# Supplementary figures and images for: 3D reconstruction of shallow sea environment using direct system calibration and faint laser line extraction (part 1 of 35)
Source: Research Square preprint supplement (doi:10.21203/rs.3.rs-5262658/v1), 2024-12-02

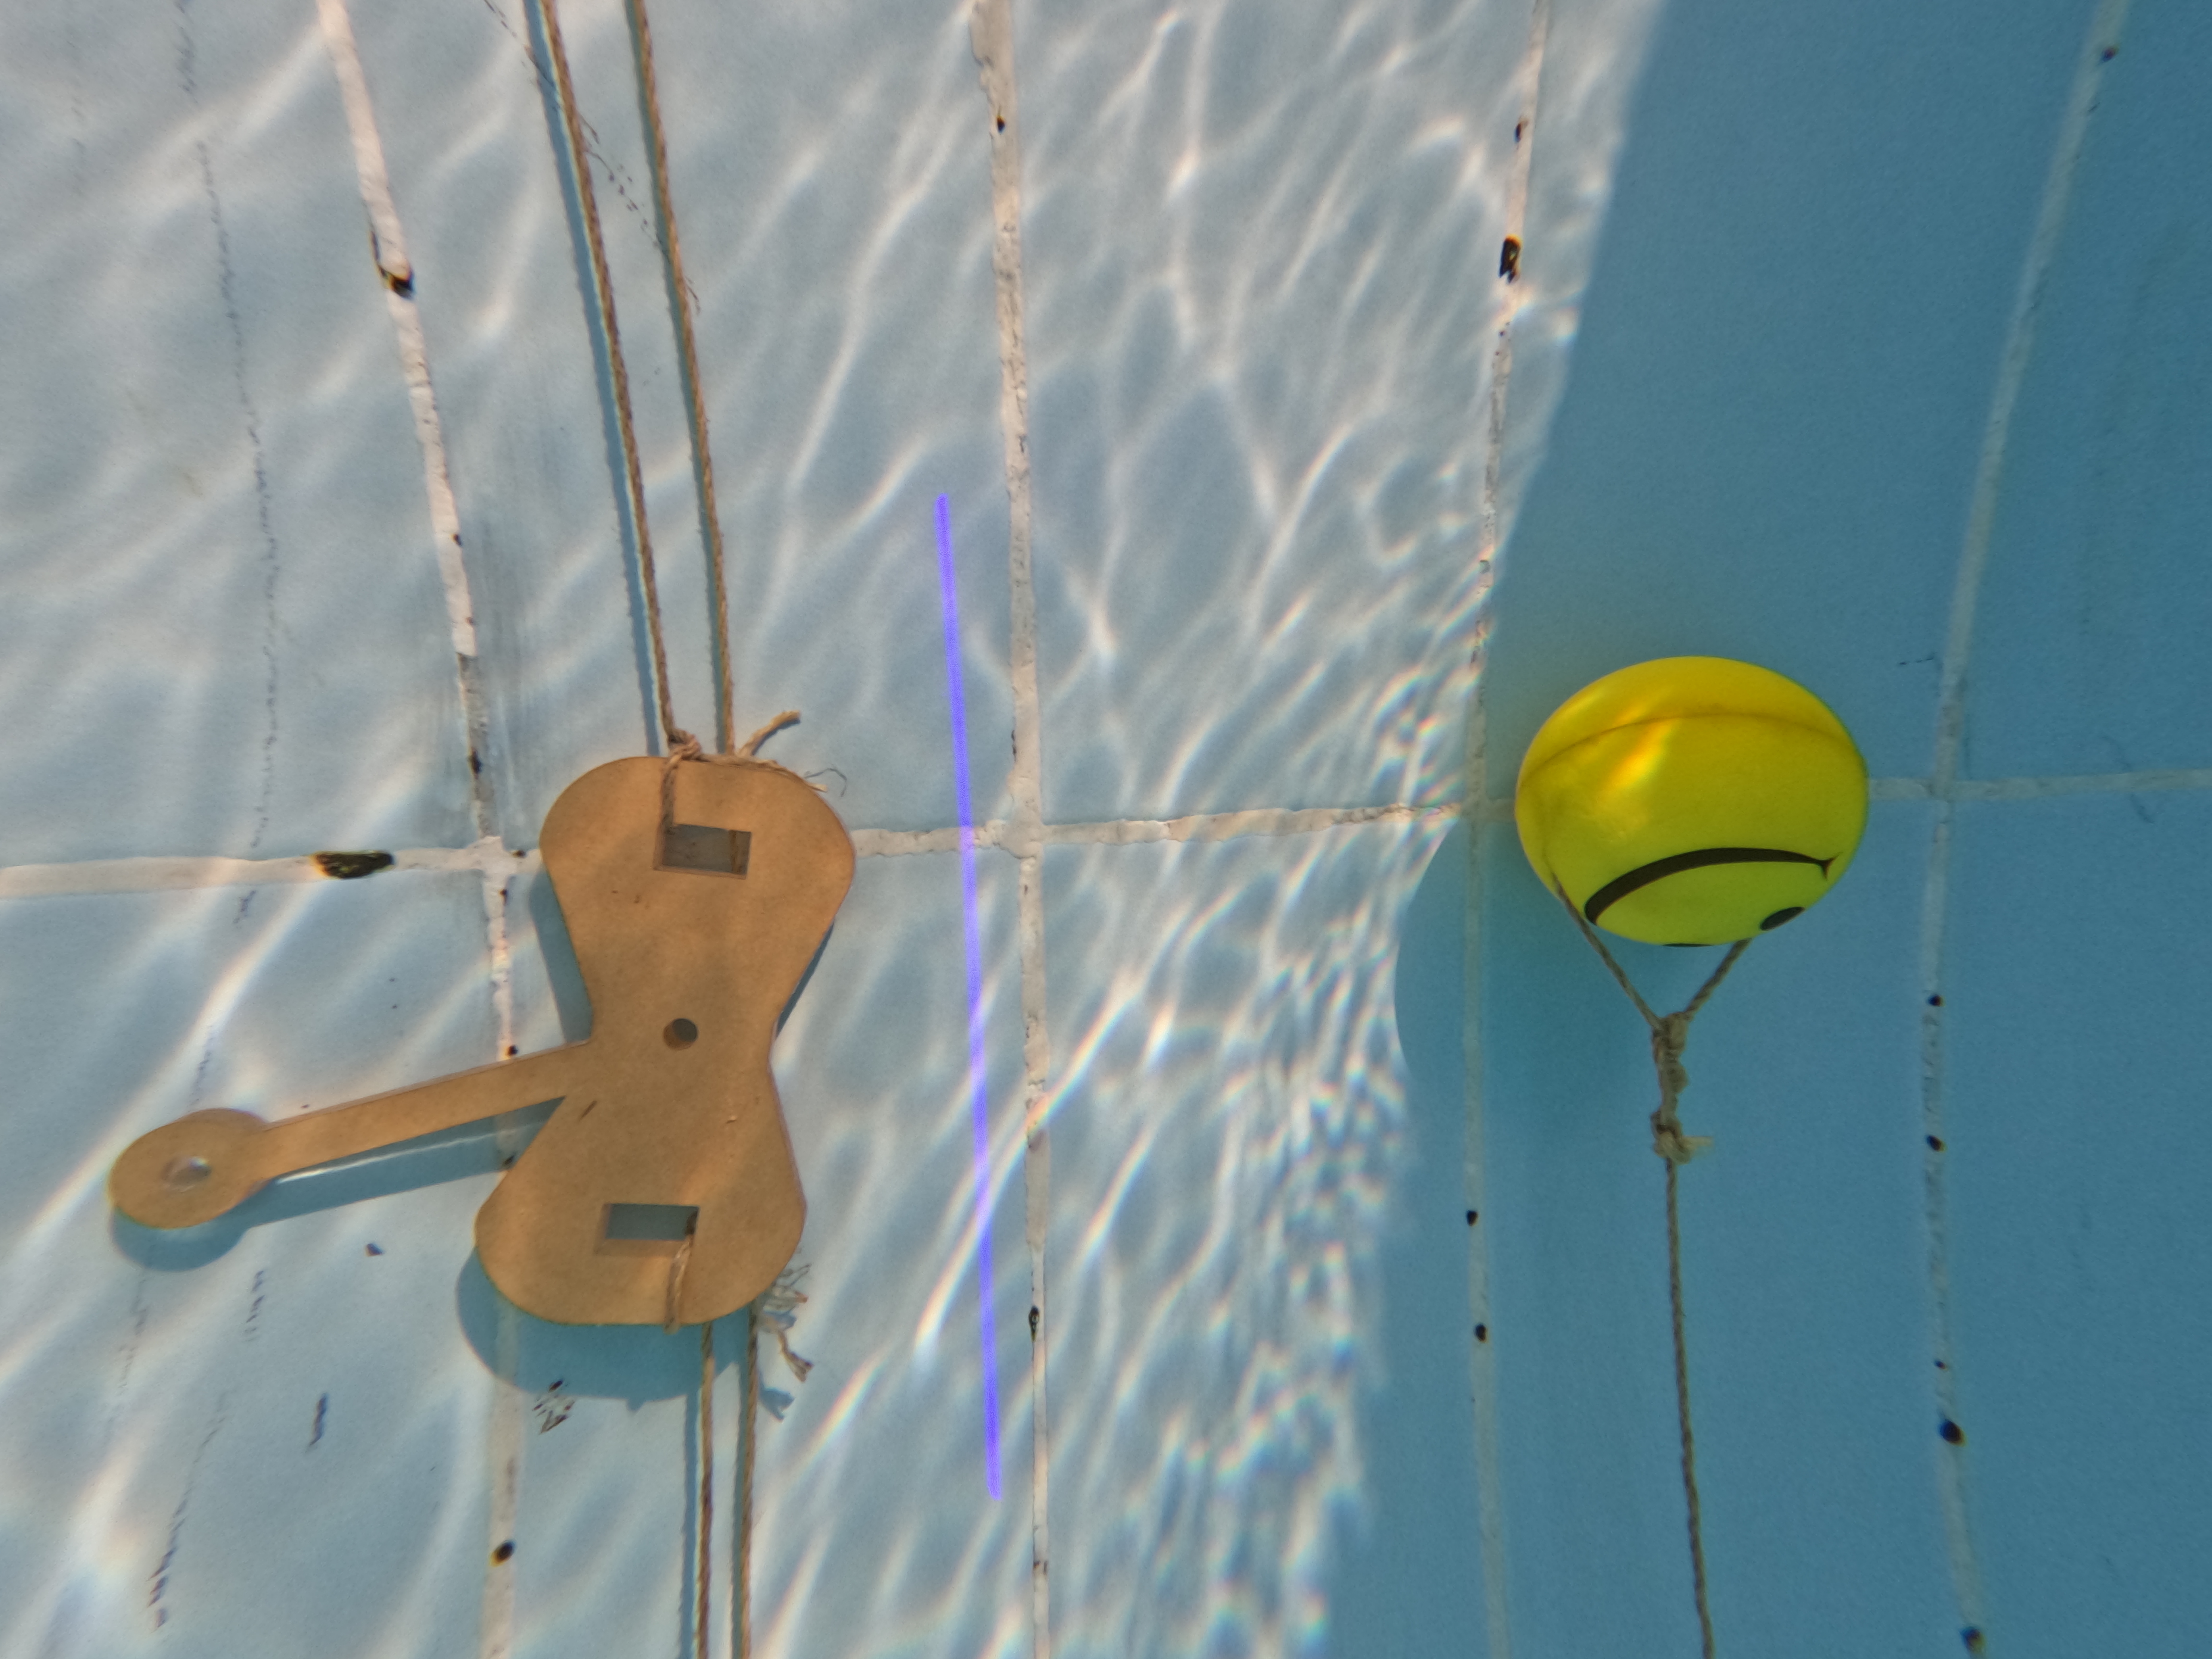

Supplement: Supplementary file 1 [file G0040395.pdf › Level_4_1/G0040395.pdf]

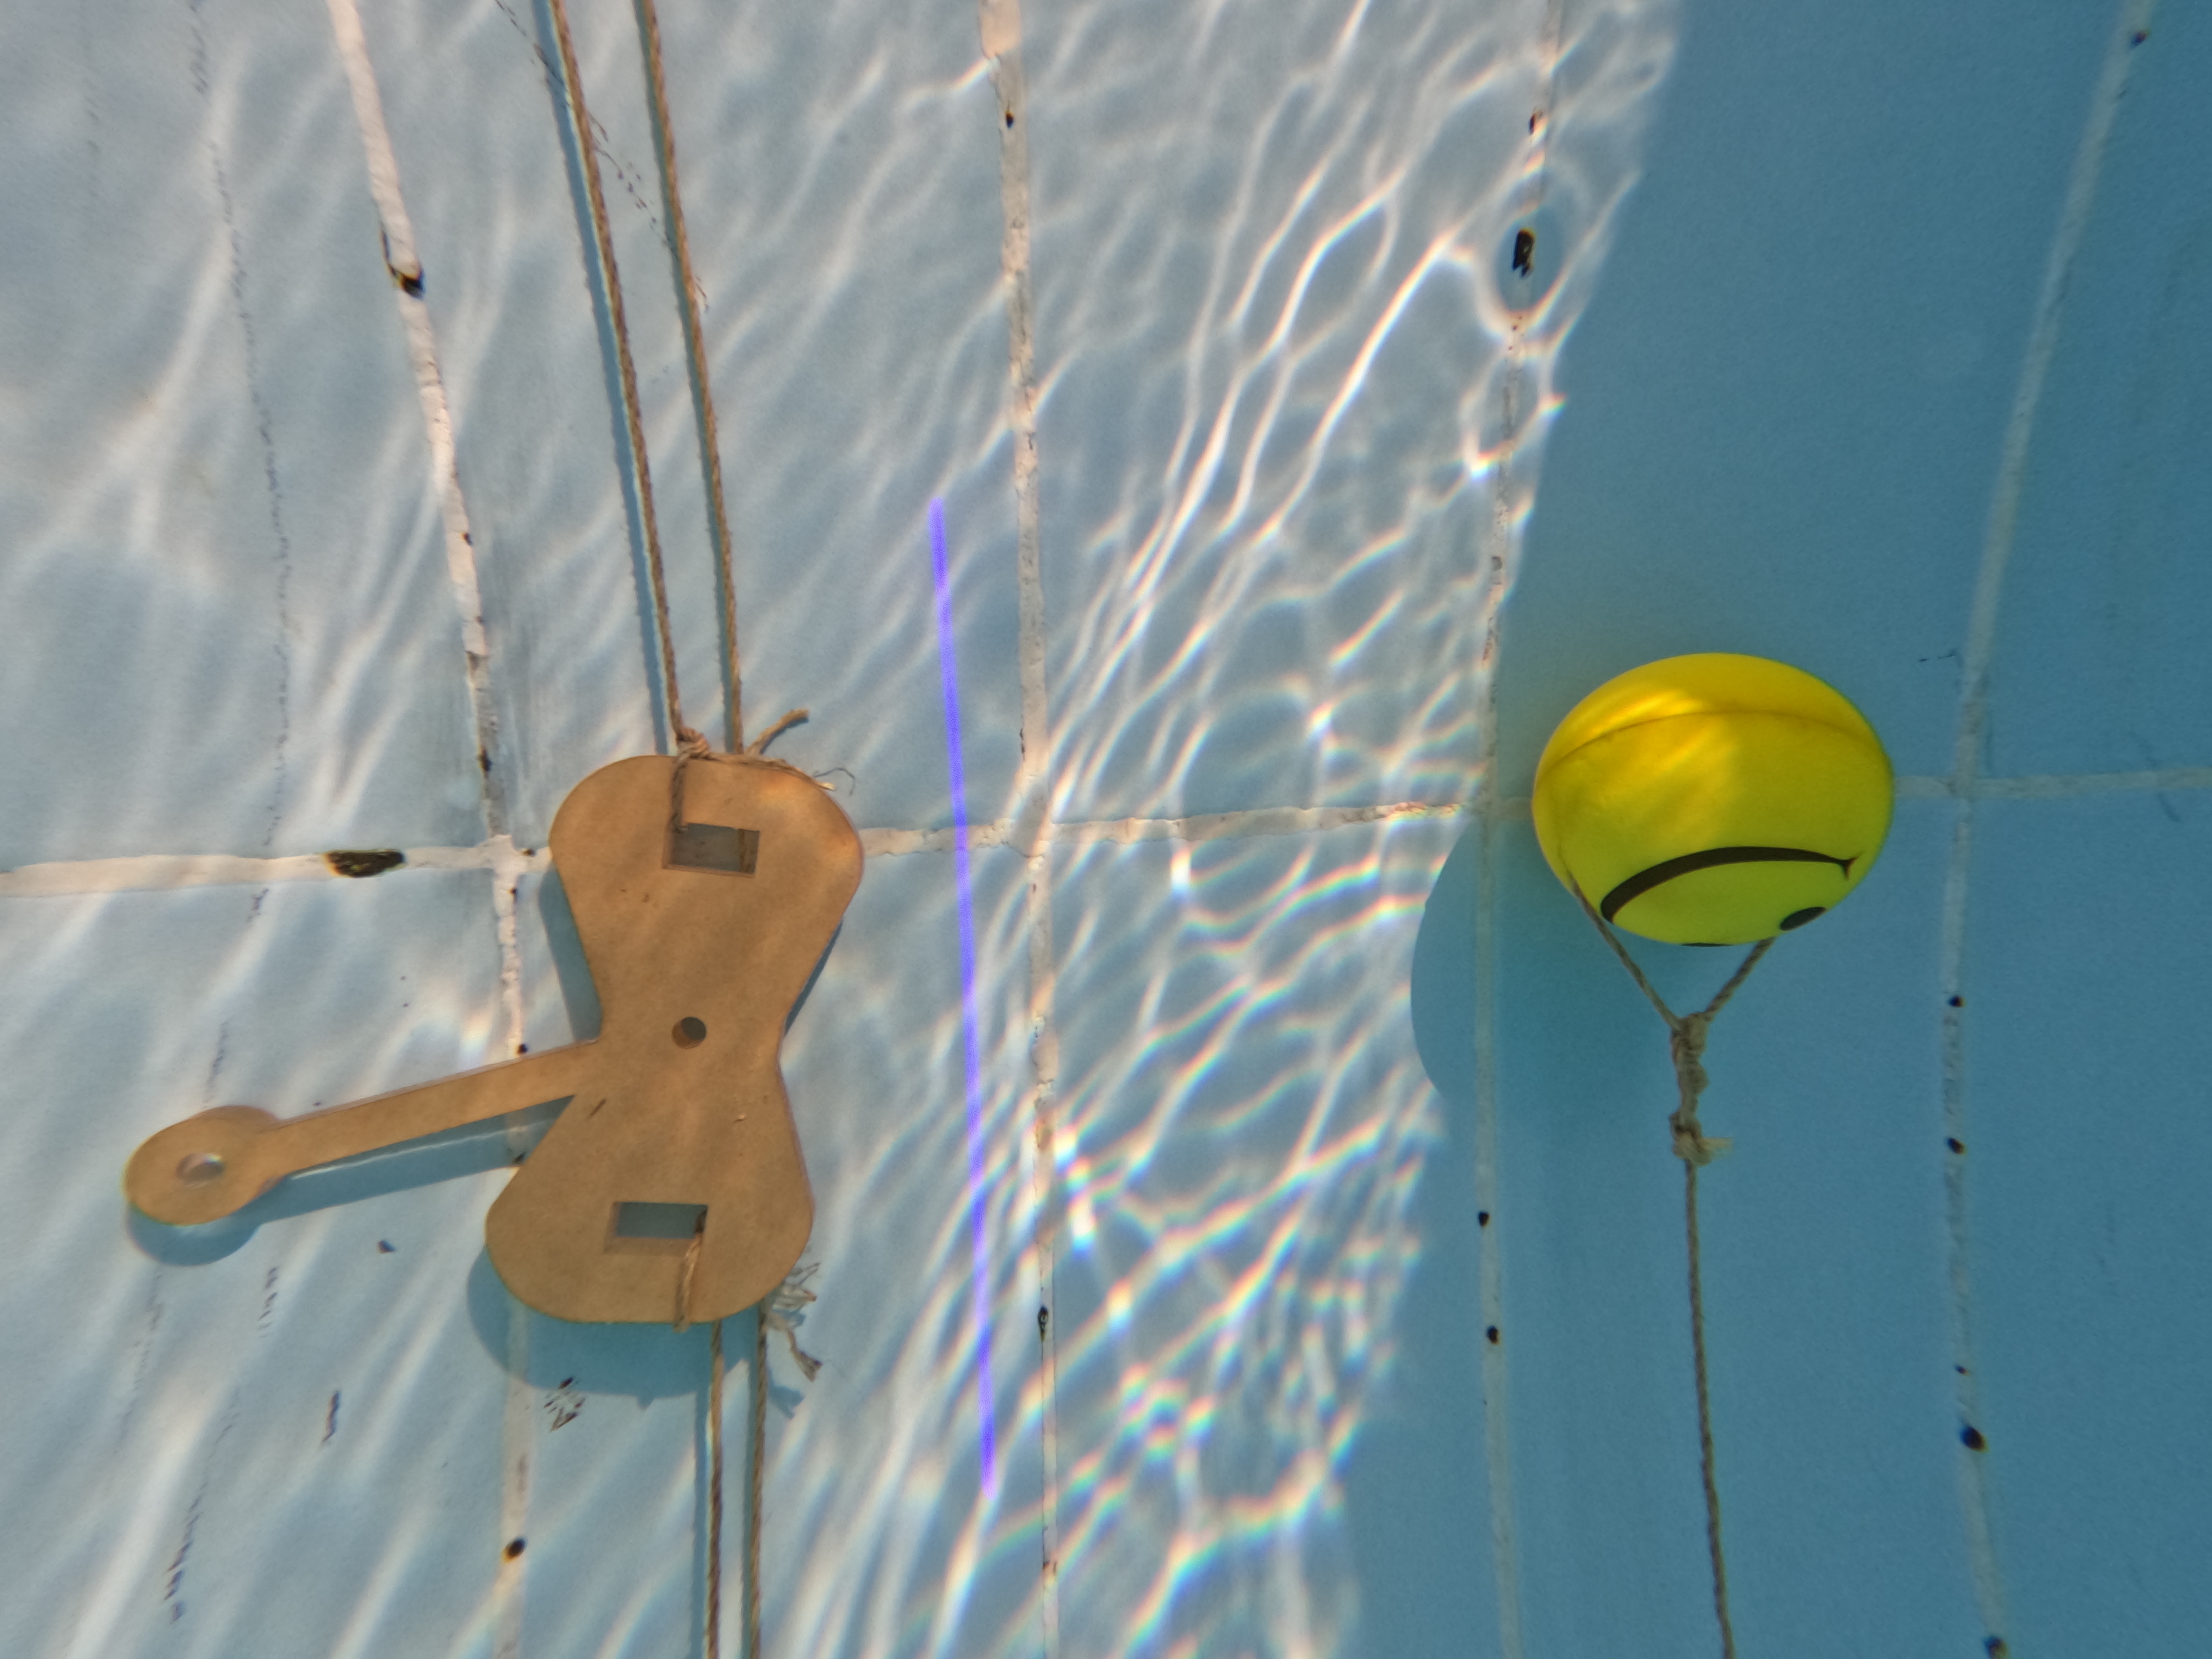

Supplement: Supplementary file 2 [file G0040396.pdf › Level_4_1/G0040396.pdf]

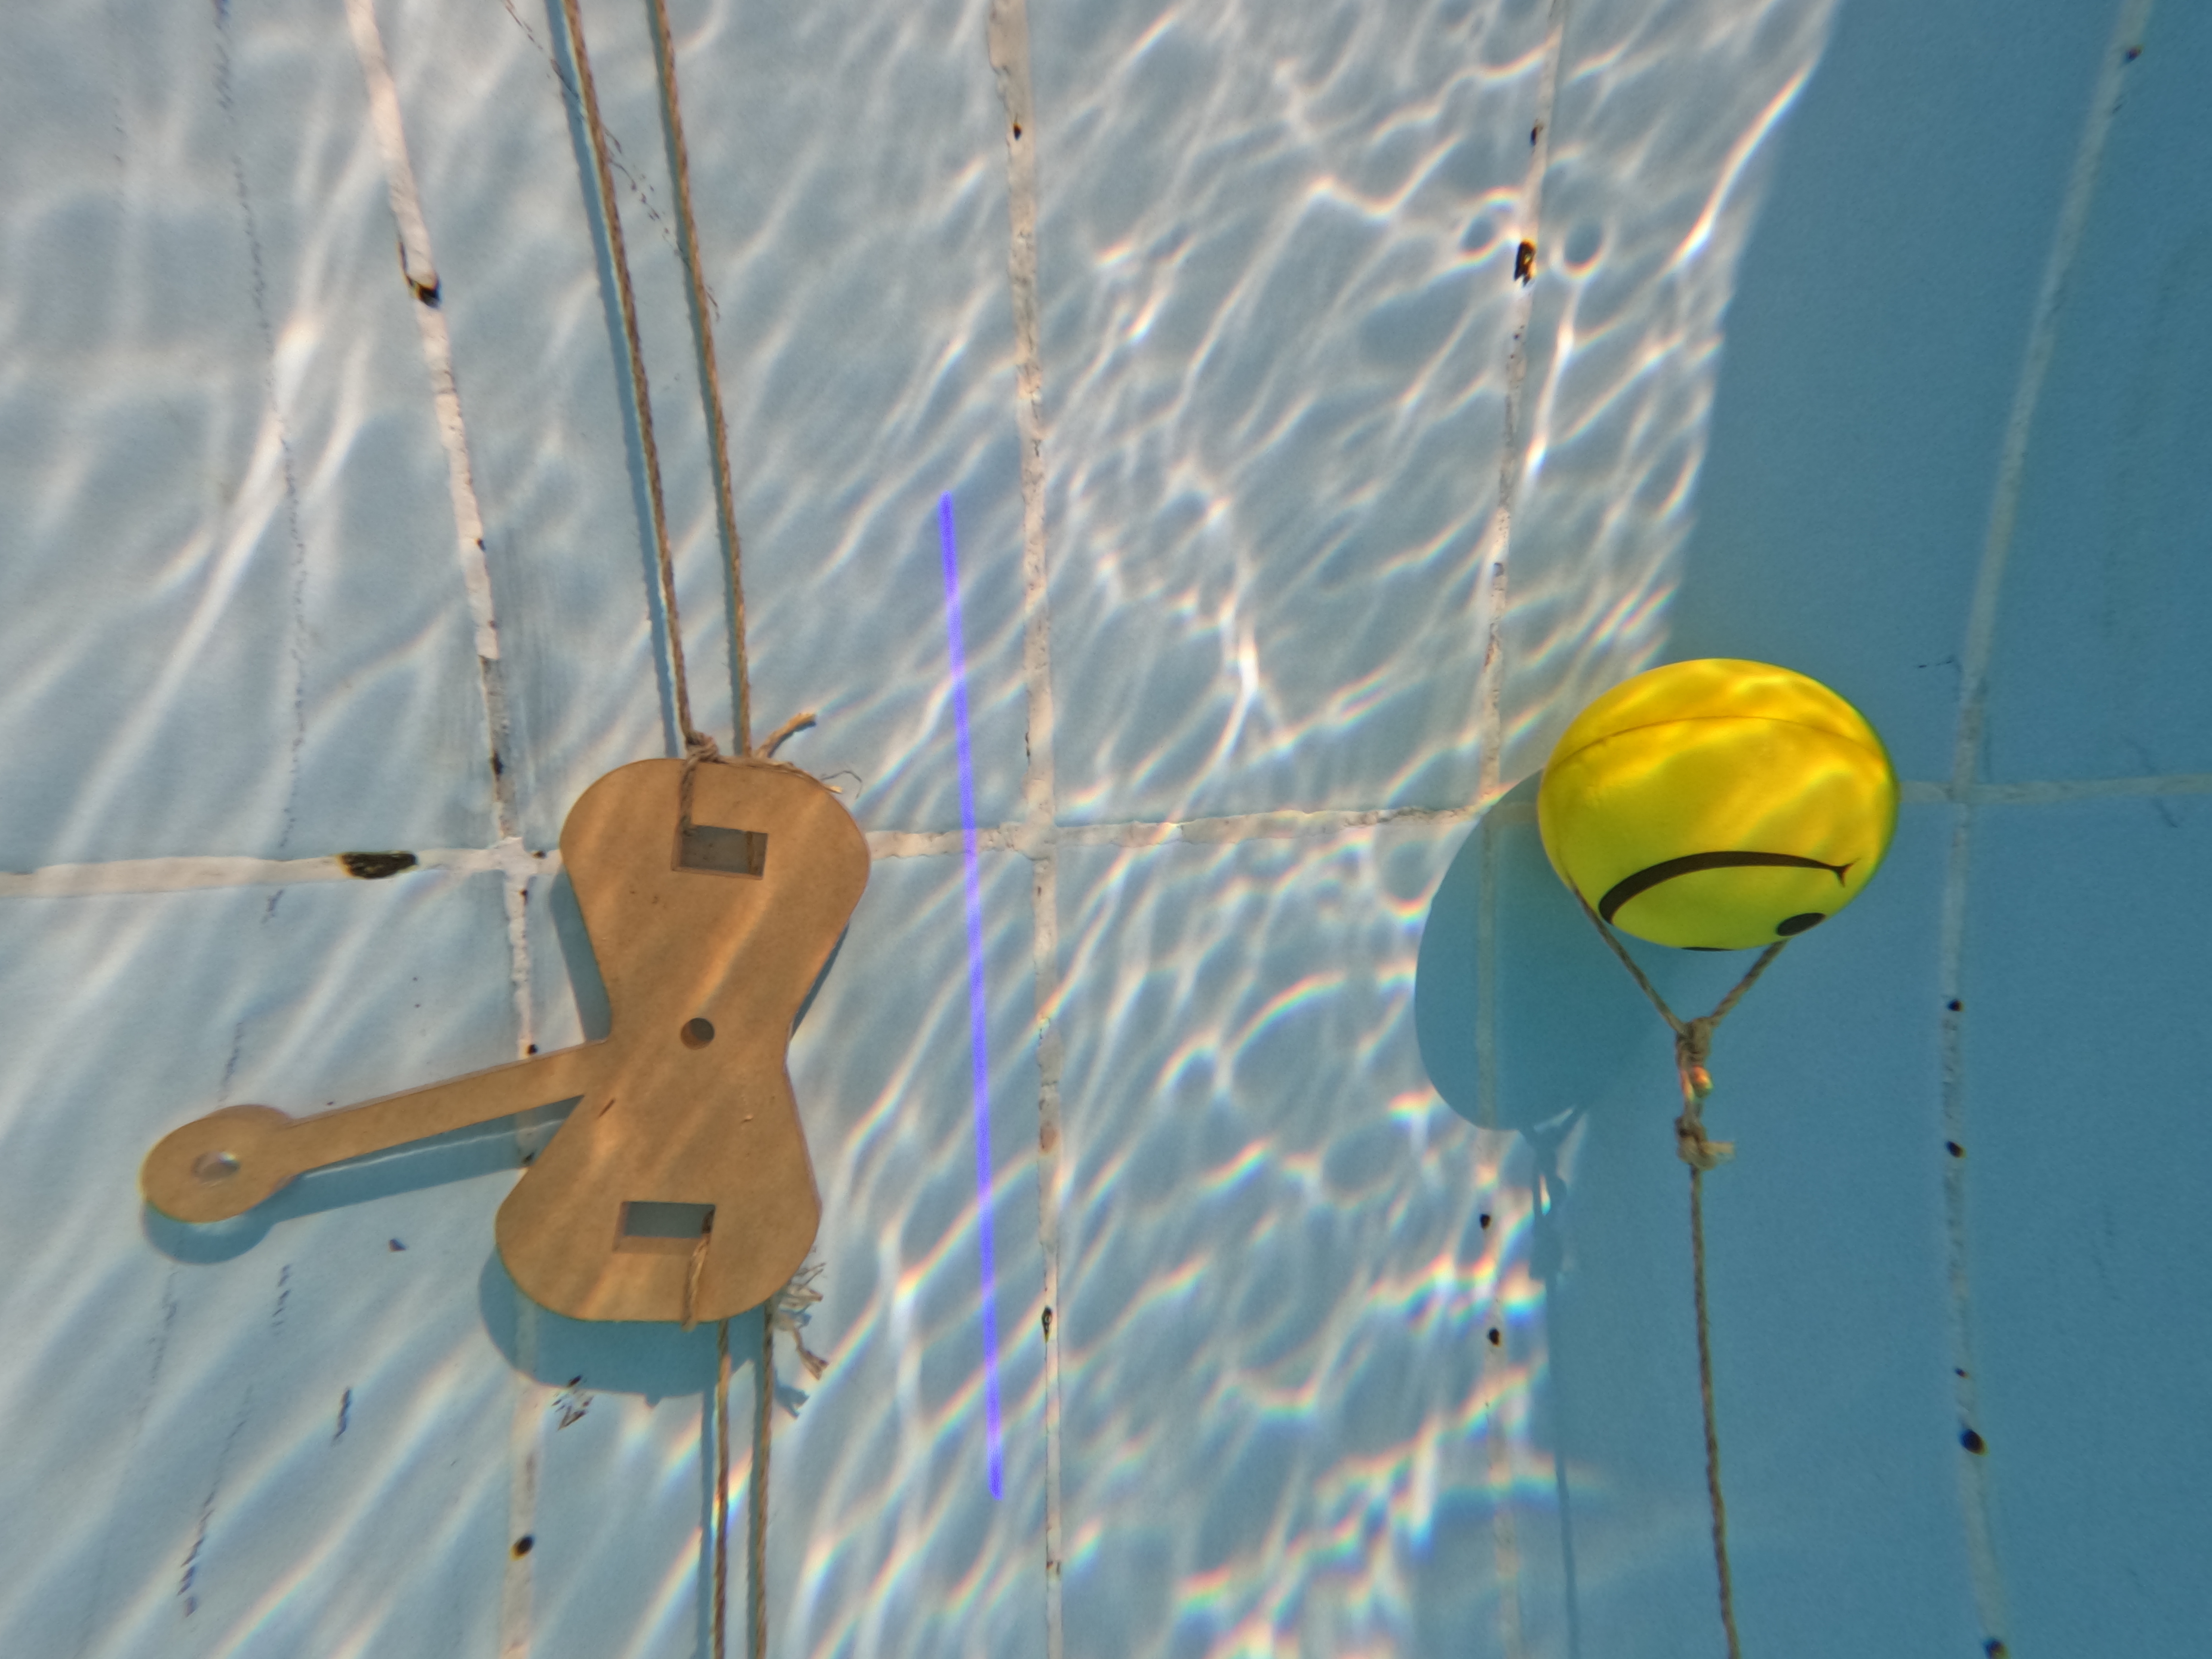

Supplement: Supplementary file 3 [file G0040397.pdf › Level_4_1/G0040397.pdf]

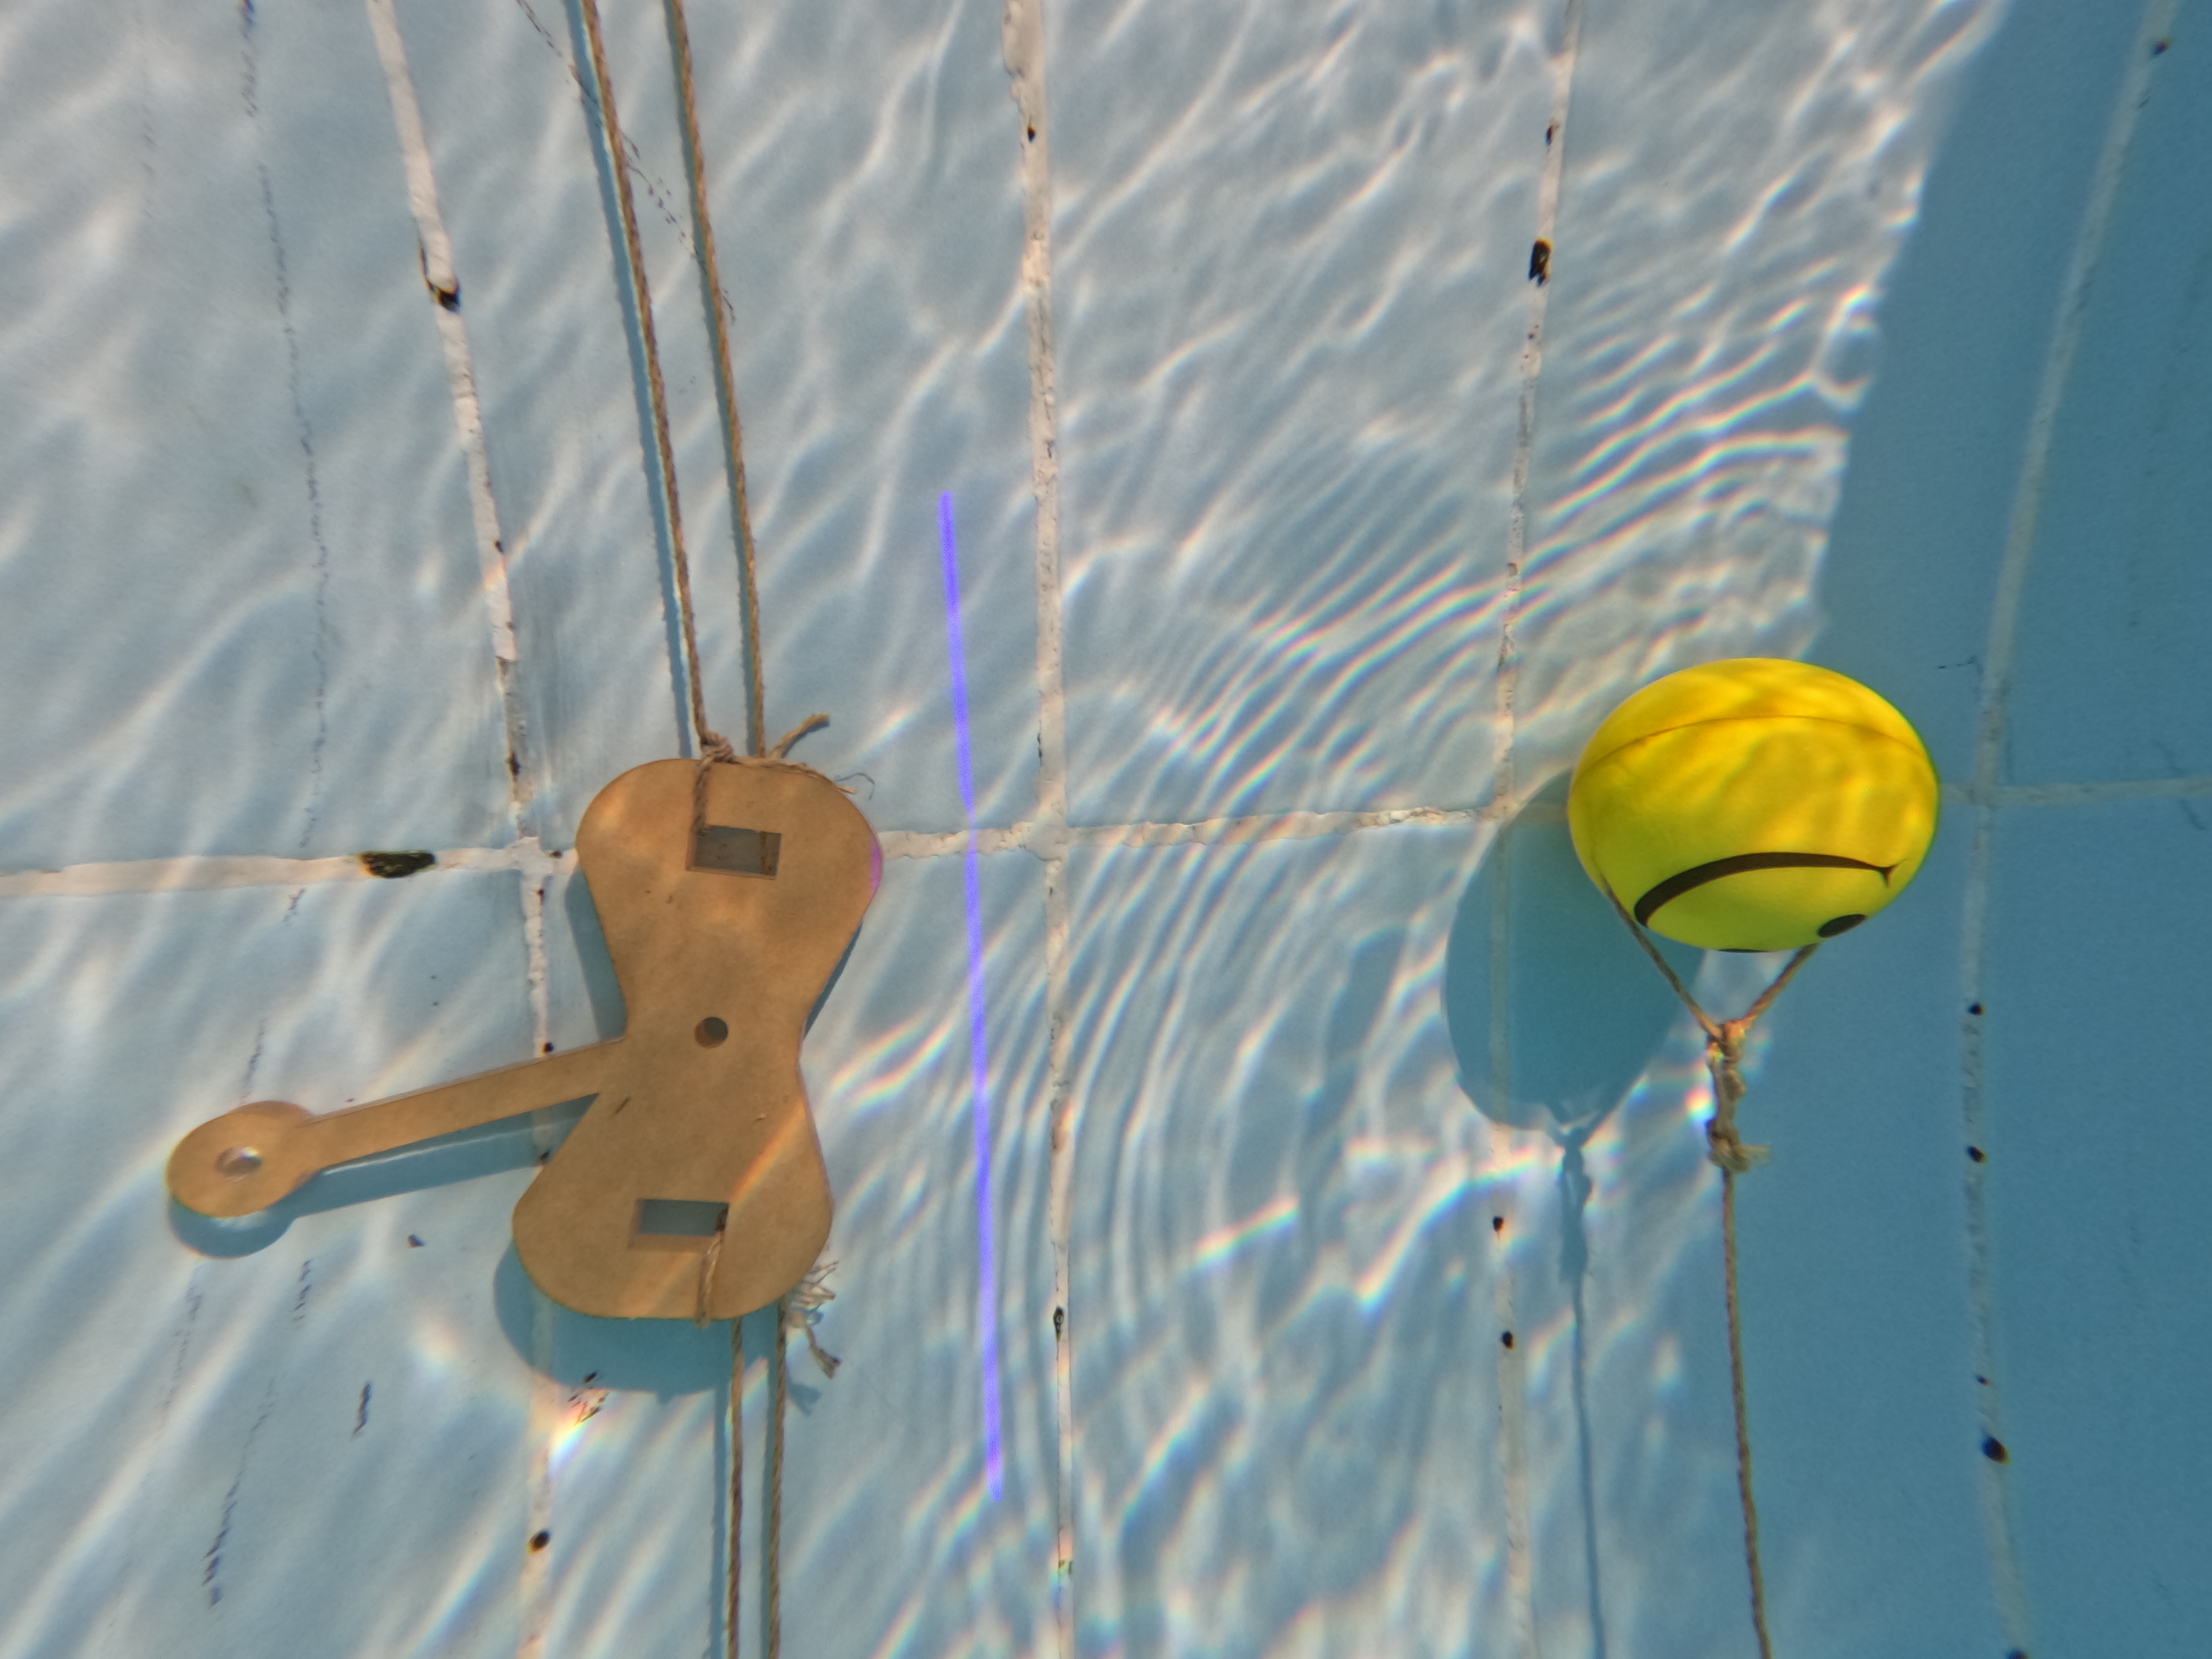

Supplement: Supplementary file 4 [file G0040398.pdf › Level_4_1/G0040398.pdf]

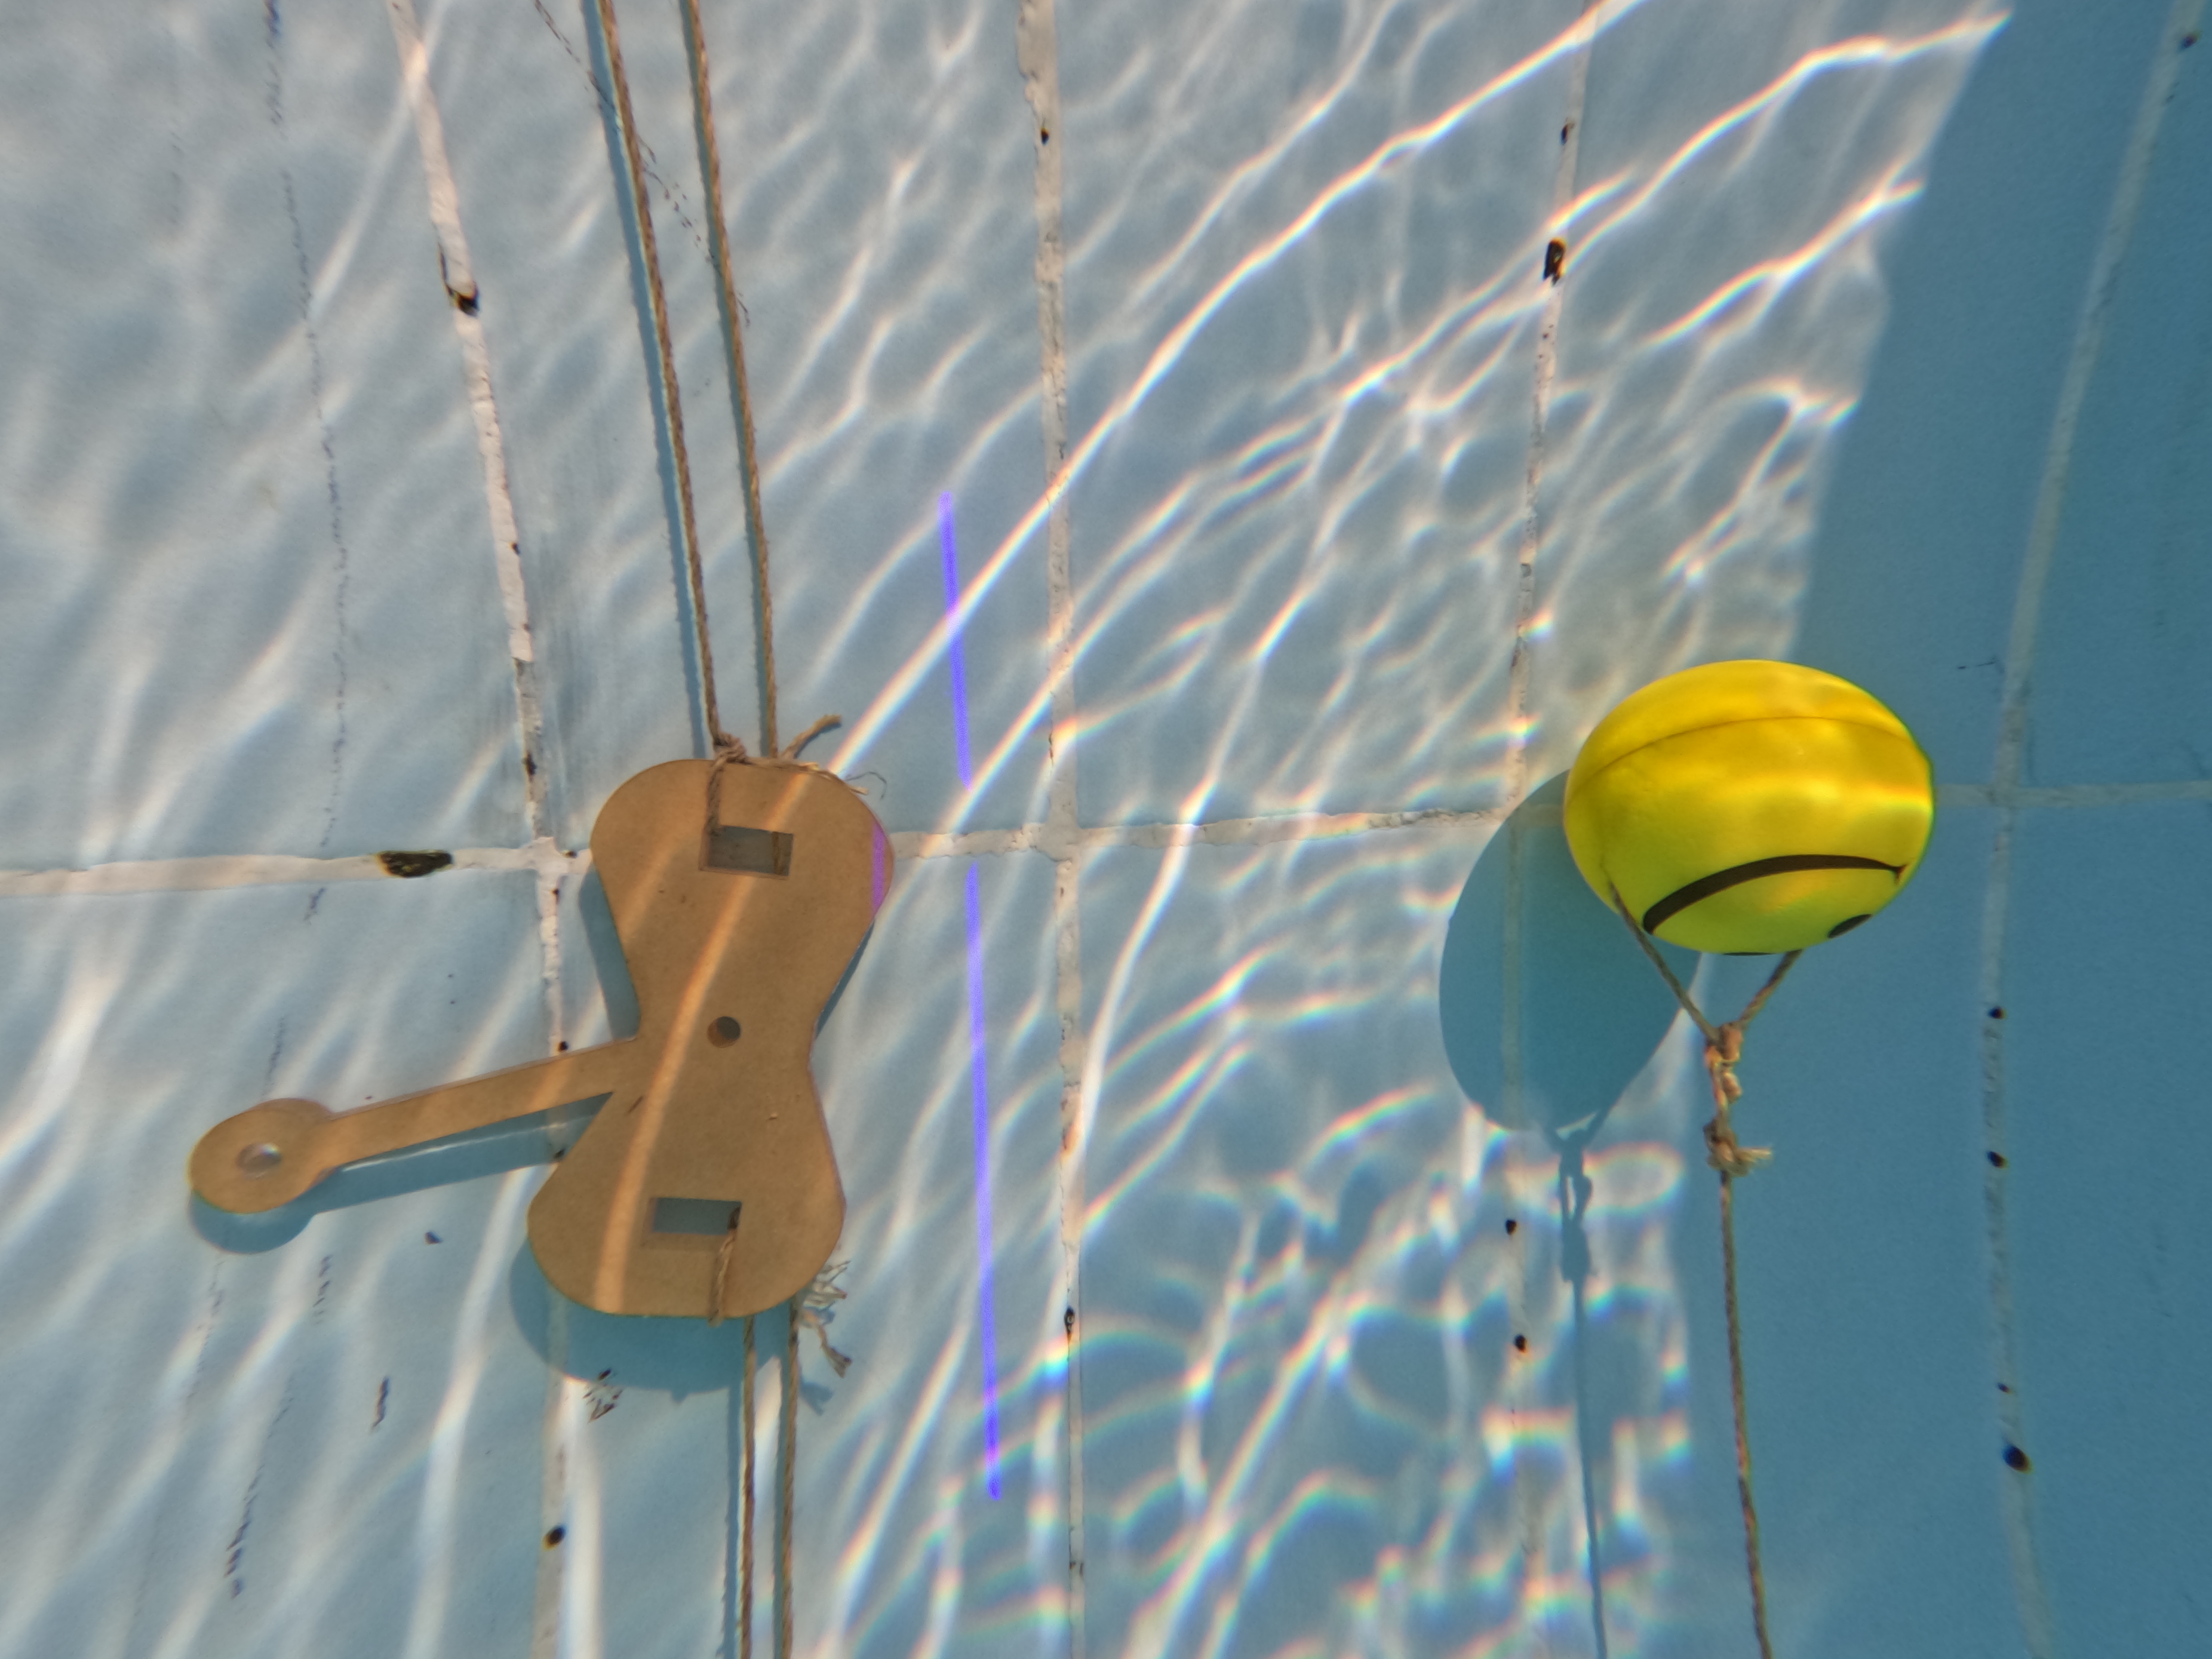

Supplement: Supplementary file 5 [file G0040399.pdf › Level_4_1/G0040399.pdf]

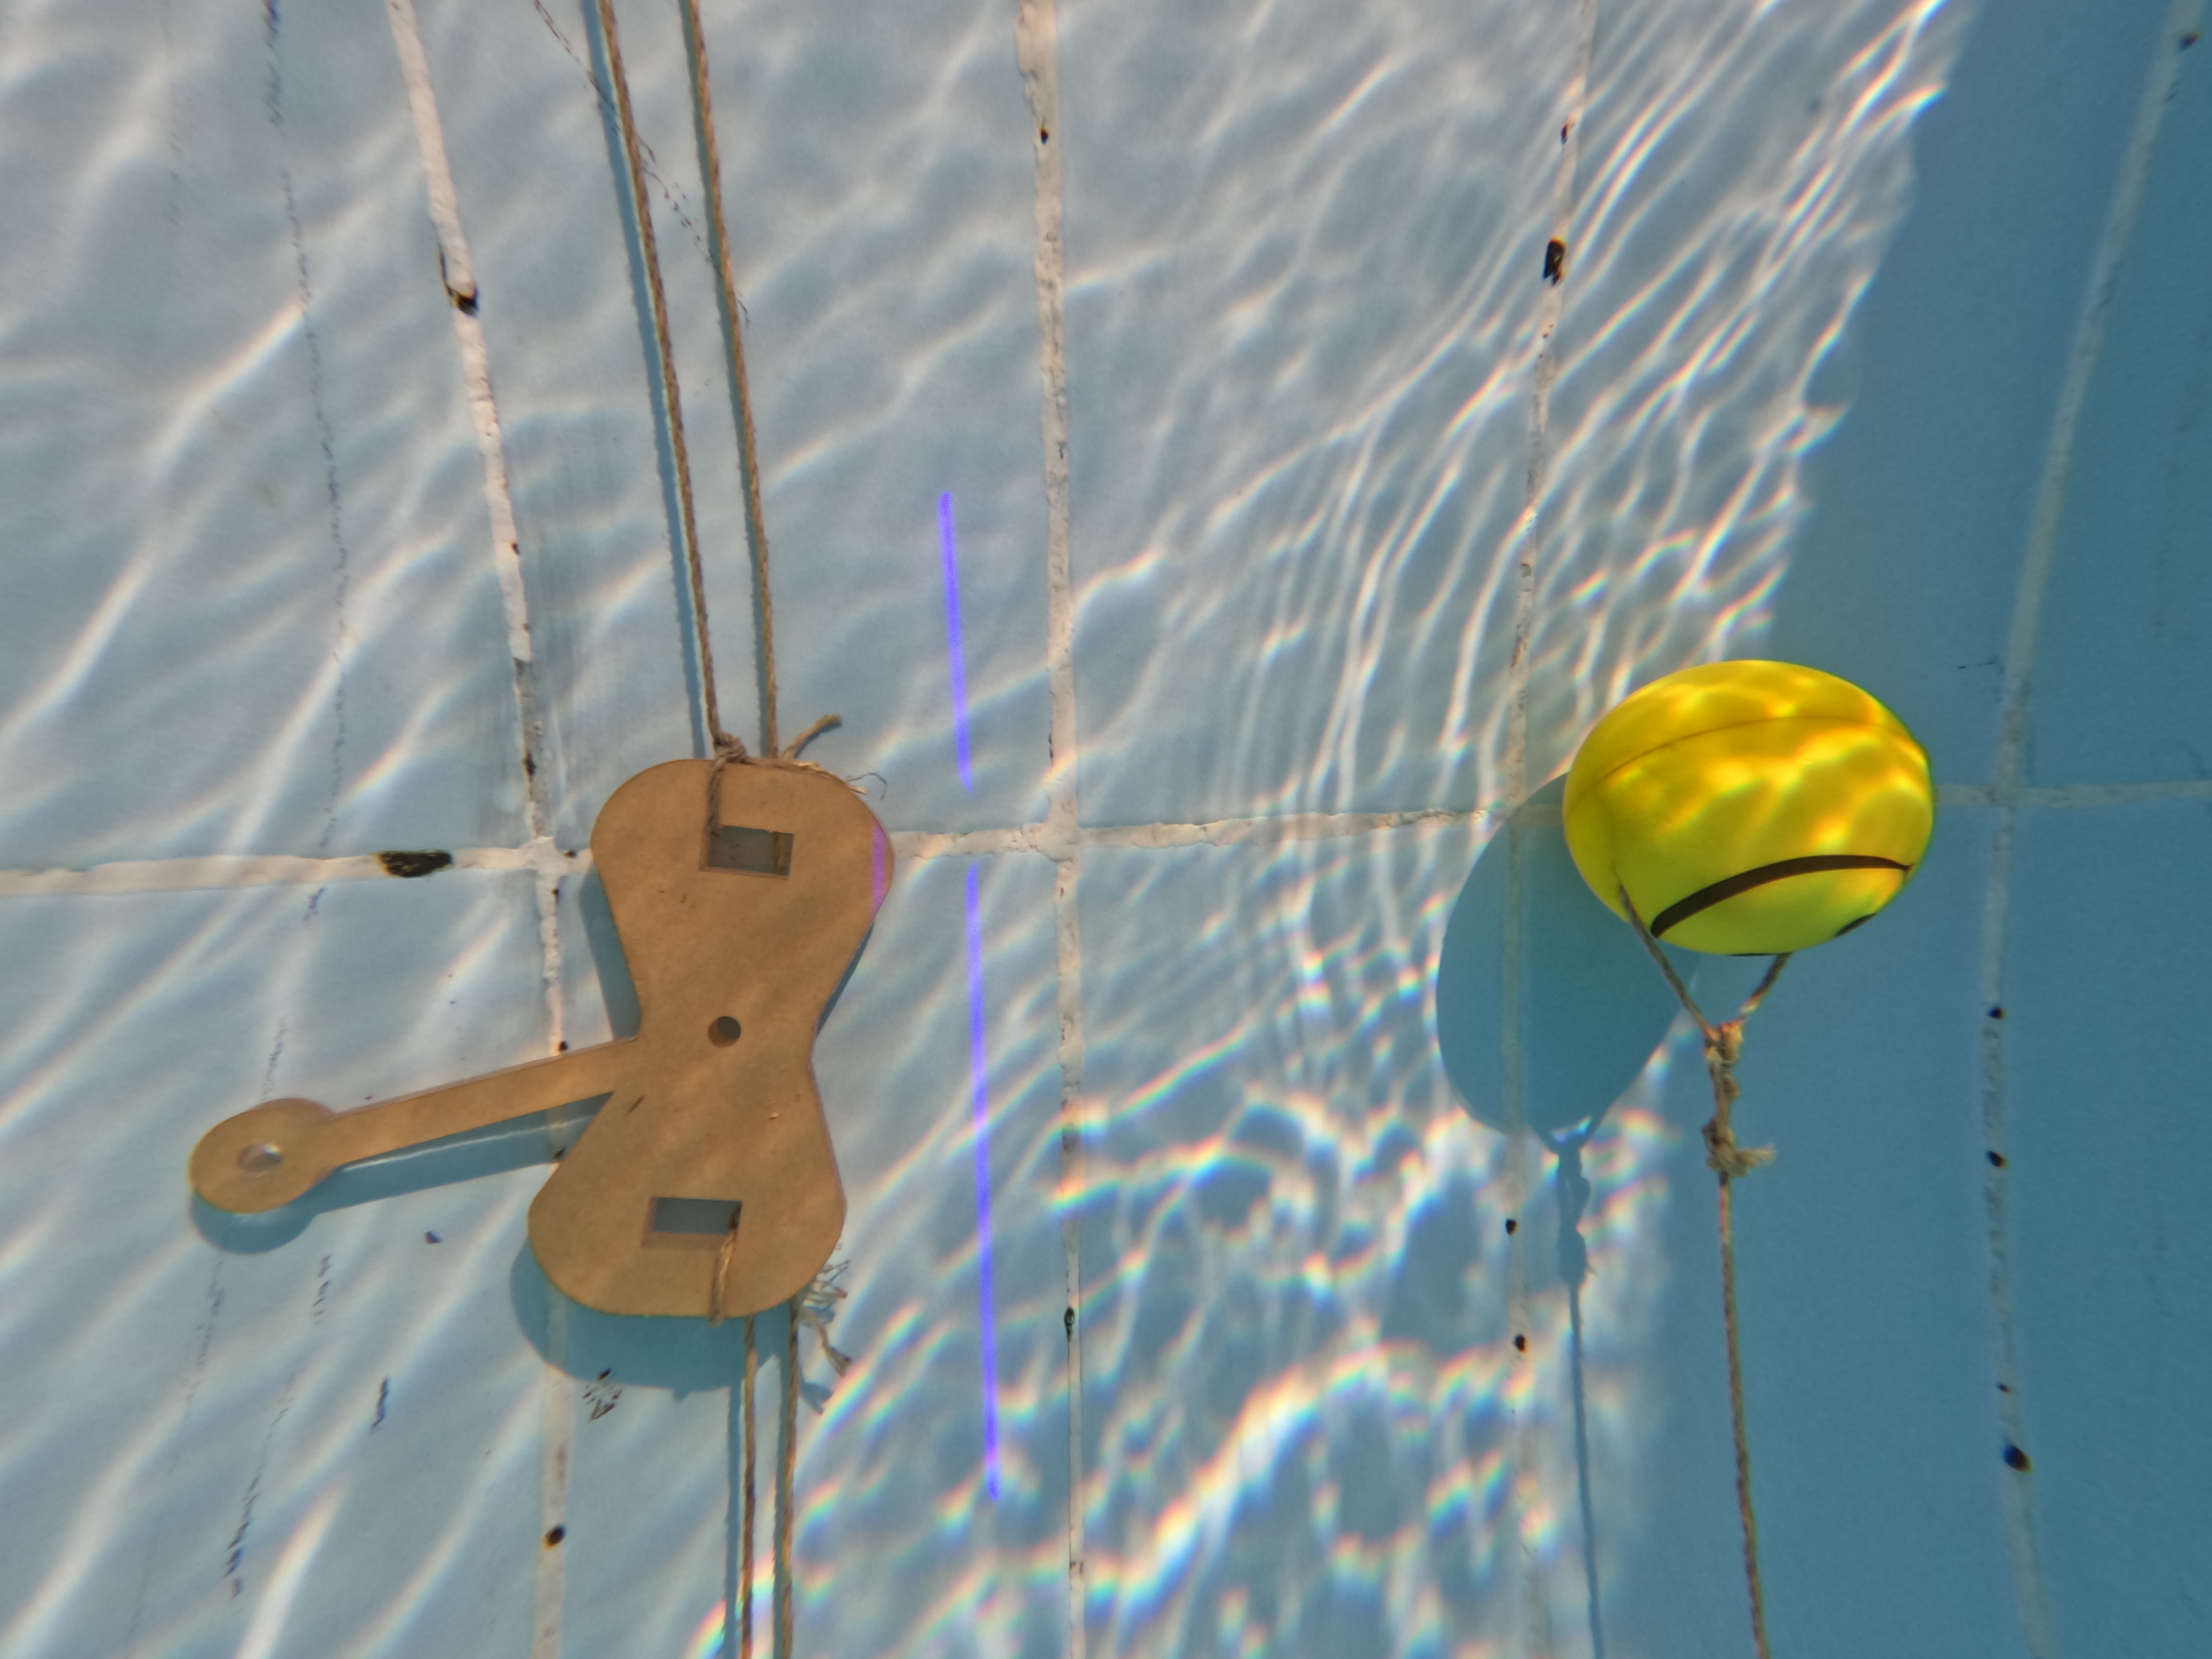

Supplement: Supplementary file 6 [file G0040400.pdf › Level_4_1/G0040400.pdf]

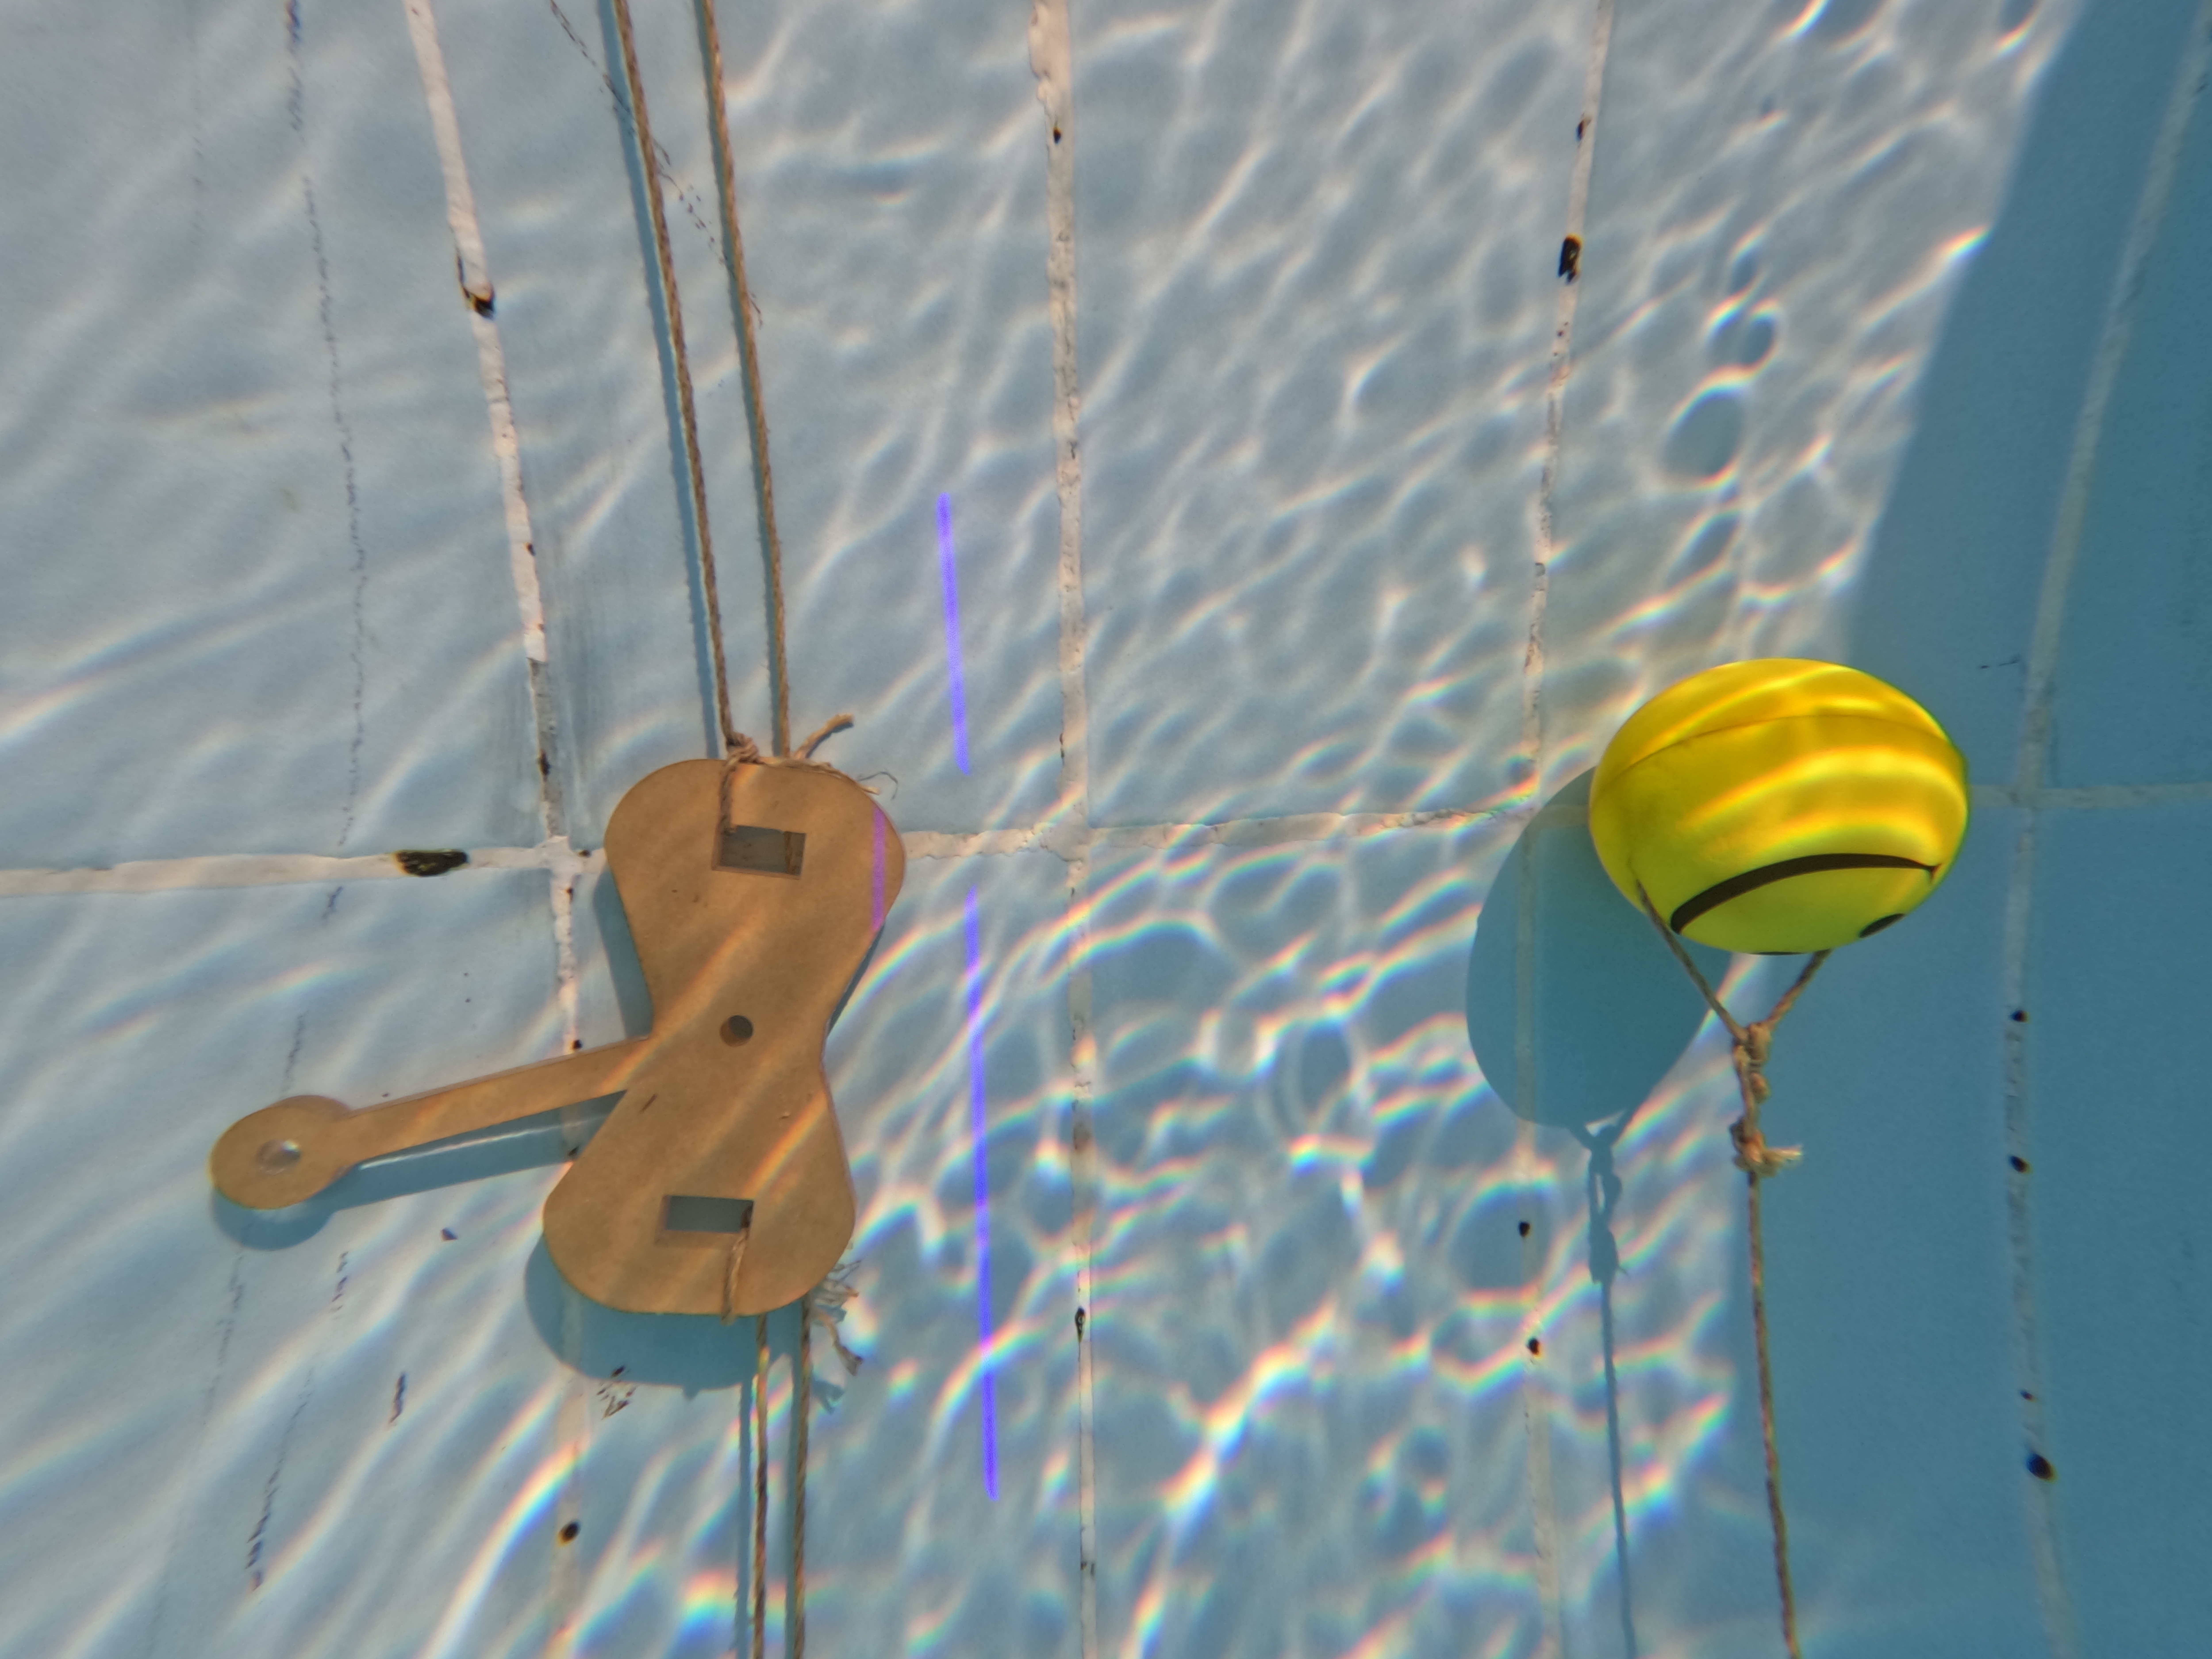

Supplement: Supplementary file 7 [file G0040401.pdf › Level_4_1/G0040401.pdf]

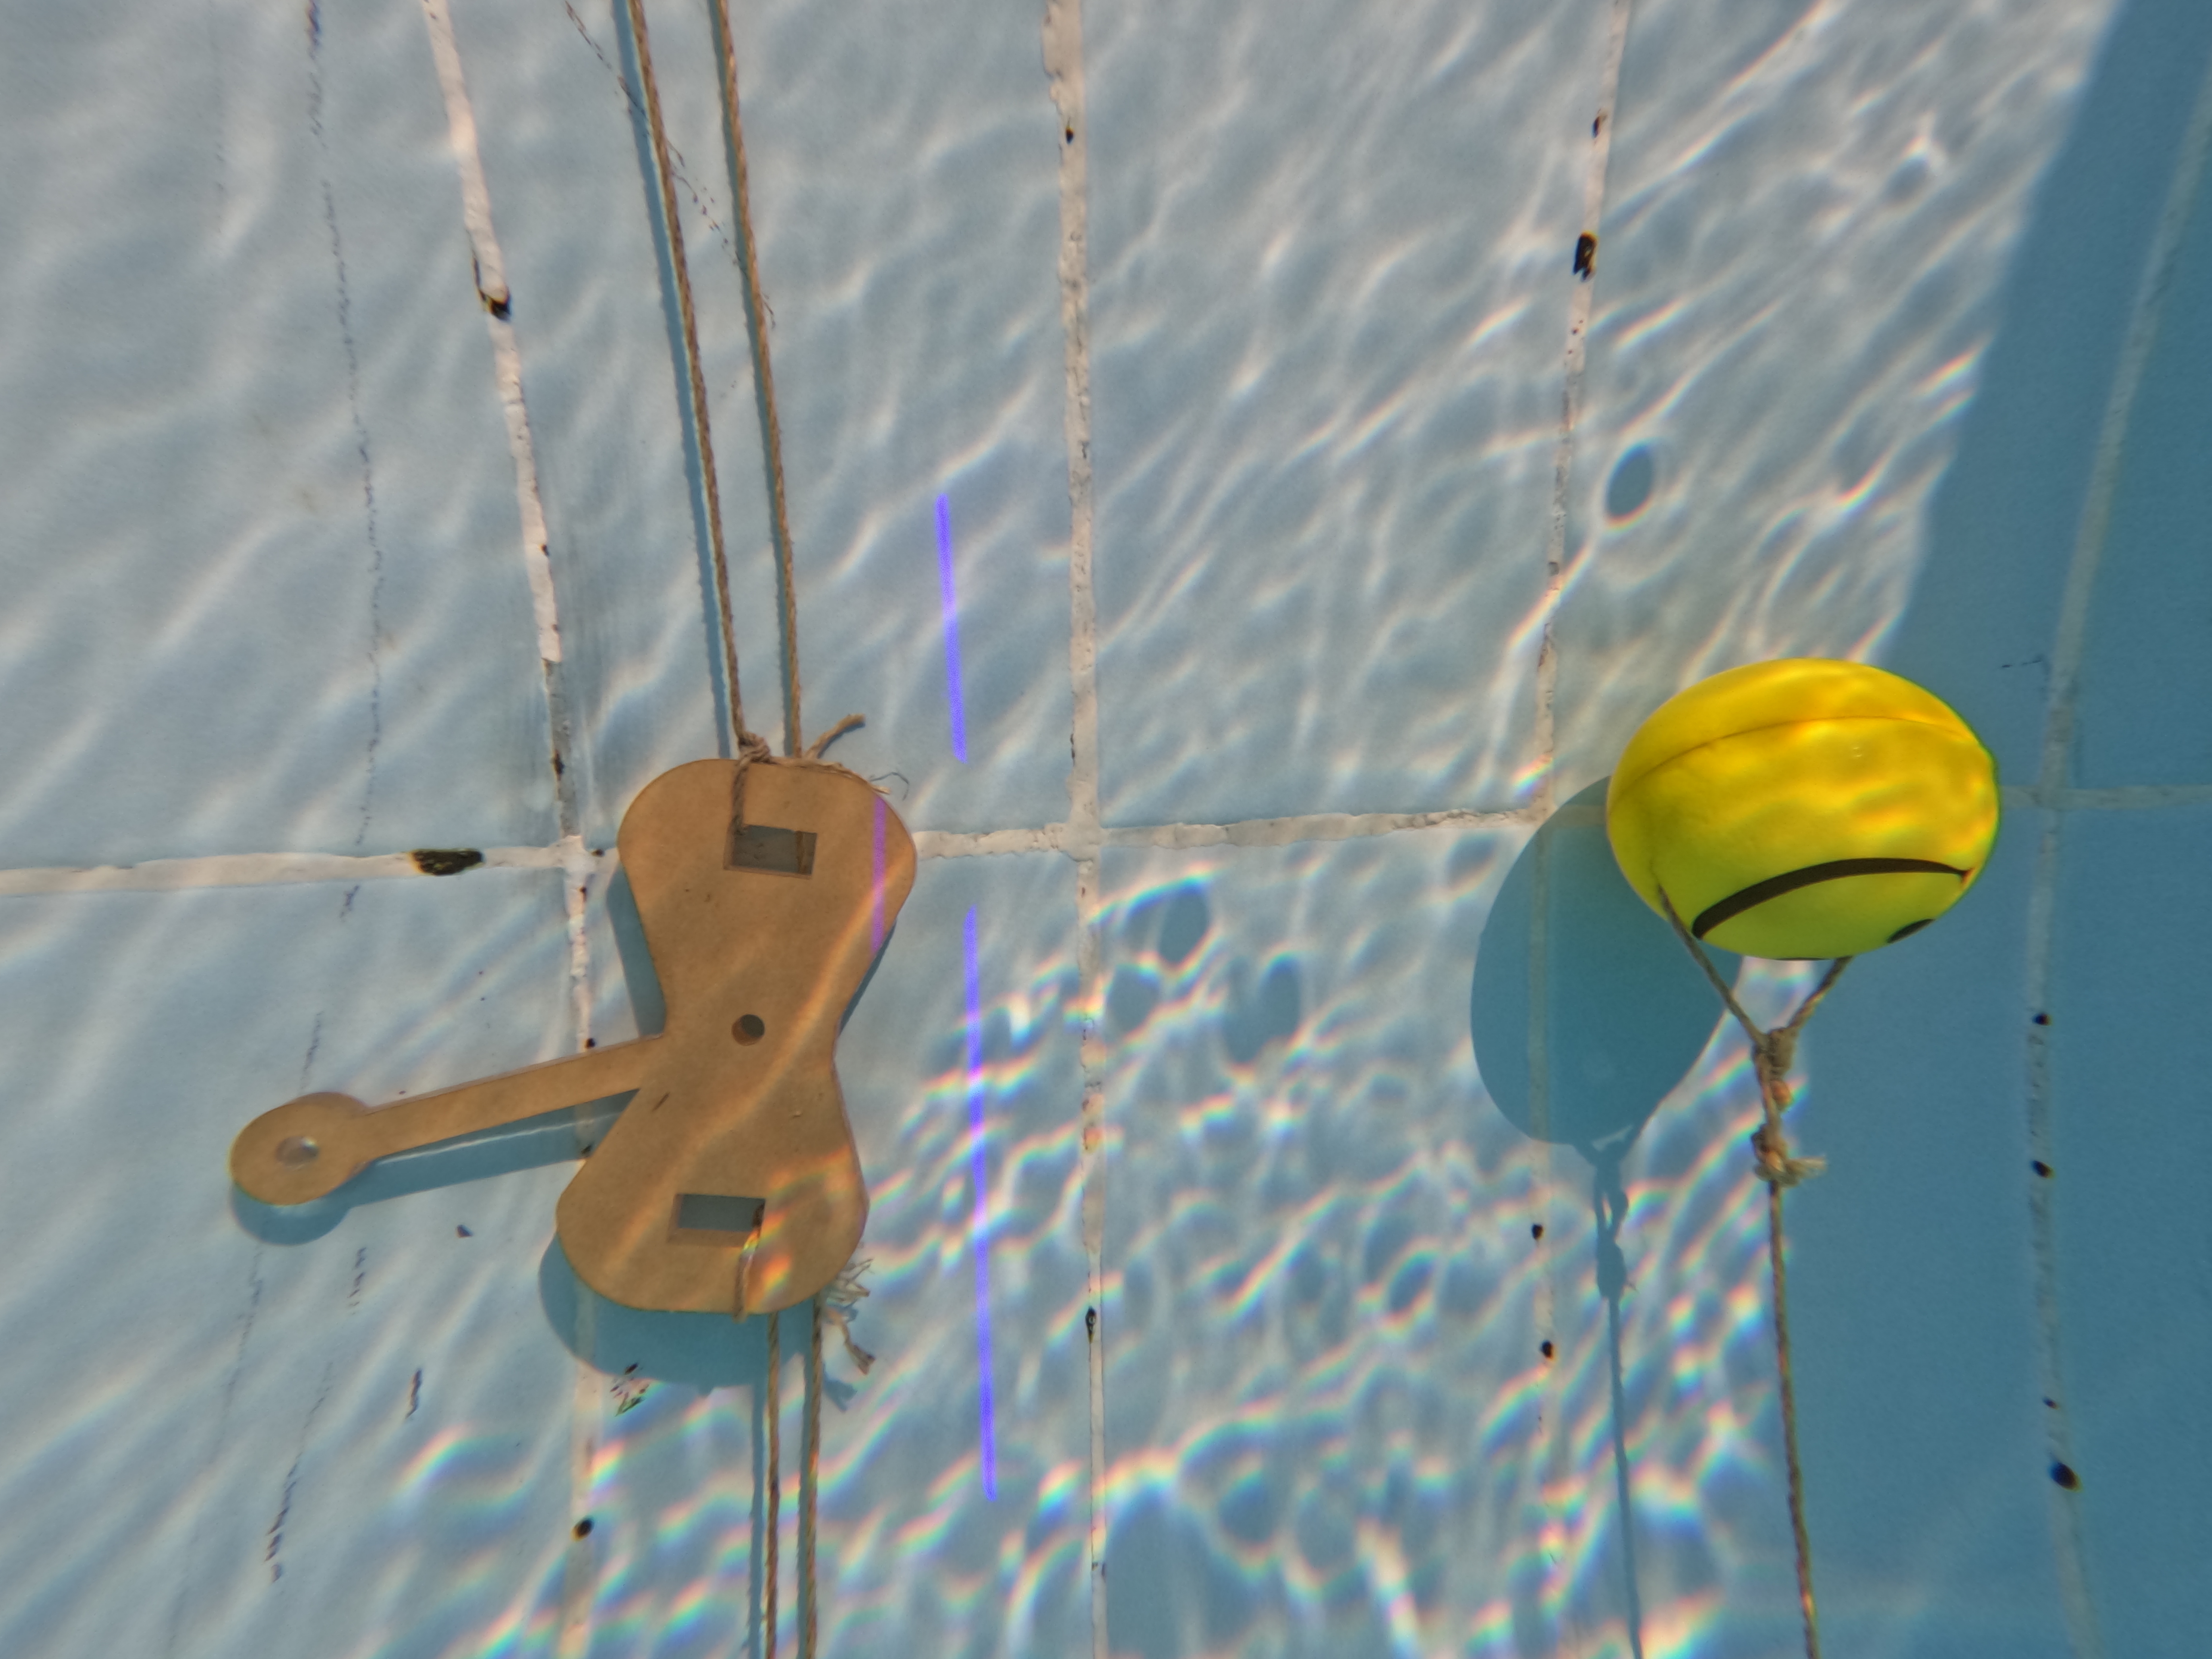

Supplement: Supplementary file 8 [file G0040402.pdf › Level_4_1/G0040402.pdf]

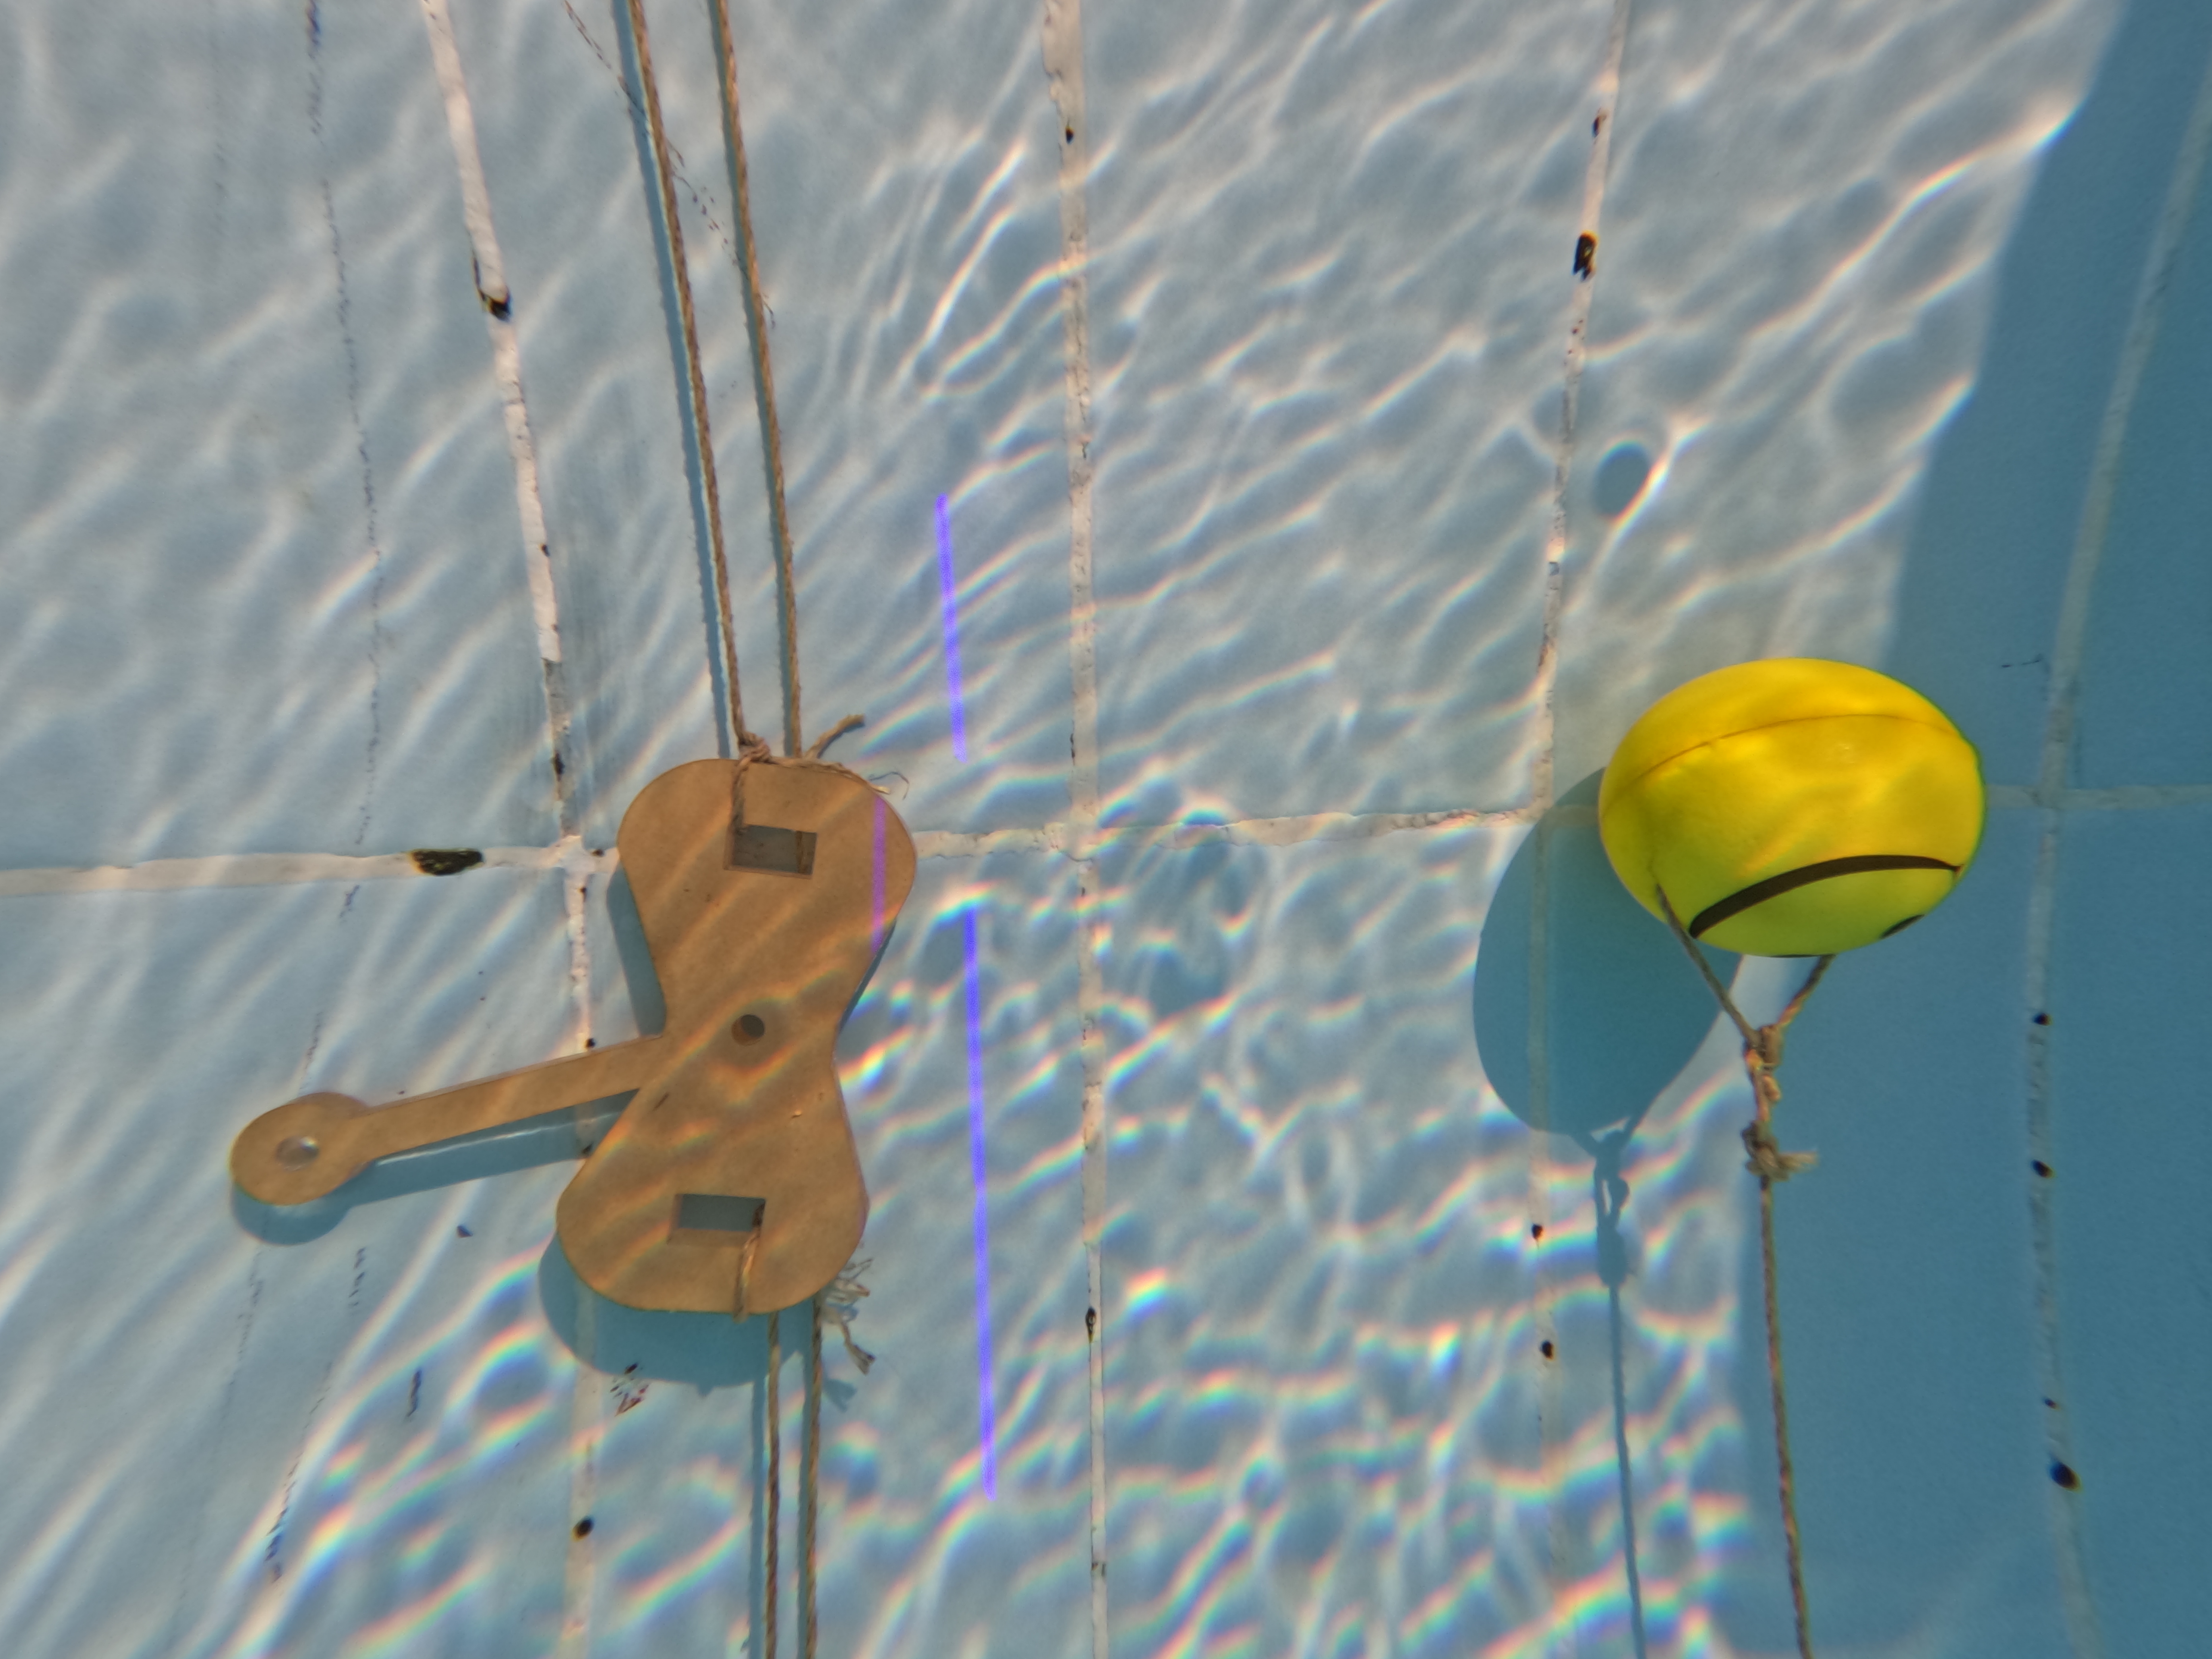

Supplement: Supplementary file 9 [file G0040403.pdf › Level_4_1/G0040403.pdf]

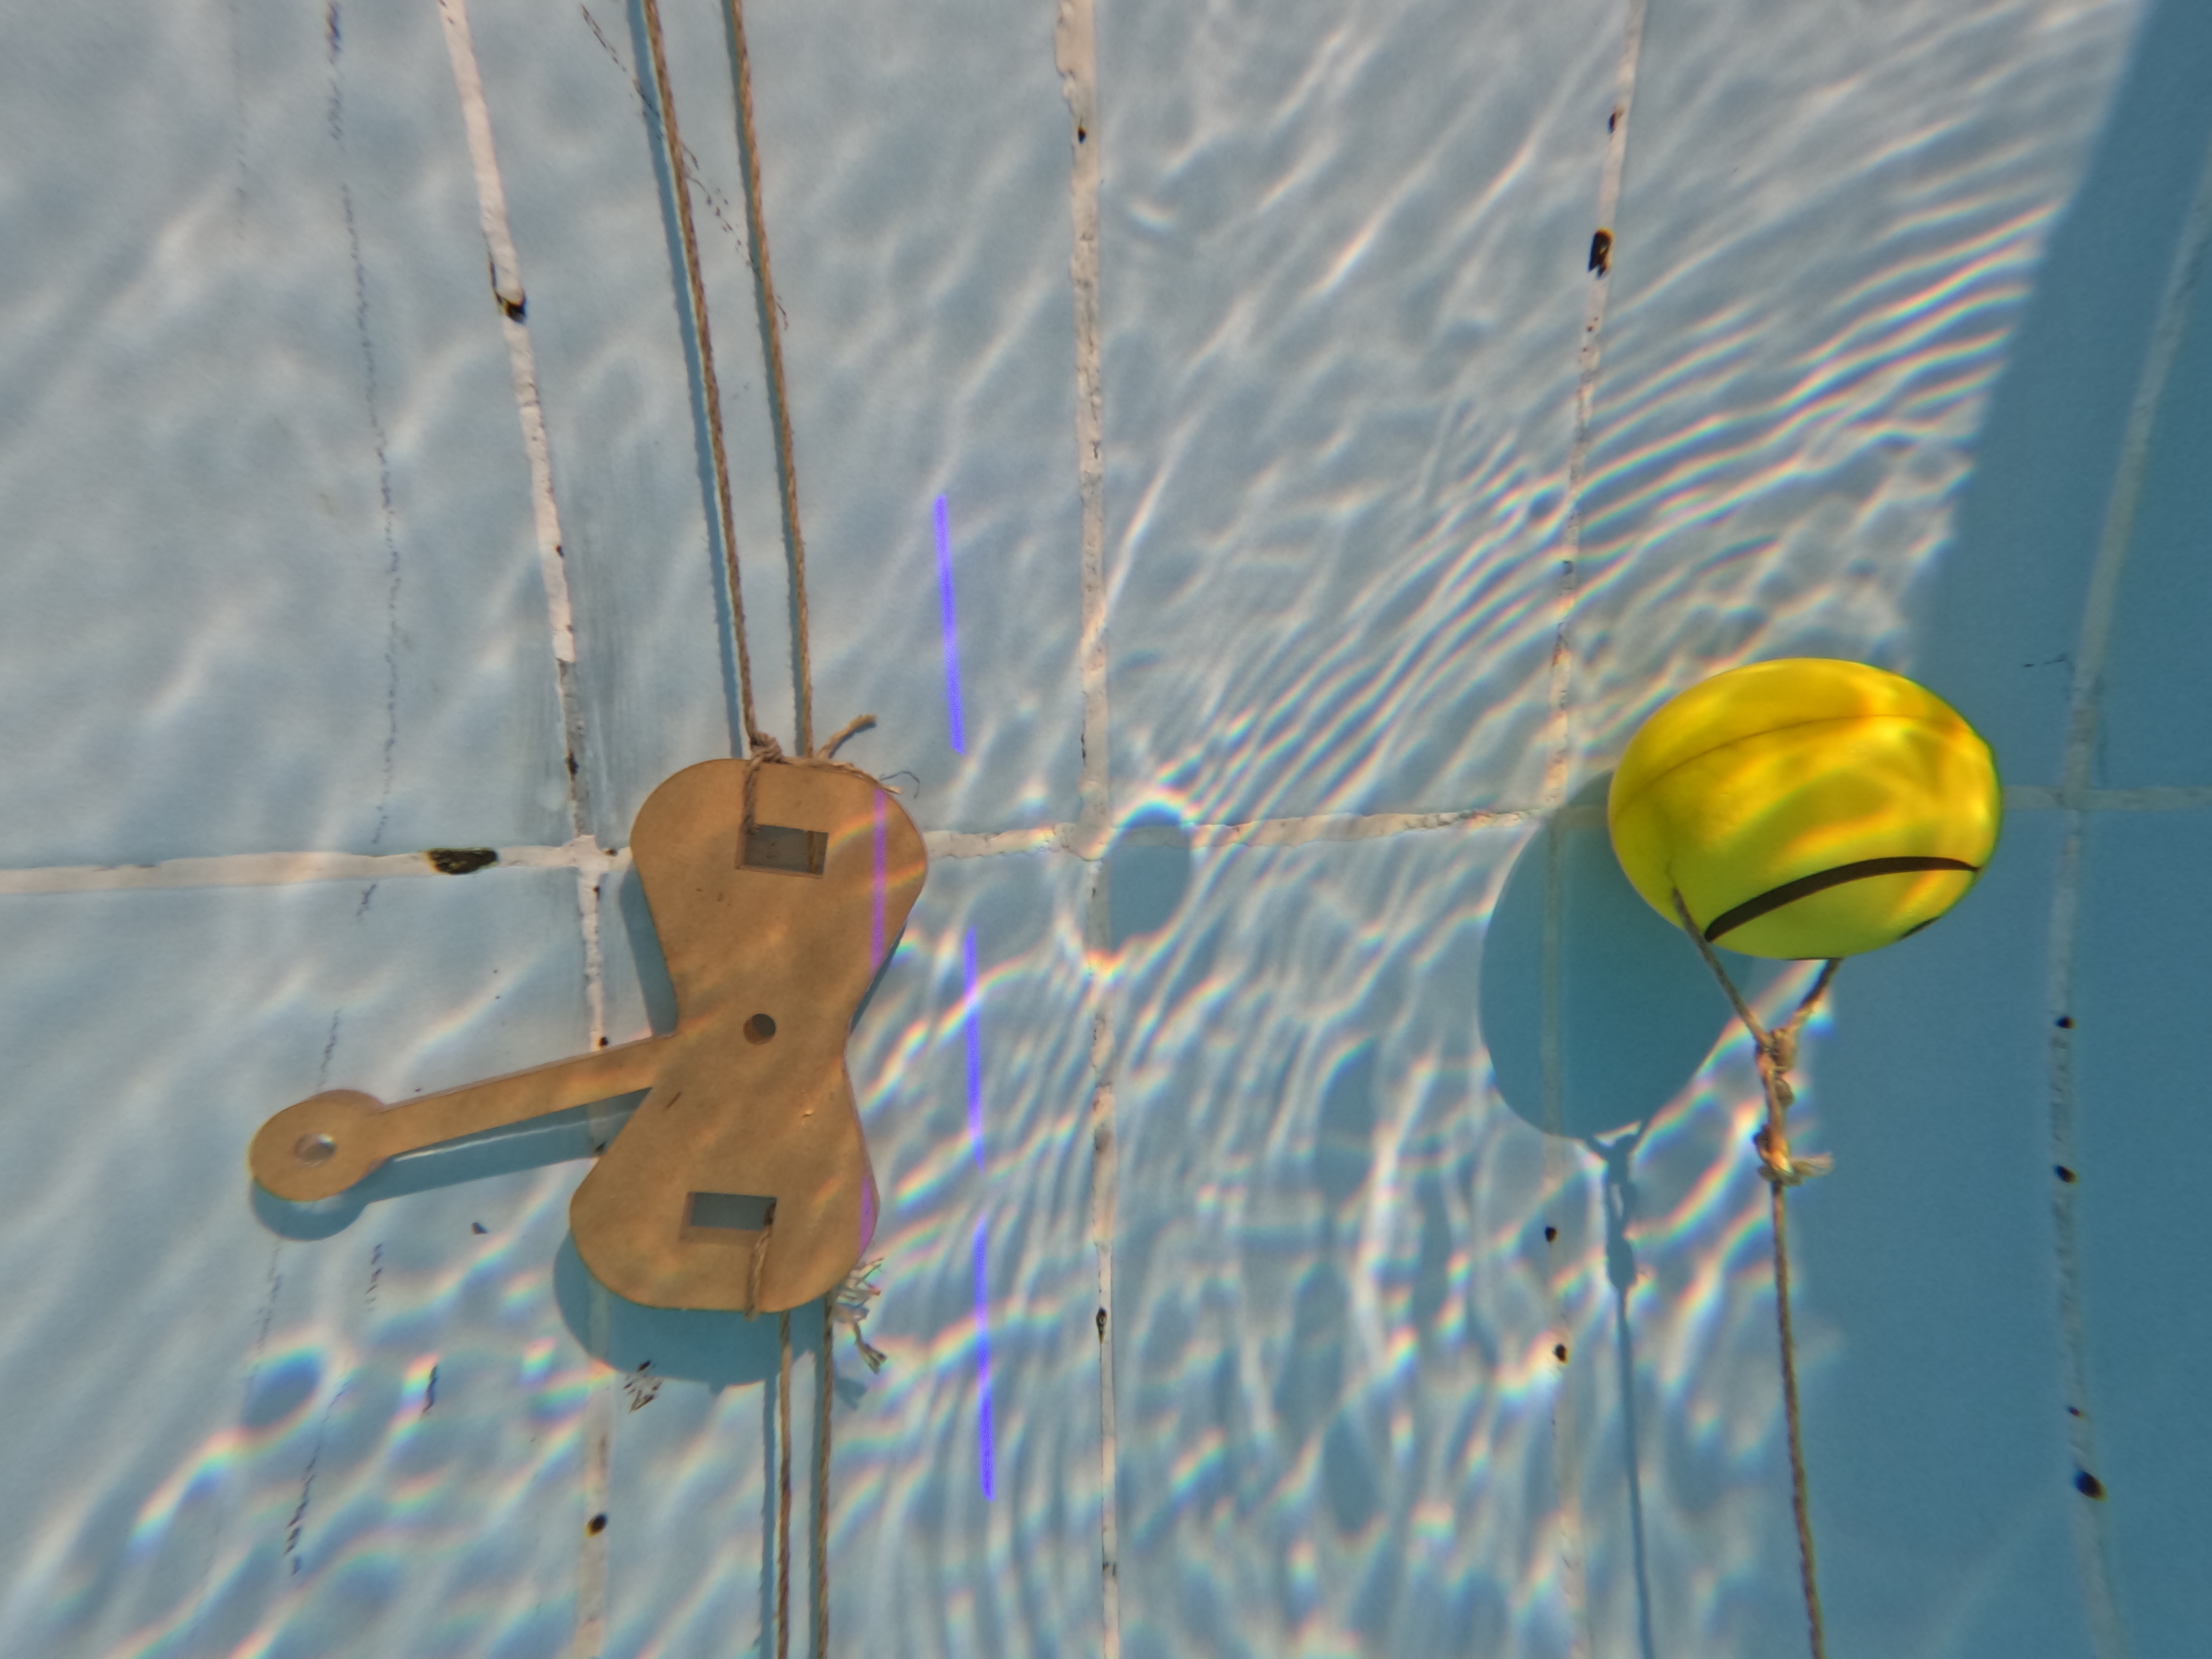

Supplement: Supplementary file 10 [file G0040404.pdf › Level_4_1/G0040404.pdf]

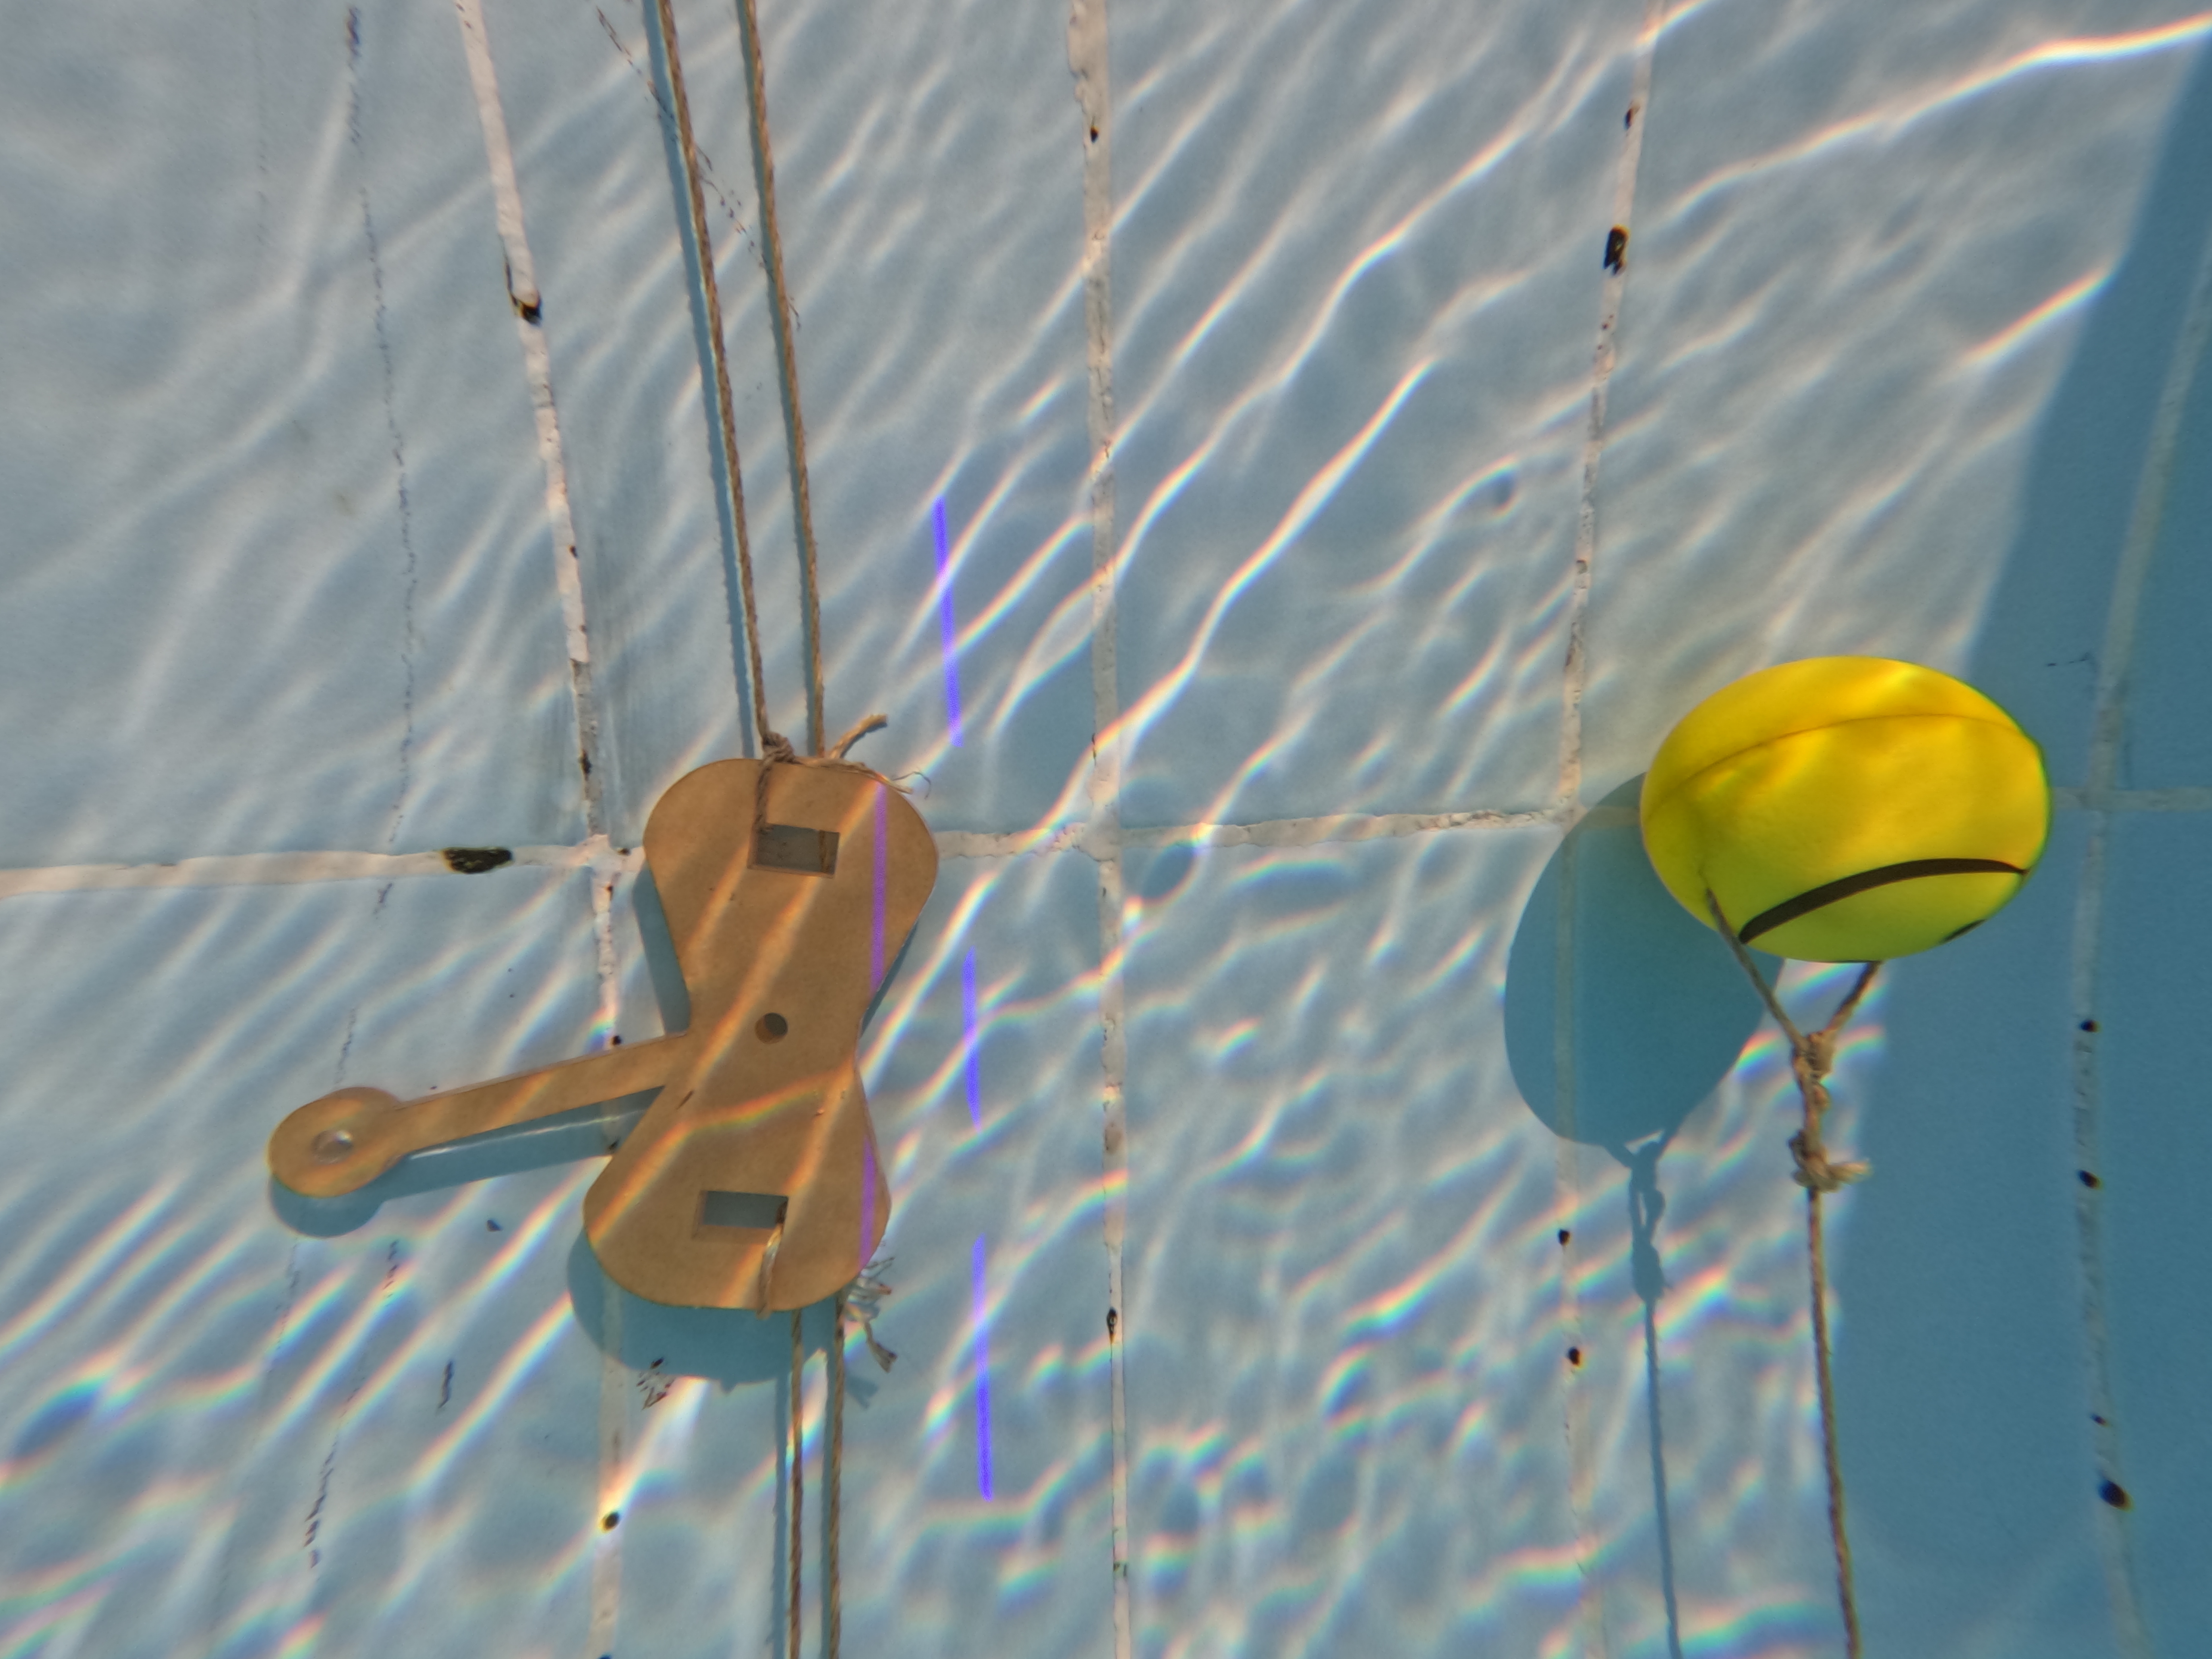

Supplement: Supplementary file 11 [file G0040405.pdf › Level_4_1/G0040405.pdf]

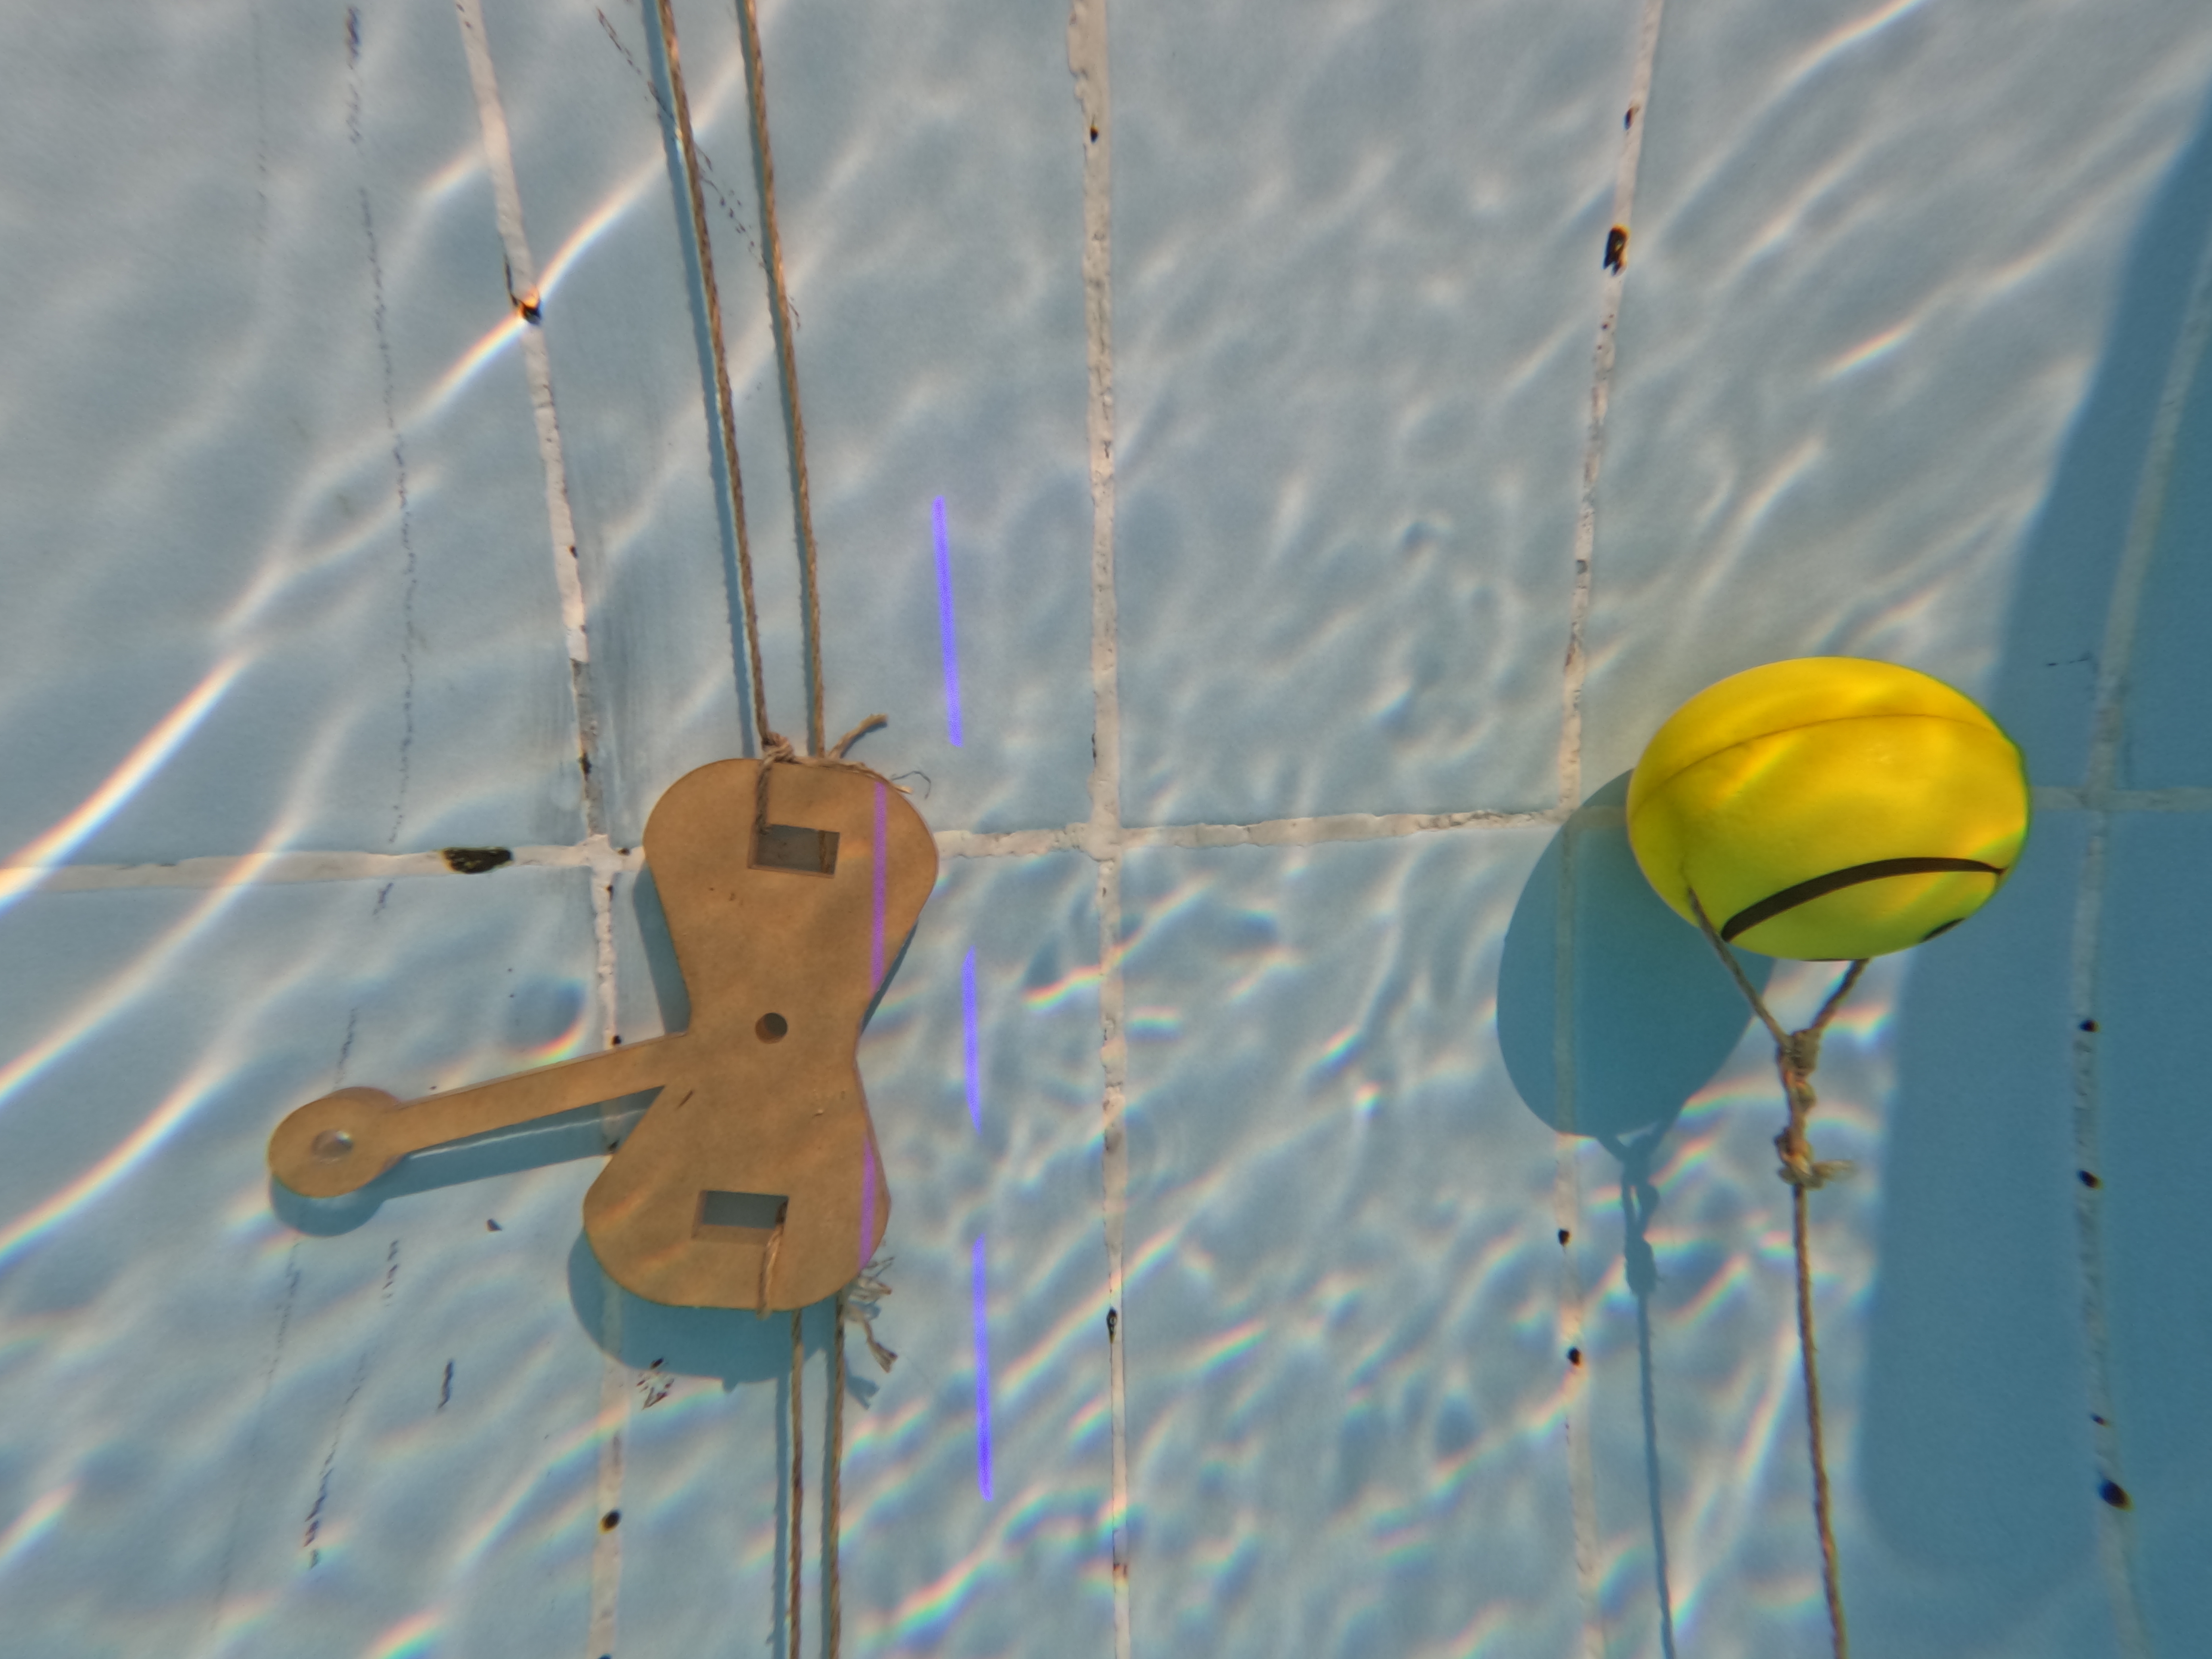

Supplement: Supplementary file 12 [file G0040406.pdf › Level_4_1/G0040406.pdf]

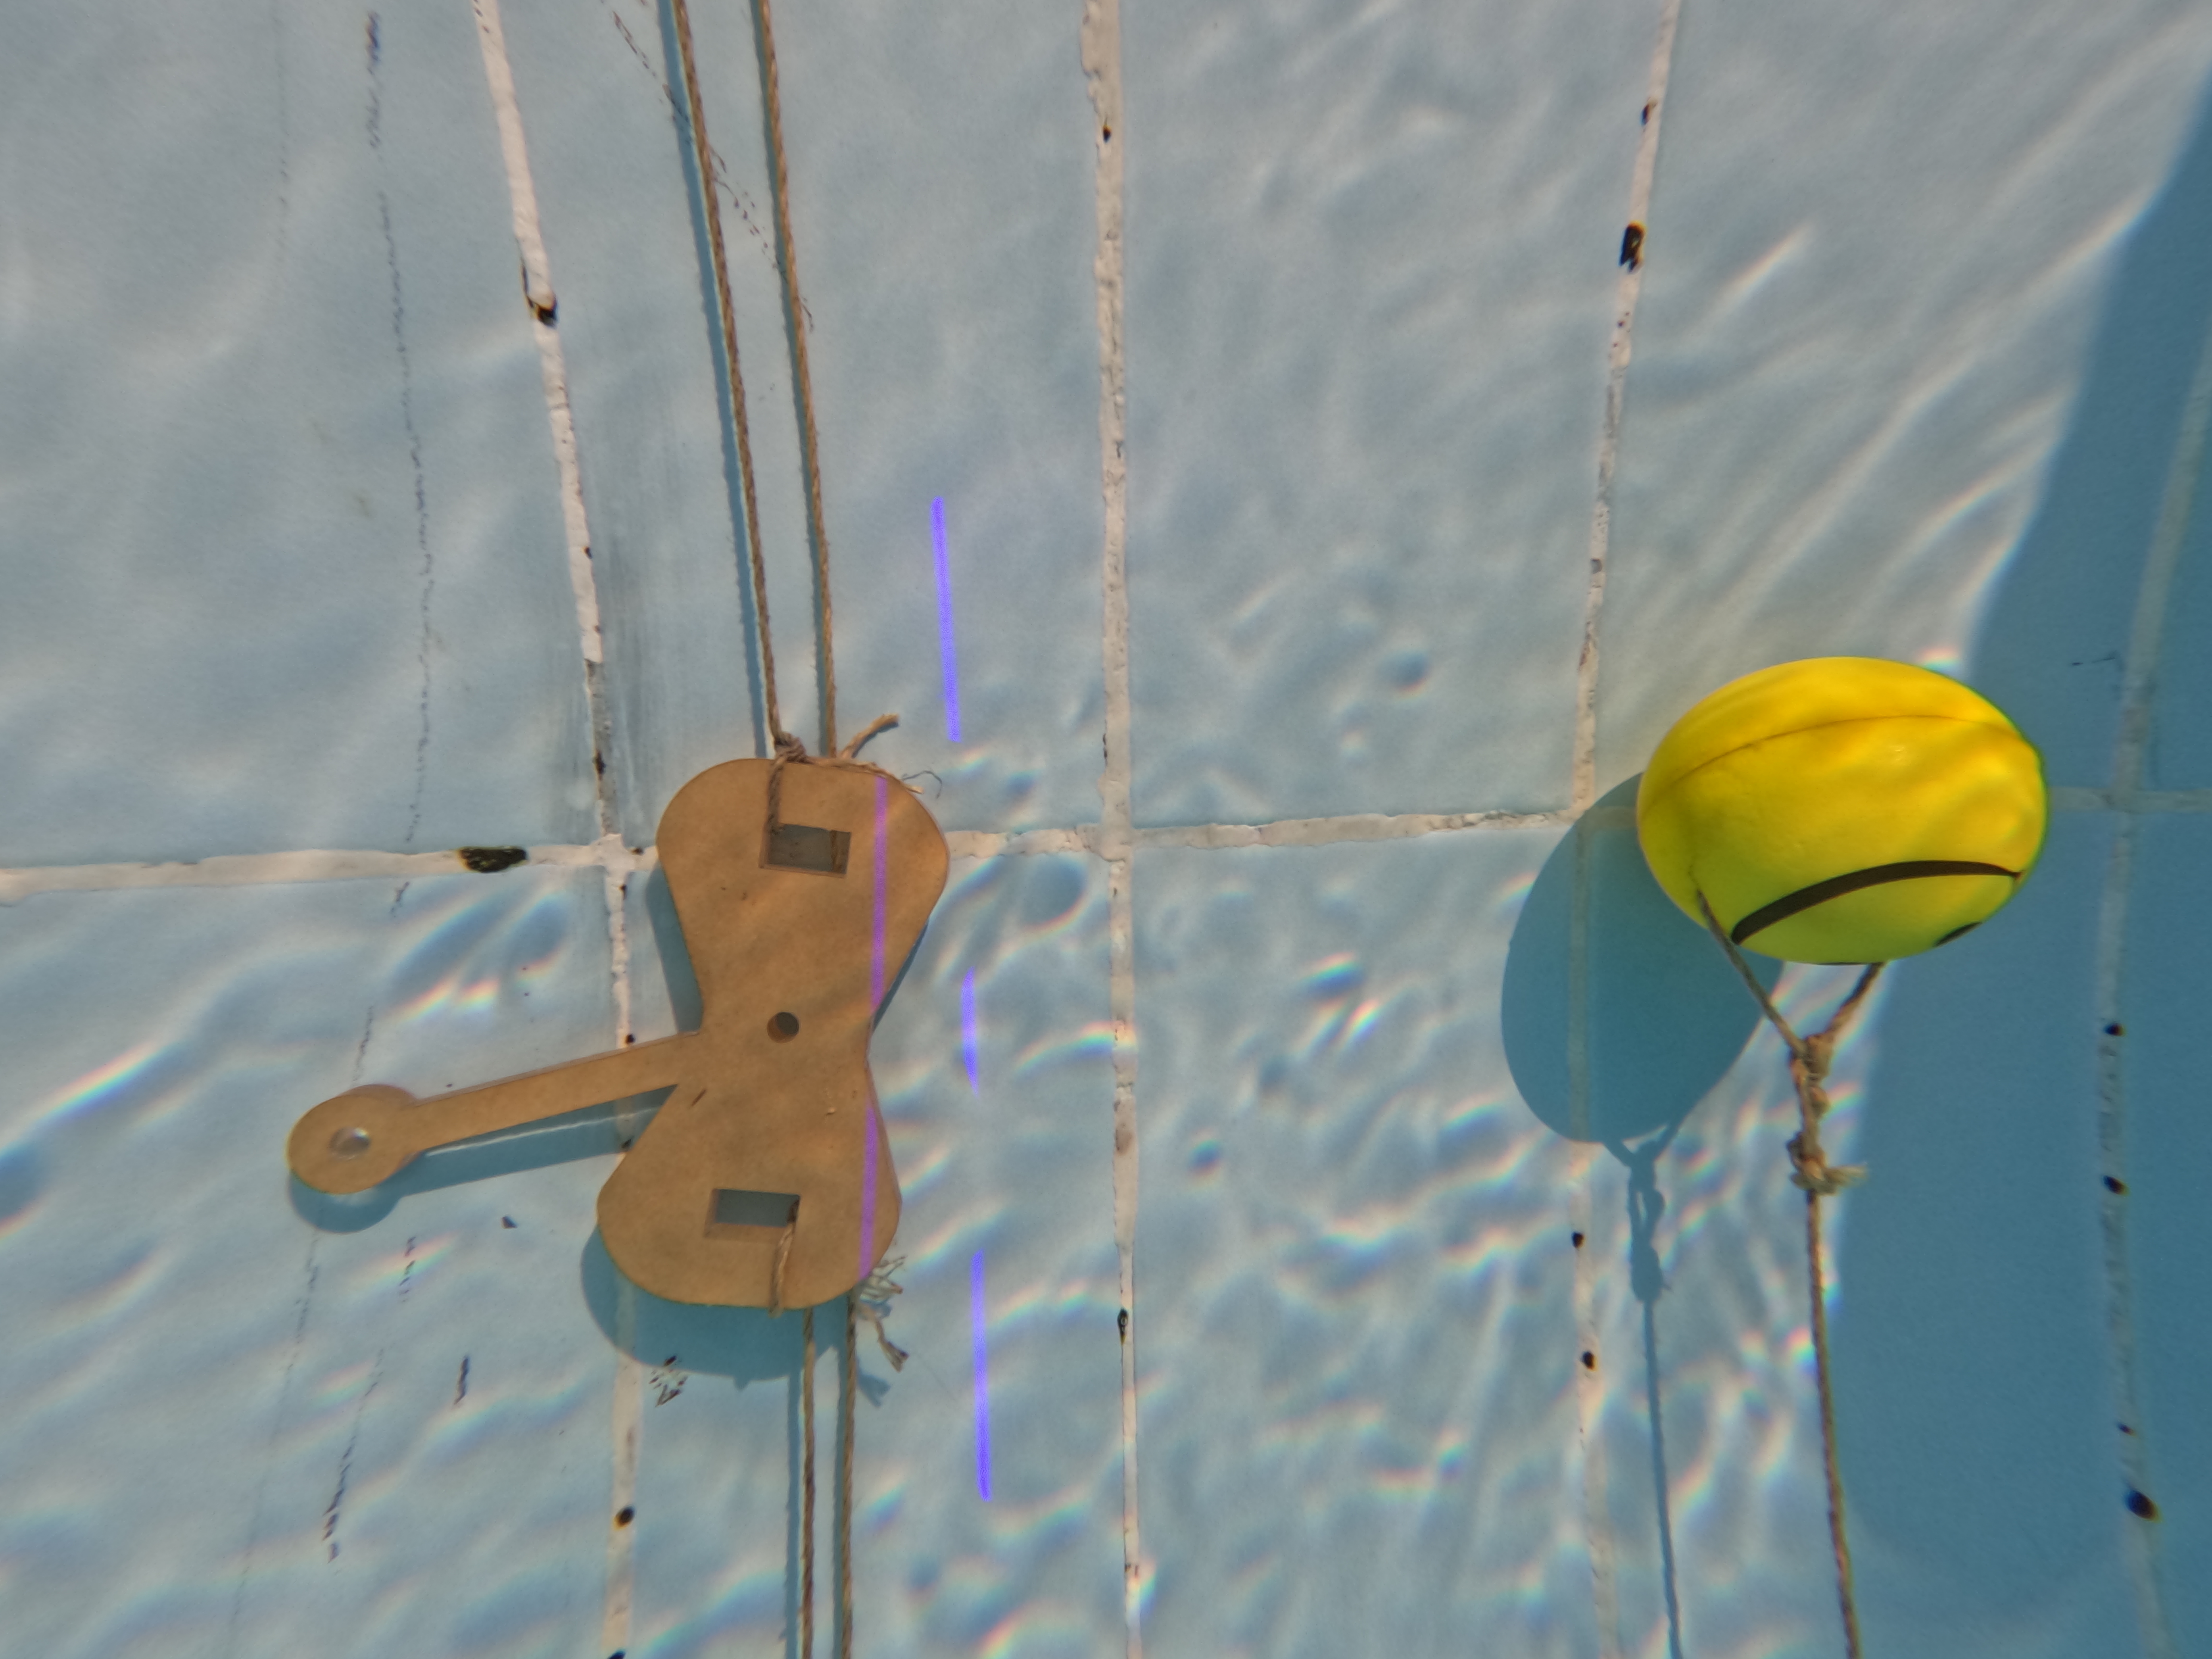

Supplement: Supplementary file 13 [file G0040407.pdf › Level_4_1/G0040407.pdf]

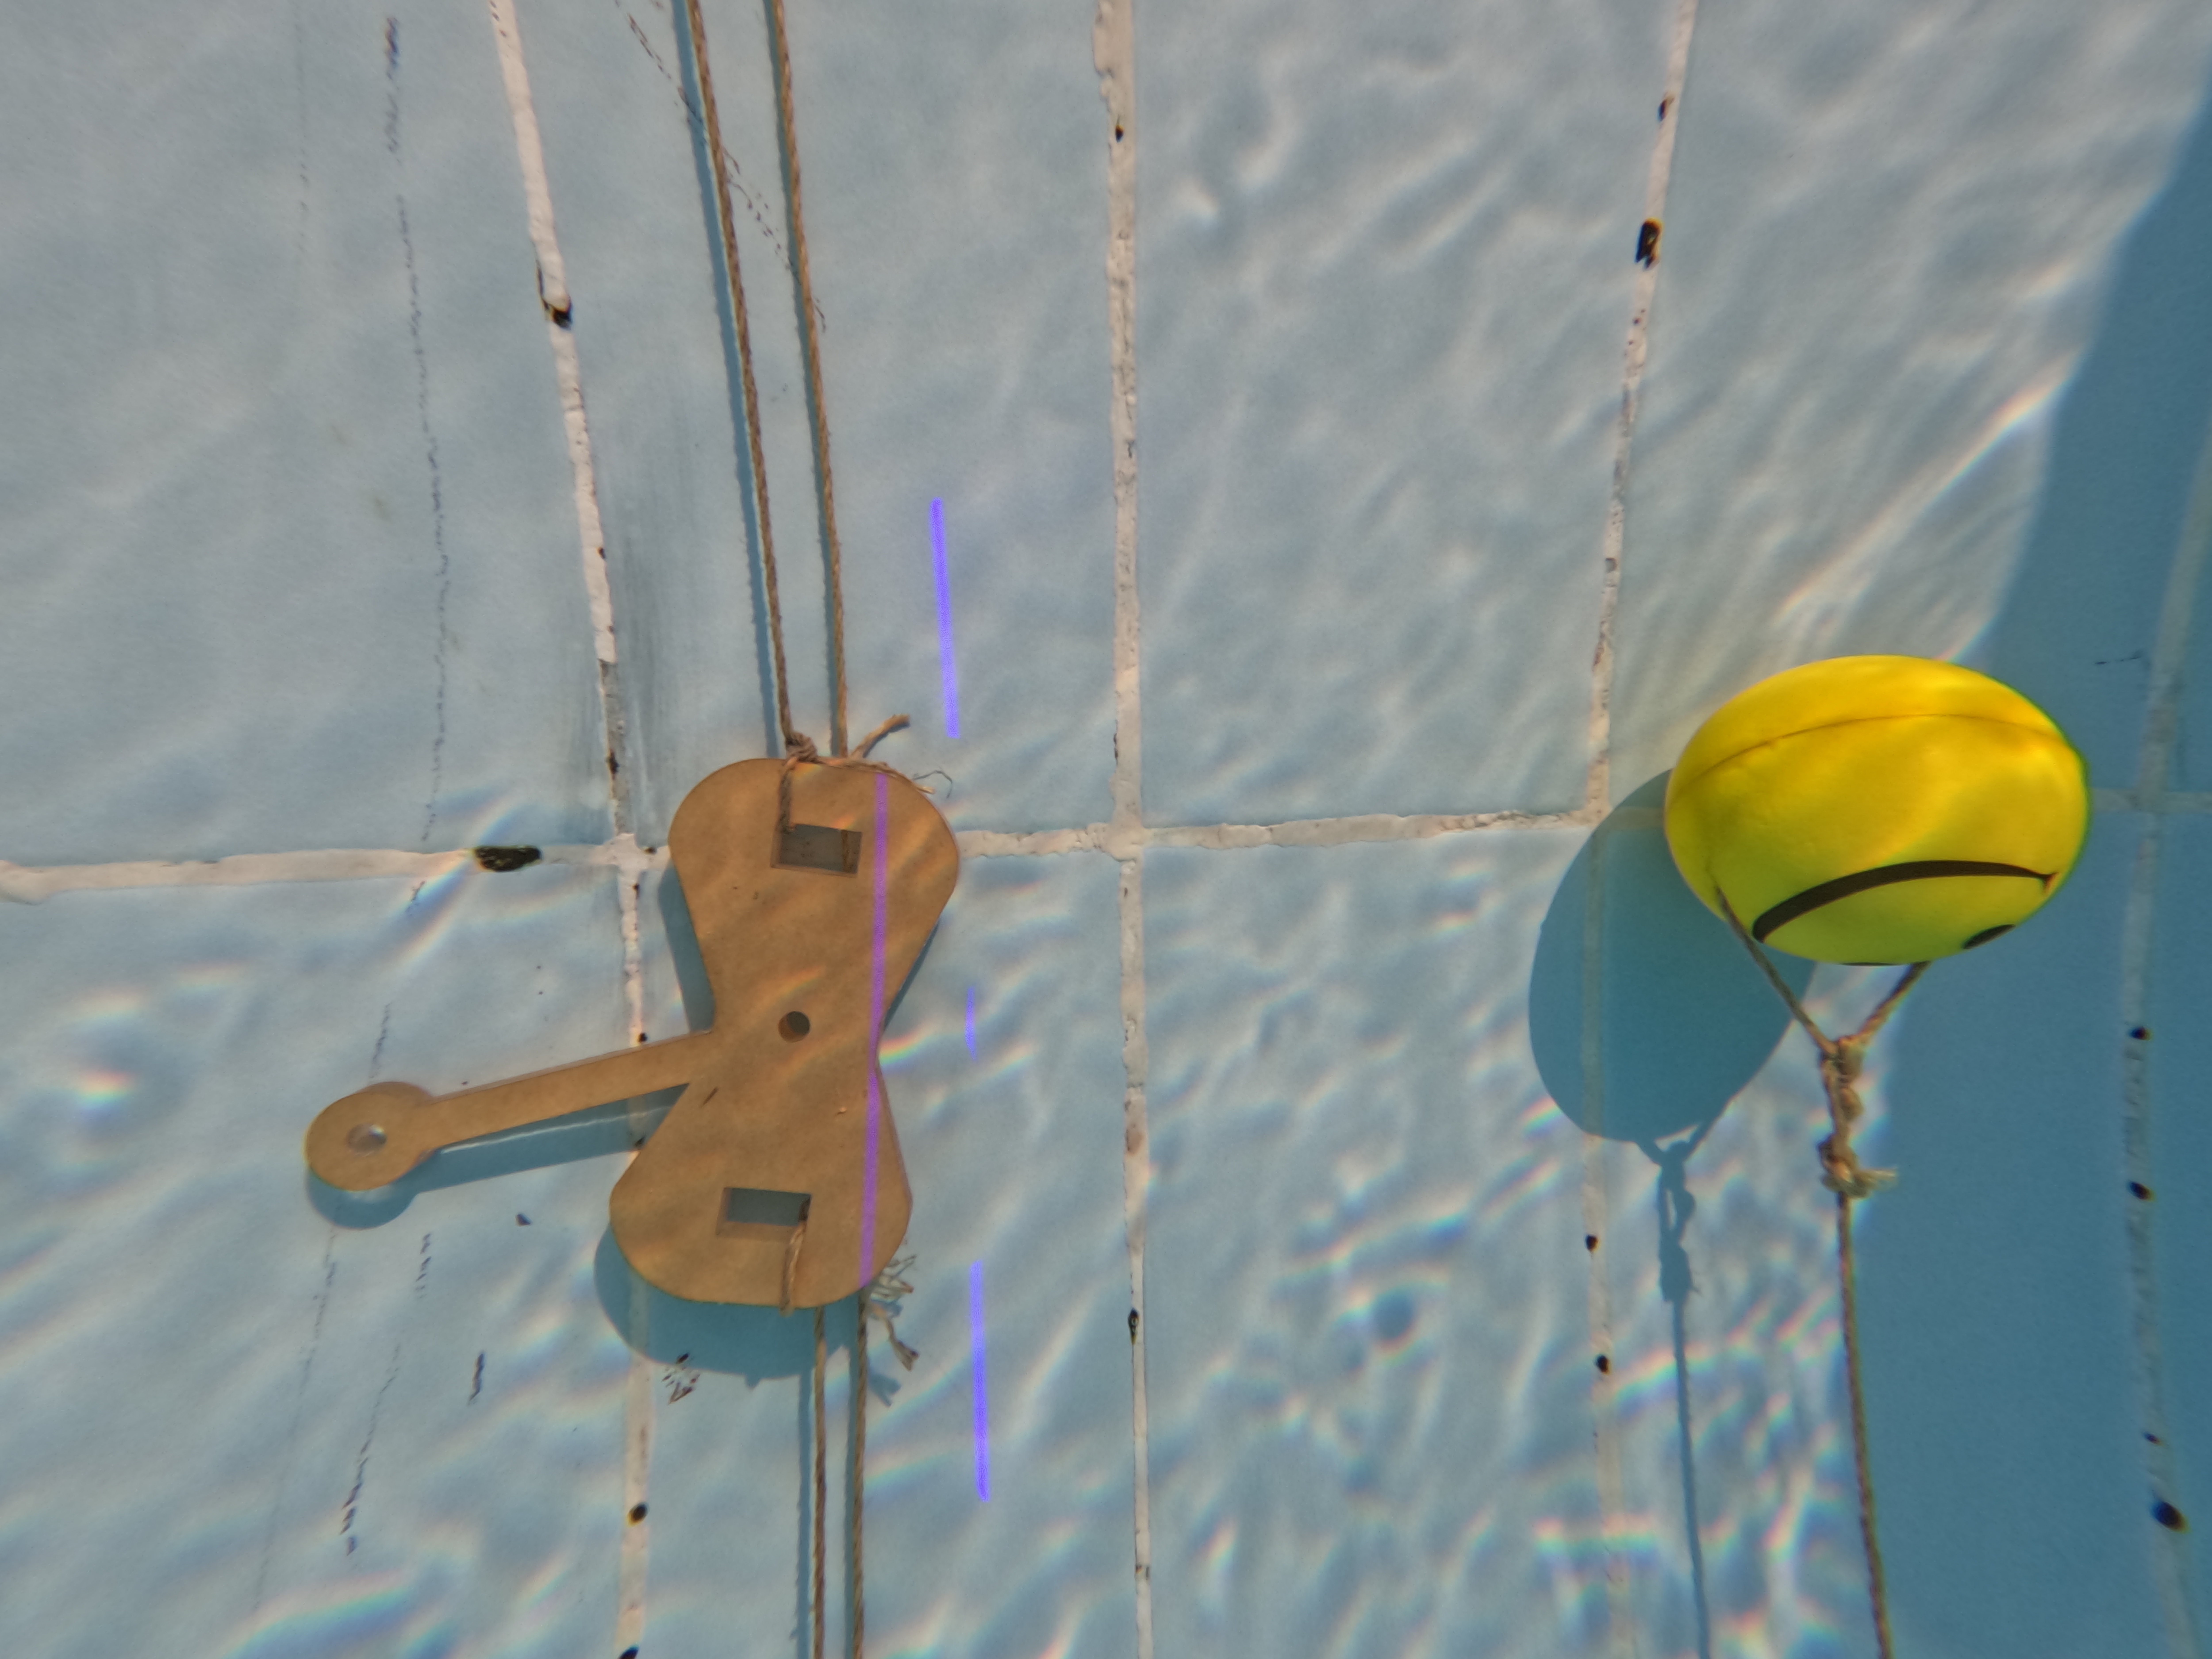

Supplement: Supplementary file 14 [file G0040408.pdf › Level_4_1/G0040408.pdf]

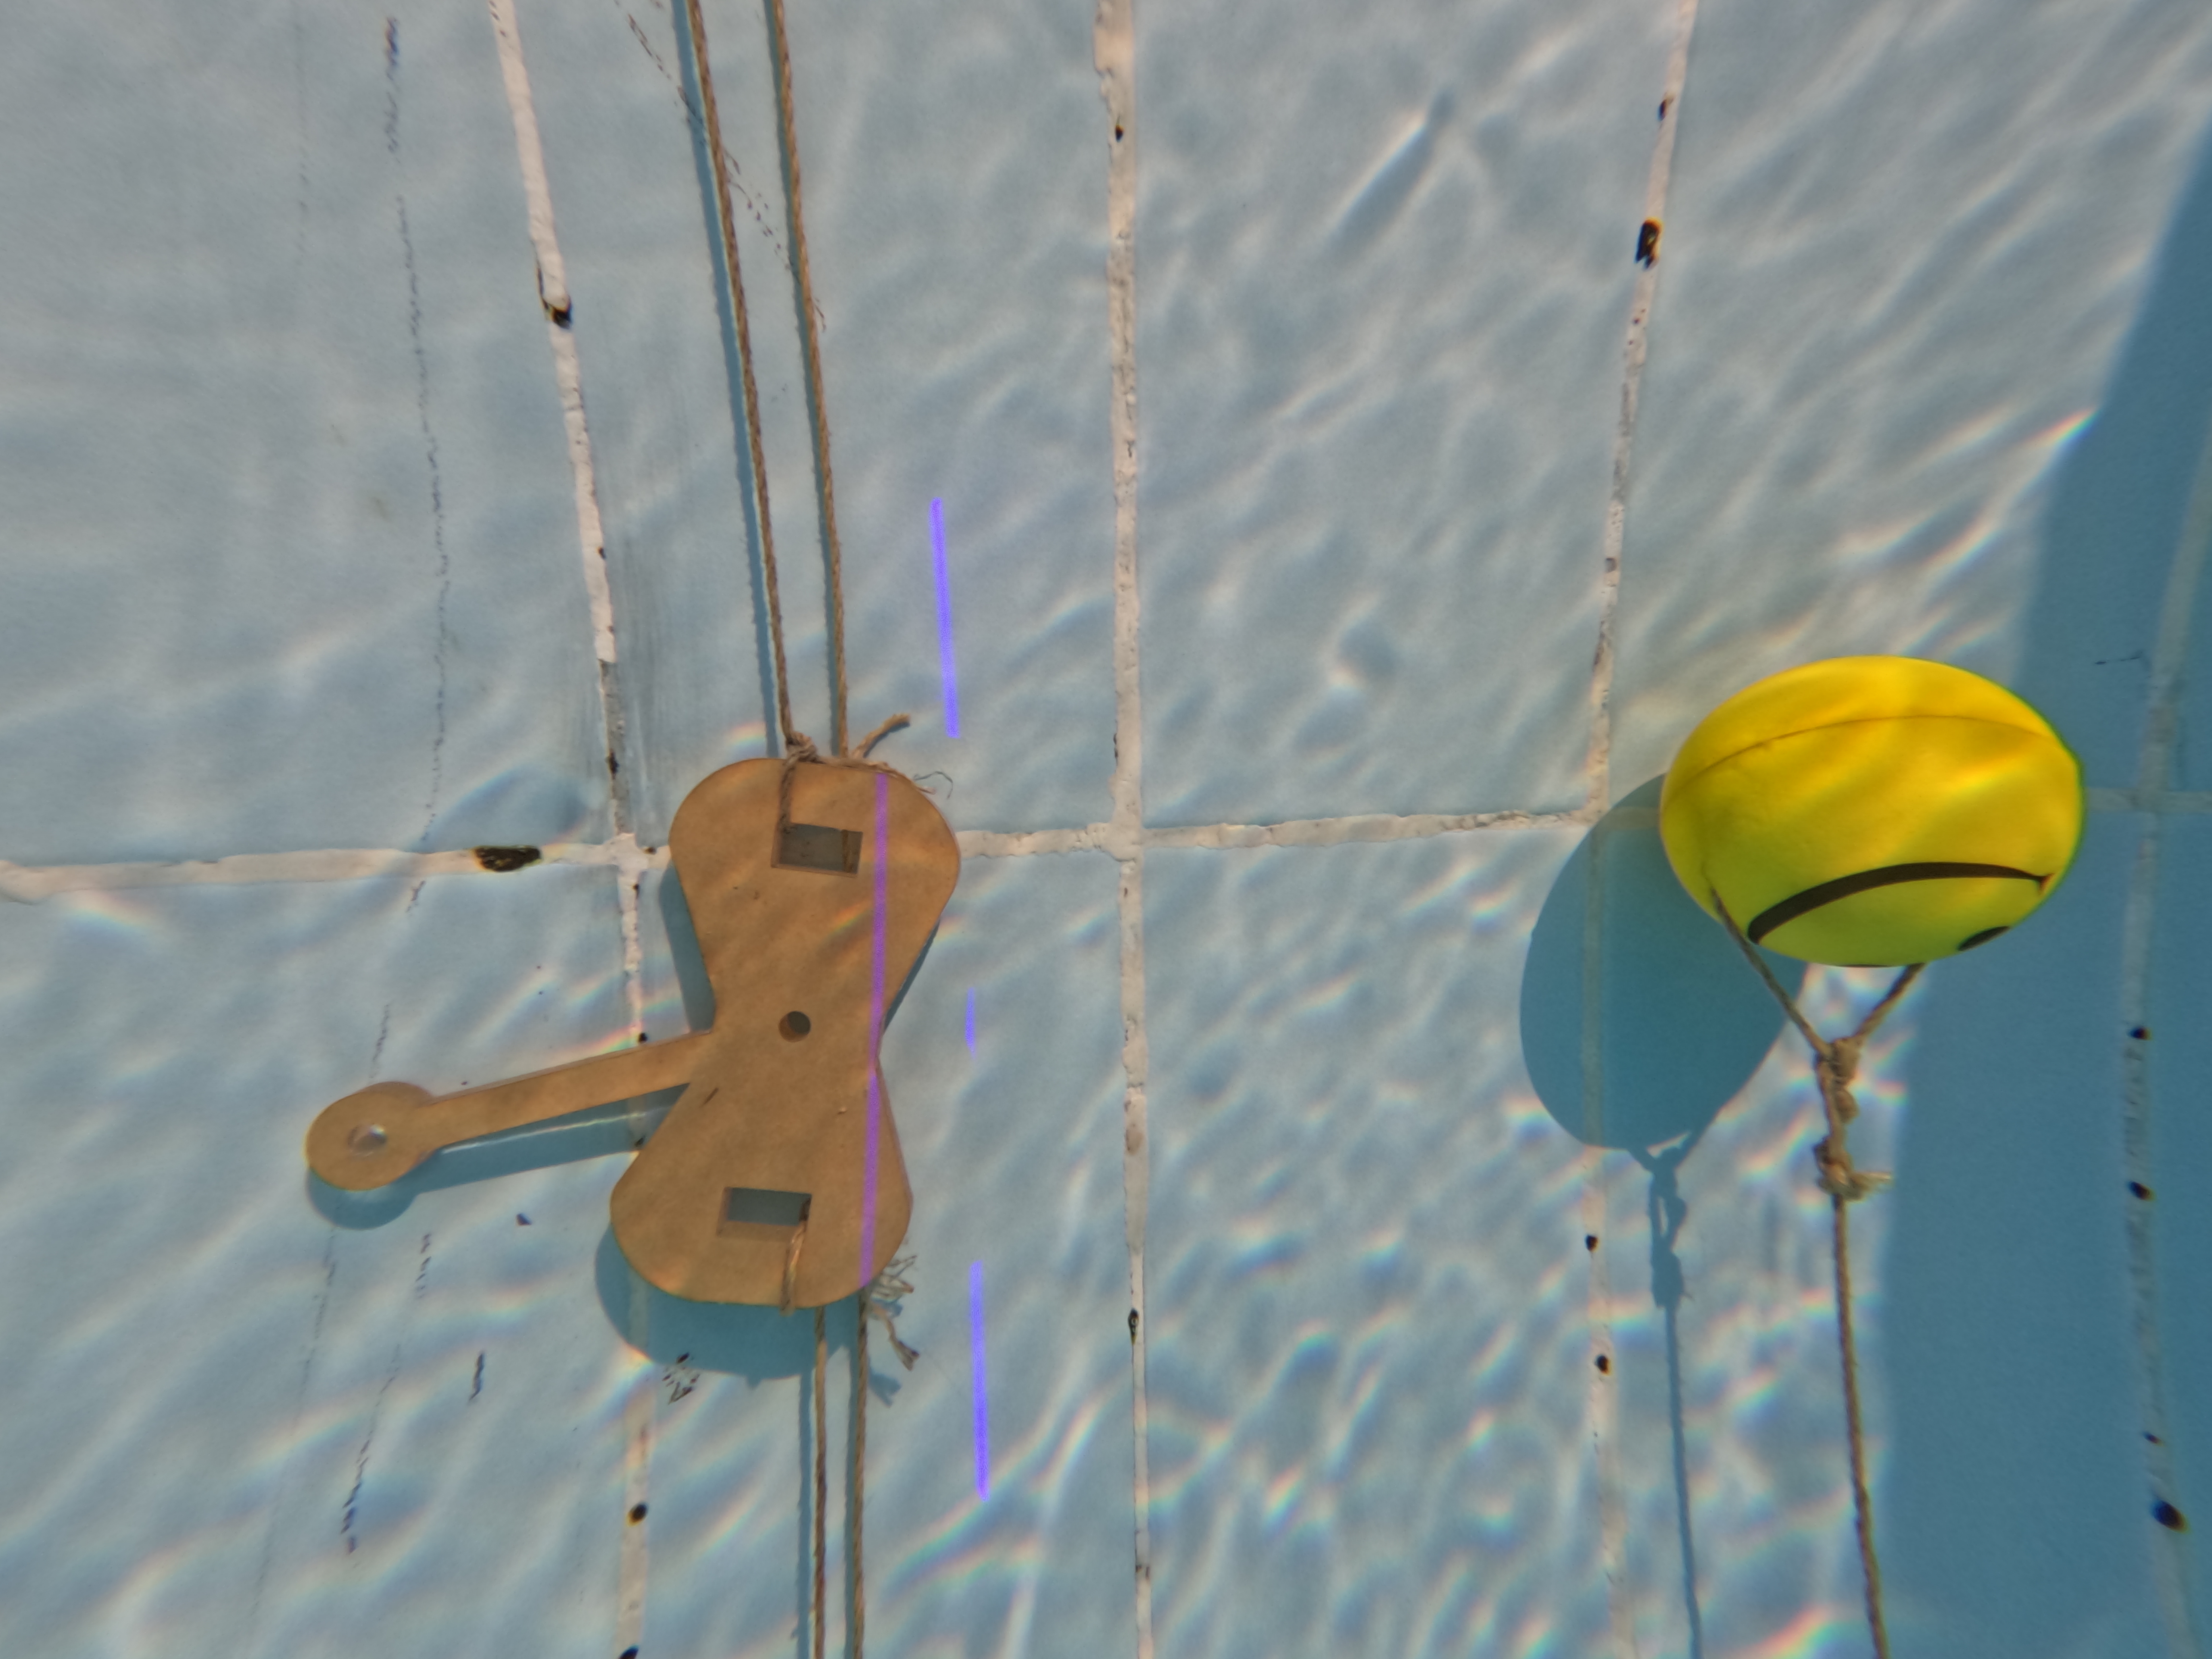

Supplement: Supplementary file 15 [file G0040409.pdf › Level_4_1/G0040409.pdf]

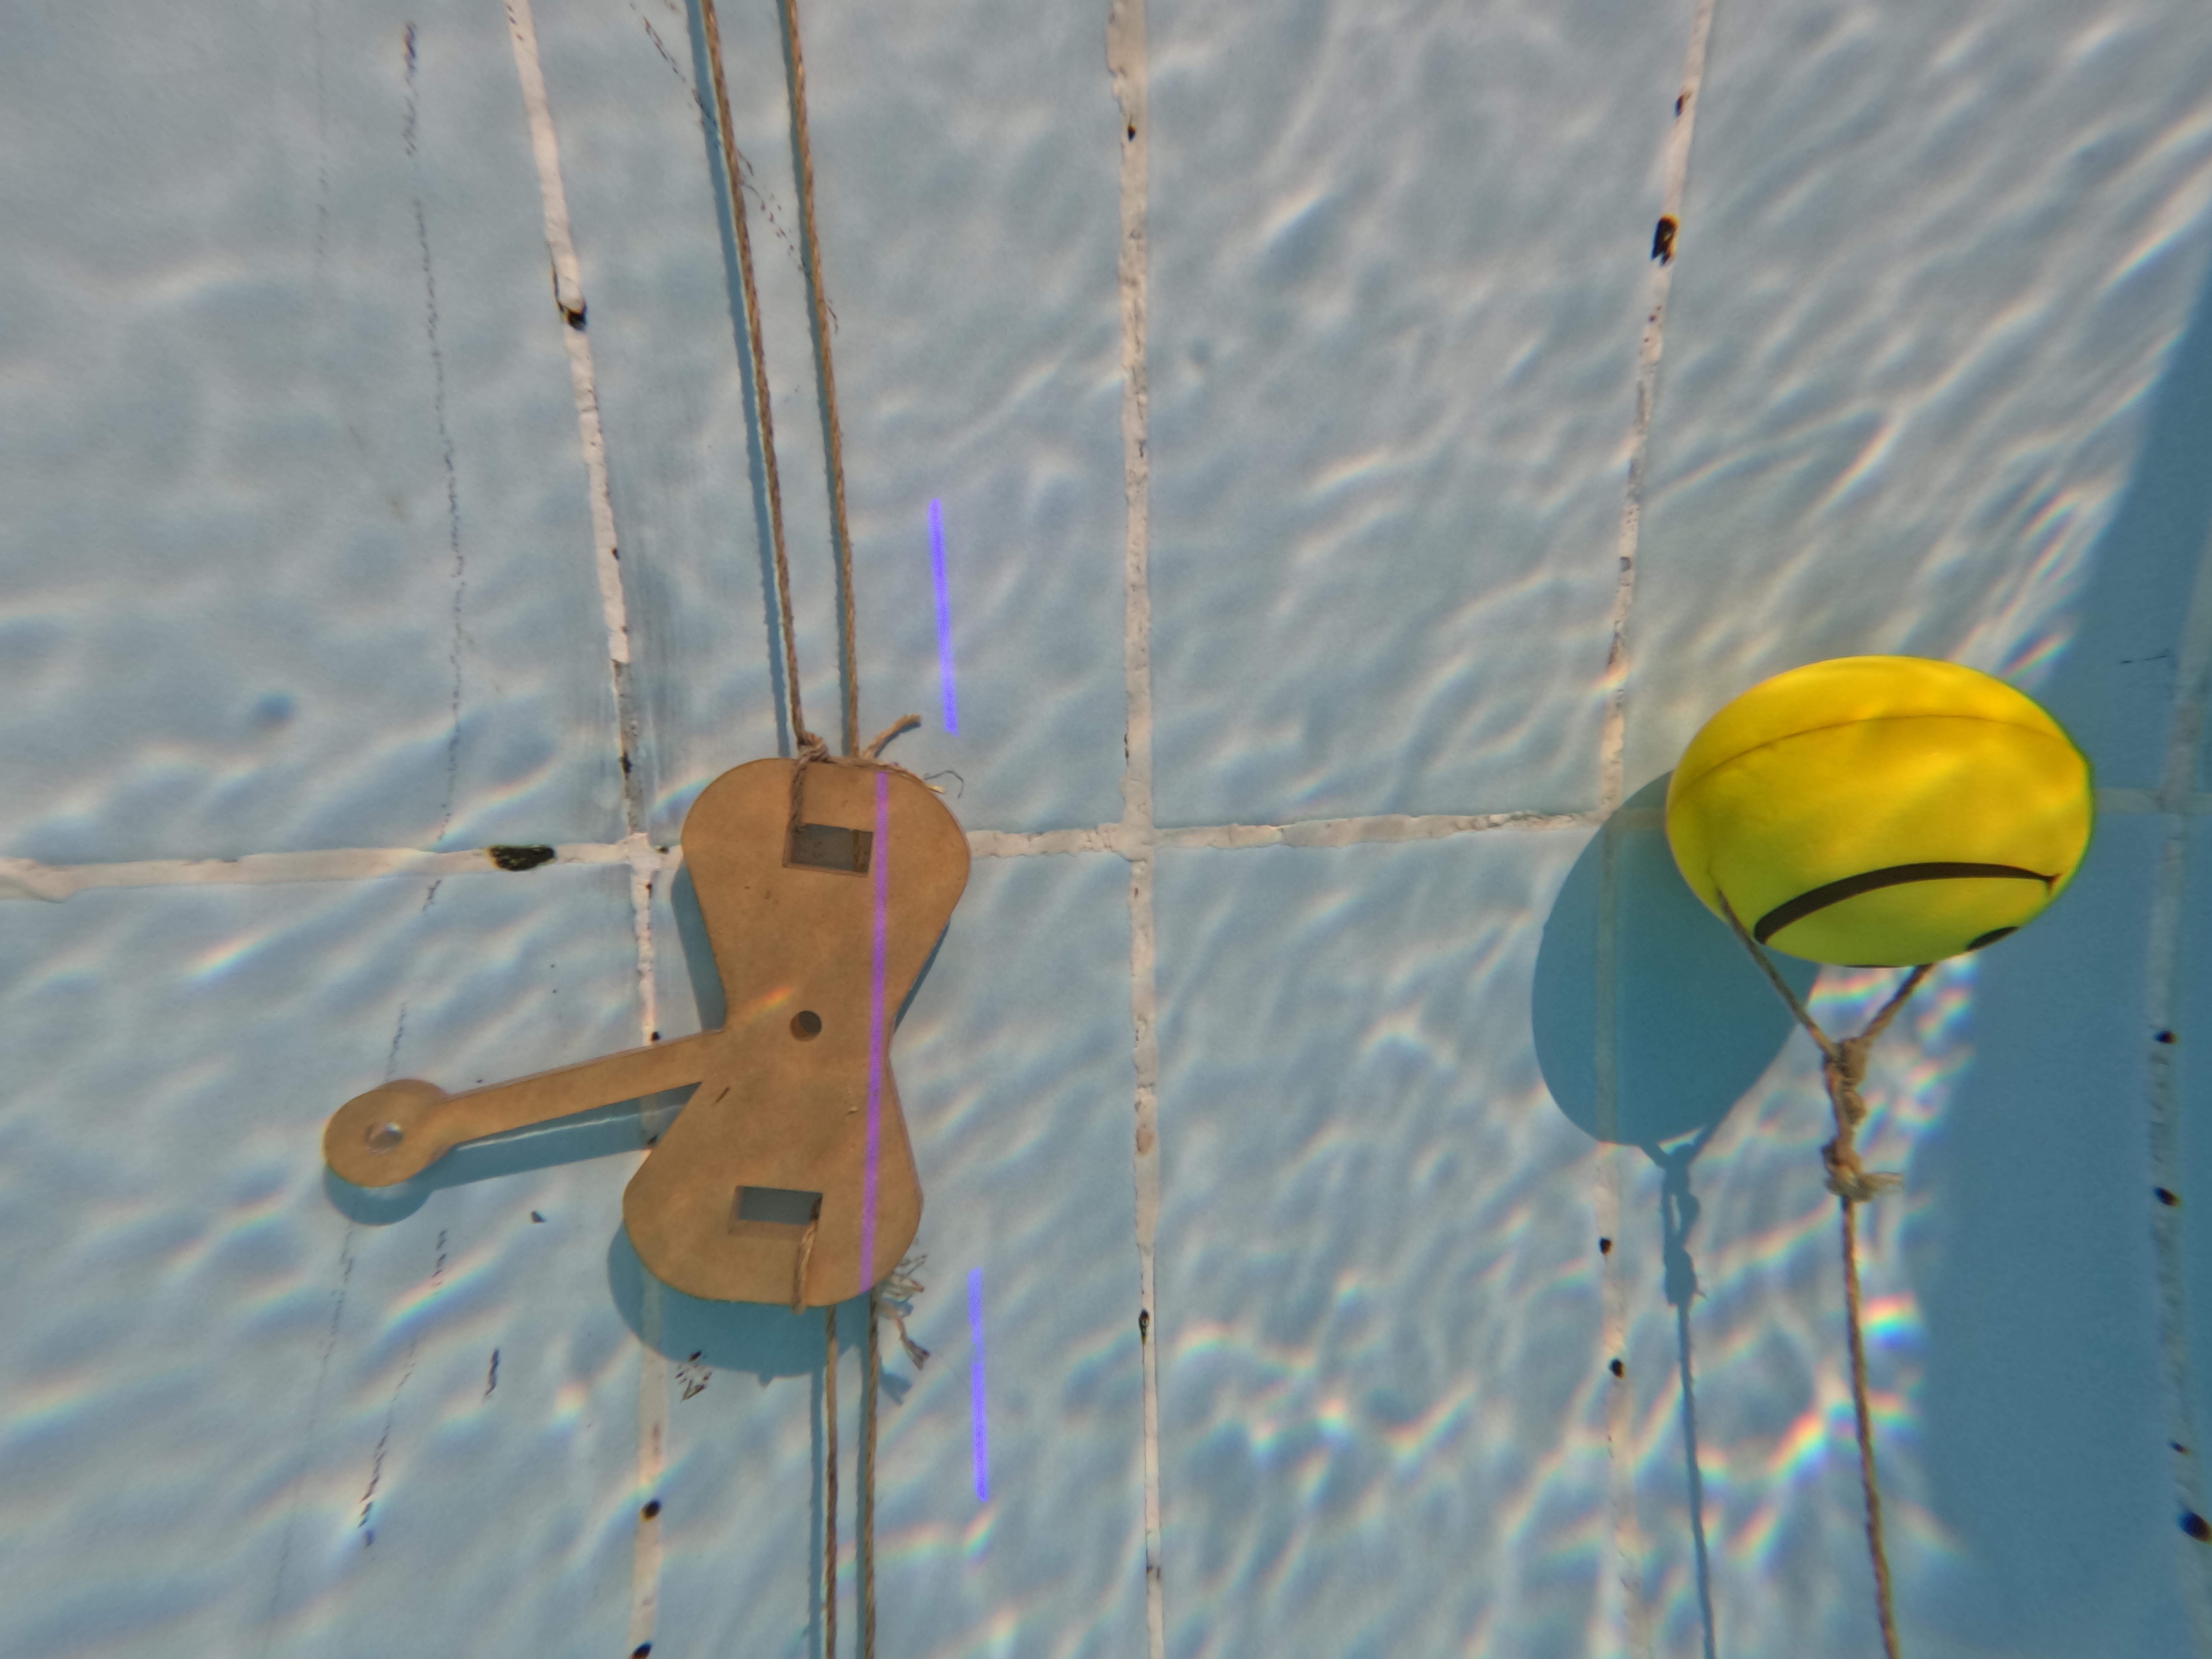

Supplement: Supplementary file 16 [file G0040410.pdf › Level_4_1/G0040410.pdf]

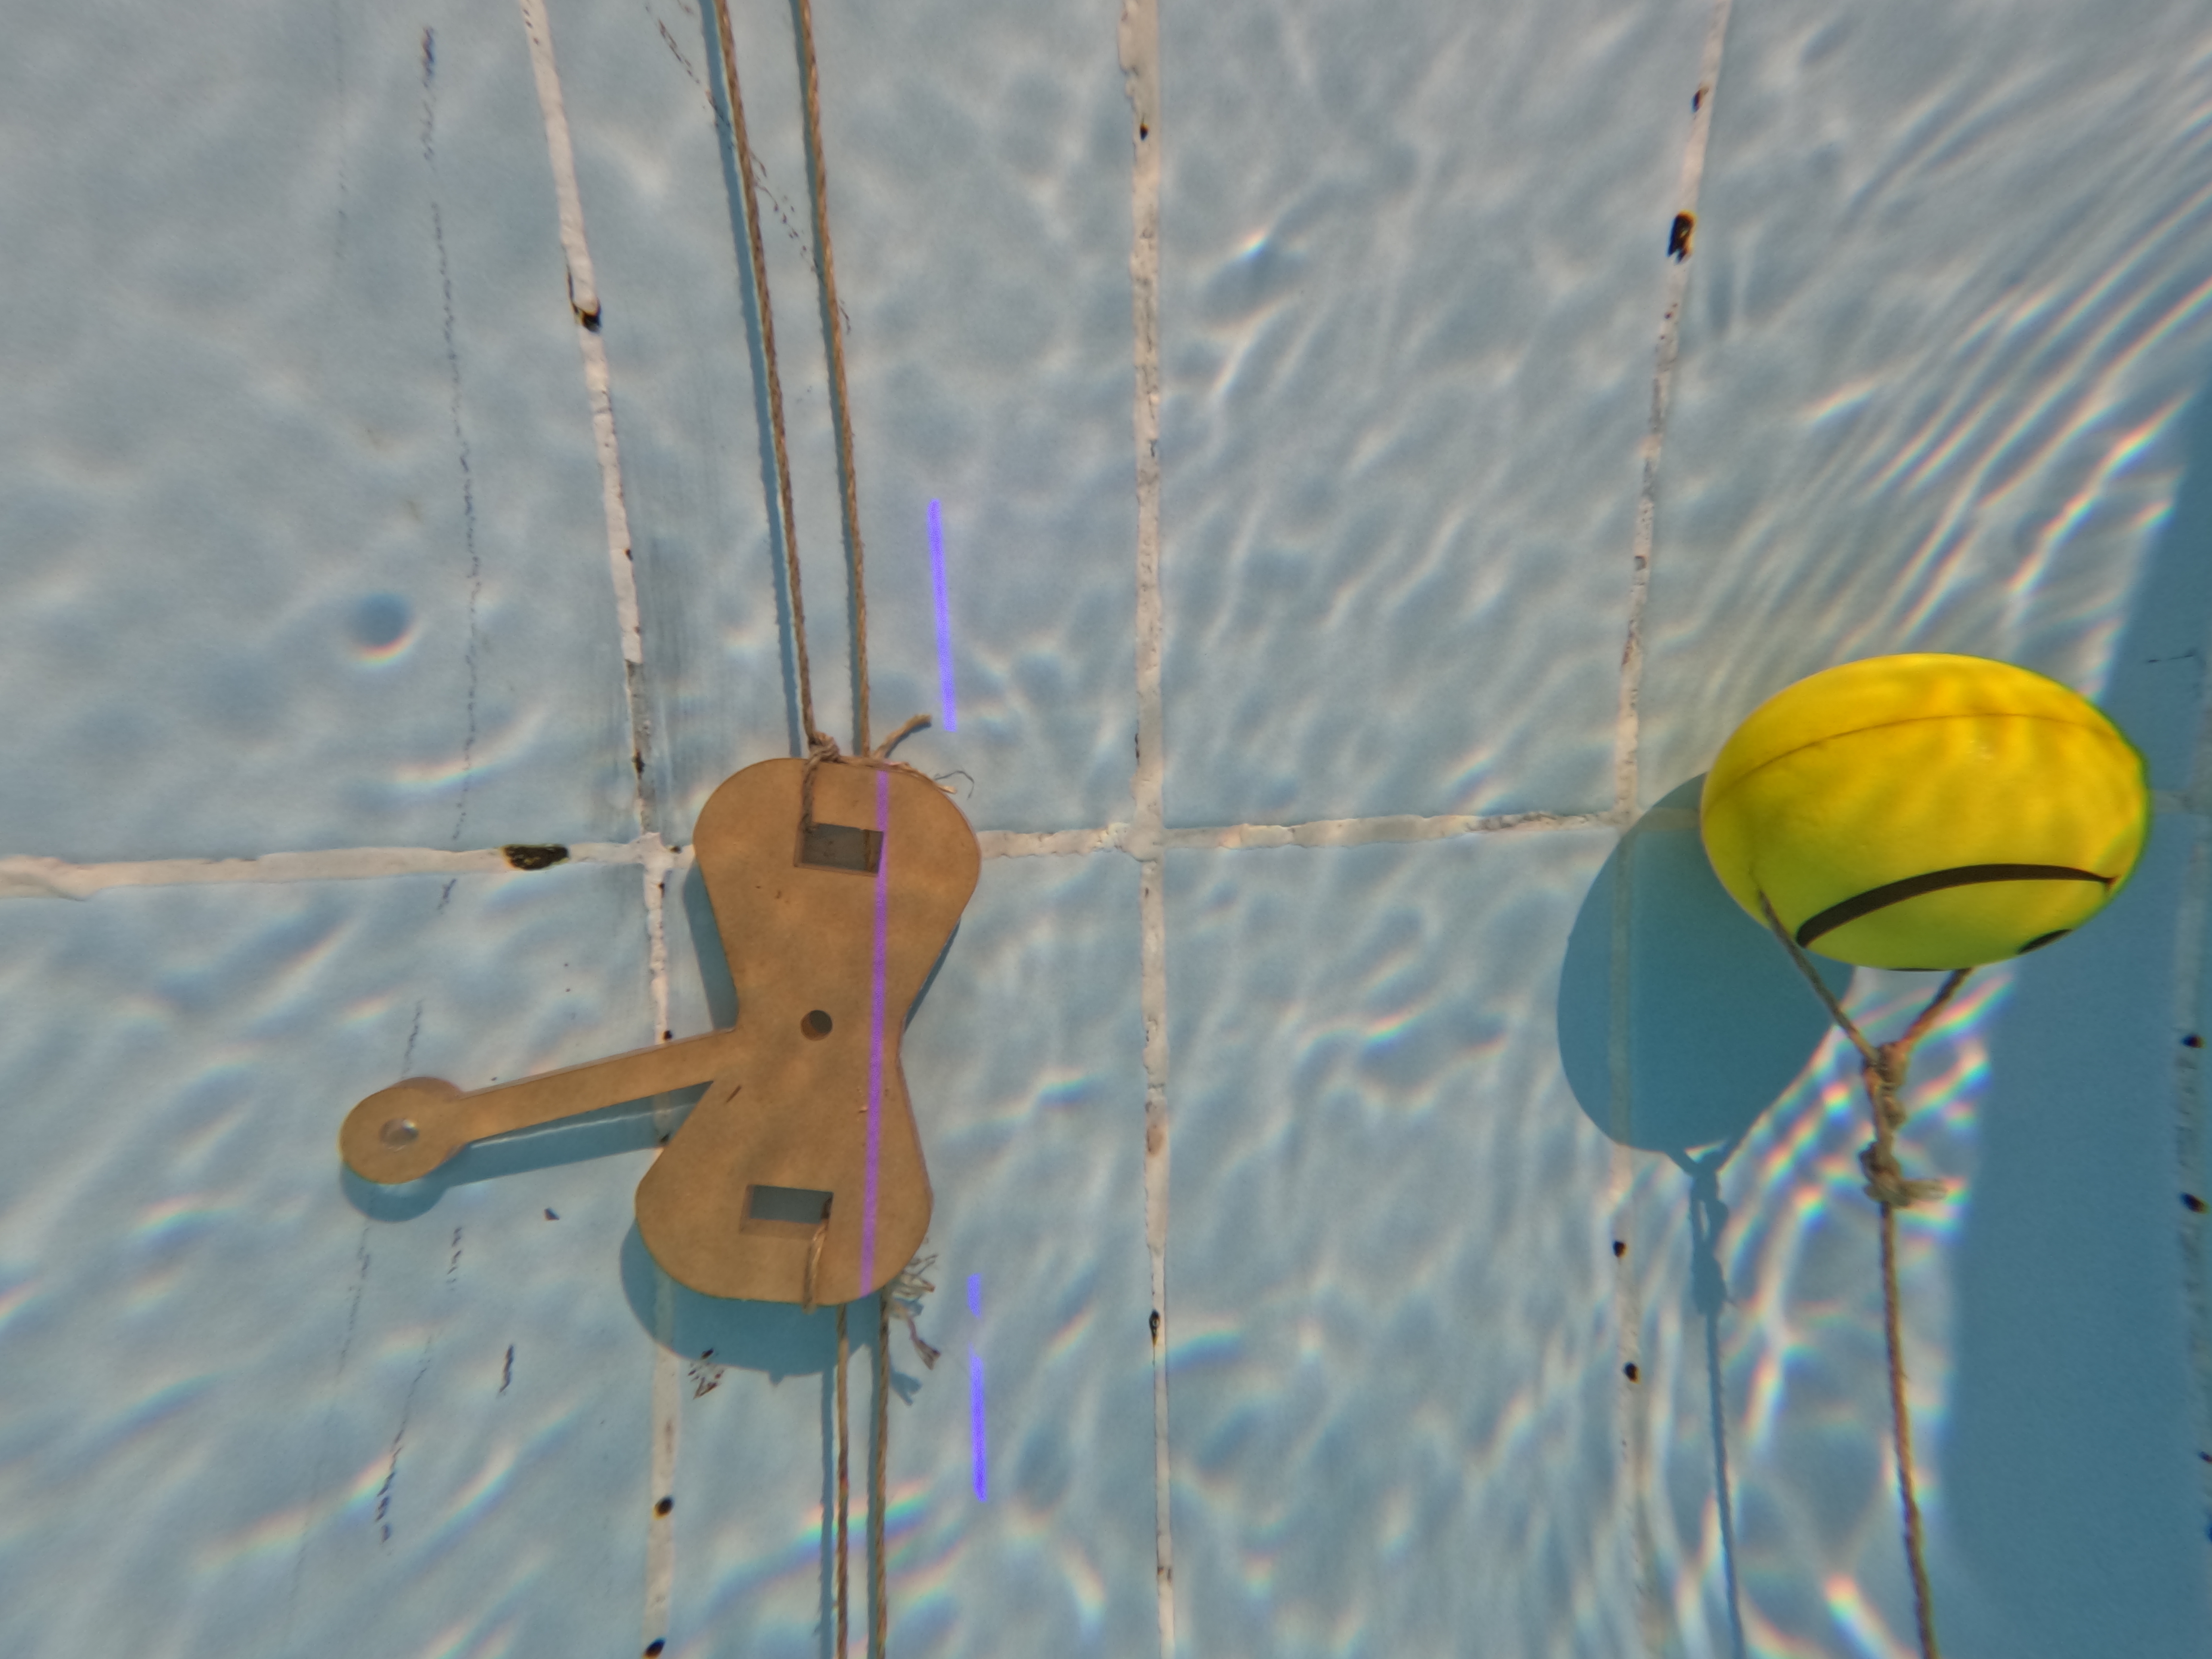

Supplement: Supplementary file 17 [file G0040411.pdf › Level_4_1/G0040411.pdf]

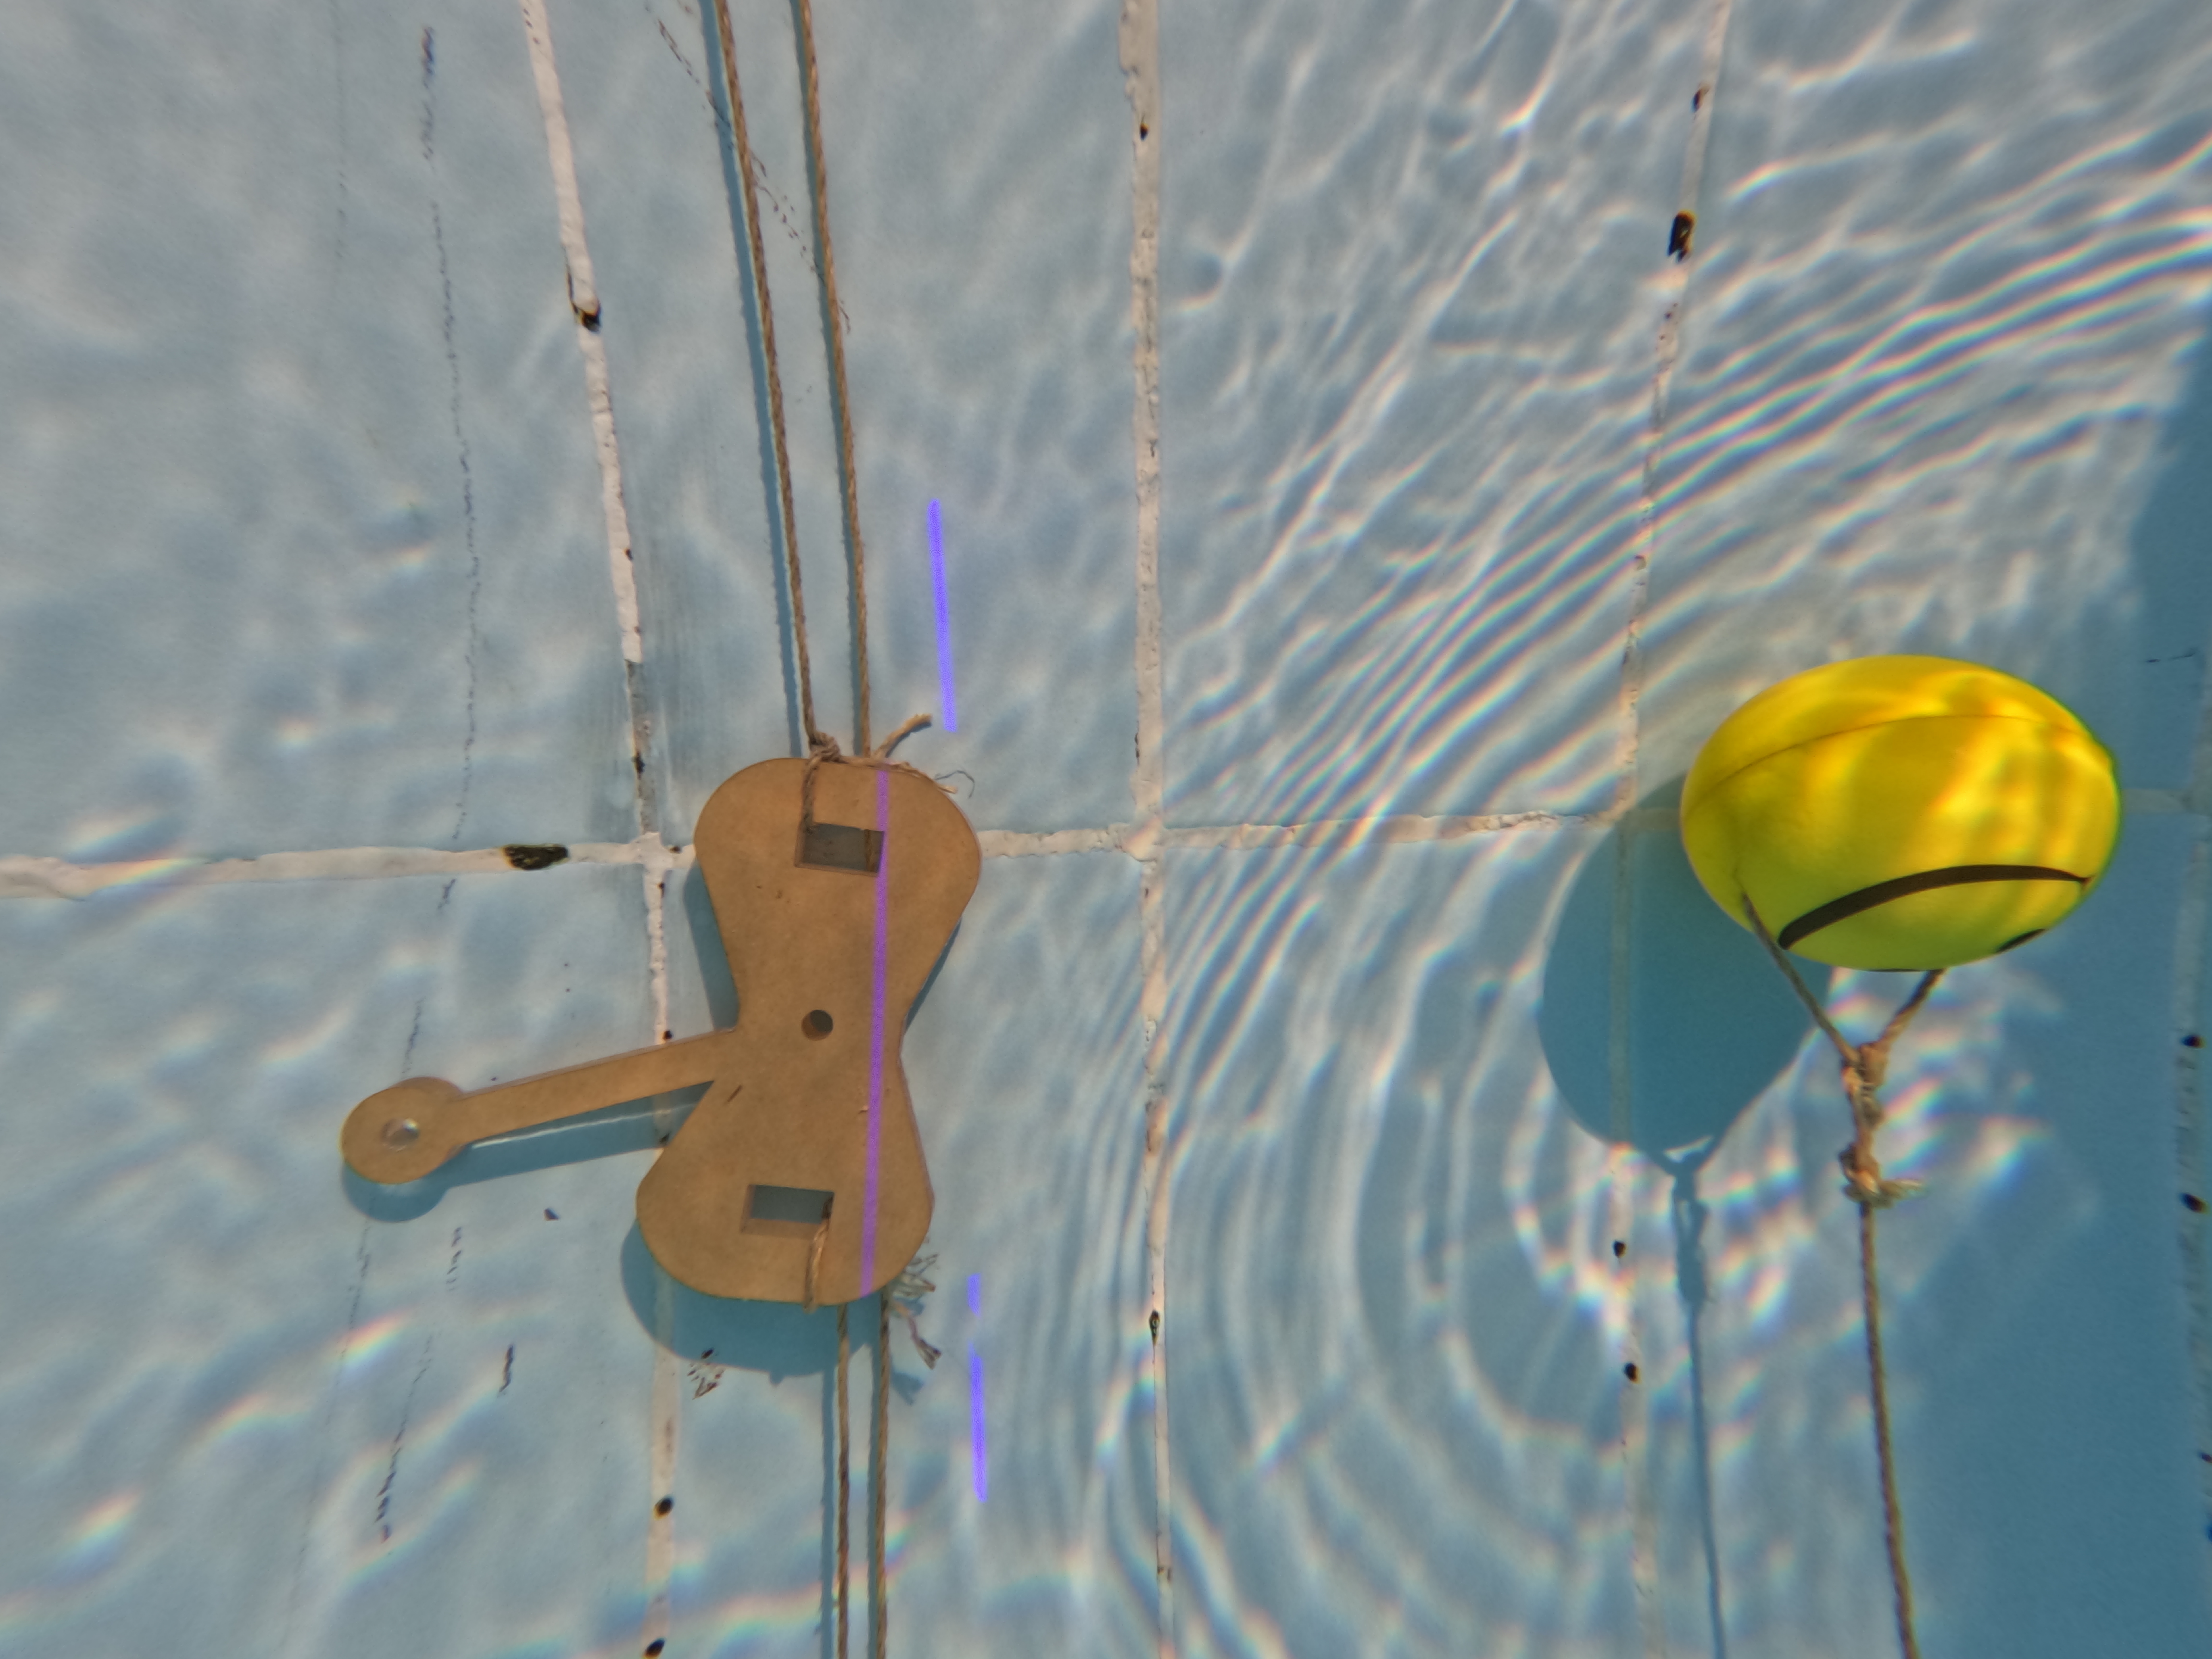

Supplement: Supplementary file 18 [file G0040412.pdf › Level_4_1/G0040412.pdf]

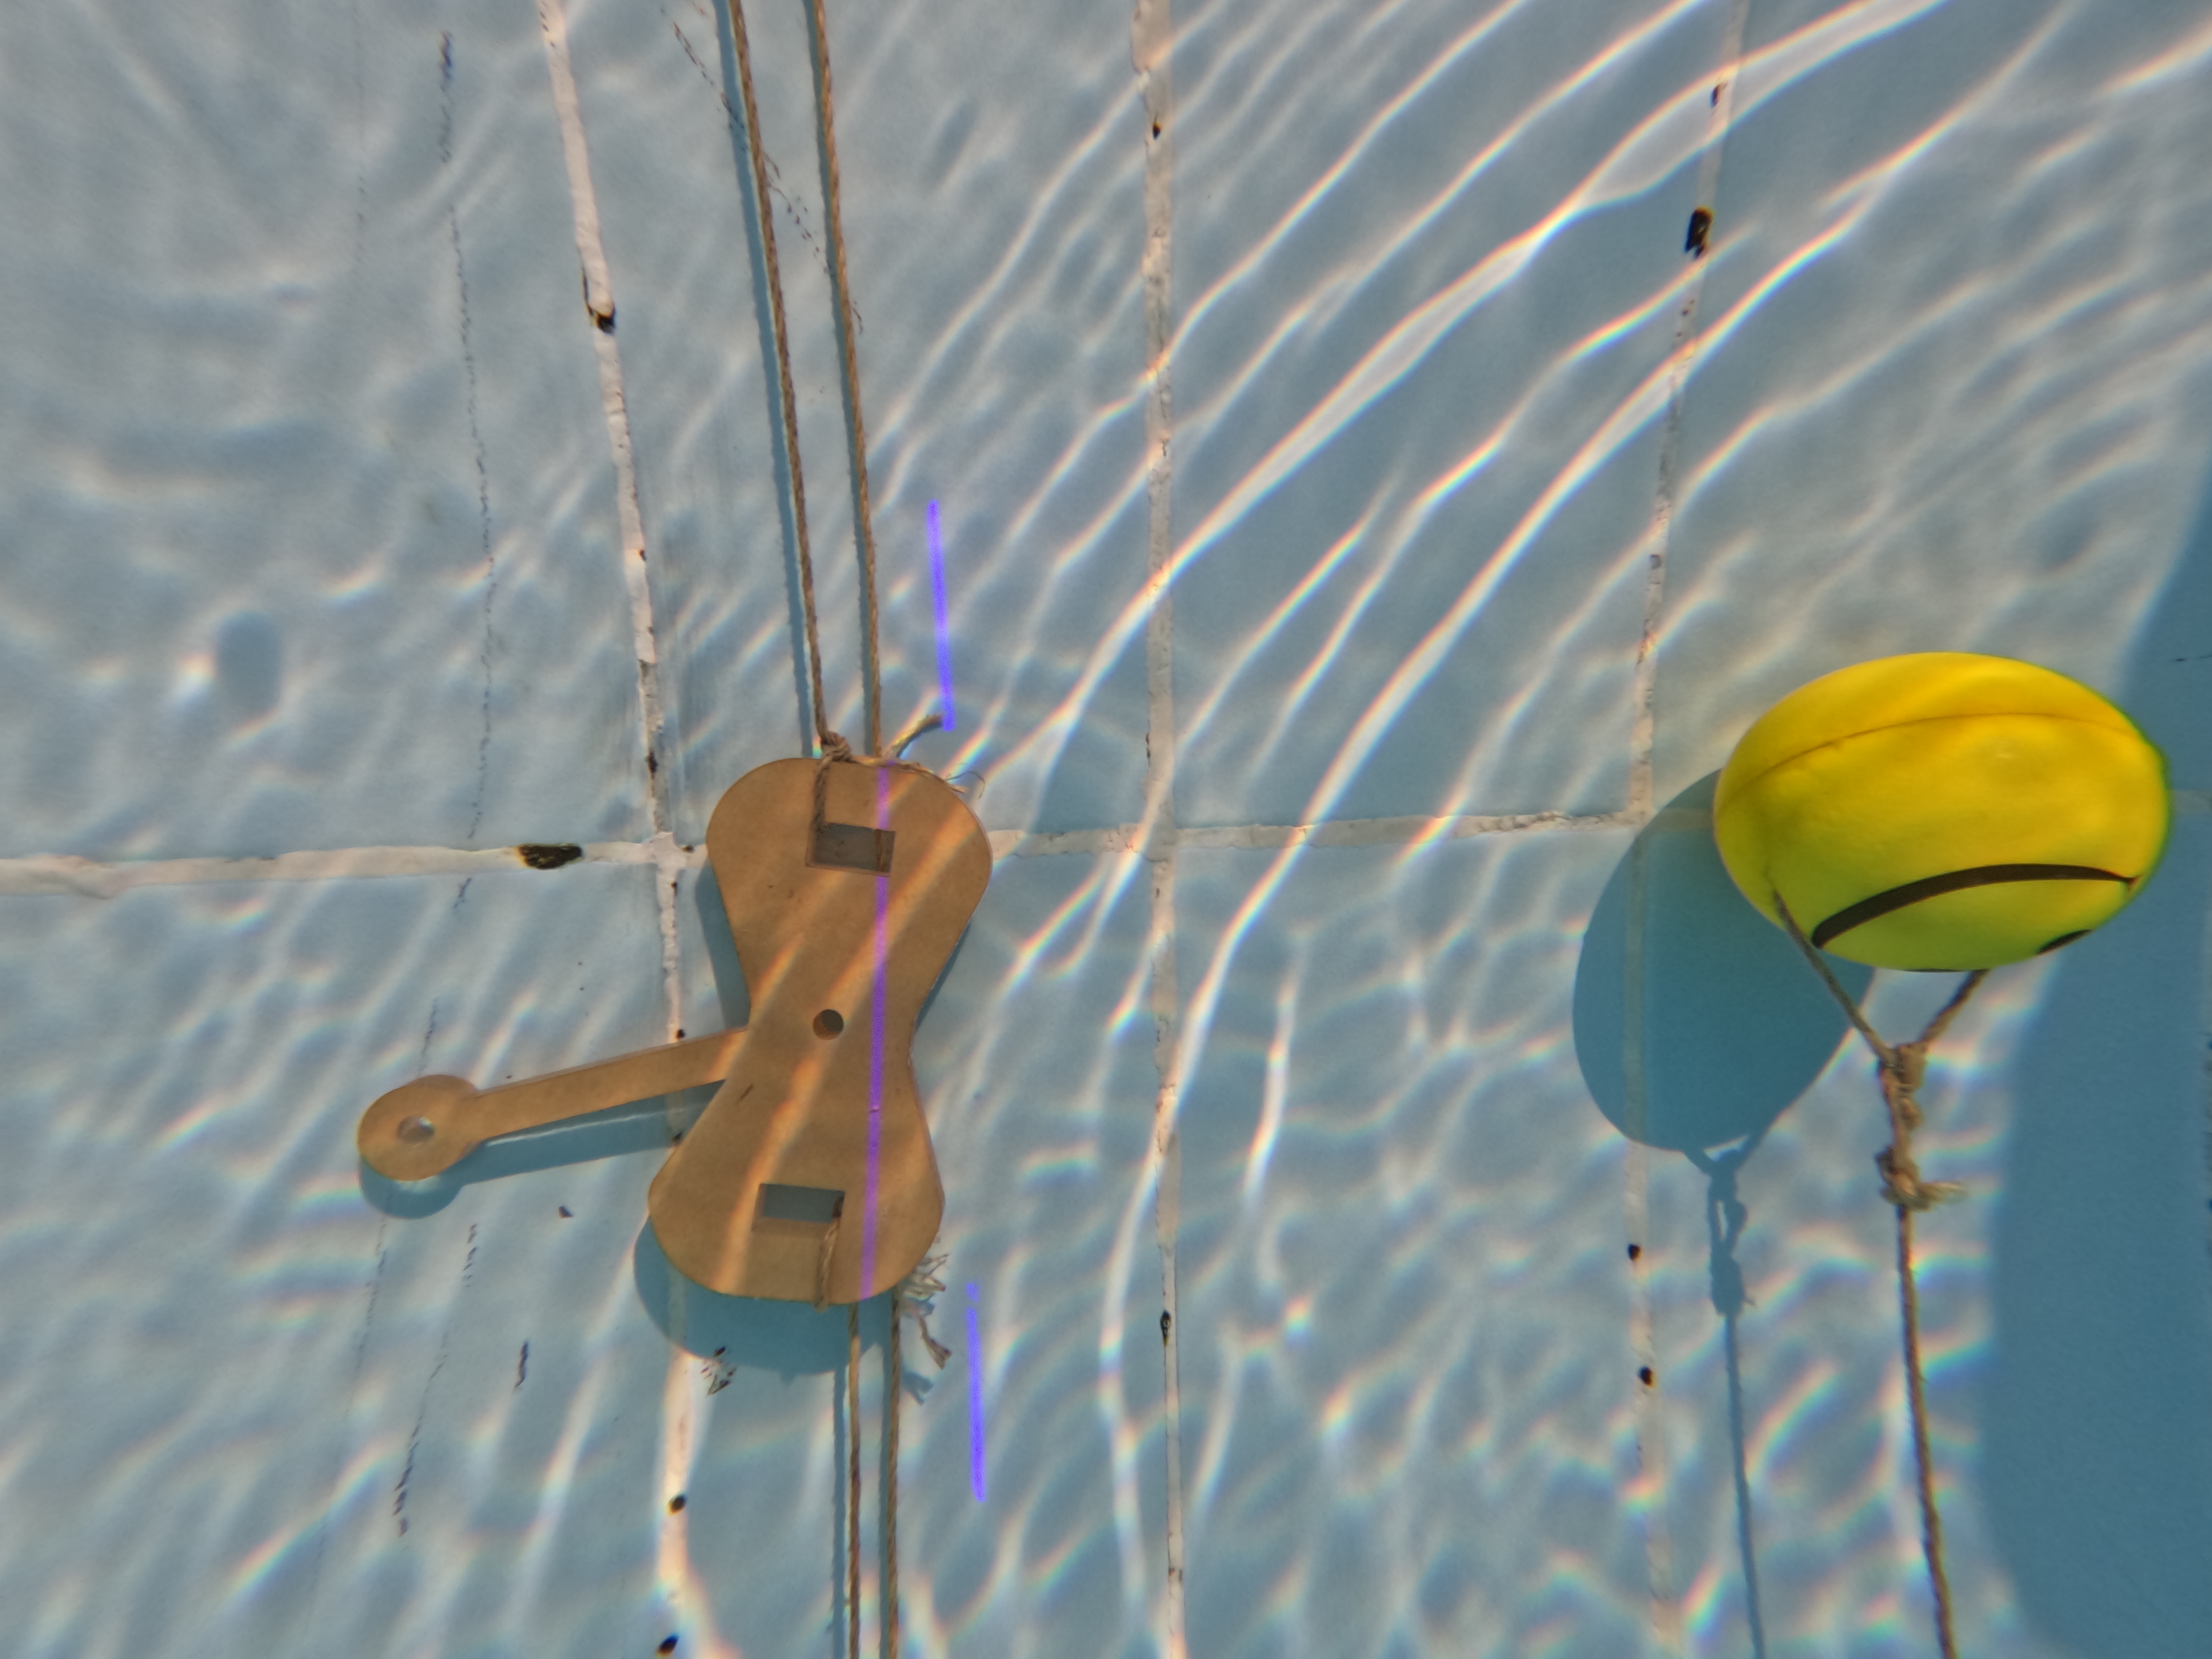

Supplement: Supplementary file 19 [file G0040413.pdf › Level_4_1/G0040413.pdf]

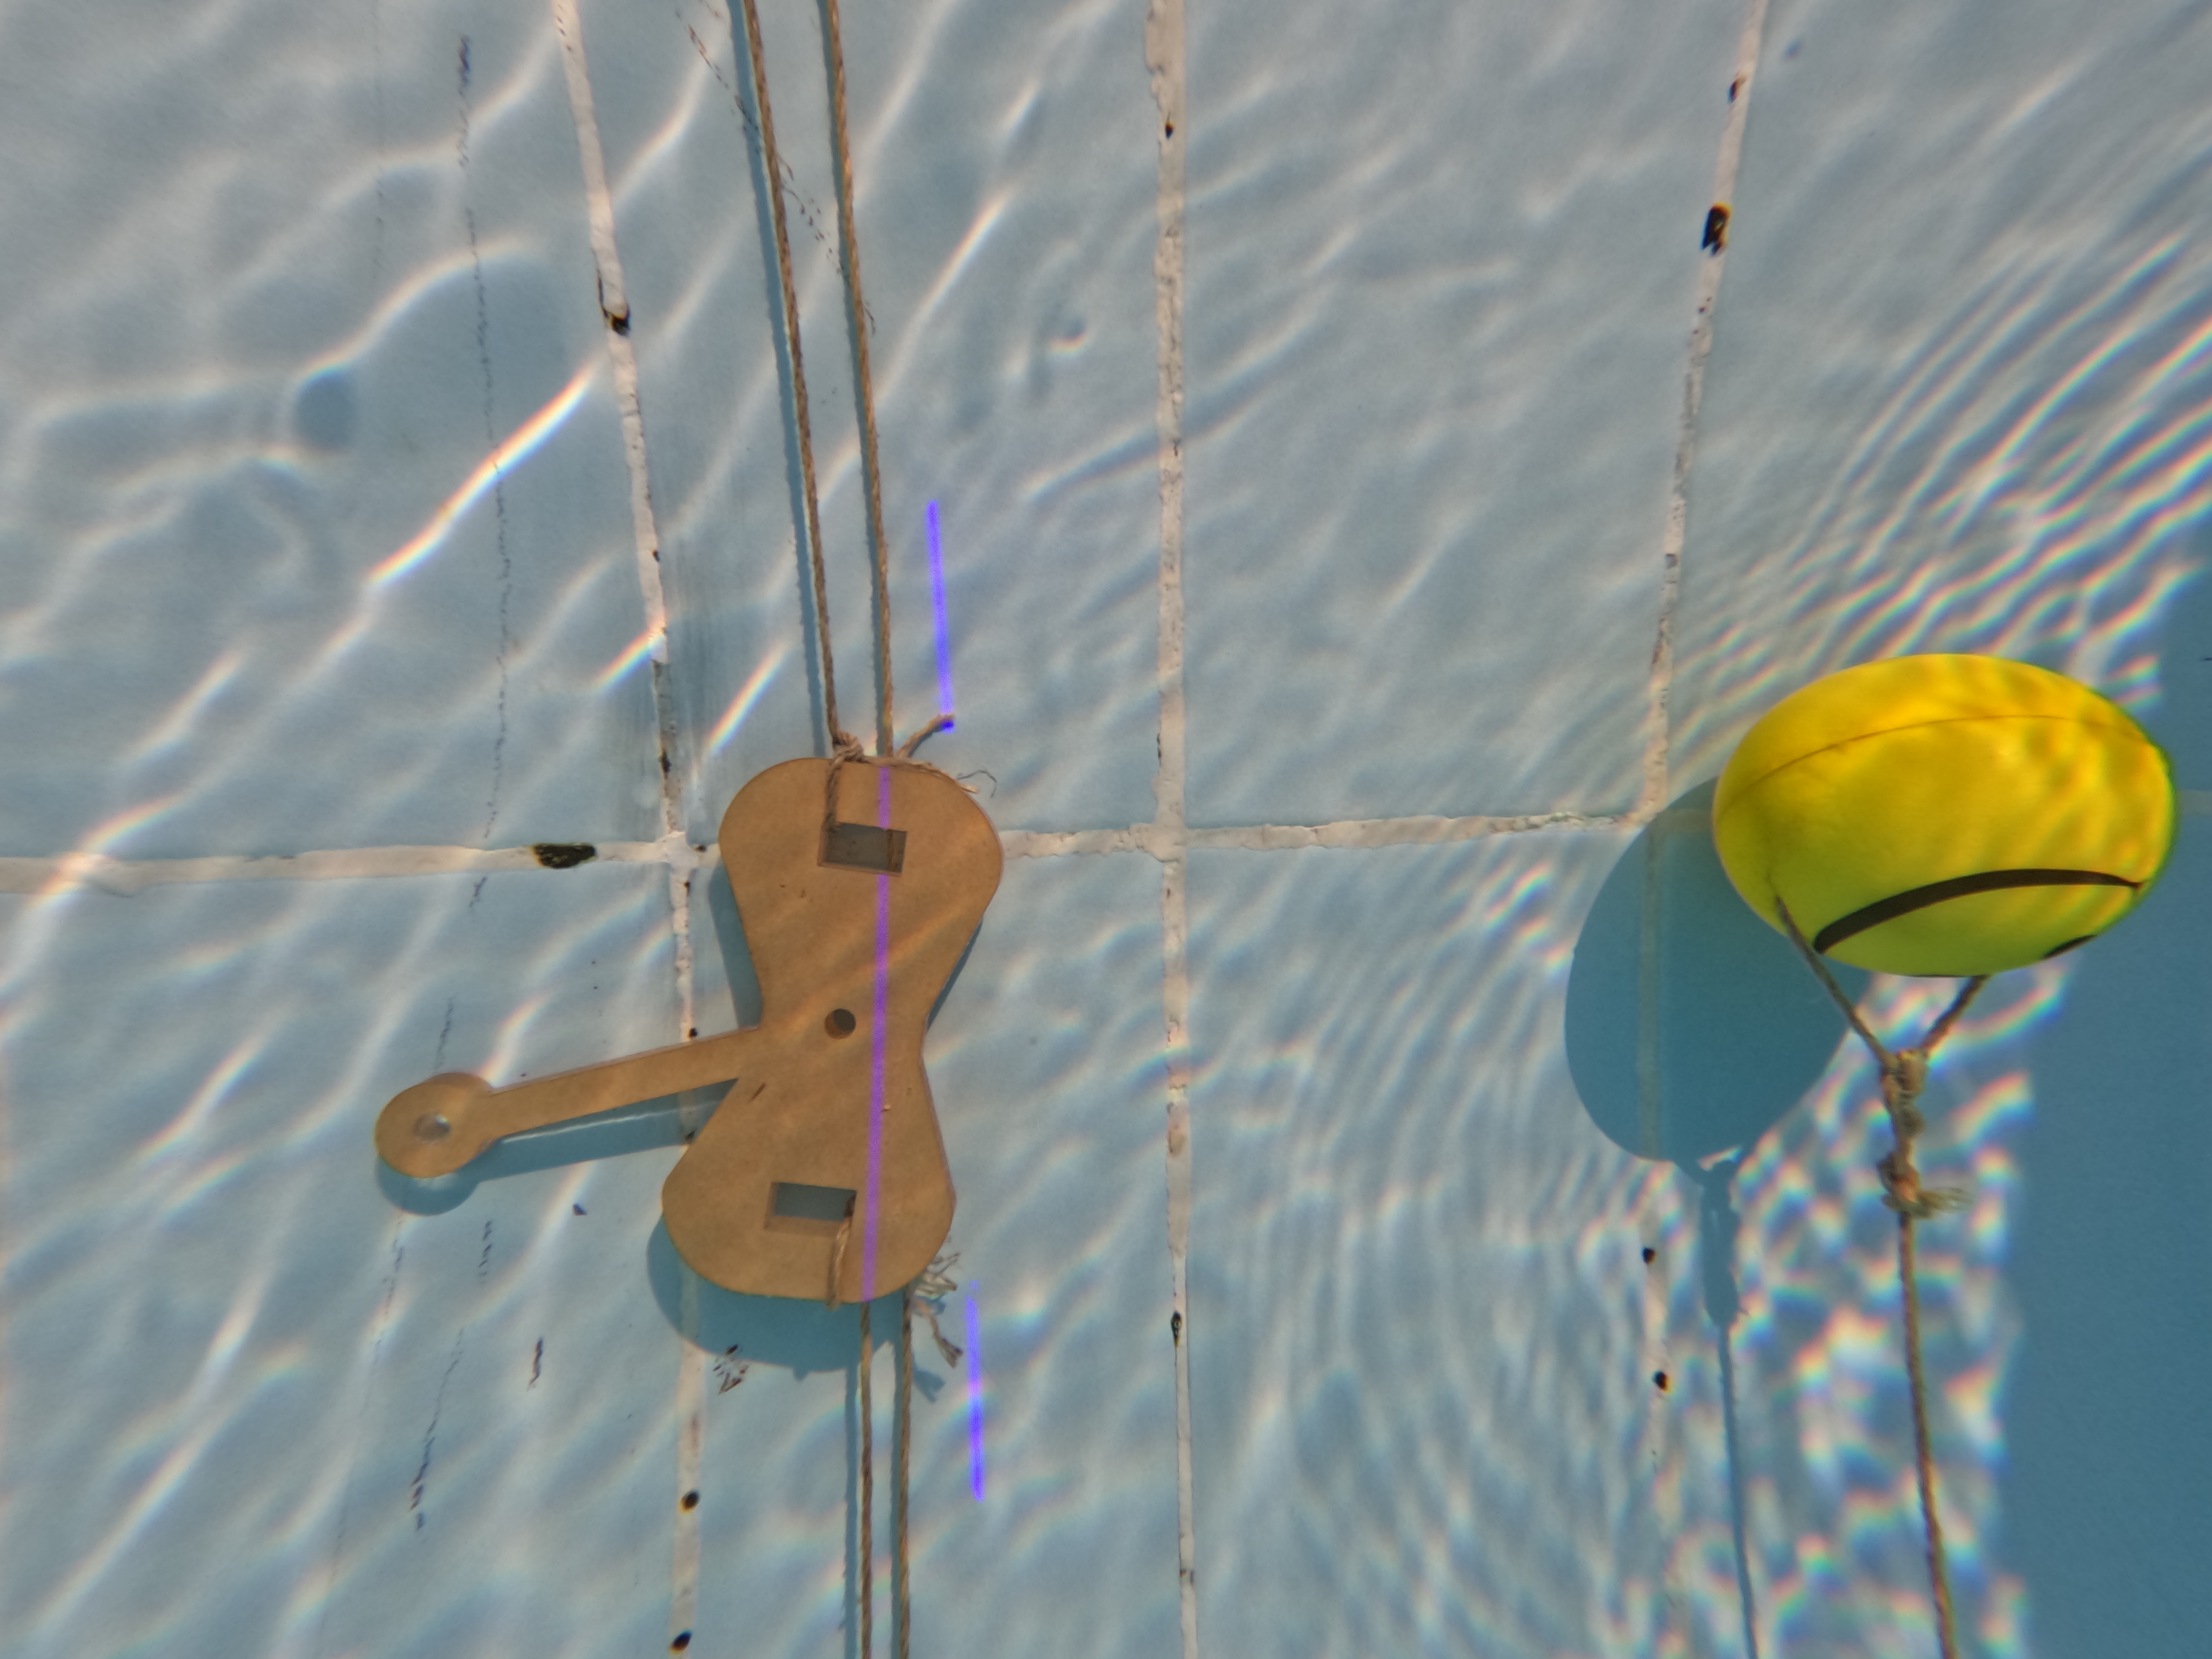

Supplement: Supplementary file 20 [file G0040414.pdf › Level_4_1/G0040414.pdf]

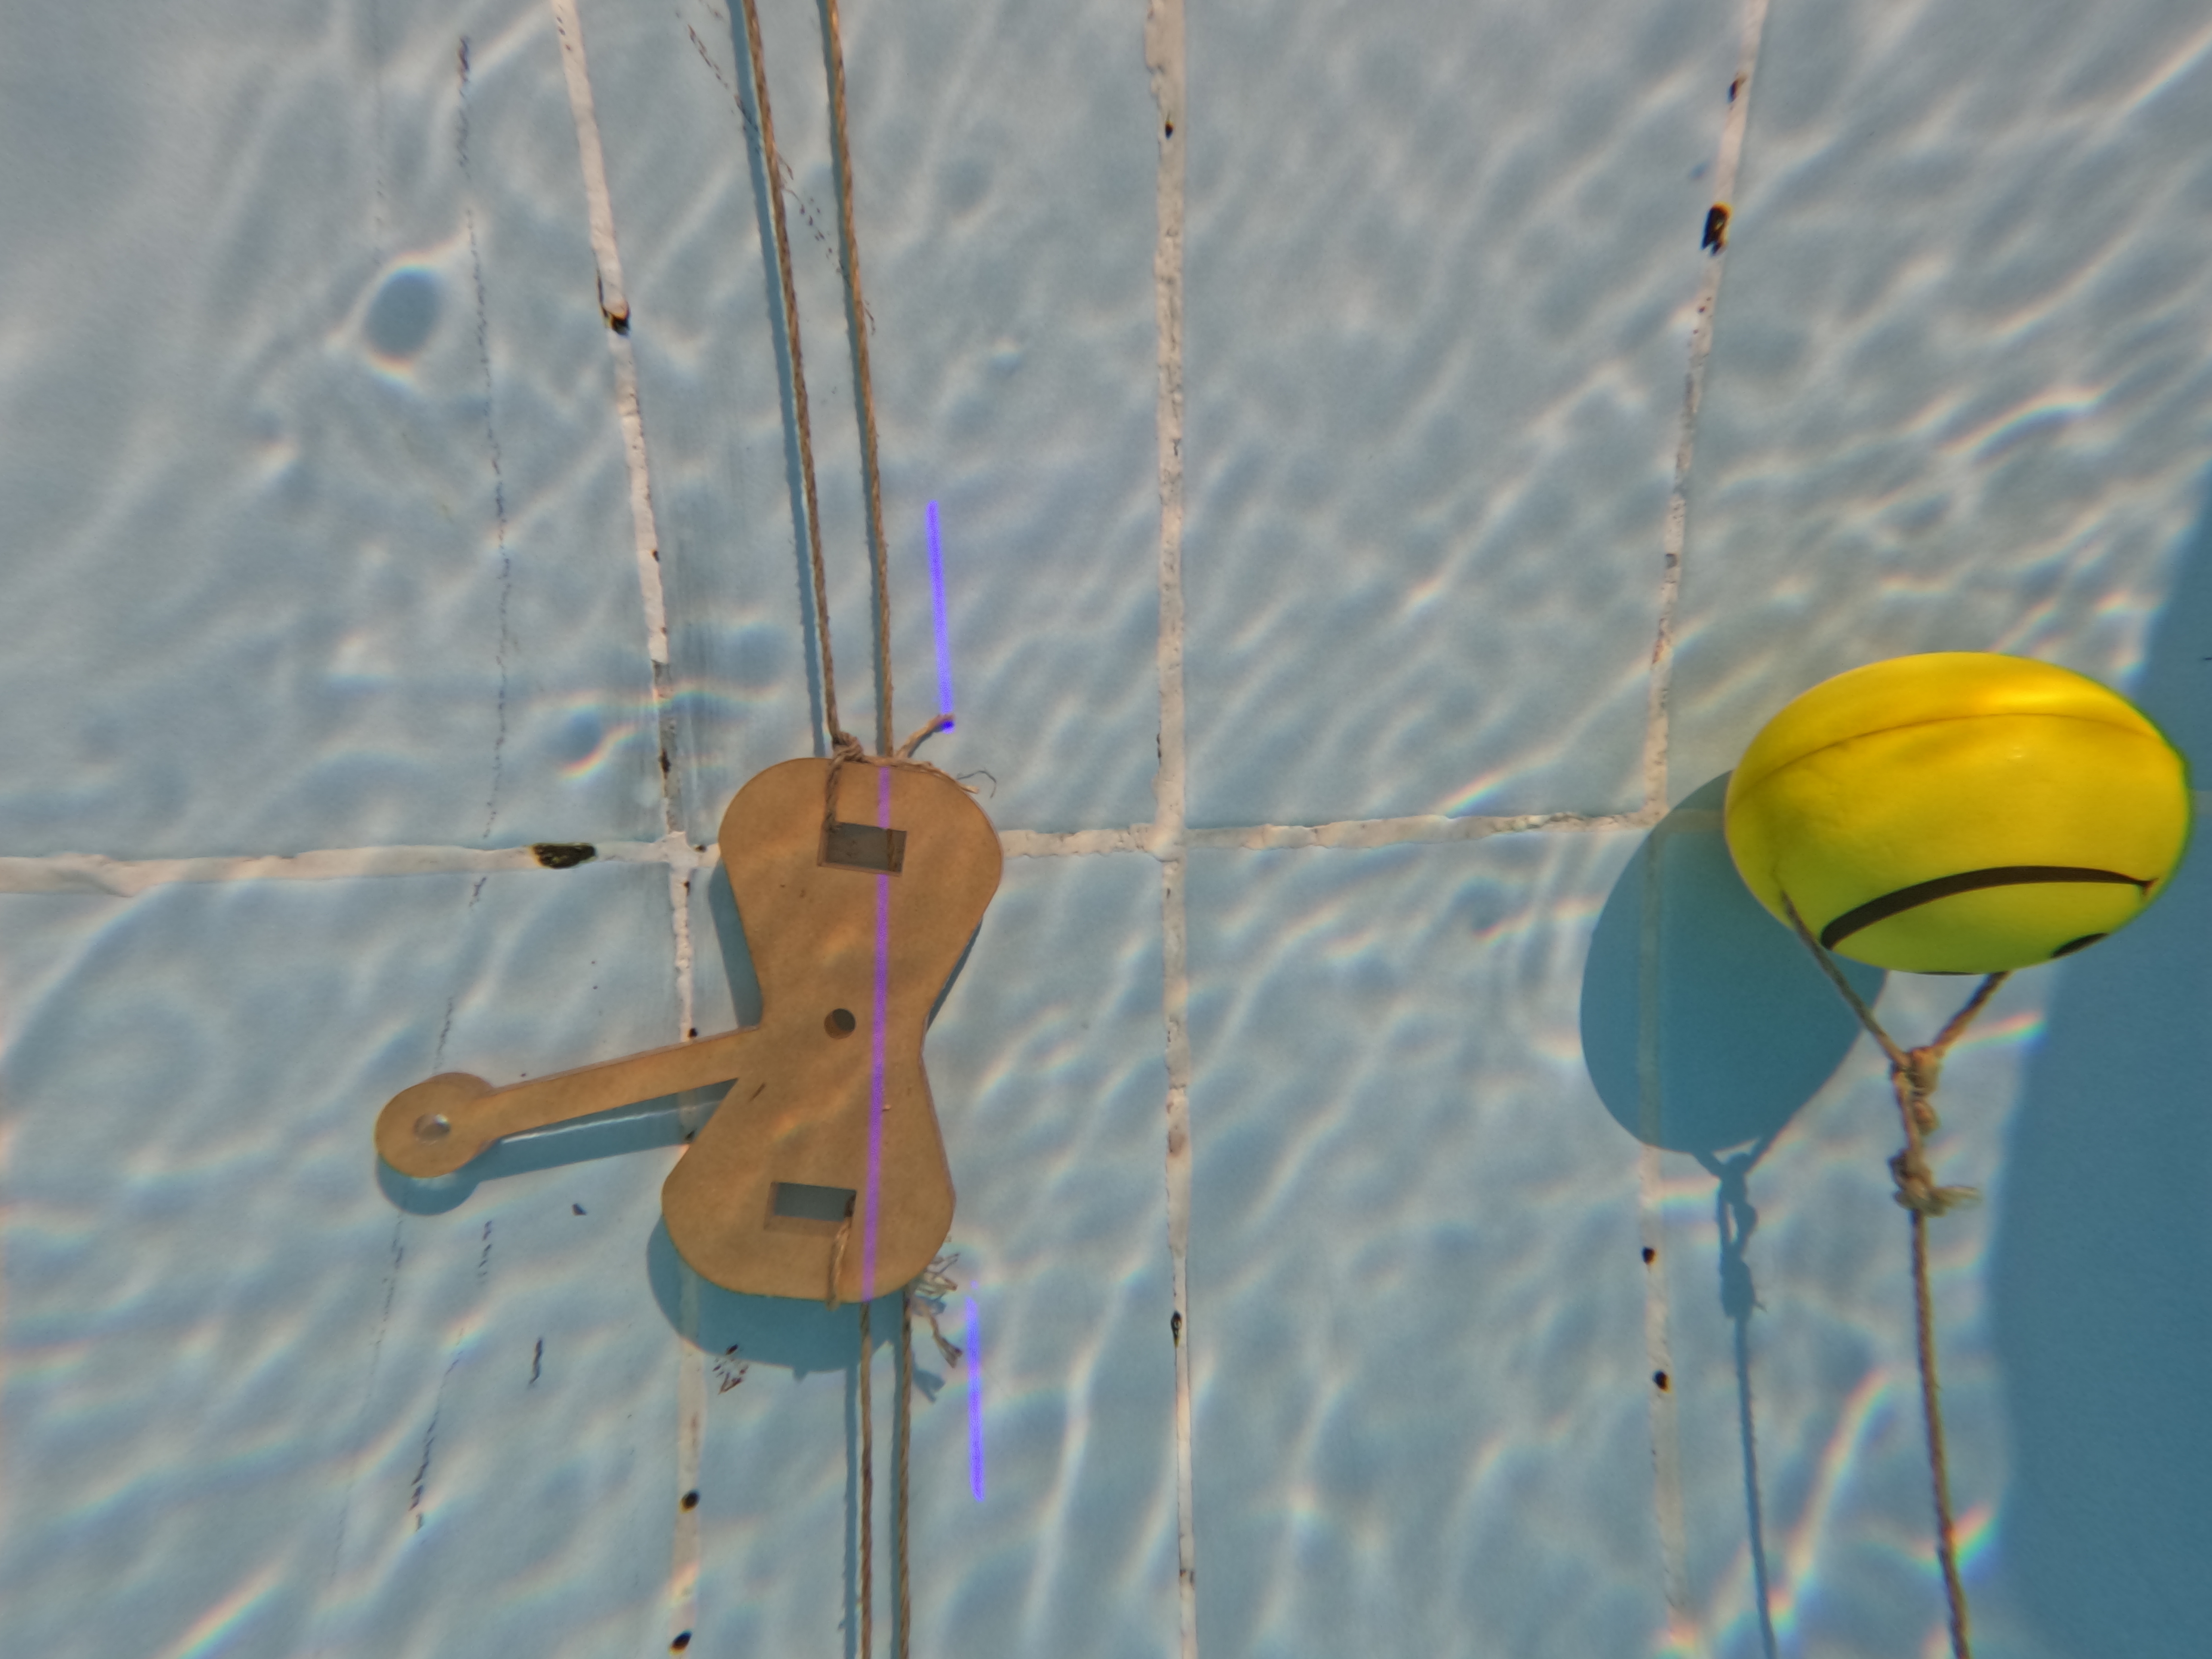

Supplement: Supplementary file 21 [file G0040415.pdf › Level_4_1/G0040415.pdf]

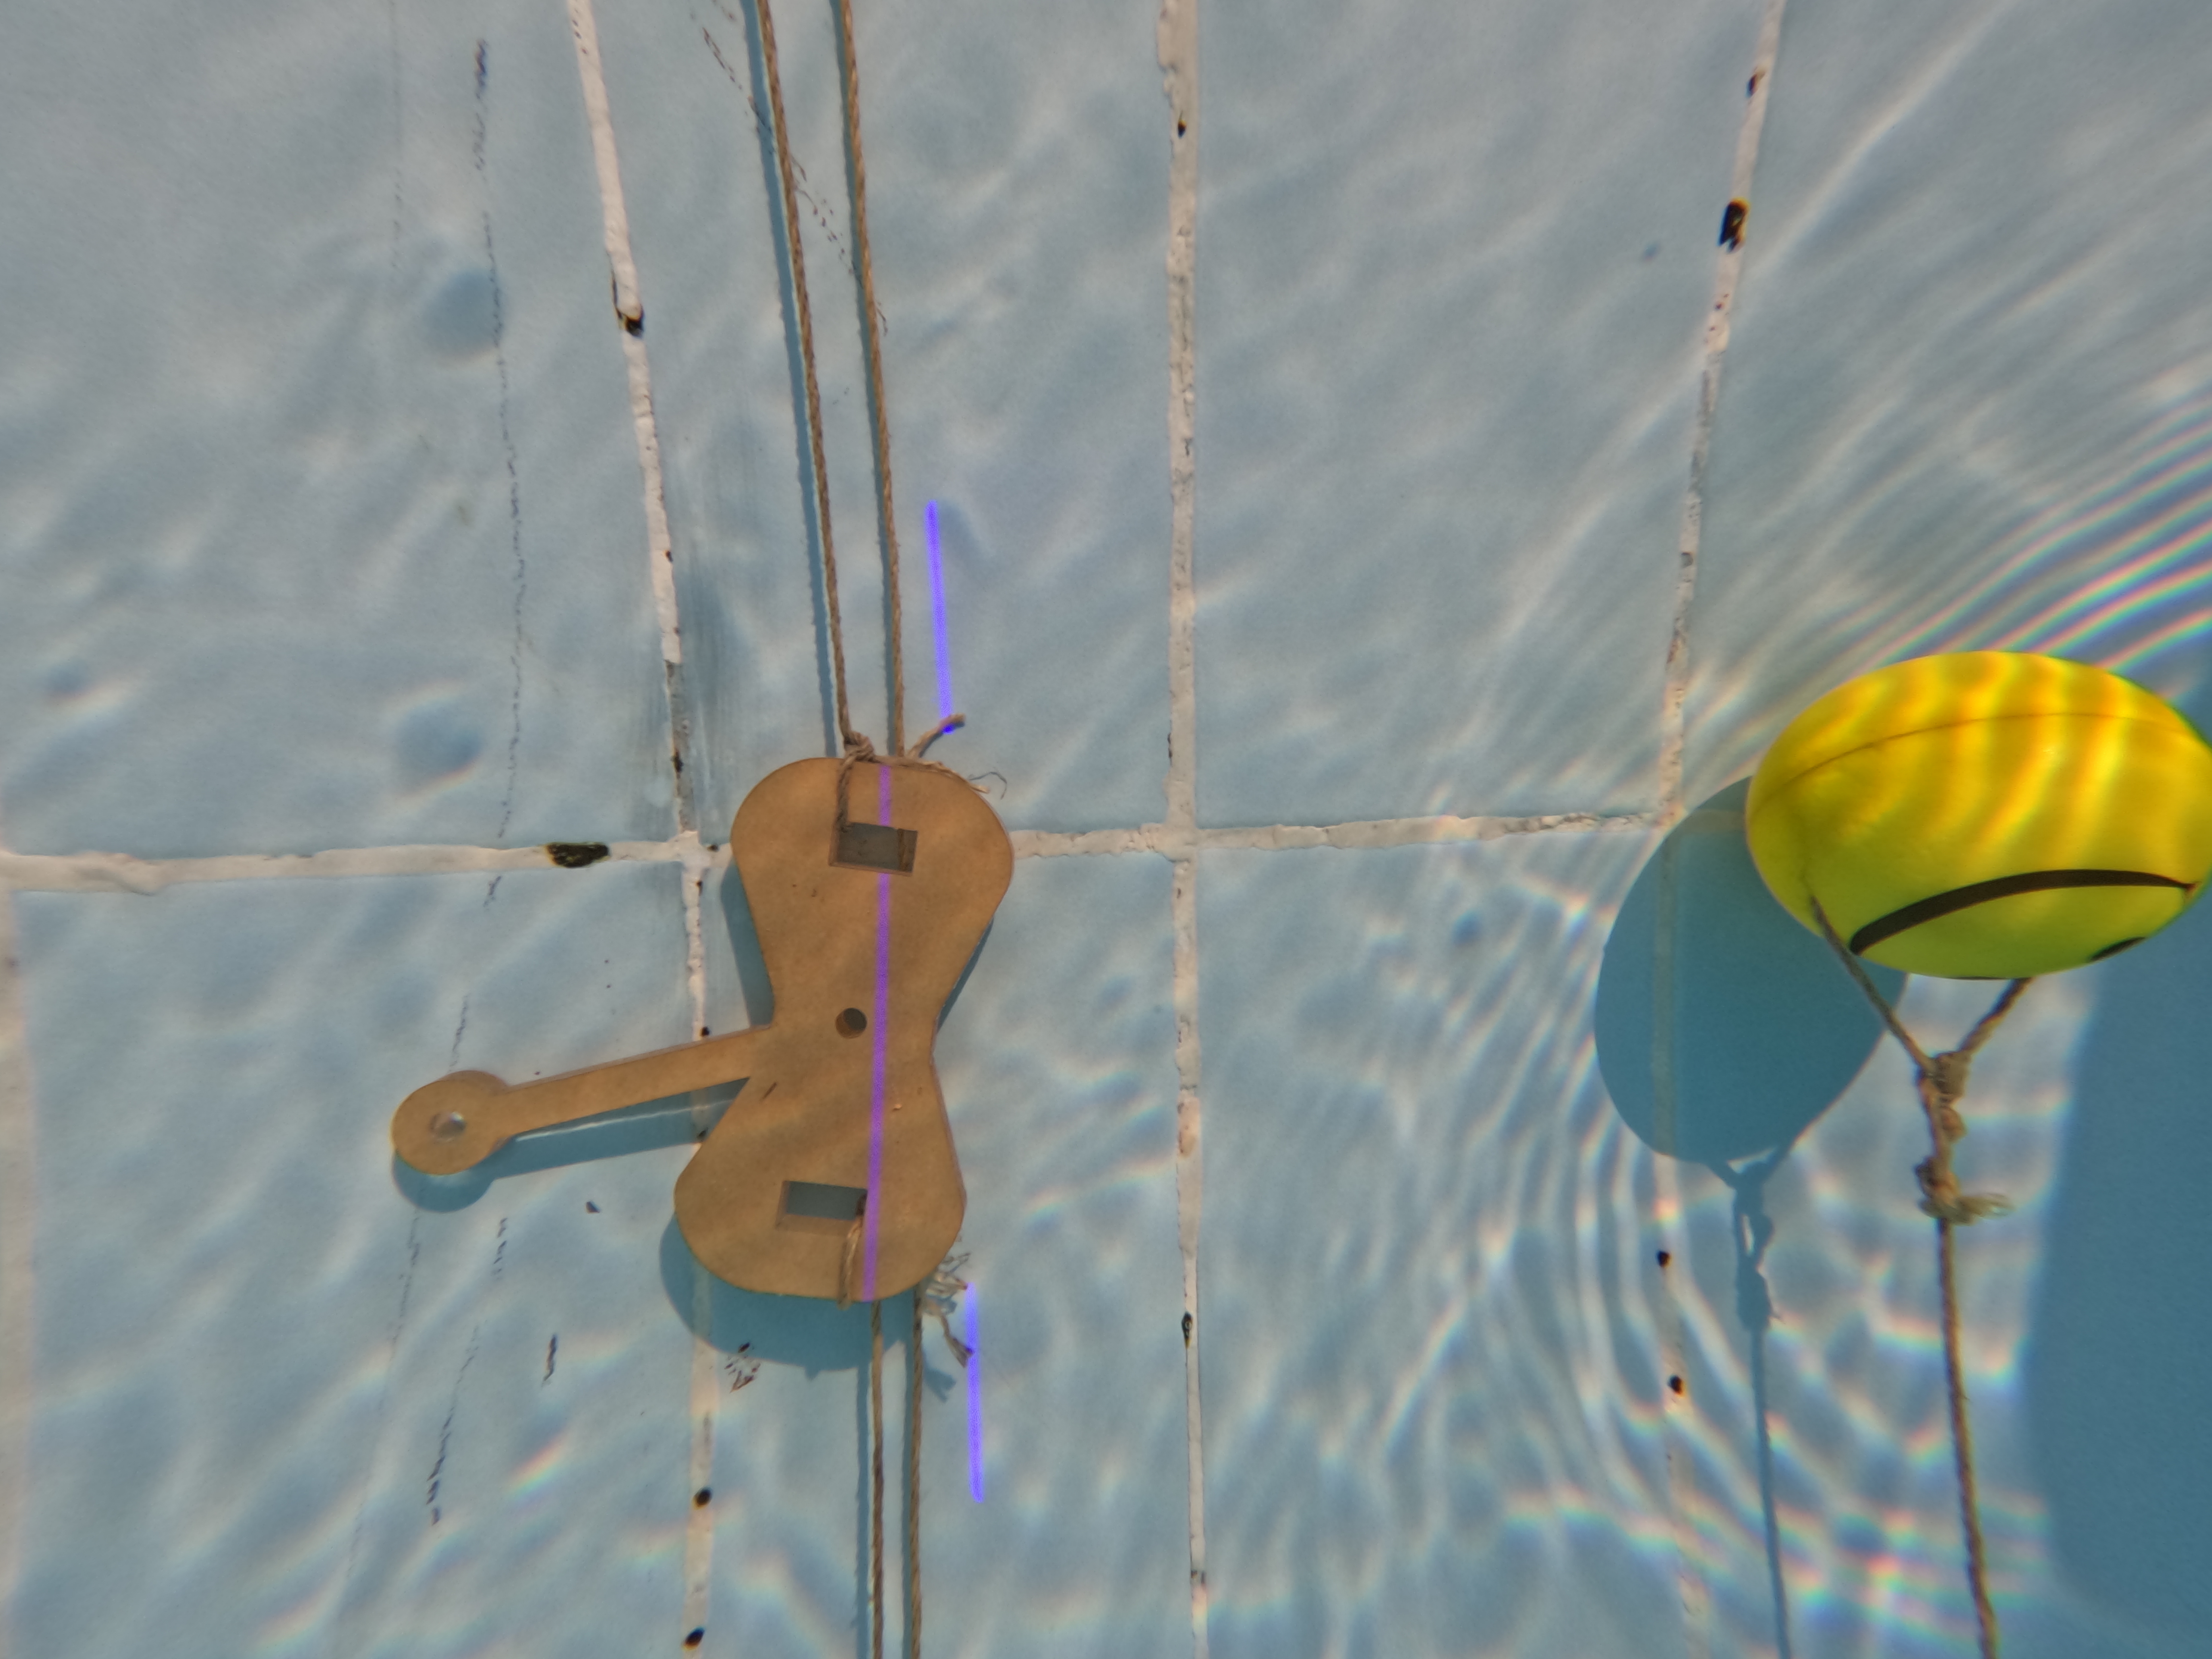

Supplement: Supplementary file 22 [file G0040416.pdf › Level_4_1/G0040416.pdf]

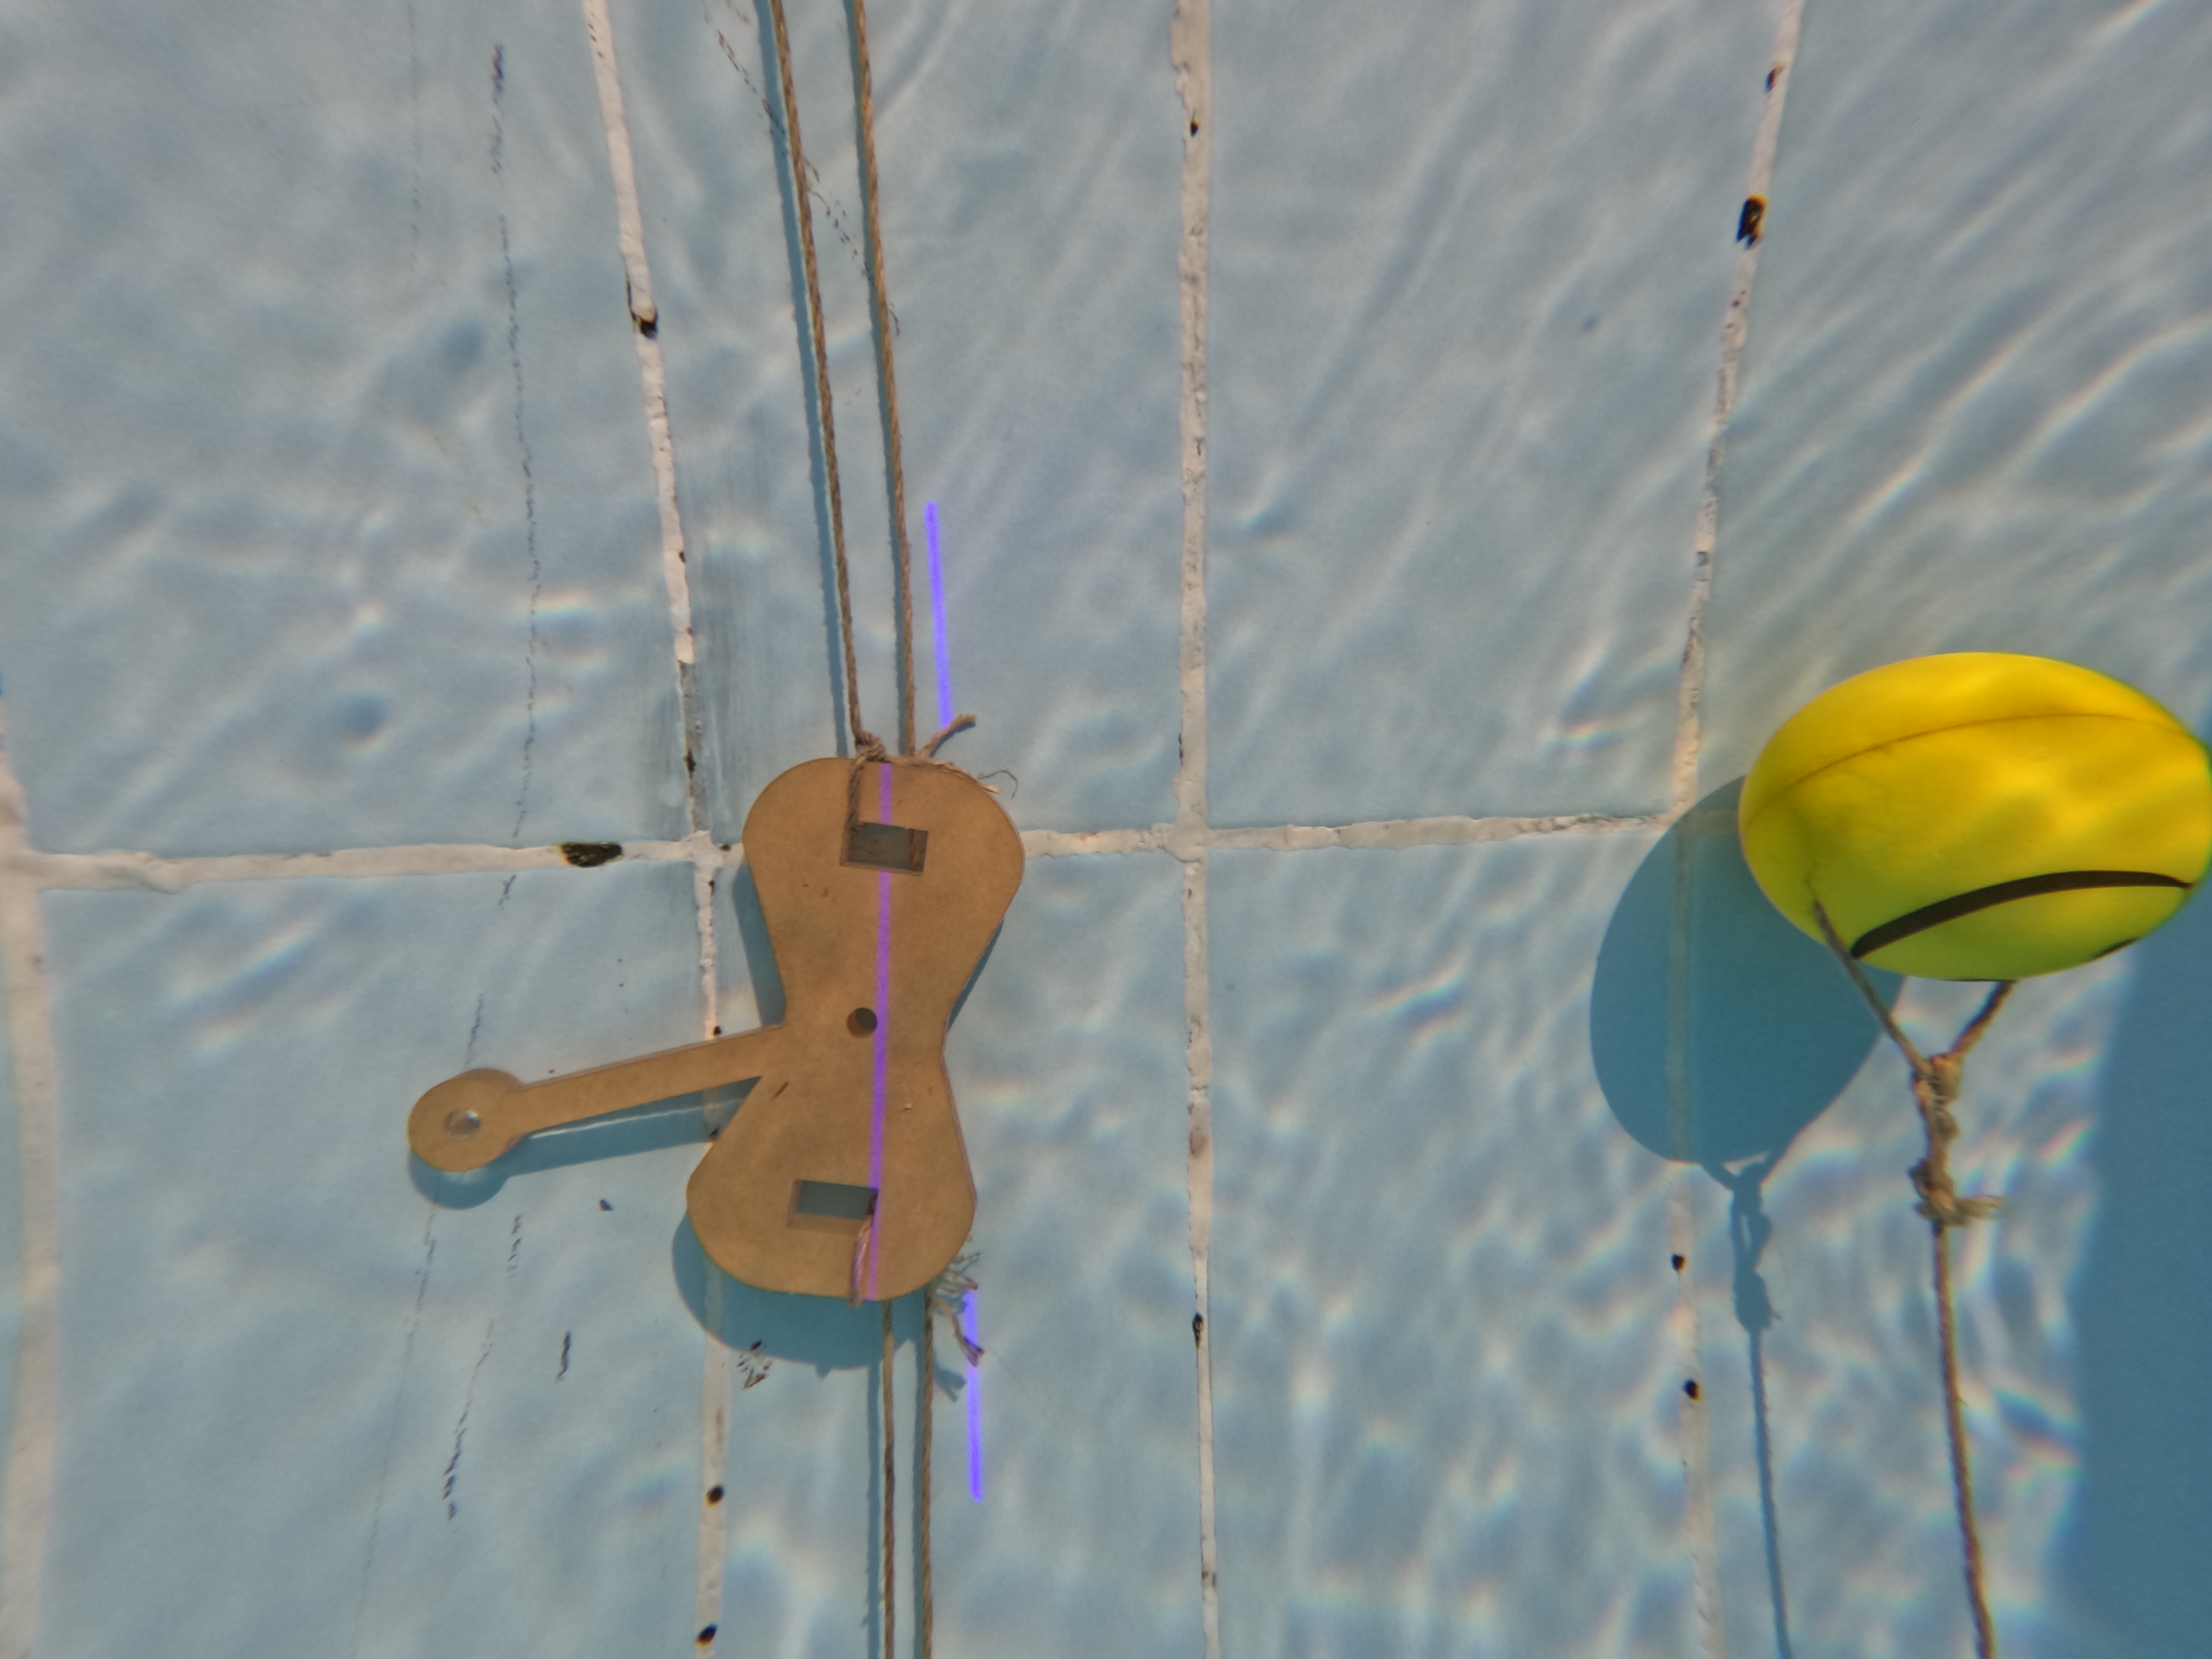

Supplement: Supplementary file 23 [file G0040417.pdf › Level_4_1/G0040417.pdf]

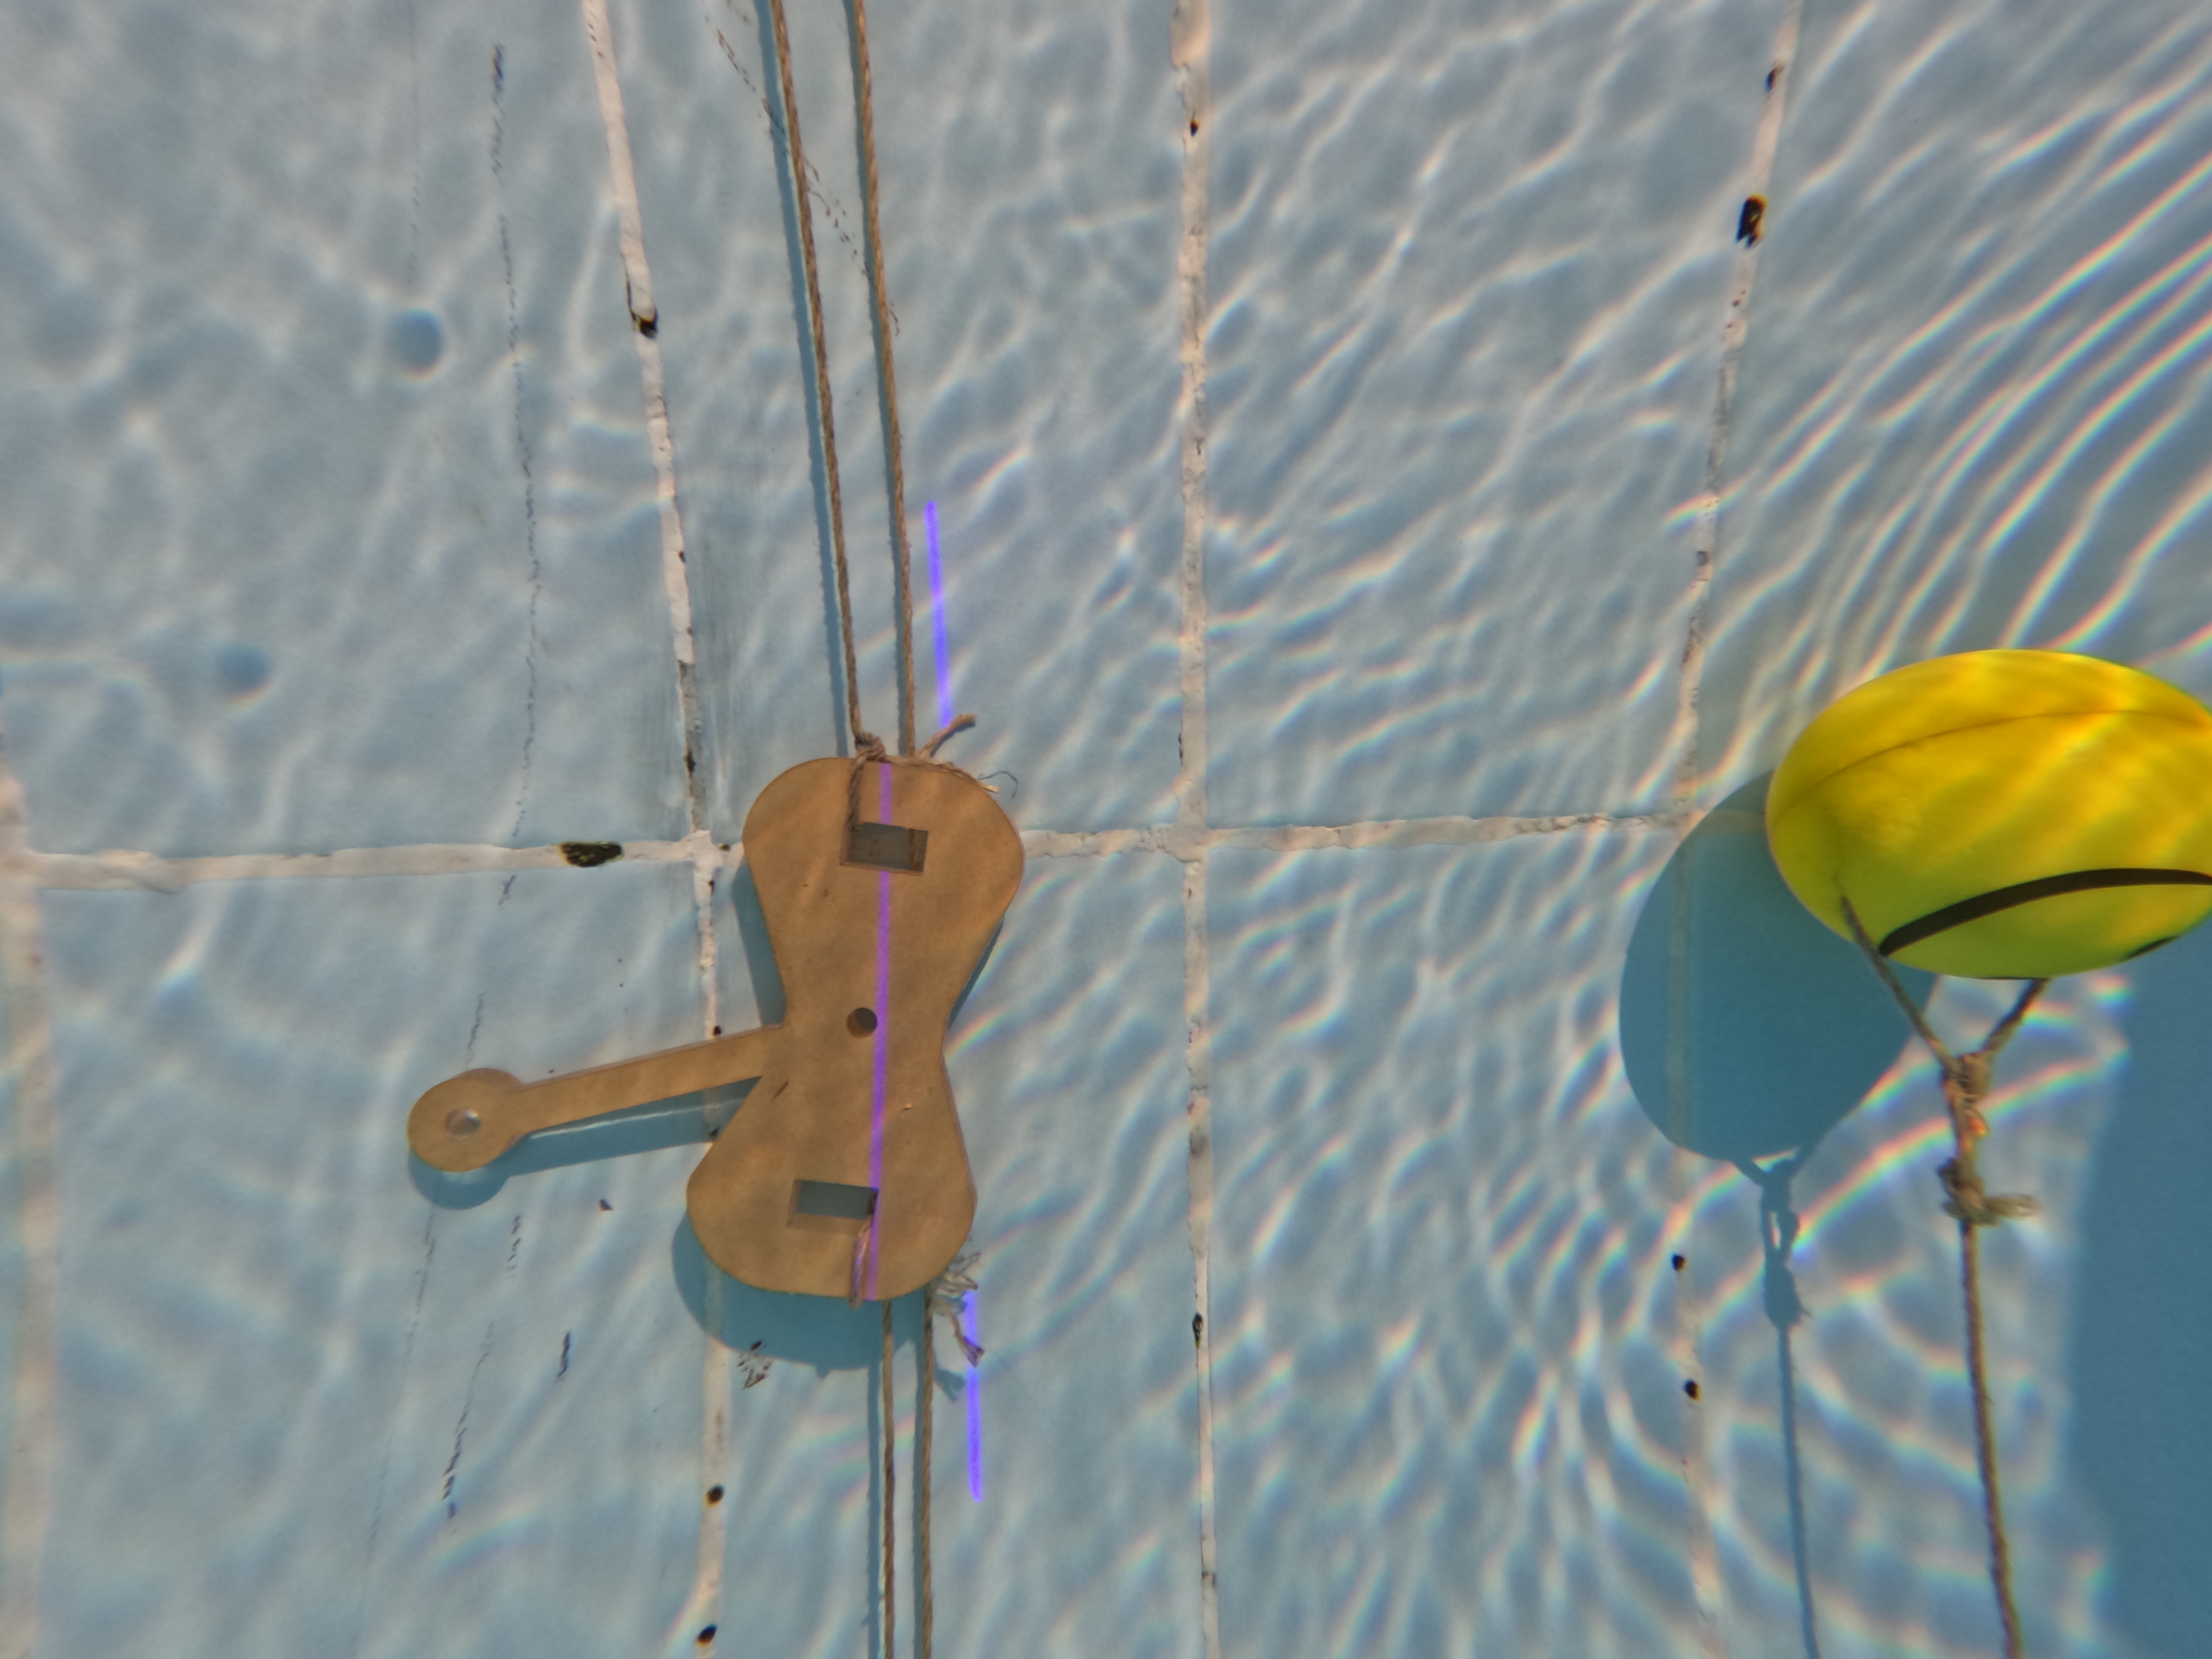

Supplement: Supplementary file 24 [file G0040418.pdf › Level_4_1/G0040418.pdf]

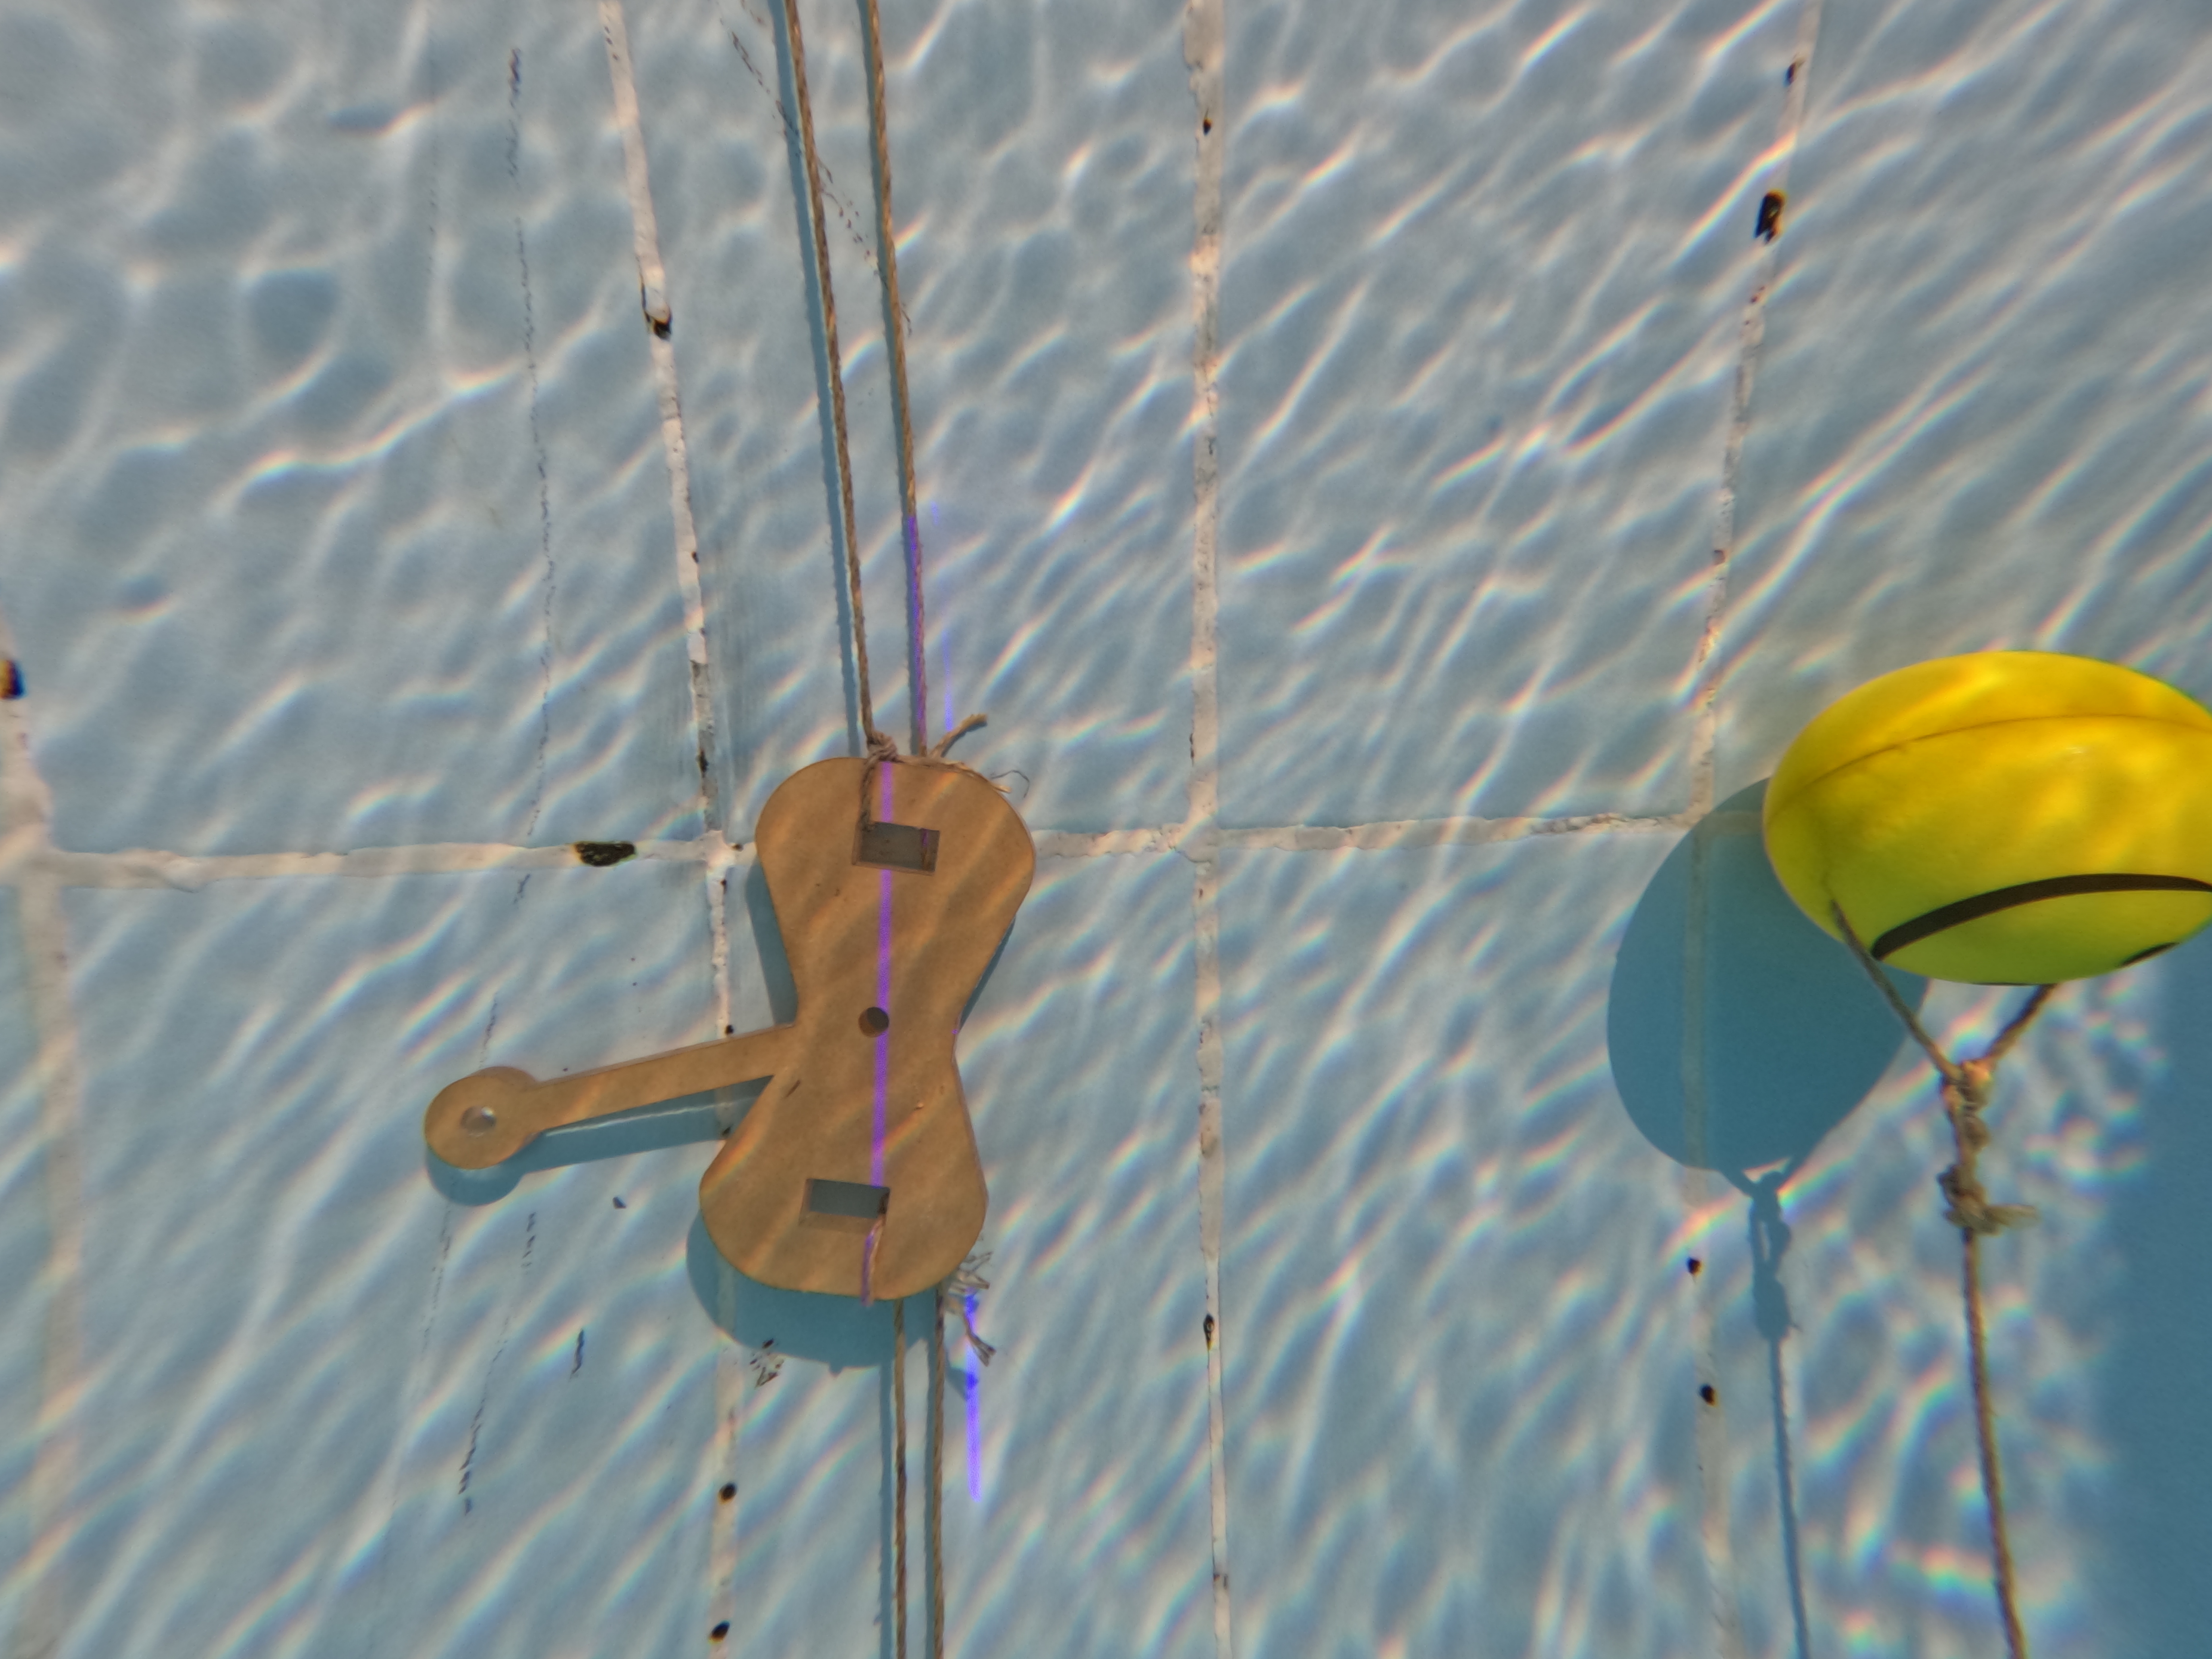

Supplement: Supplementary file 25 [file G0040419.pdf › Level_4_1/G0040419.pdf]

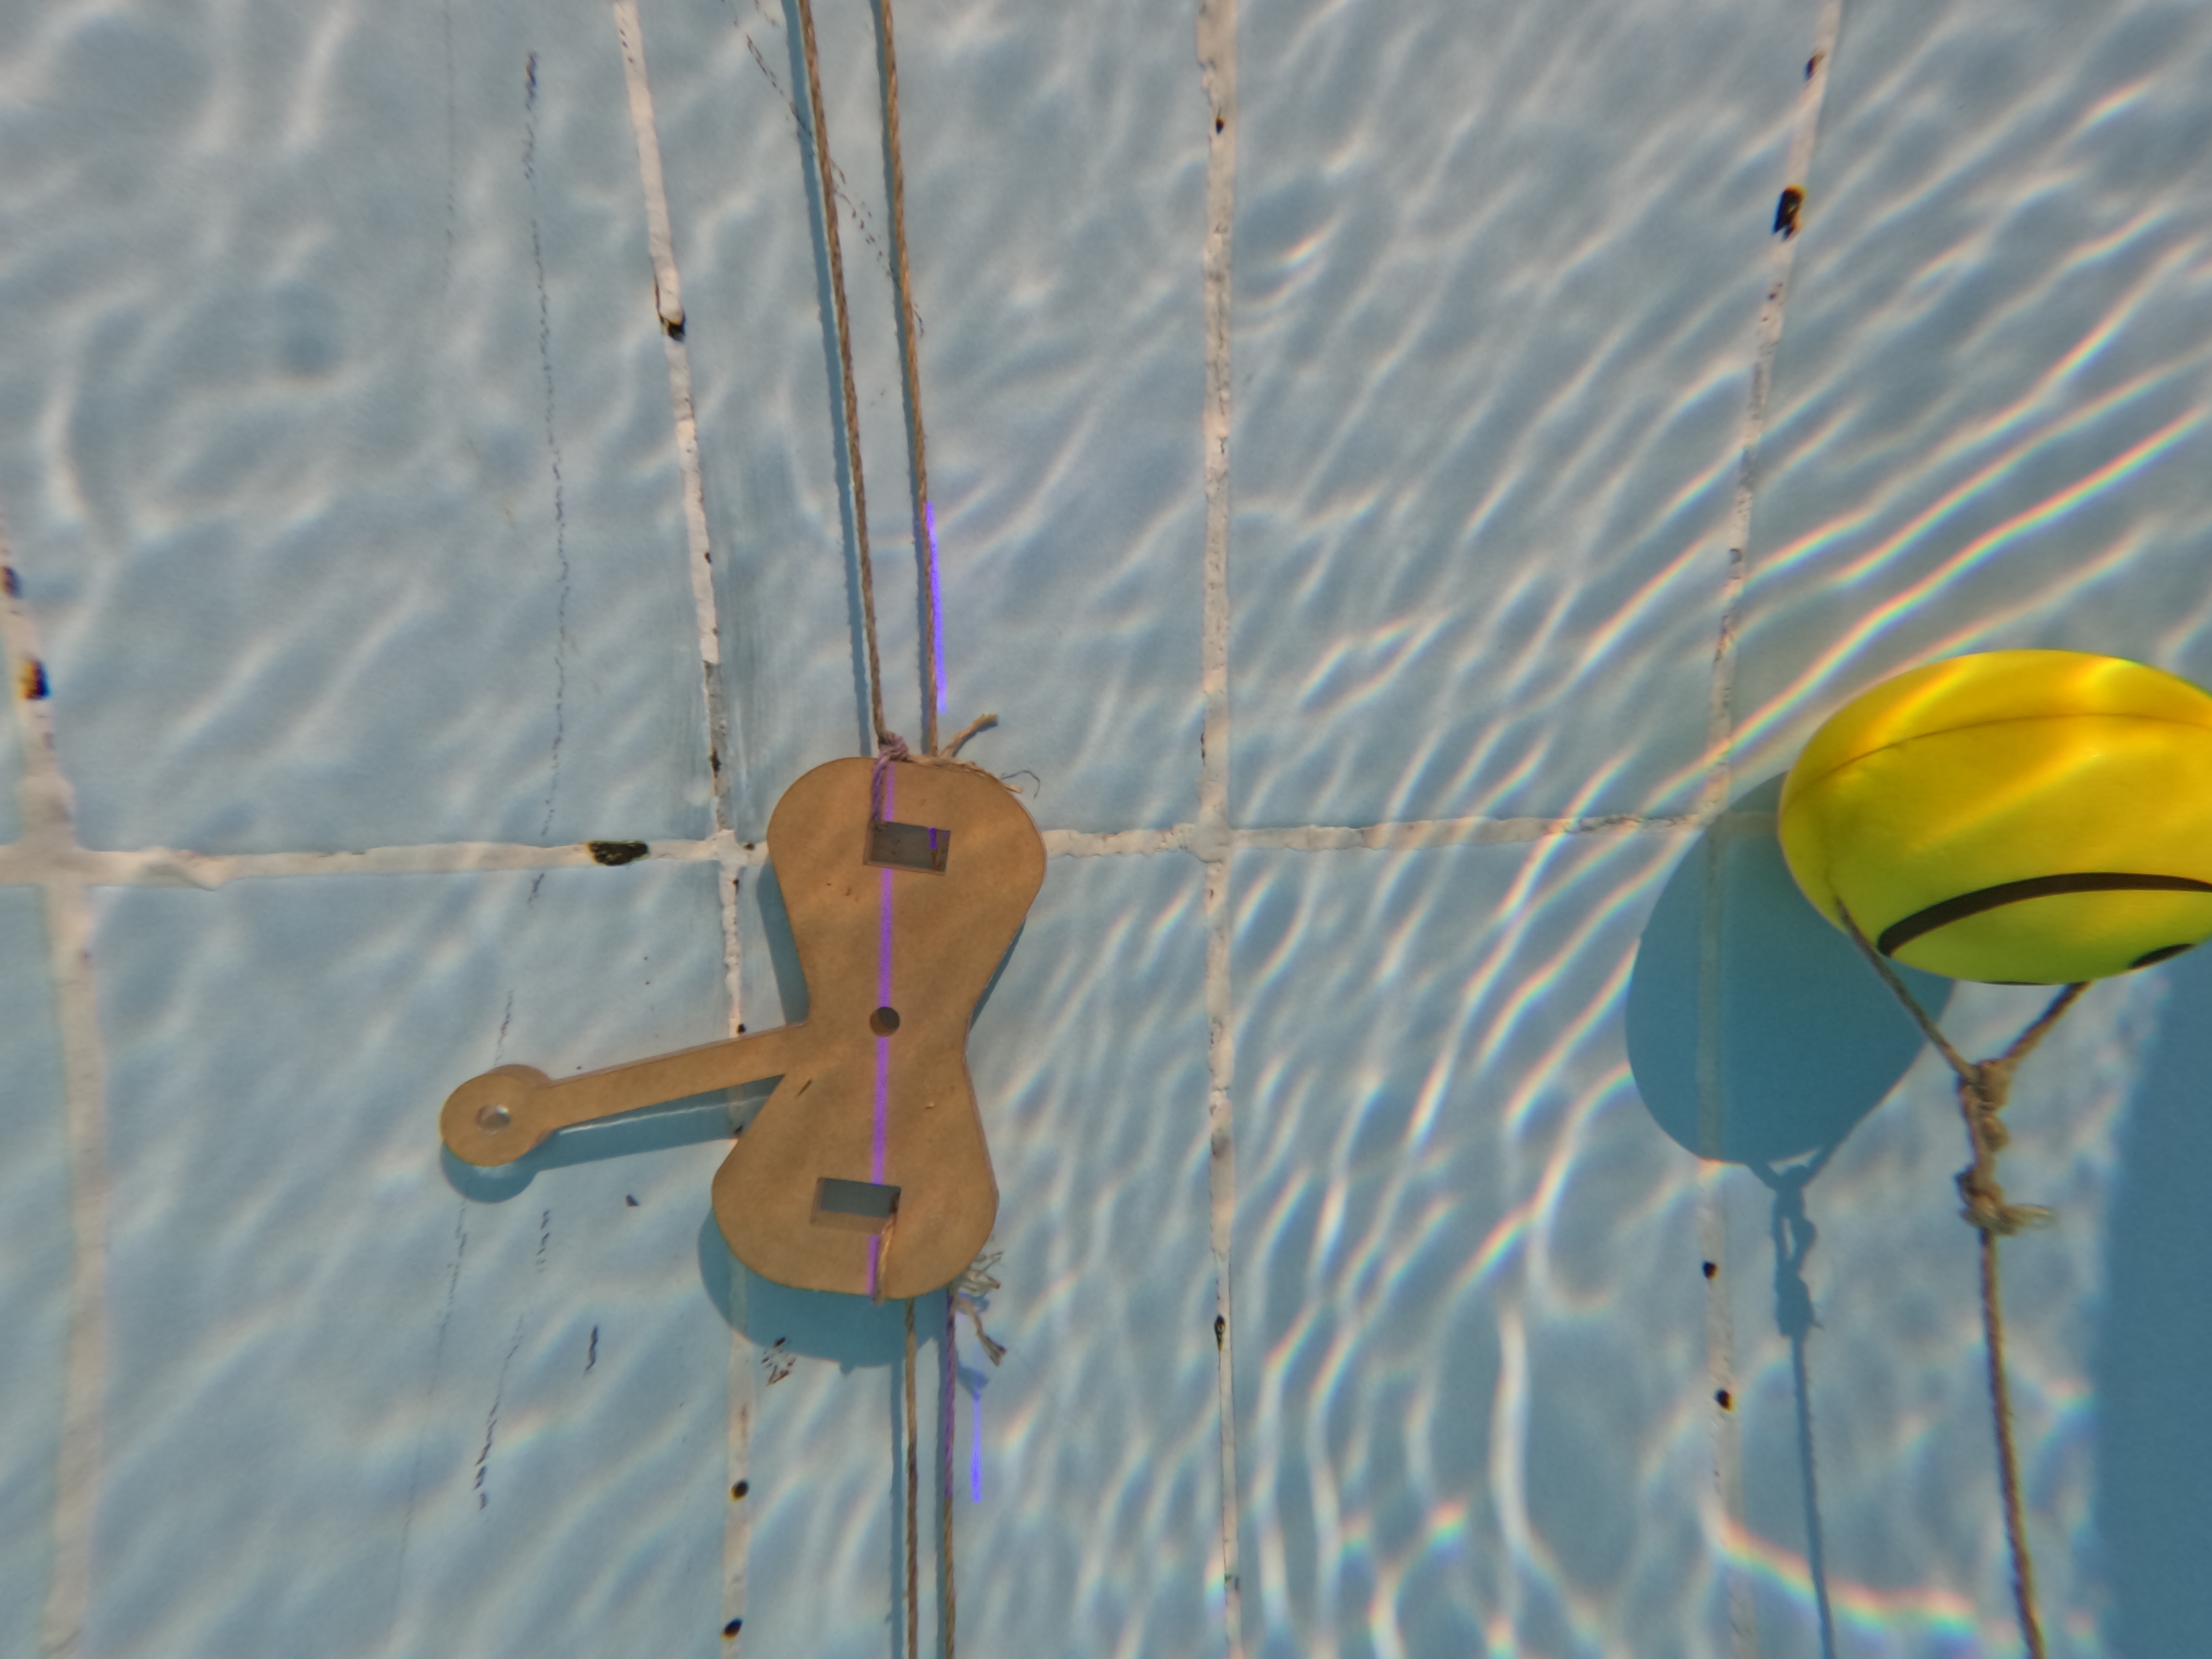

Supplement: Supplementary file 26 [file G0040420.pdf › Level_4_1/G0040420.pdf]

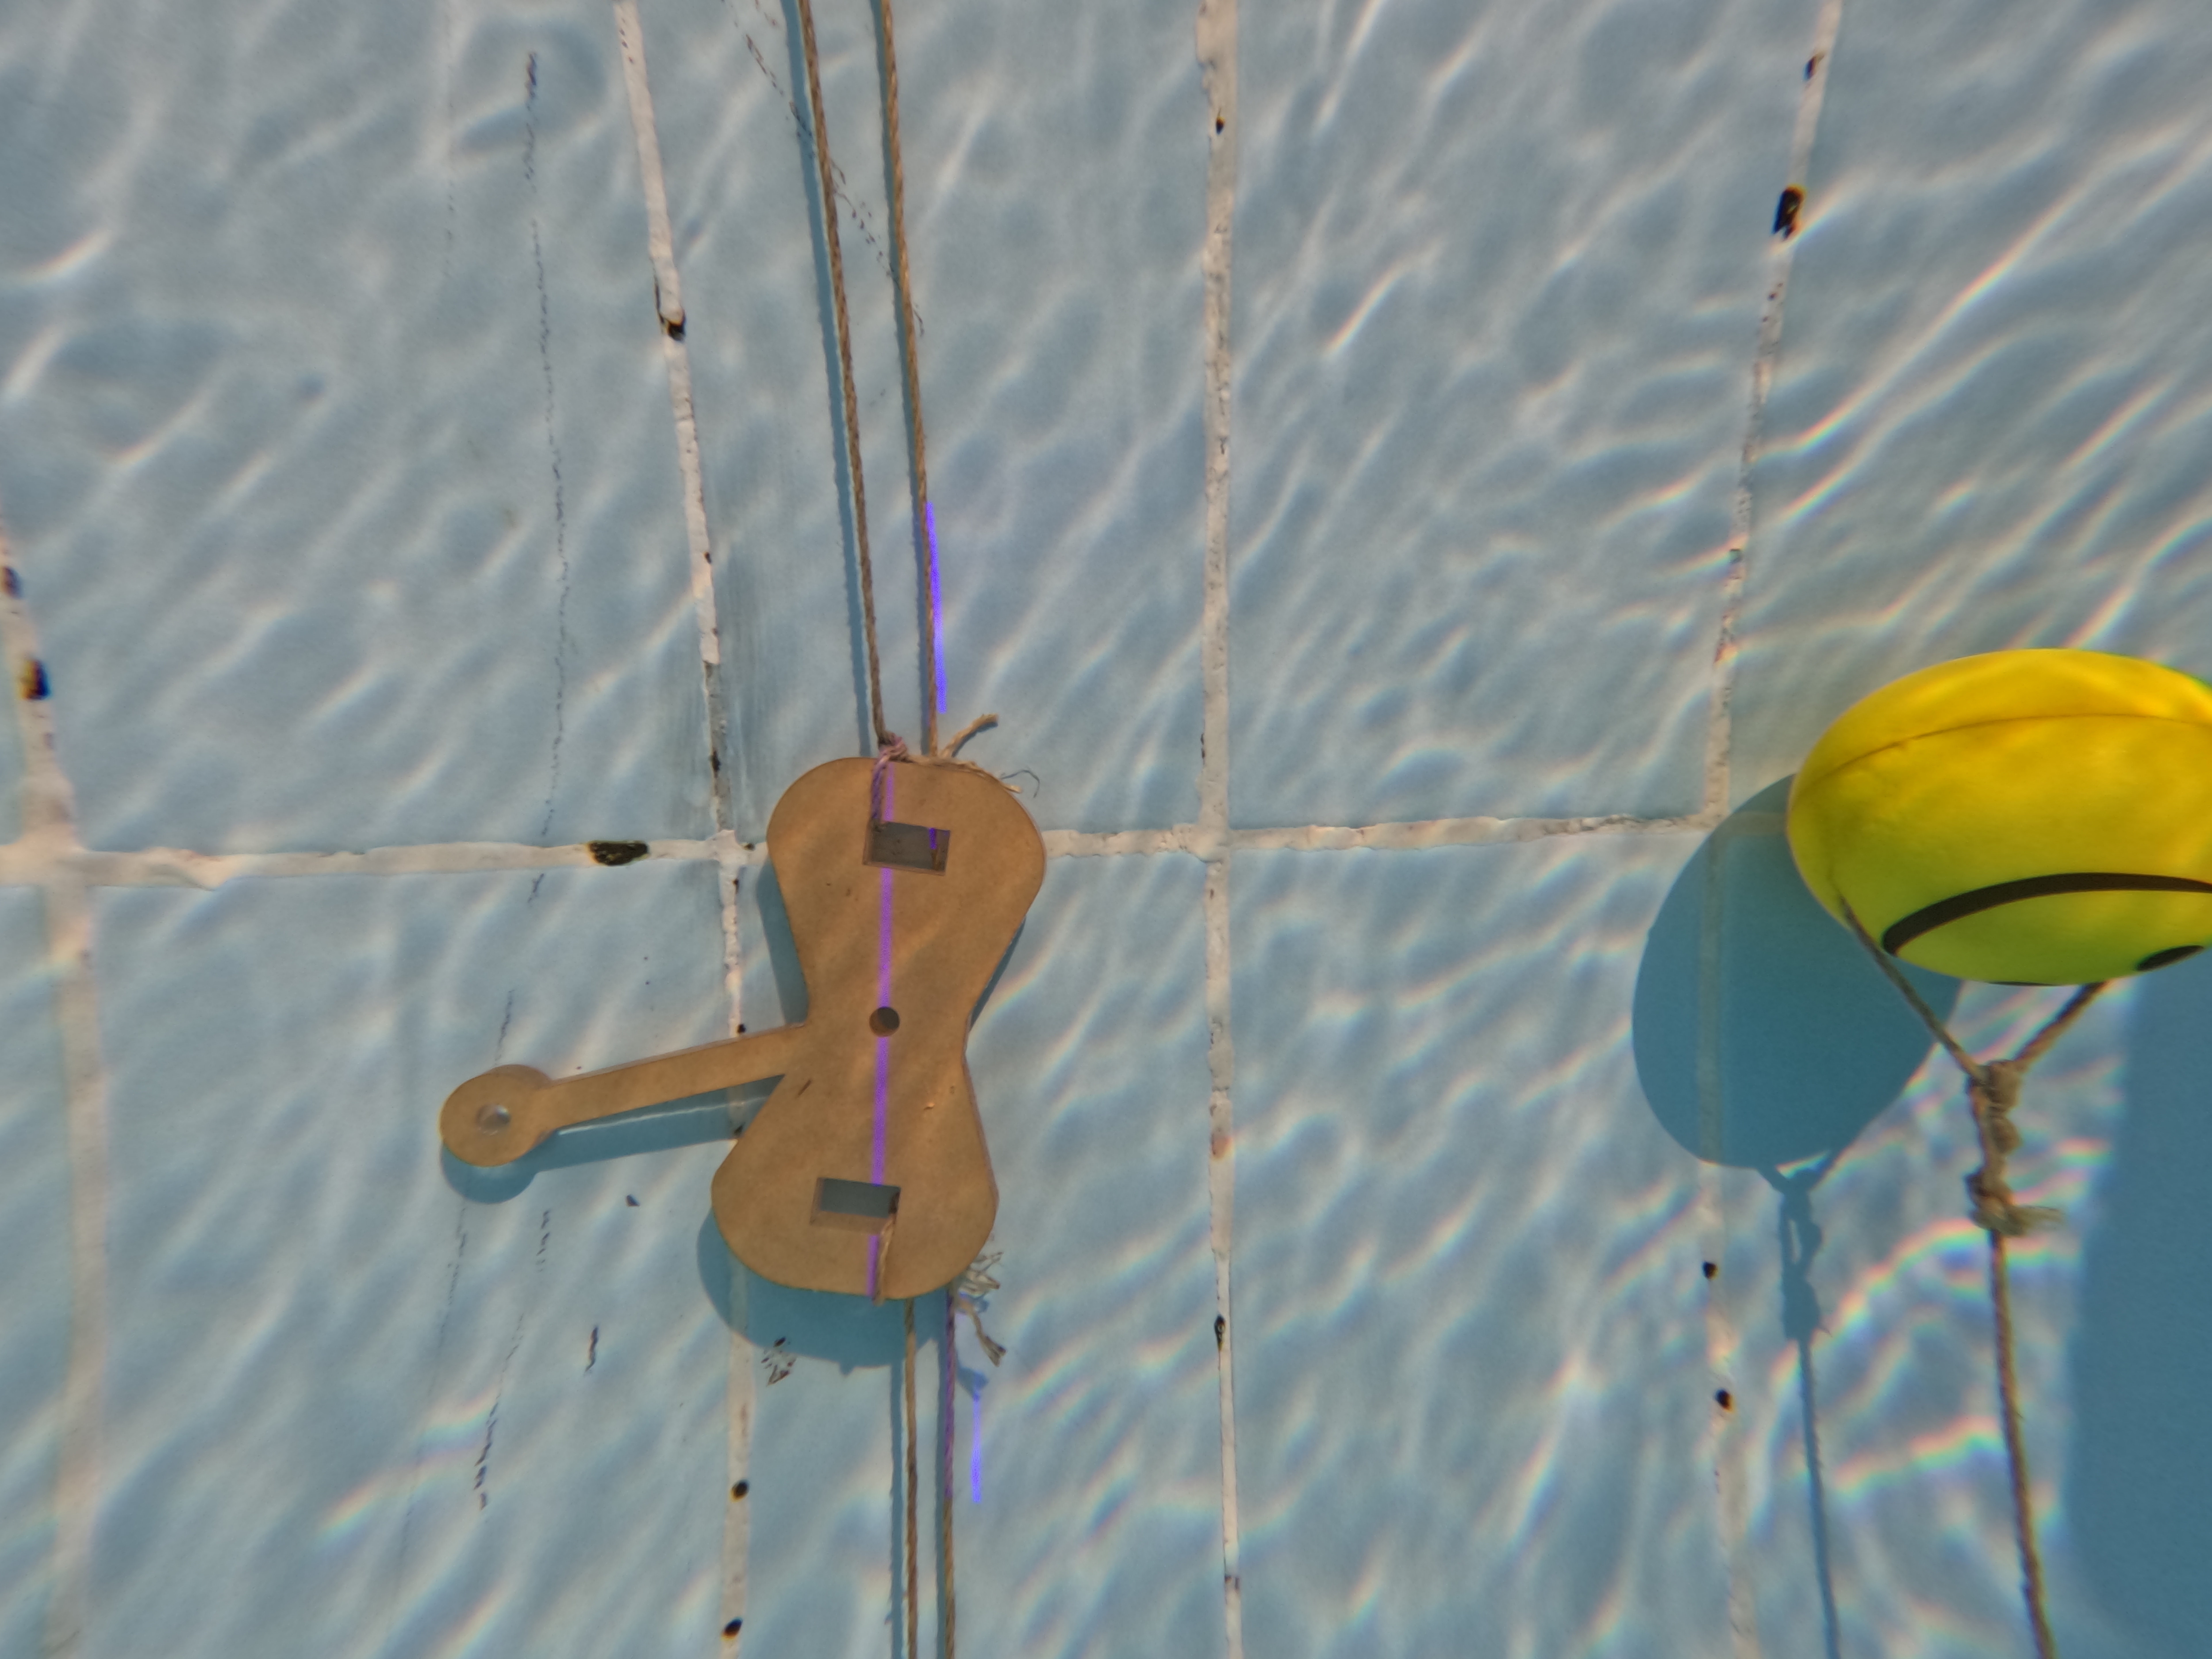

Supplement: Supplementary file 27 [file G0040421.pdf › Level_4_1/G0040421.pdf]

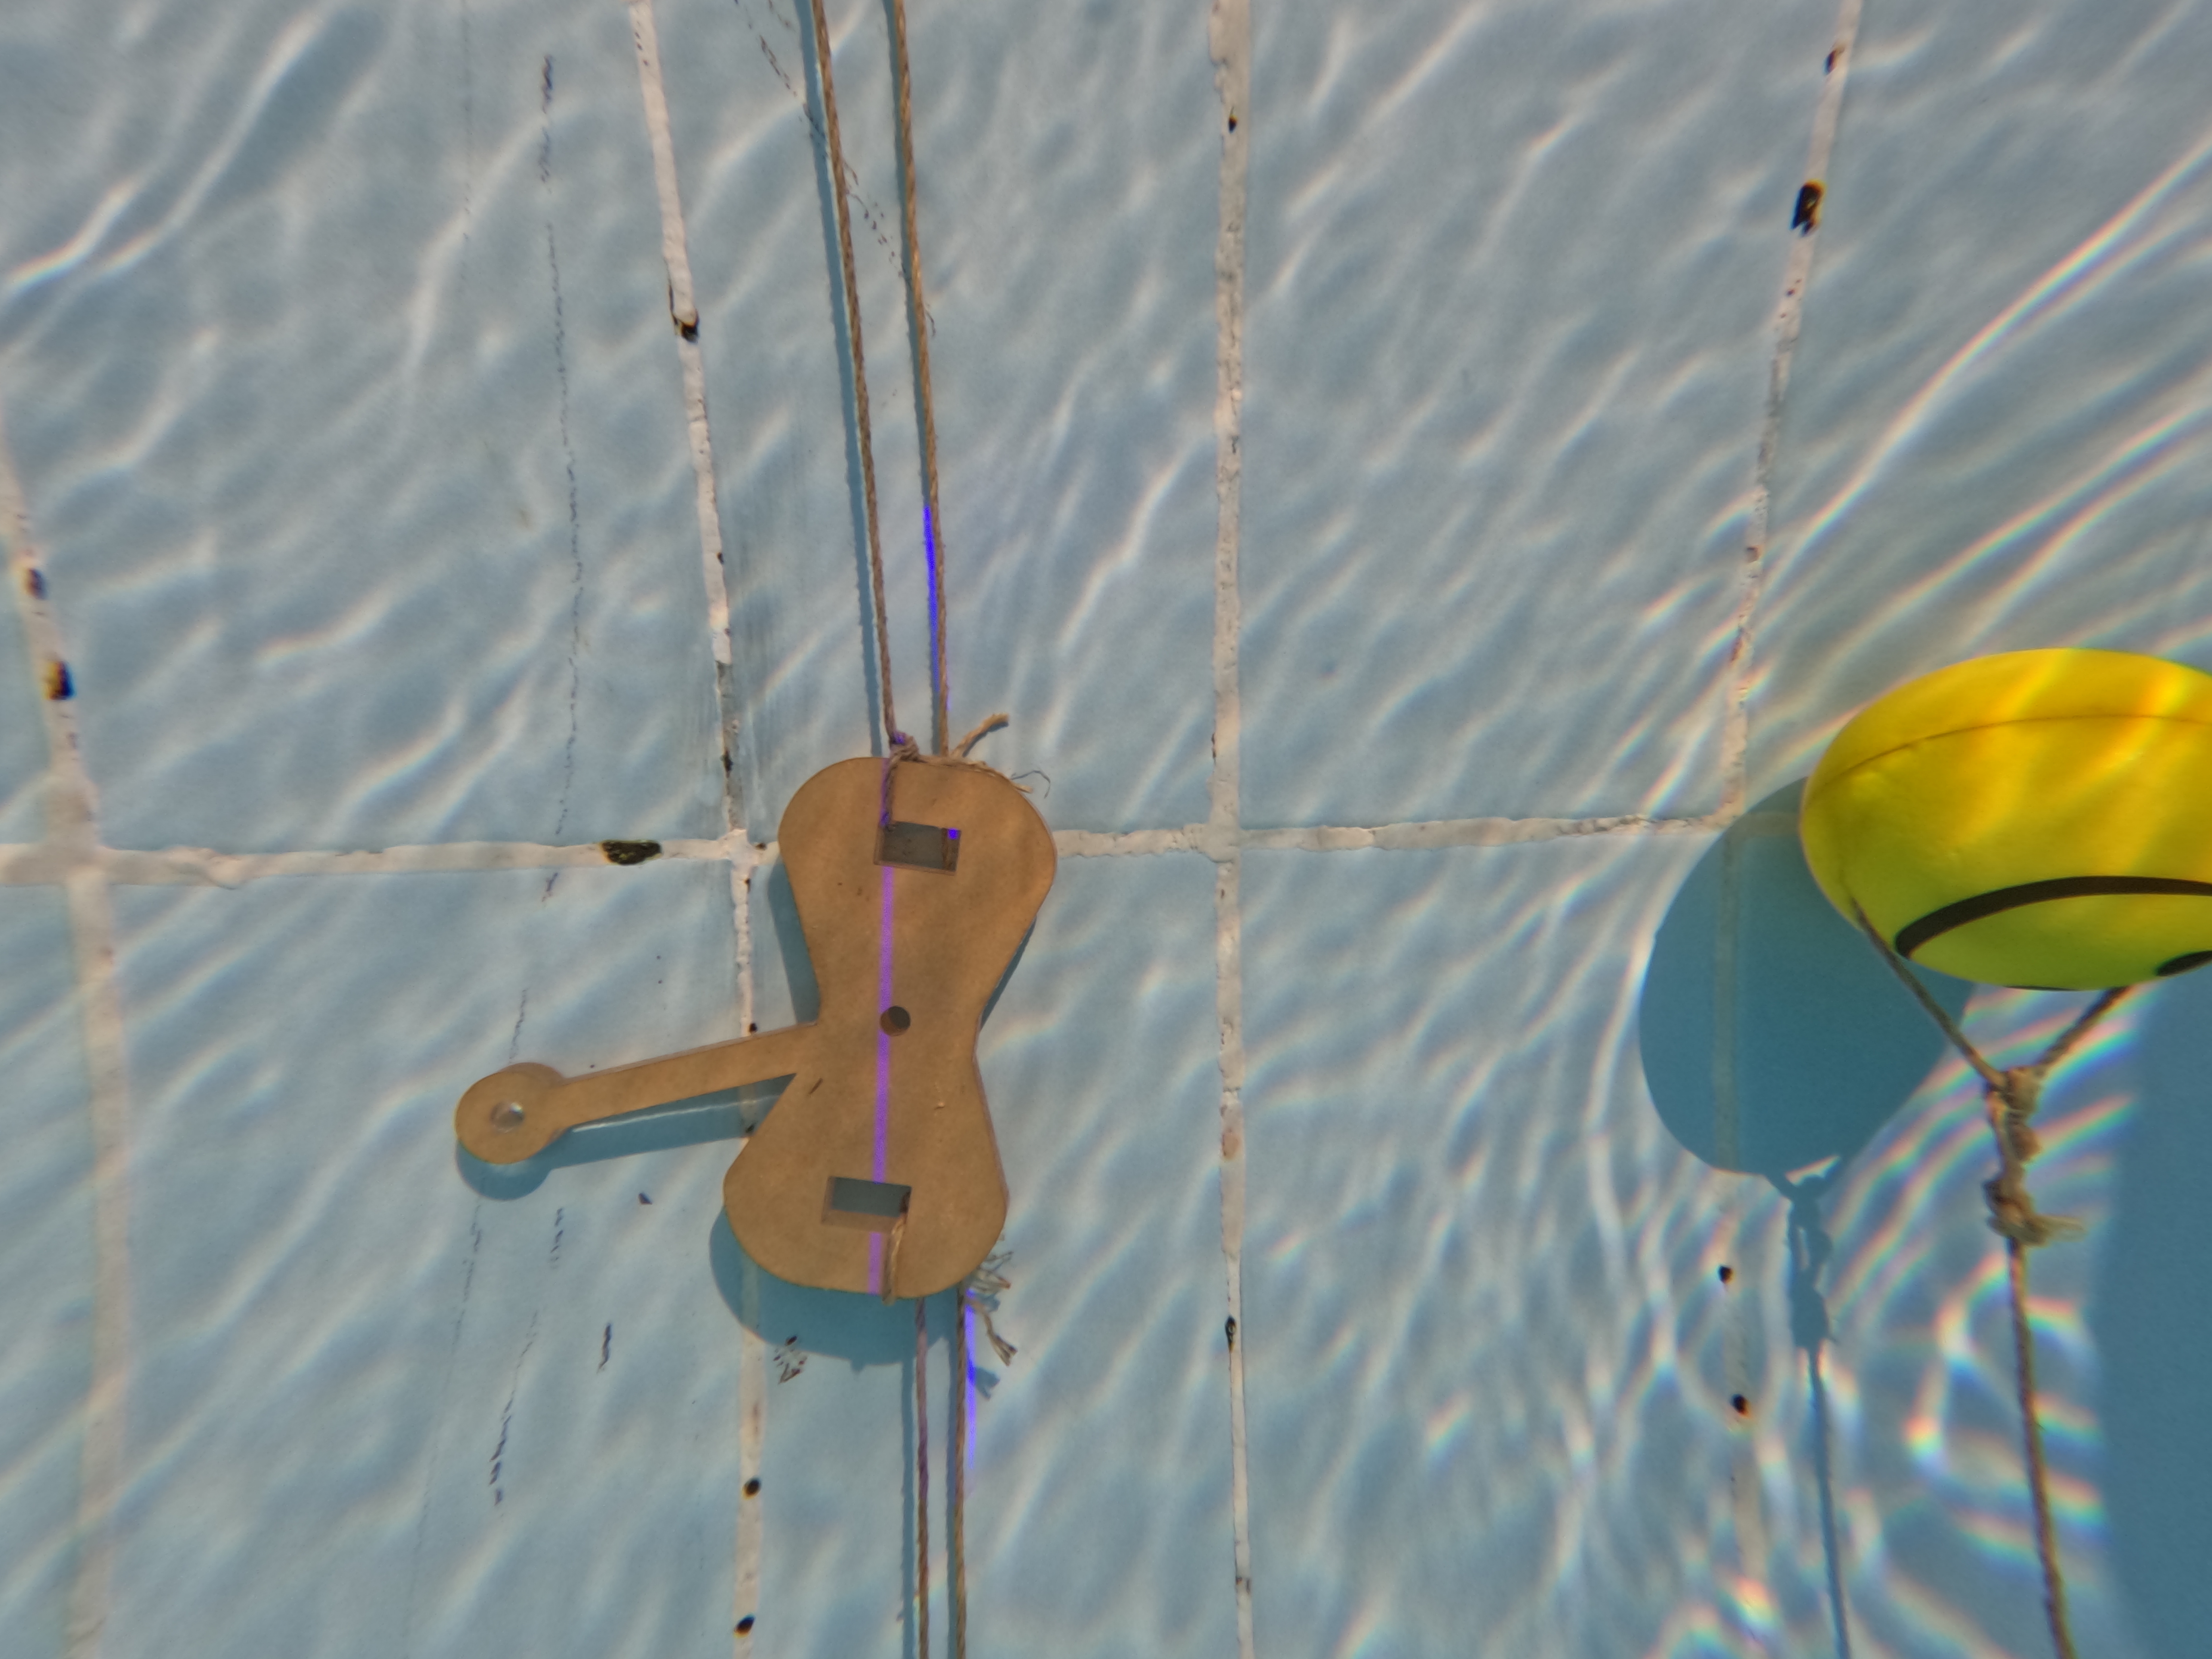

Supplement: Supplementary file 28 [file G0040422.pdf › Level_4_1/G0040422.pdf]

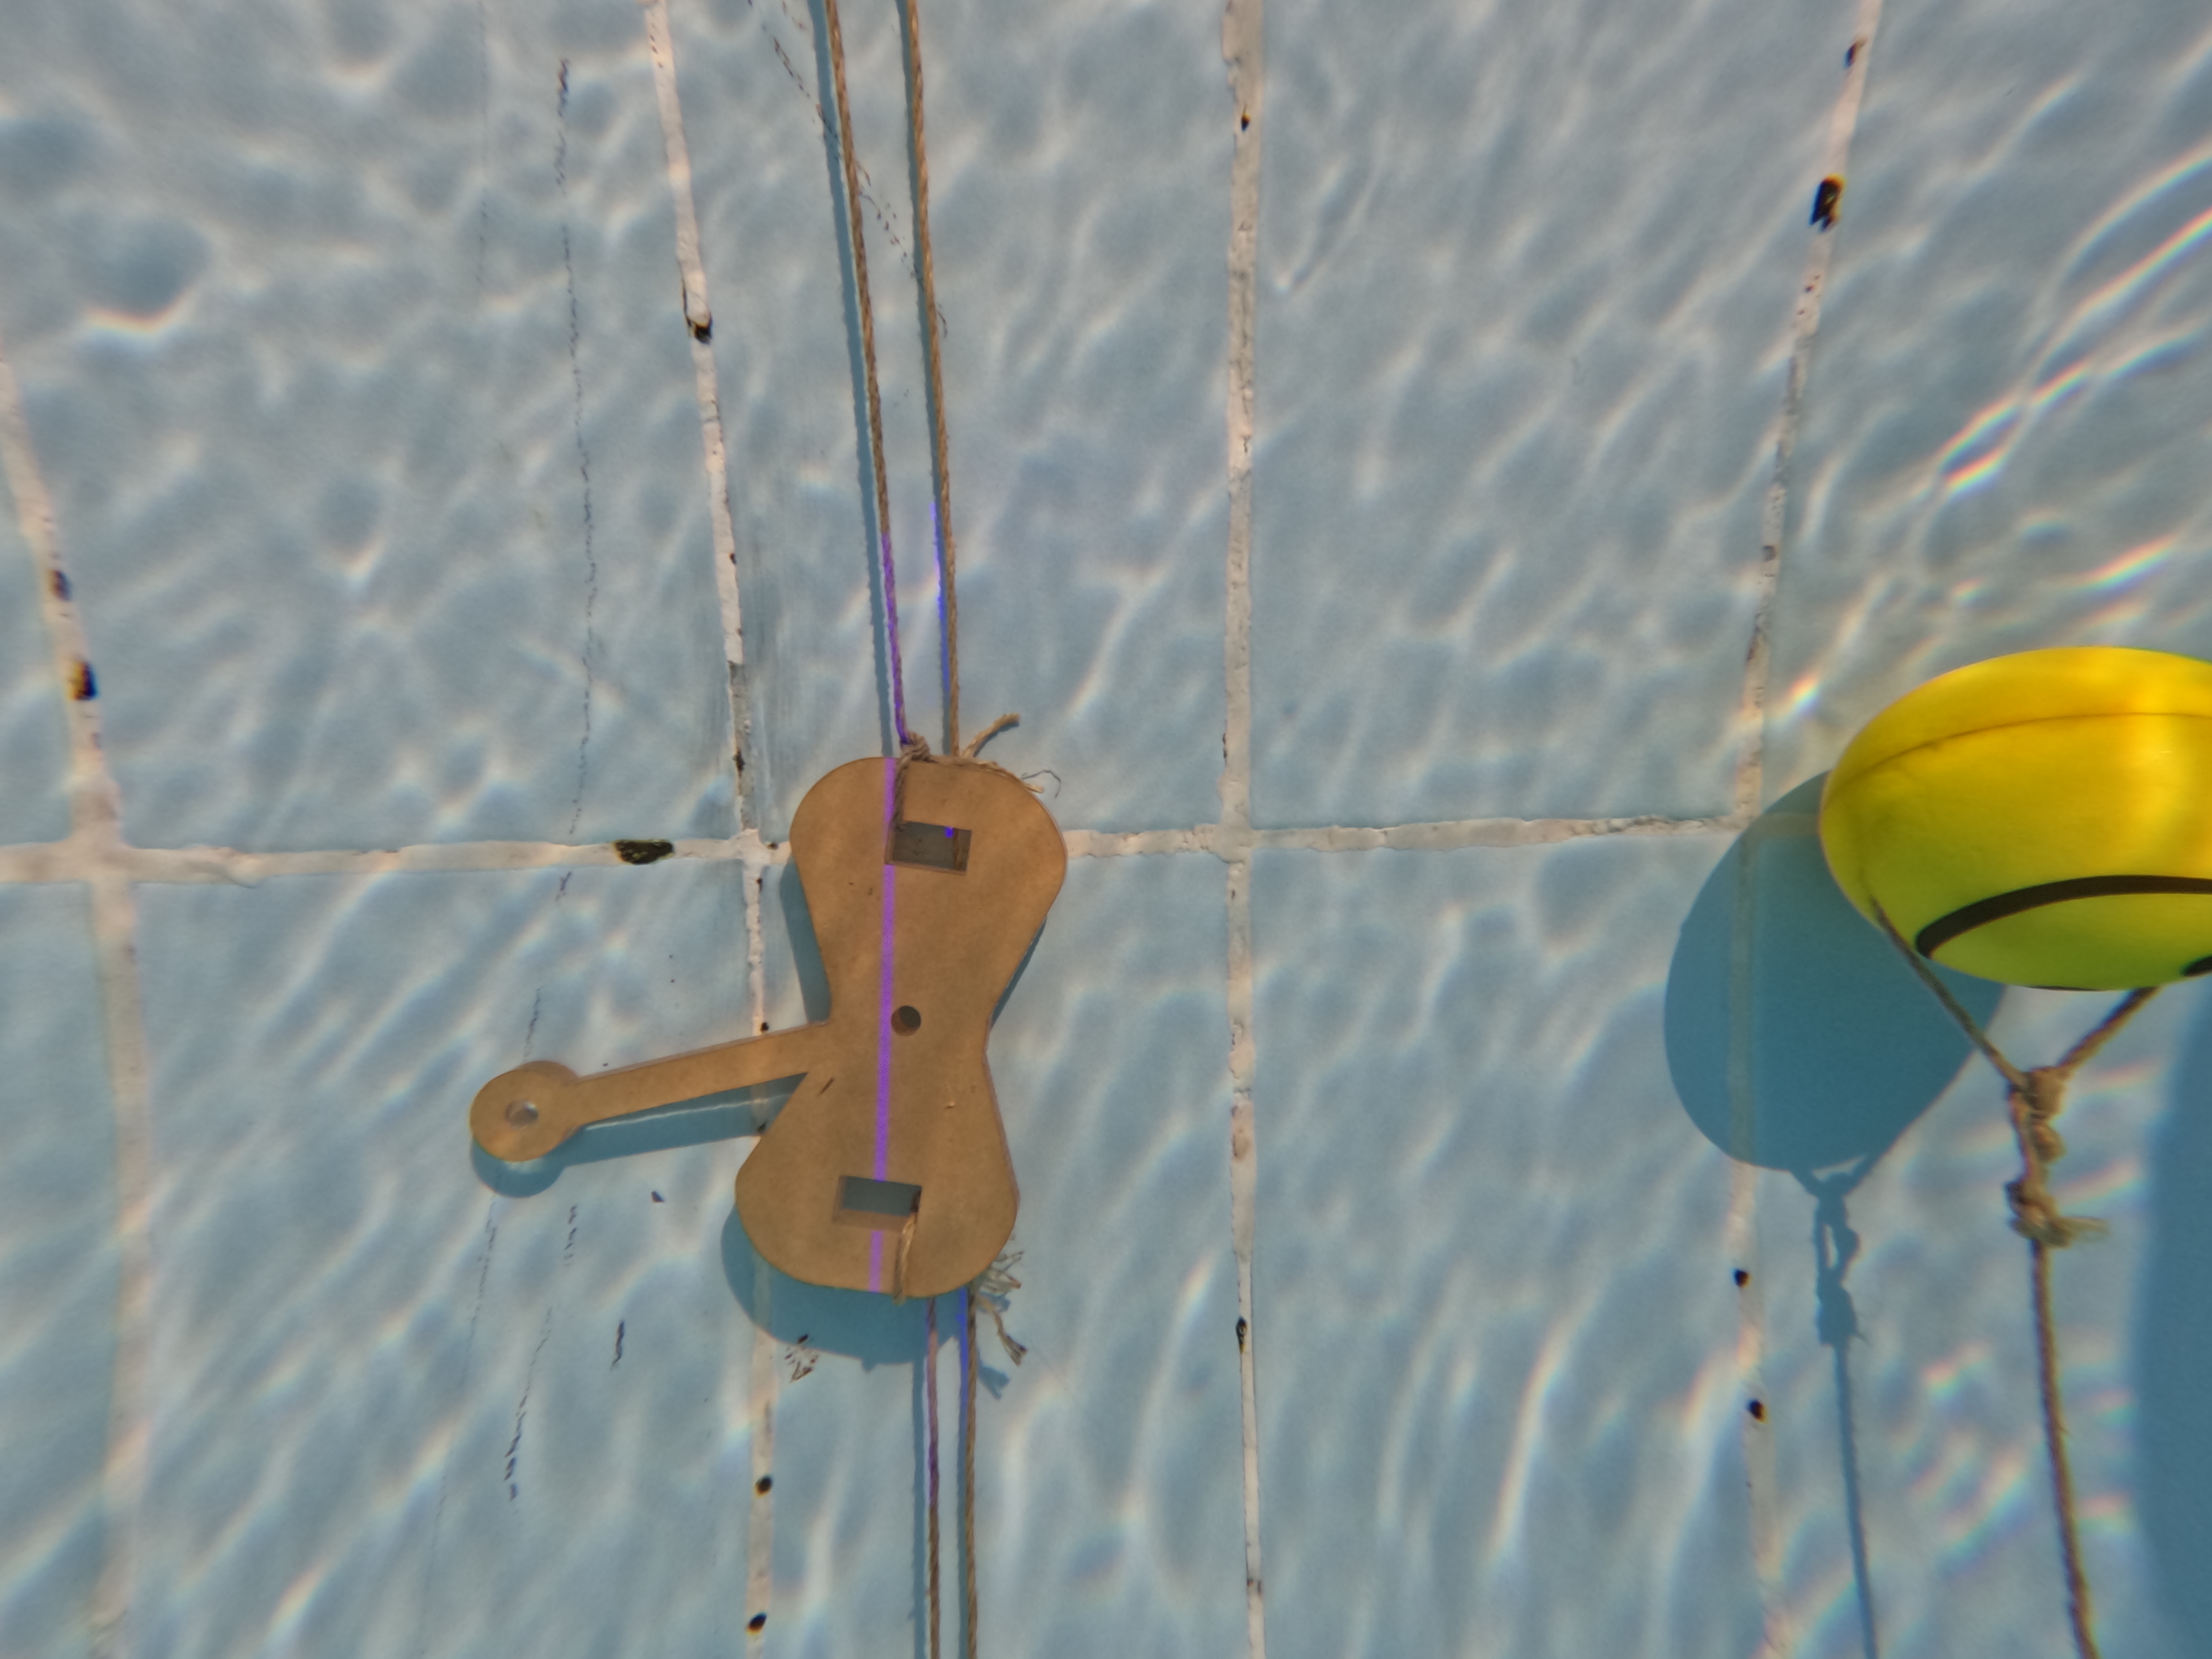

Supplement: Supplementary file 29 [file G0040423.pdf › Level_4_1/G0040423.pdf]

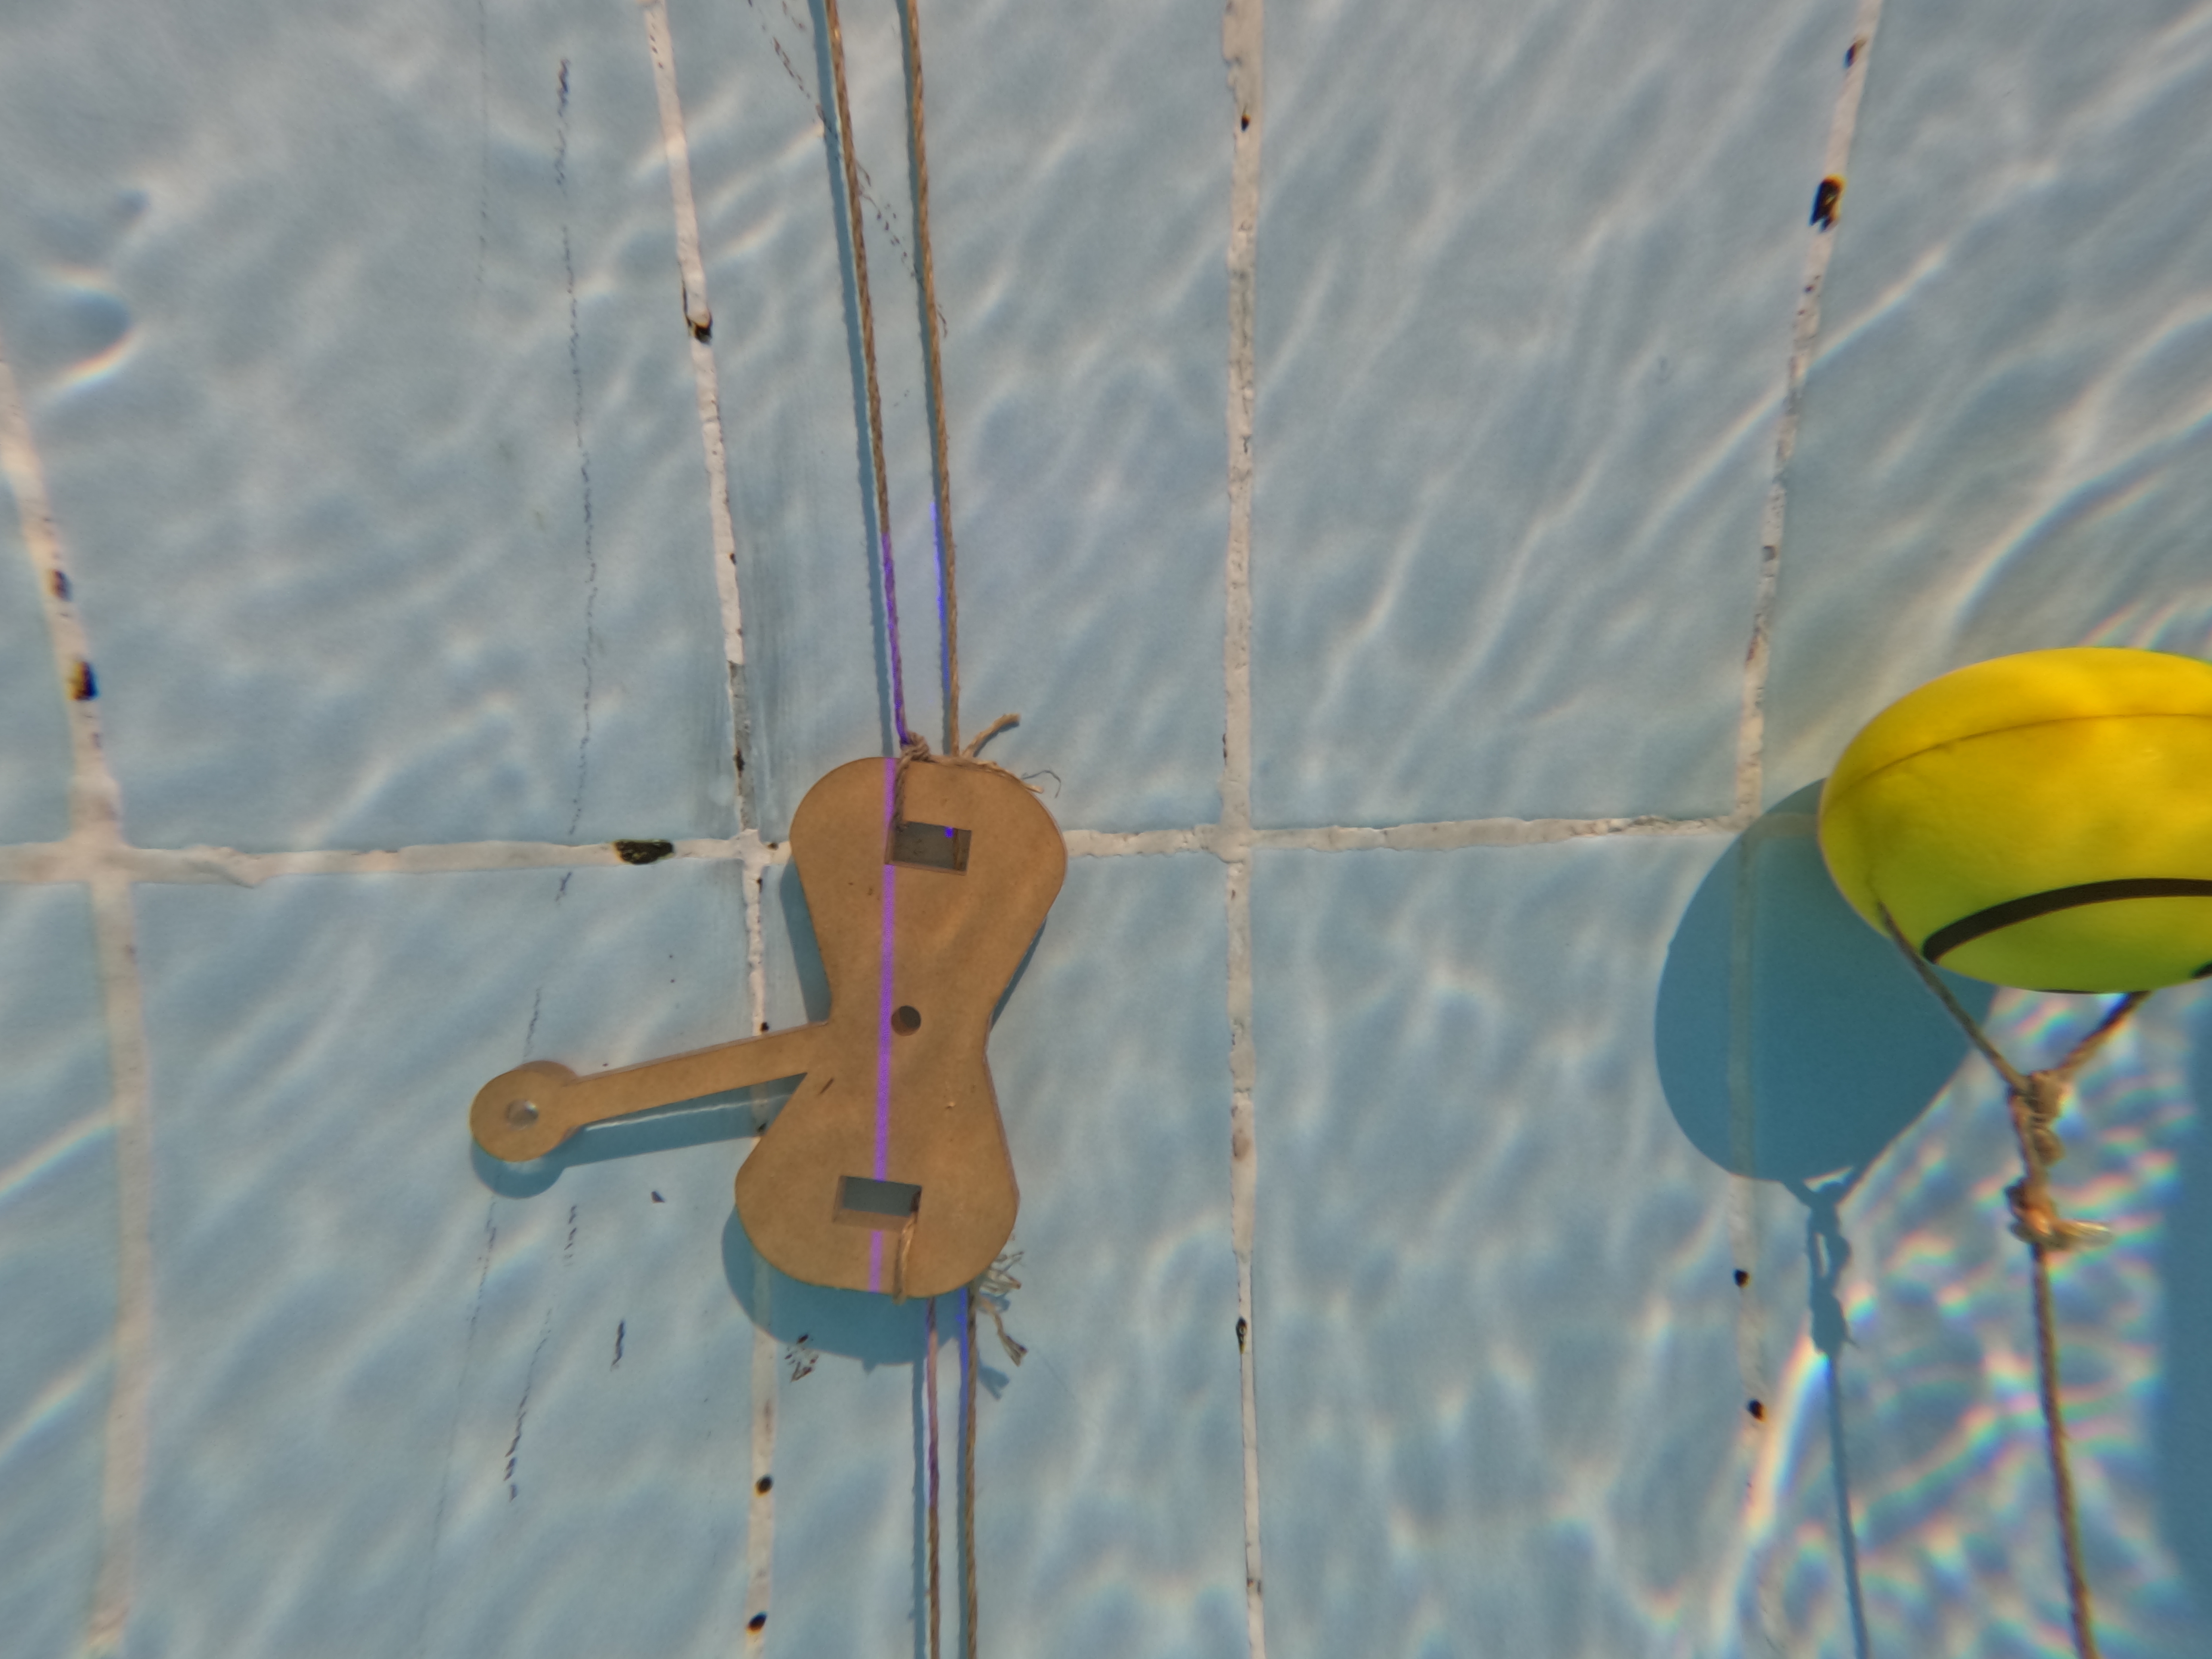

Supplement: Supplementary file 30 [file G0040424.pdf › Level_4_1/G0040424.pdf]

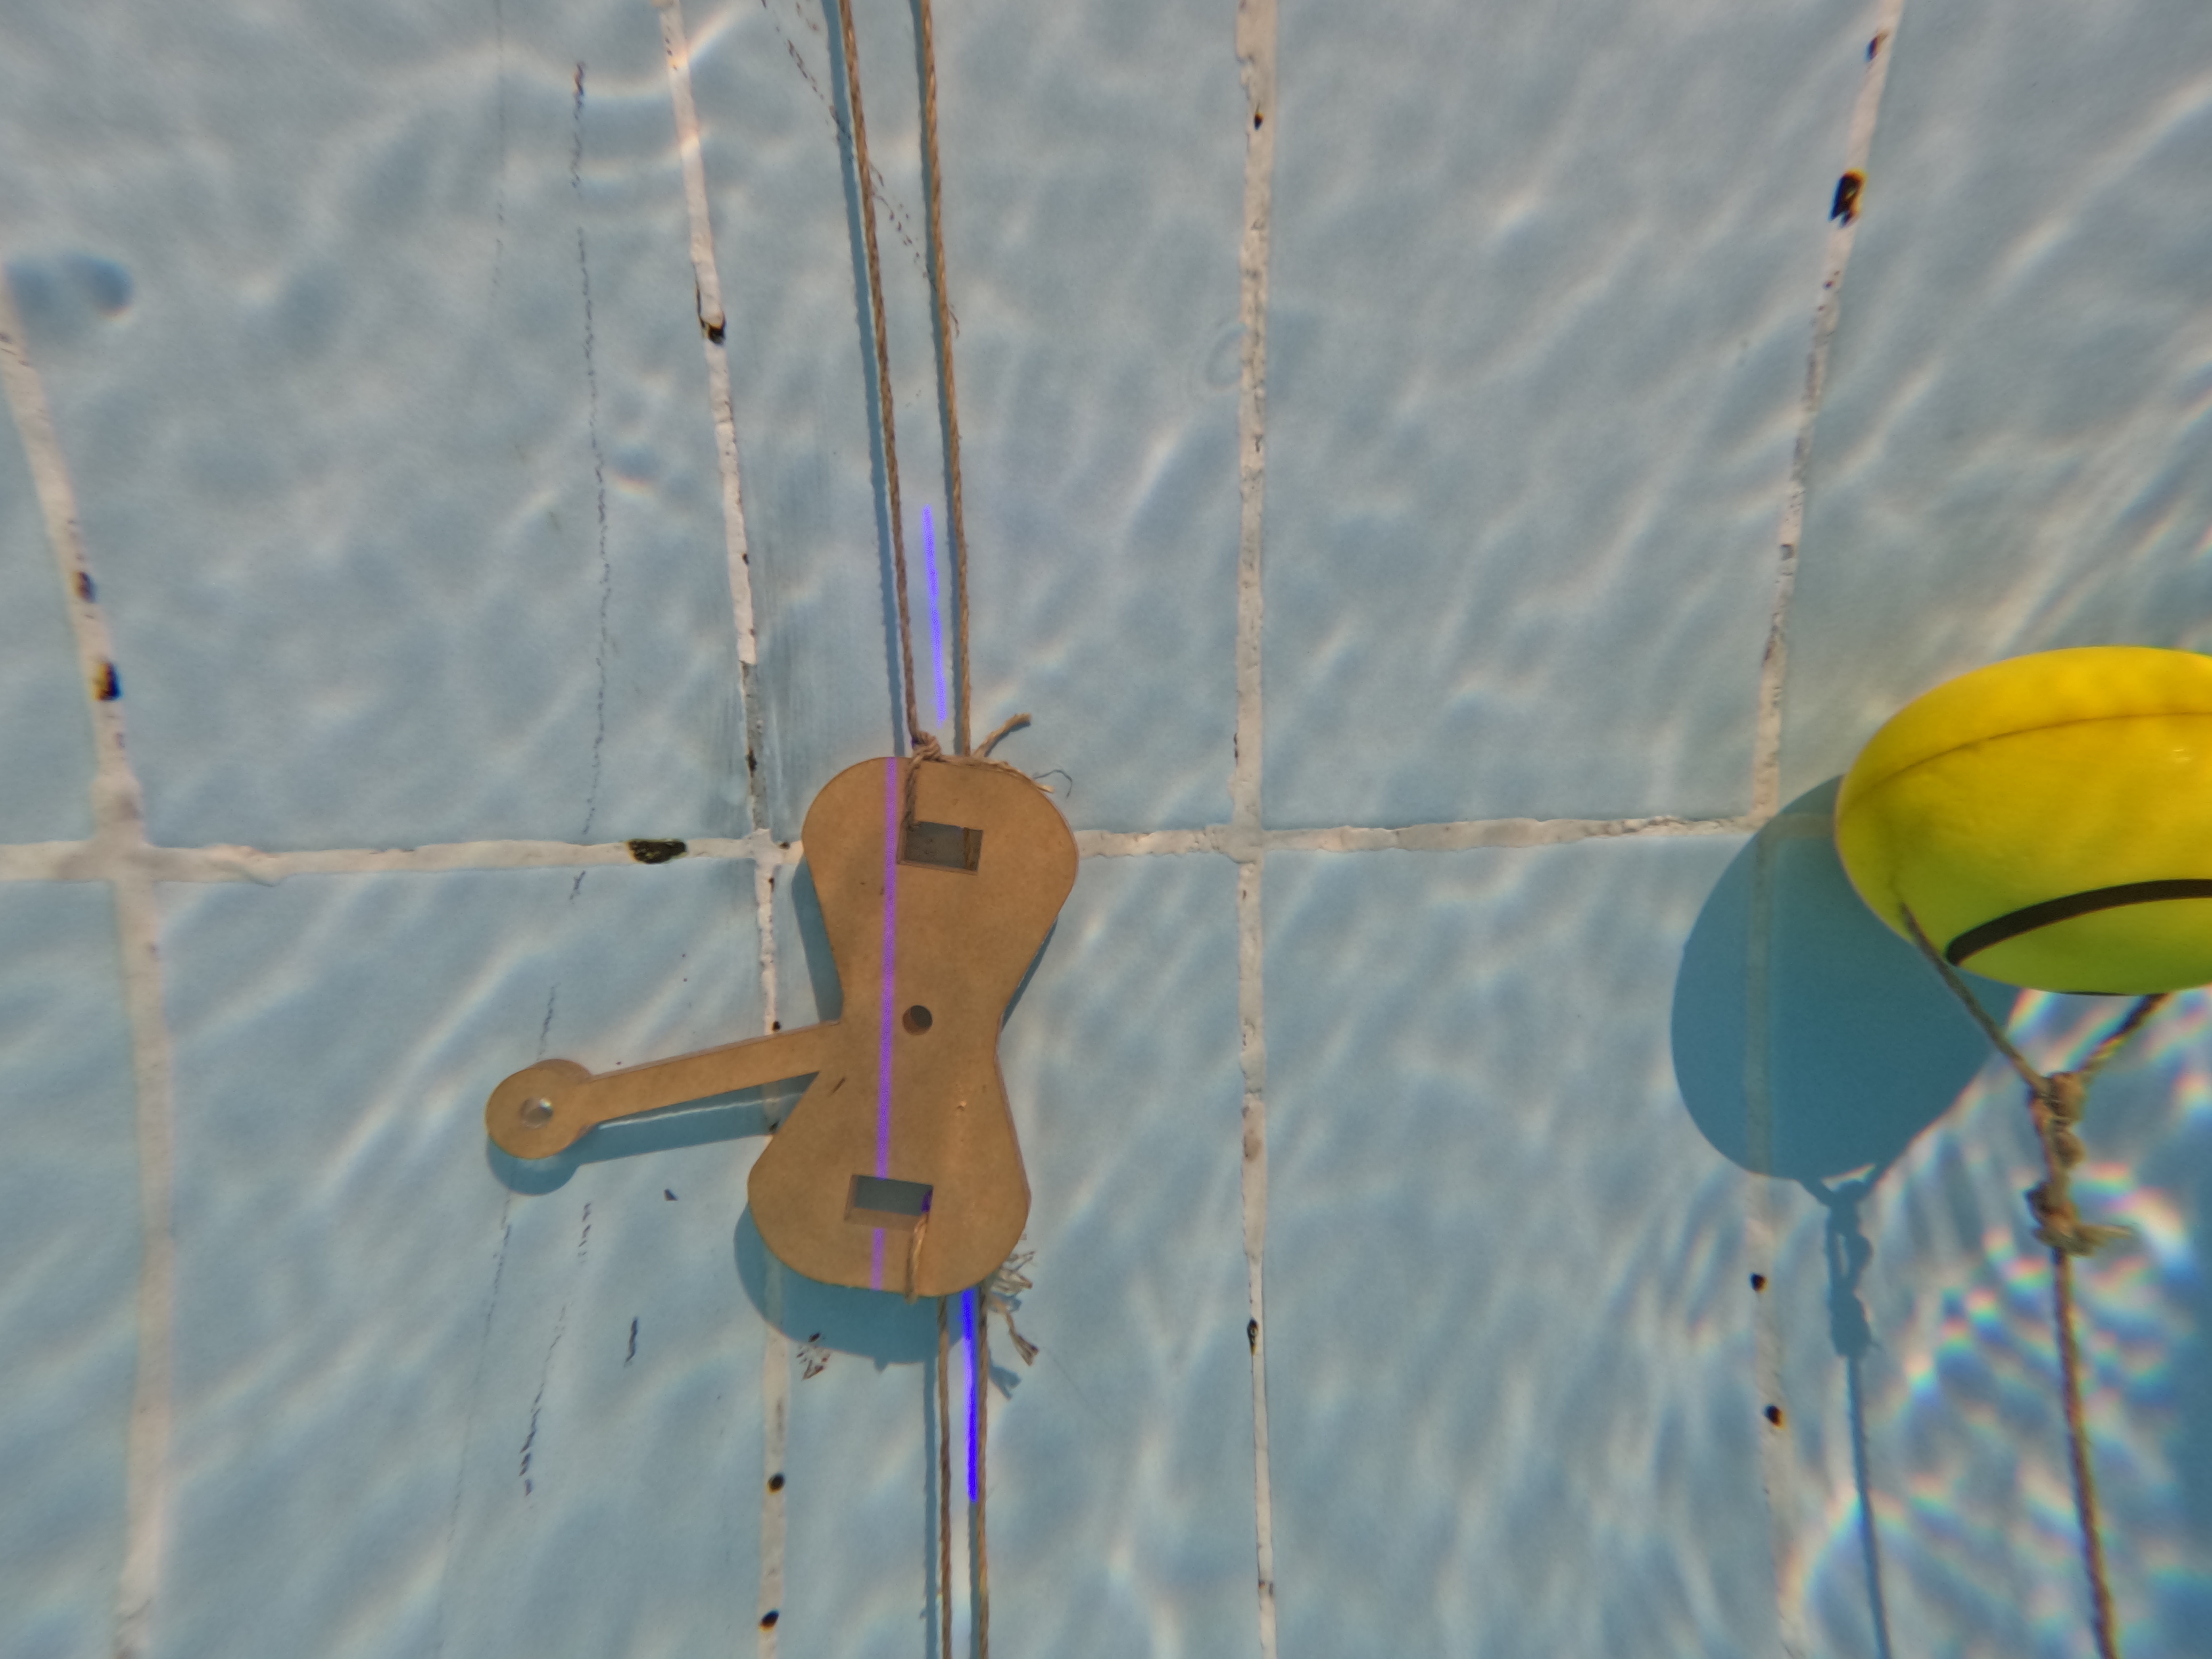

Supplement: Supplementary file 31 [file G0040425.pdf › Level_4_1/G0040425.pdf]

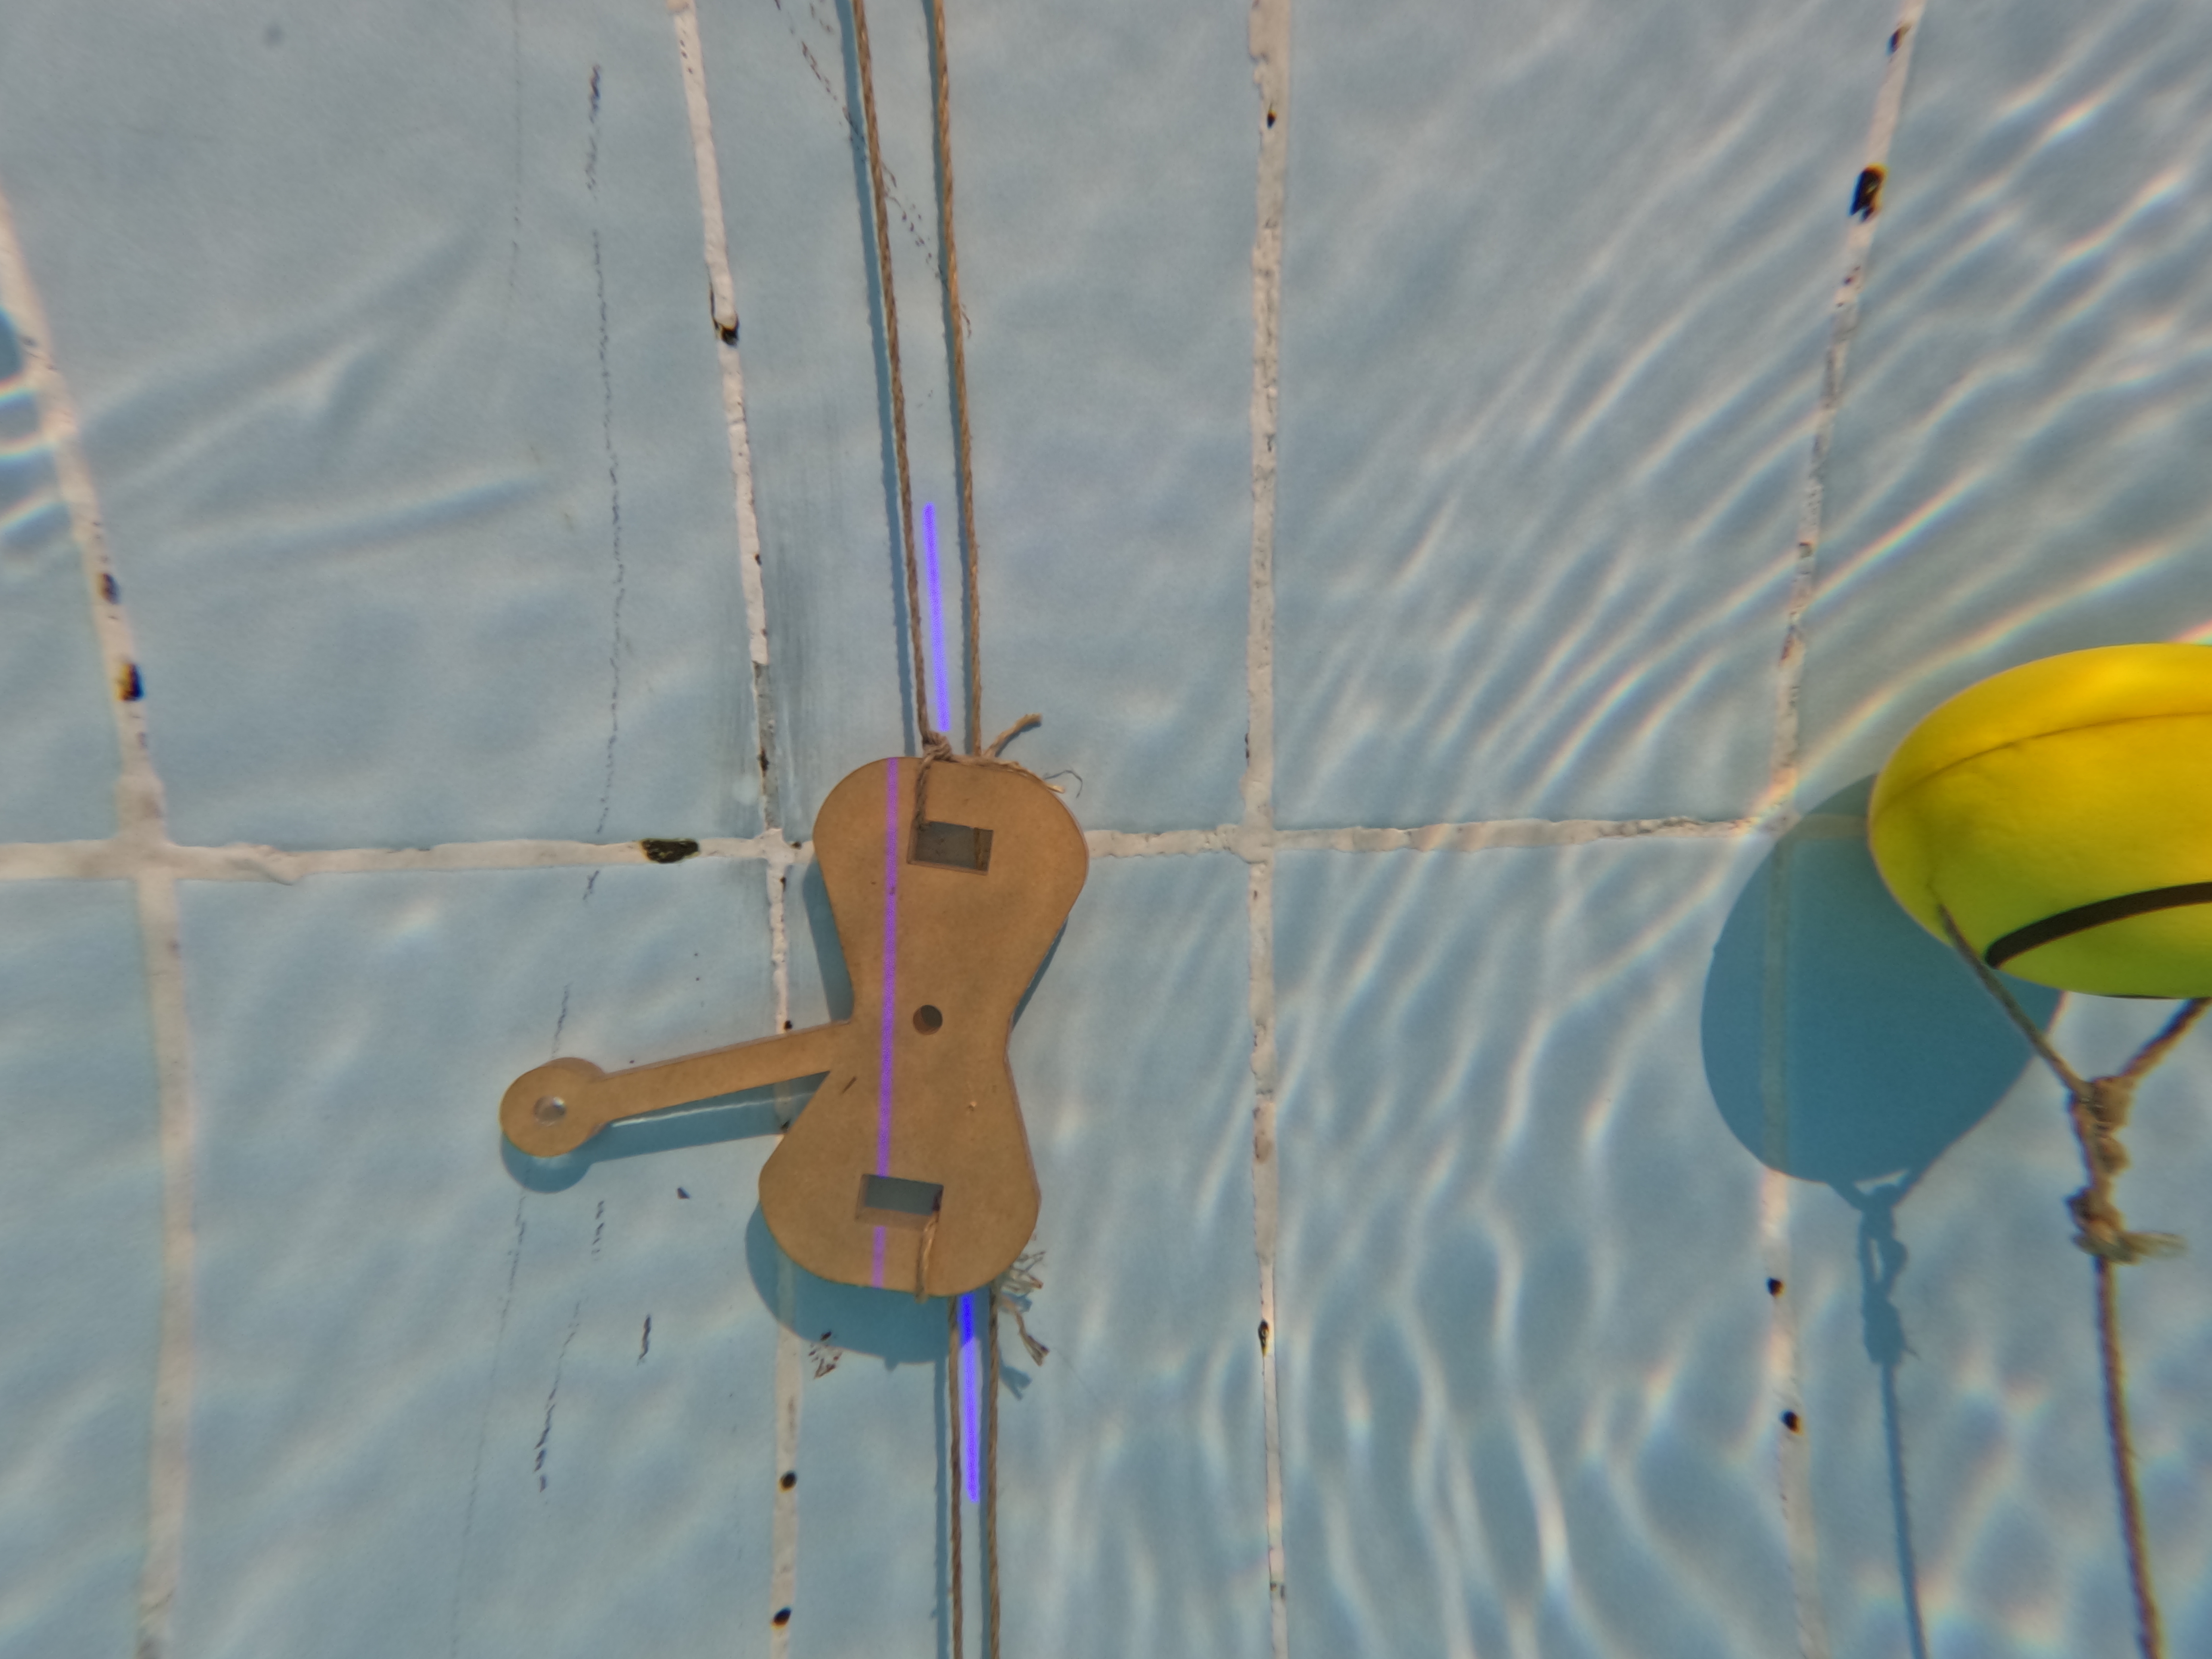

Supplement: Supplementary file 32 [file G0040426.pdf › Level_4_1/G0040426.pdf]

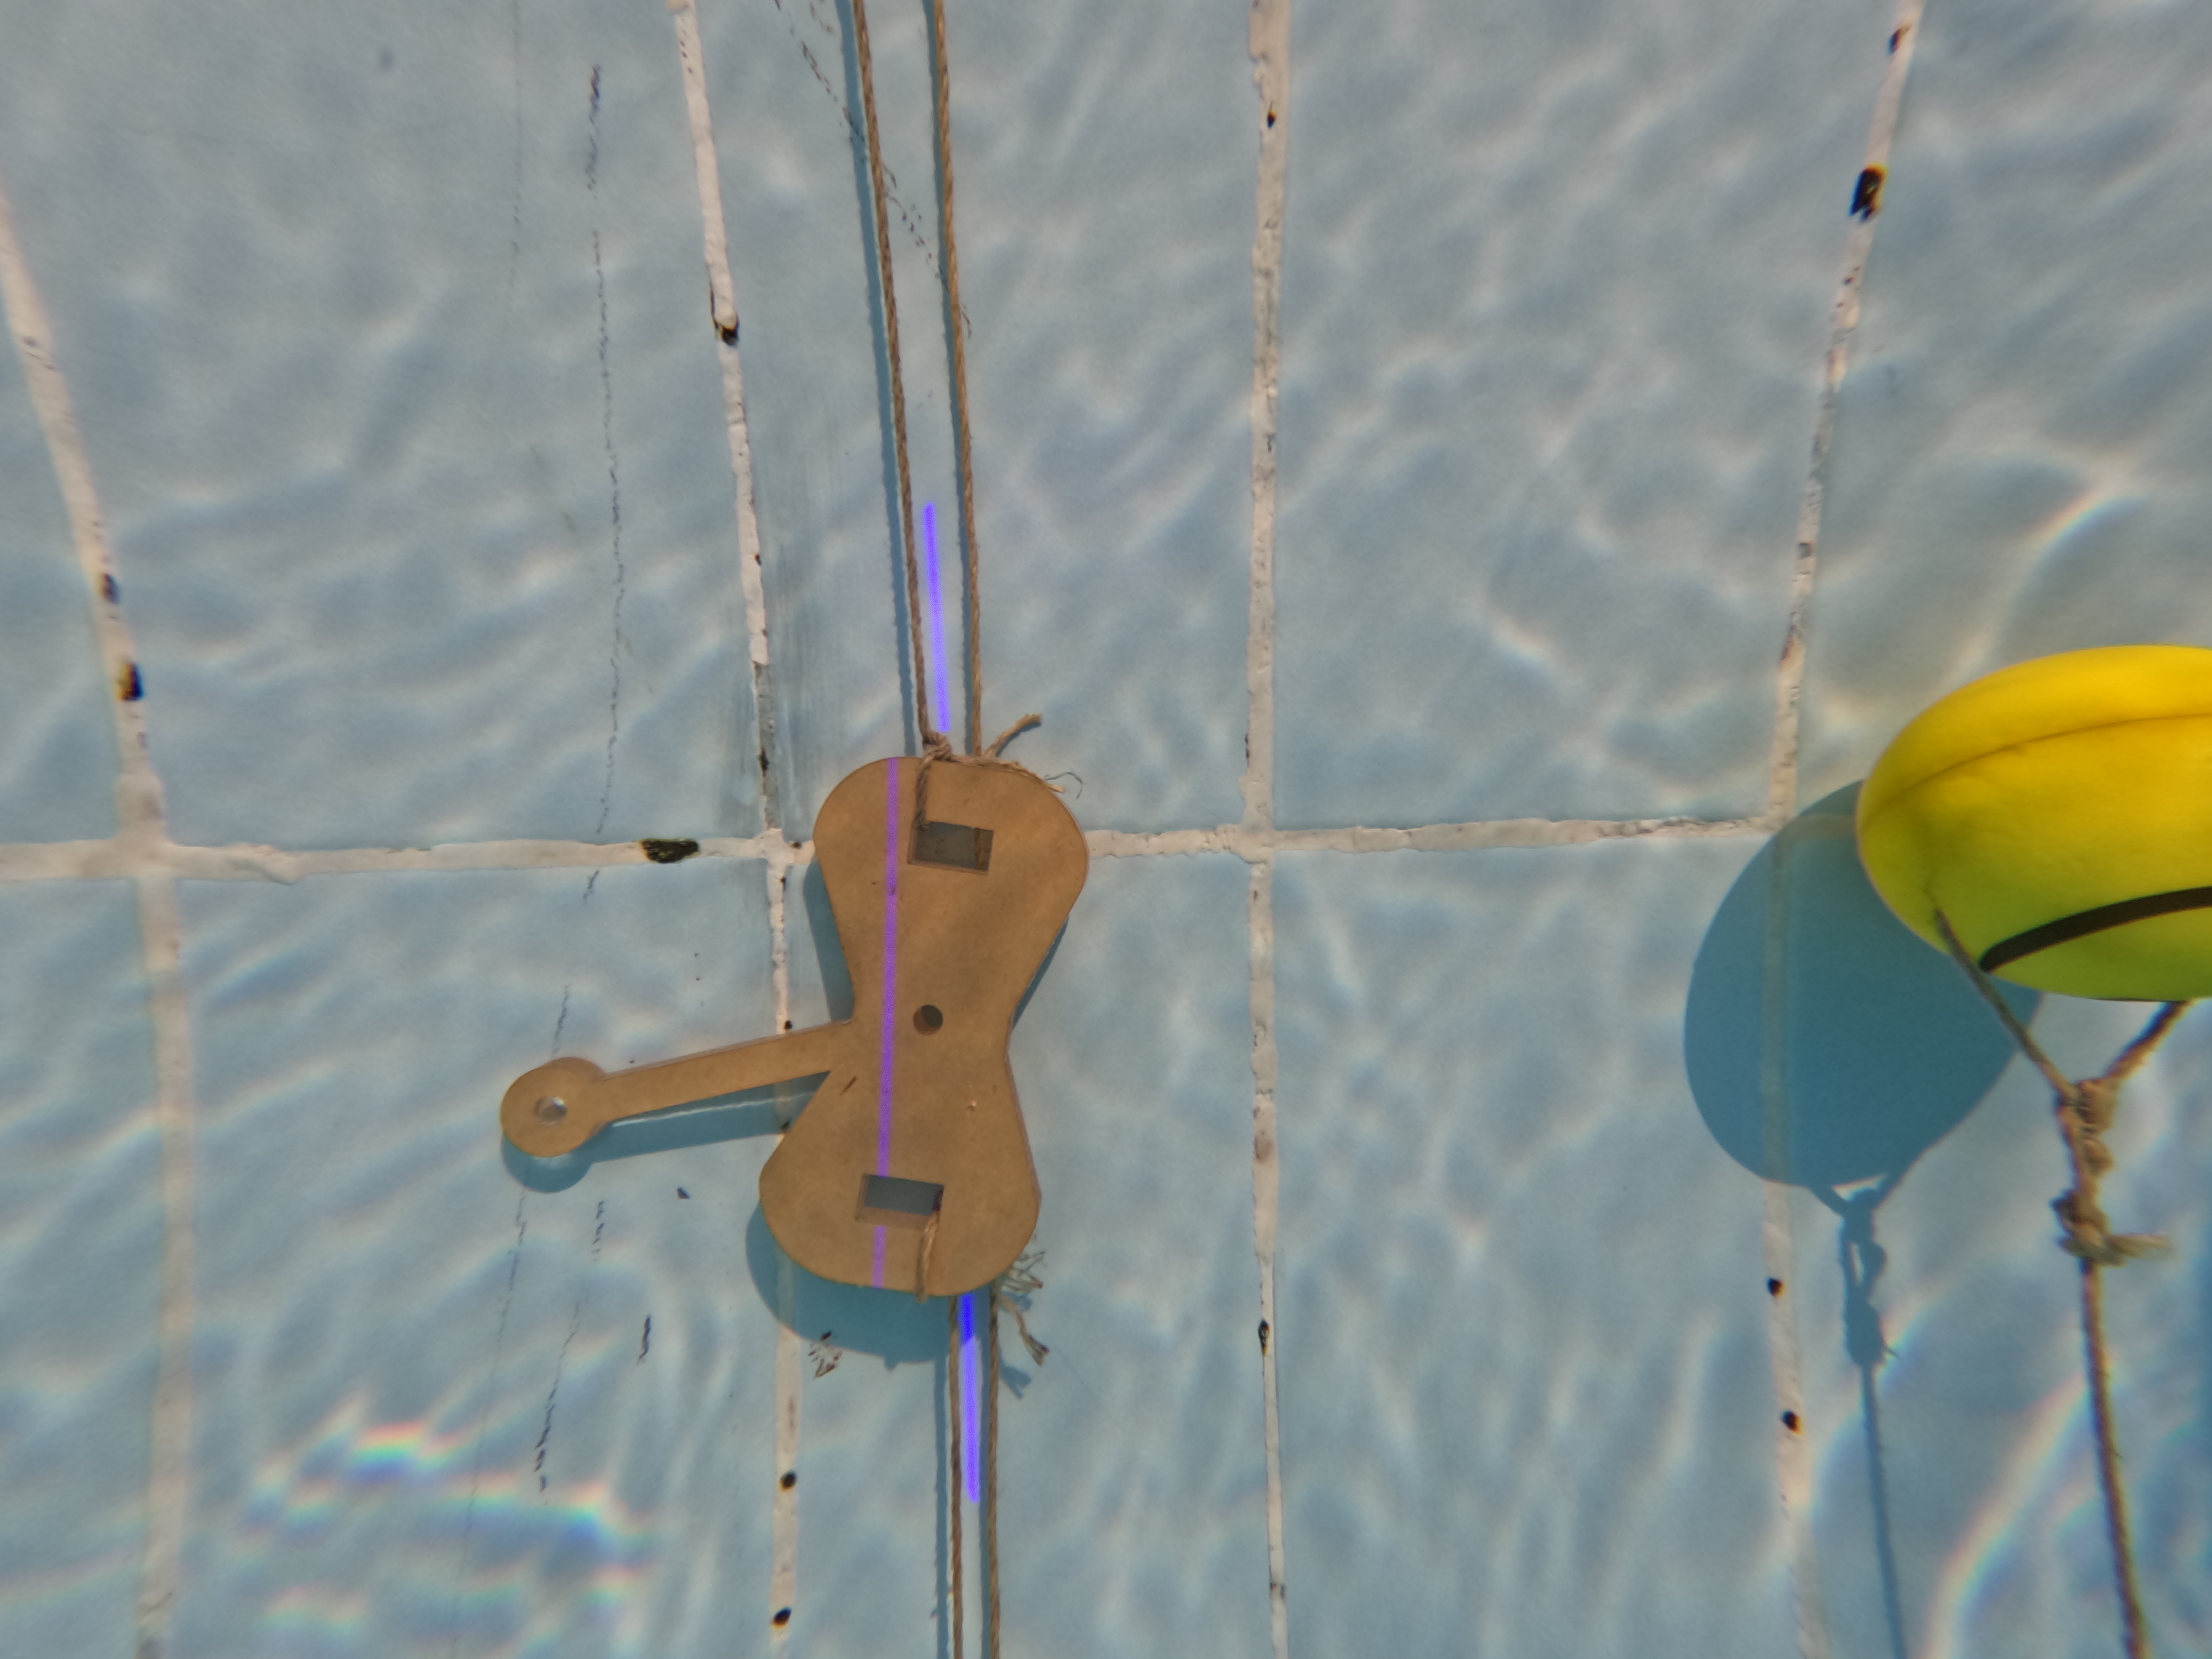

Supplement: Supplementary file 33 [file G0040427.pdf › Level_4_1/G0040427.pdf]

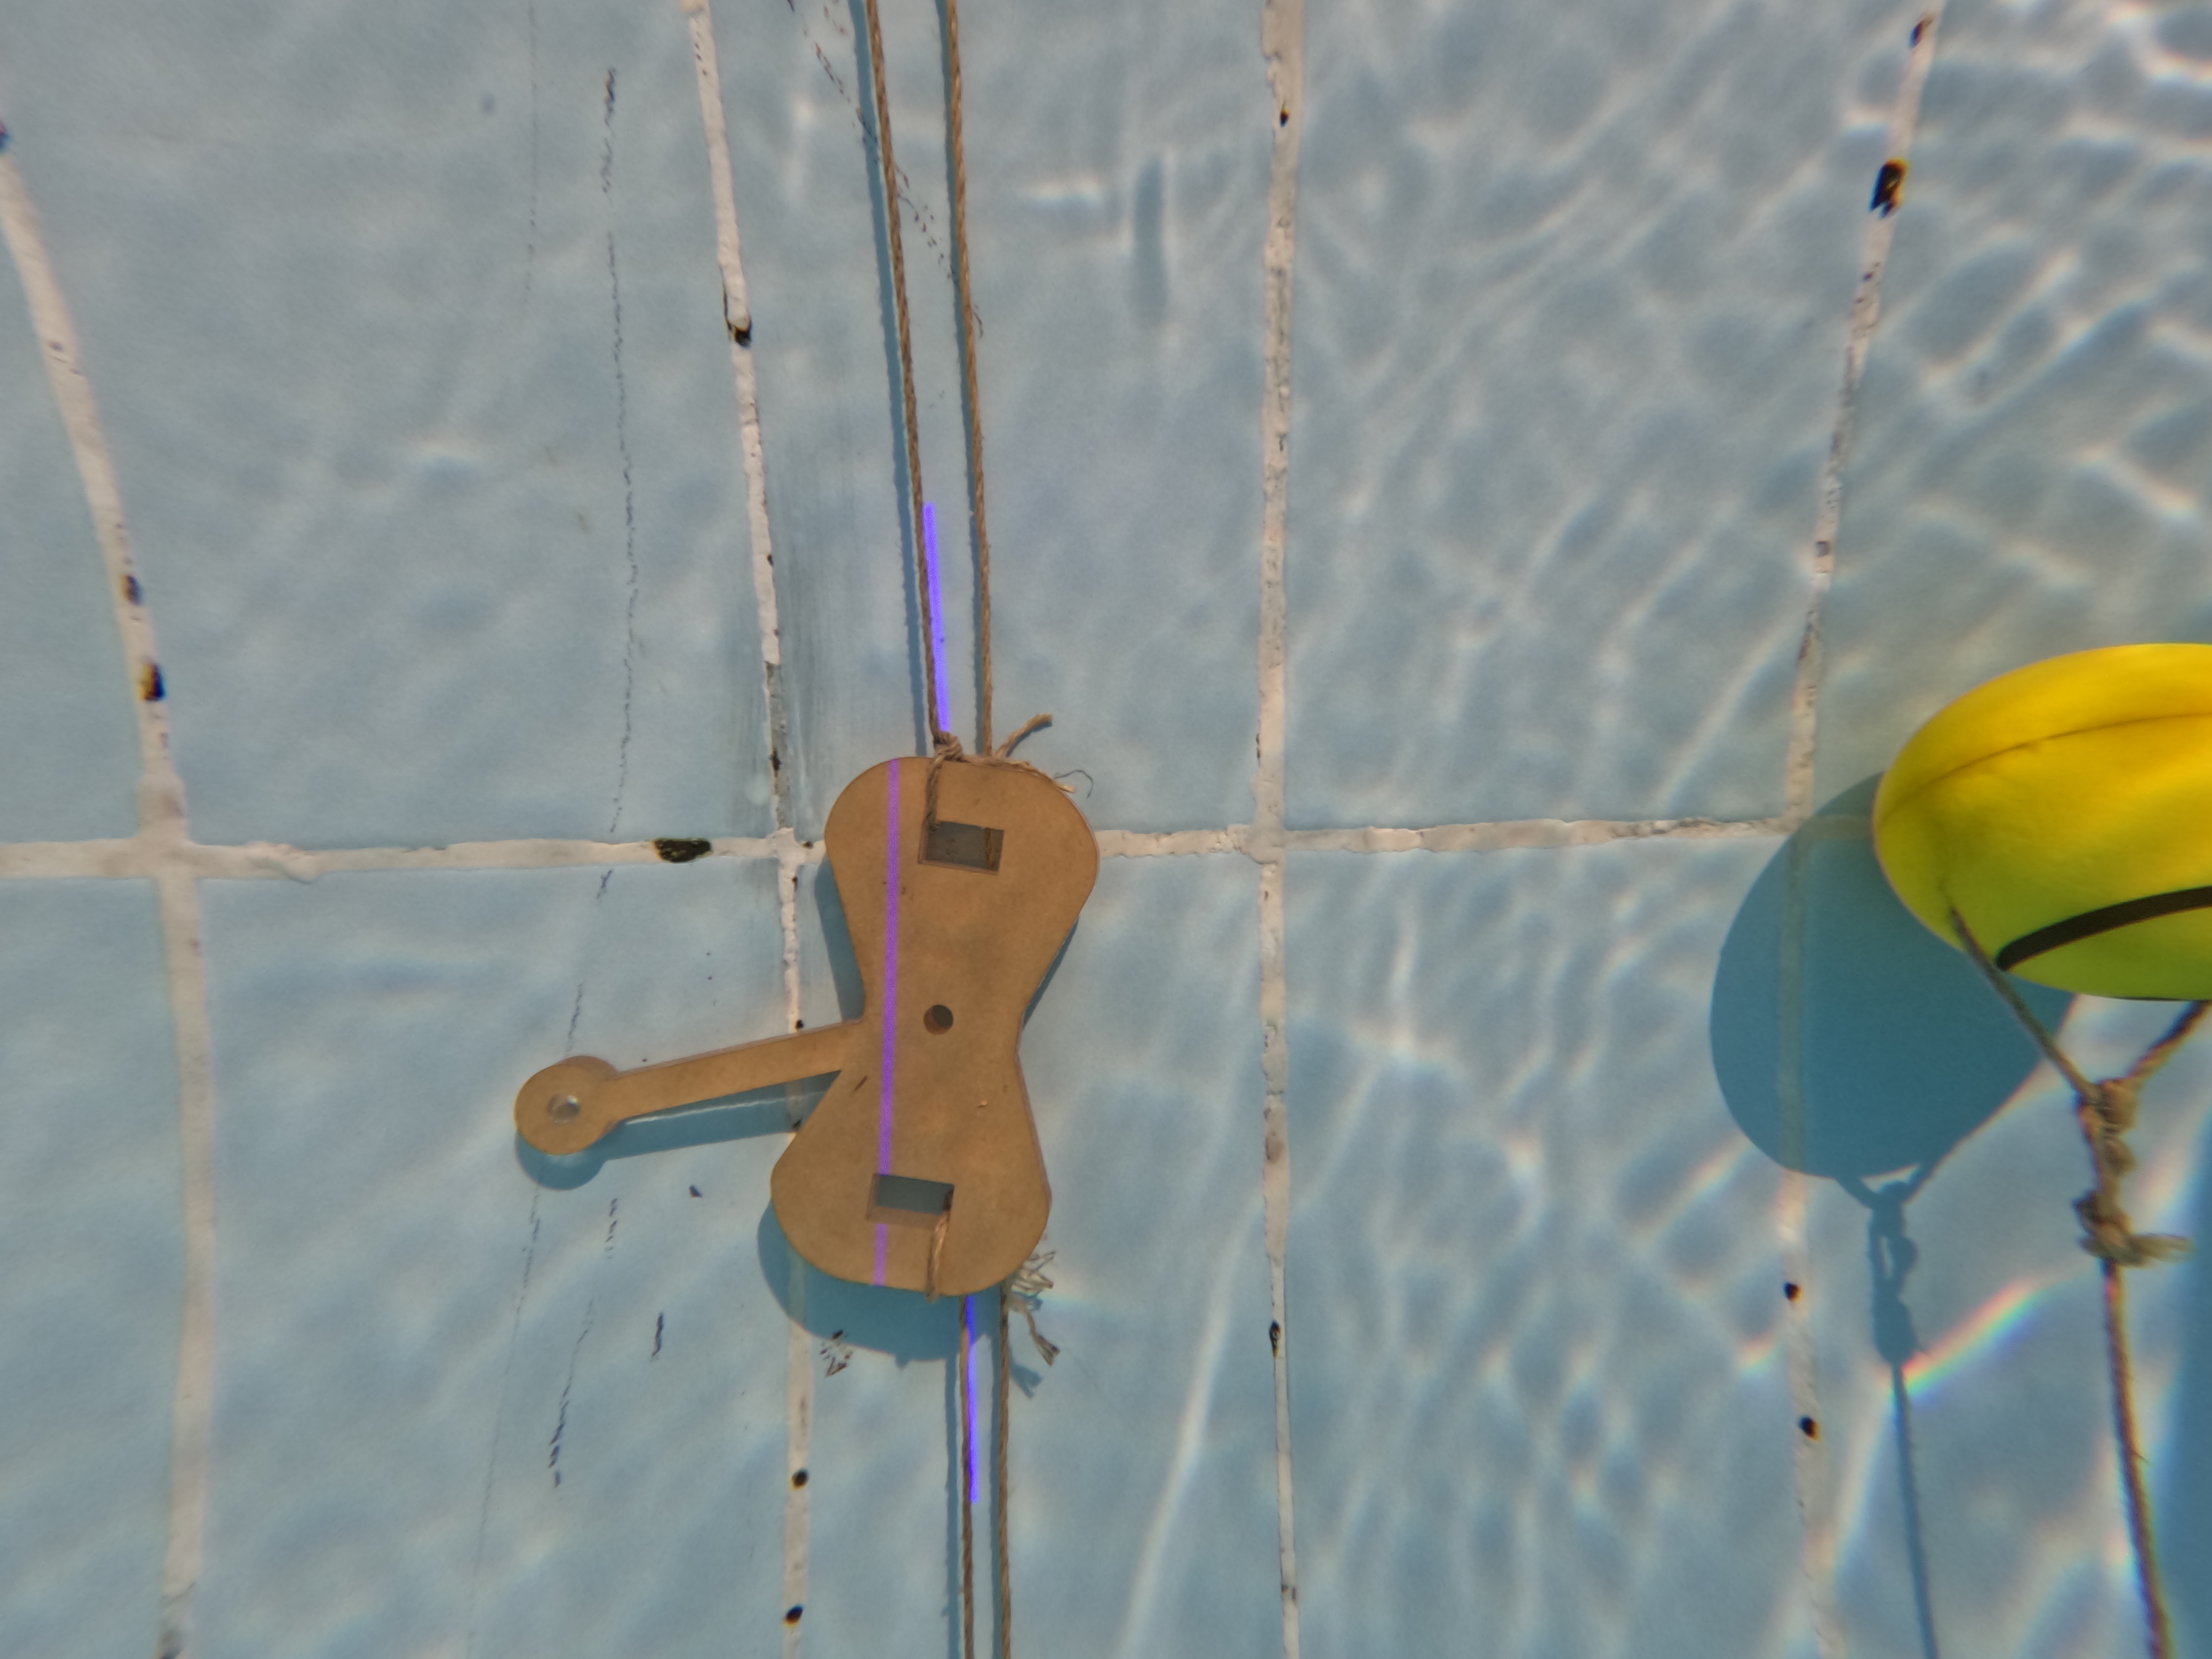

Supplement: Supplementary file 34 [file G0040428.pdf › Level_4_1/G0040428.pdf]

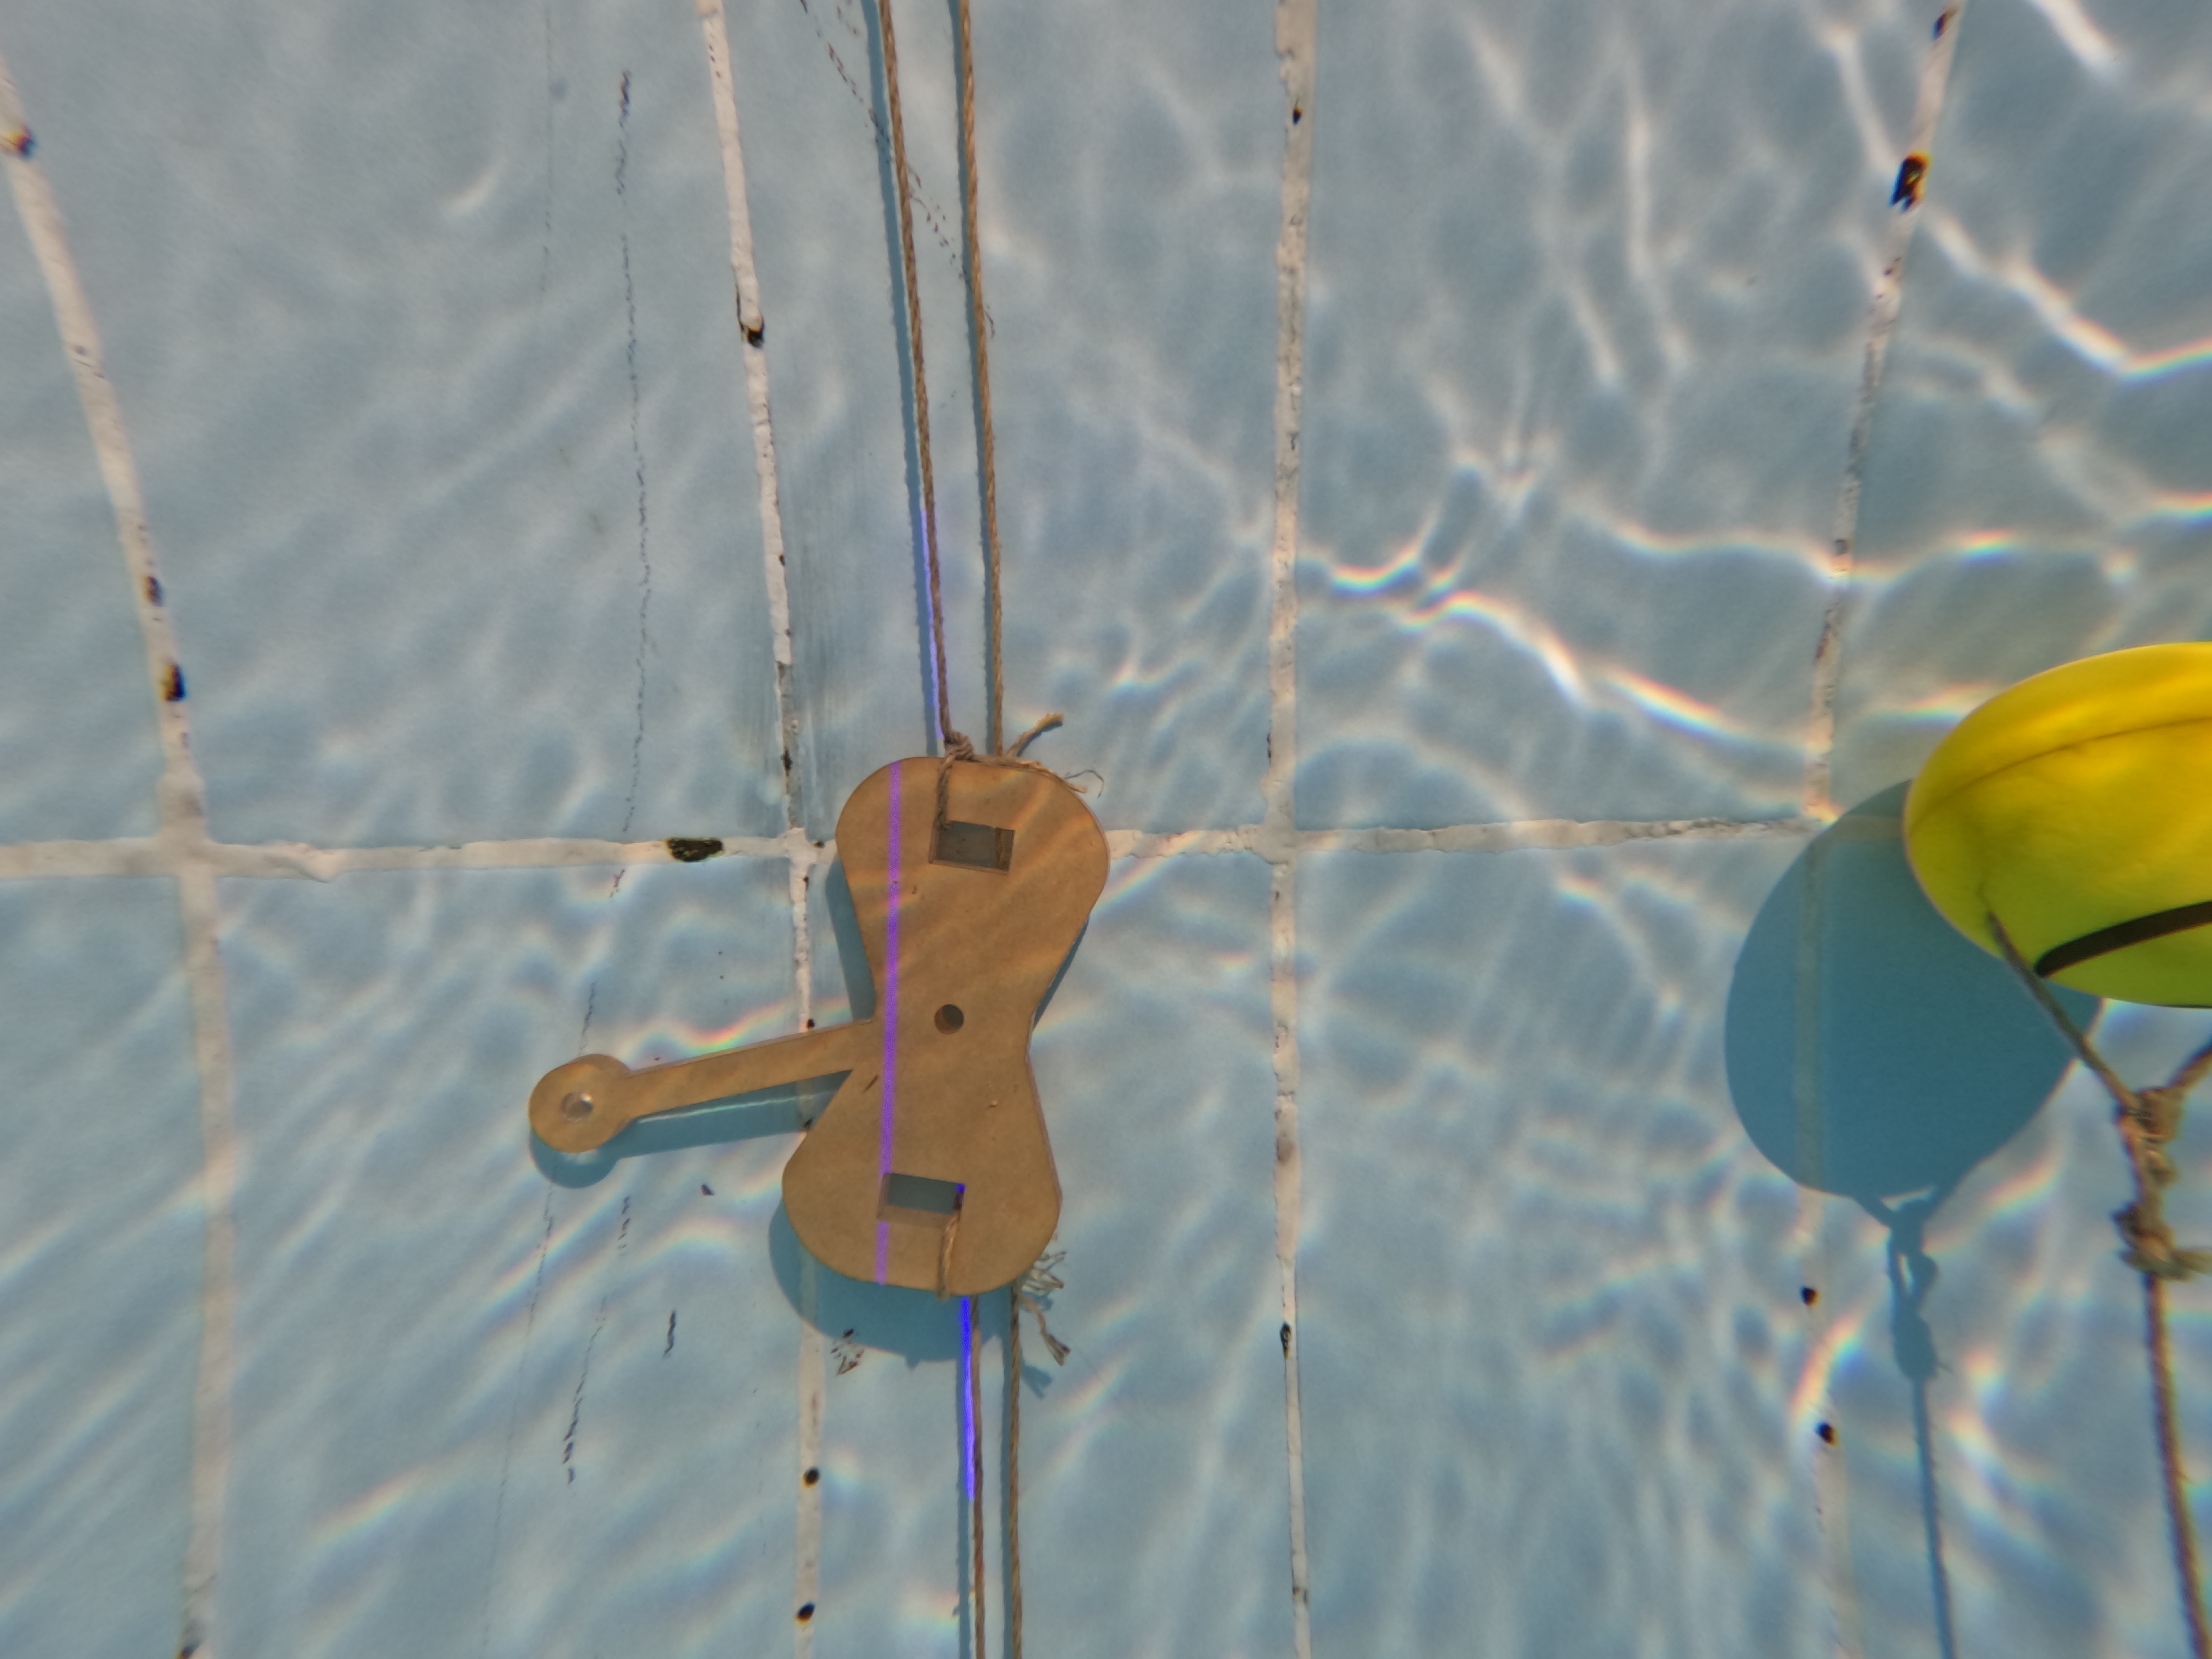

Supplement: Supplementary file 35 [file G0040429.pdf › Level_4_1/G0040429.pdf]

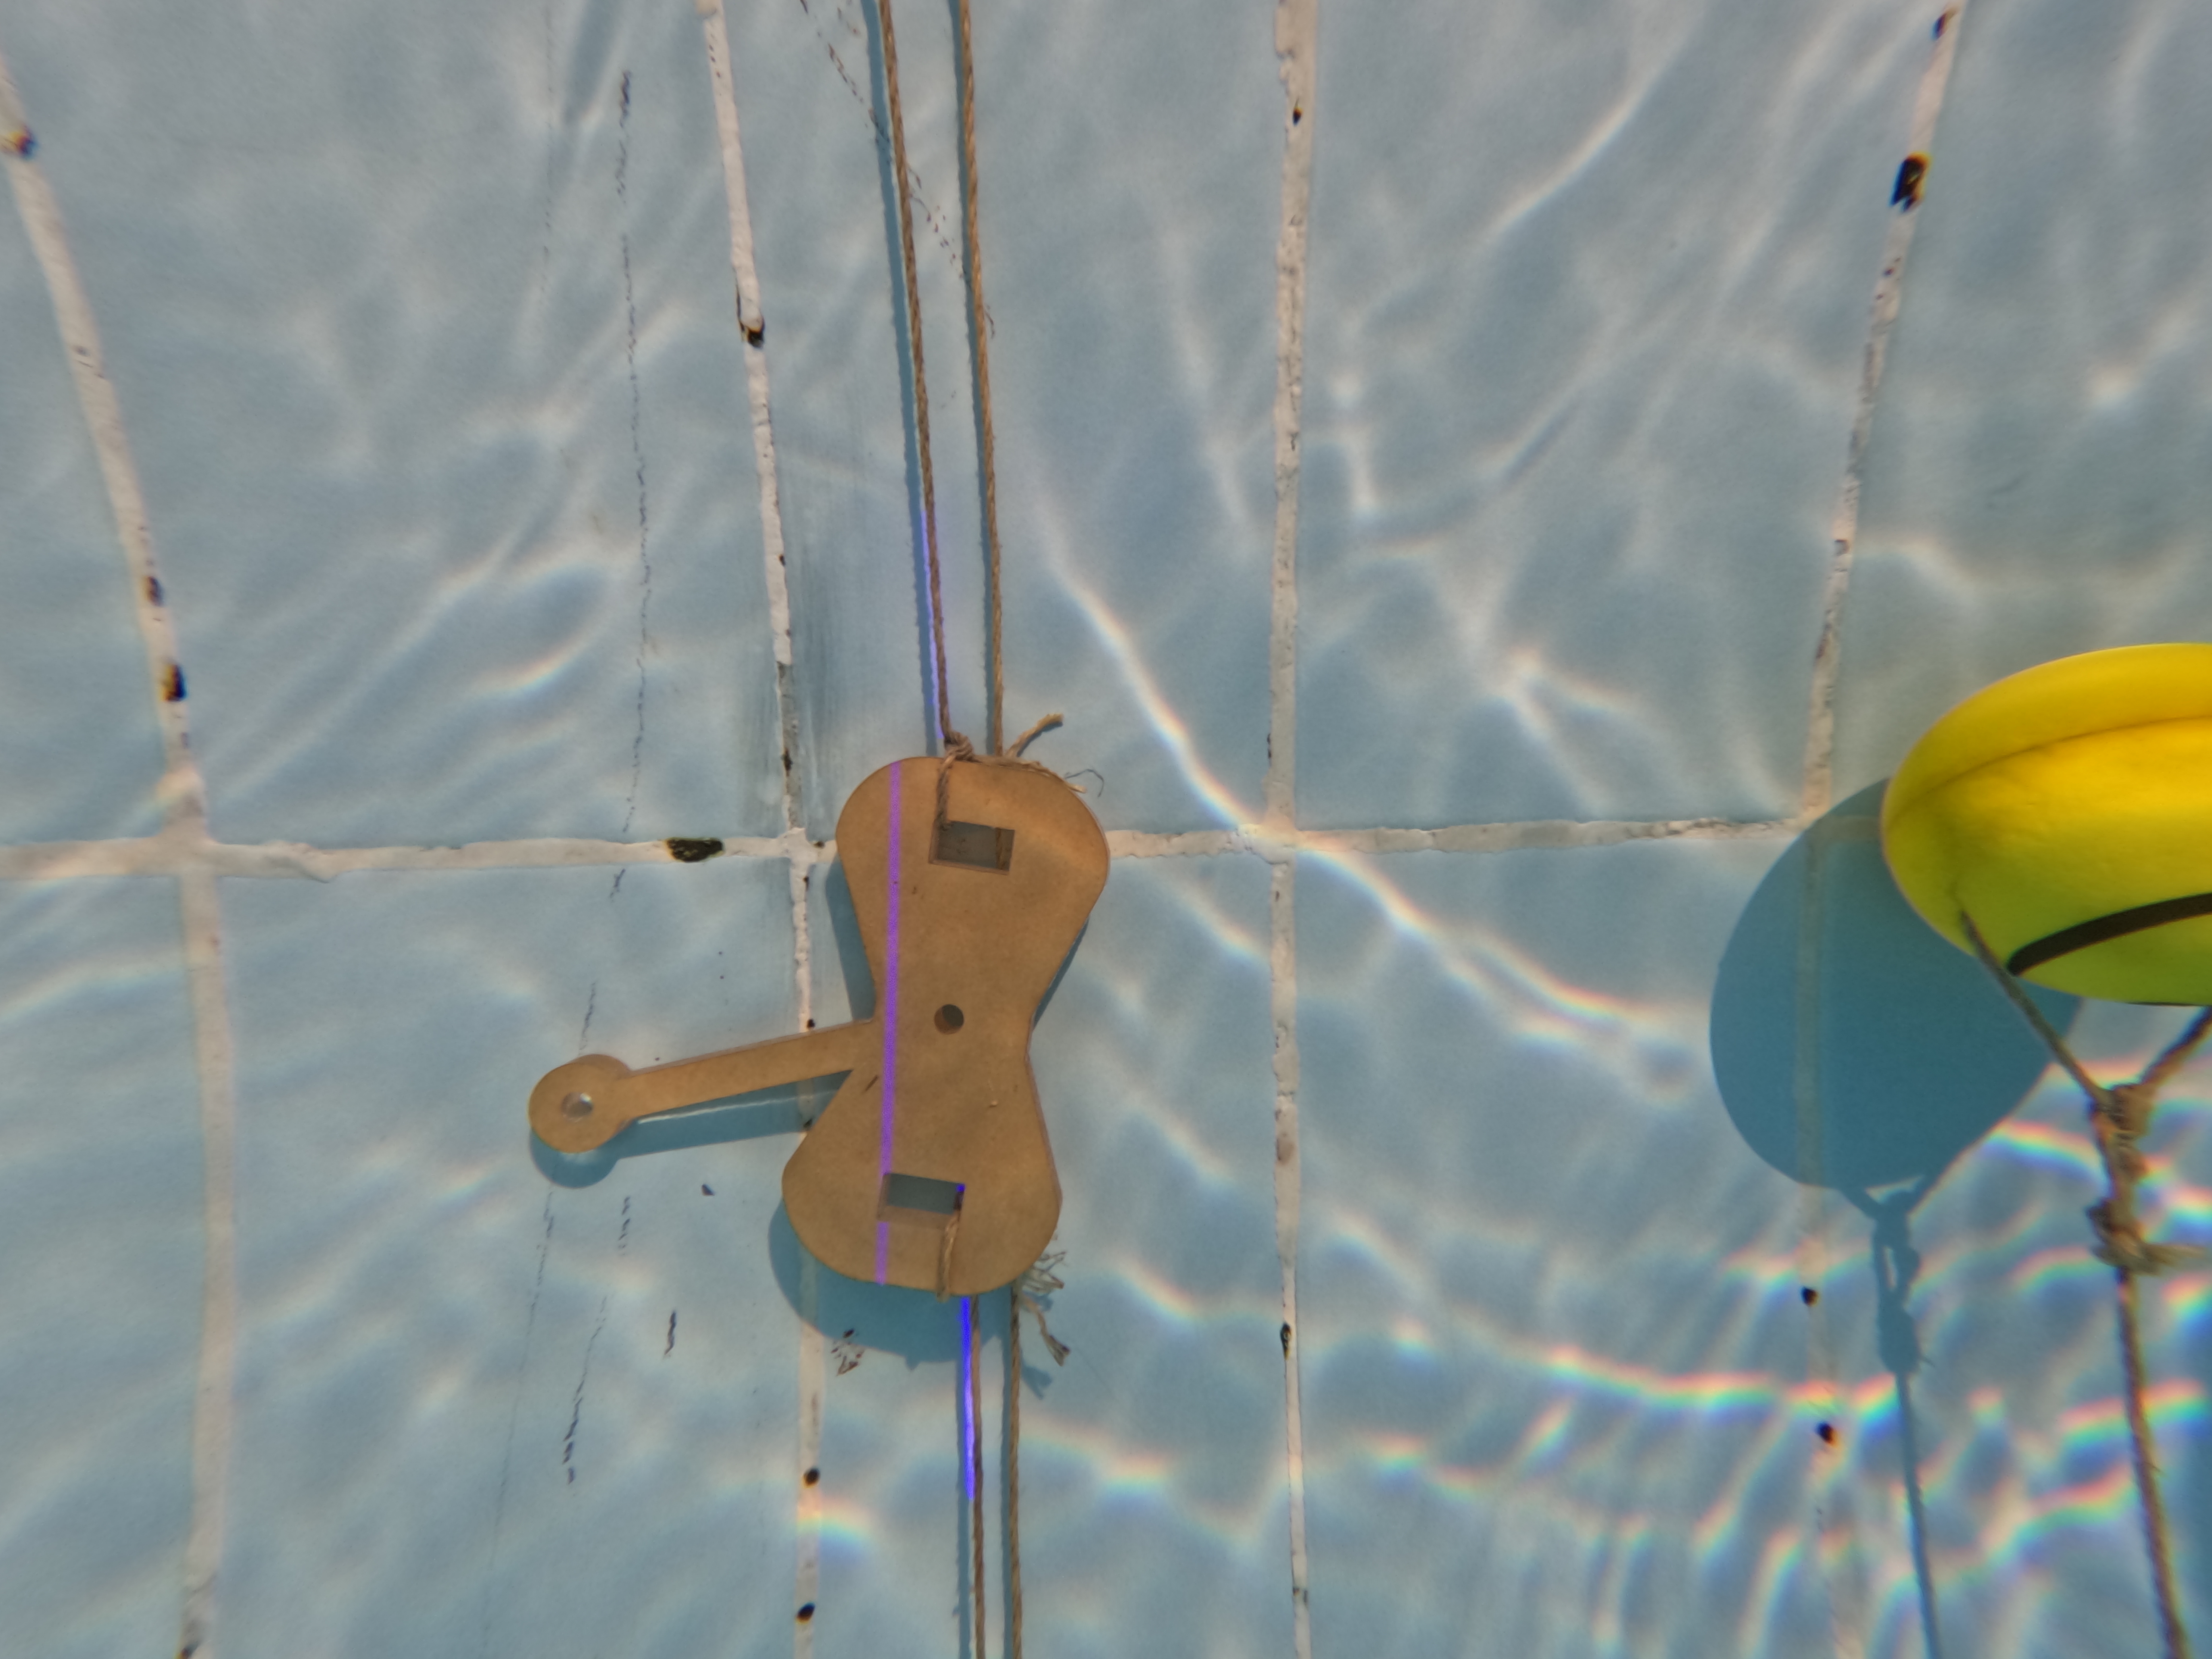

Supplement: Supplementary file 36 [file G0040430.pdf › Level_4_1/G0040430.pdf]

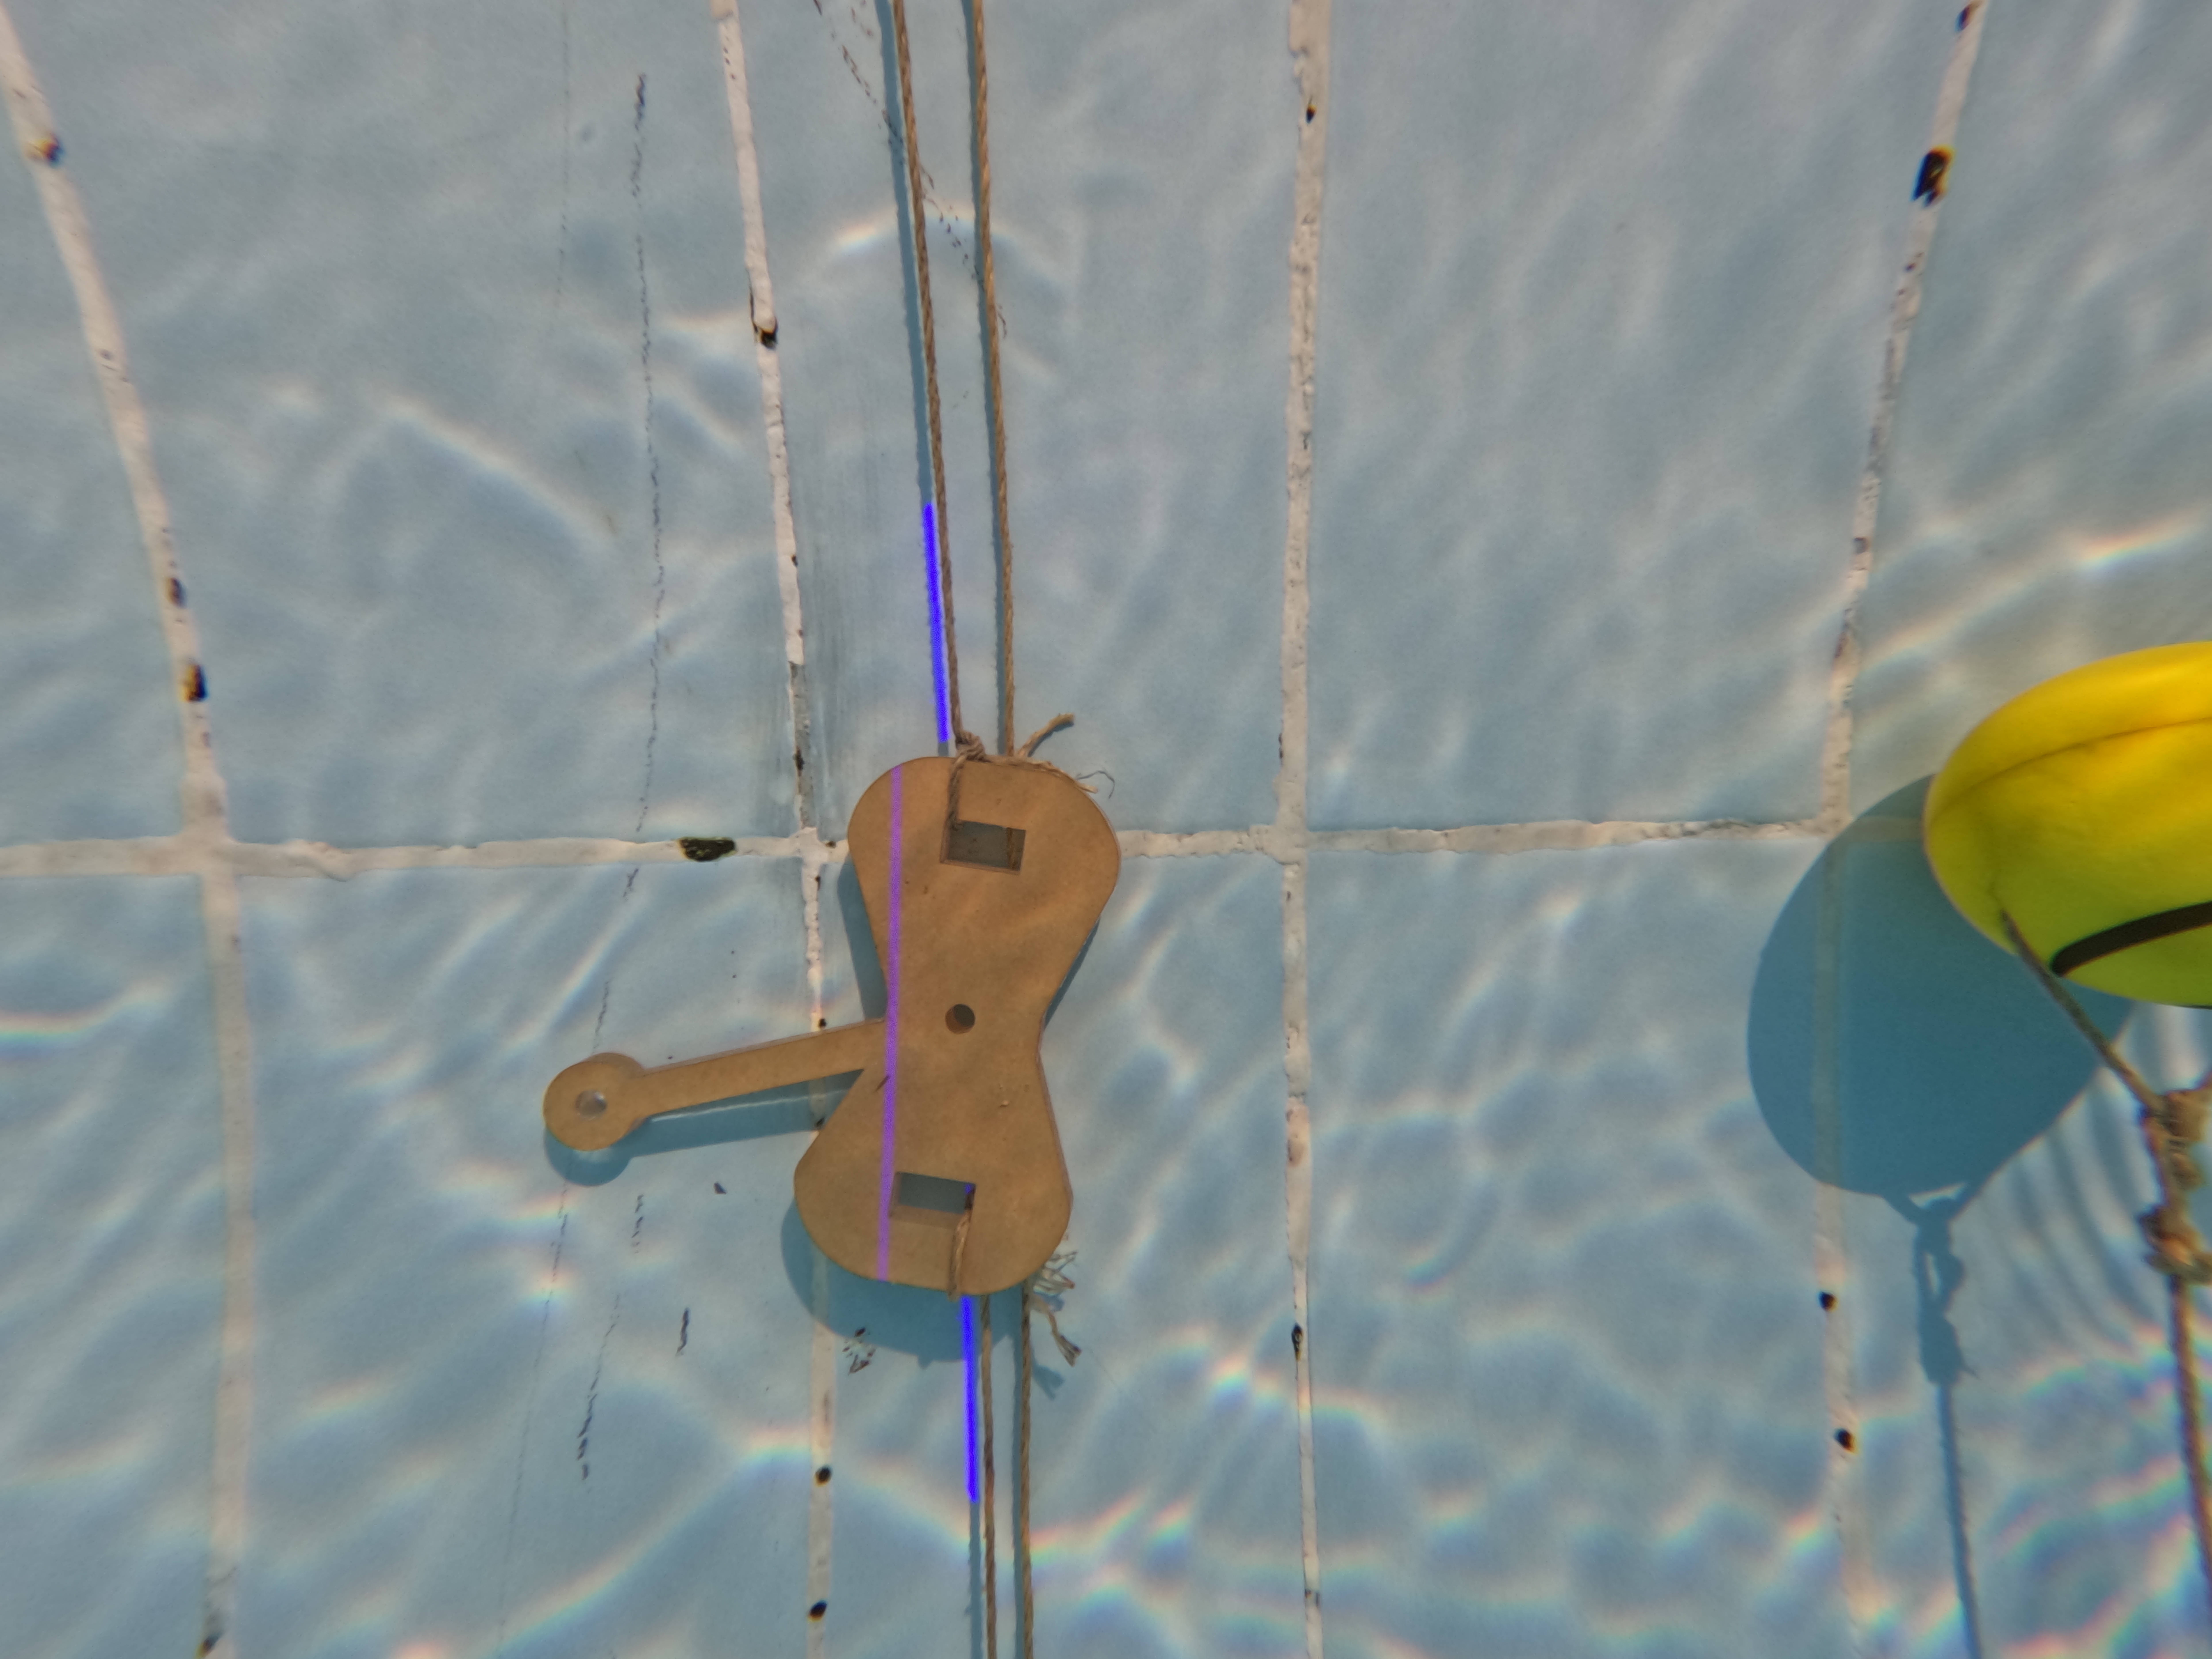

Supplement: Supplementary file 37 [file G0040431.pdf › Level_4_1/G0040431.pdf]

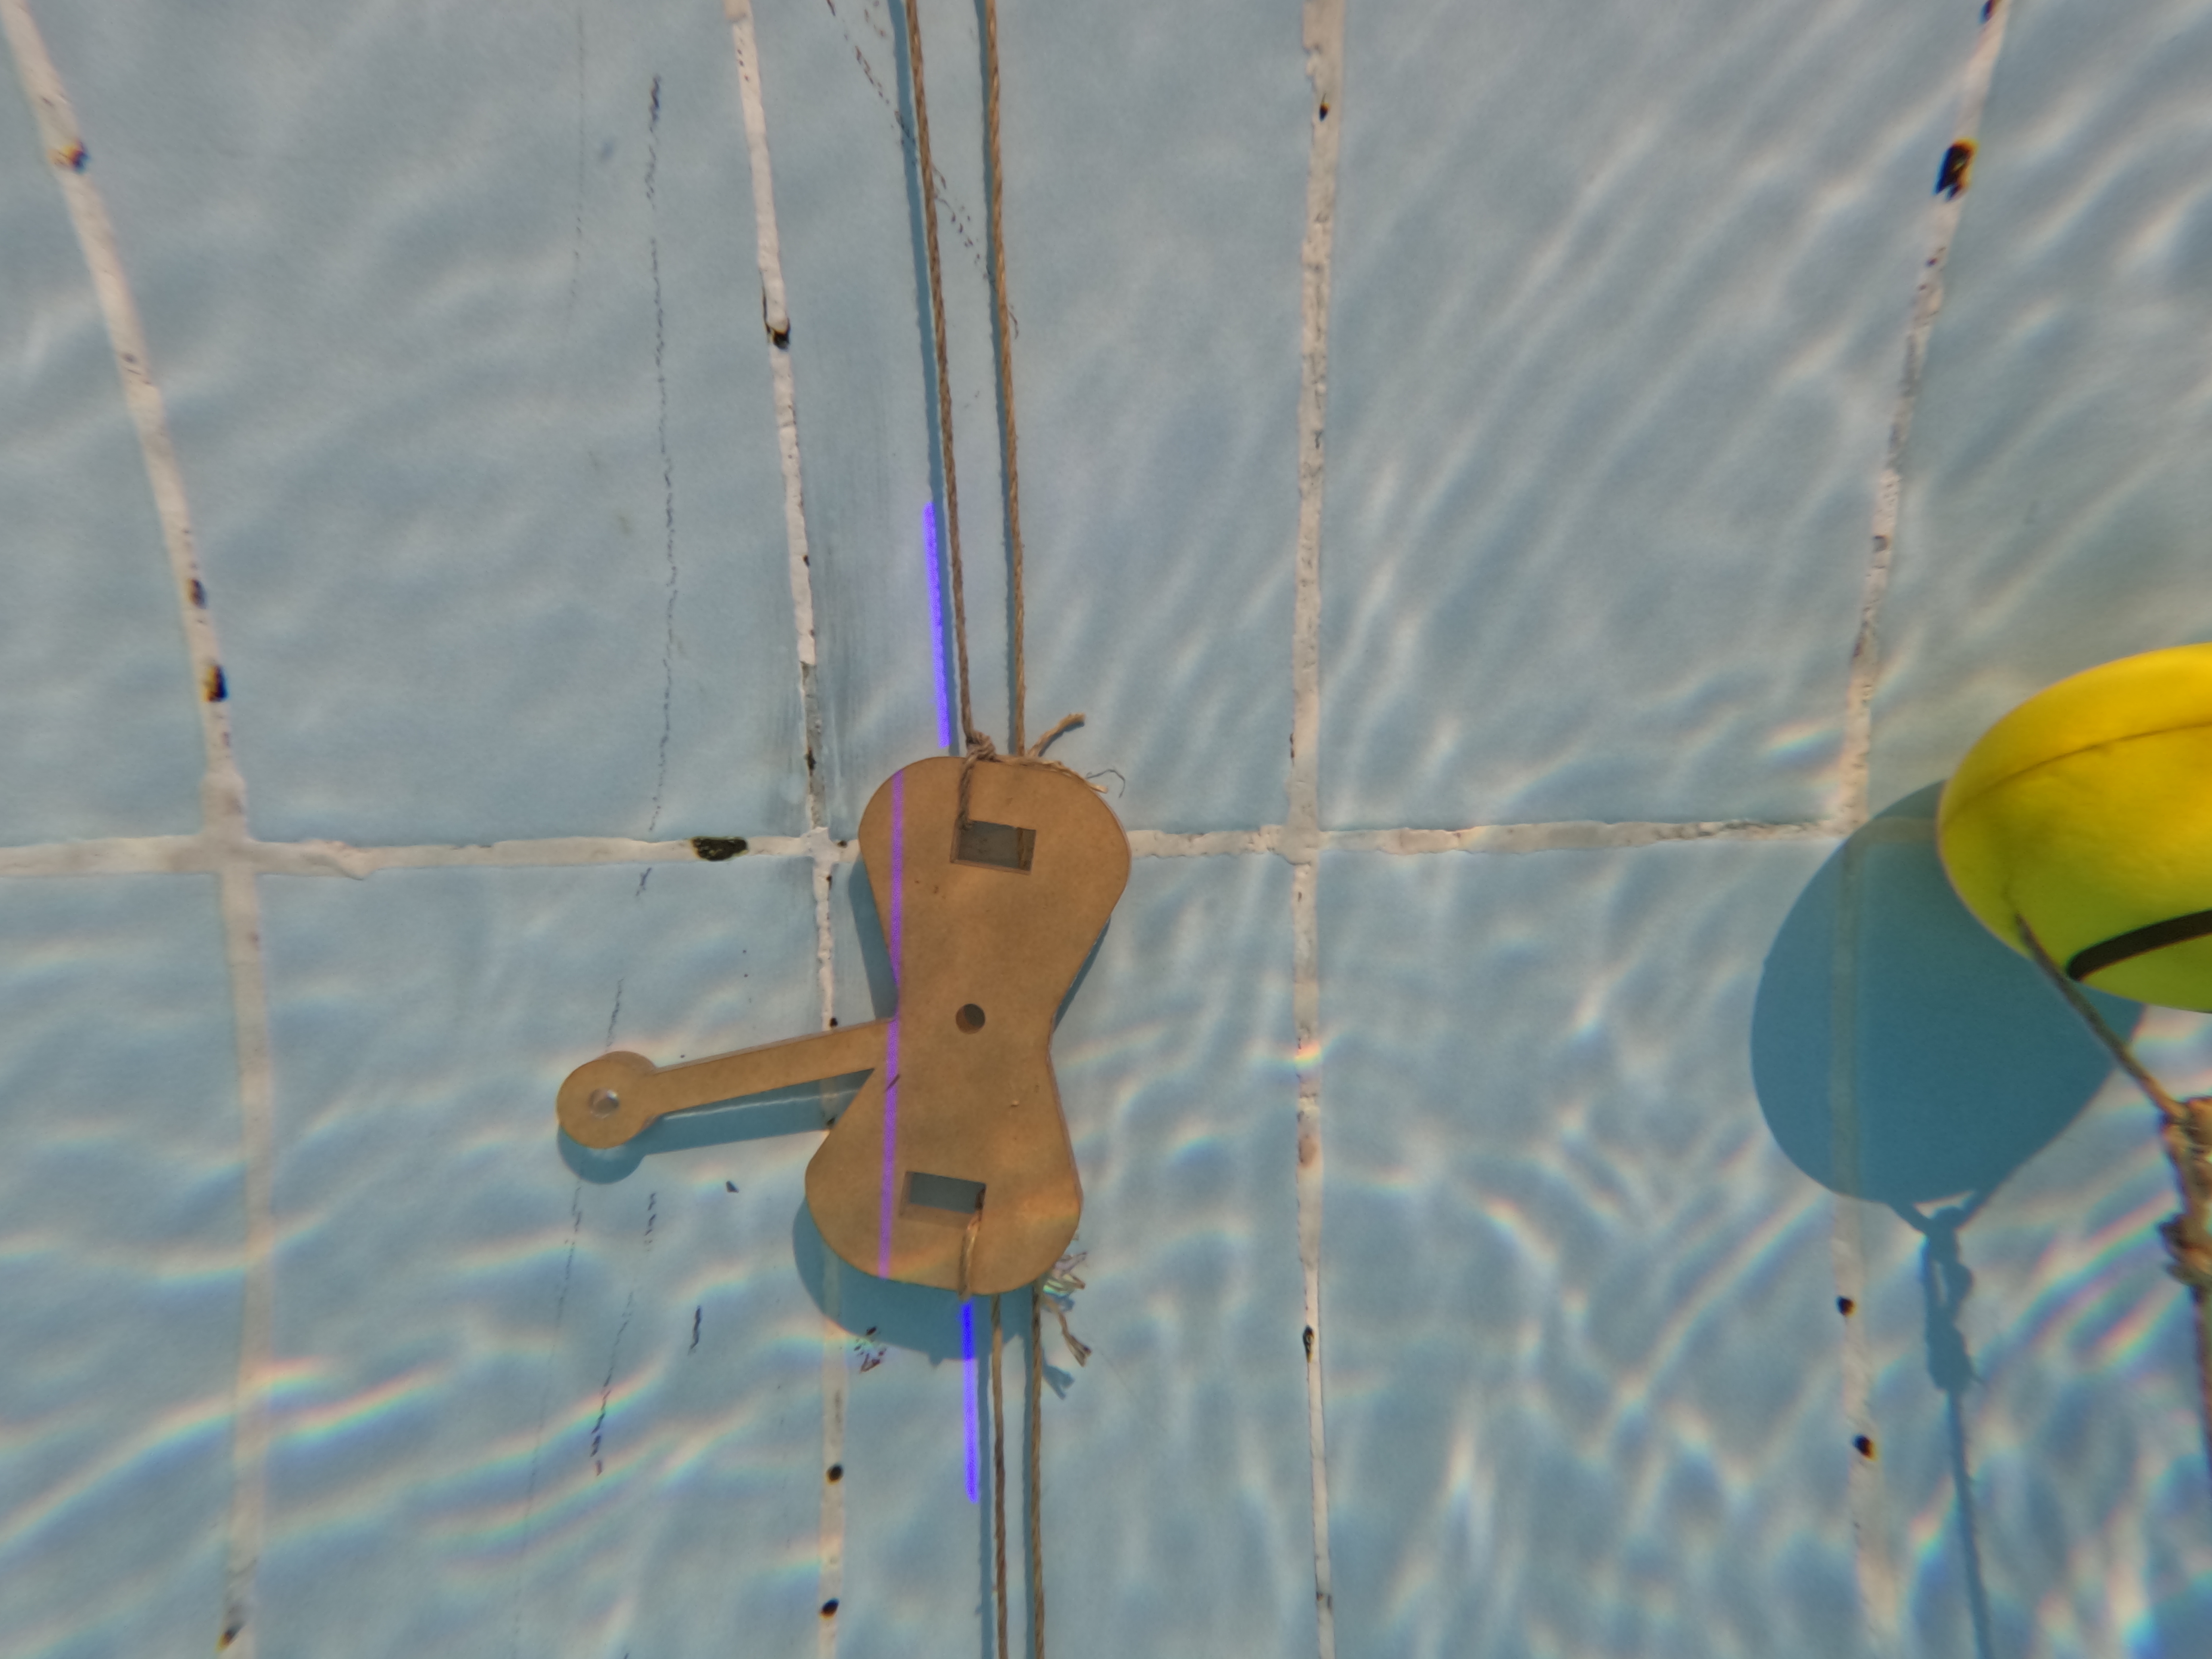

Supplement: Supplementary file 38 [file G0040432.pdf › Level_4_1/G0040432.pdf]

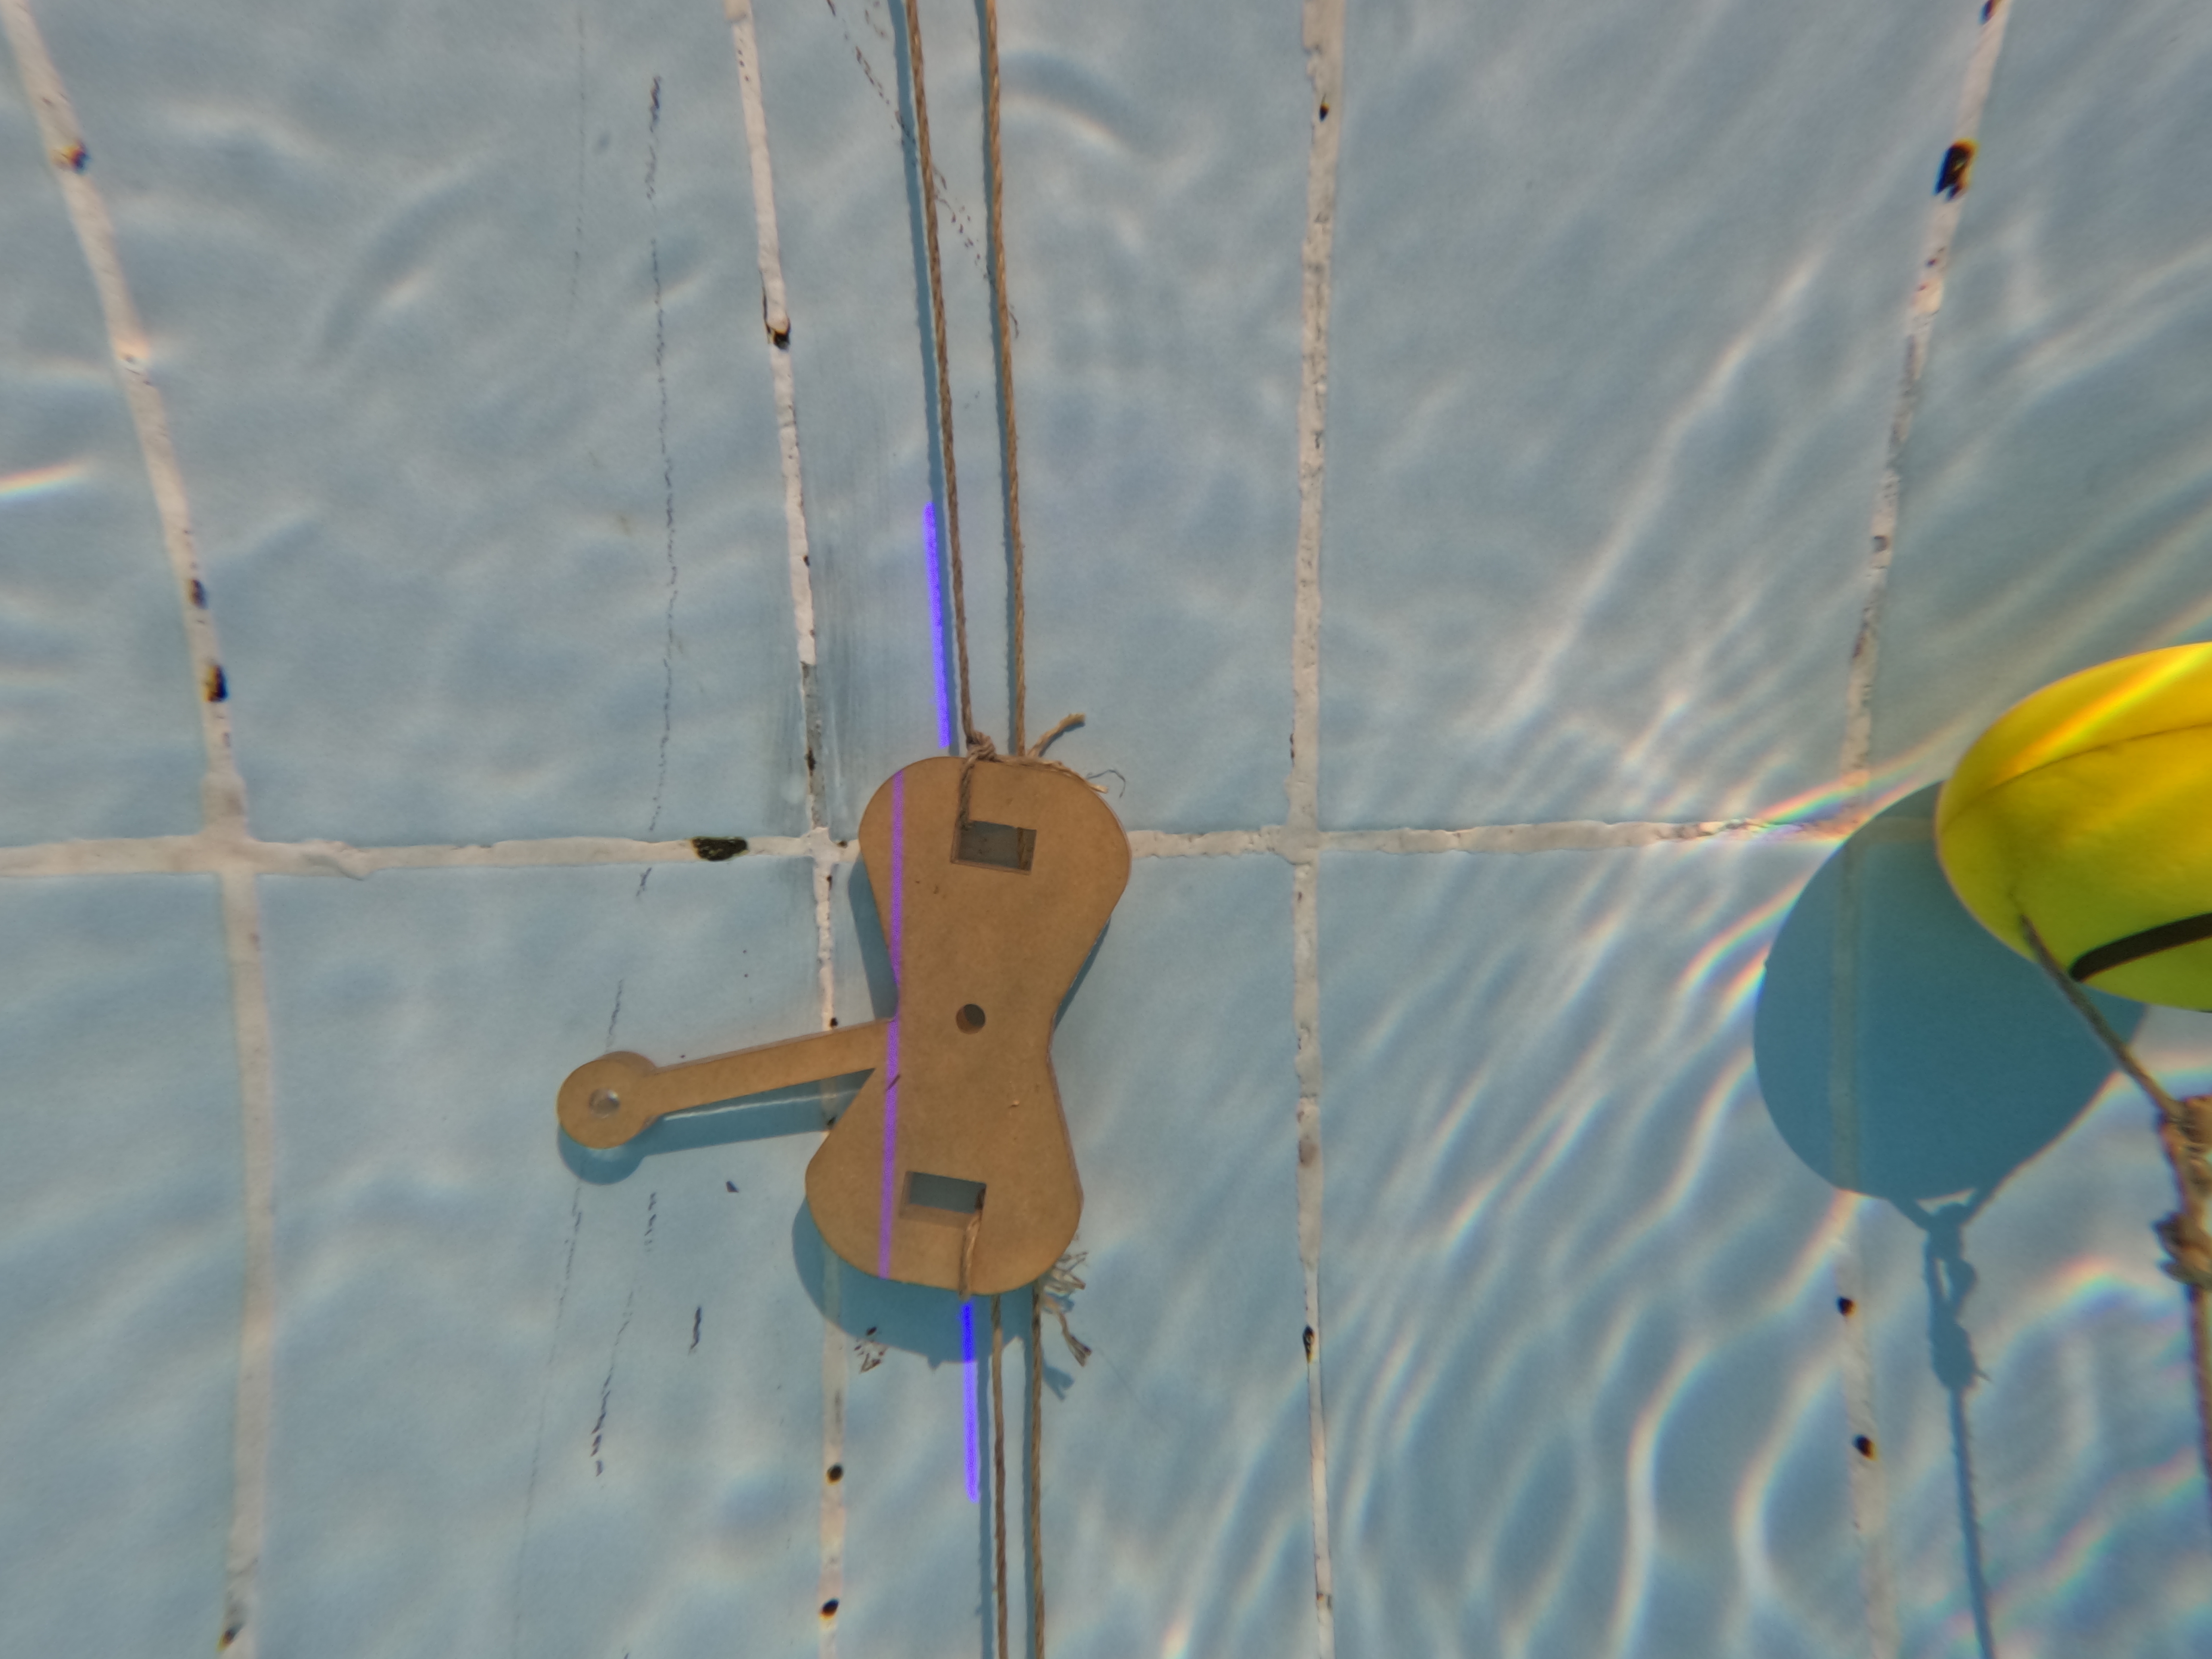

Supplement: Supplementary file 39 [file G0040433.pdf › Level_4_1/G0040433.pdf]

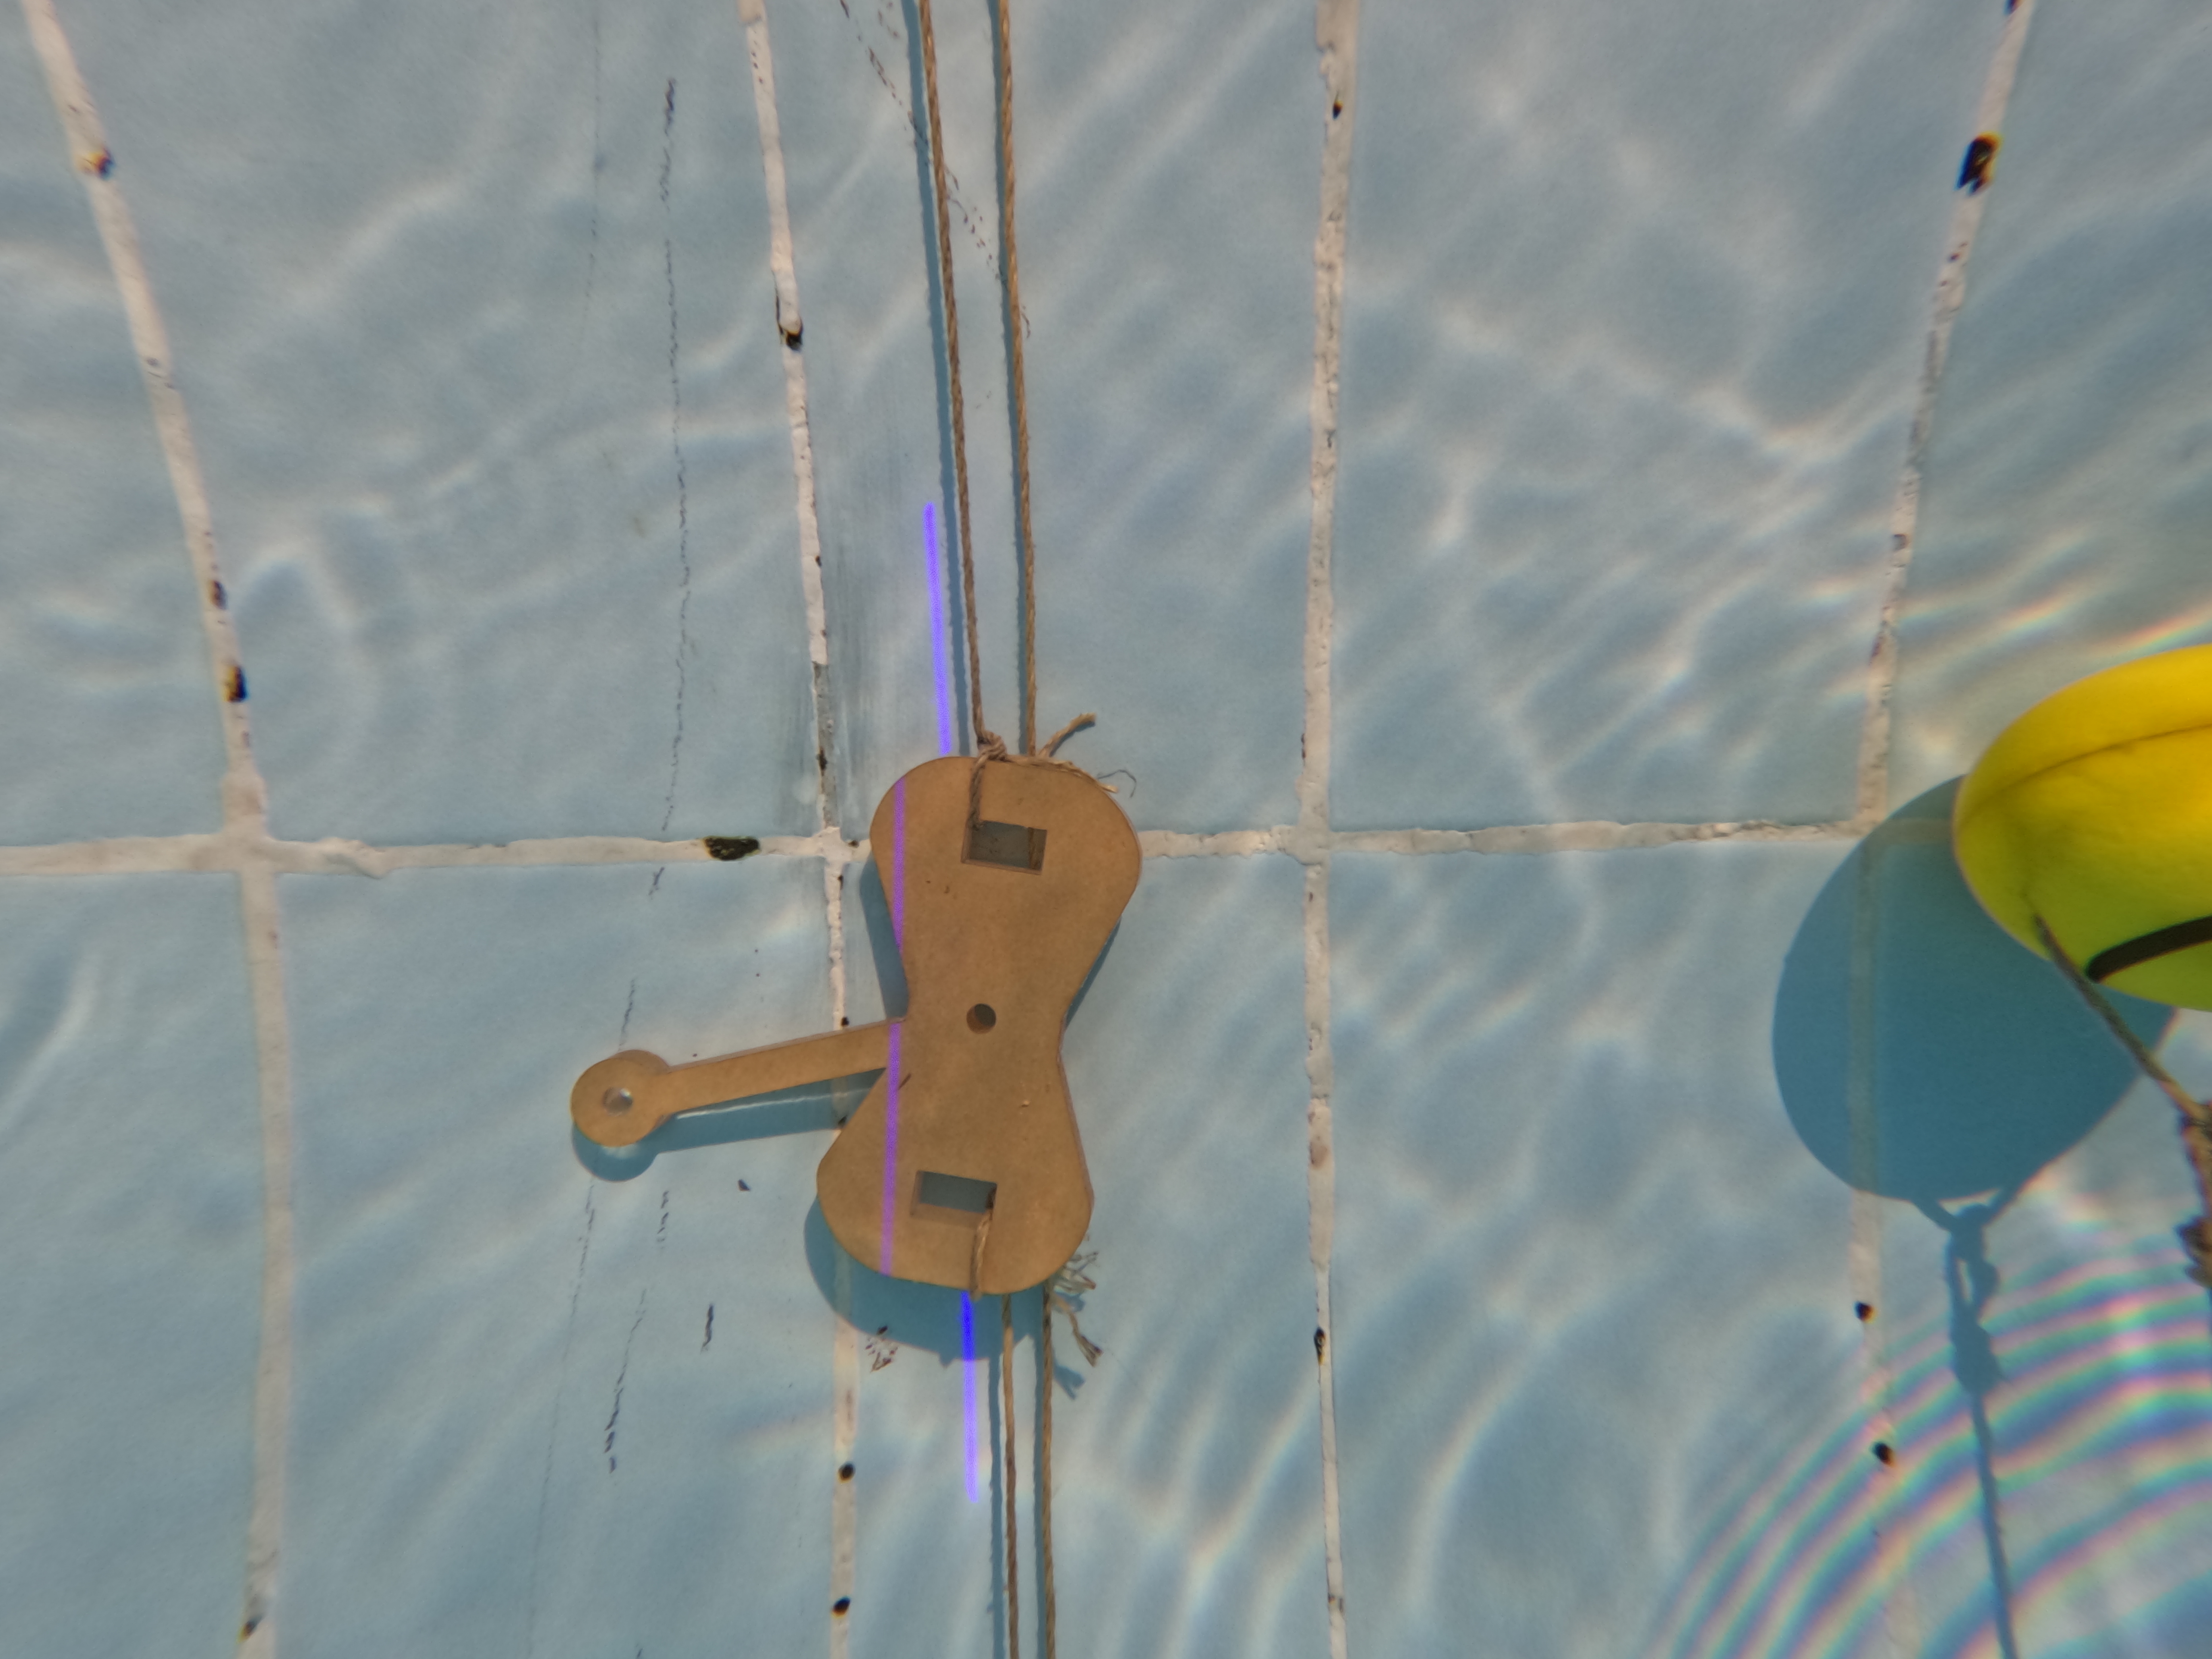

Supplement: Supplementary file 40 [file G0040434.pdf › Level_4_1/G0040434.pdf]

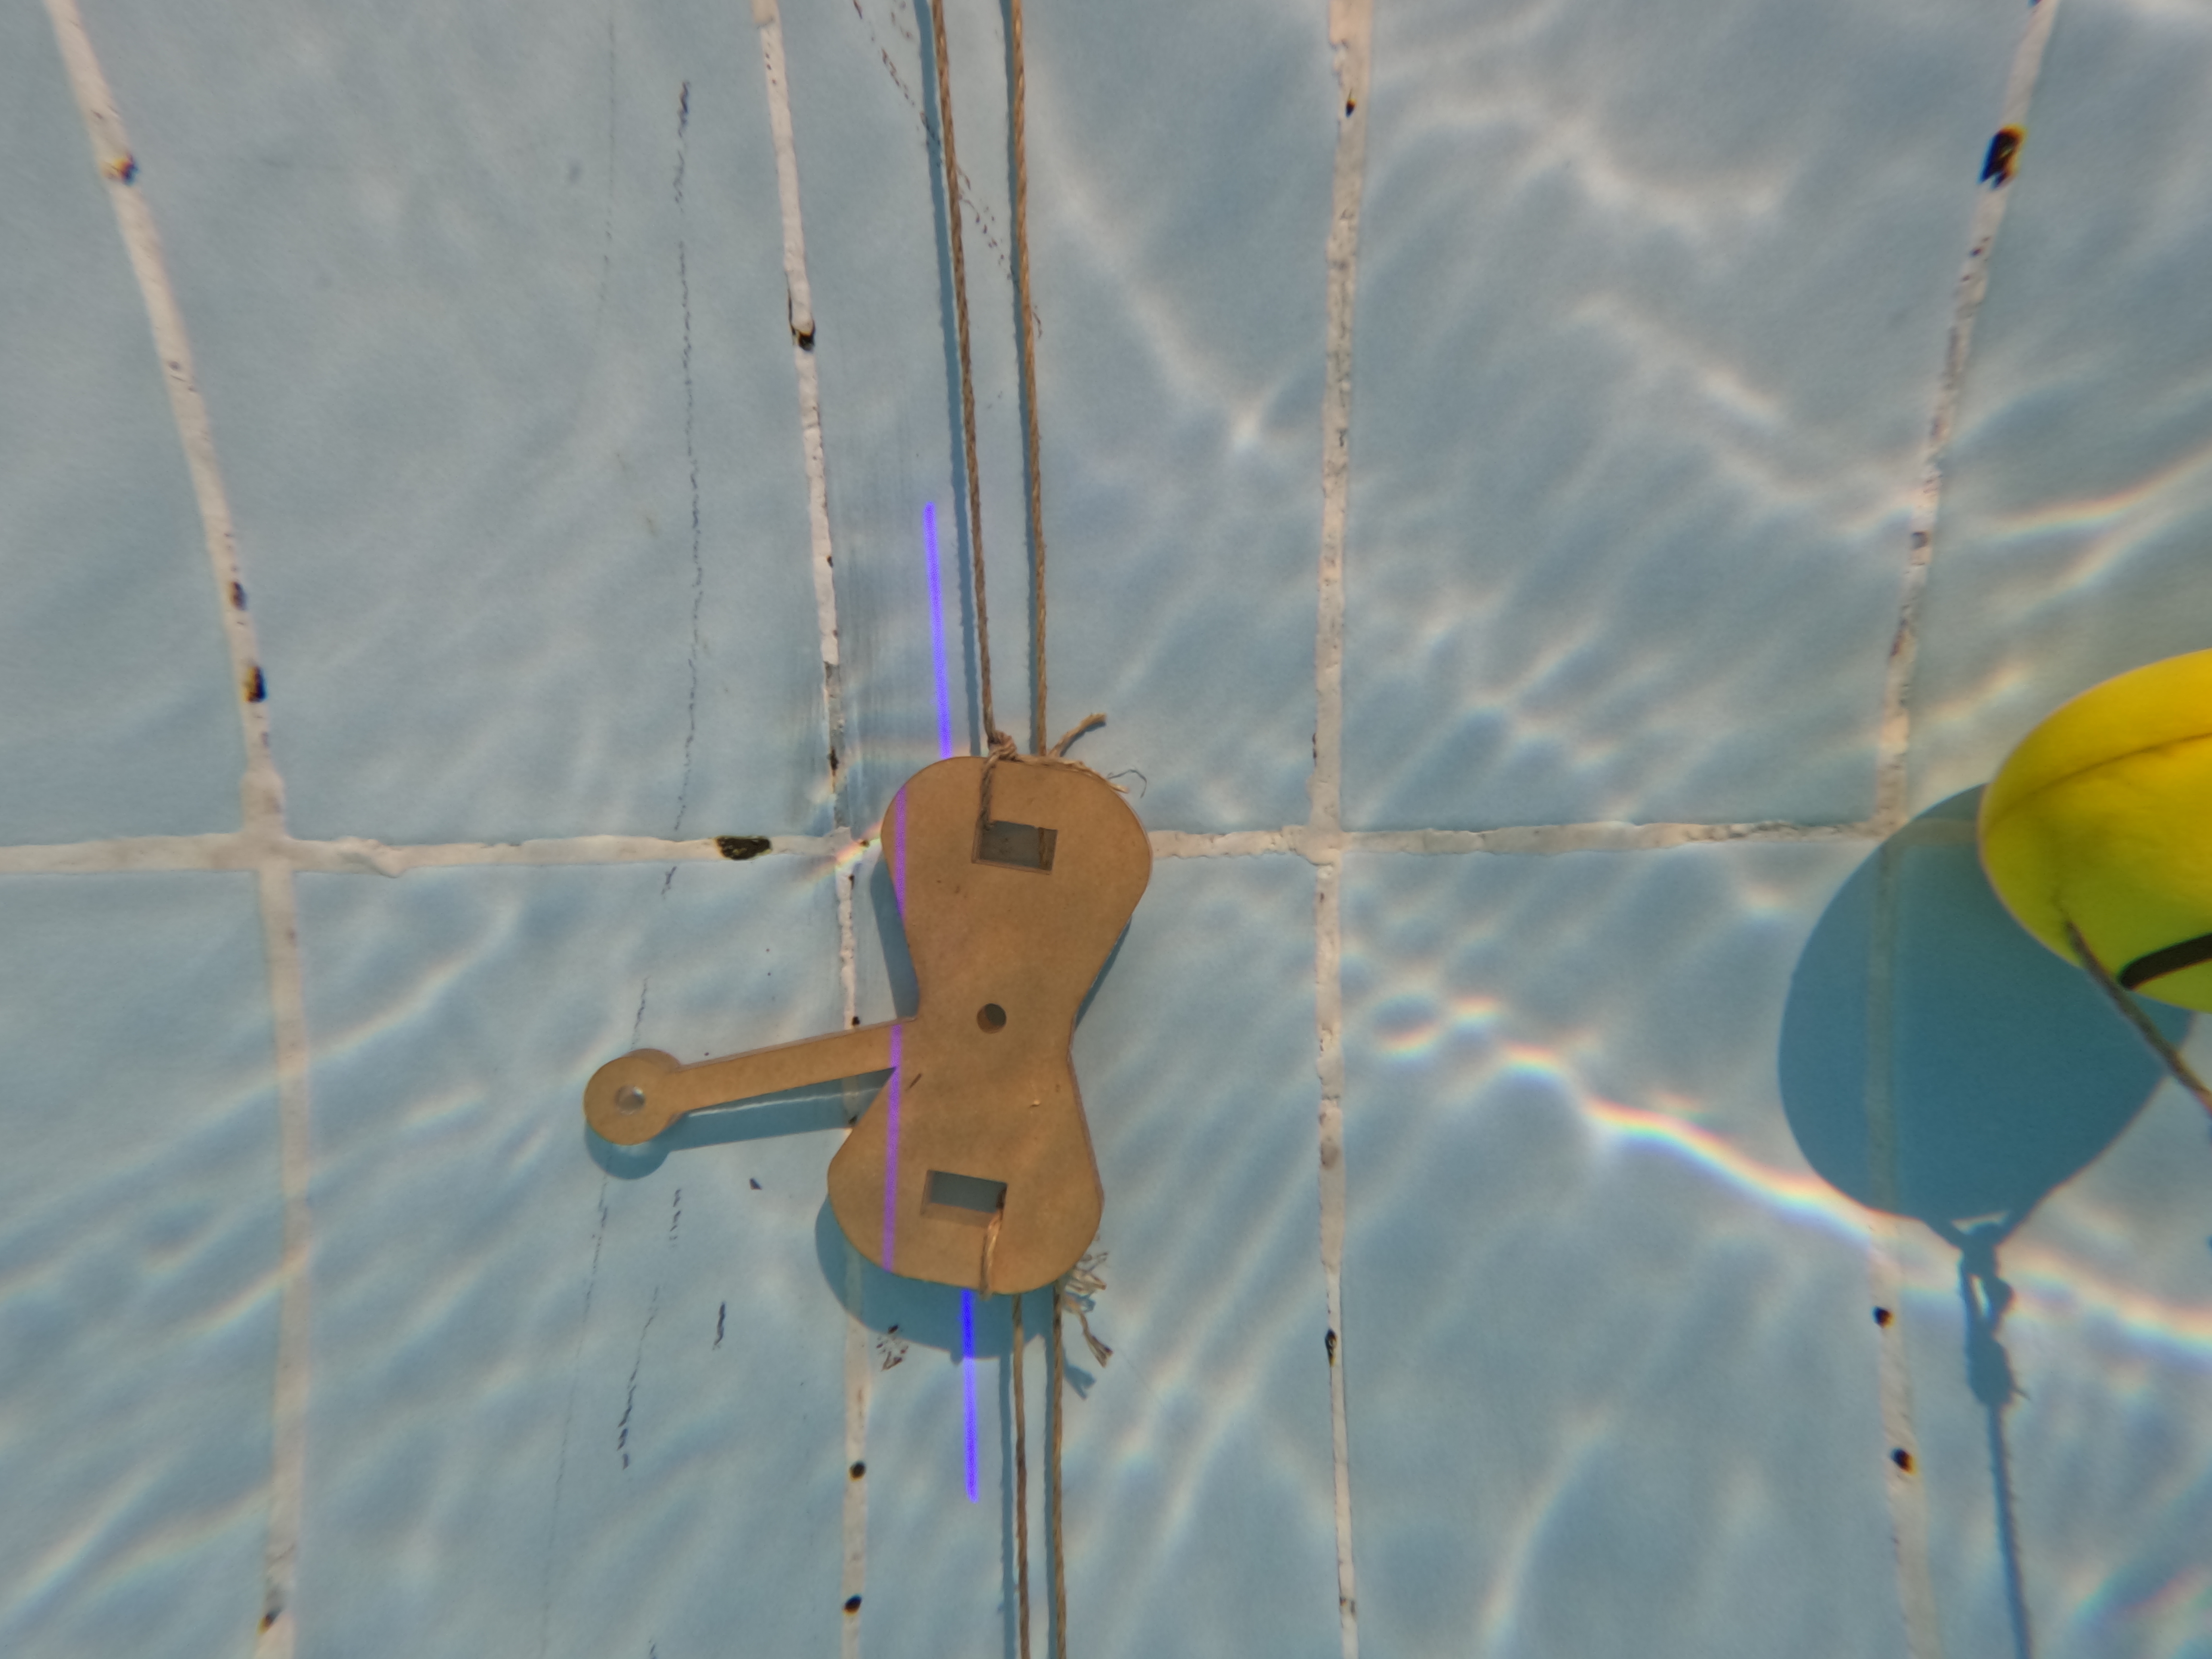

Supplement: Supplementary file 41 [file G0040435.pdf › Level_4_1/G0040435.pdf]

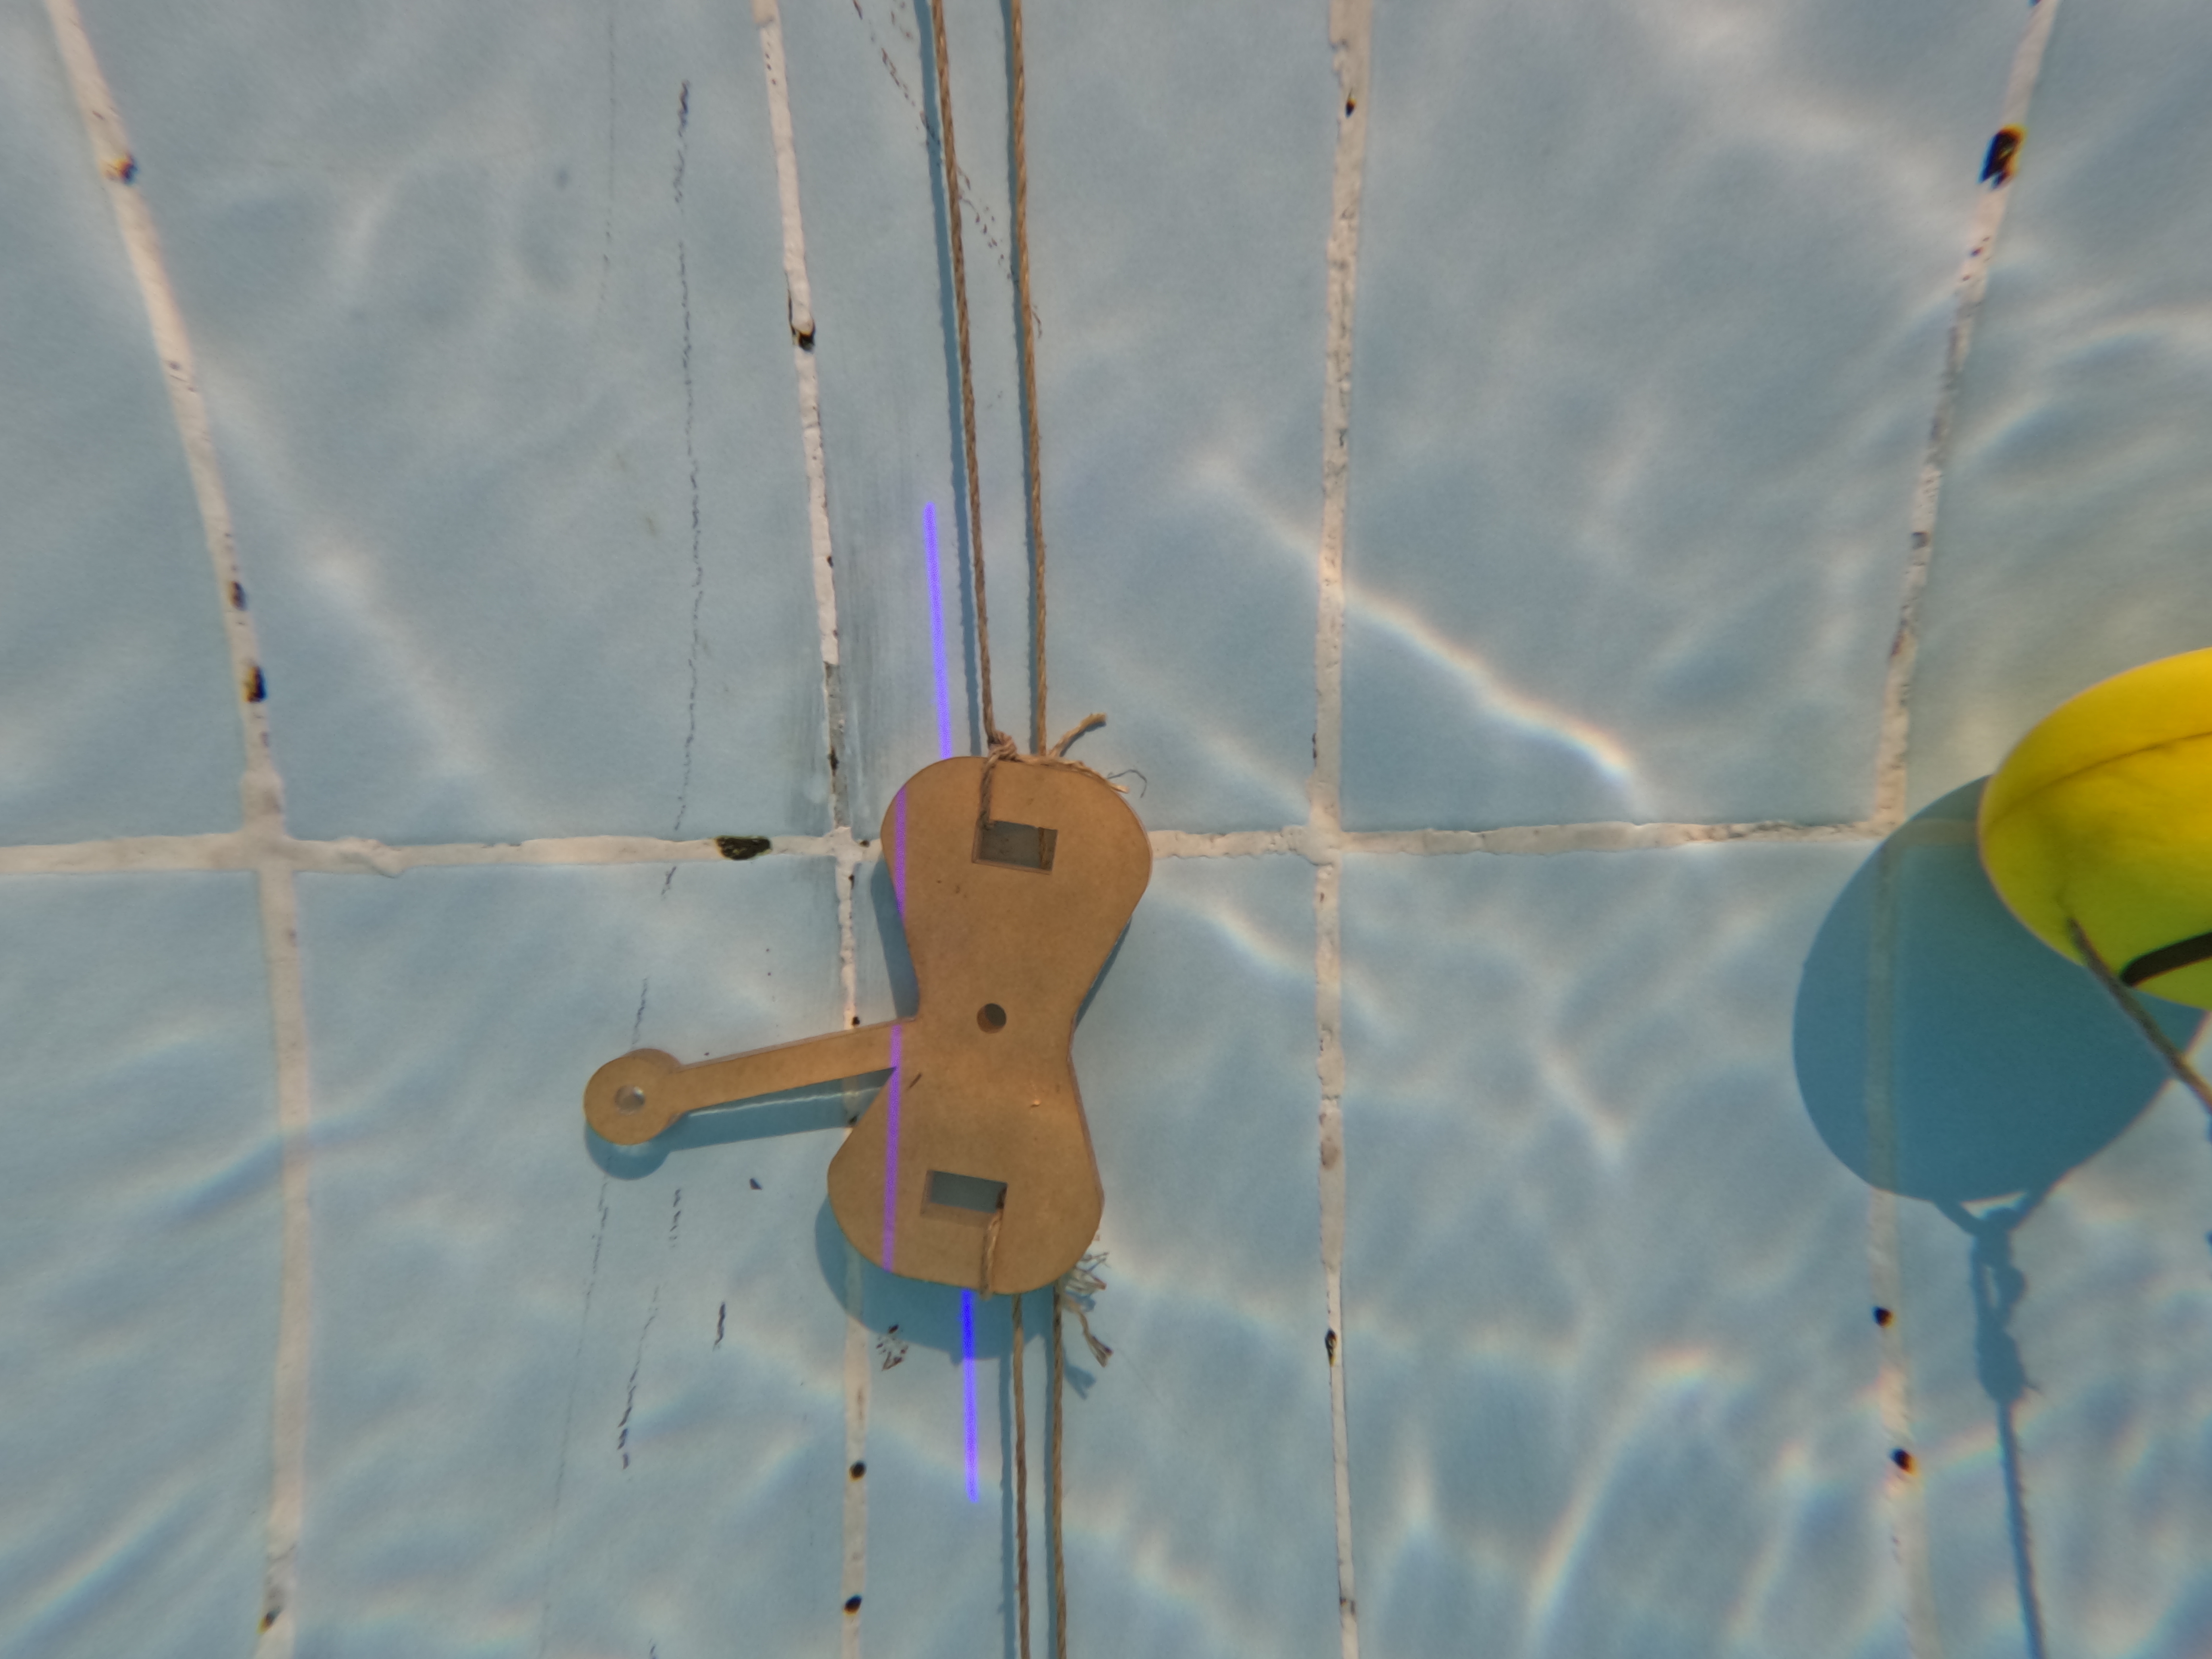

Supplement: Supplementary file 42 [file G0040436.pdf › Level_4_1/G0040436.pdf]

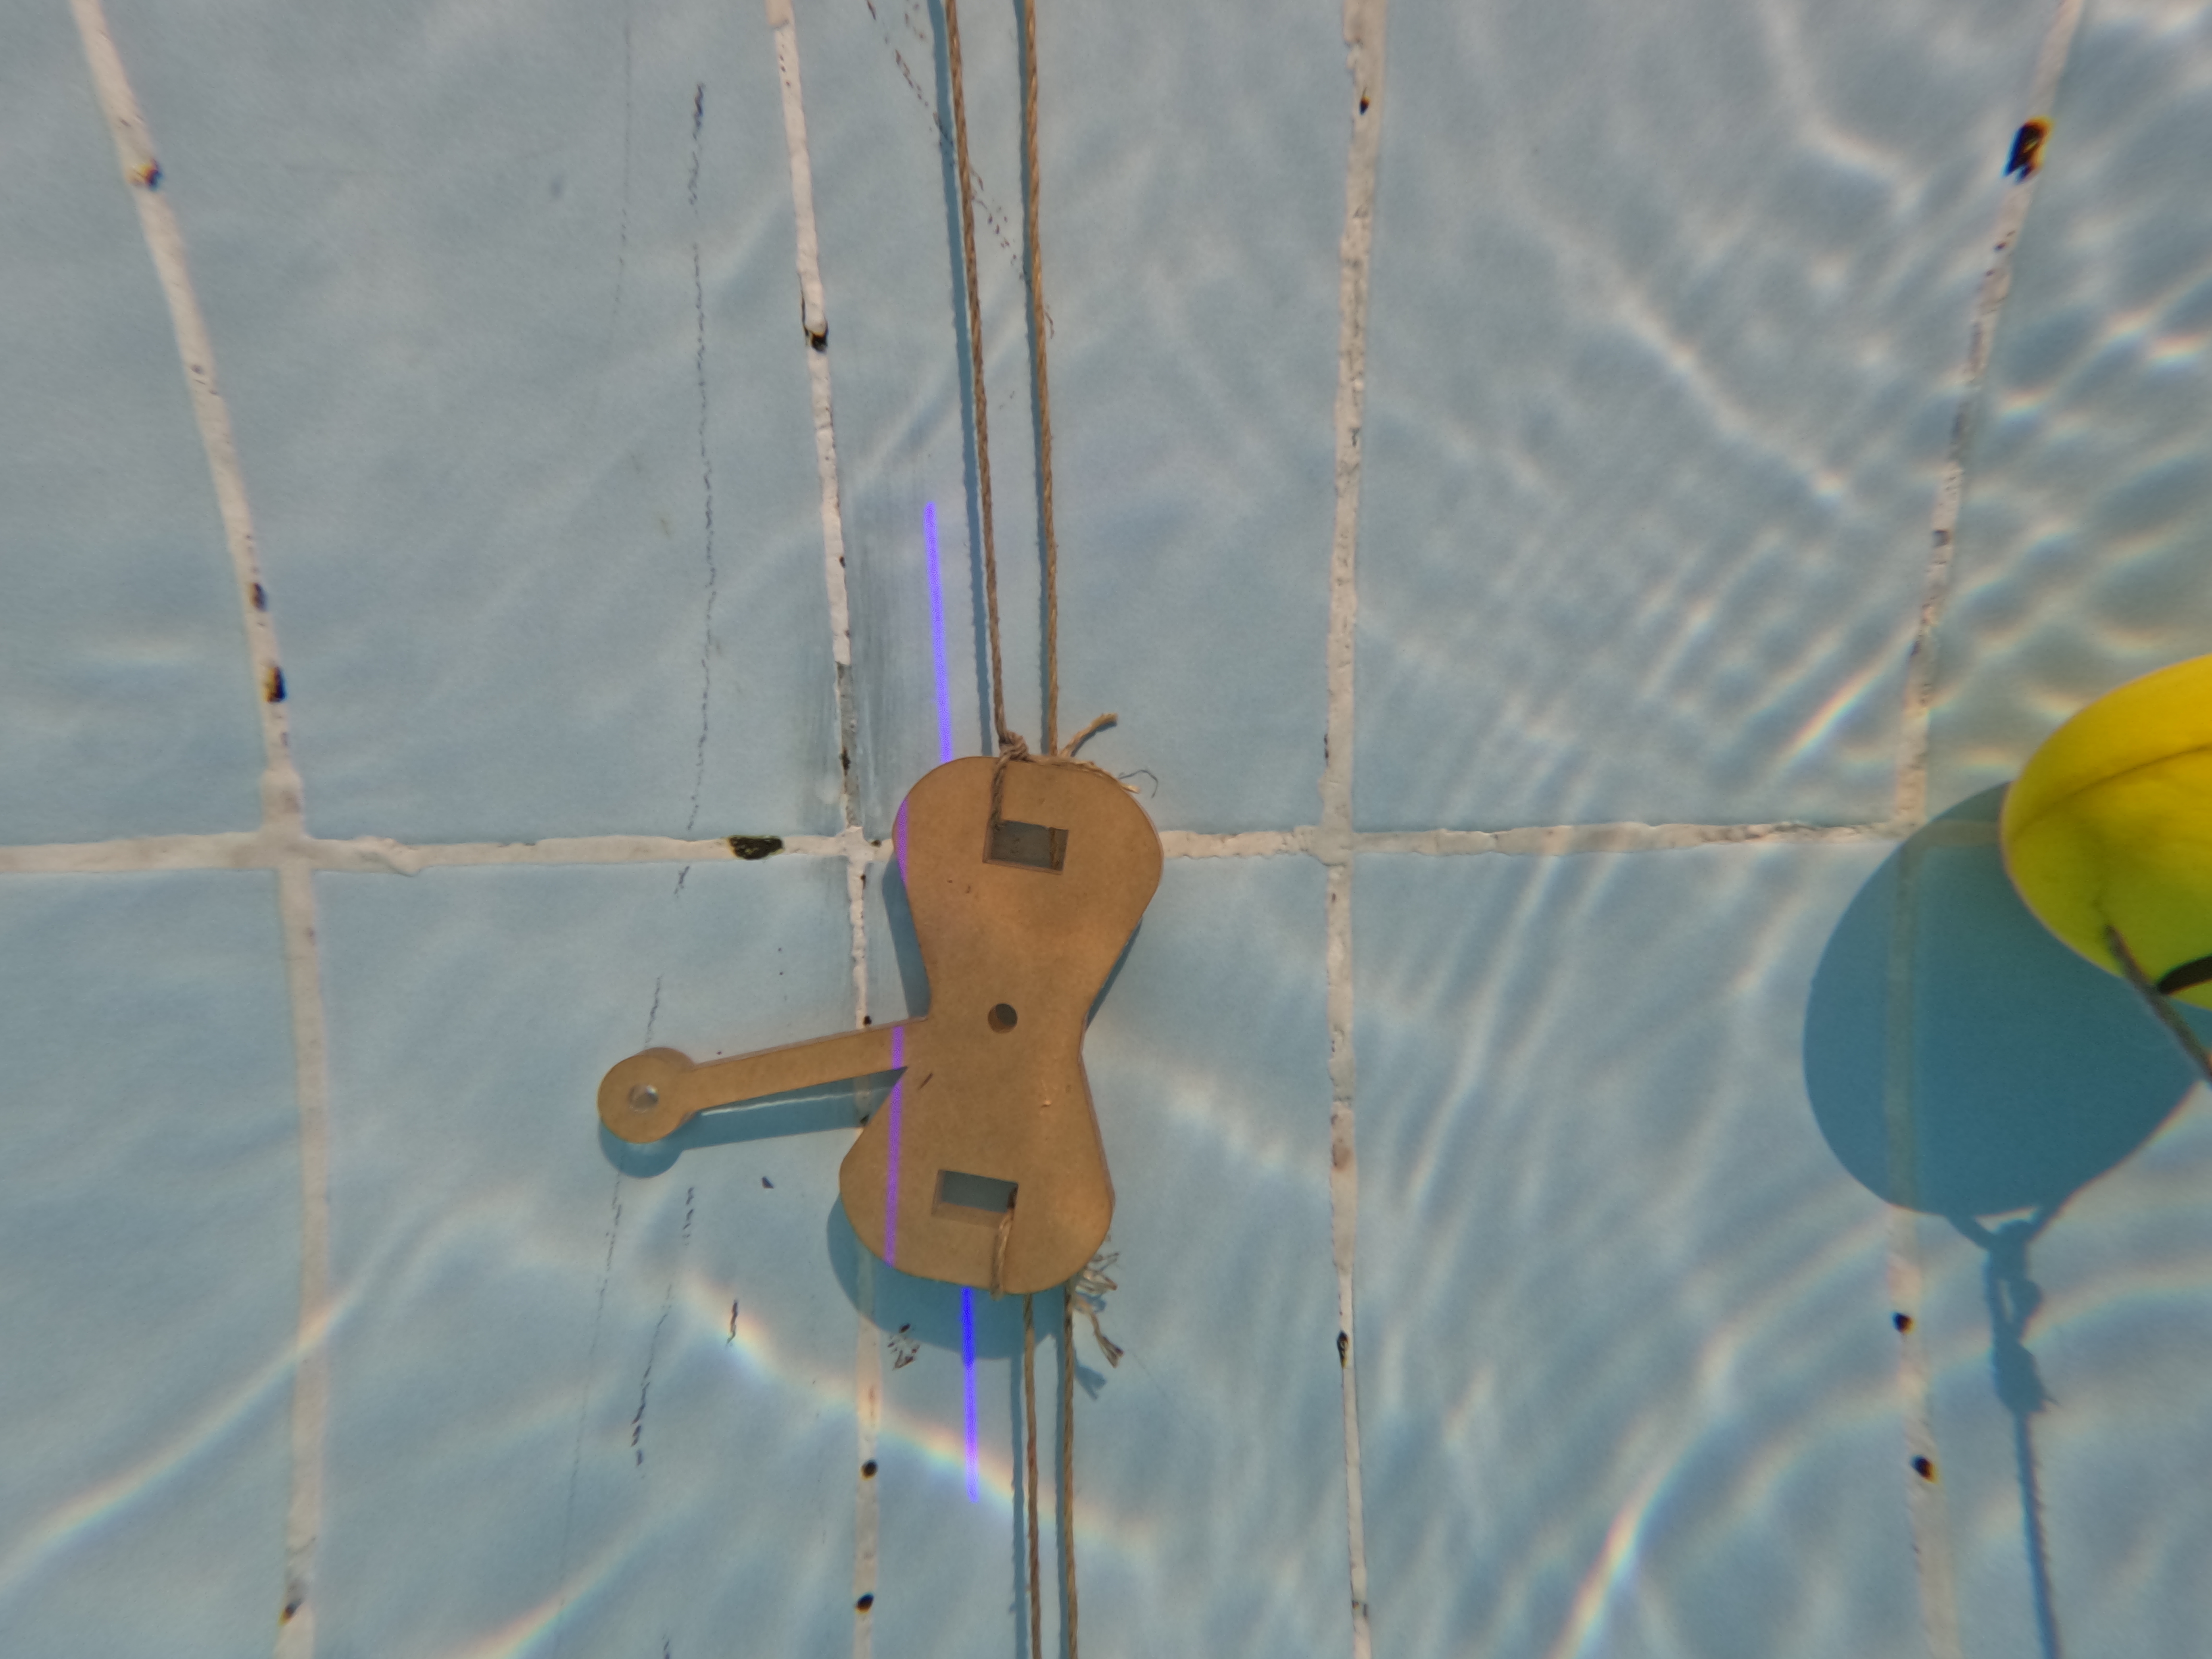

Supplement: Supplementary file 43 [file G0040437.pdf › Level_4_1/G0040437.pdf]

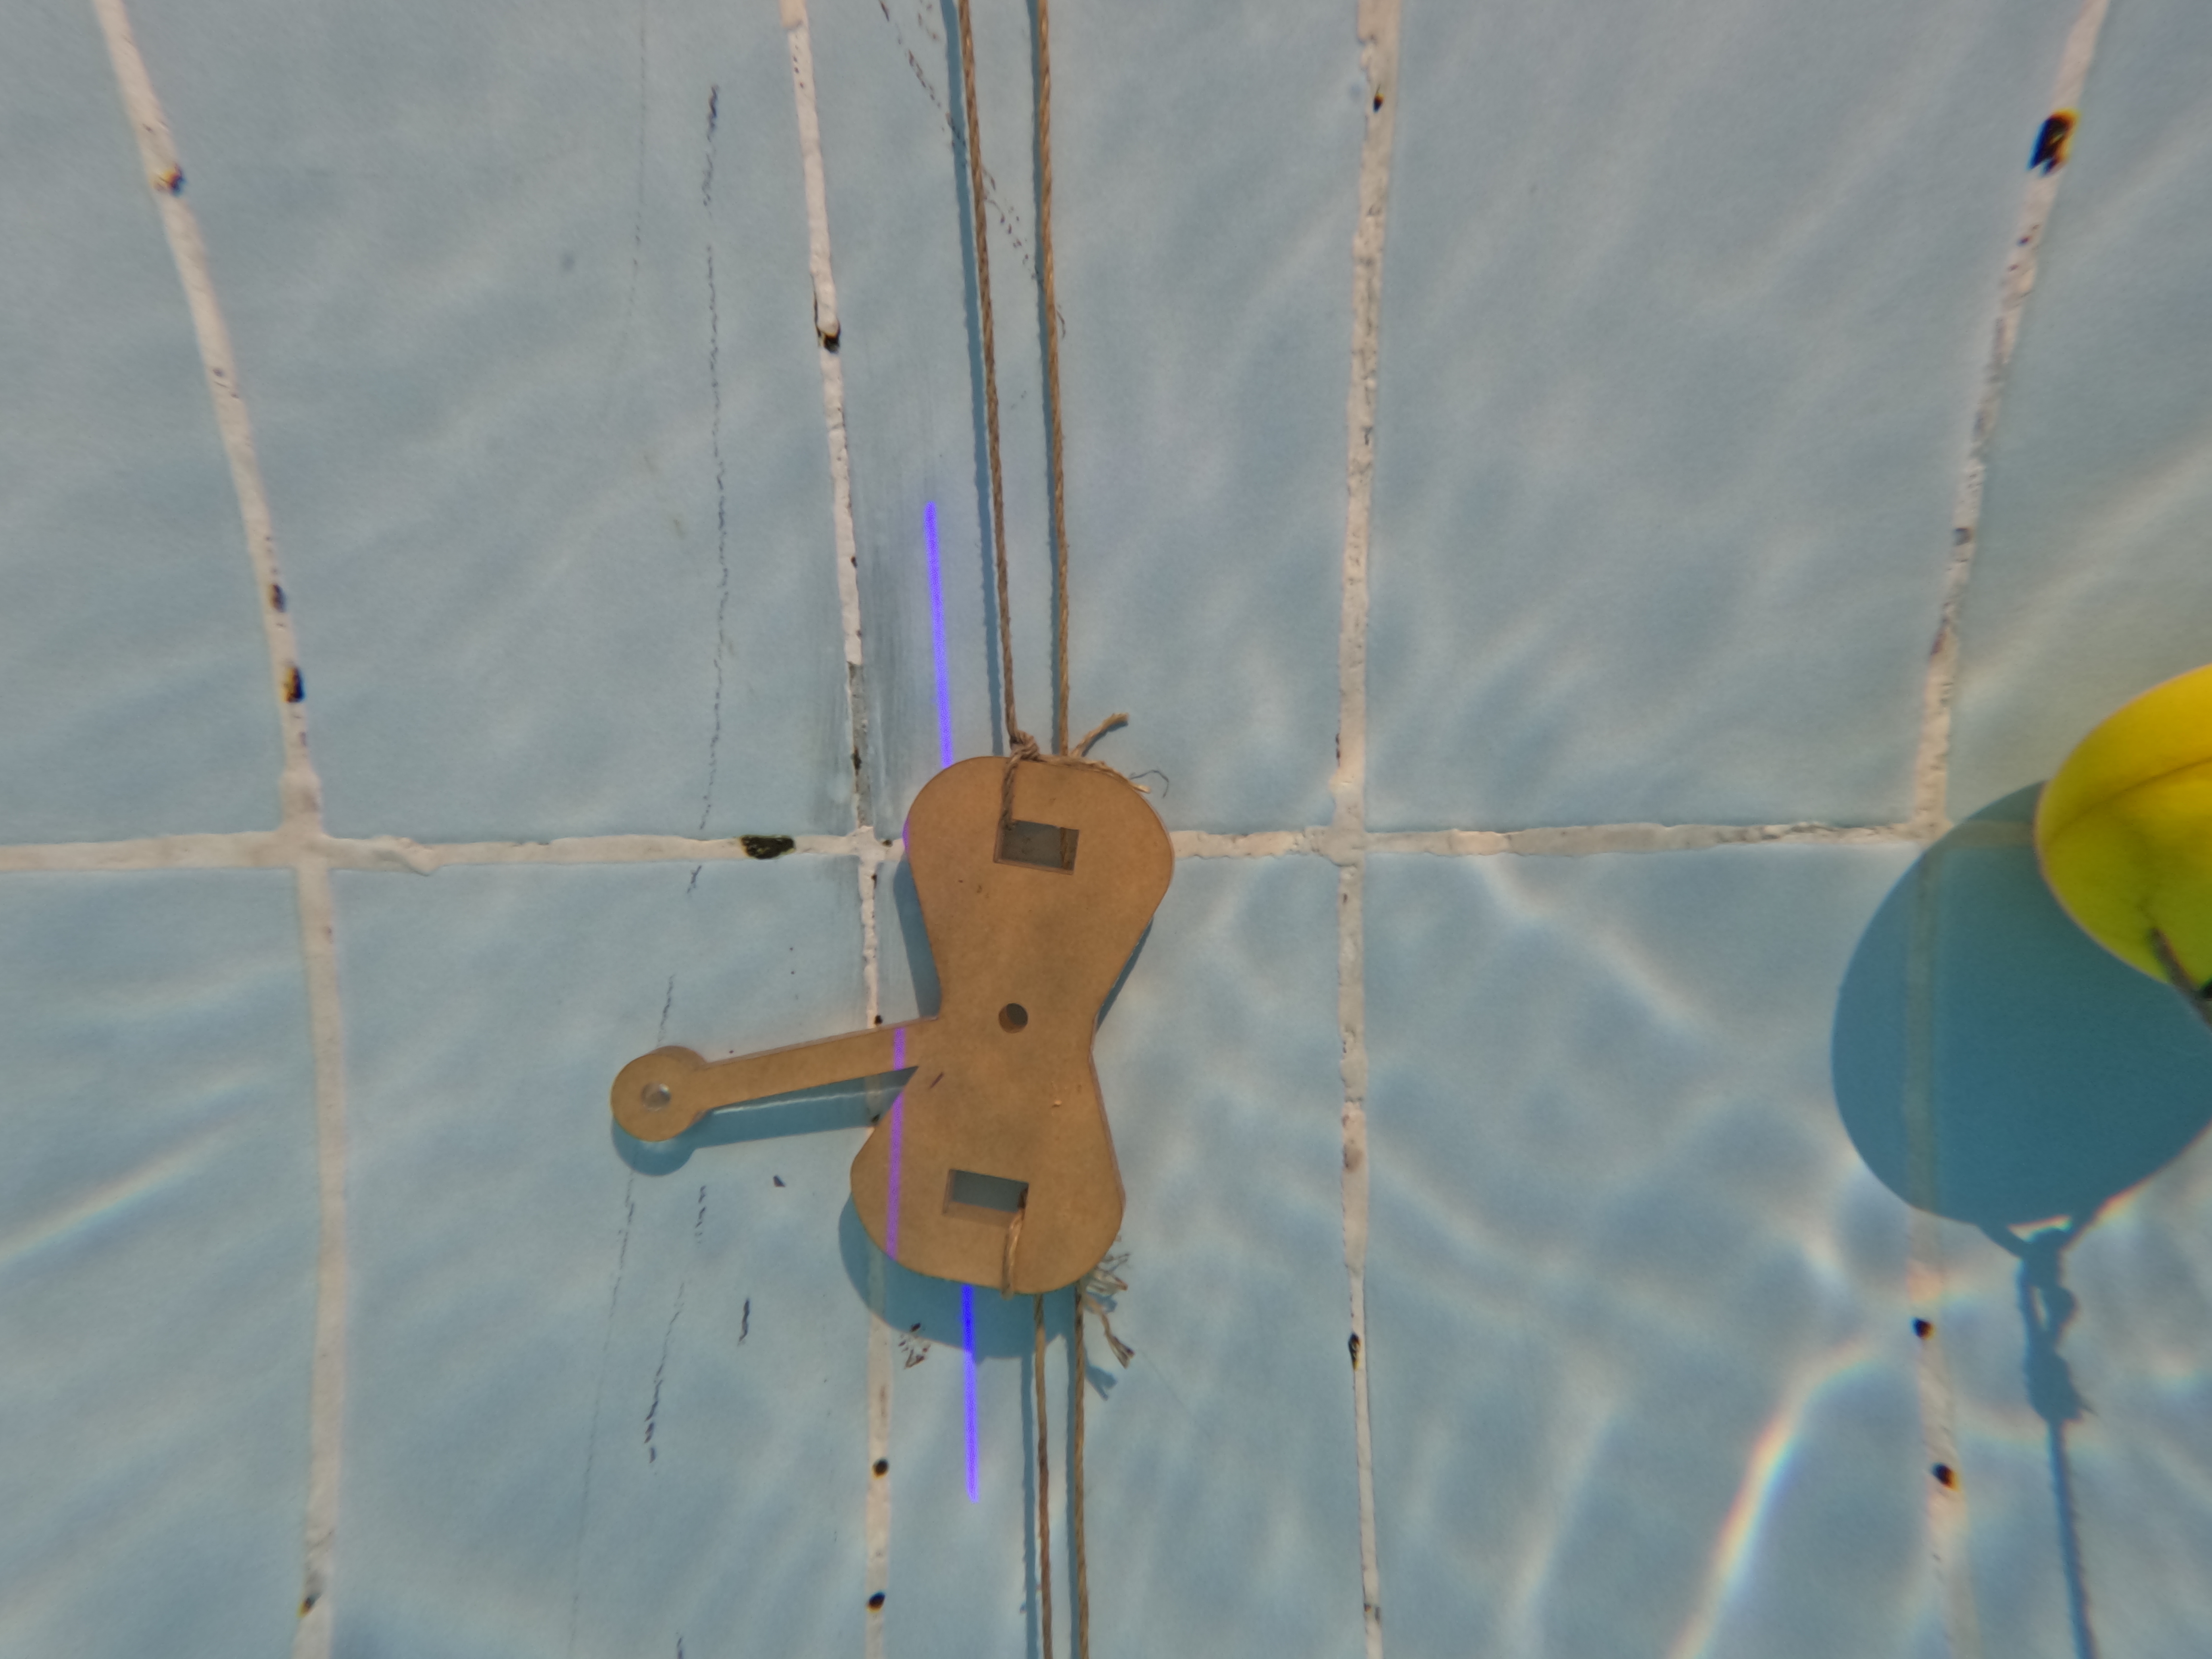

Supplement: Supplementary file 44 [file G0040438.pdf › Level_4_1/G0040438.pdf]

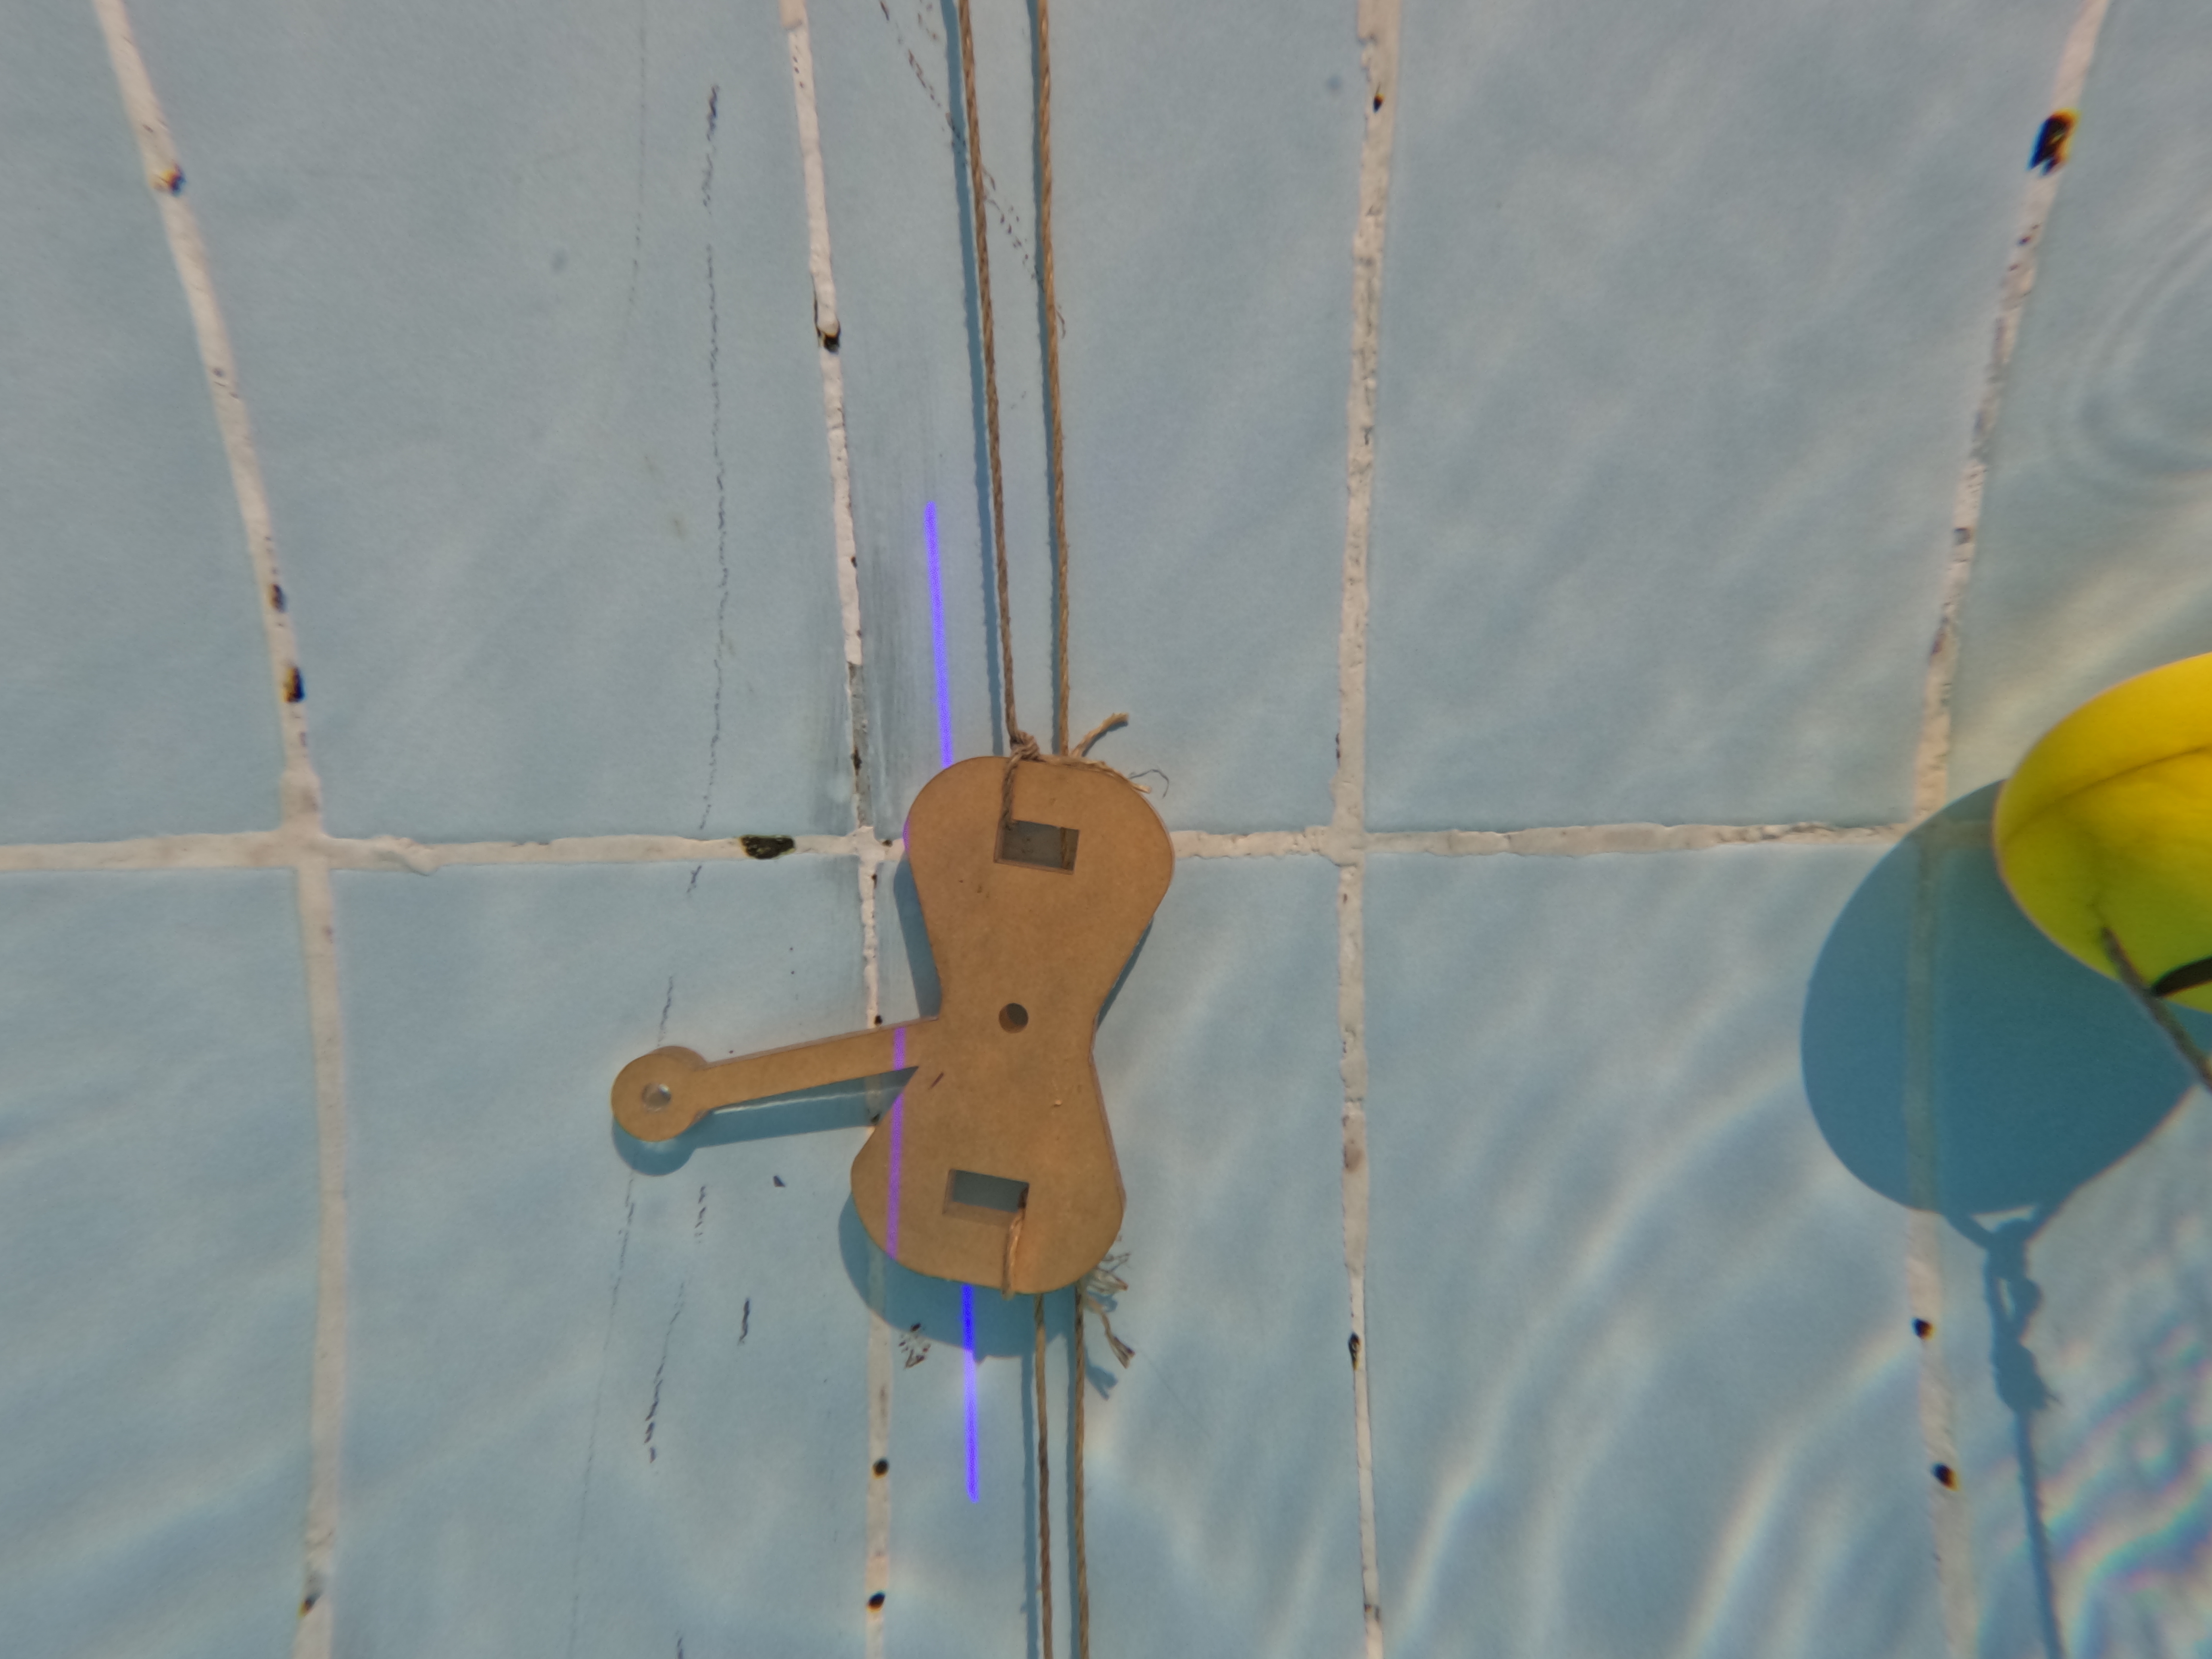

Supplement: Supplementary file 45 [file G0040439.pdf › Level_4_1/G0040439.pdf]

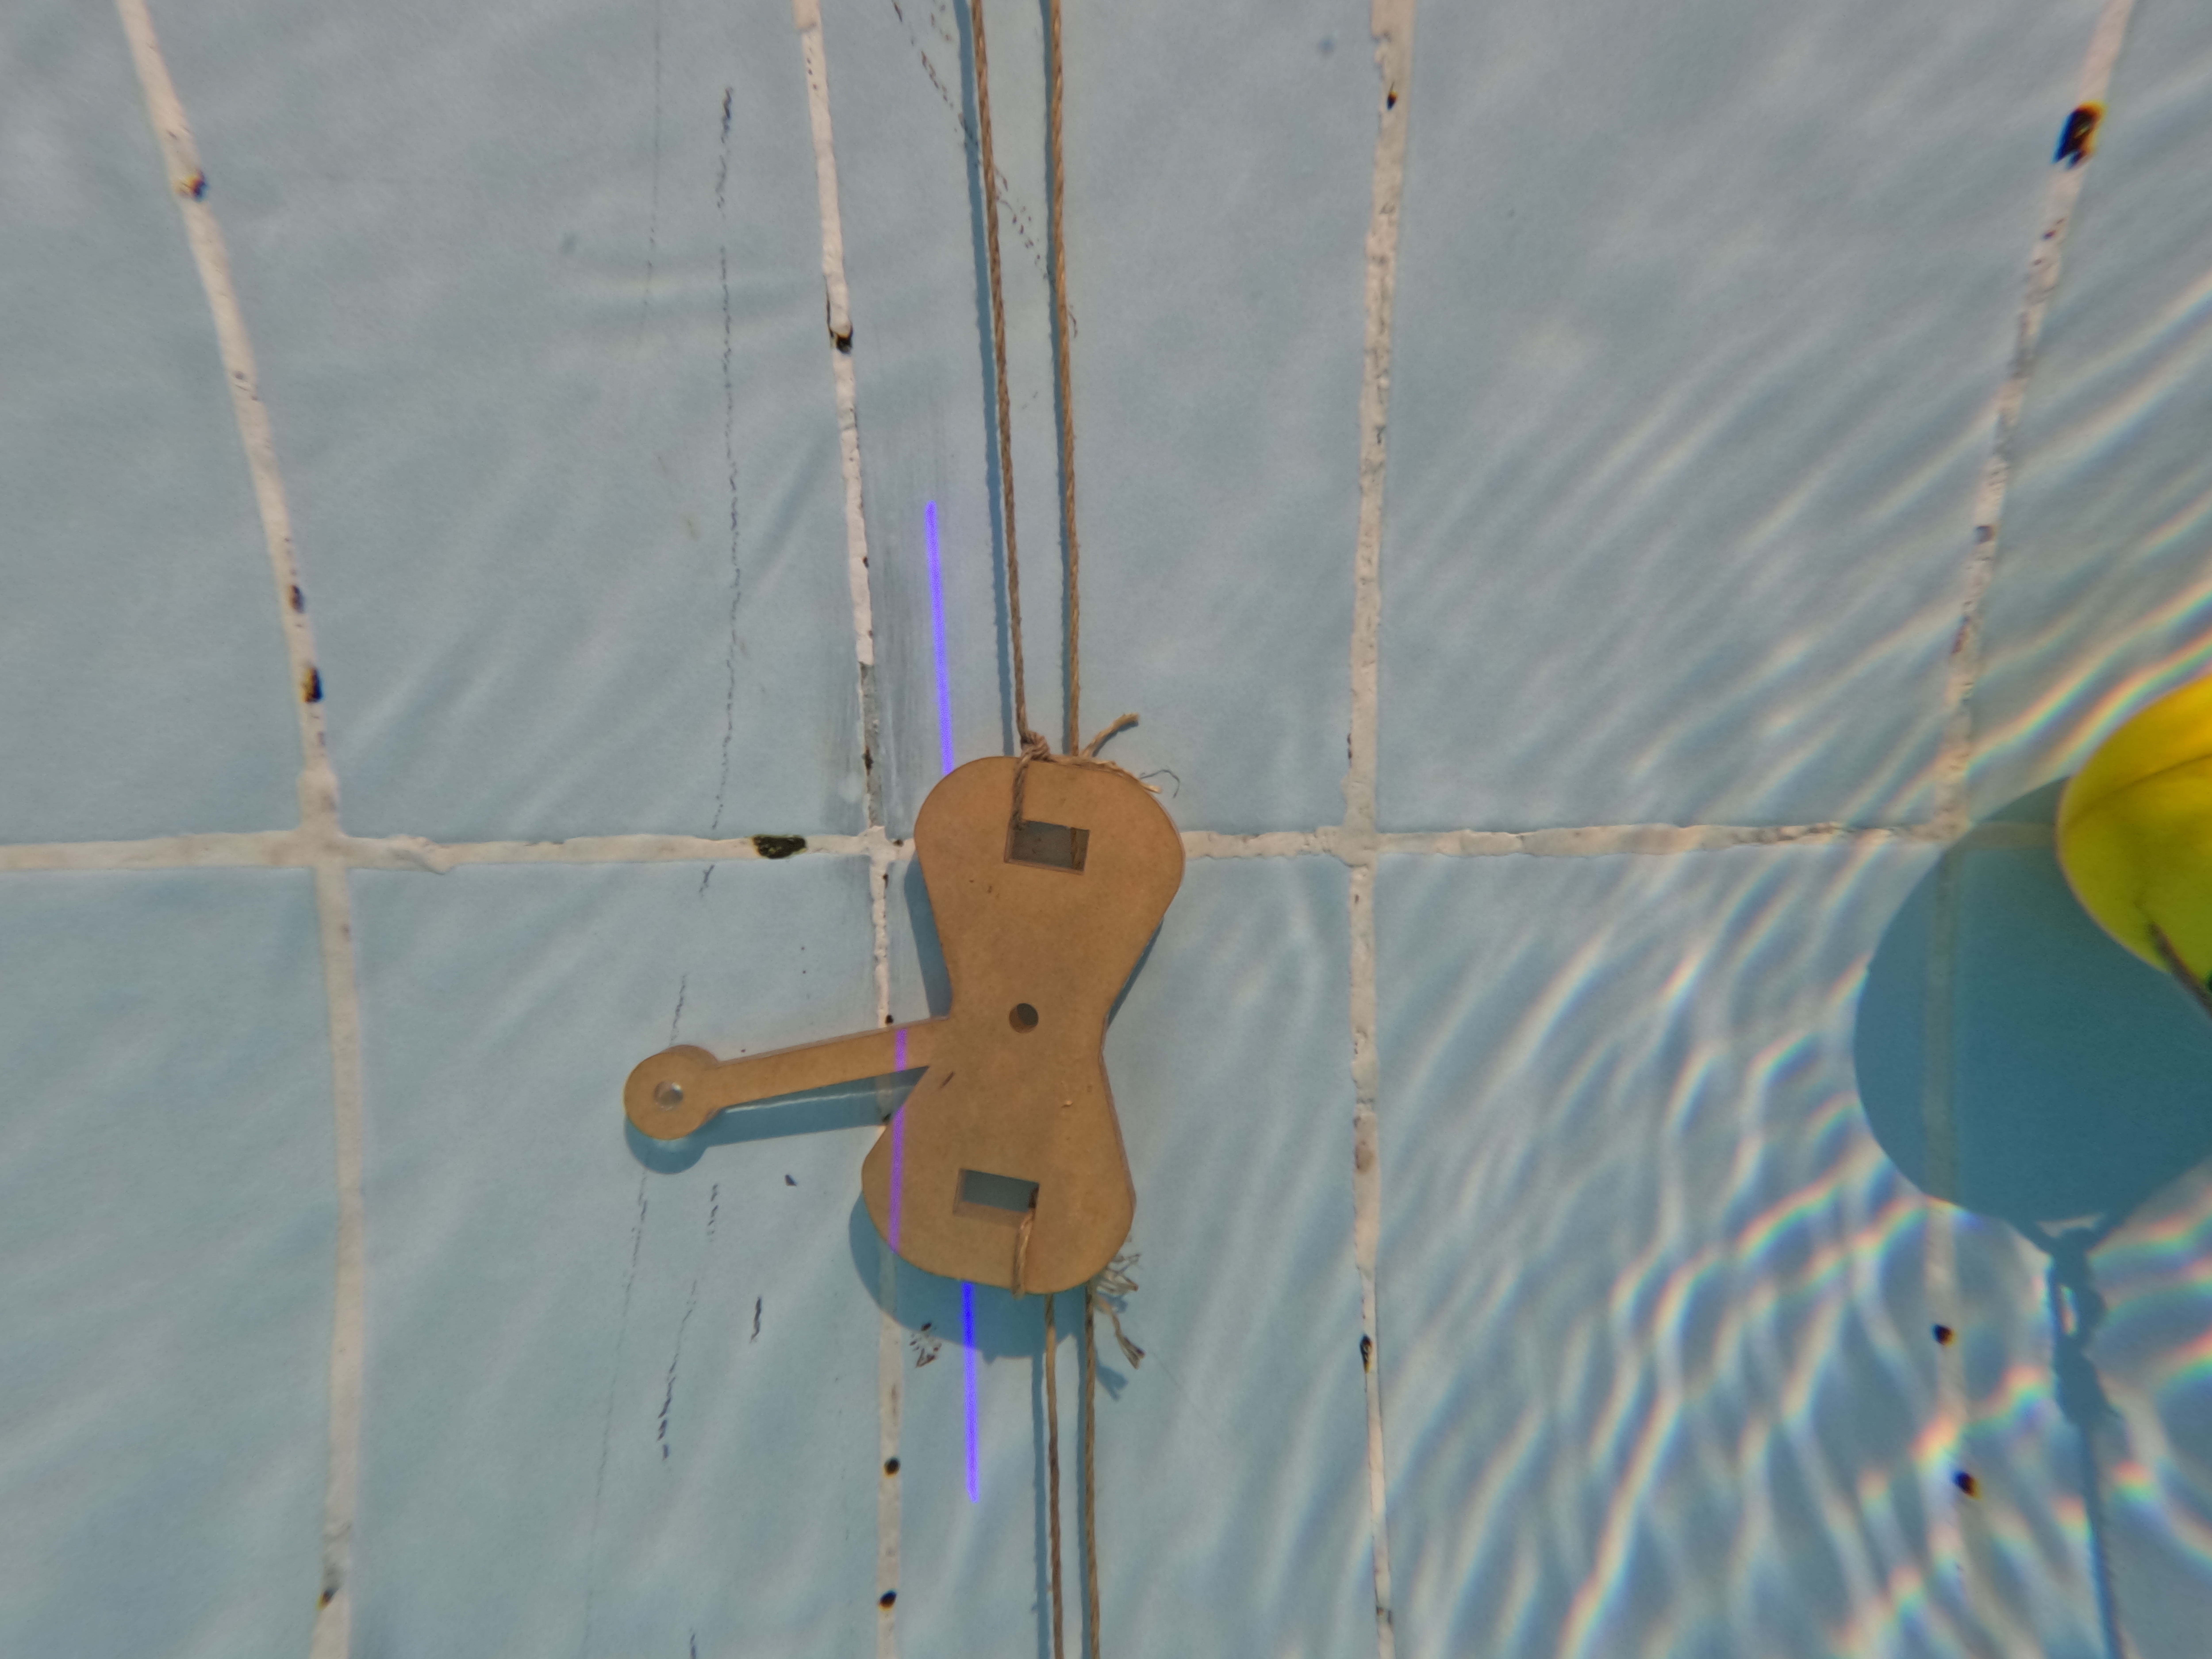

Supplement: Supplementary file 46 [file G0040440.pdf › Level_4_1/G0040440.pdf]

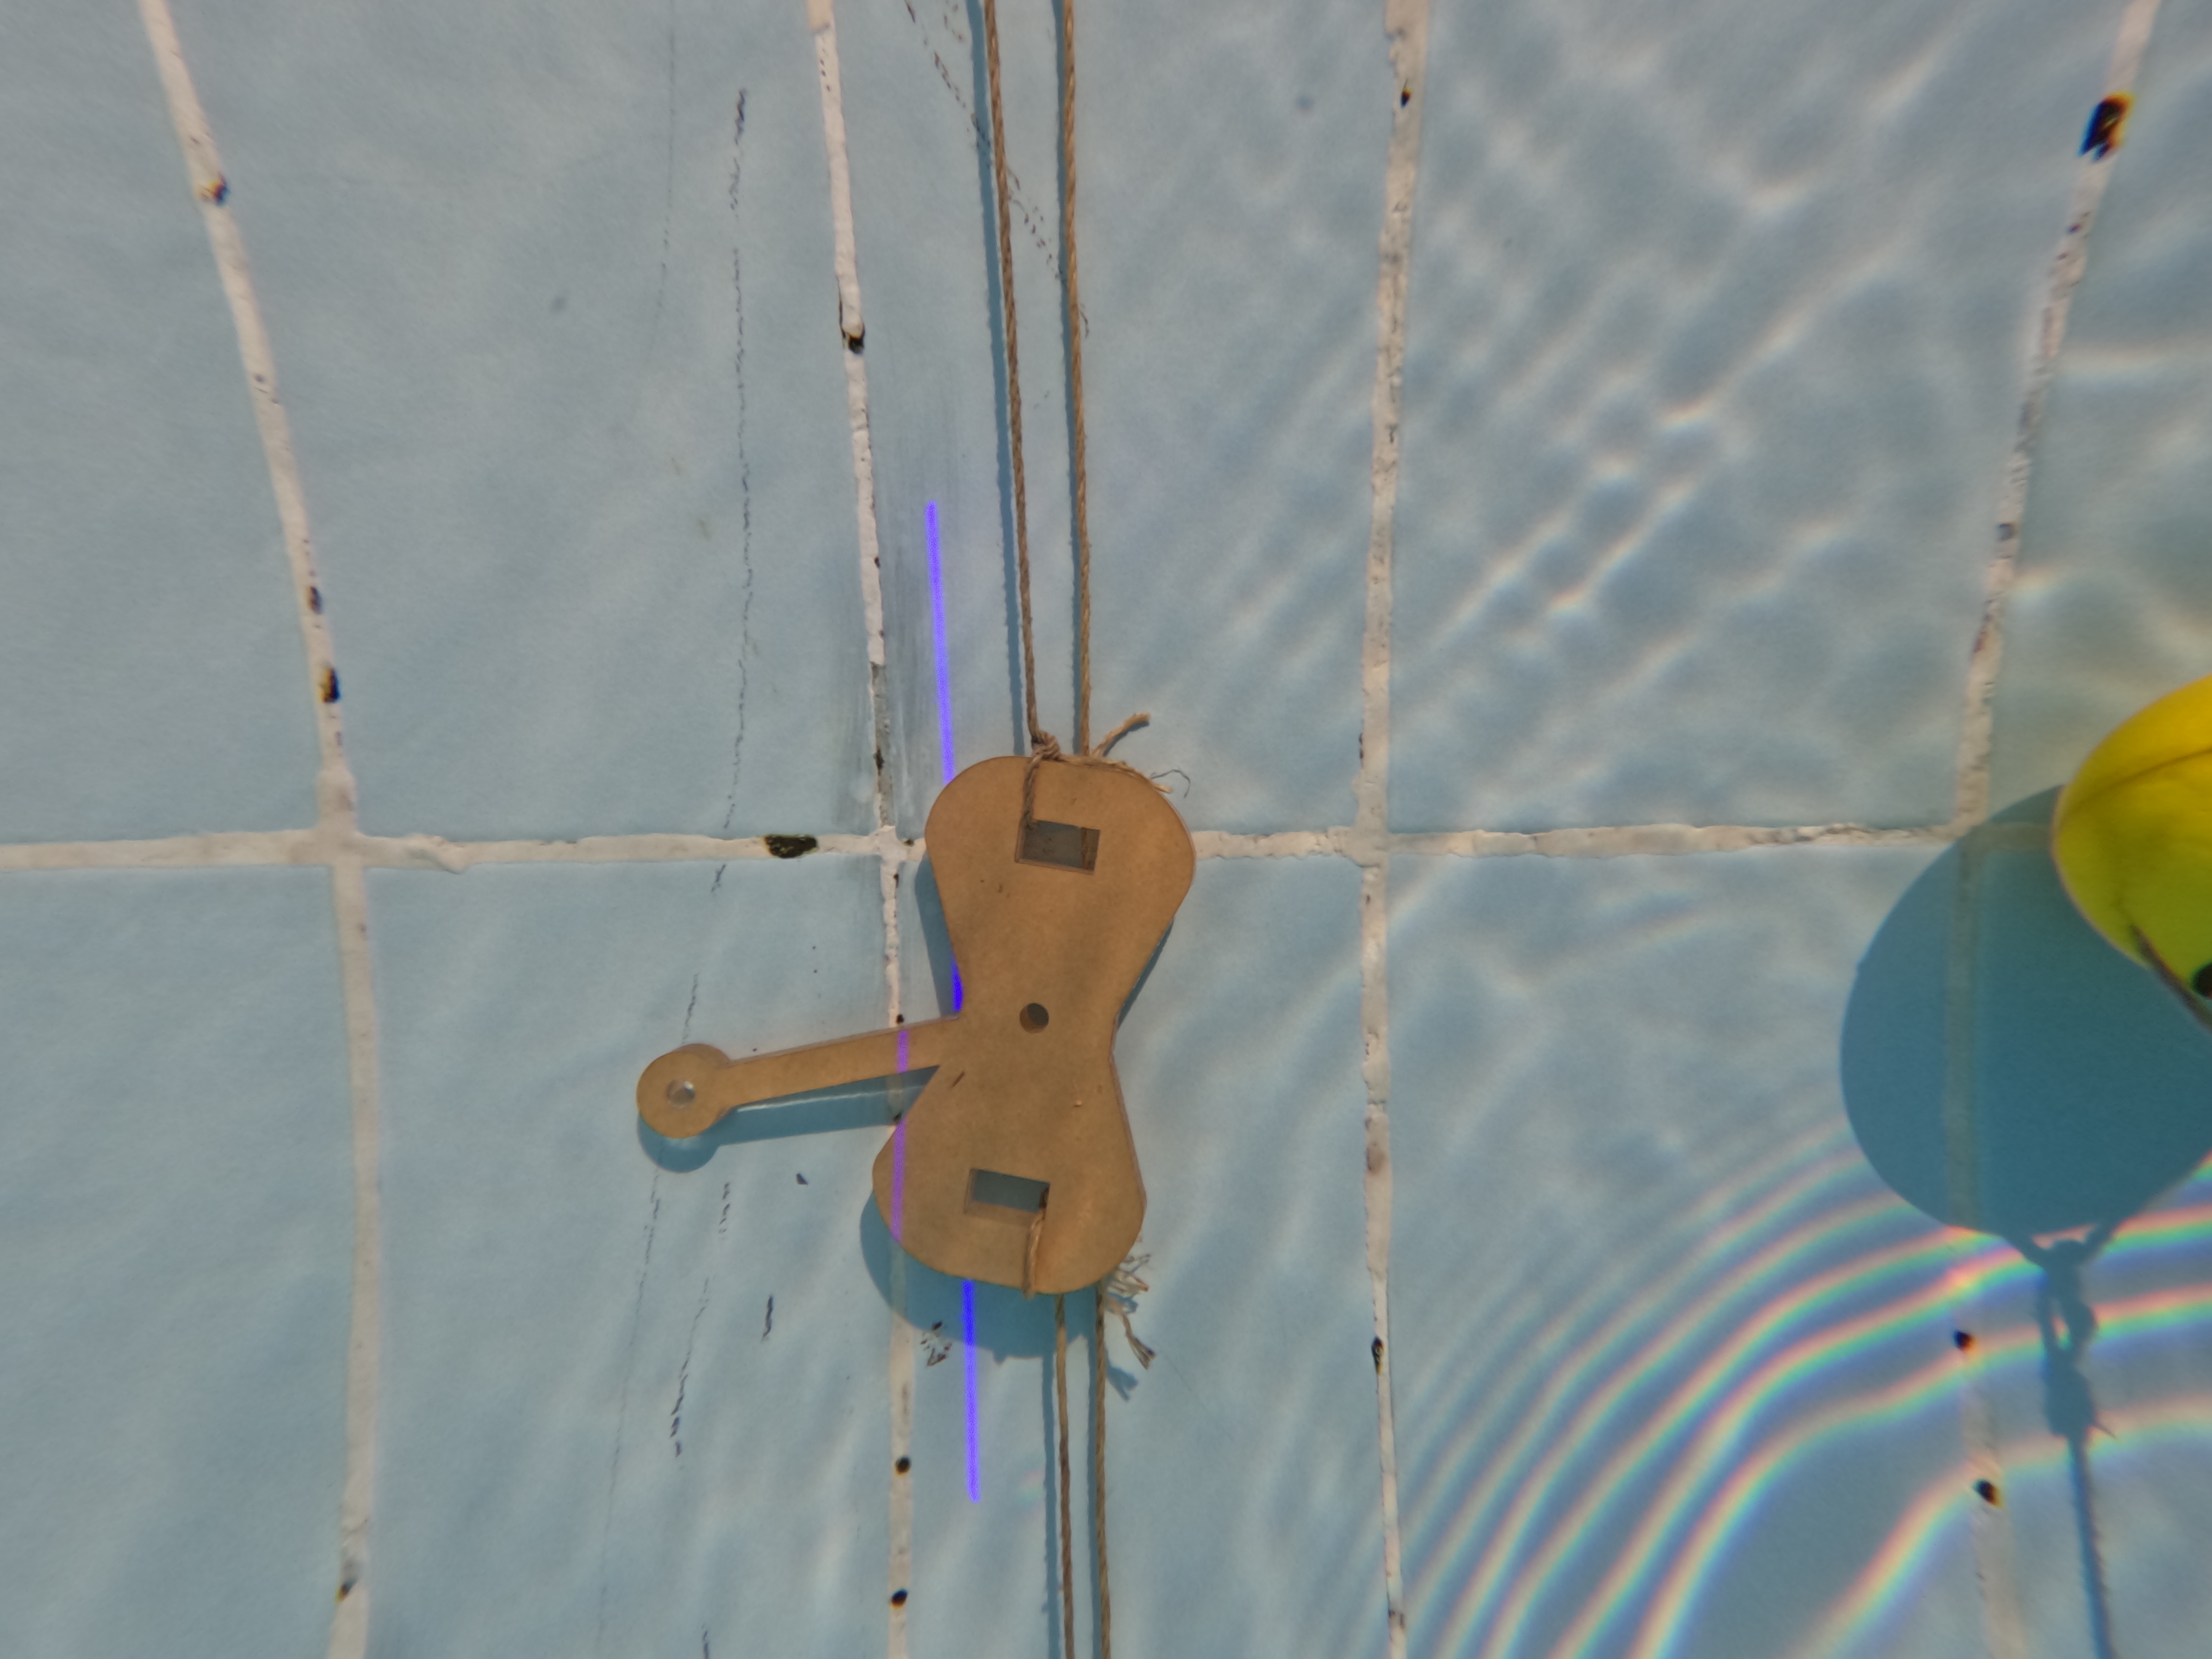

Supplement: Supplementary file 47 [file G0040441.pdf › Level_4_1/G0040441.pdf]

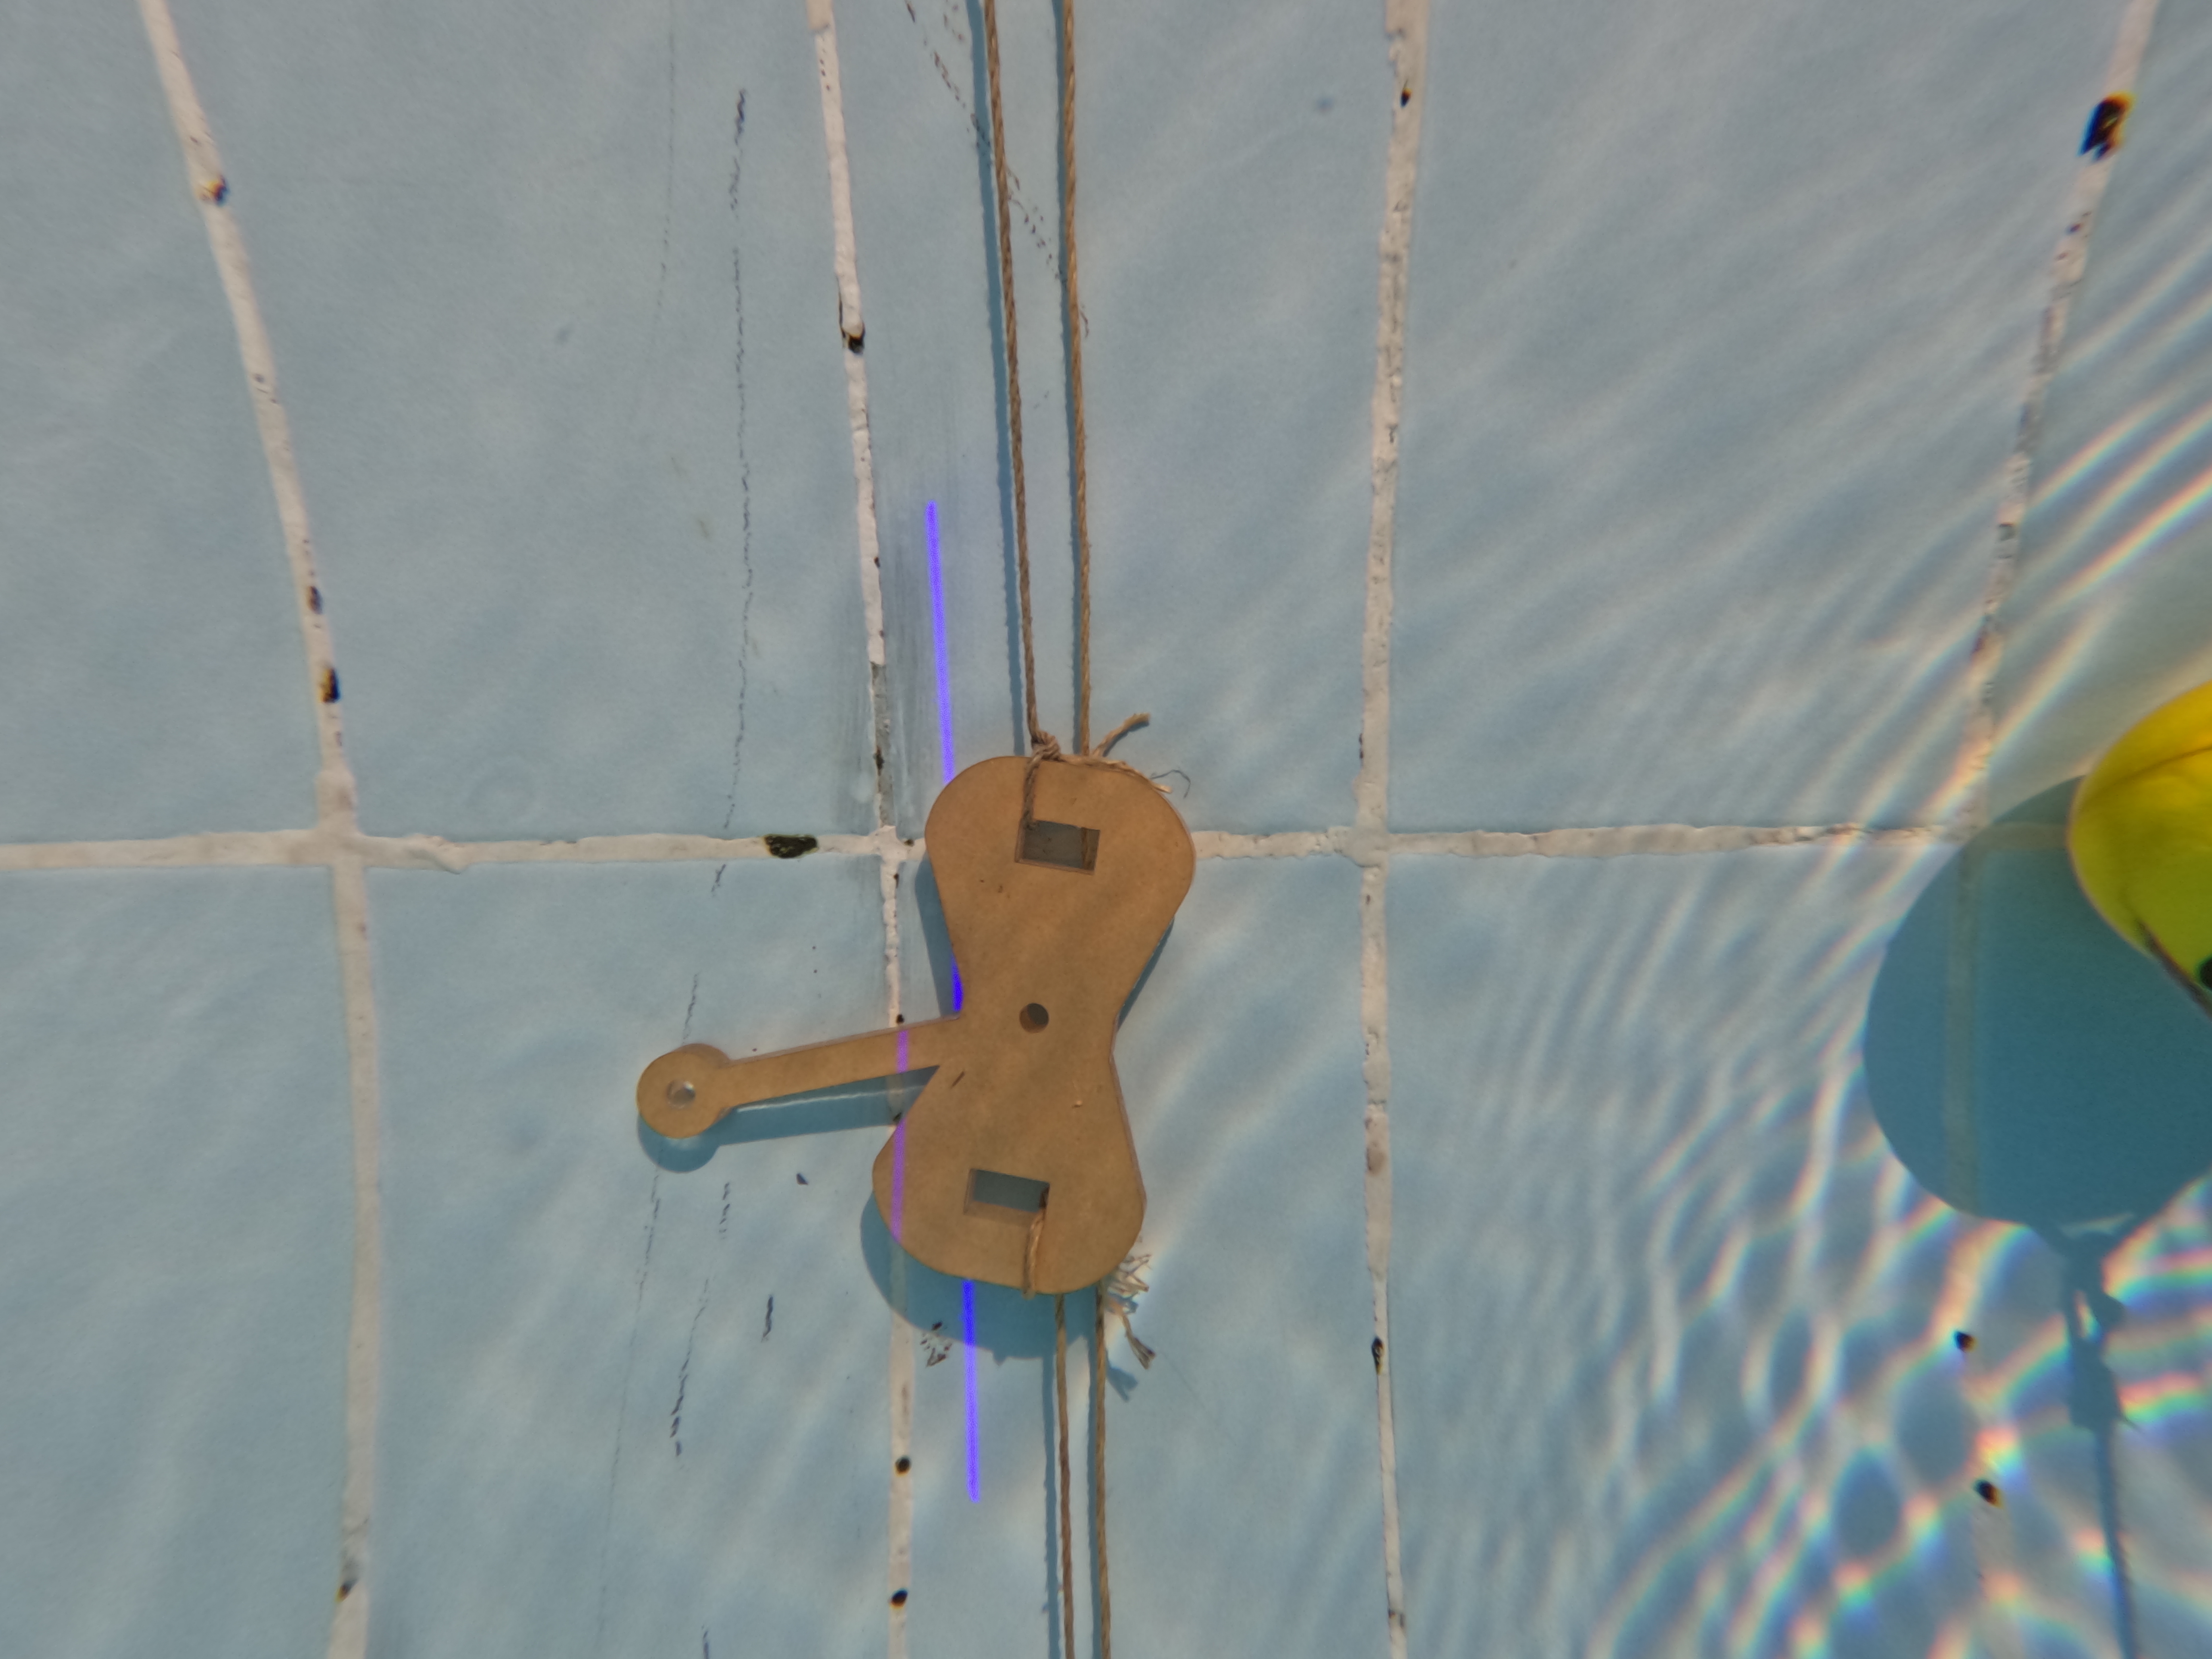

Supplement: Supplementary file 48 [file G0040442.pdf › Level_4_1/G0040442.pdf]

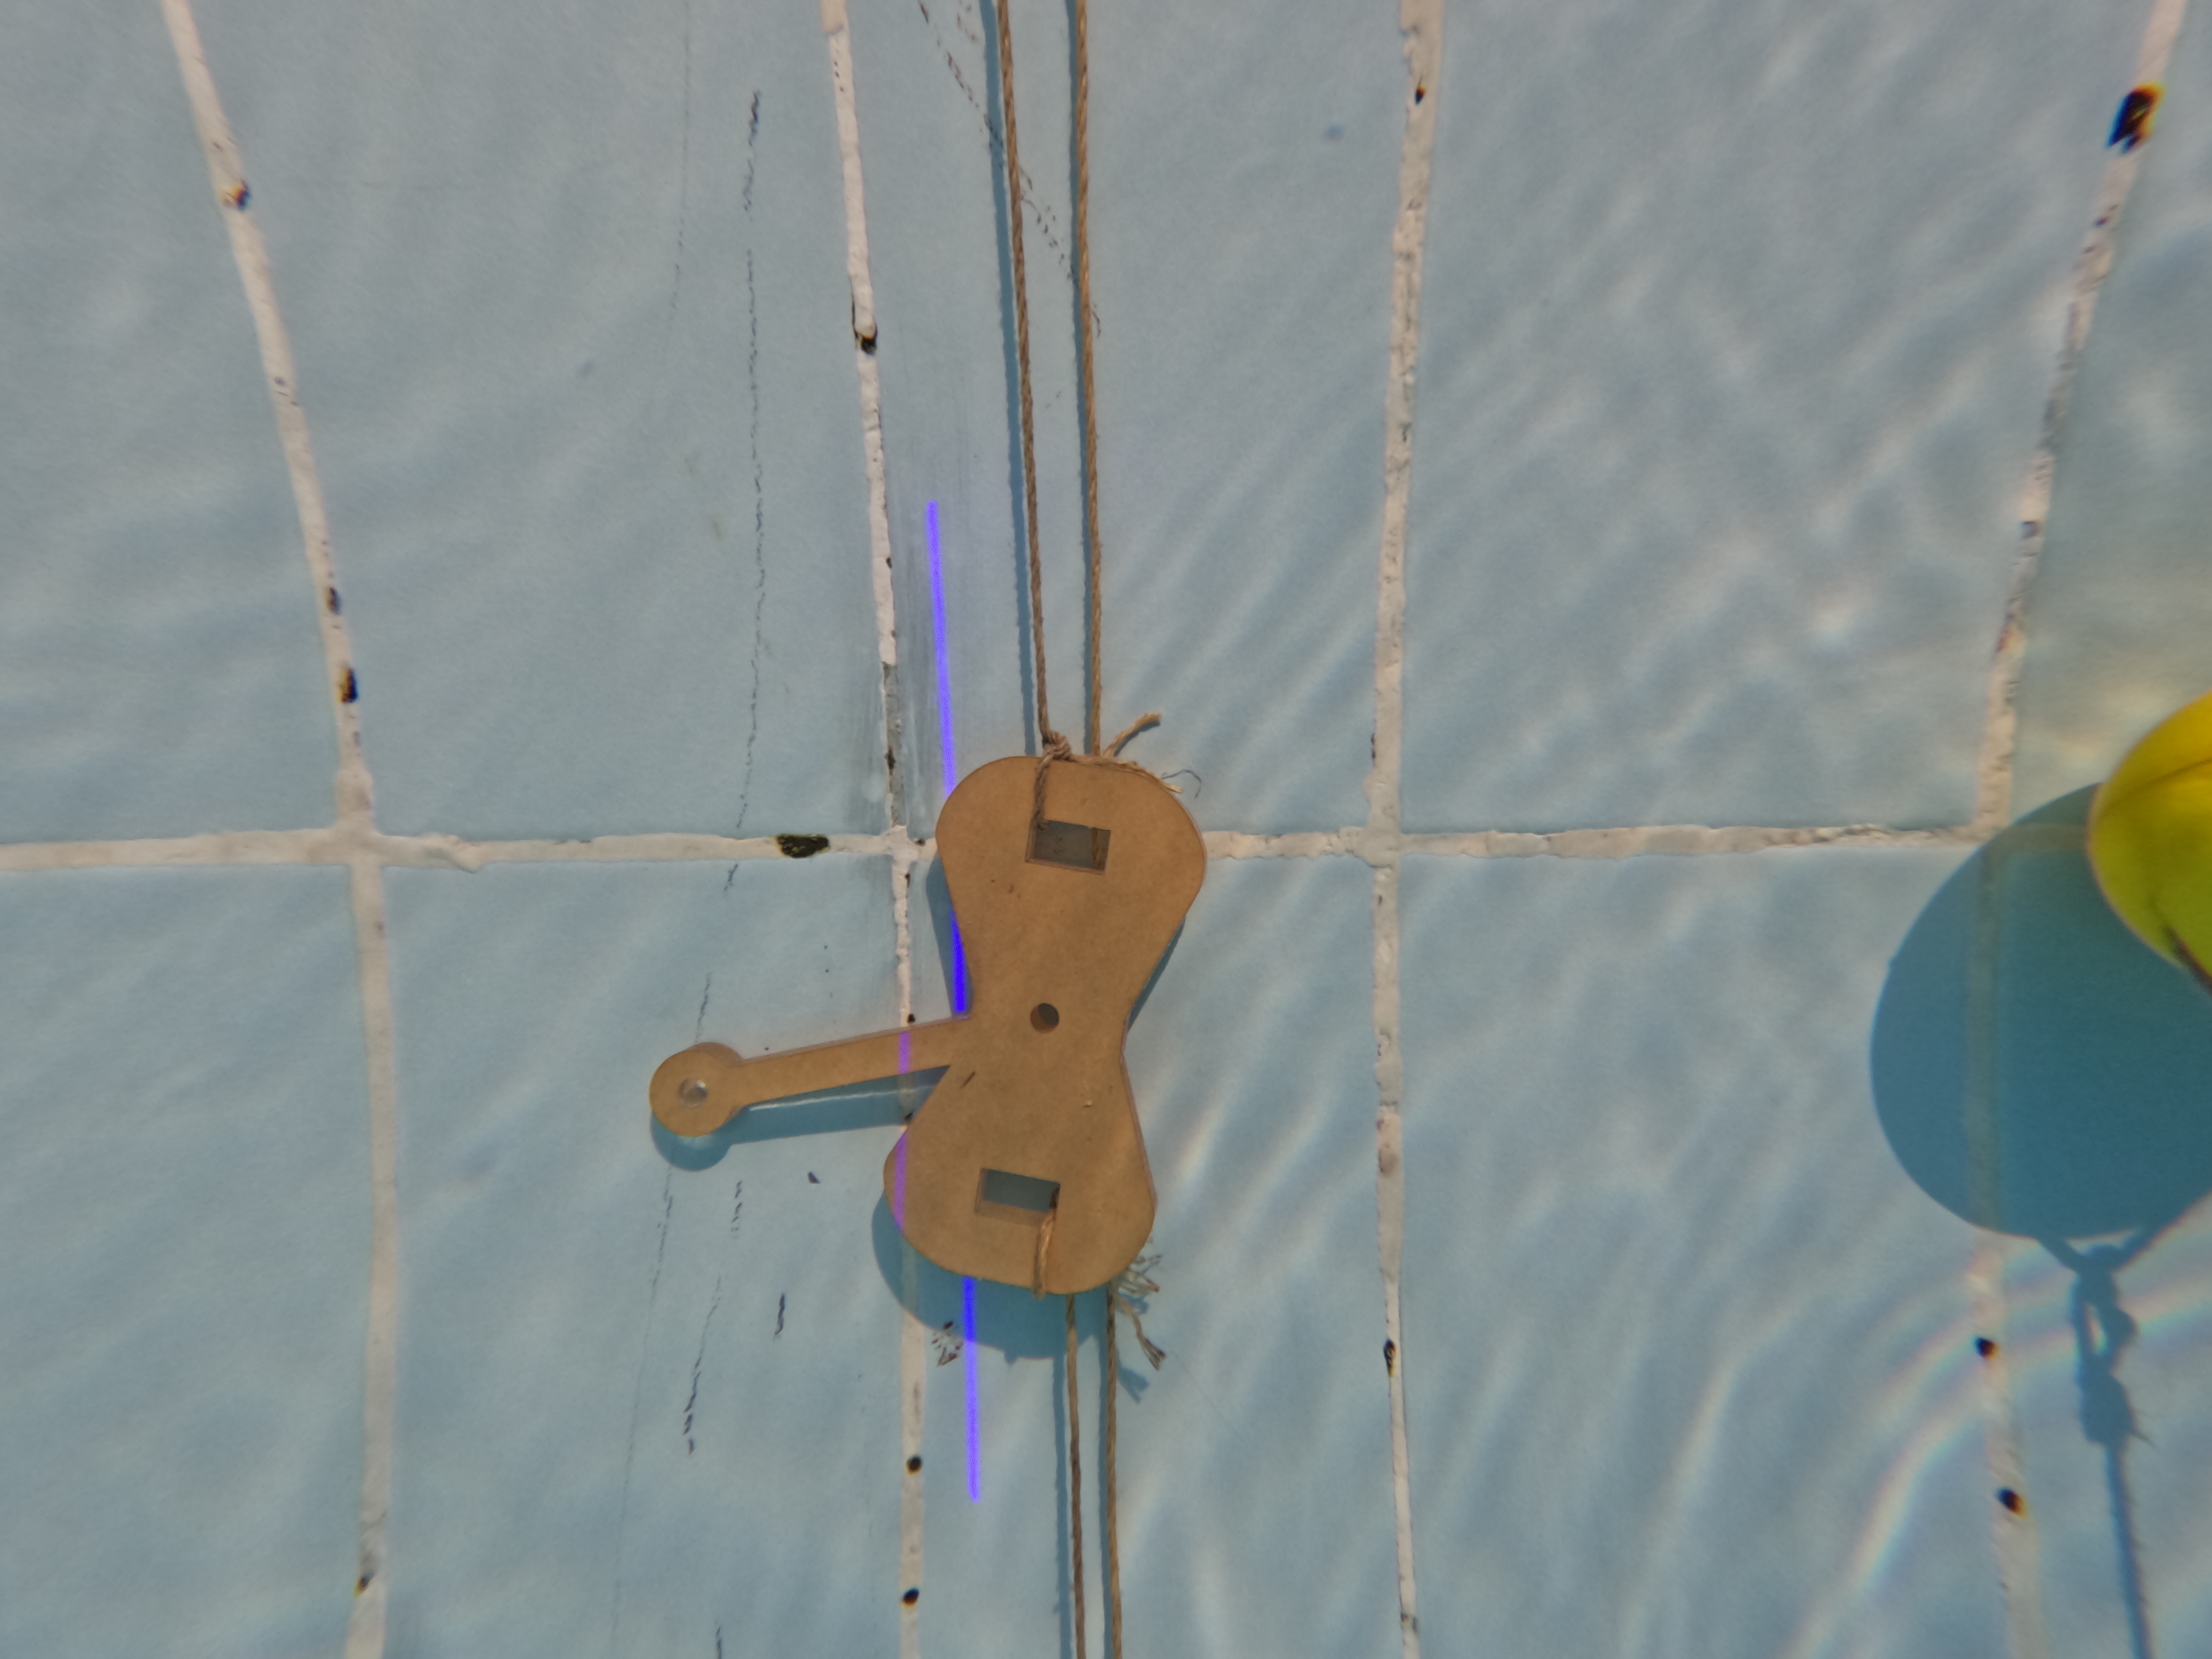

Supplement: Supplementary file 49 [file G0040443.pdf › Level_4_1/G0040443.pdf]

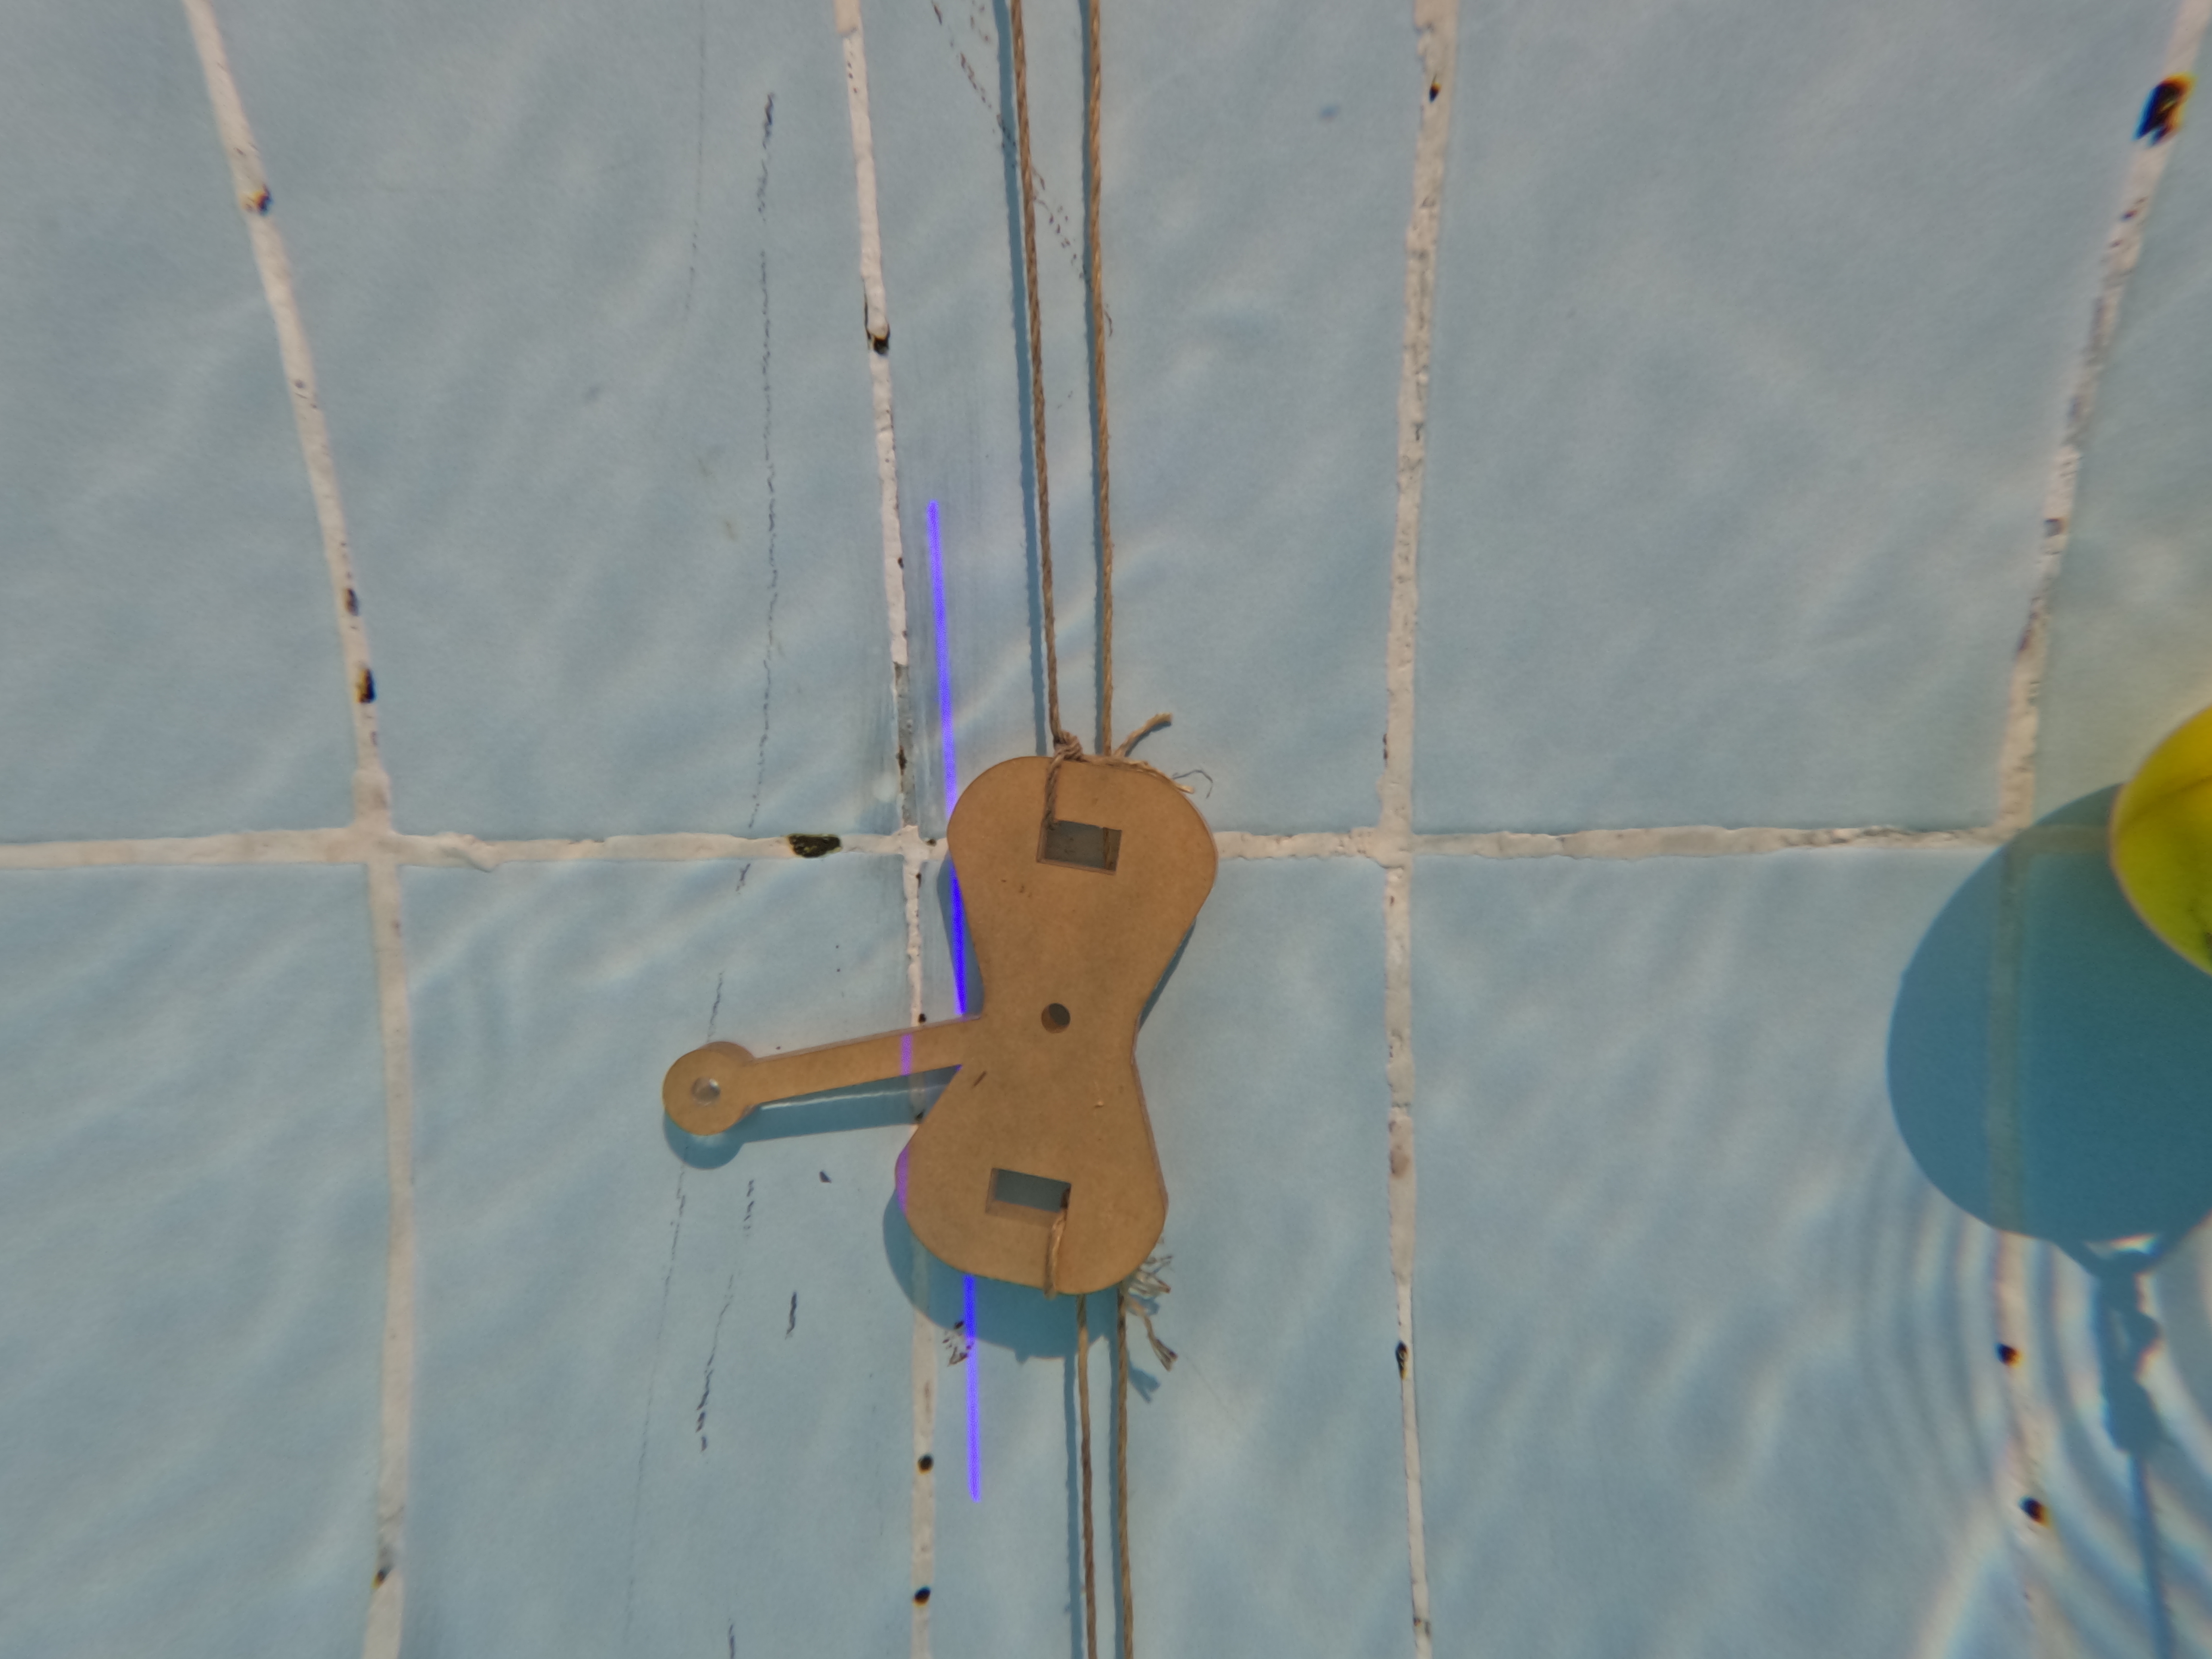

Supplement: Supplementary file 50 [file G0040444.pdf › Level_4_1/G0040444.pdf]

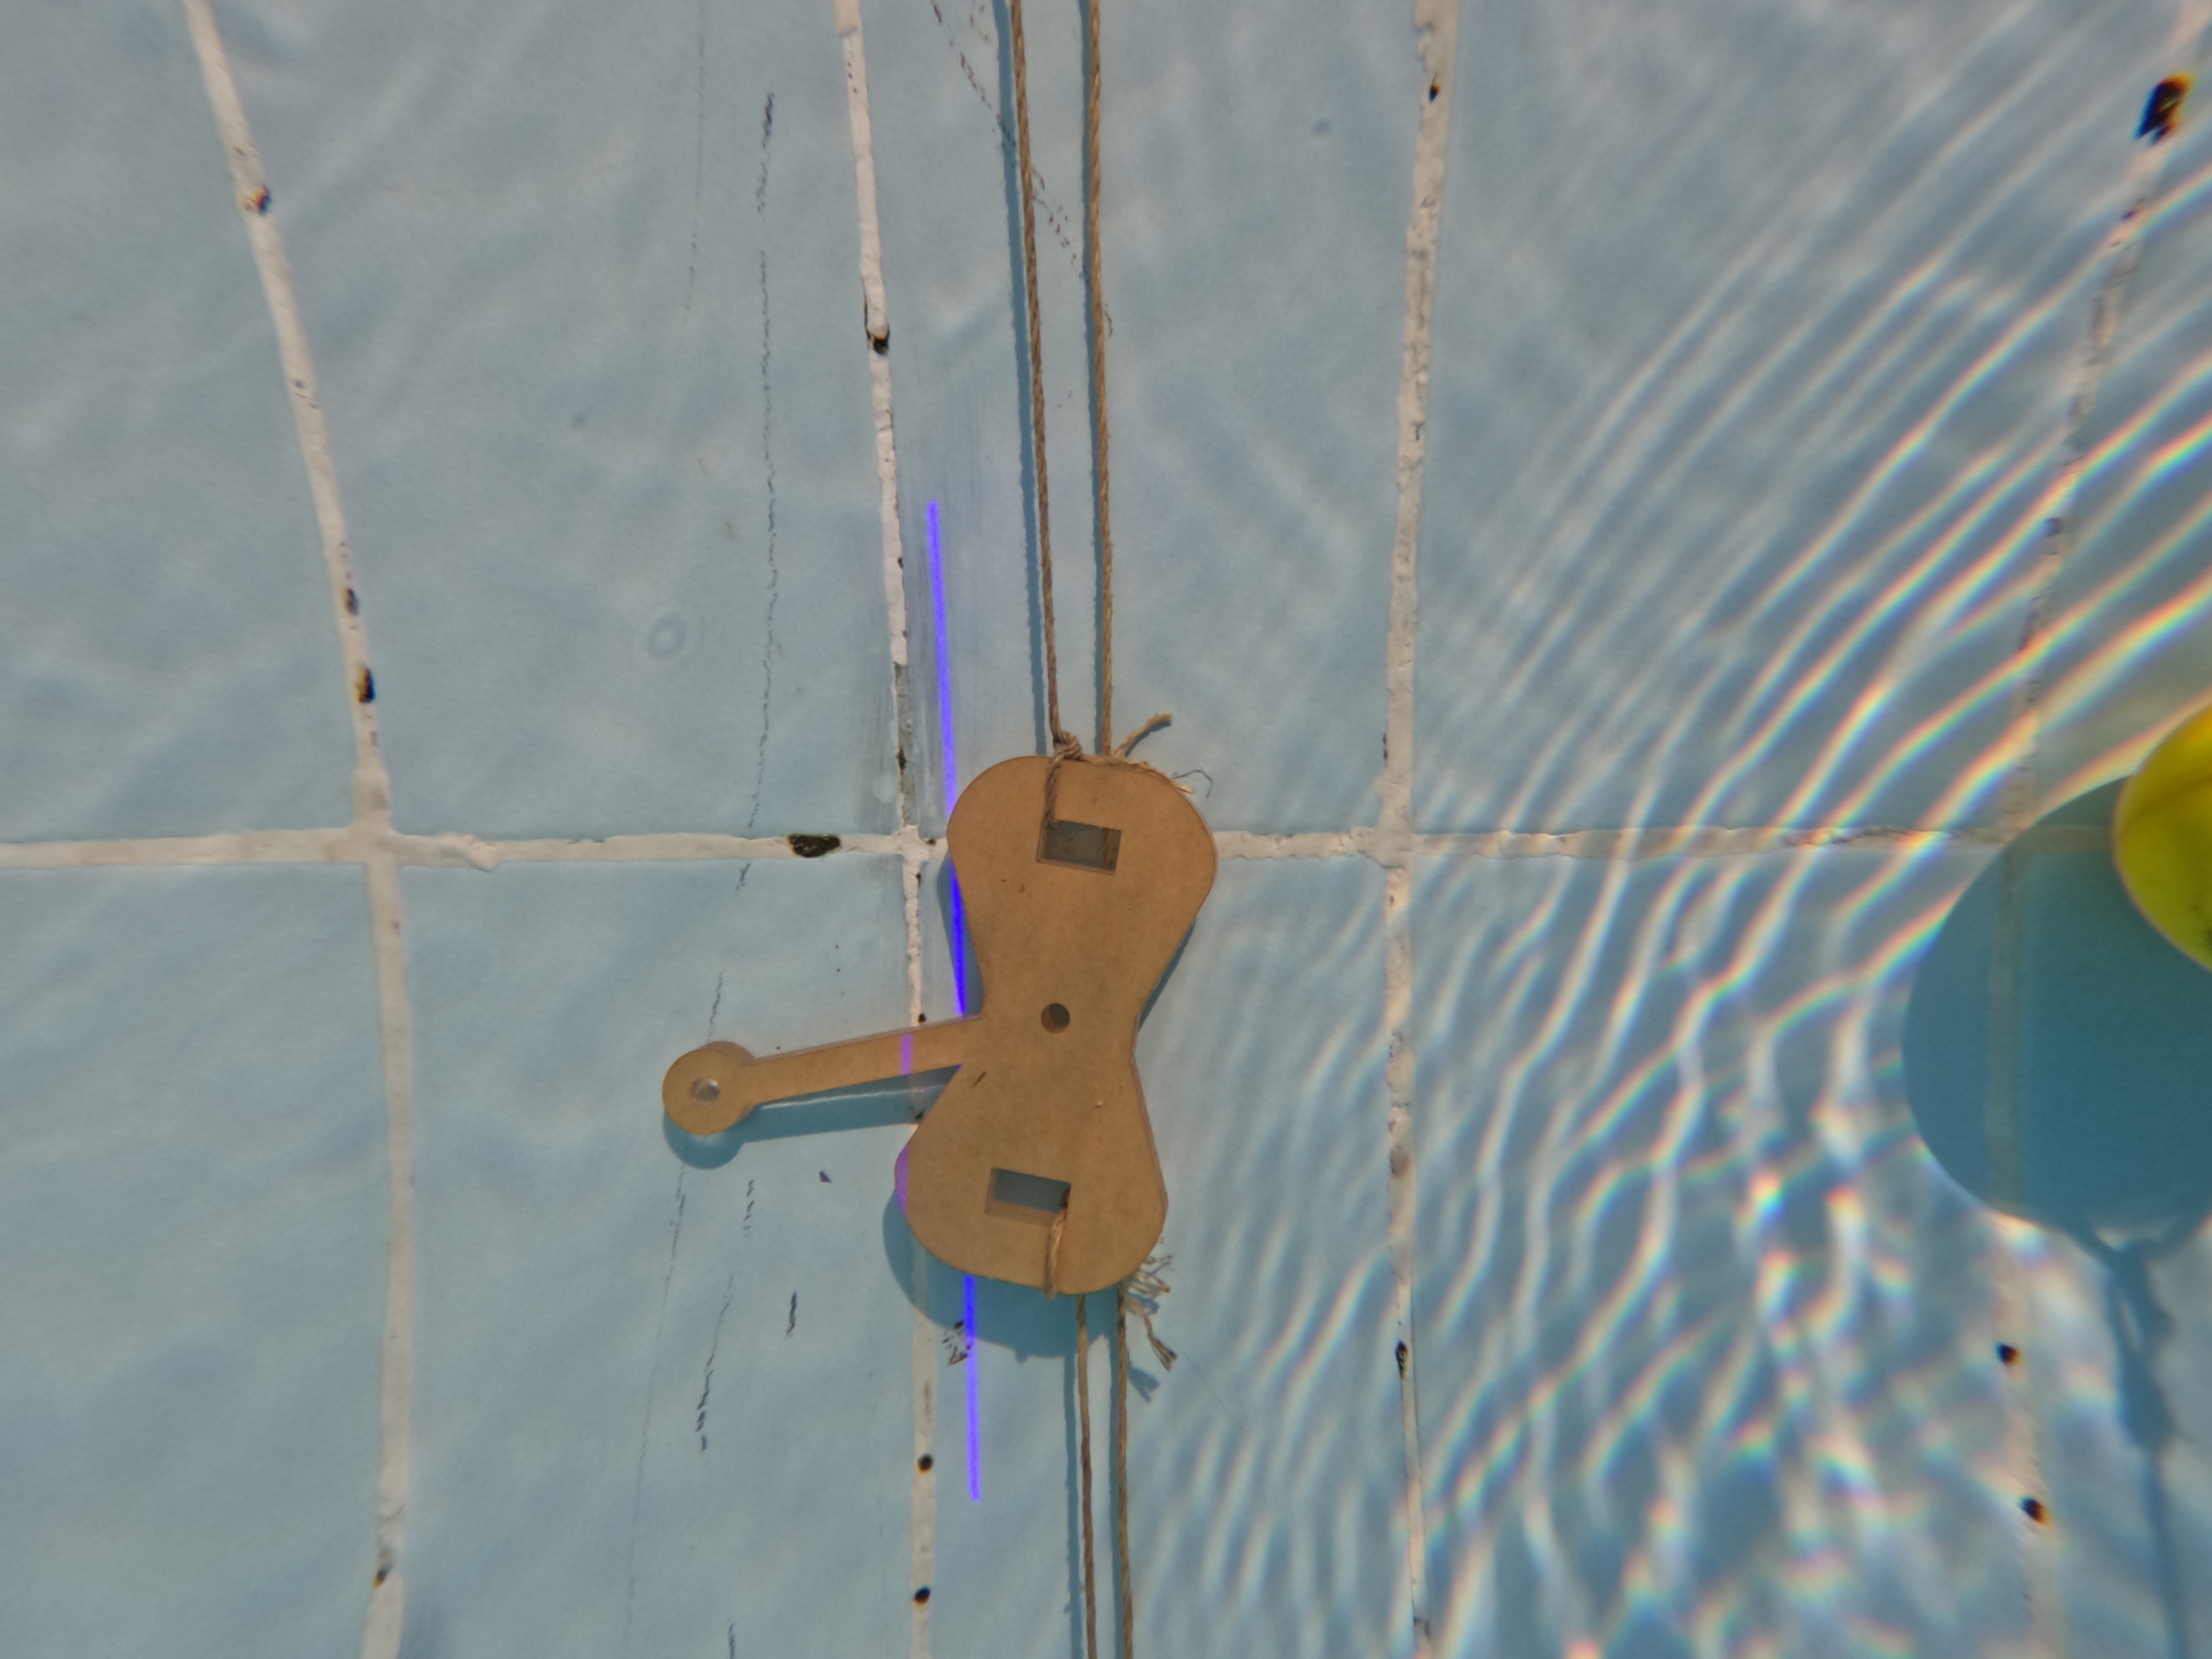

Supplement: Supplementary file 51 [file G0040445.pdf › Level_4_1/G0040445.pdf]

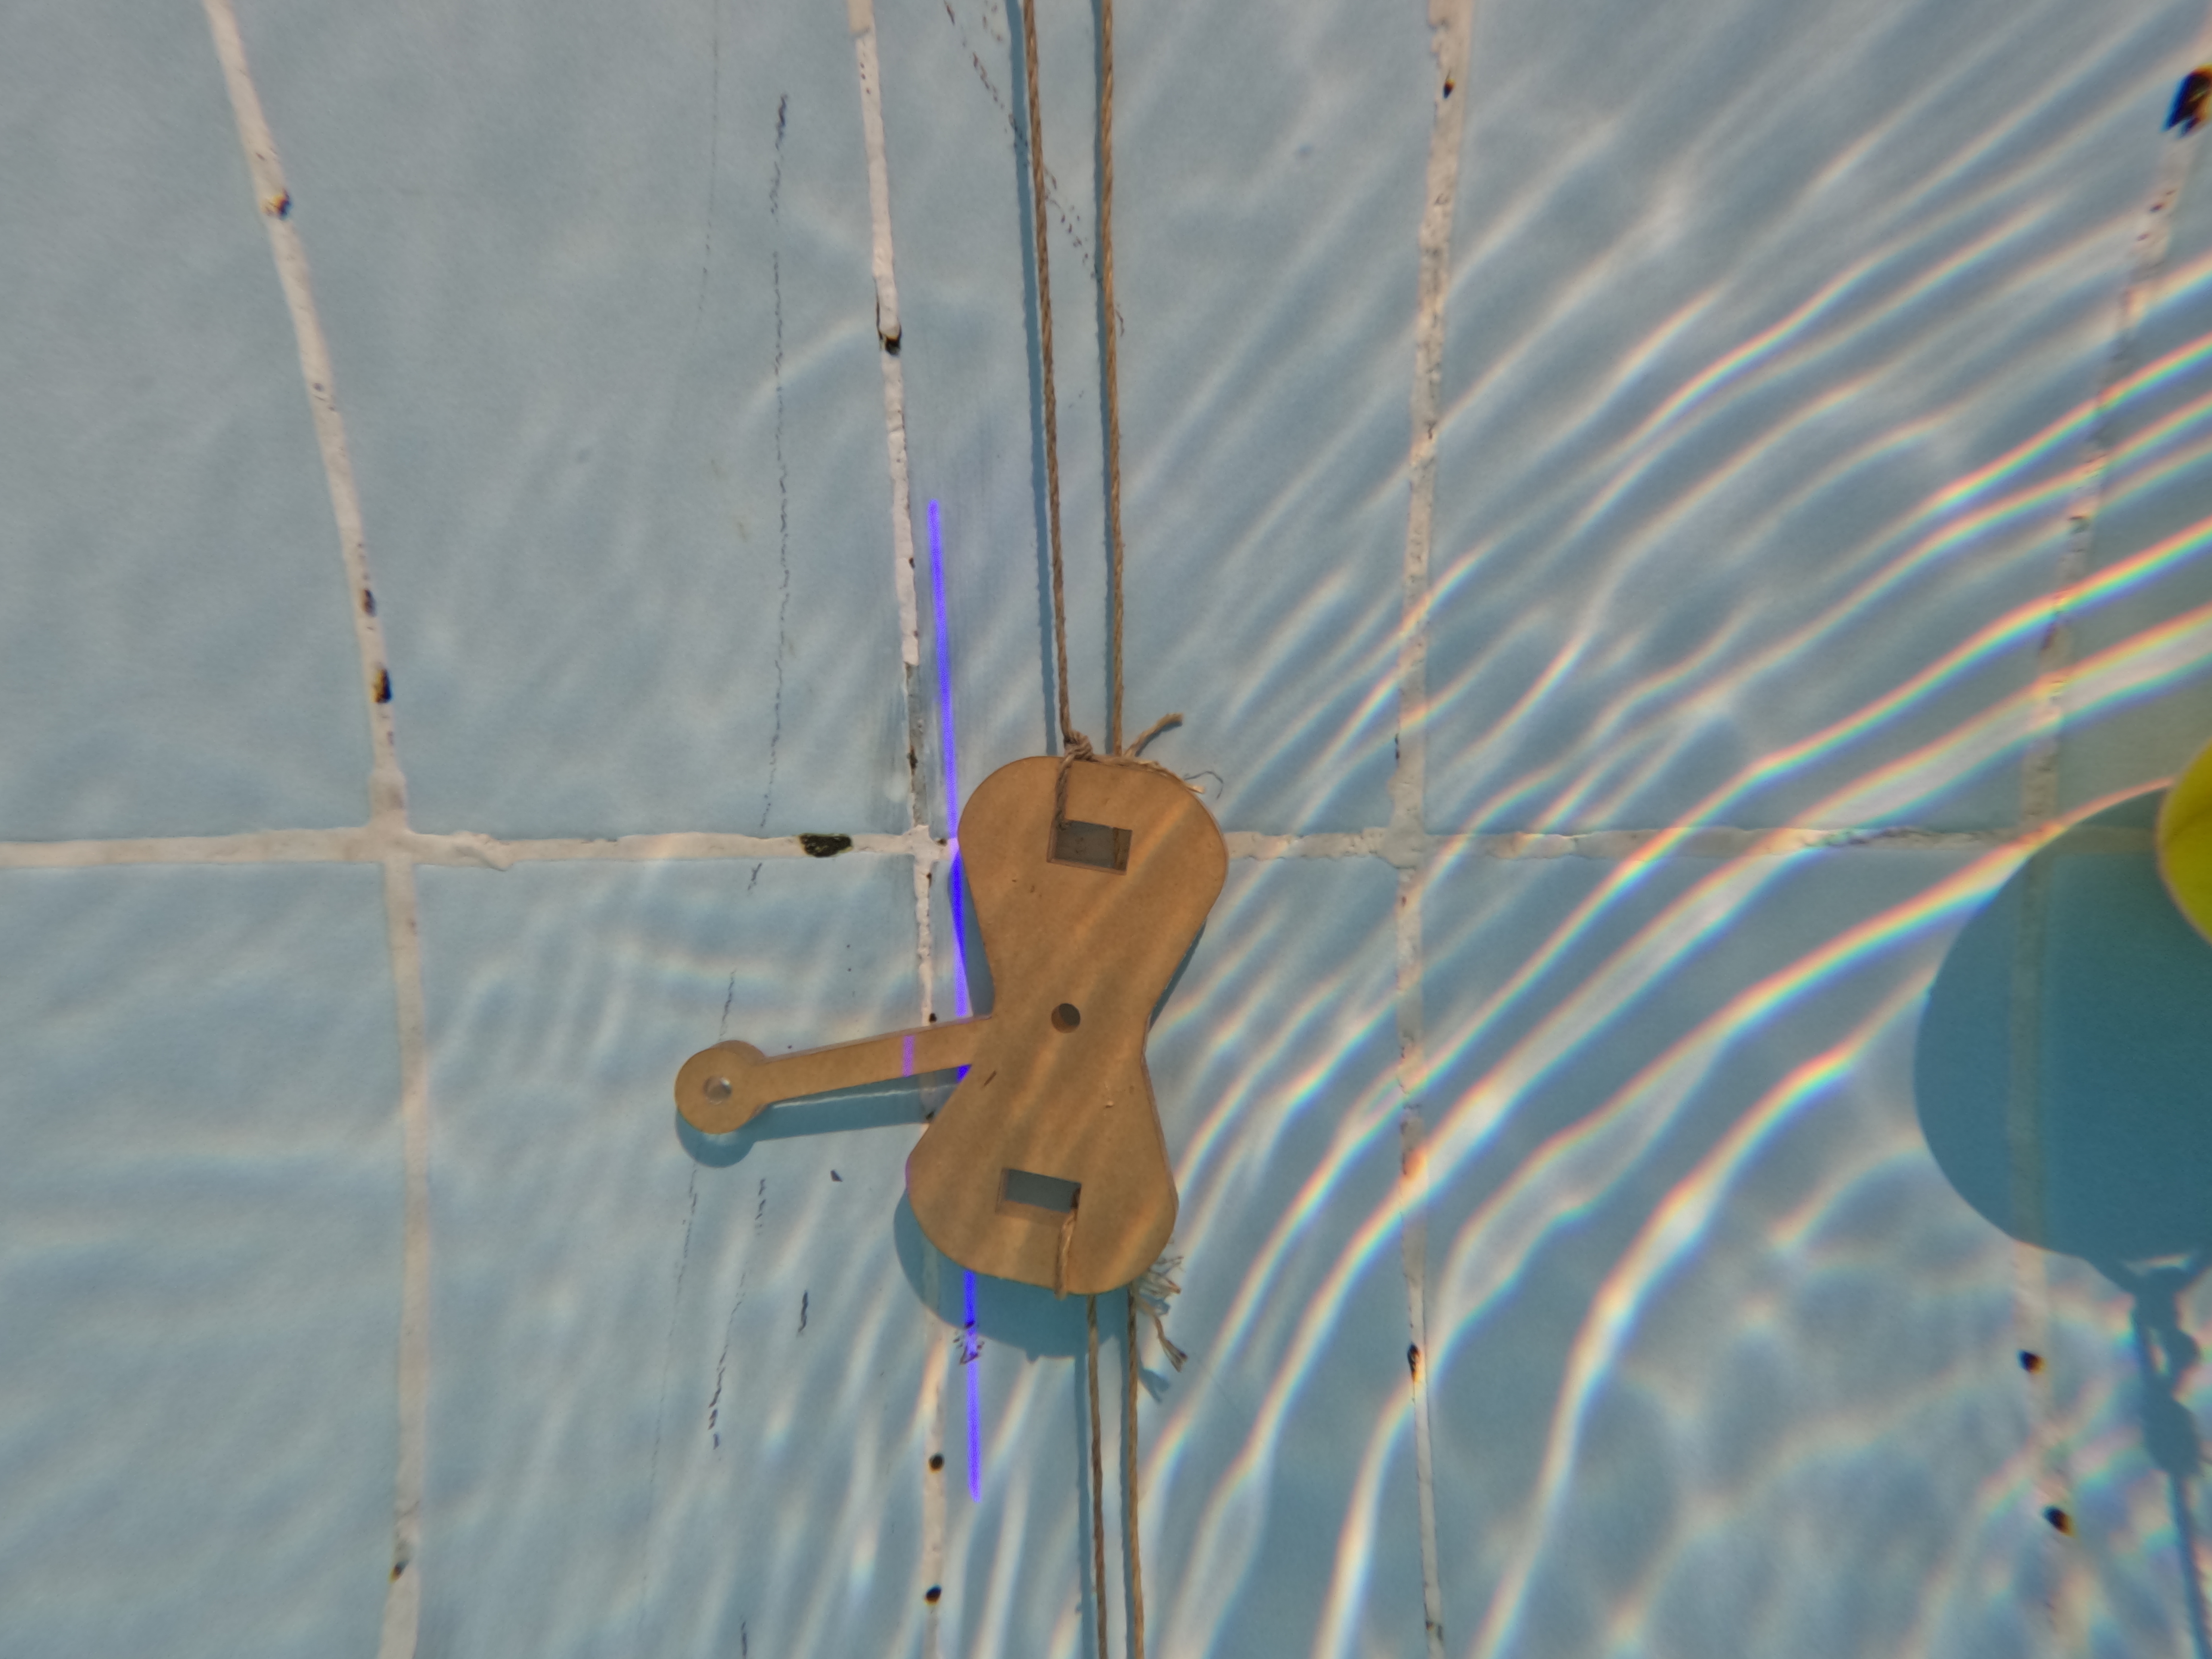

Supplement: Supplementary file 52 [file G0040446.pdf › Level_4_1/G0040446.pdf]

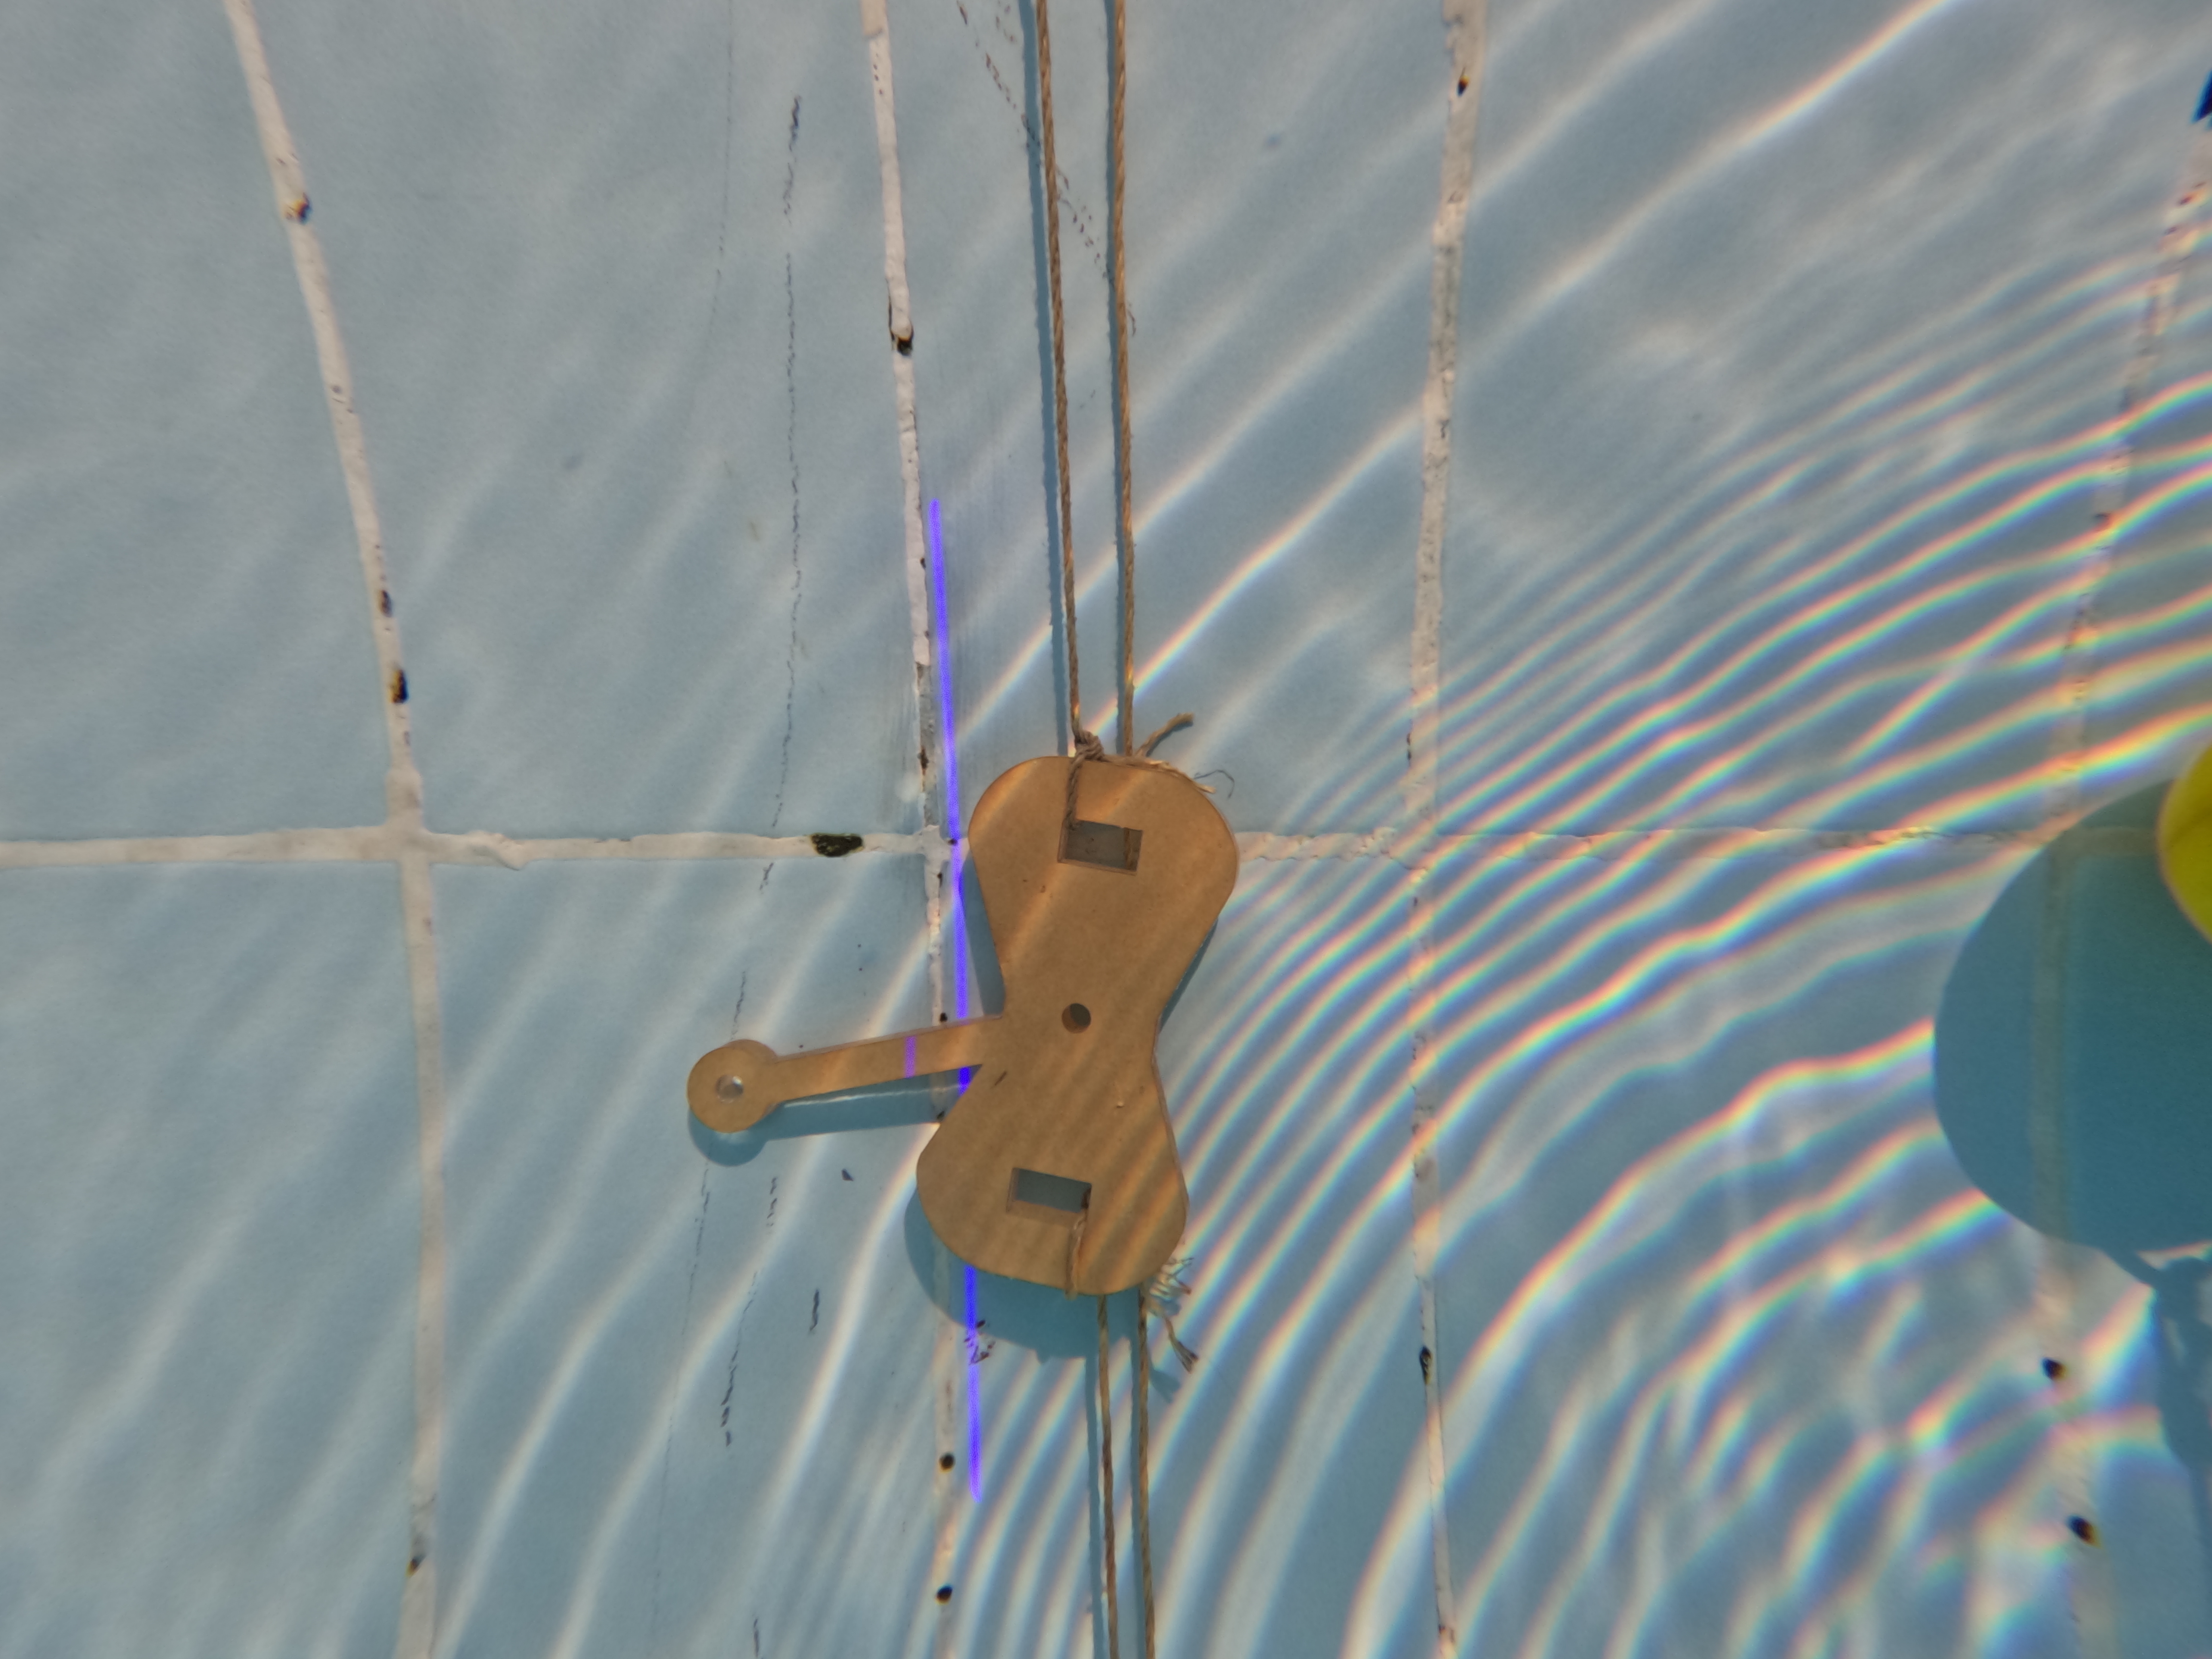

Supplement: Supplementary file 53 [file G0040447.pdf › Level_4_1/G0040447.pdf]

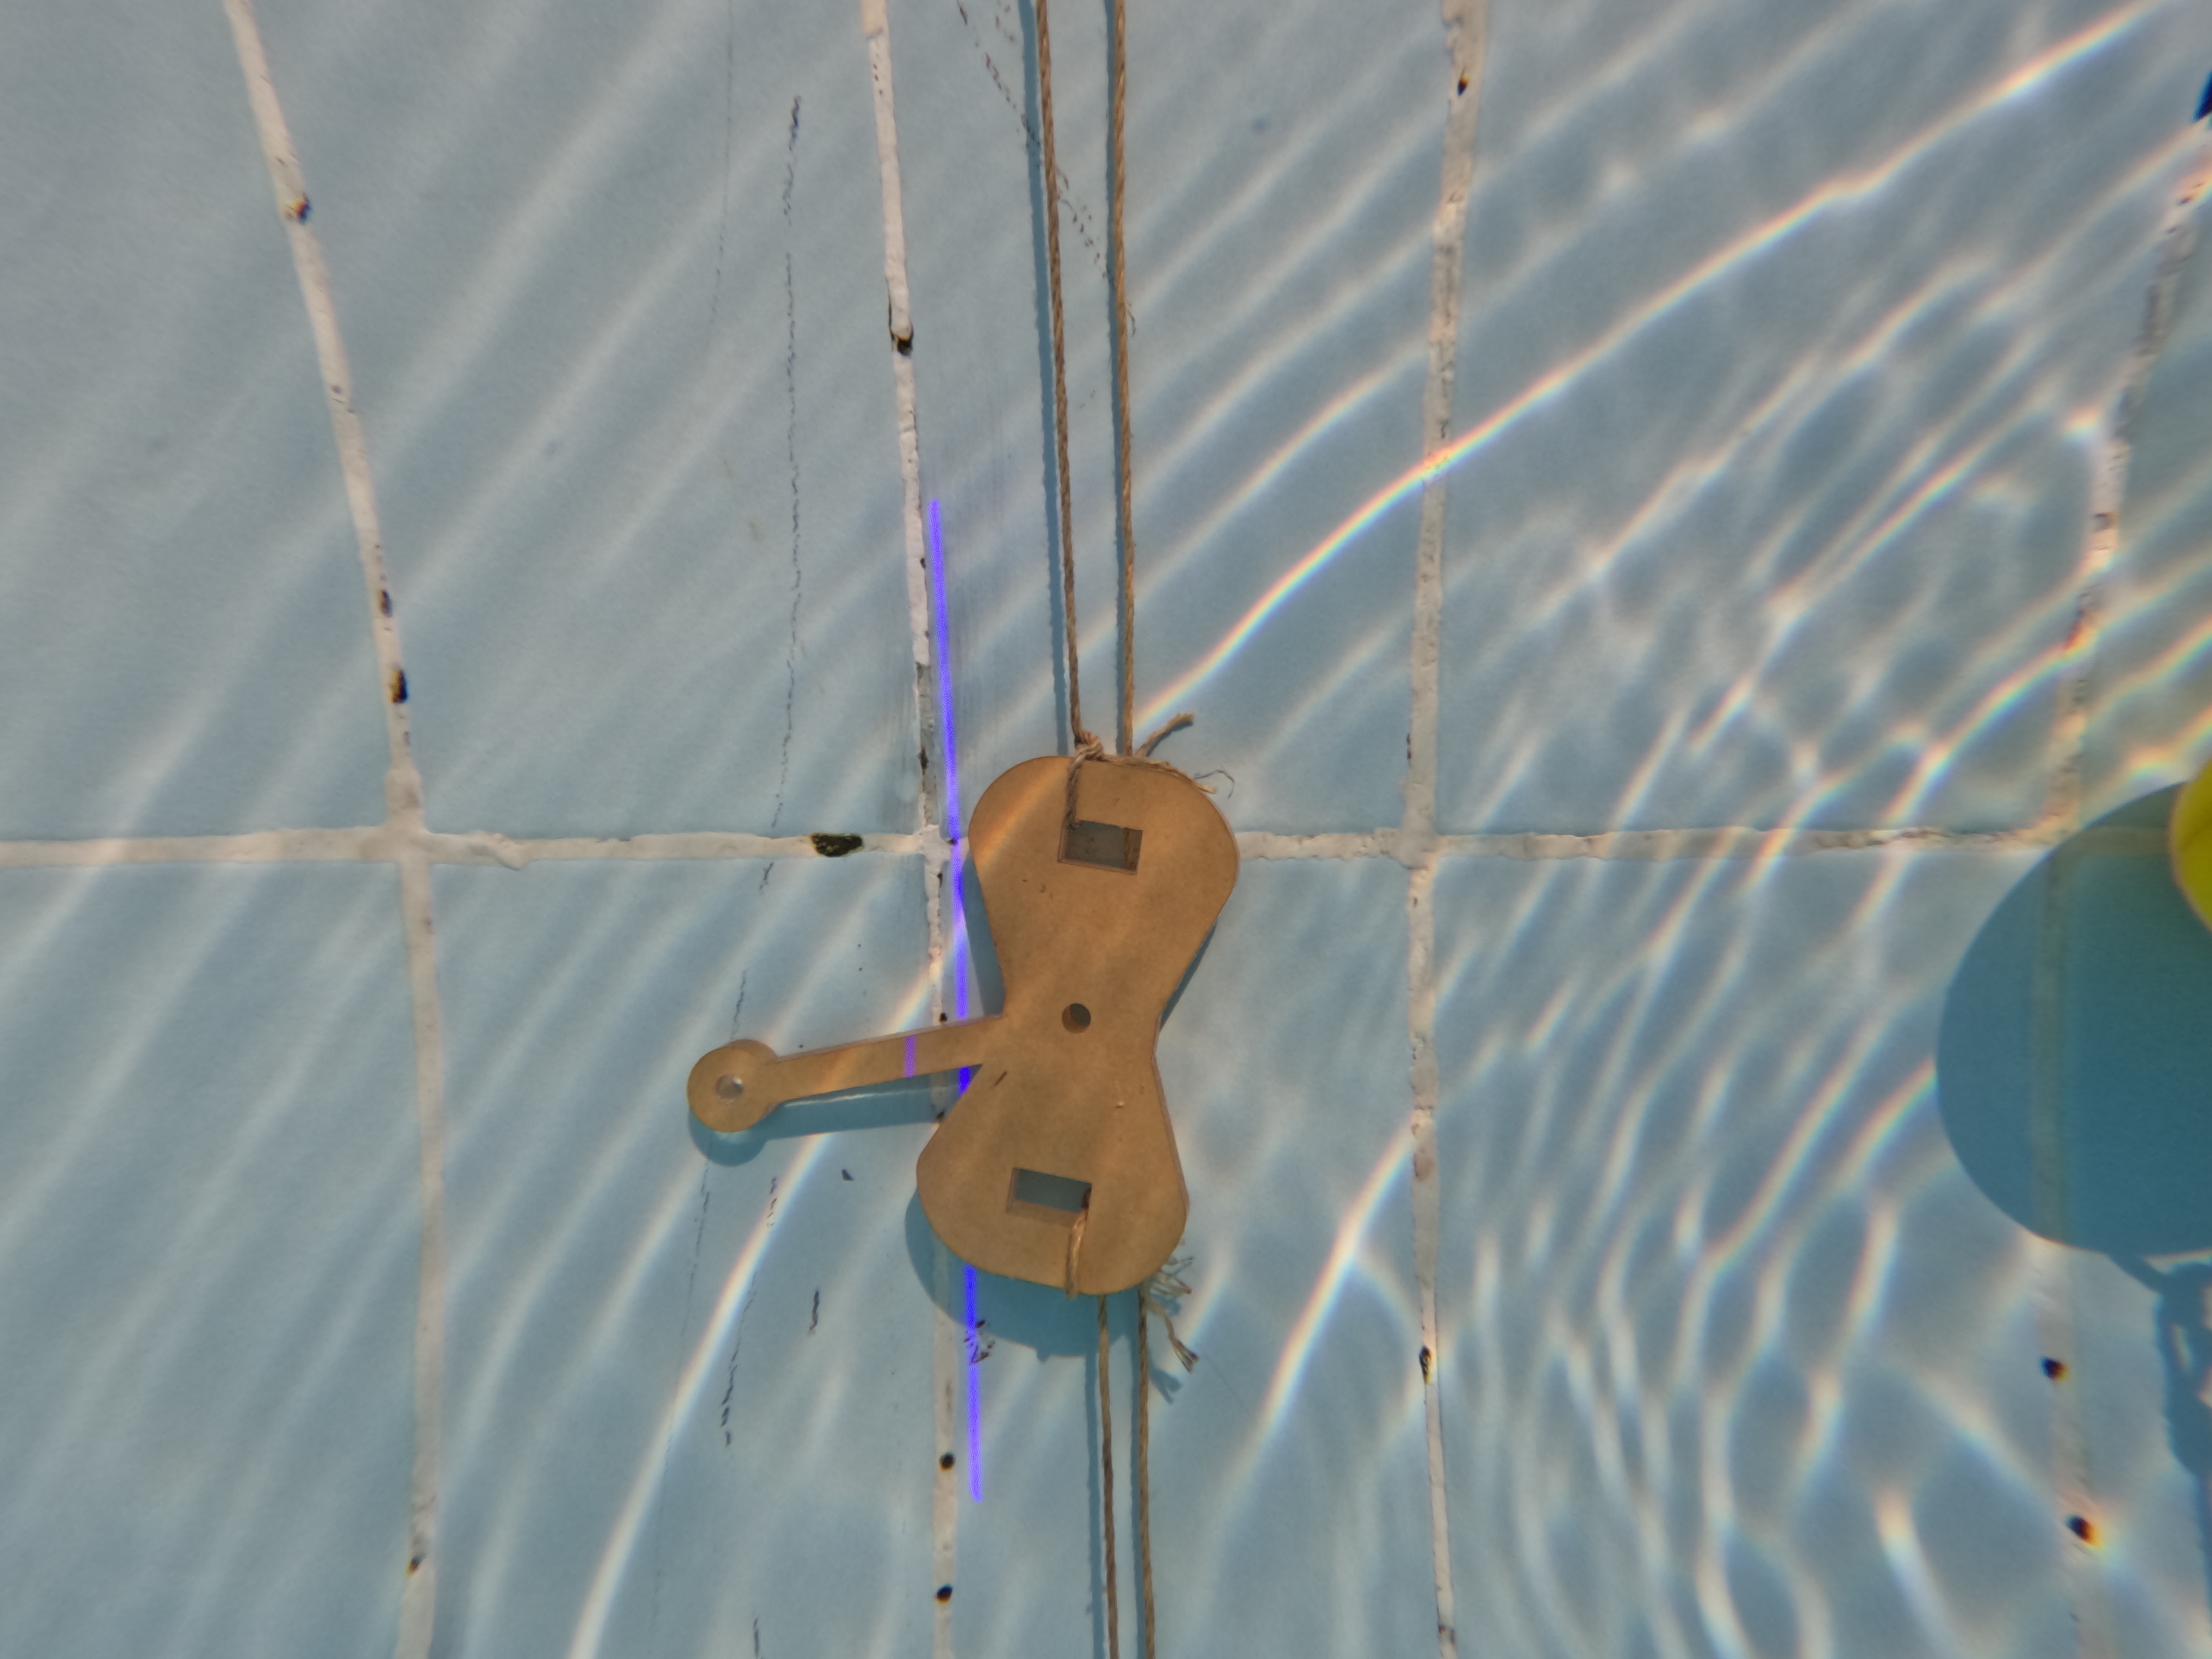

Supplement: Supplementary file 54 [file G0040448.pdf › Level_4_1/G0040448.pdf]

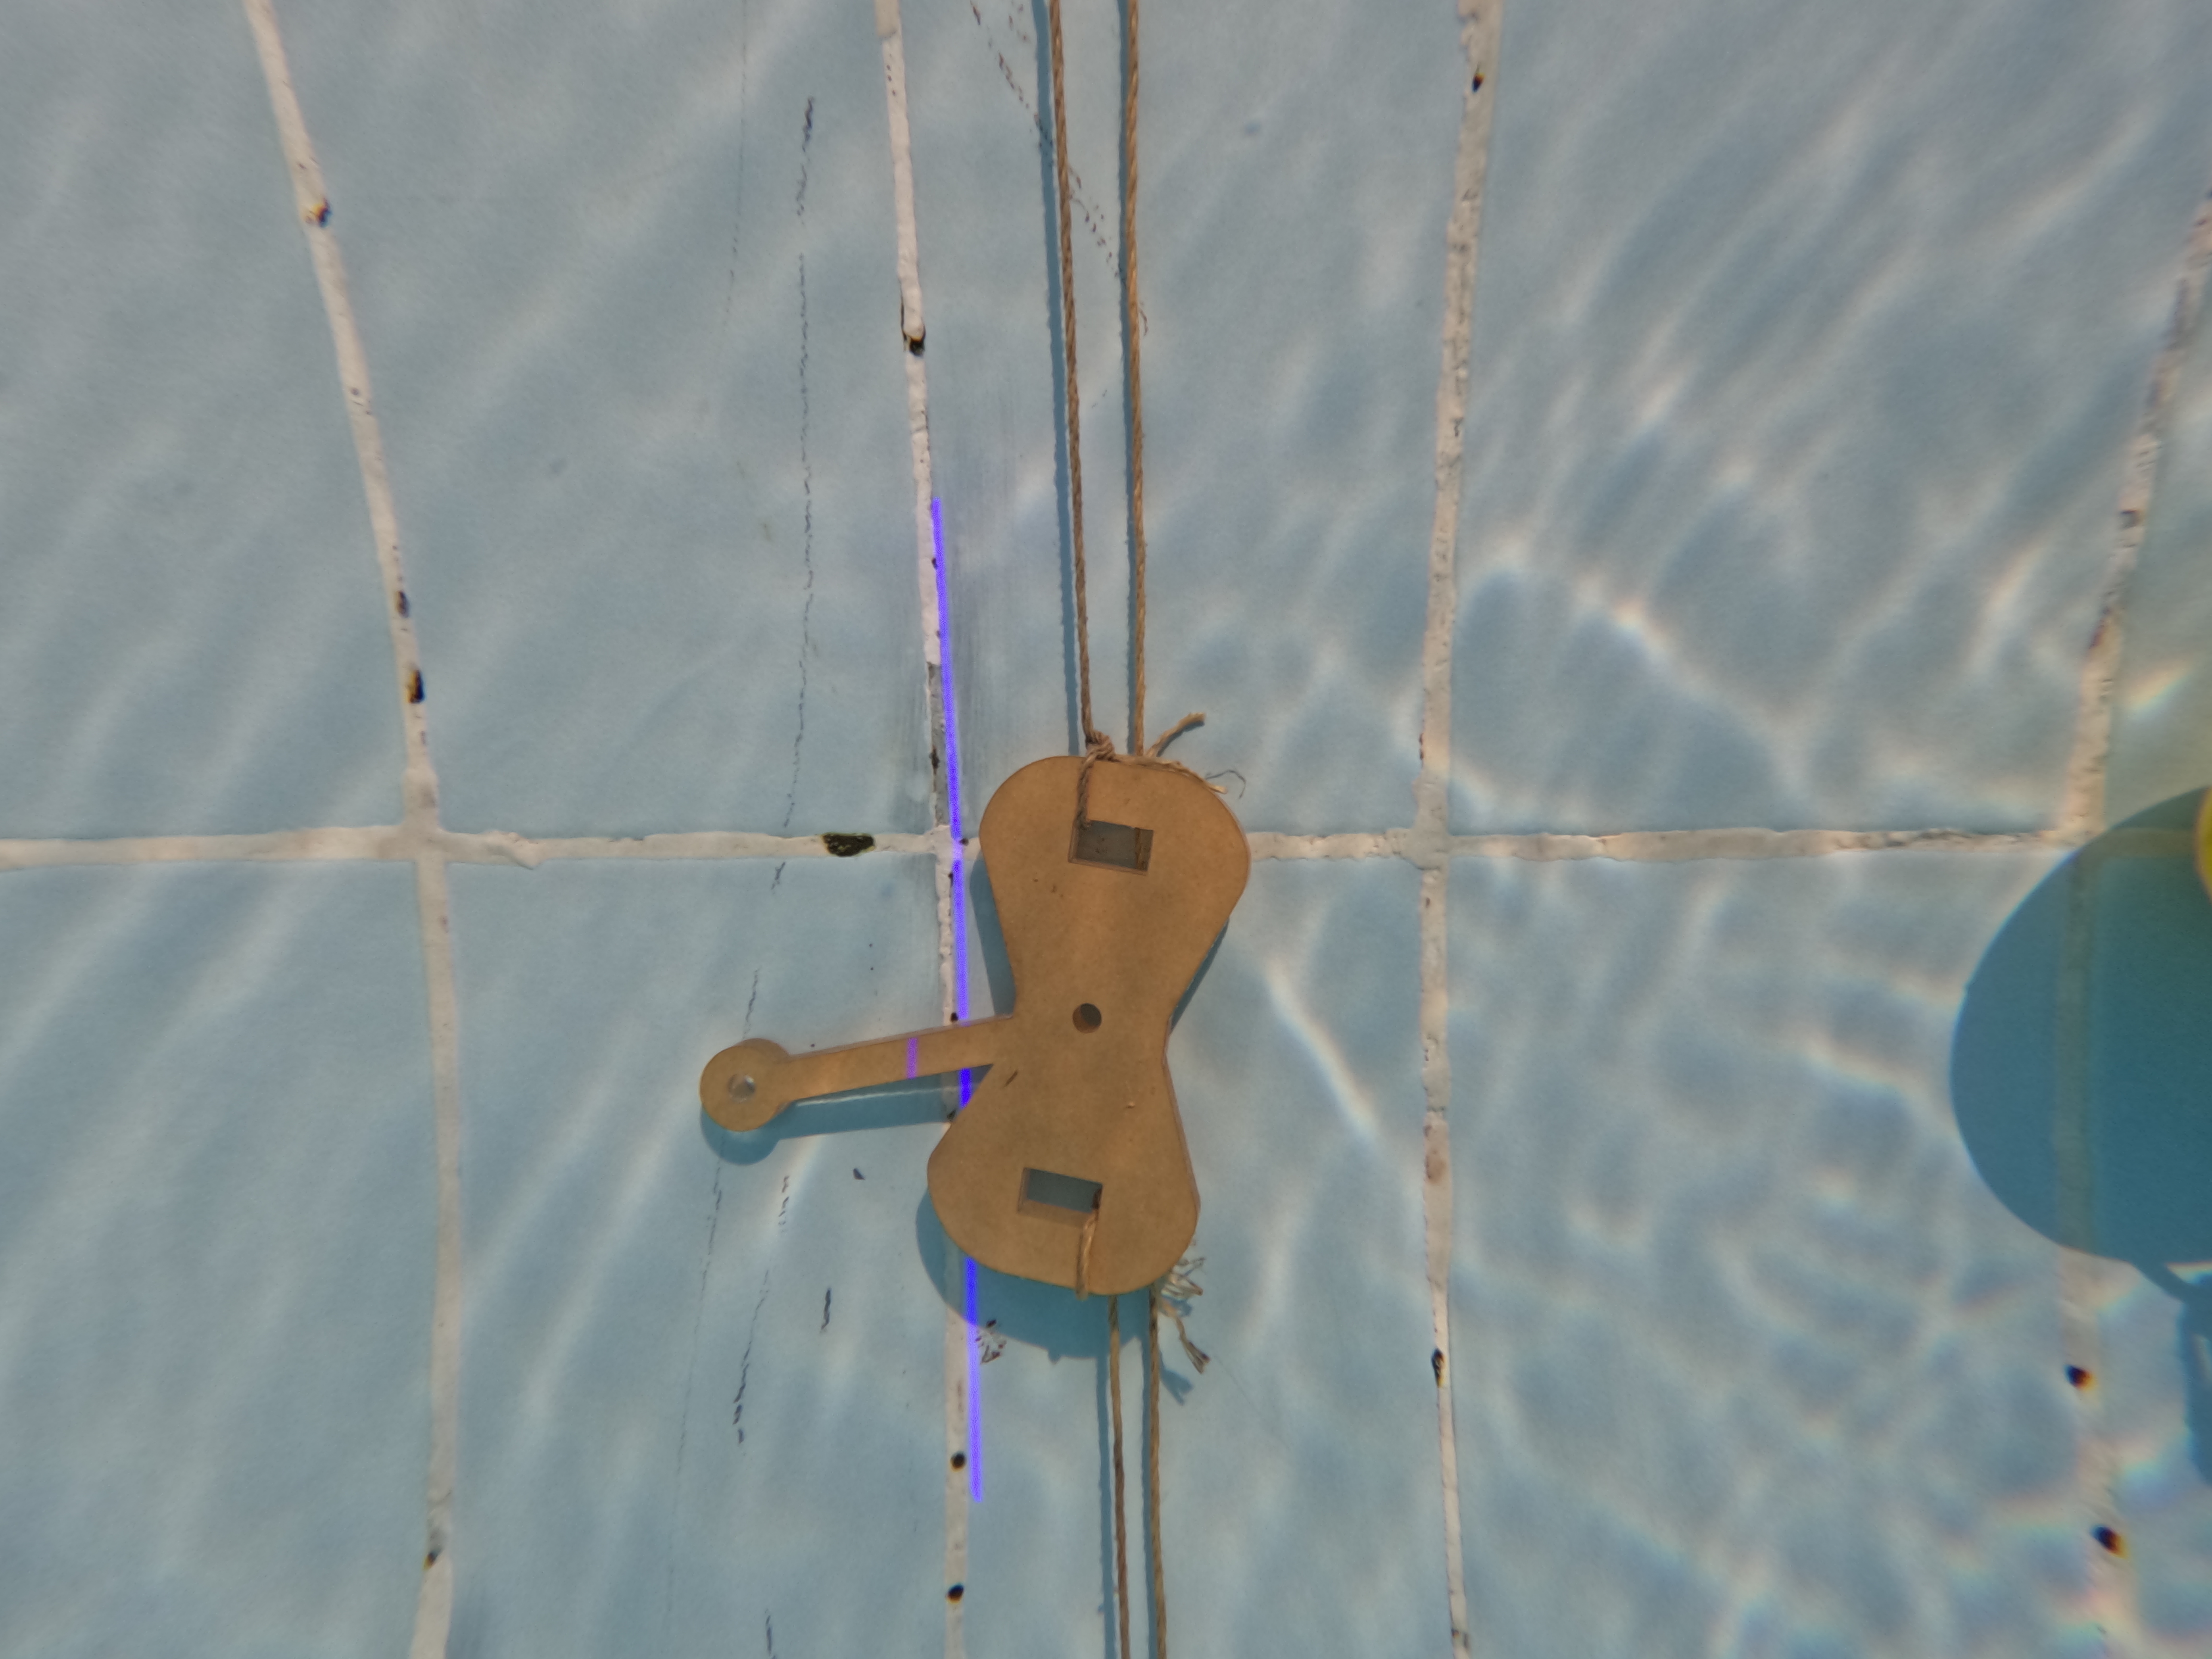

Supplement: Supplementary file 55 [file G0040449.pdf › Level_4_1/G0040449.pdf]

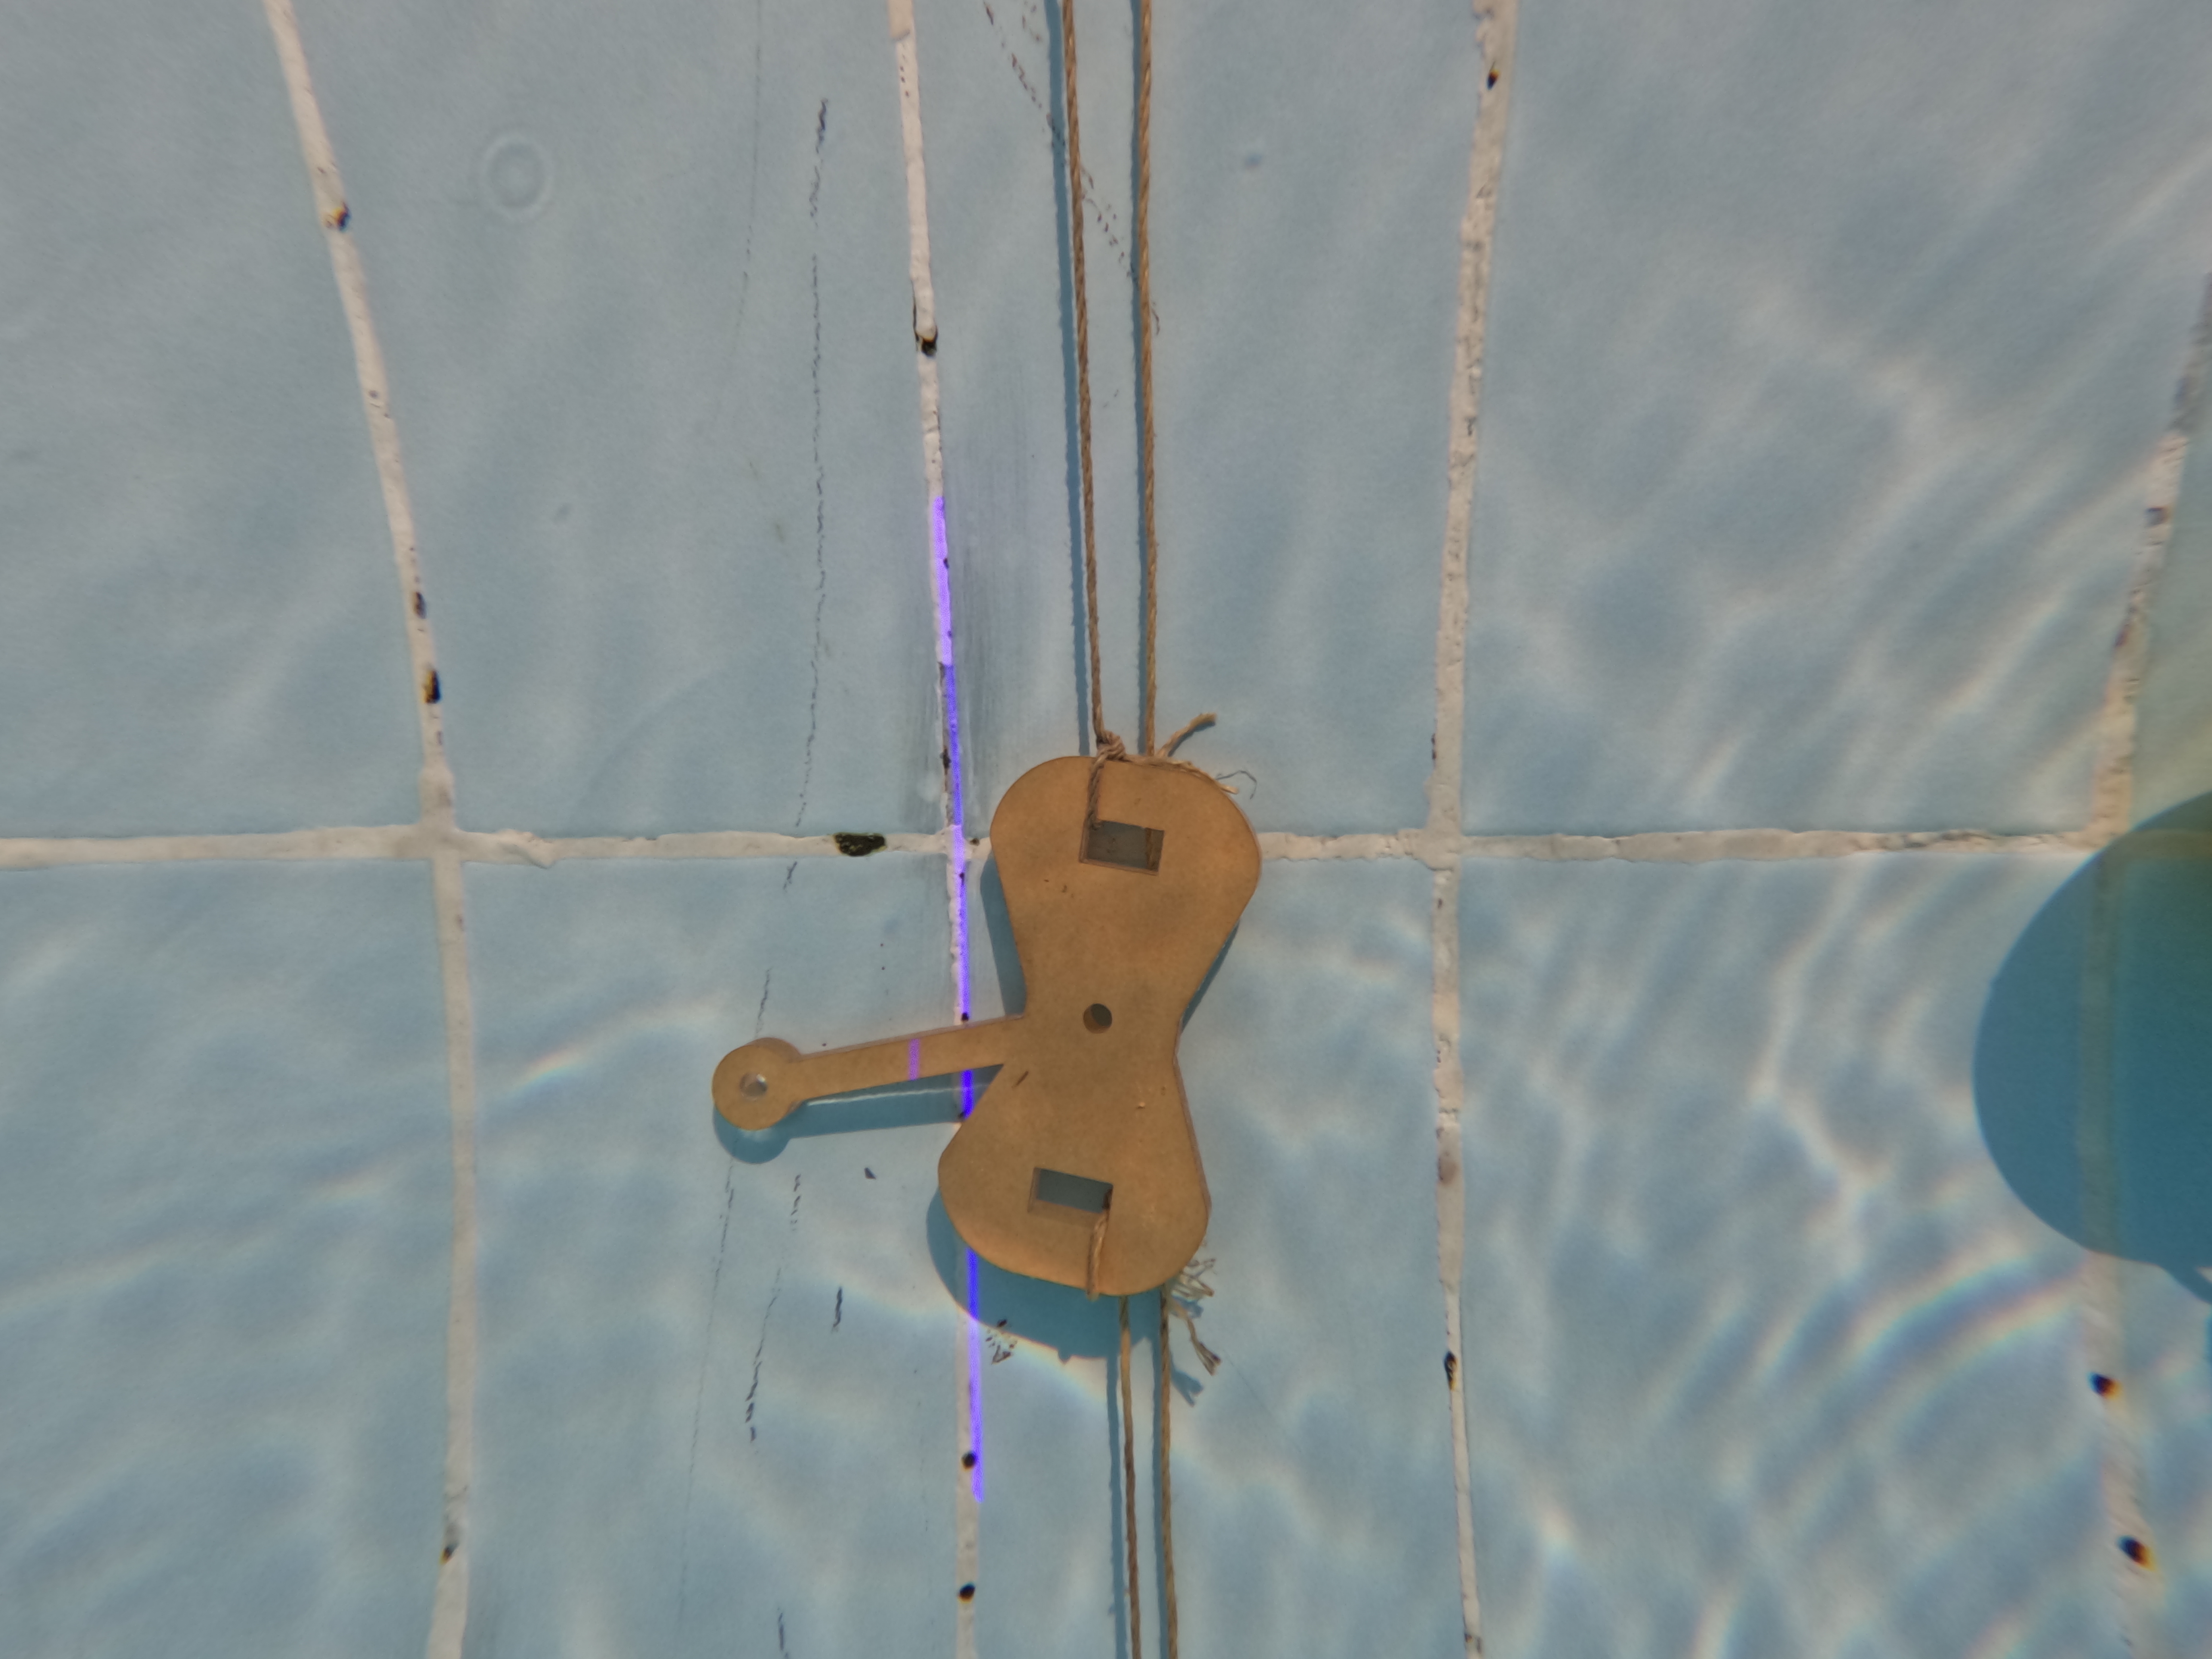

Supplement: Supplementary file 56 [file G0040450.pdf › Level_4_1/G0040450.pdf]

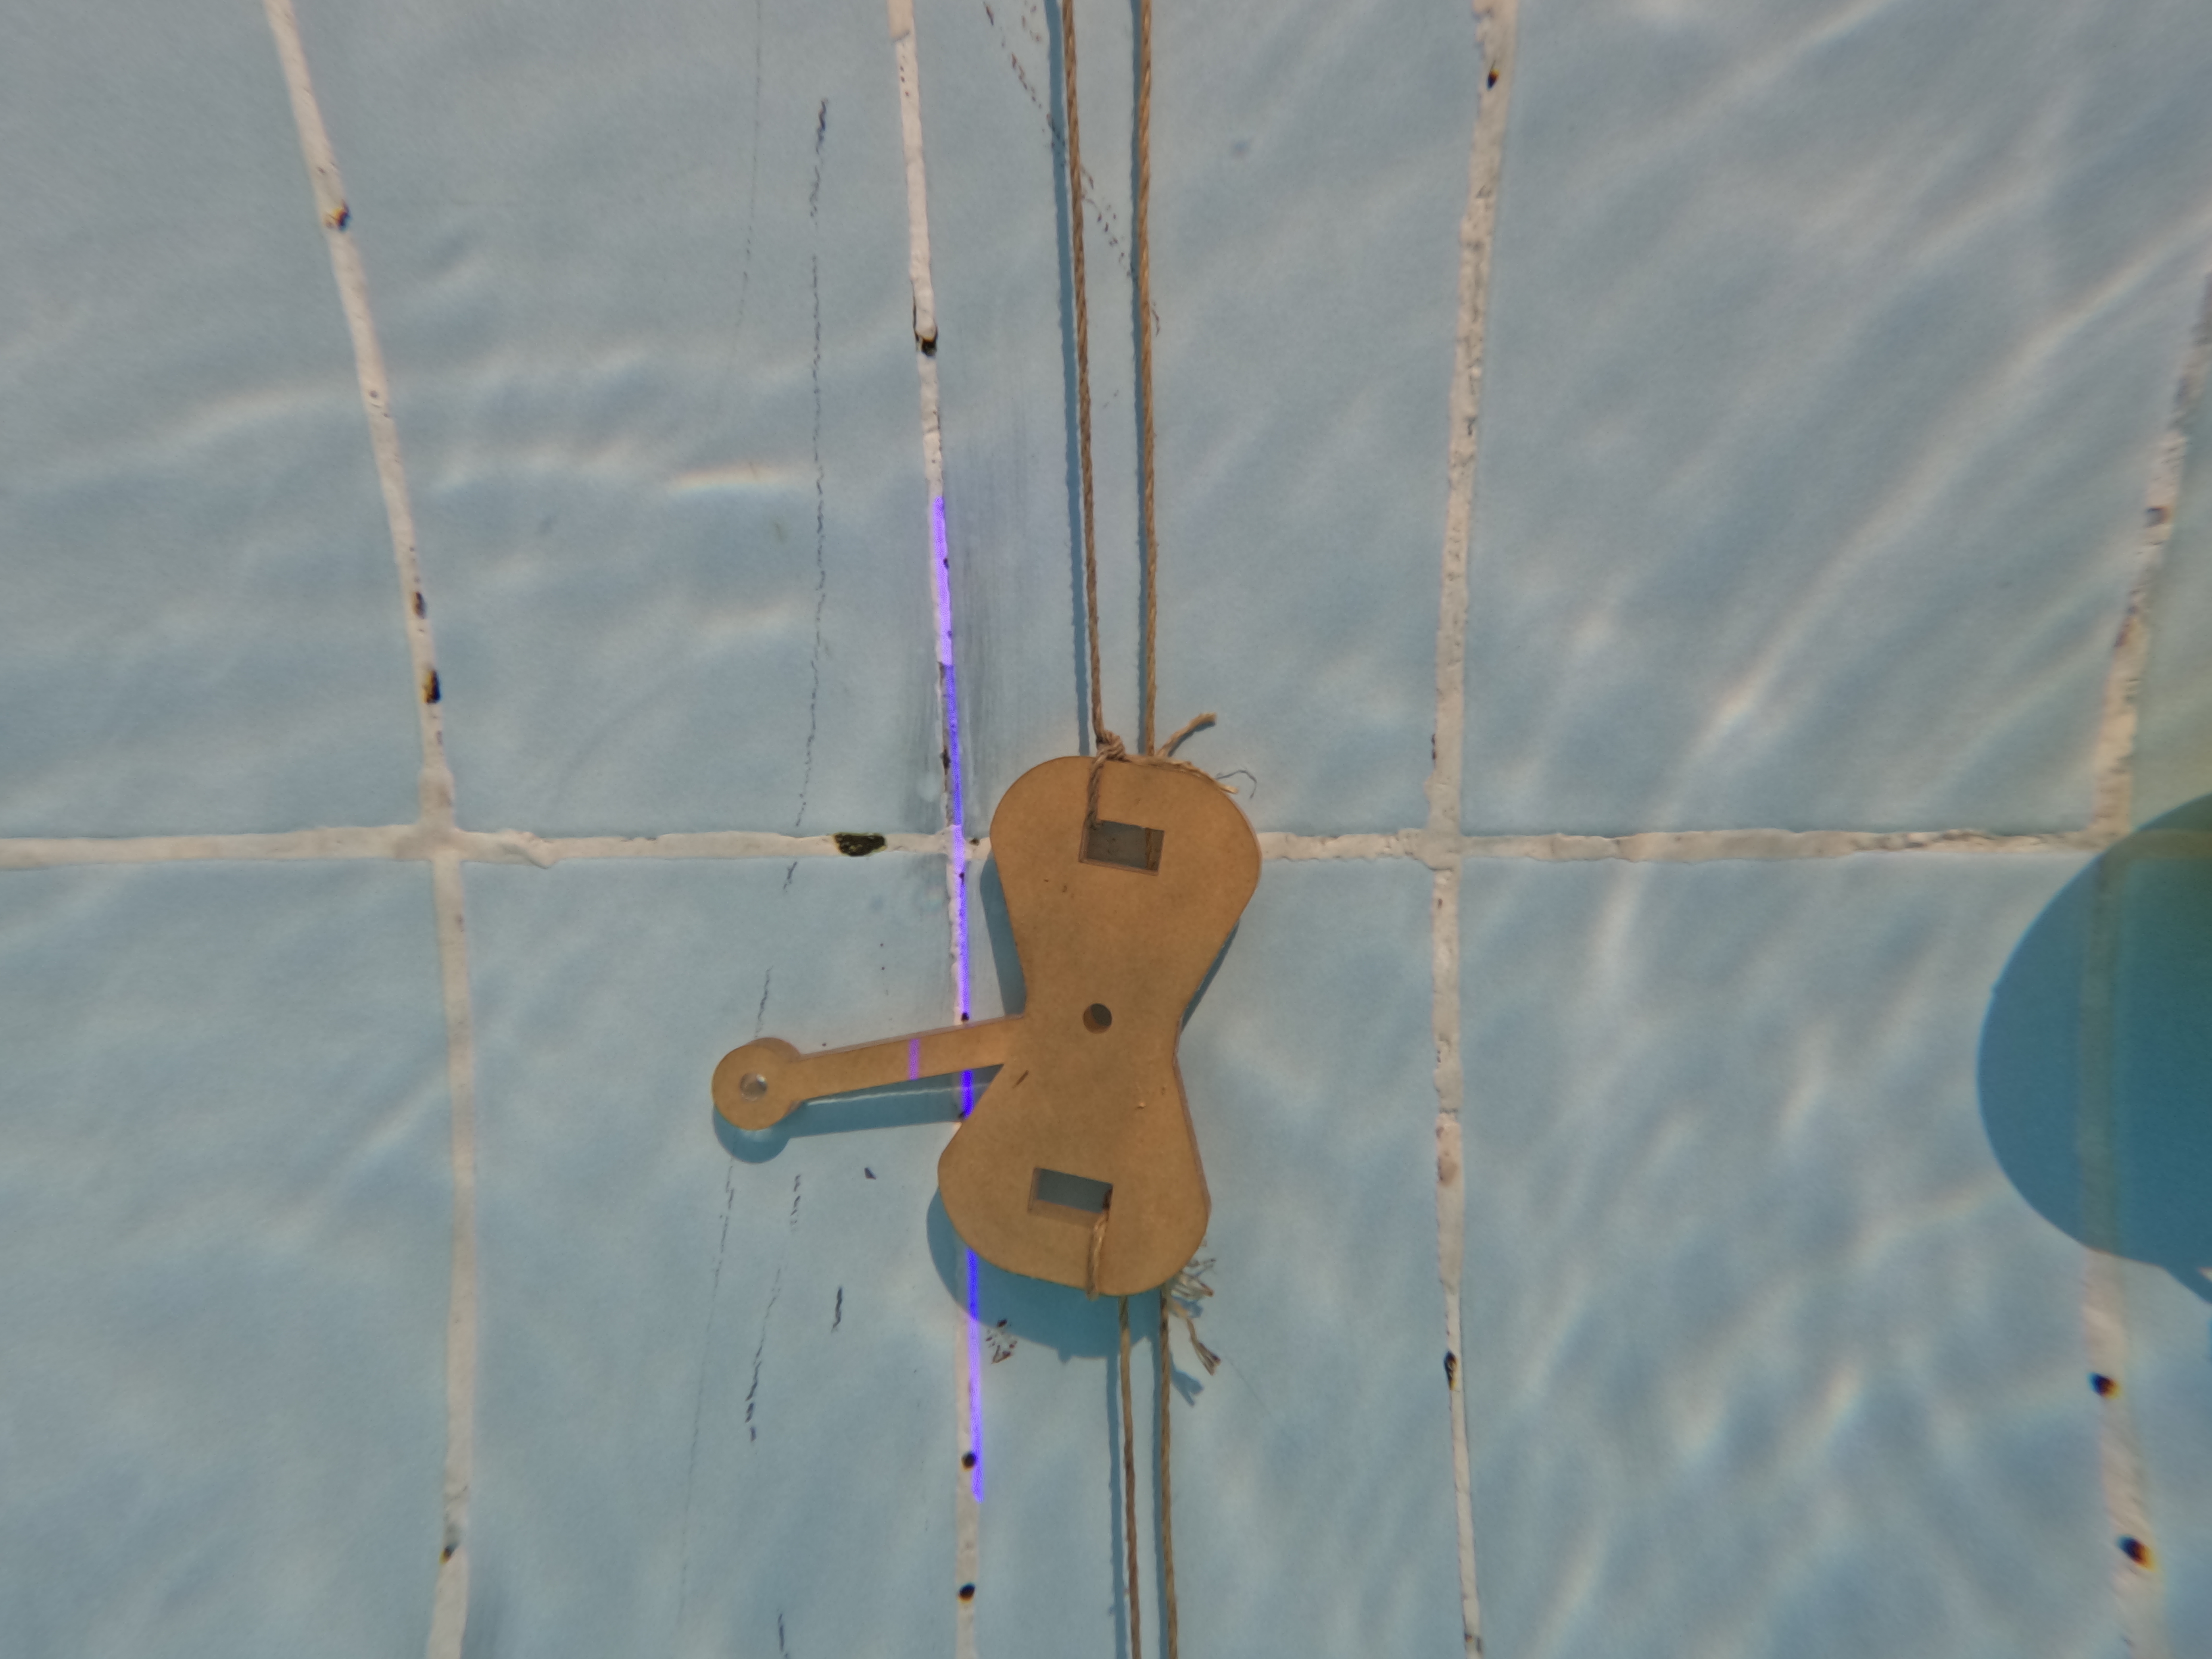

Supplement: Supplementary file 57 [file G0040451.pdf › Level_4_1/G0040451.pdf]

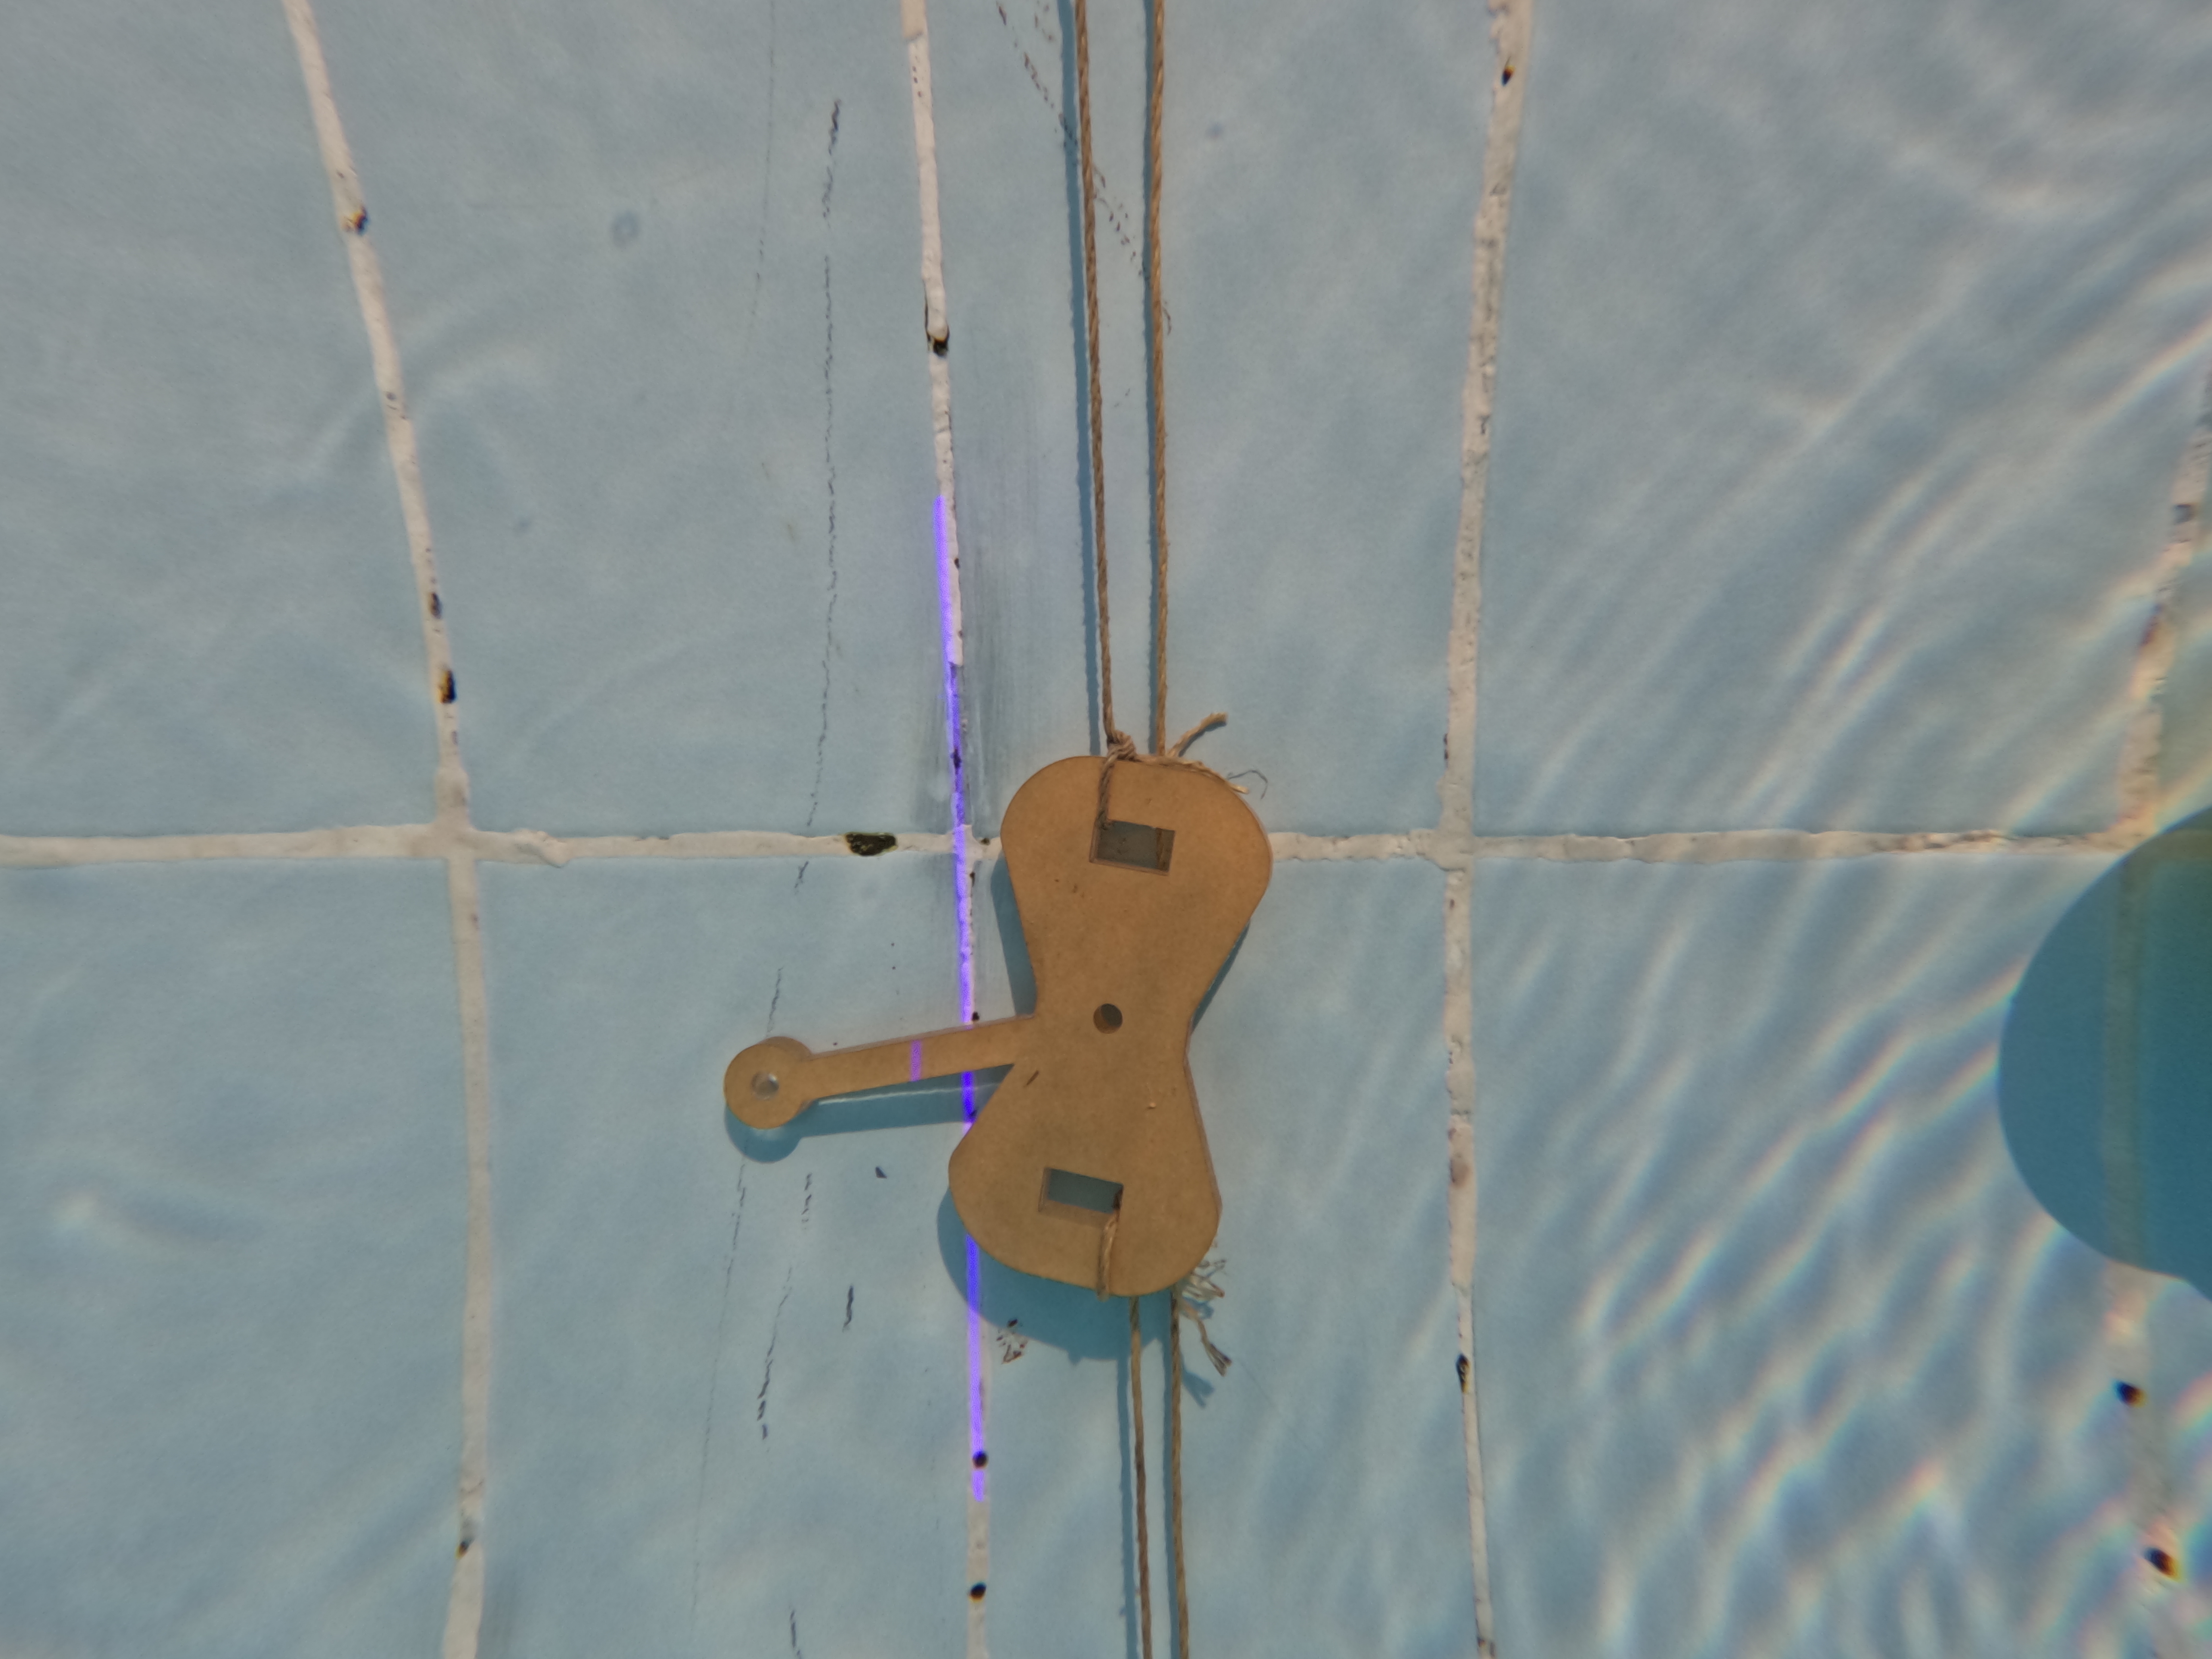

Supplement: Supplementary file 58 [file G0040452.pdf › Level_4_1/G0040452.pdf]

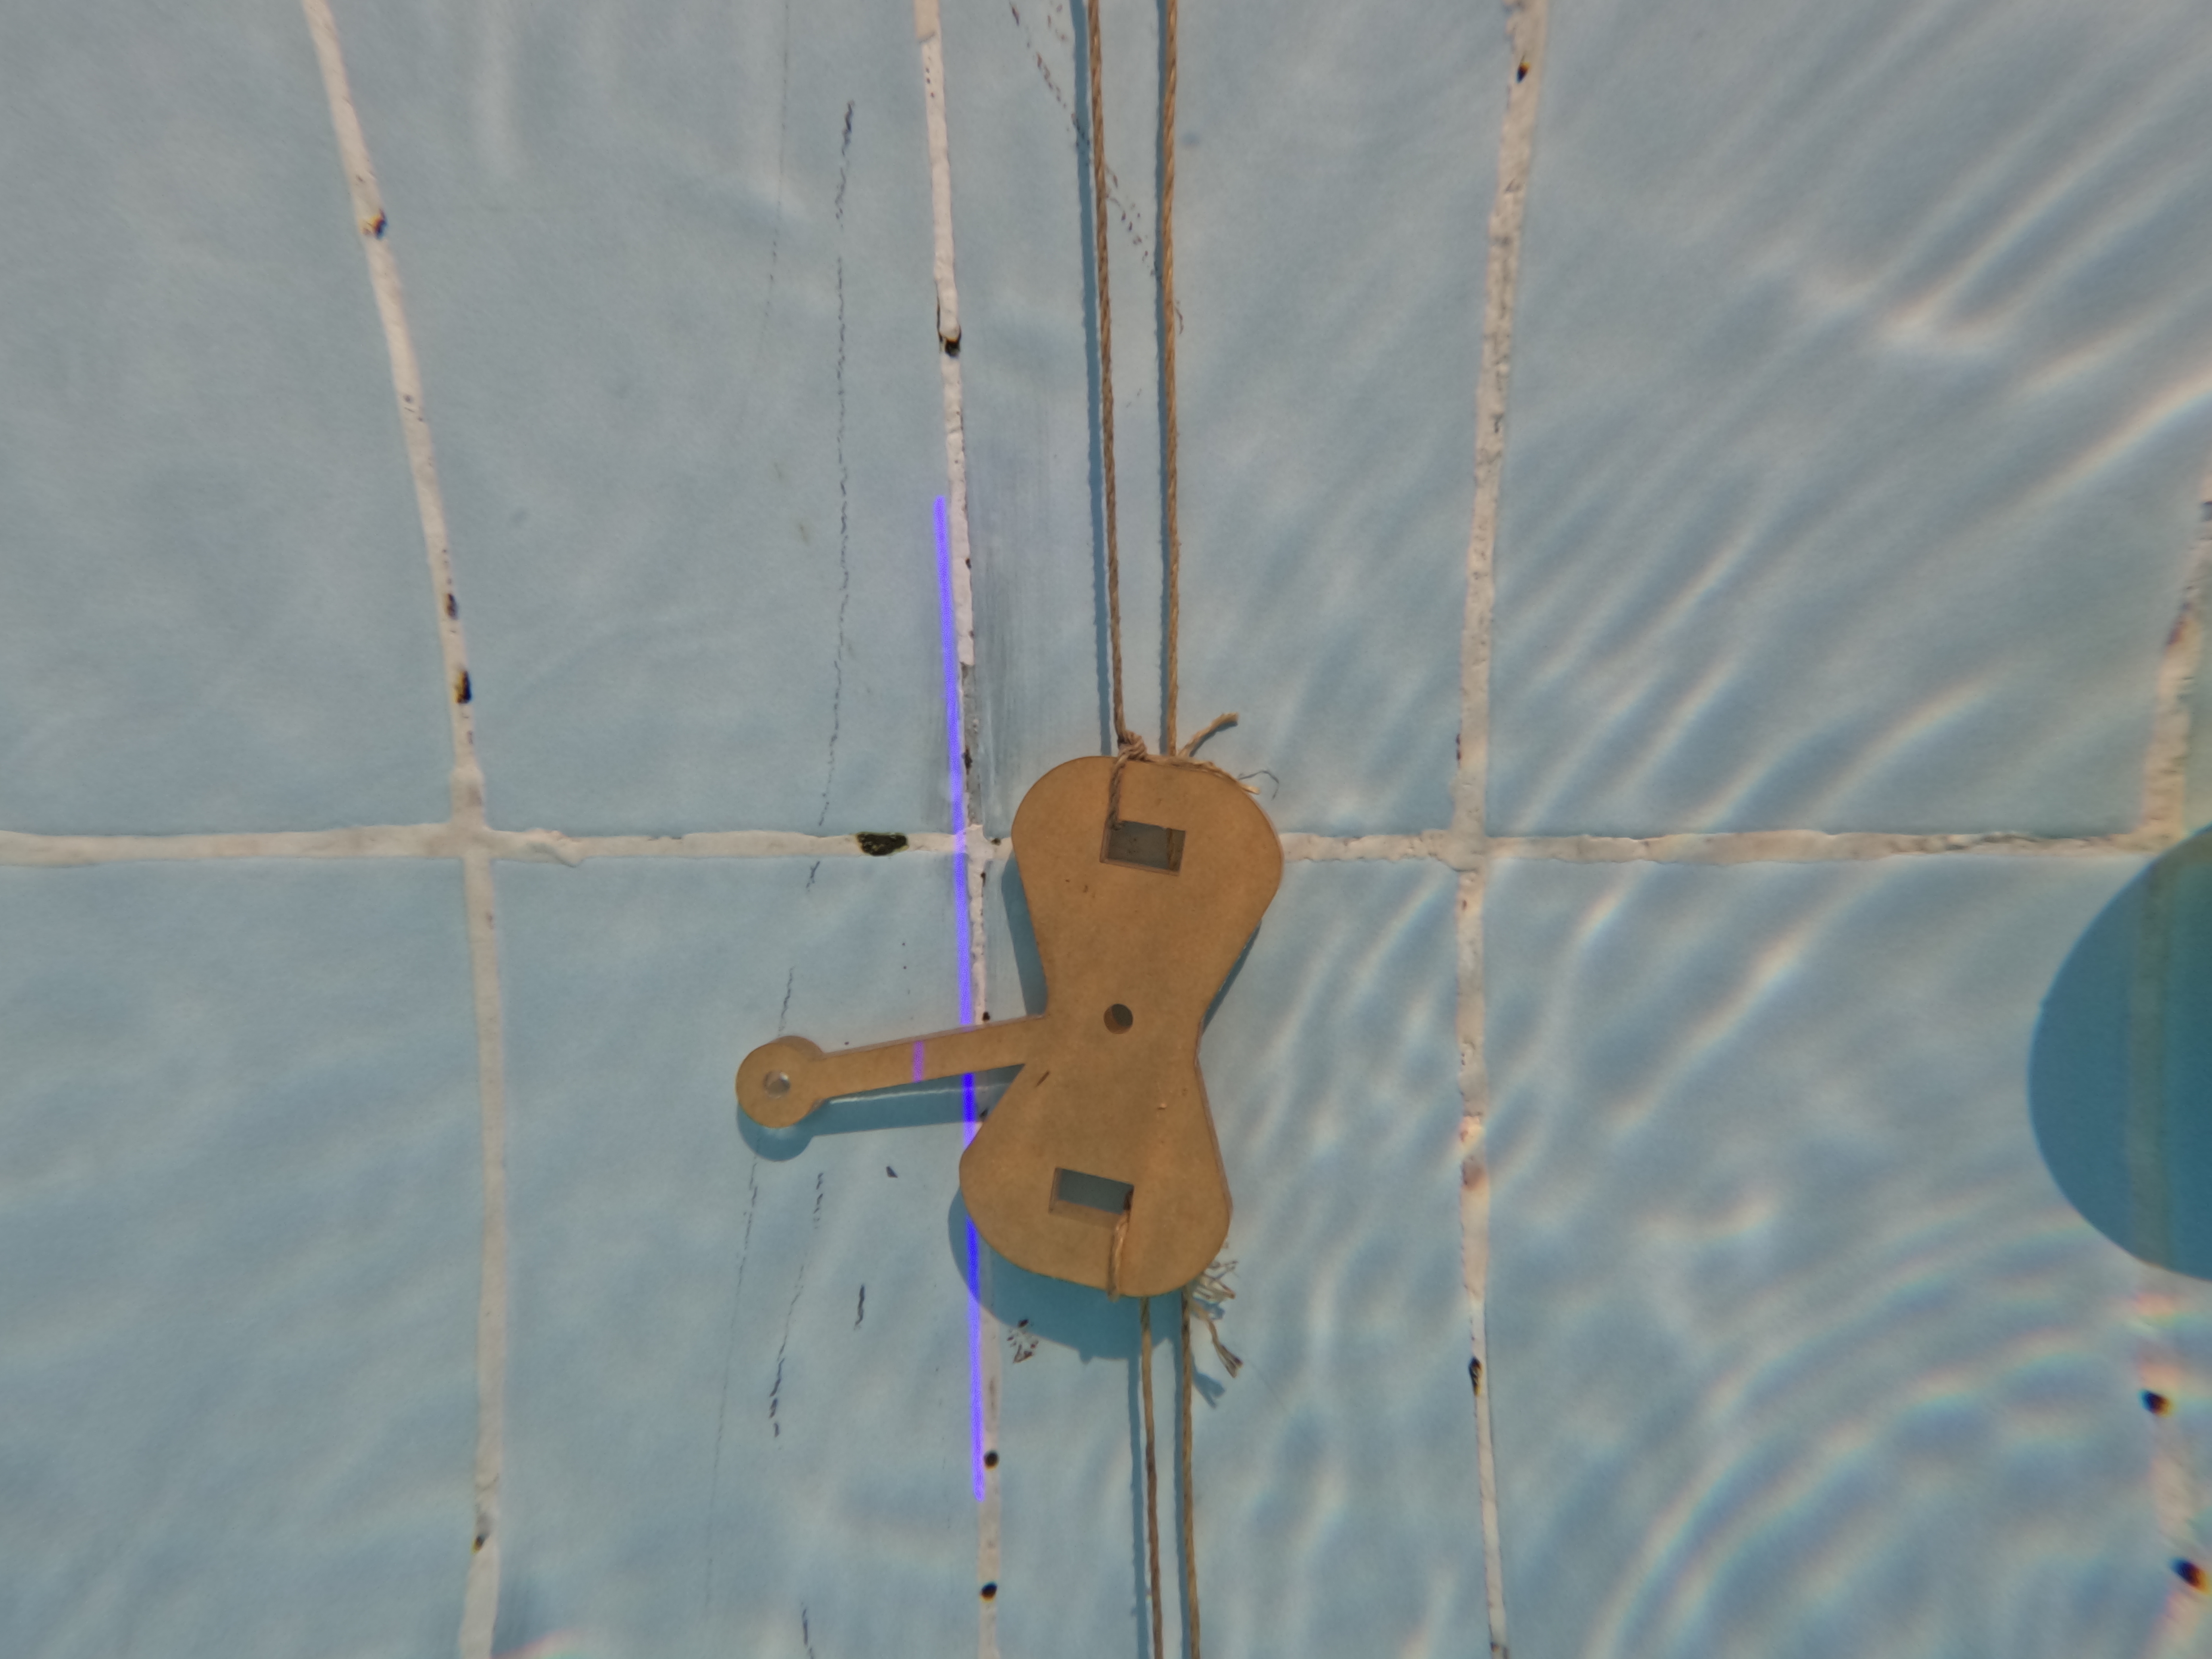

Supplement: Supplementary file 59 [file G0040453.pdf › Level_4_1/G0040453.pdf]

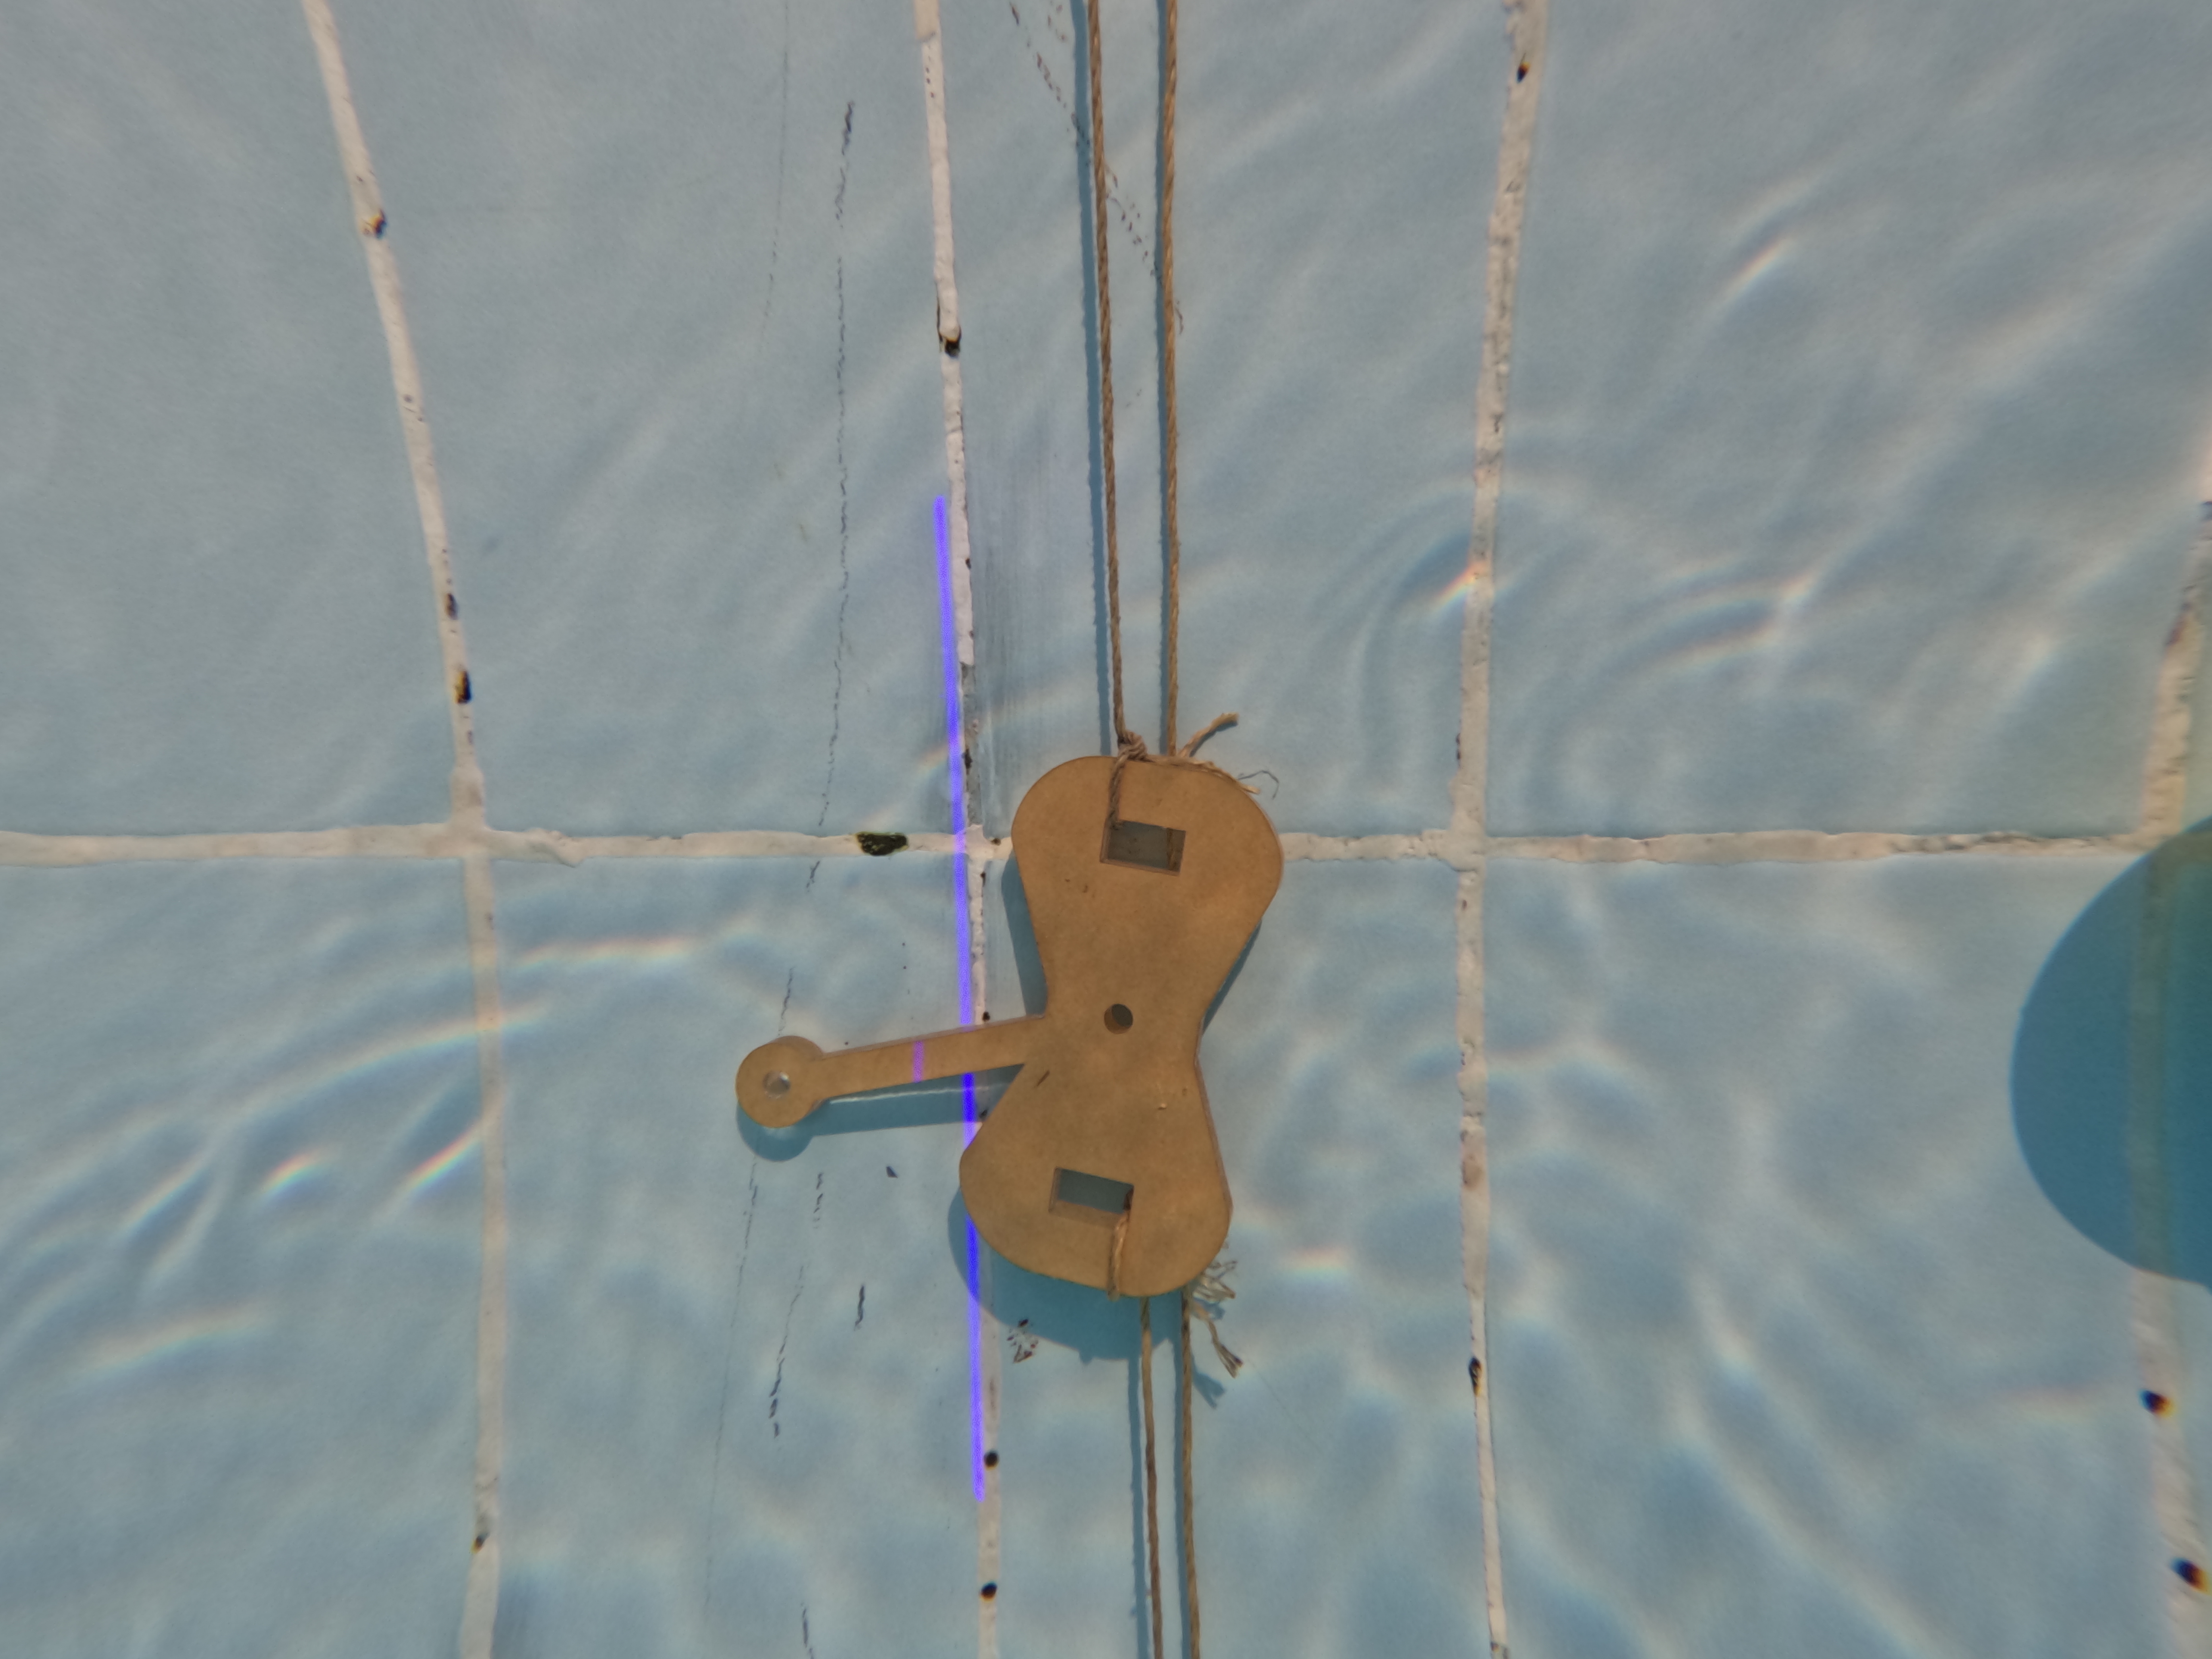

Supplement: Supplementary file 60 [file G0040454.pdf › Level_4_1/G0040454.pdf]

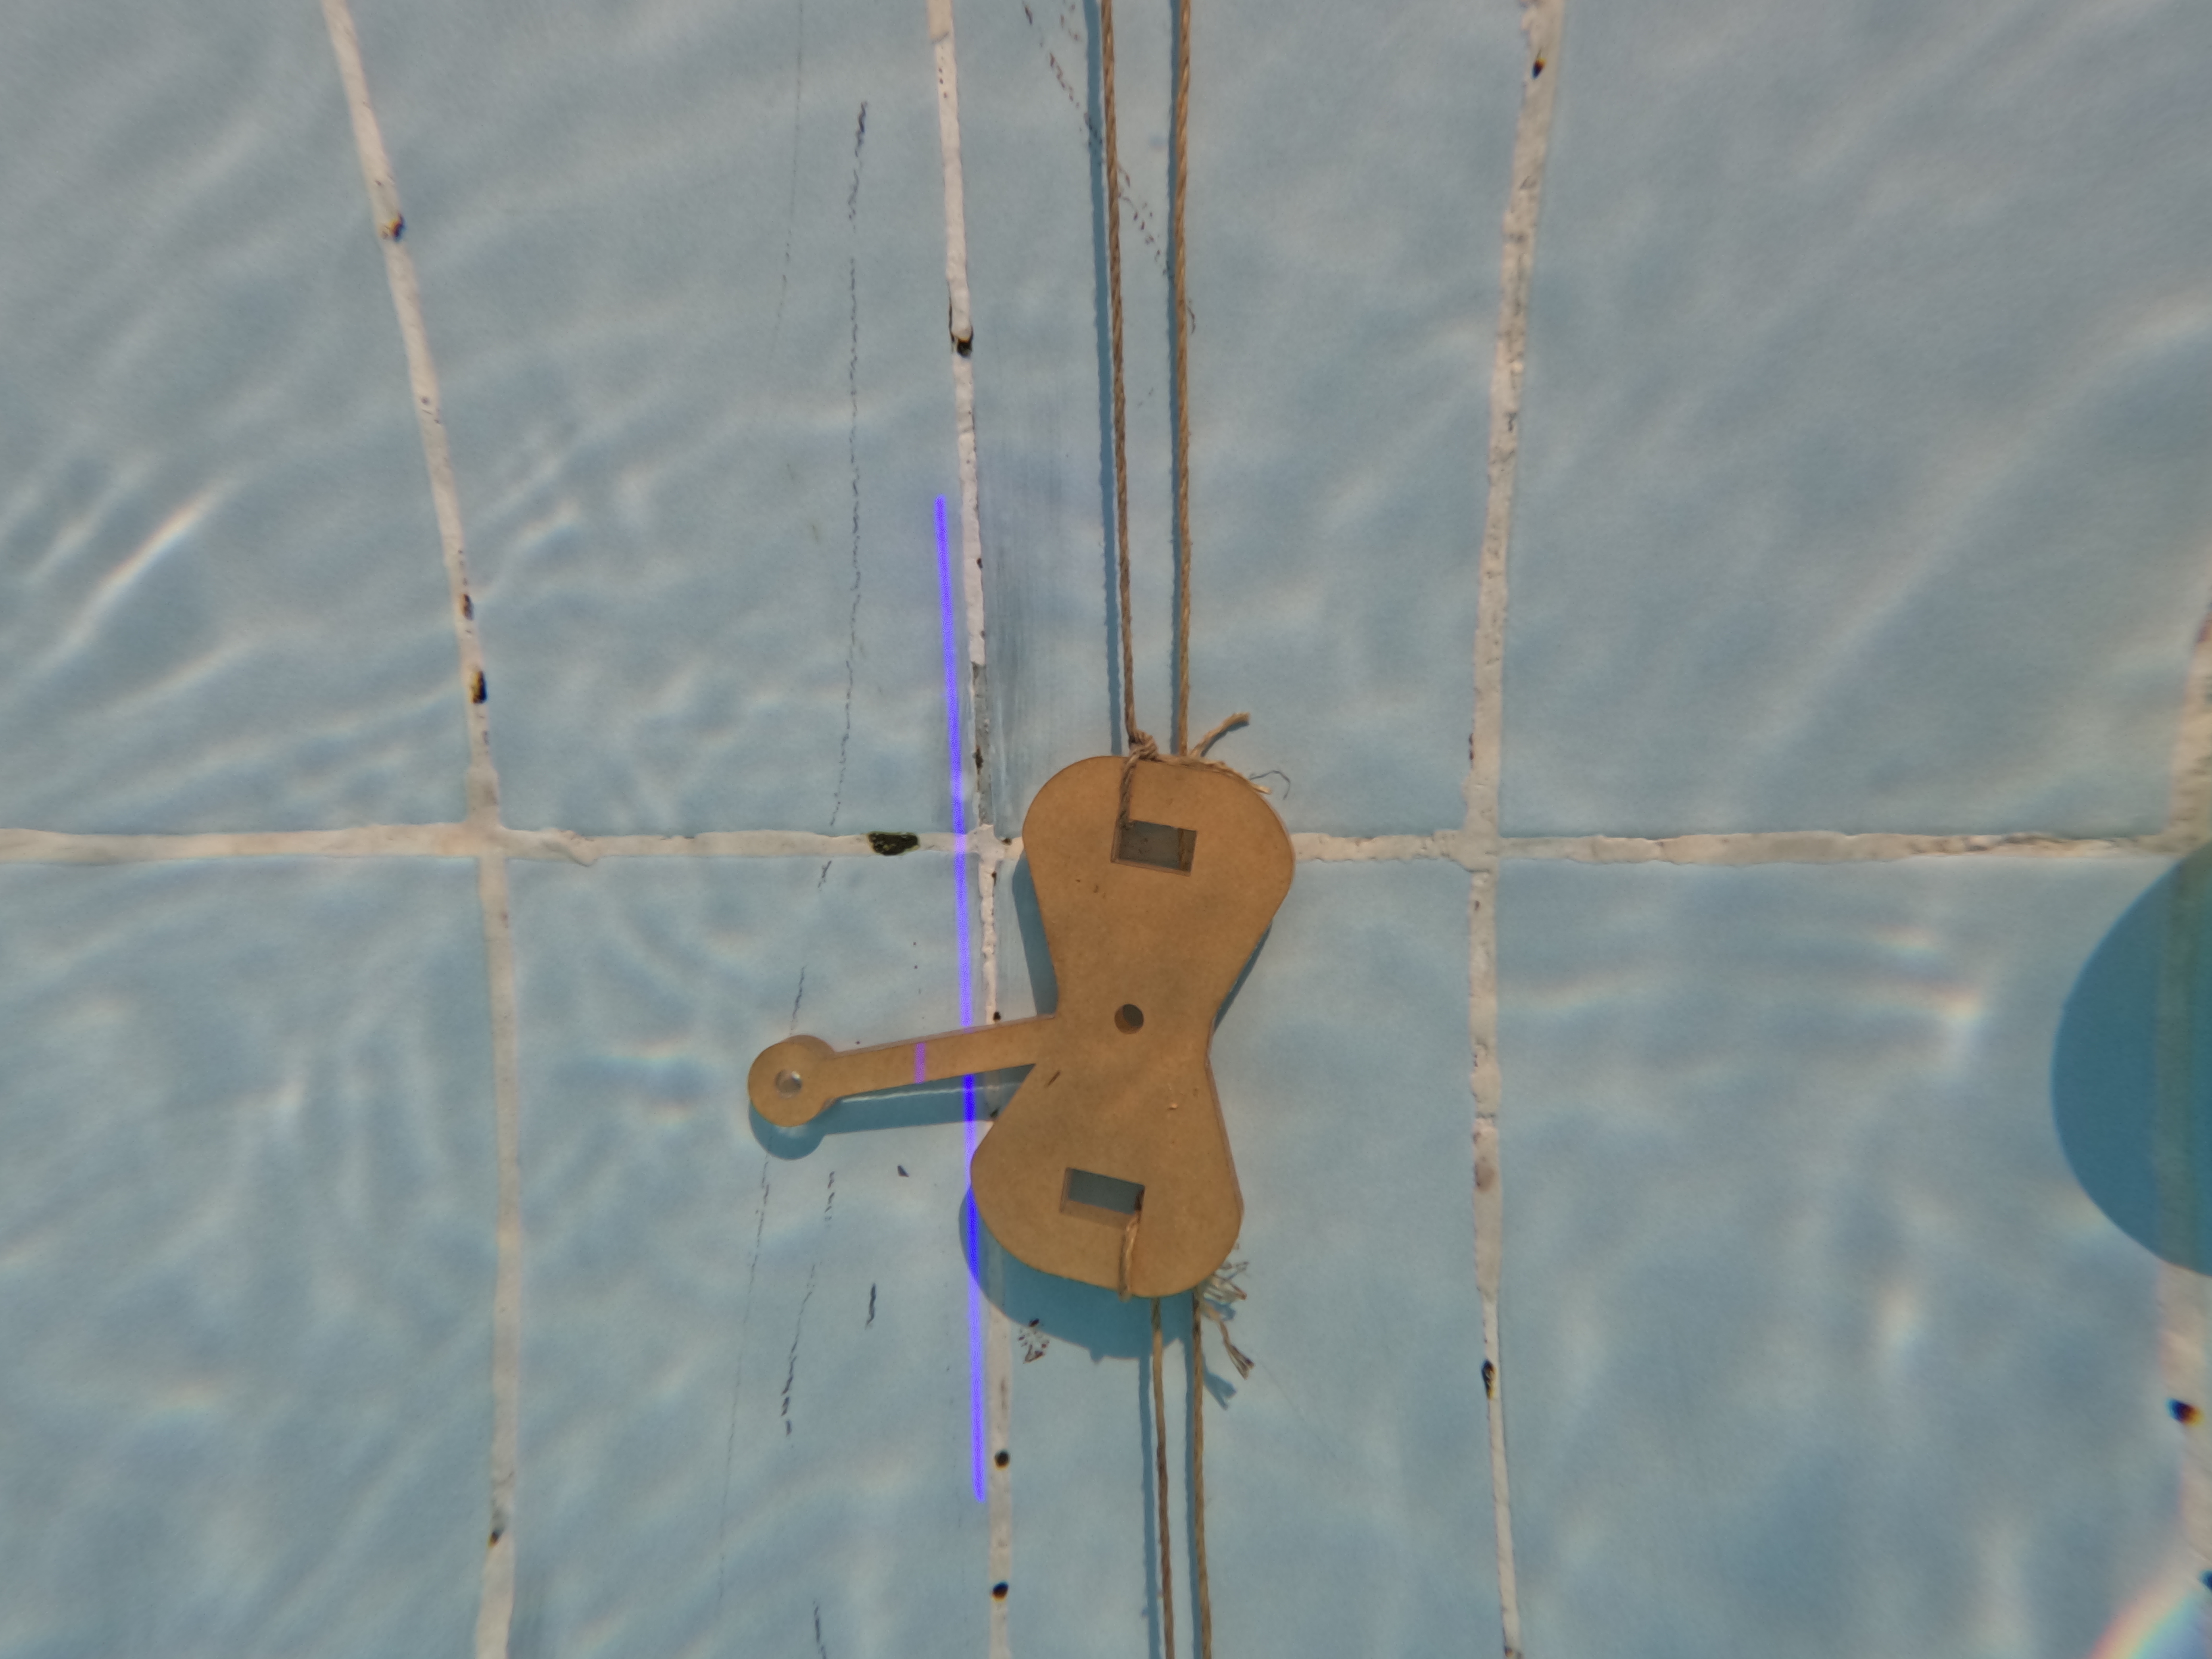

Supplement: Supplementary file 61 [file G0040455.pdf › Level_4_1/G0040455.pdf]

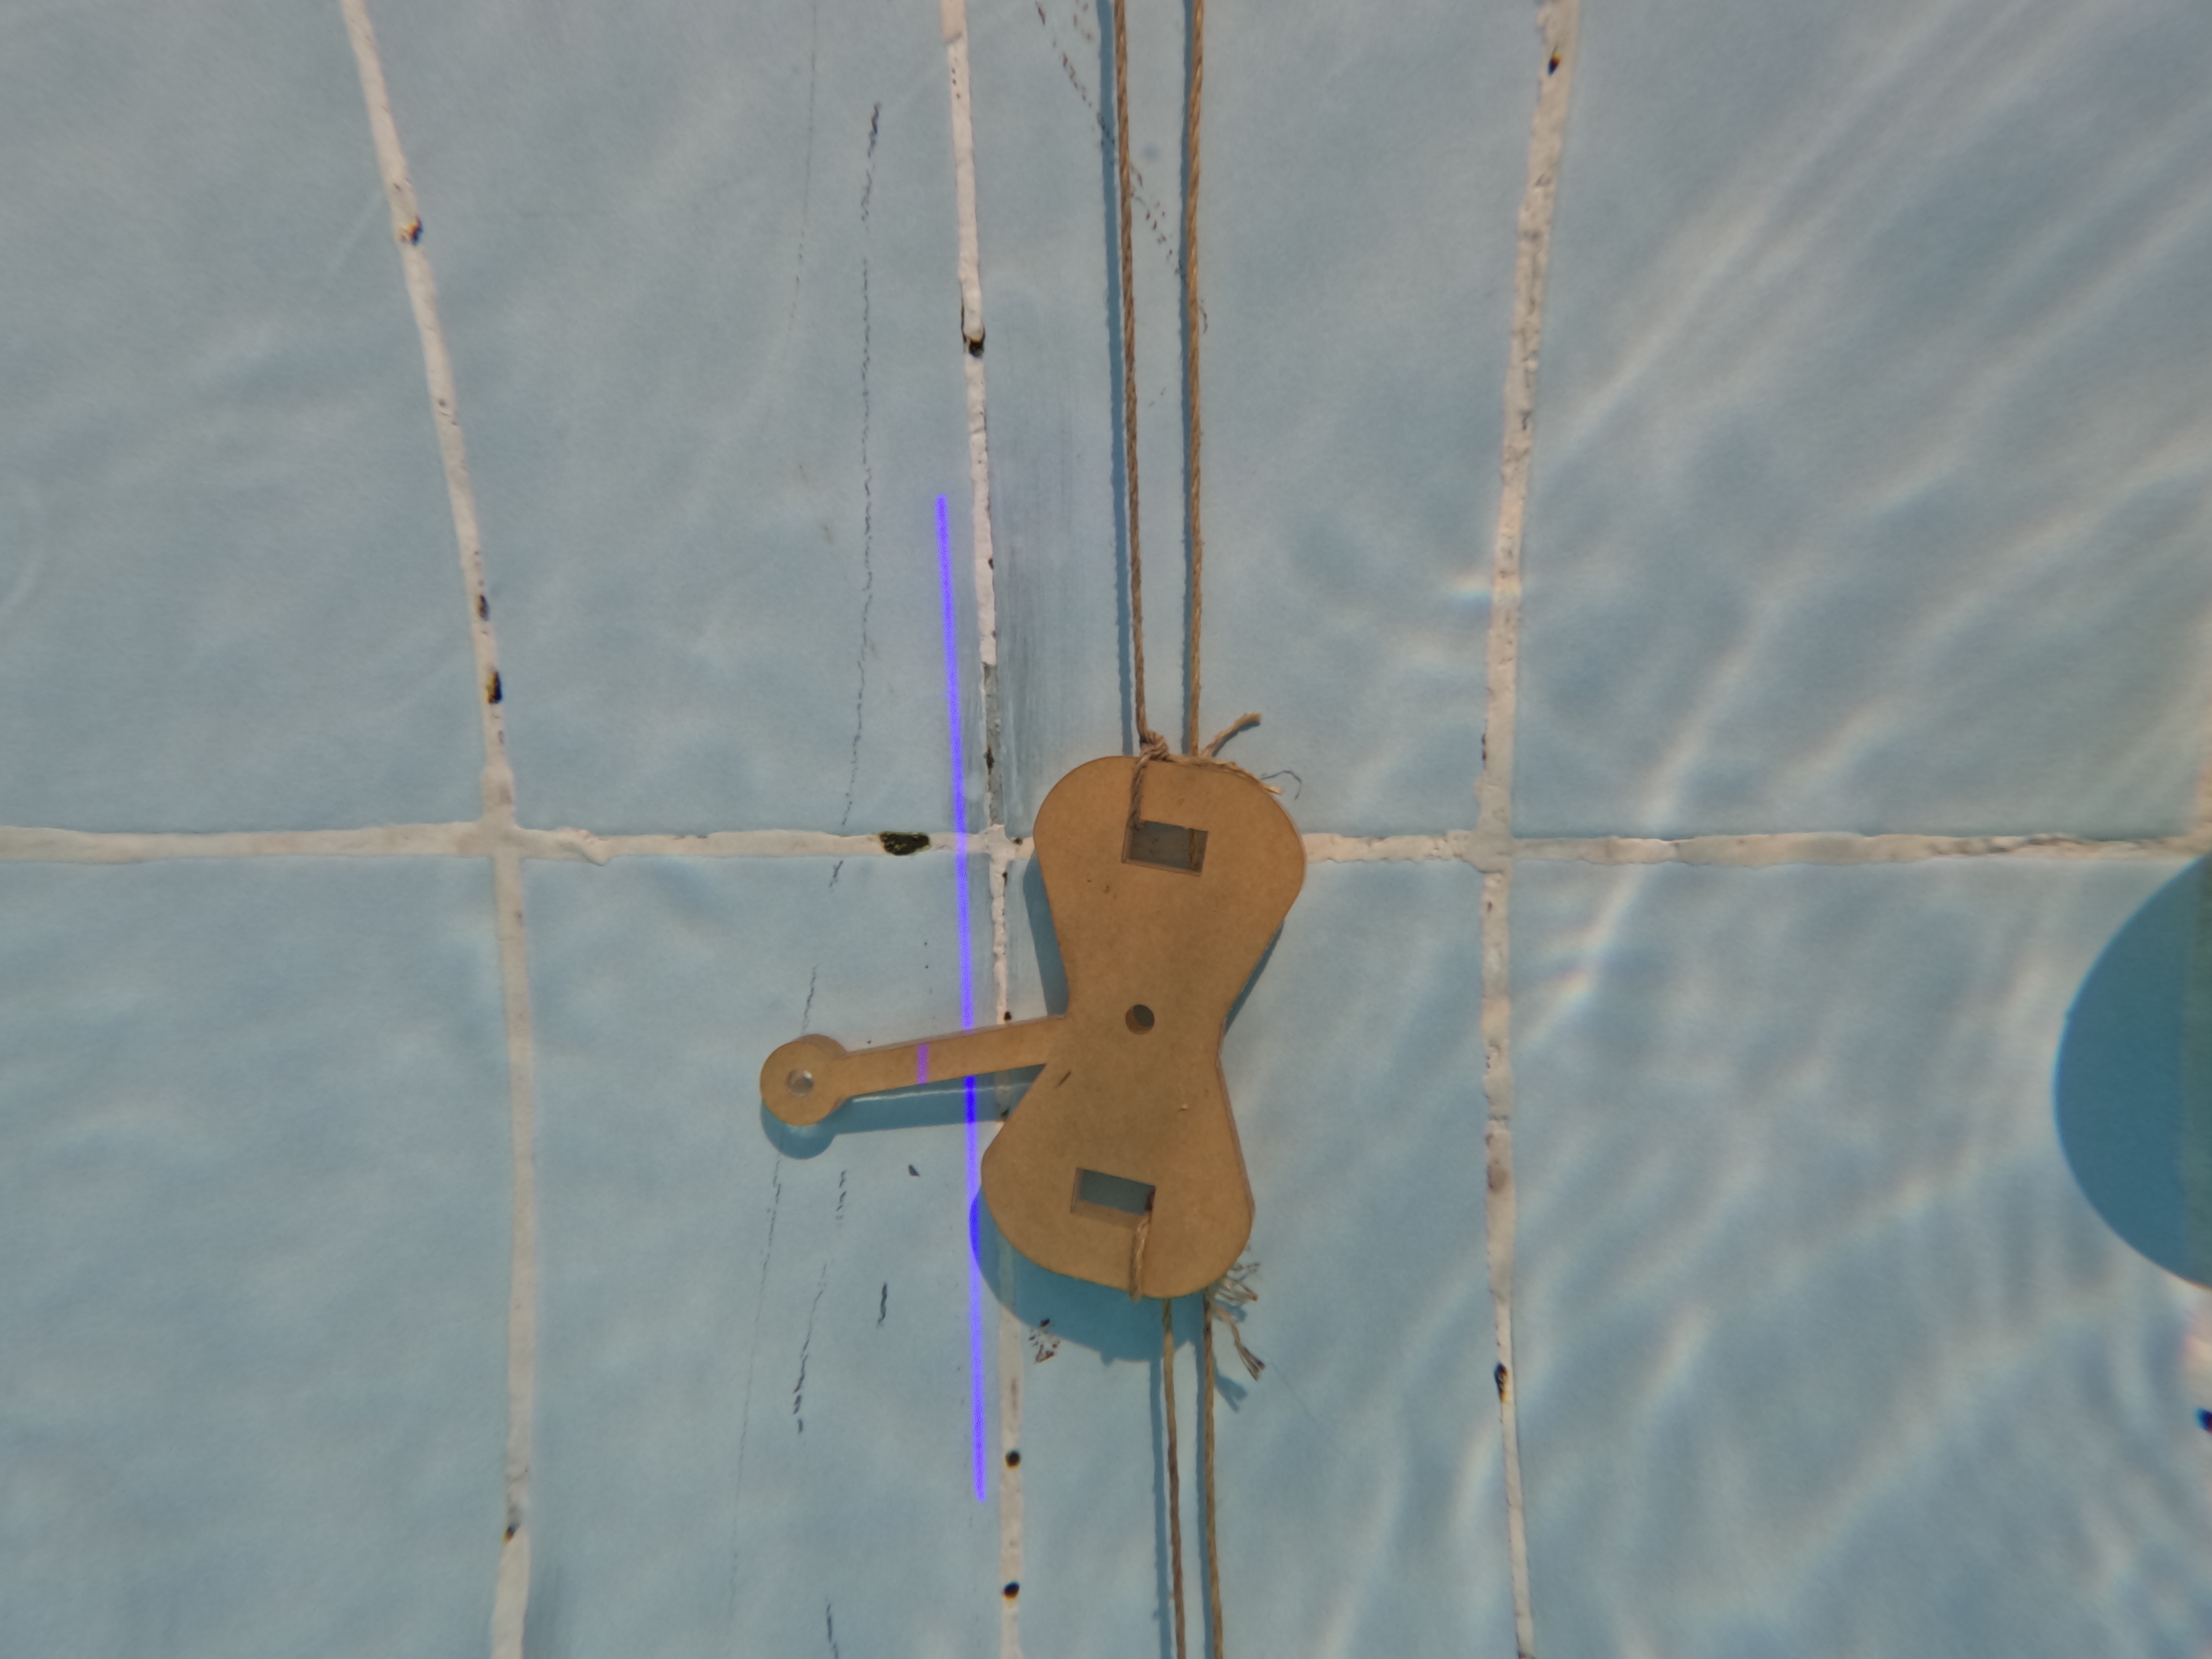

Supplement: Supplementary file 62 [file G0040456.pdf › Level_4_1/G0040456.pdf]

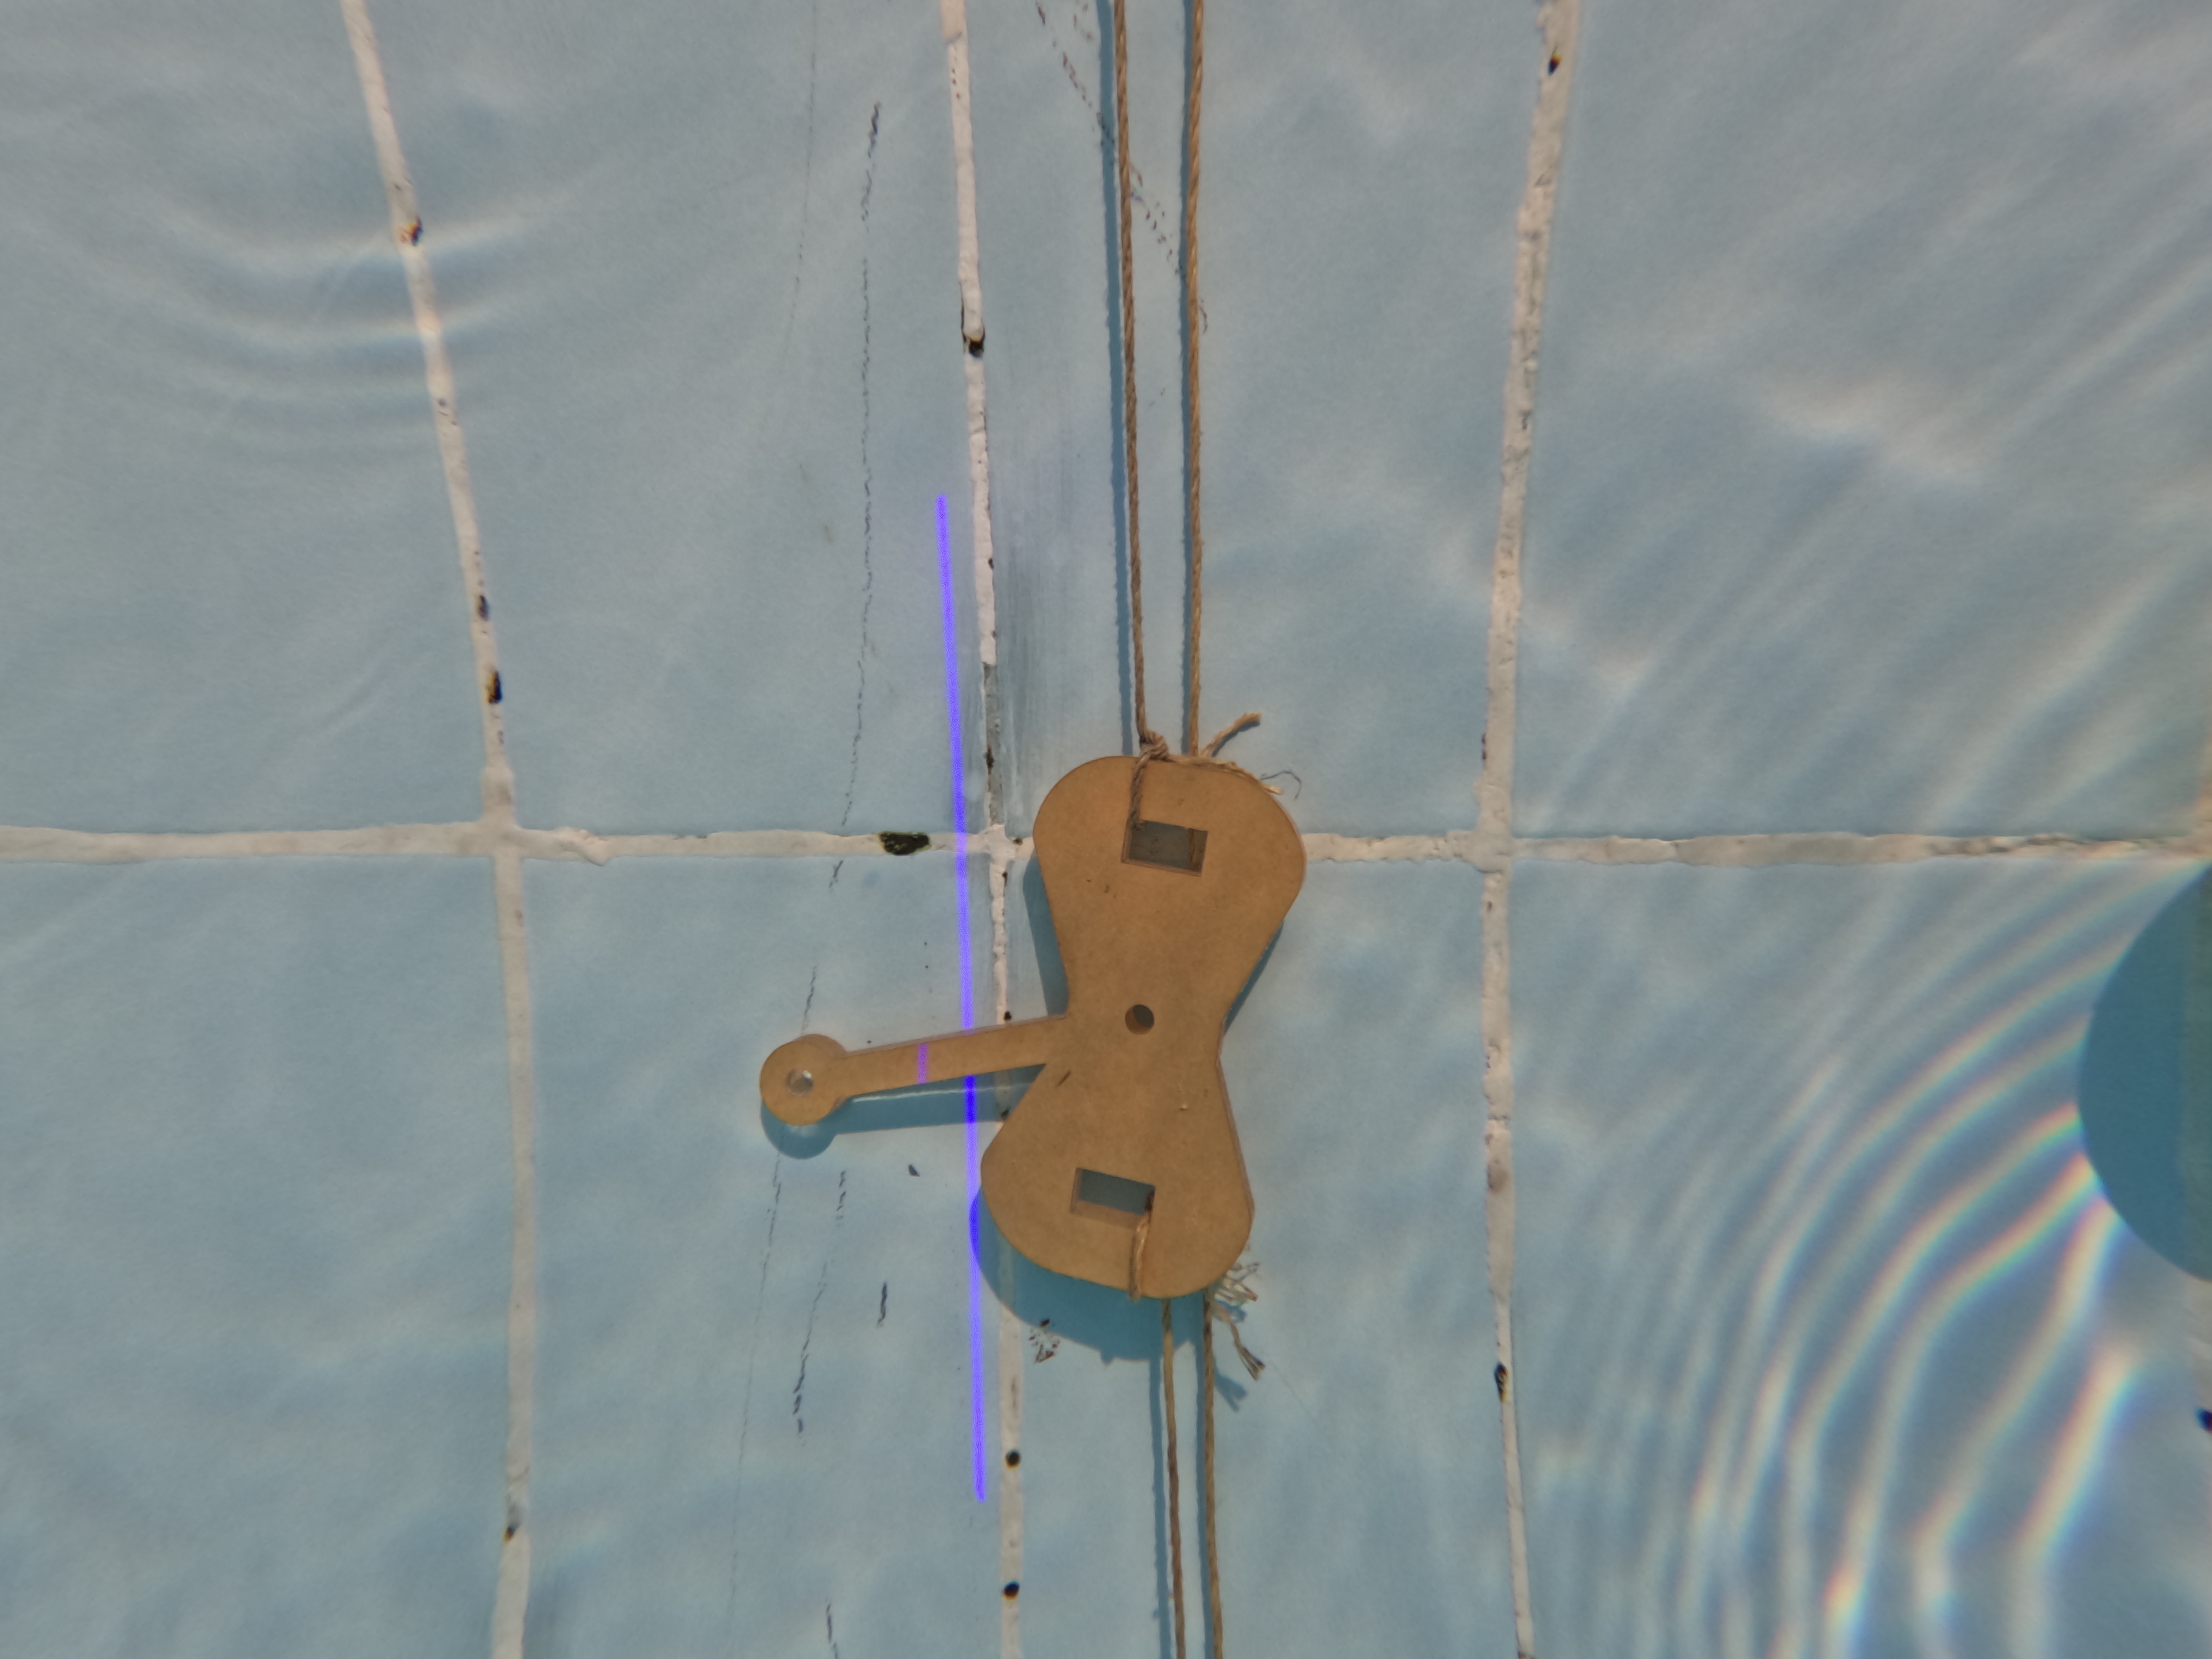

Supplement: Supplementary file 63 [file G0040457.pdf › Level_4_1/G0040457.pdf]

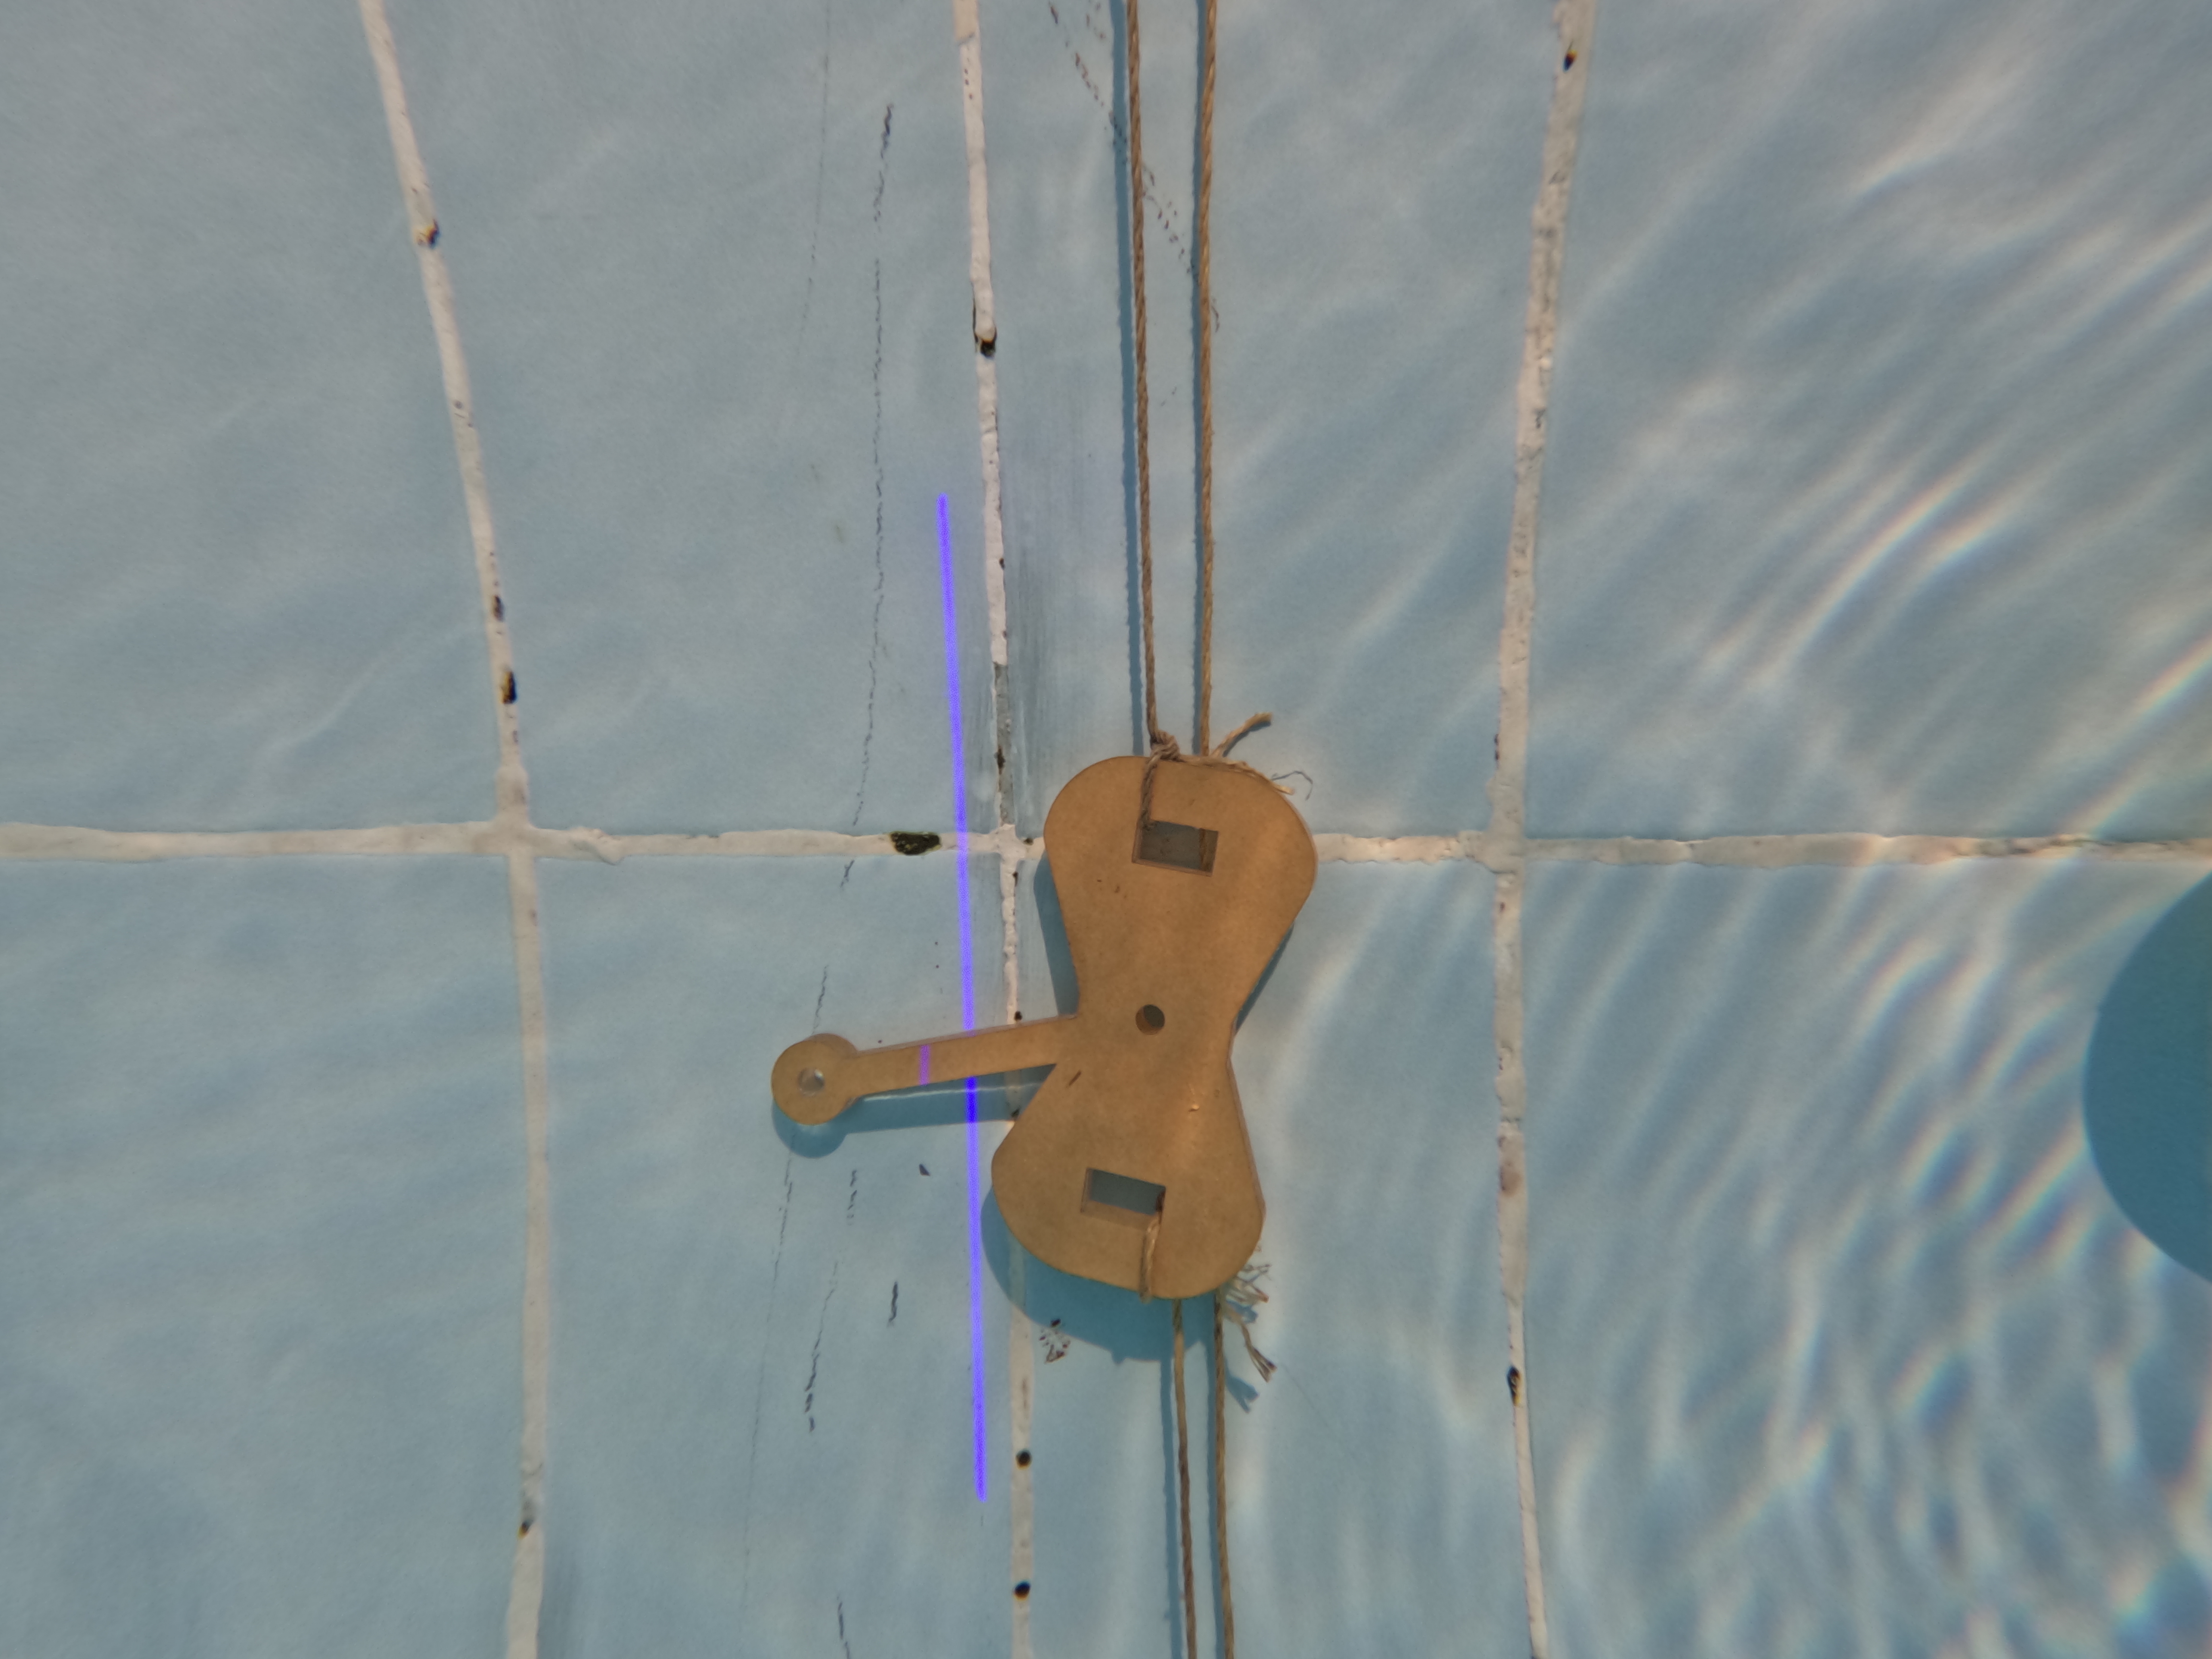

Supplement: Supplementary file 64 [file G0040458.pdf › Level_4_1/G0040458.pdf]

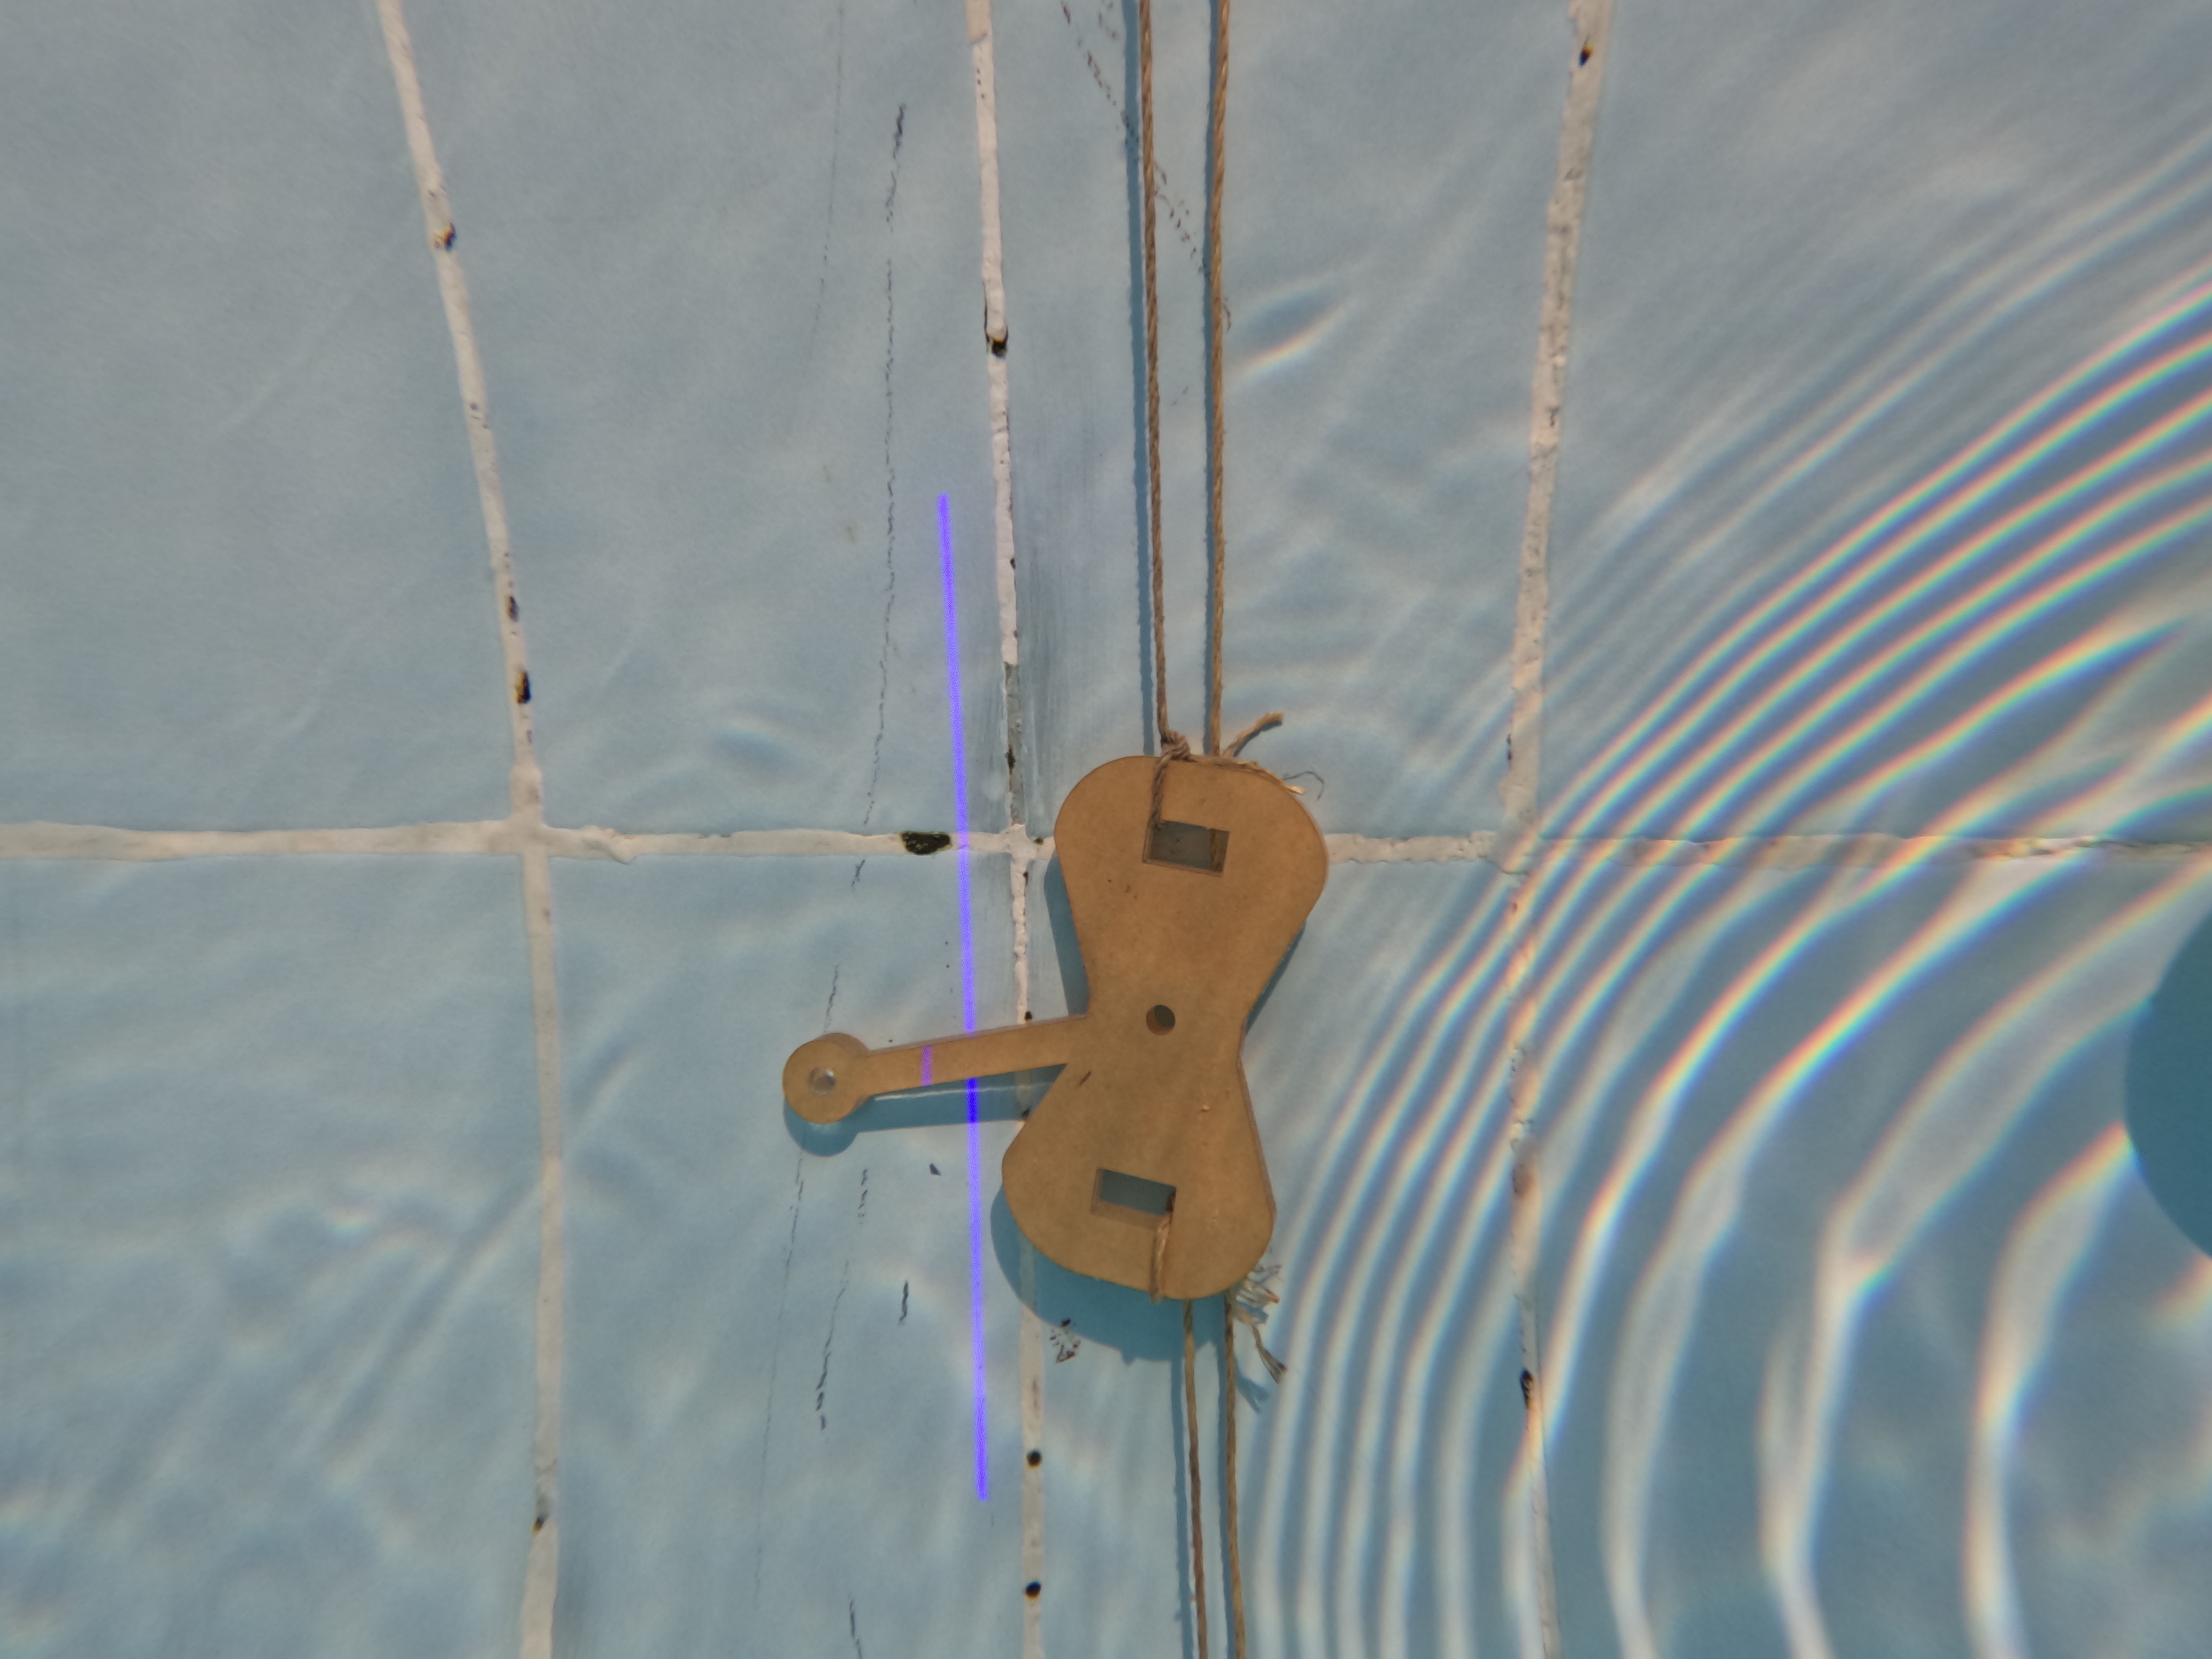

Supplement: Supplementary file 65 [file G0040459.pdf › Level_4_1/G0040459.pdf]

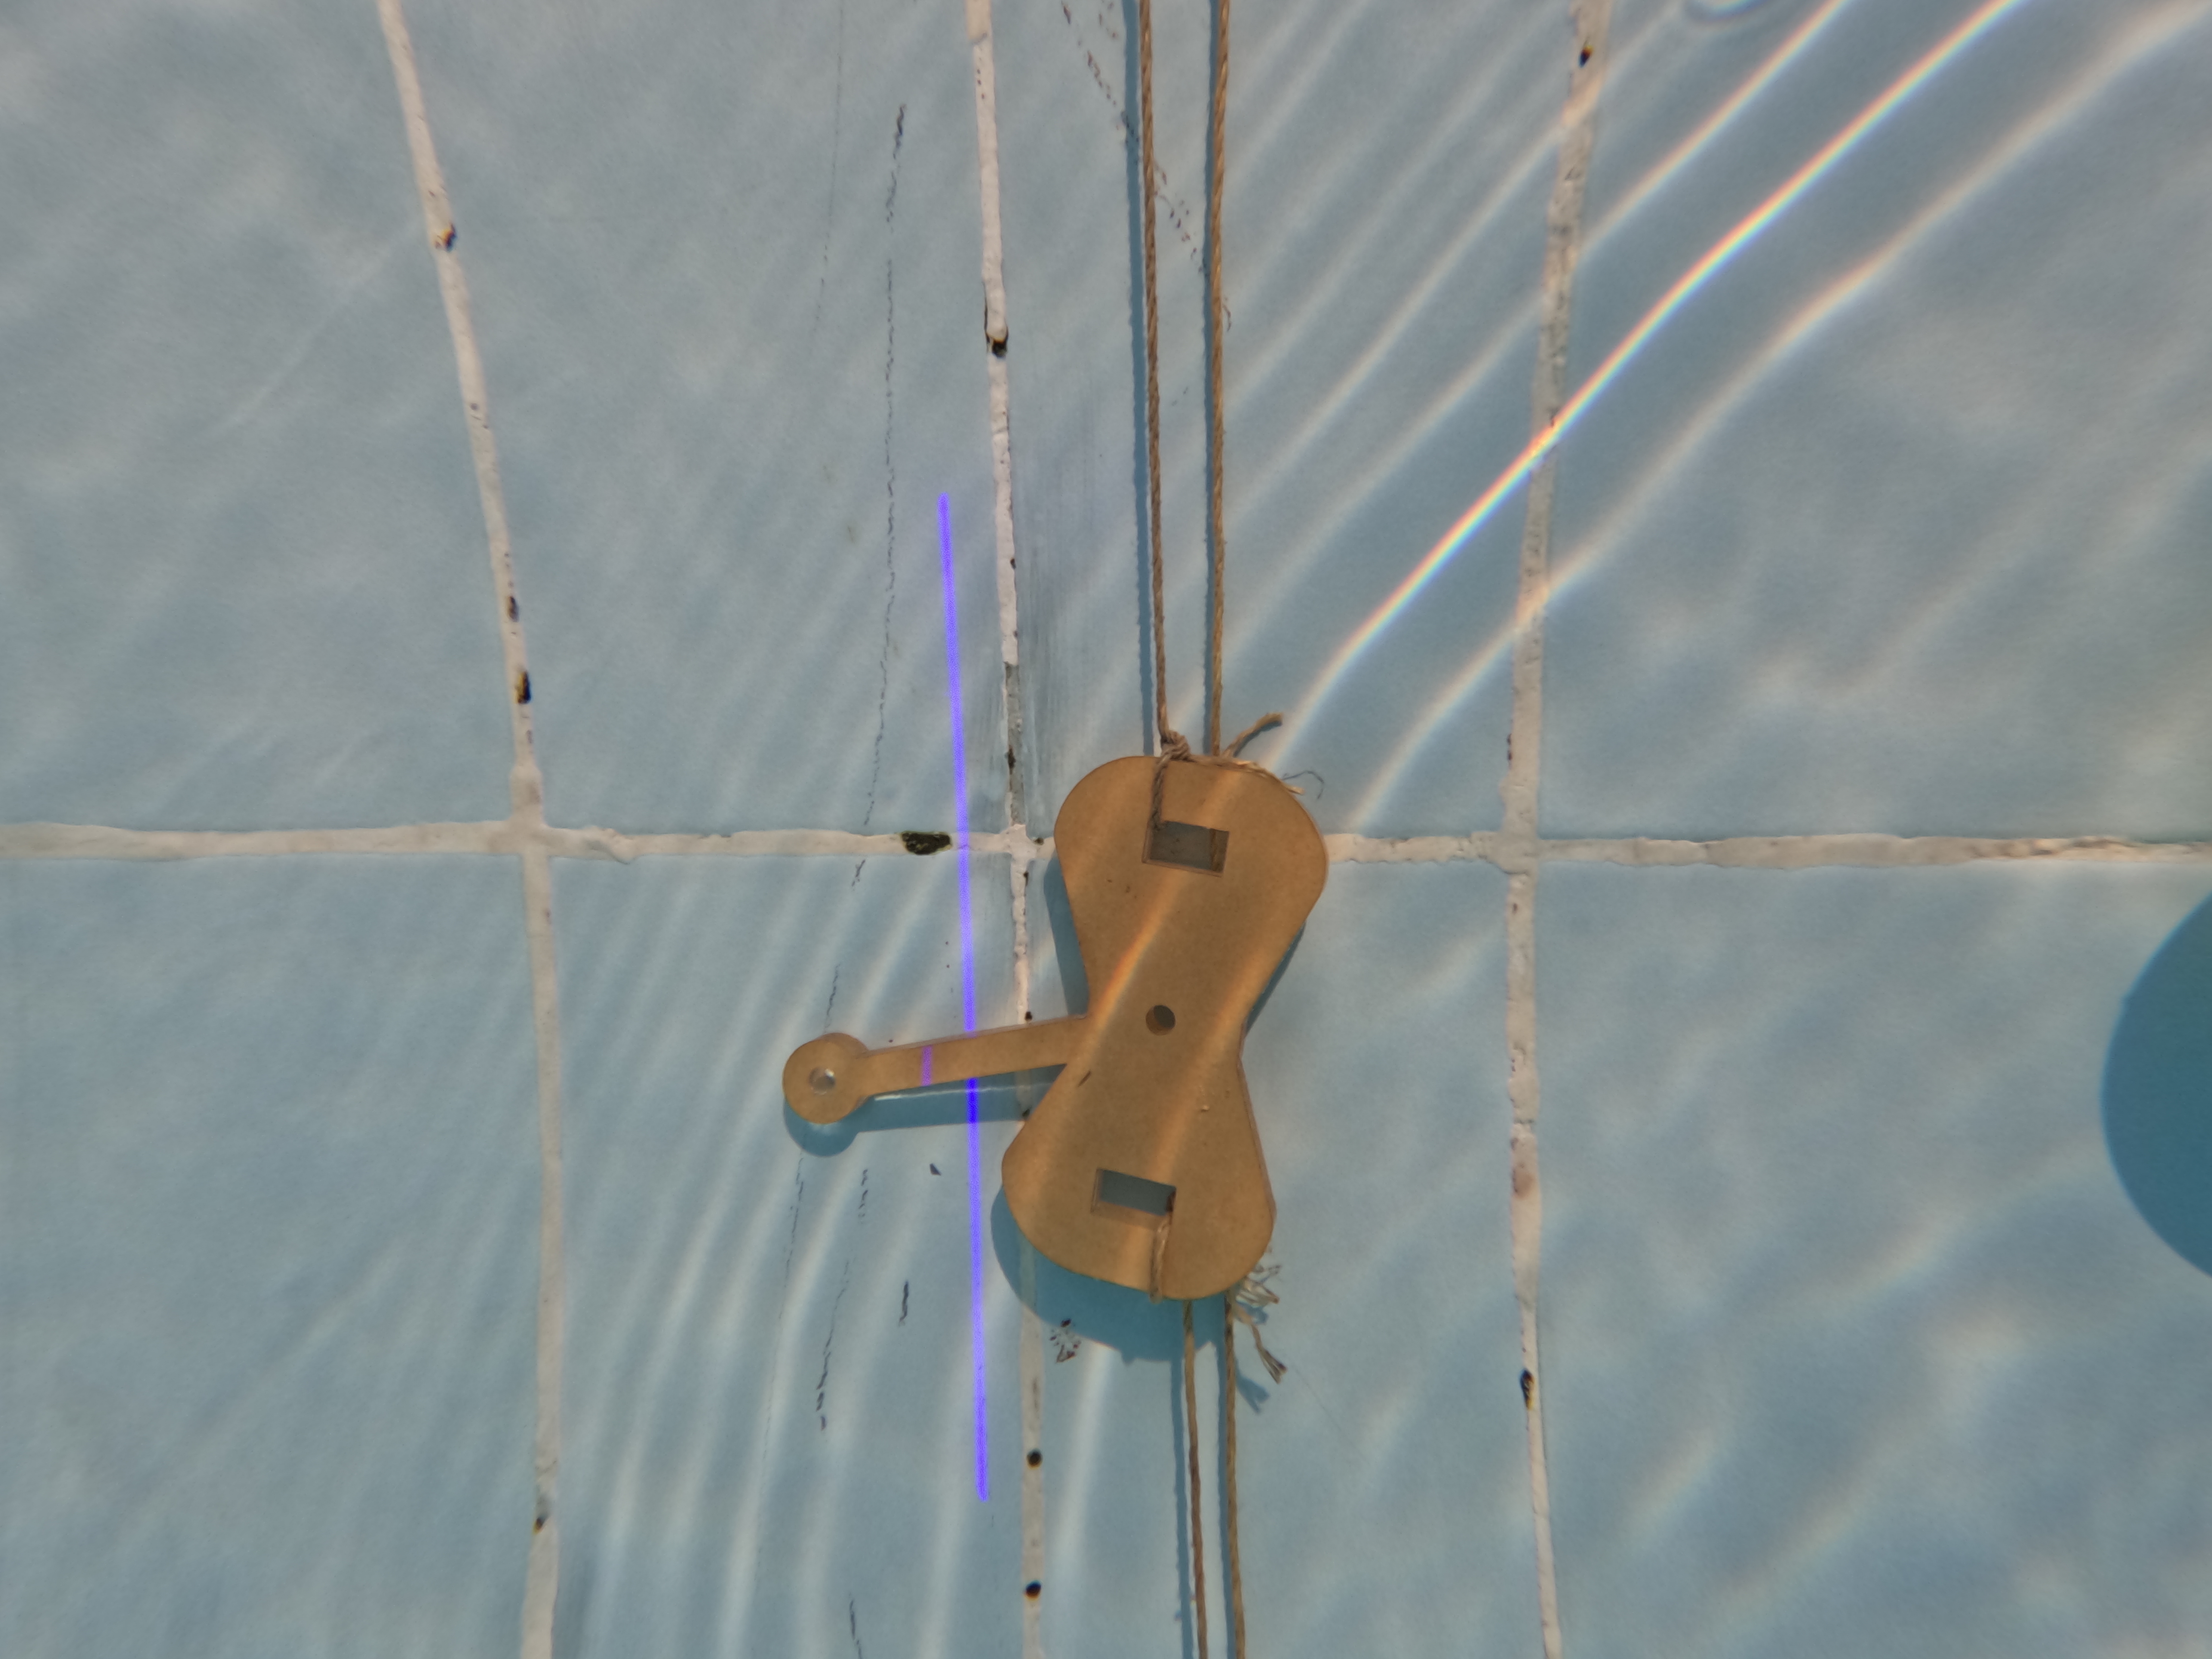

Supplement: Supplementary file 66 [file G0040460.pdf › Level_4_1/G0040460.pdf]

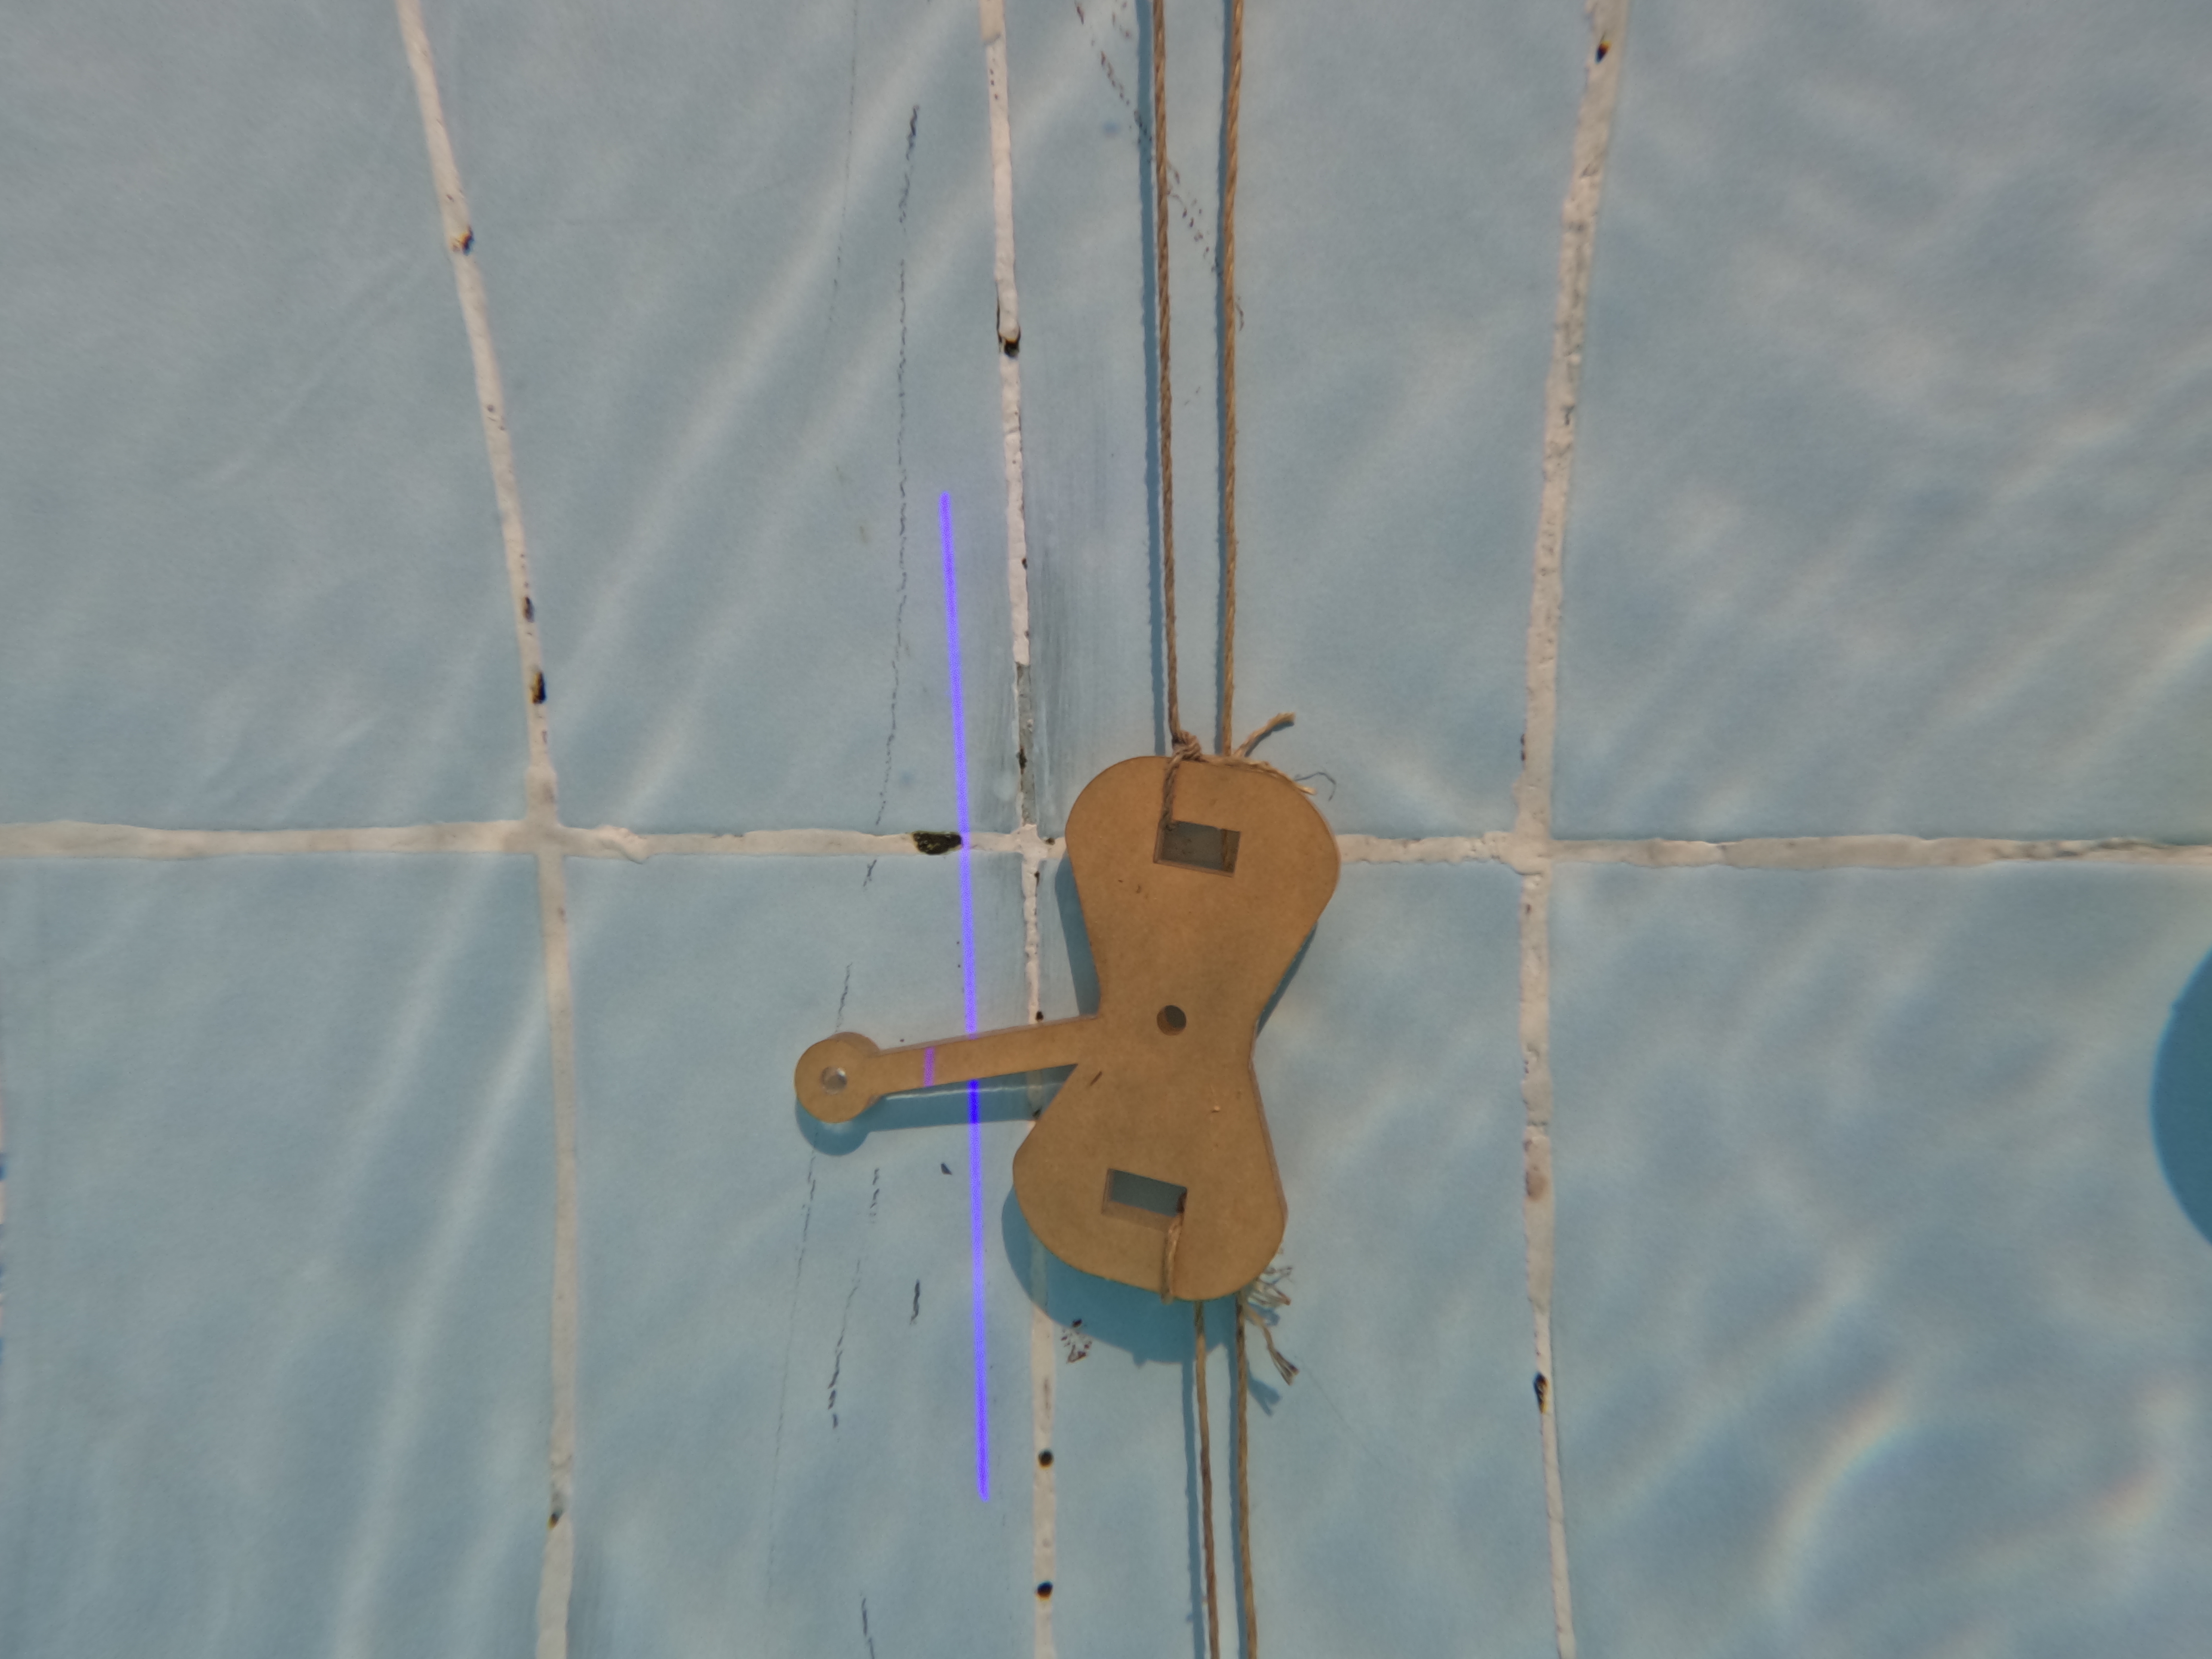

Supplement: Supplementary file 67 [file G0040461.pdf › Level_4_1/G0040461.pdf]

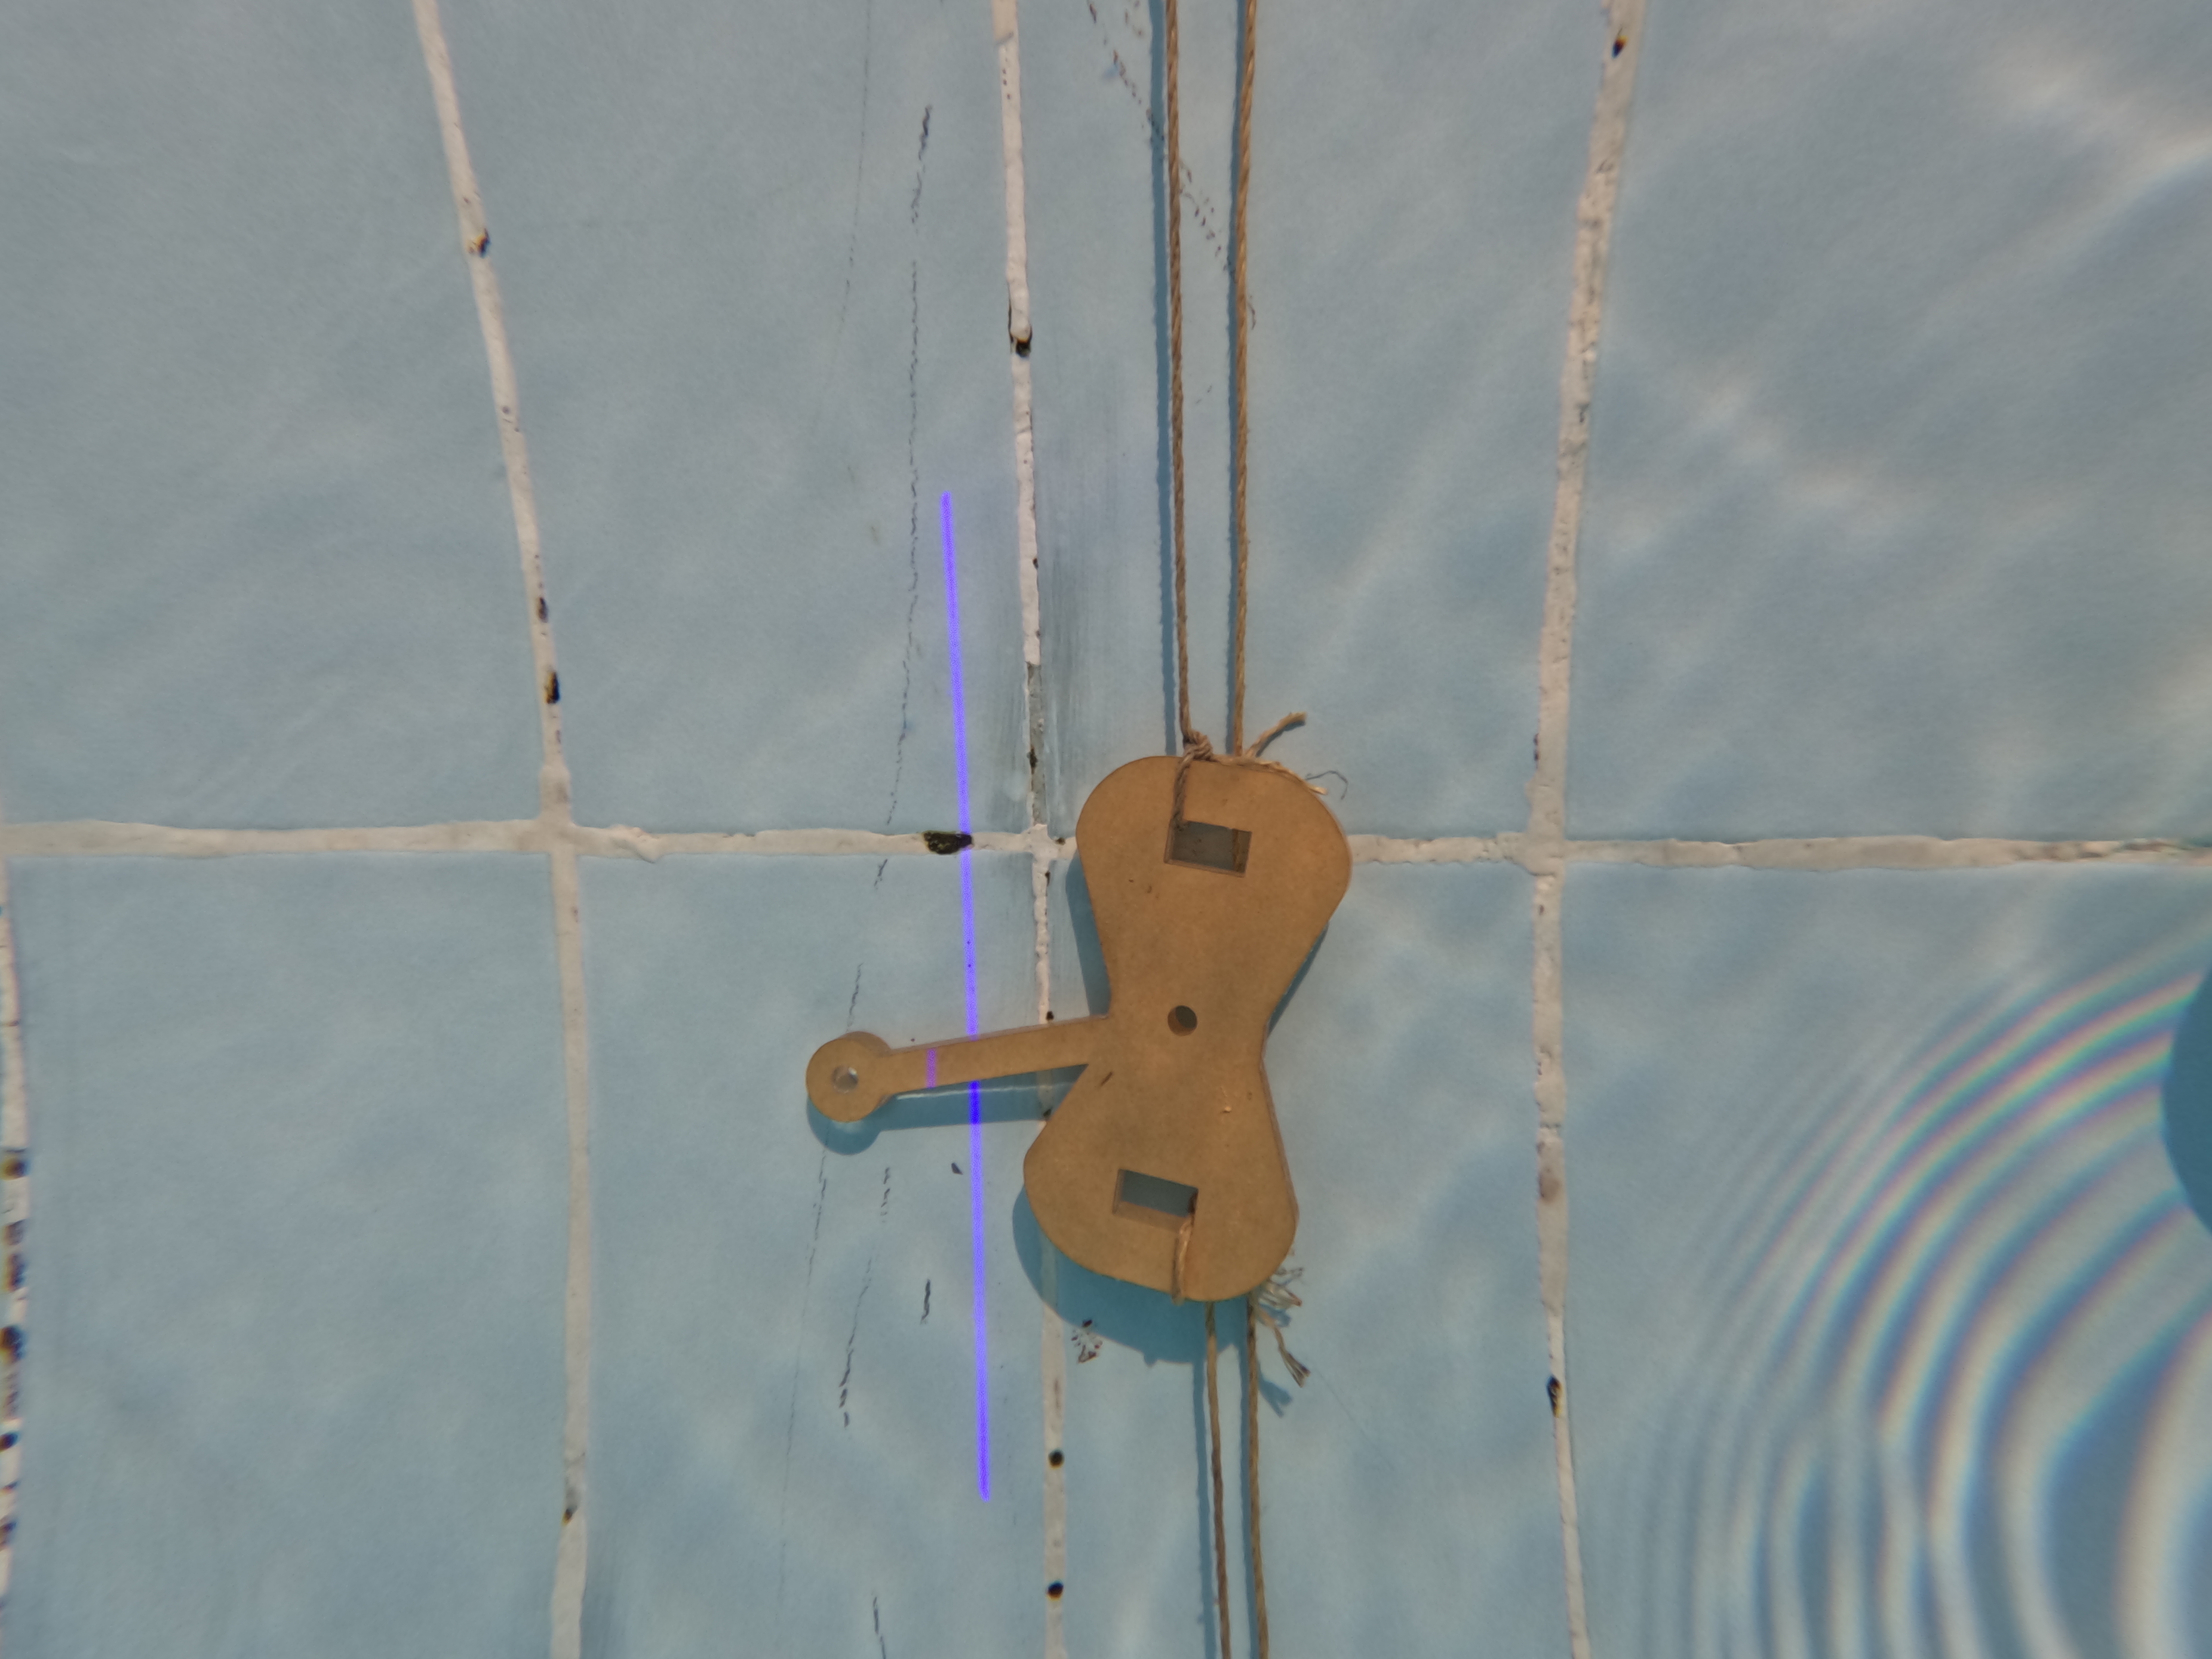

Supplement: Supplementary file 68 [file G0040462.pdf › Level_4_1/G0040462.pdf]

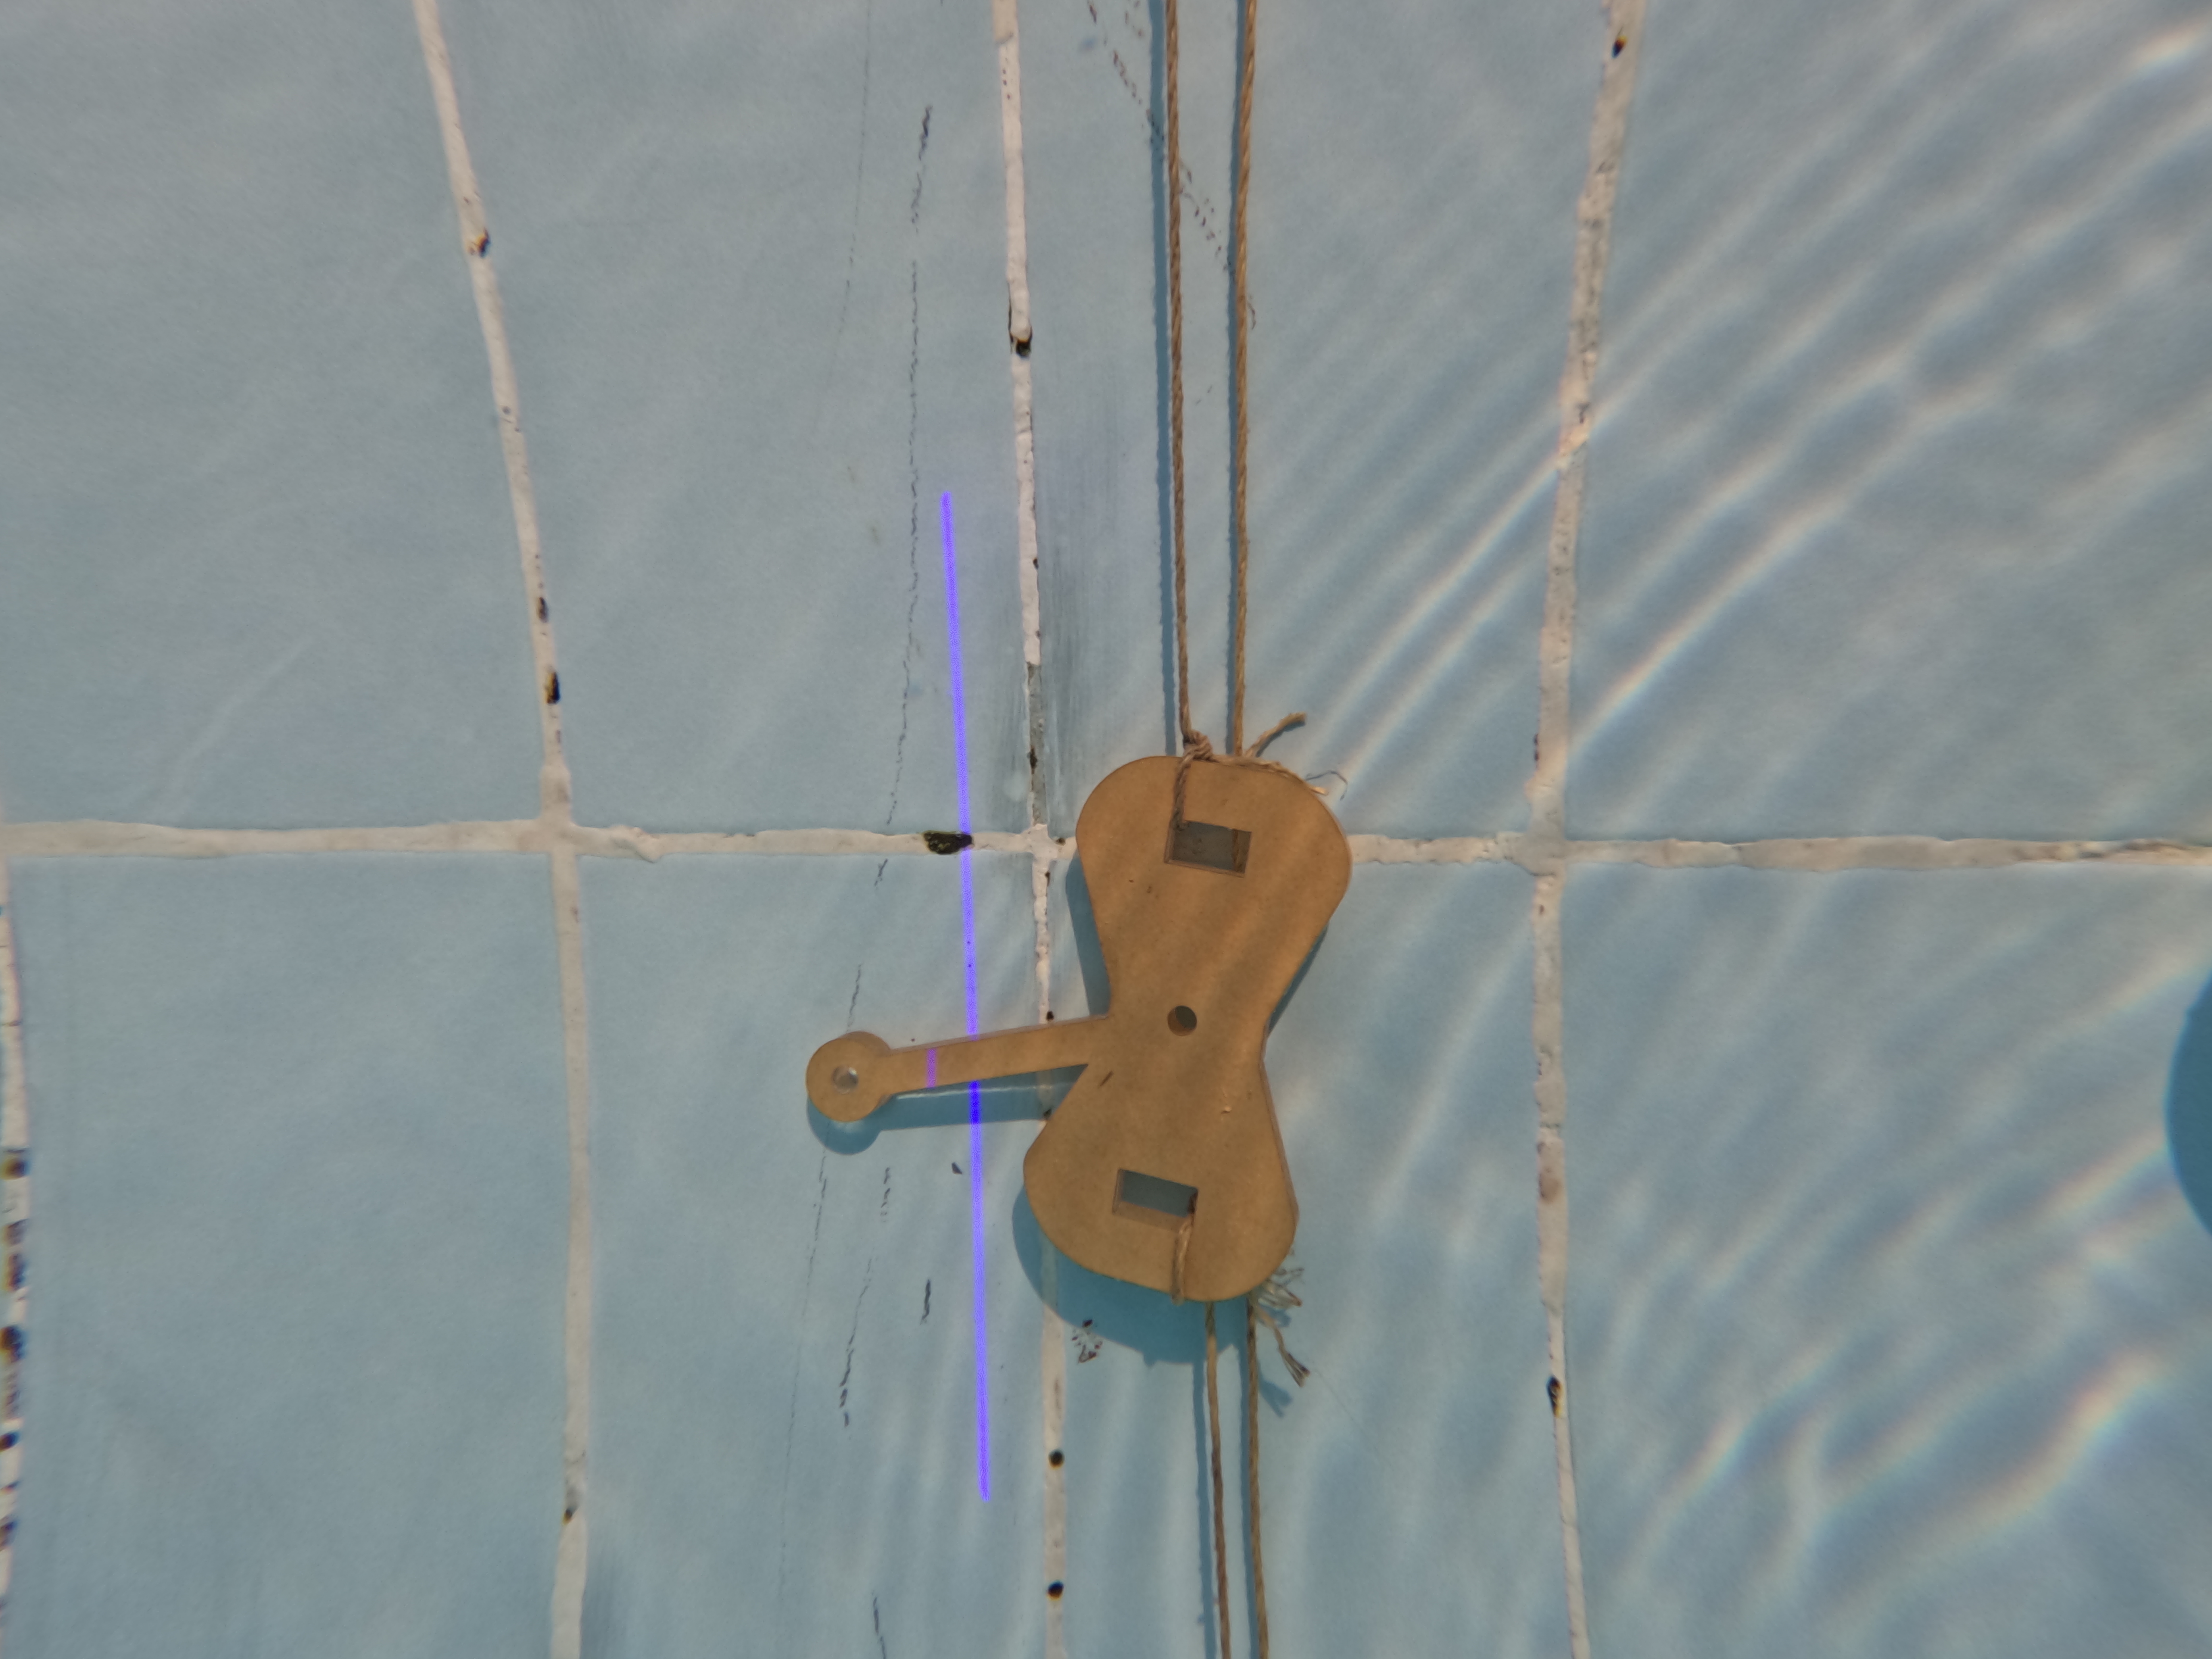

Supplement: Supplementary file 69 [file G0040463.pdf › Level_4_1/G0040463.pdf]

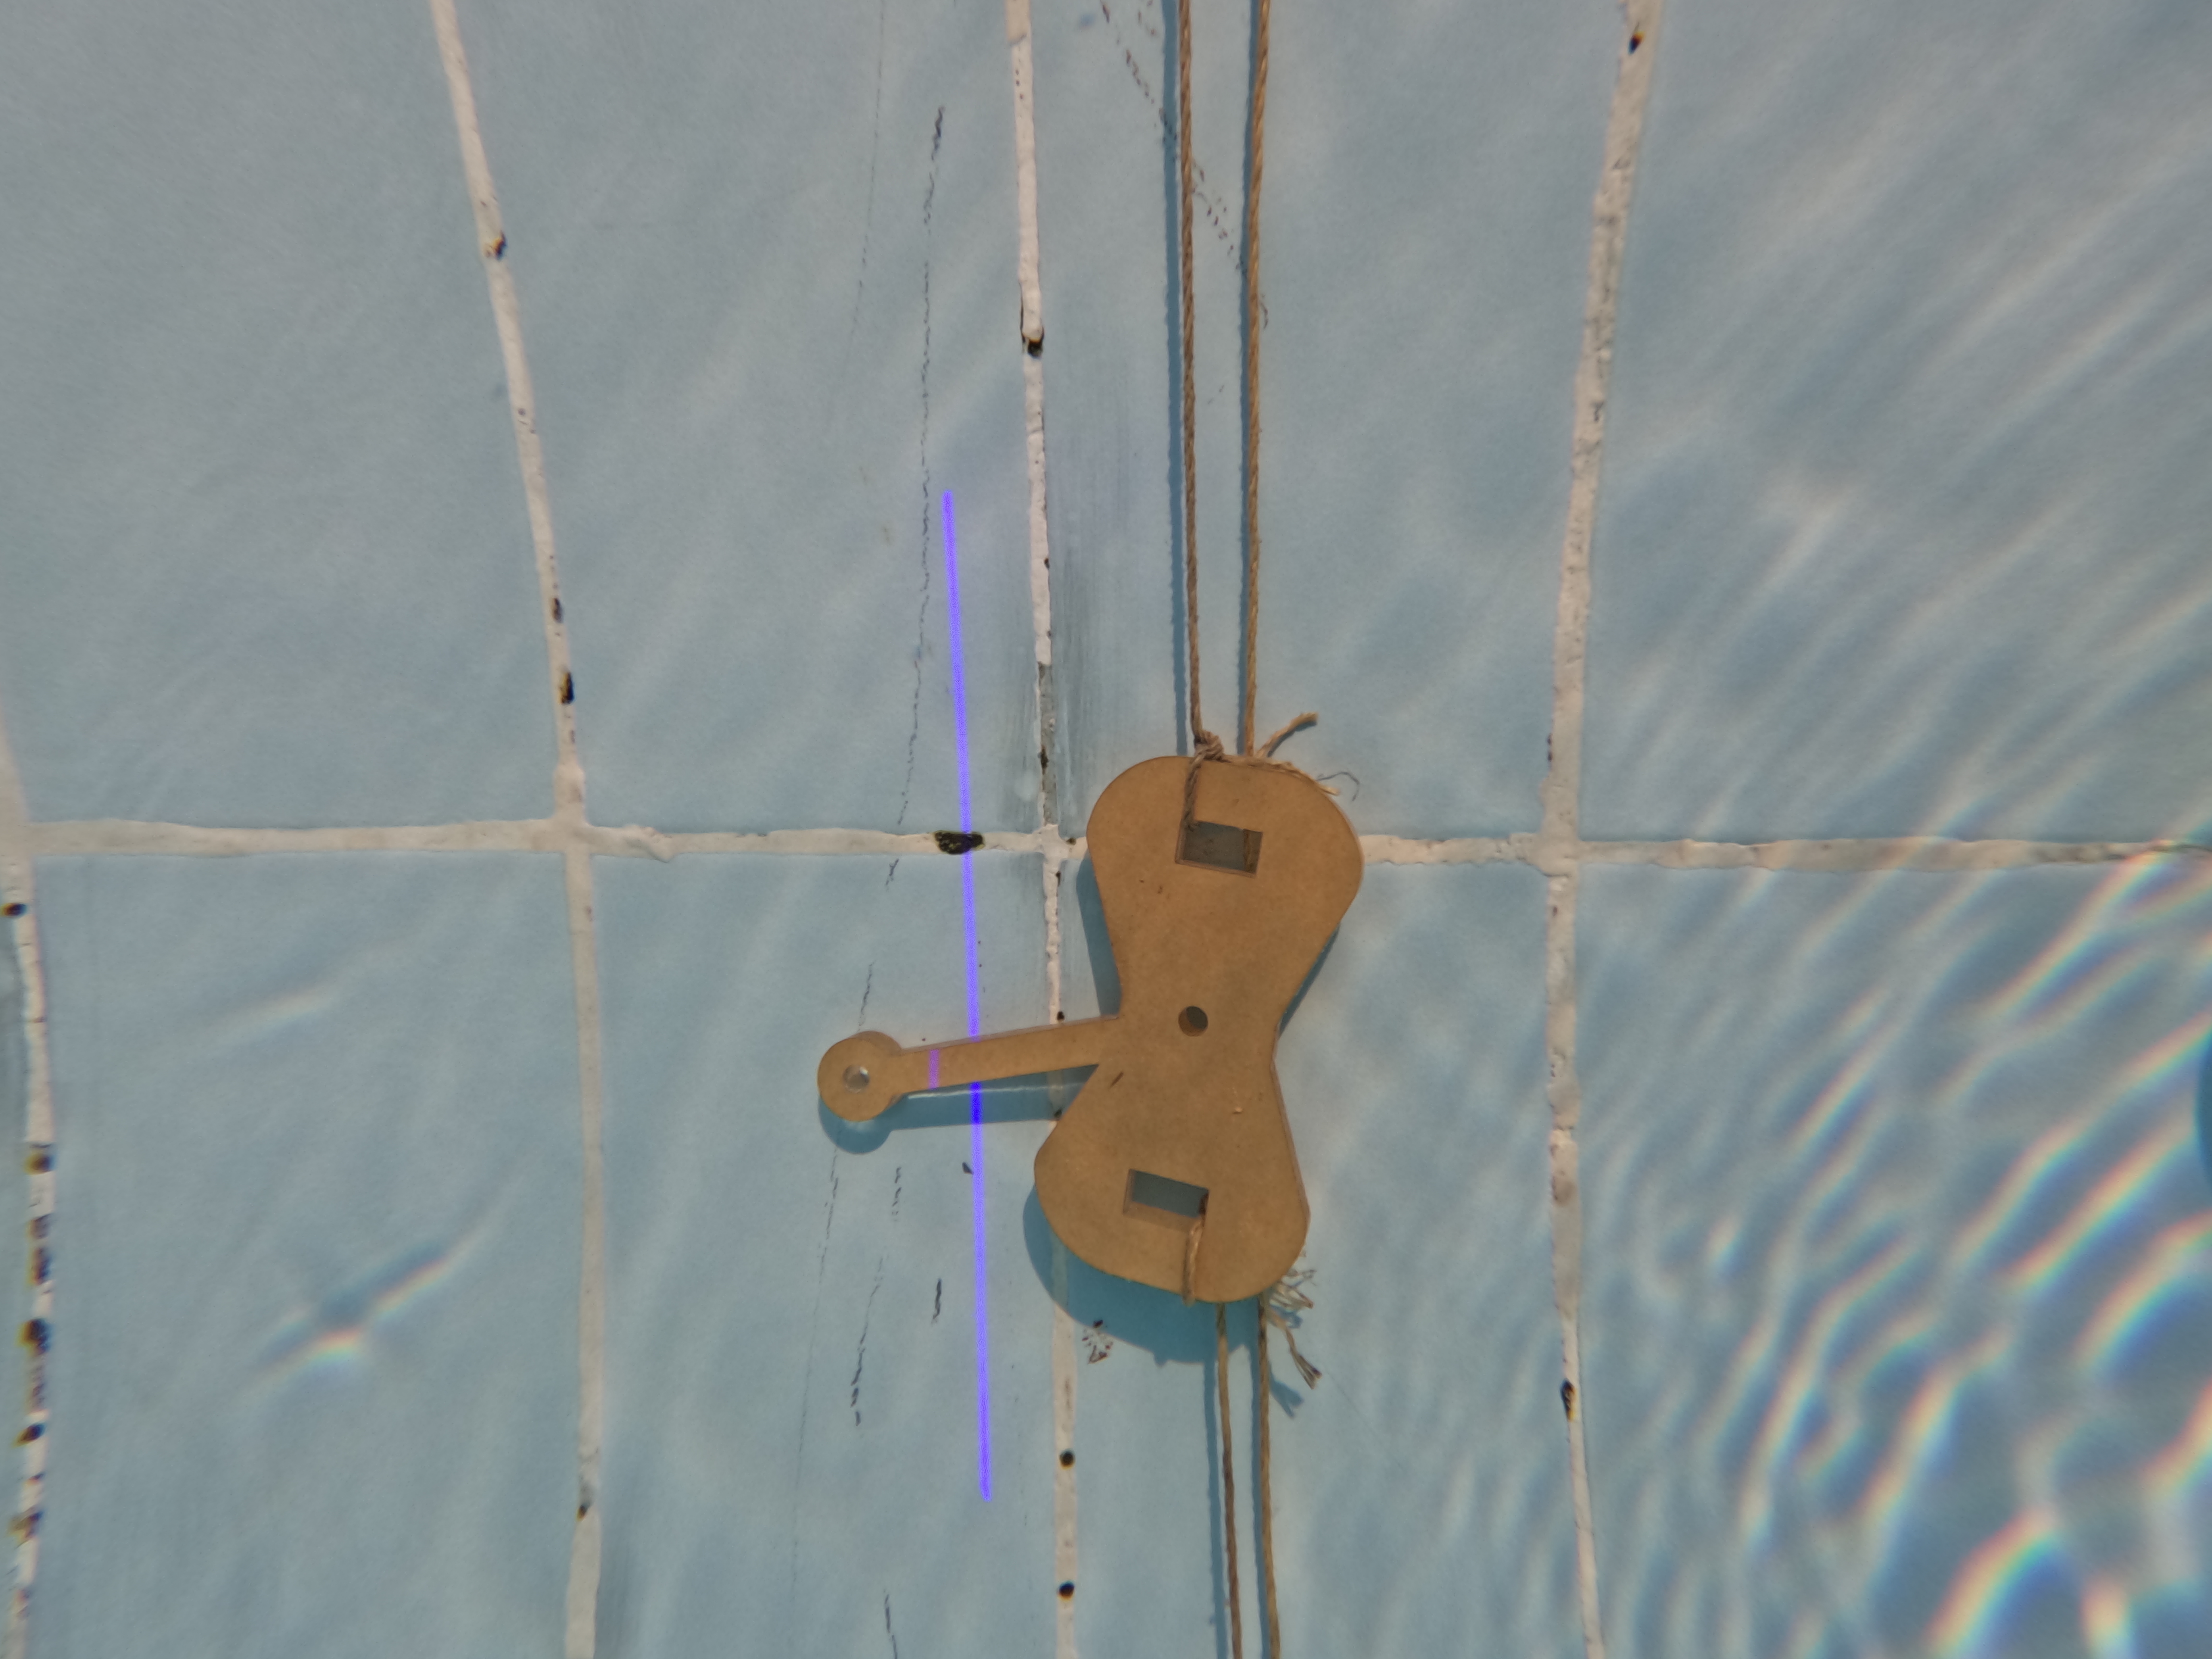

Supplement: Supplementary file 70 [file G0040464.pdf › Level_4_1/G0040464.pdf]

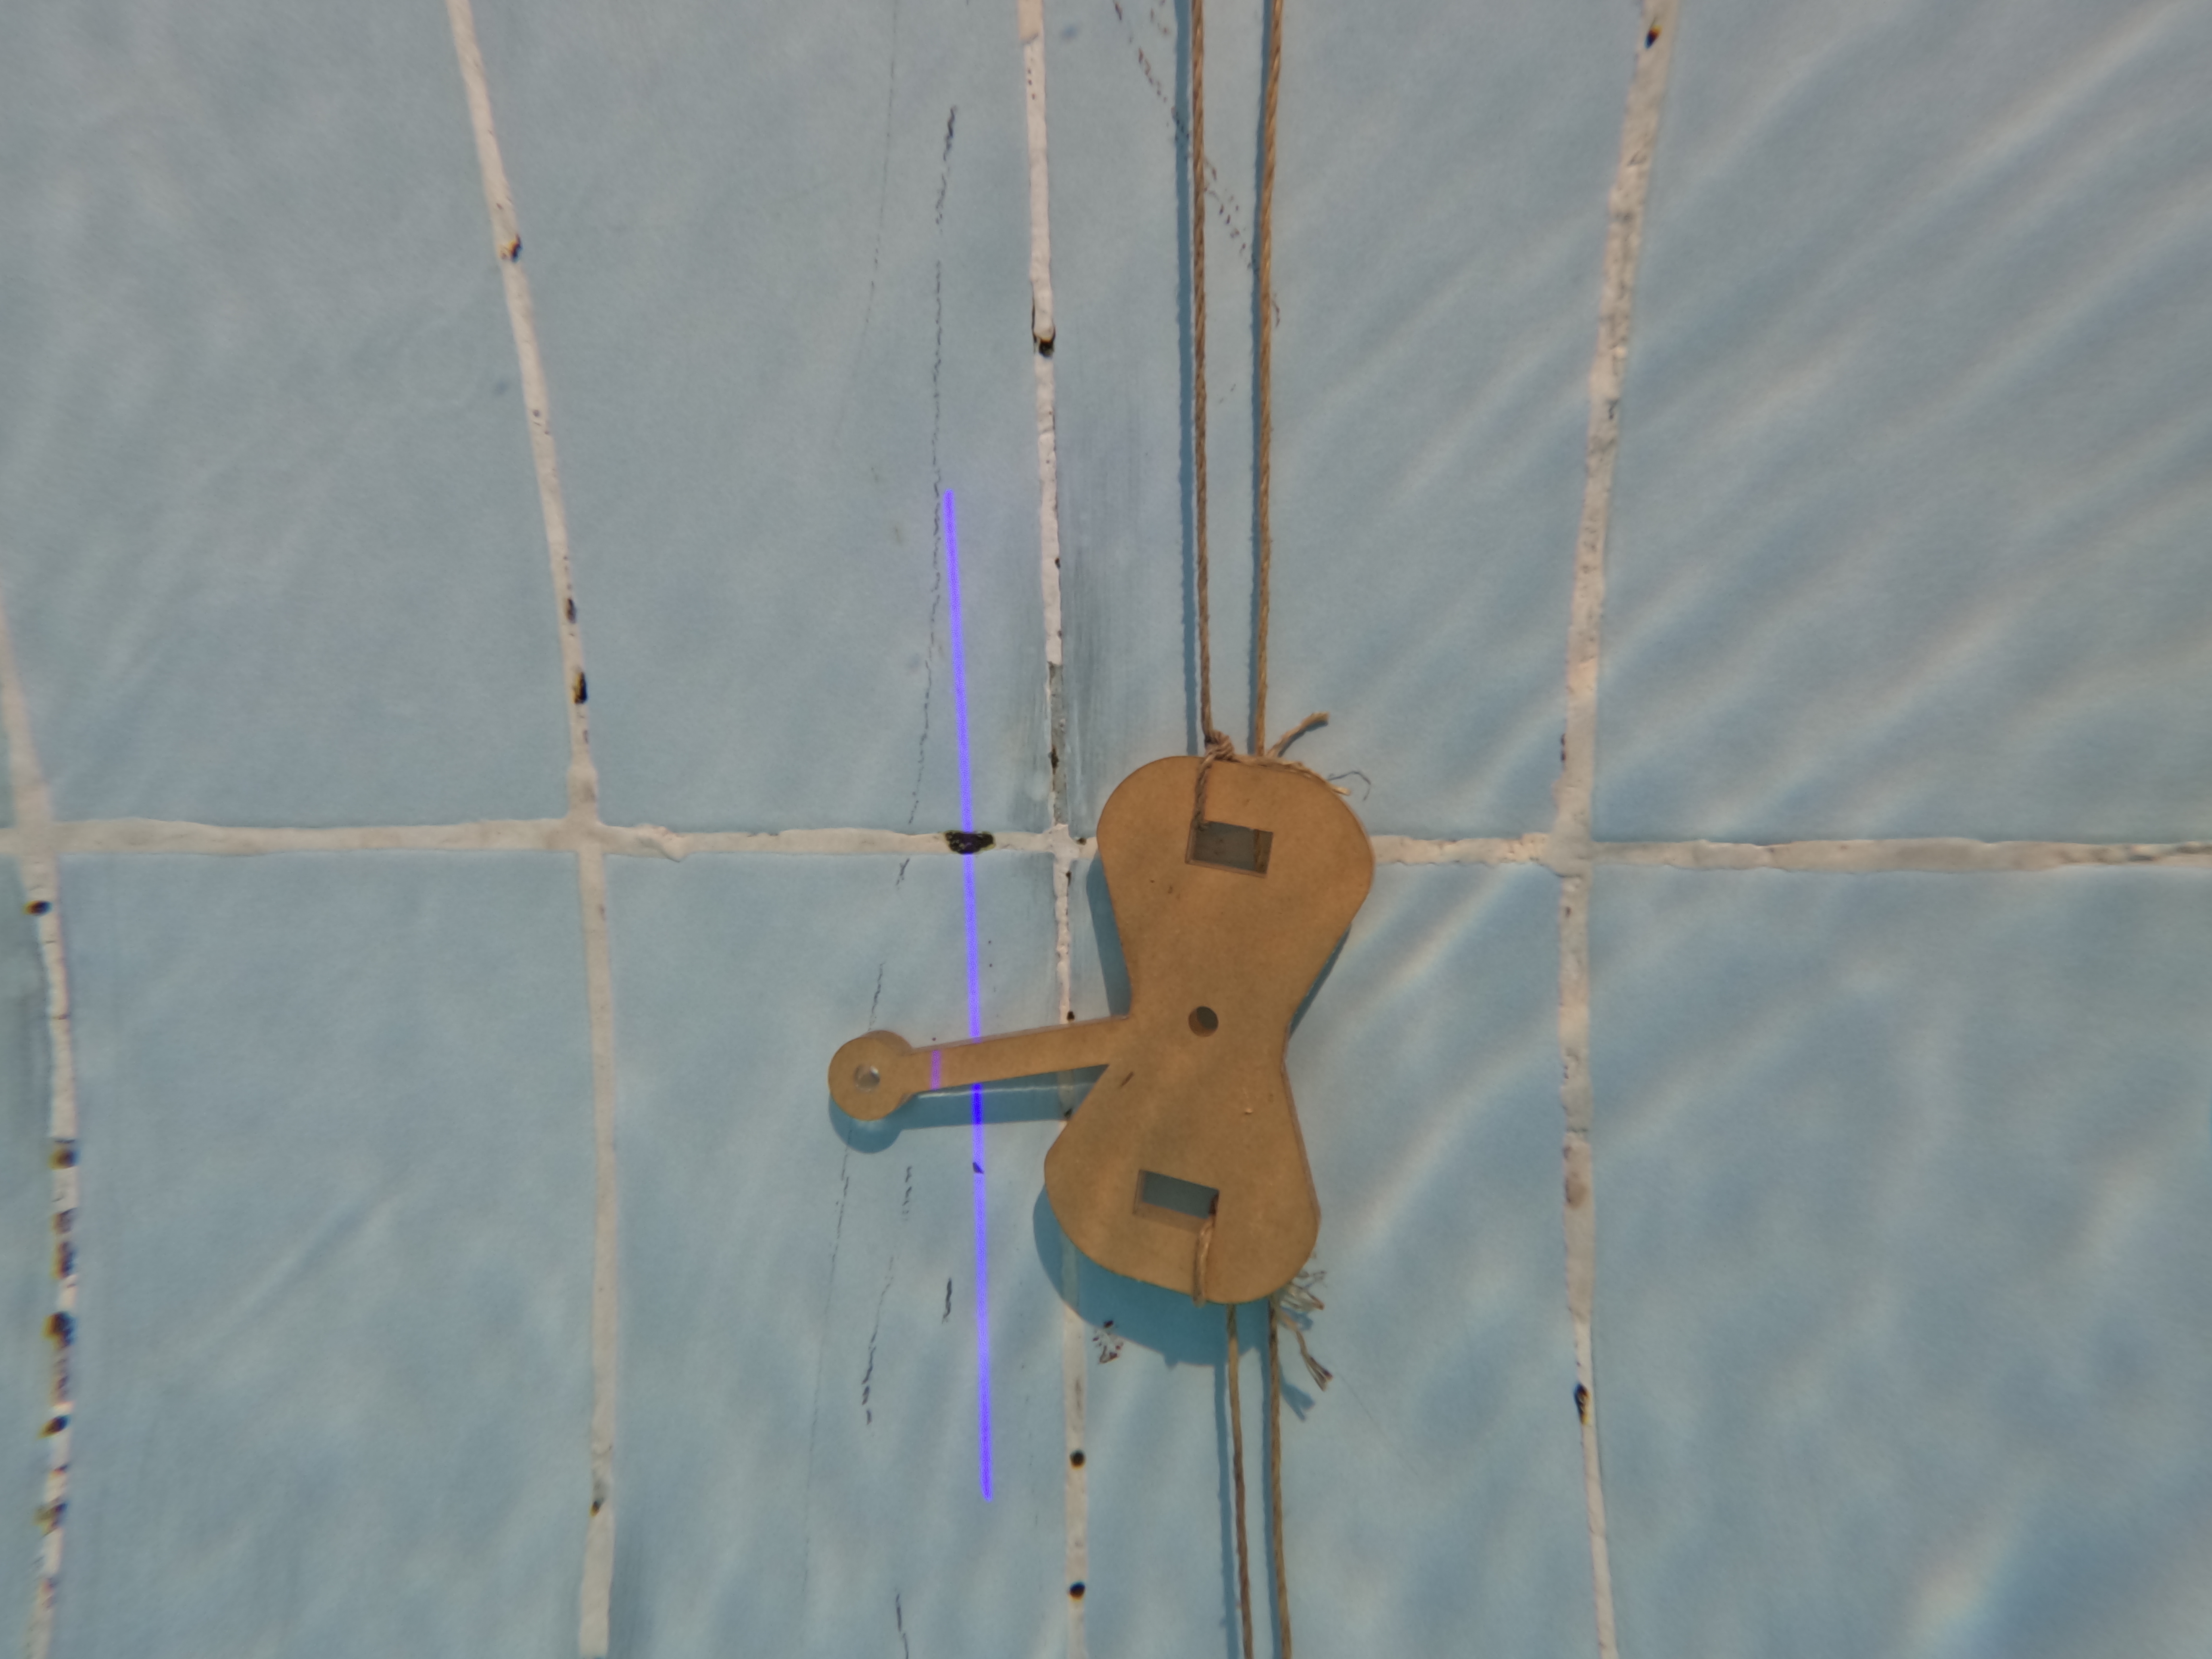

Supplement: Supplementary file 71 [file G0040465.pdf › Level_4_1/G0040465.pdf]

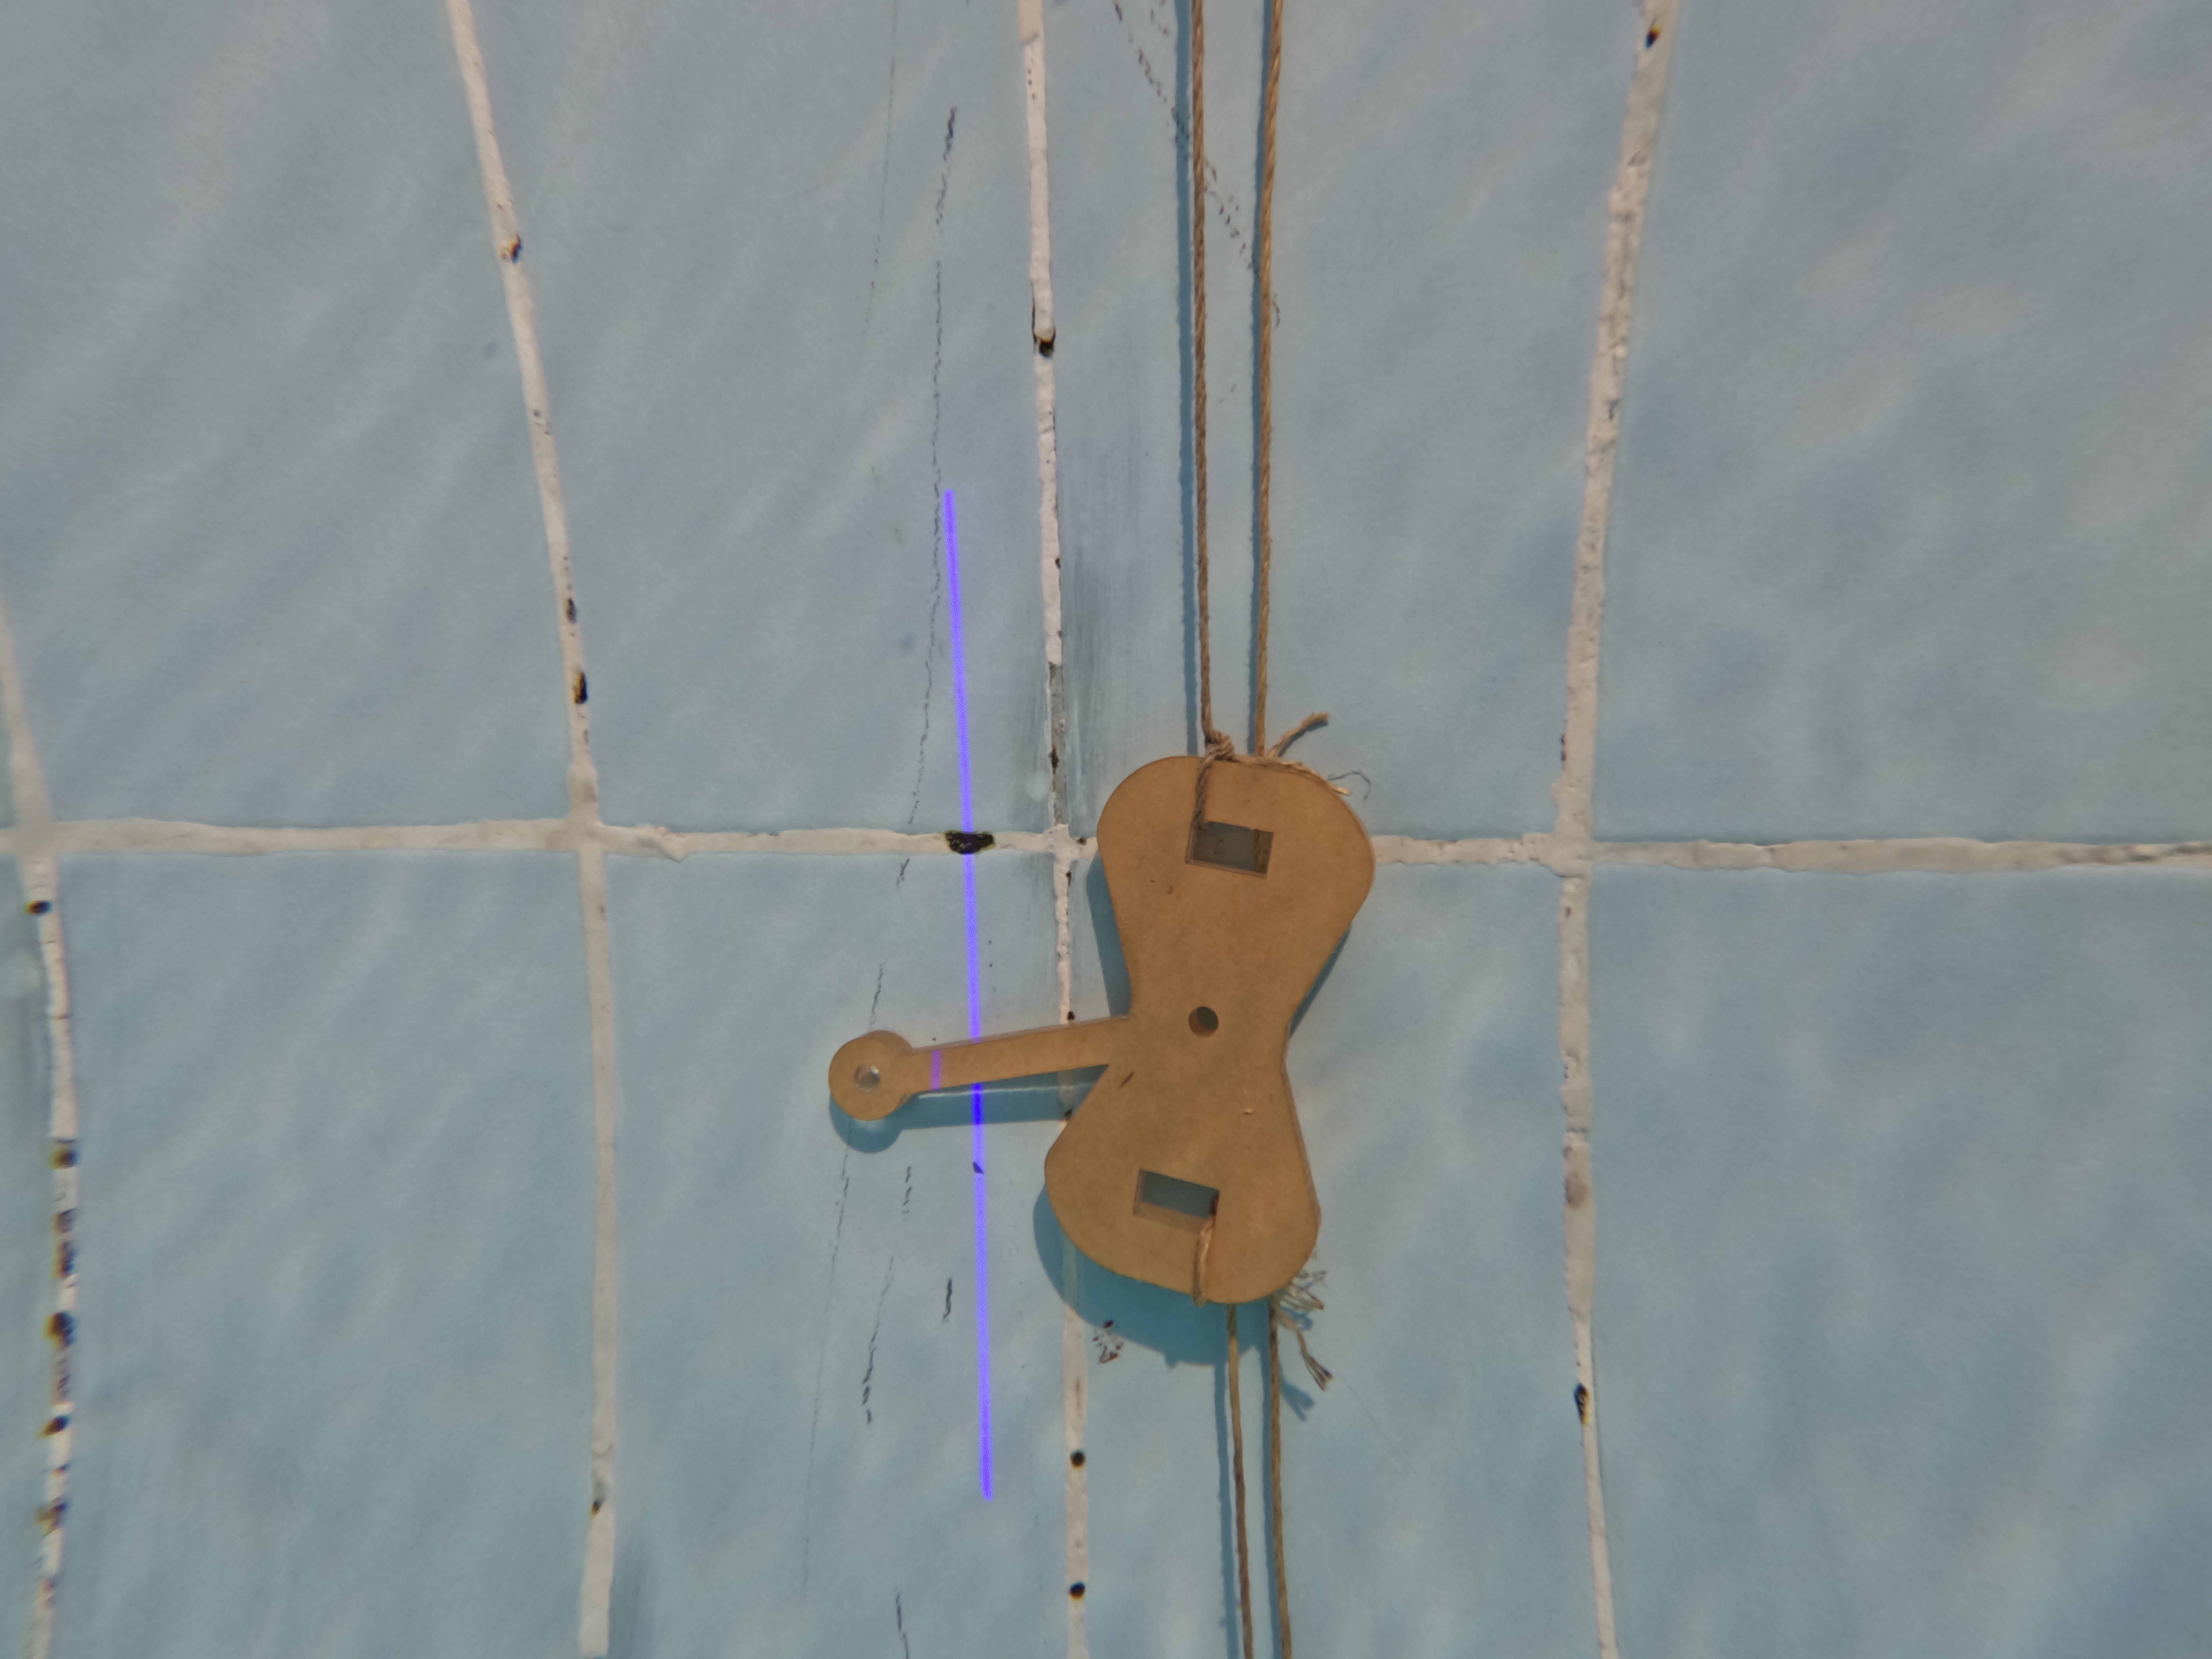

Supplement: Supplementary file 72 [file G0040466.pdf › Level_4_1/G0040466.pdf]

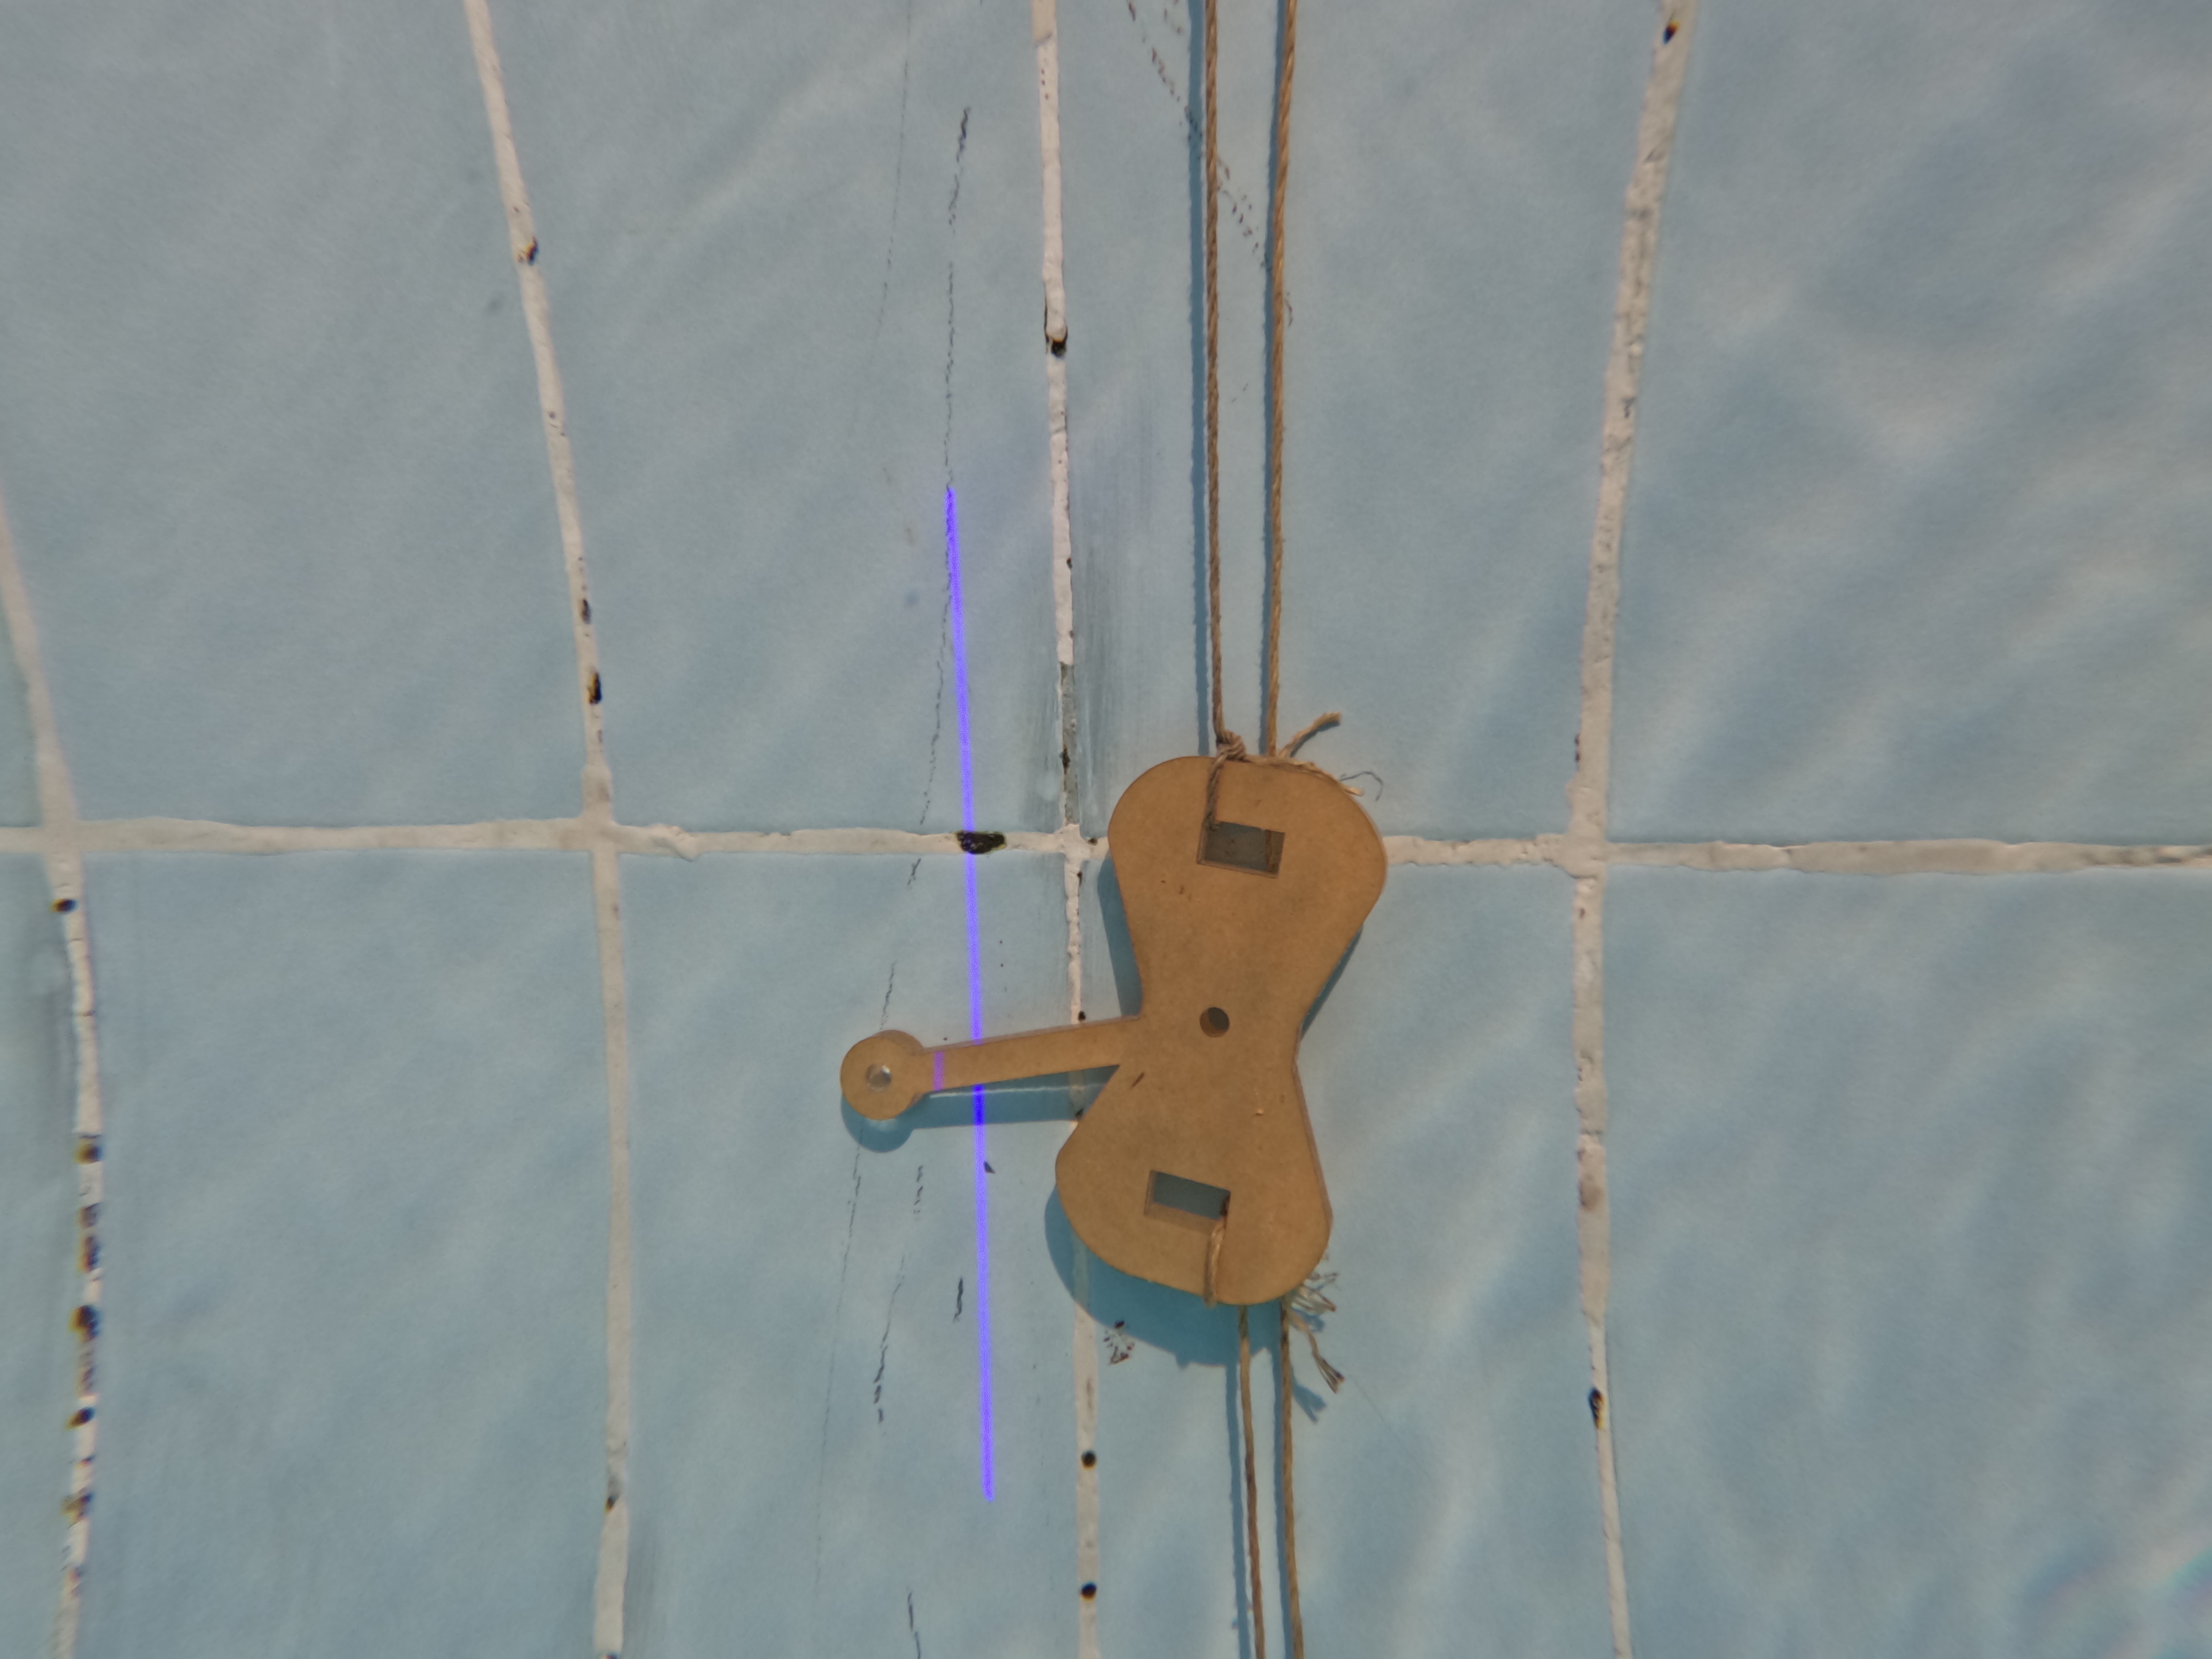

Supplement: Supplementary file 73 [file G0040467.pdf › Level_4_1/G0040467.pdf]

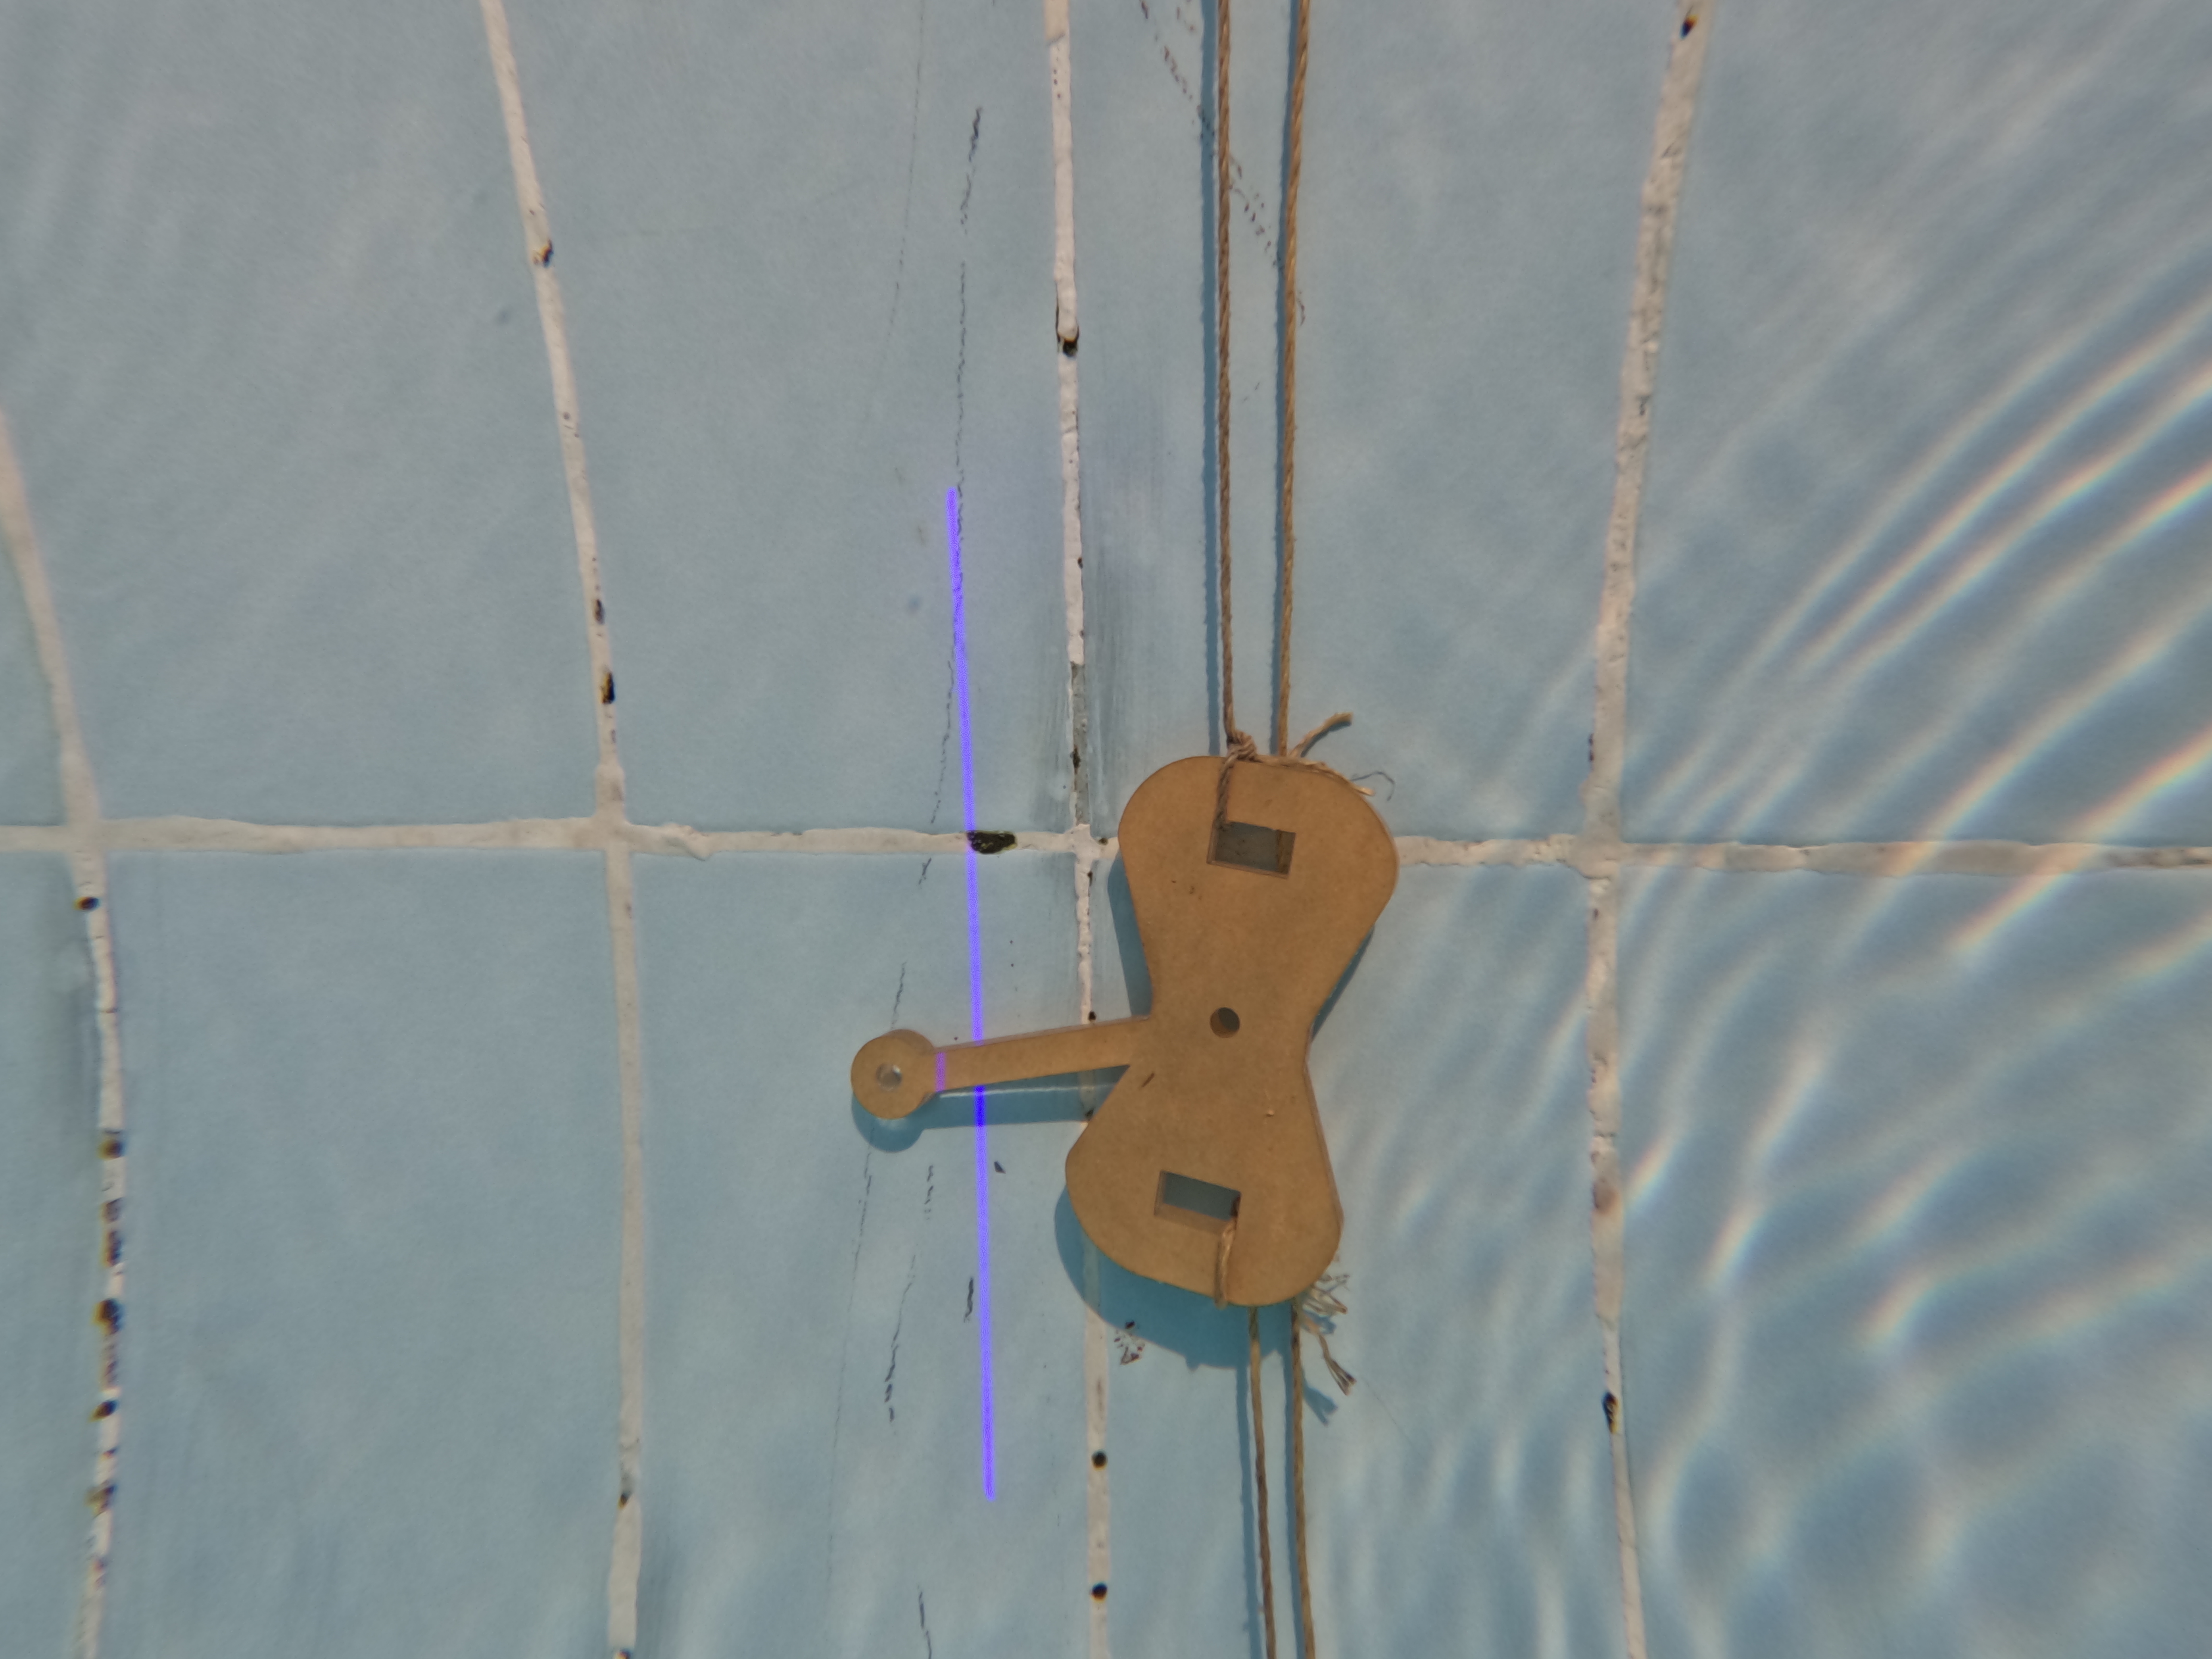

Supplement: Supplementary file 74 [file G0040468.pdf › Level_4_1/G0040468.pdf]

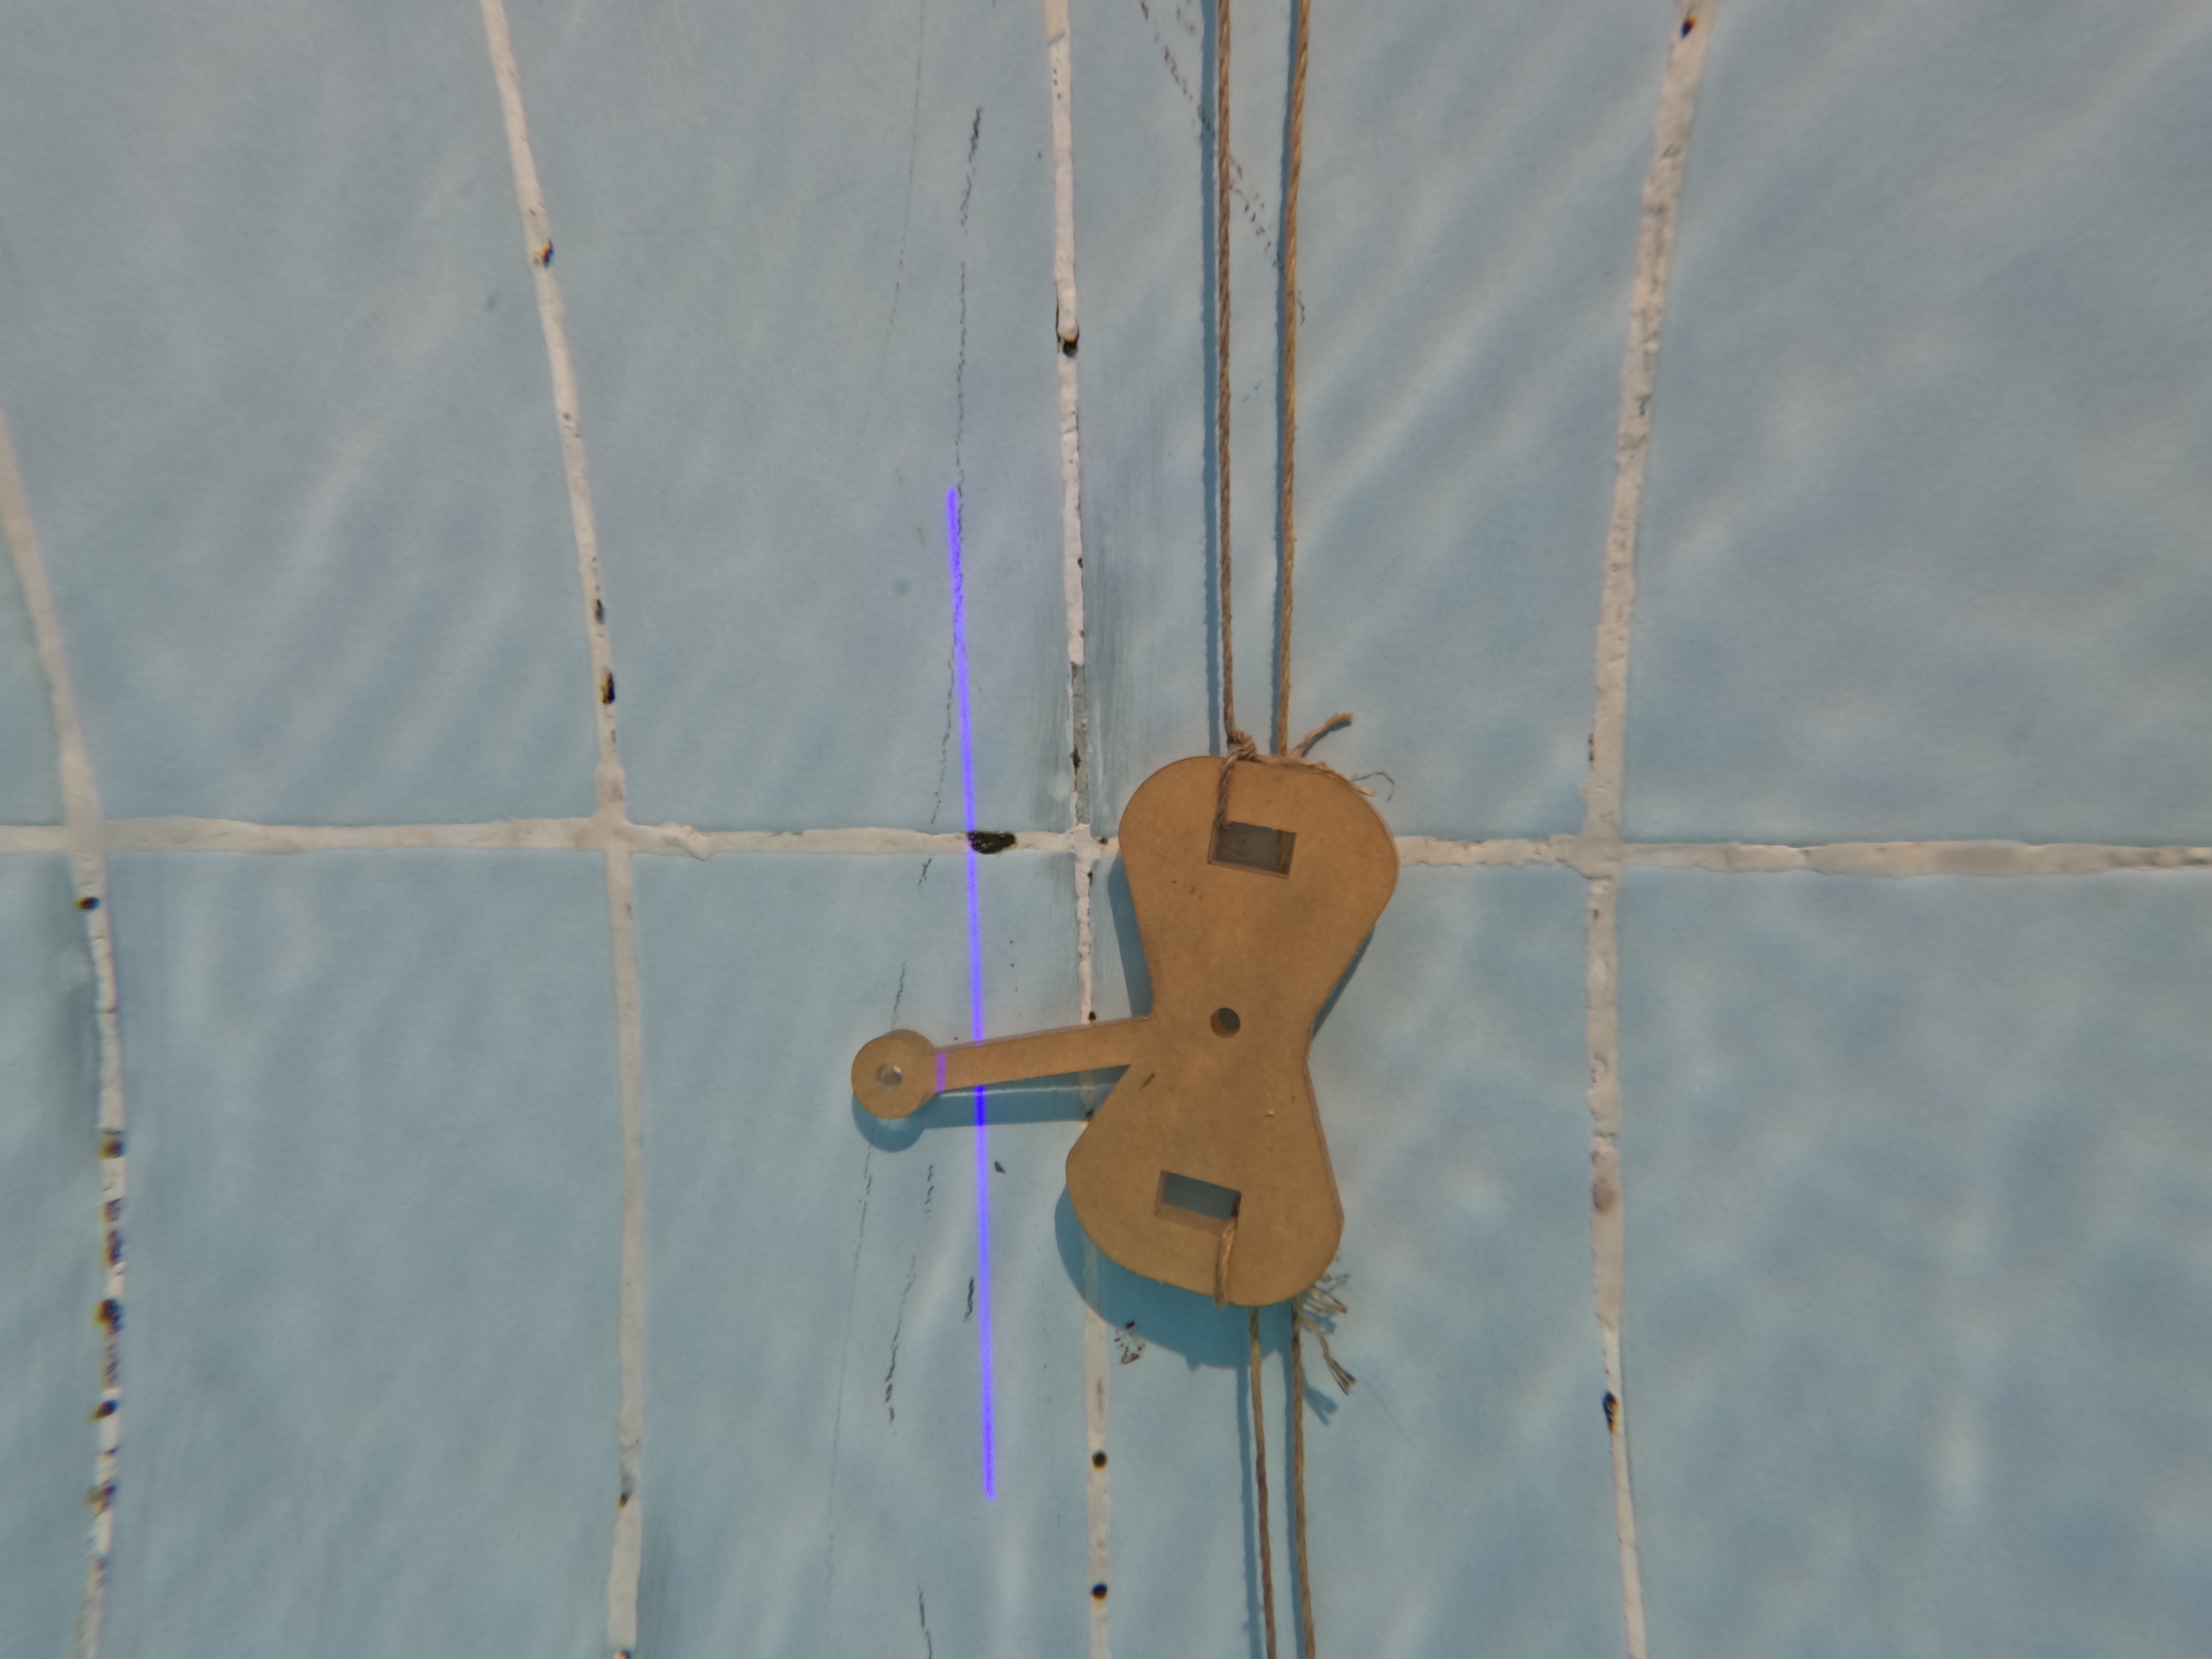

Supplement: Supplementary file 75 [file G0040469.pdf › Level_4_1/G0040469.pdf]

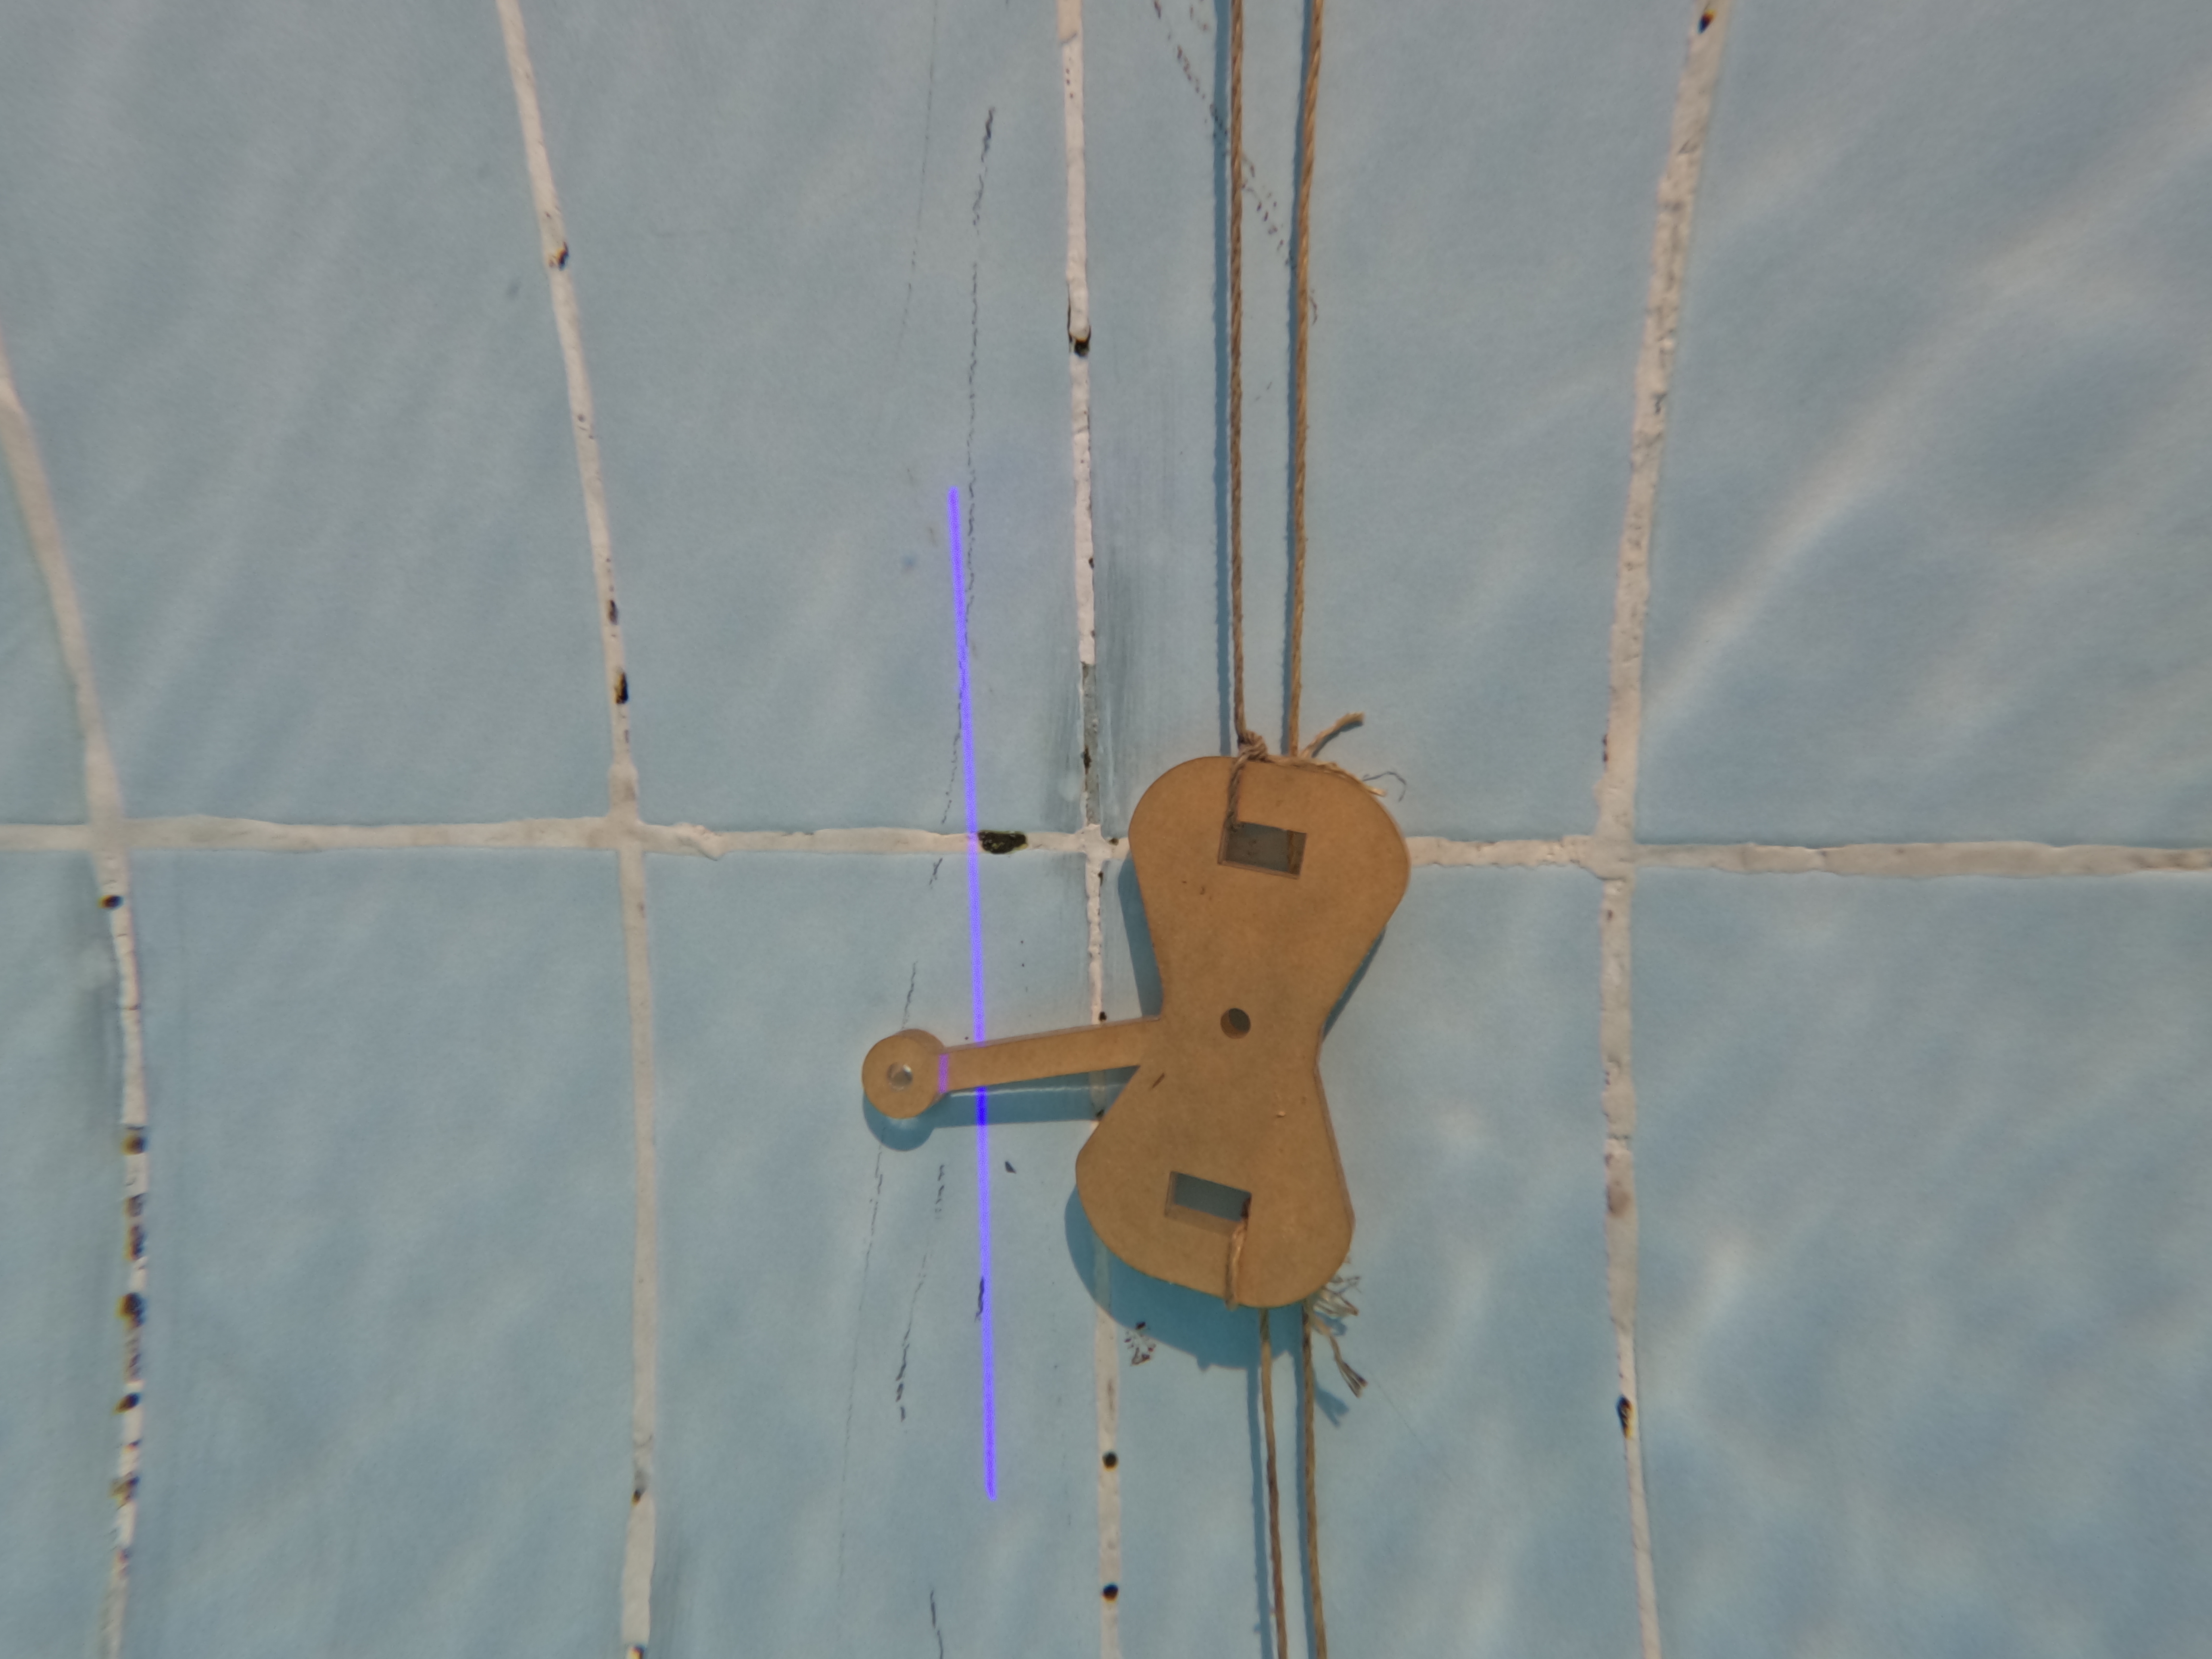

Supplement: Supplementary file 76 [file G0040470.pdf › Level_4_1/G0040470.pdf]

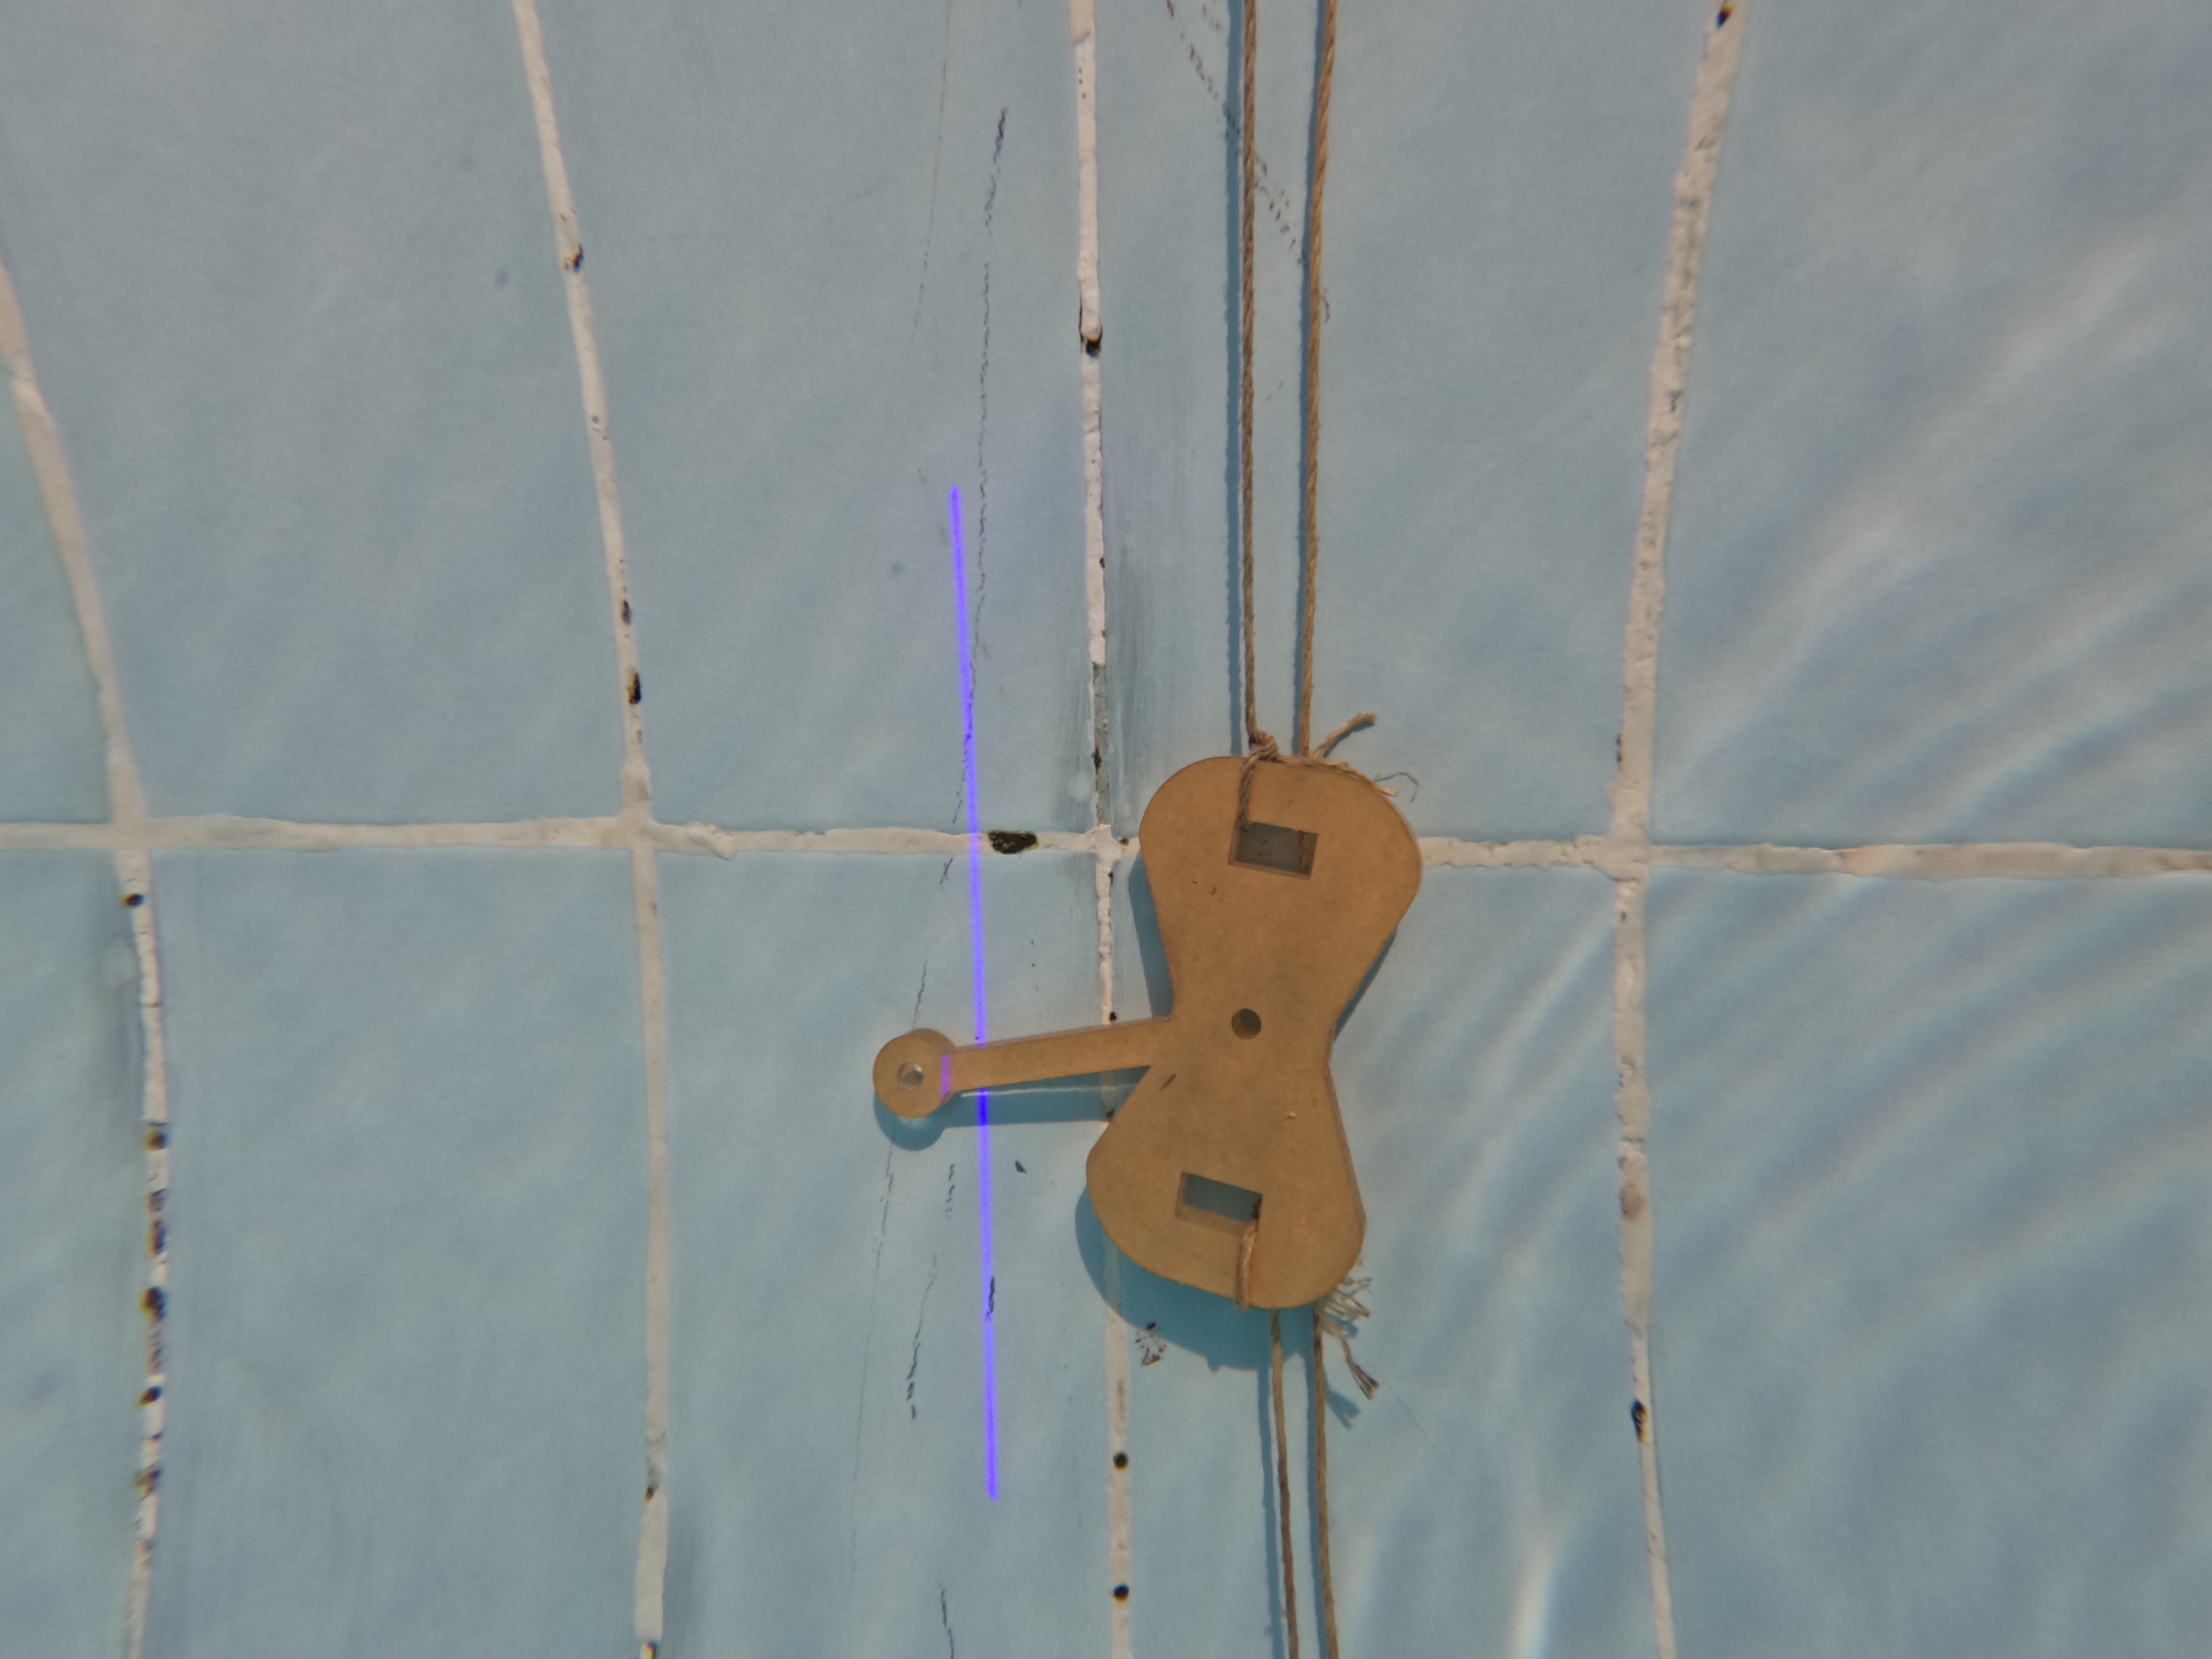

Supplement: Supplementary file 77 [file G0040471.pdf › Level_4_1/G0040471.pdf]

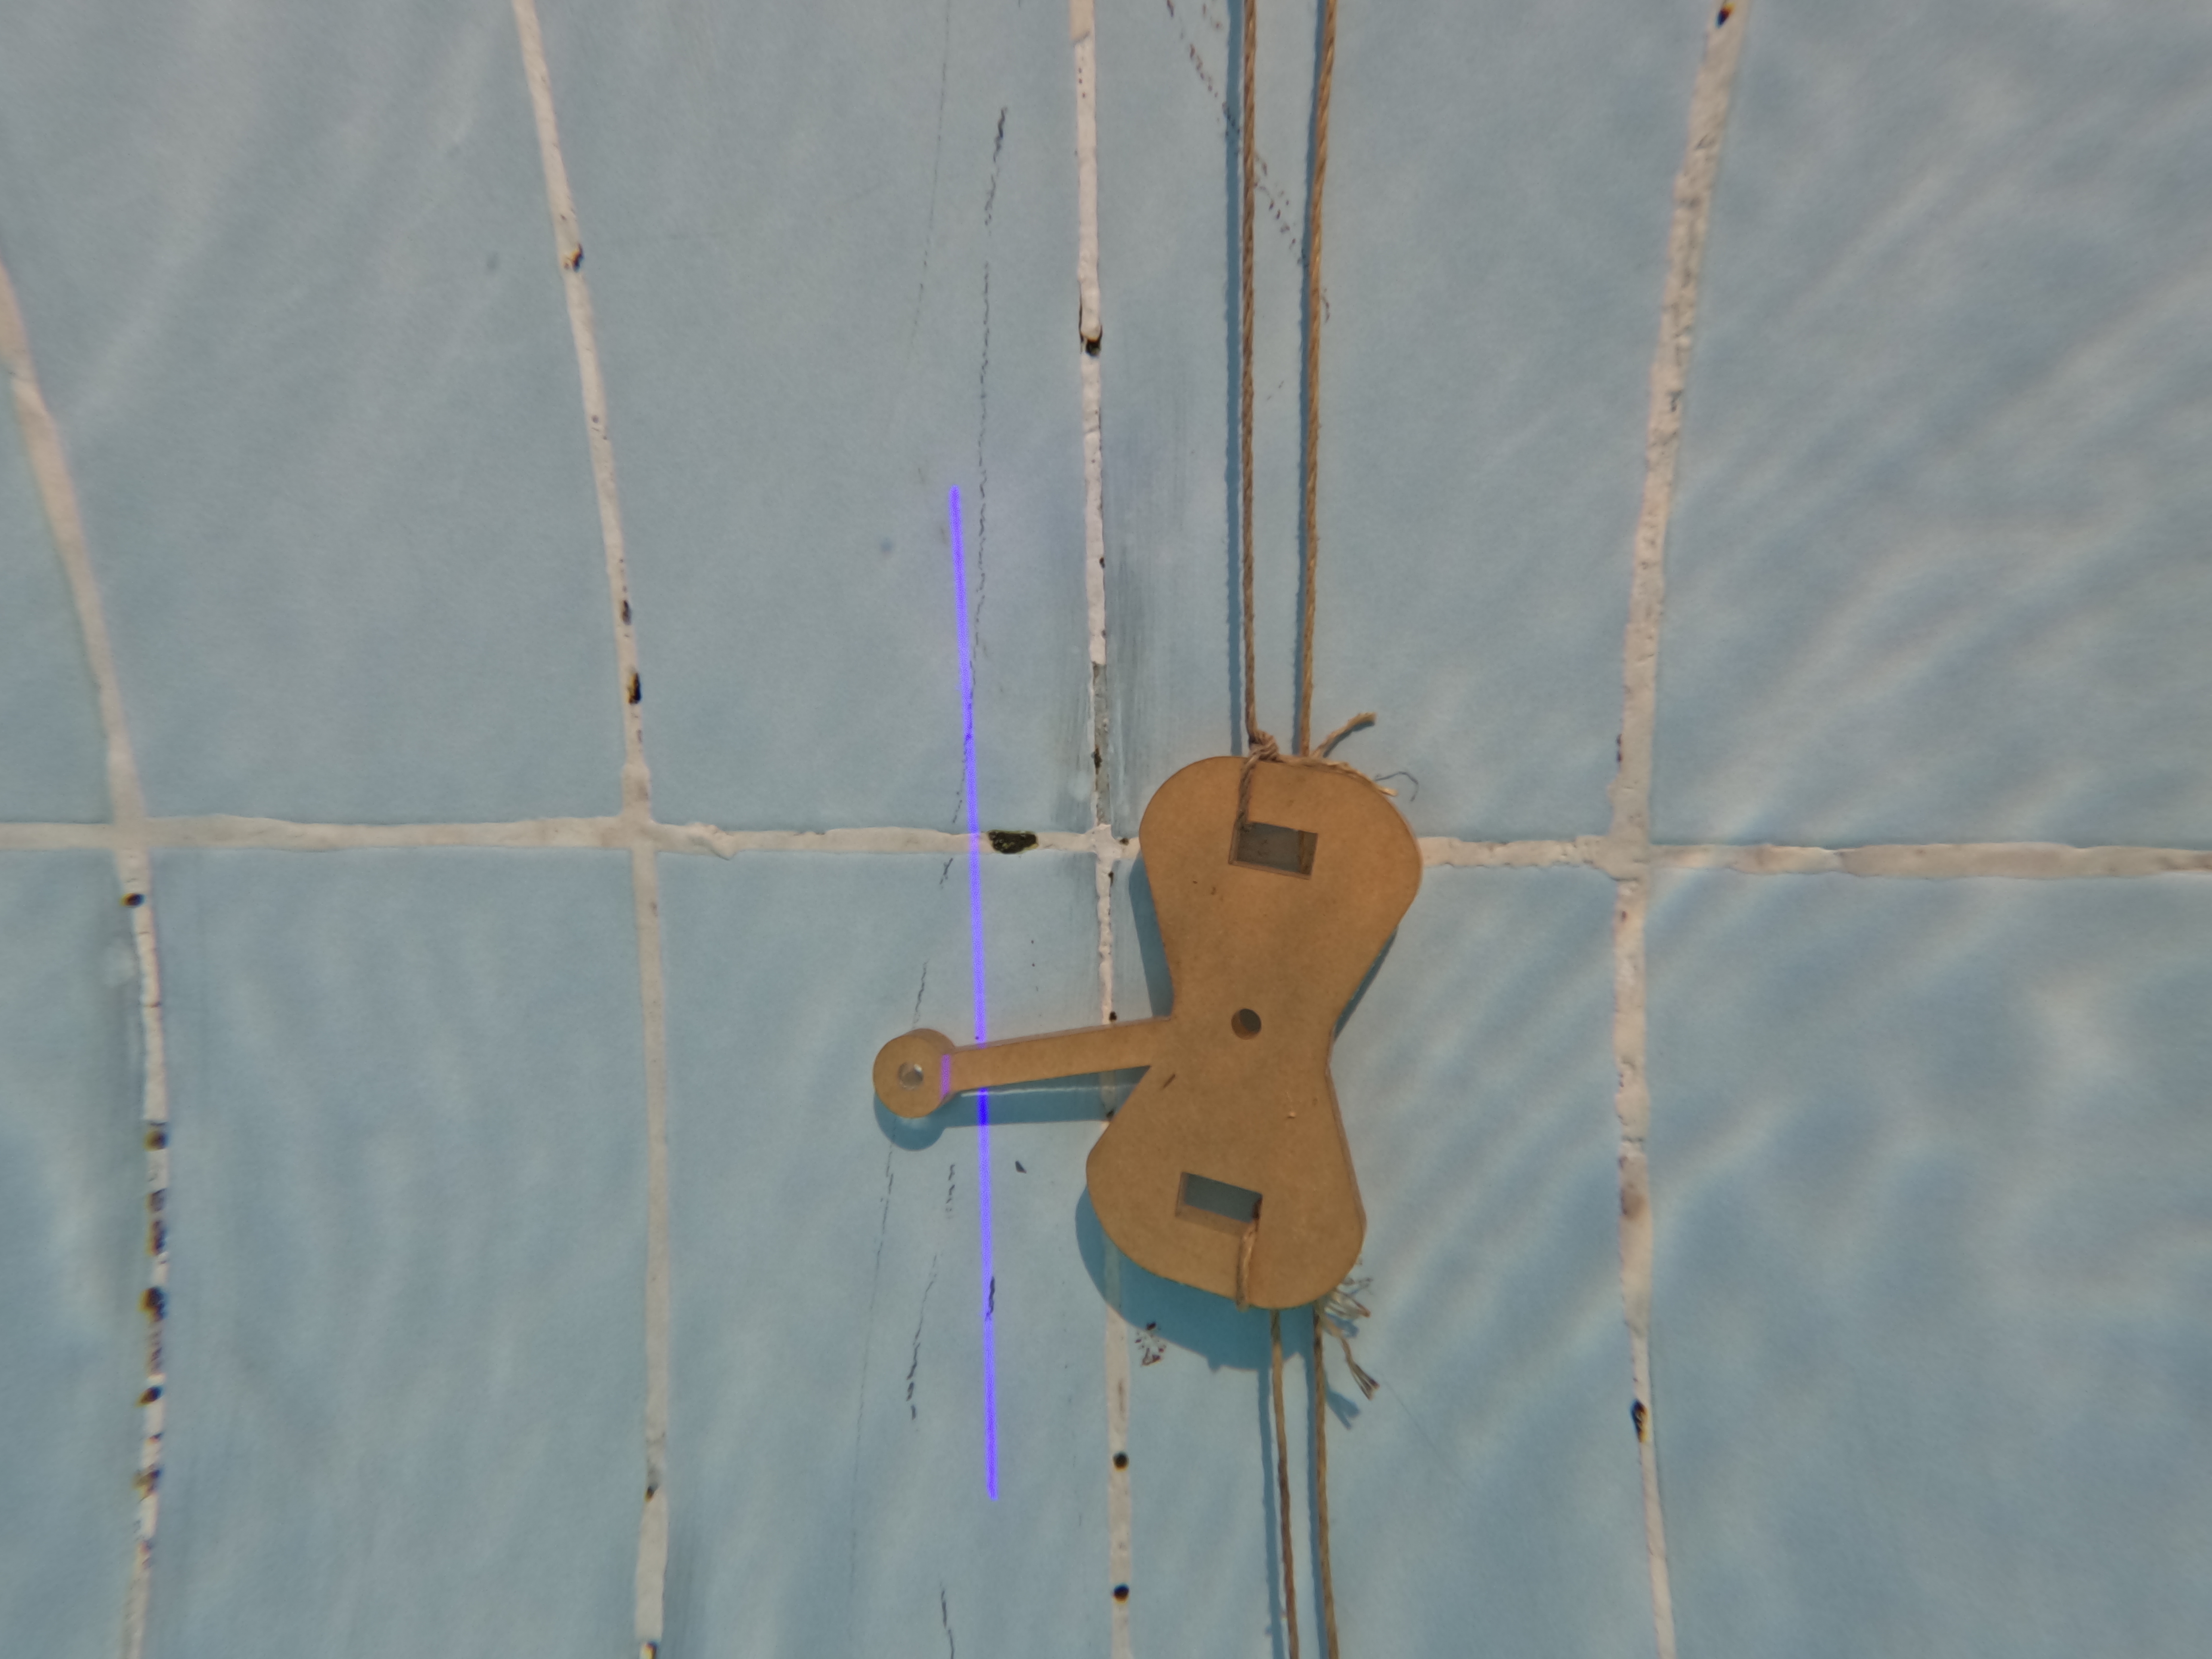

Supplement: Supplementary file 78 [file G0040472.pdf › Level_4_1/G0040472.pdf]

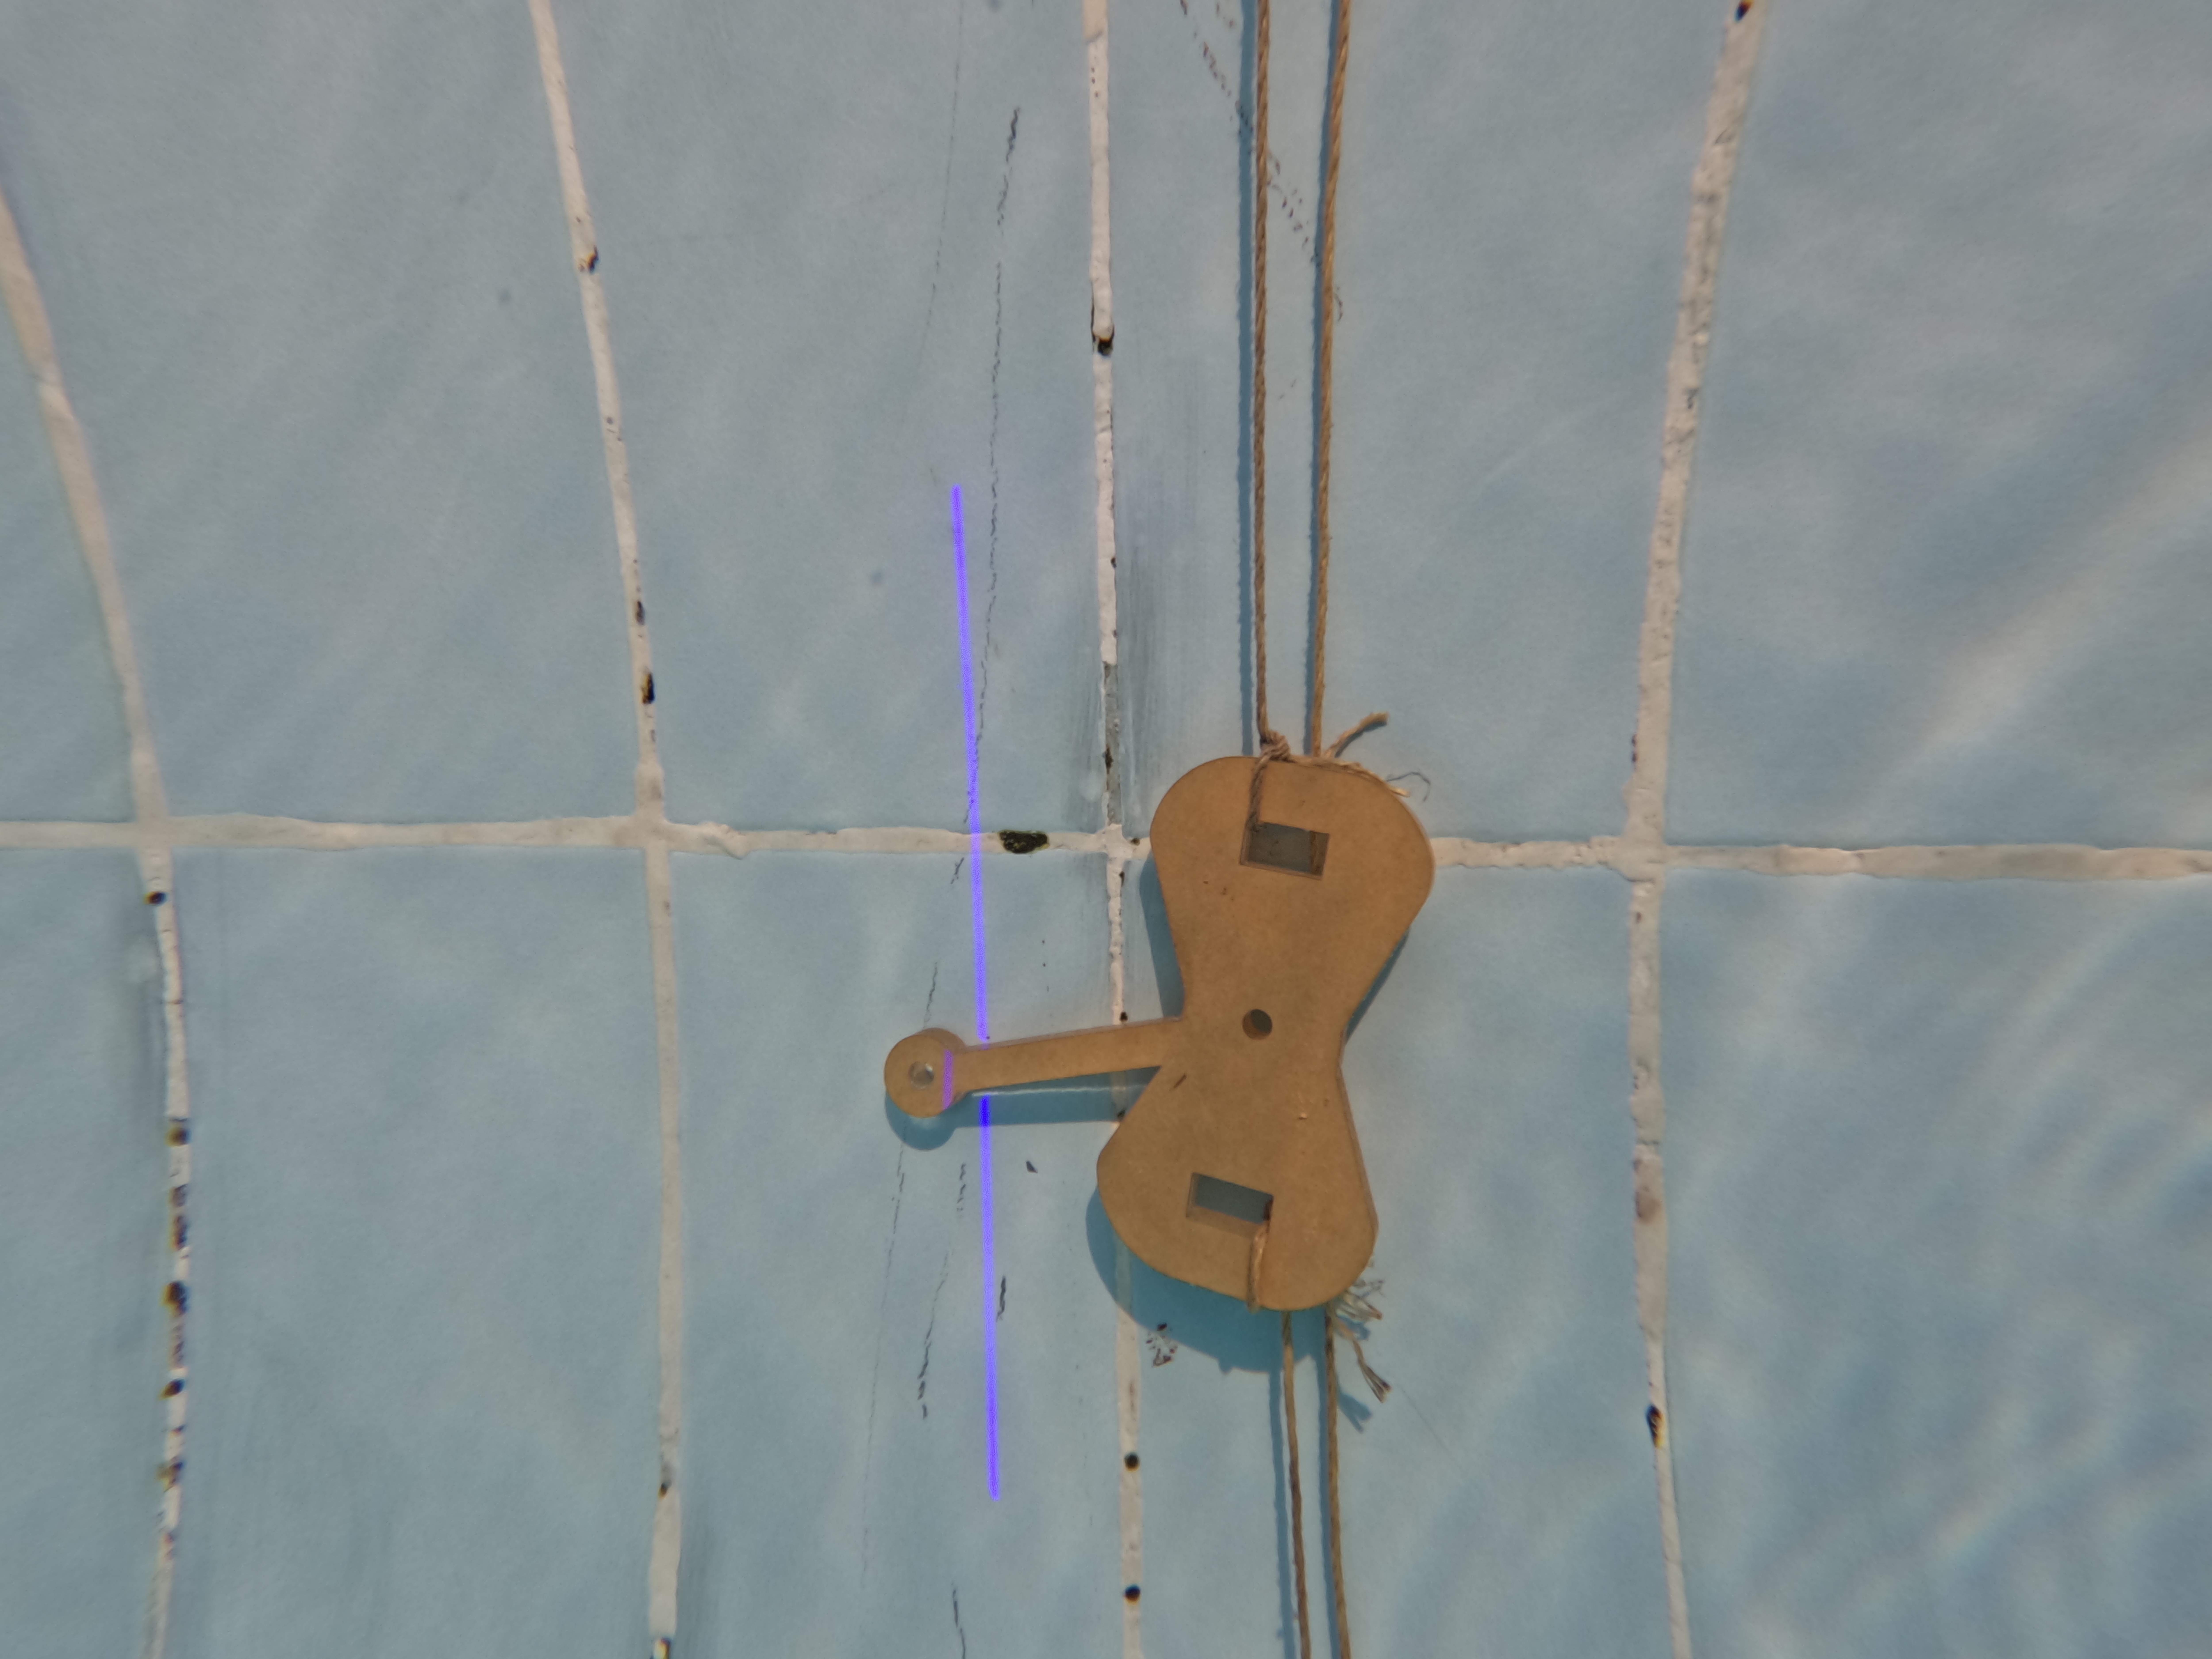

Supplement: Supplementary file 79 [file G0040473.pdf › Level_4_1/G0040473.pdf]

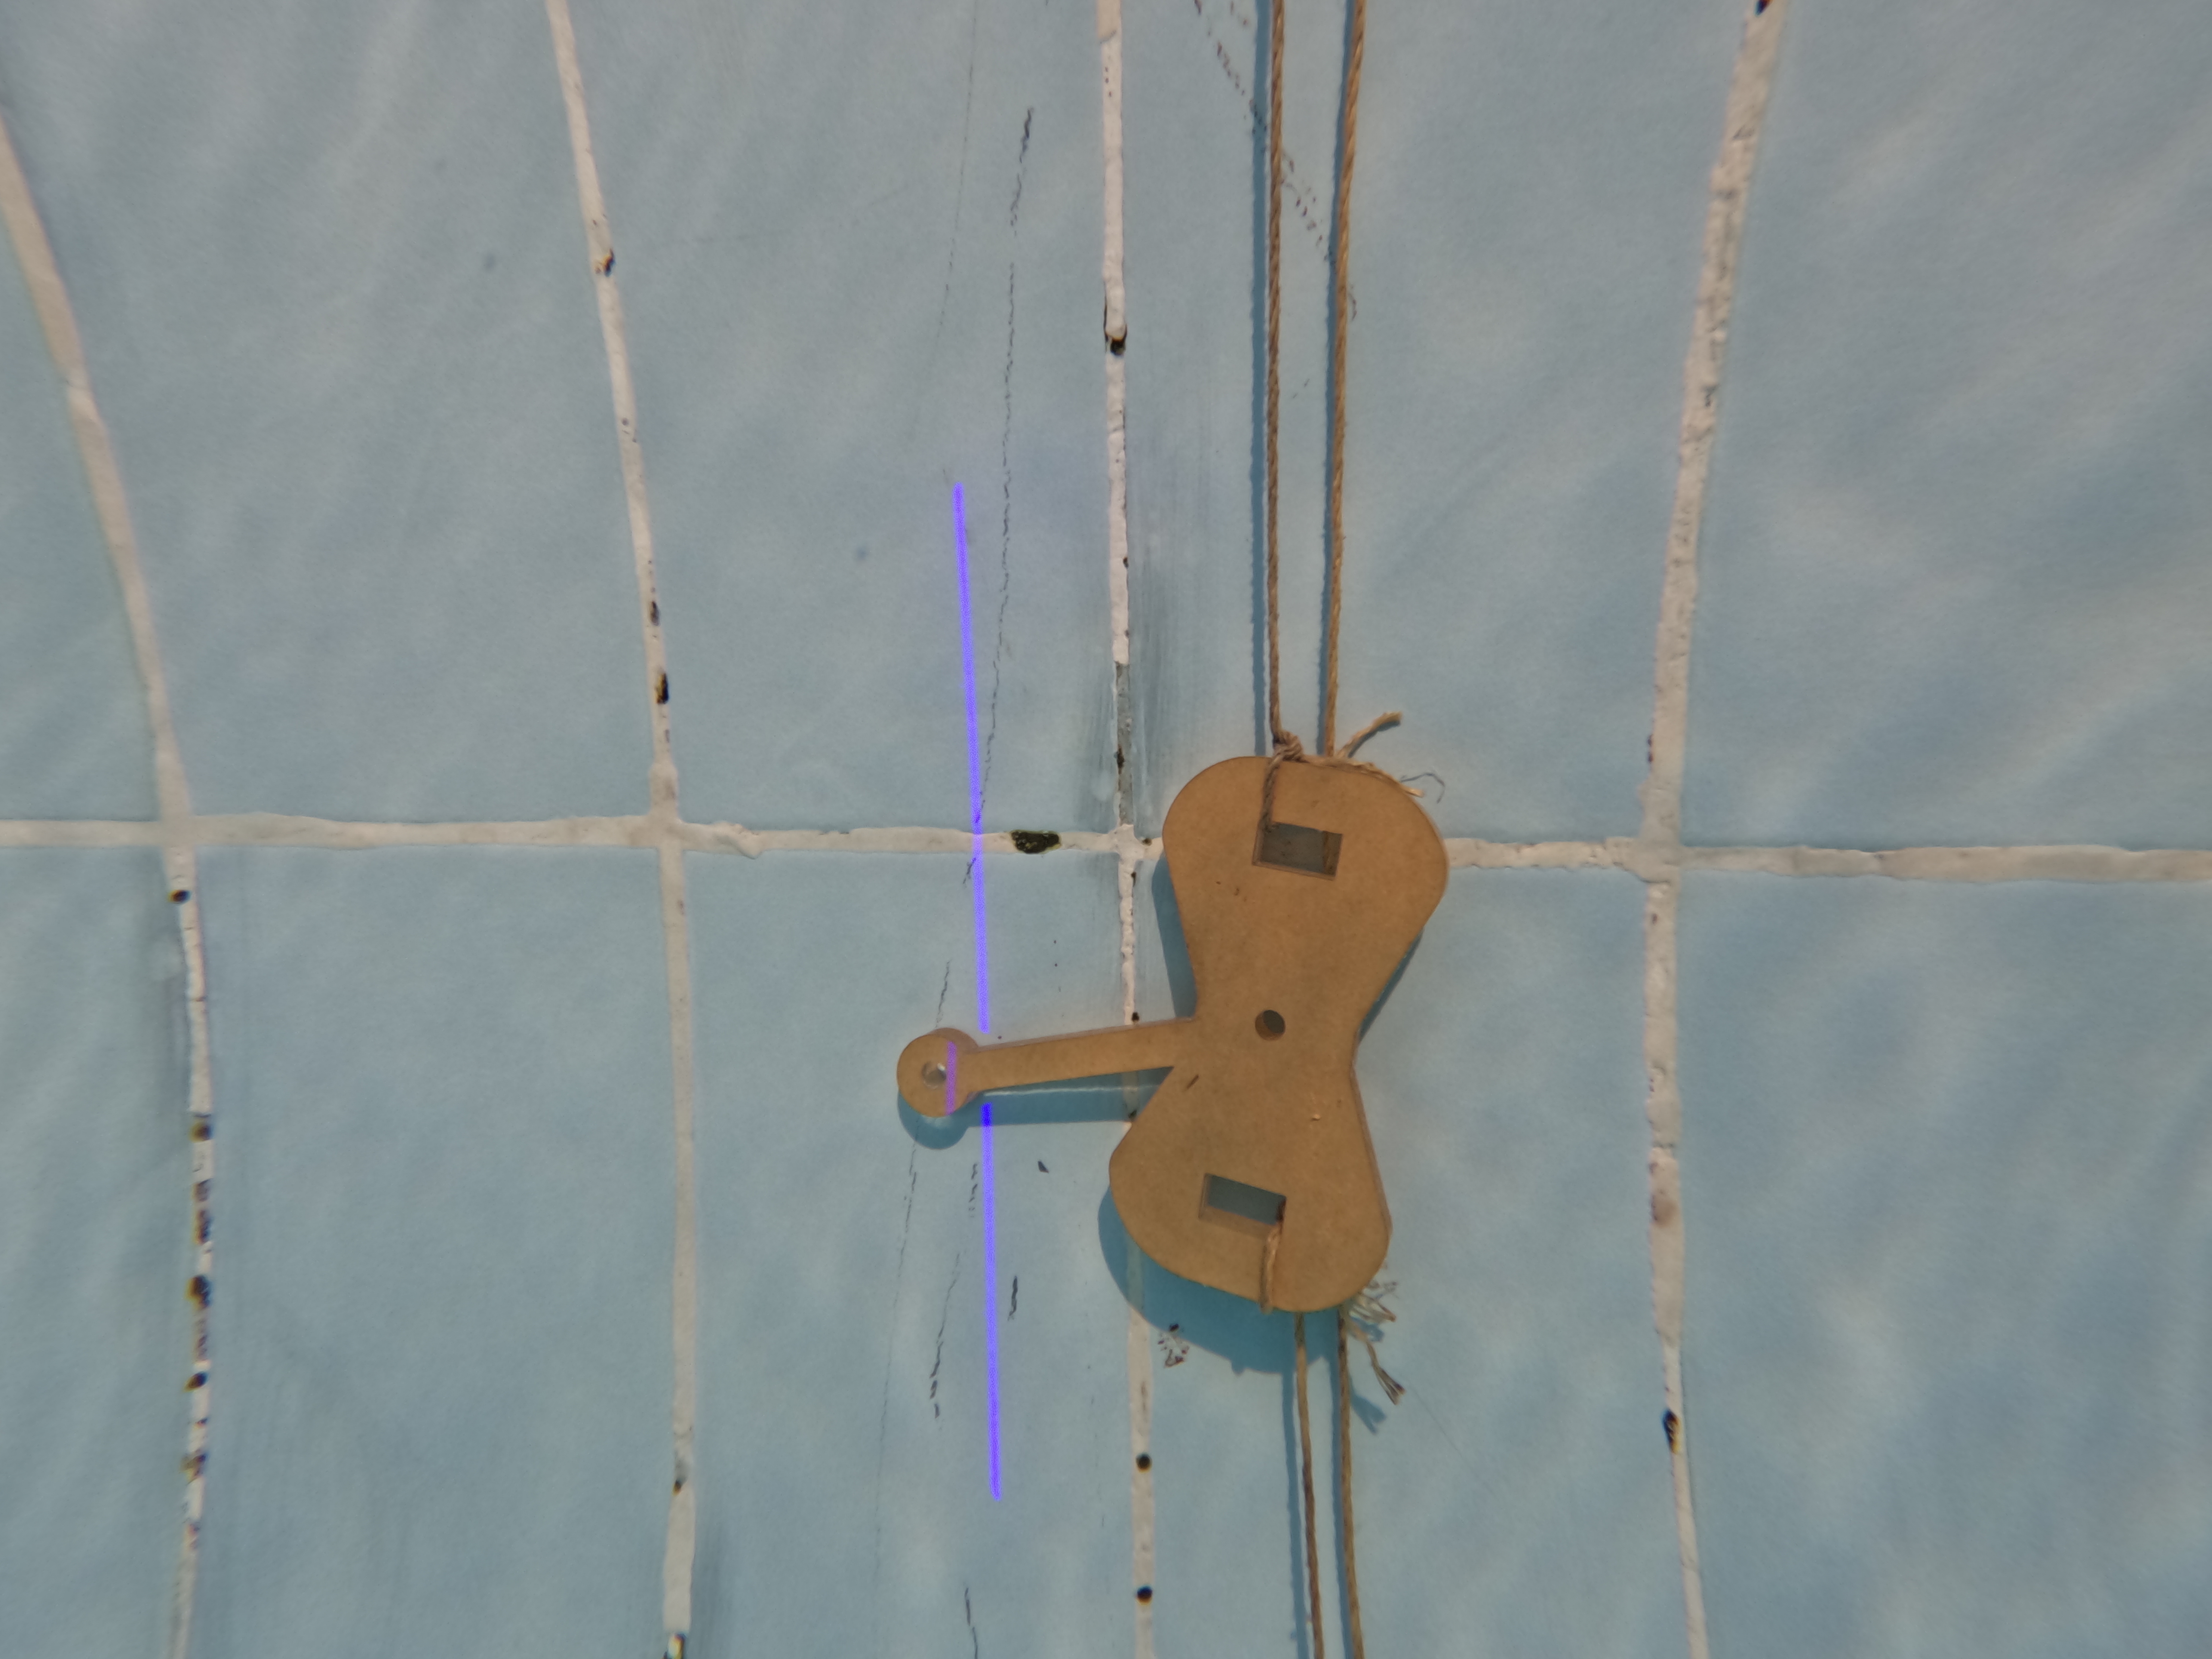

Supplement: Supplementary file 80 [file G0040474.pdf › Level_4_1/G0040474.pdf]

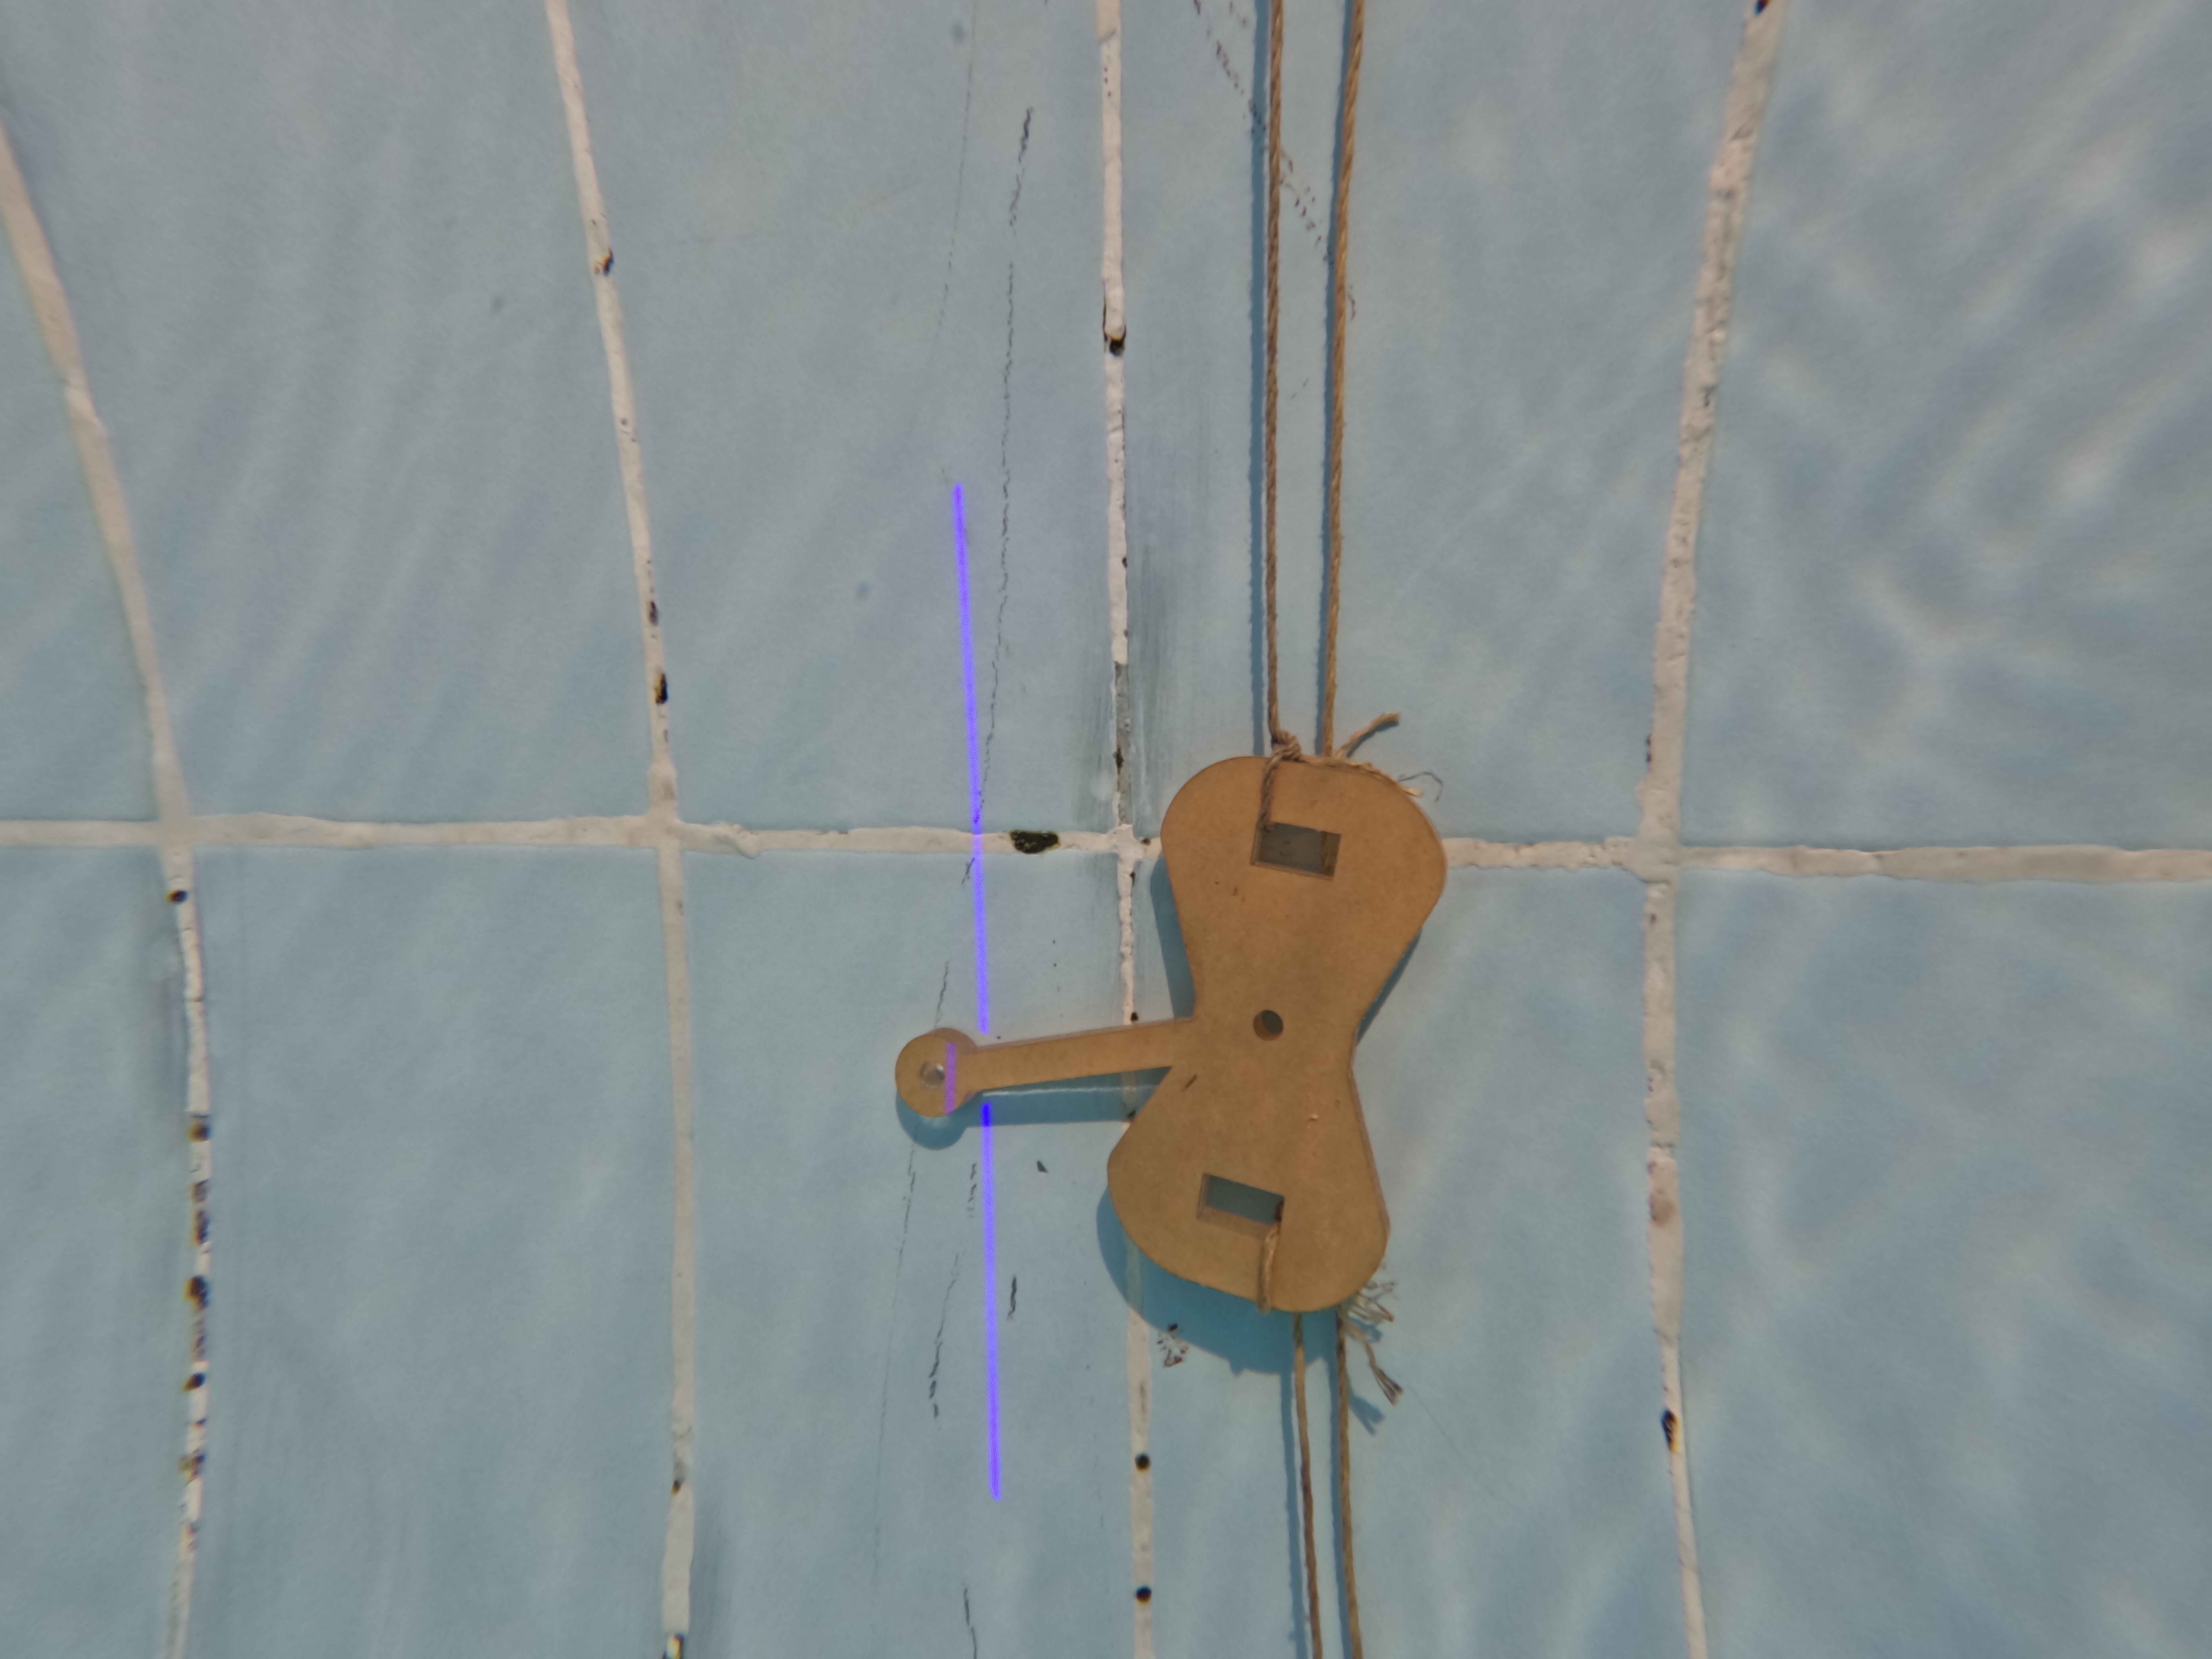

Supplement: Supplementary file 81 [file G0040475.pdf › Level_4_1/G0040475.pdf]

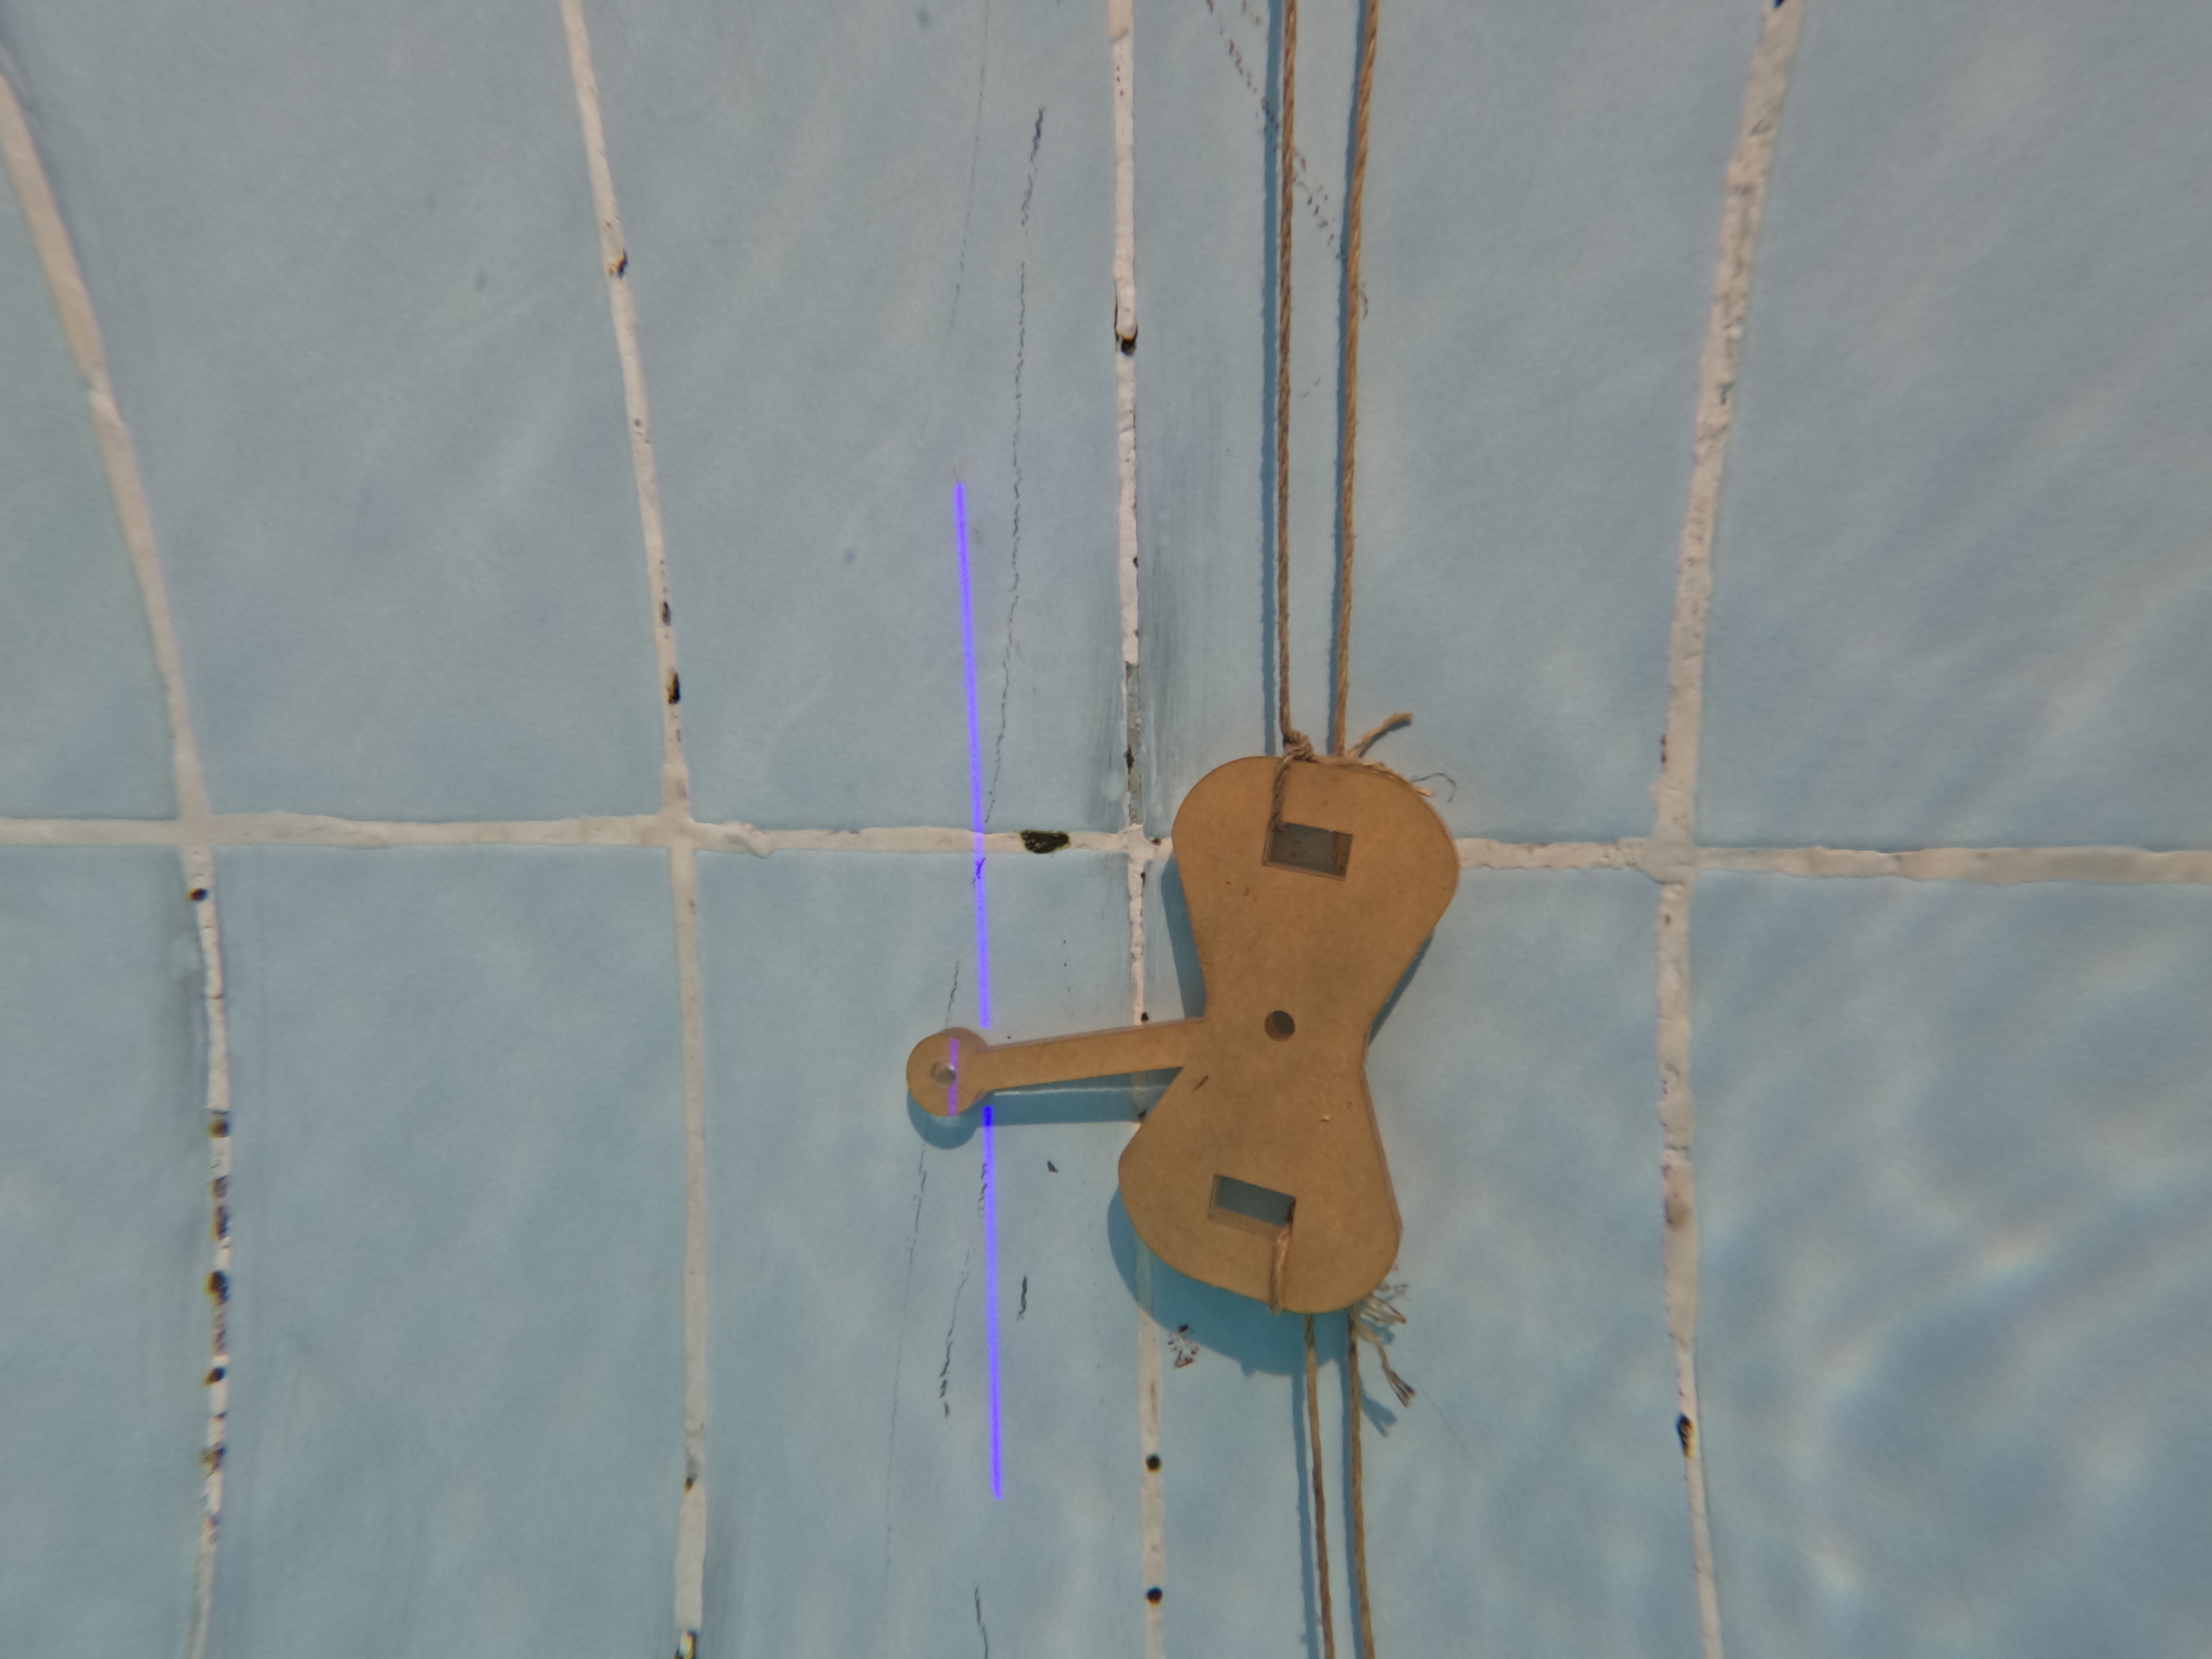

Supplement: Supplementary file 82 [file G0040476.pdf › Level_4_1/G0040476.pdf]

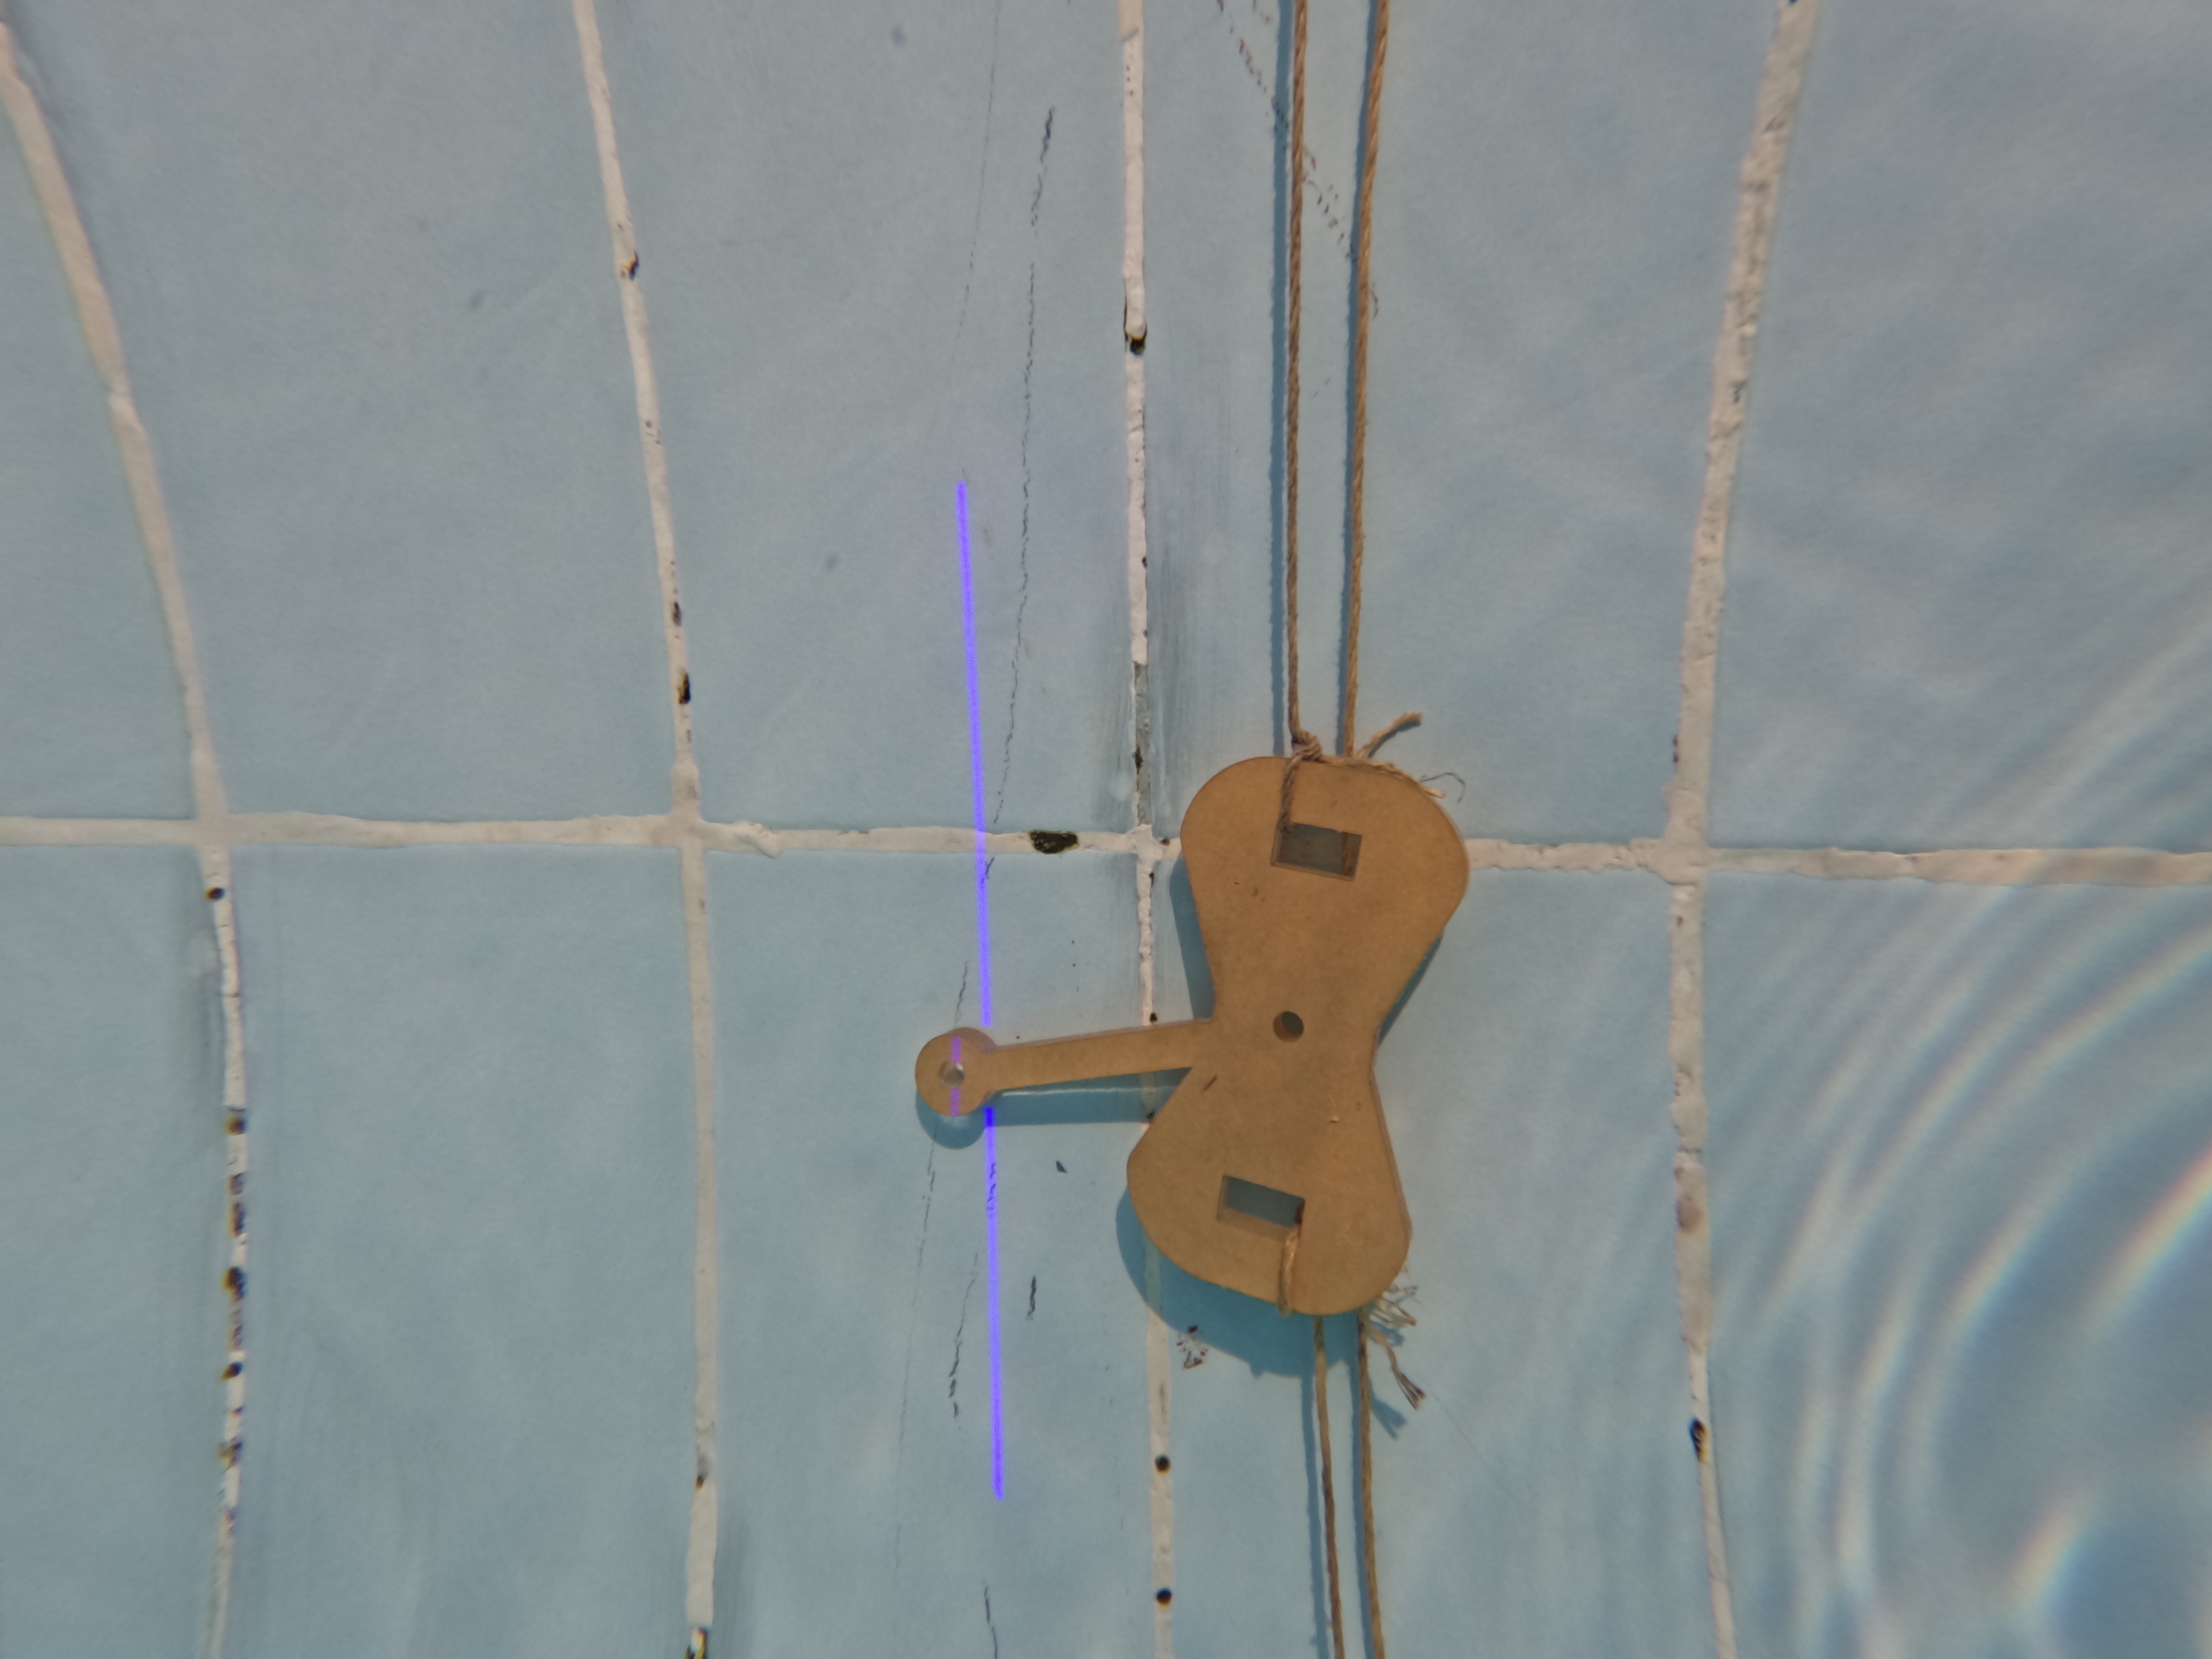

Supplement: Supplementary file 83 [file G0040477.pdf › Level_4_1/G0040477.pdf]

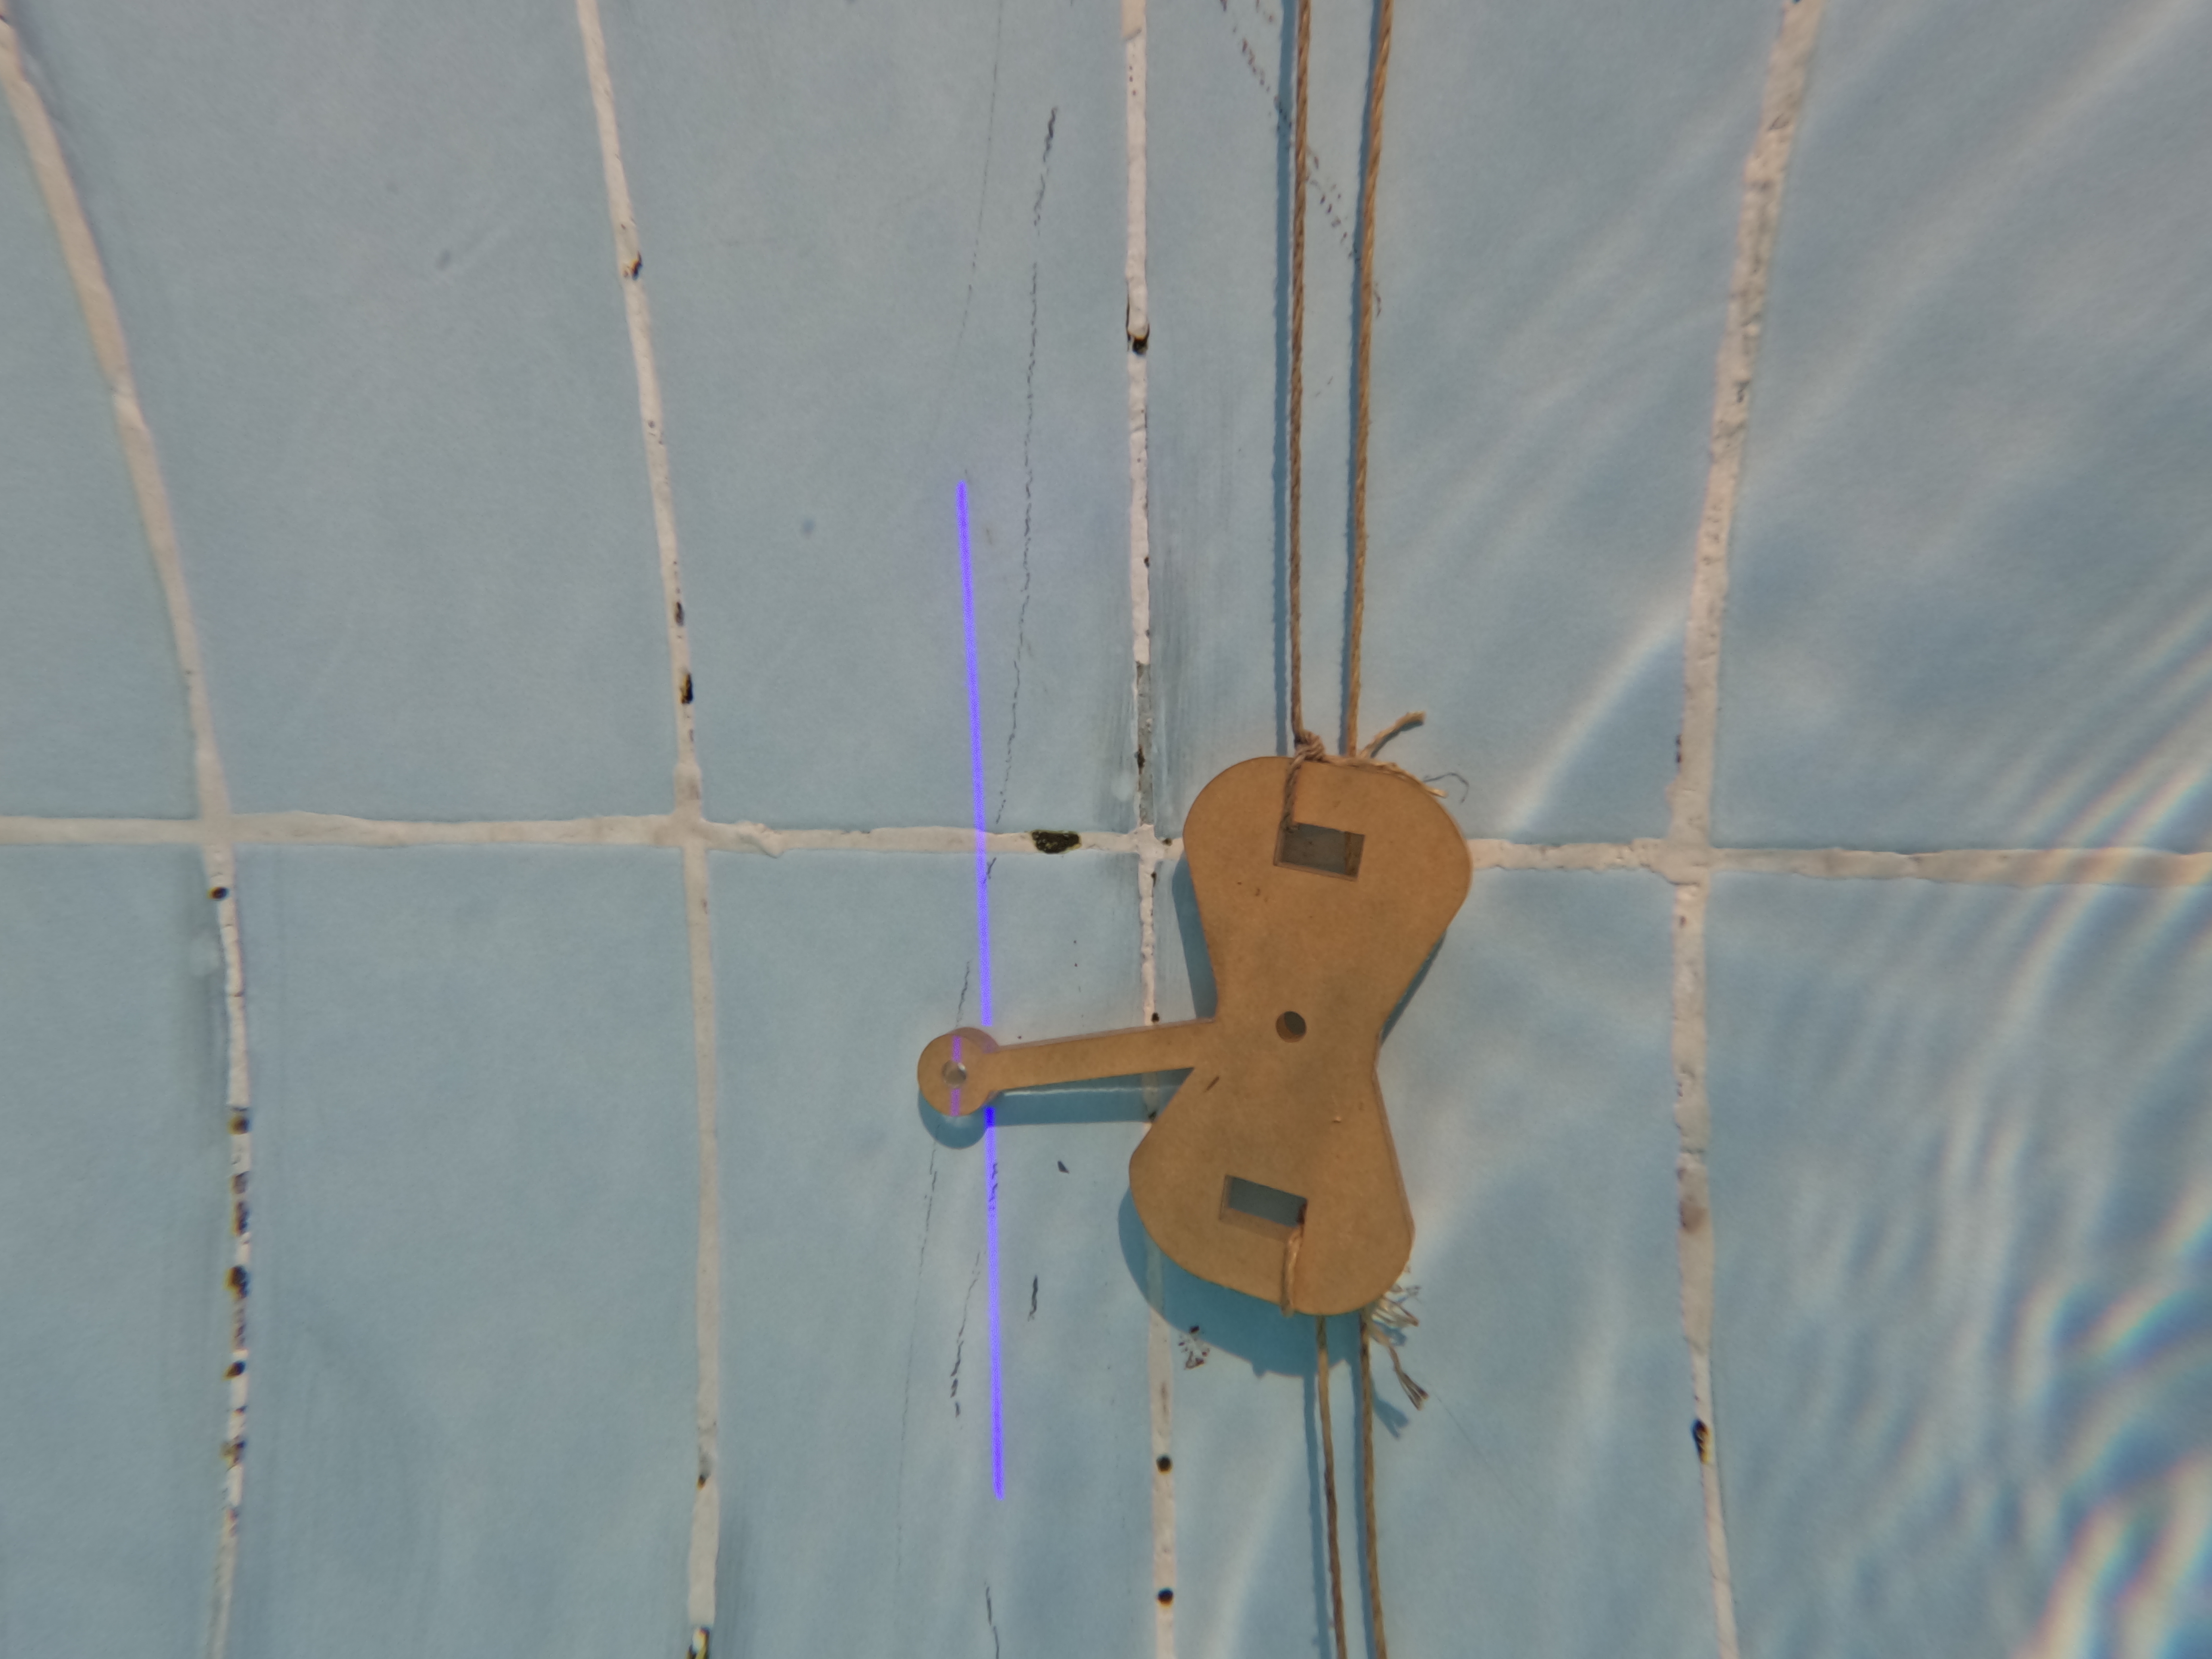

Supplement: Supplementary file 84 [file G0040478.pdf › Level_4_1/G0040478.pdf]

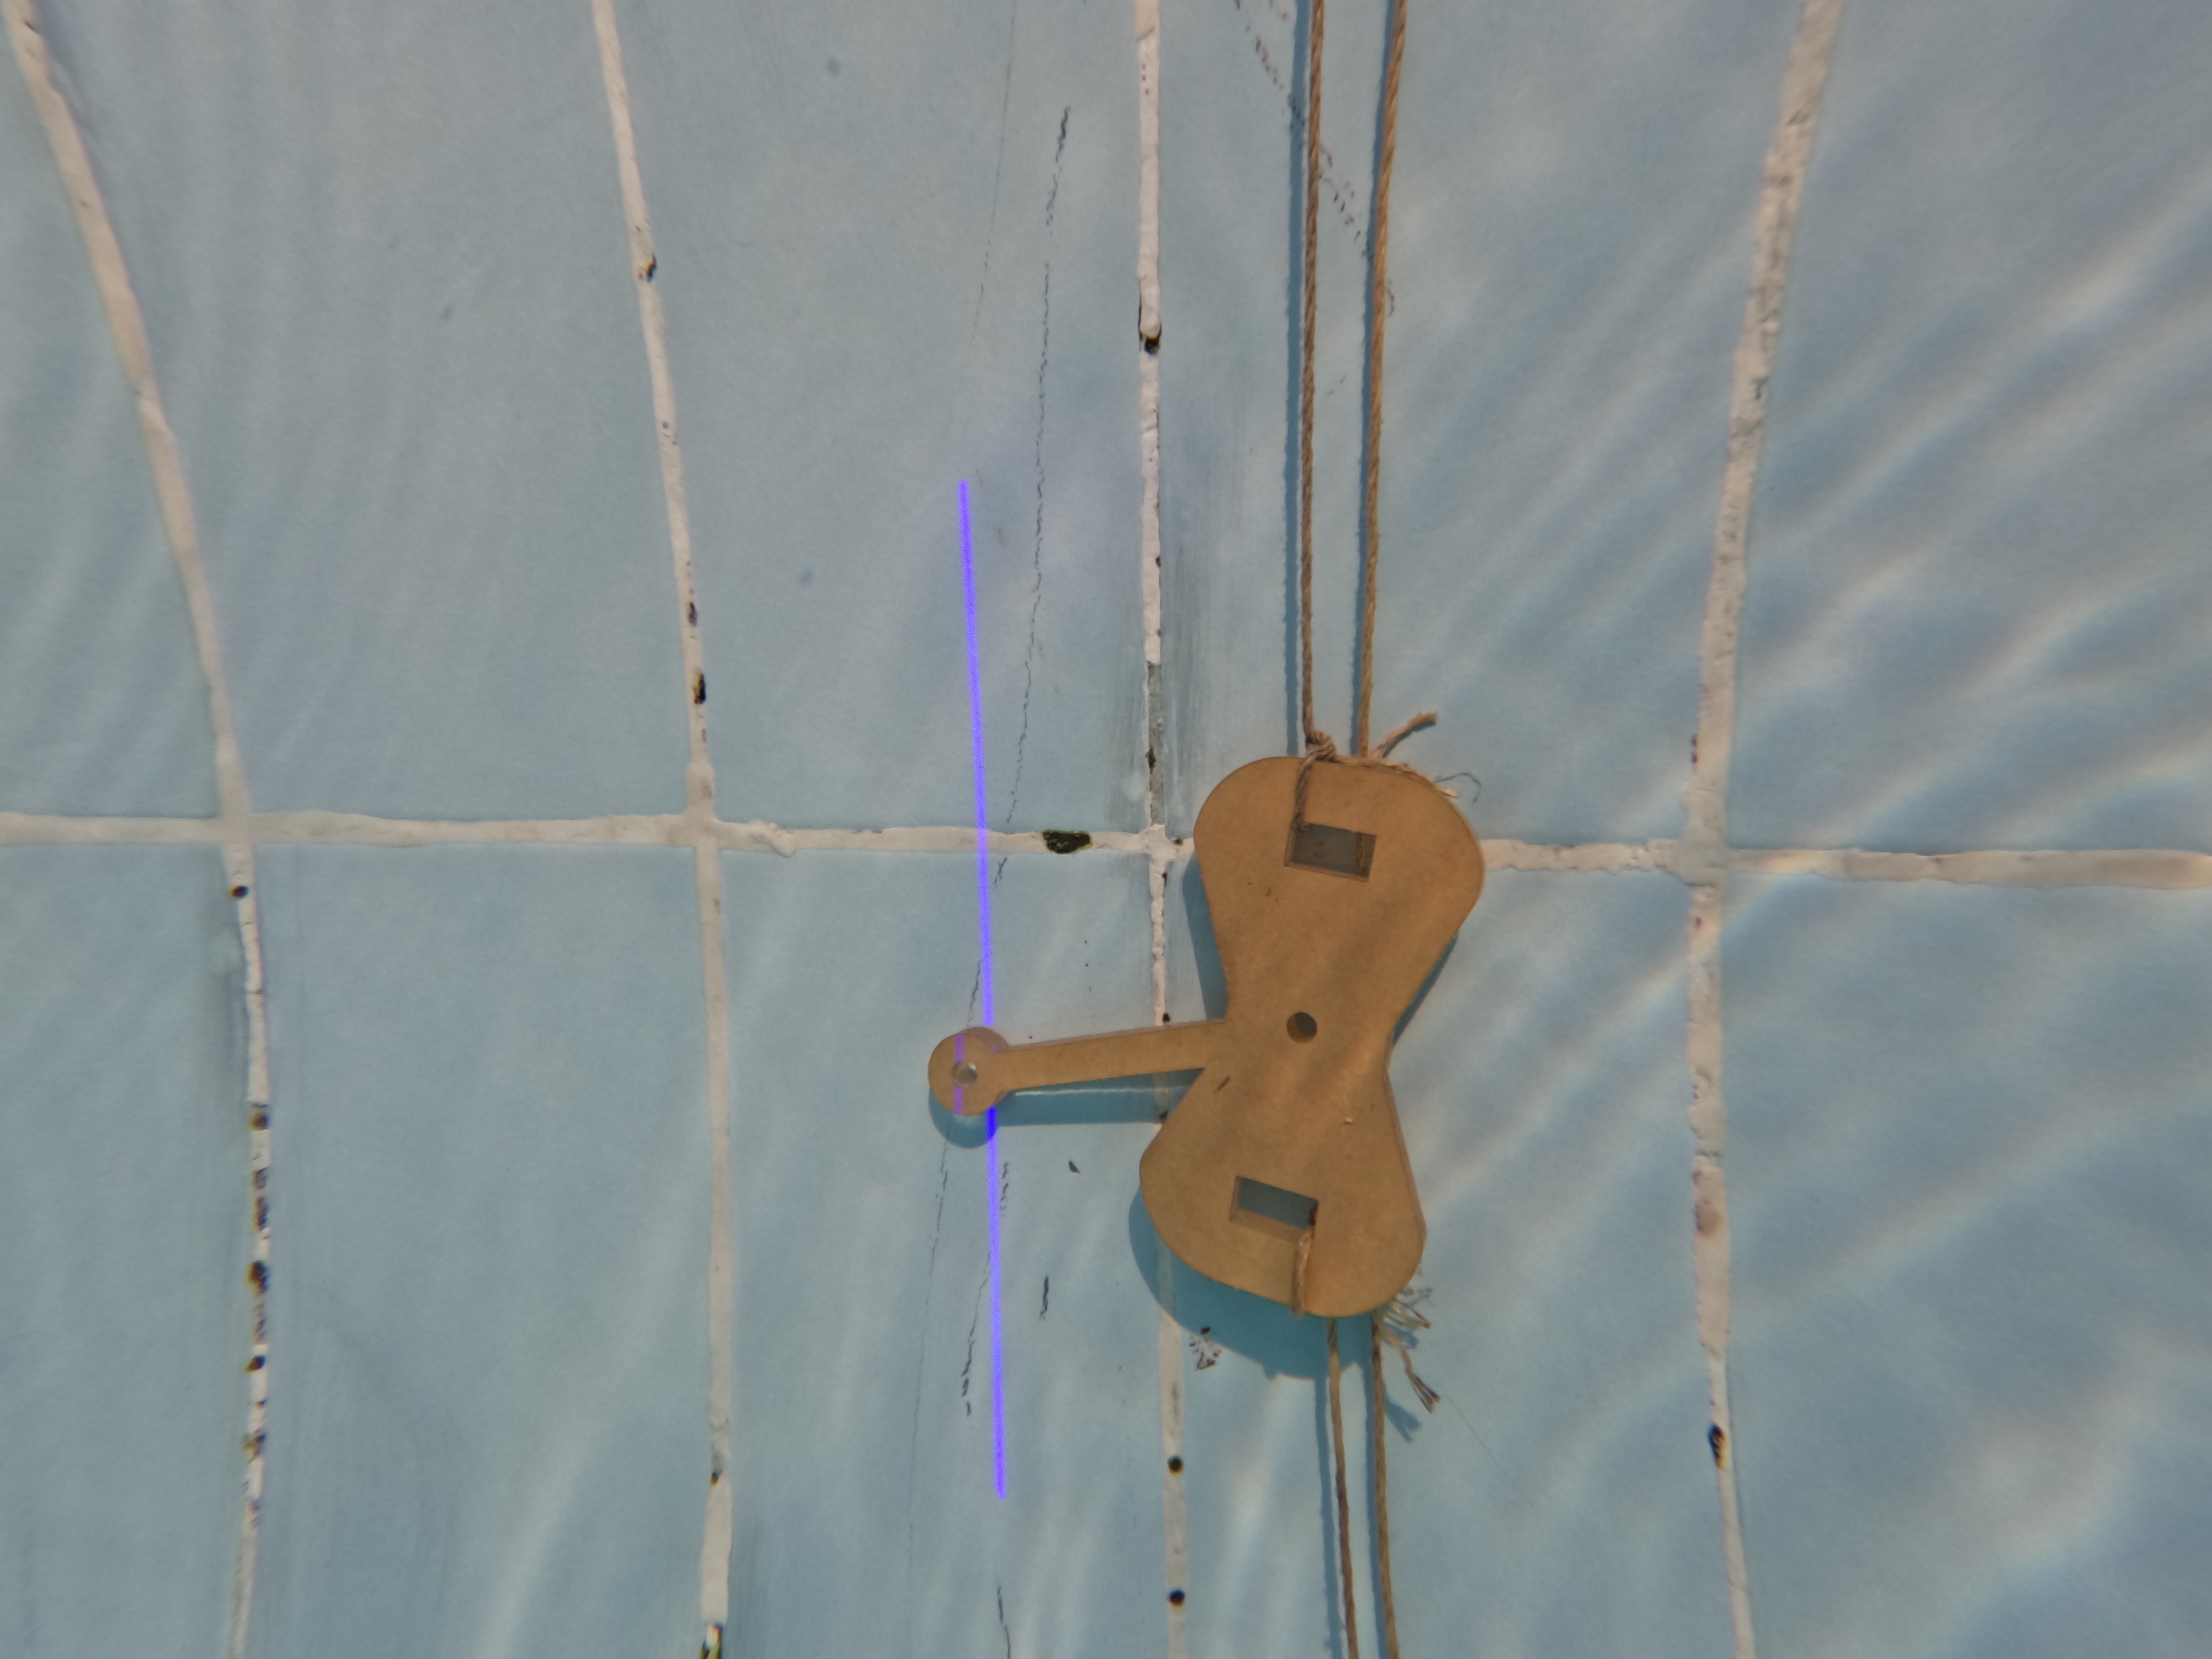

Supplement: Supplementary file 85 [file G0040479.pdf › Level_4_1/G0040479.pdf]

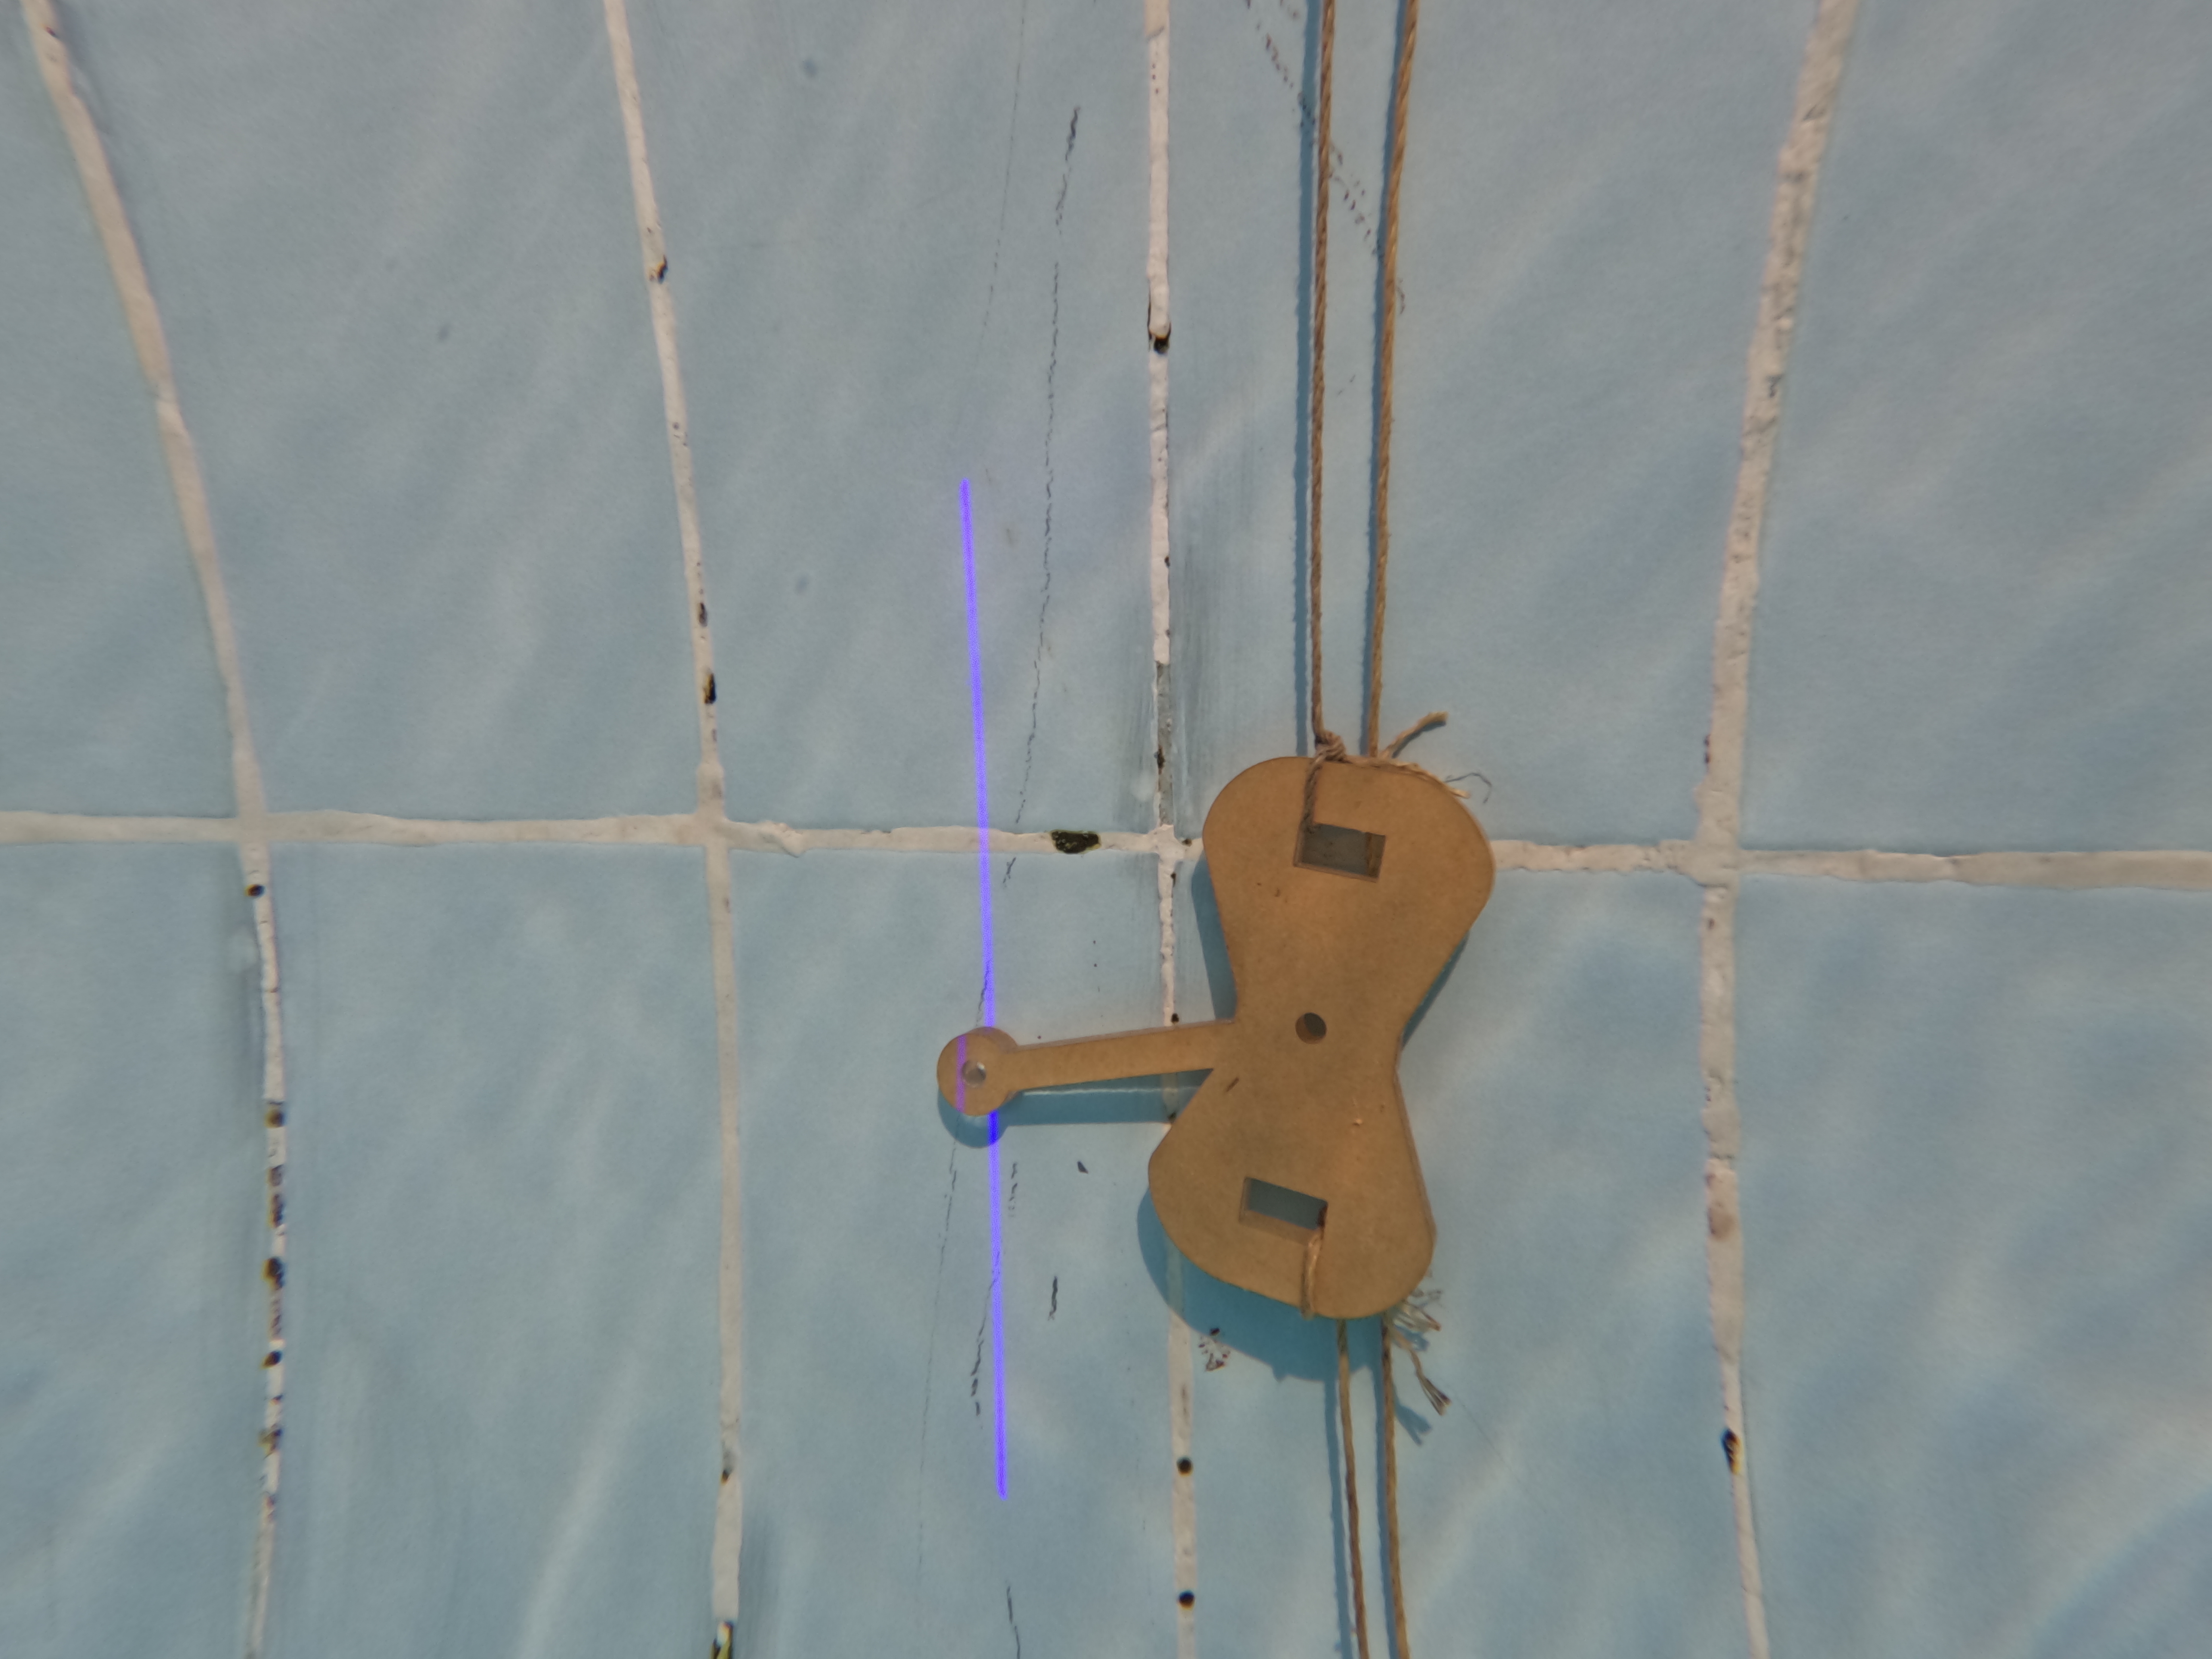

Supplement: Supplementary file 86 [file G0040480.pdf › Level_4_1/G0040480.pdf]

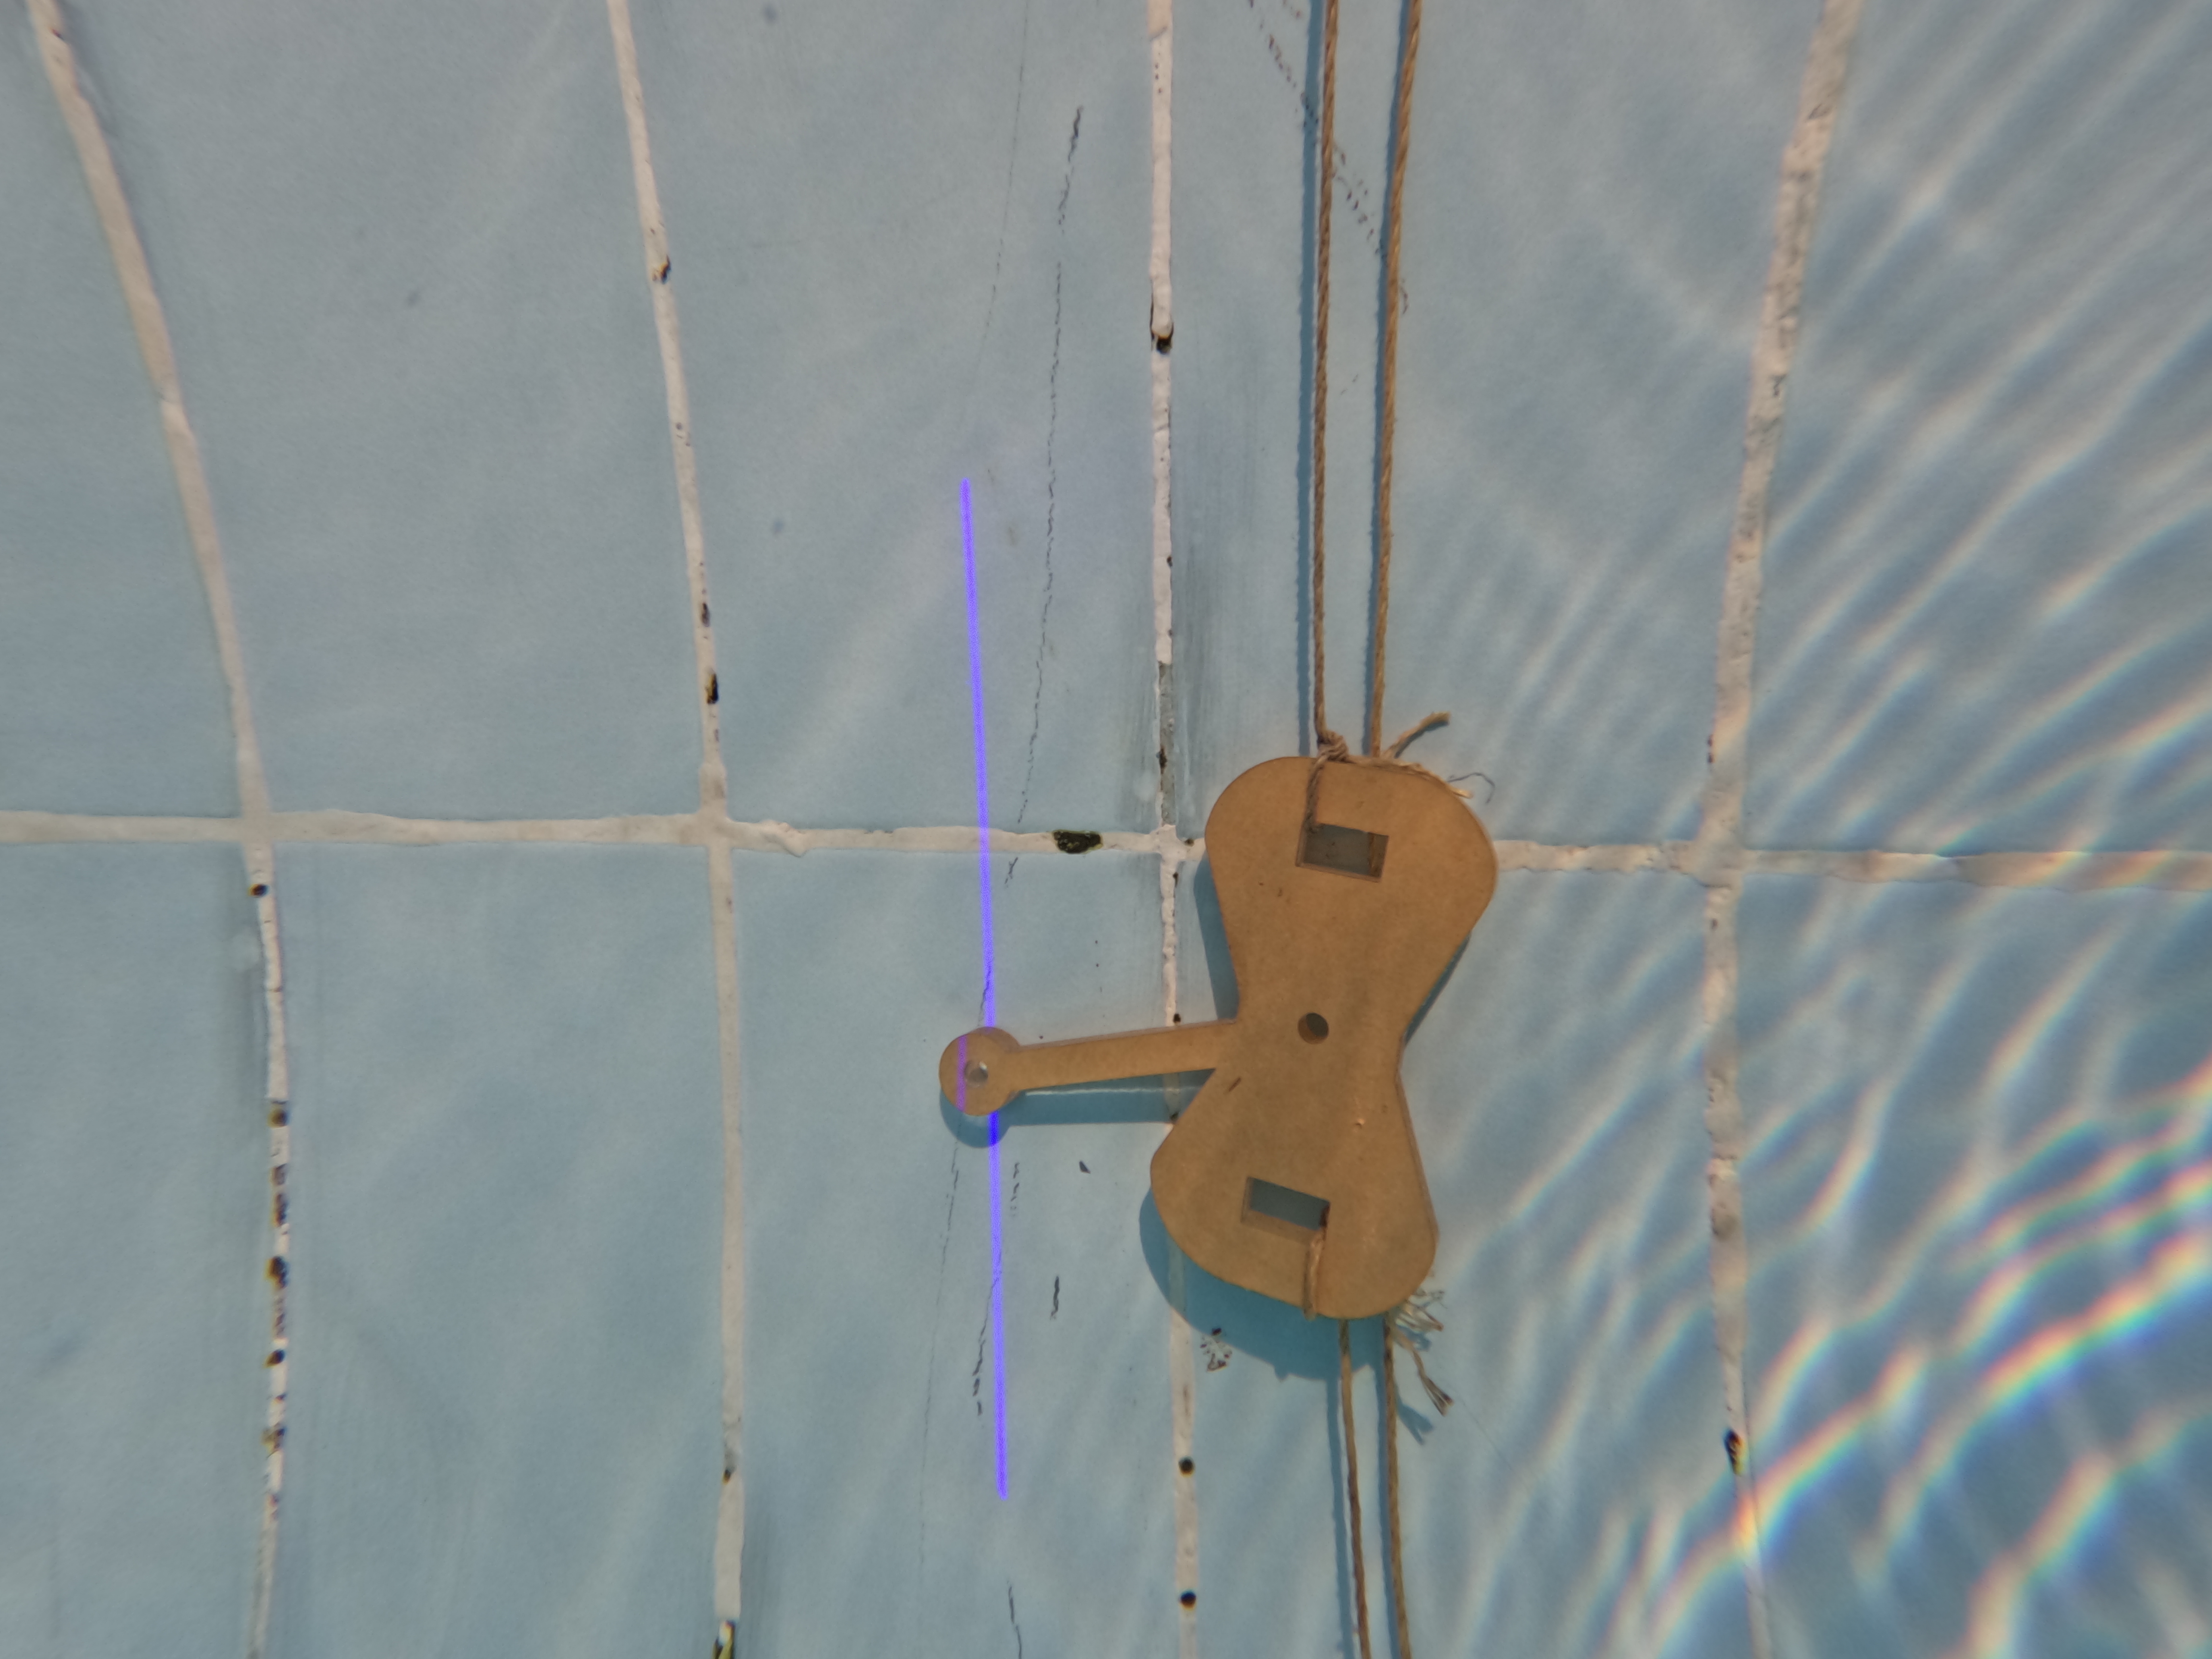

Supplement: Supplementary file 87 [file G0040481.pdf › Level_4_1/G0040481.pdf]

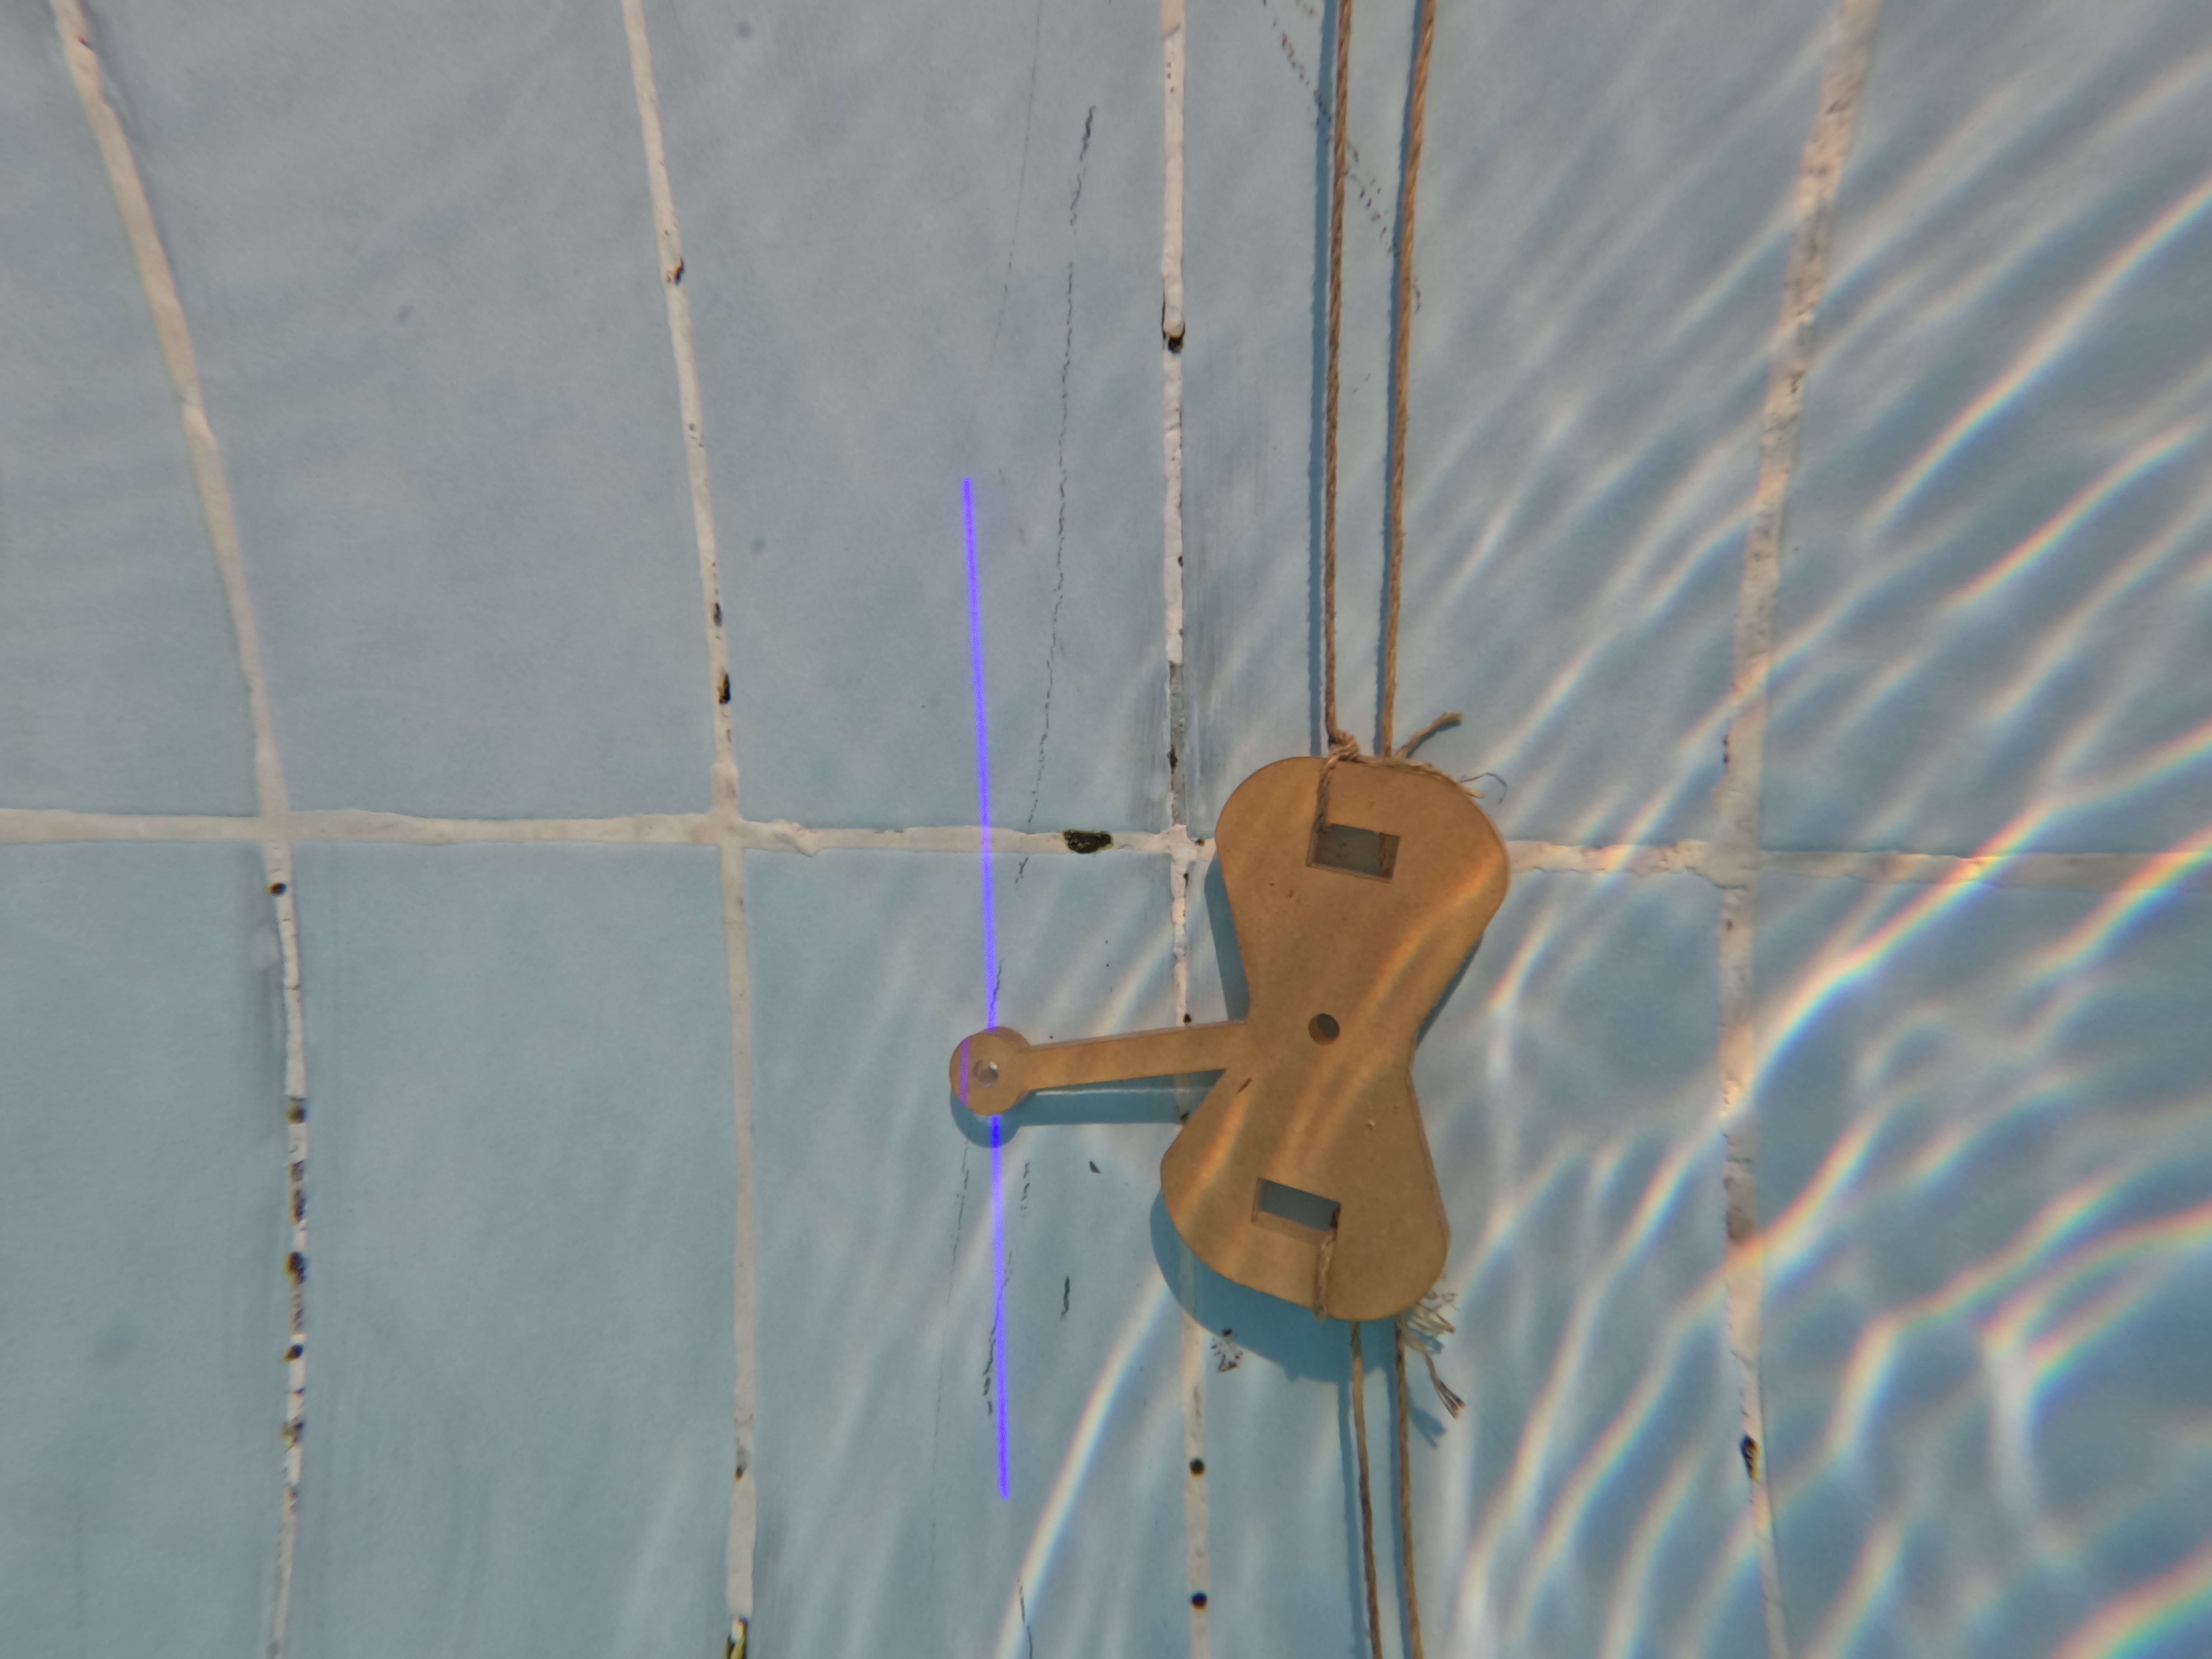

Supplement: Supplementary file 88 [file G0040482.pdf › Level_4_1/G0040482.pdf]

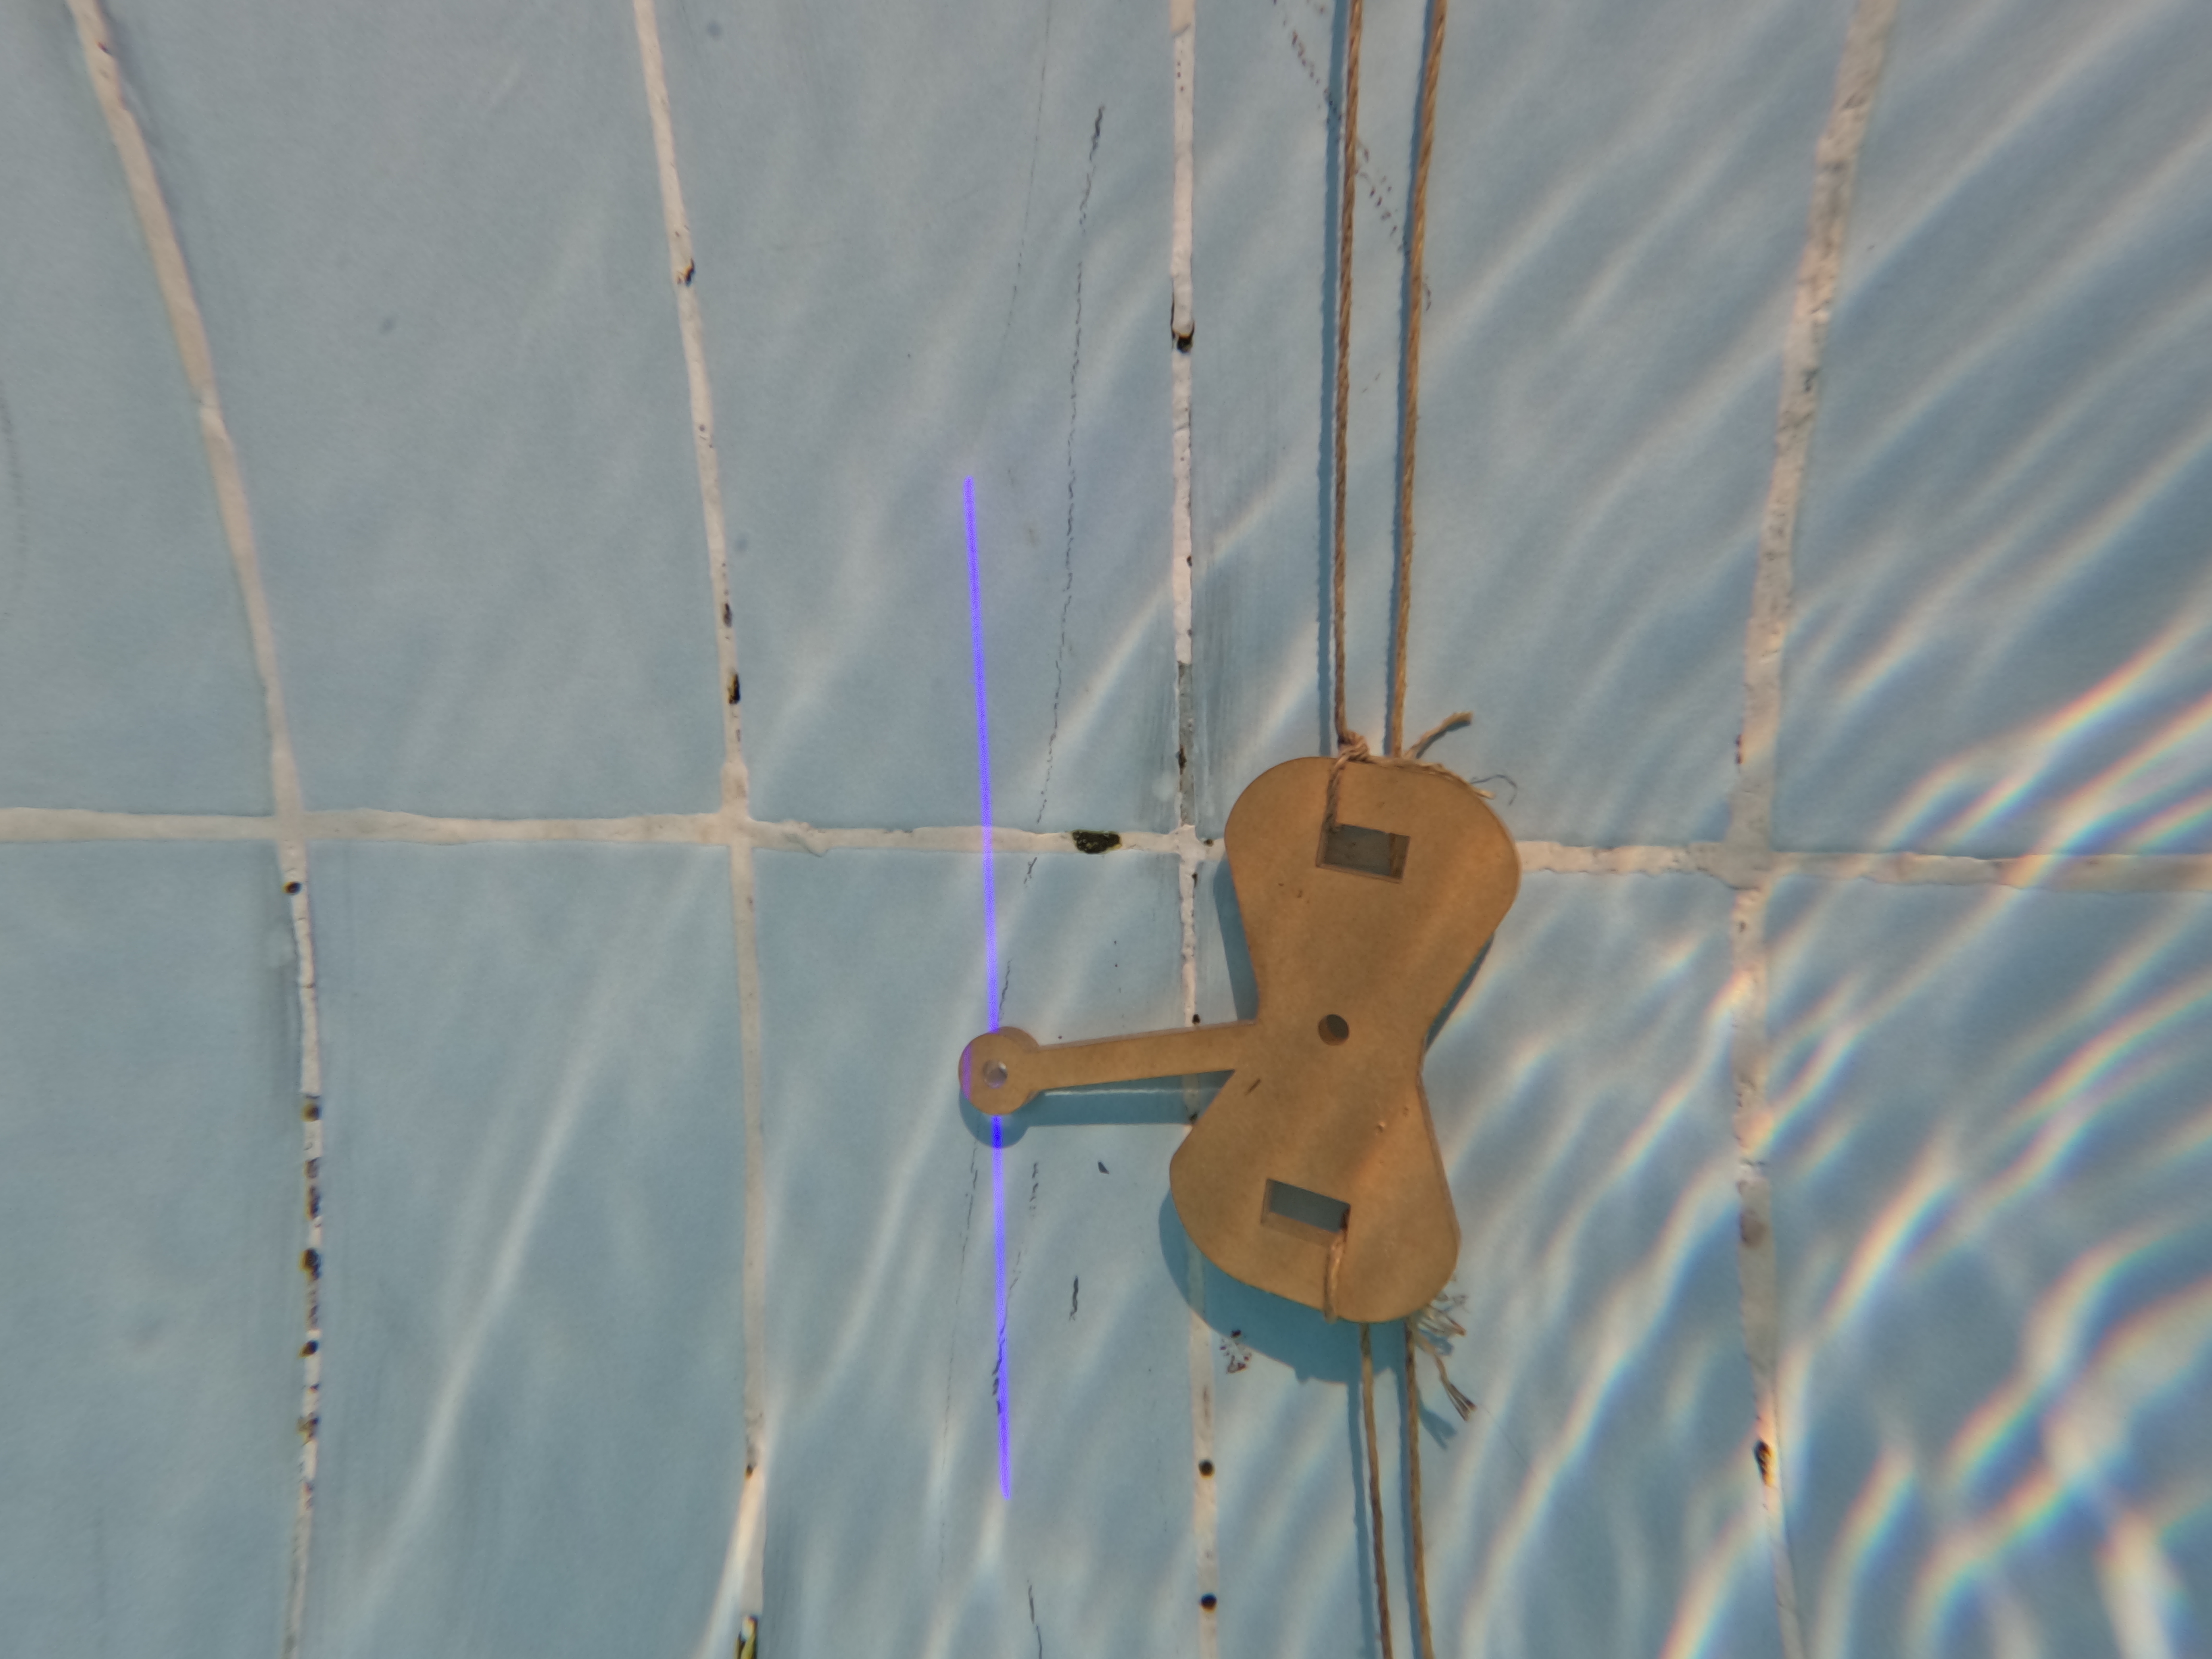

Supplement: Supplementary file 89 [file G0040483.pdf › Level_4_1/G0040483.pdf]

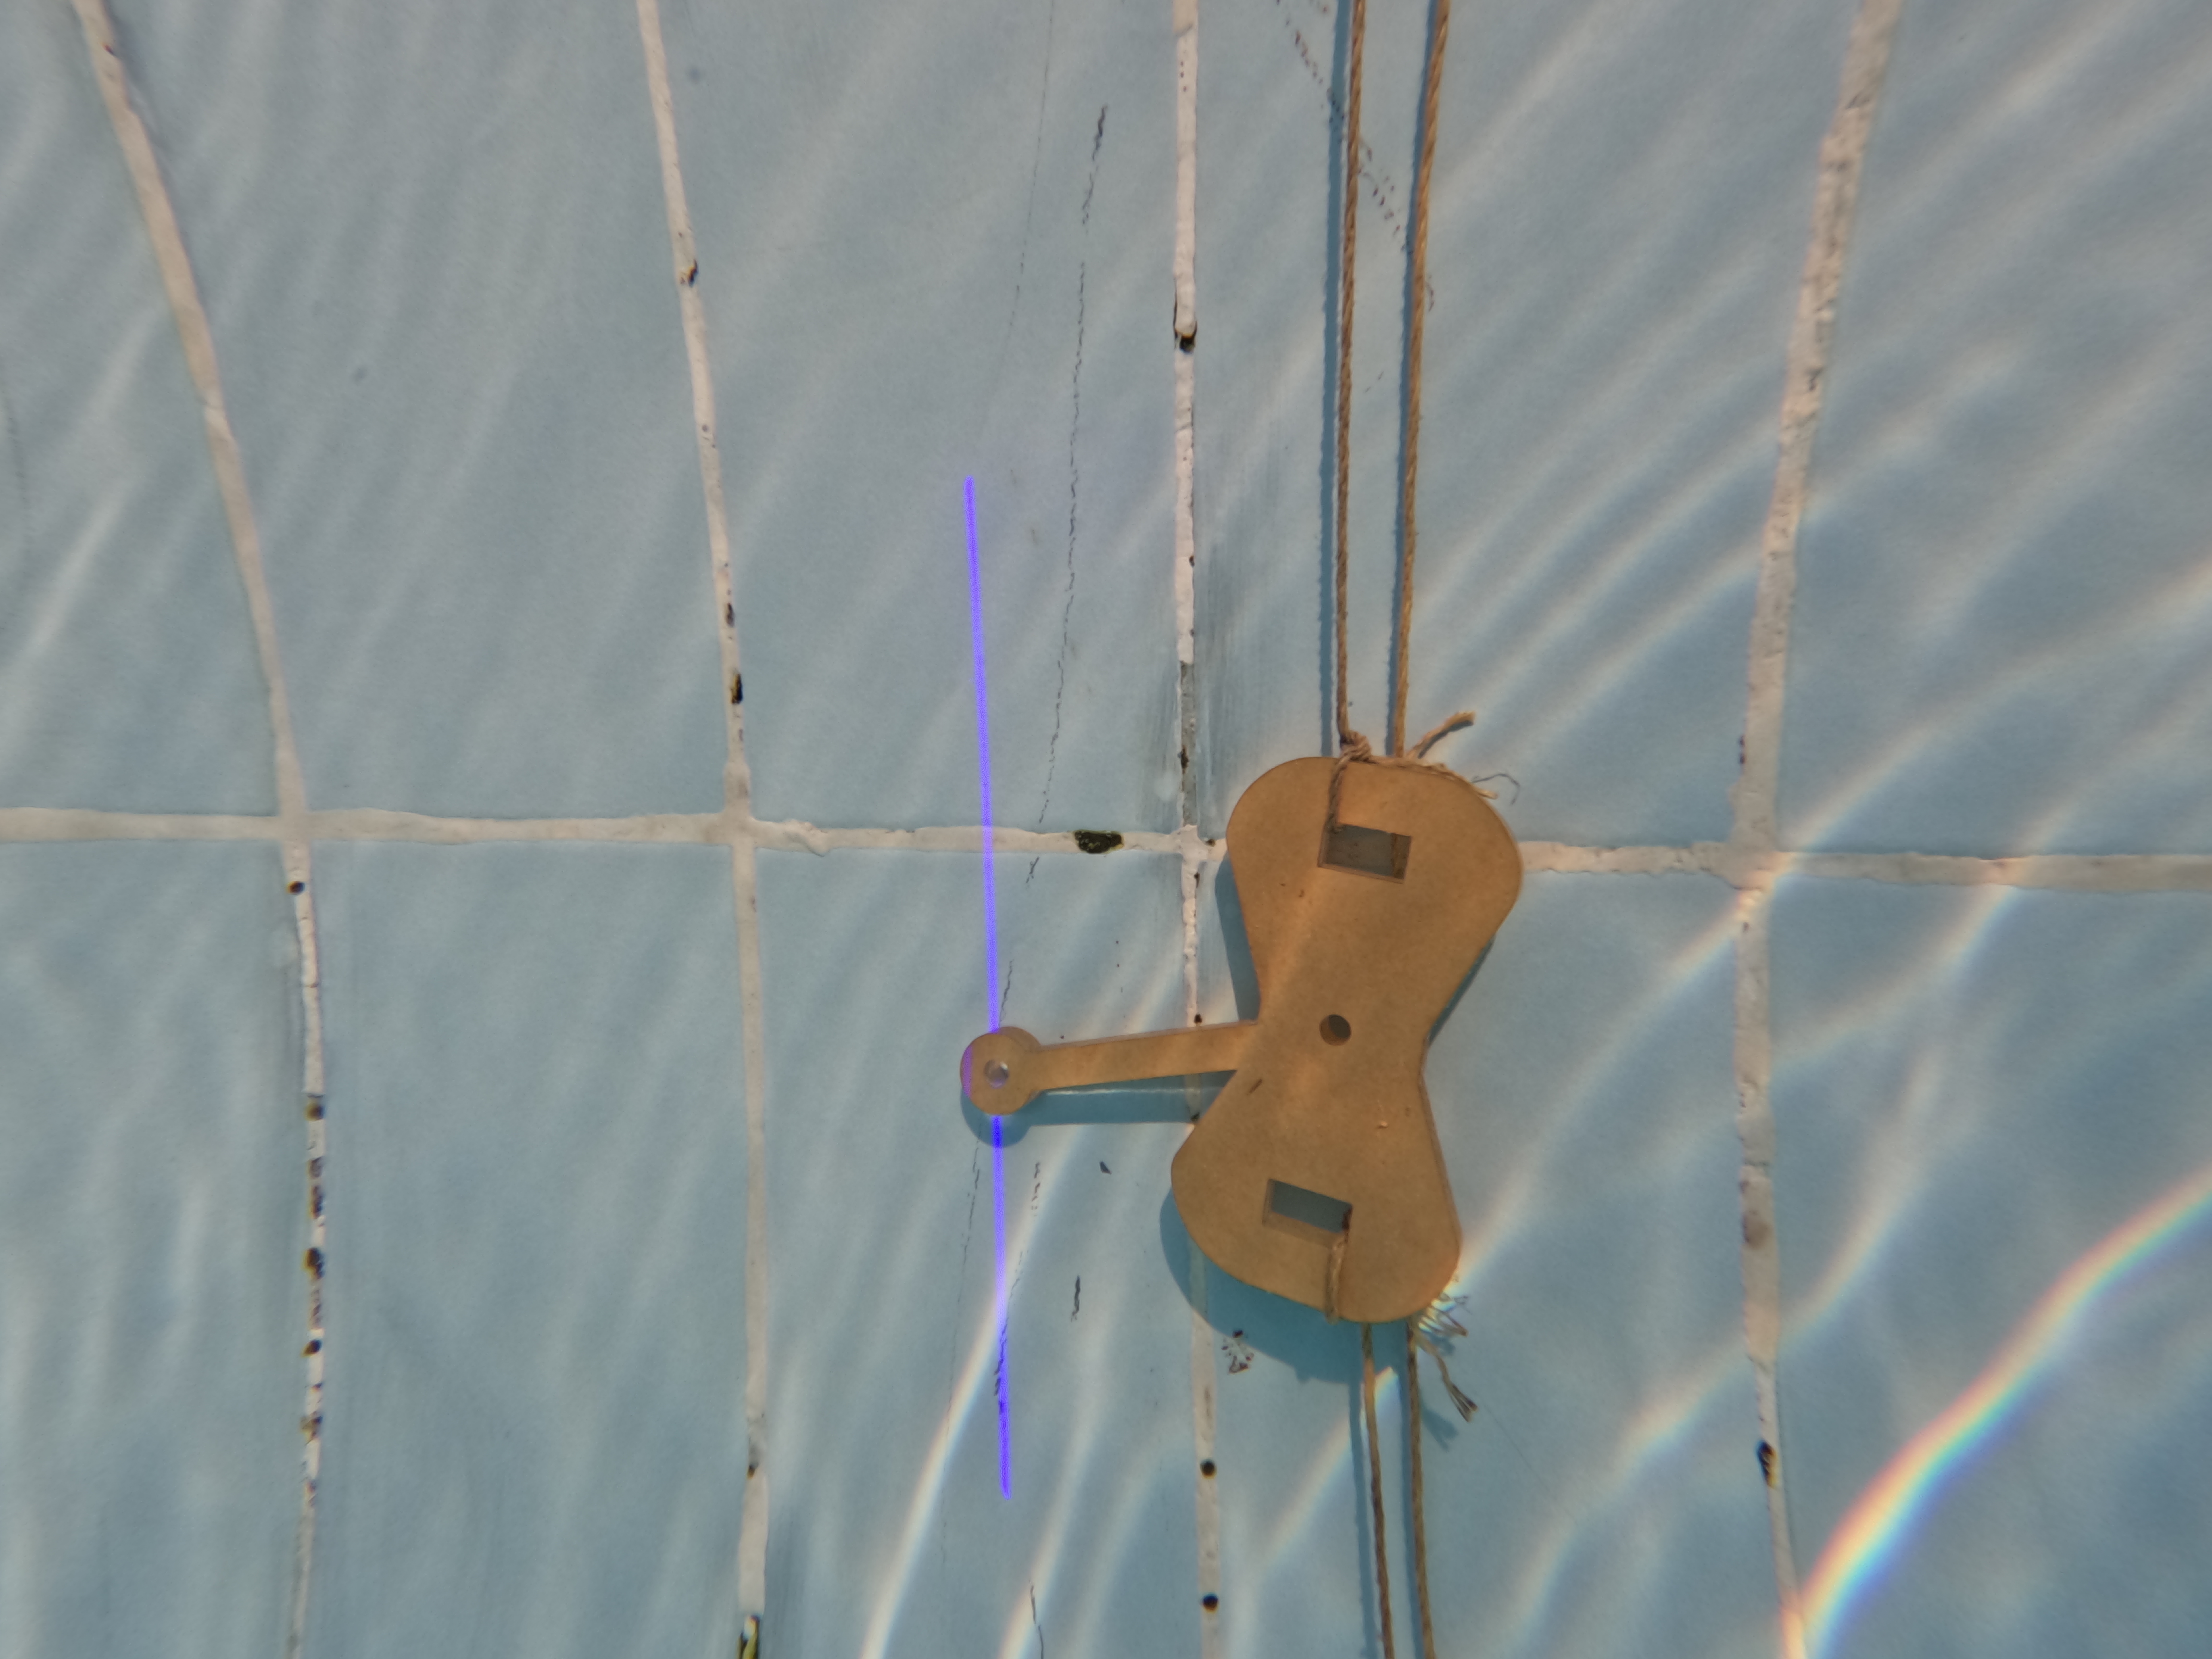

Supplement: Supplementary file 90 [file G0040484.pdf › Level_4_1/G0040484.pdf]

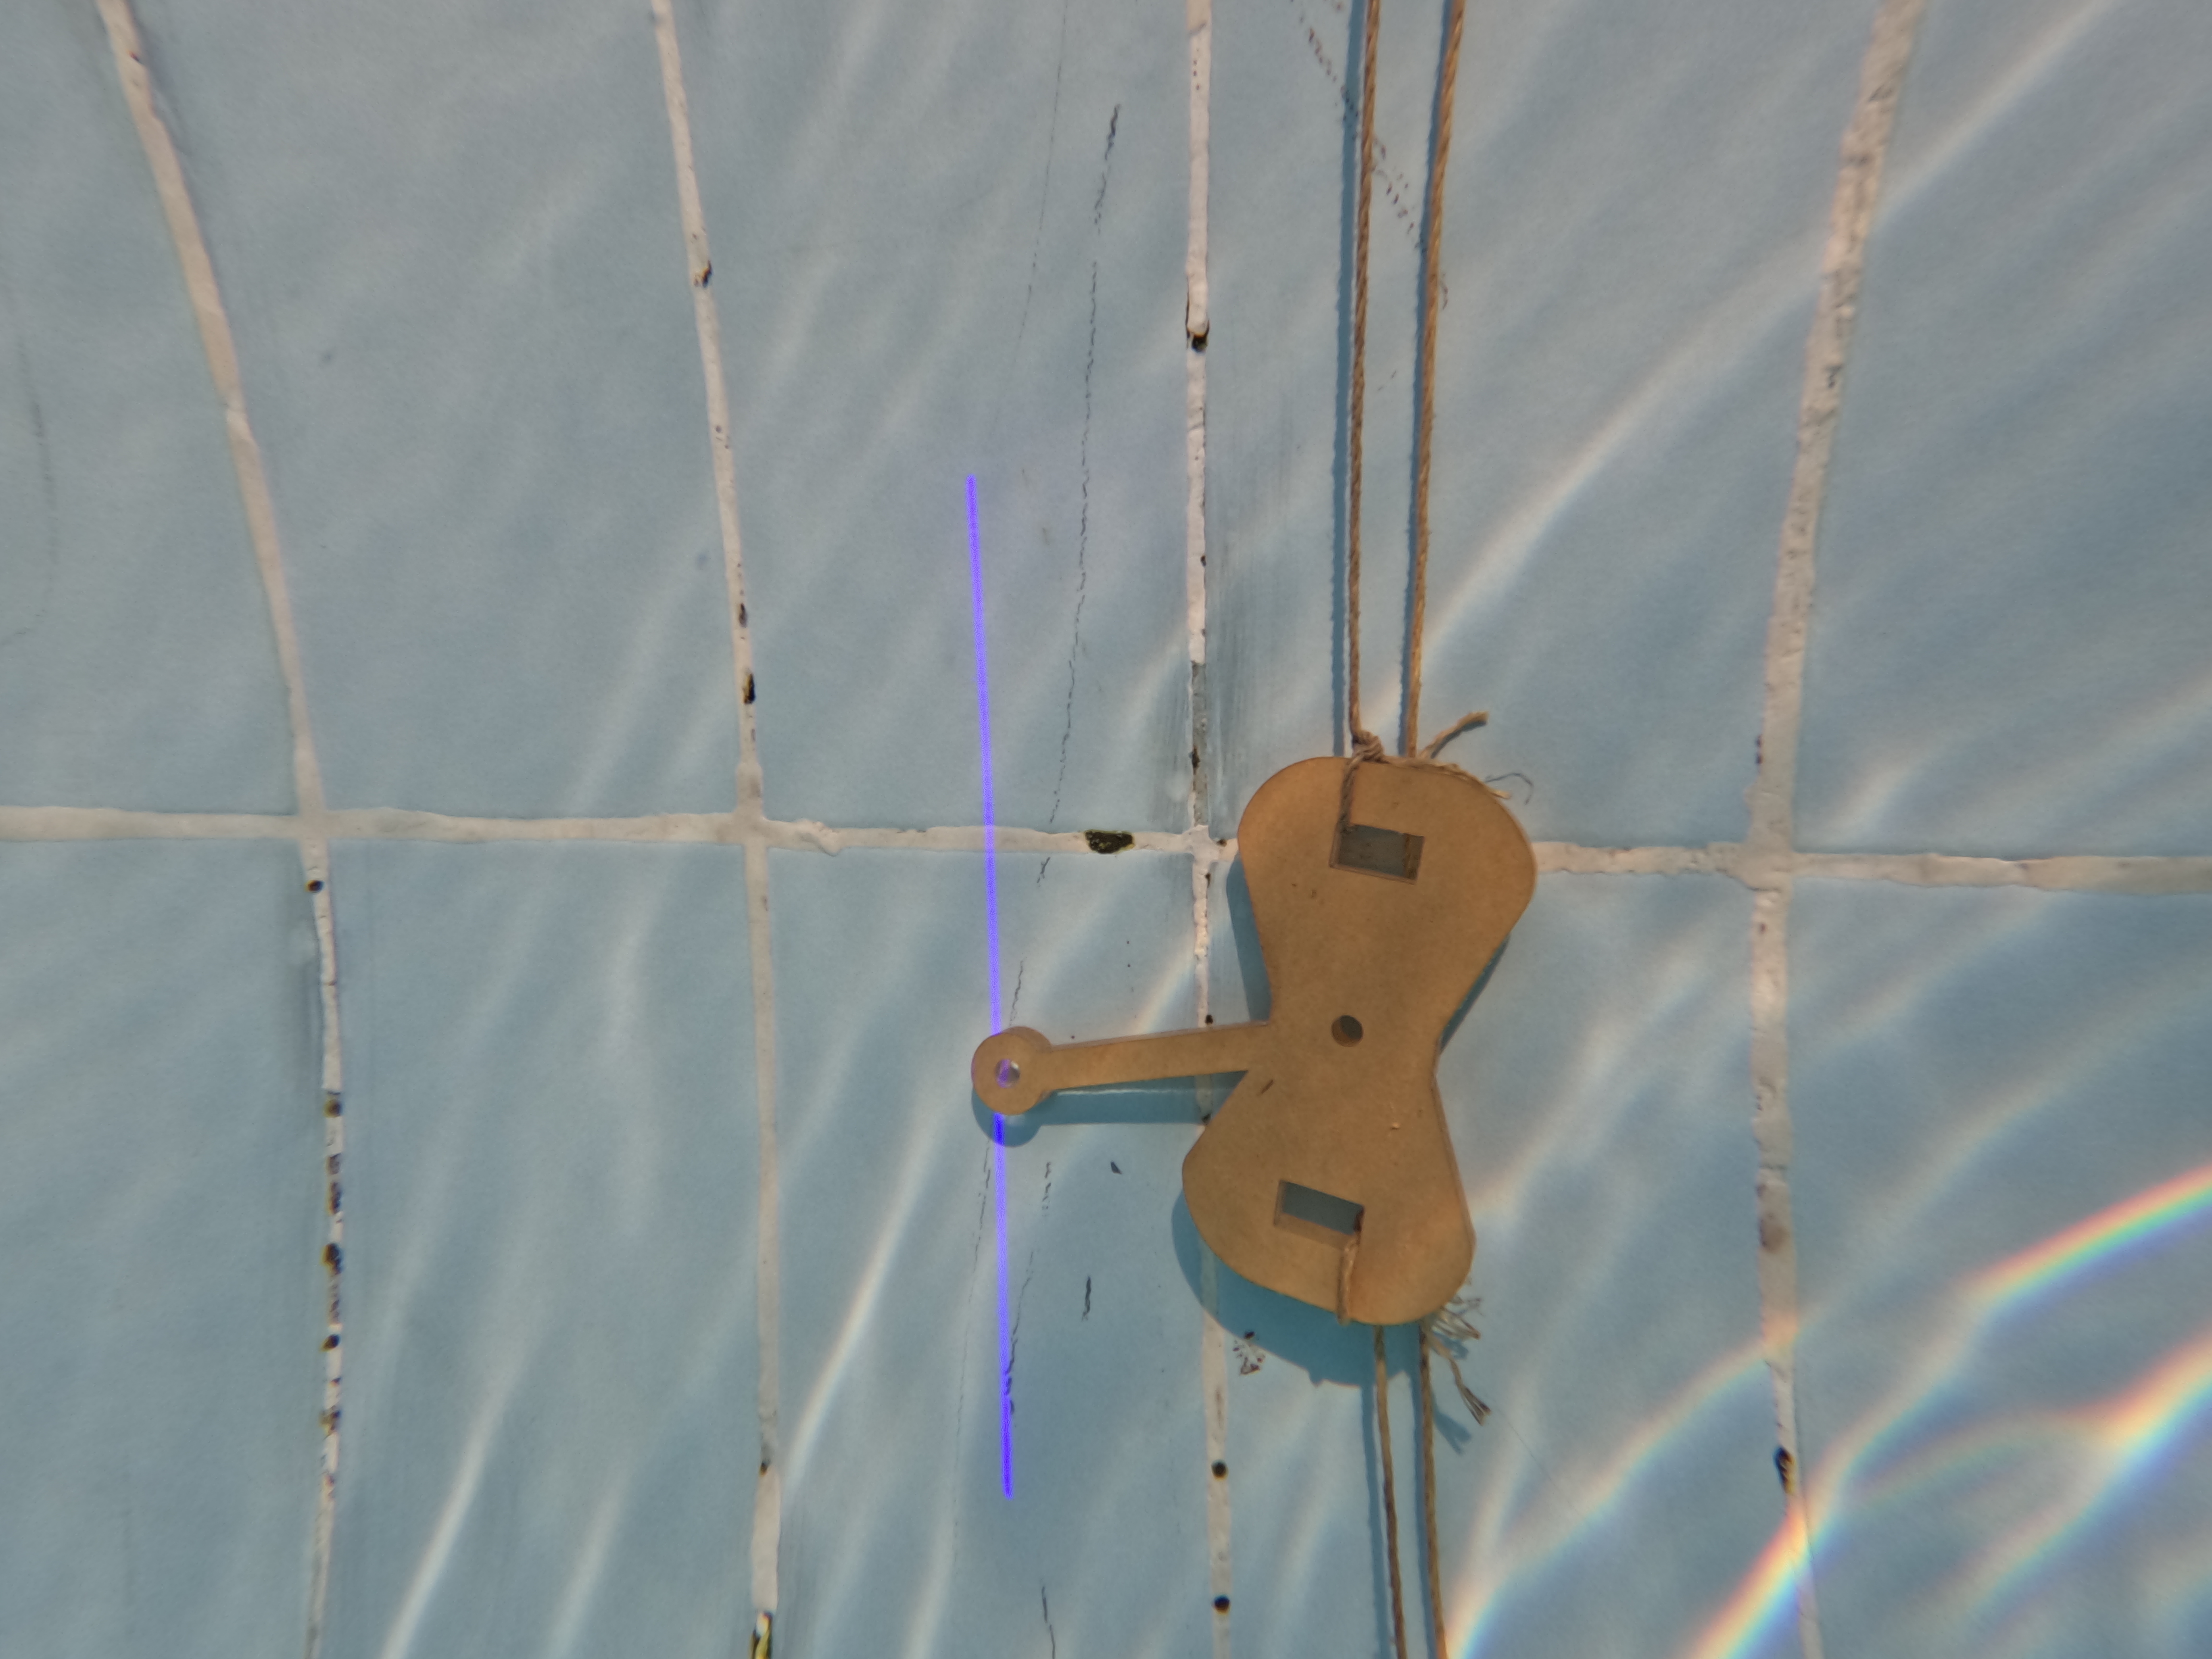

Supplement: Supplementary file 91 [file G0040485.pdf › Level_4_1/G0040485.pdf]

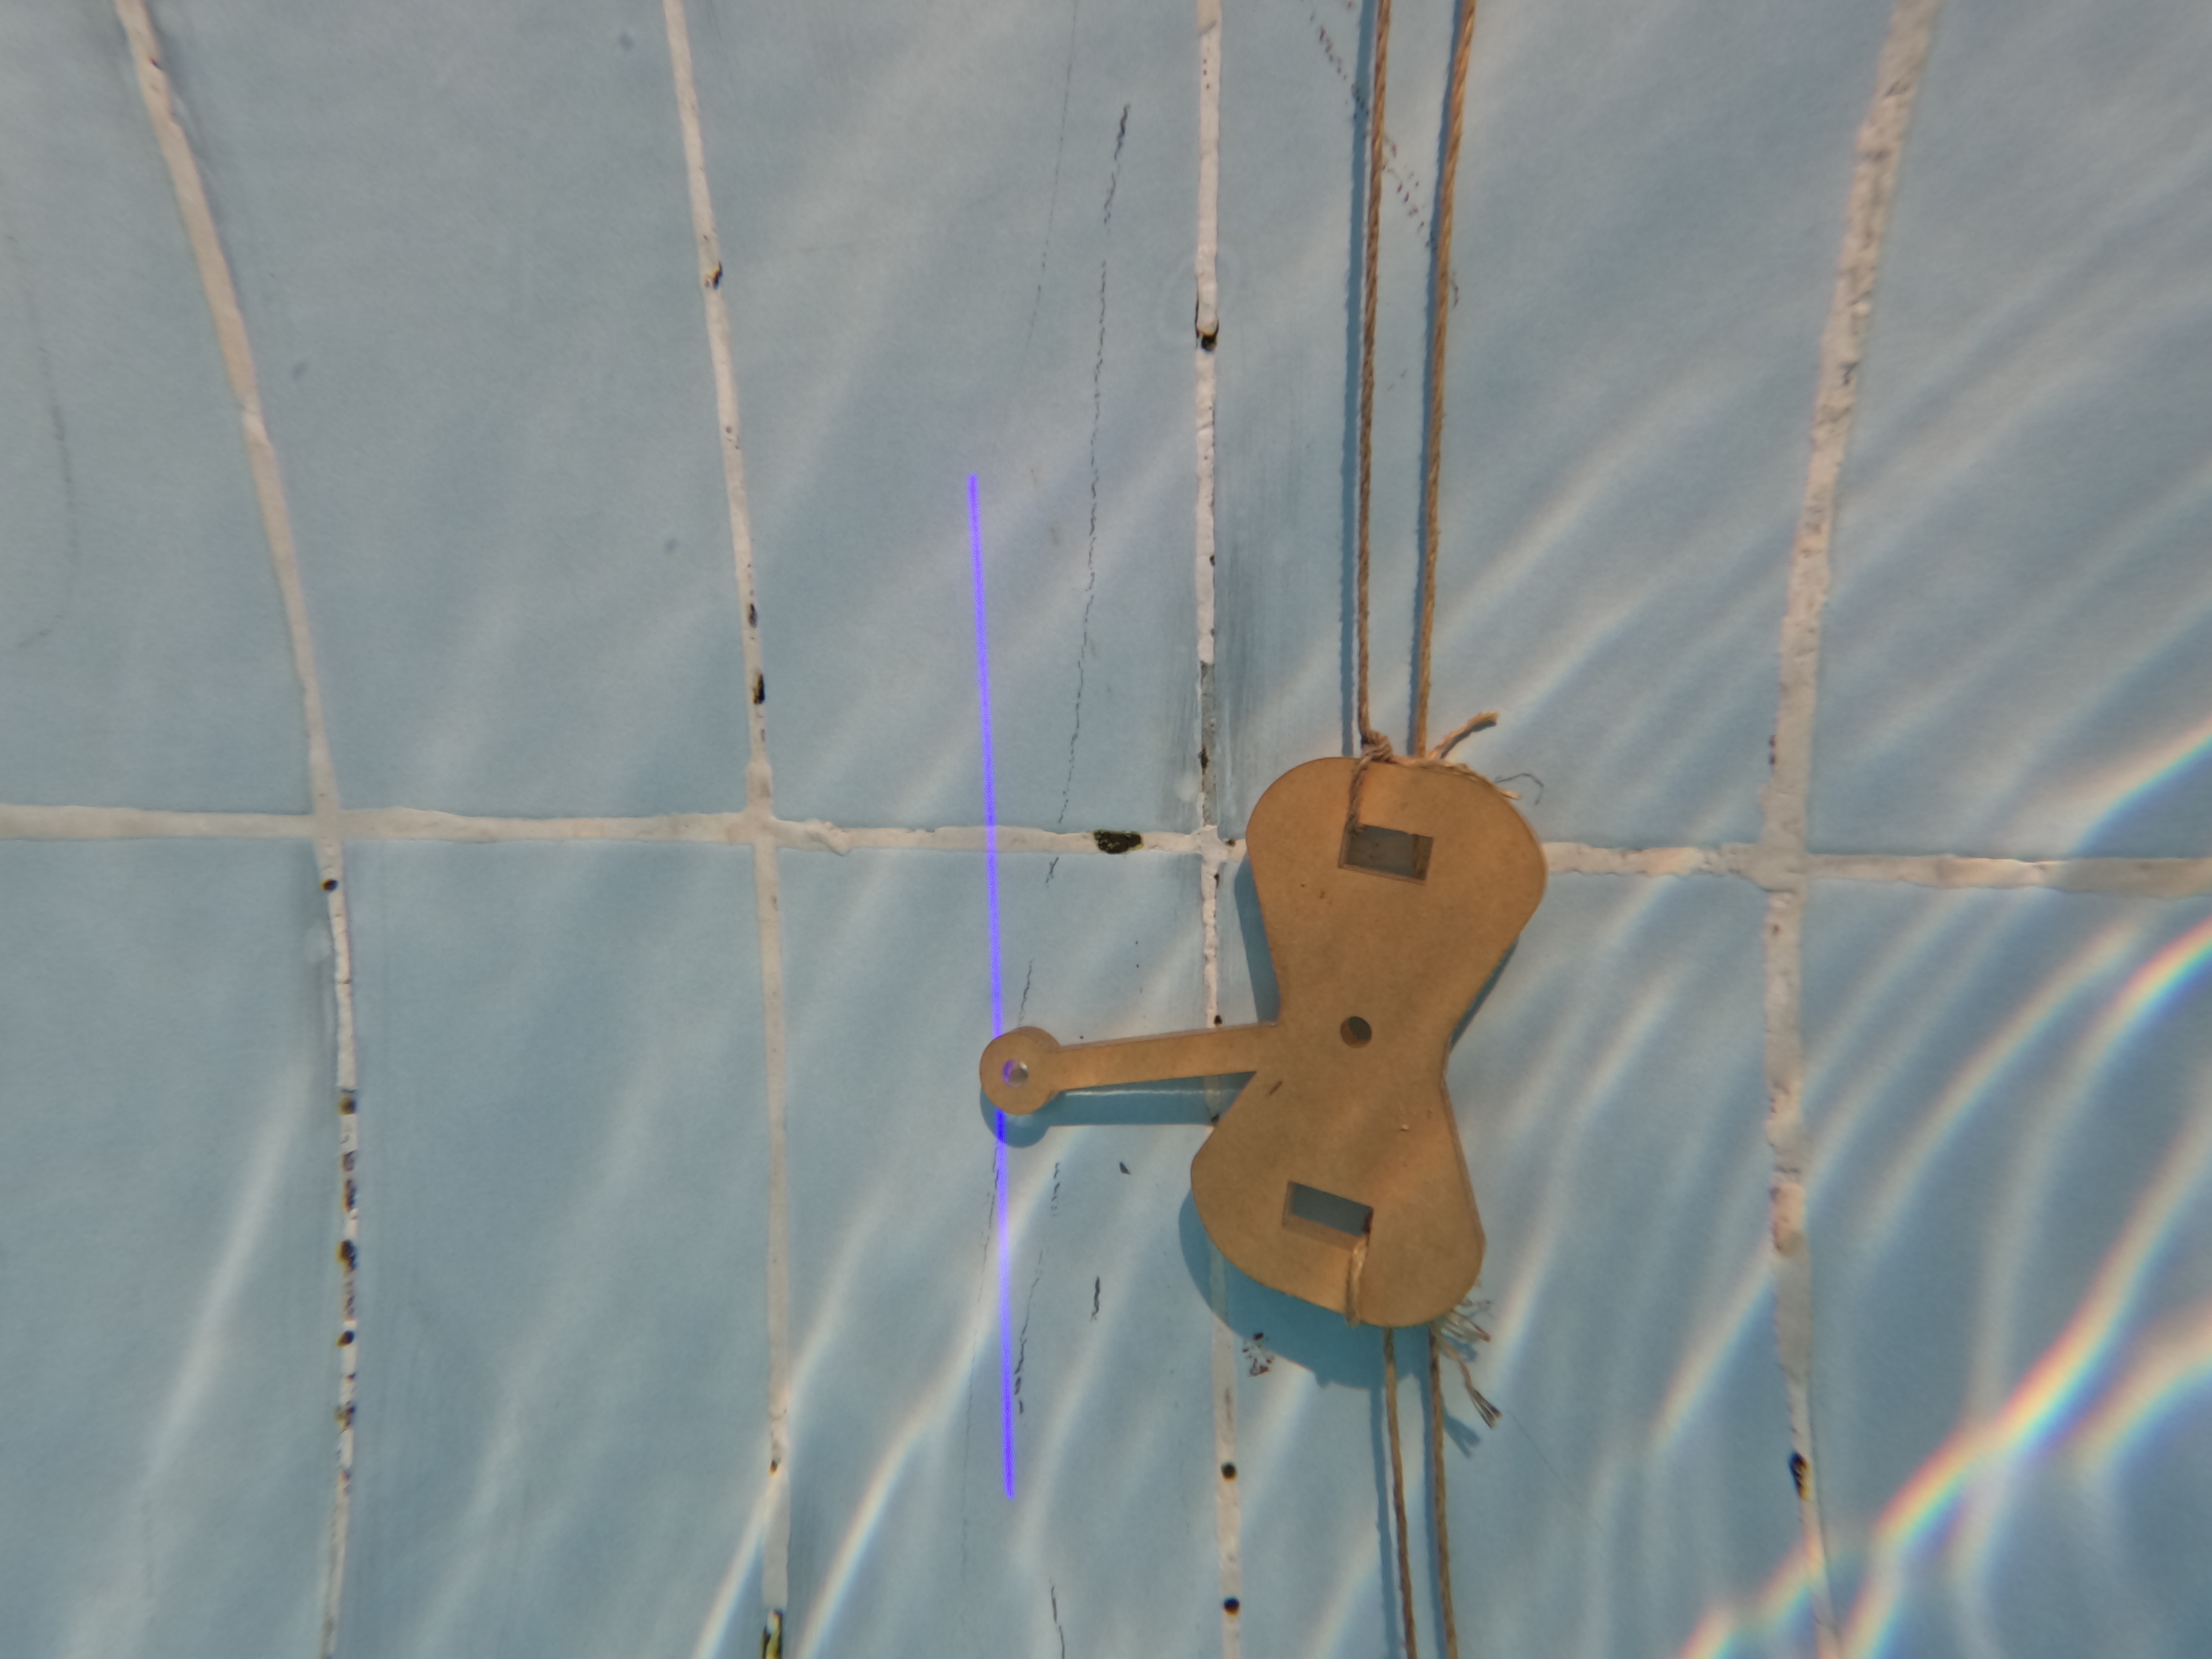

Supplement: Supplementary file 92 [file G0040486.pdf › Level_4_1/G0040486.pdf]

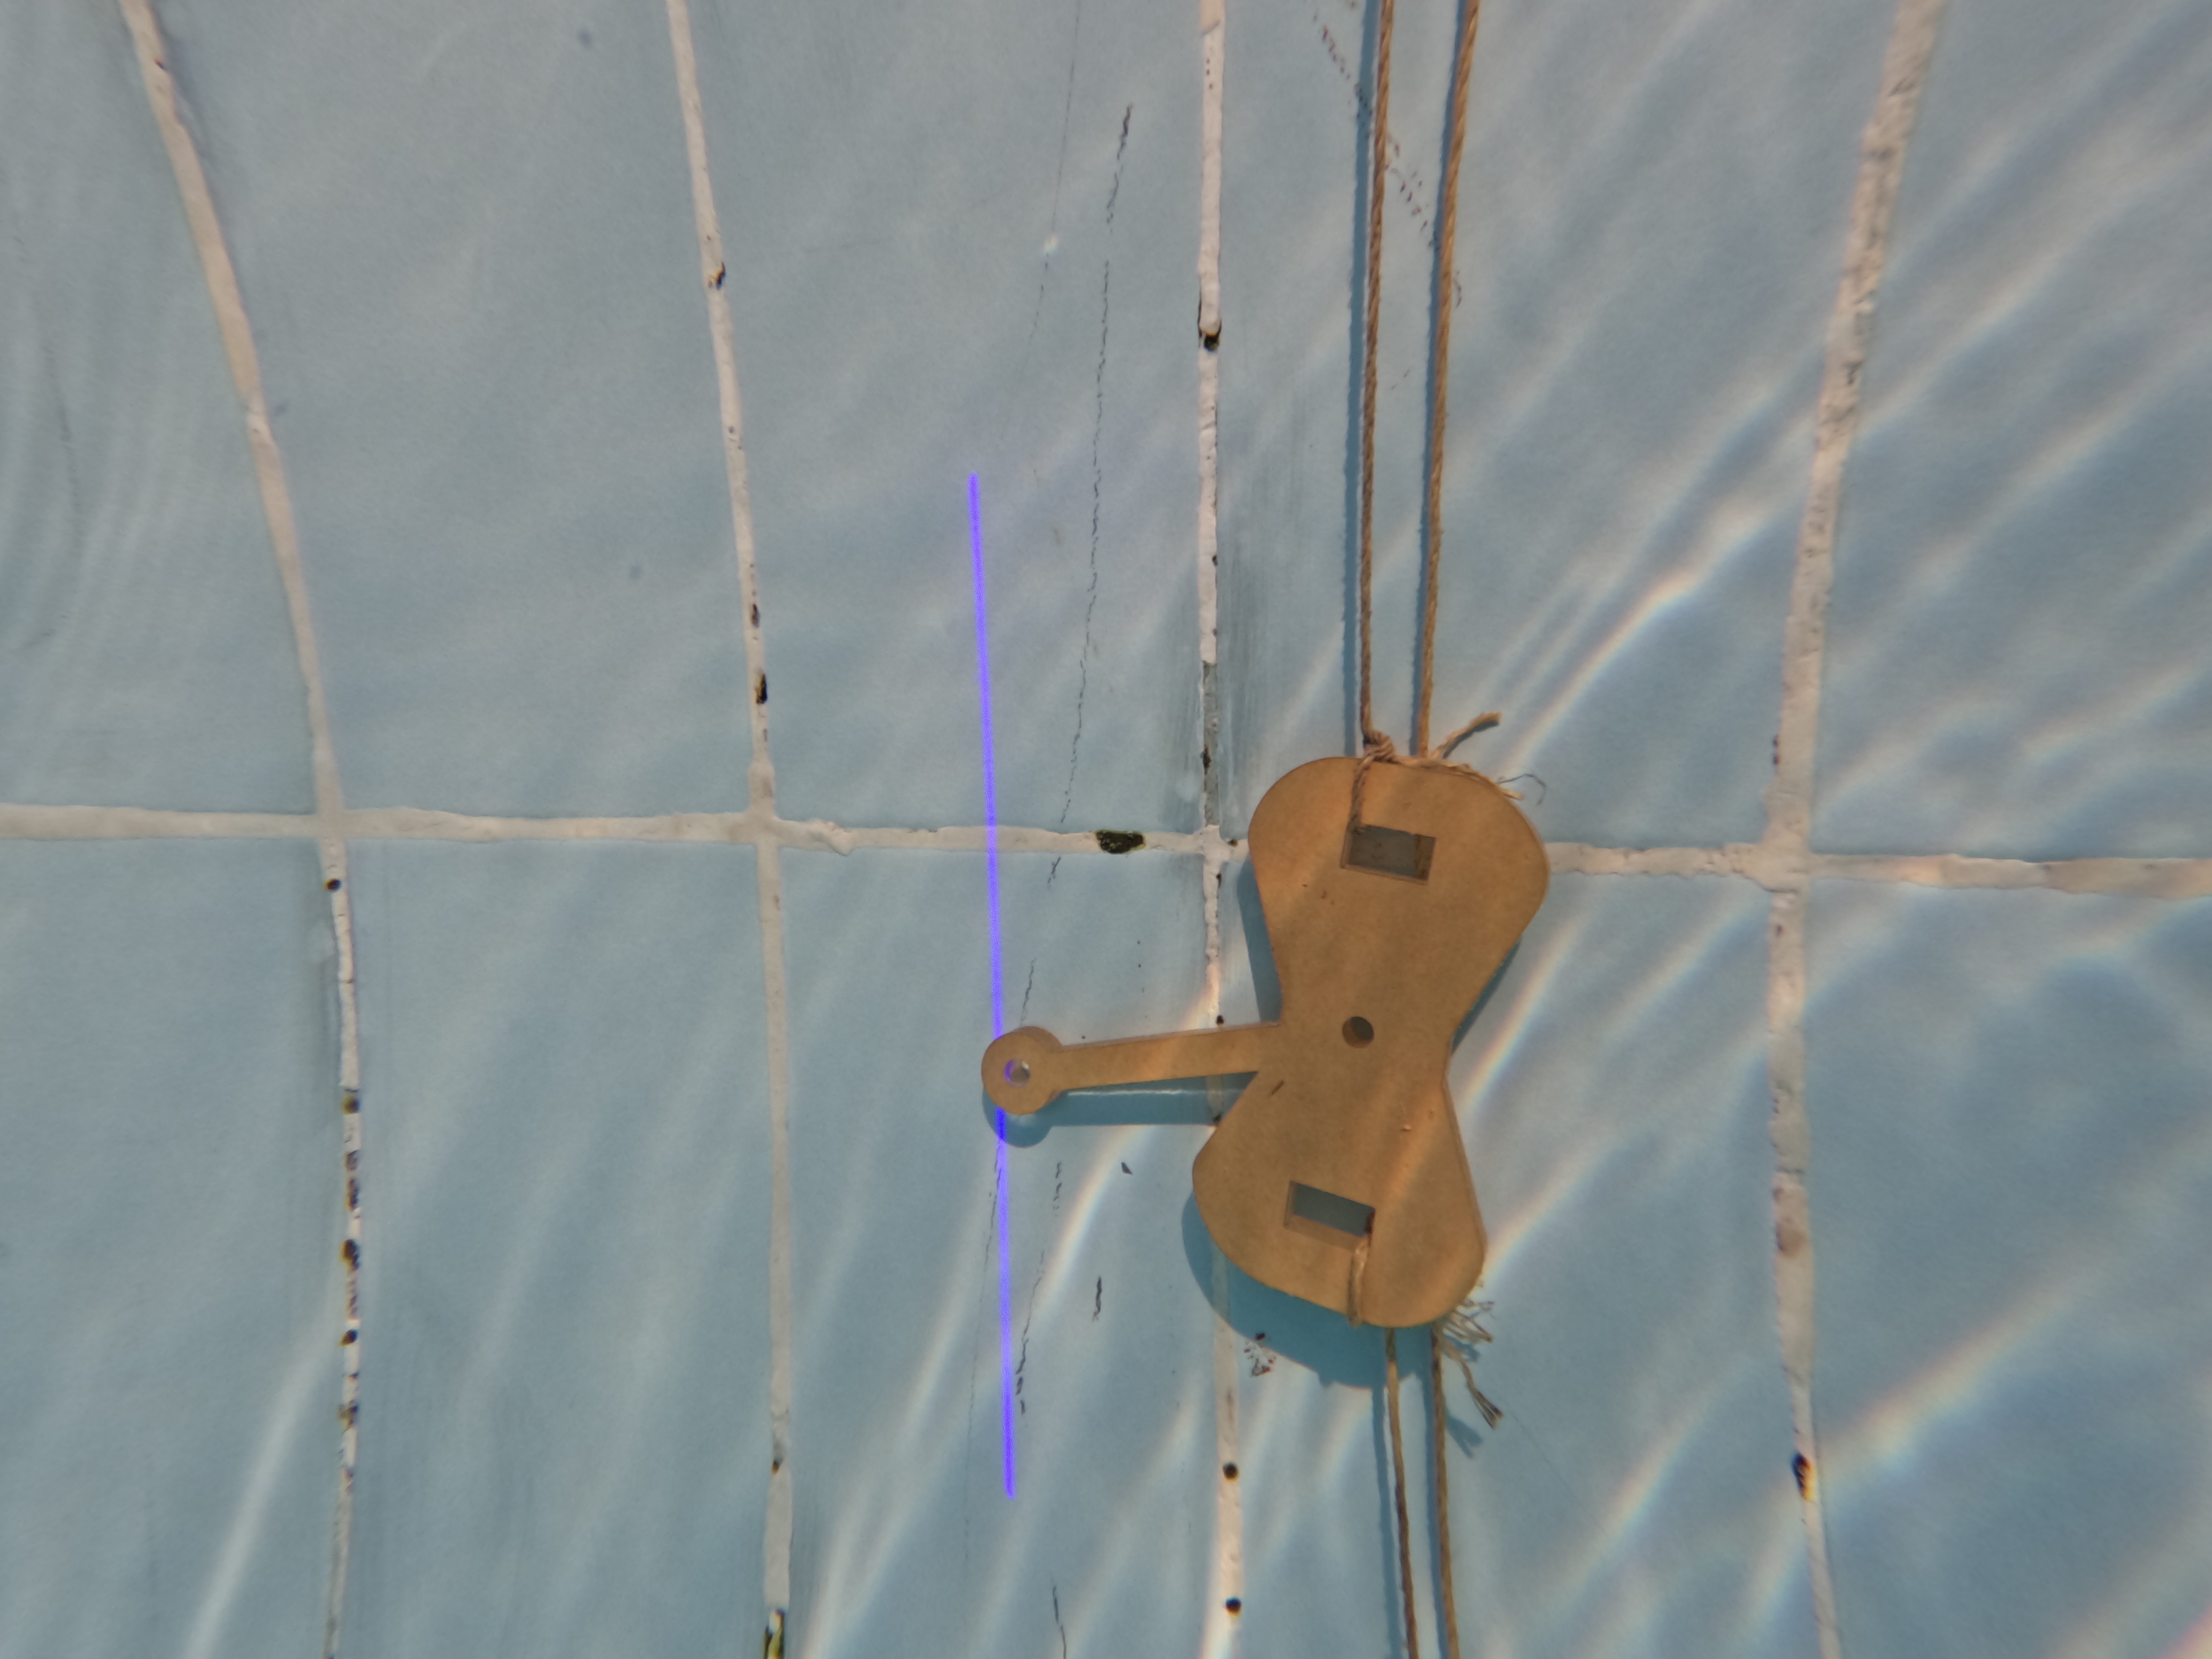

Supplement: Supplementary file 93 [file G0040487.pdf › Level_4_1/G0040487.pdf]

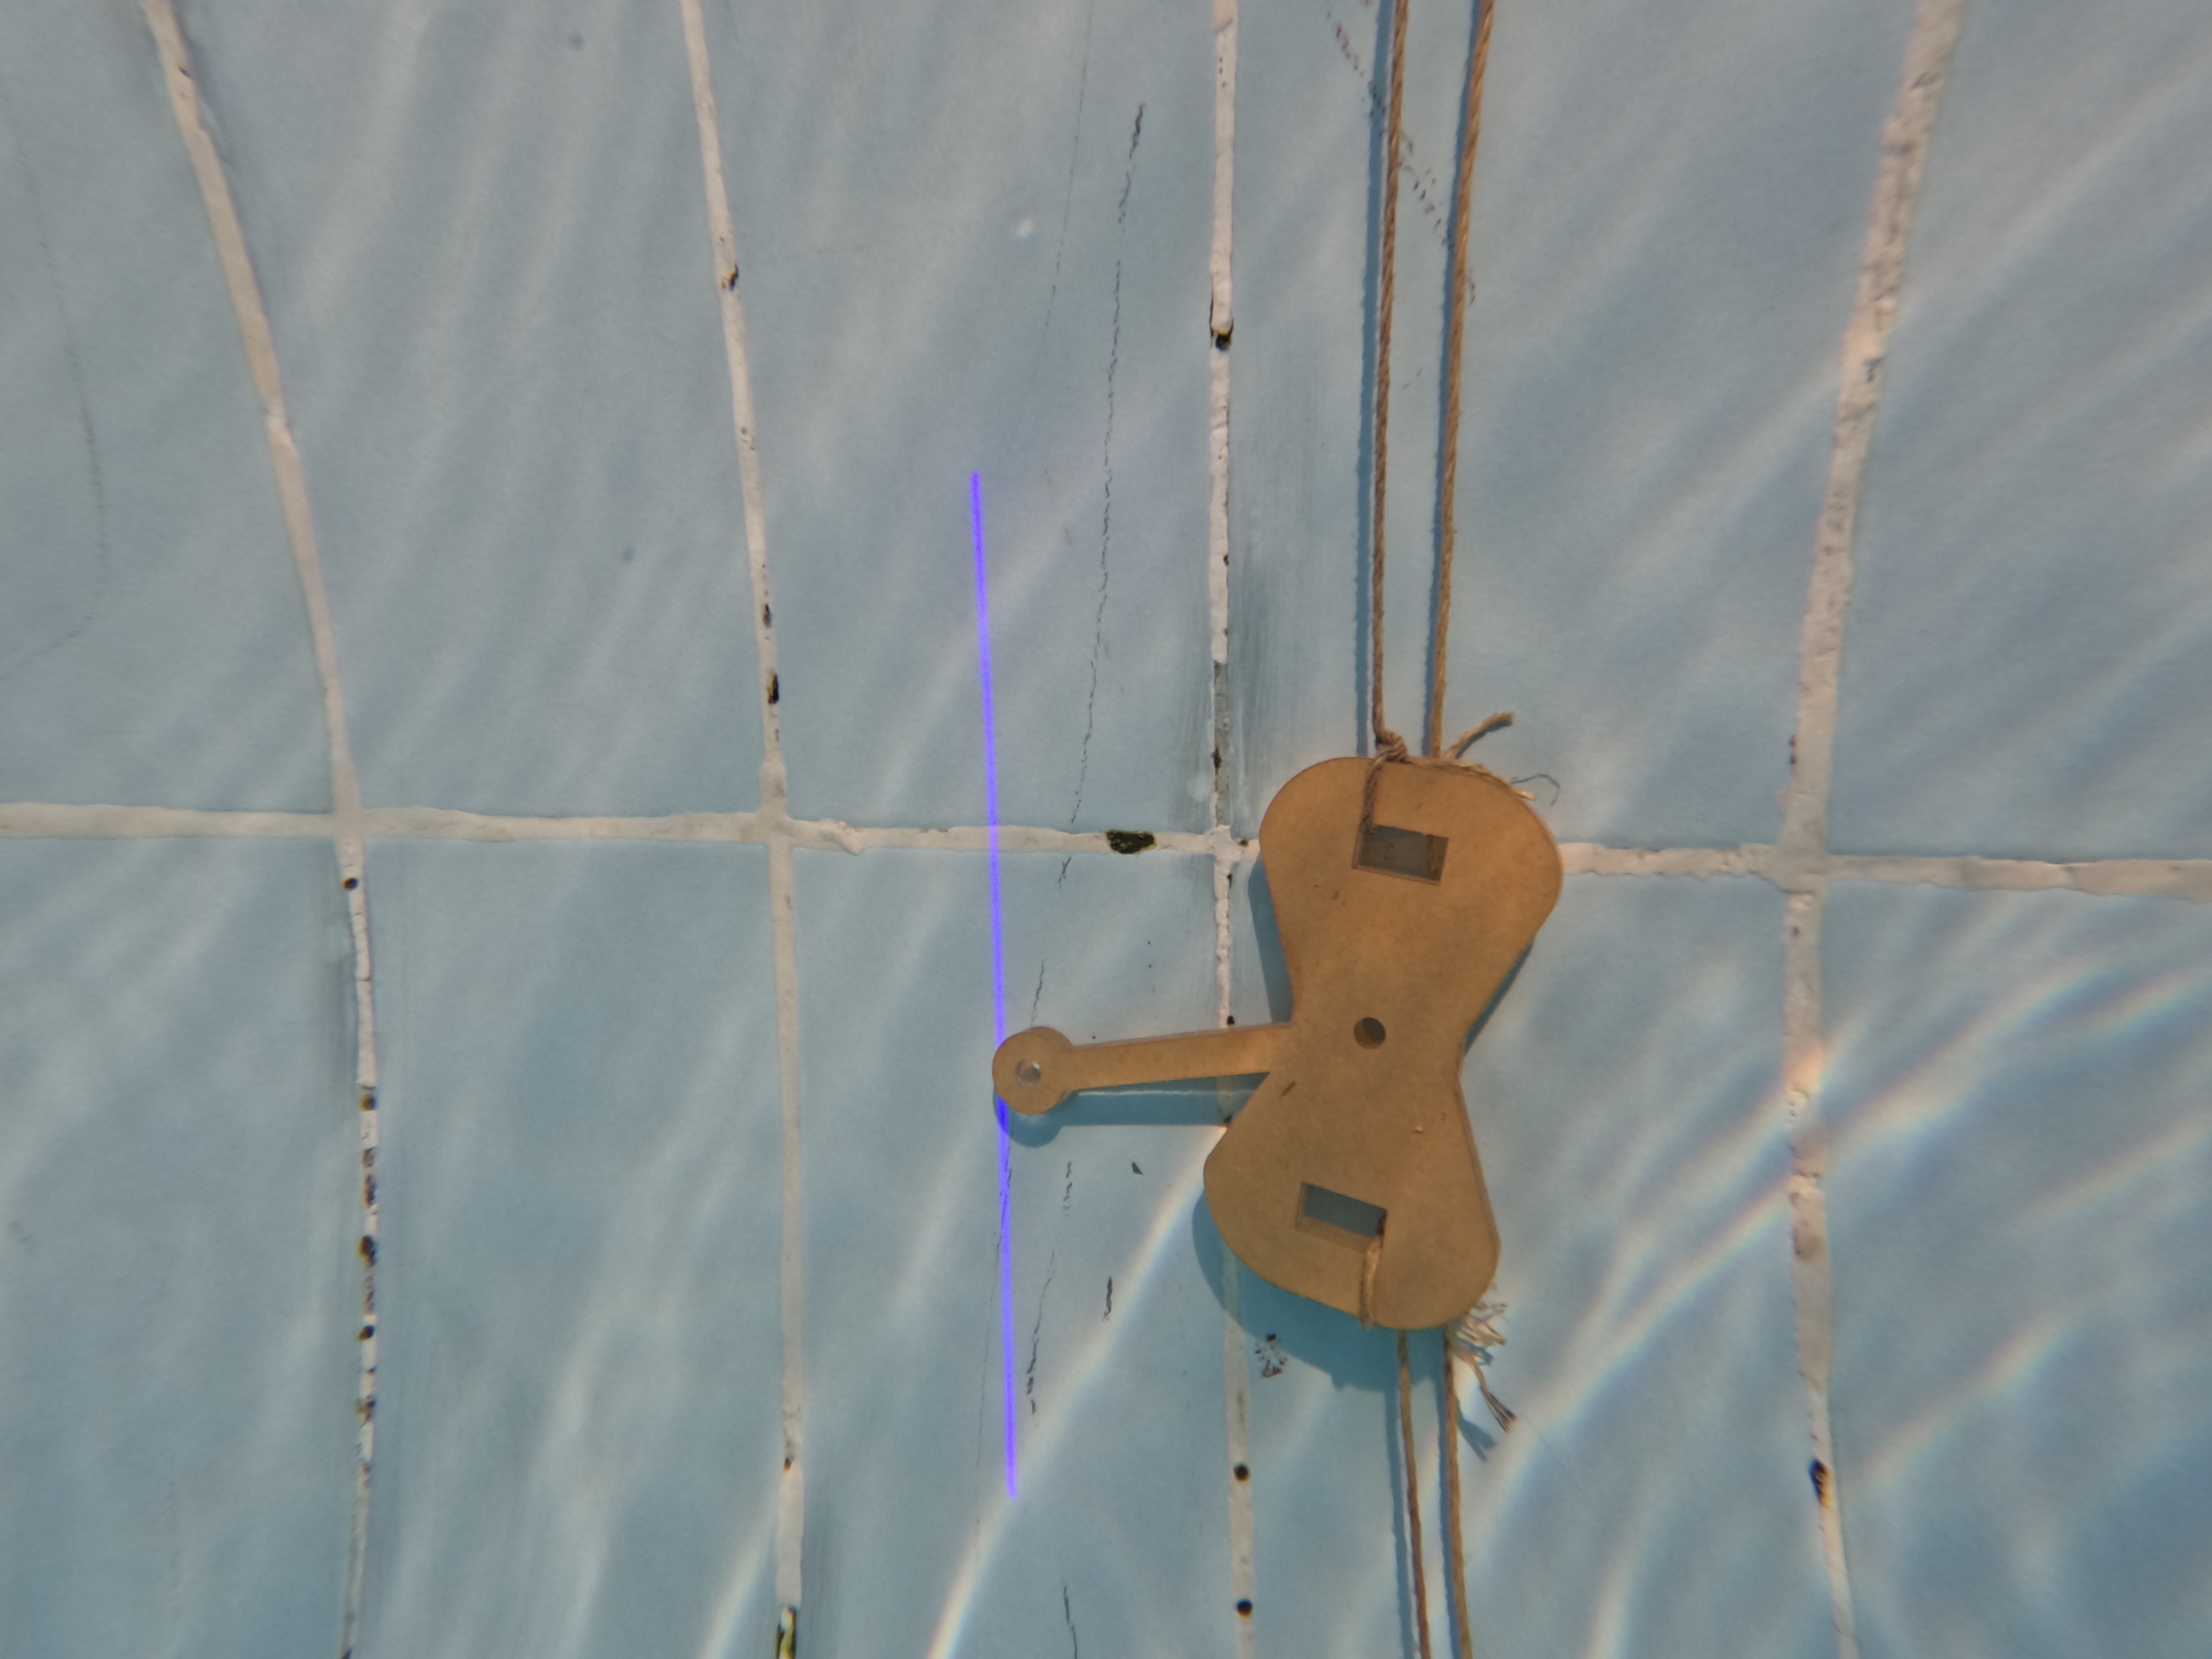

Supplement: Supplementary file 94 [file G0040488.pdf › Level_4_1/G0040488.pdf]

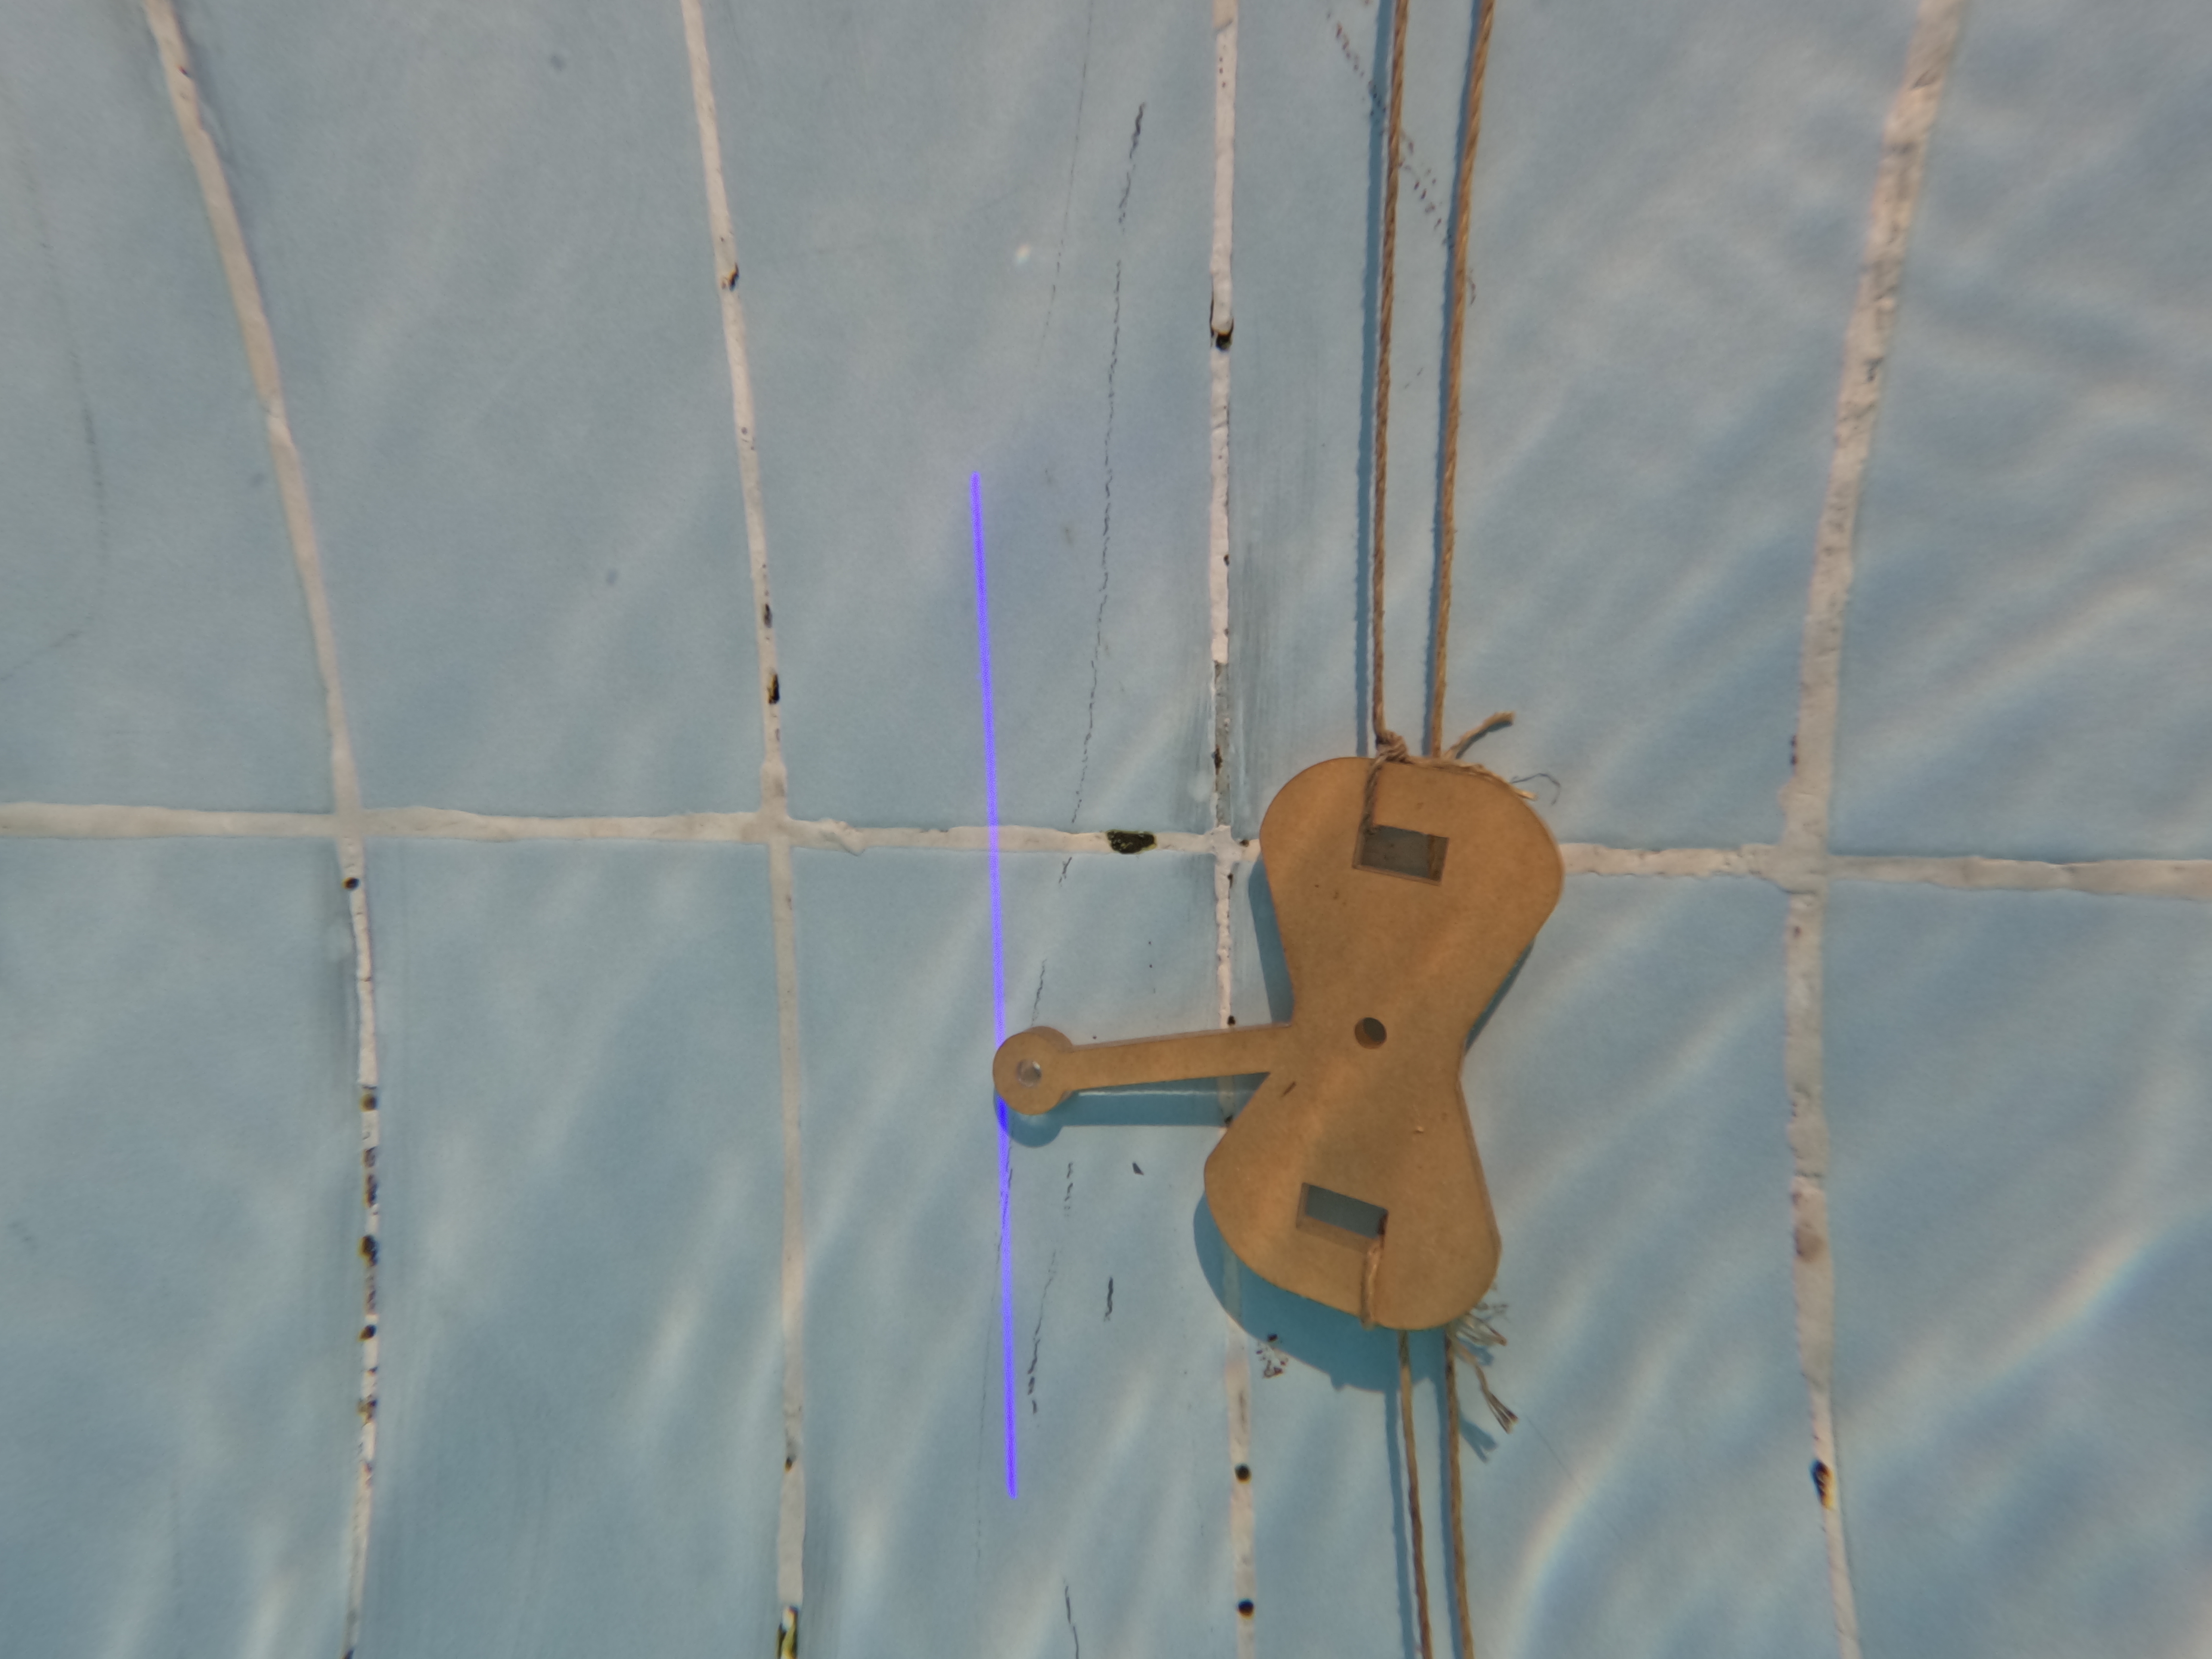

Supplement: Supplementary file 95 [file G0040489.pdf › Level_4_1/G0040489.pdf]

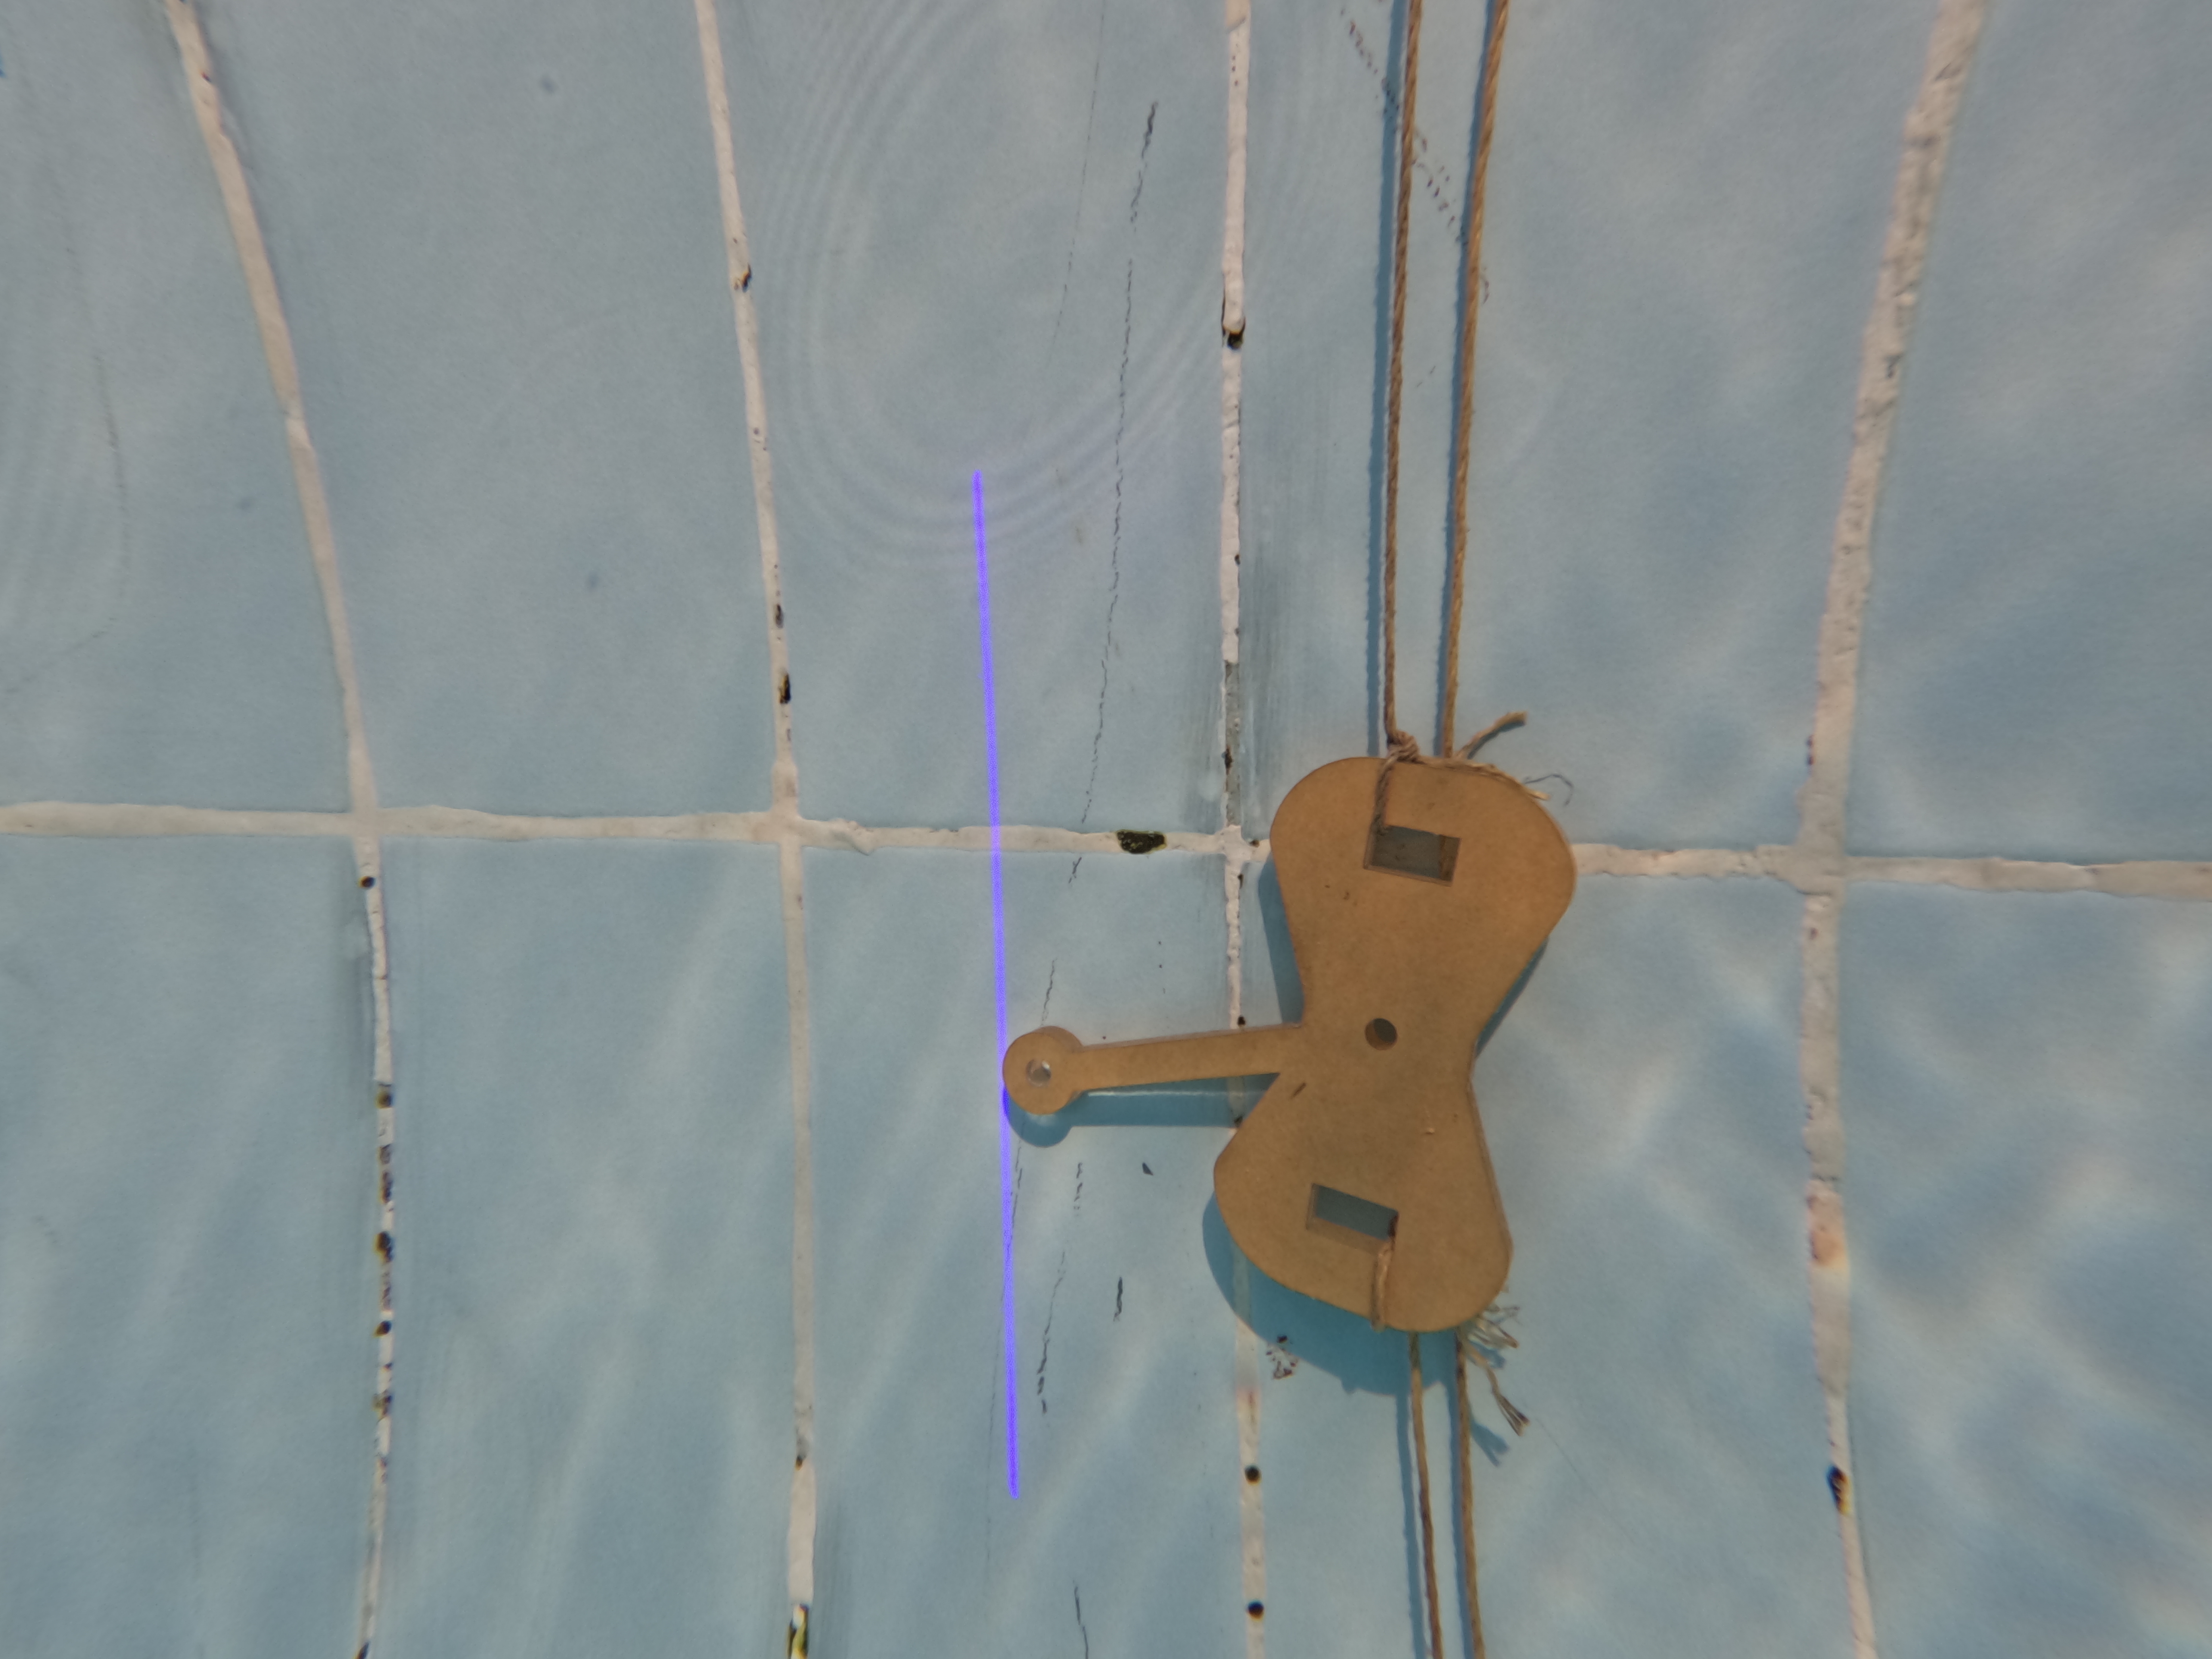

Supplement: Supplementary file 96 [file G0040490.pdf › Level_4_1/G0040490.pdf]

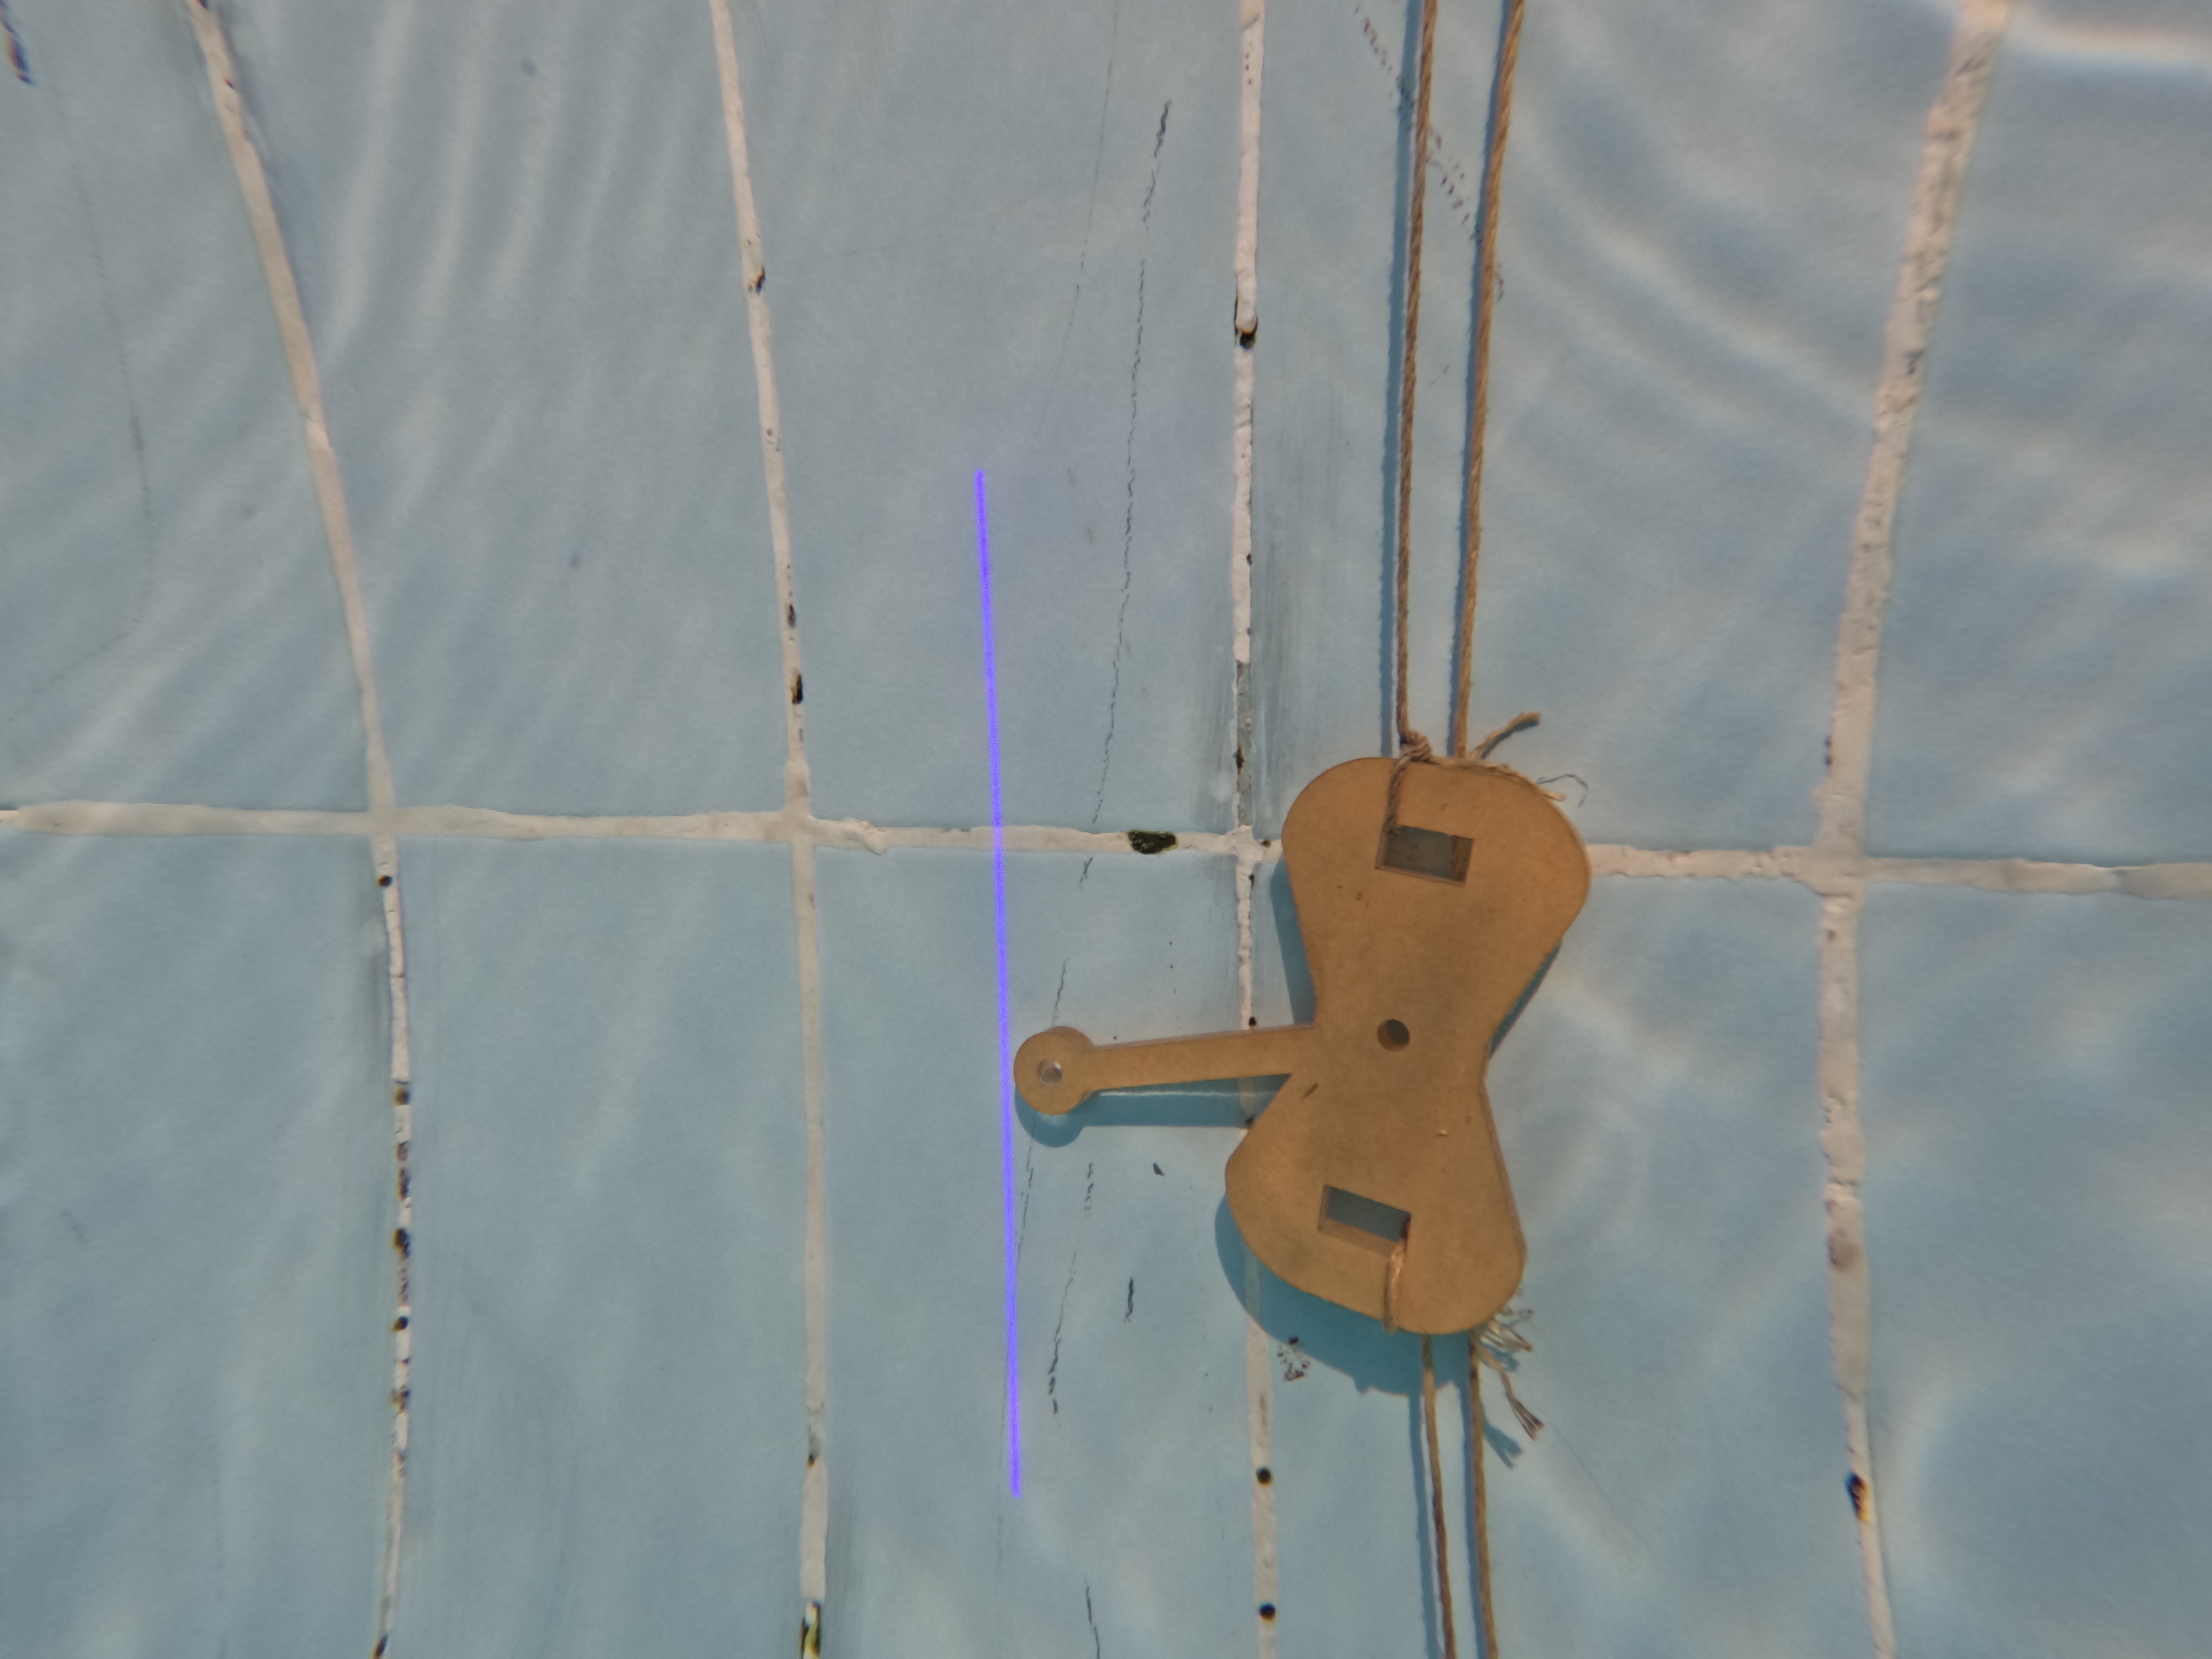

Supplement: Supplementary file 97 [file G0040491.pdf › Level_4_1/G0040491.pdf]

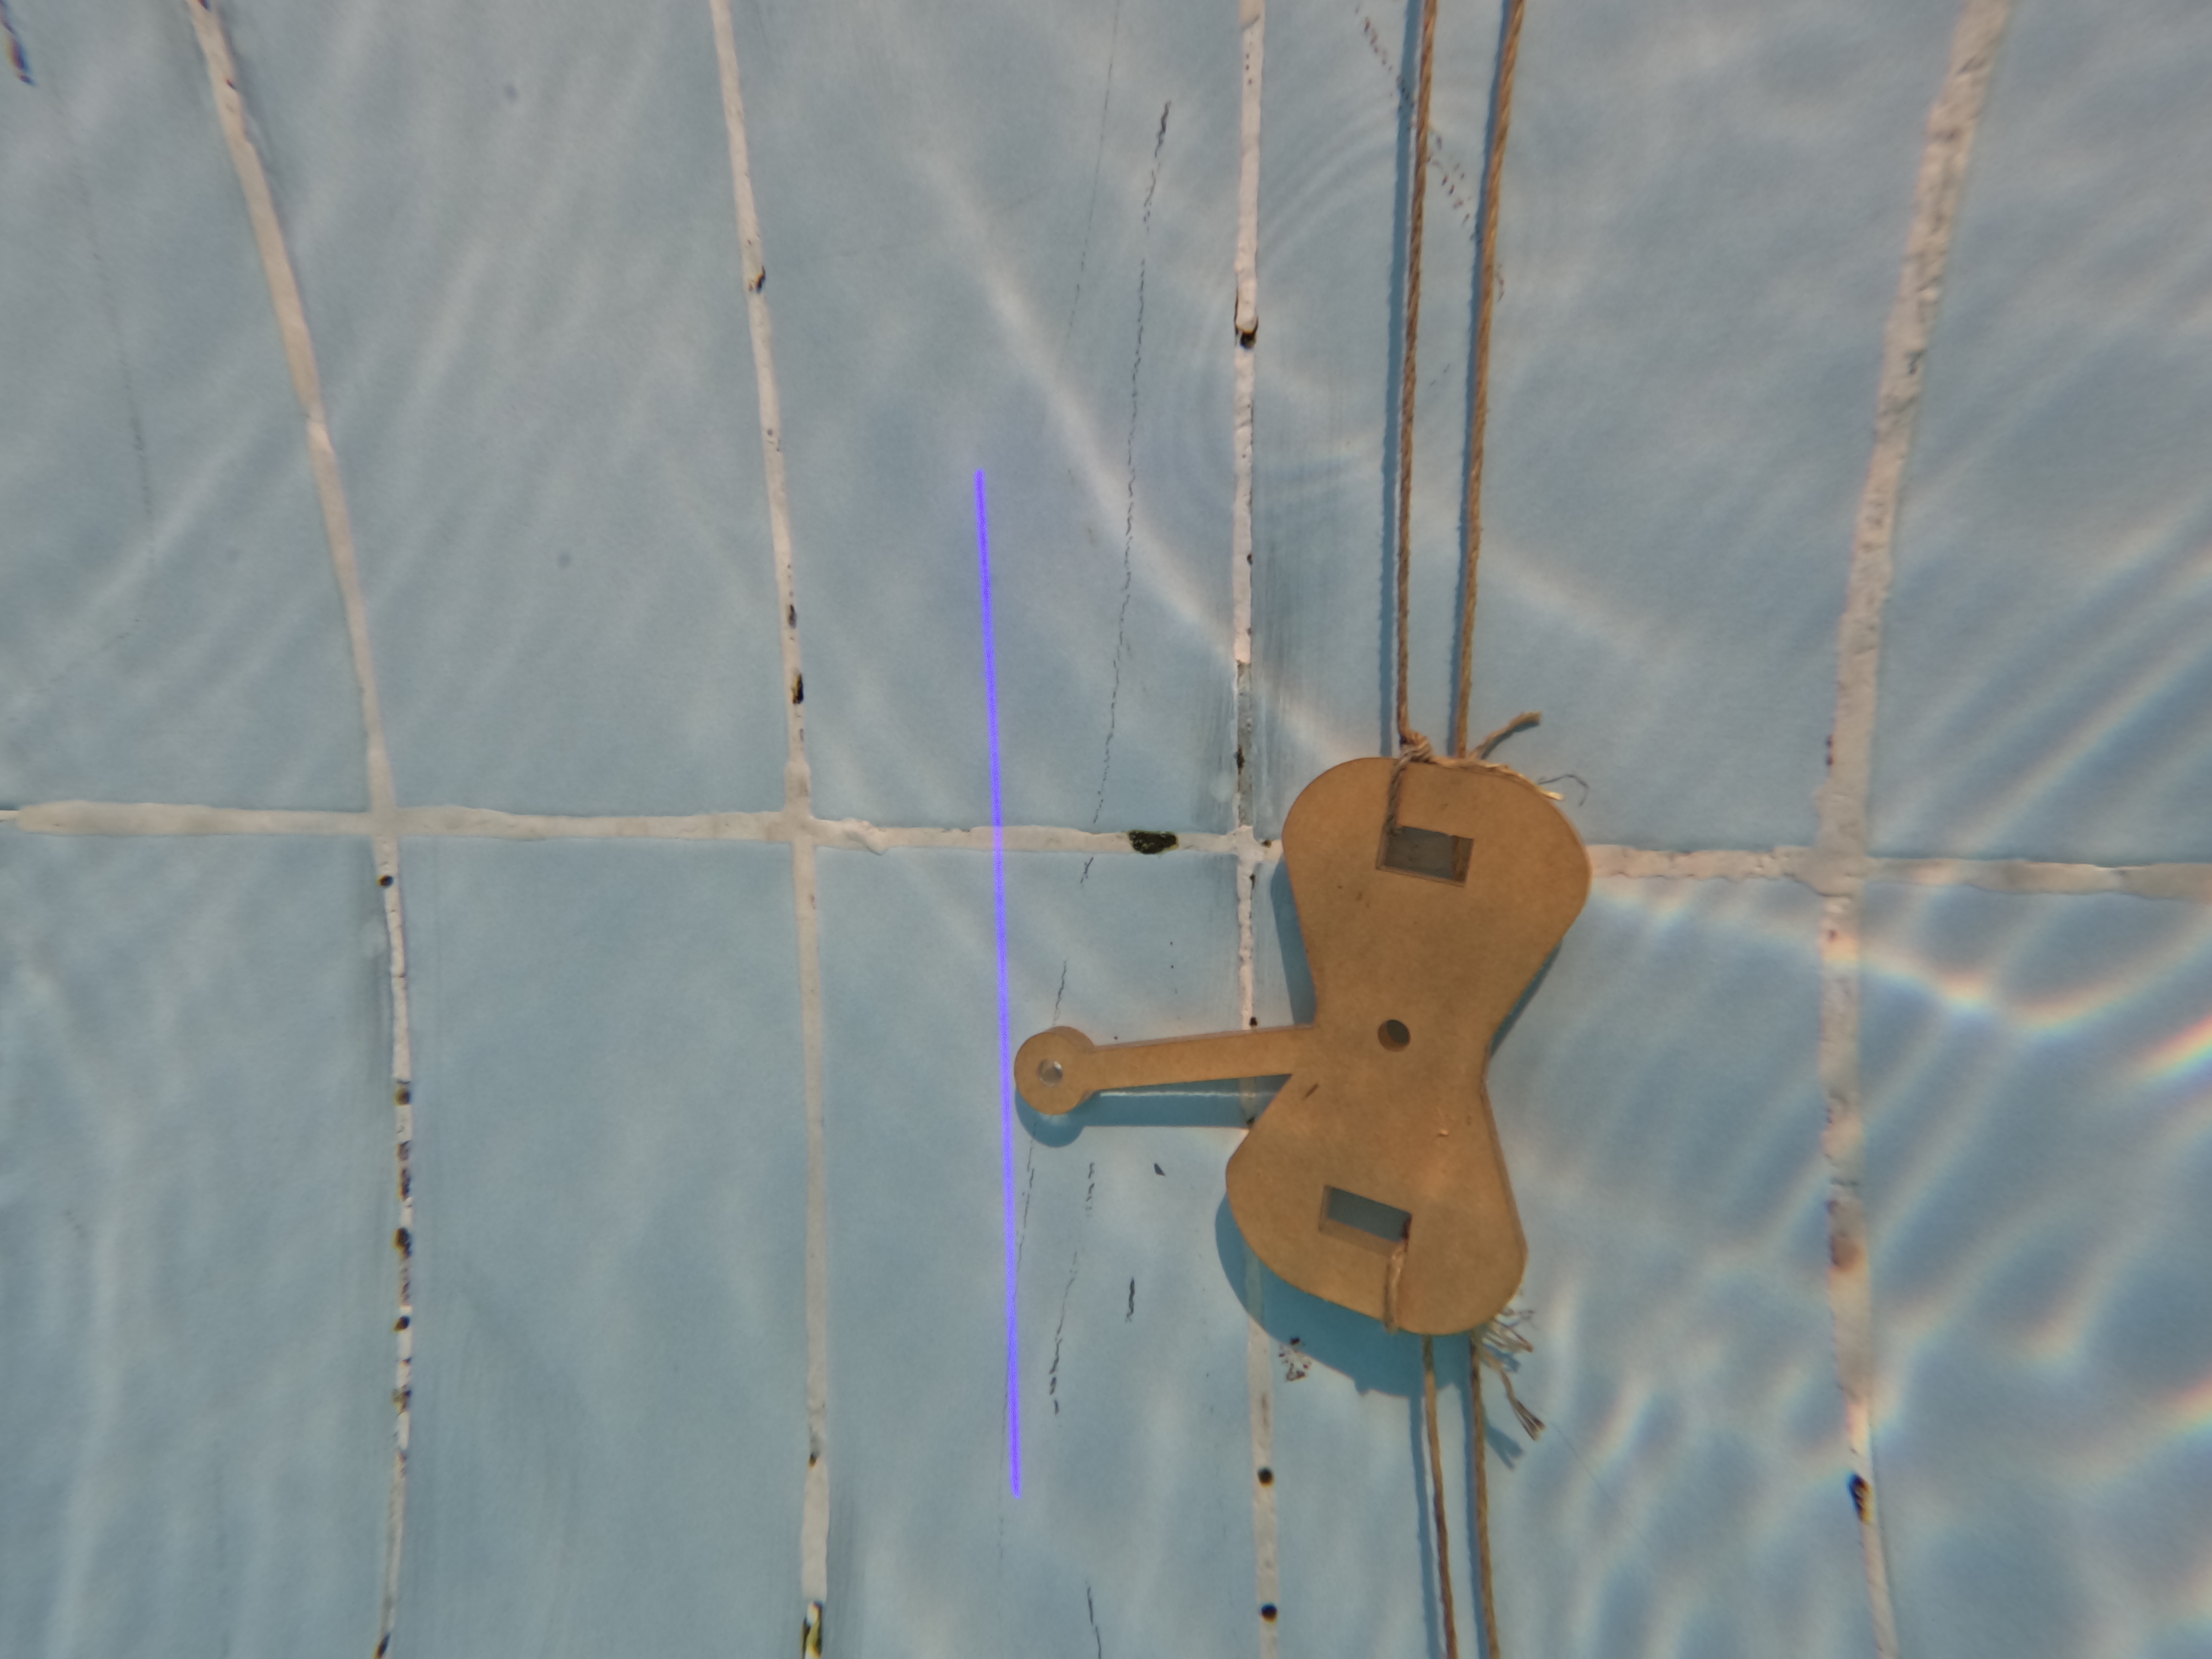

Supplement: Supplementary file 98 [file G0040492.pdf › Level_4_1/G0040492.pdf]

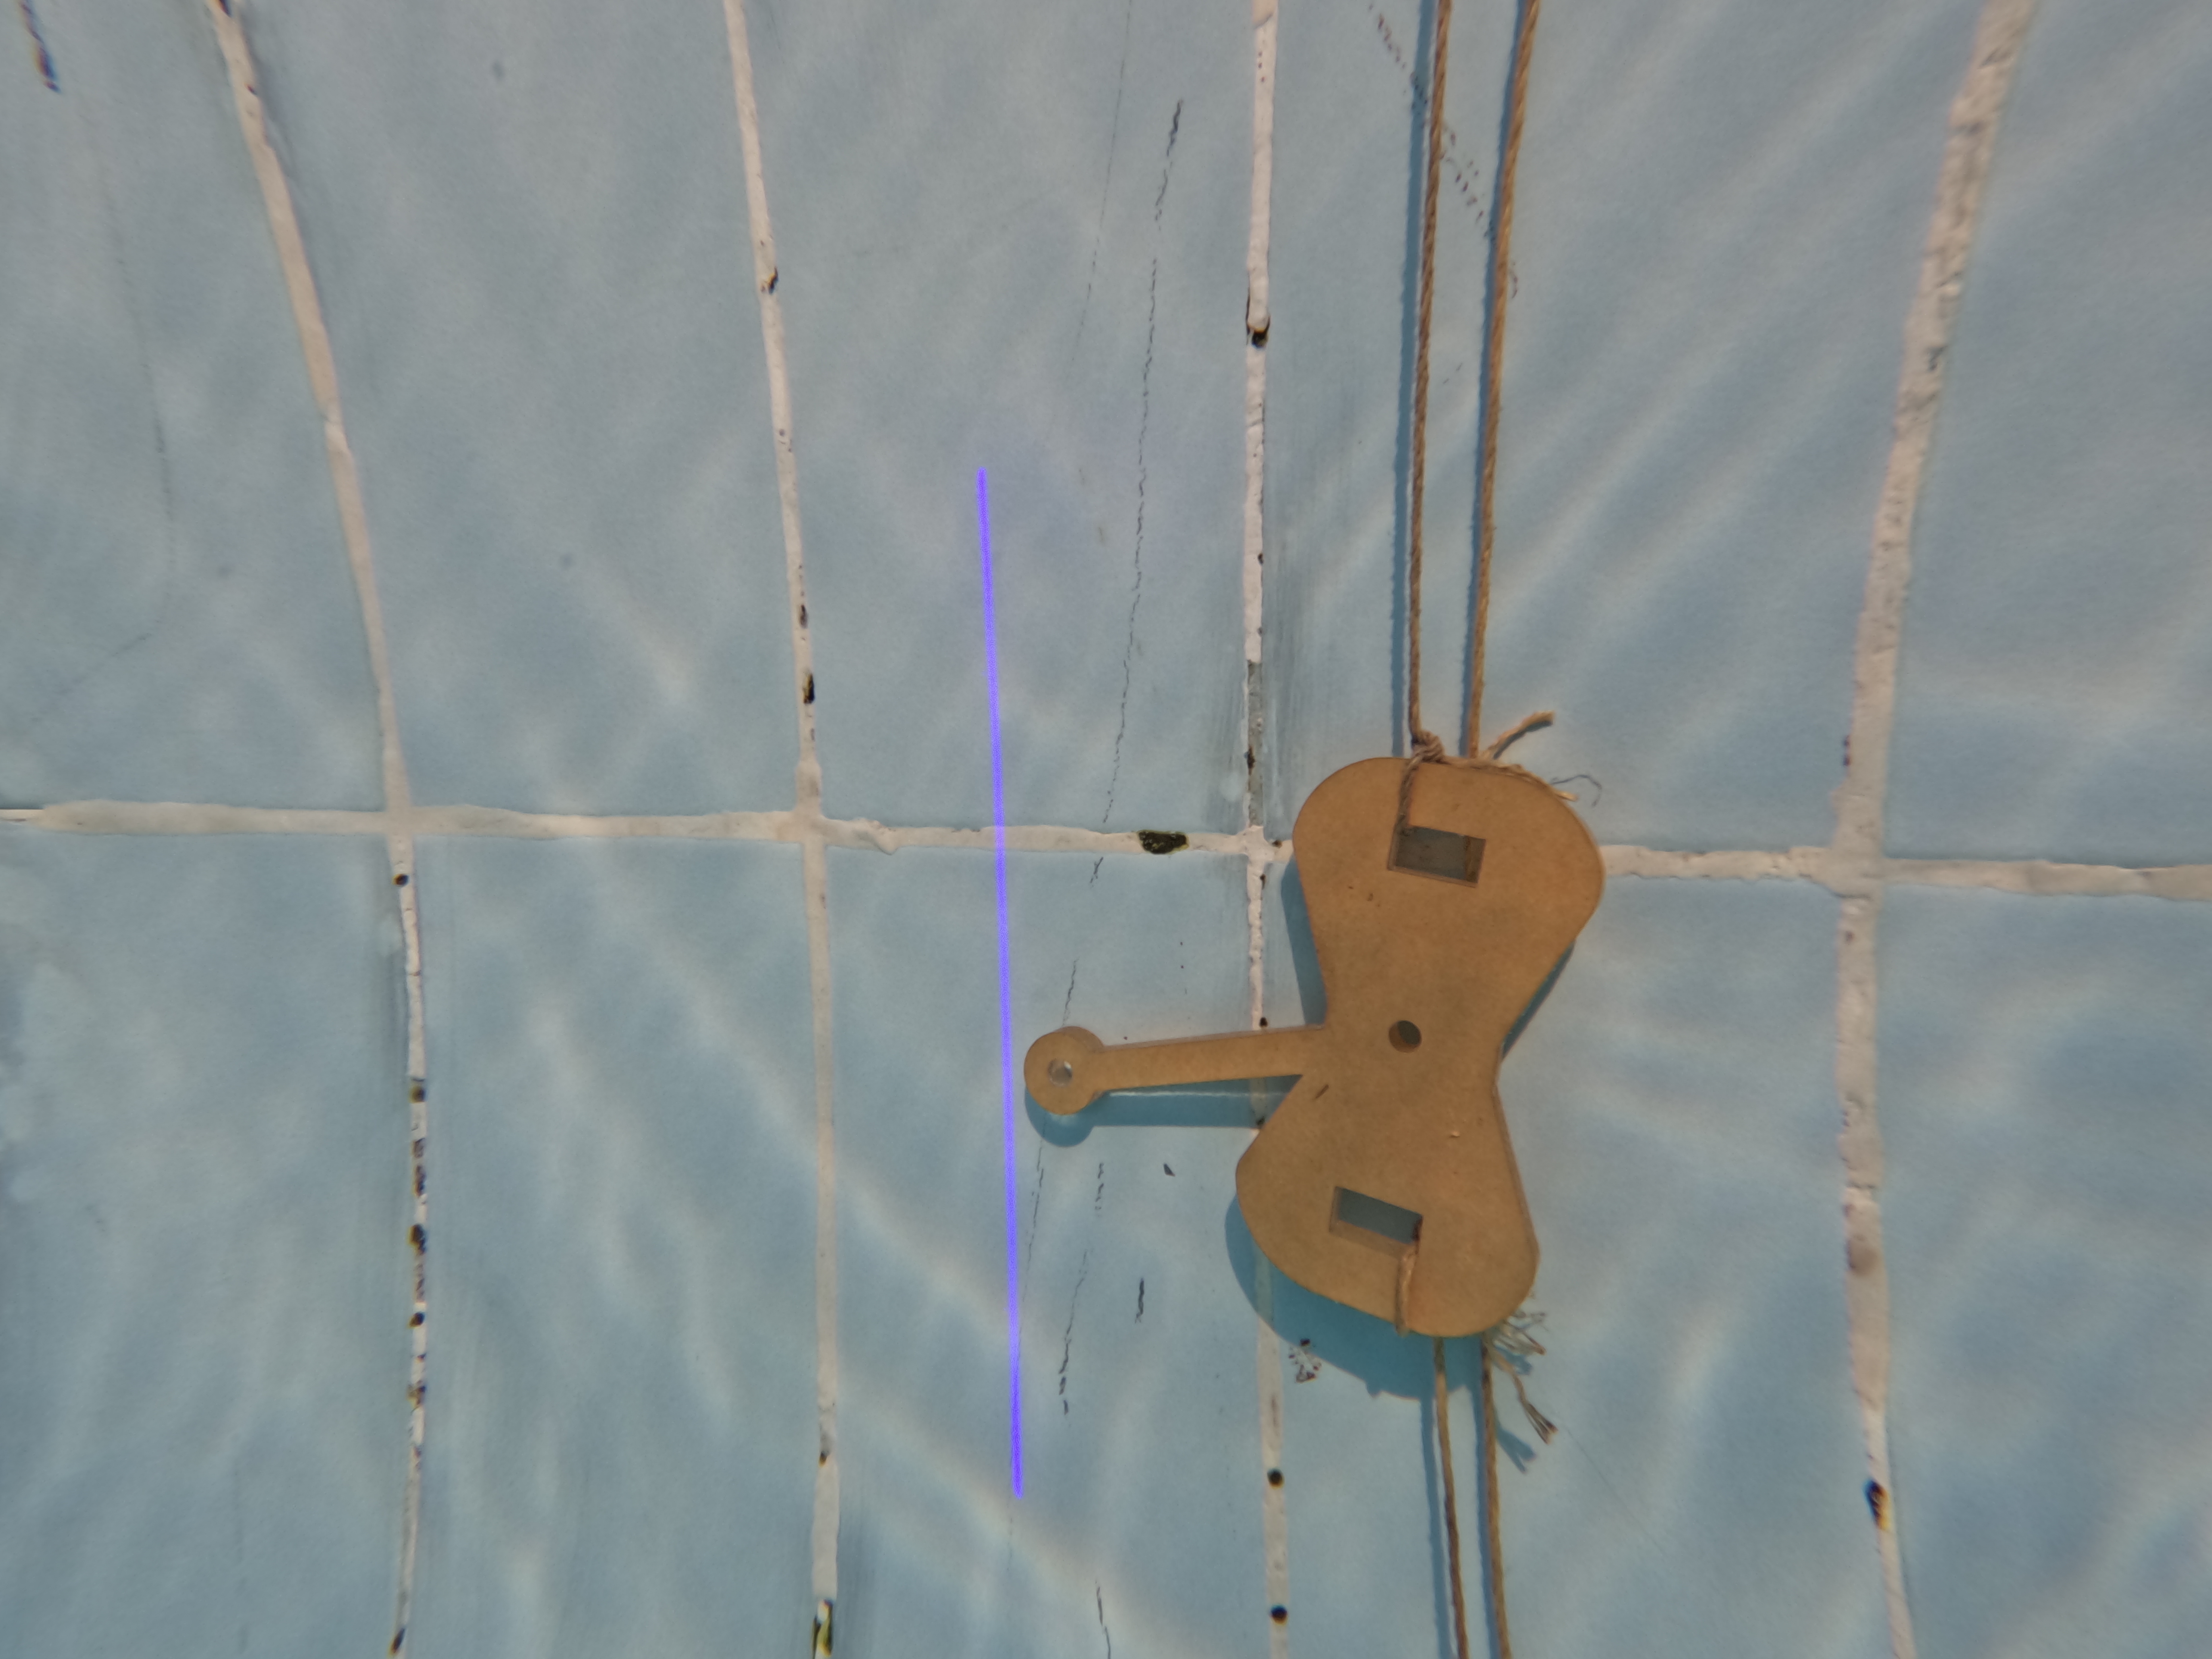

Supplement: Supplementary file 99 [file G0040493.pdf › Level_4_1/G0040493.pdf]

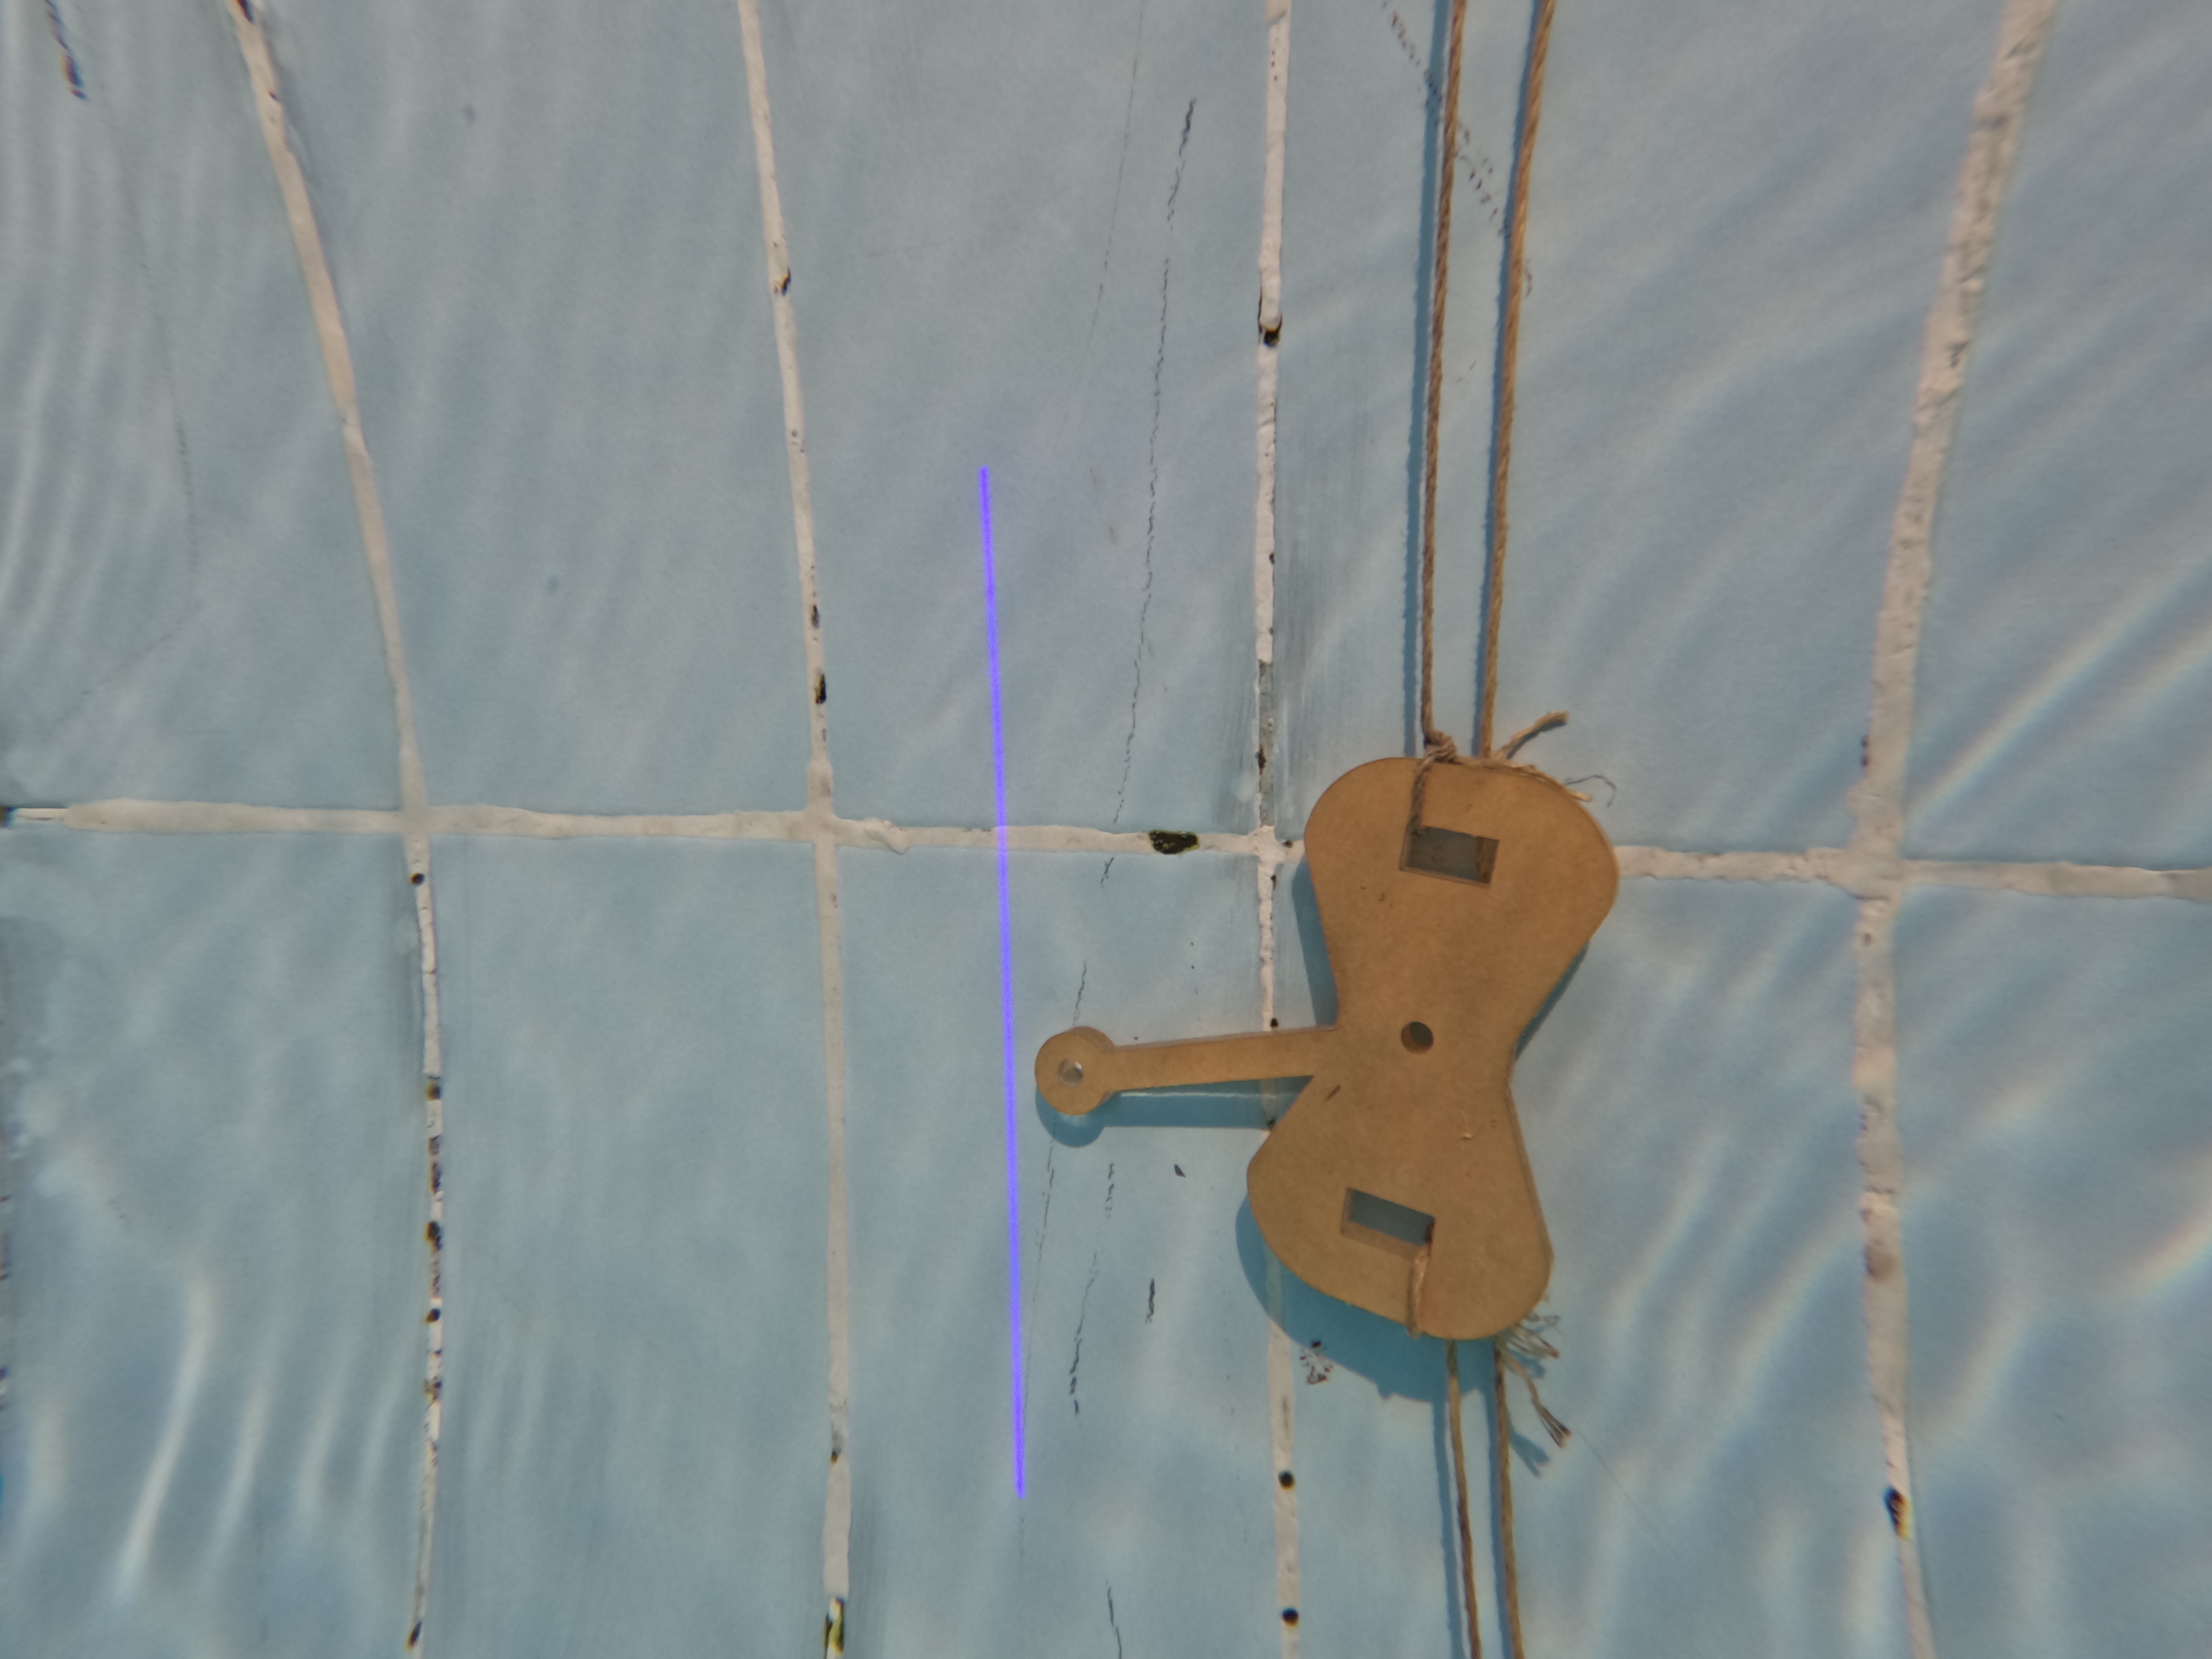

Supplement: Supplementary file 100 [file G0040494.pdf › Level_4_1/G0040494.pdf]
