# Supplementary figures and images for: 3D reconstruction of shallow sea environment using direct system calibration and faint laser line extraction (part 2 of 35)
Source: Research Square preprint supplement (doi:10.21203/rs.3.rs-5262658/v1), 2024-12-02

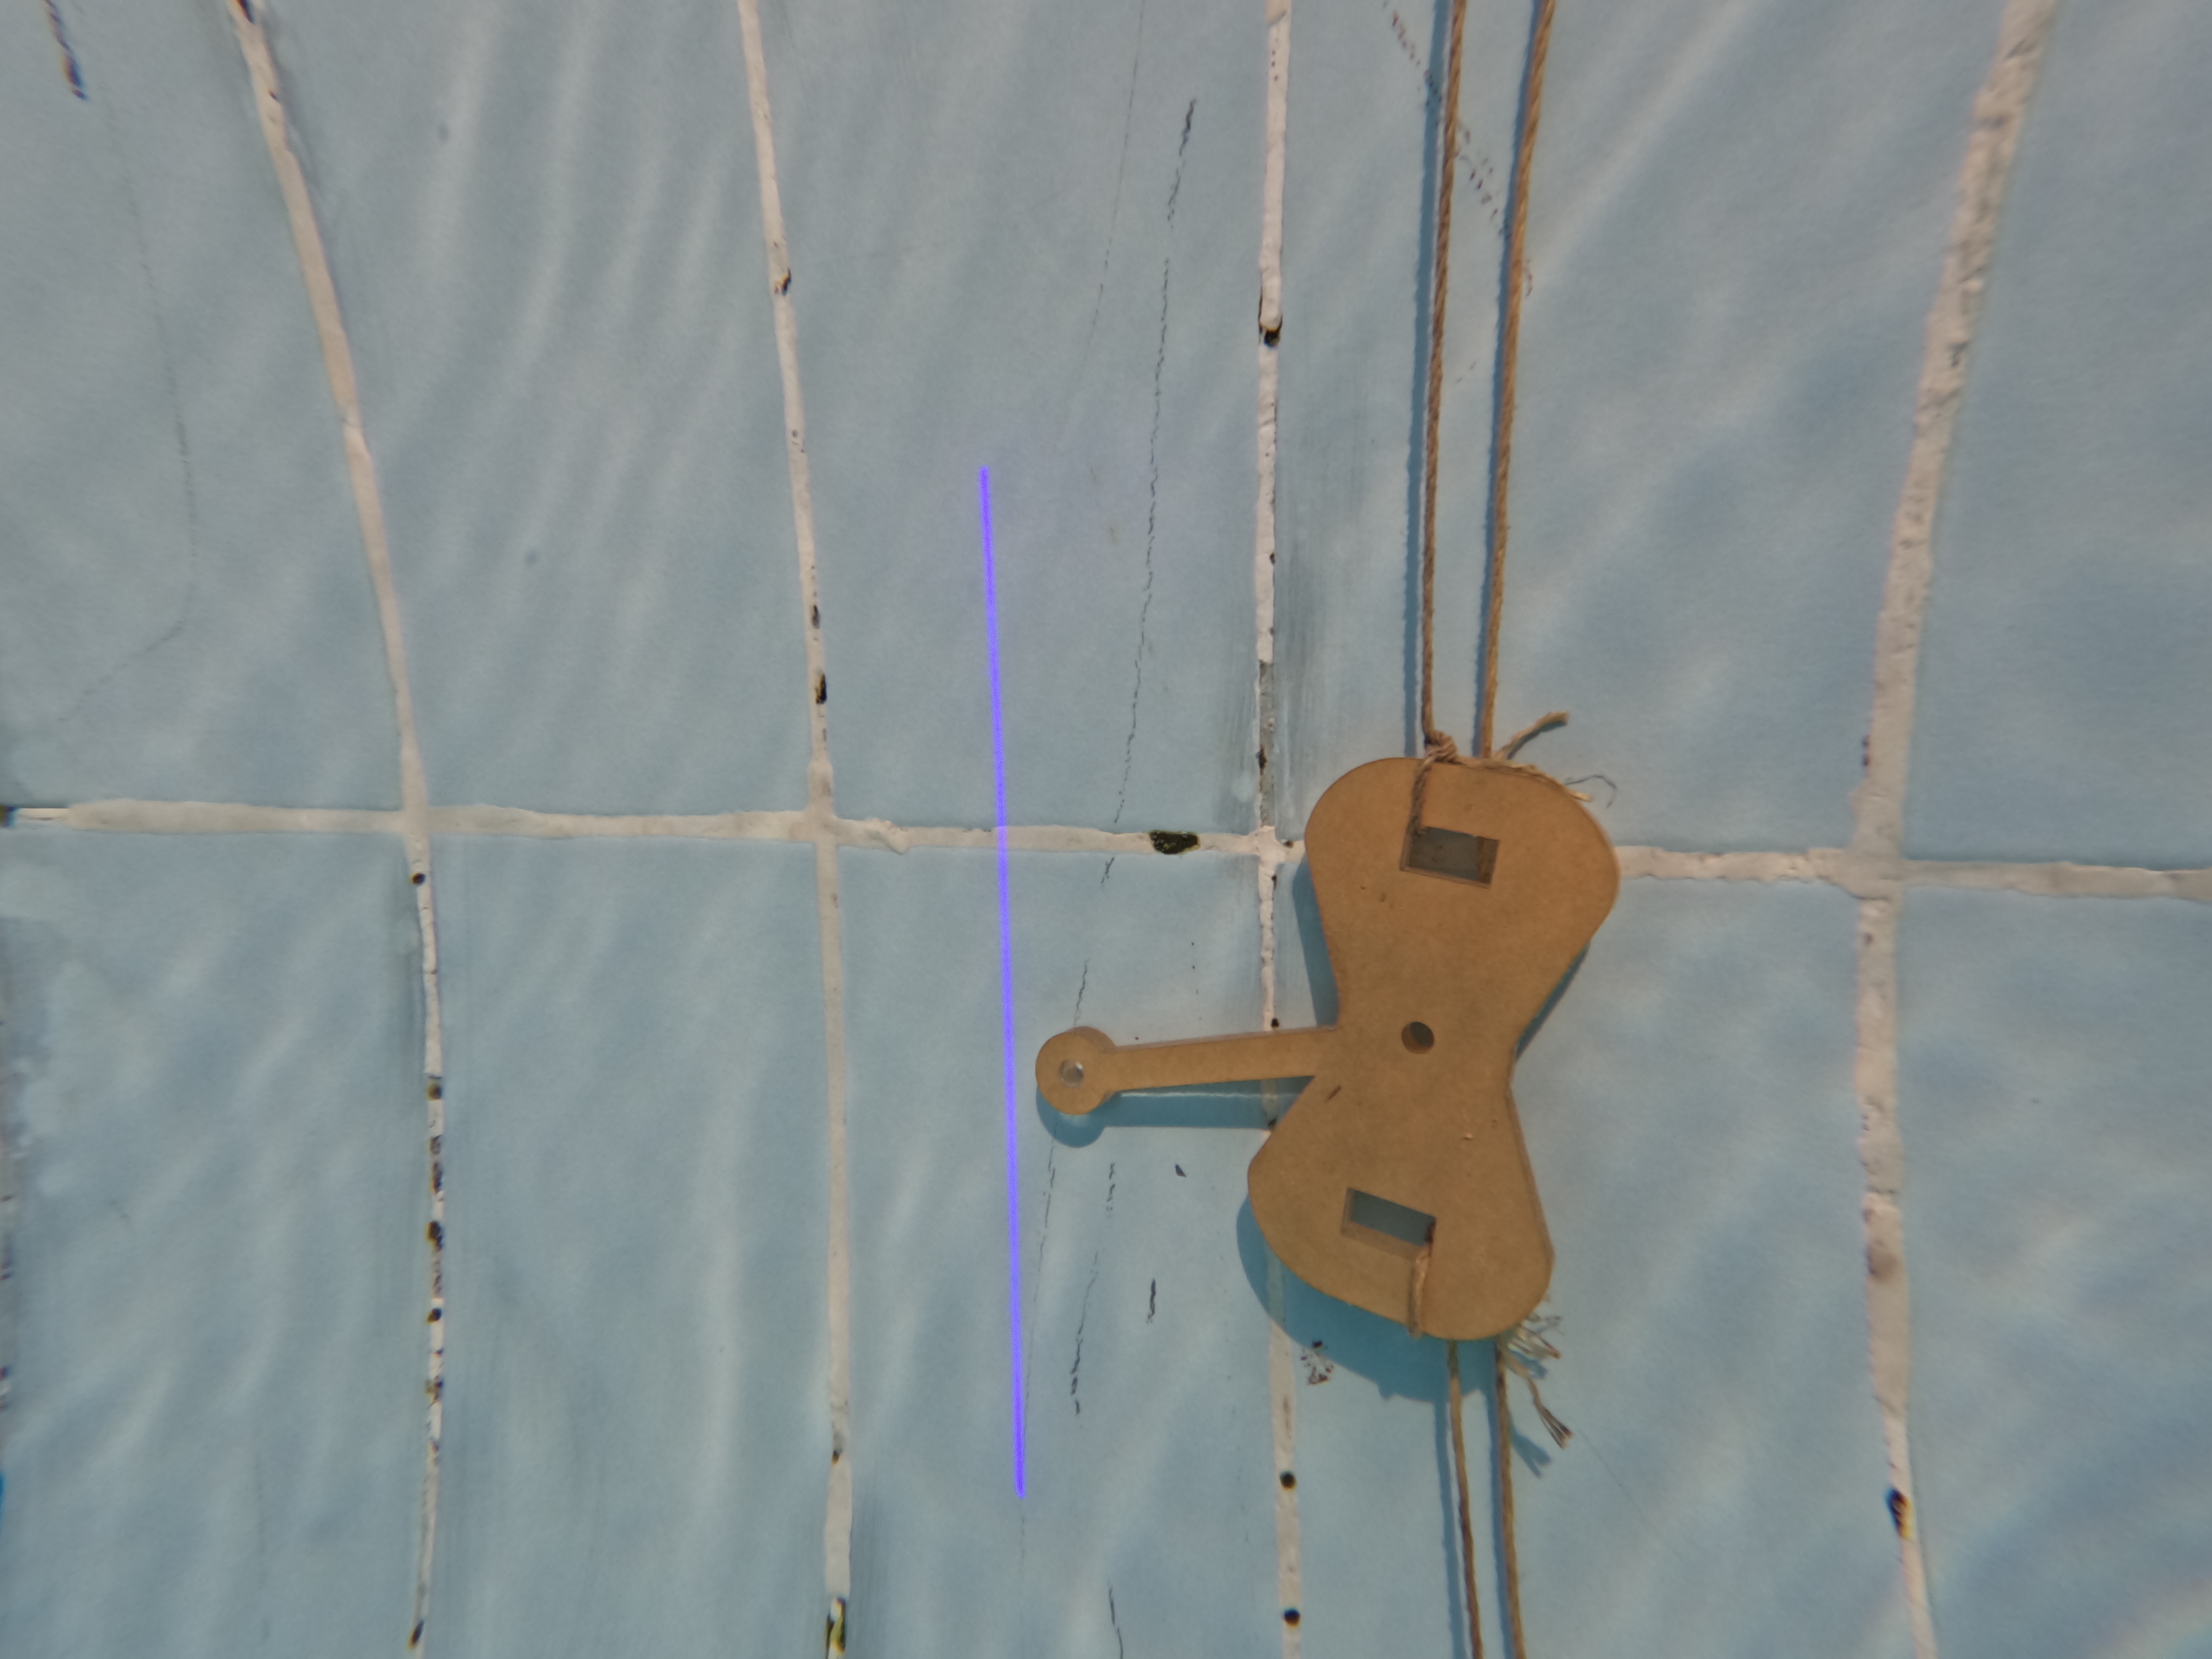

Supplement: Supplementary file 101 [file G0040495.pdf › Level_4_1/G0040495.pdf]

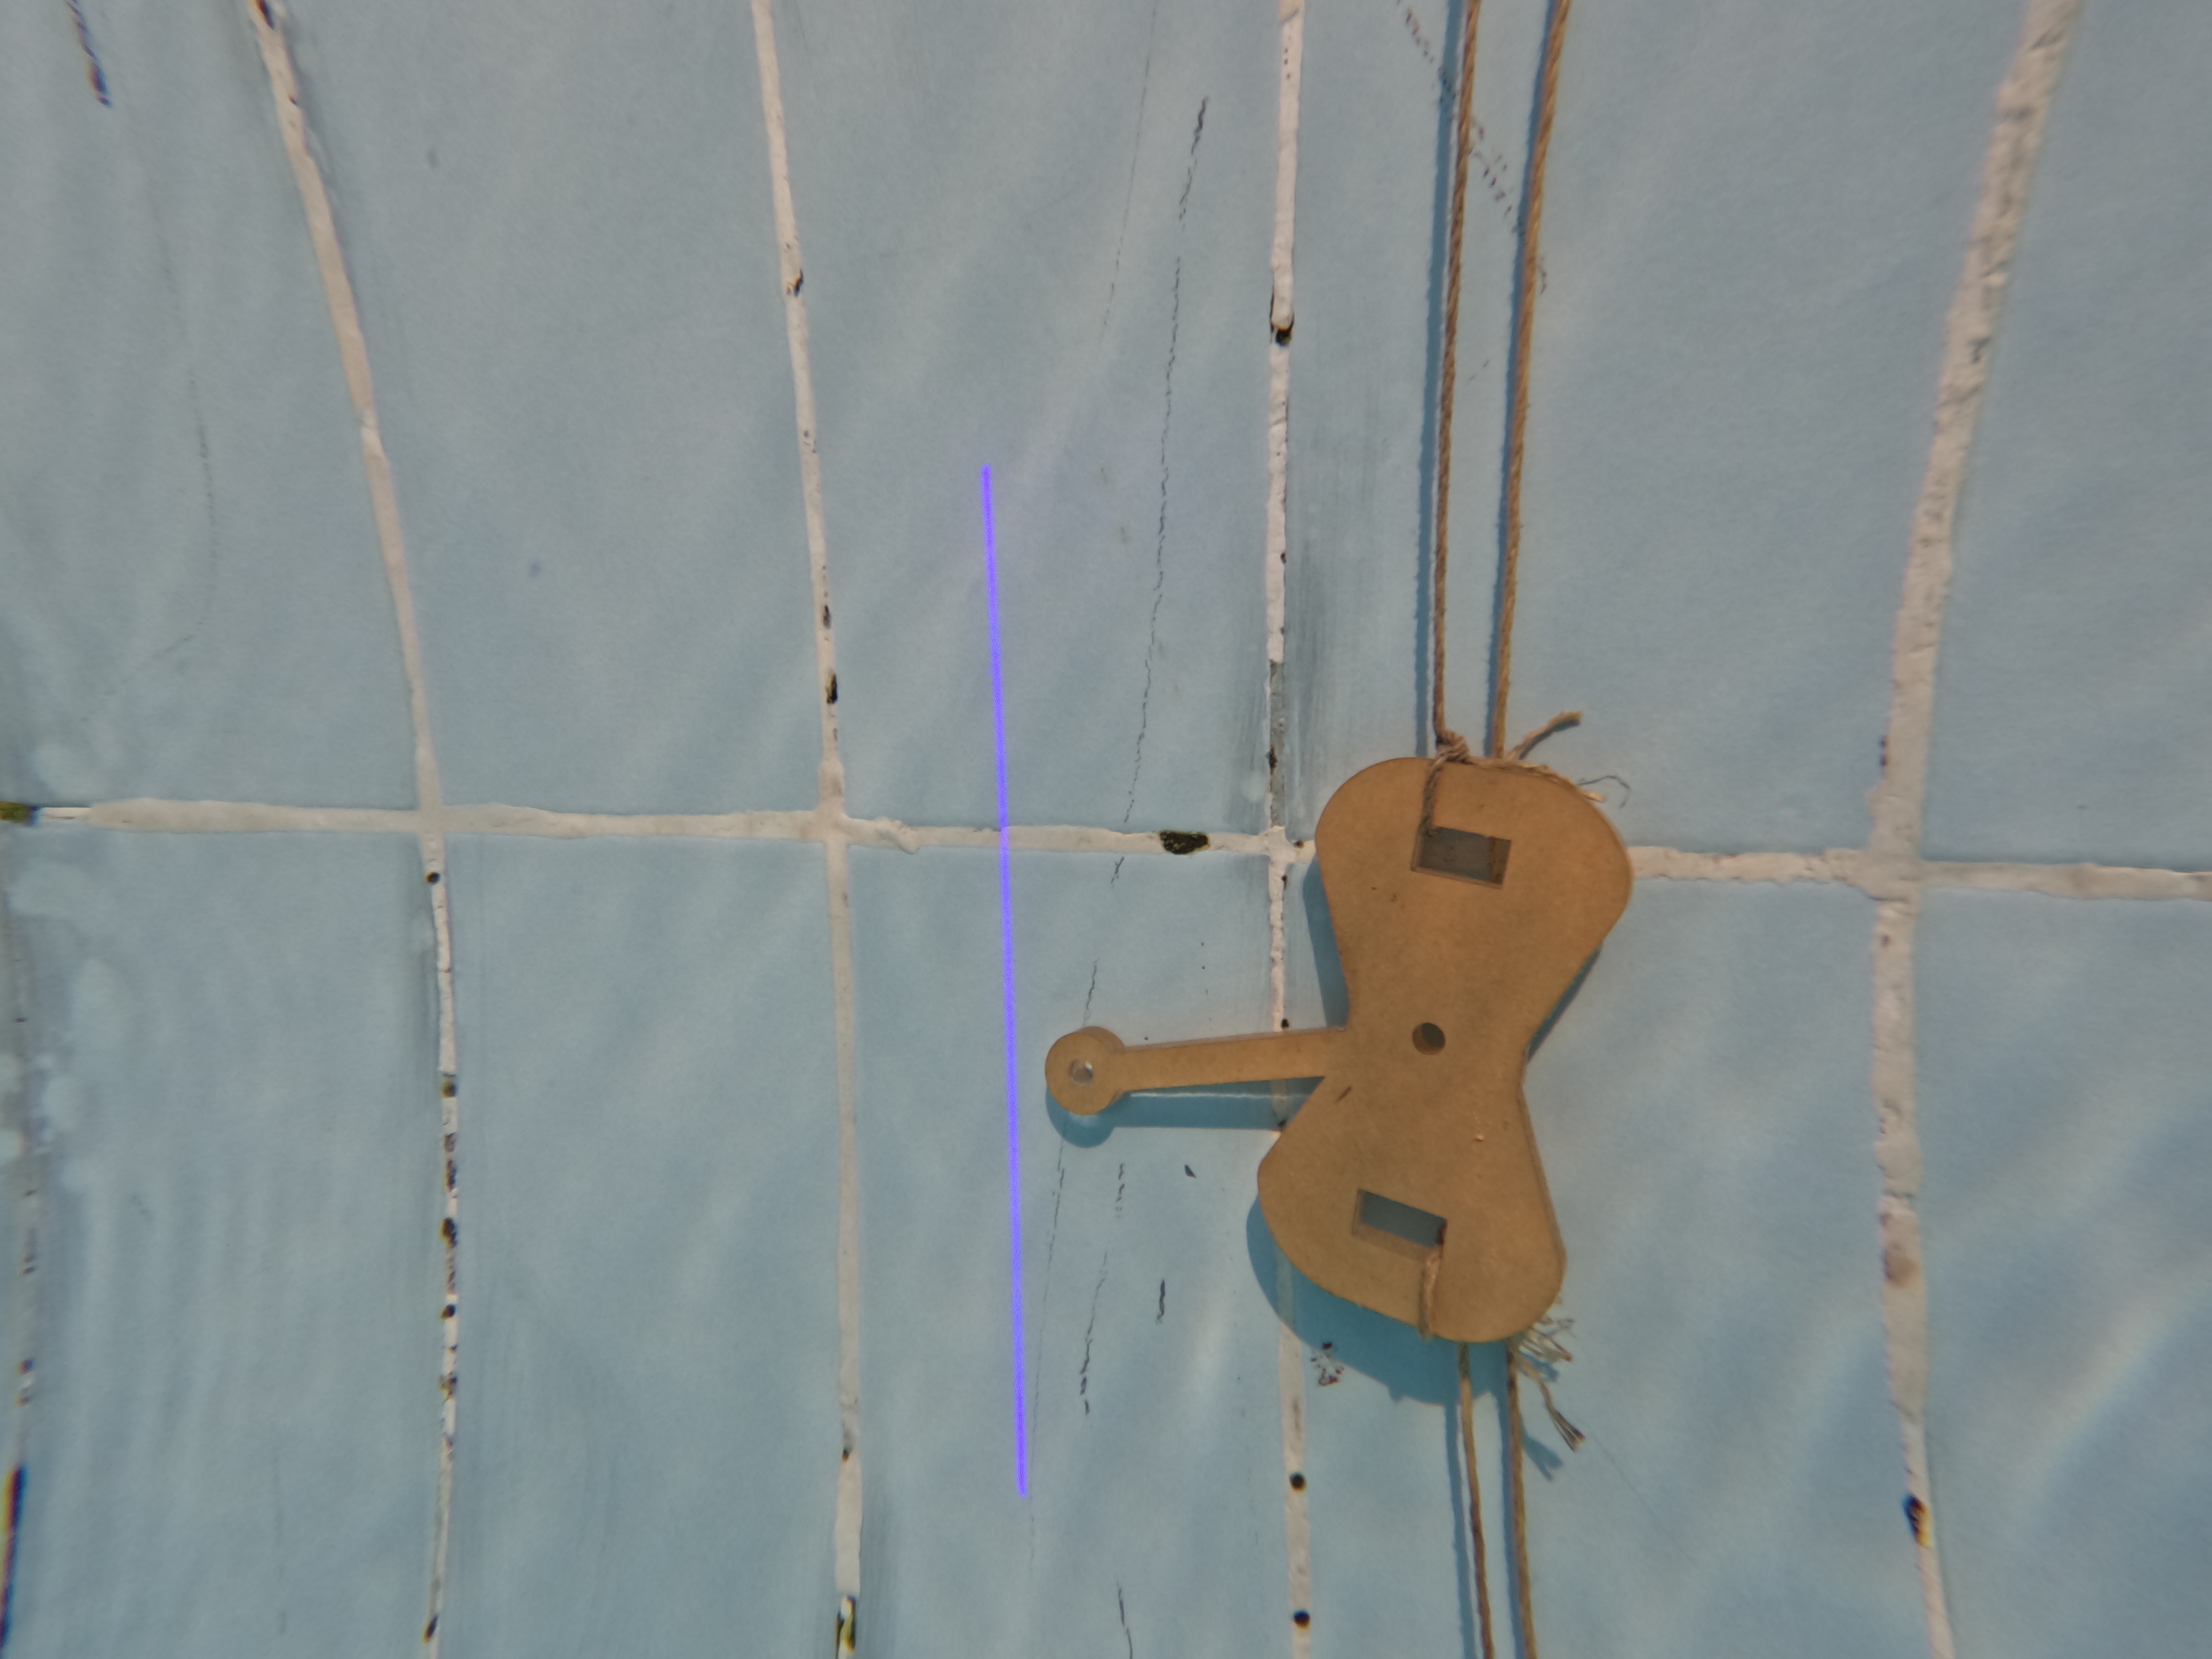

Supplement: Supplementary file 102 [file G0040496.pdf › Level_4_1/G0040496.pdf]

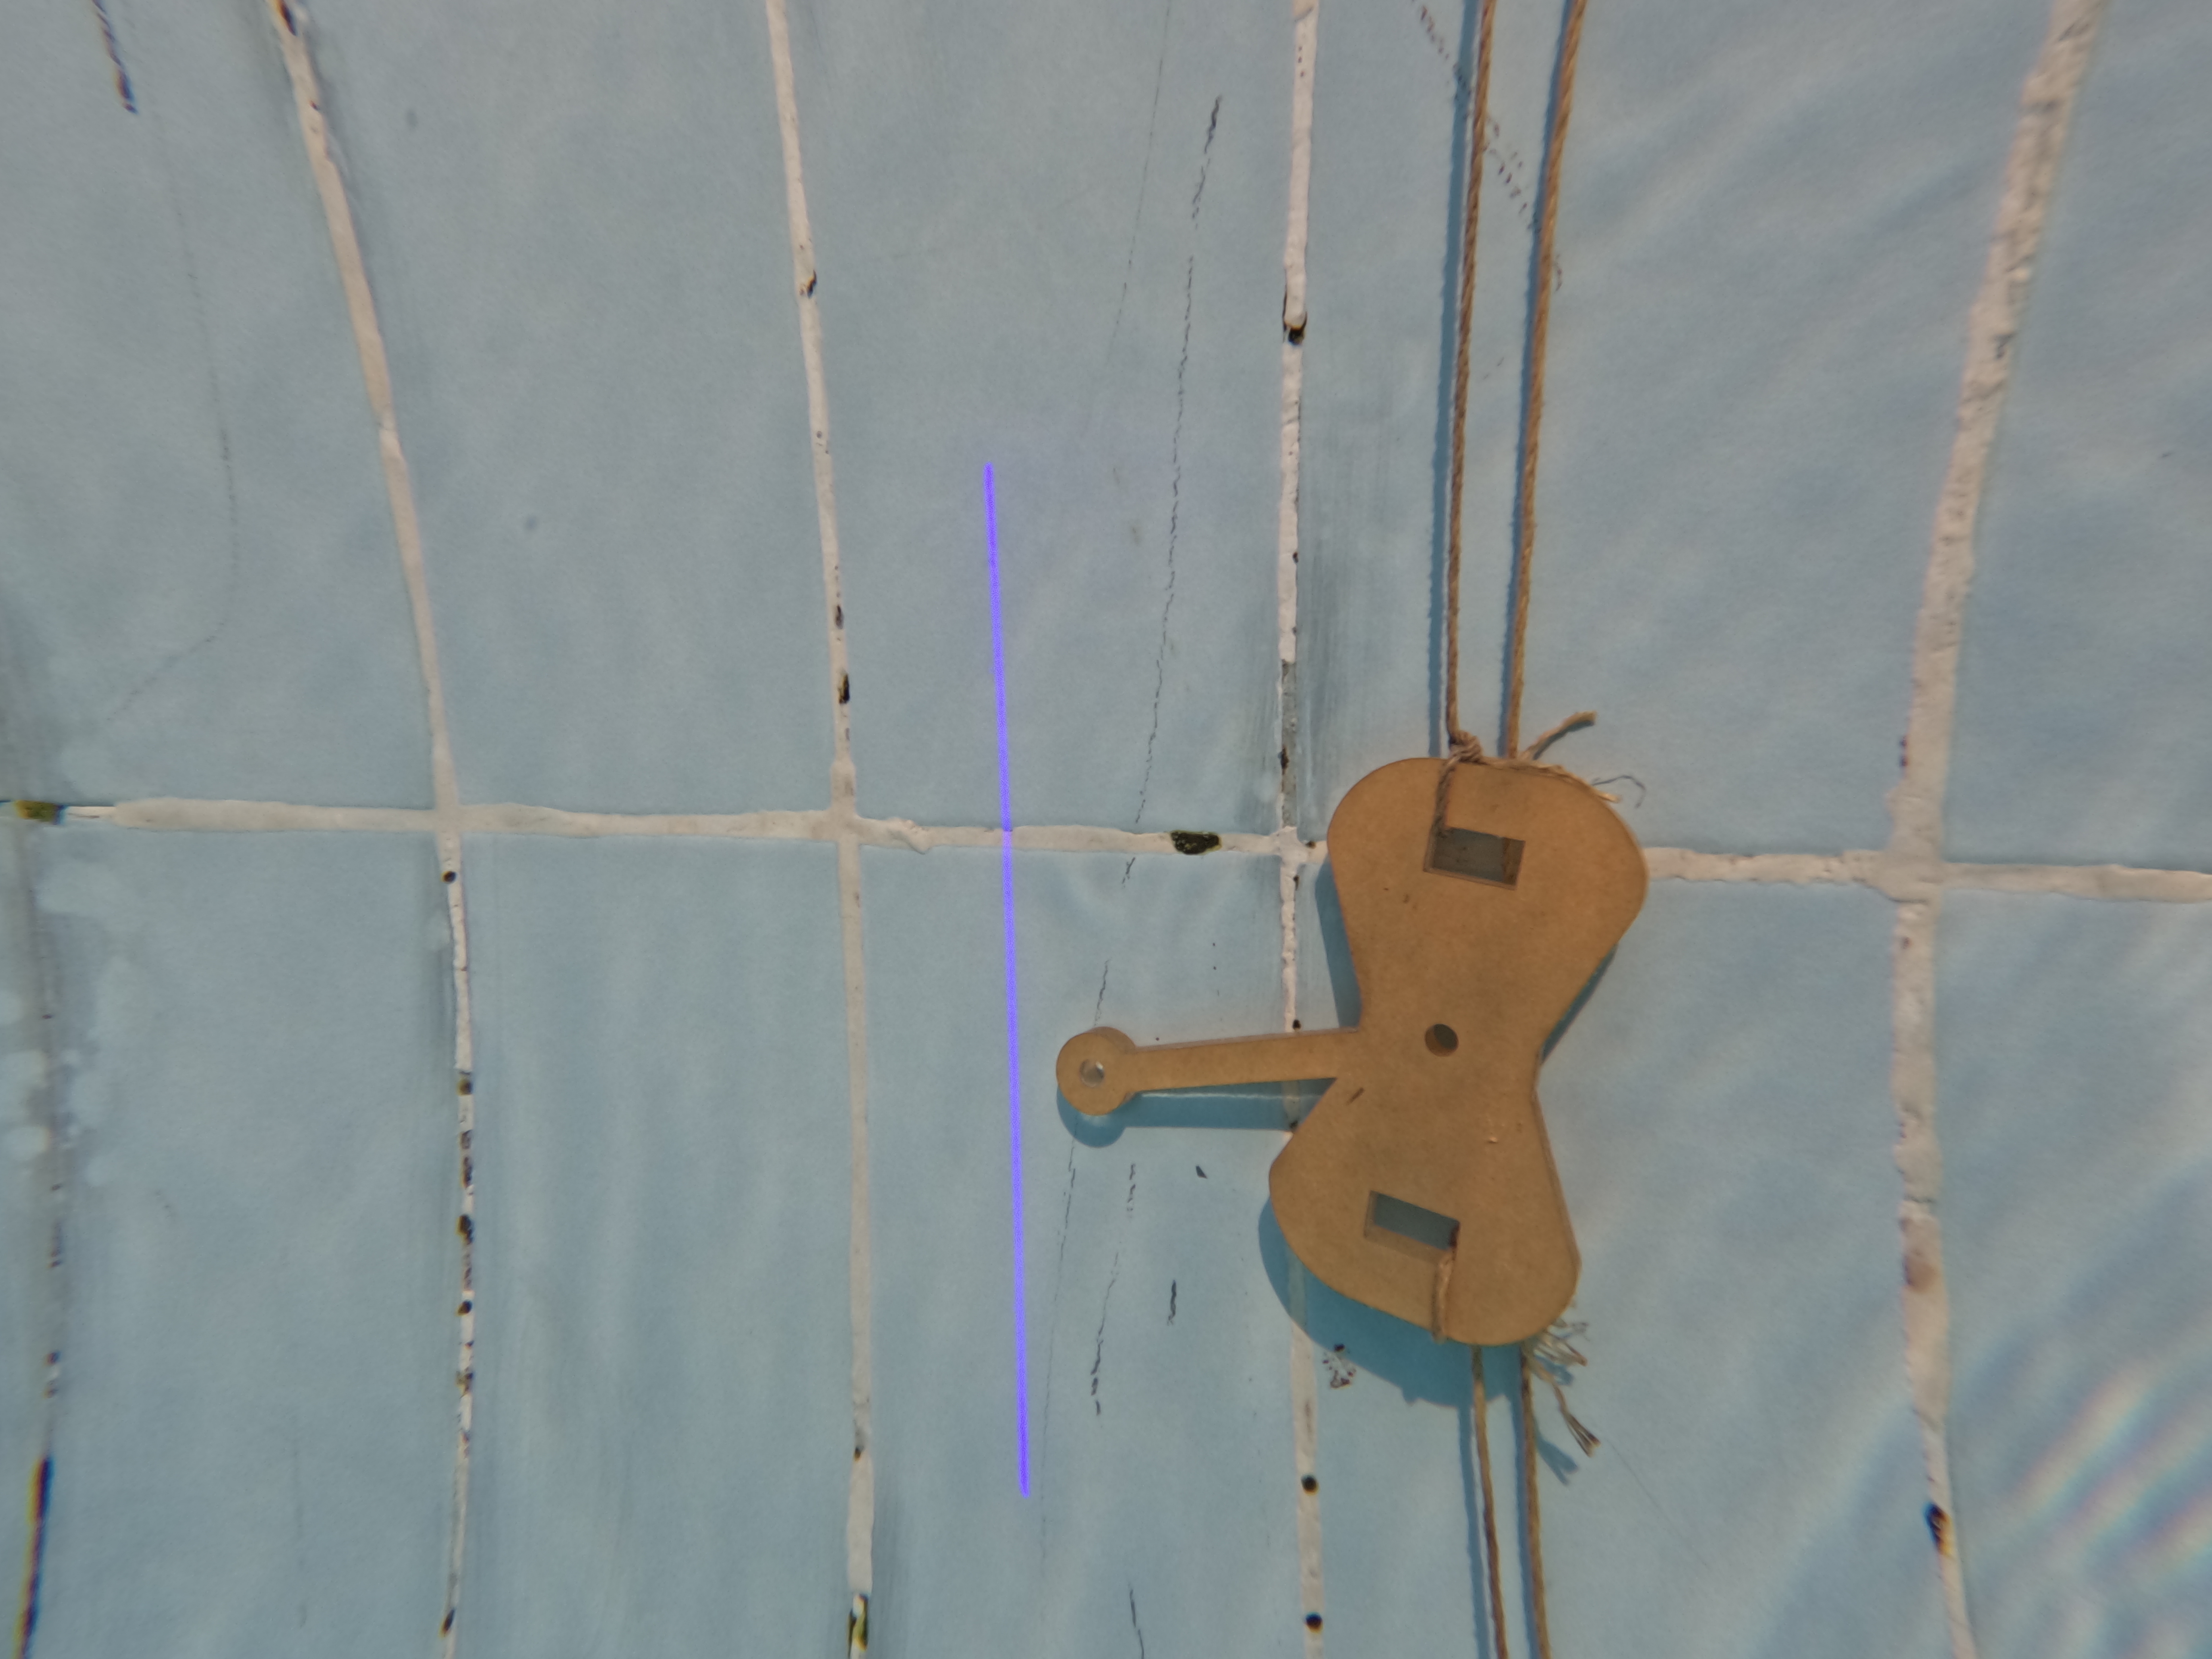

Supplement: Supplementary file 103 [file G0040497.pdf › Level_4_1/G0040497.pdf]

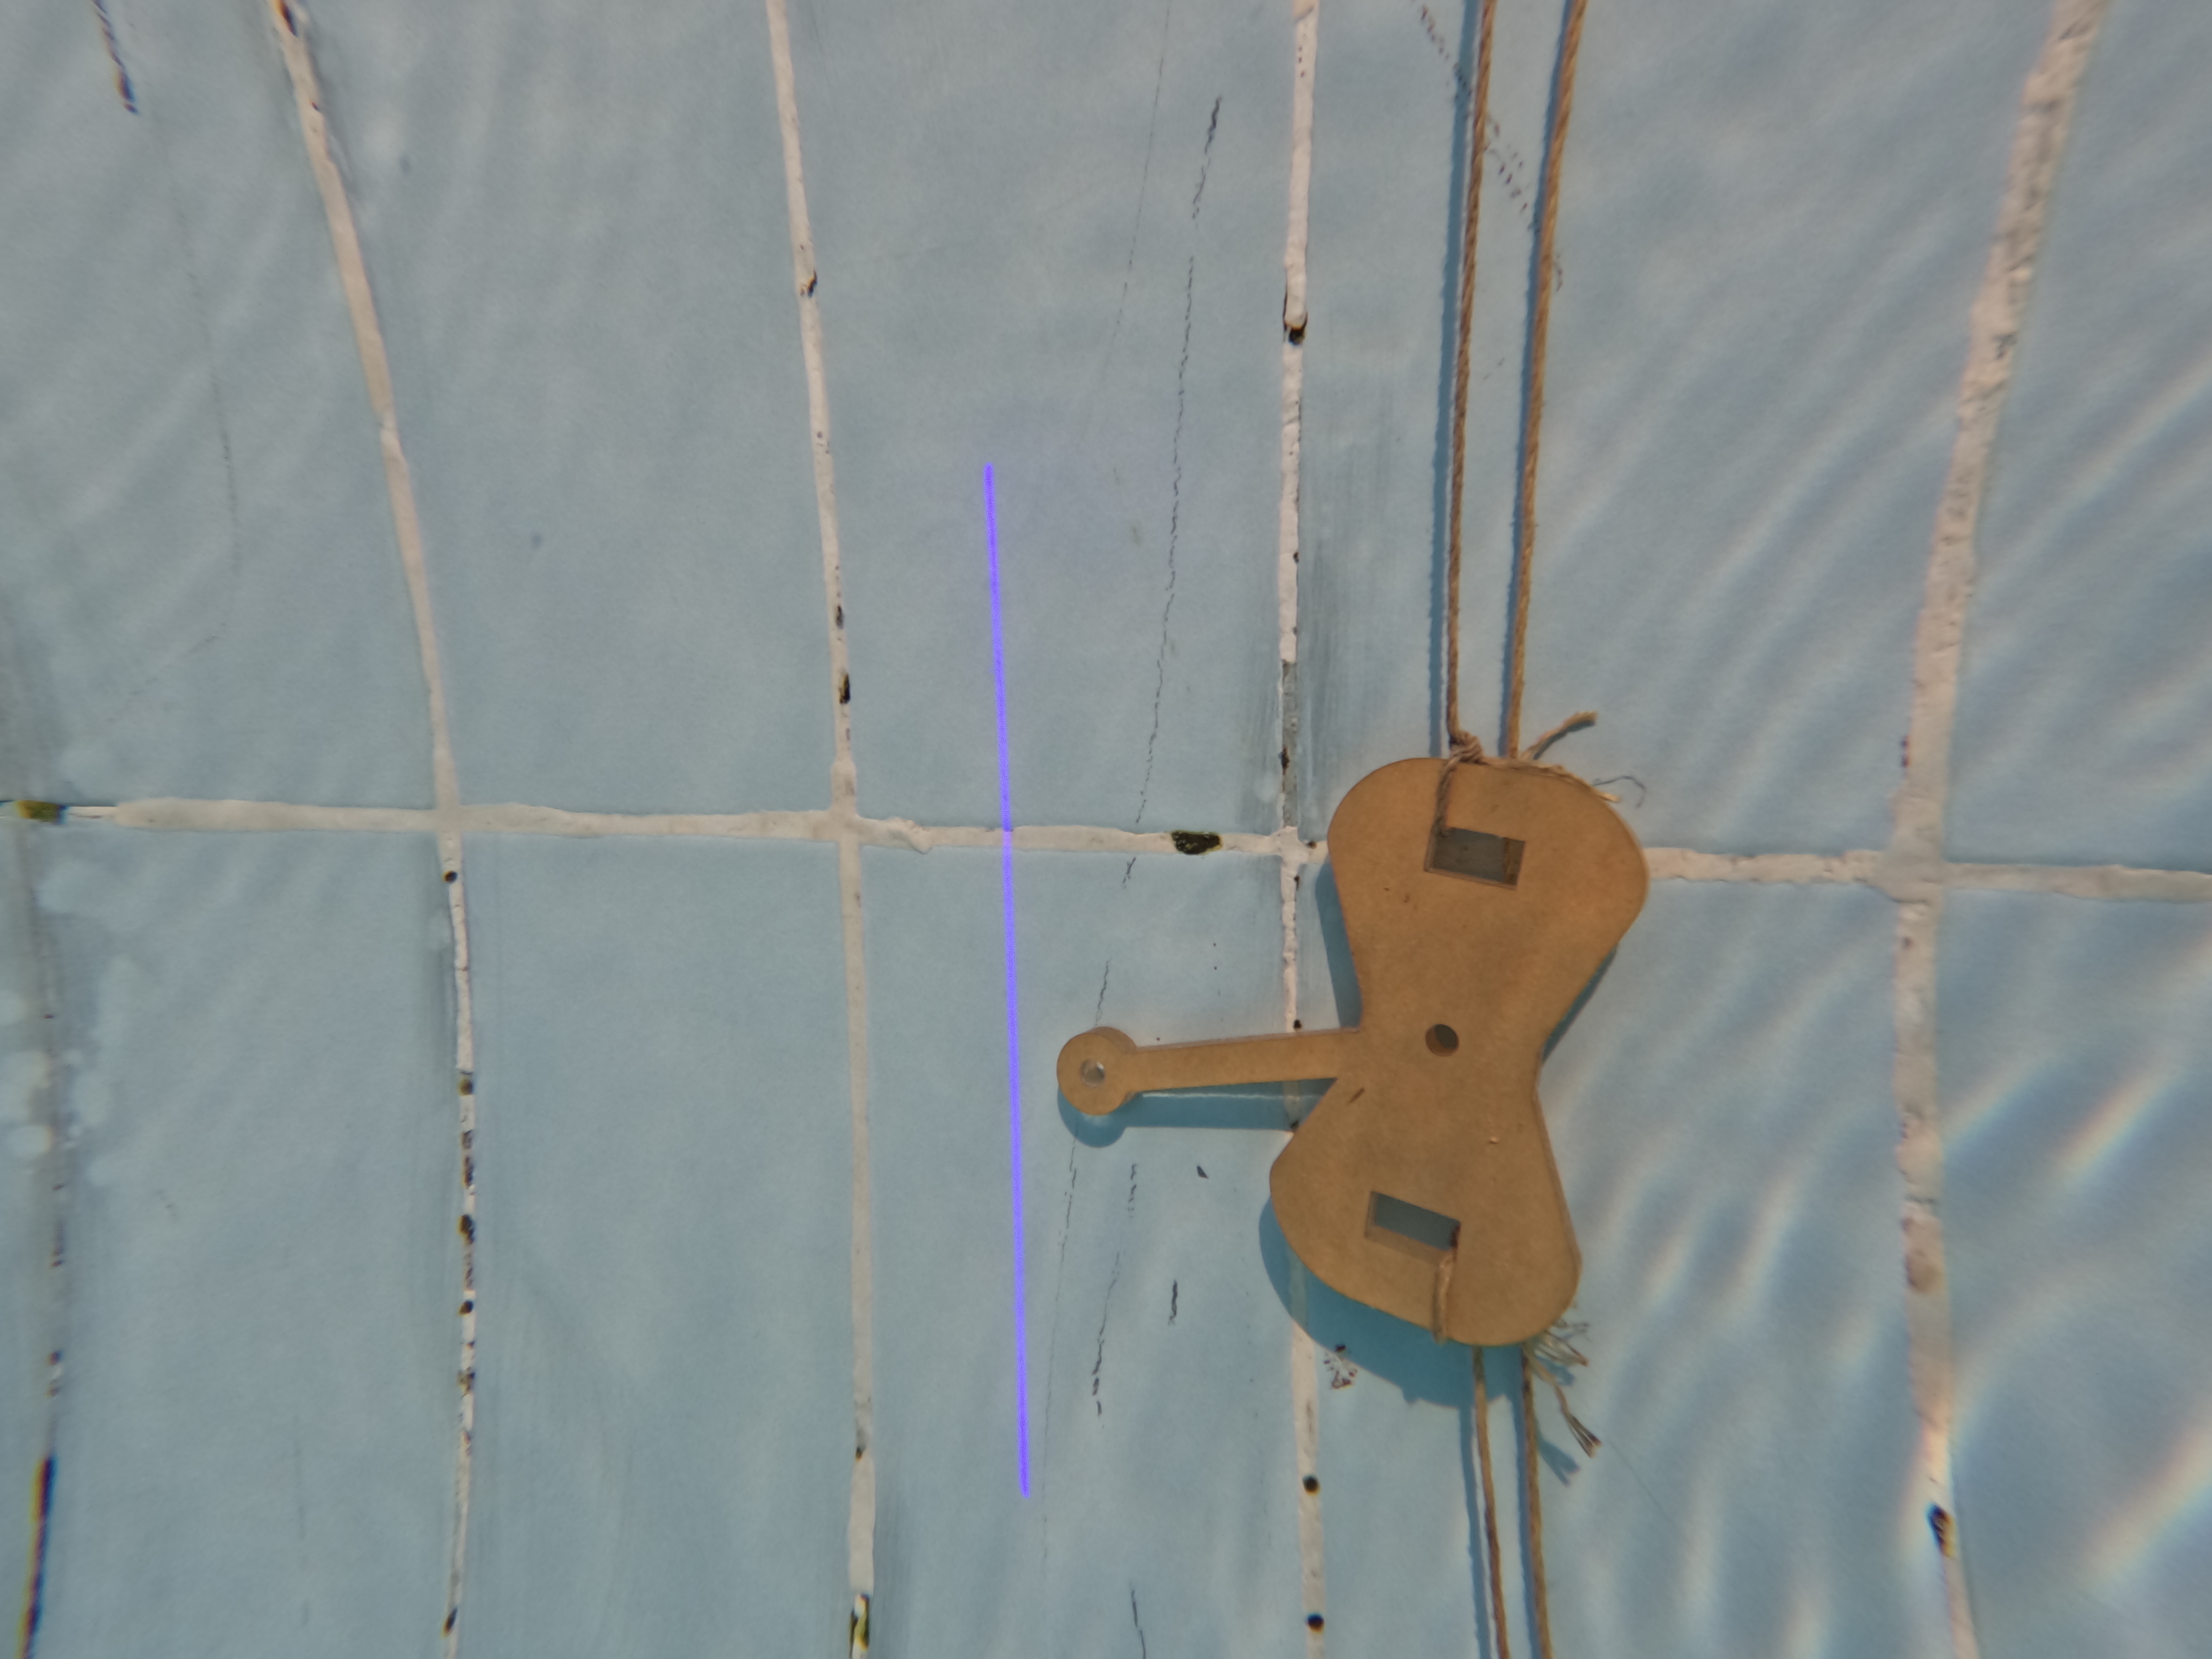

Supplement: Supplementary file 104 [file G0040498.pdf › Level_4_1/G0040498.pdf]

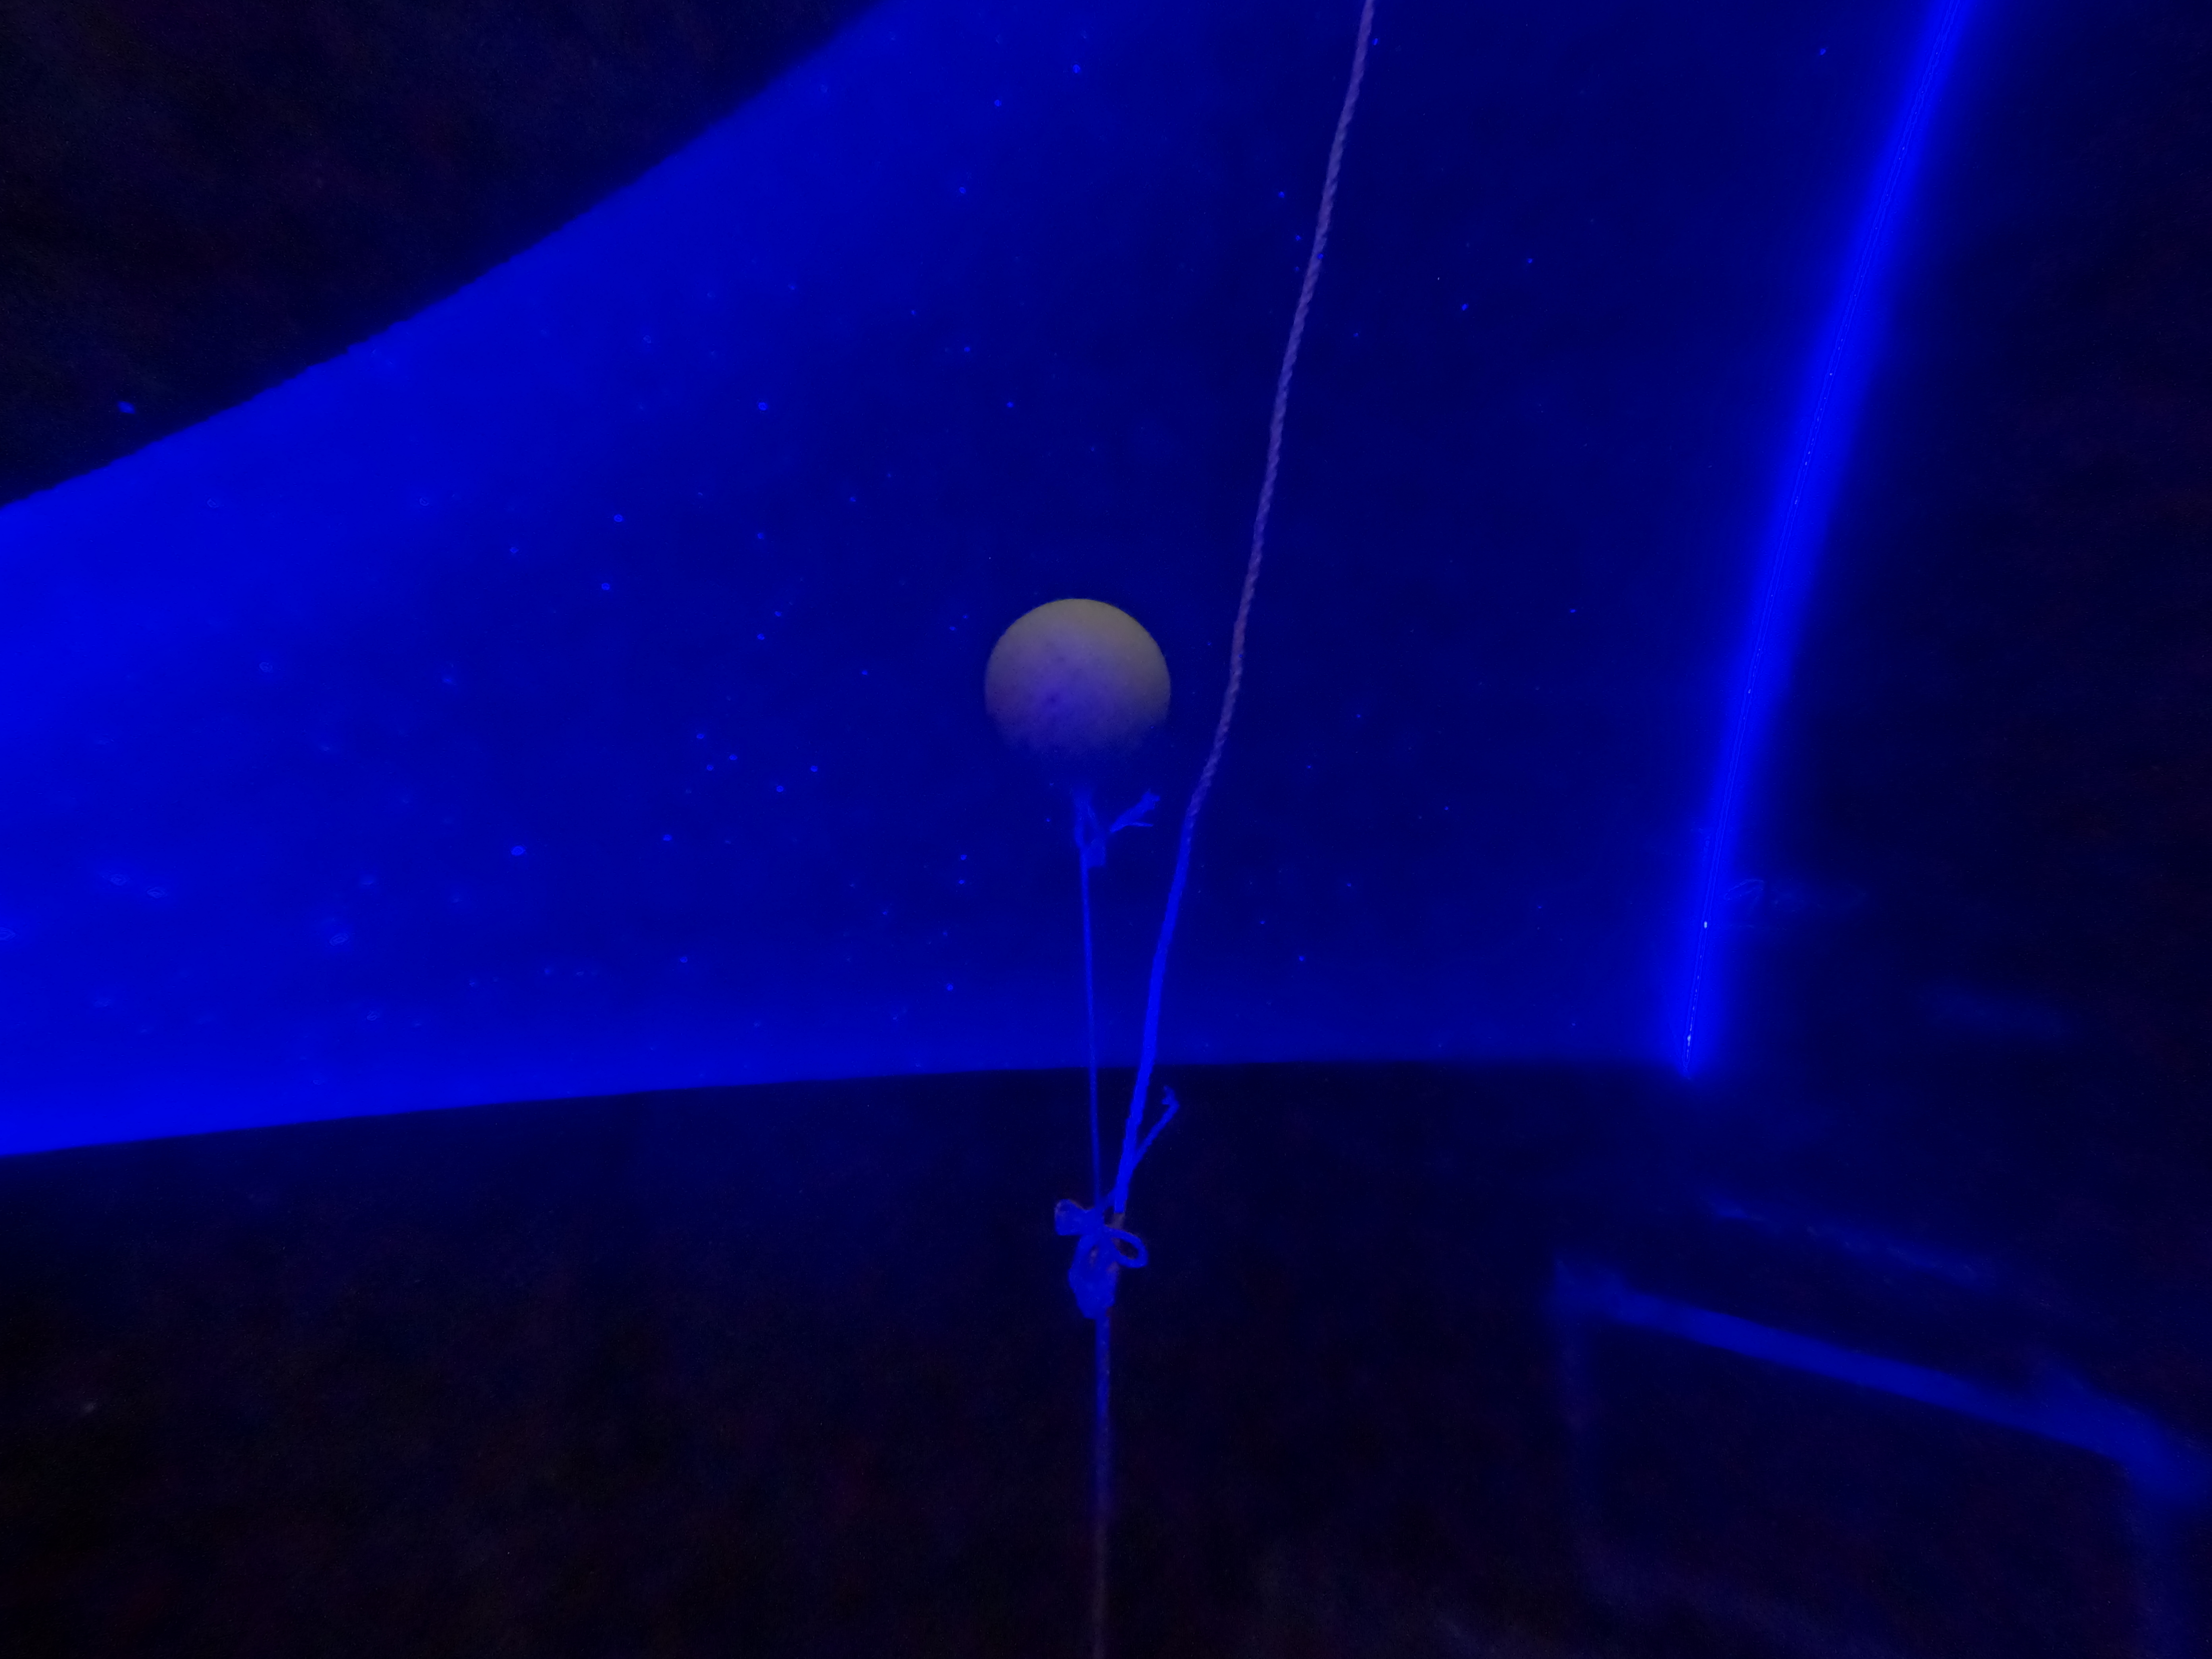

Supplement: Supplementary file 105 [file G0034535.pdf › 9/G0034535.pdf]

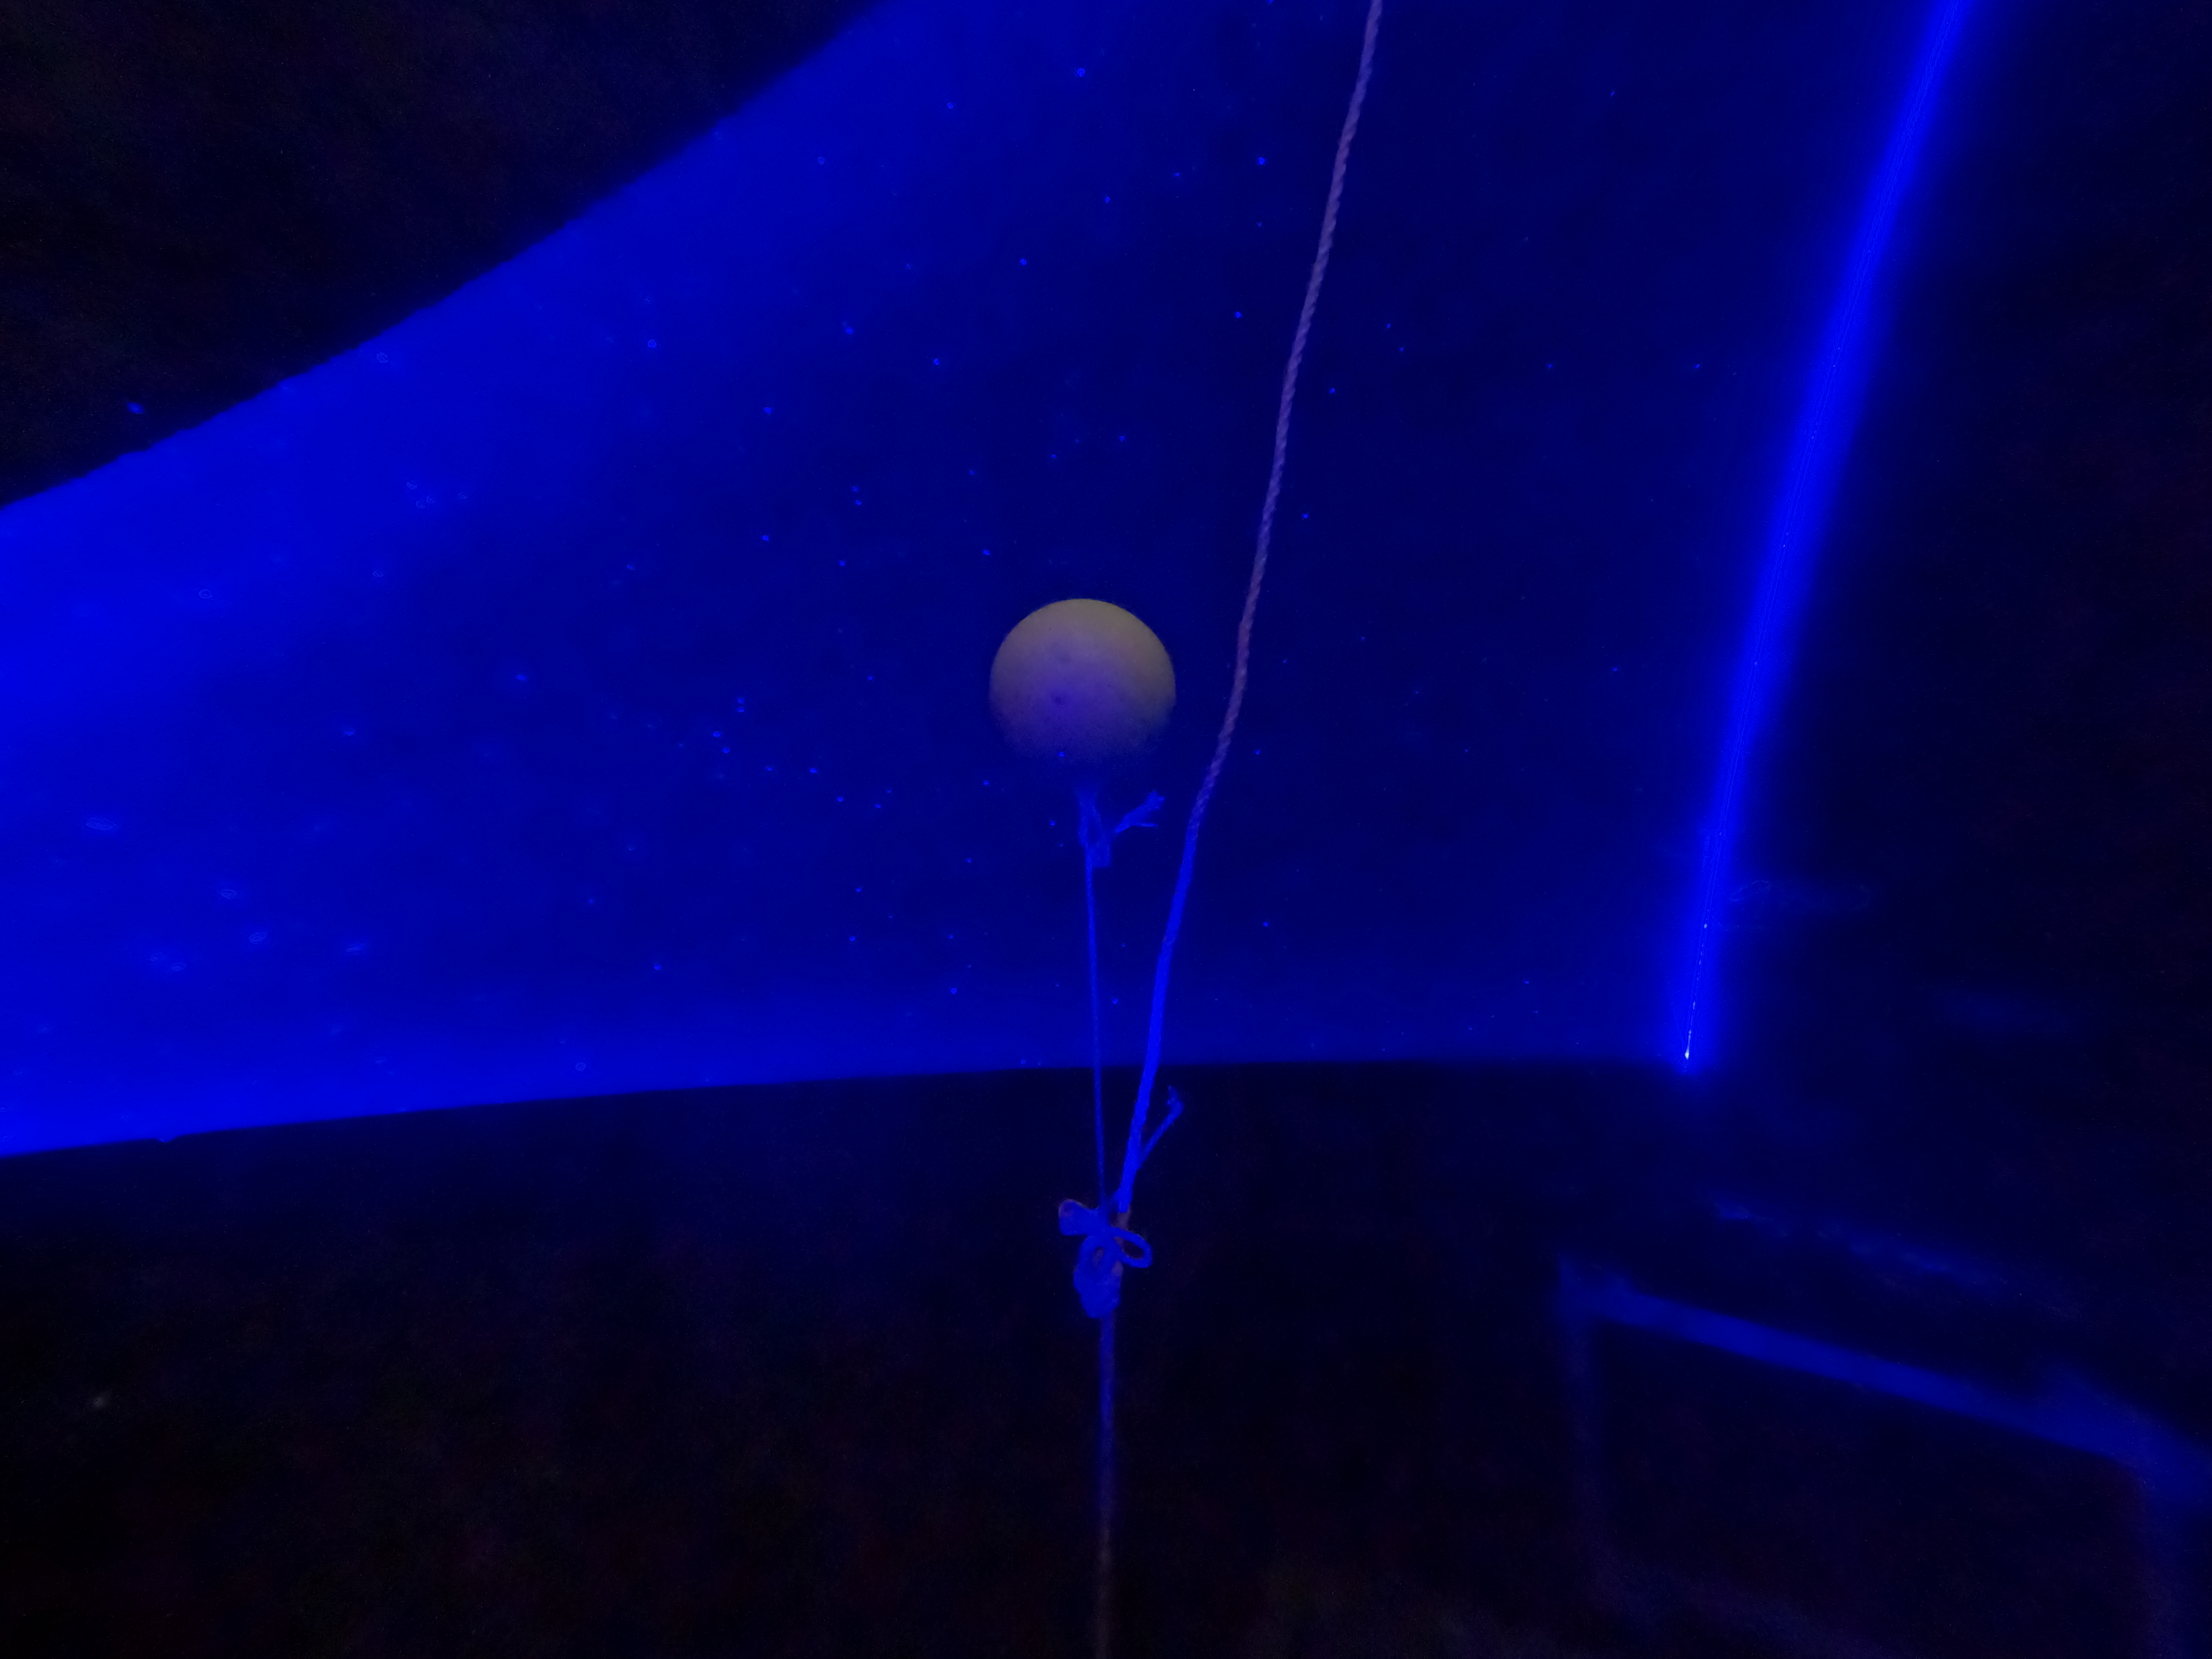

Supplement: Supplementary file 106 [file G0034536.pdf › 9/G0034536.pdf]

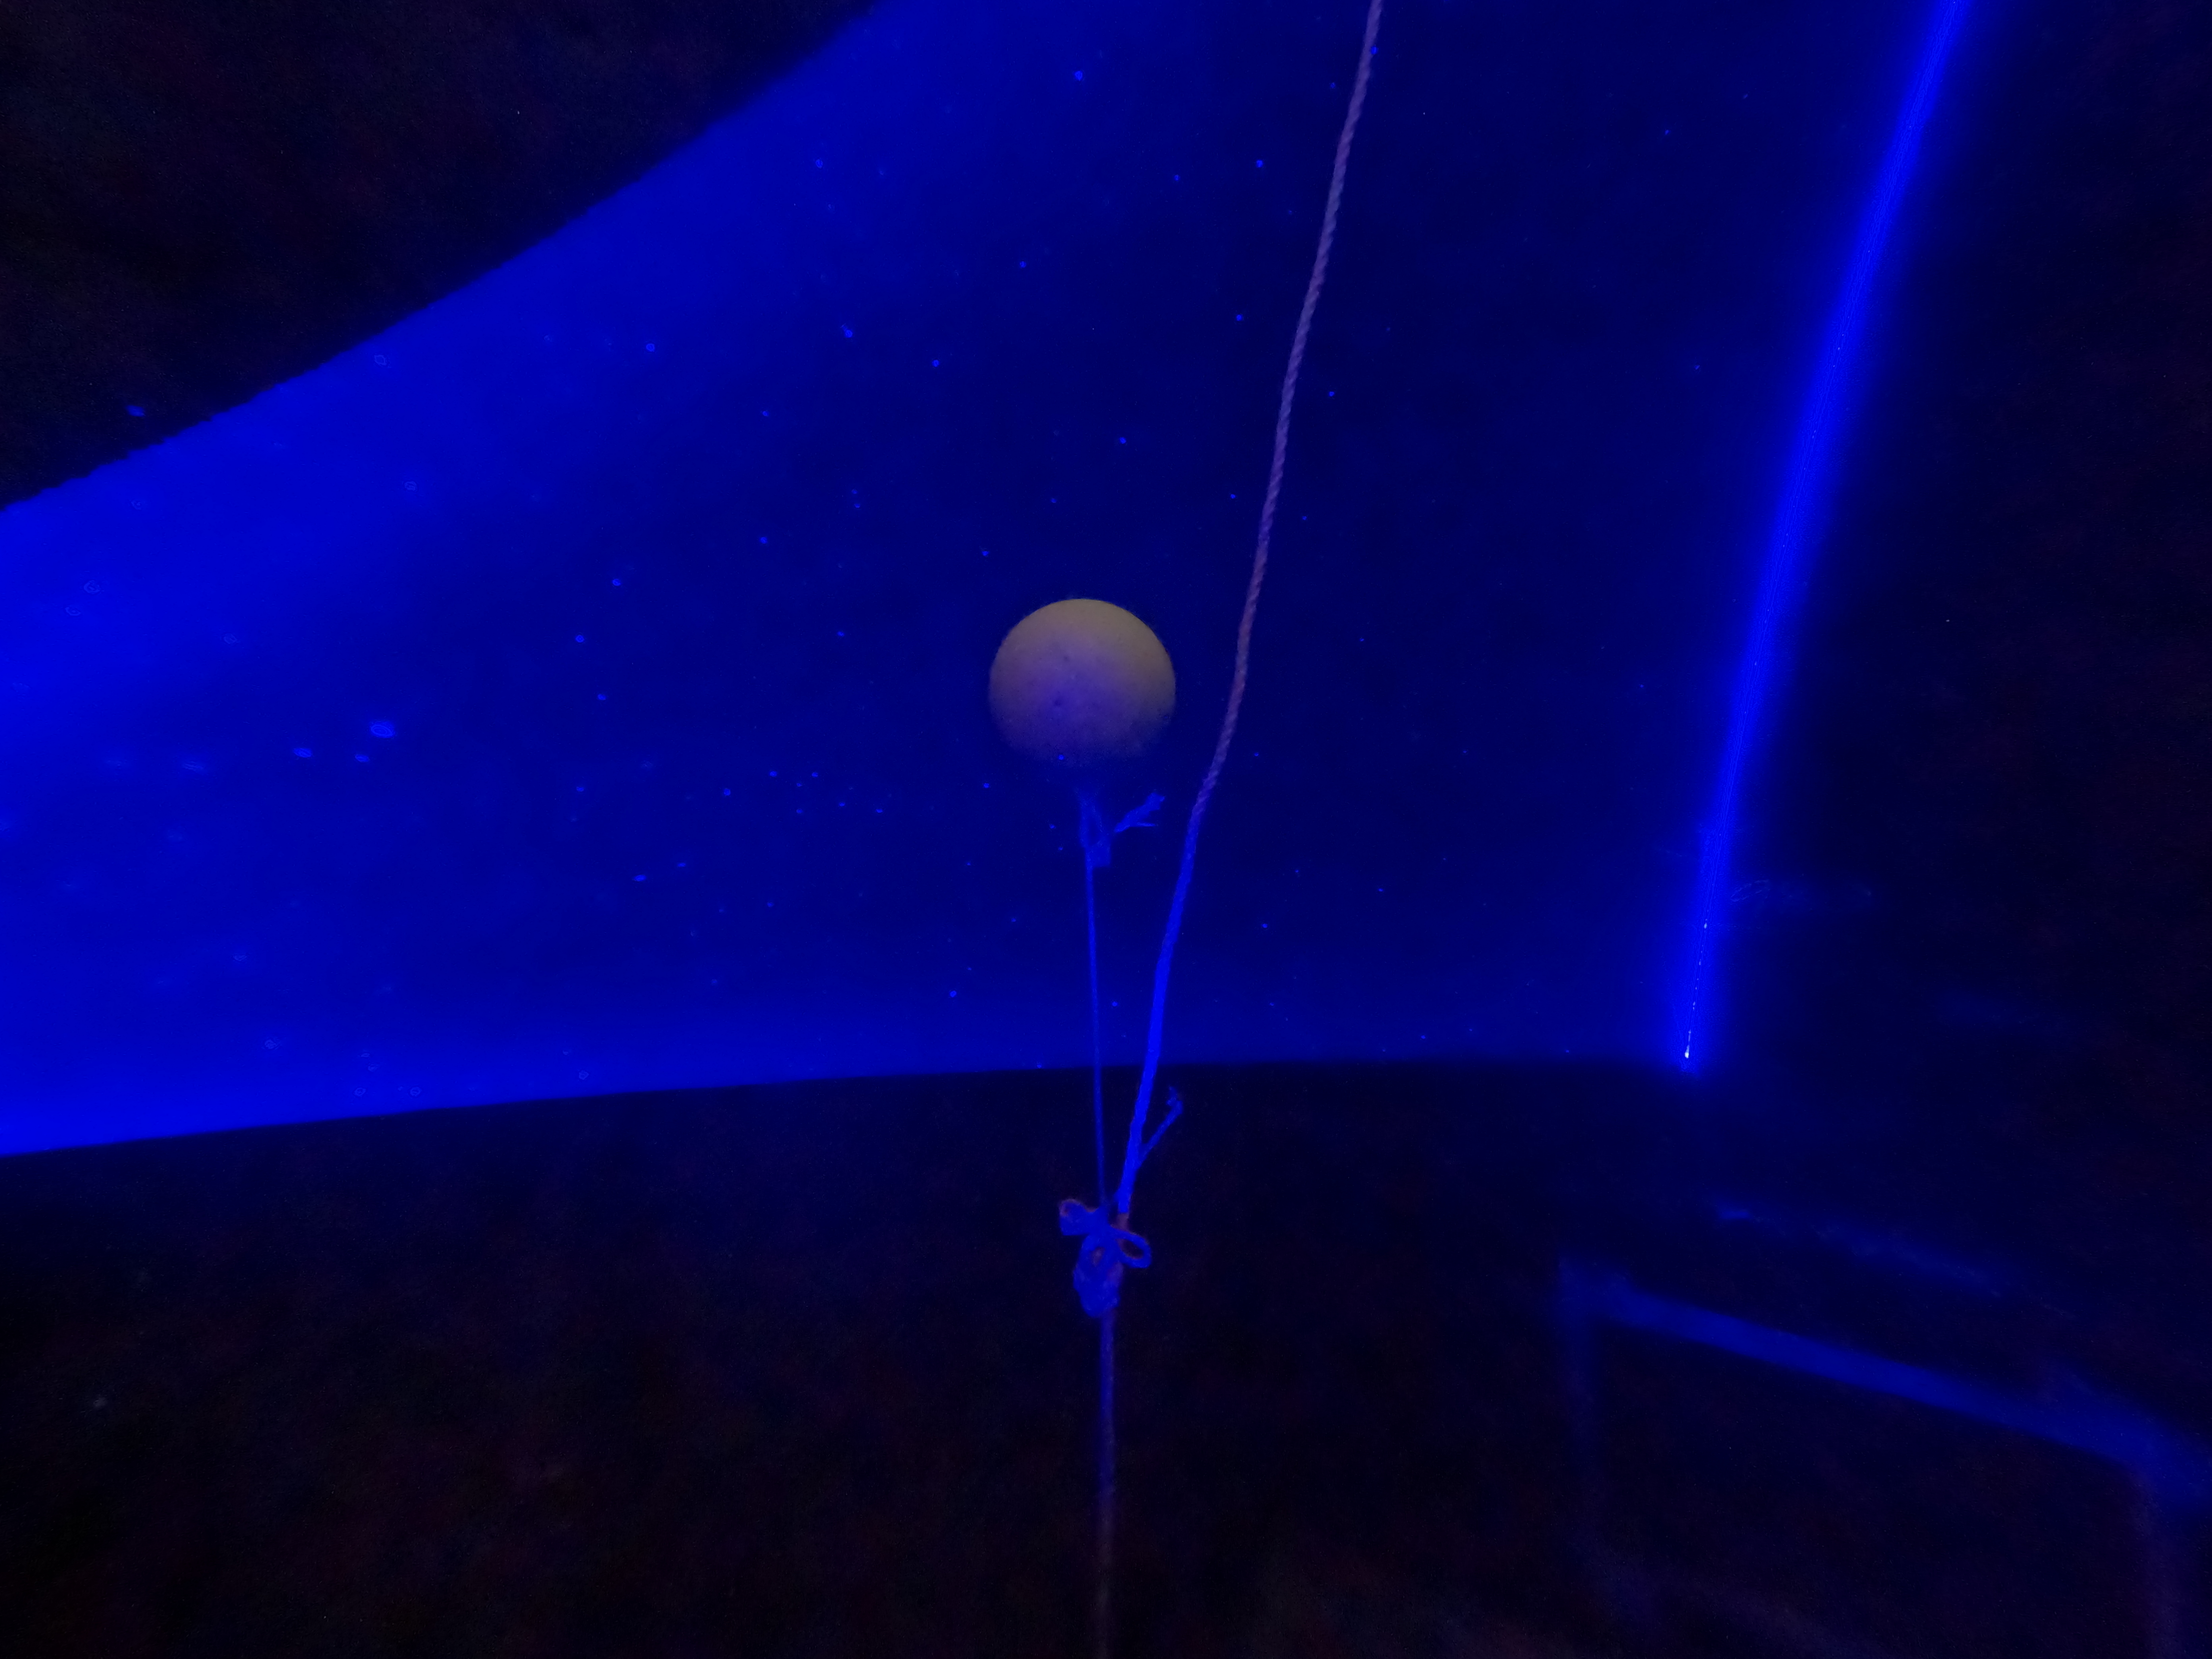

Supplement: Supplementary file 107 [file G0034537.pdf › 9/G0034537.pdf]

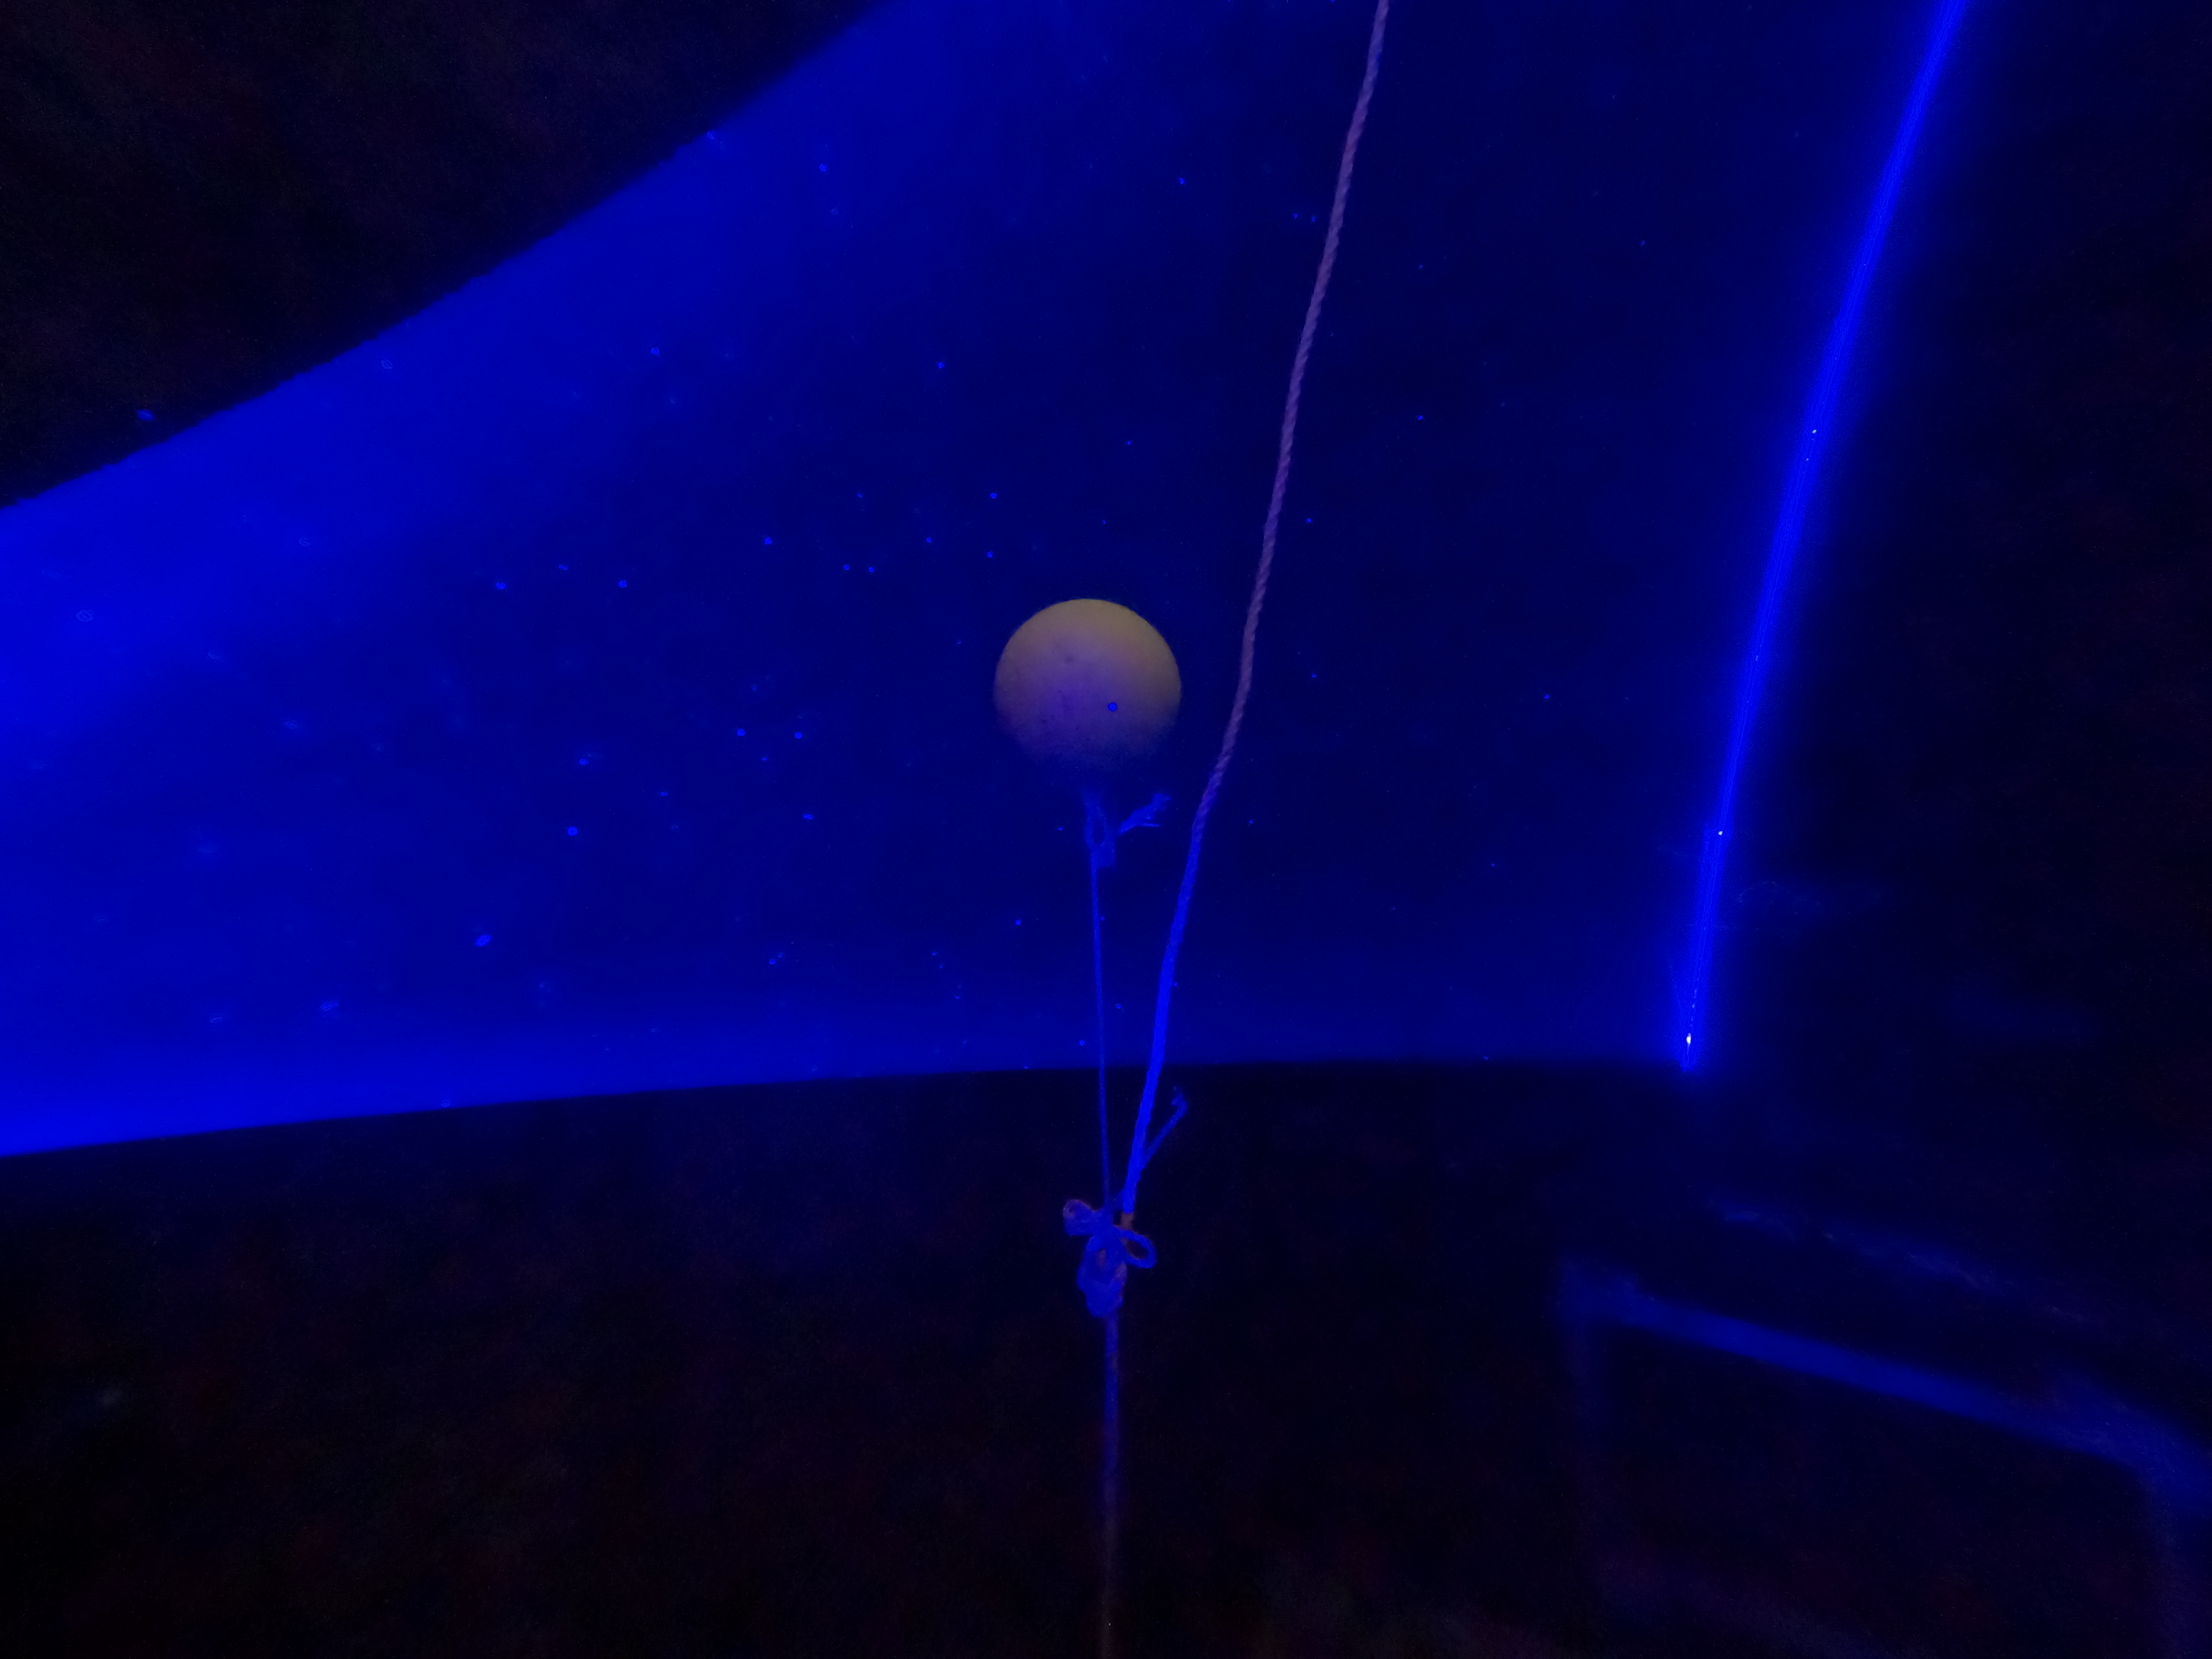

Supplement: Supplementary file 108 [file G0034538.pdf › 9/G0034538.pdf]

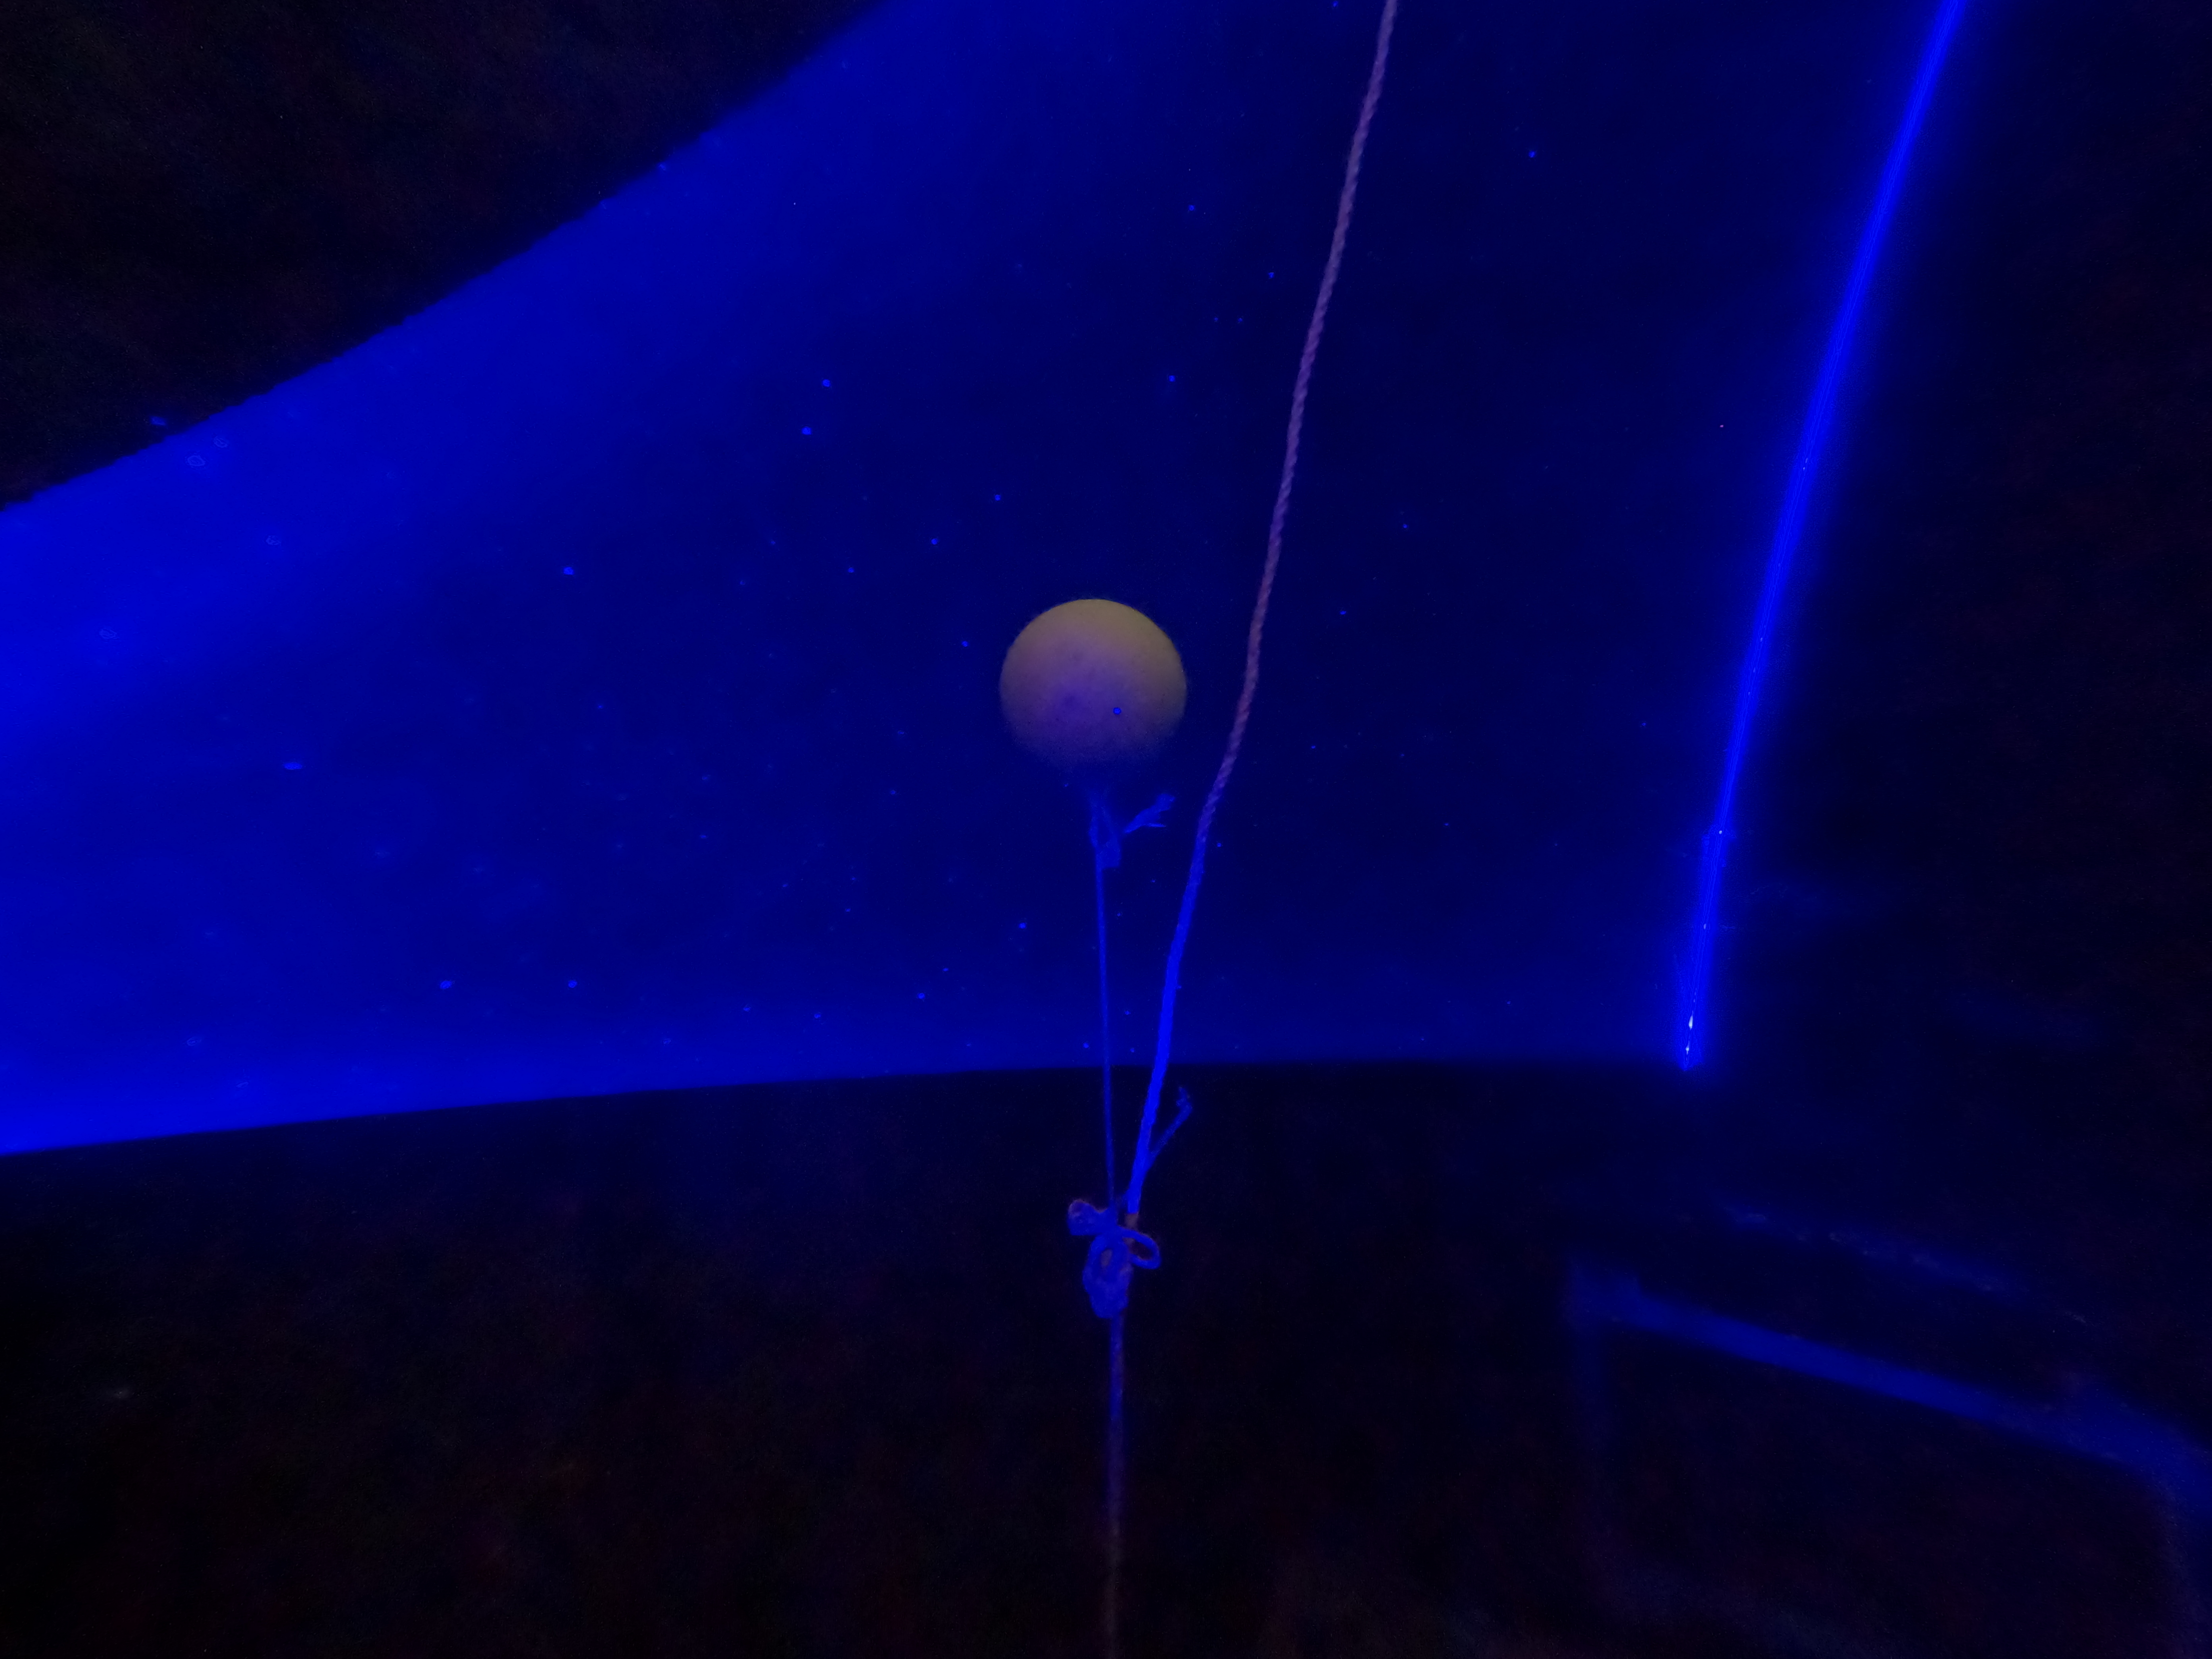

Supplement: Supplementary file 109 [file G0034539.pdf › 9/G0034539.pdf]

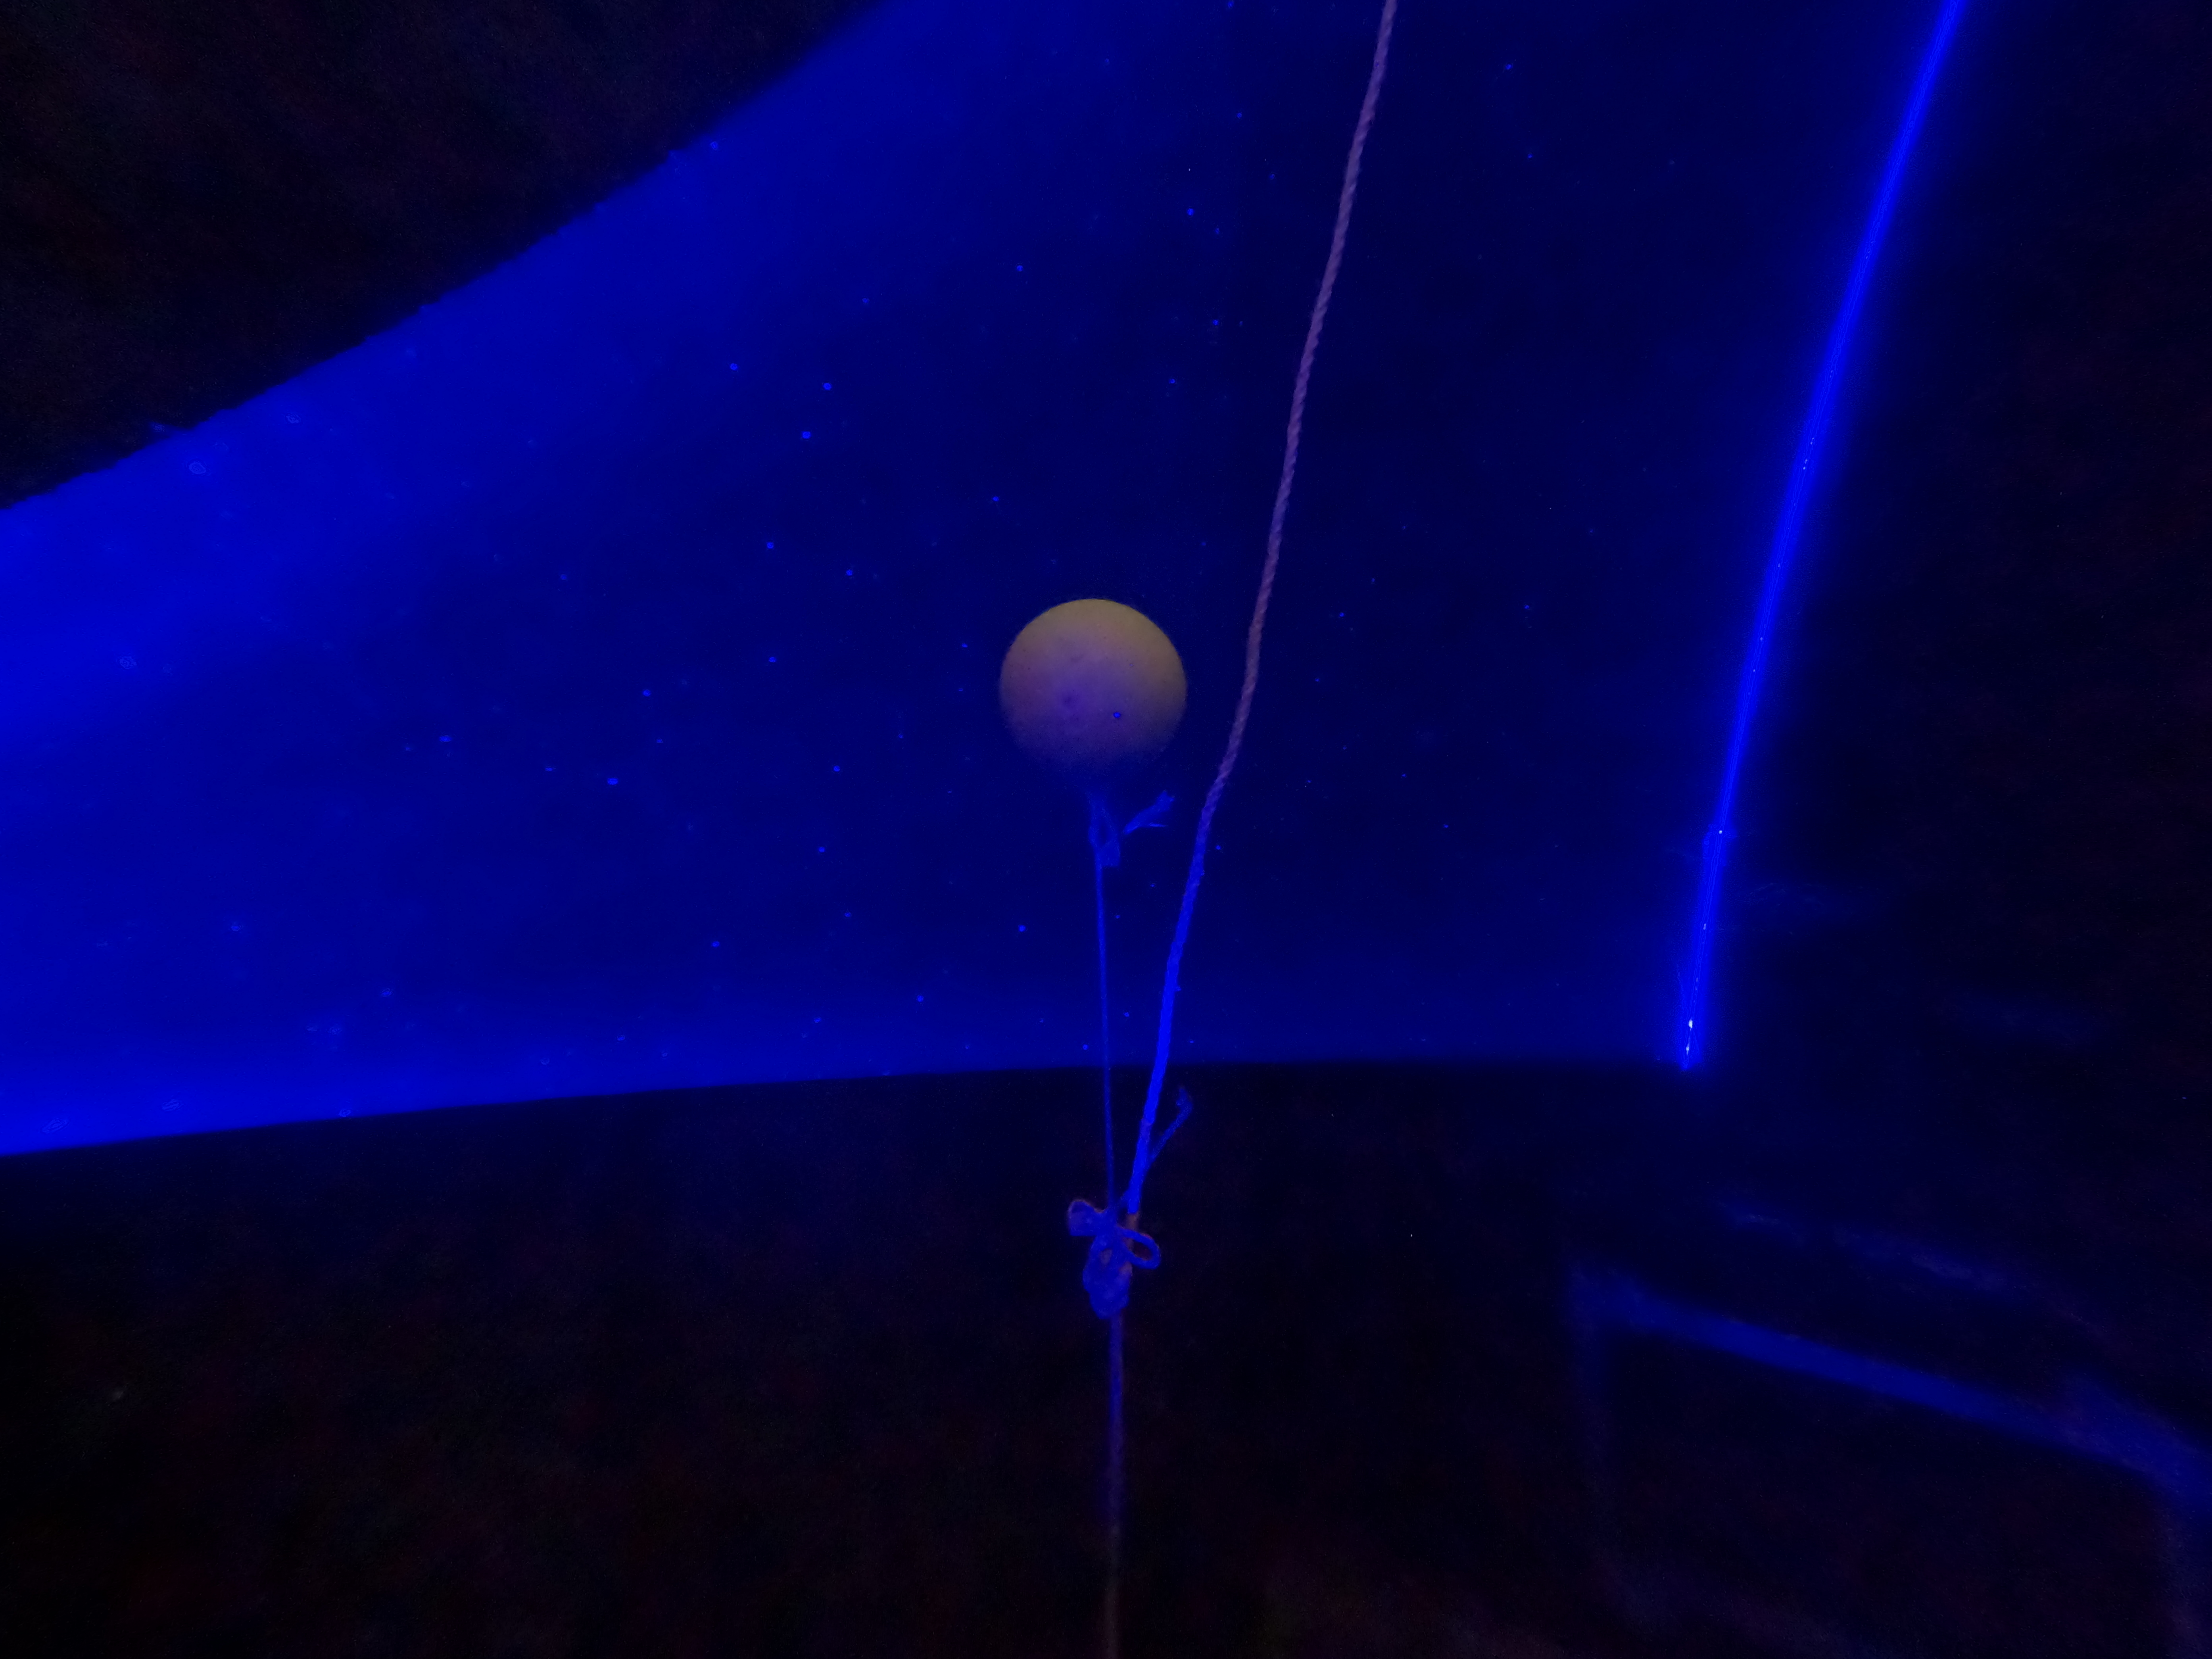

Supplement: Supplementary file 110 [file G0034540.pdf › 9/G0034540.pdf]

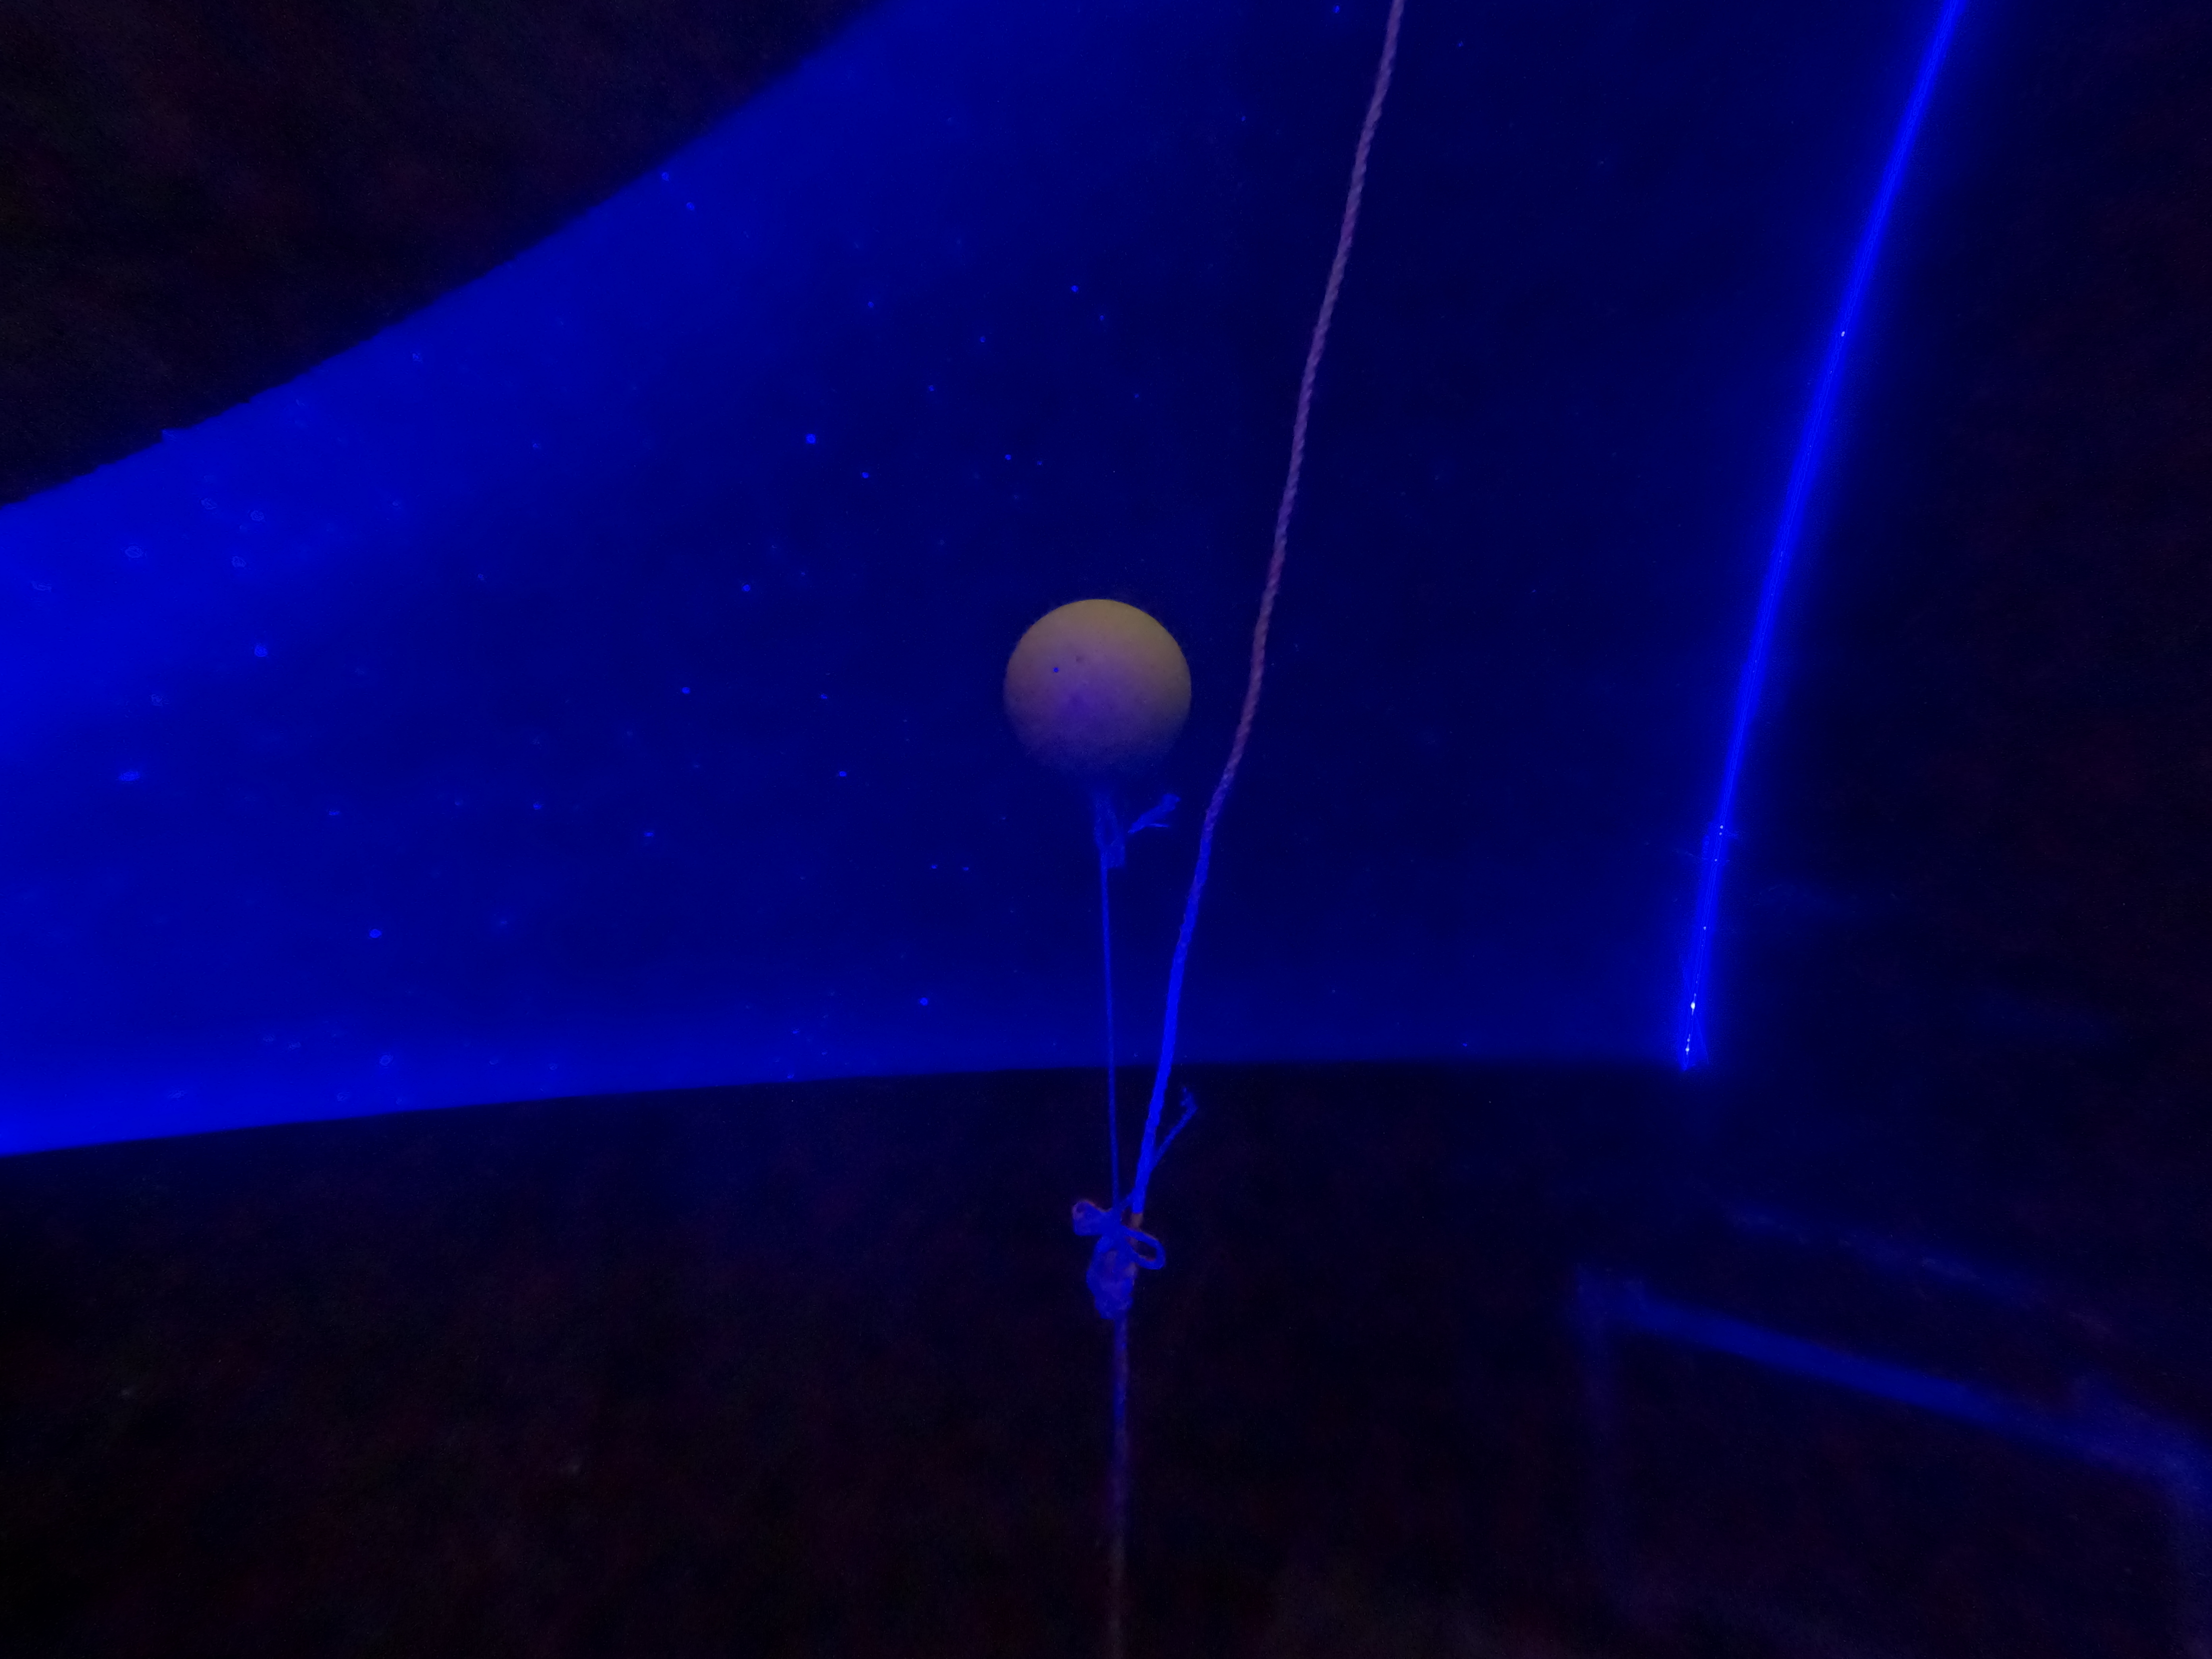

Supplement: Supplementary file 111 [file G0034541.pdf › 9/G0034541.pdf]

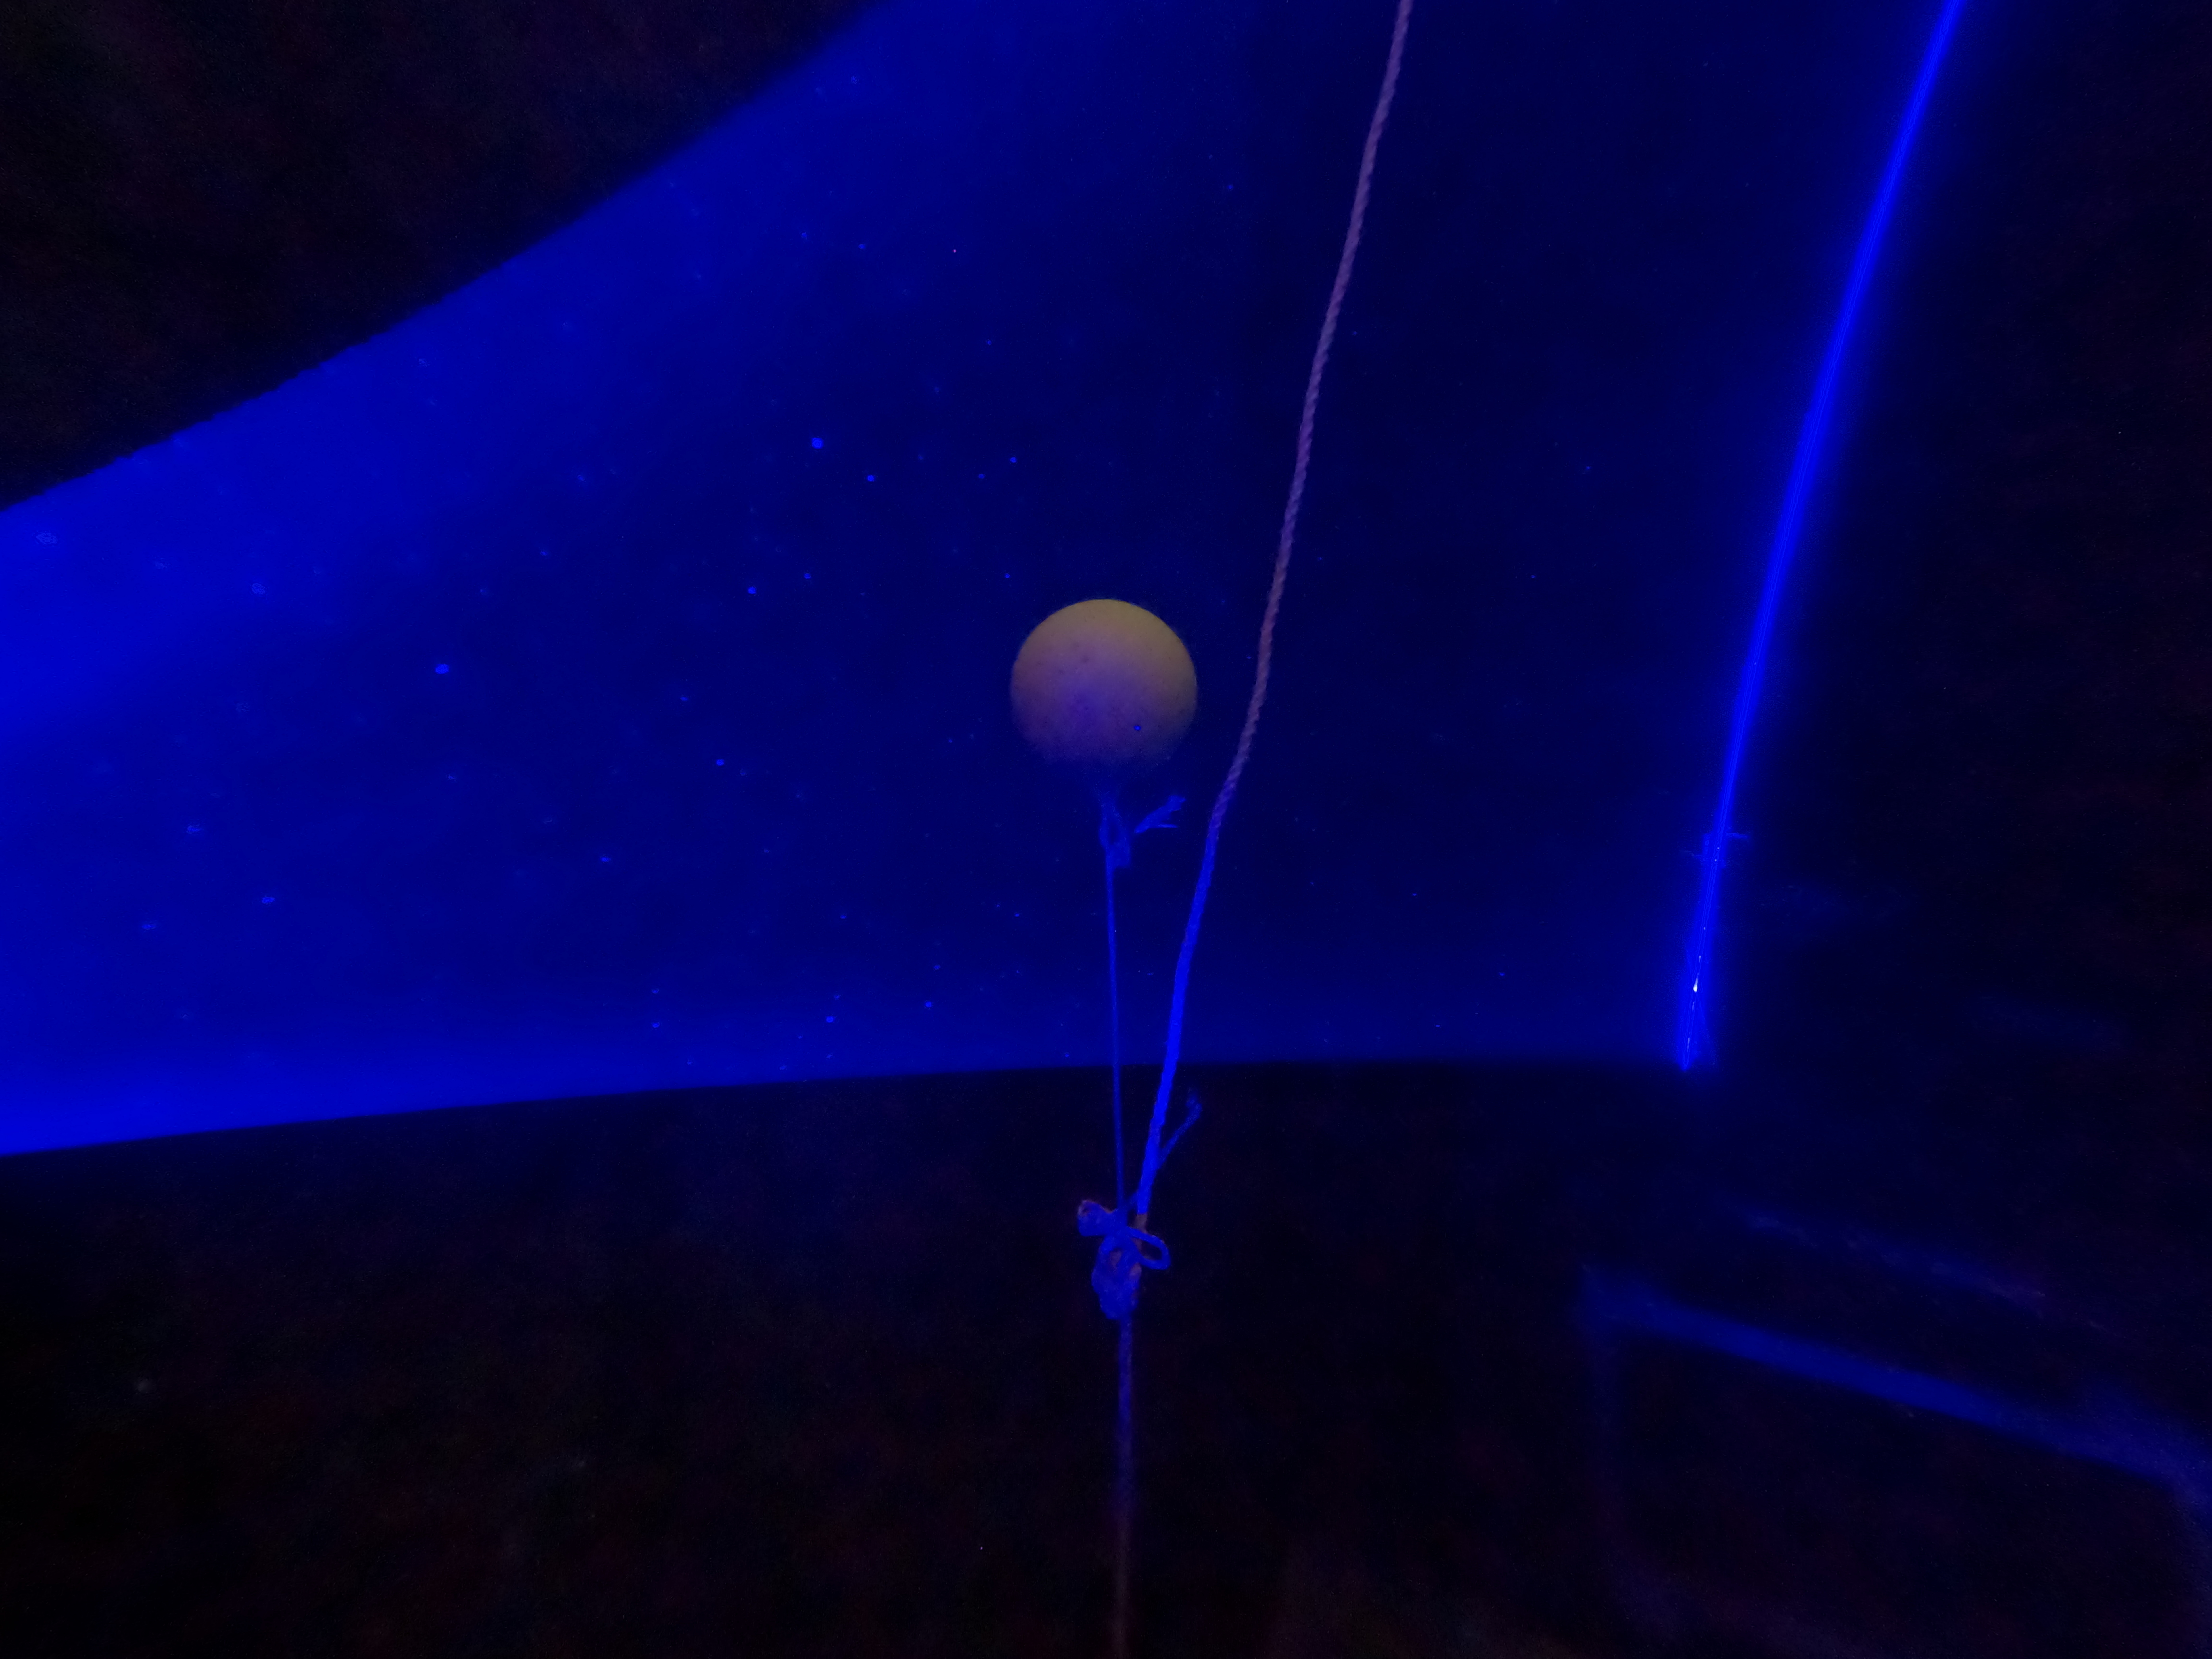

Supplement: Supplementary file 112 [file G0034542.pdf › 9/G0034542.pdf]

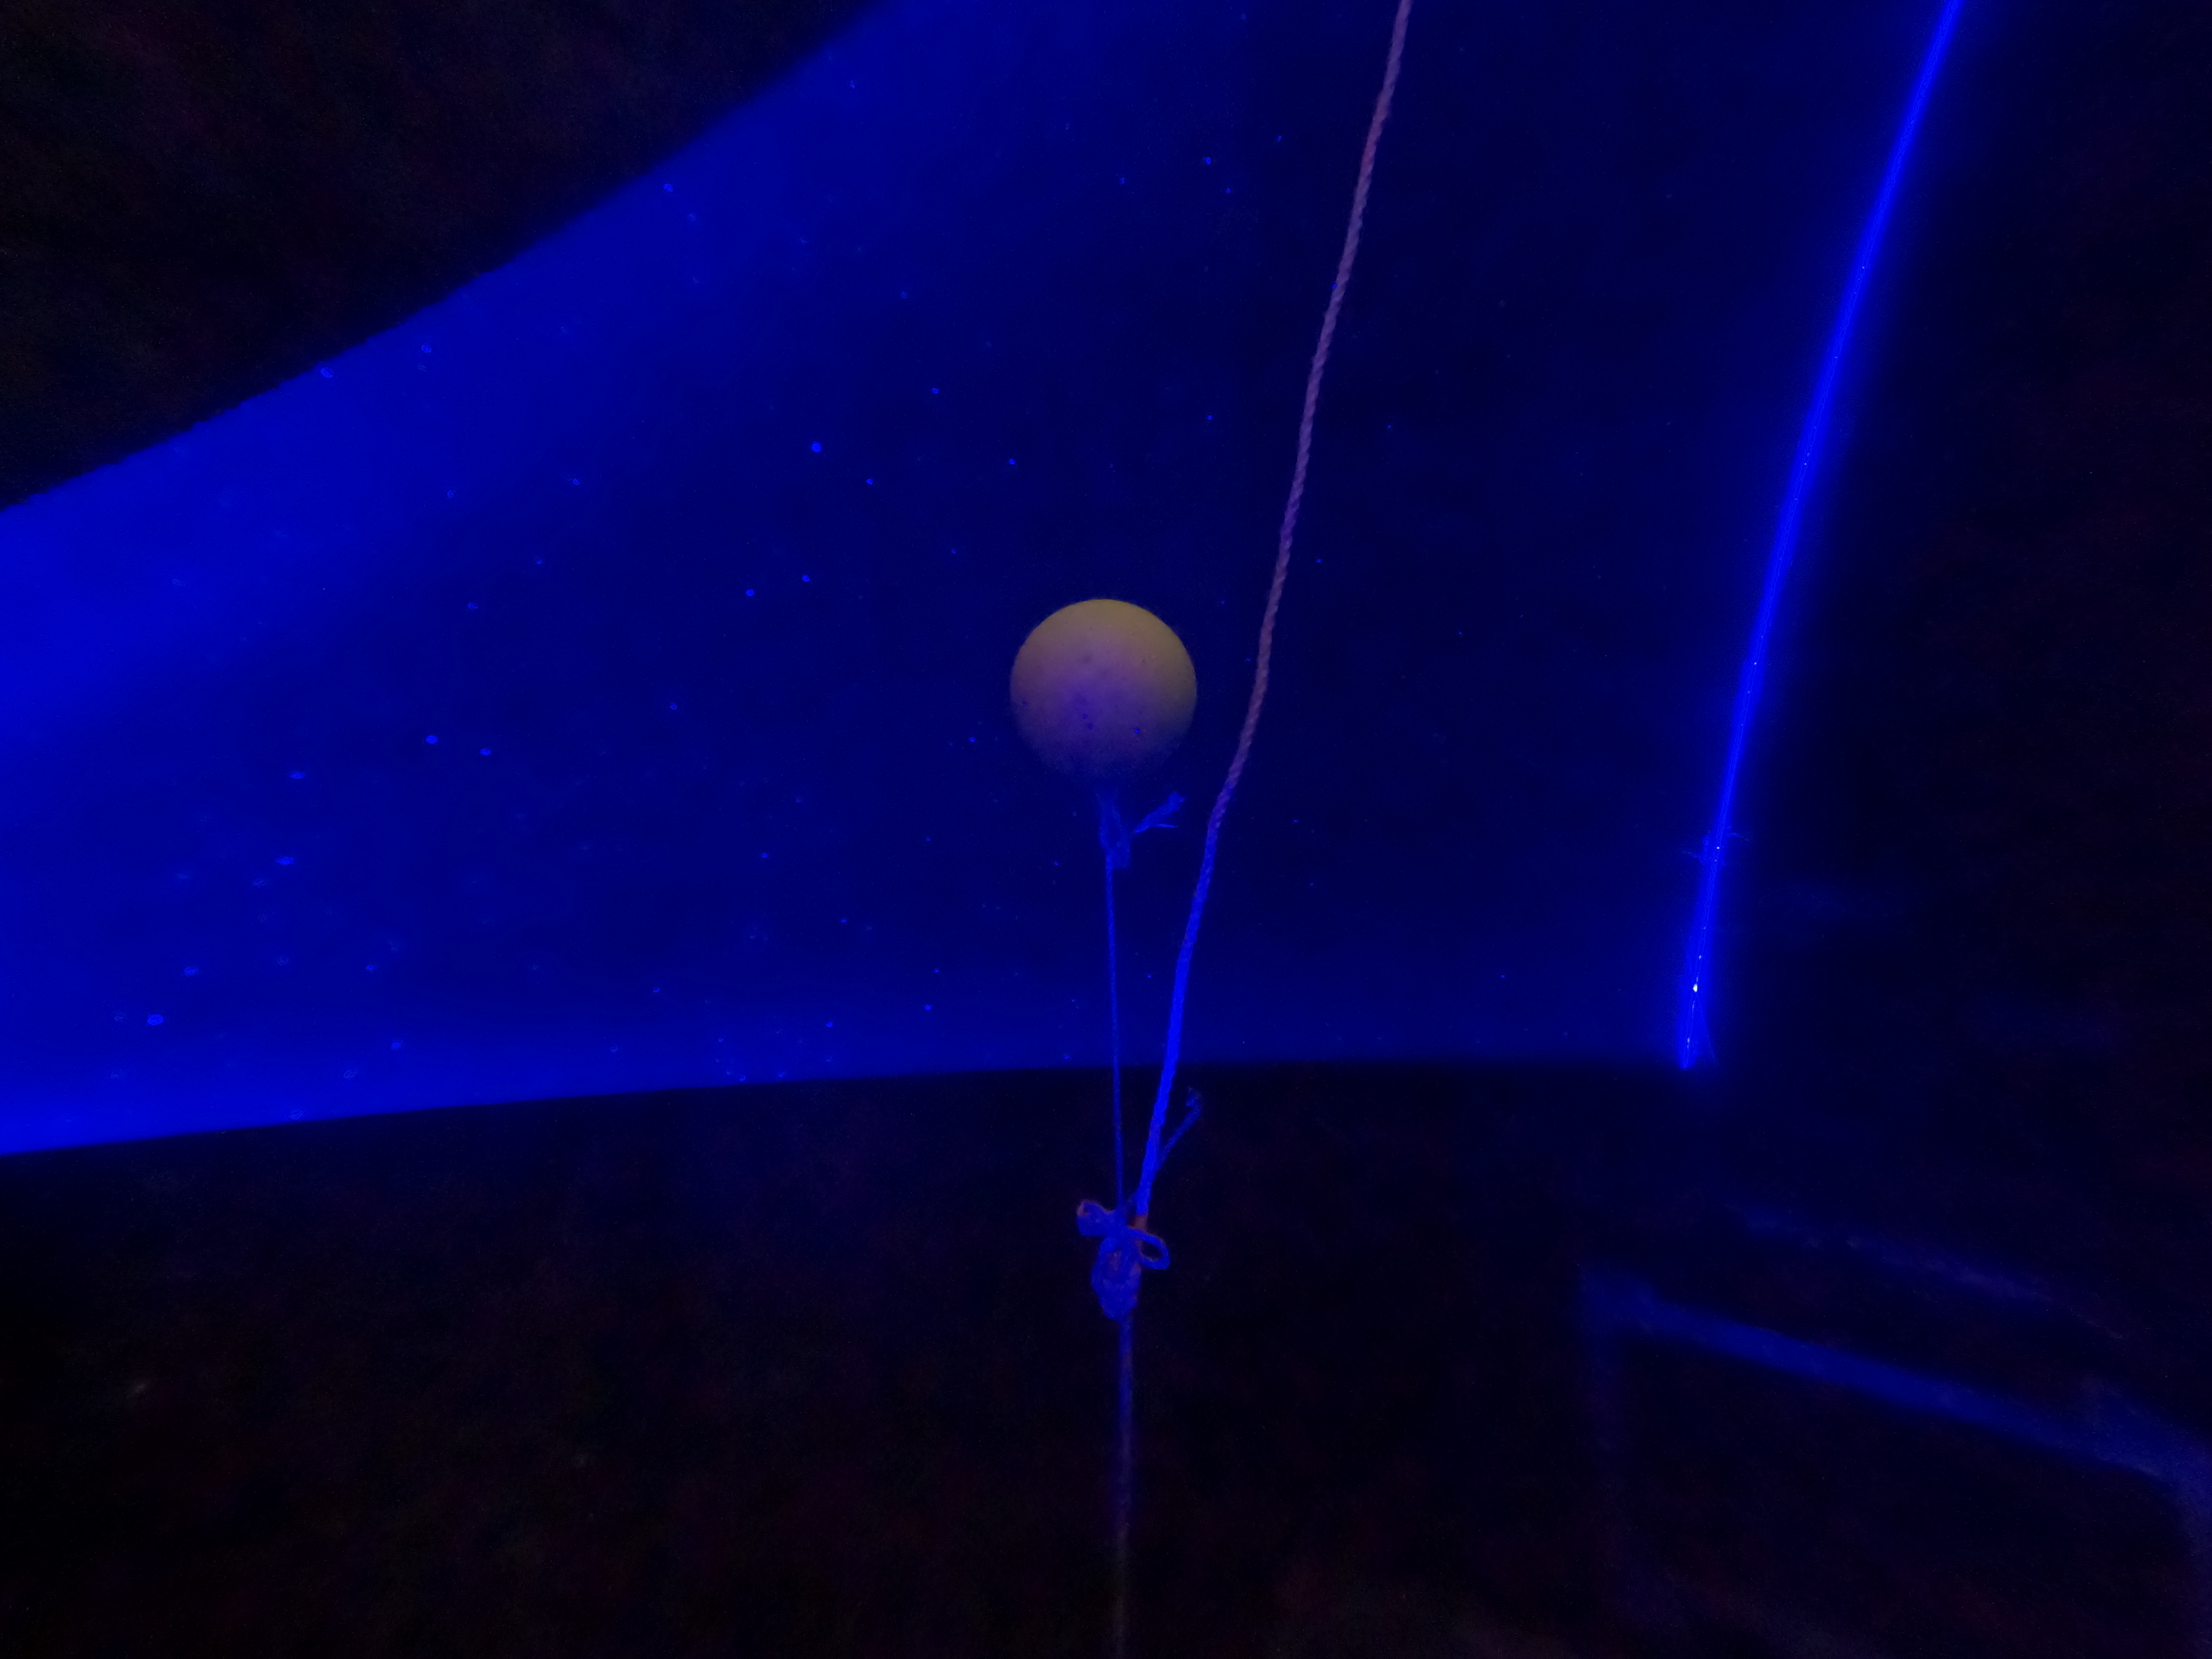

Supplement: Supplementary file 113 [file G0034543.pdf › 9/G0034543.pdf]

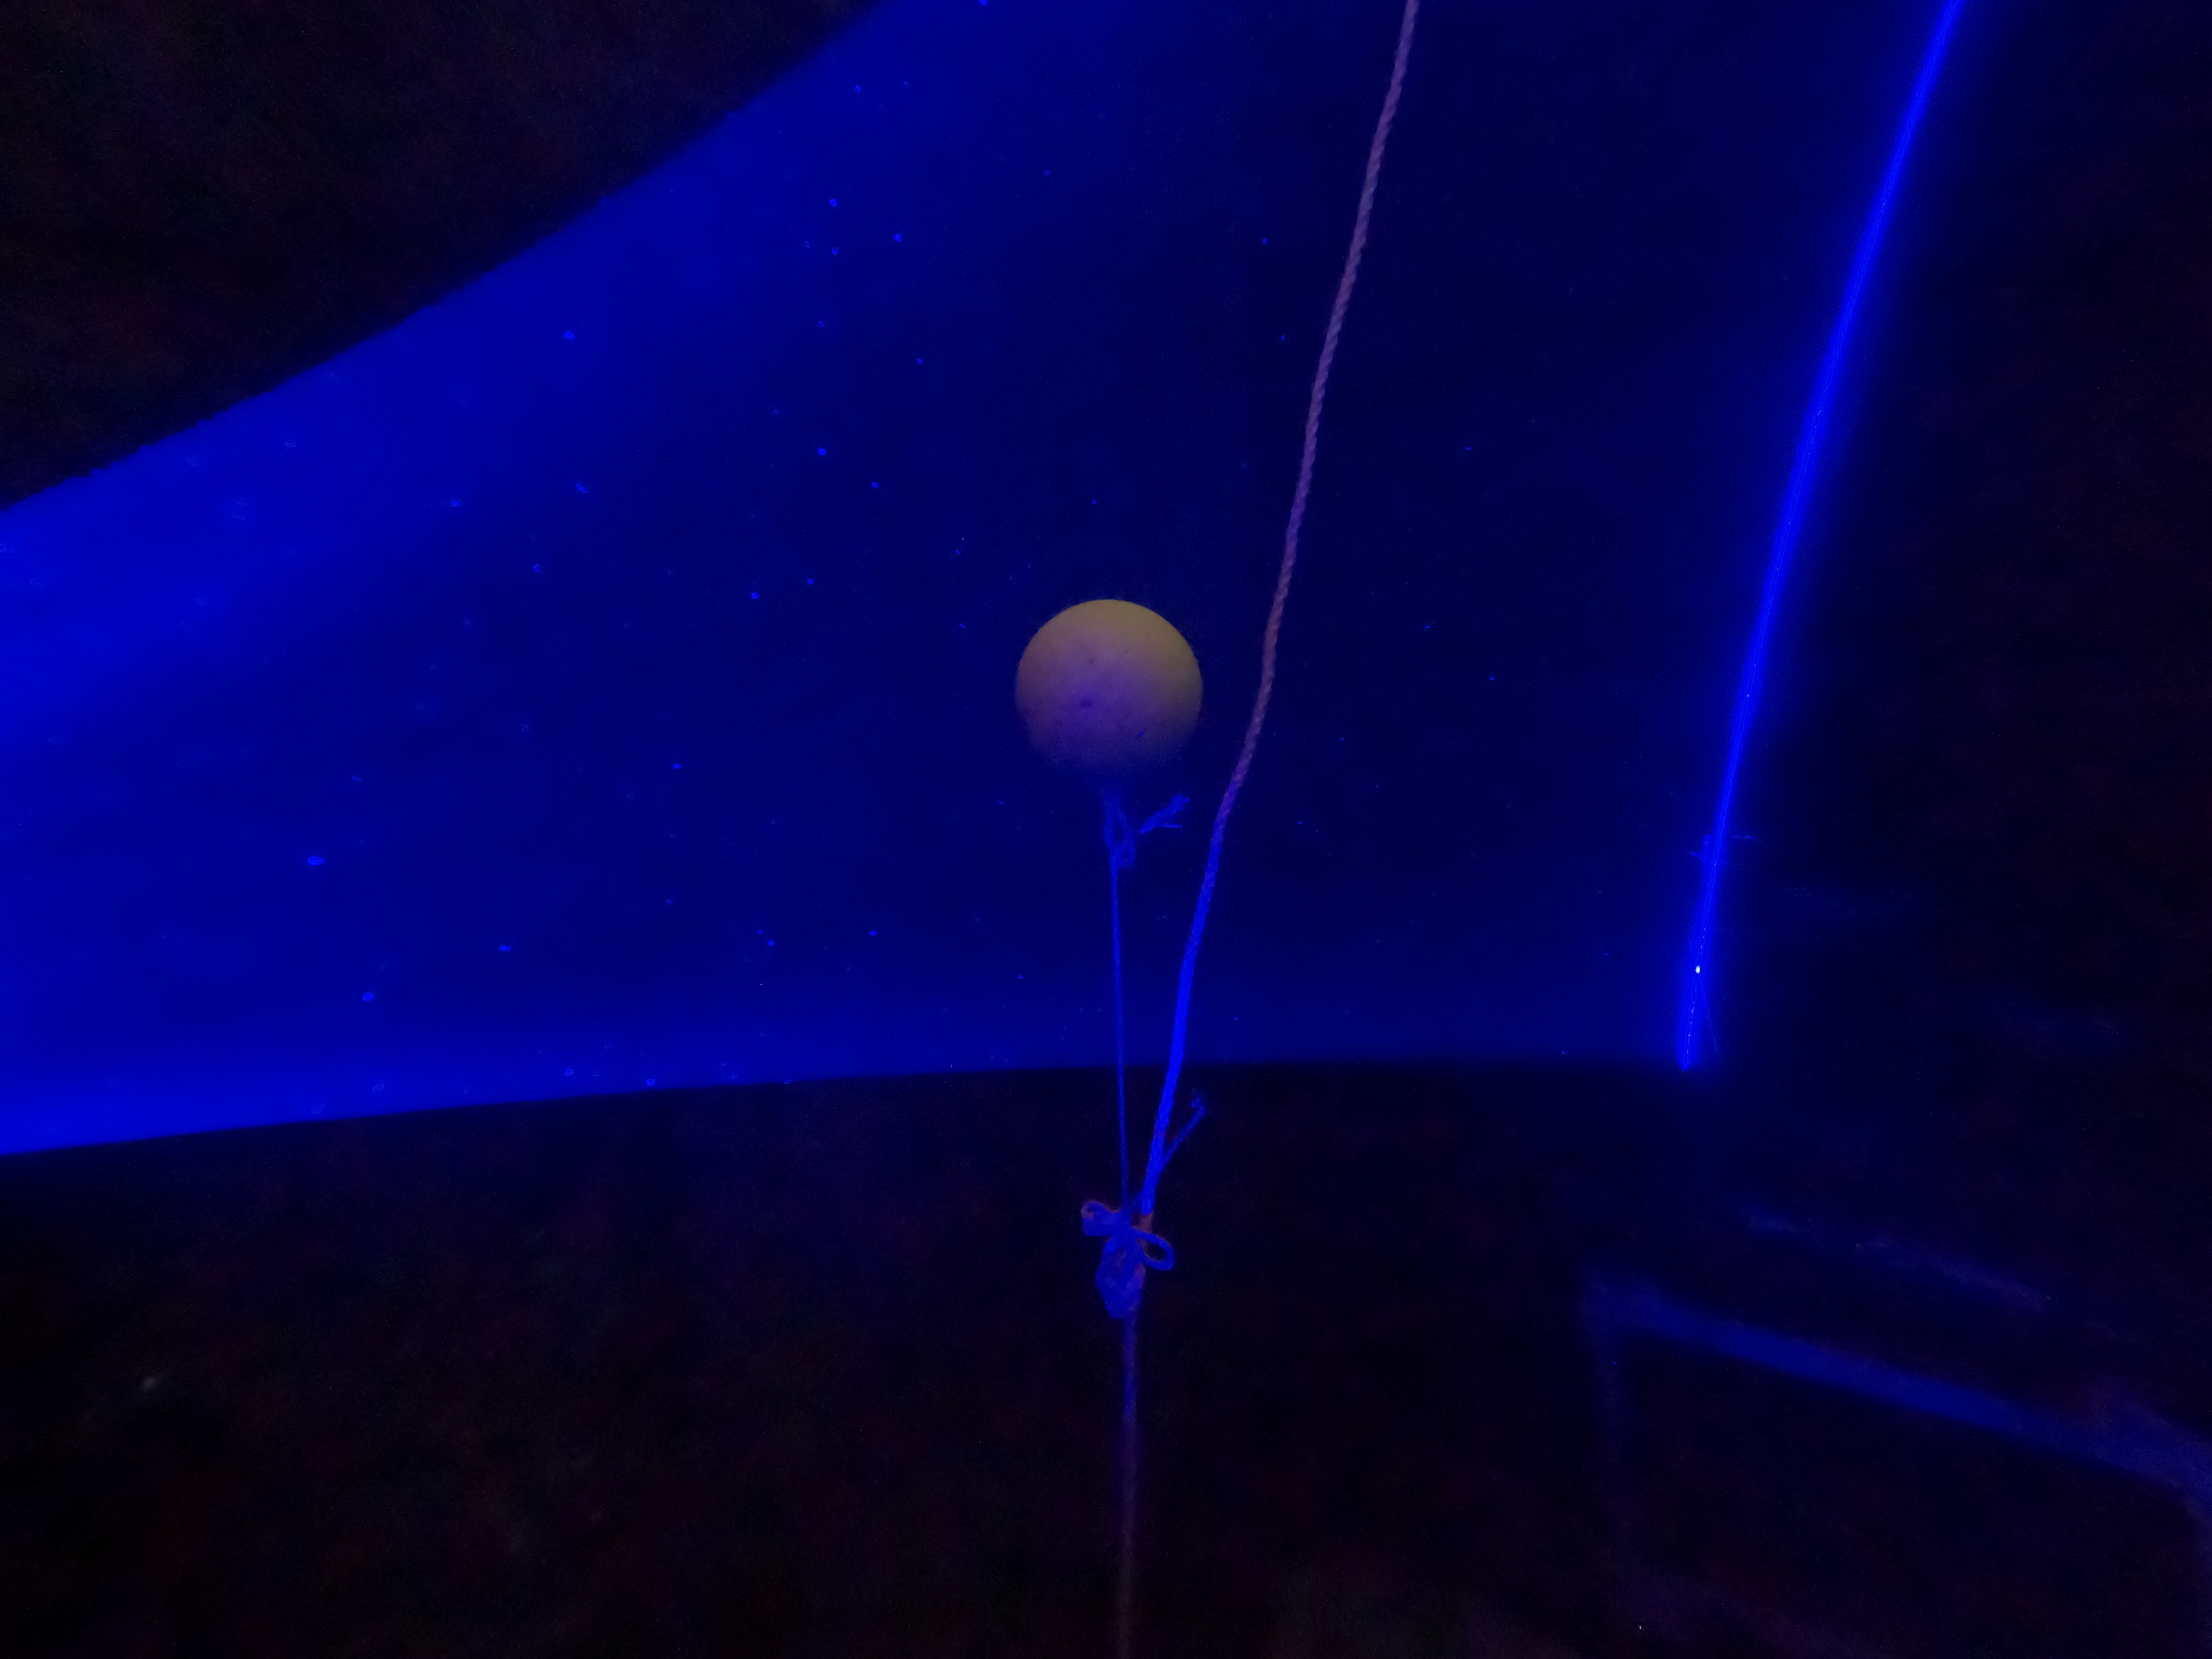

Supplement: Supplementary file 114 [file G0034544.pdf › 9/G0034544.pdf]

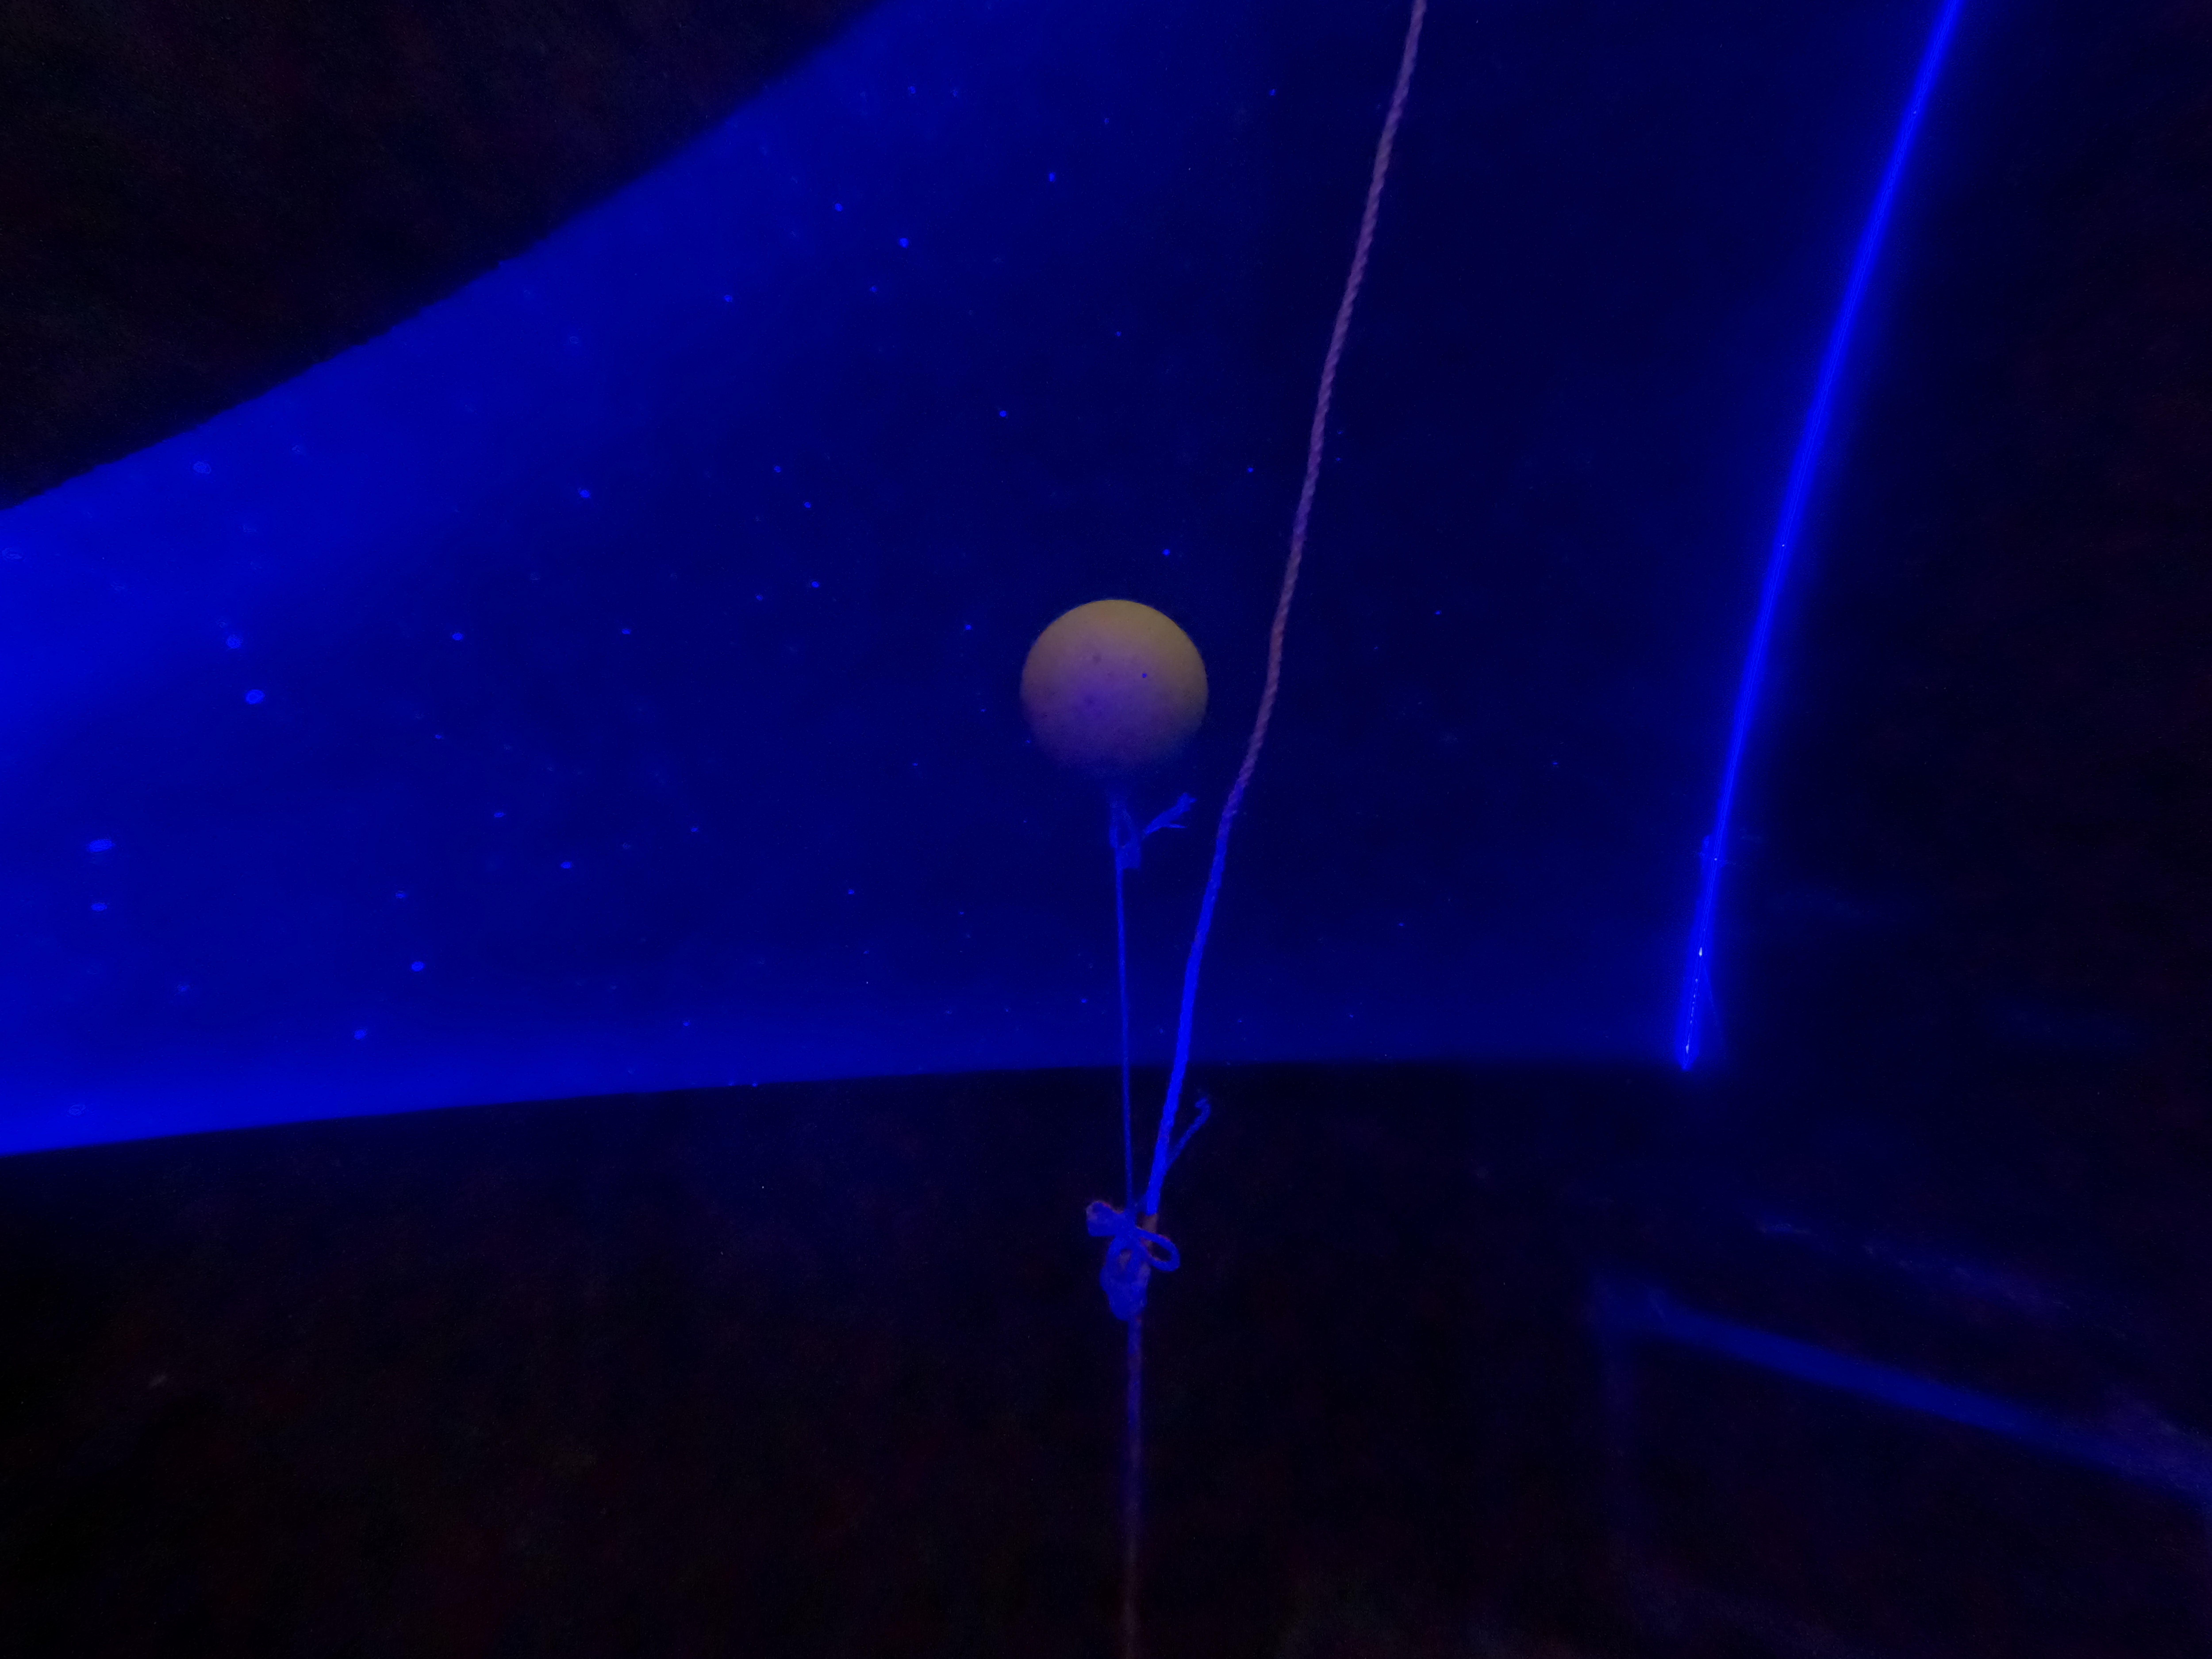

Supplement: Supplementary file 115 [file G0034545.pdf › 9/G0034545.pdf]

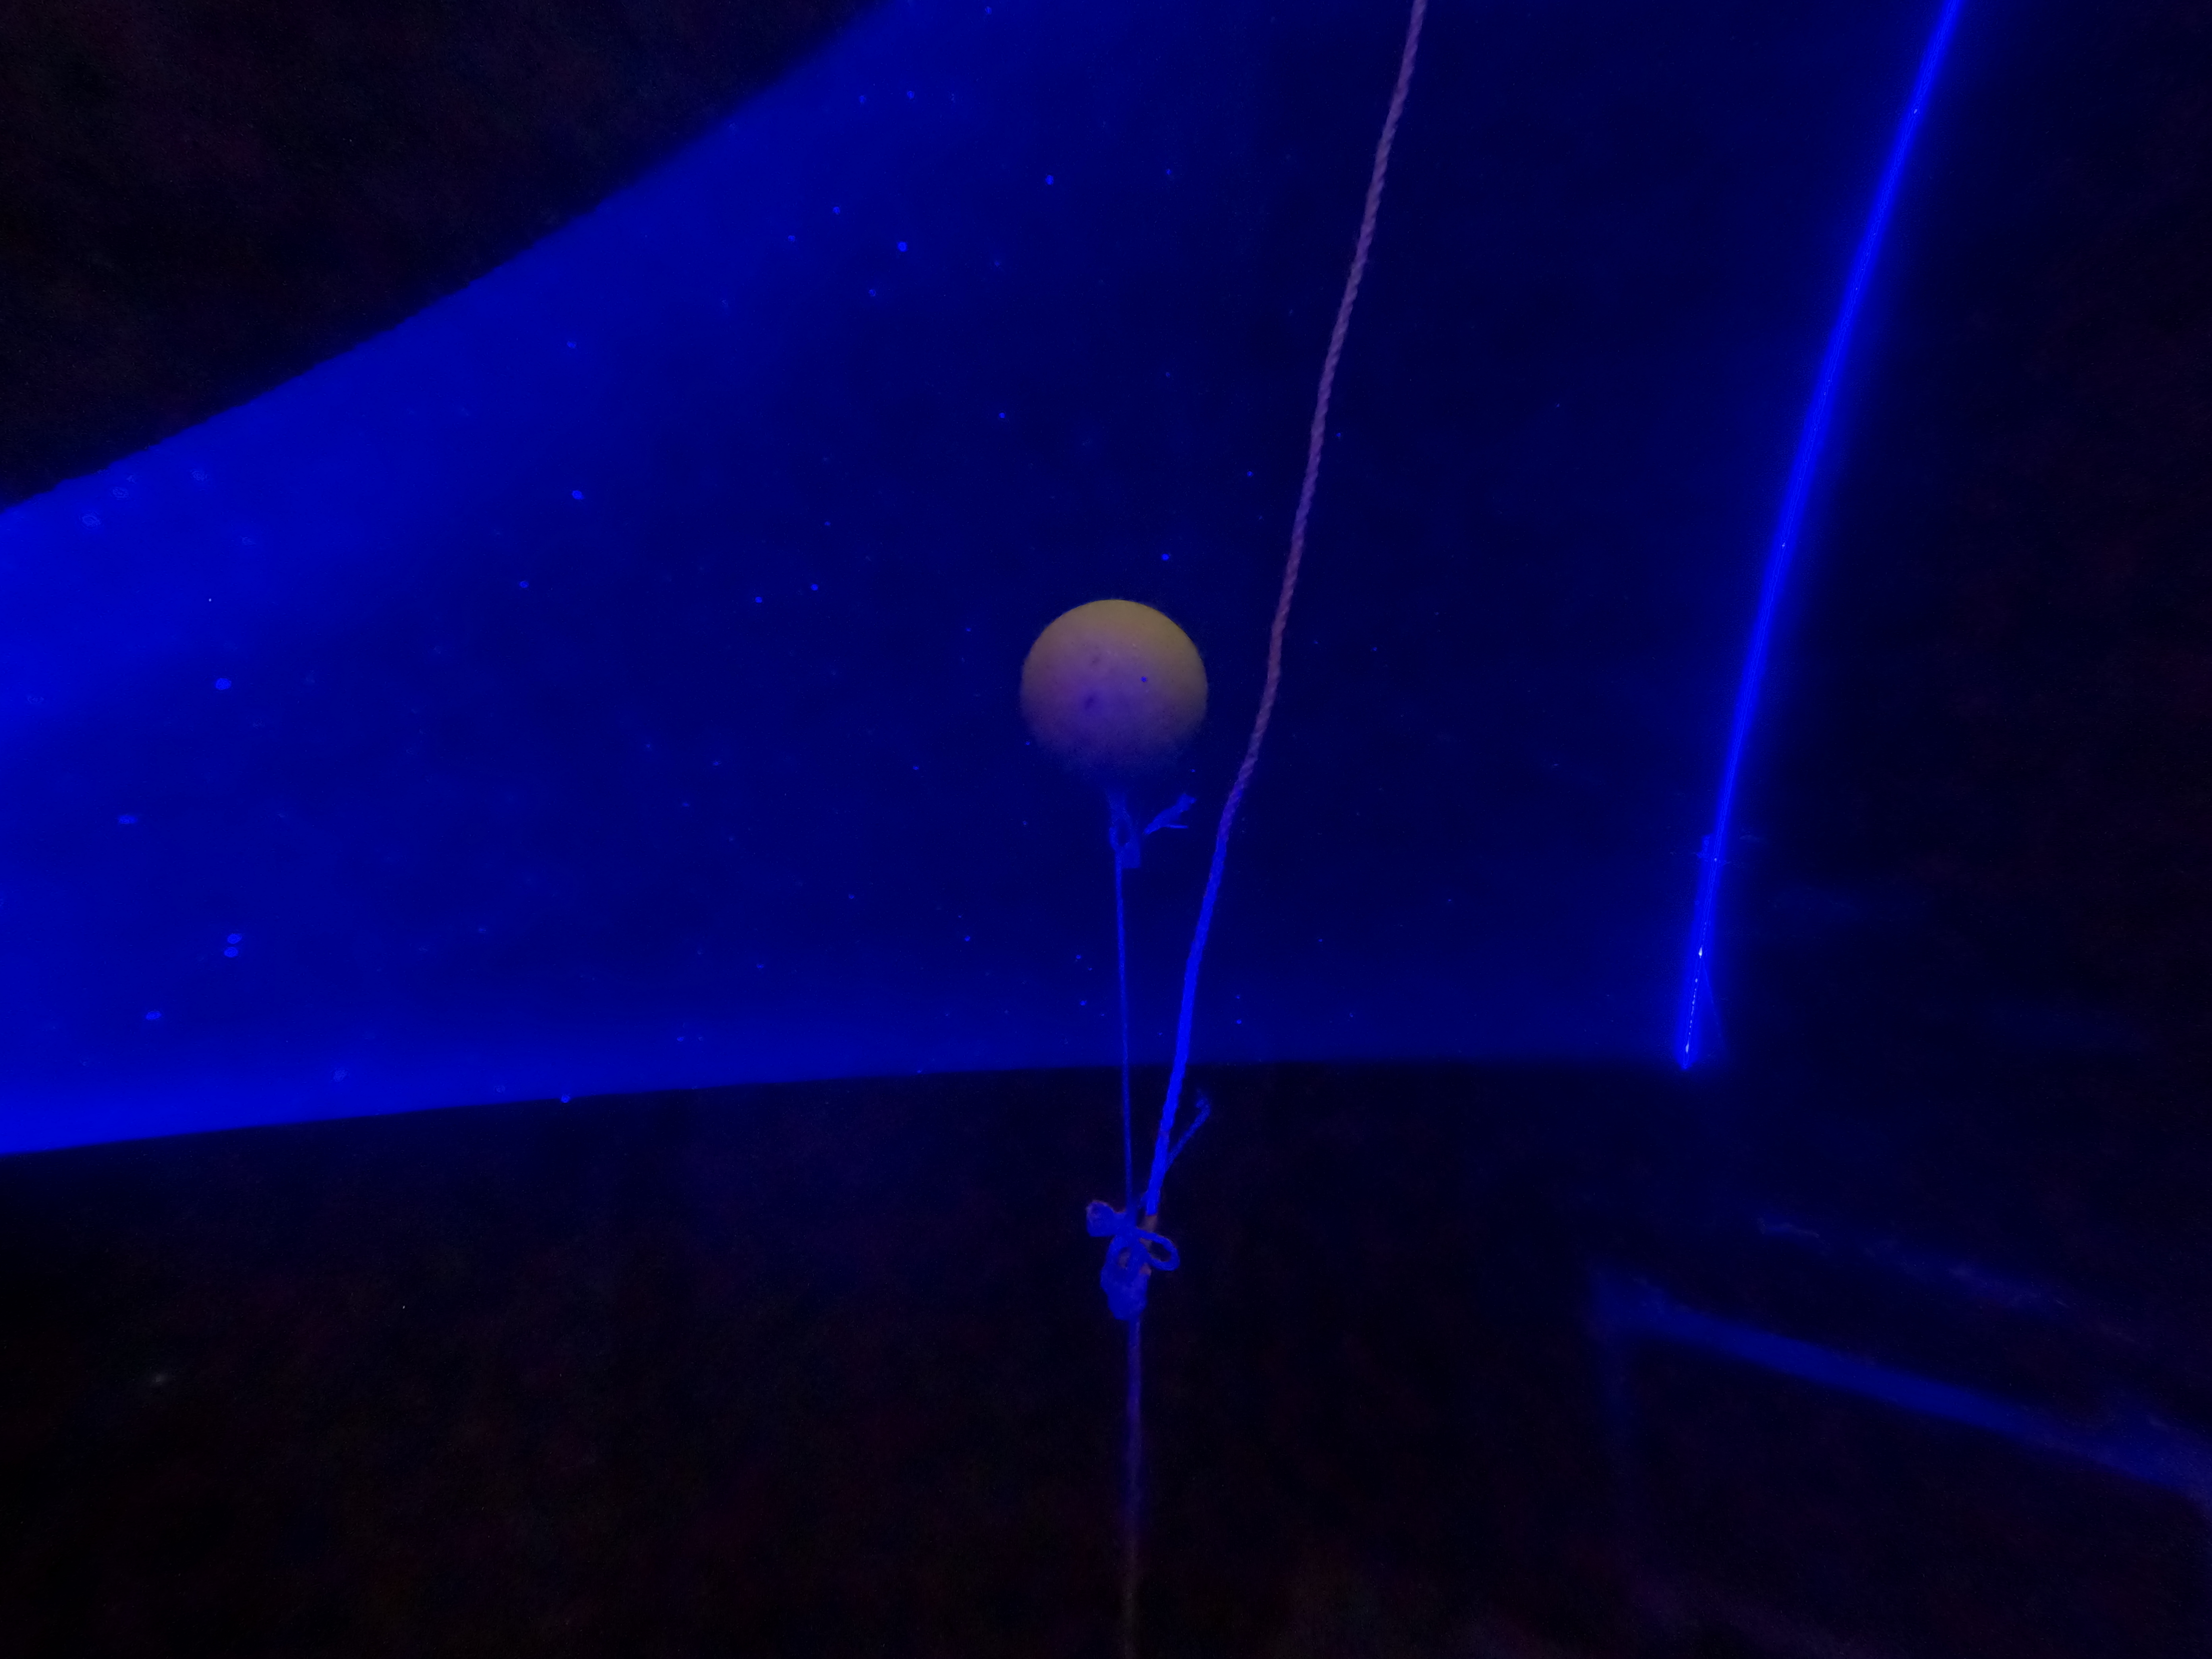

Supplement: Supplementary file 116 [file G0034546.pdf › 9/G0034546.pdf]

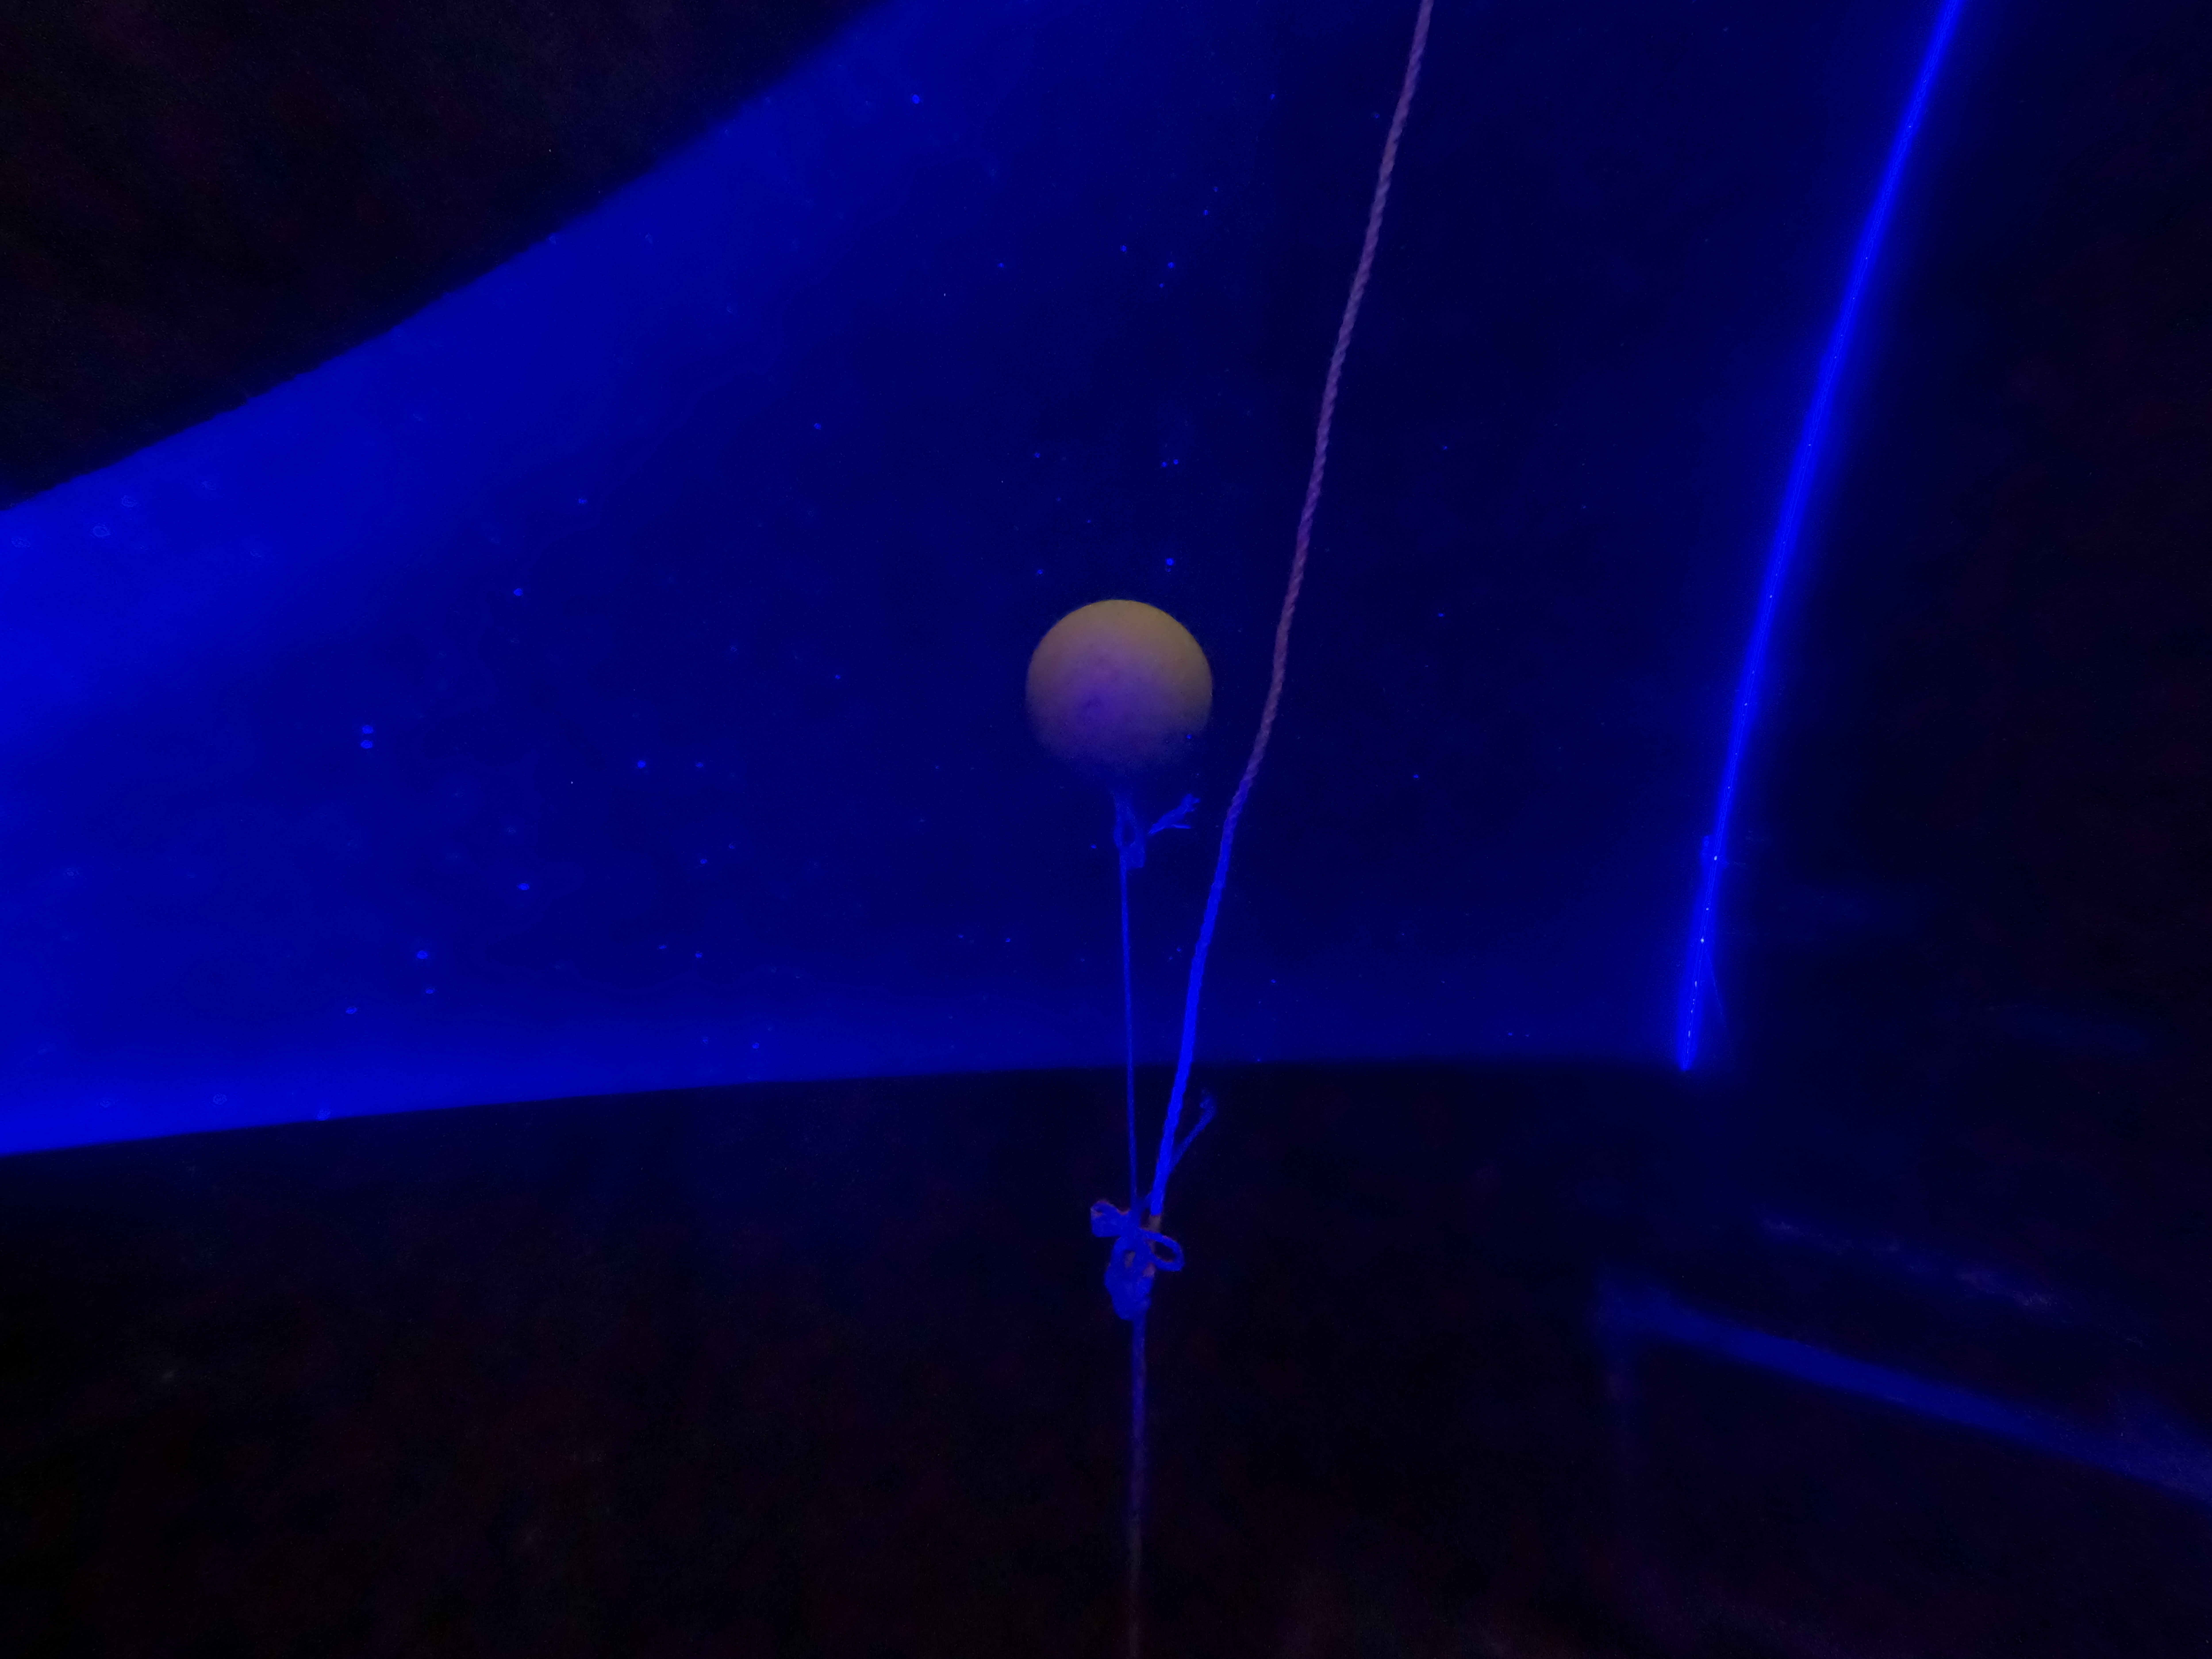

Supplement: Supplementary file 117 [file G0034547.pdf › 9/G0034547.pdf]

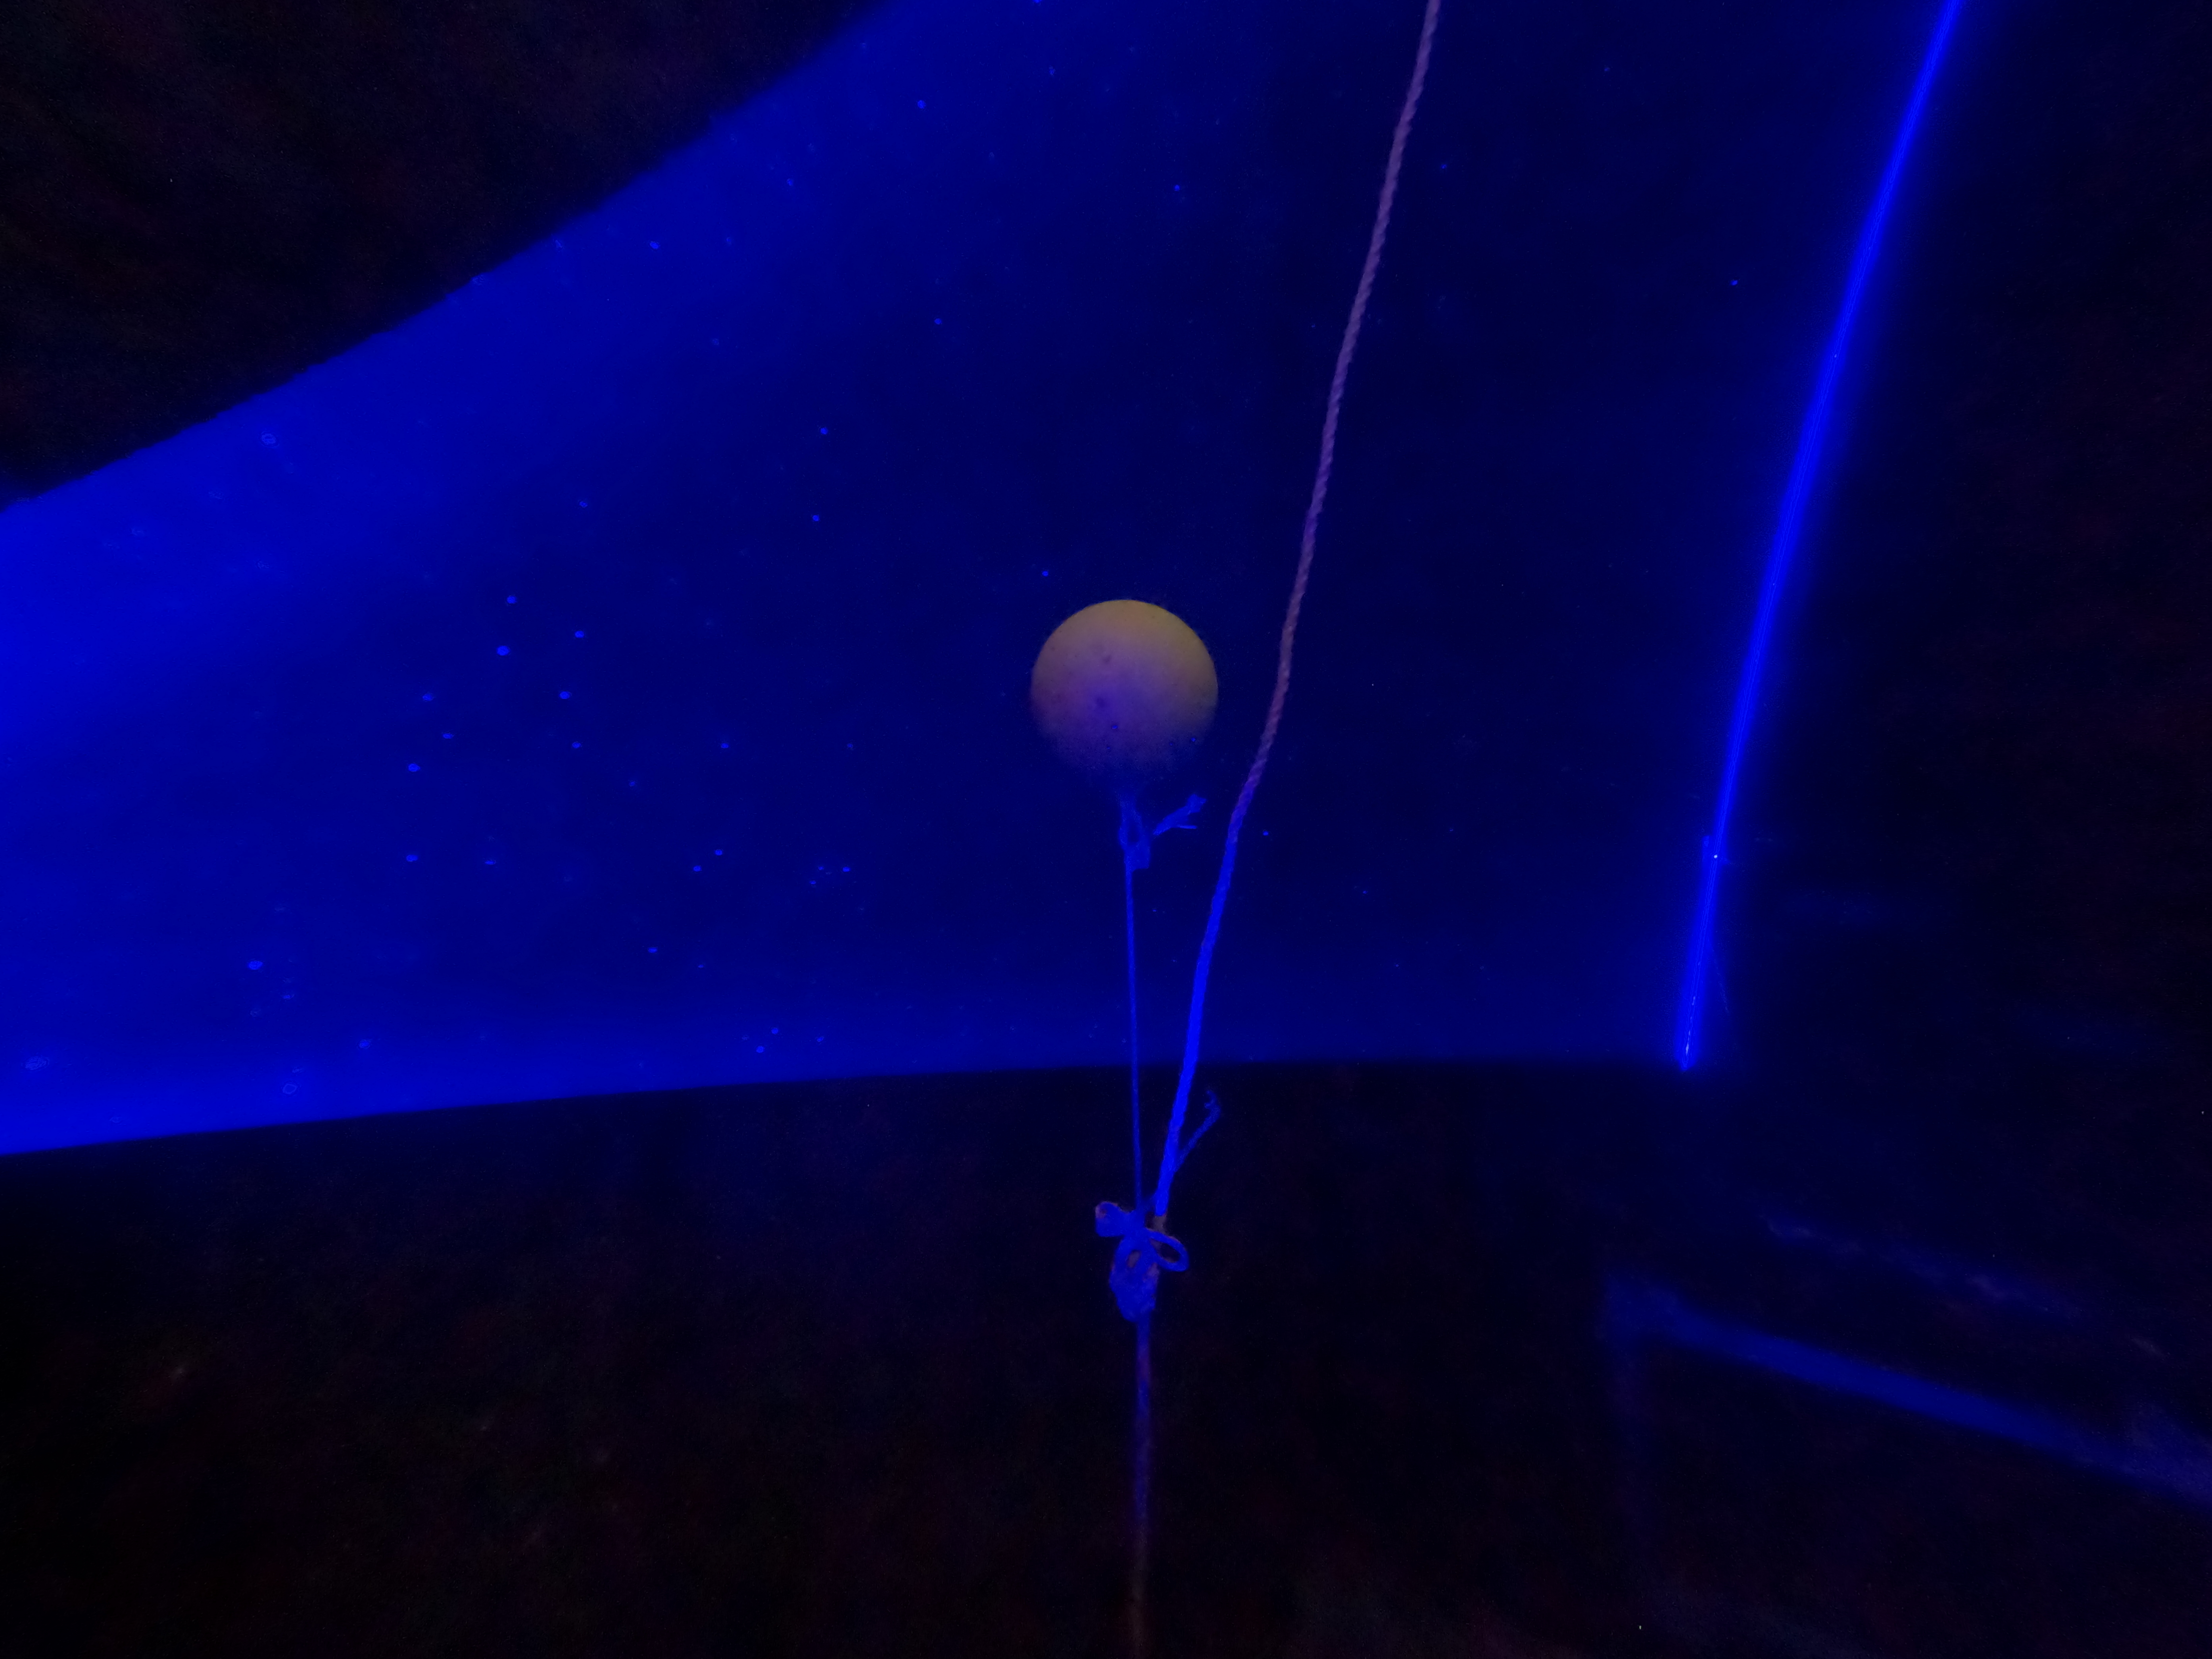

Supplement: Supplementary file 118 [file G0034548.pdf › 9/G0034548.pdf]

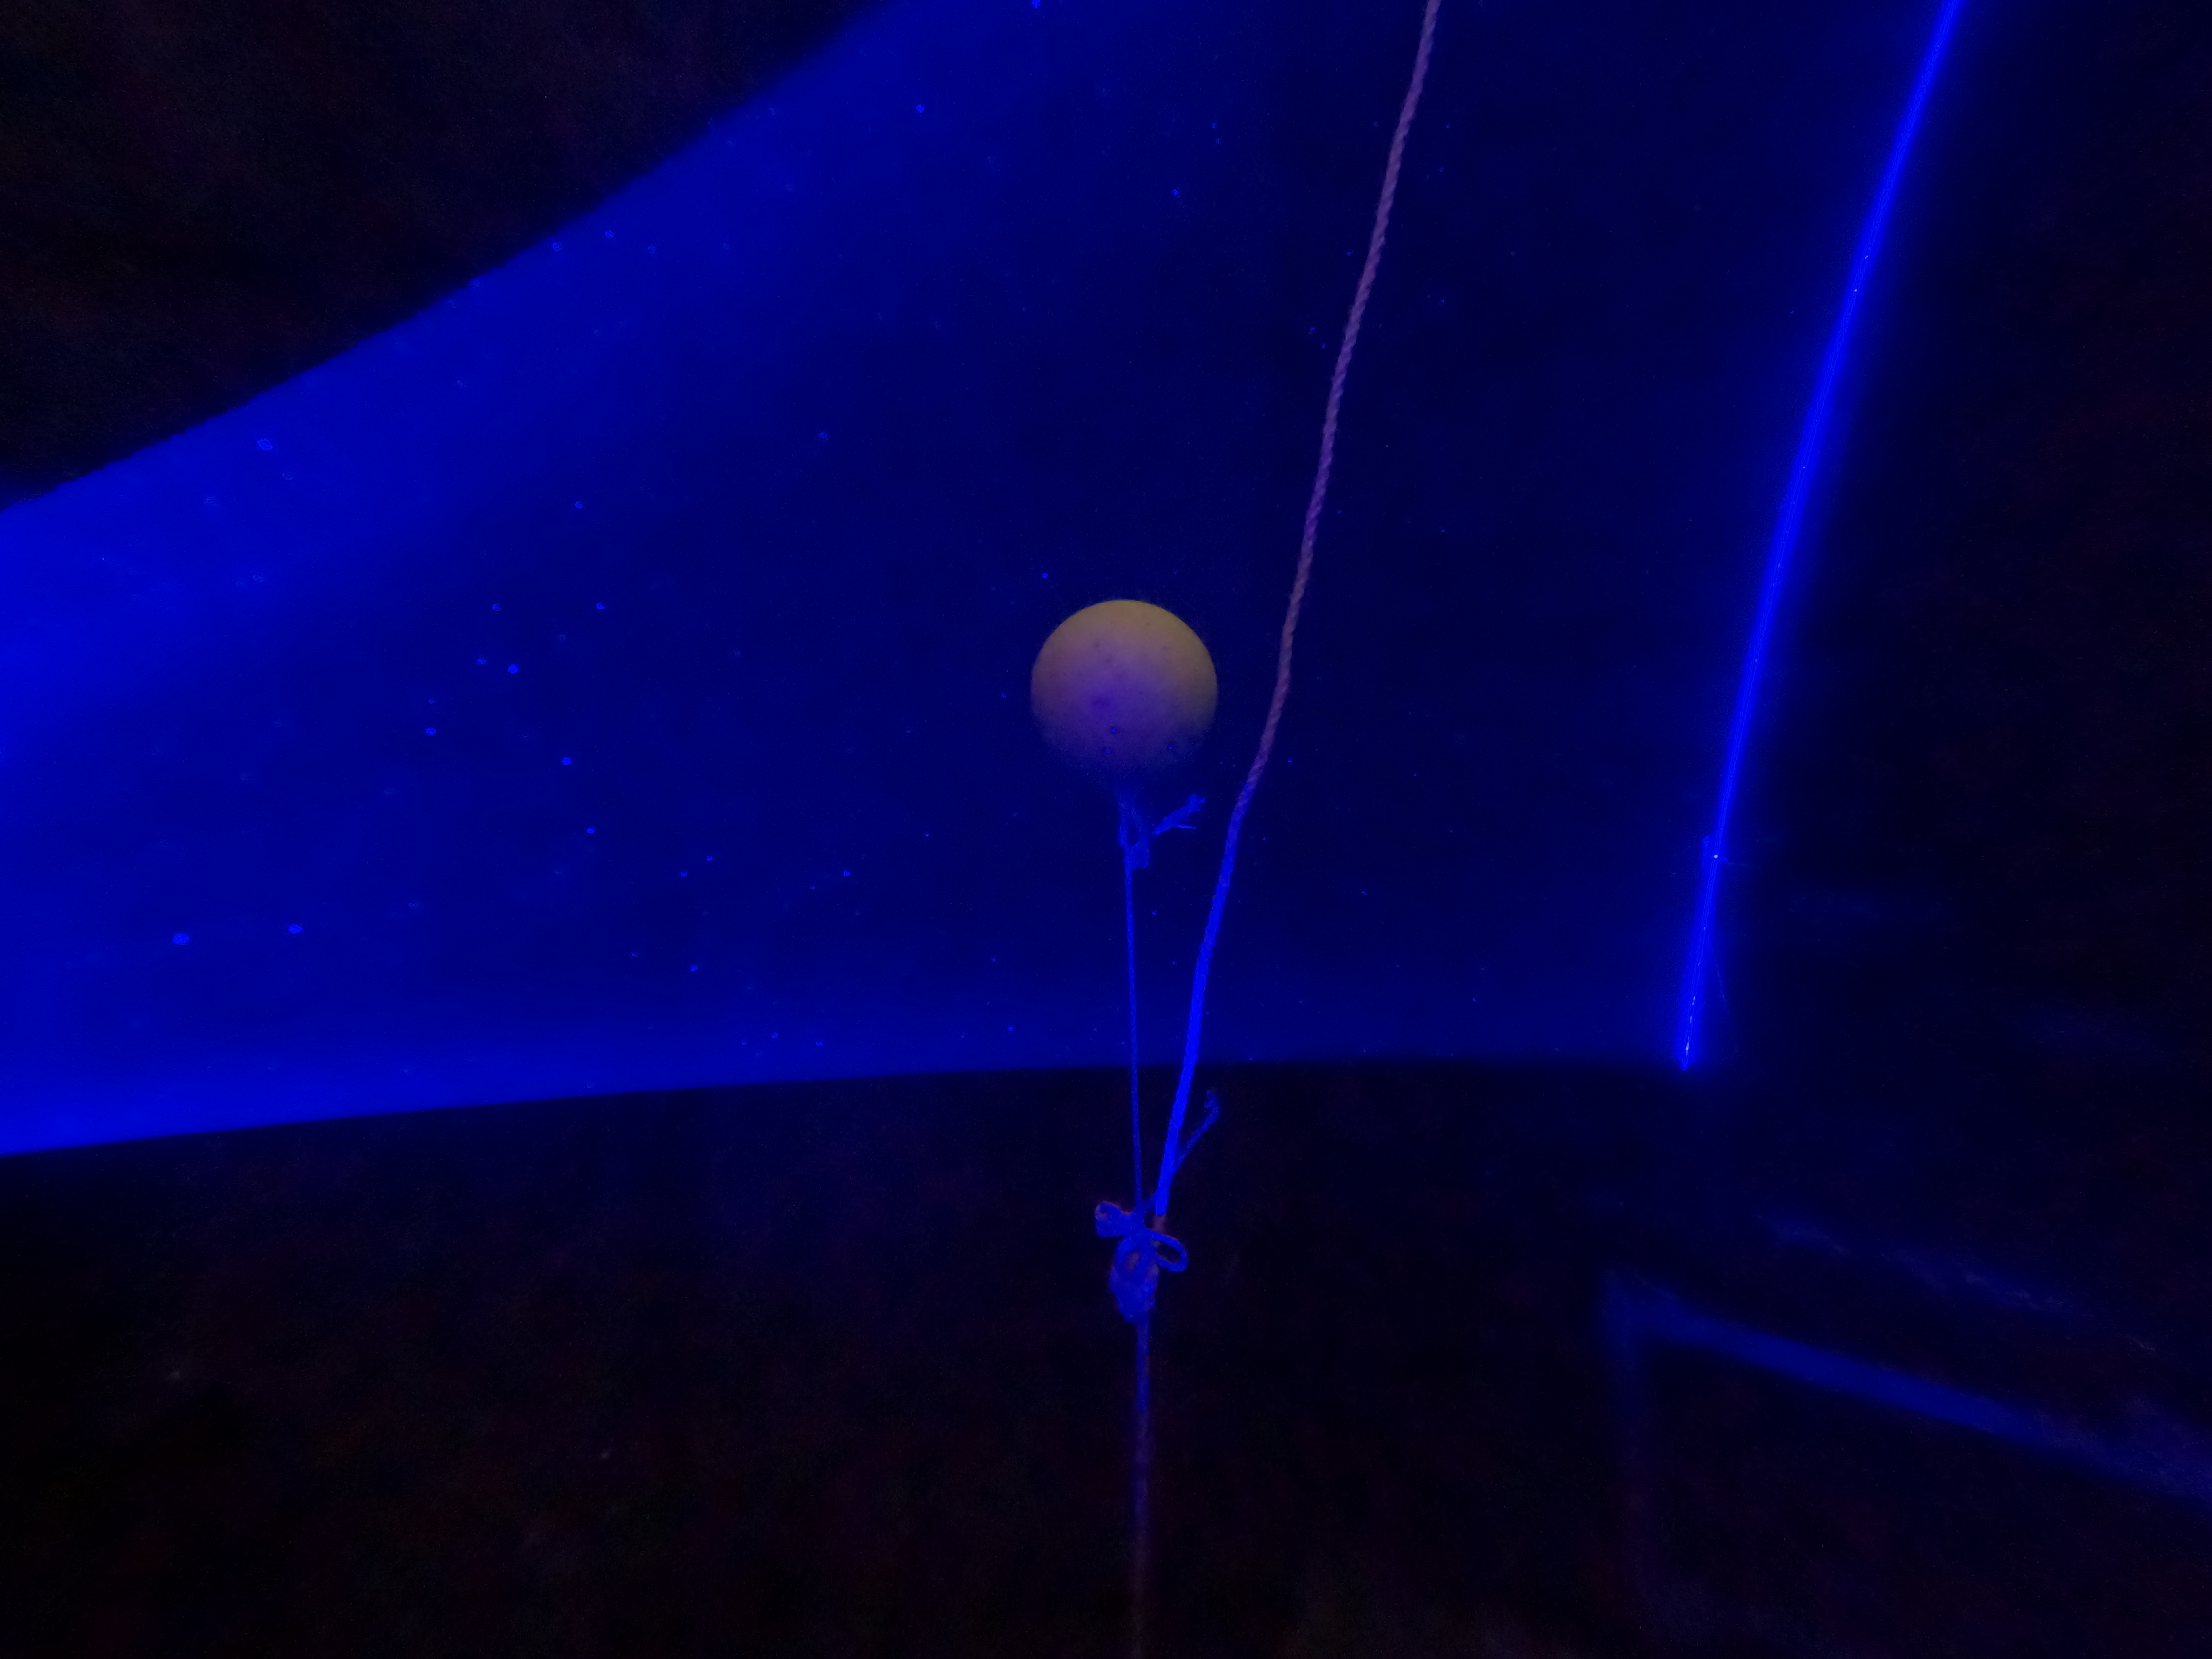

Supplement: Supplementary file 119 [file G0034549.pdf › 9/G0034549.pdf]

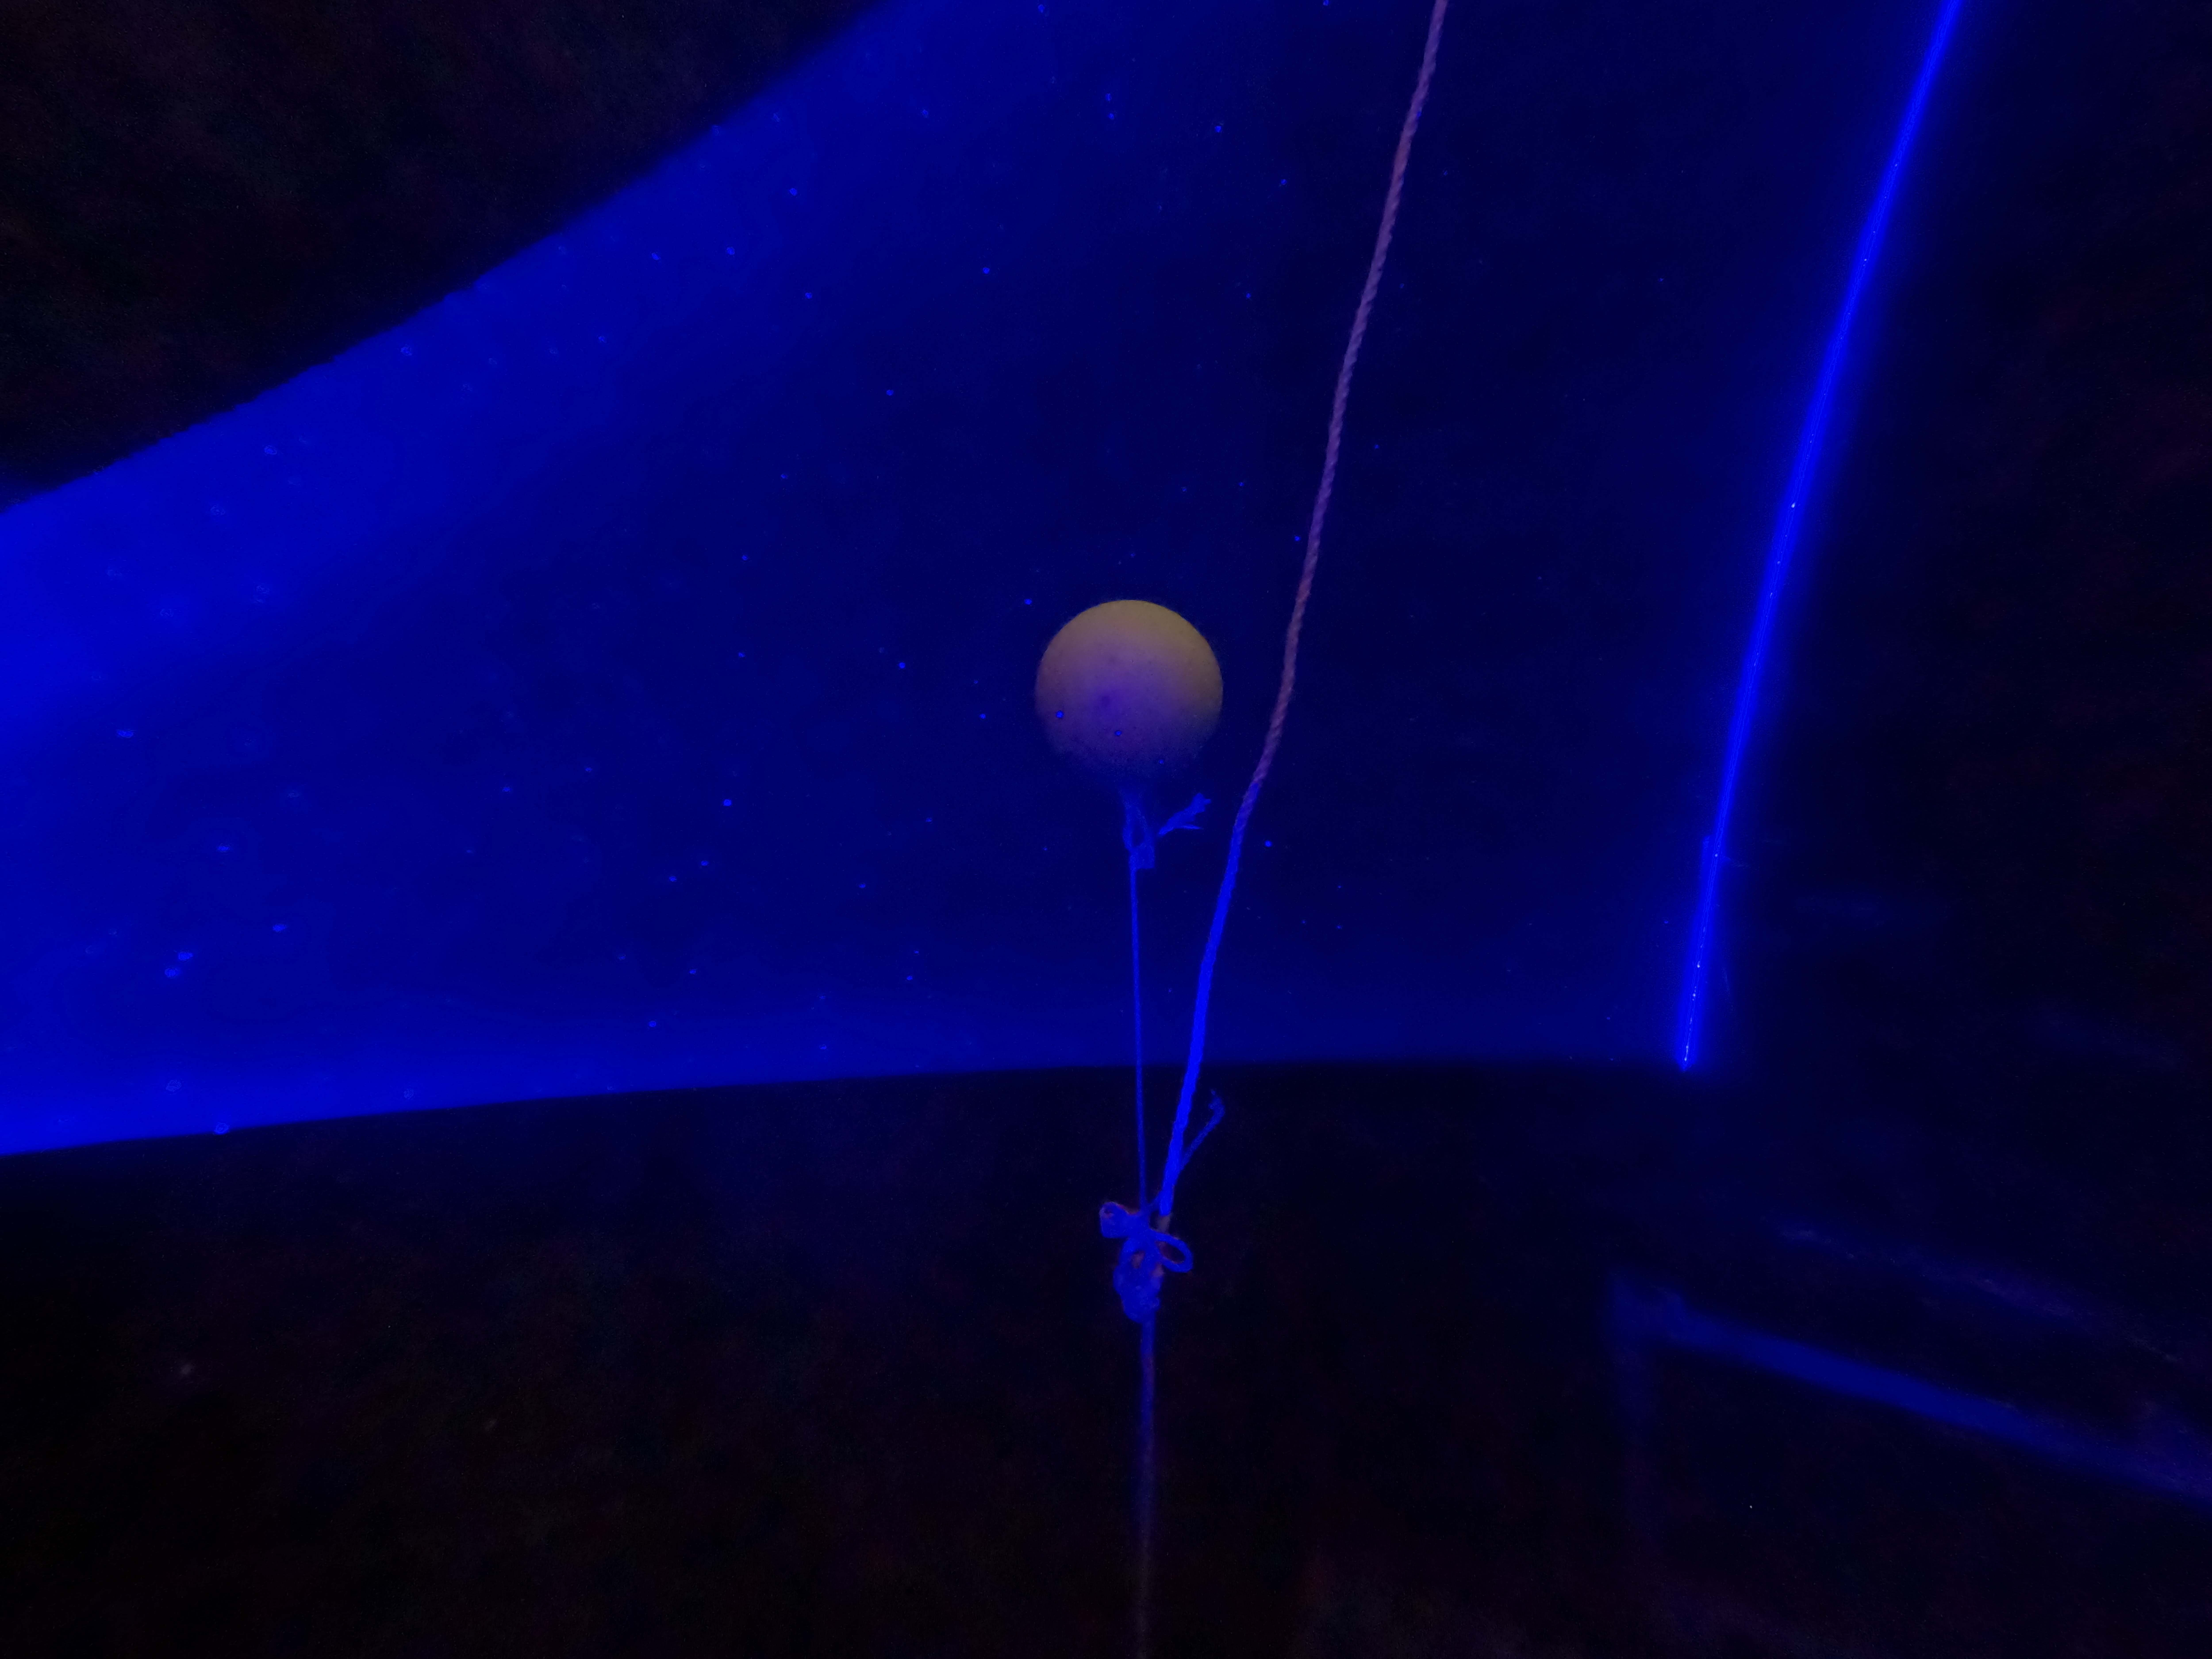

Supplement: Supplementary file 120 [file G0034550.pdf › 9/G0034550.pdf]

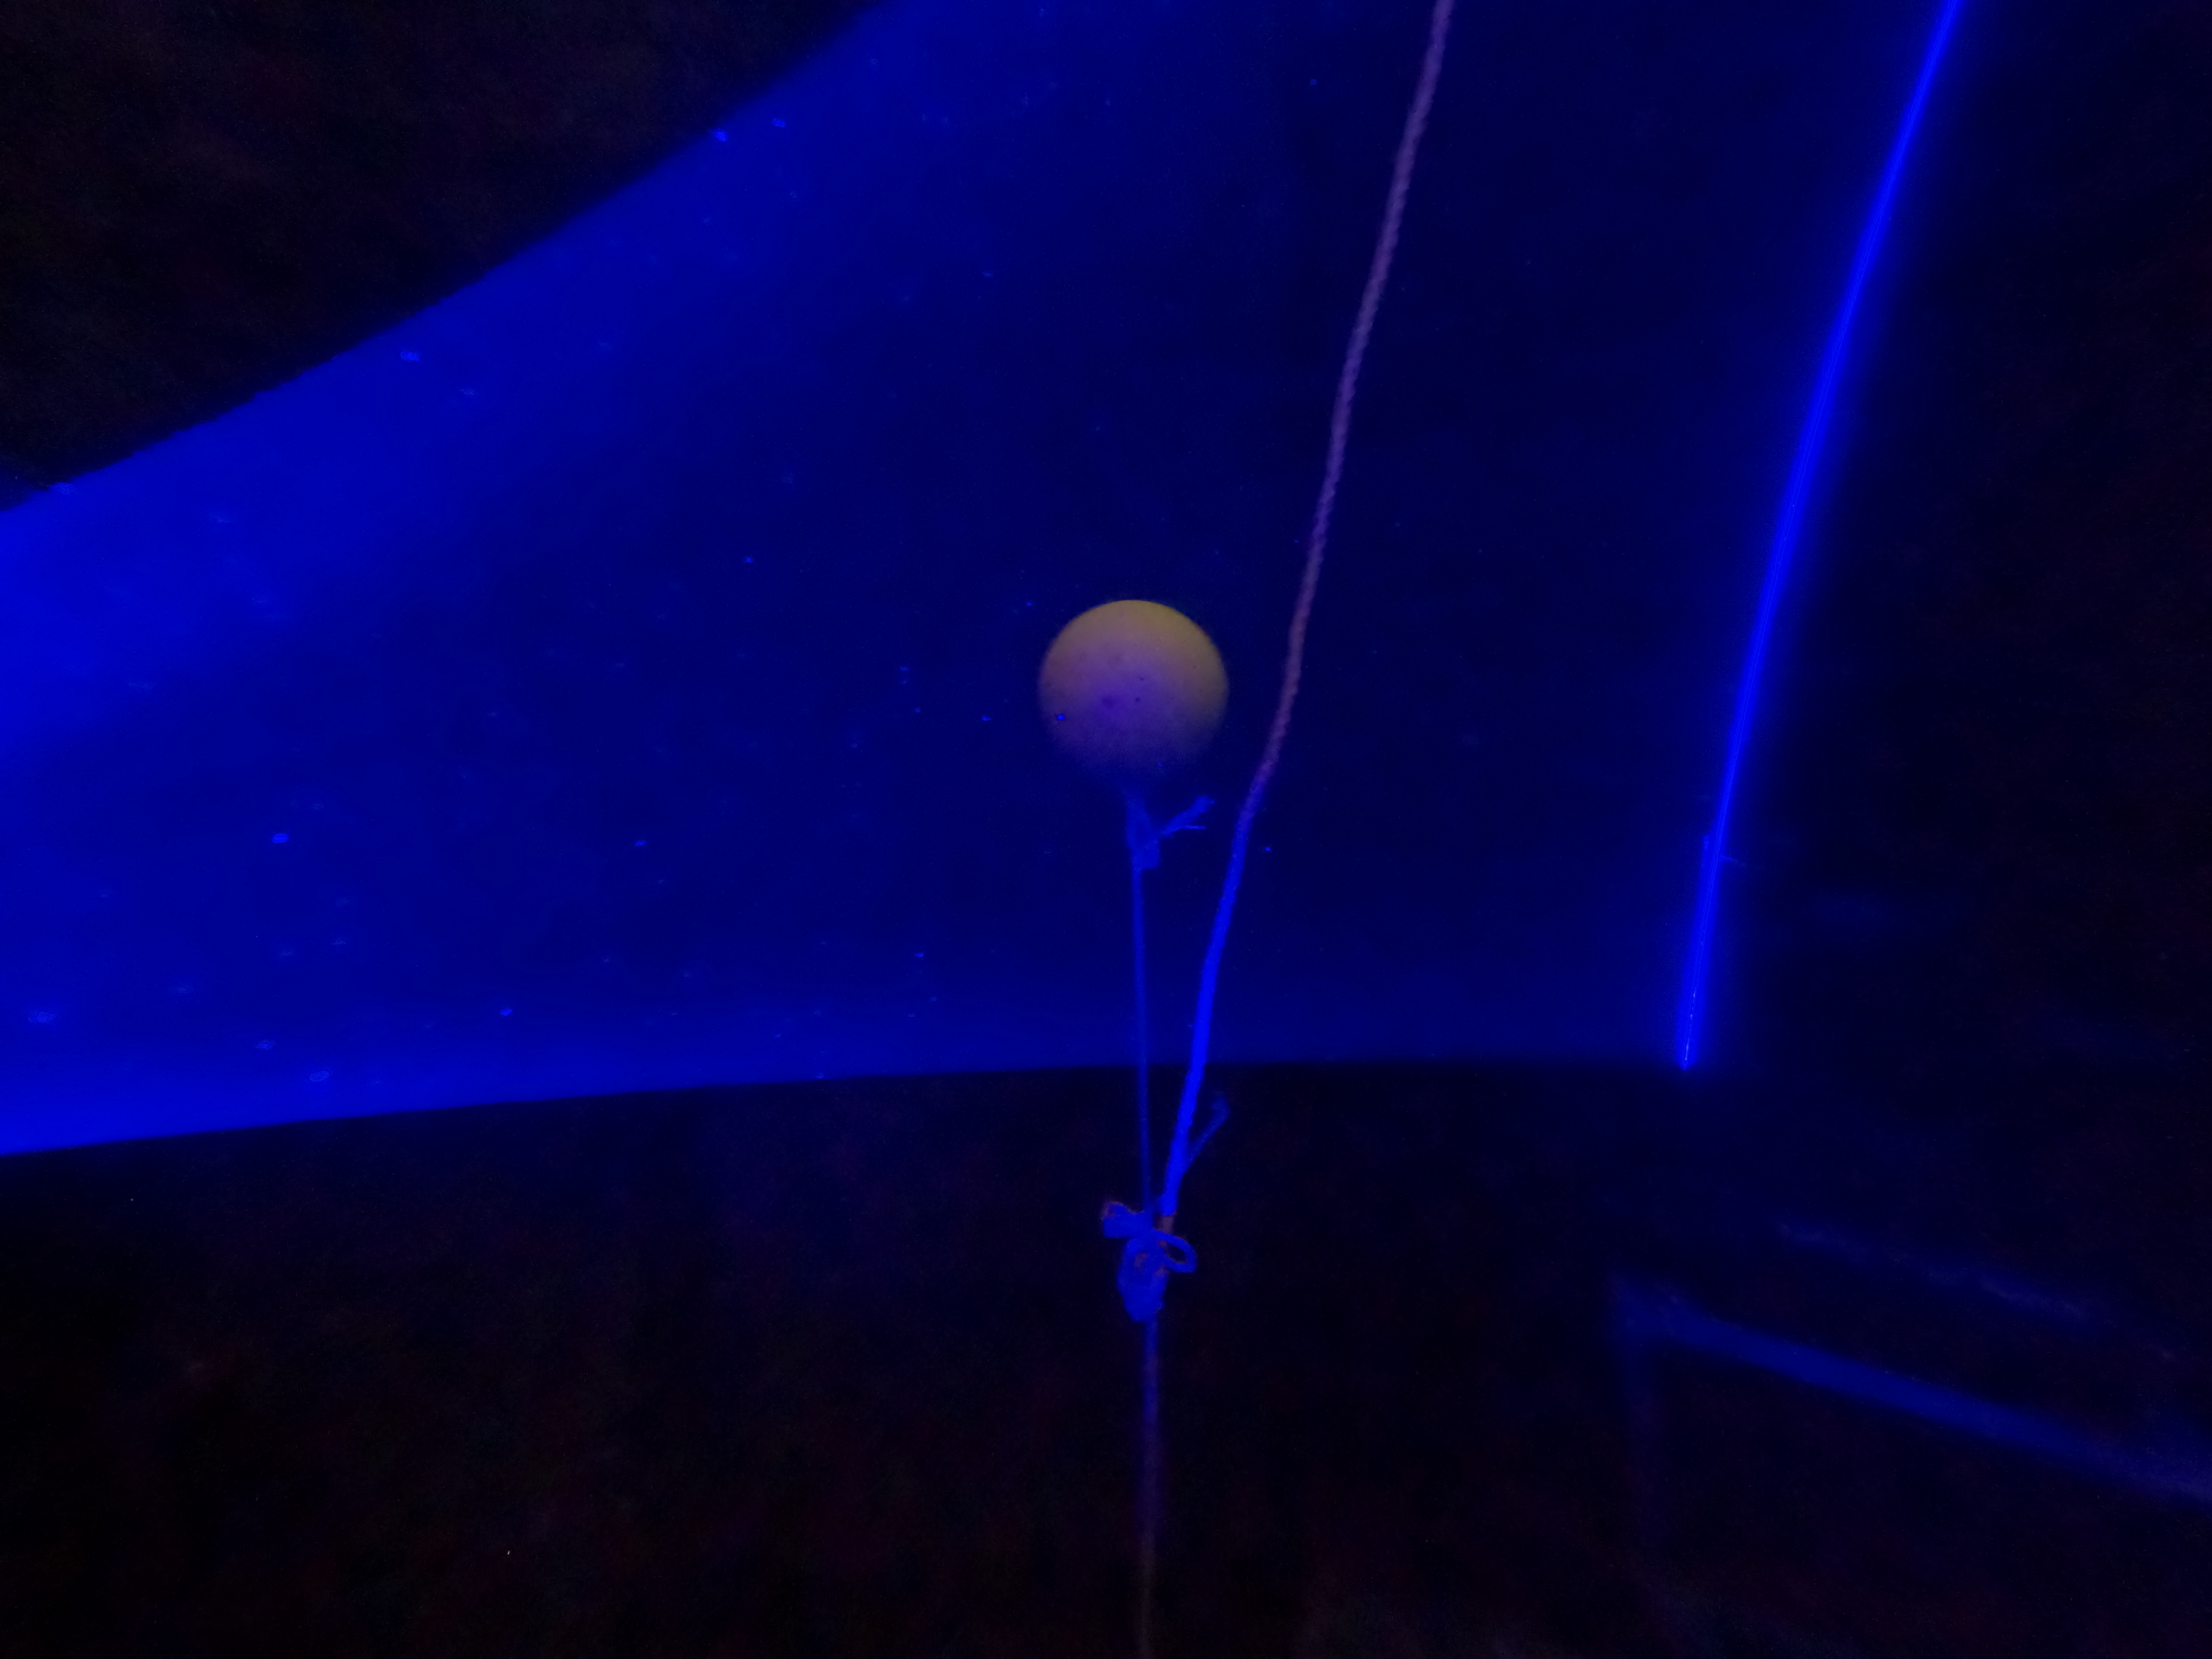

Supplement: Supplementary file 121 [file G0034551.pdf › 9/G0034551.pdf]

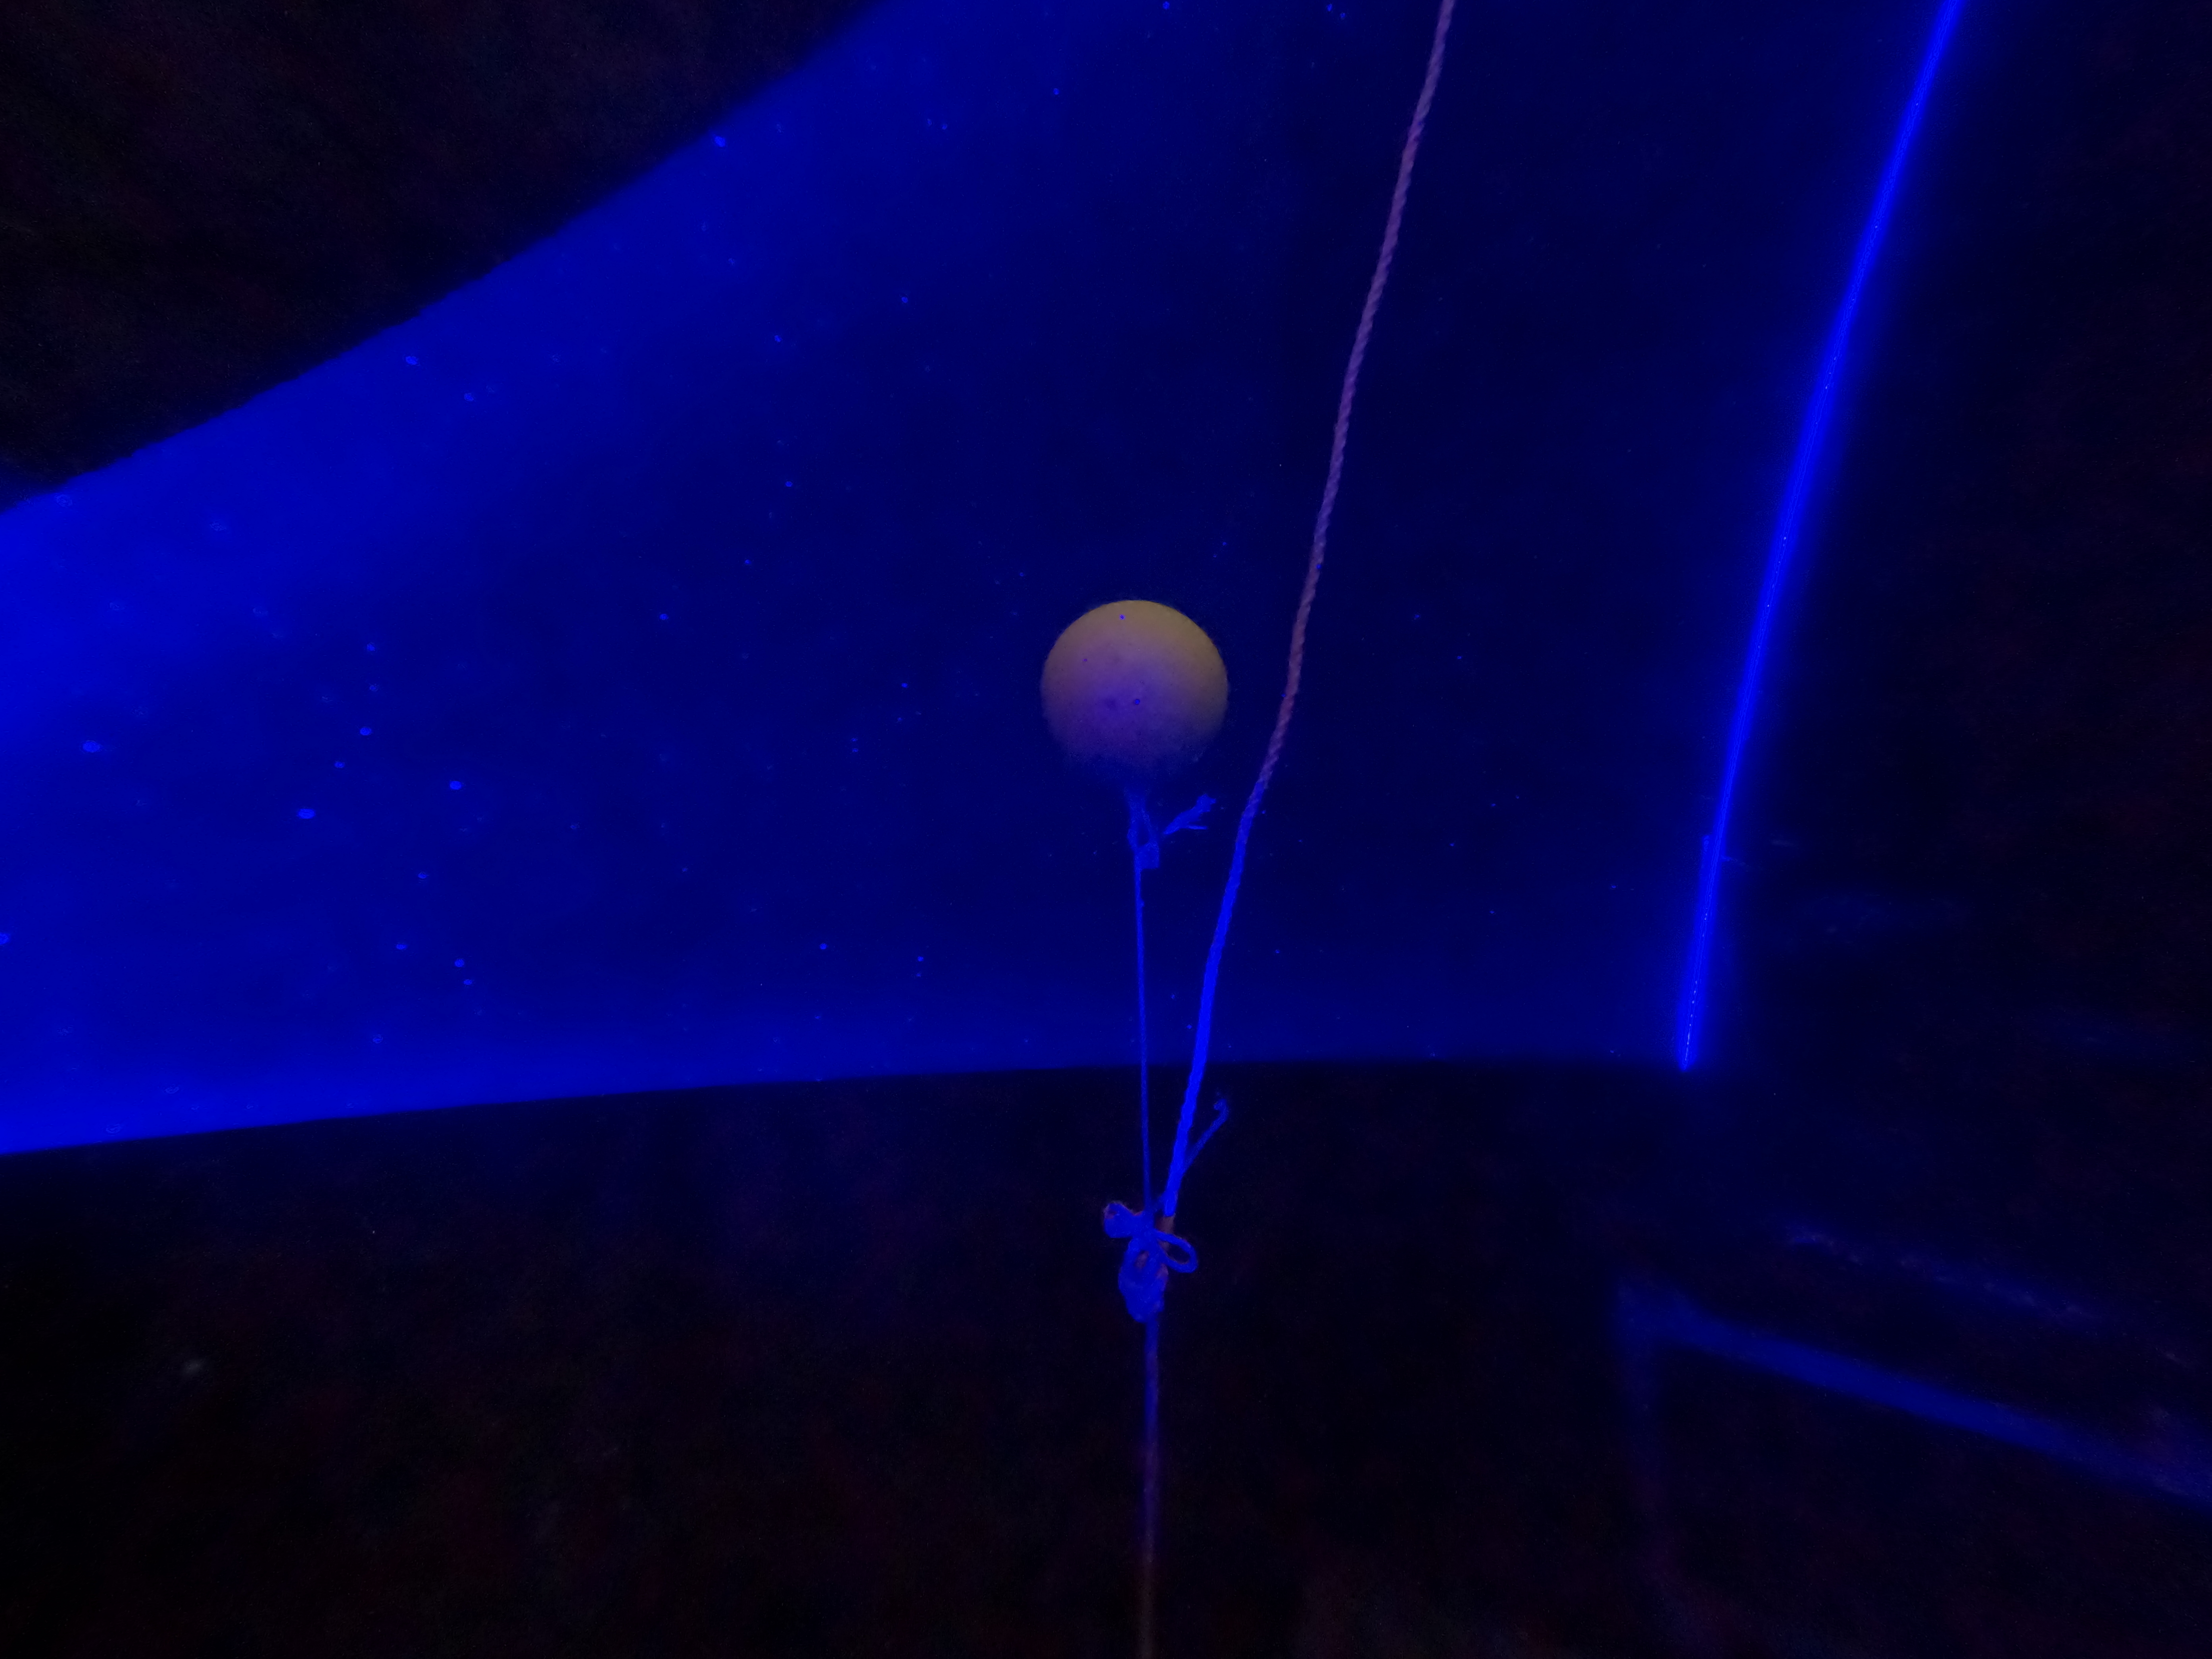

Supplement: Supplementary file 122 [file G0034552.pdf › 9/G0034552.pdf]

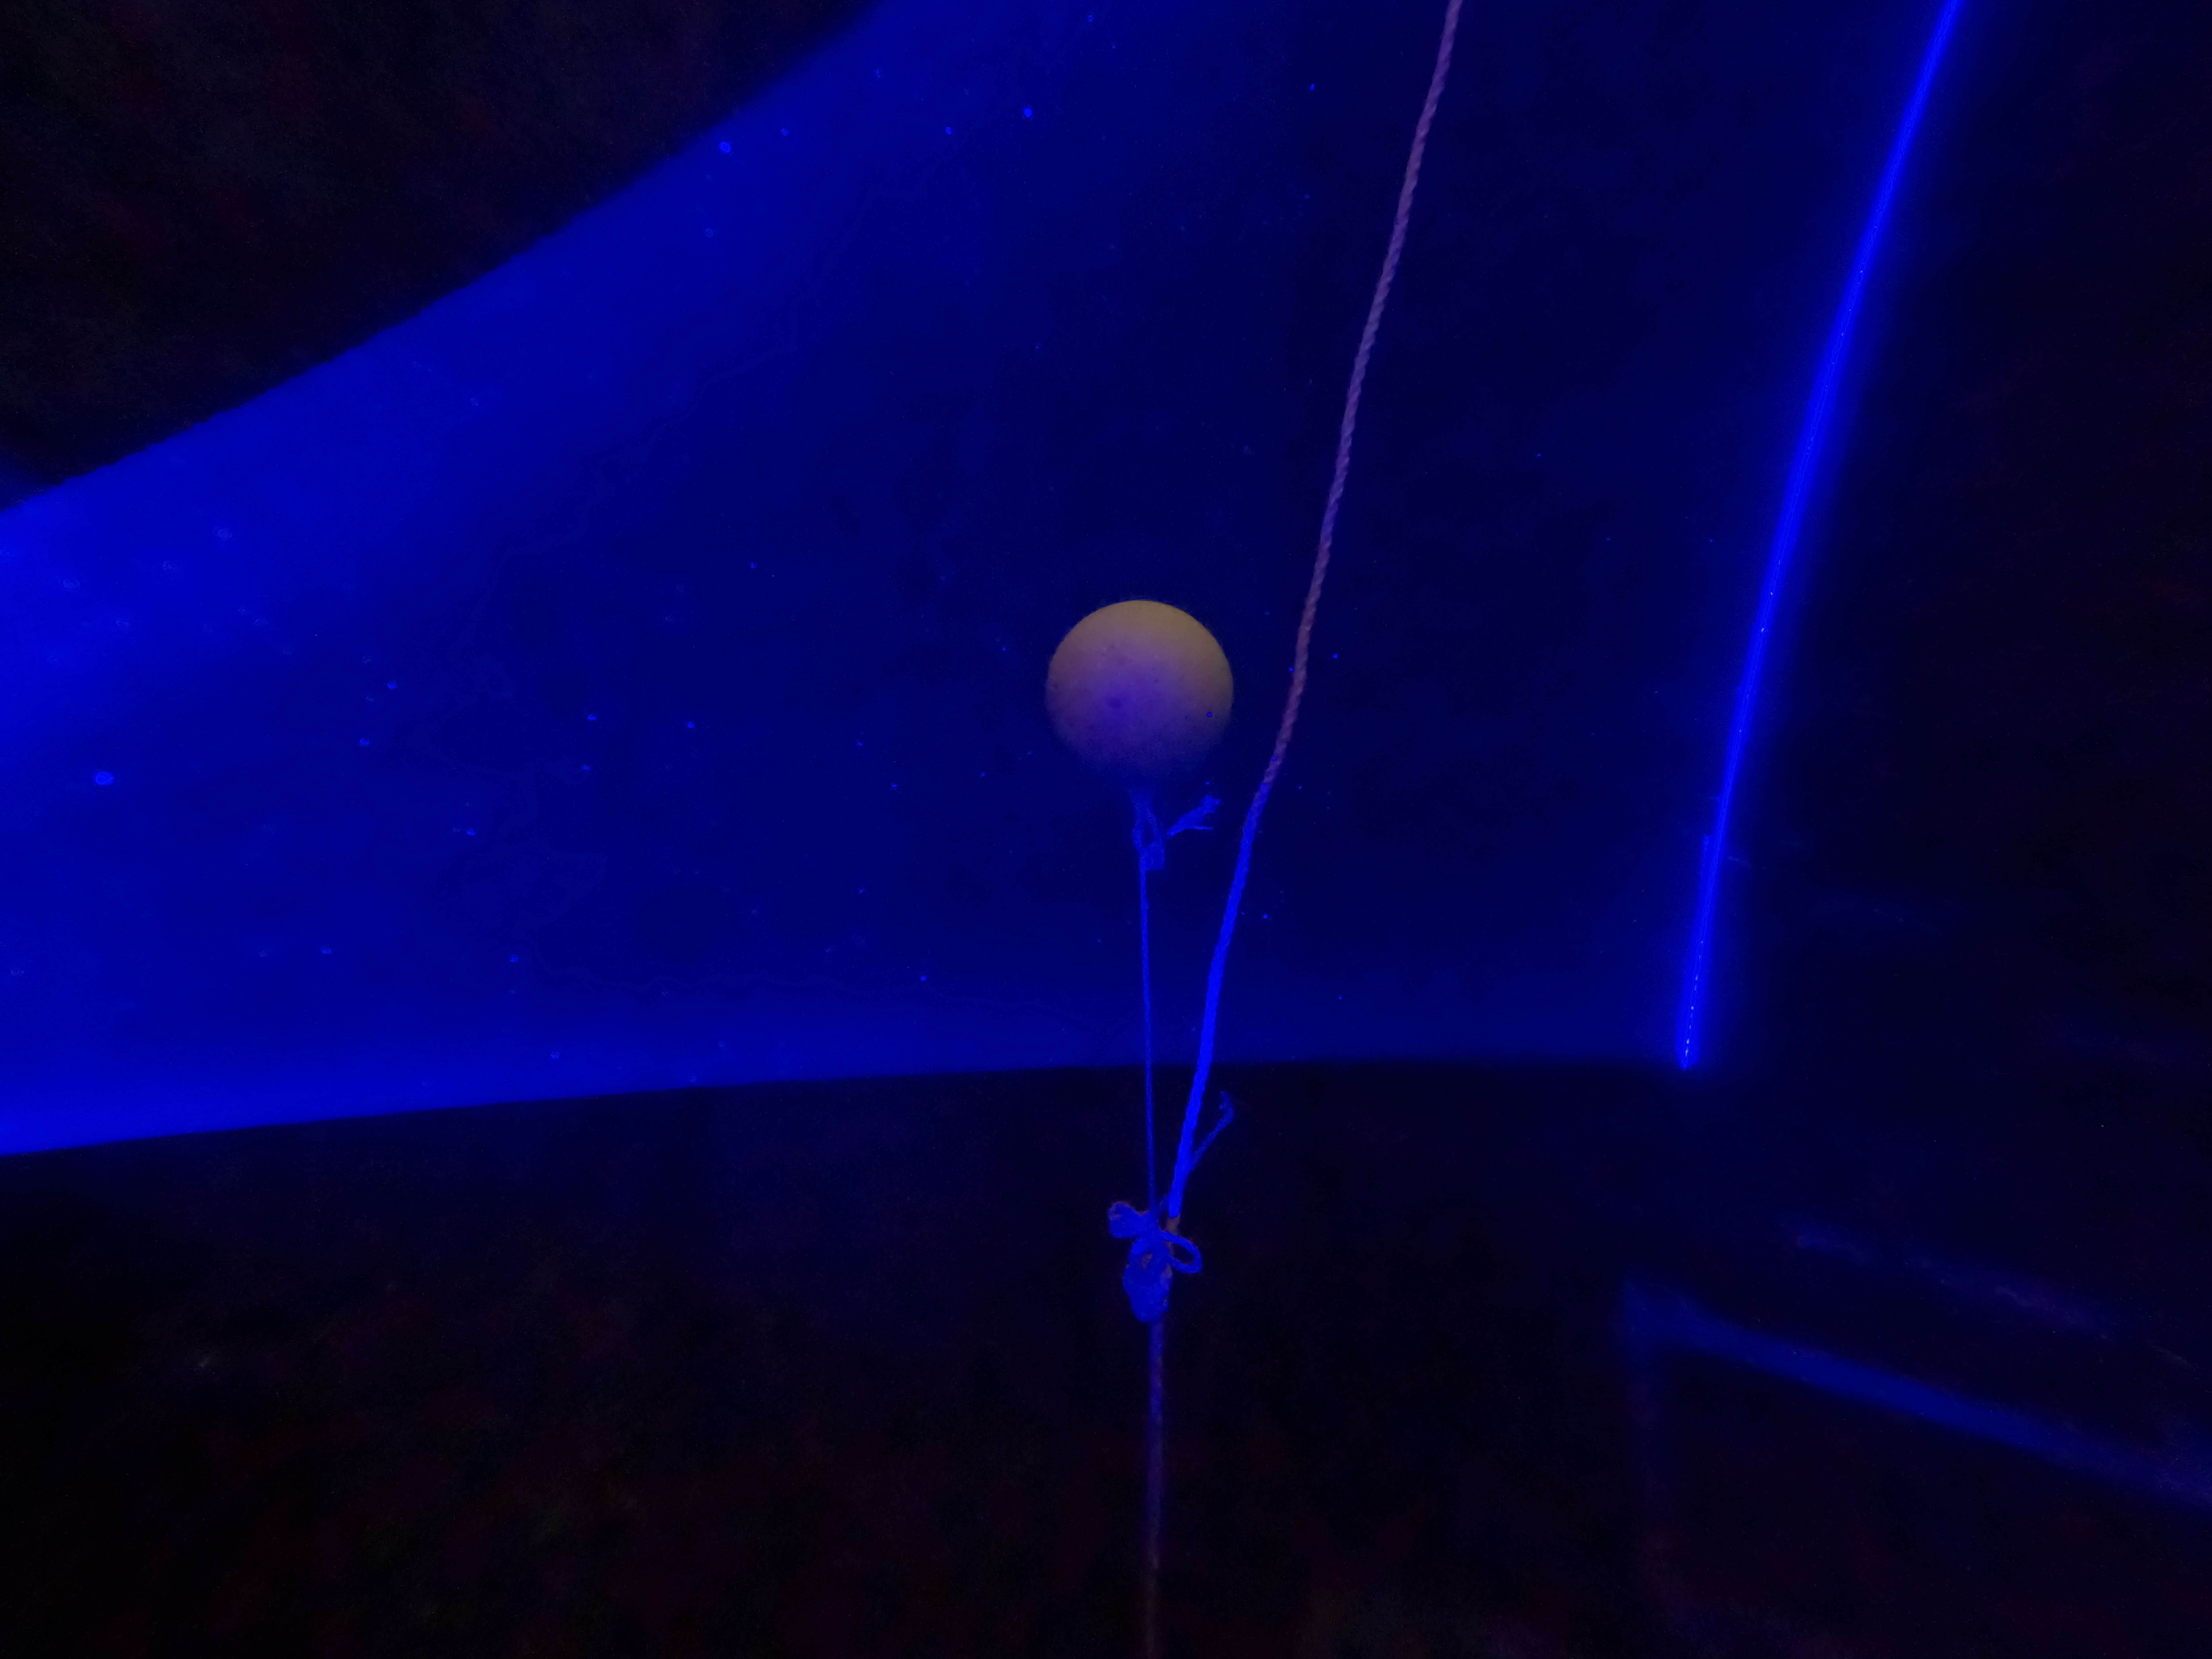

Supplement: Supplementary file 123 [file G0034553.pdf › 9/G0034553.pdf]

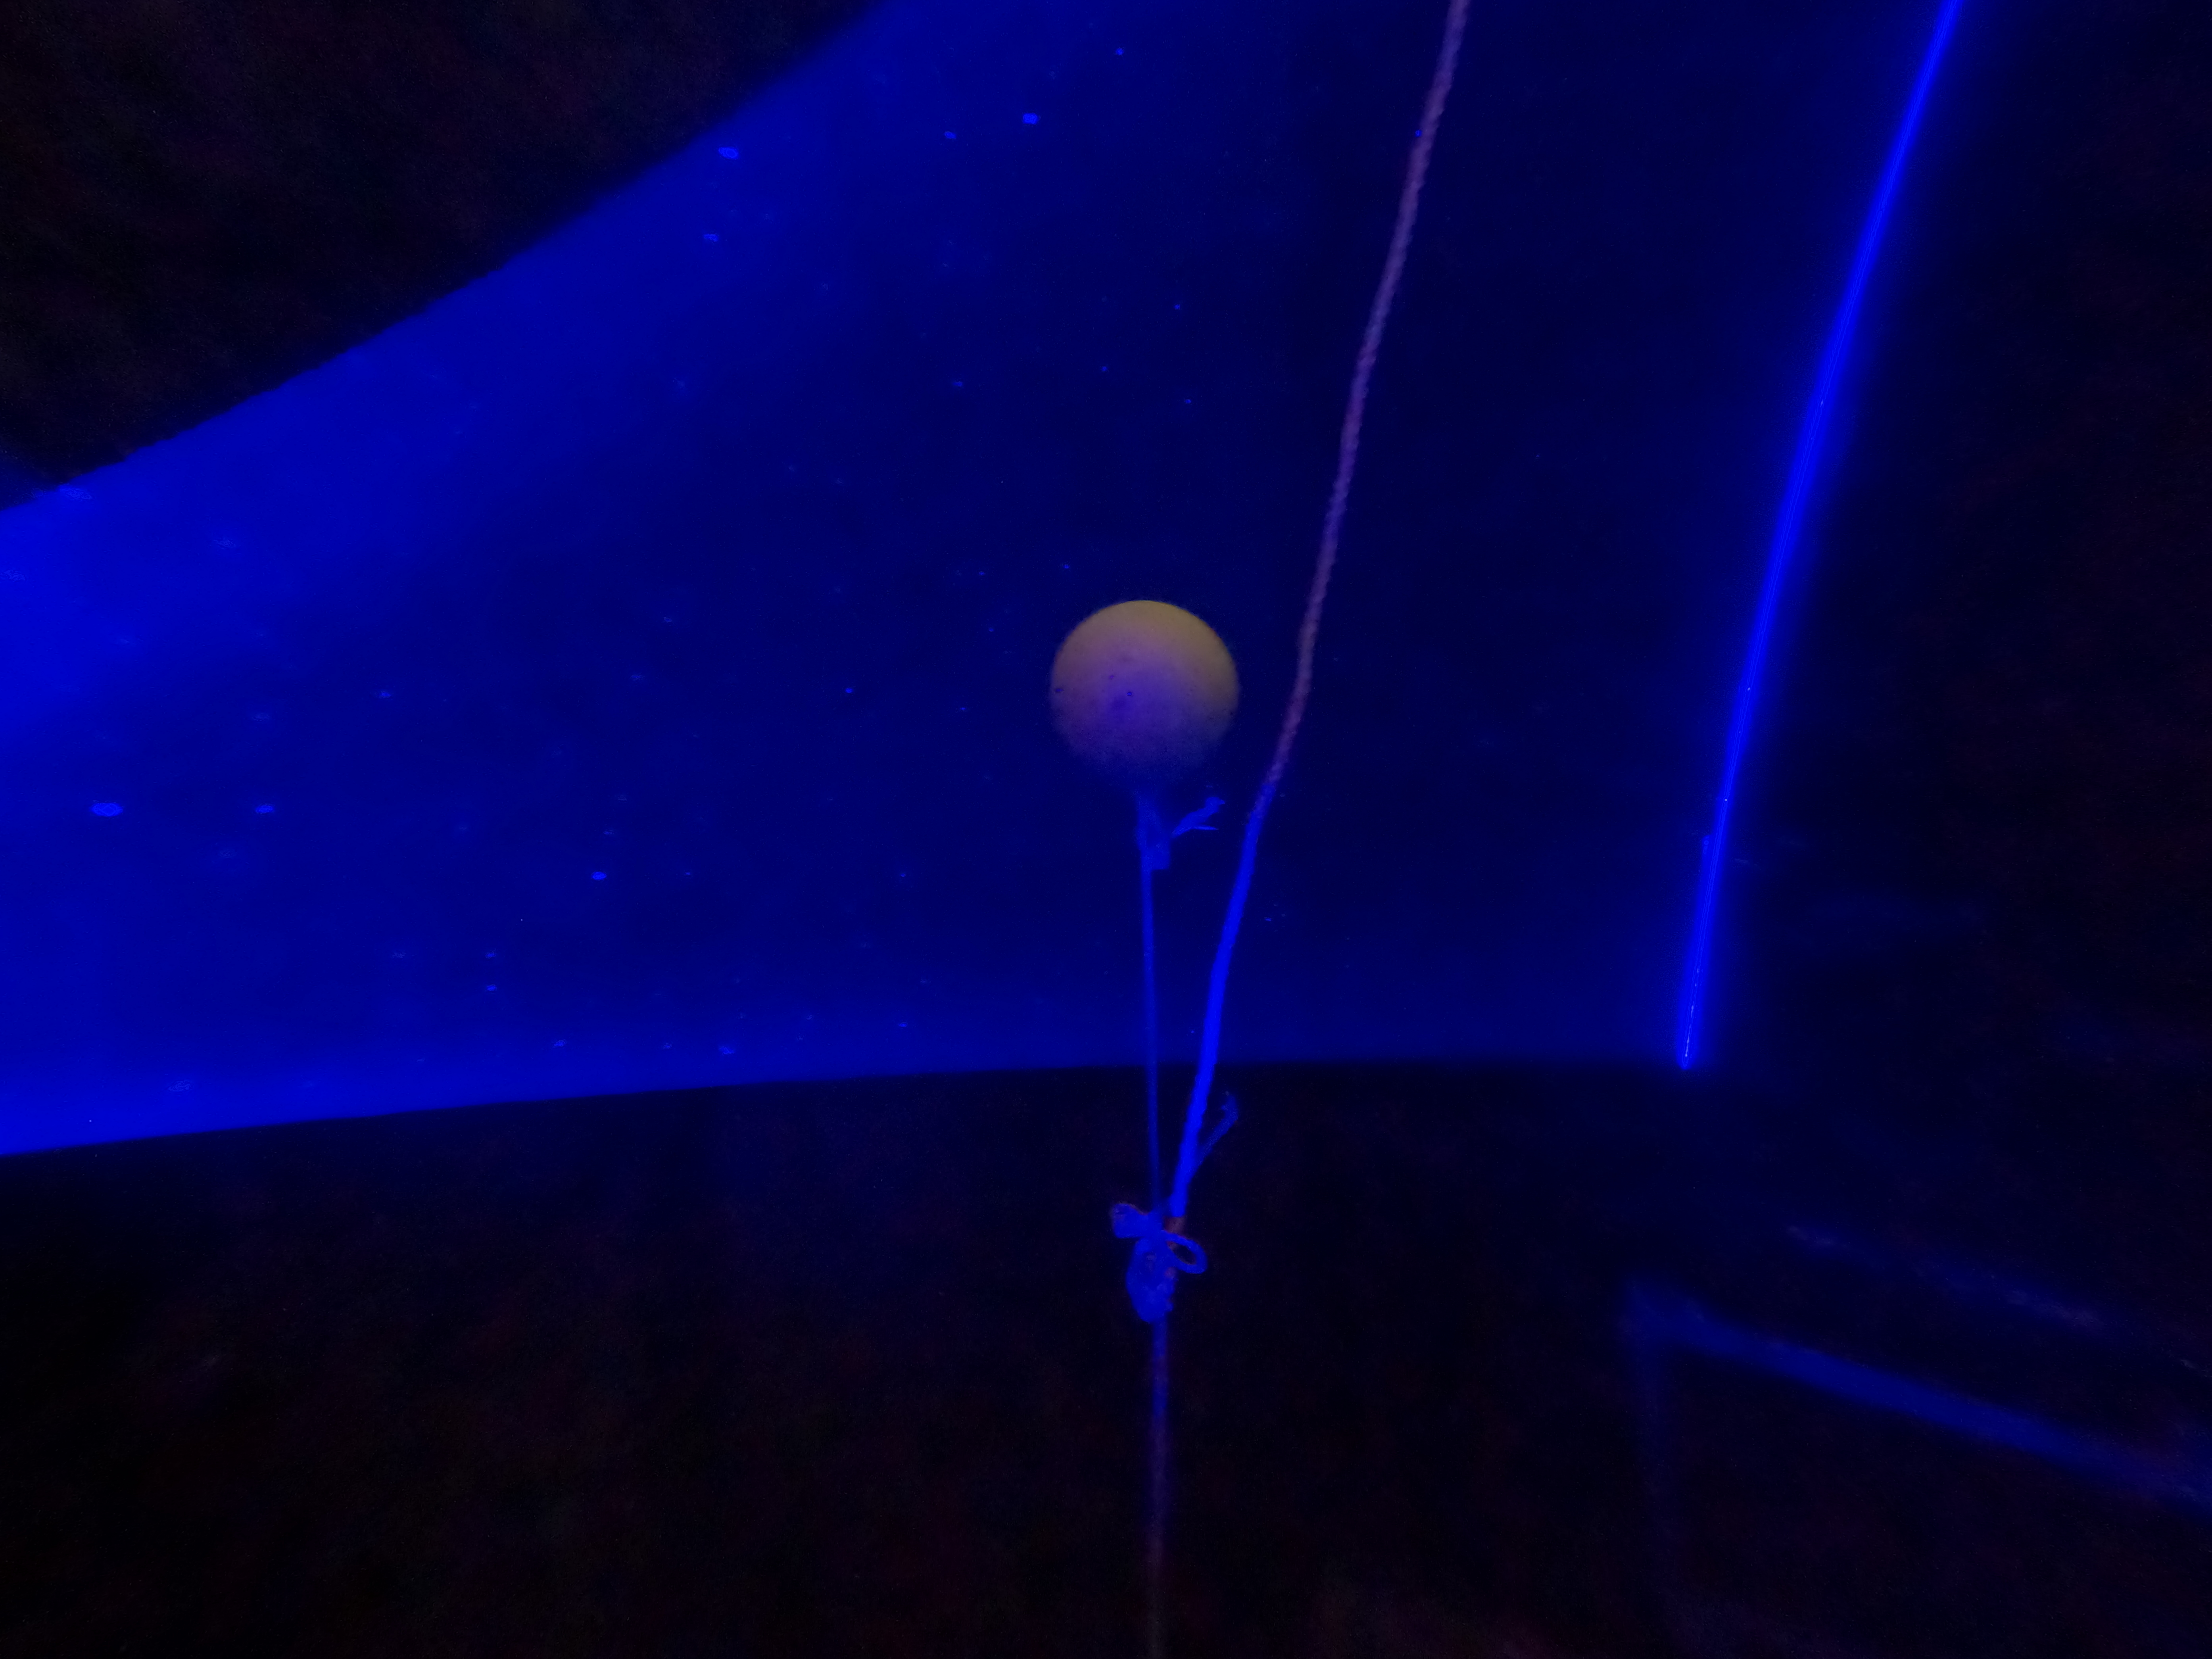

Supplement: Supplementary file 124 [file G0034554.pdf › 9/G0034554.pdf]

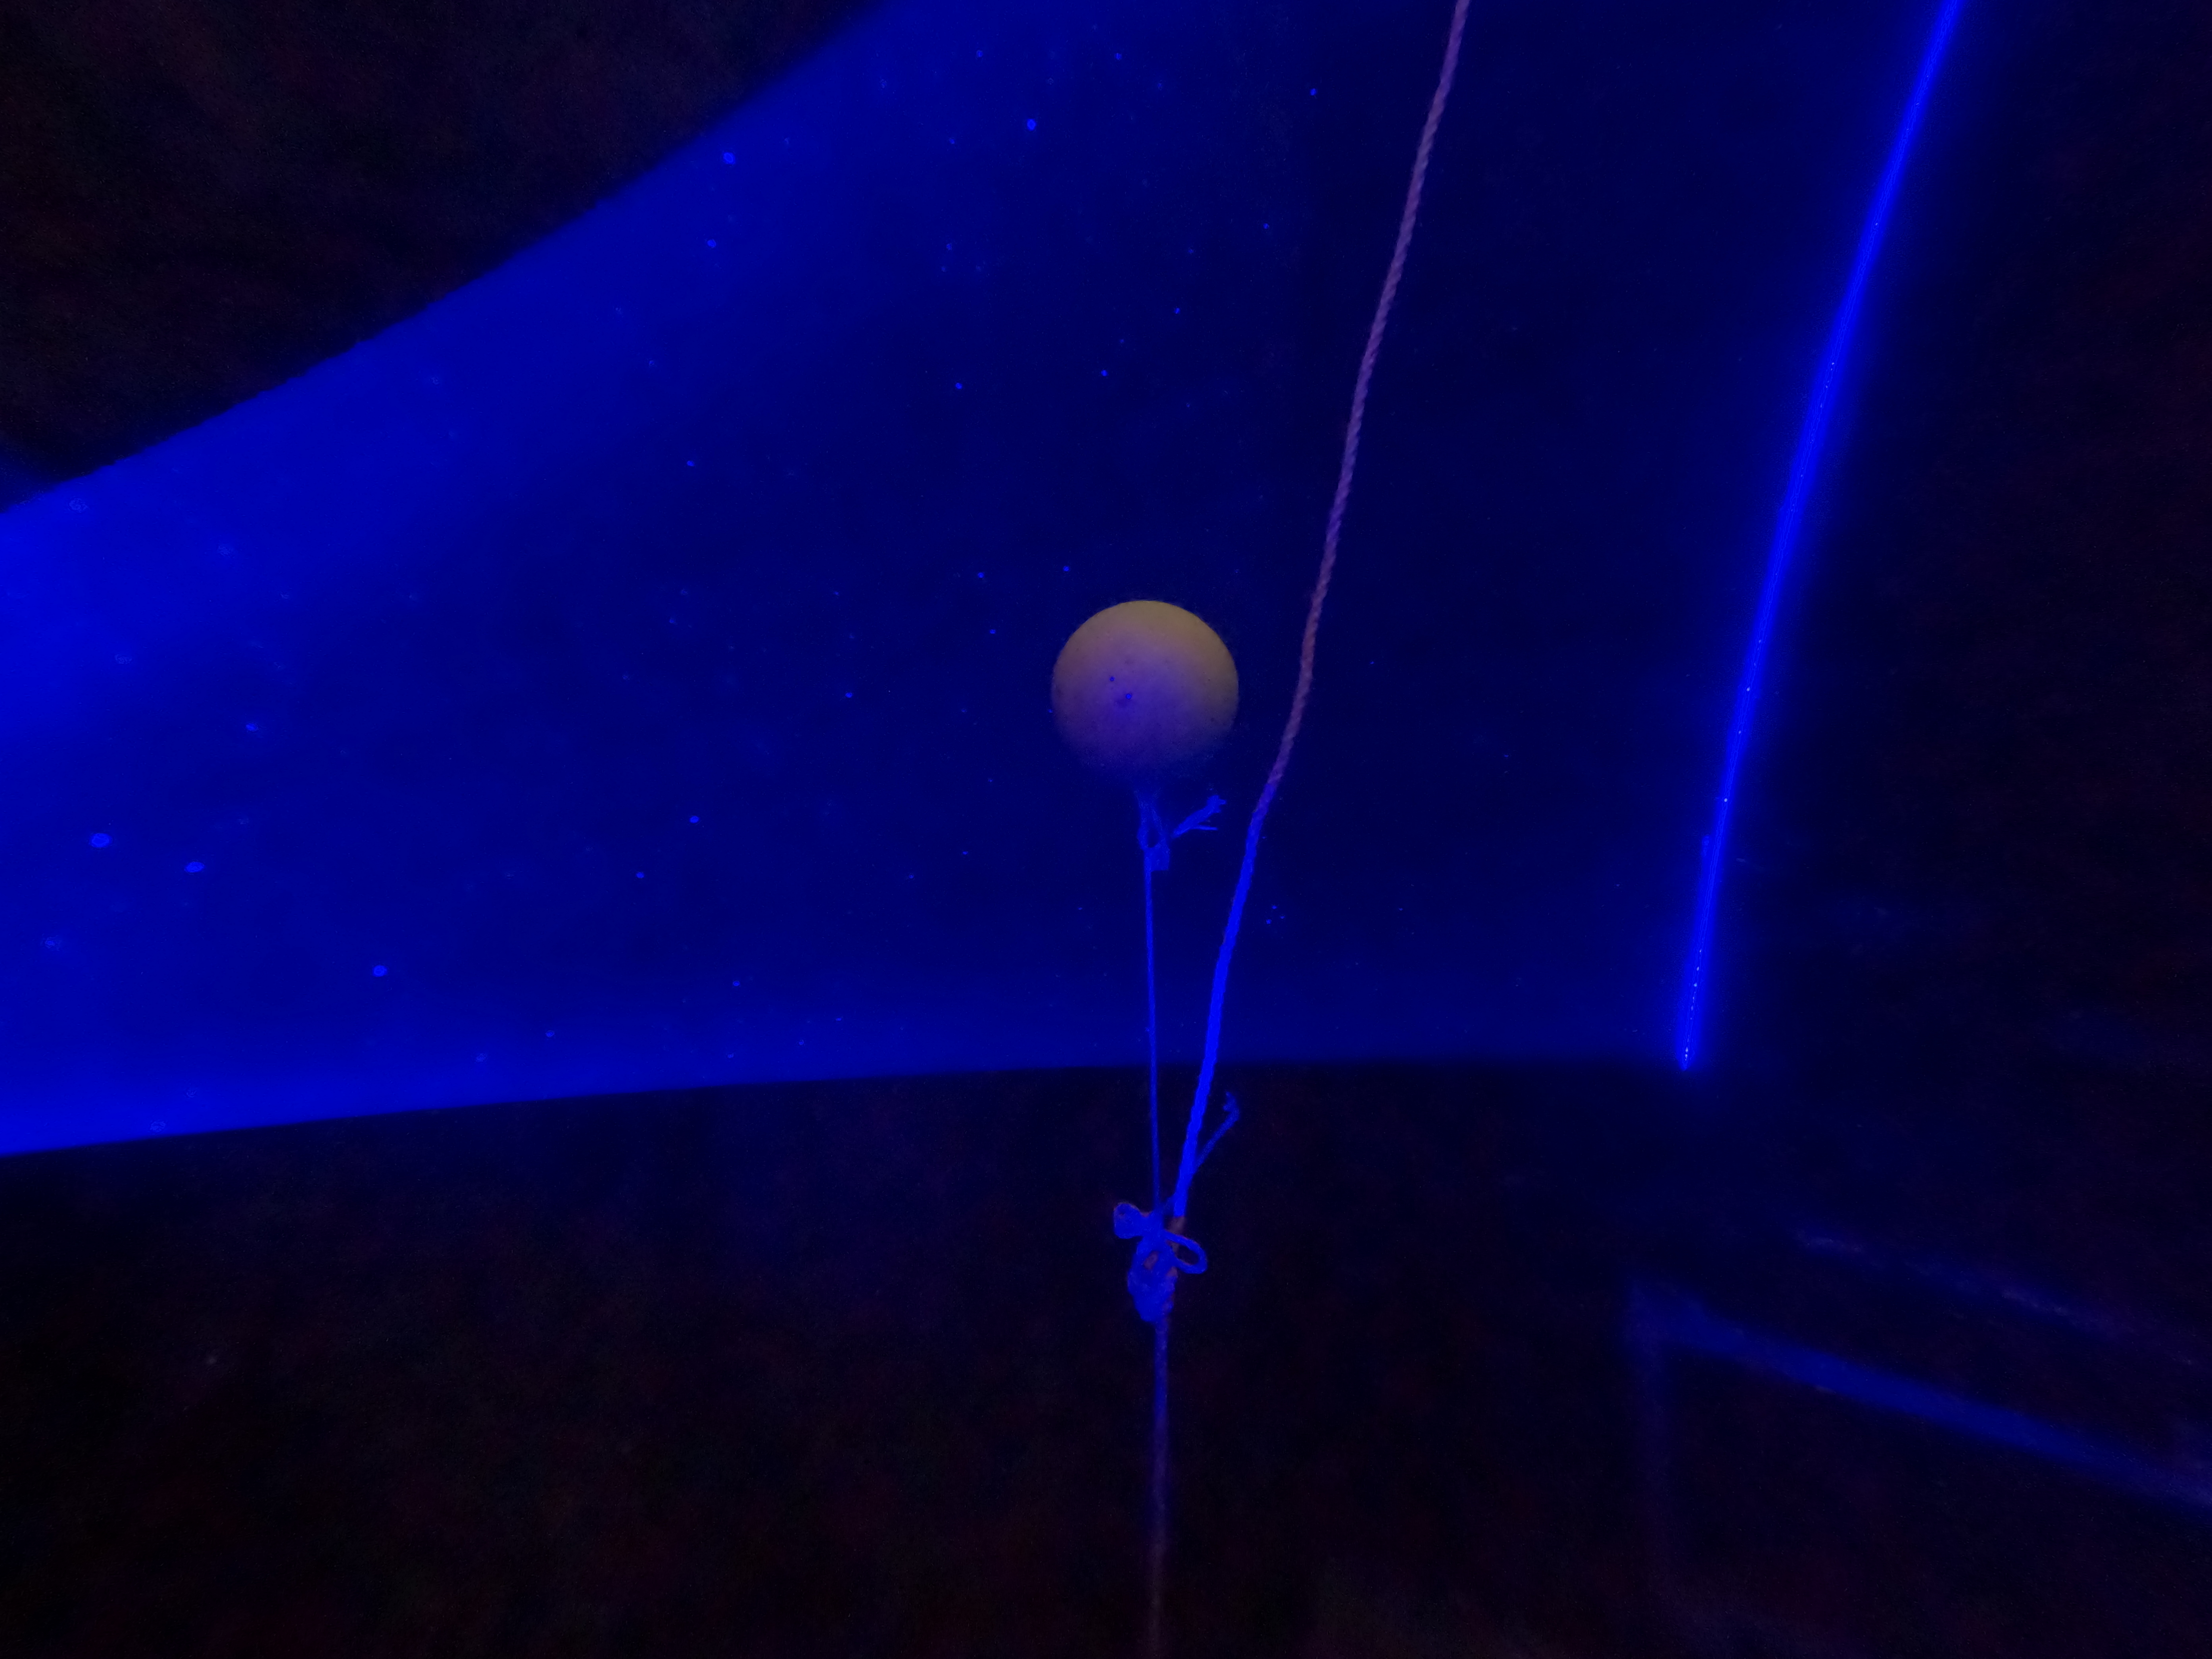

Supplement: Supplementary file 125 [file G0034555.pdf › 9/G0034555.pdf]

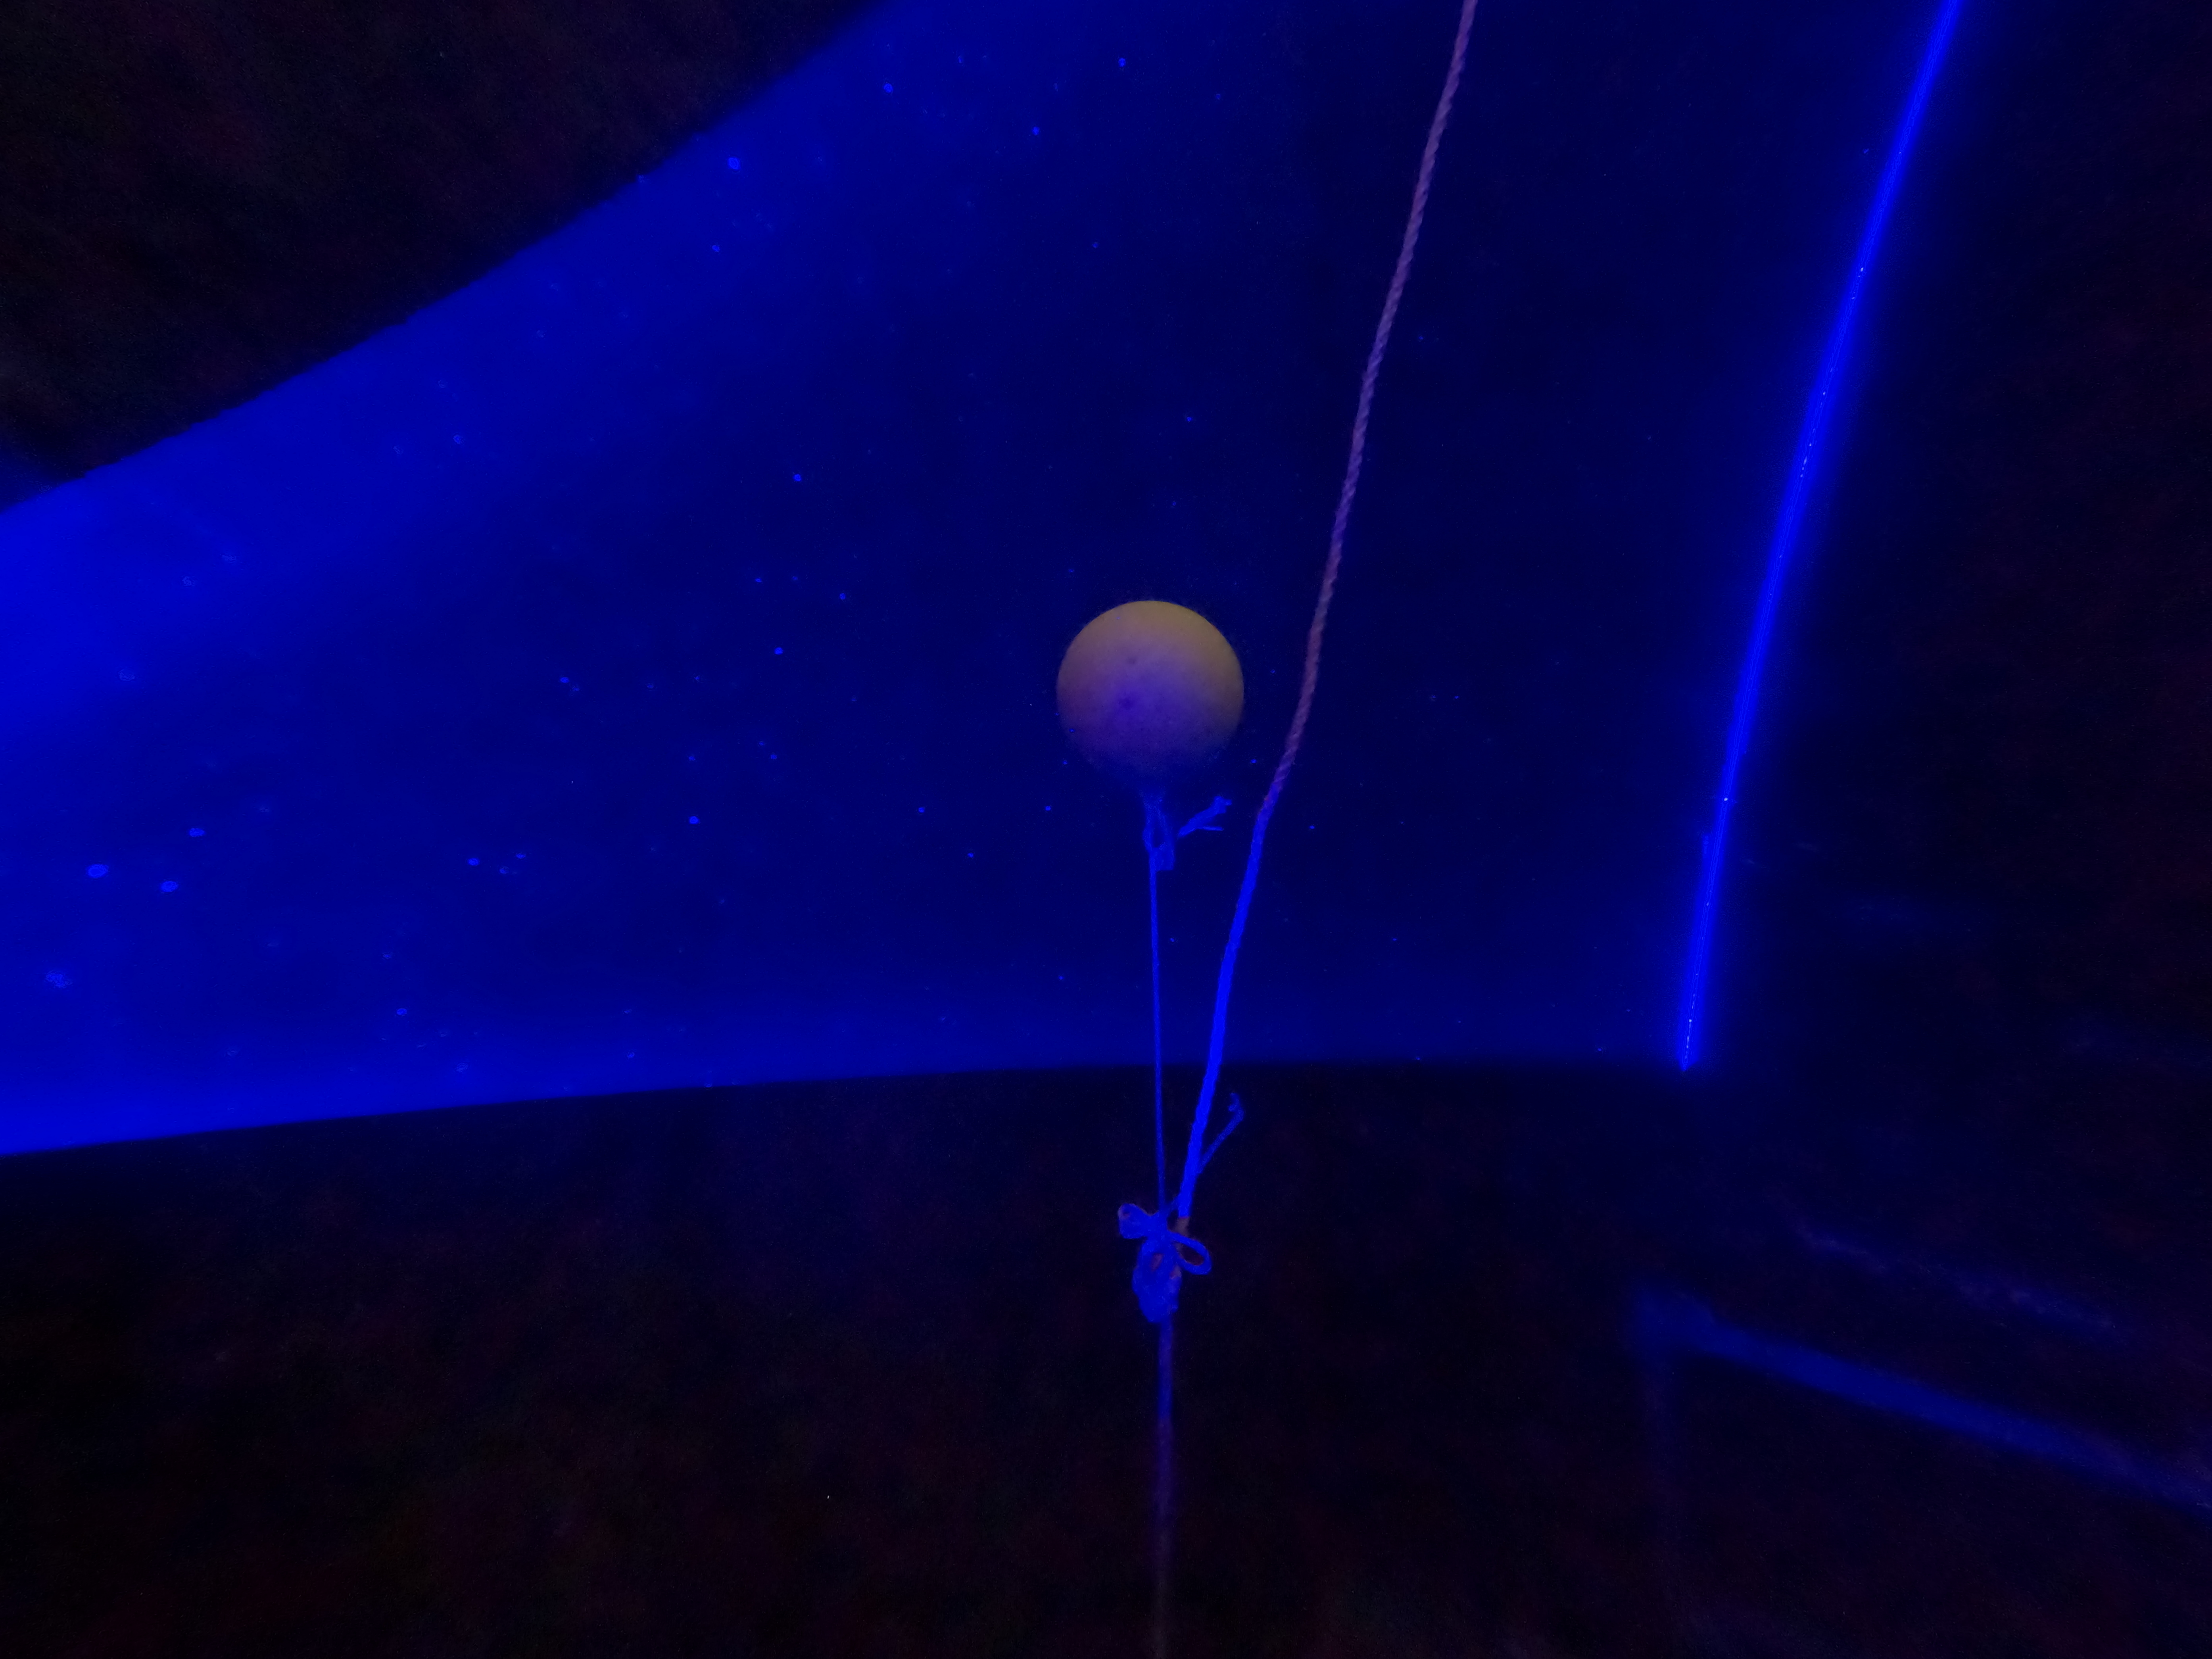

Supplement: Supplementary file 126 [file G0034556.pdf › 9/G0034556.pdf]

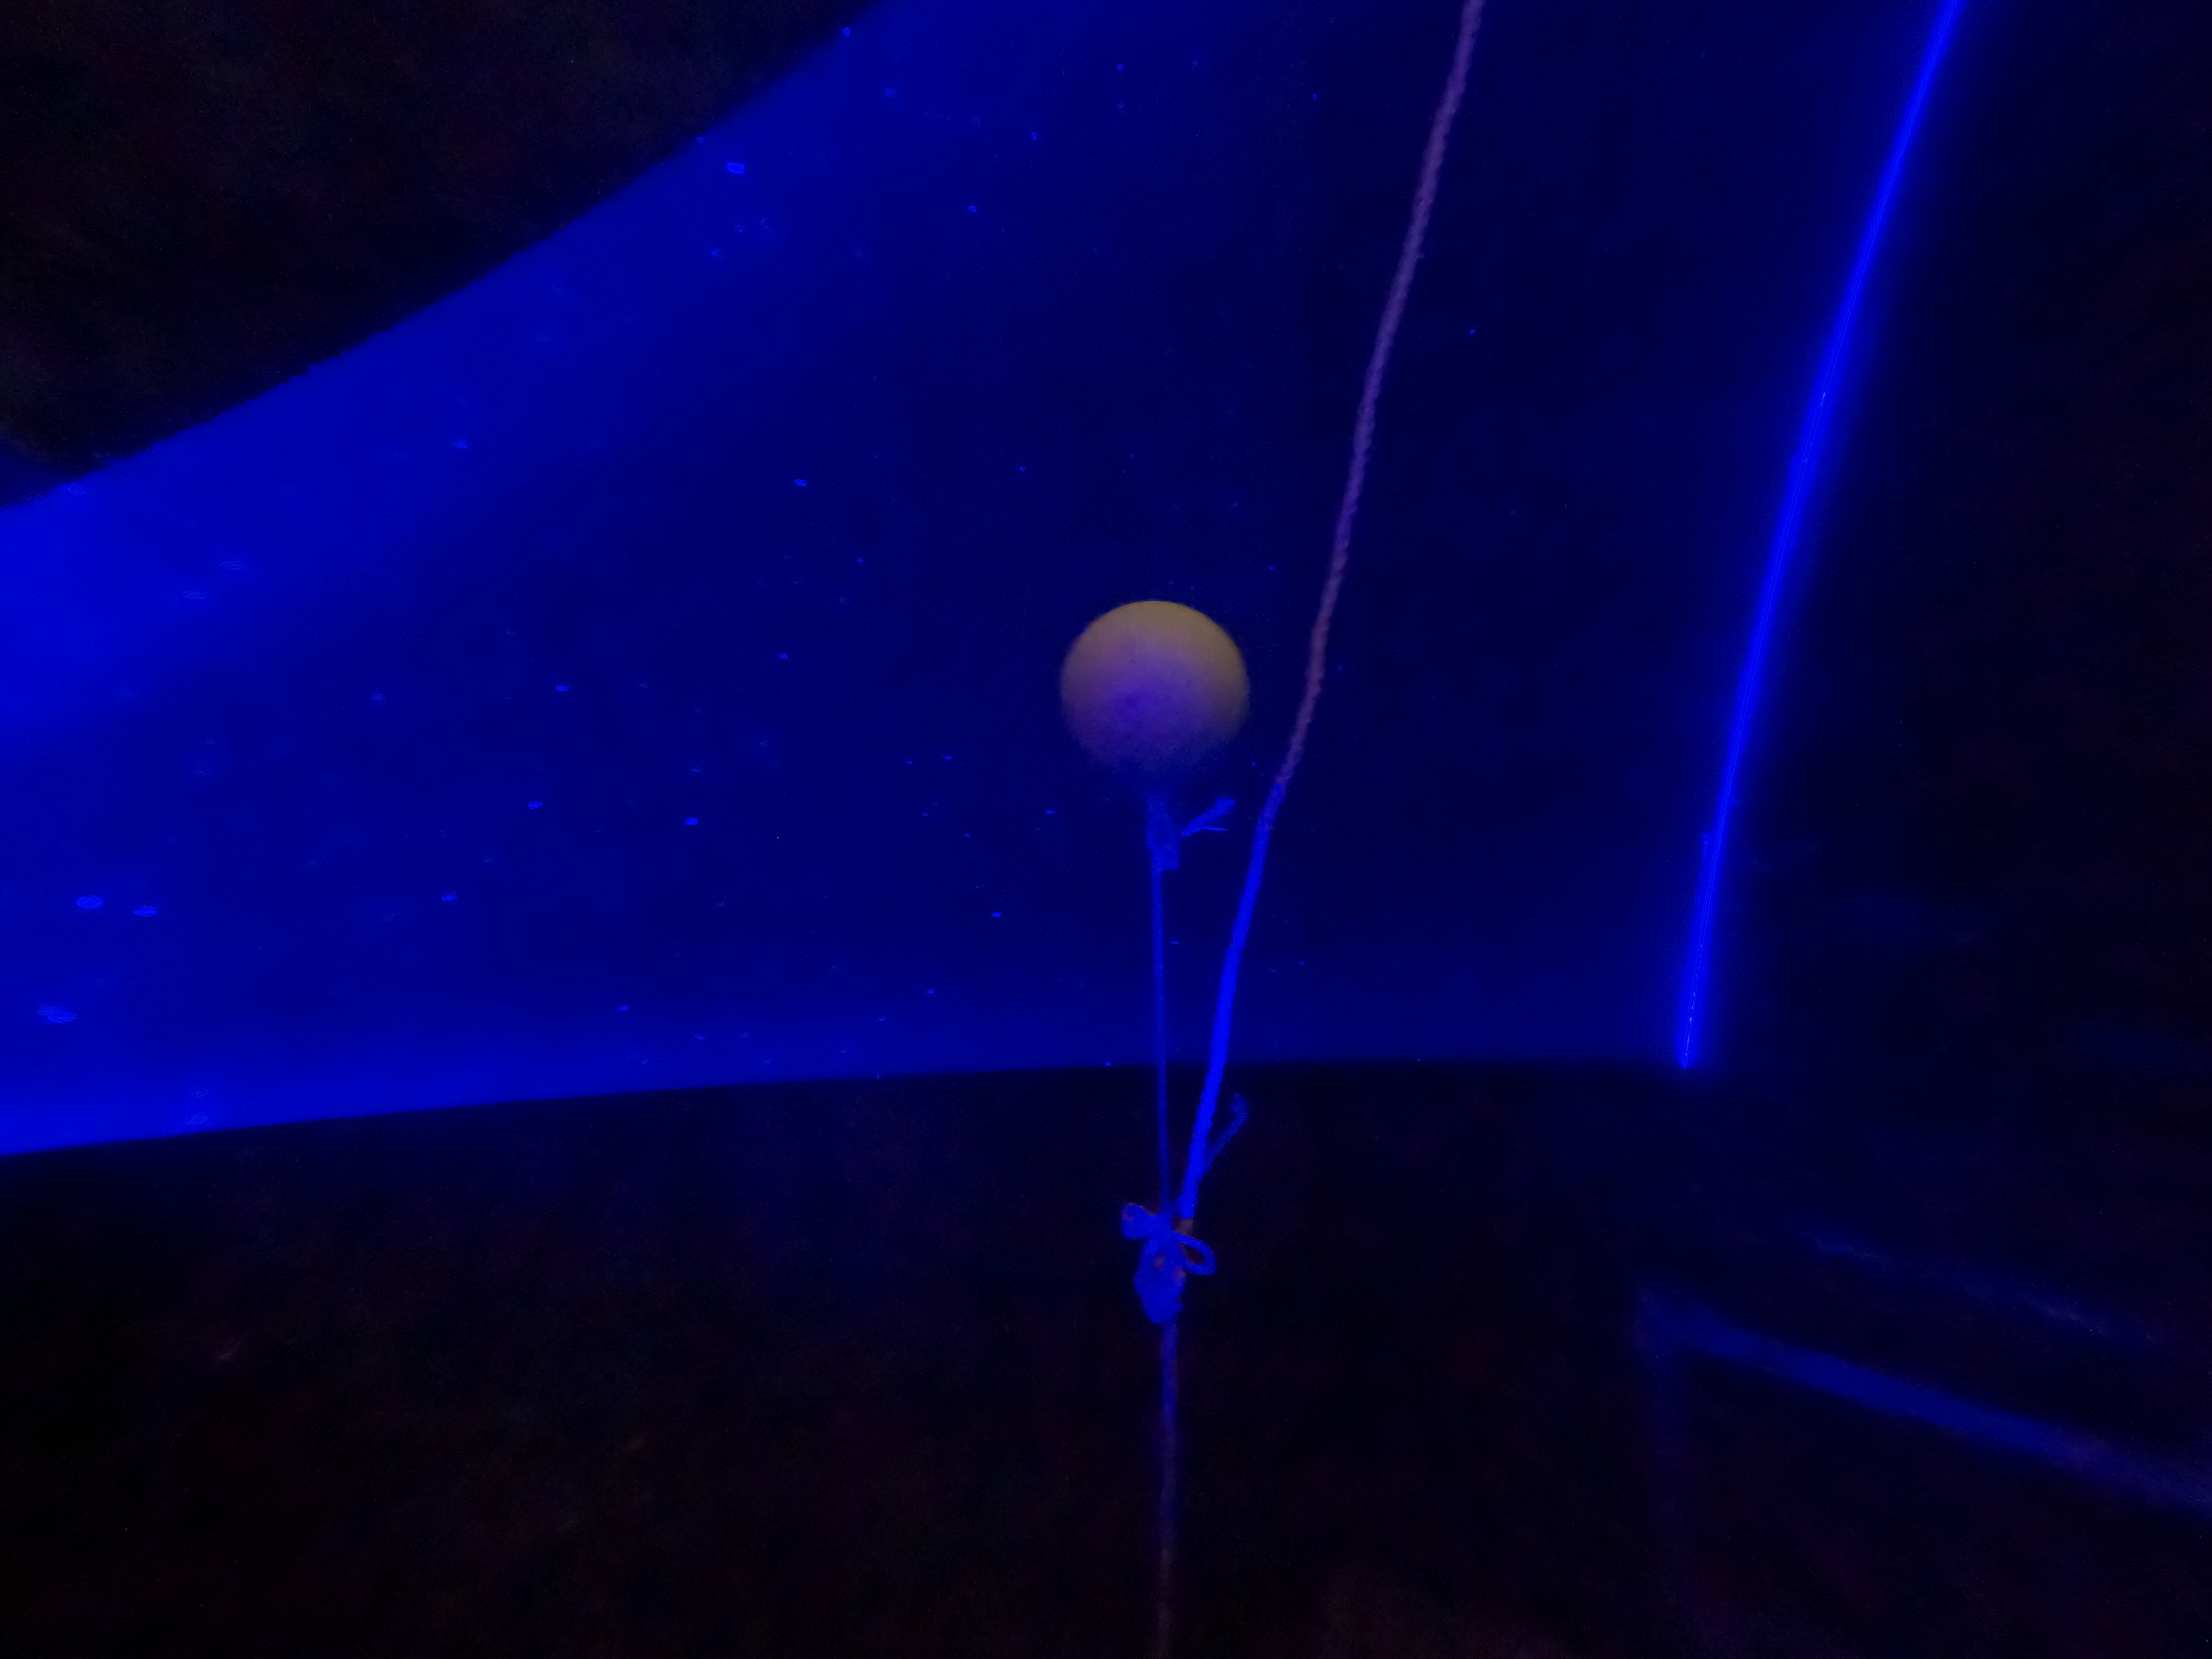

Supplement: Supplementary file 127 [file G0034557.pdf › 9/G0034557.pdf]

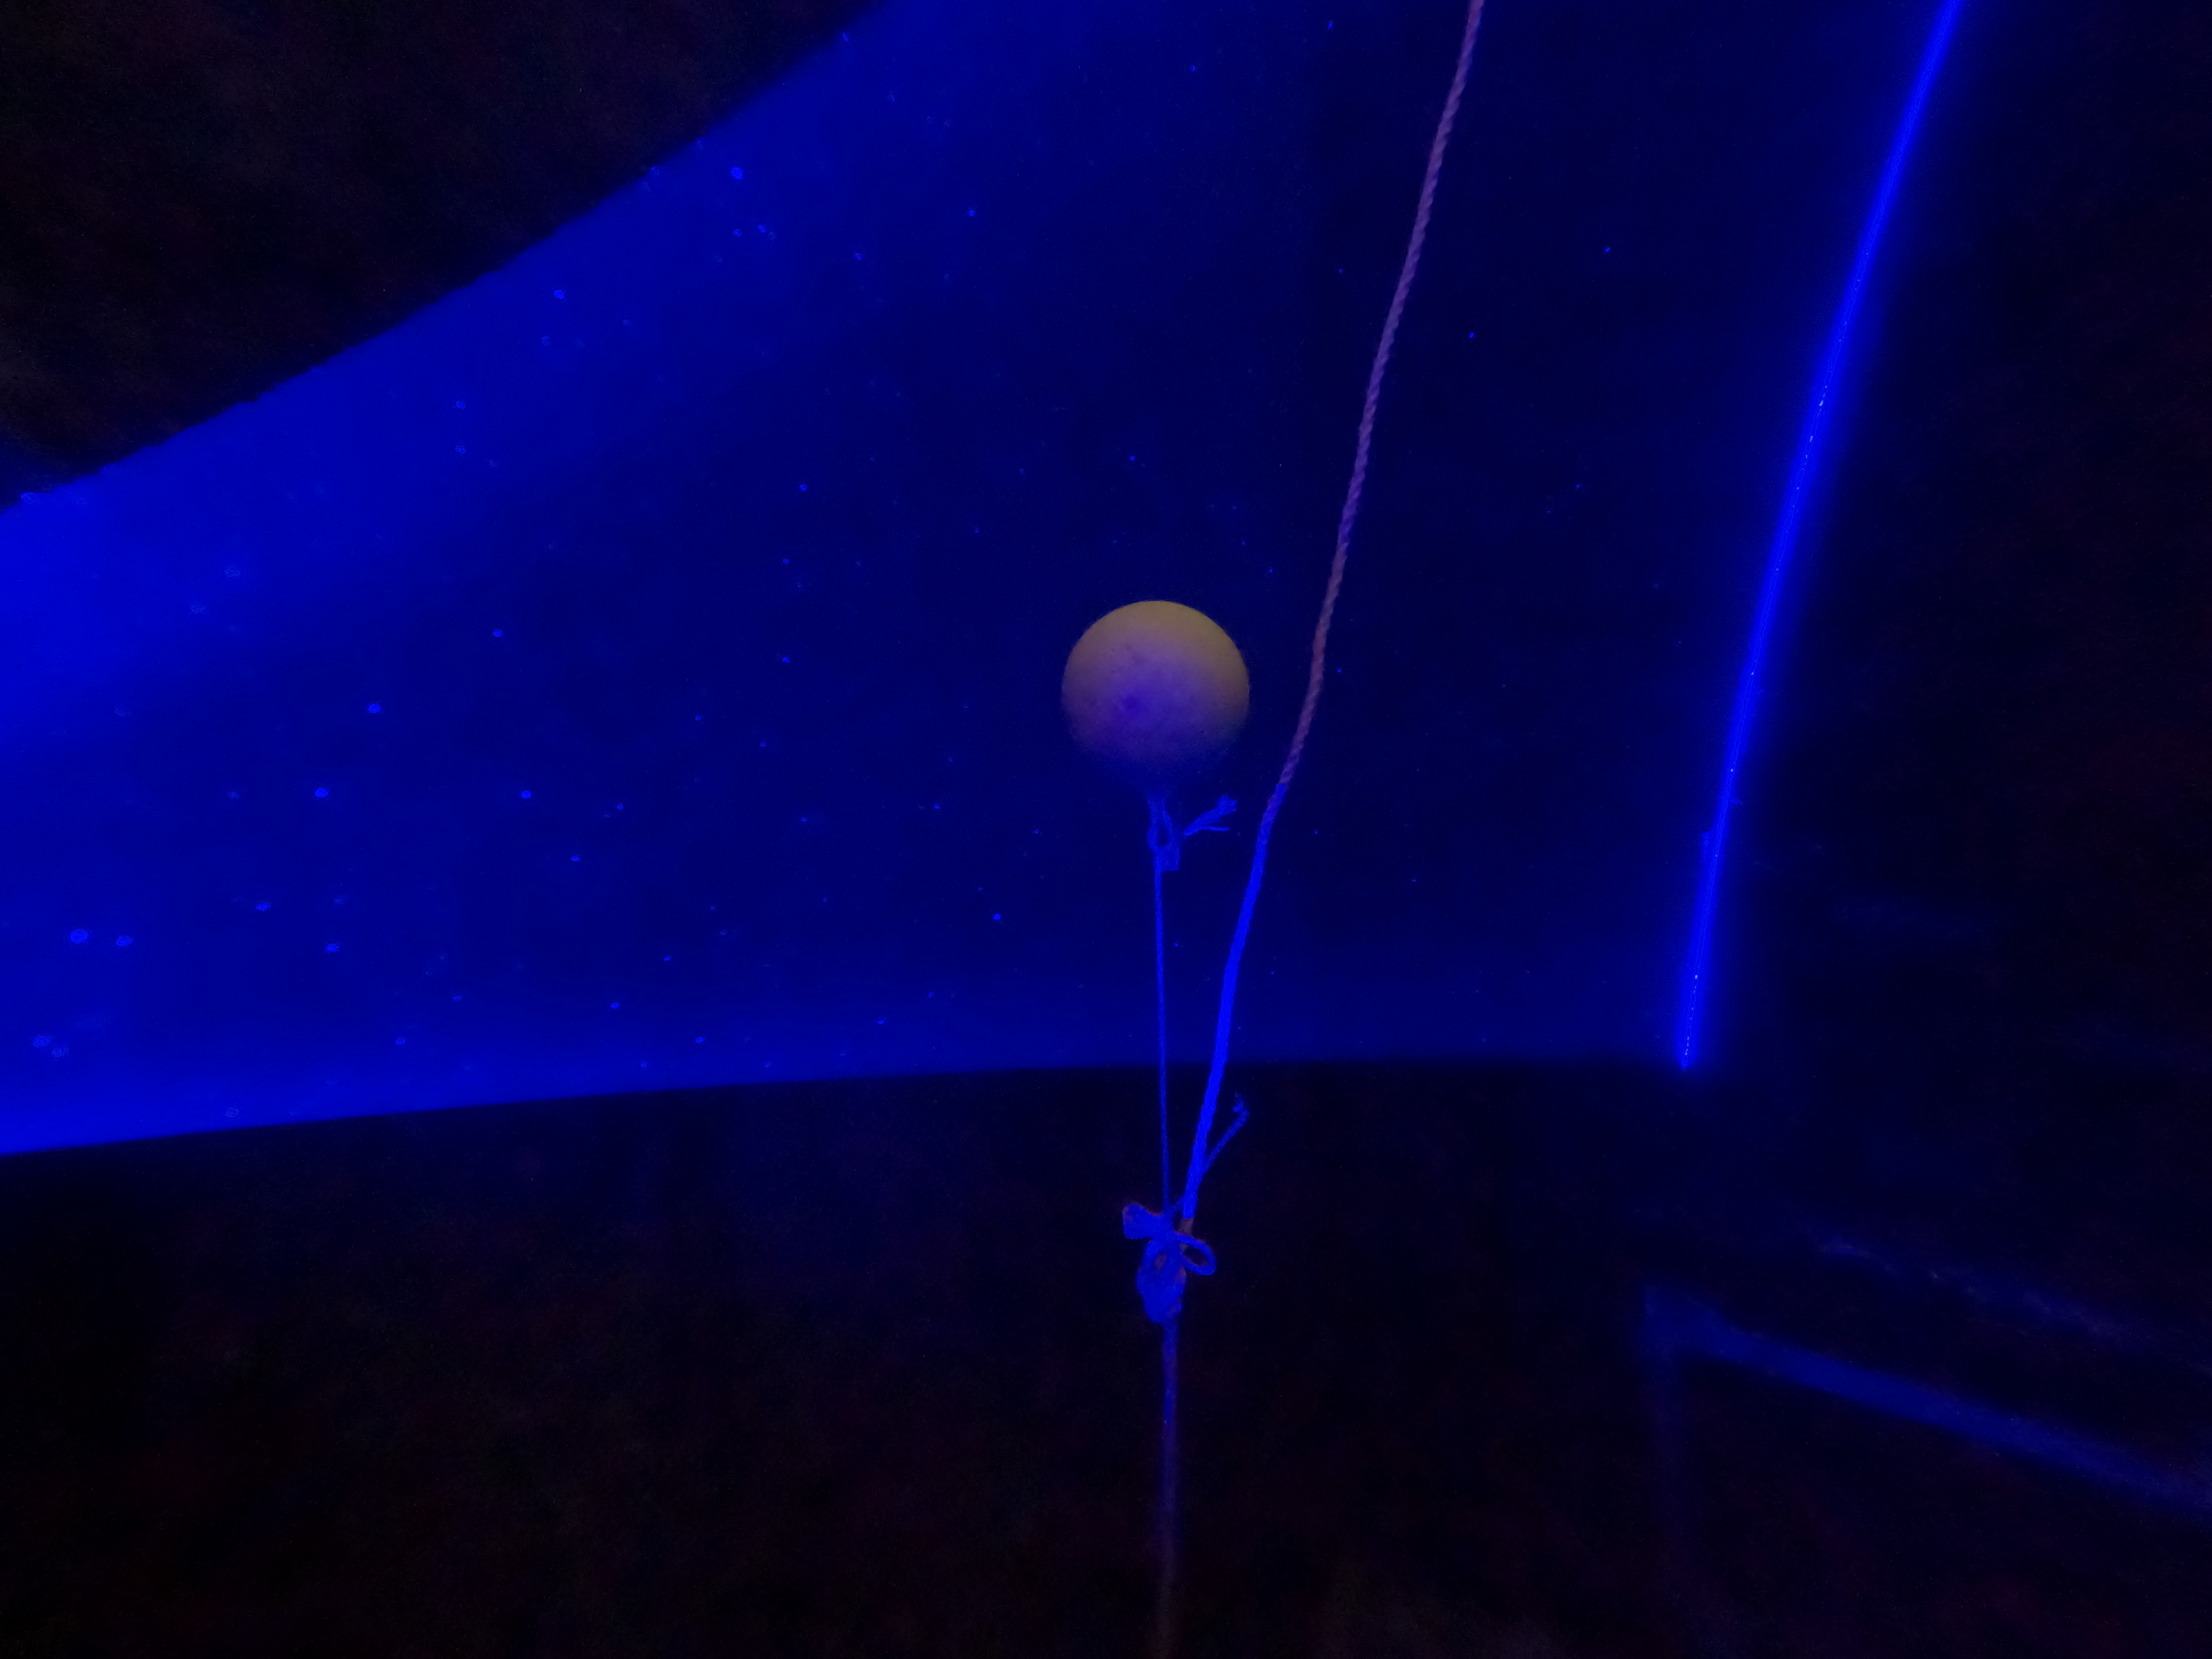

Supplement: Supplementary file 128 [file G0034558.pdf › 9/G0034558.pdf]

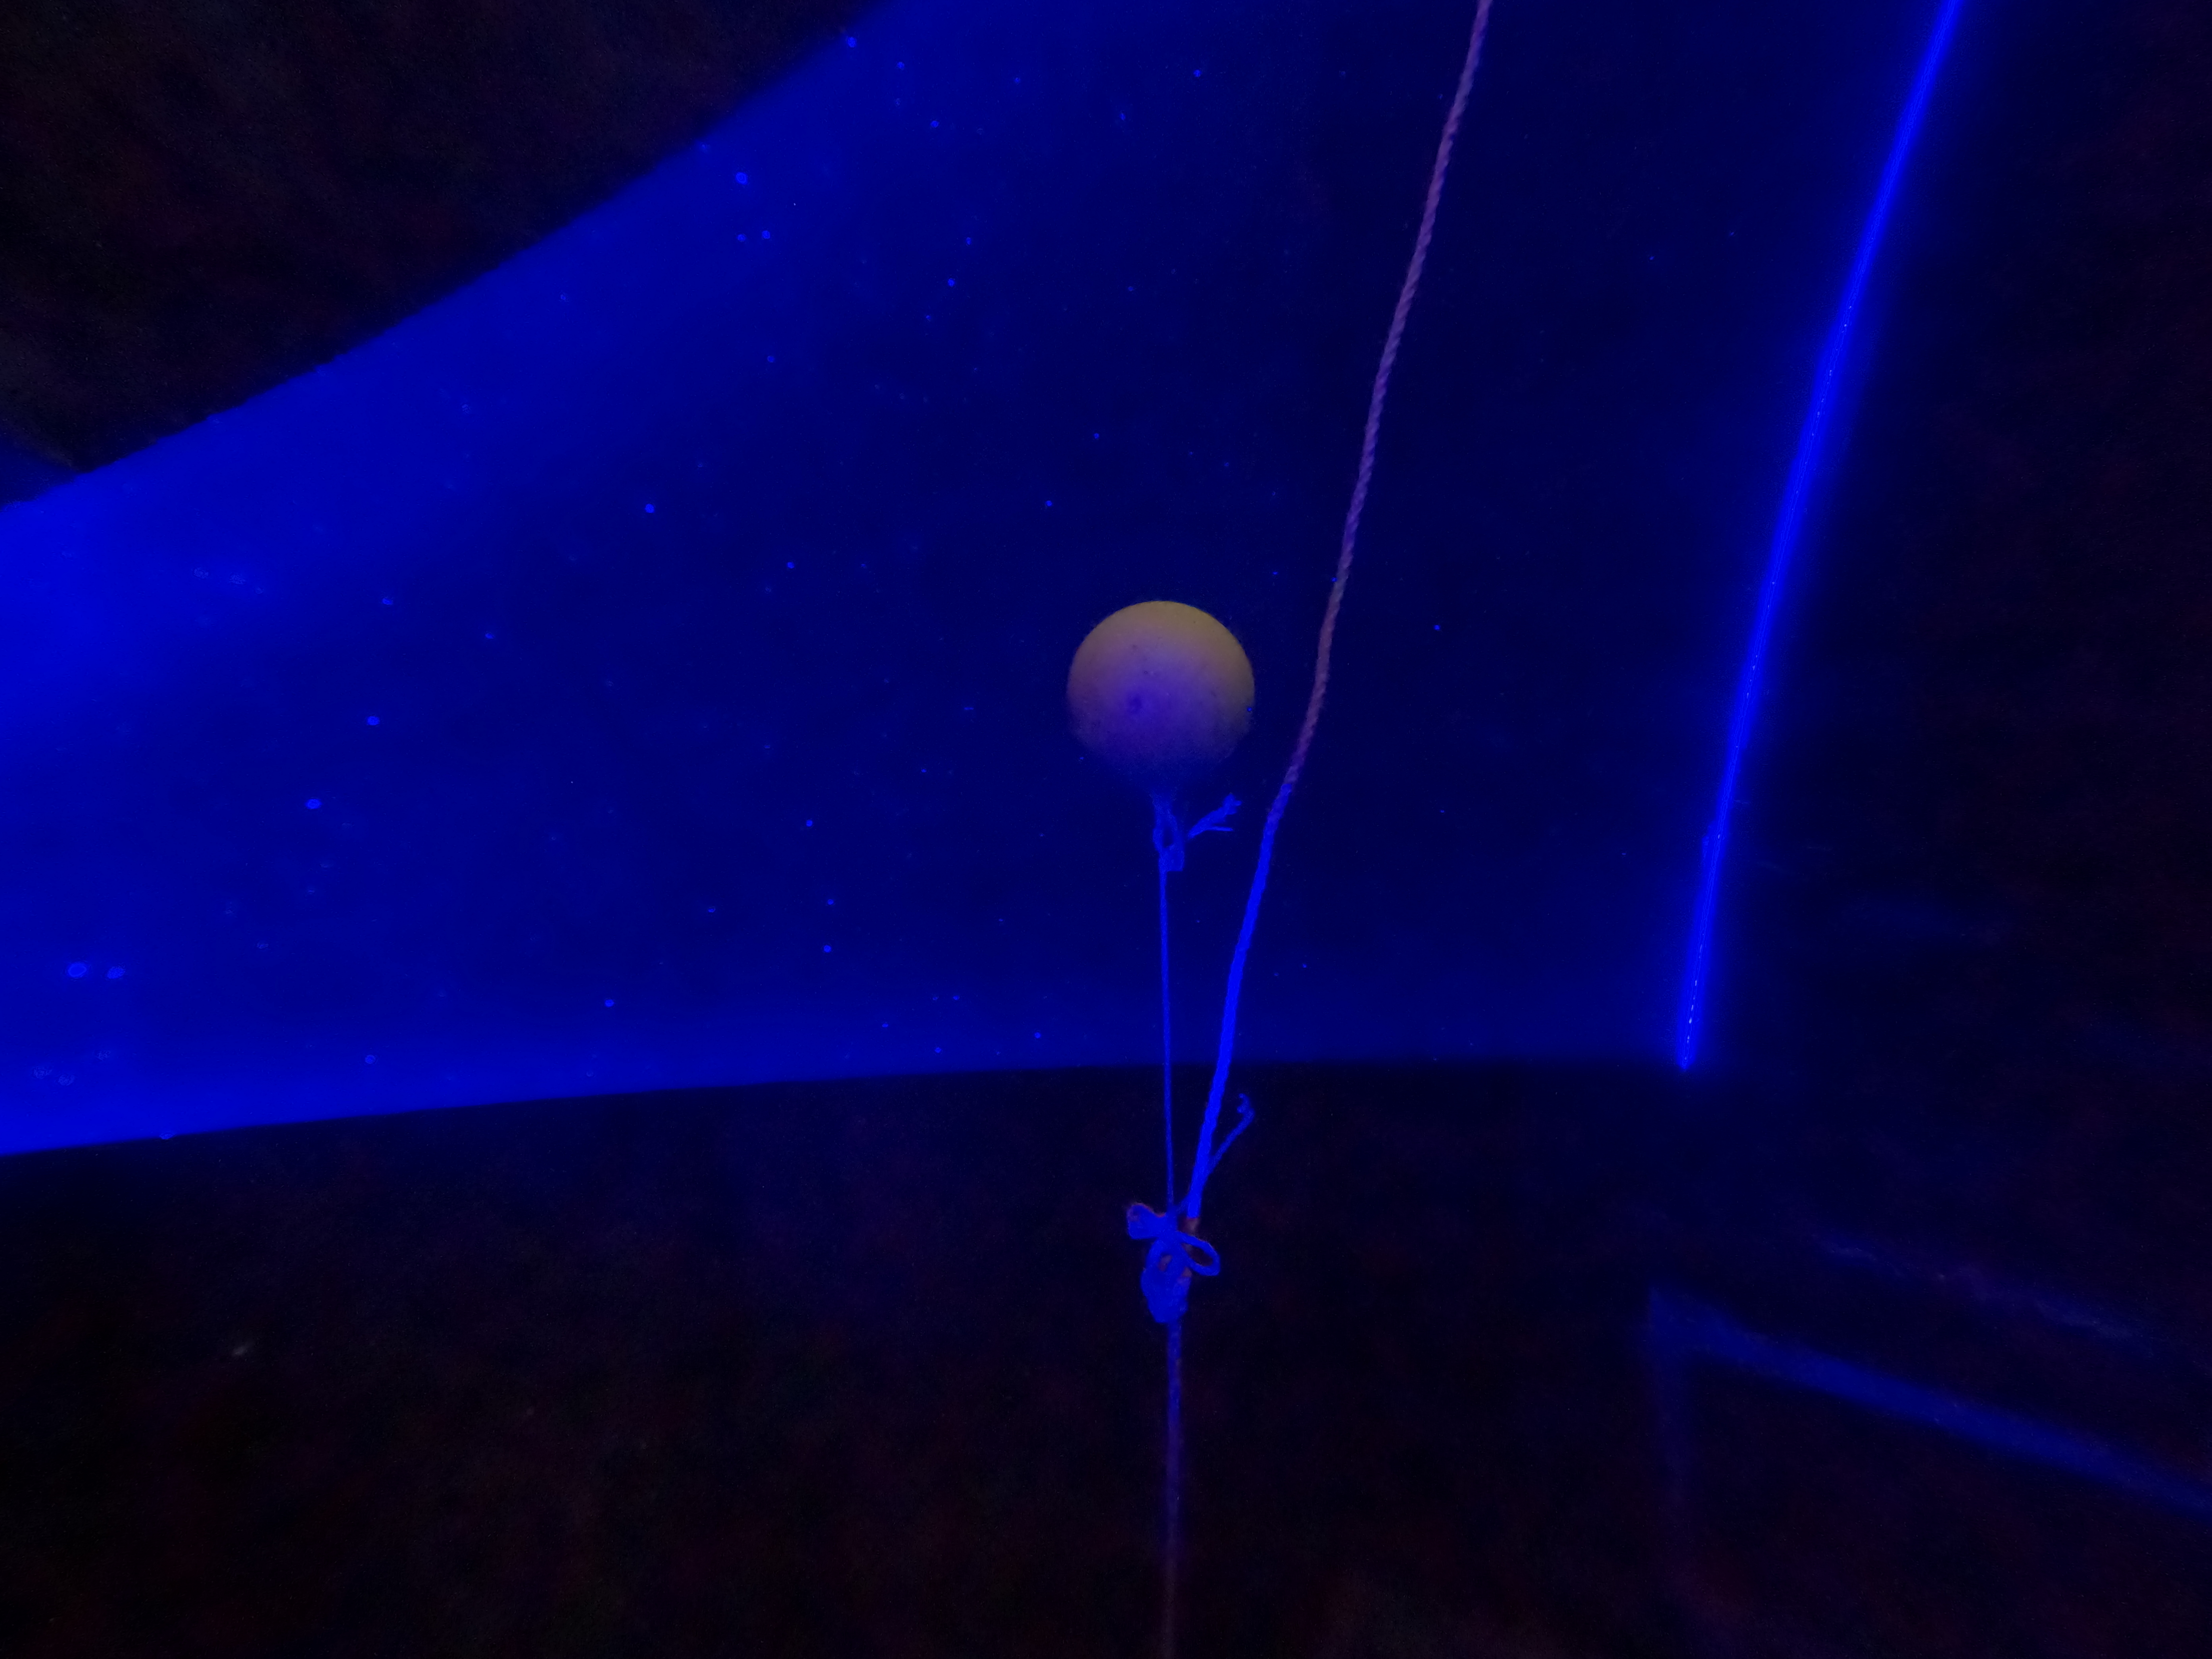

Supplement: Supplementary file 129 [file G0034559.pdf › 9/G0034559.pdf]

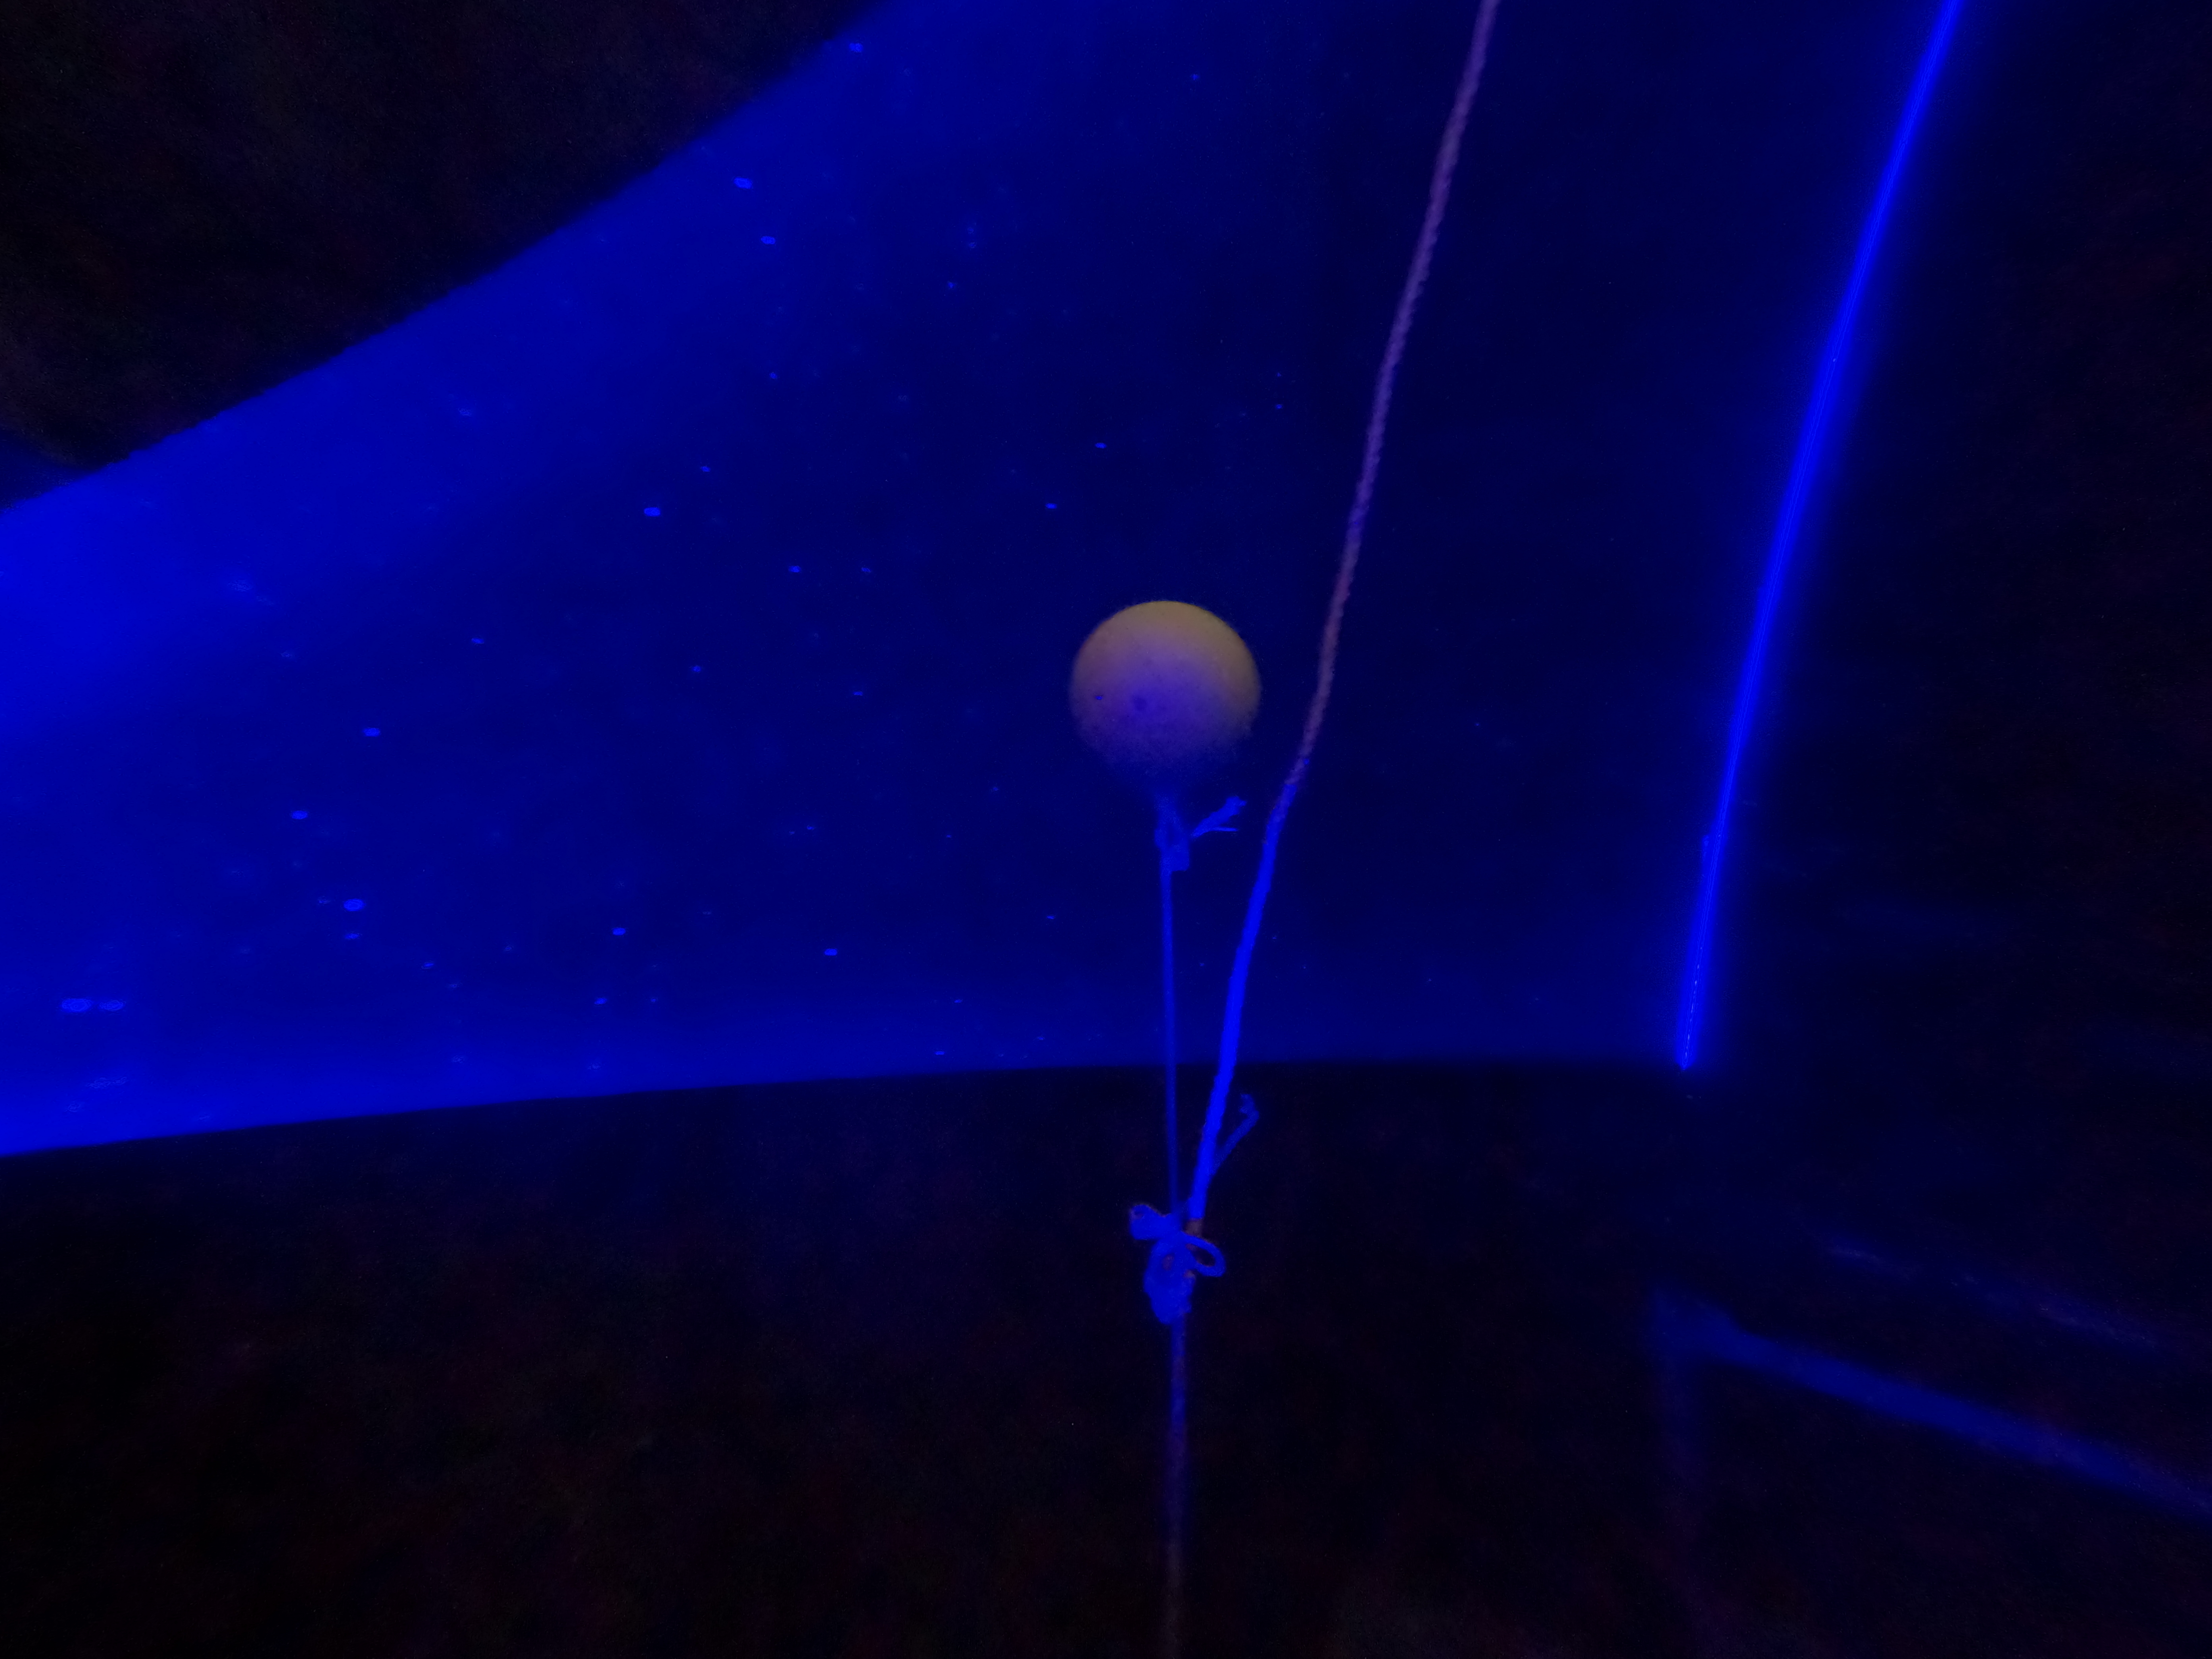

Supplement: Supplementary file 130 [file G0034560.pdf › 9/G0034560.pdf]

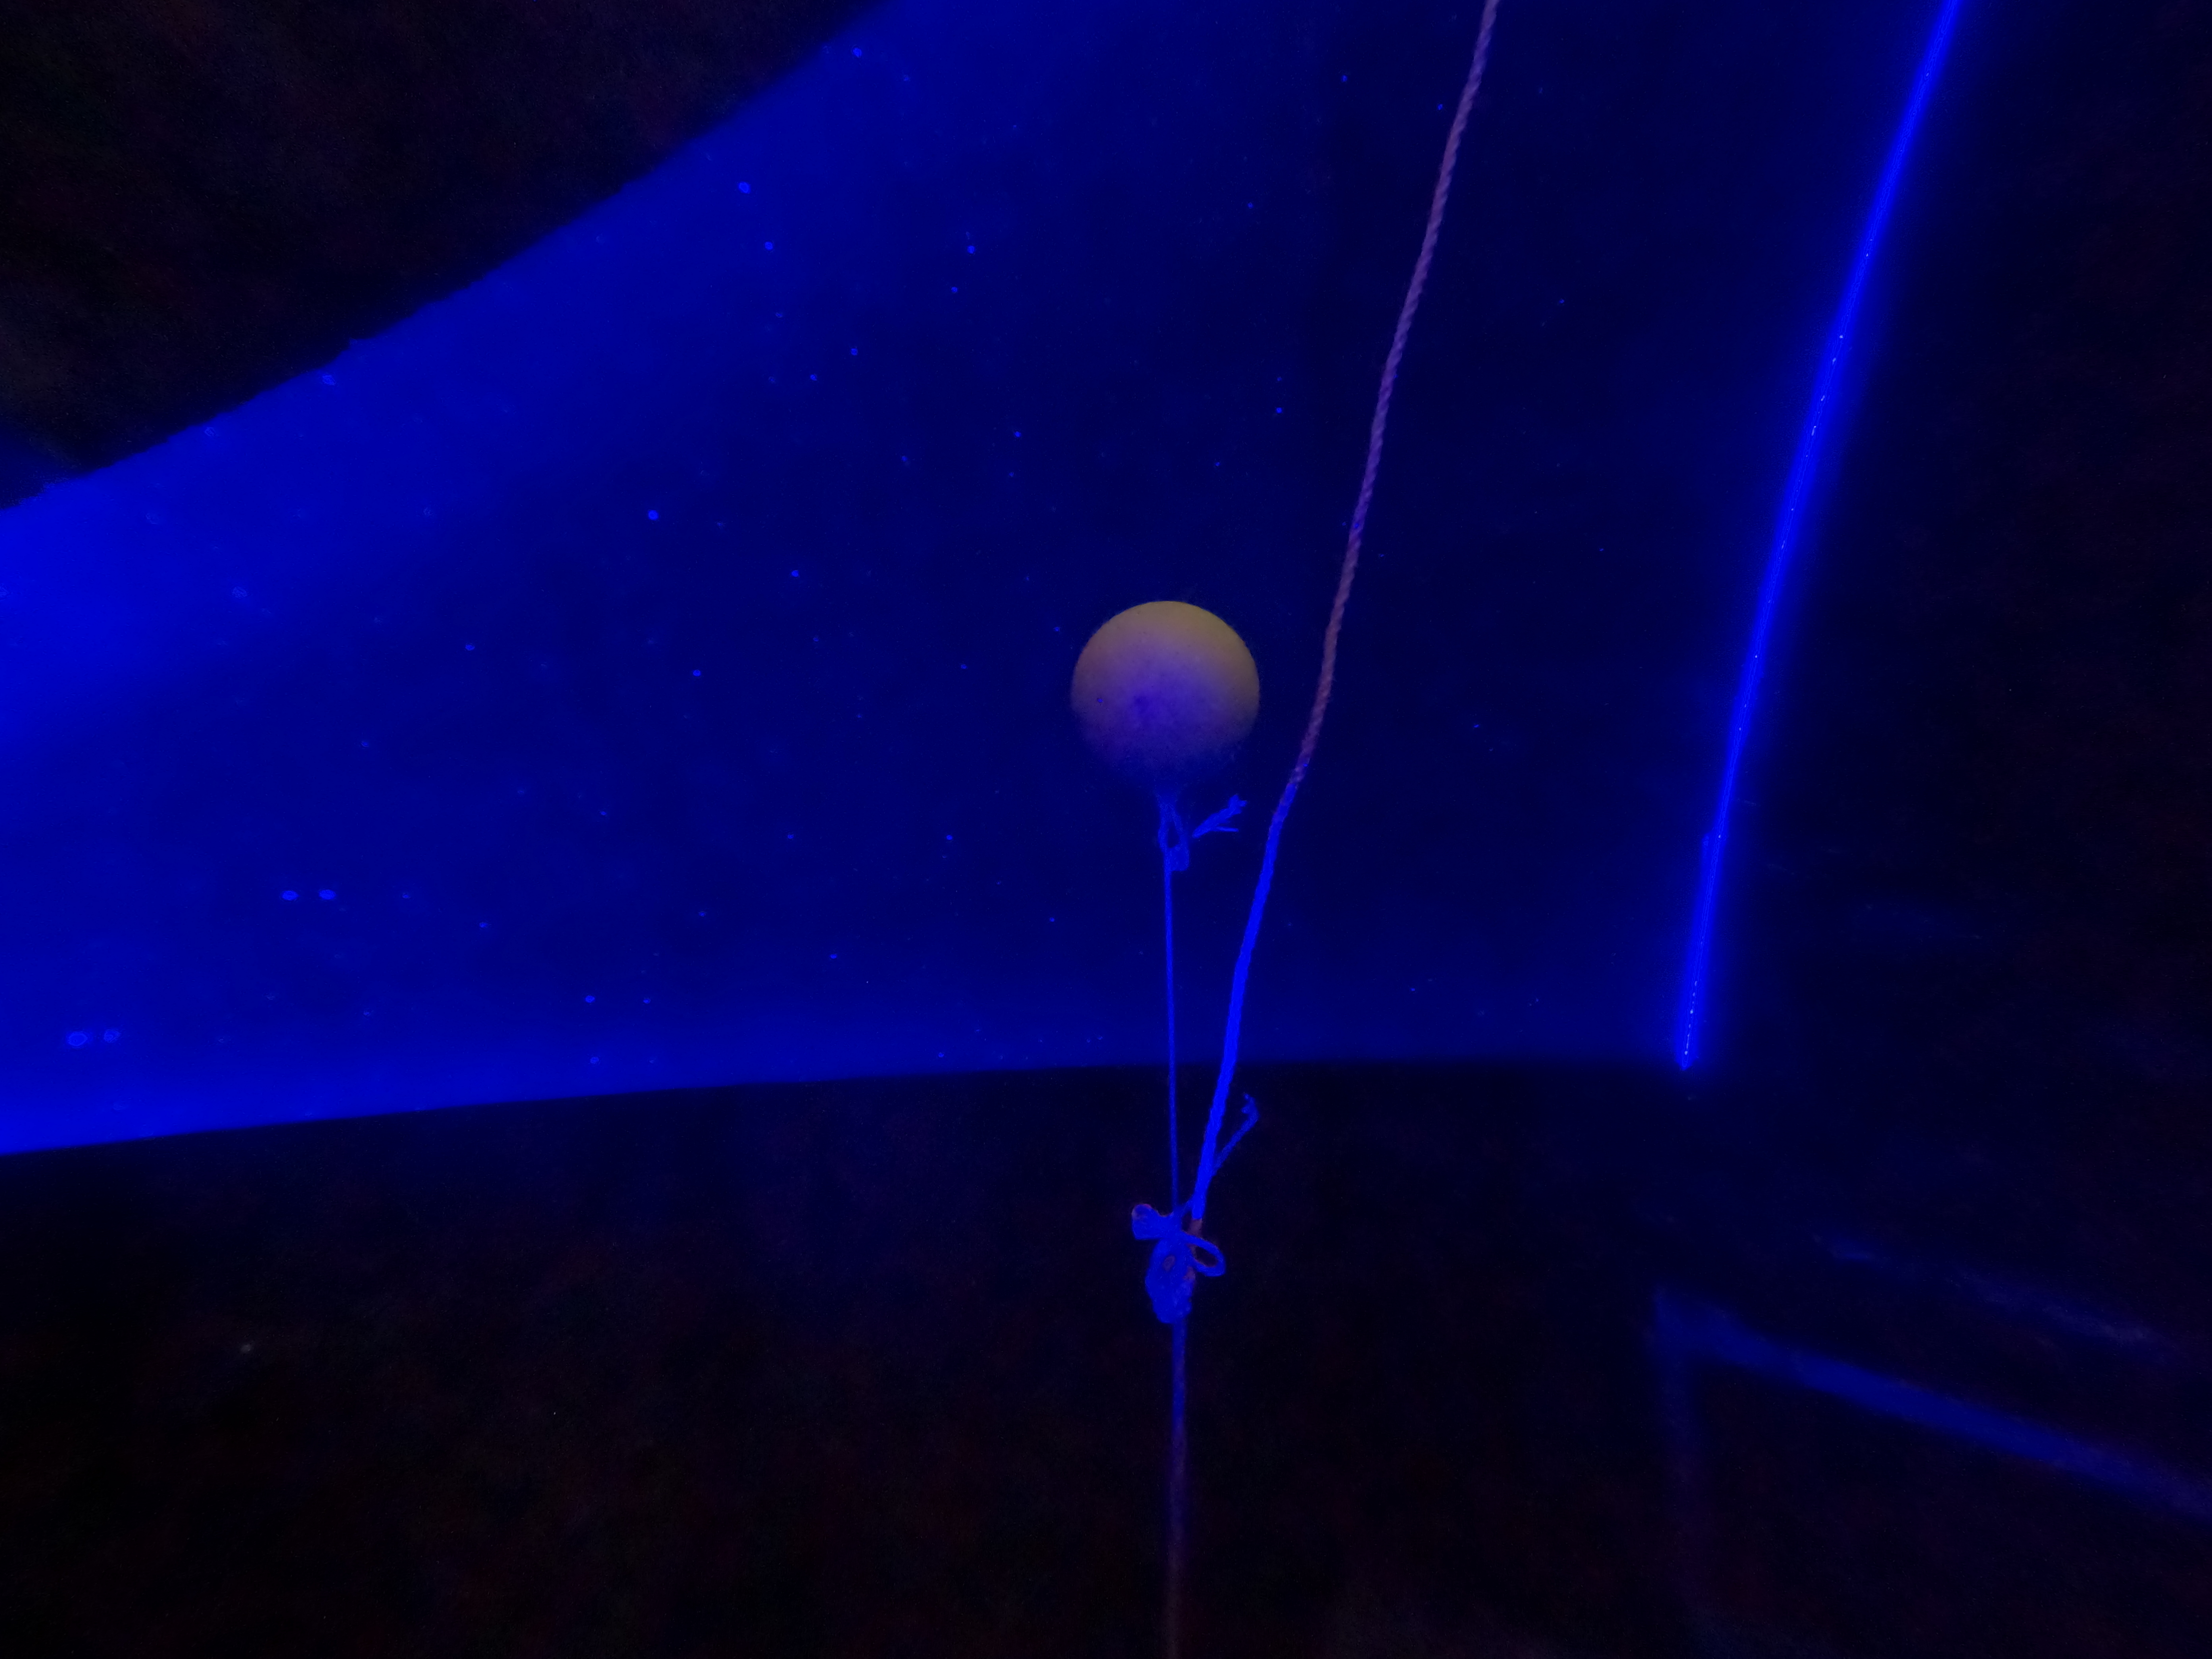

Supplement: Supplementary file 131 [file G0034561.pdf › 9/G0034561.pdf]

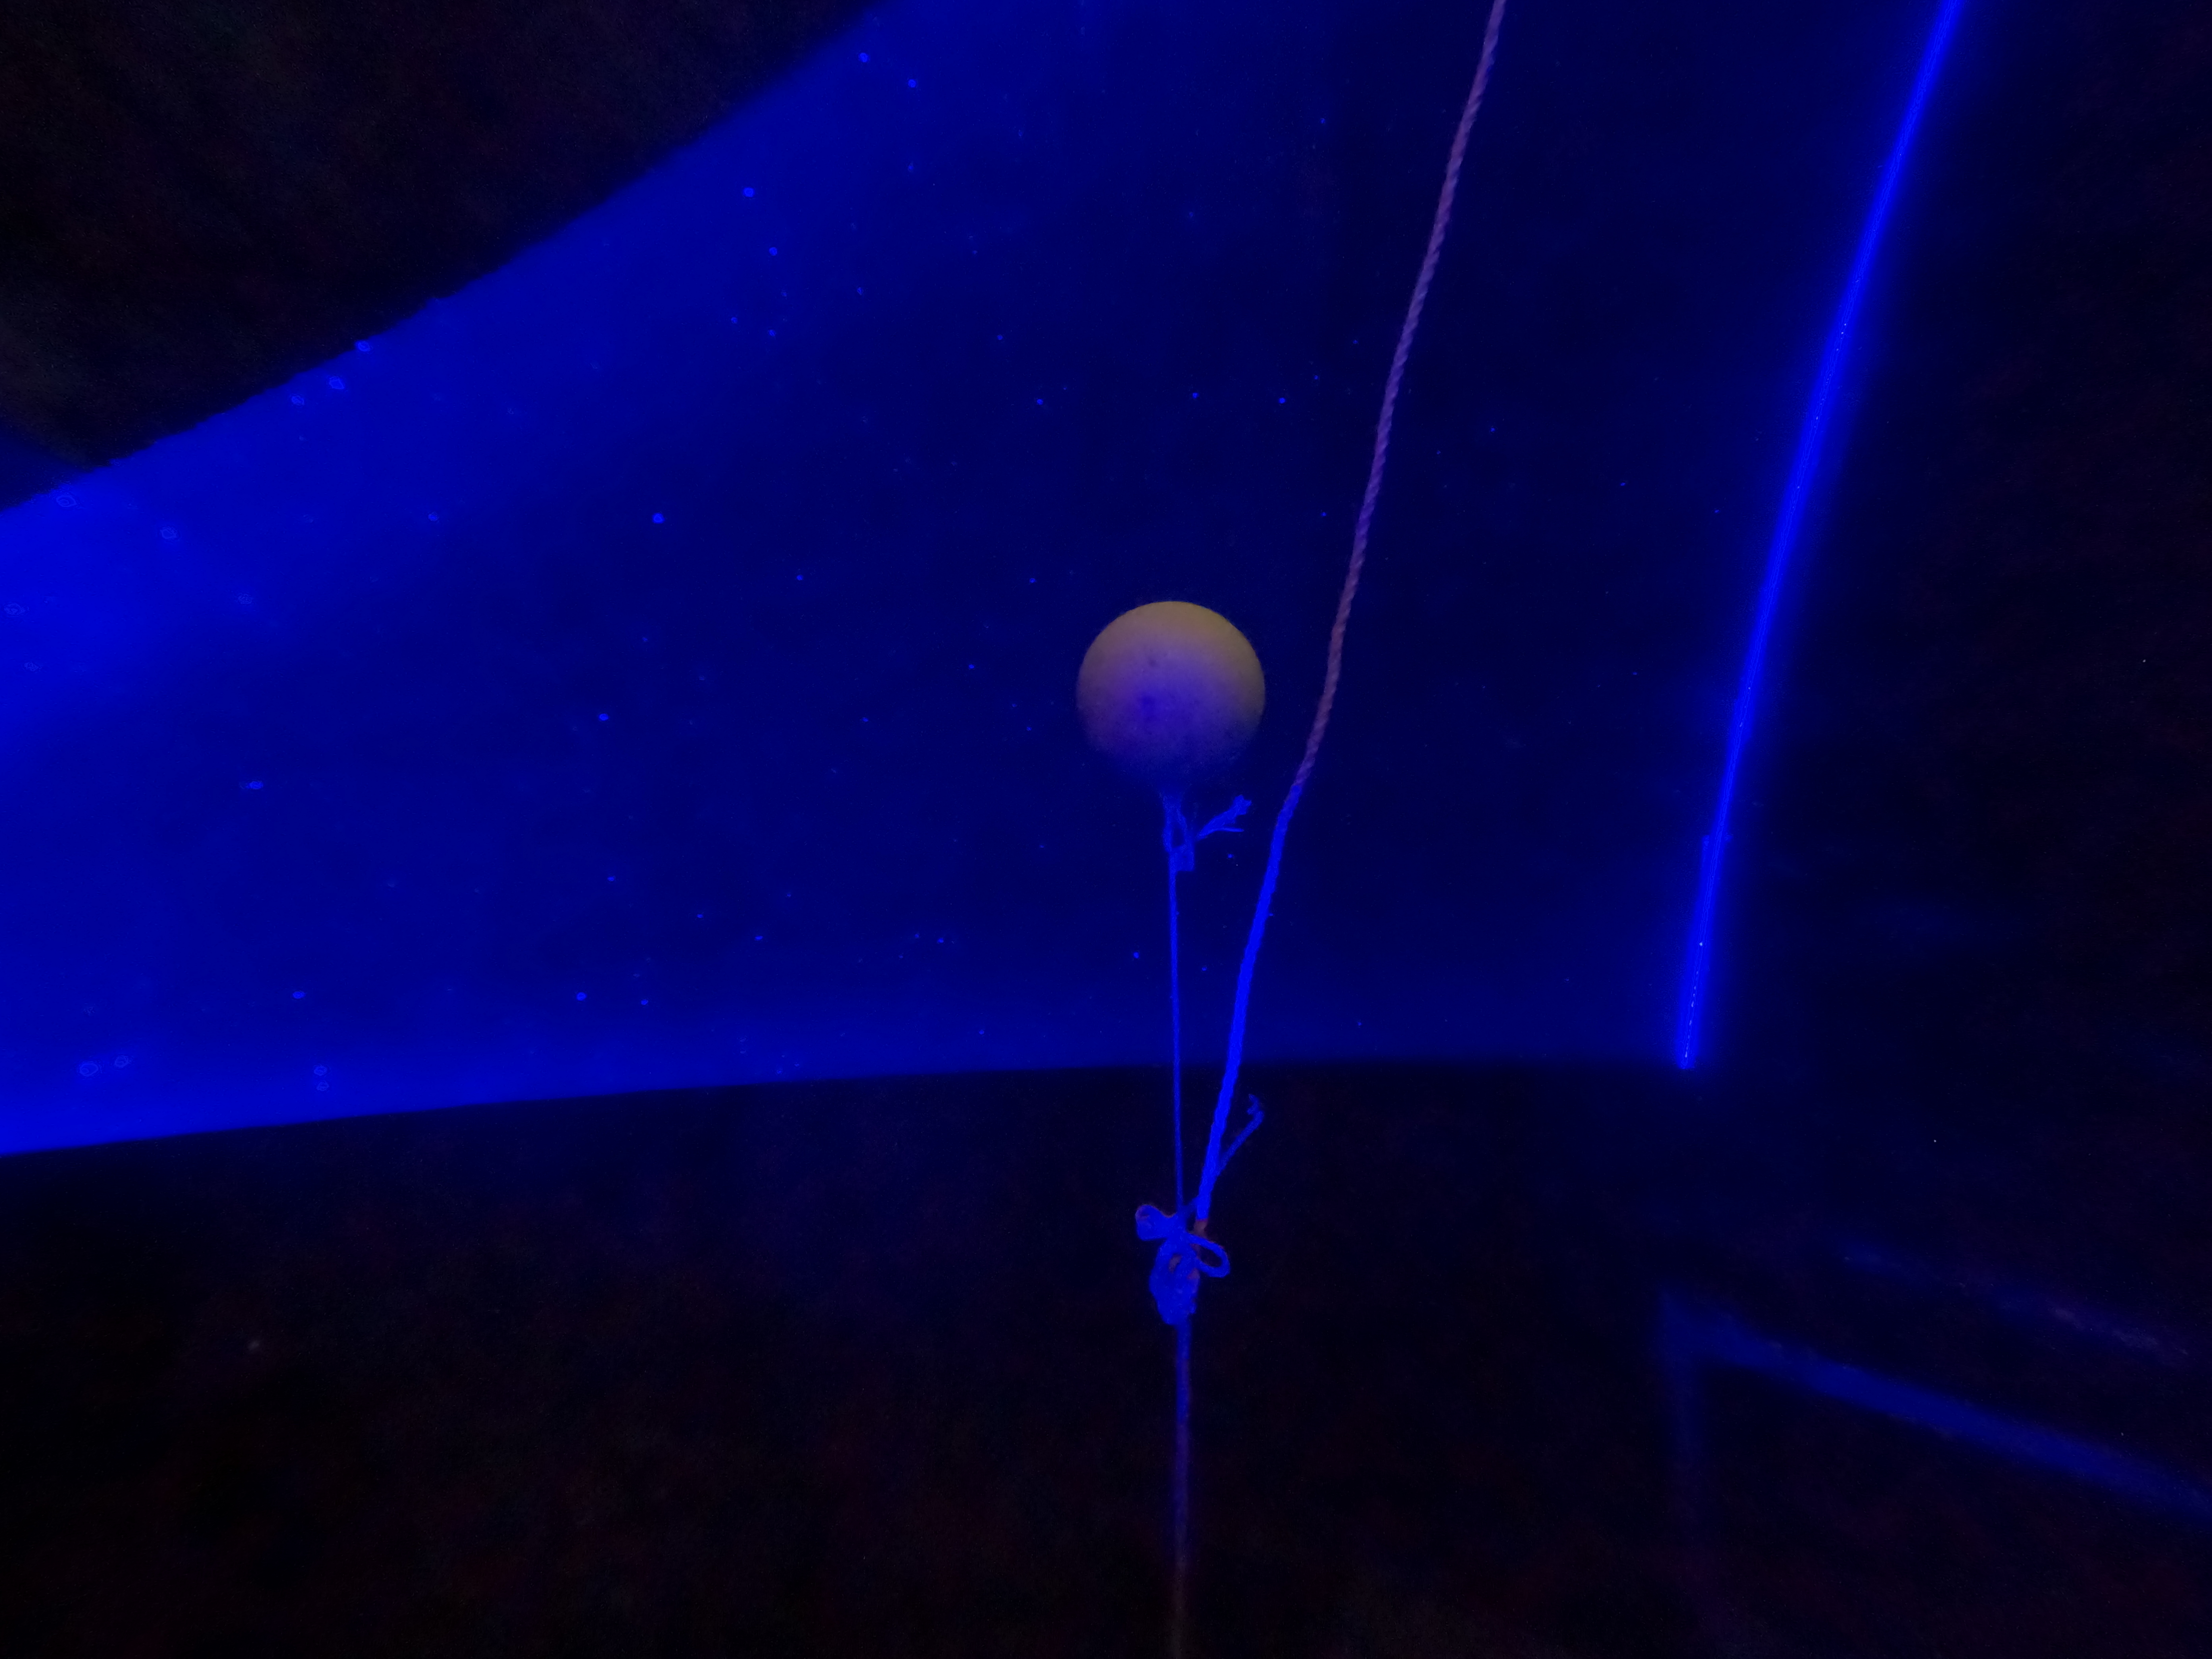

Supplement: Supplementary file 132 [file G0034562.pdf › 9/G0034562.pdf]

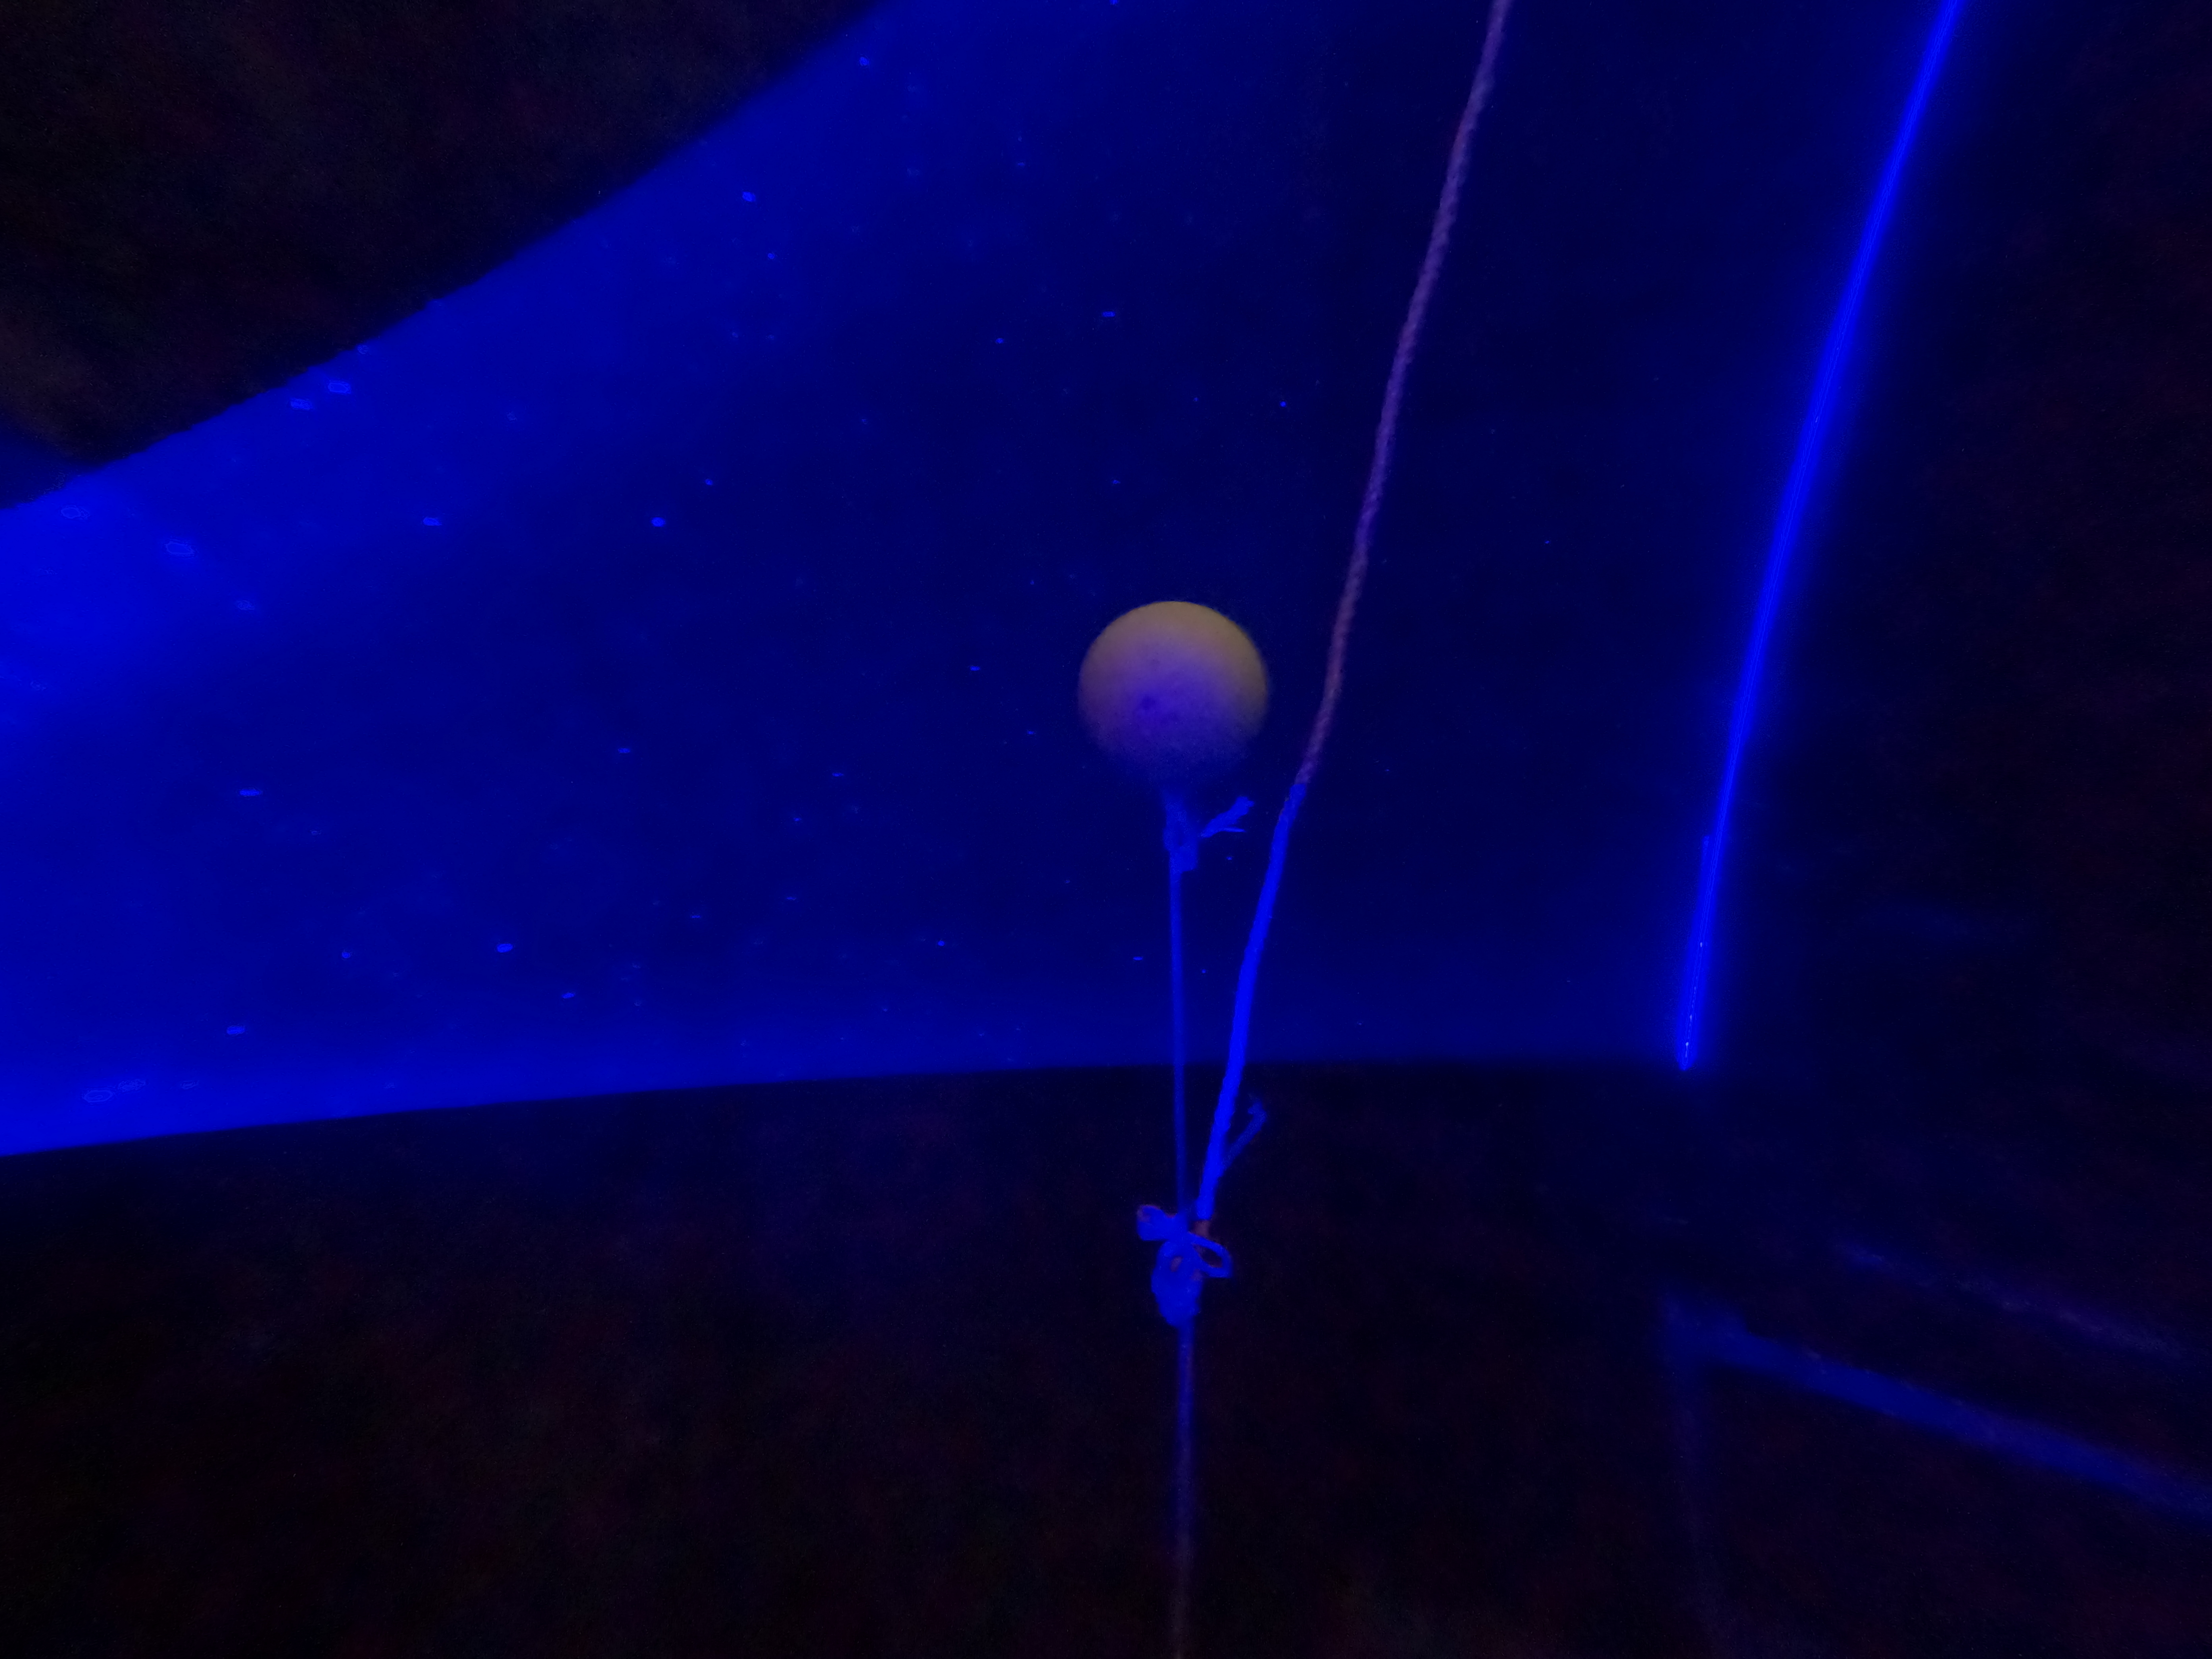

Supplement: Supplementary file 133 [file G0034563.pdf › 9/G0034563.pdf]

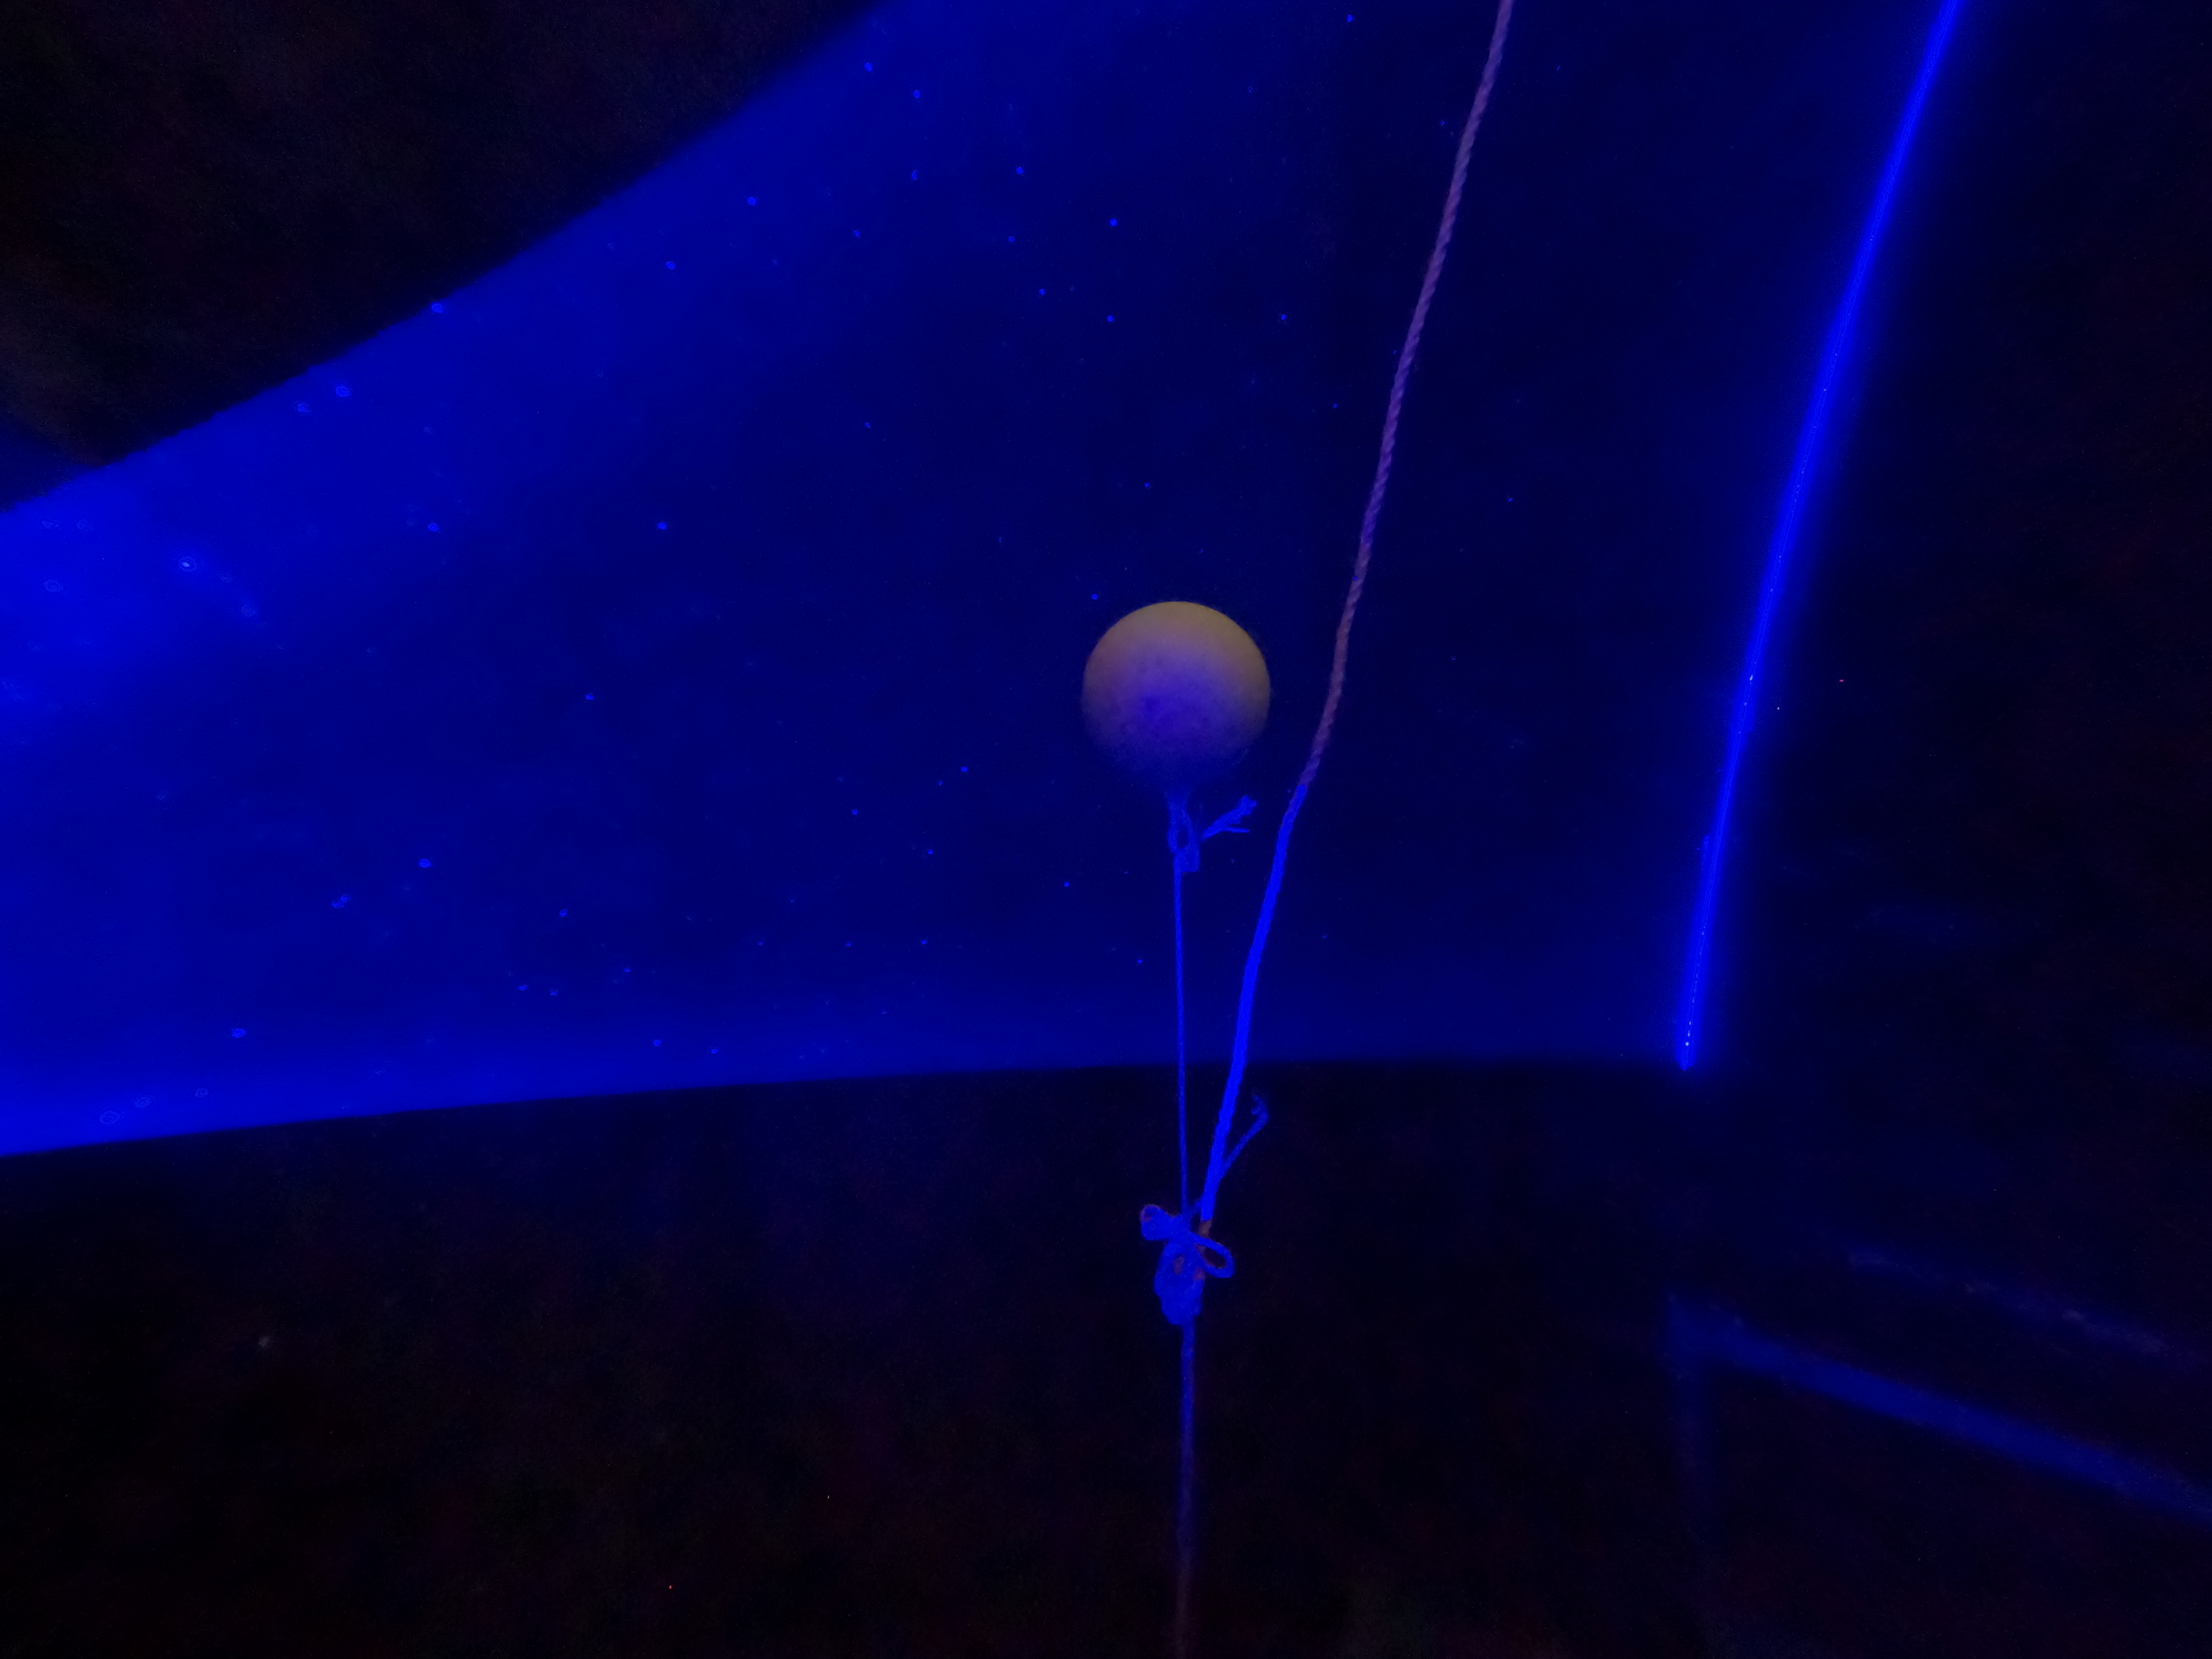

Supplement: Supplementary file 134 [file G0034564.pdf › 9/G0034564.pdf]

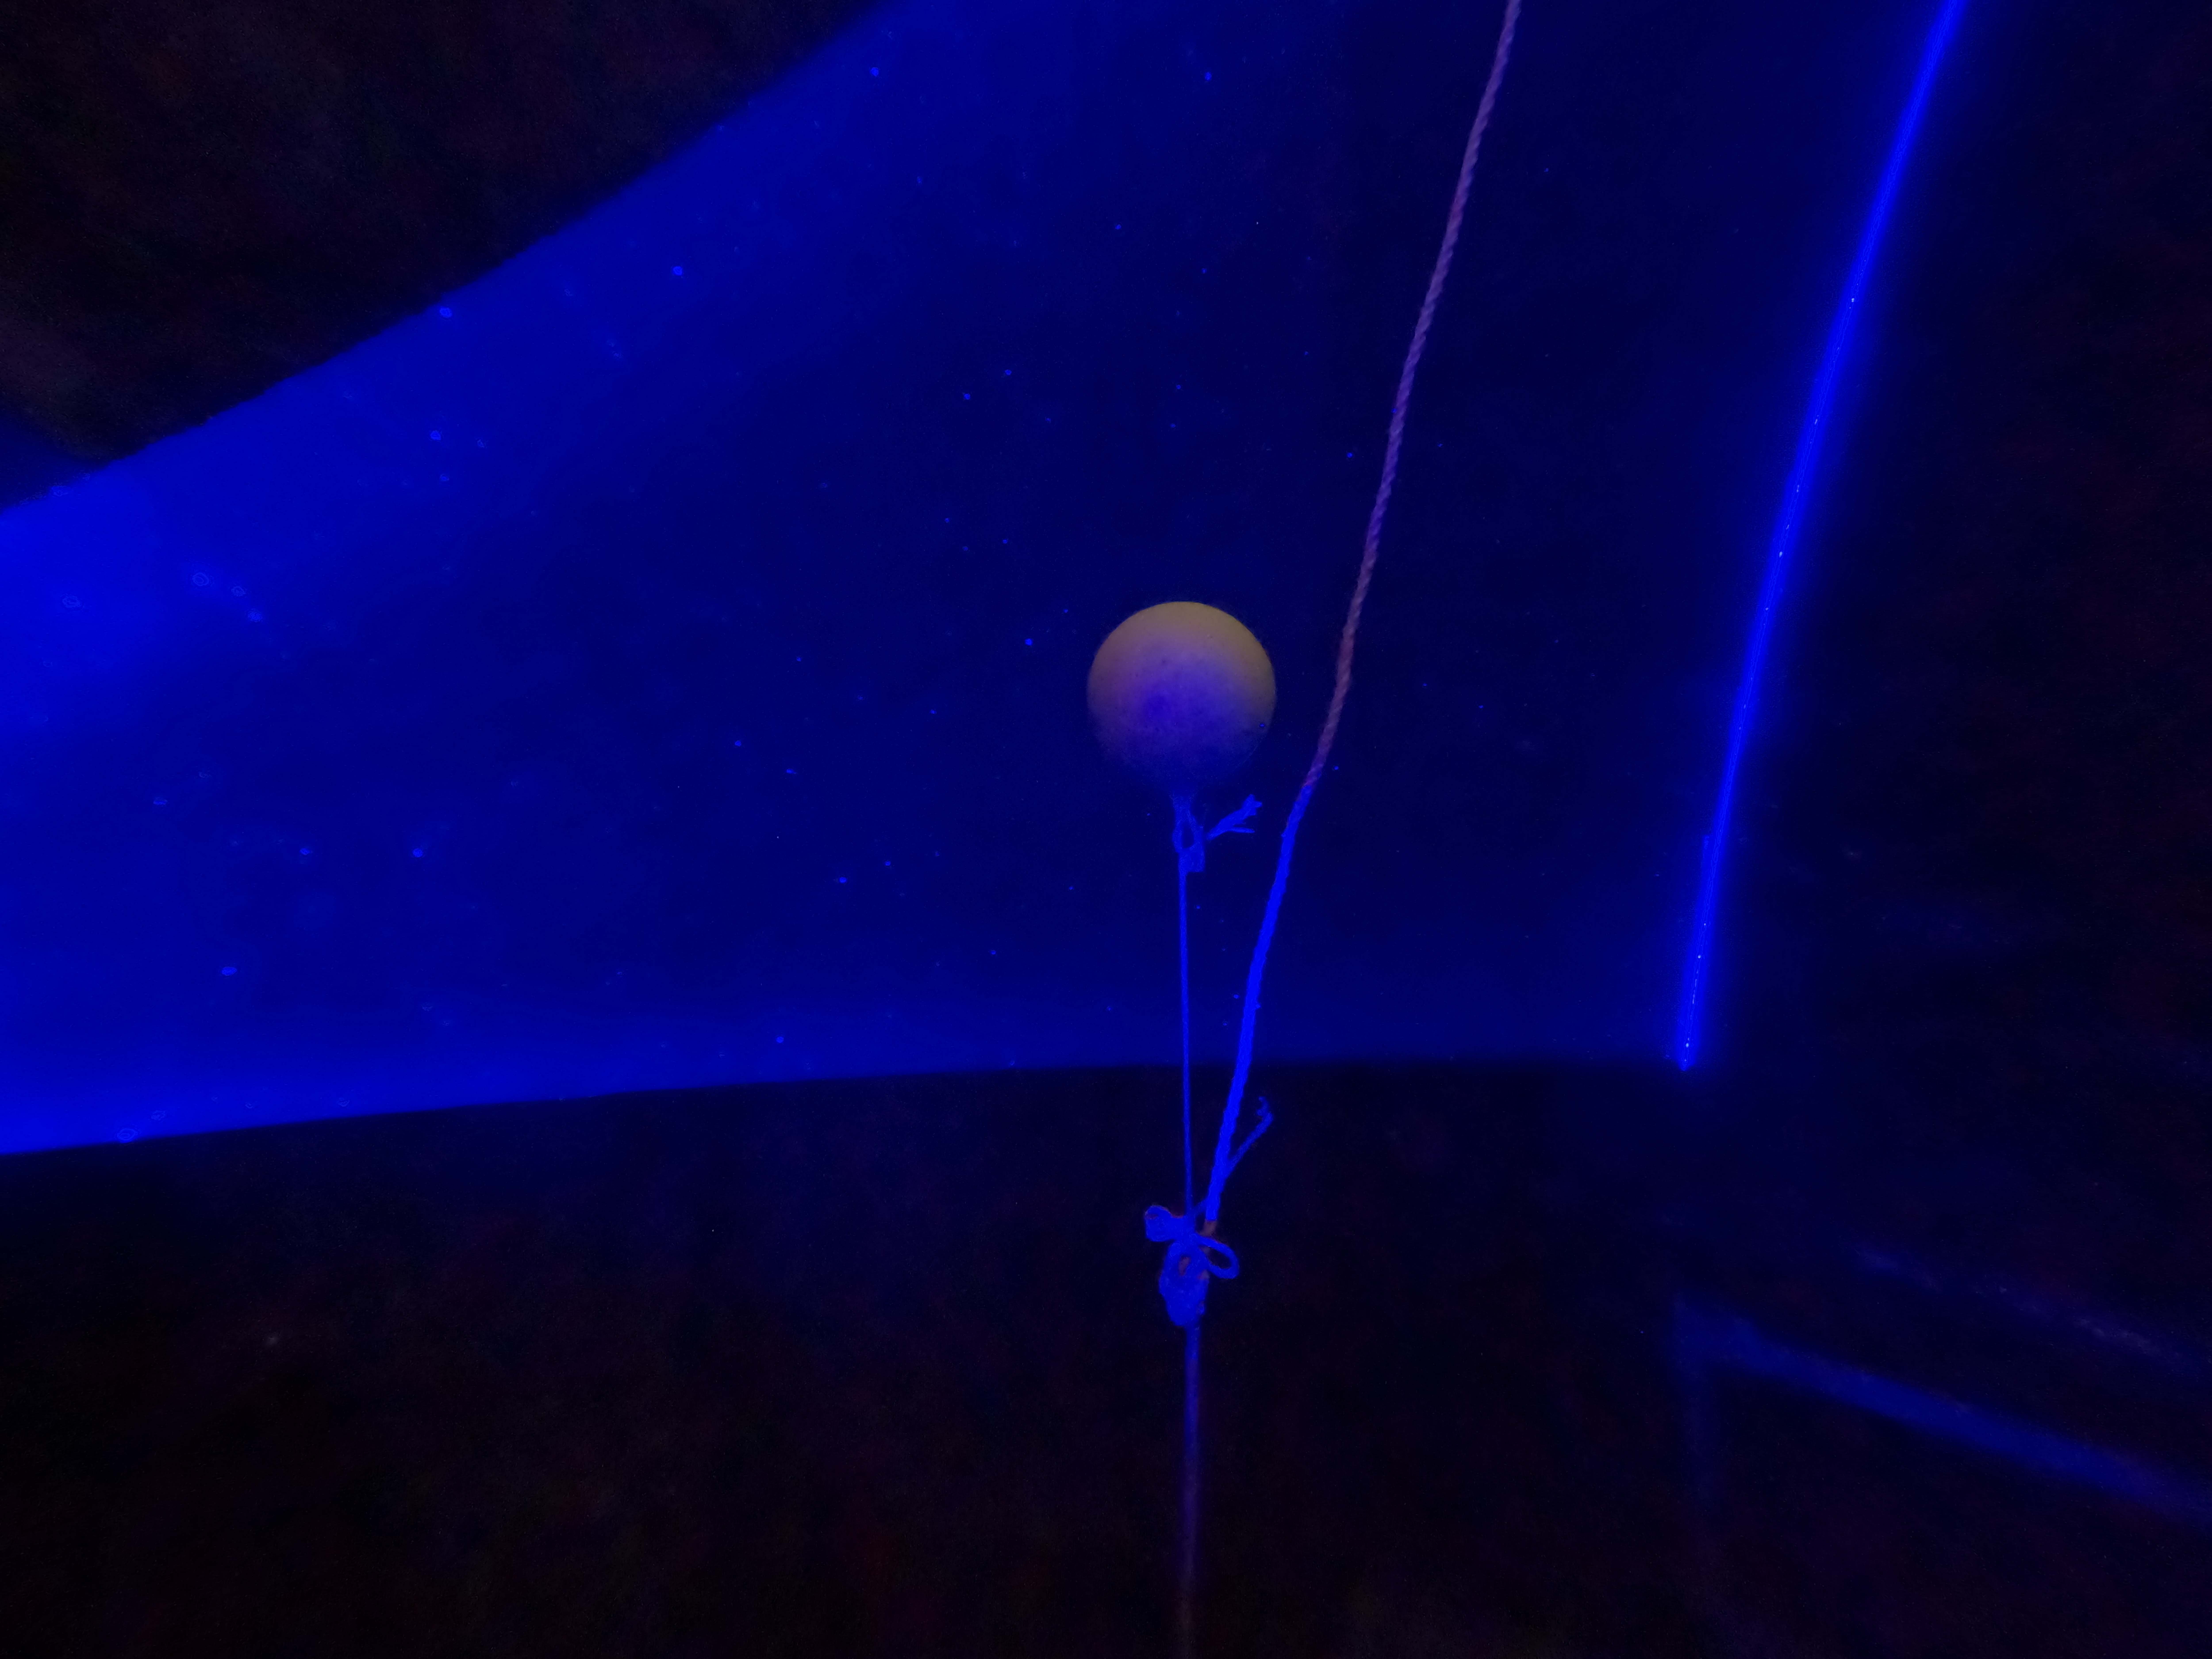

Supplement: Supplementary file 135 [file G0034565.pdf › 9/G0034565.pdf]

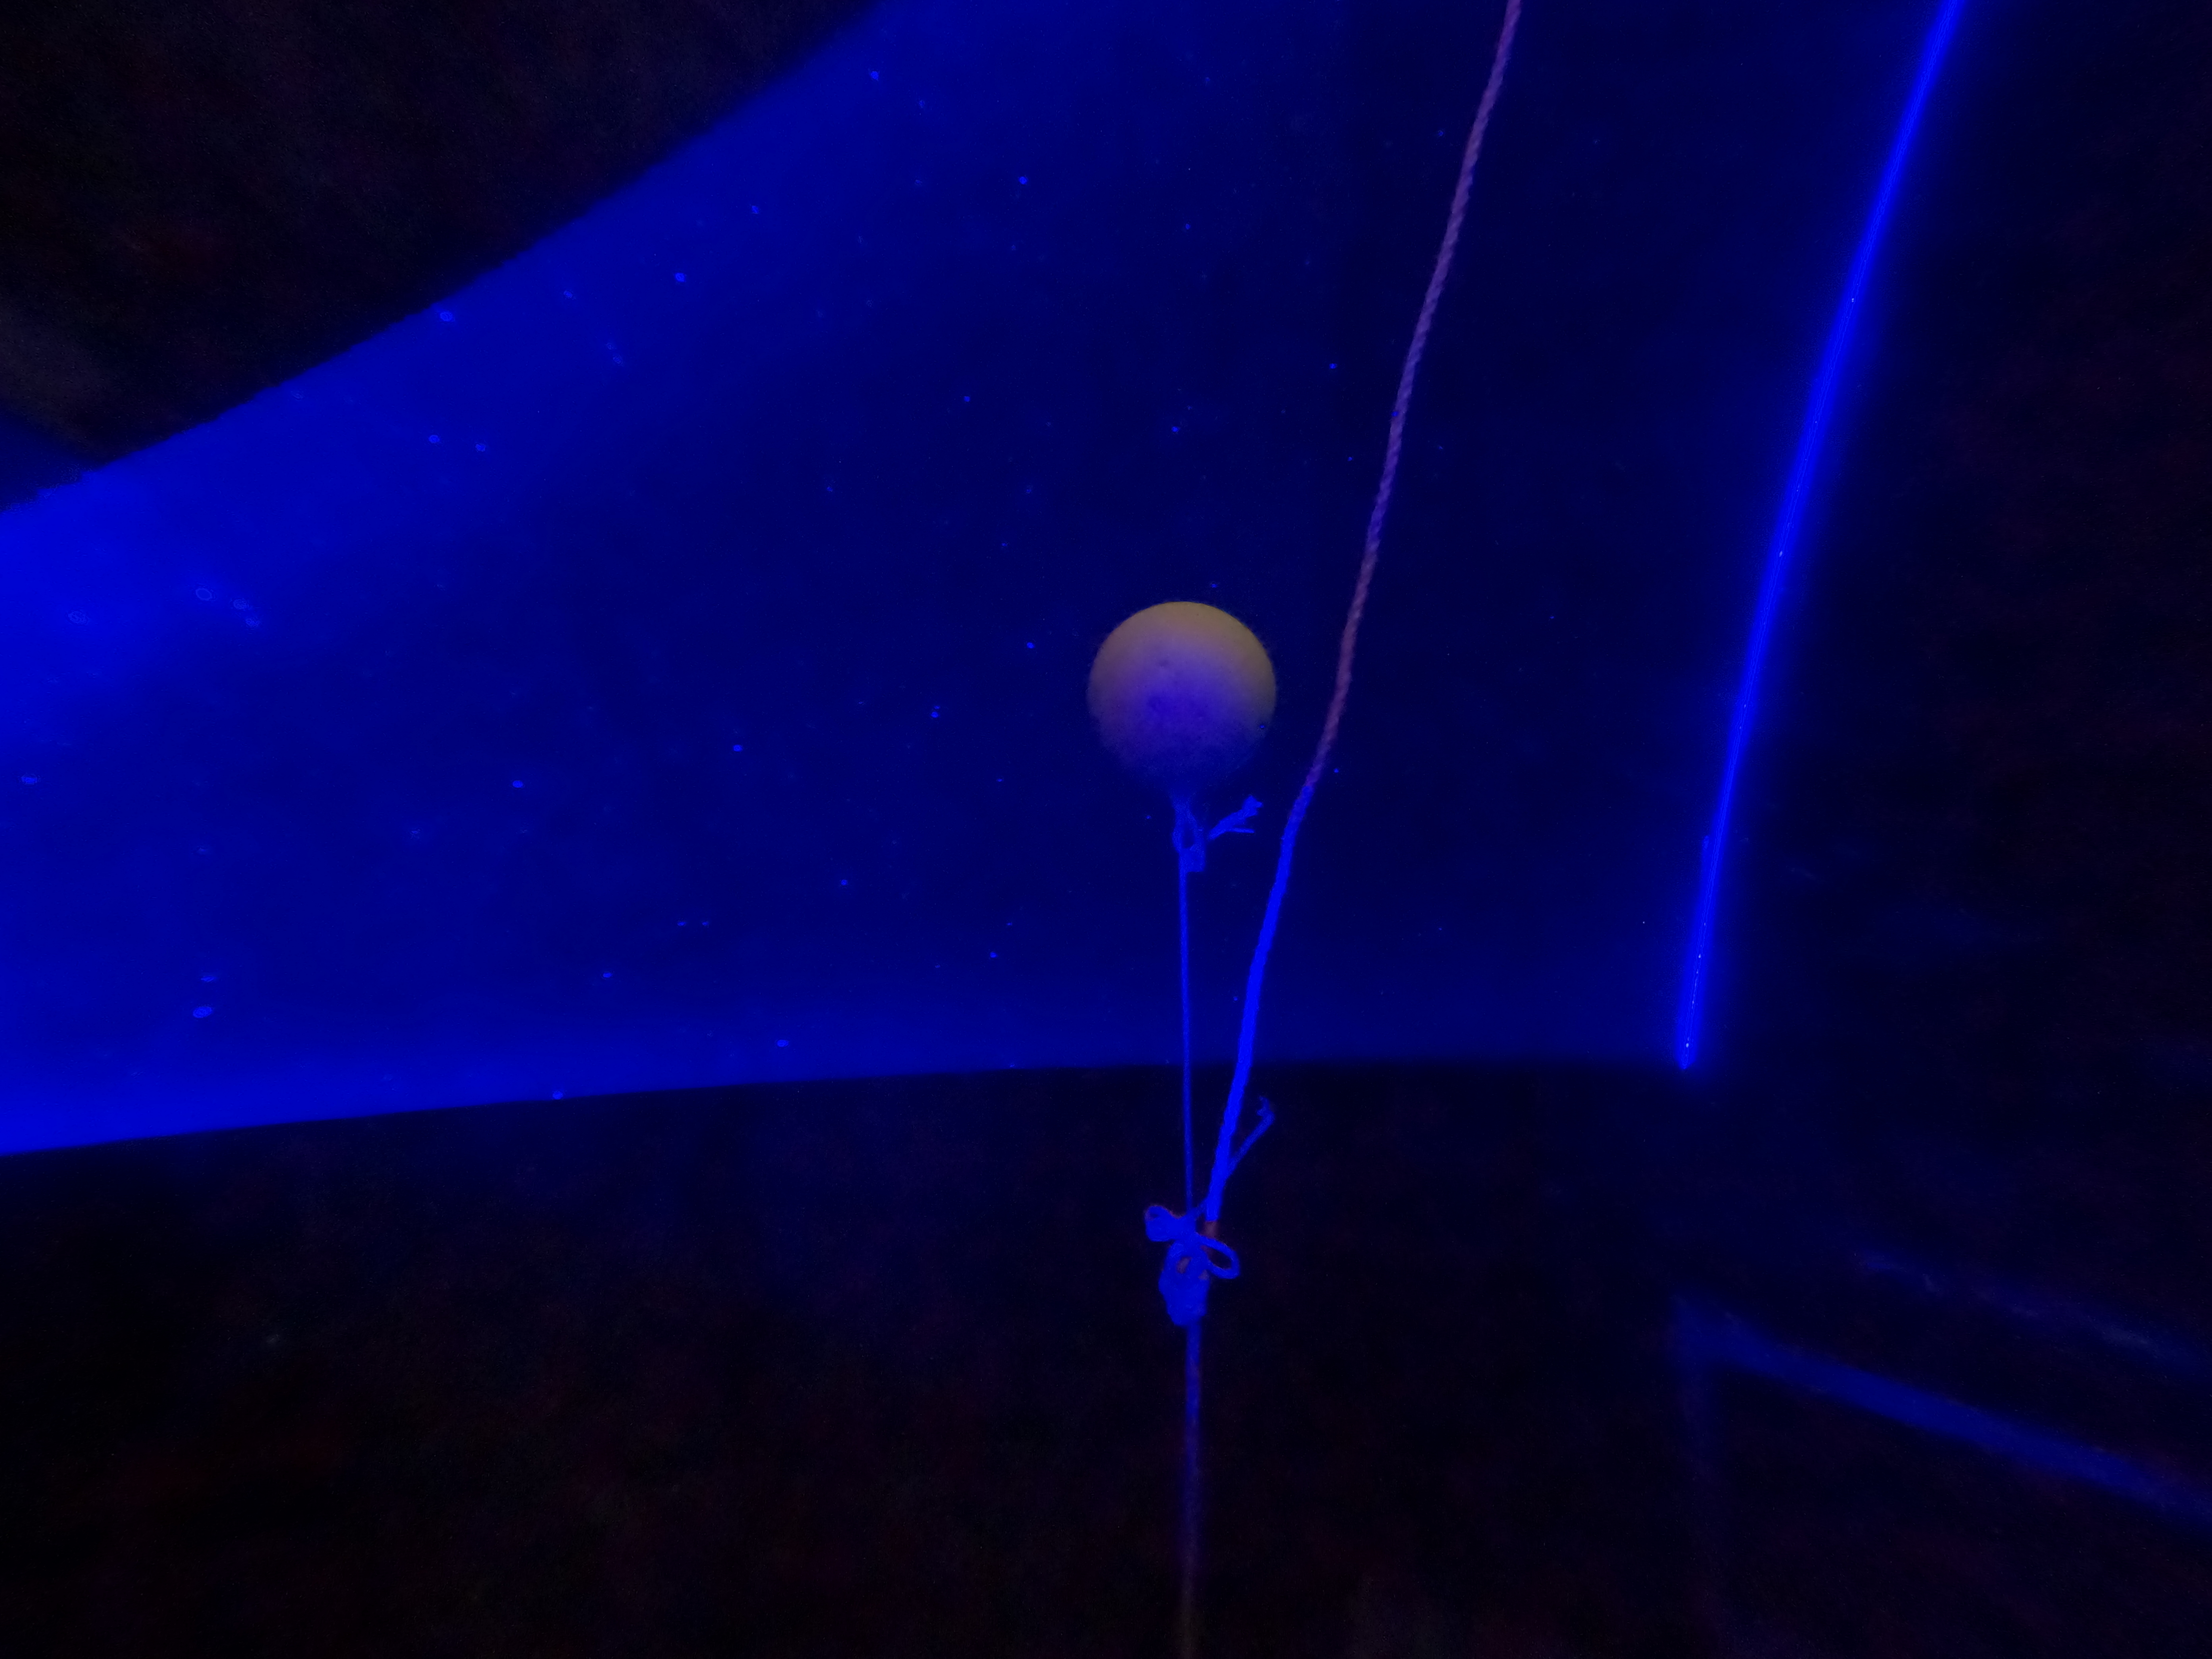

Supplement: Supplementary file 136 [file G0034566.pdf › 9/G0034566.pdf]

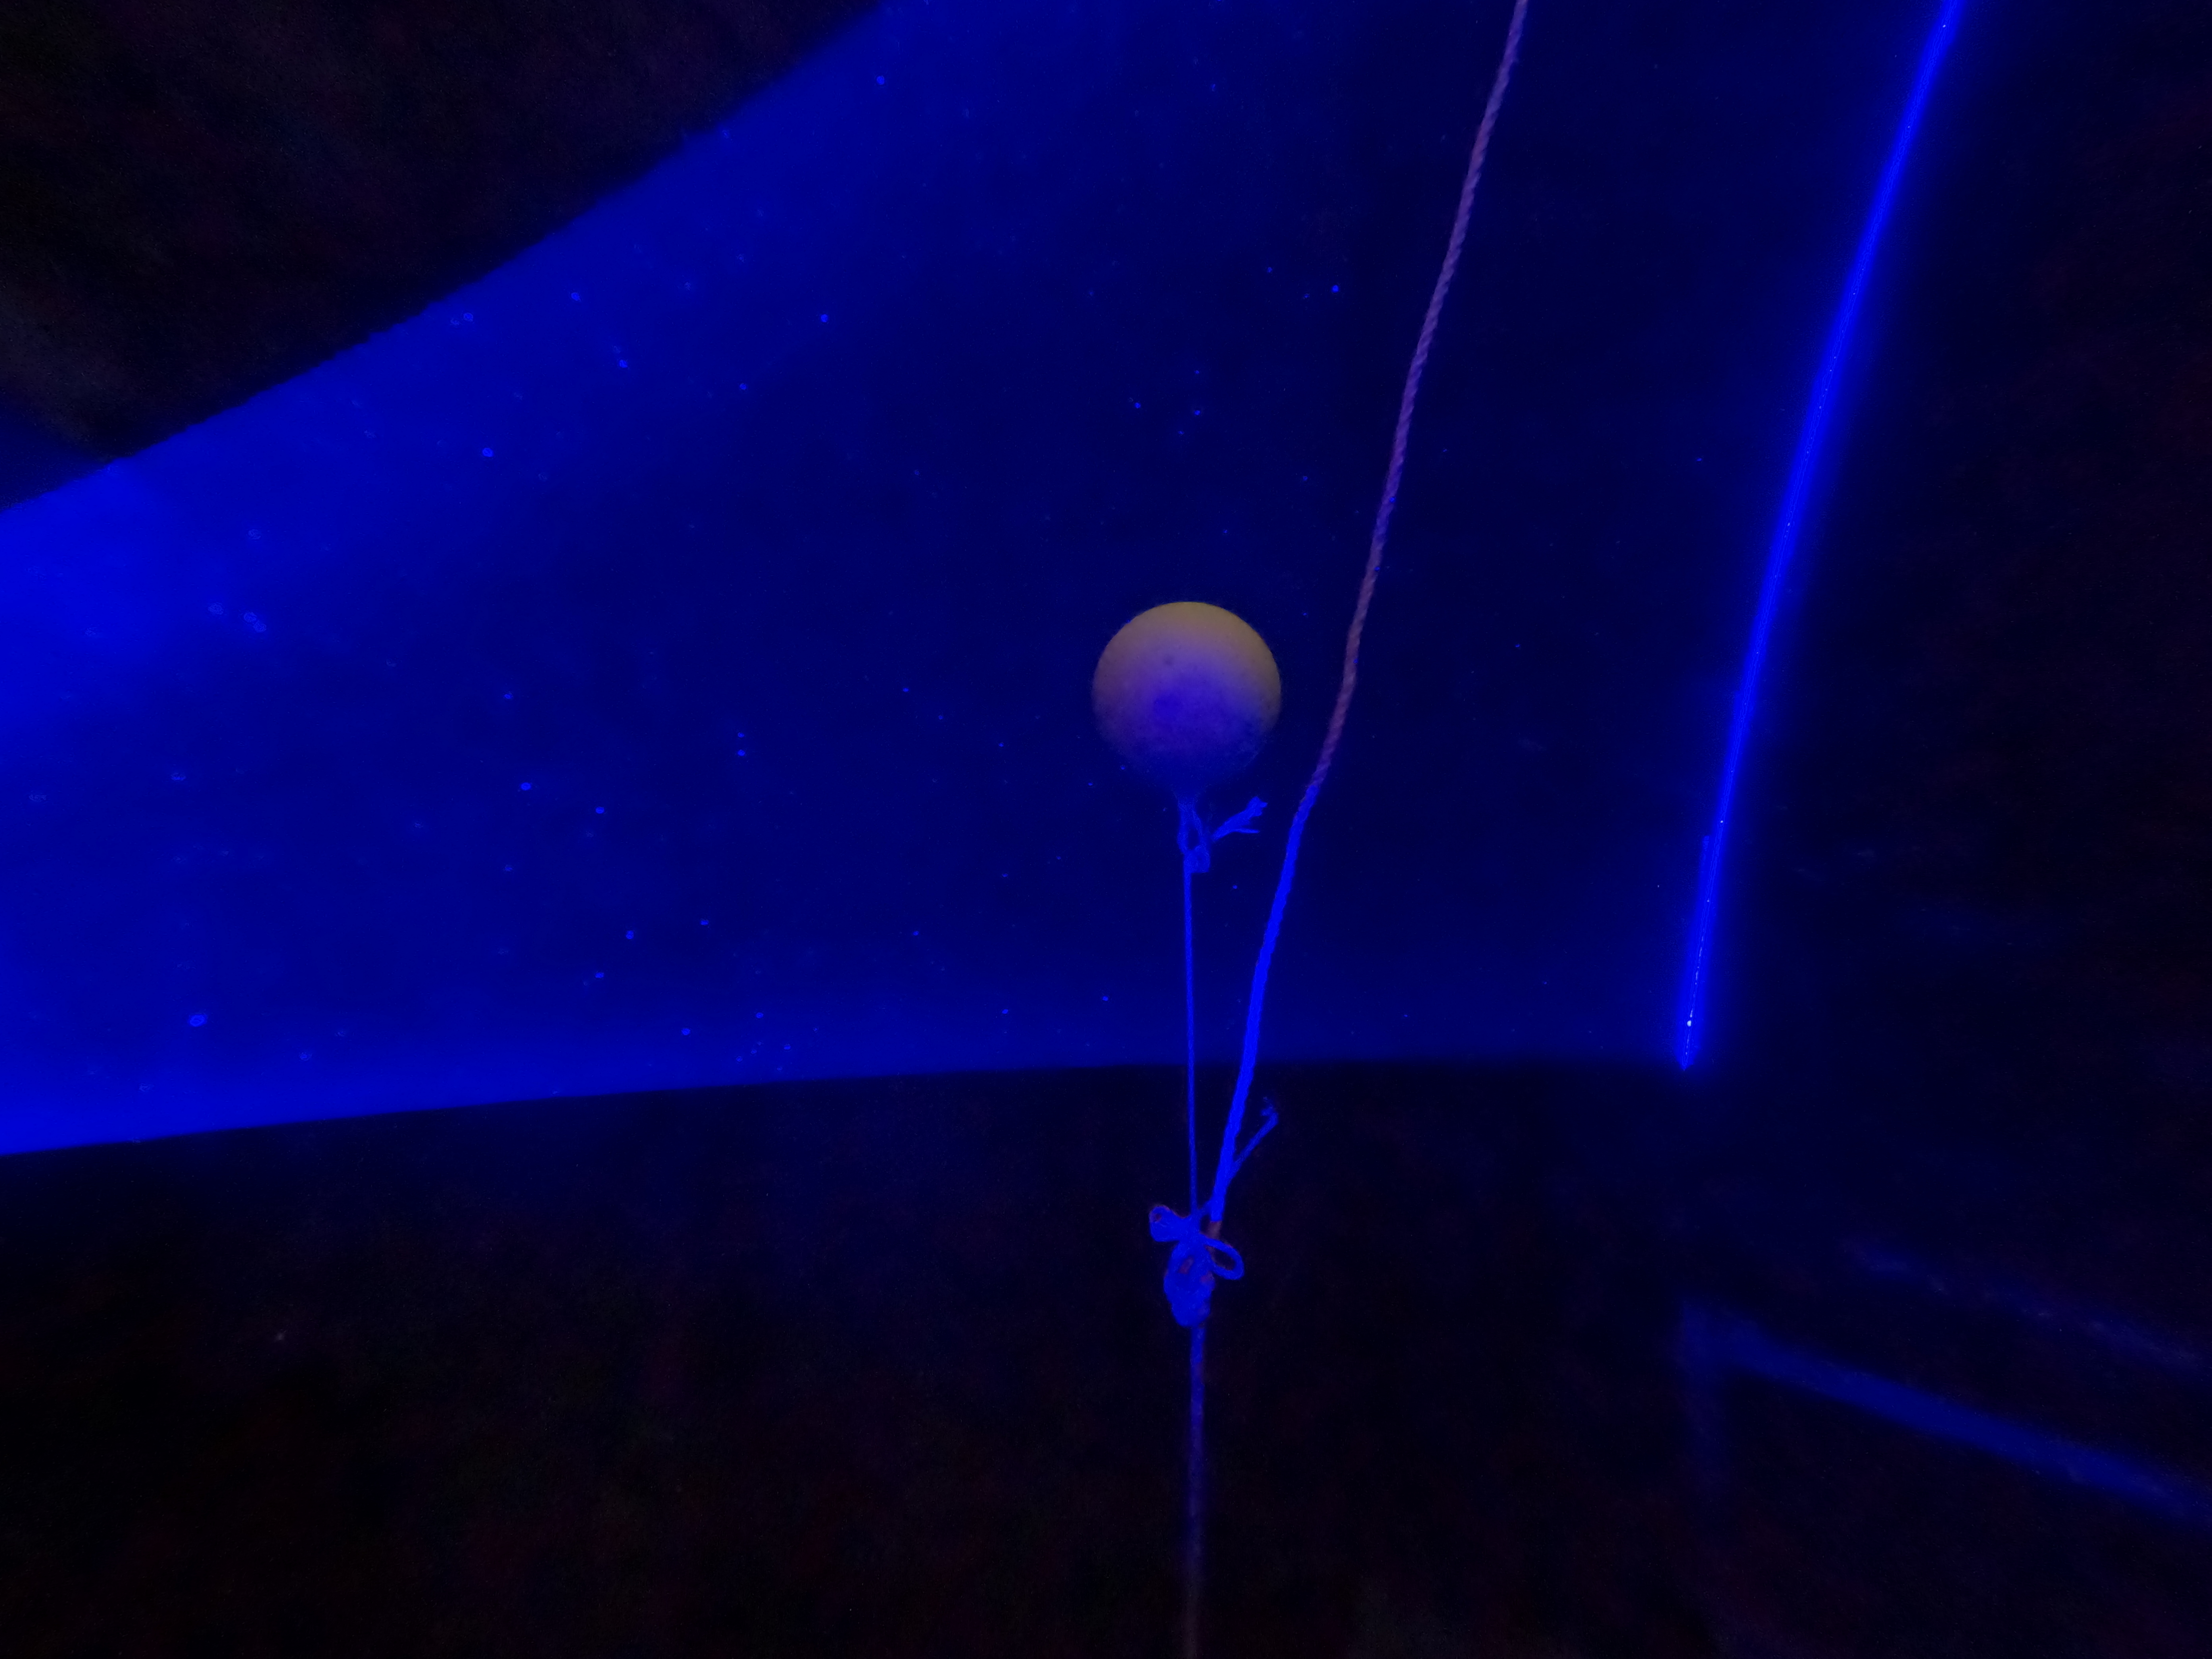

Supplement: Supplementary file 137 [file G0034567.pdf › 9/G0034567.pdf]

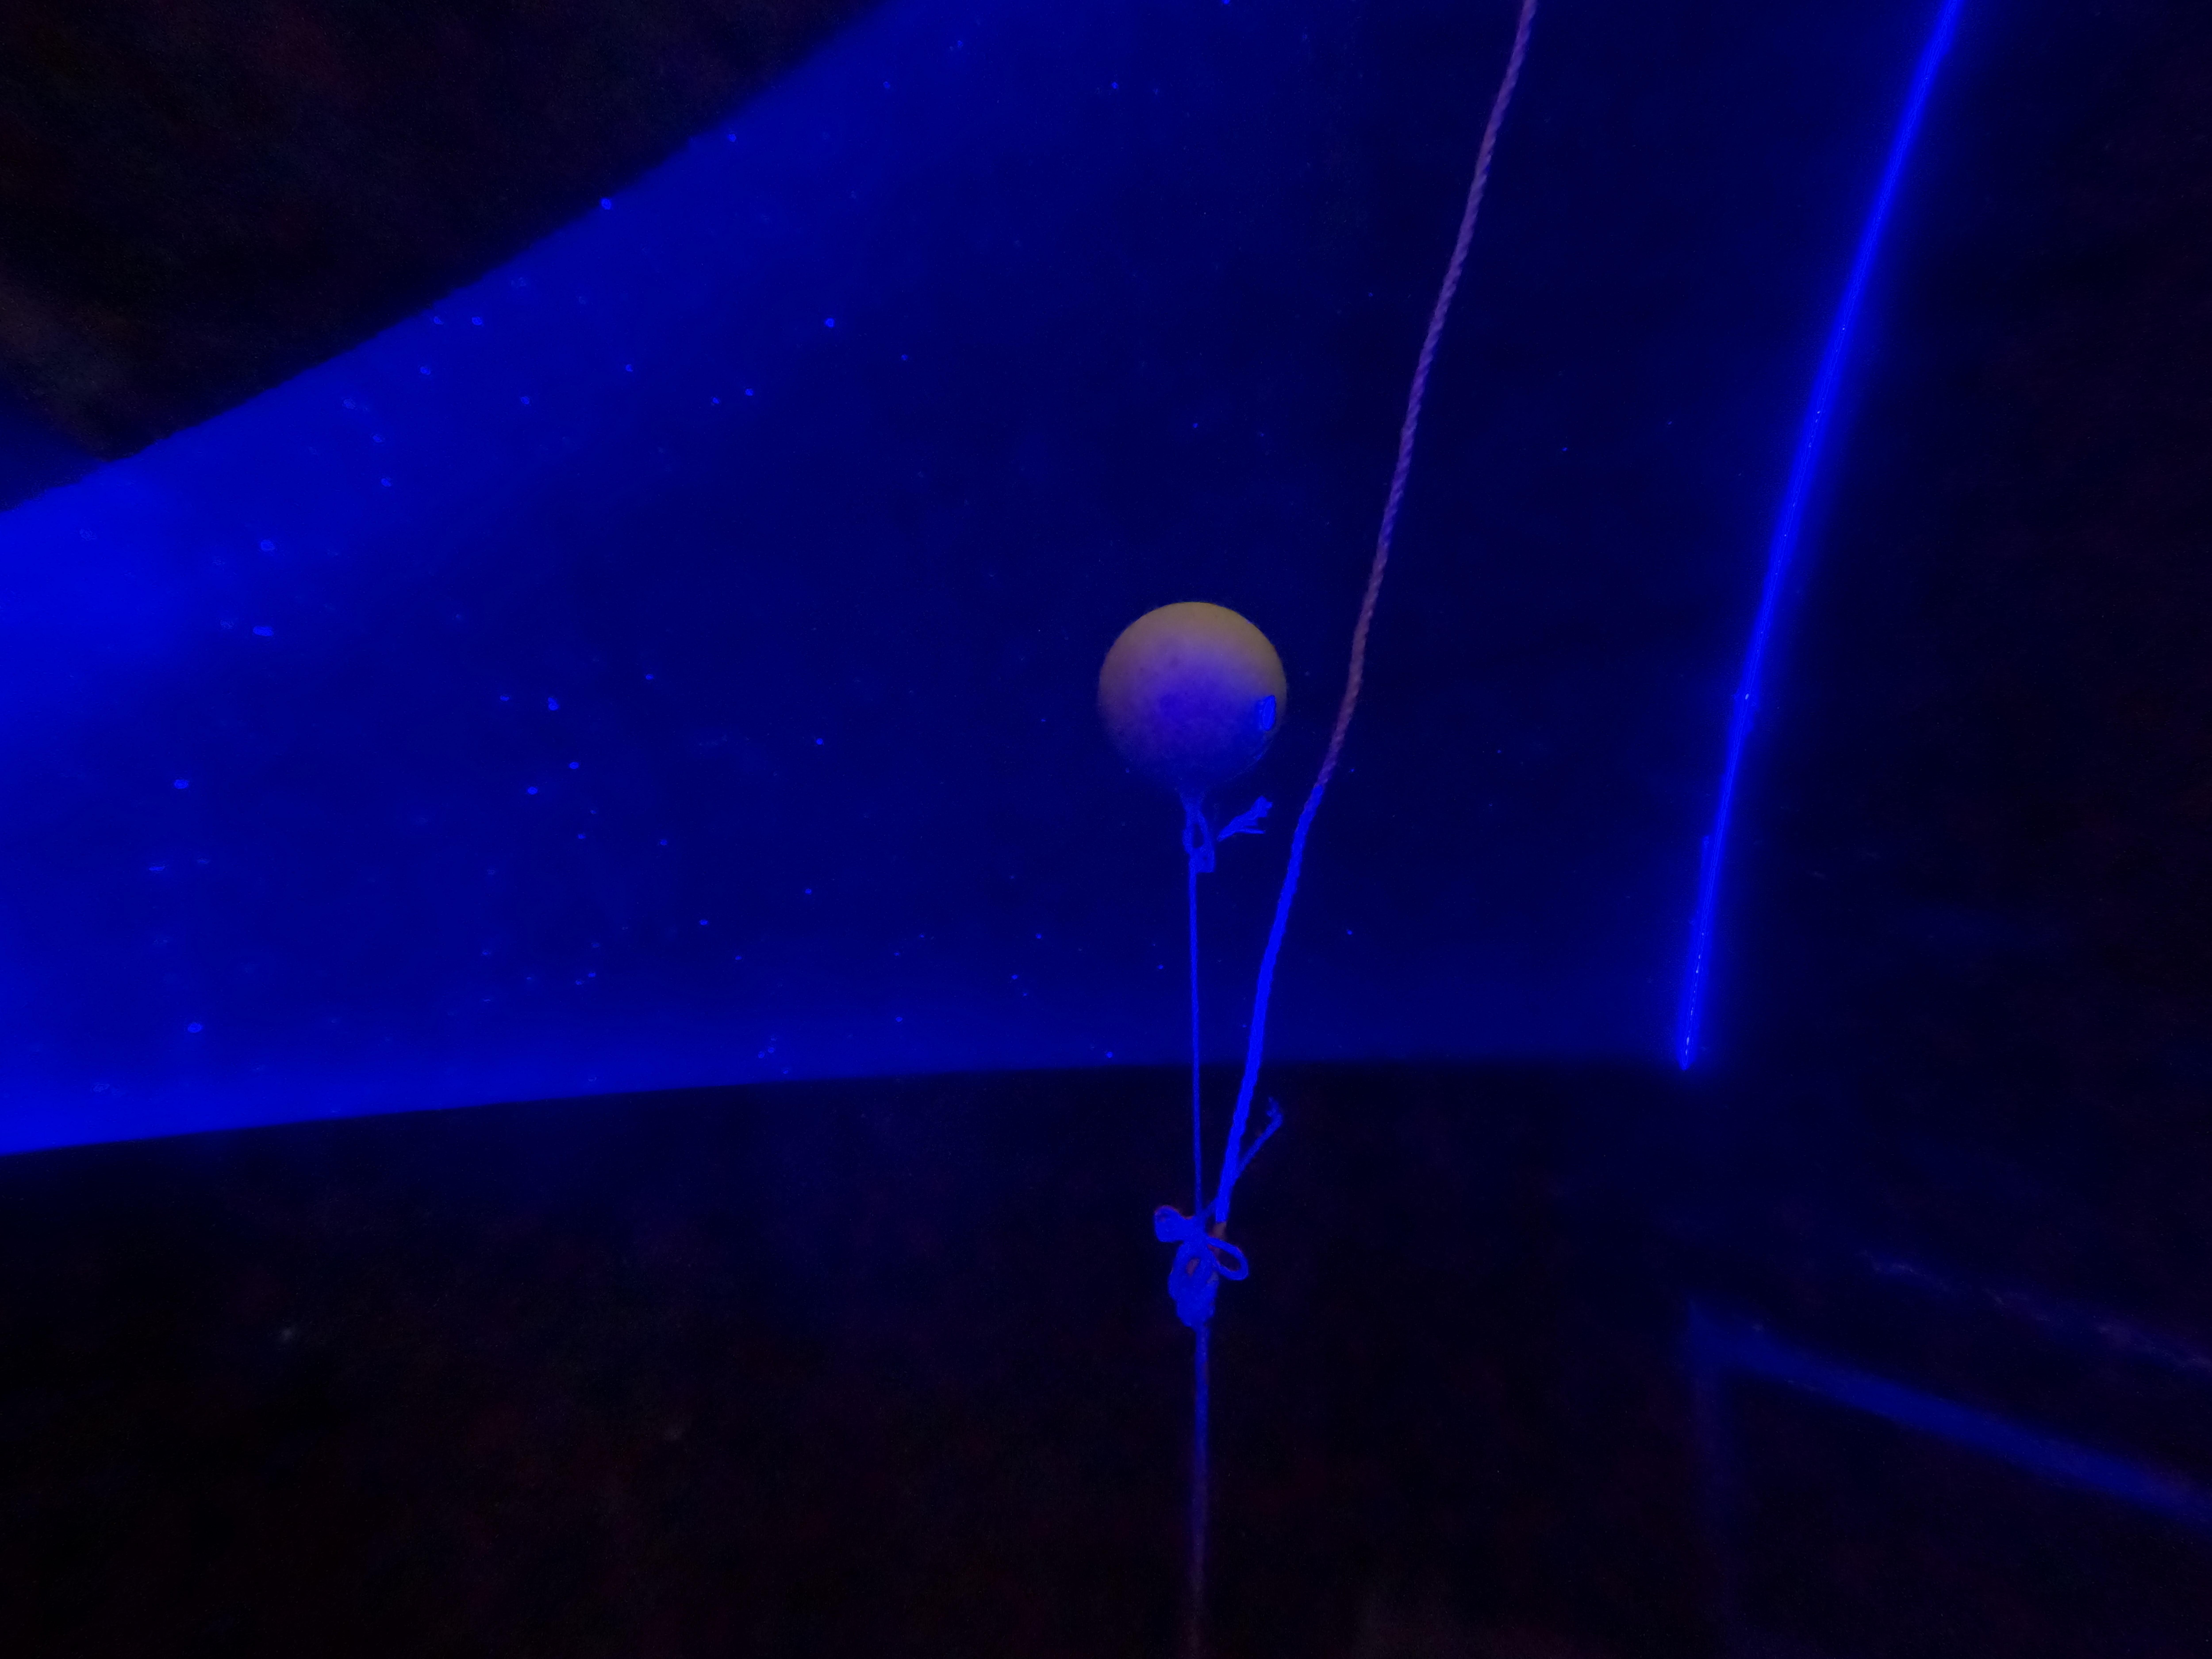

Supplement: Supplementary file 138 [file G0034568.pdf › 9/G0034568.pdf]

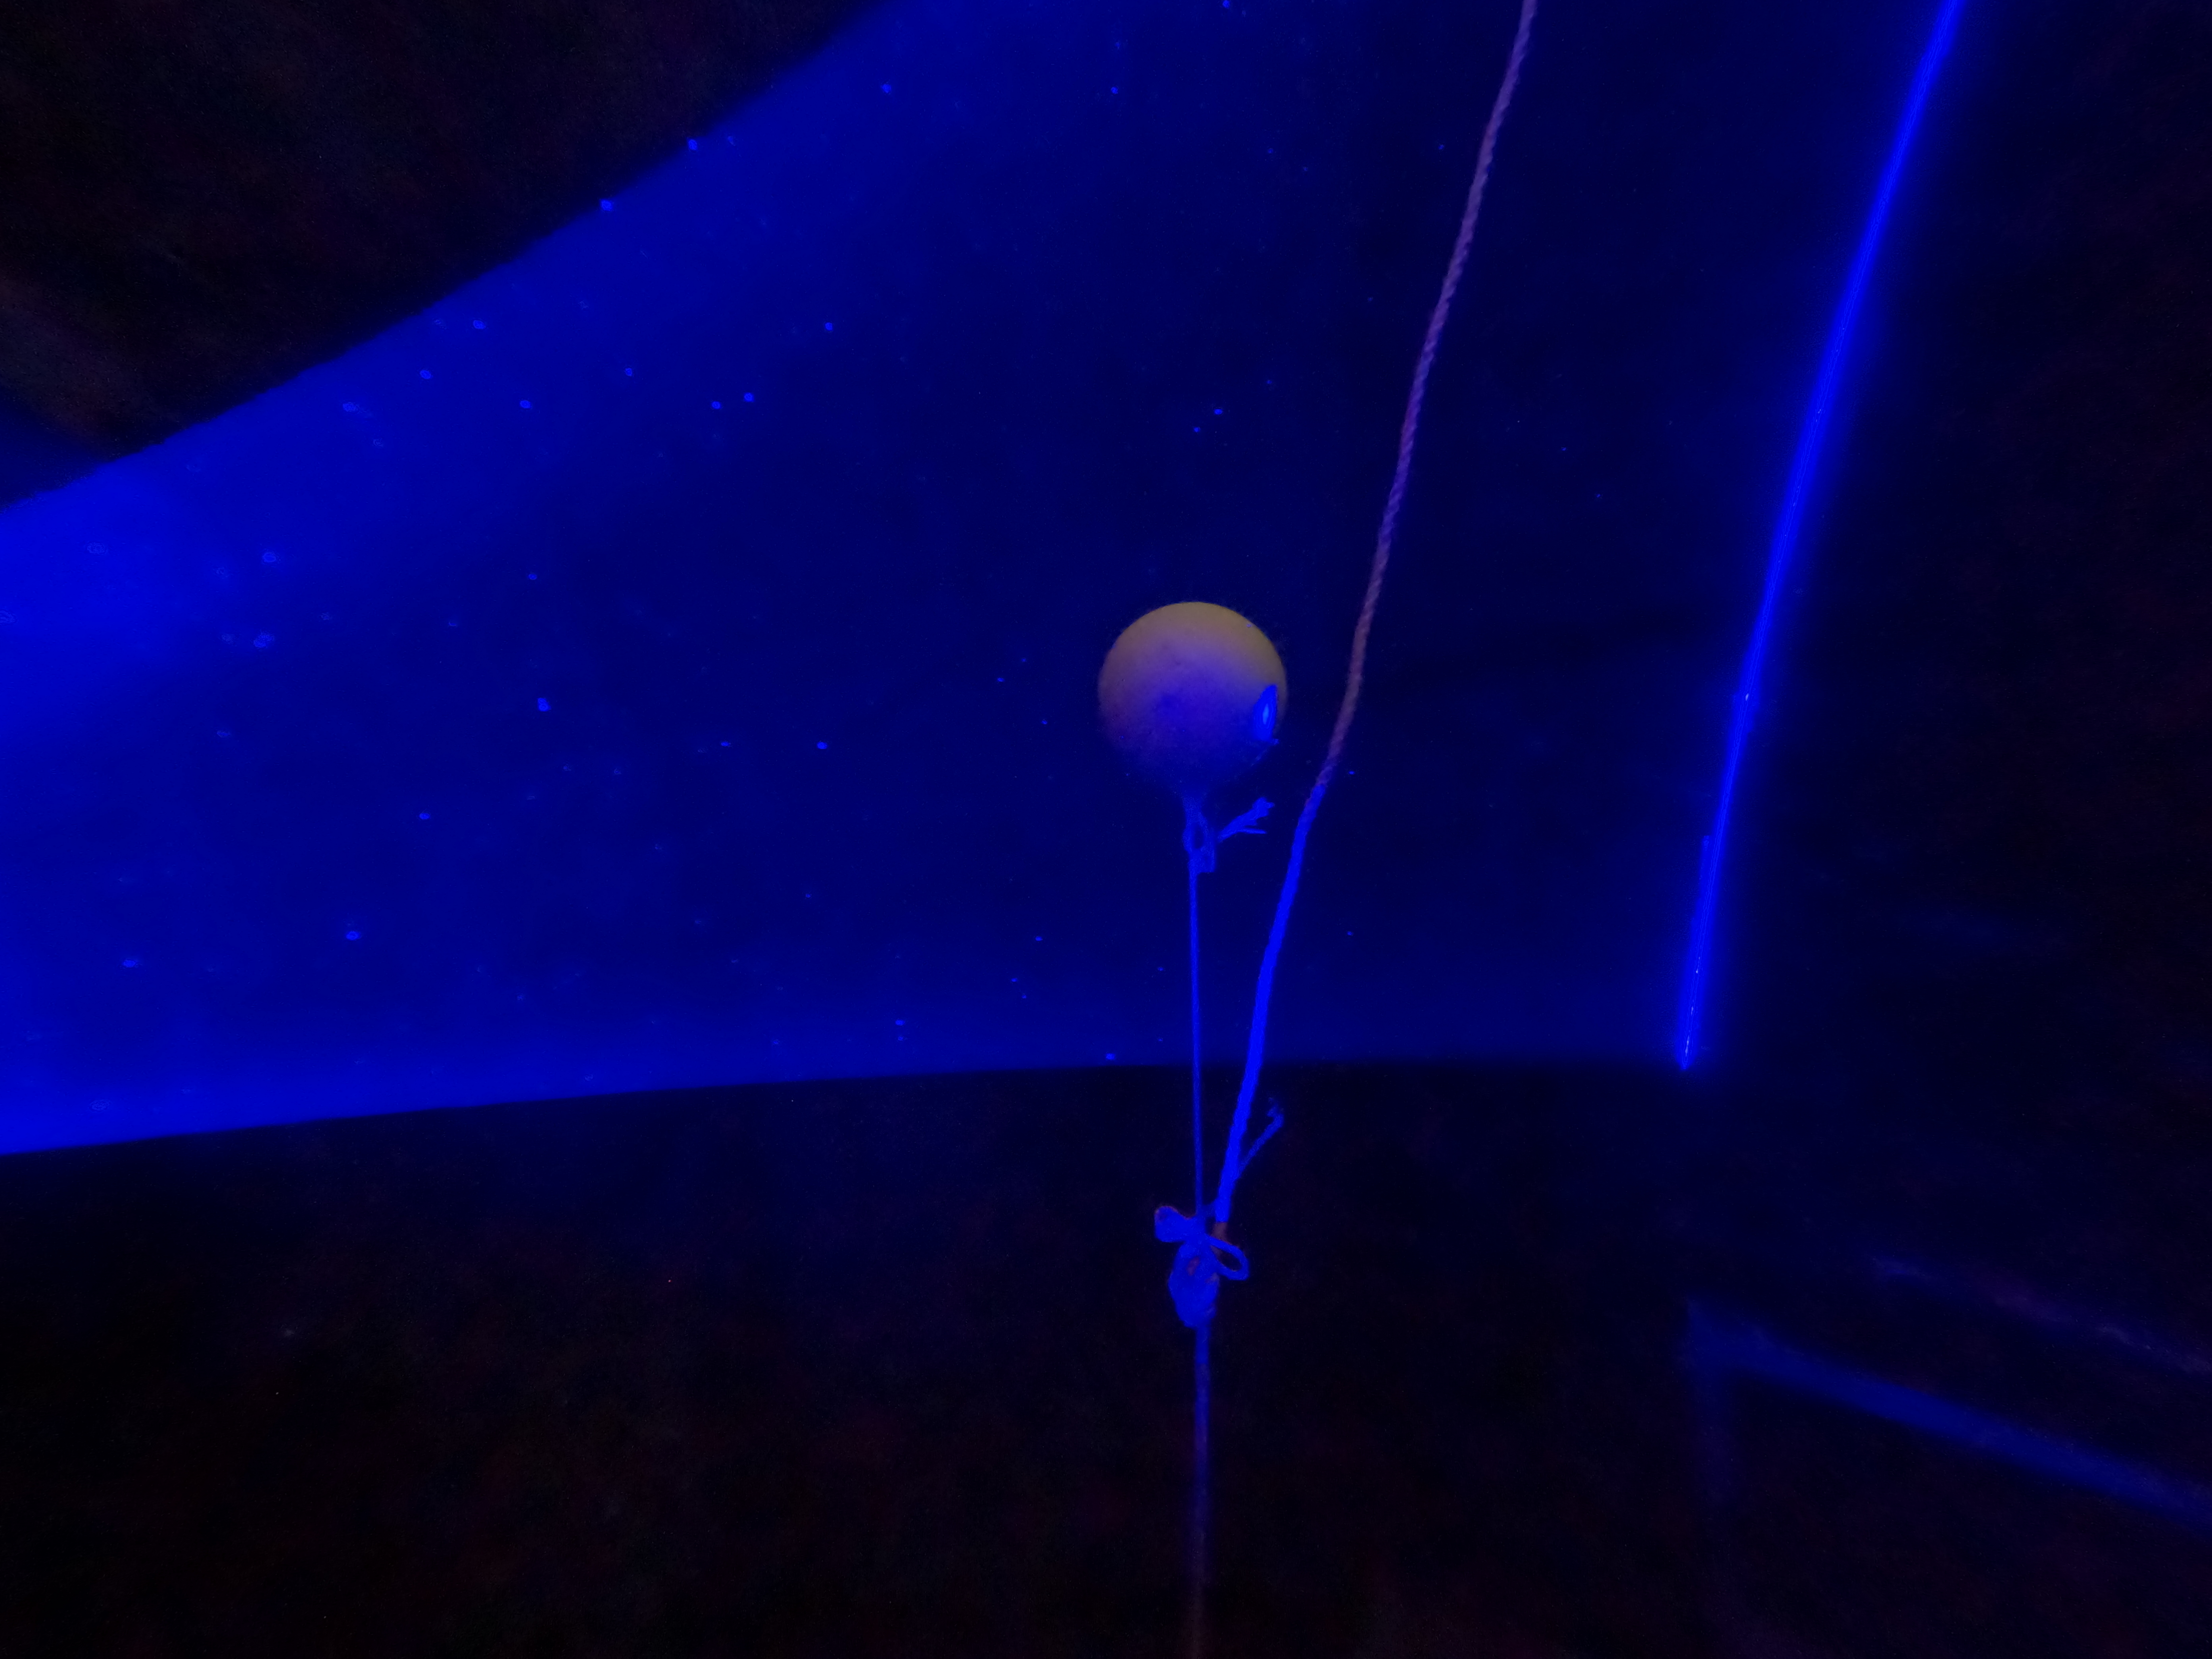

Supplement: Supplementary file 139 [file G0034569.pdf › 9/G0034569.pdf]

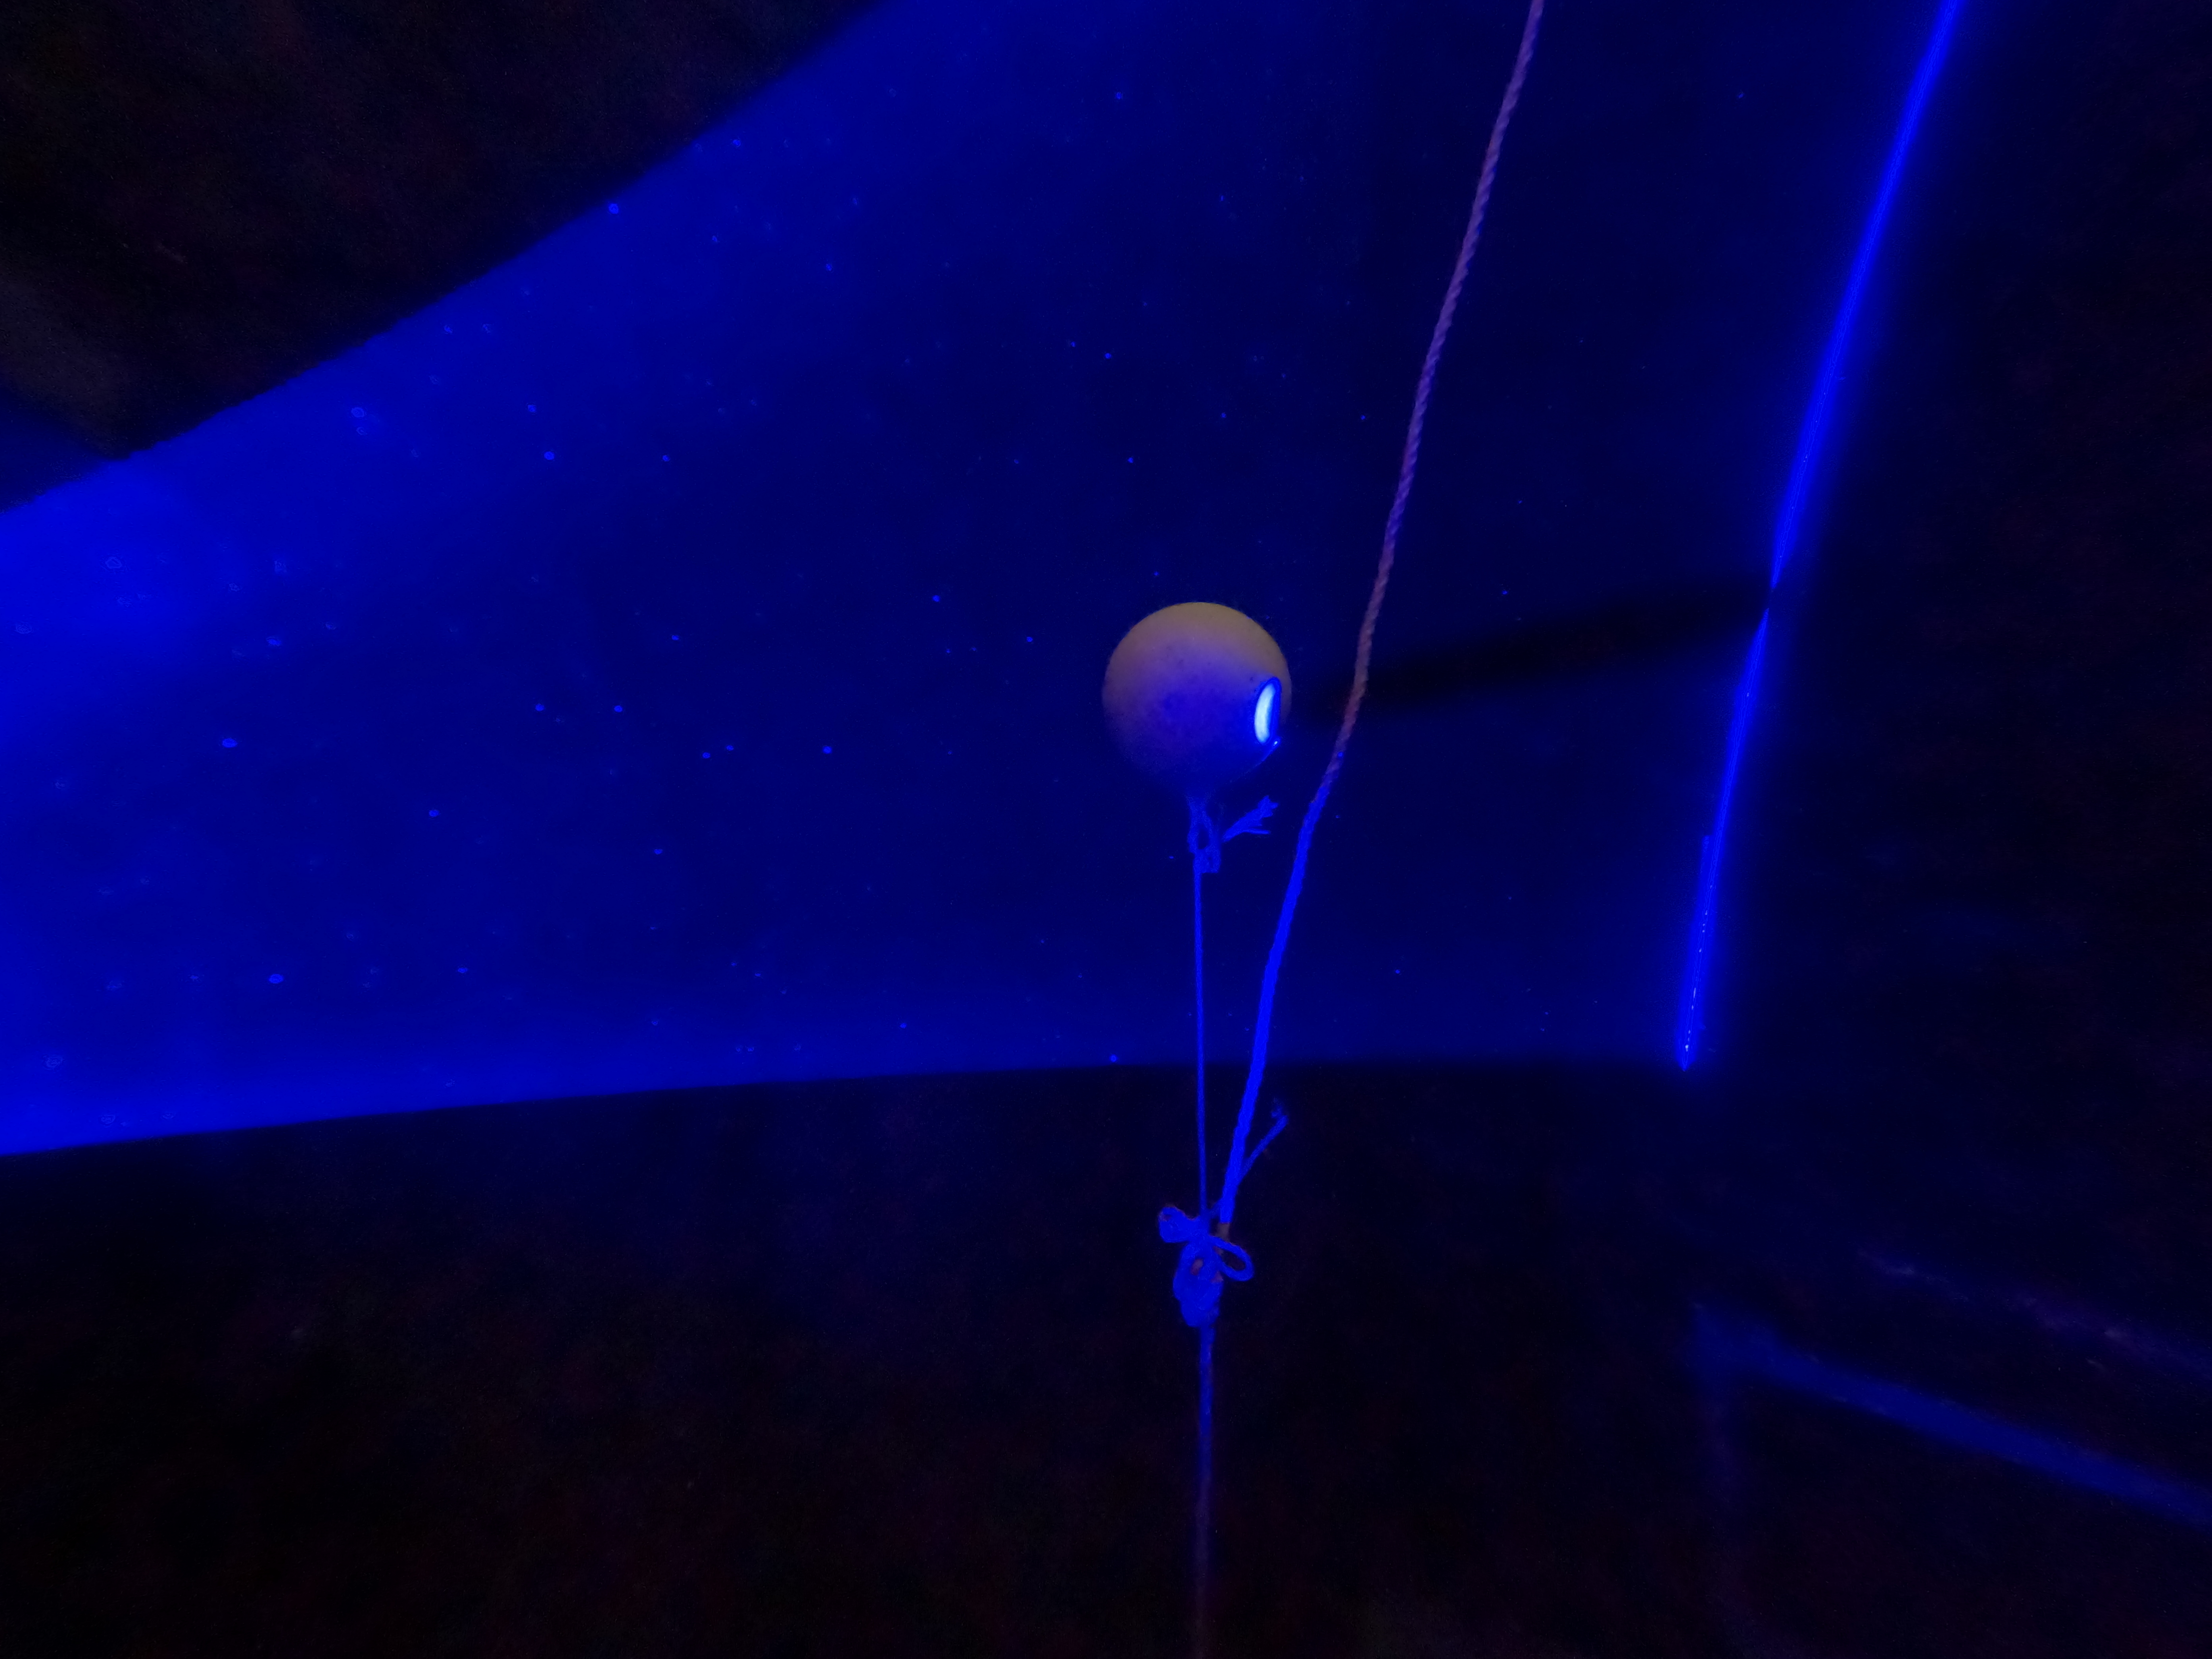

Supplement: Supplementary file 140 [file G0034570.pdf › 9/G0034570.pdf]

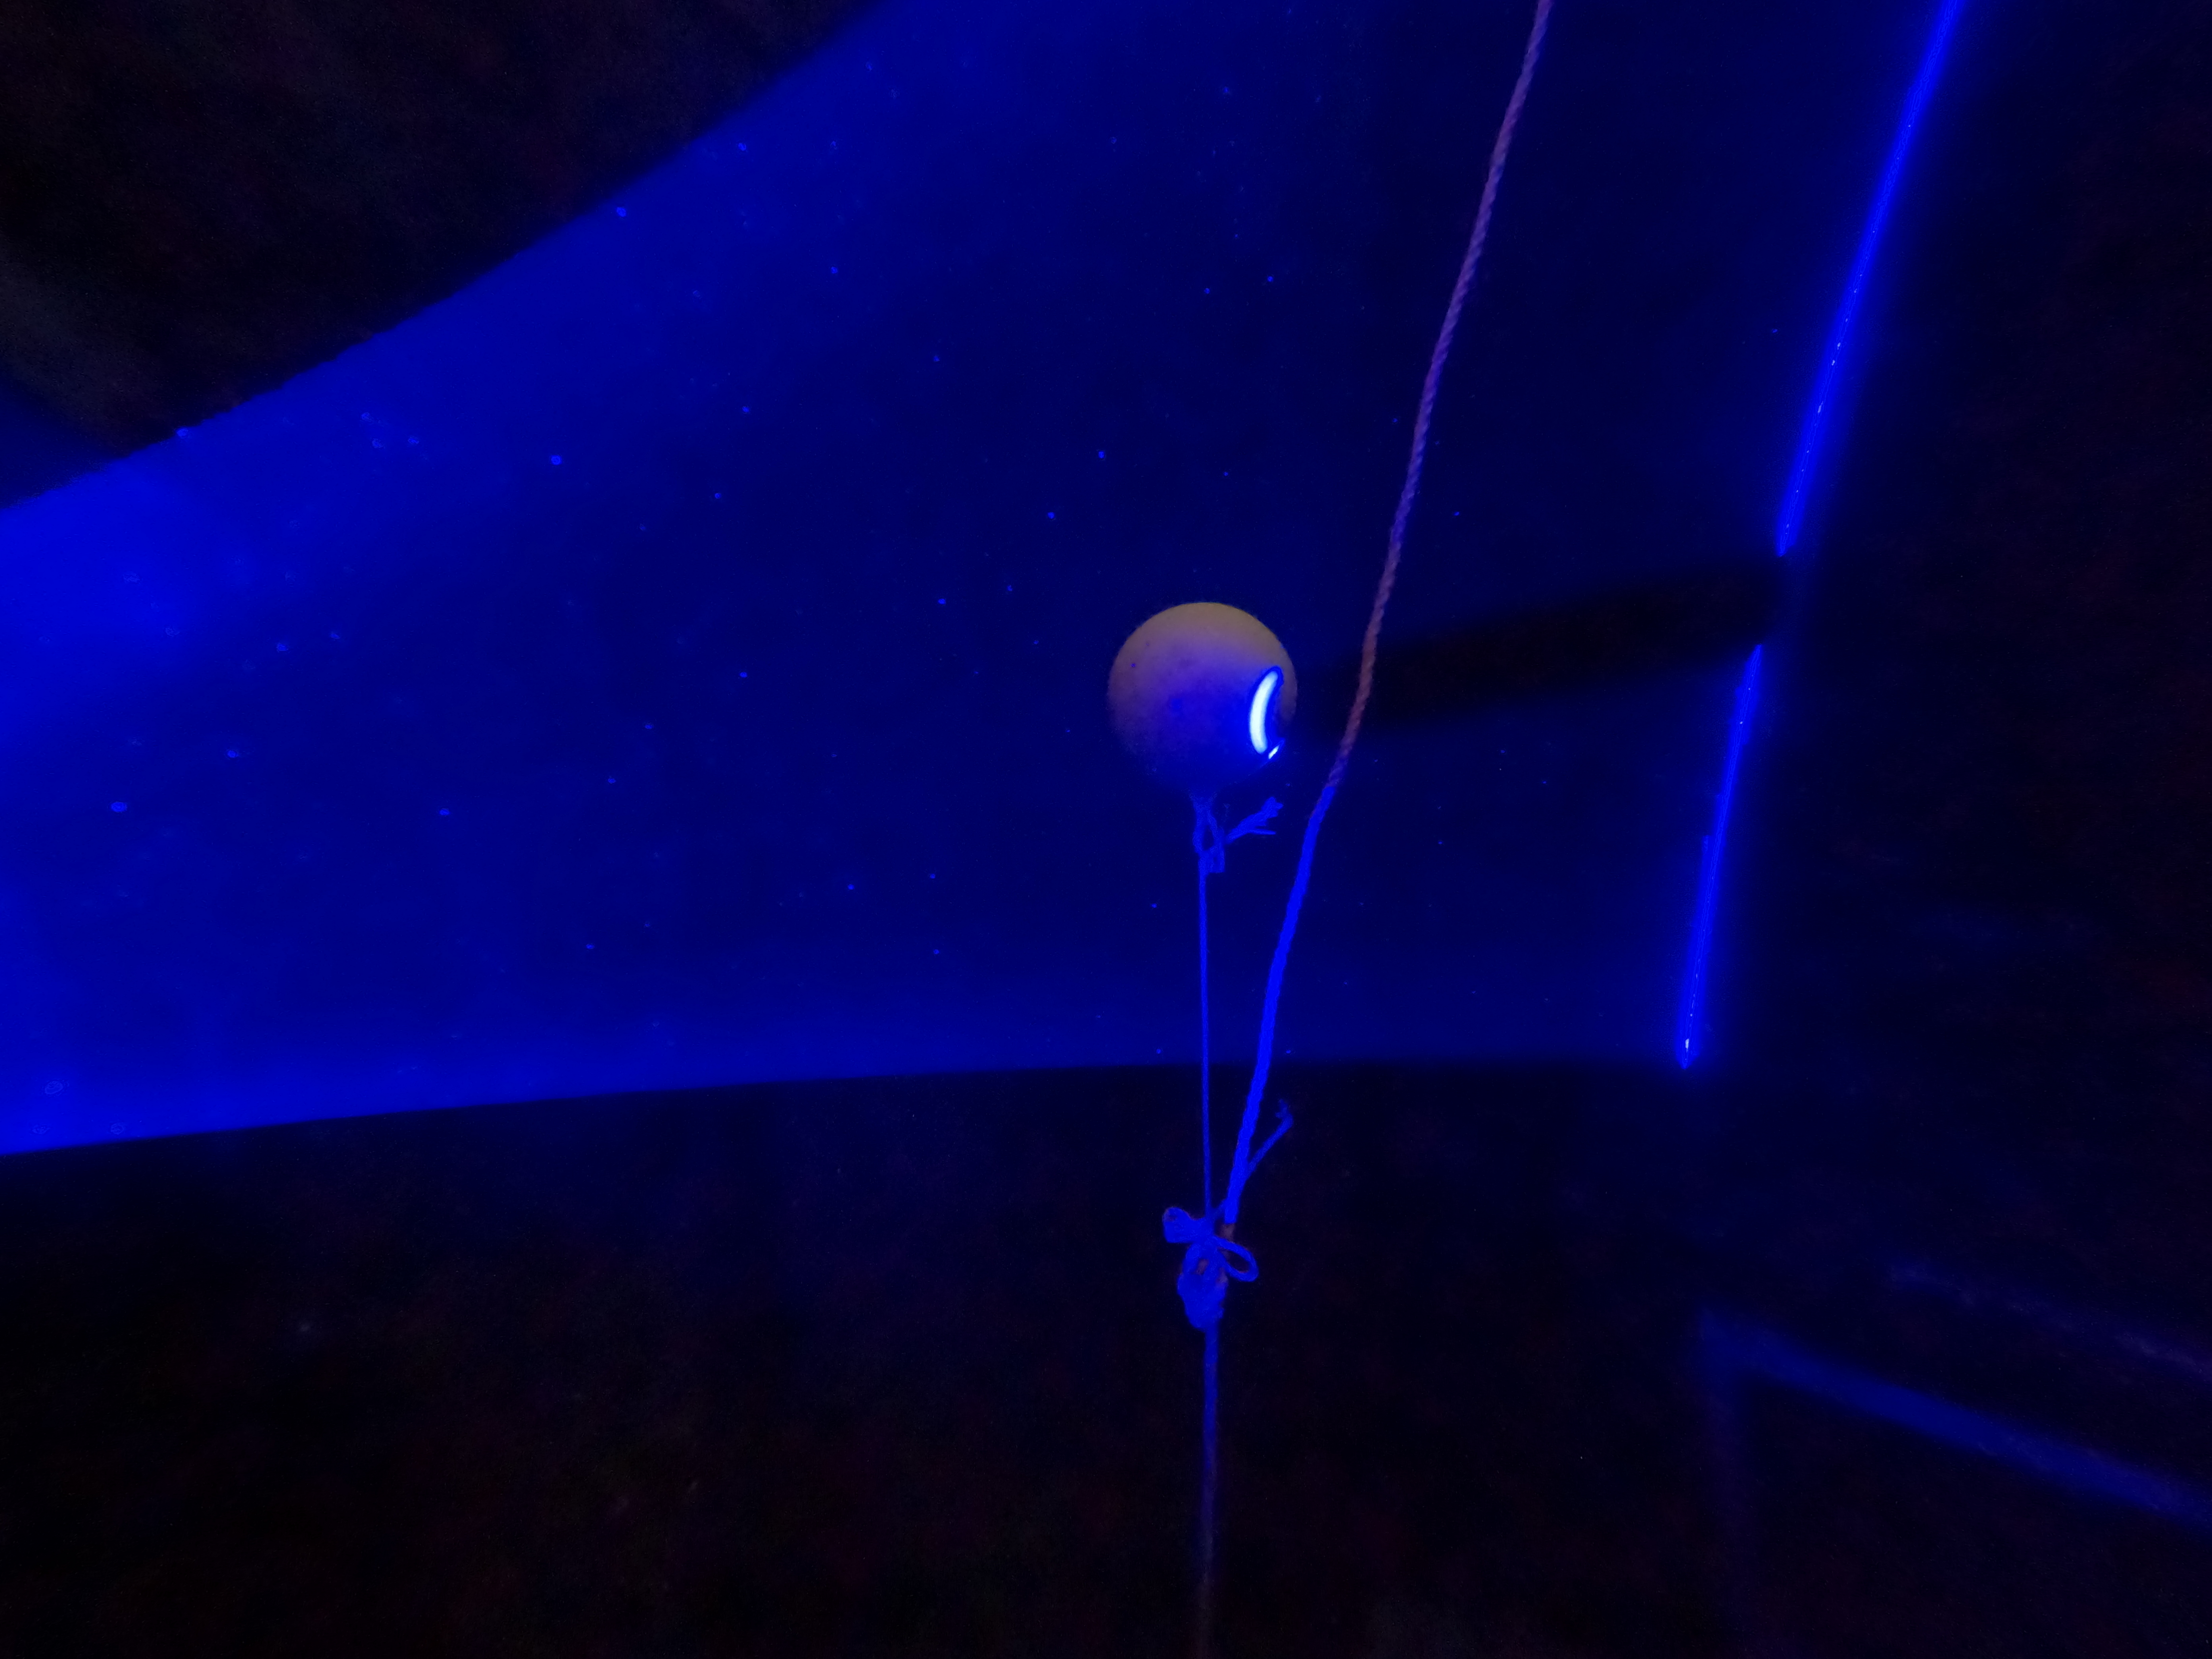

Supplement: Supplementary file 141 [file G0034571.pdf › 9/G0034571.pdf]

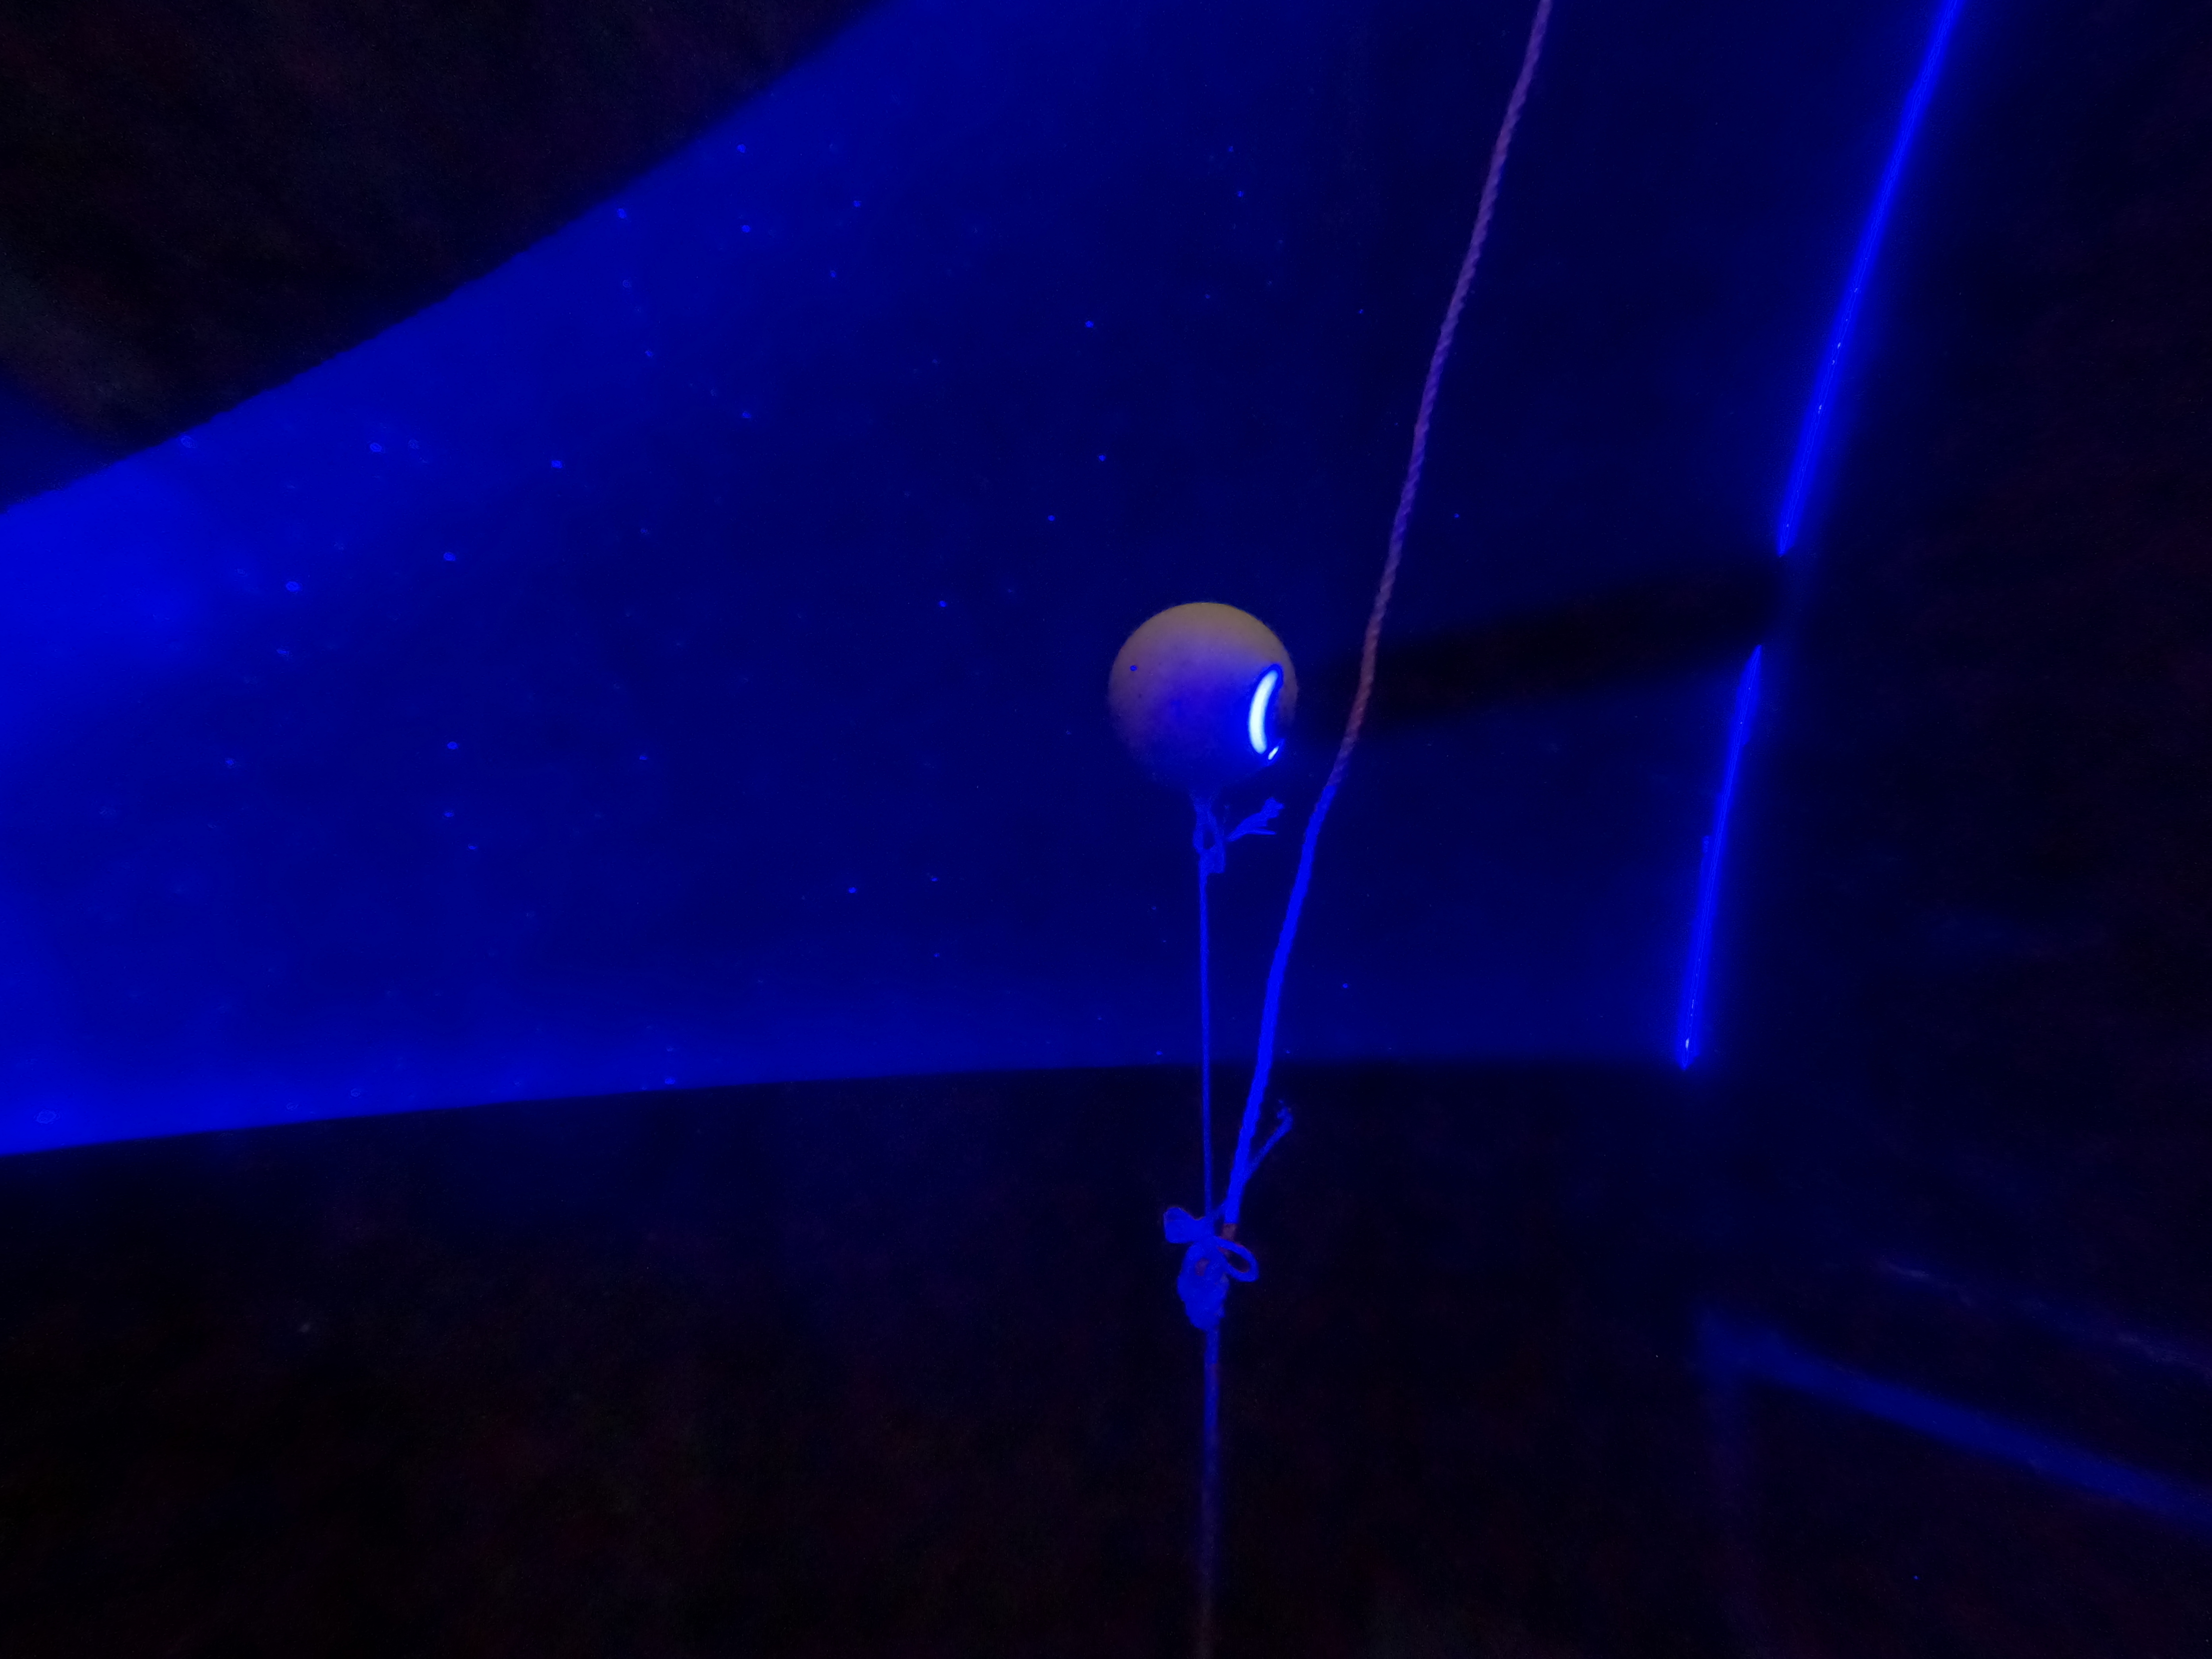

Supplement: Supplementary file 142 [file G0034572.pdf › 9/G0034572.pdf]

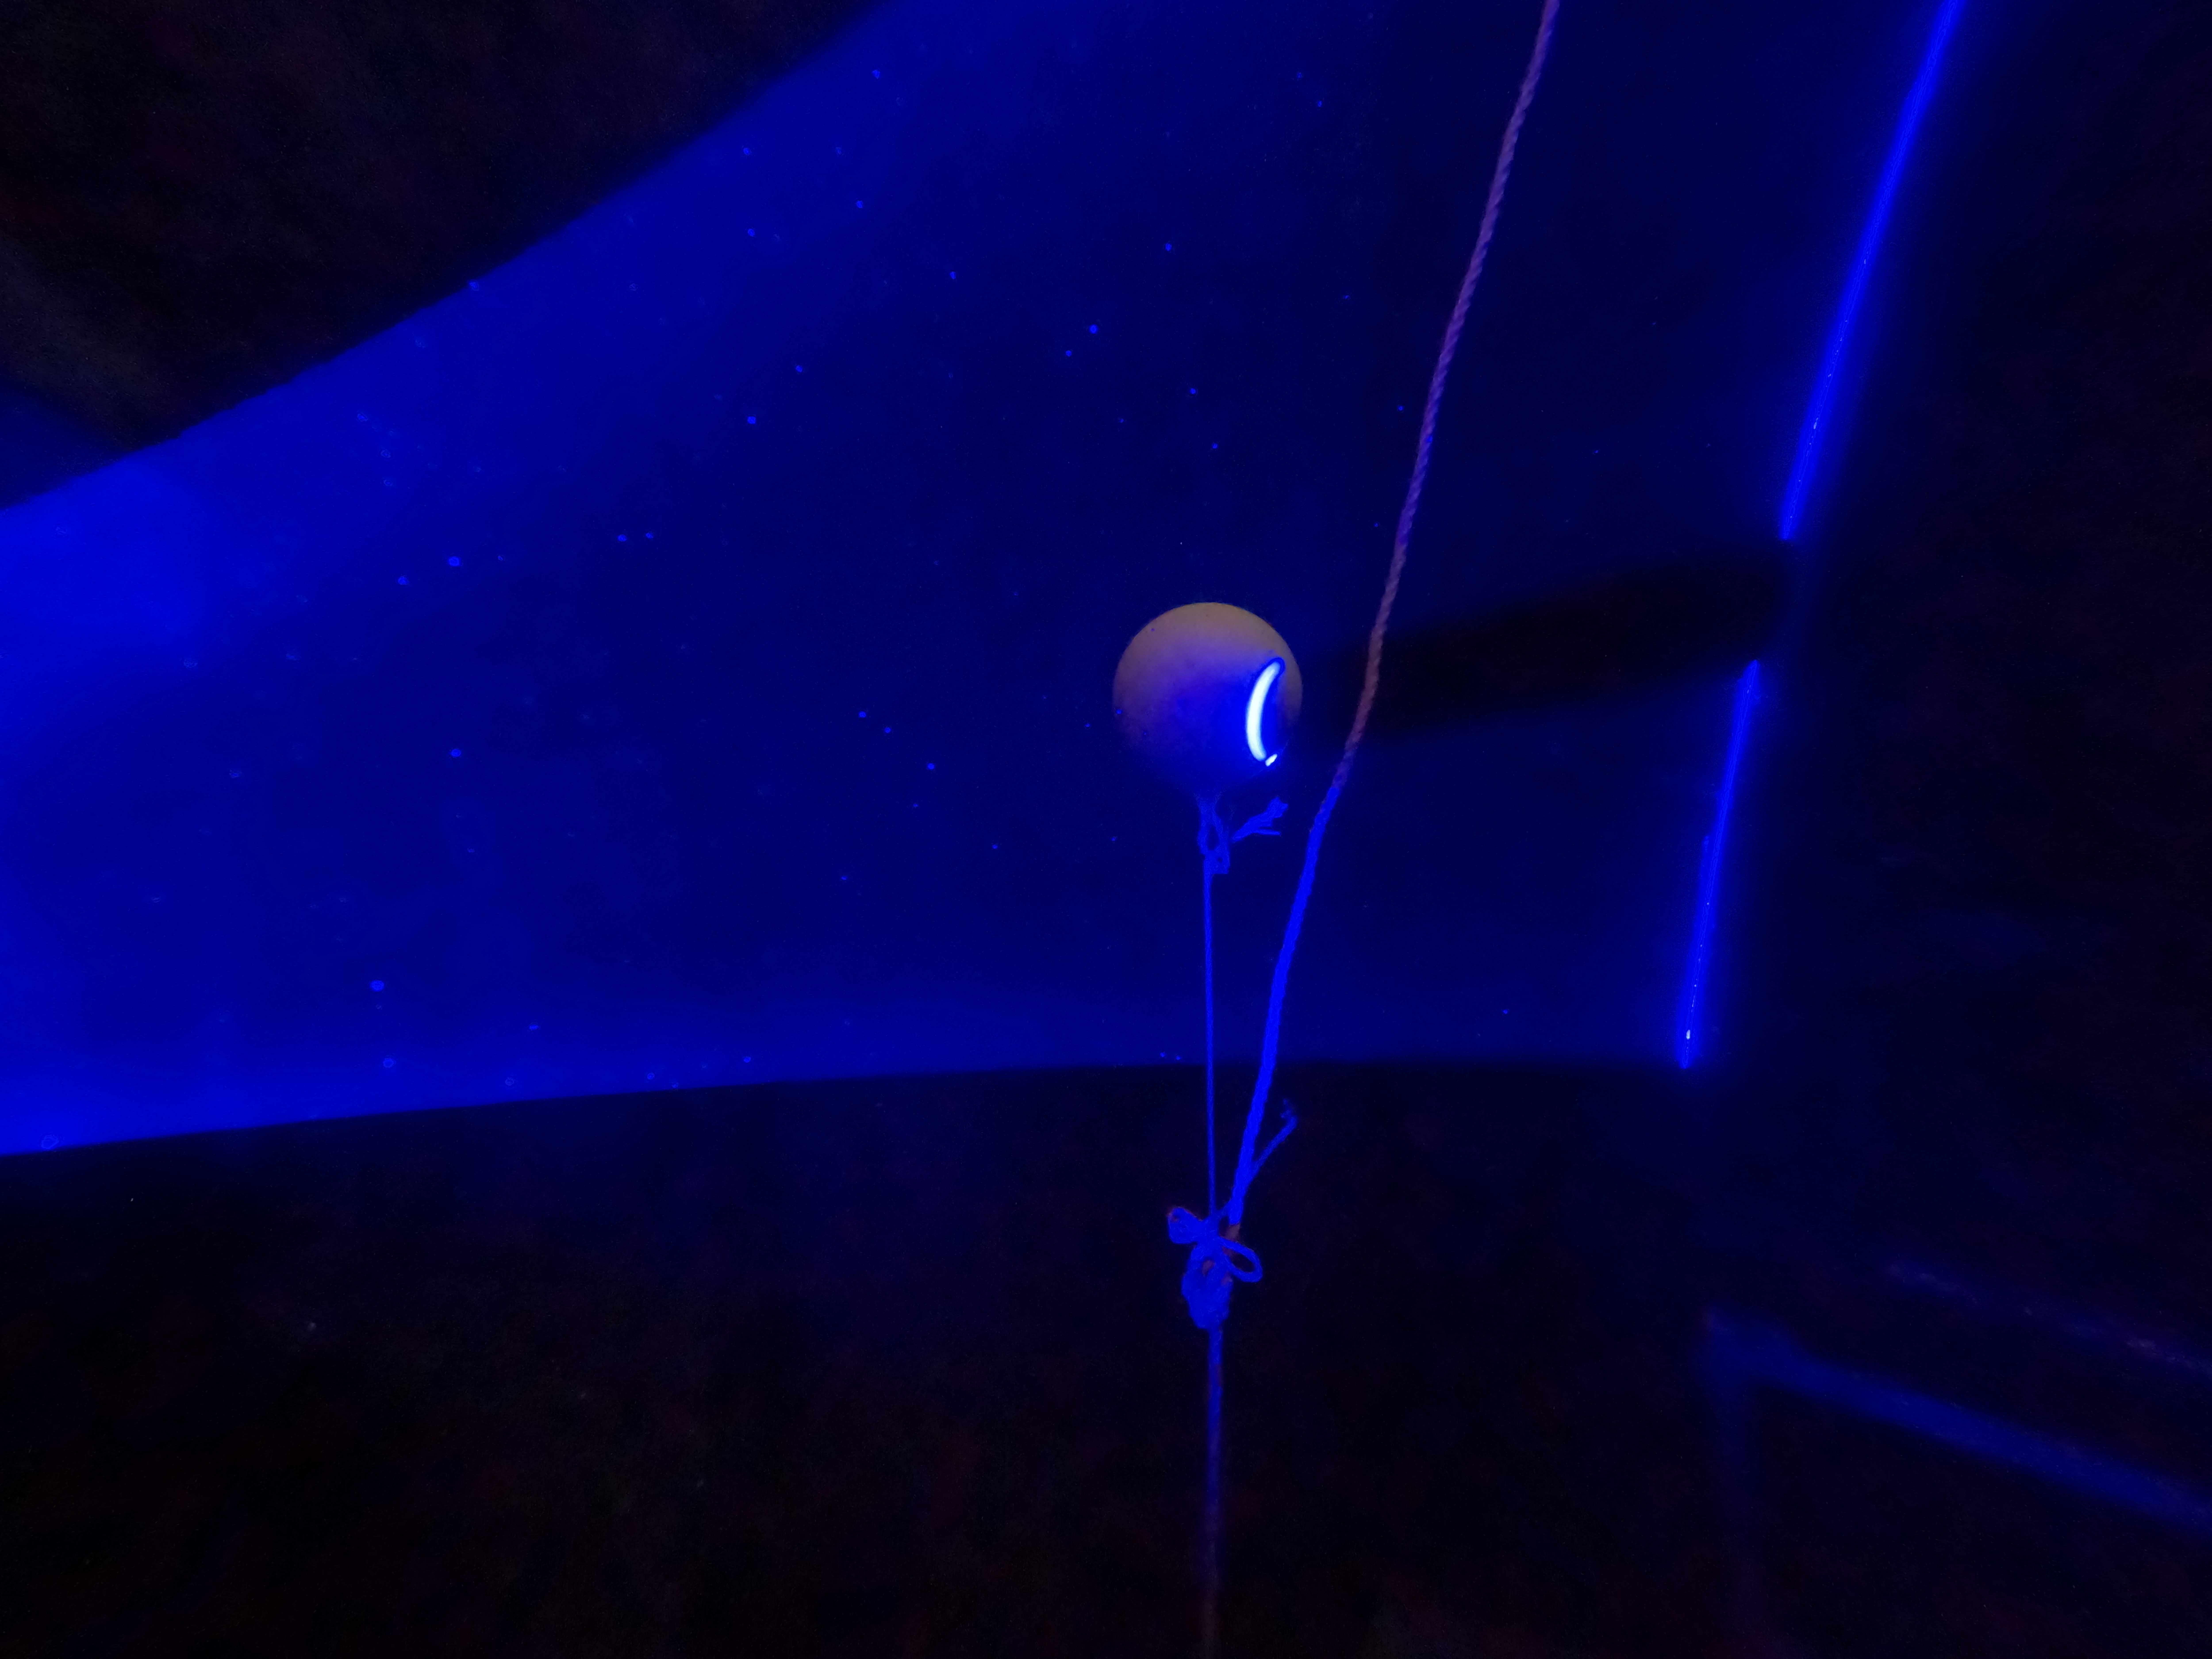

Supplement: Supplementary file 143 [file G0034573.pdf › 9/G0034573.pdf]

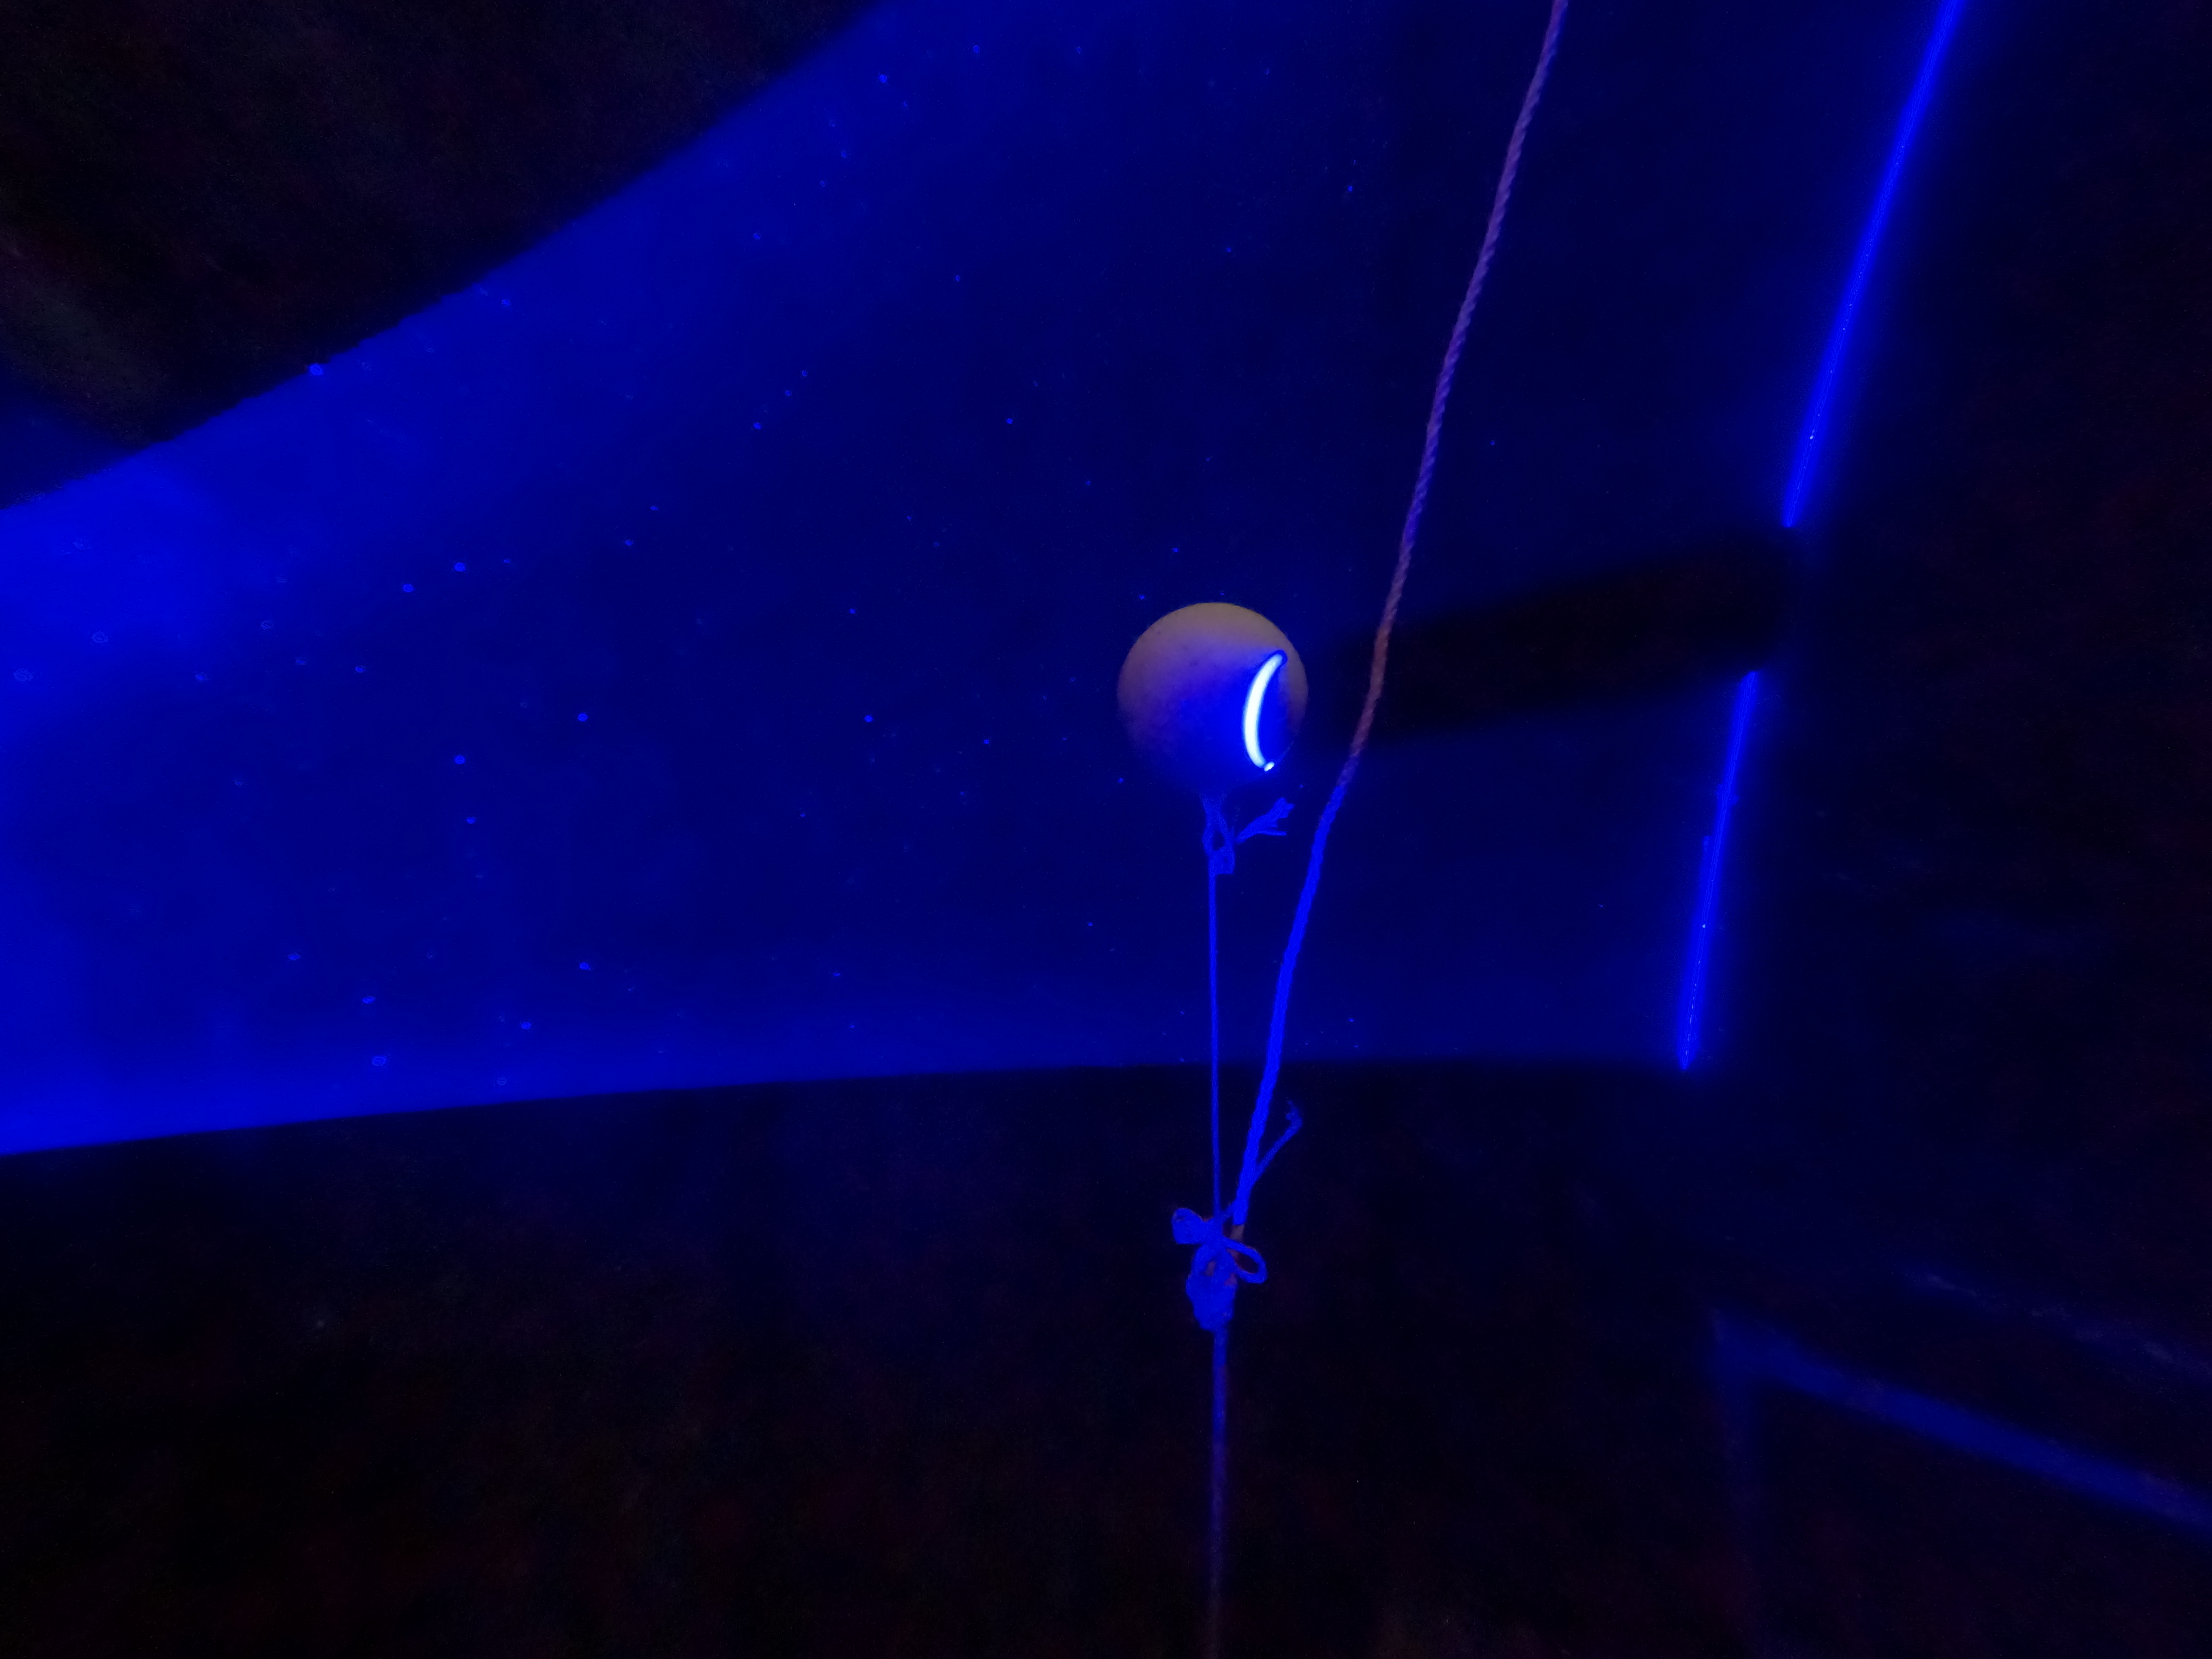

Supplement: Supplementary file 144 [file G0034574.pdf › 9/G0034574.pdf]

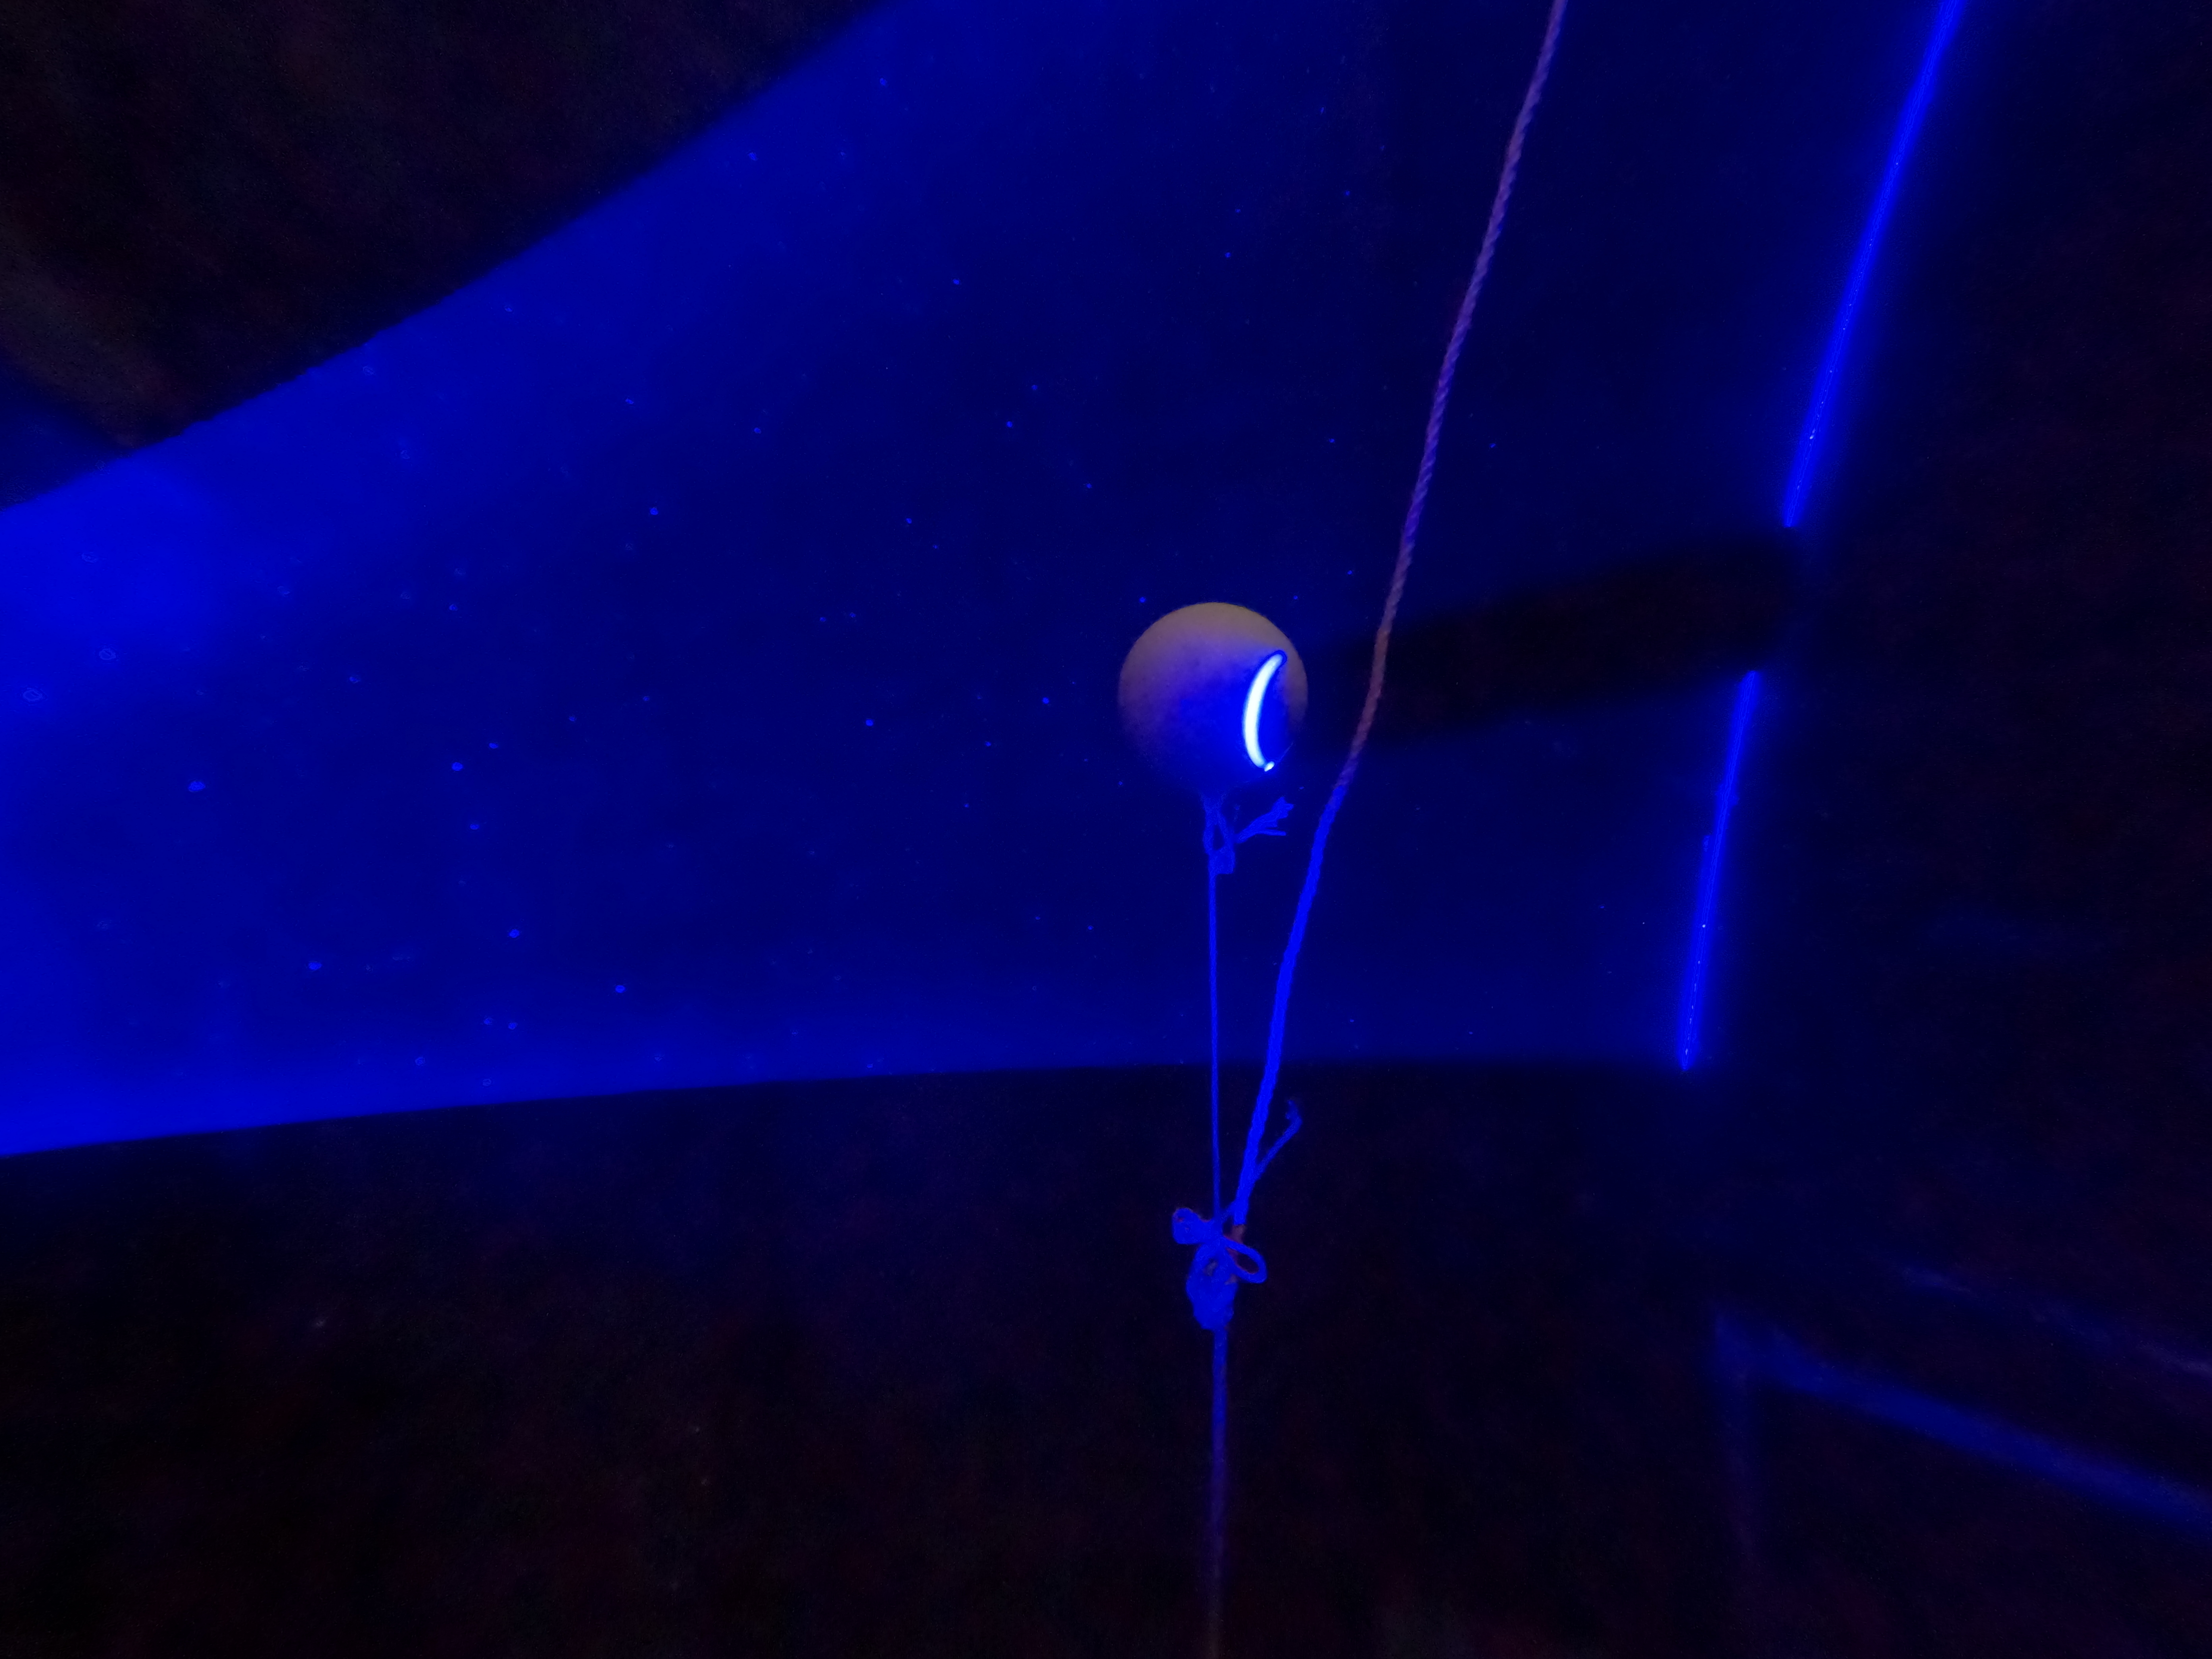

Supplement: Supplementary file 145 [file G0034575.pdf › 9/G0034575.pdf]

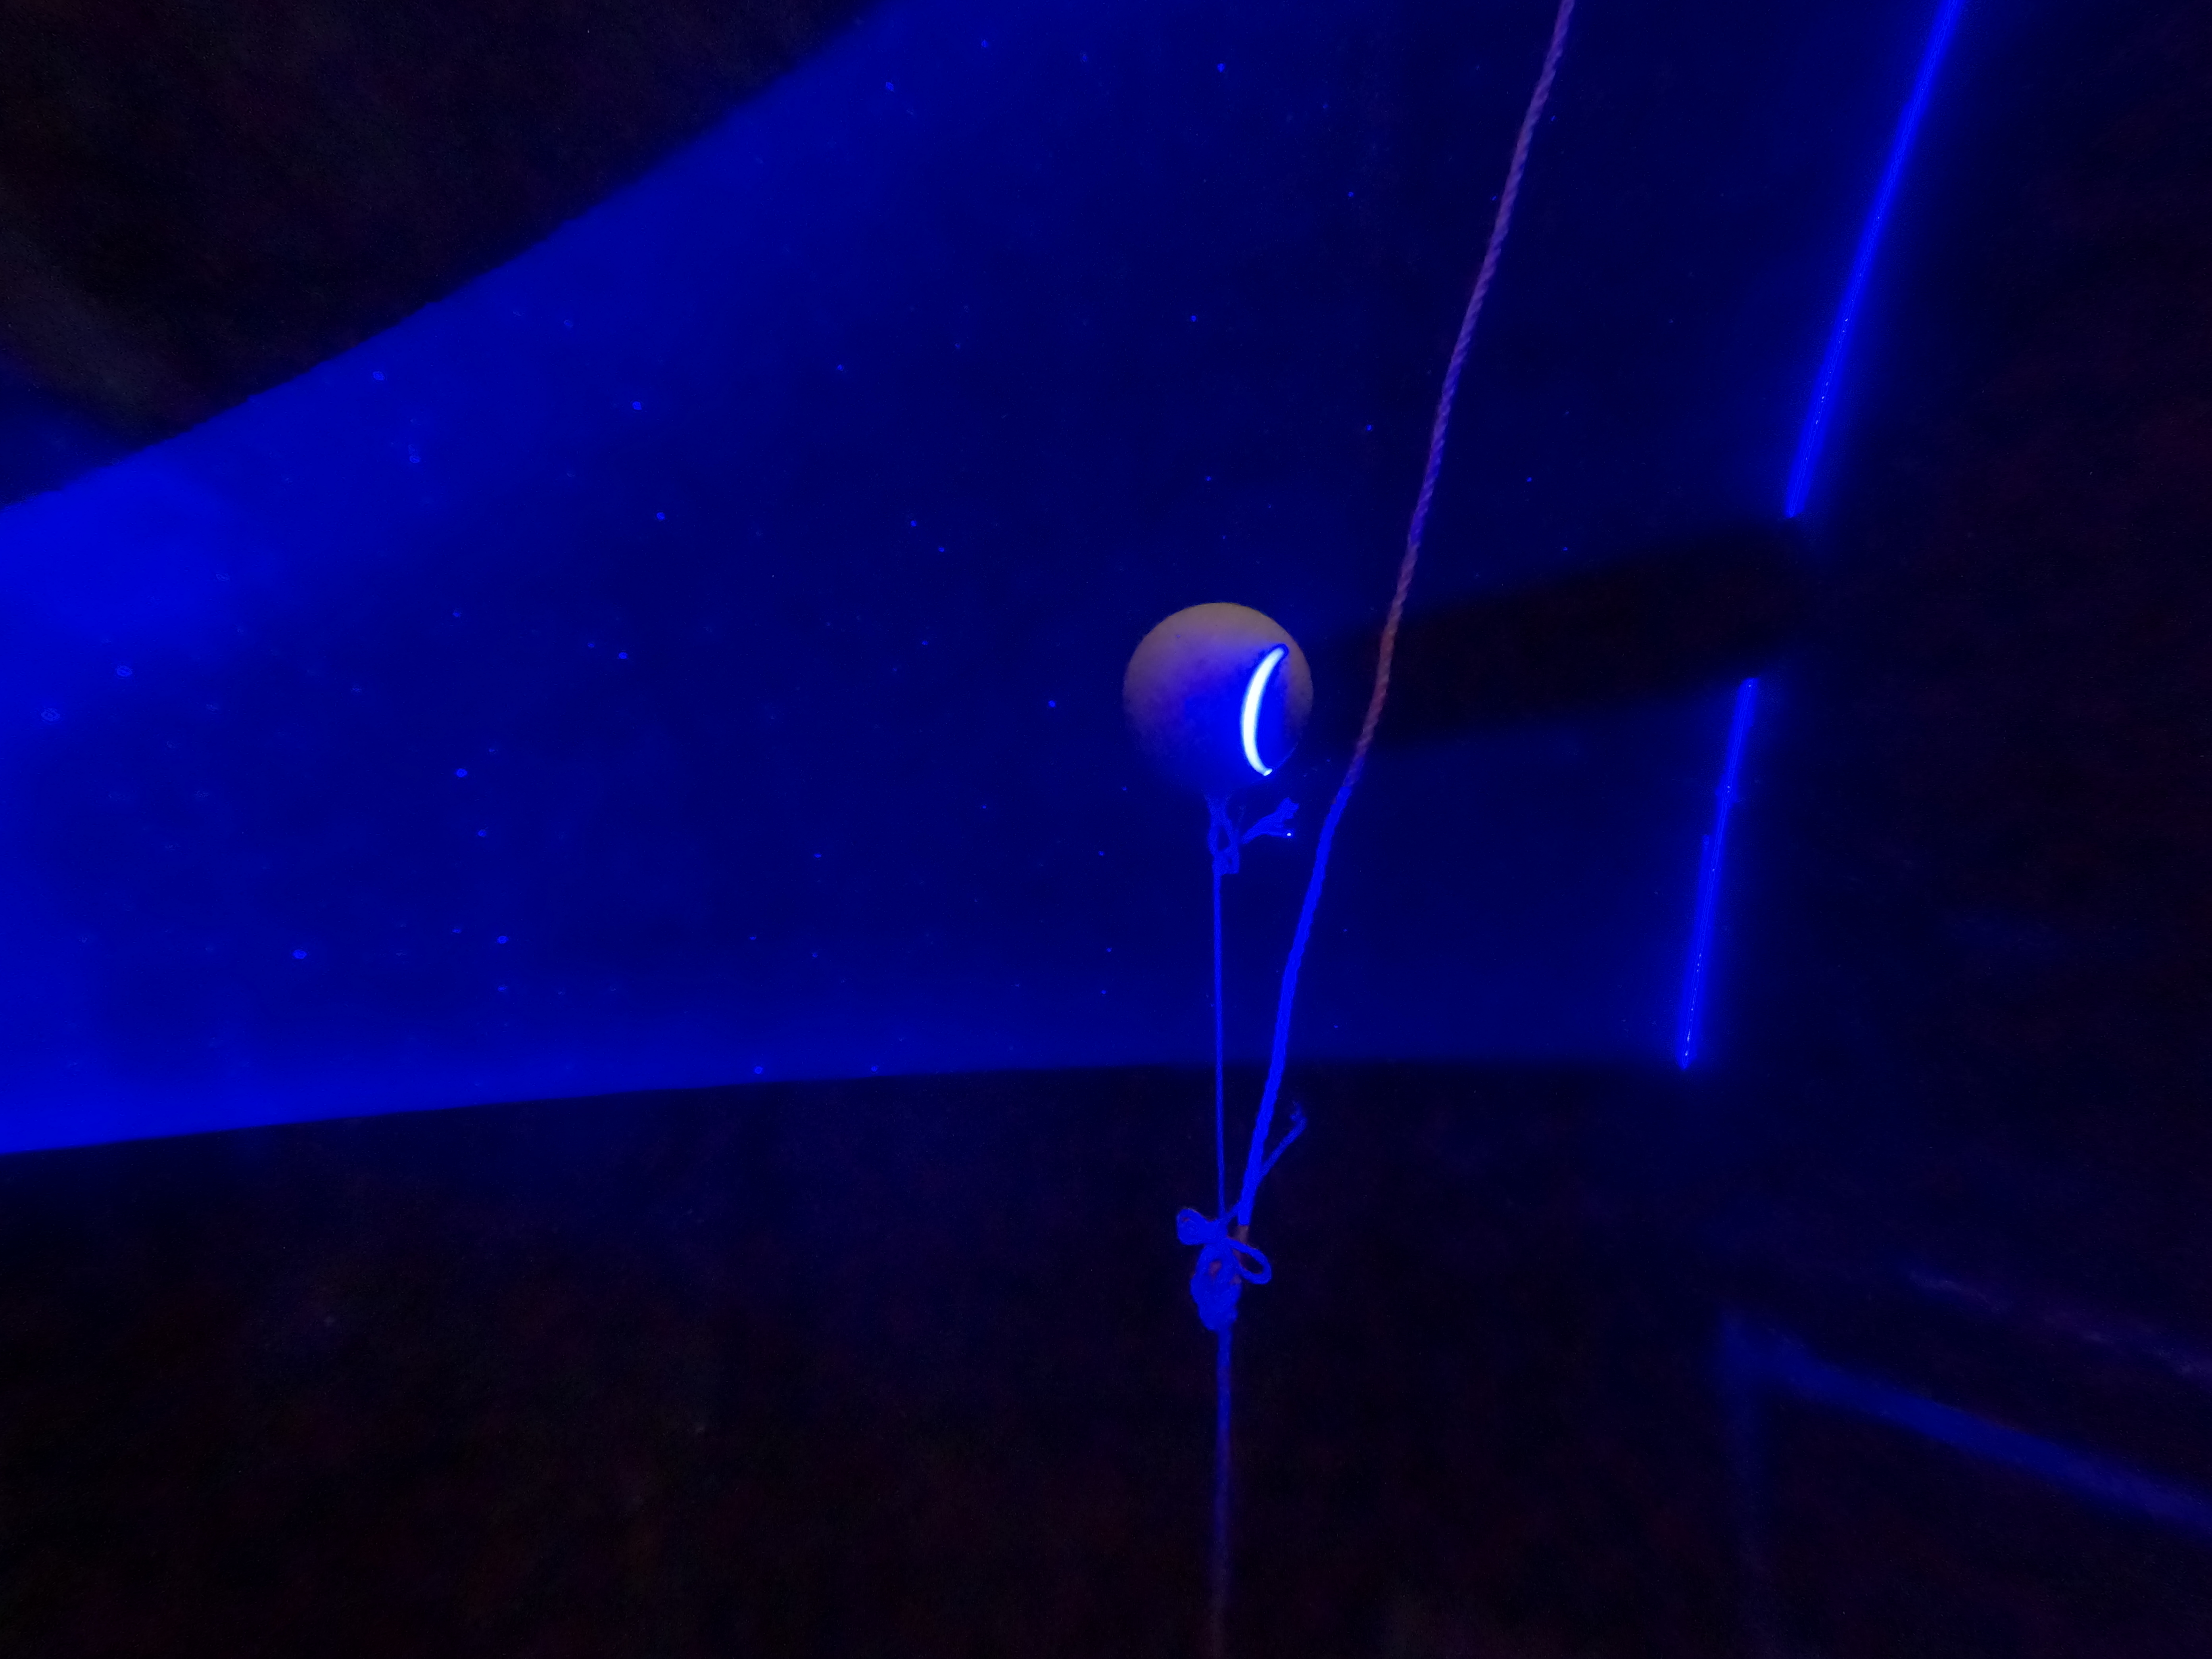

Supplement: Supplementary file 146 [file G0034576.pdf › 9/G0034576.pdf]

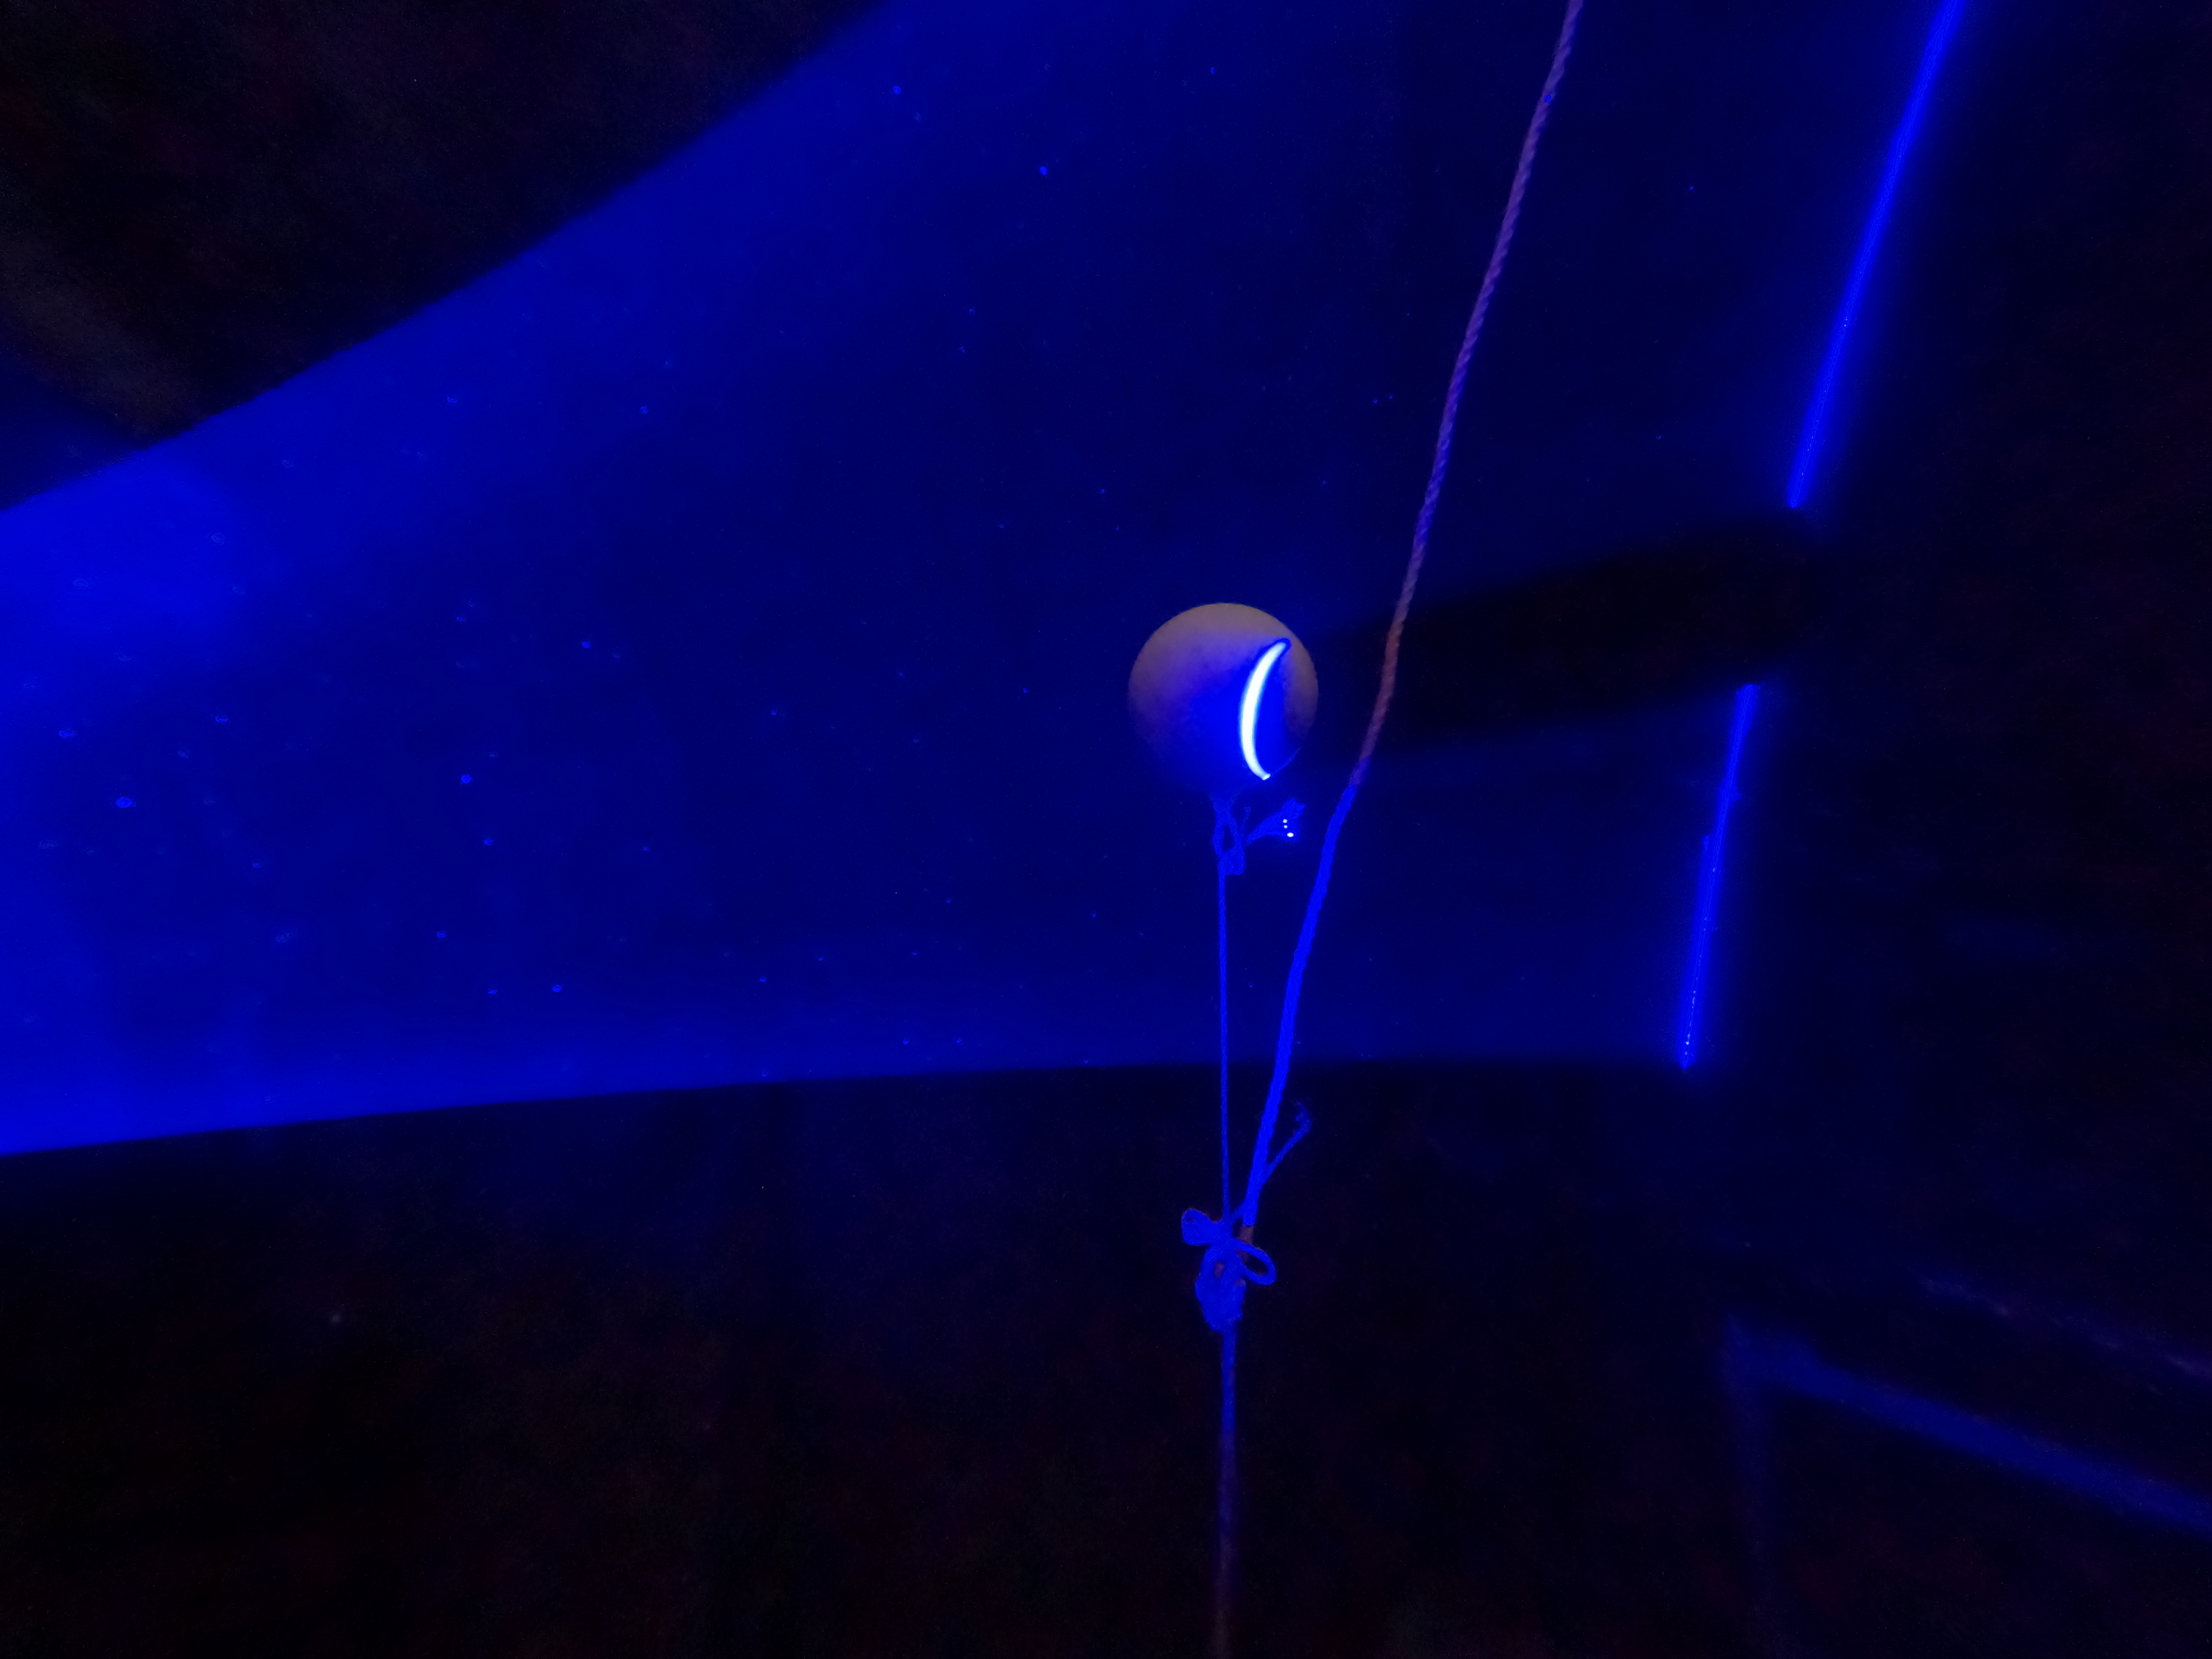

Supplement: Supplementary file 147 [file G0034577.pdf › 9/G0034577.pdf]

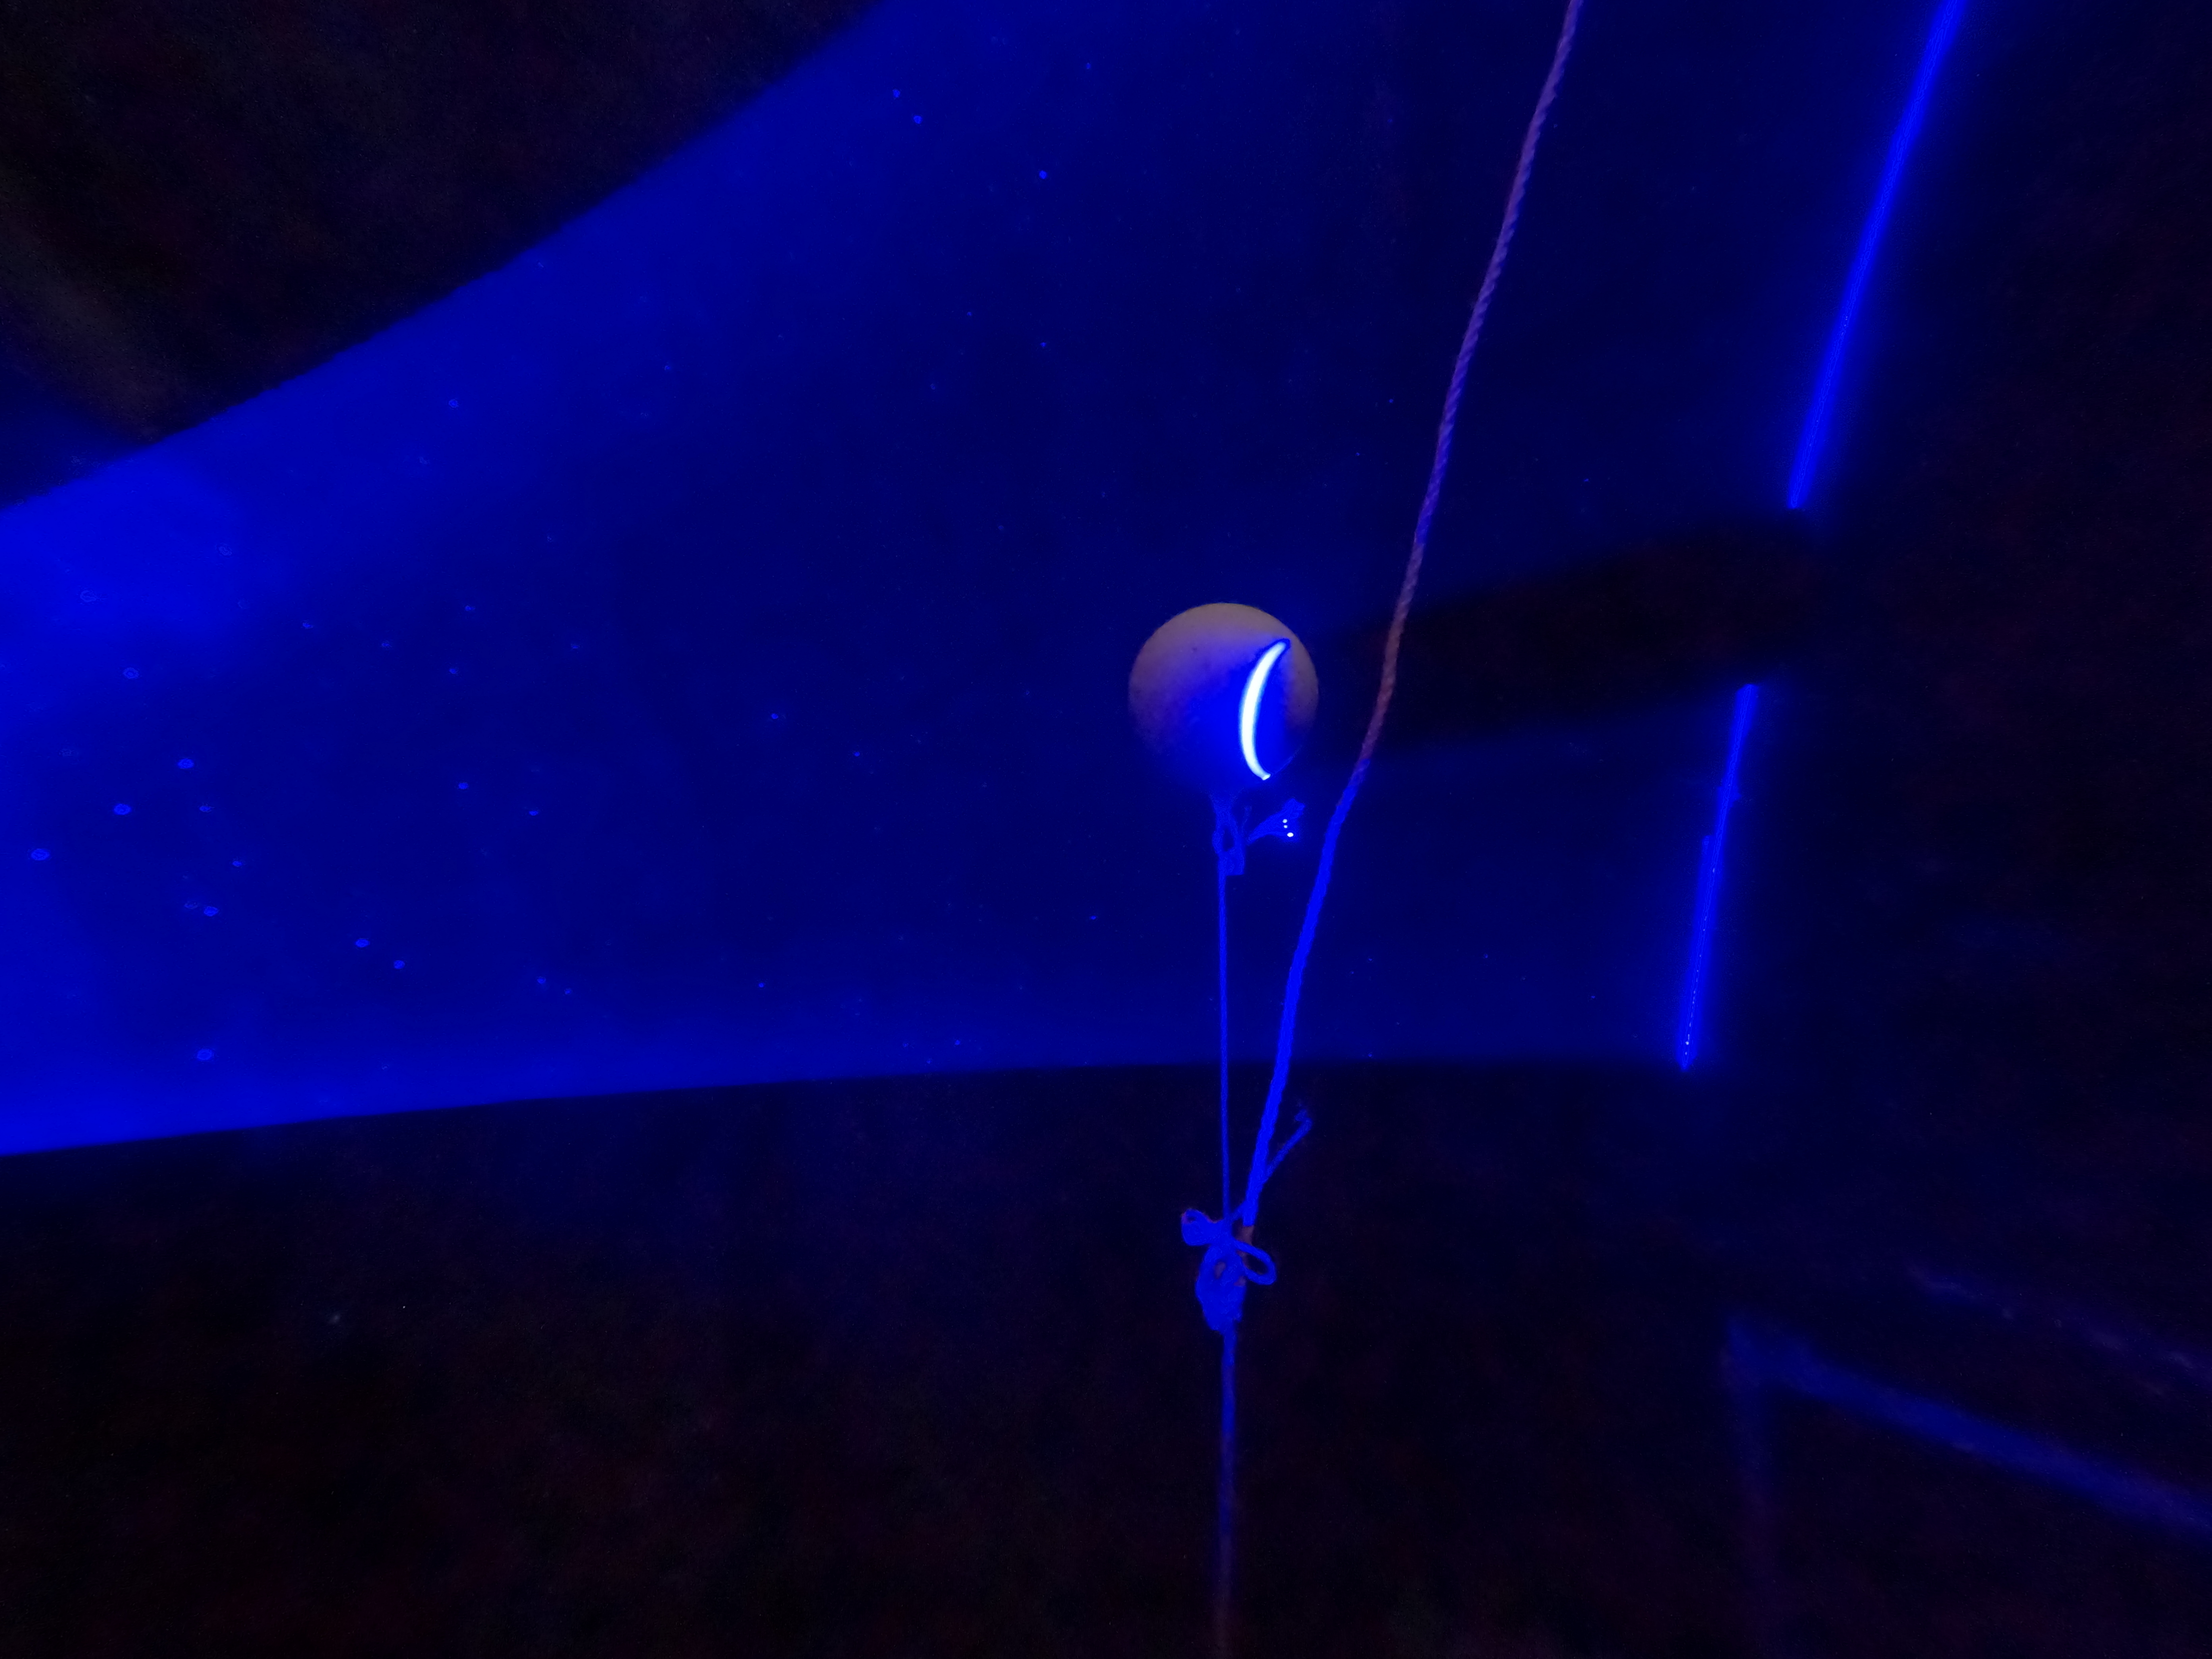

Supplement: Supplementary file 148 [file G0034578.pdf › 9/G0034578.pdf]

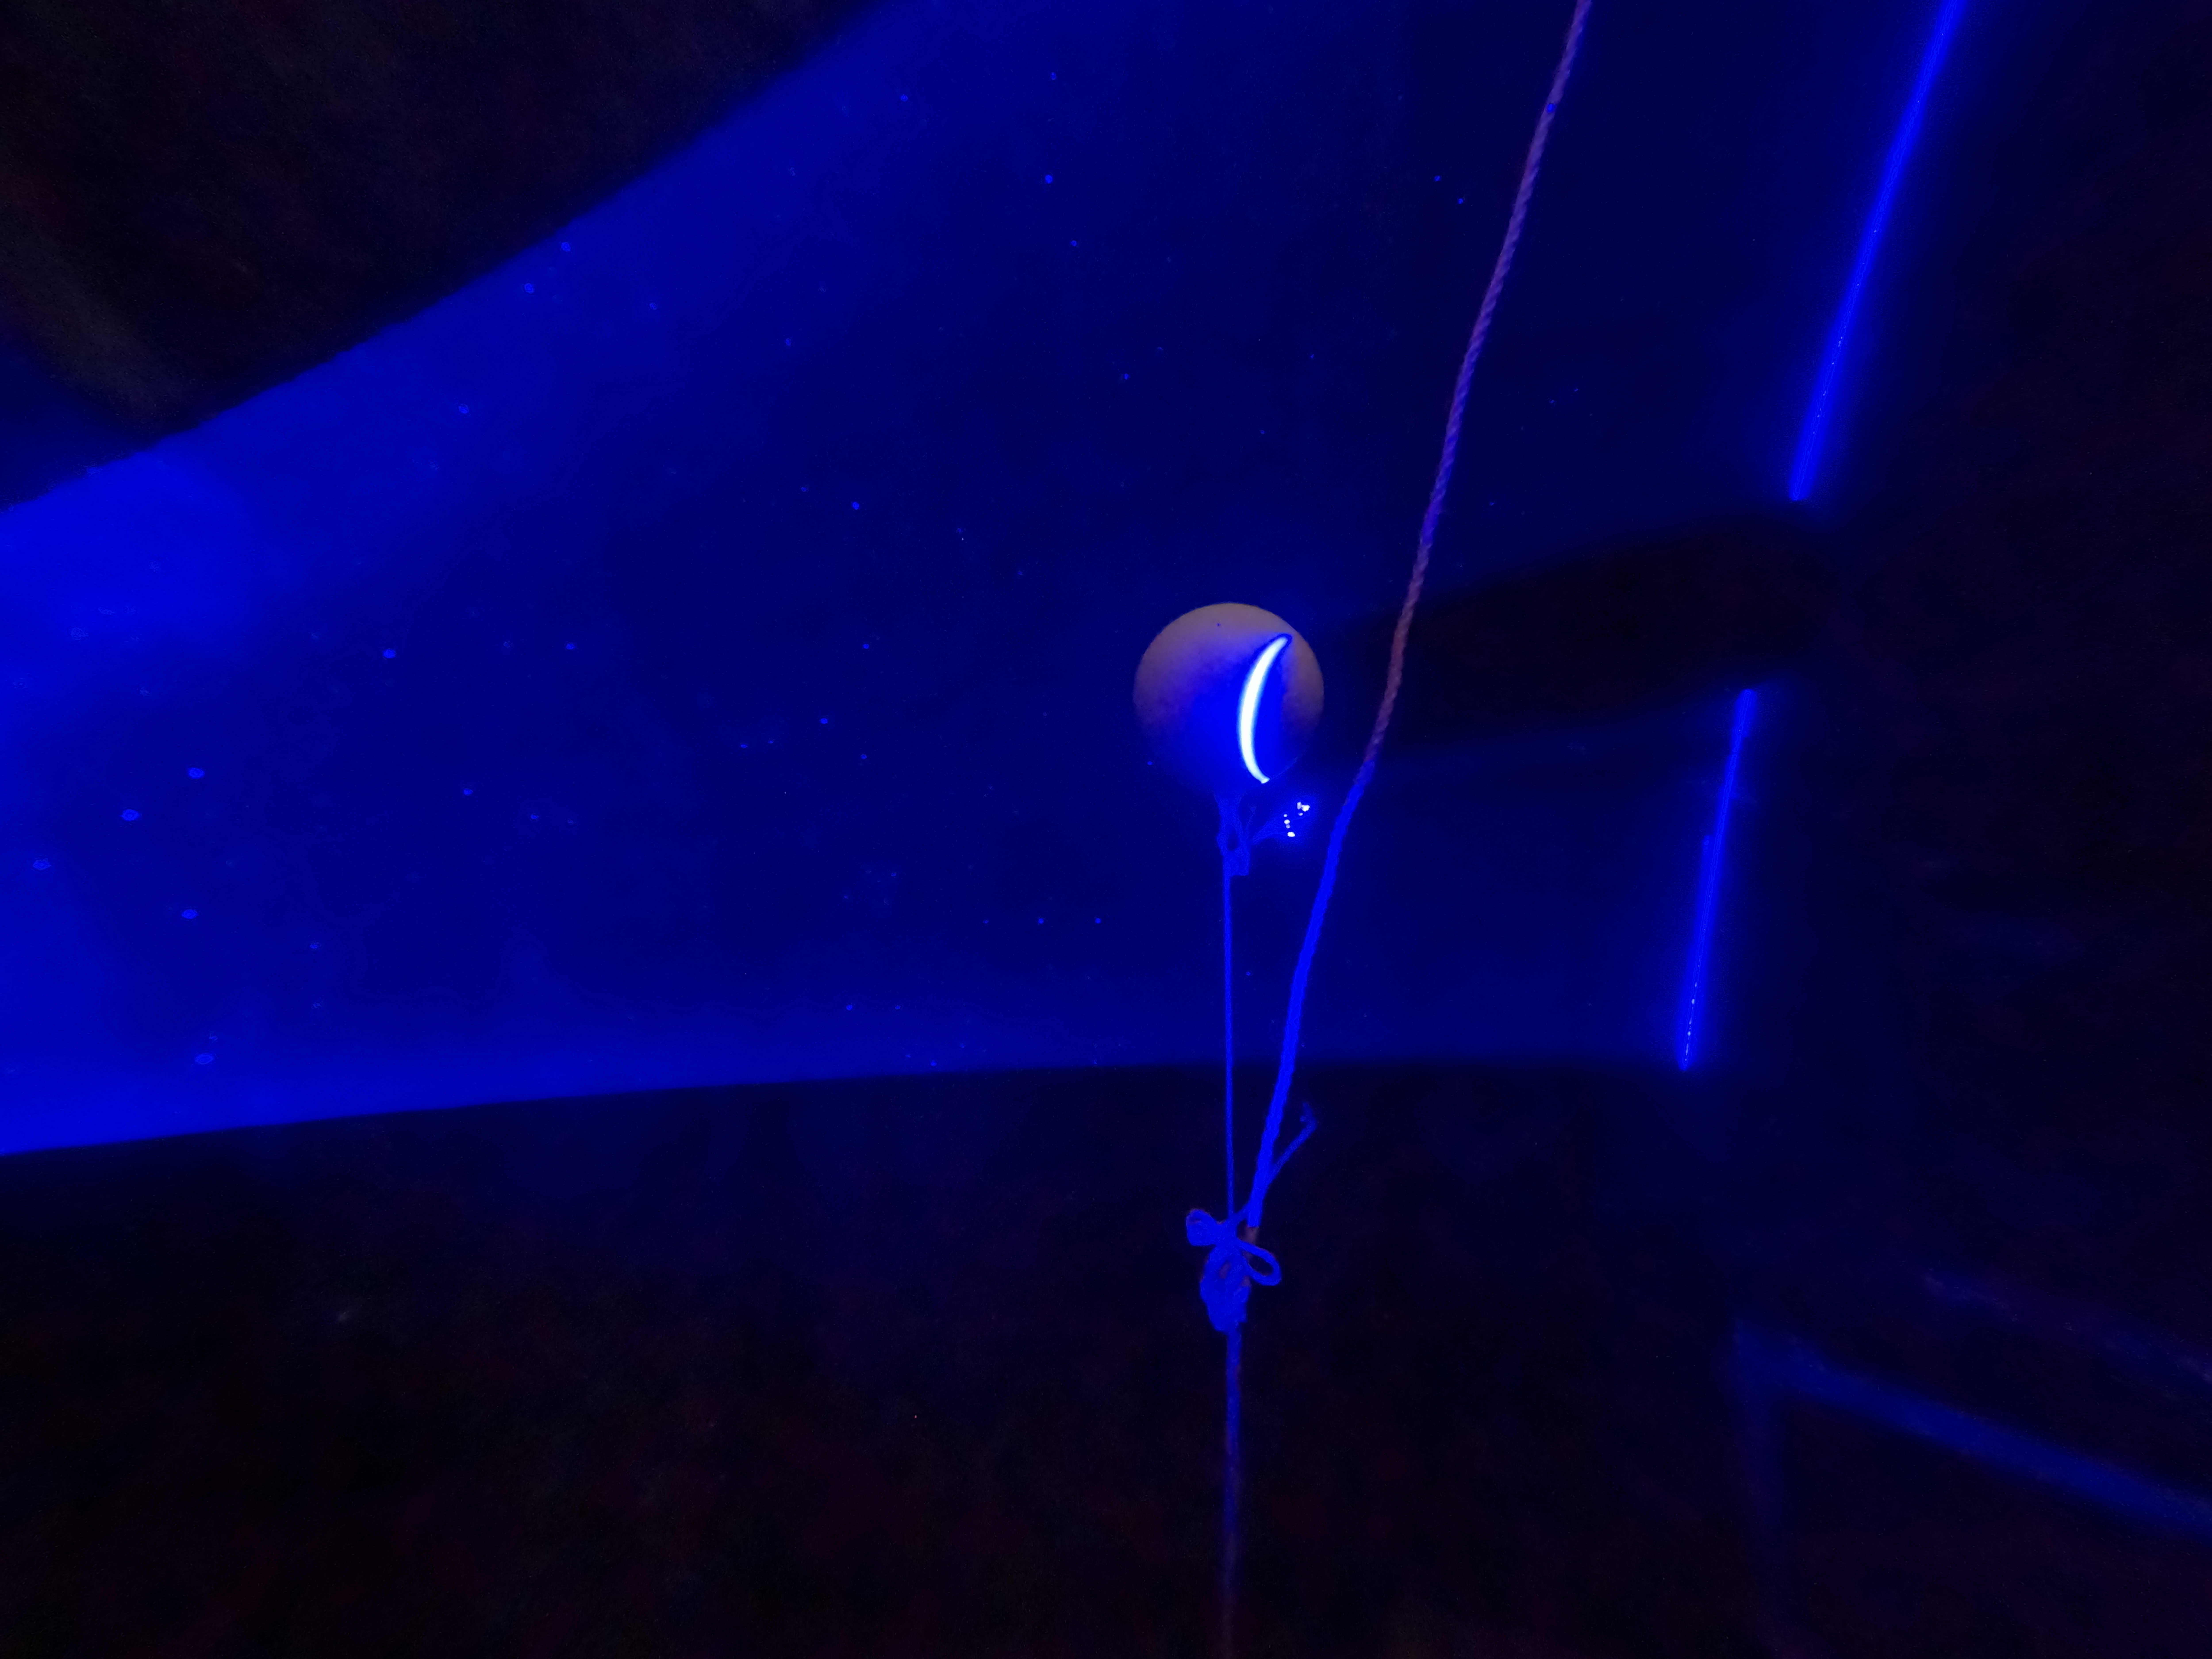

Supplement: Supplementary file 149 [file G0034579.pdf › 9/G0034579.pdf]

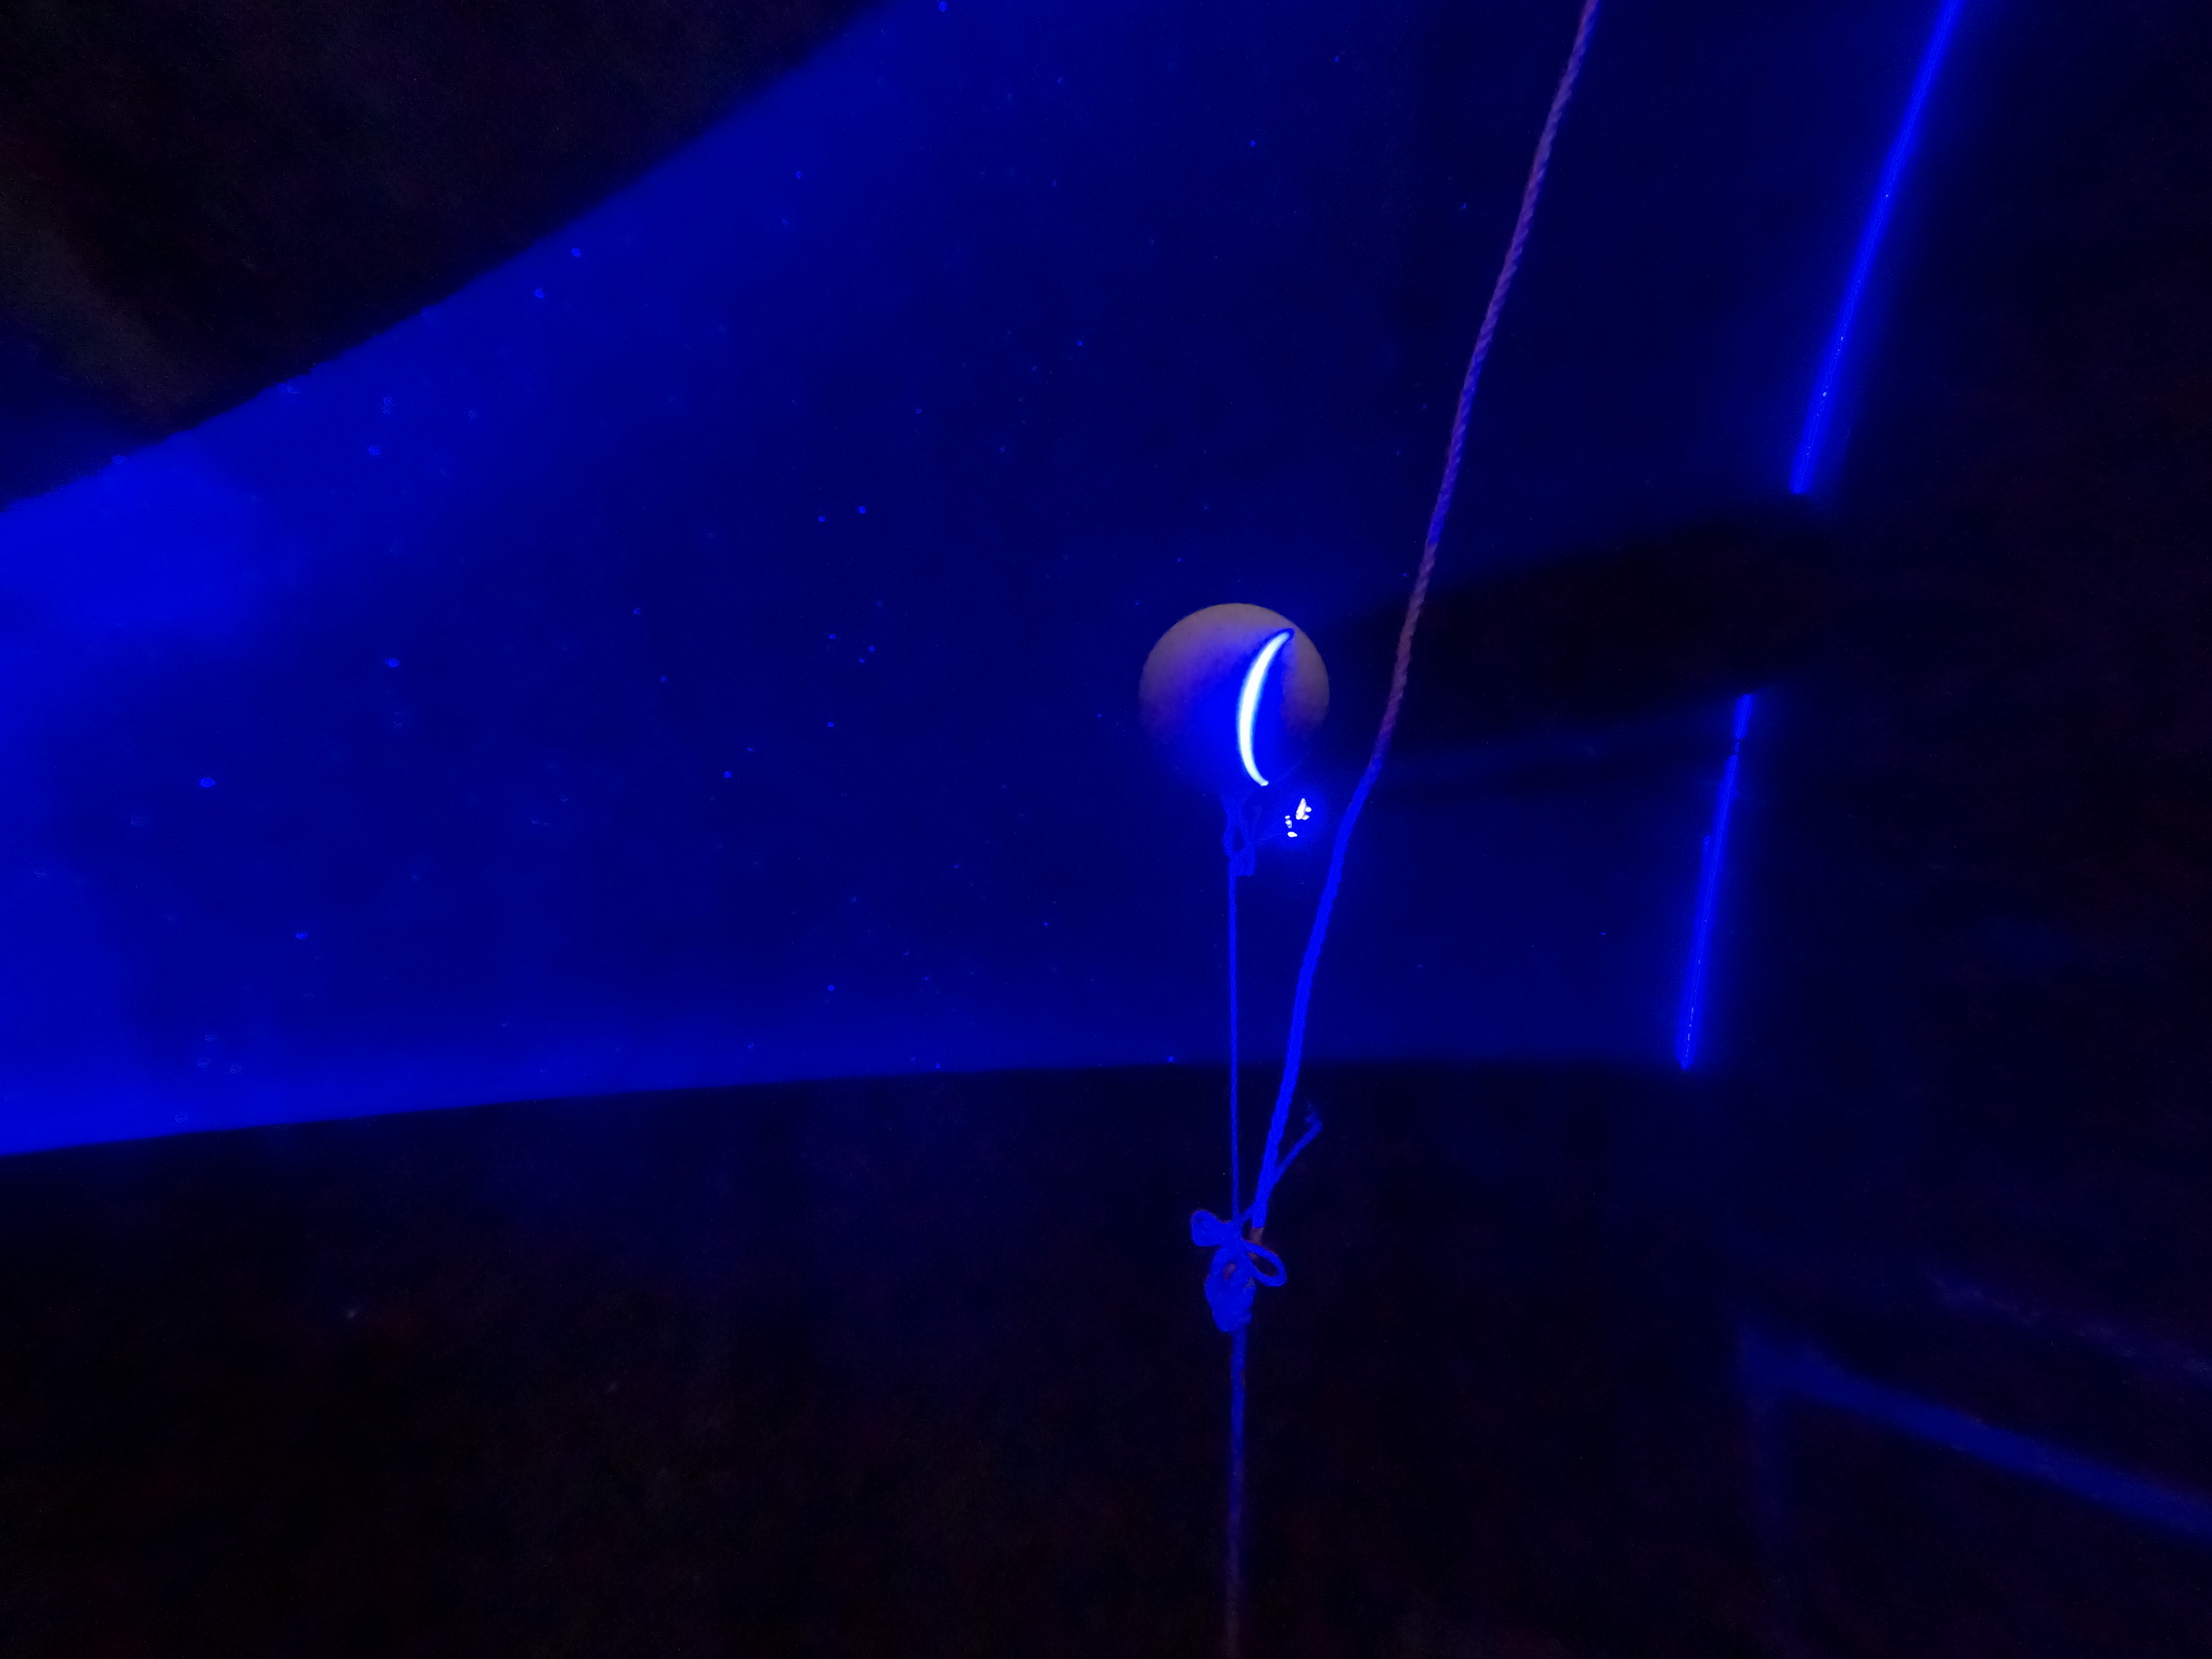

Supplement: Supplementary file 150 [file G0034580.pdf › 9/G0034580.pdf]

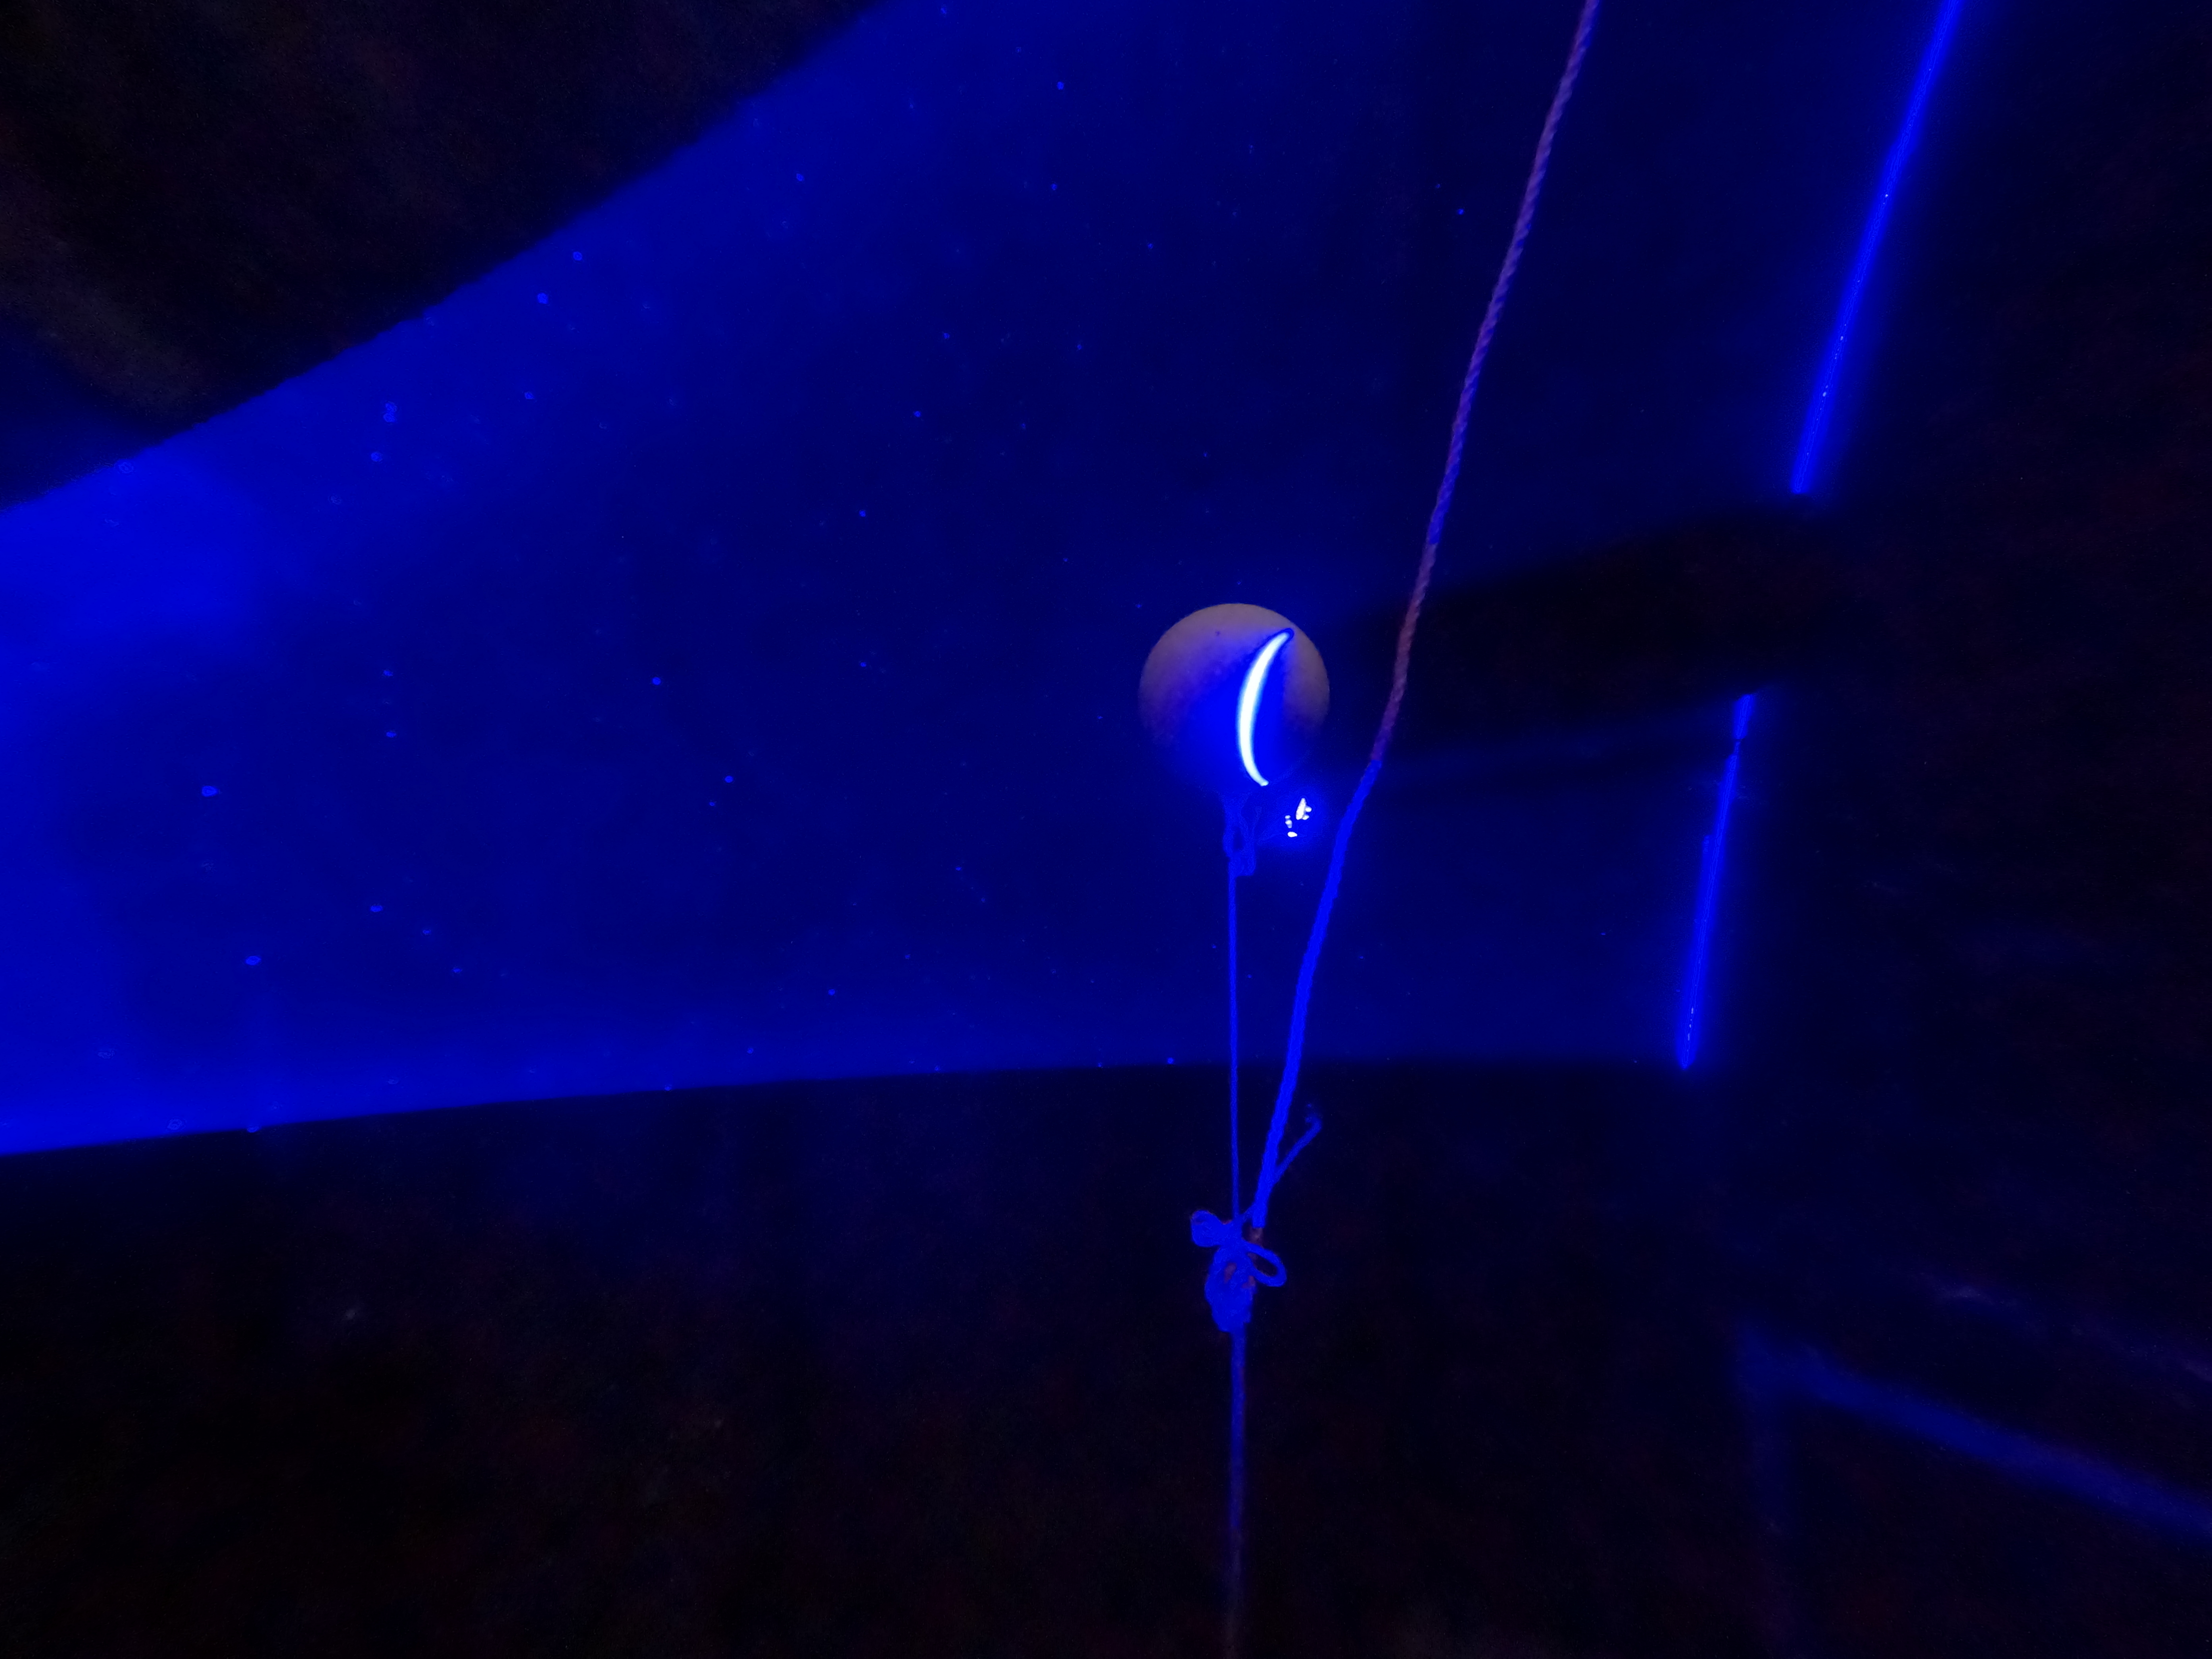

Supplement: Supplementary file 151 [file G0034581.pdf › 9/G0034581.pdf]

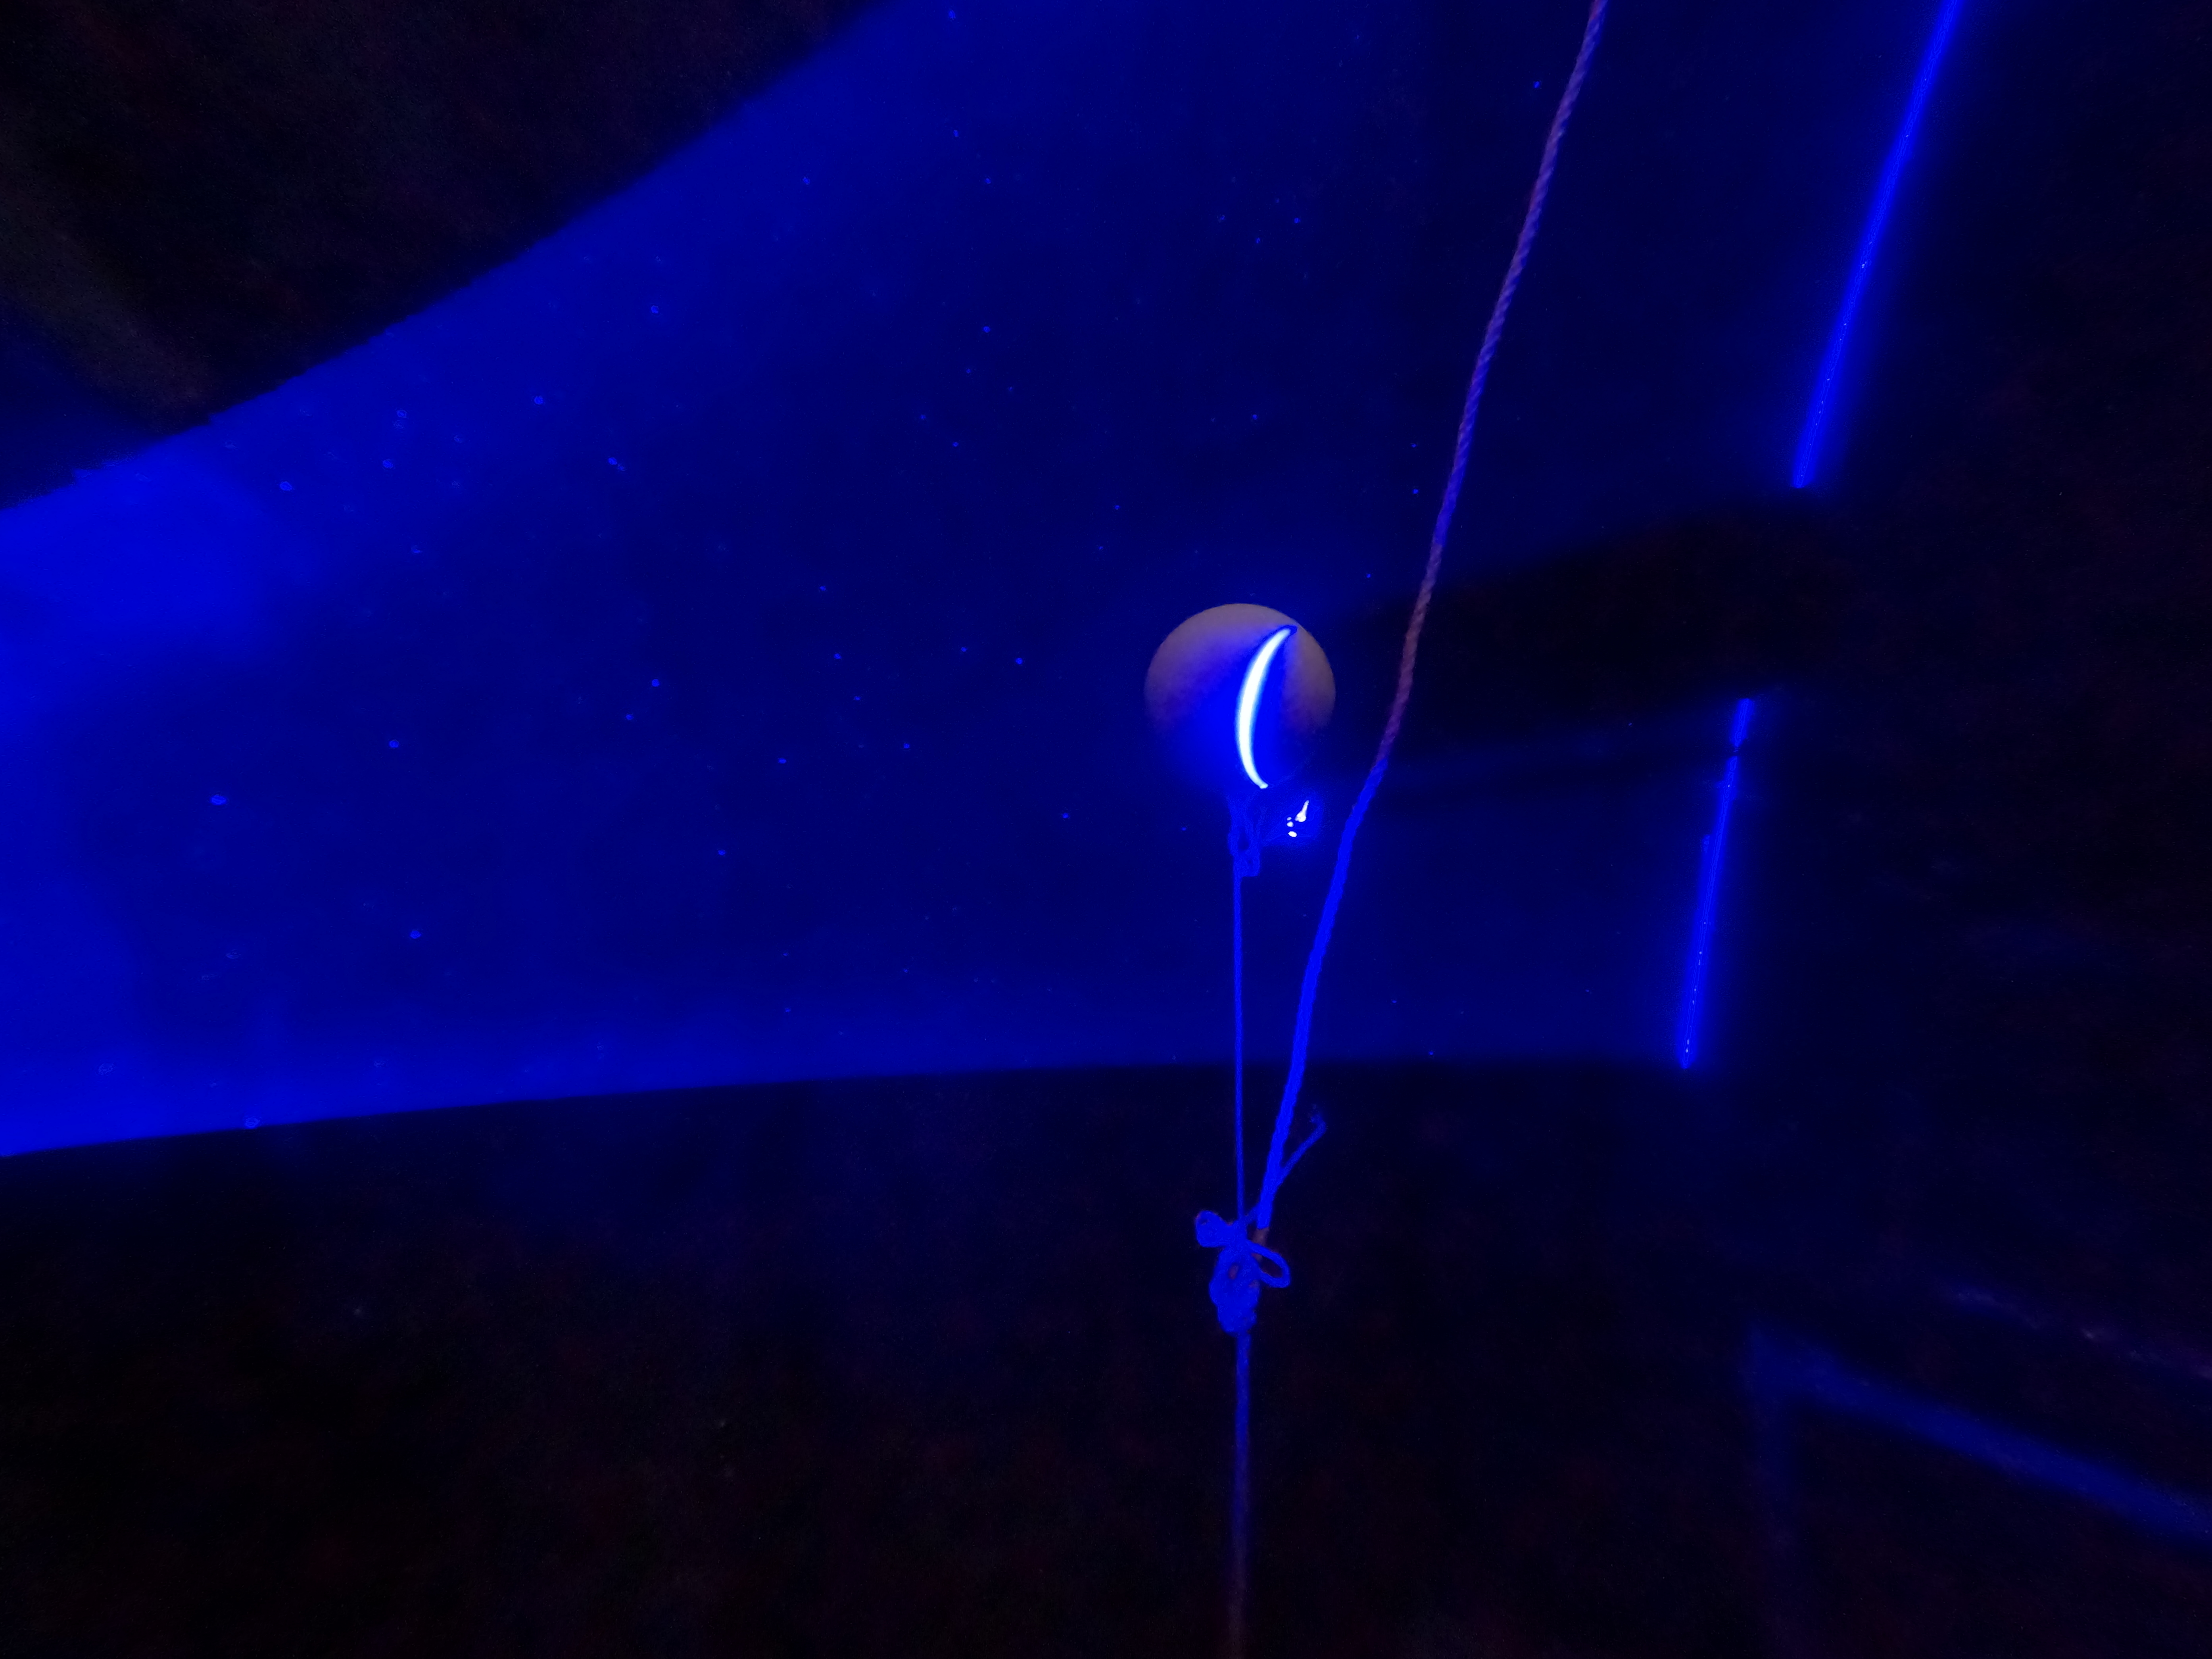

Supplement: Supplementary file 152 [file G0034582.pdf › 9/G0034582.pdf]

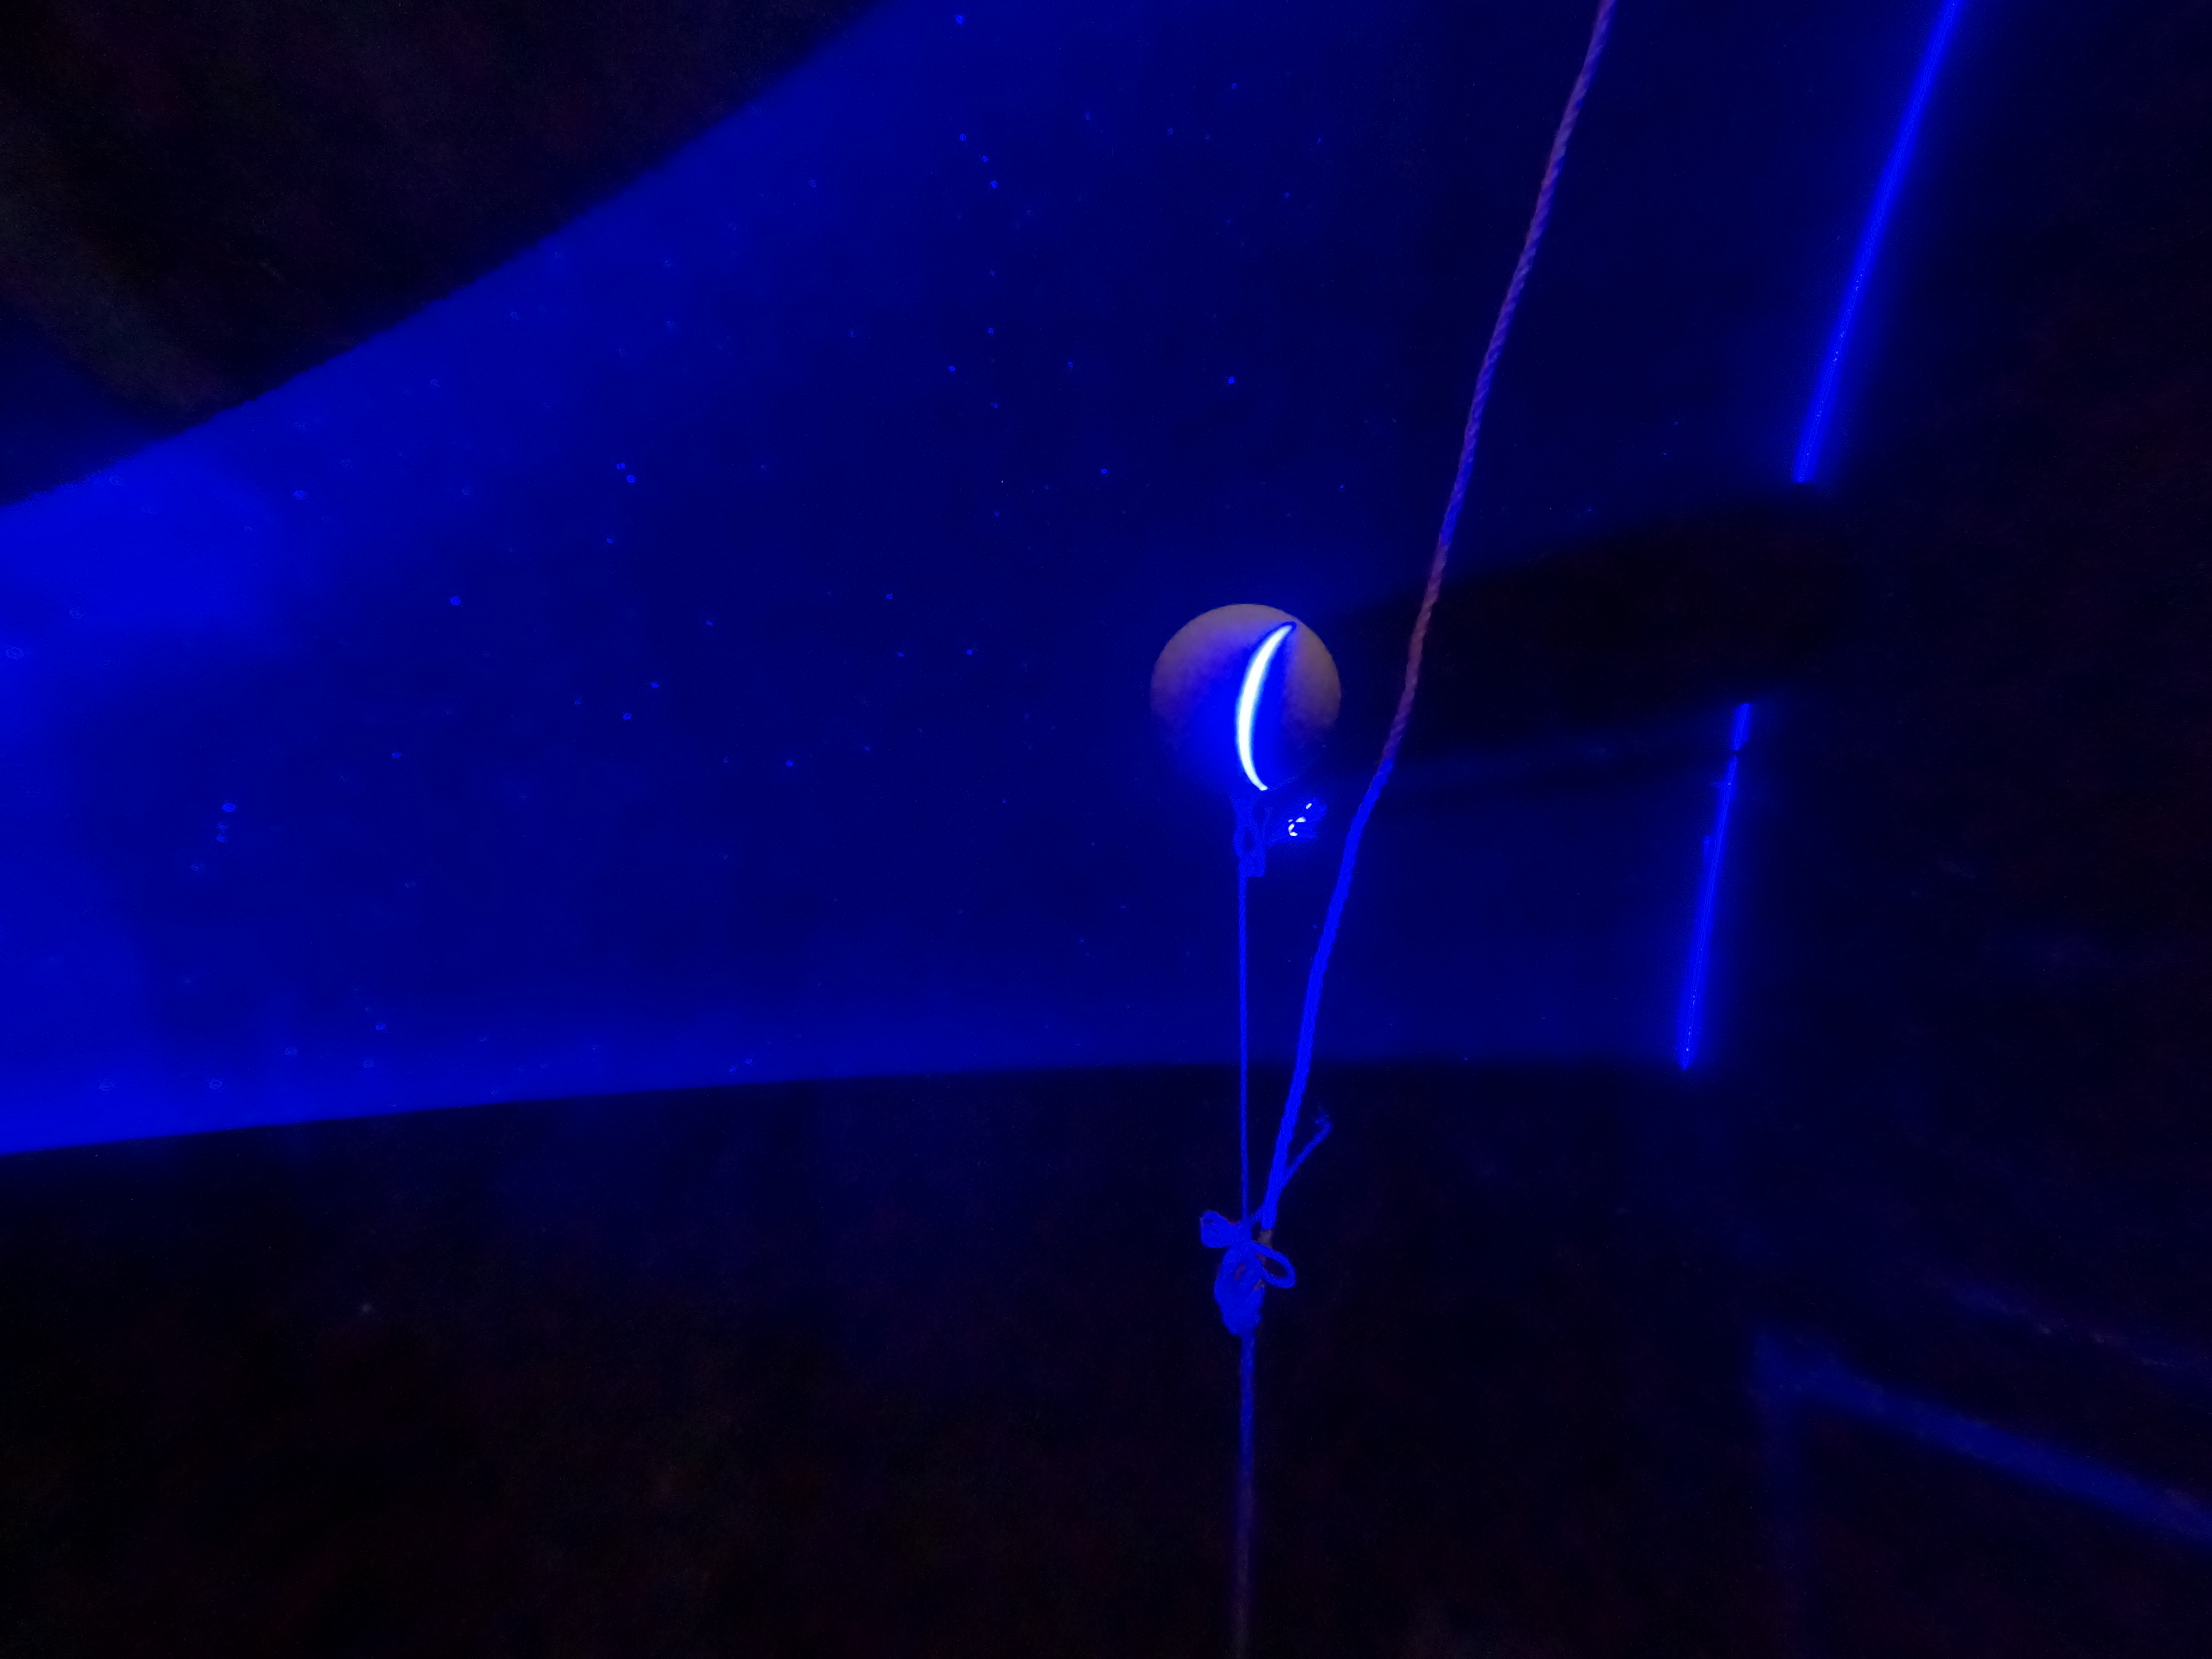

Supplement: Supplementary file 153 [file G0034583.pdf › 9/G0034583.pdf]

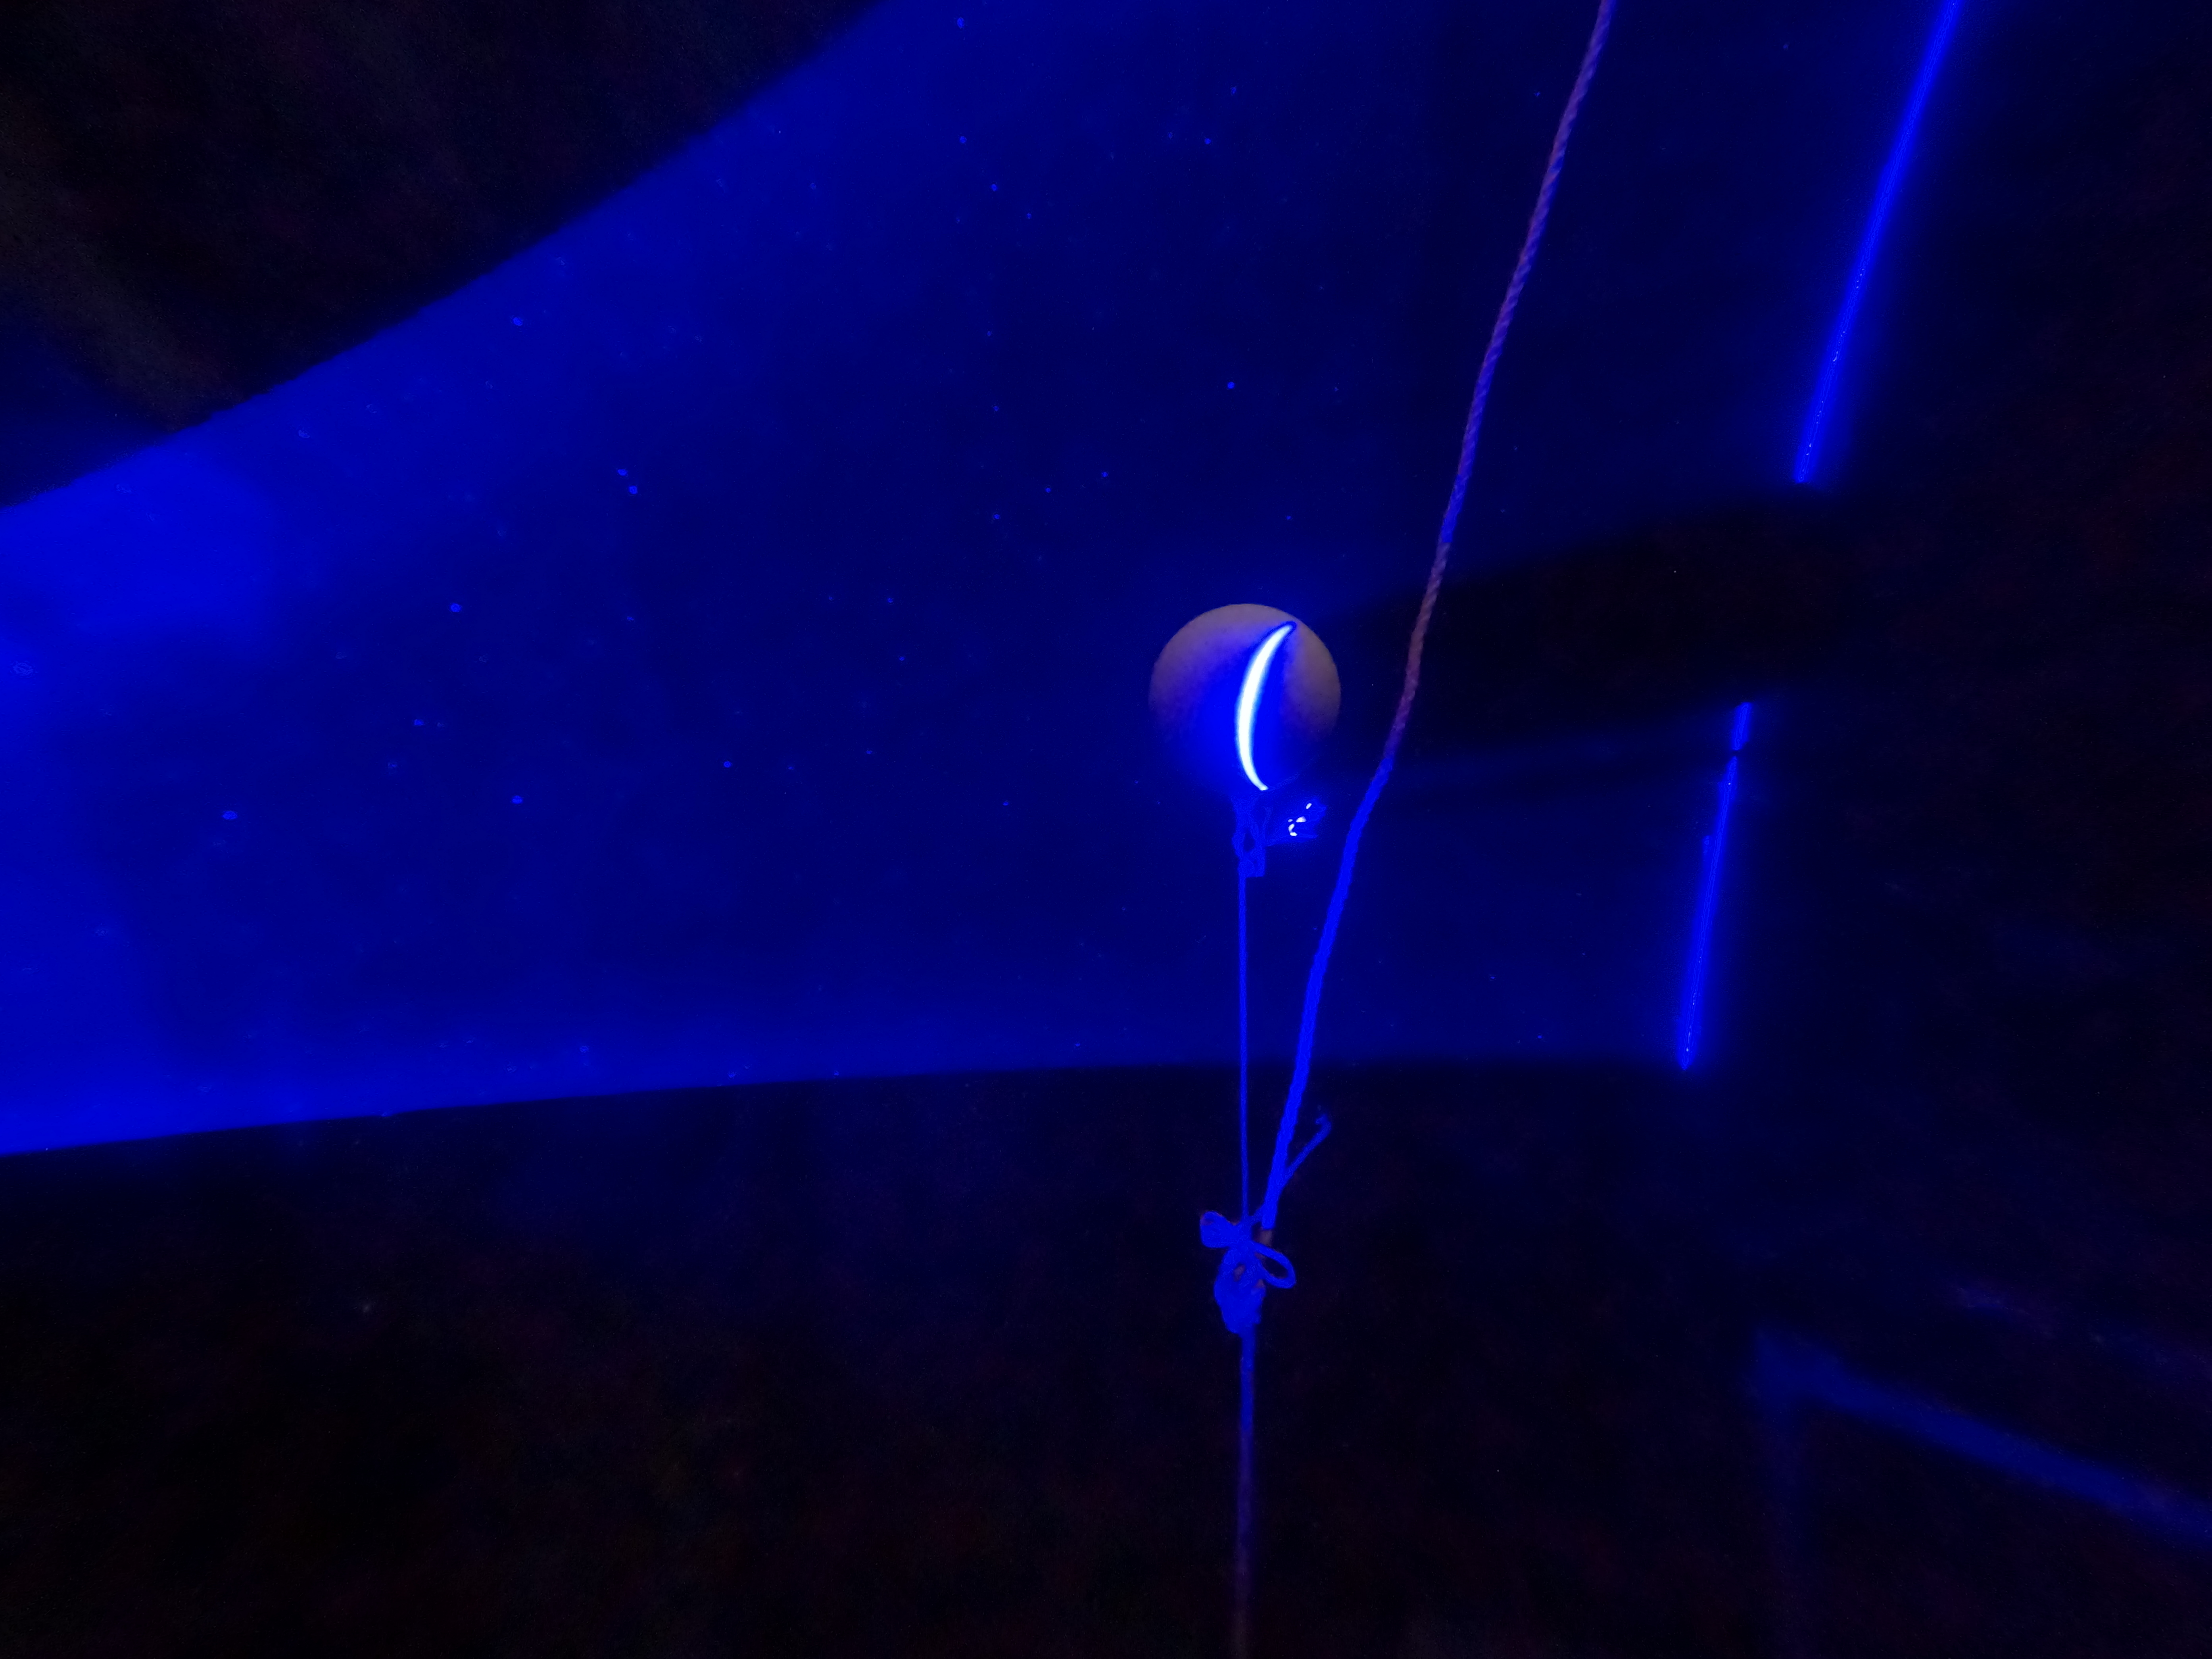

Supplement: Supplementary file 154 [file G0034584.pdf › 9/G0034584.pdf]

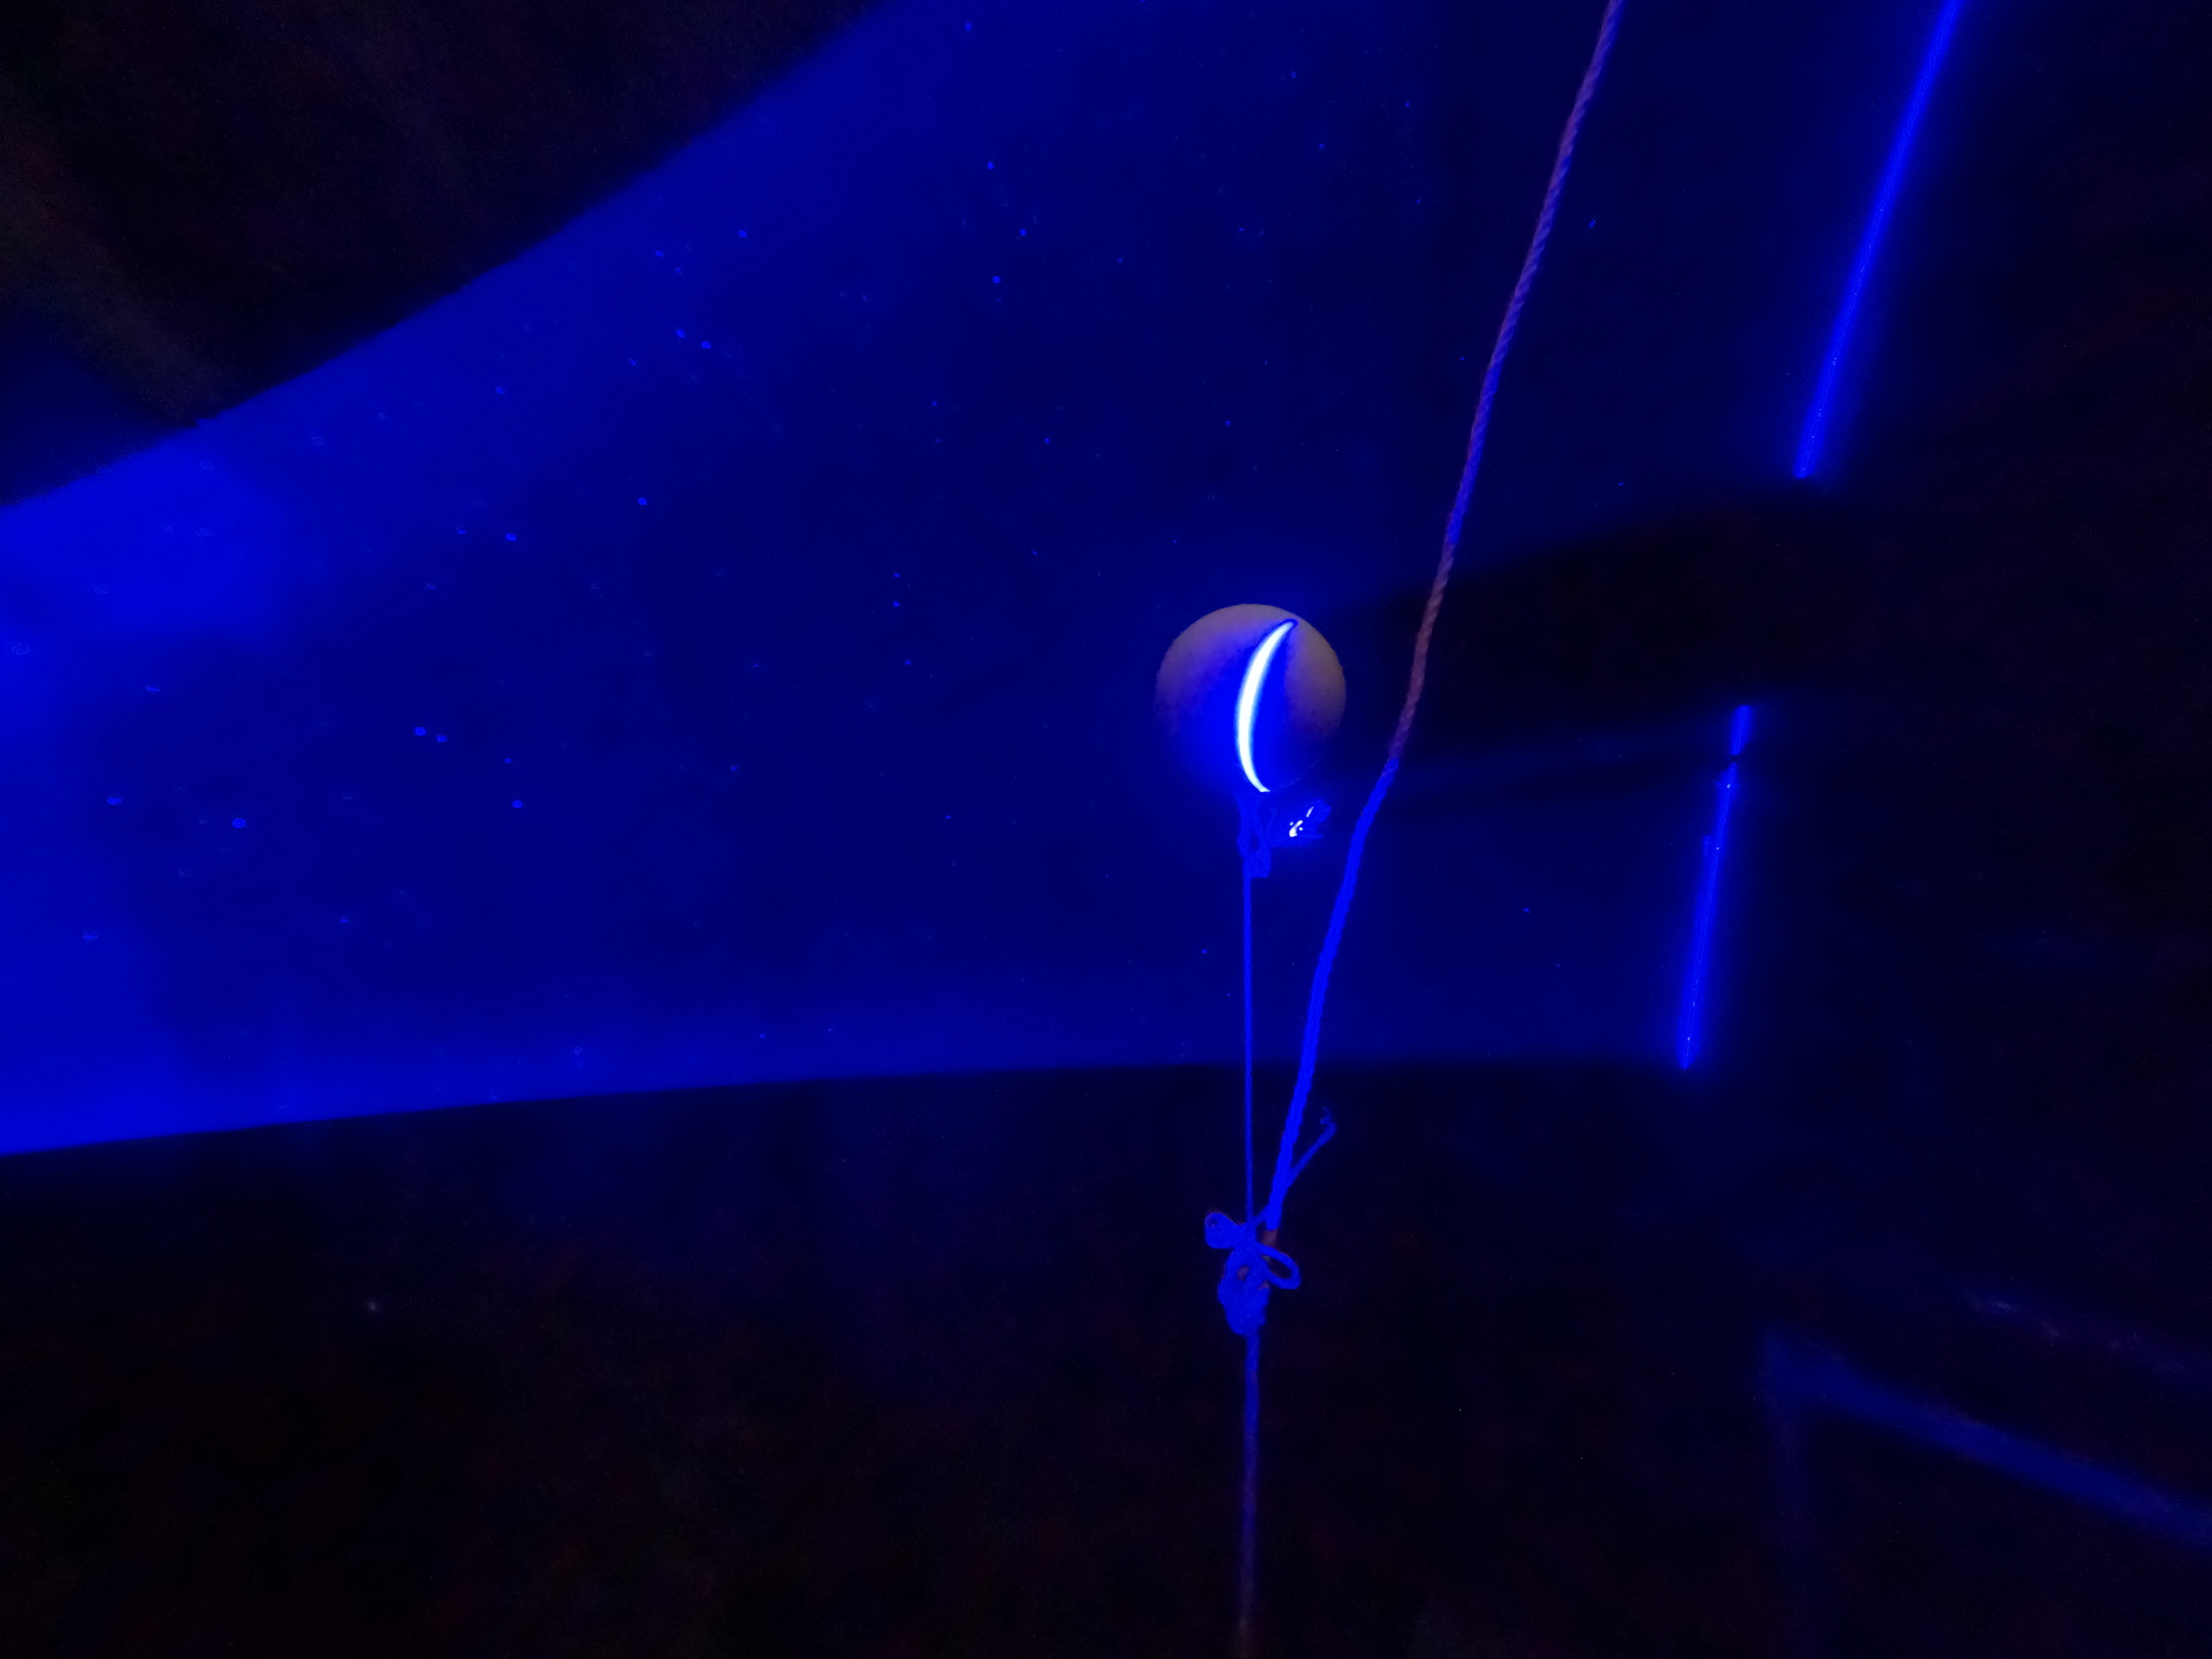

Supplement: Supplementary file 155 [file G0034585.pdf › 9/G0034585.pdf]

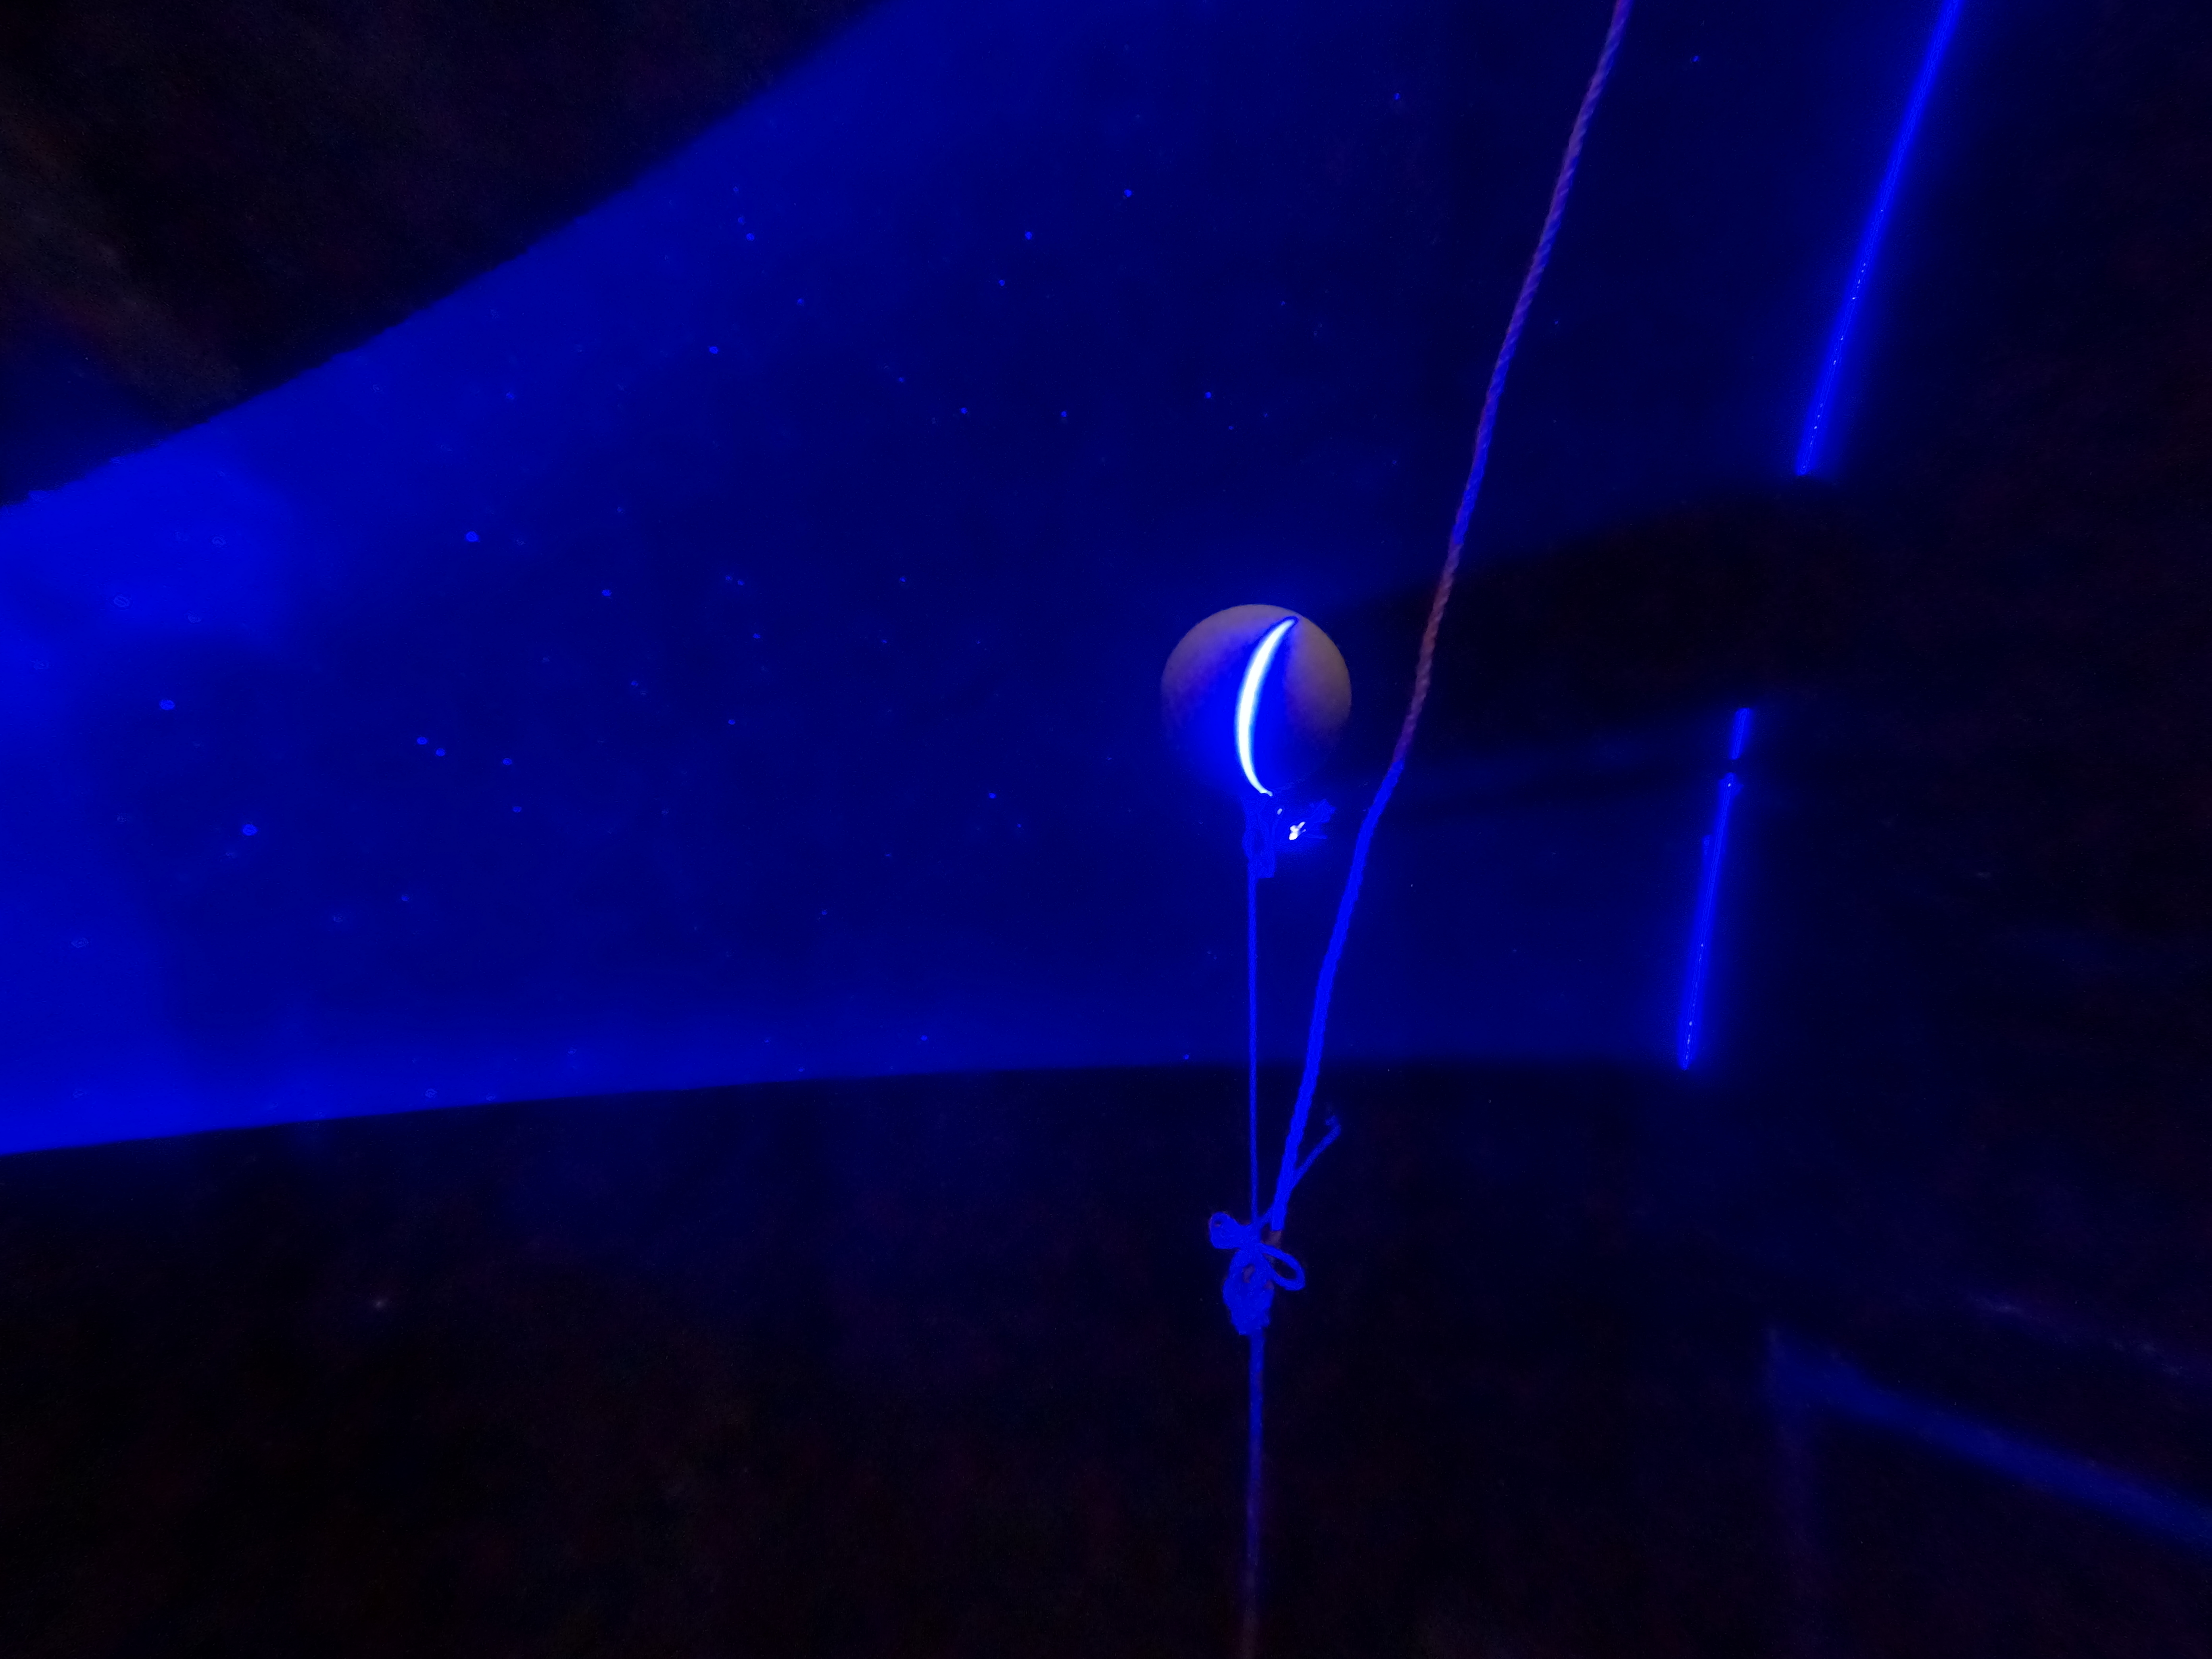

Supplement: Supplementary file 156 [file G0034586.pdf › 9/G0034586.pdf]

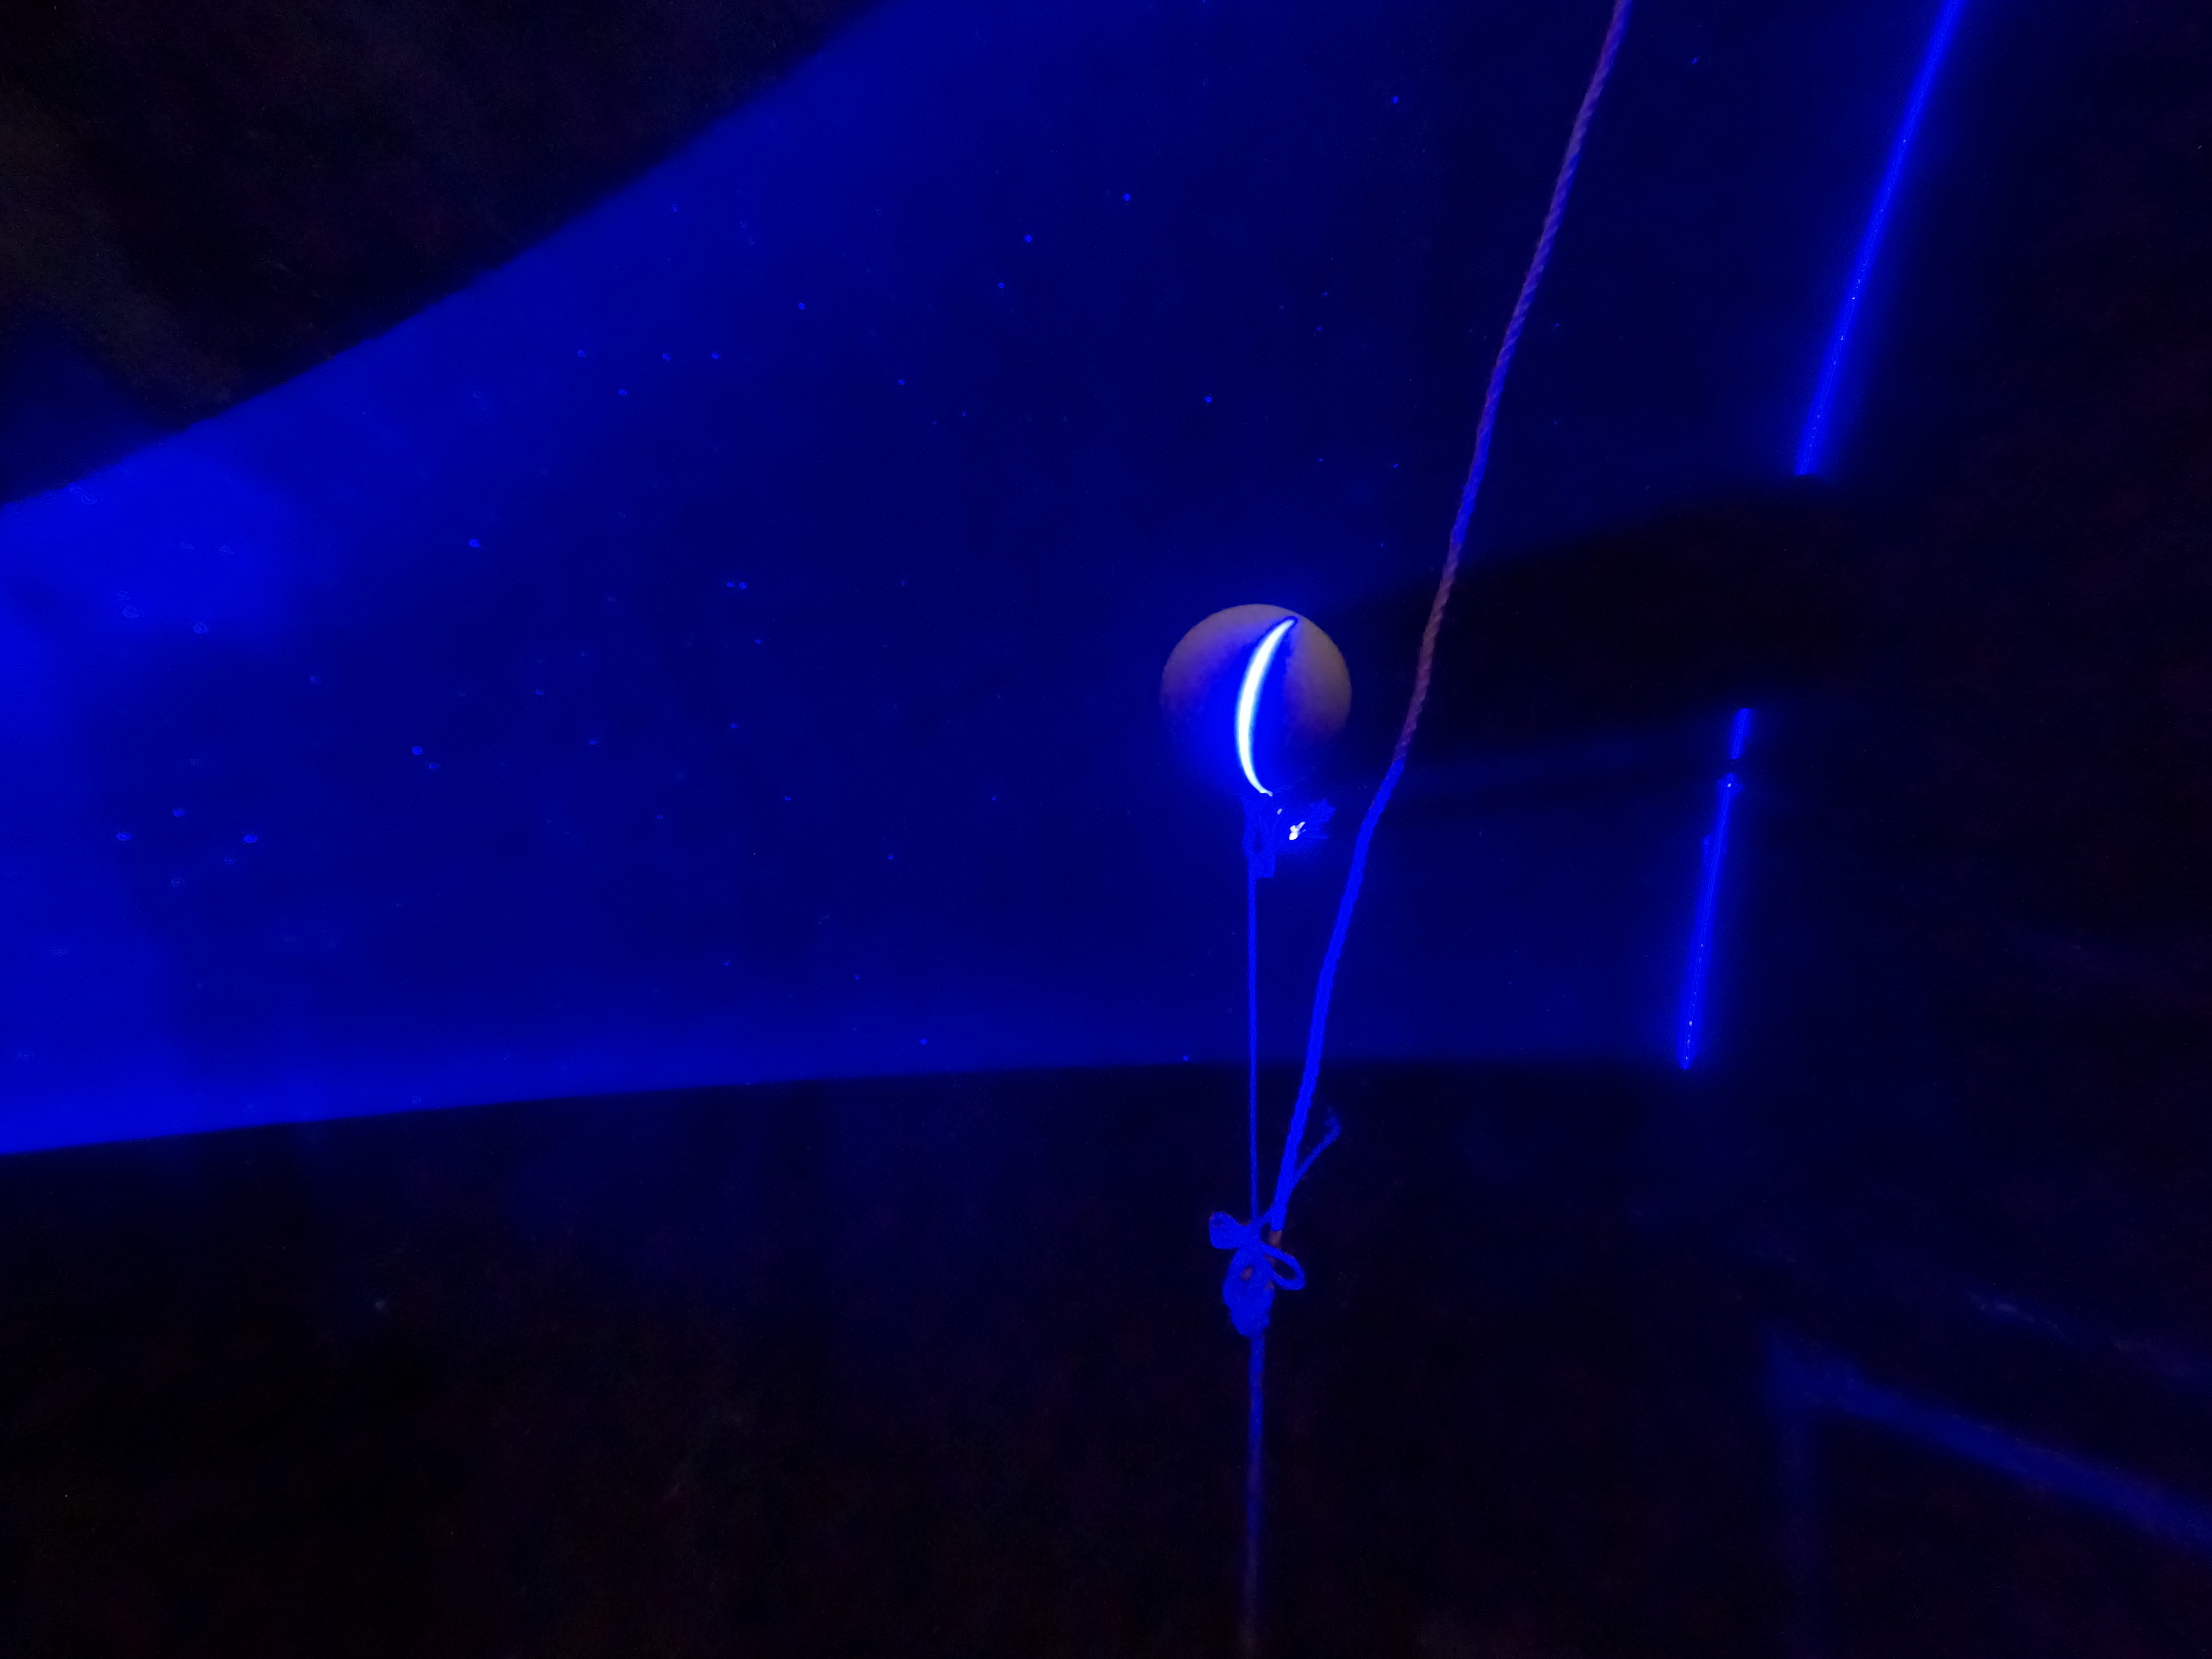

Supplement: Supplementary file 157 [file G0034587.pdf › 9/G0034587.pdf]

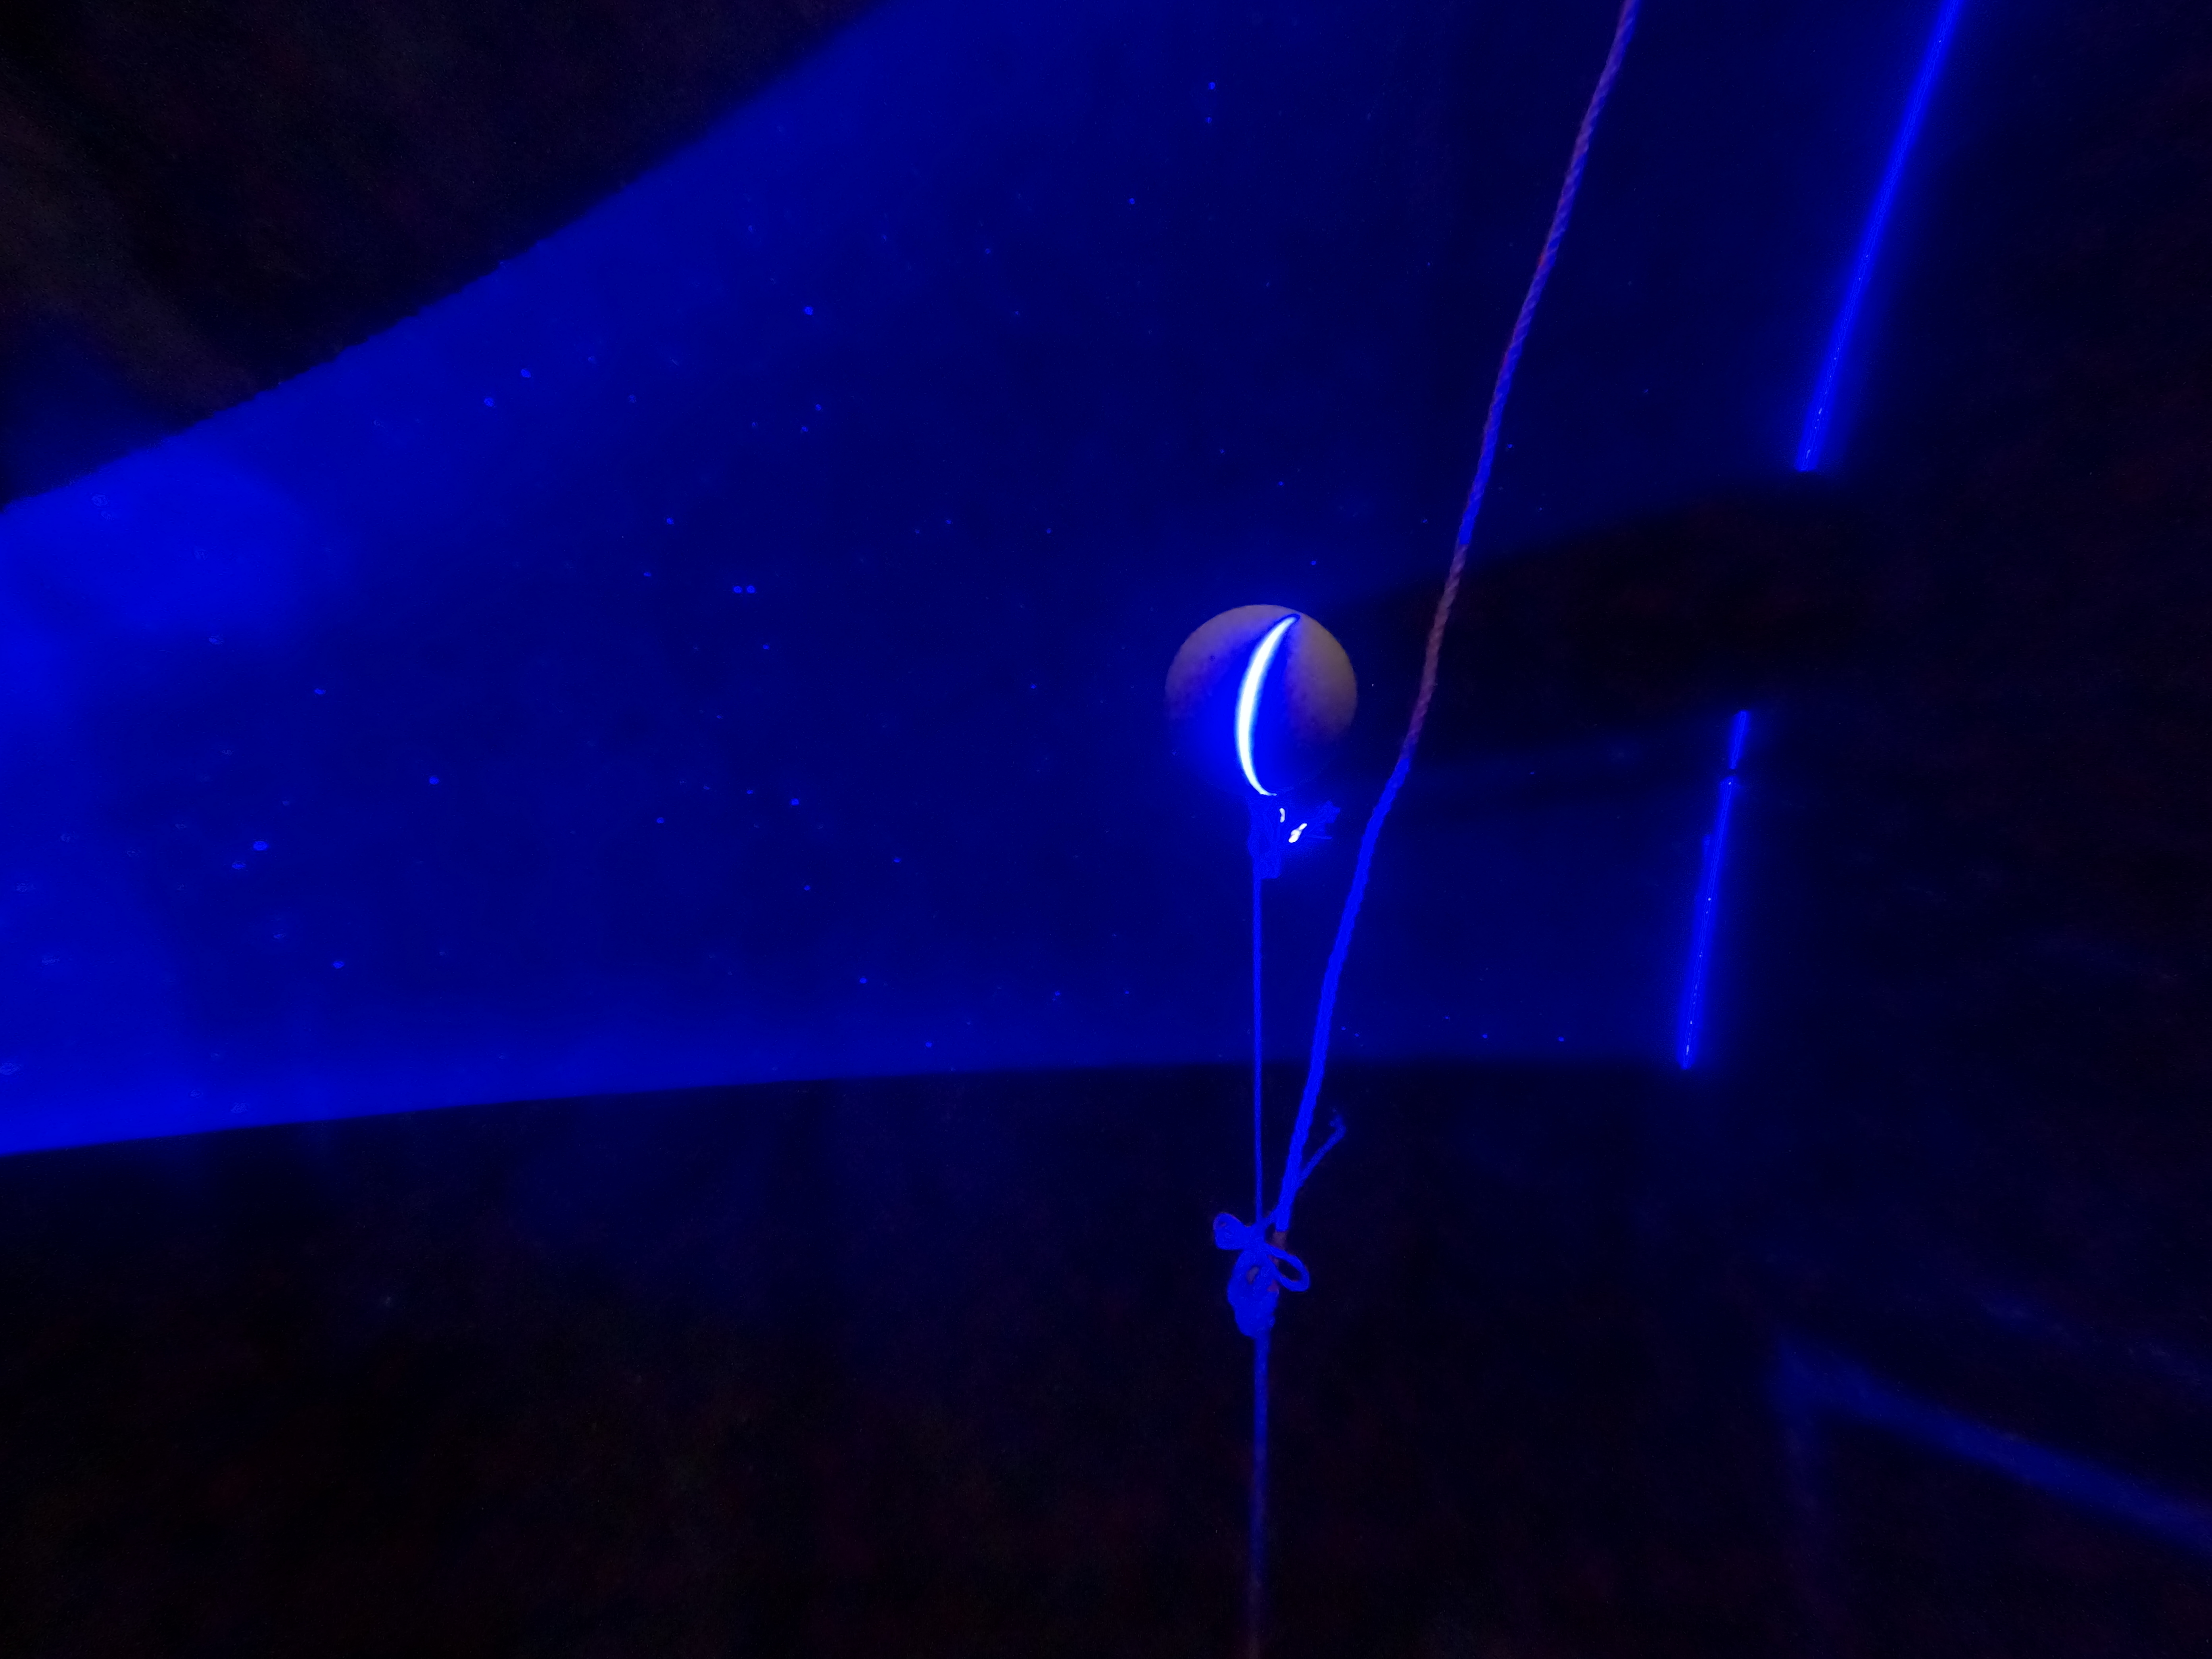

Supplement: Supplementary file 158 [file G0034588.pdf › 9/G0034588.pdf]

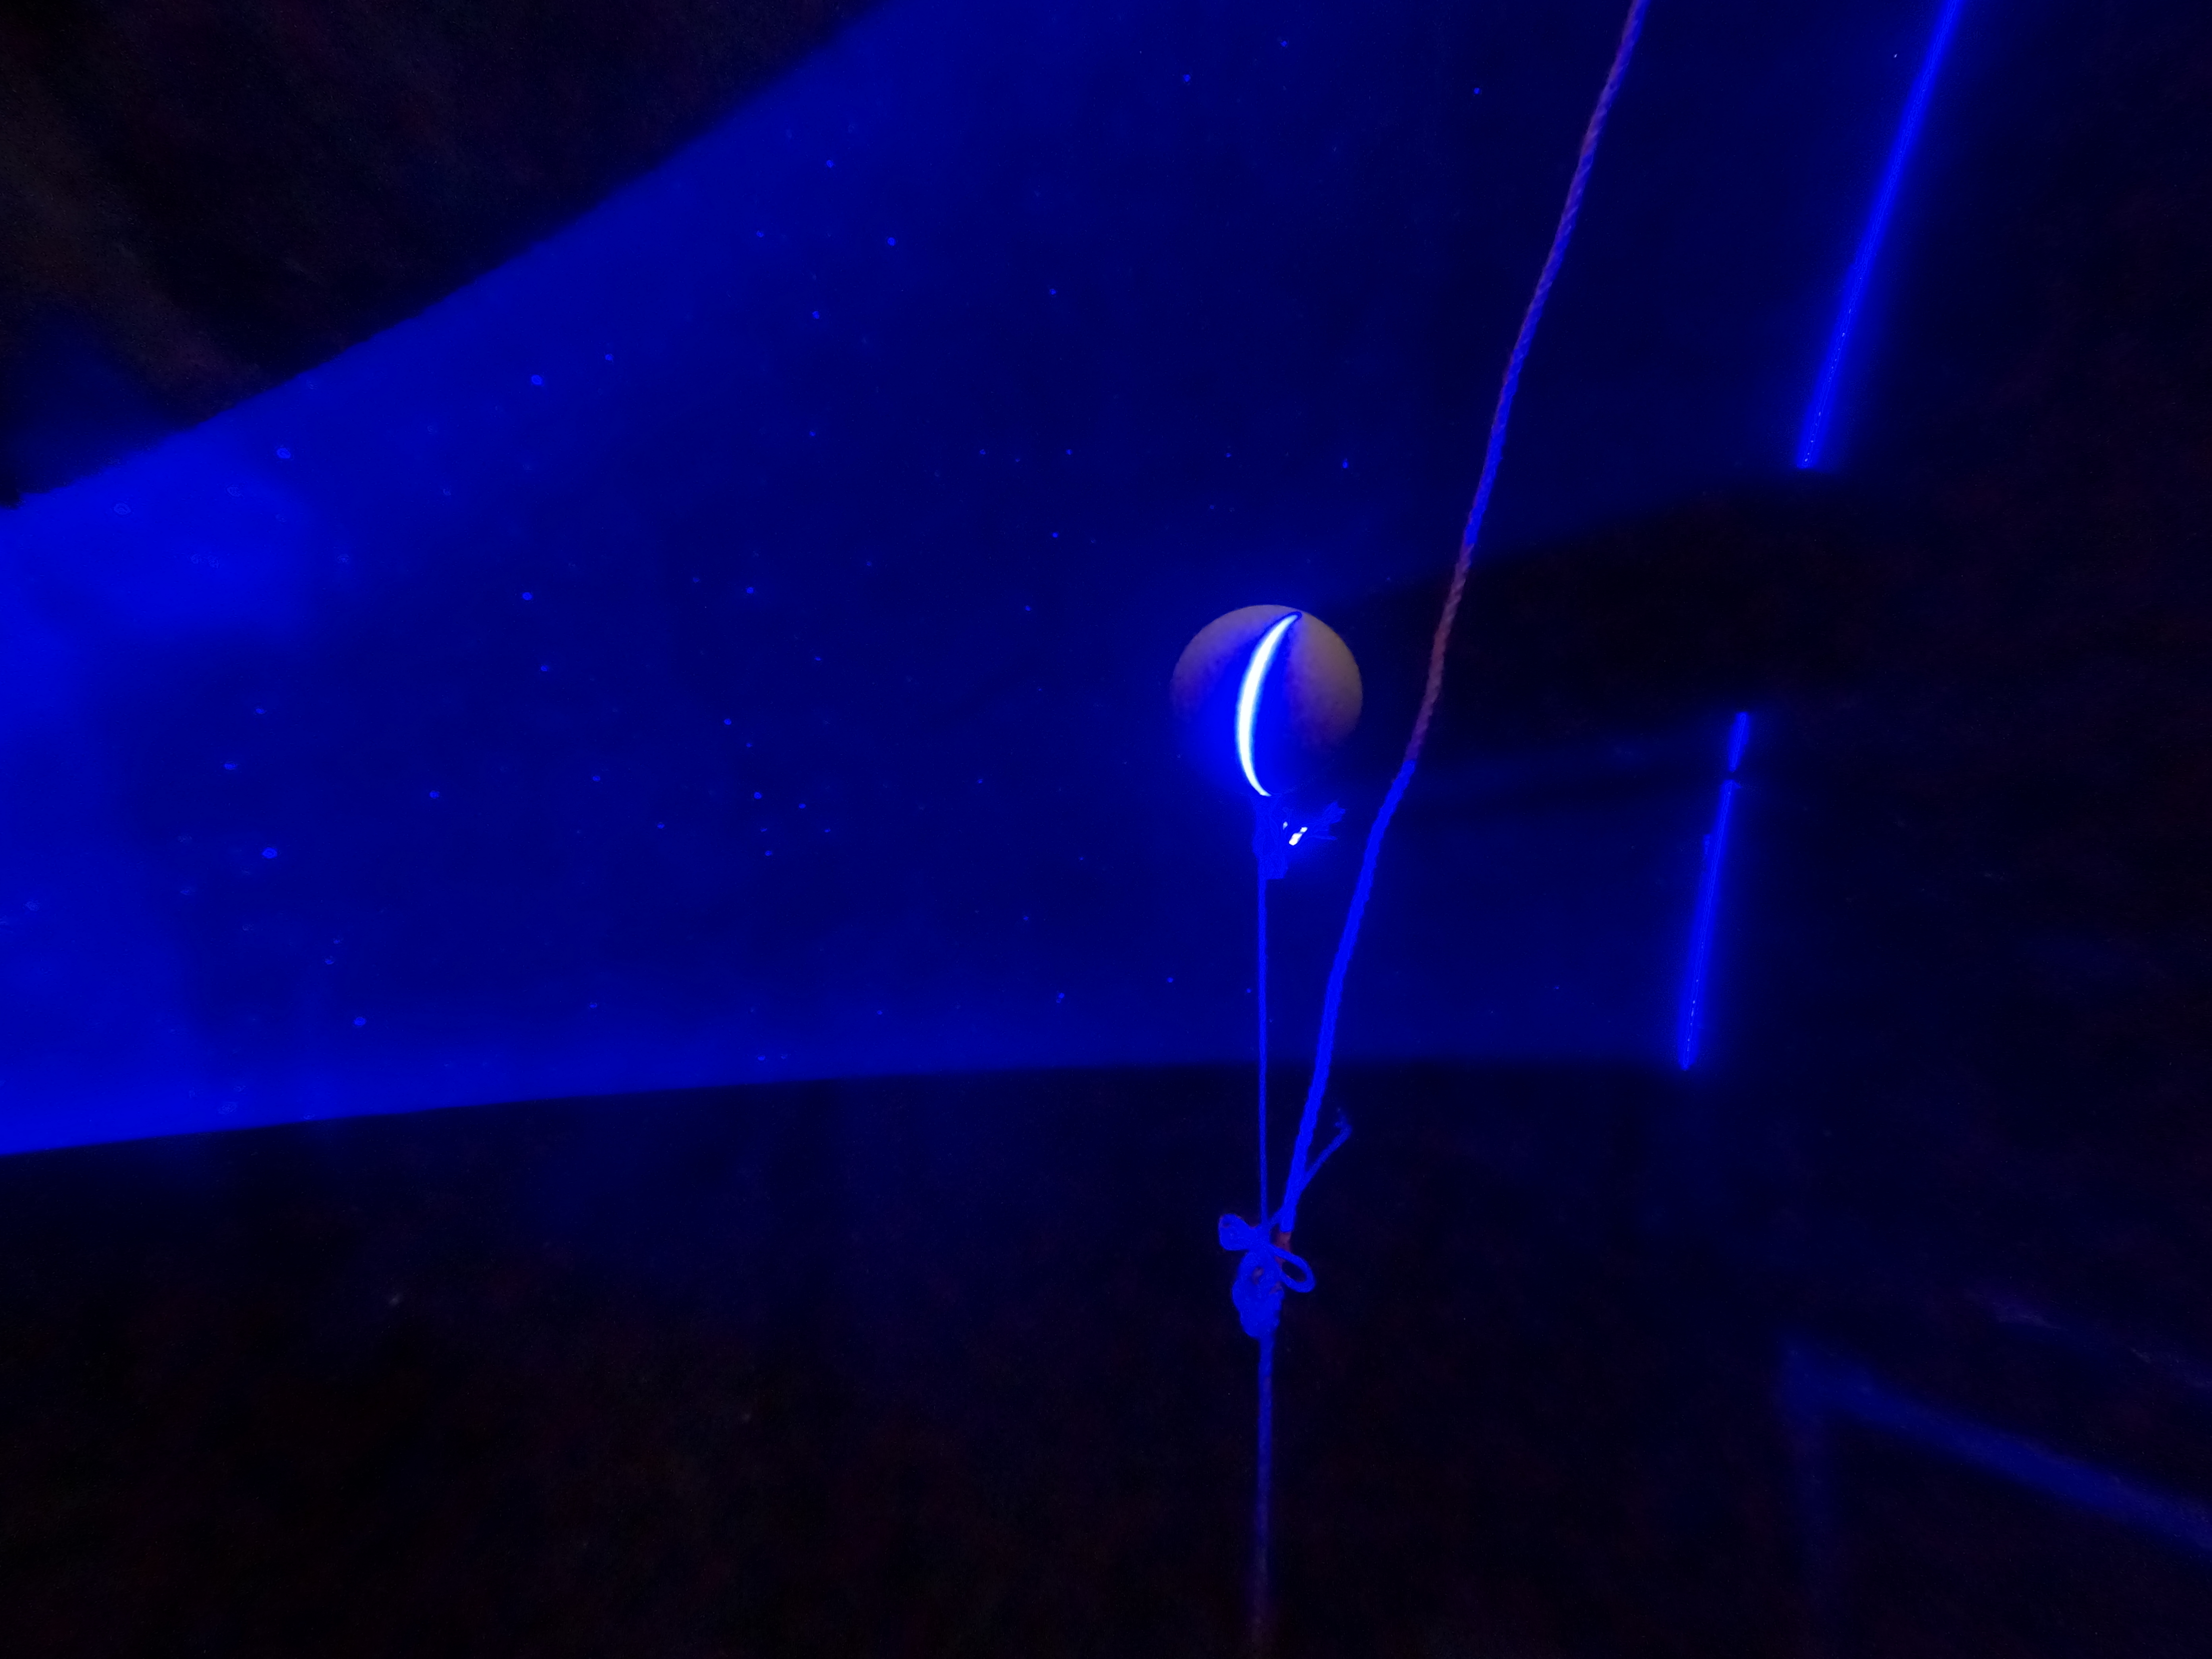

Supplement: Supplementary file 159 [file G0034589.pdf › 9/G0034589.pdf]

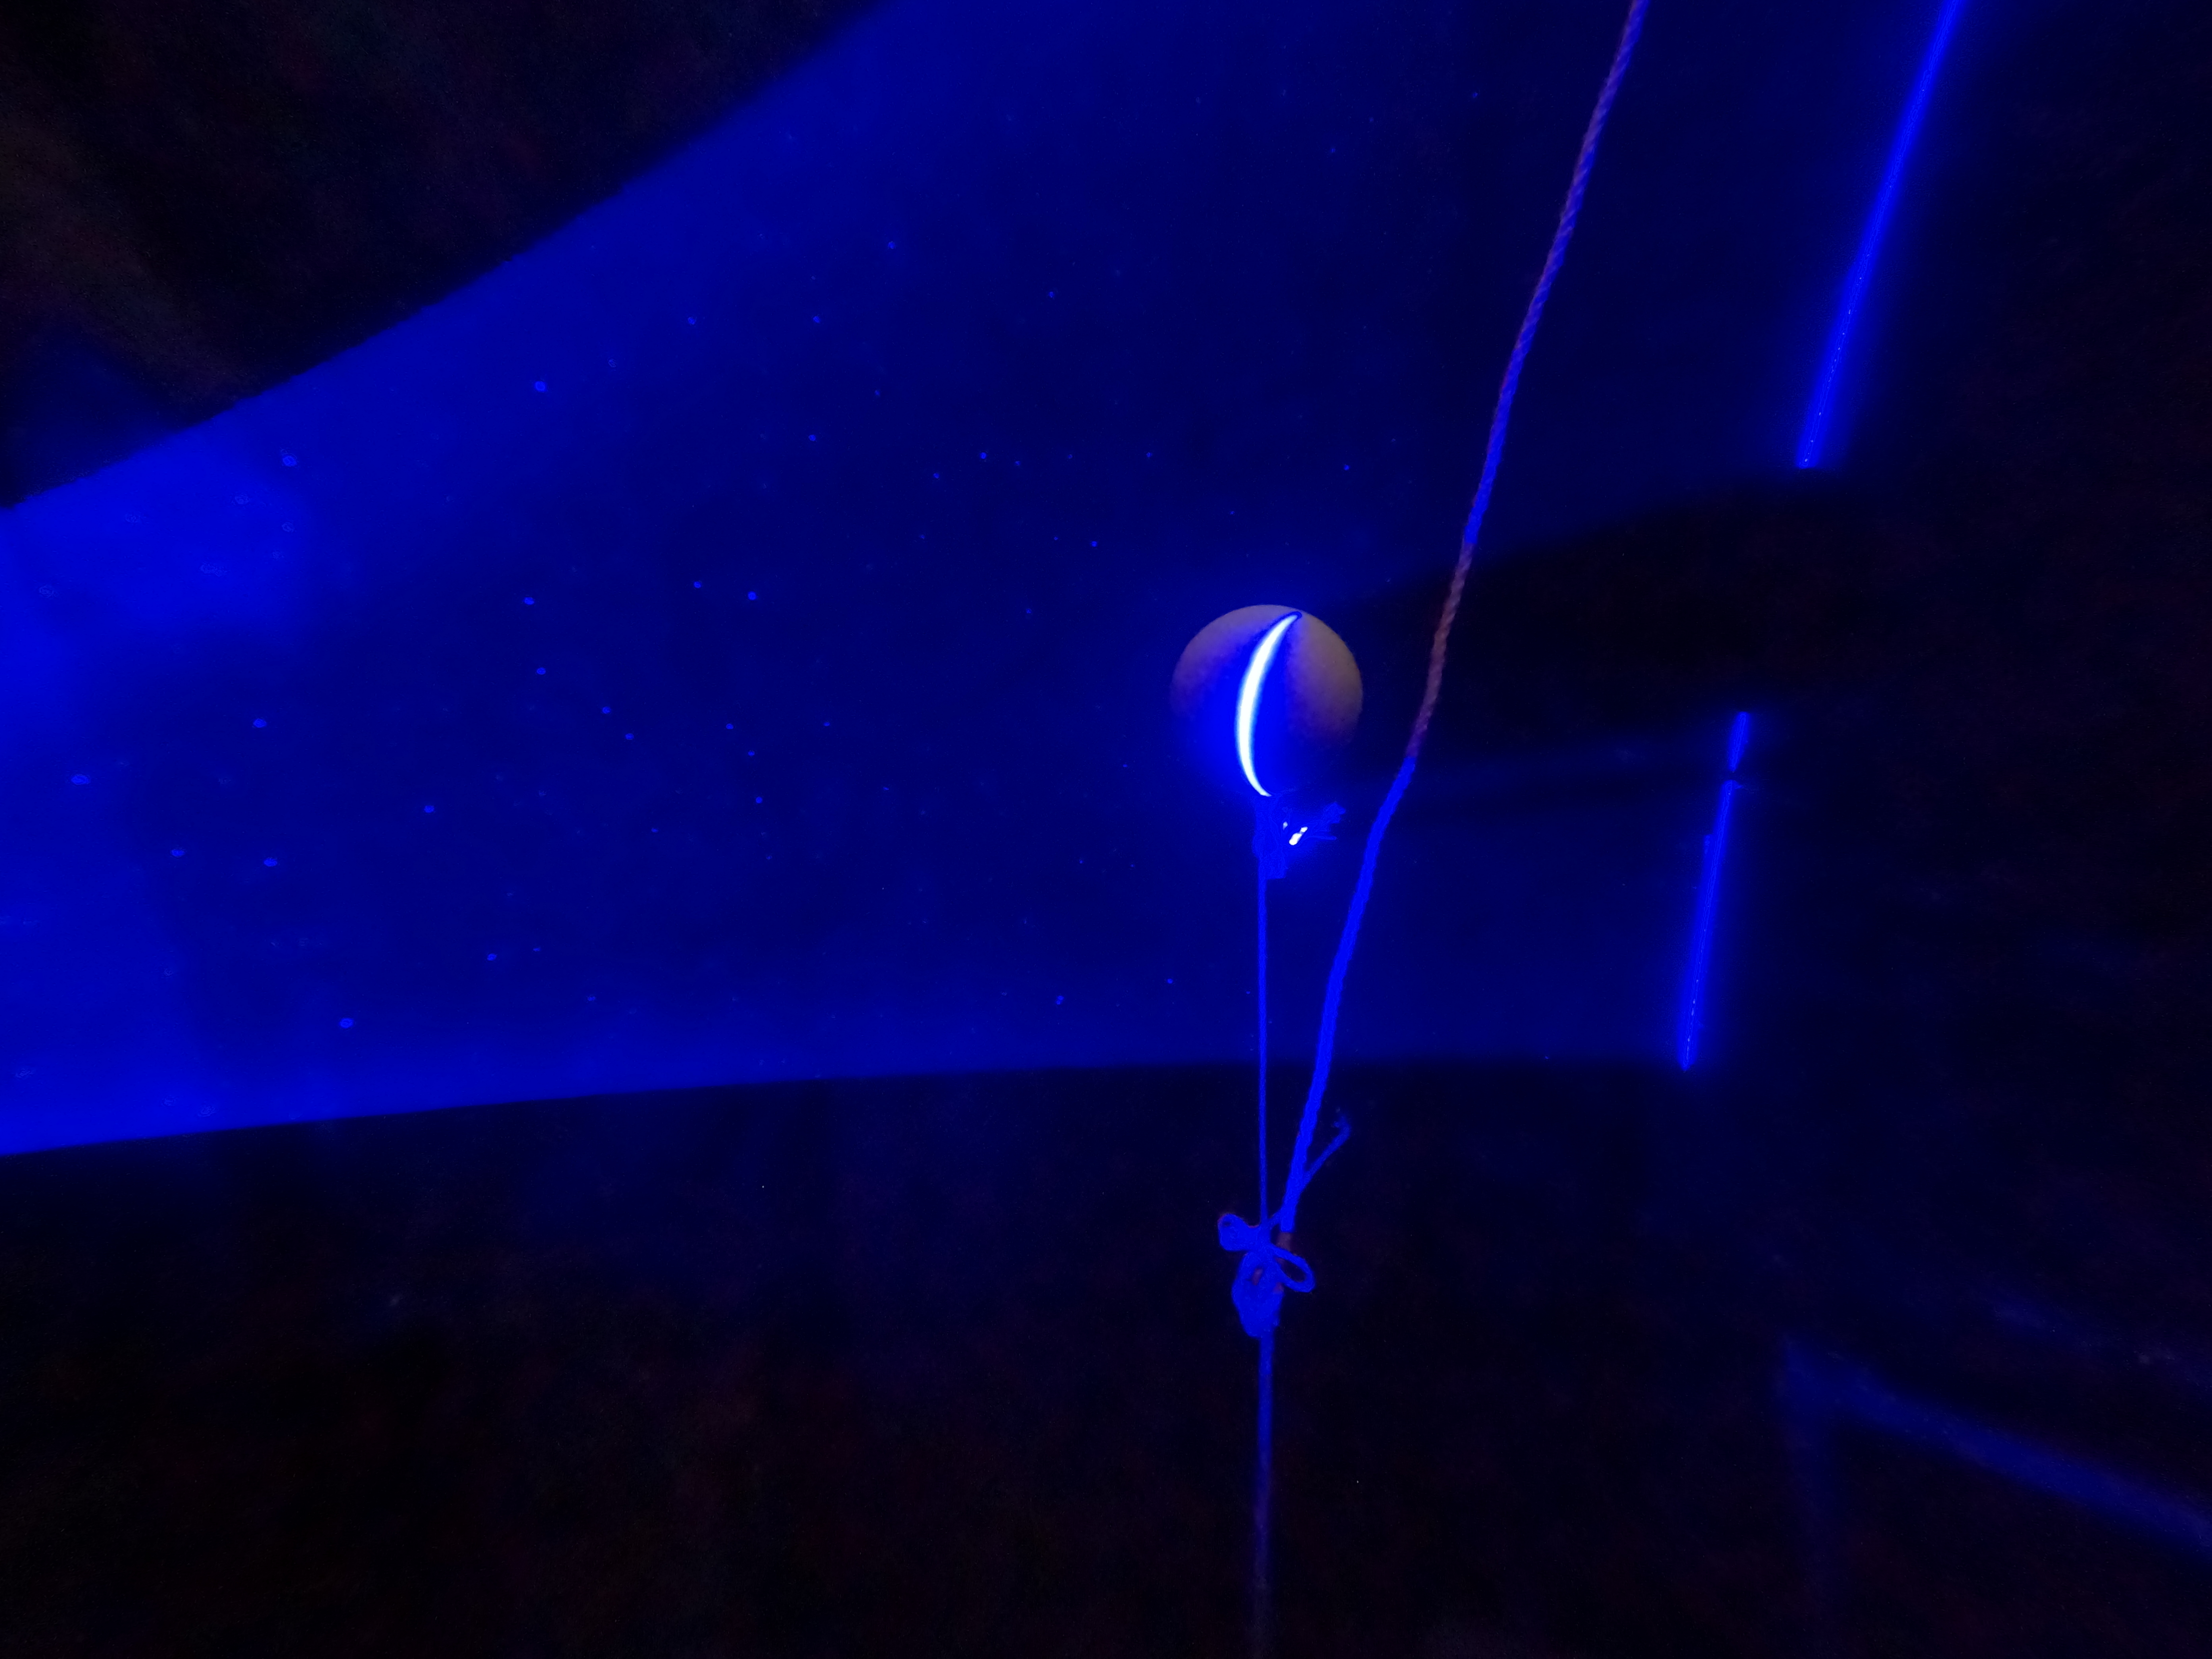

Supplement: Supplementary file 160 [file G0034590.pdf › 9/G0034590.pdf]

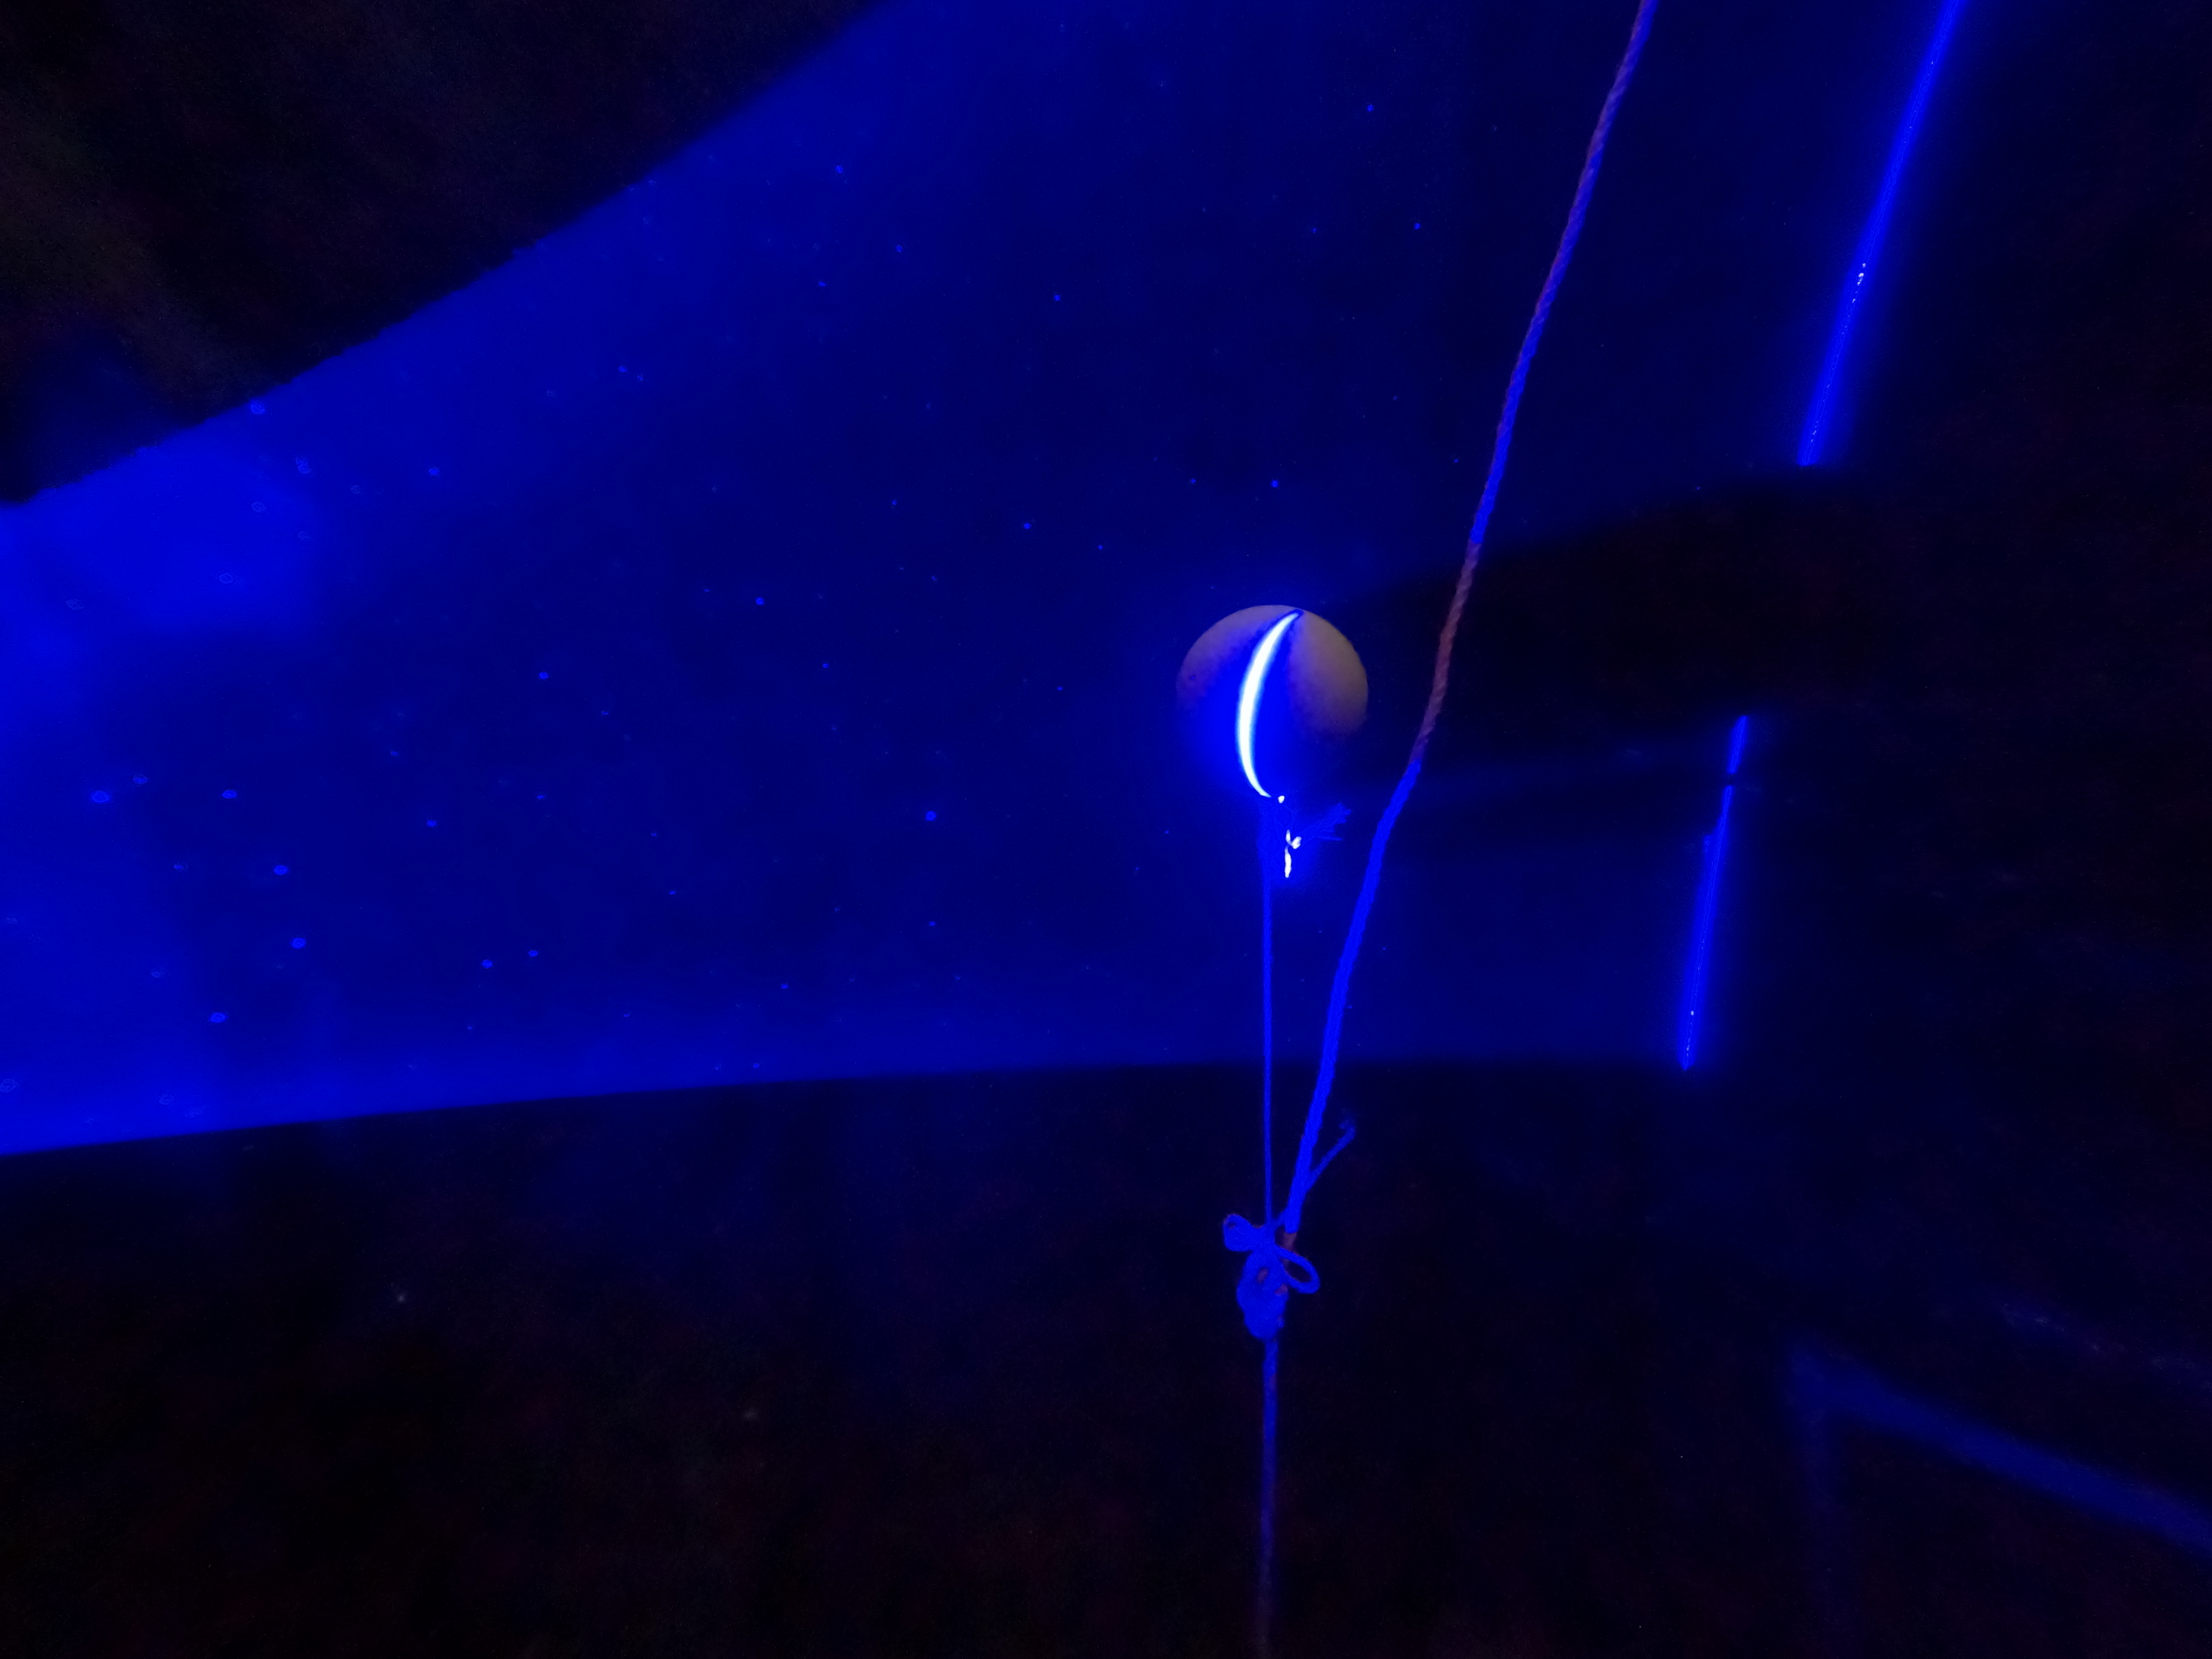

Supplement: Supplementary file 161 [file G0034591.pdf › 9/G0034591.pdf]

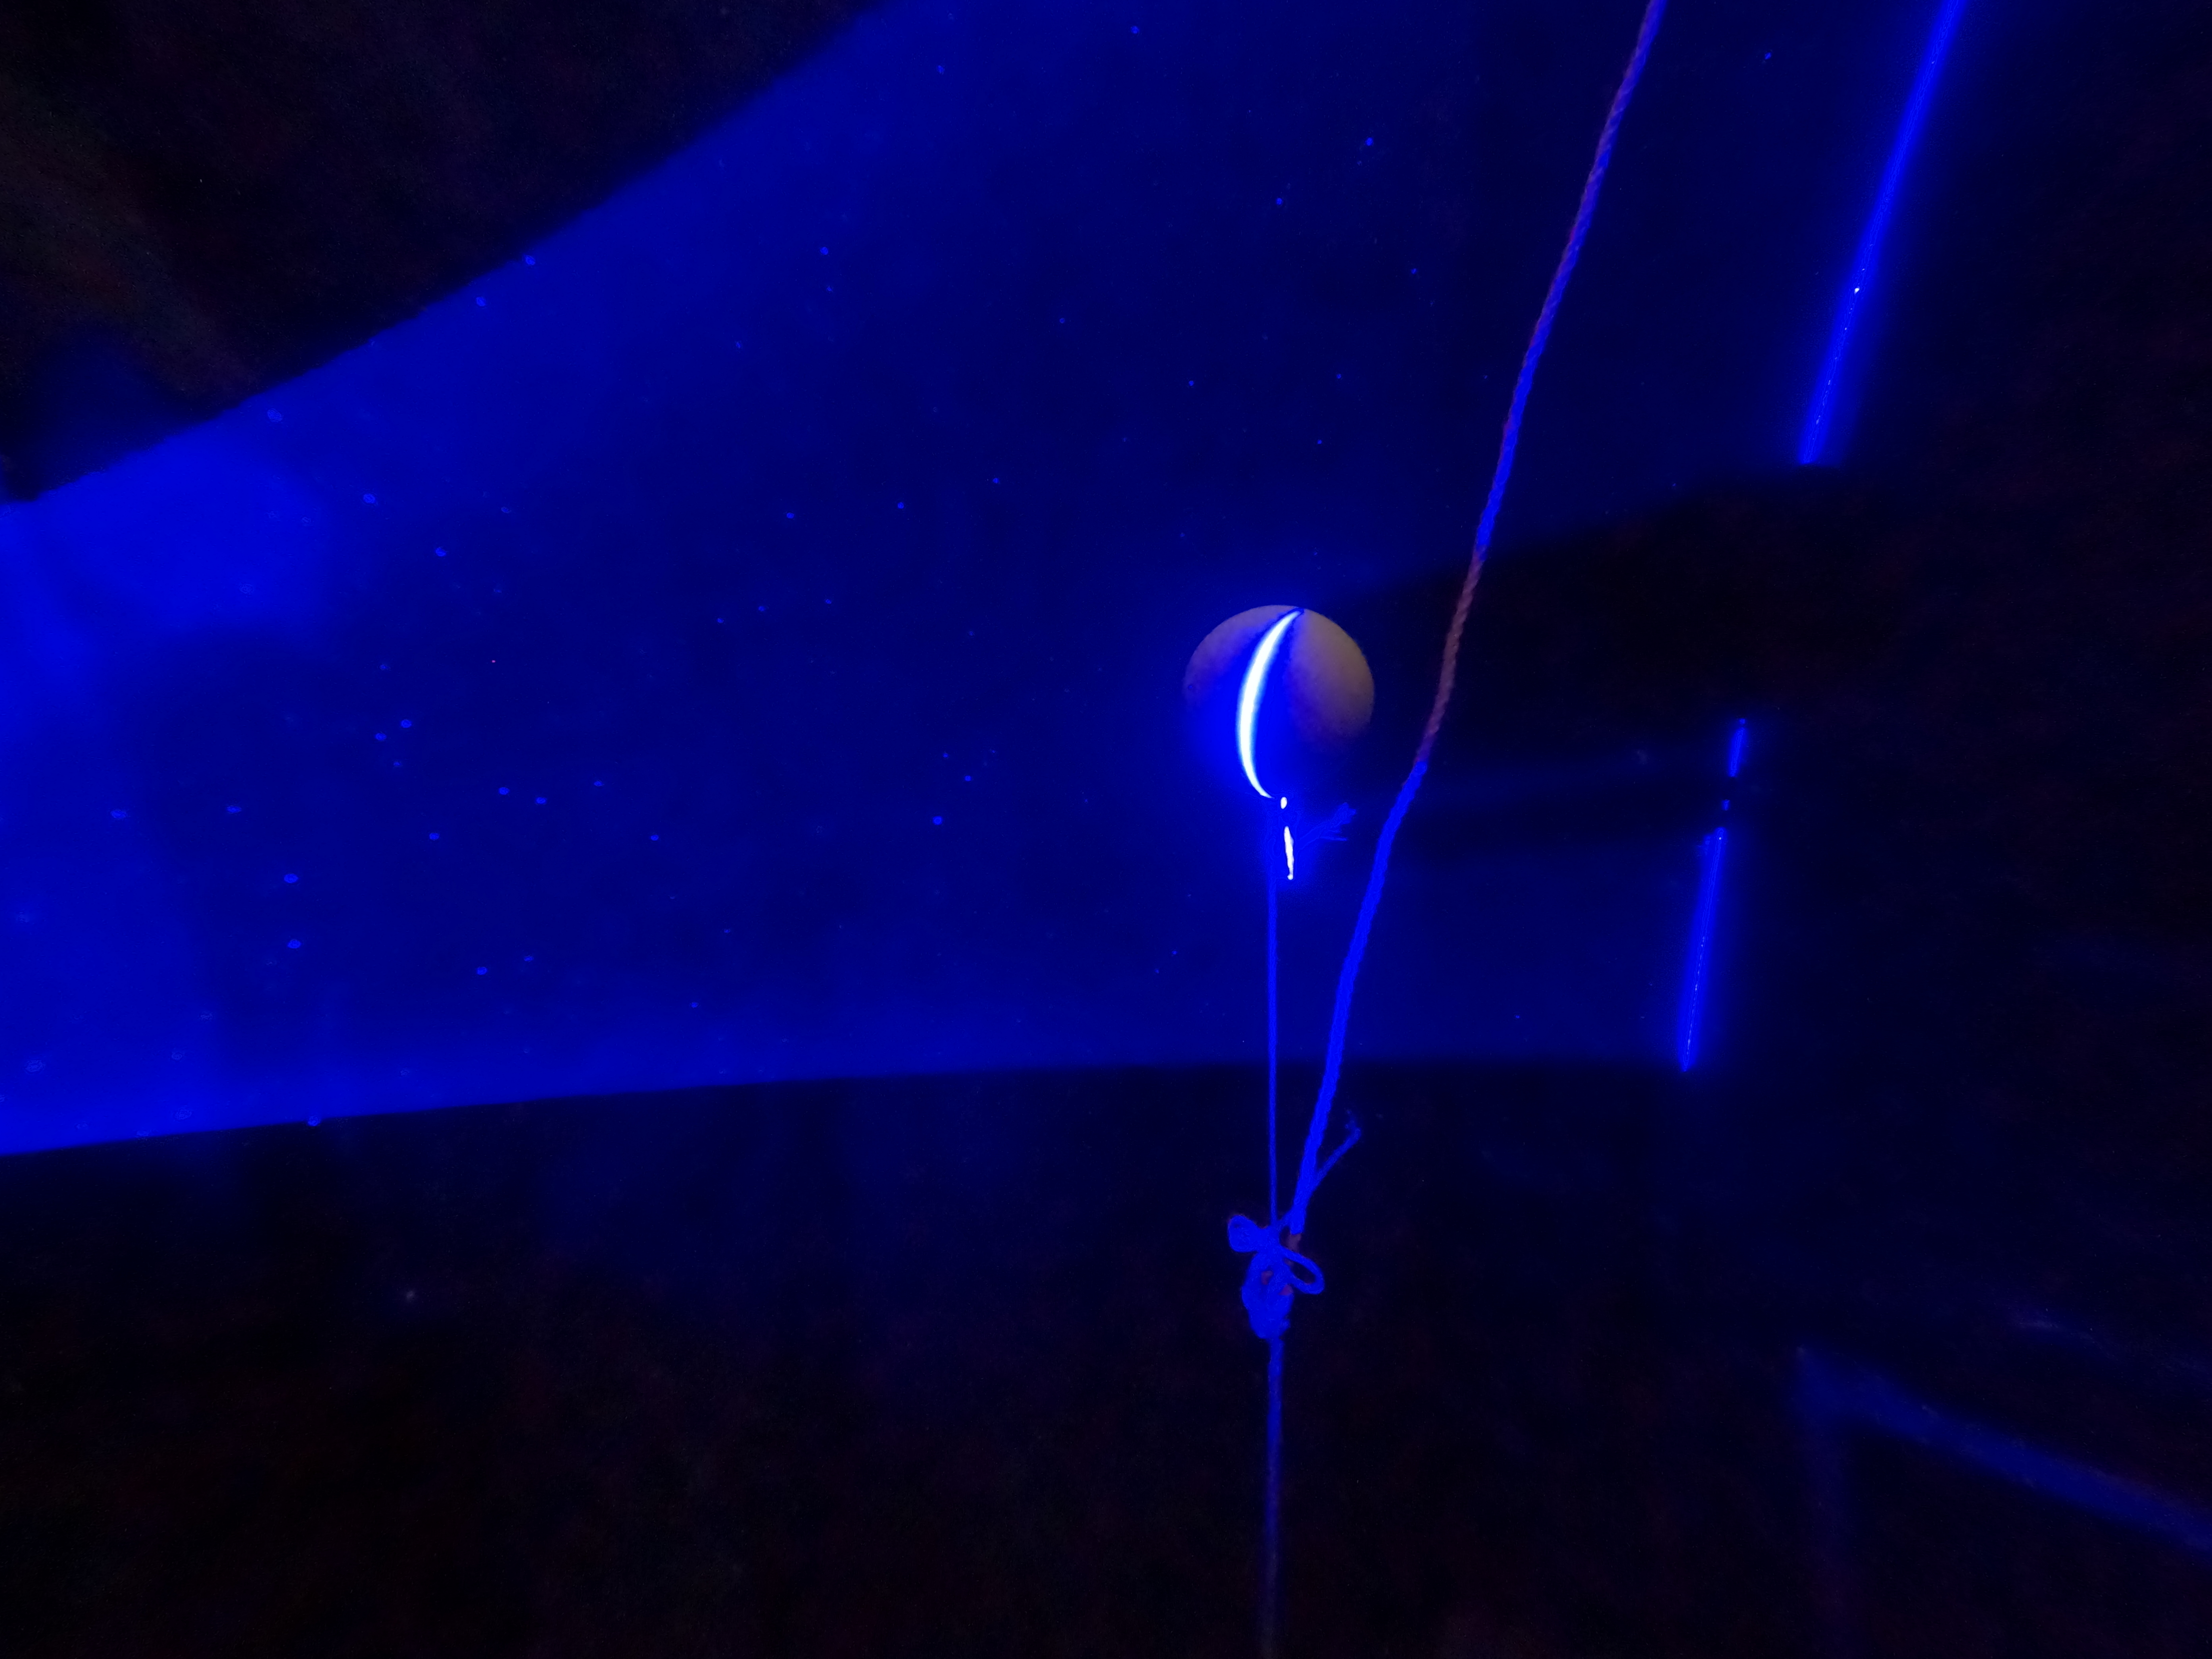

Supplement: Supplementary file 162 [file G0034592.pdf › 9/G0034592.pdf]

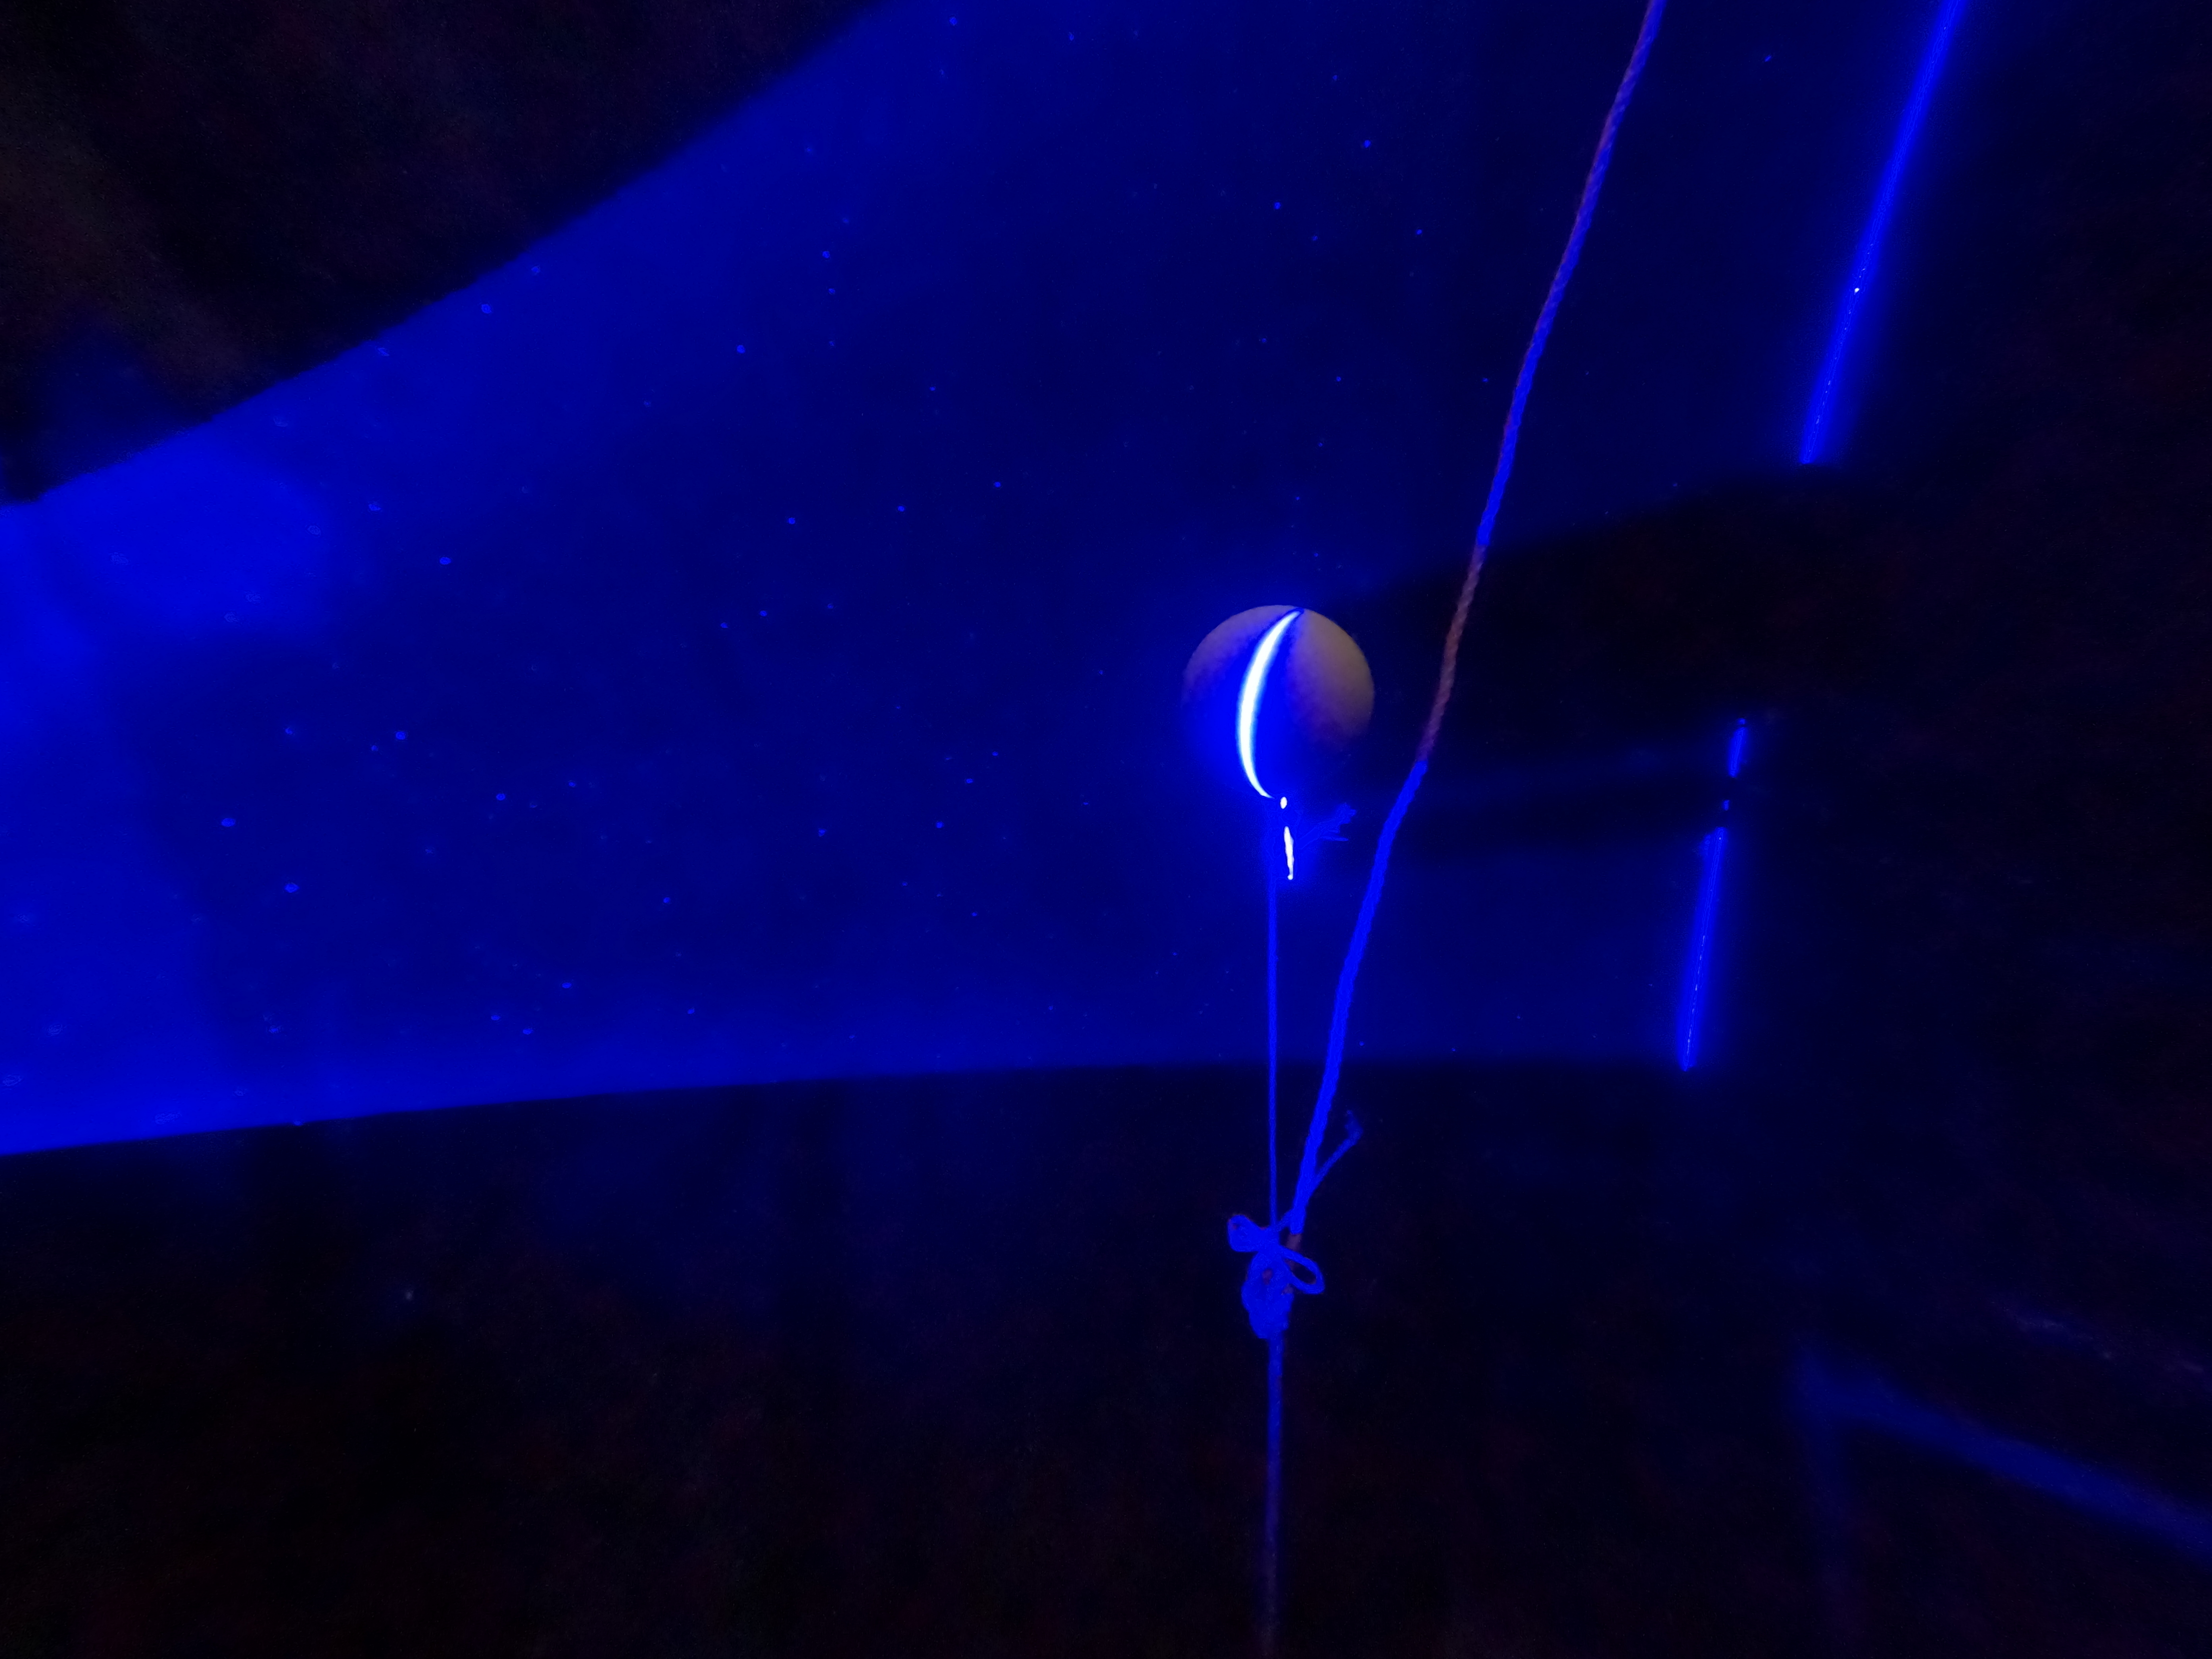

Supplement: Supplementary file 163 [file G0034593.pdf › 9/G0034593.pdf]

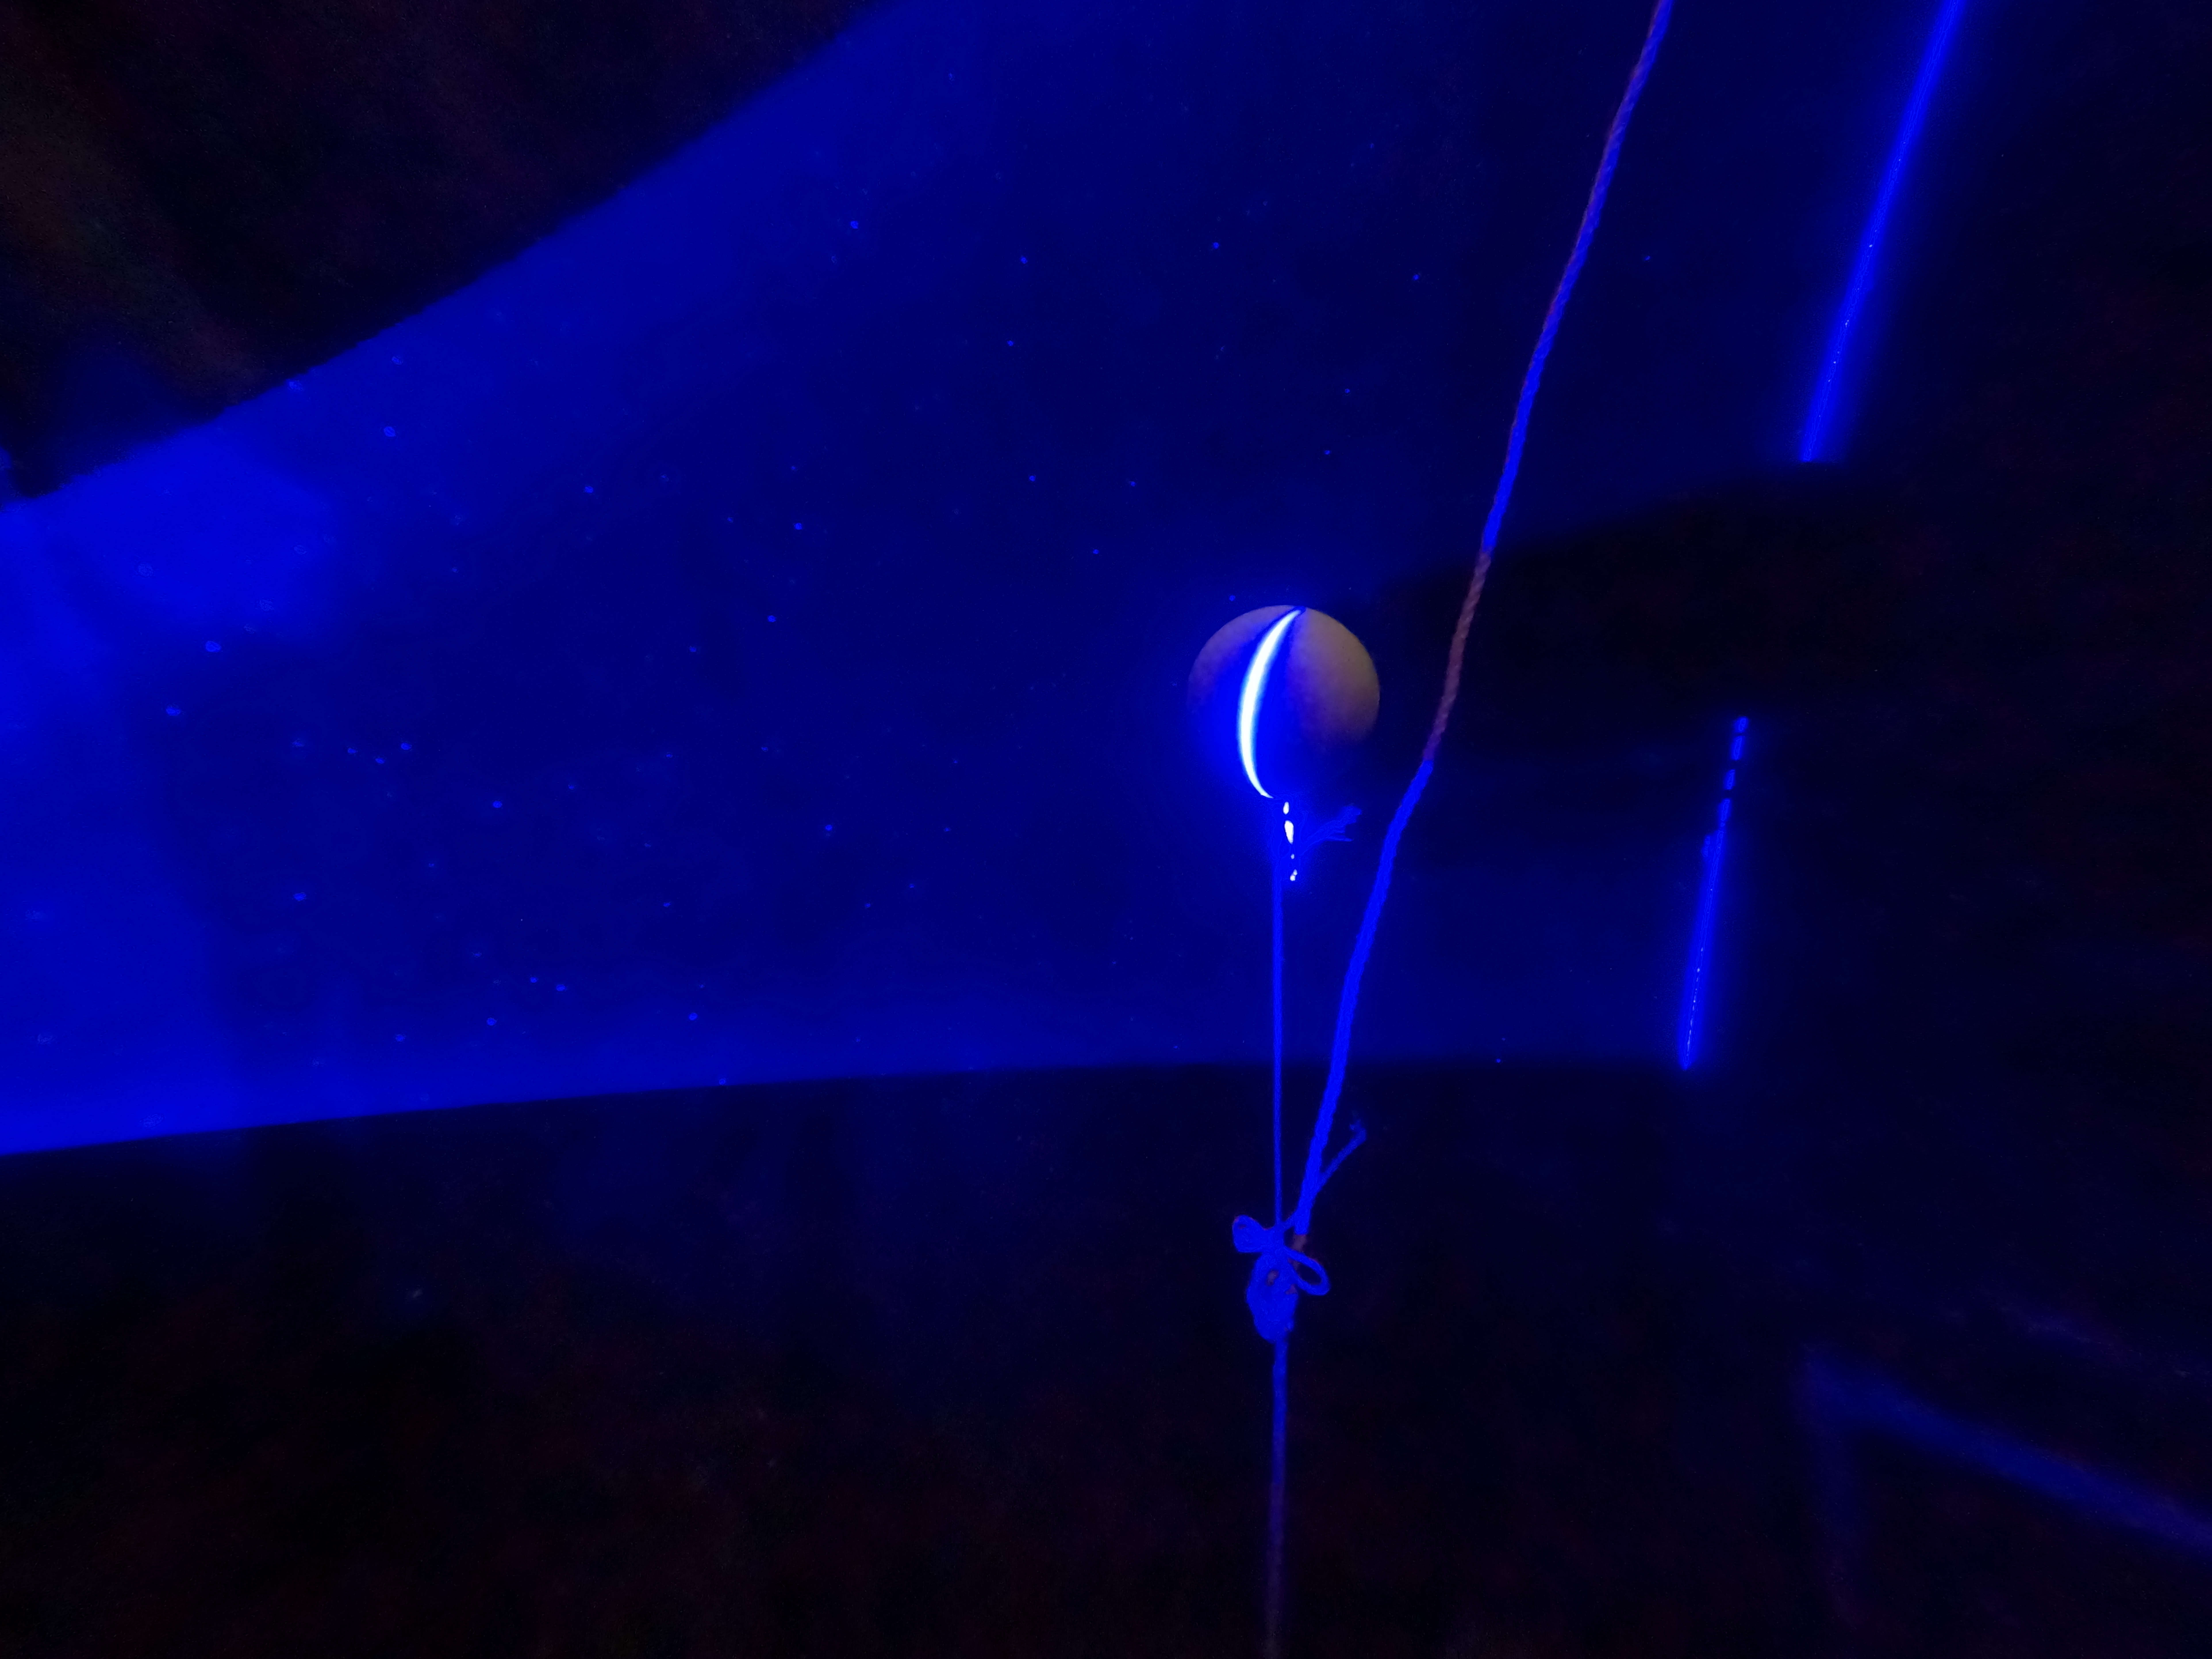

Supplement: Supplementary file 164 [file G0034594.pdf › 9/G0034594.pdf]

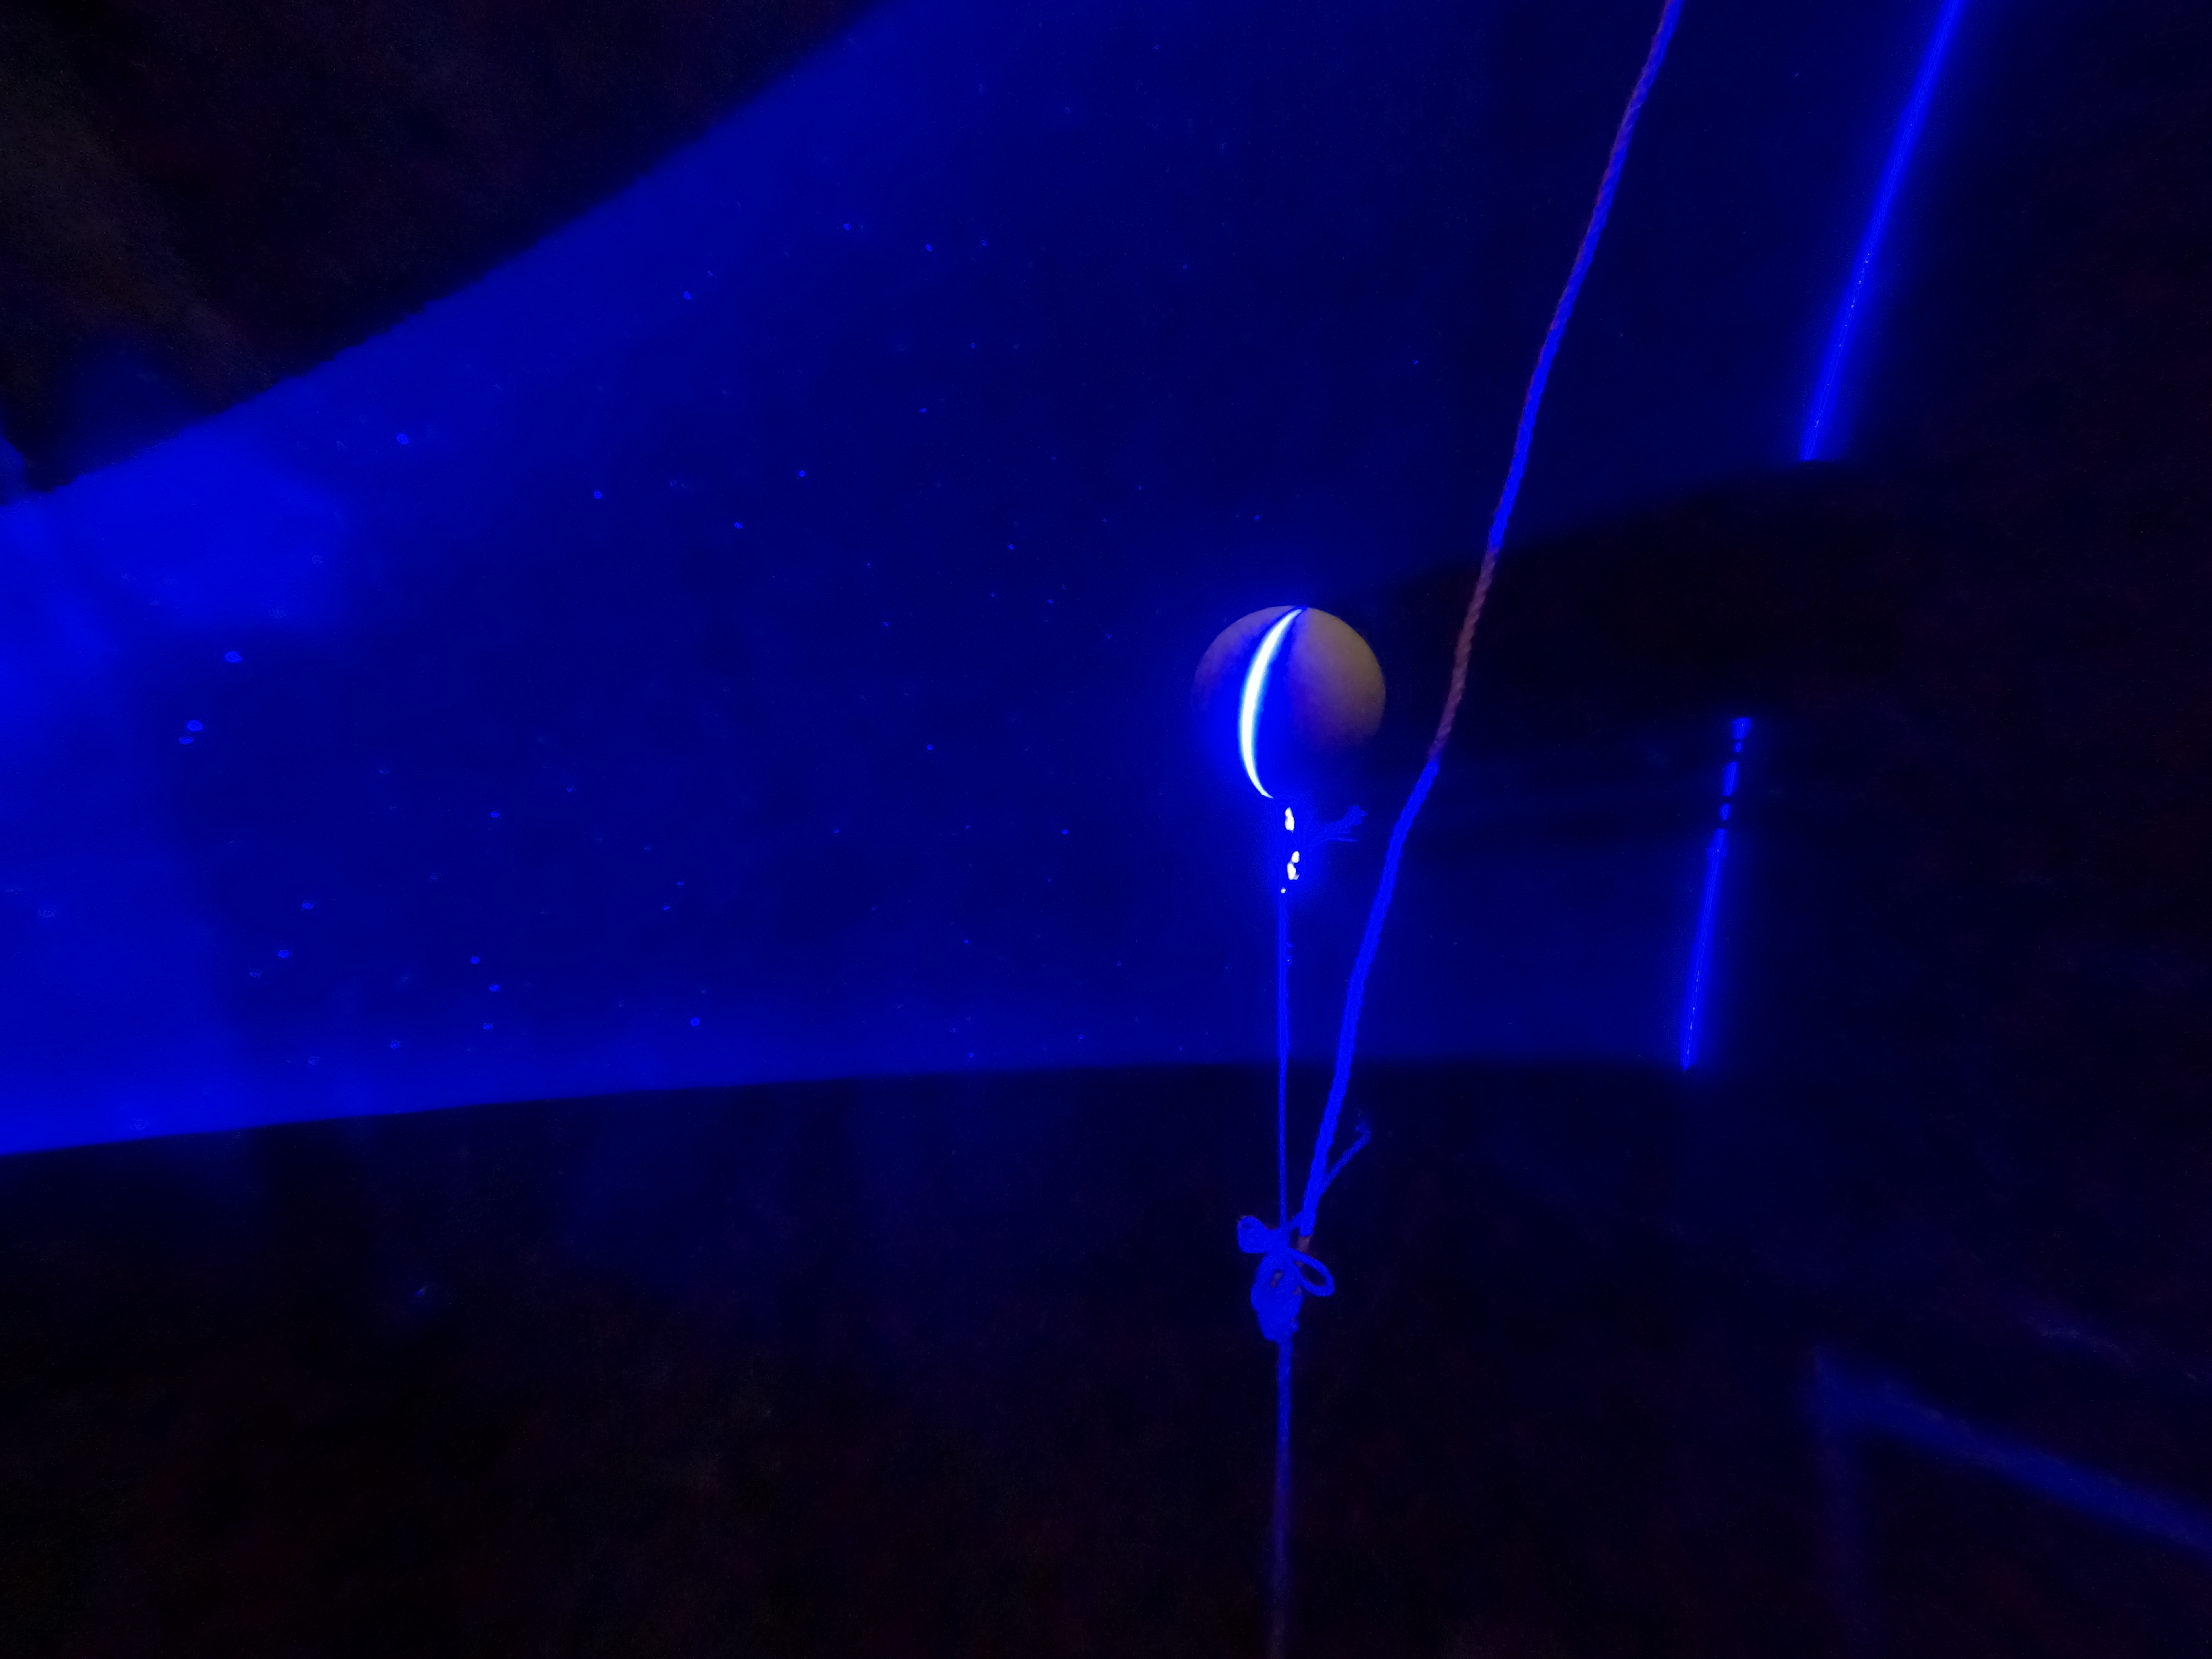

Supplement: Supplementary file 165 [file G0034595.pdf › 9/G0034595.pdf]

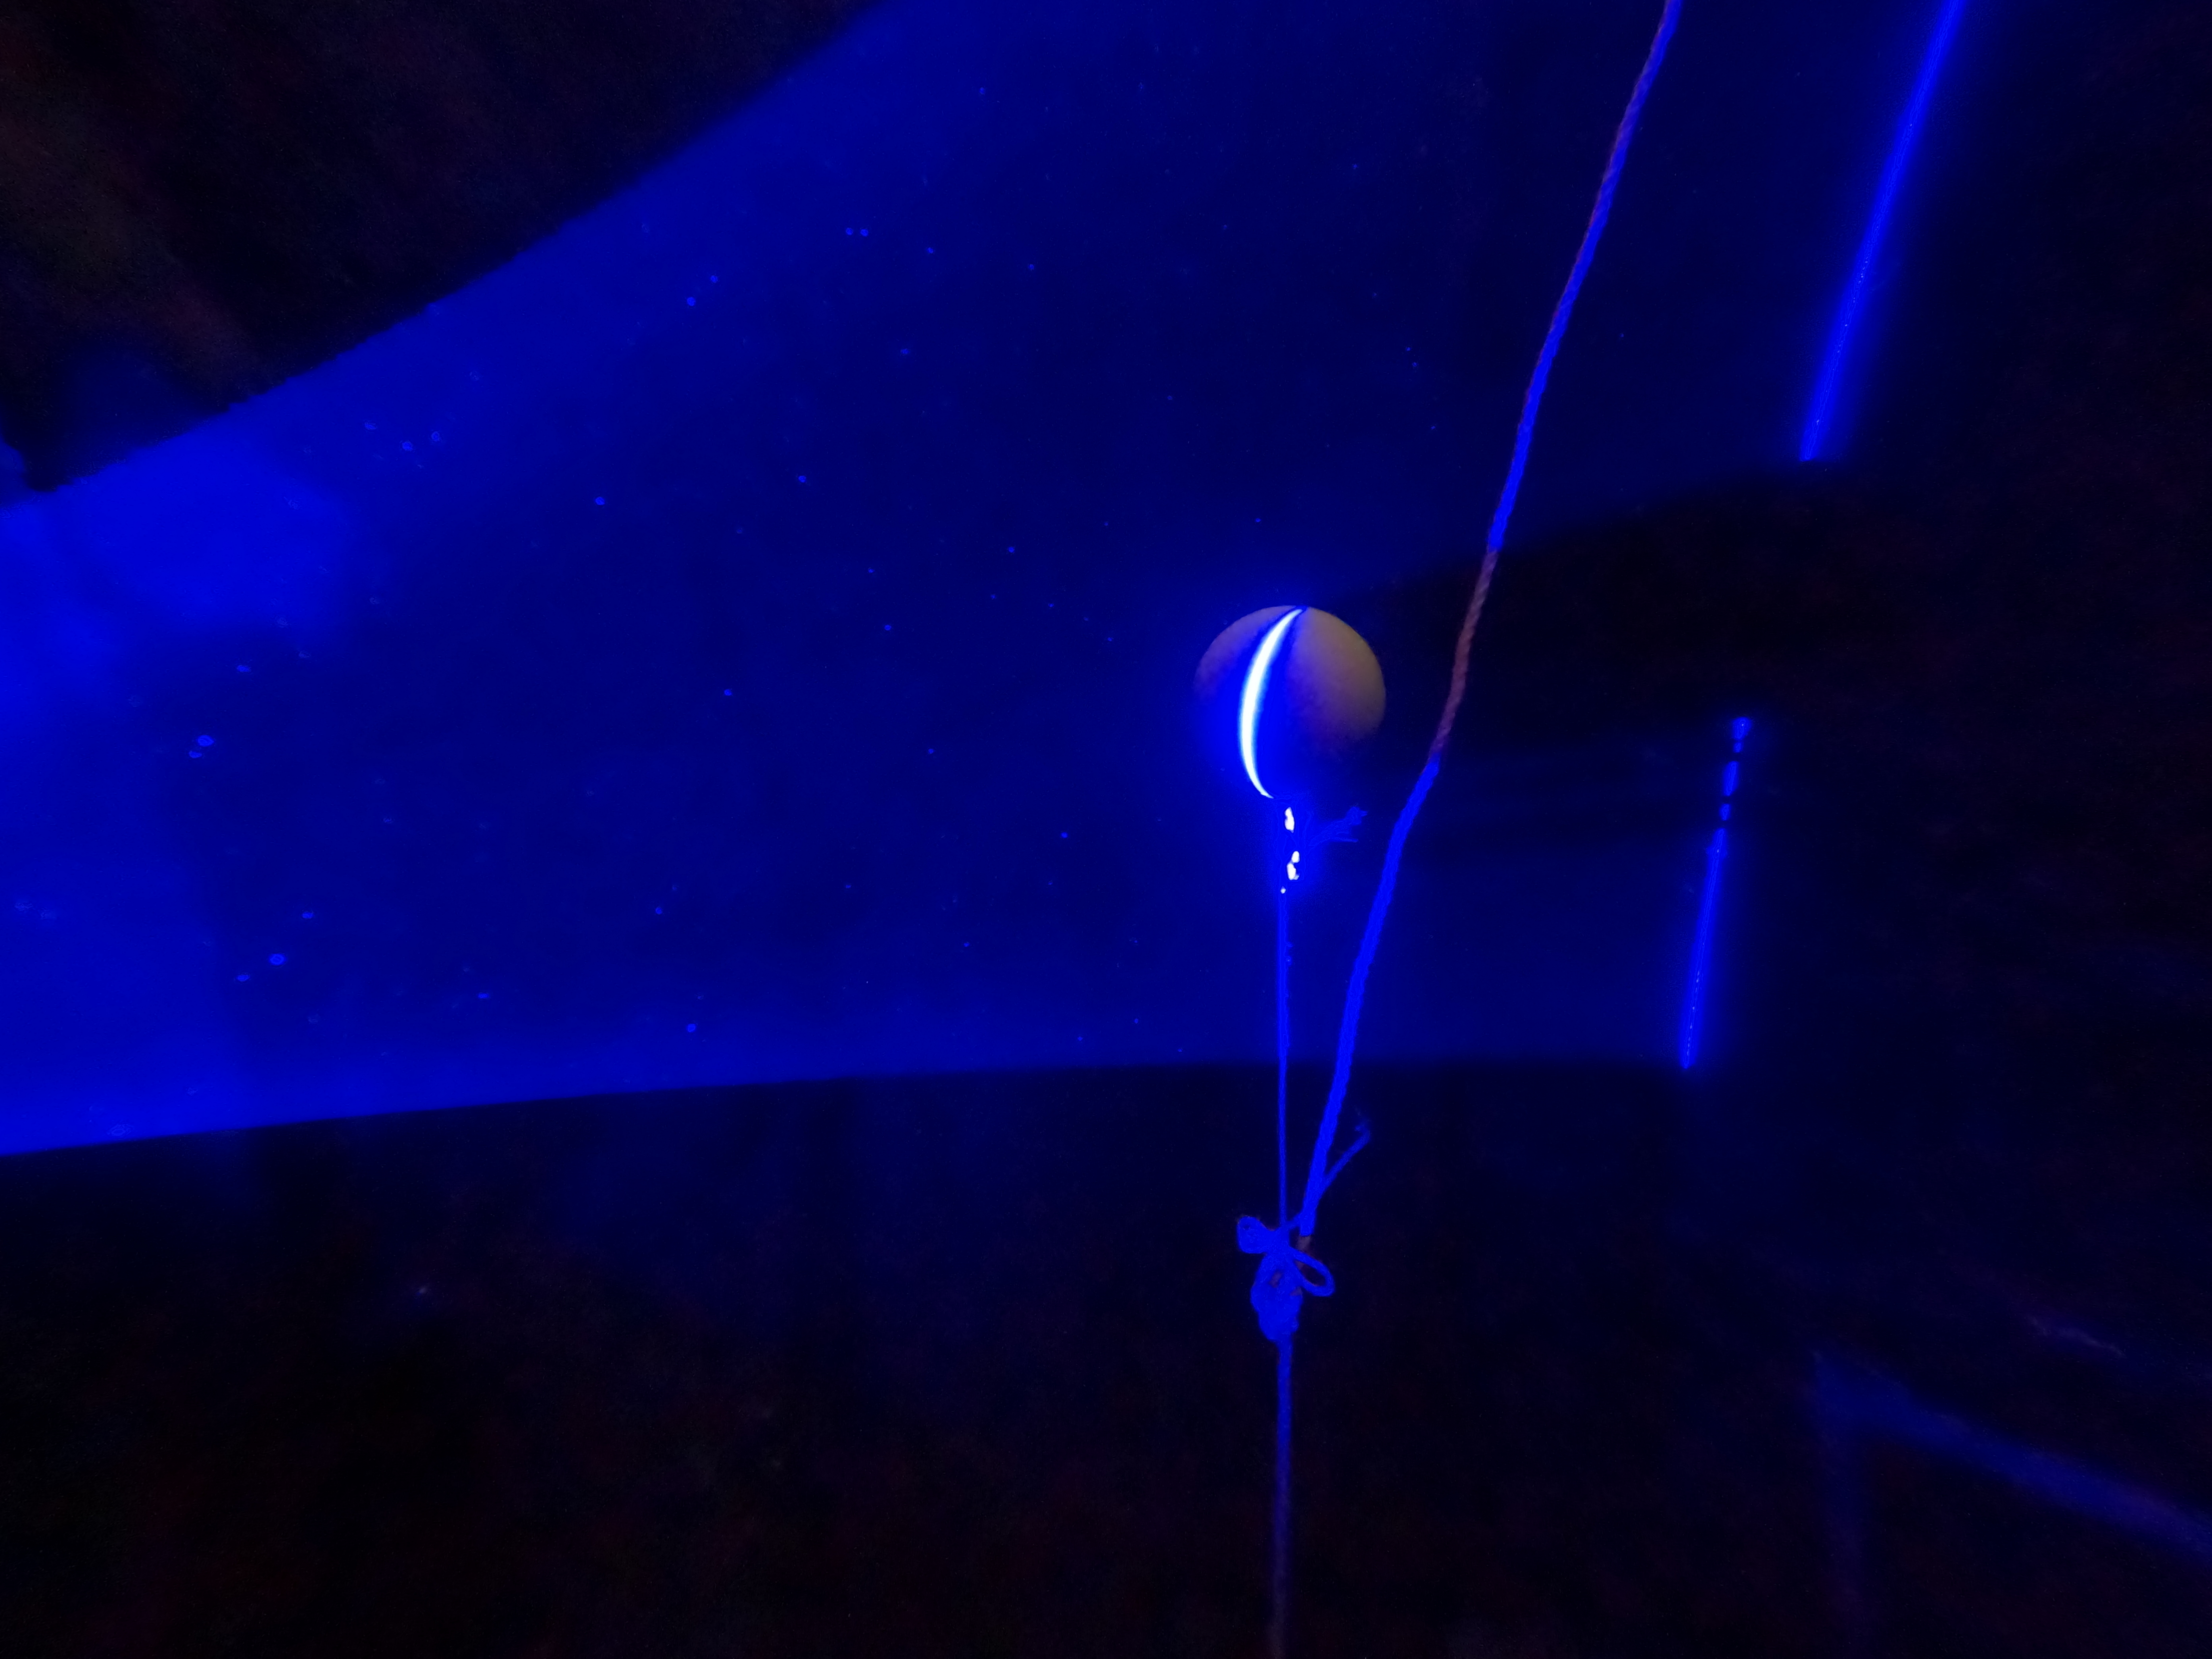

Supplement: Supplementary file 166 [file G0034596.pdf › 9/G0034596.pdf]

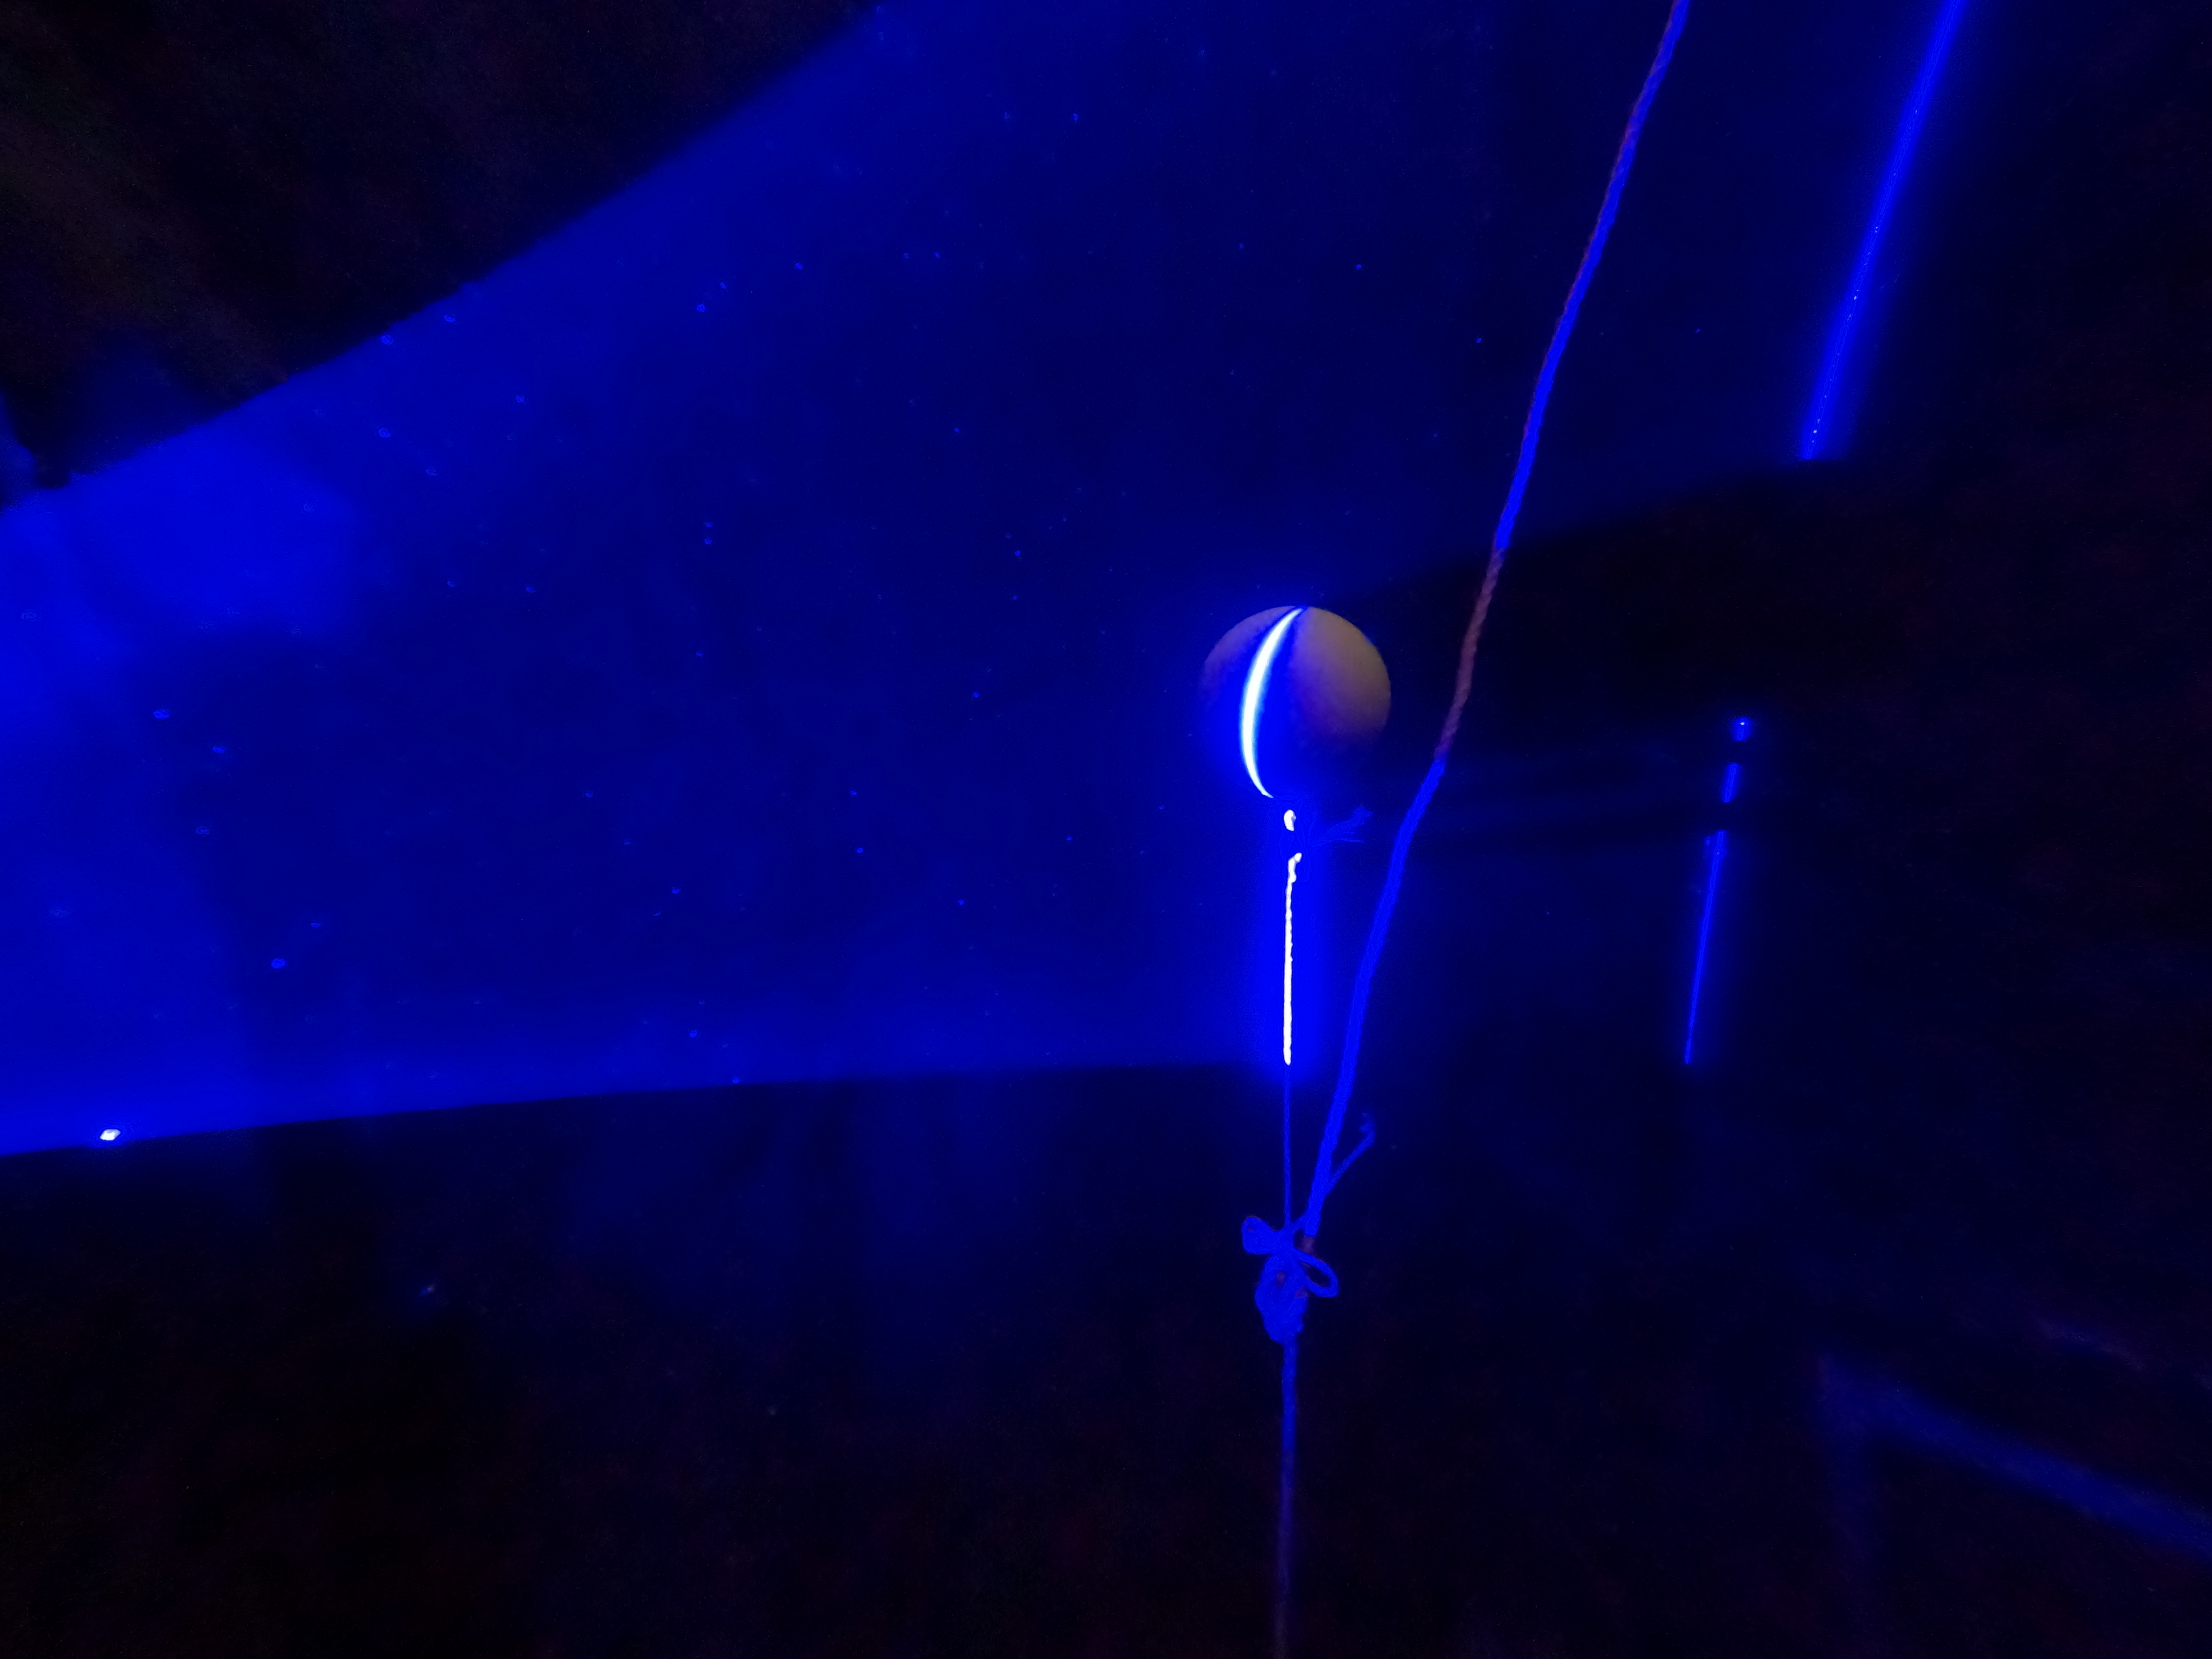

Supplement: Supplementary file 167 [file G0034597.pdf › 9/G0034597.pdf]

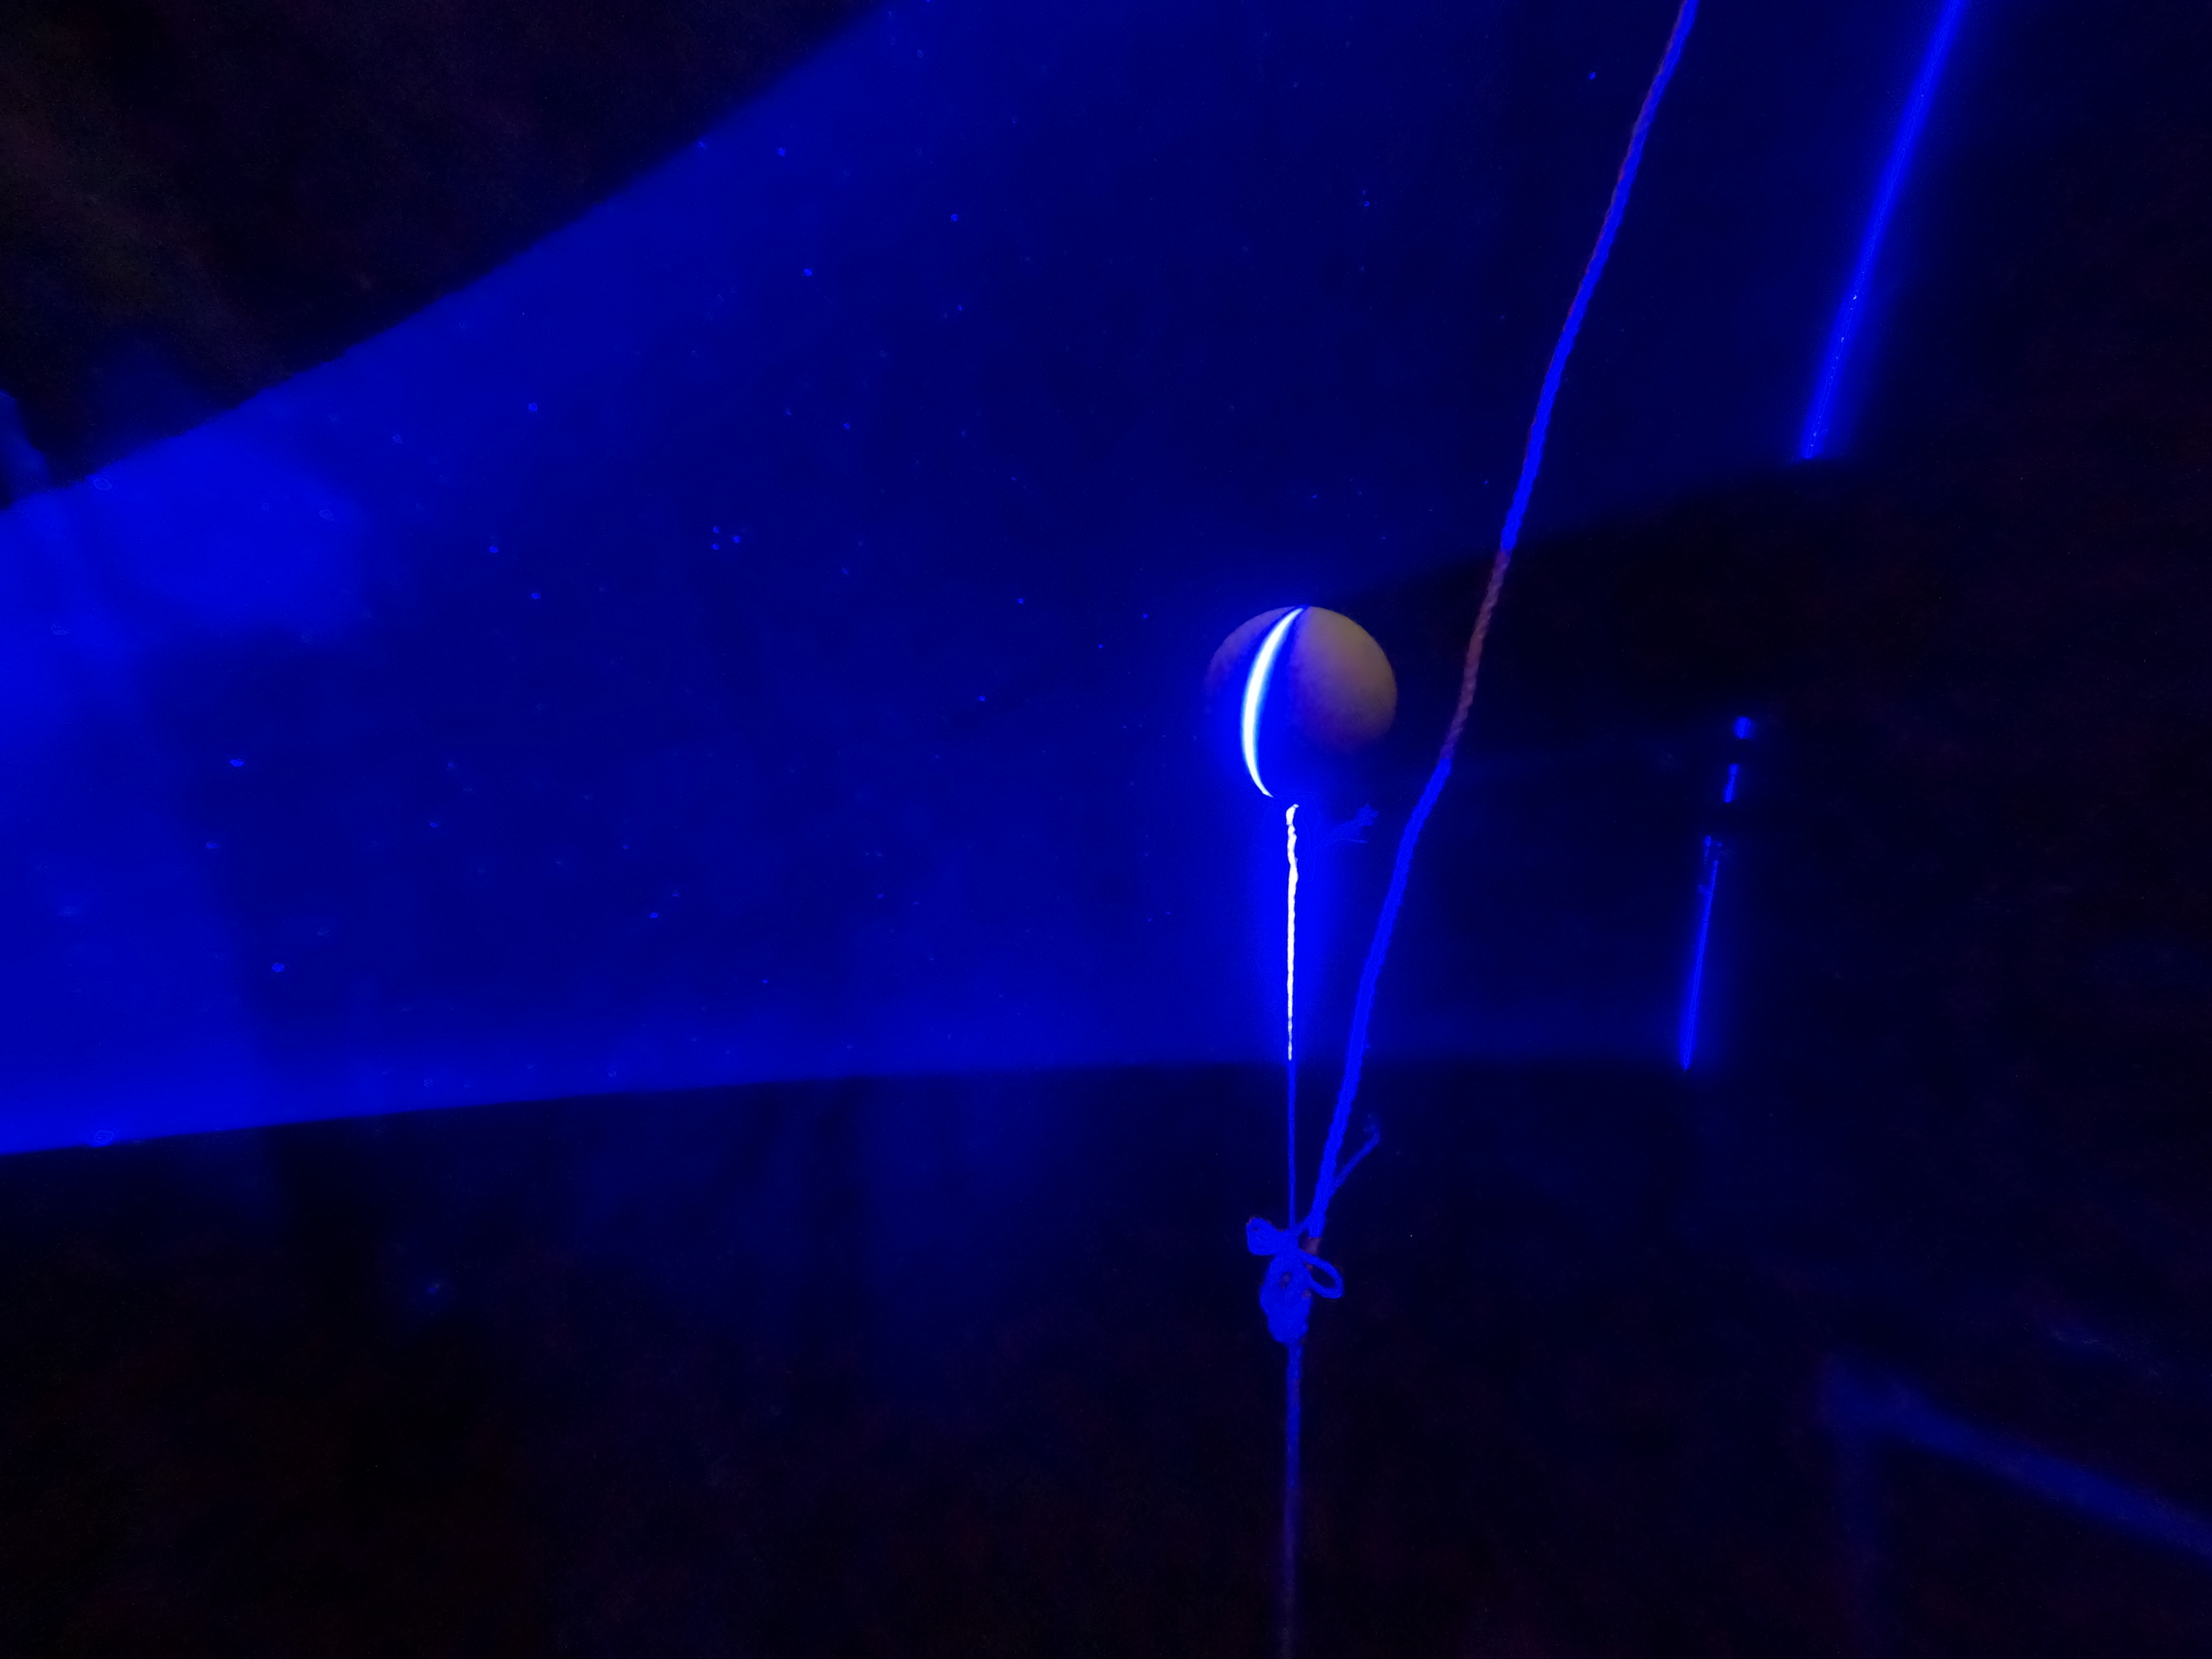

Supplement: Supplementary file 168 [file G0034598.pdf › 9/G0034598.pdf]

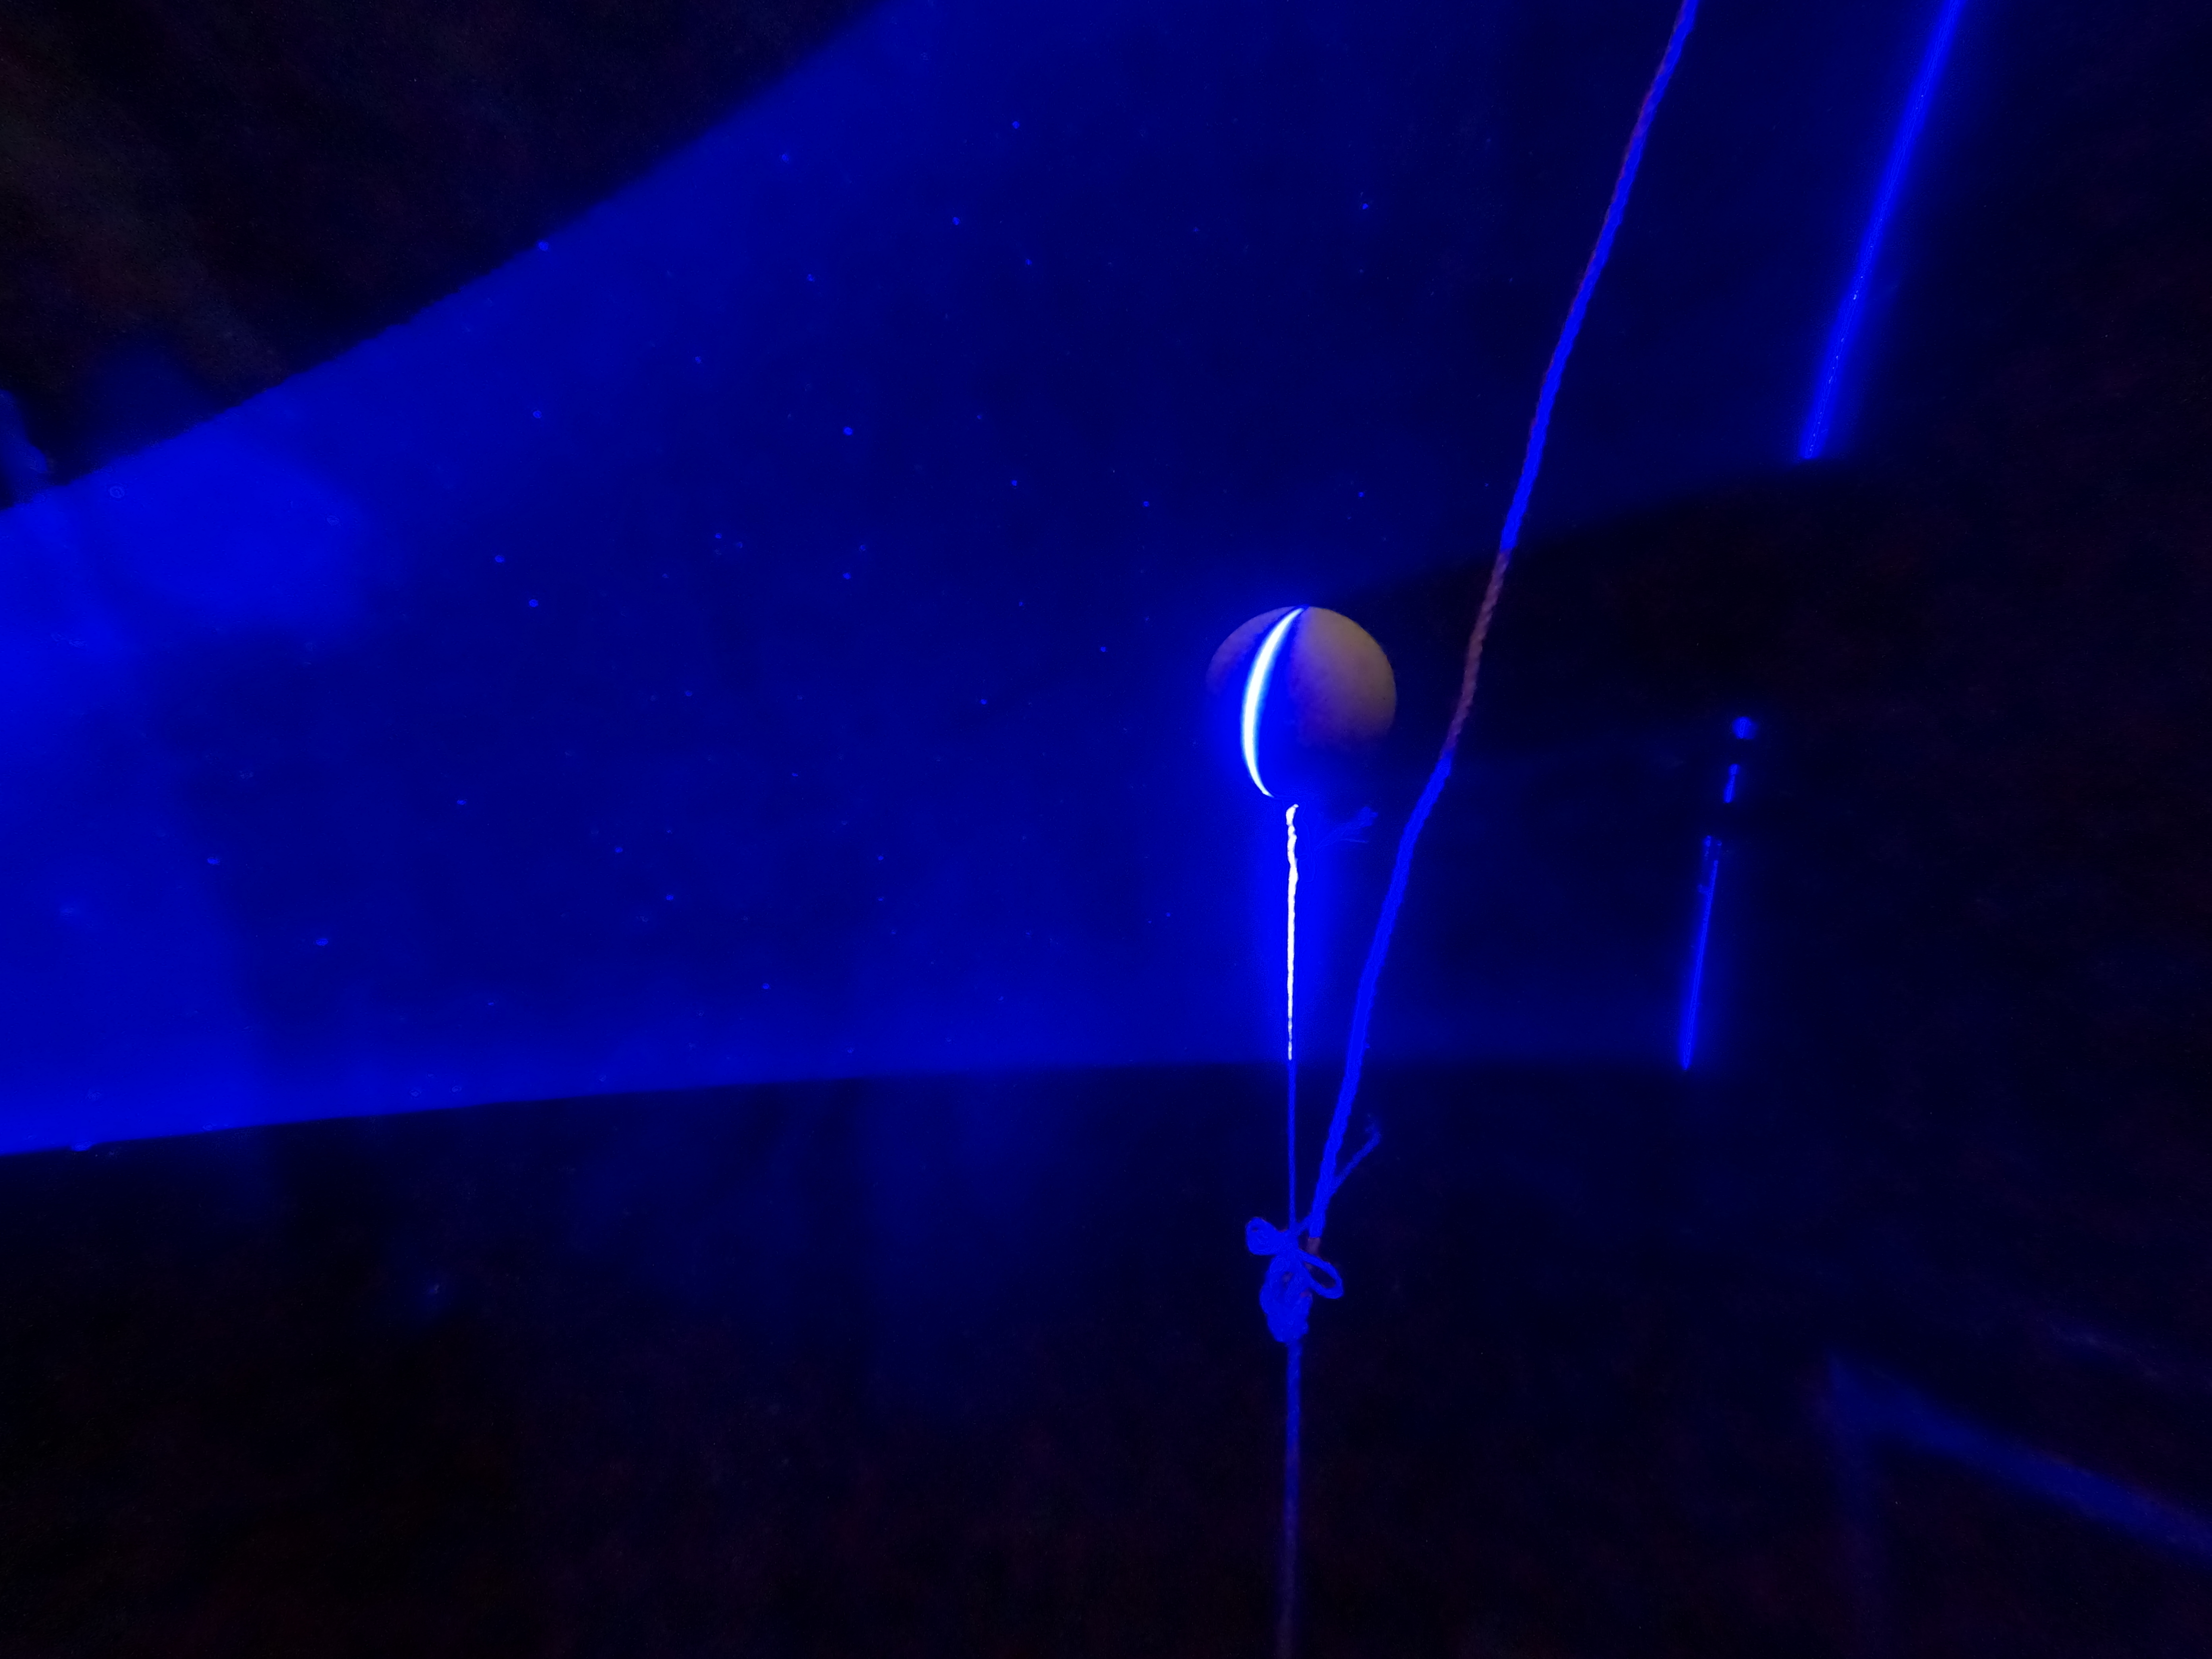

Supplement: Supplementary file 169 [file G0034599.pdf › 9/G0034599.pdf]

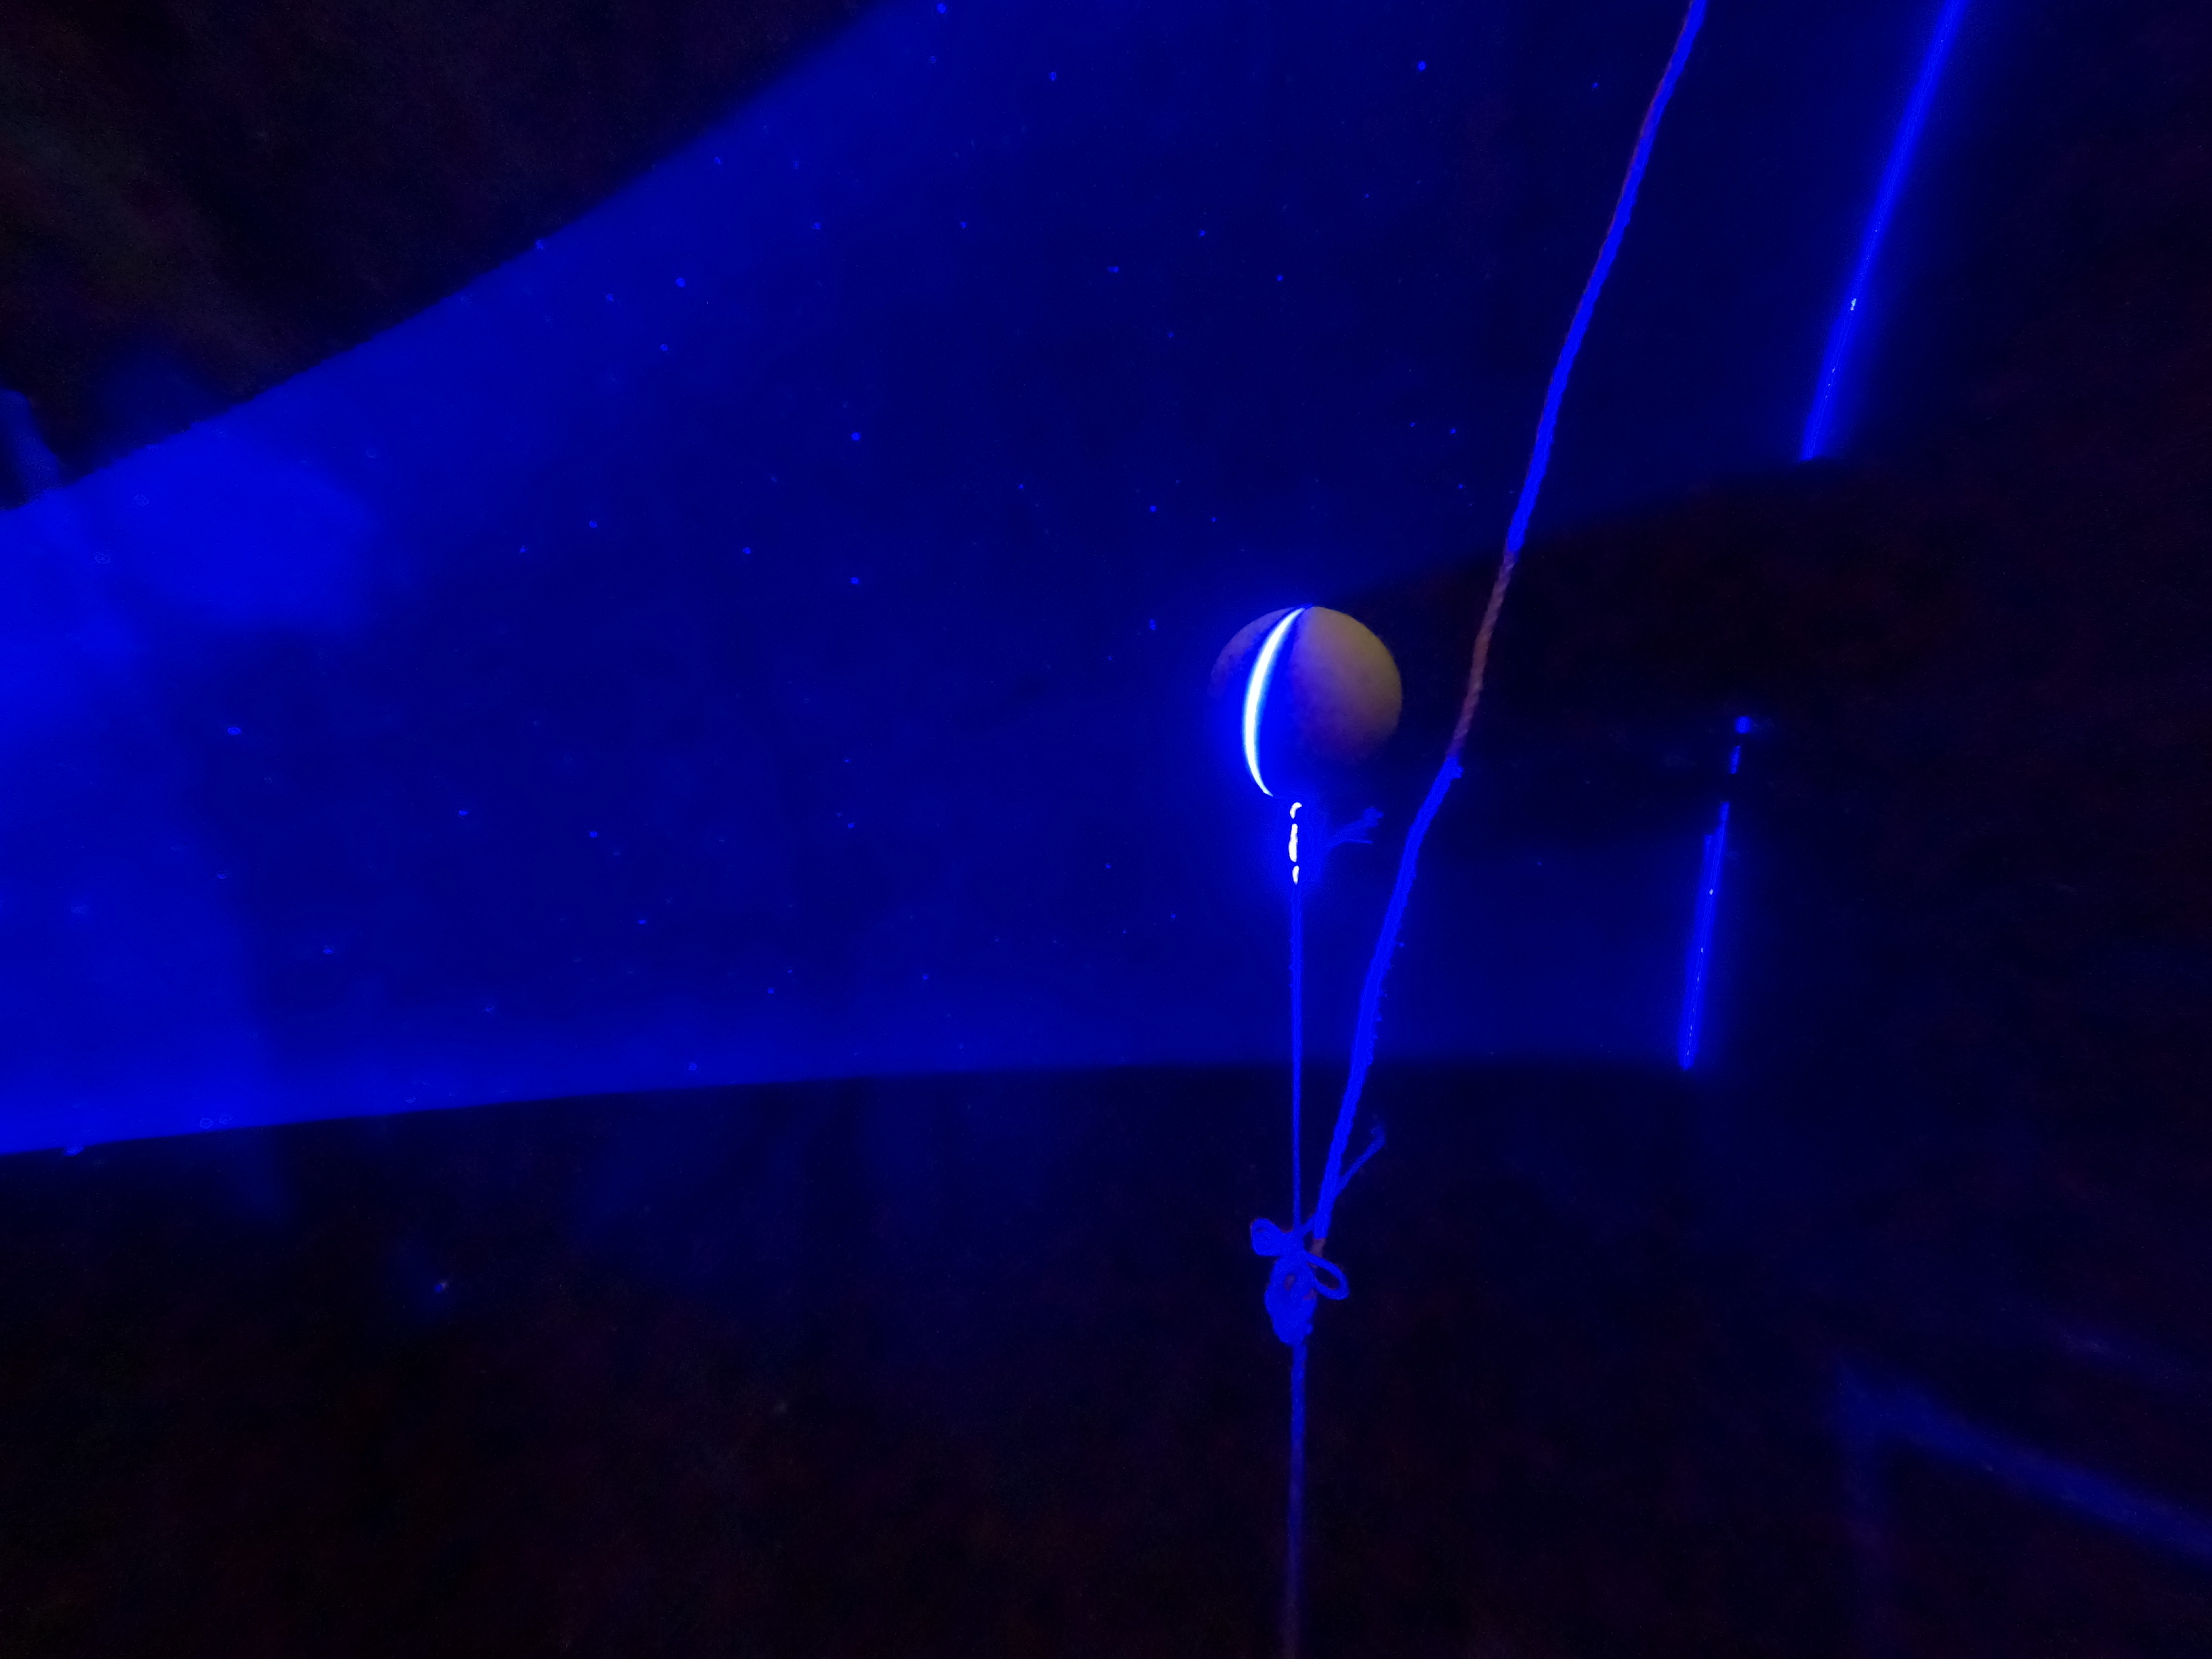

Supplement: Supplementary file 170 [file G0034600.pdf › 9/G0034600.pdf]

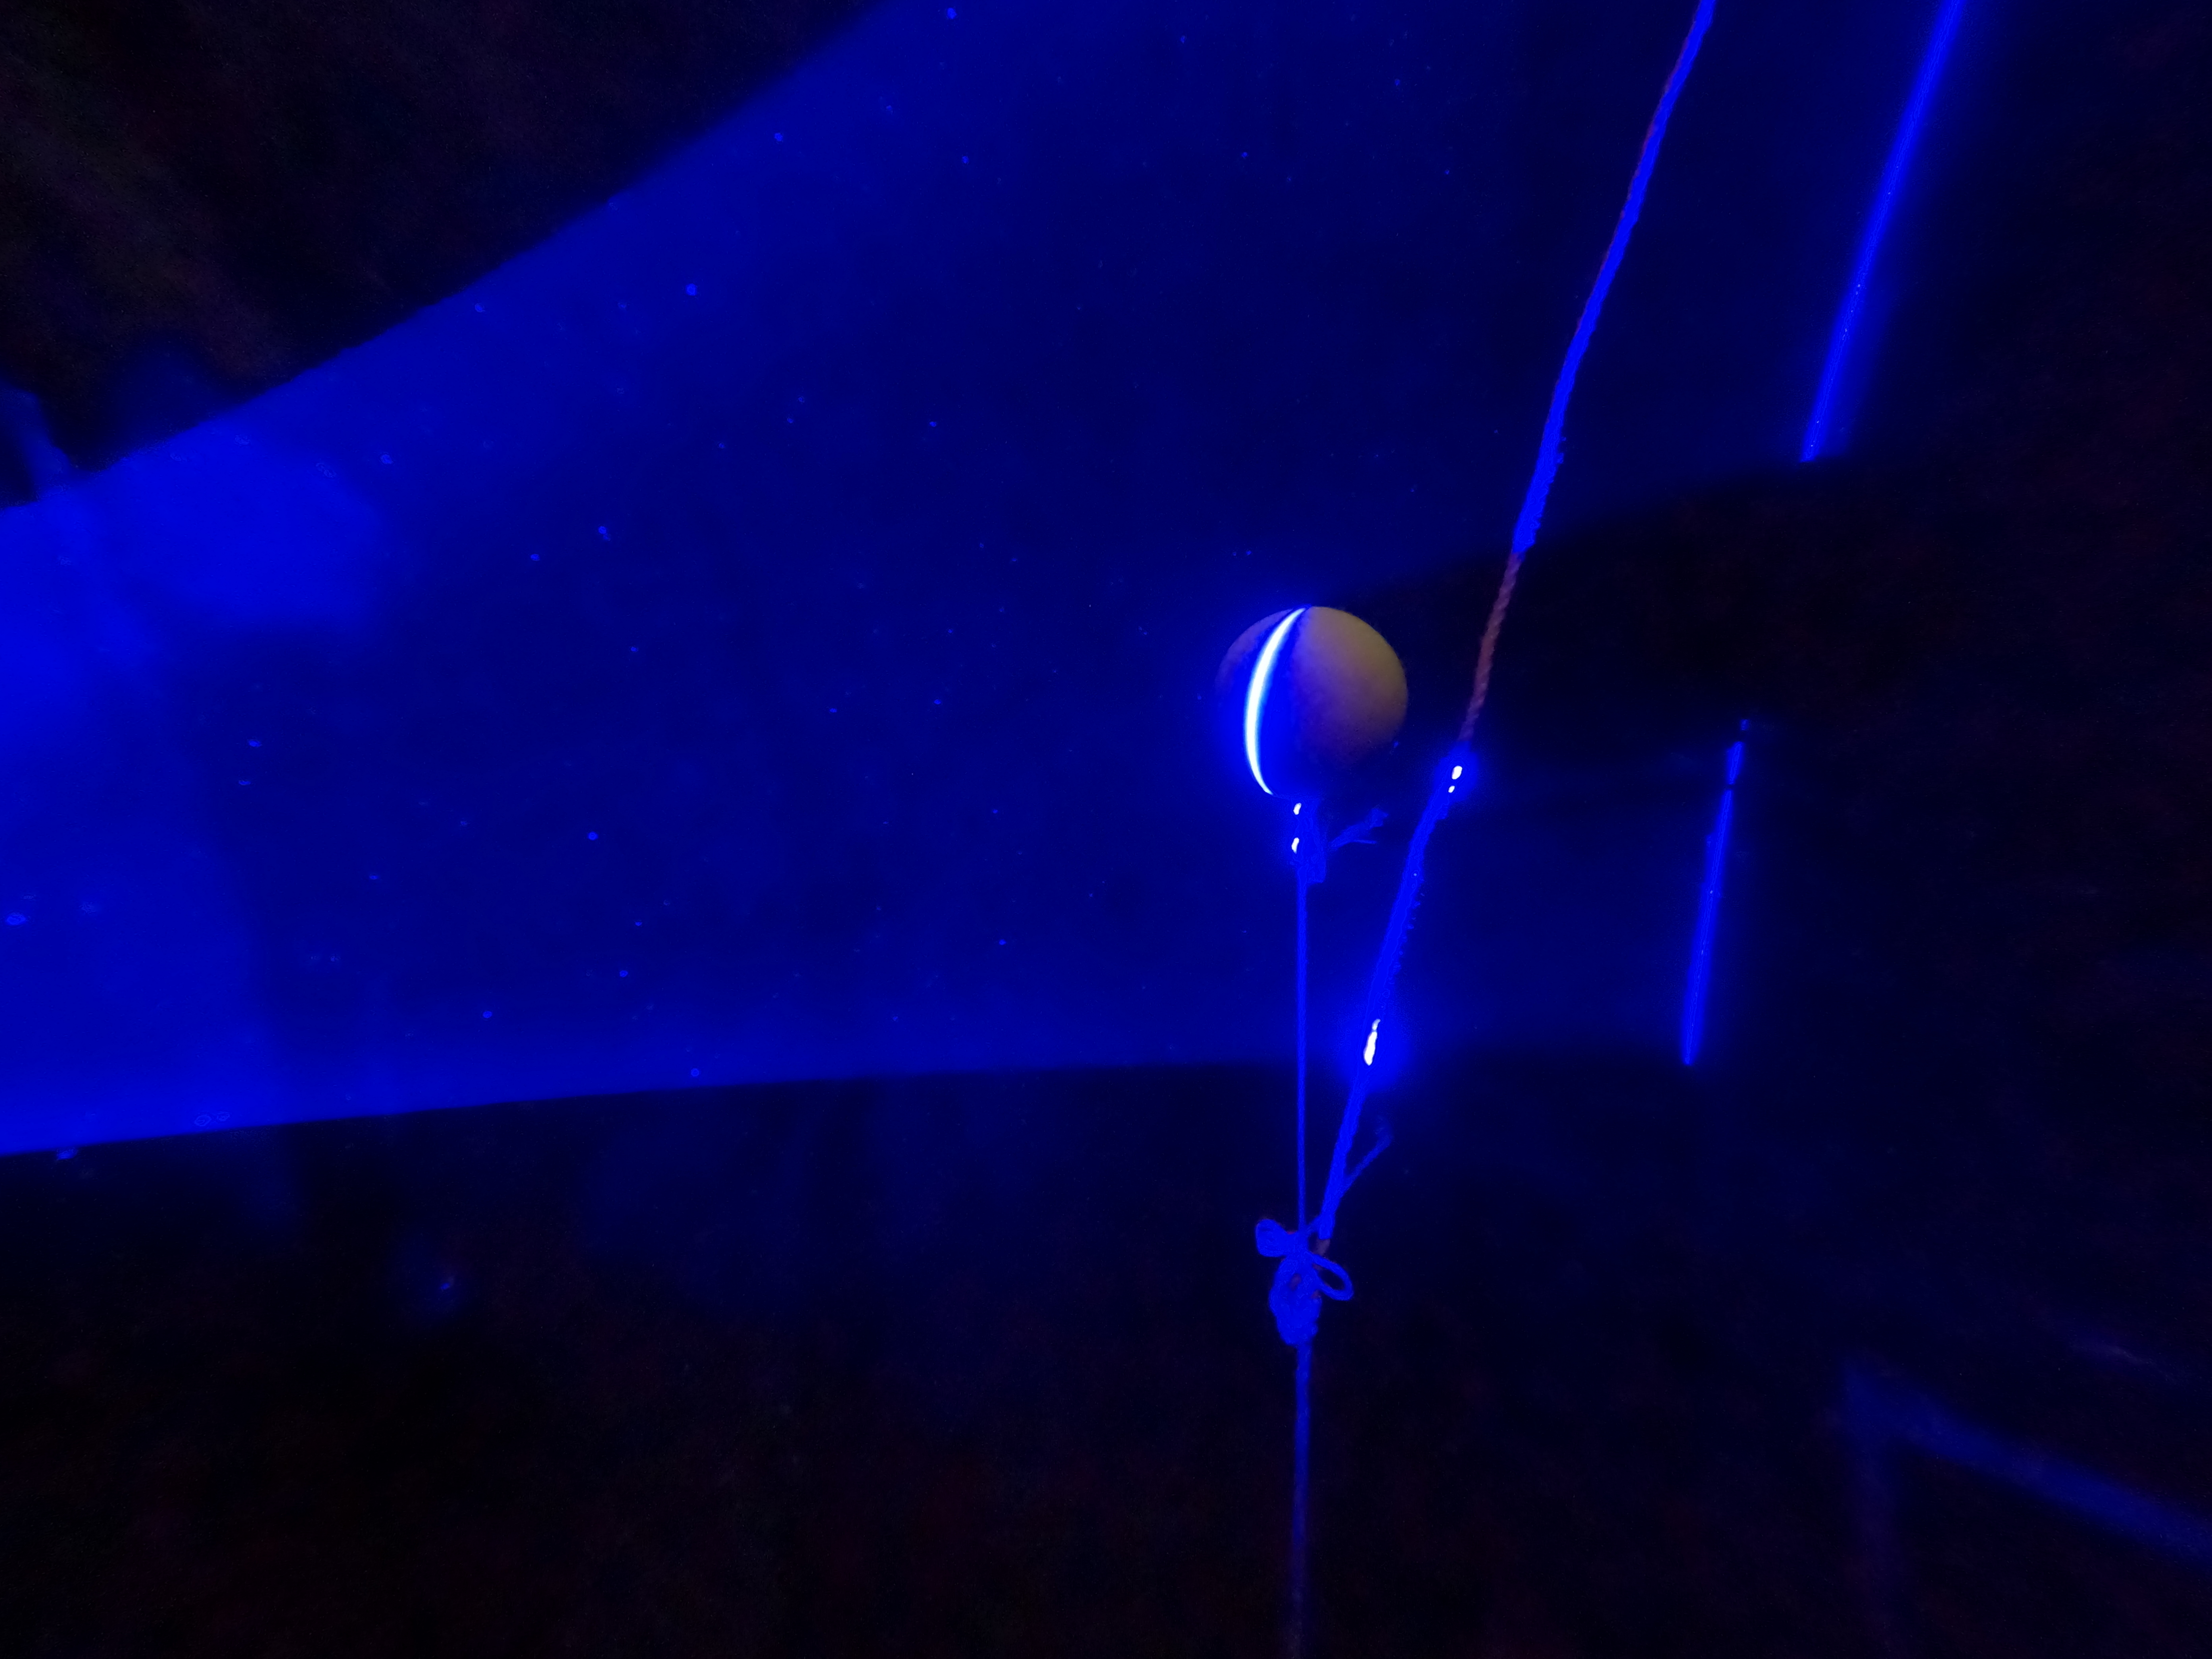

Supplement: Supplementary file 171 [file G0034601.pdf › 9/G0034601.pdf]

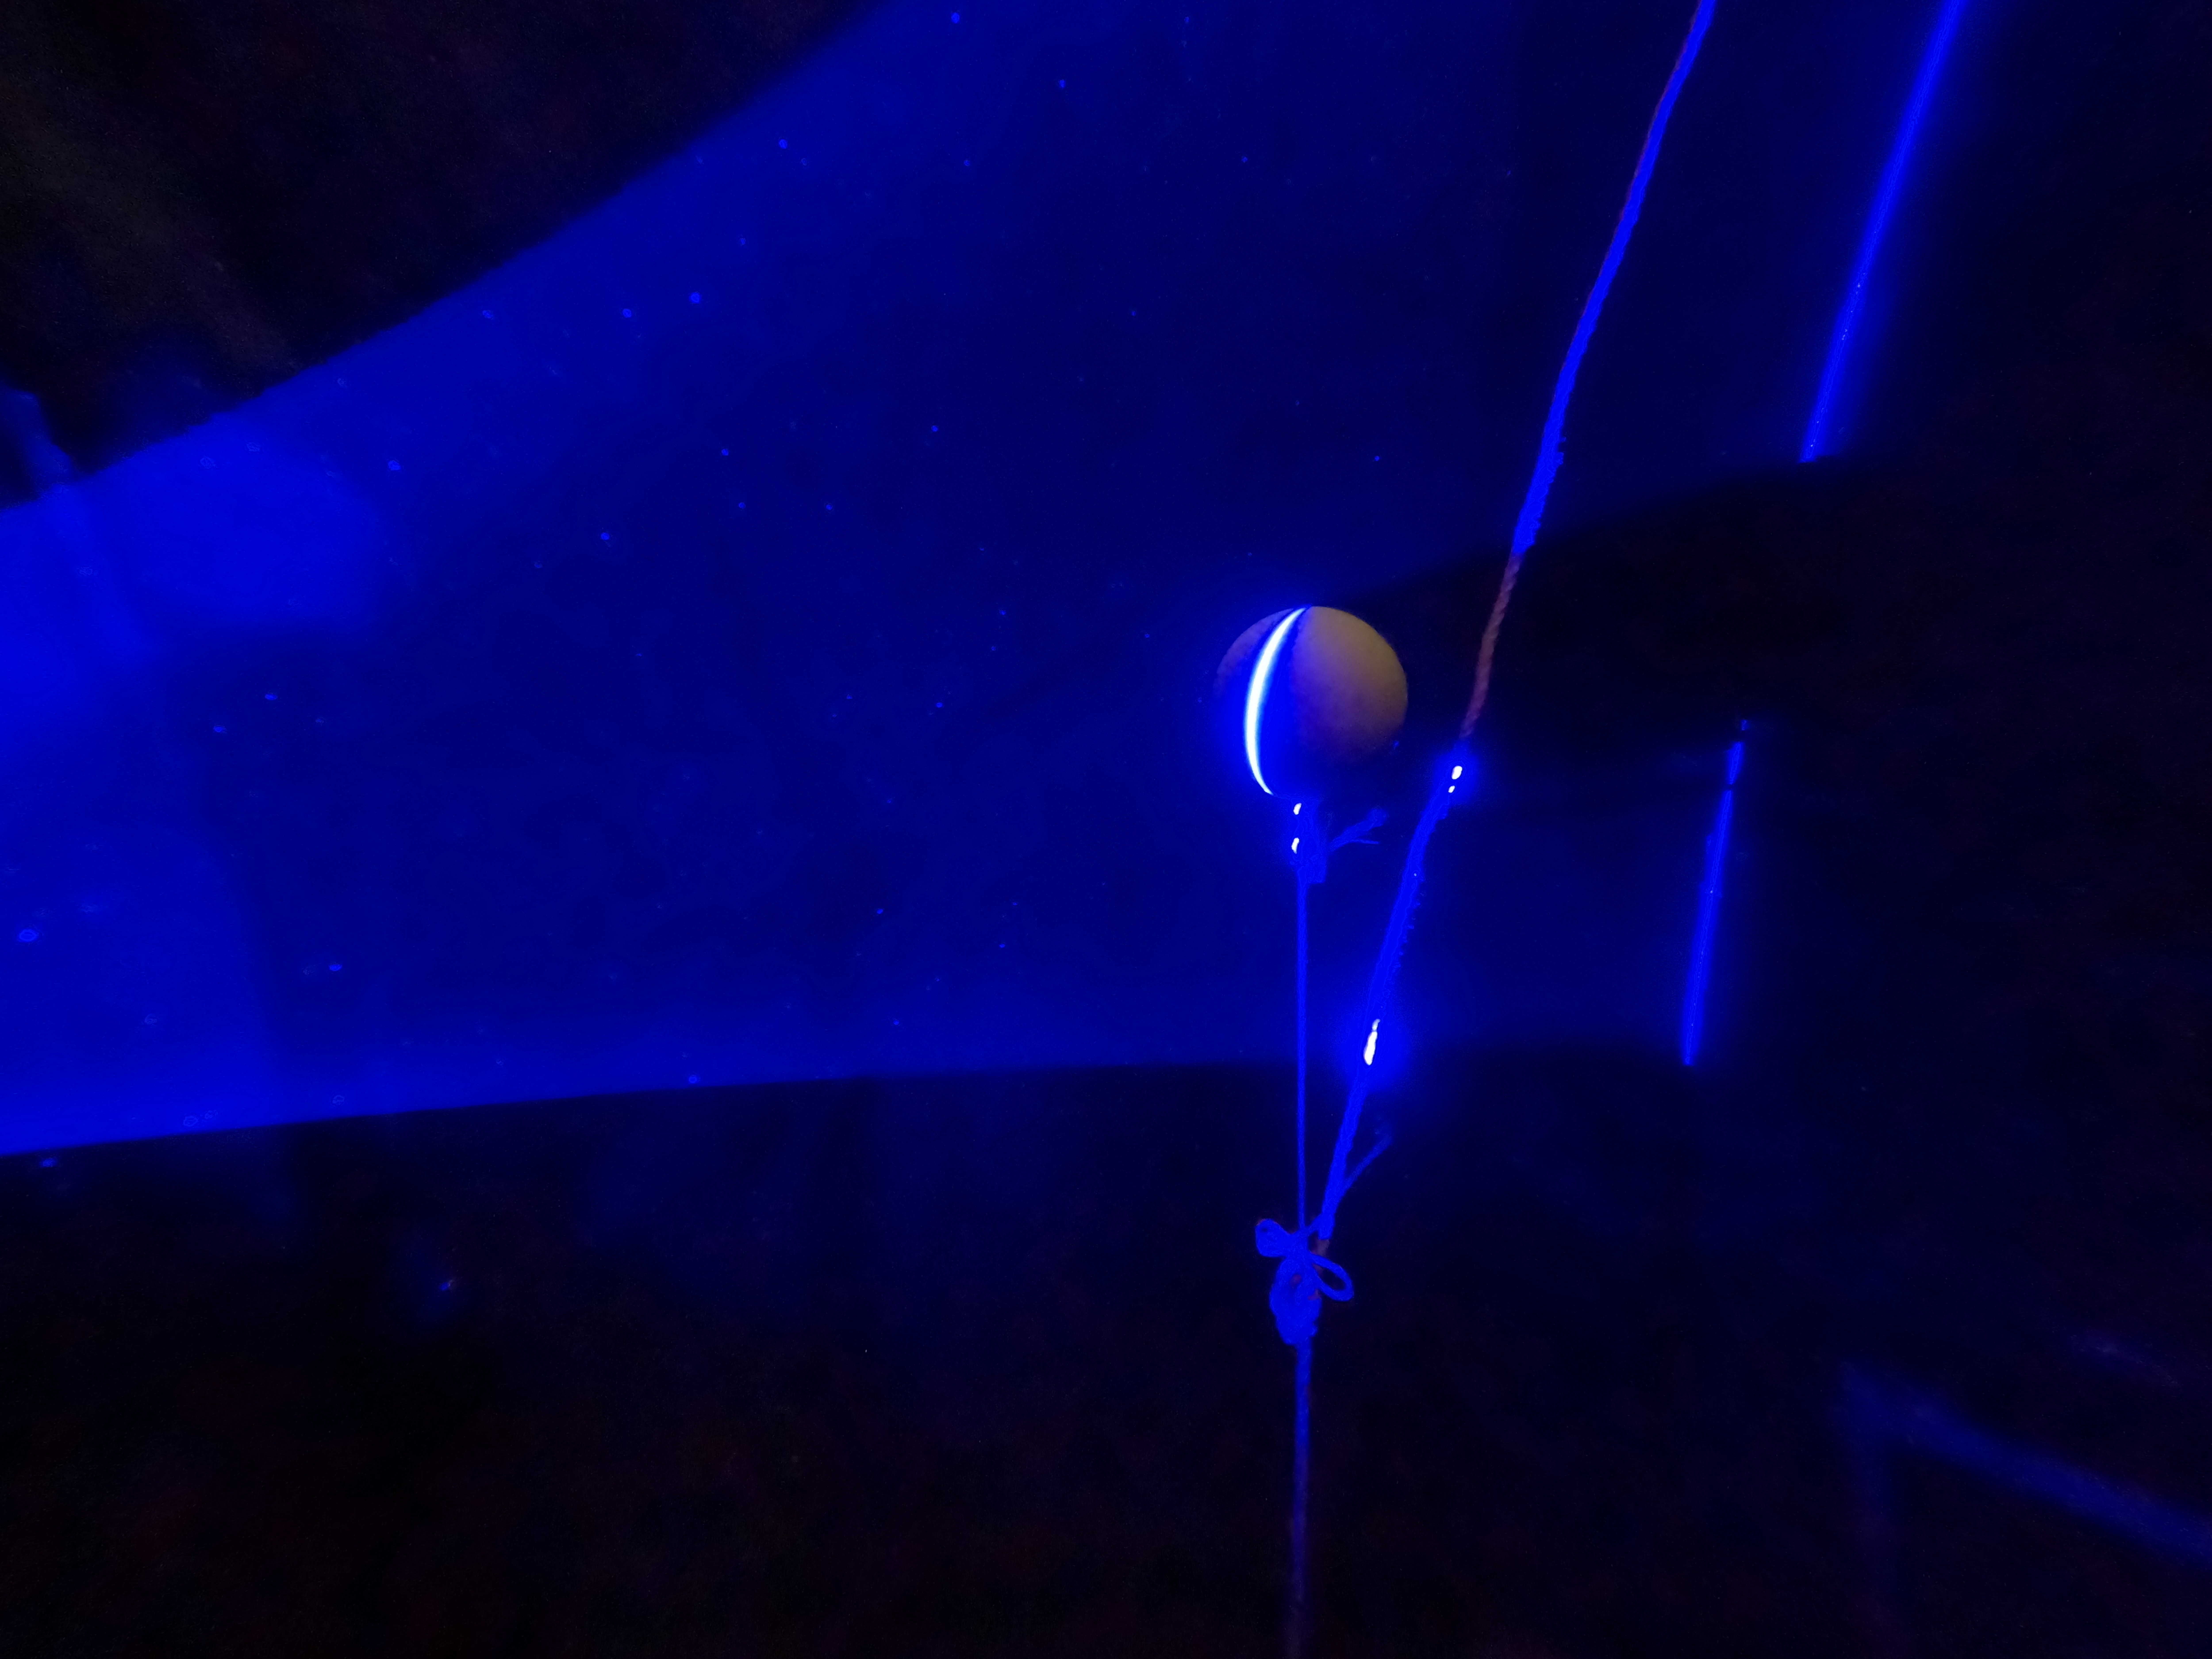

Supplement: Supplementary file 172 [file G0034602.pdf › 9/G0034602.pdf]

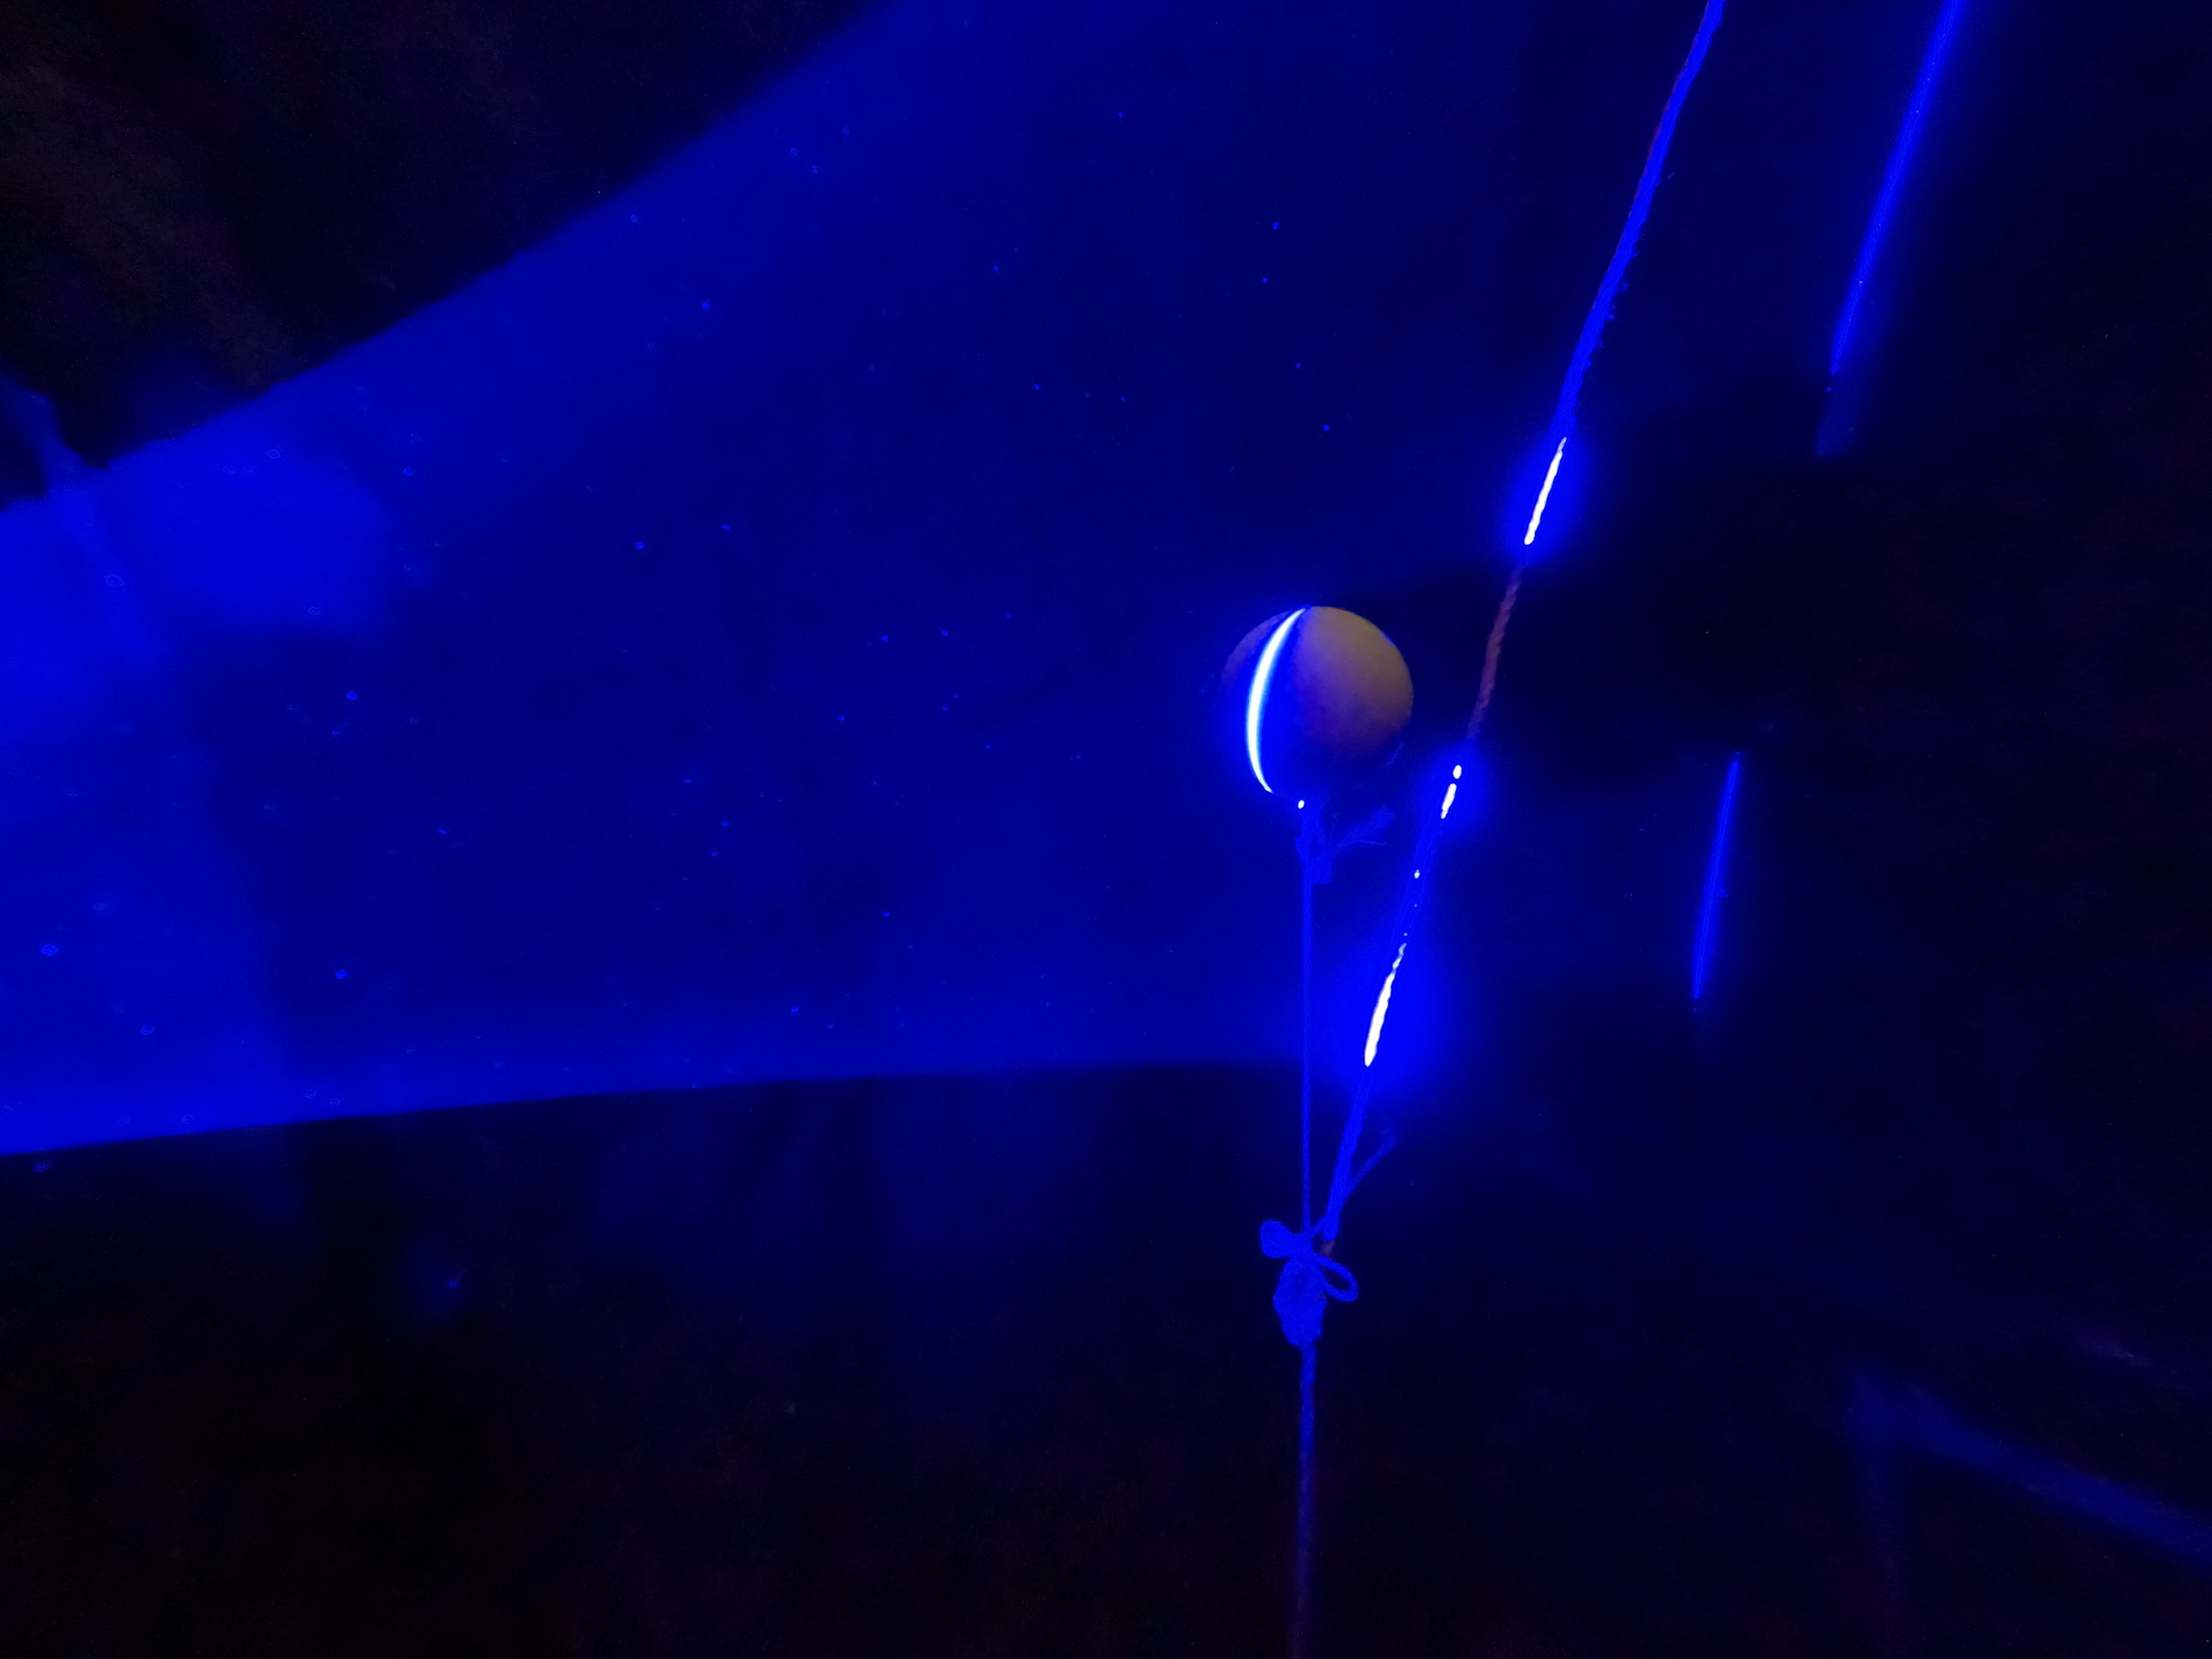

Supplement: Supplementary file 173 [file G0034603.pdf › 9/G0034603.pdf]

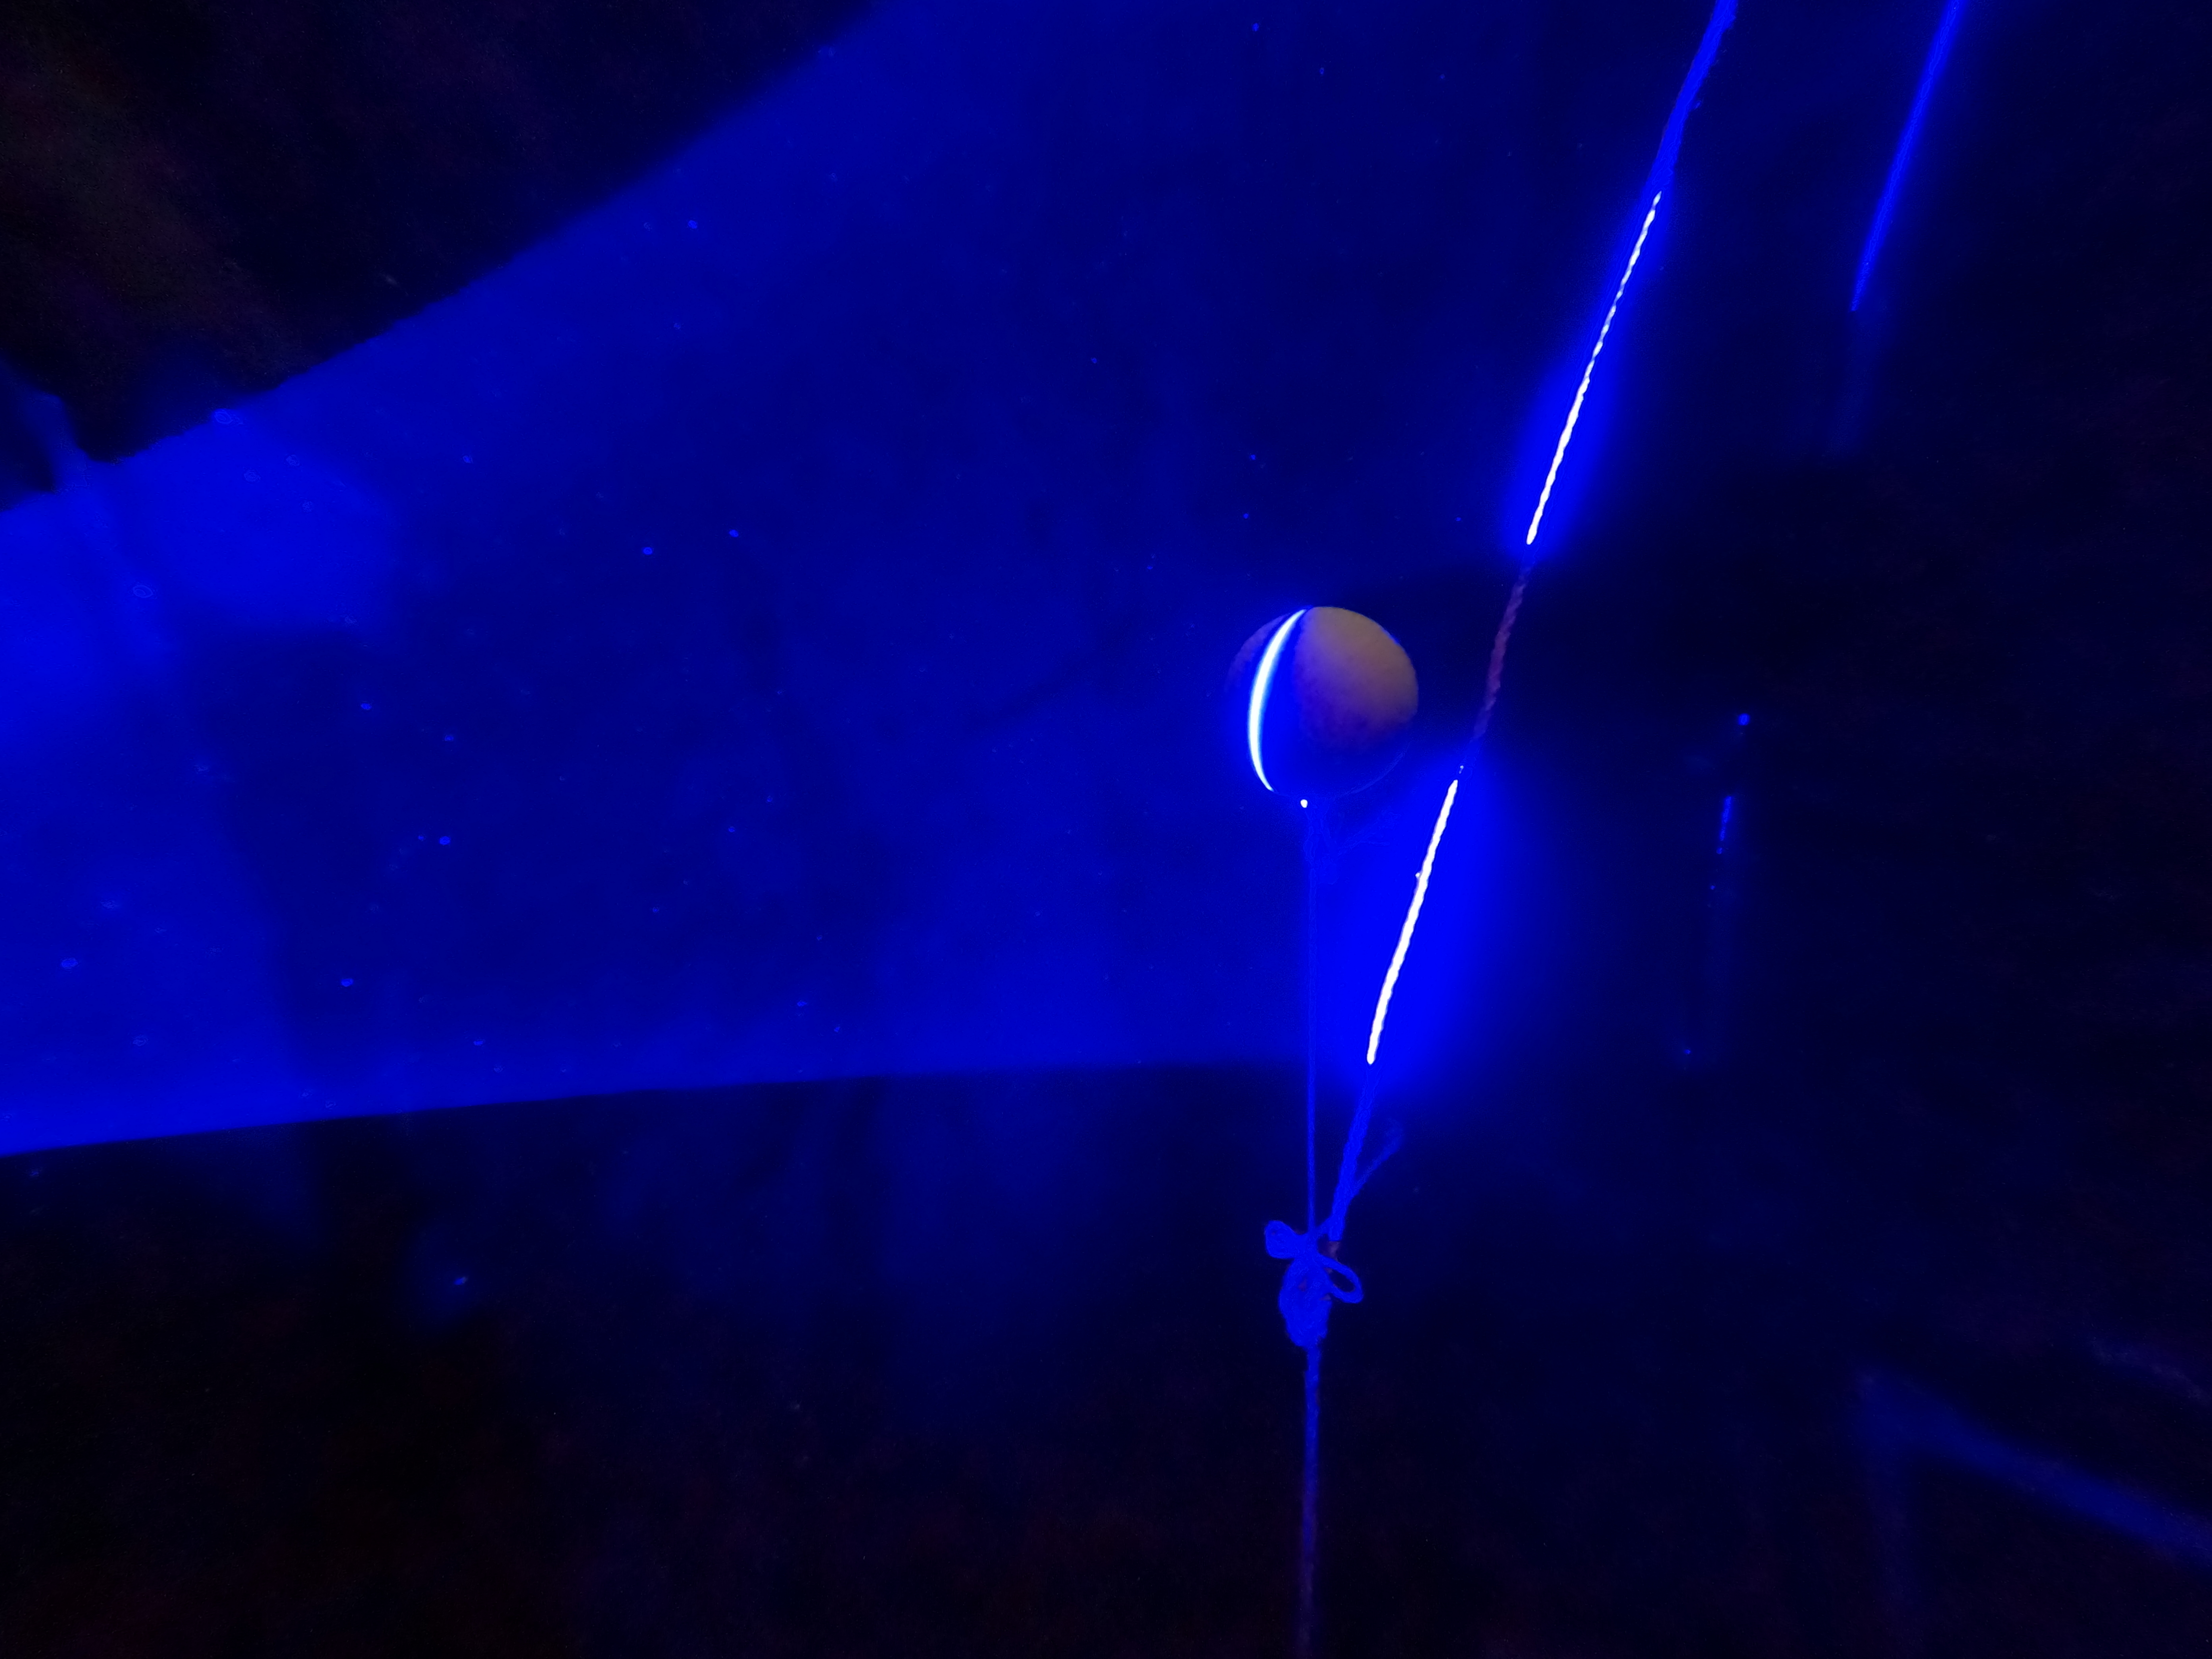

Supplement: Supplementary file 174 [file G0034604.pdf › 9/G0034604.pdf]

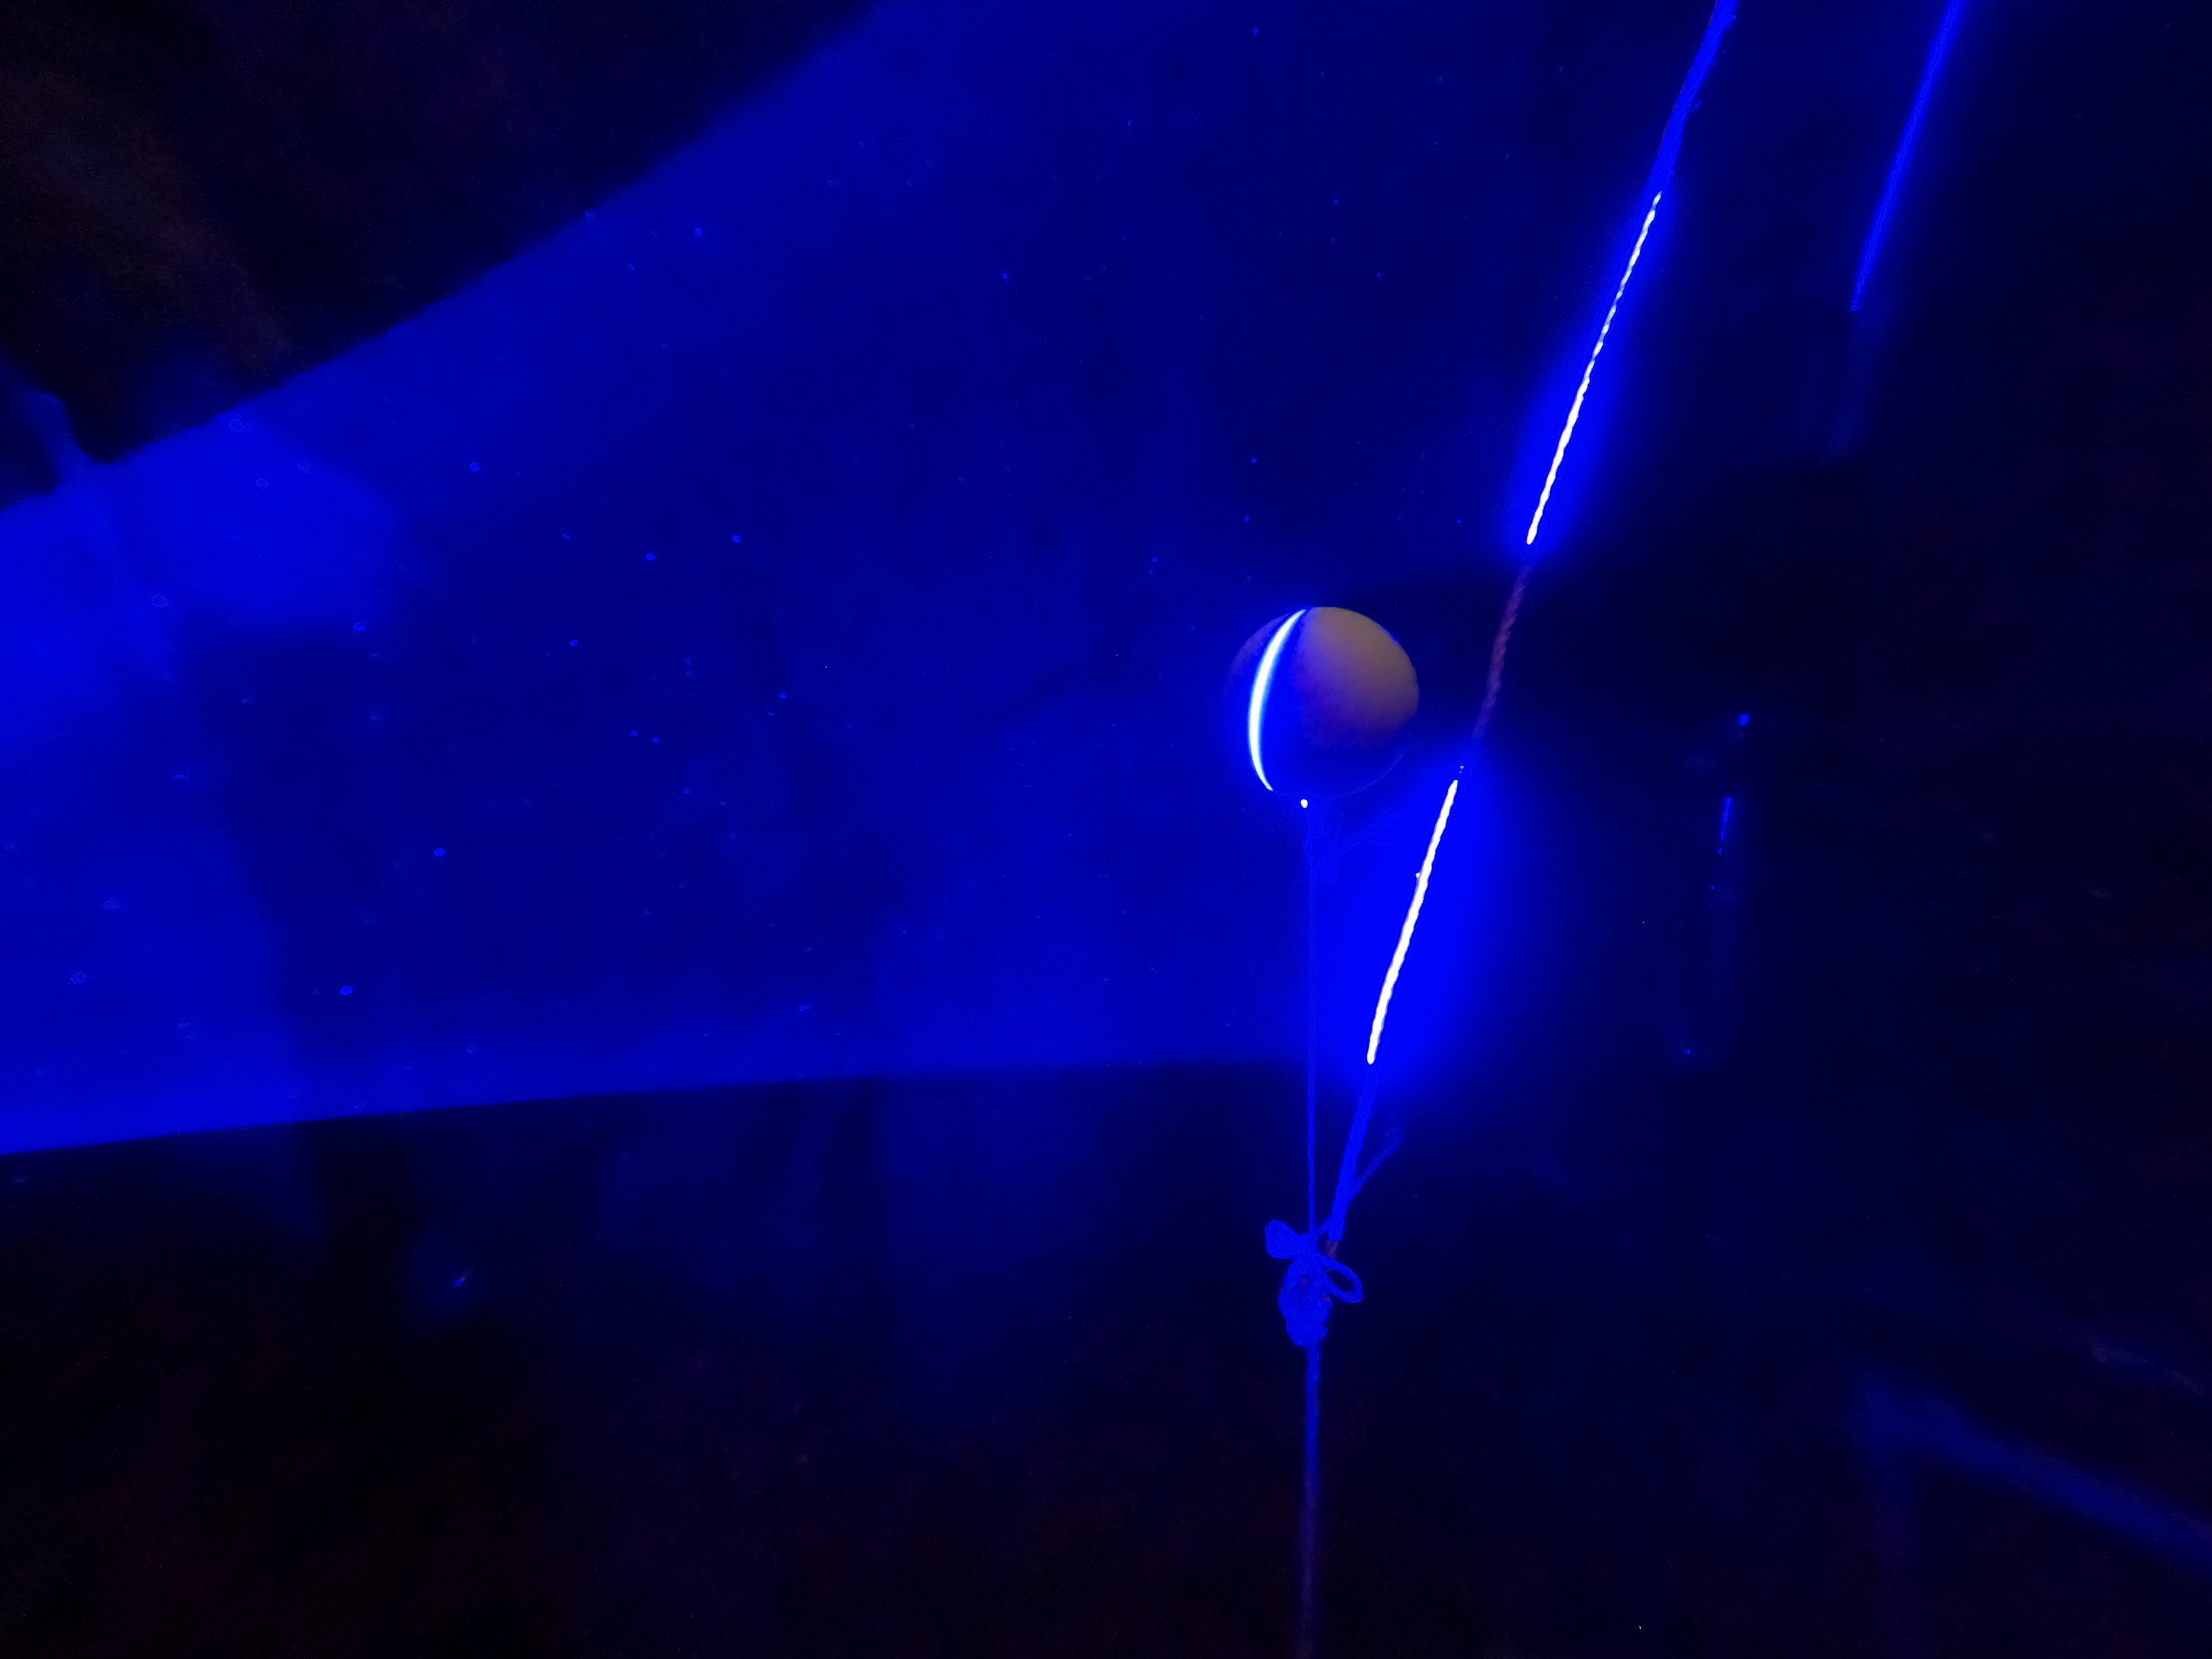

Supplement: Supplementary file 175 [file G0034605.pdf › 9/G0034605.pdf]

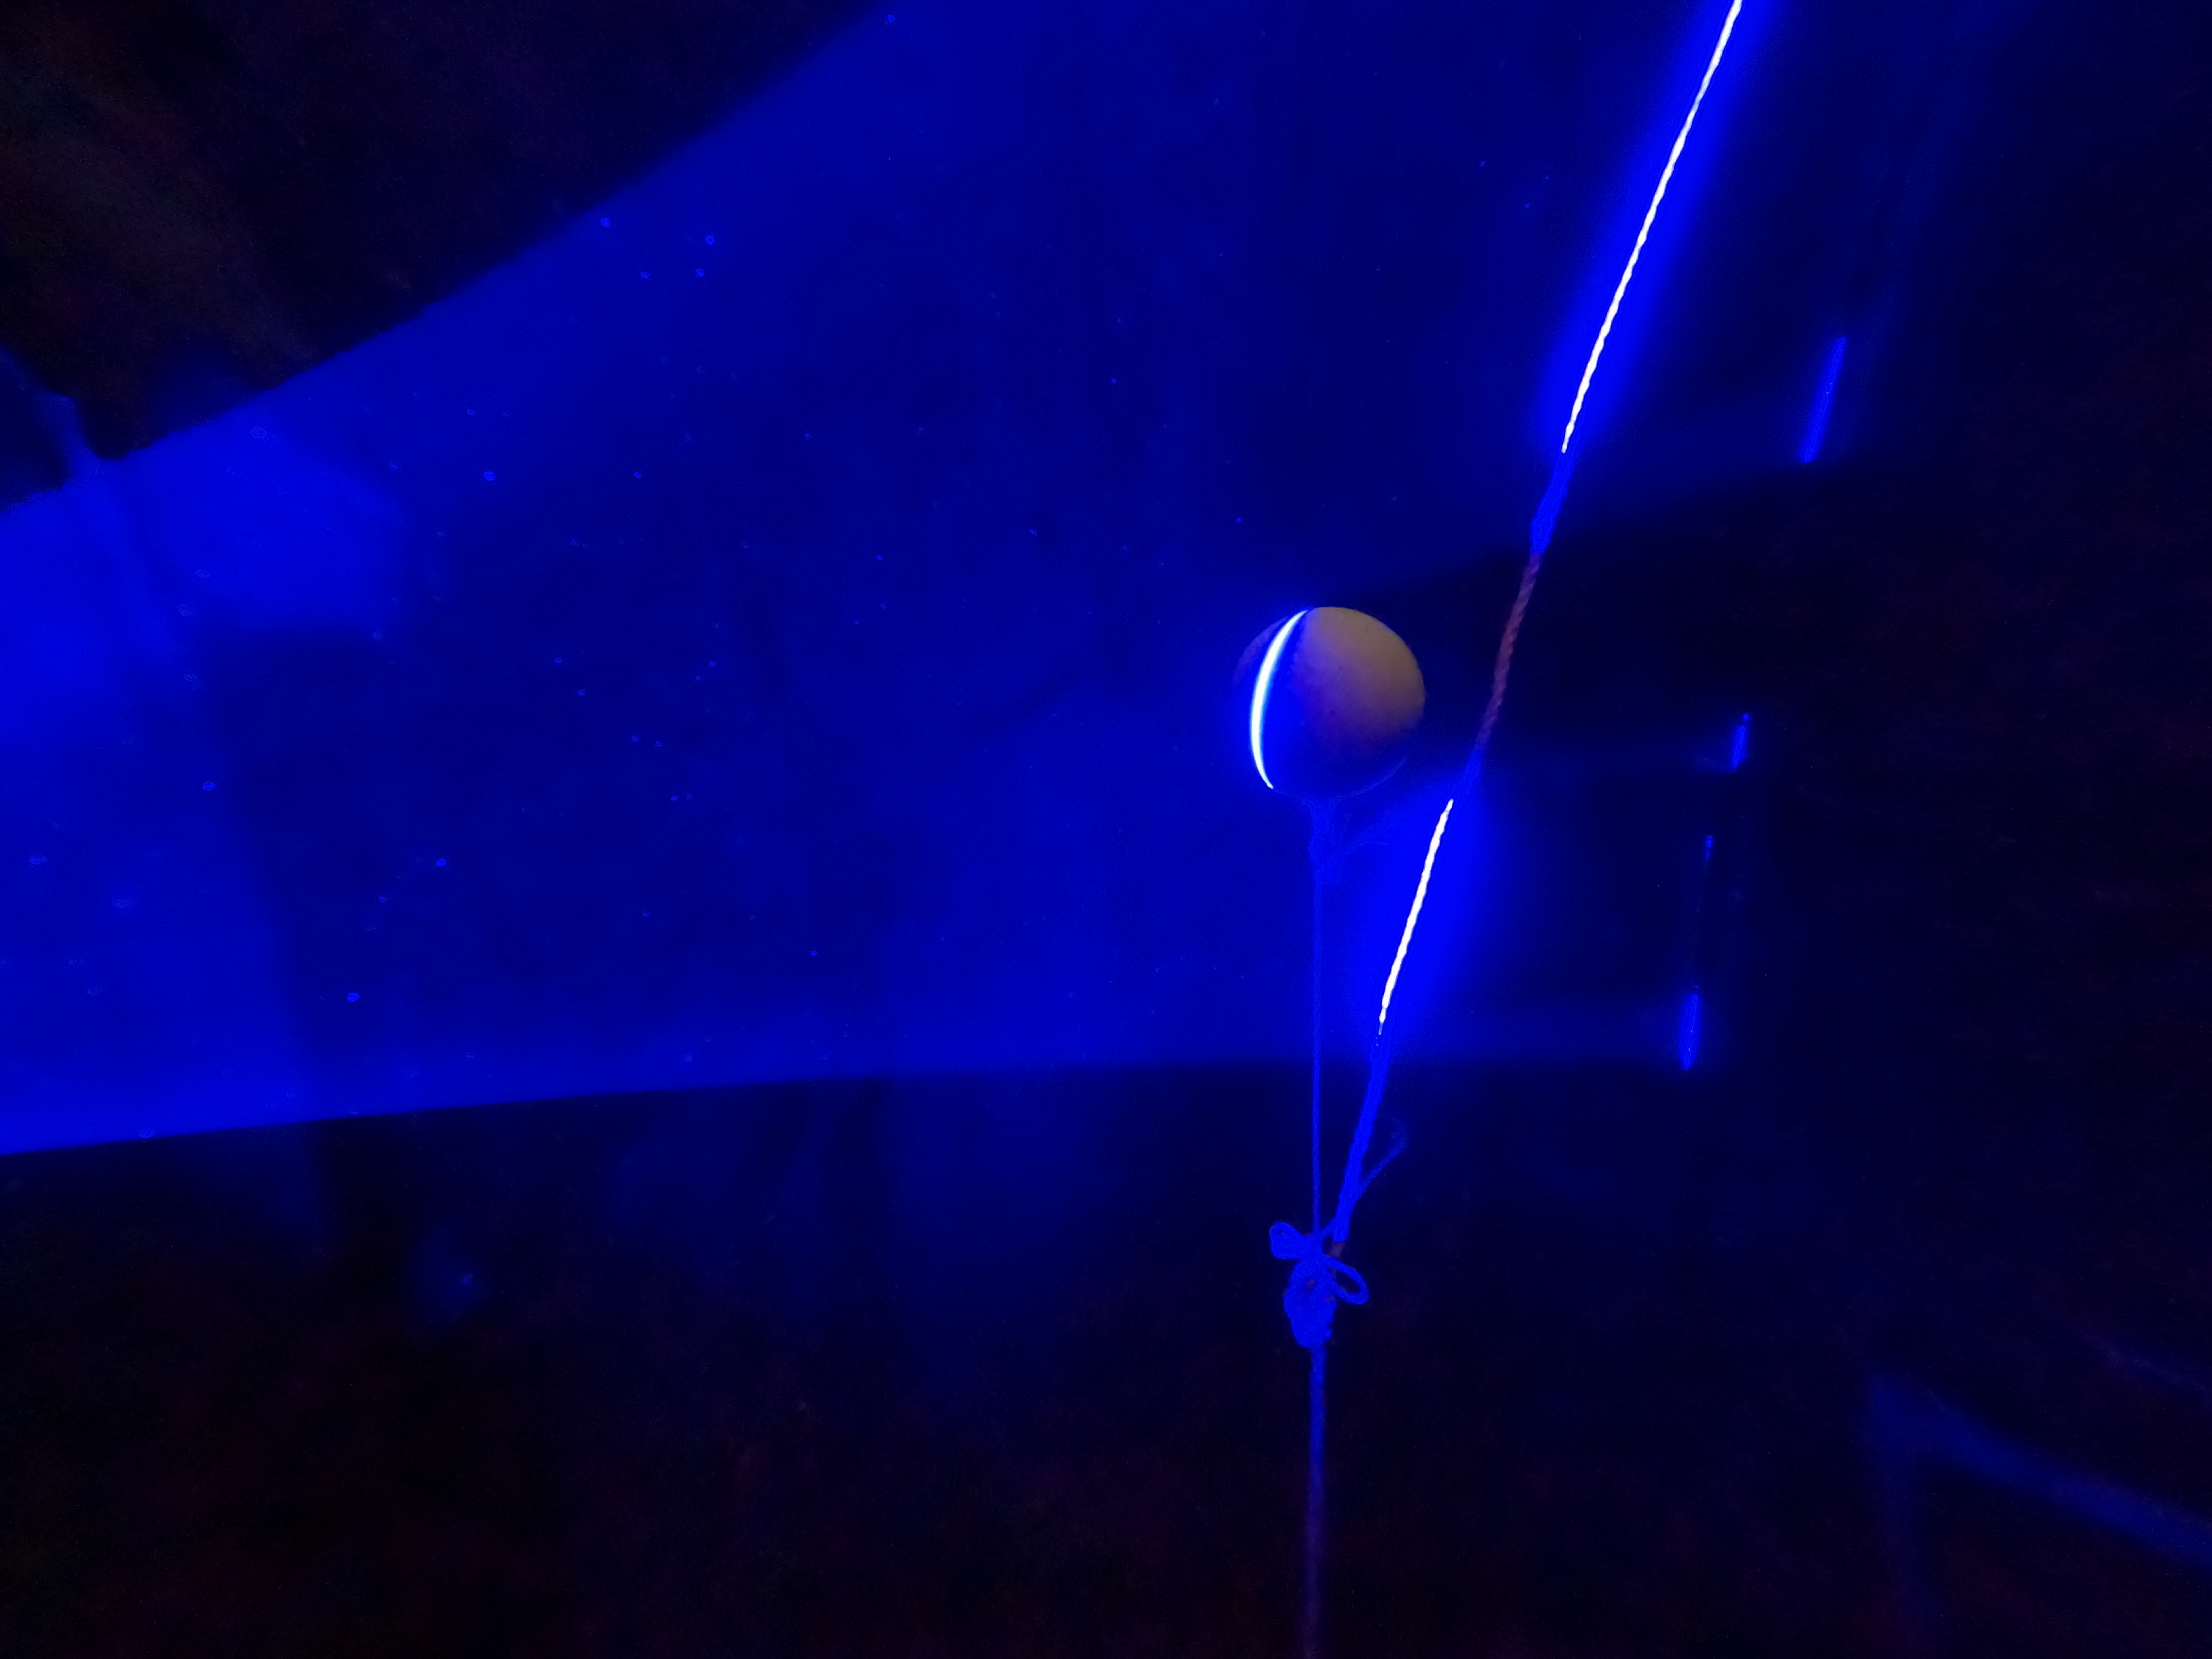

Supplement: Supplementary file 176 [file G0034606.pdf › 9/G0034606.pdf]

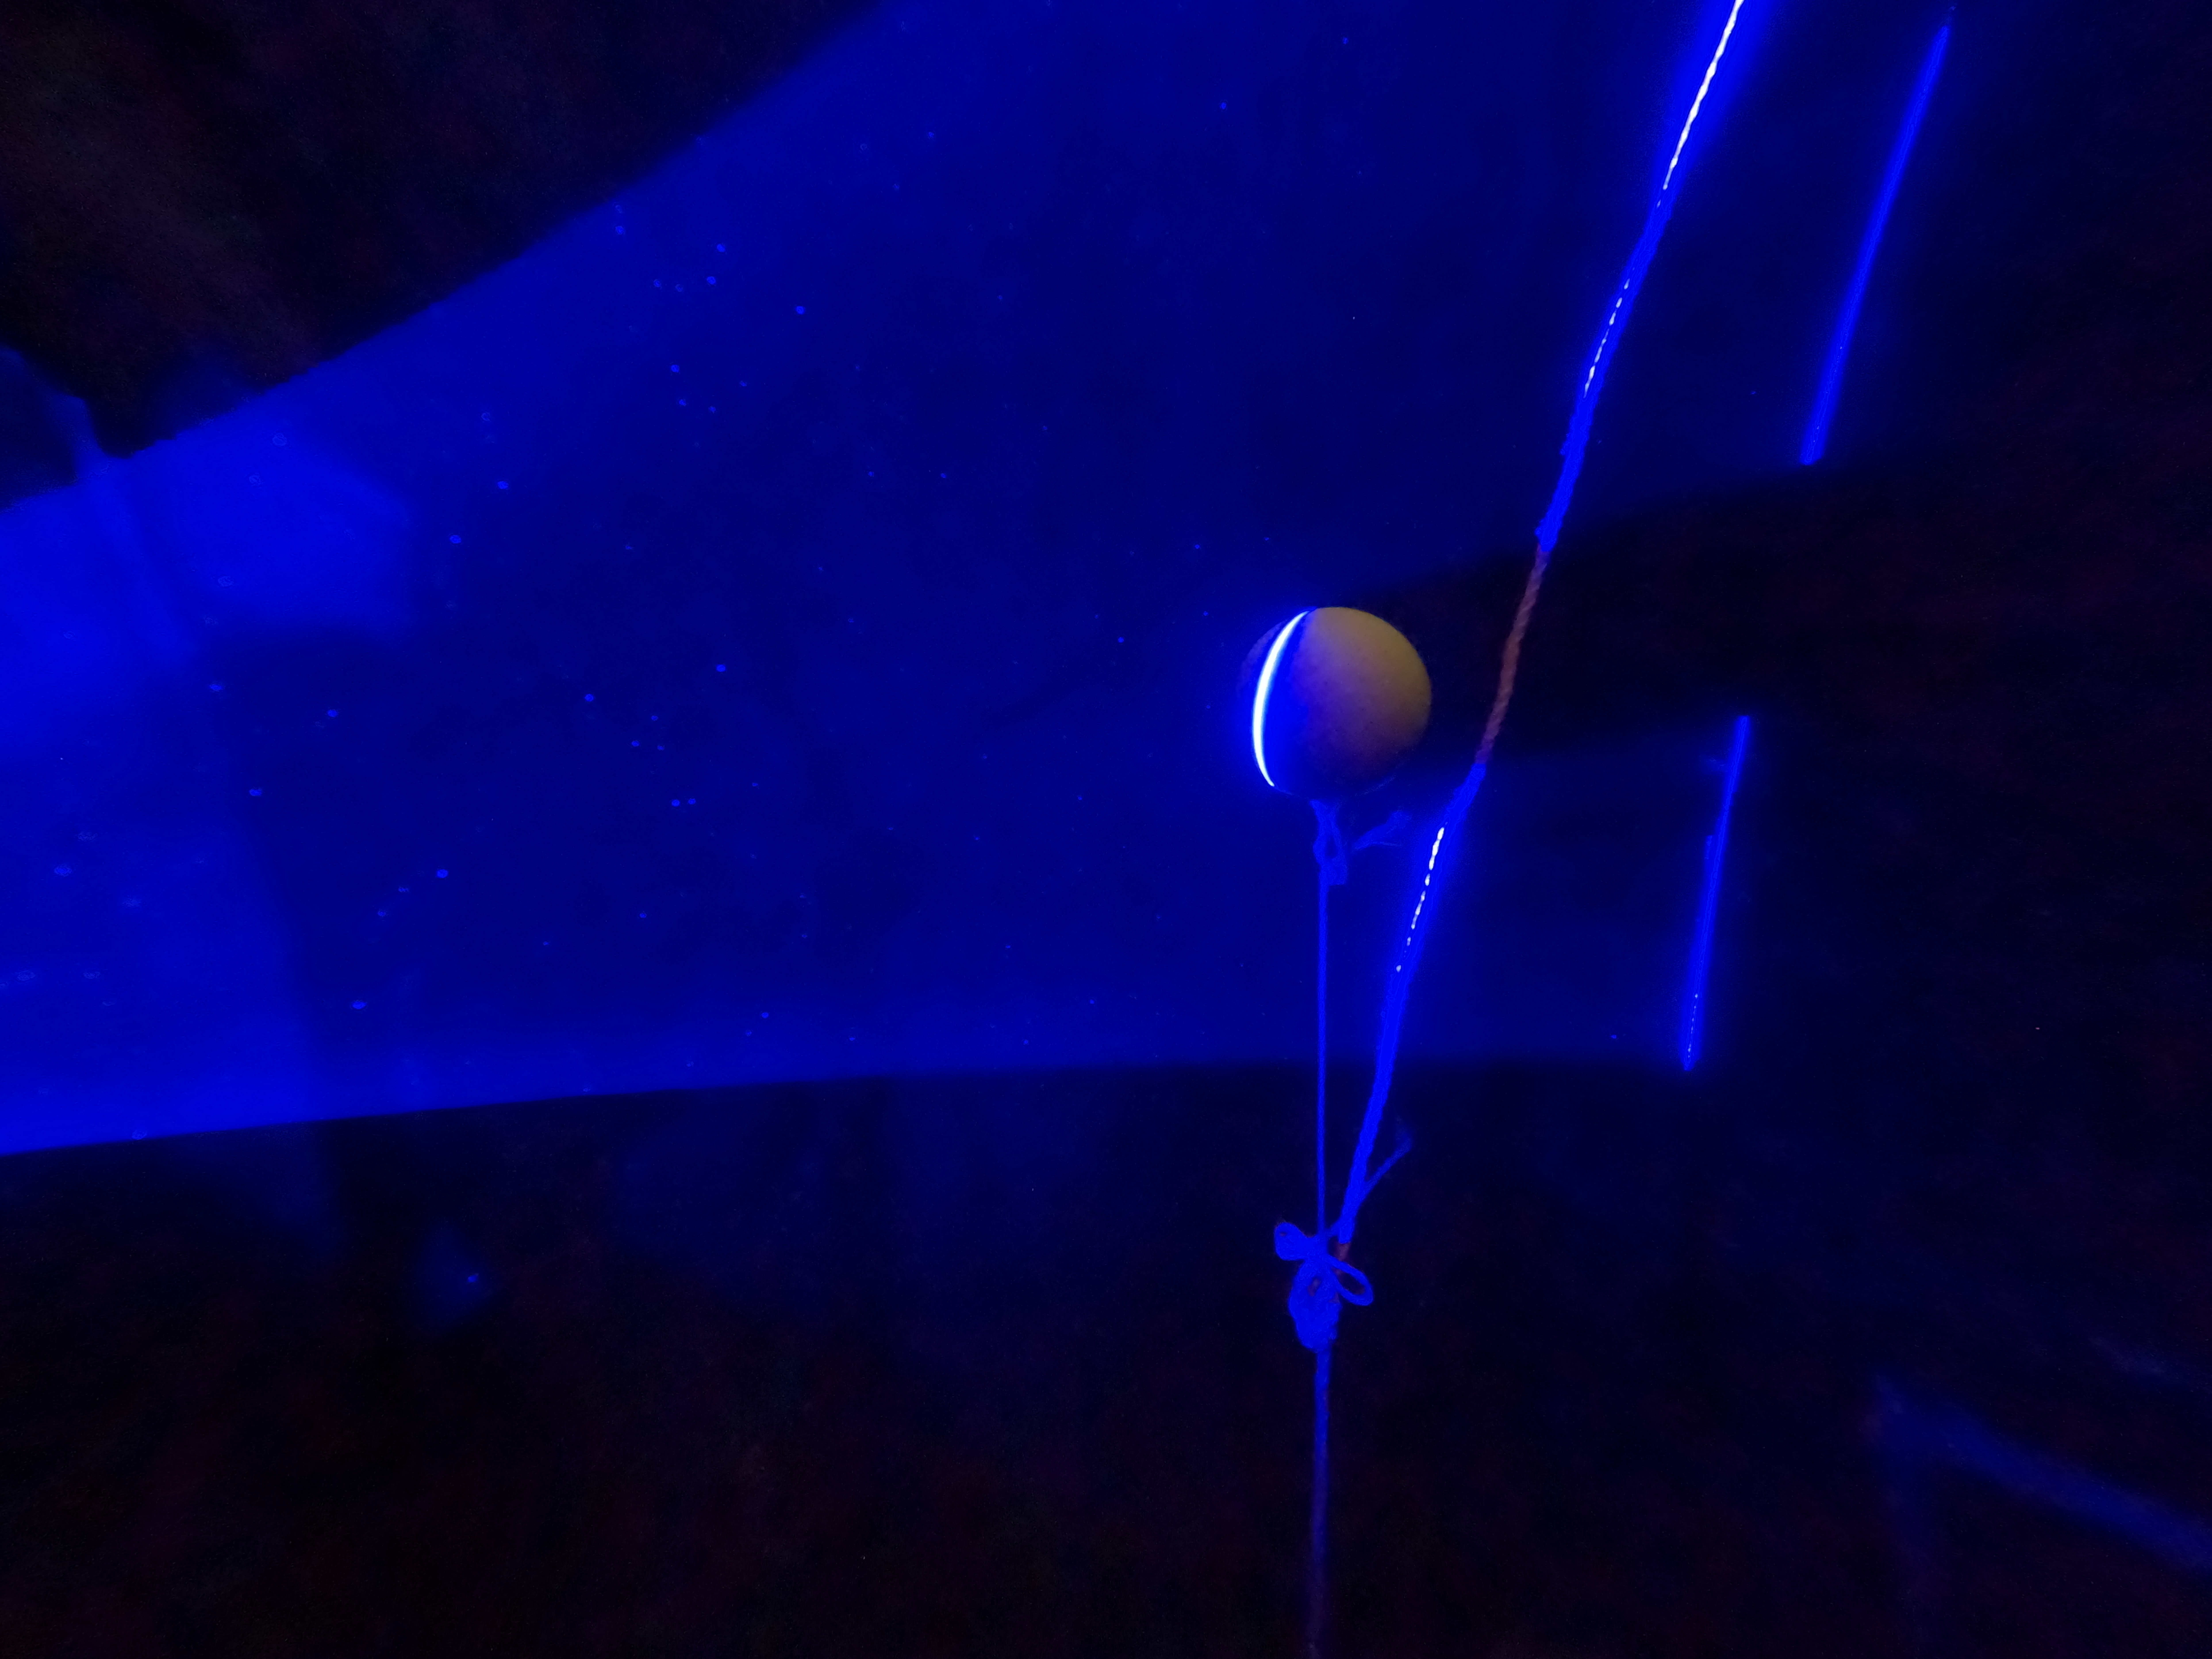

Supplement: Supplementary file 177 [file G0034607.pdf › 9/G0034607.pdf]

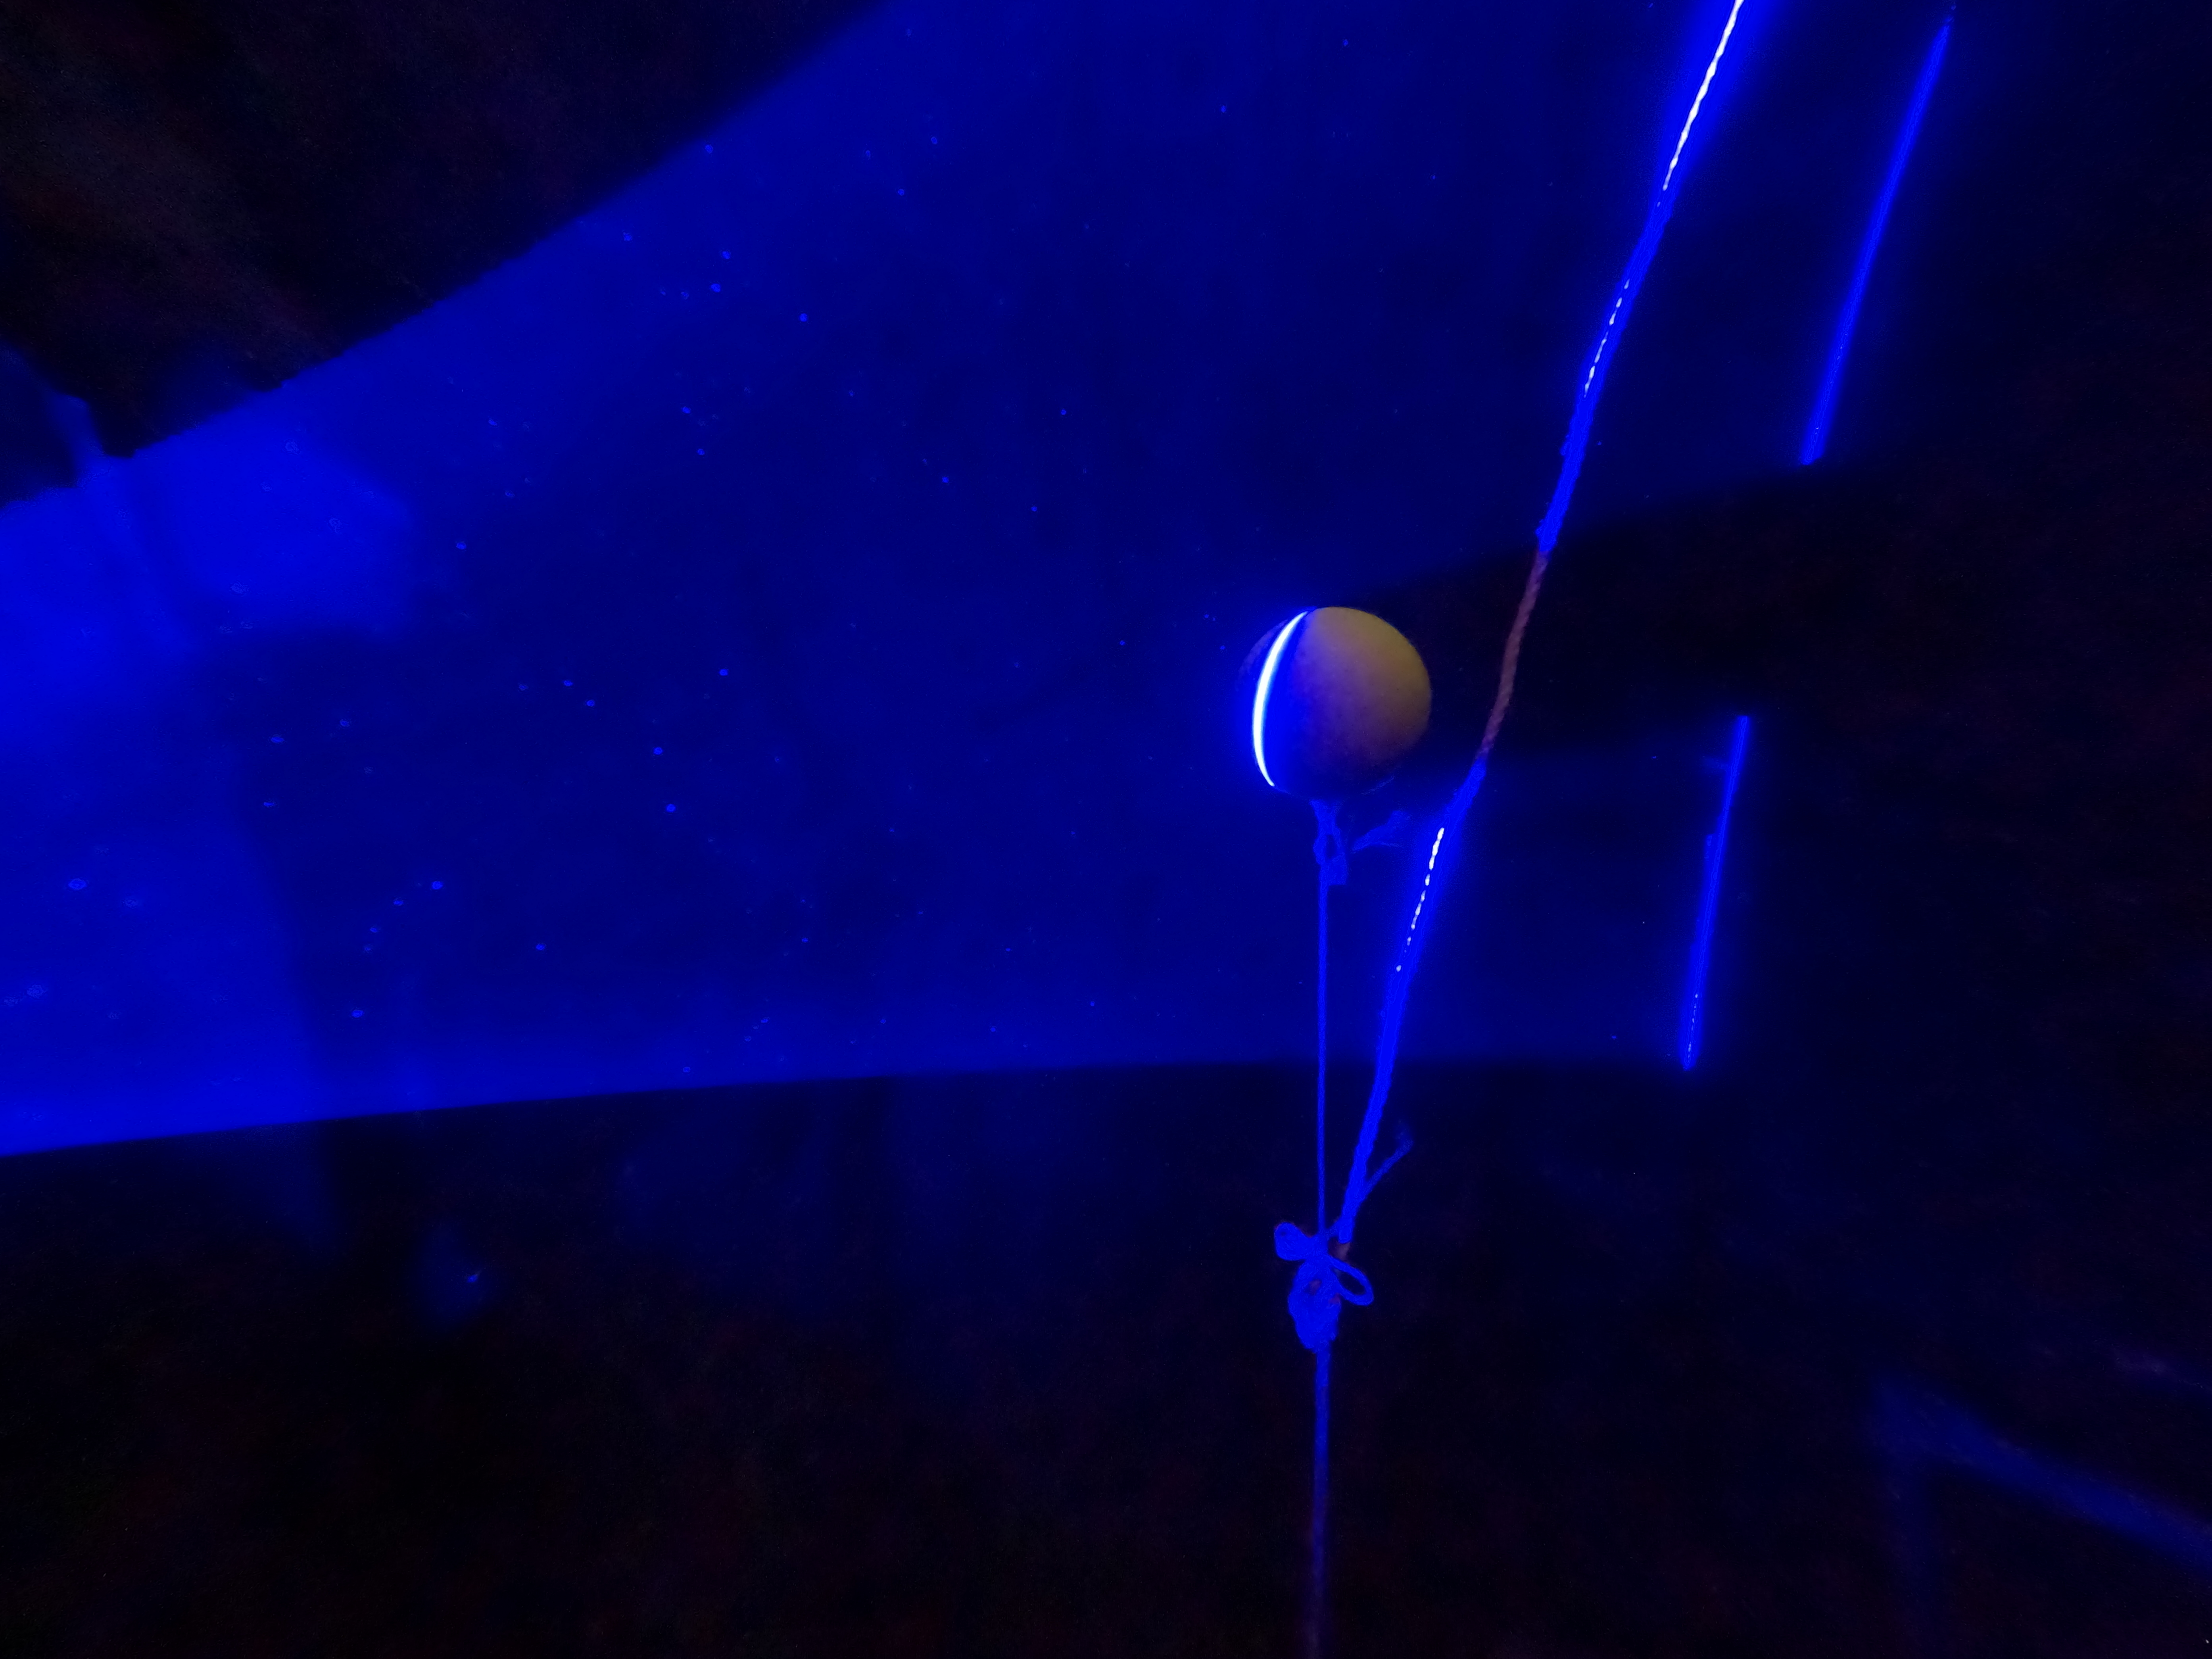

Supplement: Supplementary file 178 [file G0034608.pdf › 9/G0034608.pdf]

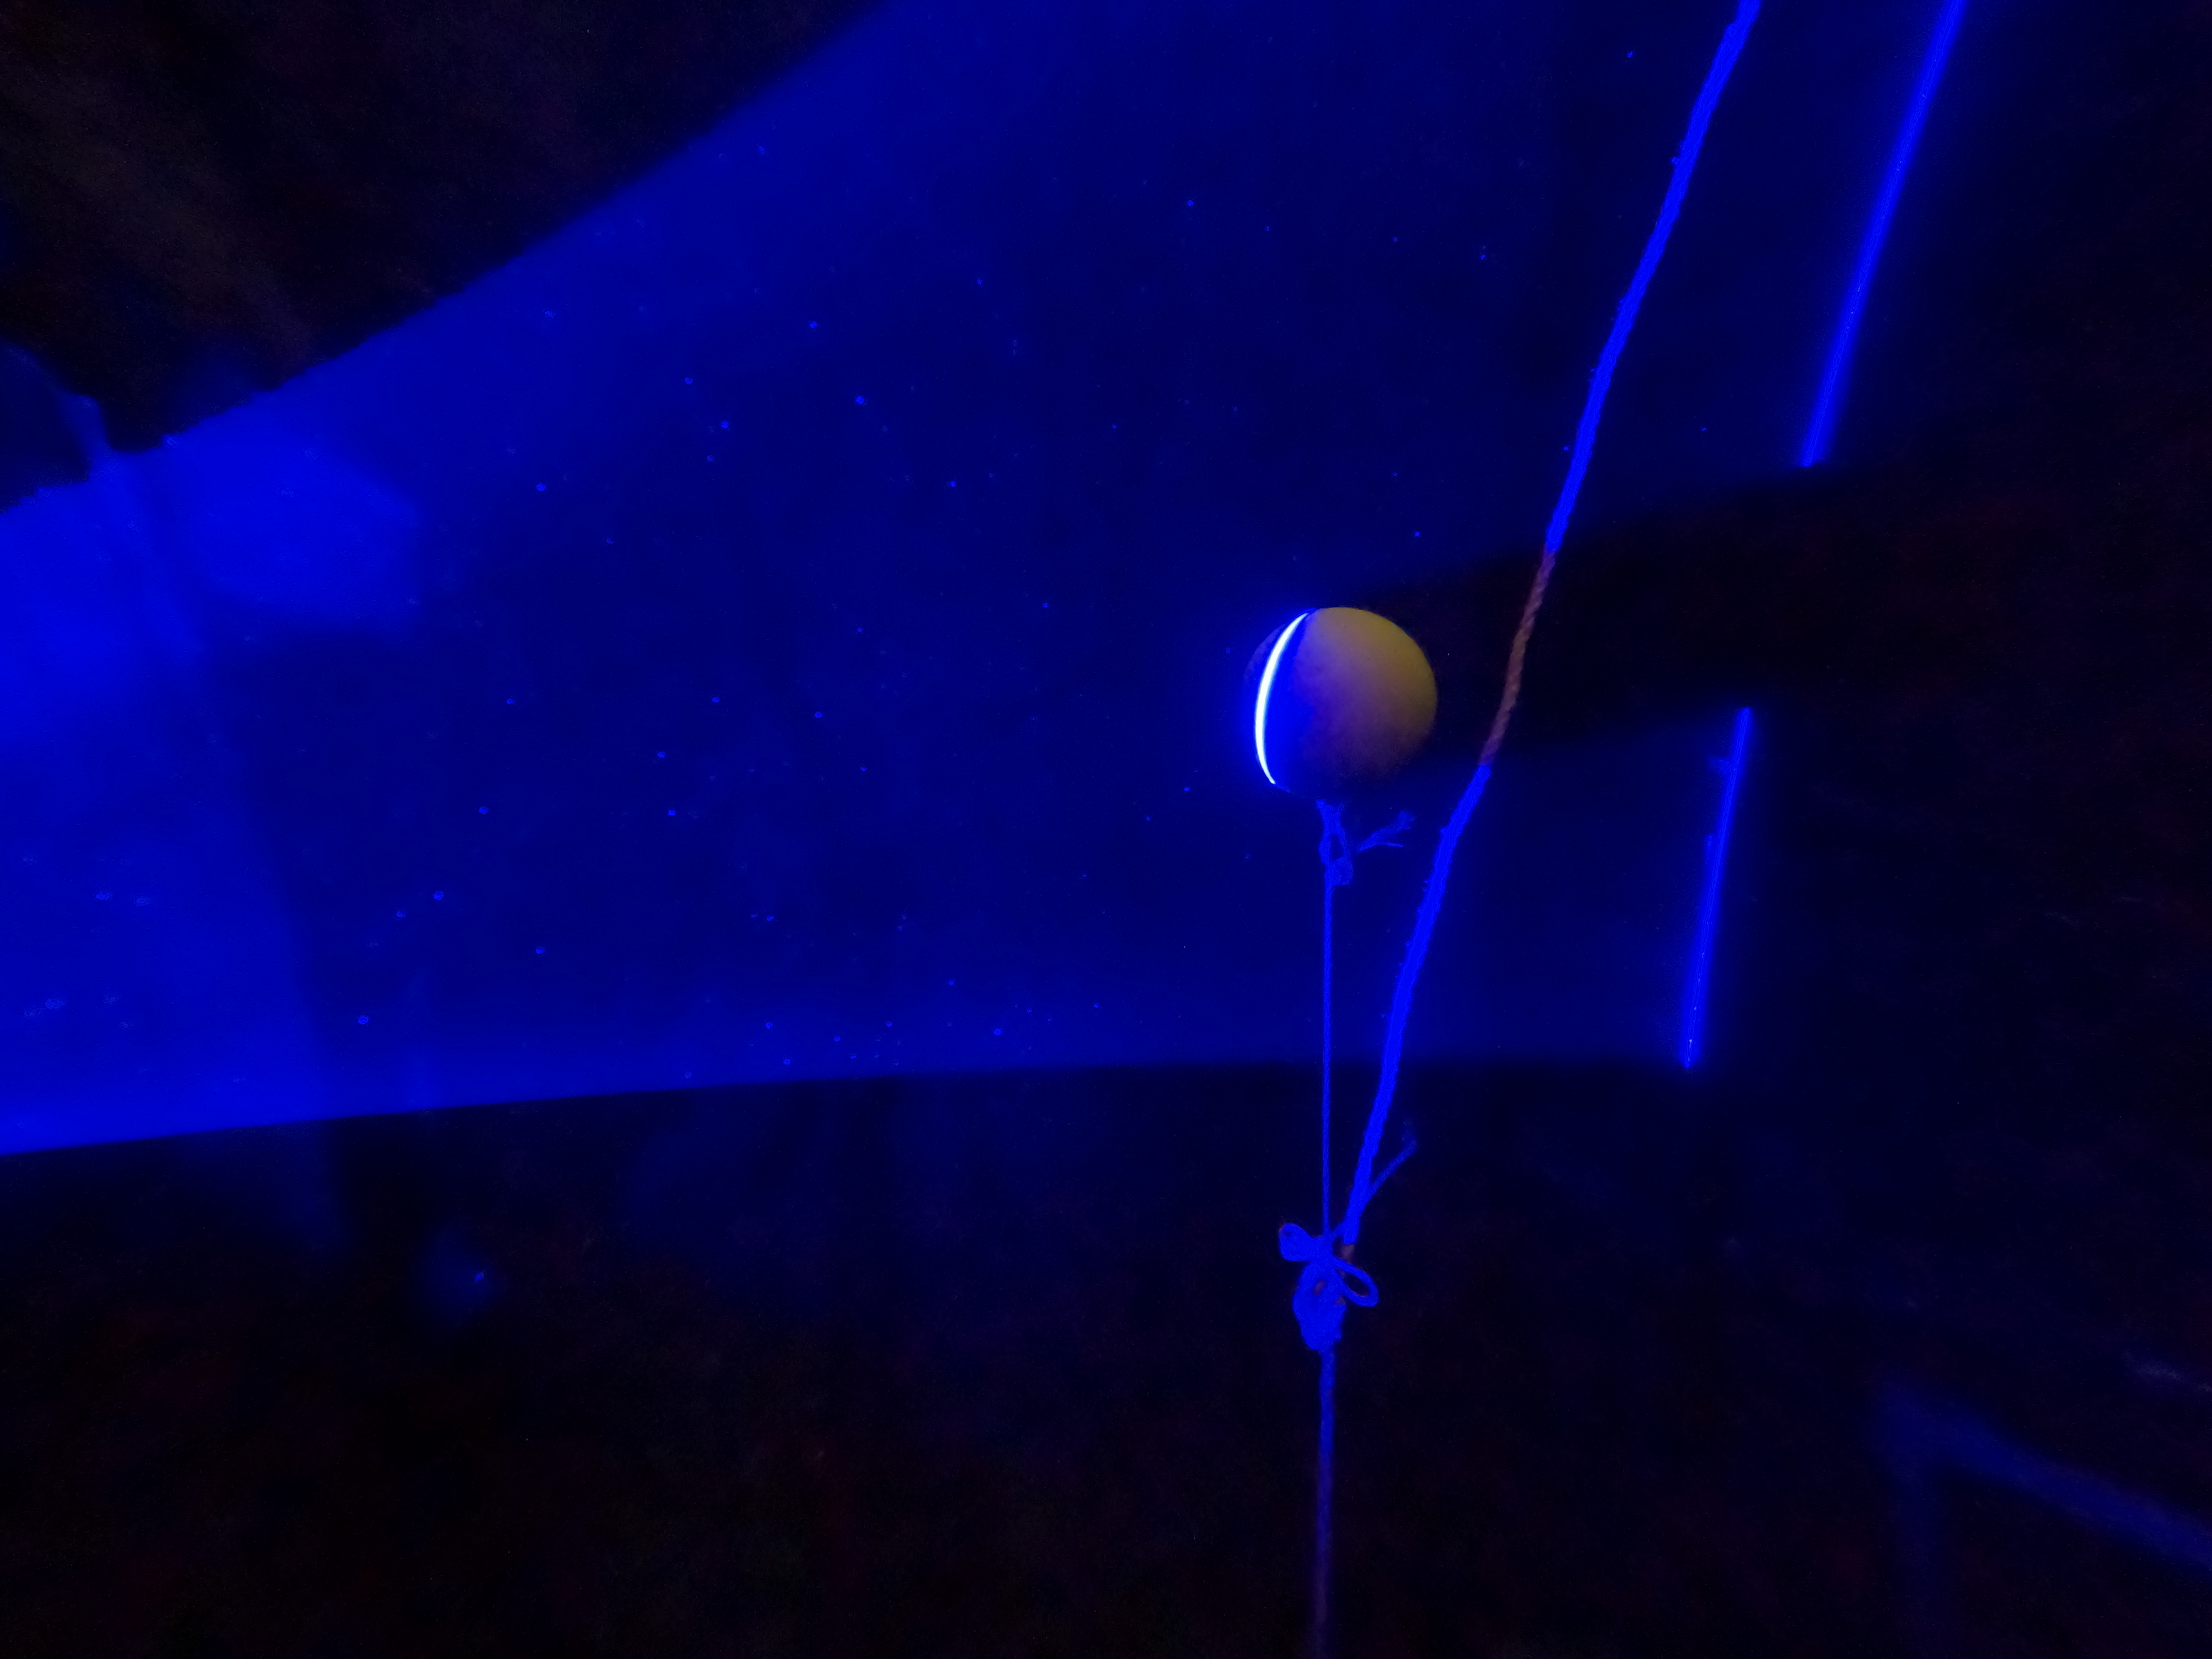

Supplement: Supplementary file 179 [file G0034609.pdf › 9/G0034609.pdf]

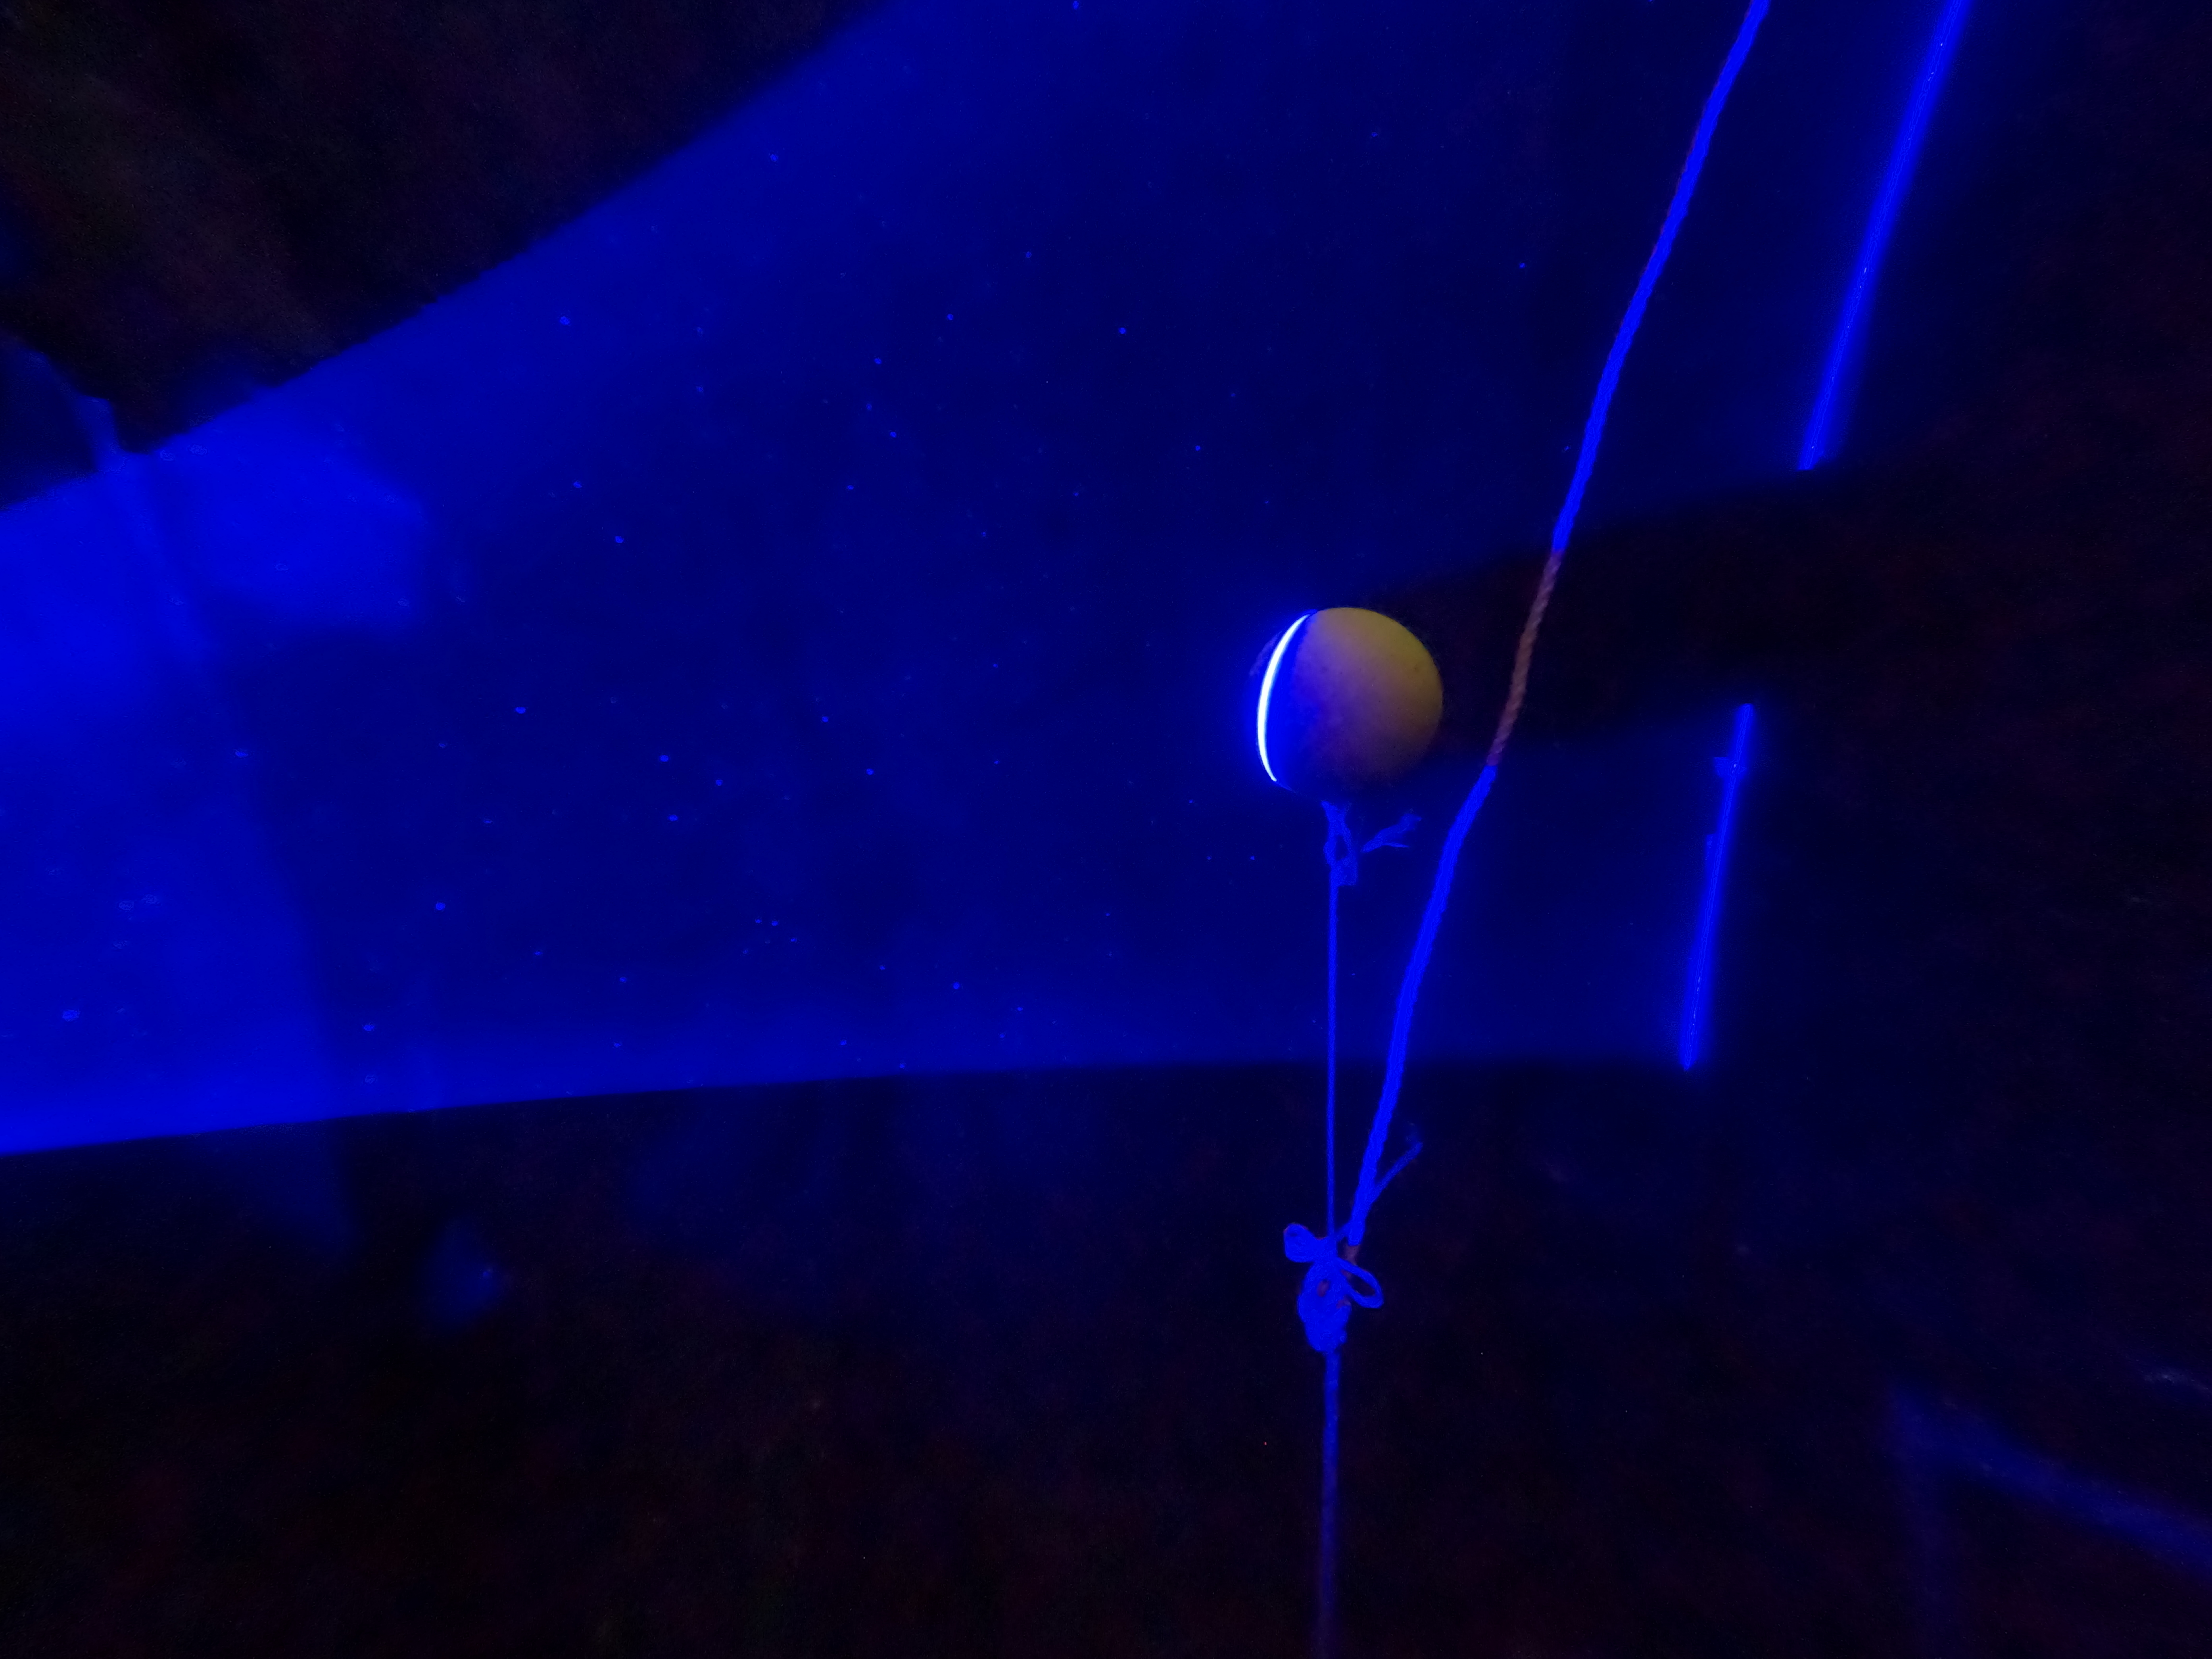

Supplement: Supplementary file 180 [file G0034610.pdf › 9/G0034610.pdf]

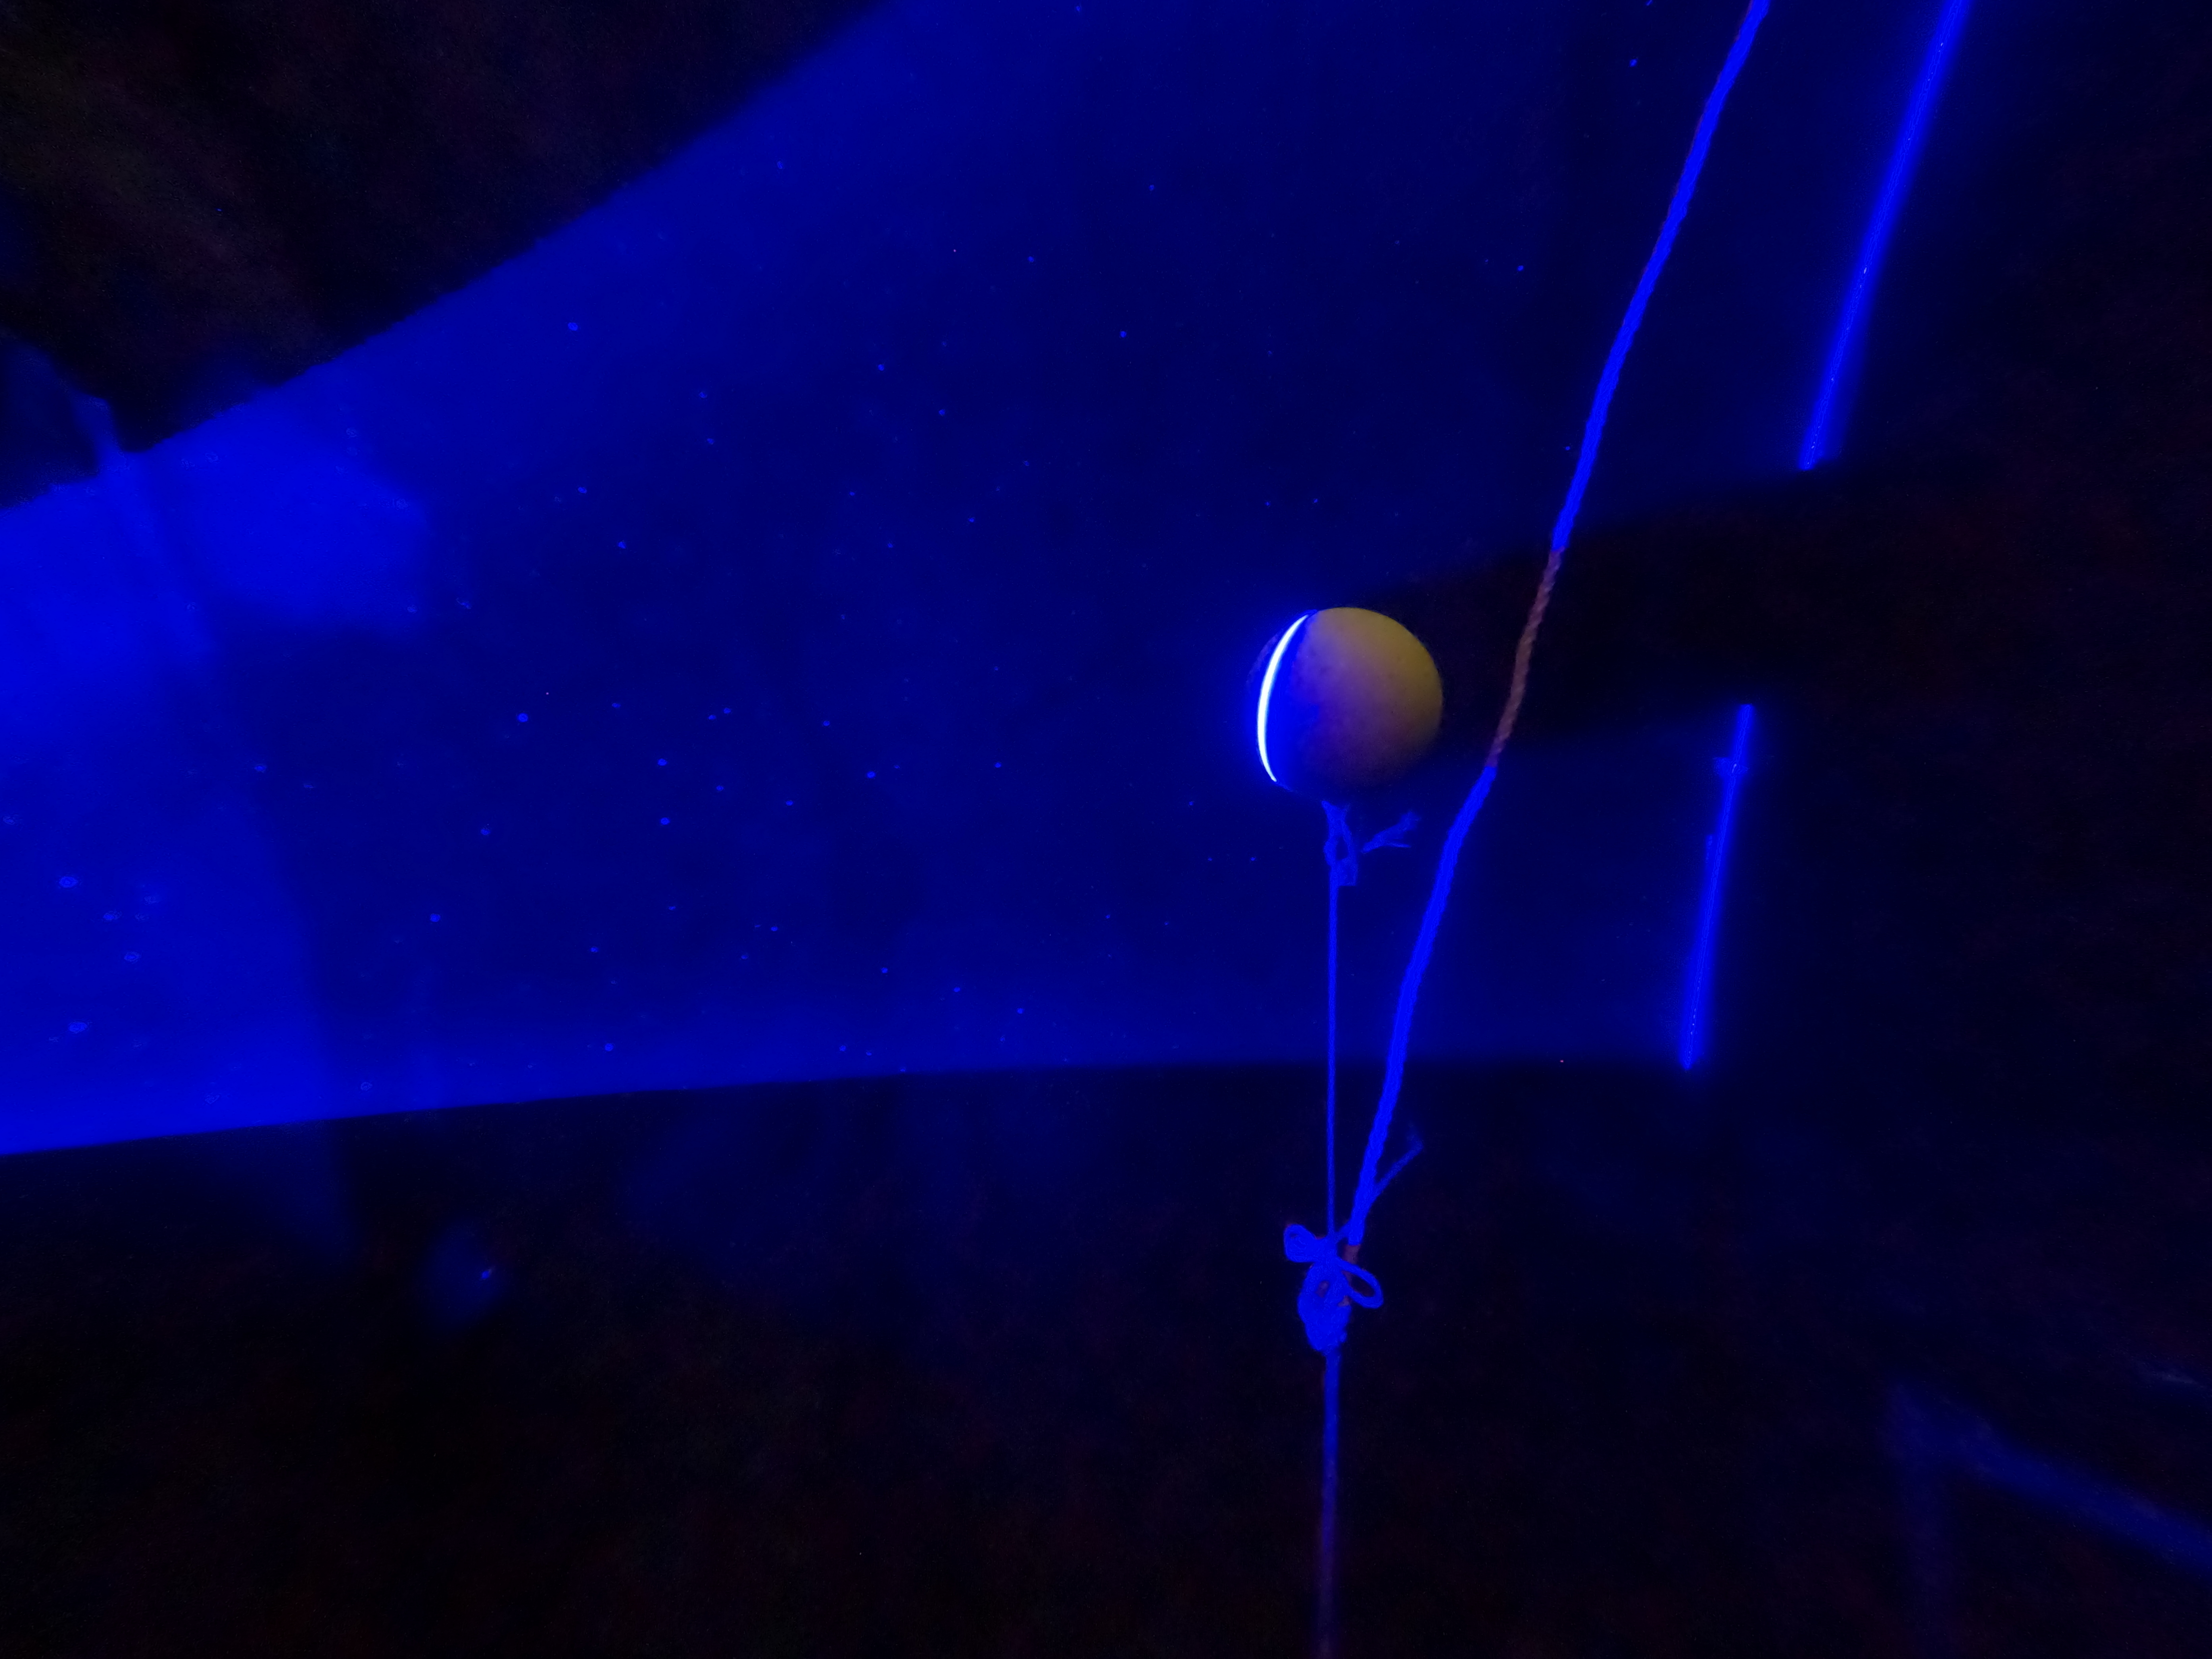

Supplement: Supplementary file 181 [file G0034611.pdf › 9/G0034611.pdf]

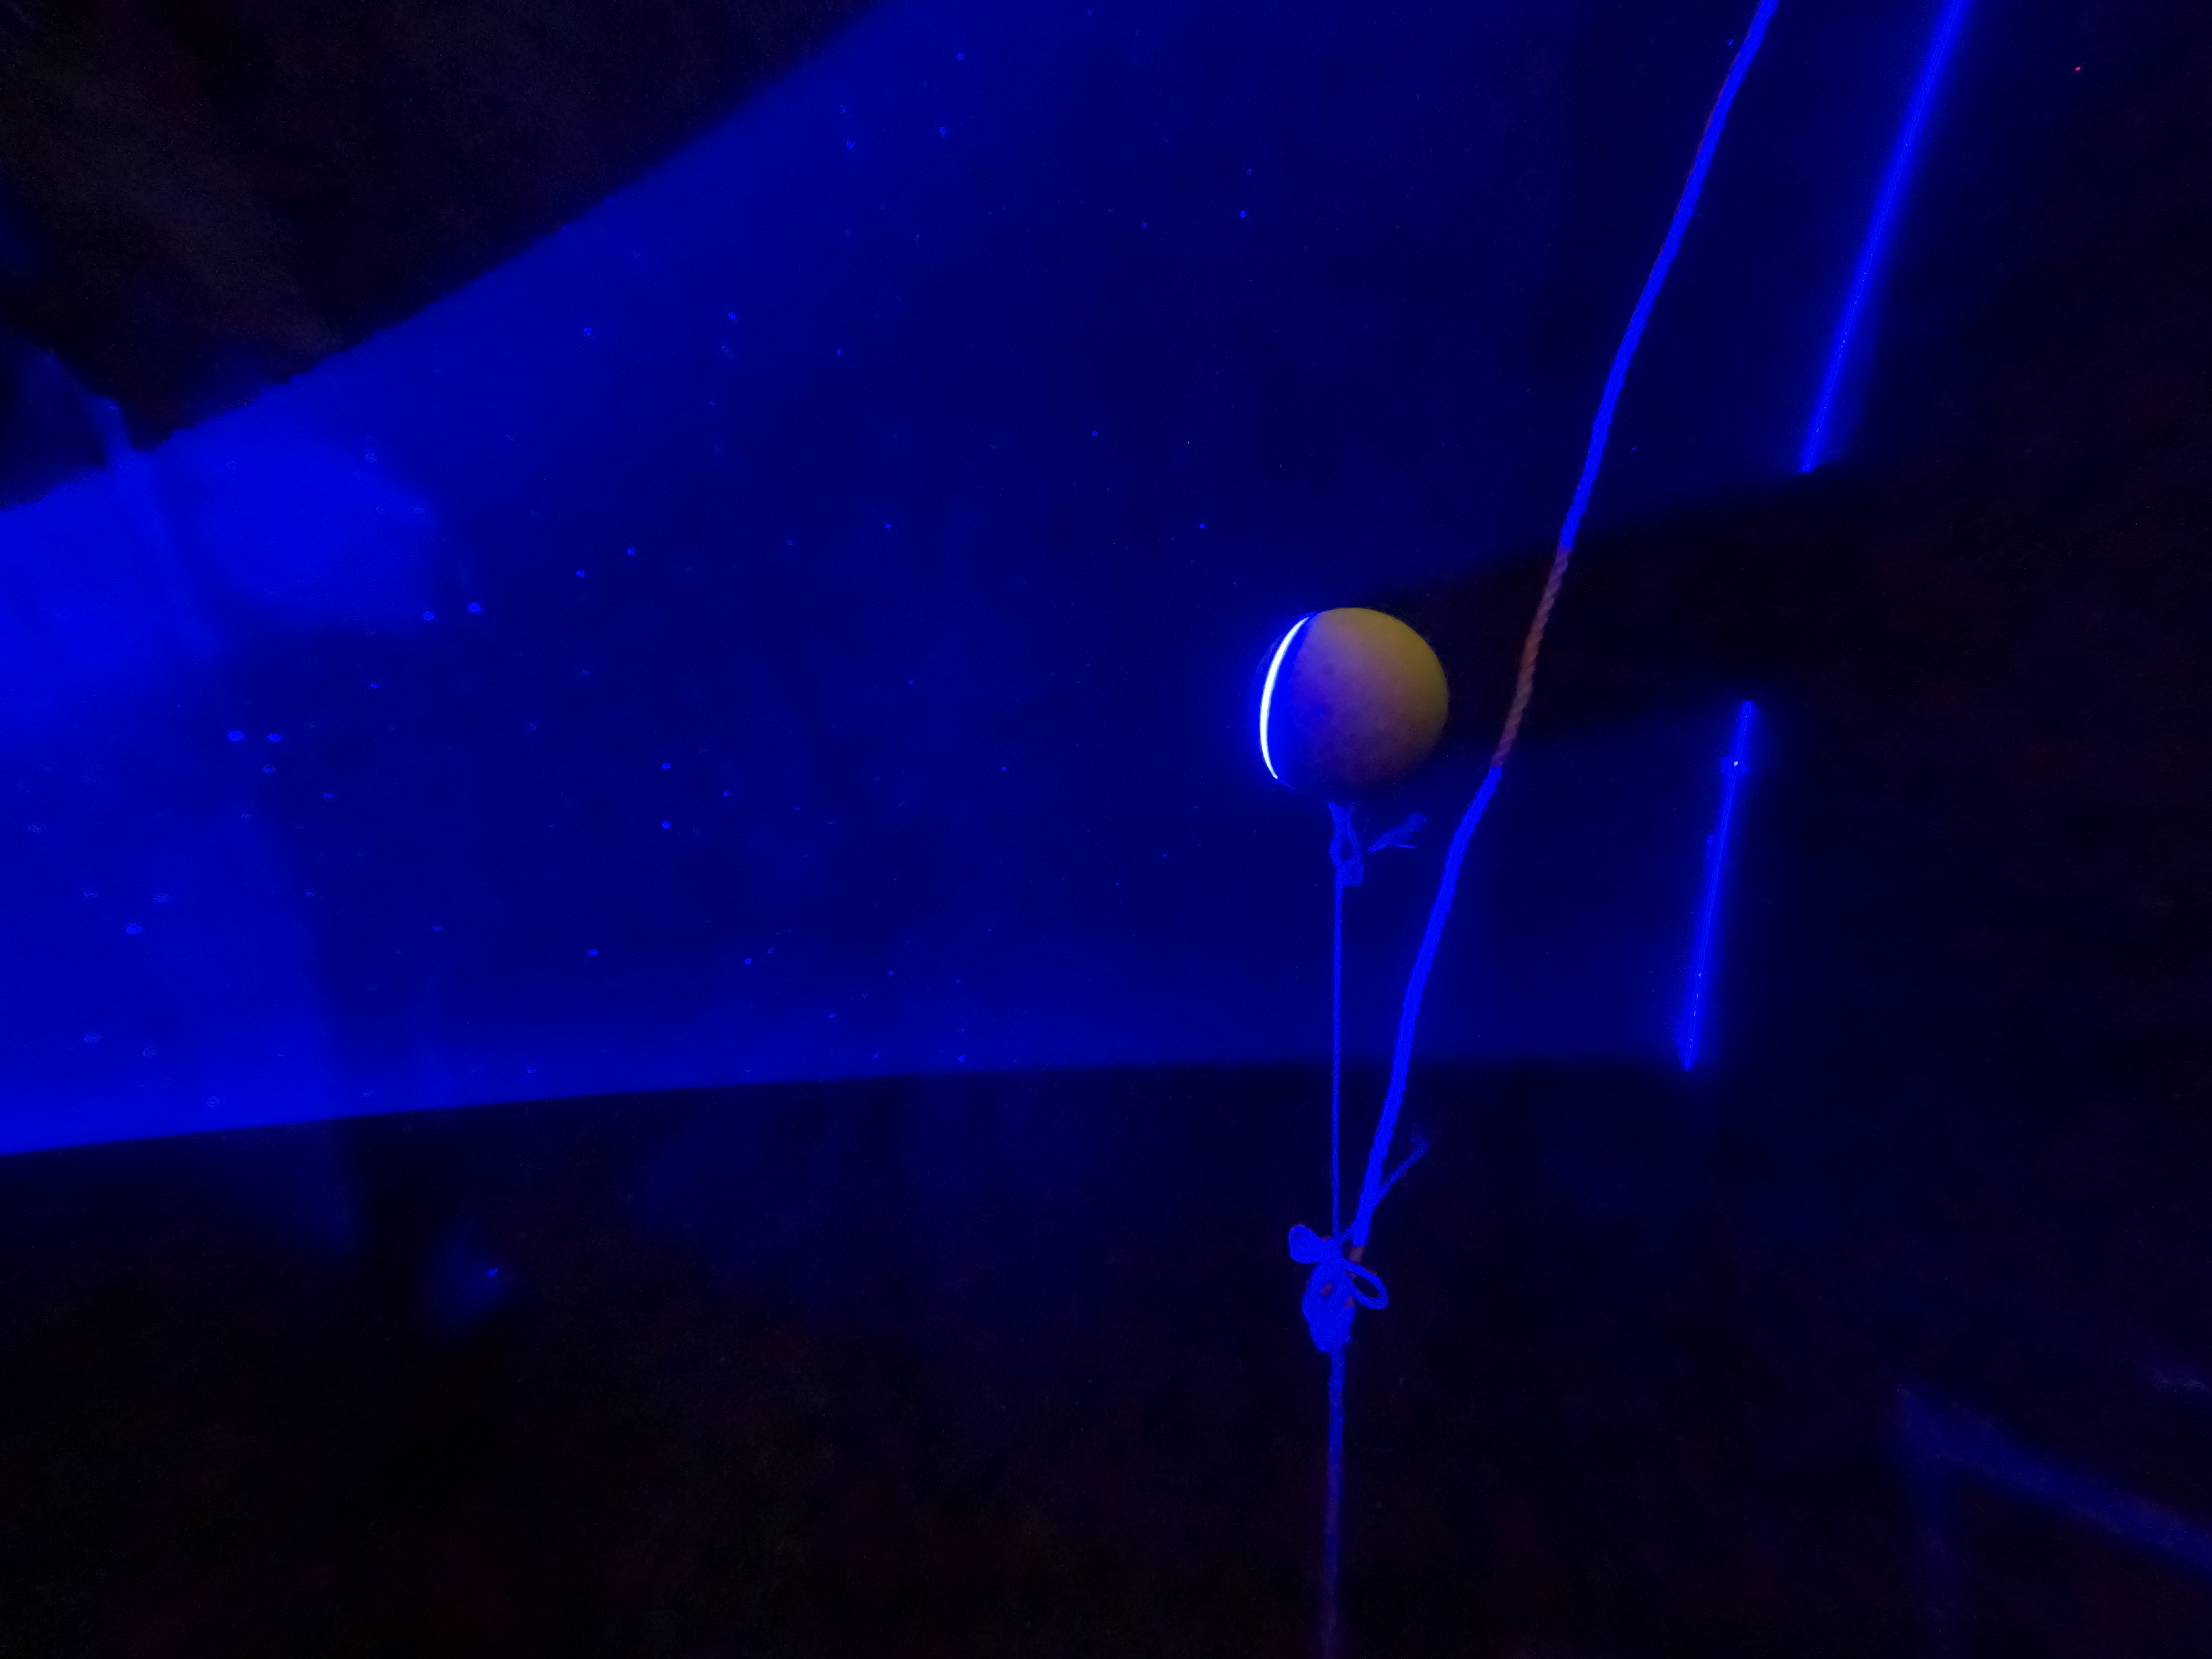

Supplement: Supplementary file 182 [file G0034612.pdf › 9/G0034612.pdf]

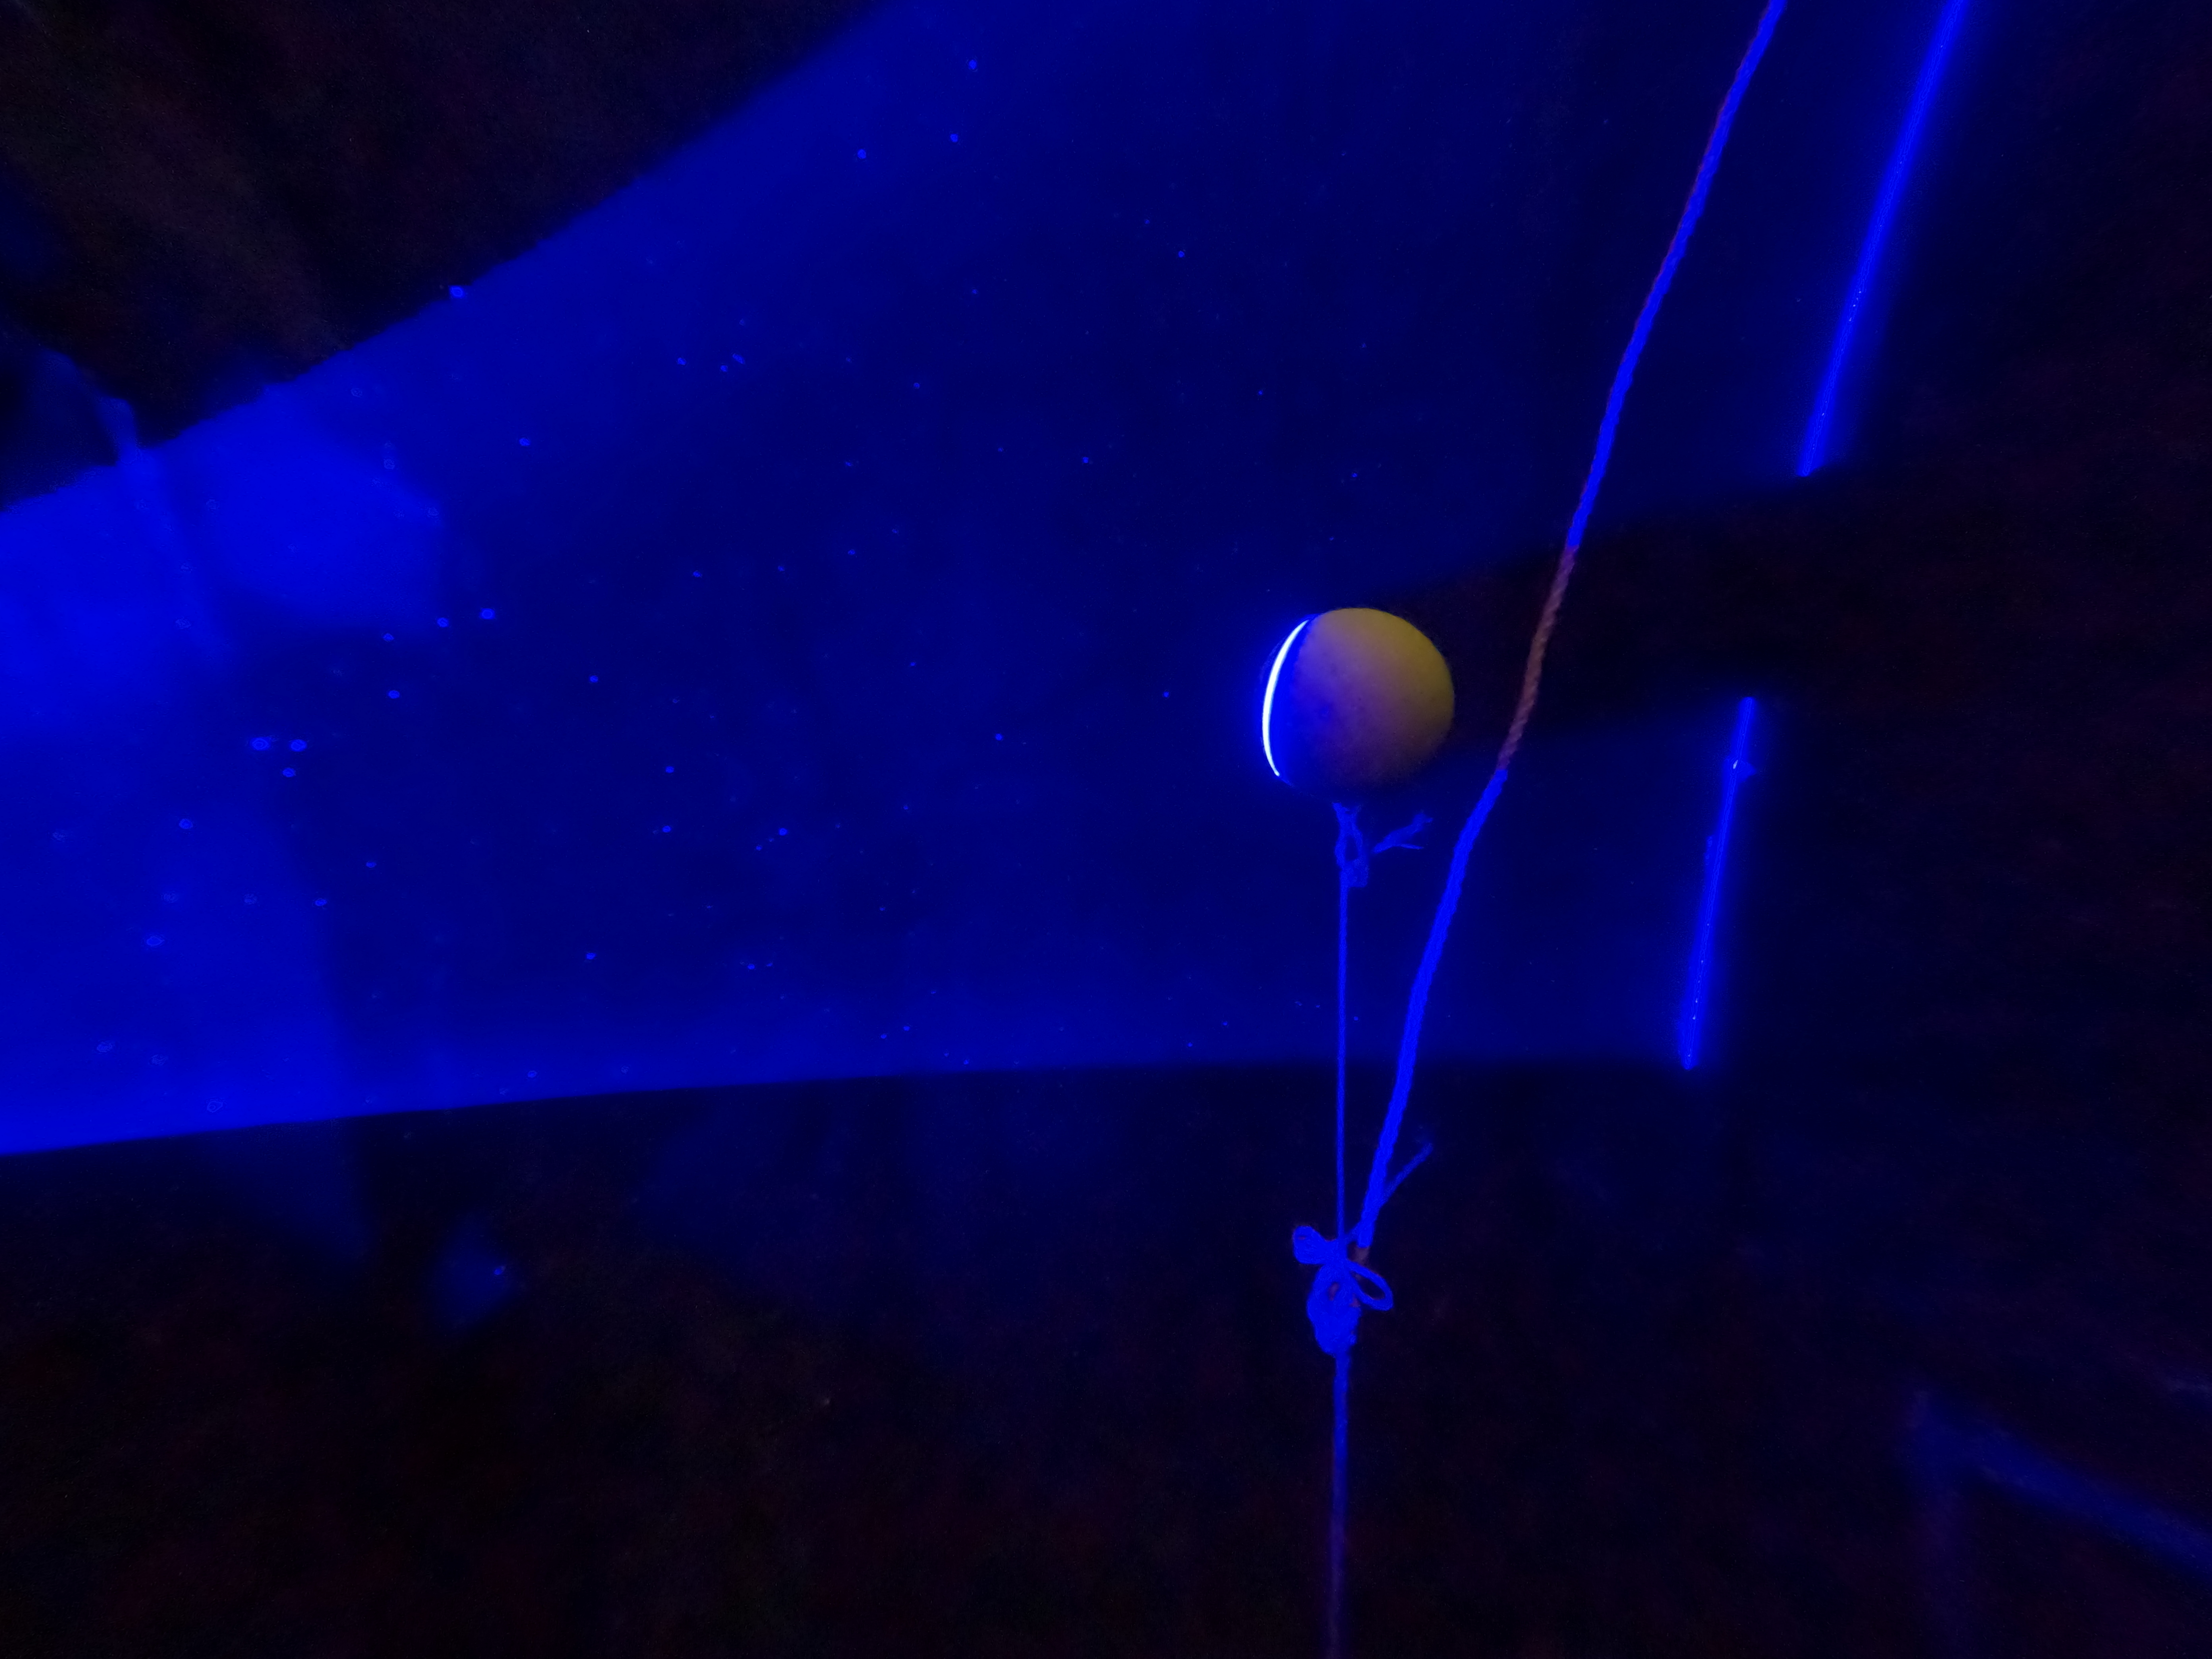

Supplement: Supplementary file 183 [file G0034613.pdf › 9/G0034613.pdf]

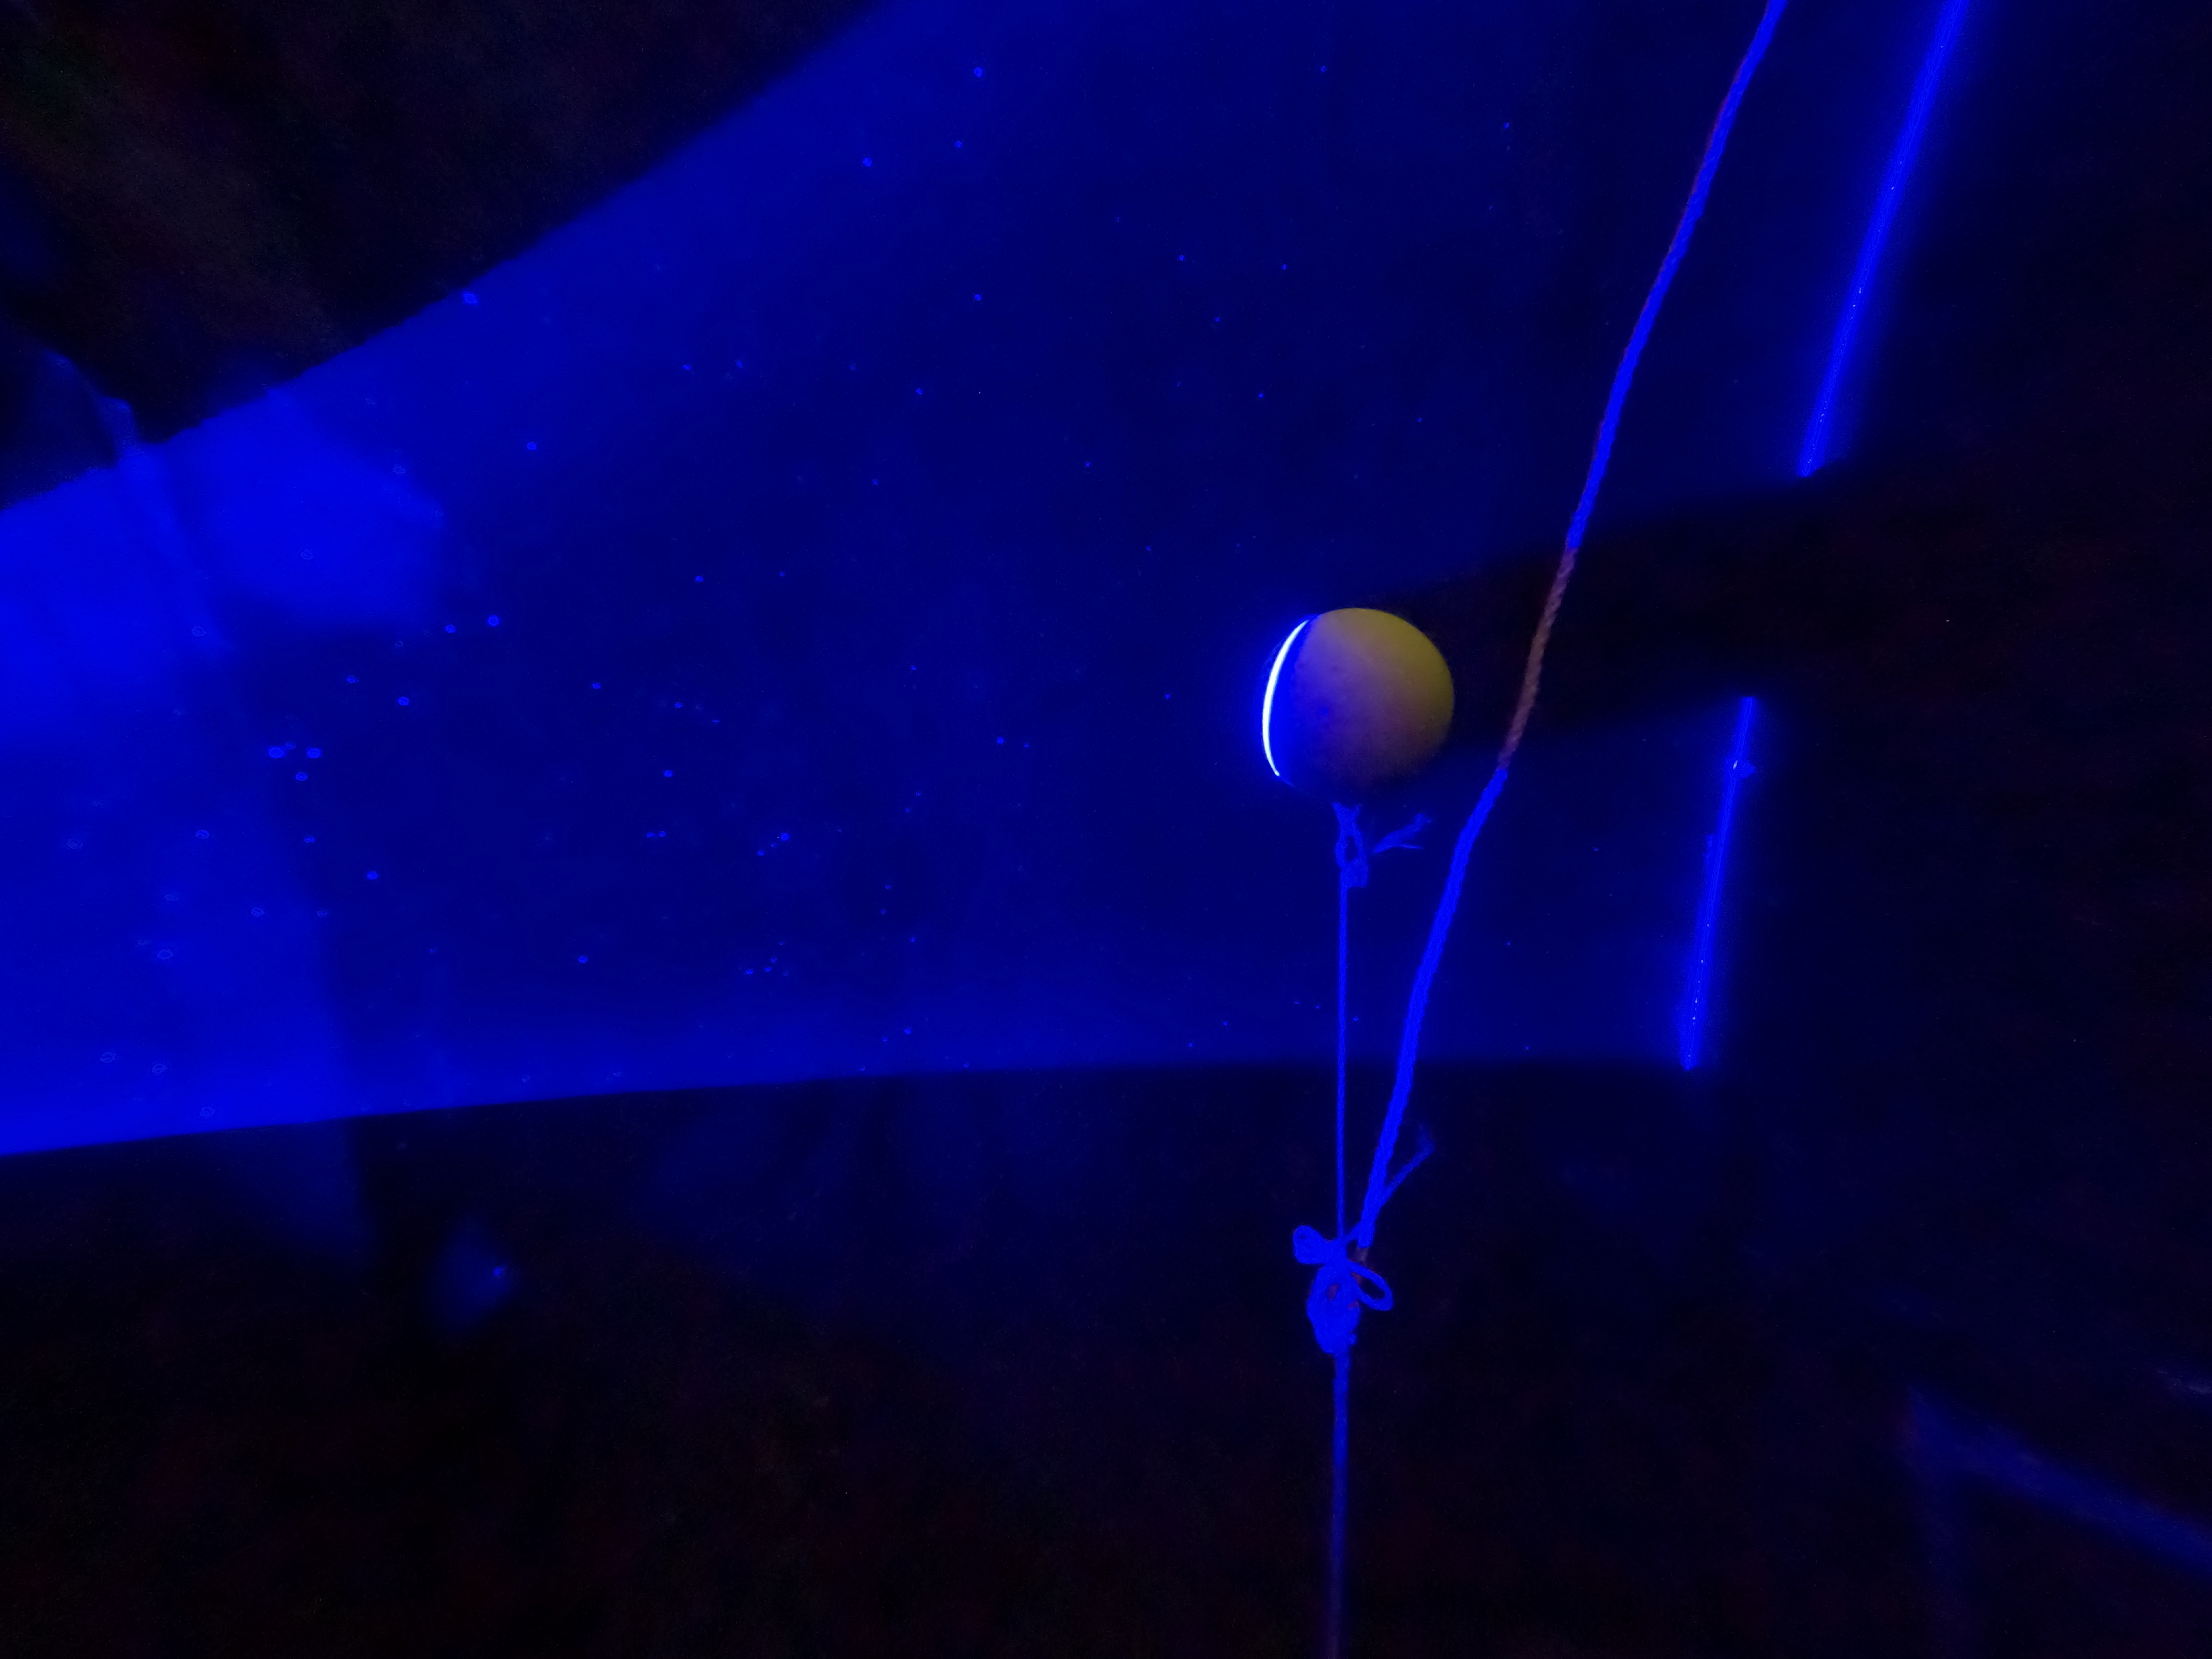

Supplement: Supplementary file 184 [file G0034614.pdf › 9/G0034614.pdf]

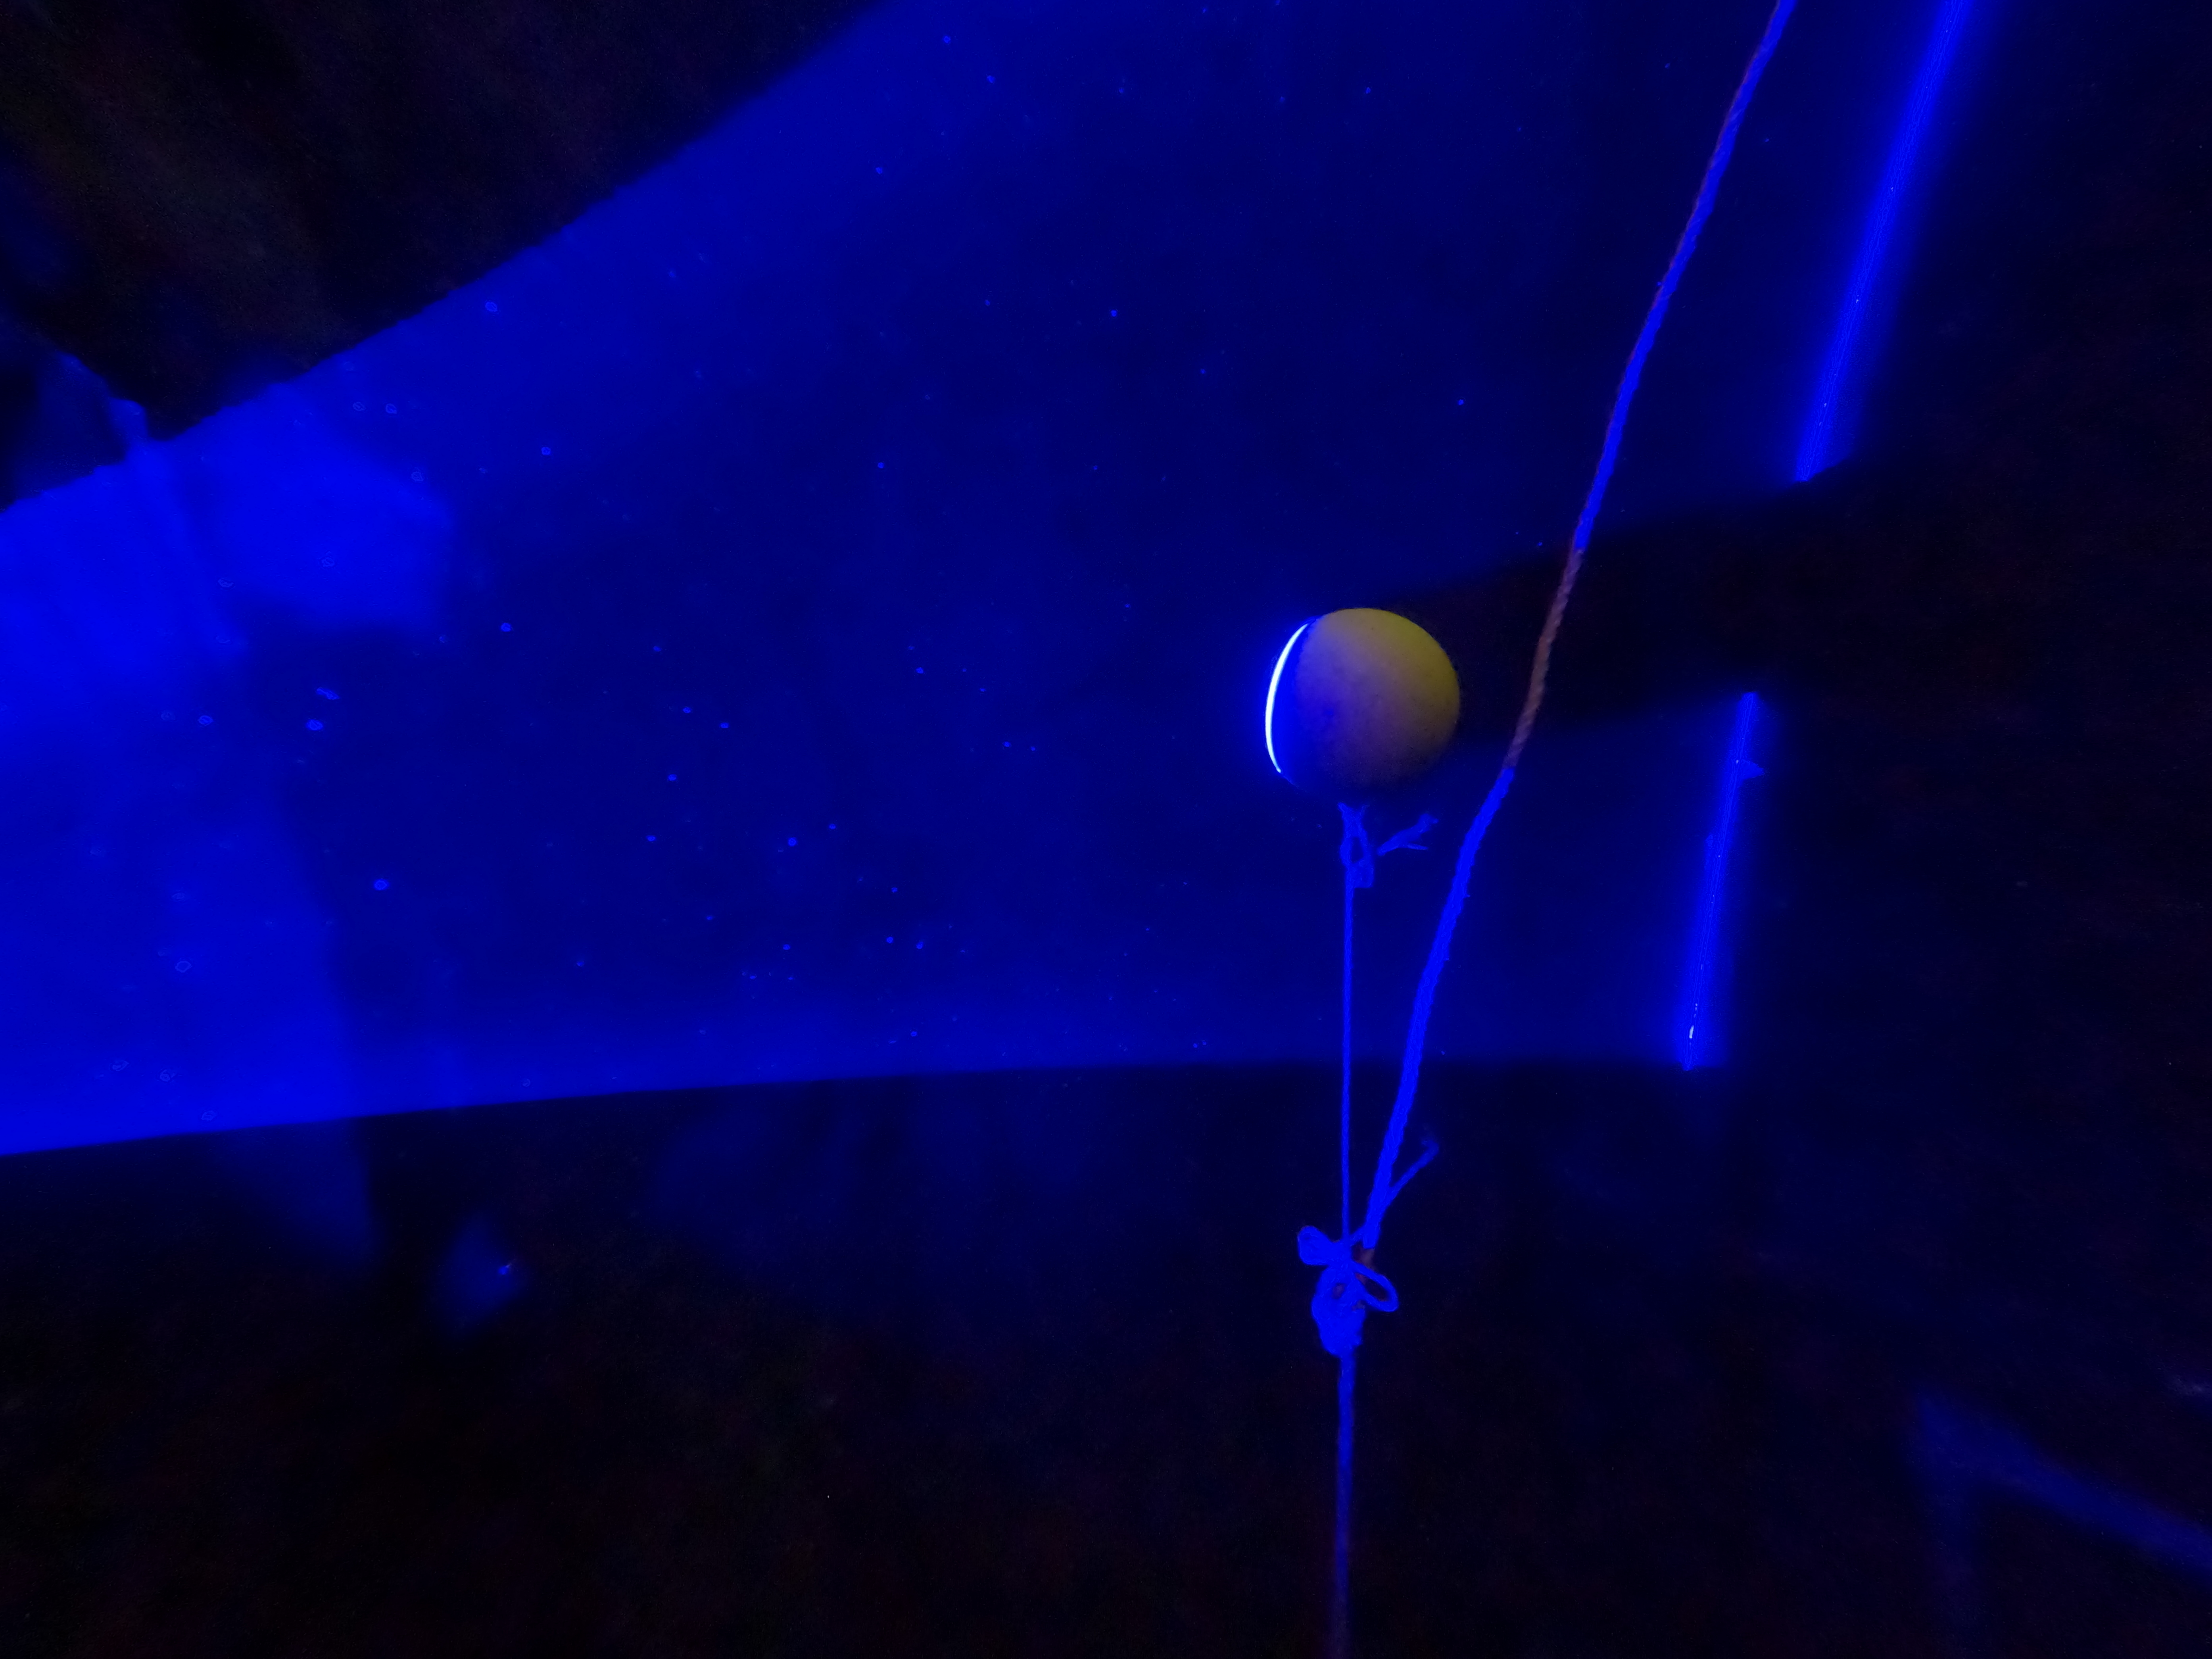

Supplement: Supplementary file 185 [file G0034615.pdf › 9/G0034615.pdf]

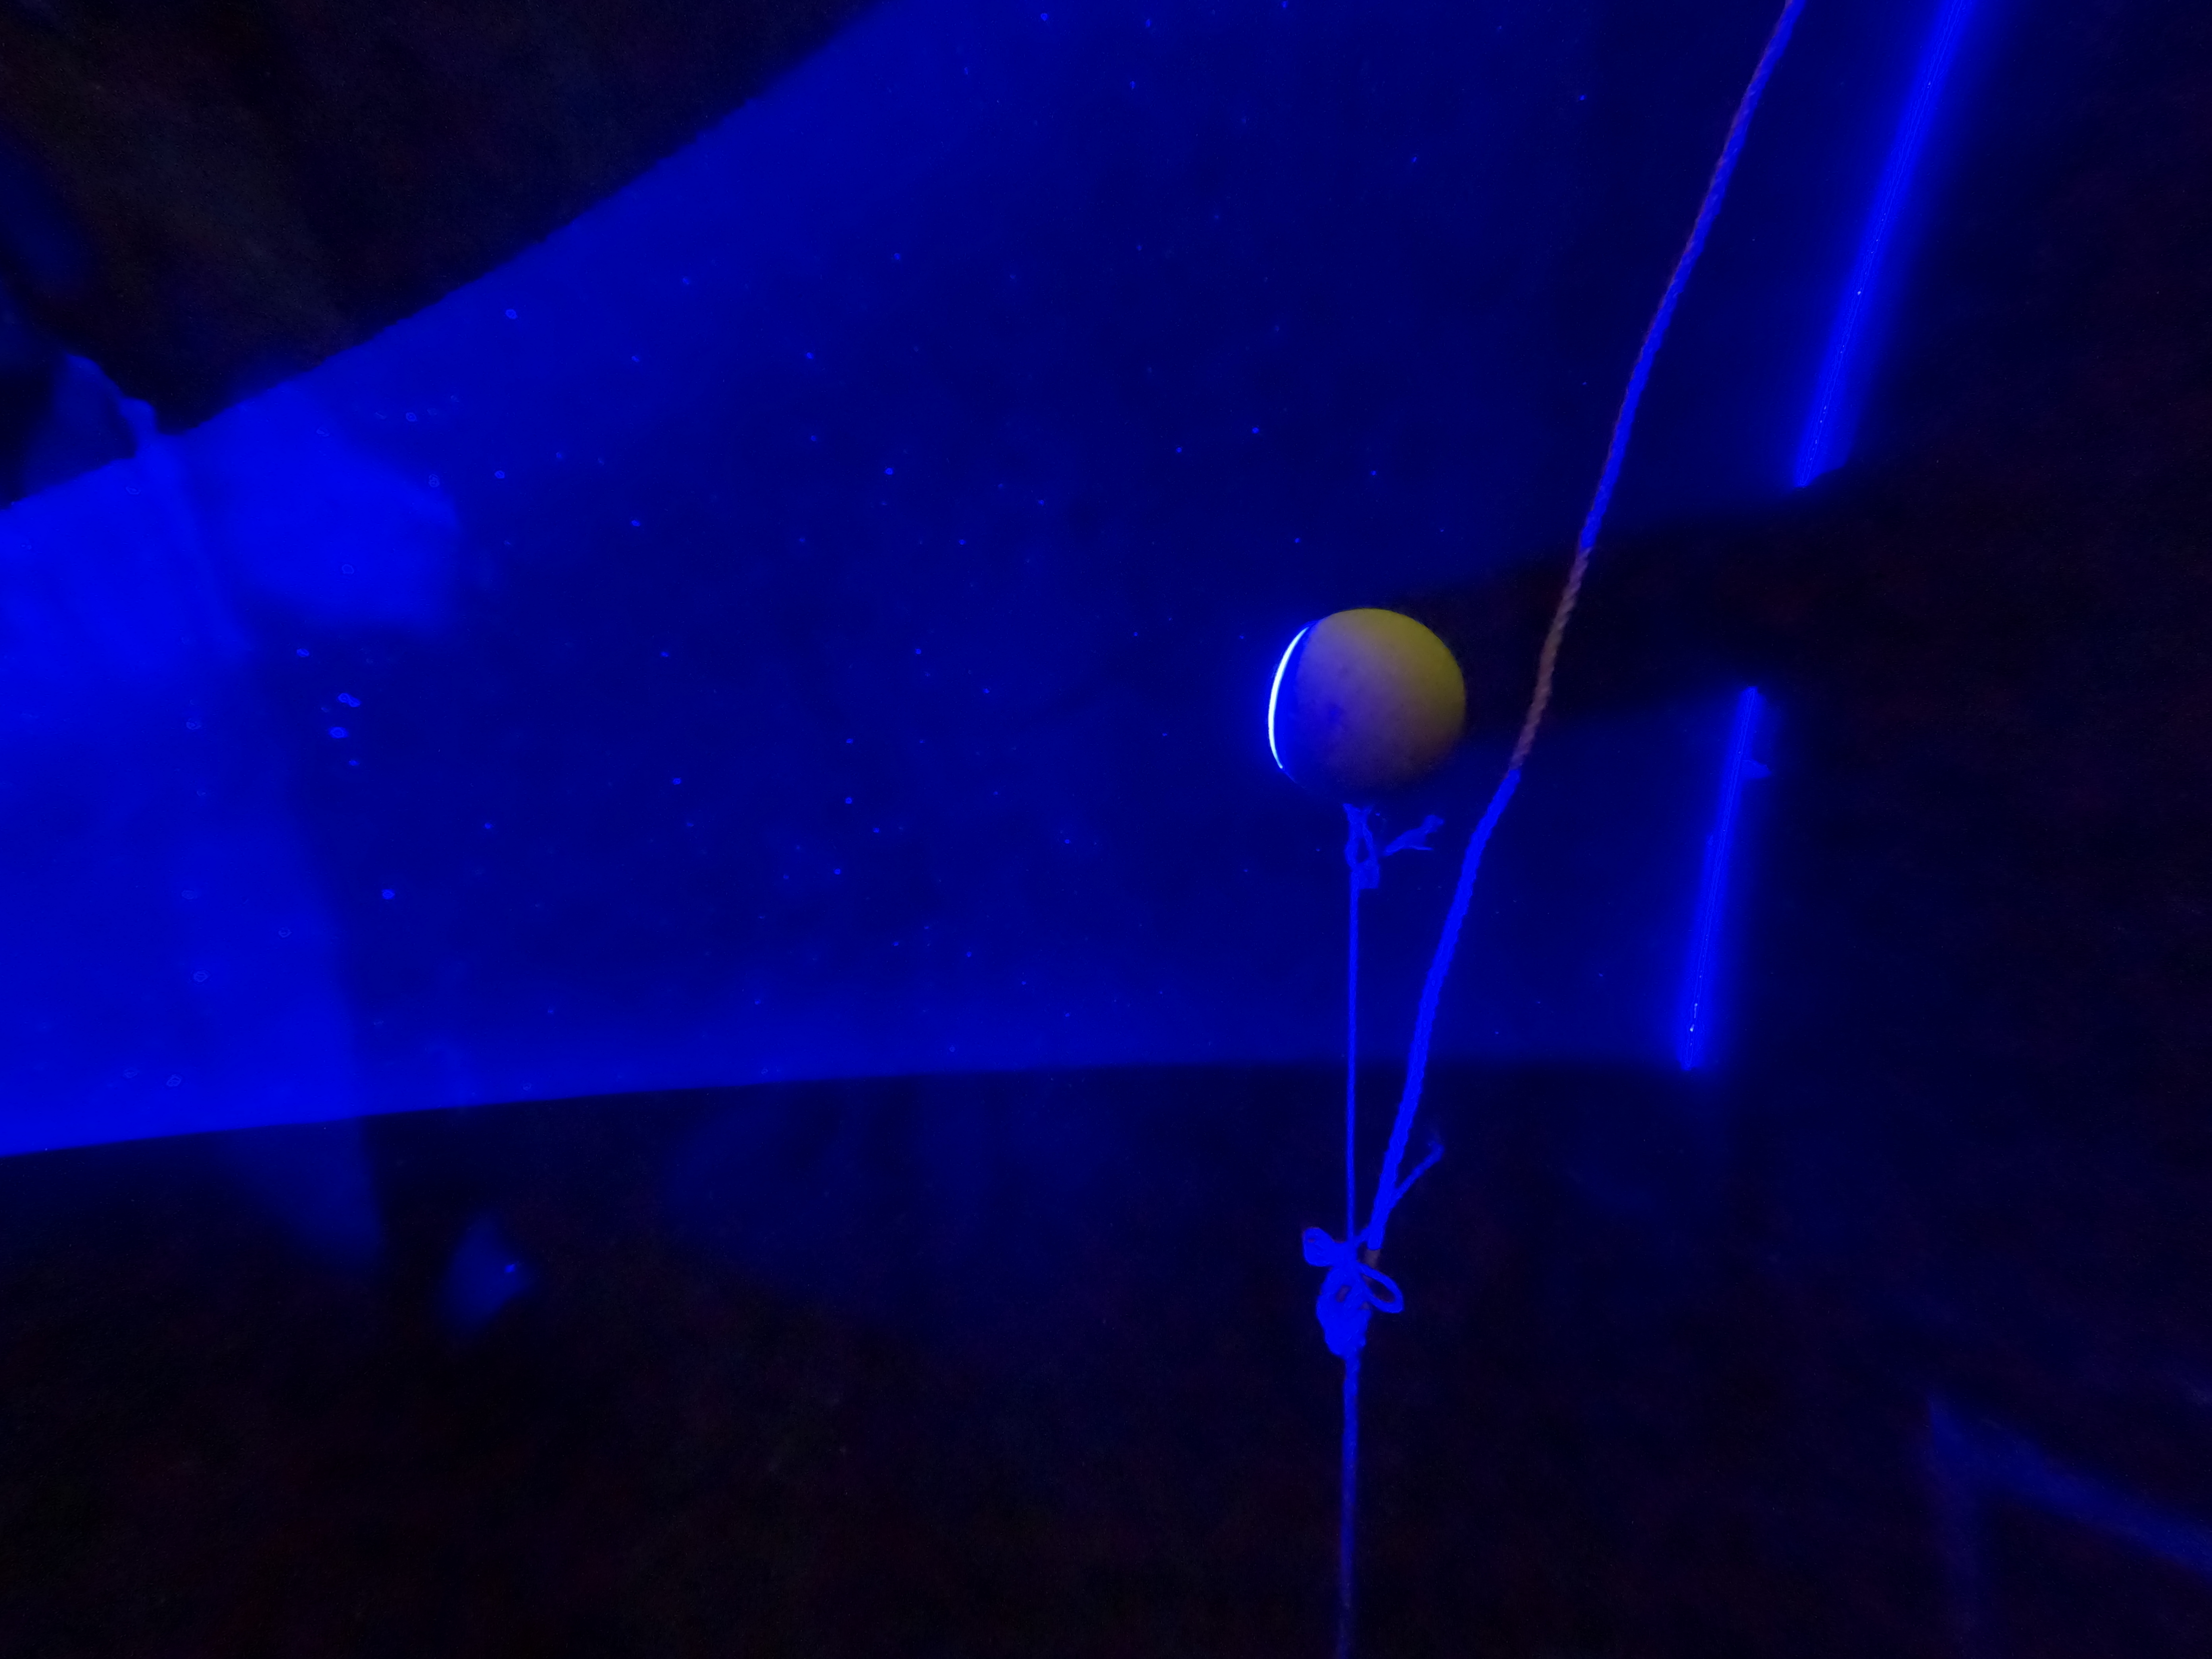

Supplement: Supplementary file 186 [file G0034616.pdf › 9/G0034616.pdf]

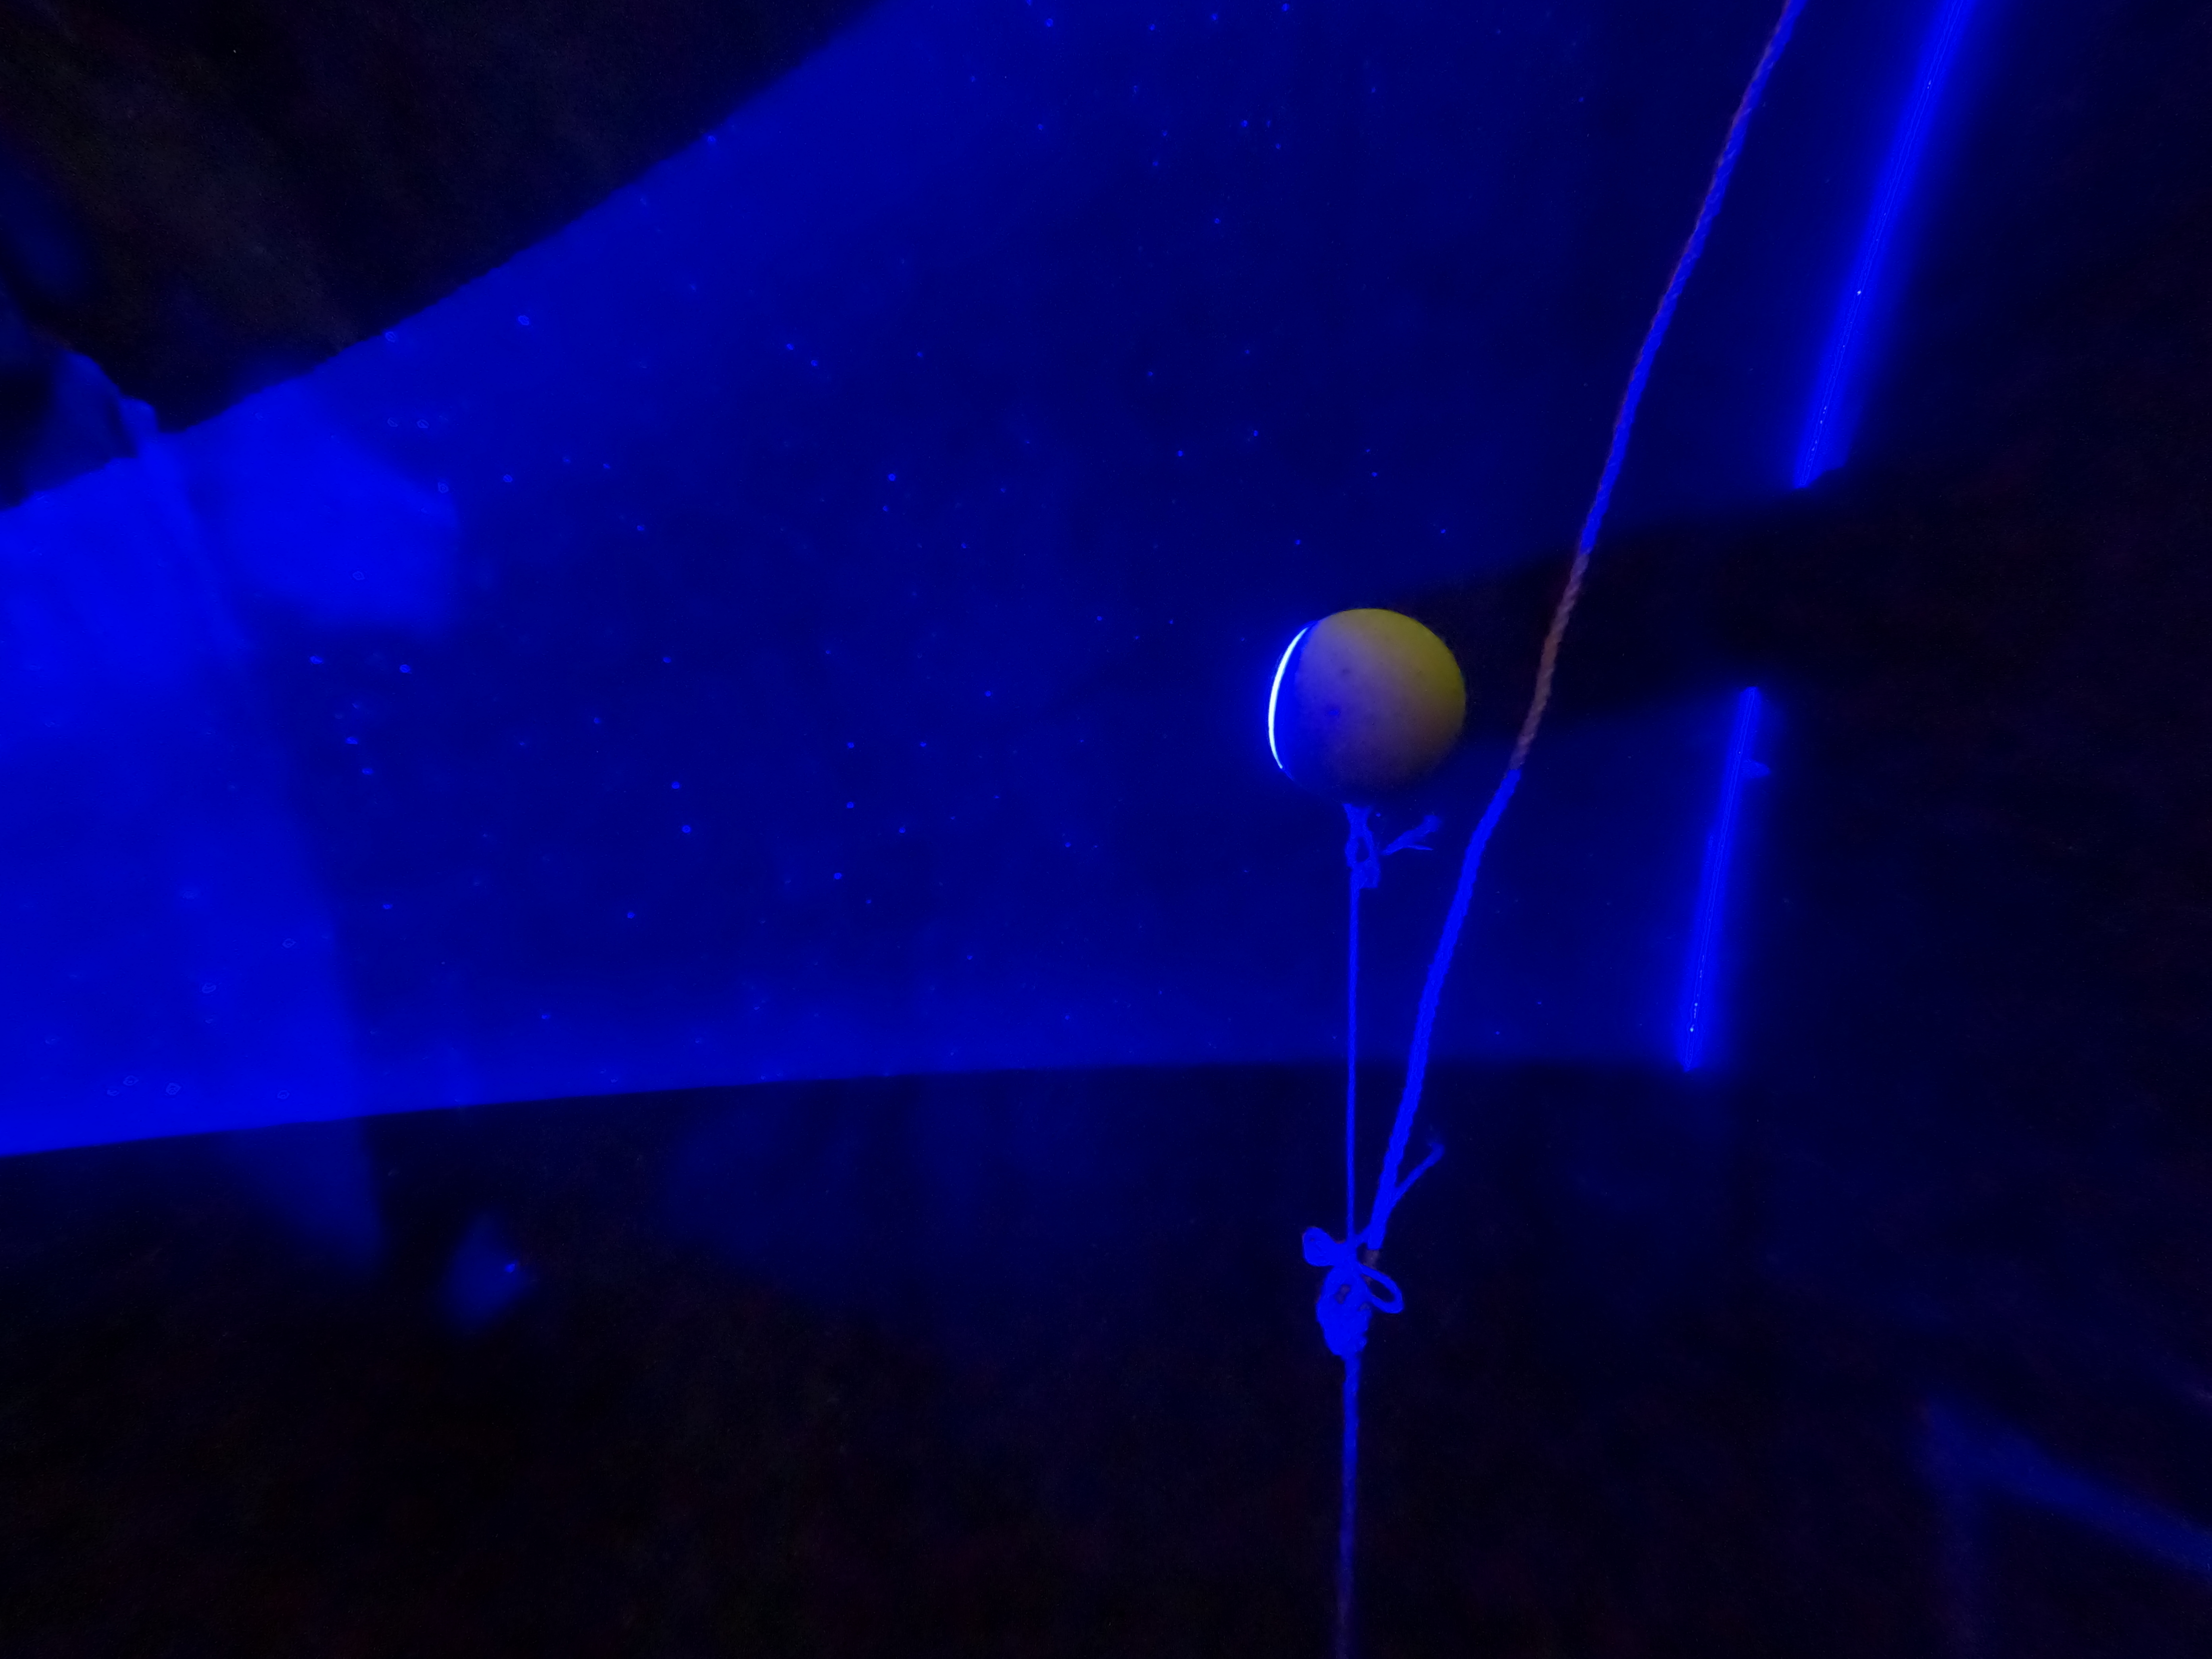

Supplement: Supplementary file 187 [file G0034617.pdf › 9/G0034617.pdf]

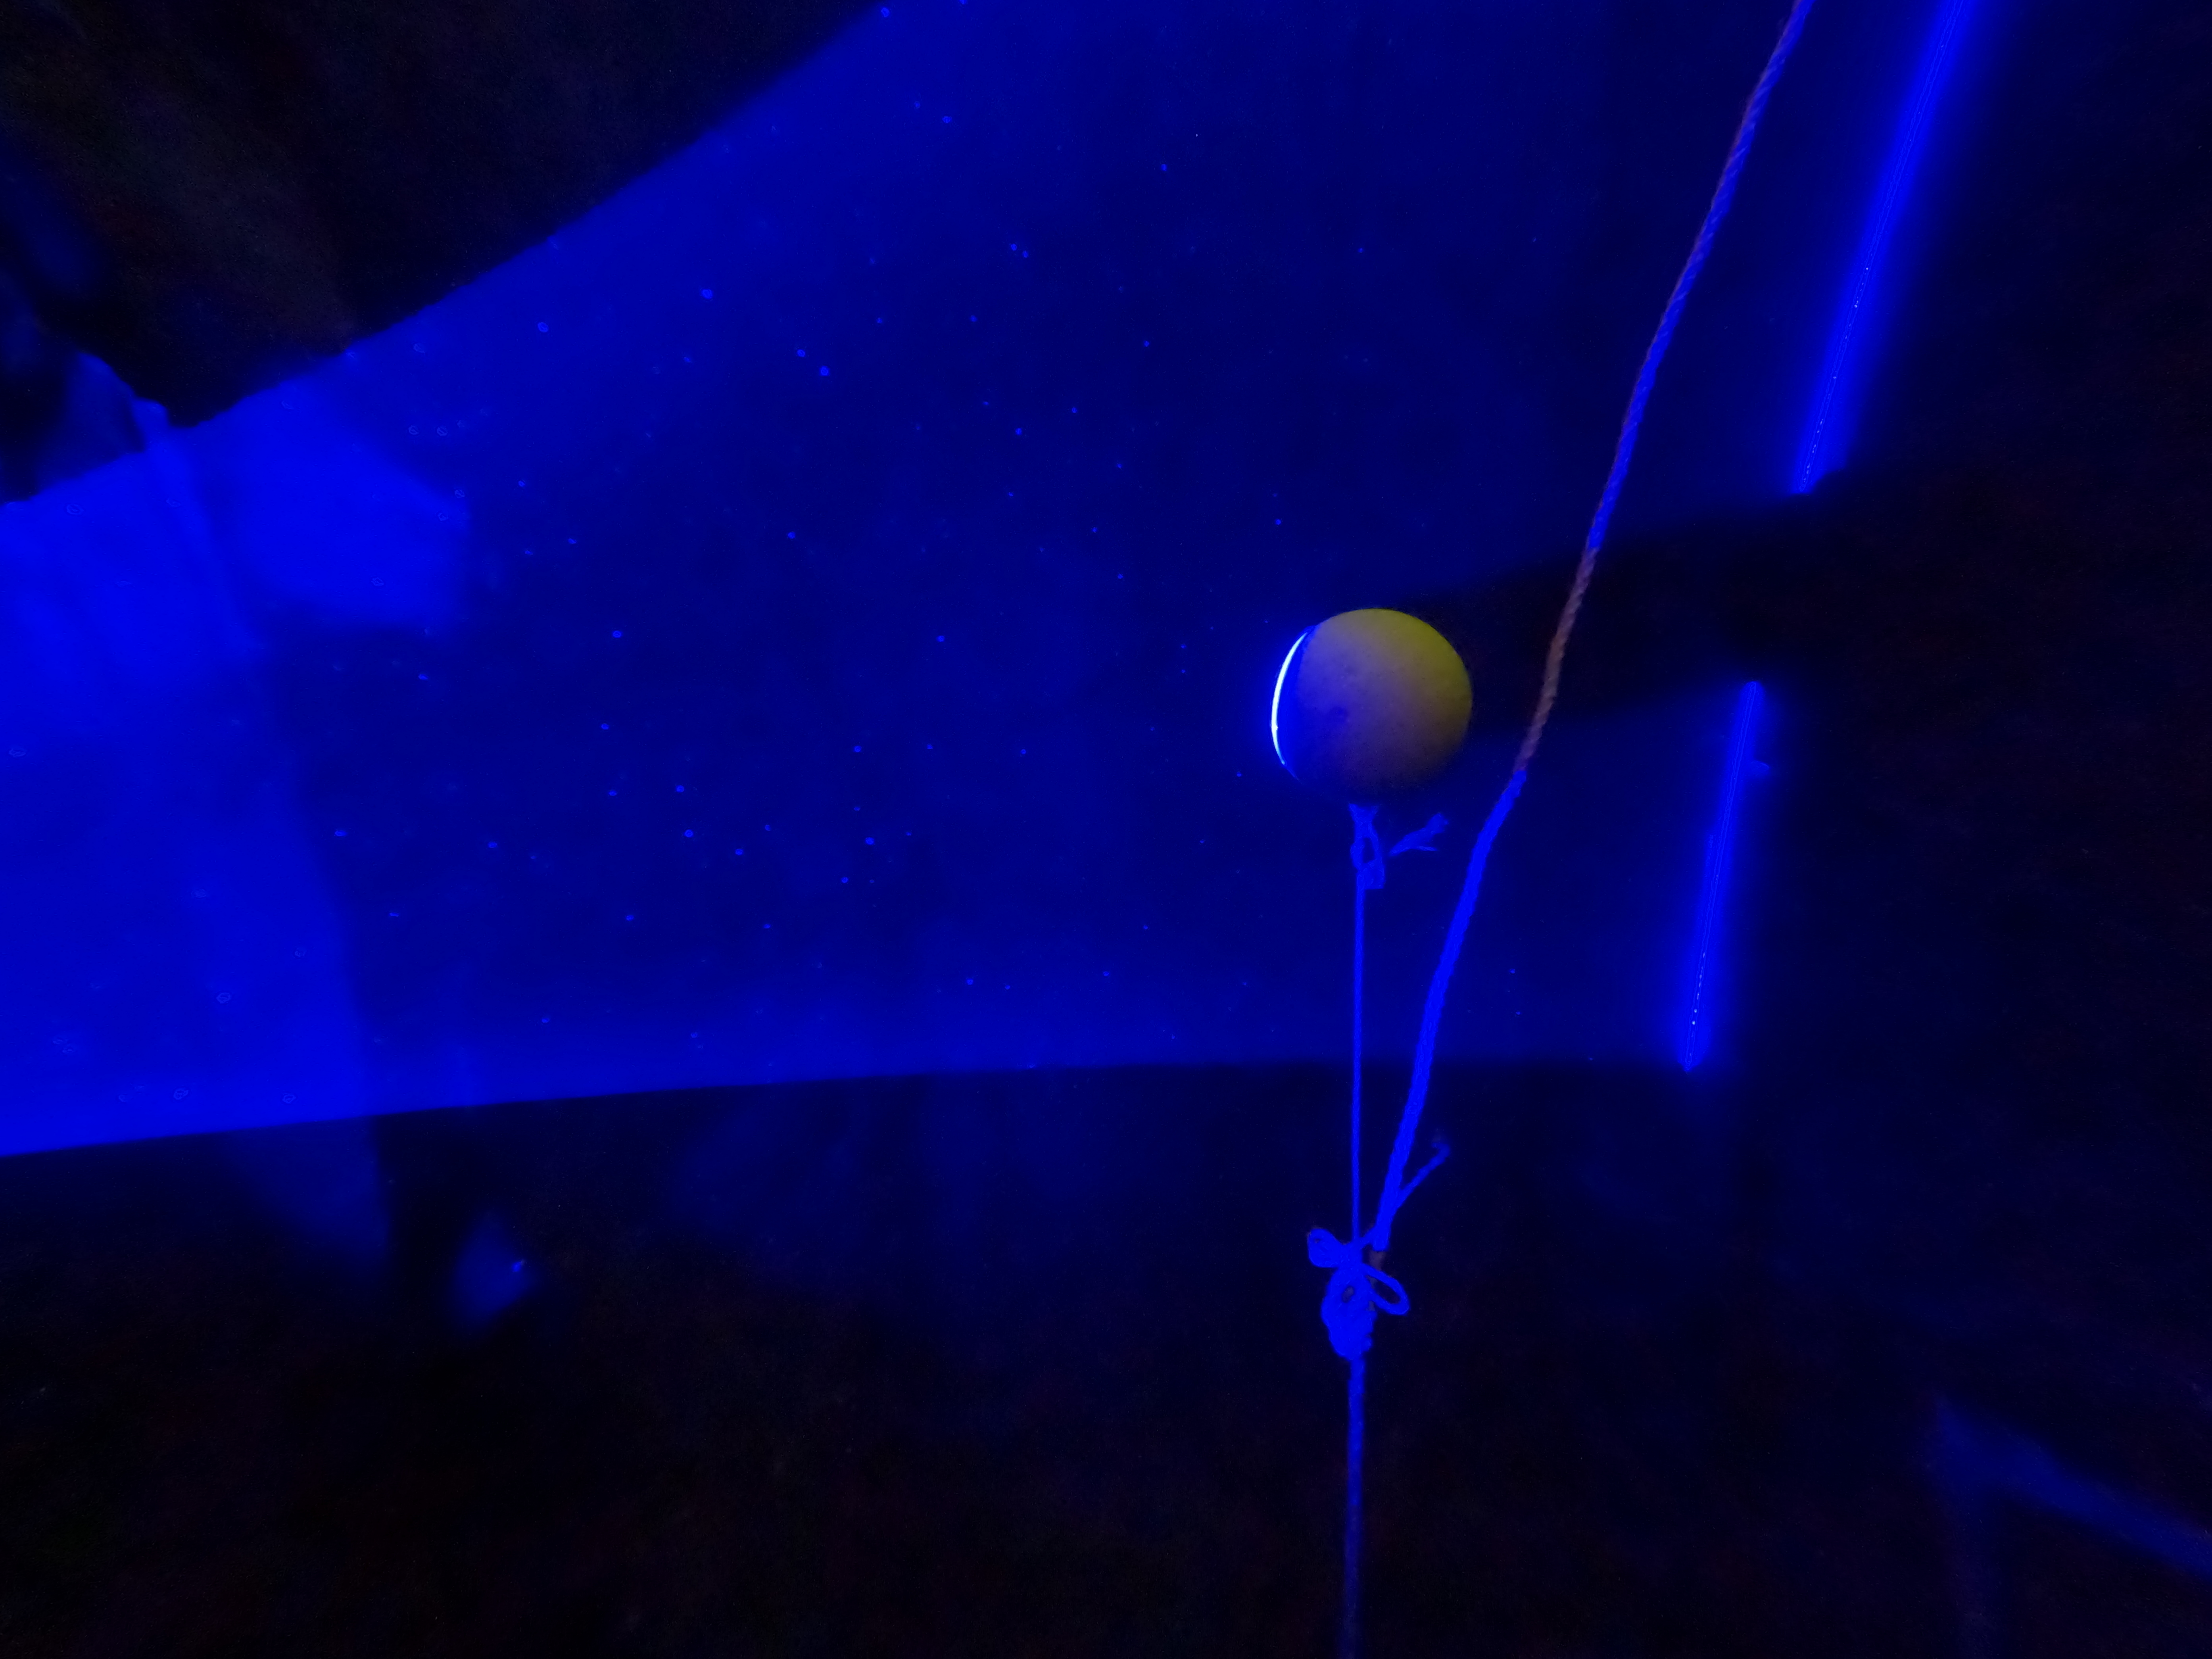

Supplement: Supplementary file 188 [file G0034618.pdf › 9/G0034618.pdf]

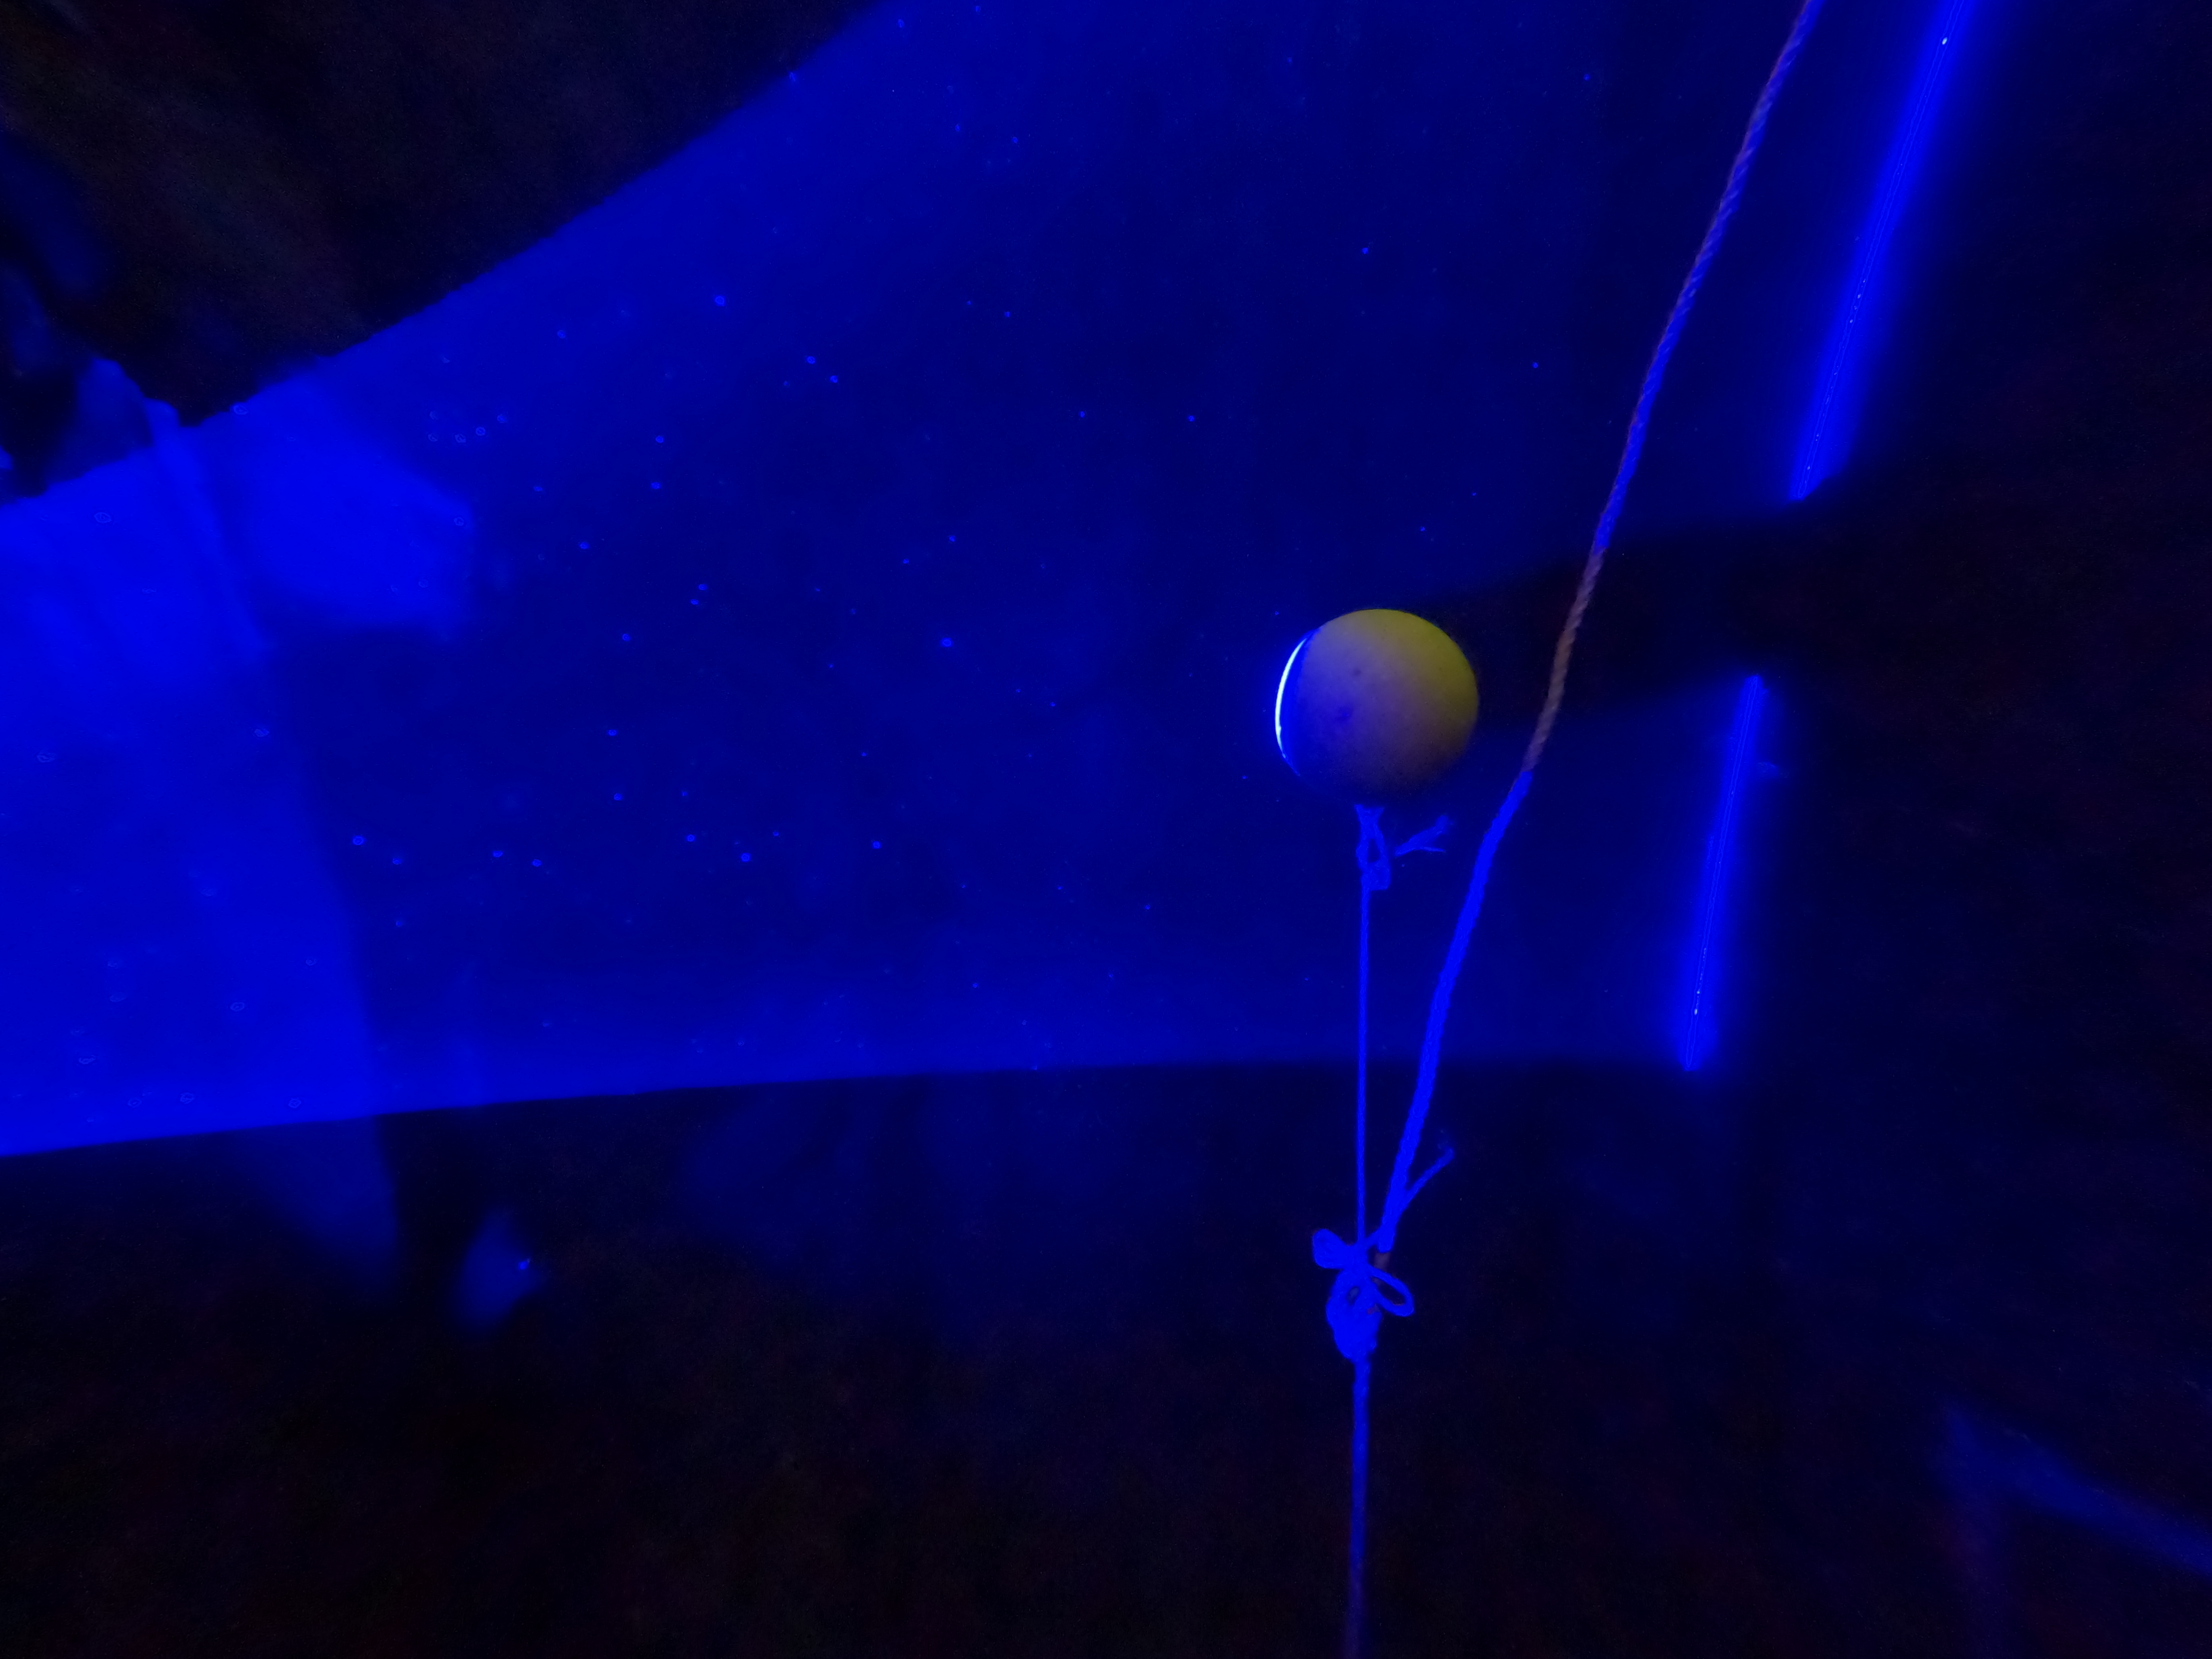

Supplement: Supplementary file 189 [file G0034619.pdf › 9/G0034619.pdf]

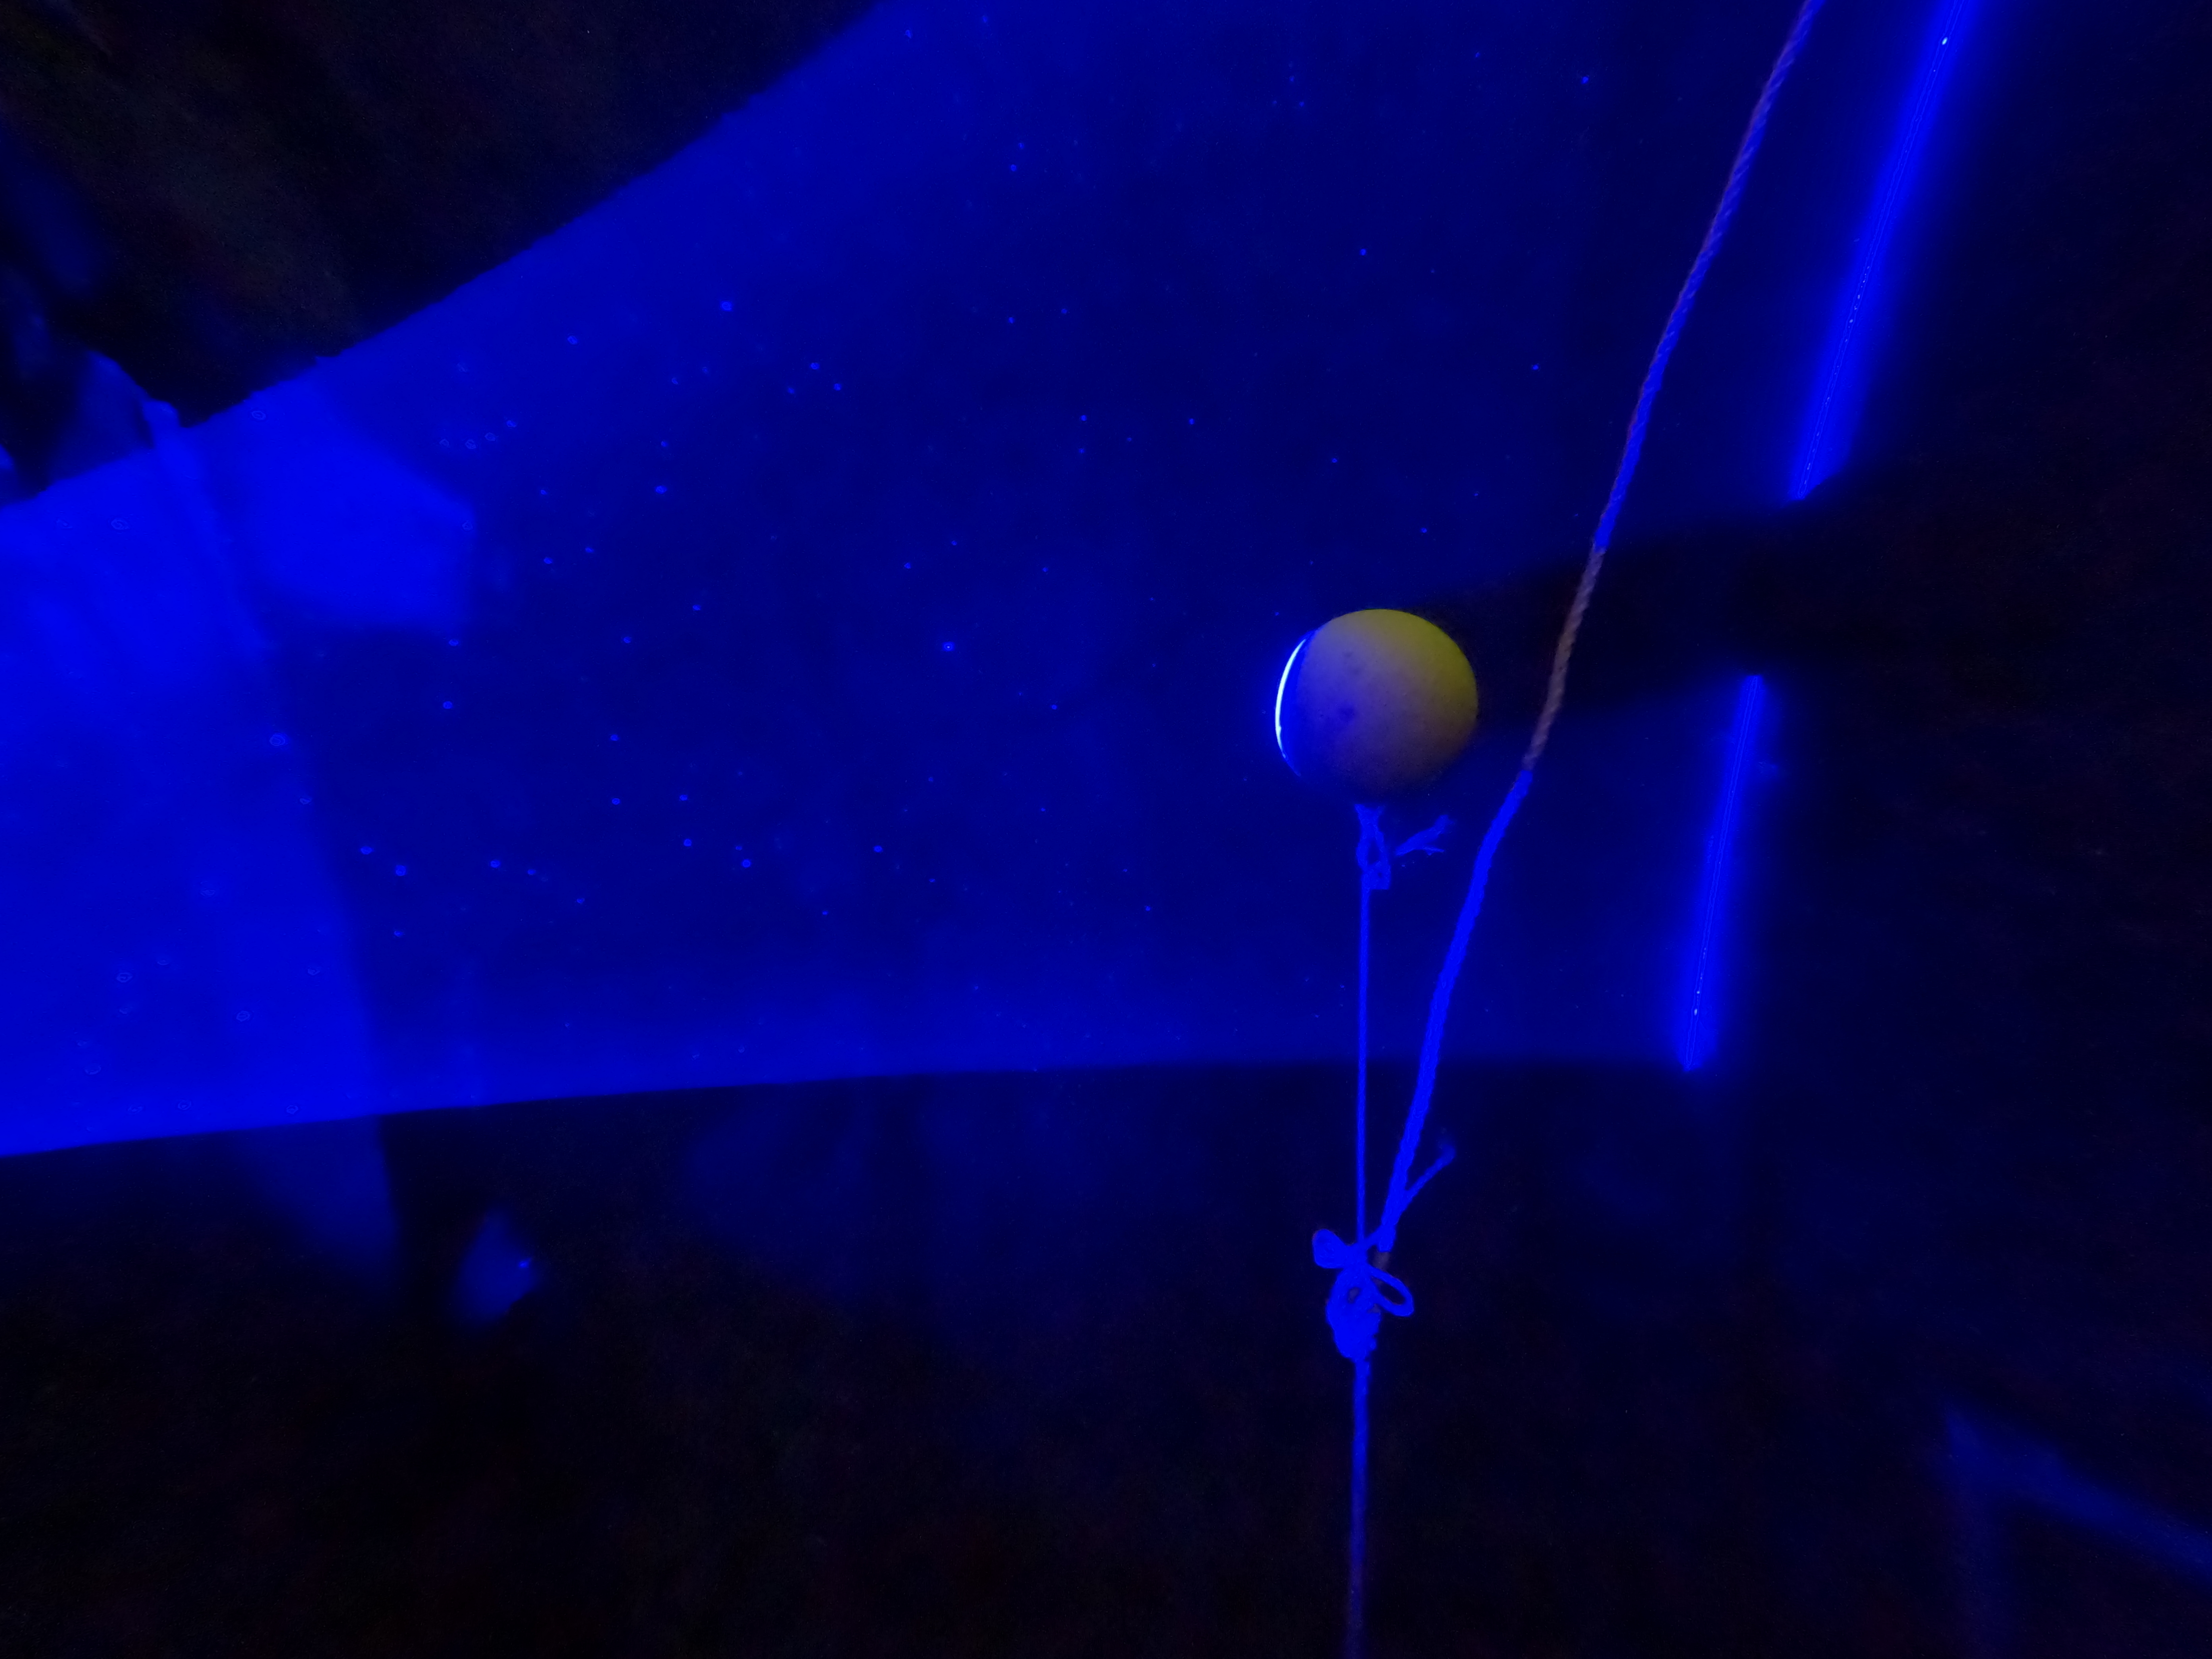

Supplement: Supplementary file 190 [file G0034620.pdf › 9/G0034620.pdf]

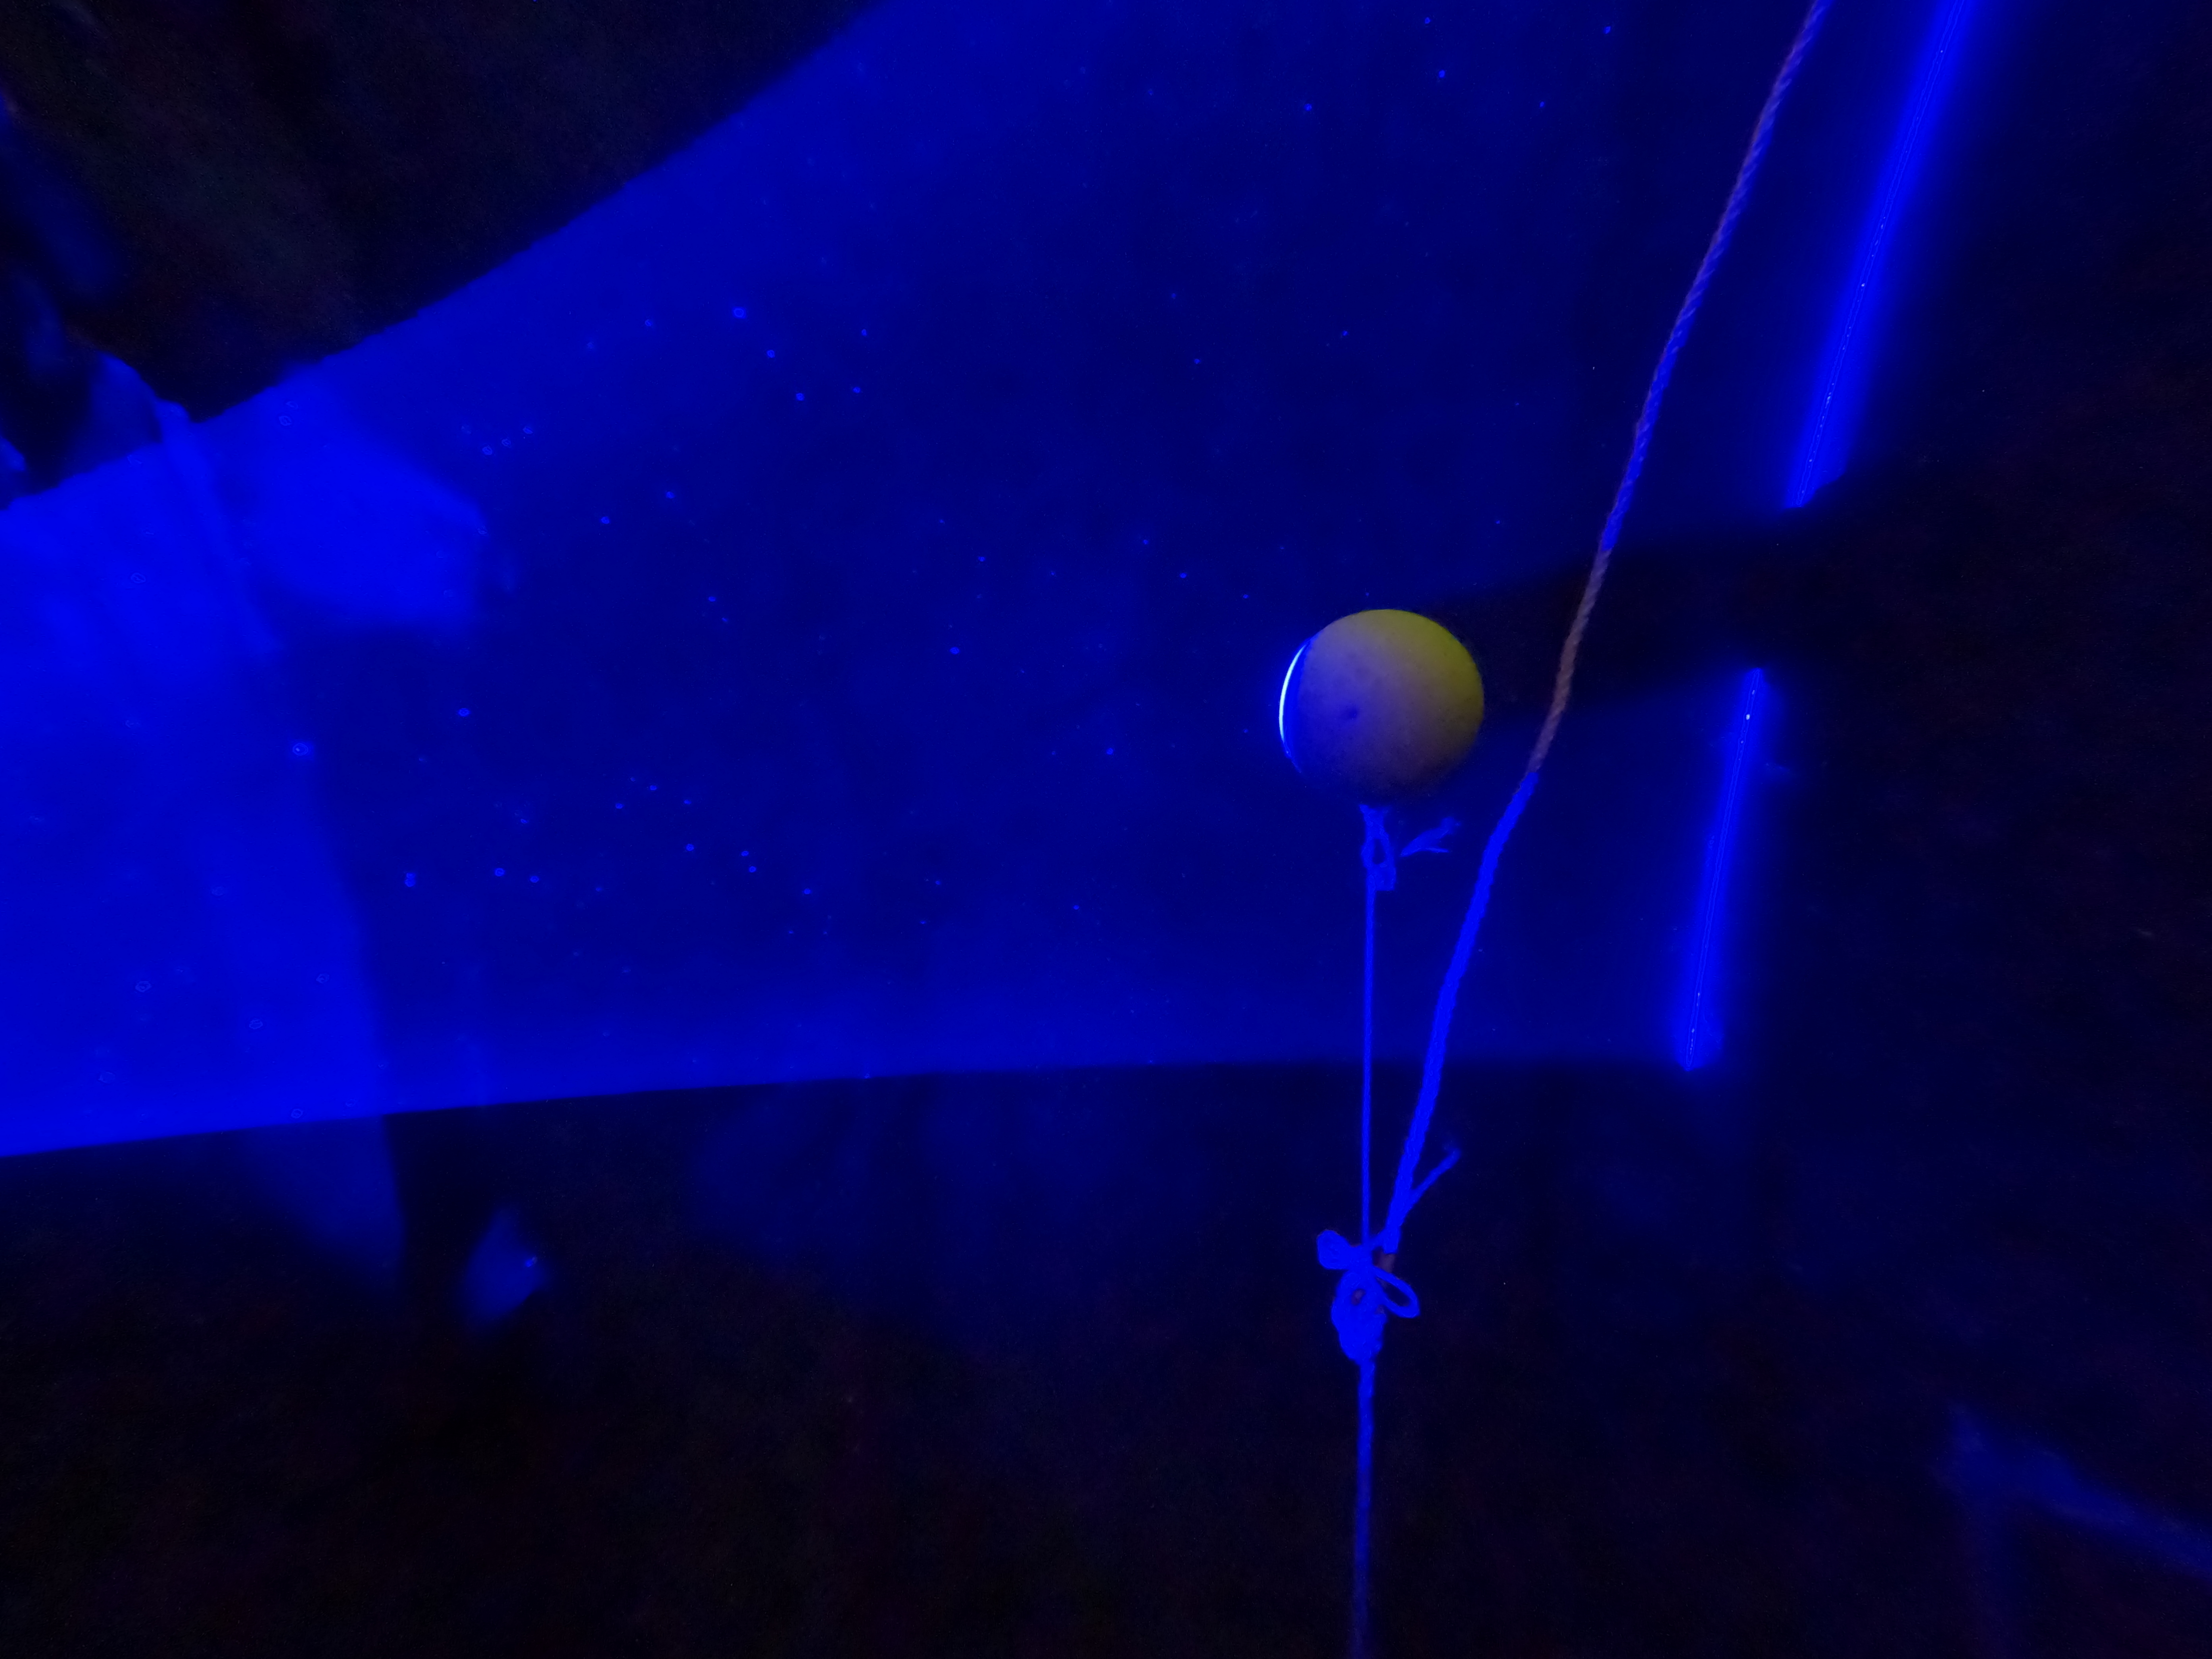

Supplement: Supplementary file 191 [file G0034621.pdf › 9/G0034621.pdf]

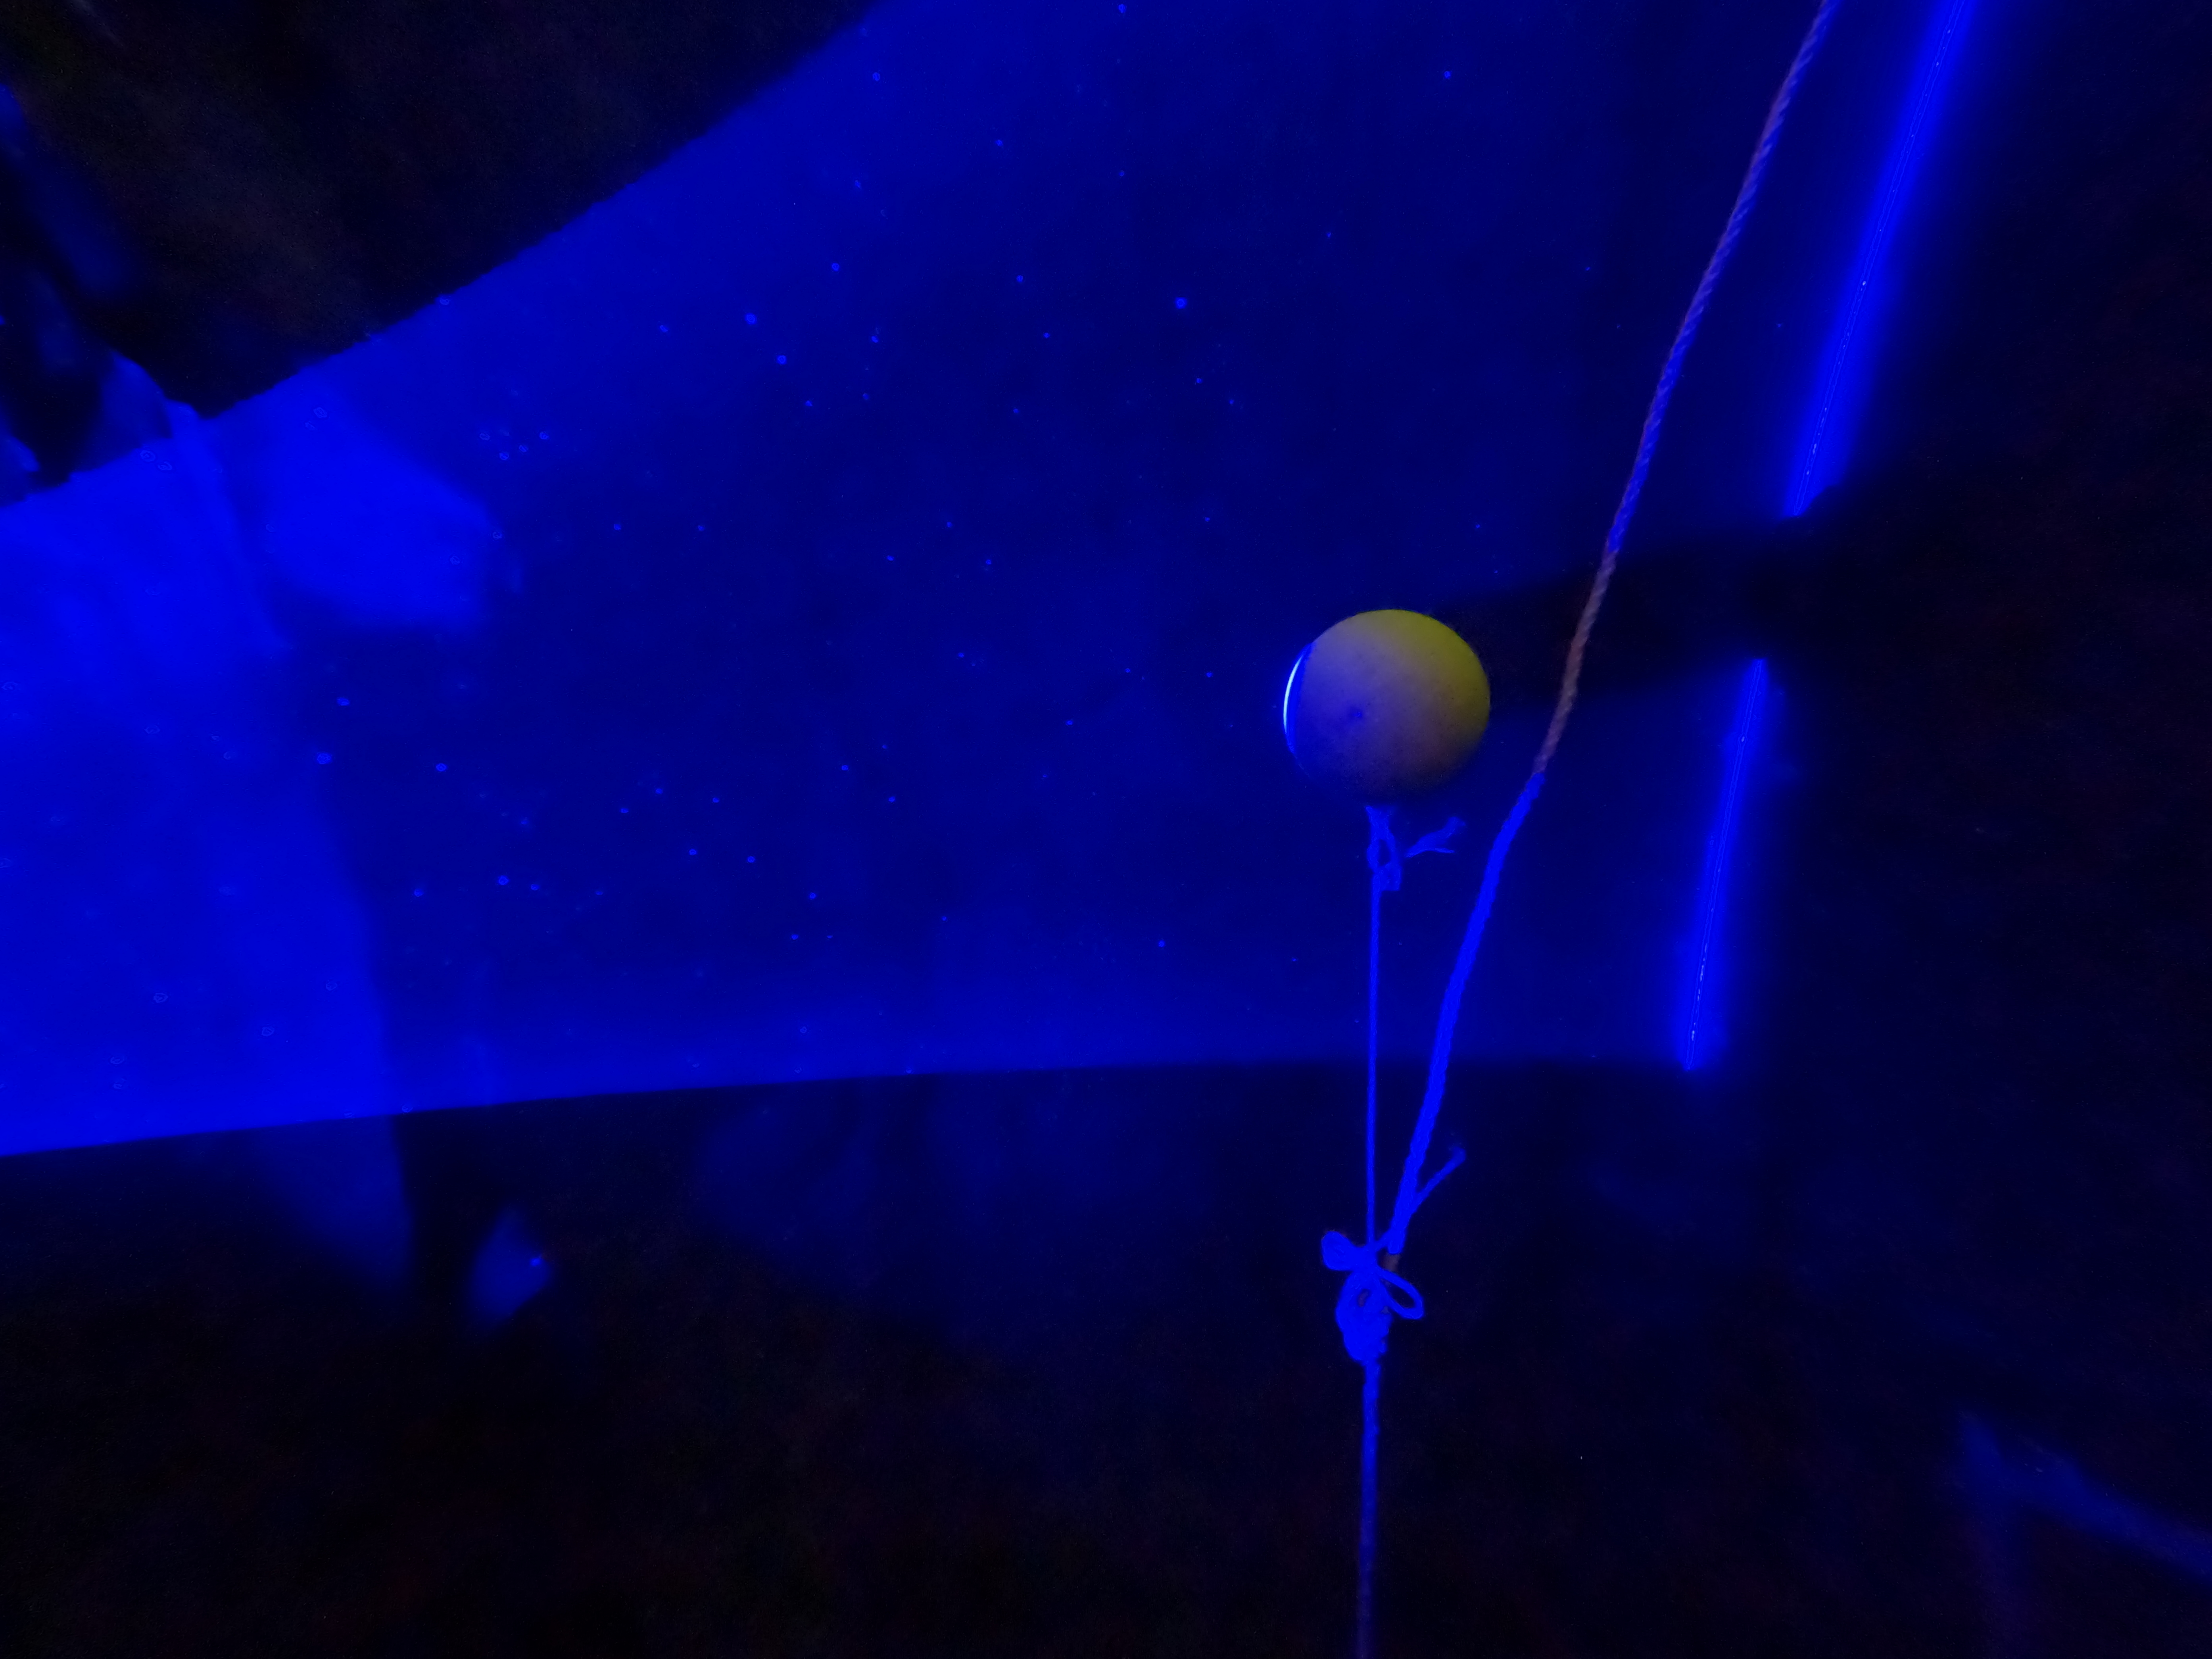

Supplement: Supplementary file 192 [file G0034622.pdf › 9/G0034622.pdf]

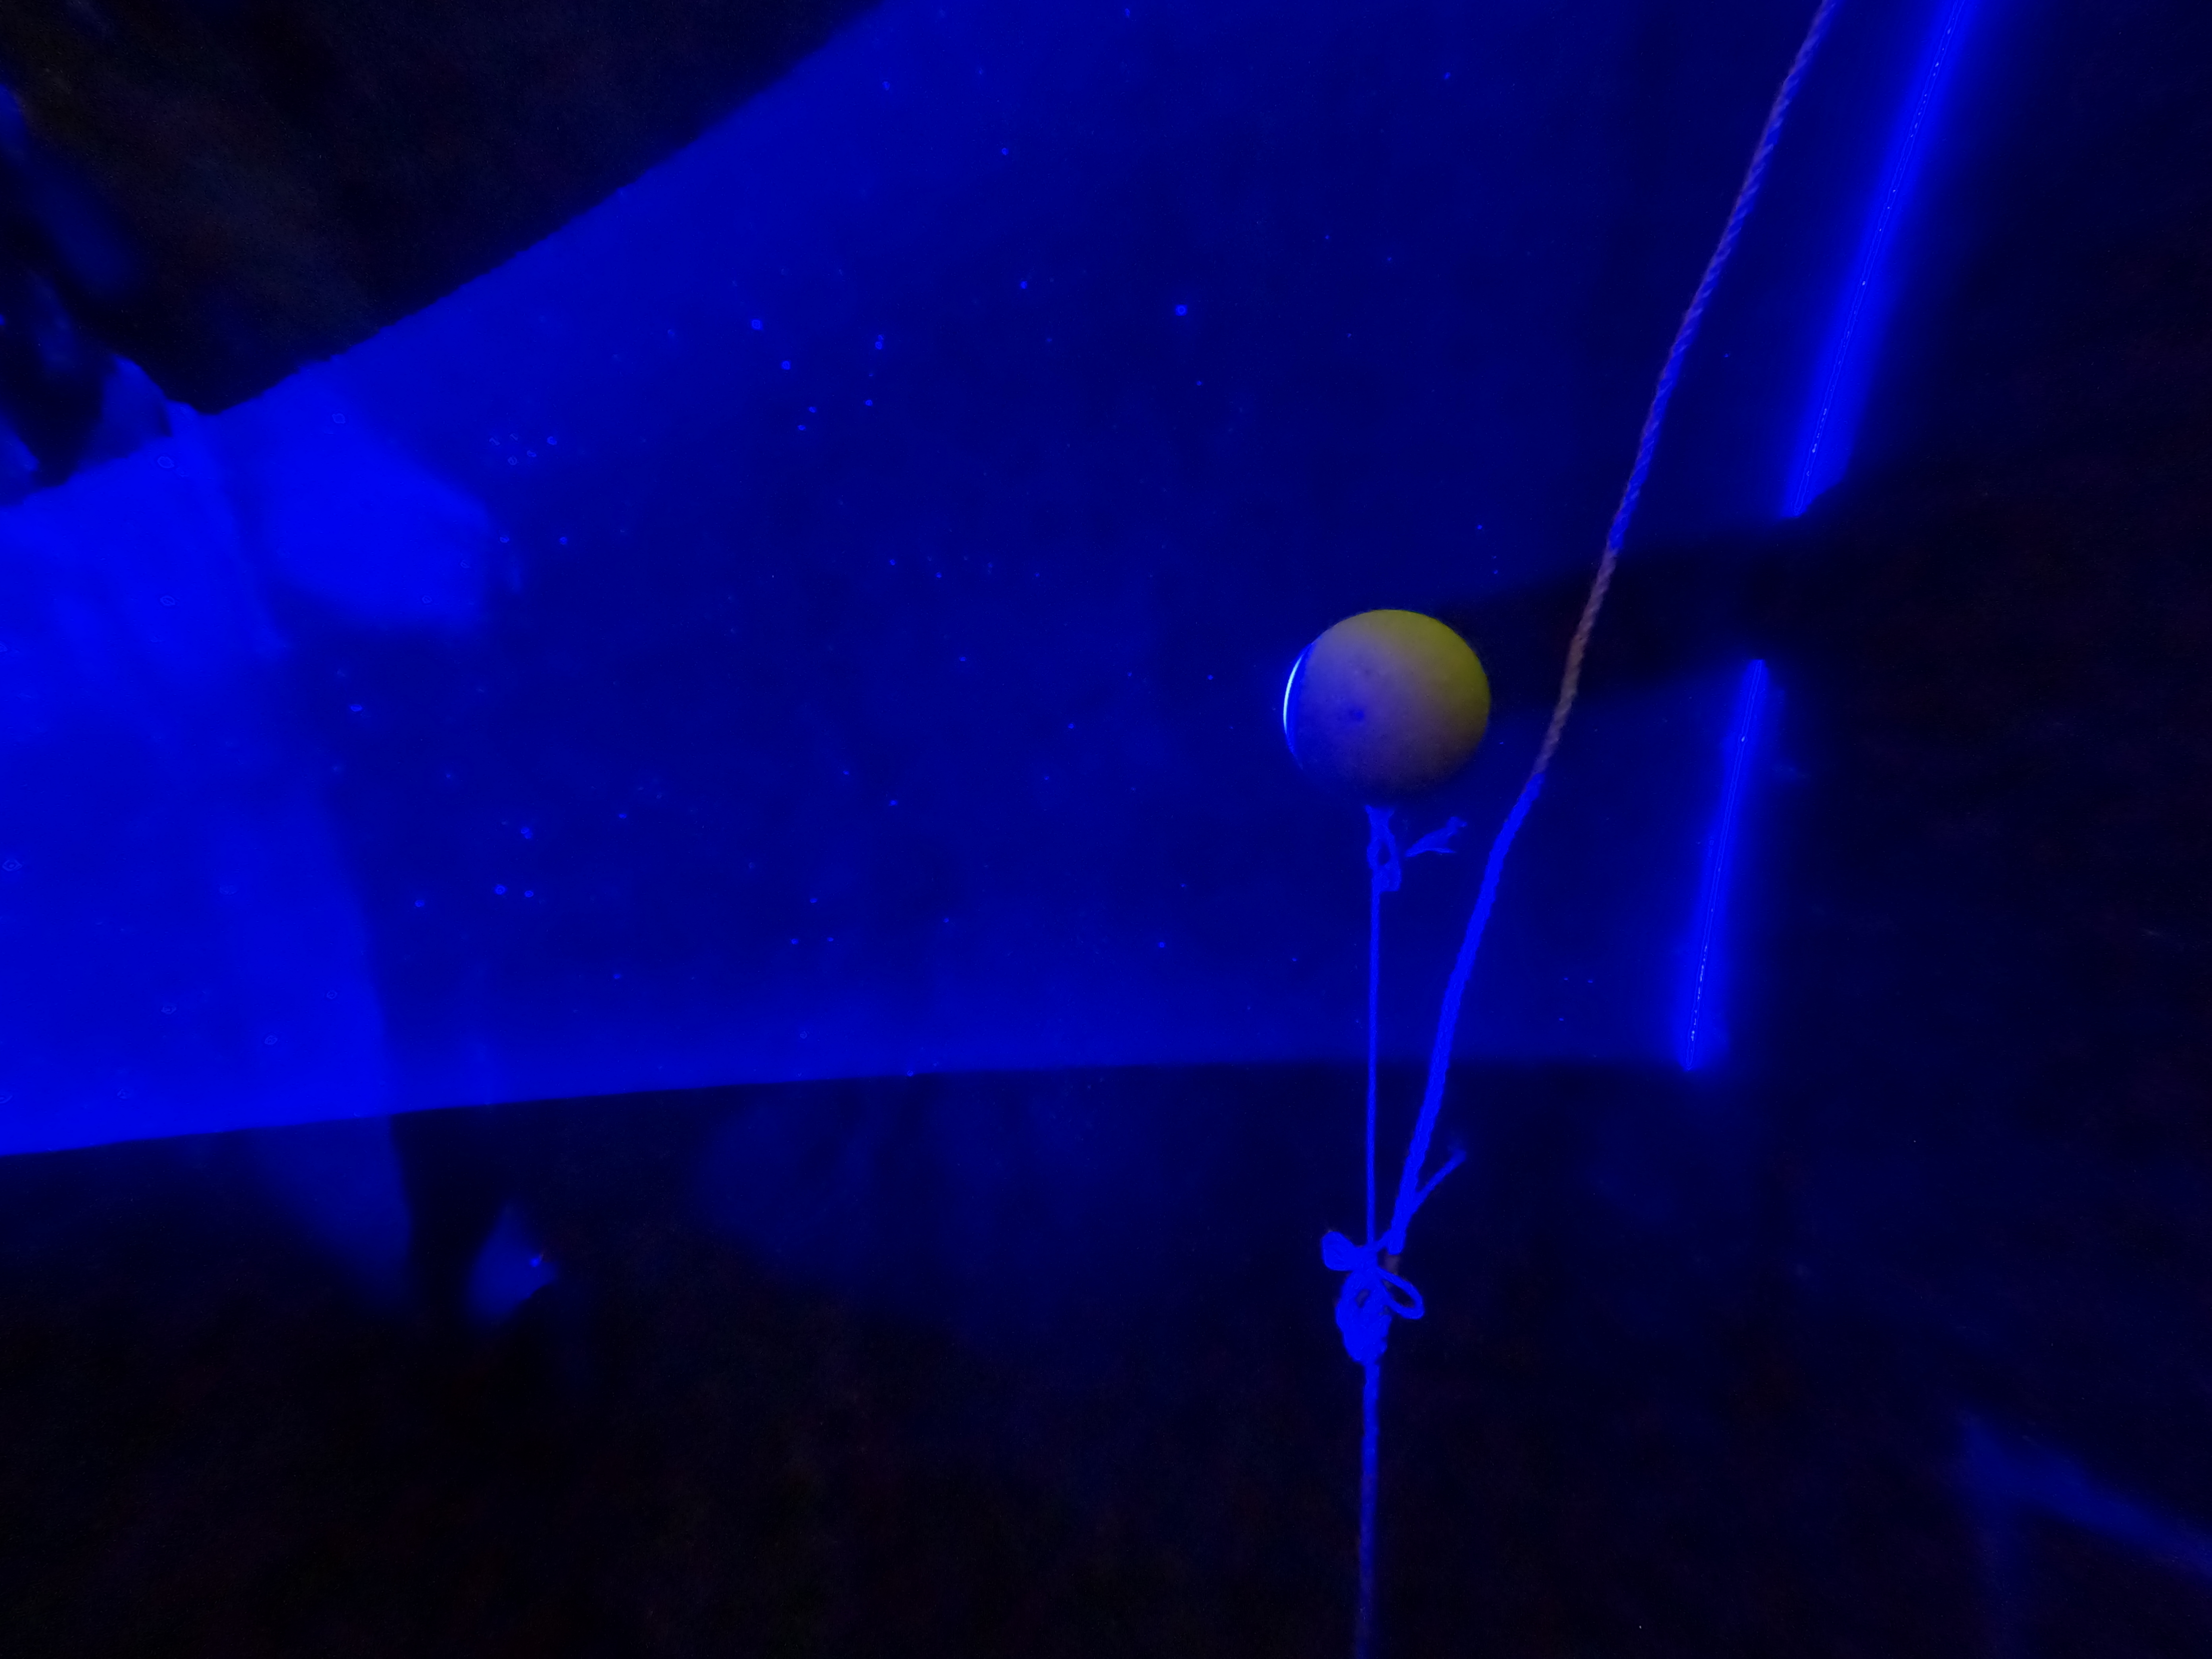

Supplement: Supplementary file 193 [file G0034623.pdf › 9/G0034623.pdf]

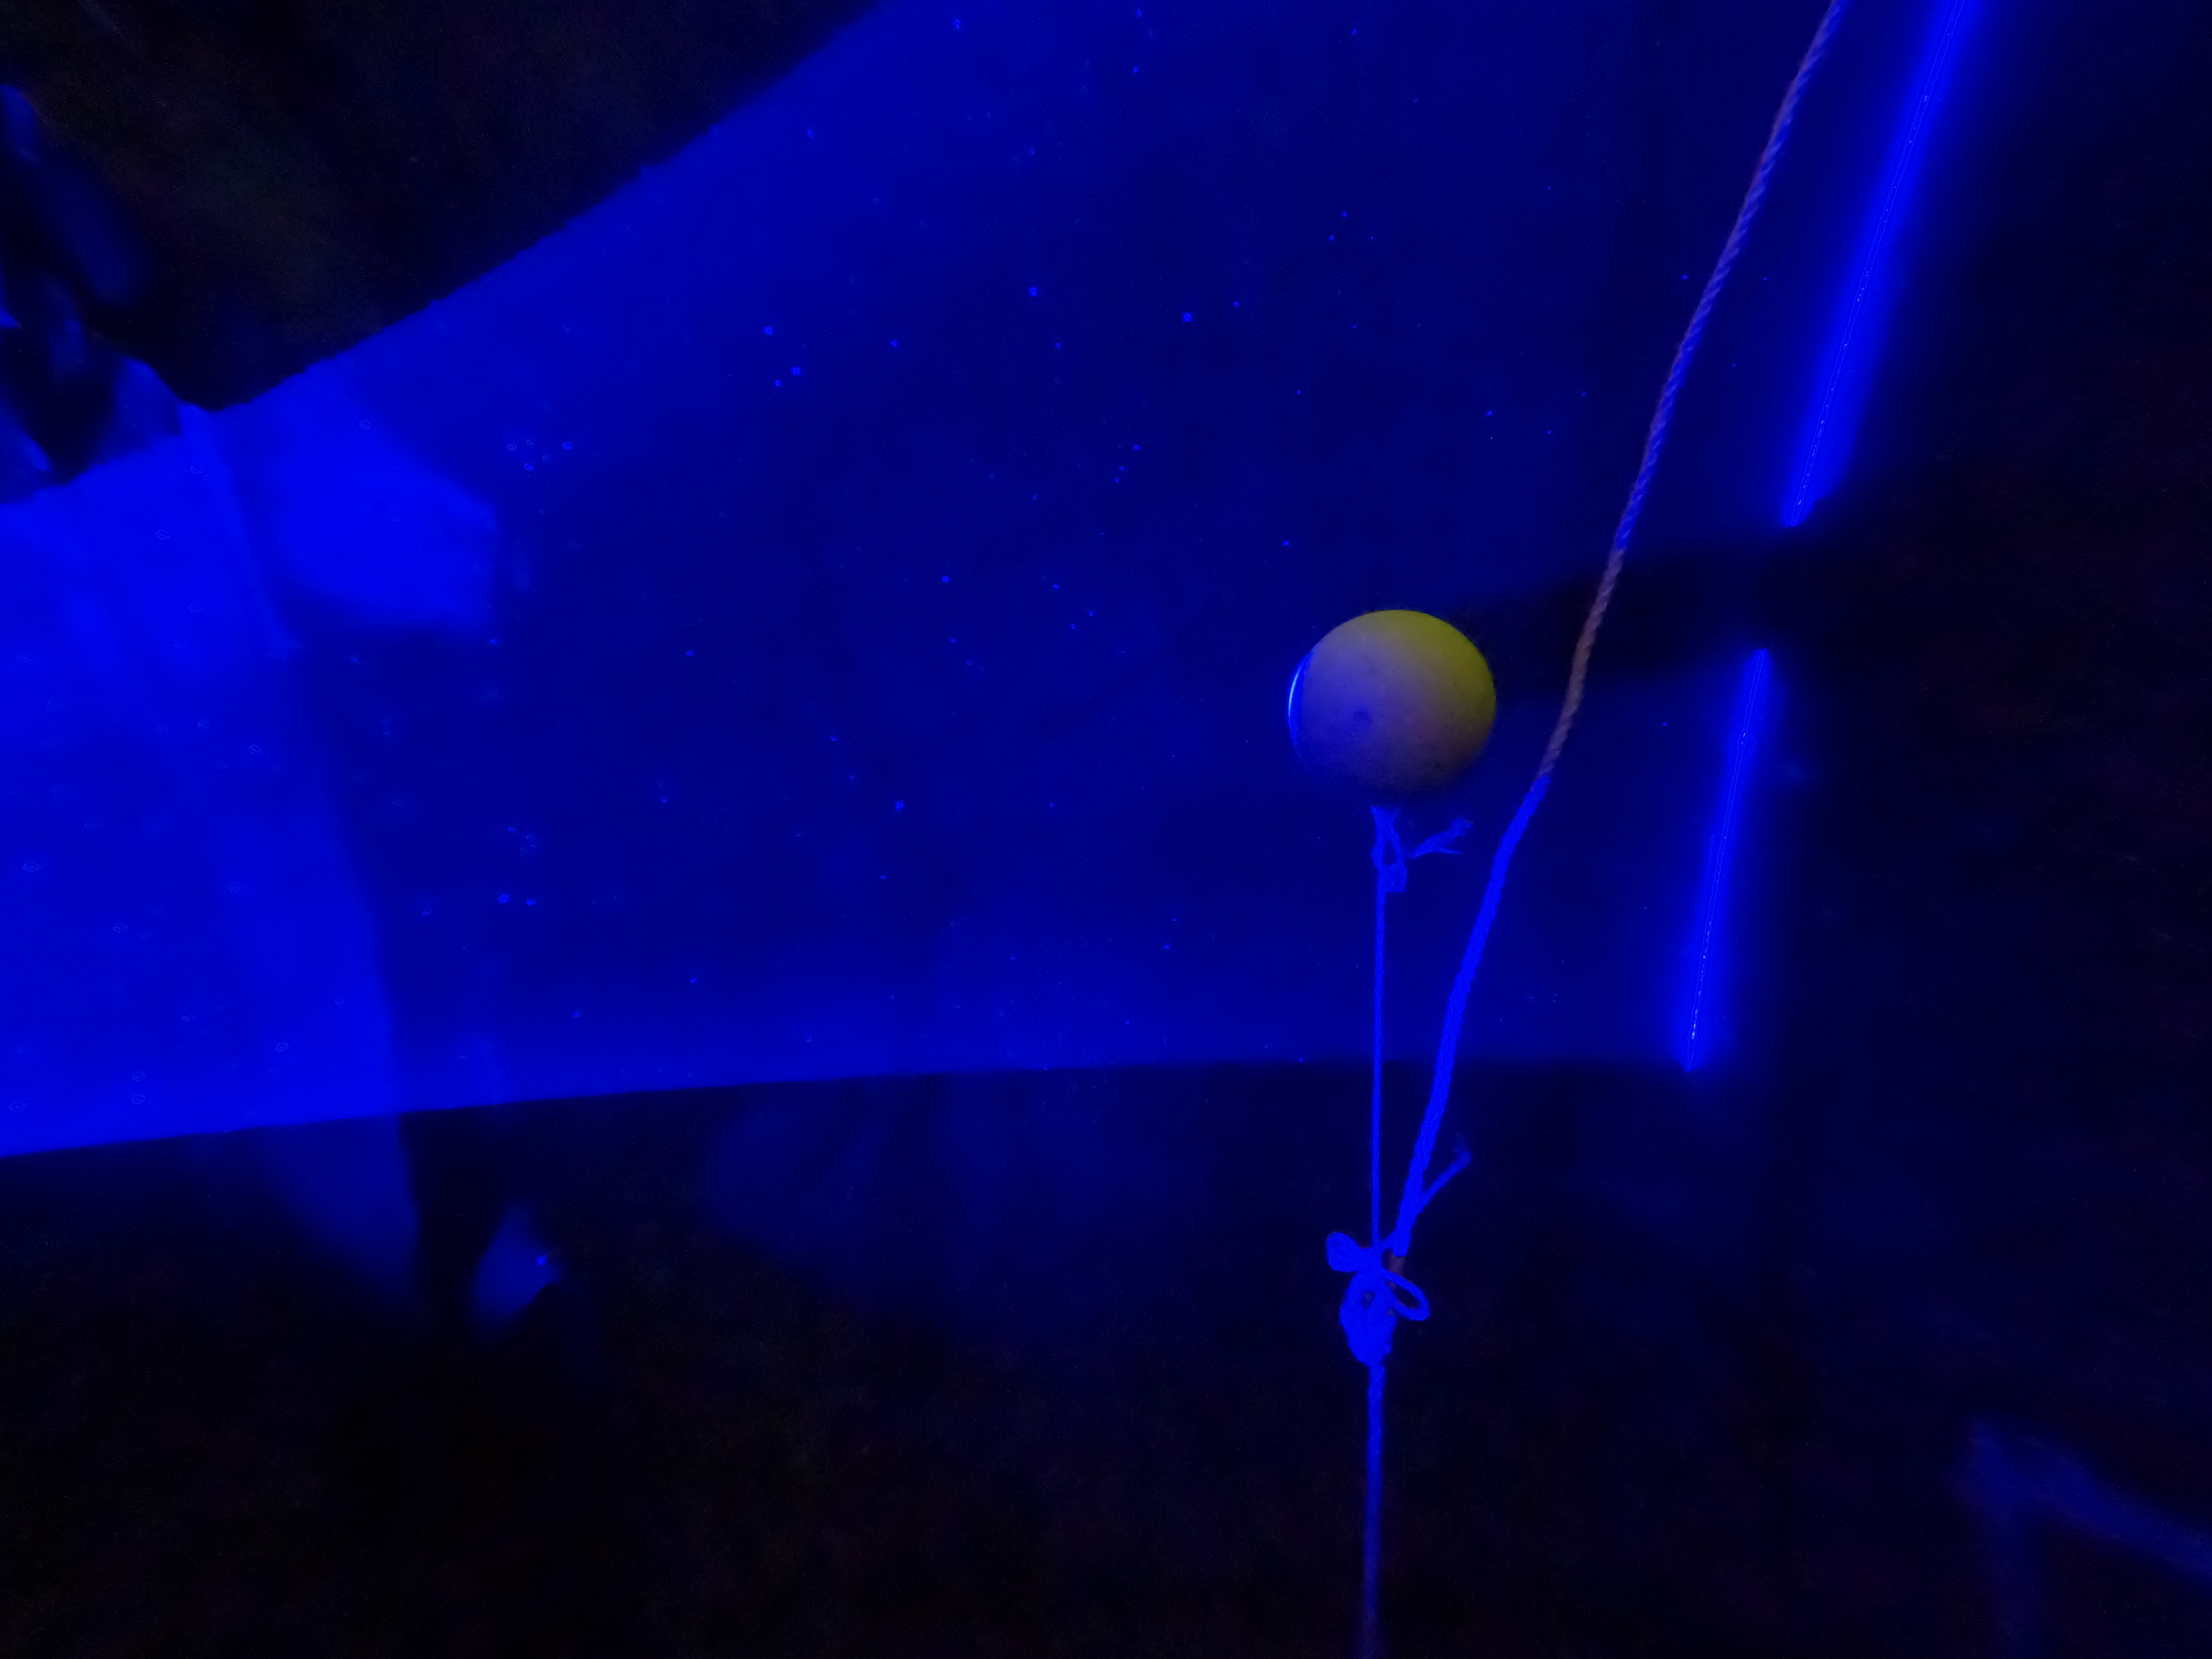

Supplement: Supplementary file 194 [file G0034624.pdf › 9/G0034624.pdf]

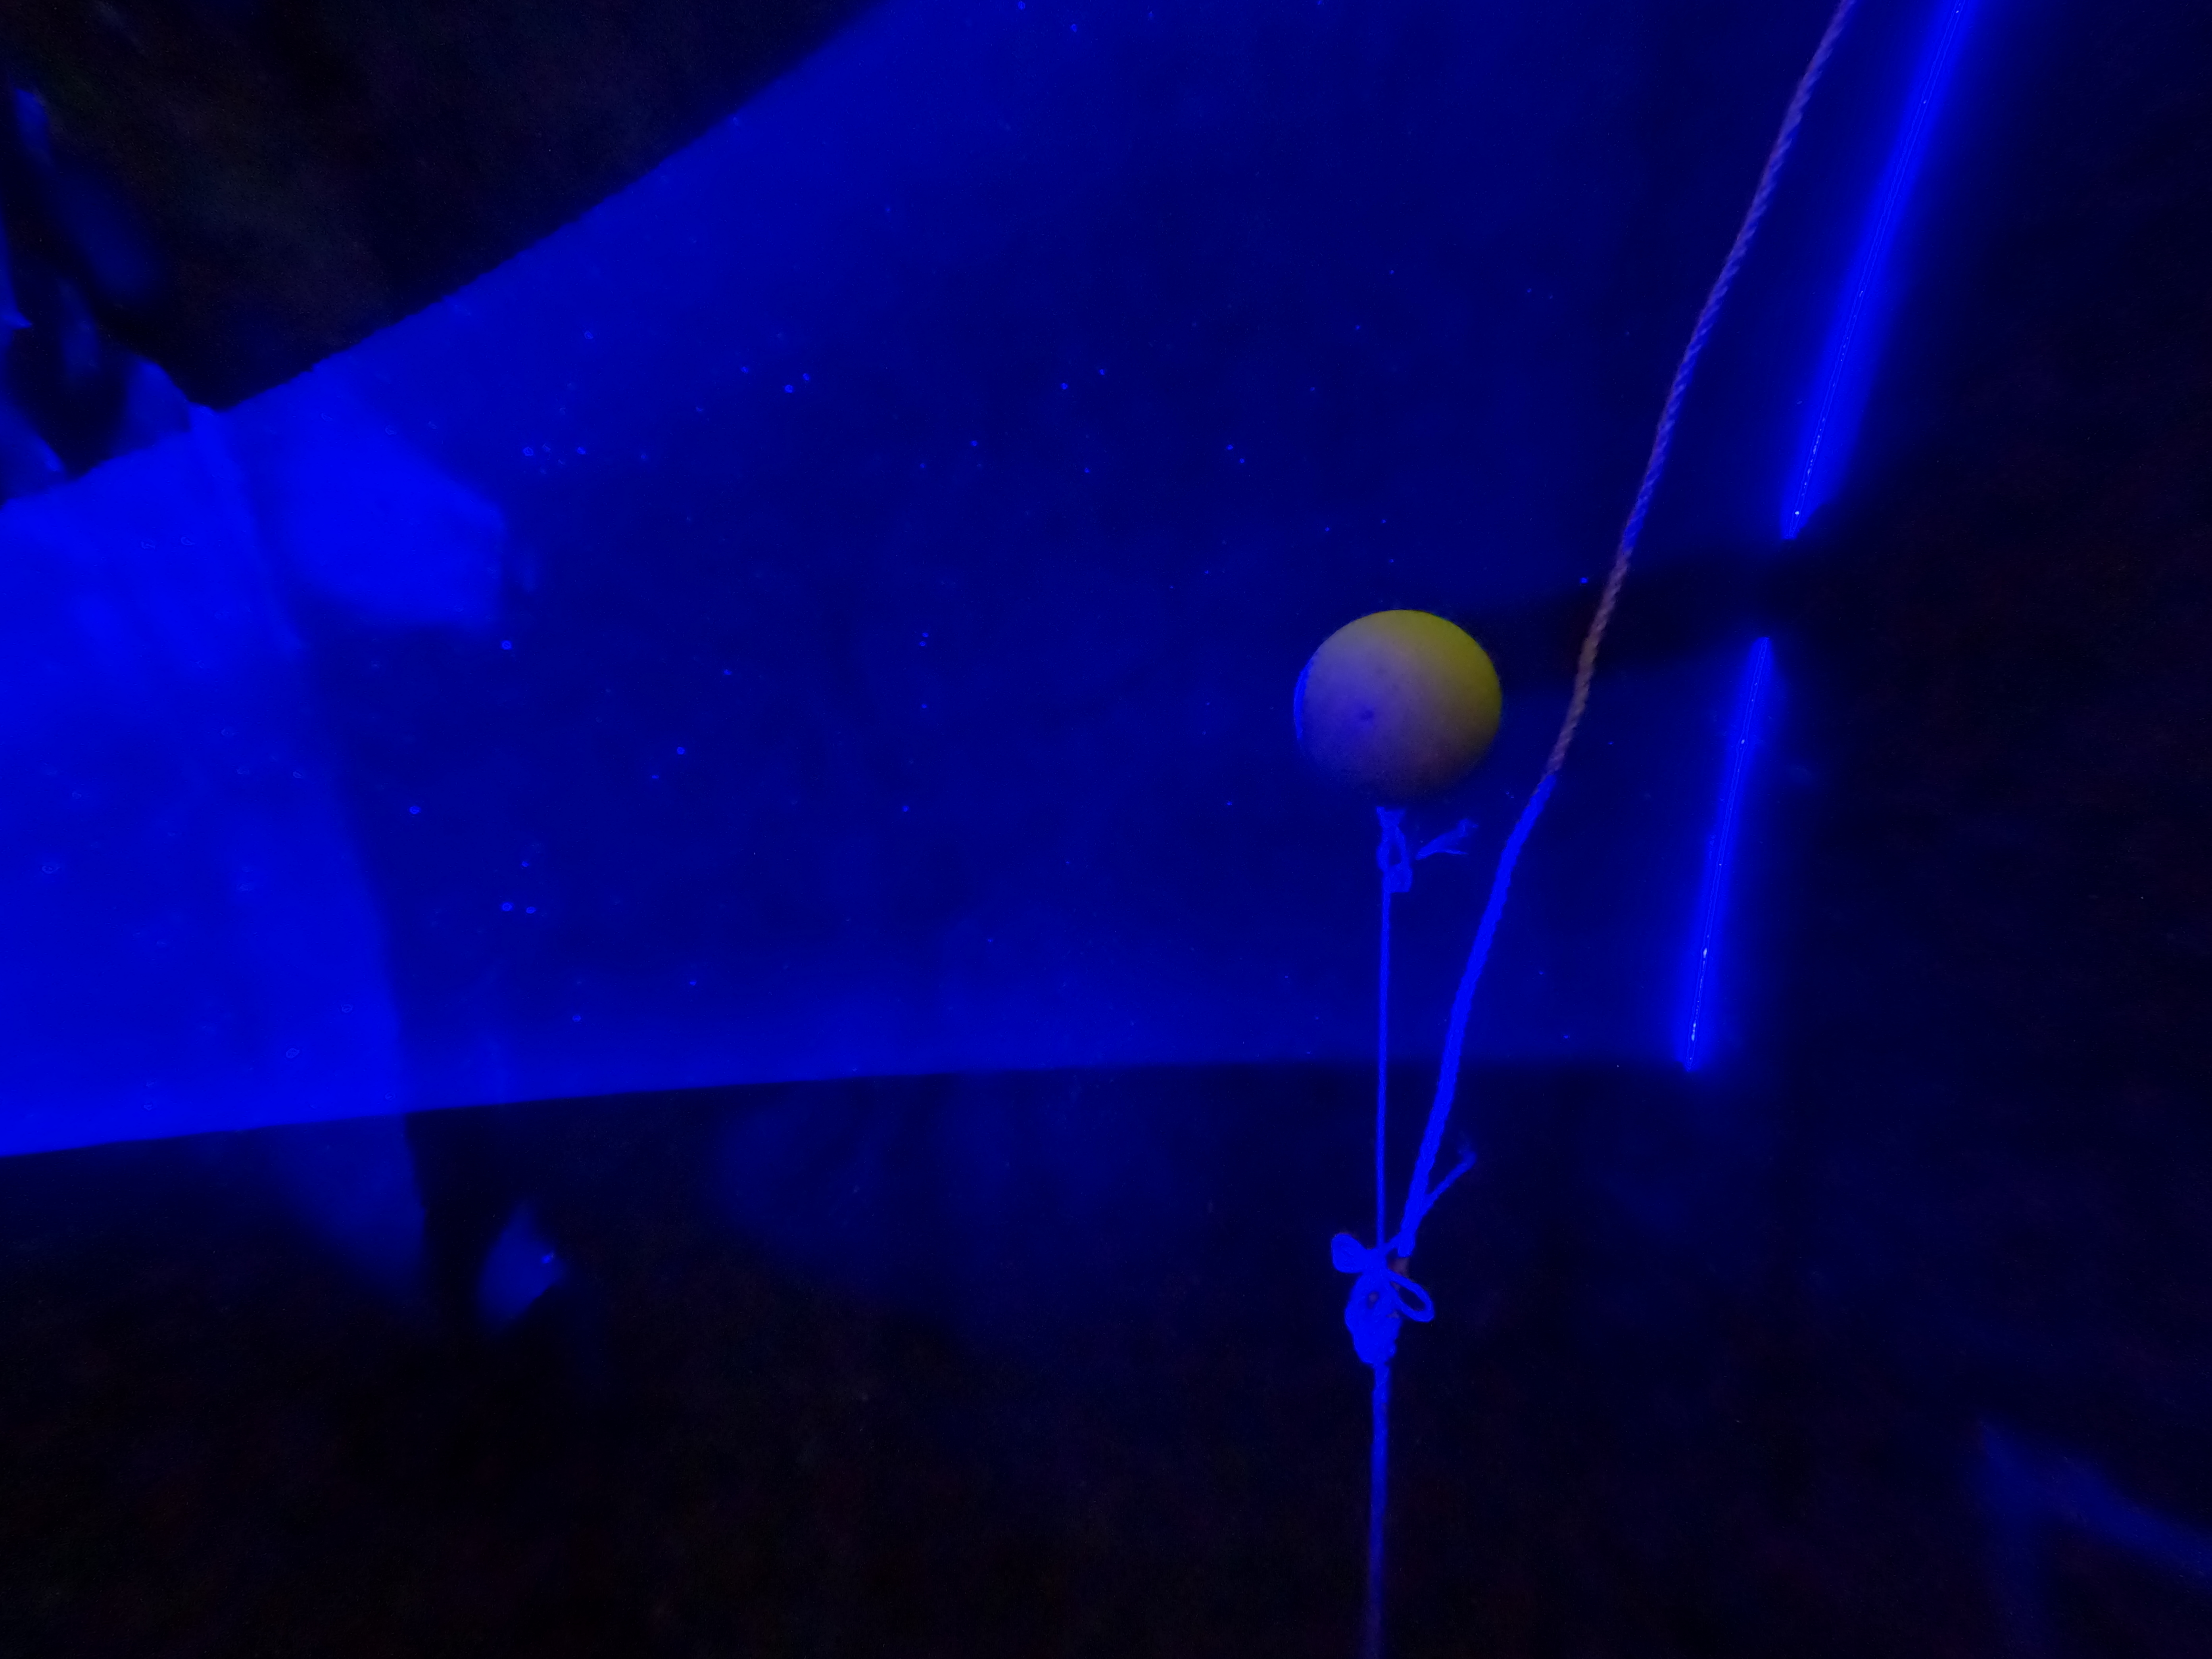

Supplement: Supplementary file 195 [file G0034625.pdf › 9/G0034625.pdf]

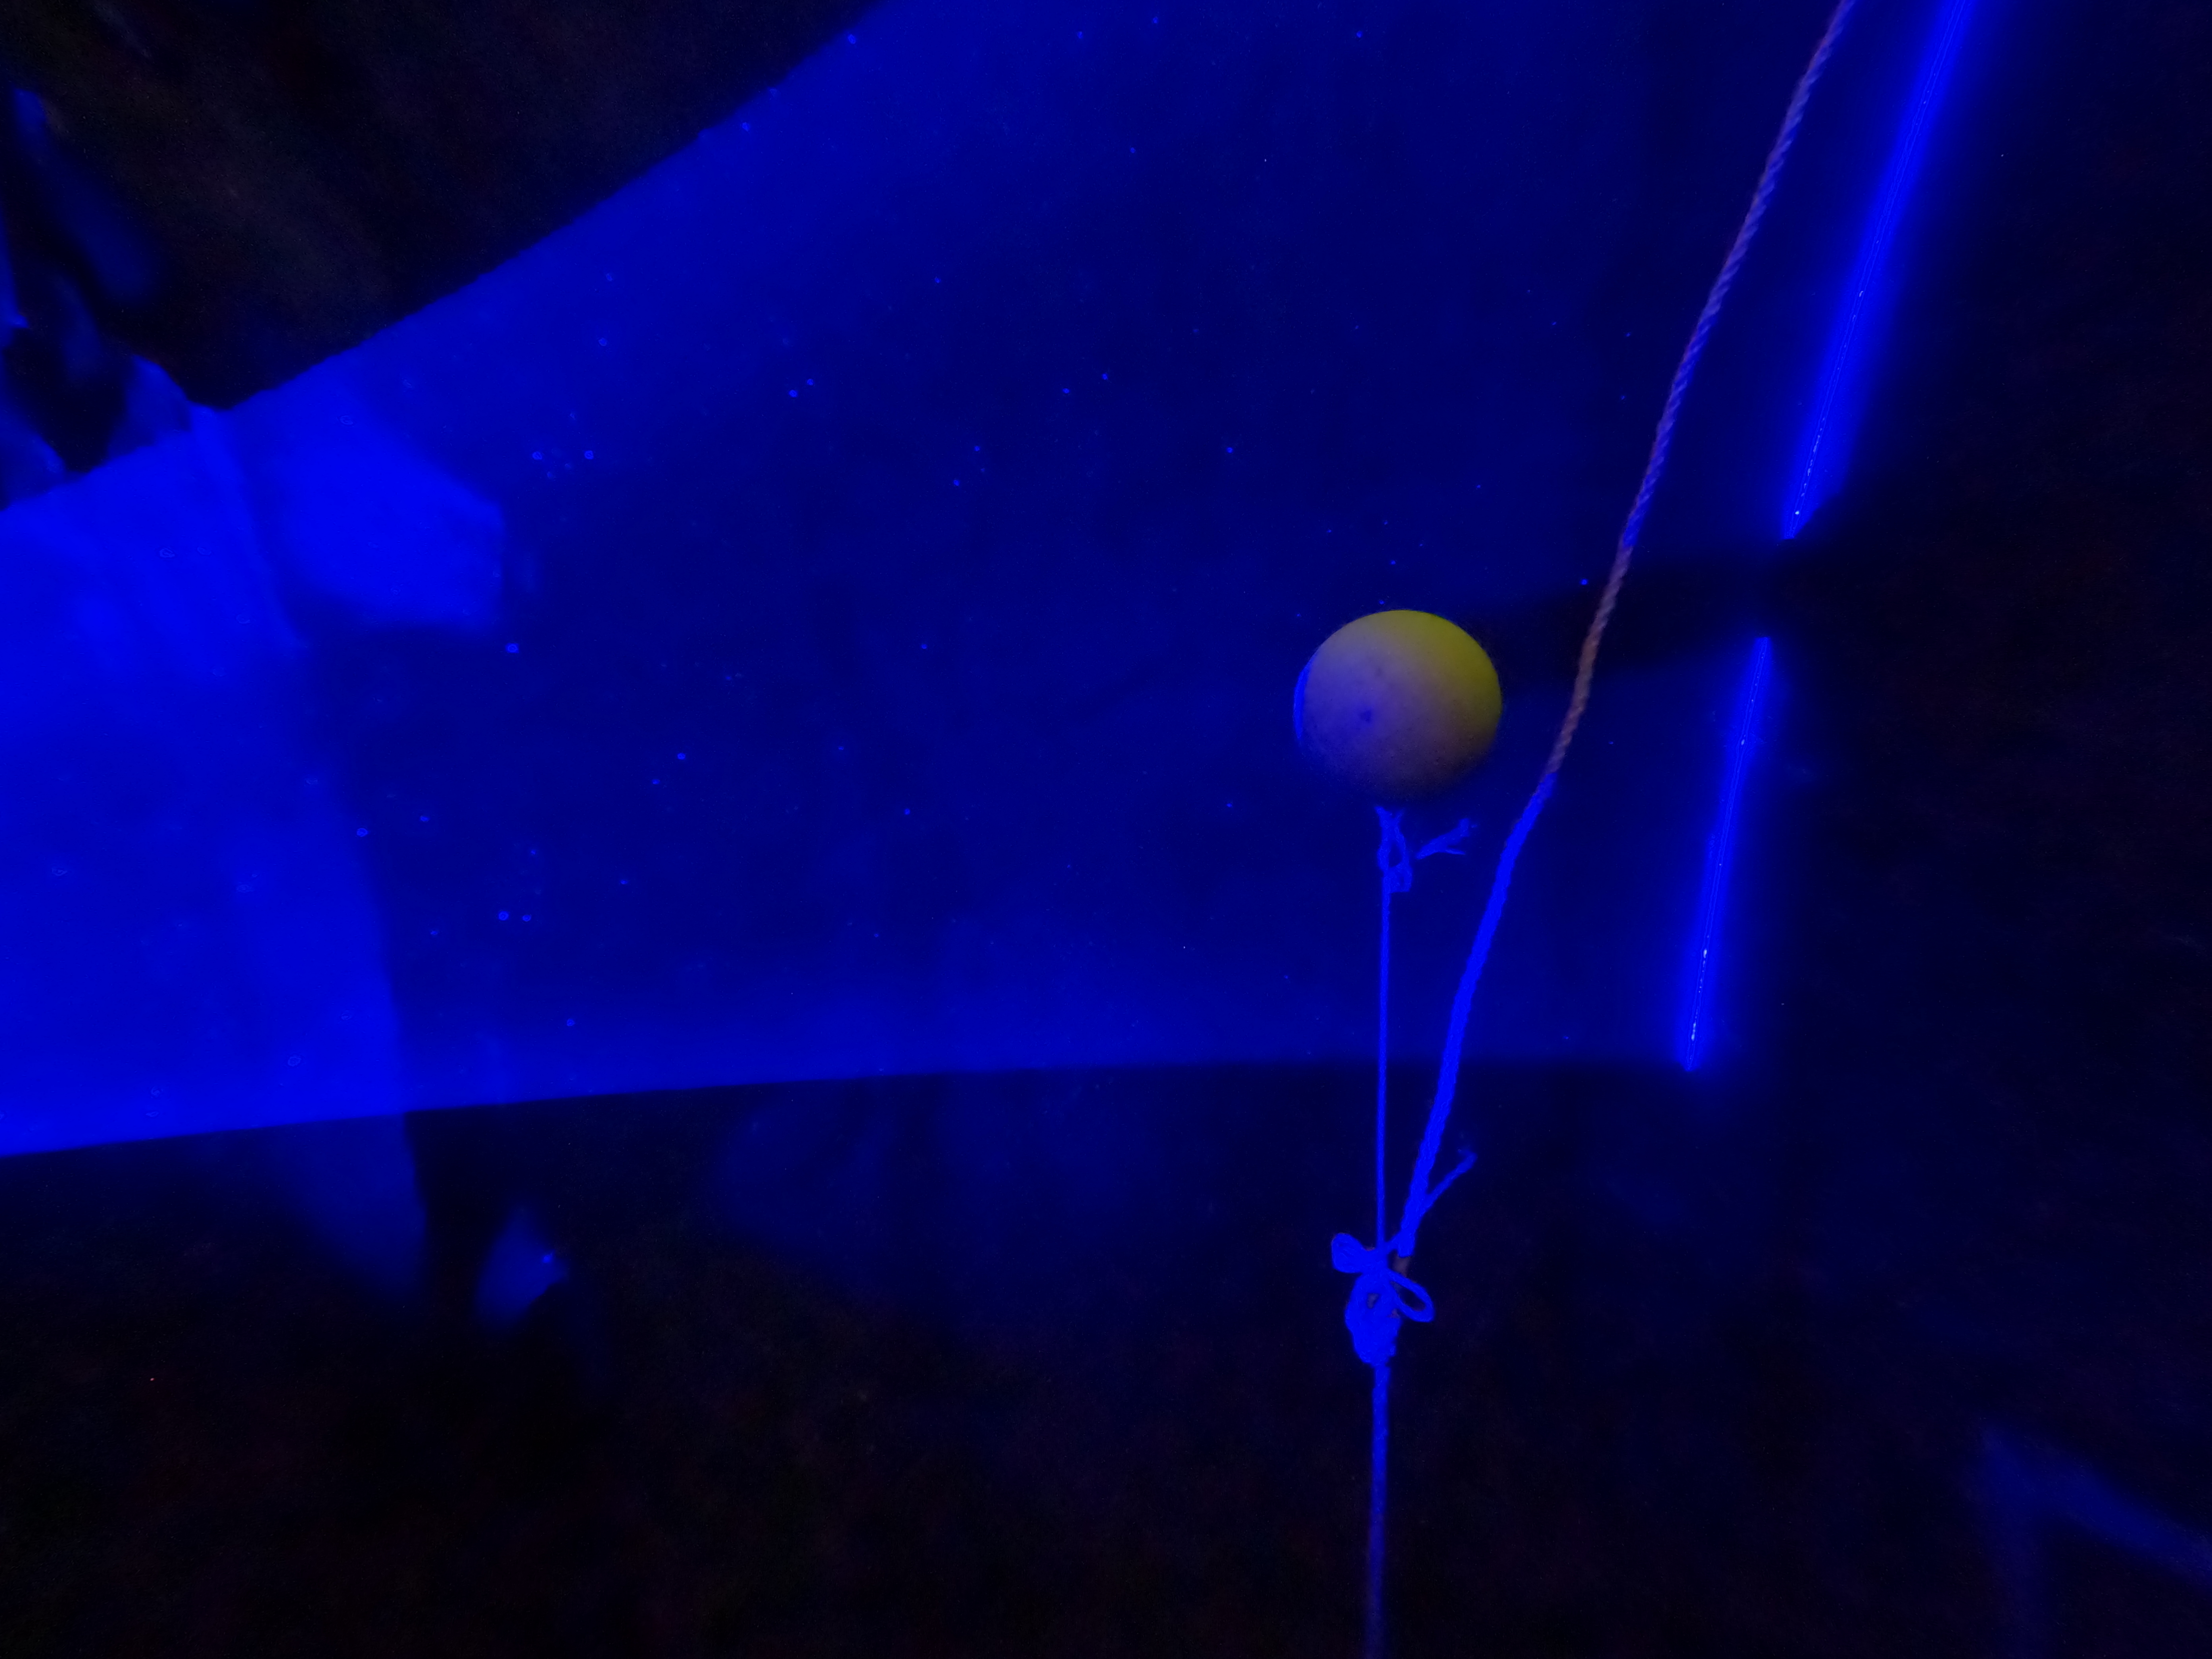

Supplement: Supplementary file 196 [file G0034626.pdf › 9/G0034626.pdf]

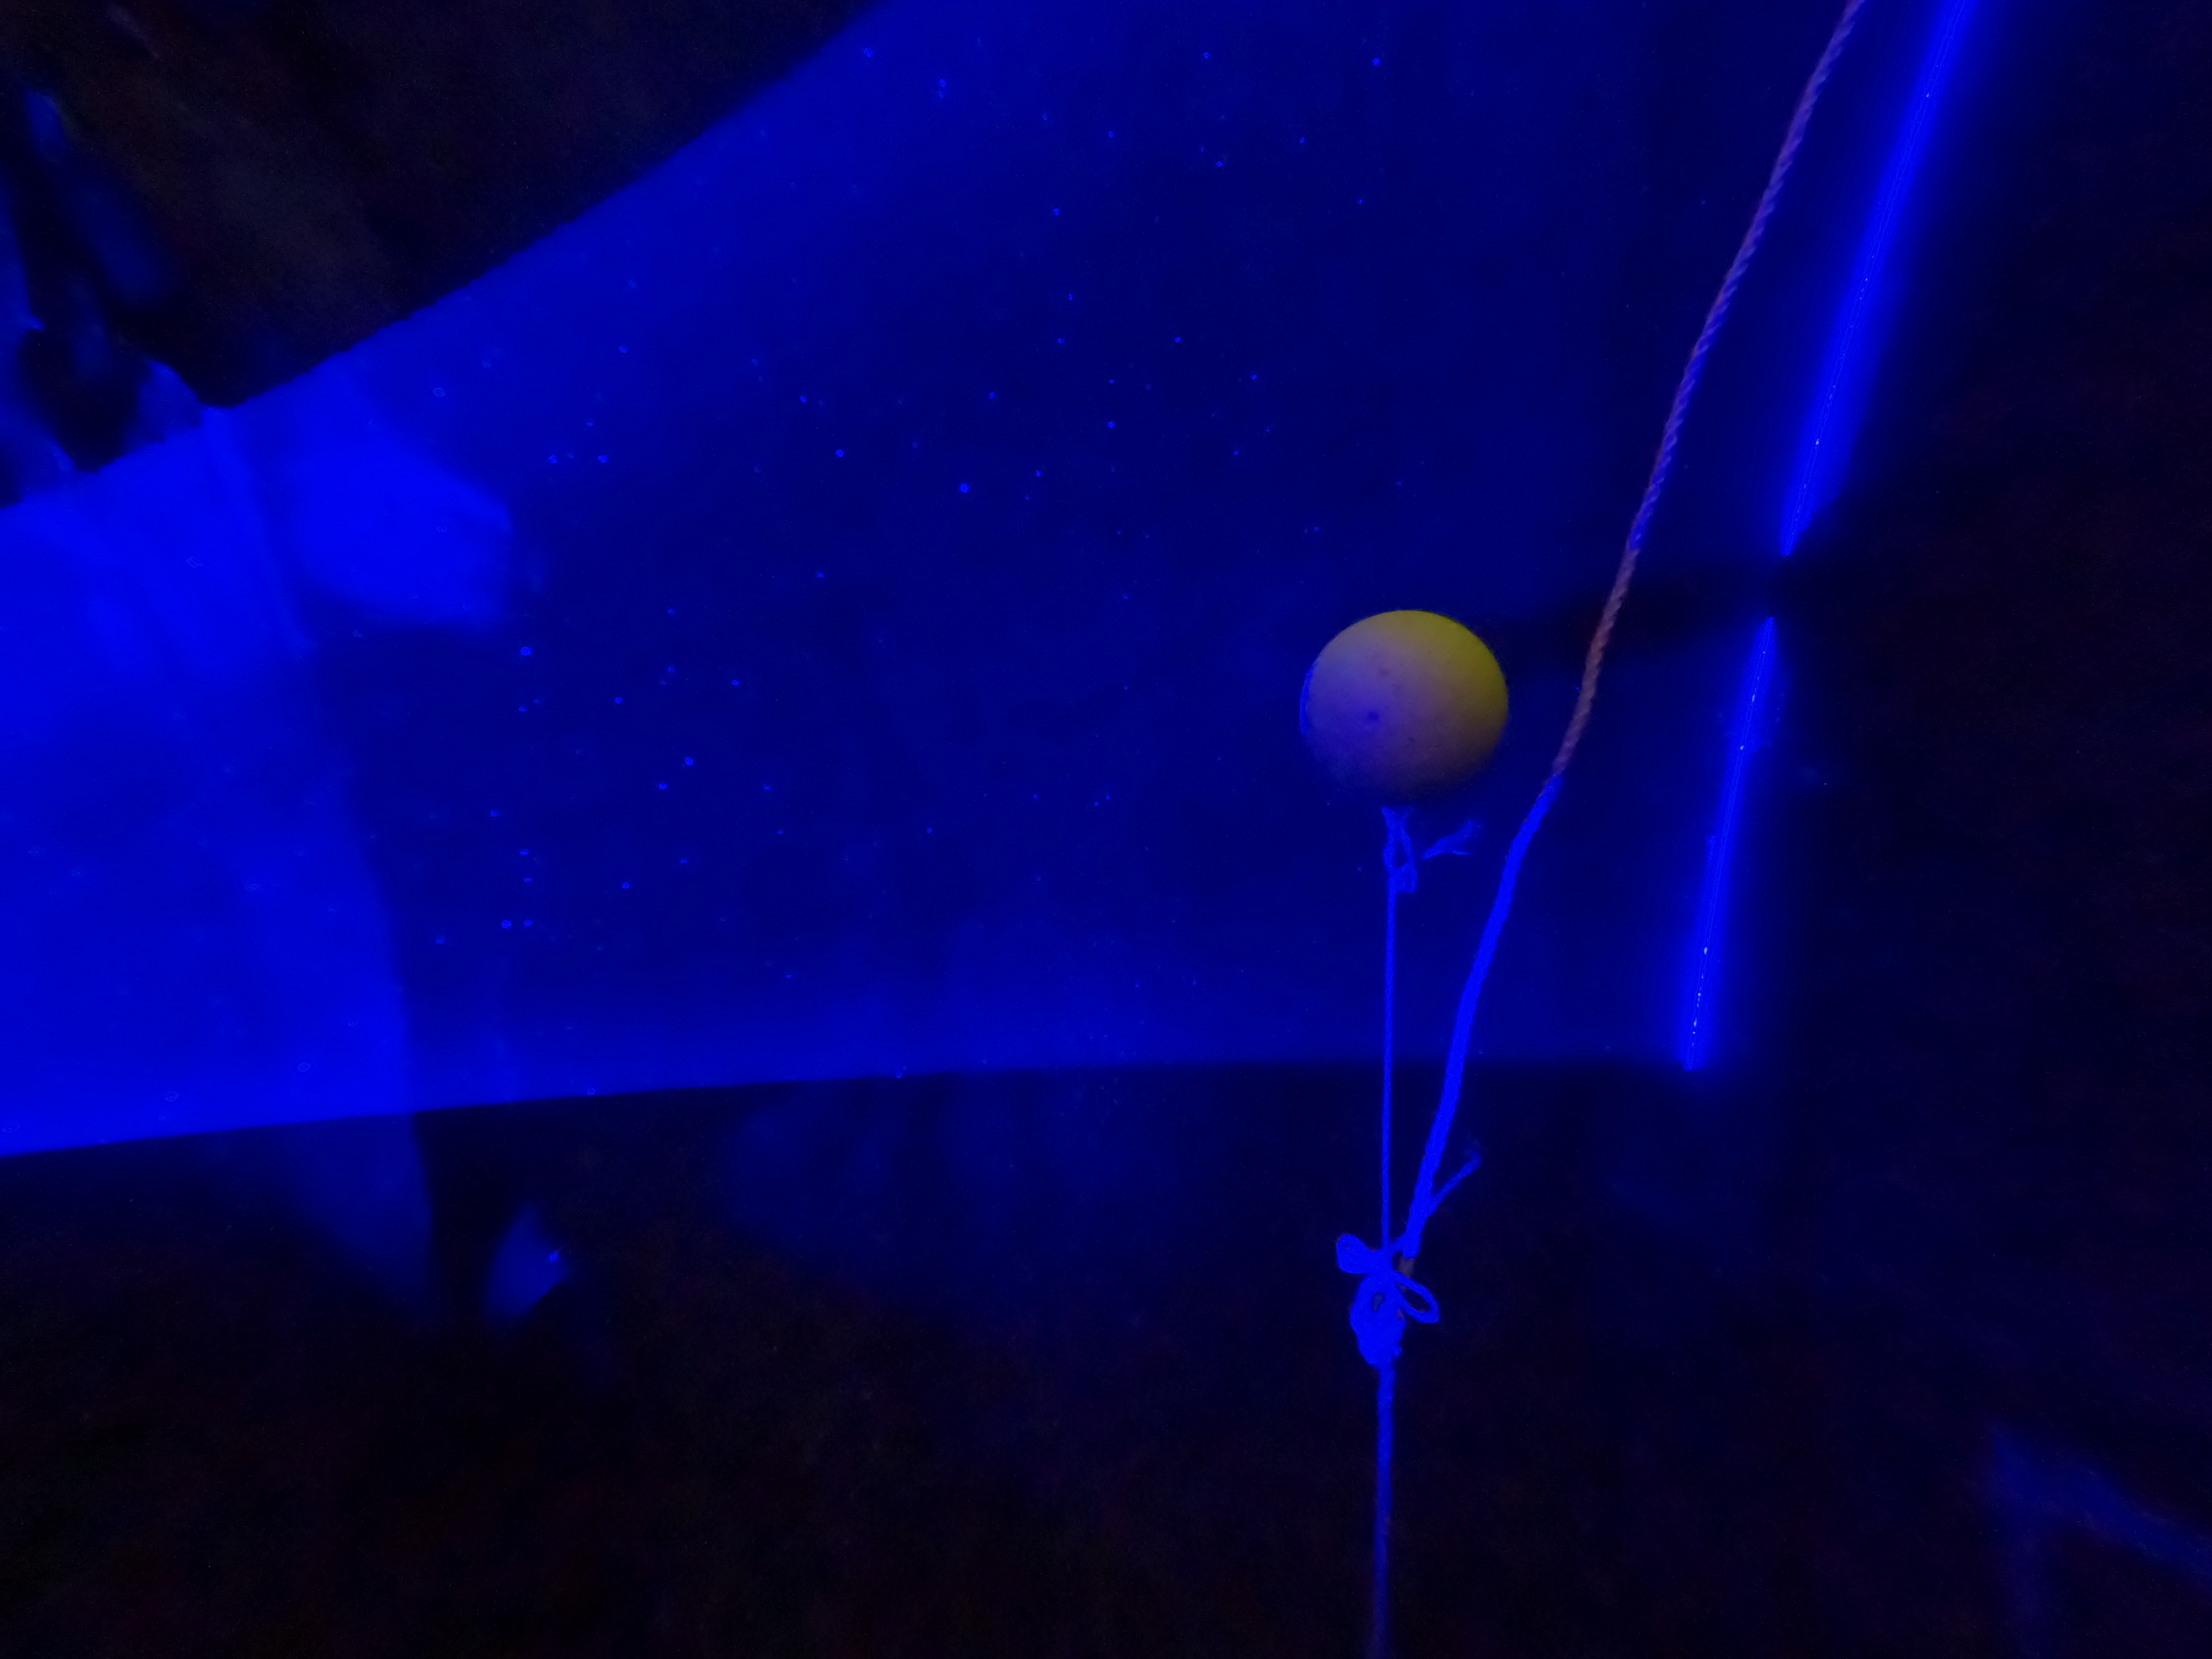

Supplement: Supplementary file 197 [file G0034627.pdf › 9/G0034627.pdf]

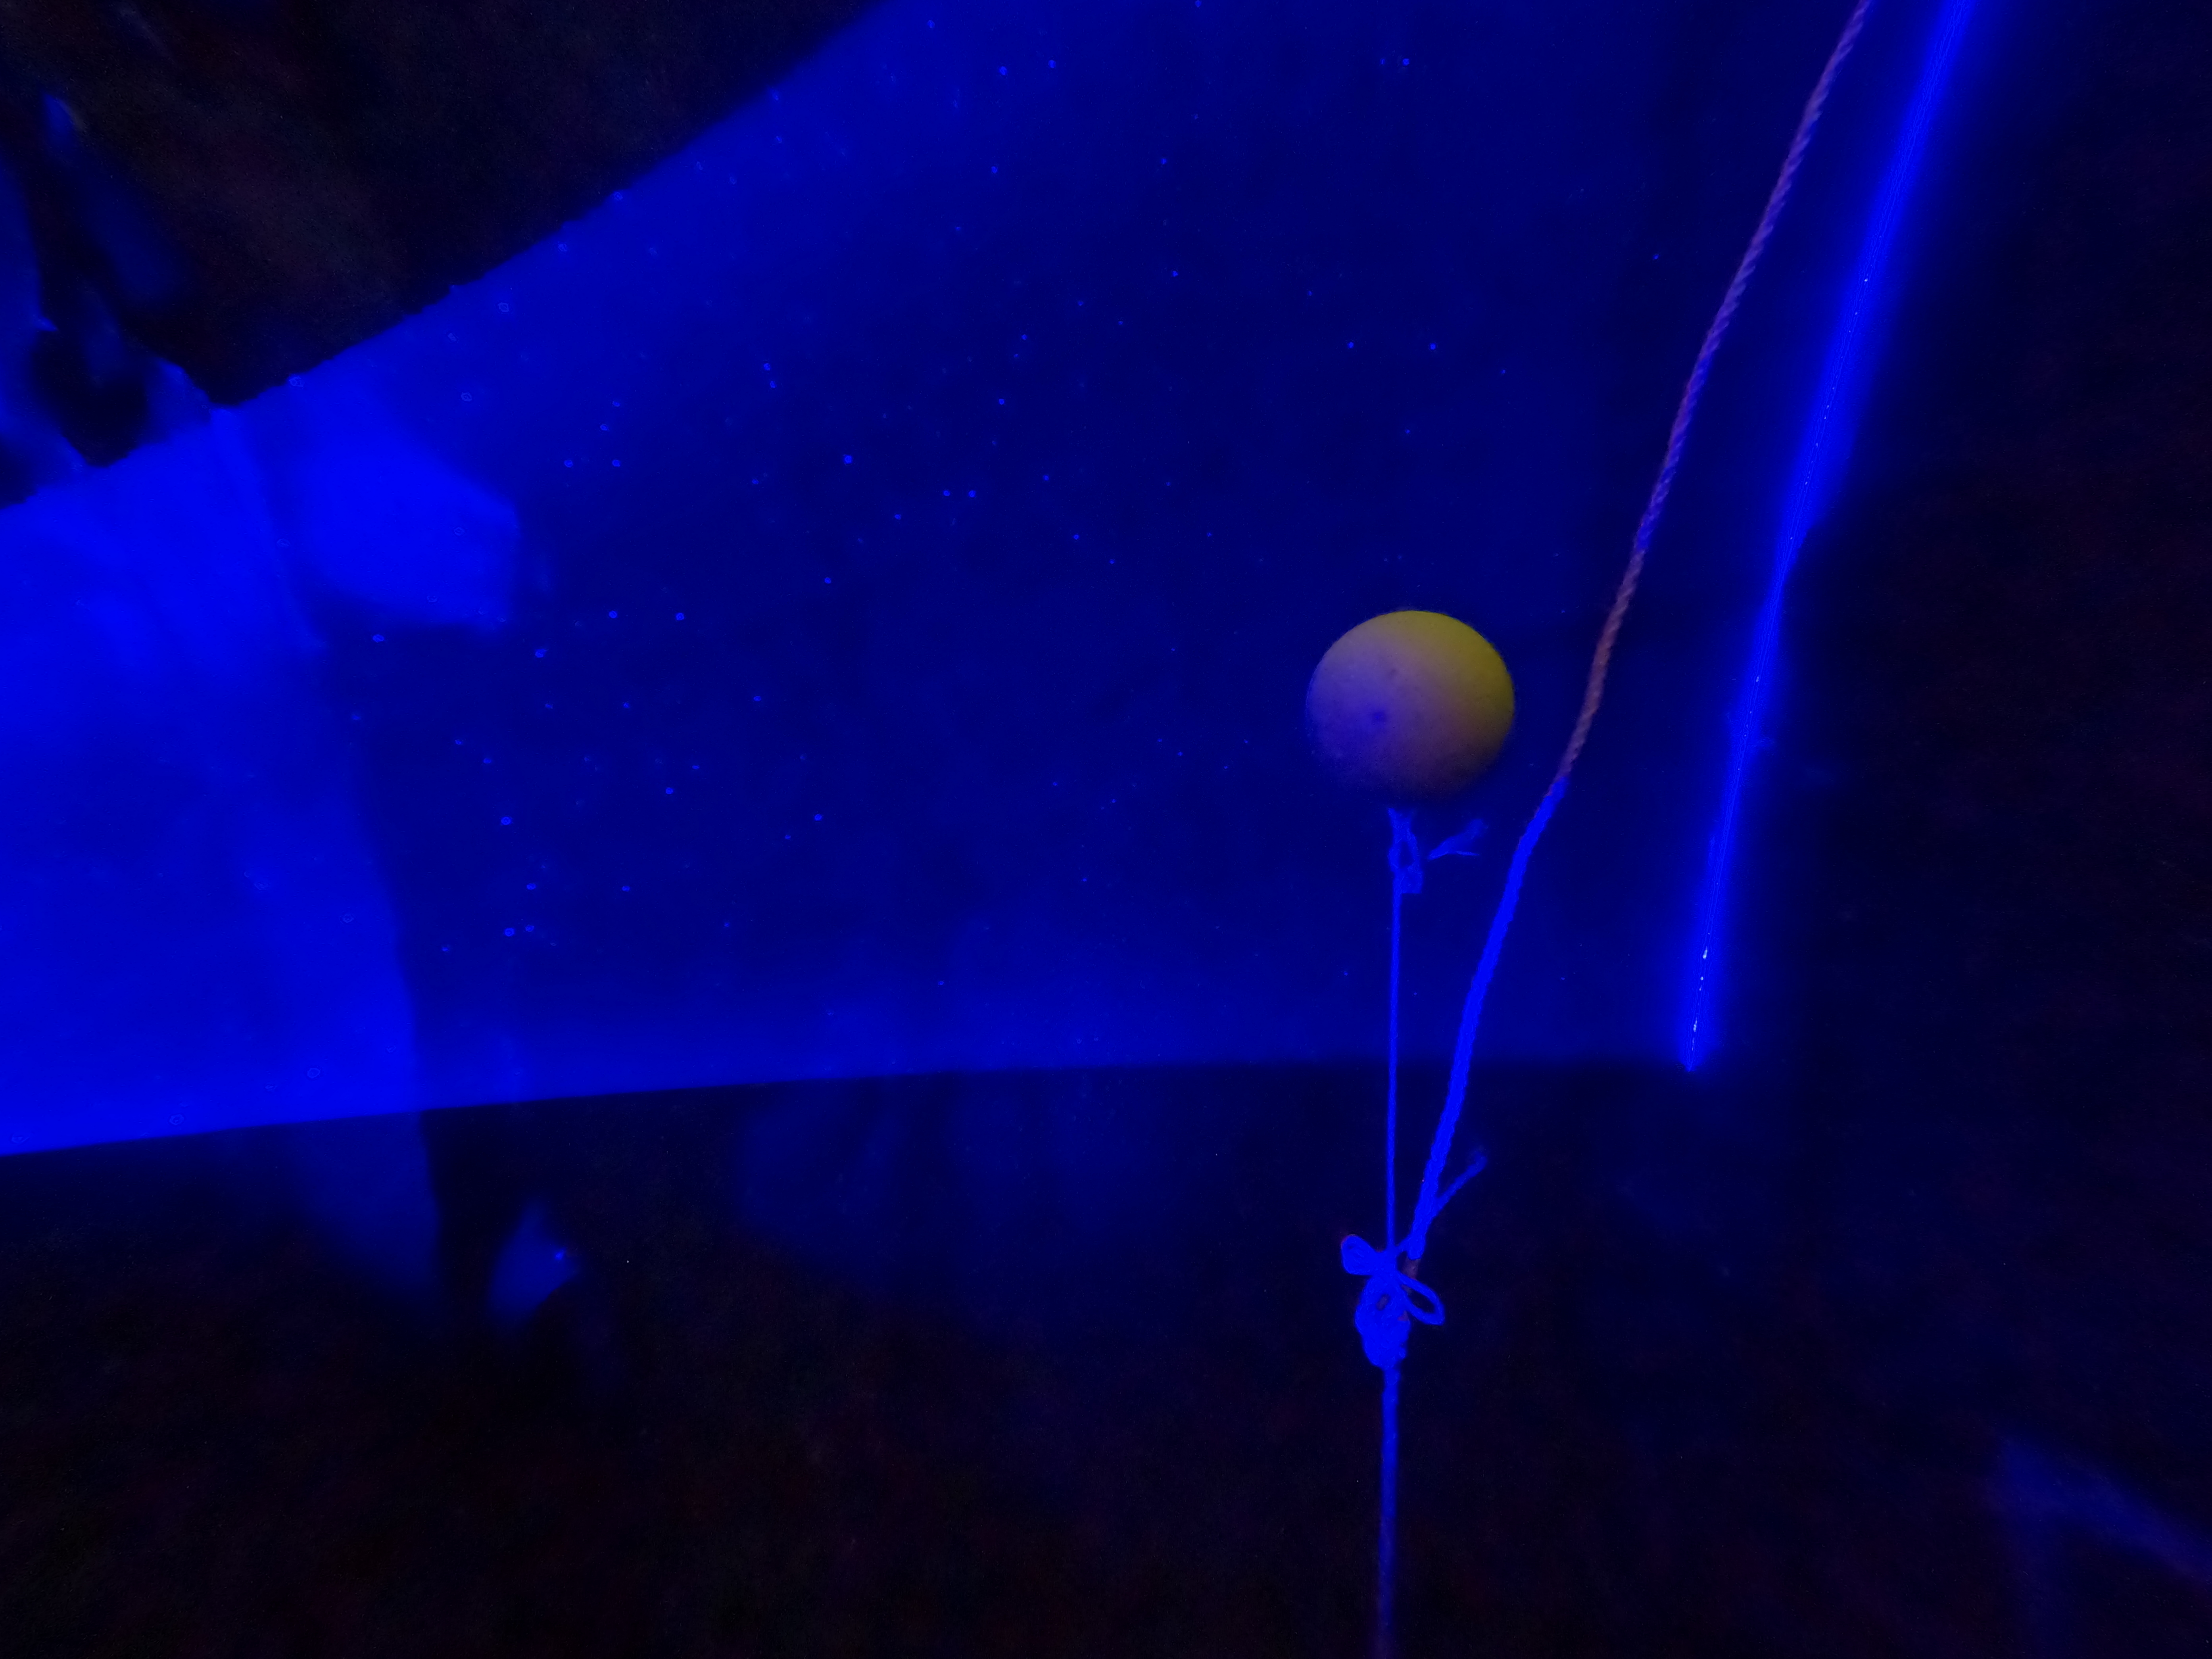

Supplement: Supplementary file 198 [file G0034628.pdf › 9/G0034628.pdf]

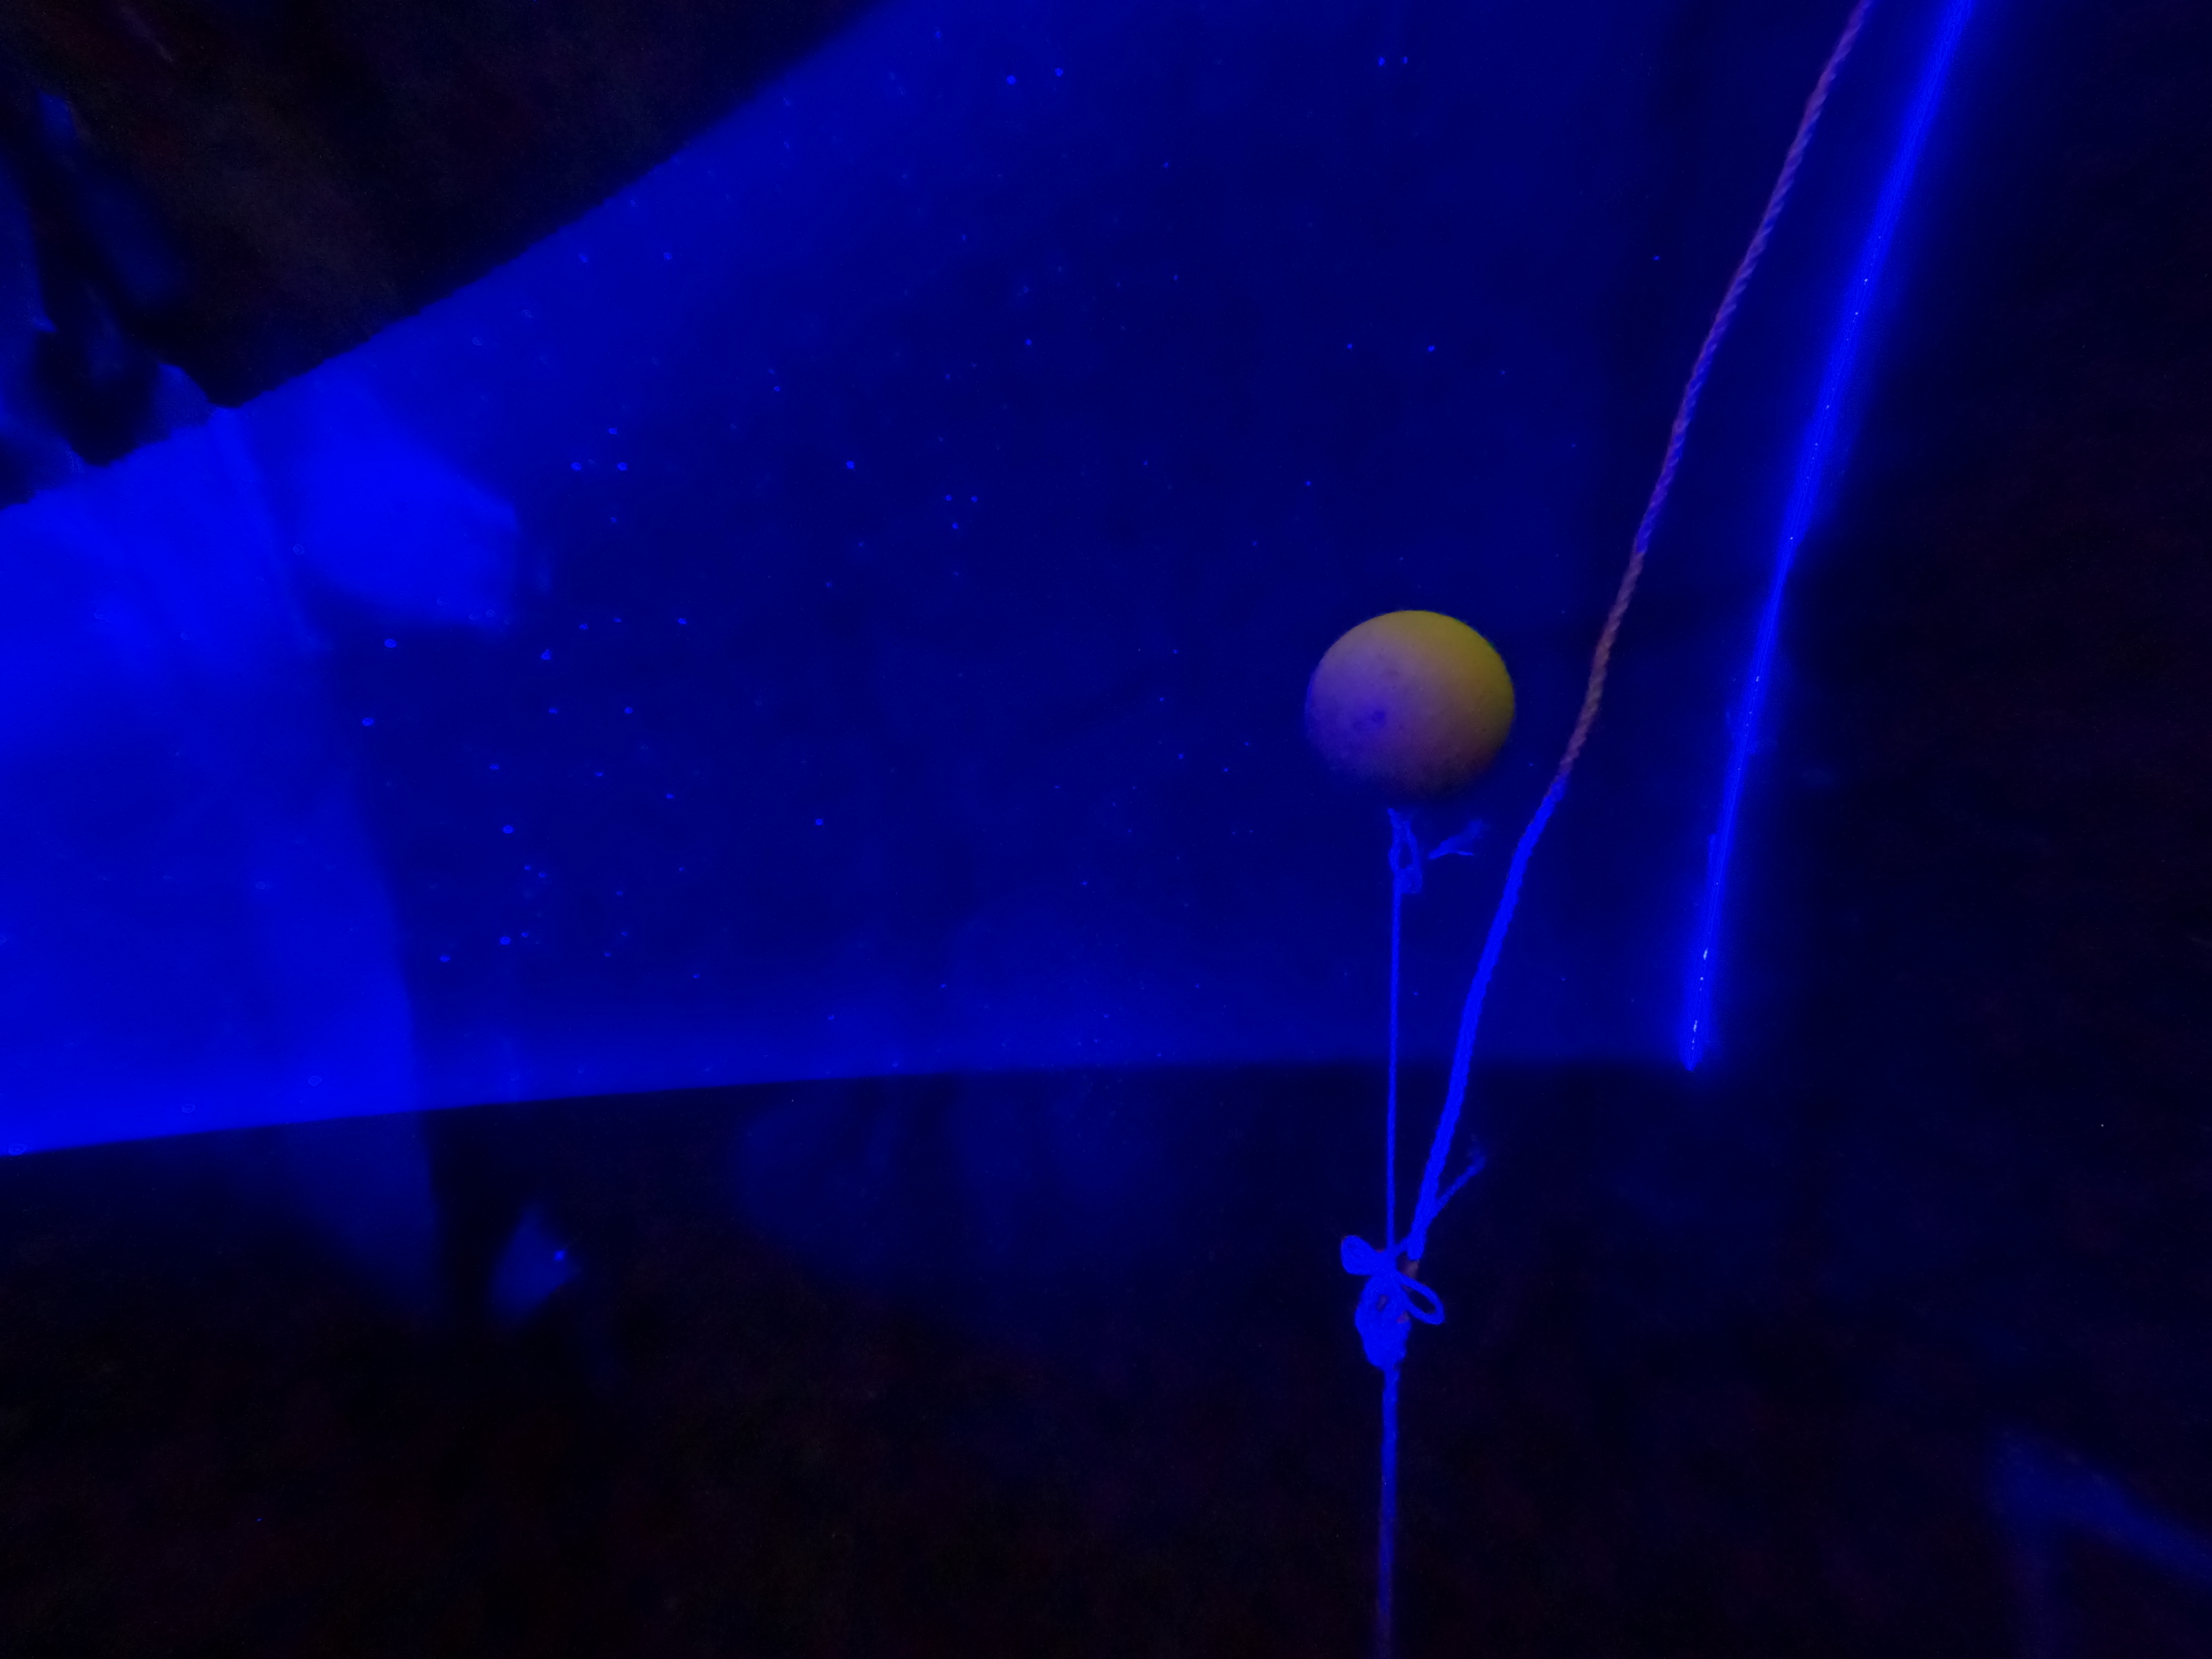

Supplement: Supplementary file 199 [file G0034629.pdf › 9/G0034629.pdf]

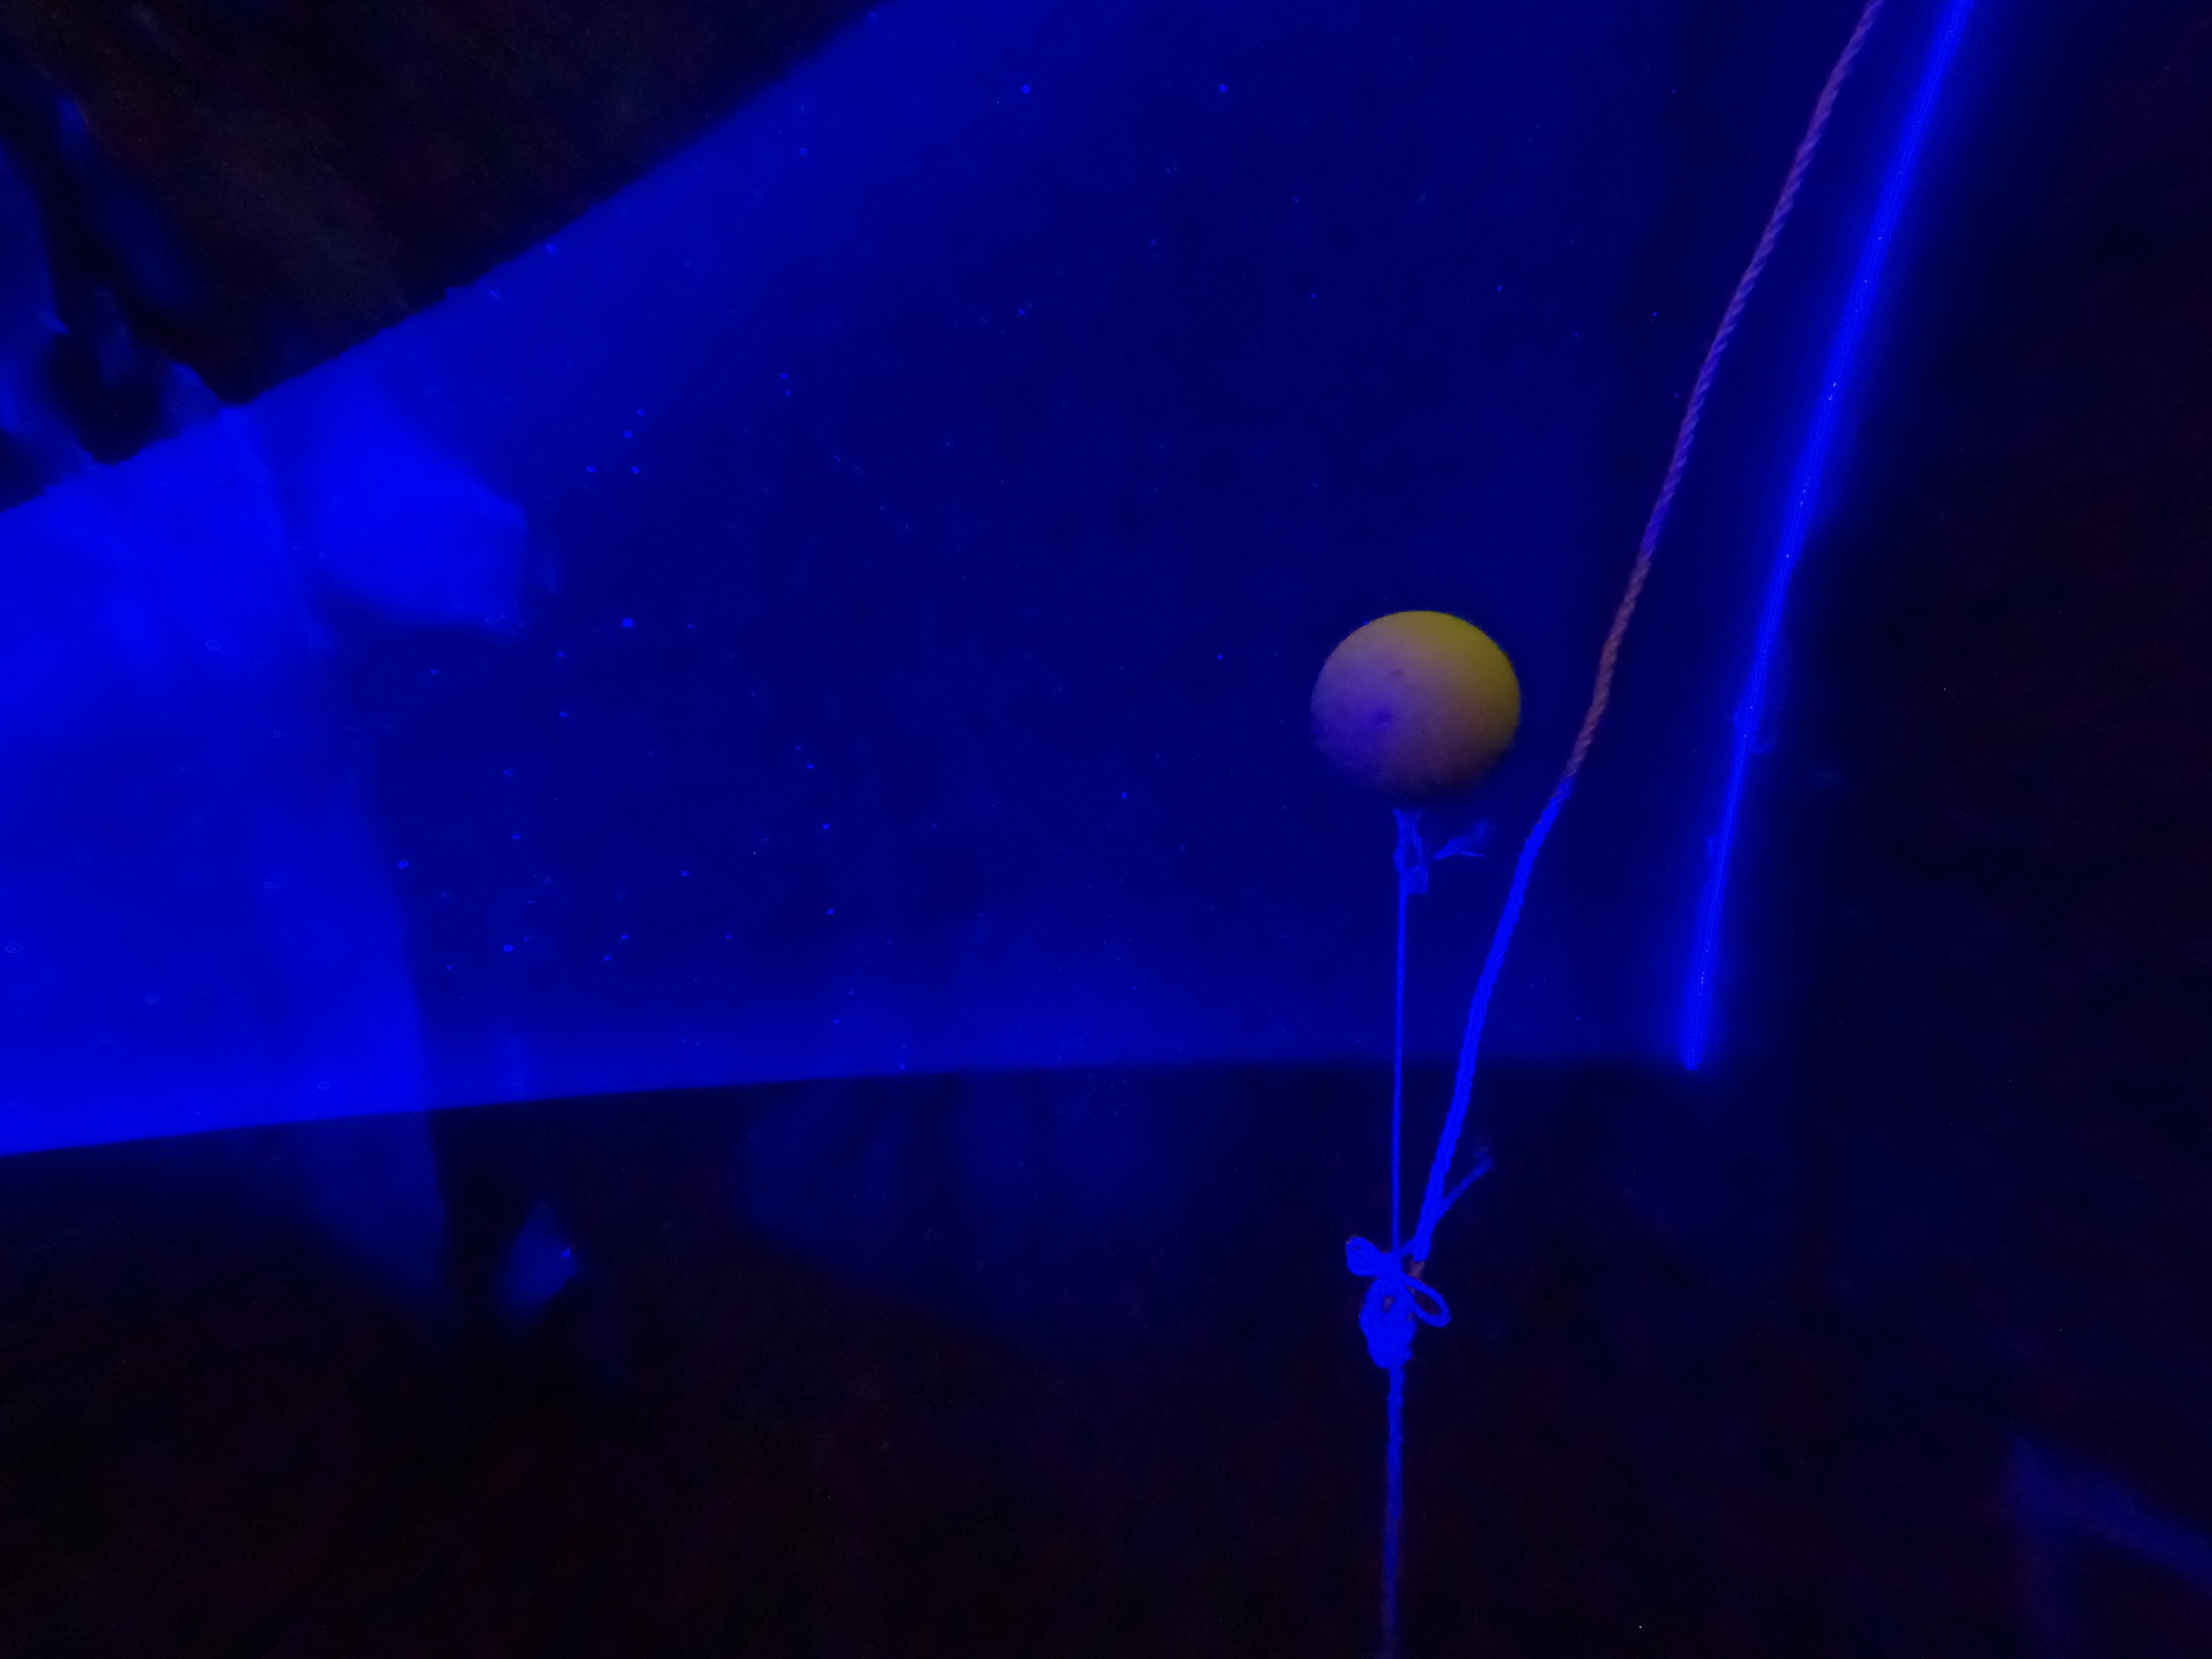

Supplement: Supplementary file 200 [file G0034630.pdf › 9/G0034630.pdf]
