# Supplementary figures and images for: 3D reconstruction of shallow sea environment using direct system calibration and faint laser line extraction (part 3 of 35)
Source: Research Square preprint supplement (doi:10.21203/rs.3.rs-5262658/v1), 2024-12-02

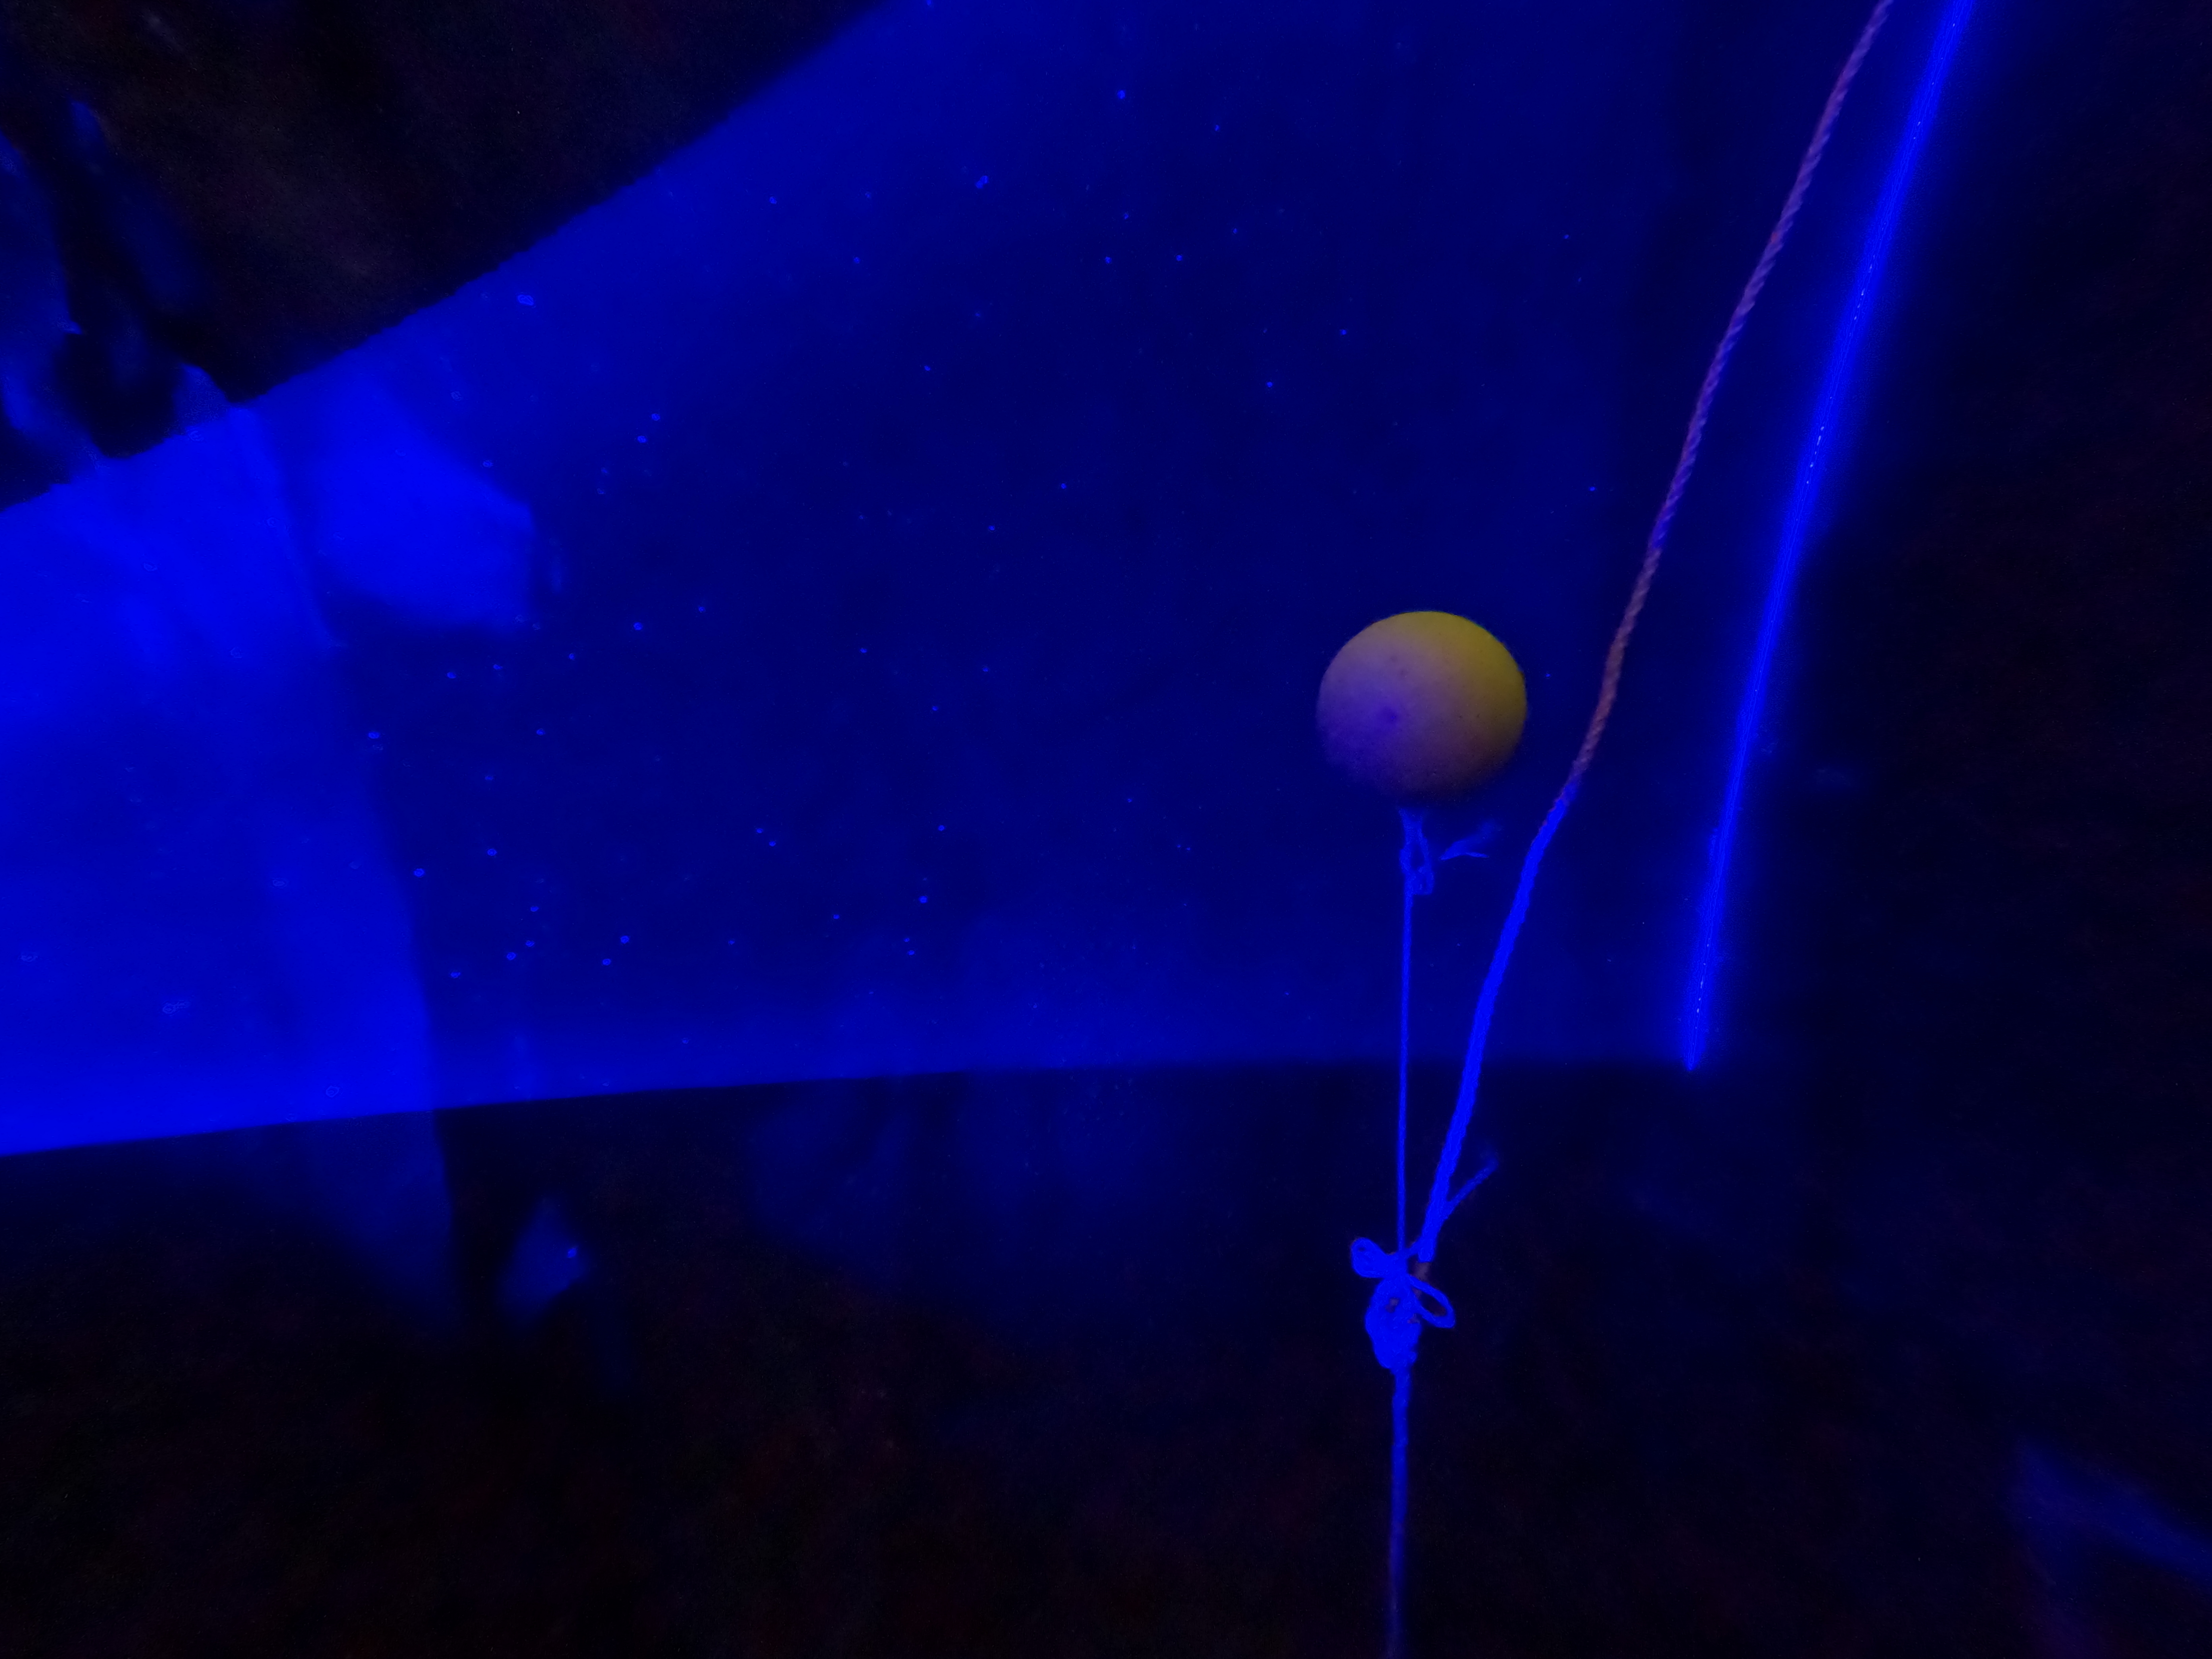

Supplement: Supplementary file 201 [file G0034631.pdf › 9/G0034631.pdf]

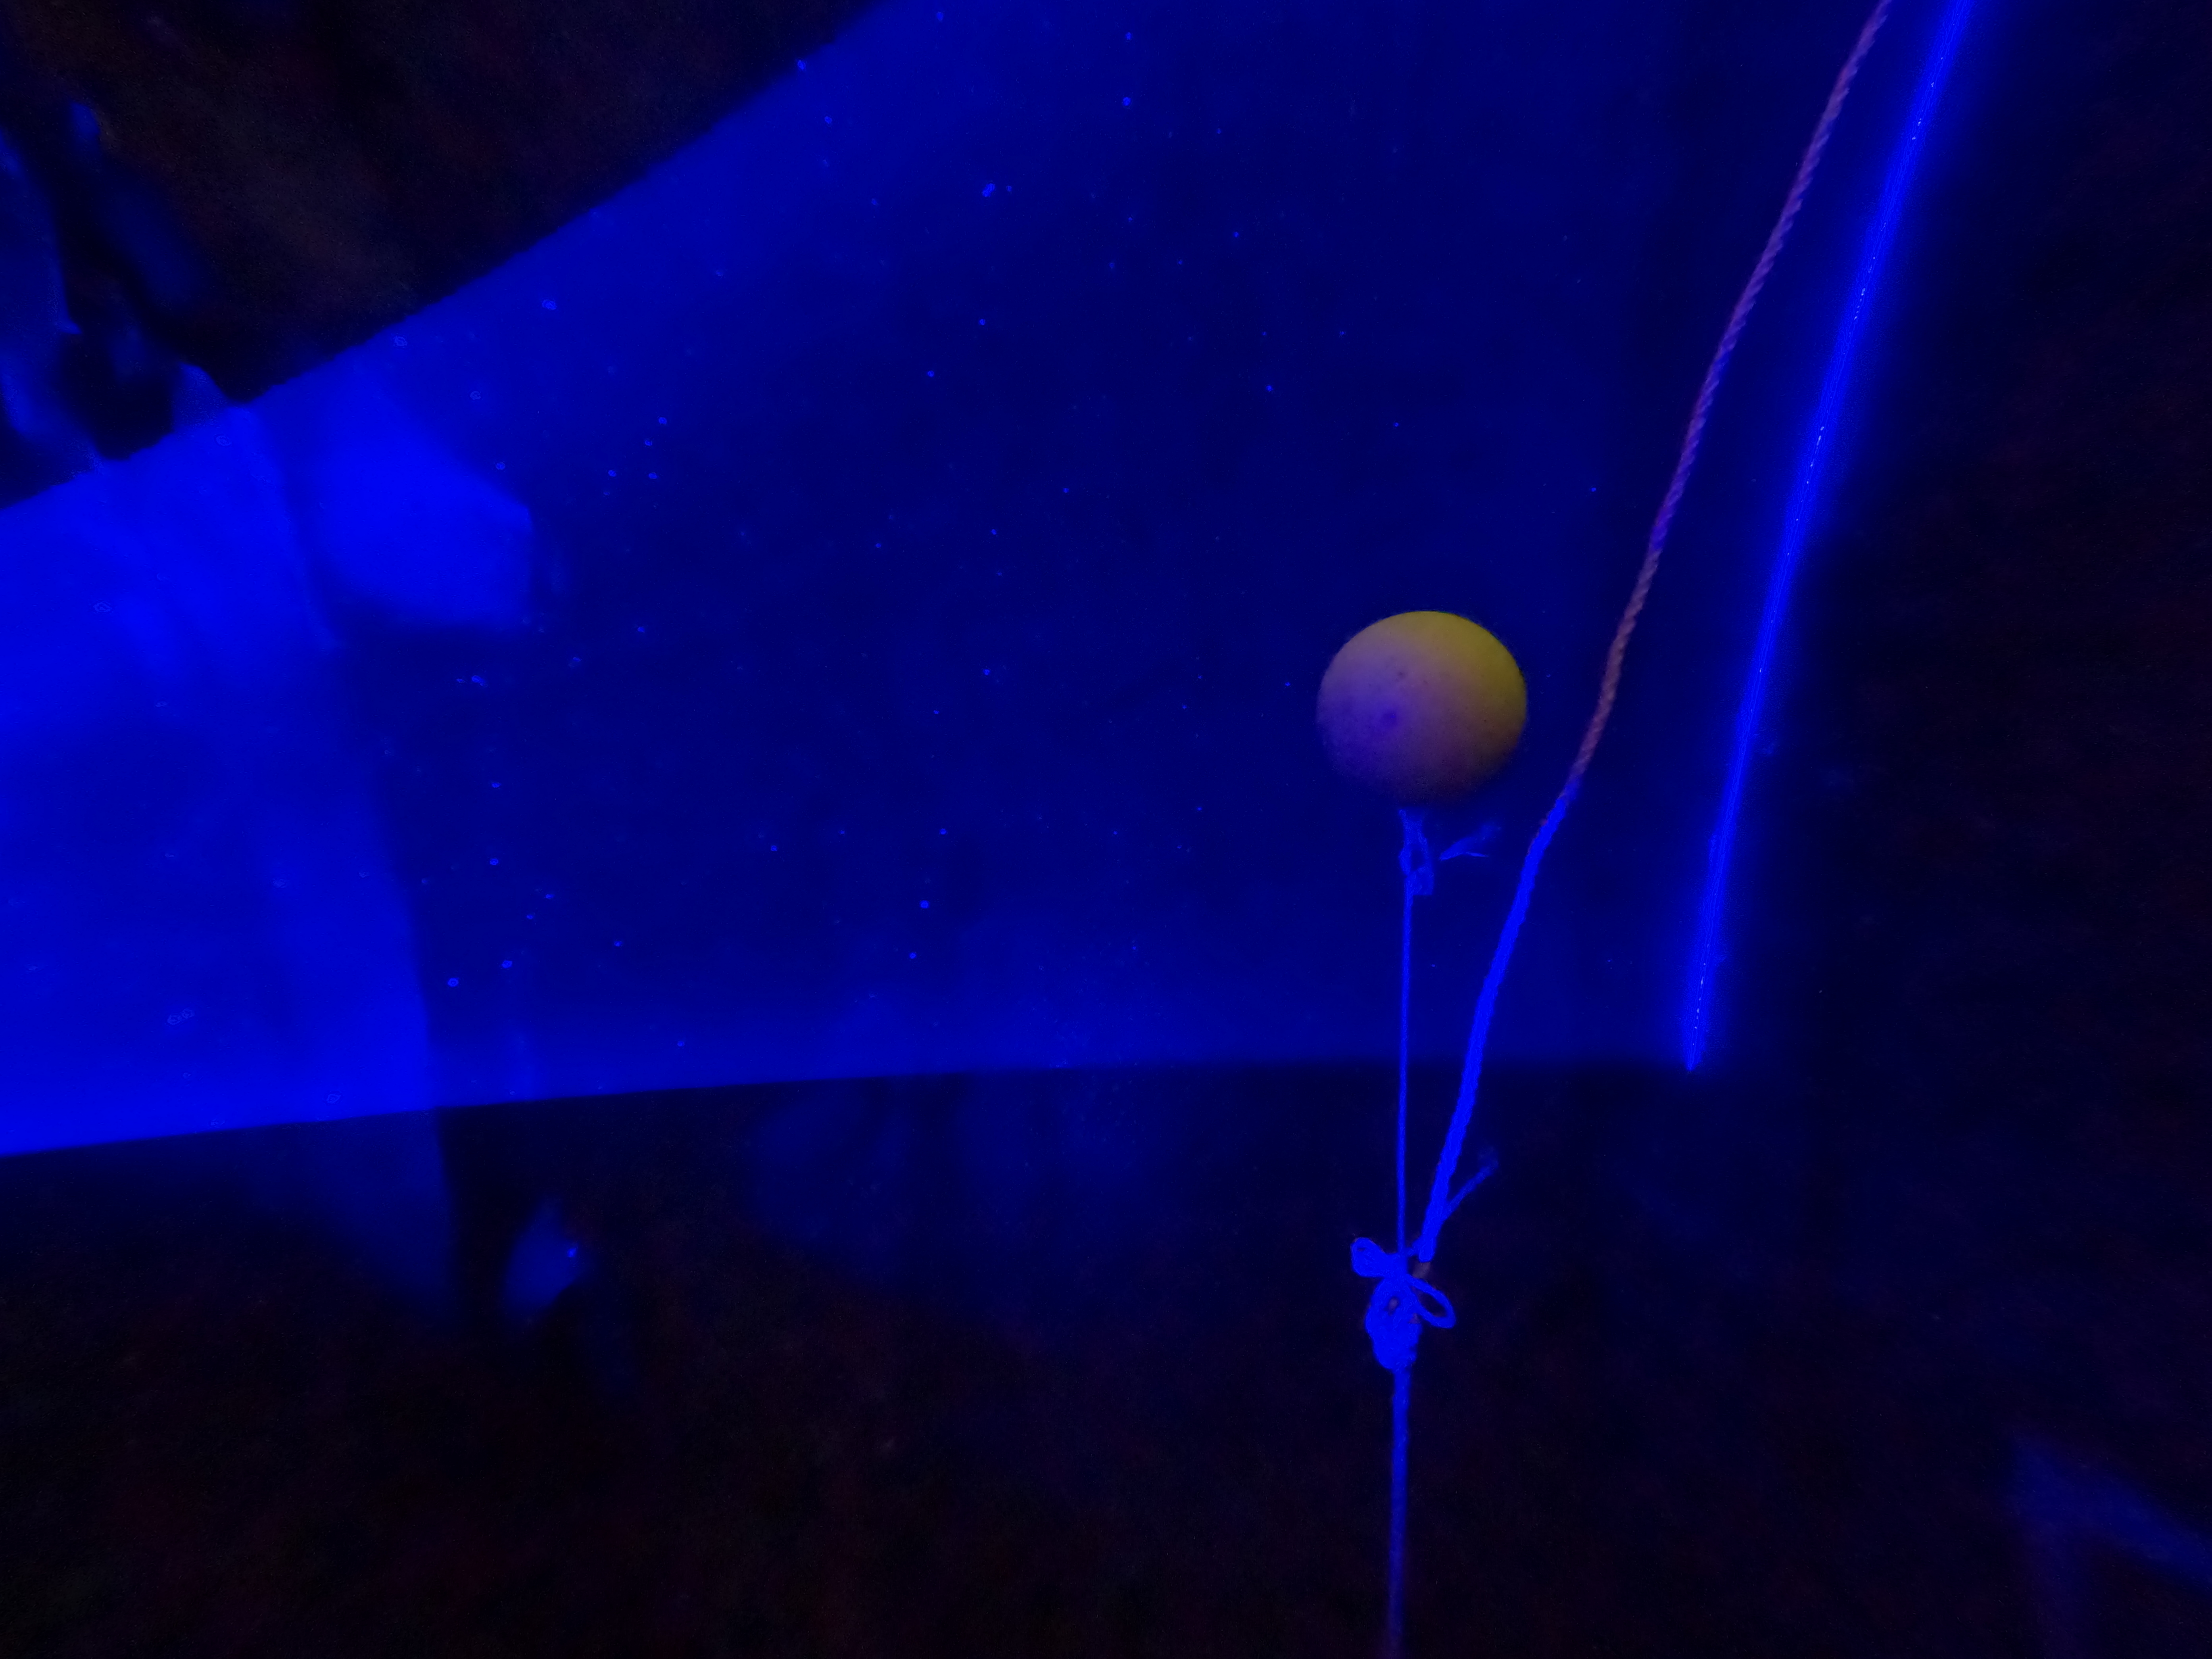

Supplement: Supplementary file 202 [file G0034632.pdf › 9/G0034632.pdf]

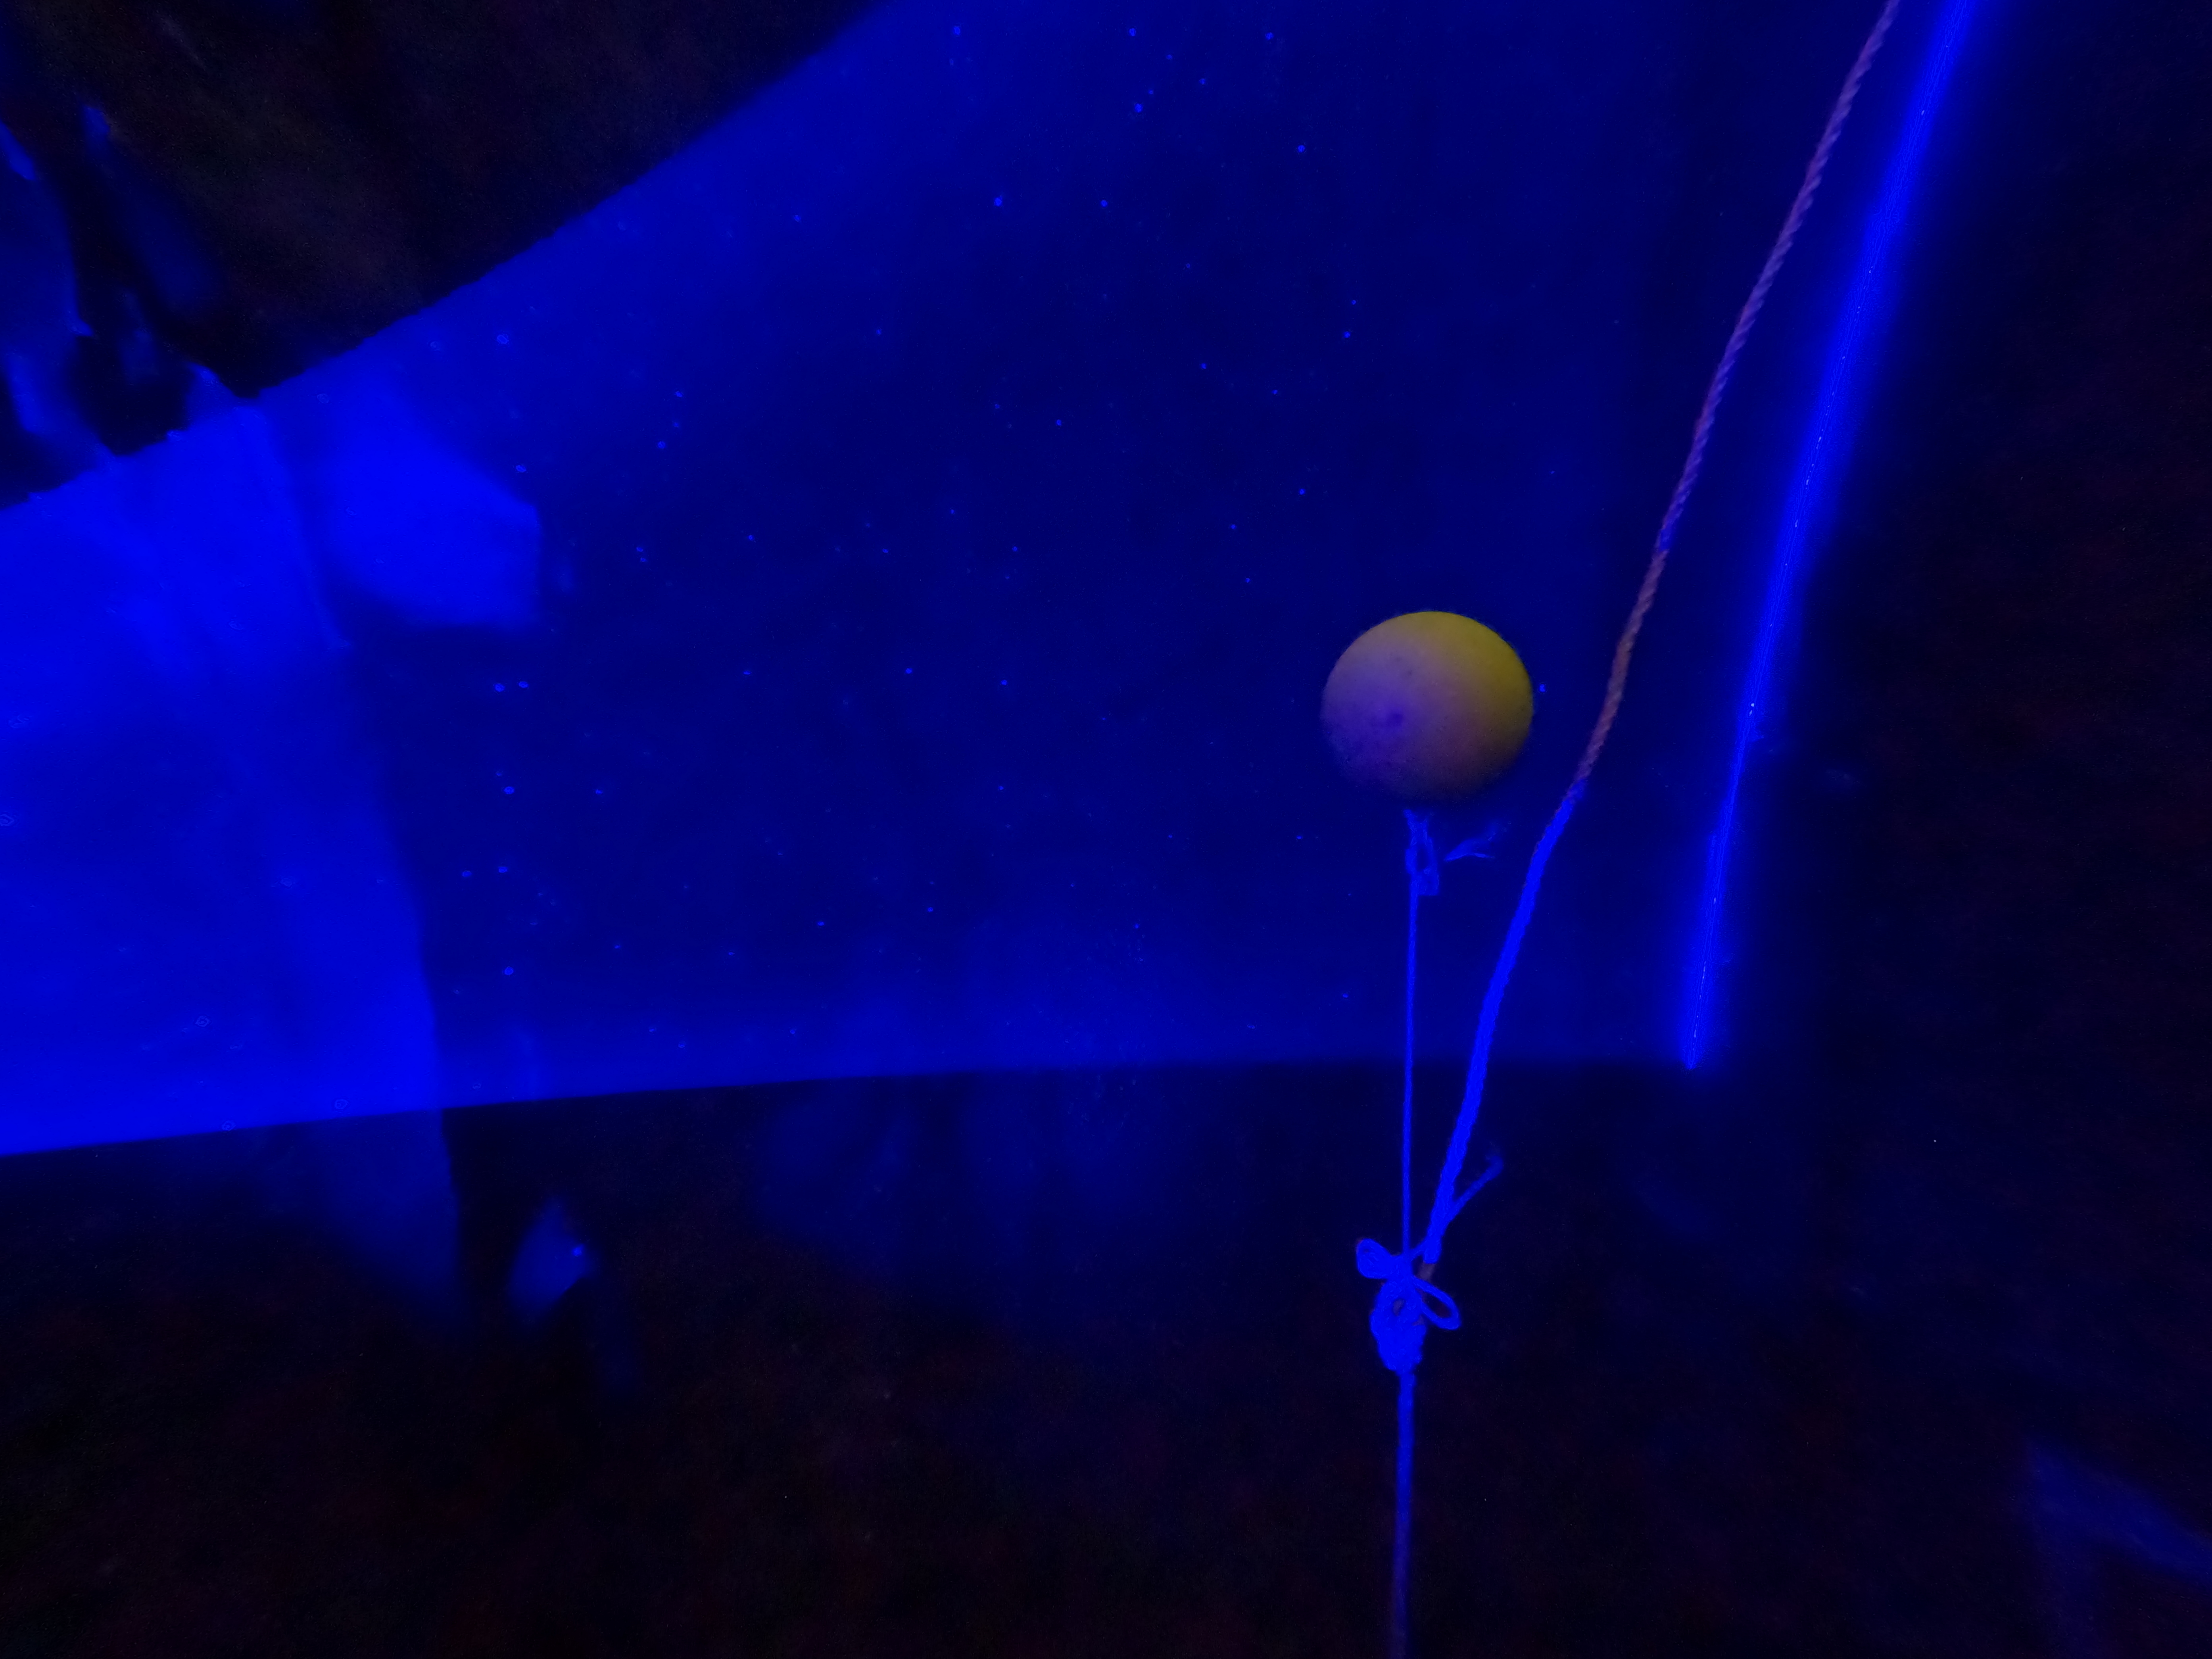

Supplement: Supplementary file 203 [file G0034633.pdf › 9/G0034633.pdf]

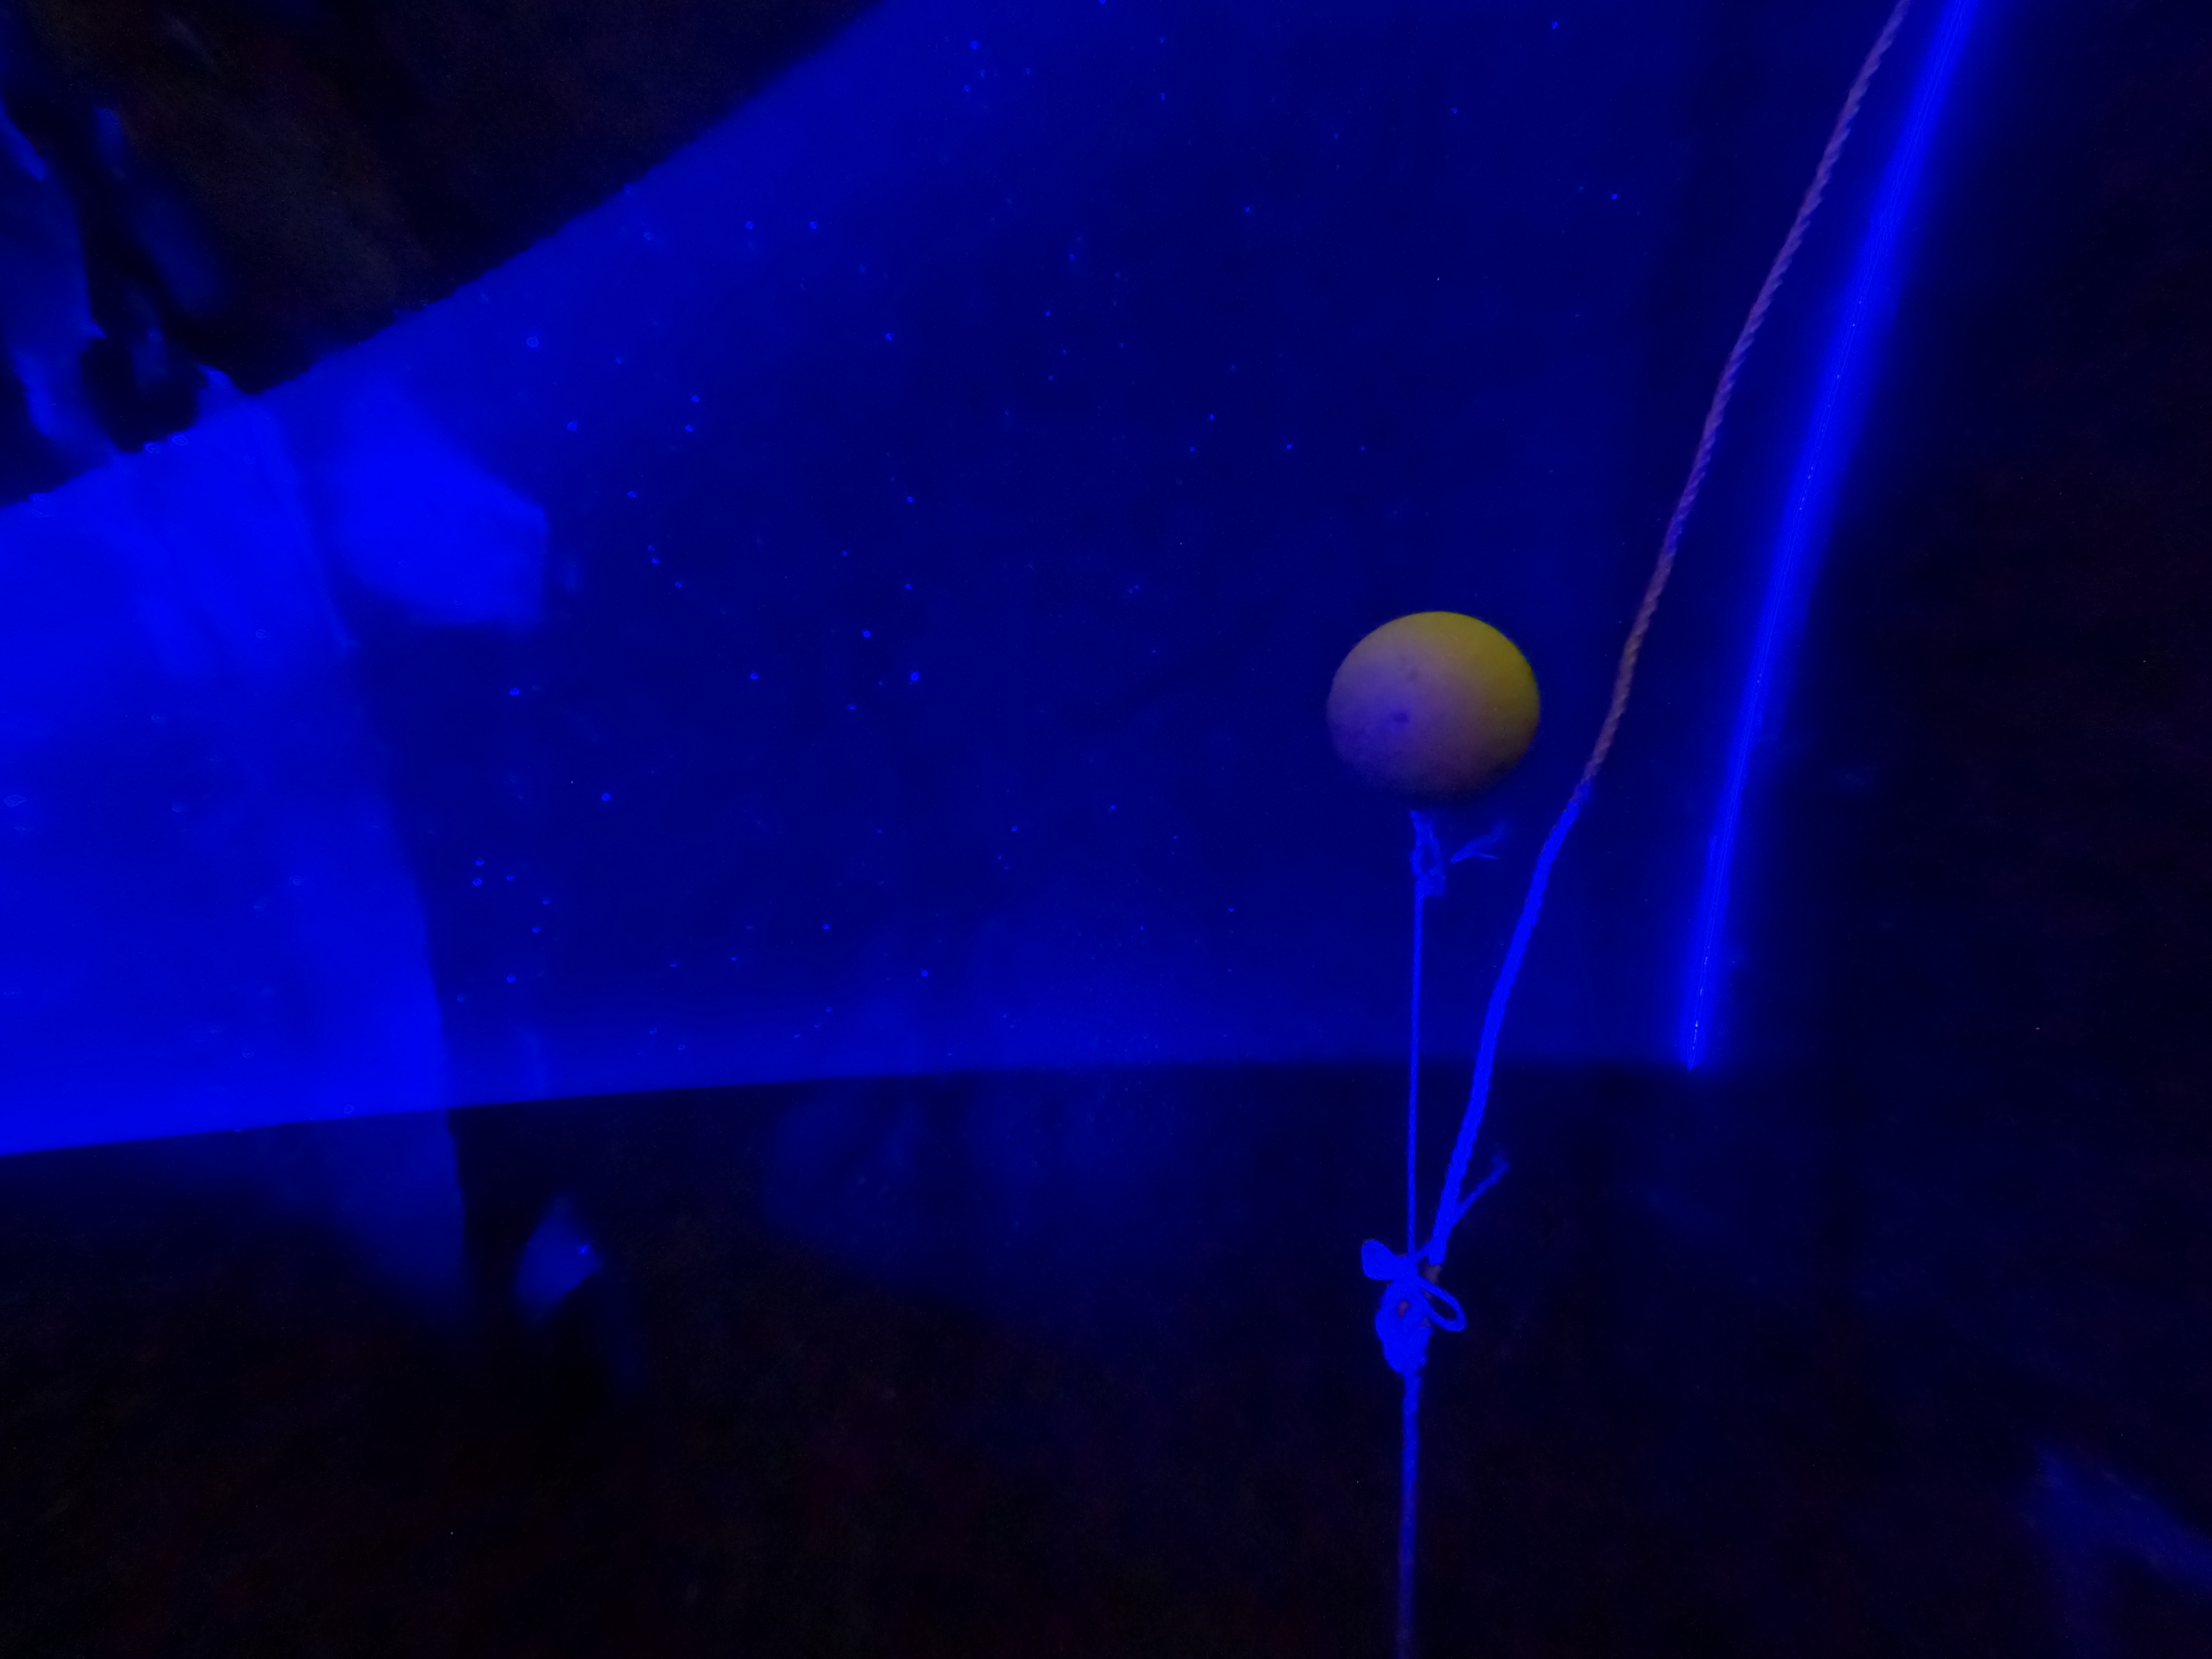

Supplement: Supplementary file 204 [file G0034634.pdf › 9/G0034634.pdf]

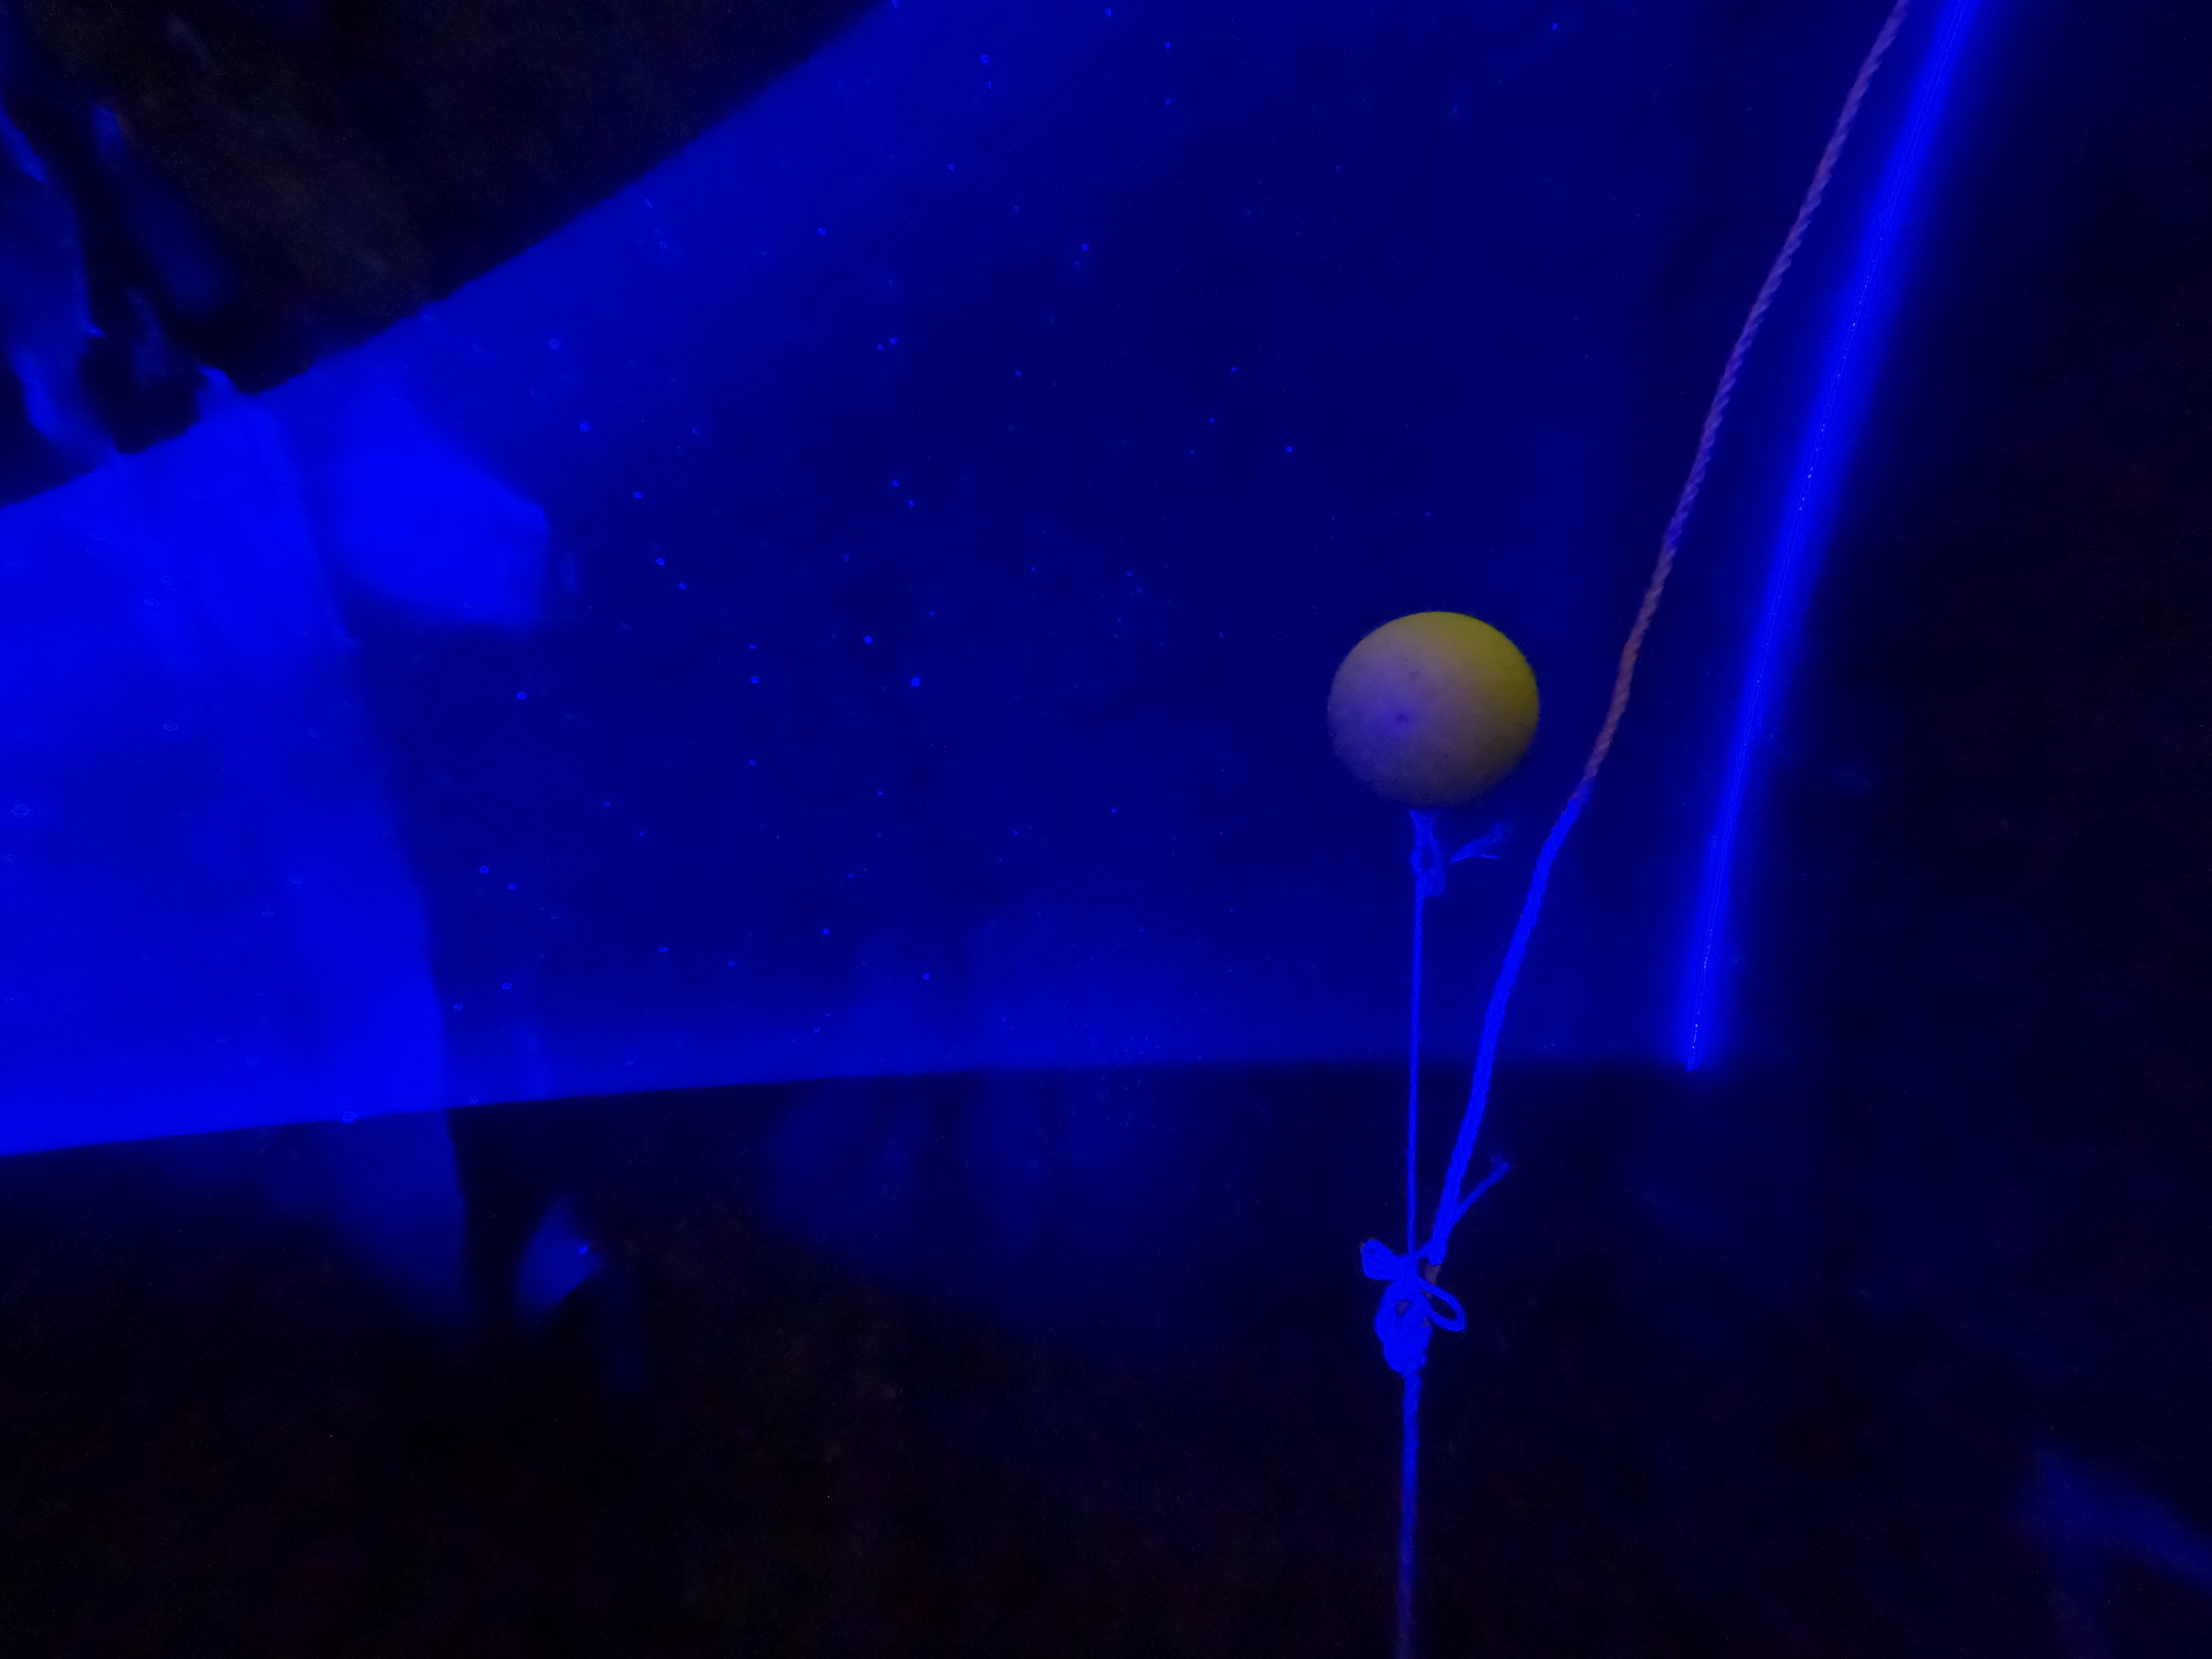

Supplement: Supplementary file 205 [file G0034635.pdf › 9/G0034635.pdf]

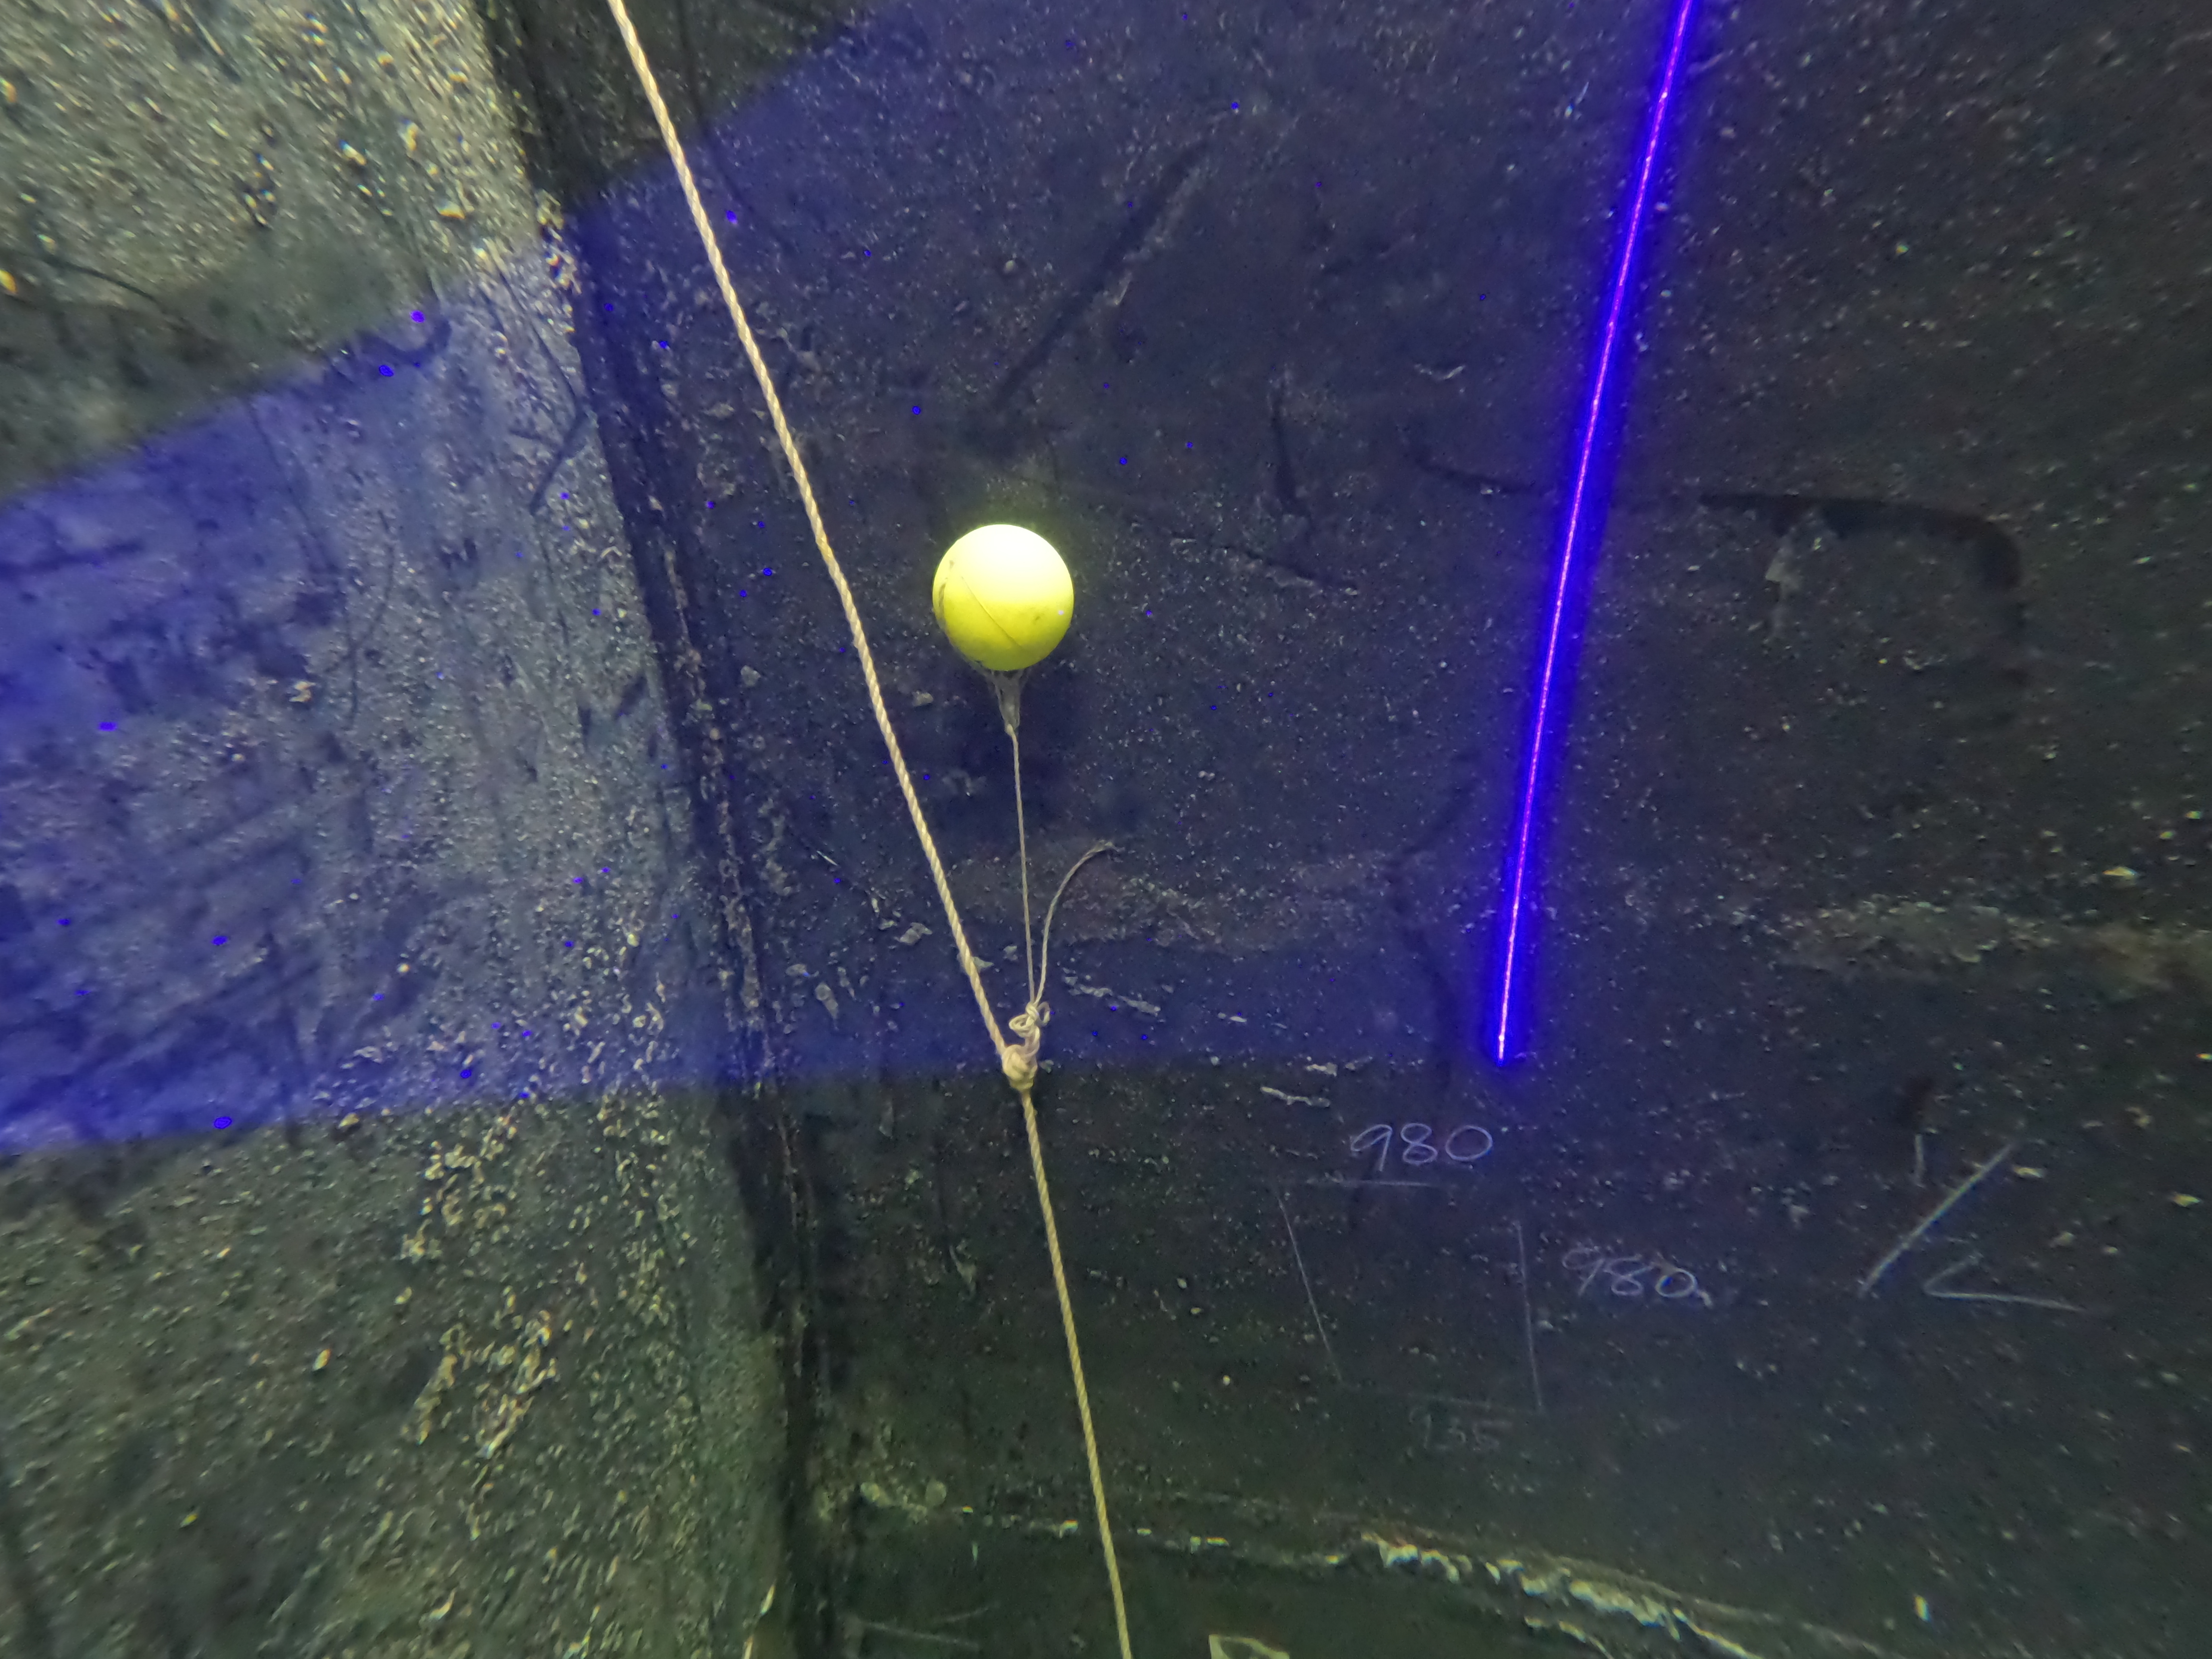

980

980

Z

Supplement: Supplementary file 206 [file G0030999.pdf › 4/G0030999.pdf]

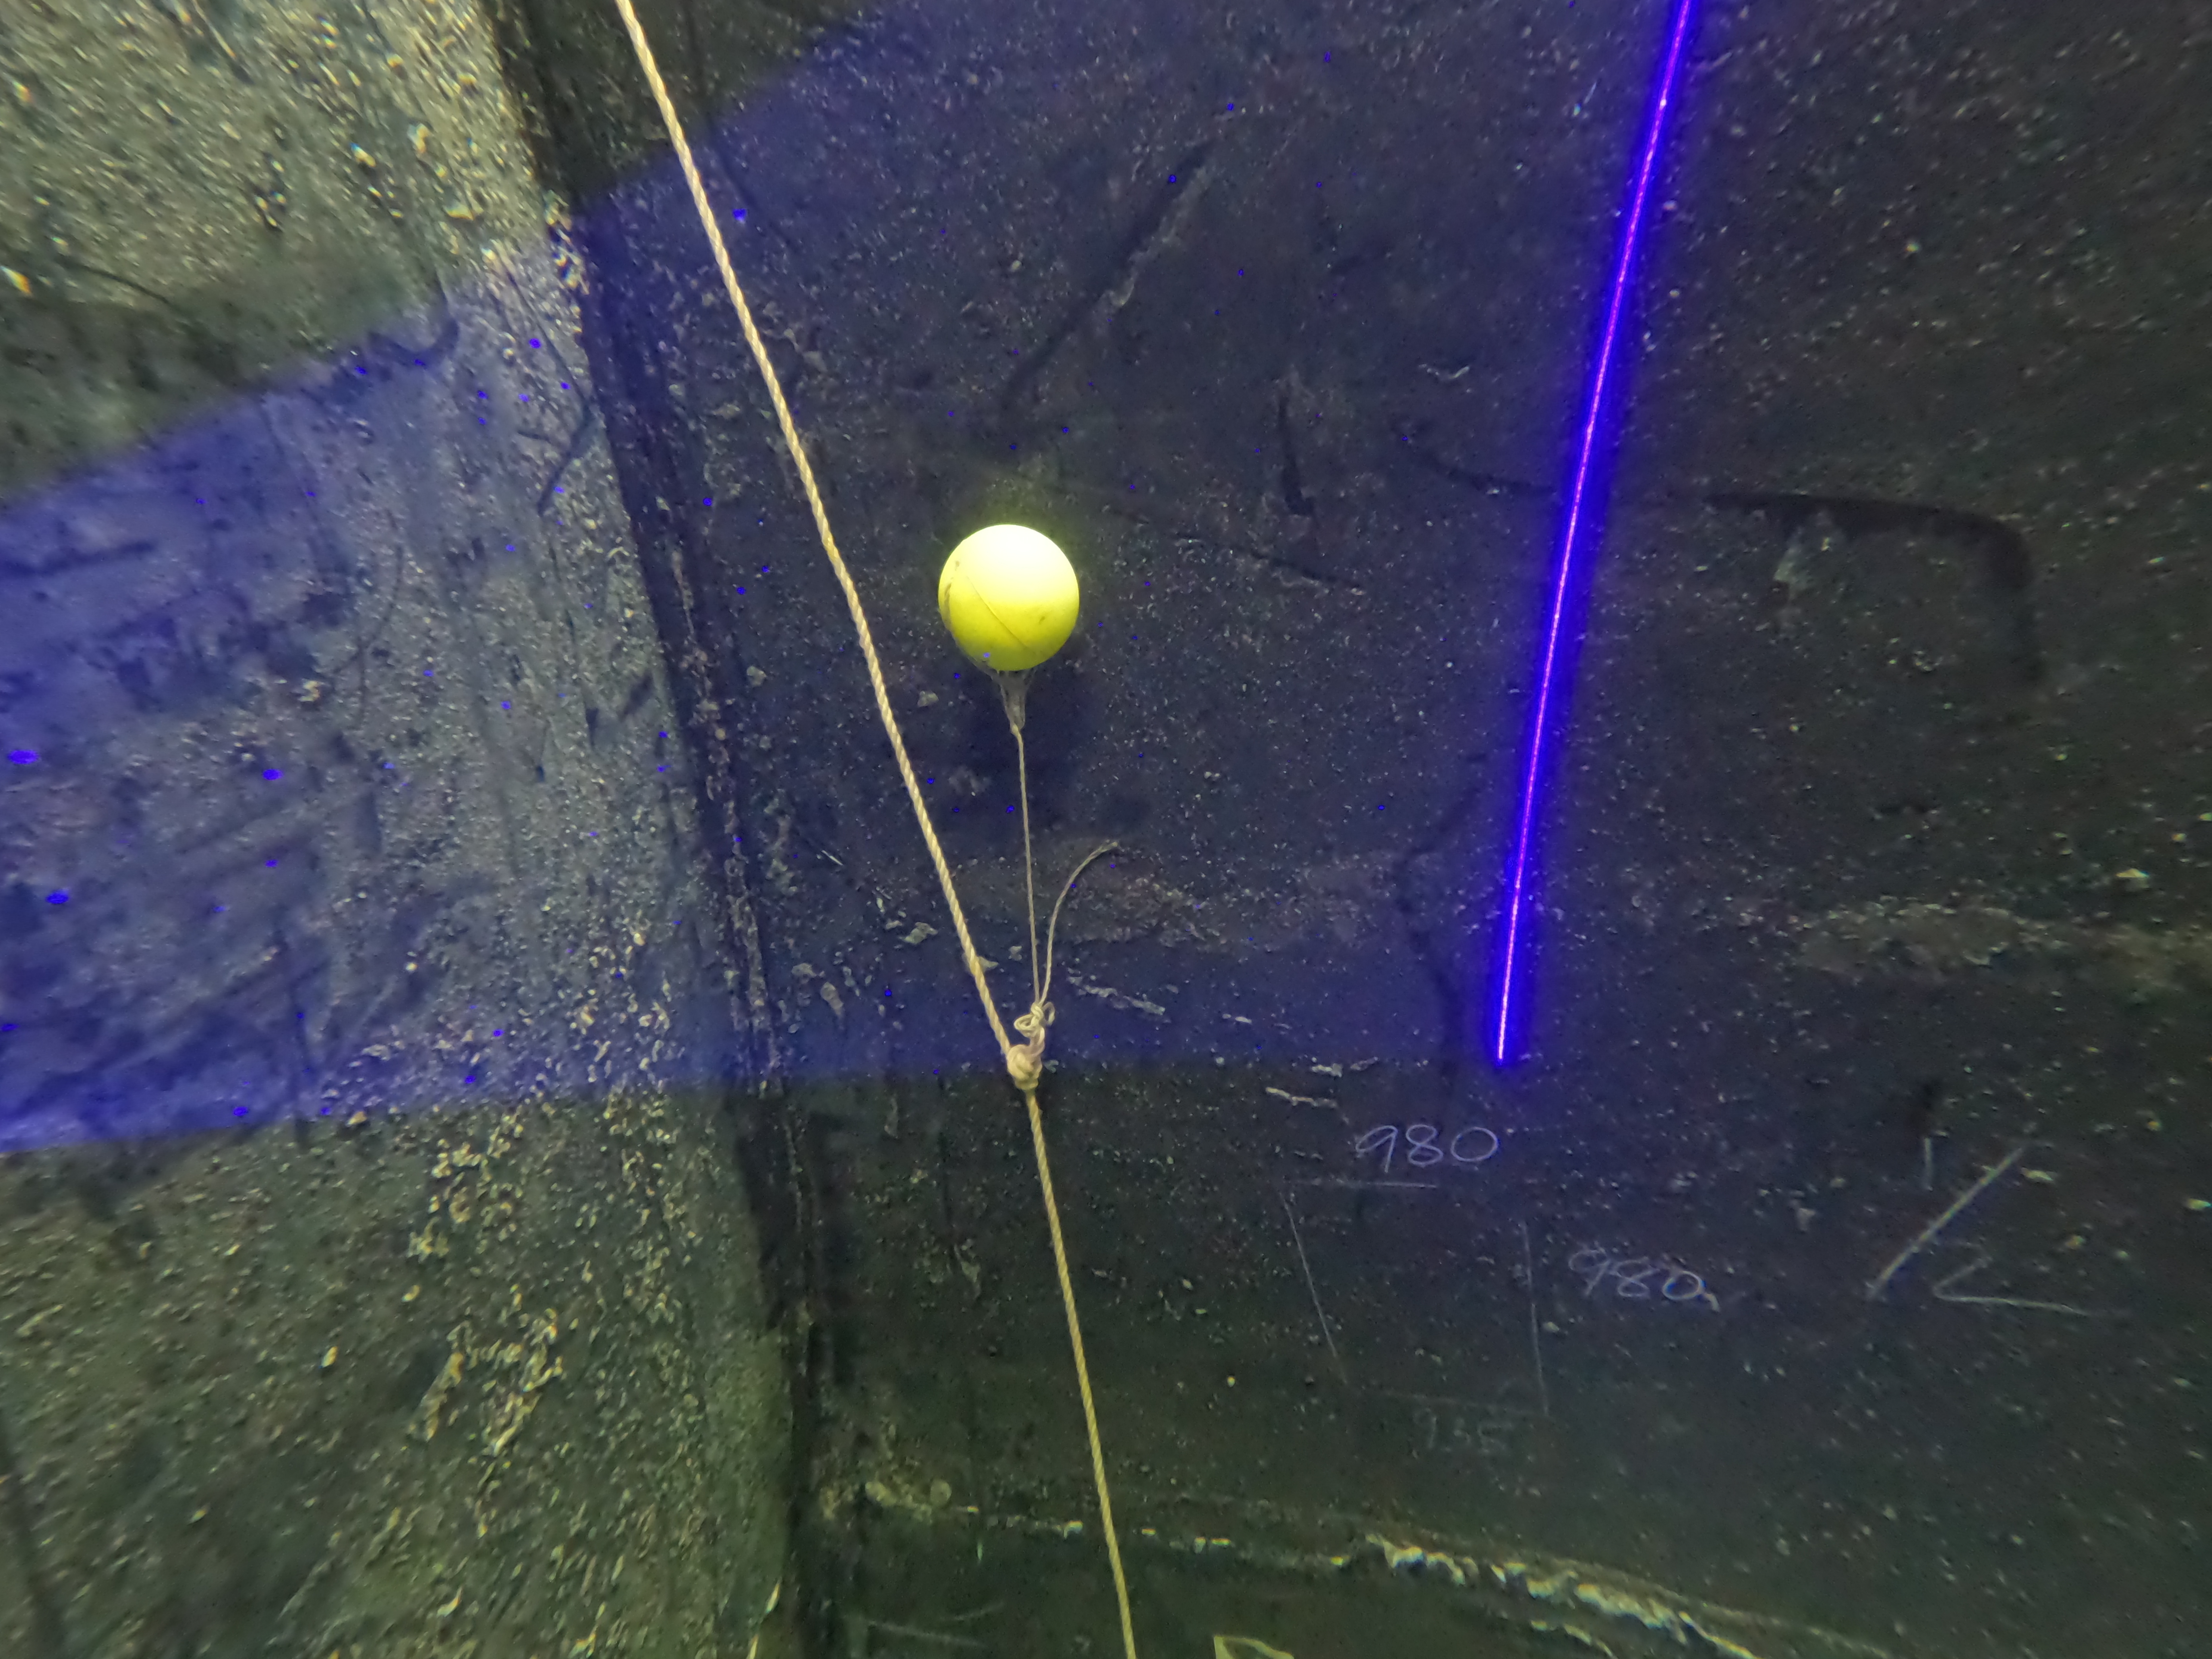

980

980

Supplement: Supplementary file 207 [file G0031000.pdf › 4/G0031000.pdf]

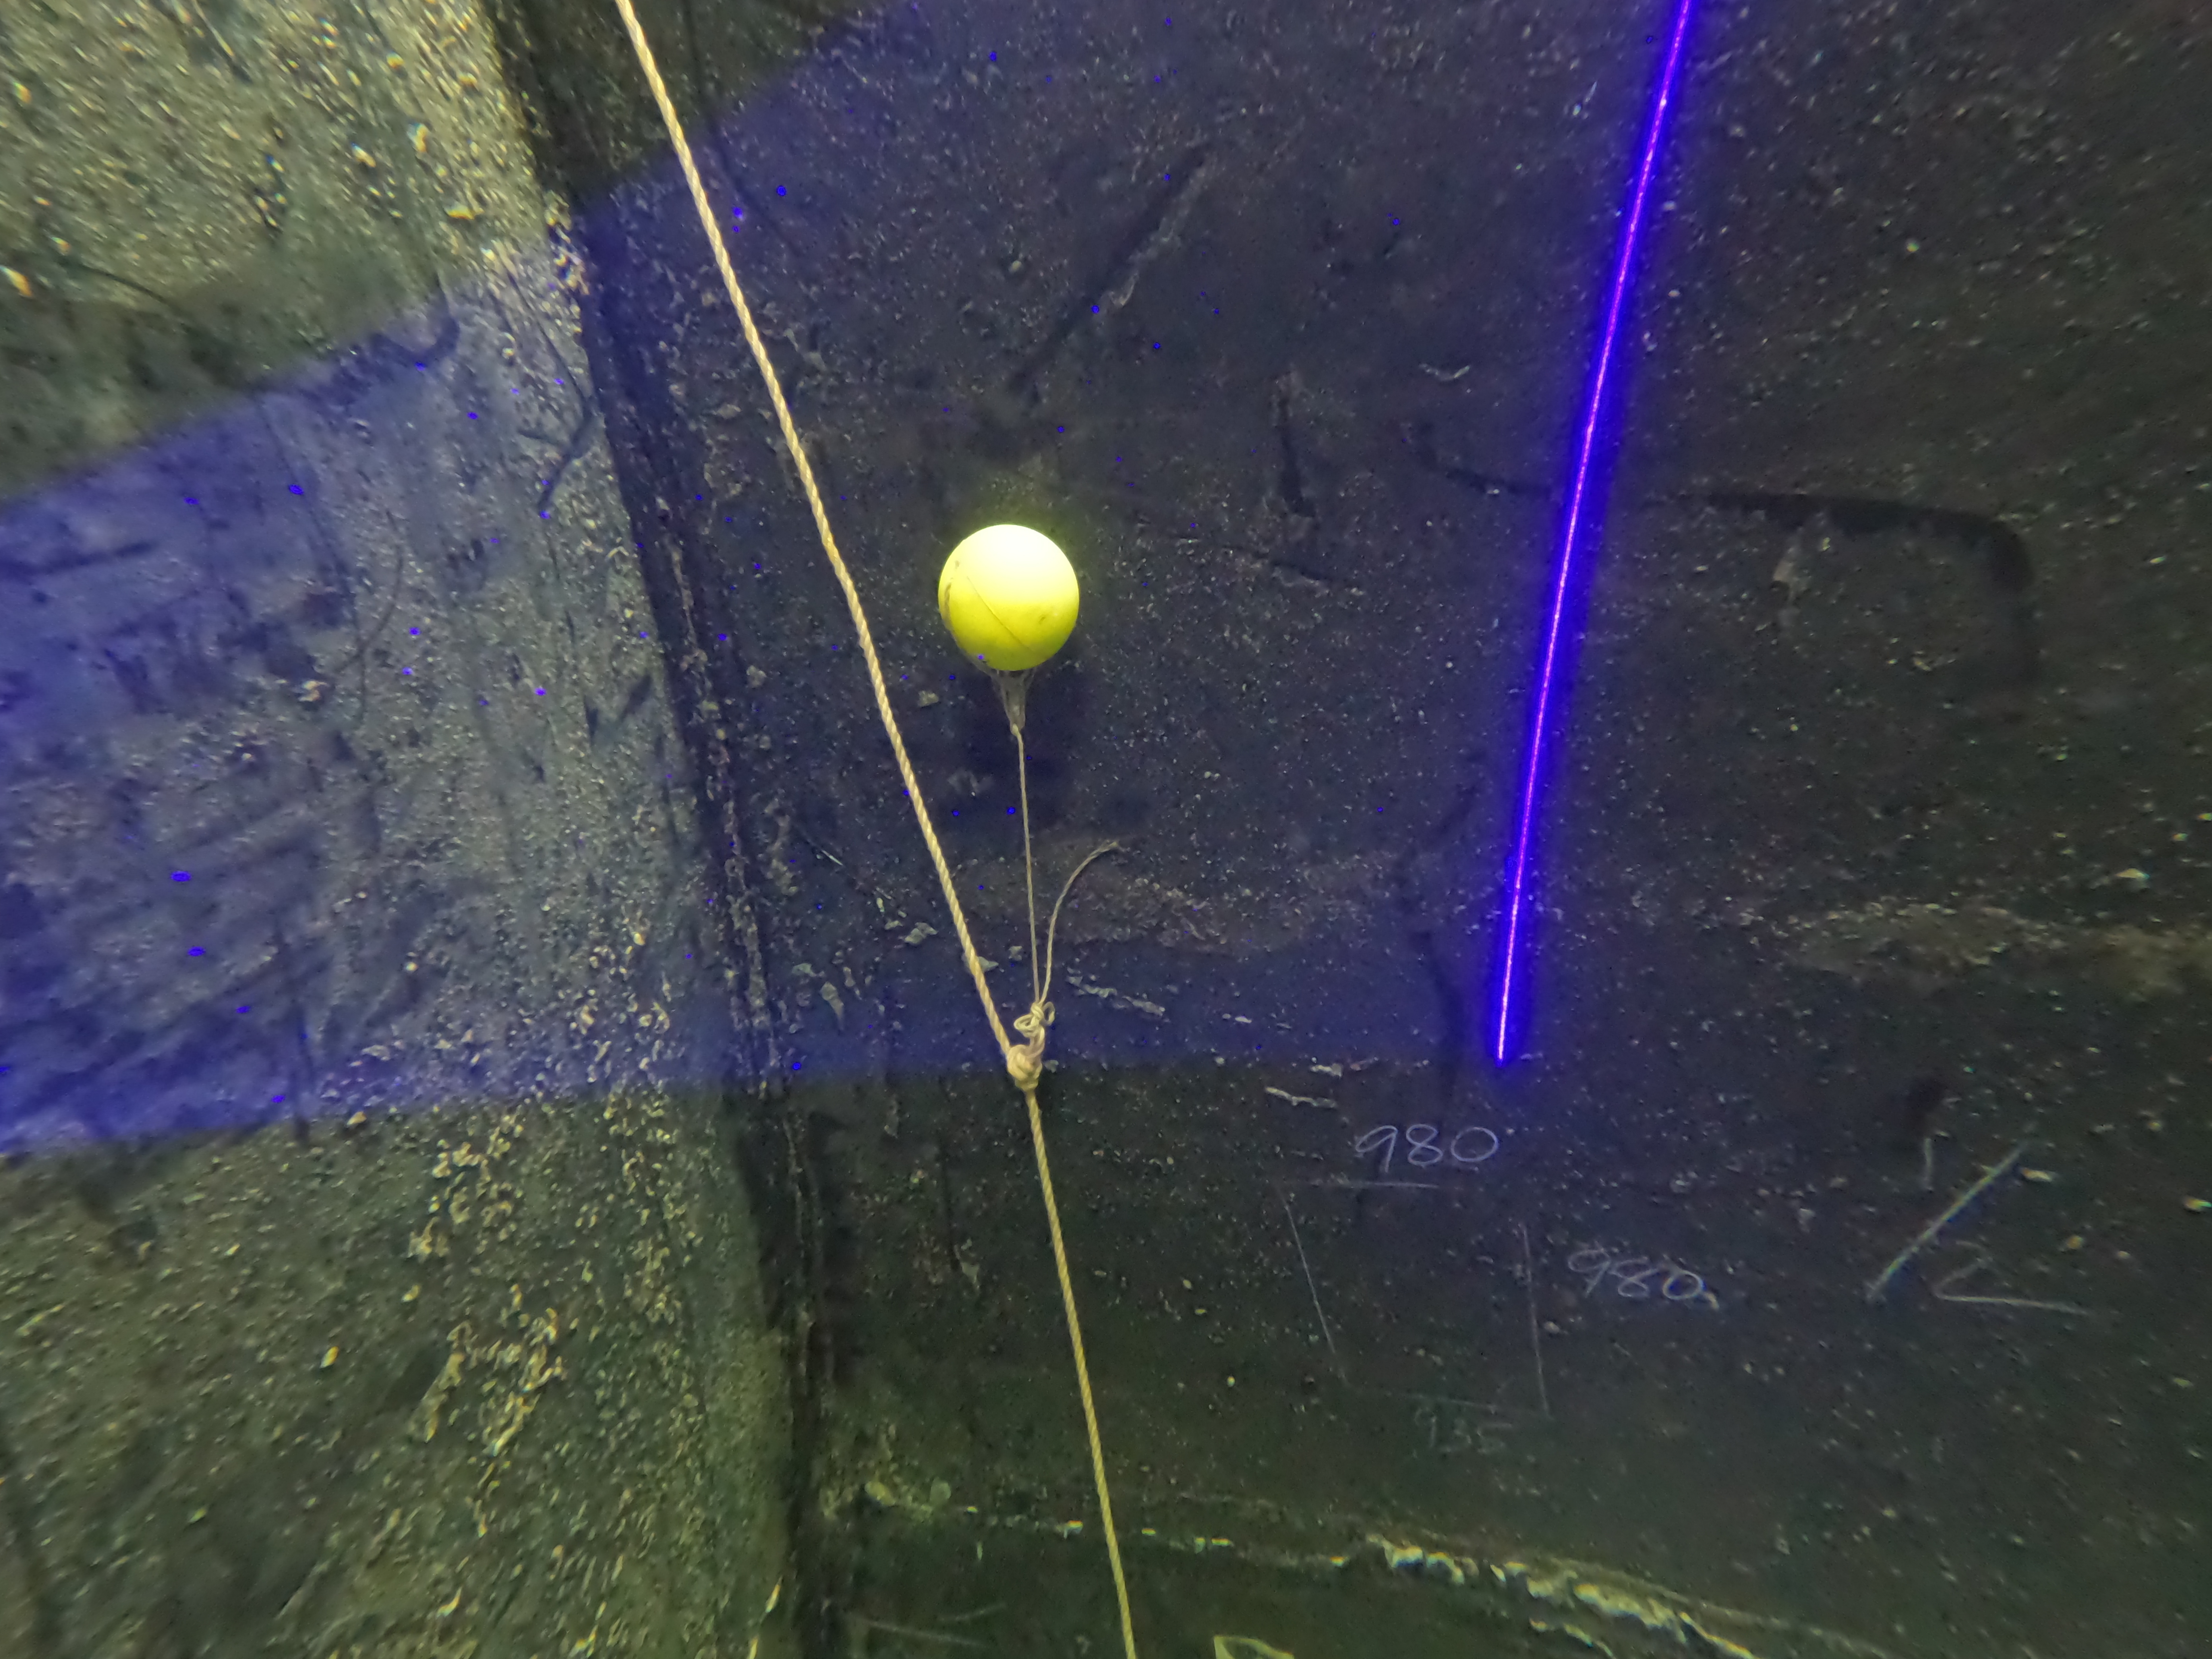

980

980

935

Supplement: Supplementary file 208 [file G0031001.pdf › 4/G0031001.pdf]

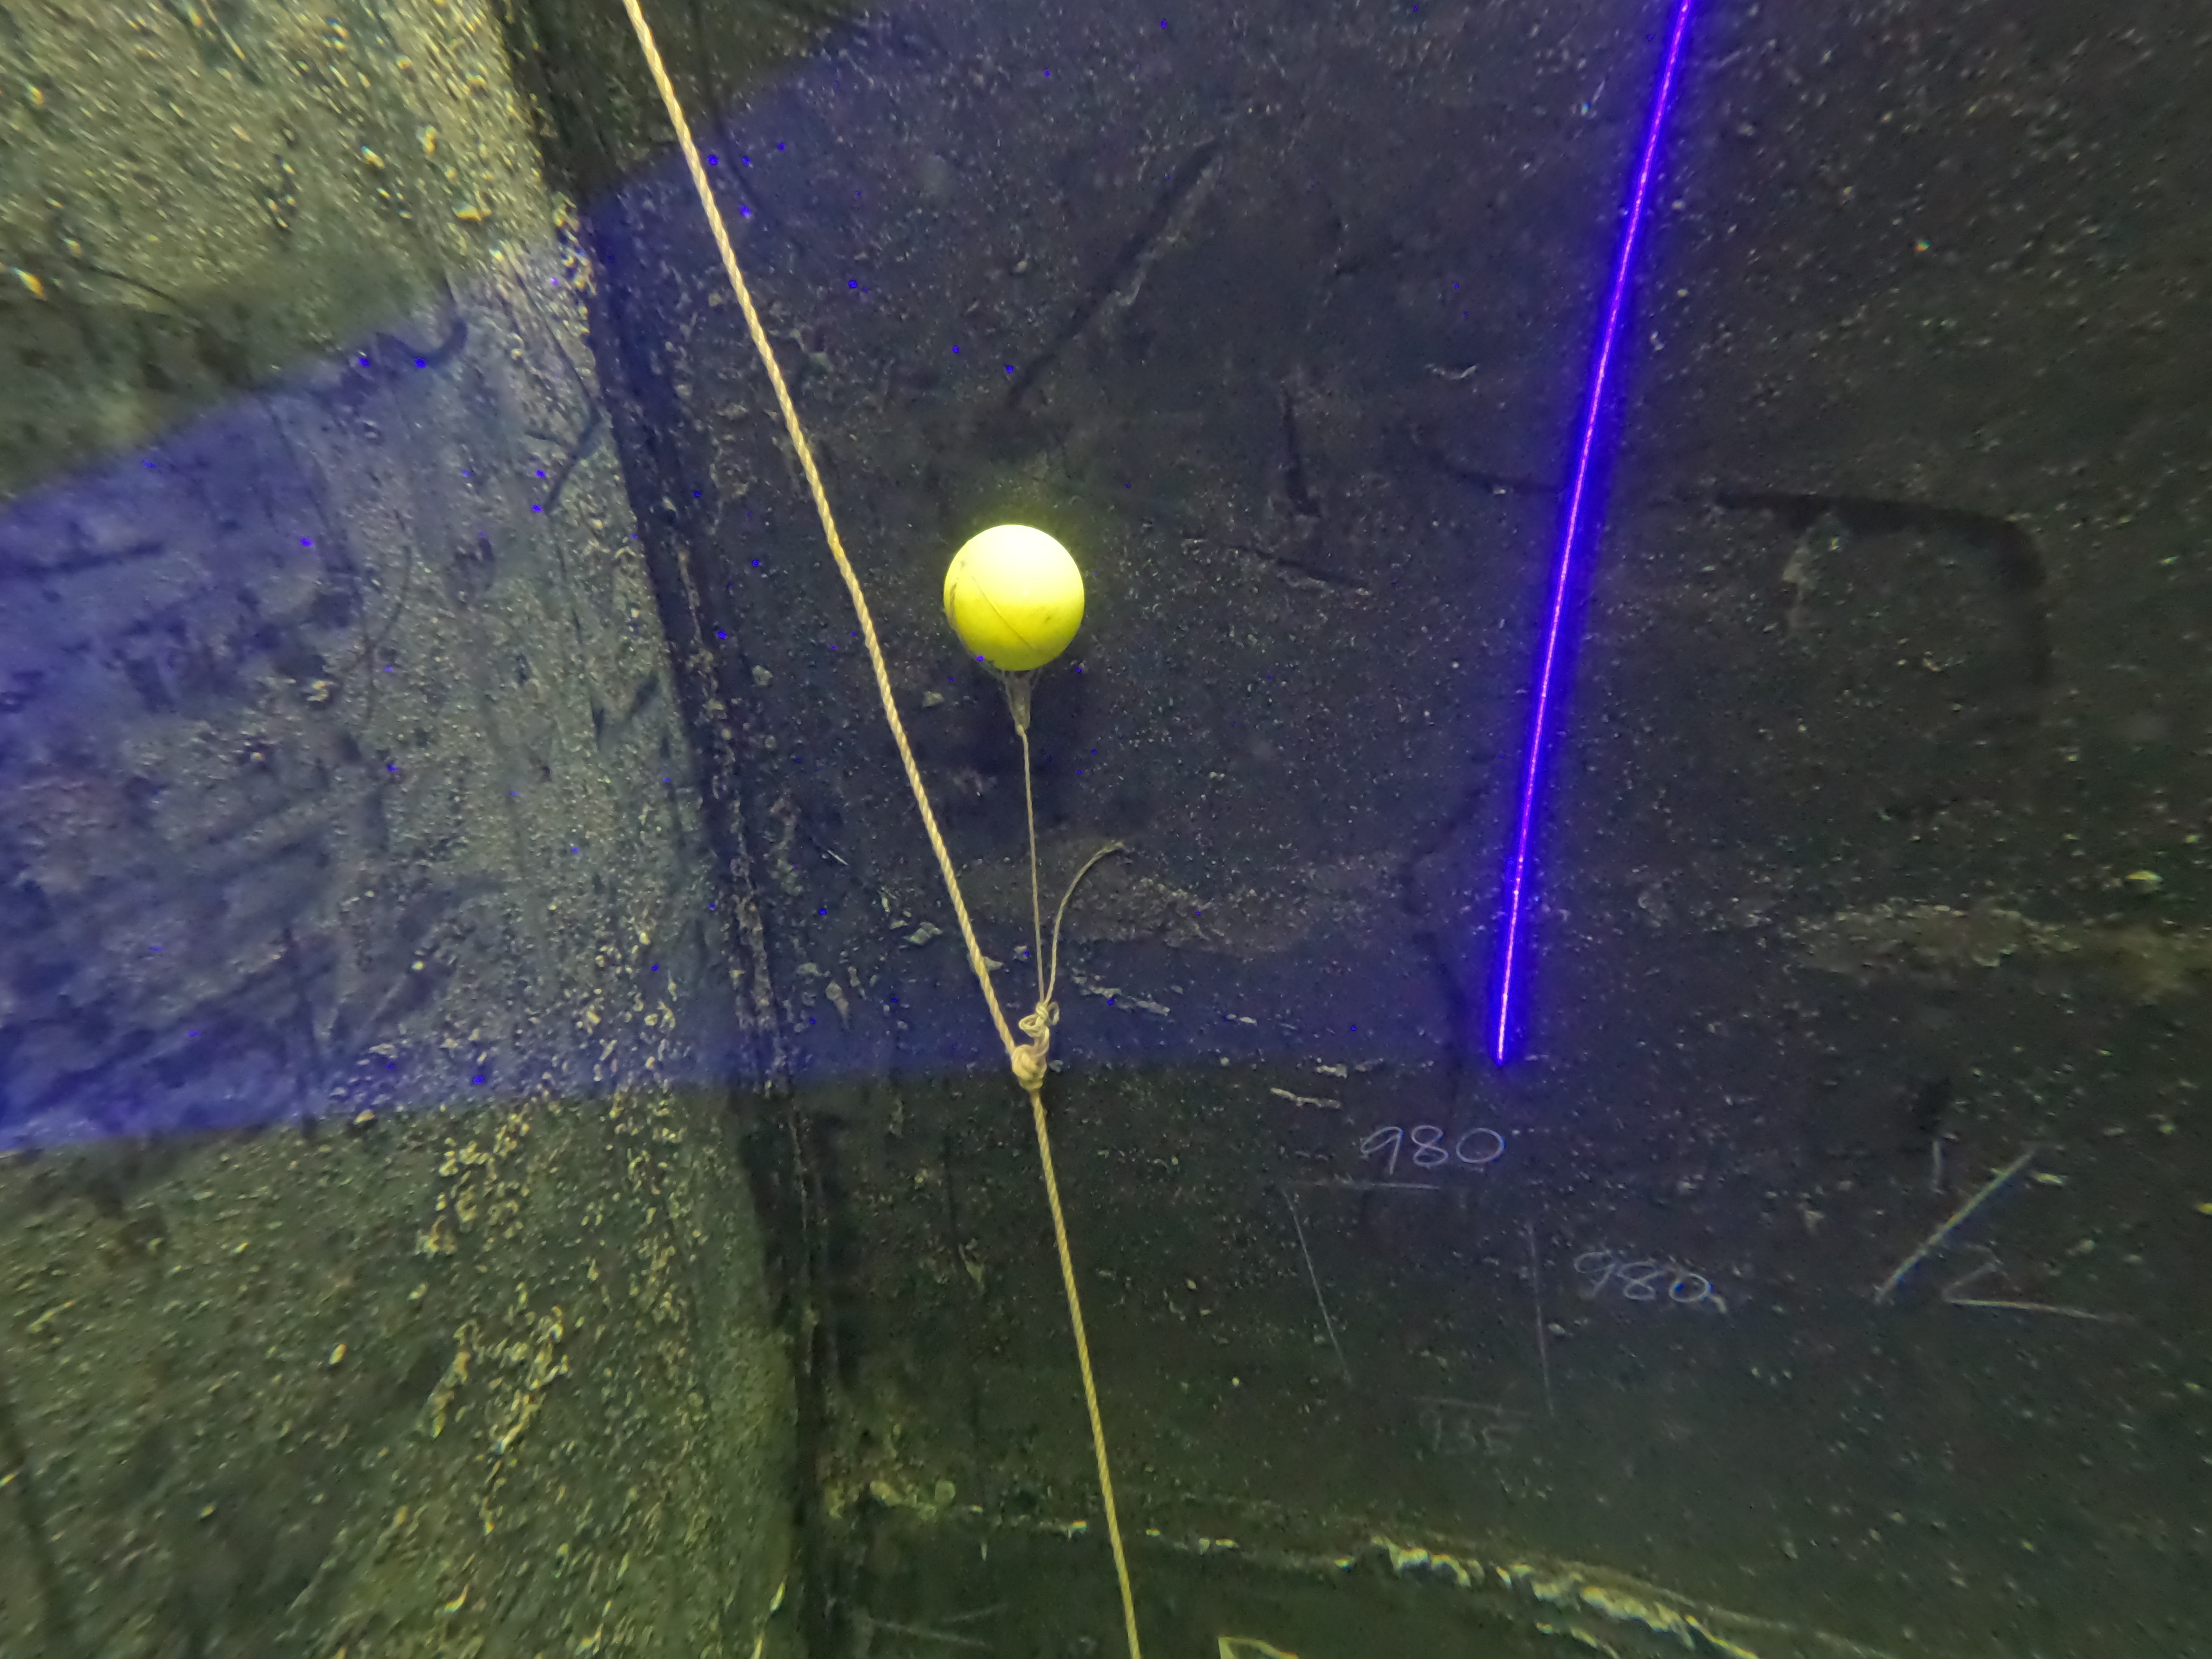

Supplement: Supplementary file 209 [file G0031002.pdf › 4/G0031002.pdf]

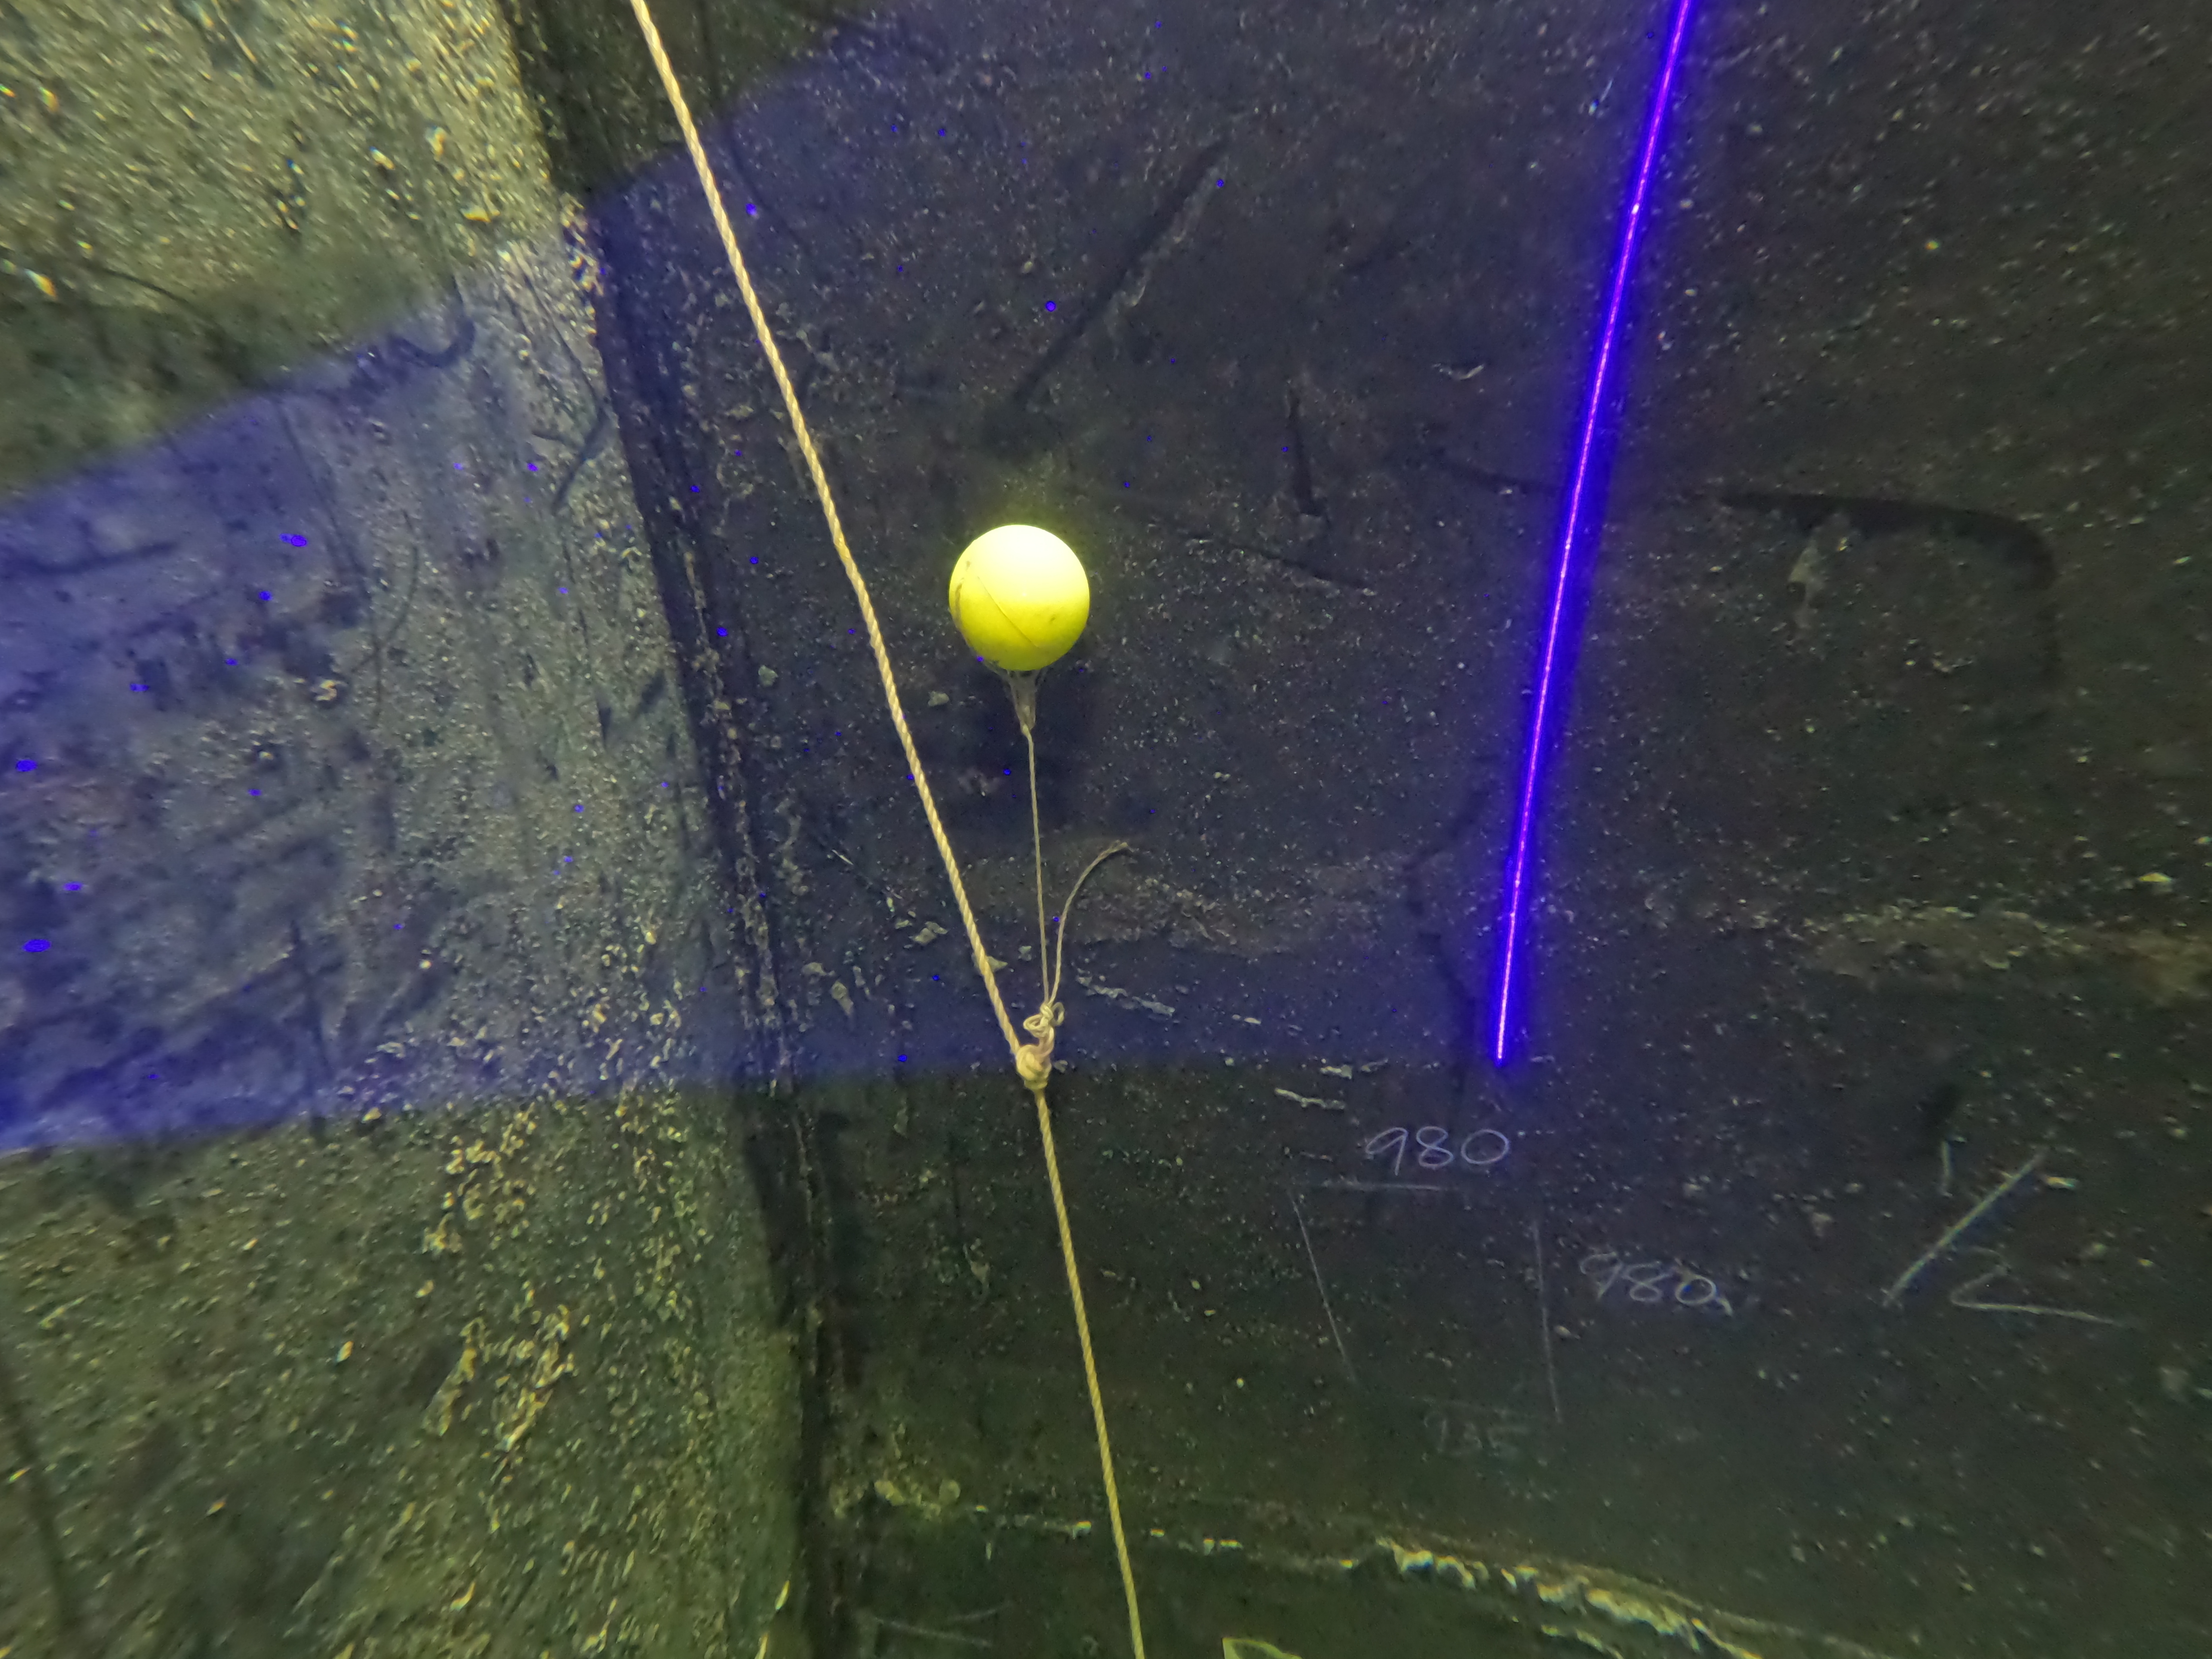

980

980

X

Supplement: Supplementary file 210 [file G0031003.pdf › 4/G0031003.pdf]

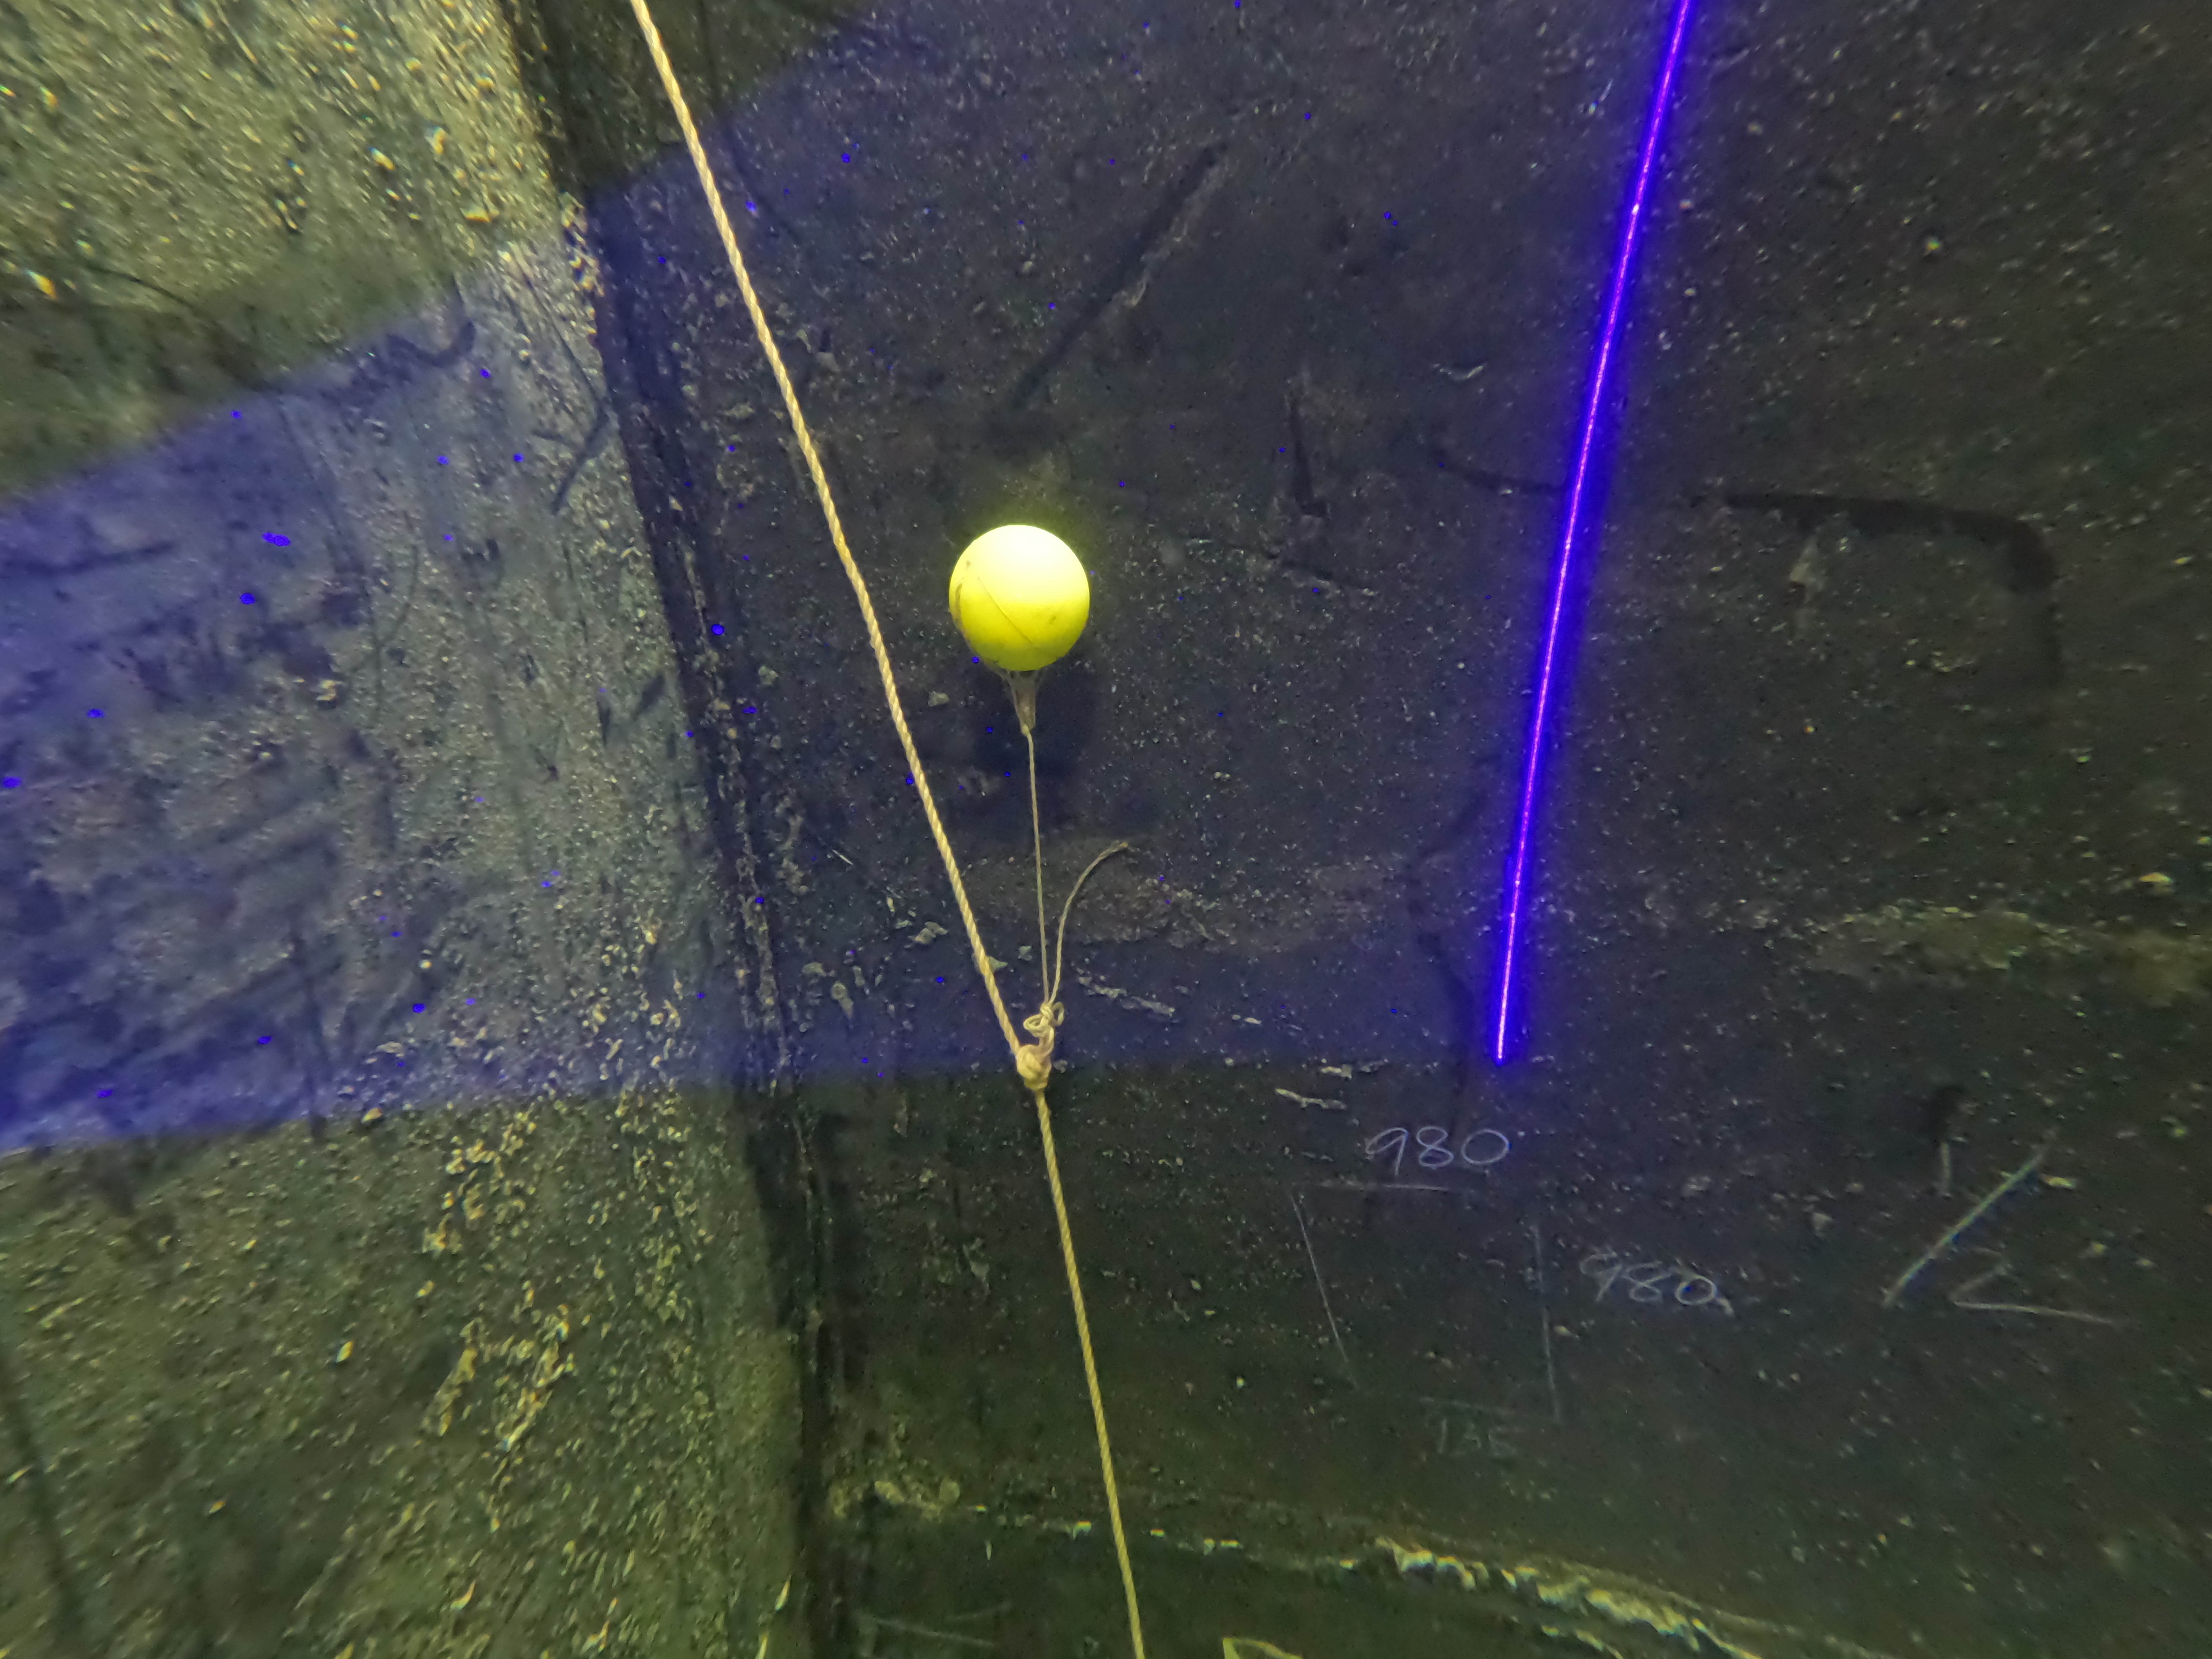

980

980

135

Z

Supplement: Supplementary file 211 [file G0031004.pdf › 4/G0031004.pdf]

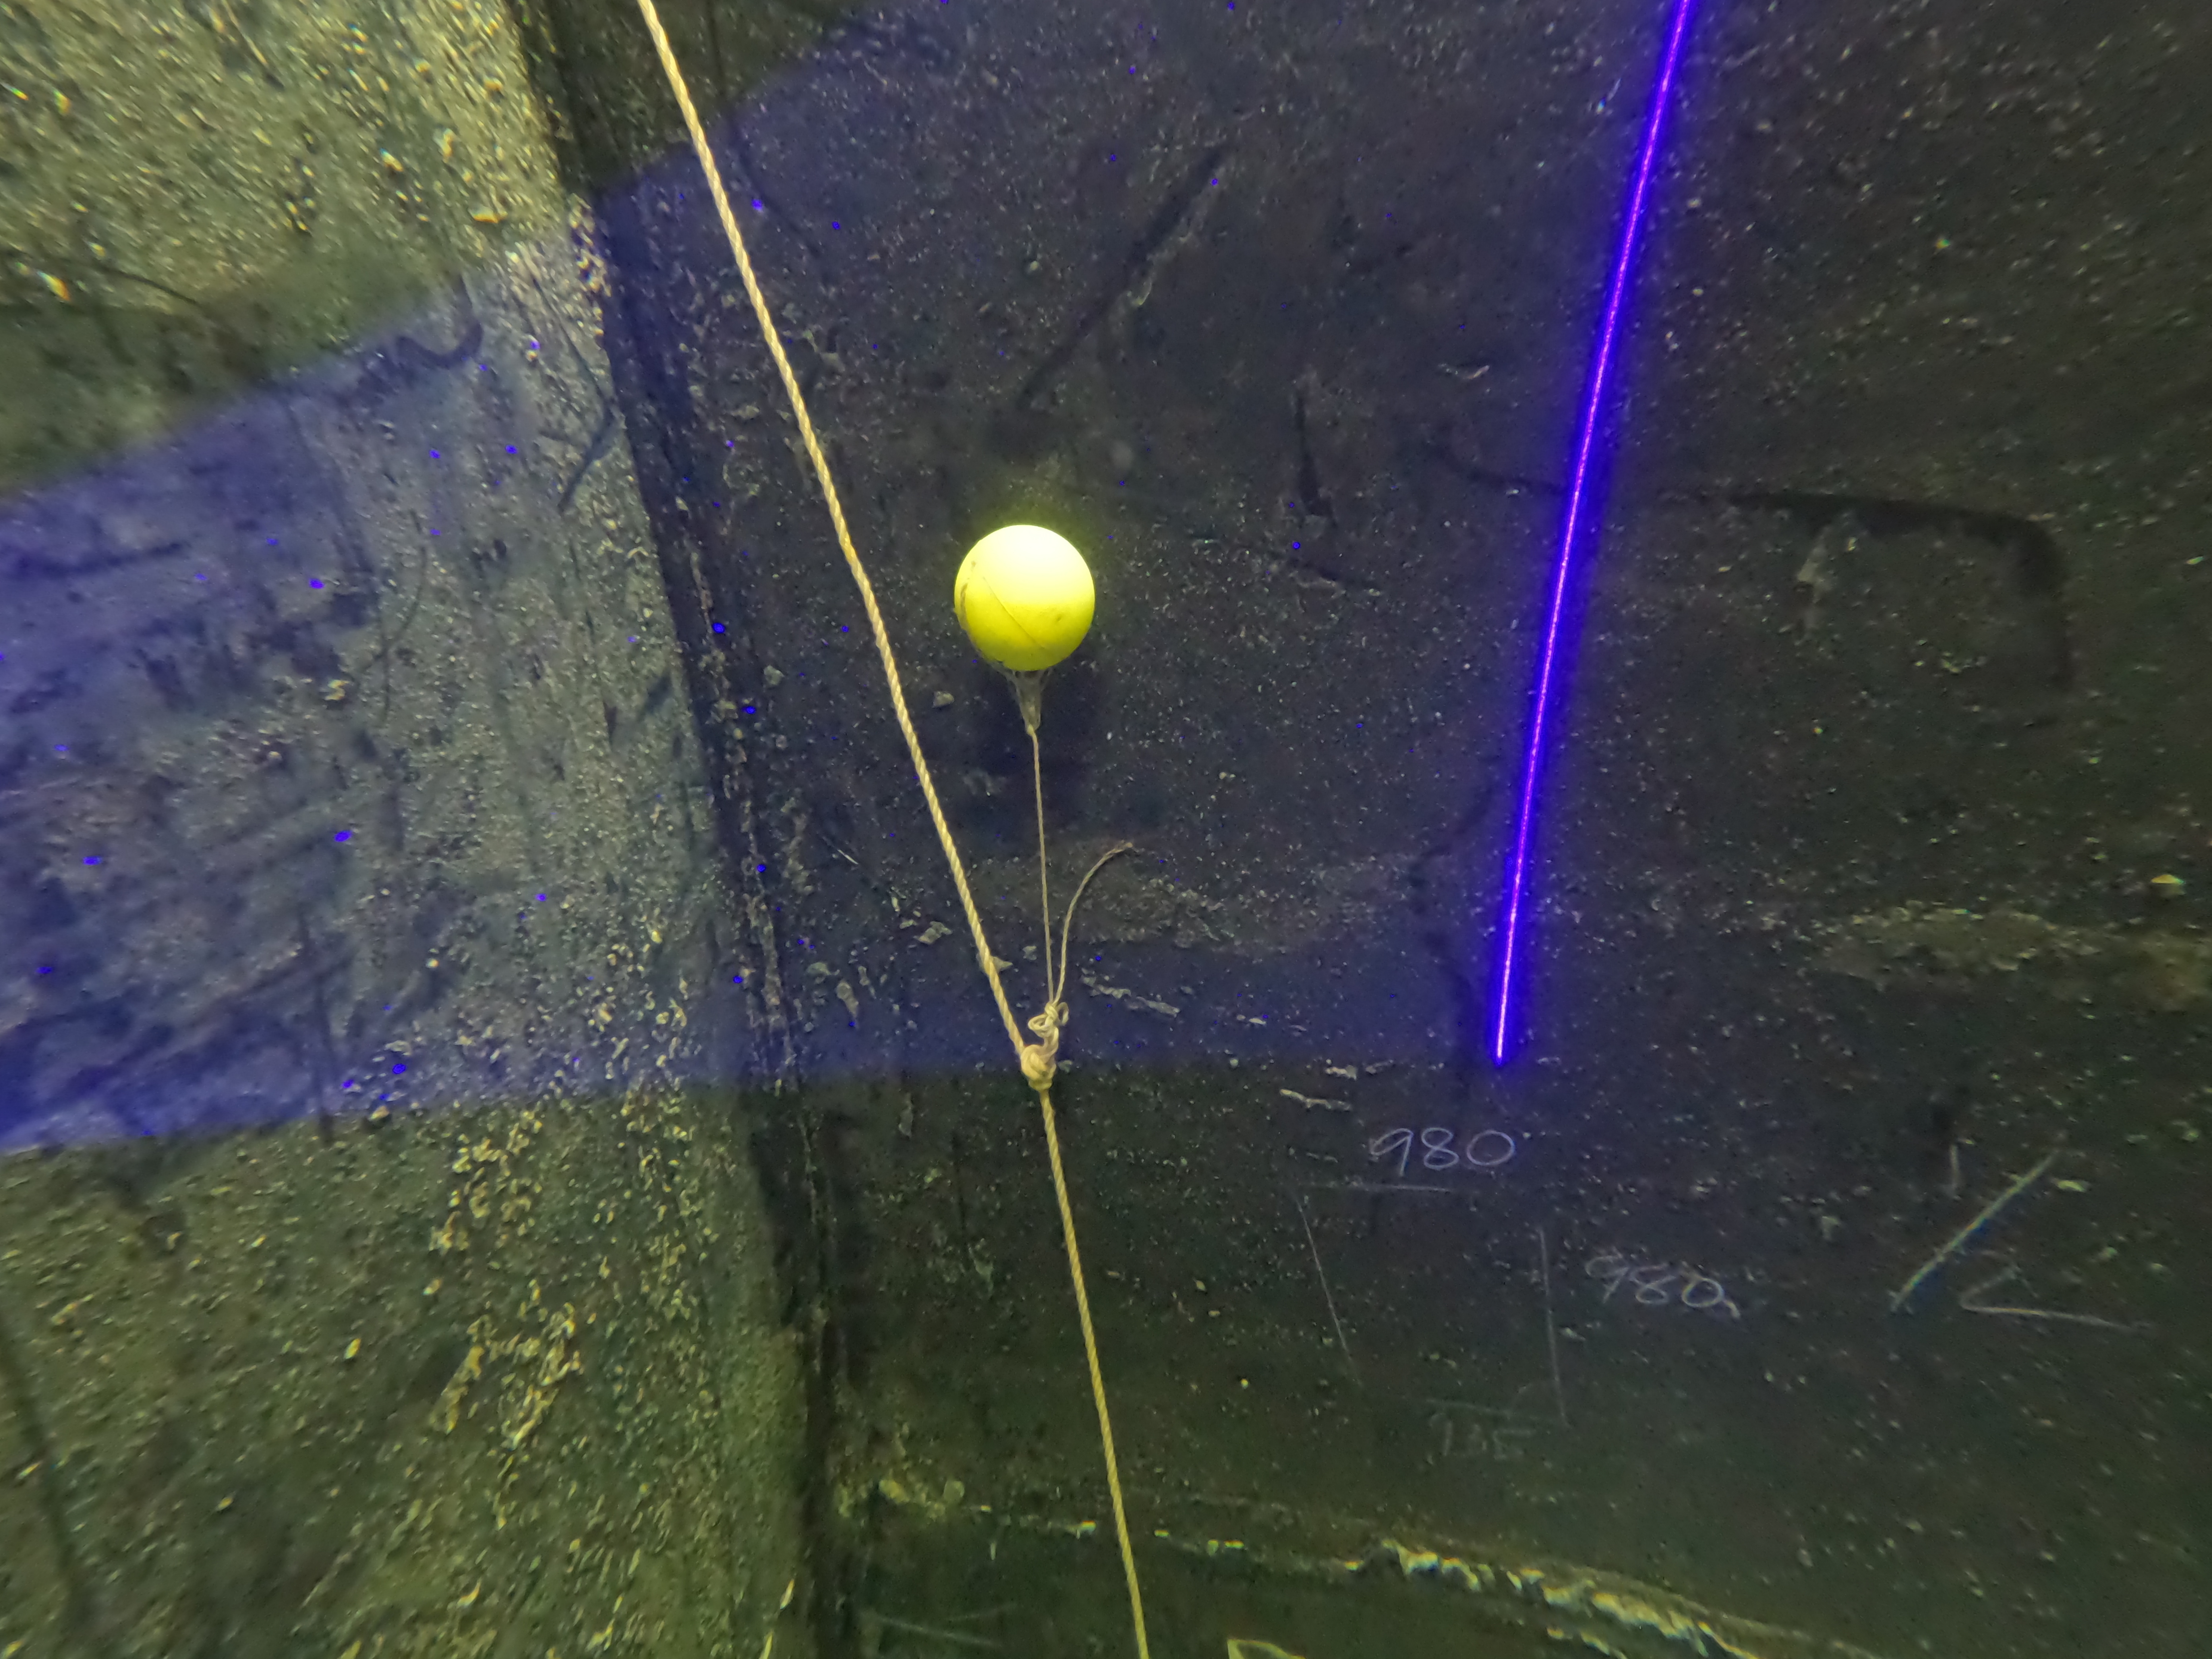

980

980

985

Supplement: Supplementary file 212 [file G0031005.pdf › 4/G0031005.pdf]

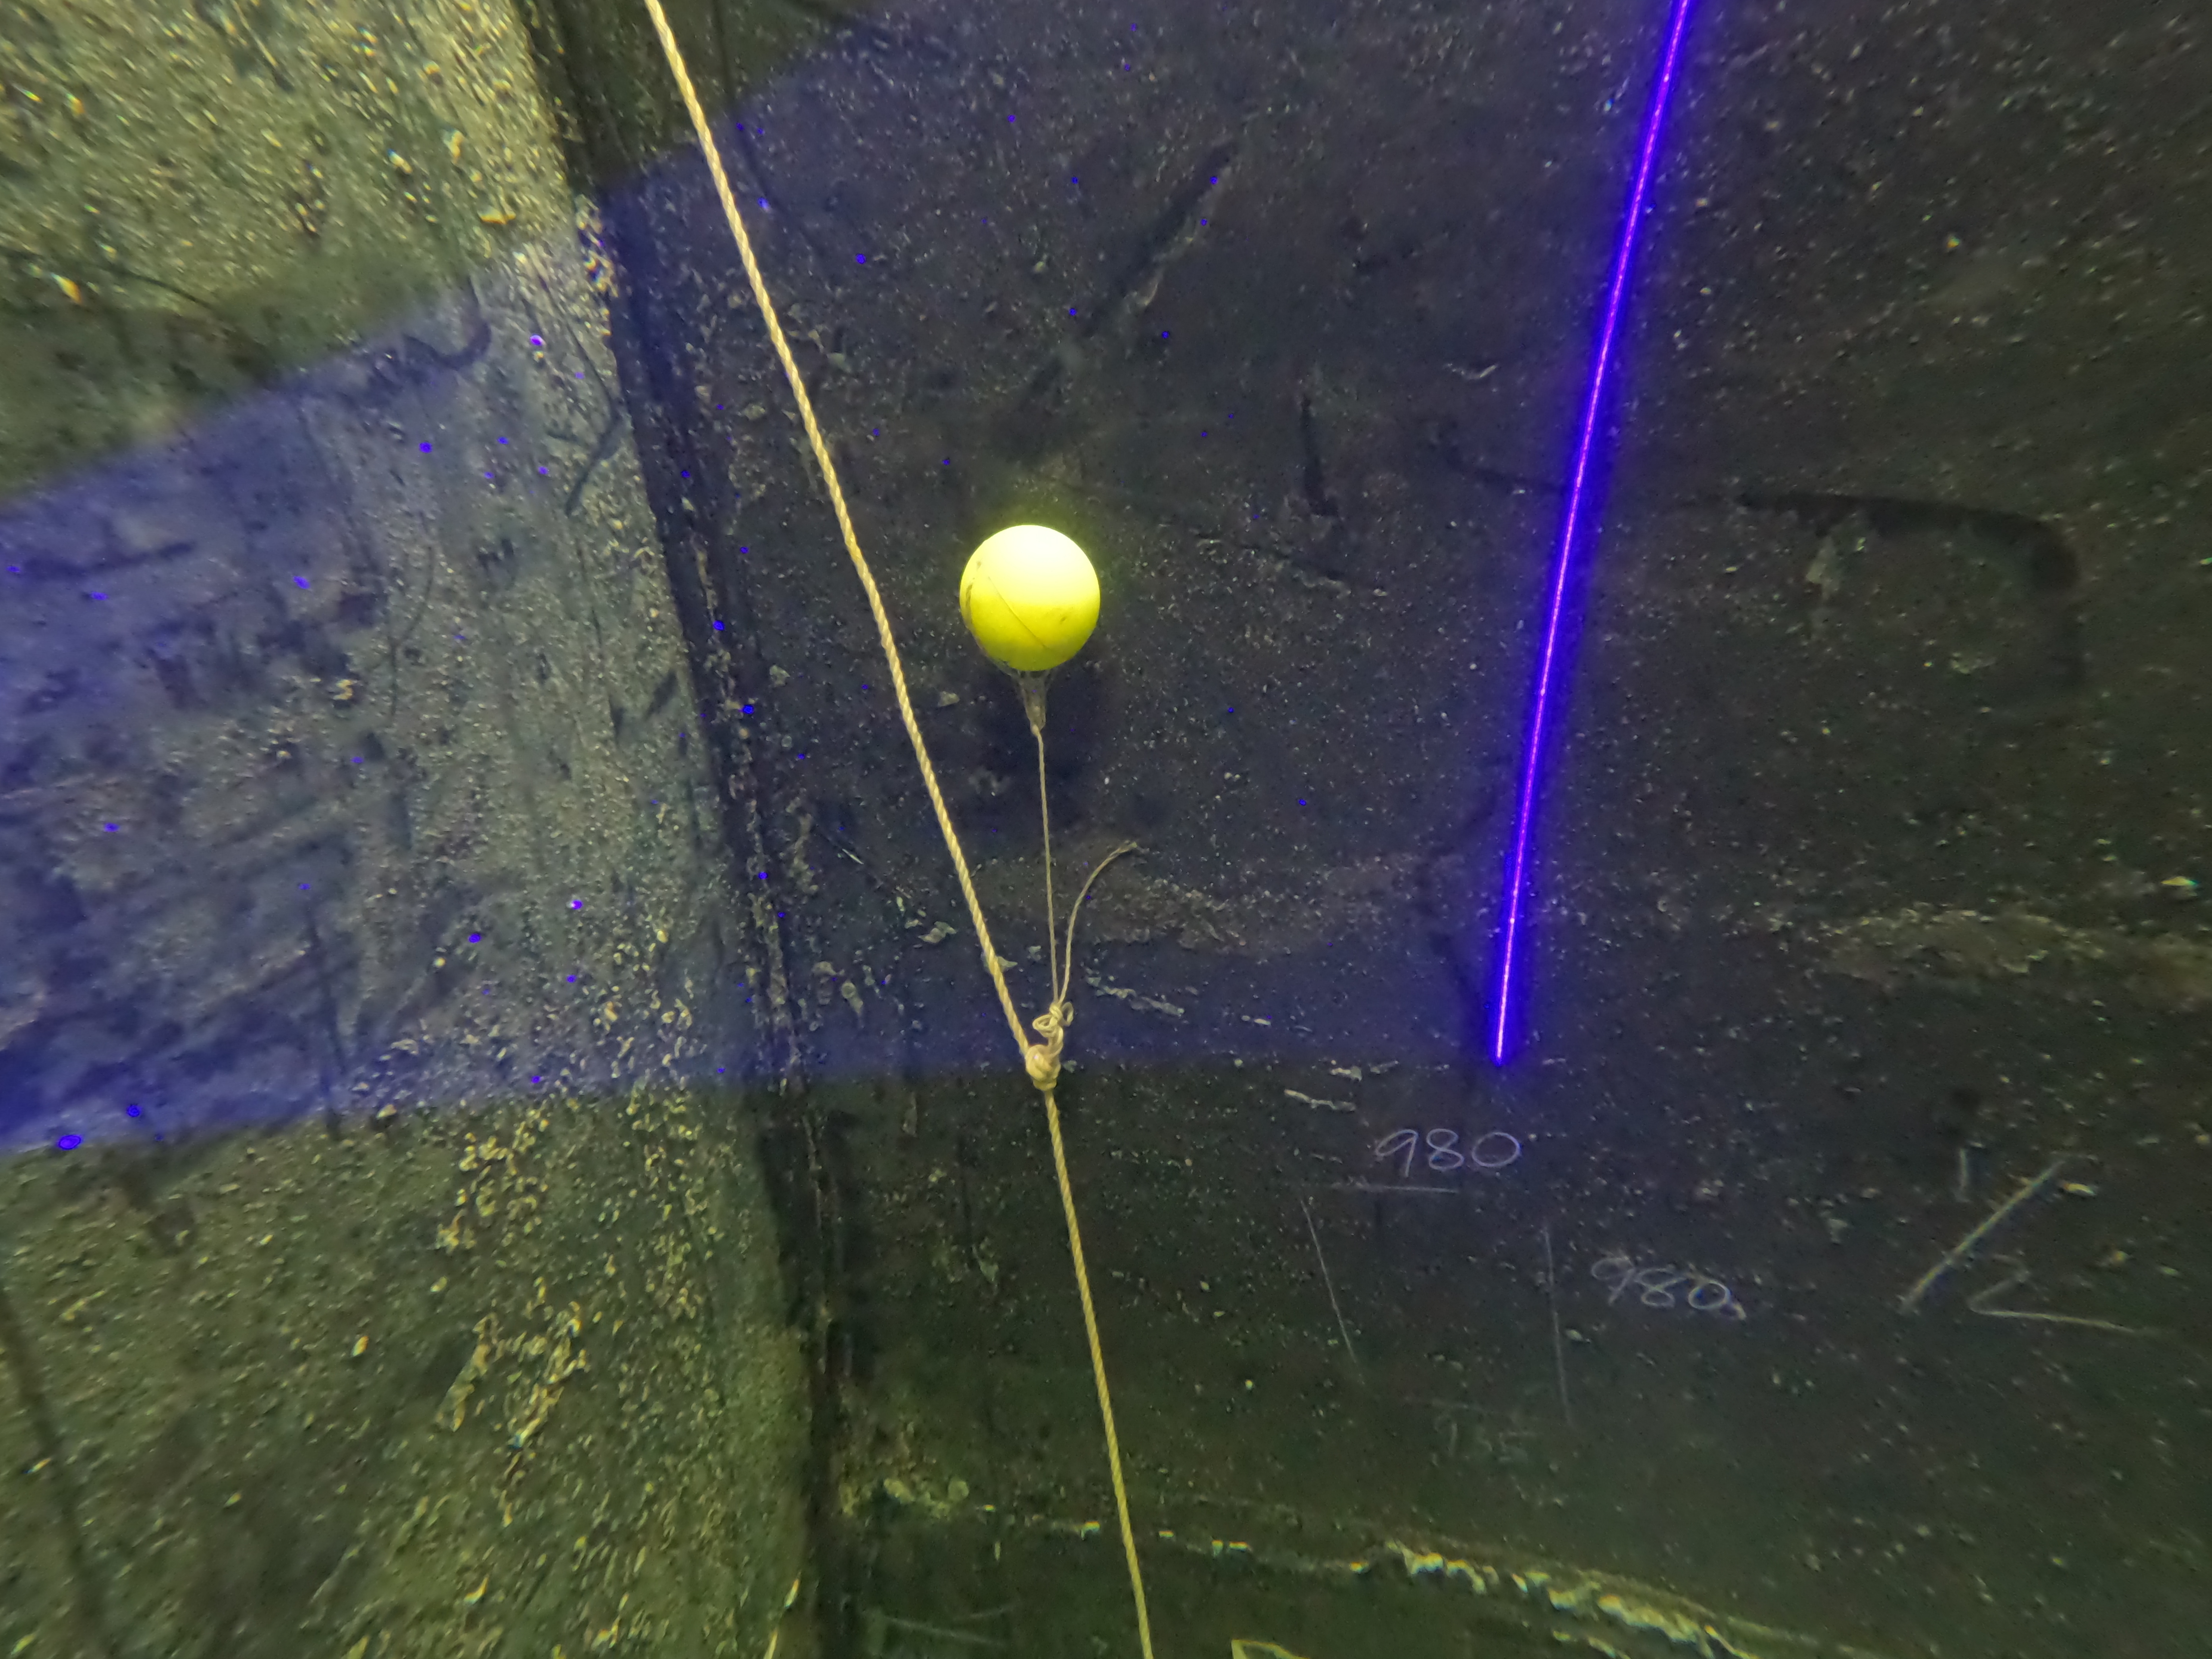

Supplement: Supplementary file 213 [file G0031006.pdf › 4/G0031006.pdf]

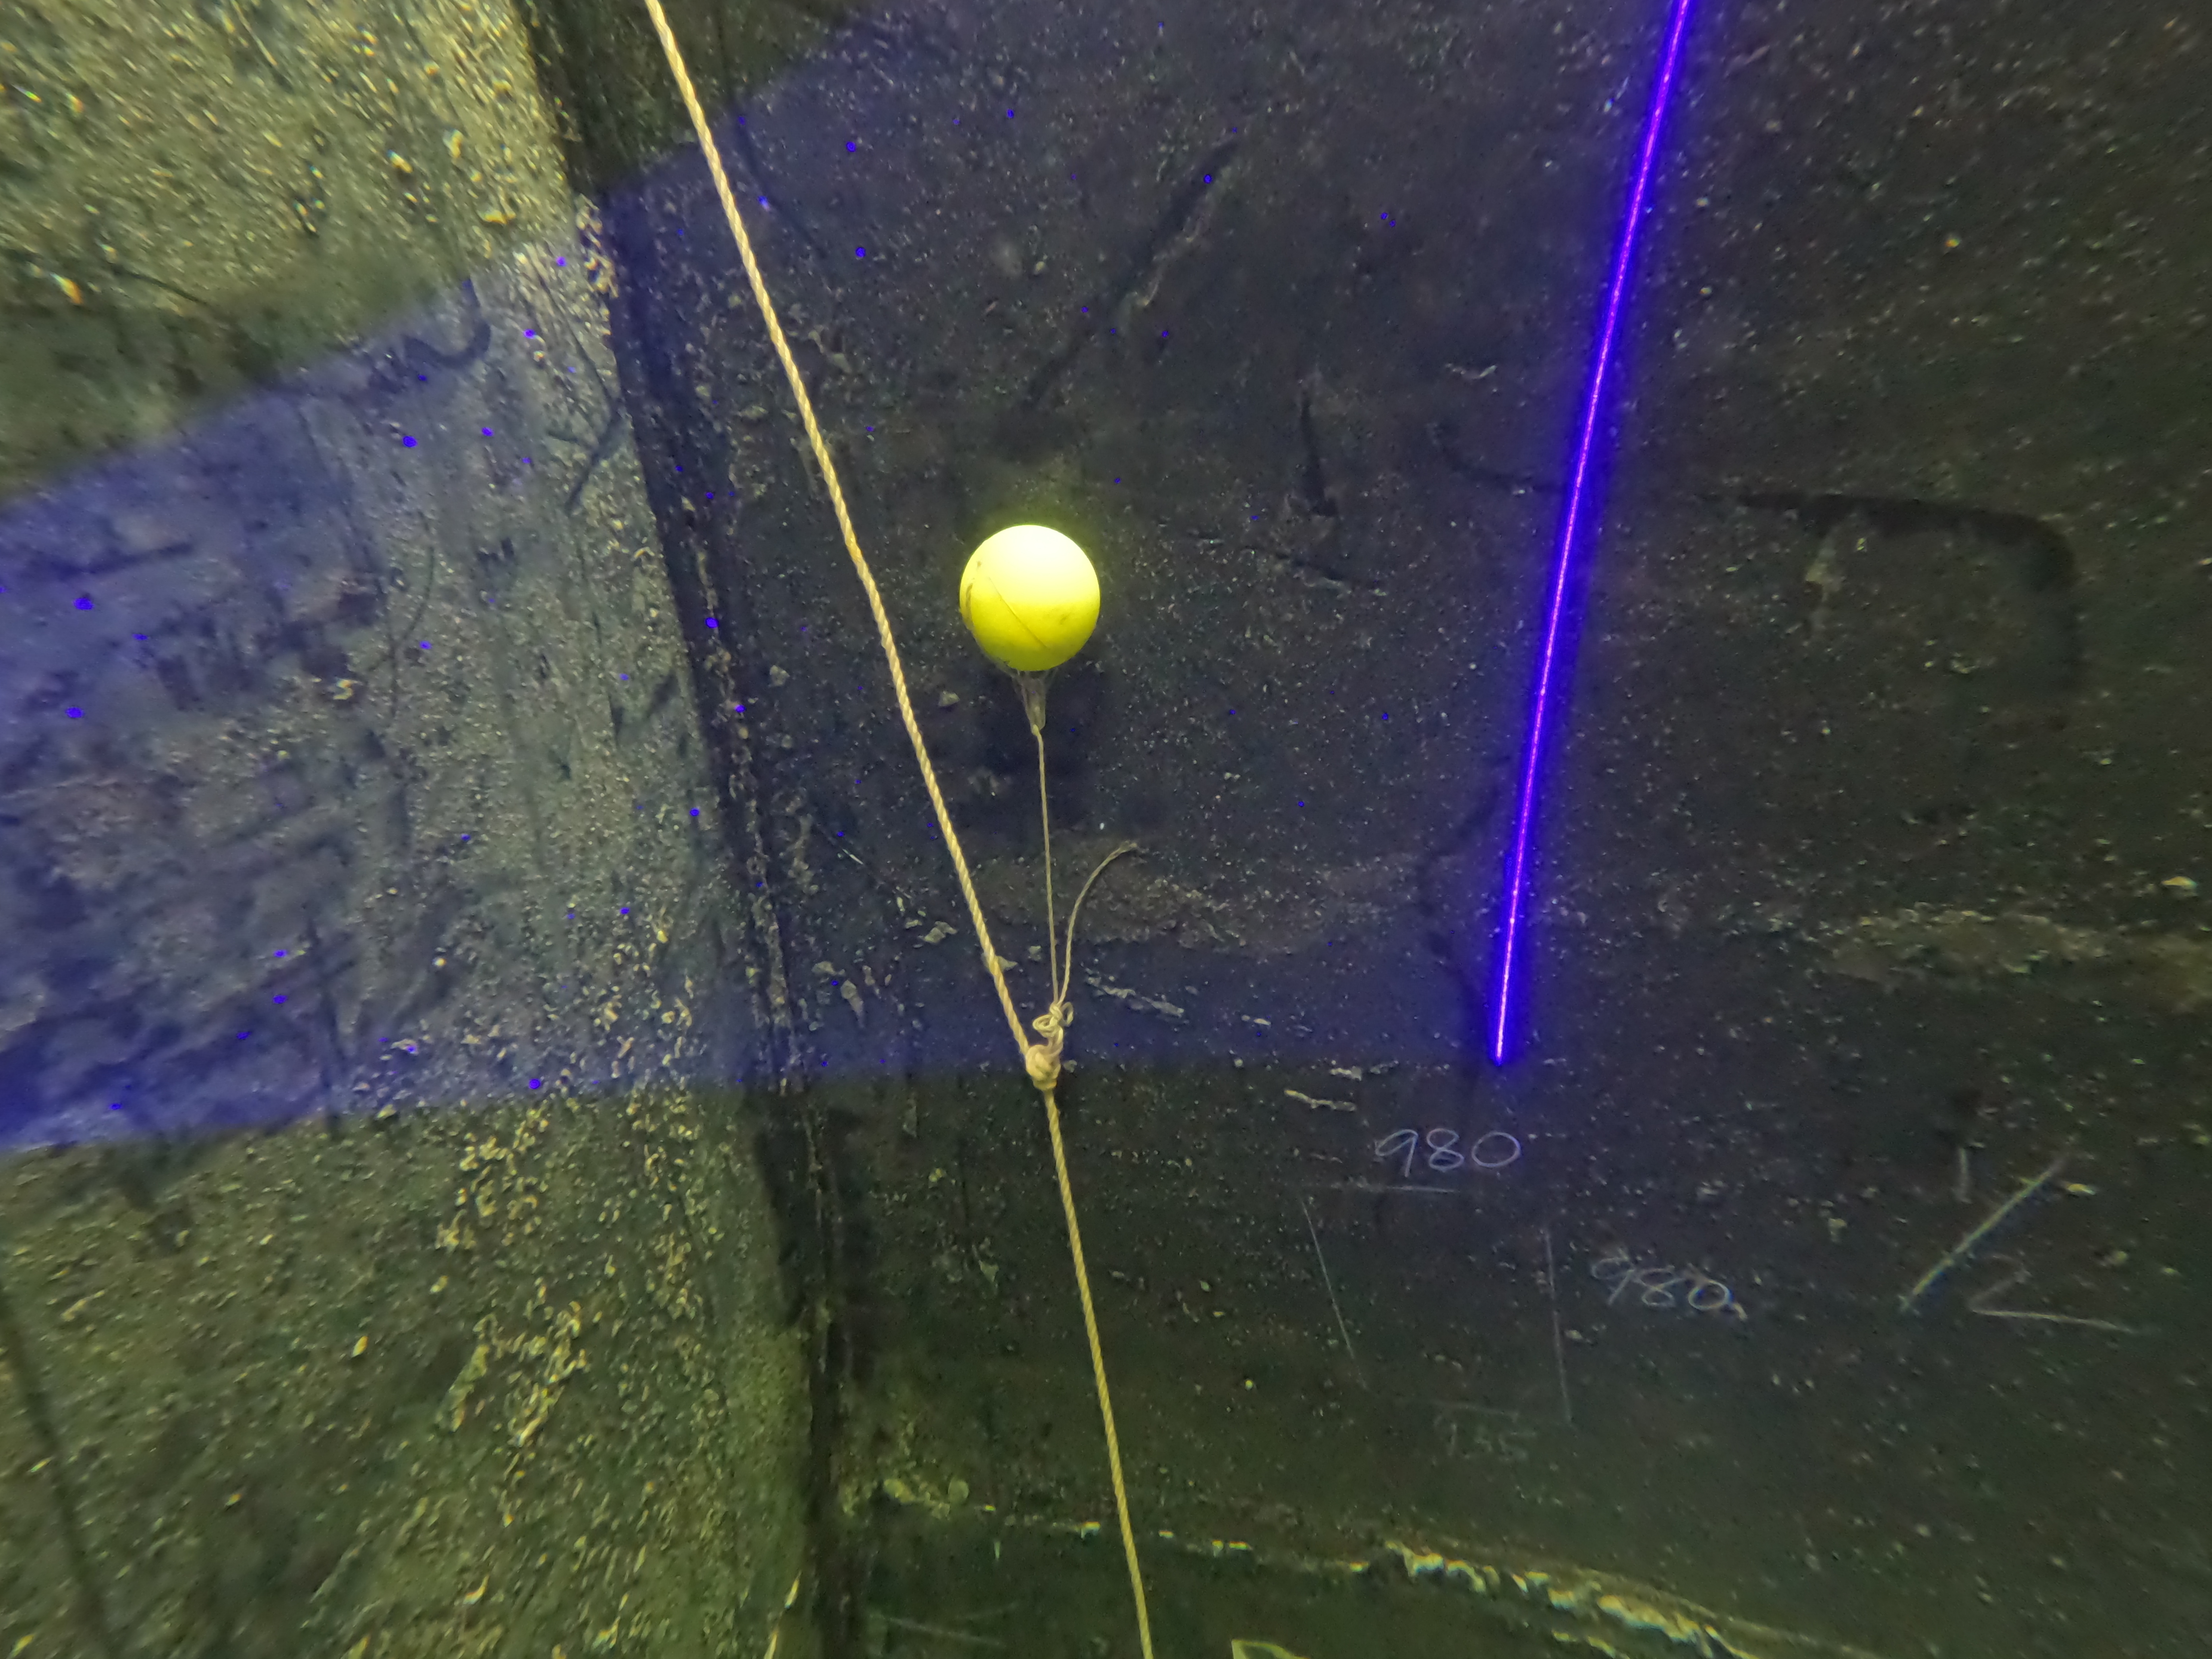

Supplement: Supplementary file 214 [file G0031007.pdf › 4/G0031007.pdf]

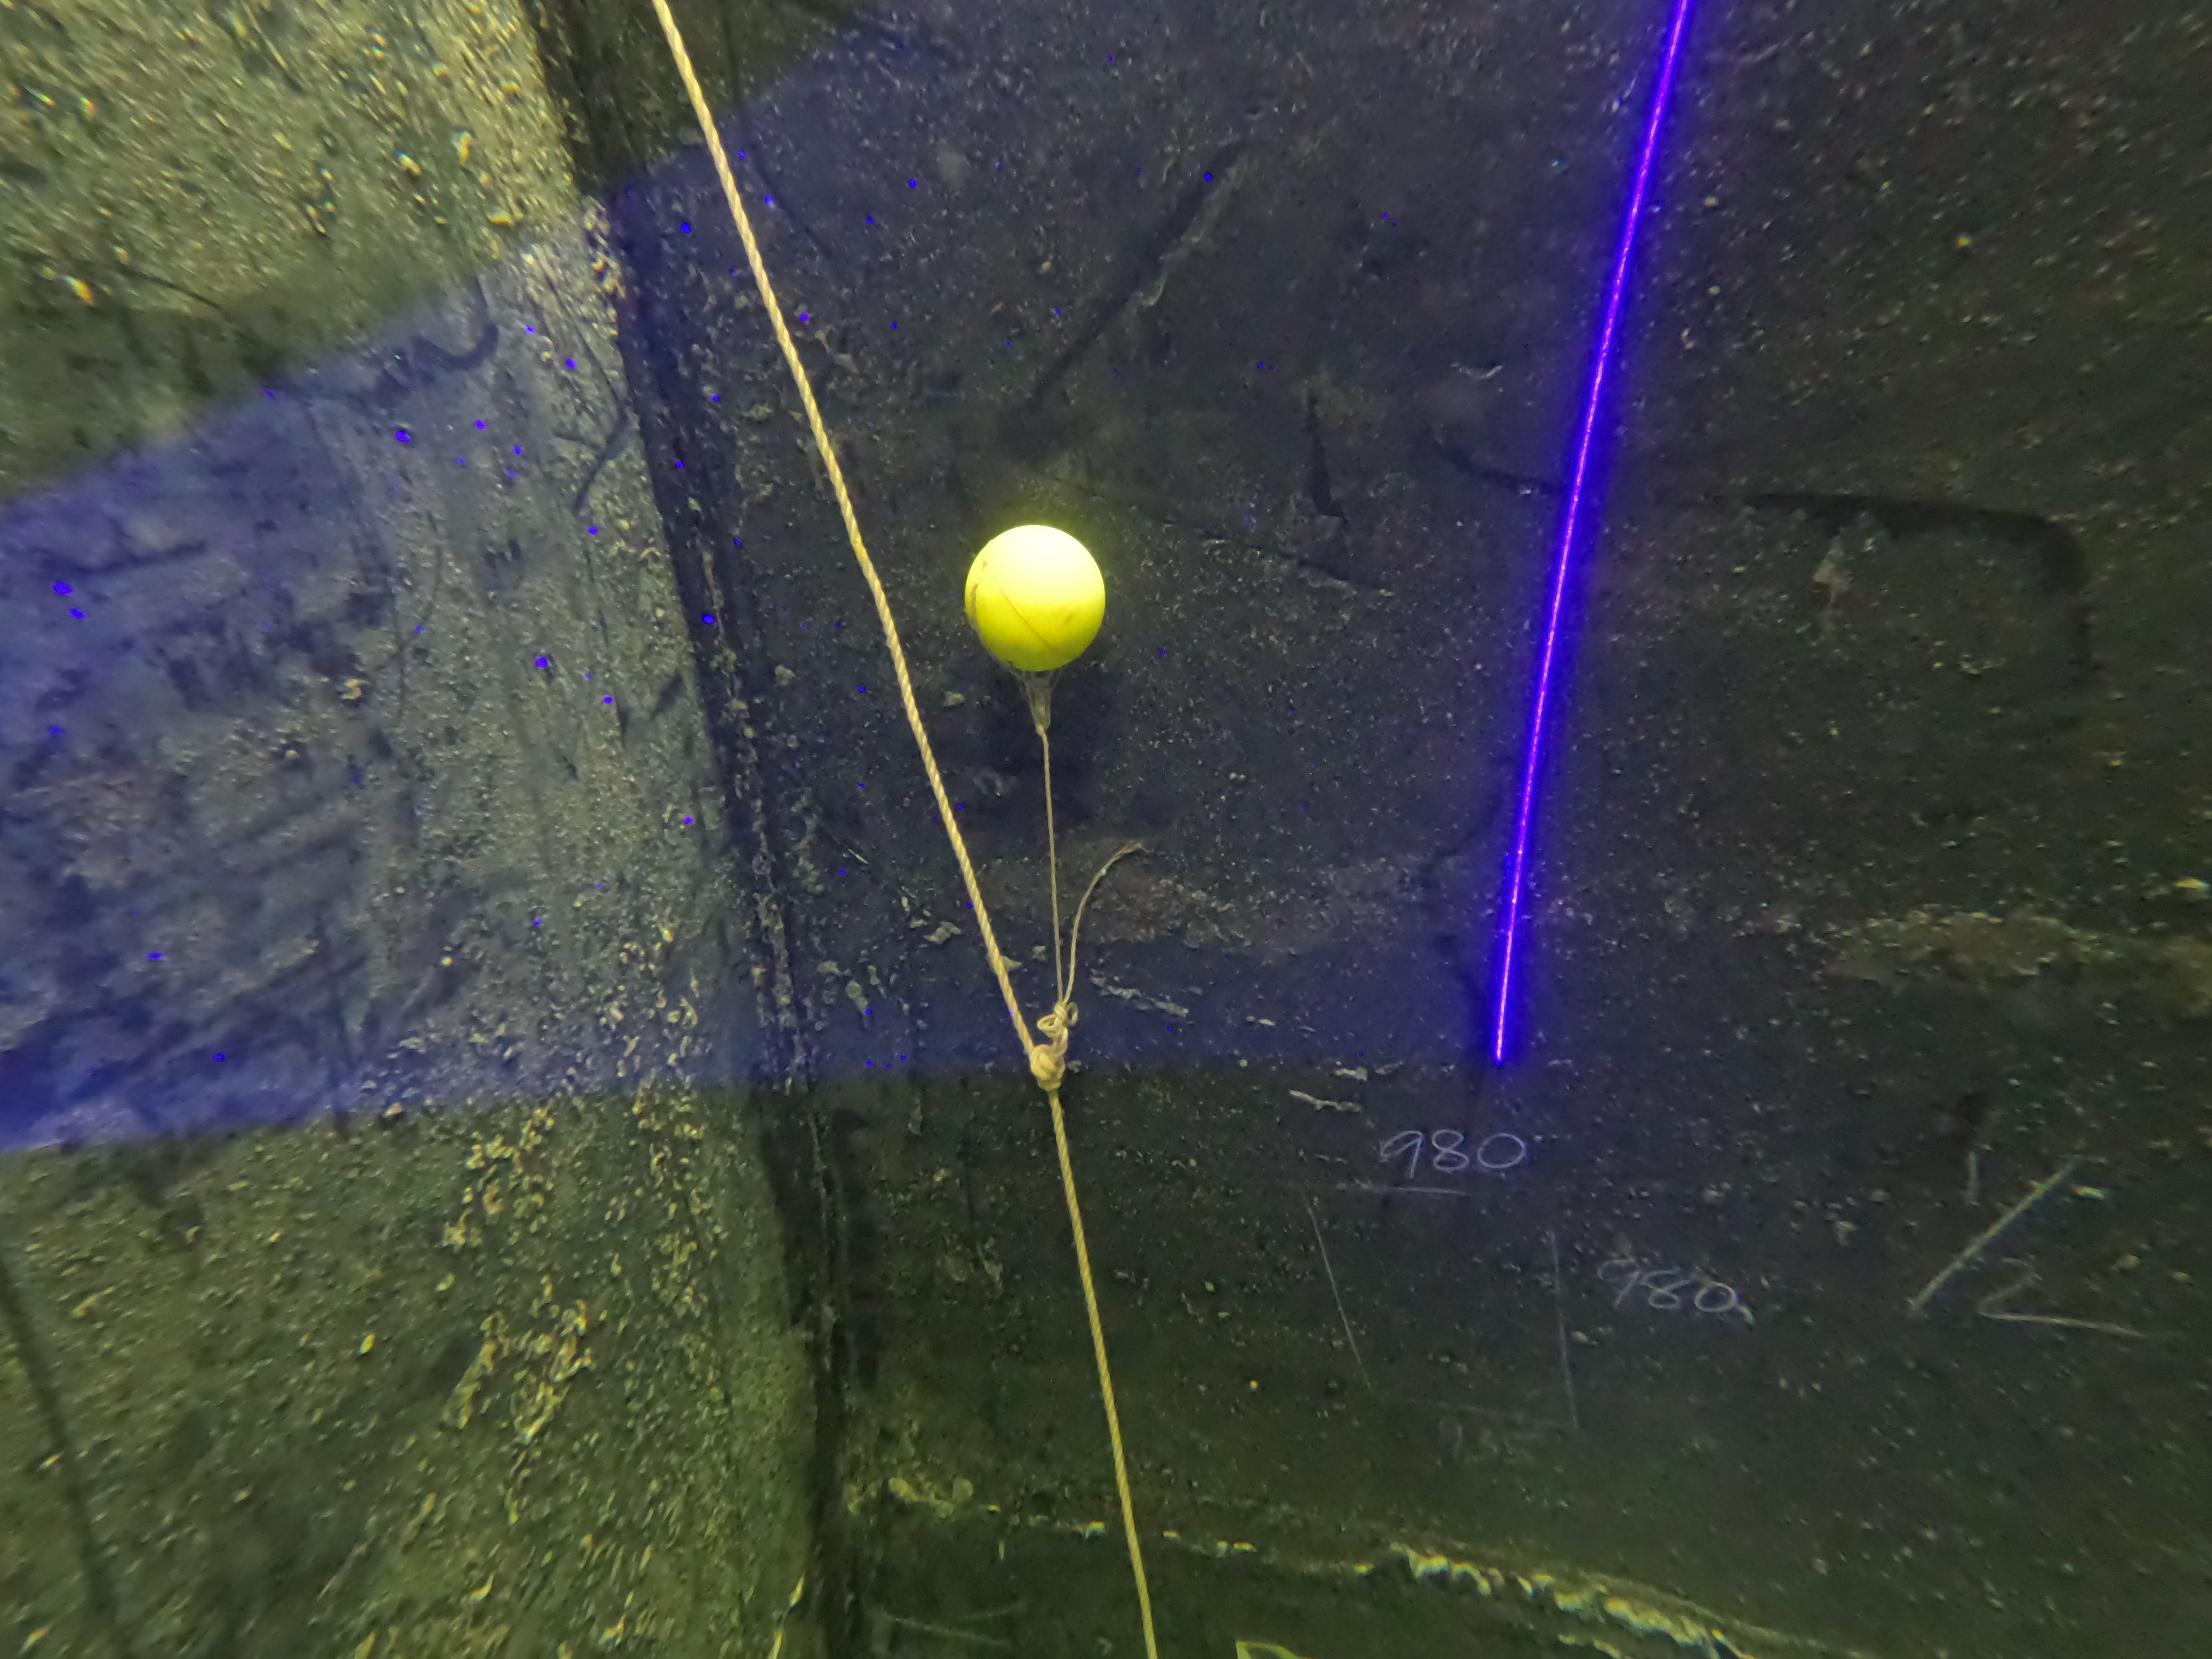

980

980

Supplement: Supplementary file 215 [file G0031008.pdf › 4/G0031008.pdf]

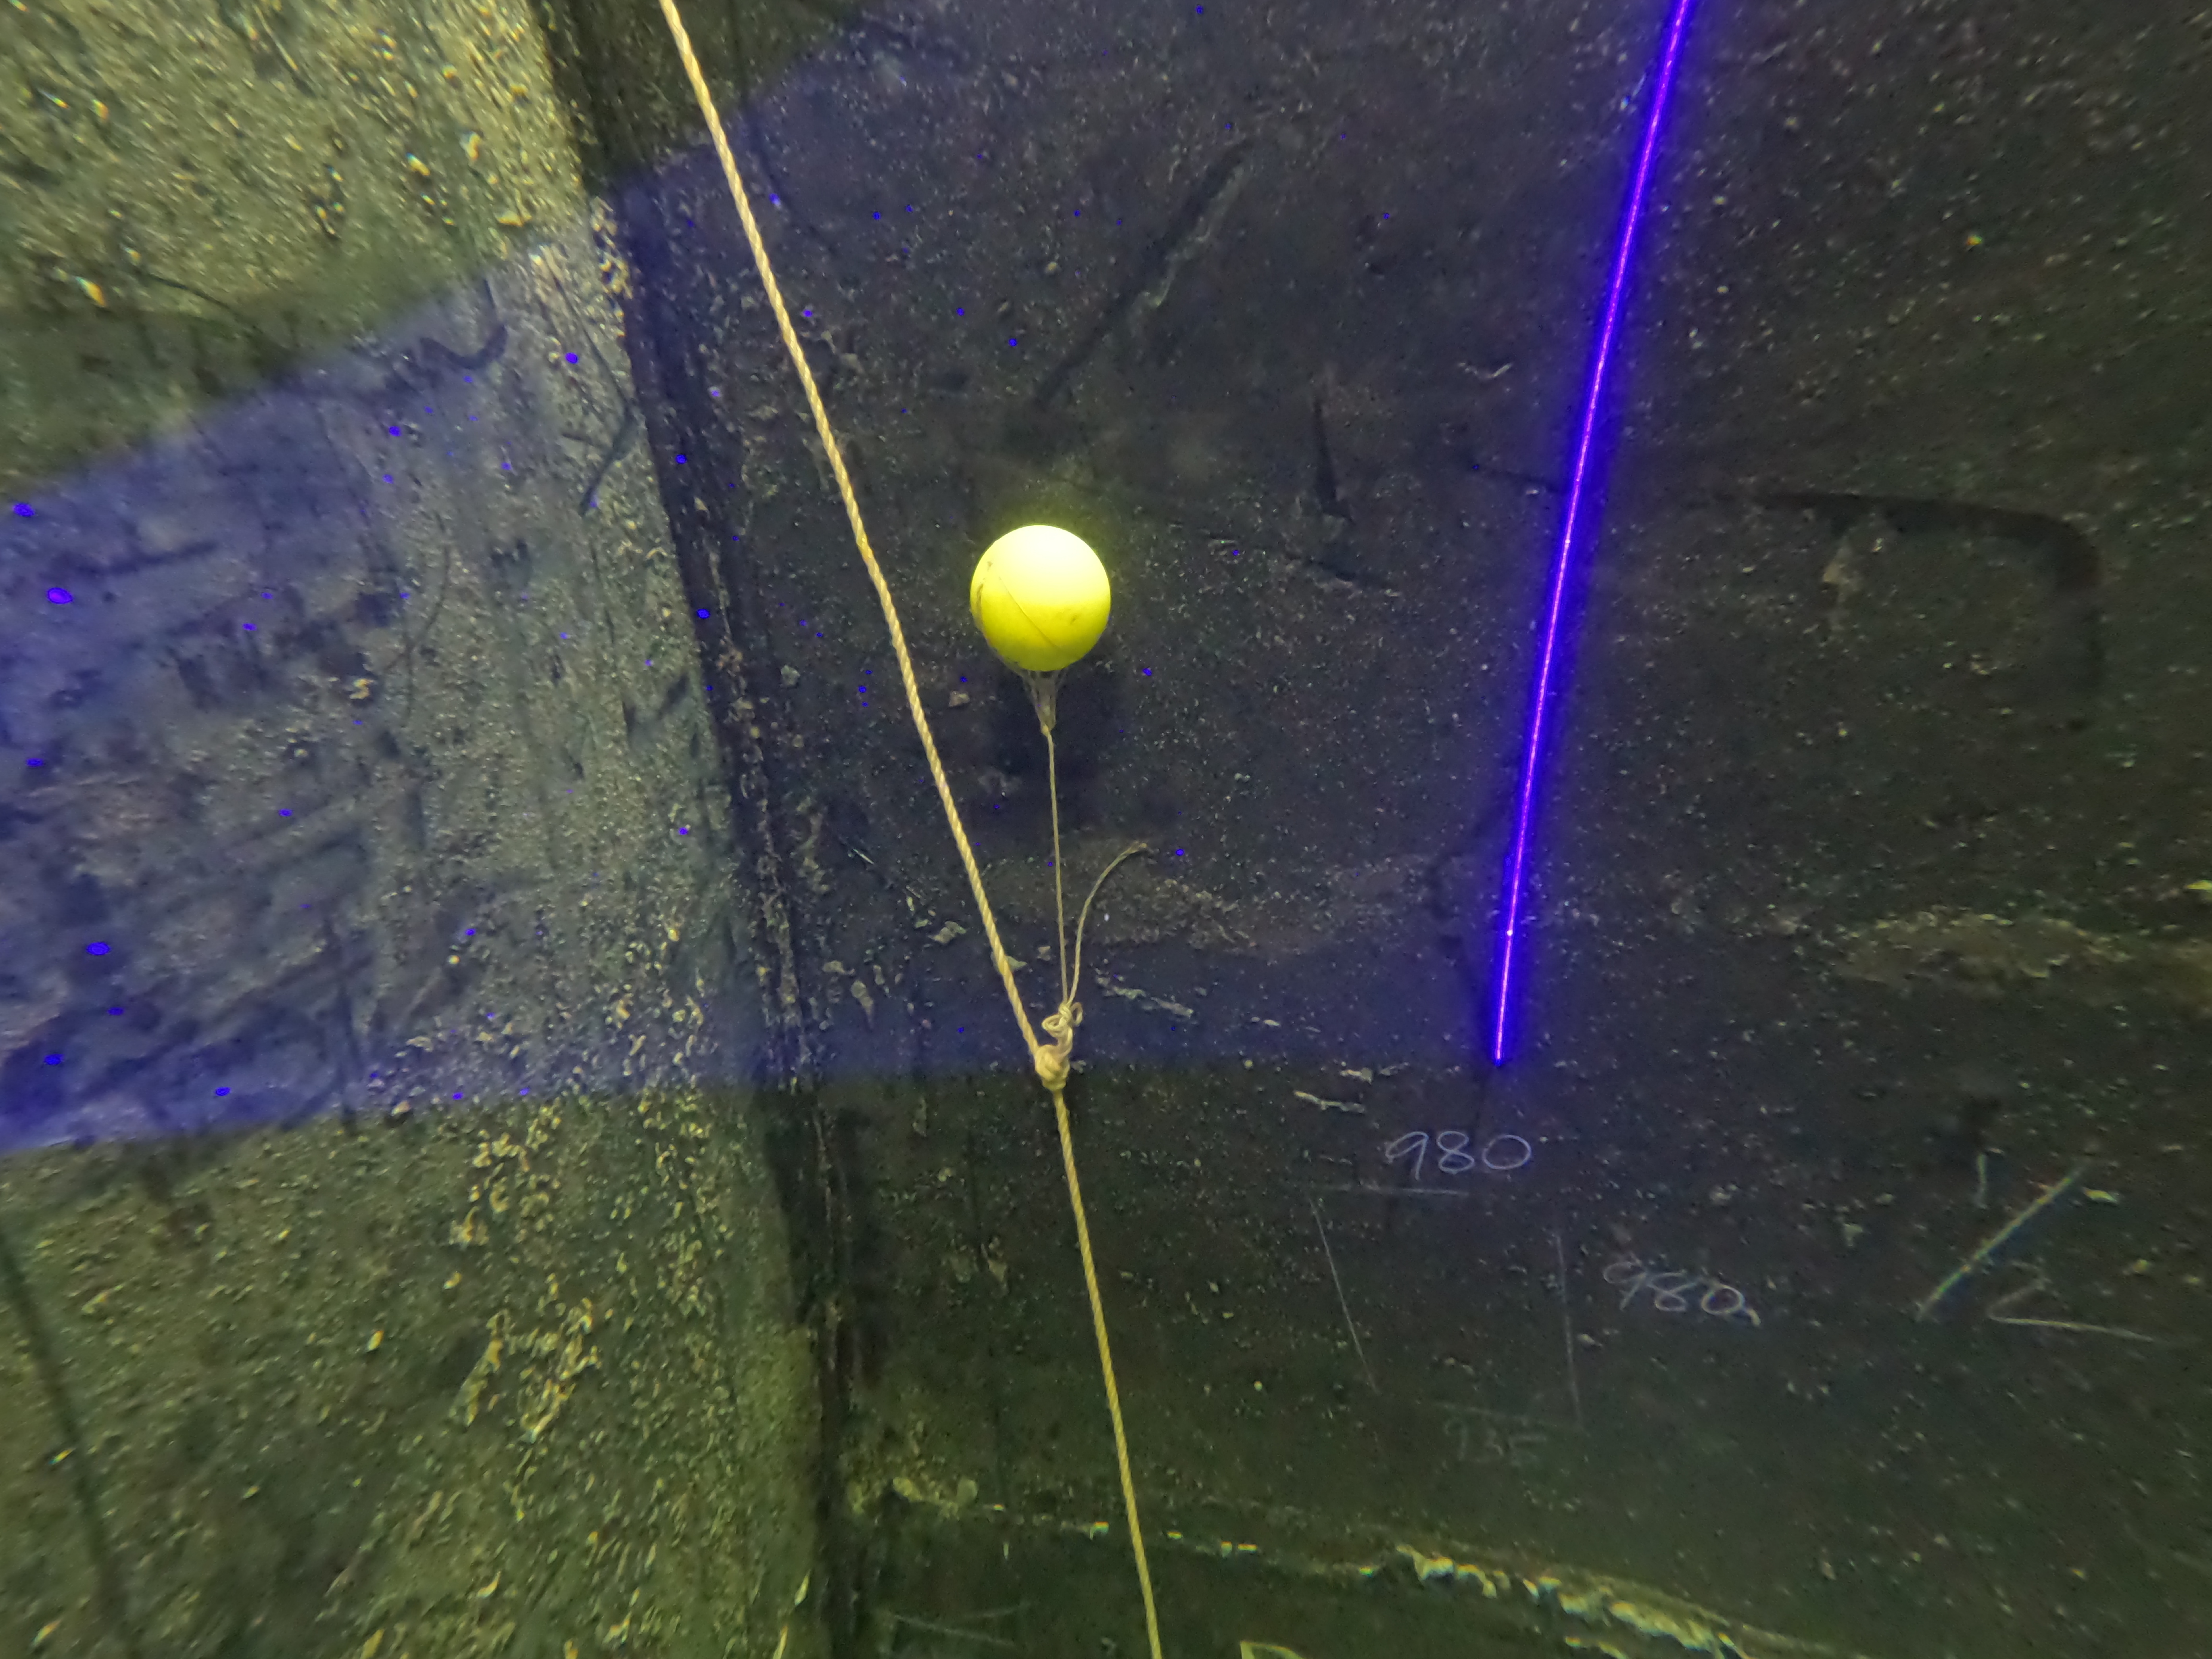

980

980

Supplement: Supplementary file 216 [file G0031009.pdf › 4/G0031009.pdf]

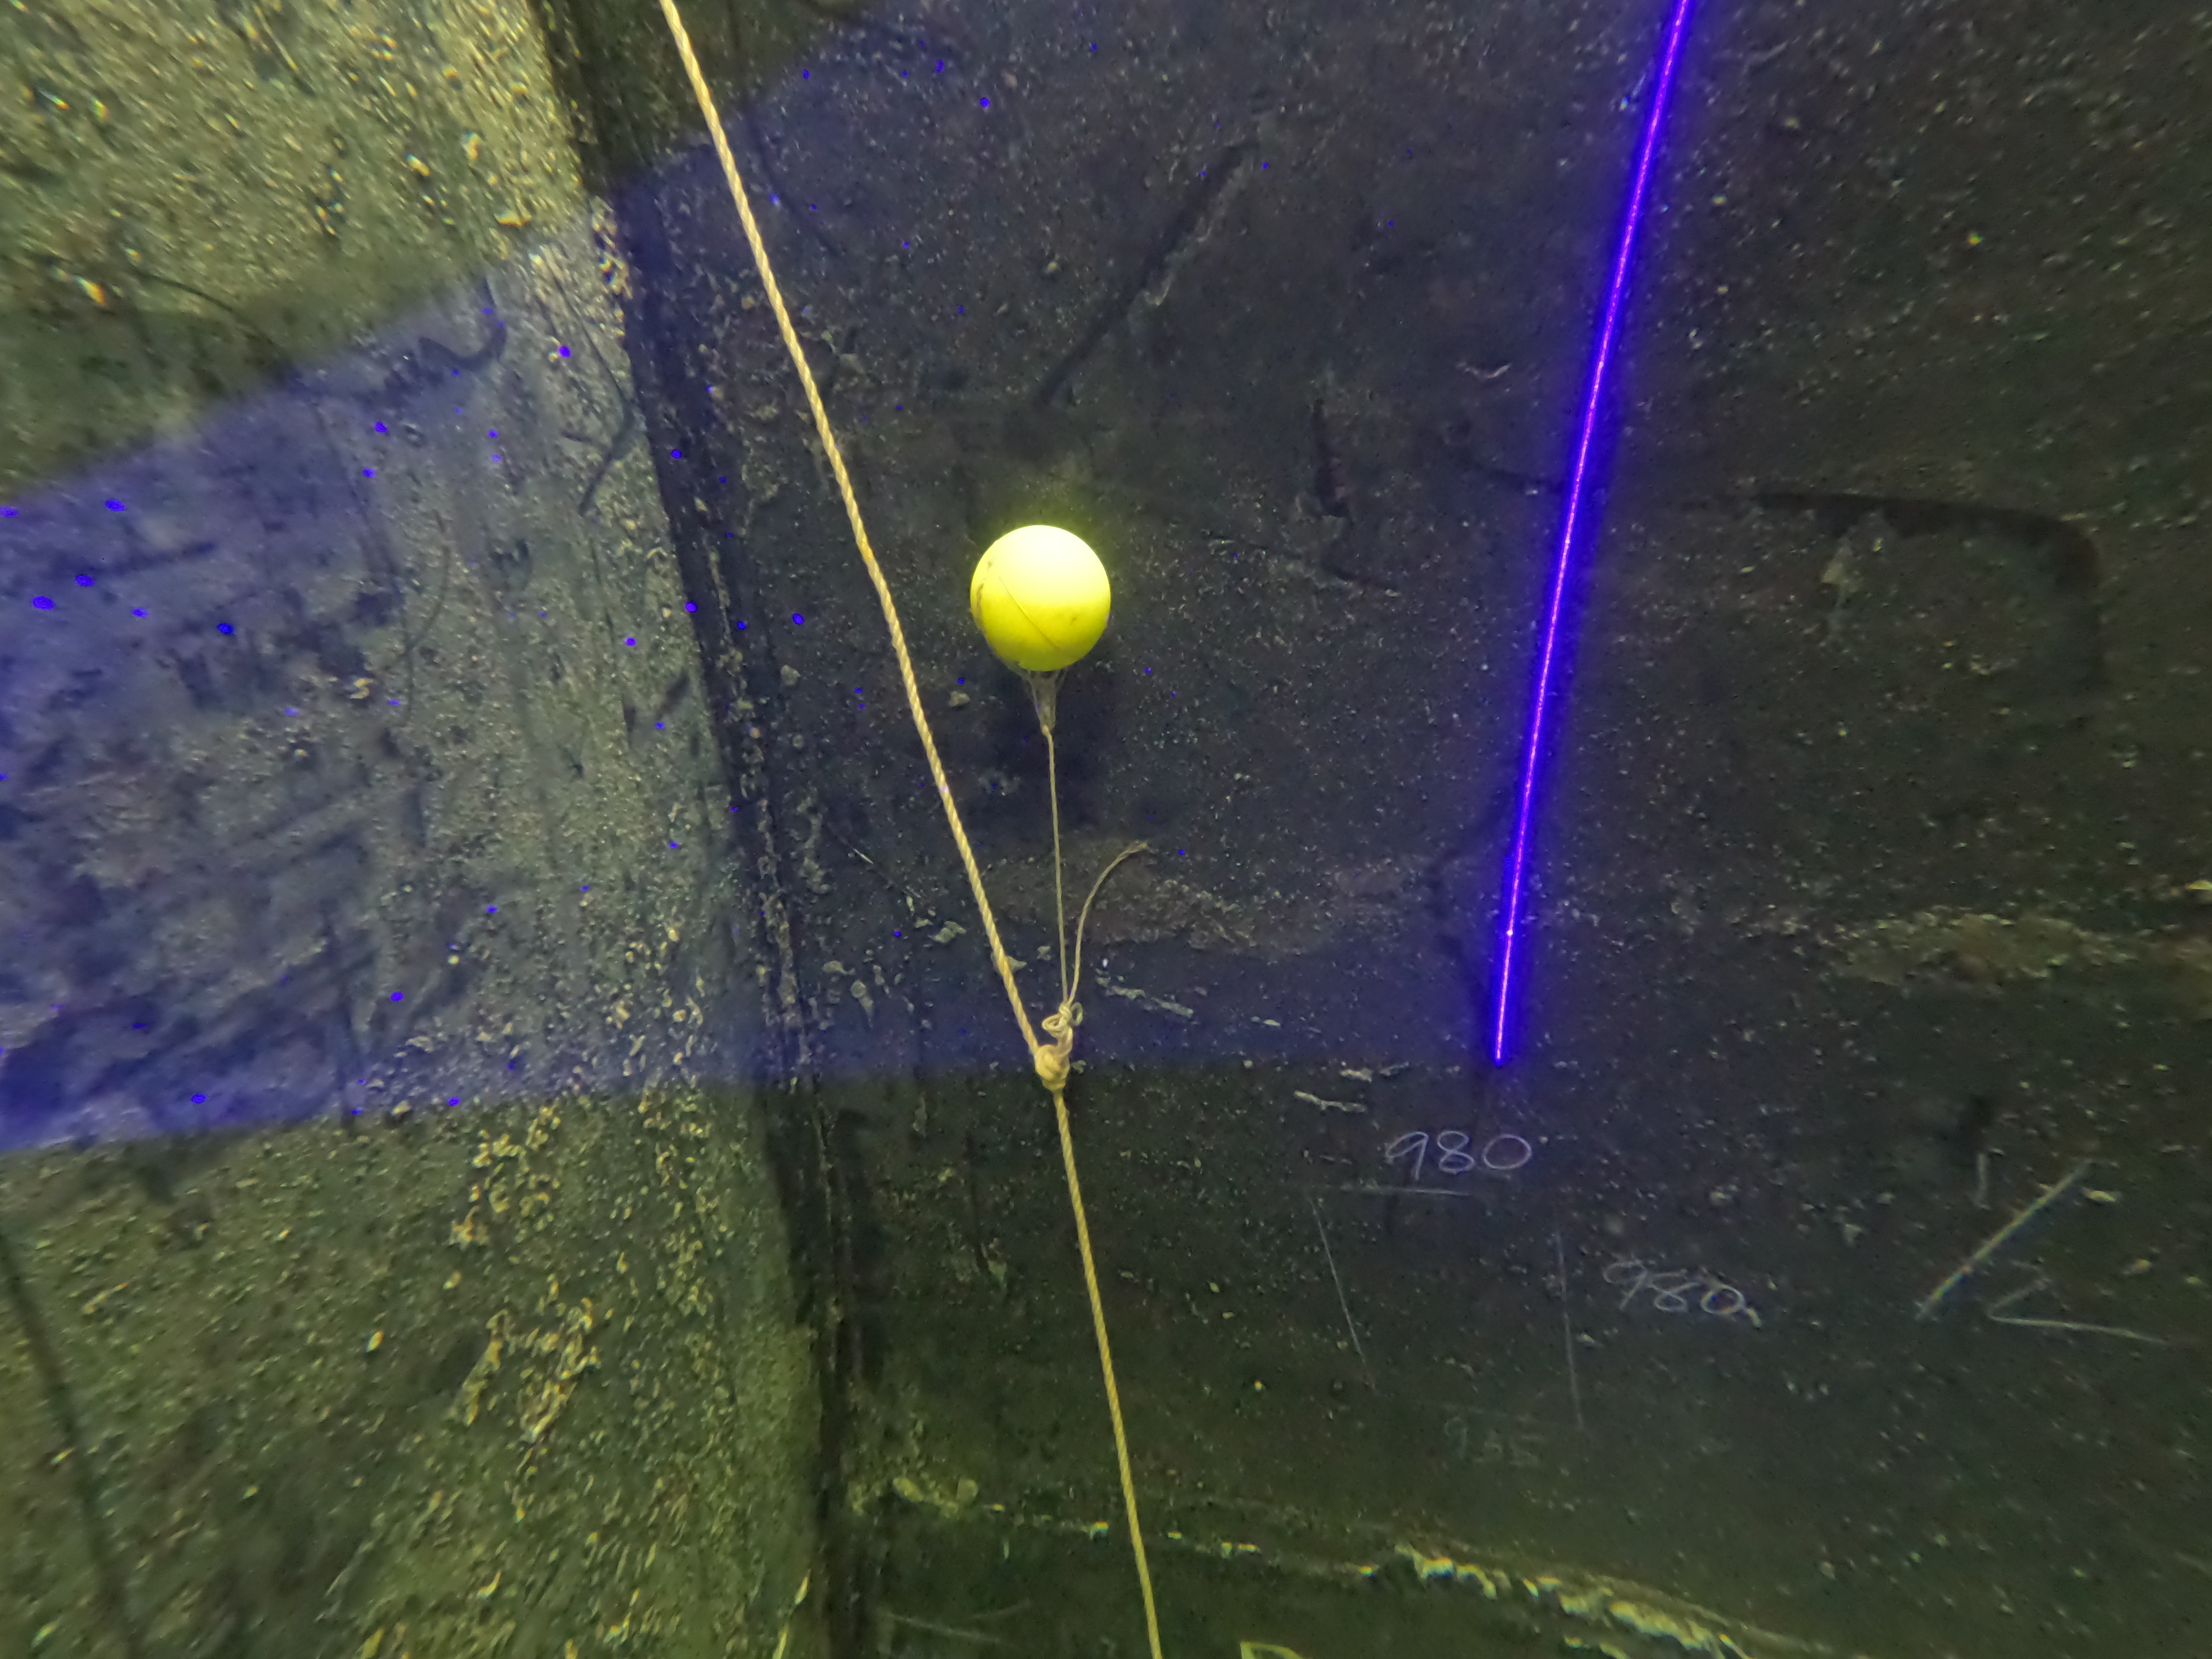

980

980

Supplement: Supplementary file 217 [file G0031010.pdf › 4/G0031010.pdf]

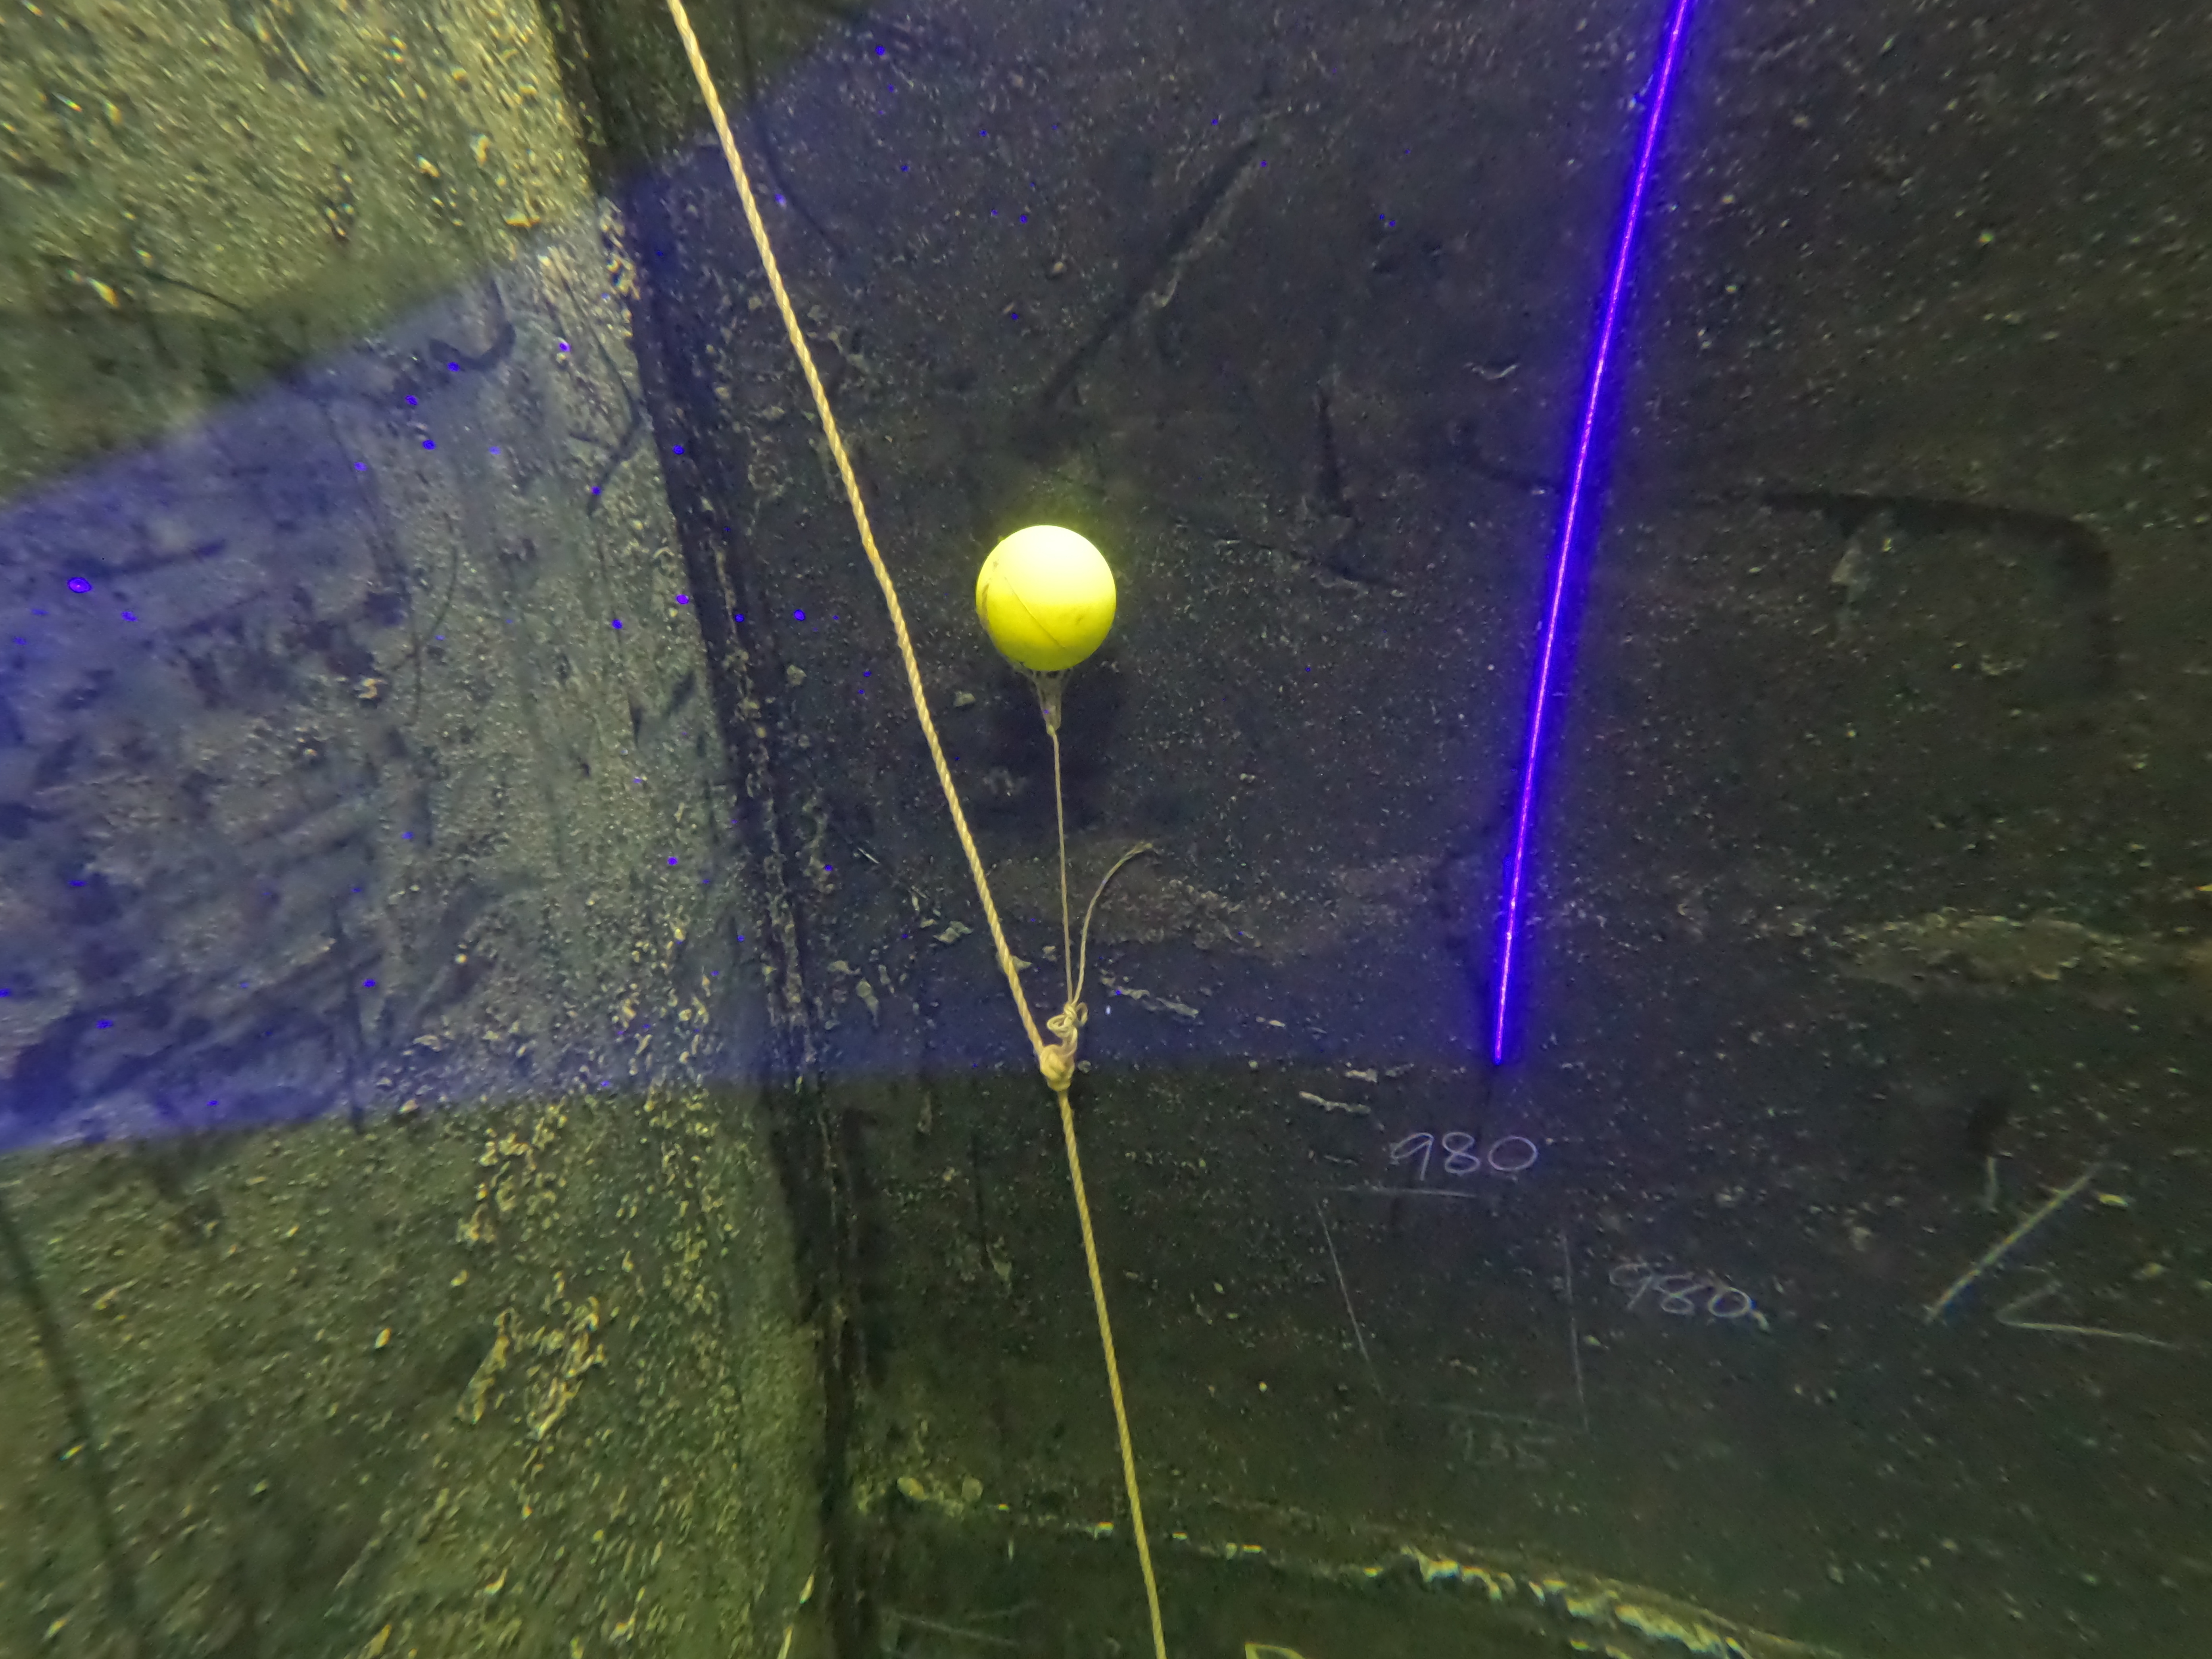

Supplement: Supplementary file 218 [file G0031011.pdf › 4/G0031011.pdf]

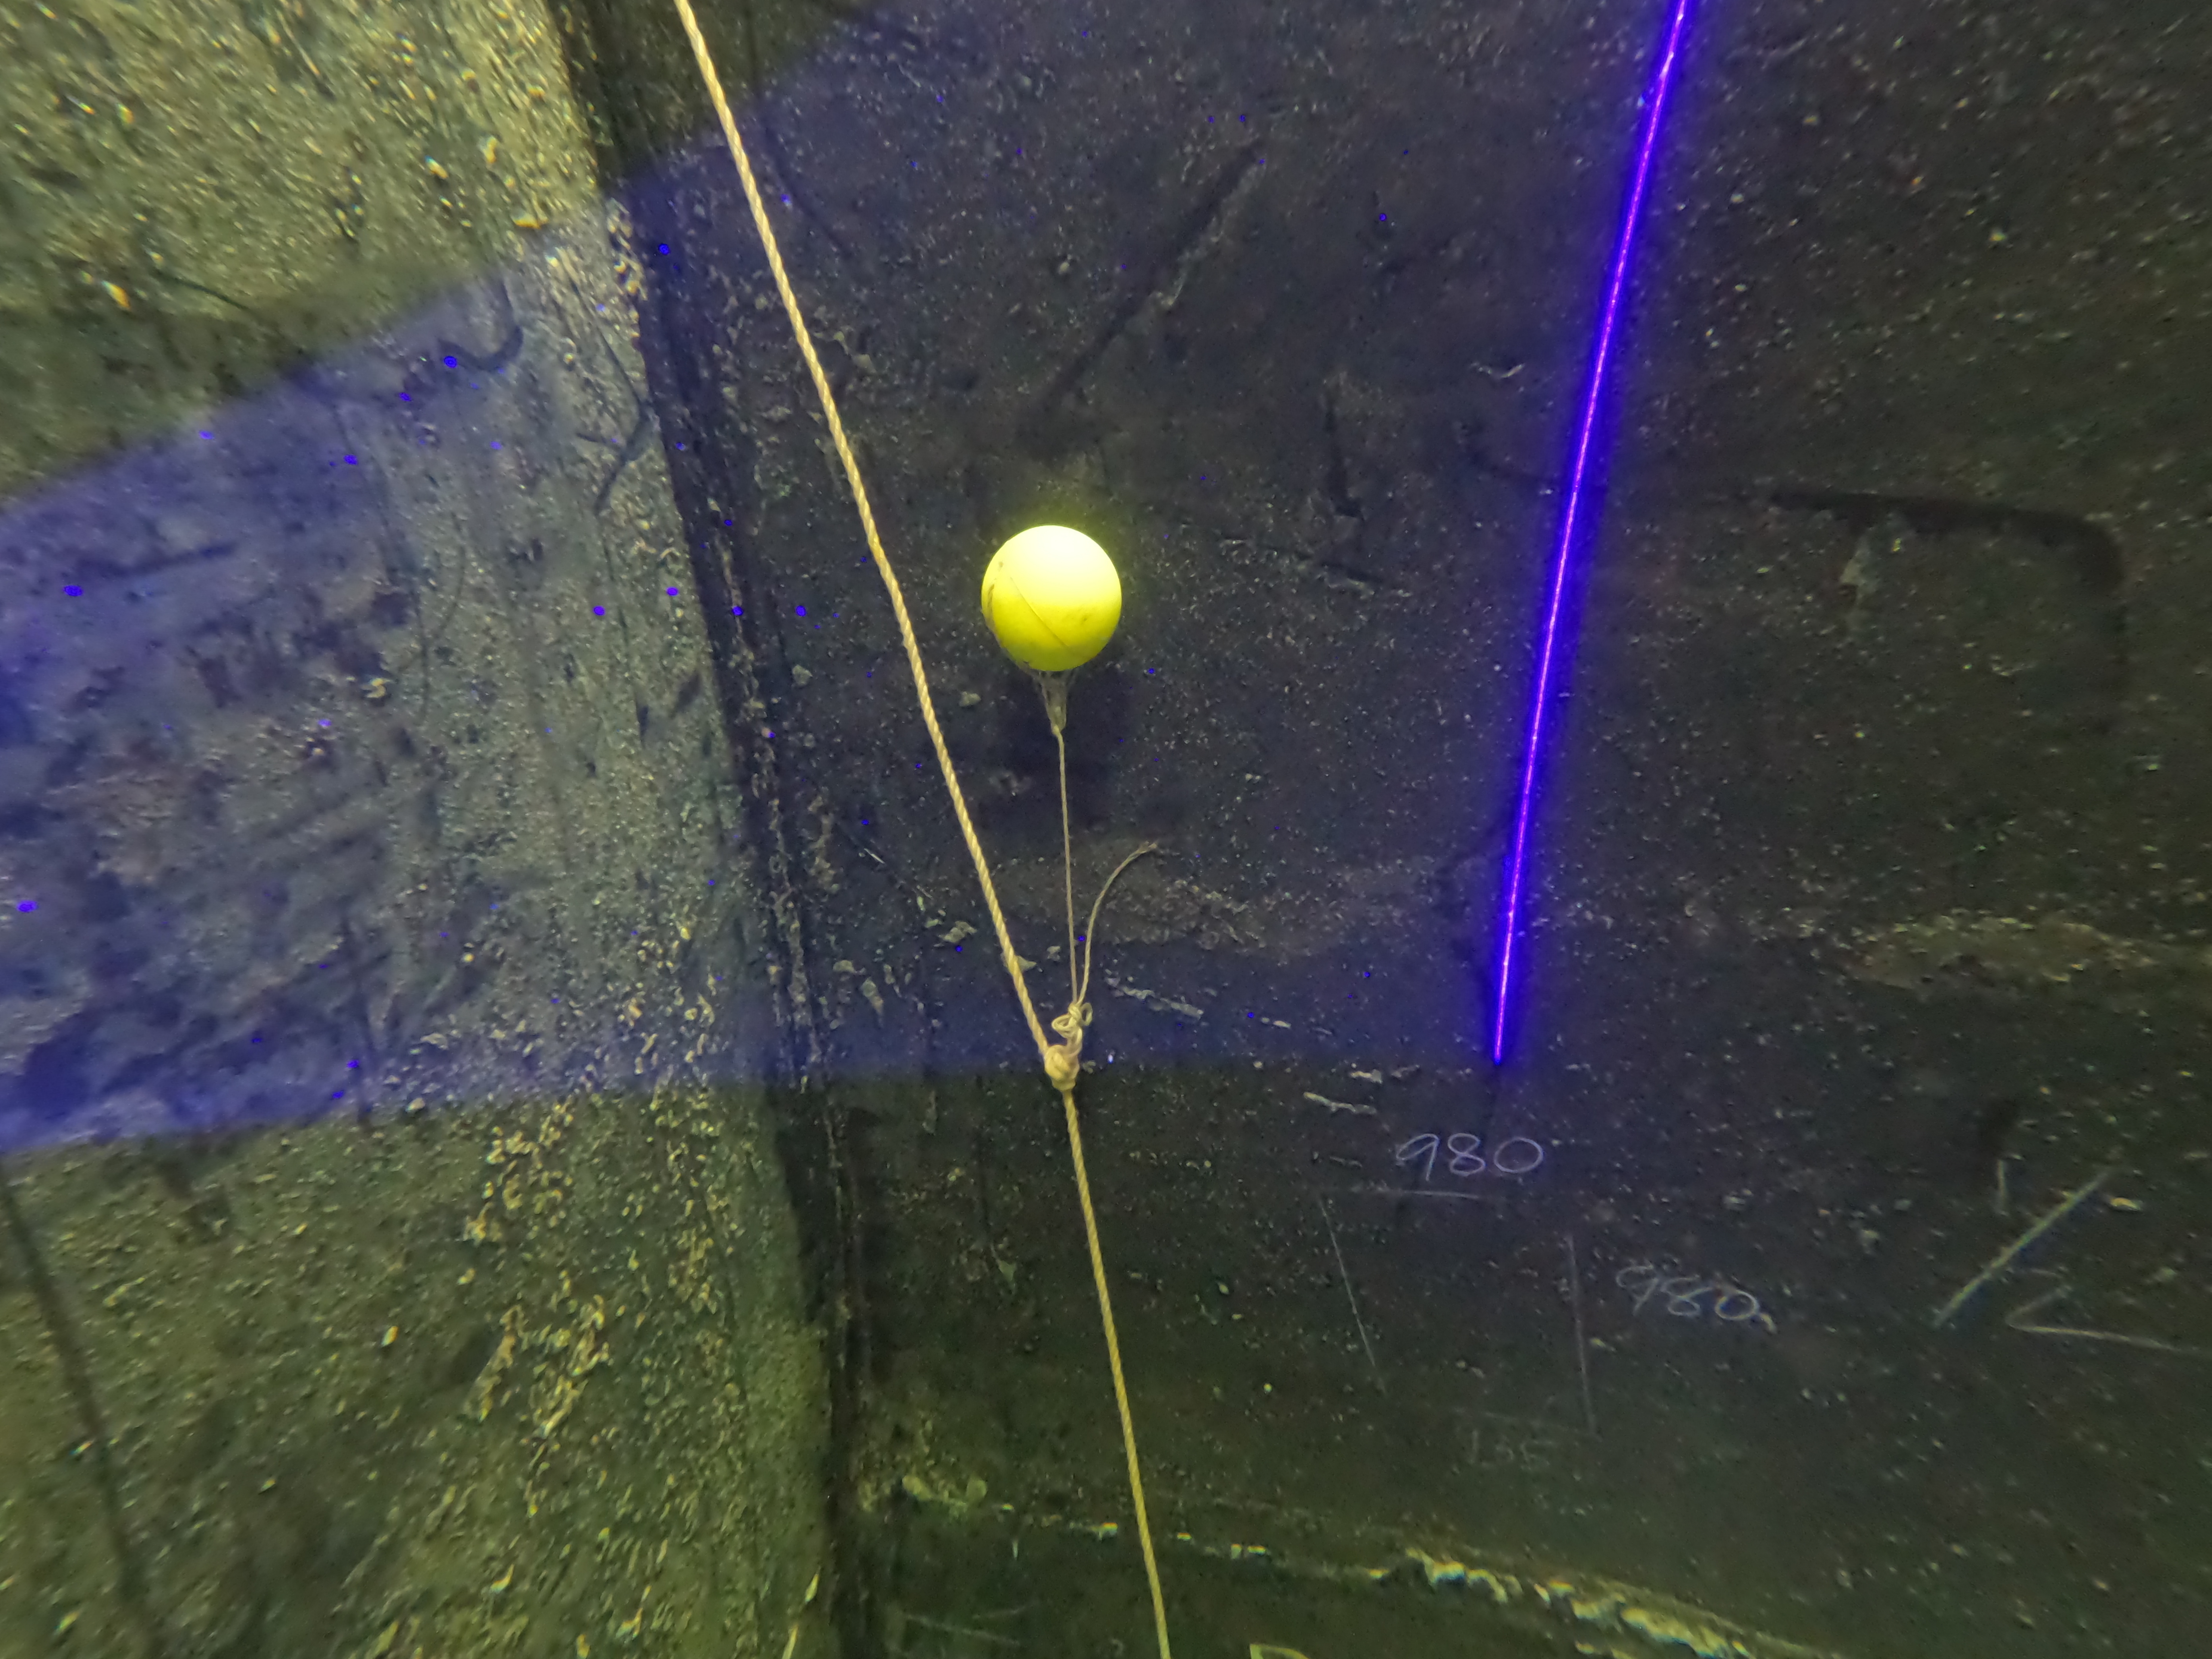

Supplement: Supplementary file 219 [file G0031012.pdf › 4/G0031012.pdf]

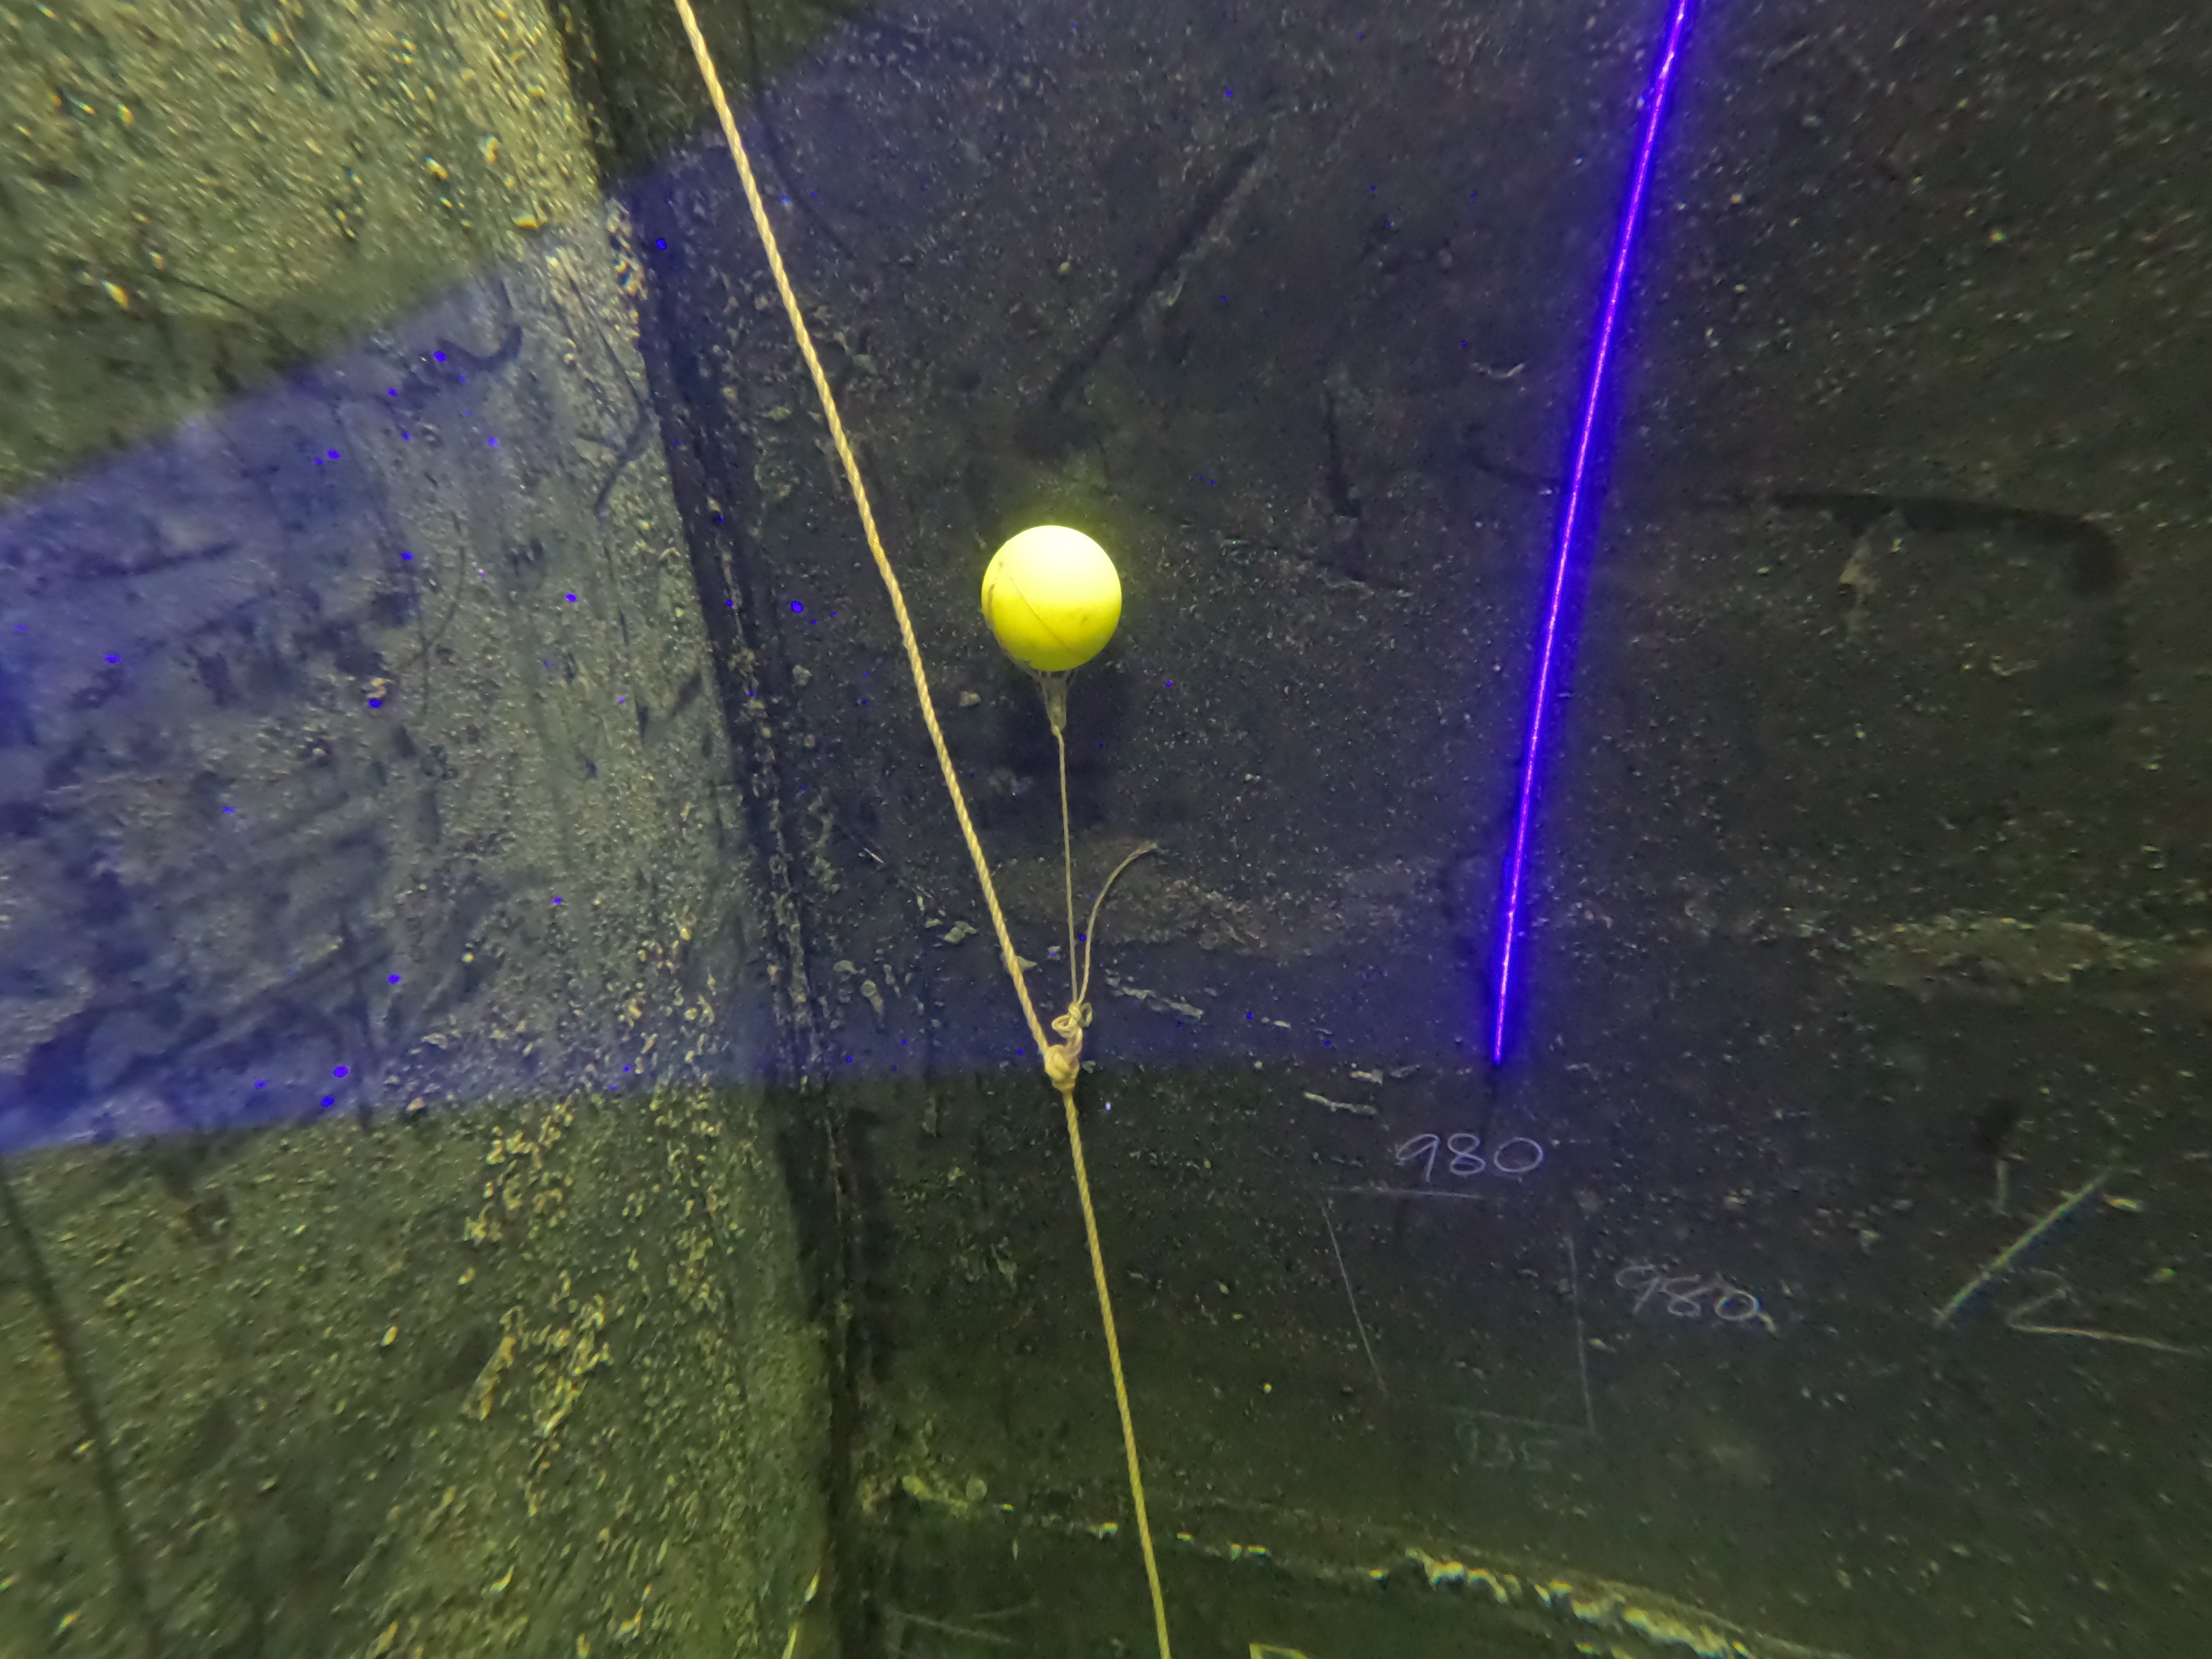

Supplement: Supplementary file 220 [file G0031013.pdf › 4/G0031013.pdf]

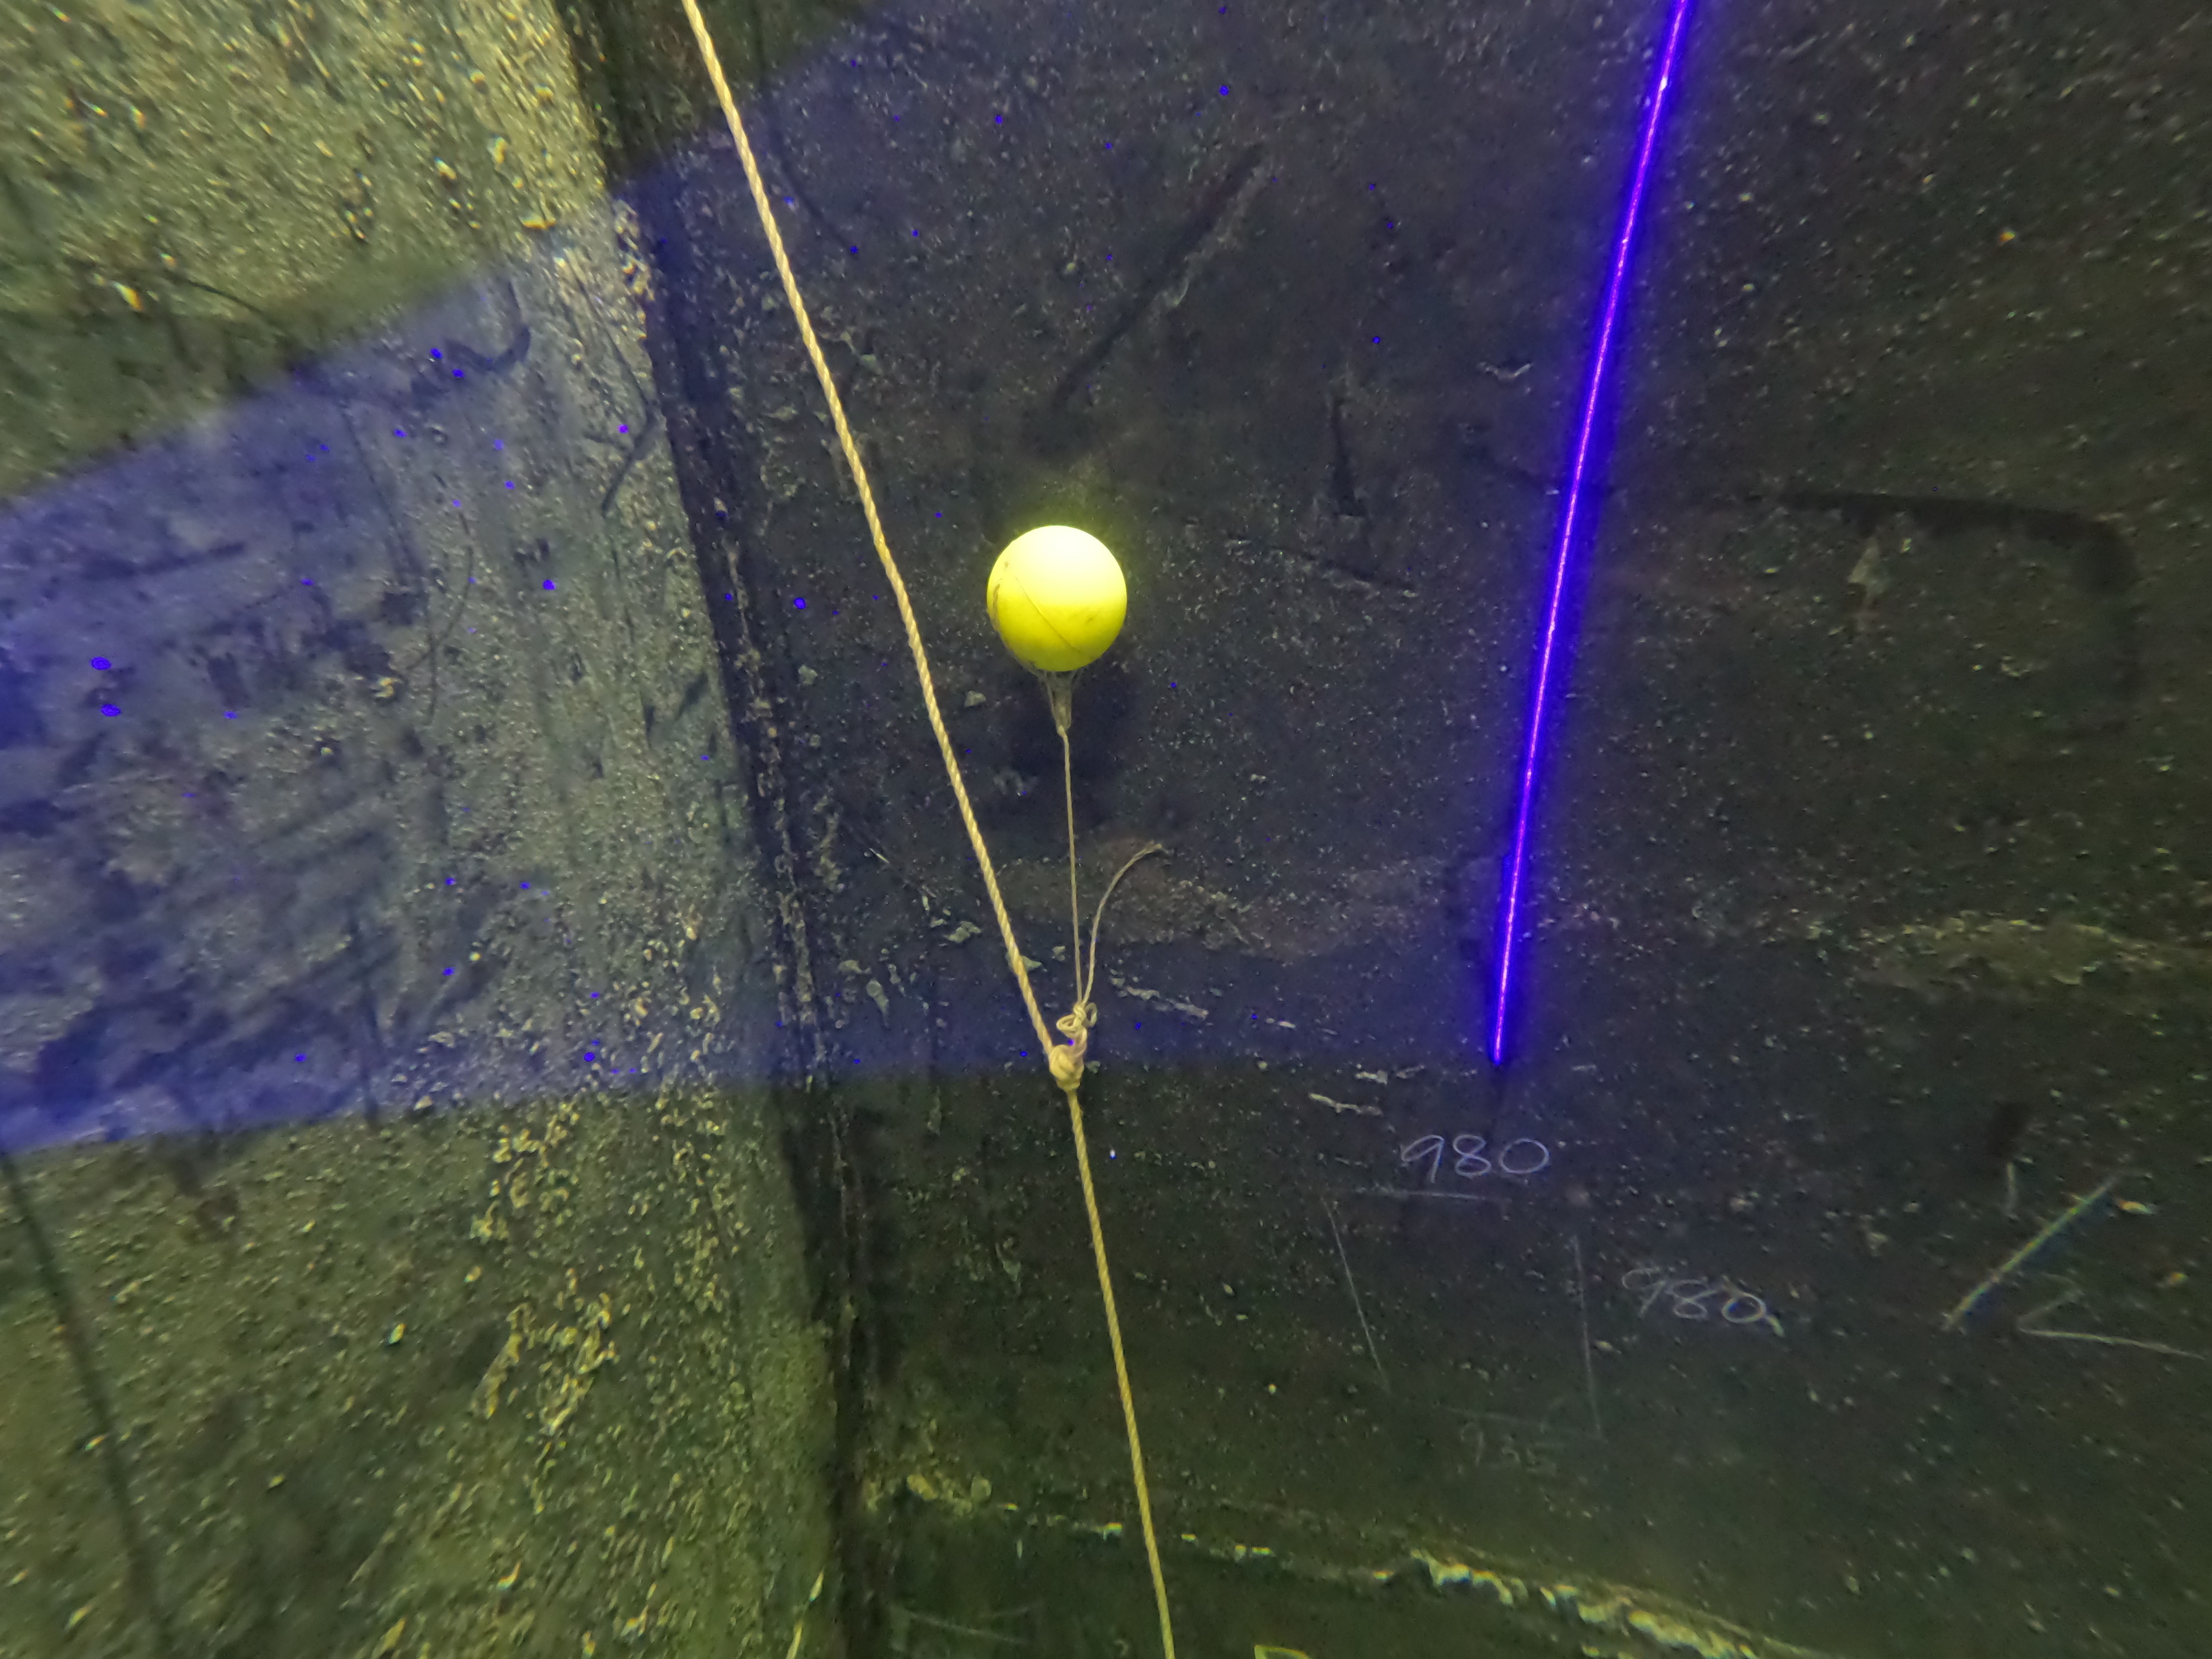

Supplement: Supplementary file 221 [file G0031014.pdf › 4/G0031014.pdf]

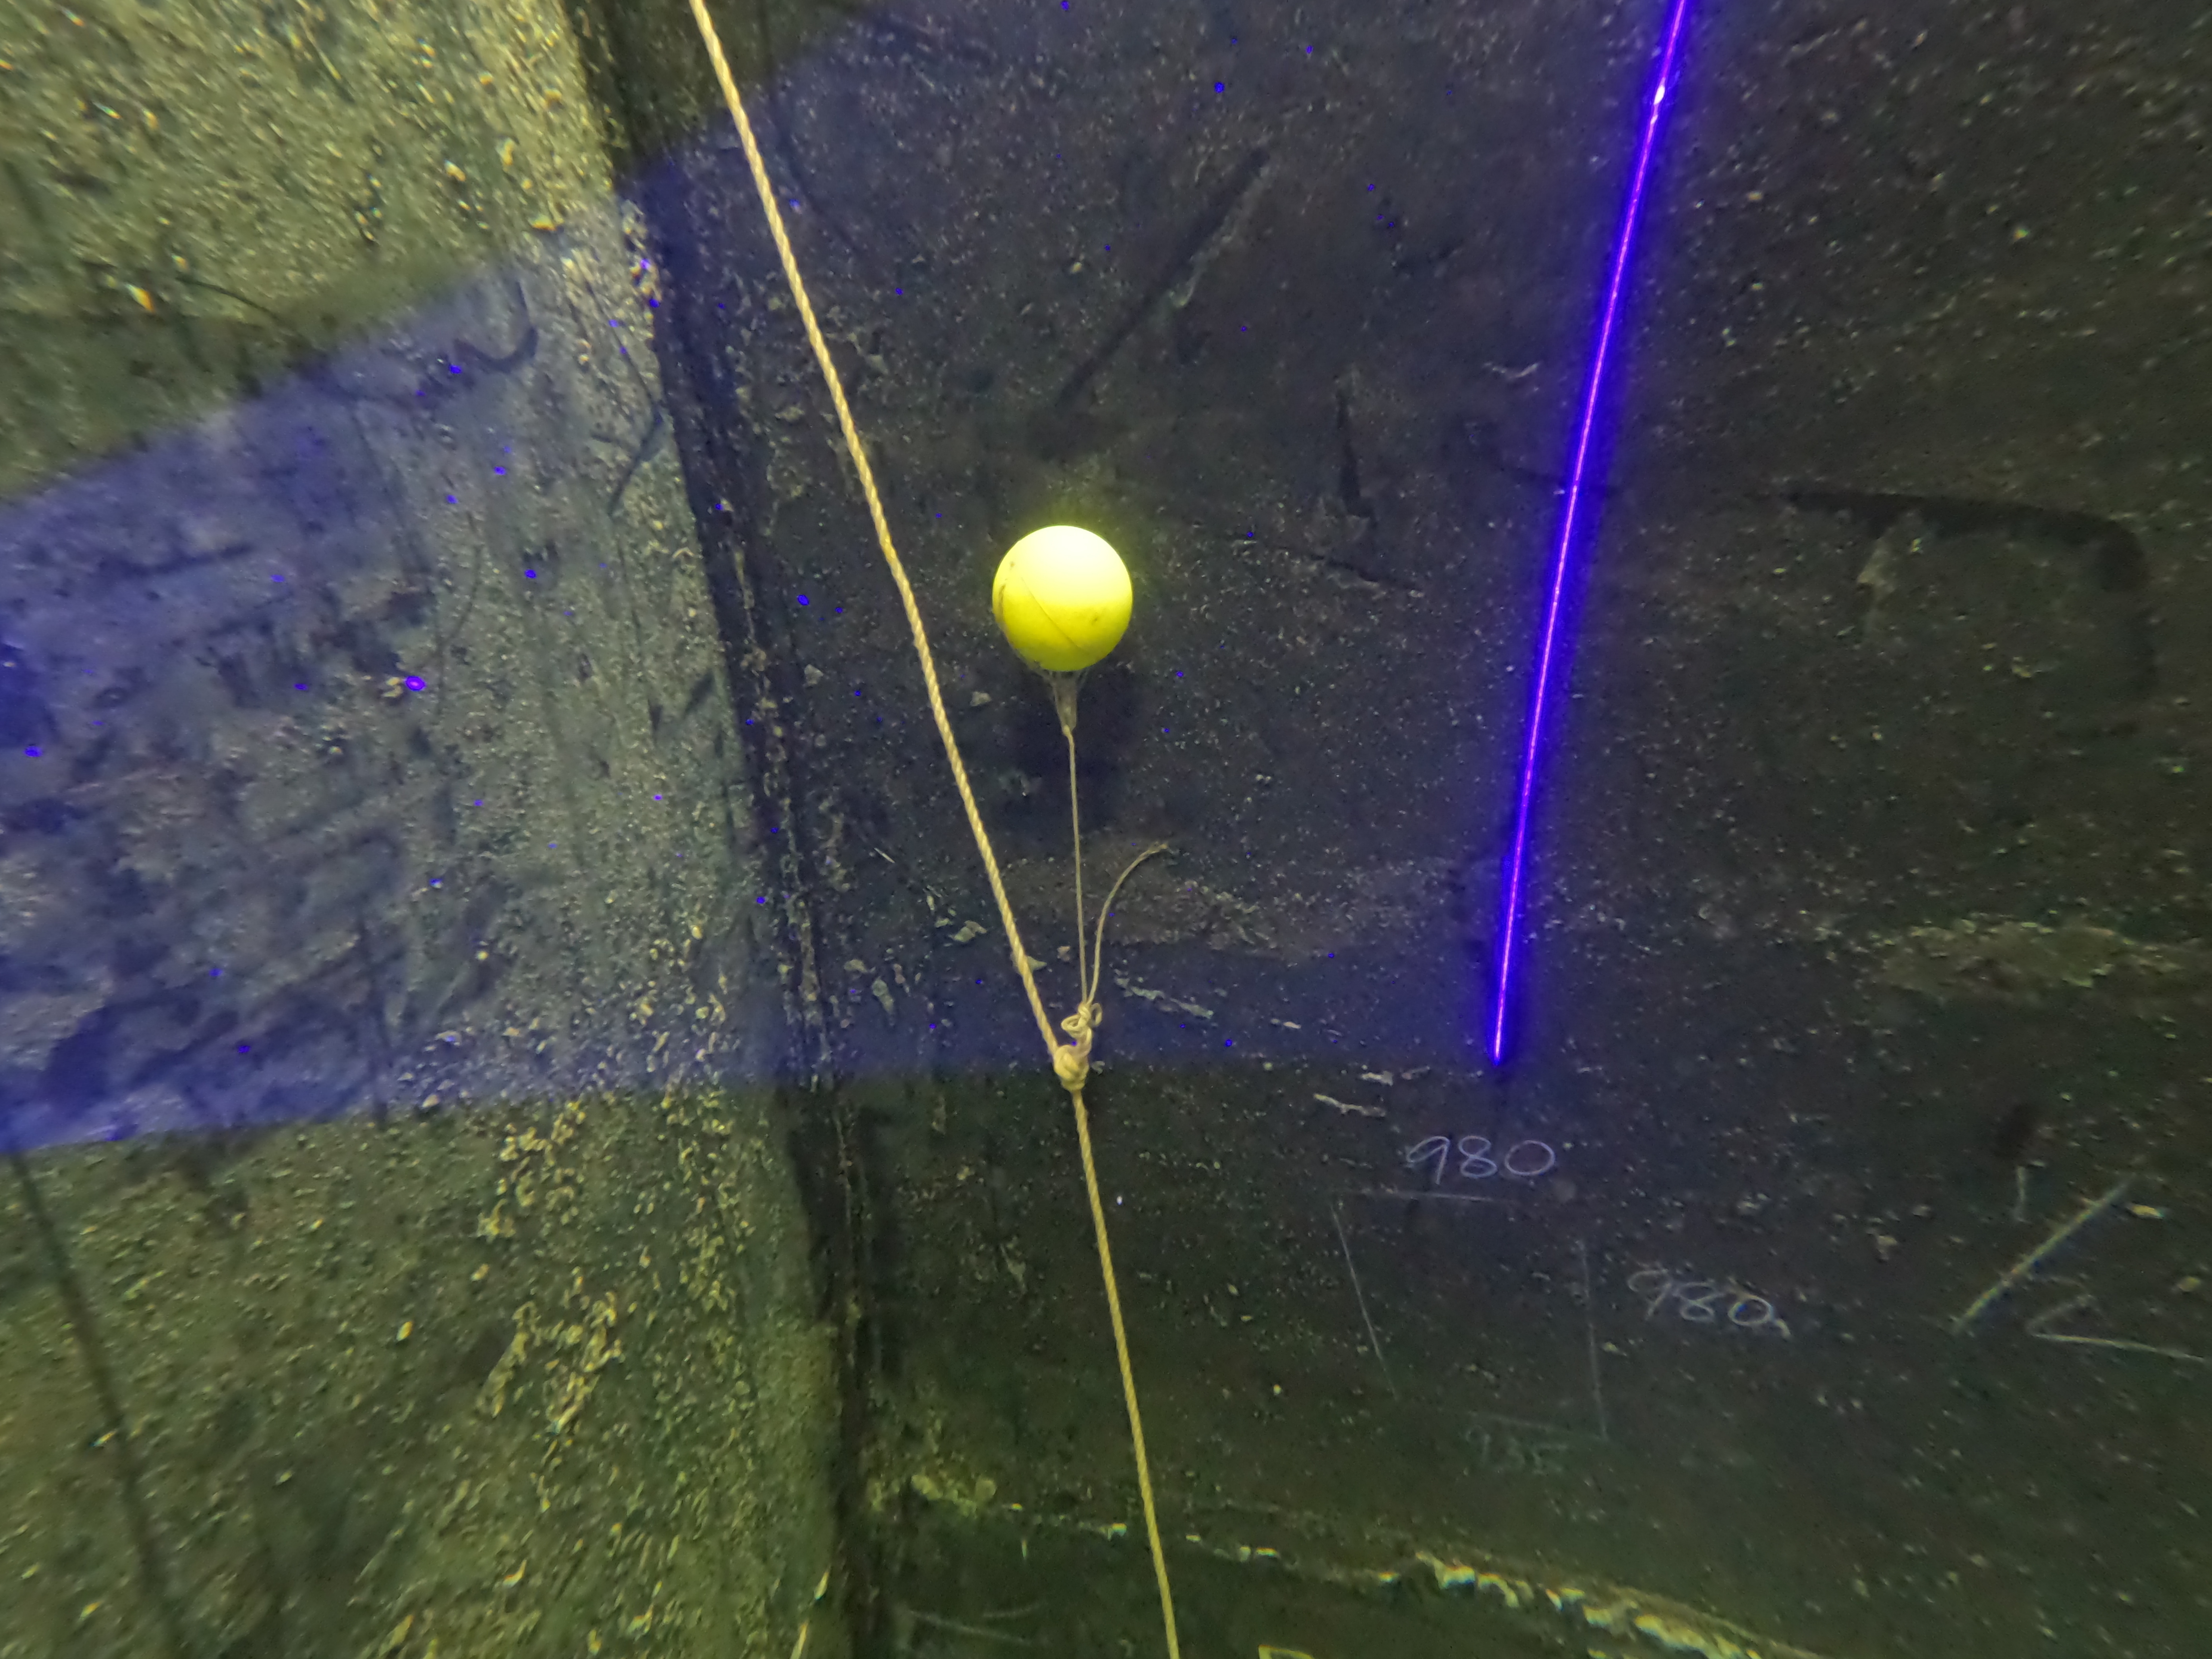

Supplement: Supplementary file 222 [file G0031015.pdf › 4/G0031015.pdf]

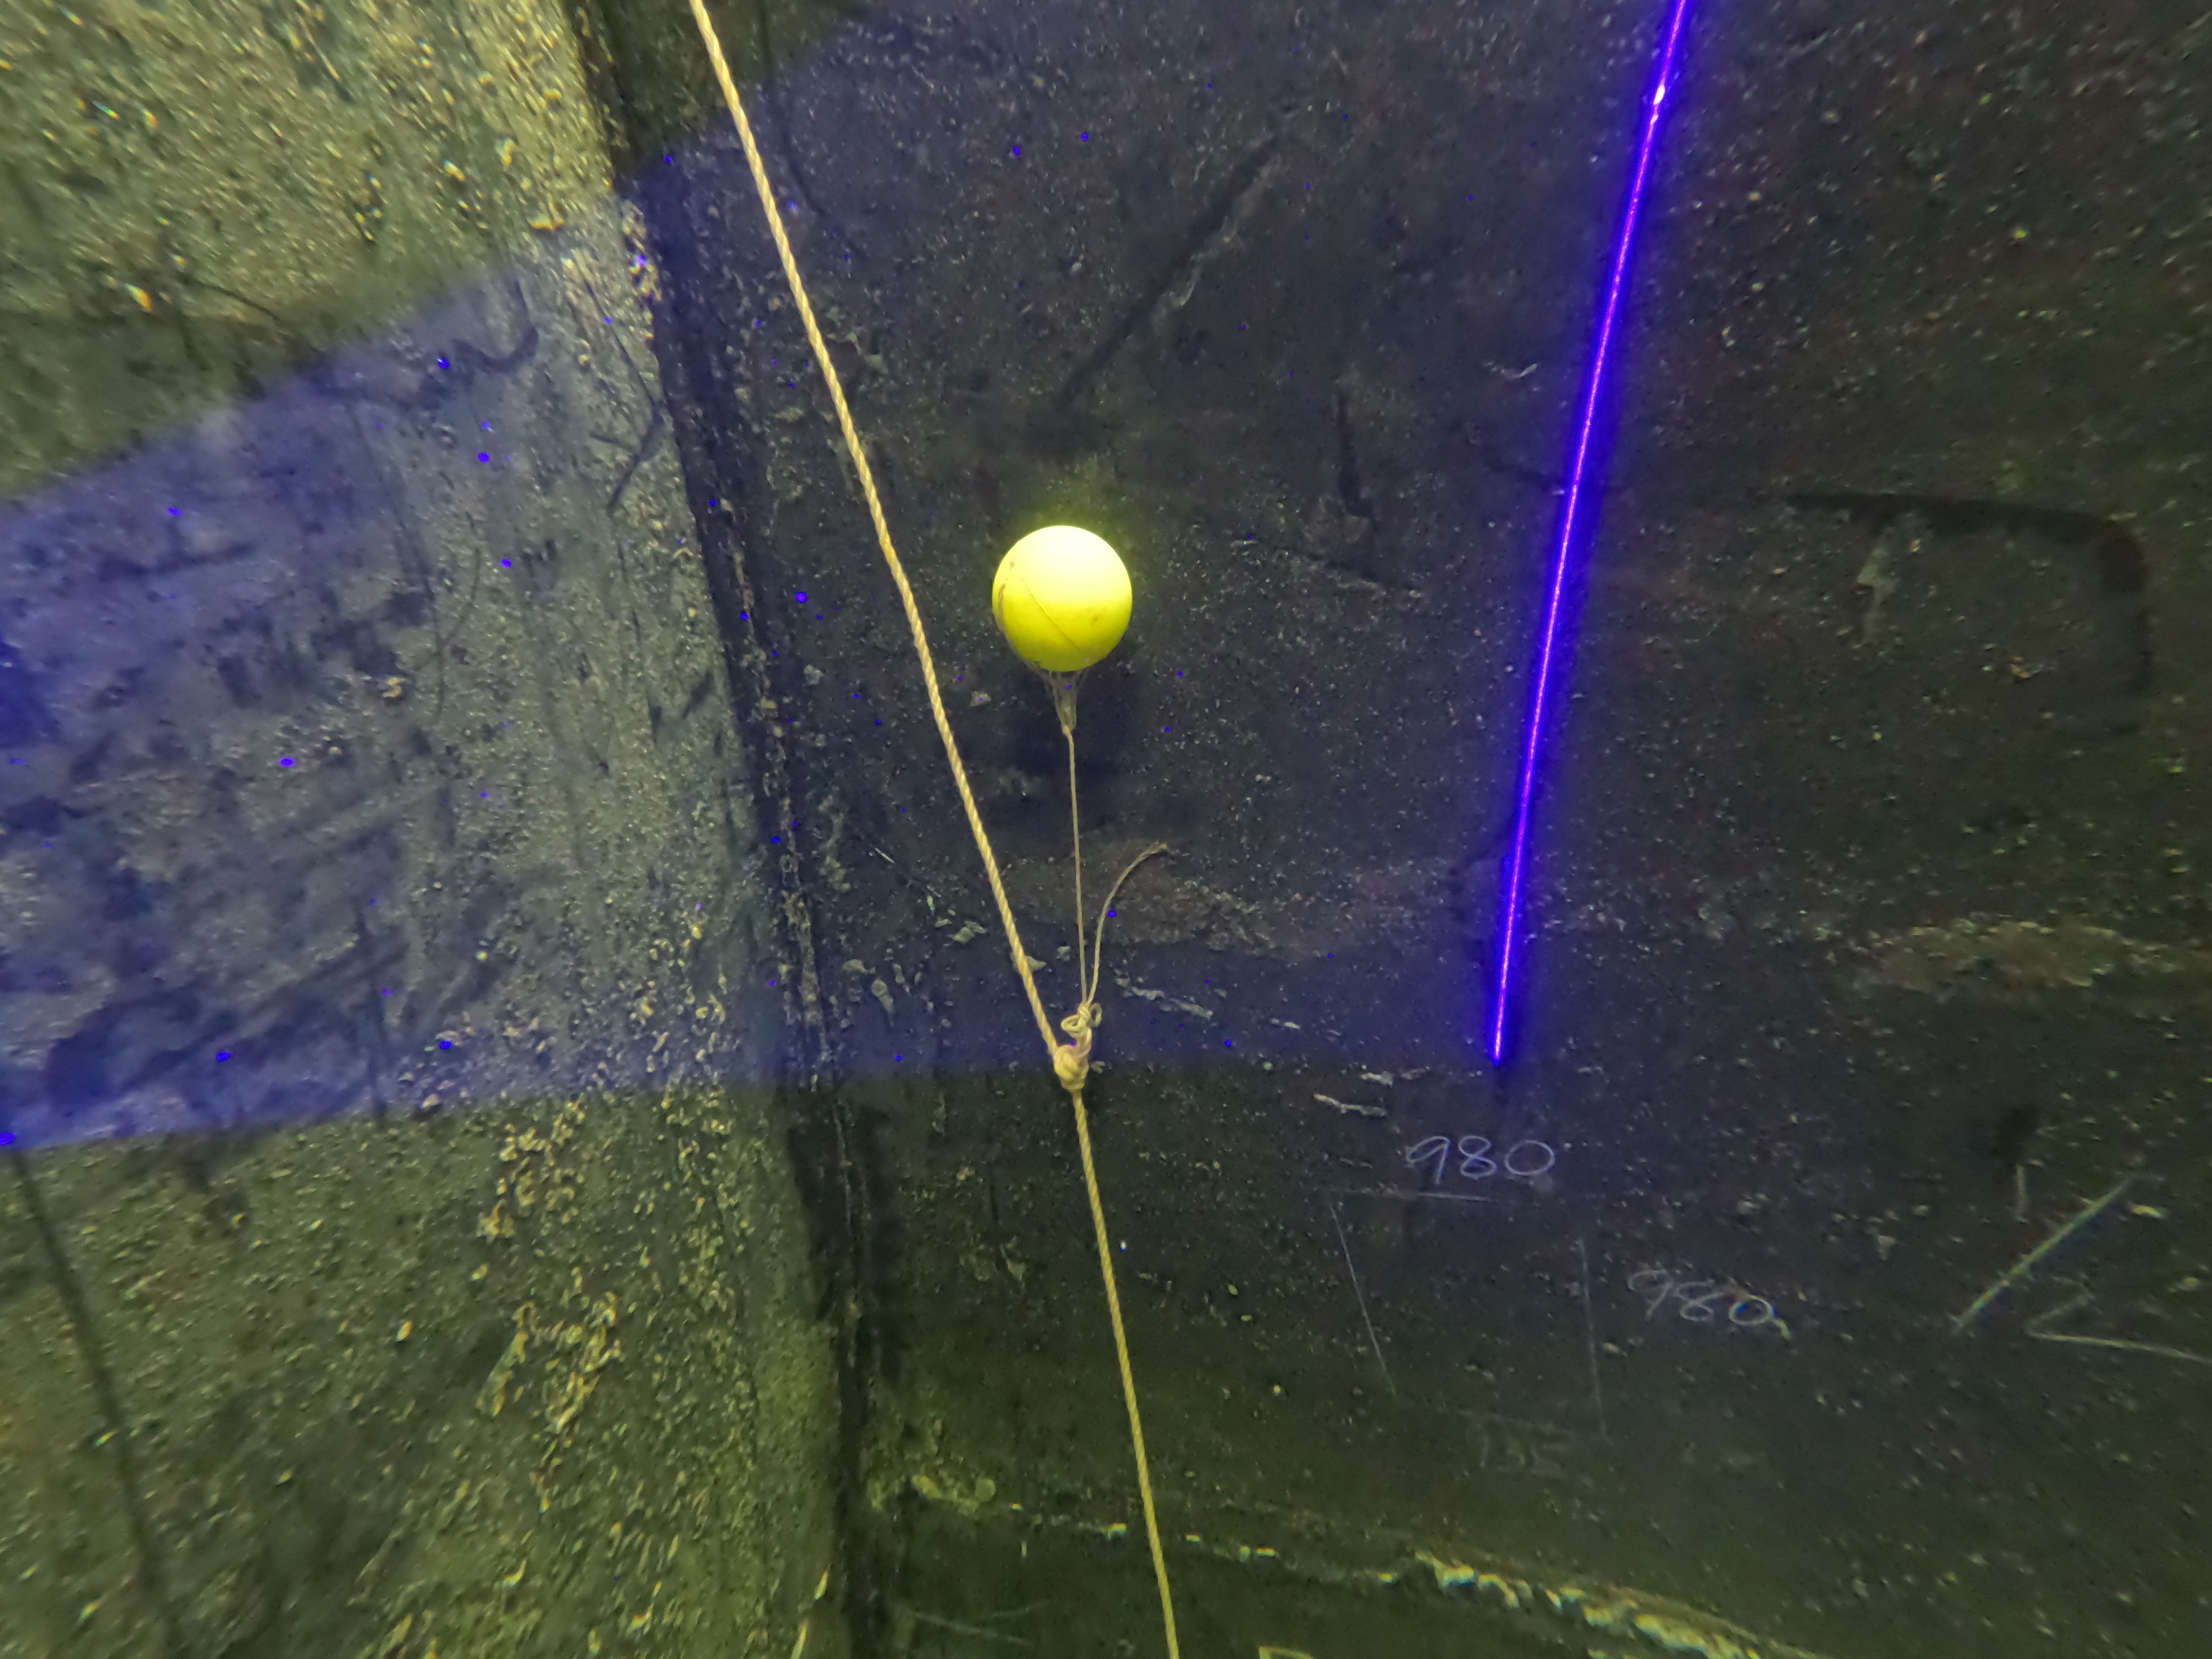

Supplement: Supplementary file 223 [file G0031016.pdf › 4/G0031016.pdf]

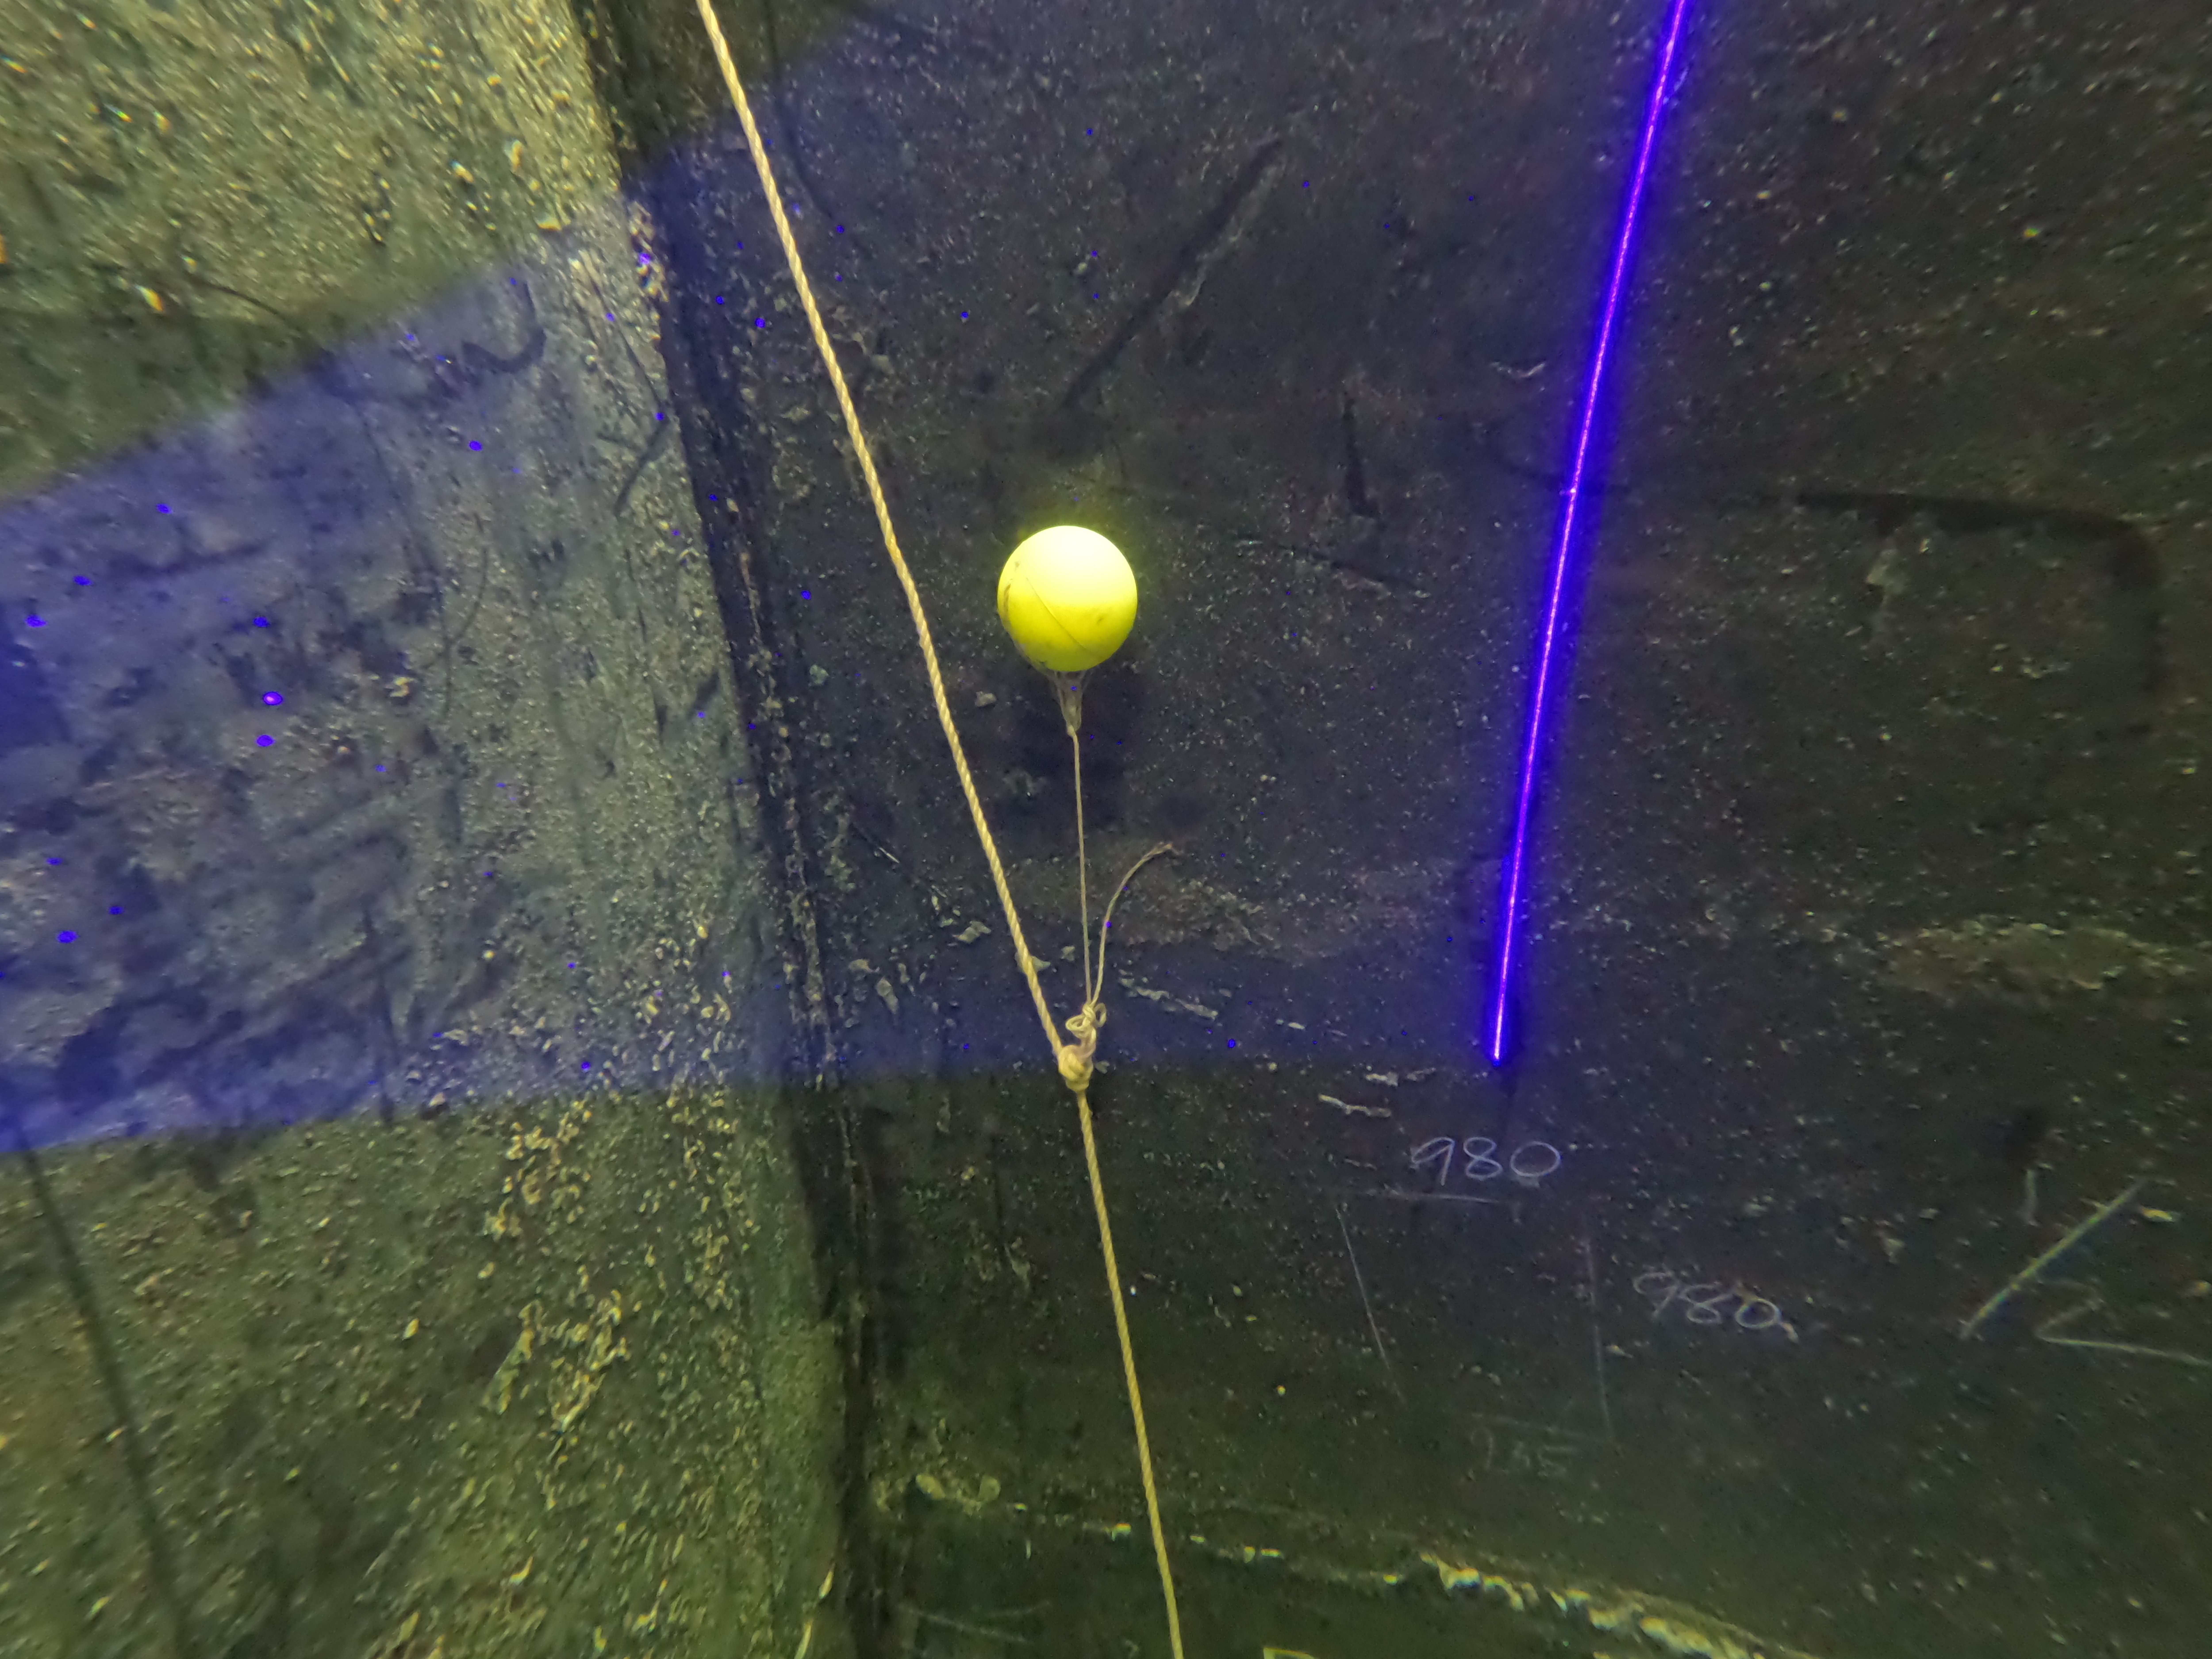

Supplement: Supplementary file 224 [file G0031017.pdf › 4/G0031017.pdf]

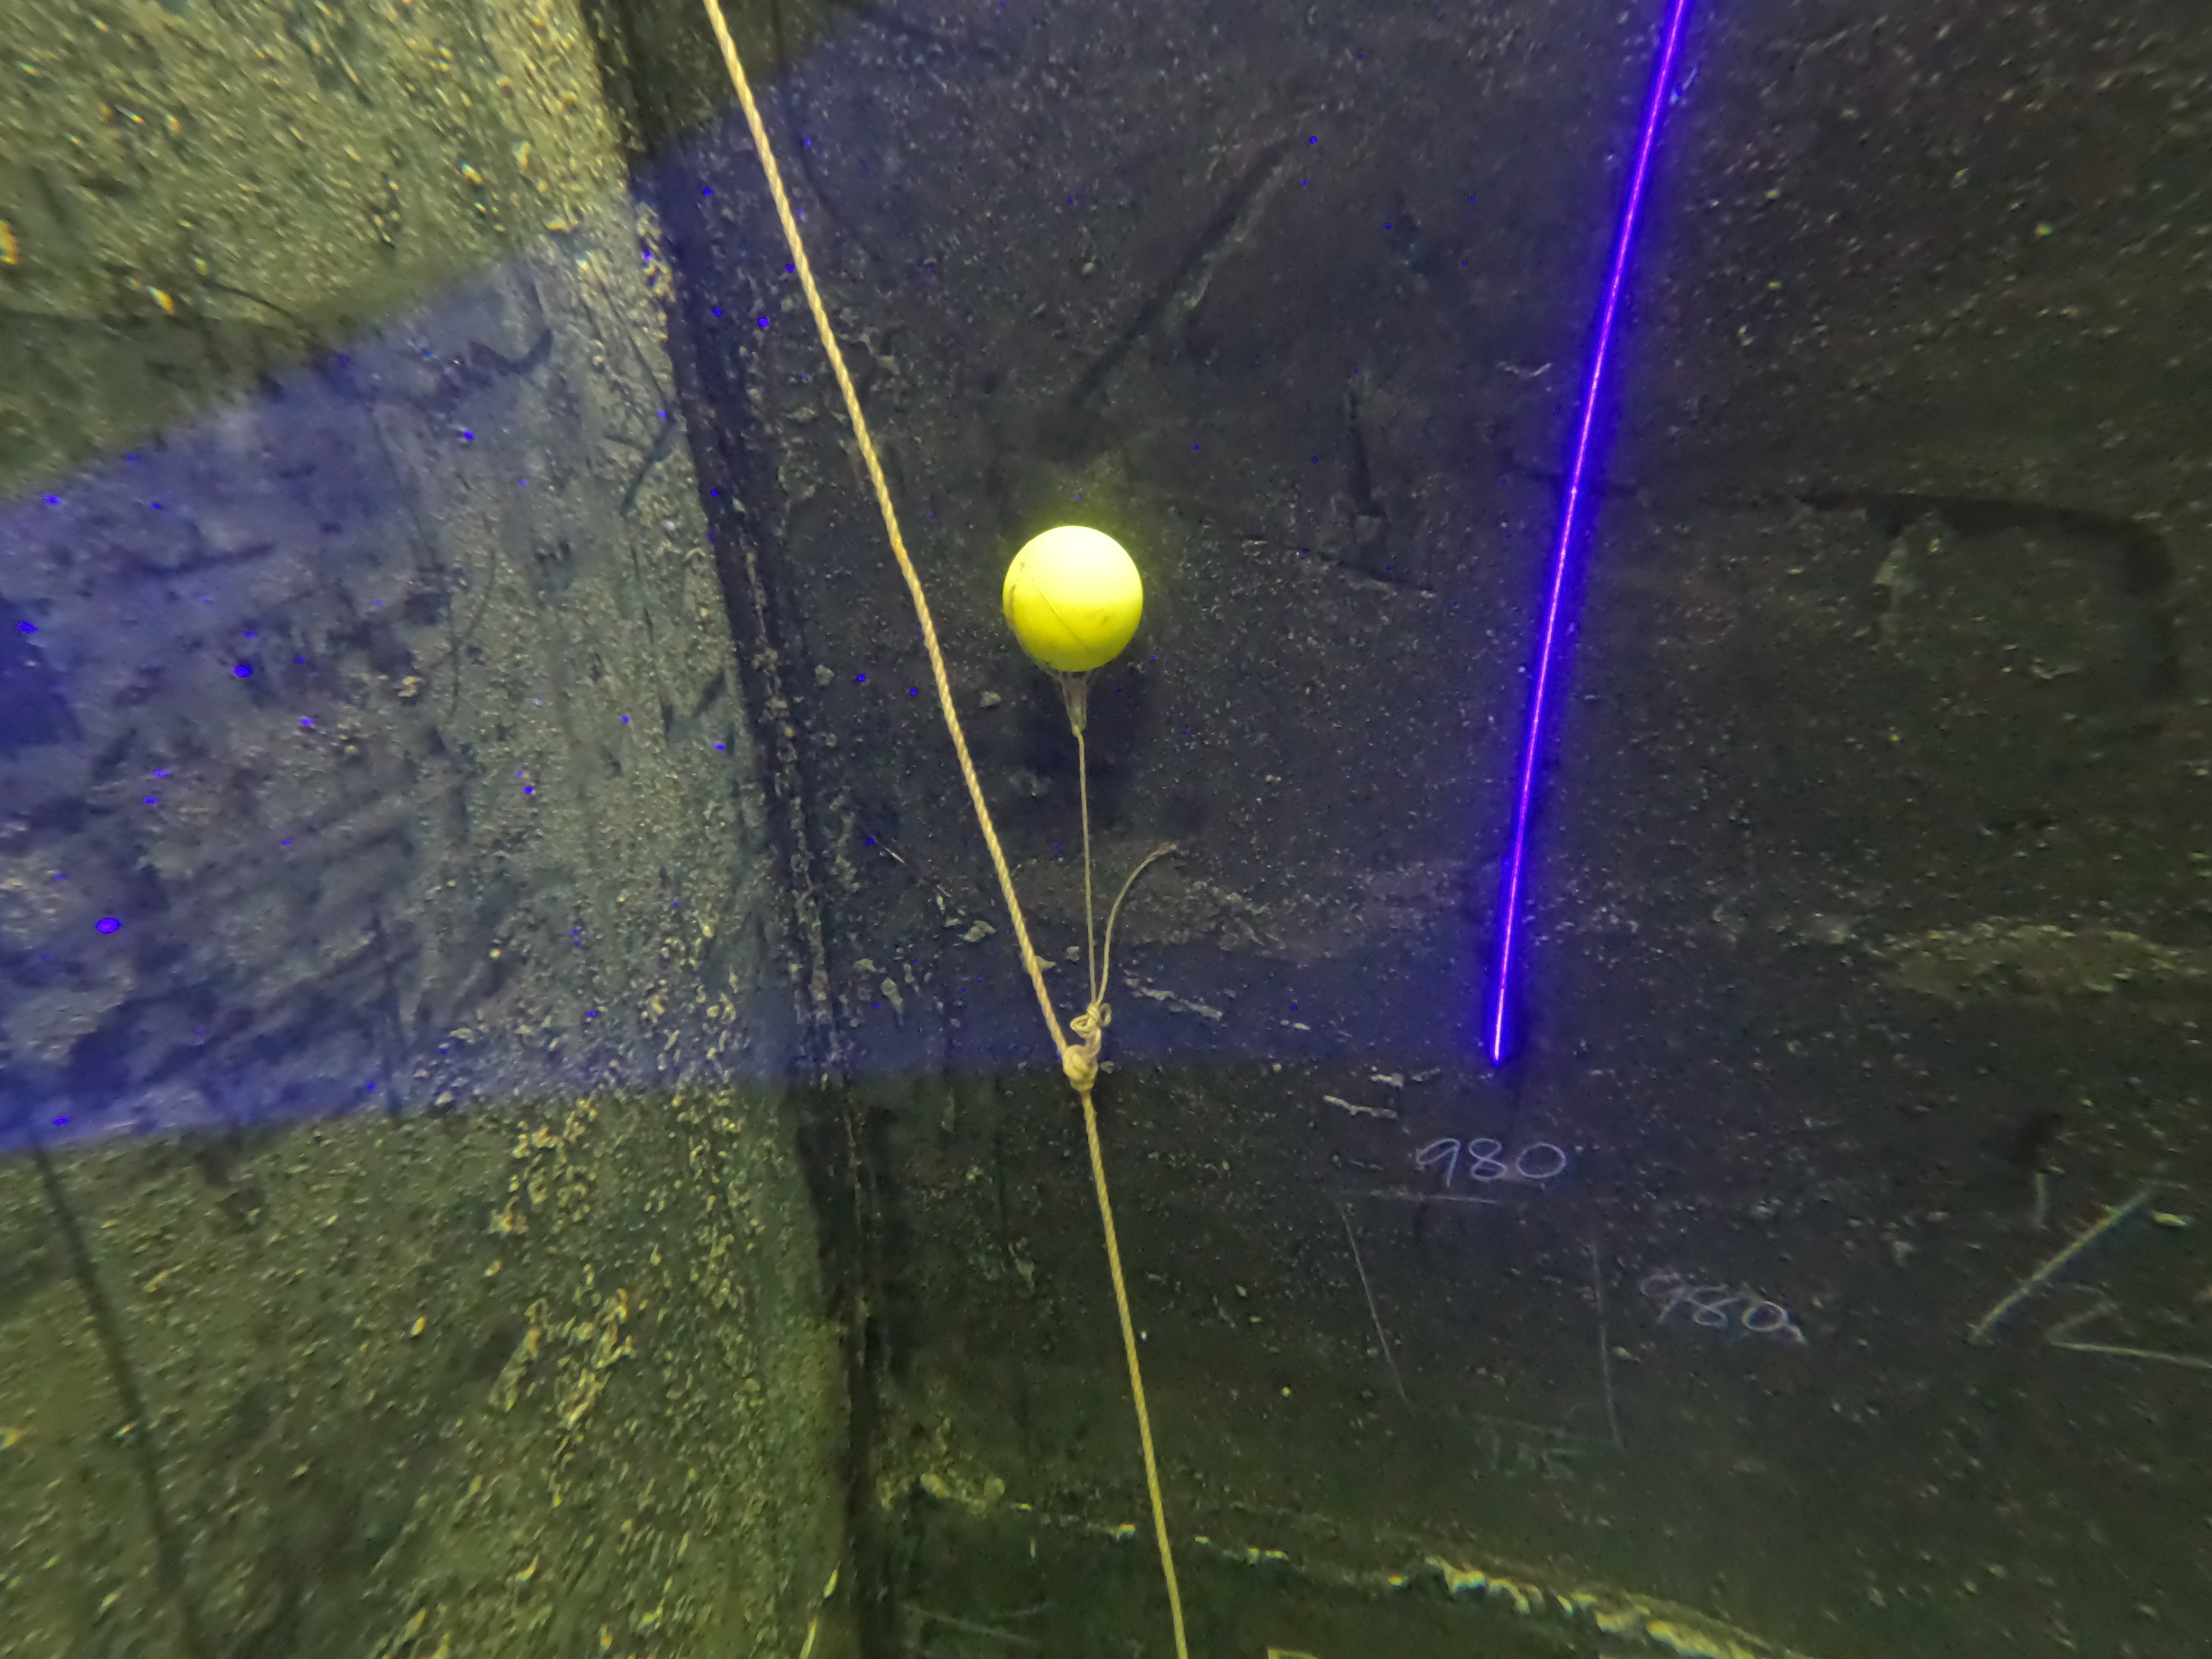

Supplement: Supplementary file 225 [file G0031018.pdf › 4/G0031018.pdf]

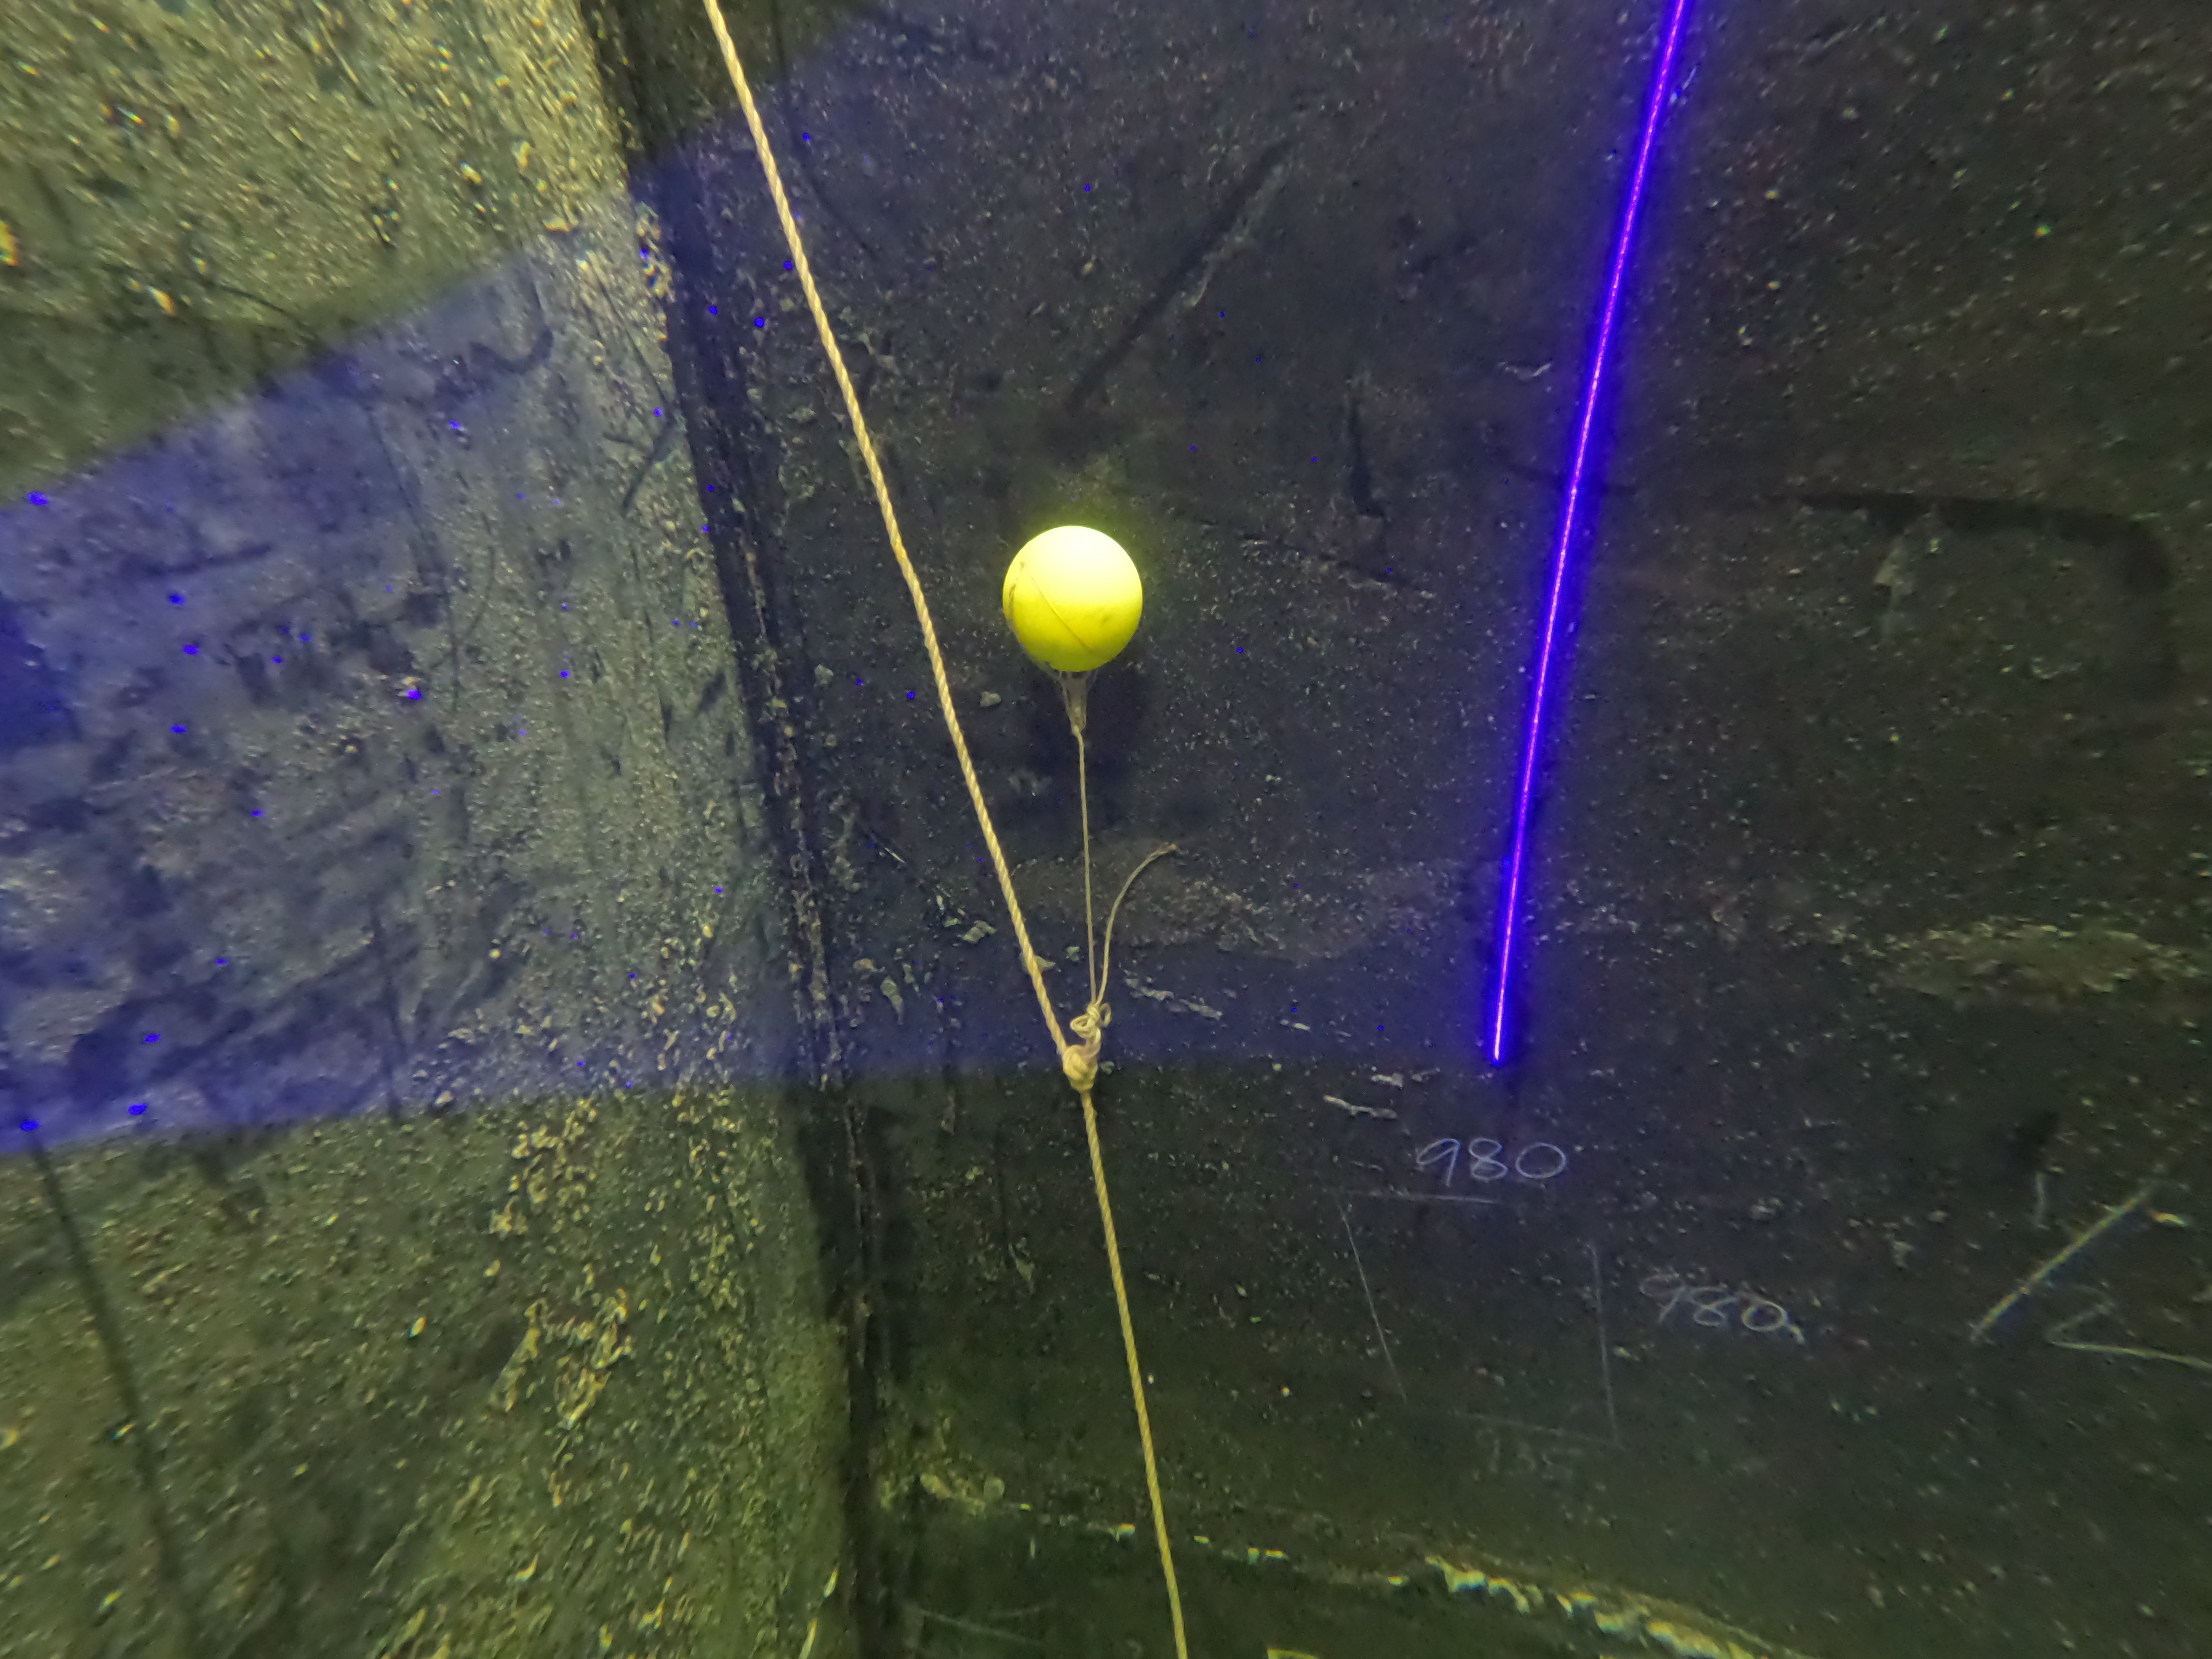

980

980

Supplement: Supplementary file 226 [file G0031019.pdf › 4/G0031019.pdf]

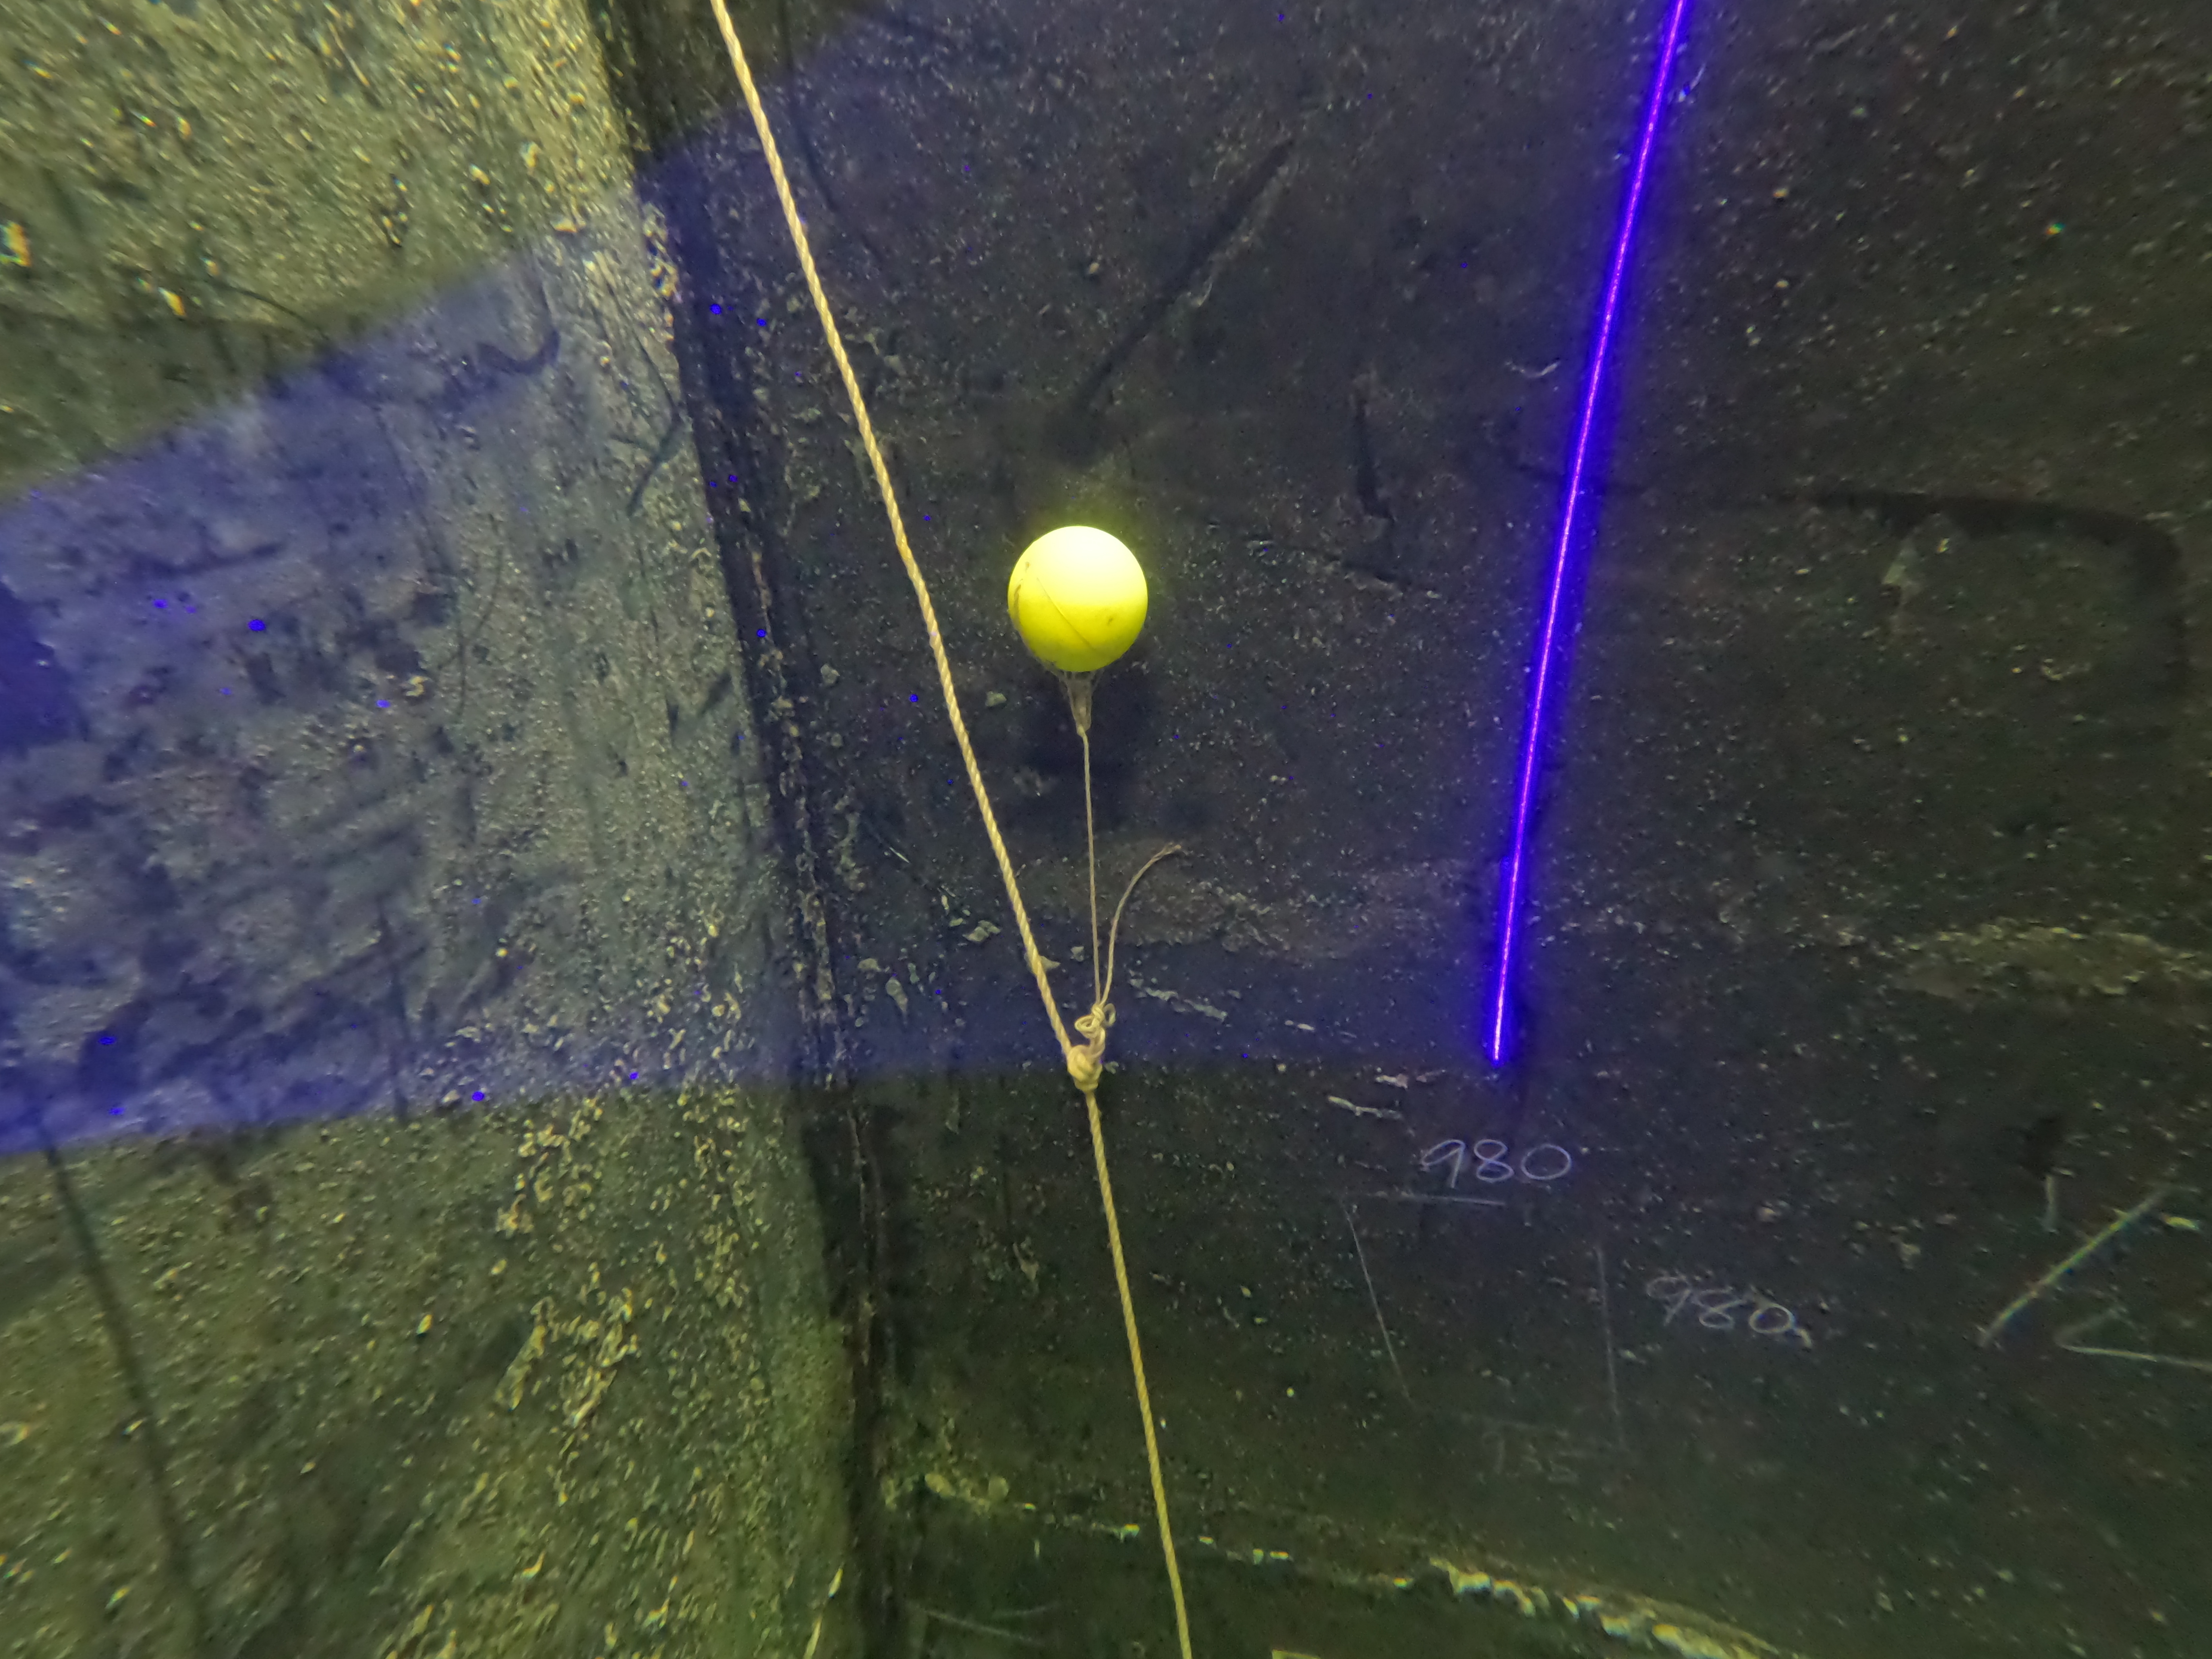

Supplement: Supplementary file 227 [file G0031020.pdf › 4/G0031020.pdf]

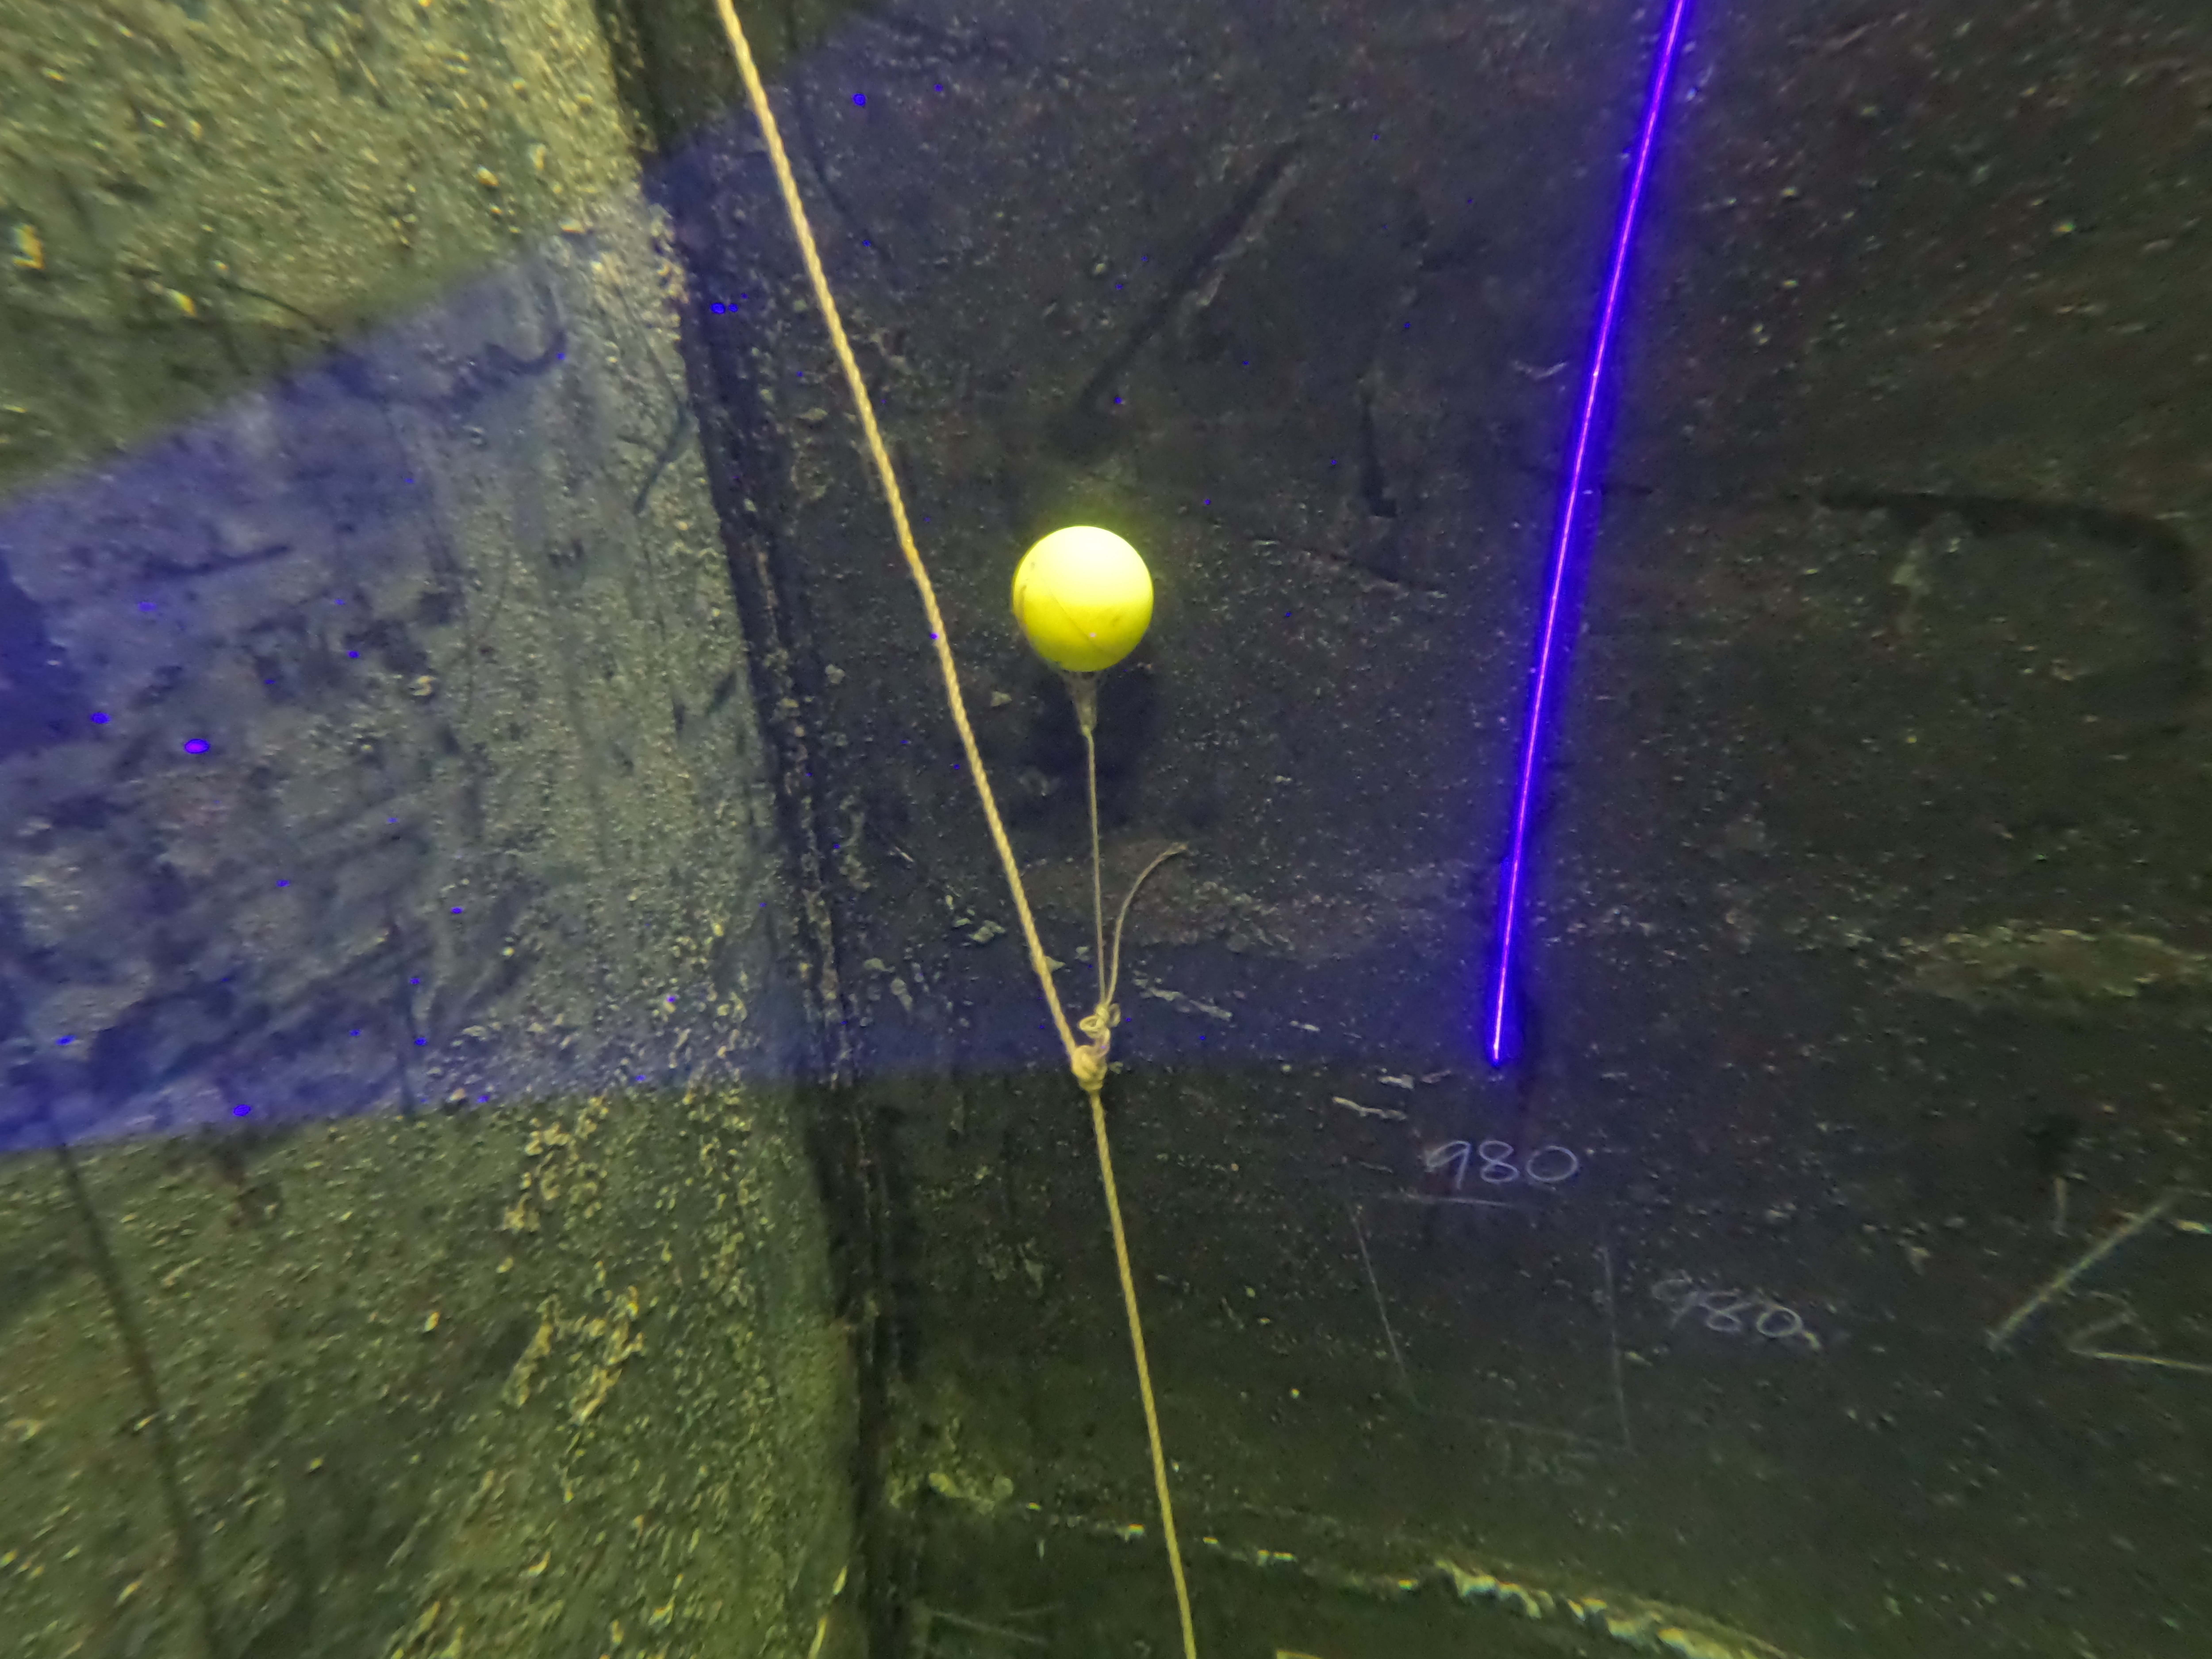

Supplement: Supplementary file 228 [file G0031021.pdf › 4/G0031021.pdf]

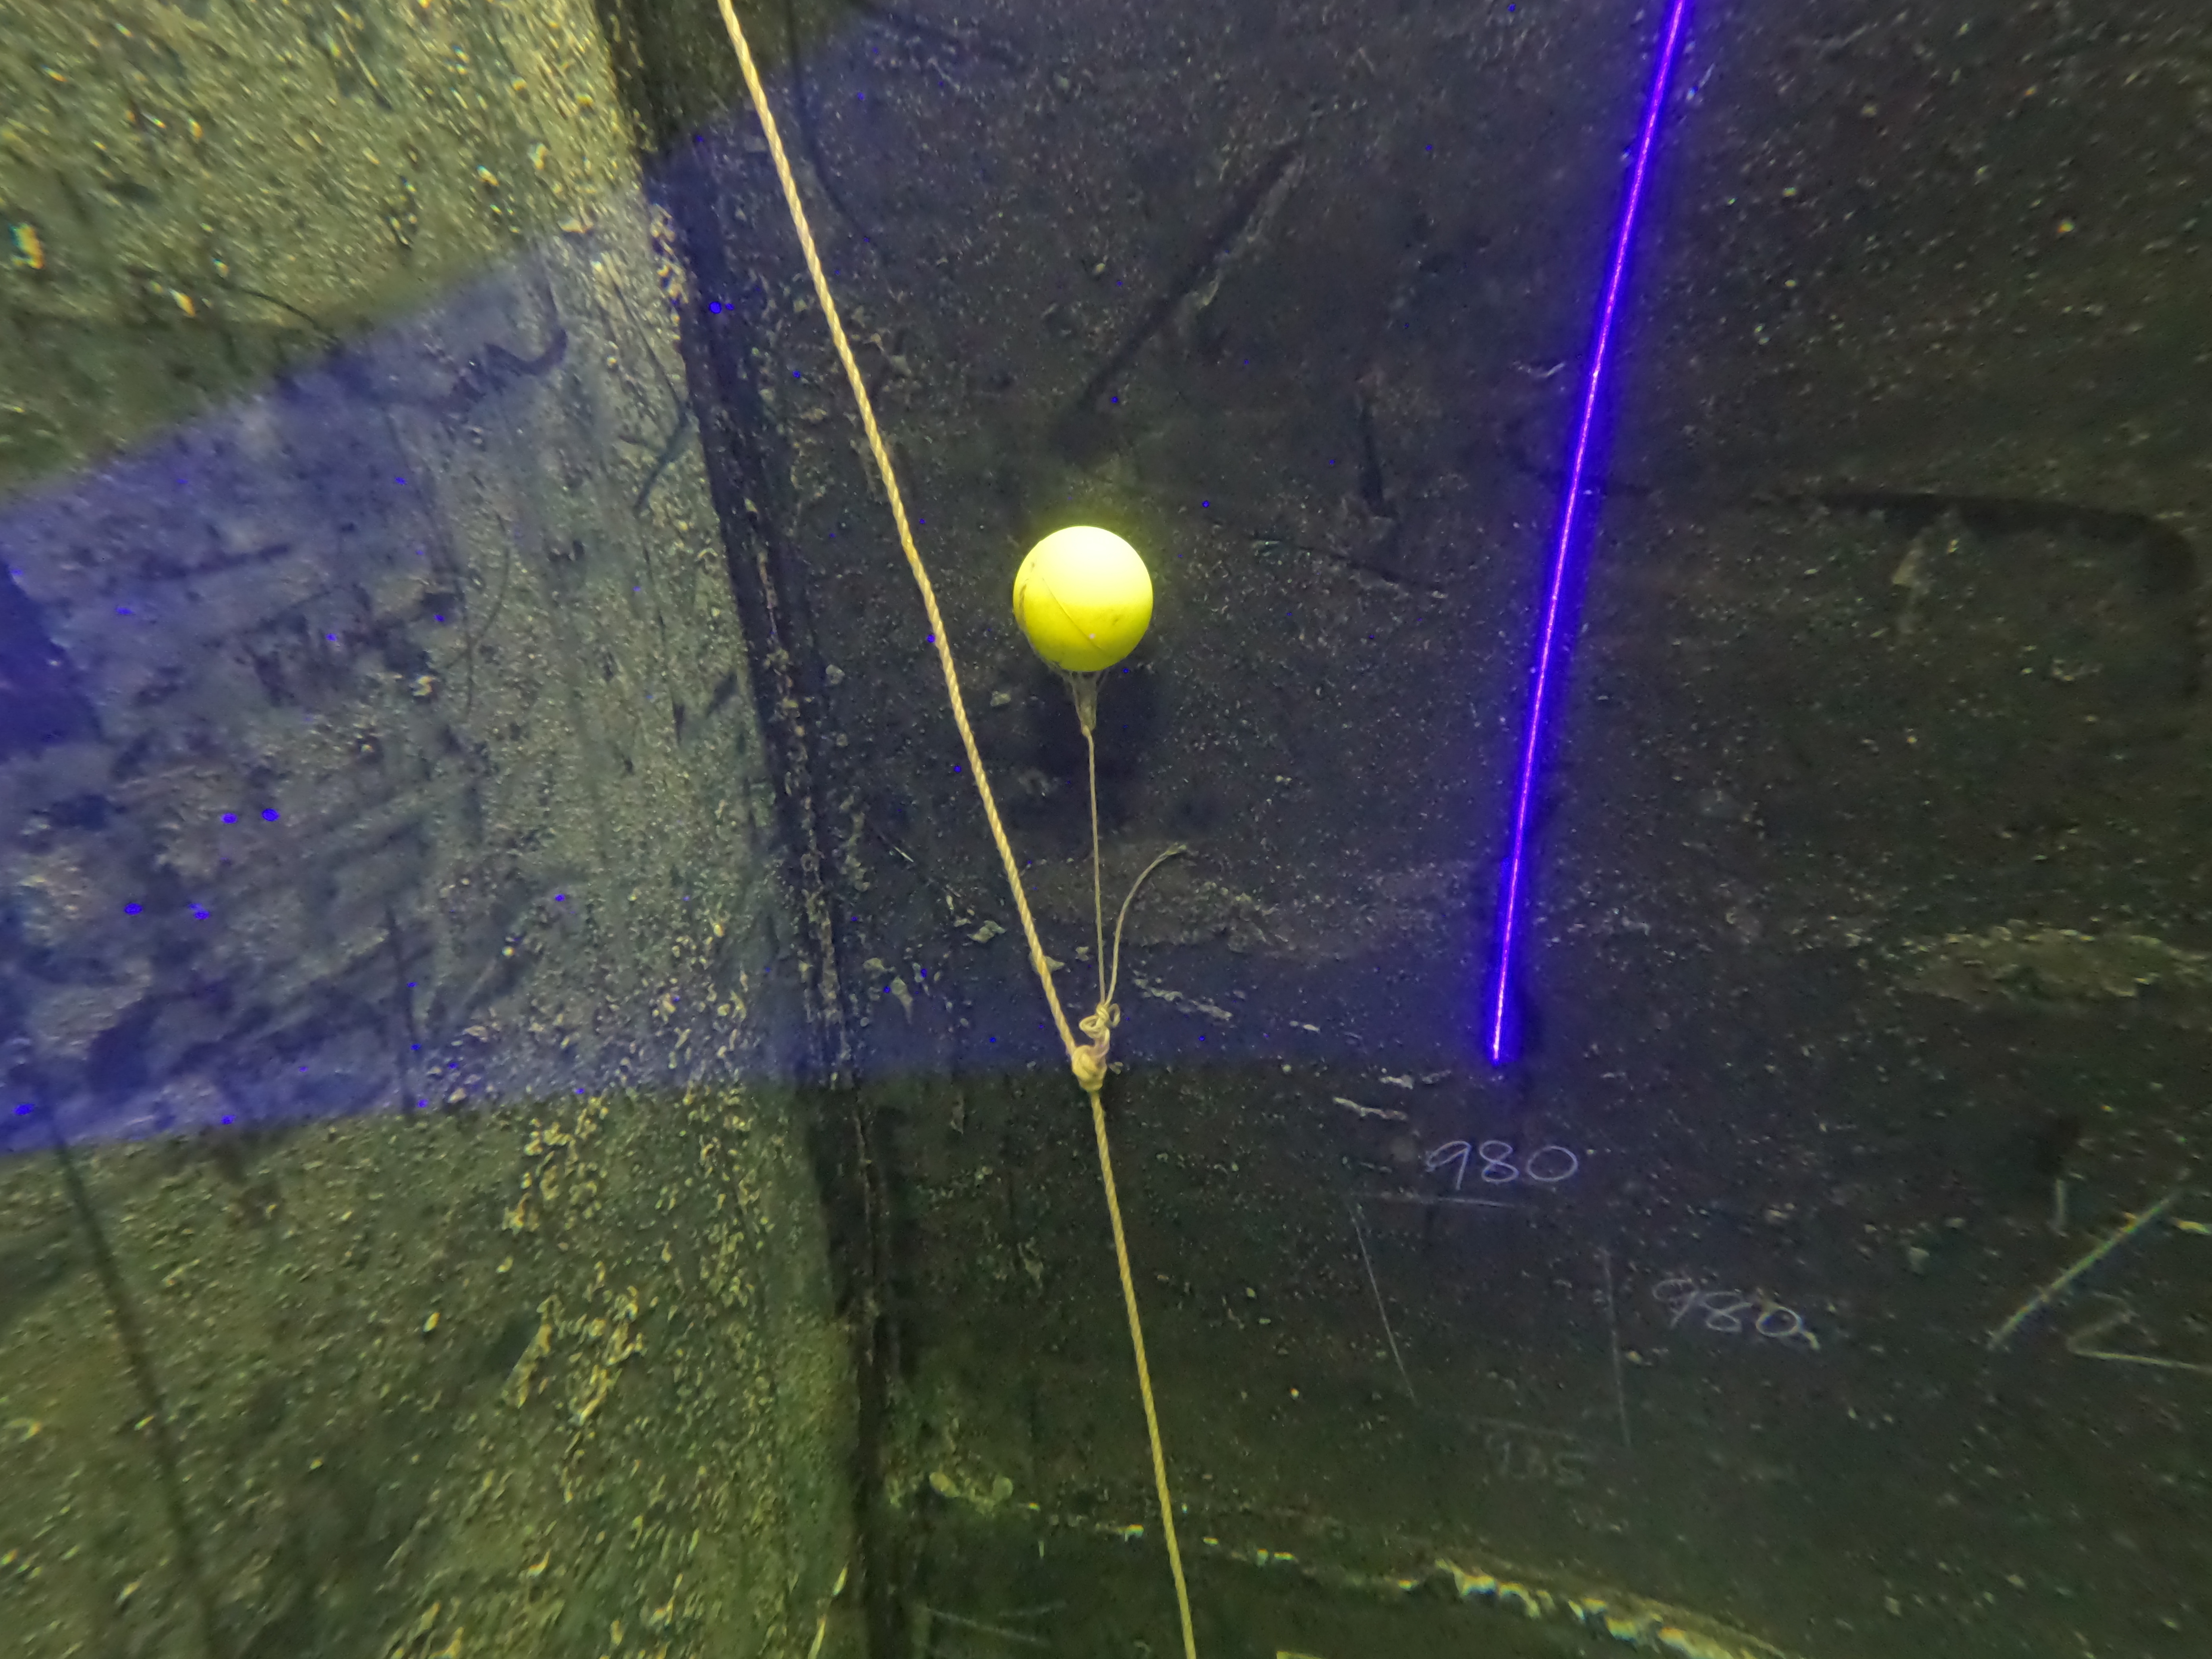

Supplement: Supplementary file 229 [file G0031022.pdf › 4/G0031022.pdf]

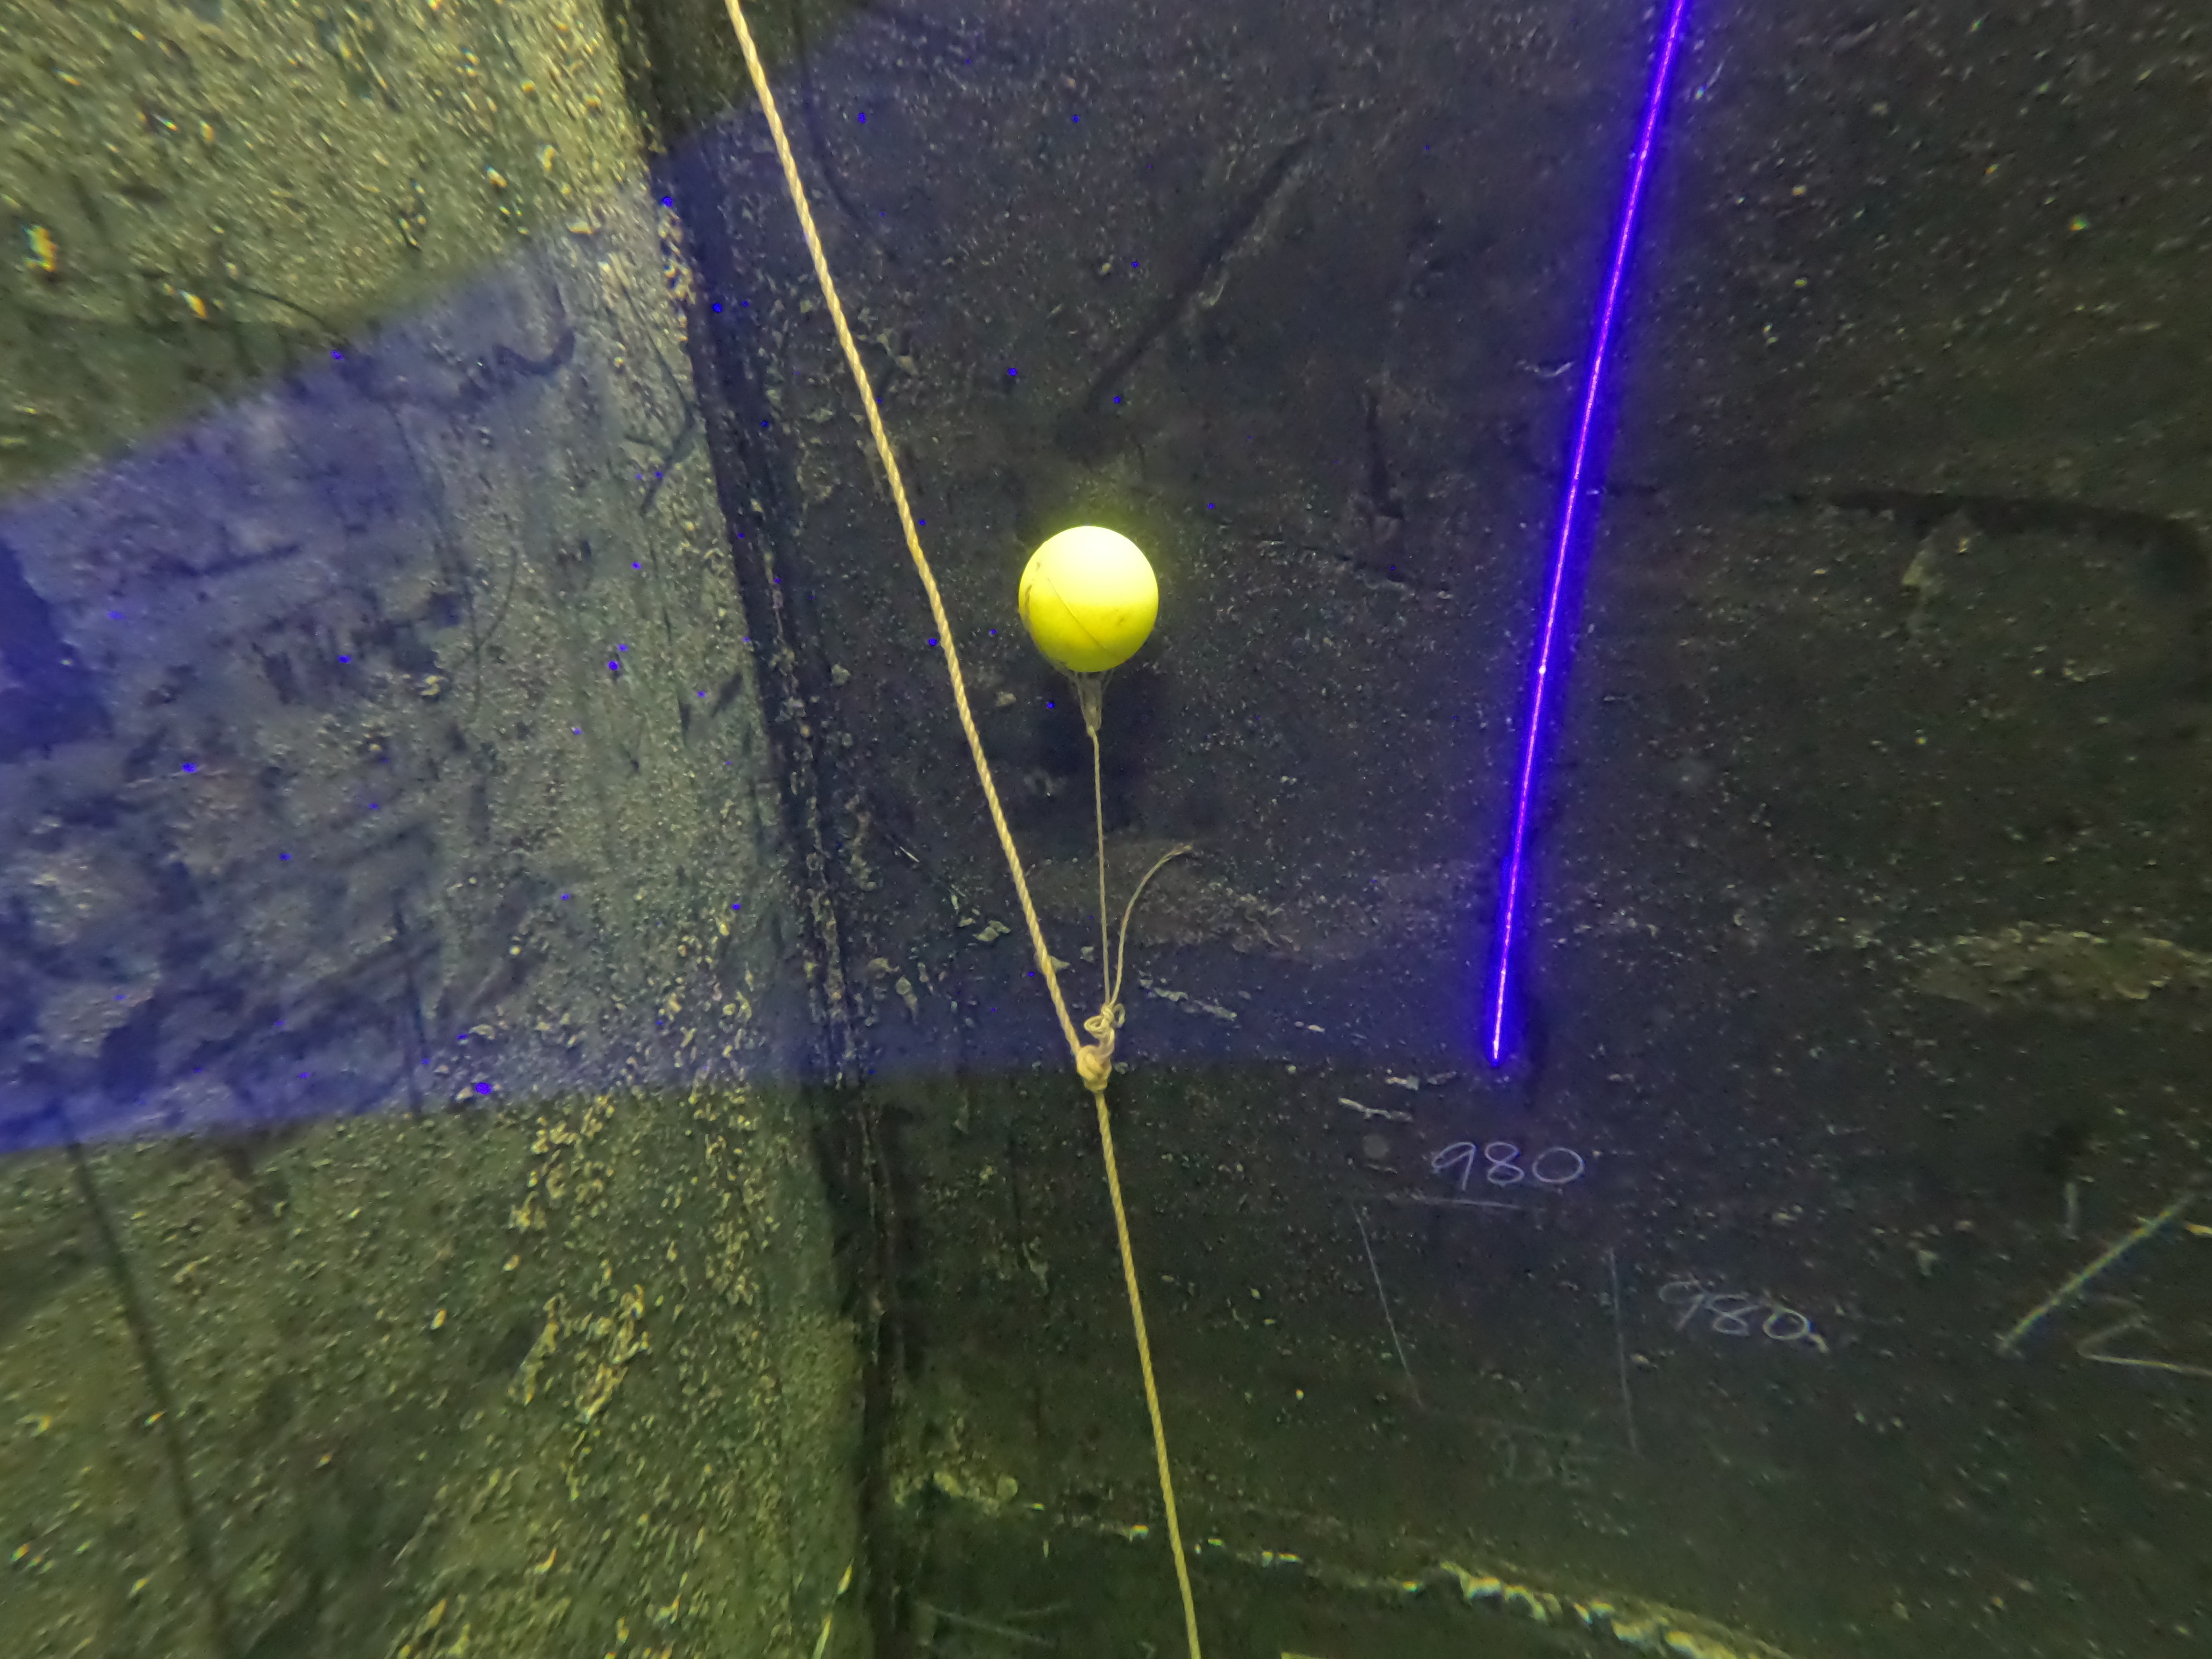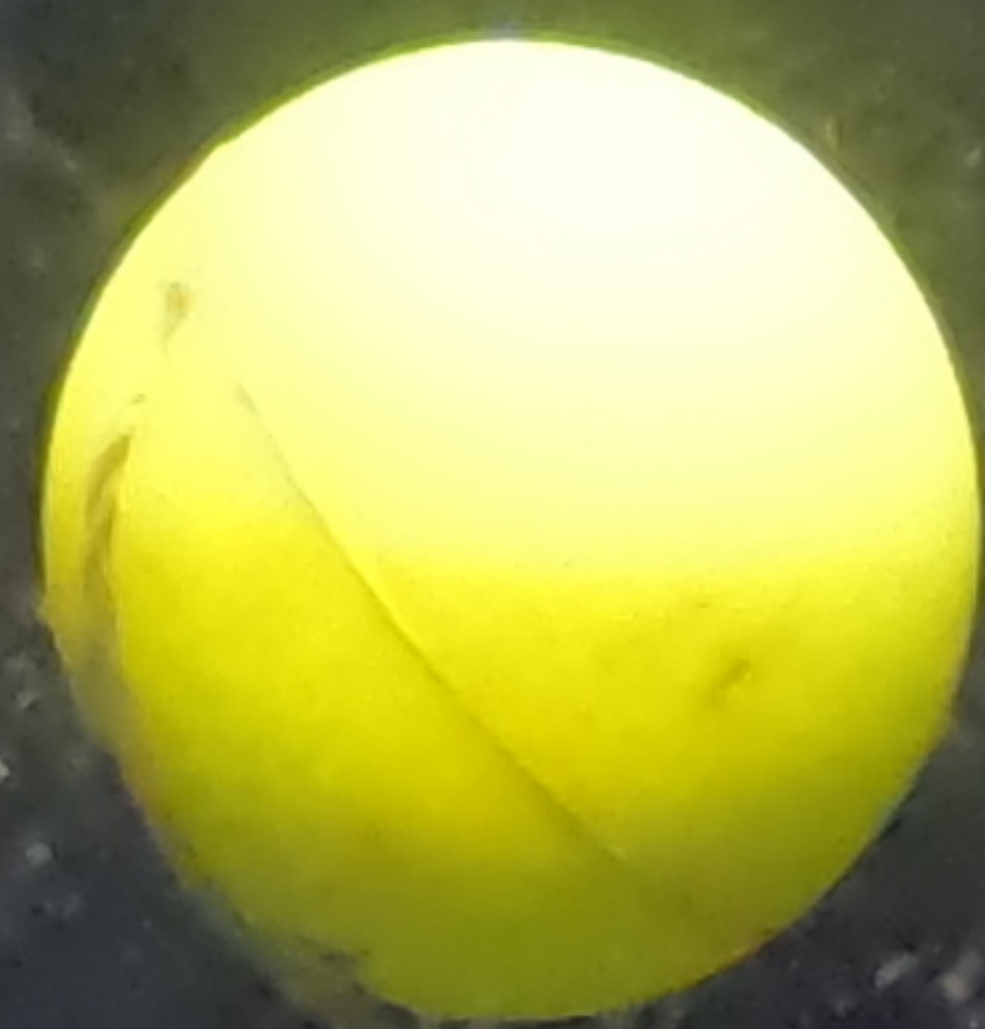

980

980

Supplement: Supplementary file 230 [file G0031023.pdf › 4/G0031023.pdf]

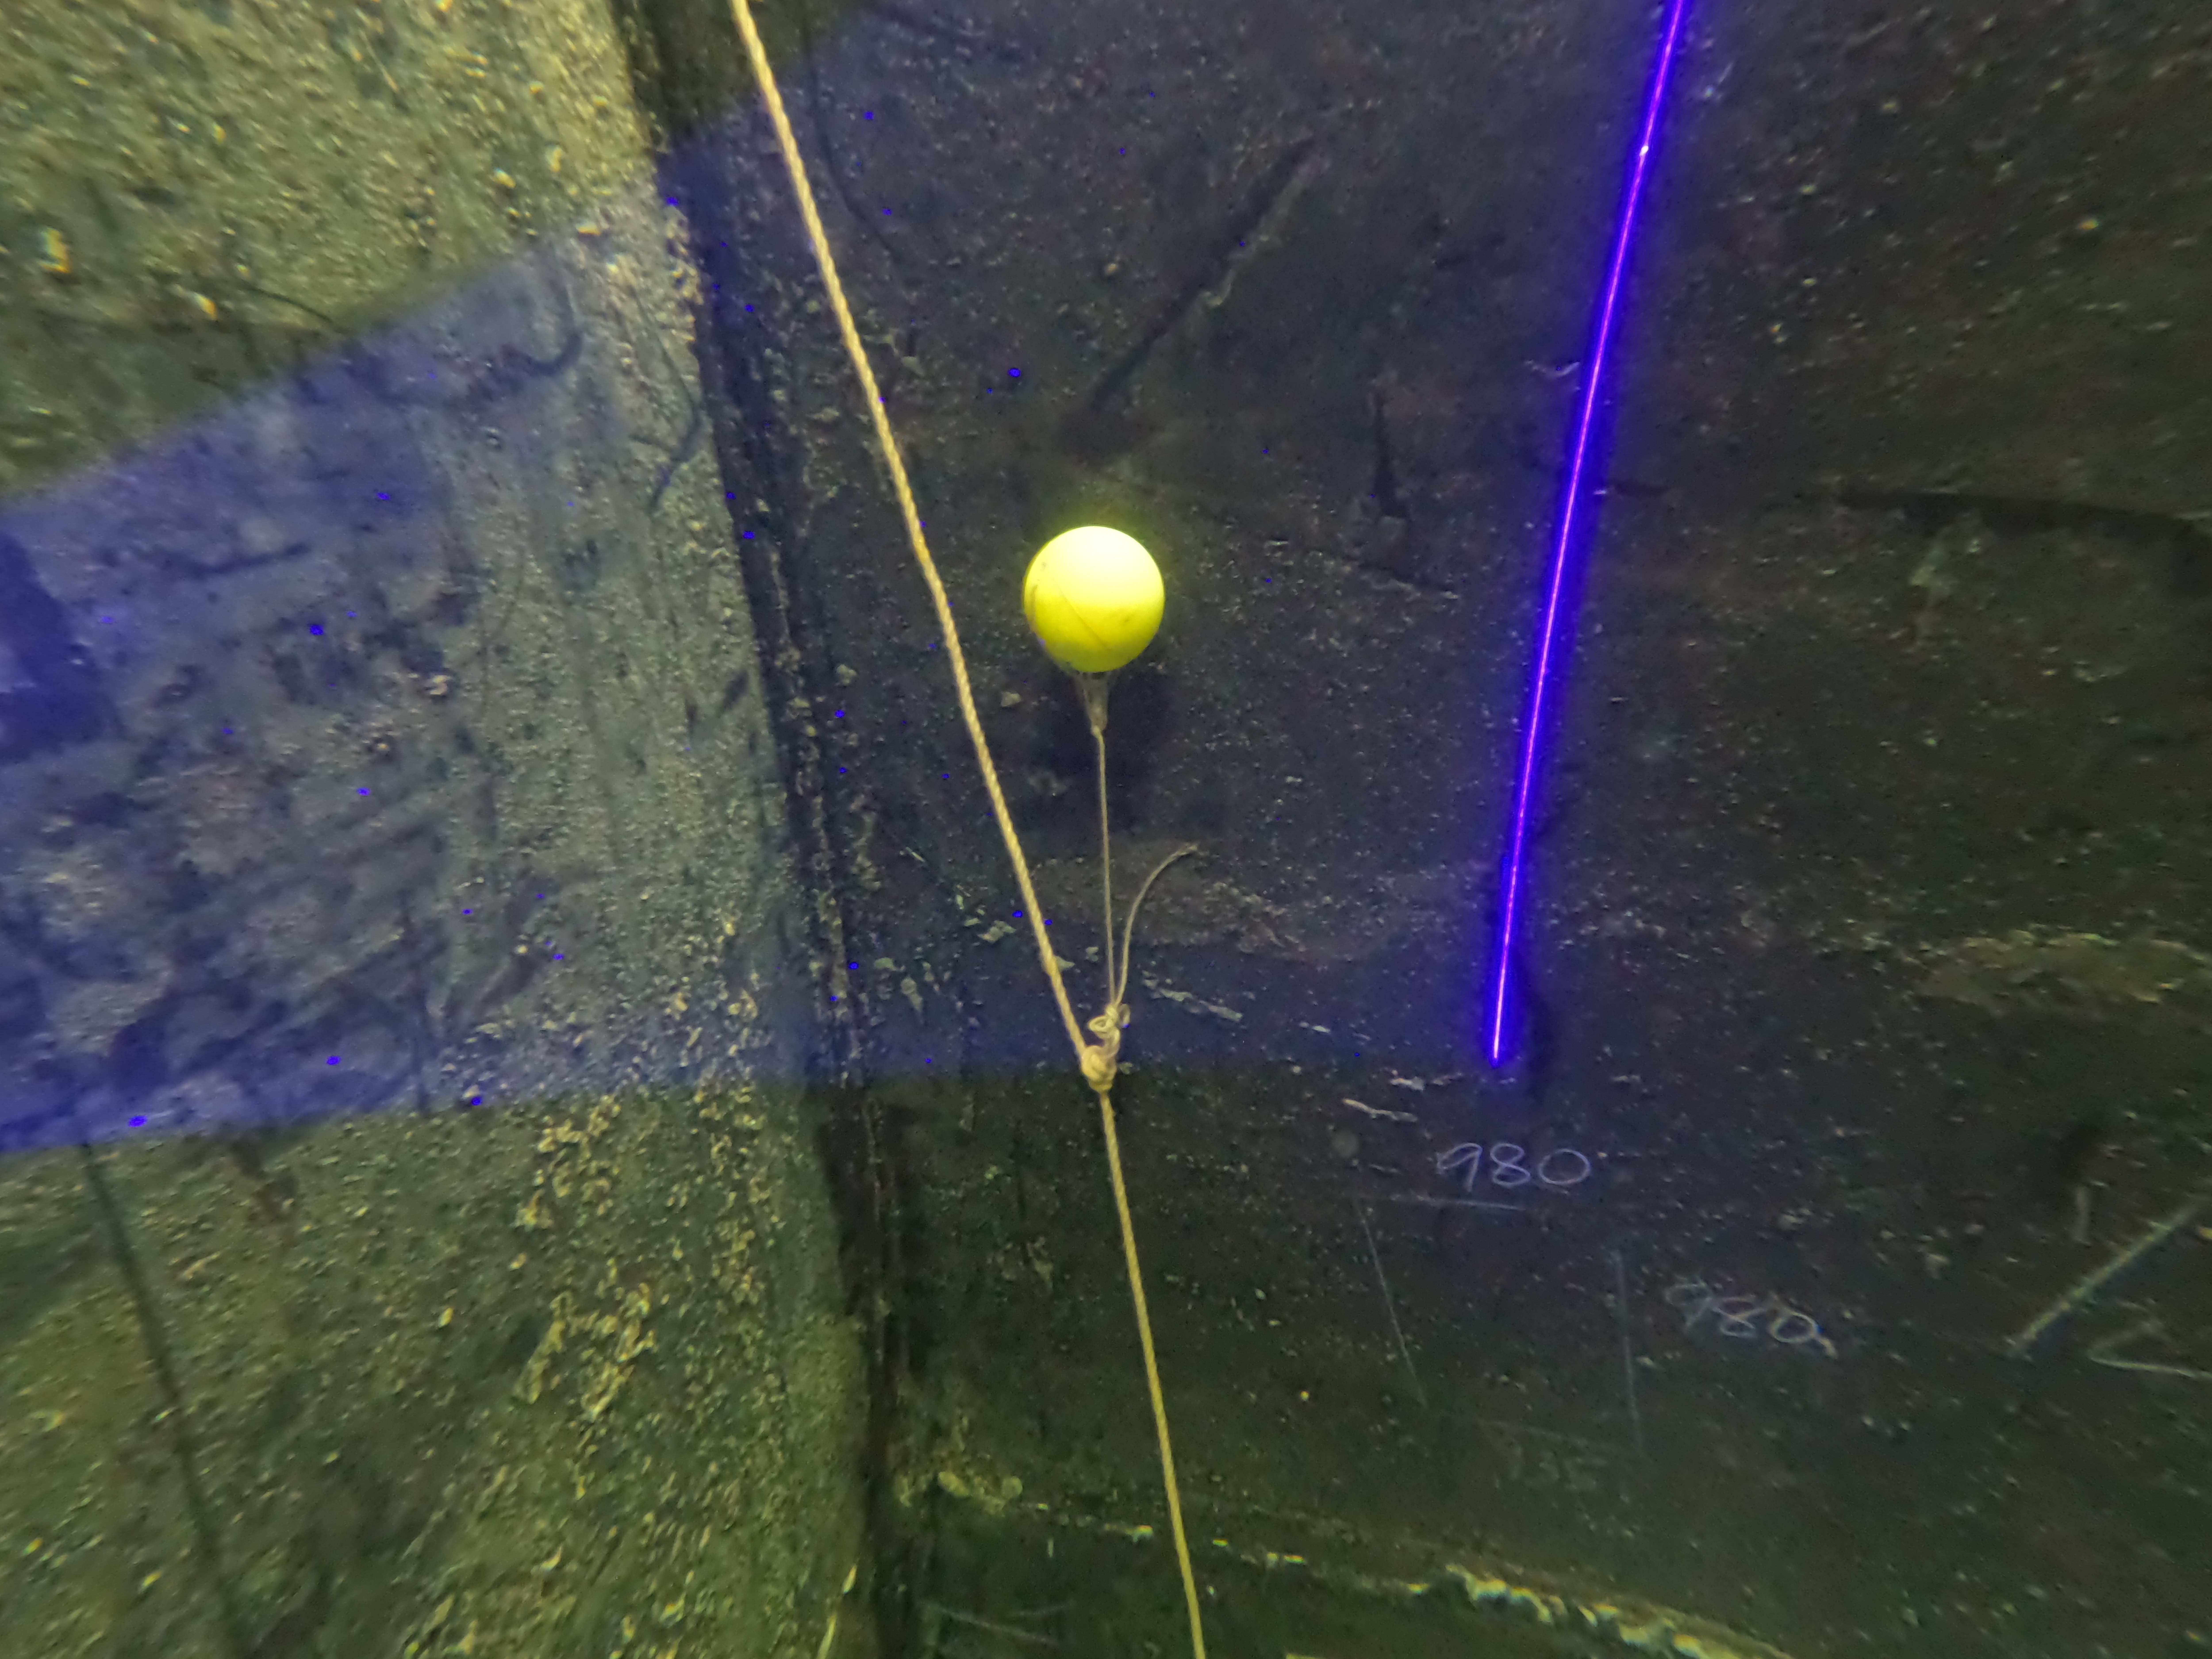

980

980

Supplement: Supplementary file 231 [file G0031024.pdf › 4/G0031024.pdf]

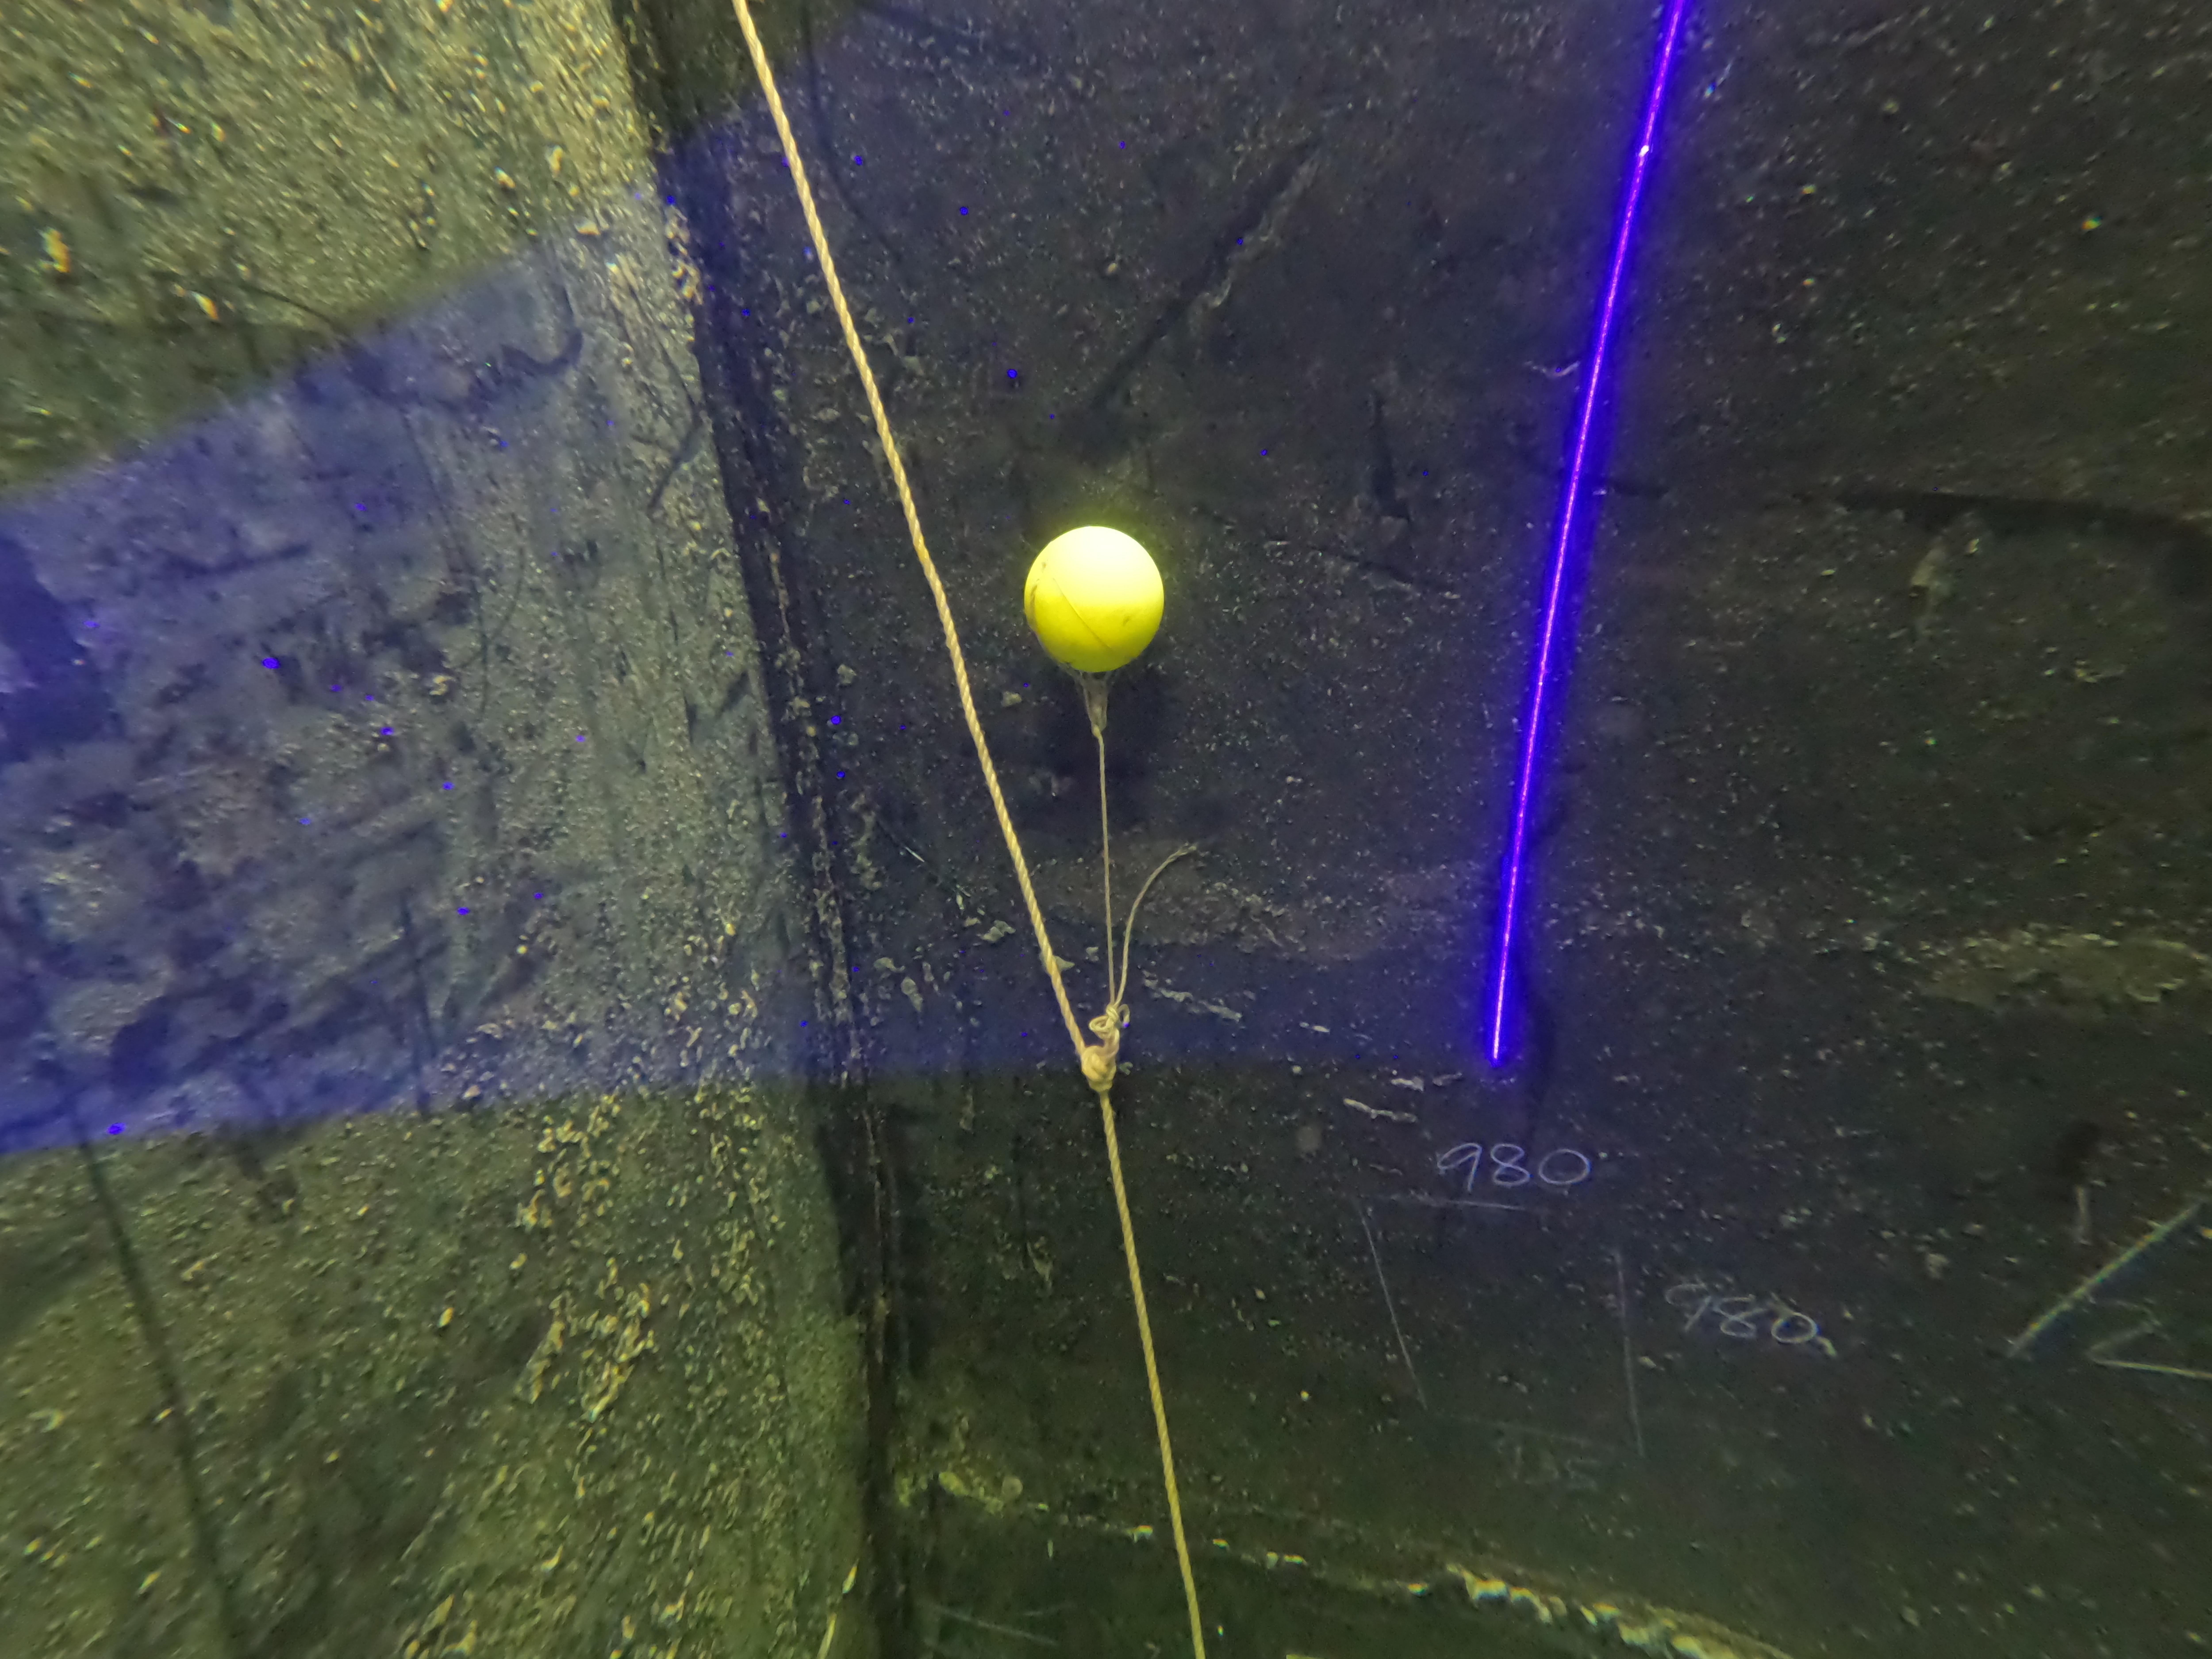

Supplement: Supplementary file 232 [file G0031025.pdf › 4/G0031025.pdf]

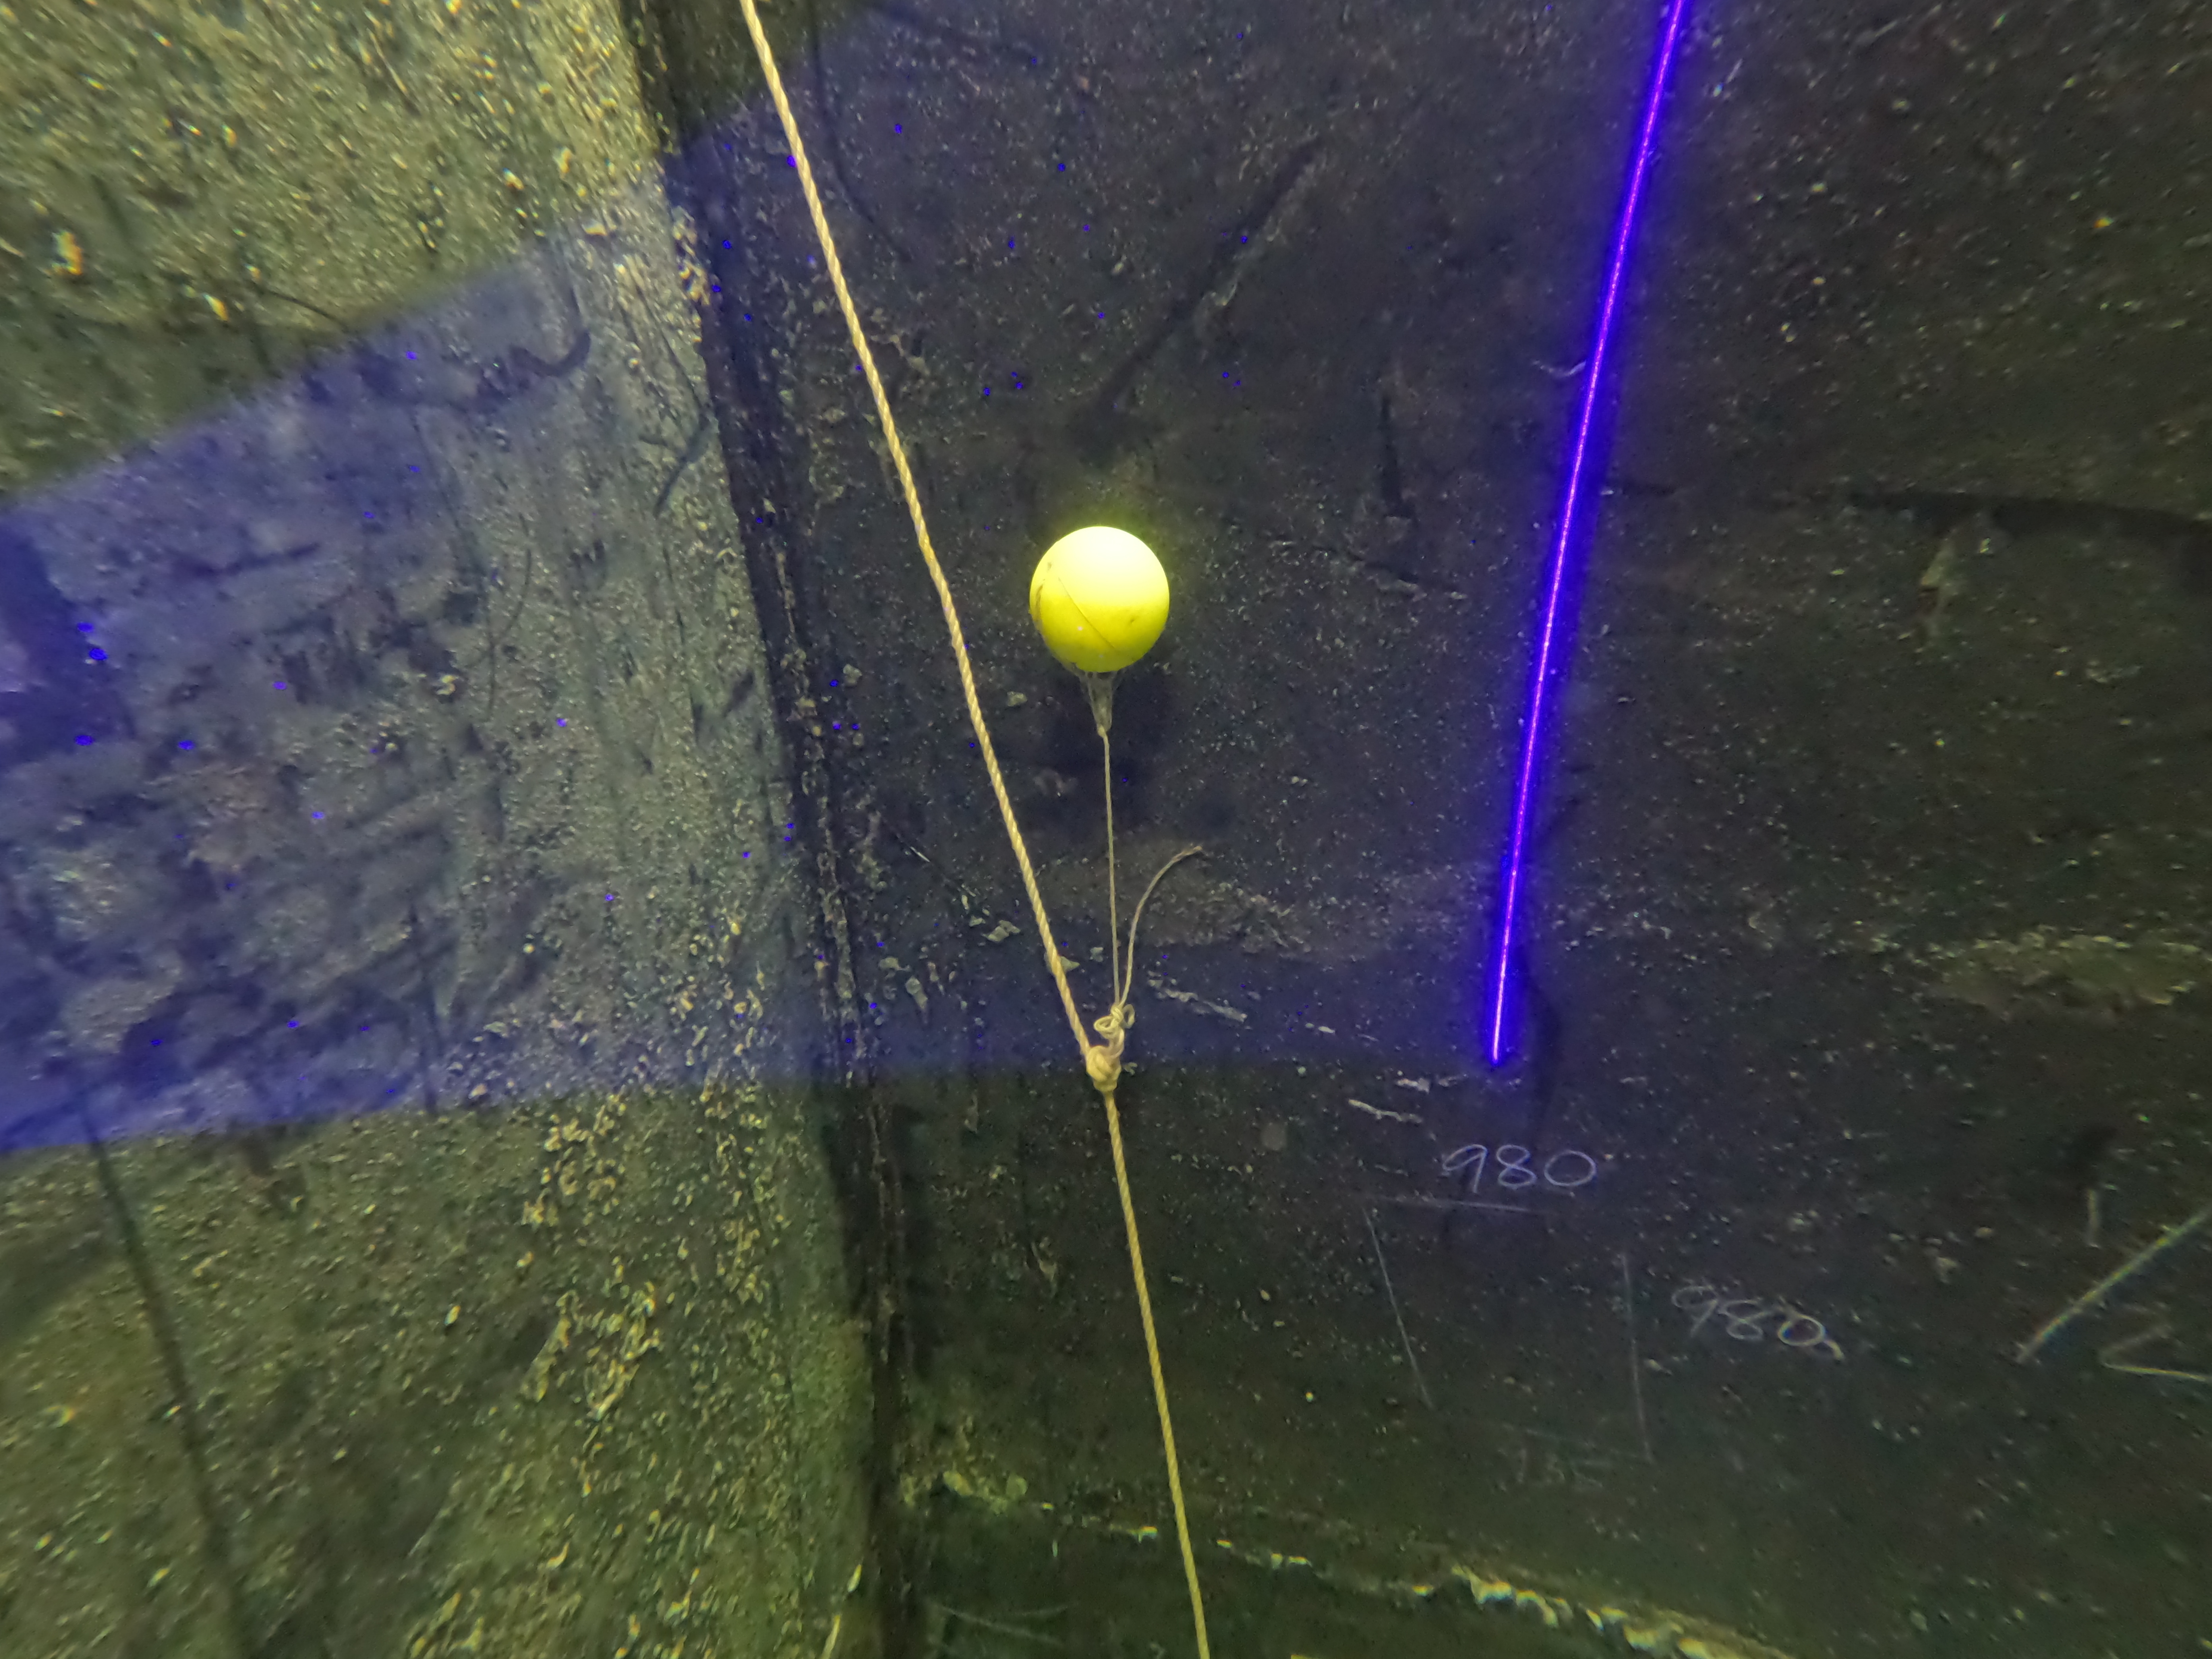

Supplement: Supplementary file 233 [file G0031026.pdf › 4/G0031026.pdf]

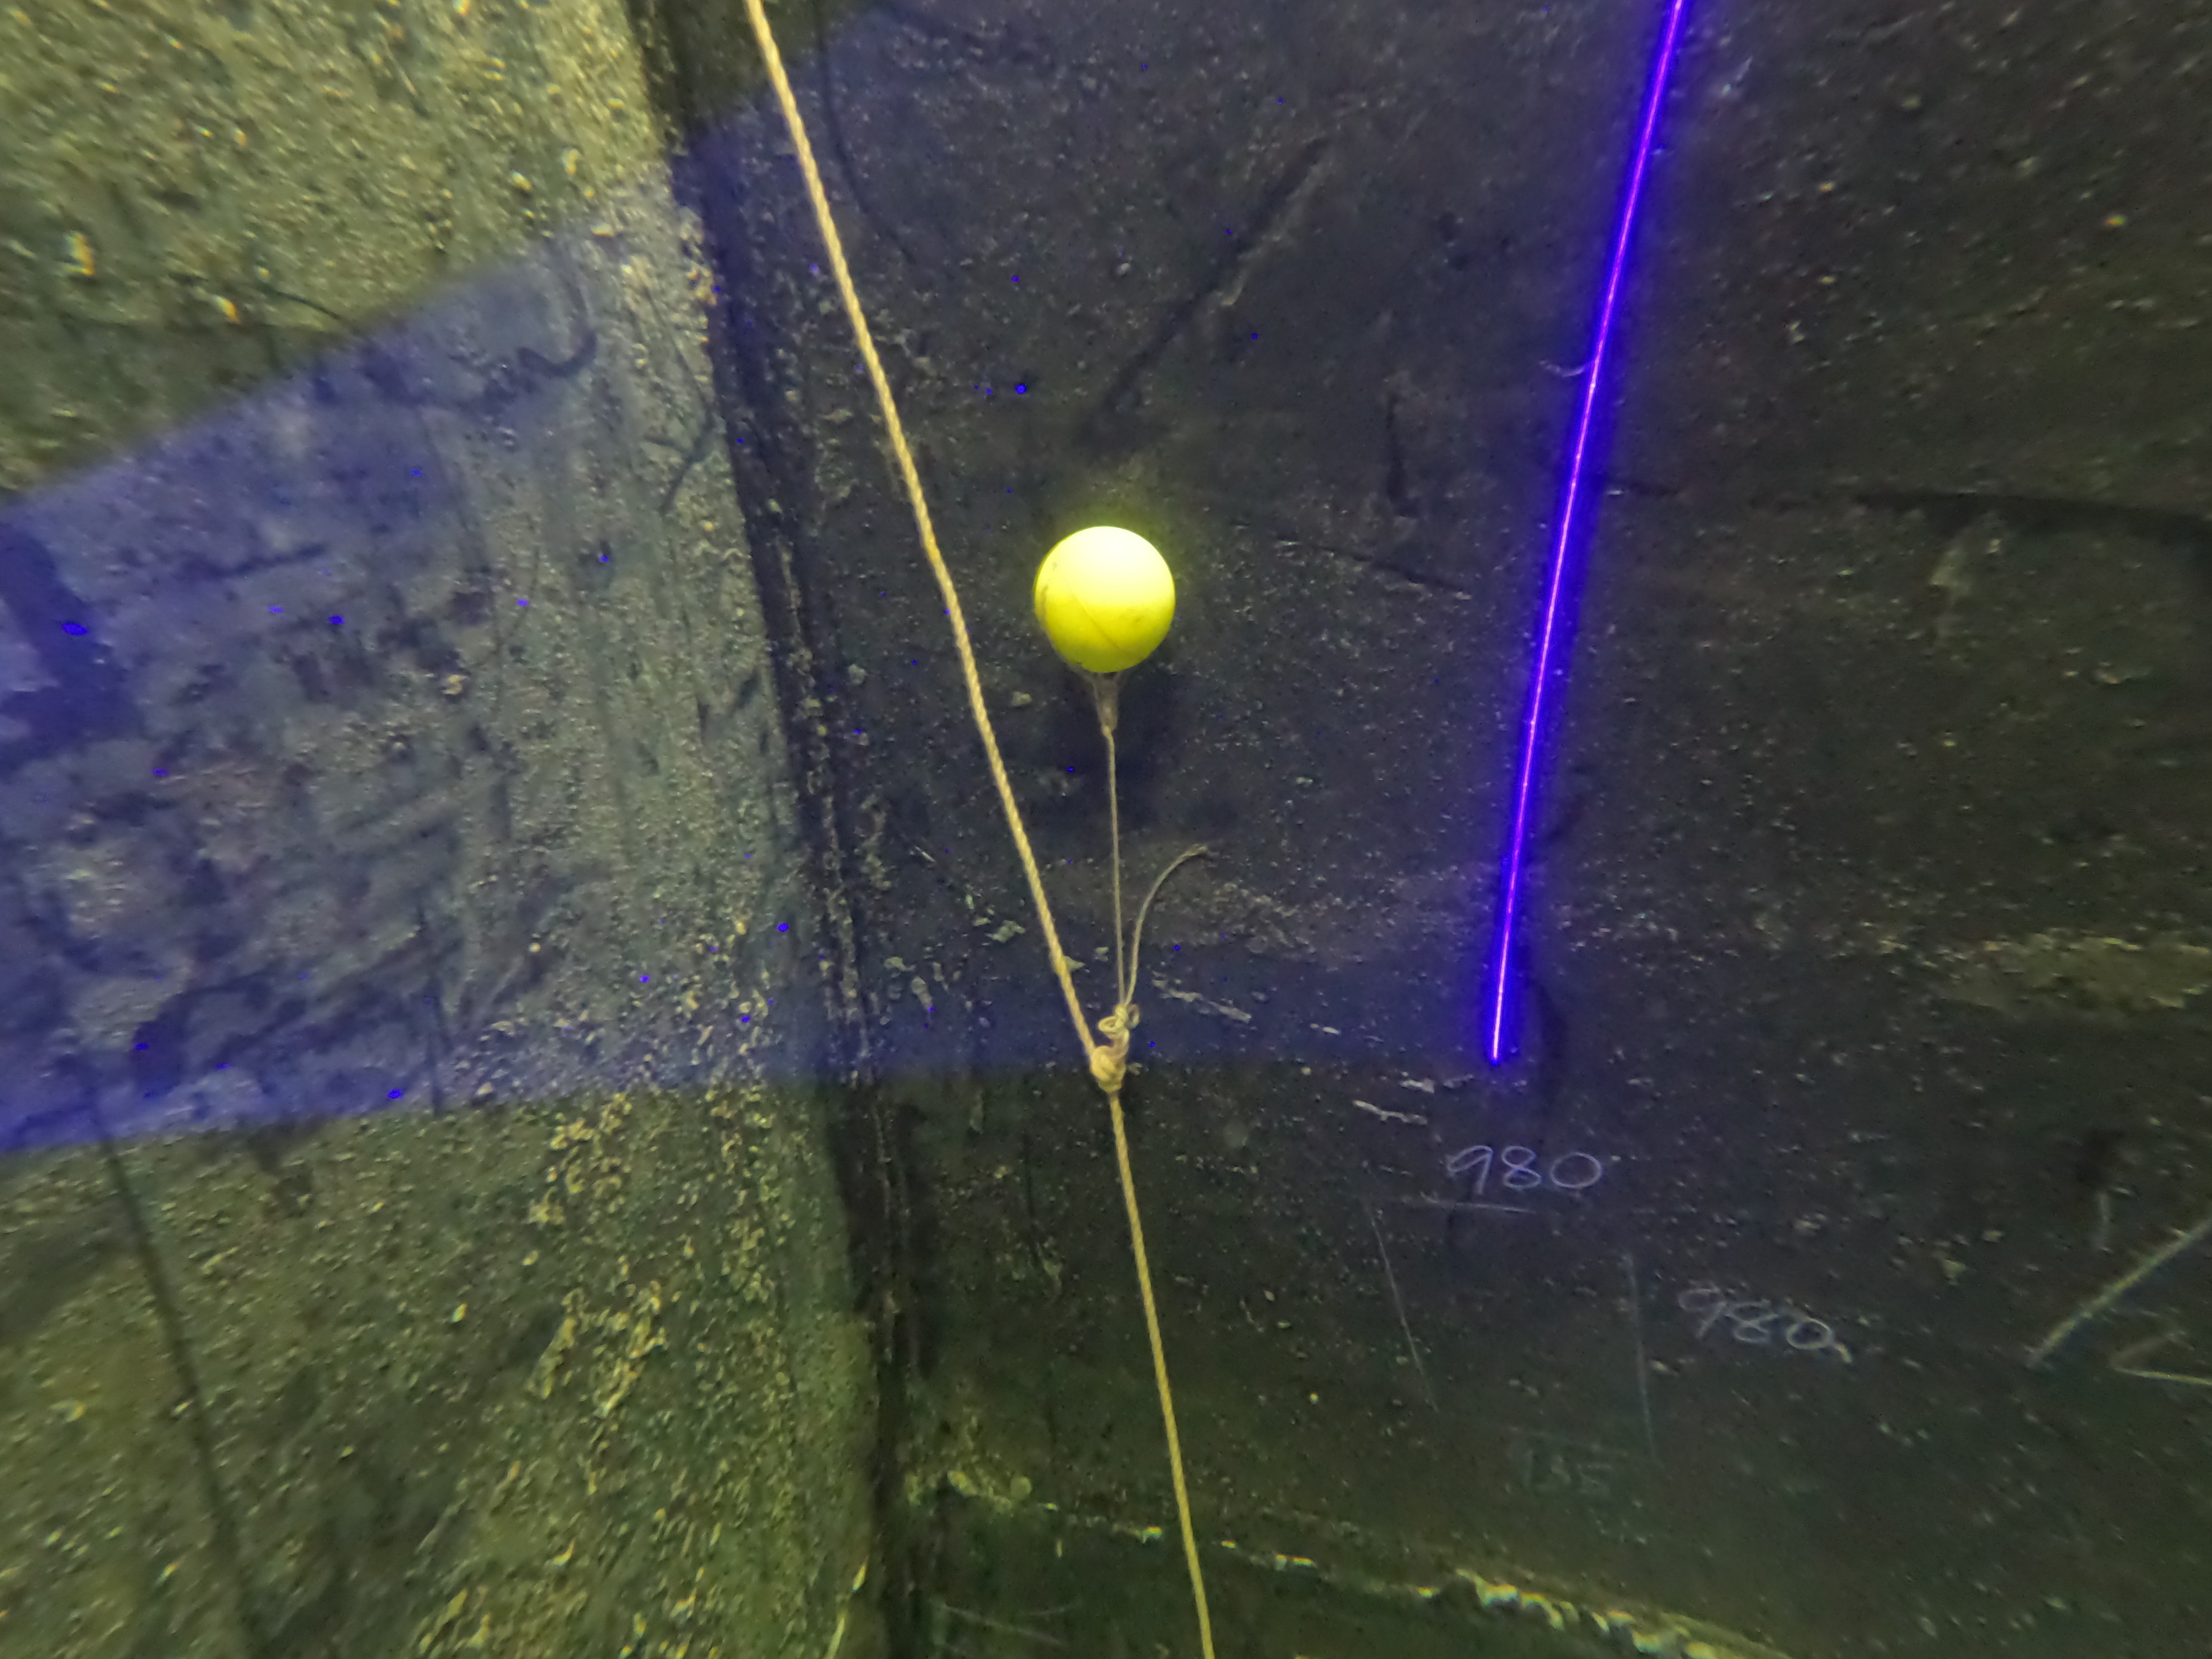

980

980

Supplement: Supplementary file 234 [file G0031027.pdf › 4/G0031027.pdf]

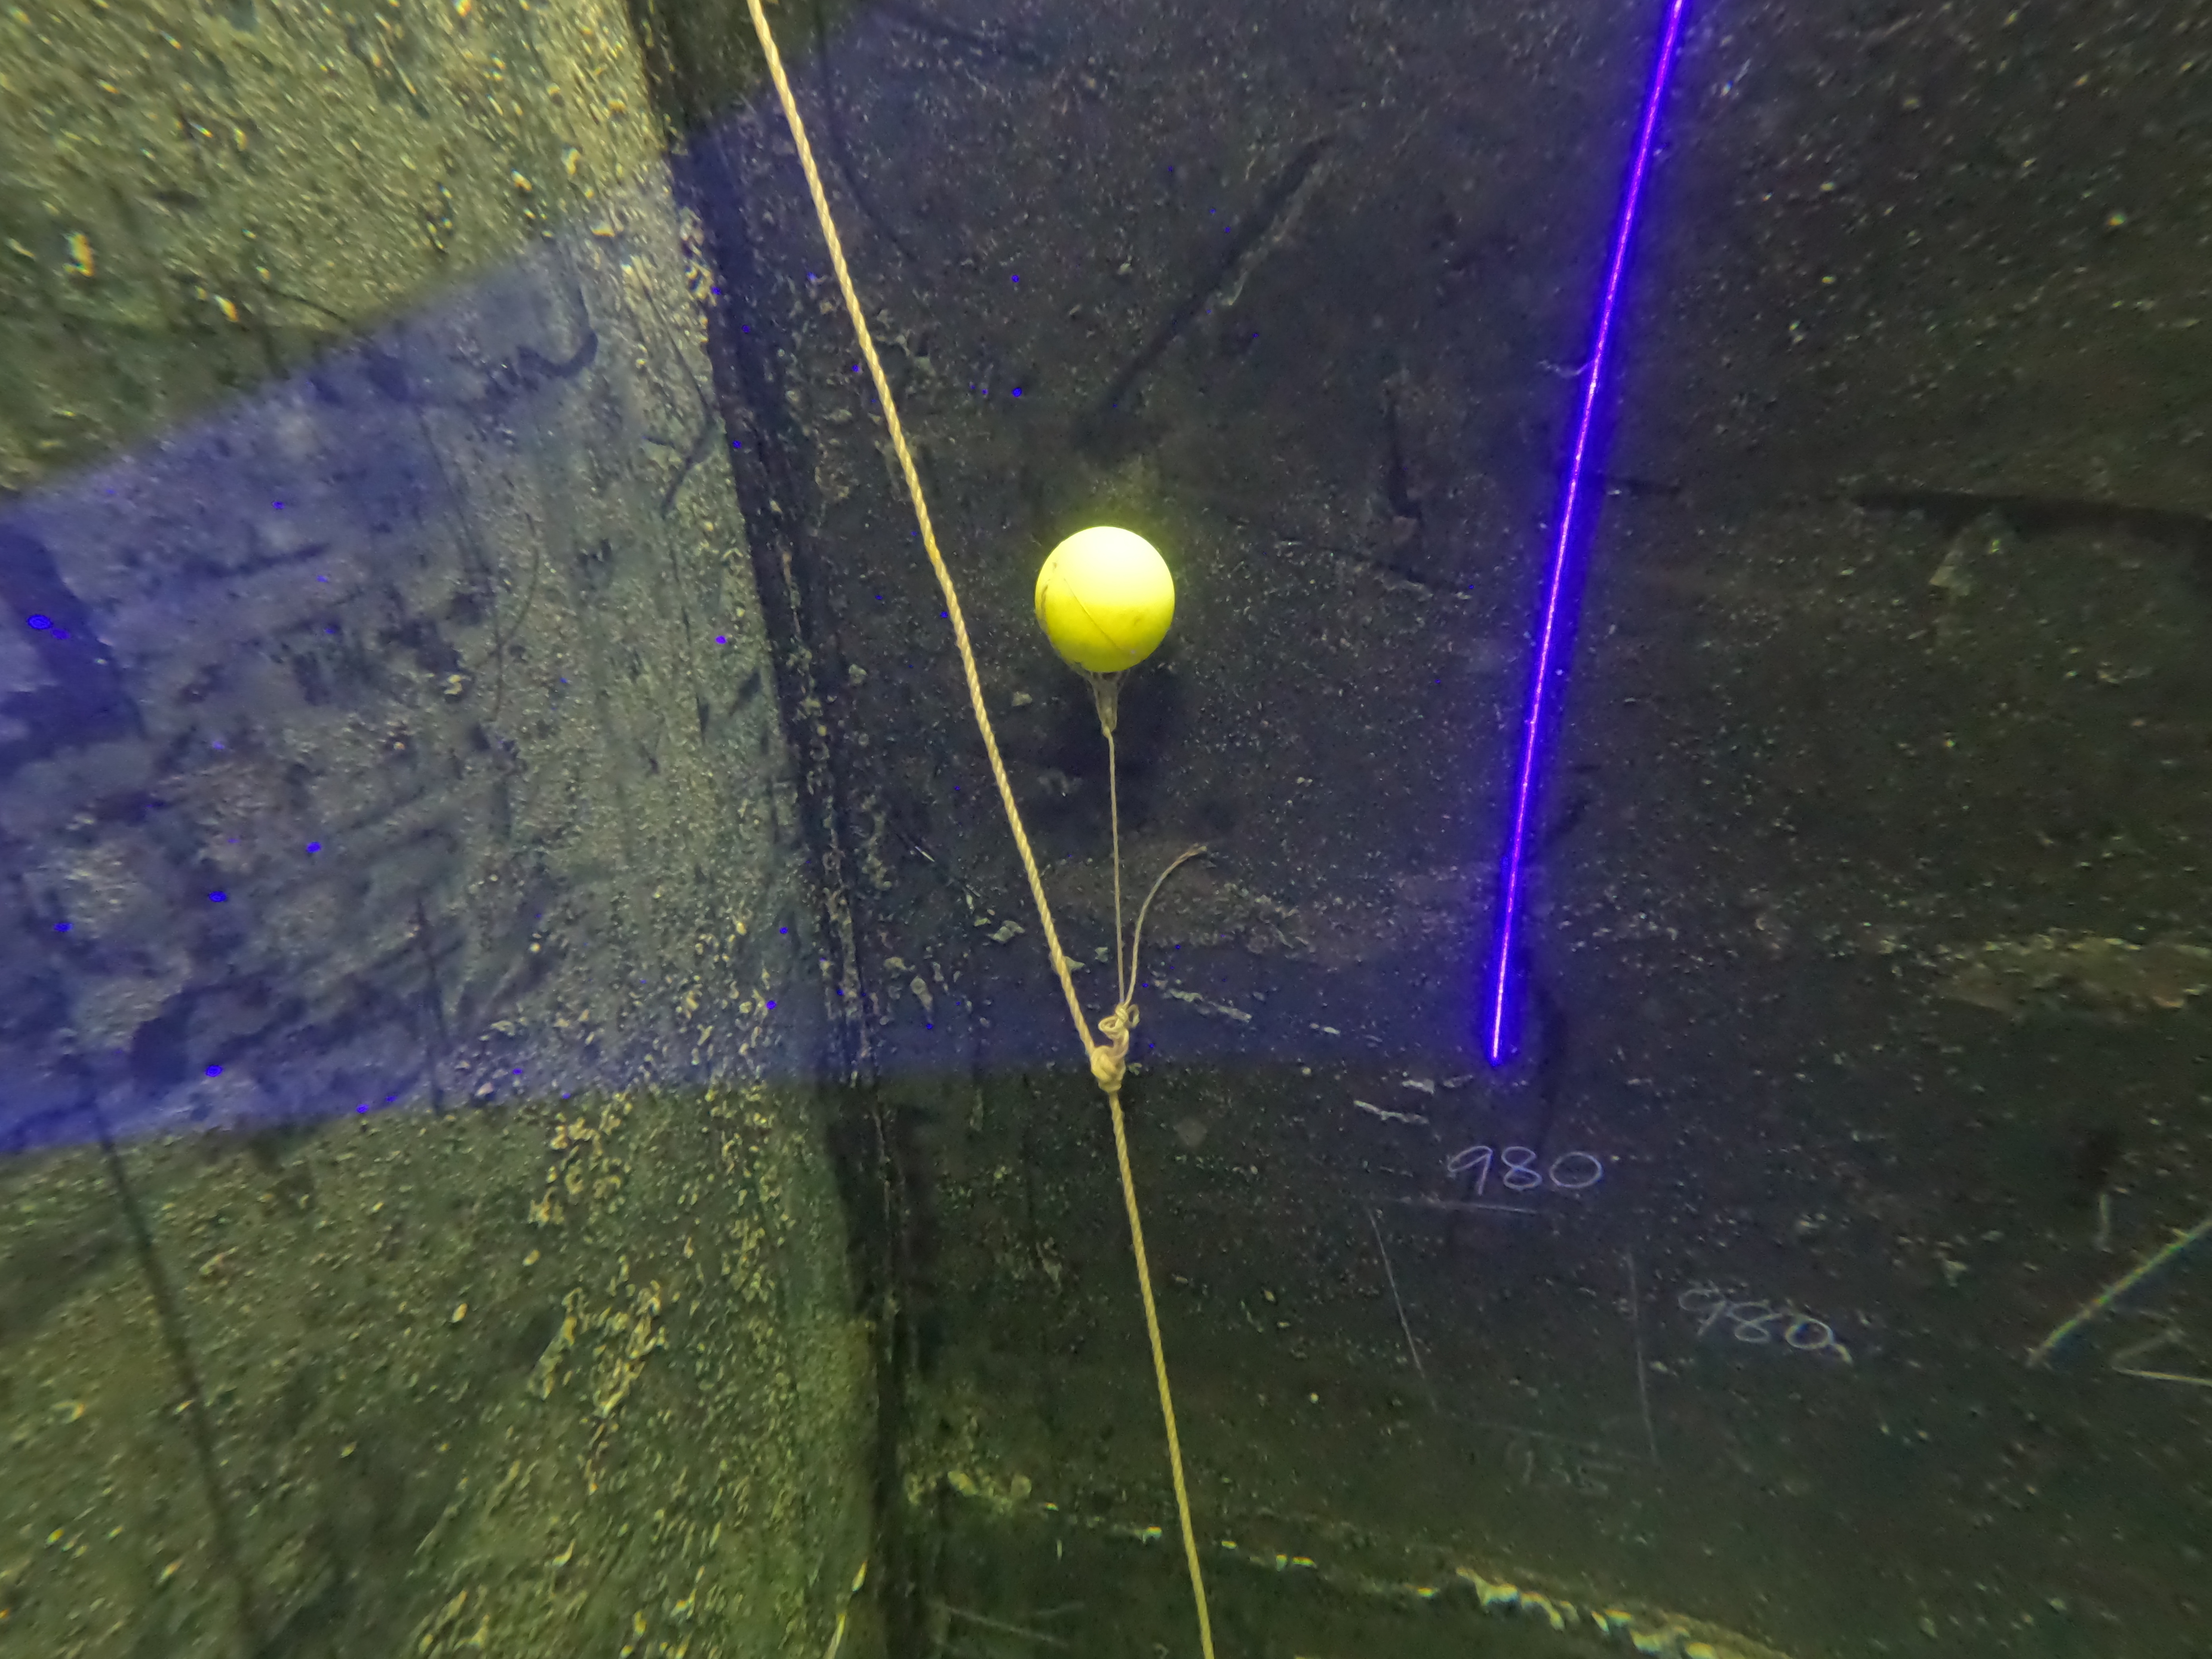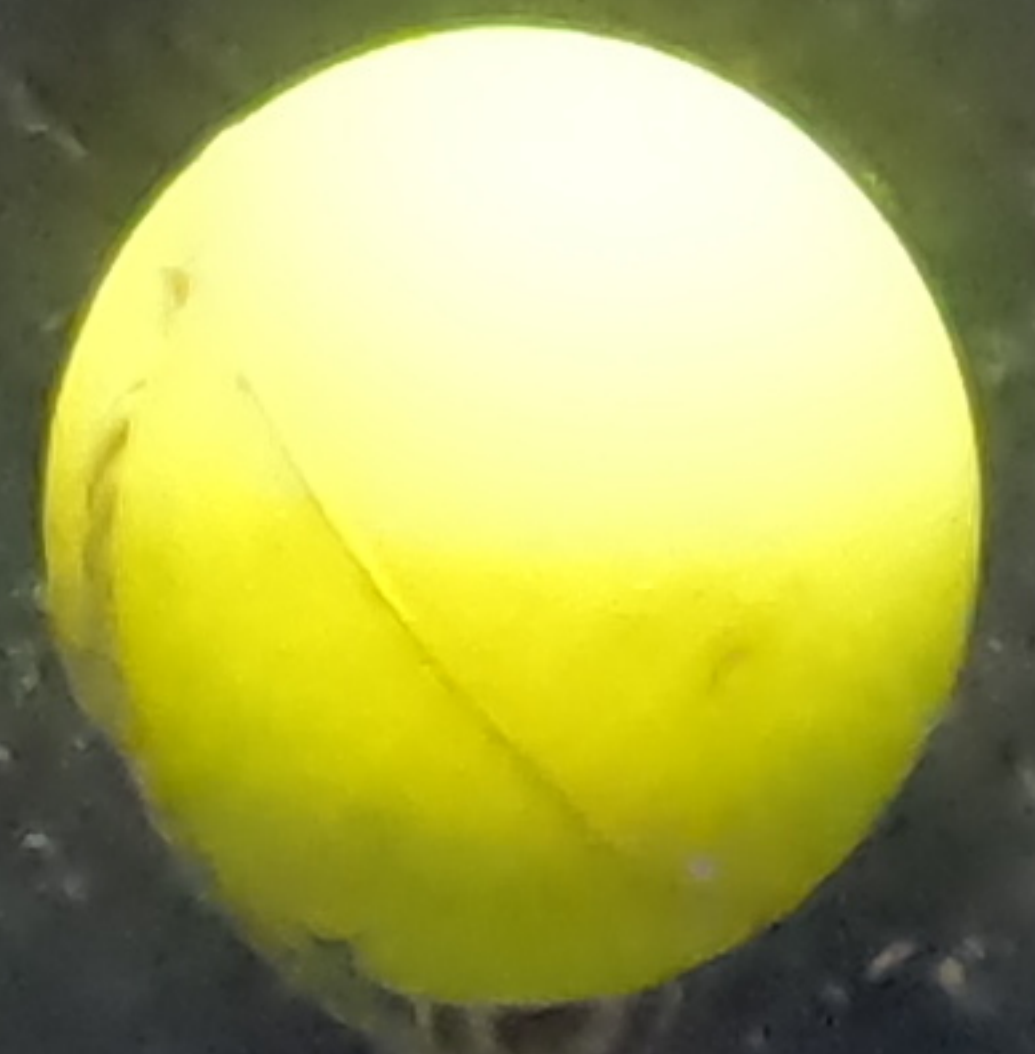

980

980

Supplement: Supplementary file 235 [file G0031028.pdf › 4/G0031028.pdf]

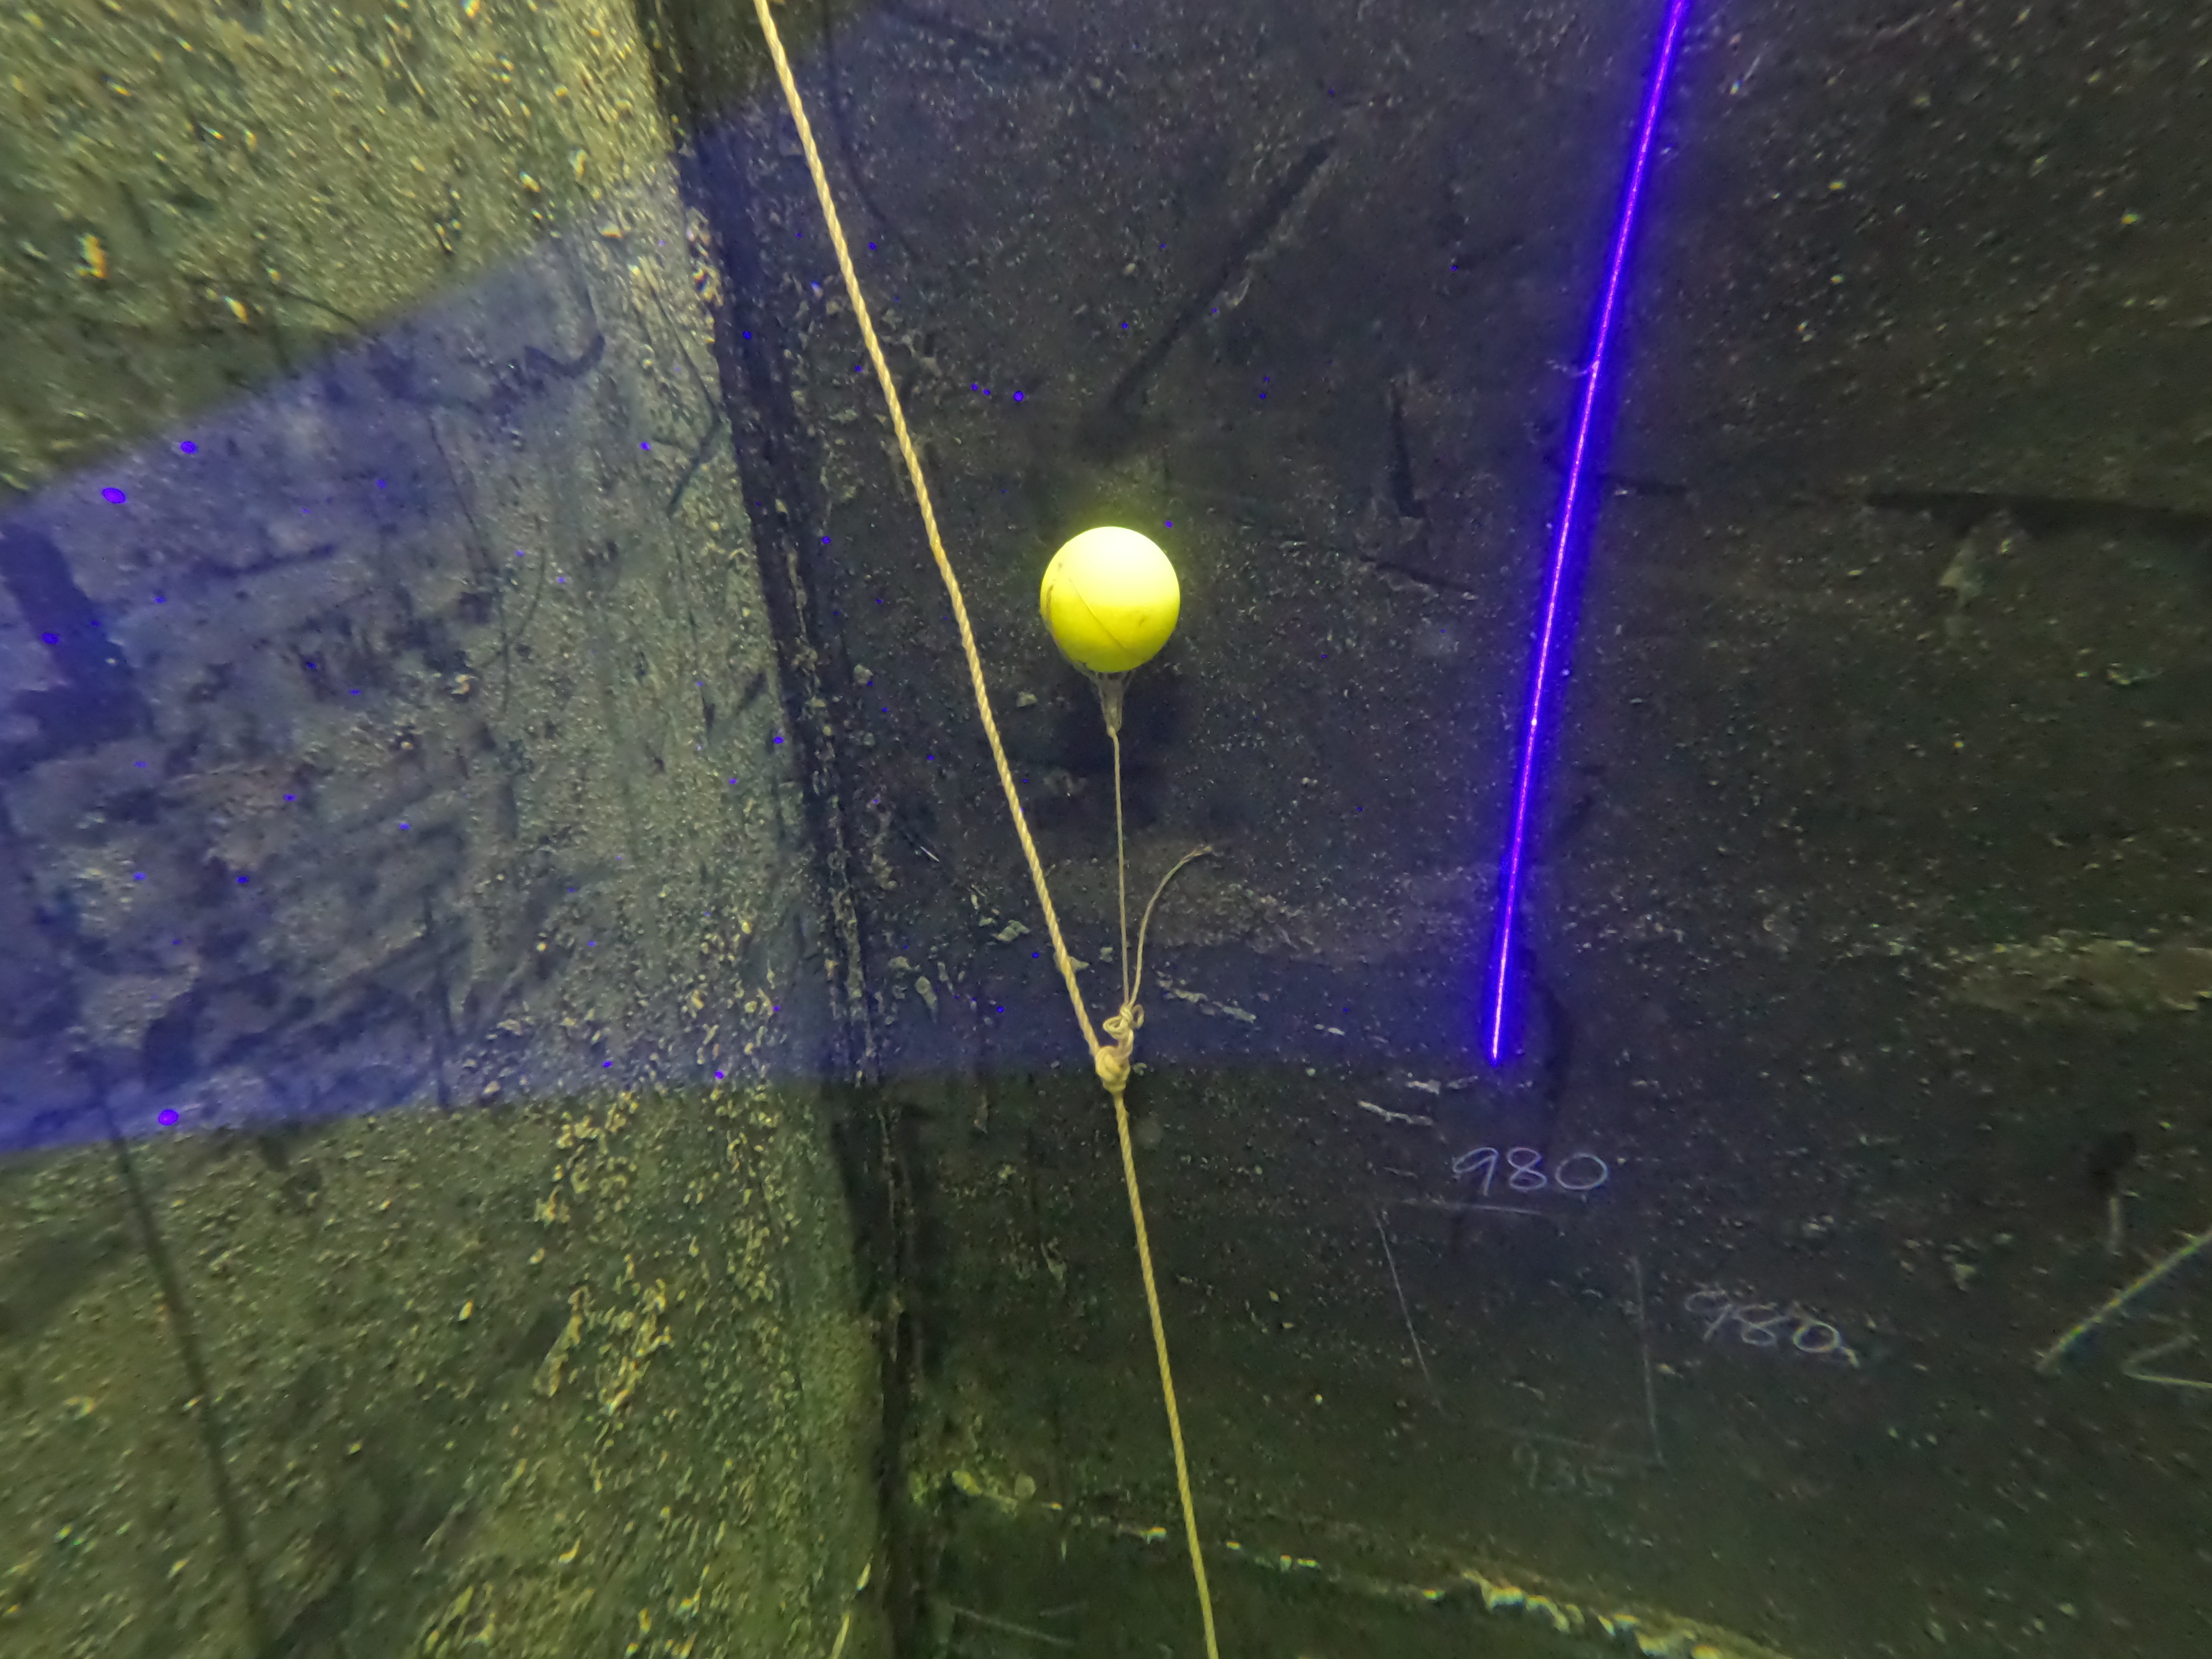

980

980

Supplement: Supplementary file 236 [file G0031029.pdf › 4/G0031029.pdf]

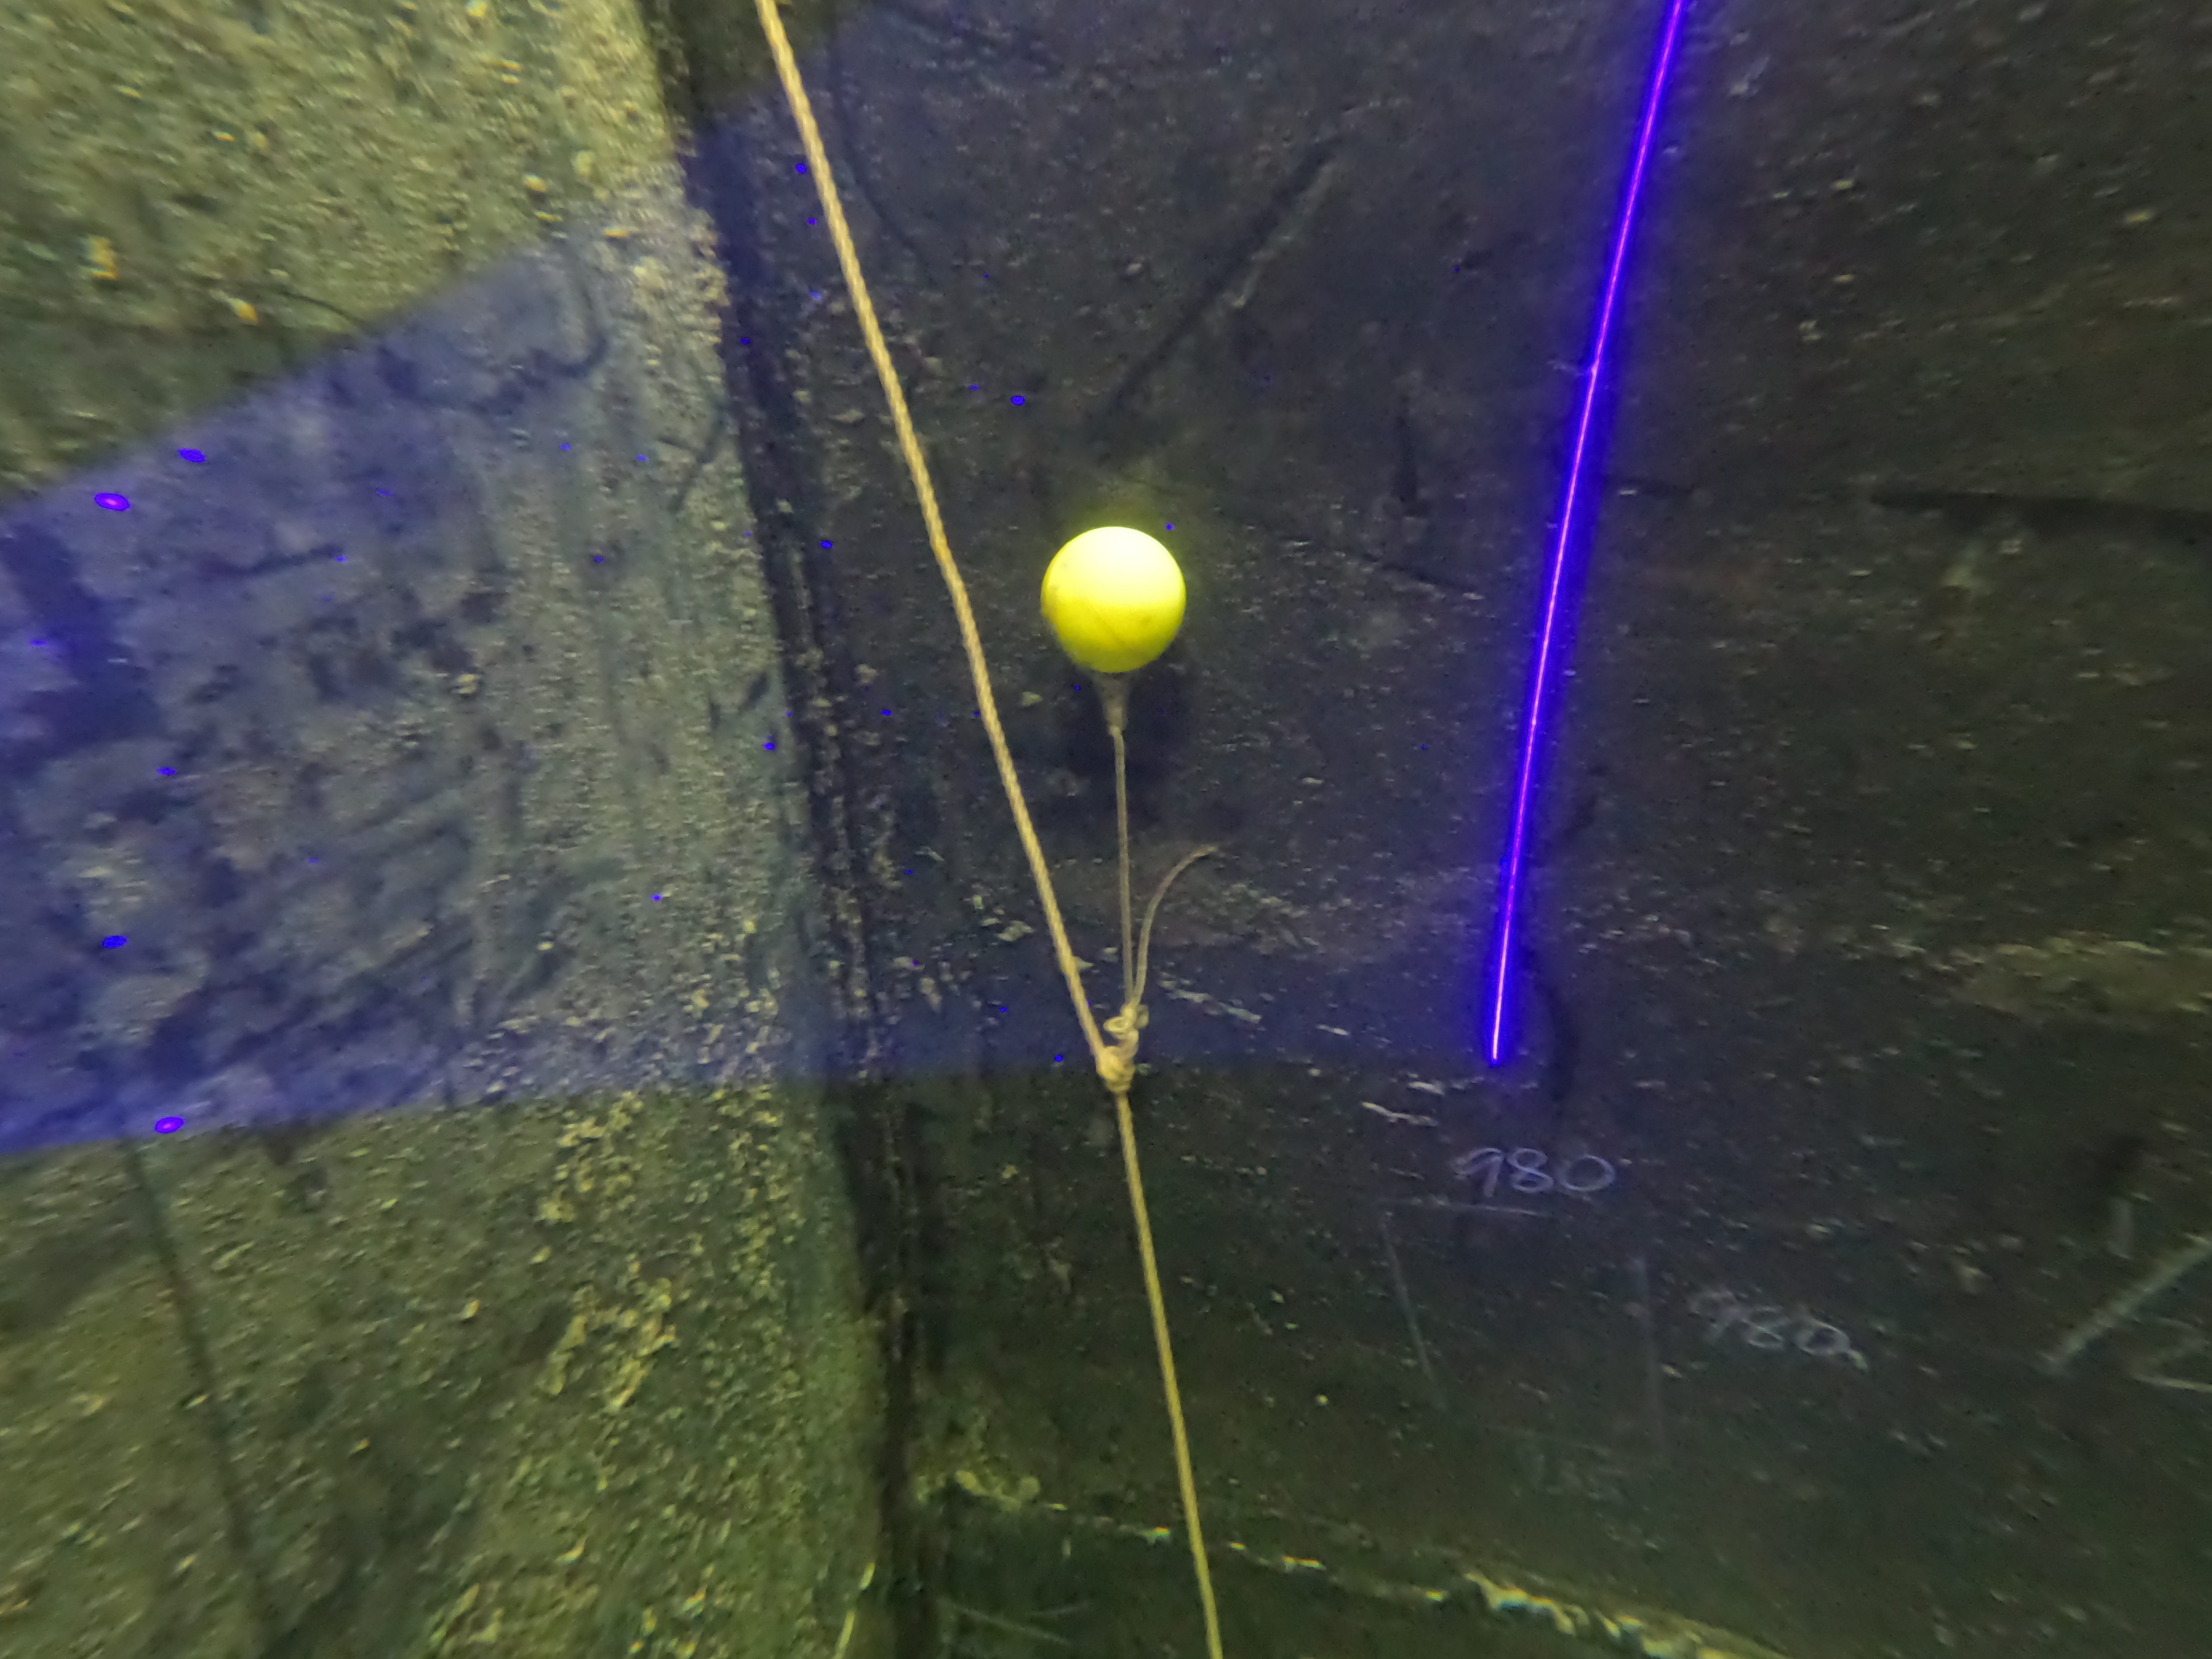

Supplement: Supplementary file 237 [file G0031030.pdf › 4/G0031030.pdf]

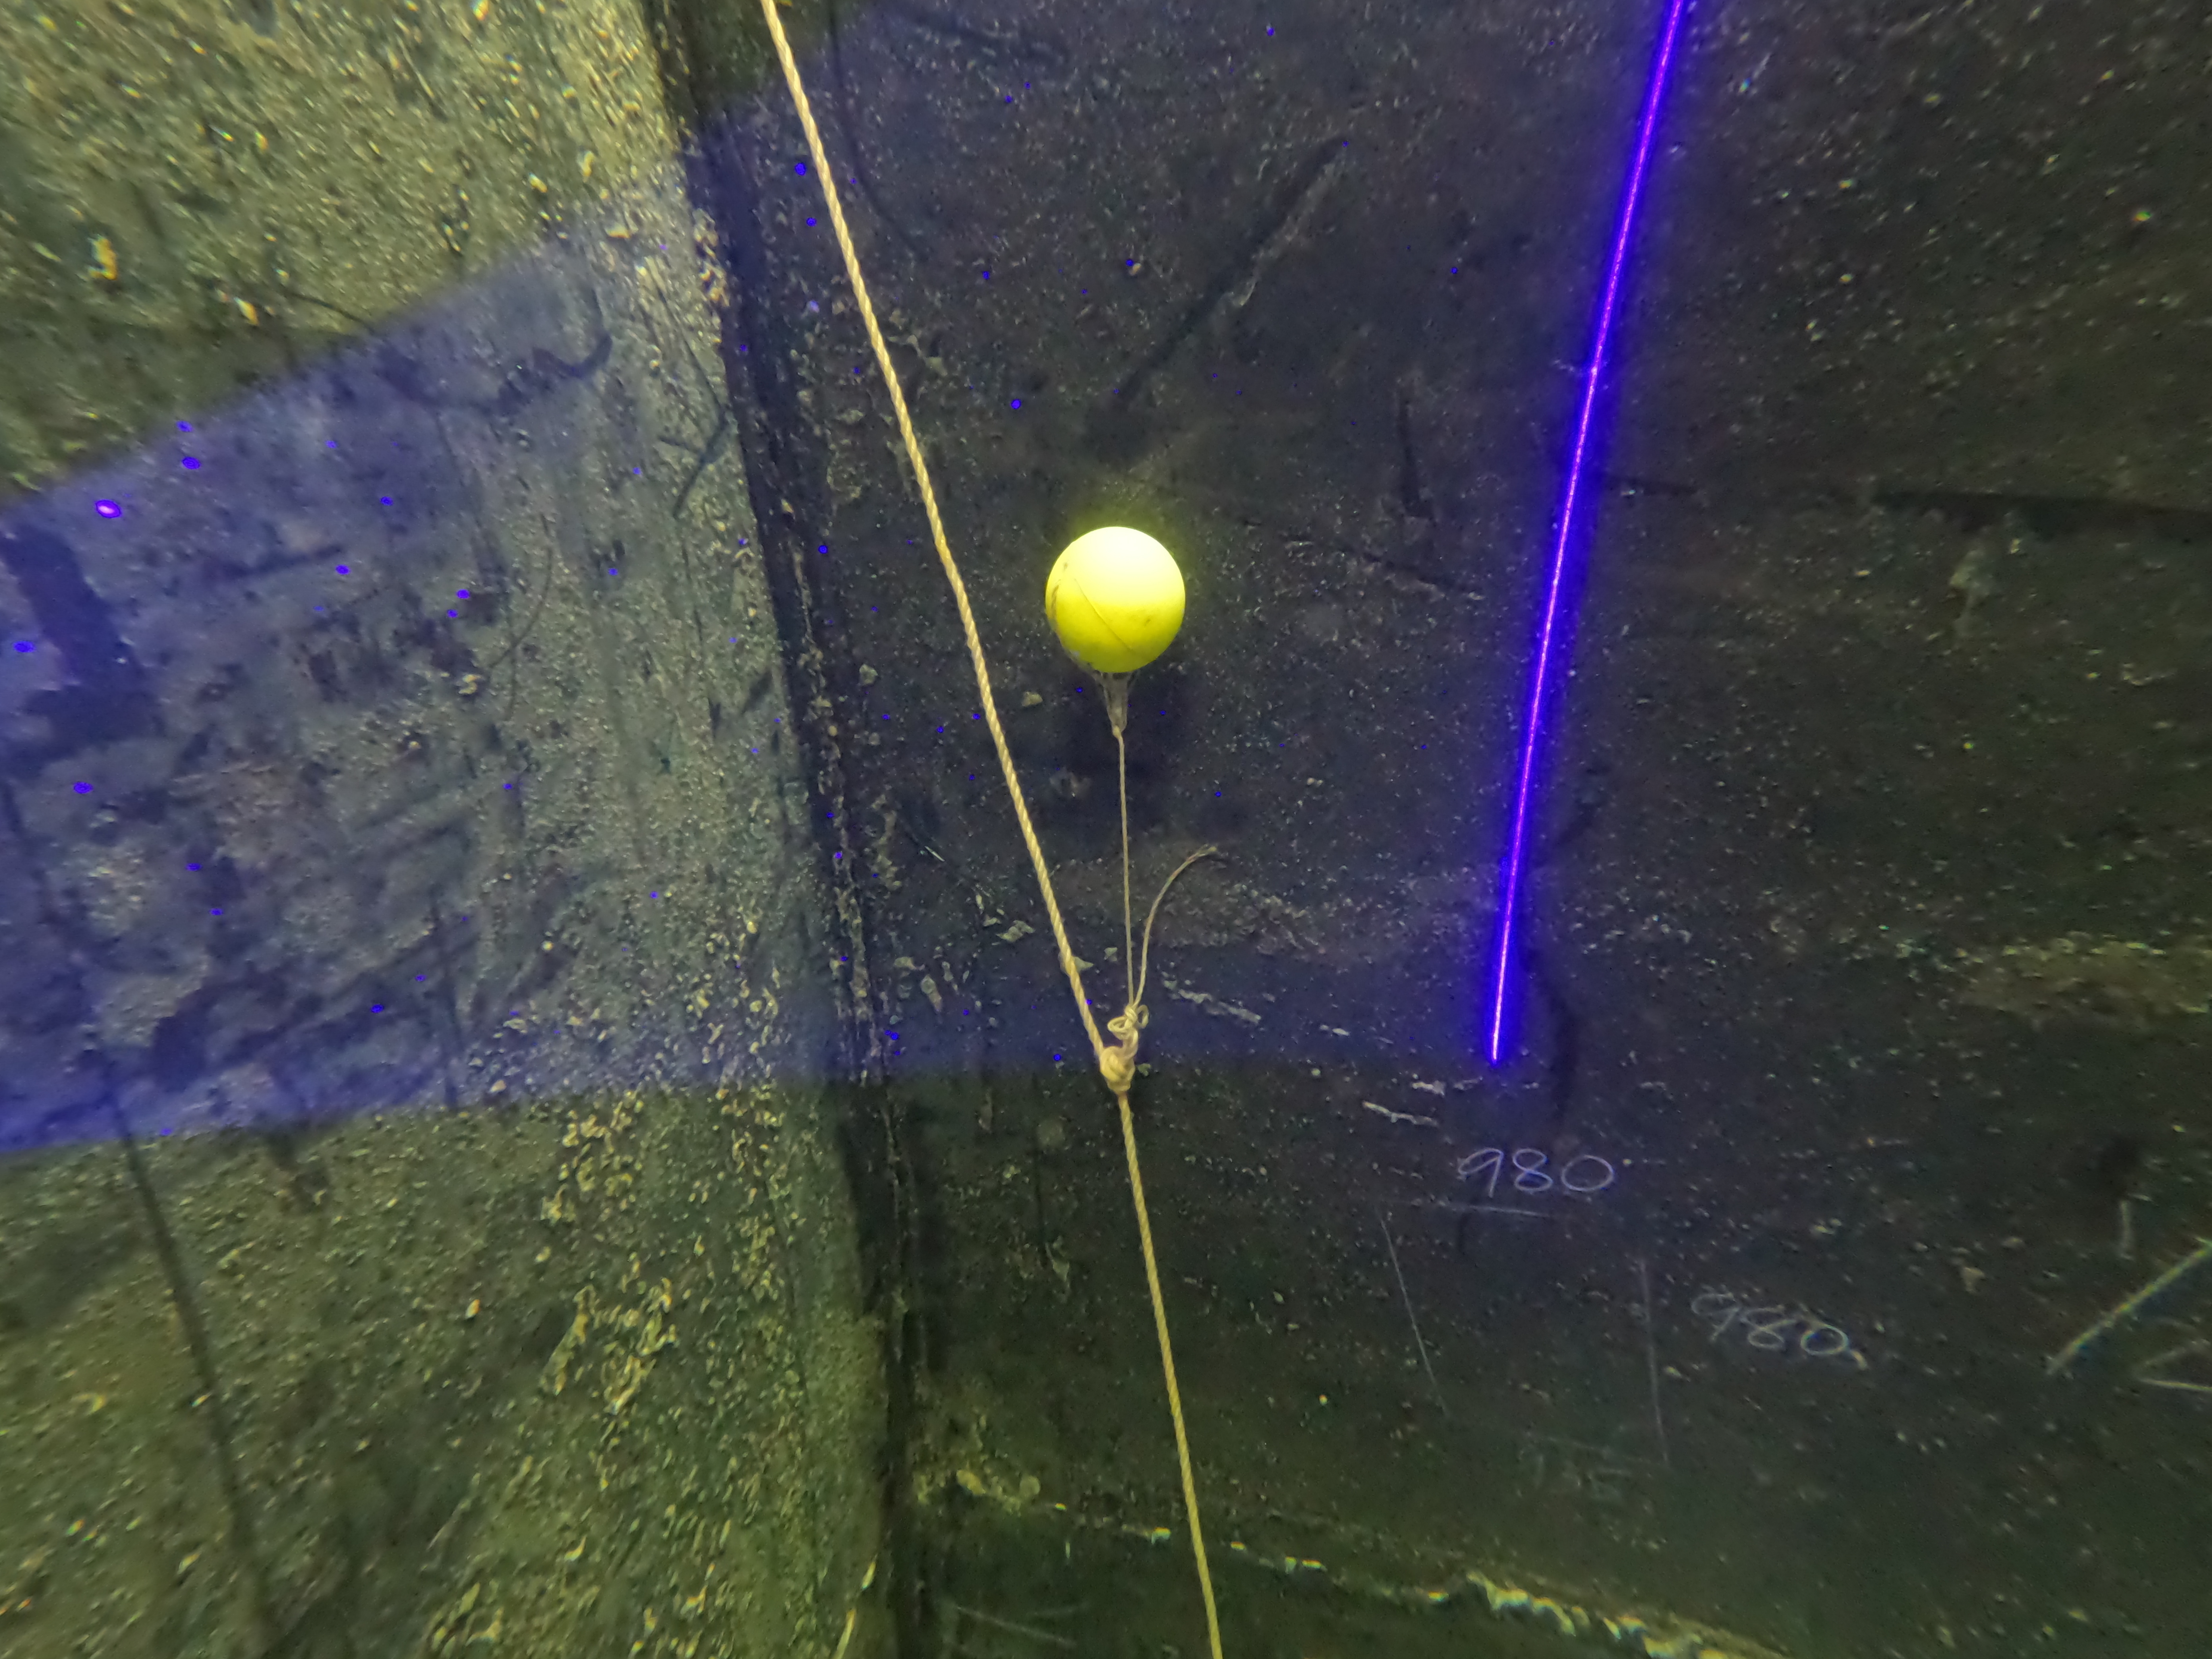

Supplement: Supplementary file 238 [file G0031031.pdf › 4/G0031031.pdf]

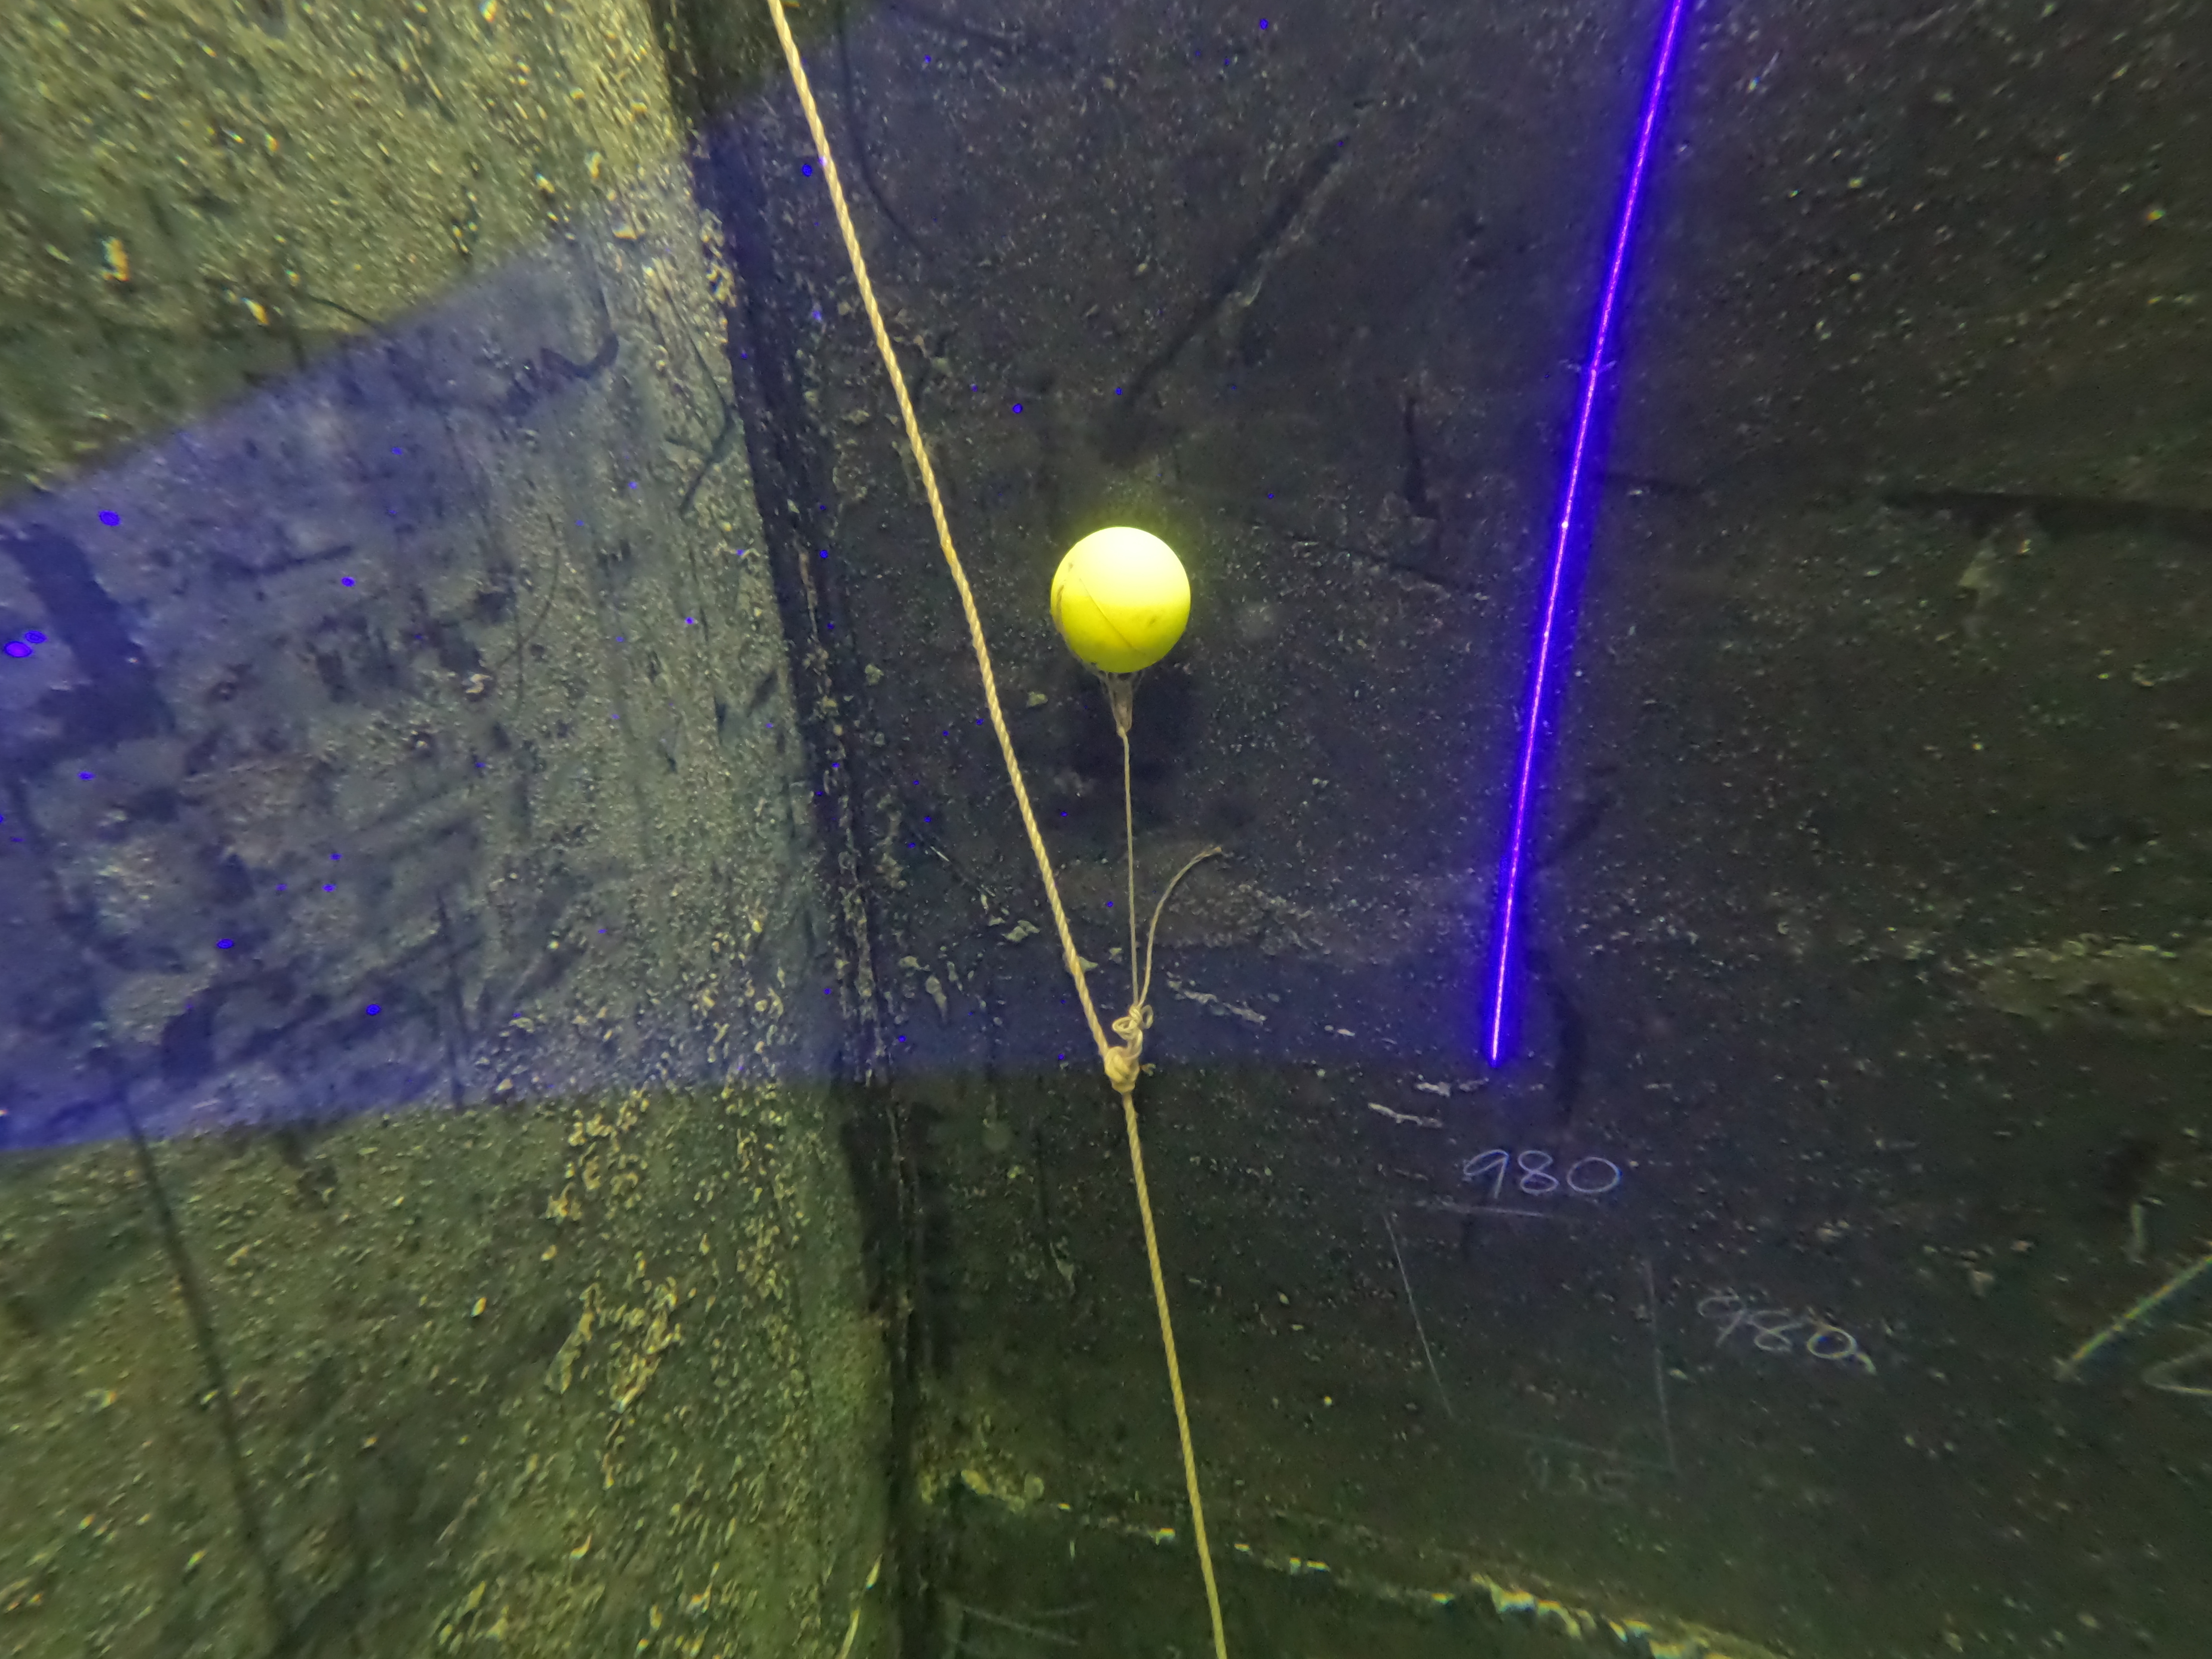

Supplement: Supplementary file 239 [file G0031032.pdf › 4/G0031032.pdf]

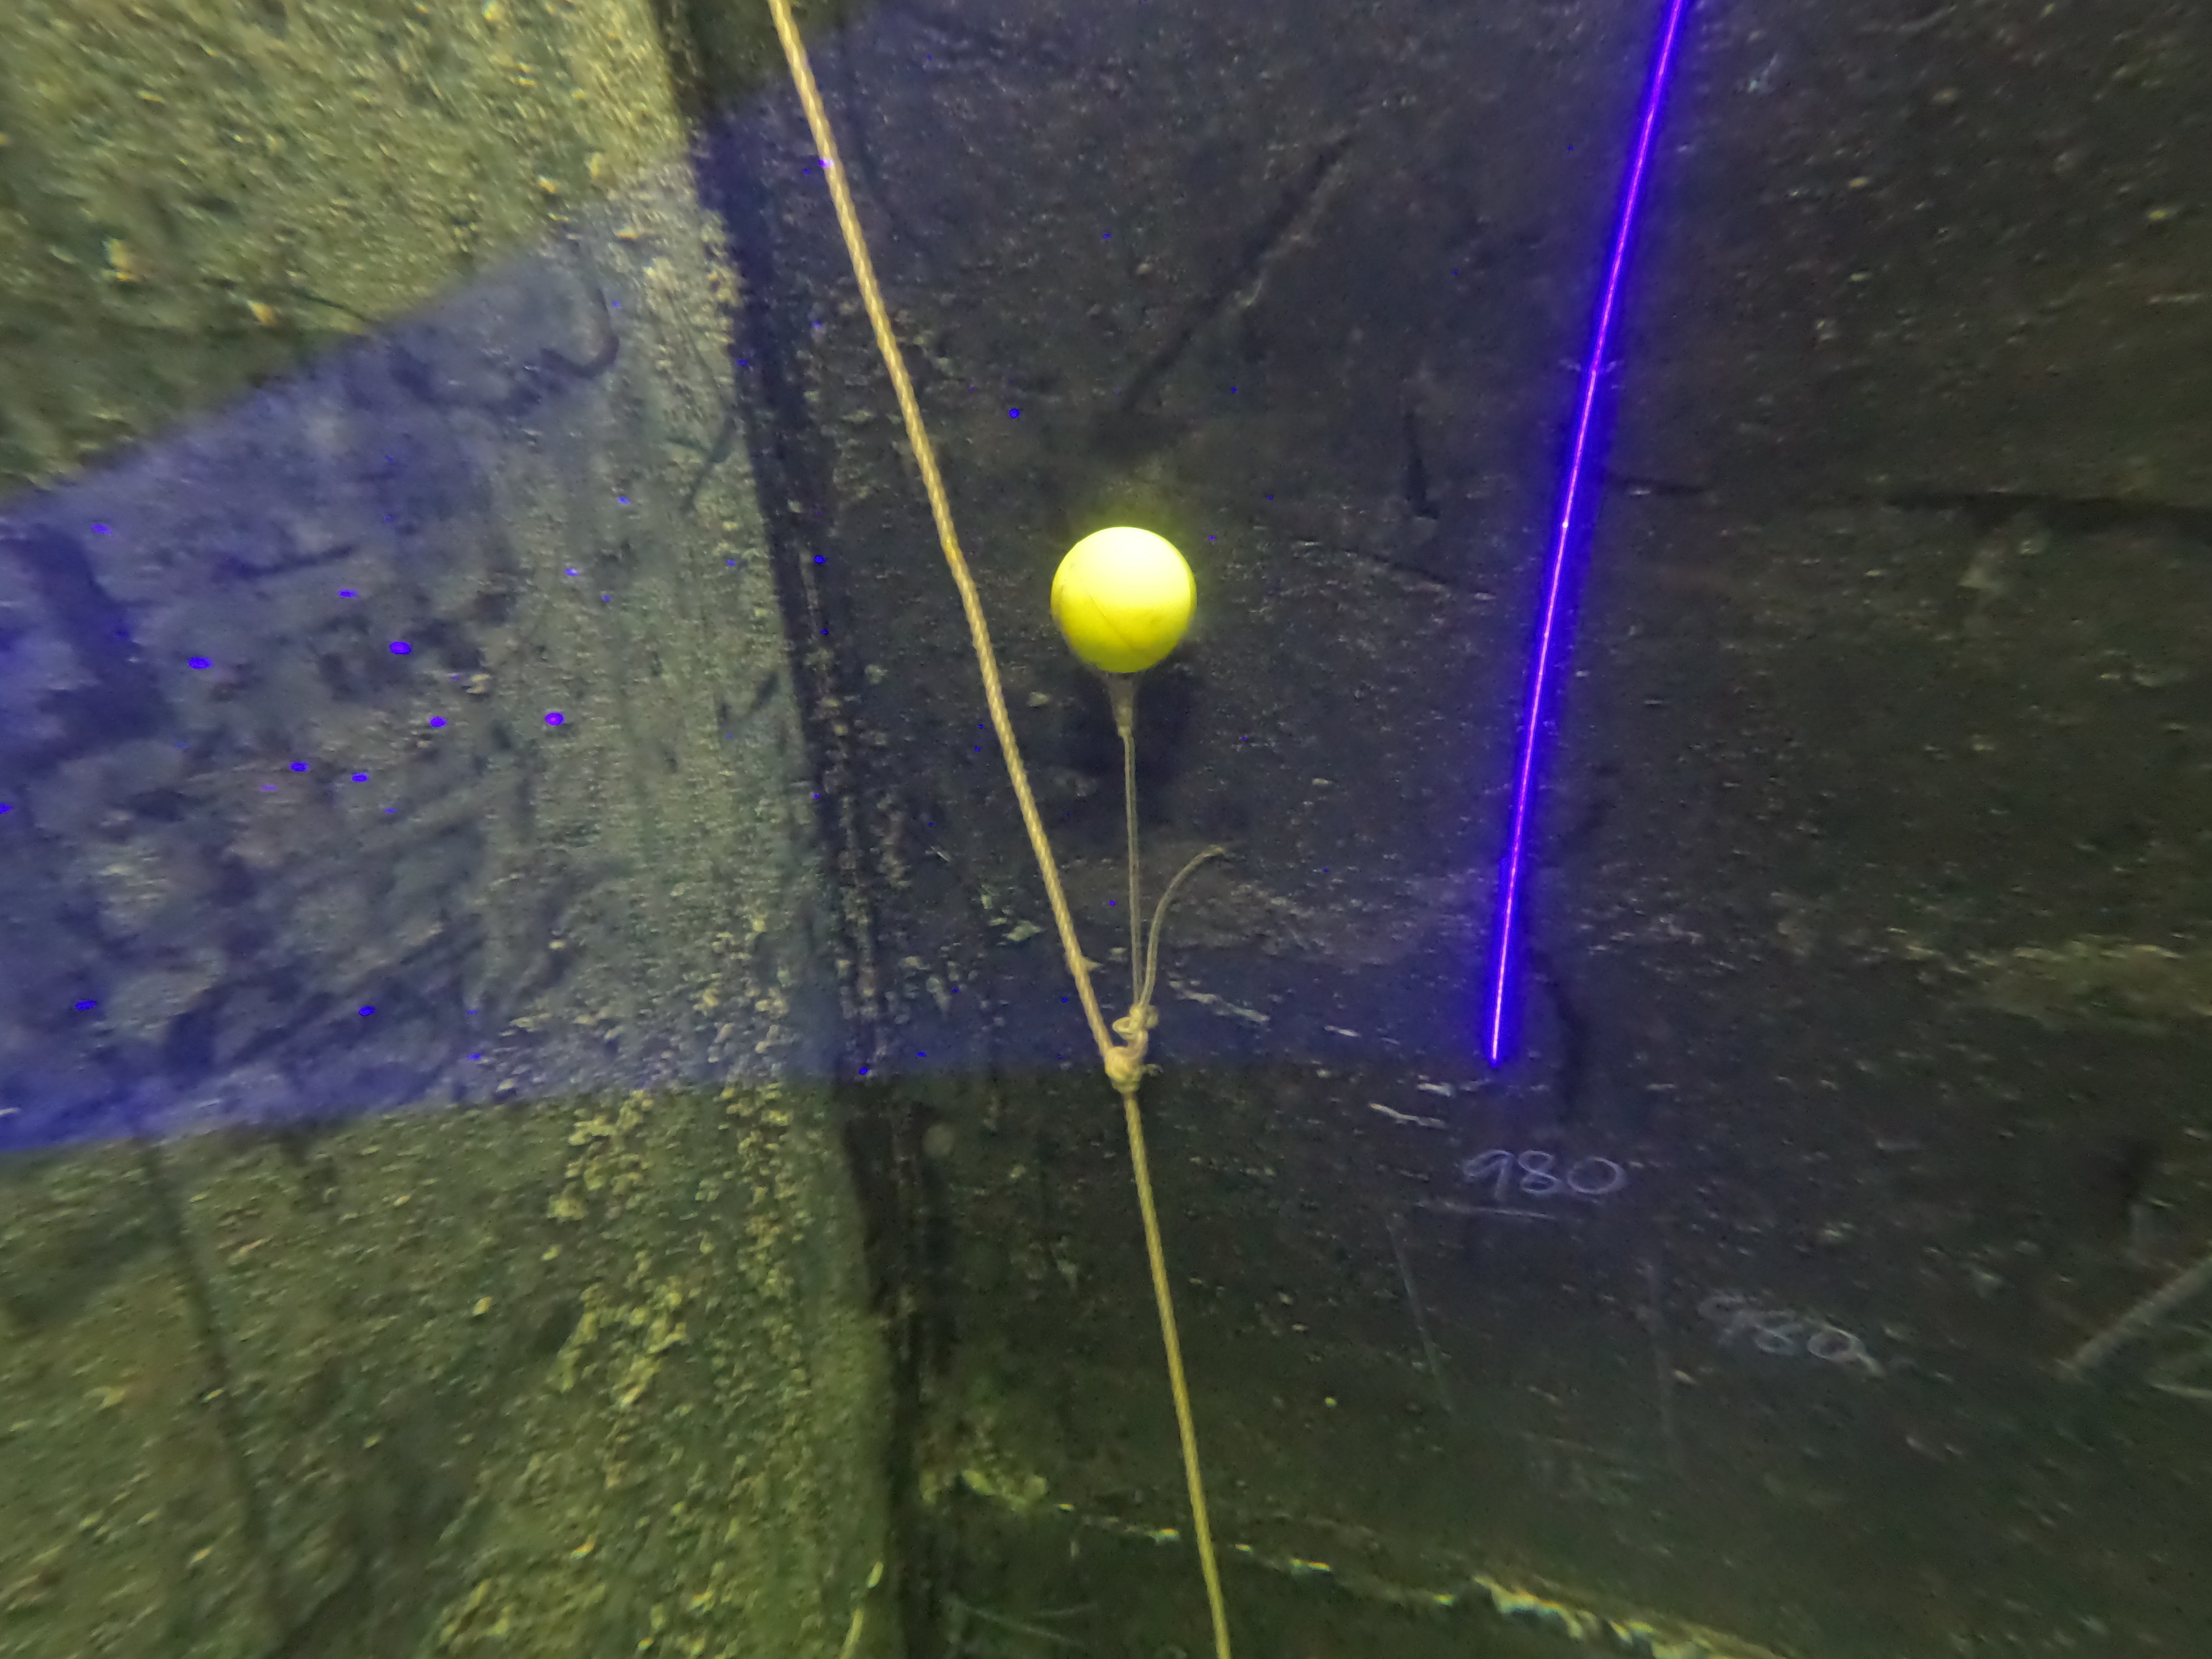

Supplement: Supplementary file 240 [file G0031033.pdf › 4/G0031033.pdf]

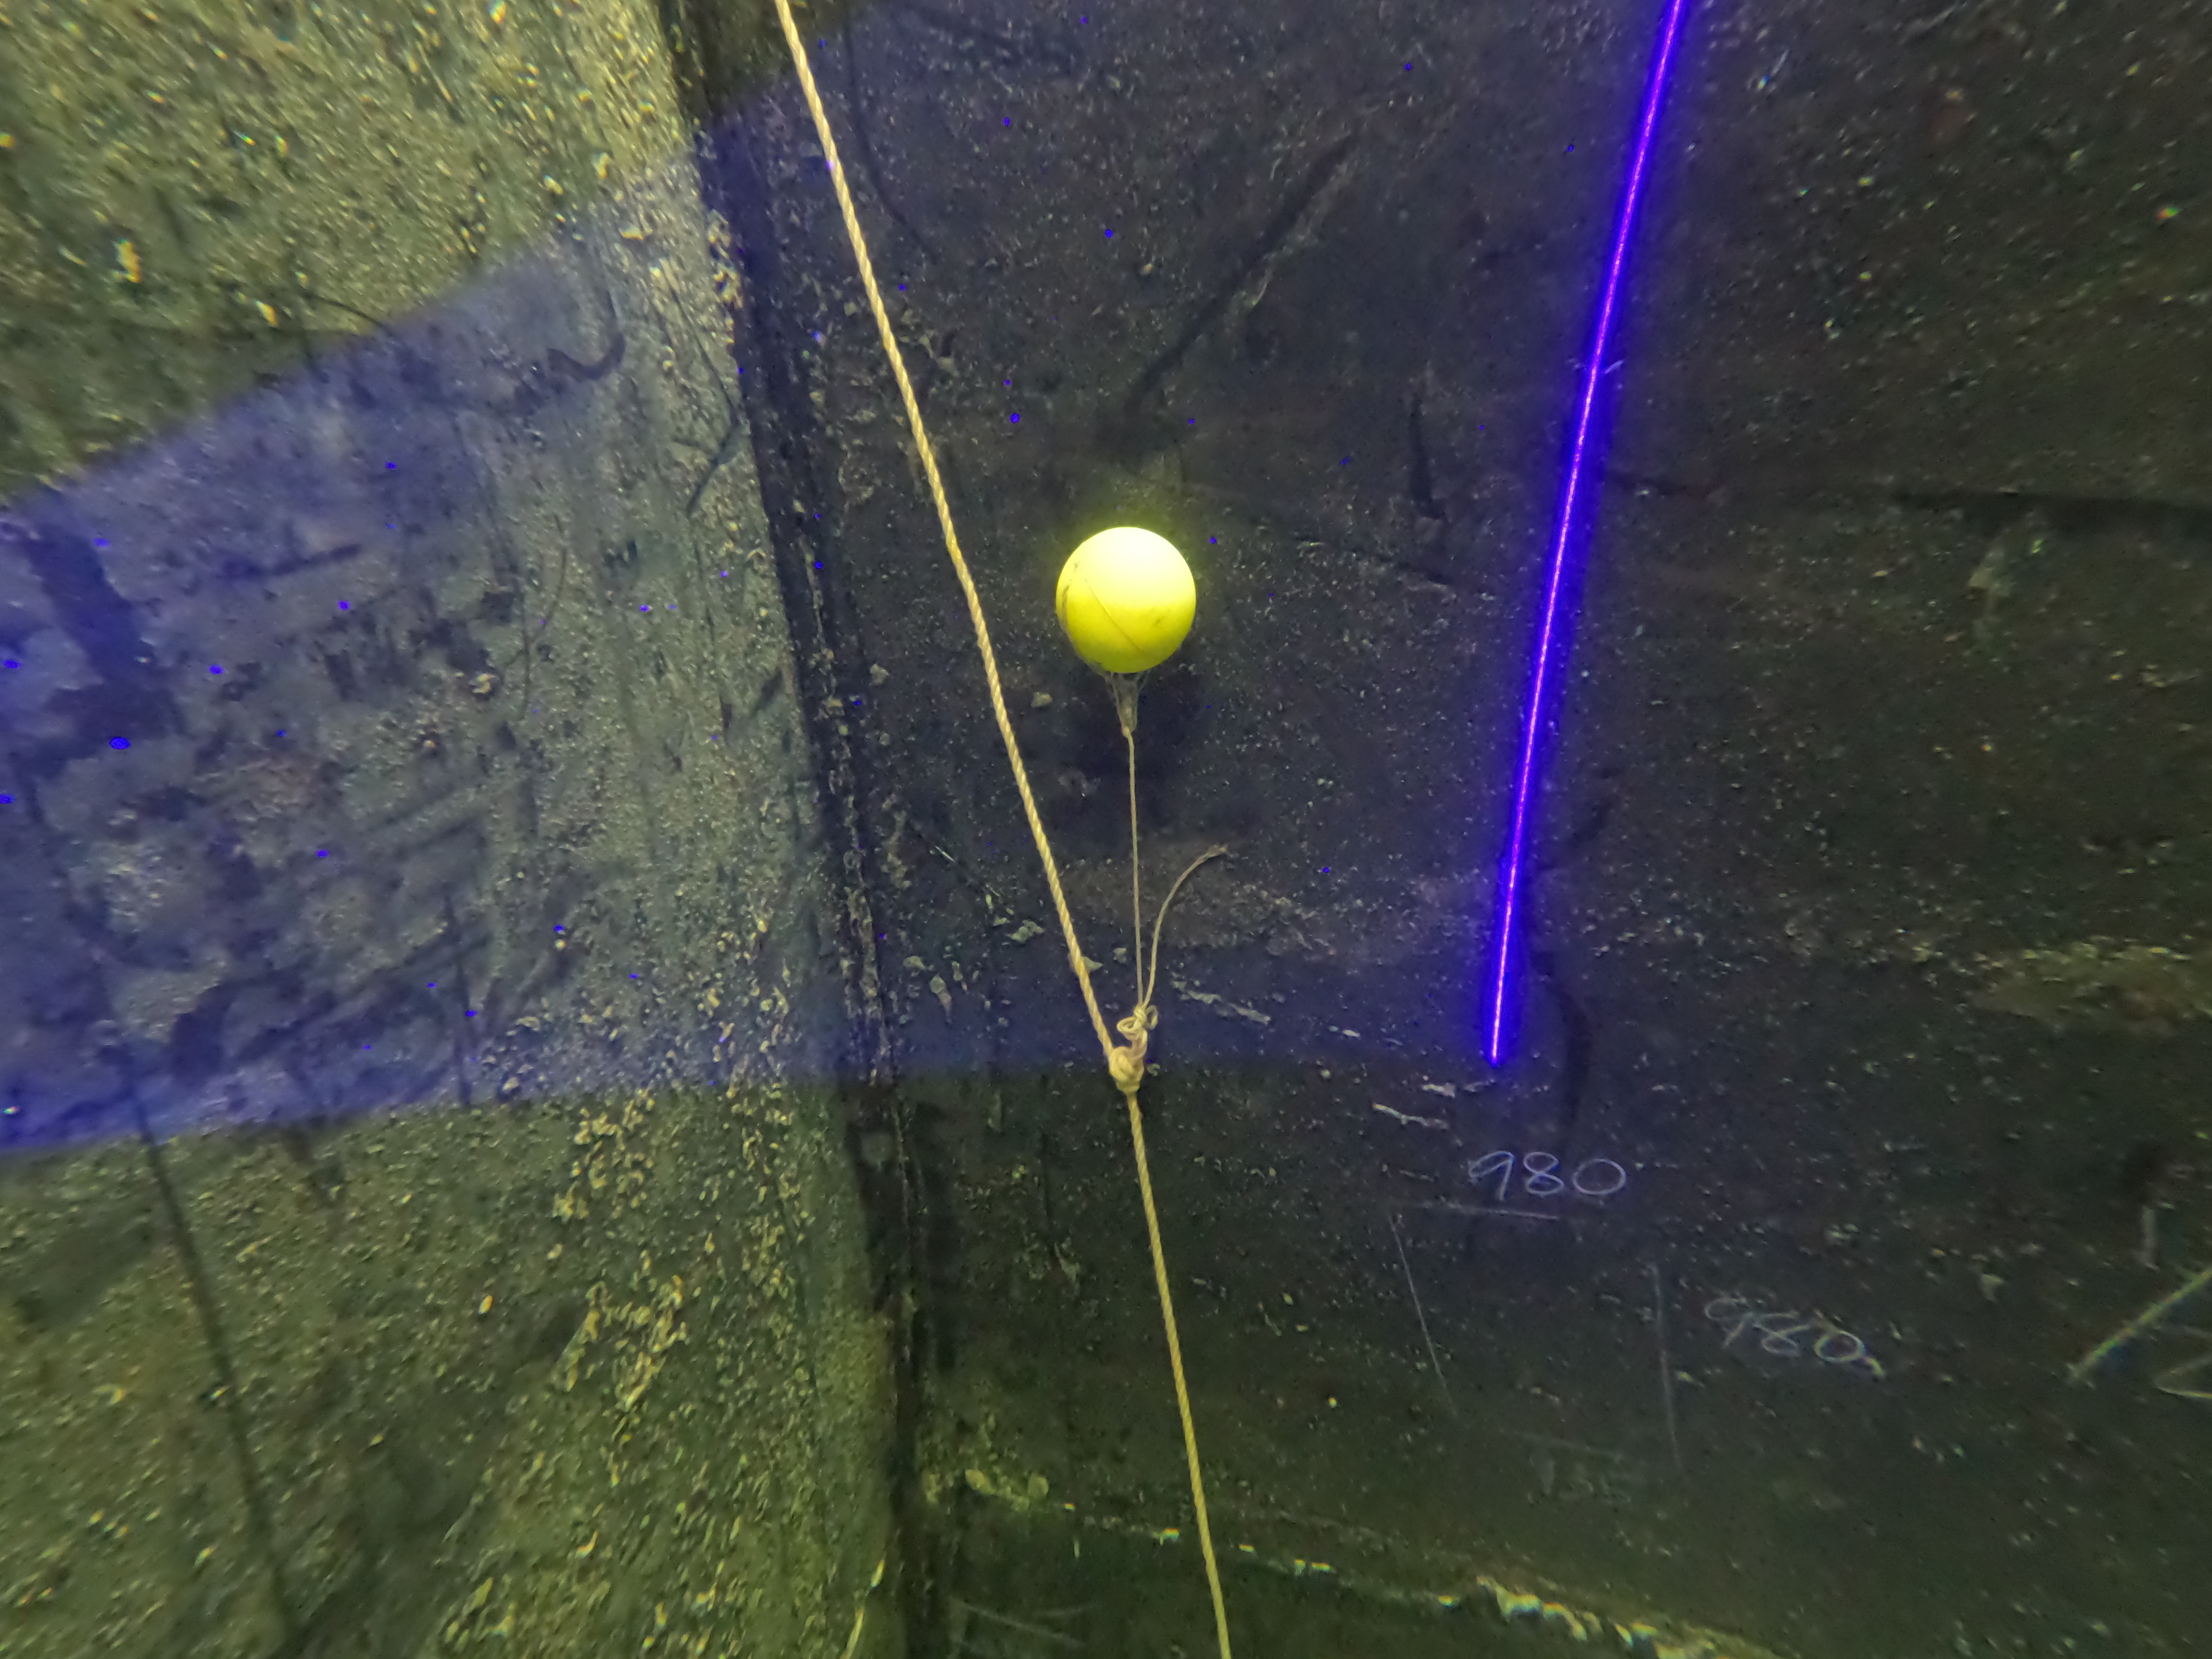

Supplement: Supplementary file 241 [file G0031034.pdf › 4/G0031034.pdf]

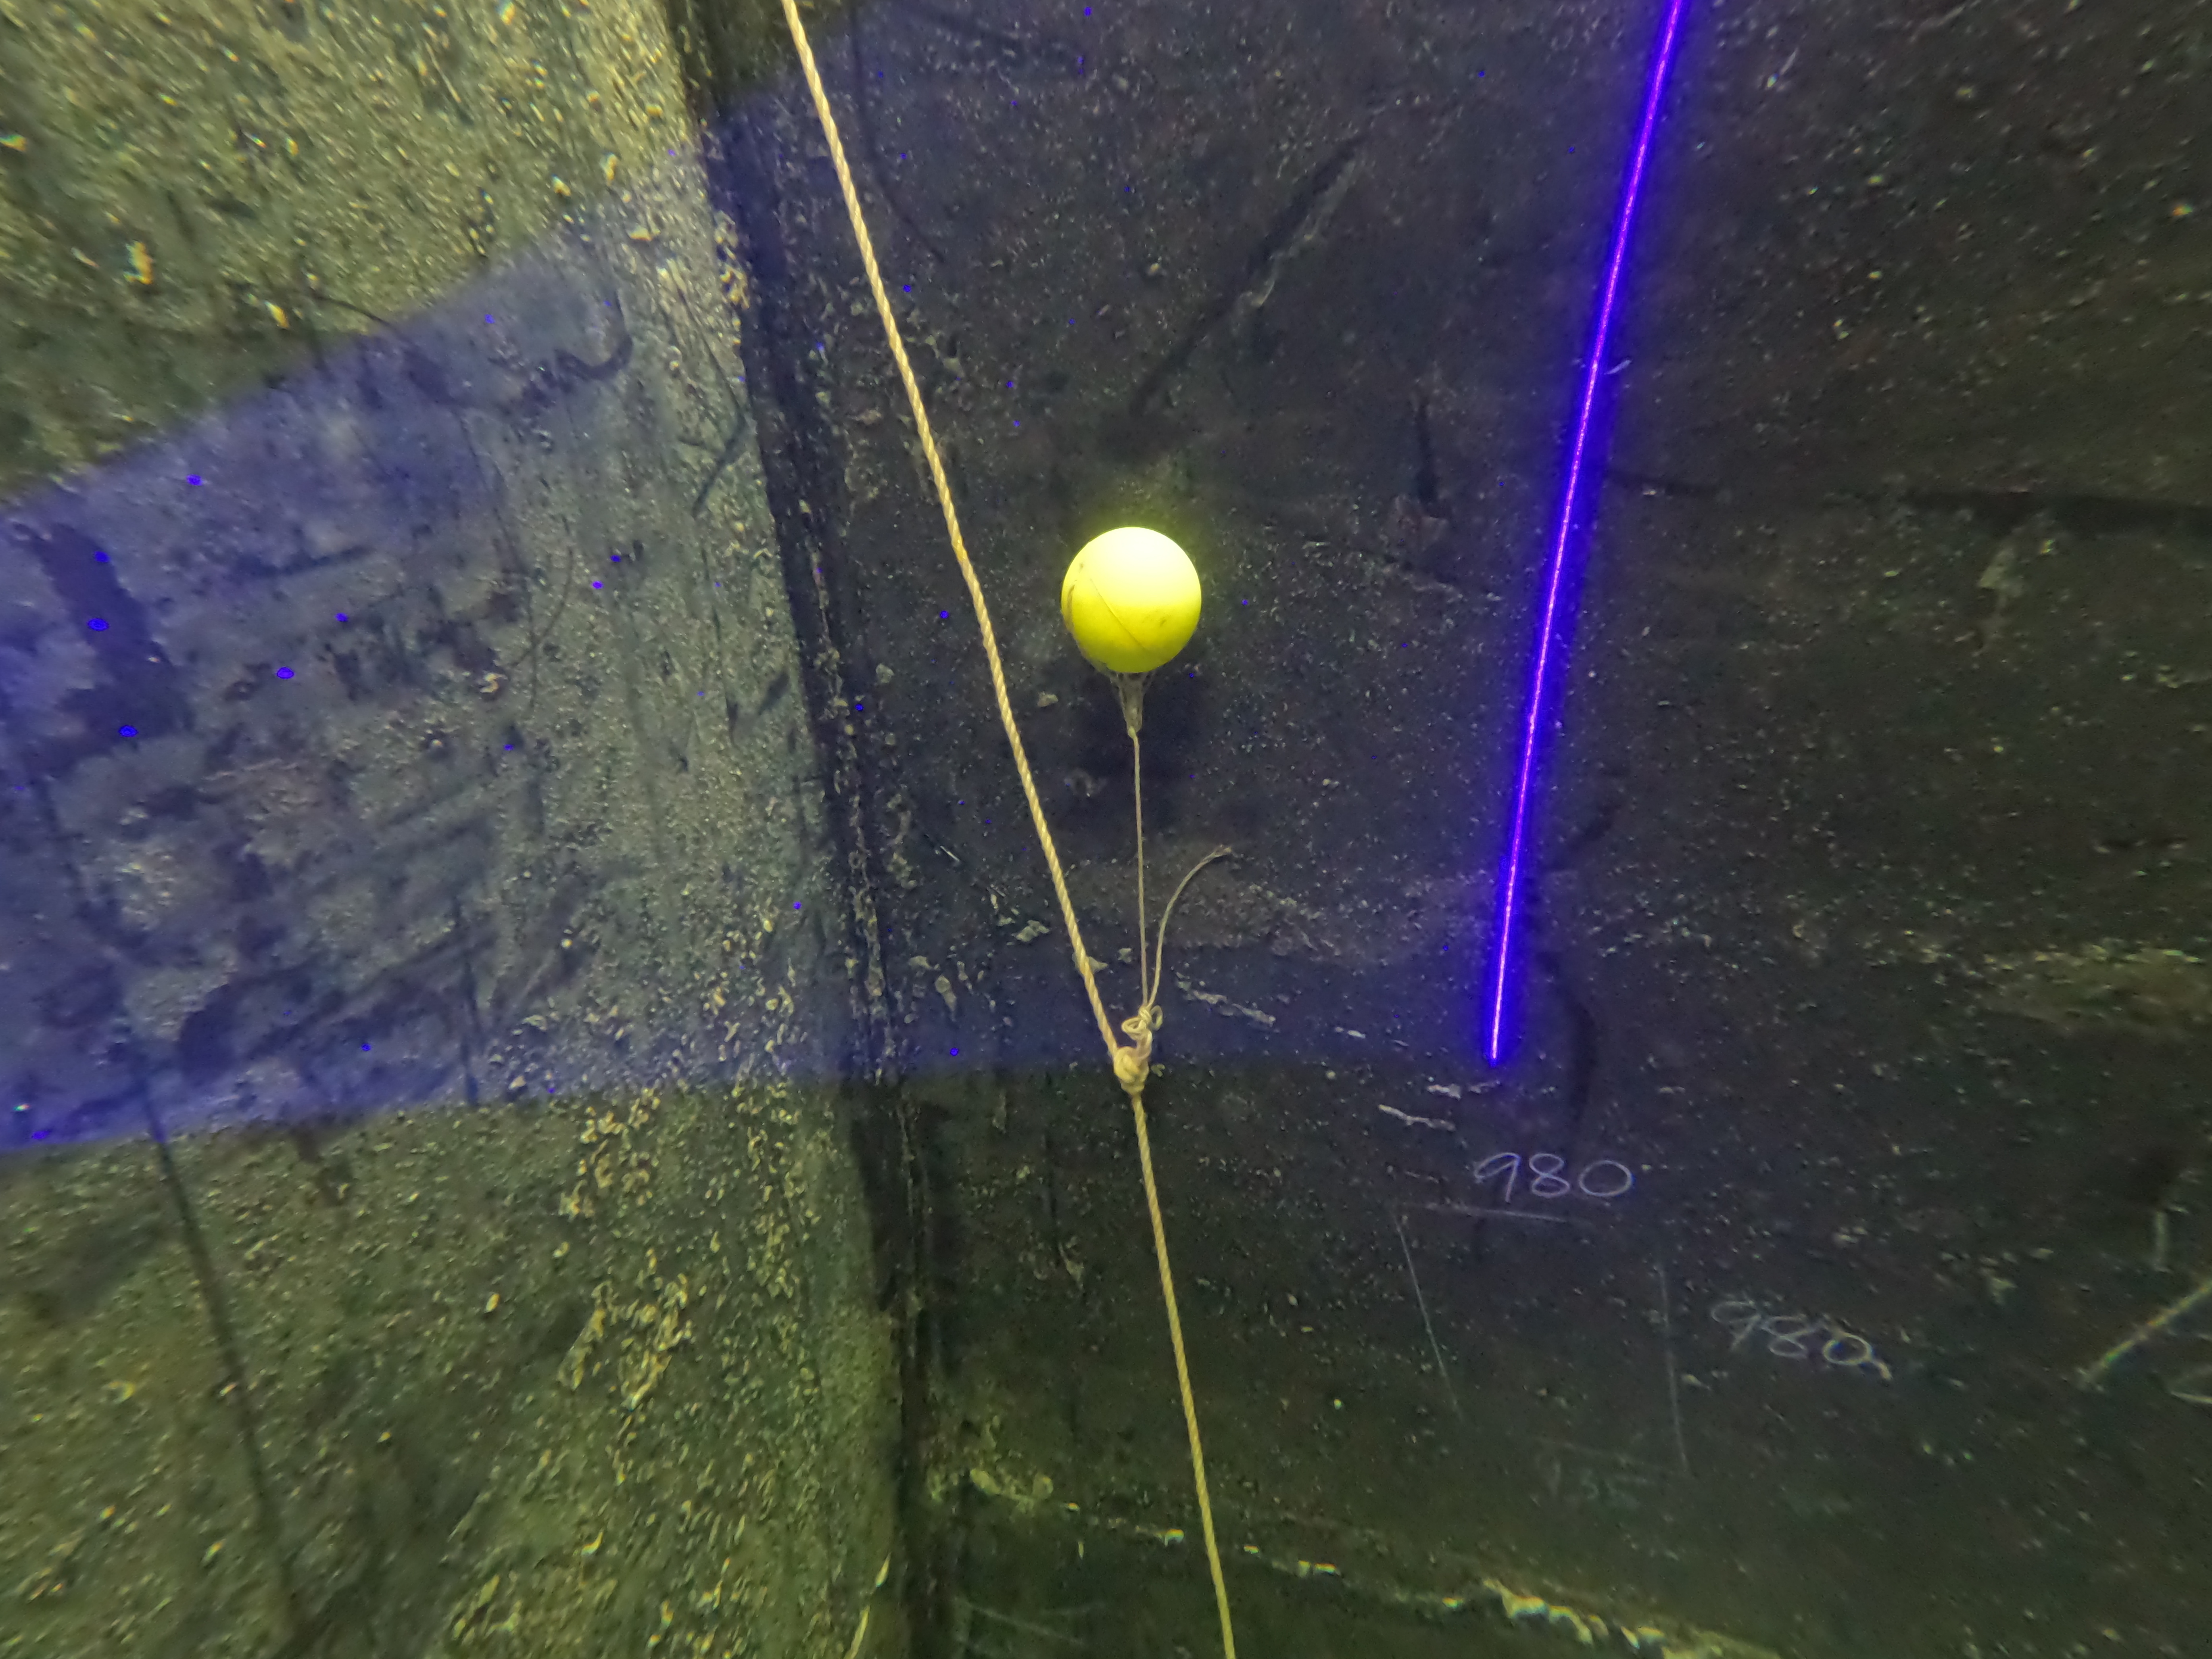

980

980

Supplement: Supplementary file 242 [file G0031035.pdf › 4/G0031035.pdf]

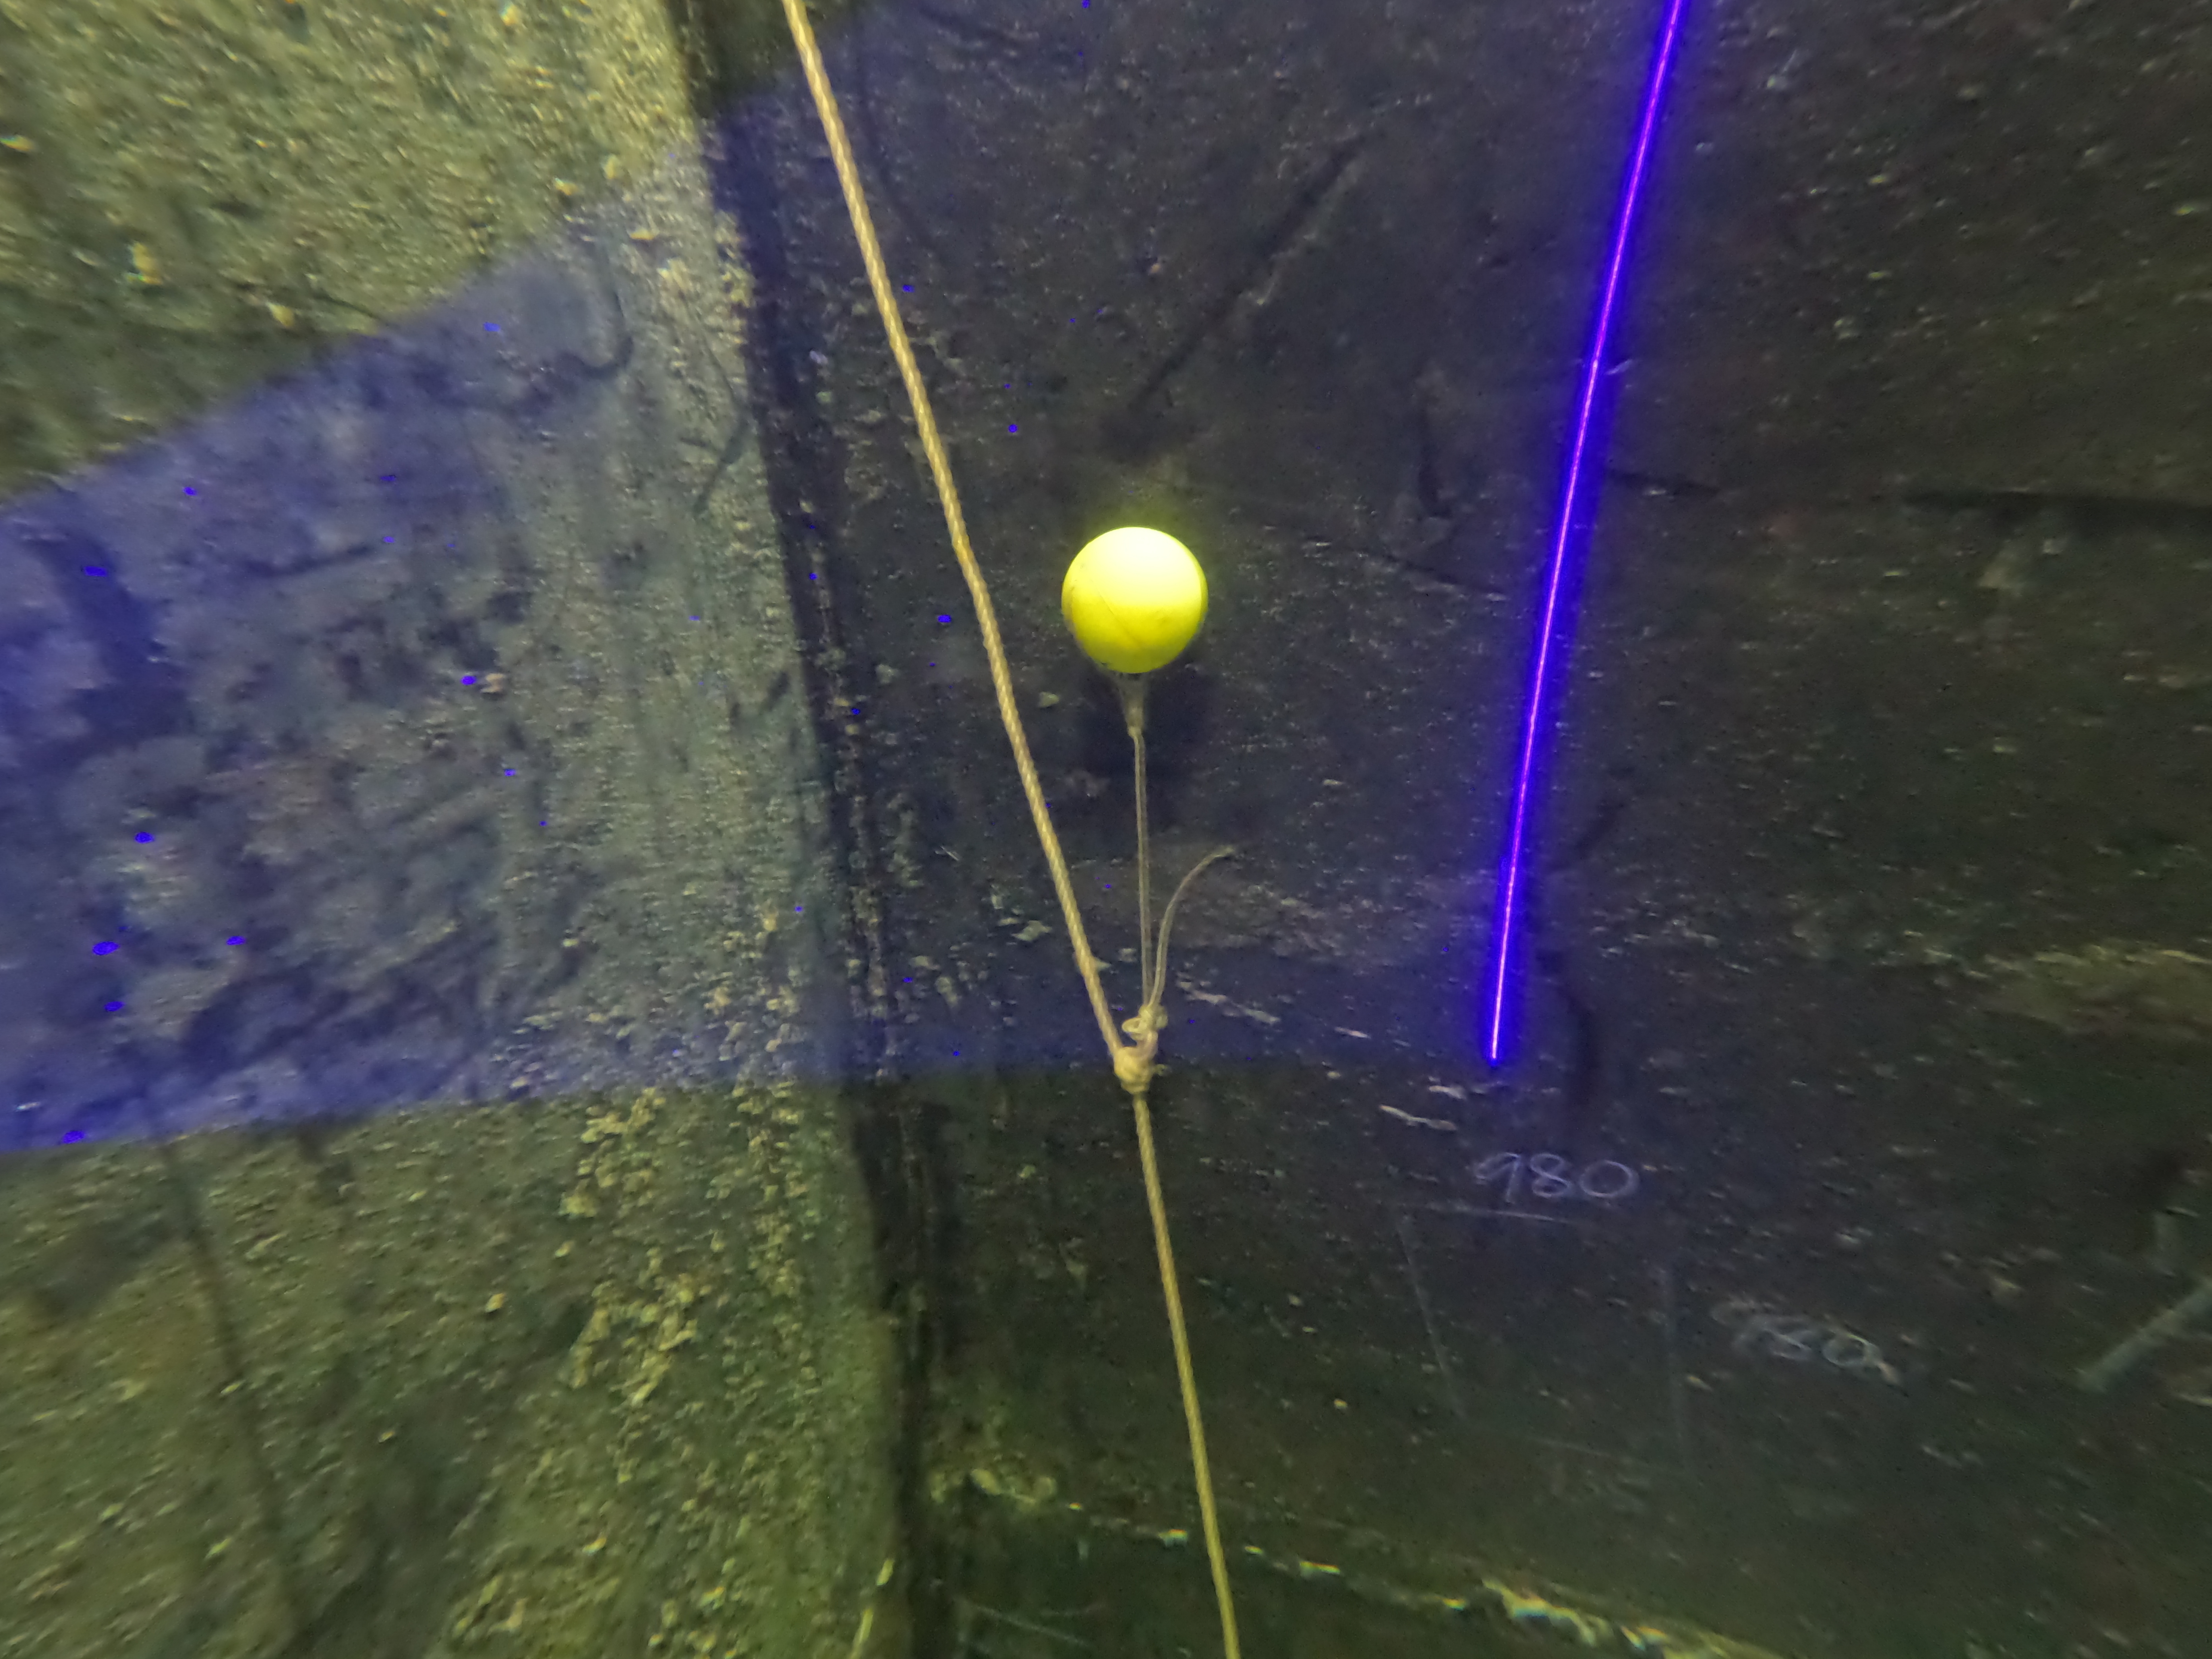

Supplement: Supplementary file 243 [file G0031036.pdf › 4/G0031036.pdf]

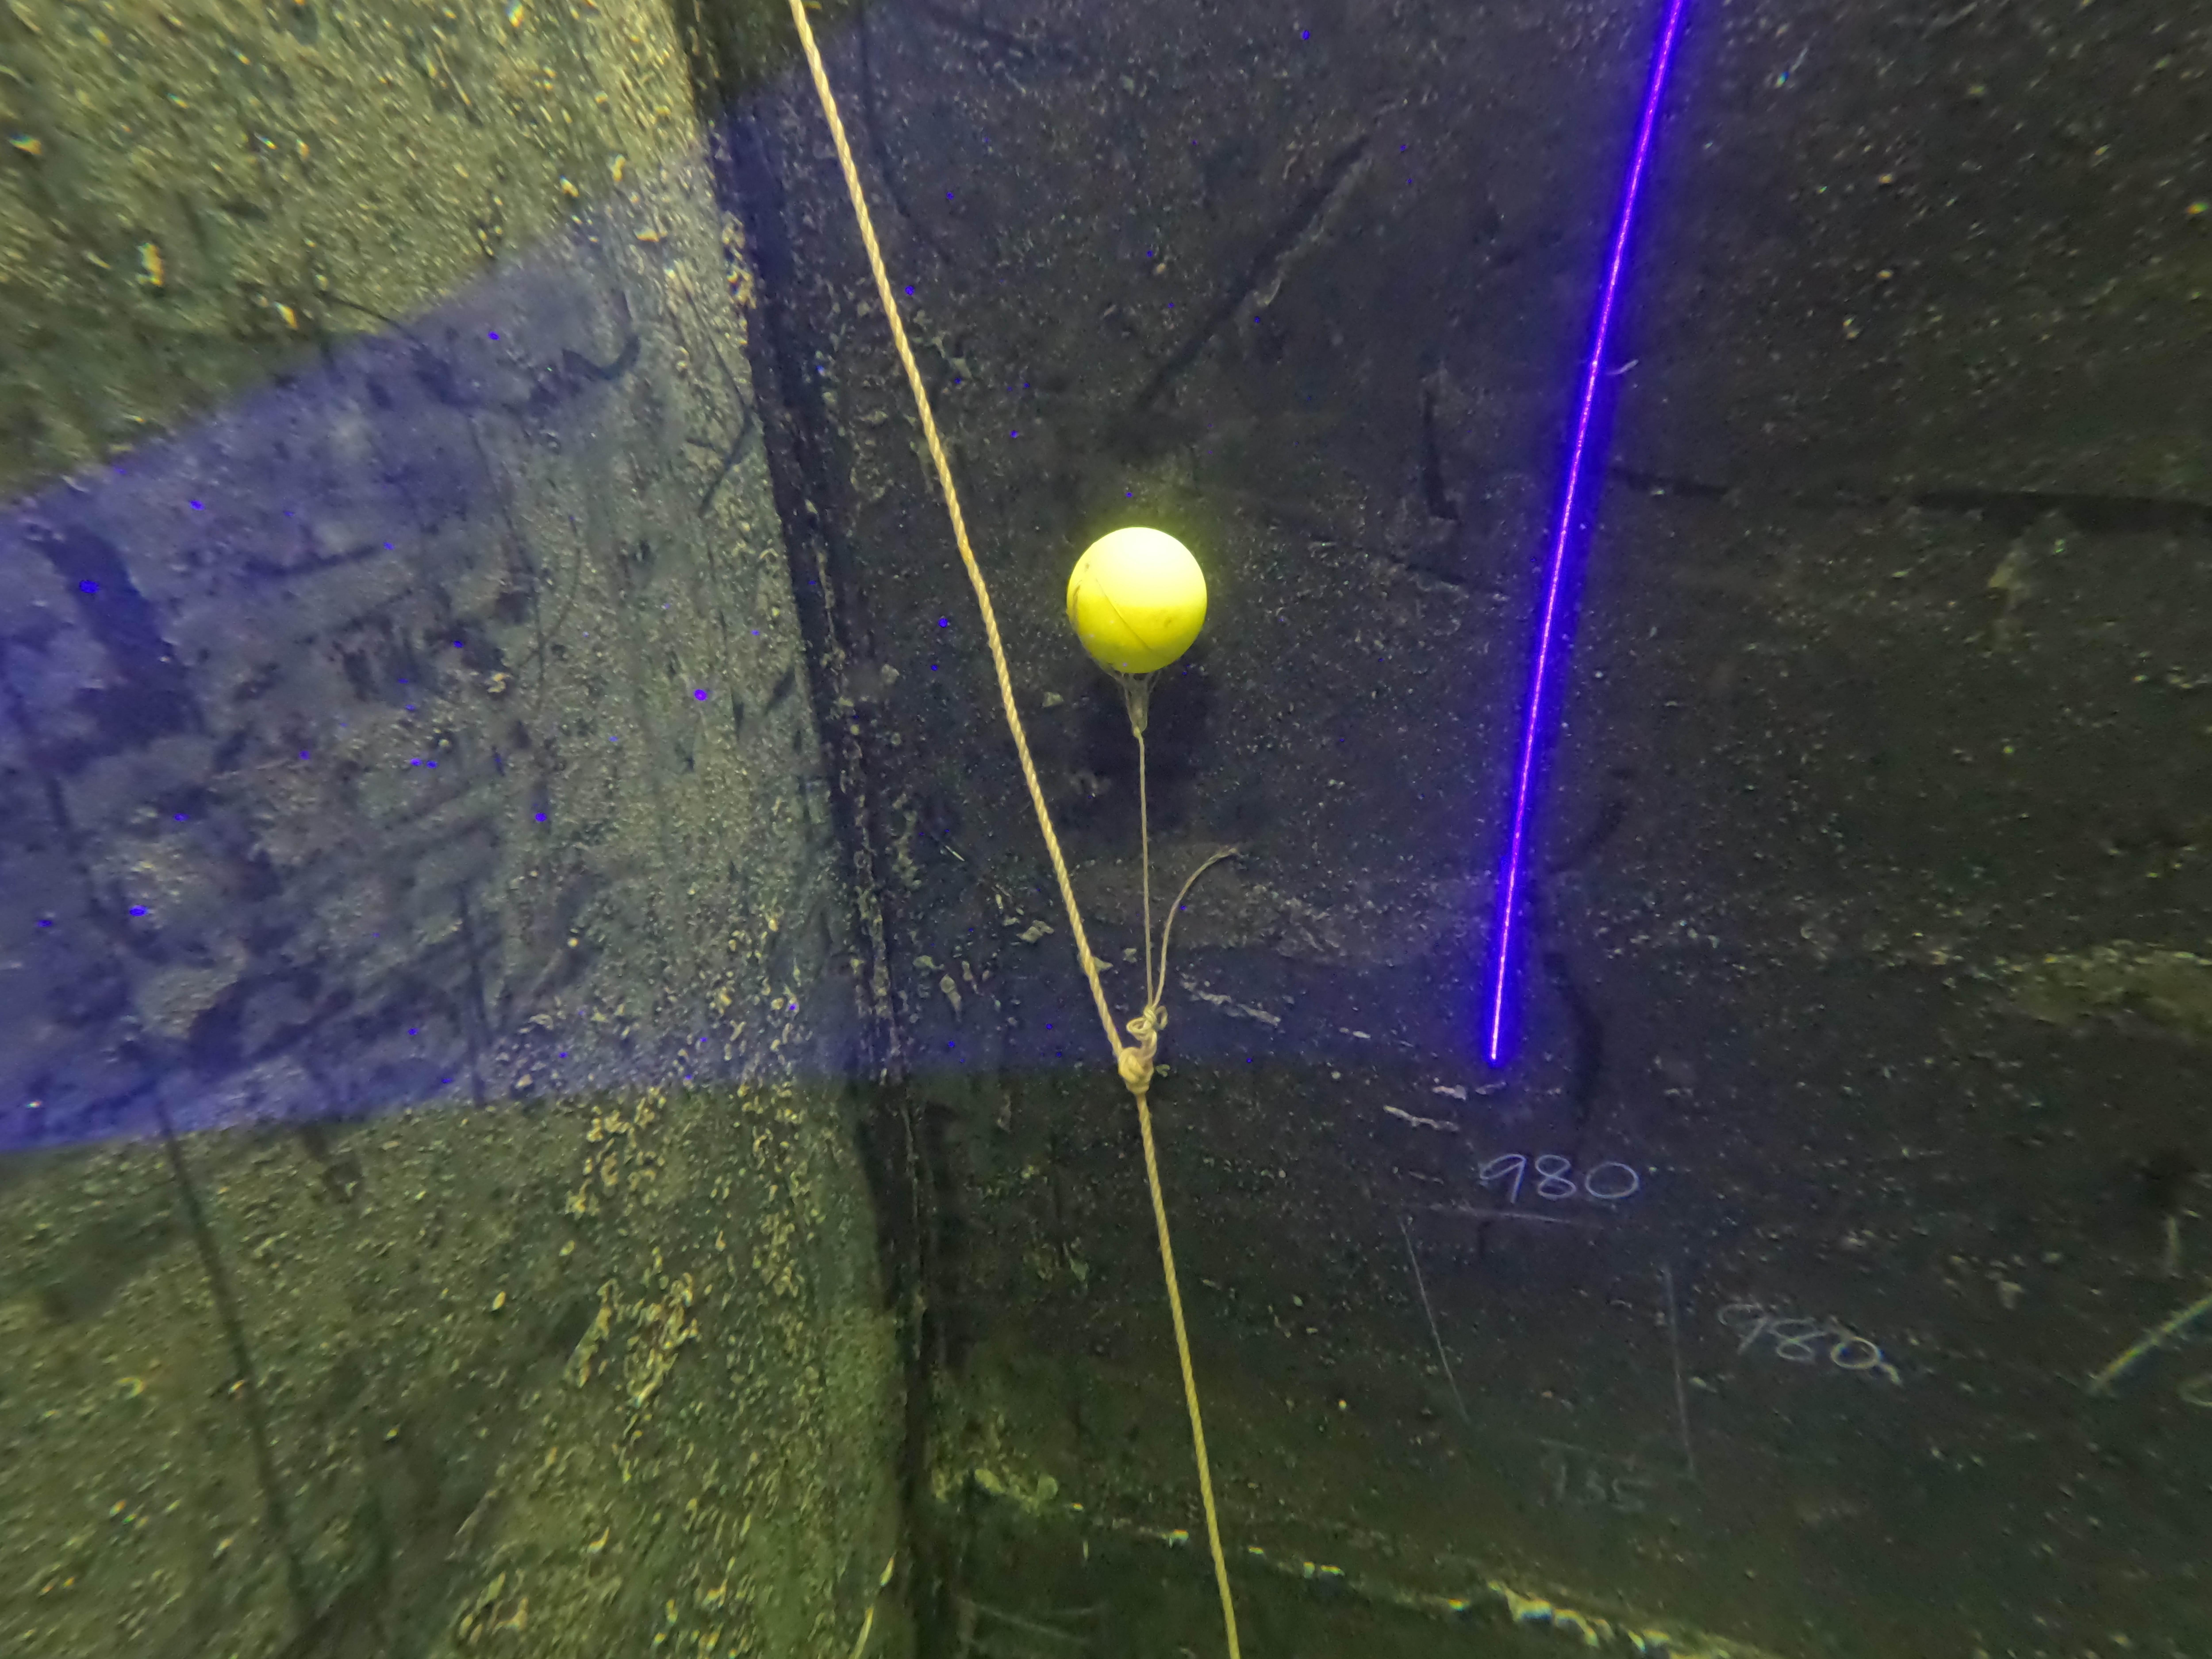

980

980

Supplement: Supplementary file 244 [file G0031037.pdf › 4/G0031037.pdf]

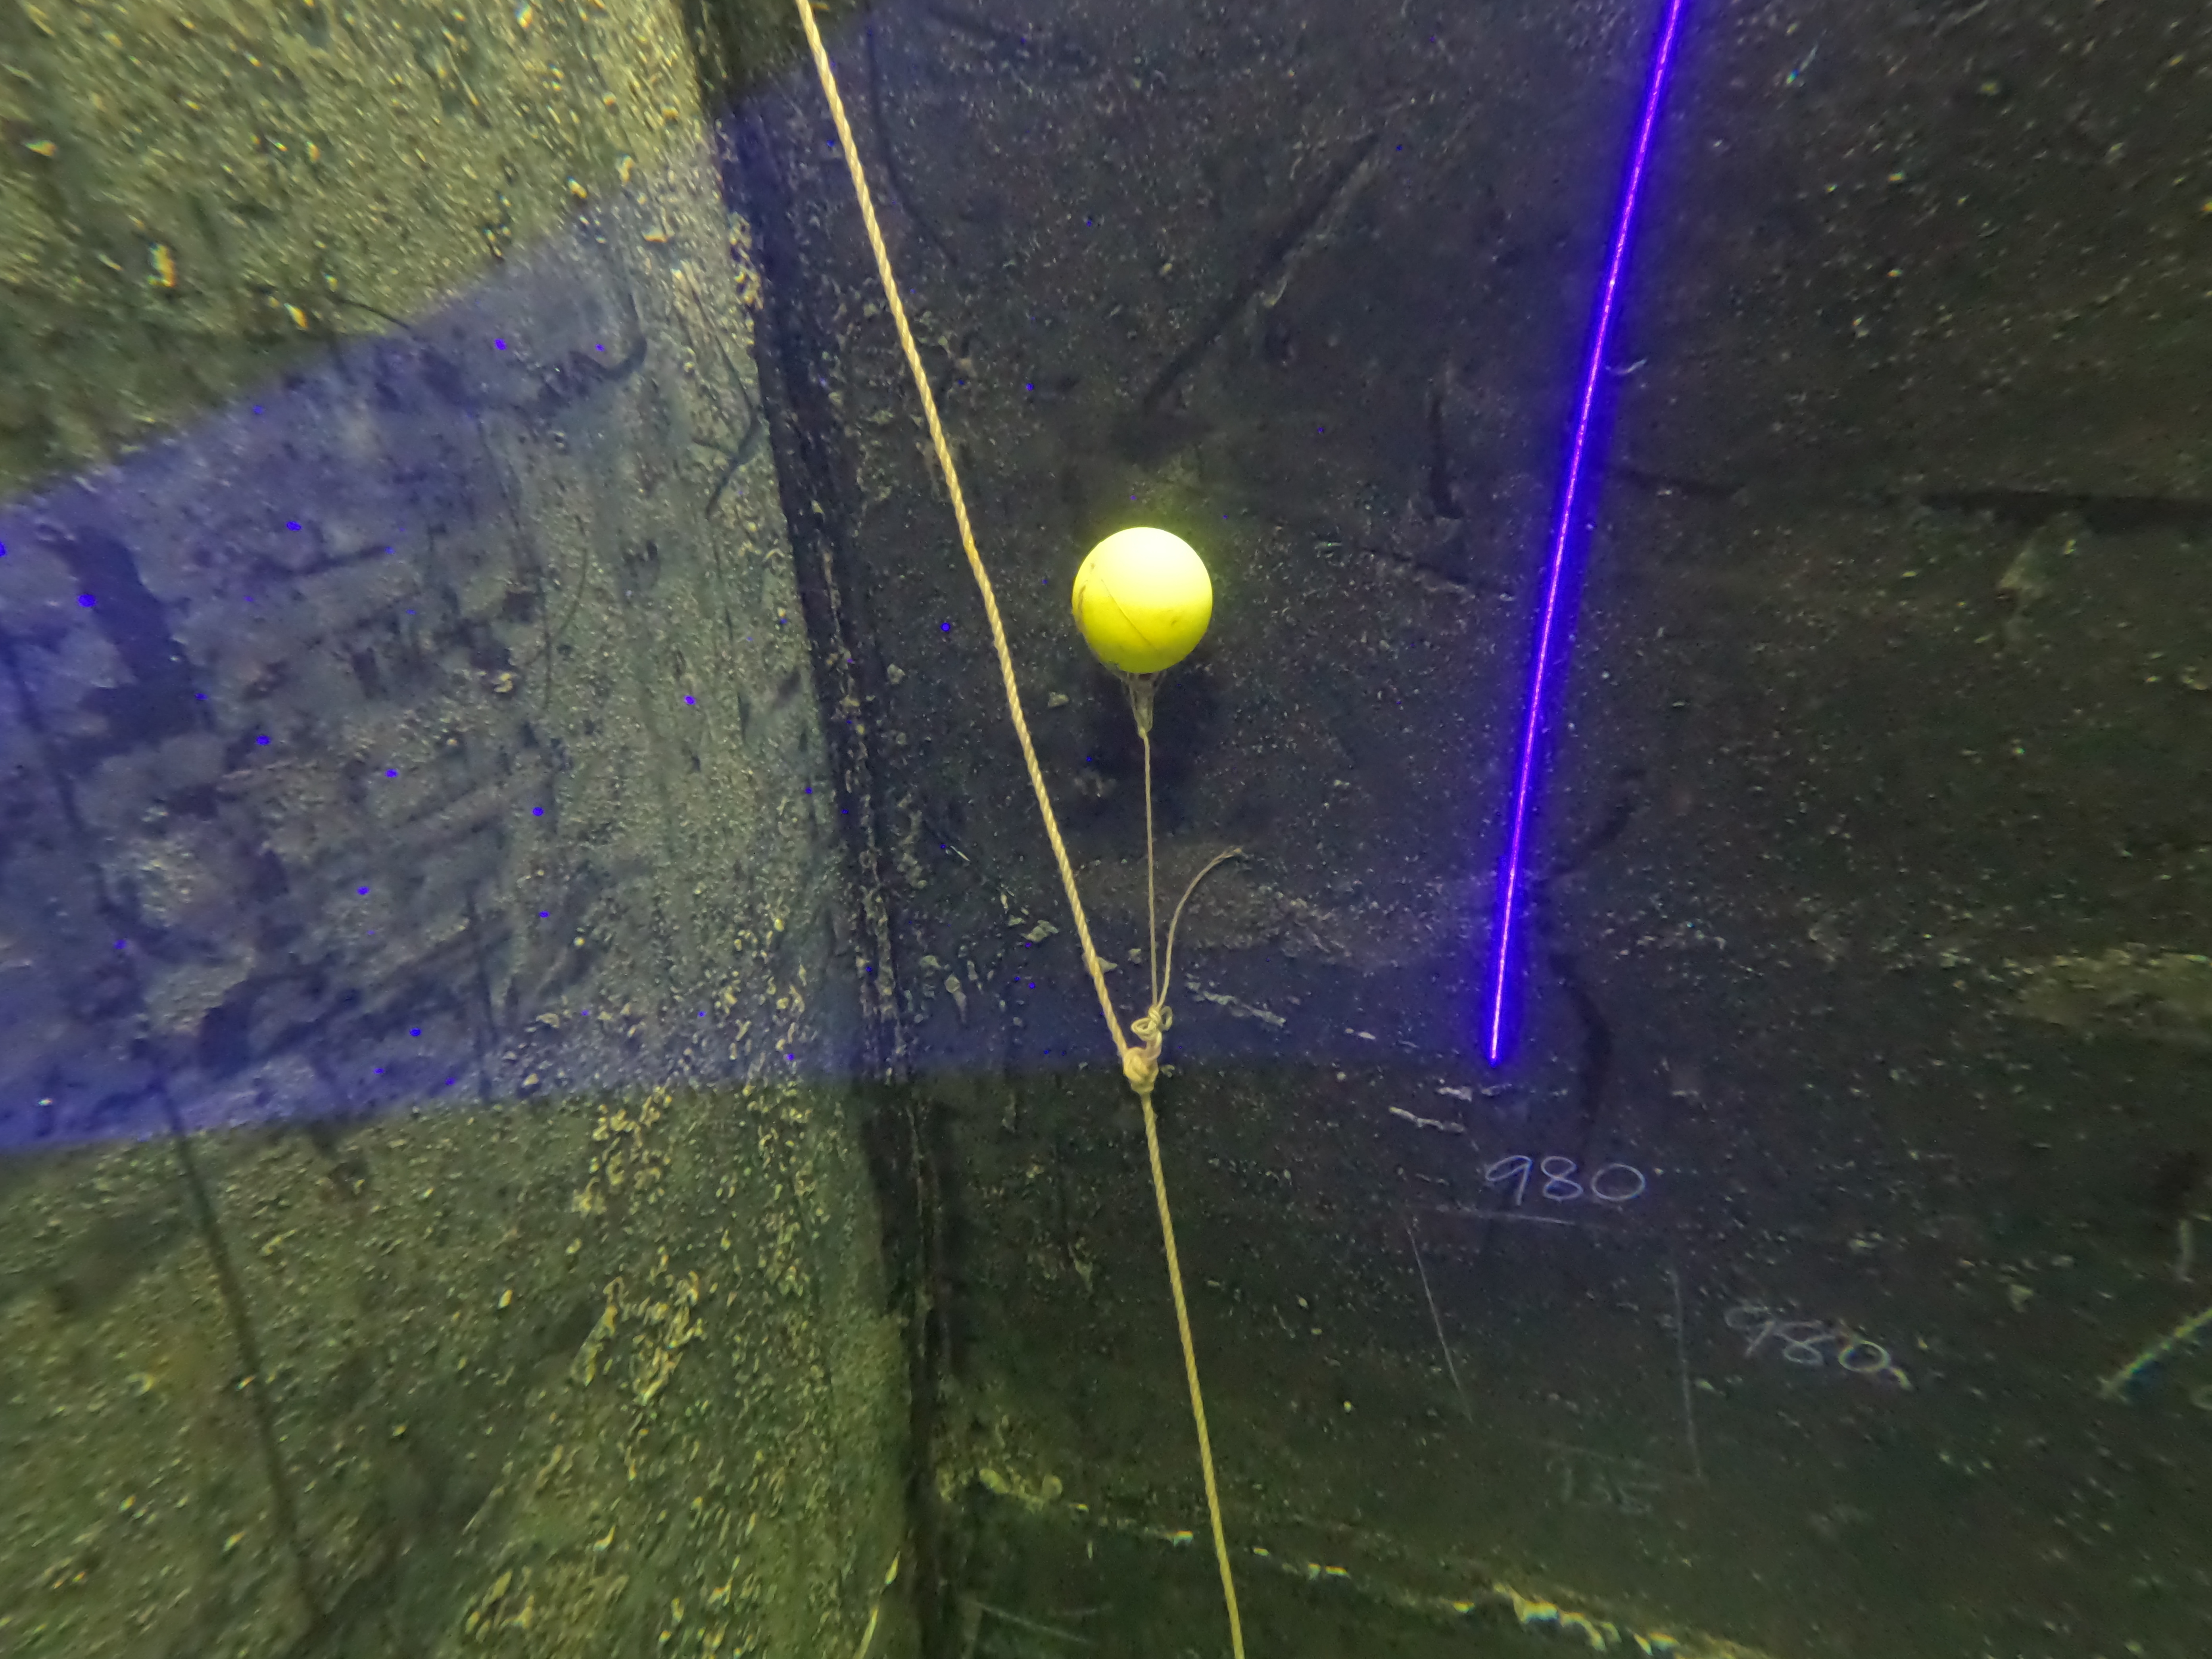

980

980

Supplement: Supplementary file 245 [file G0031038.pdf › 4/G0031038.pdf]

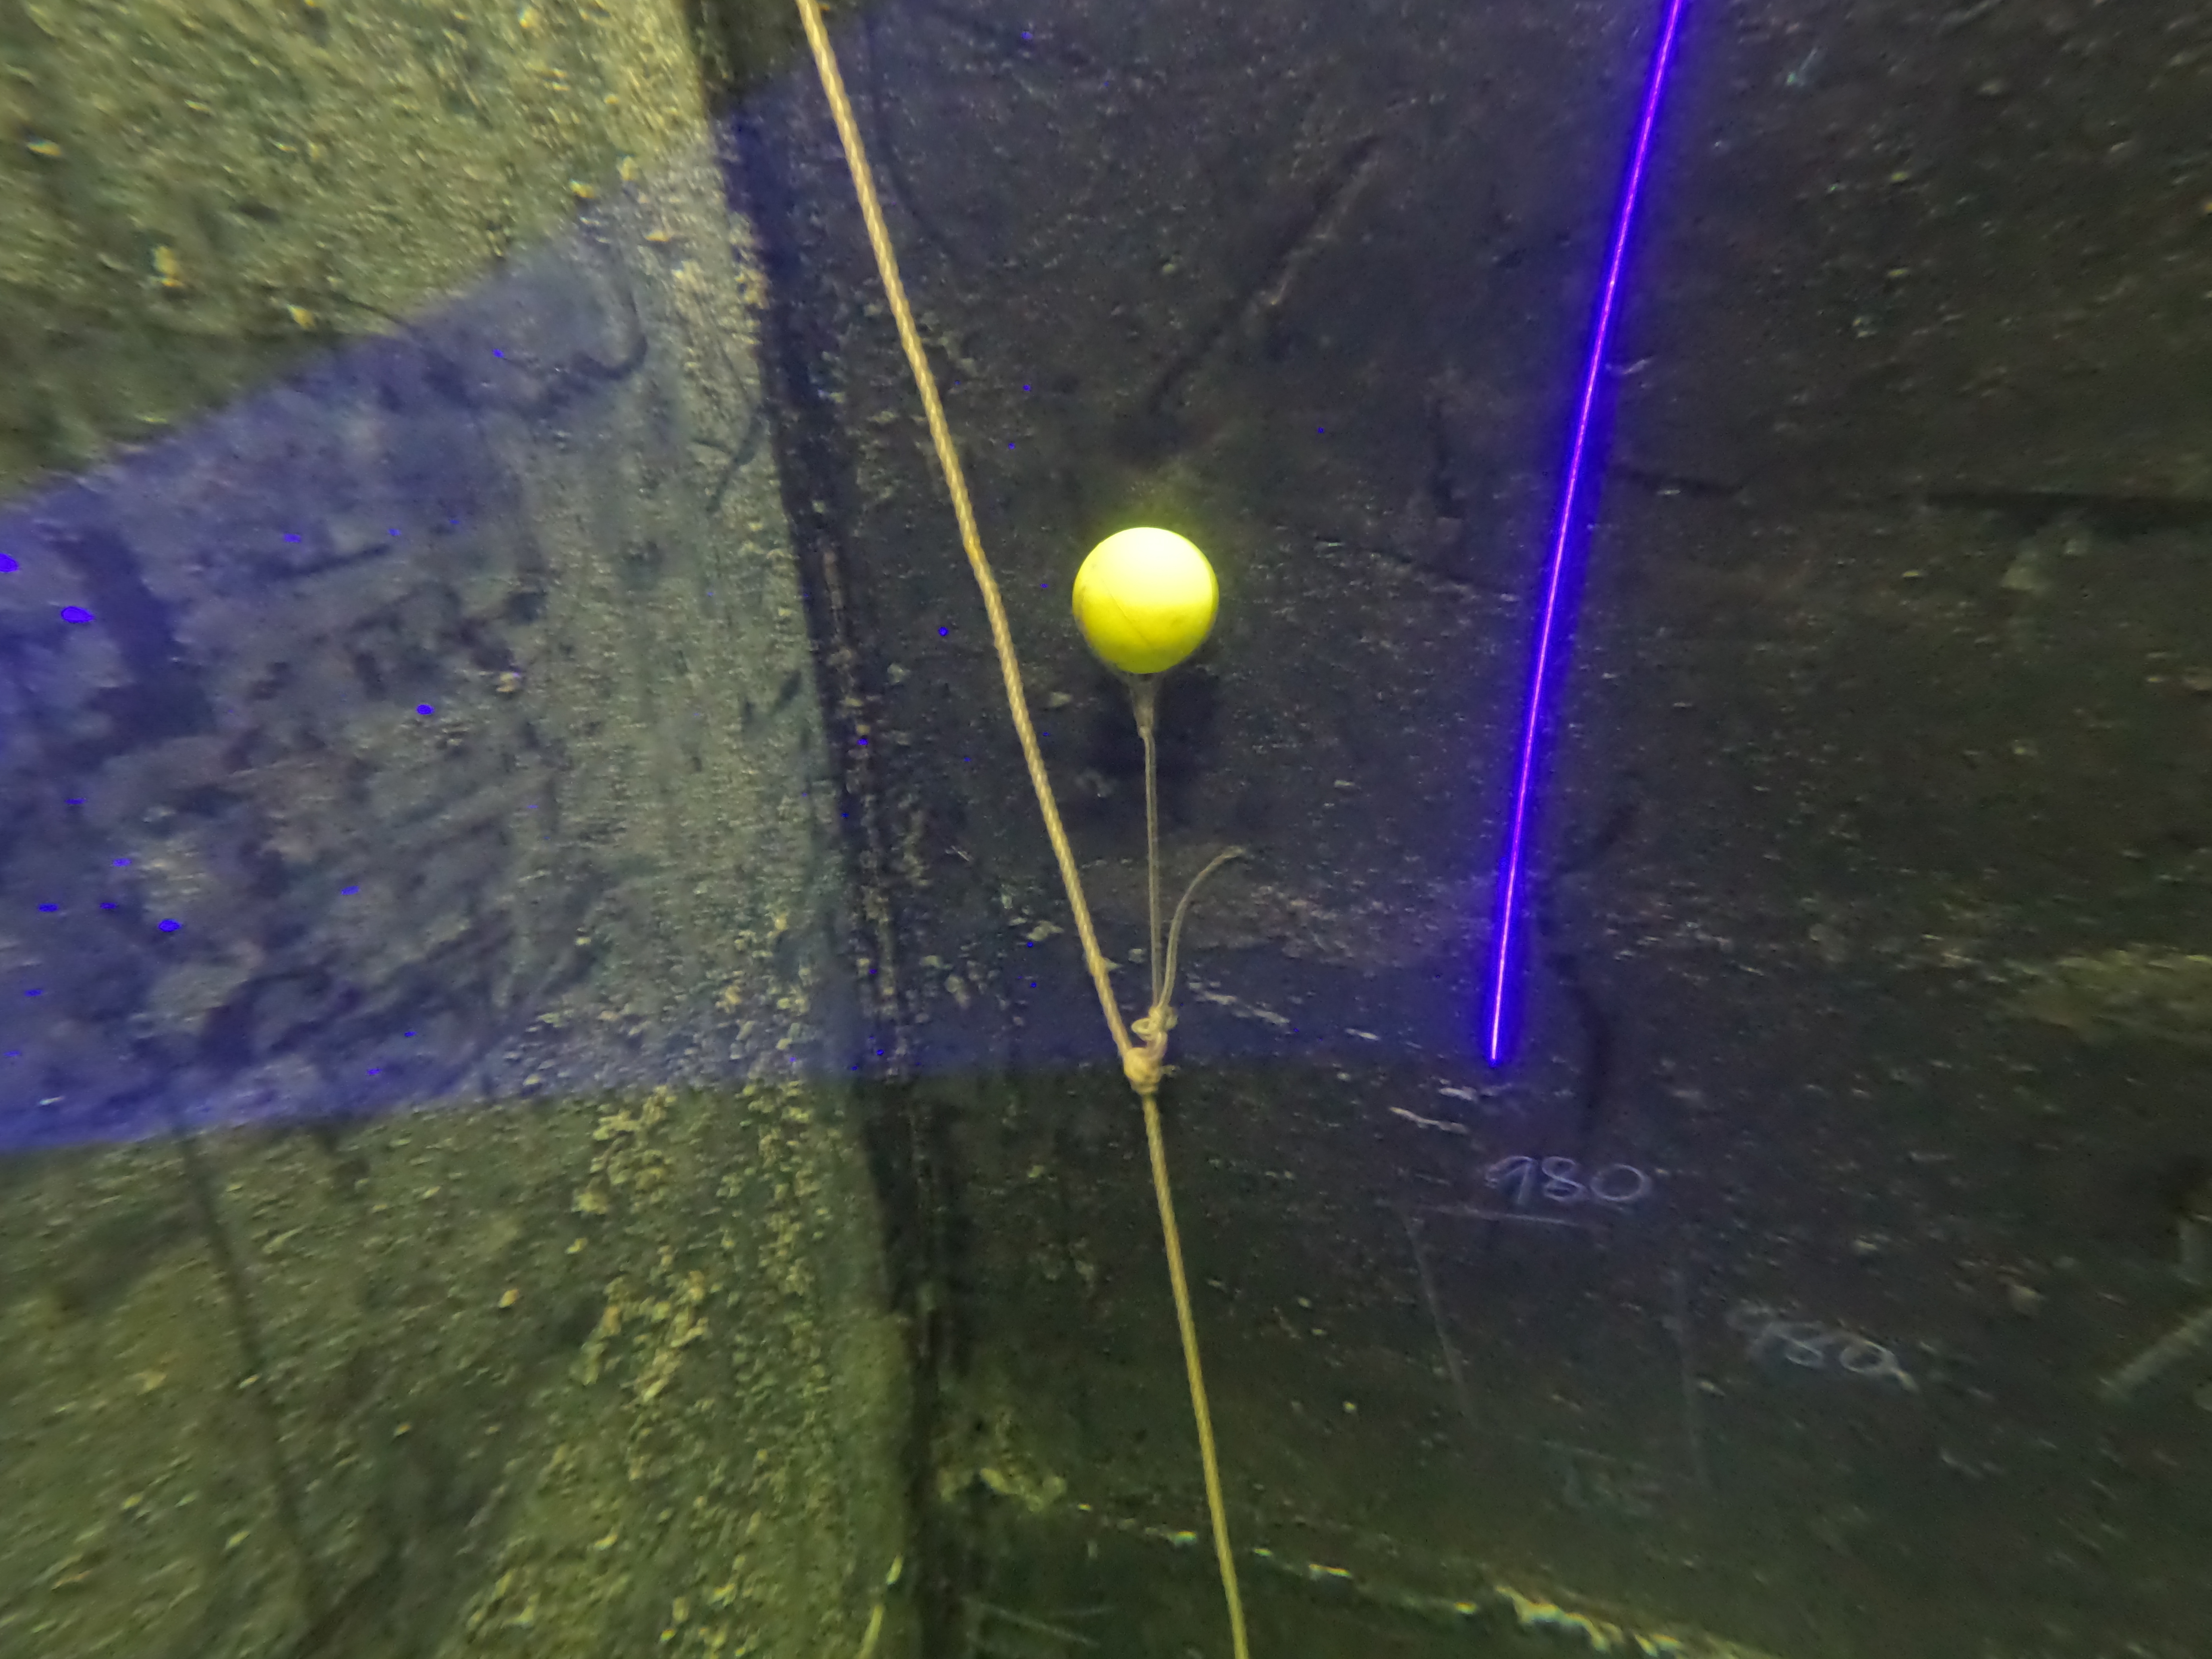

Supplement: Supplementary file 246 [file G0031039.pdf › 4/G0031039.pdf]

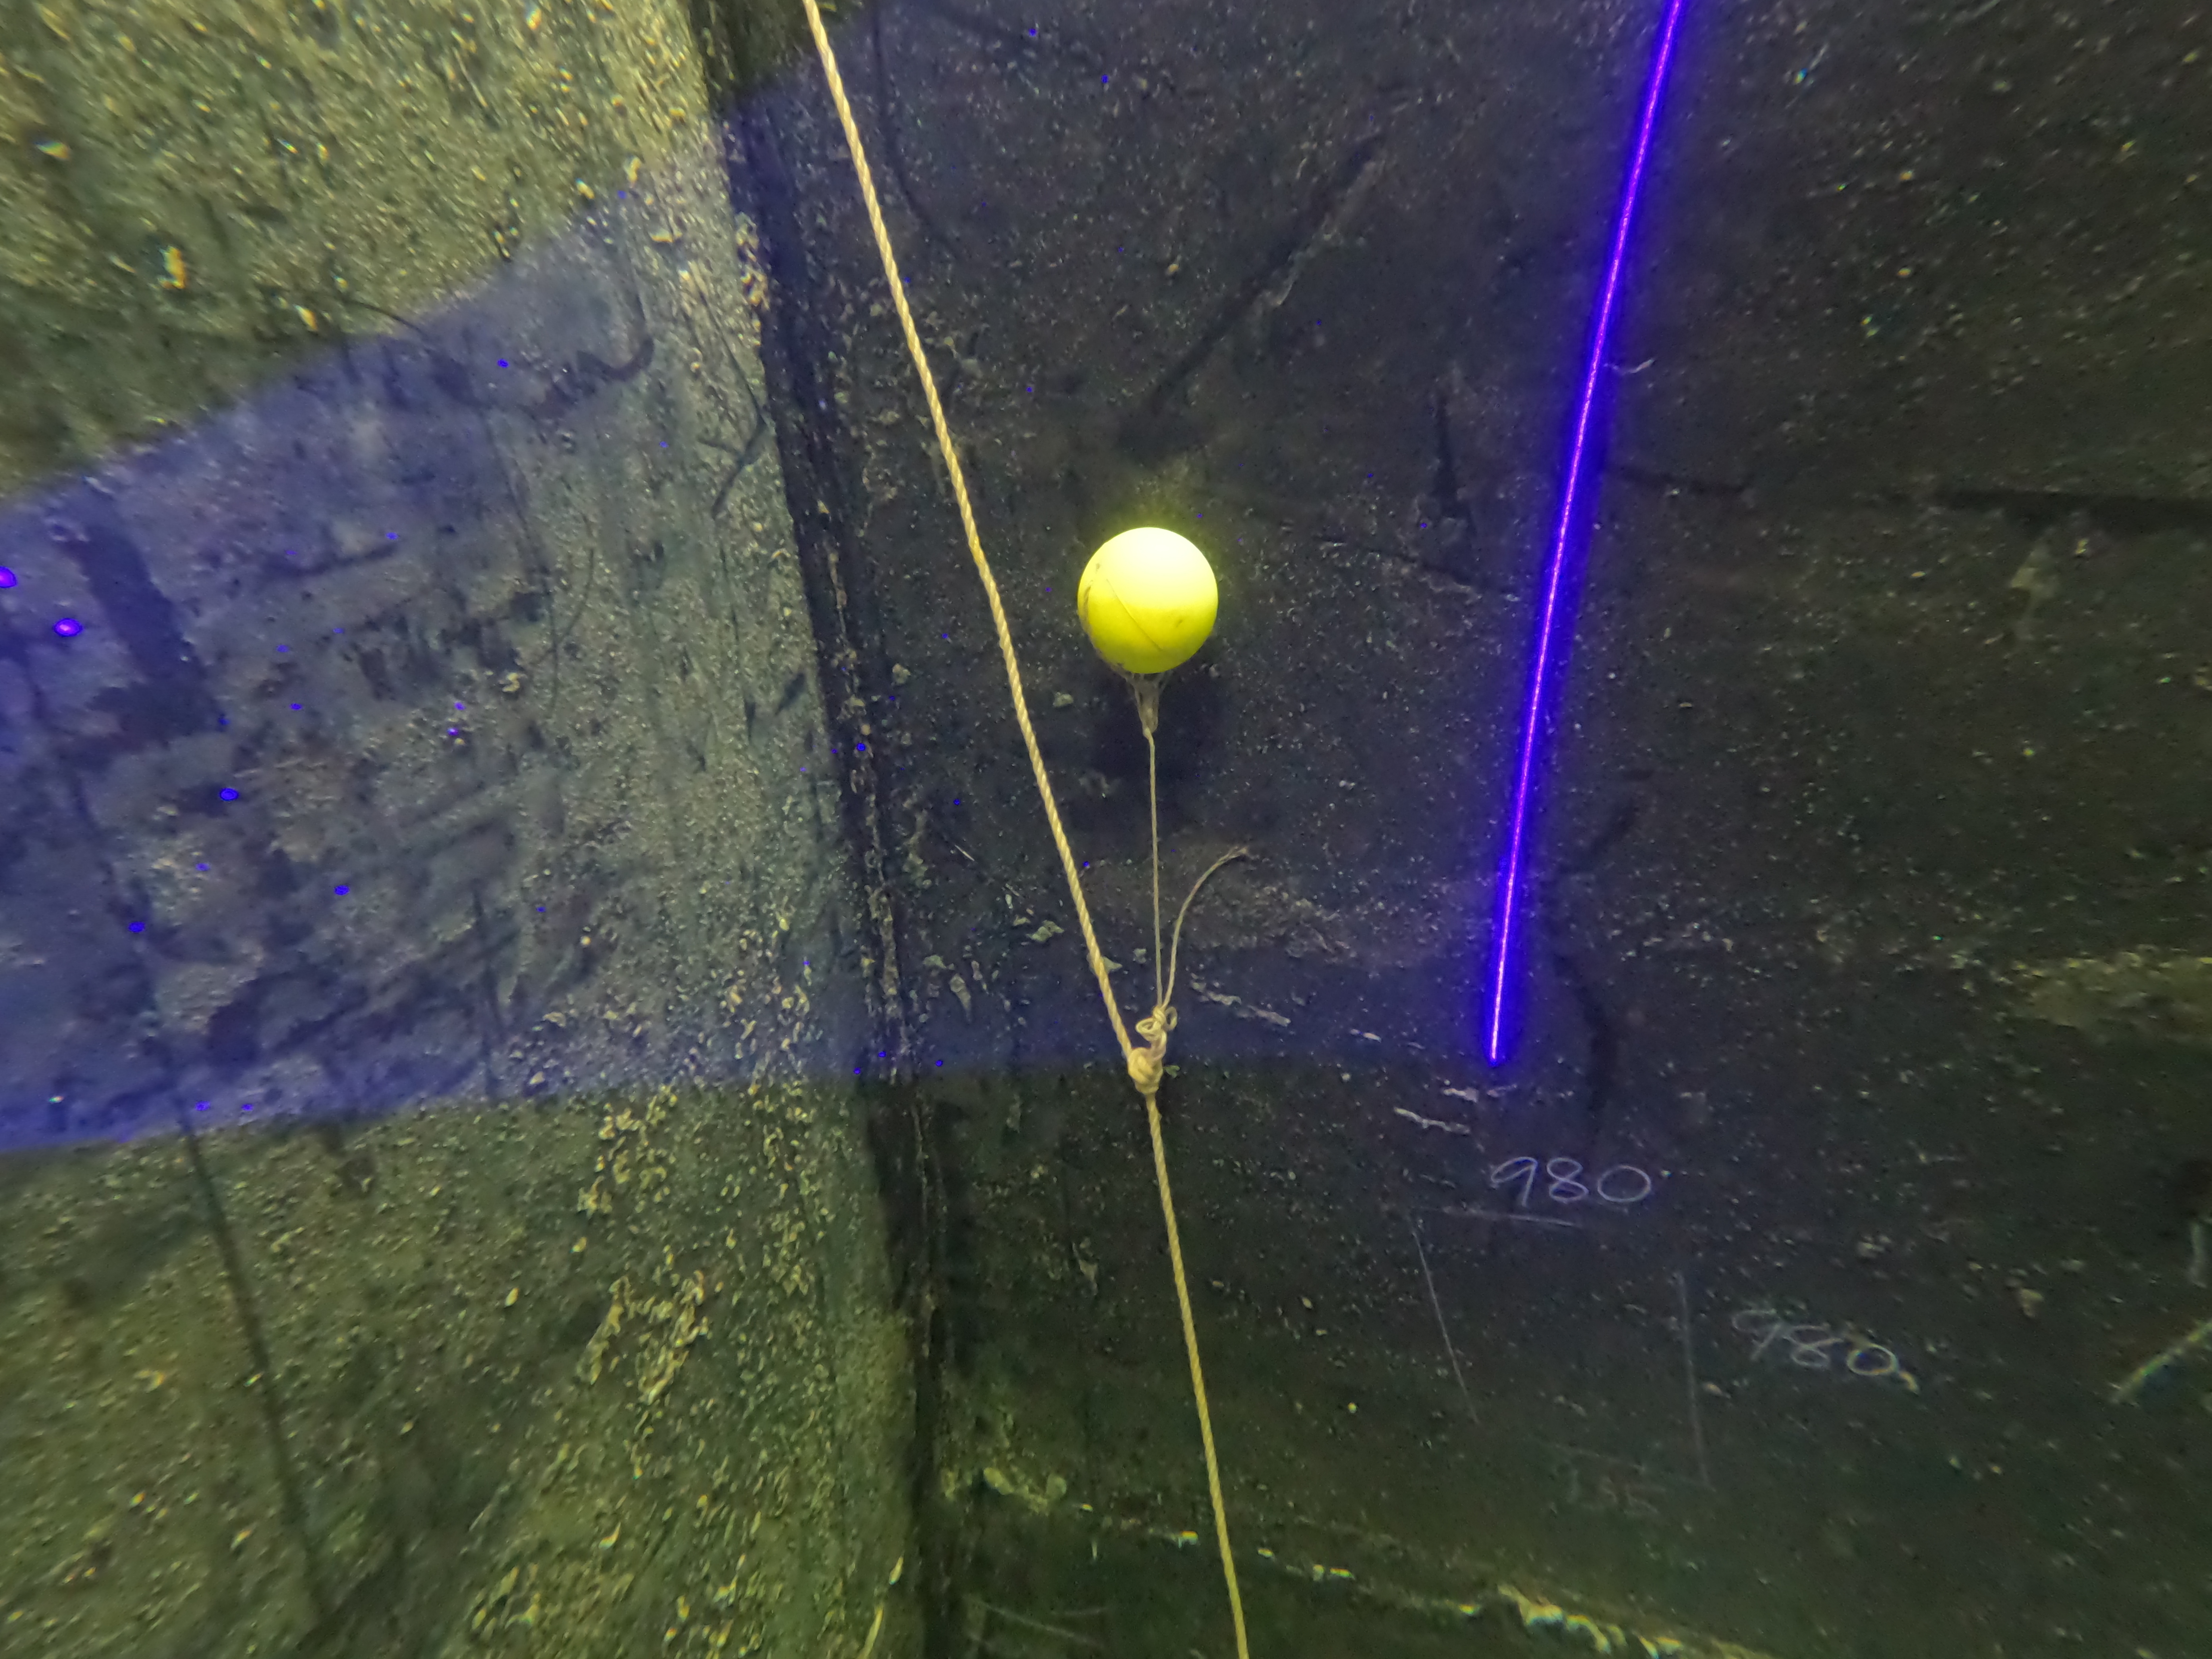

980

980

Supplement: Supplementary file 247 [file G0031040.pdf › 4/G0031040.pdf]

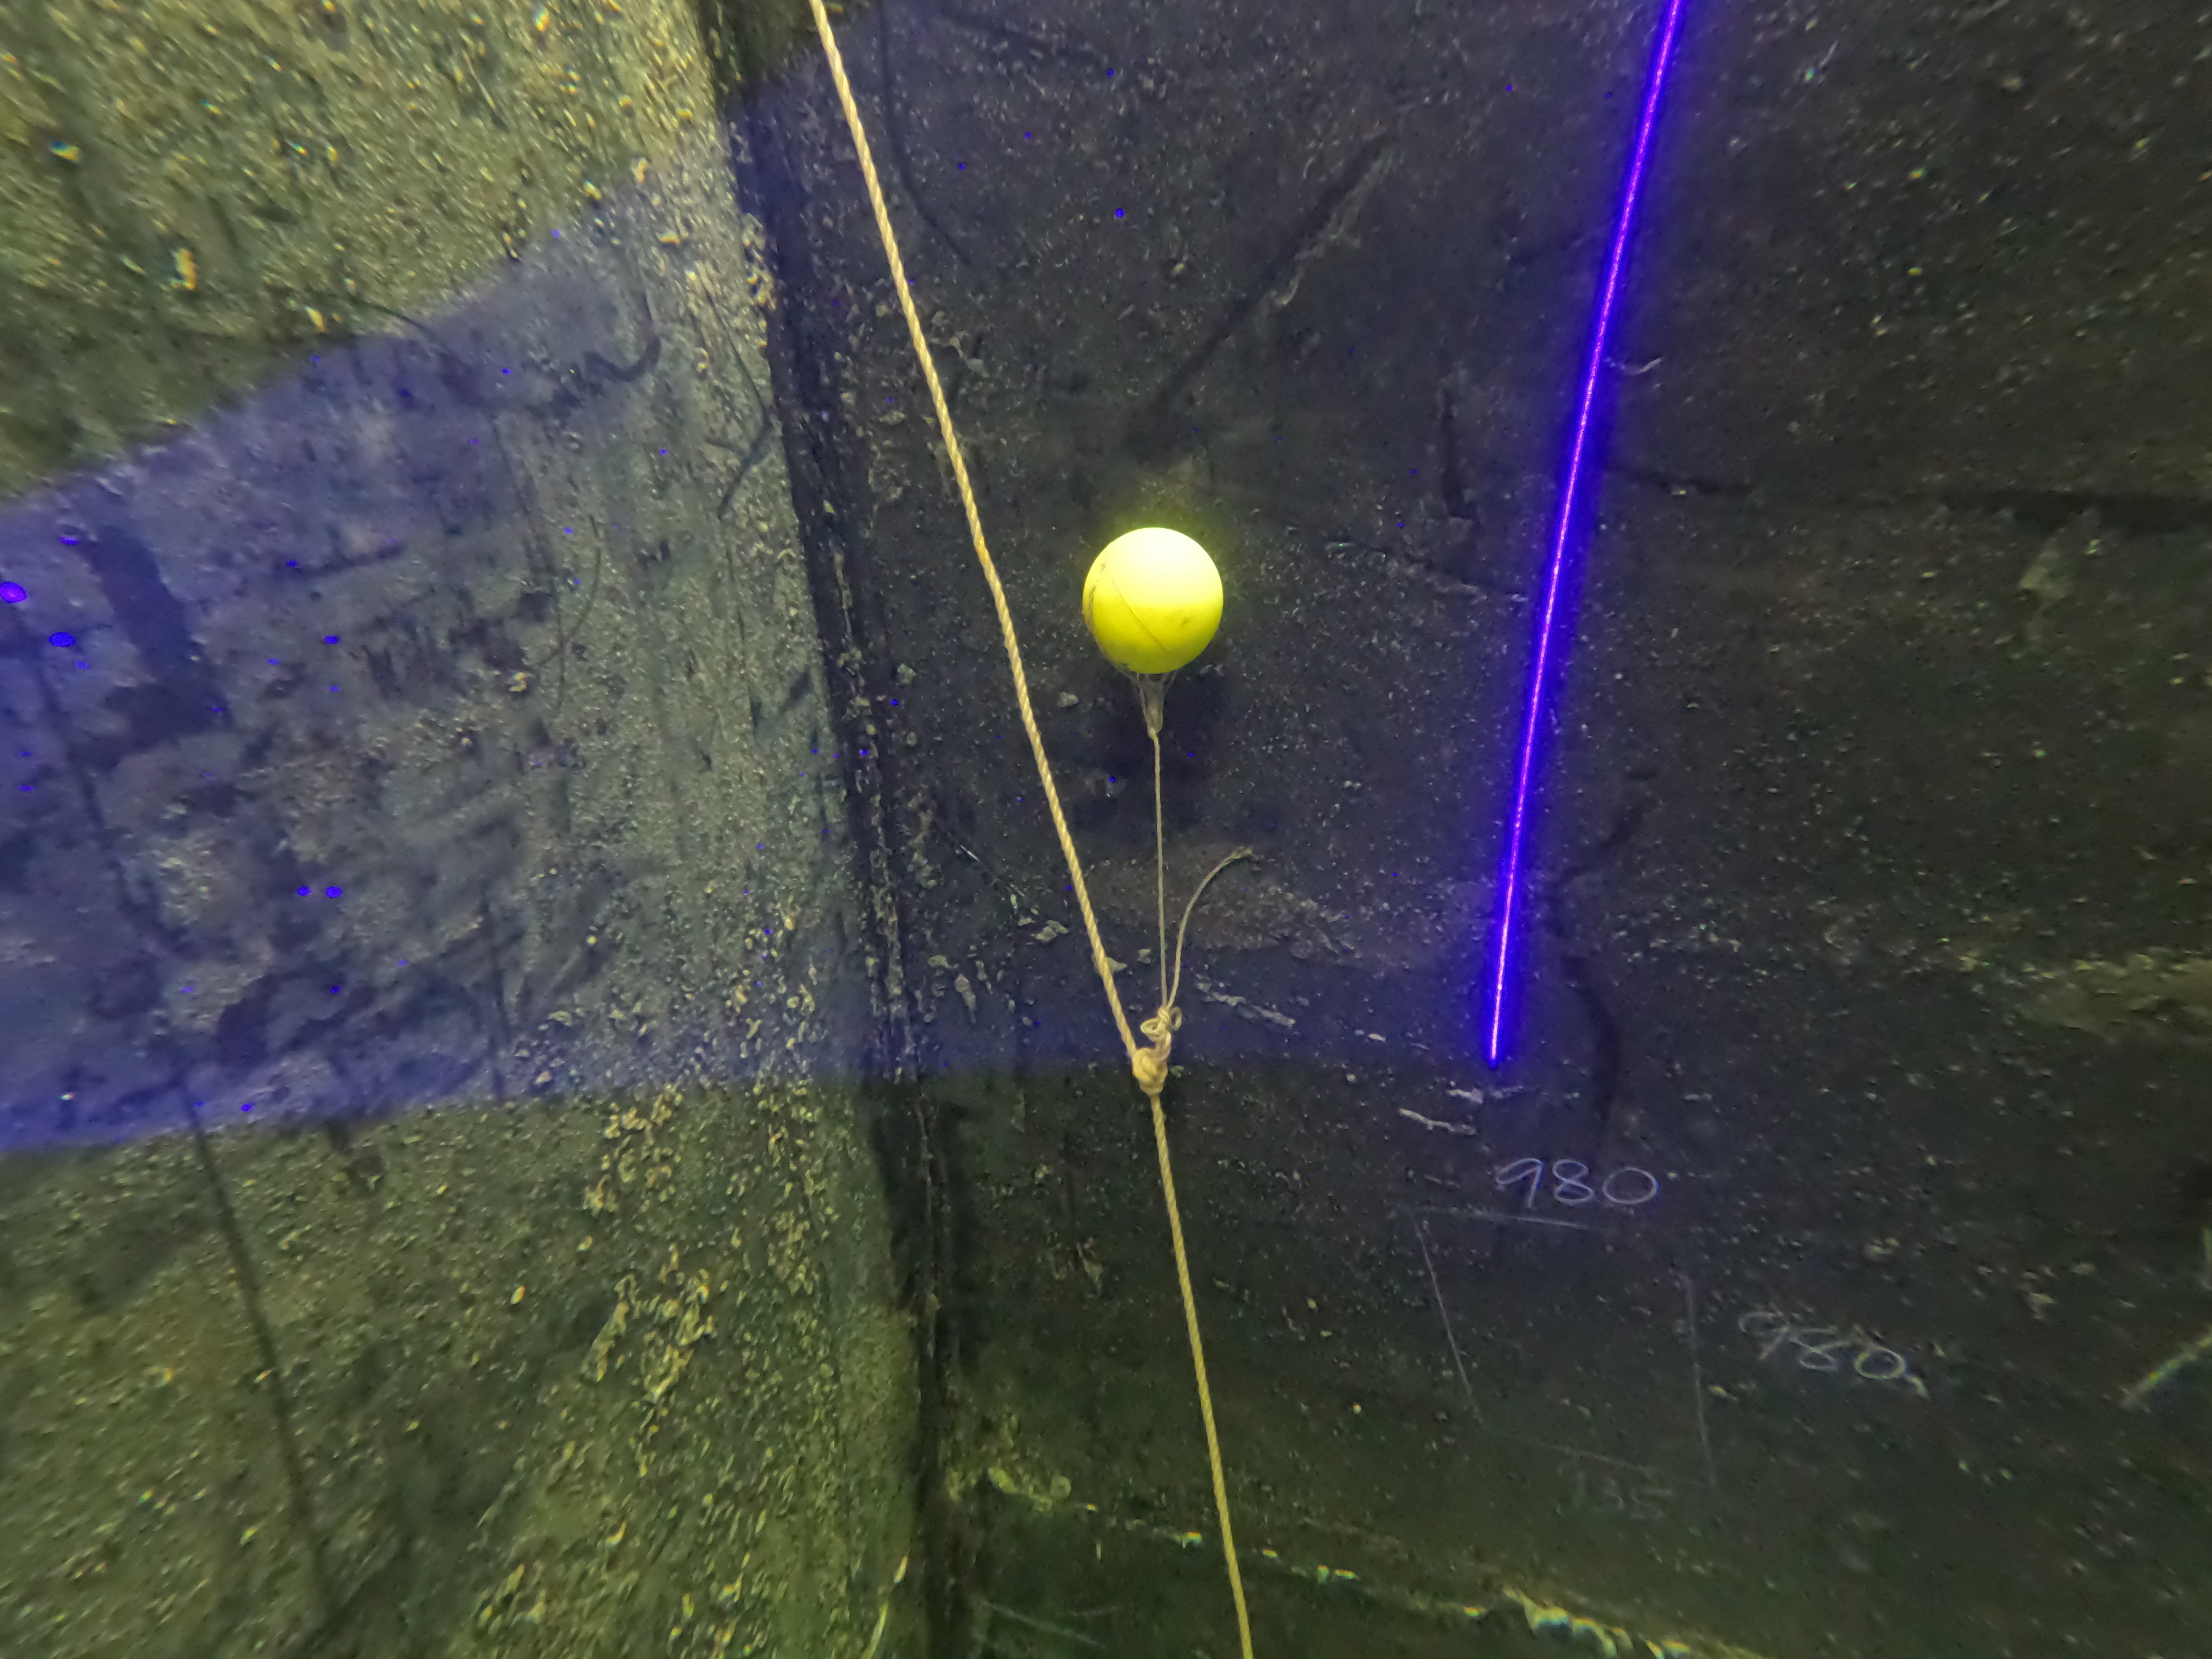

Supplement: Supplementary file 248 [file G0031041.pdf › 4/G0031041.pdf]

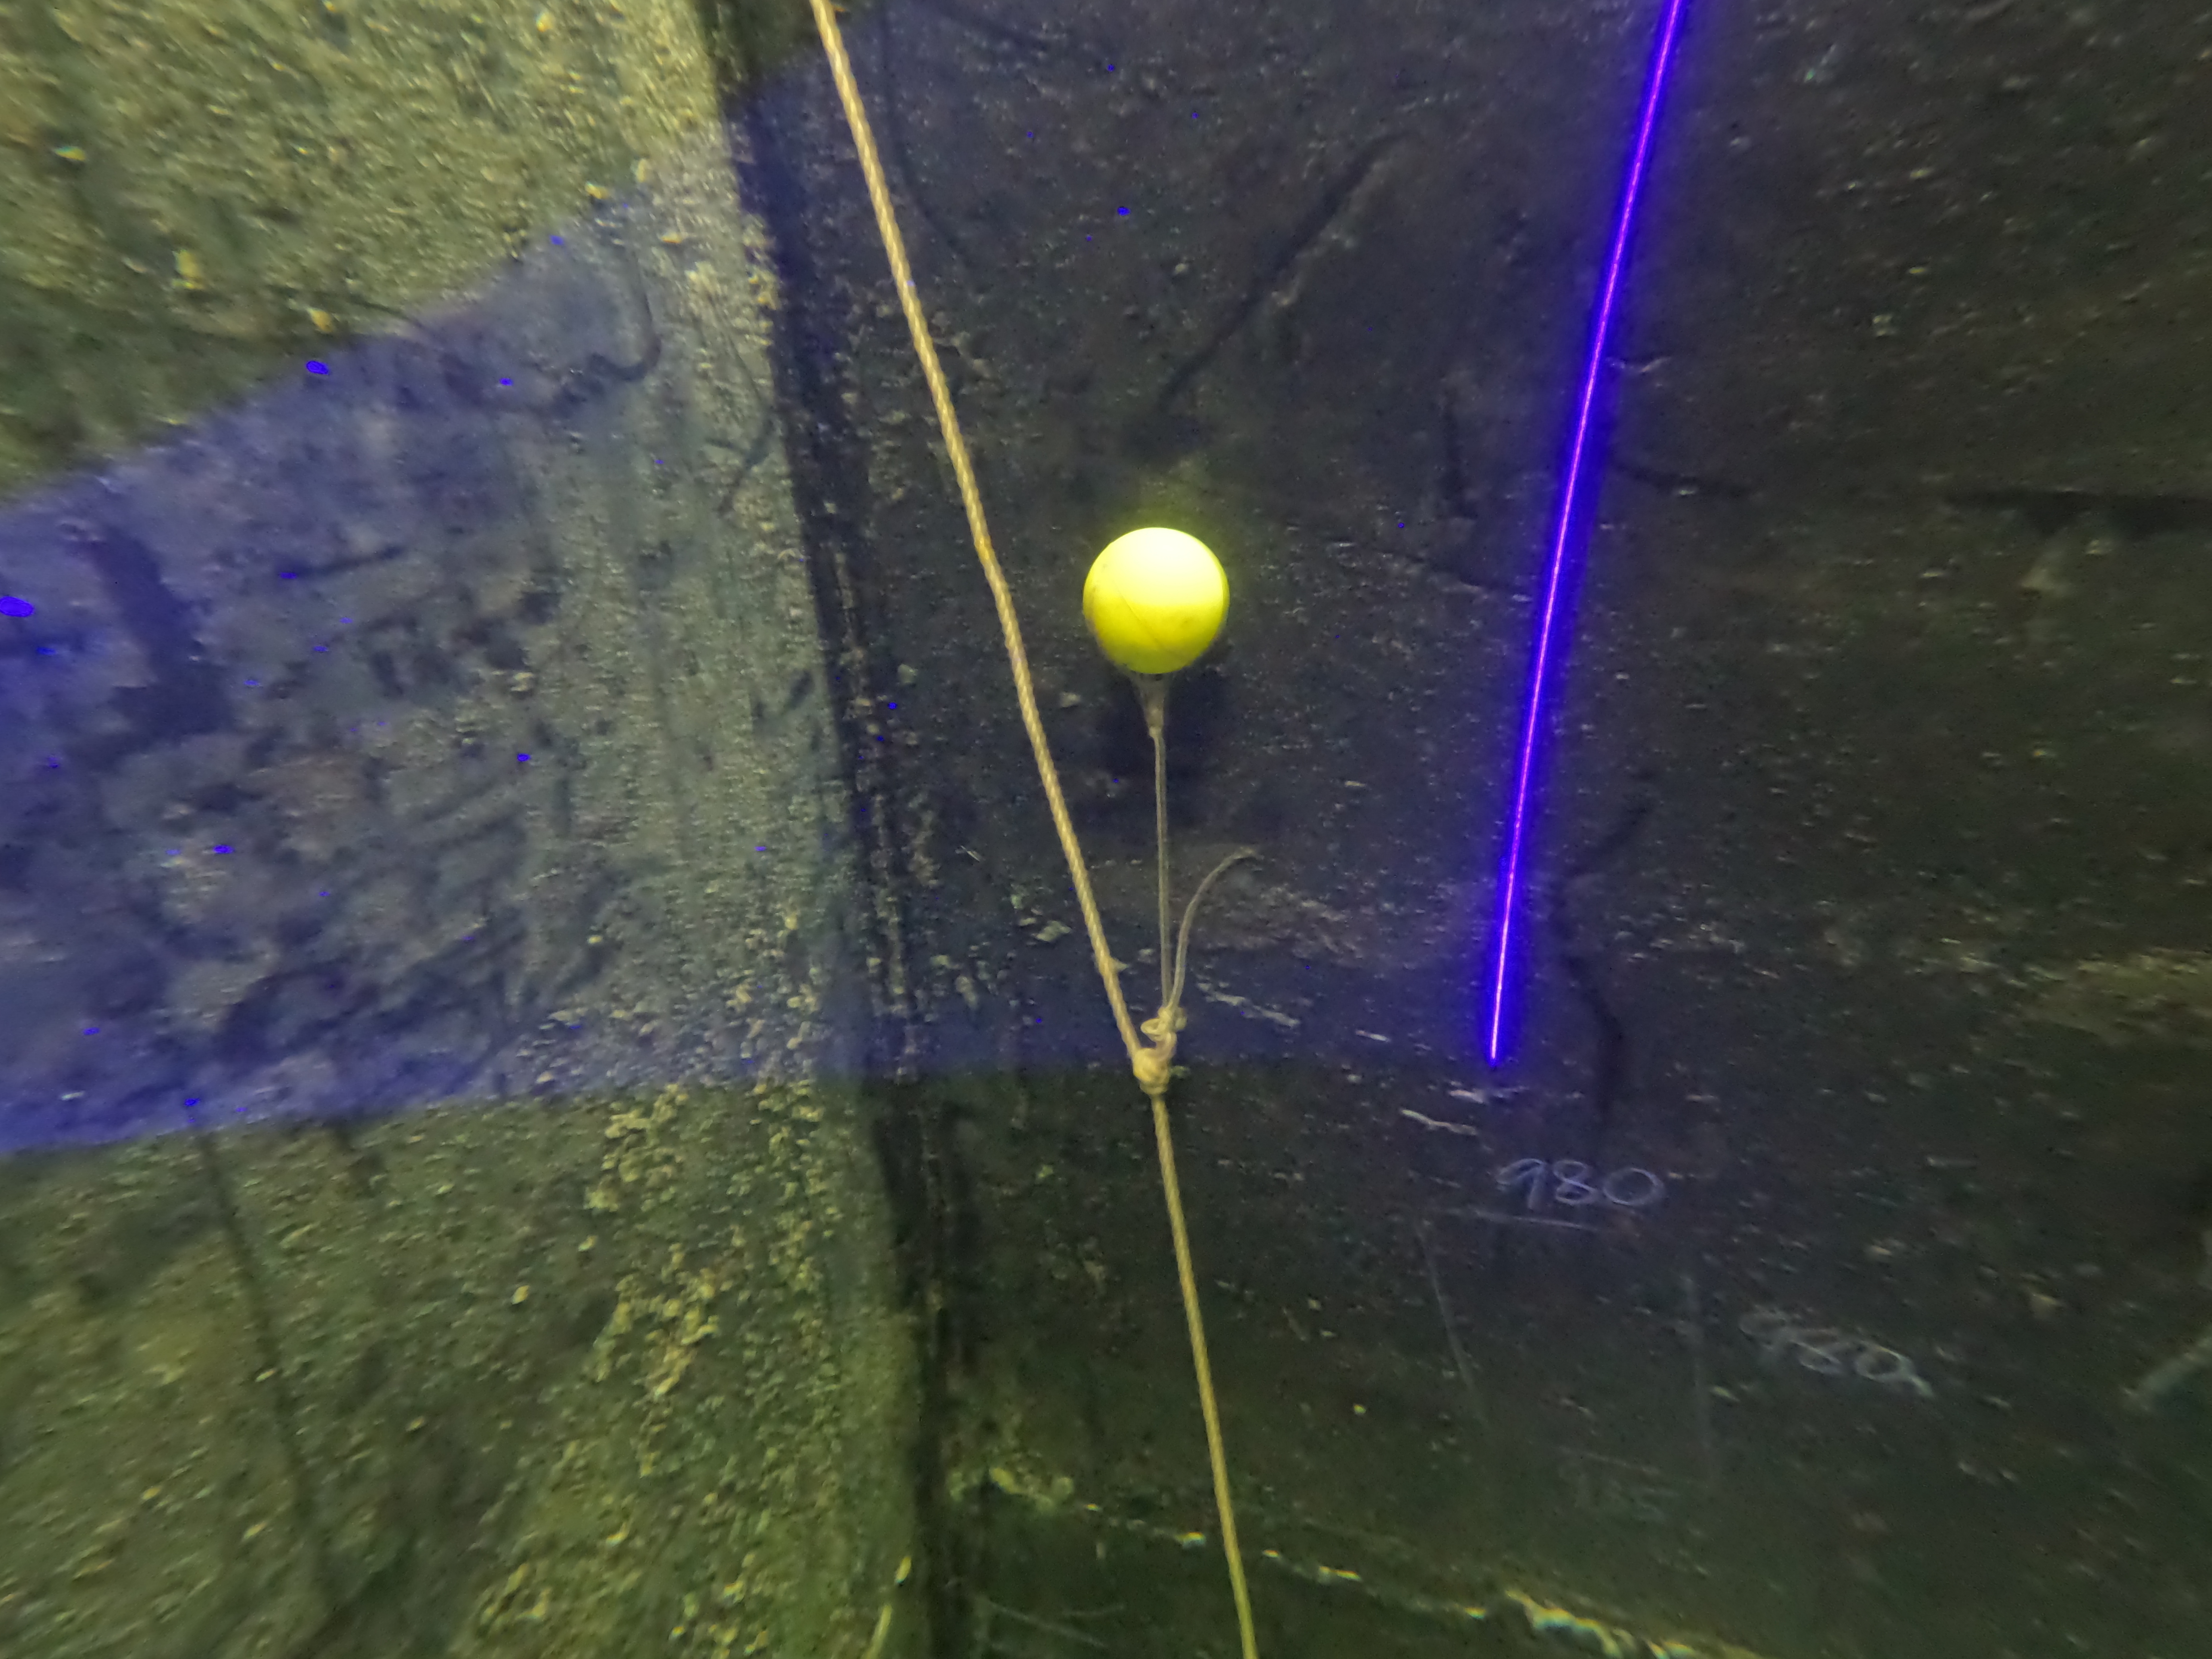

980

980

Supplement: Supplementary file 249 [file G0031042.pdf › 4/G0031042.pdf]

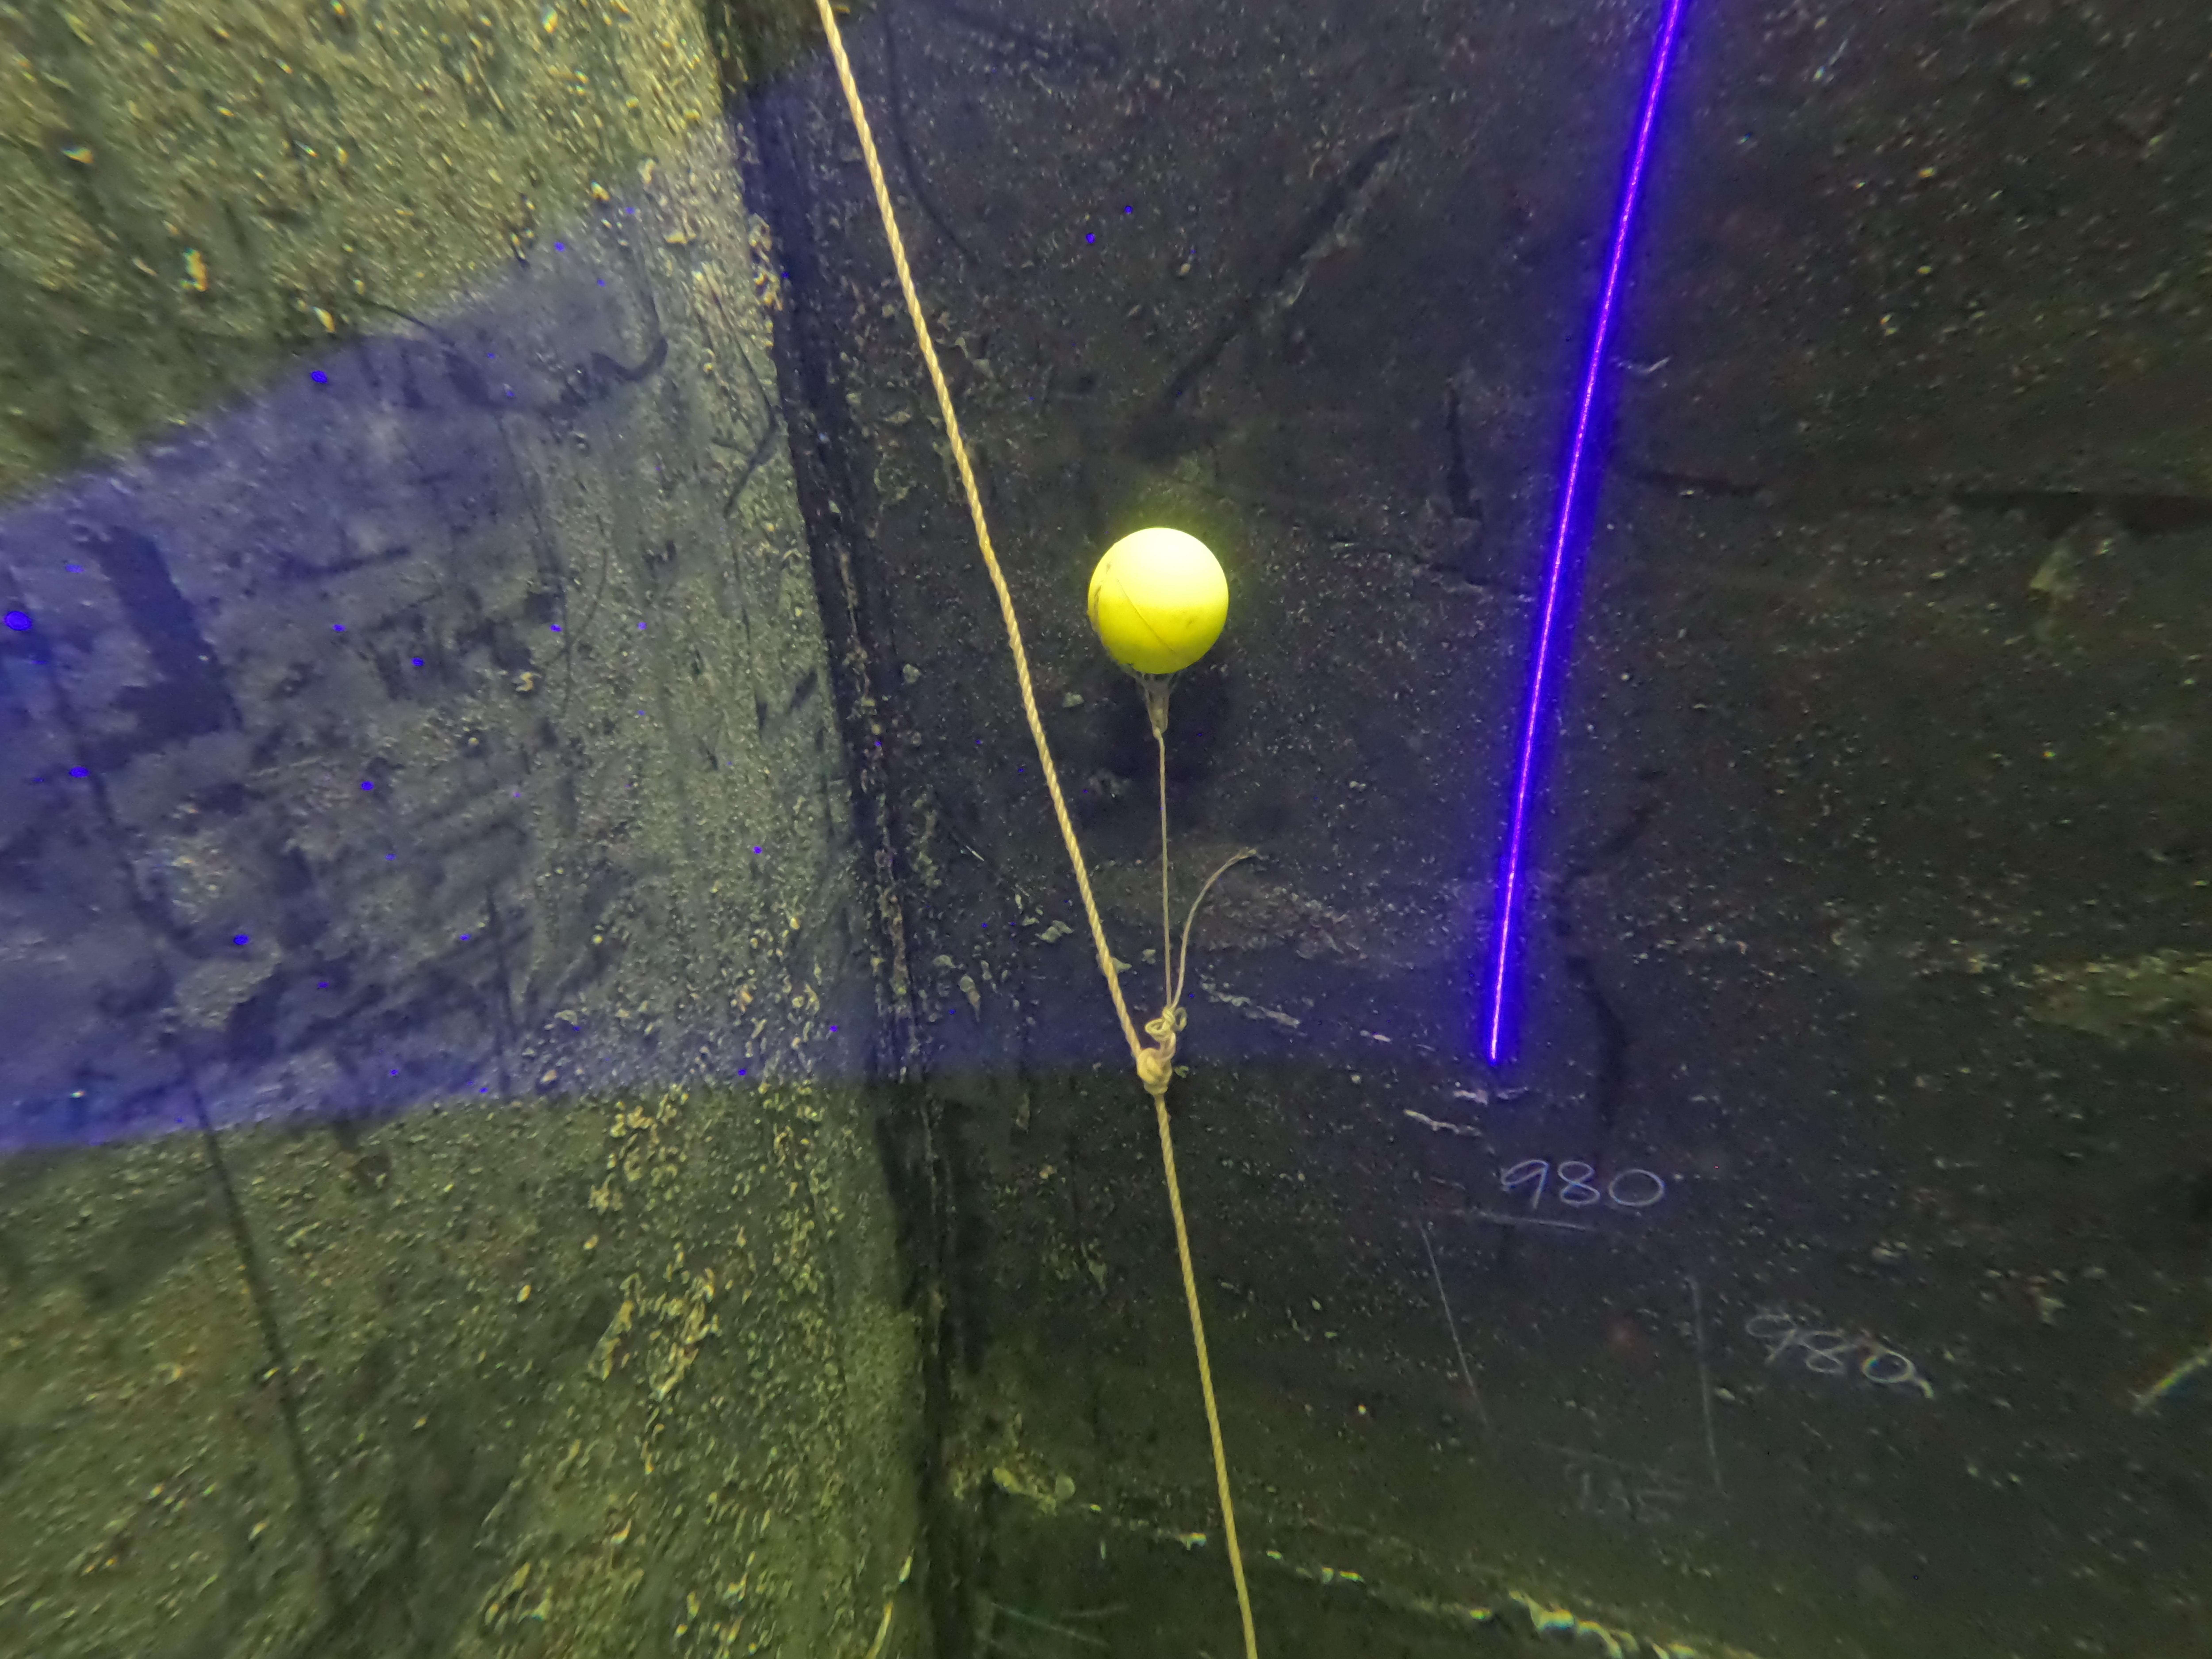

980

980

Supplement: Supplementary file 250 [file G0031043.pdf › 4/G0031043.pdf]

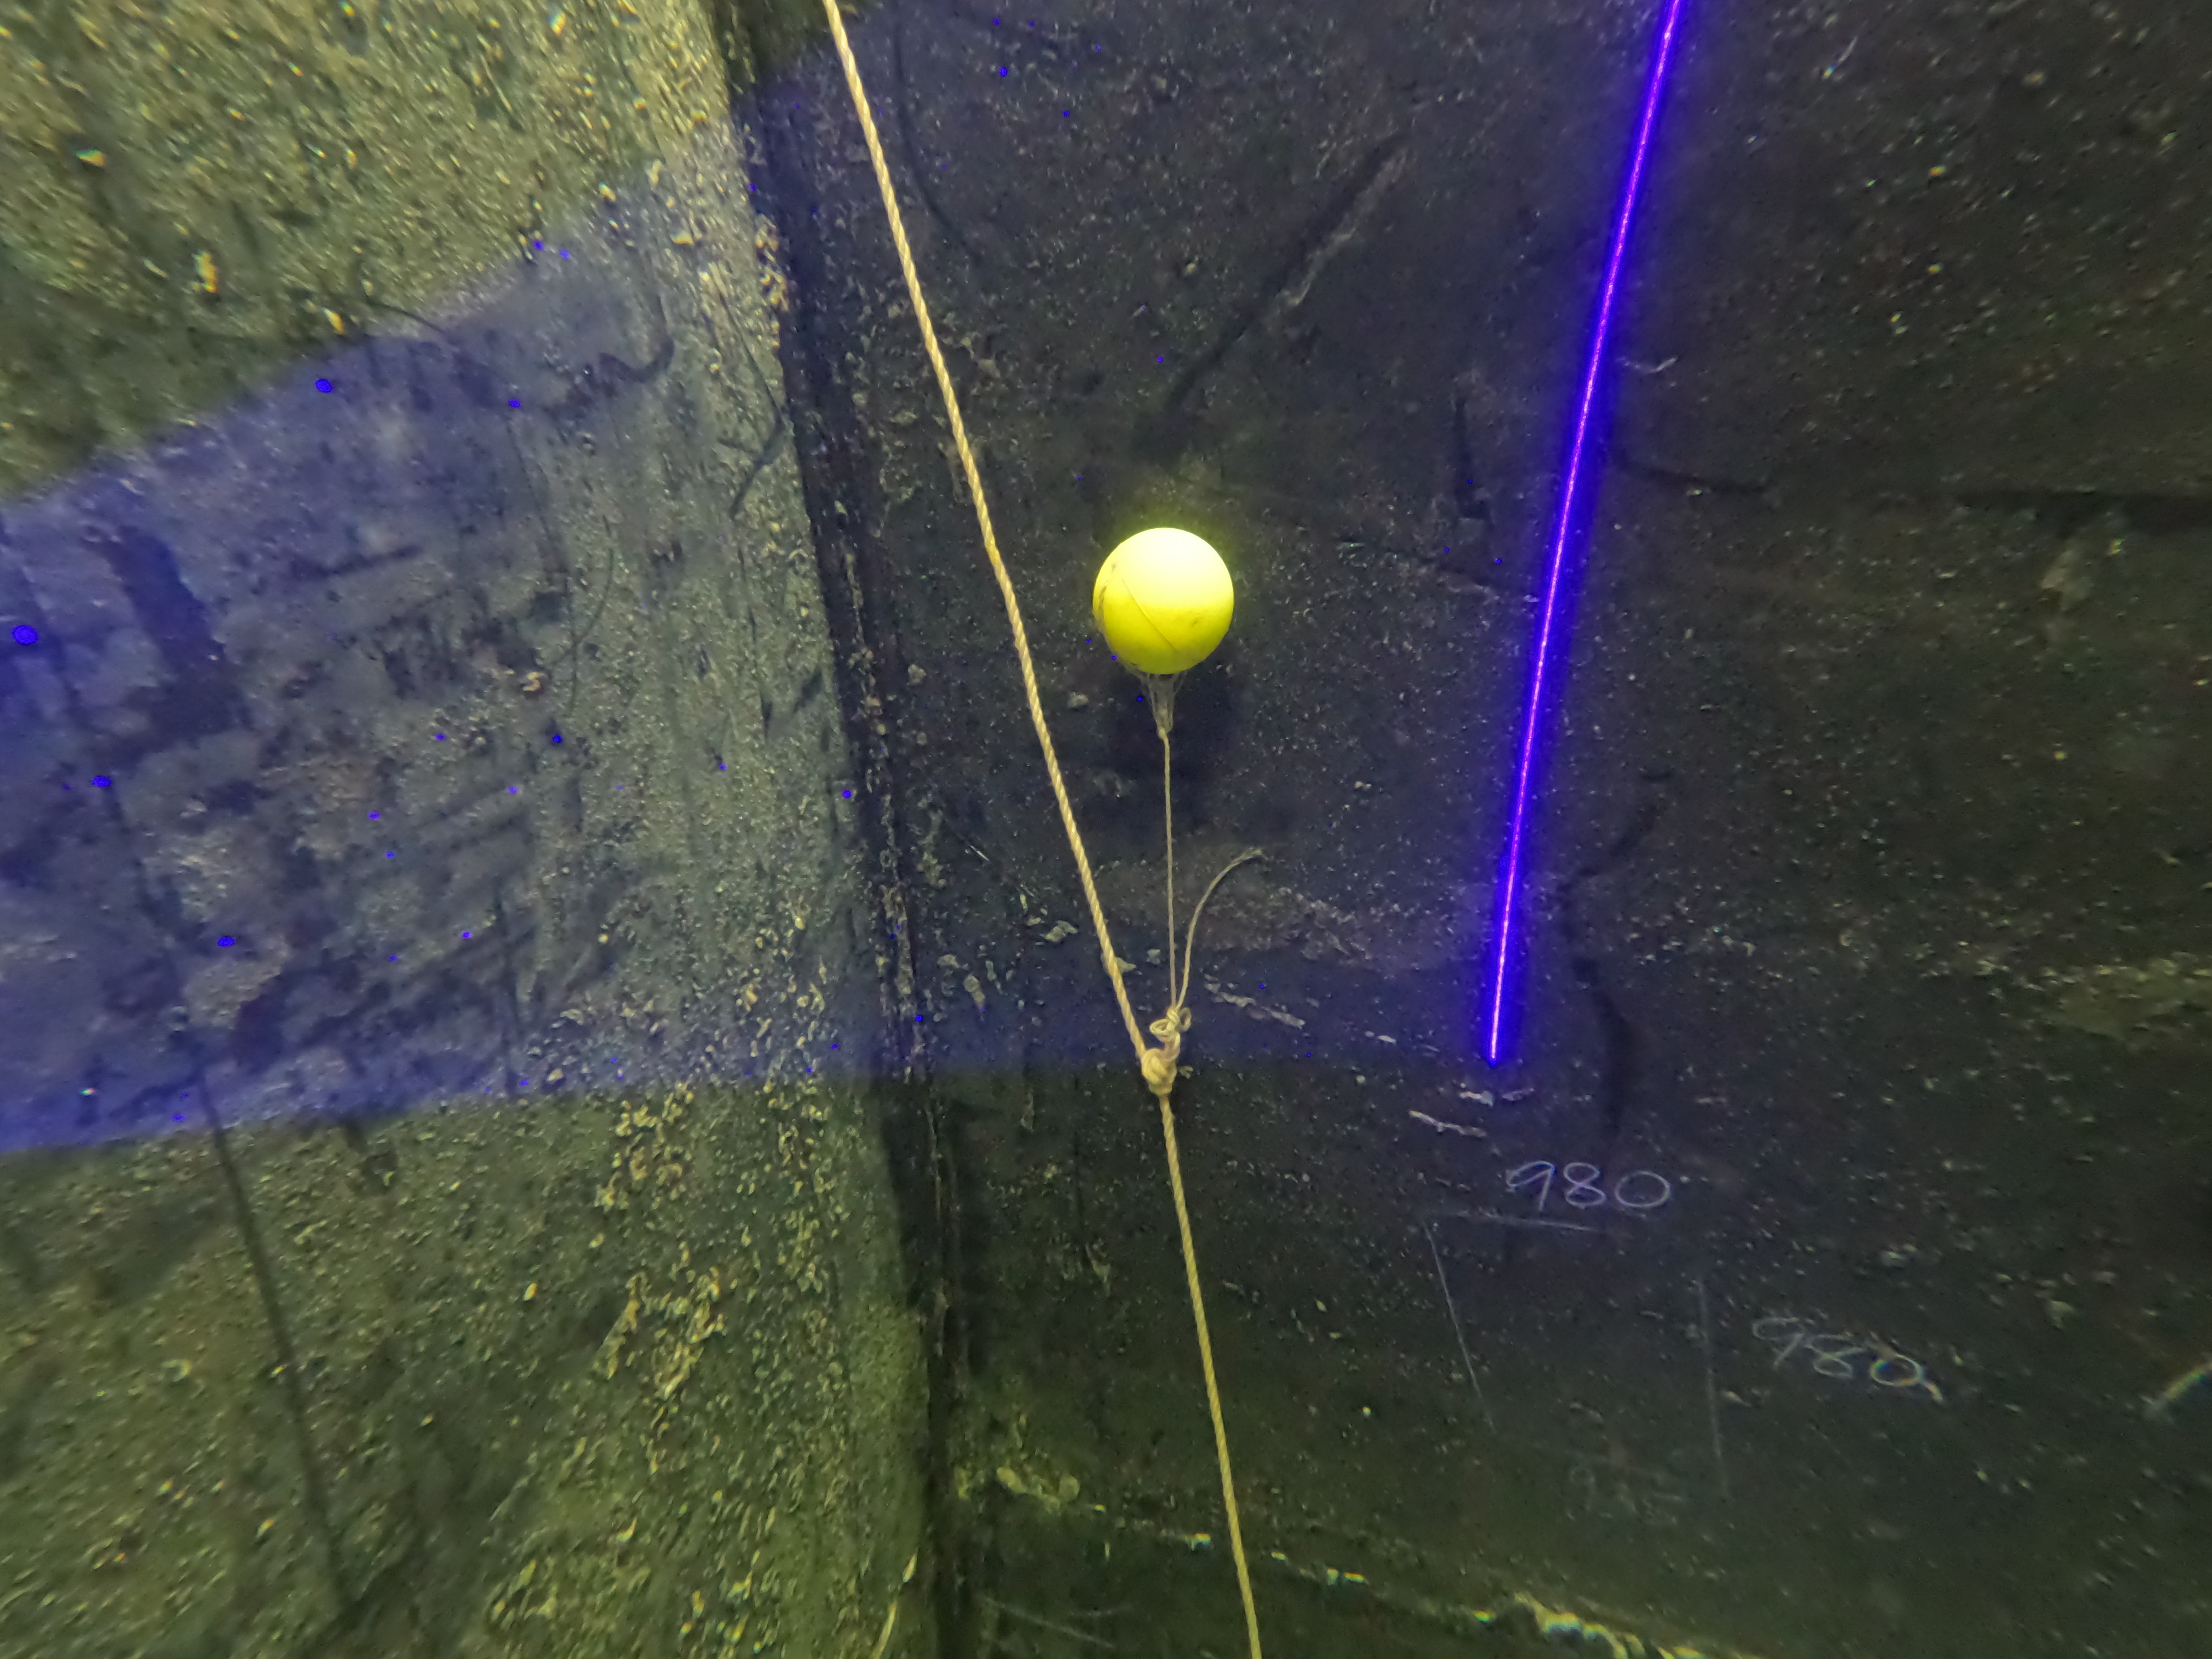

Supplement: Supplementary file 251 [file G0031044.pdf › 4/G0031044.pdf]

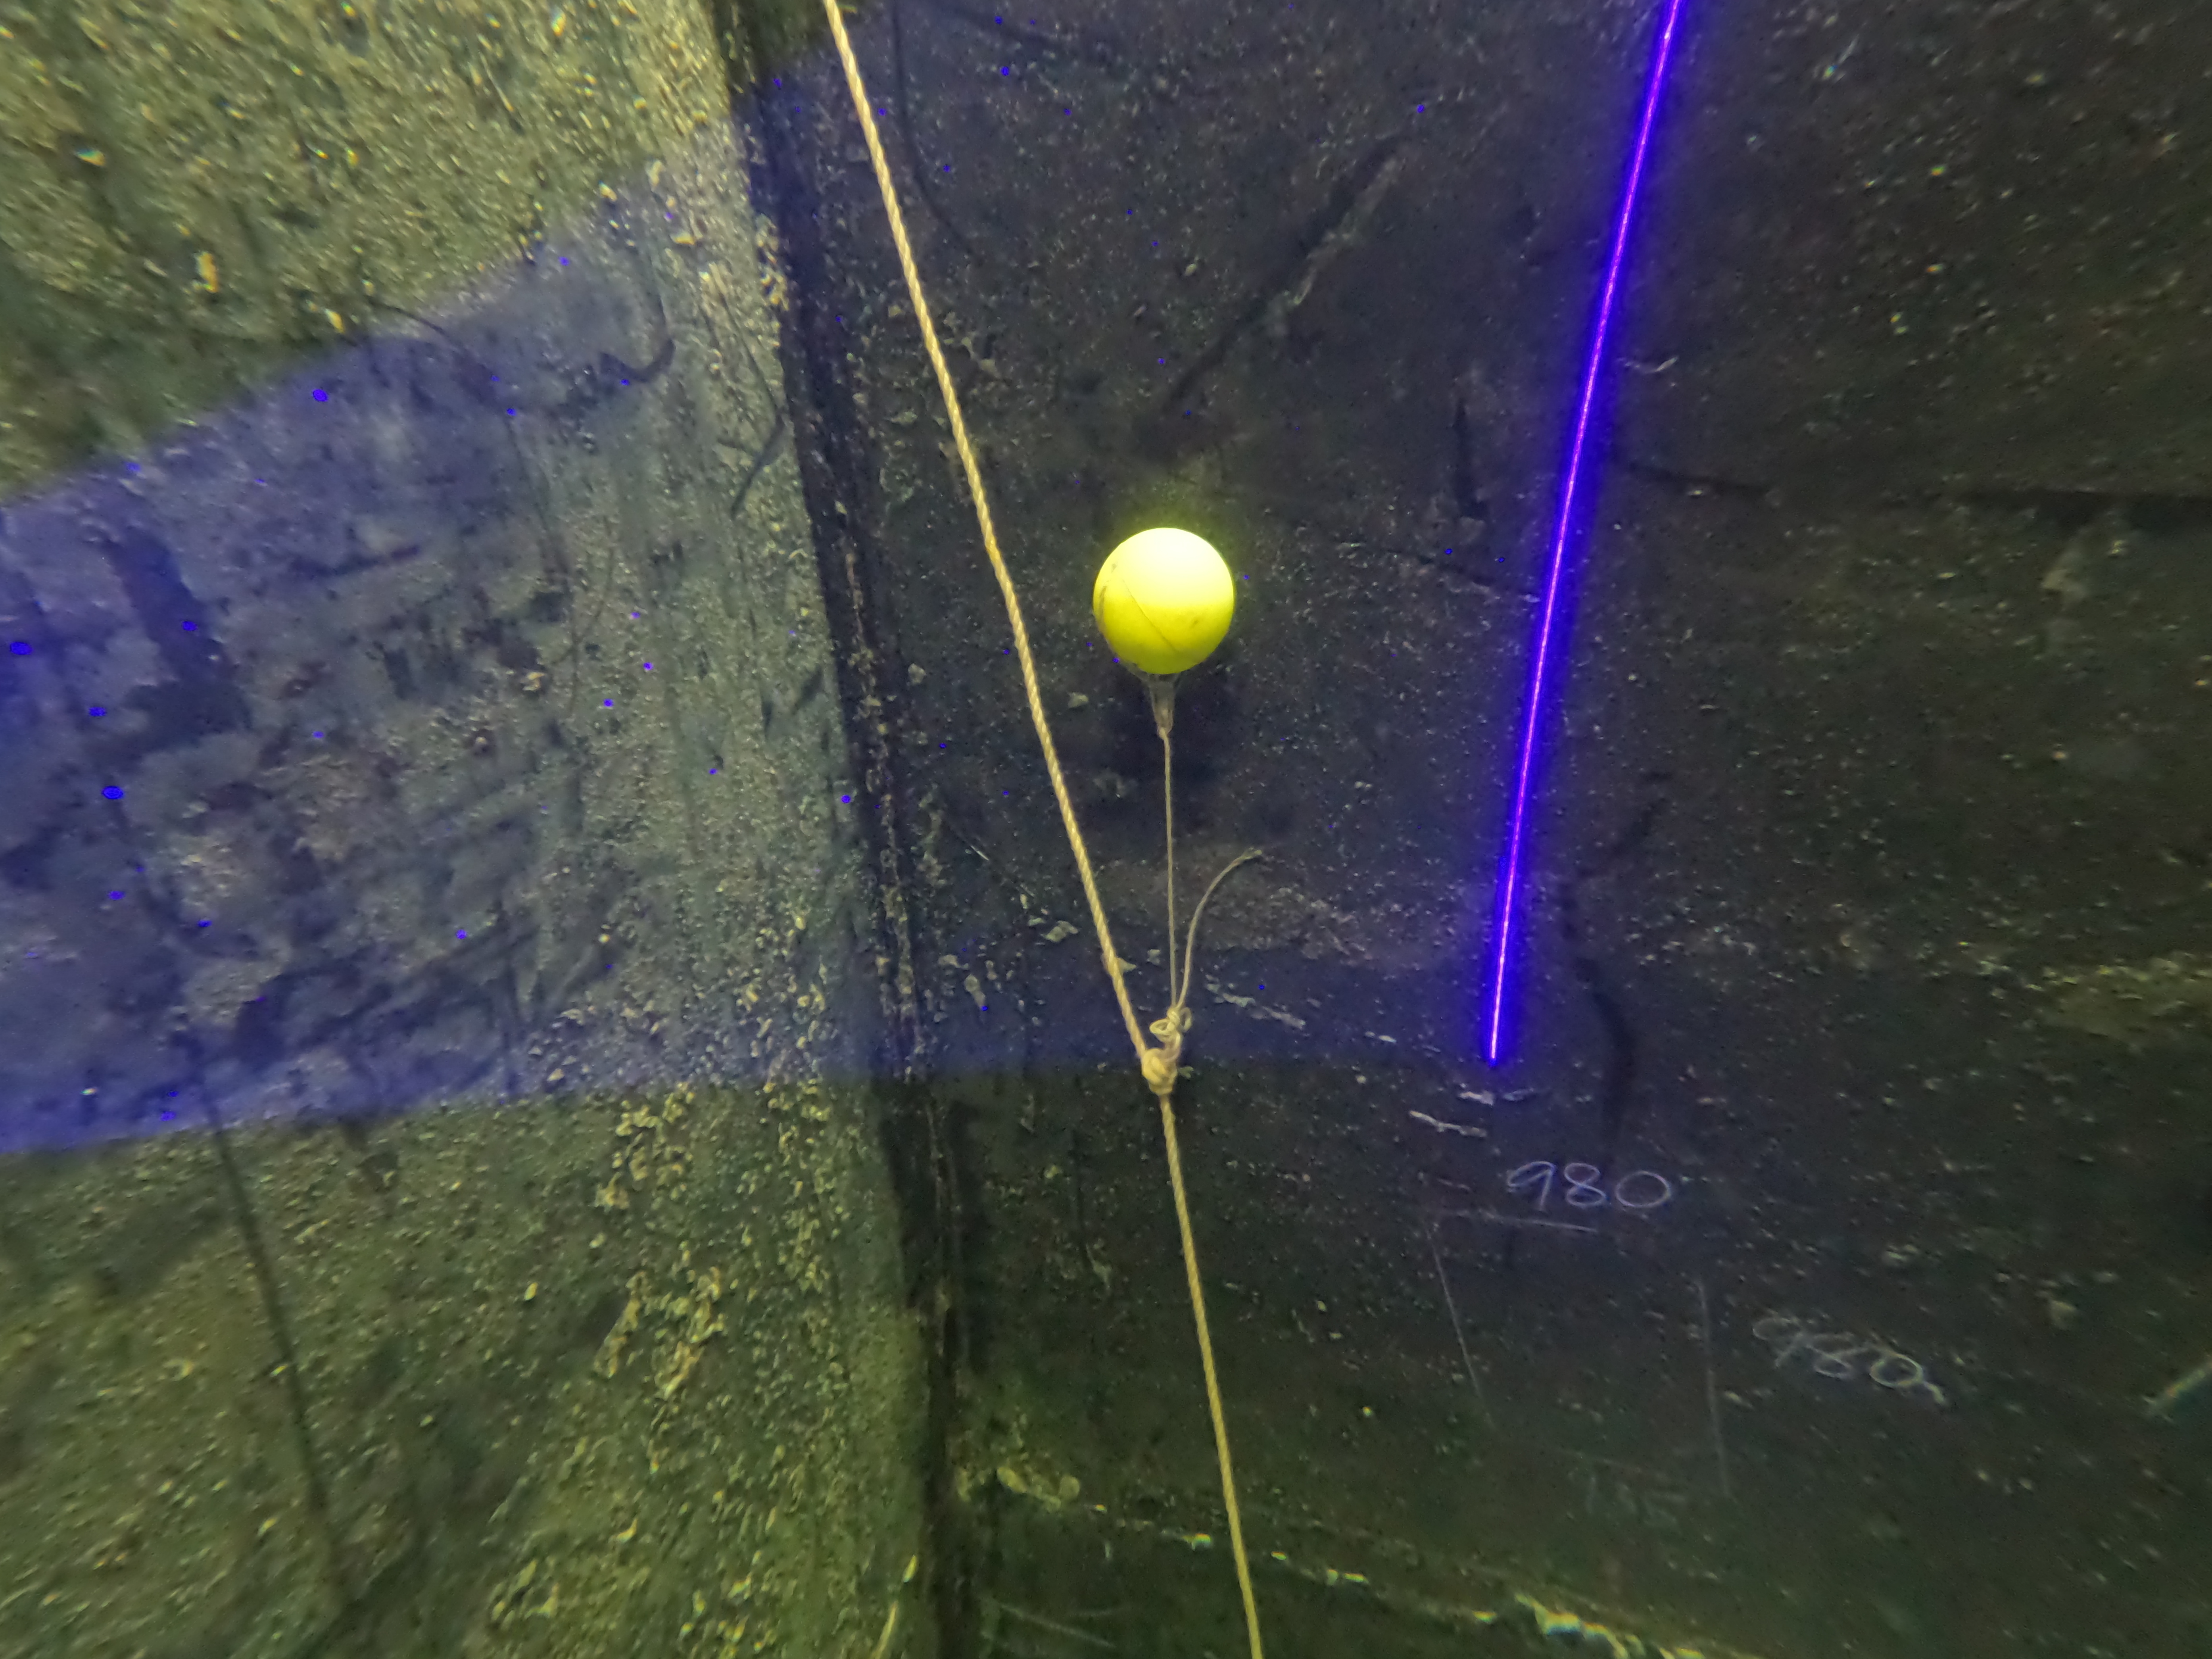

Supplement: Supplementary file 252 [file G0031045.pdf › 4/G0031045.pdf]

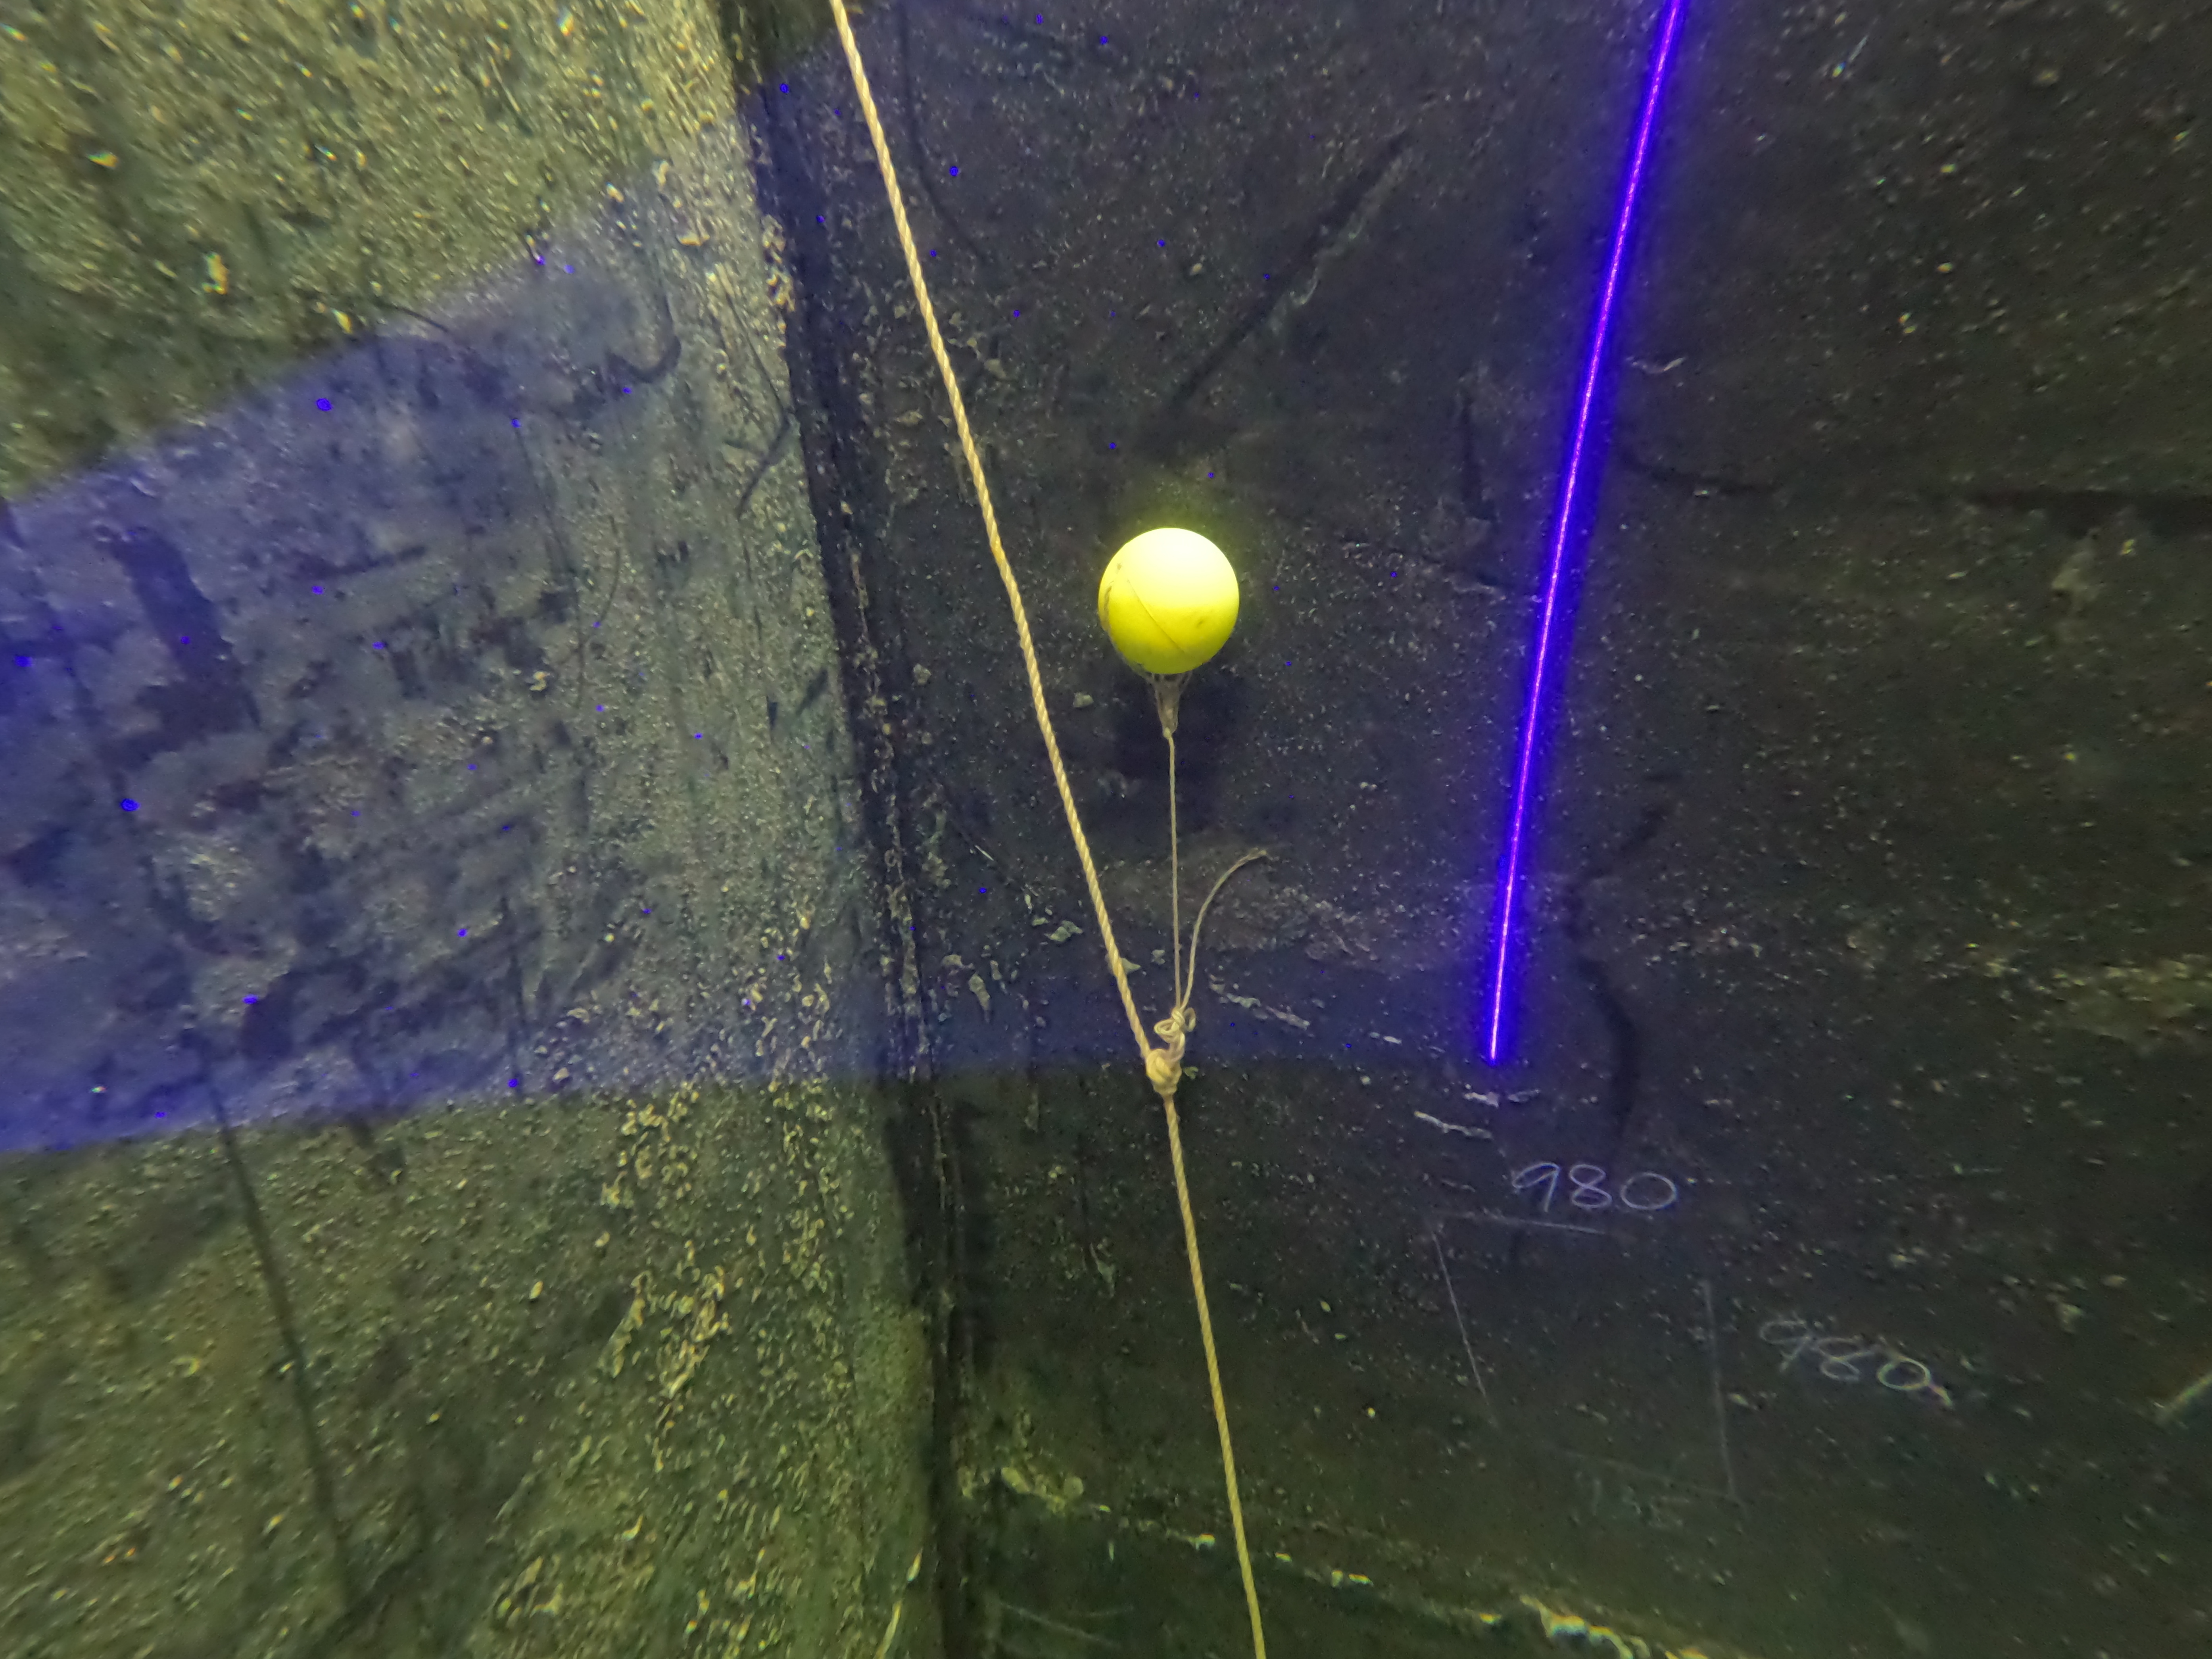

980

980

Supplement: Supplementary file 253 [file G0031046.pdf › 4/G0031046.pdf]

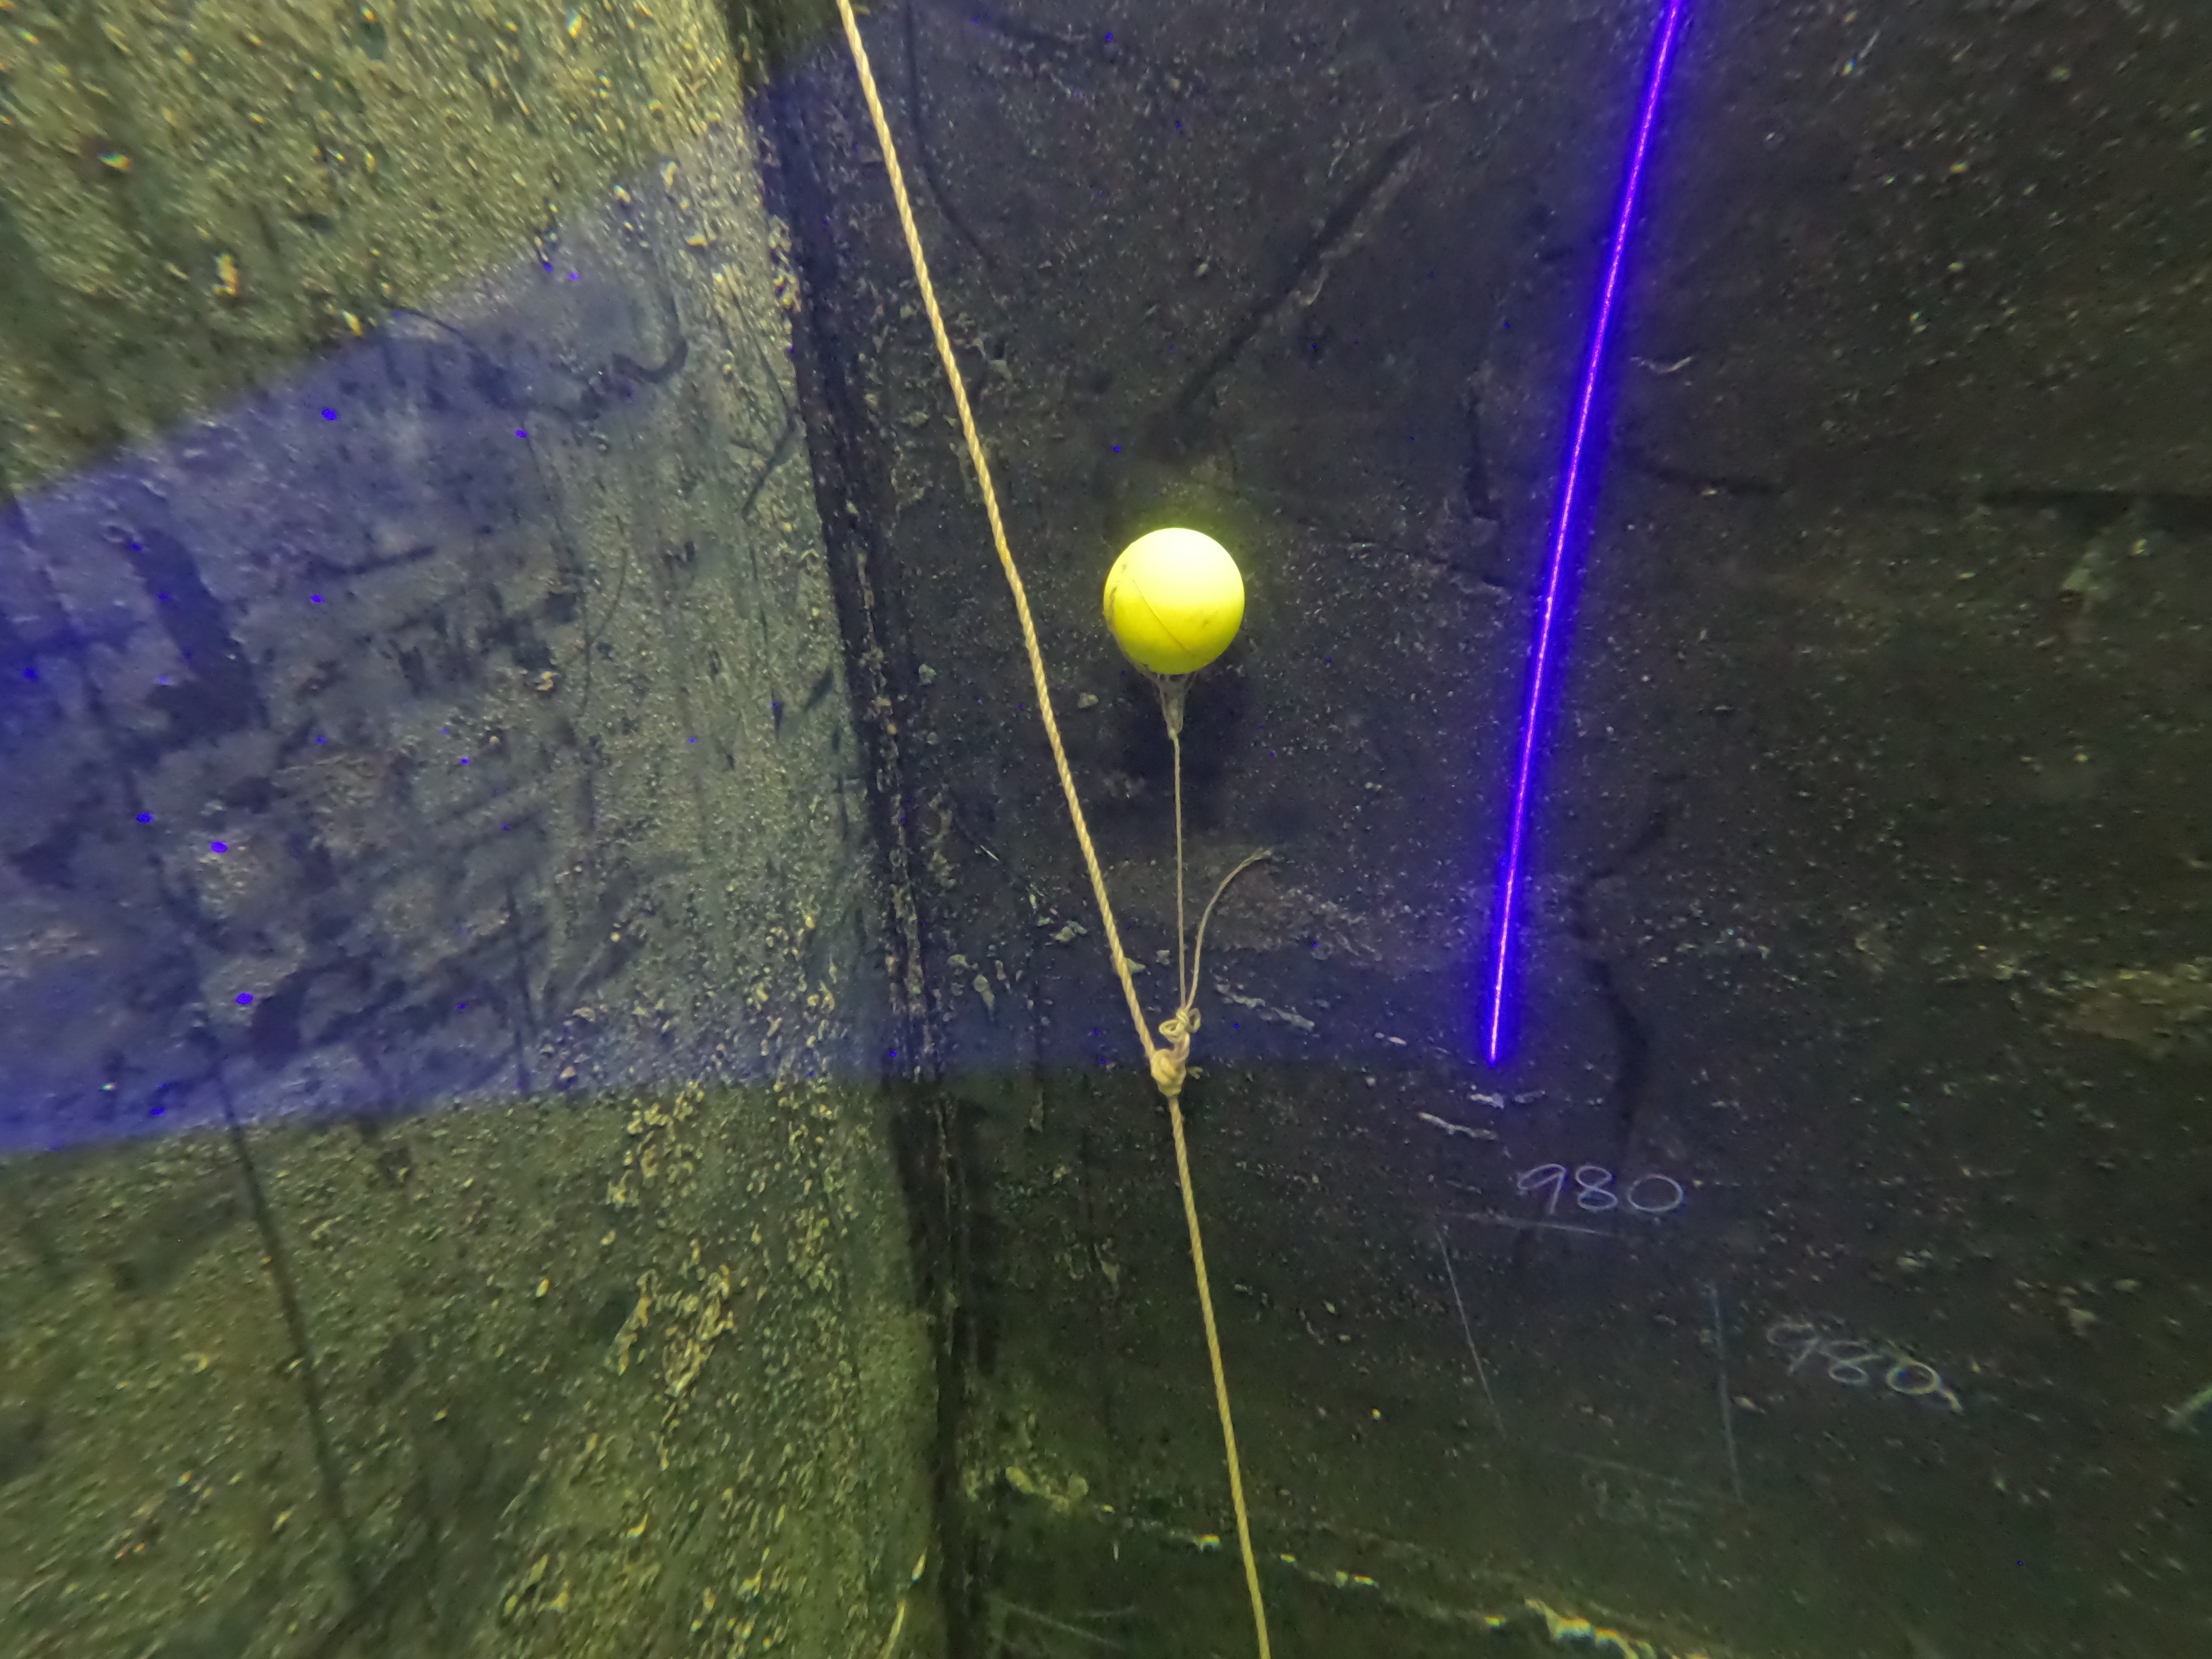

980

980

Supplement: Supplementary file 254 [file G0031047.pdf › 4/G0031047.pdf]

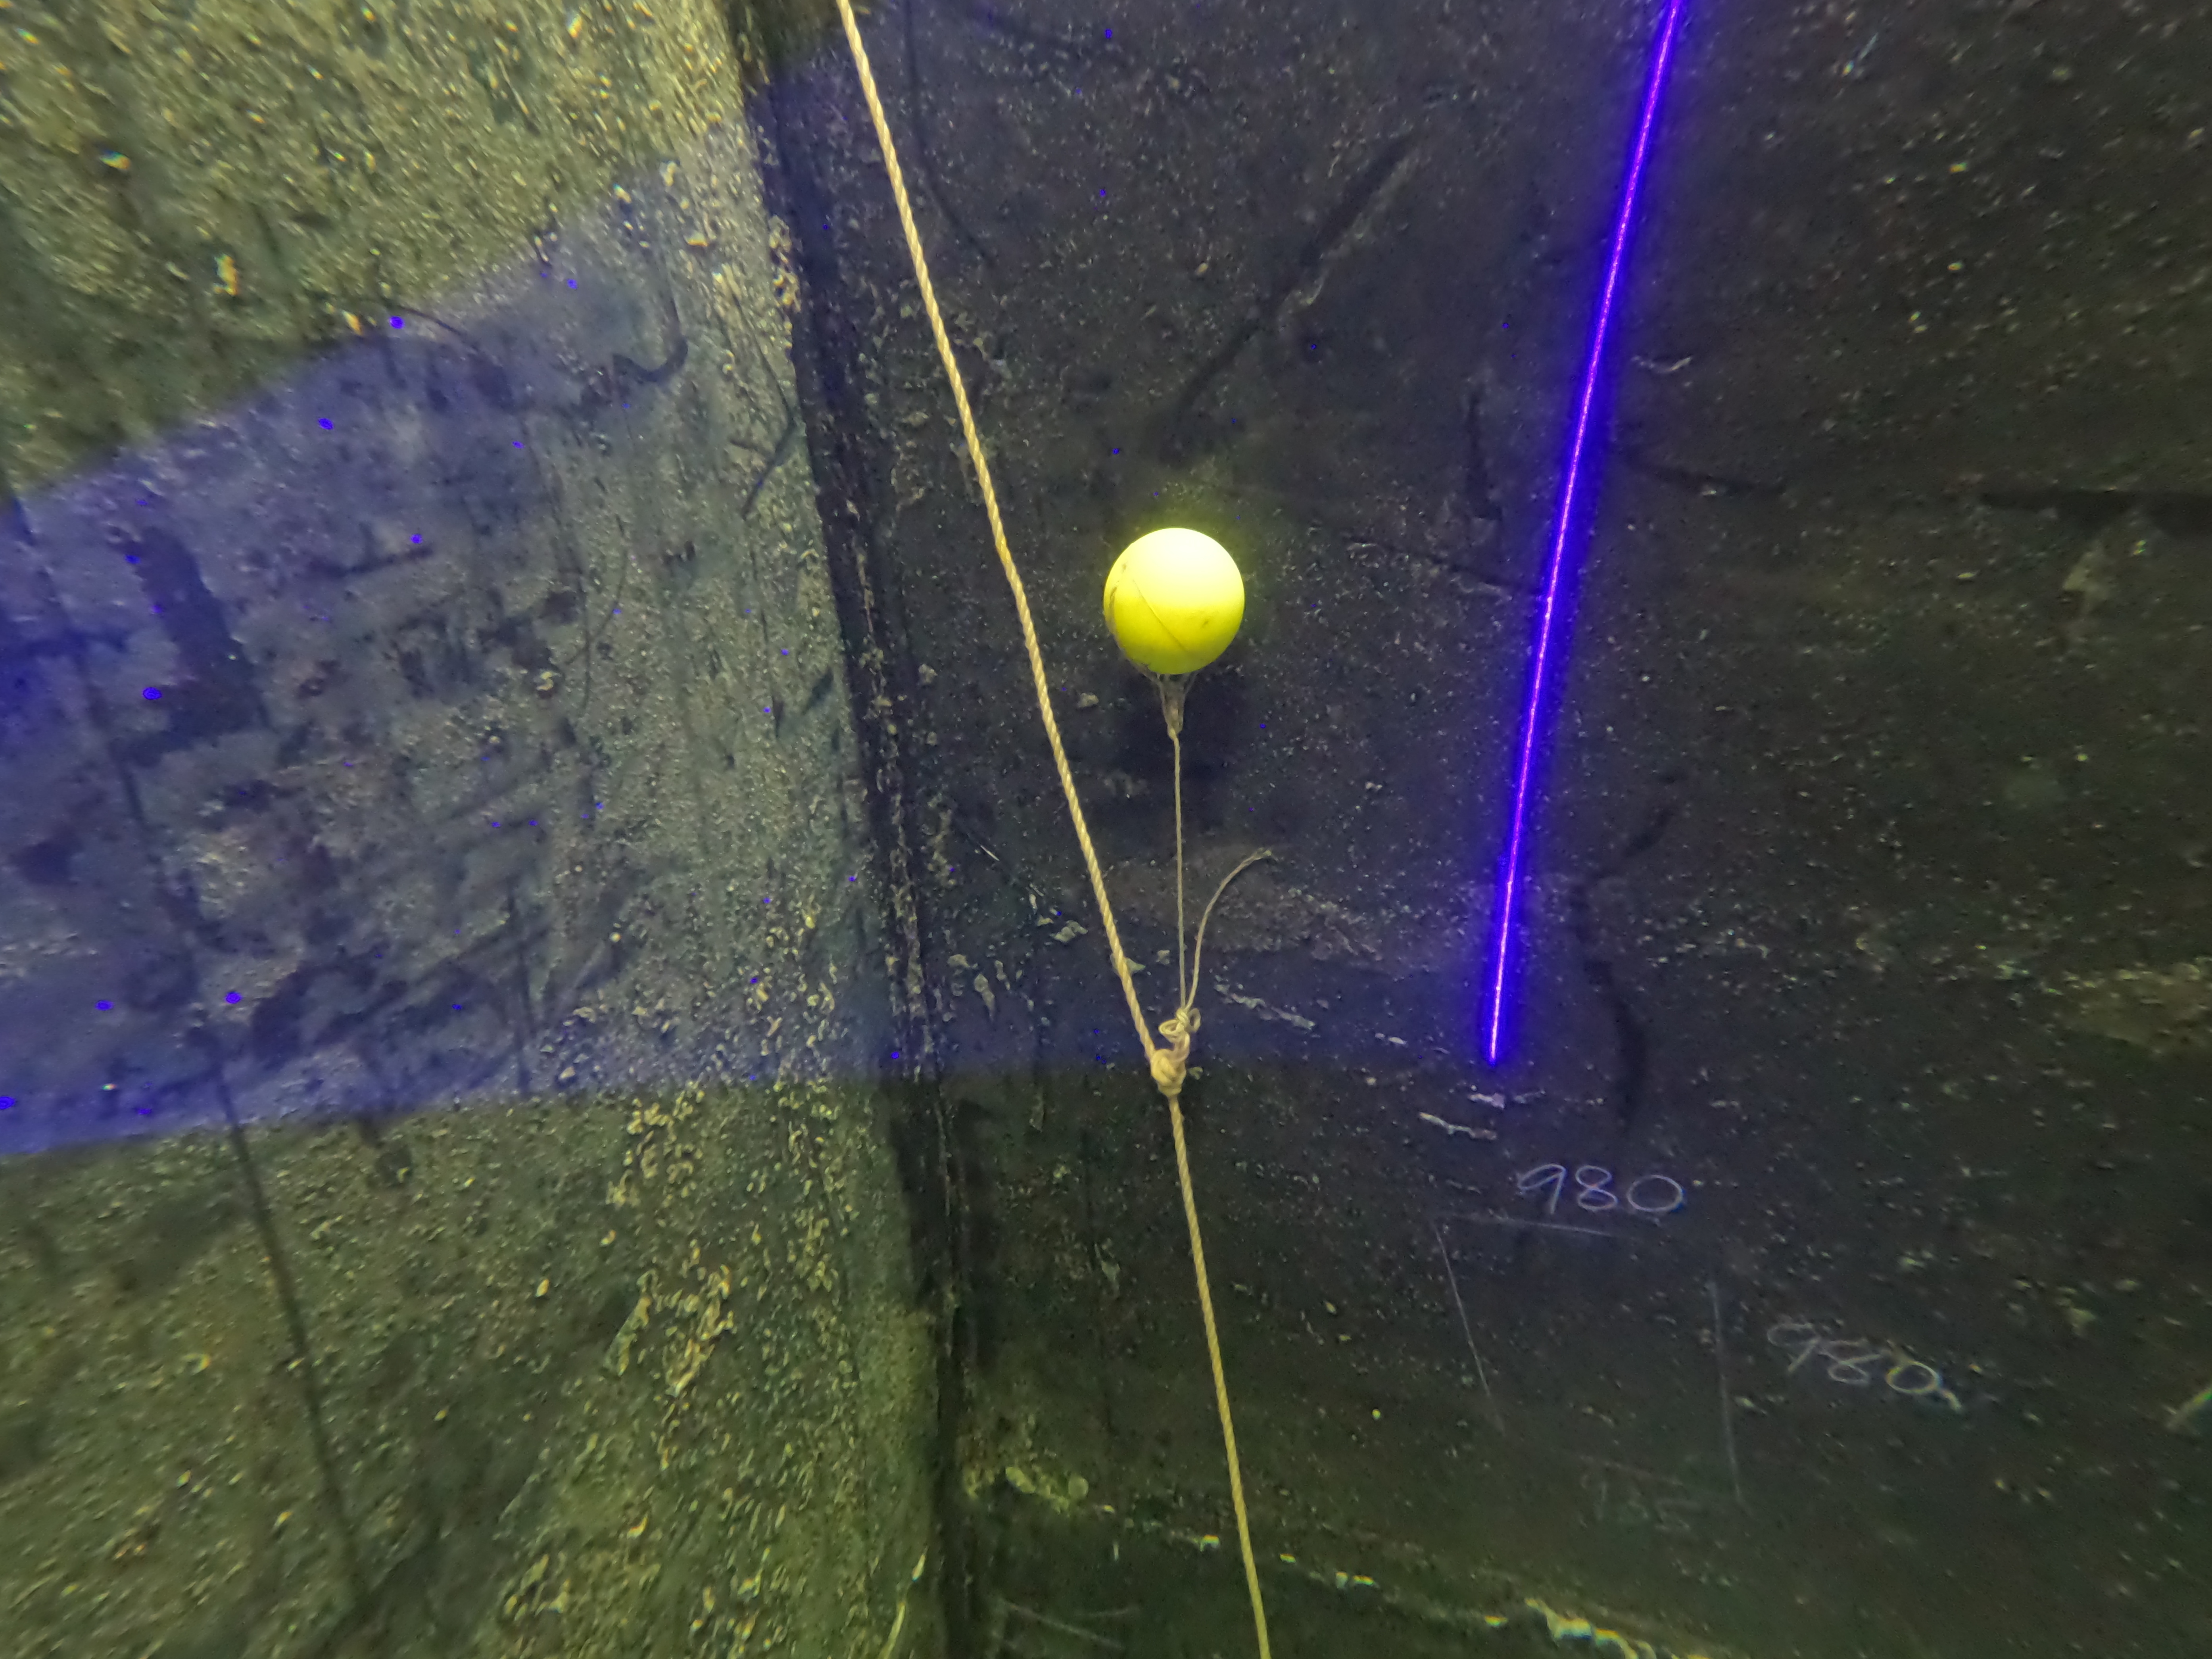

980

980

Supplement: Supplementary file 255 [file G0031048.pdf › 4/G0031048.pdf]

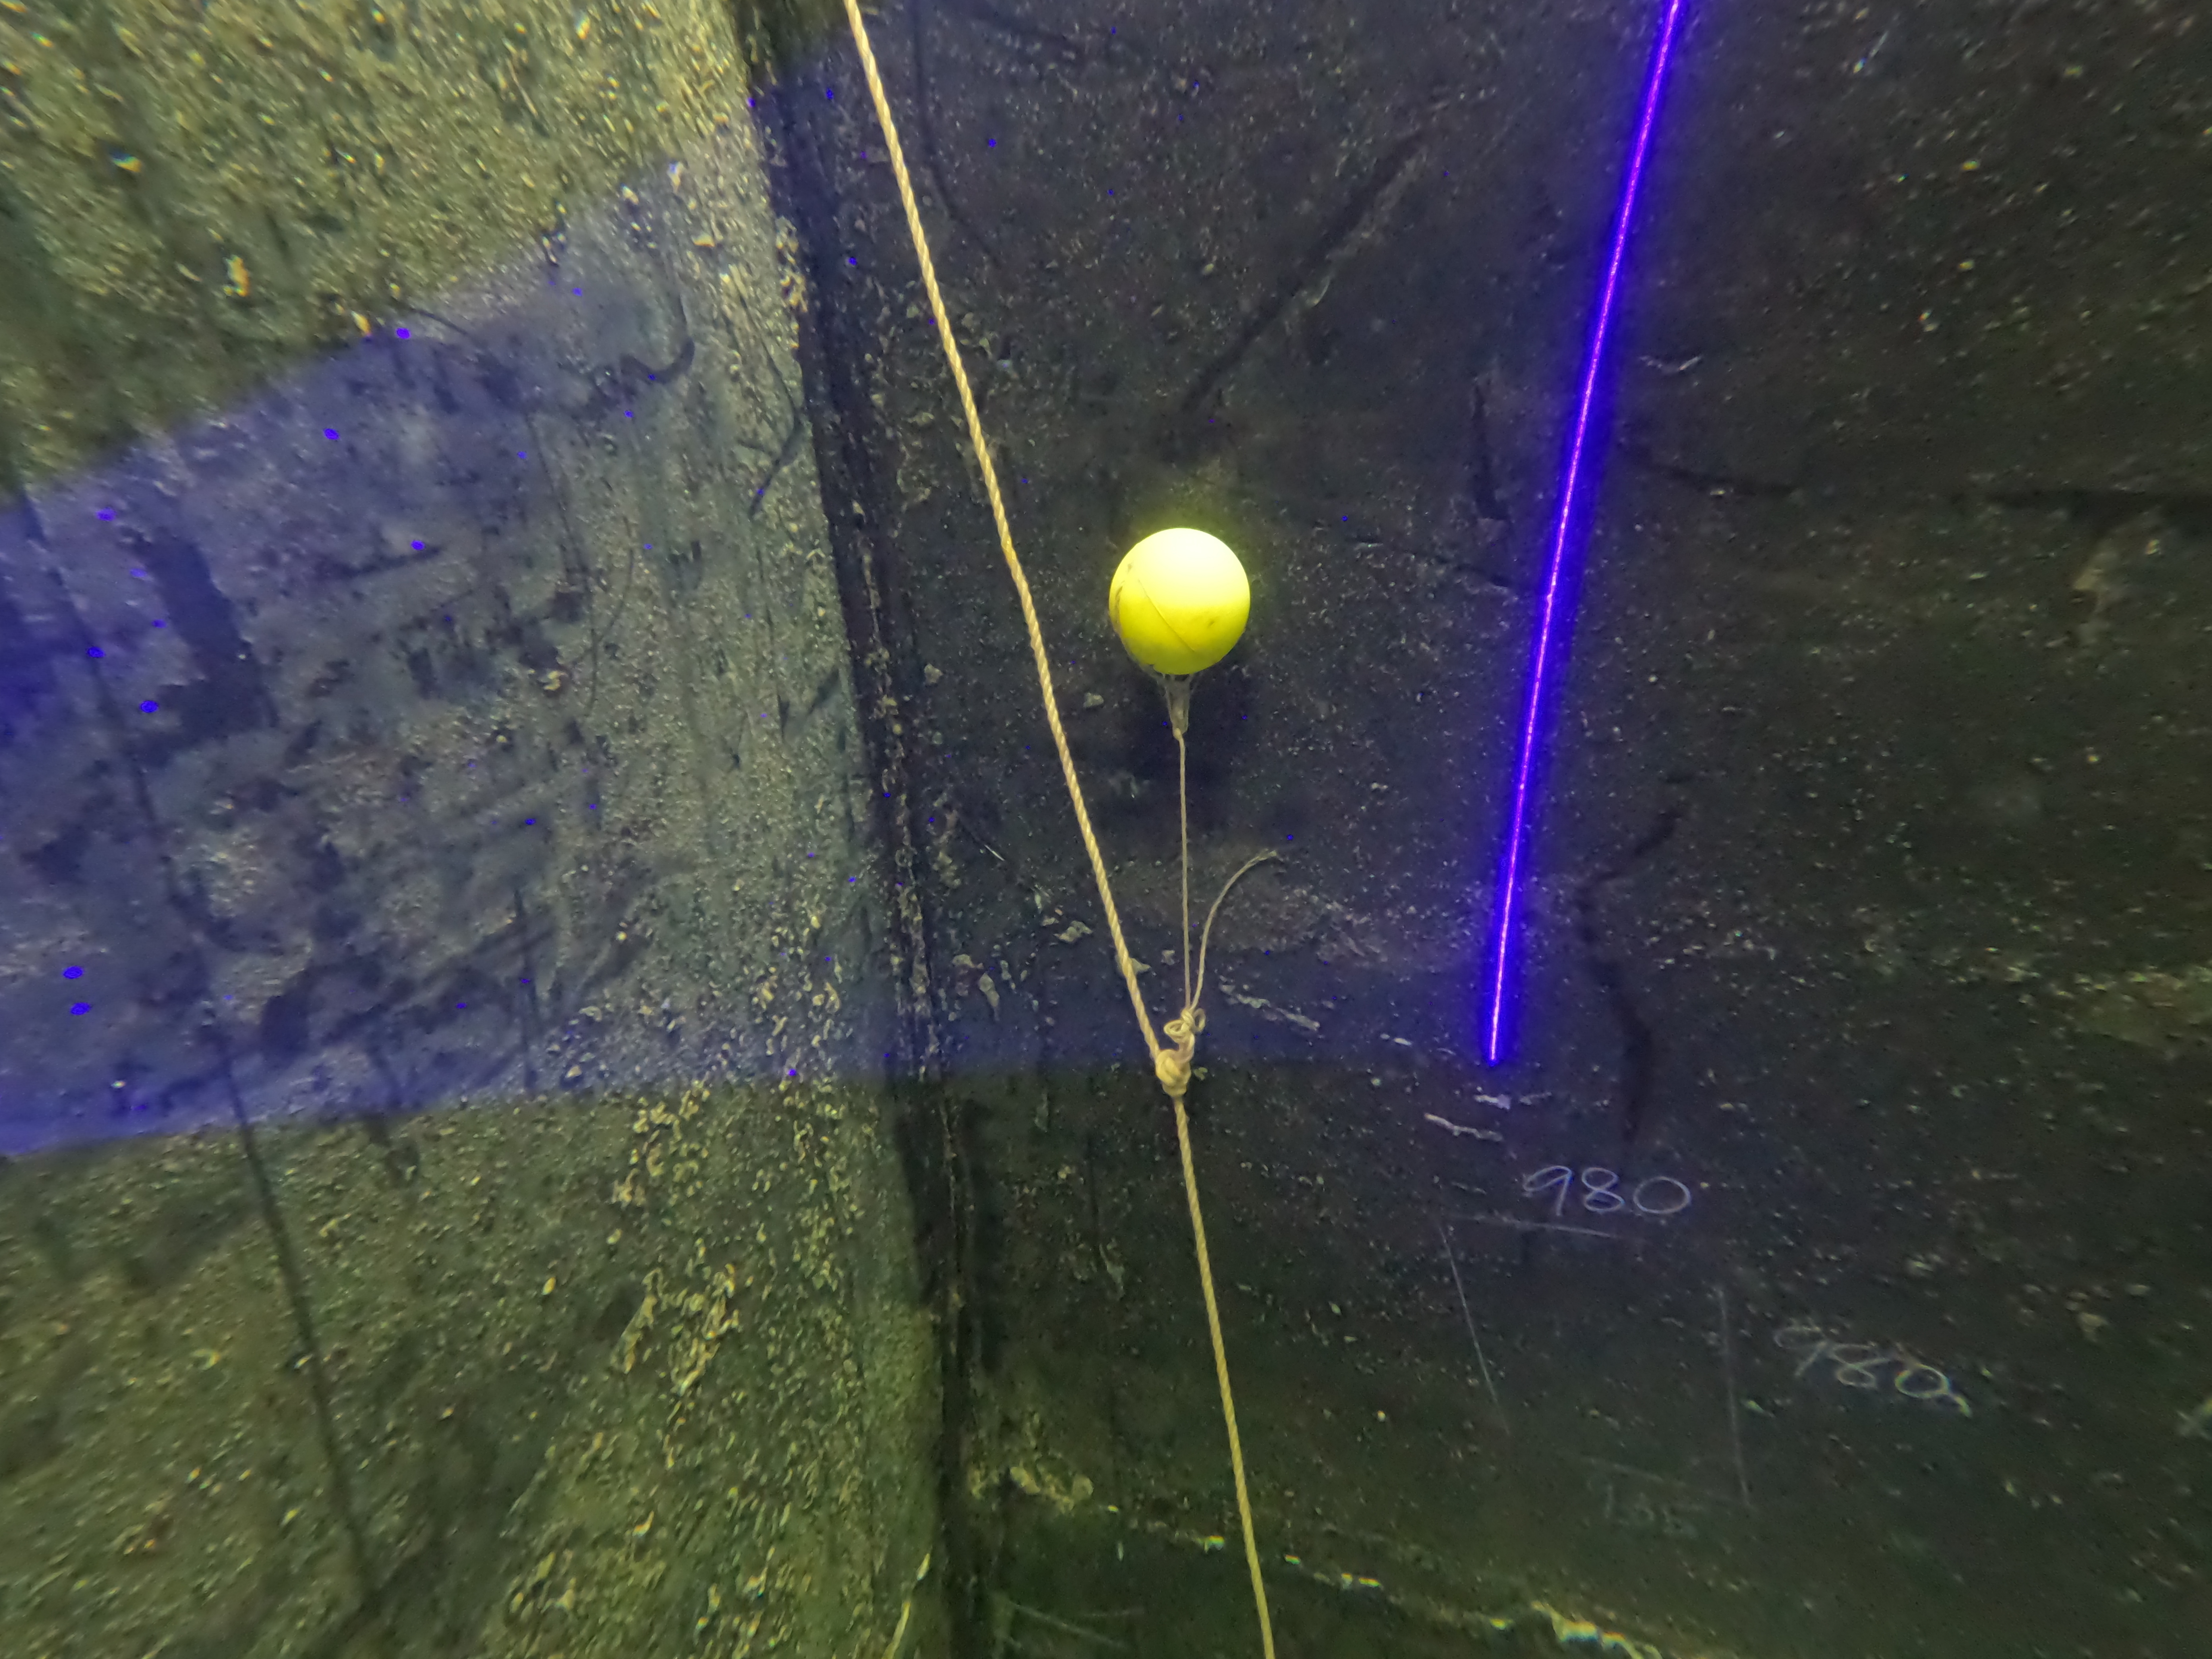

Supplement: Supplementary file 256 [file G0031049.pdf › 4/G0031049.pdf]

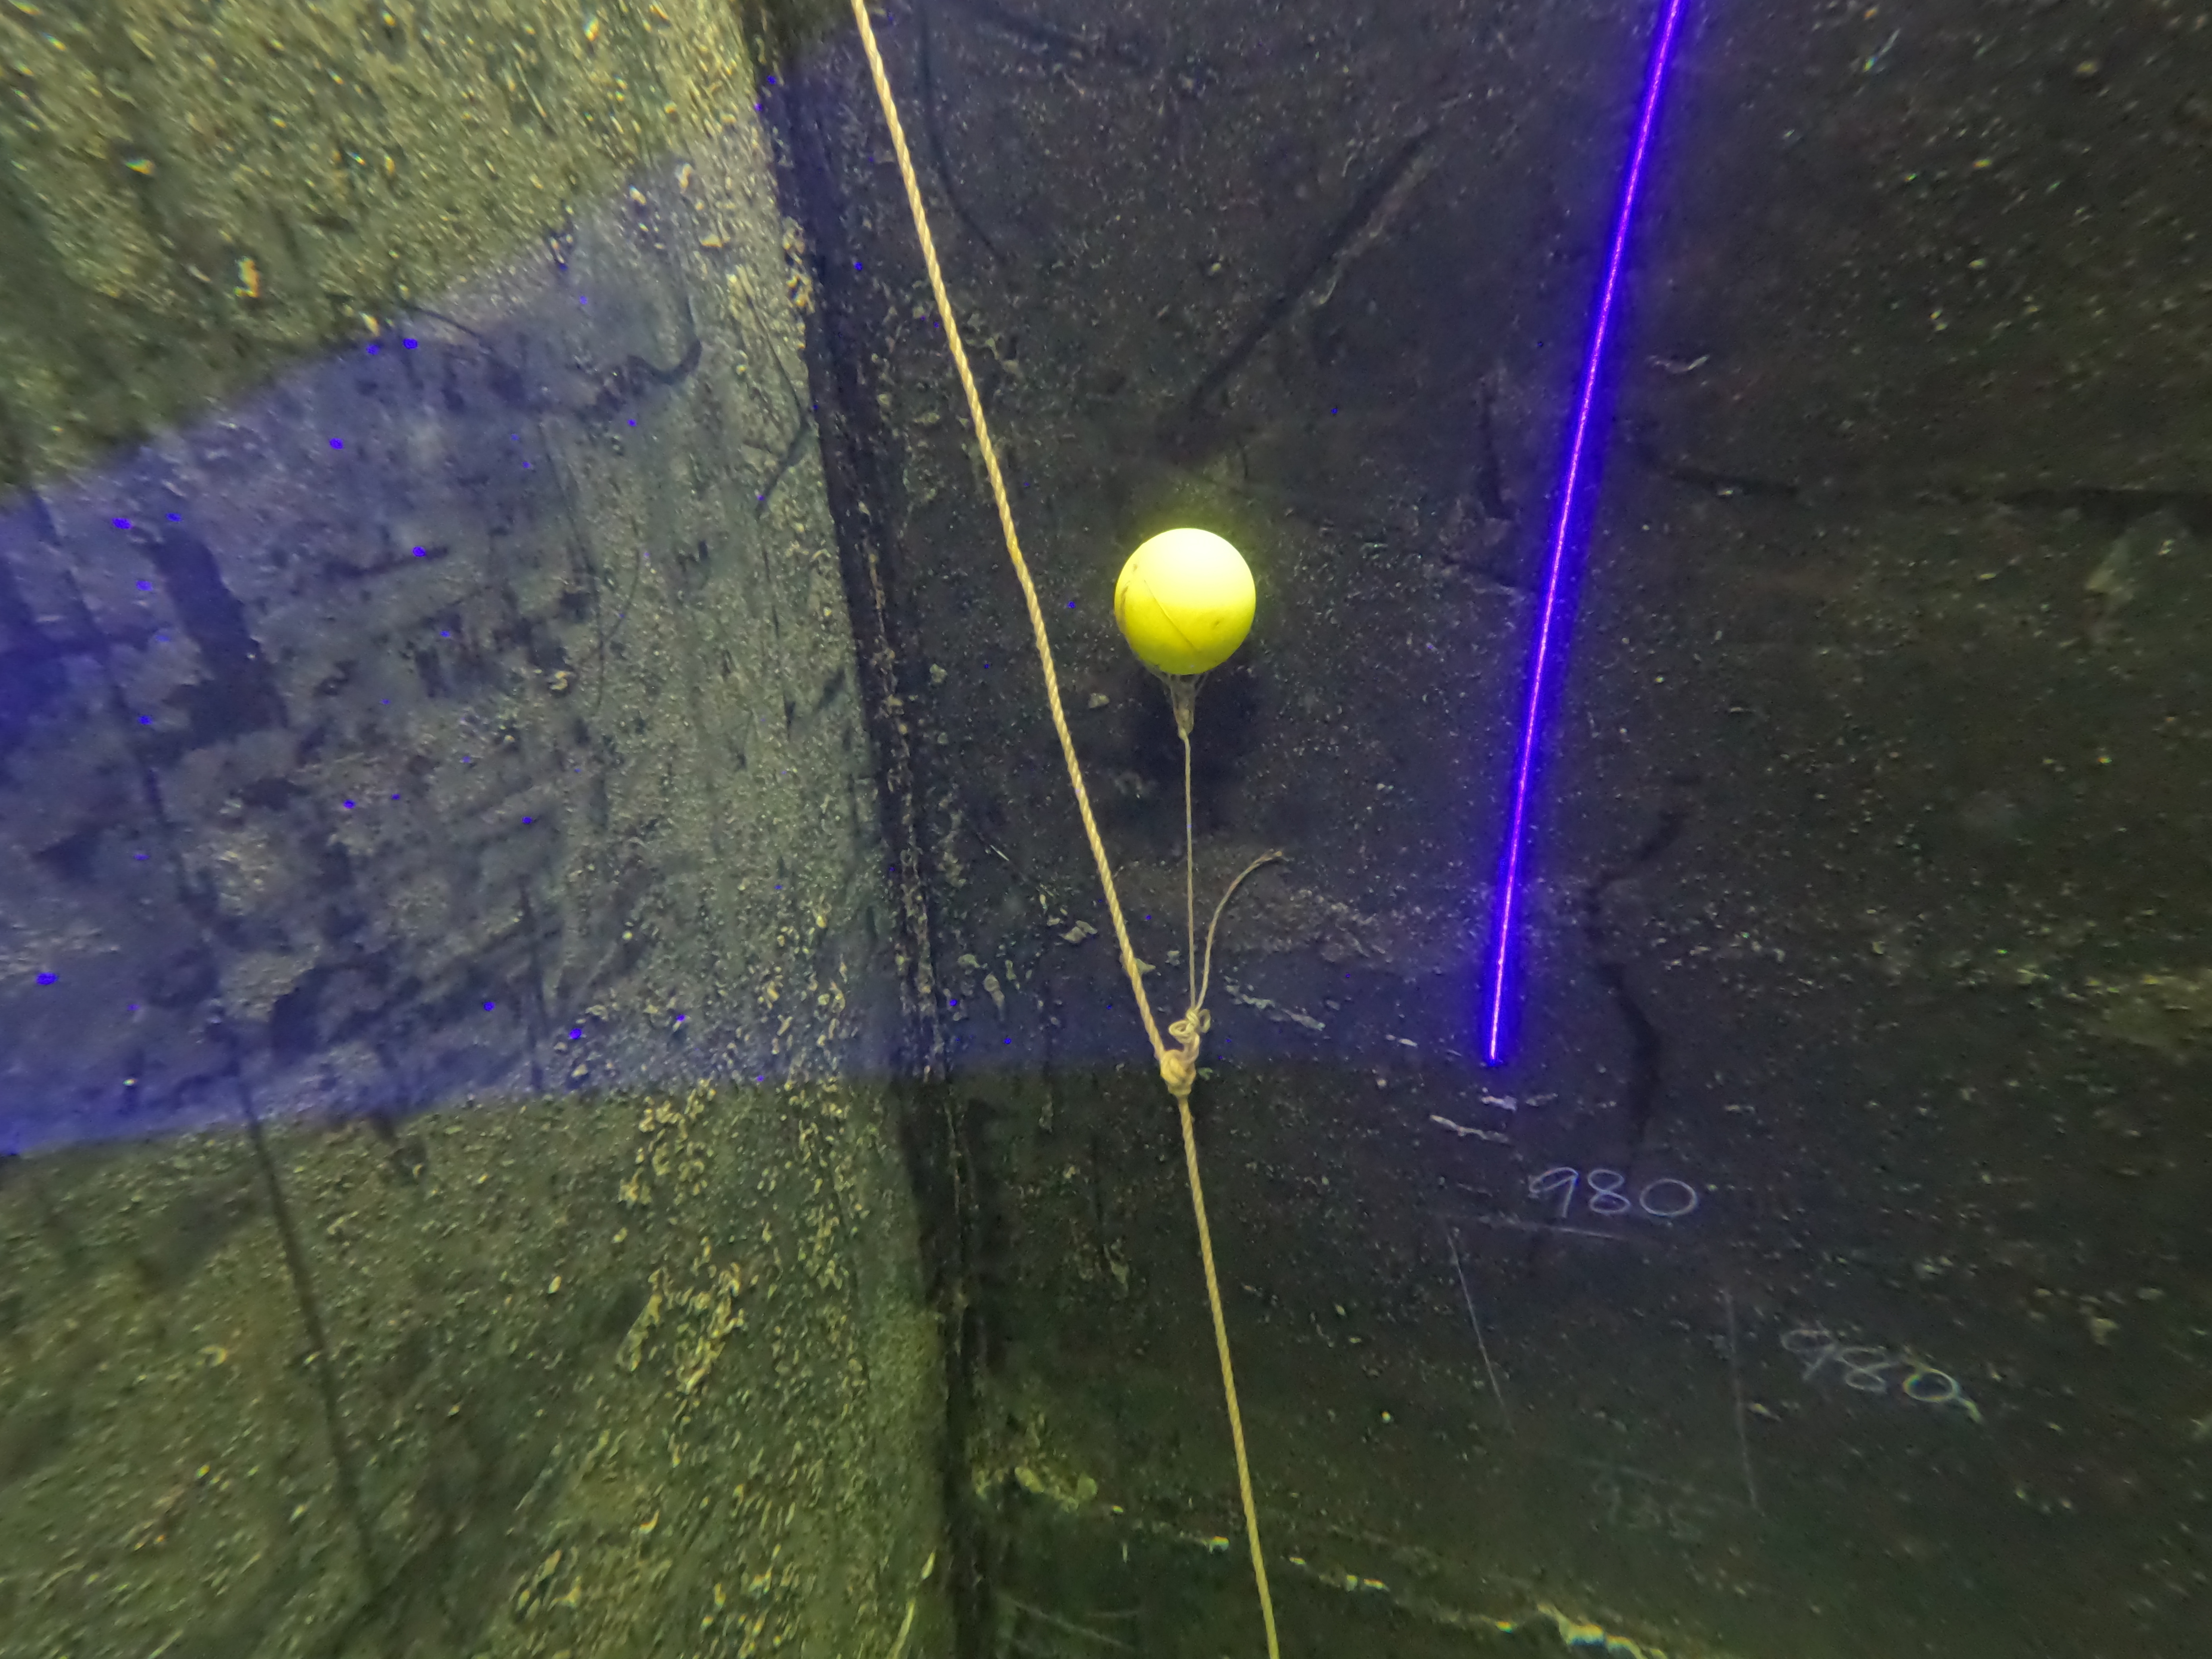

Supplement: Supplementary file 257 [file G0031050.pdf › 4/G0031050.pdf]

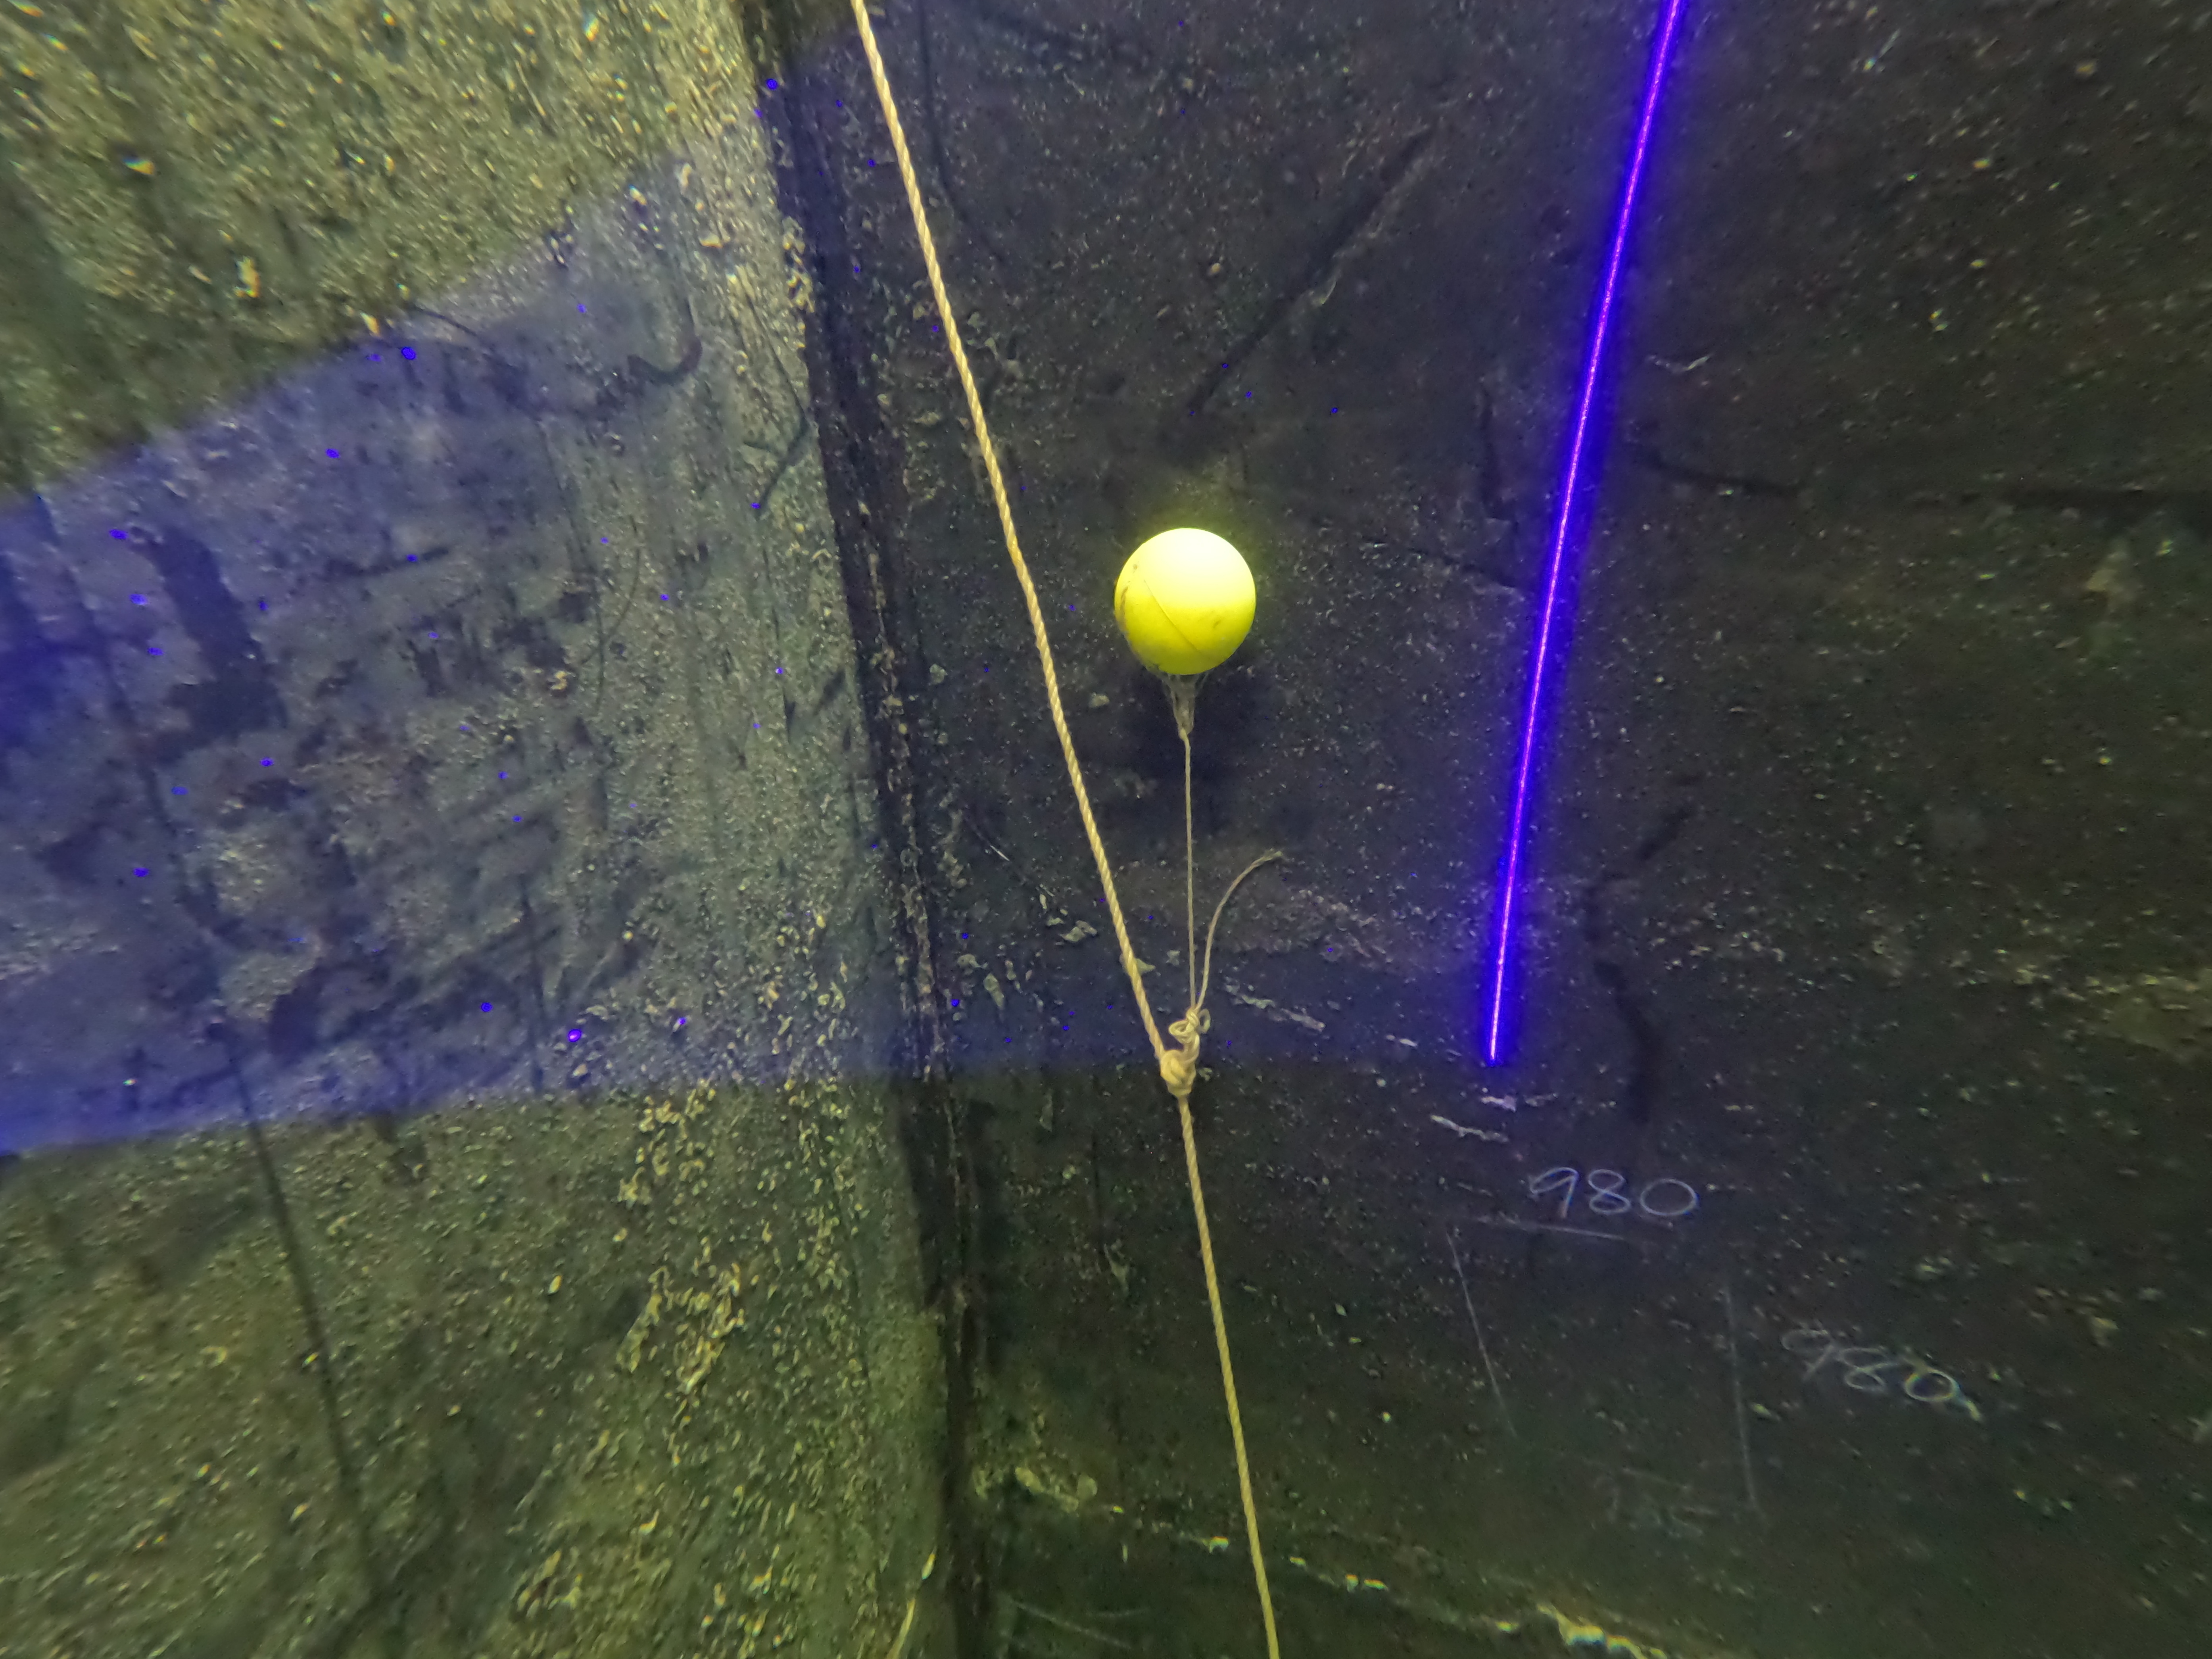

980

980

Supplement: Supplementary file 258 [file G0031051.pdf › 4/G0031051.pdf]

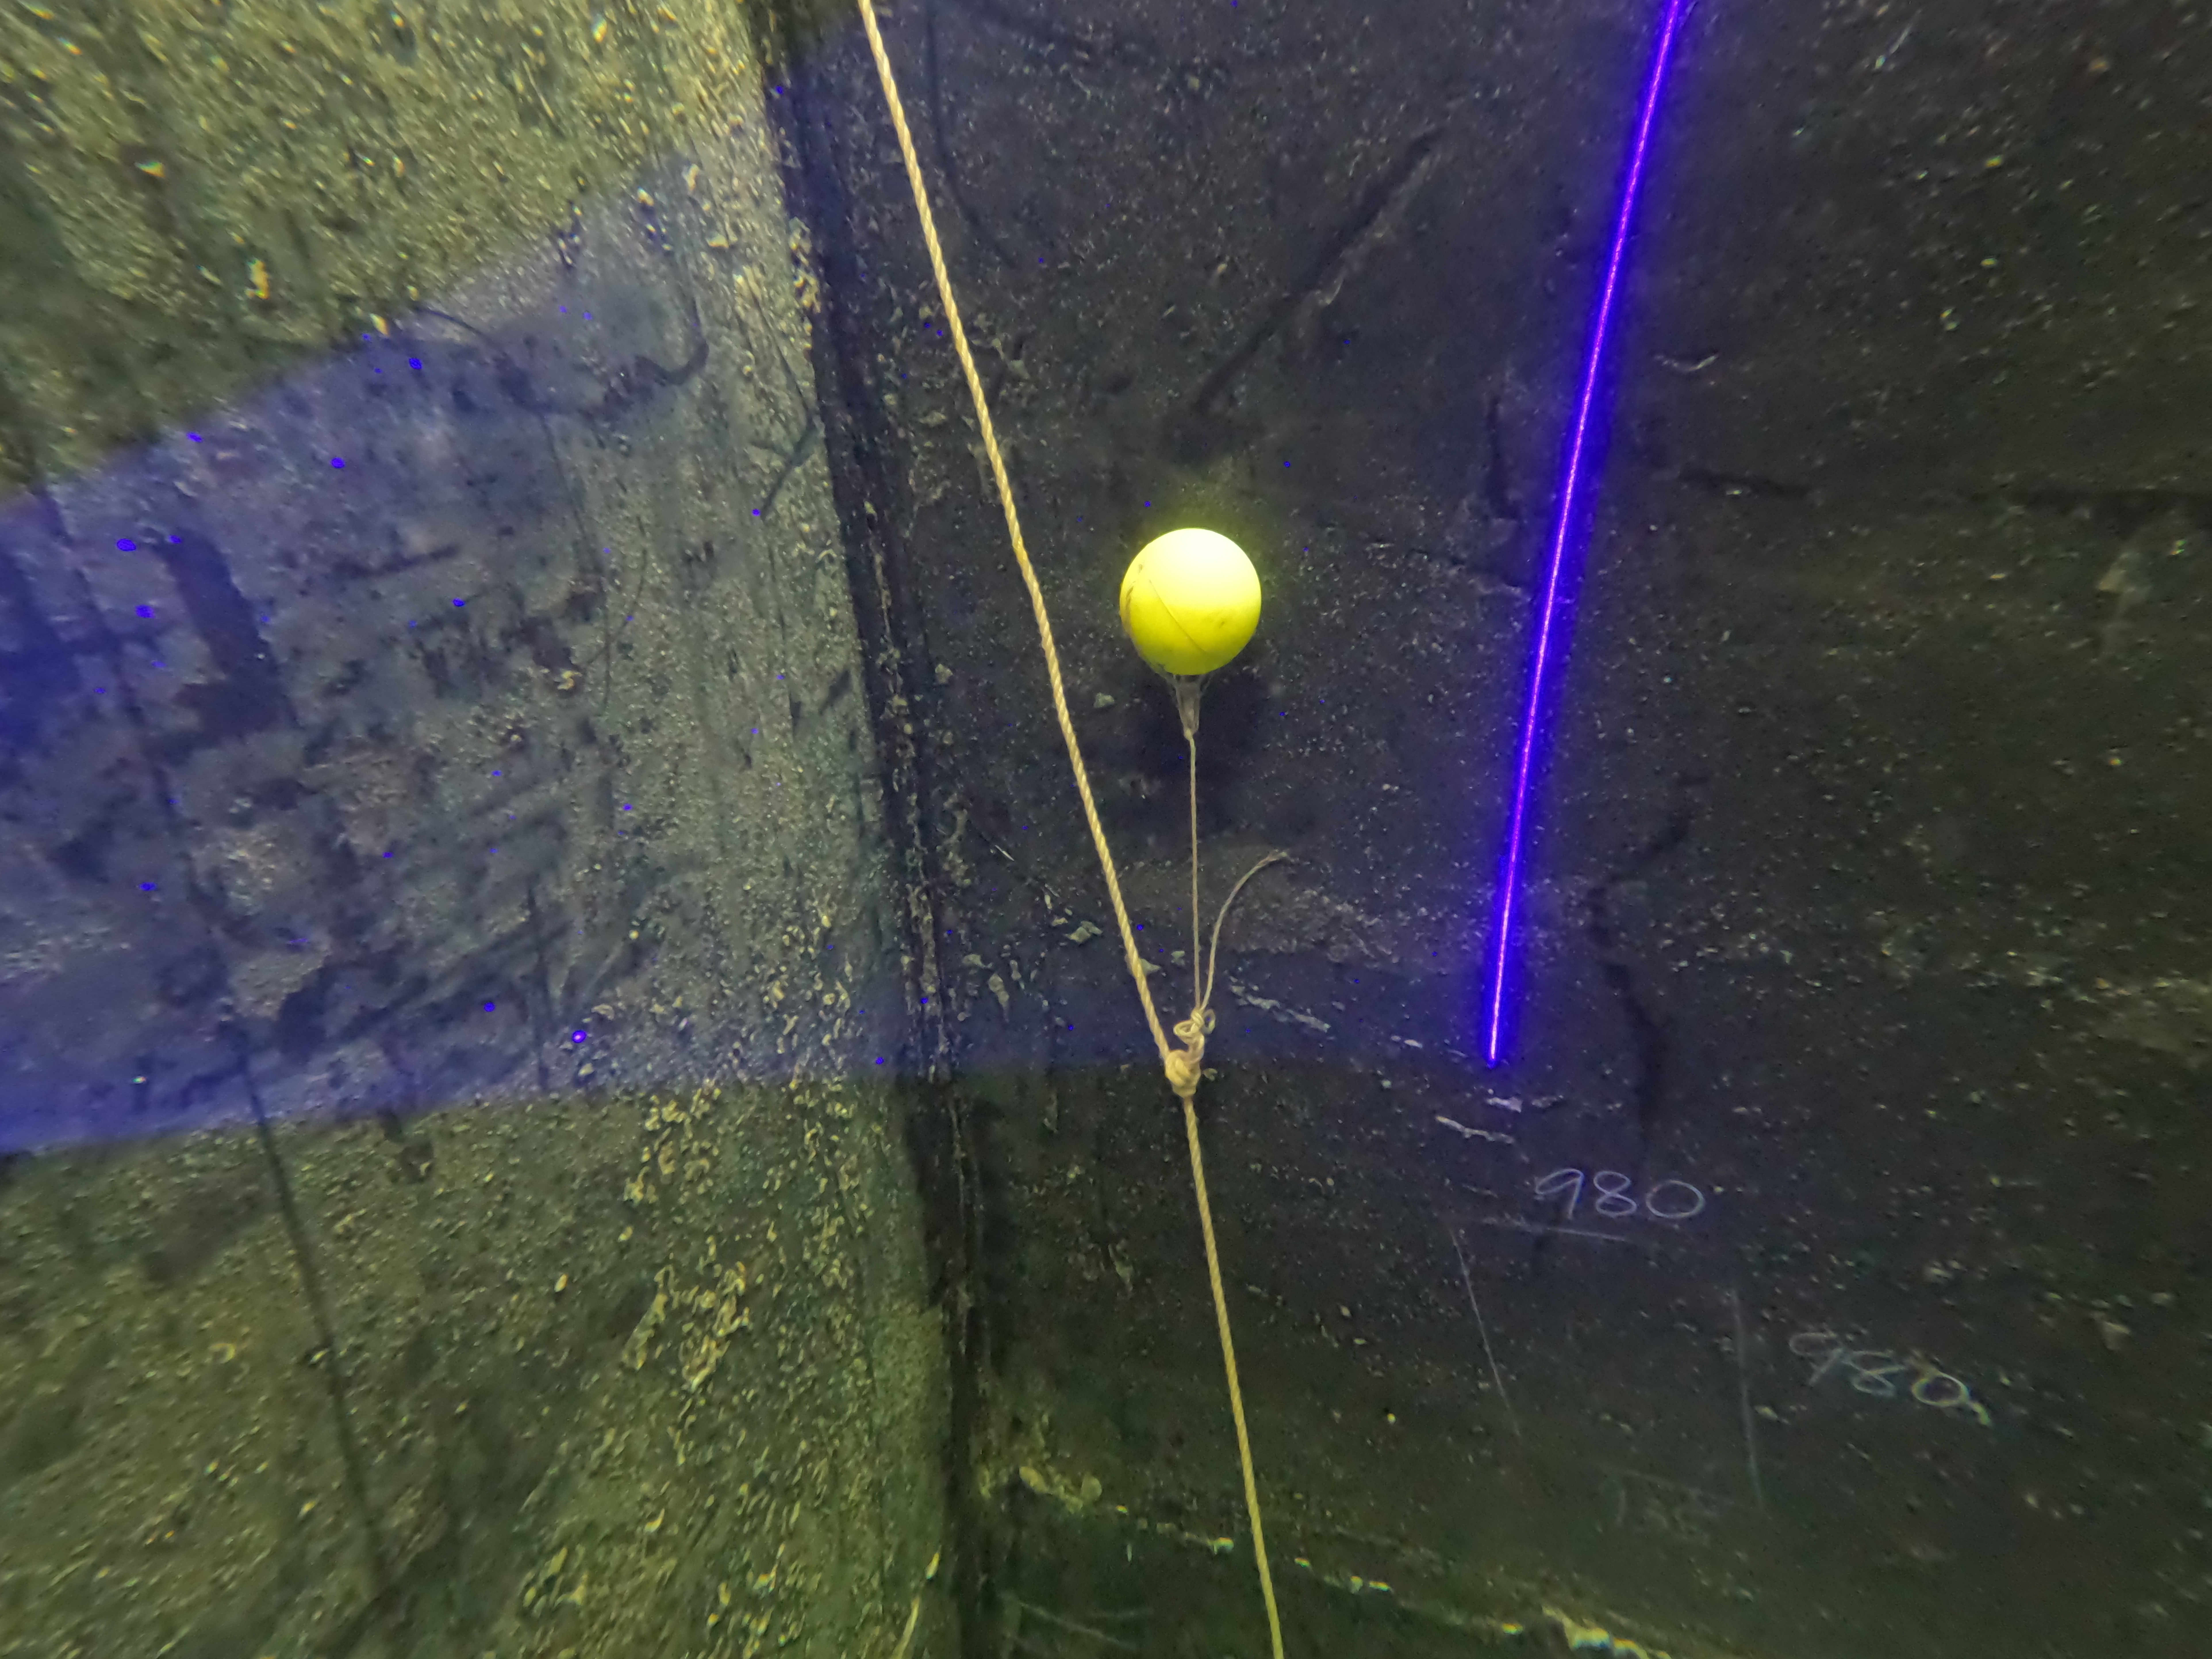

Supplement: Supplementary file 259 [file G0031052.pdf › 4/G0031052.pdf]

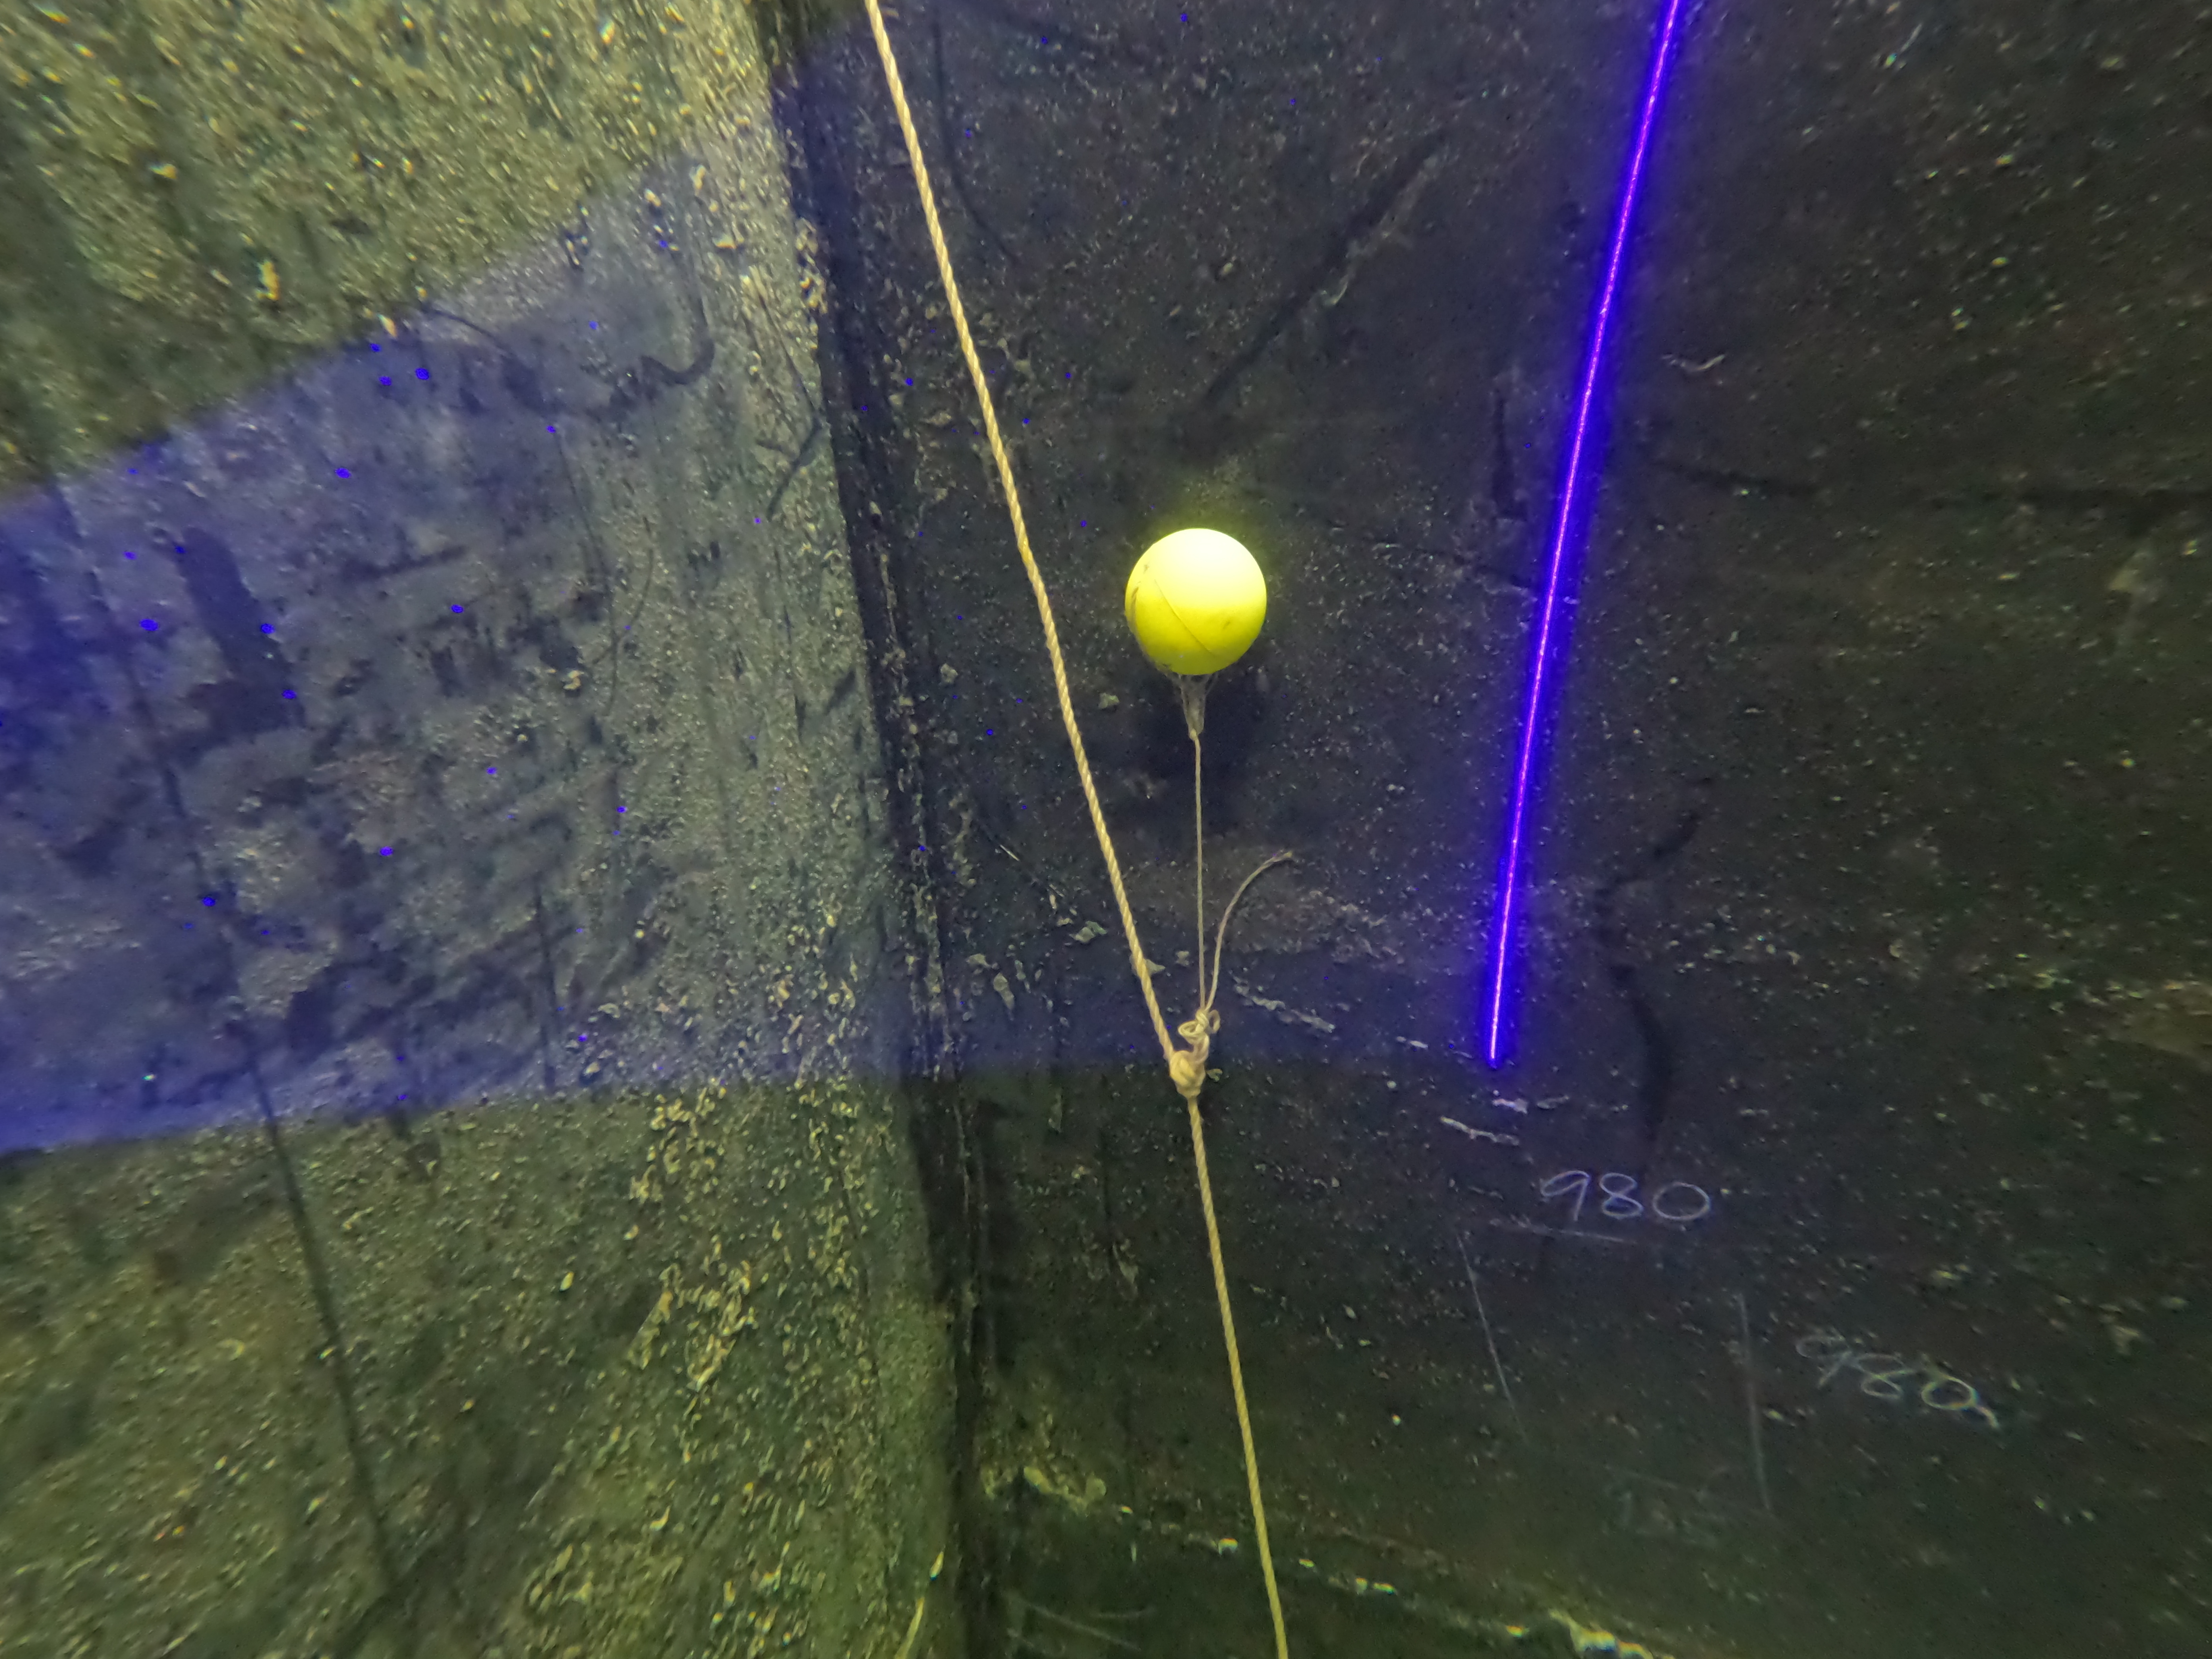

Supplement: Supplementary file 260 [file G0031053.pdf › 4/G0031053.pdf]

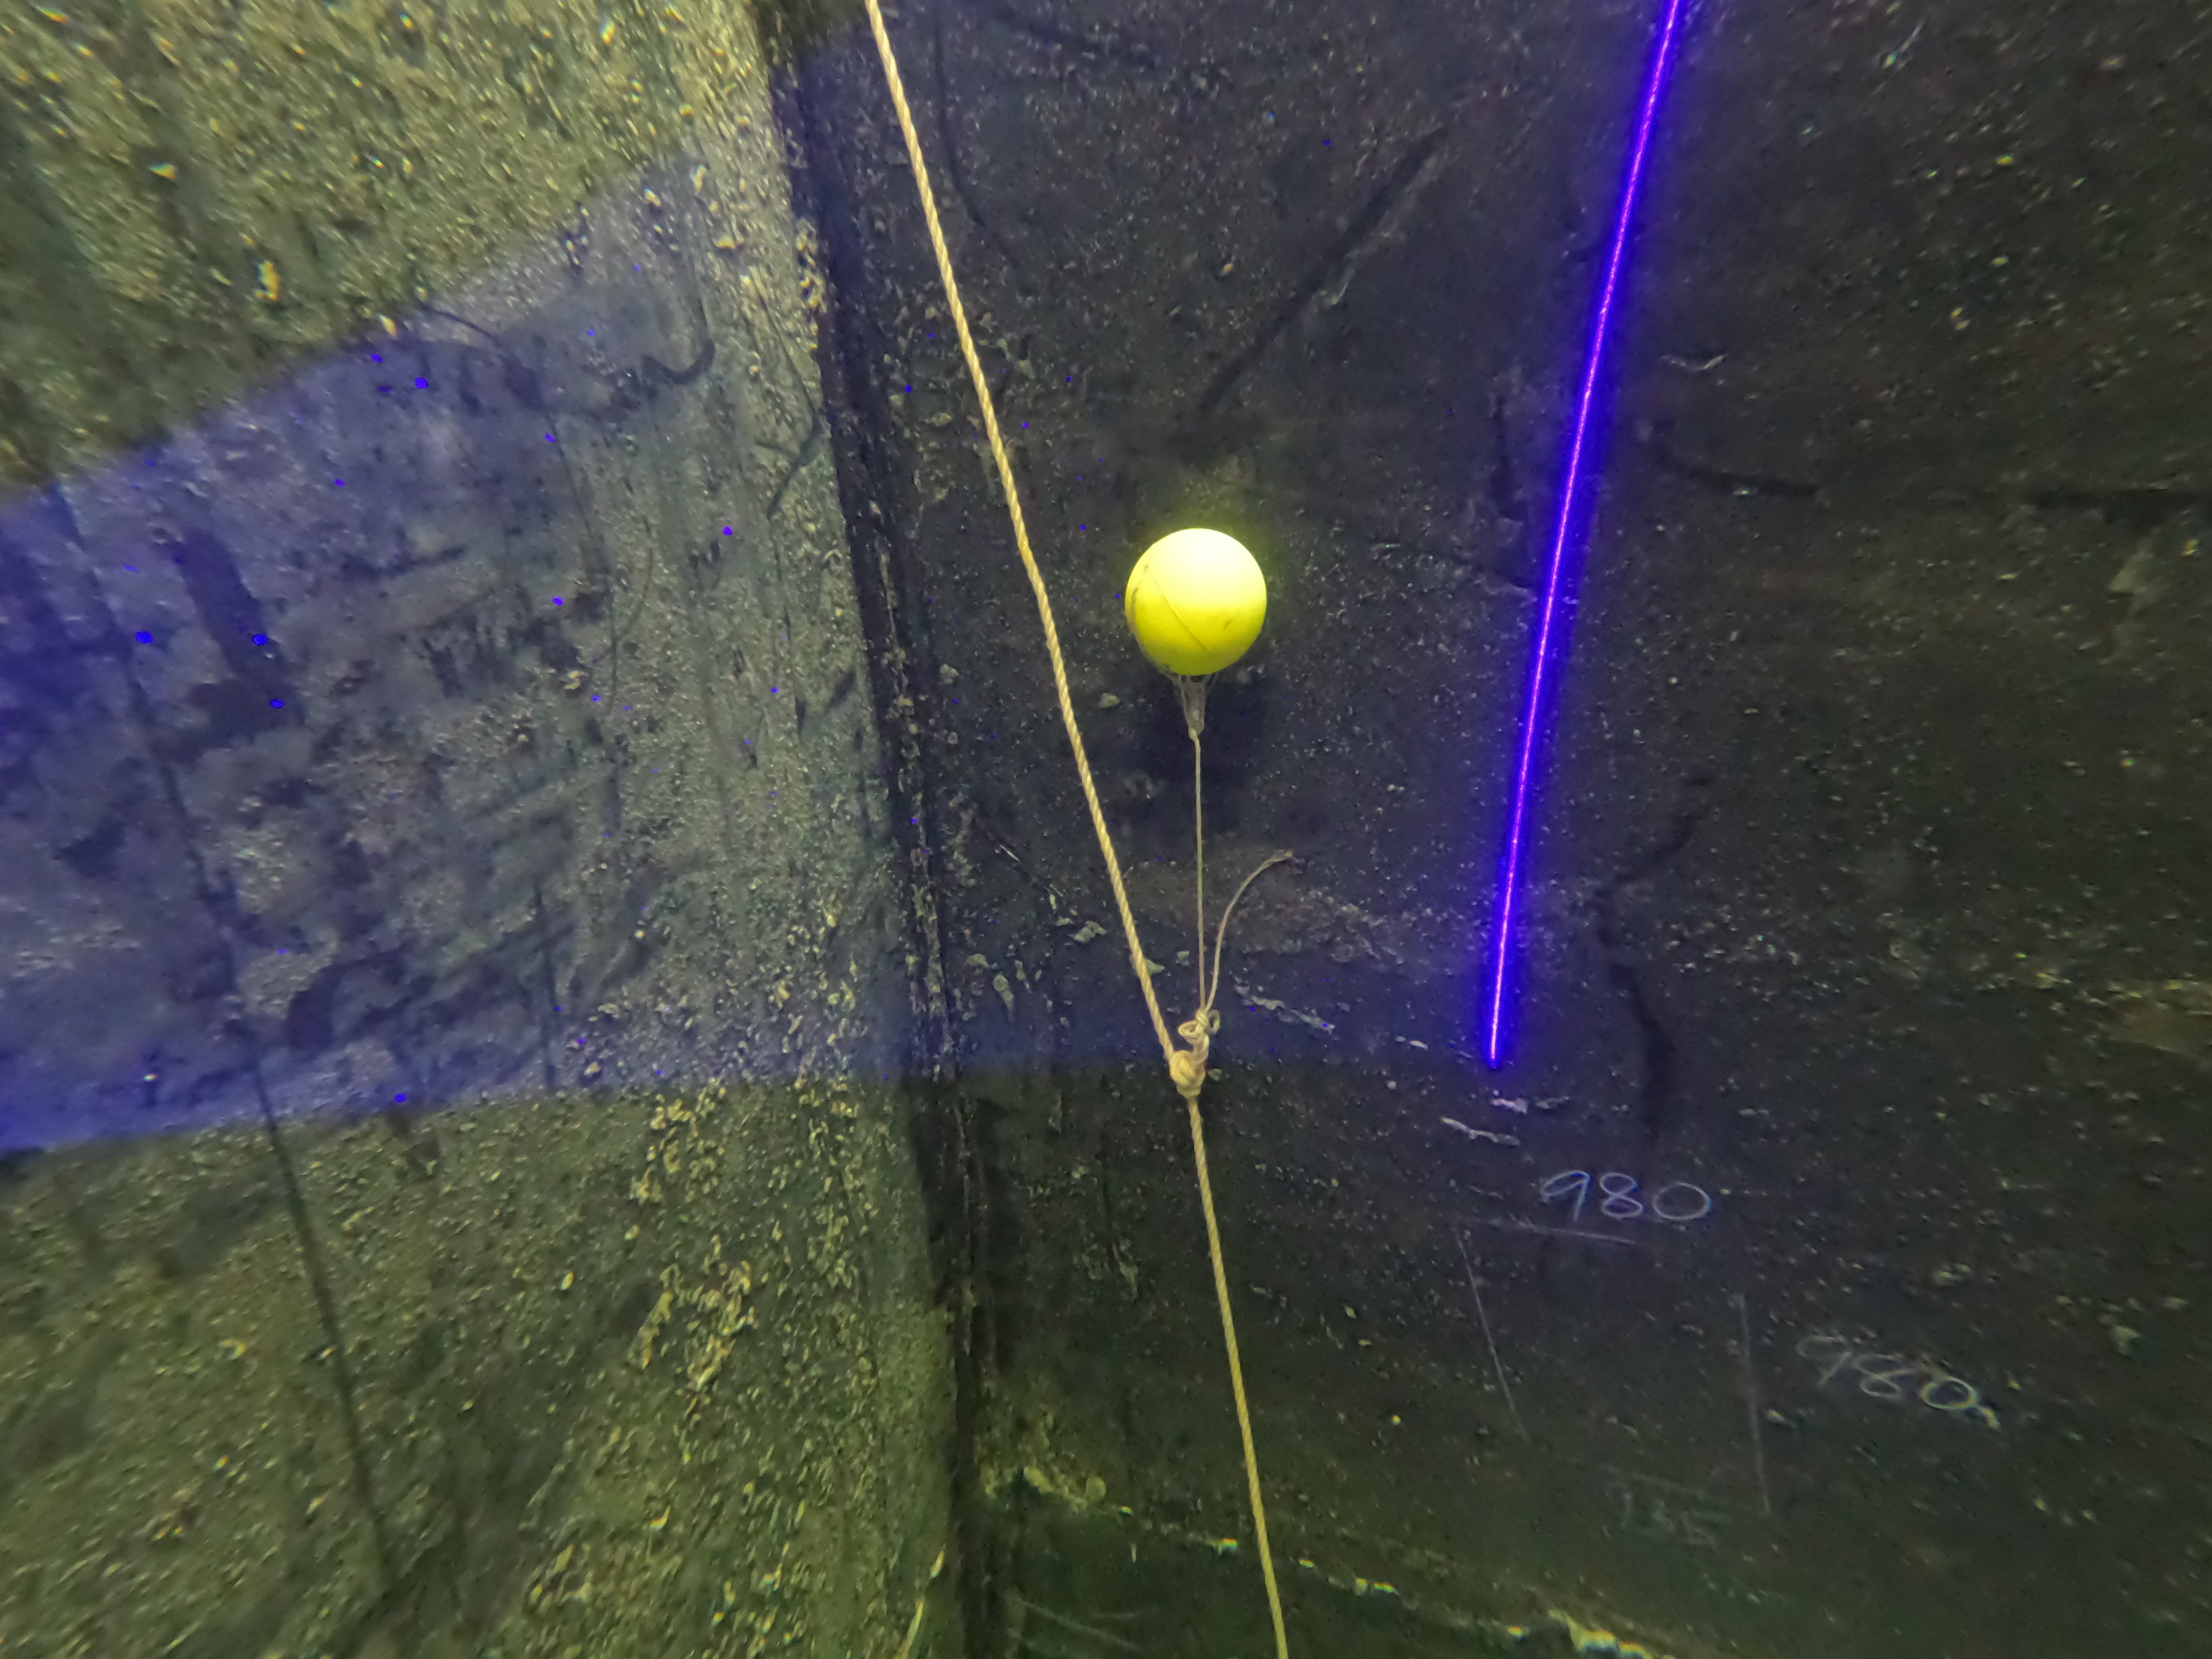

980

980

Supplement: Supplementary file 261 [file G0031054.pdf › 4/G0031054.pdf]

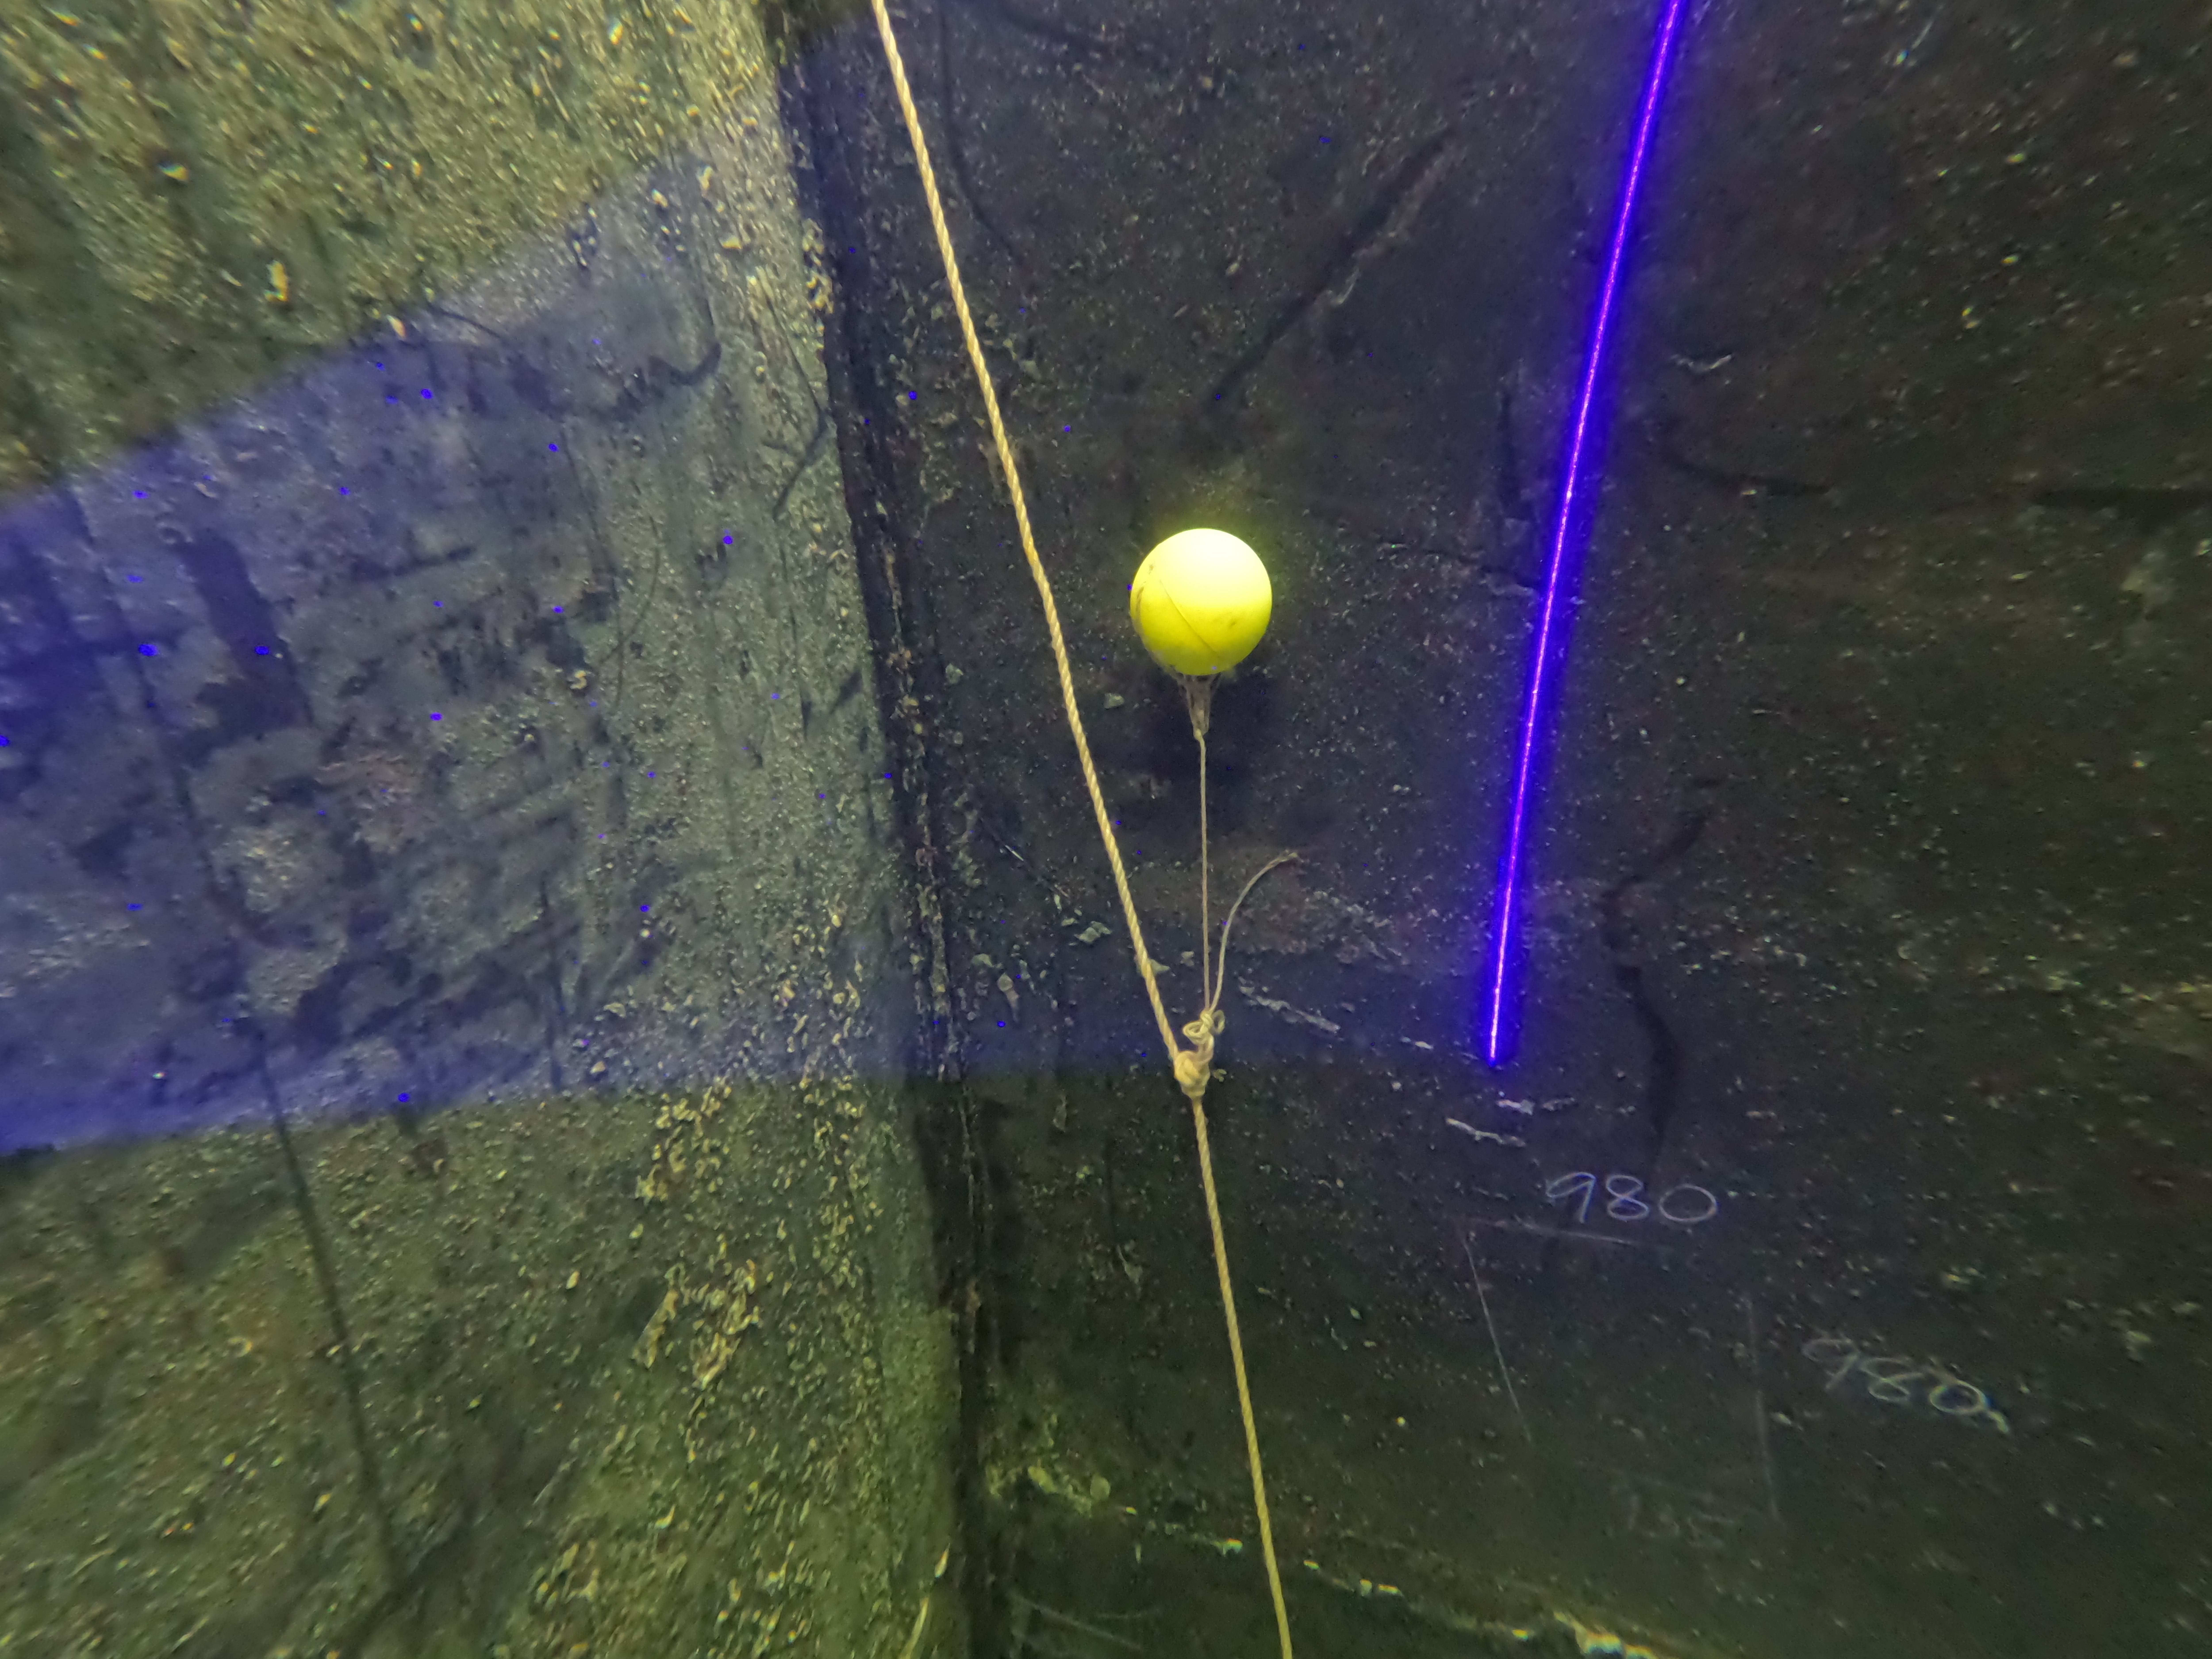

Supplement: Supplementary file 262 [file G0031055.pdf › 4/G0031055.pdf]

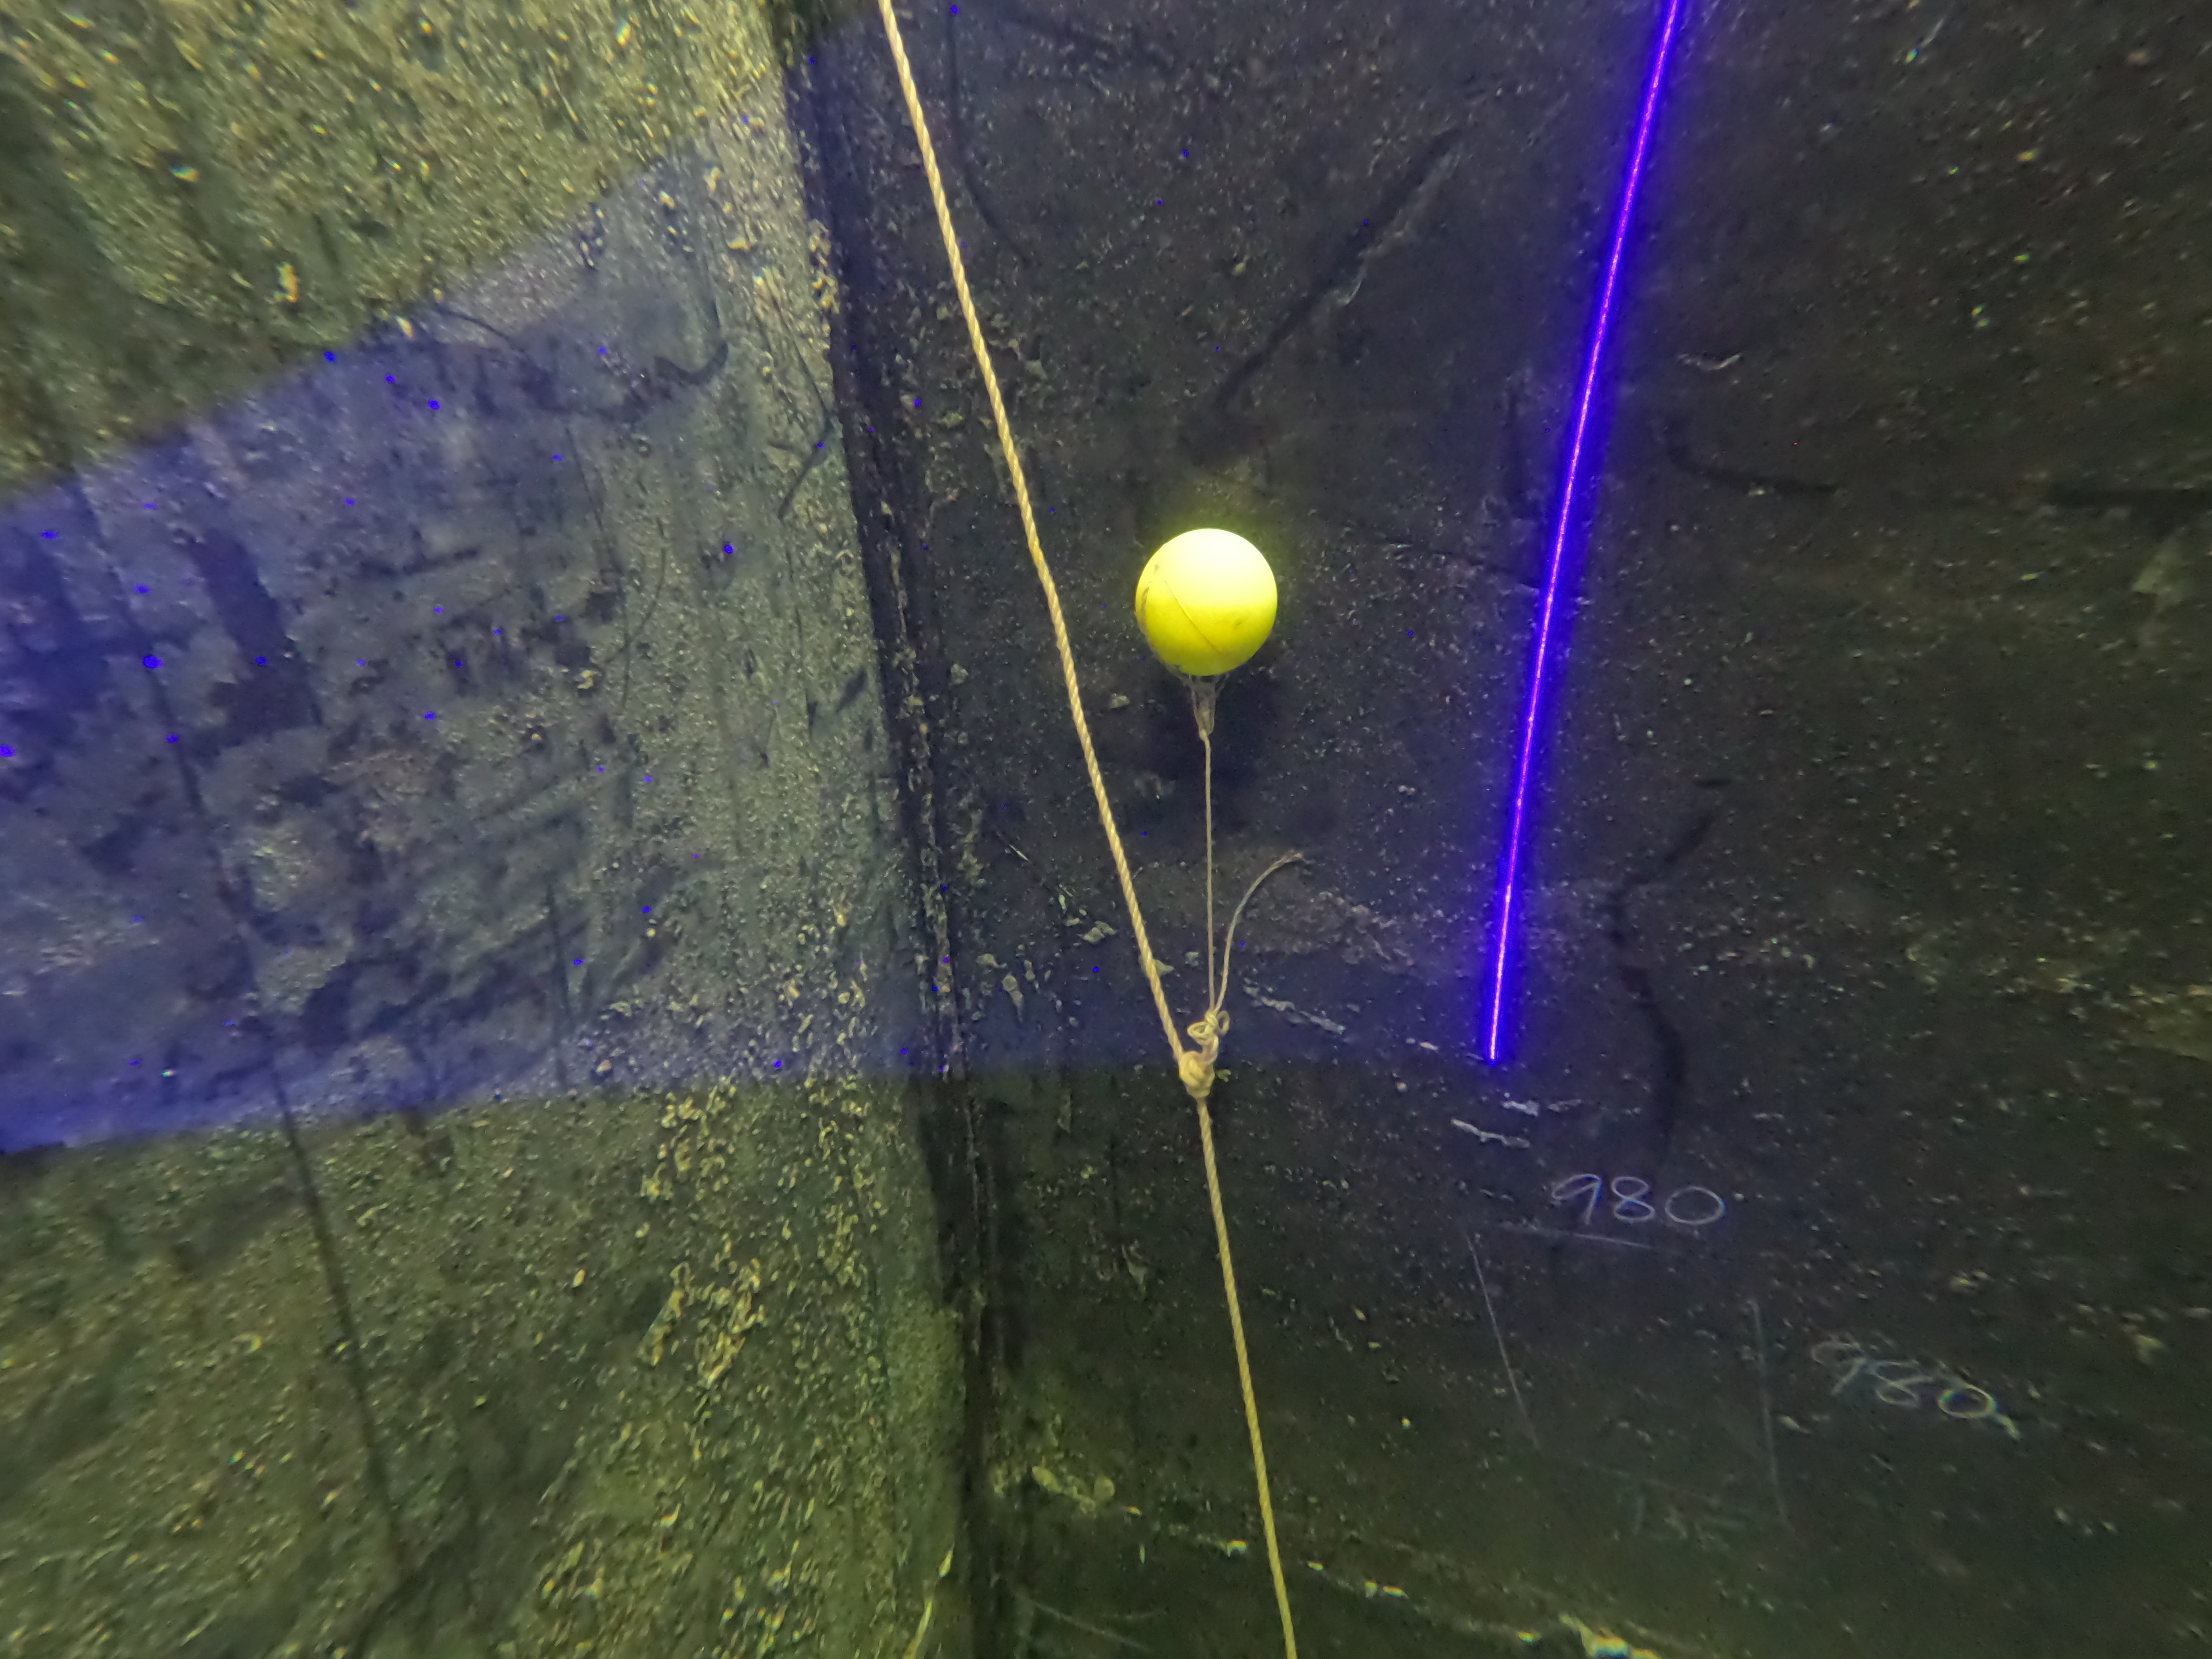

980

980

Supplement: Supplementary file 263 [file G0031056.pdf › 4/G0031056.pdf]

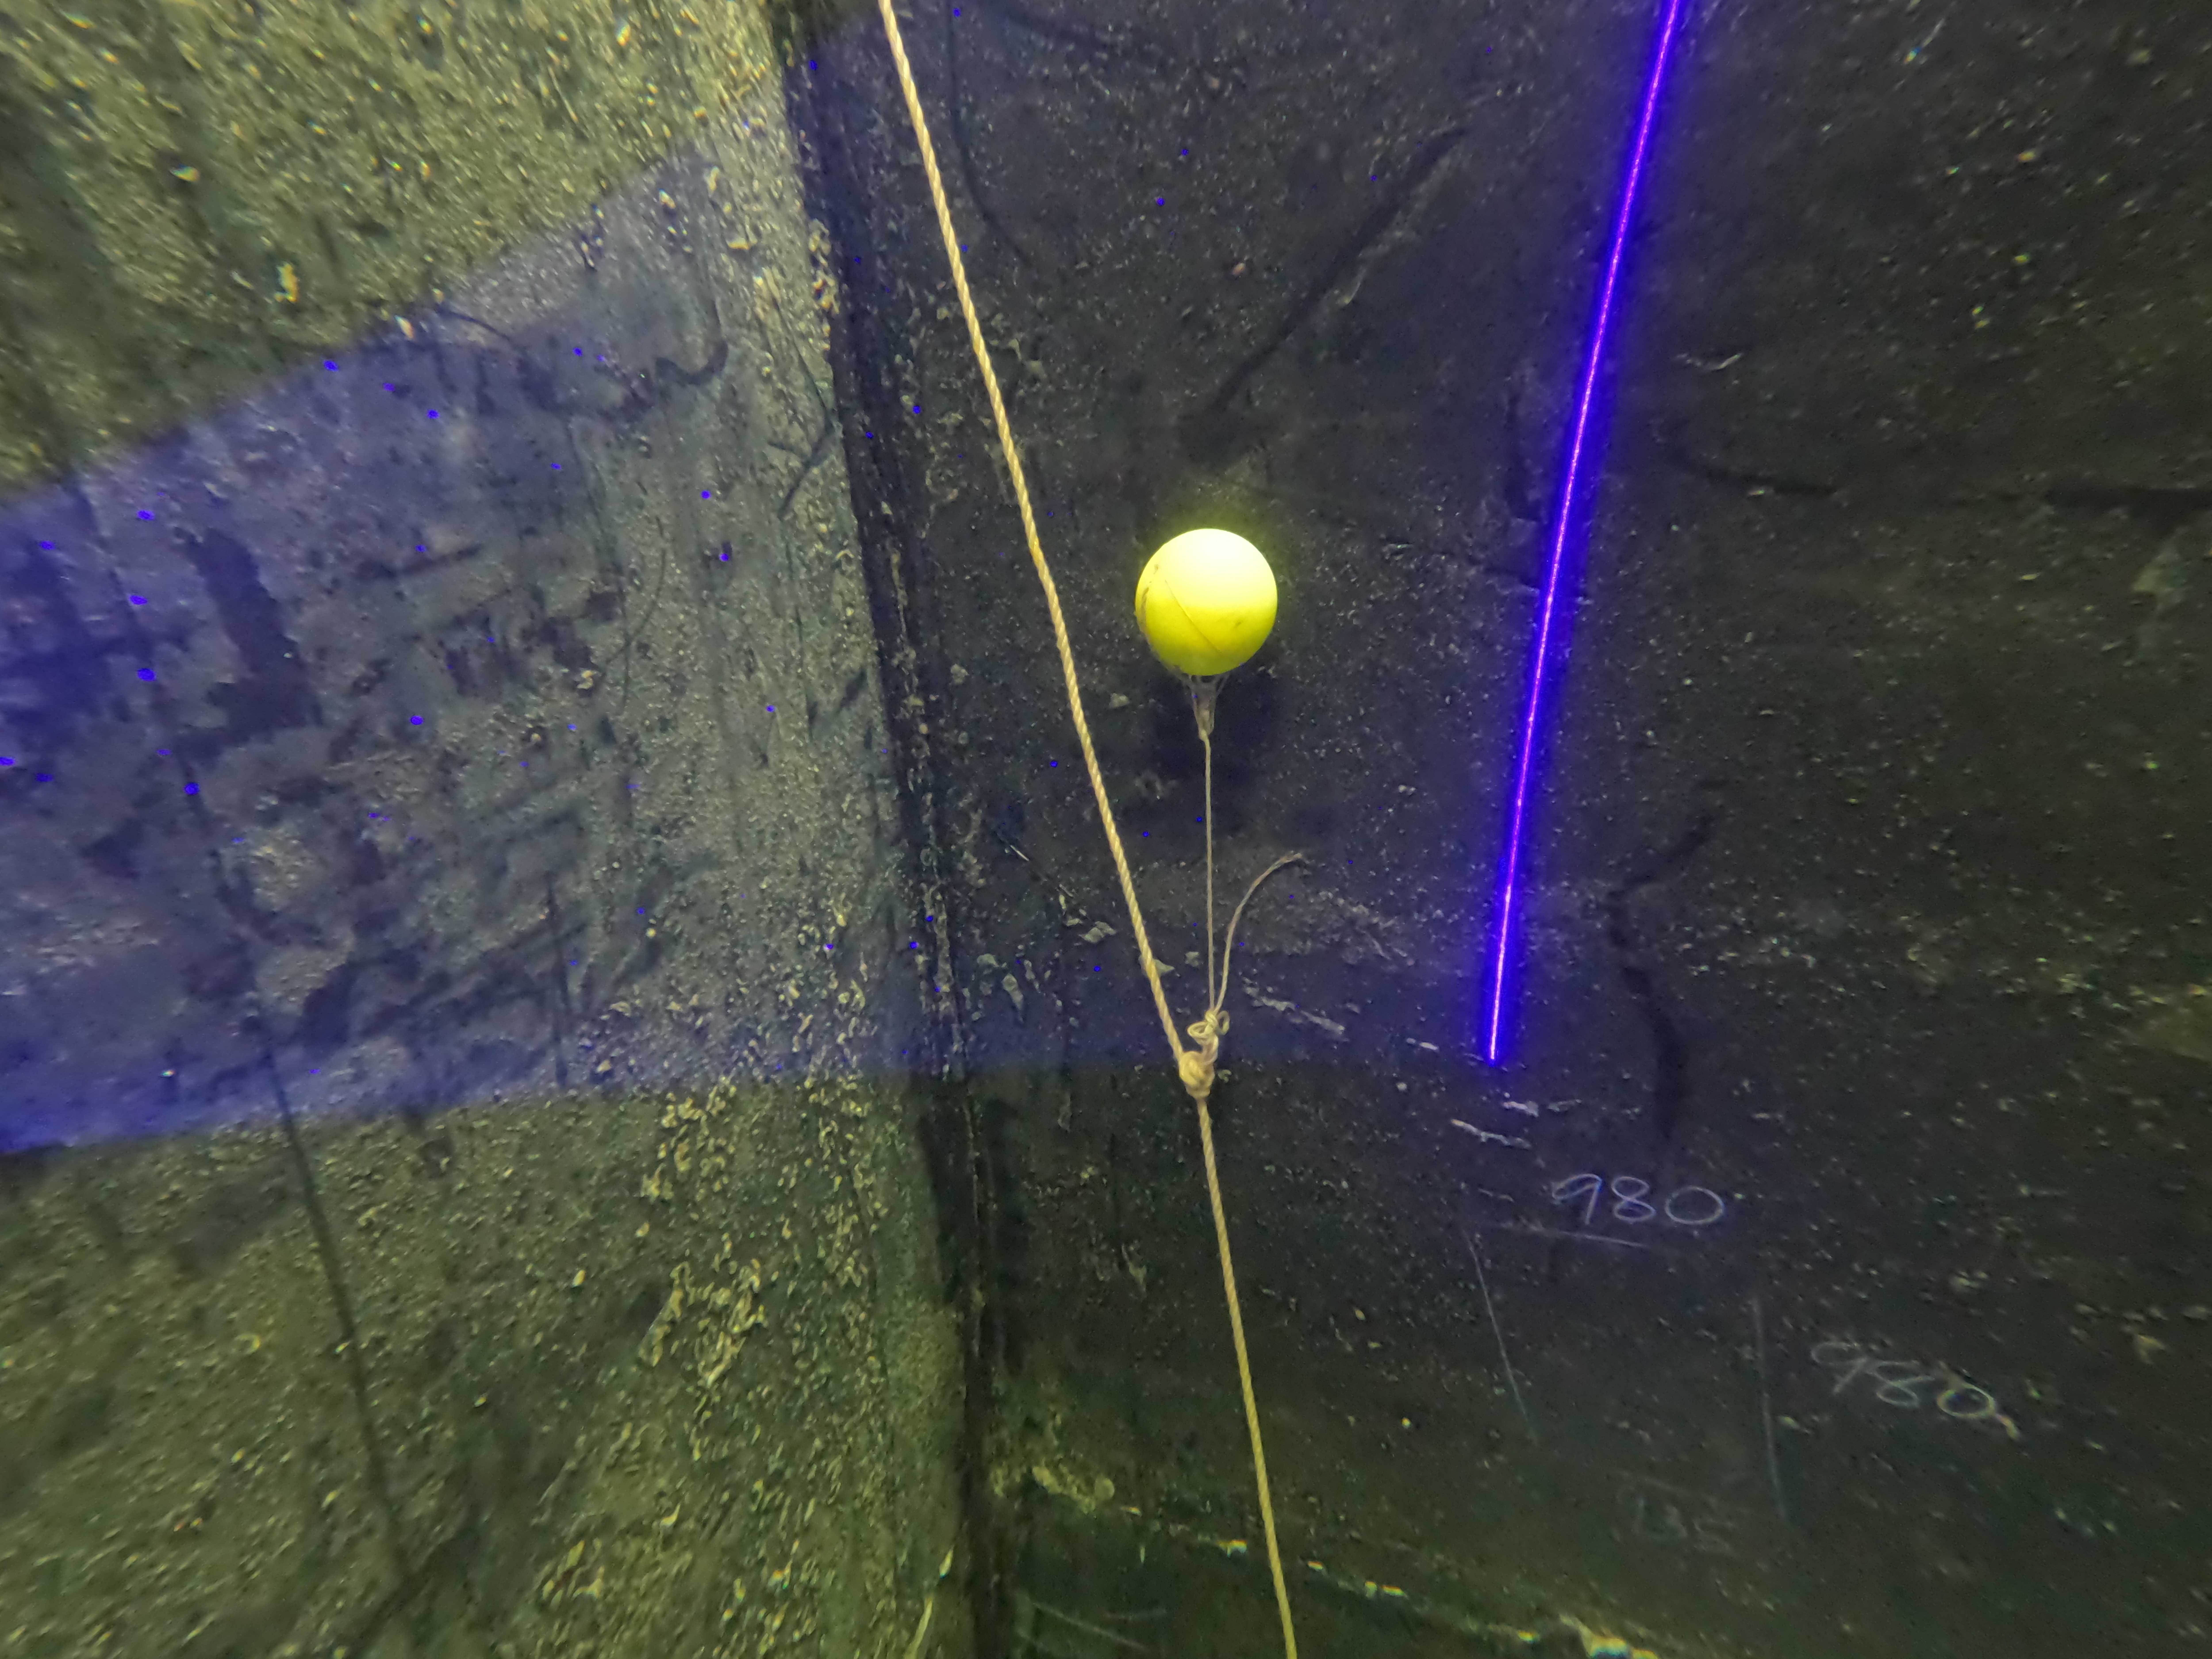

Supplement: Supplementary file 264 [file G0031057.pdf › 4/G0031057.pdf]

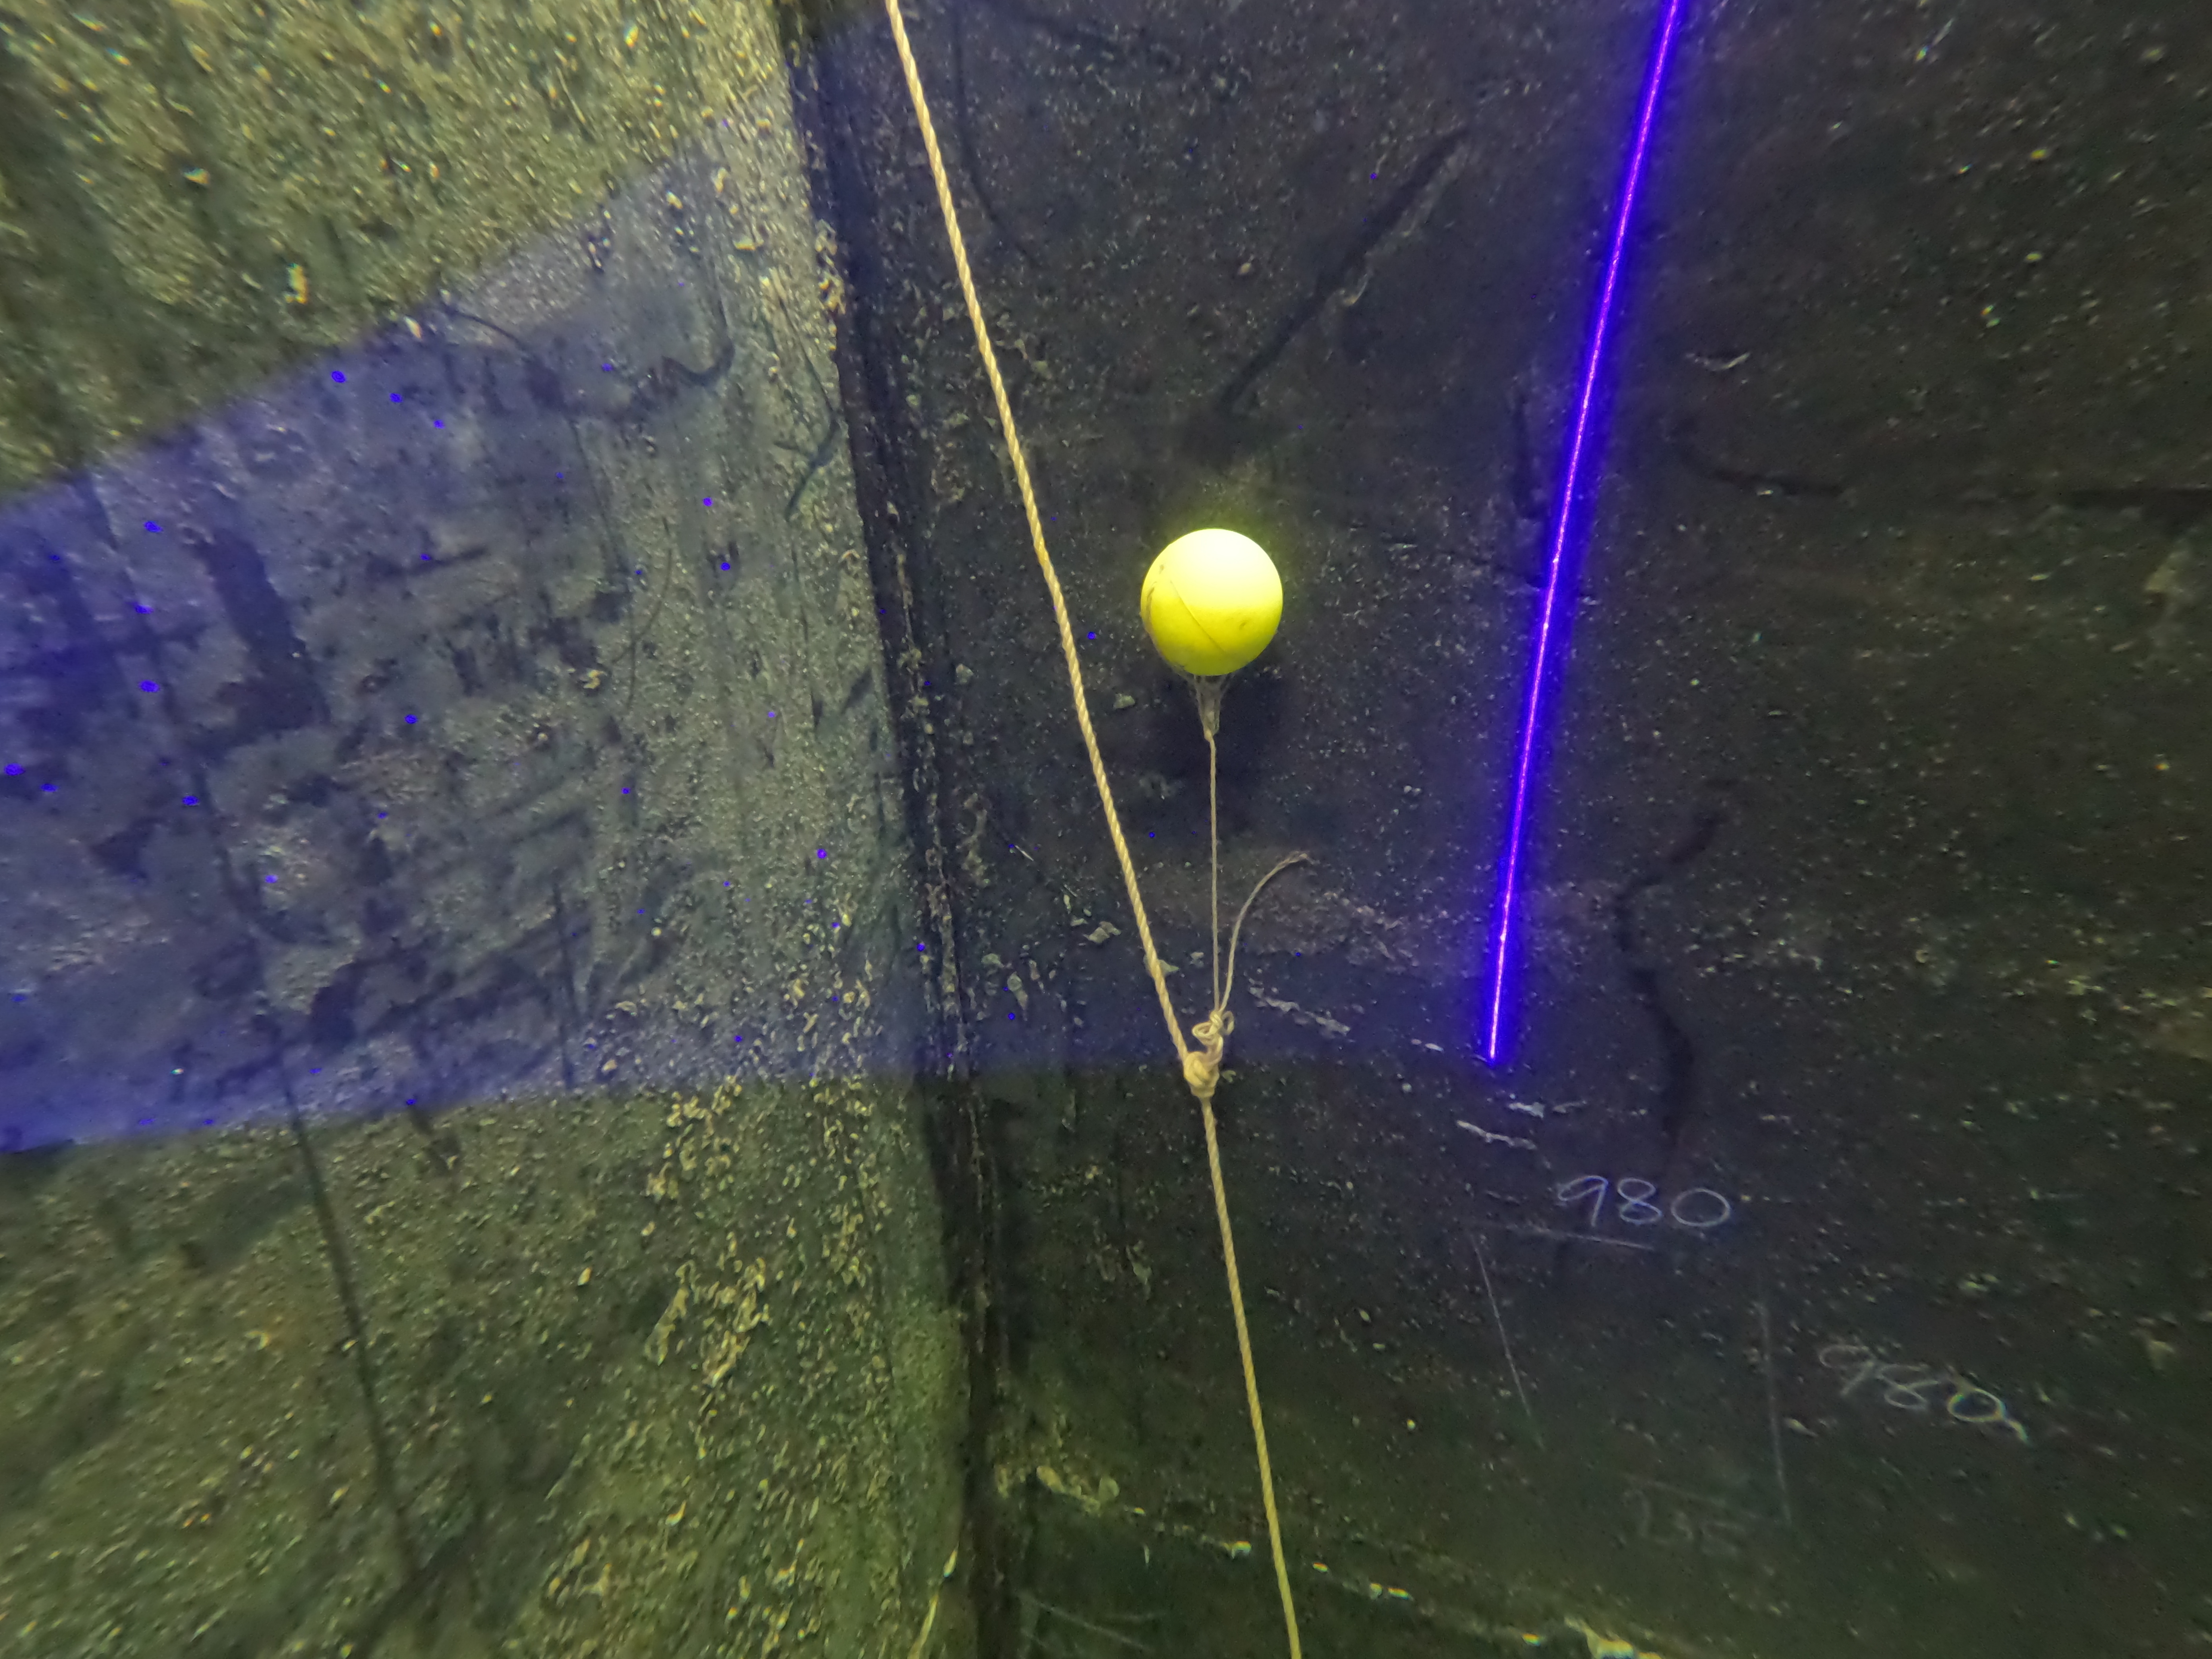

Supplement: Supplementary file 265 [file G0031058.pdf › 4/G0031058.pdf]

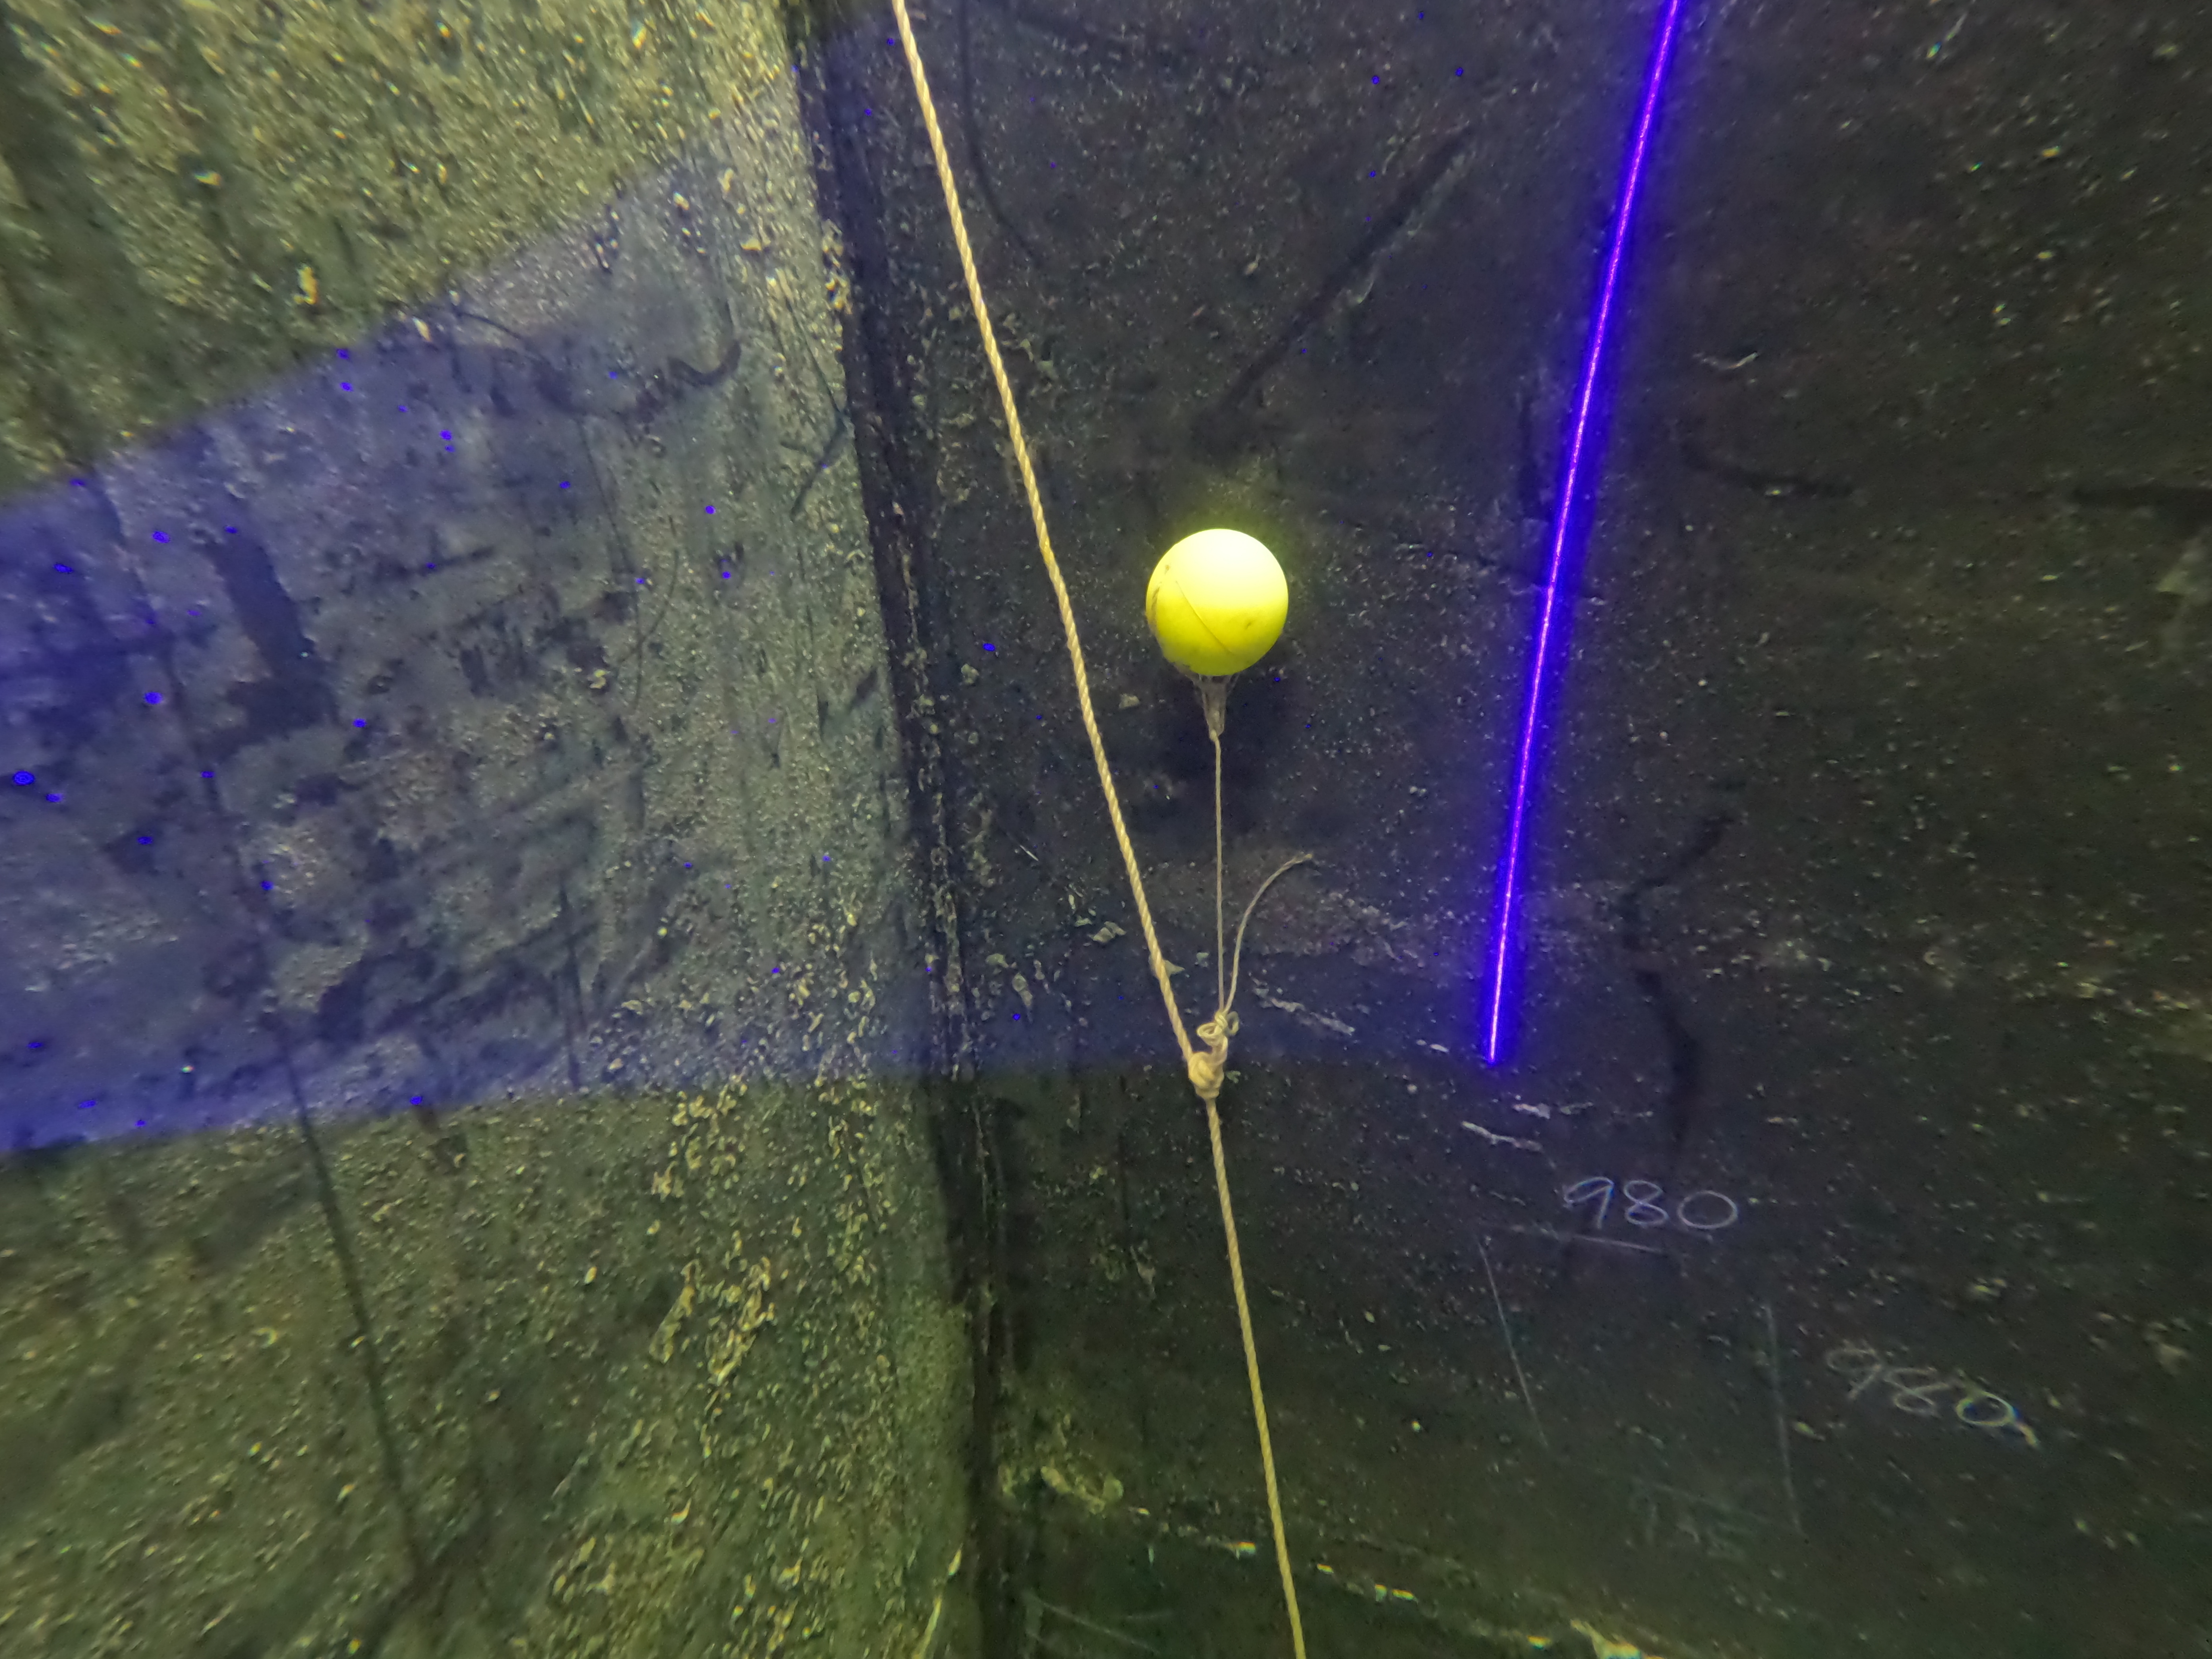

Supplement: Supplementary file 266 [file G0031059.pdf › 4/G0031059.pdf]

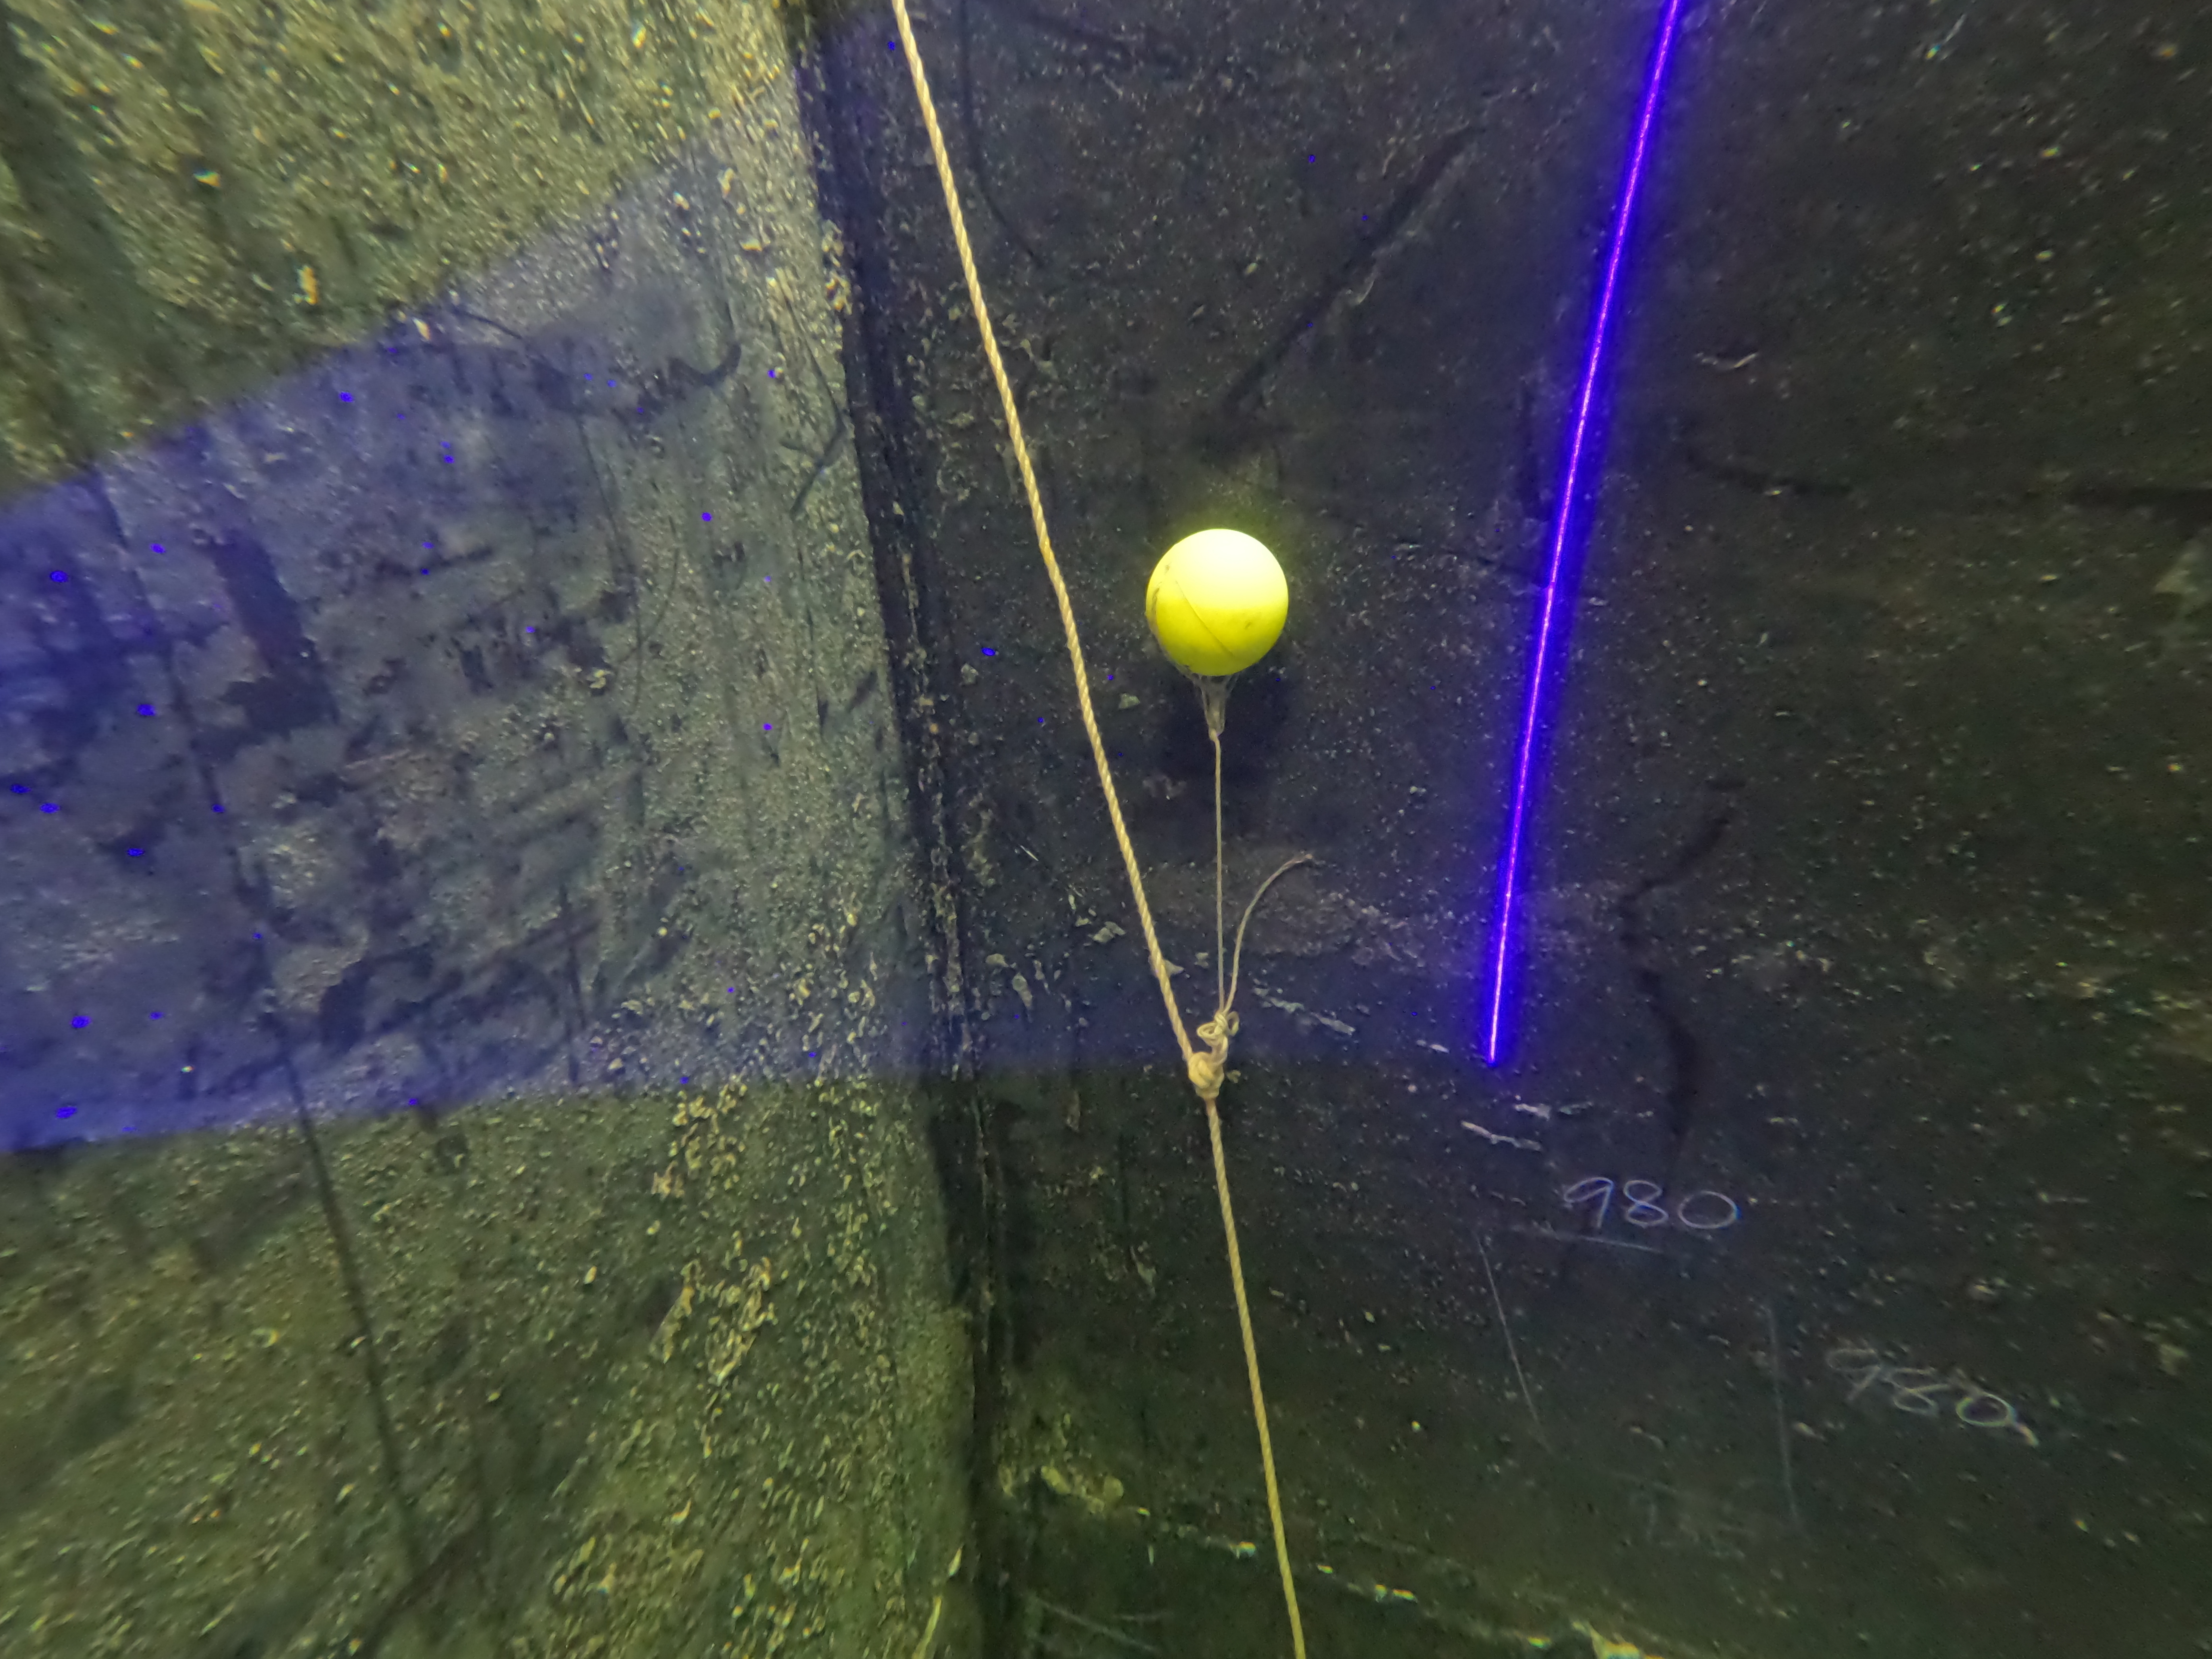

980

980

Supplement: Supplementary file 267 [file G0031060.pdf › 4/G0031060.pdf]

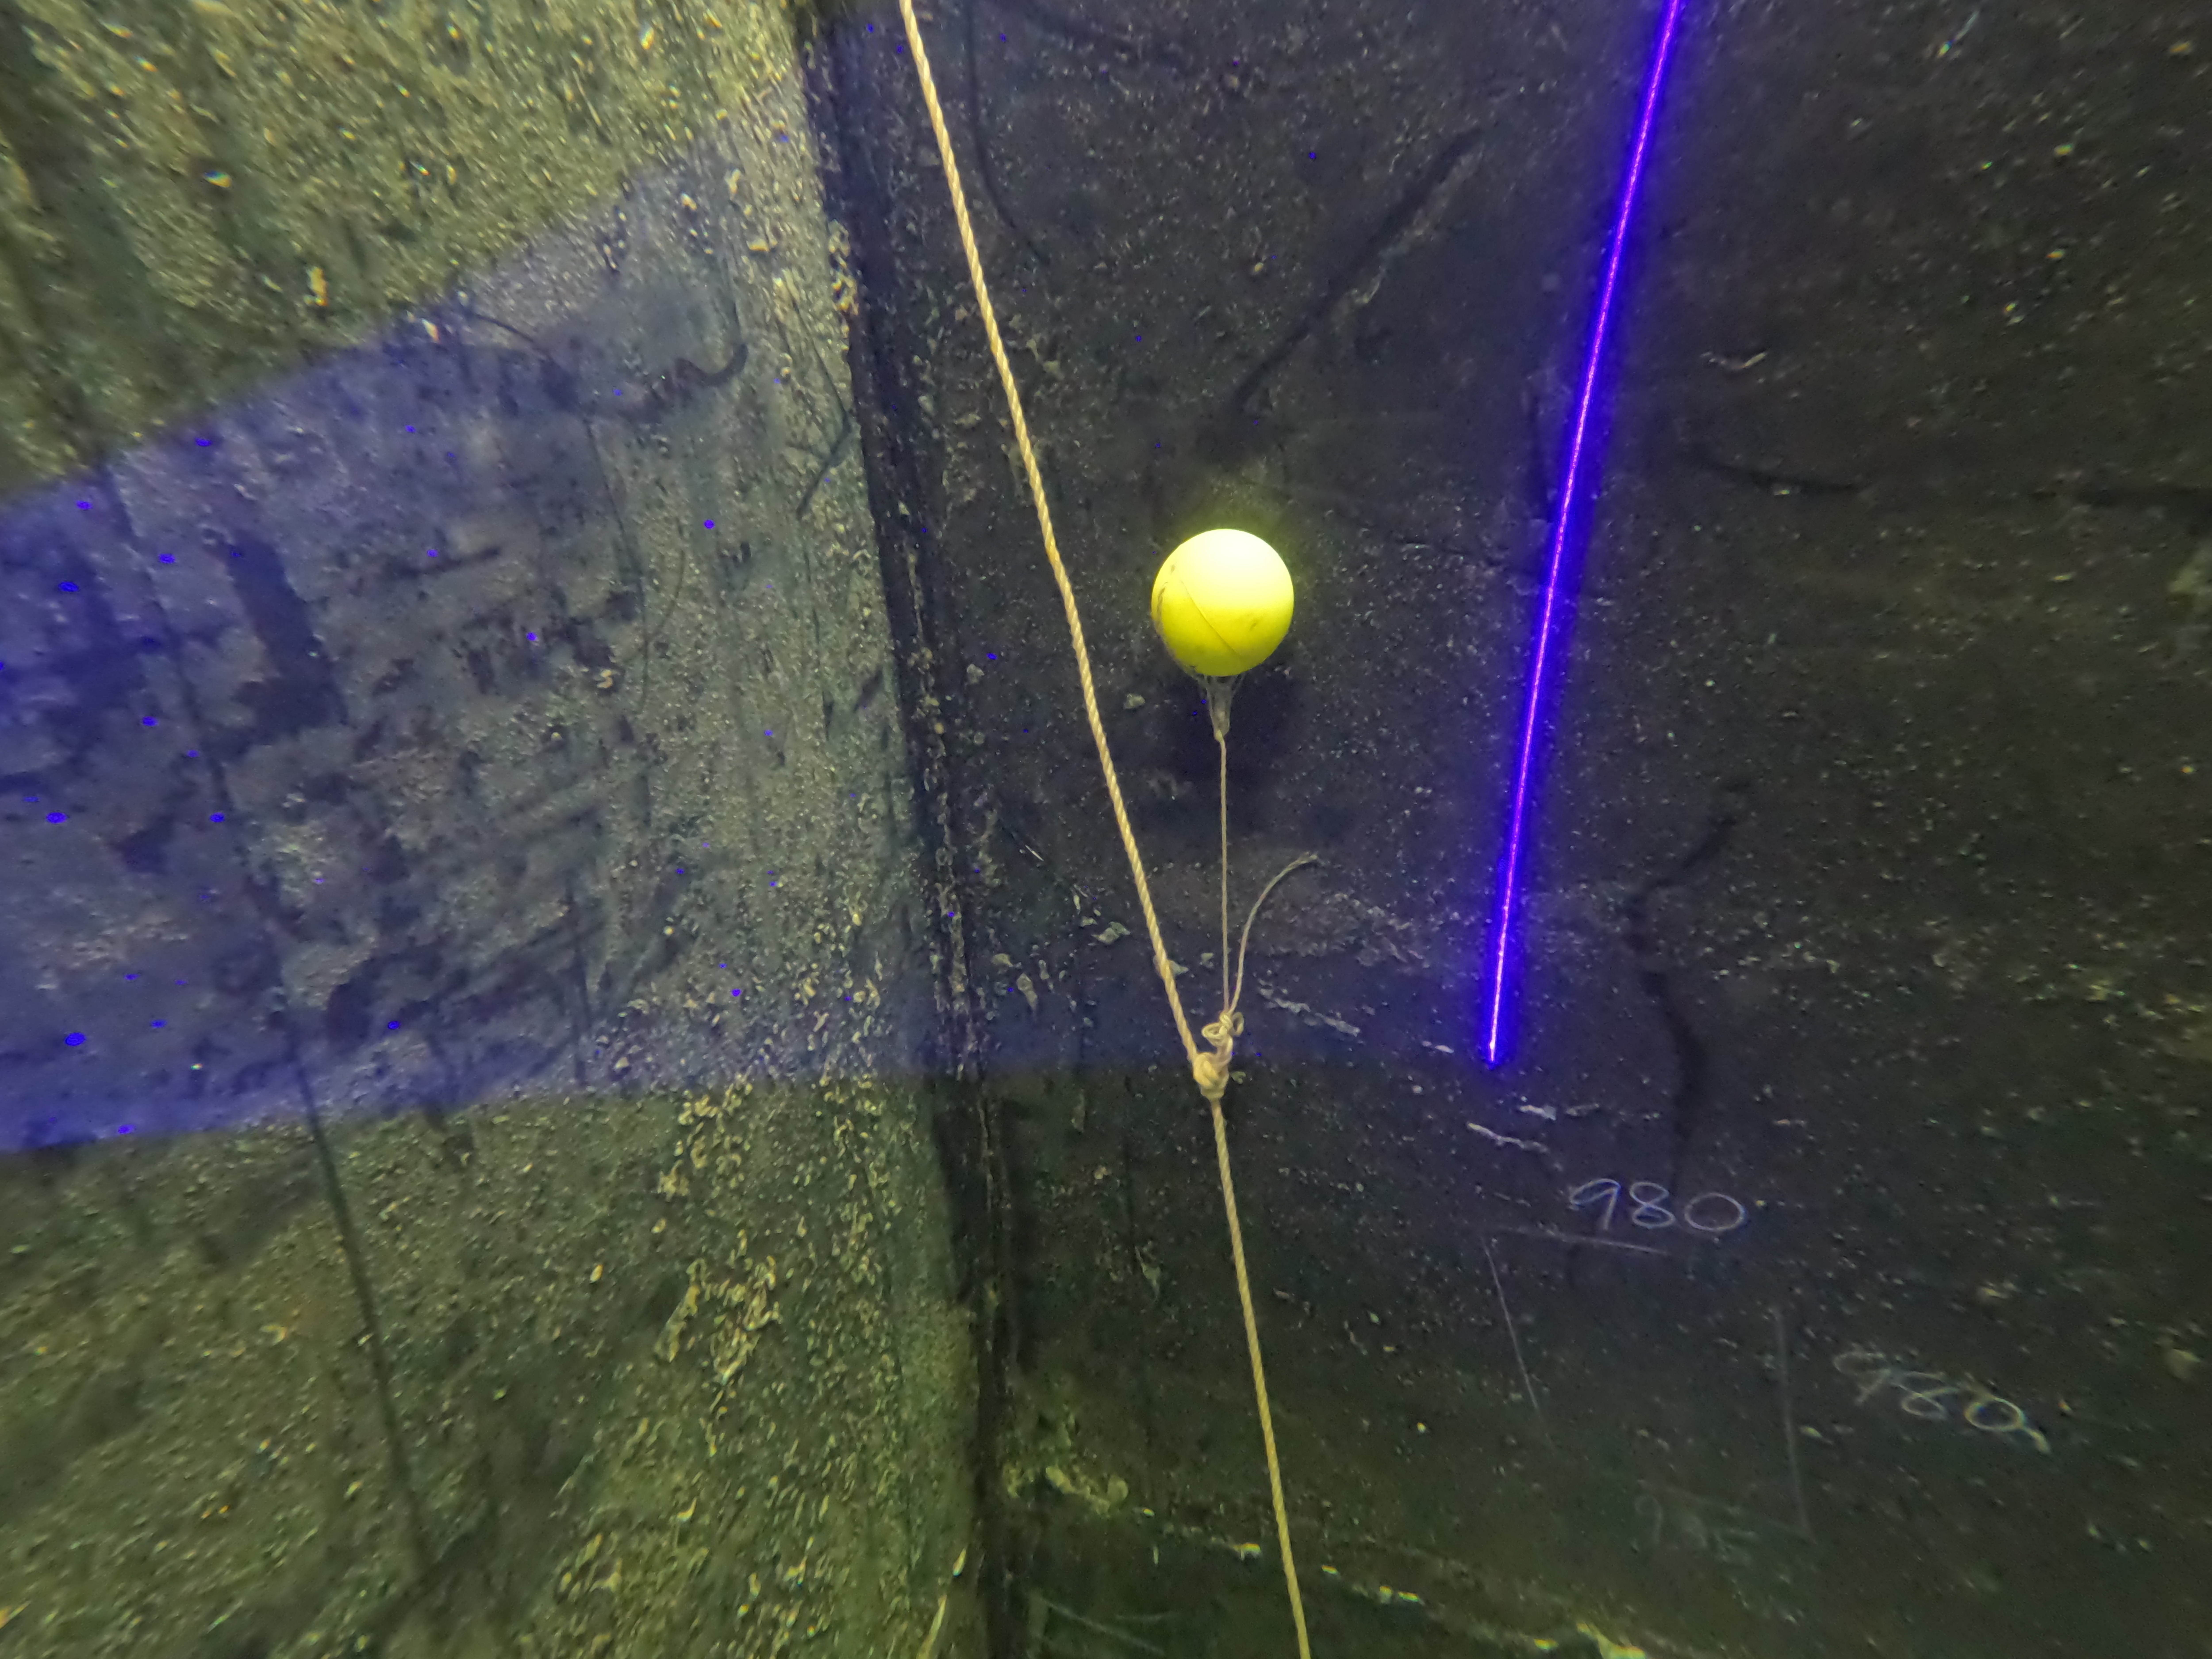

Supplement: Supplementary file 268 [file G0031061.pdf › 4/G0031061.pdf]

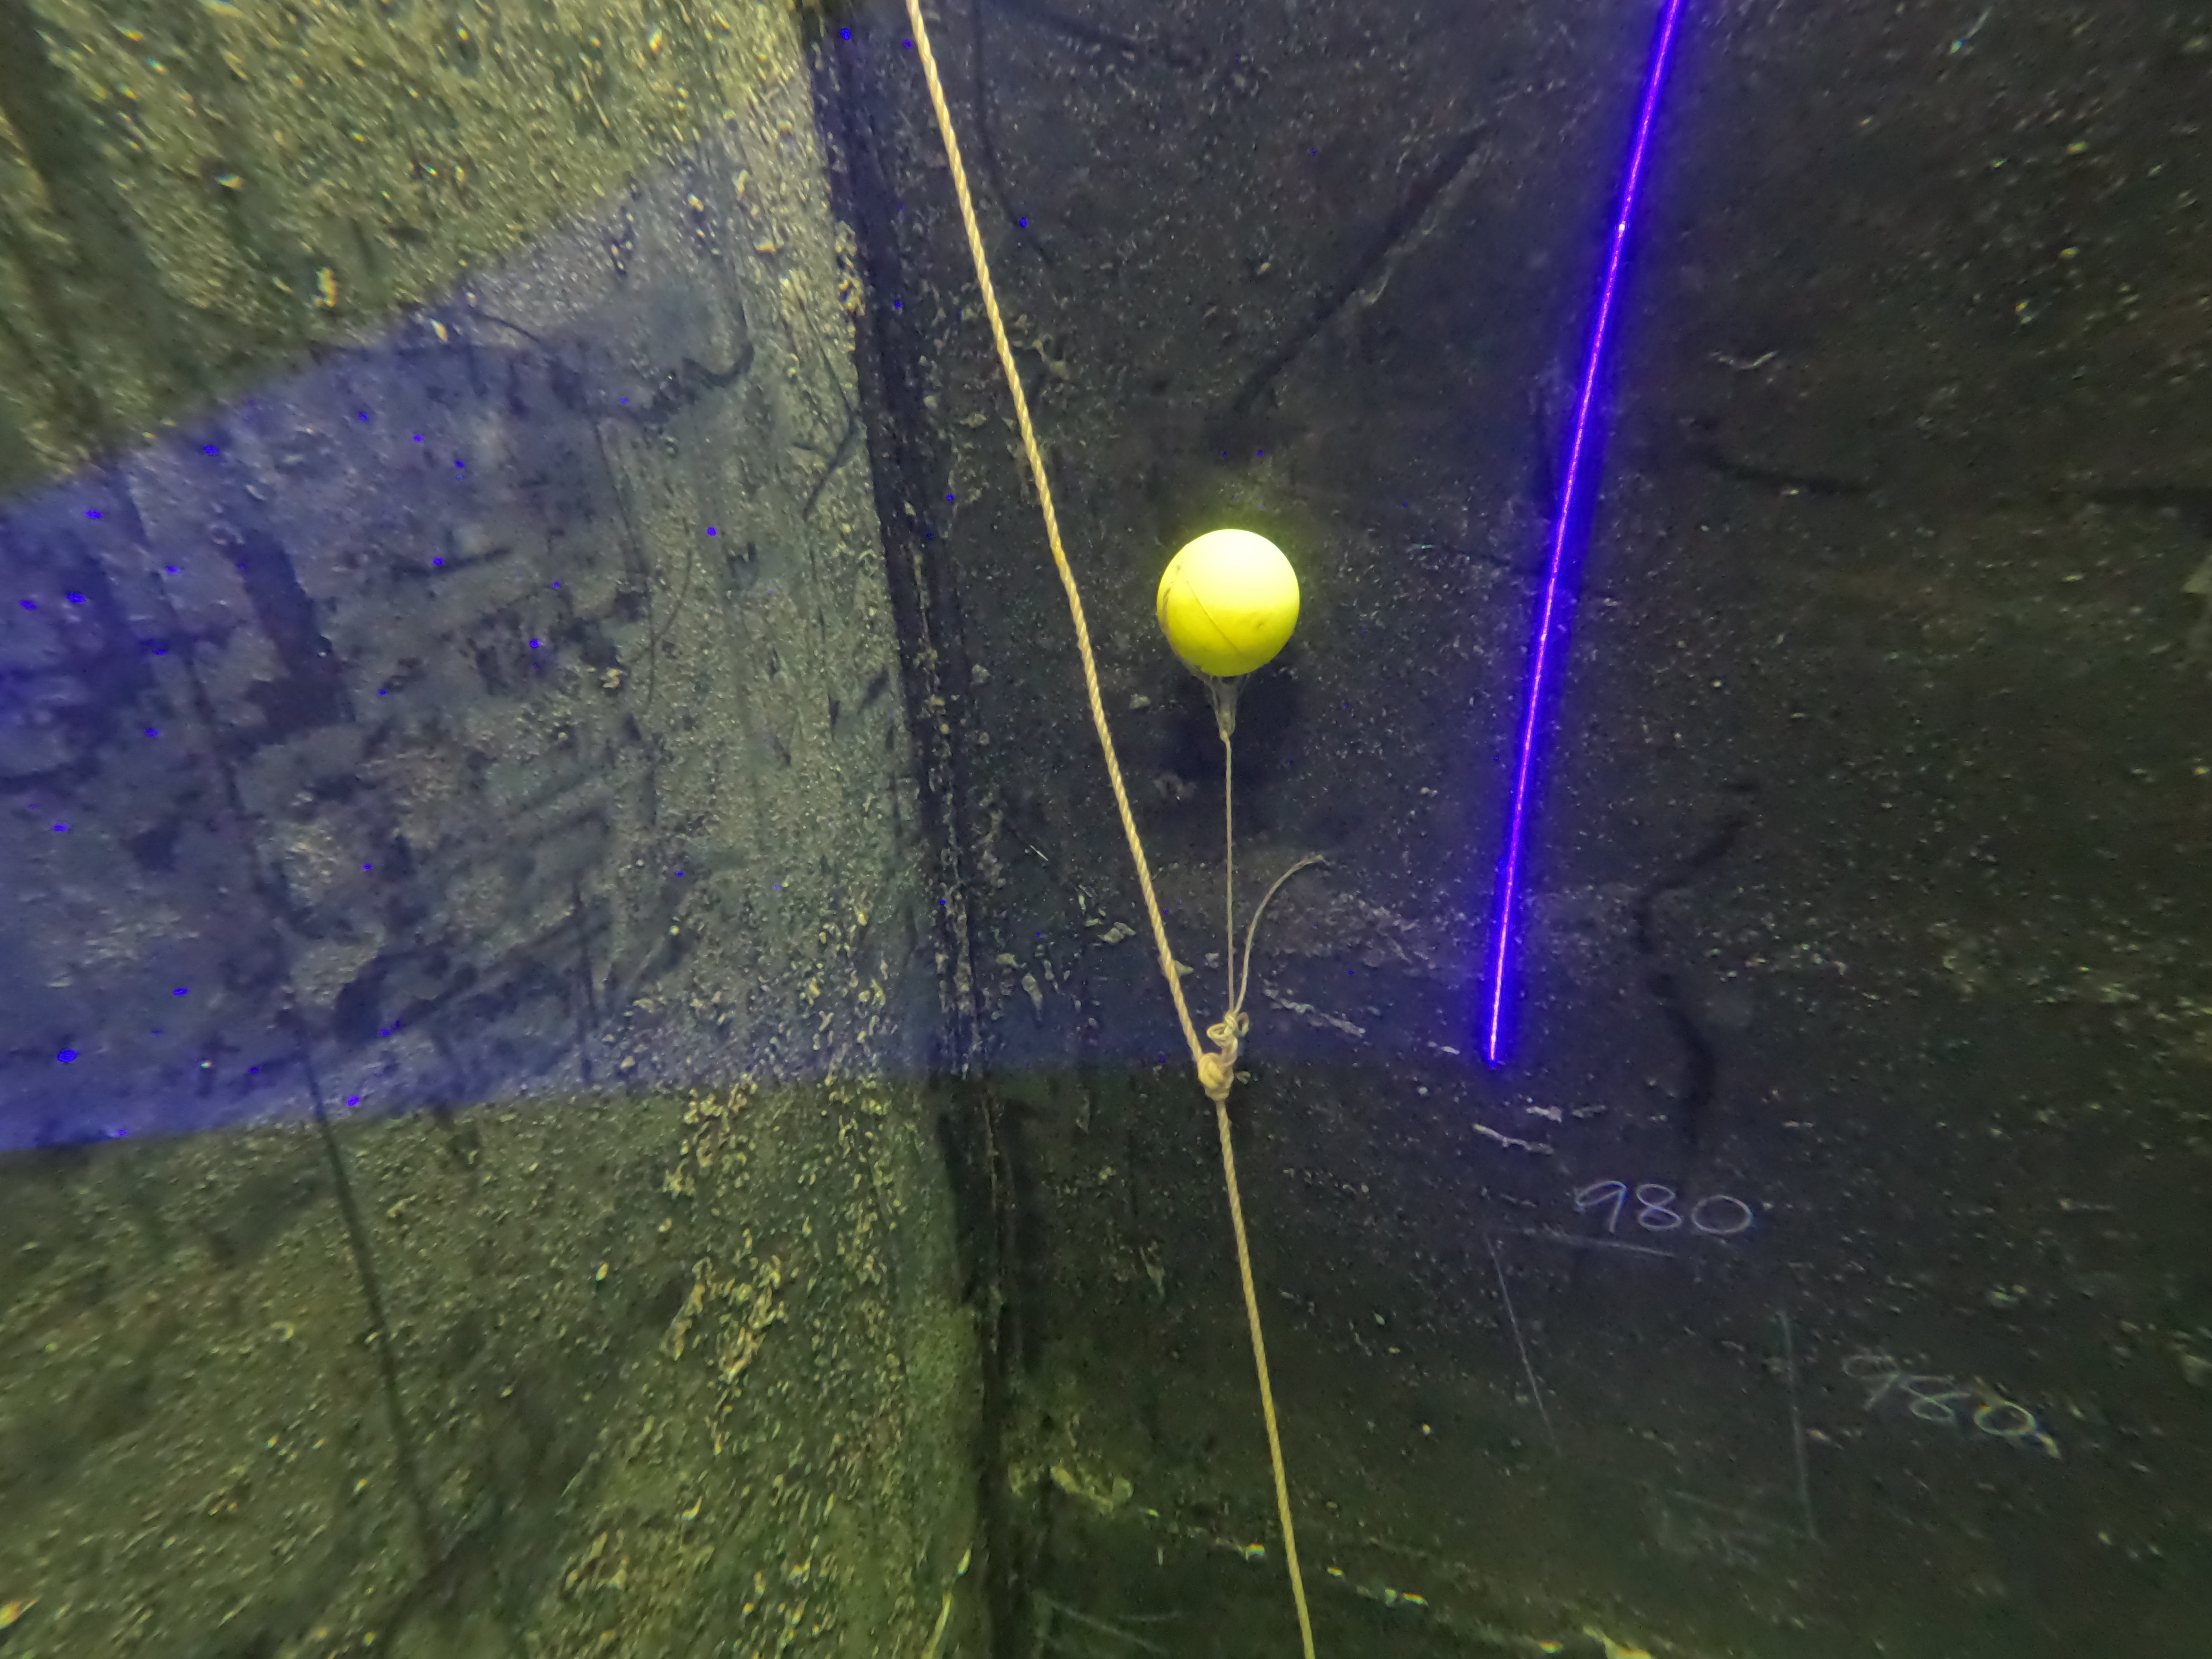

Supplement: Supplementary file 269 [file G0031062.pdf › 4/G0031062.pdf]

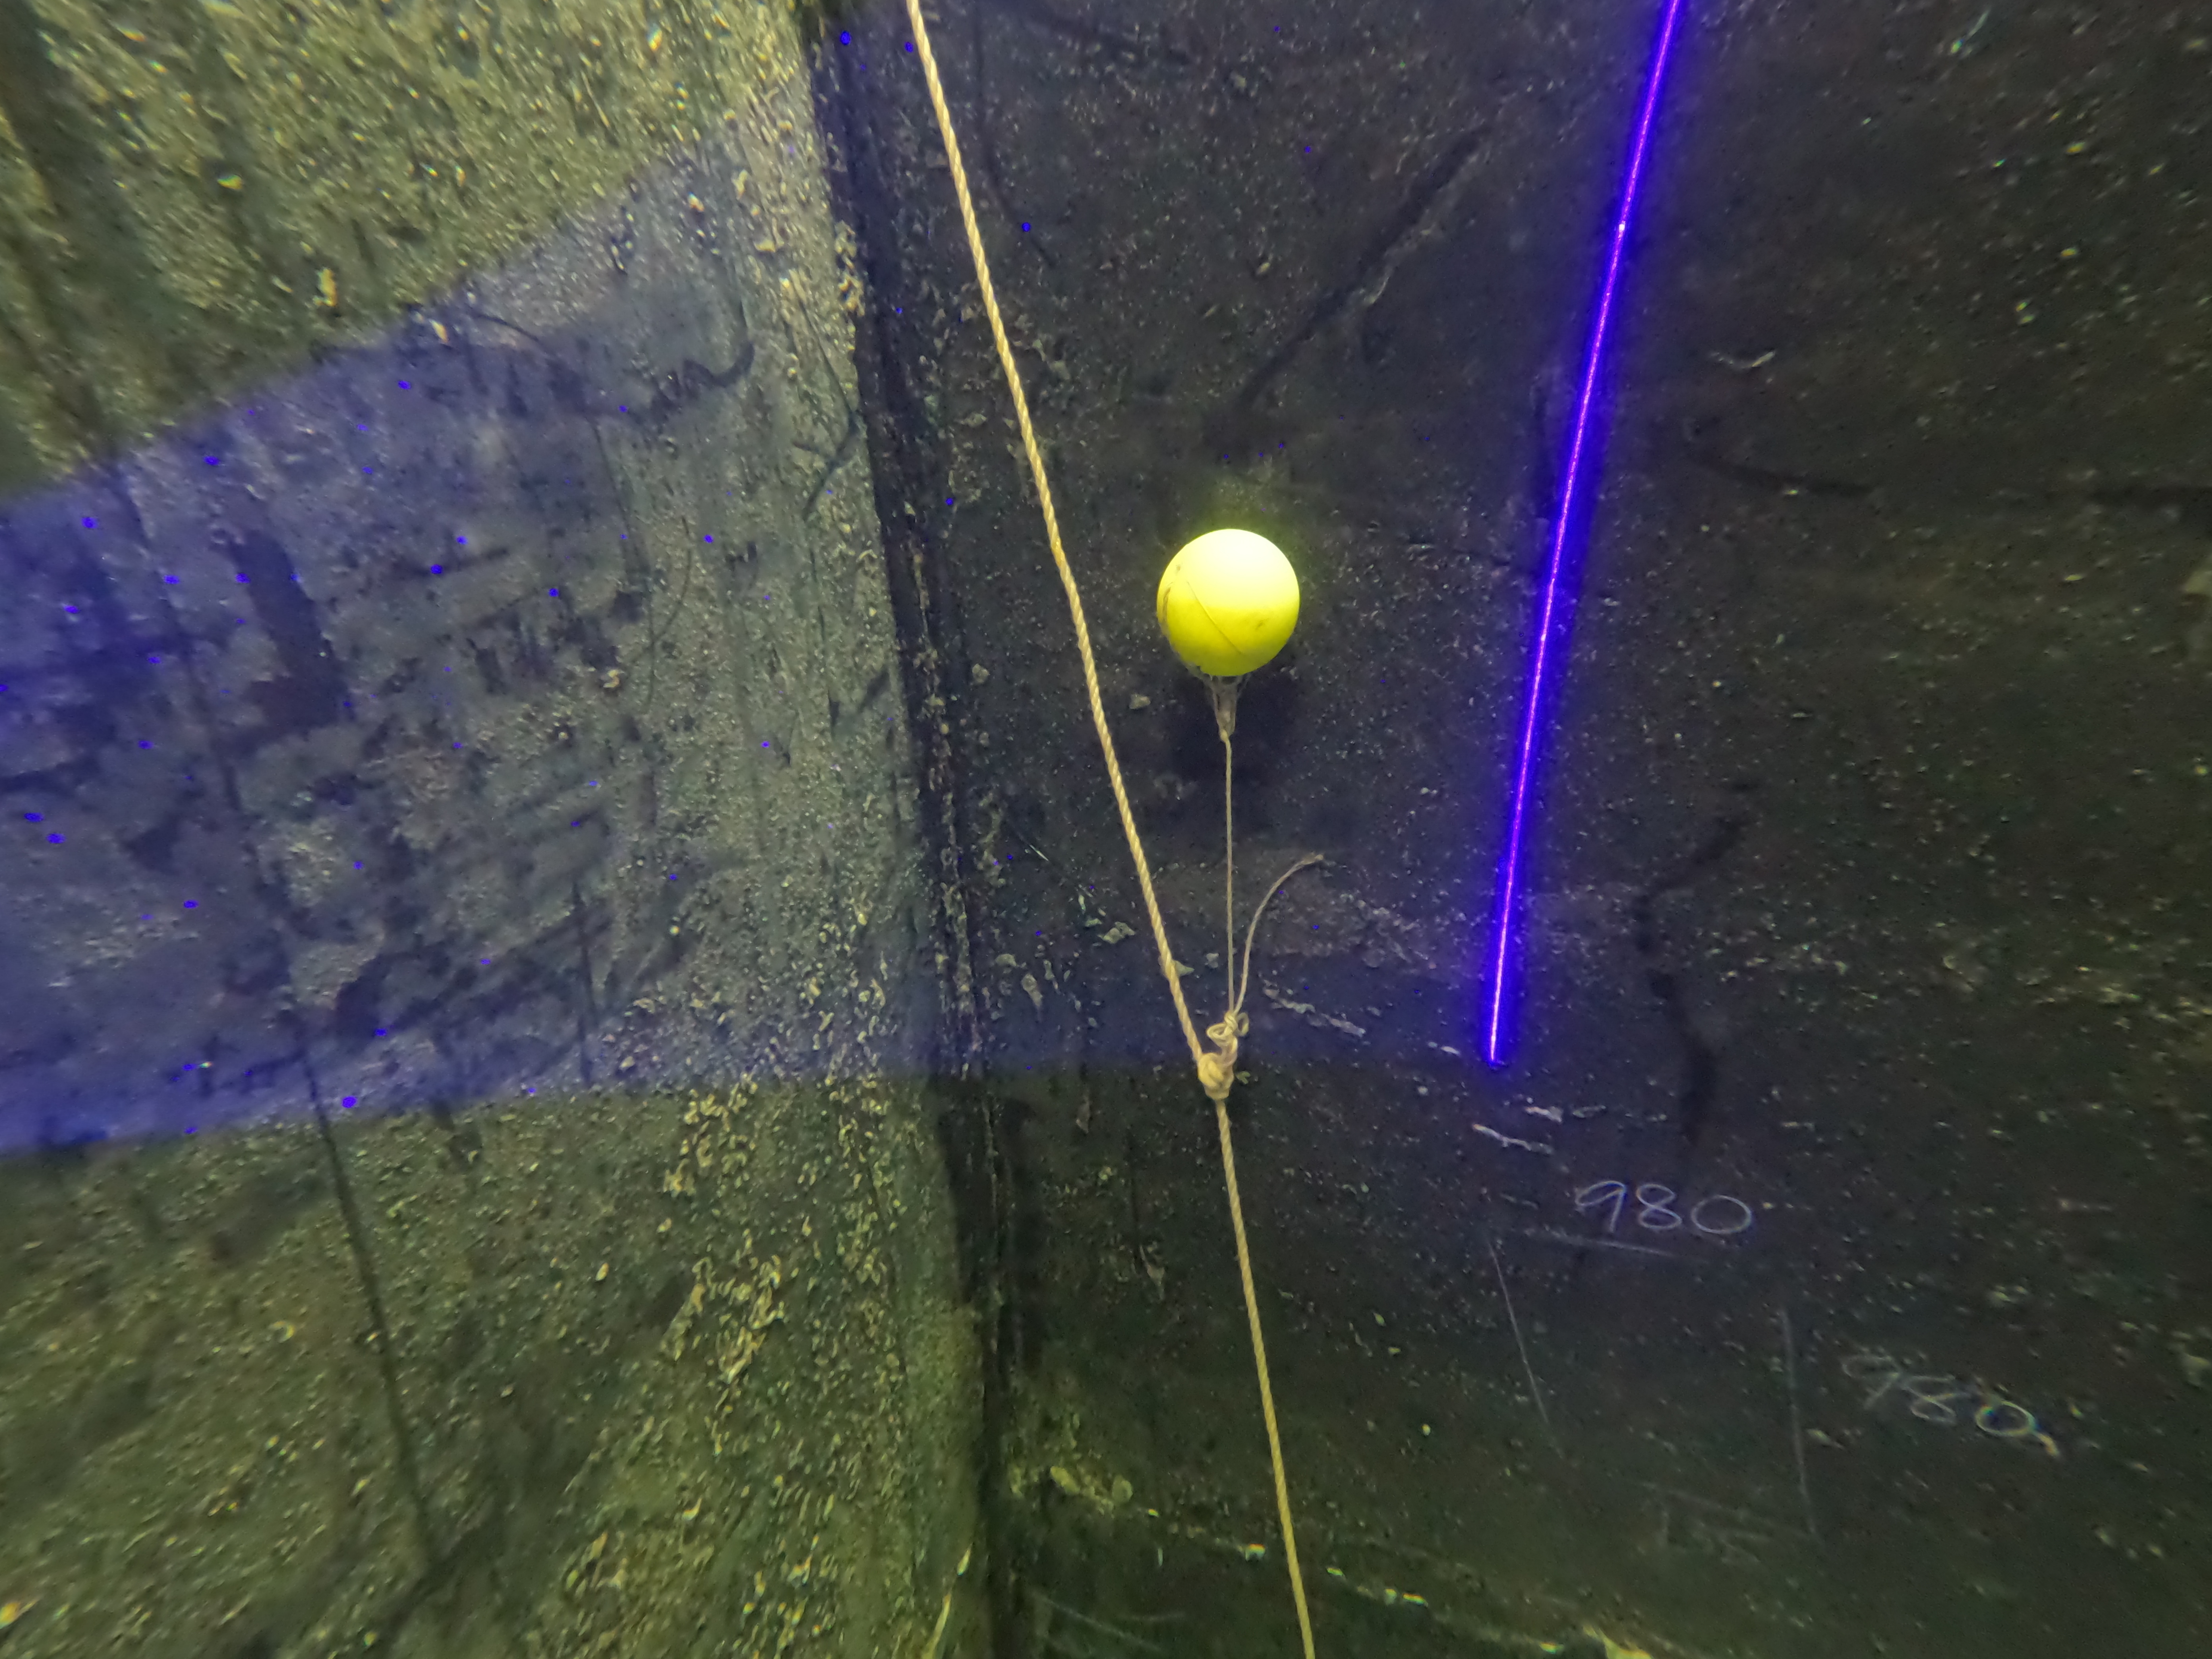

Supplement: Supplementary file 270 [file G0031063.pdf › 4/G0031063.pdf]

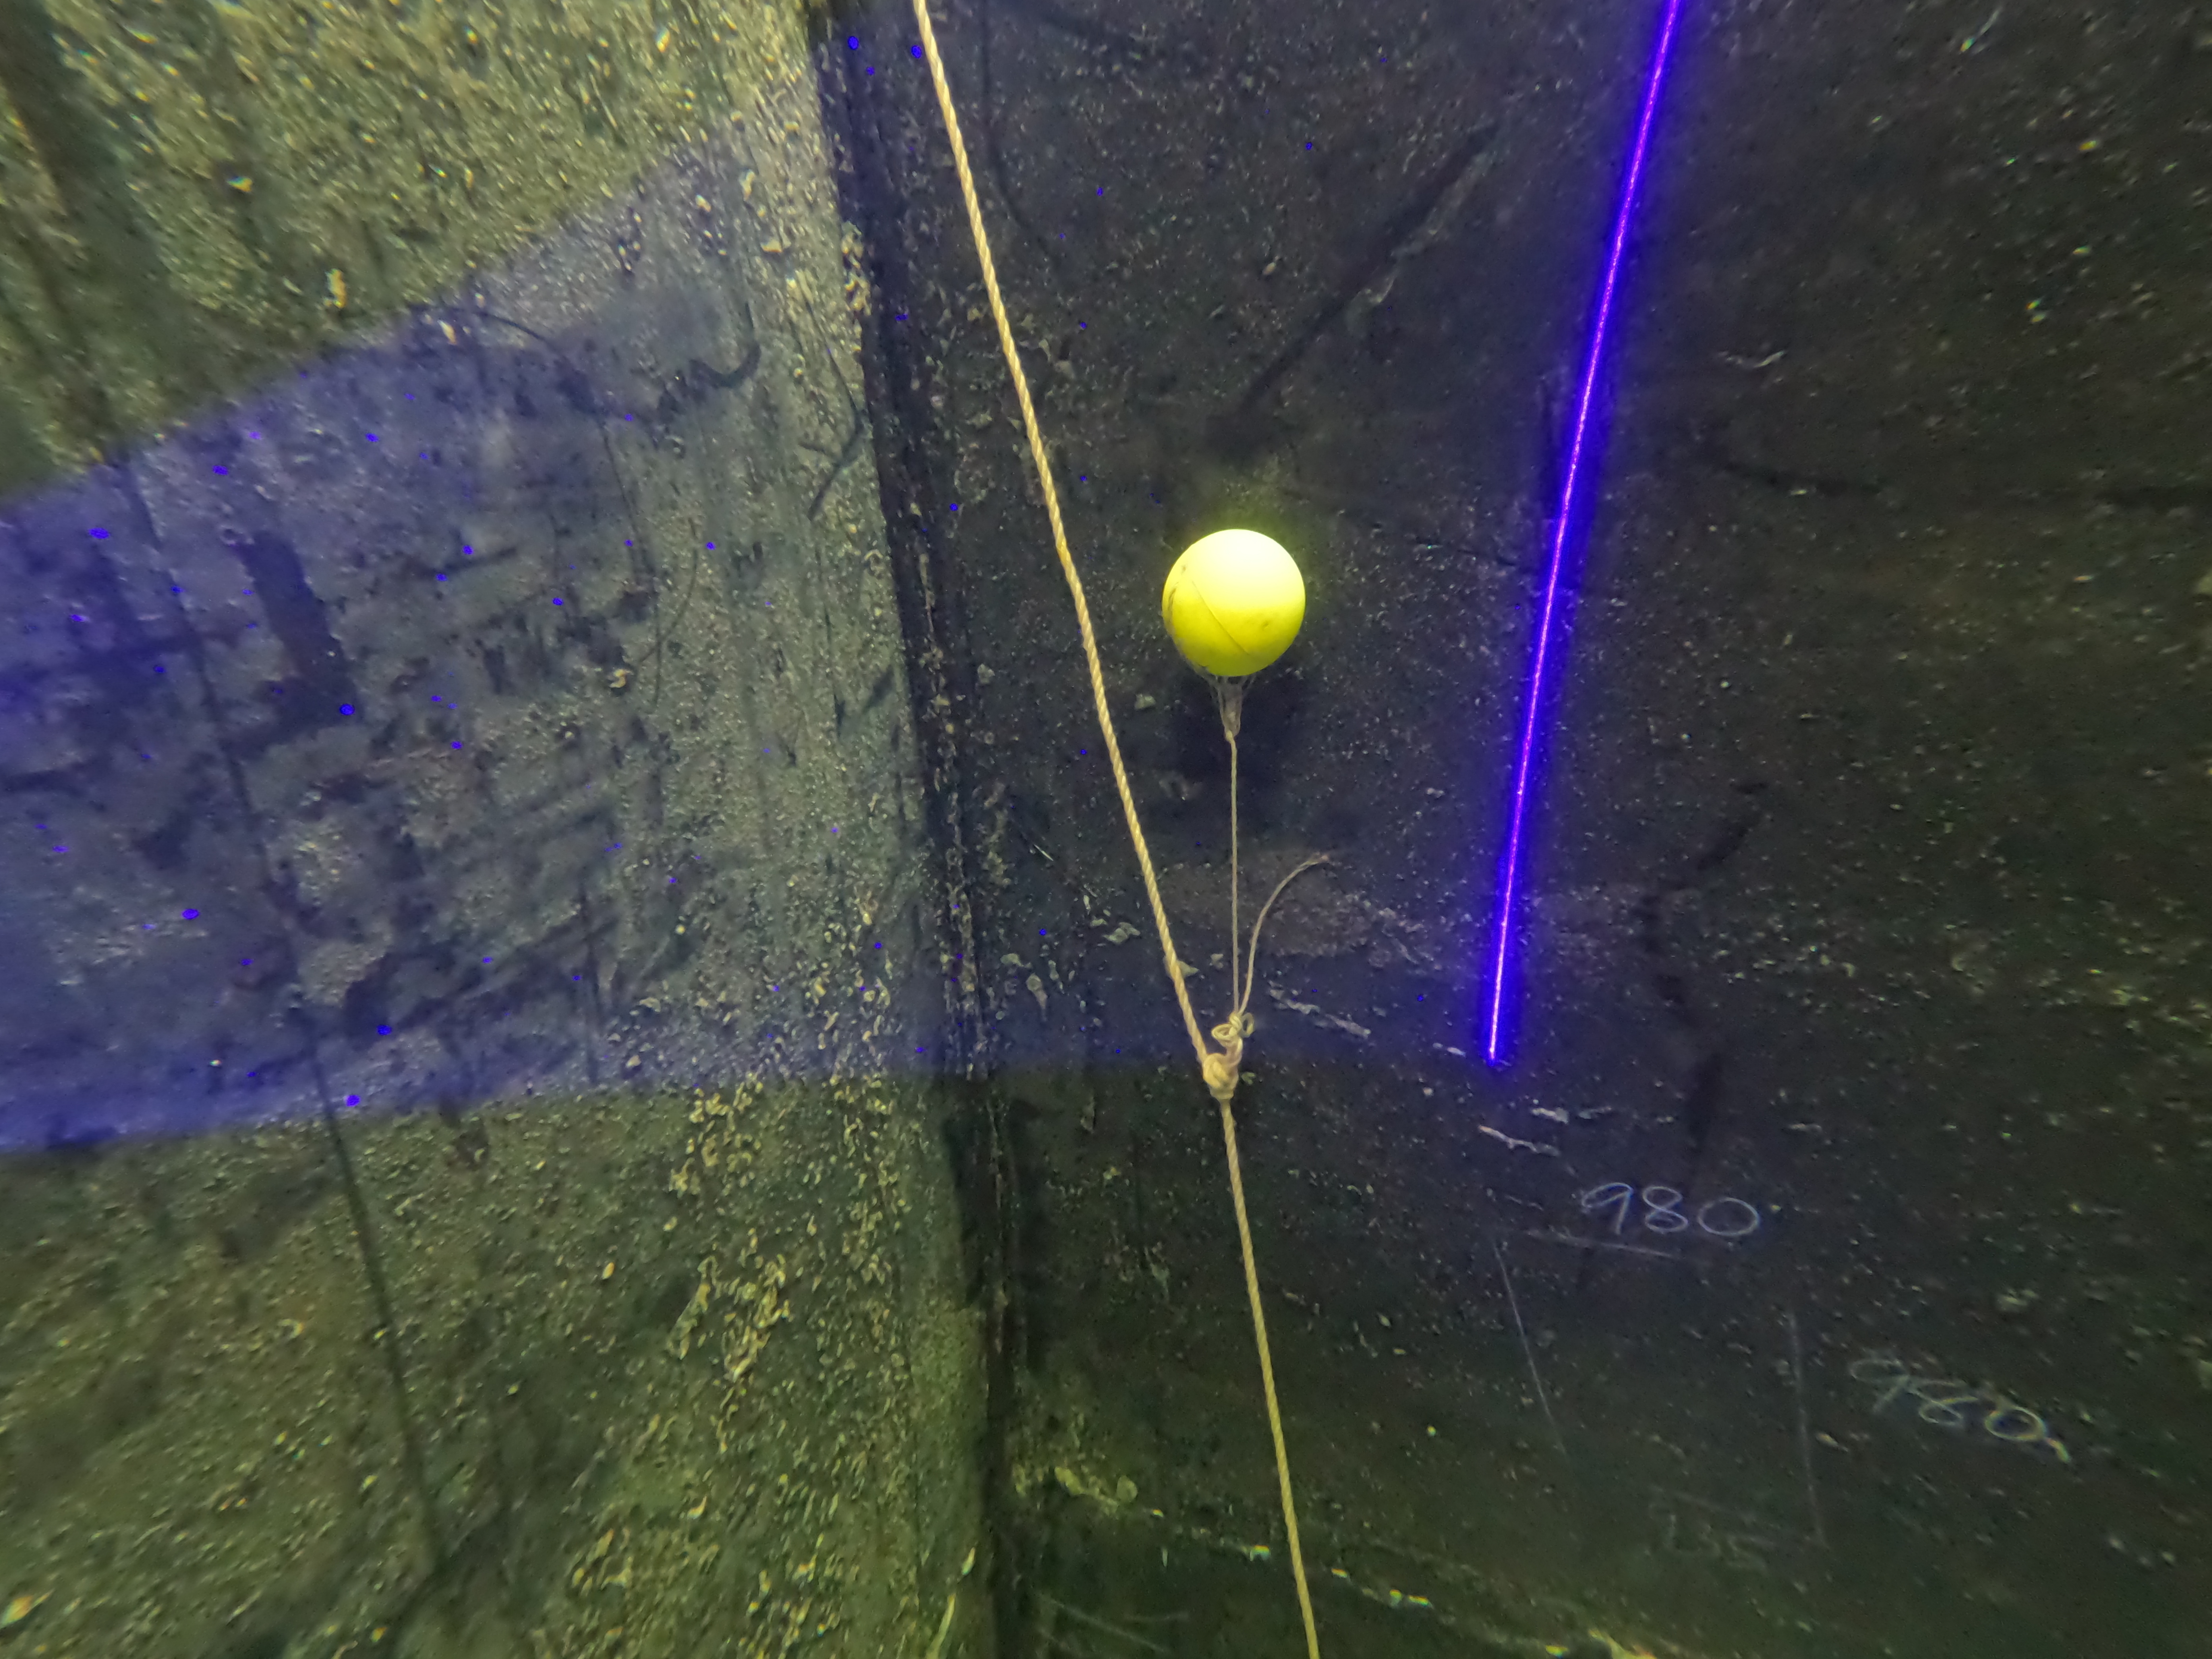

980

980

Supplement: Supplementary file 271 [file G0031064.pdf › 4/G0031064.pdf]

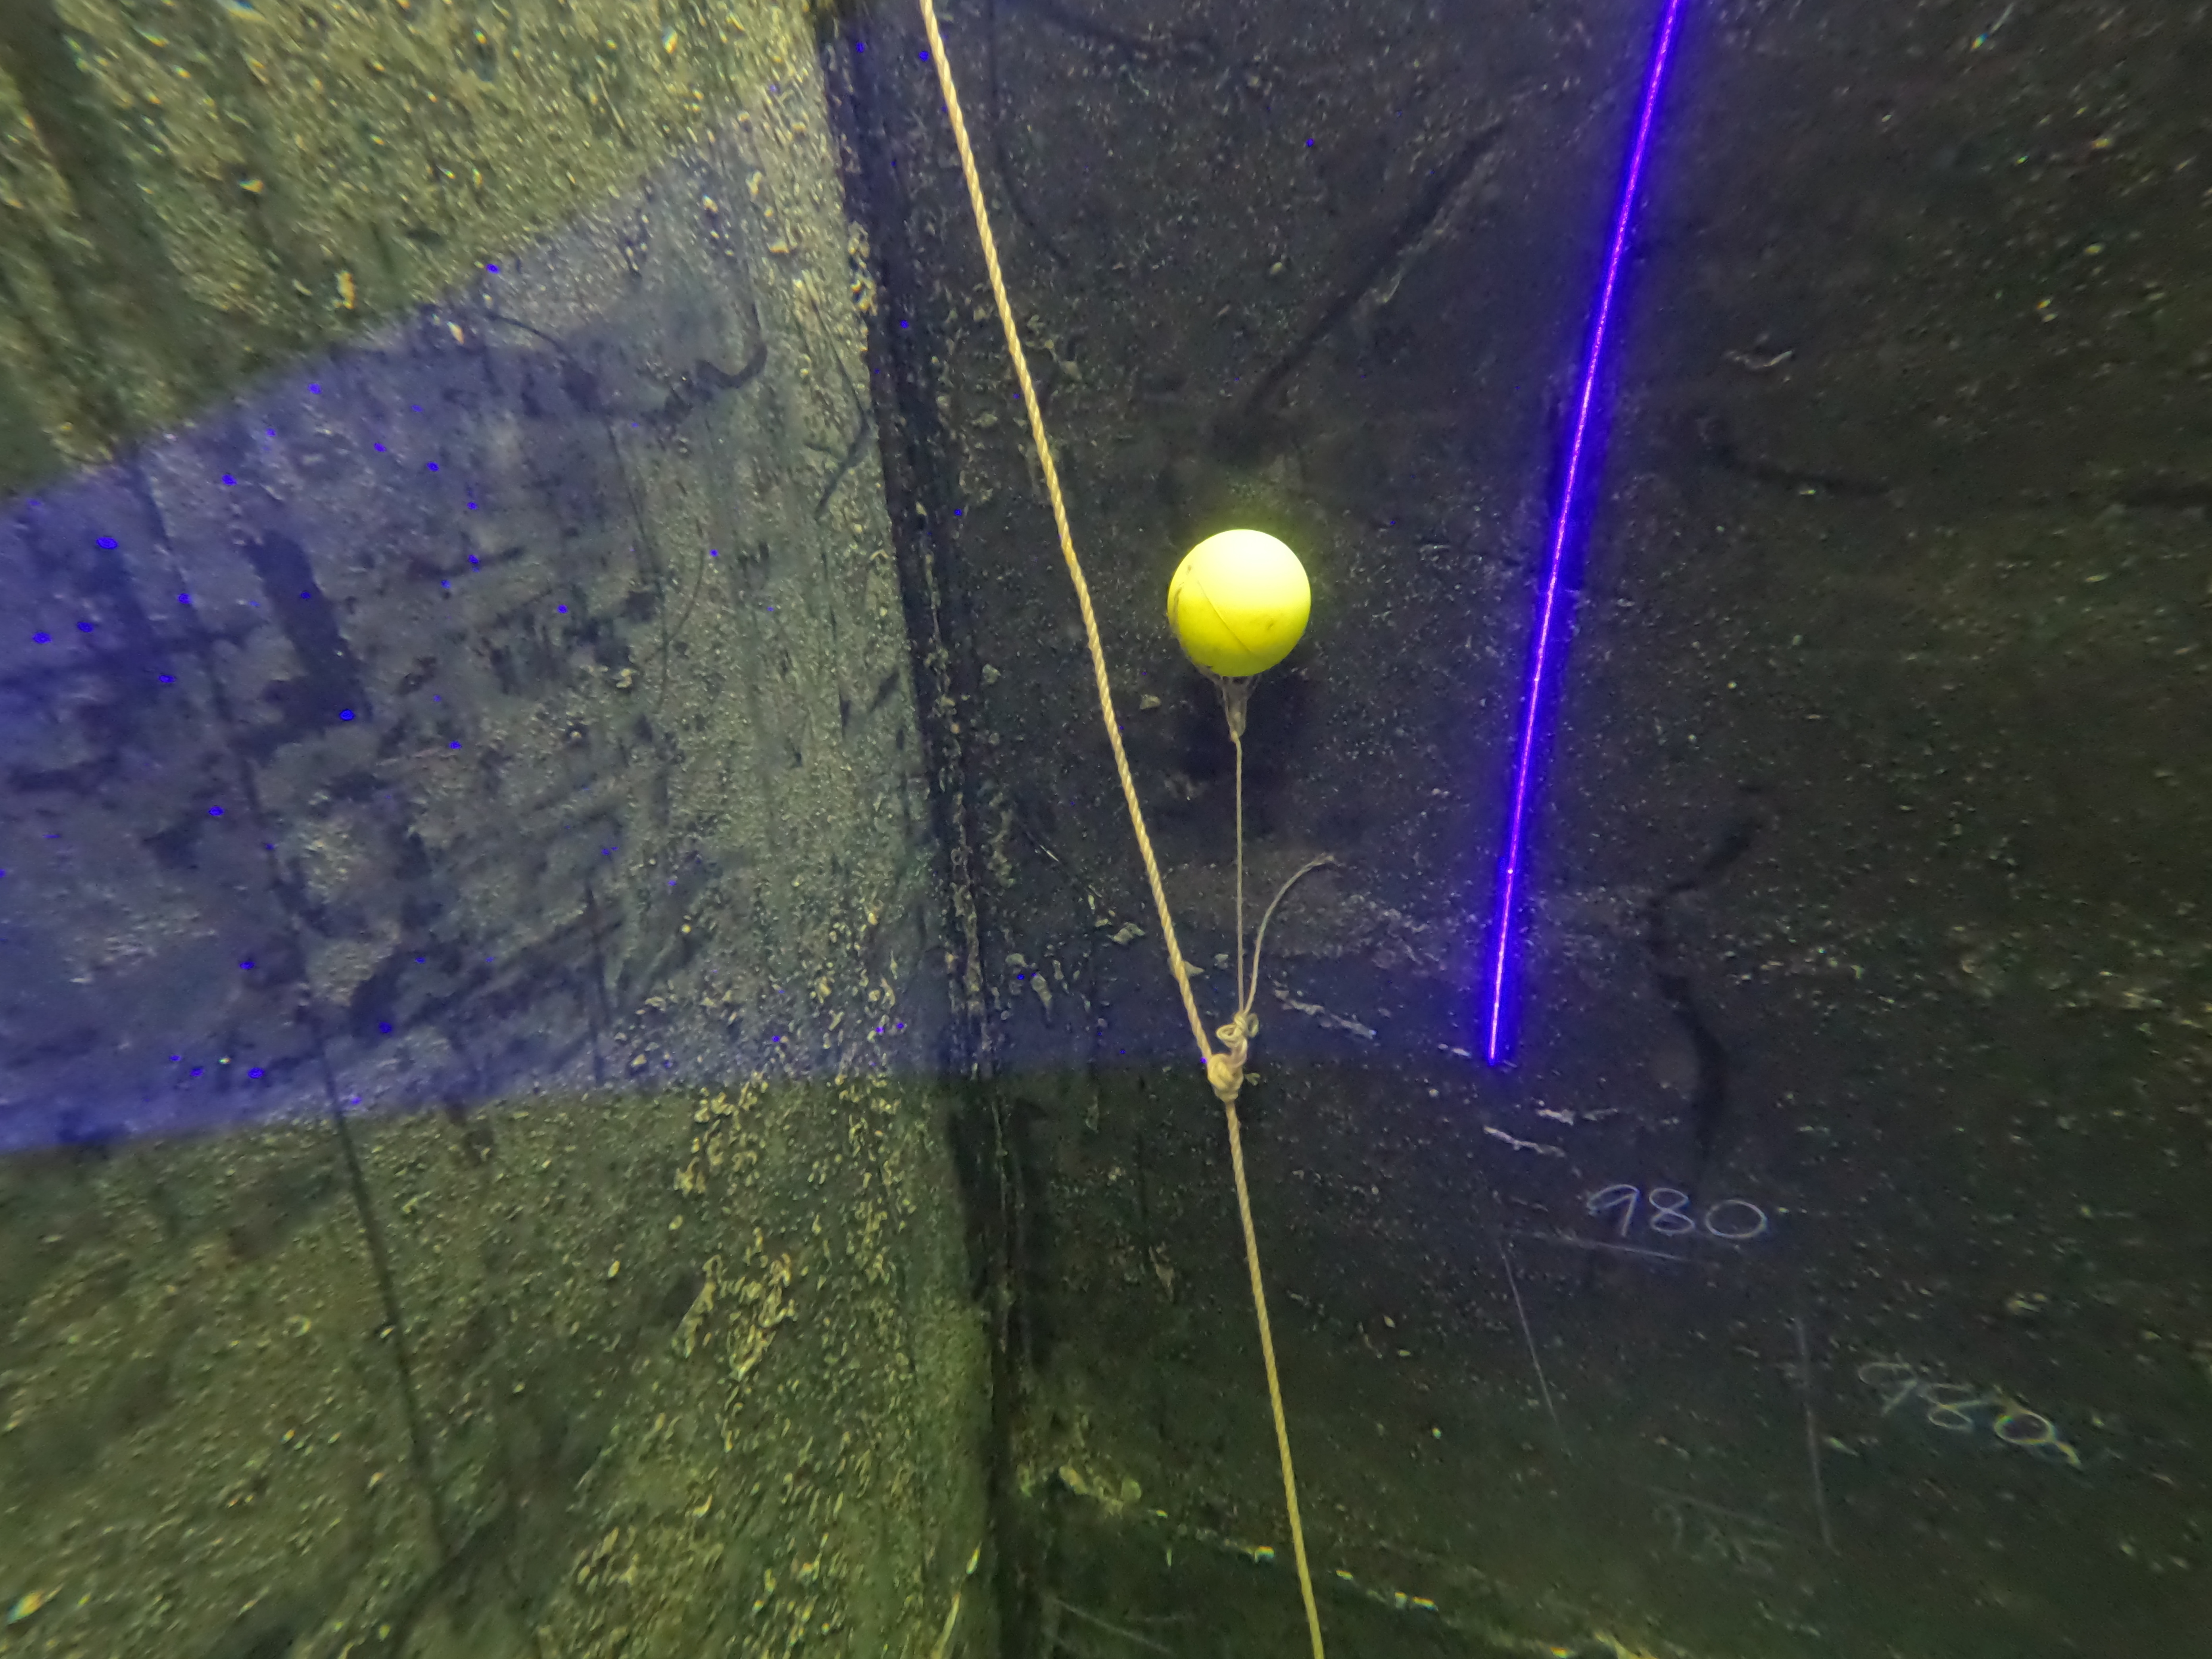

Supplement: Supplementary file 272 [file G0031065.pdf › 4/G0031065.pdf]

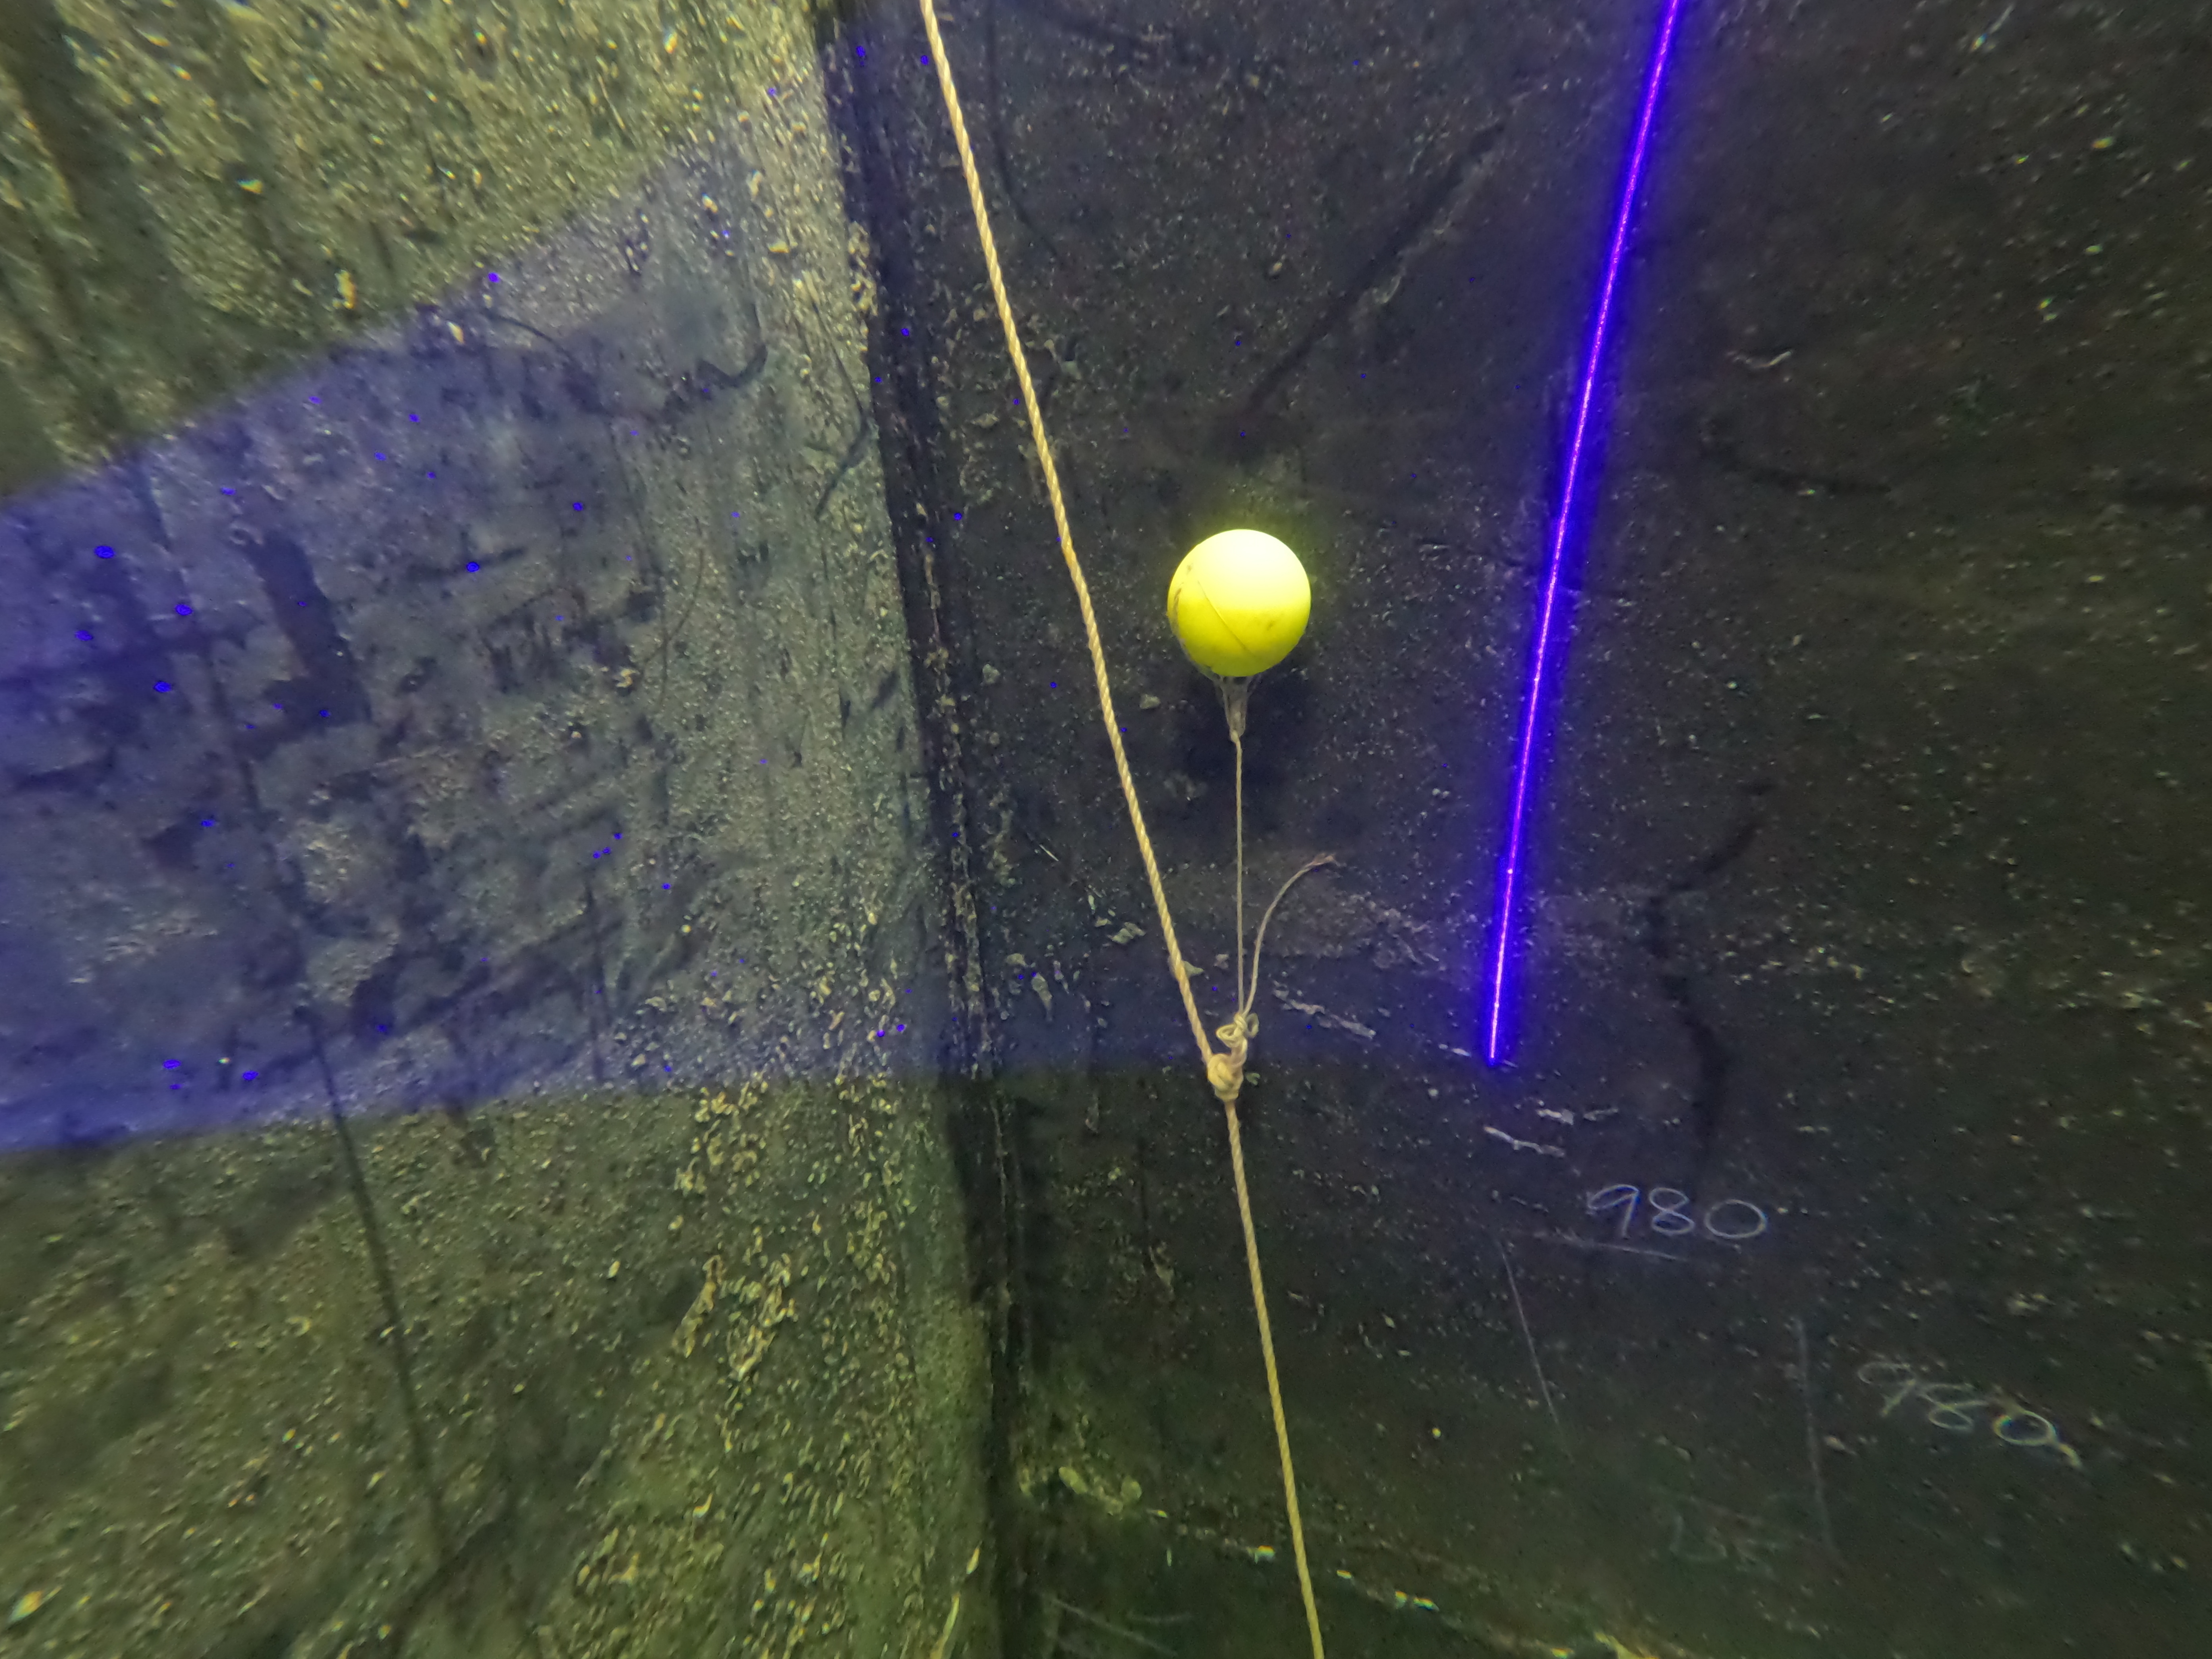

980

980

Supplement: Supplementary file 273 [file G0031066.pdf › 4/G0031066.pdf]

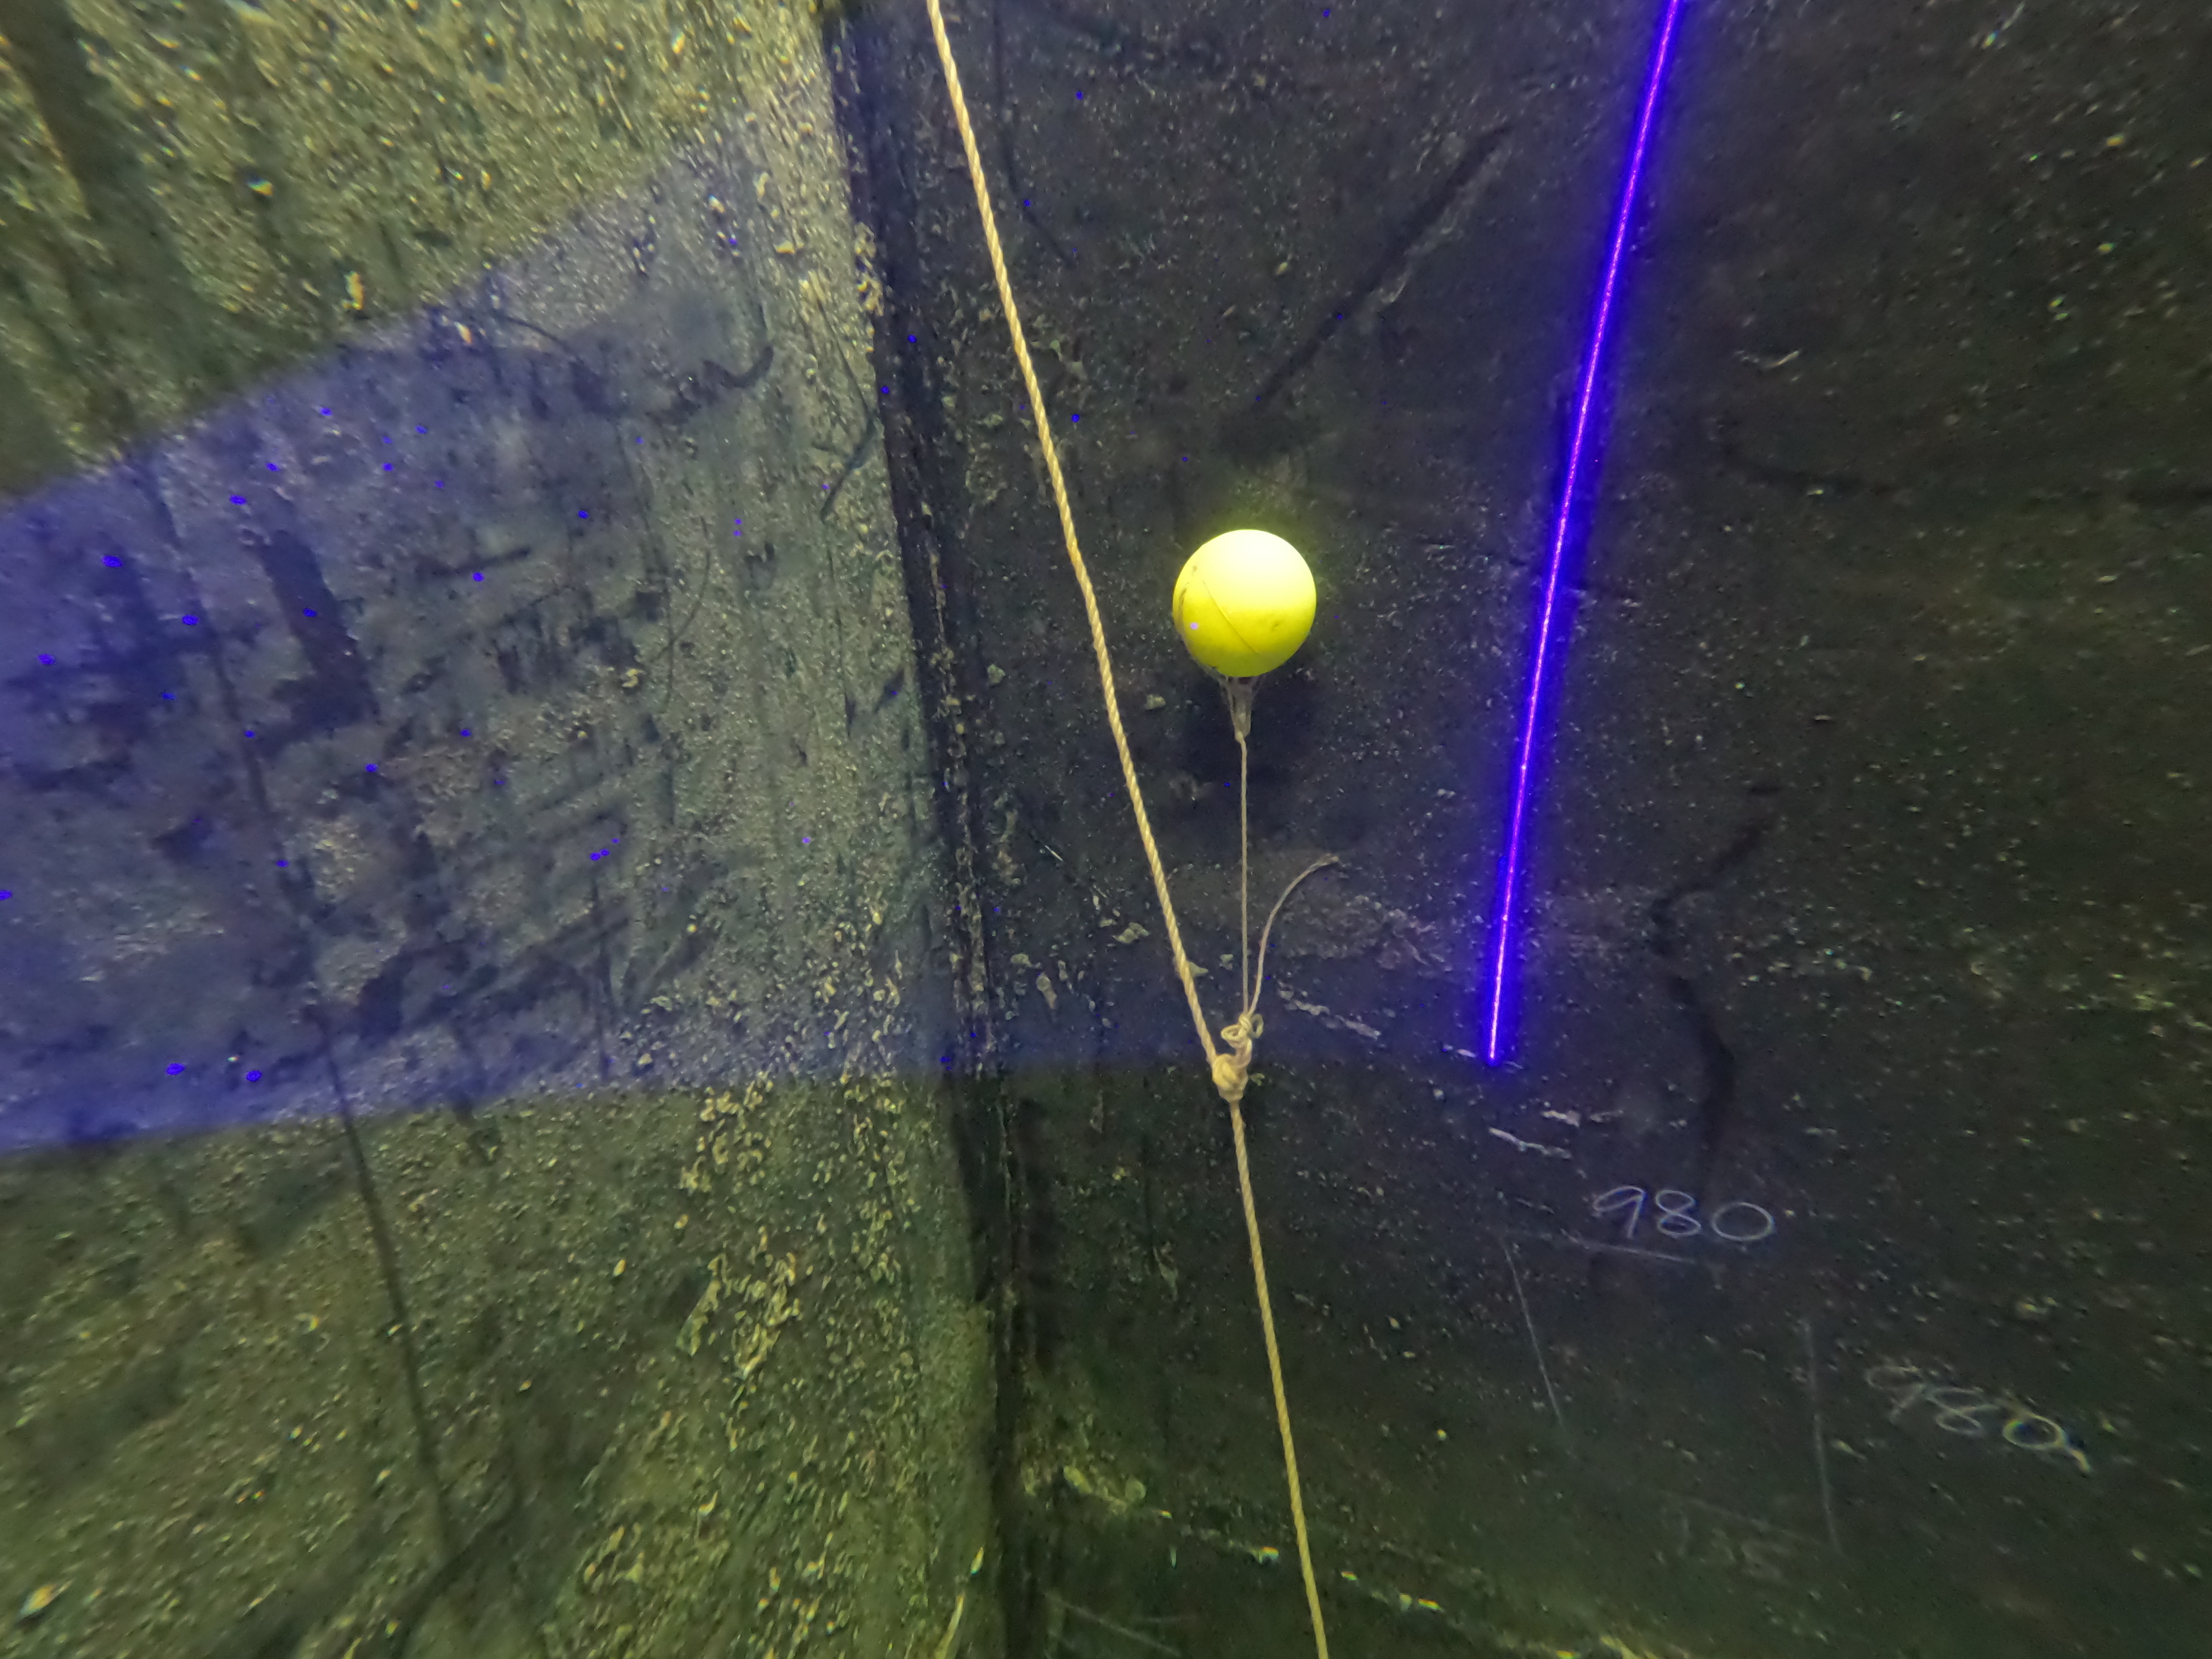

980

980

Supplement: Supplementary file 274 [file G0031067.pdf › 4/G0031067.pdf]

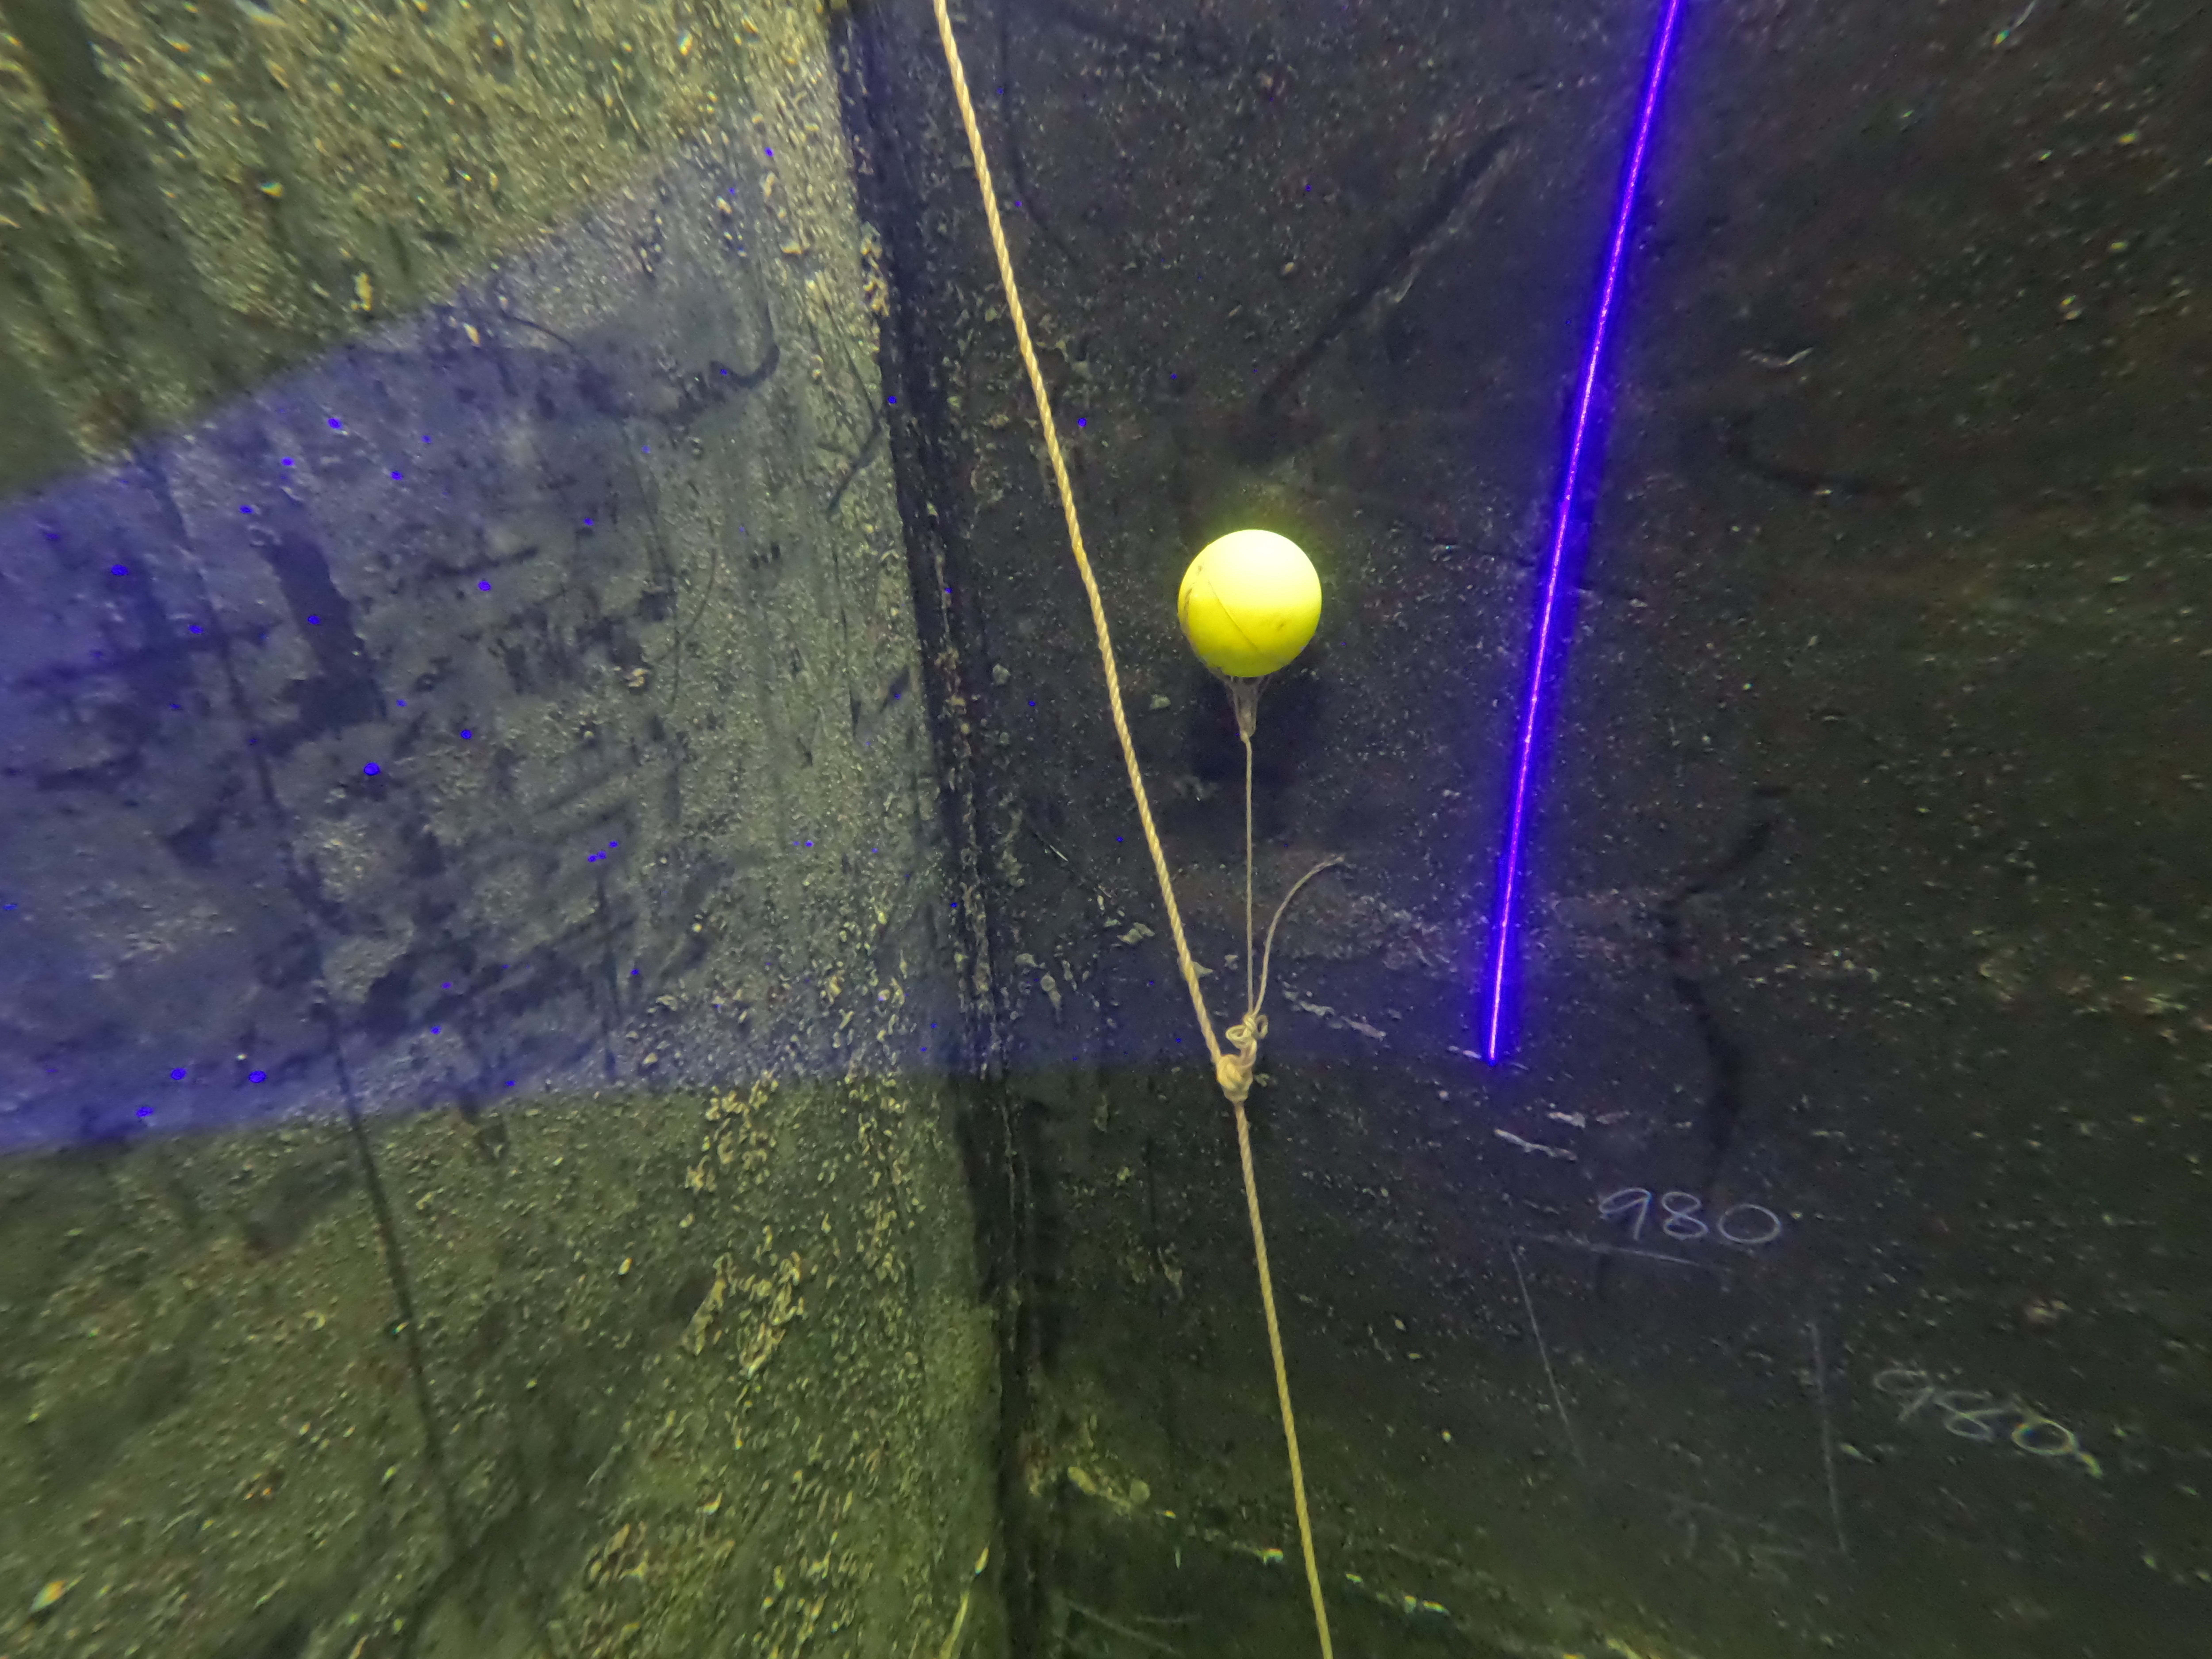

Supplement: Supplementary file 275 [file G0031068.pdf › 4/G0031068.pdf]

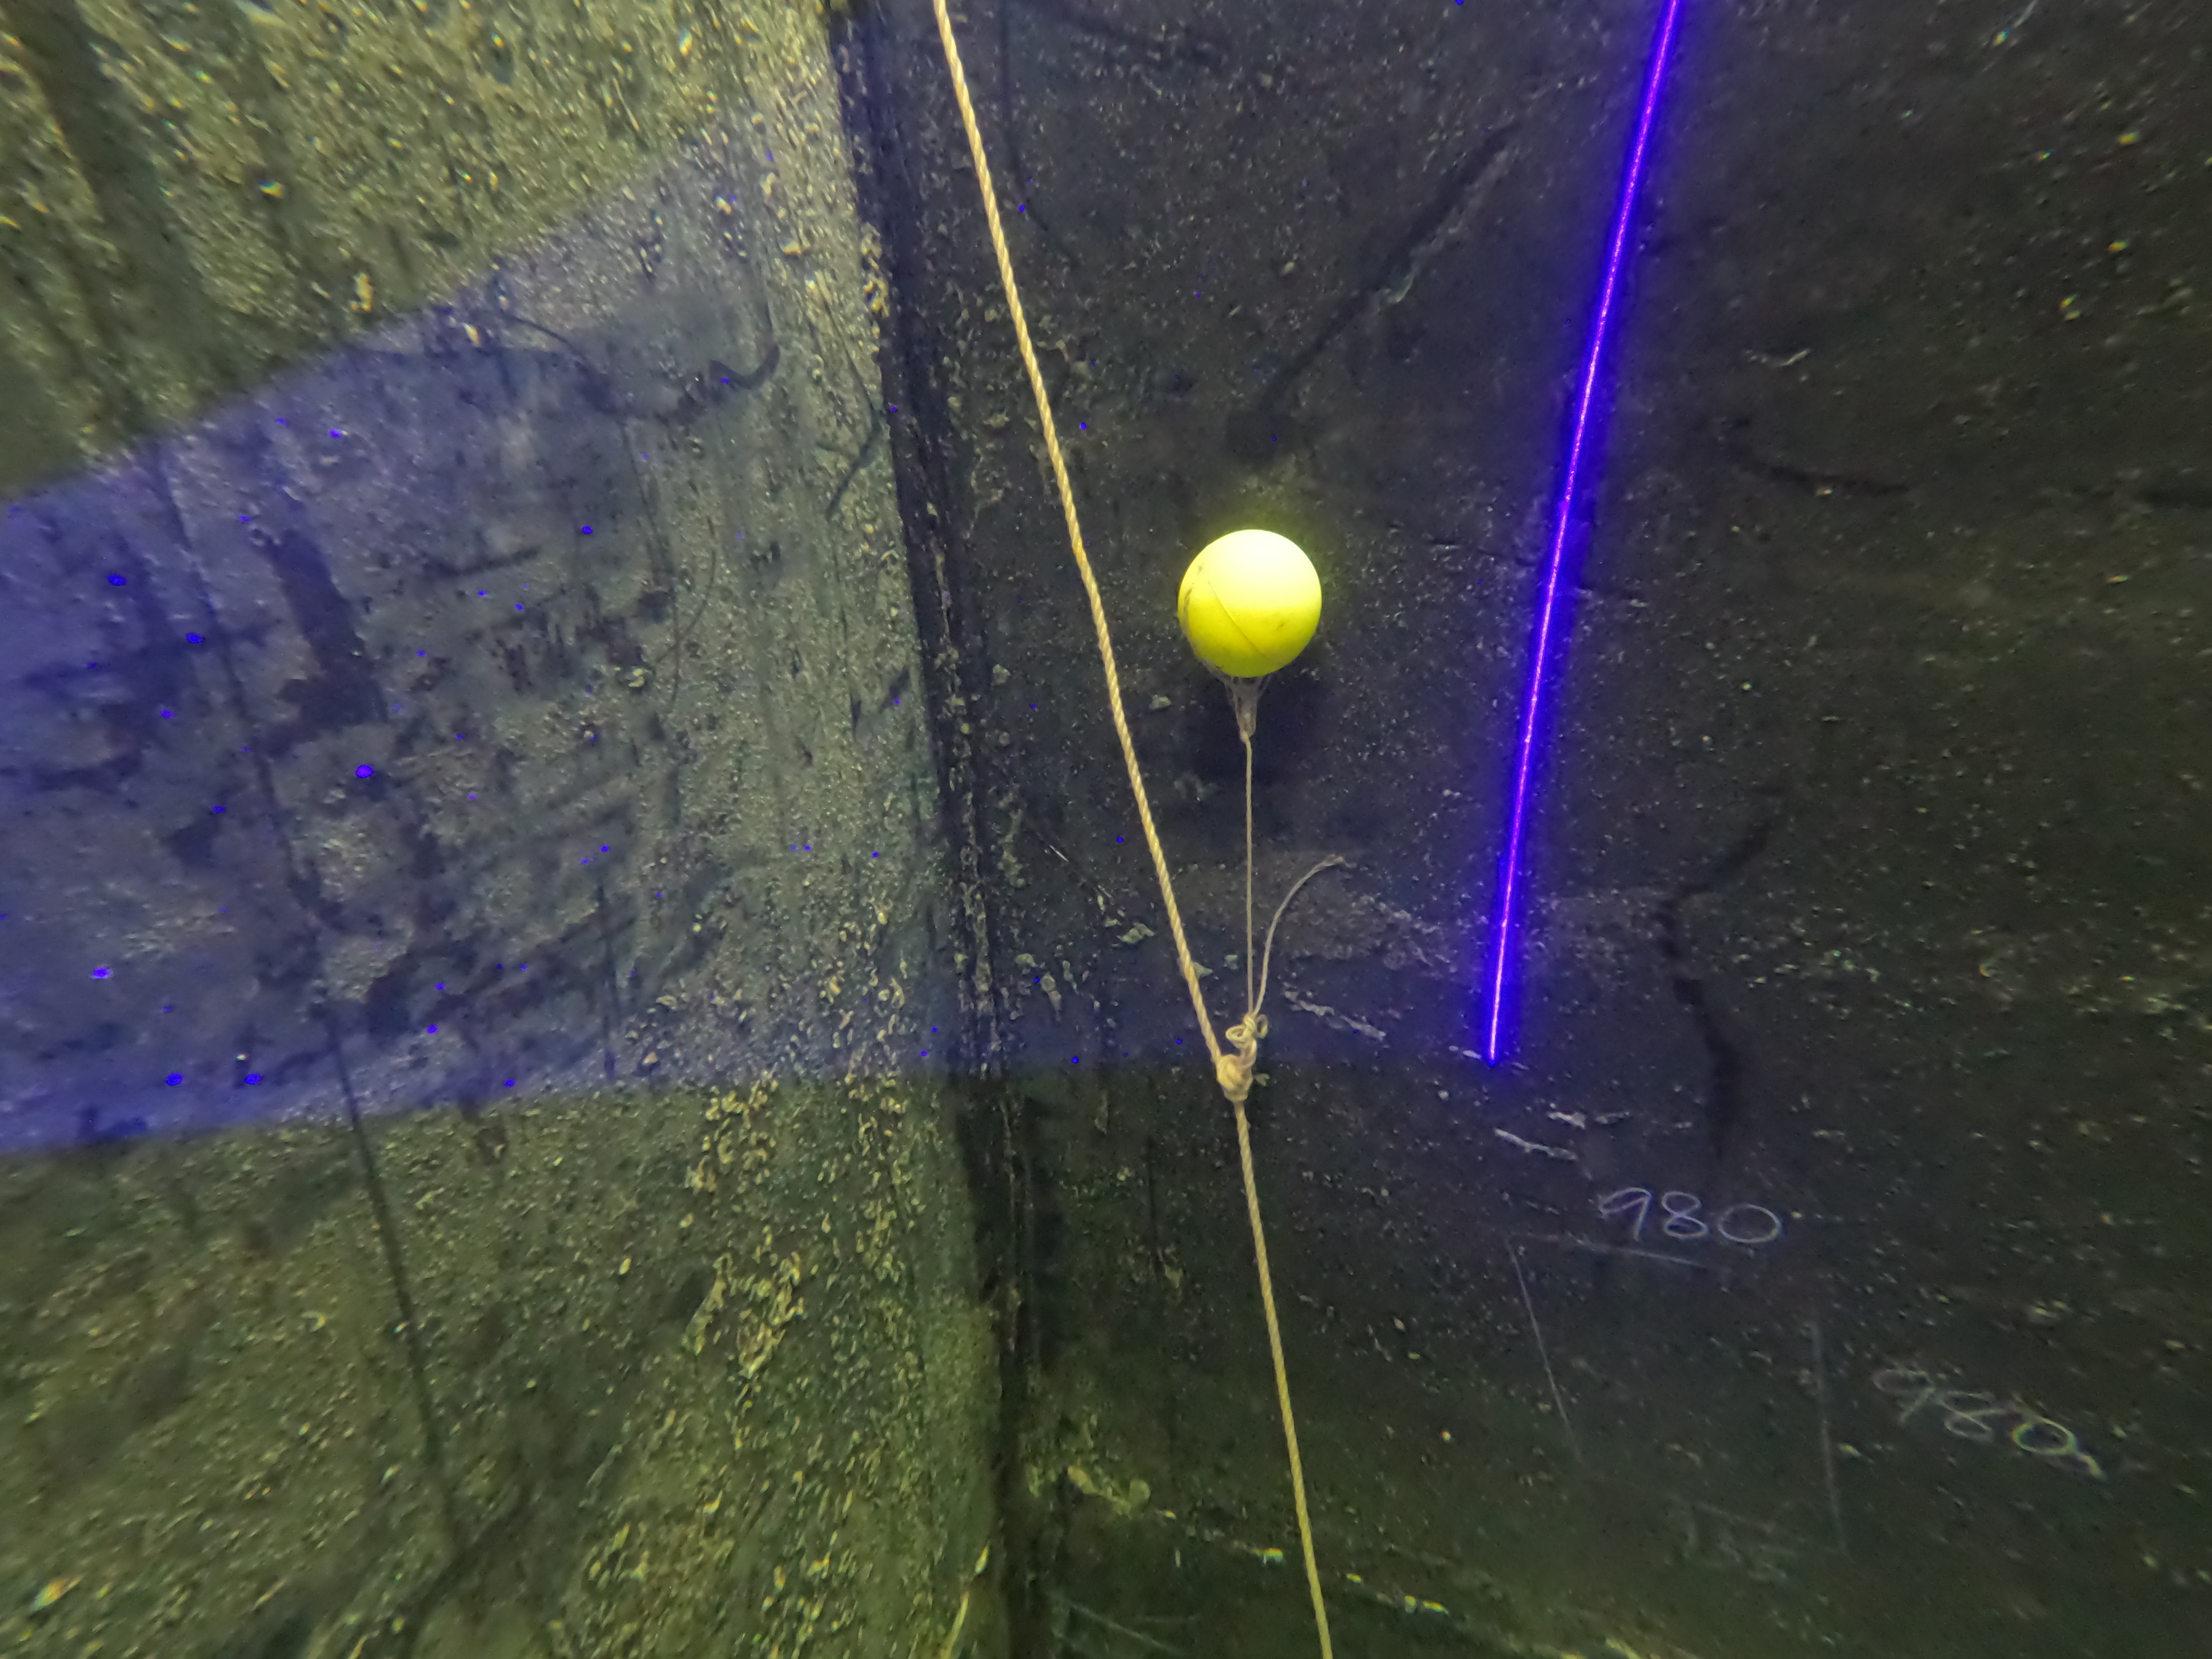

Supplement: Supplementary file 276 [file G0031069.pdf › 4/G0031069.pdf]

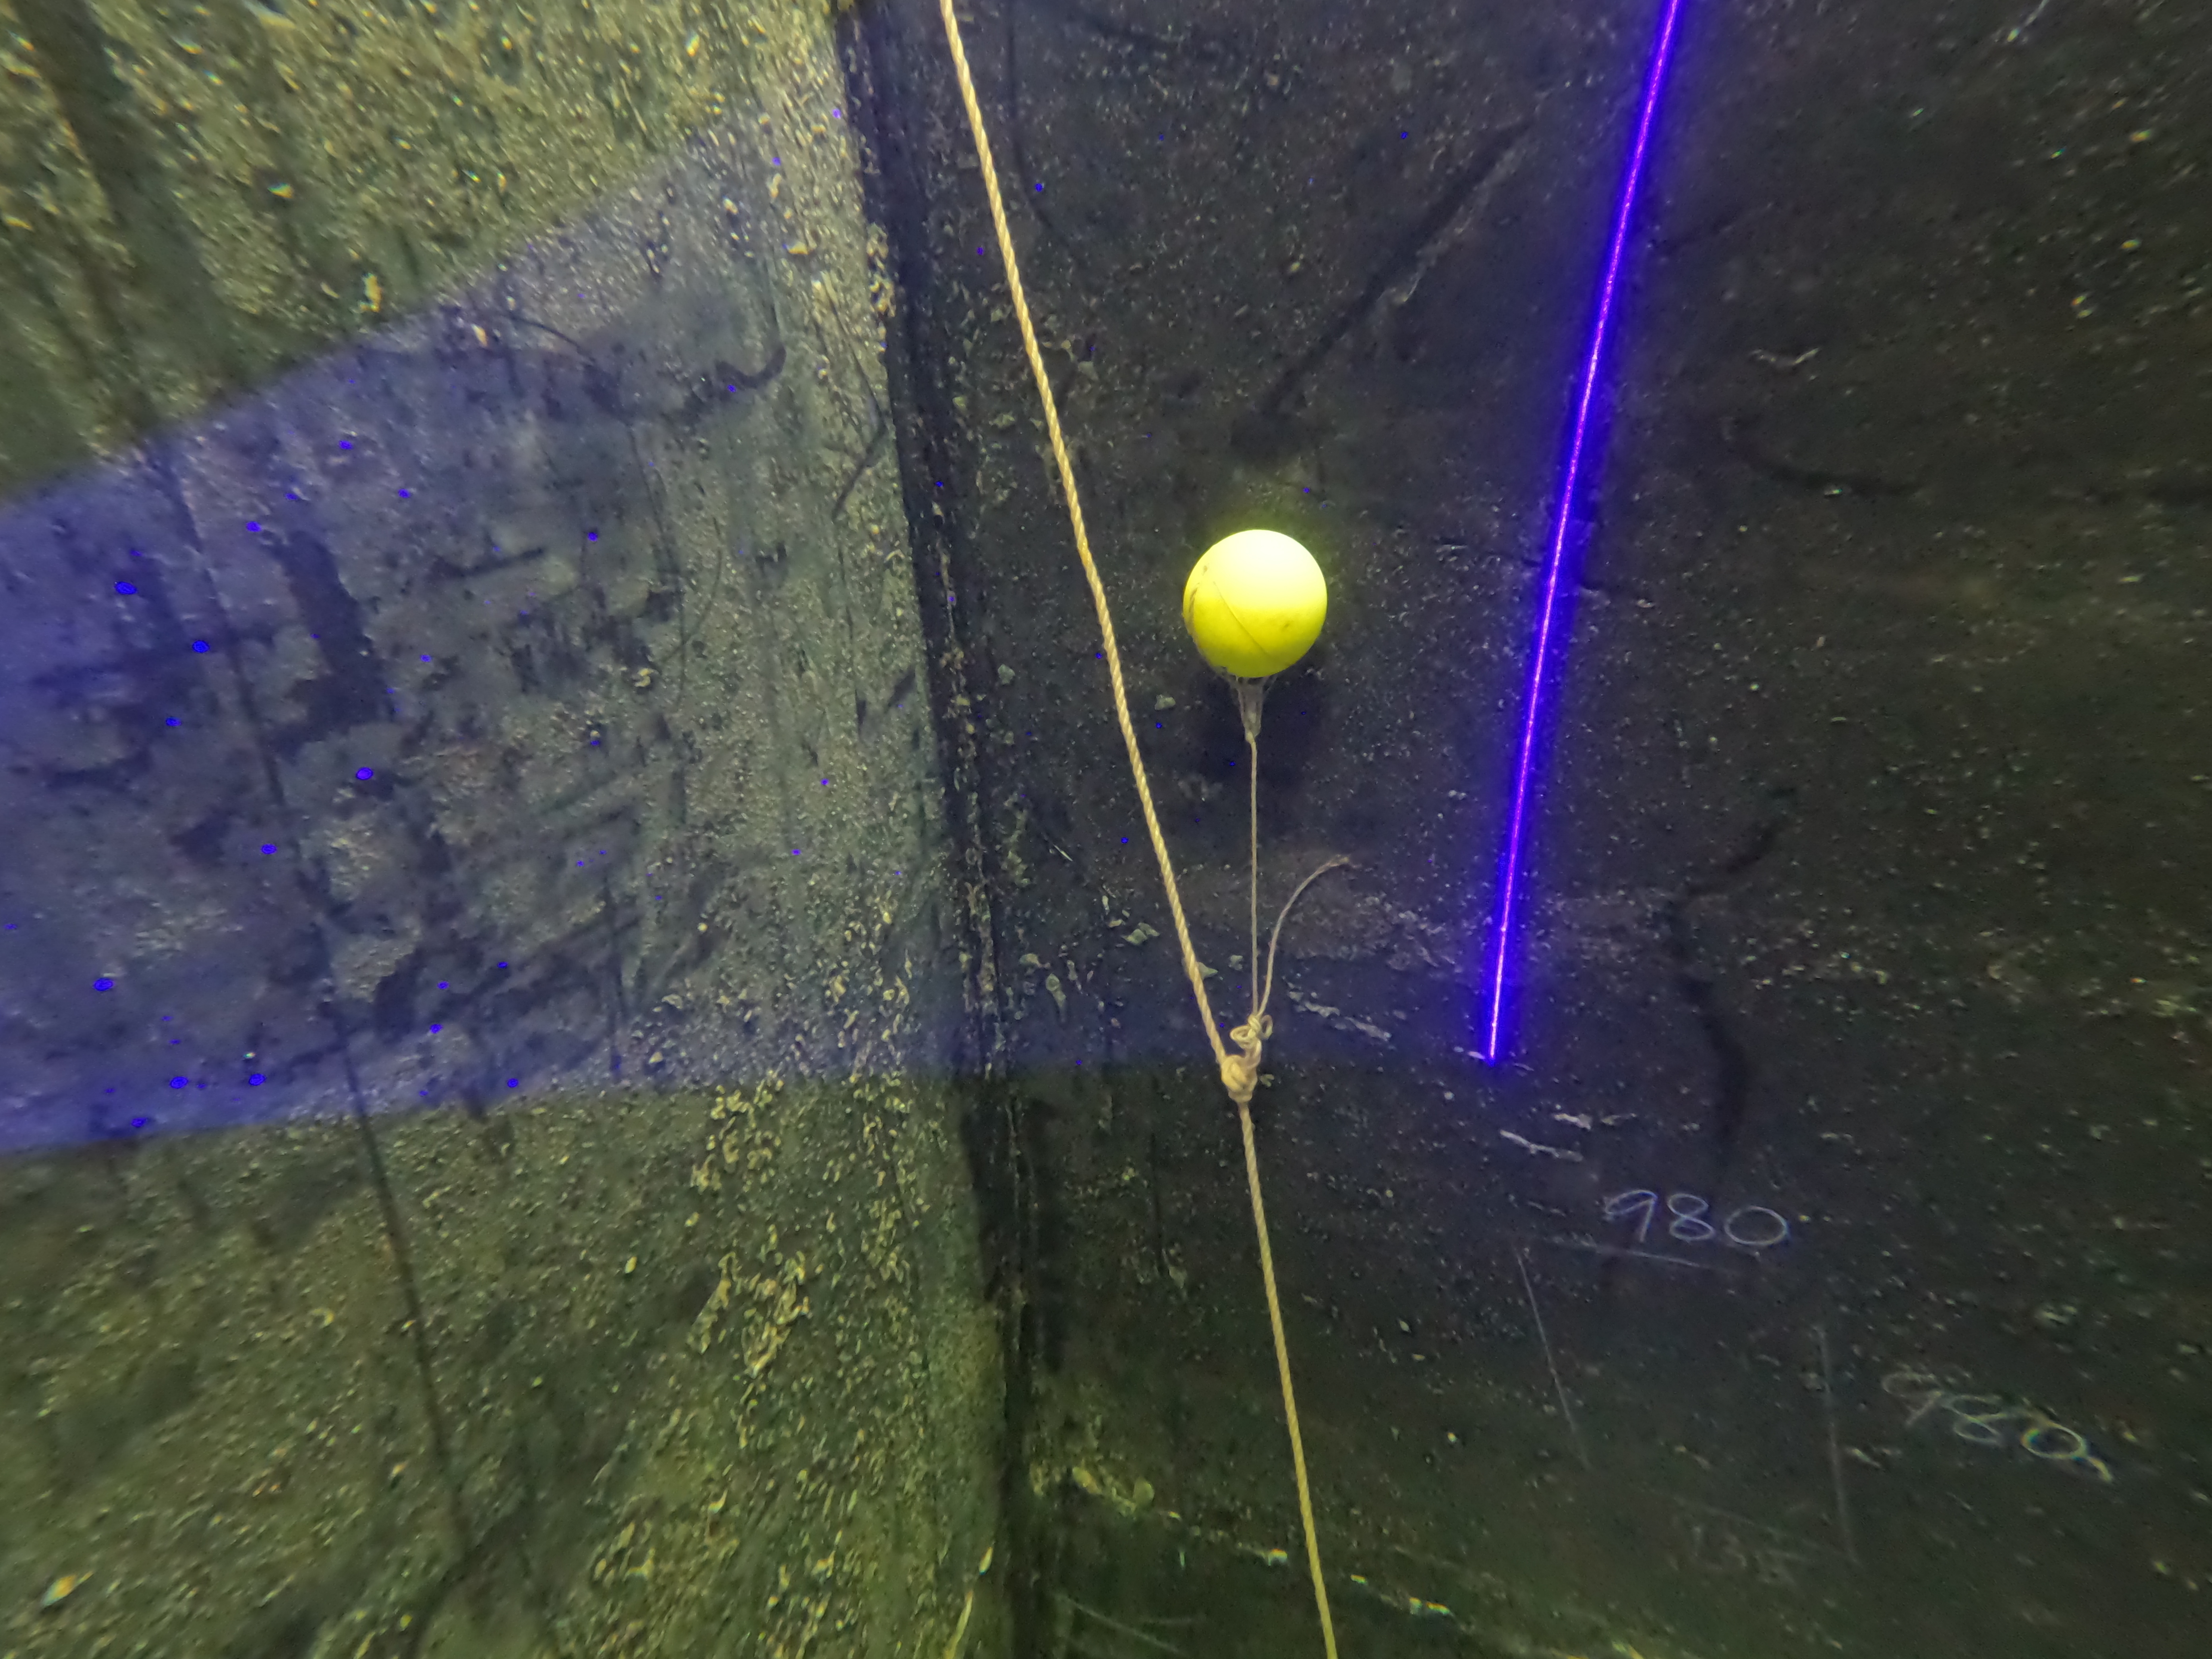

980

980

Supplement: Supplementary file 277 [file G0031070.pdf › 4/G0031070.pdf]

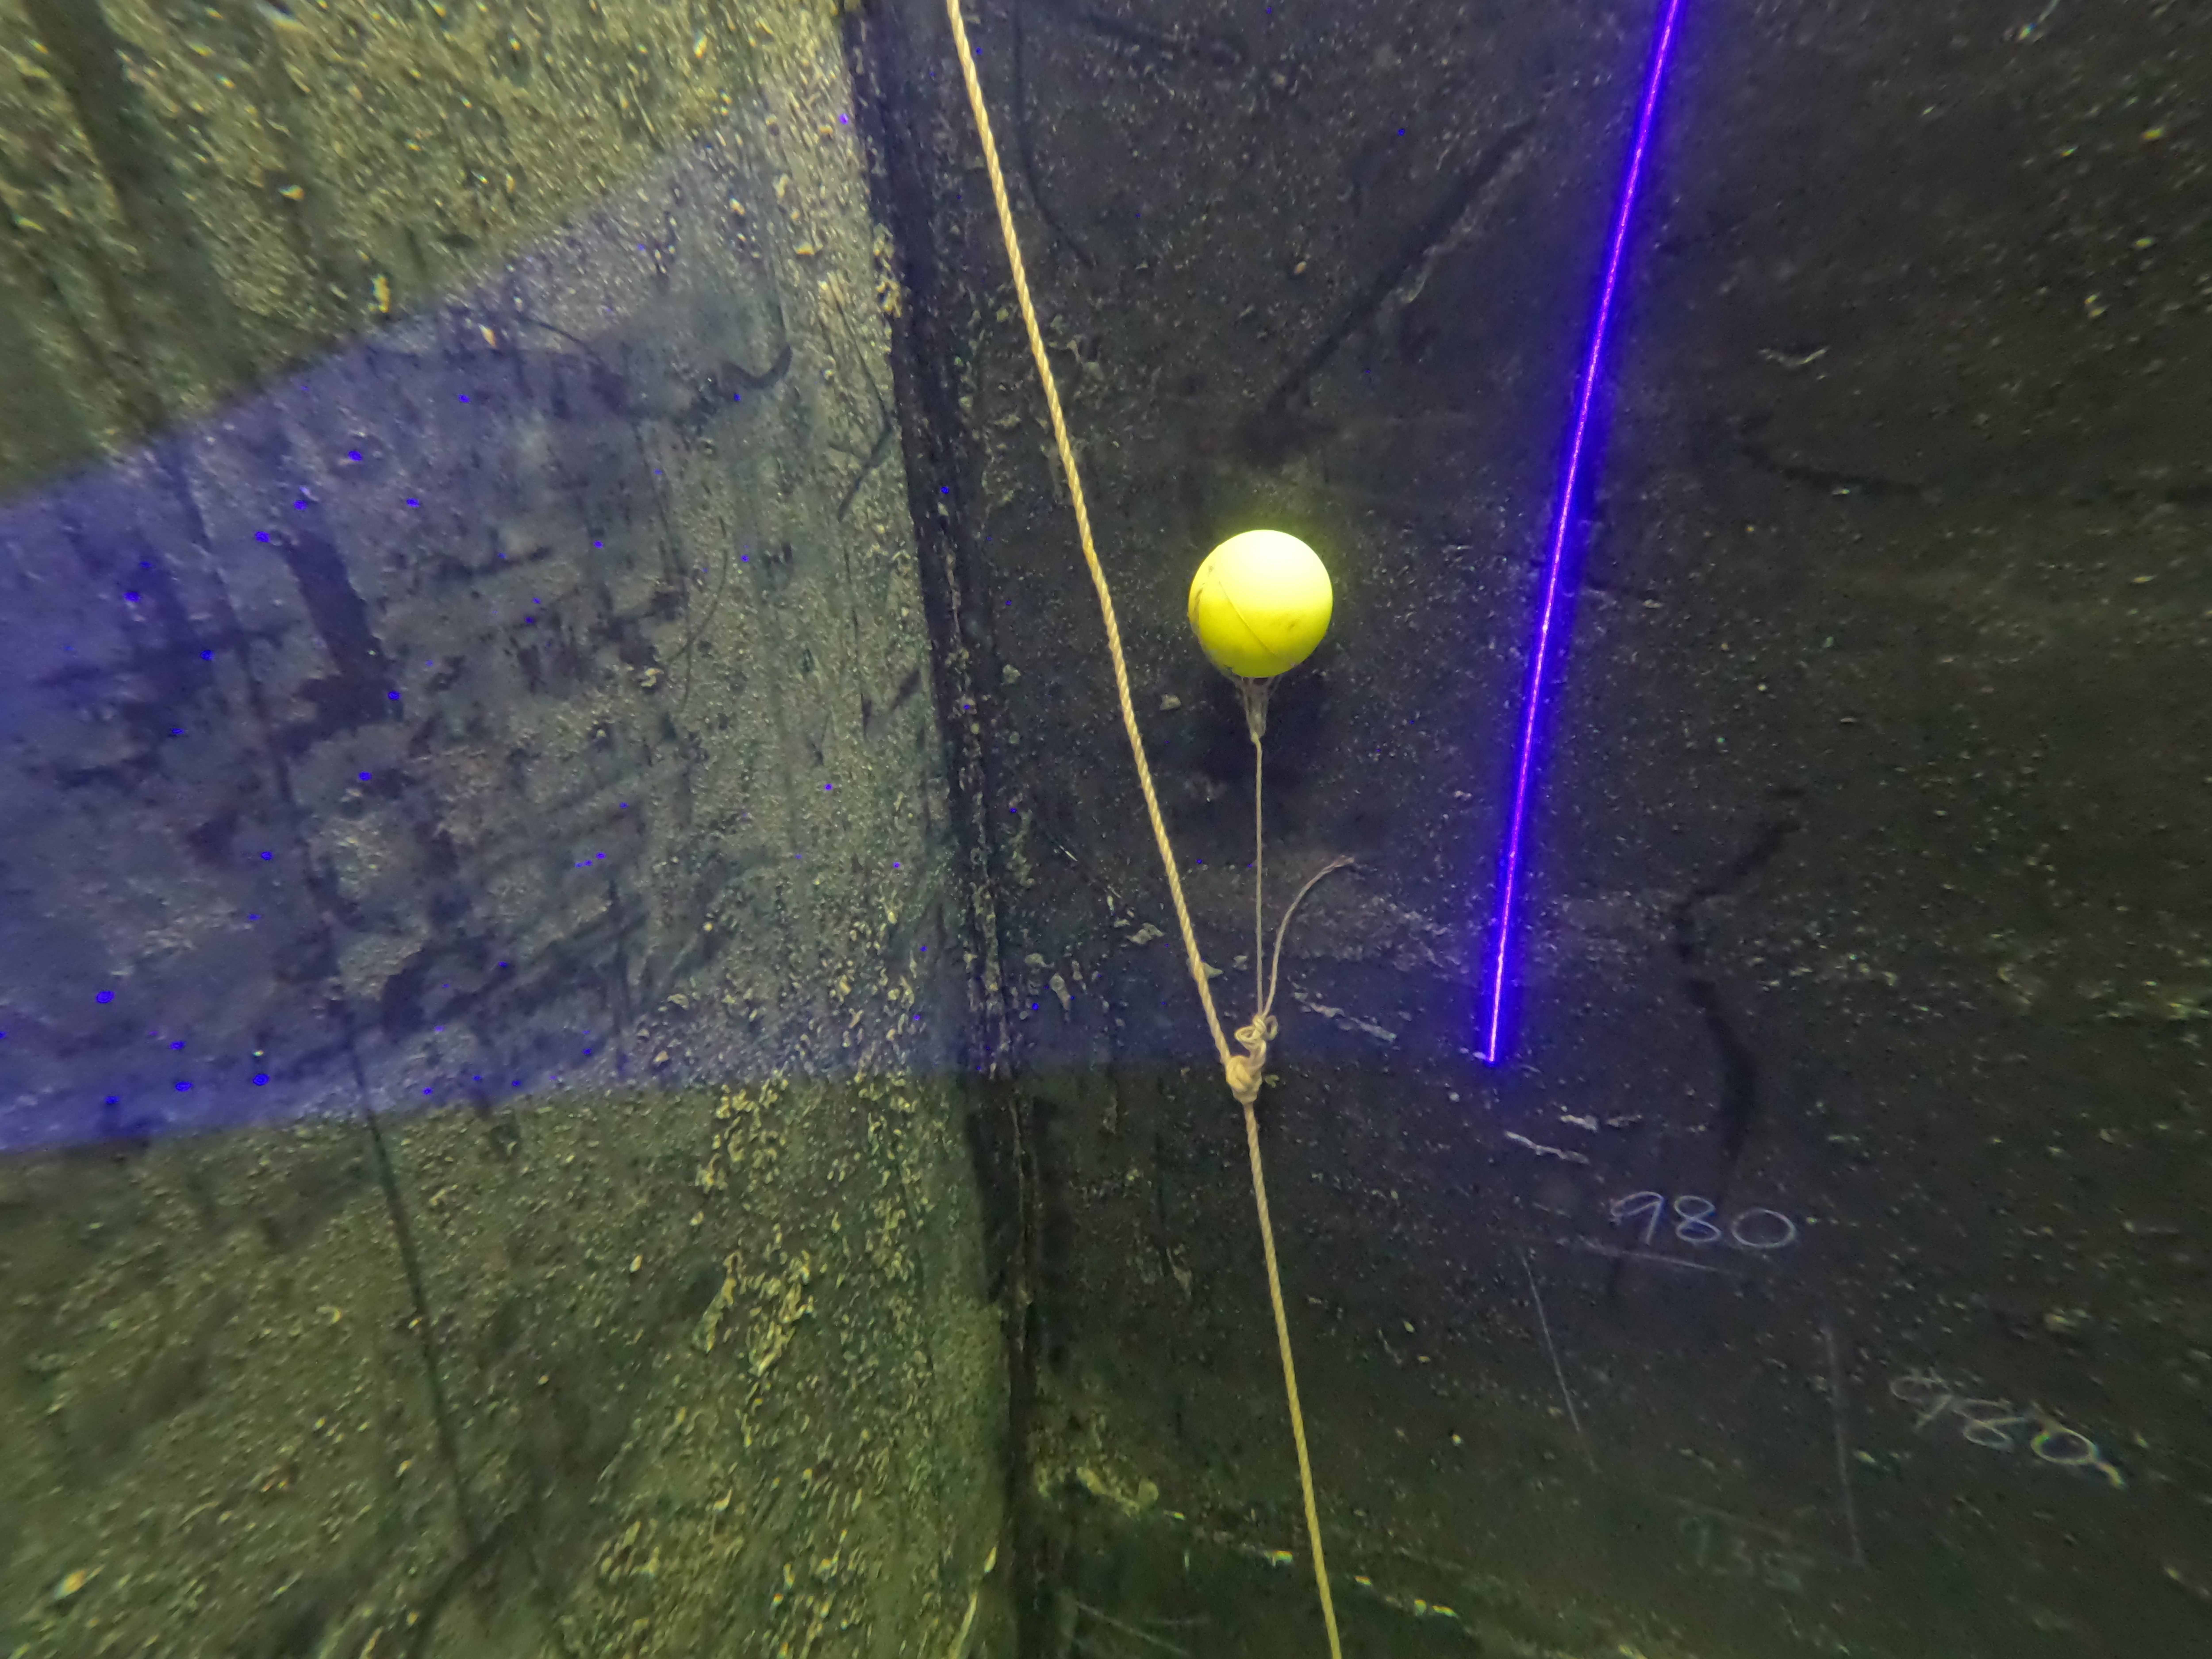

980

980

Supplement: Supplementary file 278 [file G0031071.pdf › 4/G0031071.pdf]

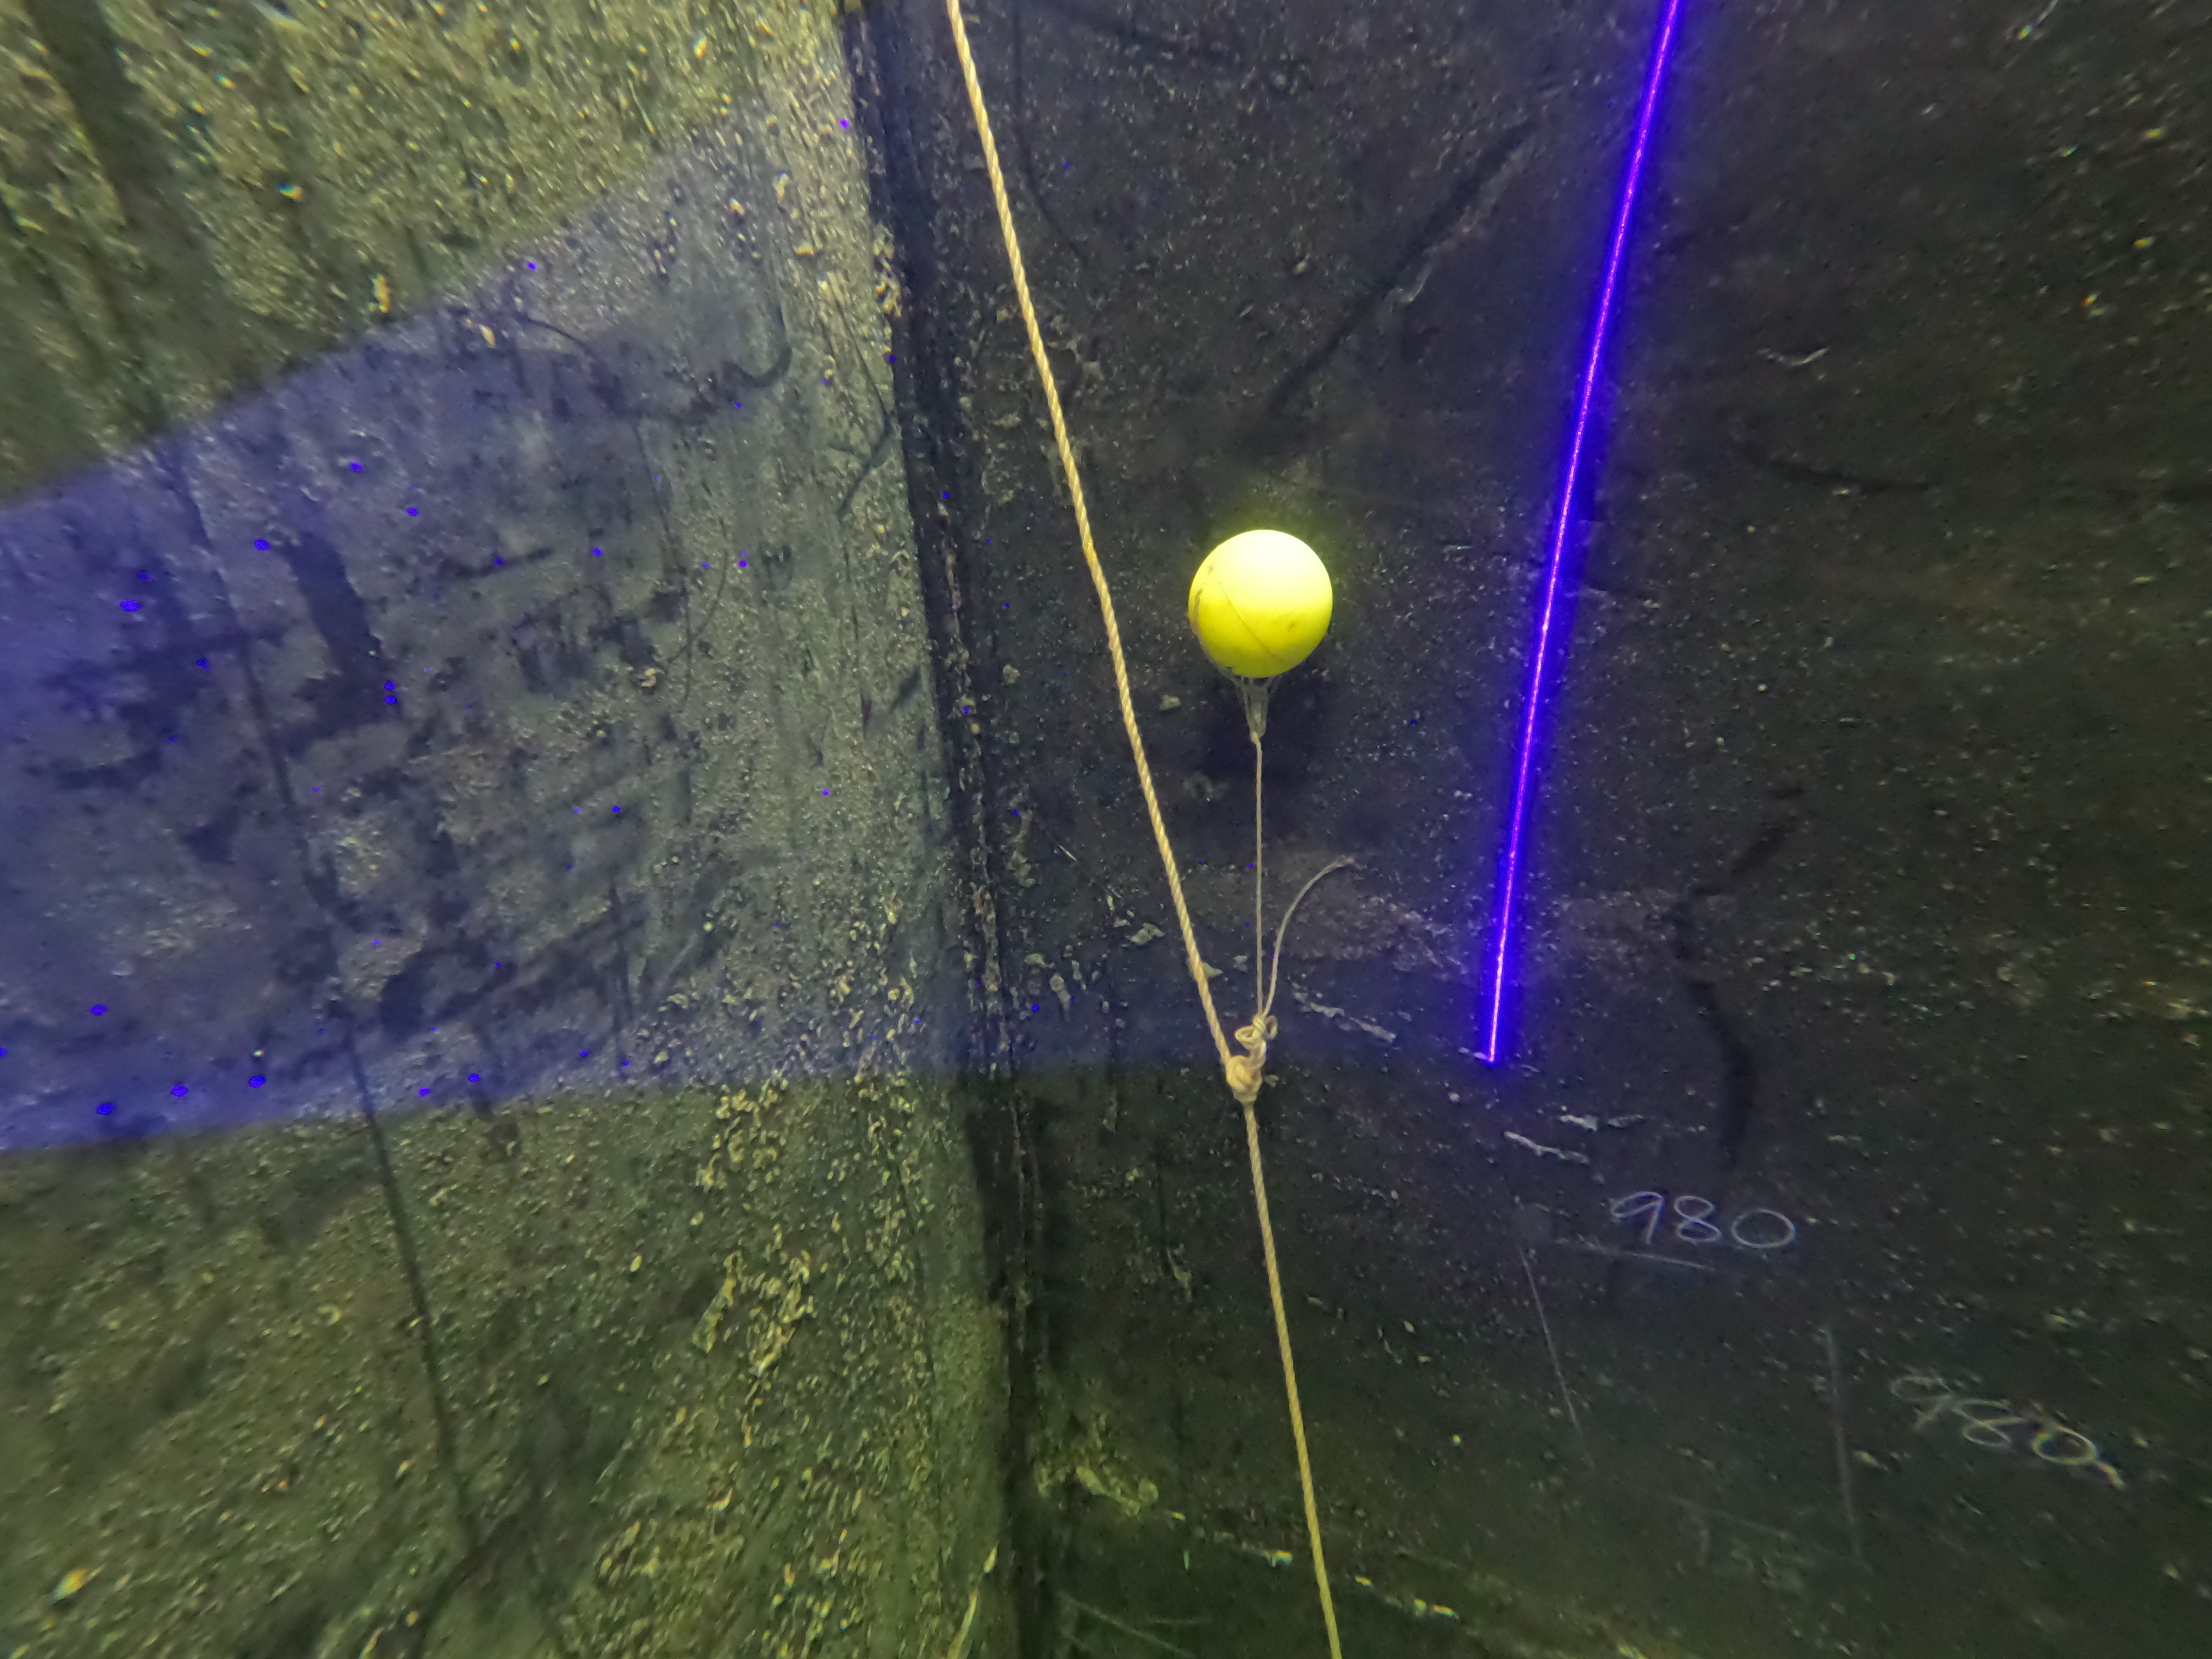

Supplement: Supplementary file 279 [file G0031072.pdf › 4/G0031072.pdf]

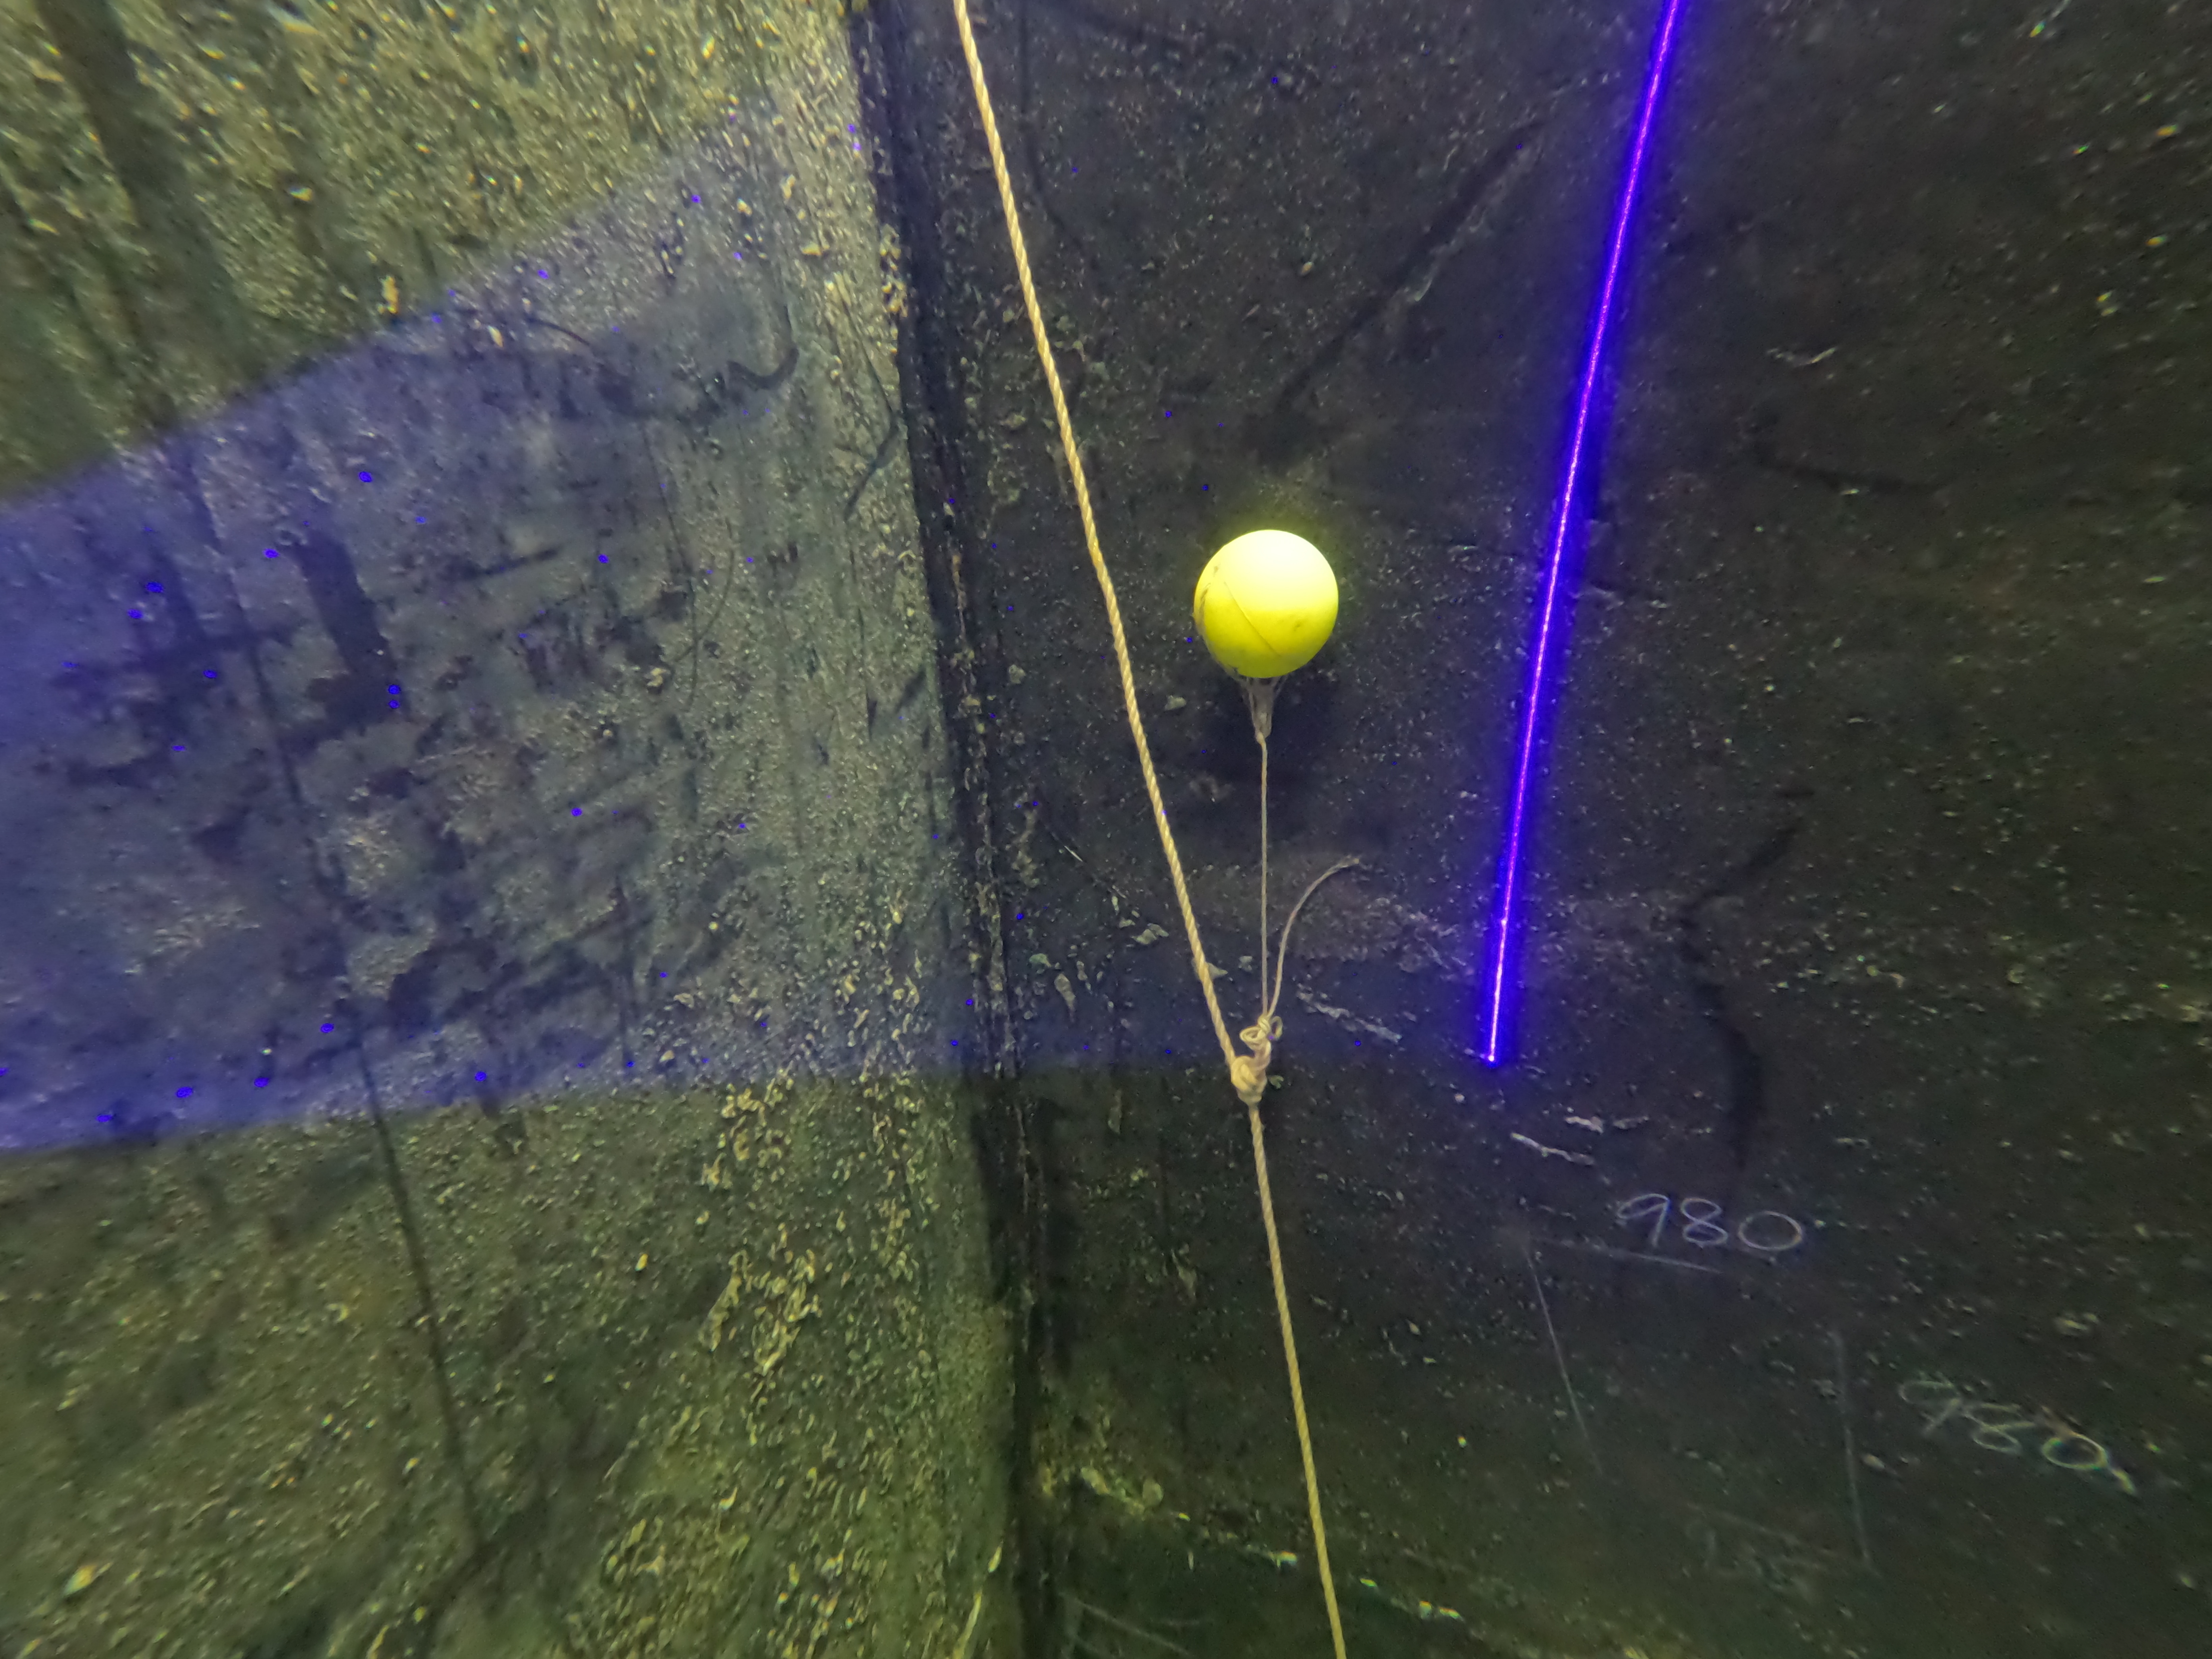

980

980

Supplement: Supplementary file 280 [file G0031073.pdf › 4/G0031073.pdf]

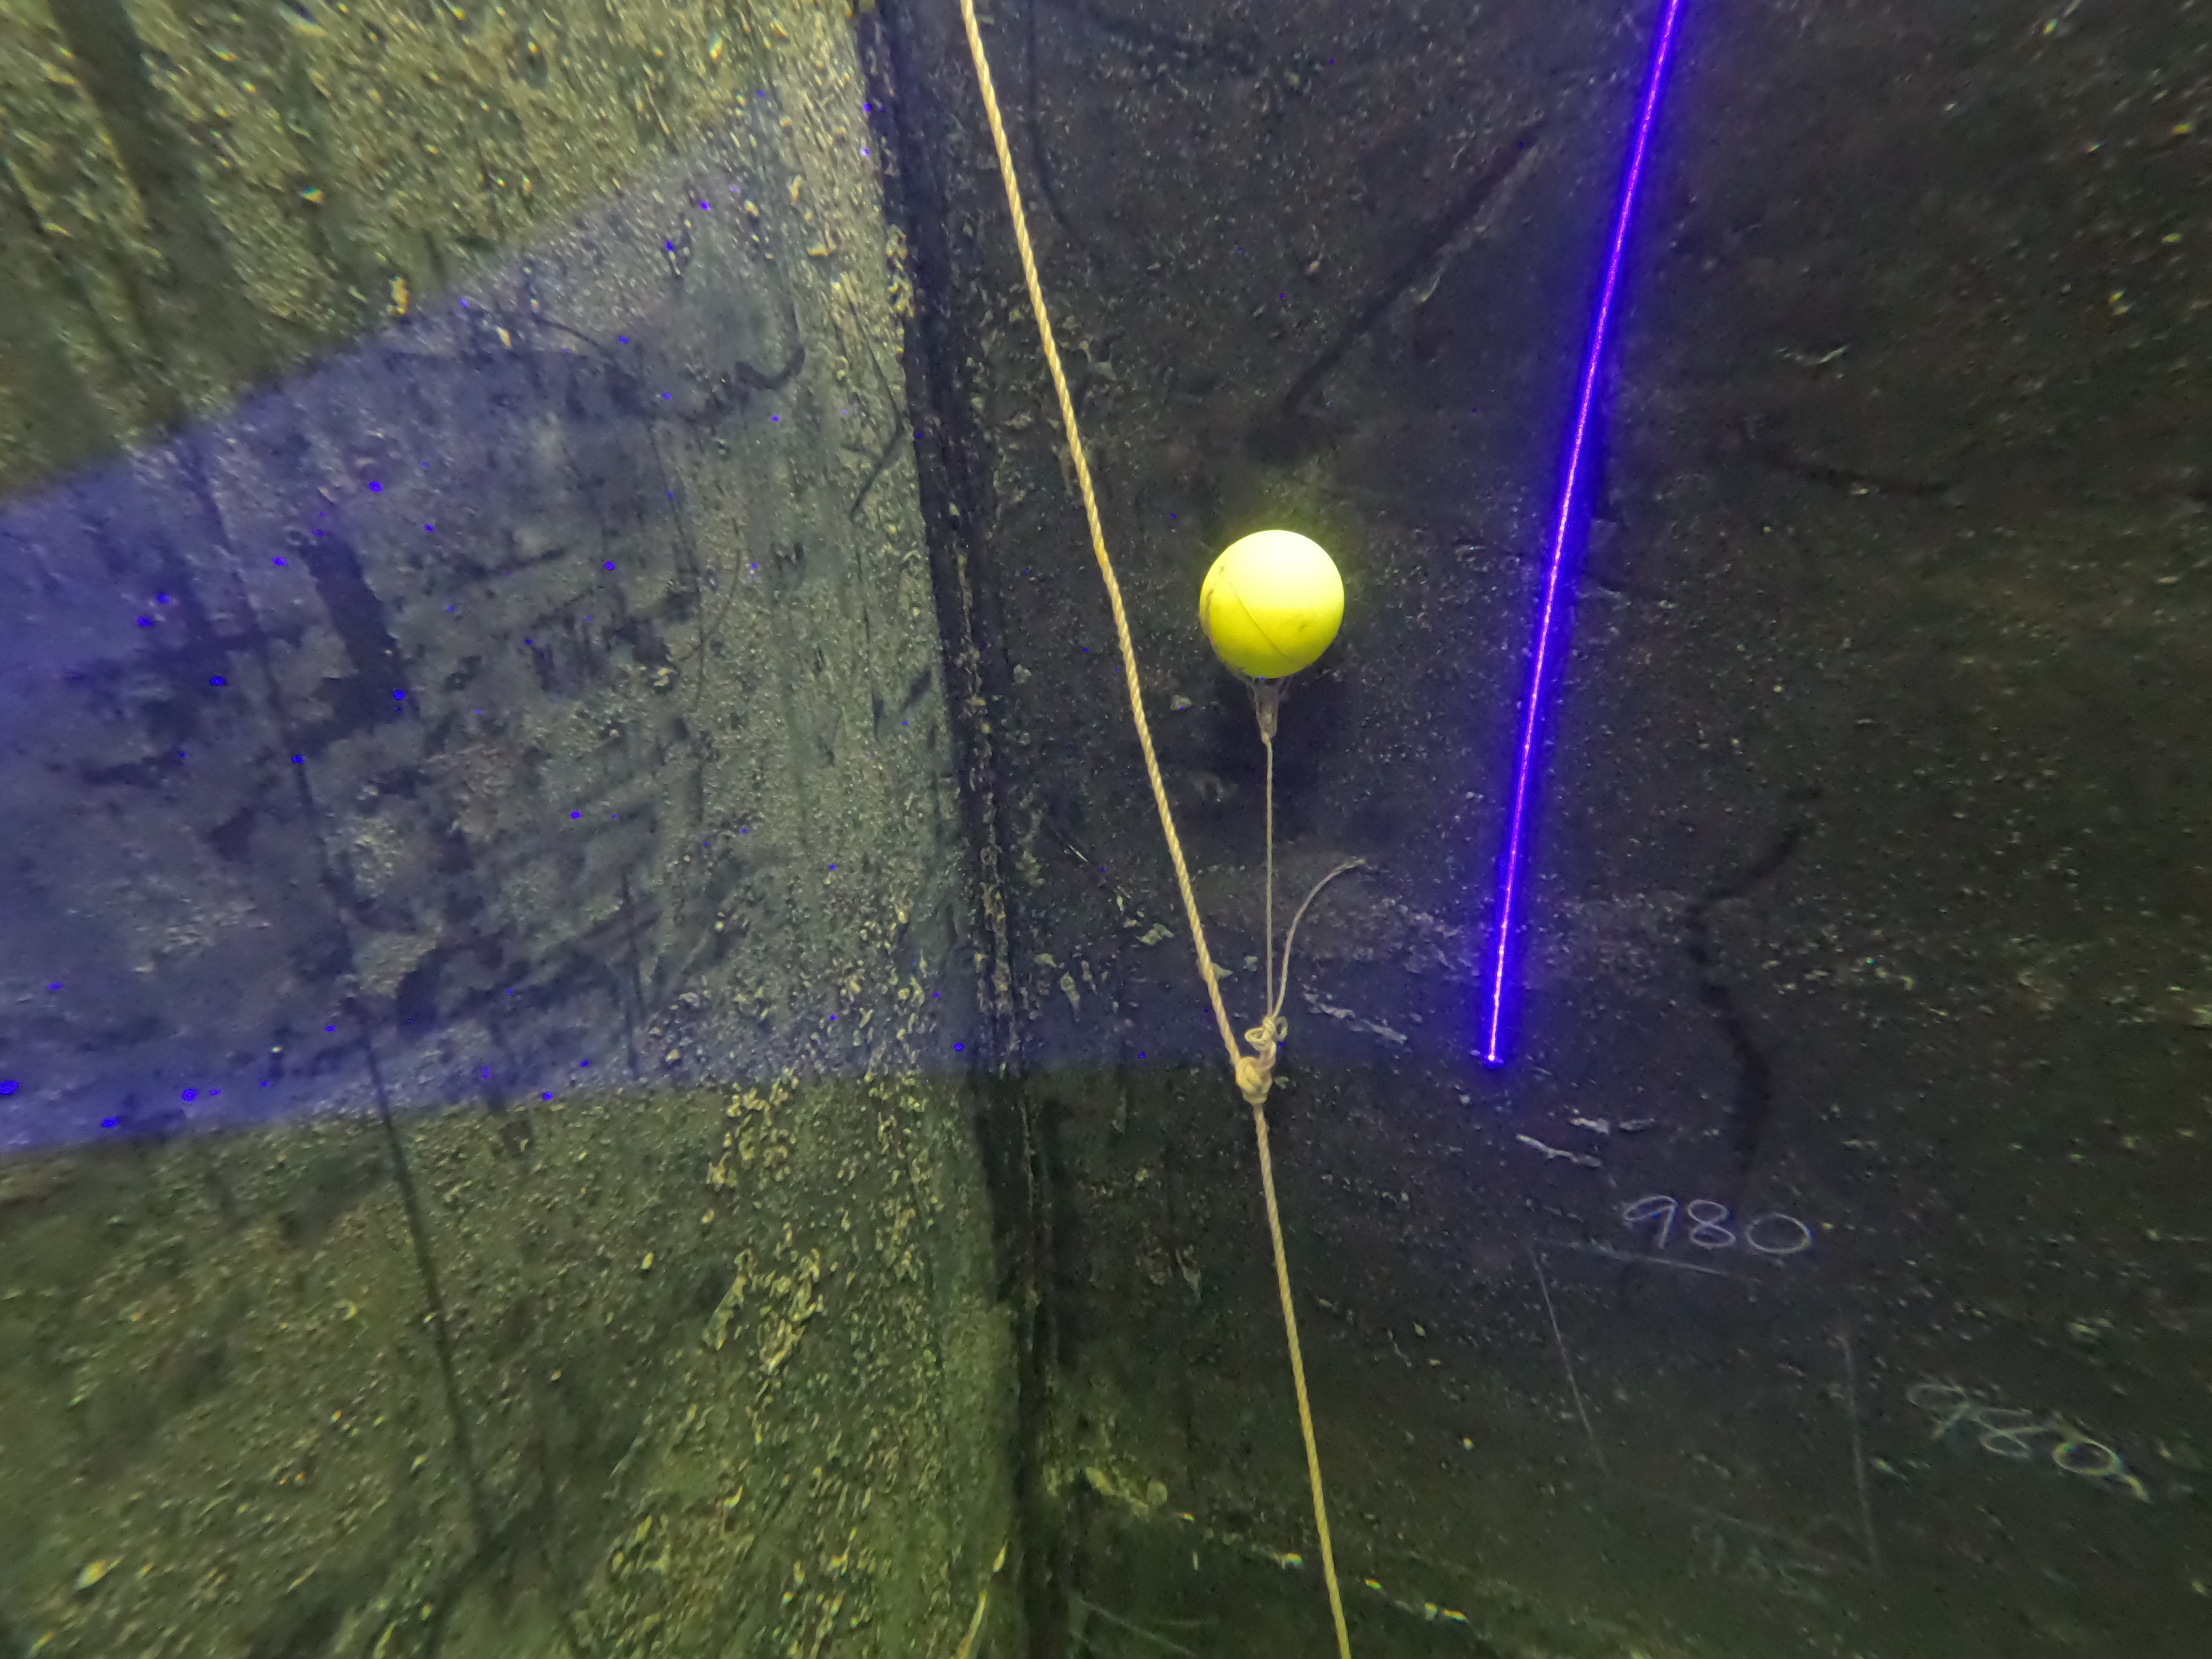

980

980

Supplement: Supplementary file 281 [file G0031074.pdf › 4/G0031074.pdf]

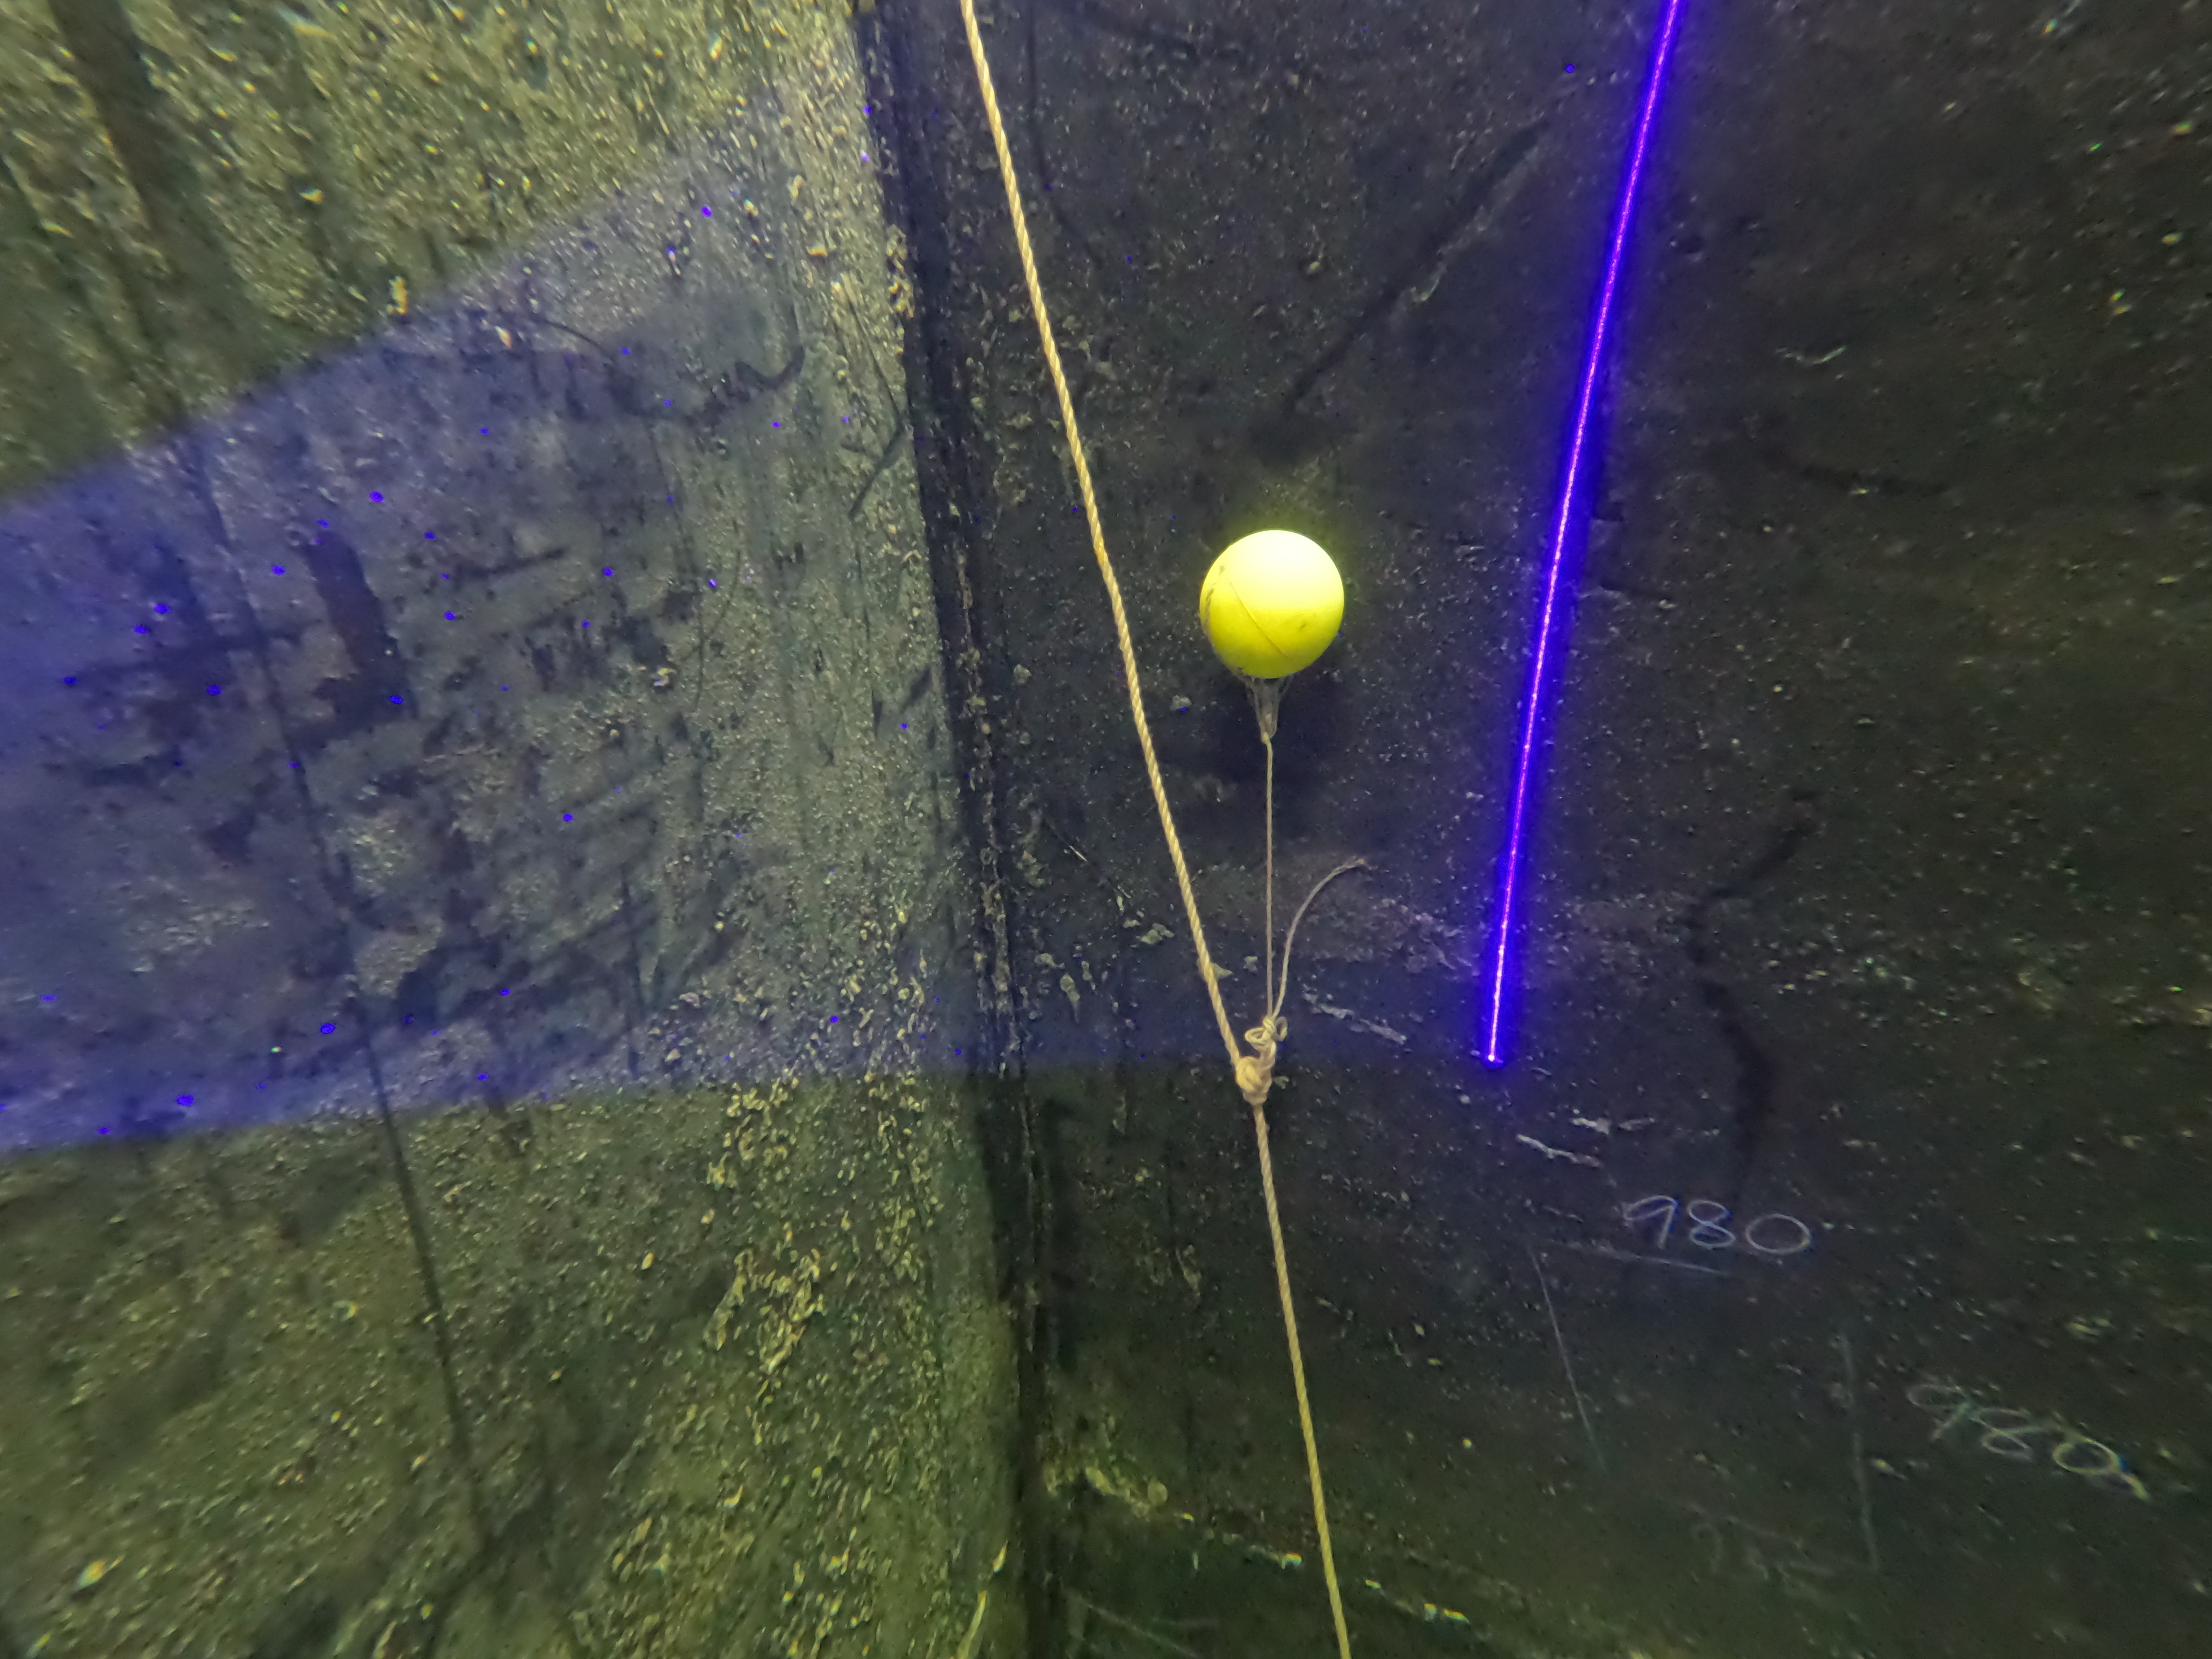

Supplement: Supplementary file 282 [file G0031075.pdf › 4/G0031075.pdf]

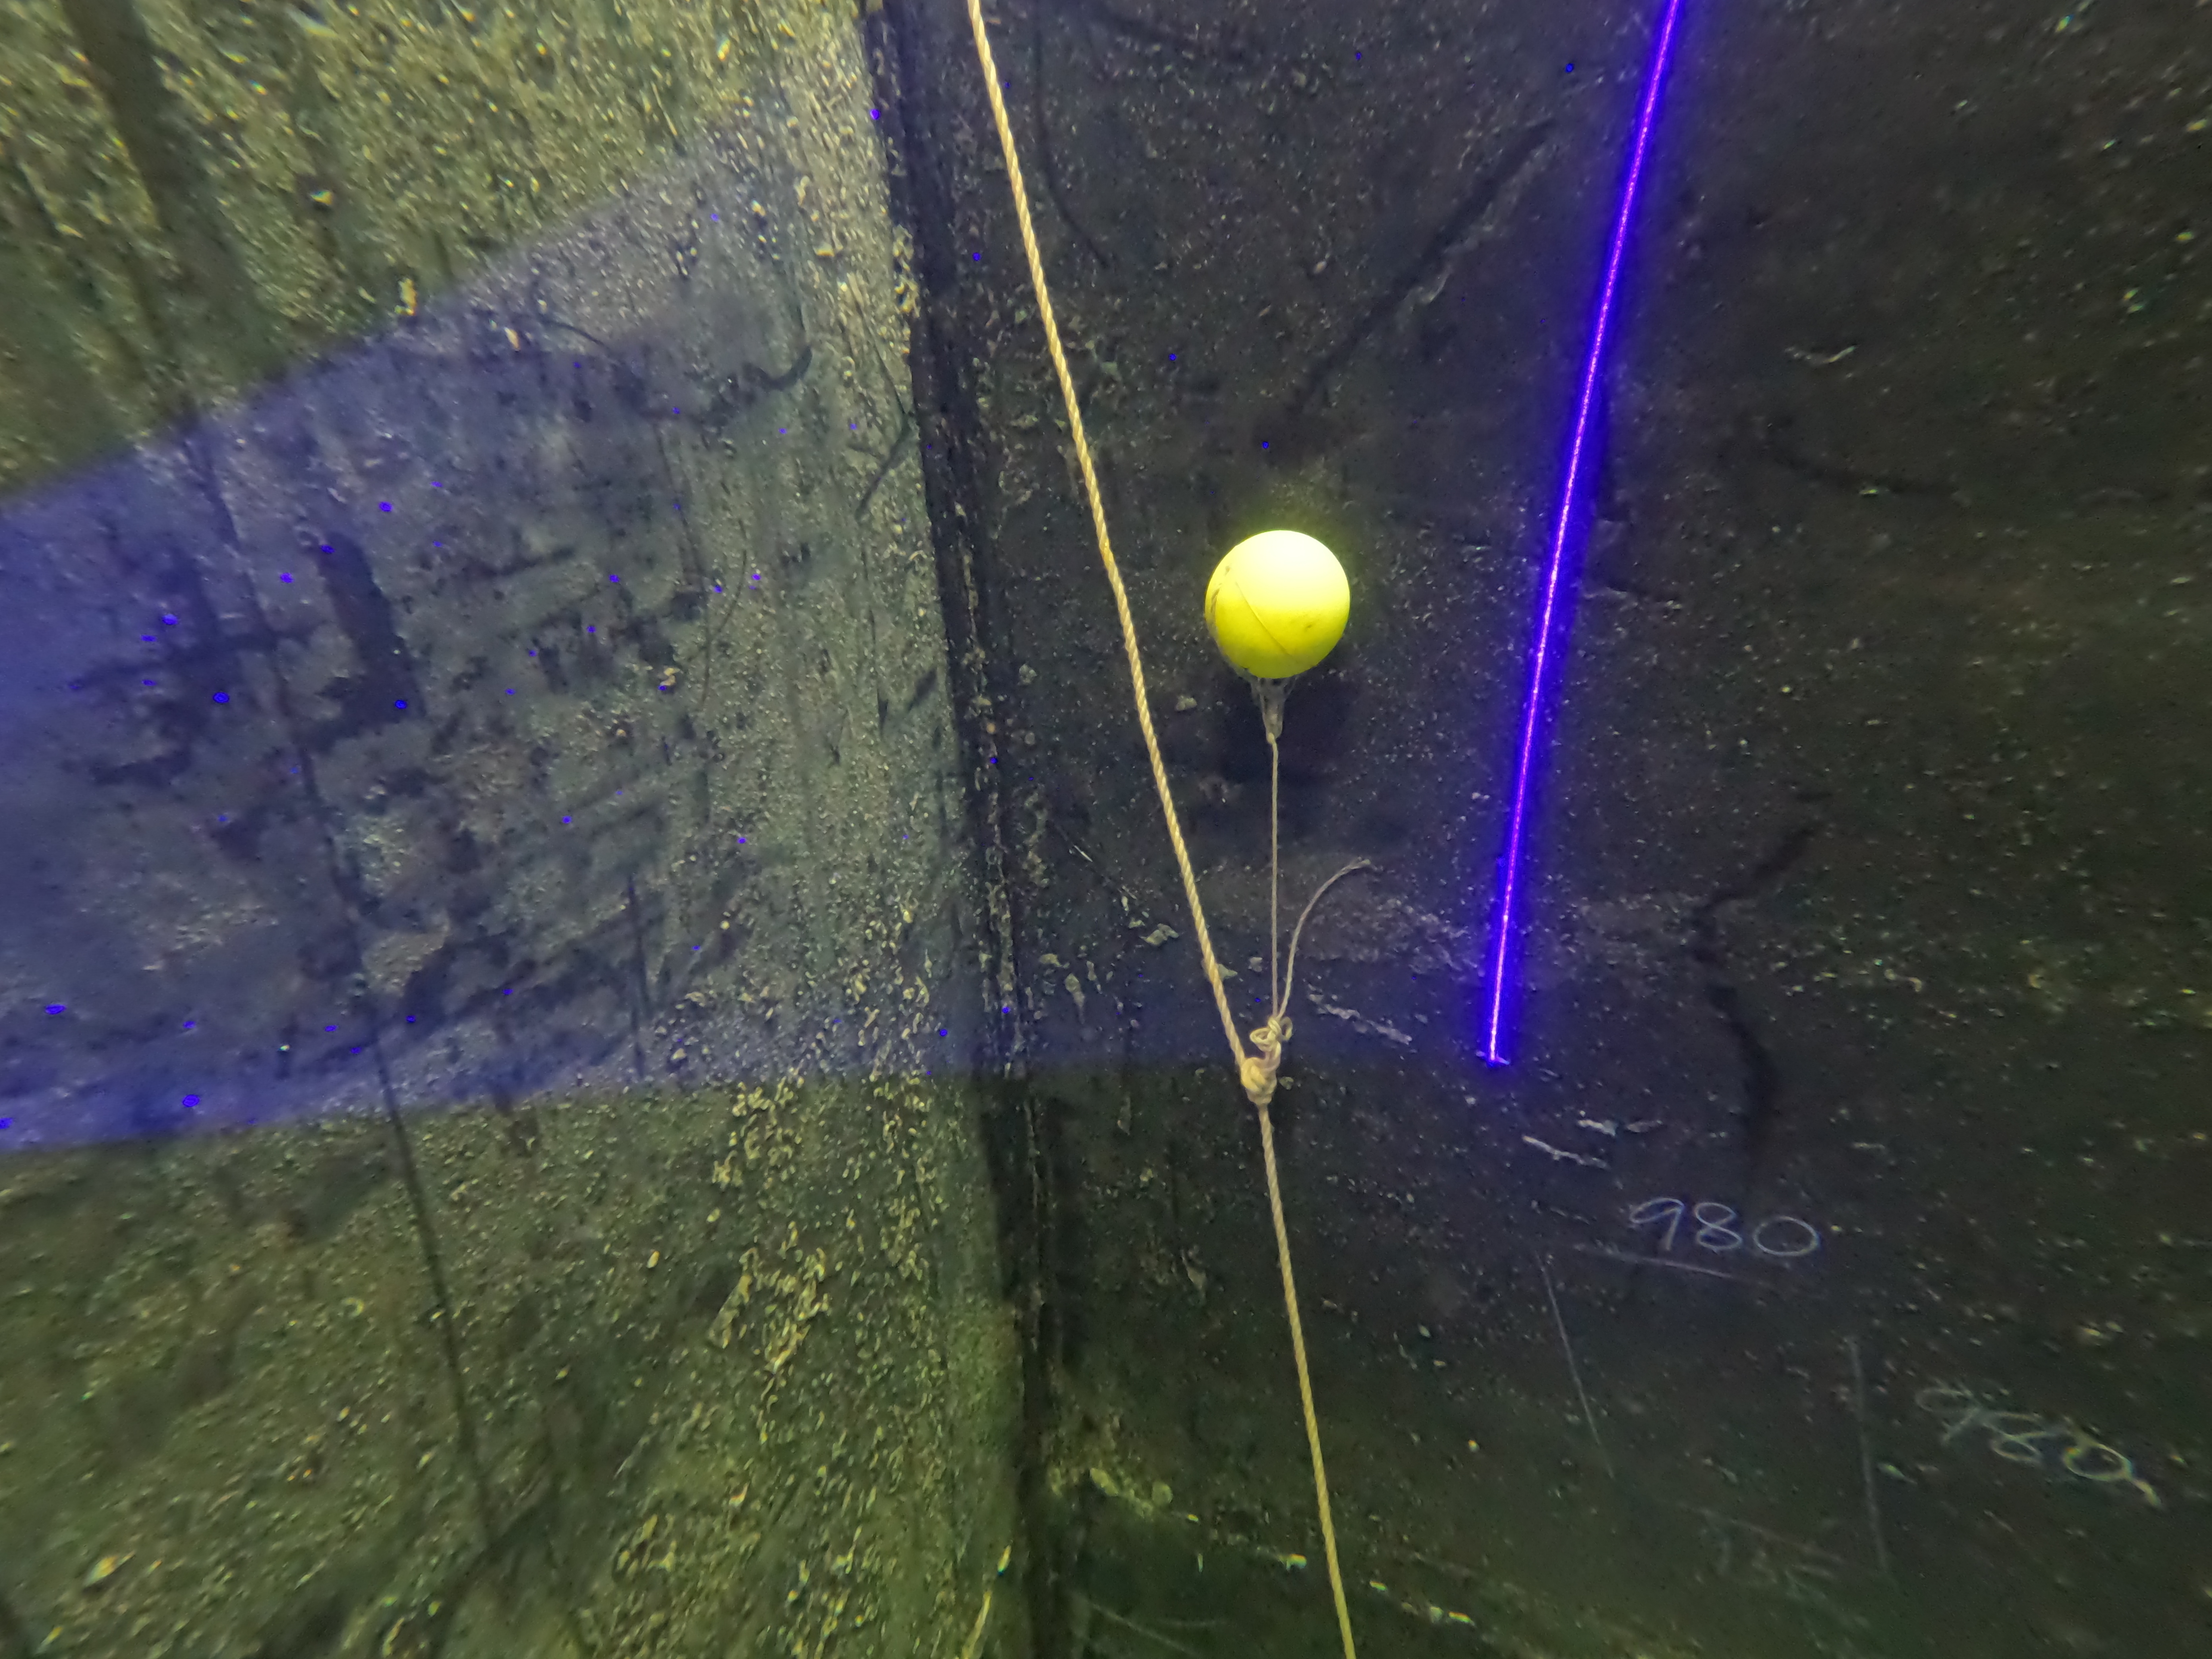

980

980

Supplement: Supplementary file 283 [file G0031076.pdf › 4/G0031076.pdf]

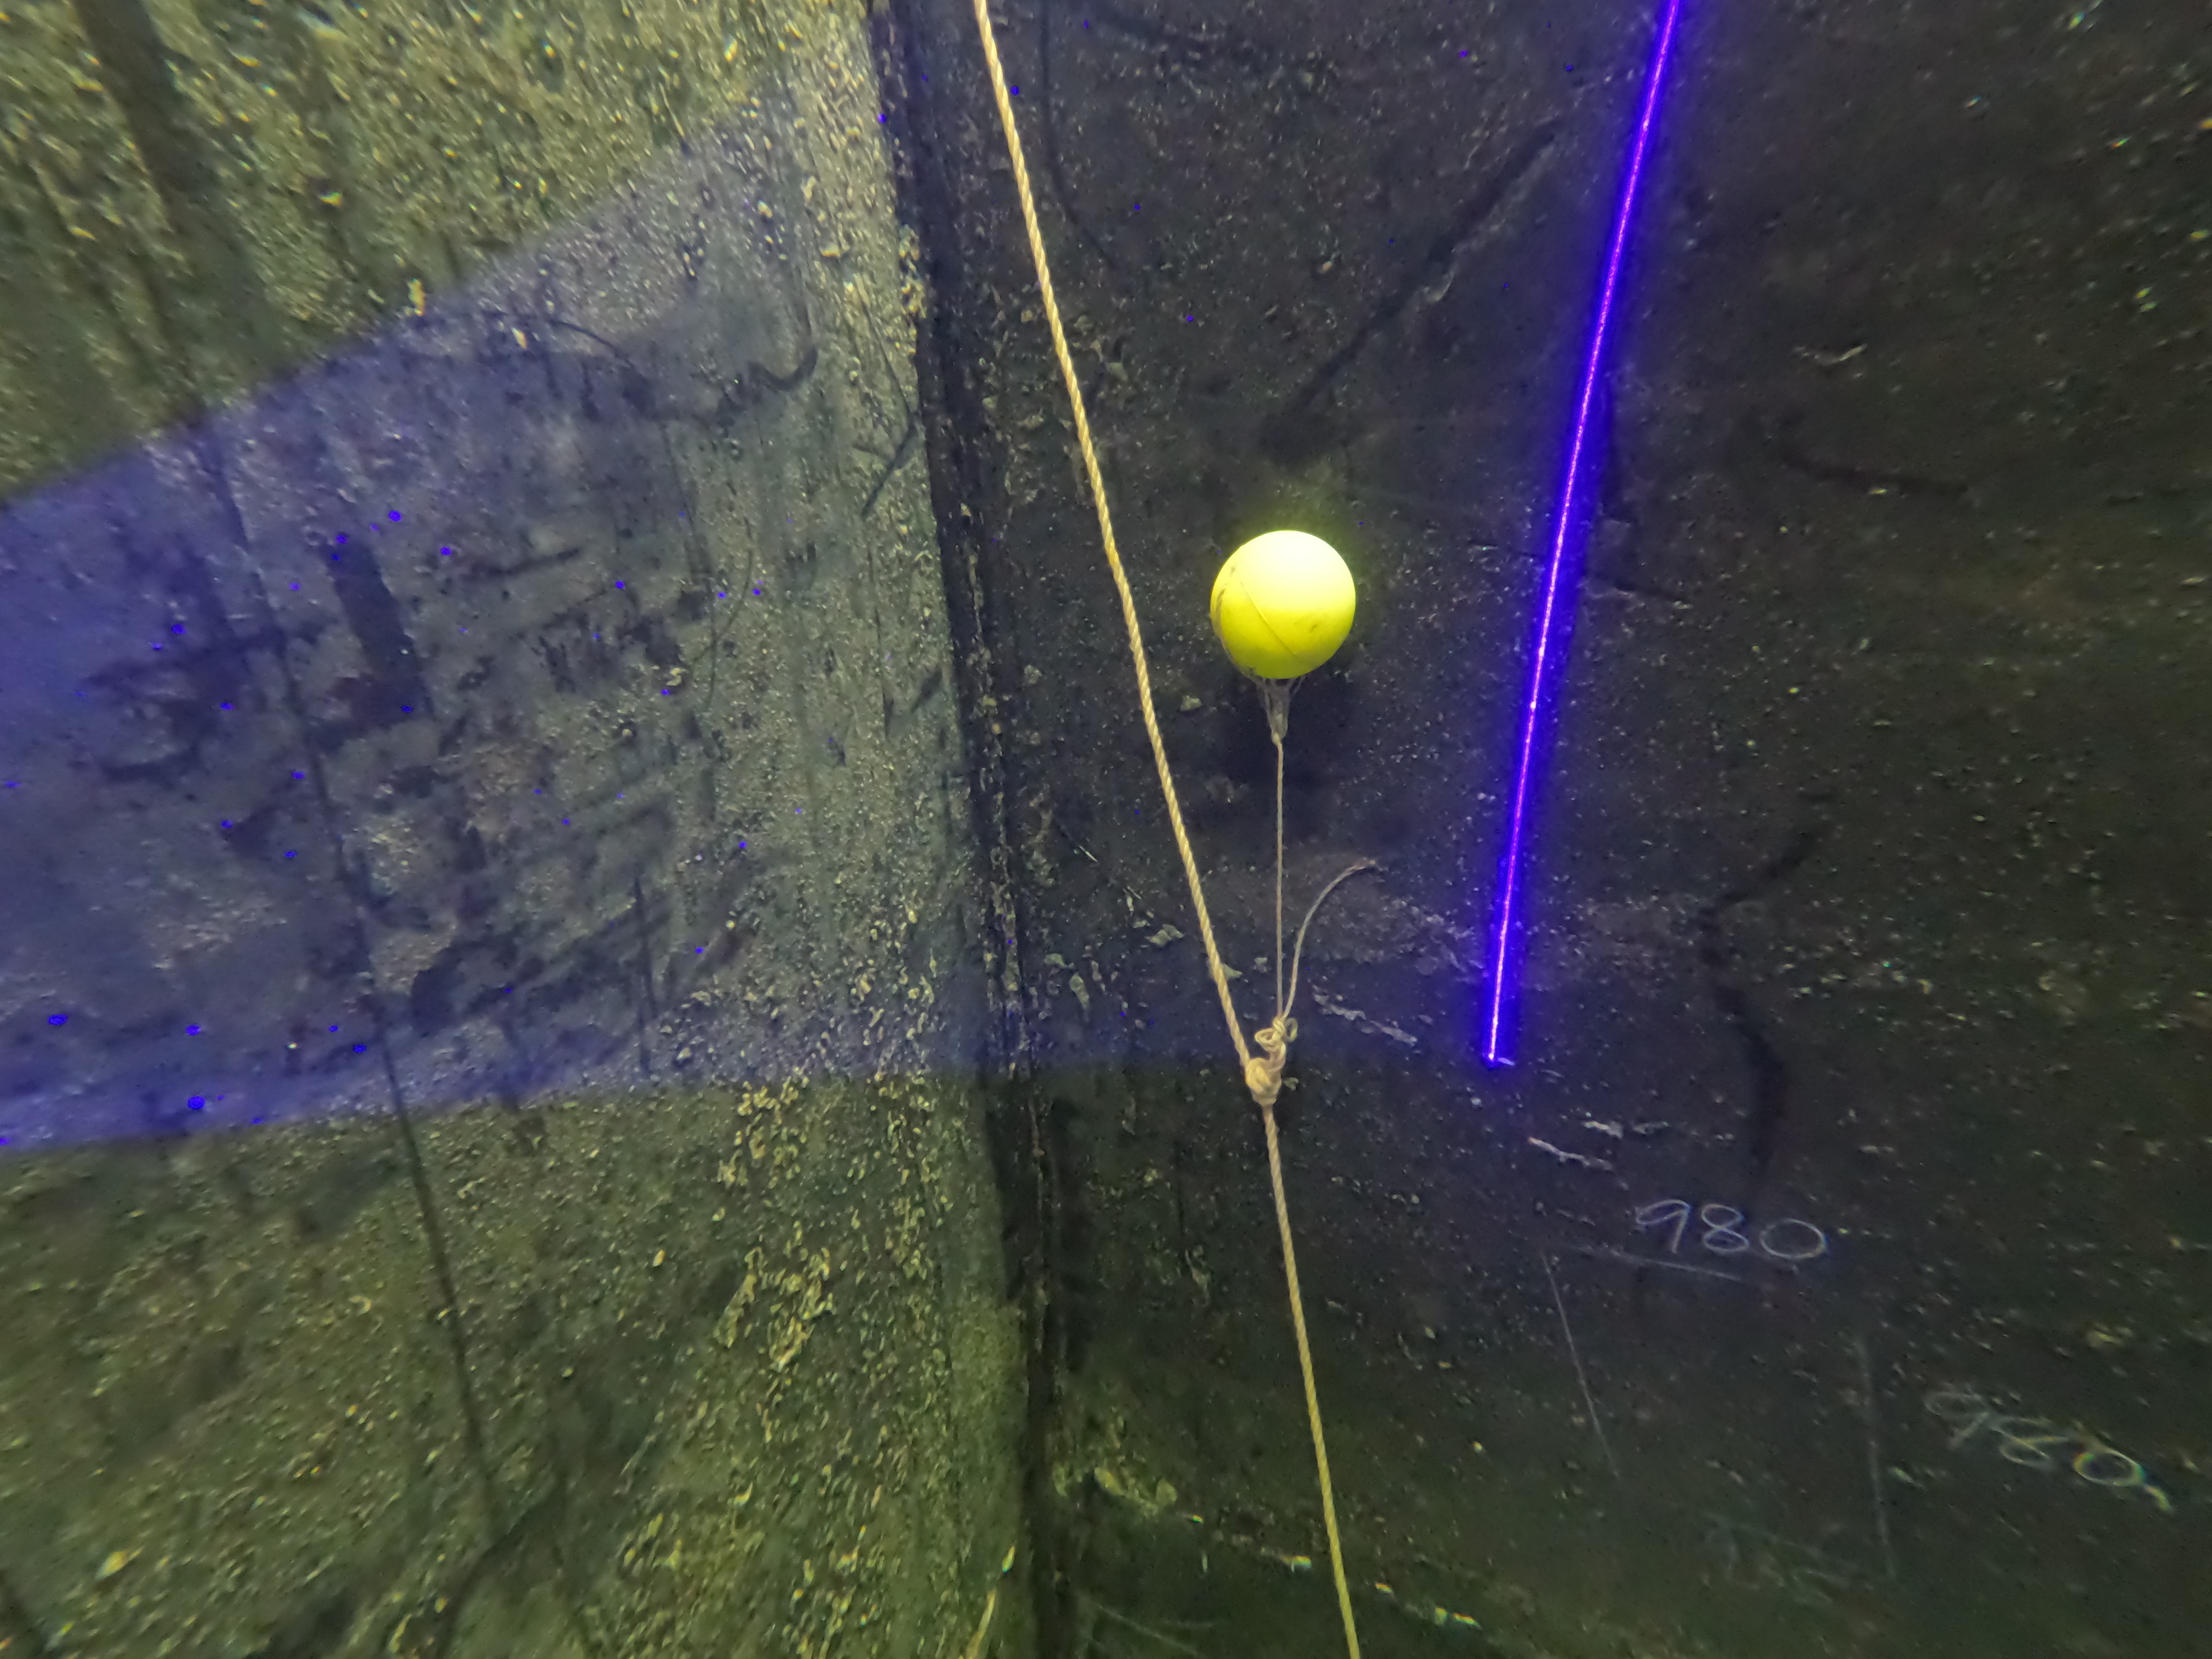

Supplement: Supplementary file 284 [file G0031077.pdf › 4/G0031077.pdf]

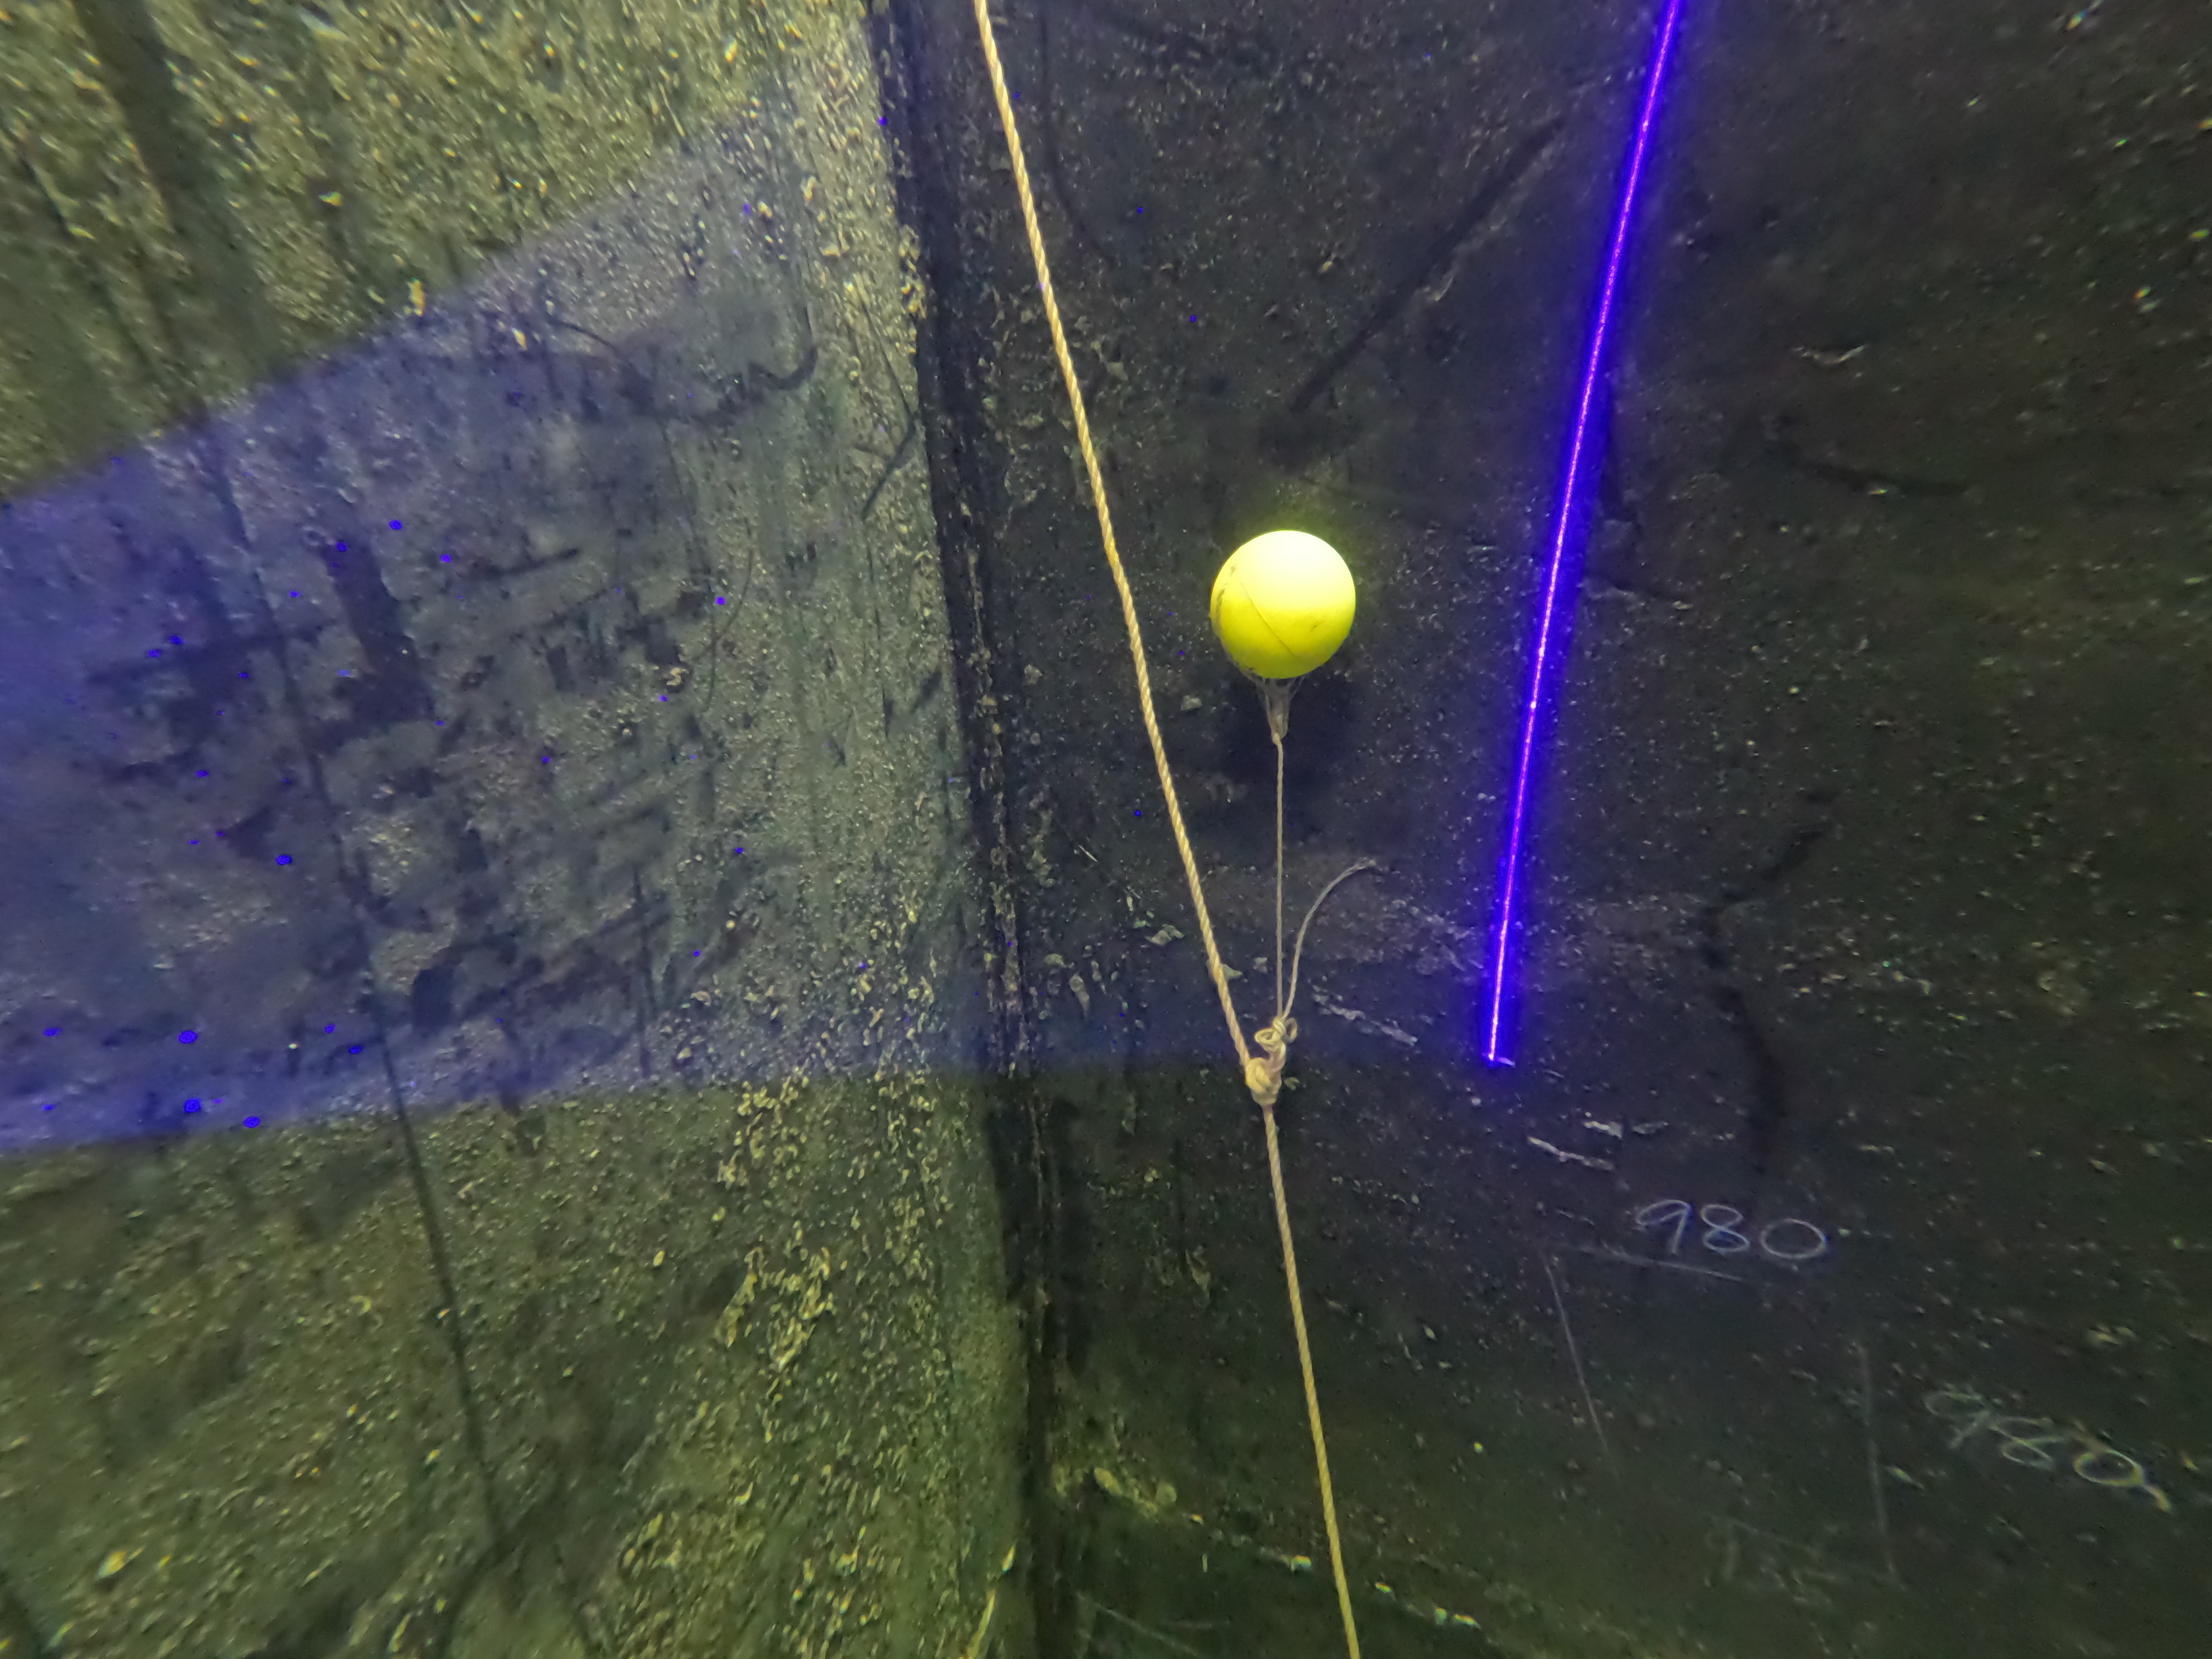

980

980

Supplement: Supplementary file 285 [file G0031078.pdf › 4/G0031078.pdf]

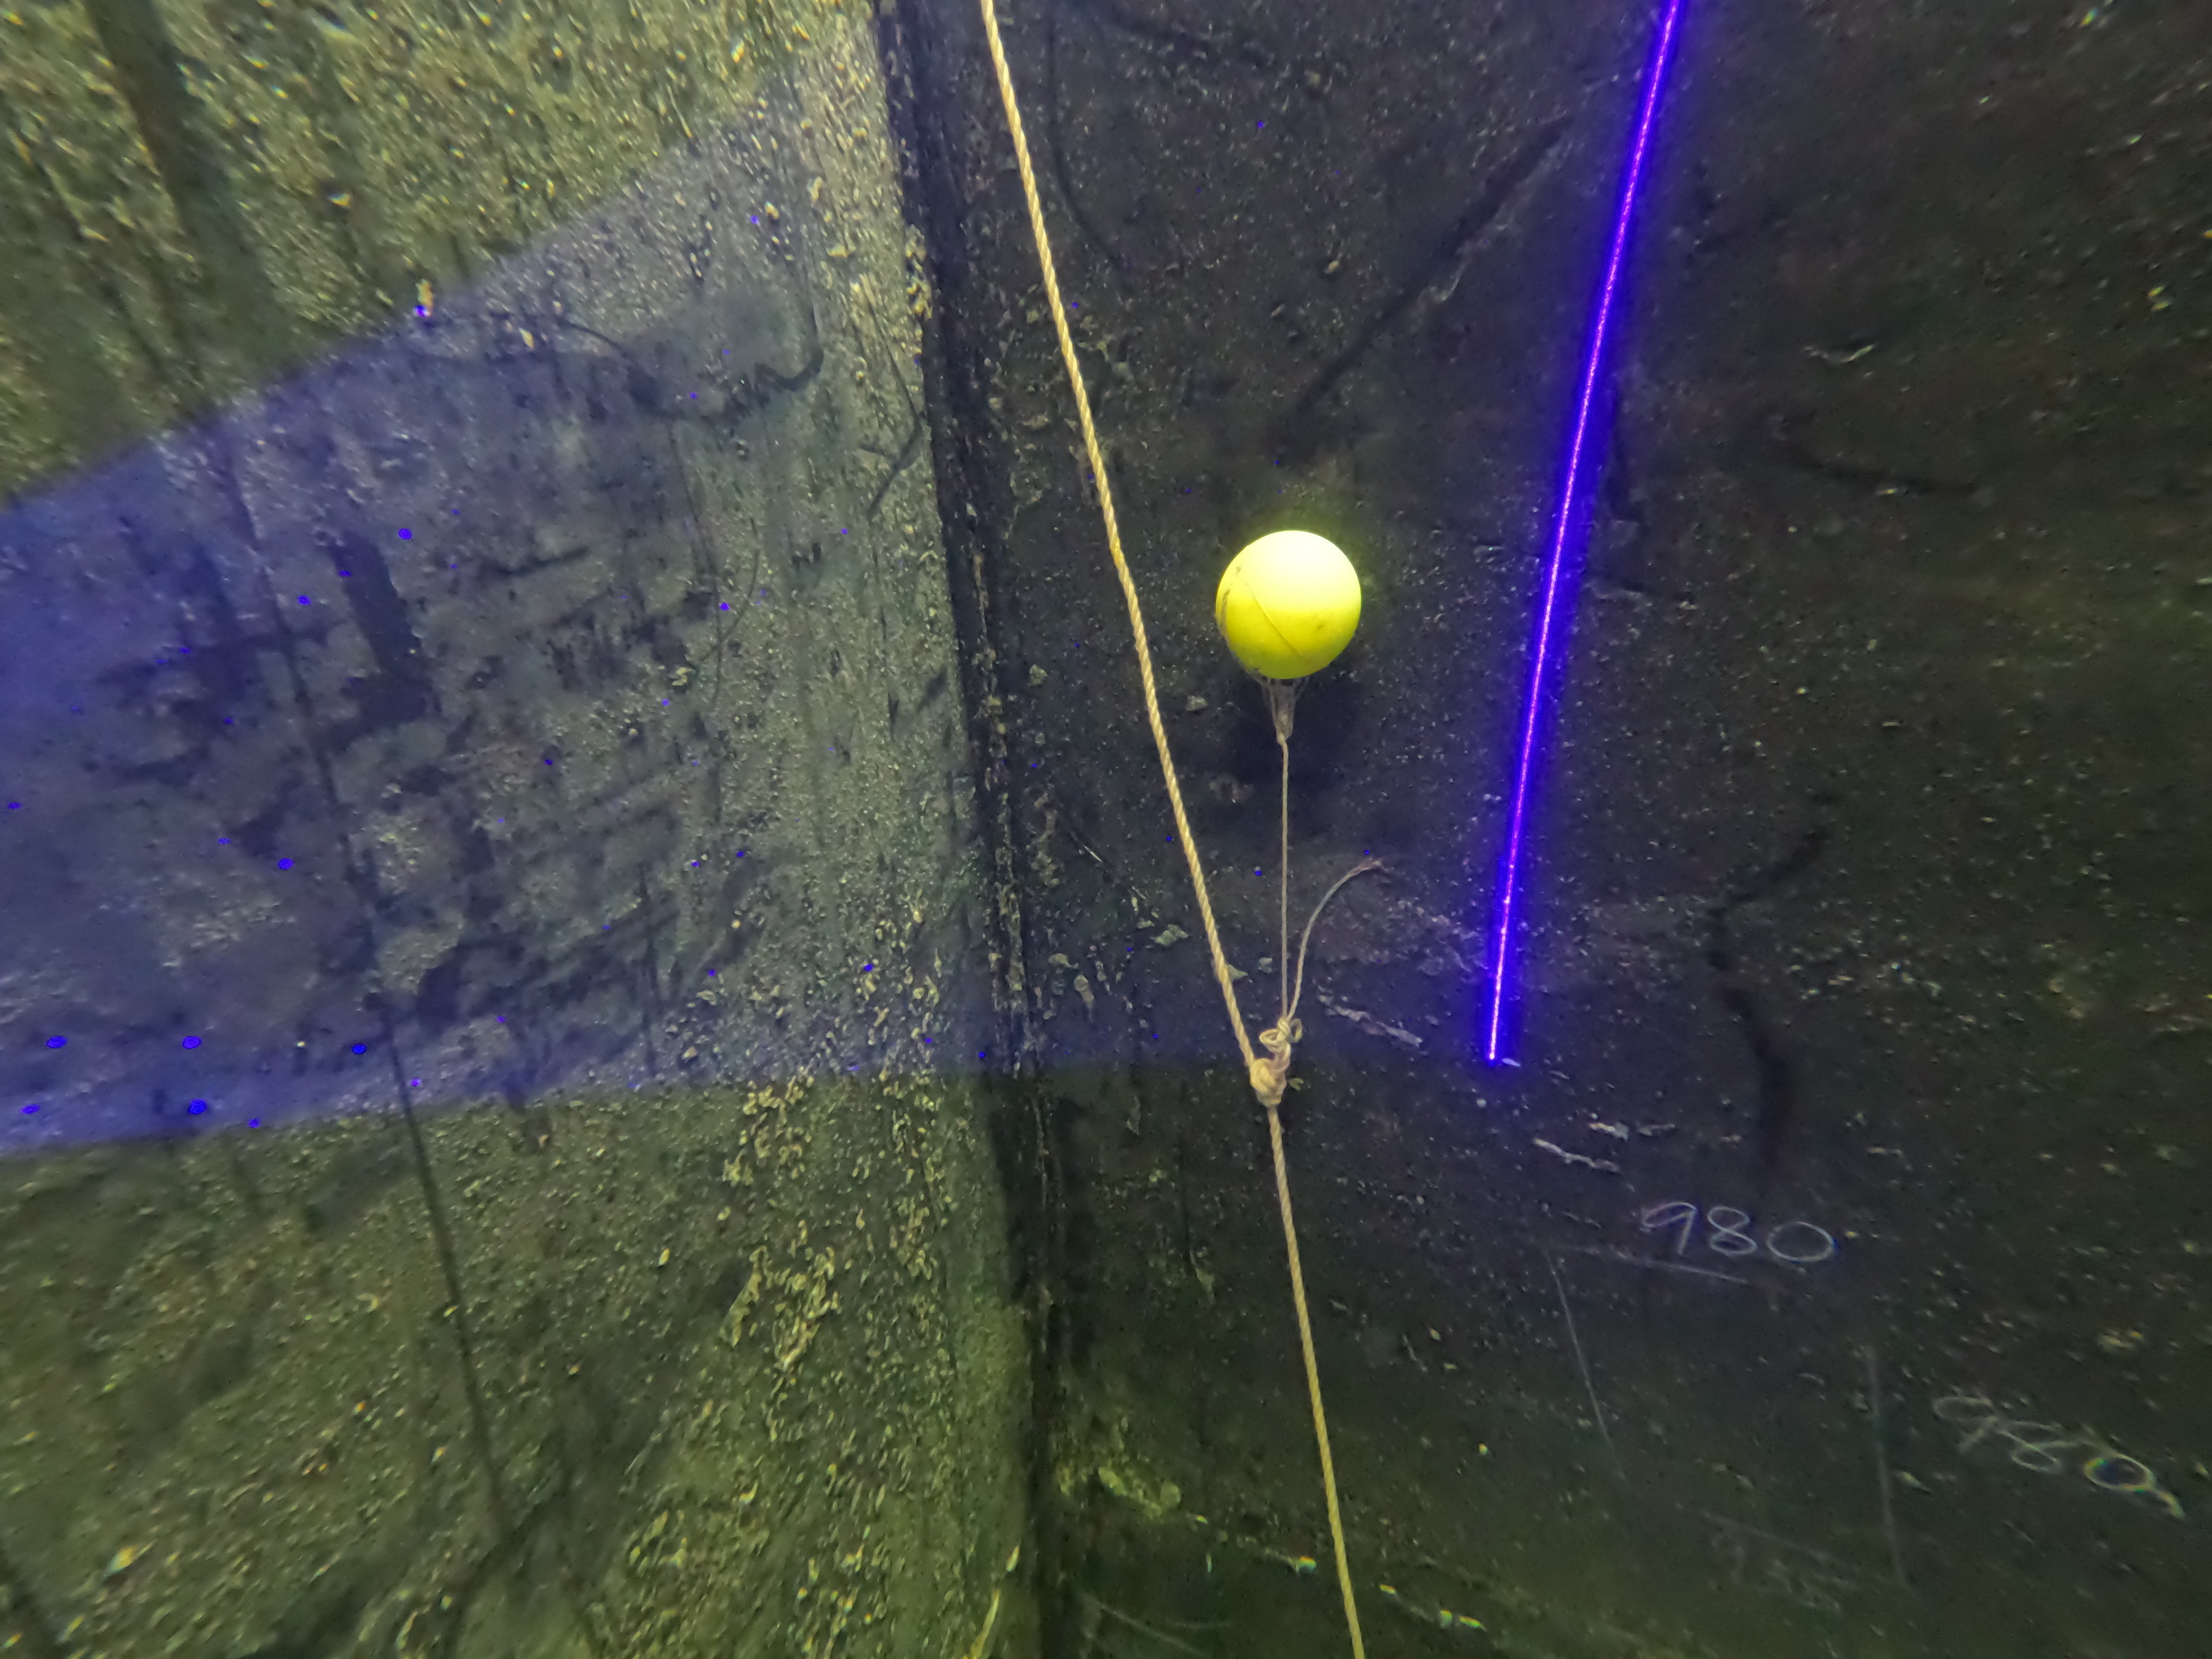

Supplement: Supplementary file 286 [file G0031079.pdf › 4/G0031079.pdf]

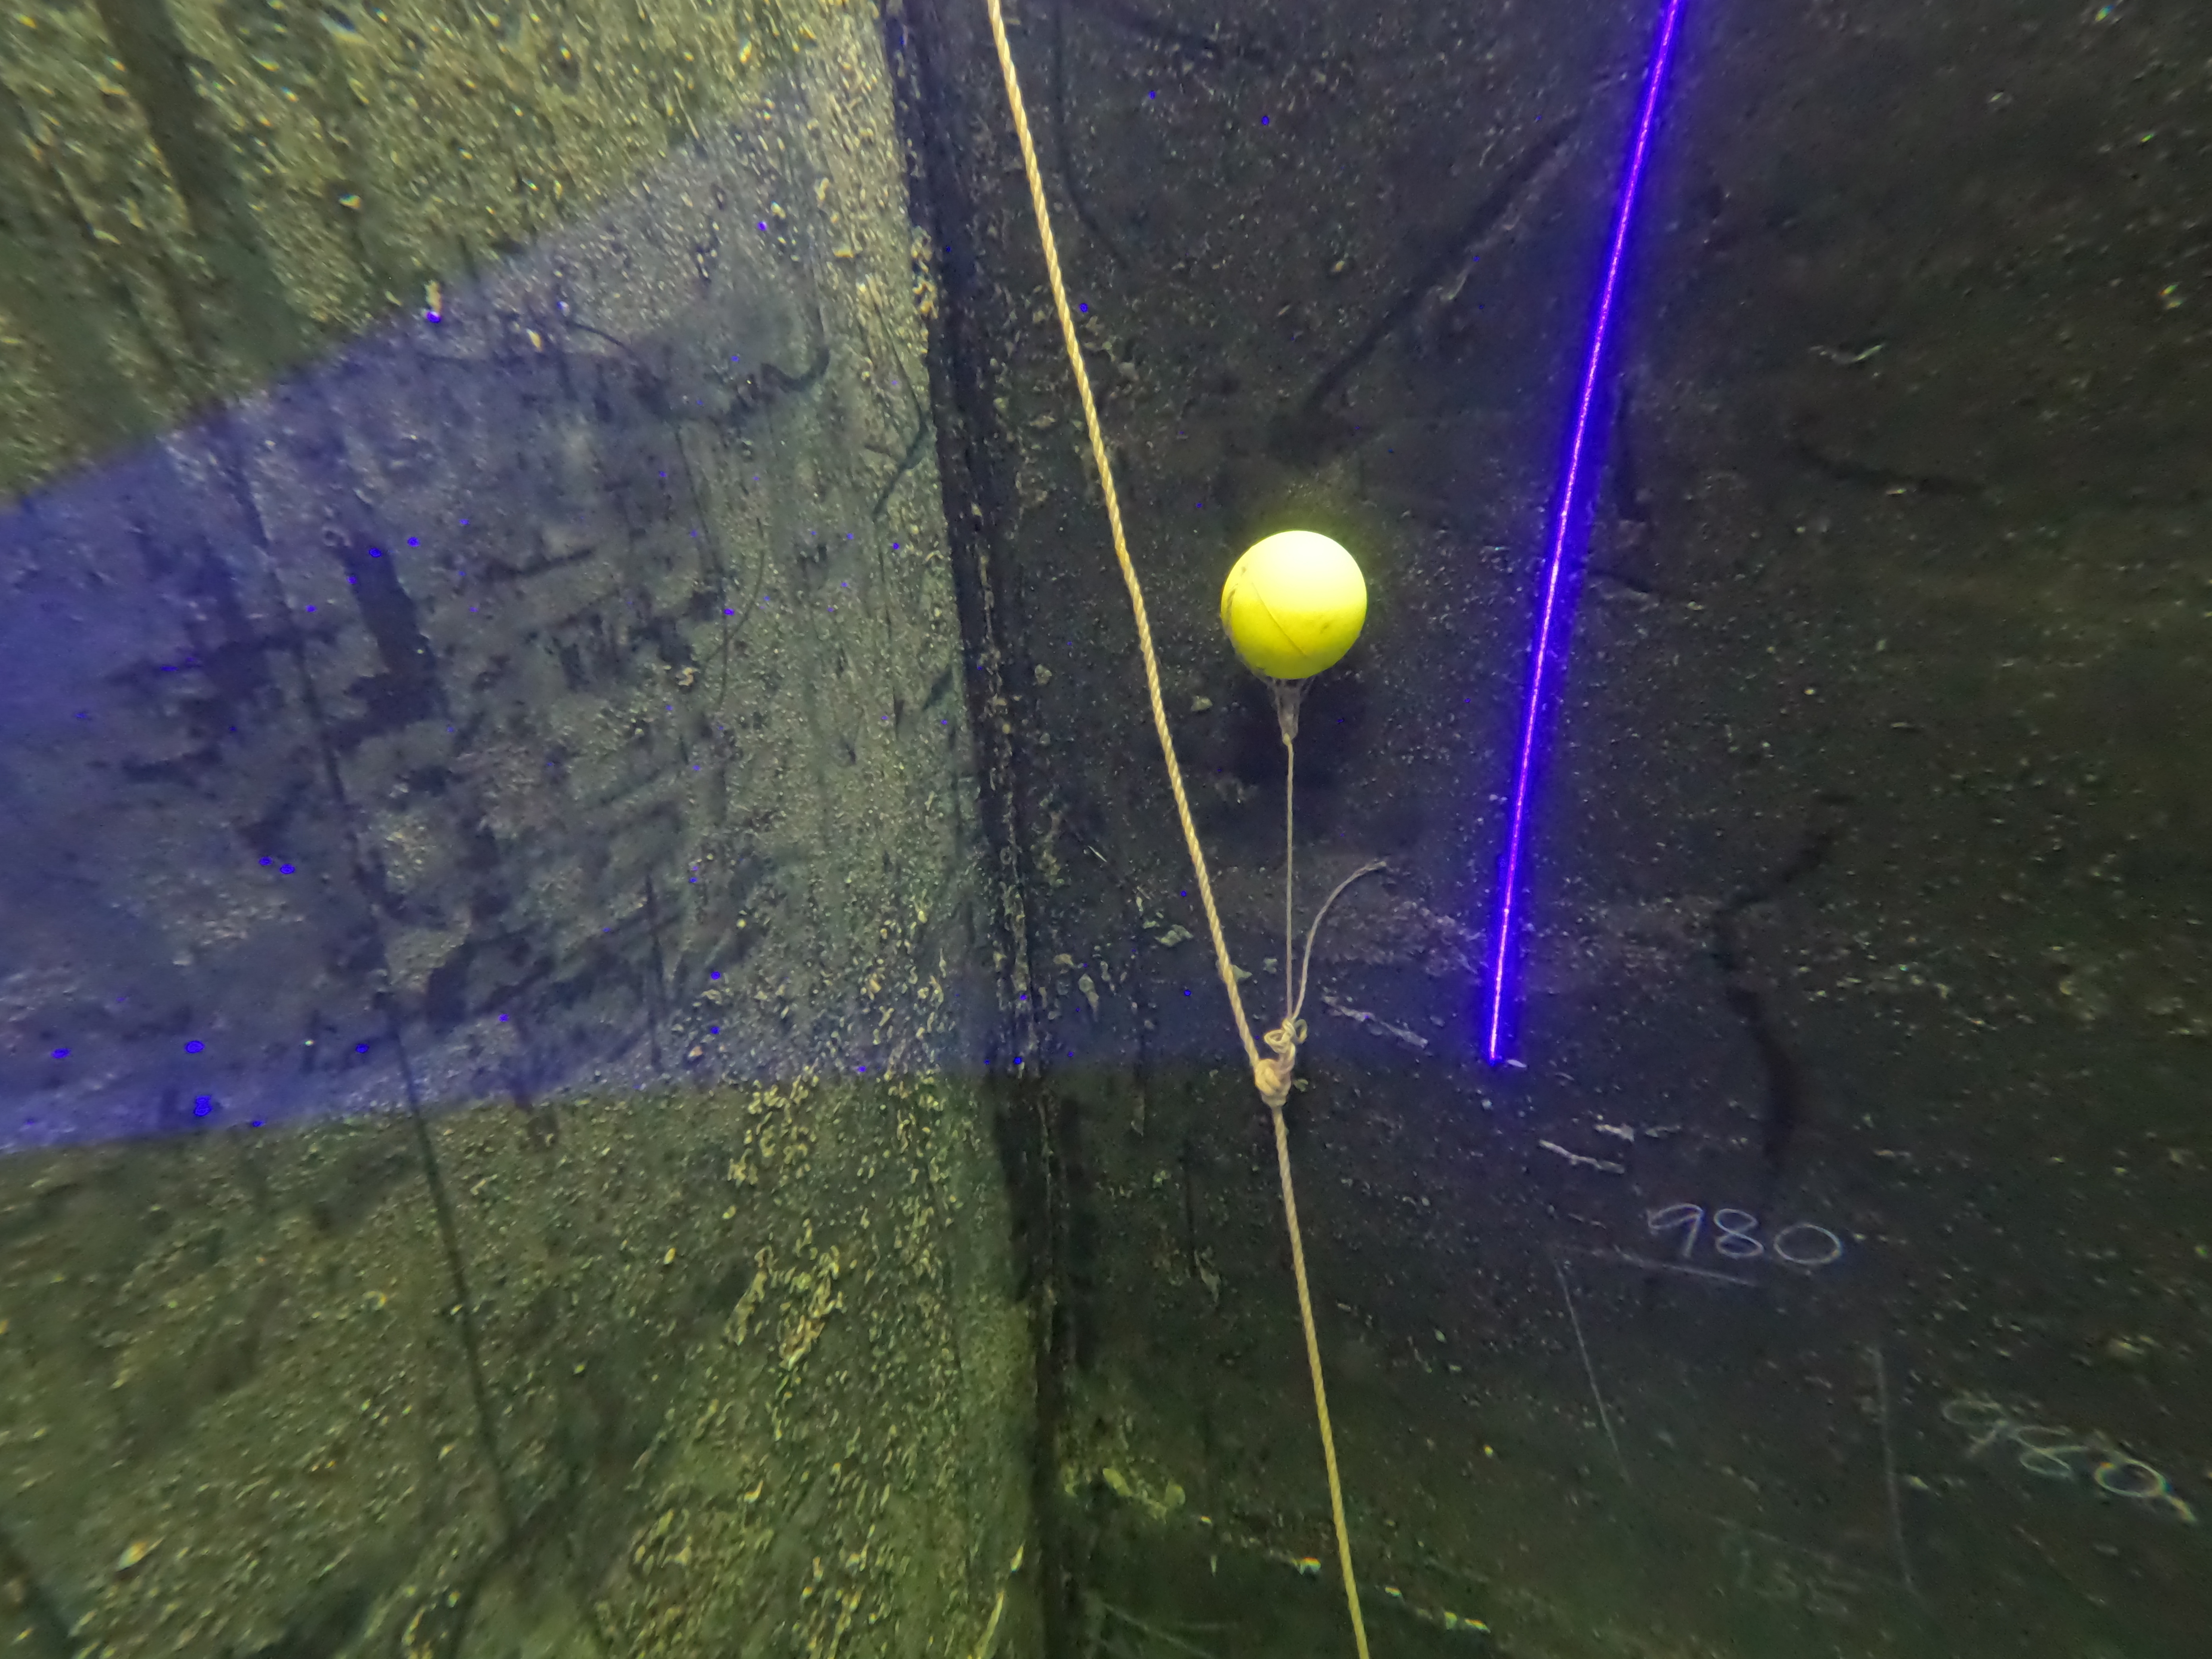

Supplement: Supplementary file 287 [file G0031080.pdf › 4/G0031080.pdf]

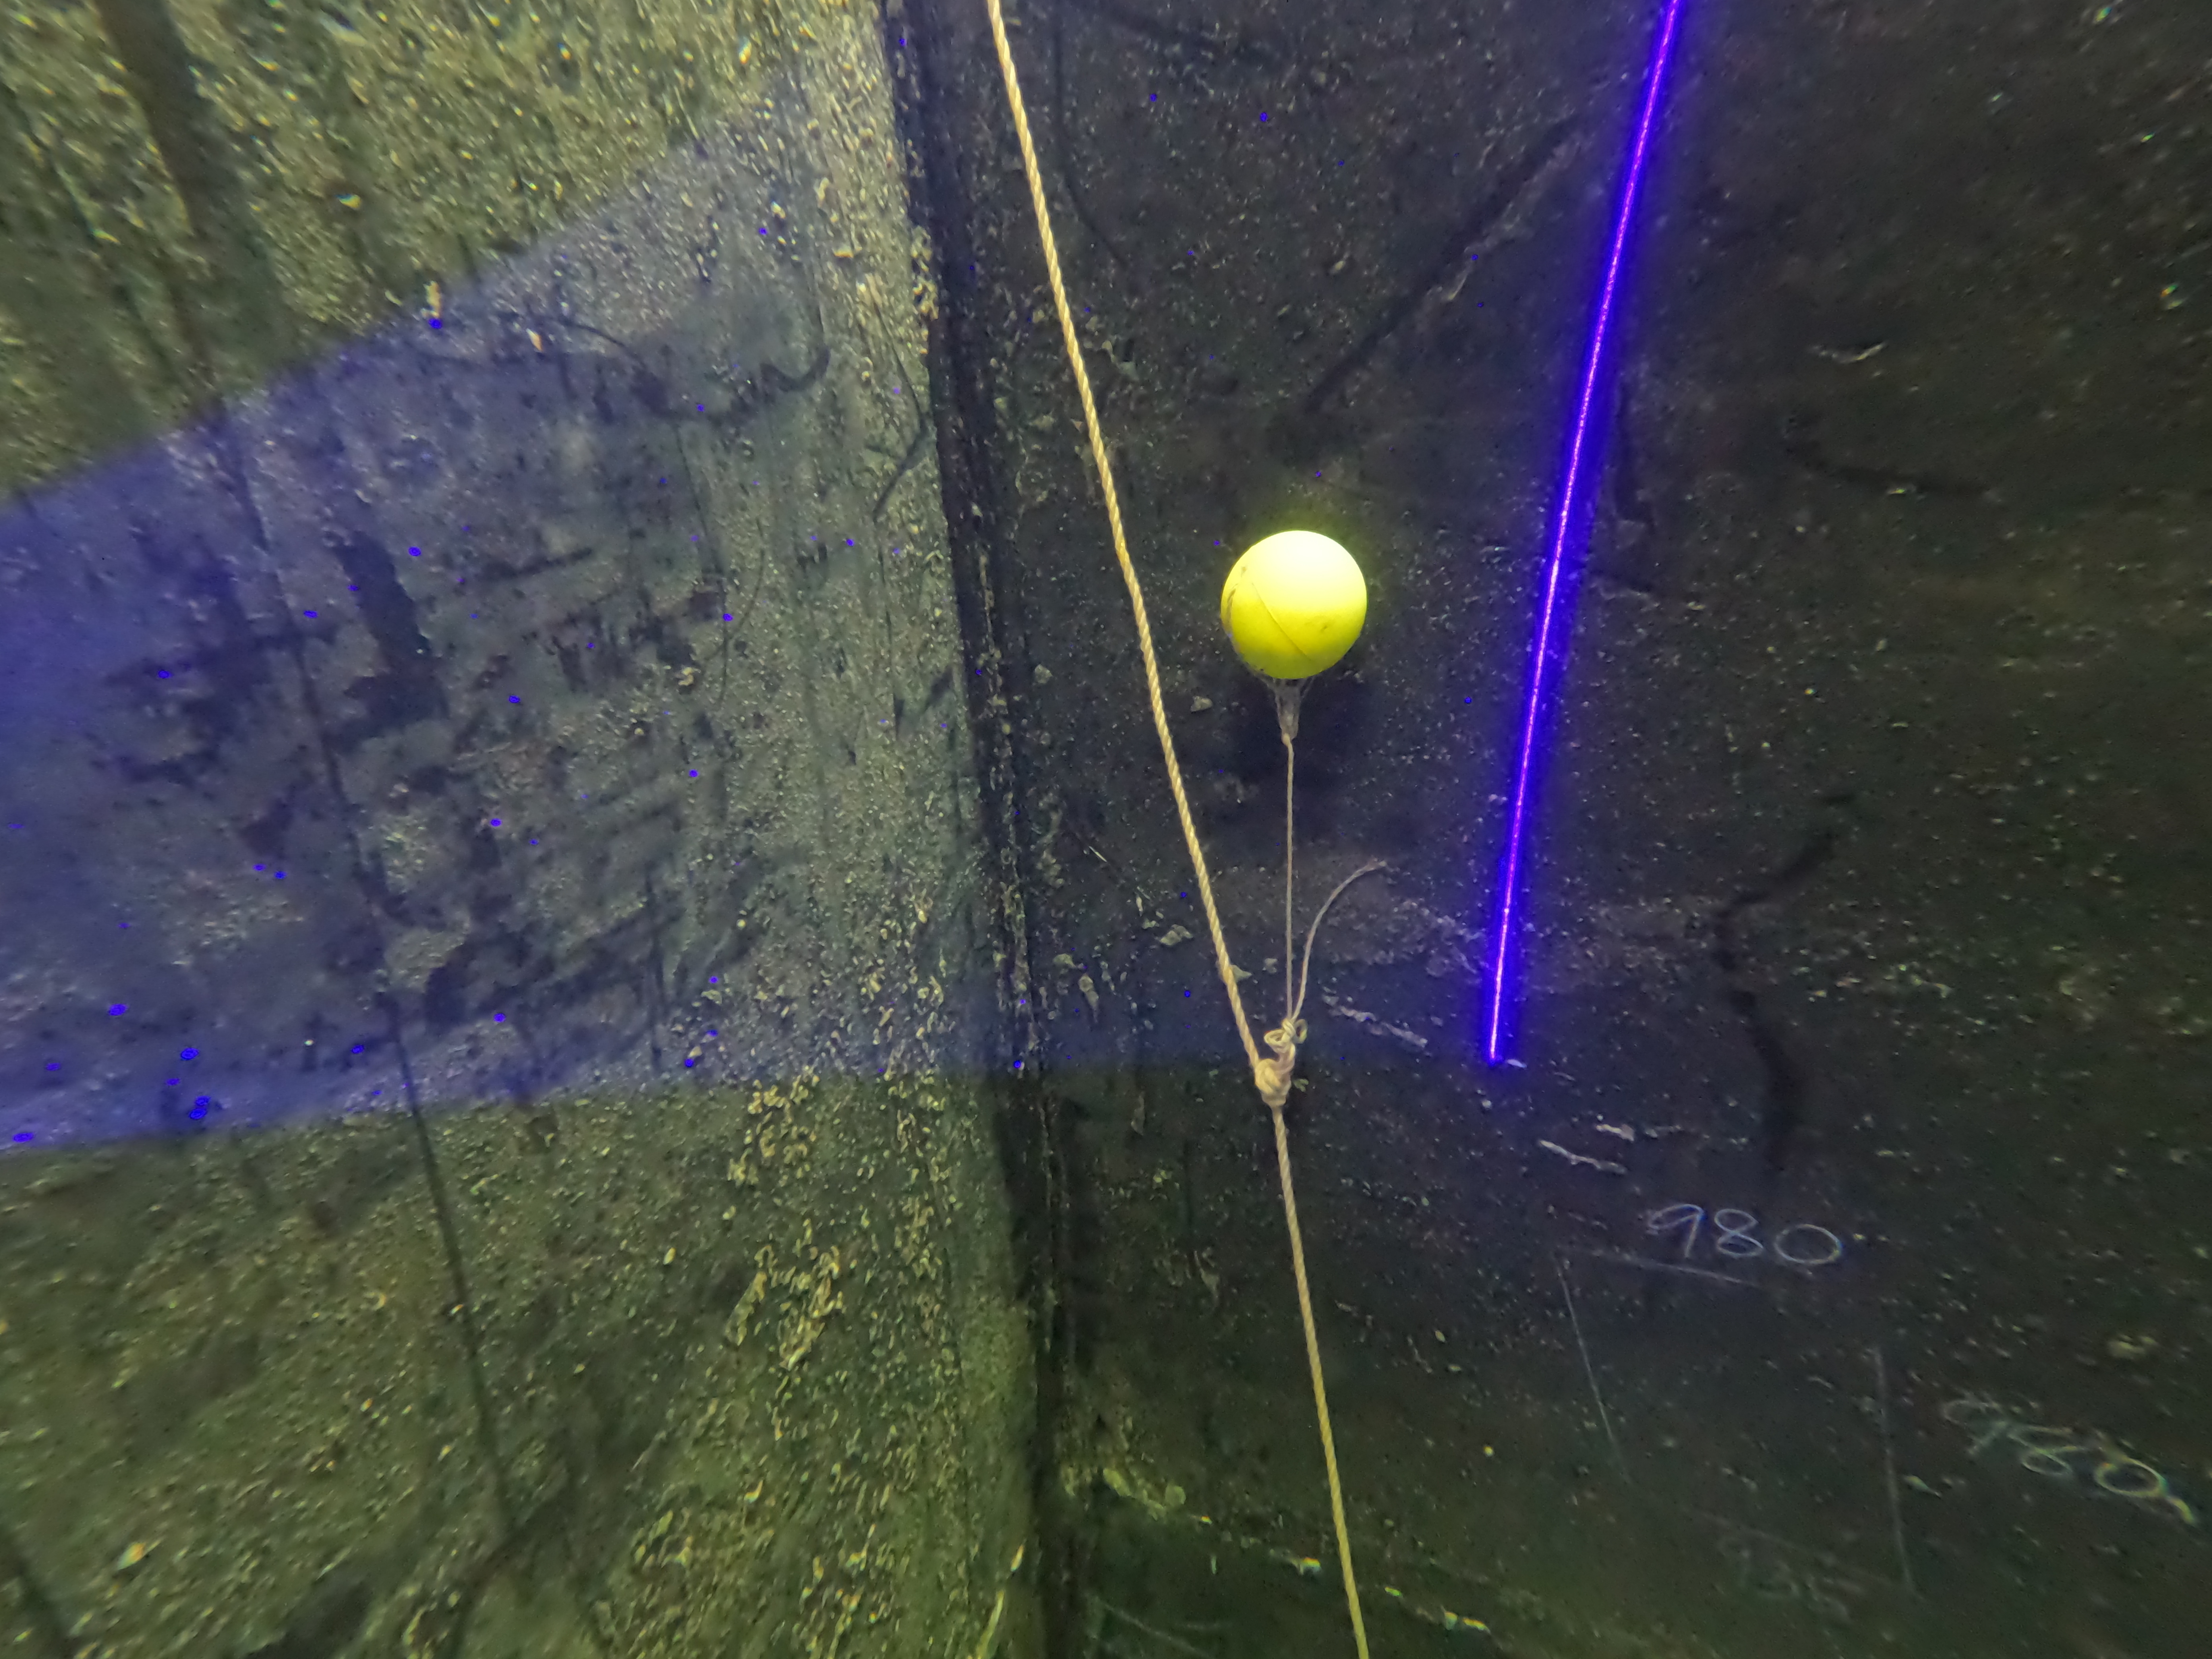

980

980

Supplement: Supplementary file 288 [file G0031081.pdf › 4/G0031081.pdf]

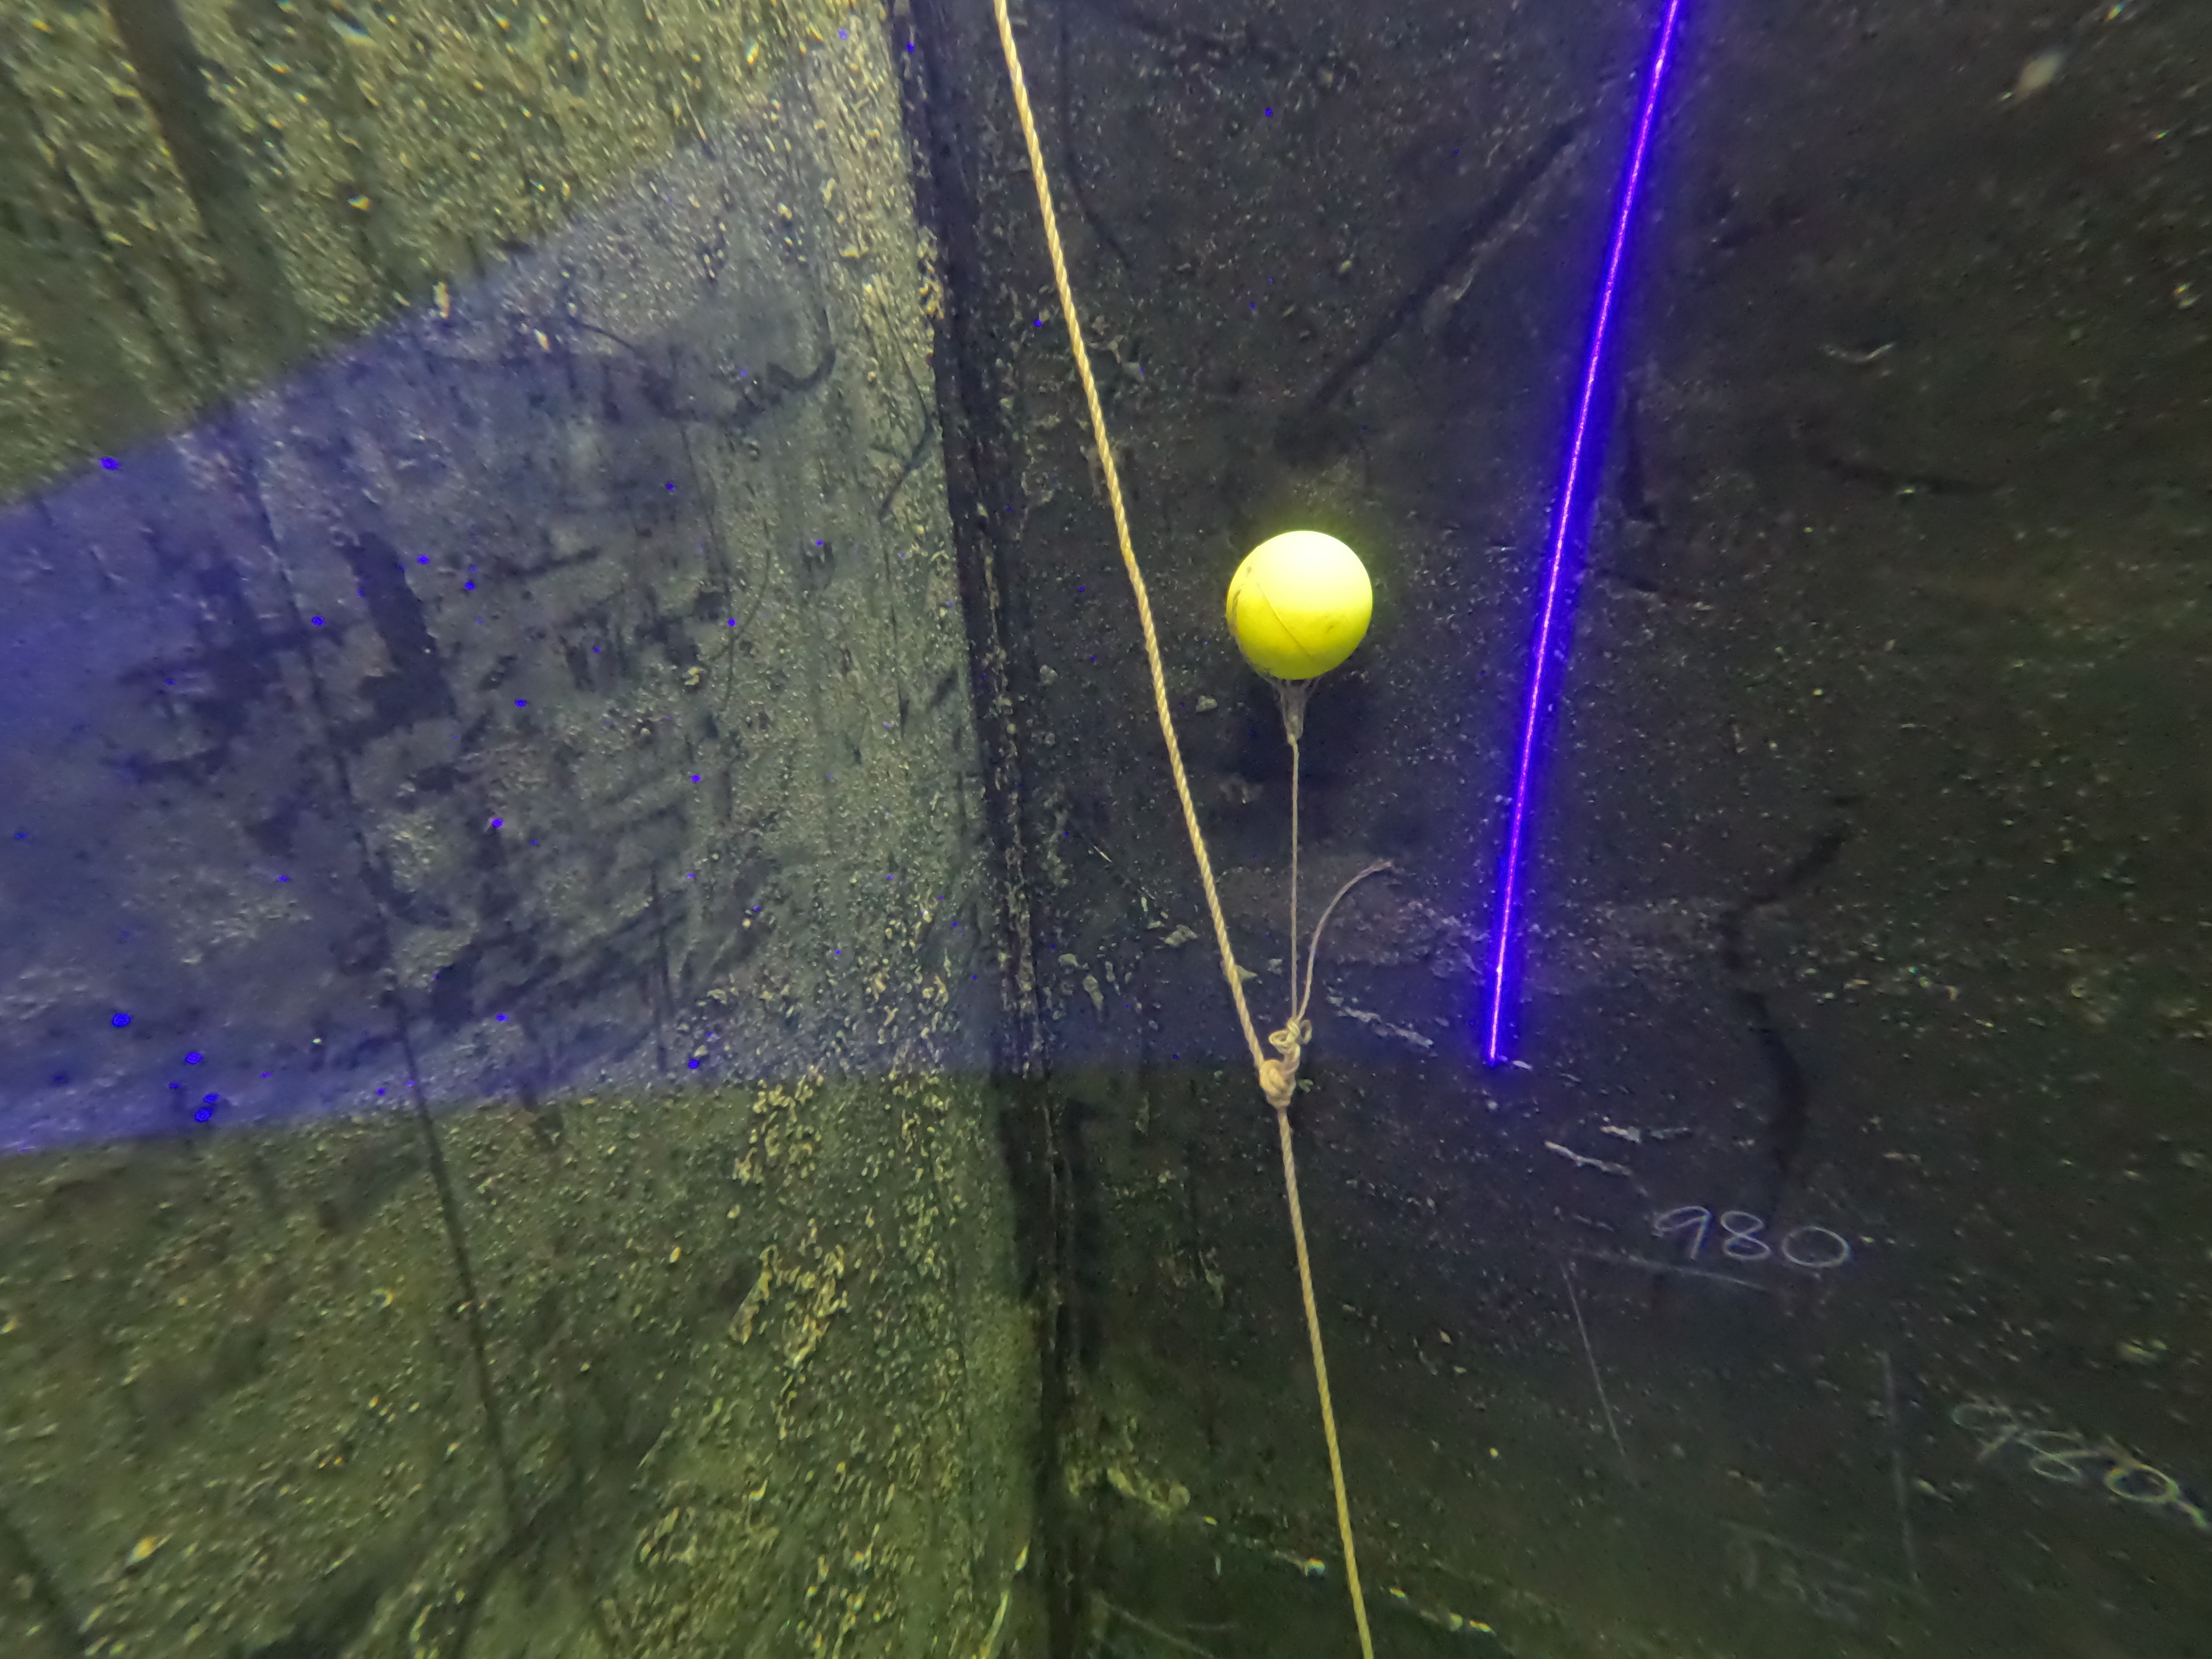

980

980

Supplement: Supplementary file 289 [file G0031082.pdf › 4/G0031082.pdf]

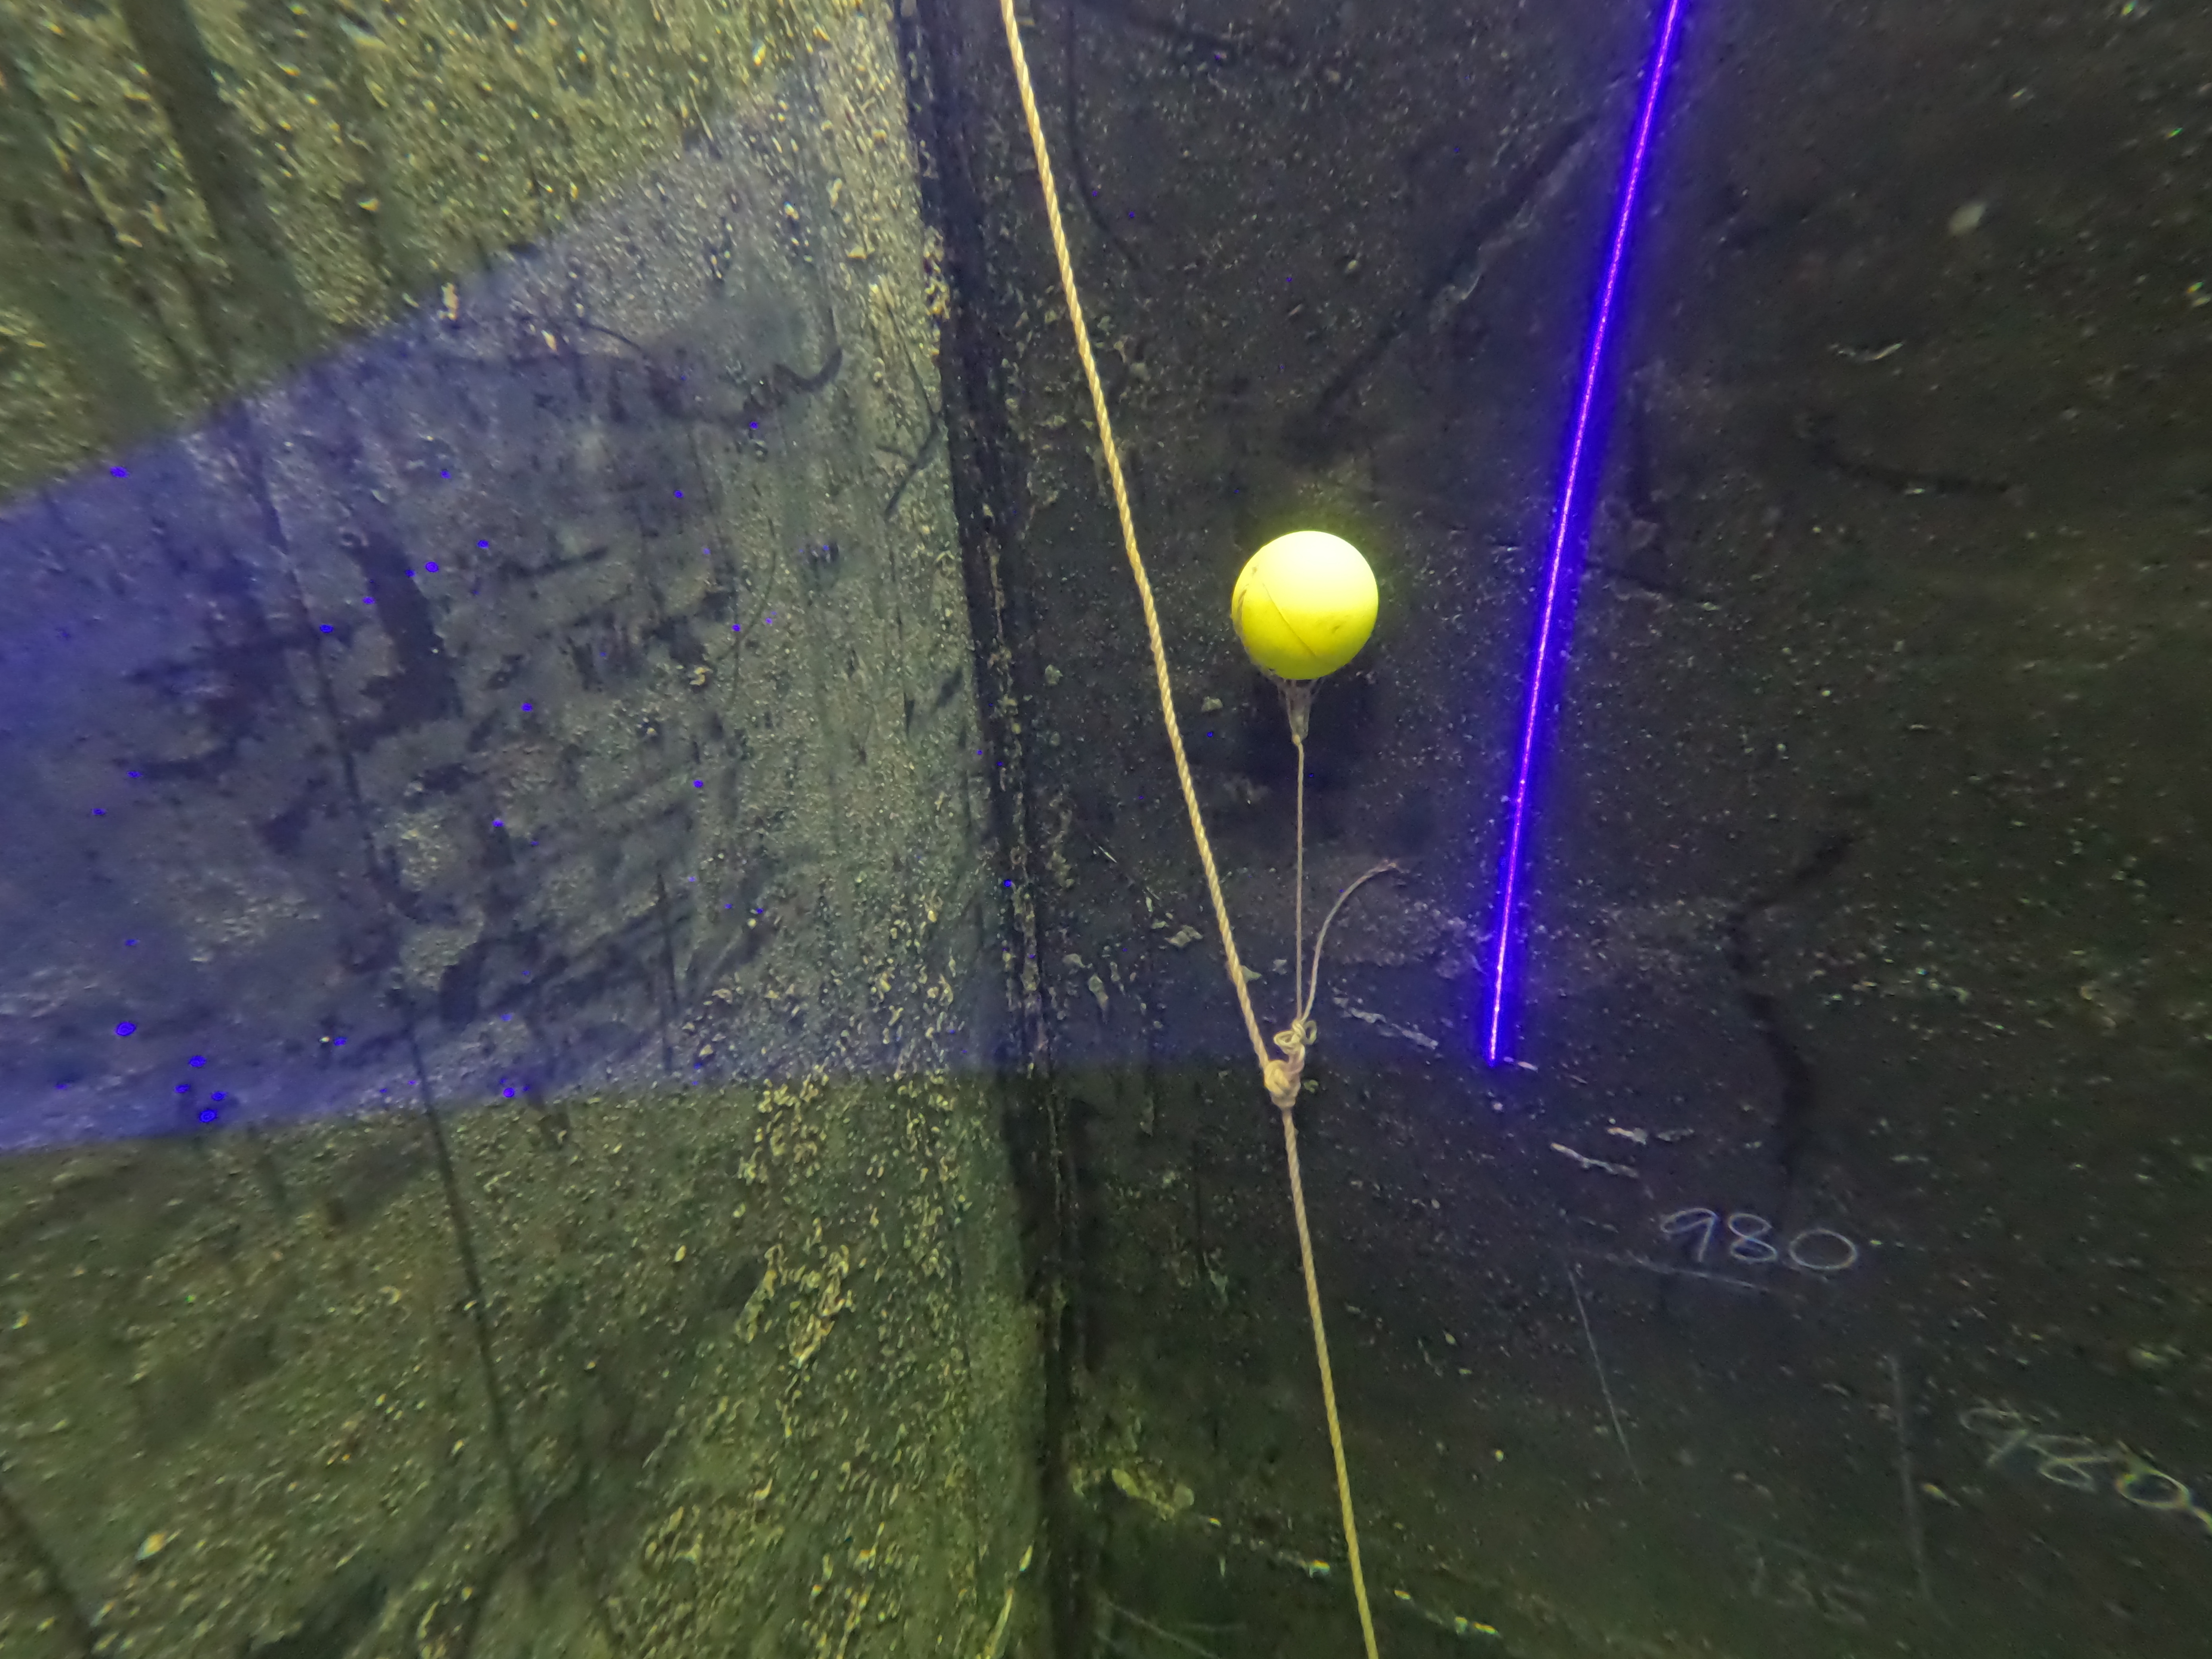

Supplement: Supplementary file 290 [file G0031083.pdf › 4/G0031083.pdf]

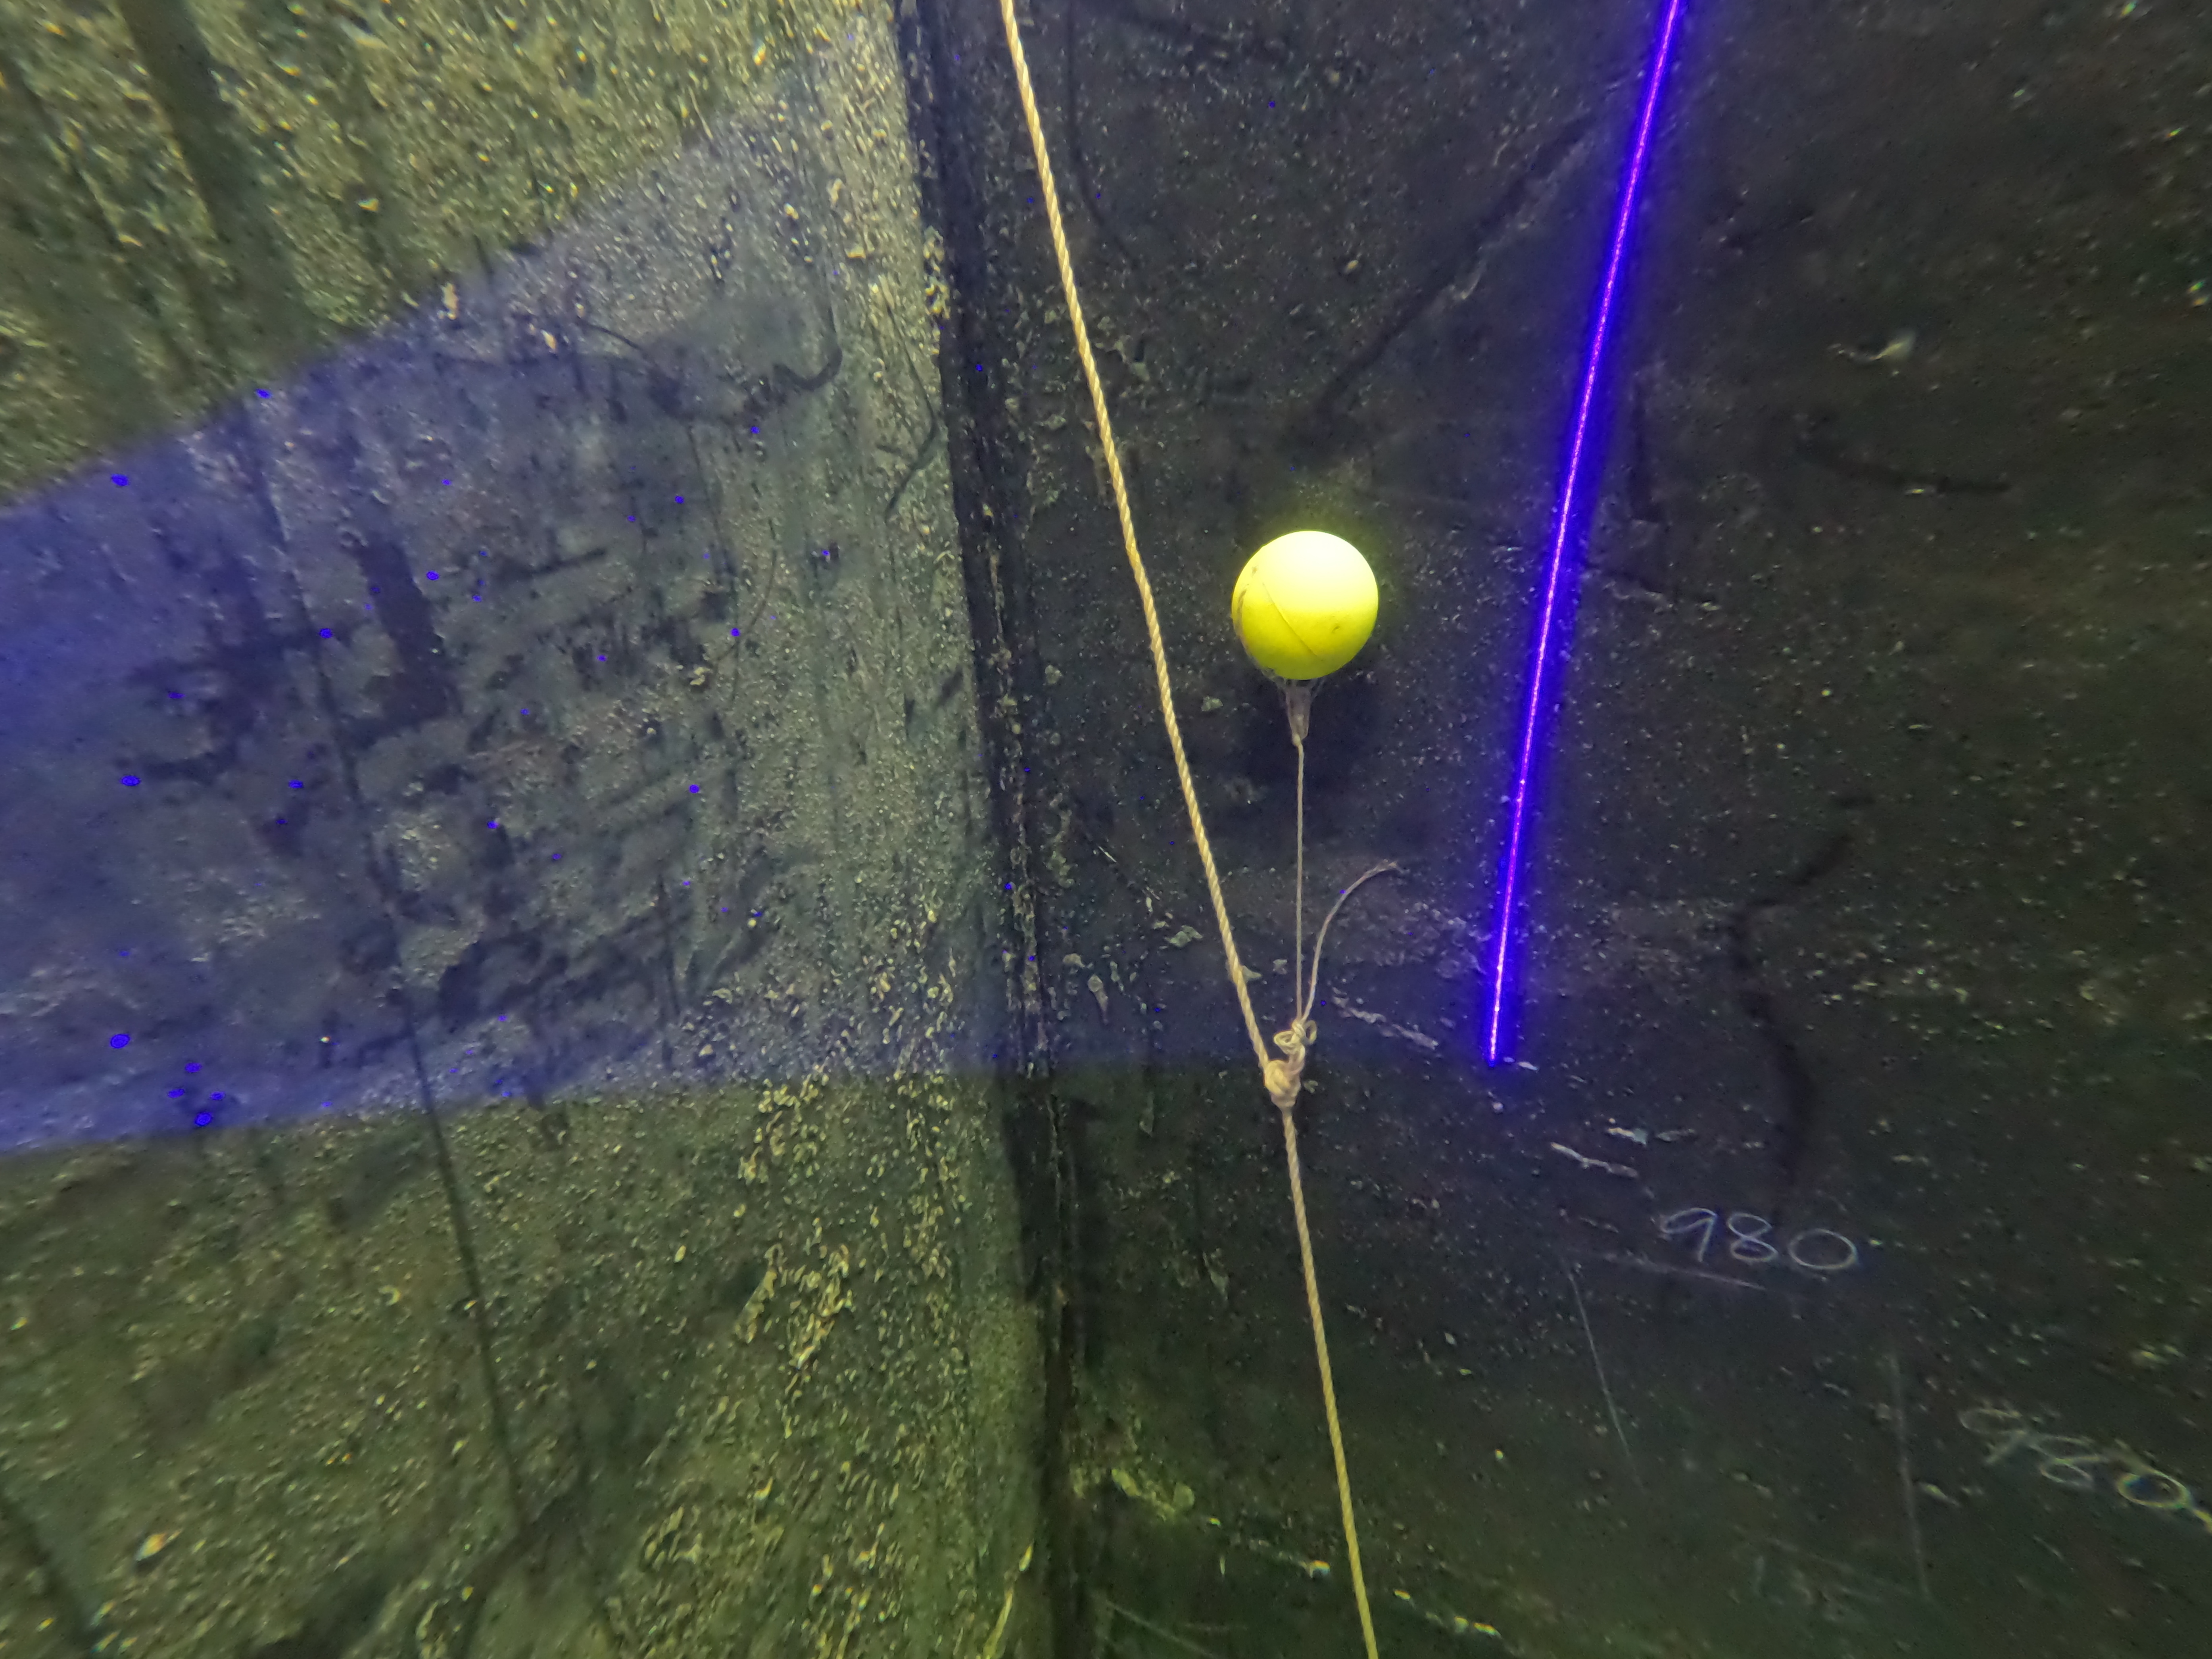

980

980

Supplement: Supplementary file 291 [file G0031084.pdf › 4/G0031084.pdf]

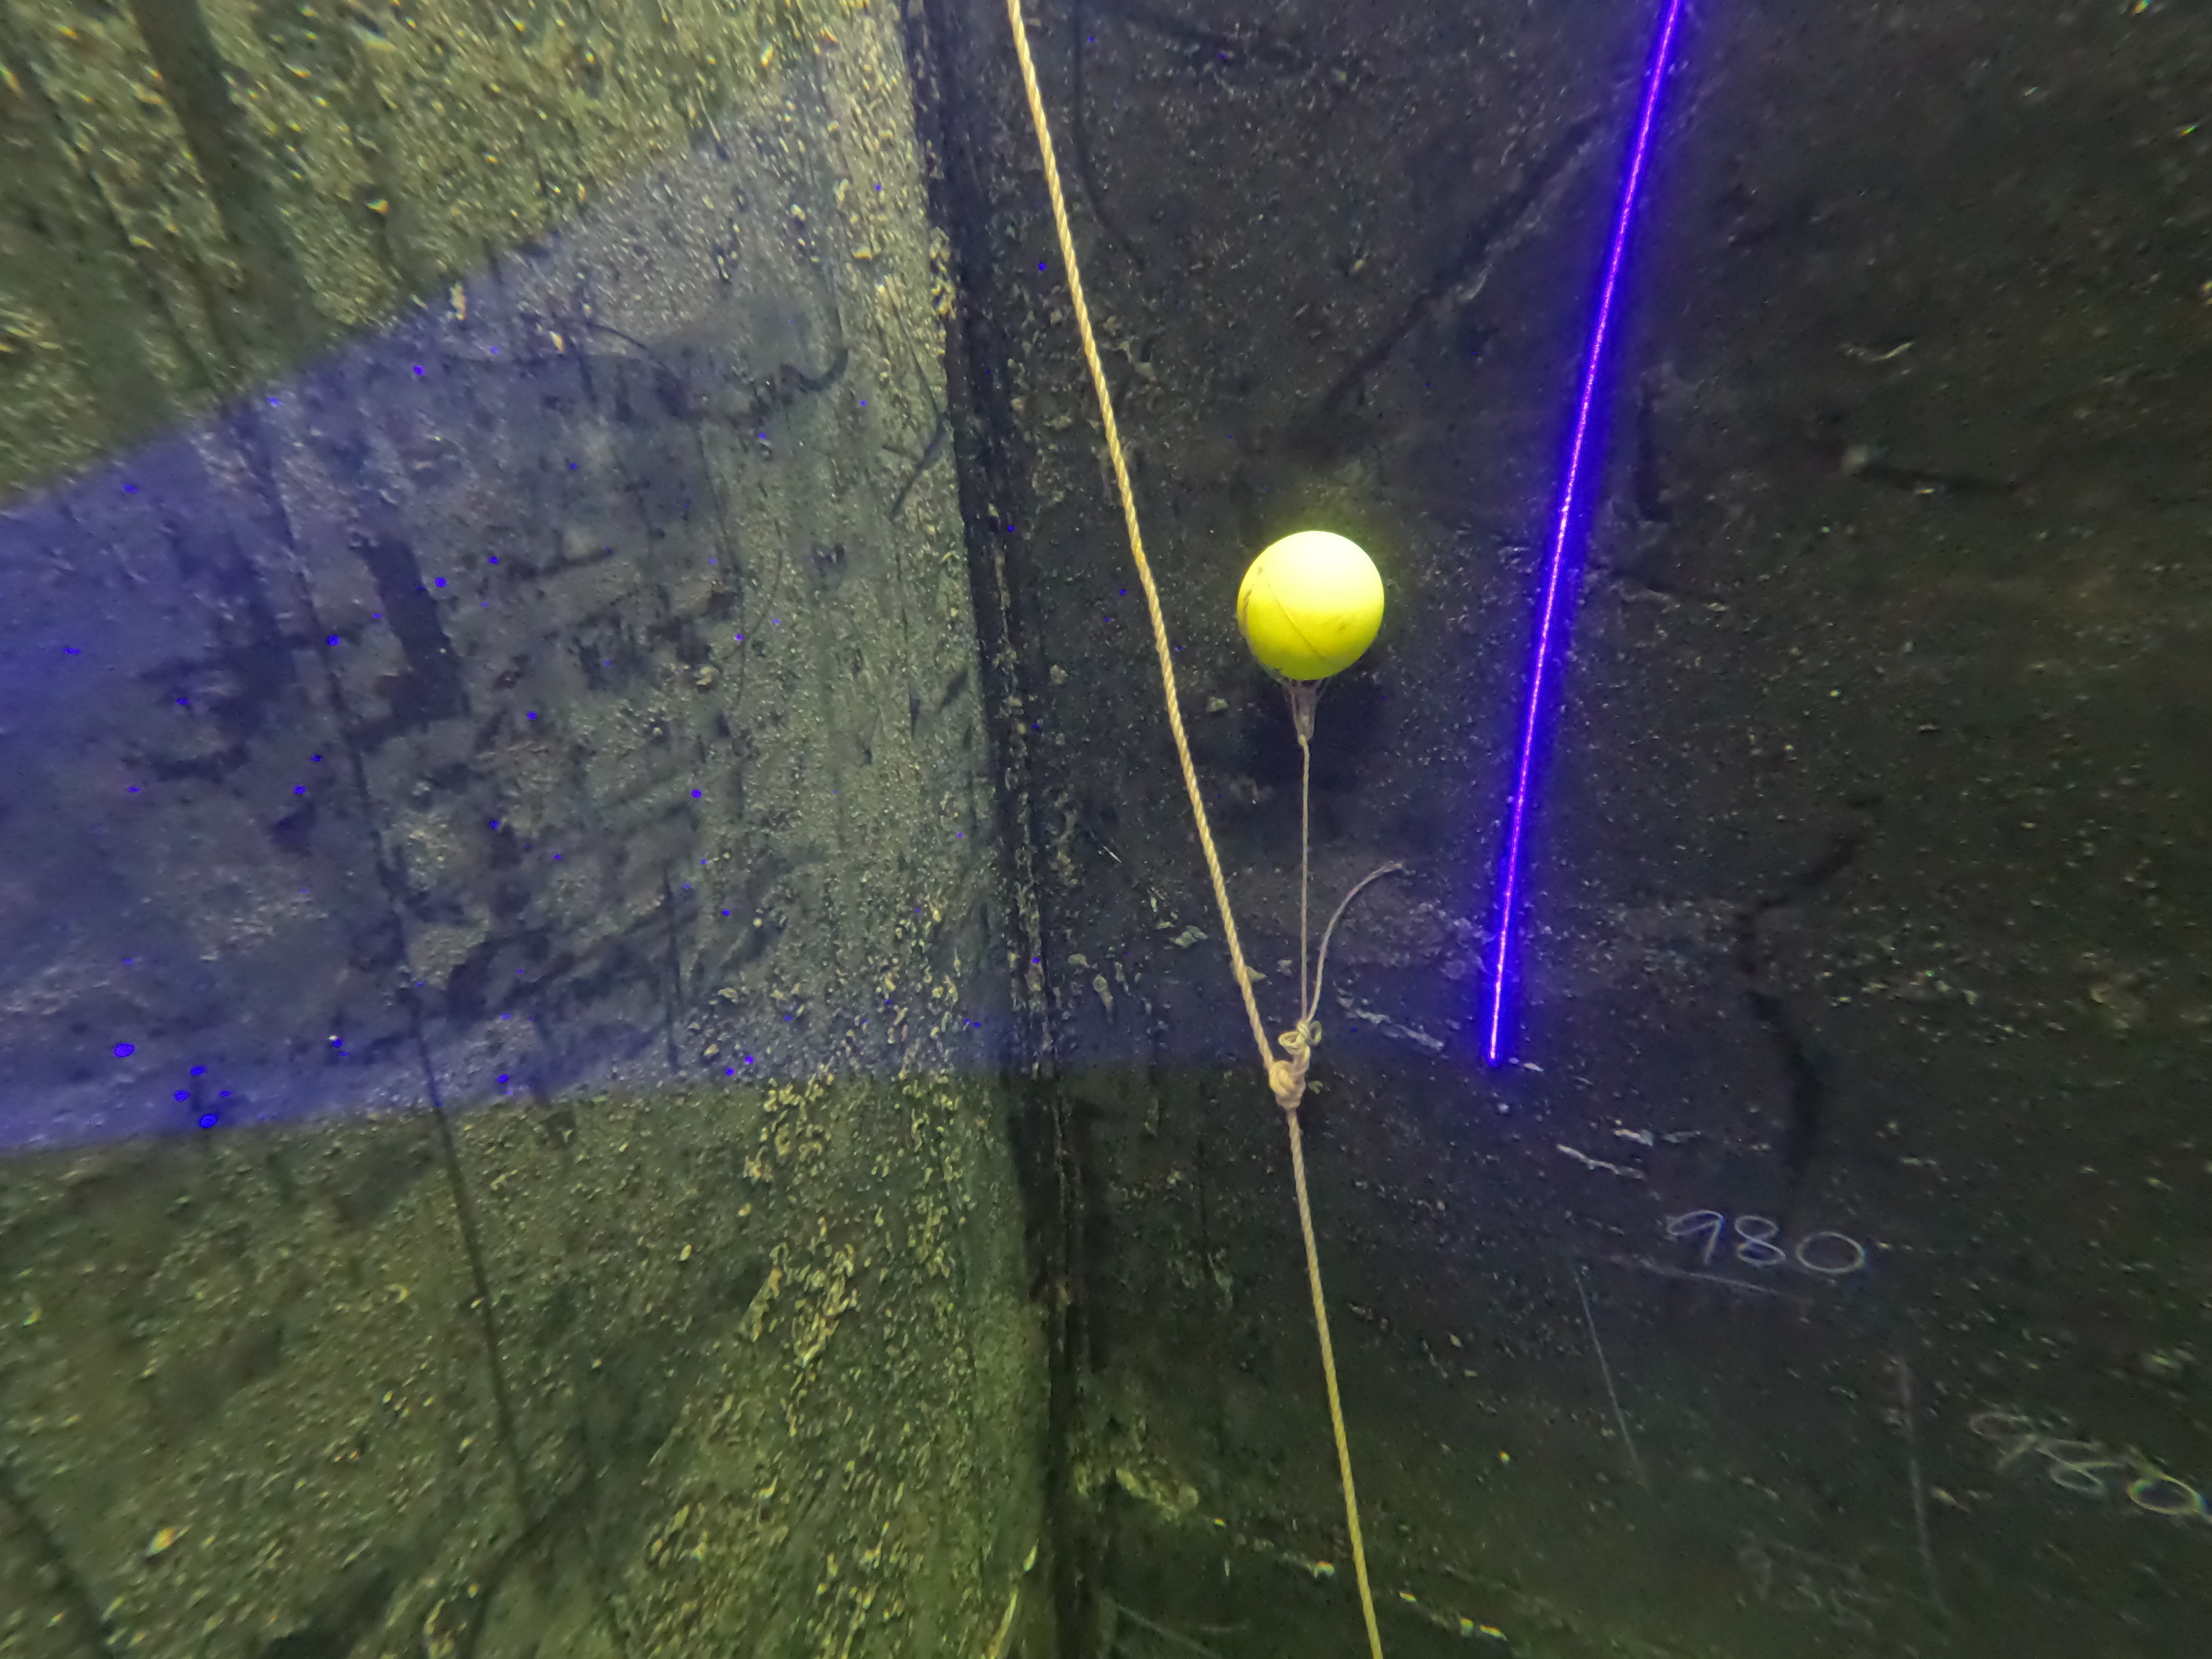

980

980

Supplement: Supplementary file 292 [file G0031085.pdf › 4/G0031085.pdf]

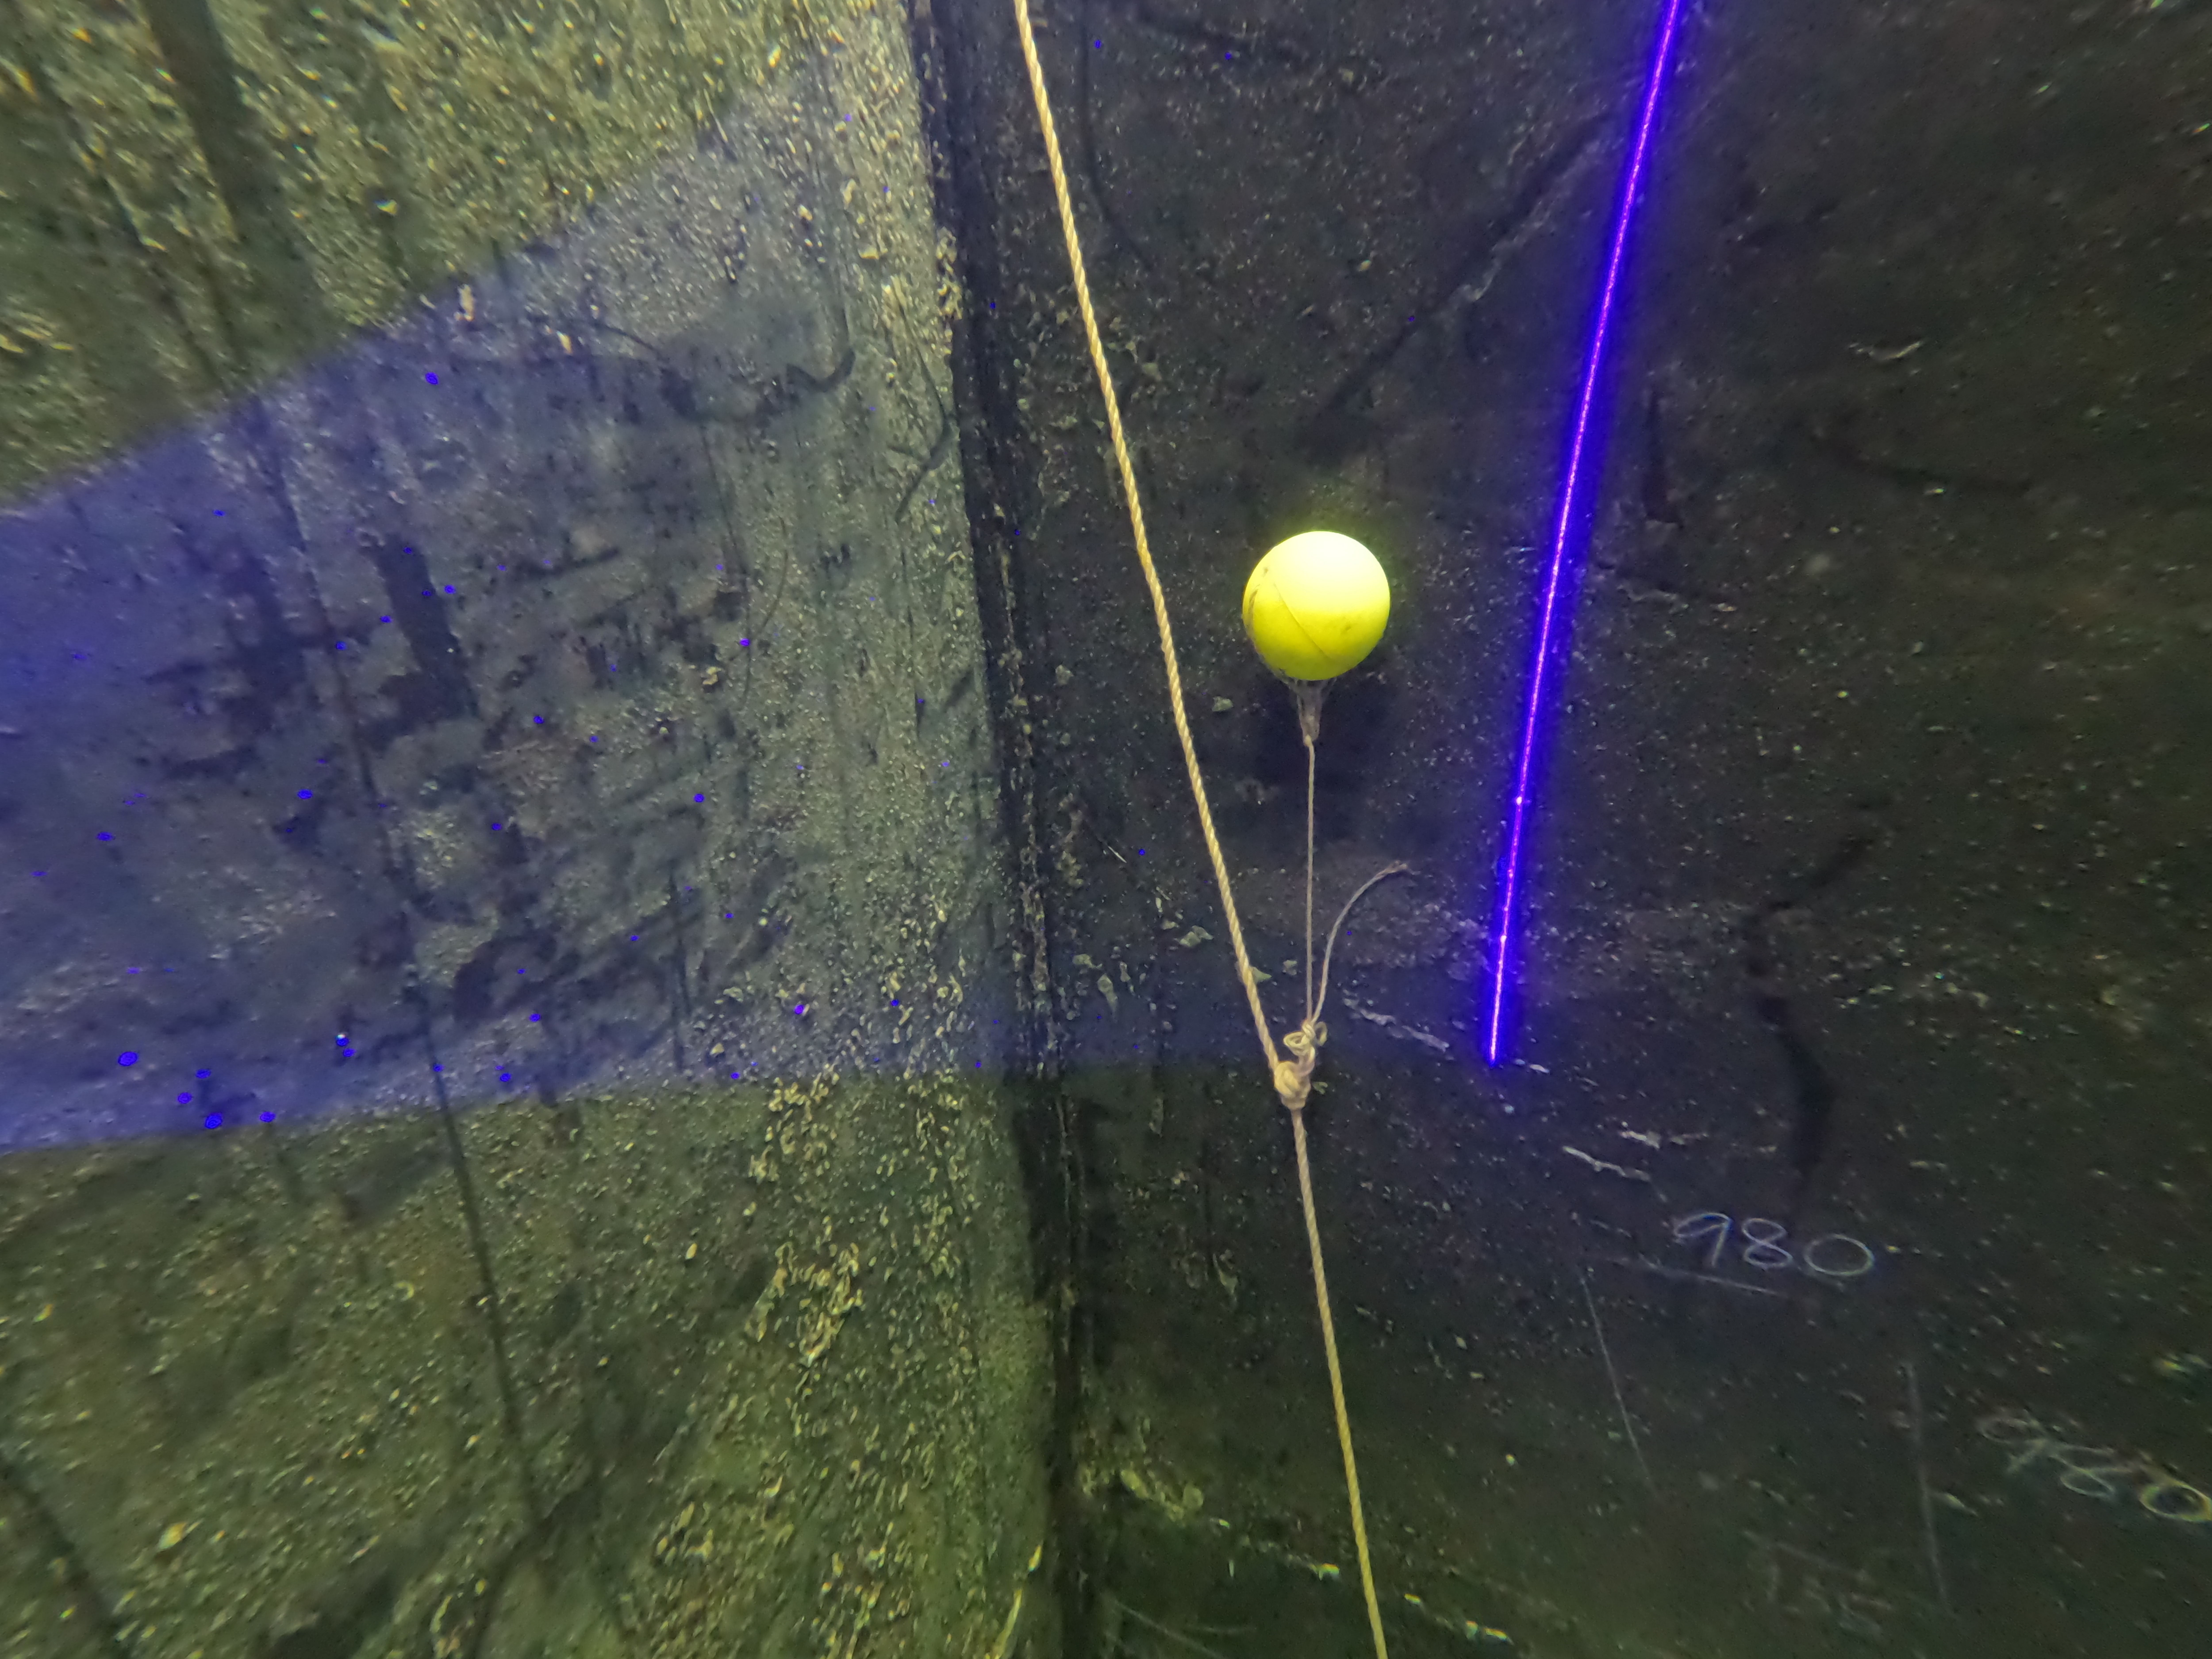

980

980

Supplement: Supplementary file 293 [file G0031086.pdf › 4/G0031086.pdf]

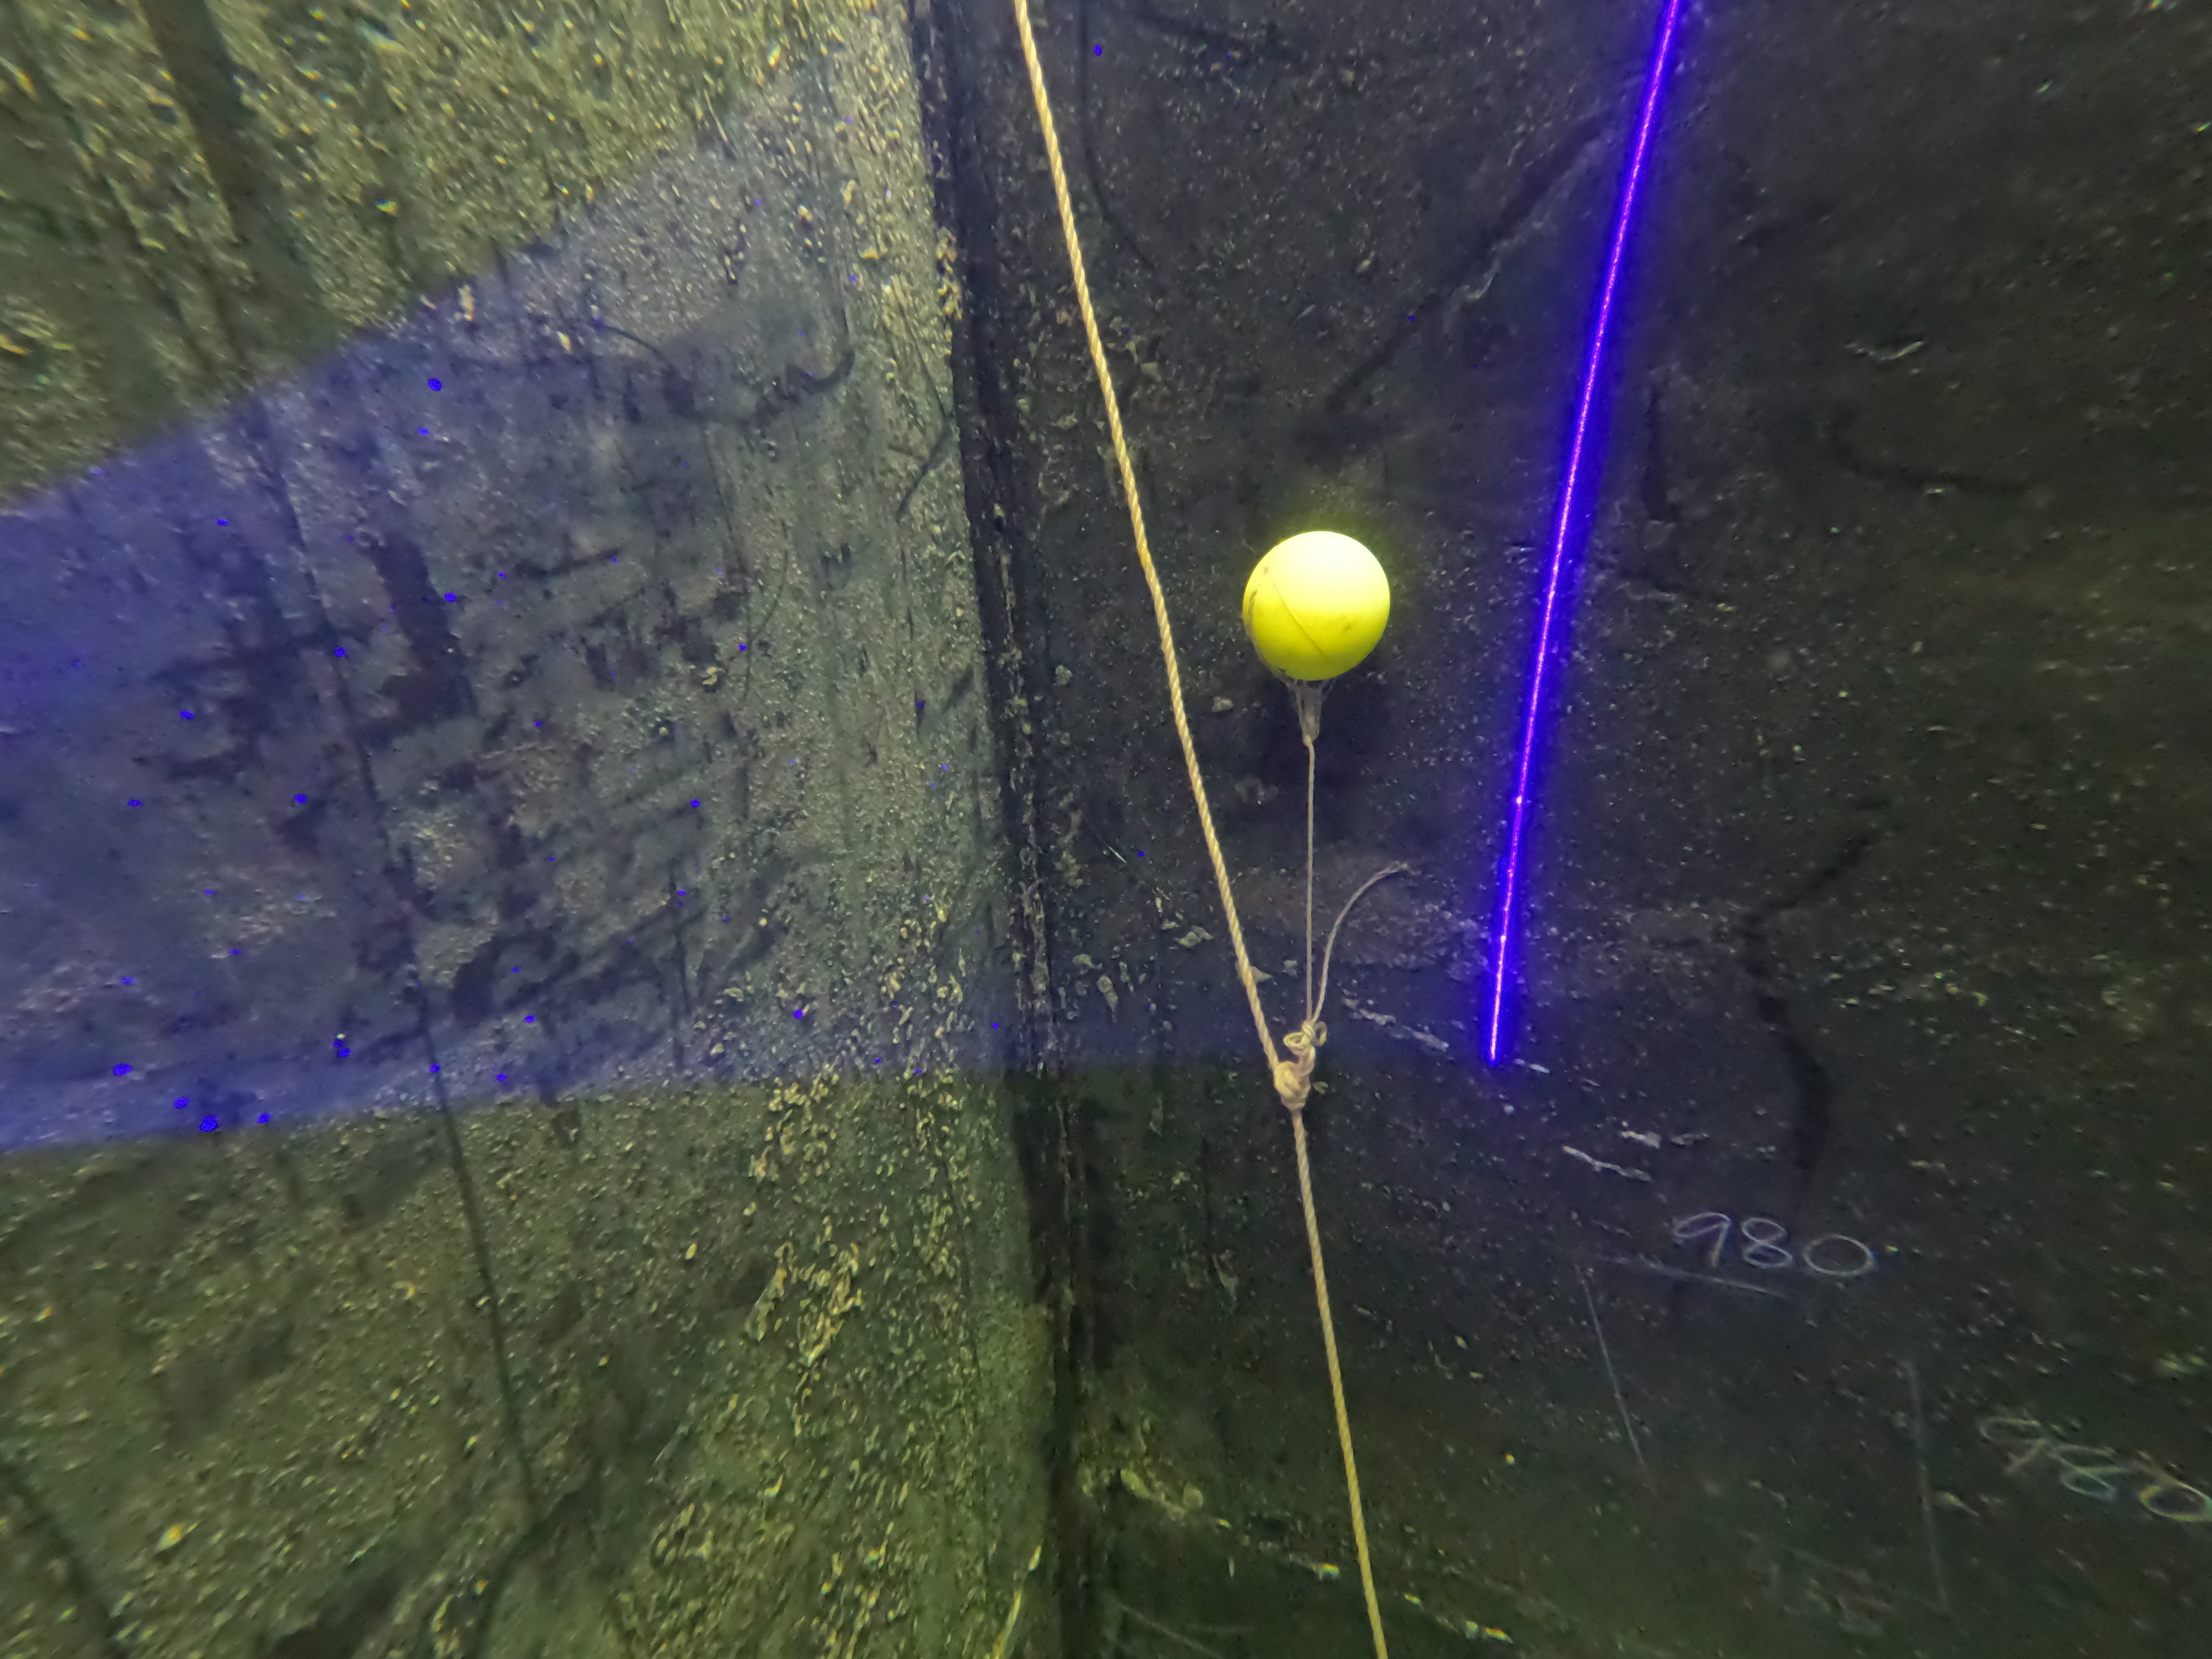

Supplement: Supplementary file 294 [file G0031087.pdf › 4/G0031087.pdf]

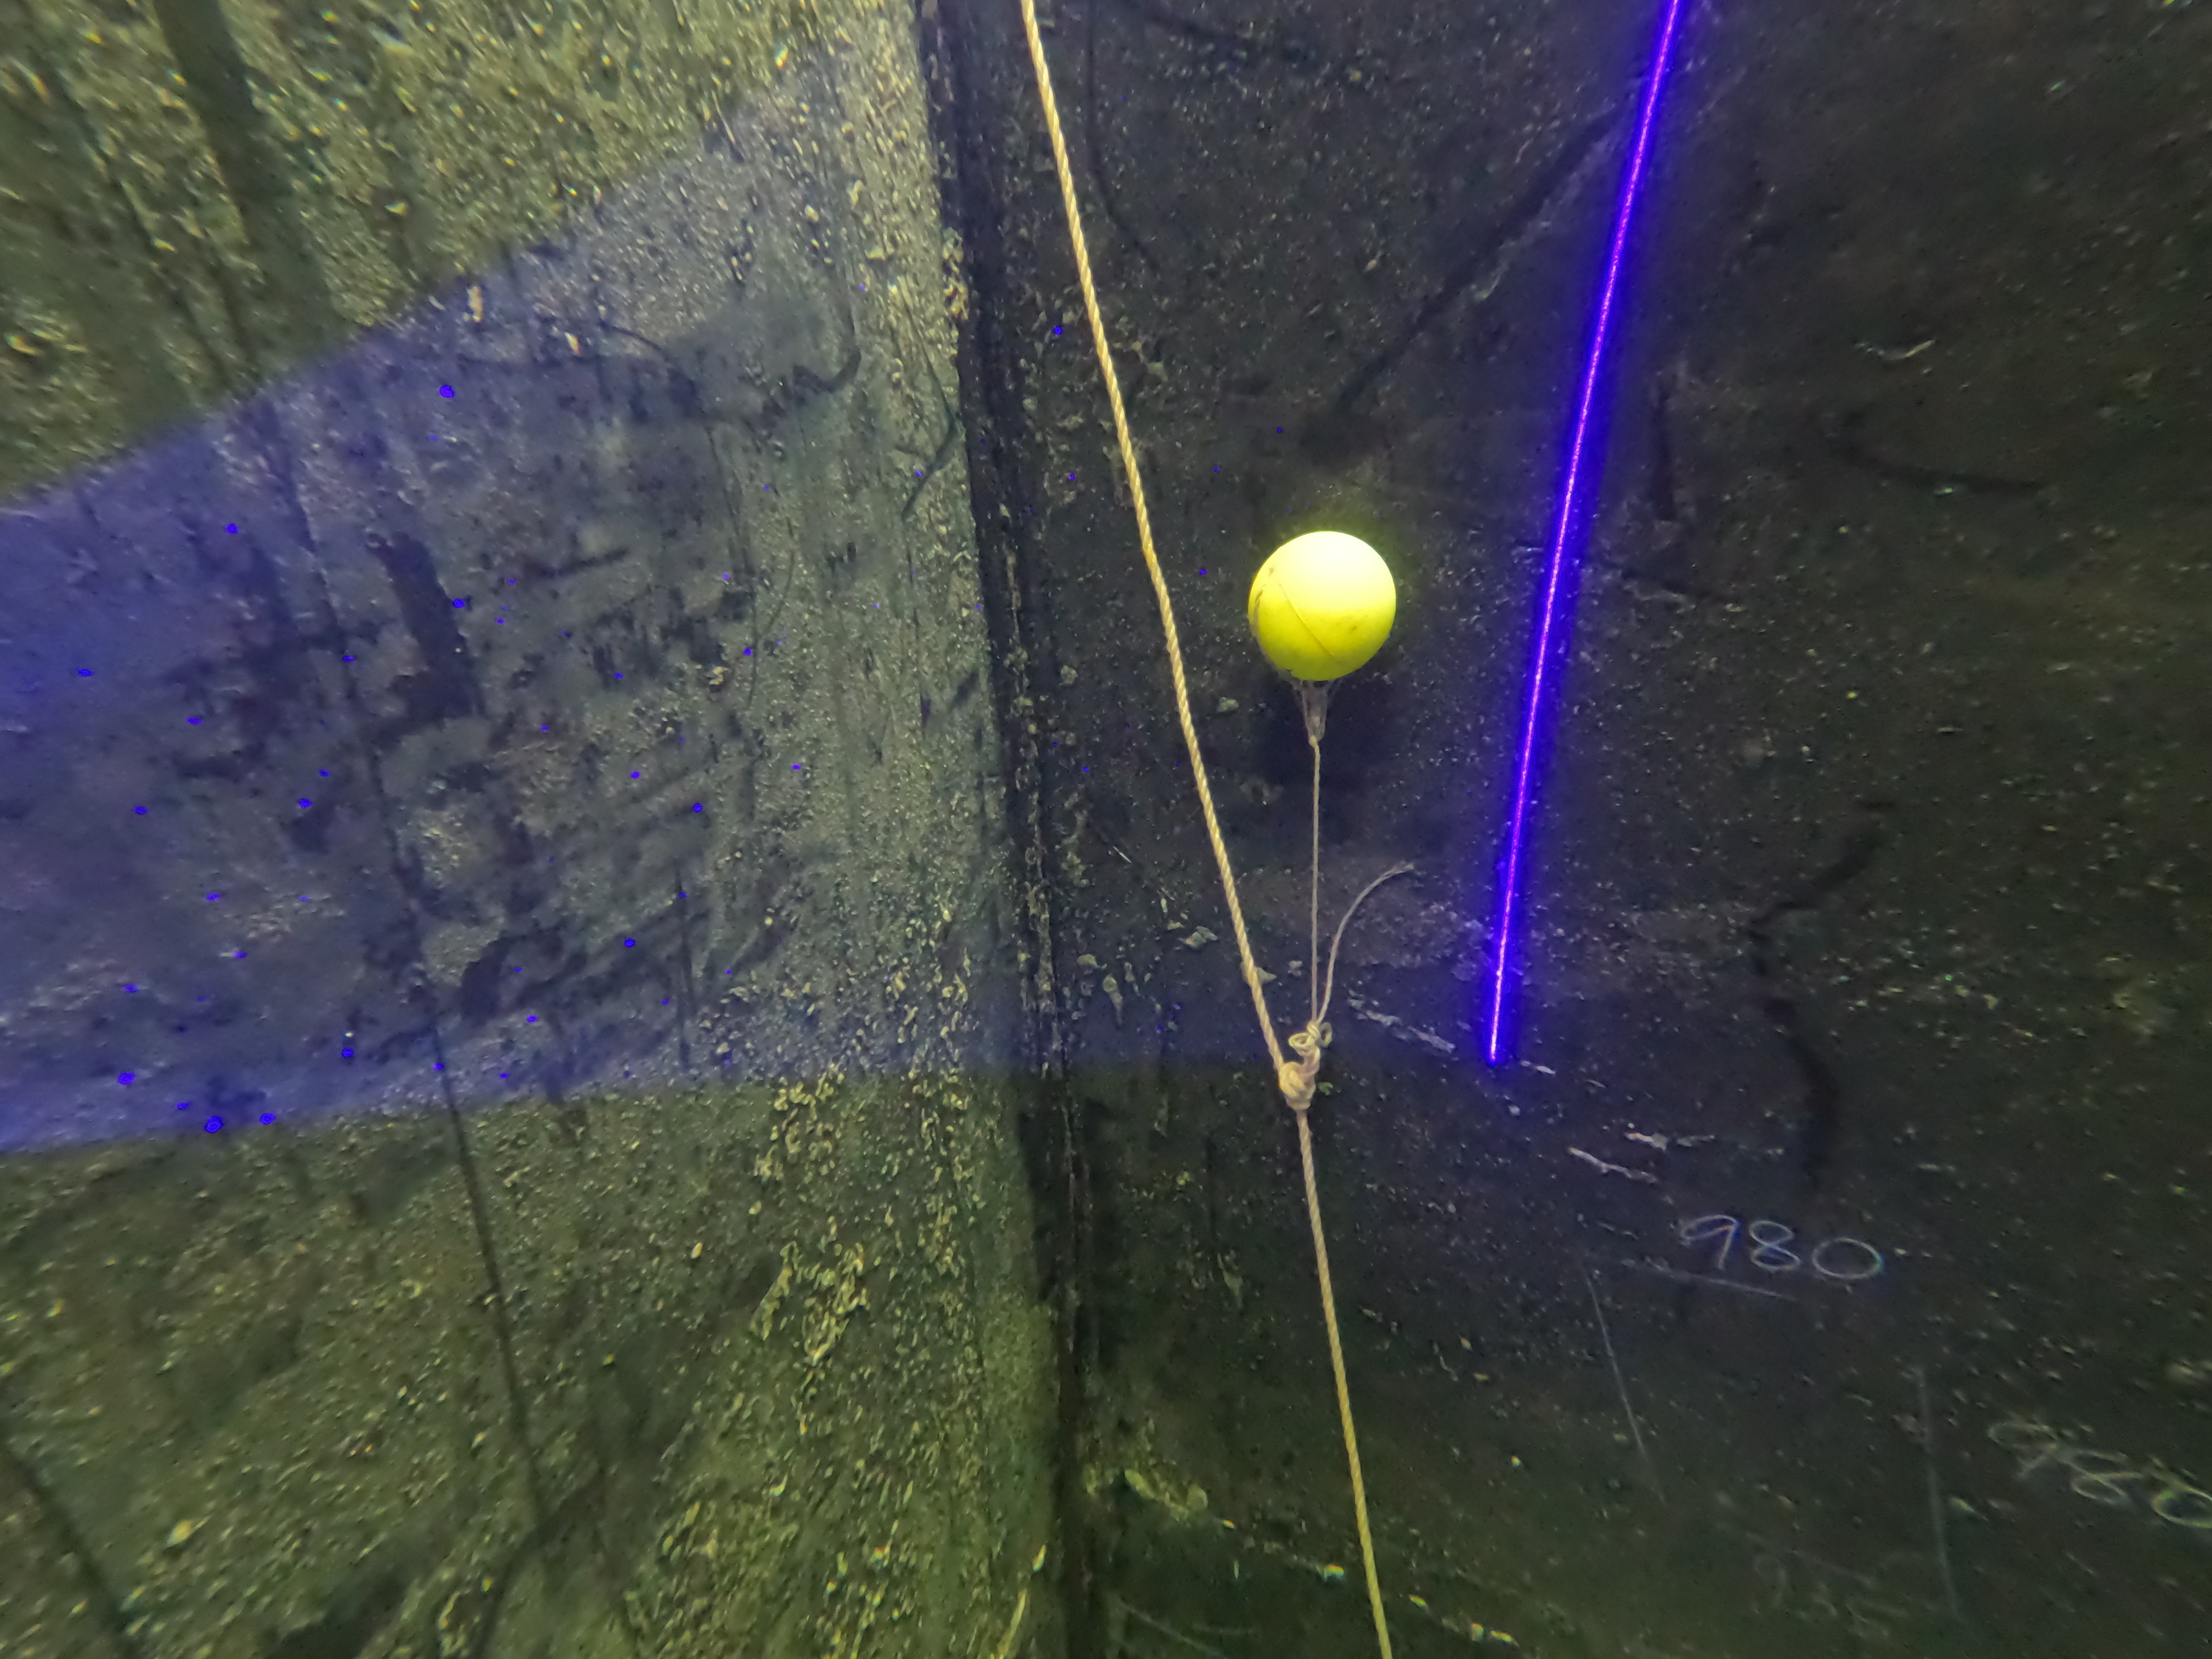

Supplement: Supplementary file 295 [file G0031088.pdf › 4/G0031088.pdf]

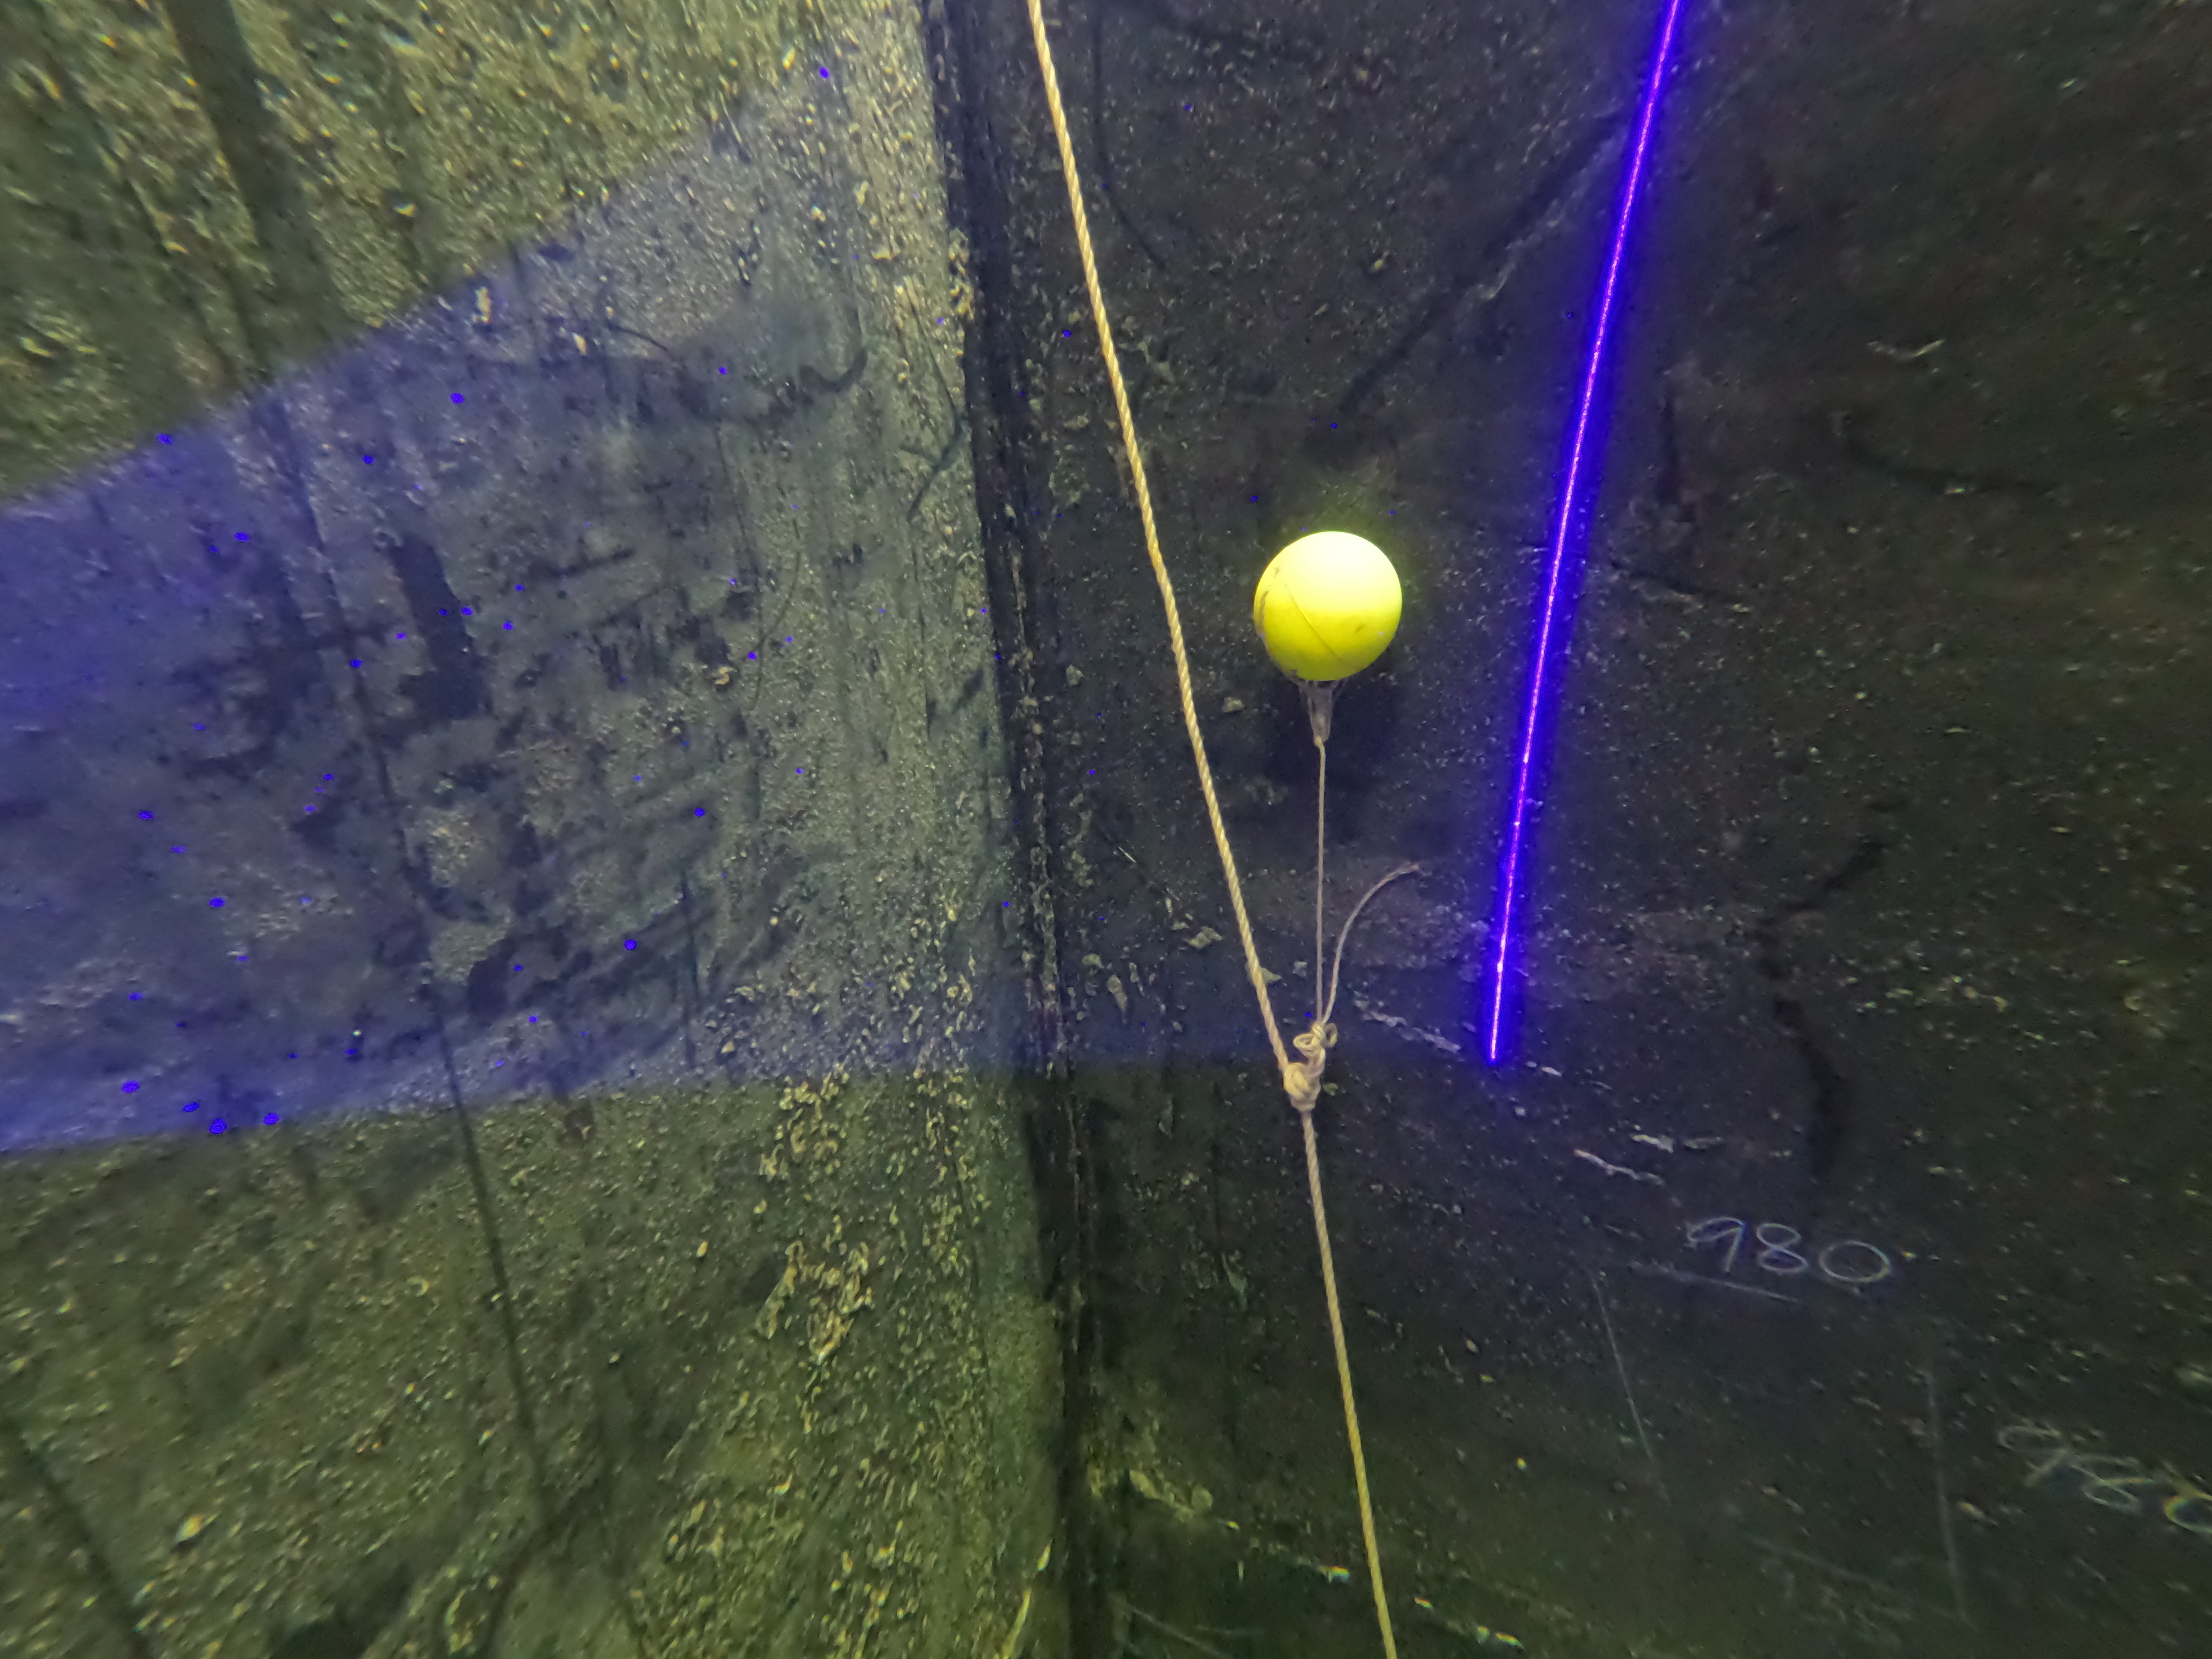

Supplement: Supplementary file 296 [file G0031089.pdf › 4/G0031089.pdf]

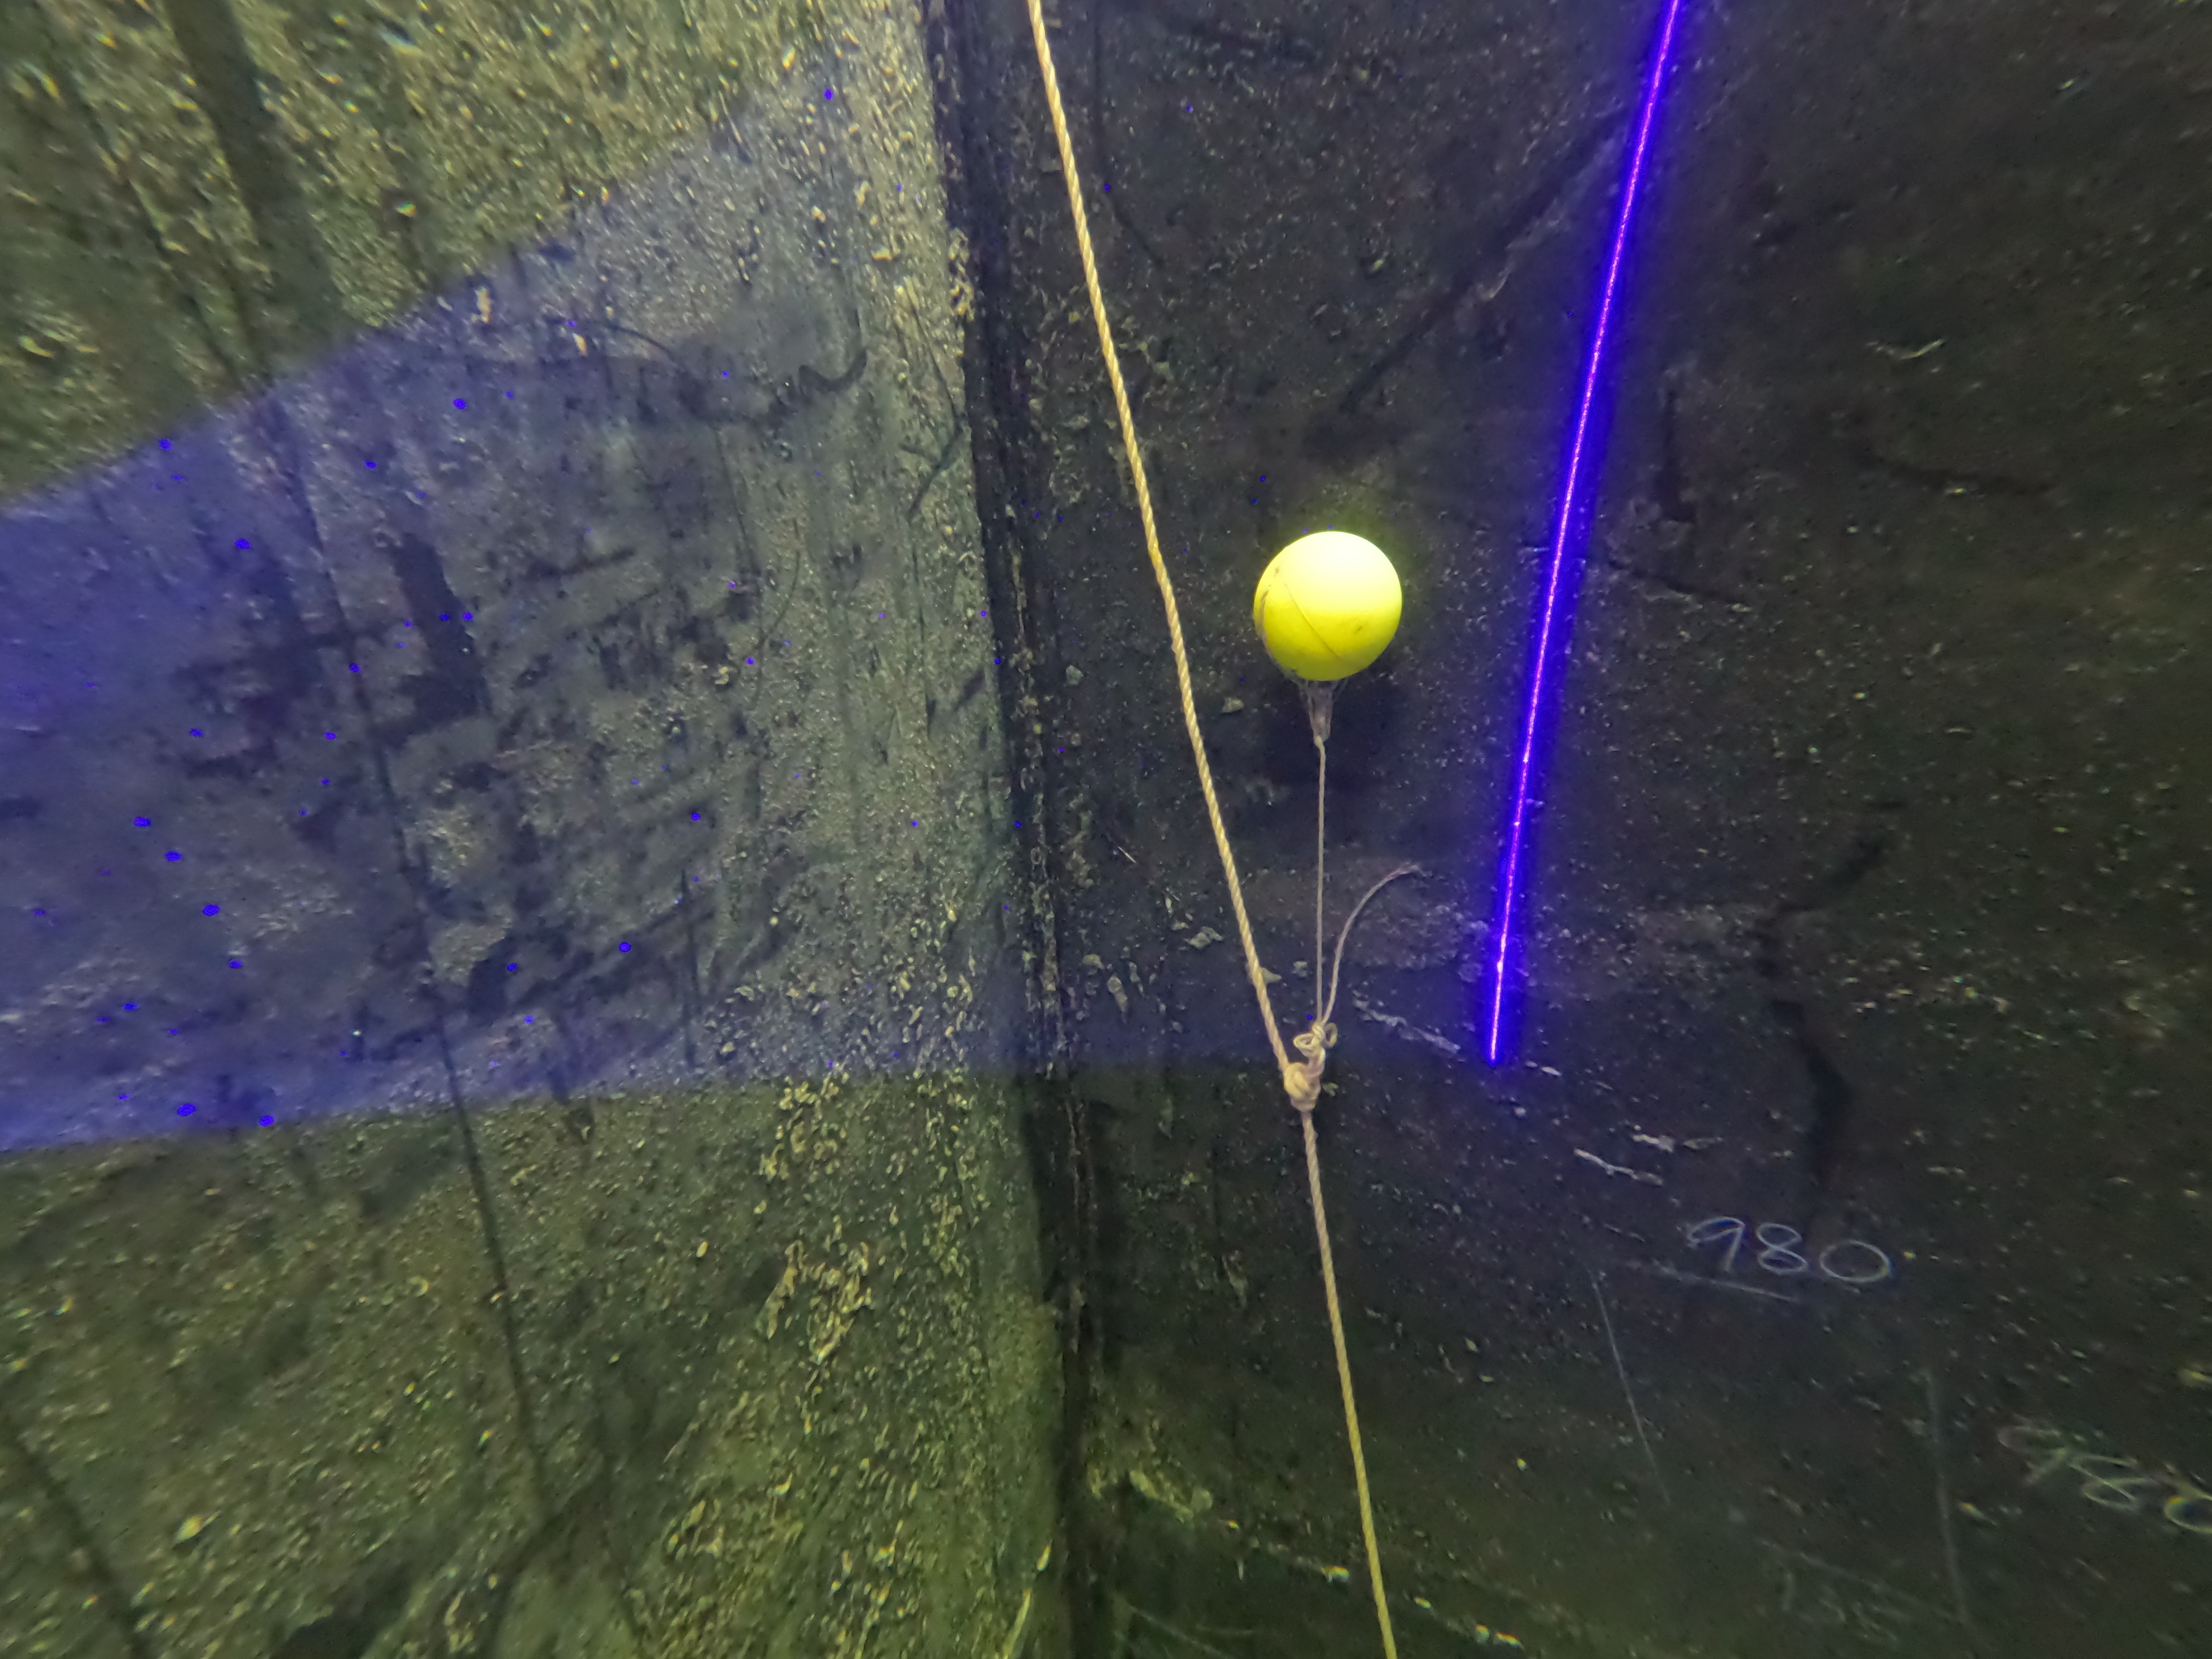

980

980

Supplement: Supplementary file 297 [file G0031090.pdf › 4/G0031090.pdf]

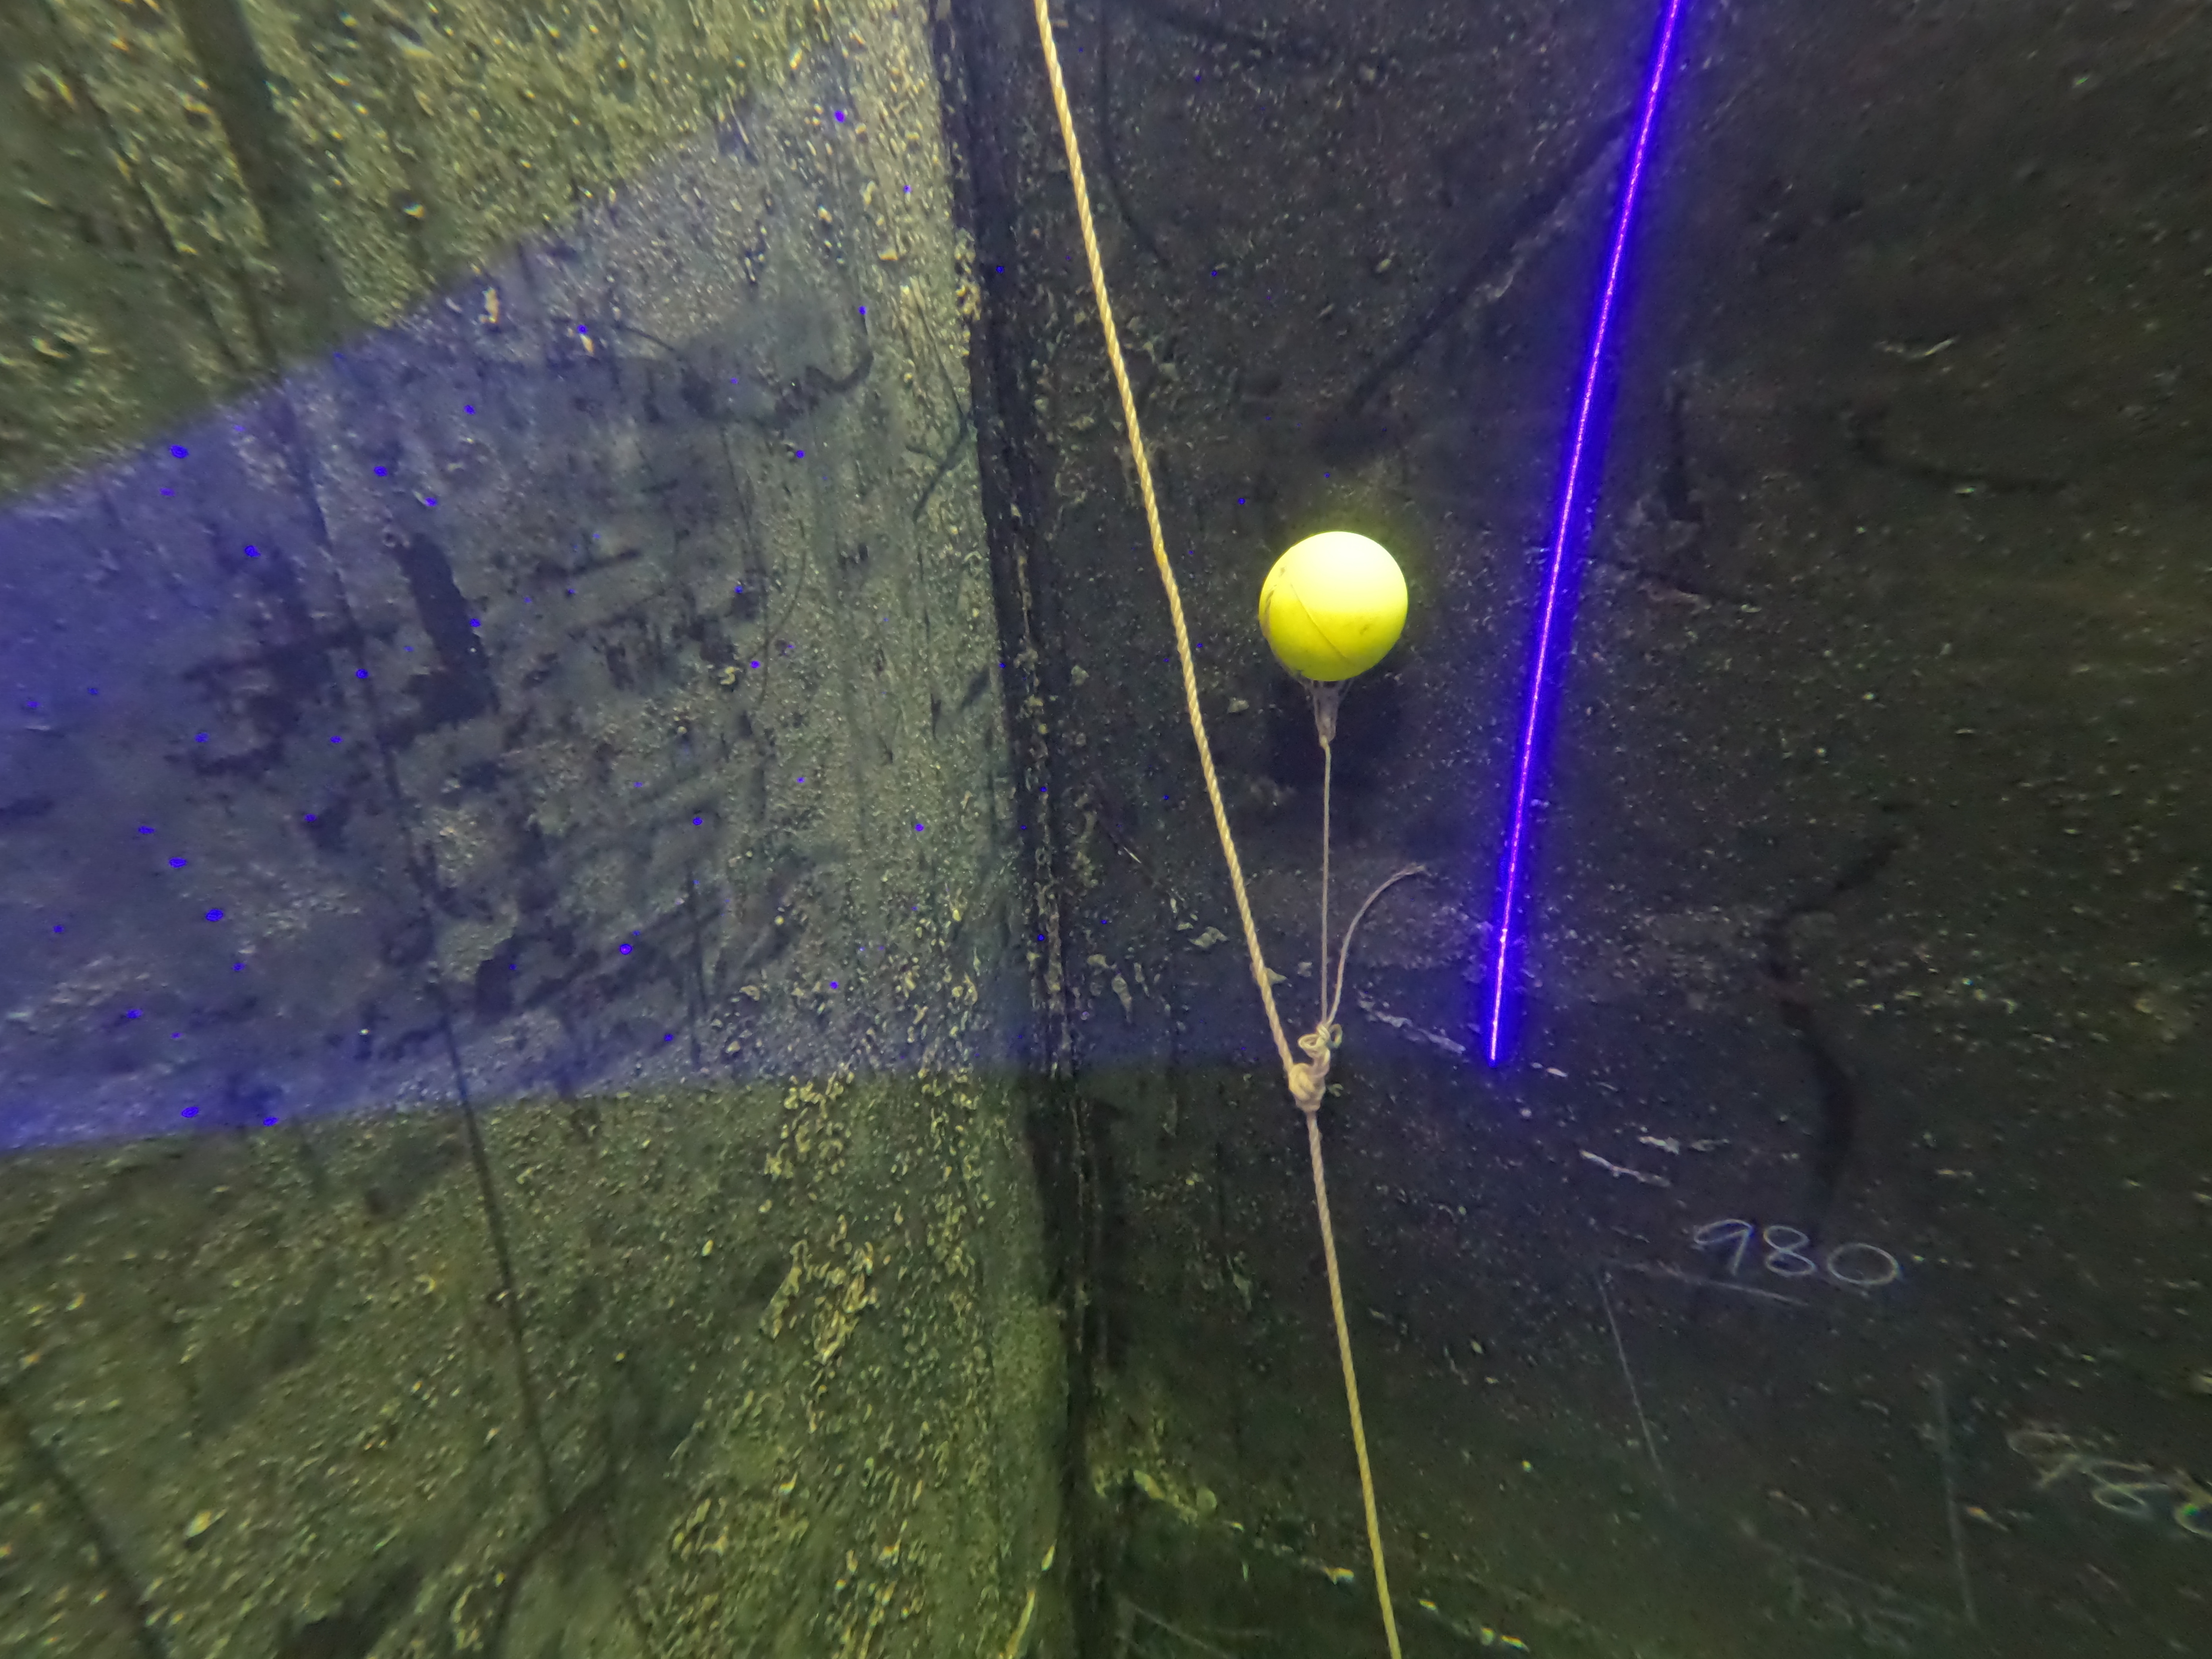

980

Supplement: Supplementary file 298 [file G0031091.pdf › 4/G0031091.pdf]

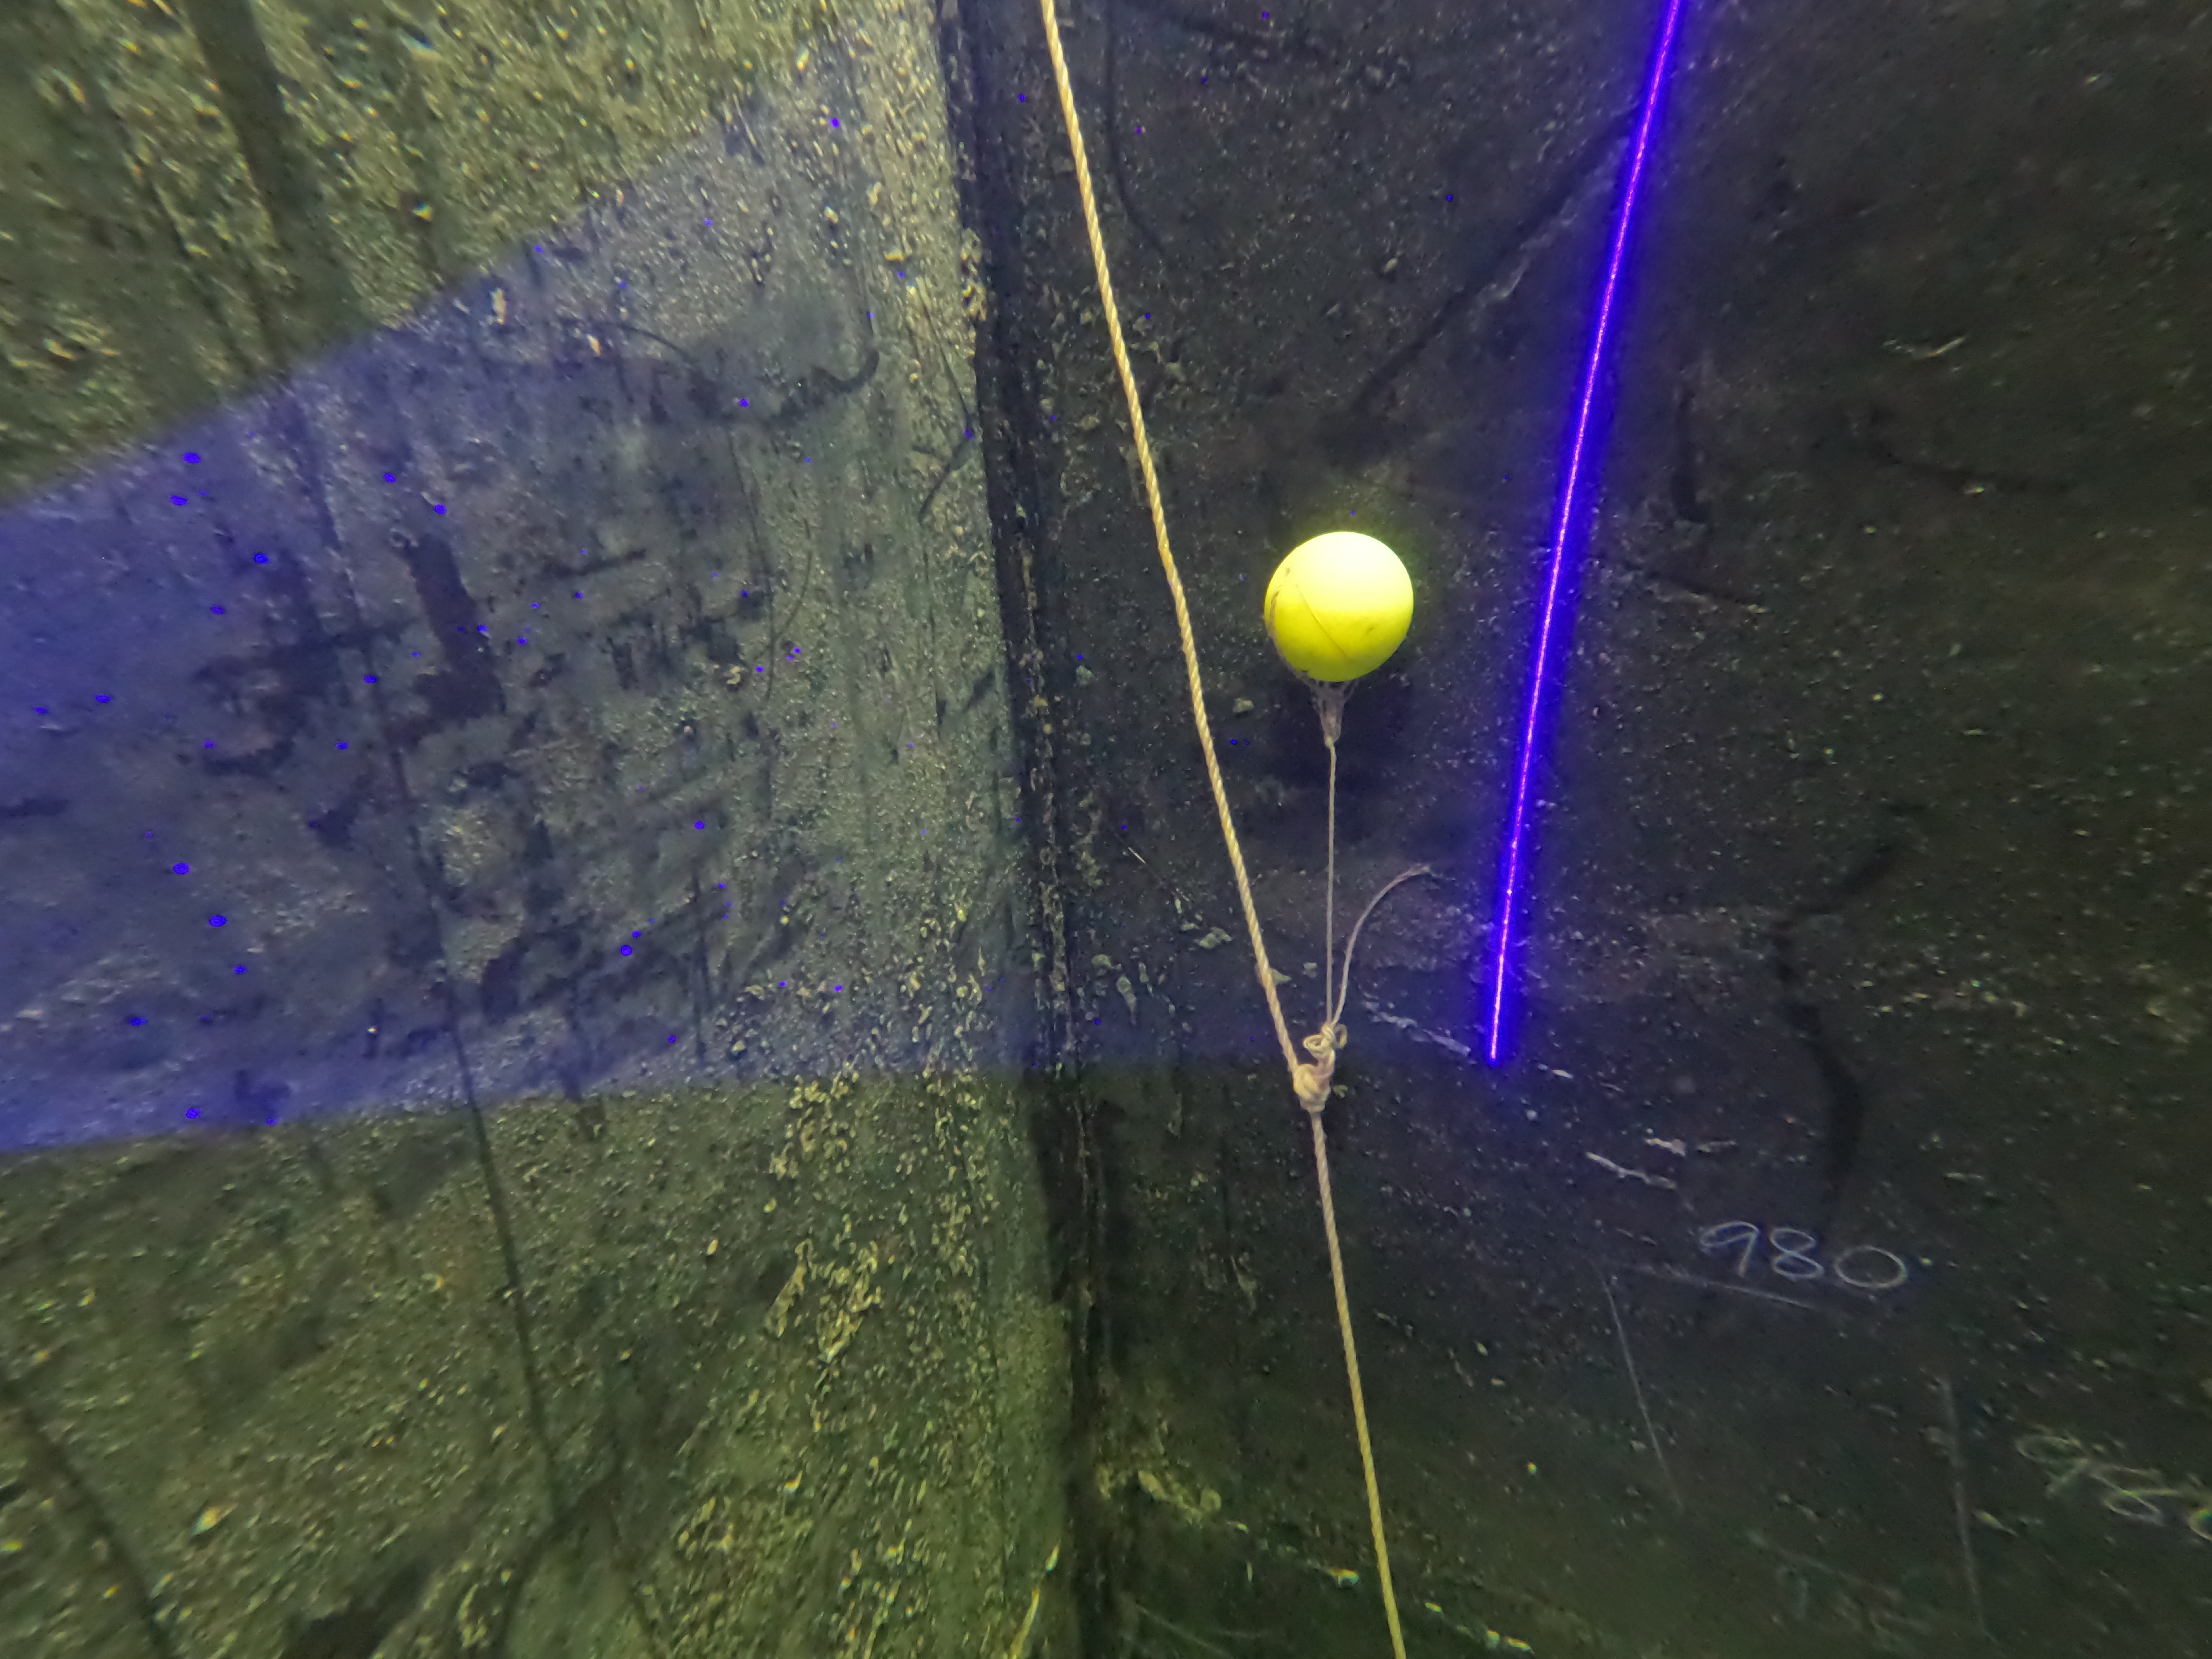

980

Supplement: Supplementary file 299 [file G0031092.pdf › 4/G0031092.pdf]

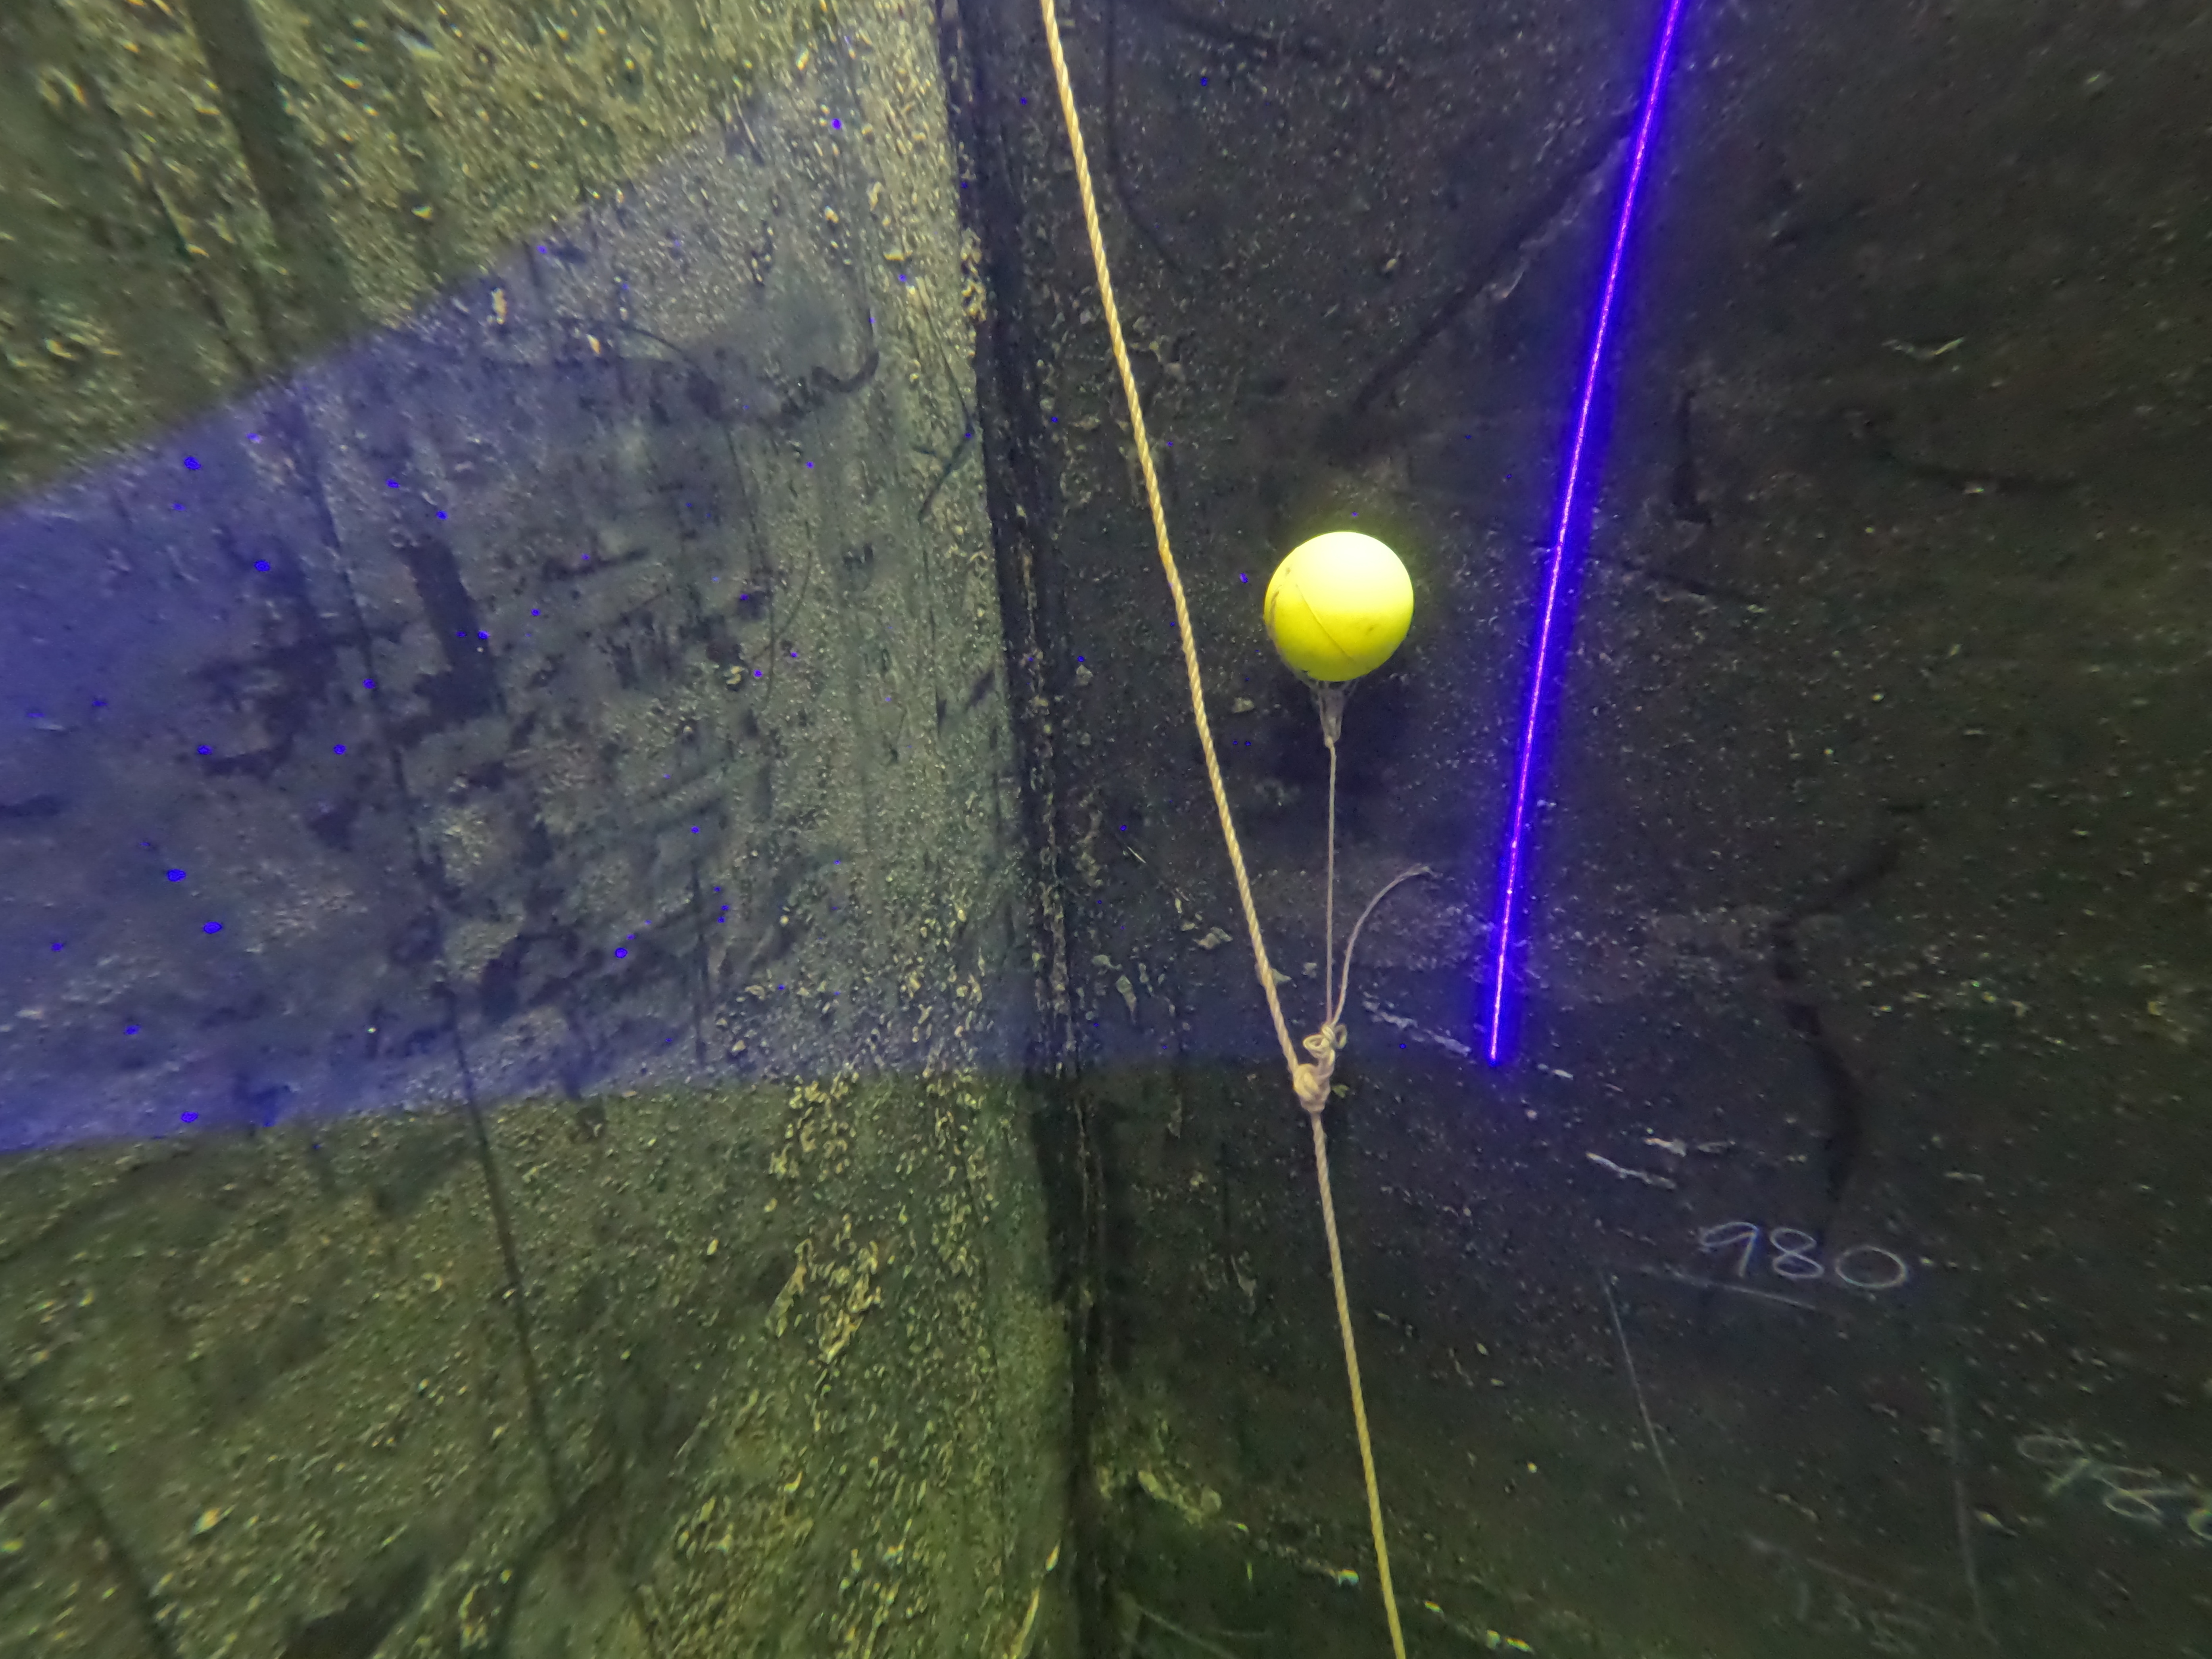

980

Supplement: Supplementary file 300 [file G0031093.pdf › 4/G0031093.pdf]
