# Supplementary figures and images for: 3D reconstruction of shallow sea environment using direct system calibration and faint laser line extraction (part 4 of 35)
Source: Research Square preprint supplement (doi:10.21203/rs.3.rs-5262658/v1), 2024-12-02

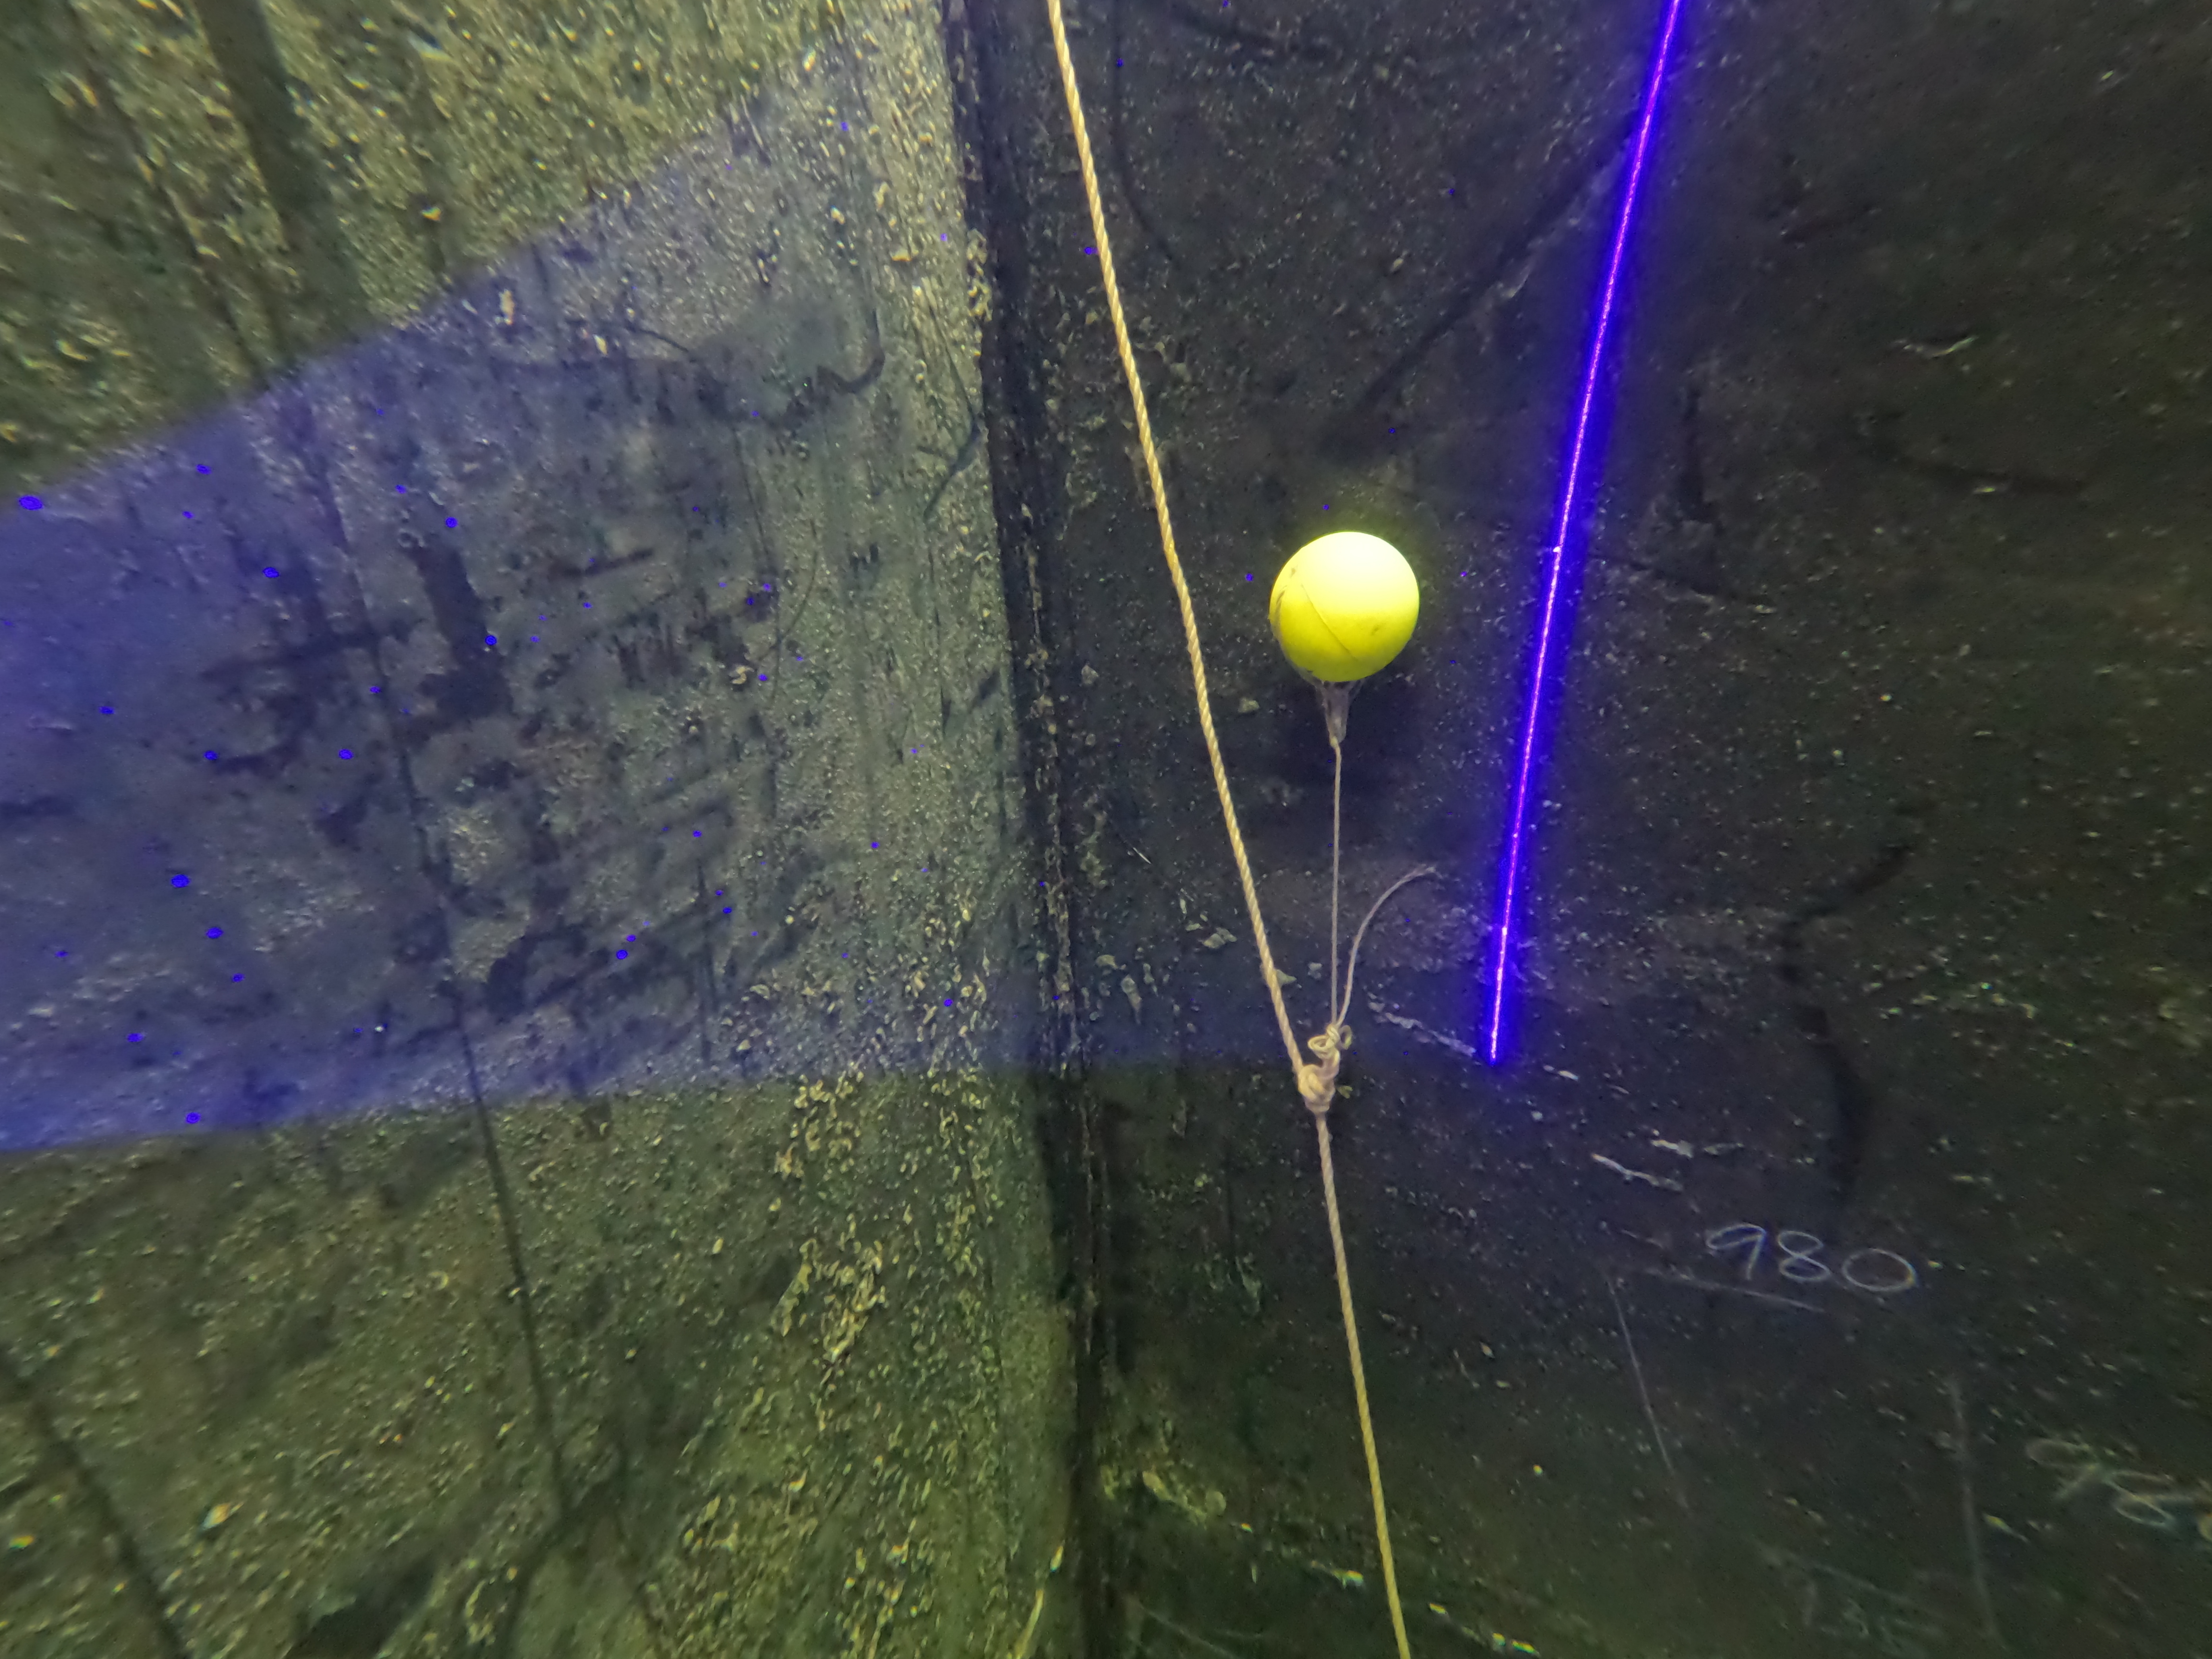

980

Supplement: Supplementary file 301 [file G0031094.pdf › 4/G0031094.pdf]

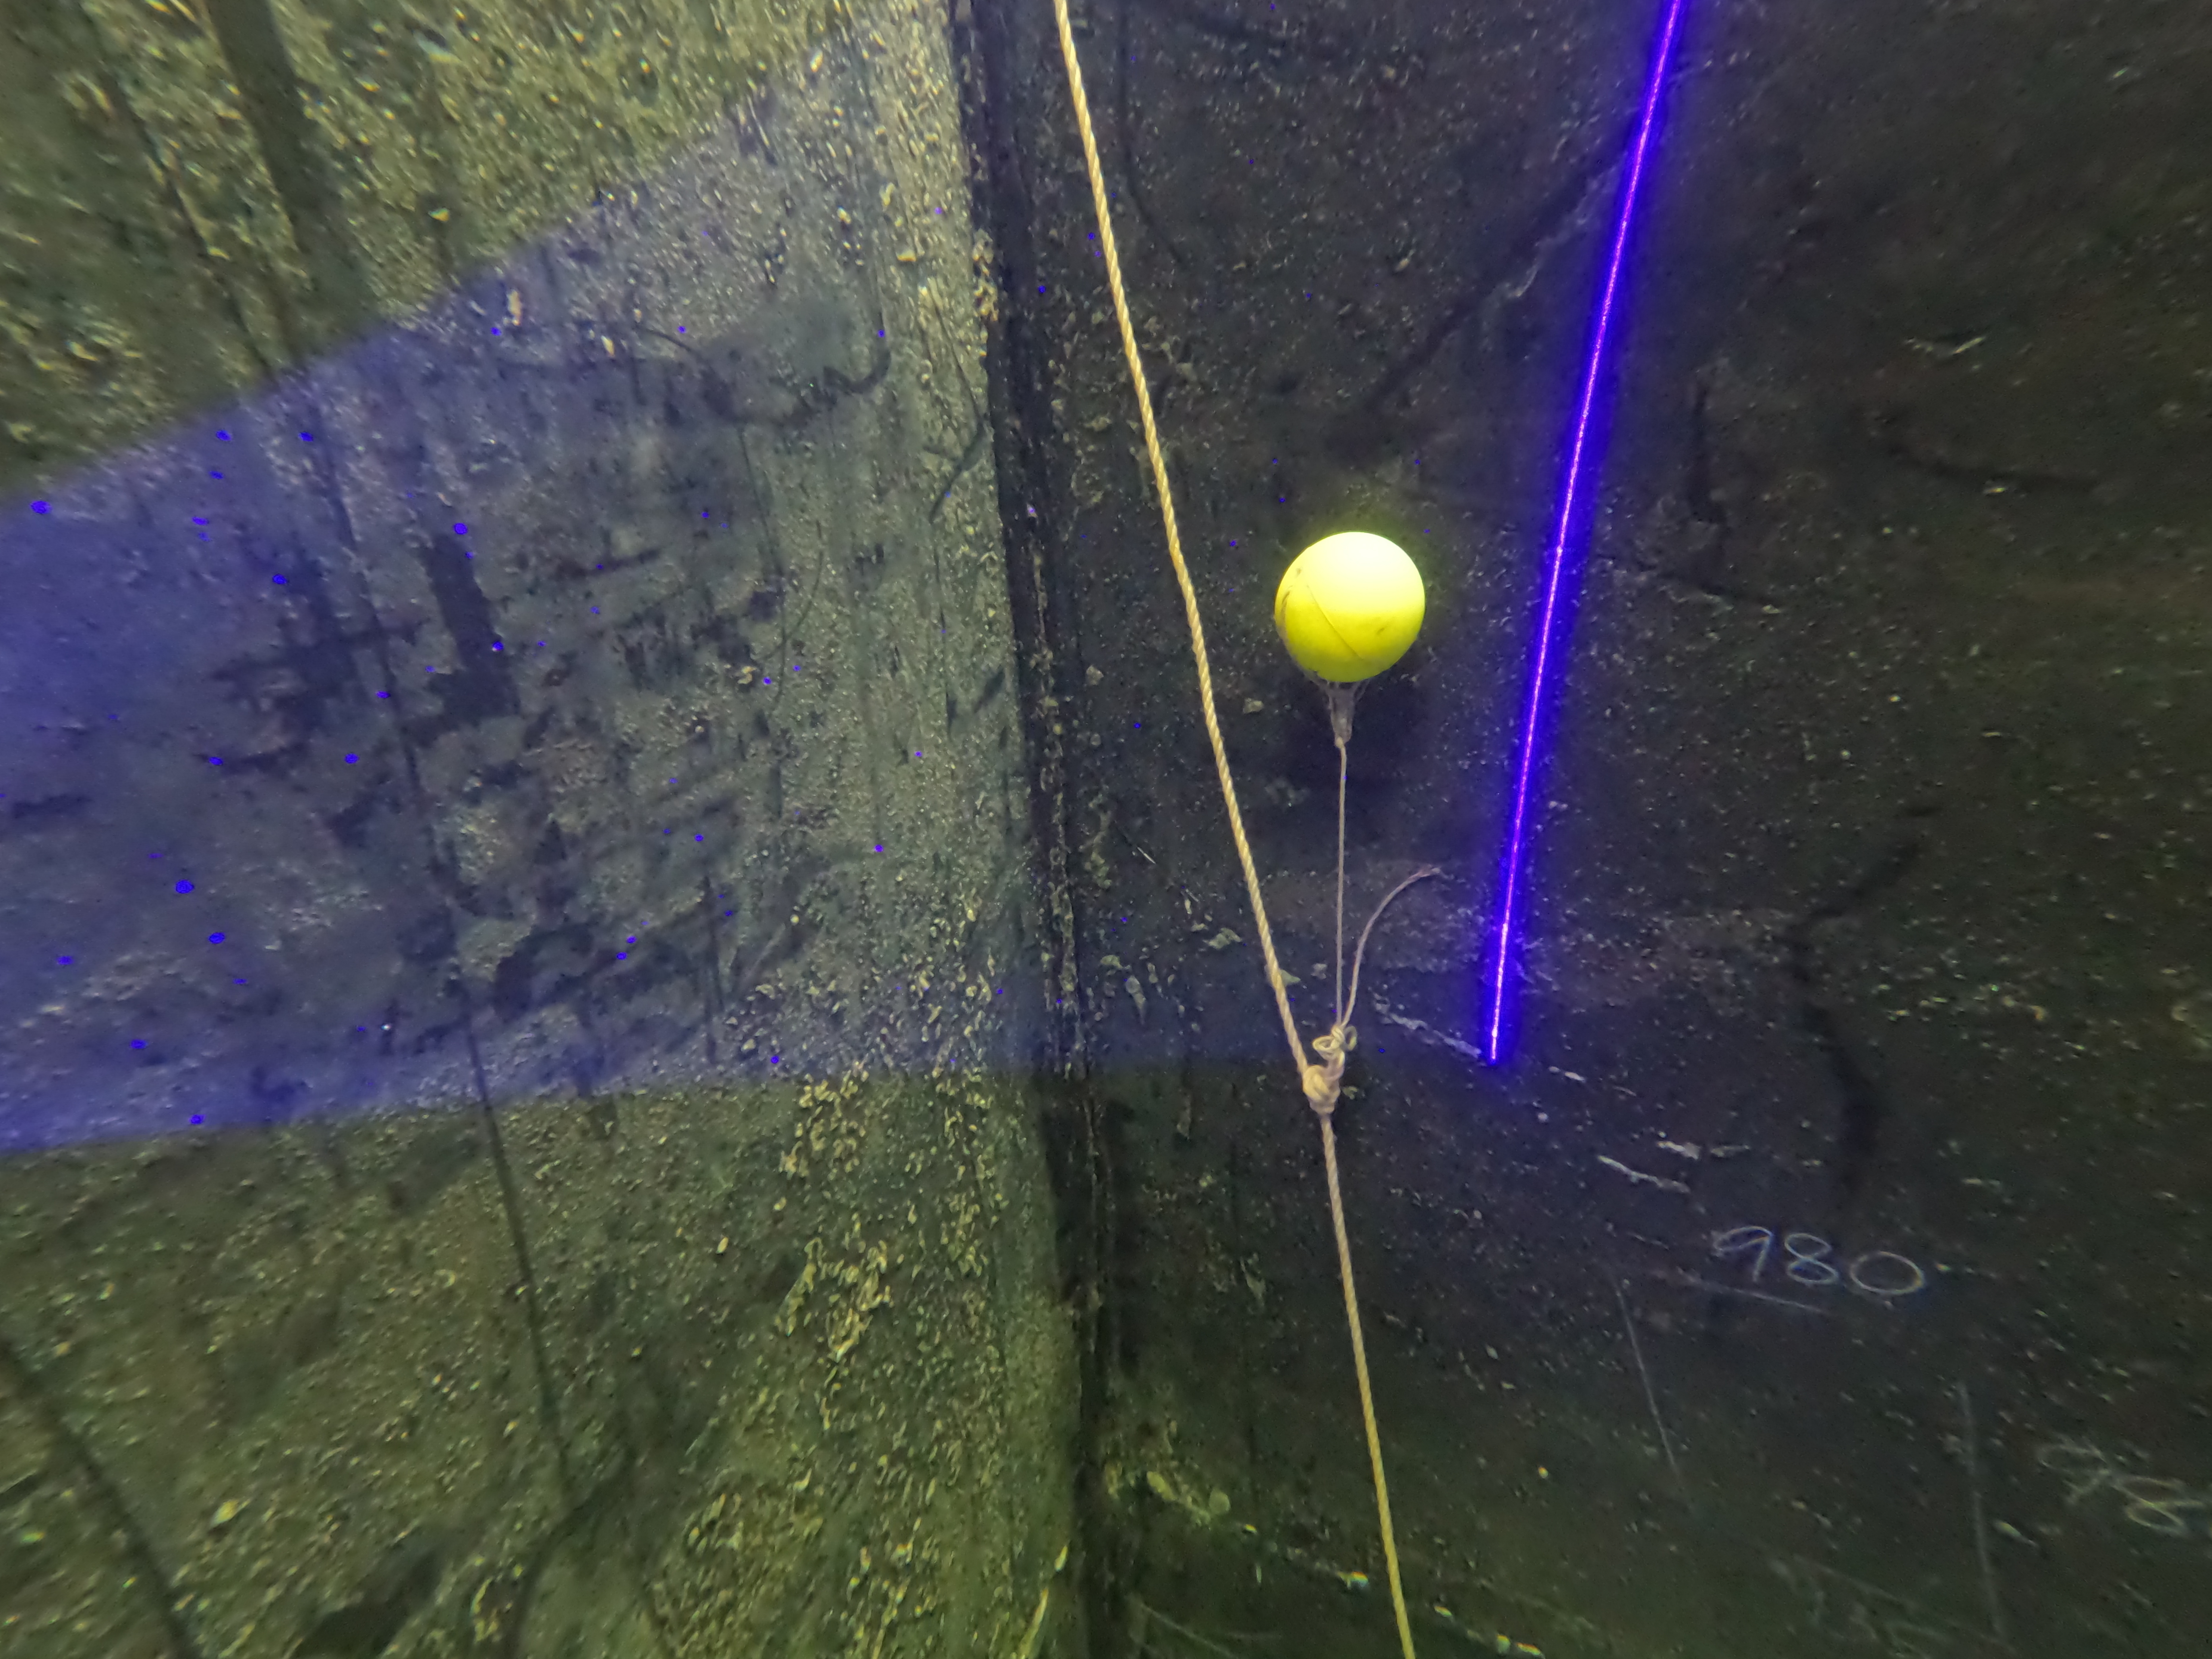

980

Supplement: Supplementary file 302 [file G0031095.pdf › 4/G0031095.pdf]

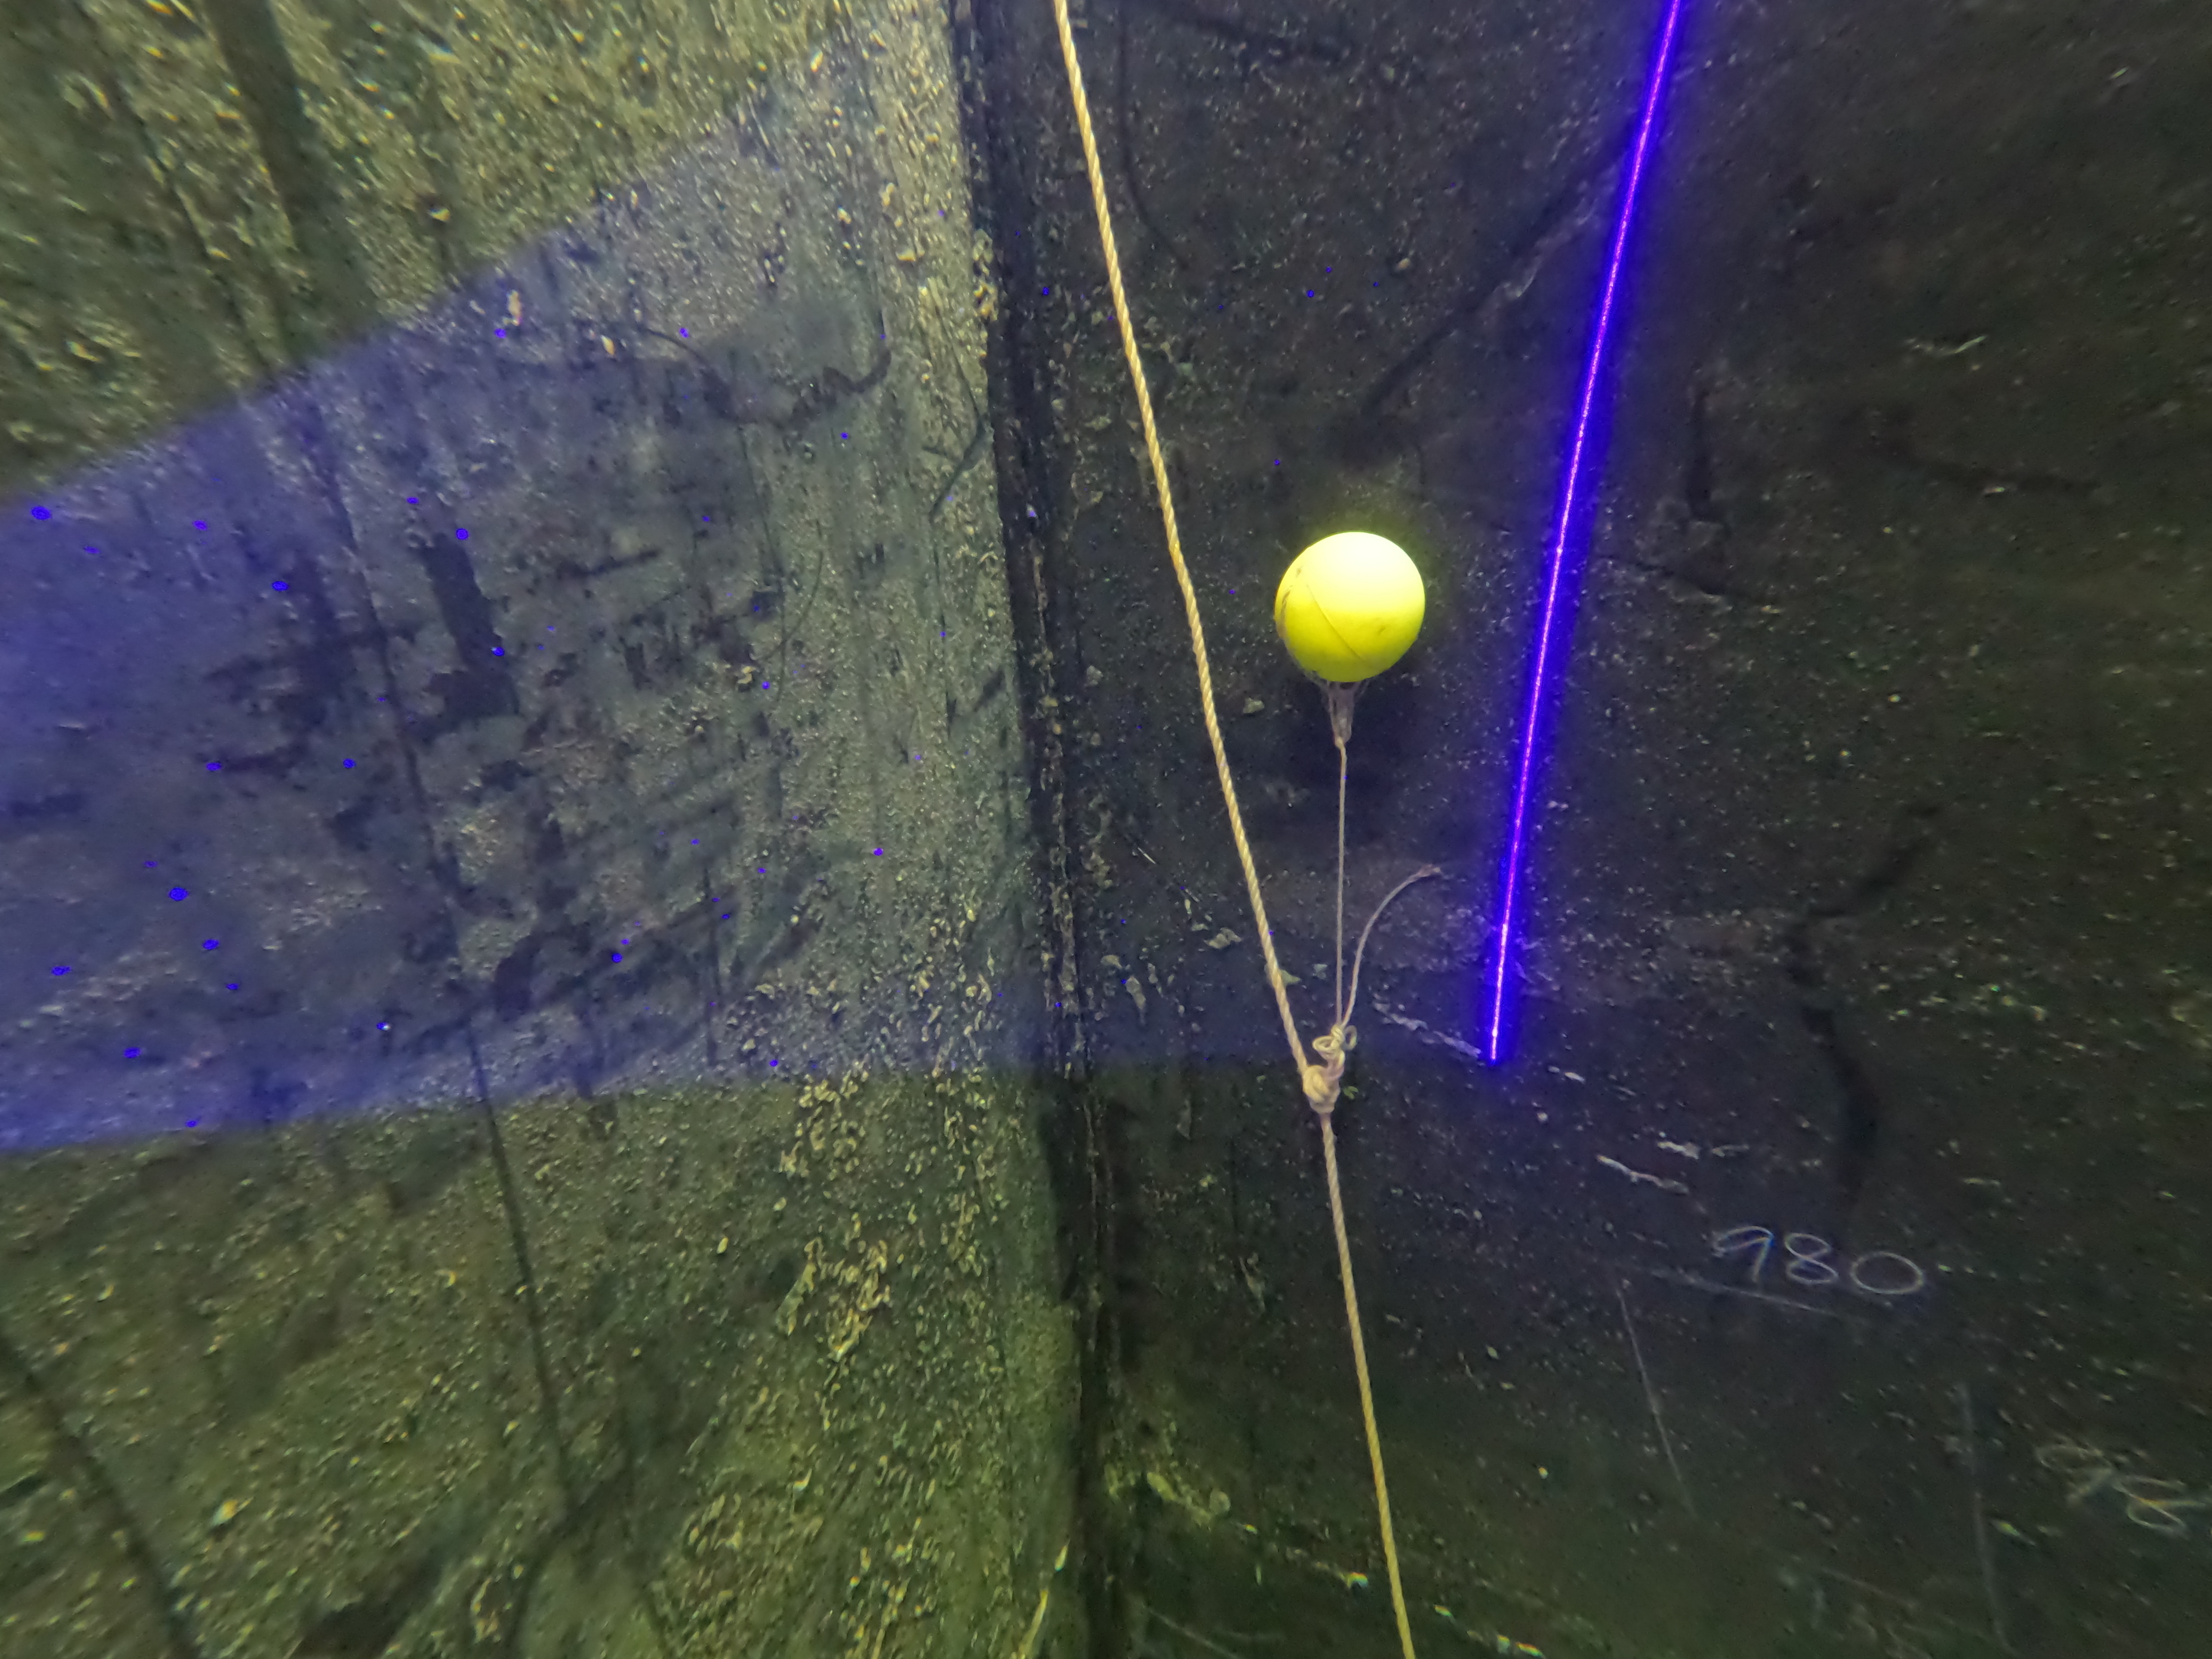

980

Supplement: Supplementary file 303 [file G0031096.pdf › 4/G0031096.pdf]

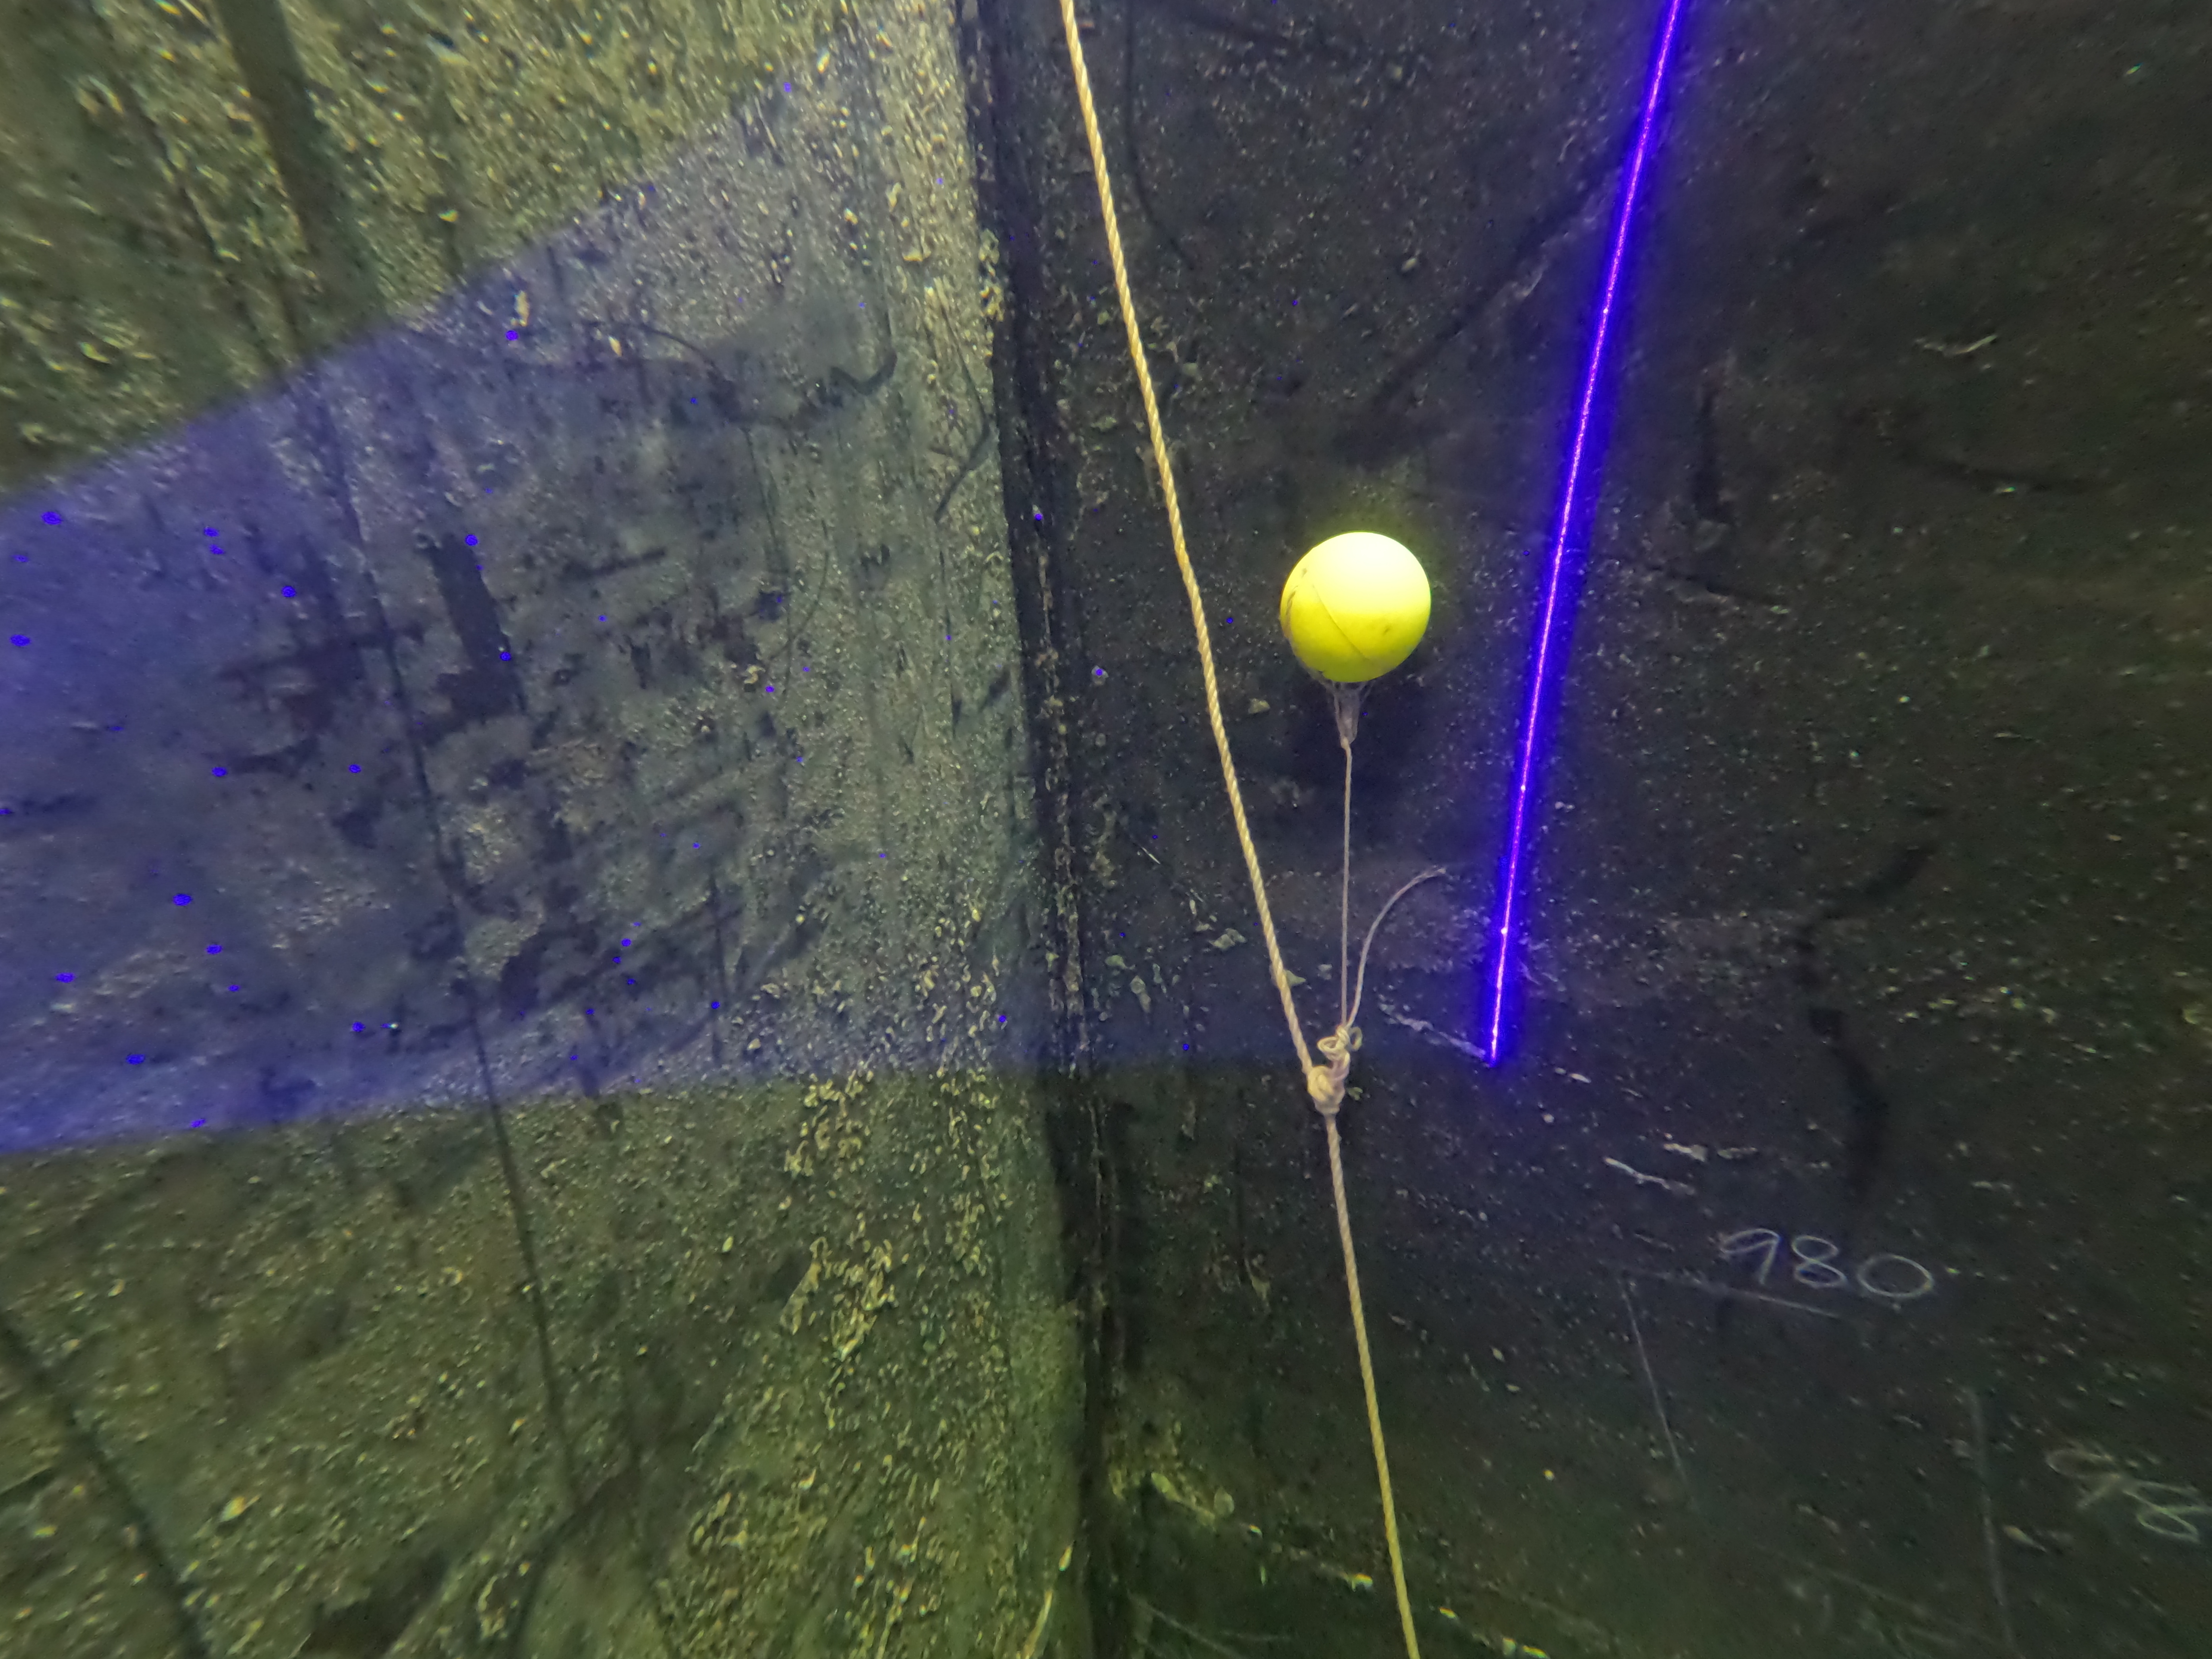

980

Supplement: Supplementary file 304 [file G0031097.pdf › 4/G0031097.pdf]

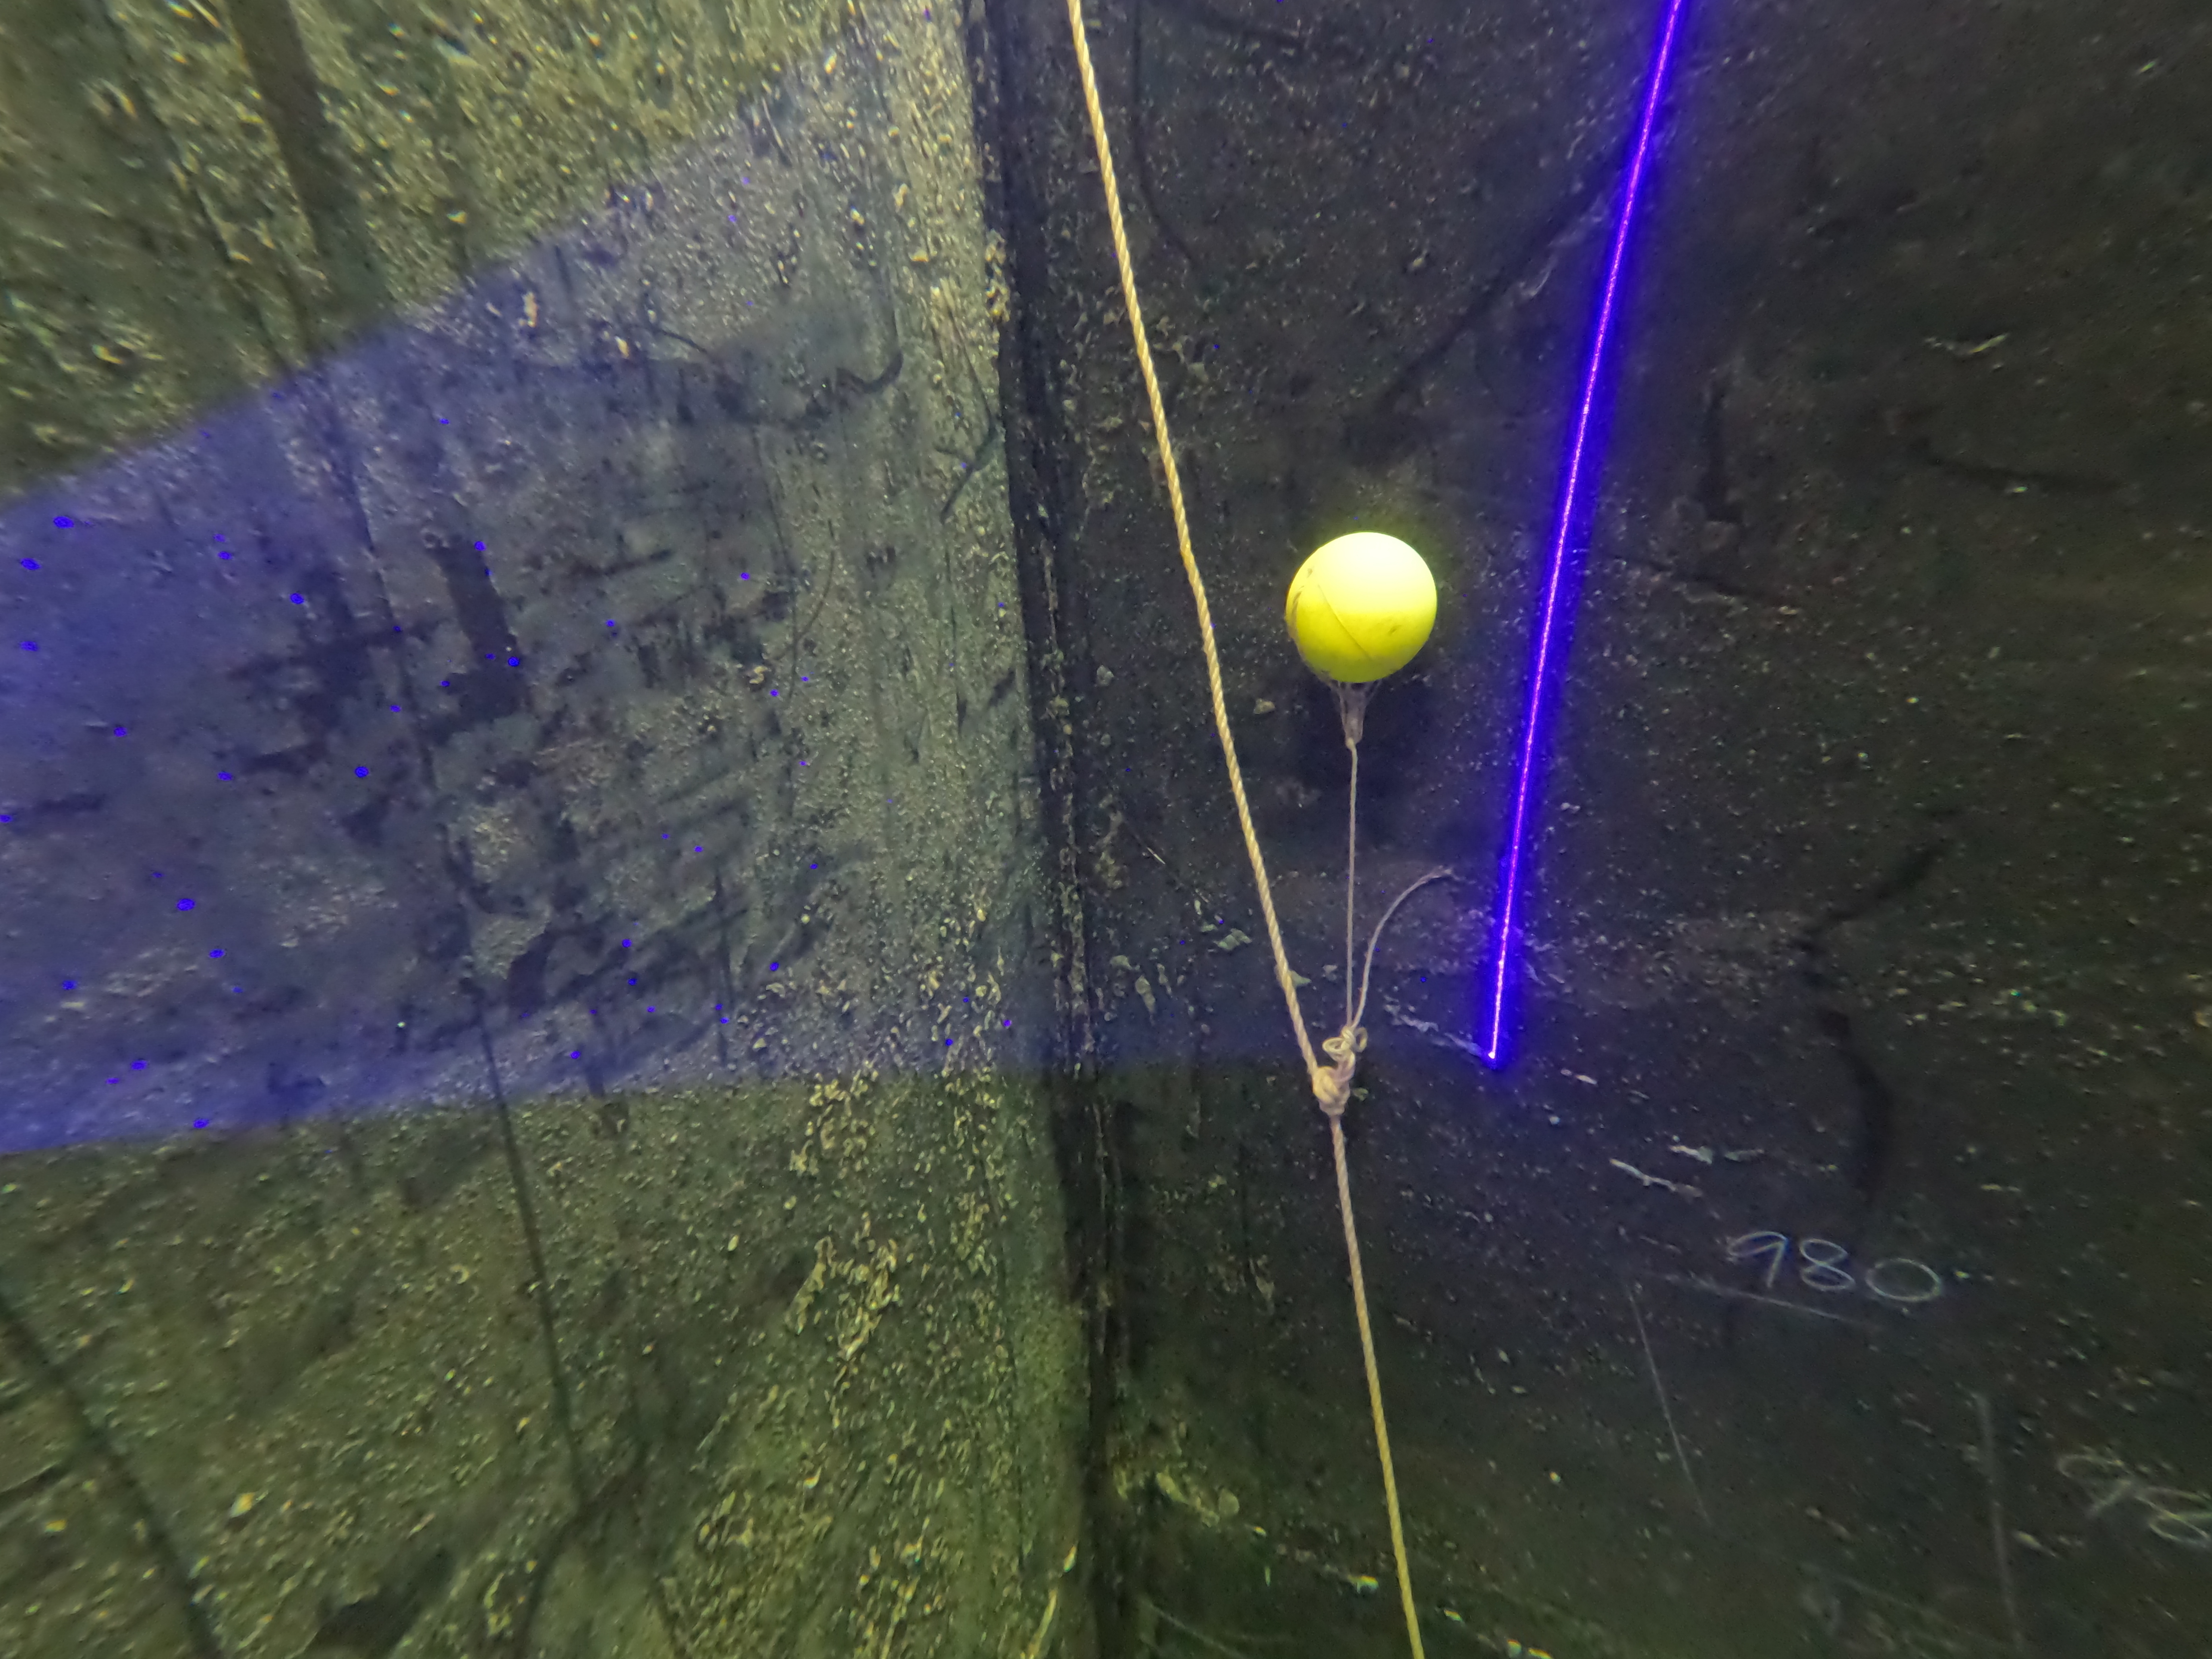

980

Supplement: Supplementary file 305 [file G0031098.pdf › 4/G0031098.pdf]

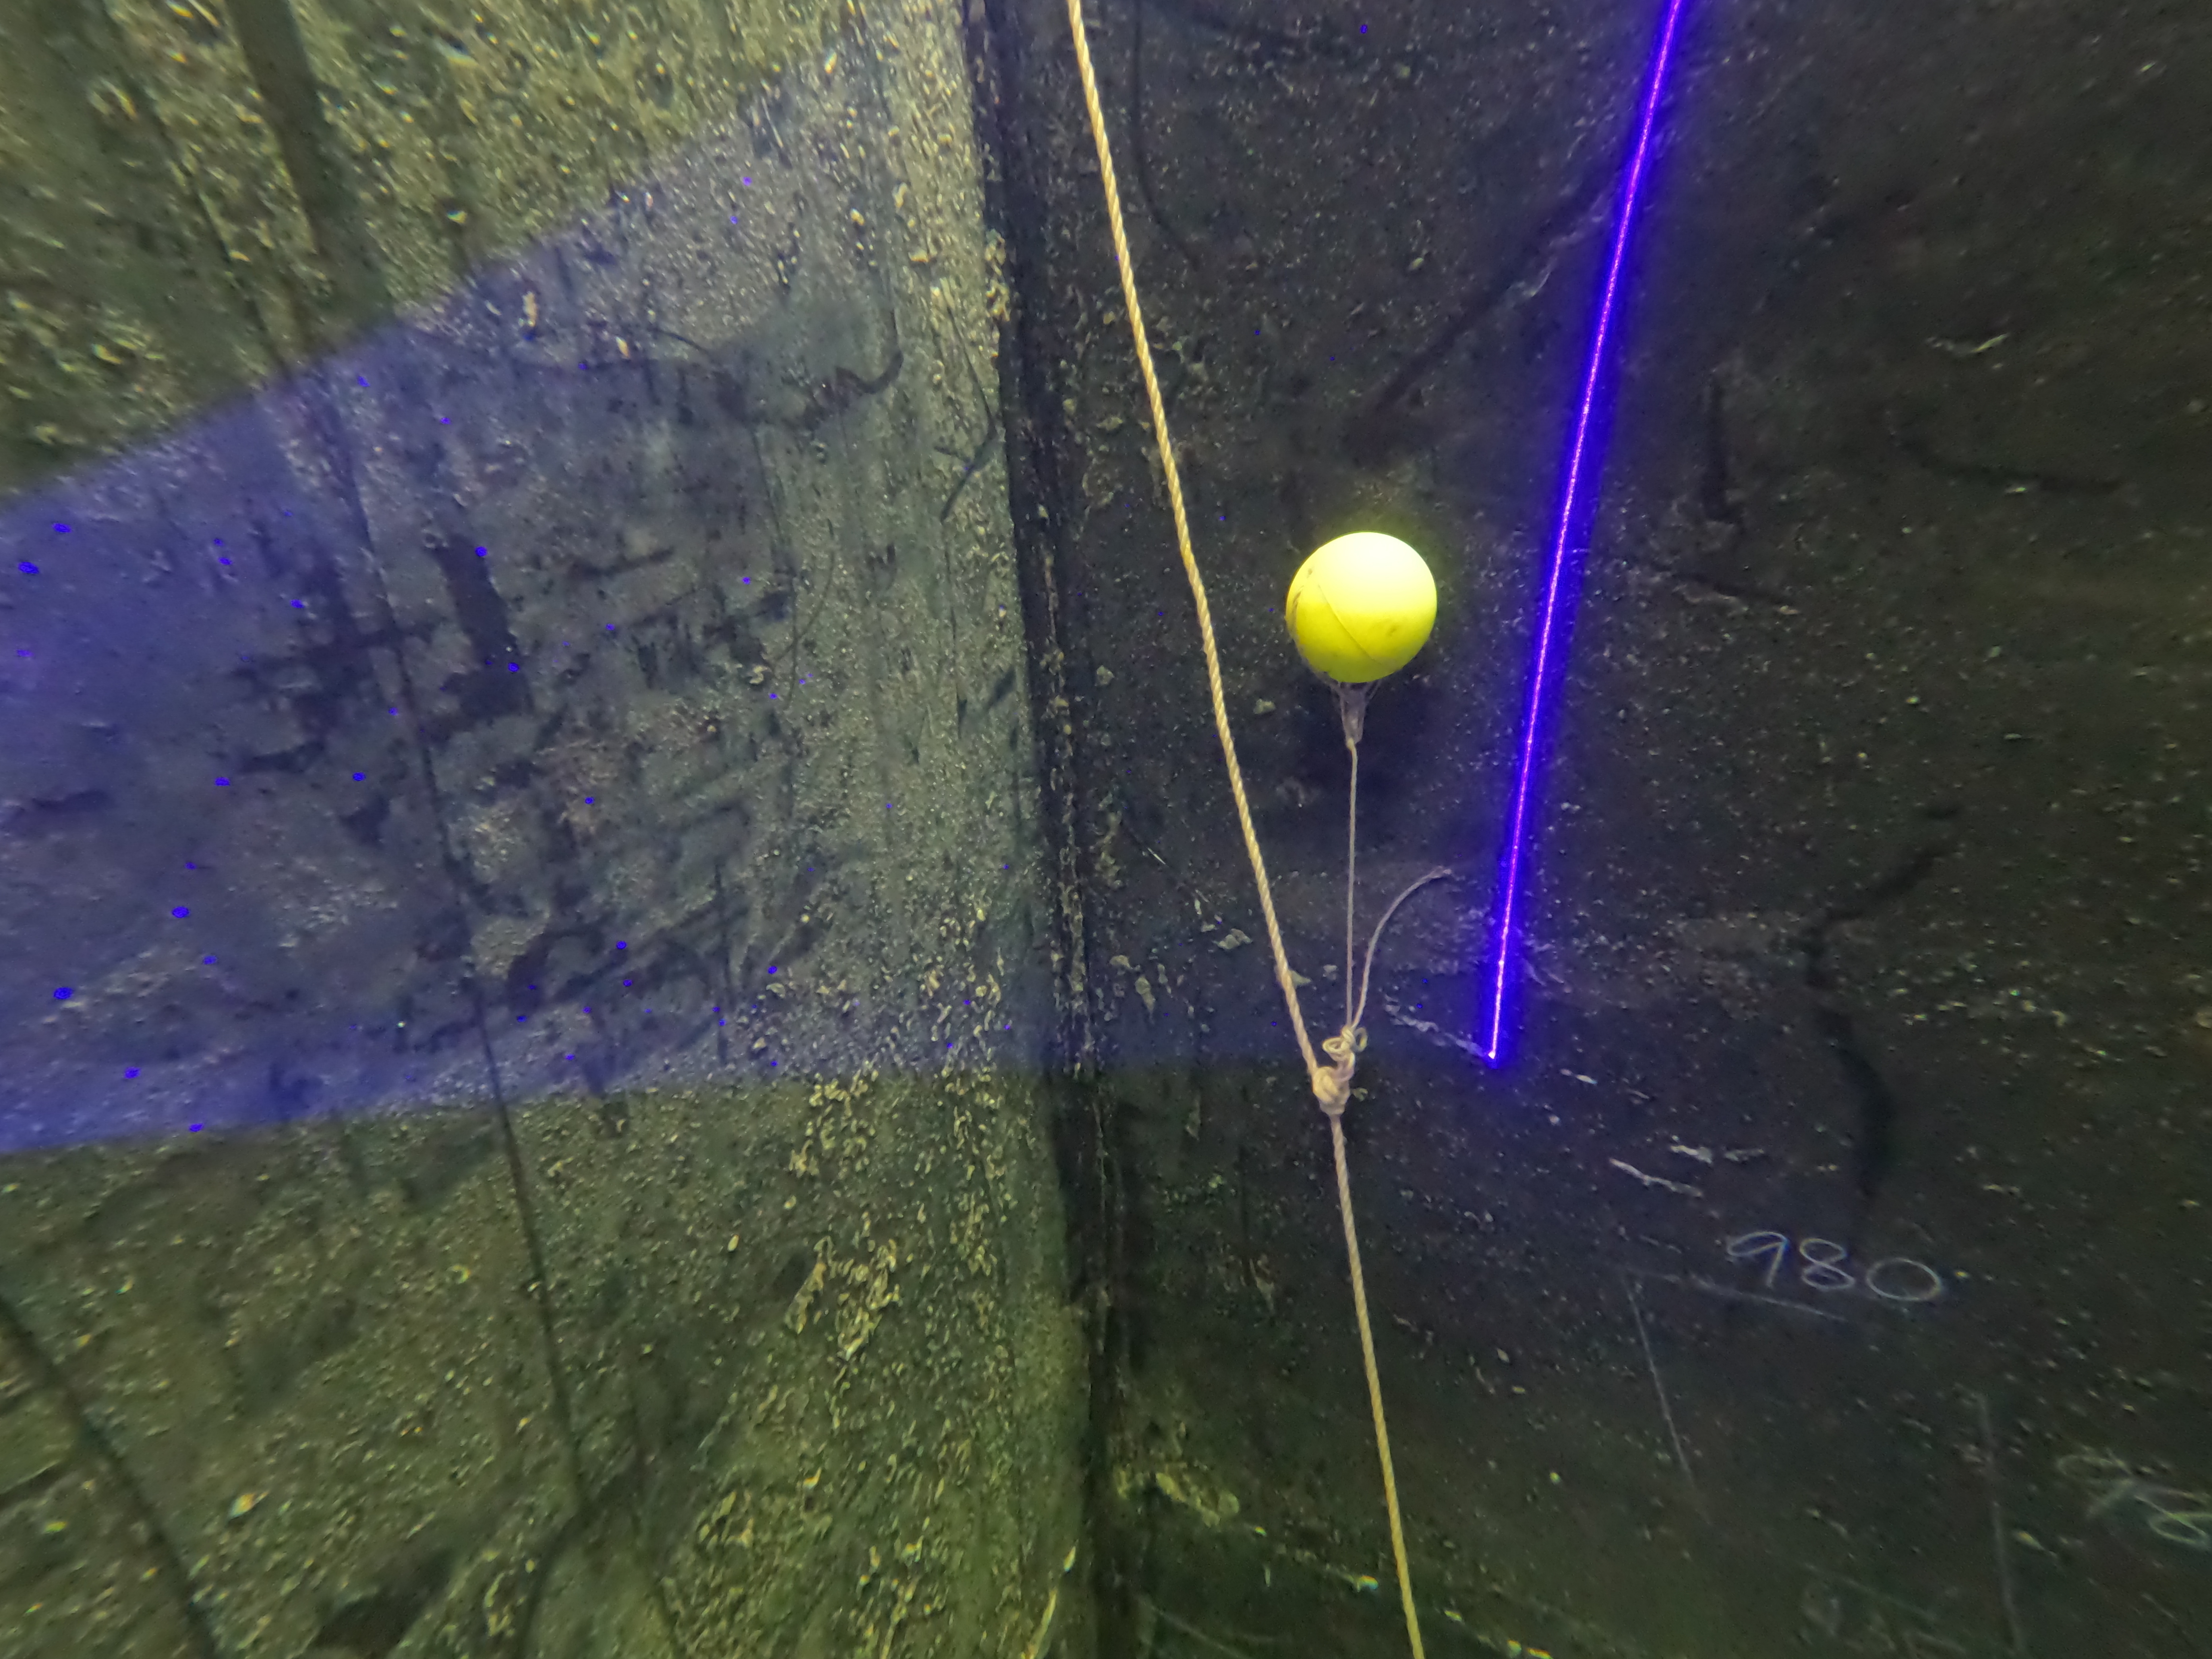

980

Supplement: Supplementary file 306 [file G0031099.pdf › 4/G0031099.pdf]

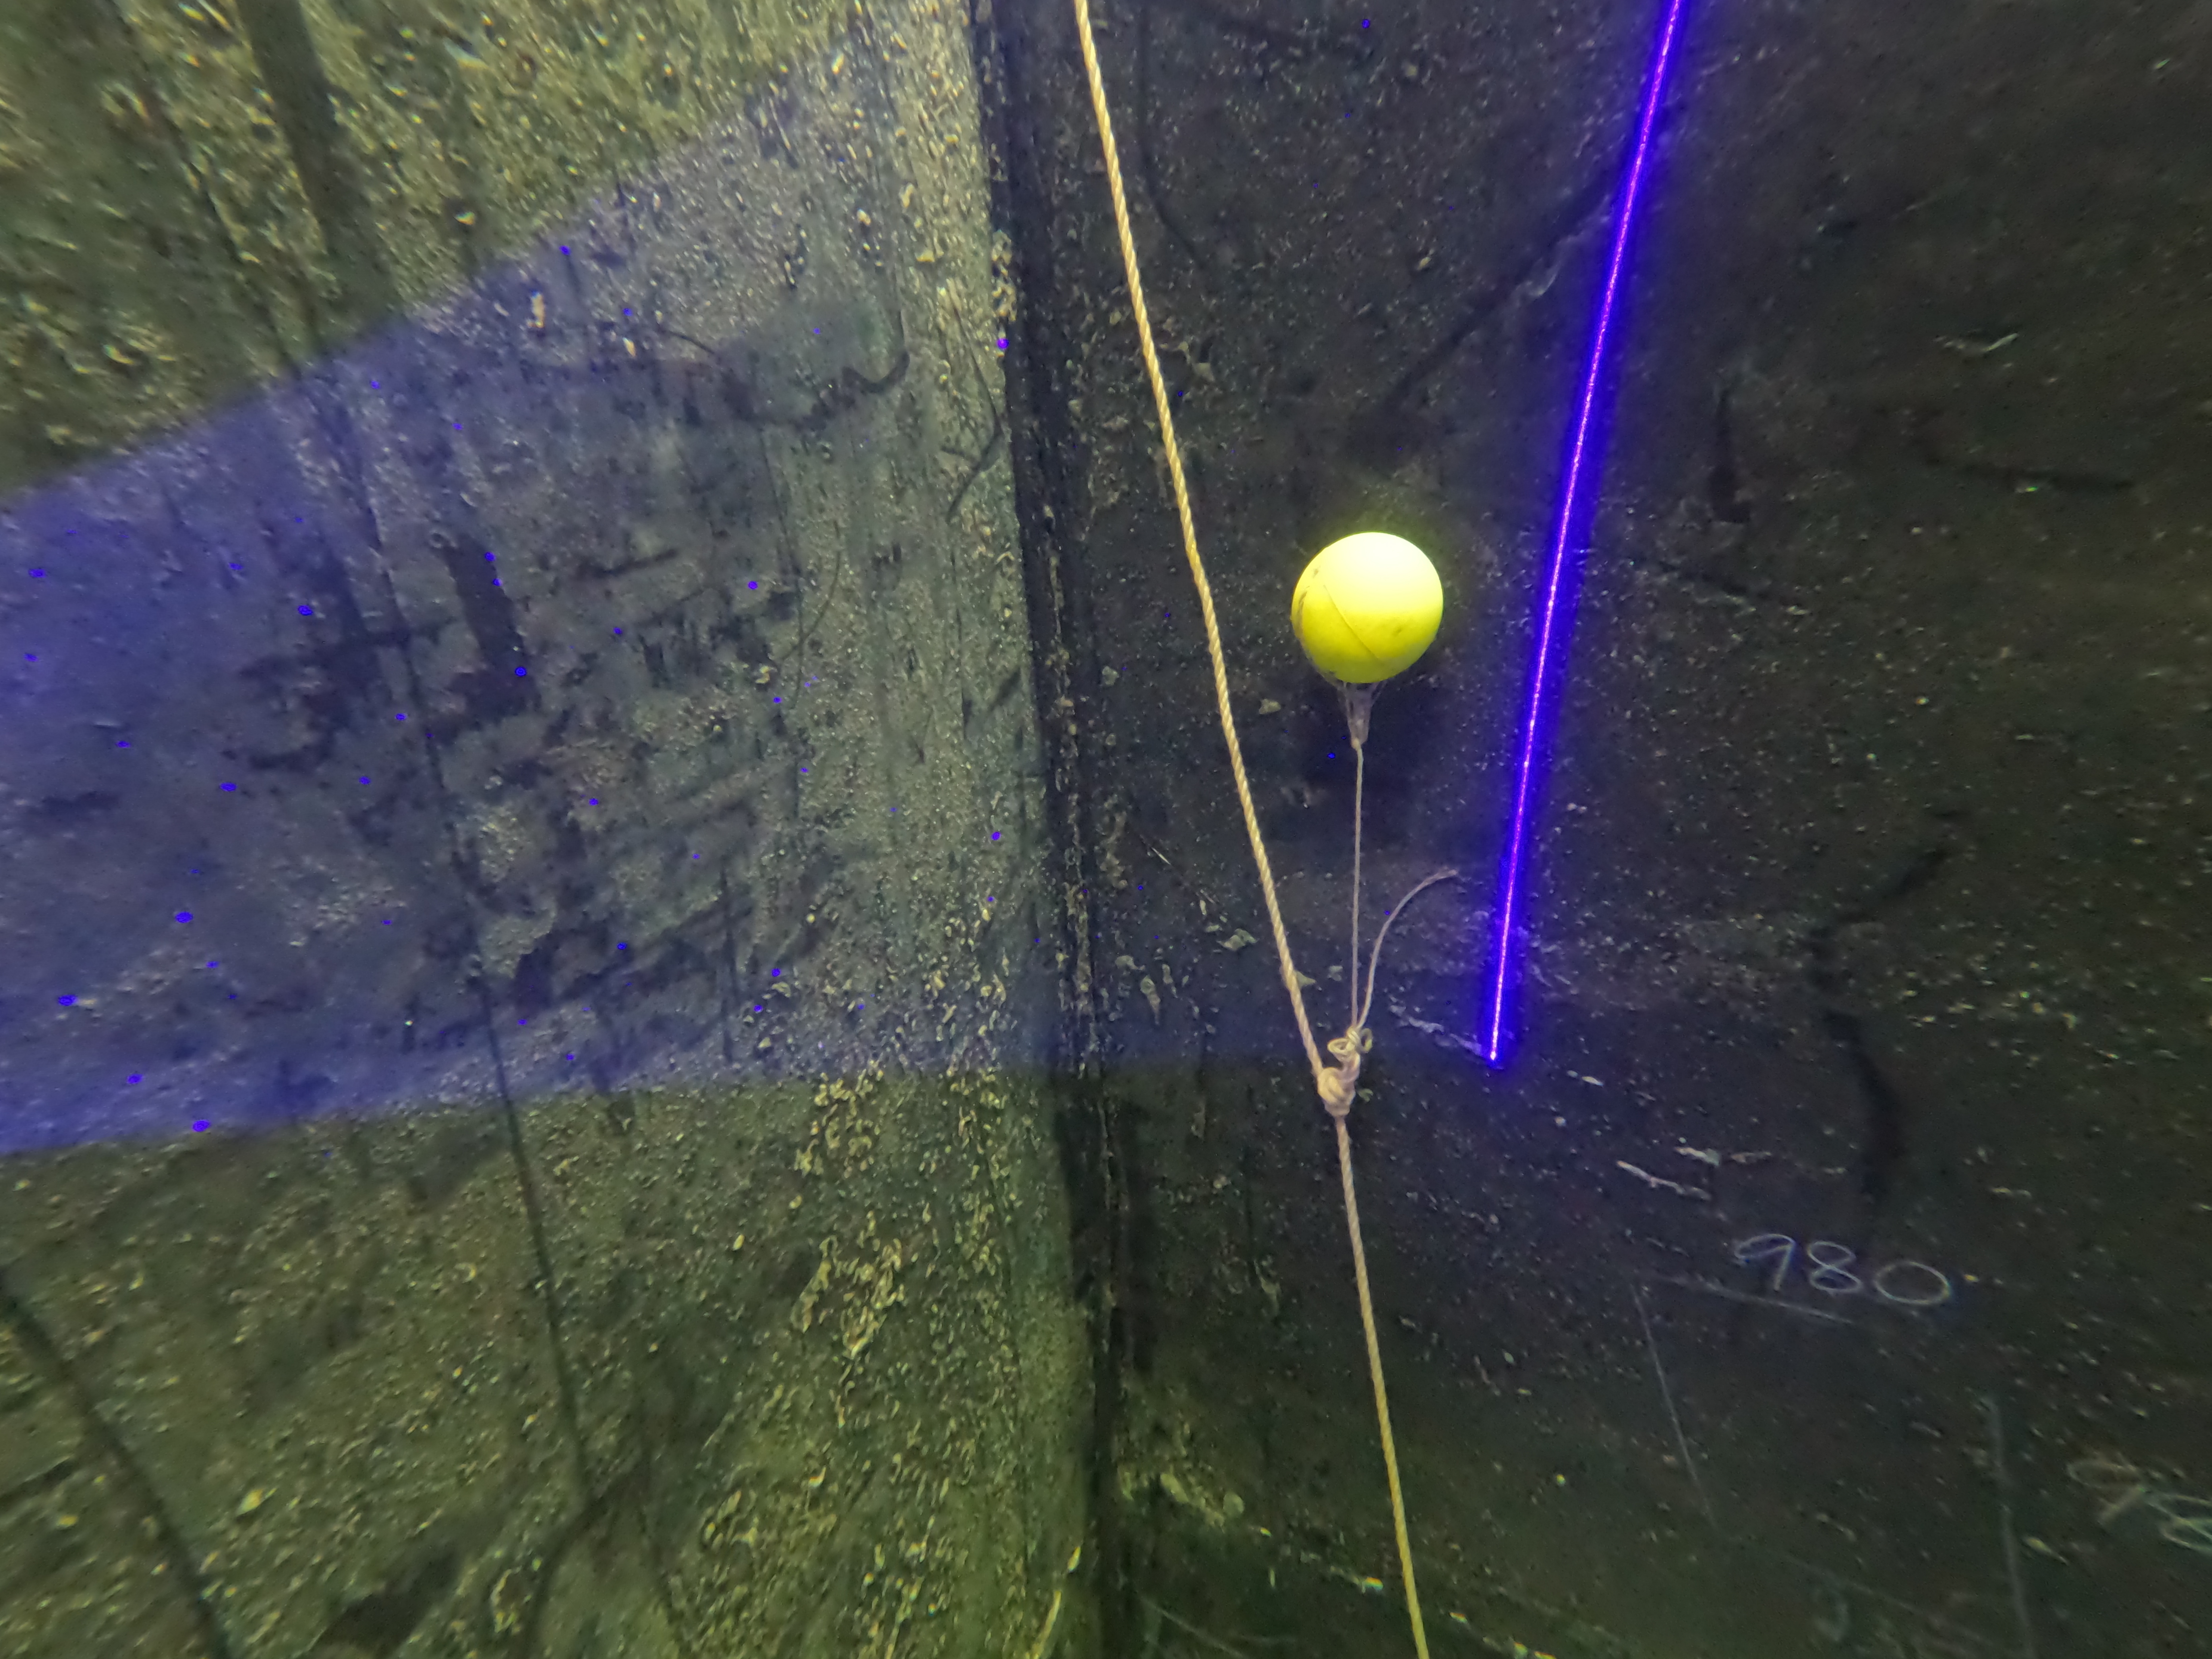

980

Supplement: Supplementary file 307 [file G0031100.pdf › 4/G0031100.pdf]

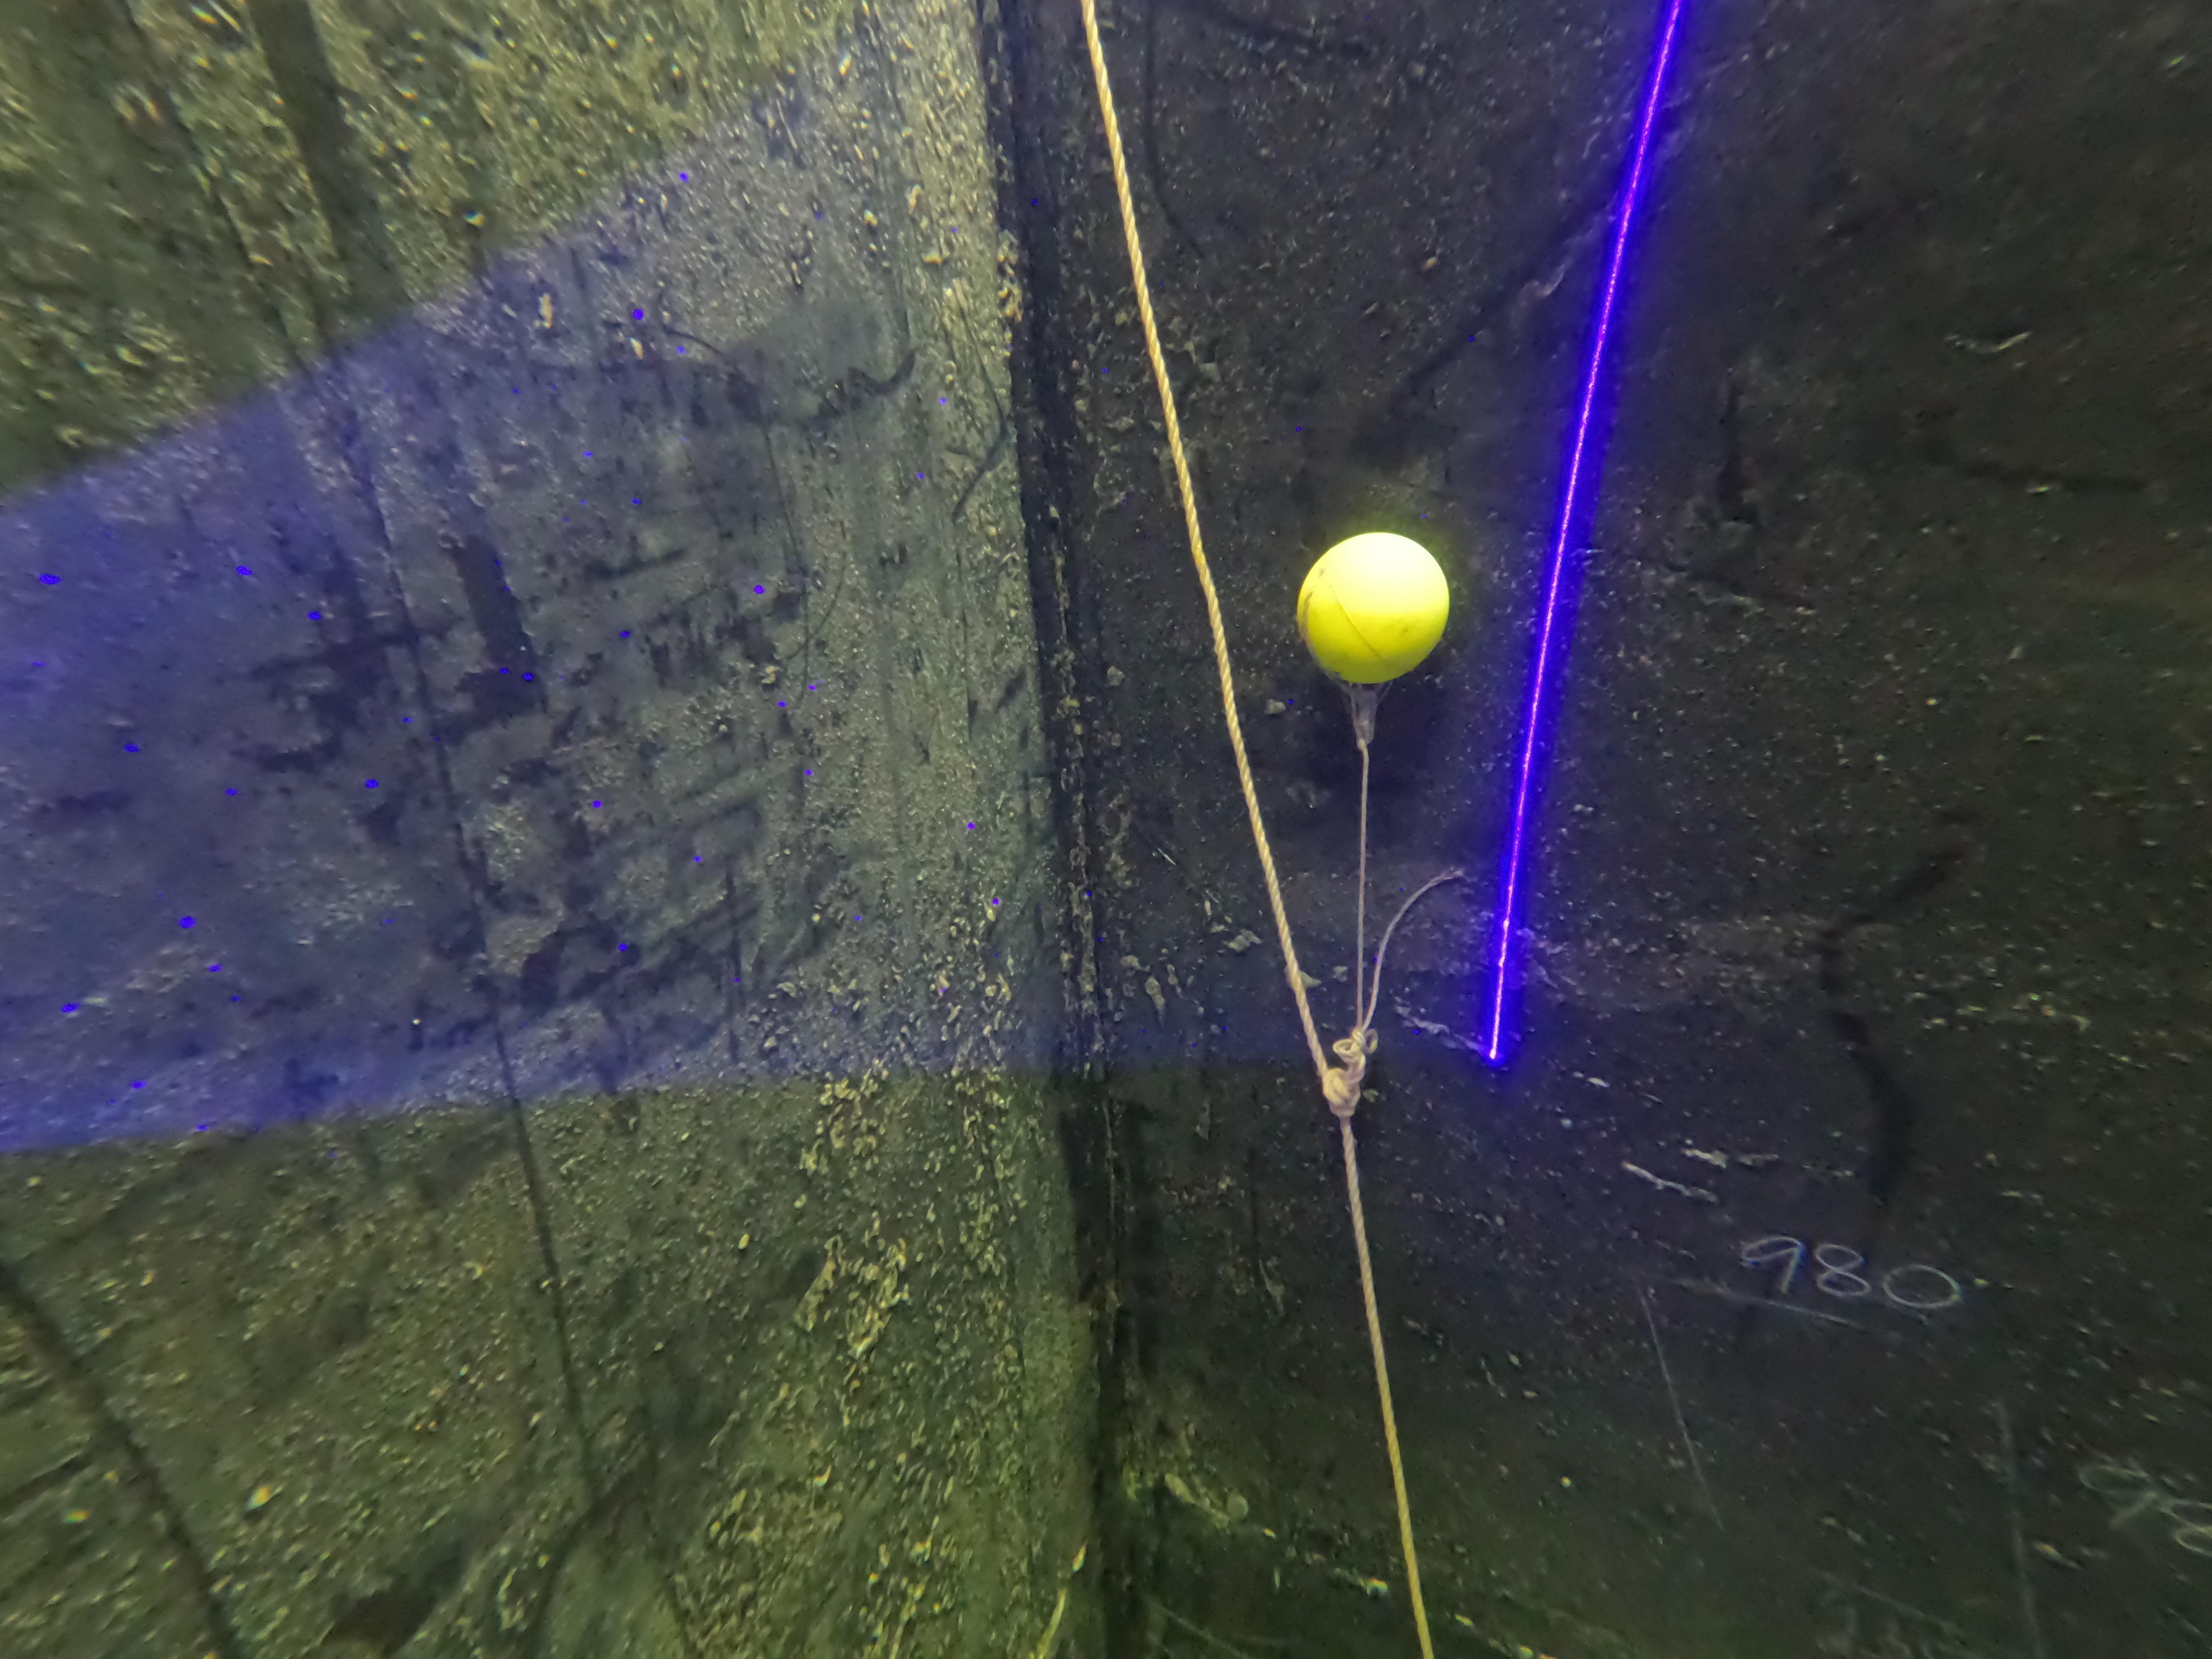

980

Supplement: Supplementary file 308 [file G0031101.pdf › 4/G0031101.pdf]

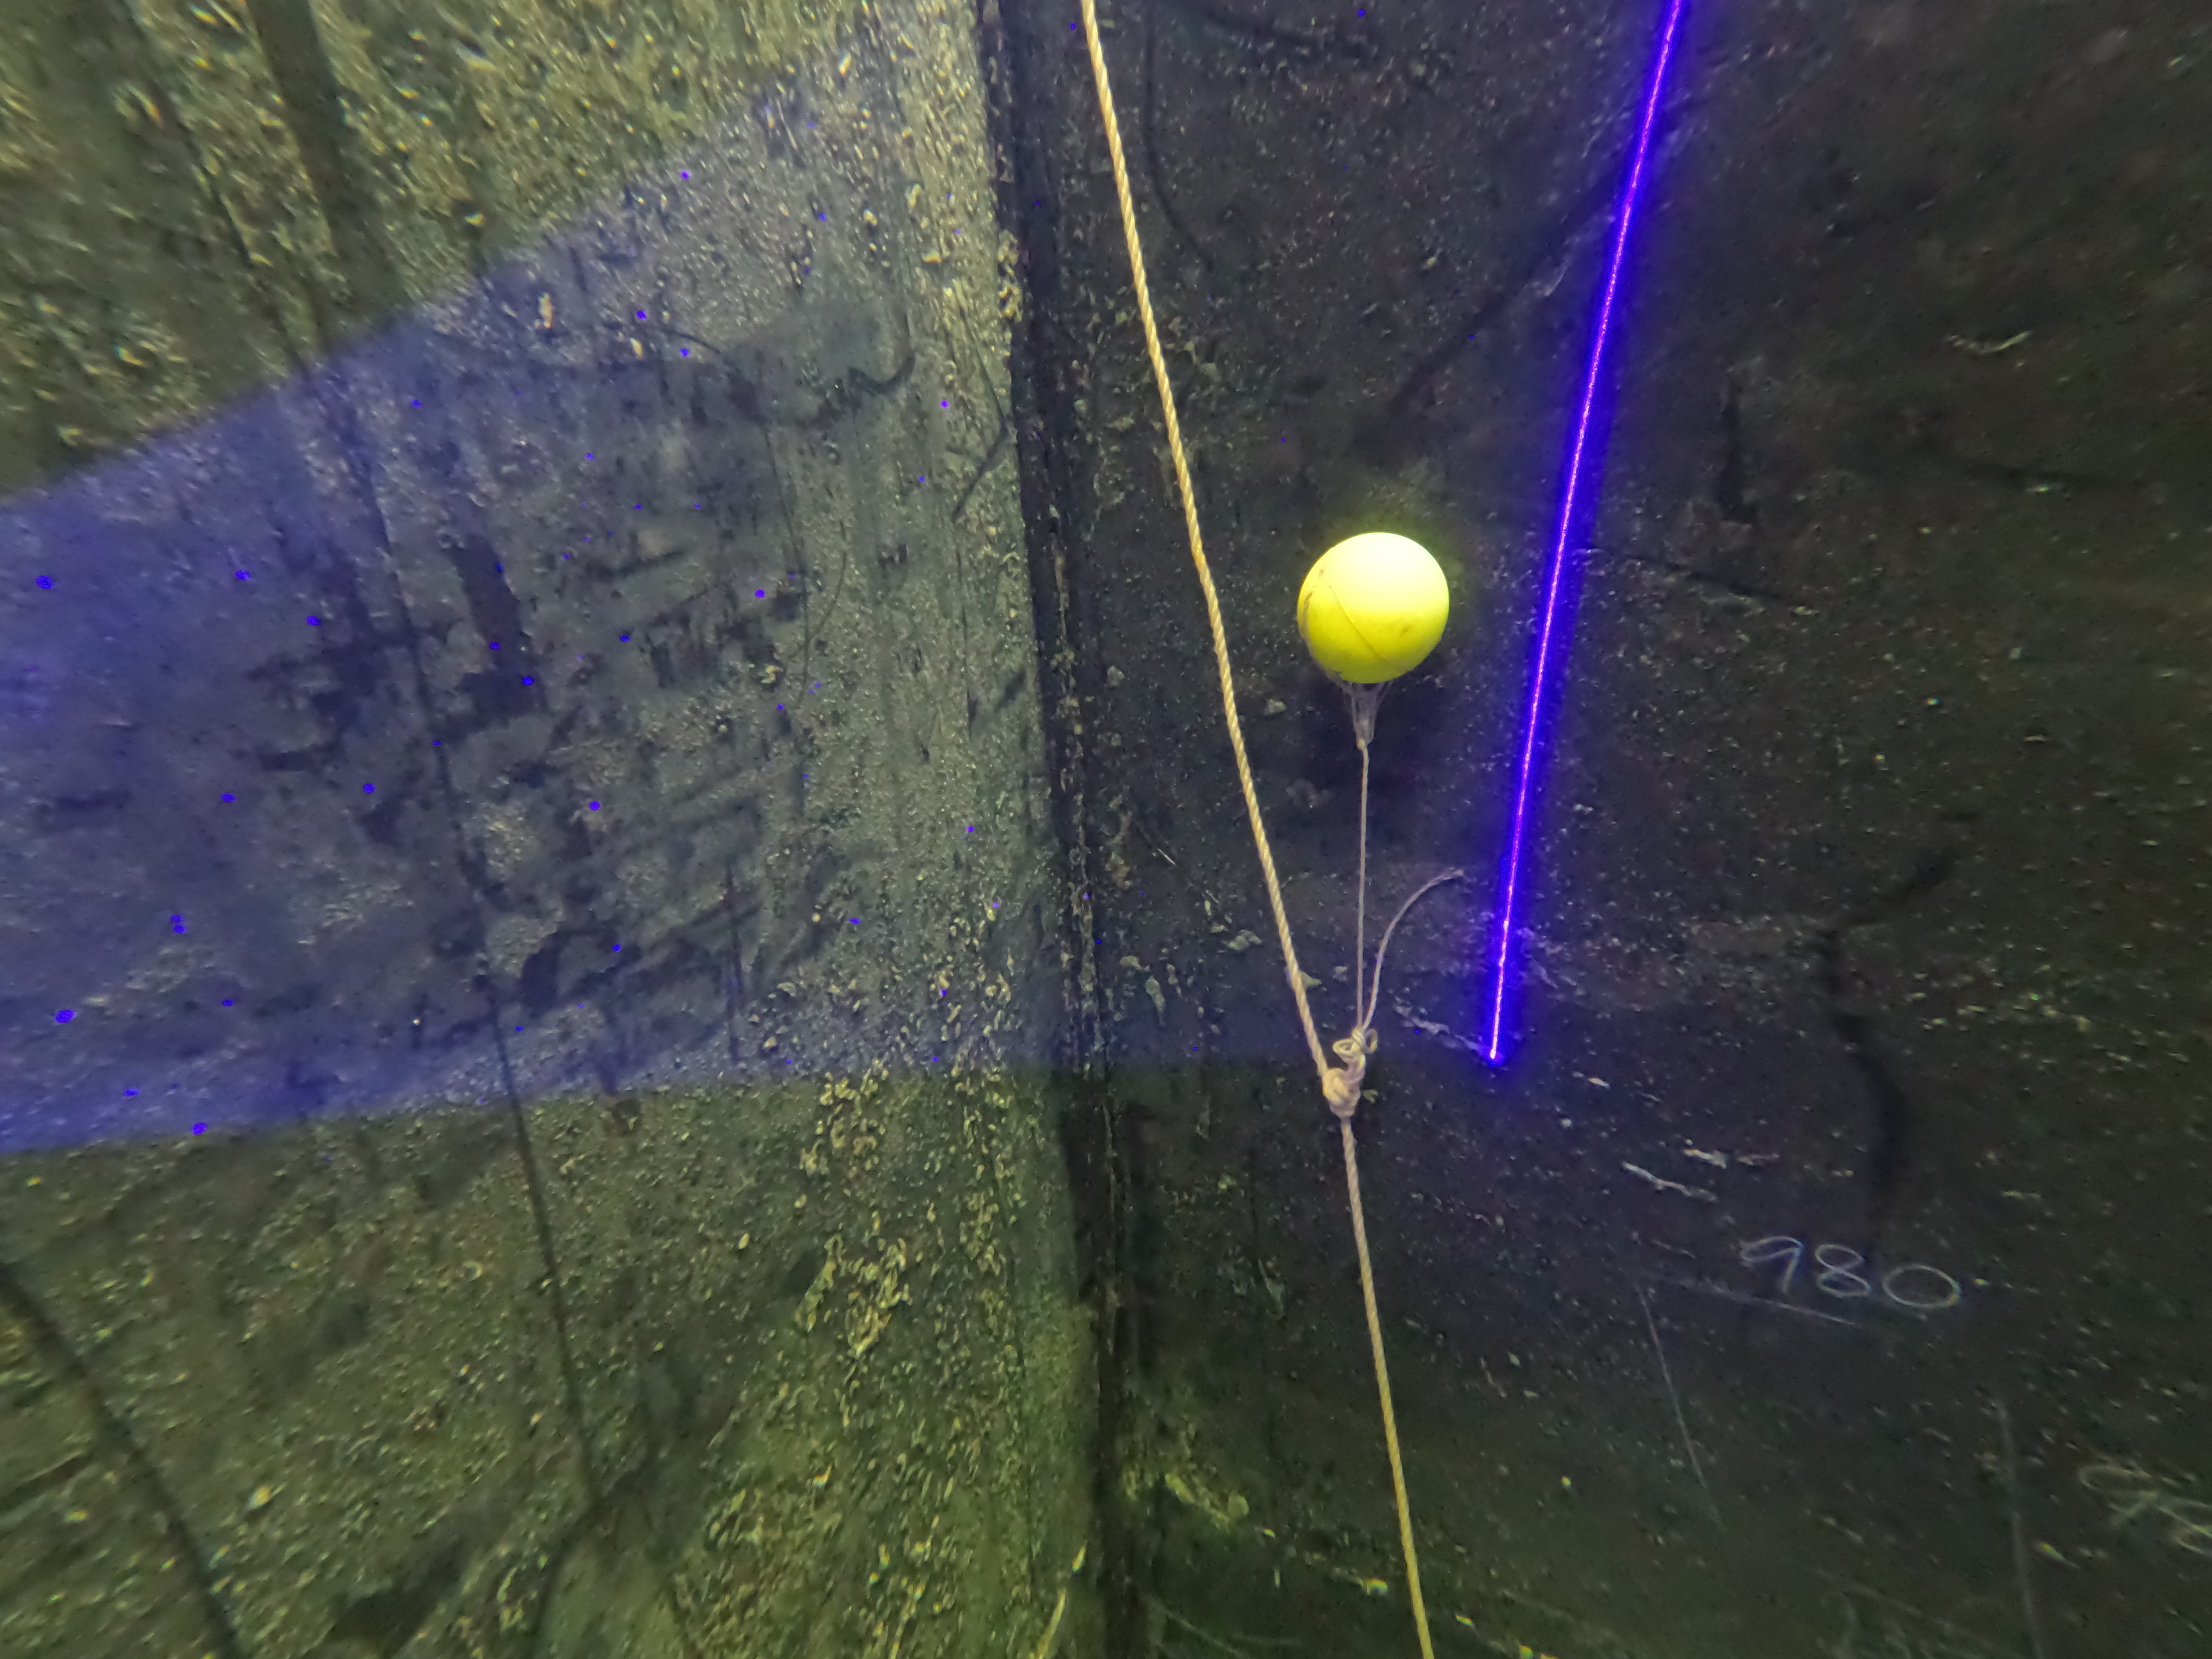

980

Supplement: Supplementary file 309 [file G0031102.pdf › 4/G0031102.pdf]

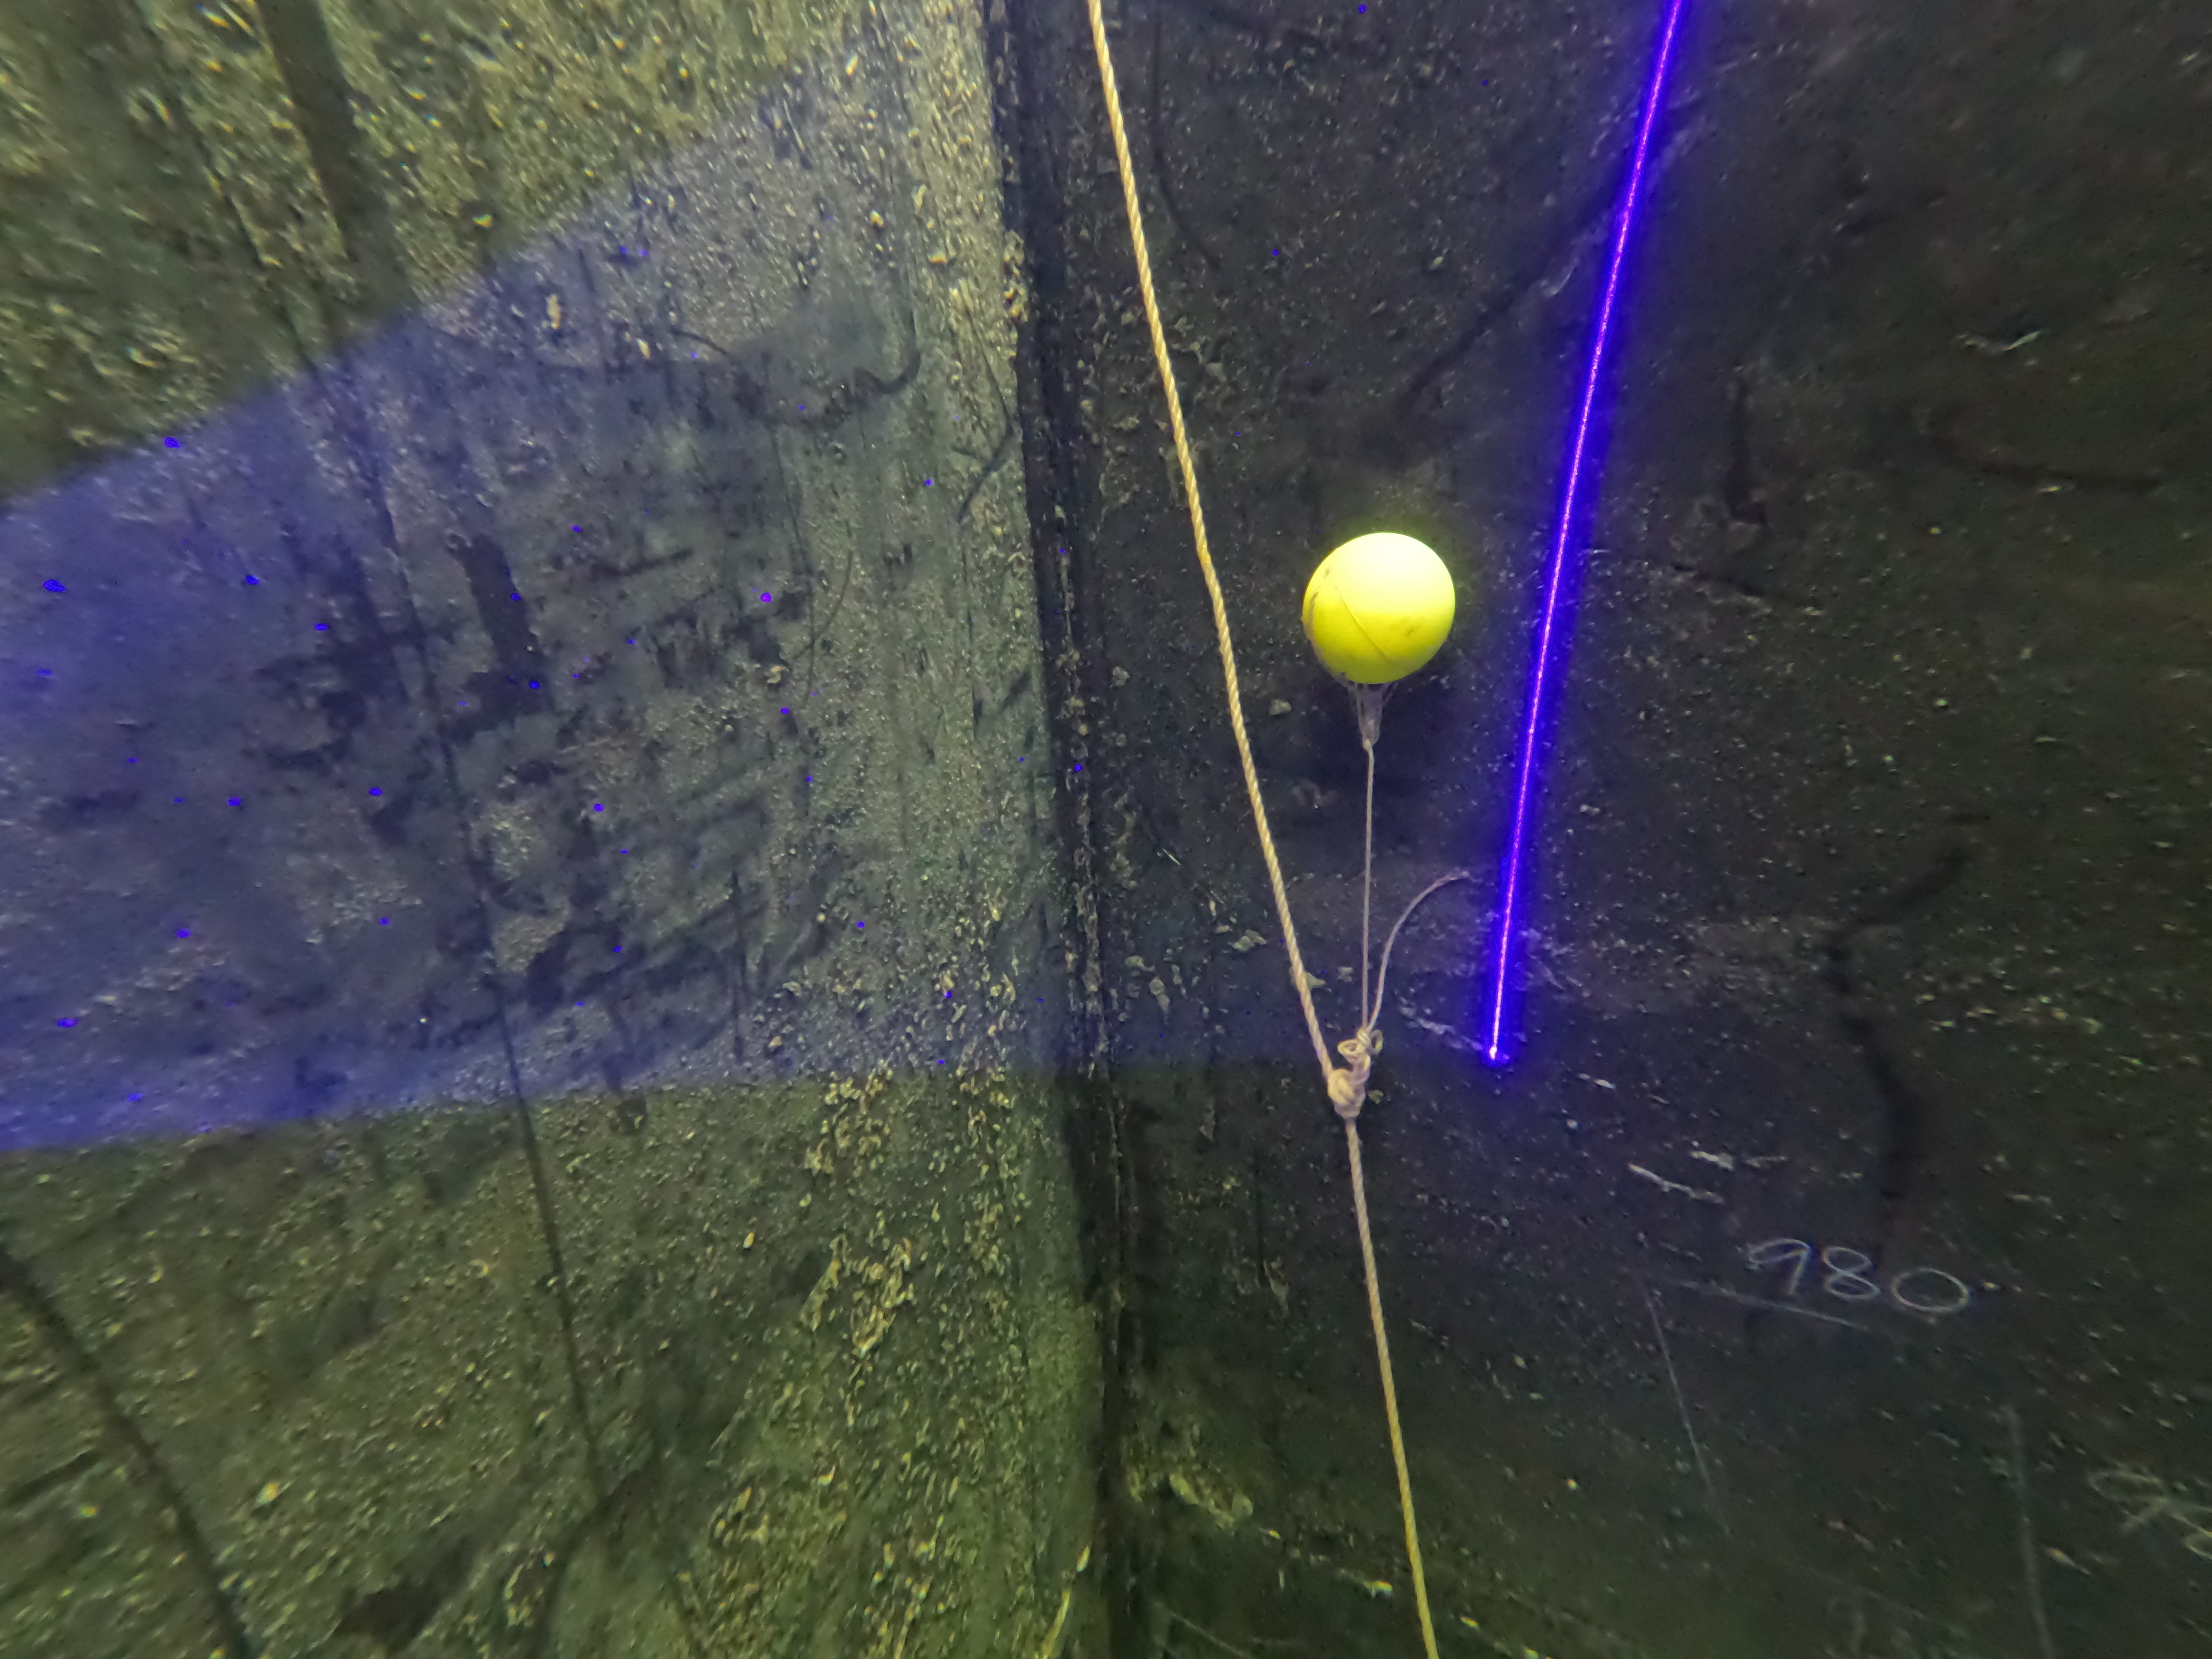

980

Supplement: Supplementary file 310 [file G0031103.pdf › 4/G0031103.pdf]

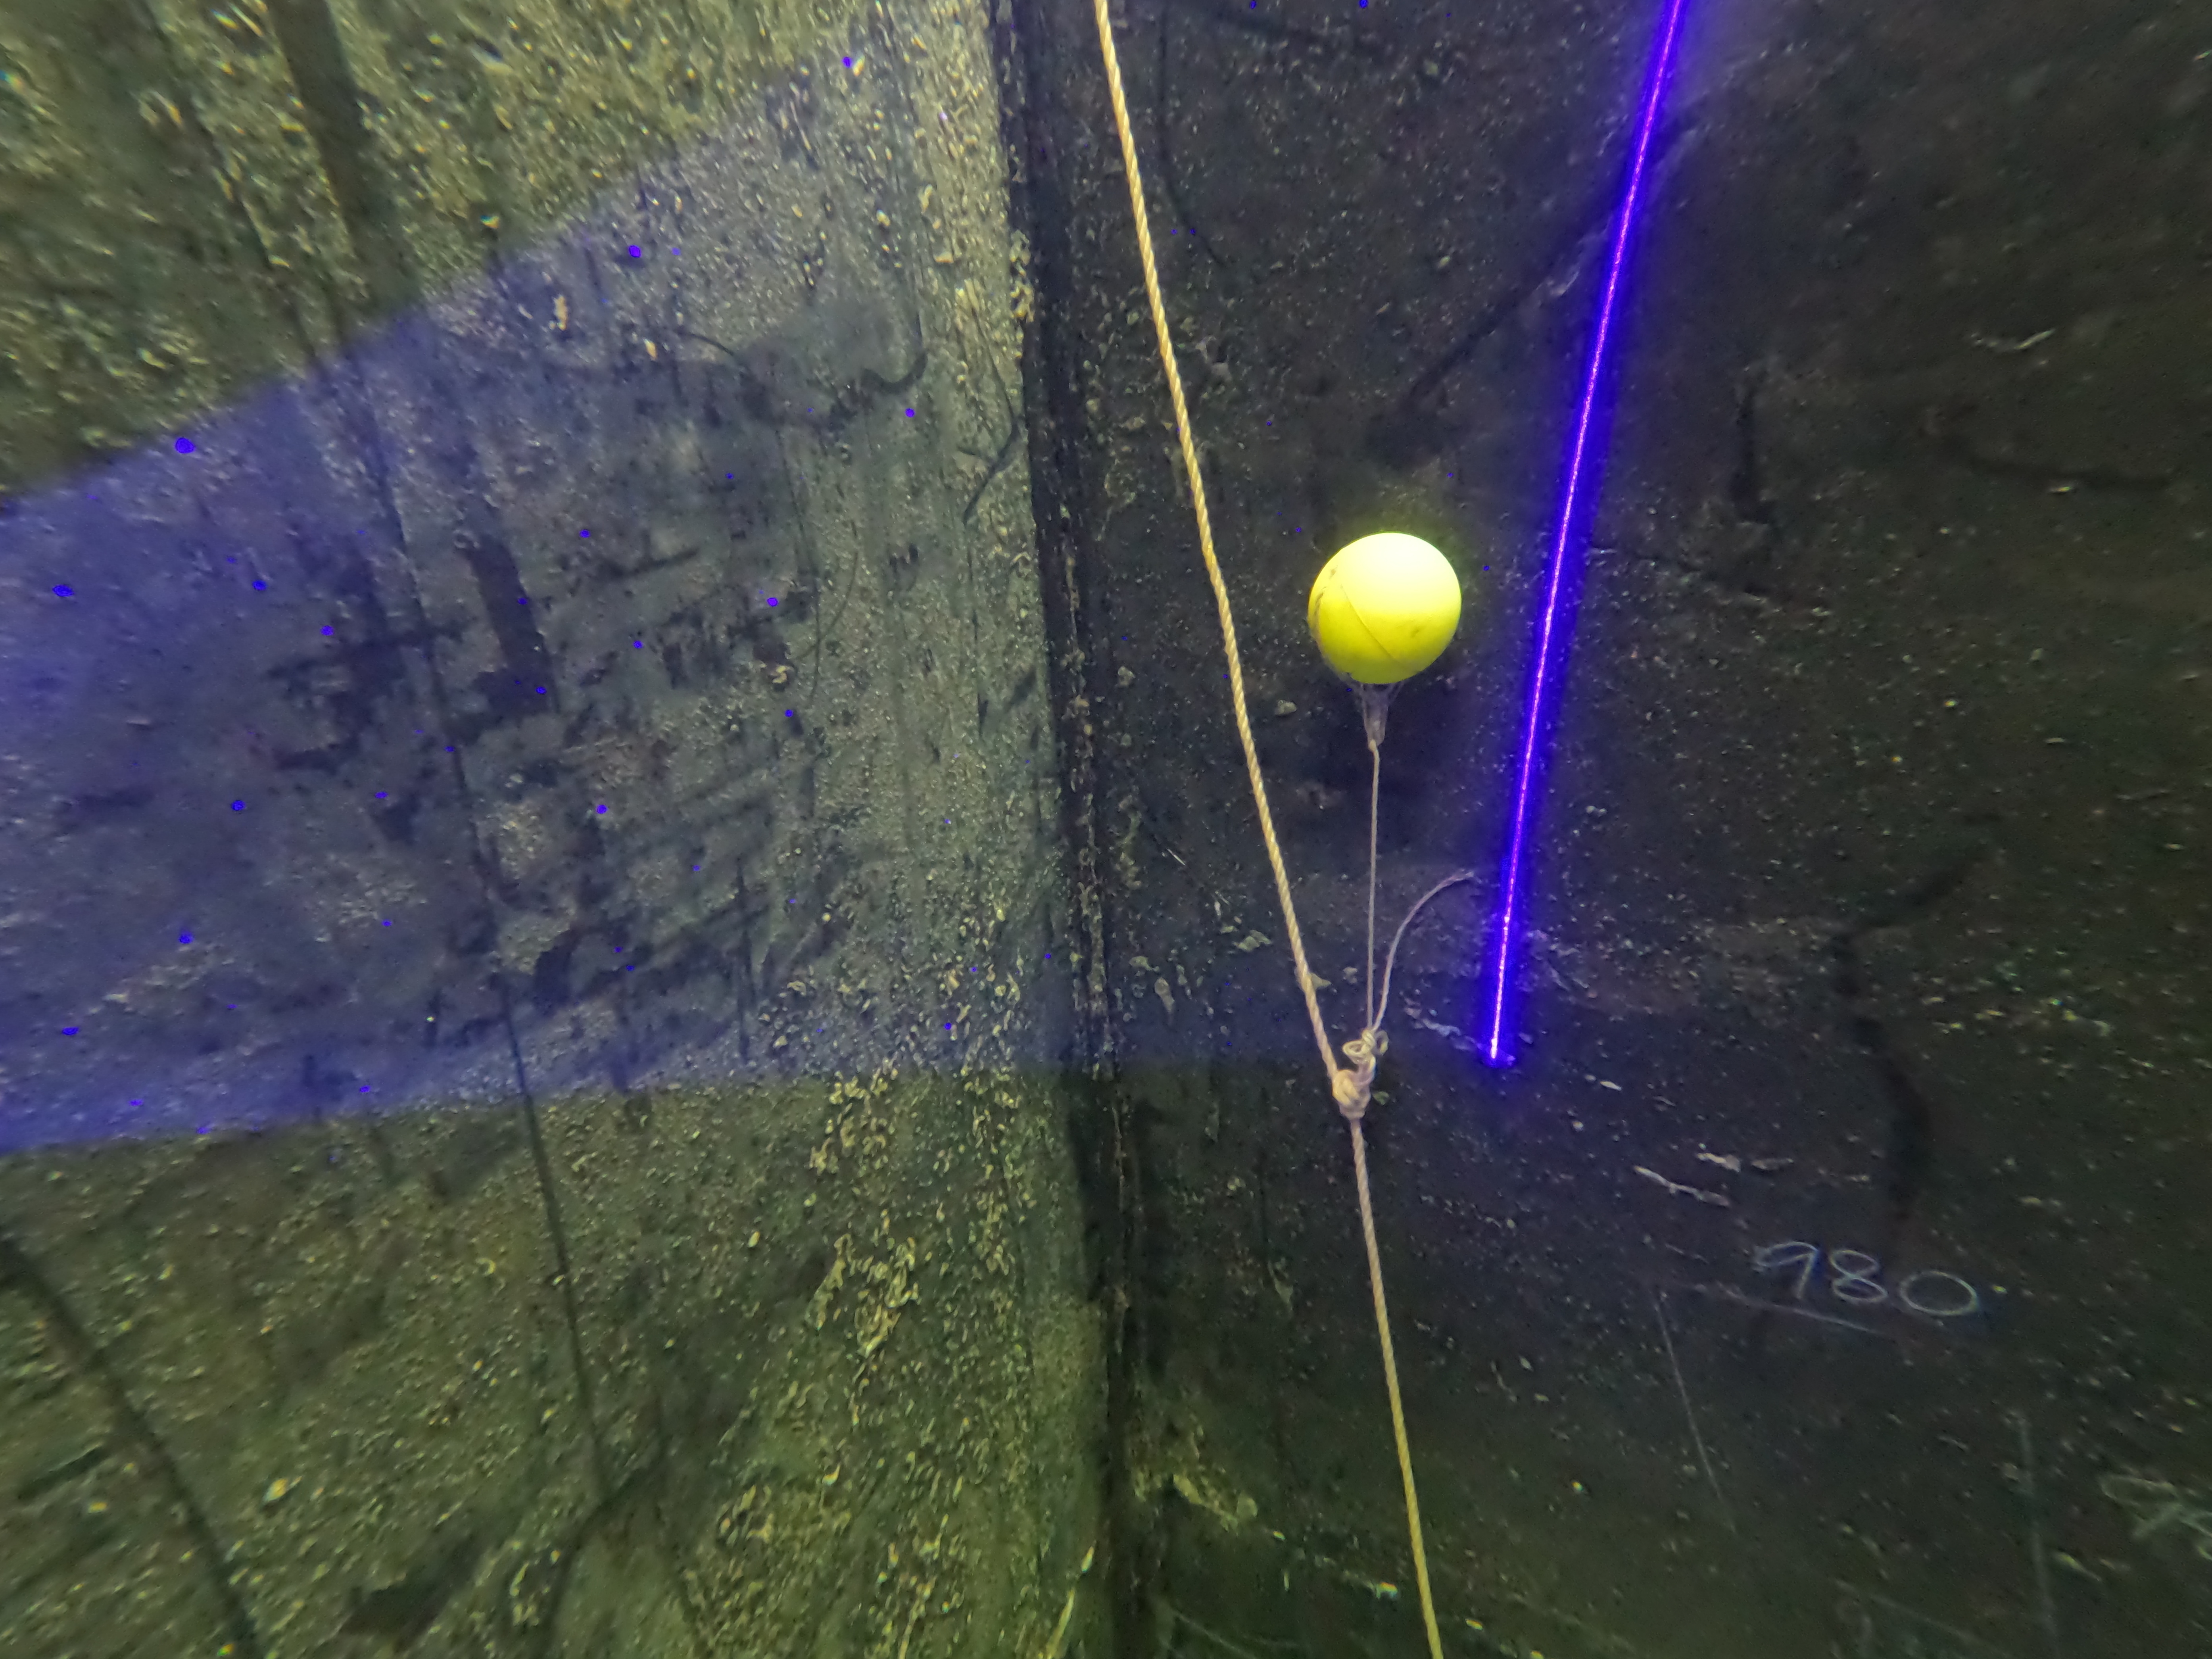

980

Supplement: Supplementary file 311 [file G0031104.pdf › 4/G0031104.pdf]

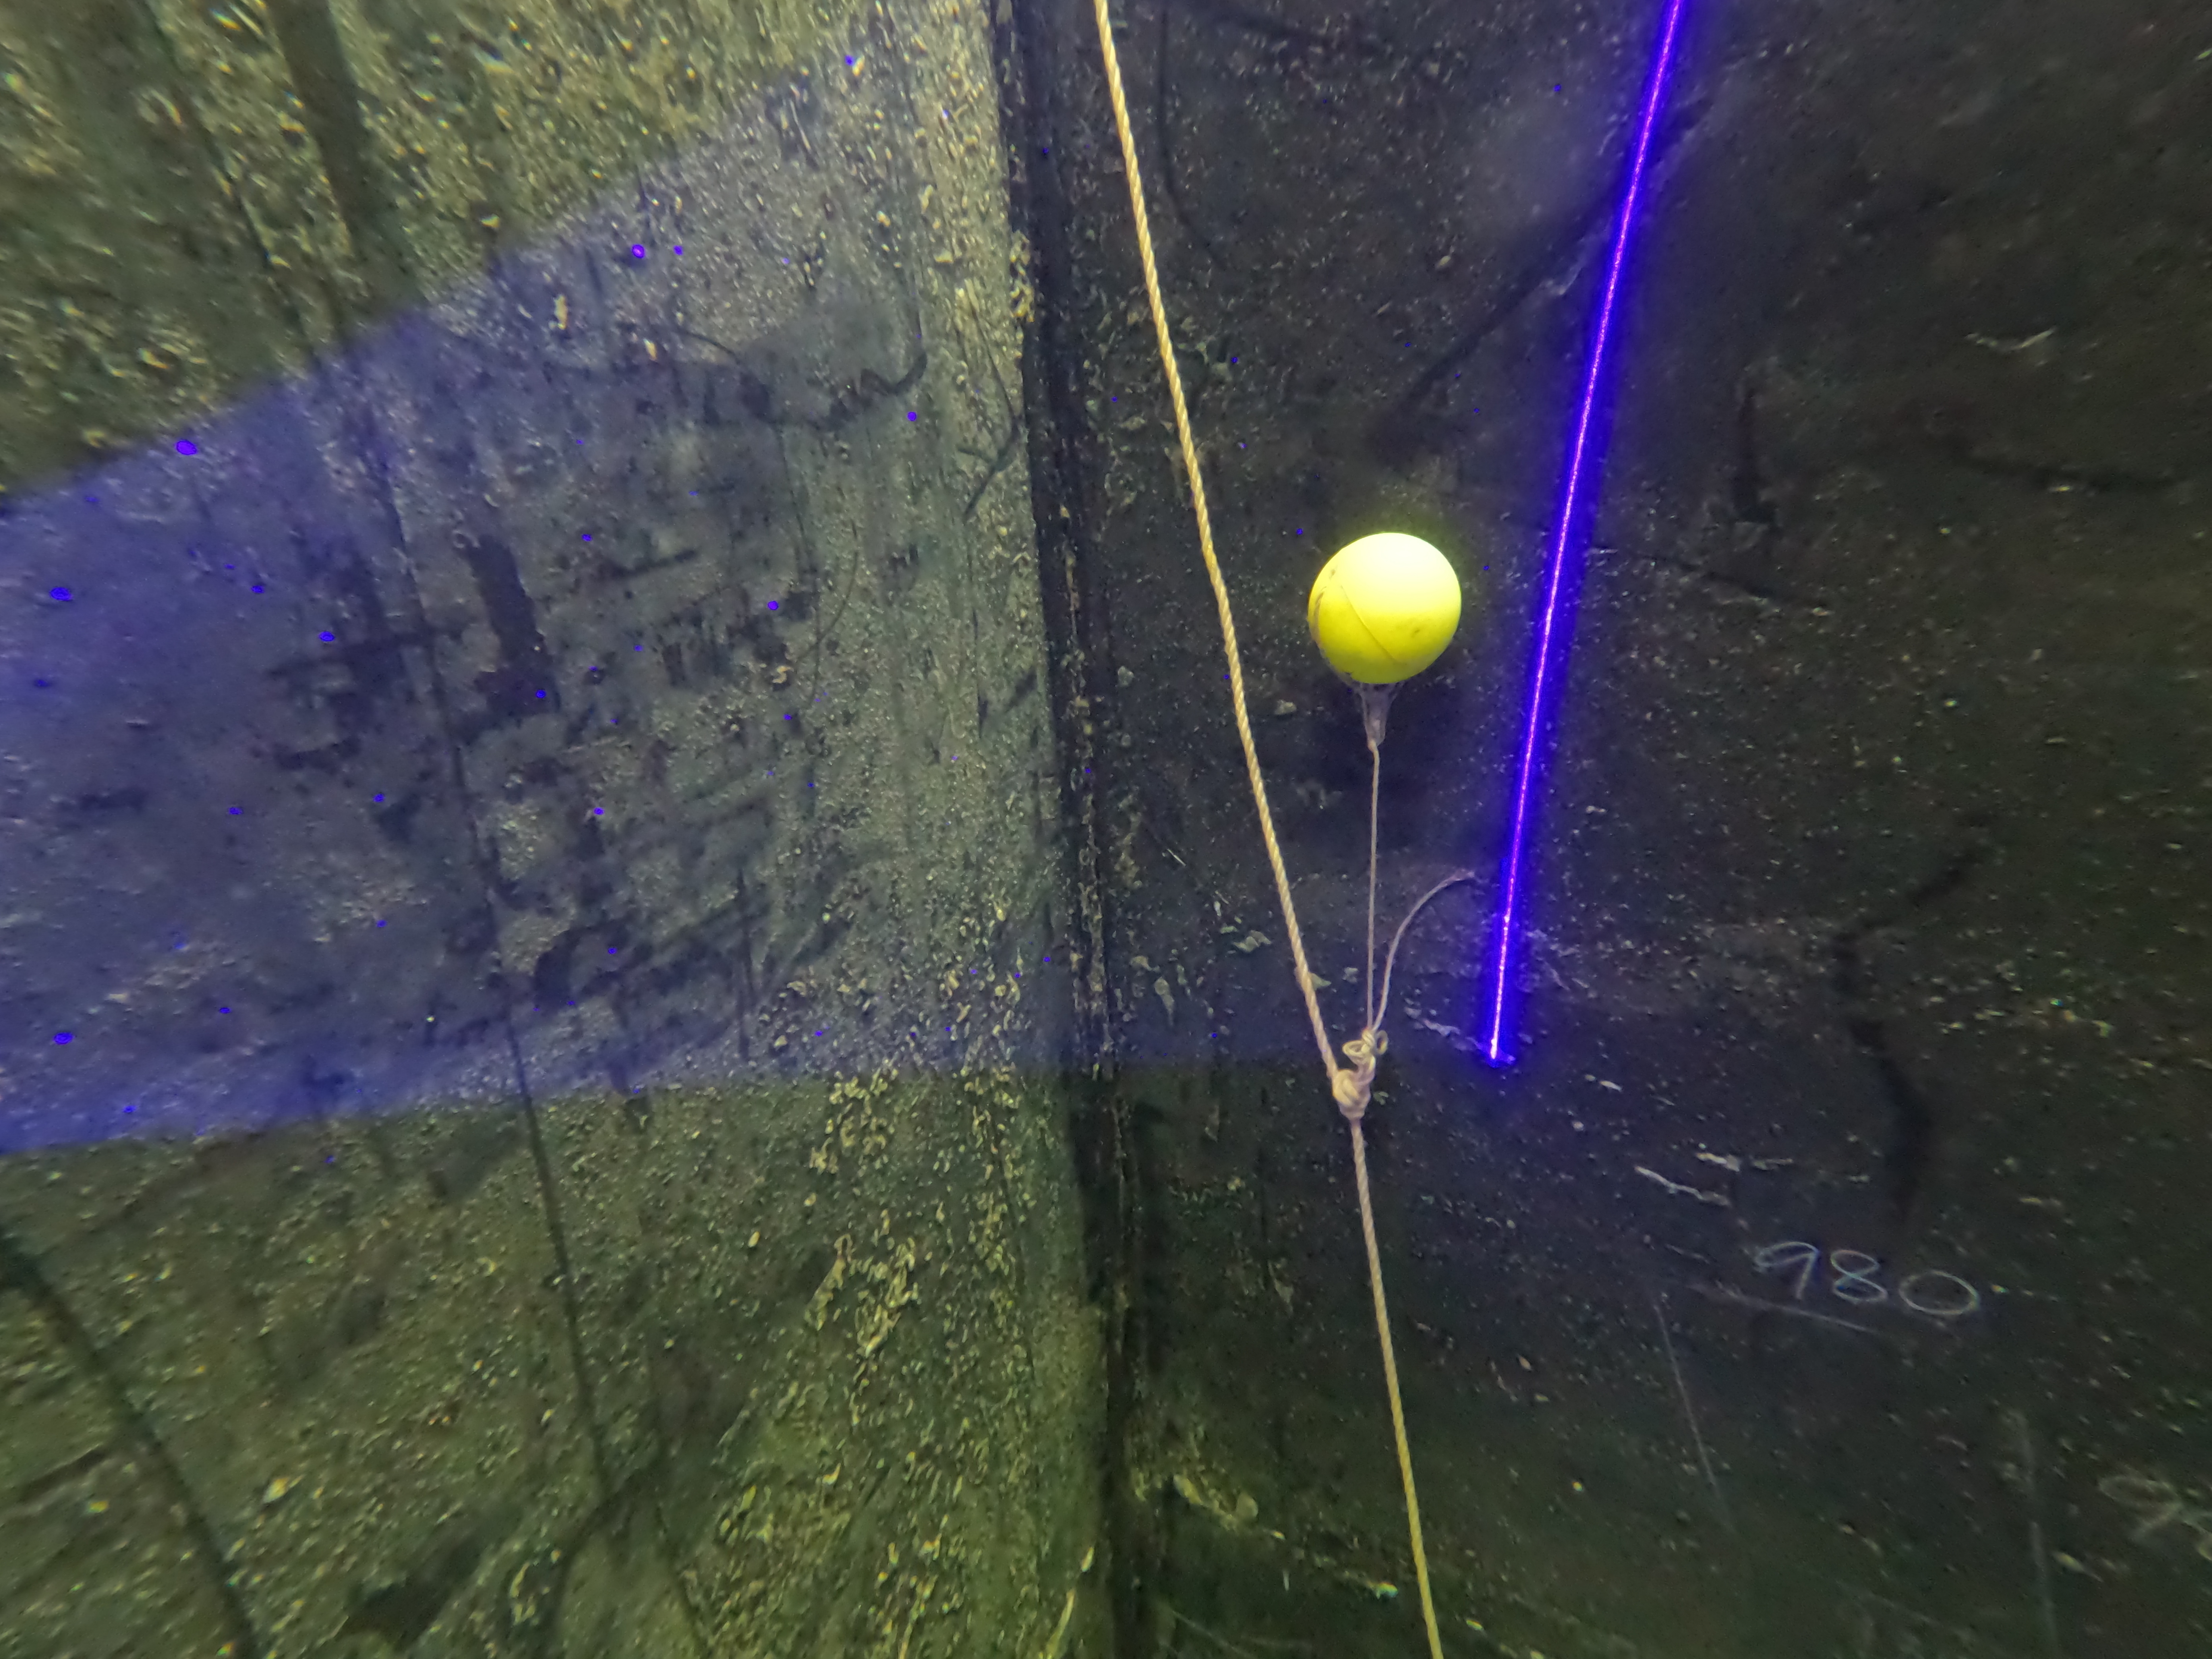

980

Supplement: Supplementary file 312 [file G0031105.pdf › 4/G0031105.pdf]

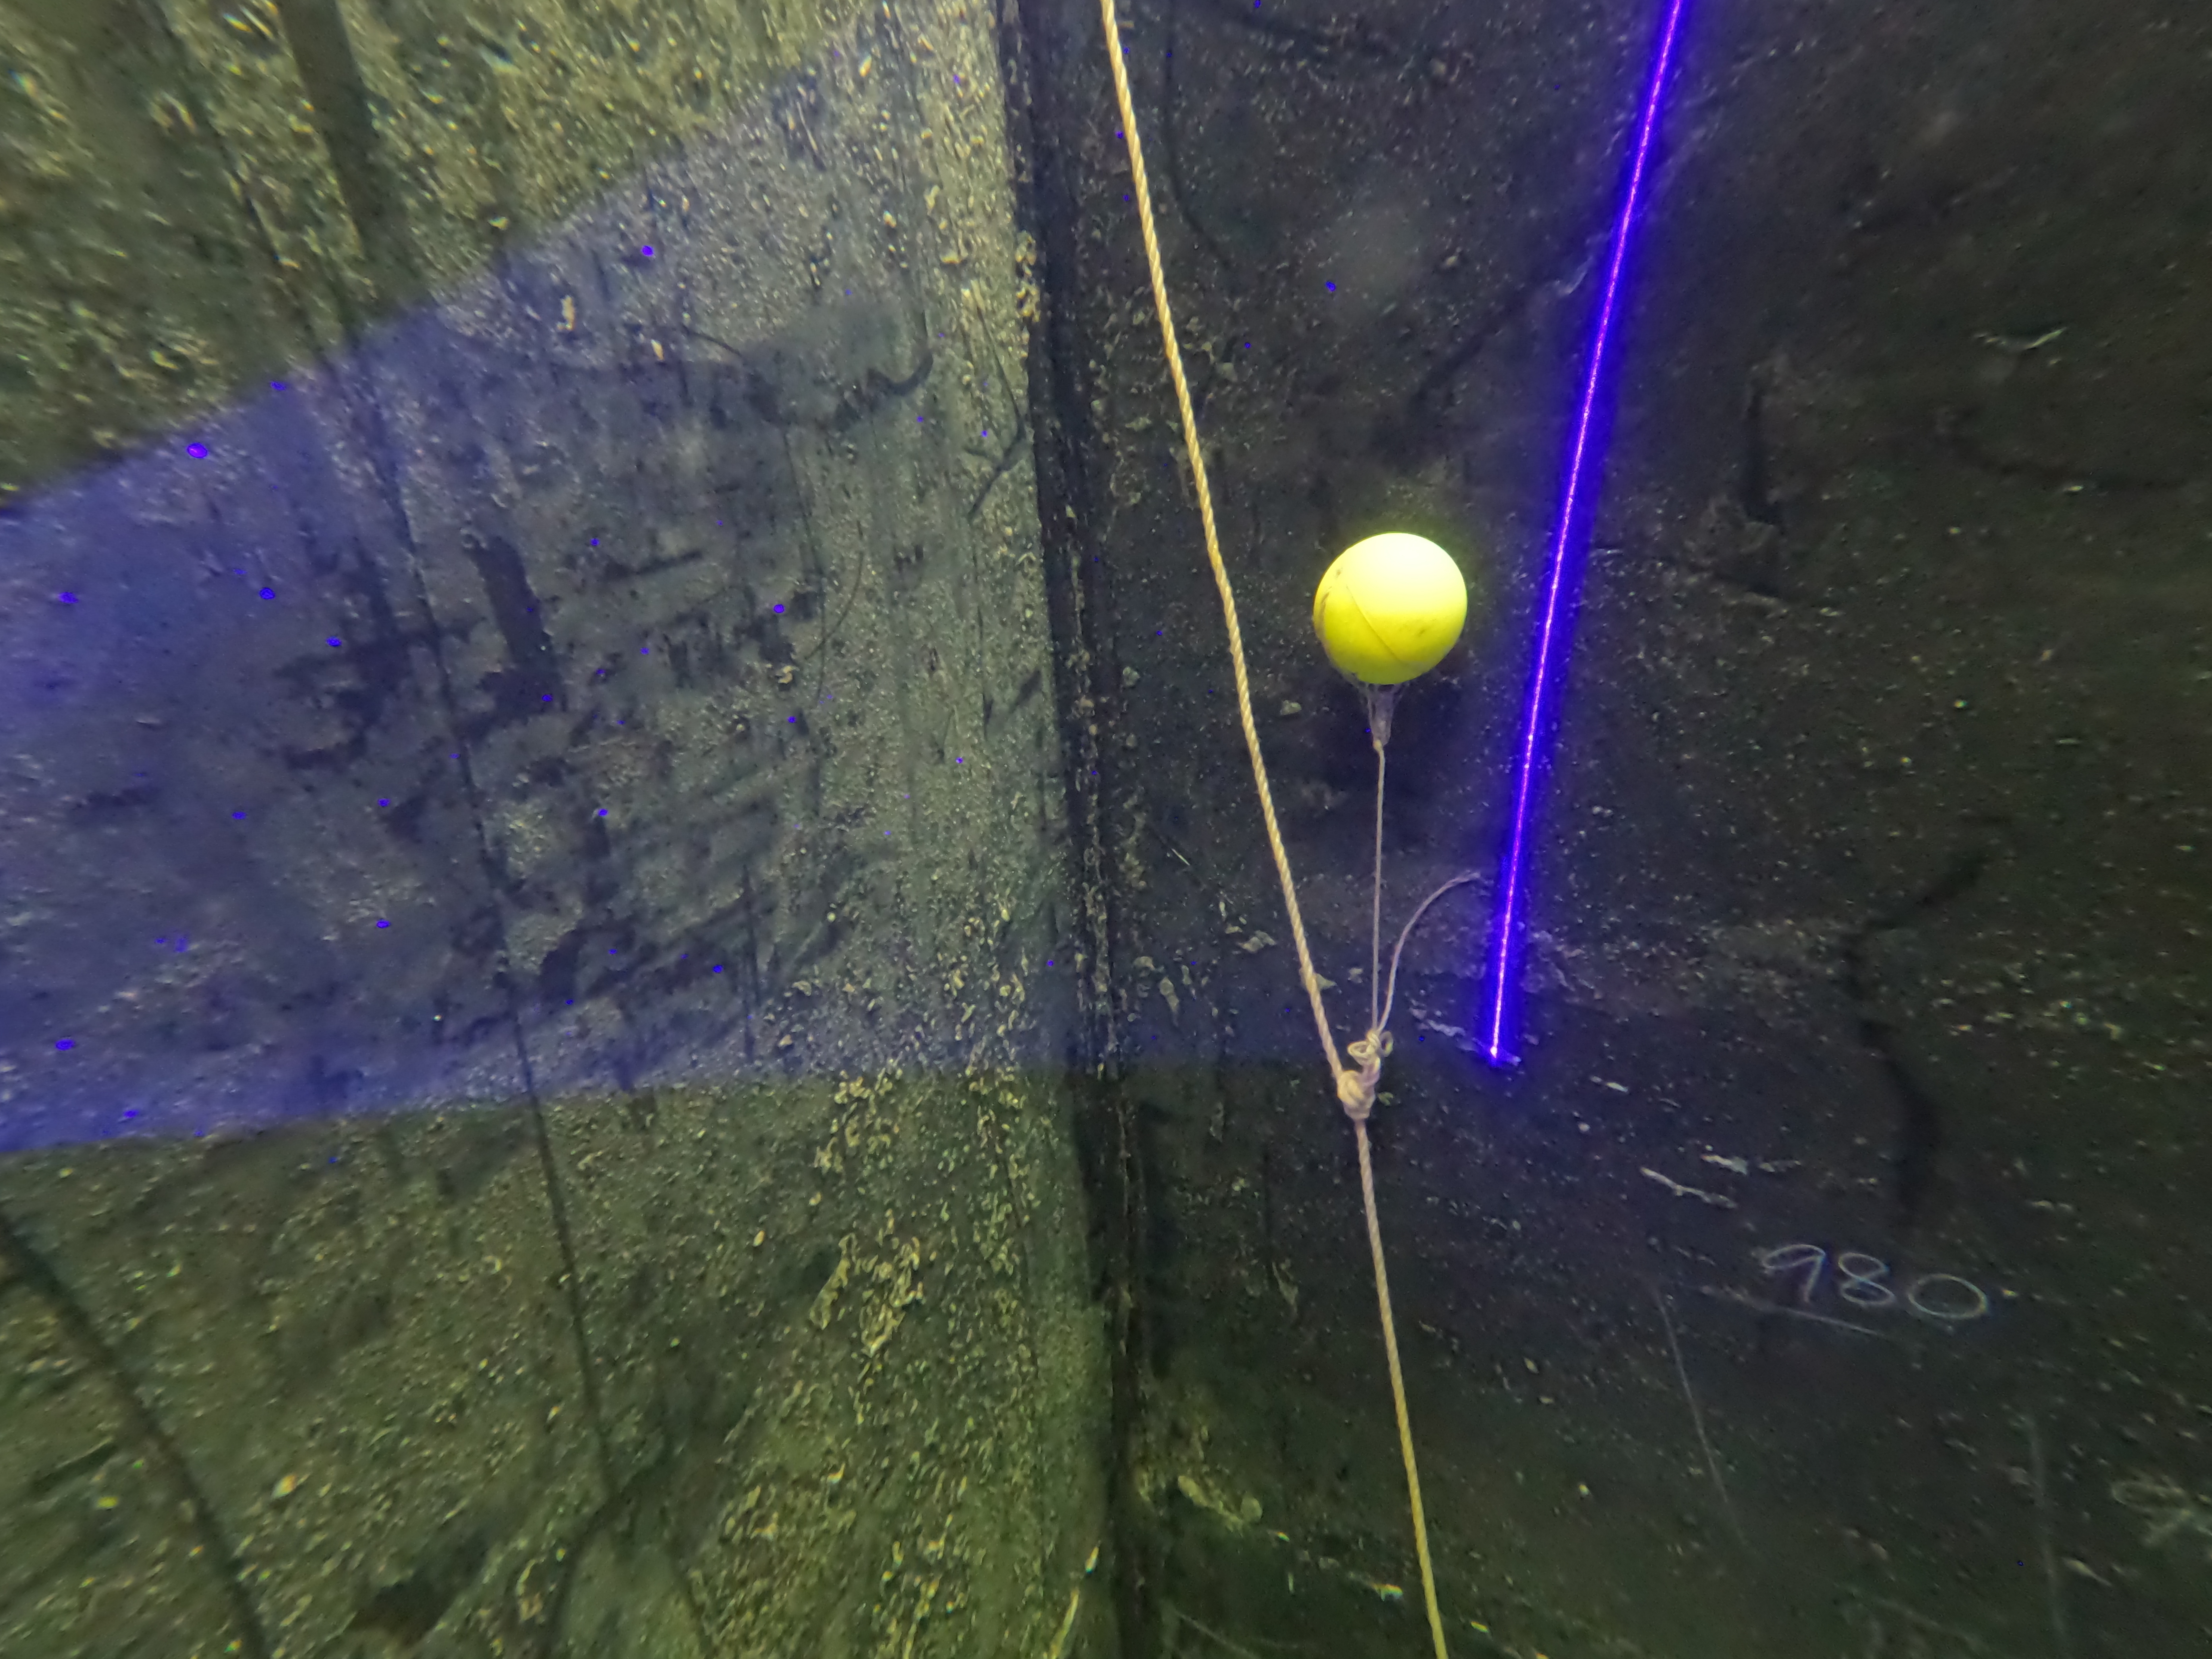

980

Supplement: Supplementary file 313 [file G0031106.pdf › 4/G0031106.pdf]

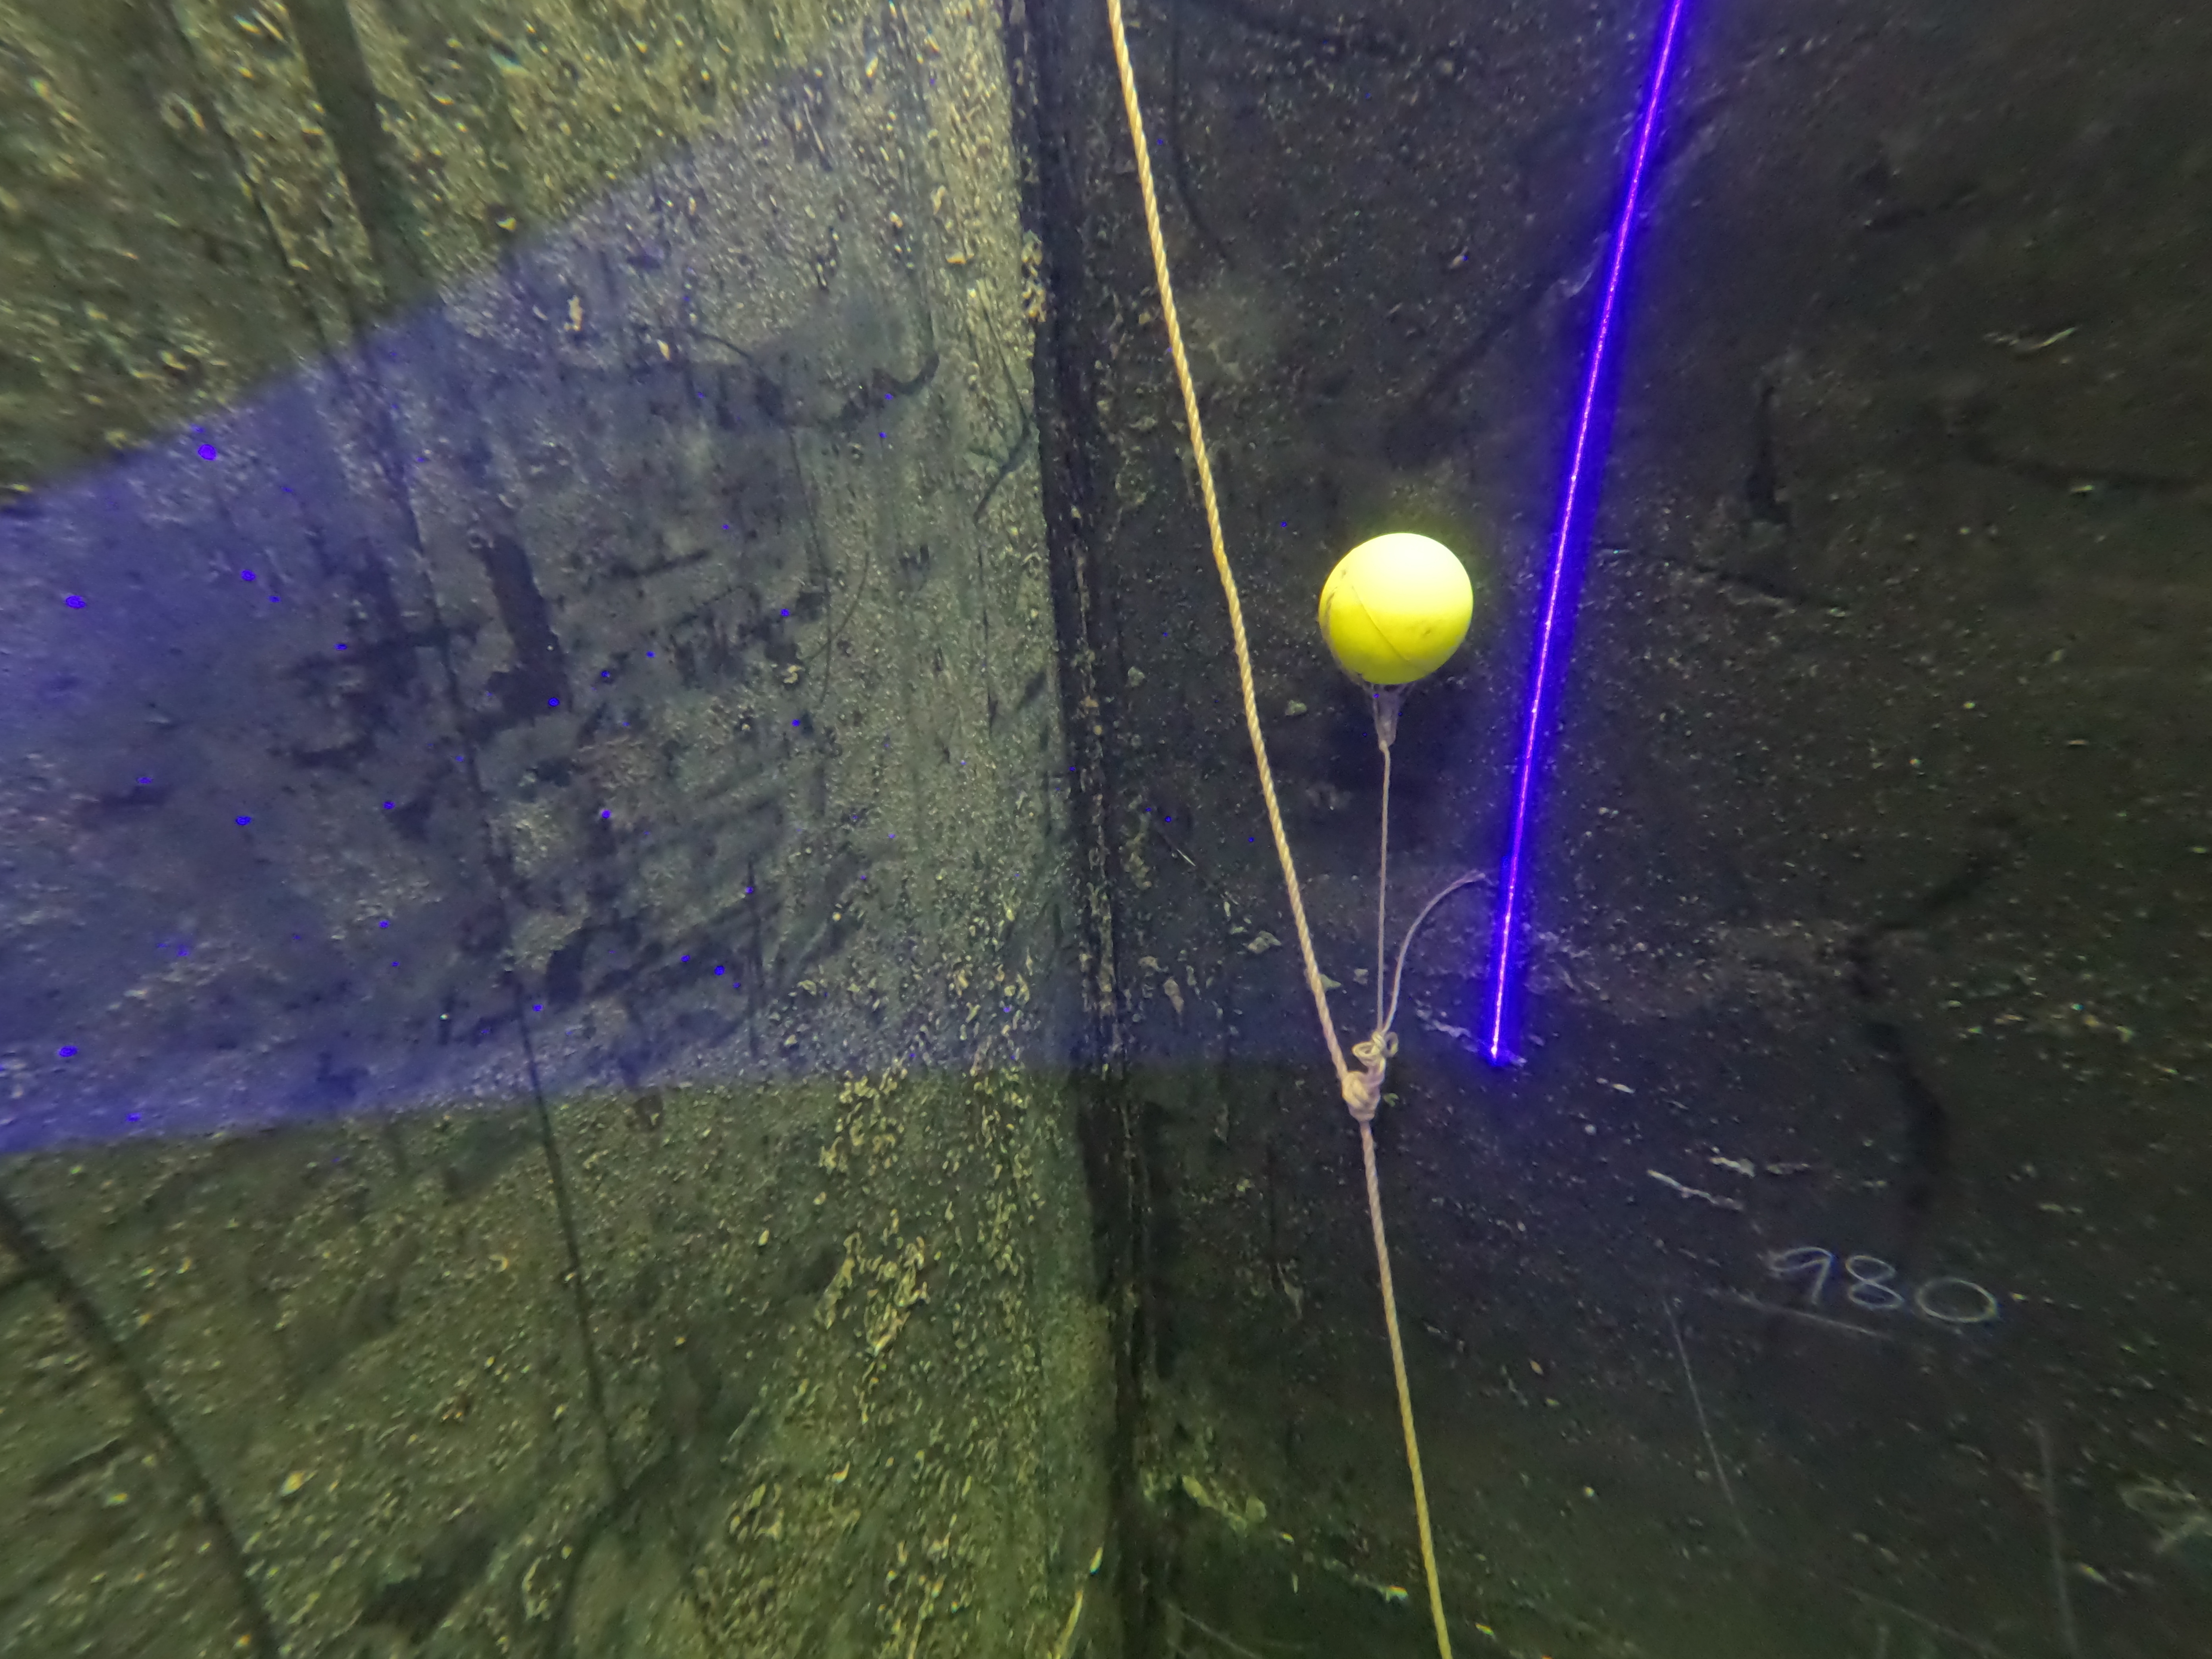

980

Supplement: Supplementary file 314 [file G0031107.pdf › 4/G0031107.pdf]

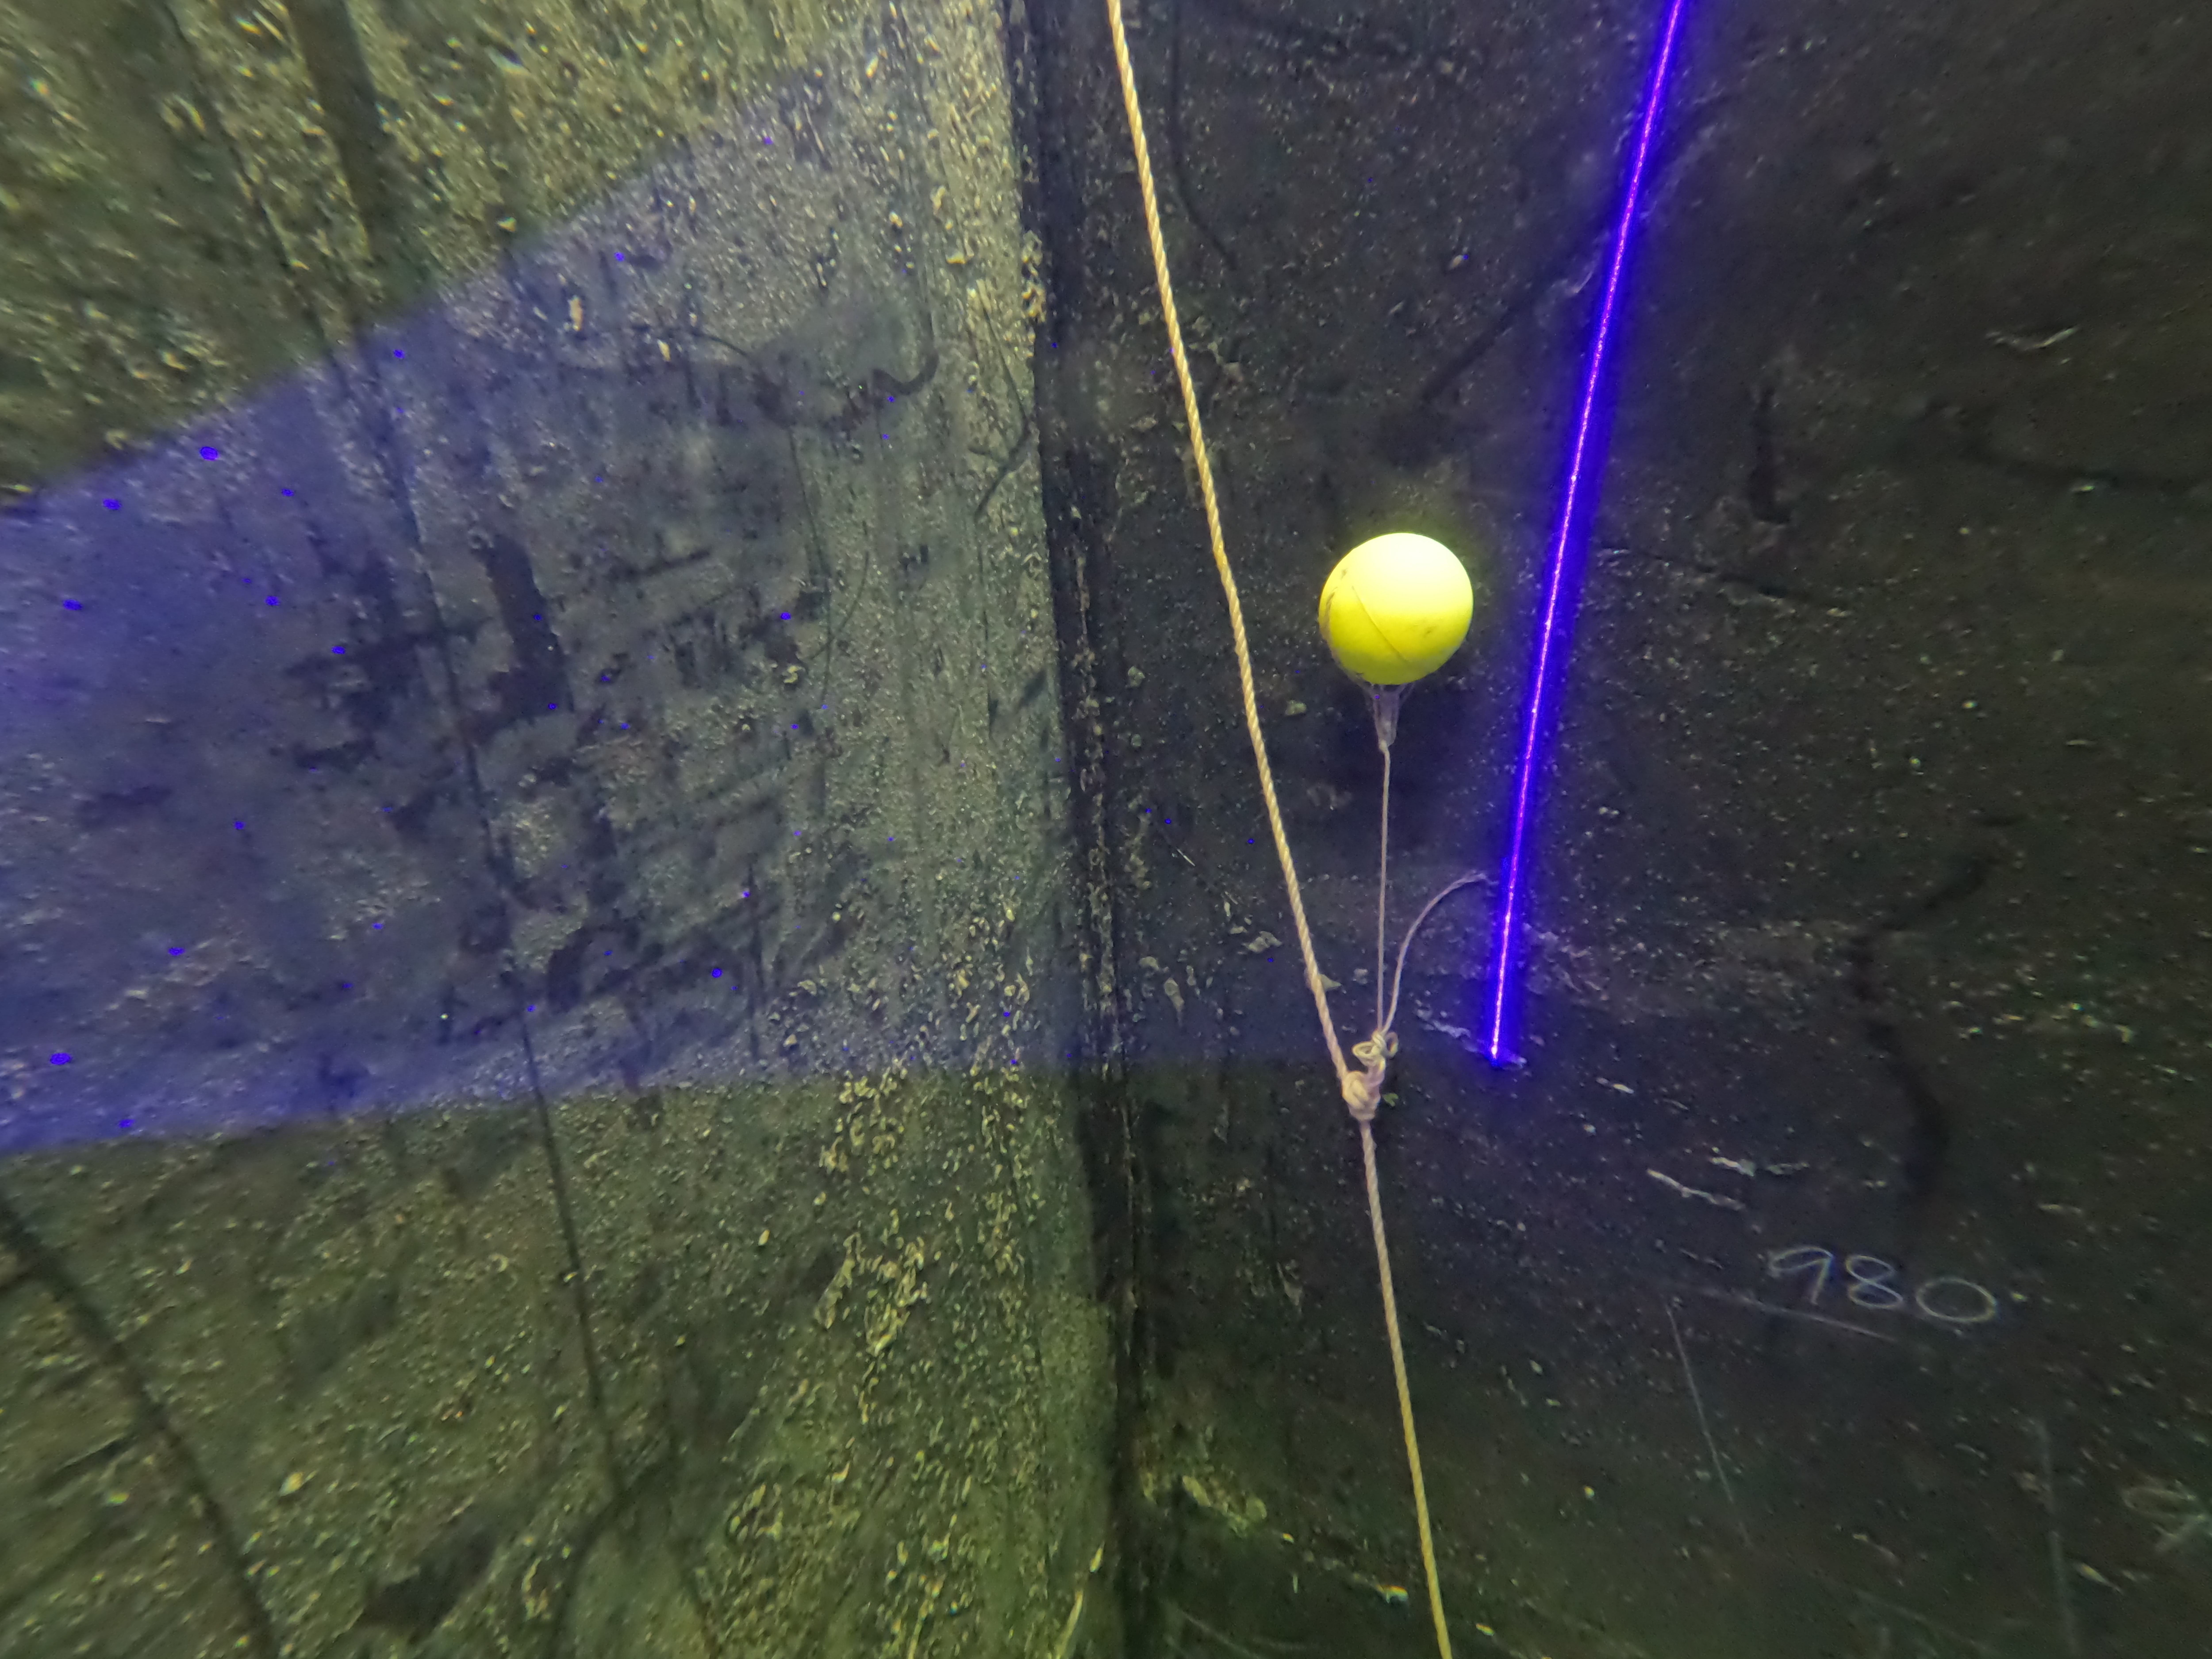

980

Supplement: Supplementary file 315 [file G0031108.pdf › 4/G0031108.pdf]

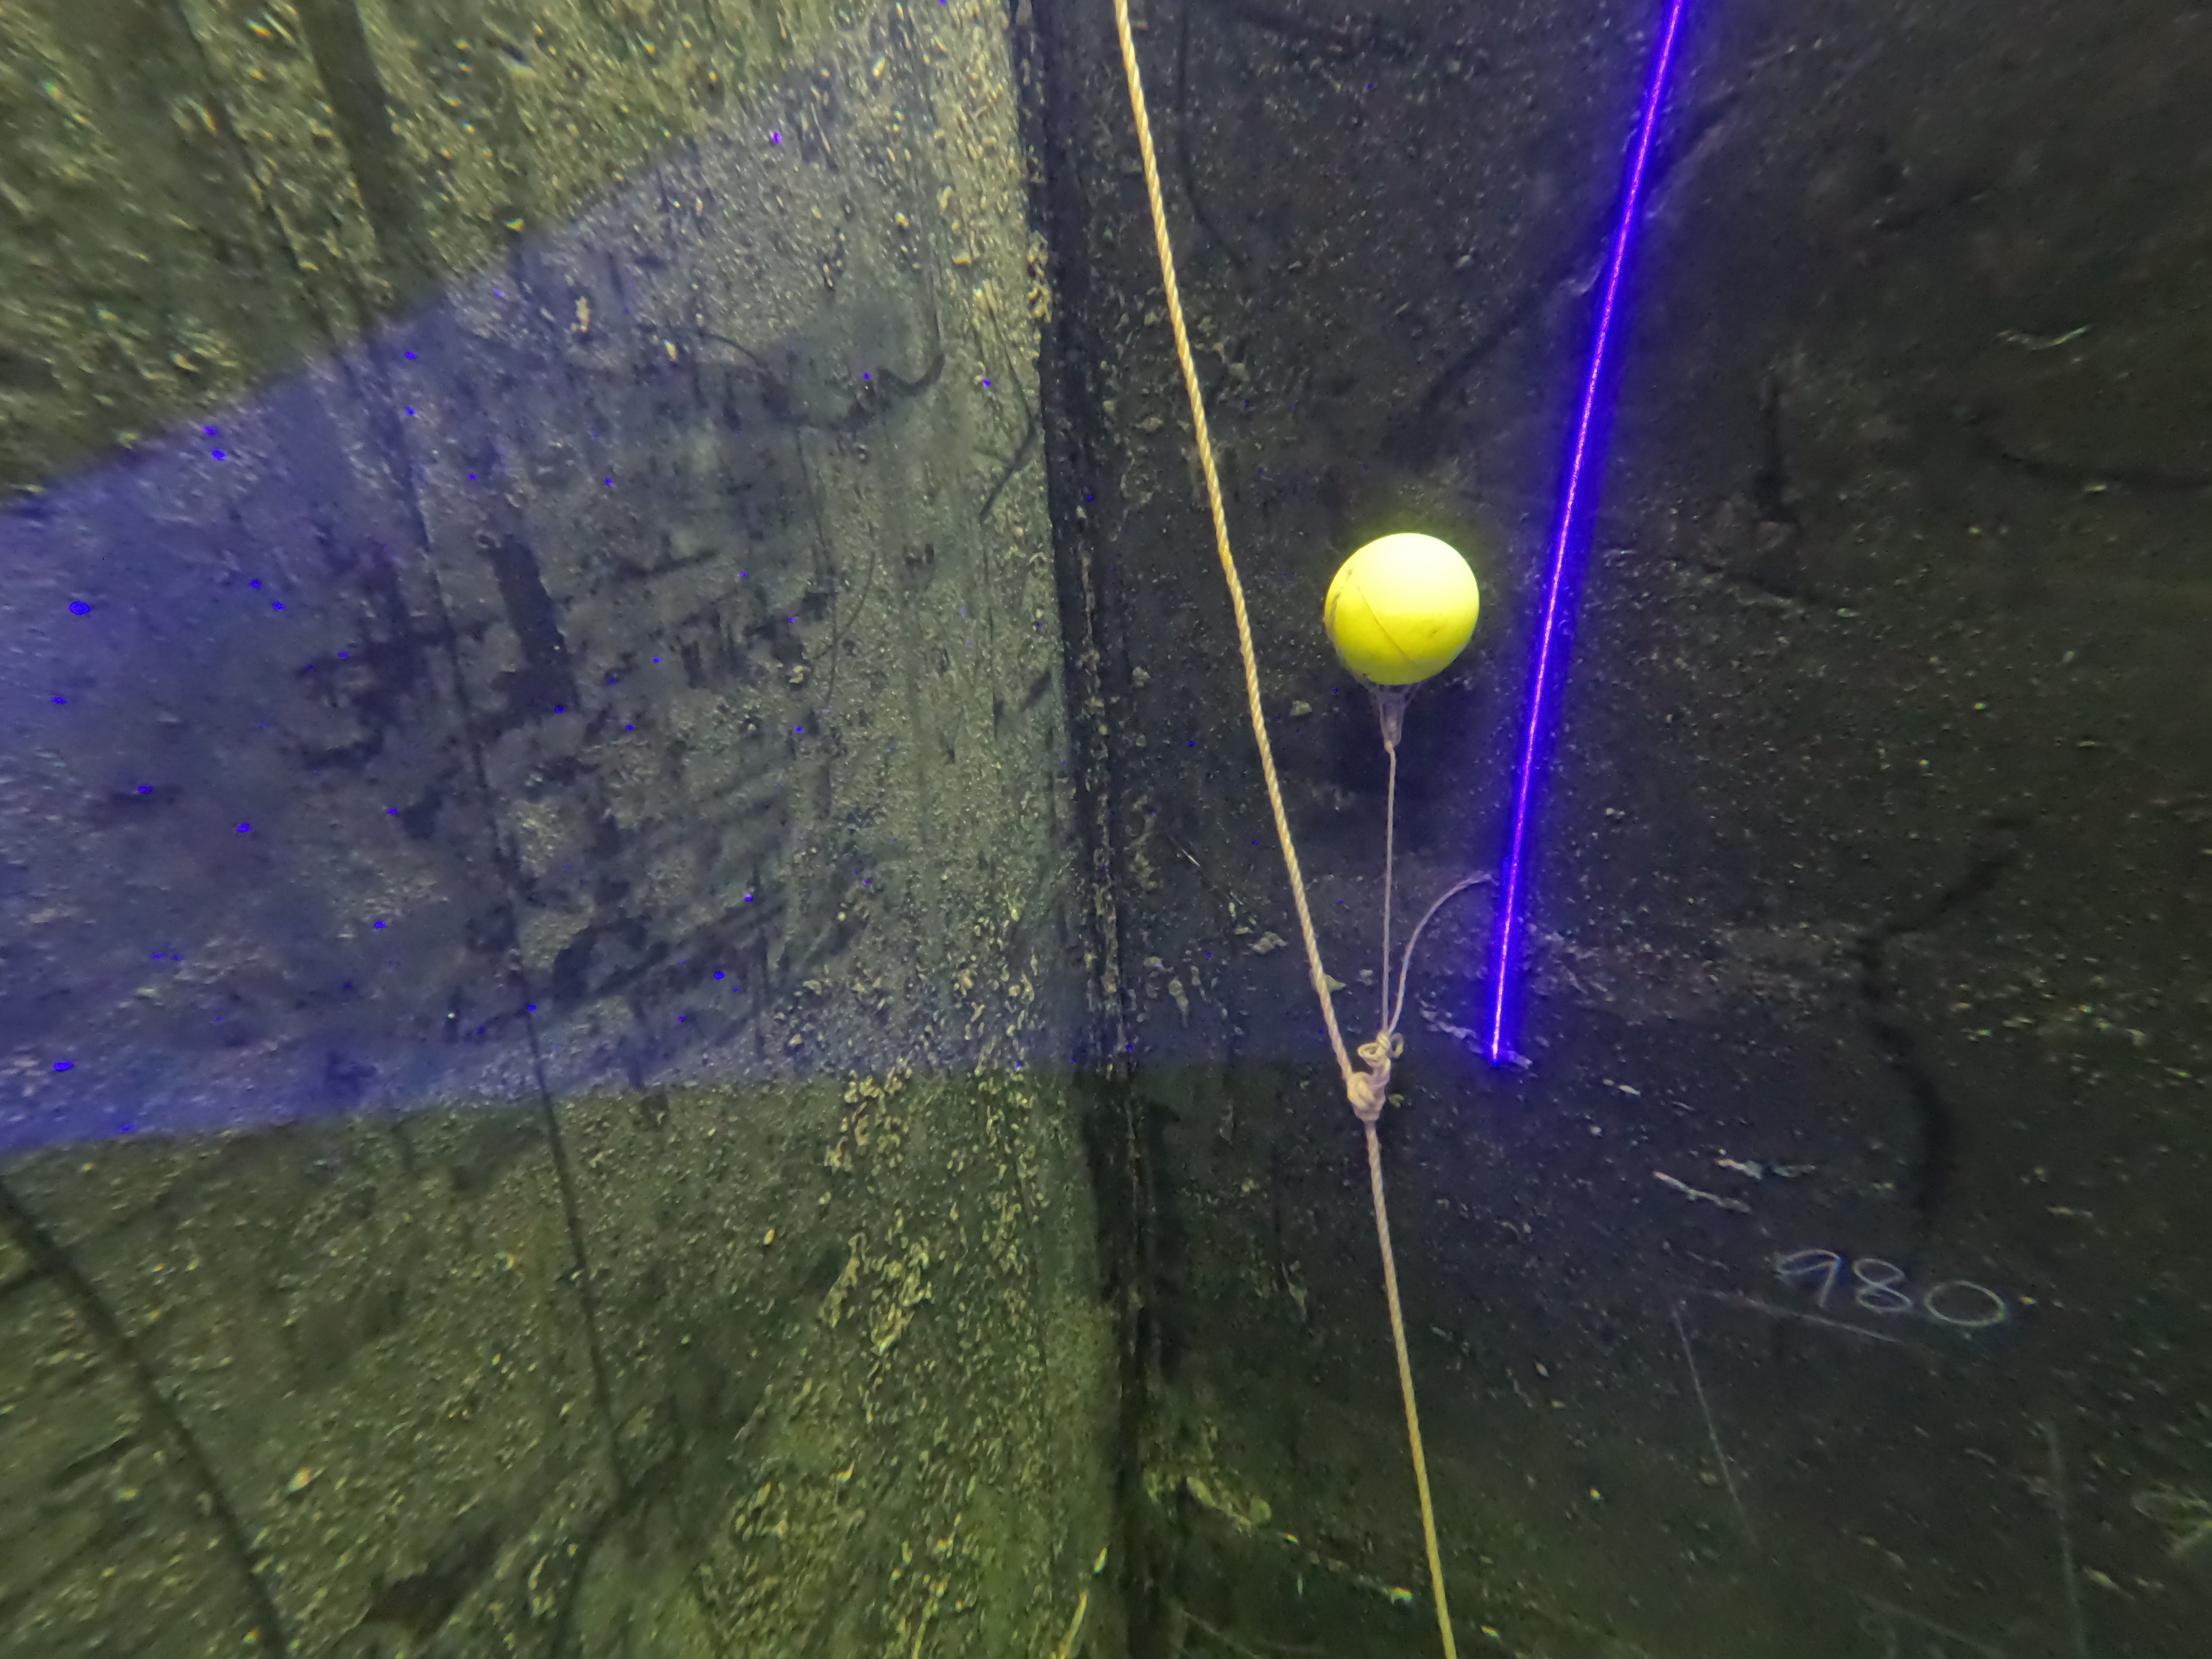

980

Supplement: Supplementary file 316 [file G0031109.pdf › 4/G0031109.pdf]

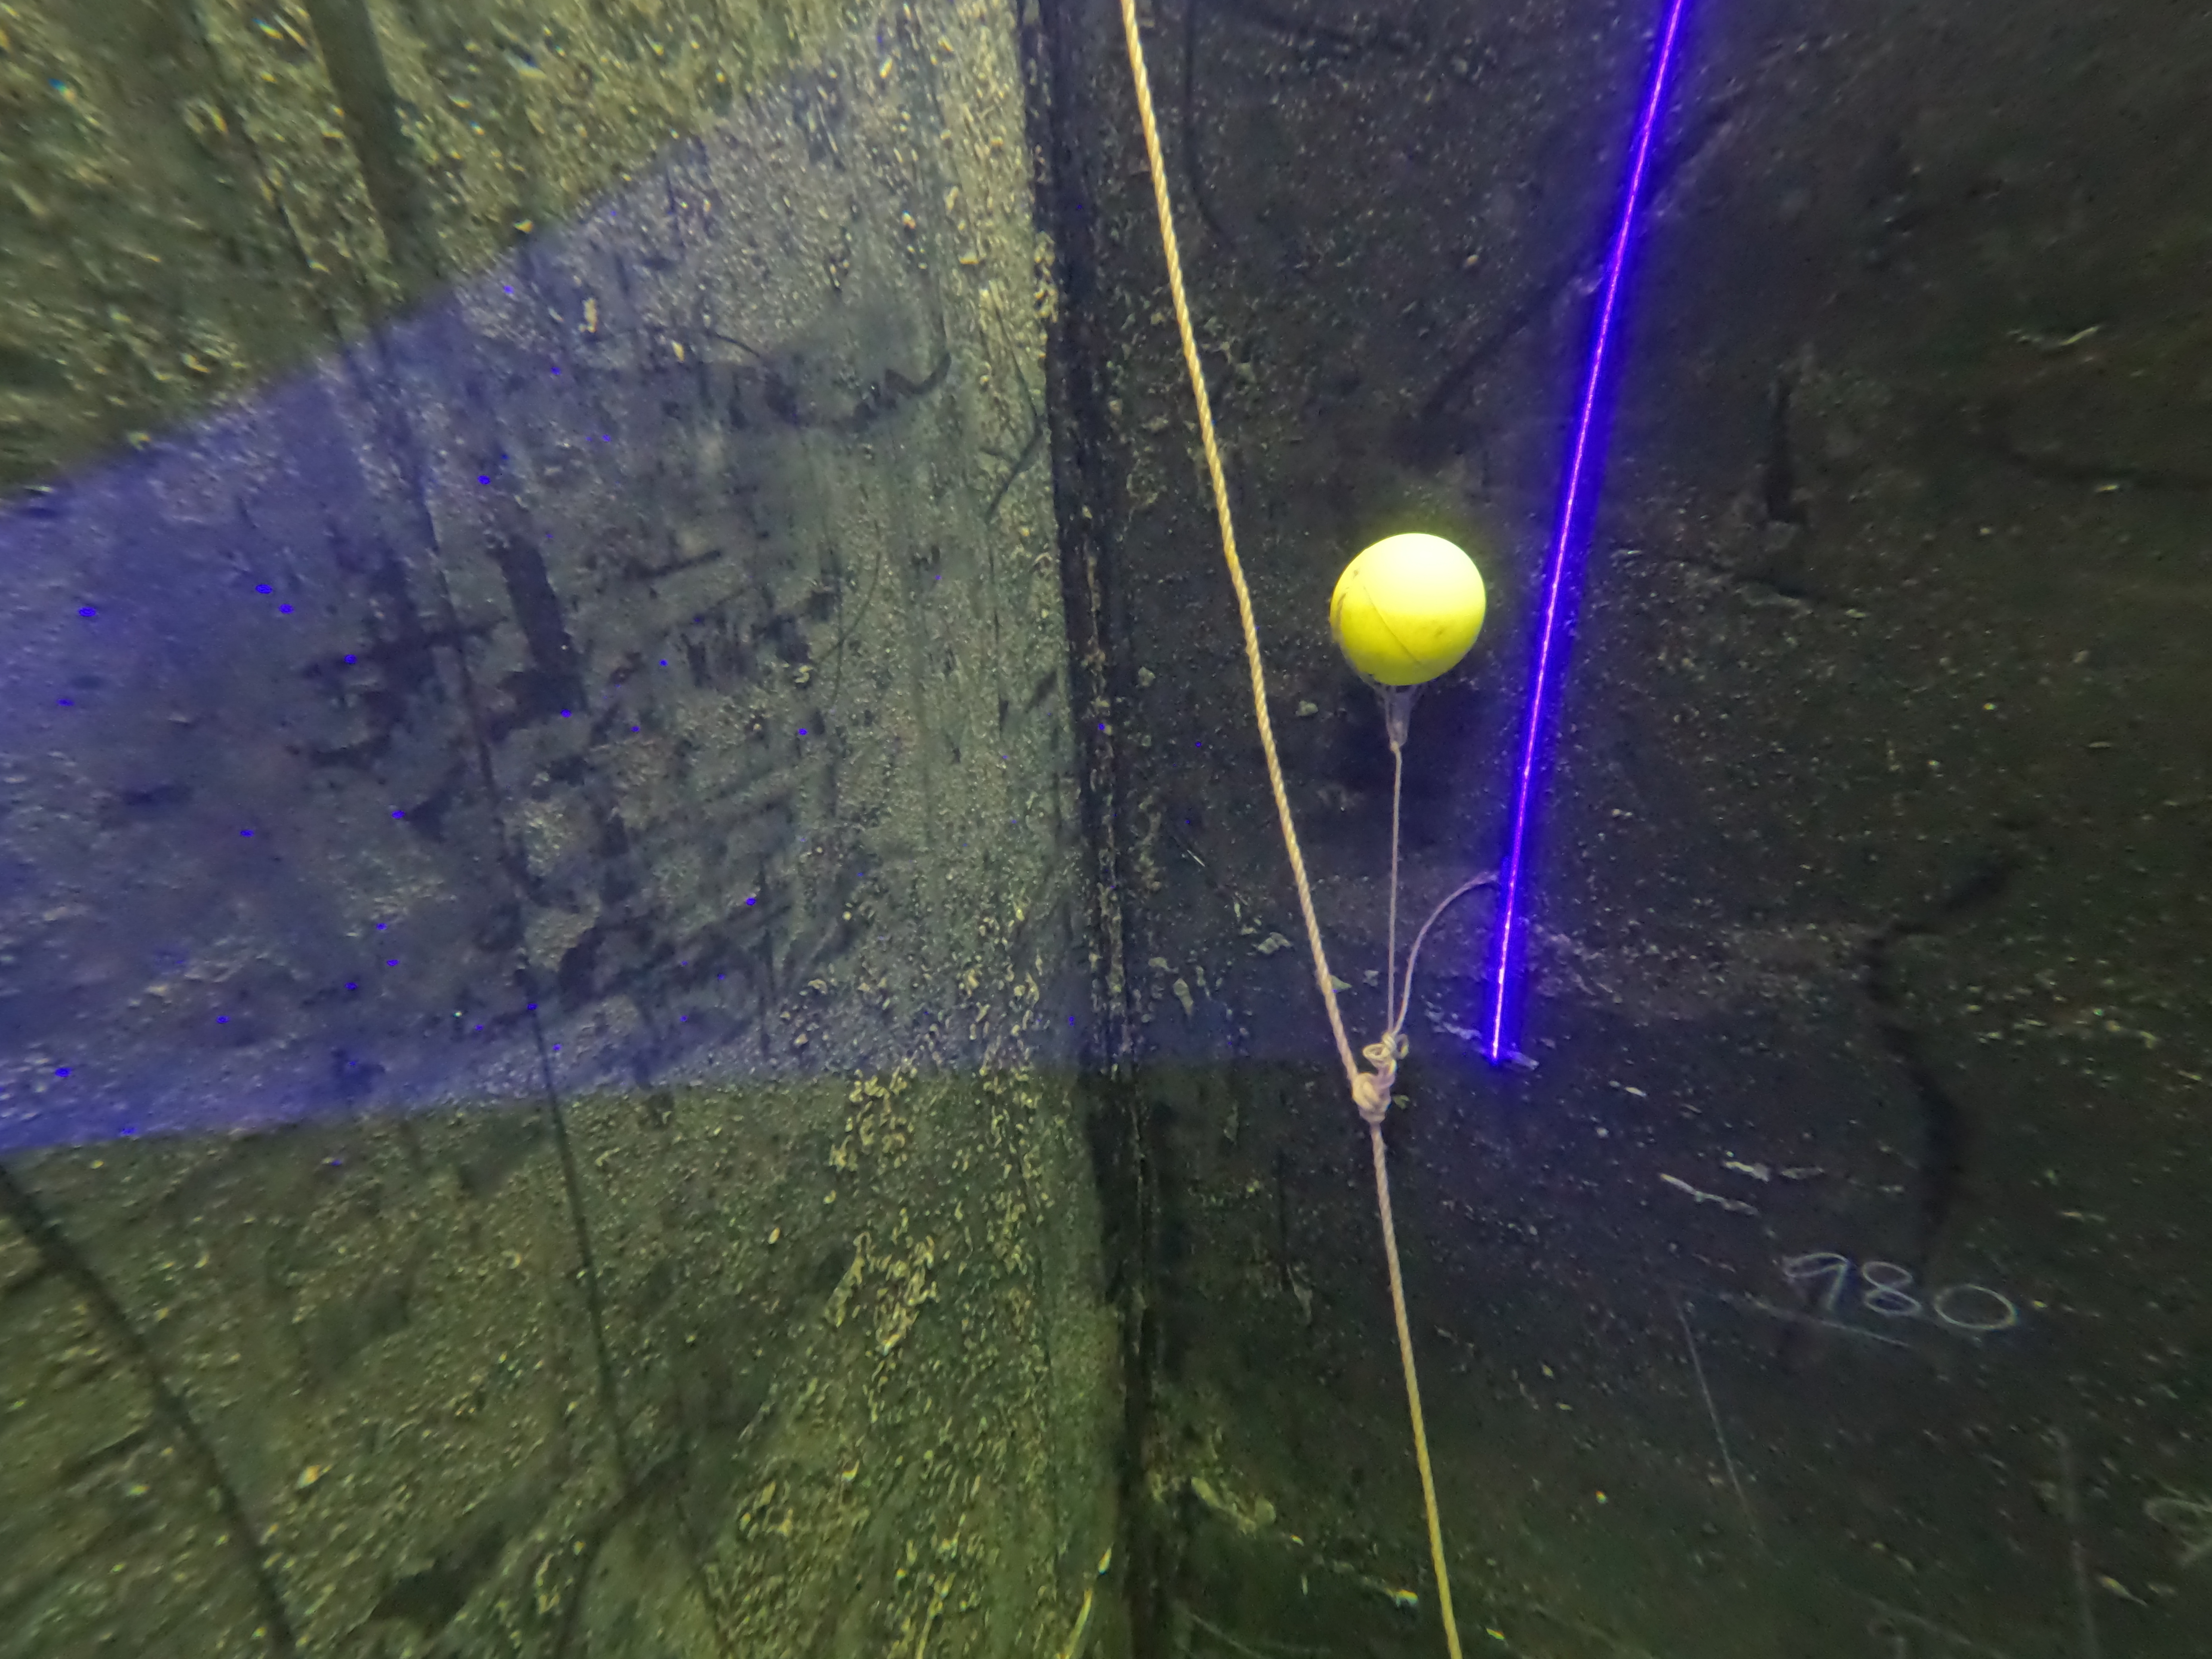

980

Supplement: Supplementary file 317 [file G0031110.pdf › 4/G0031110.pdf]

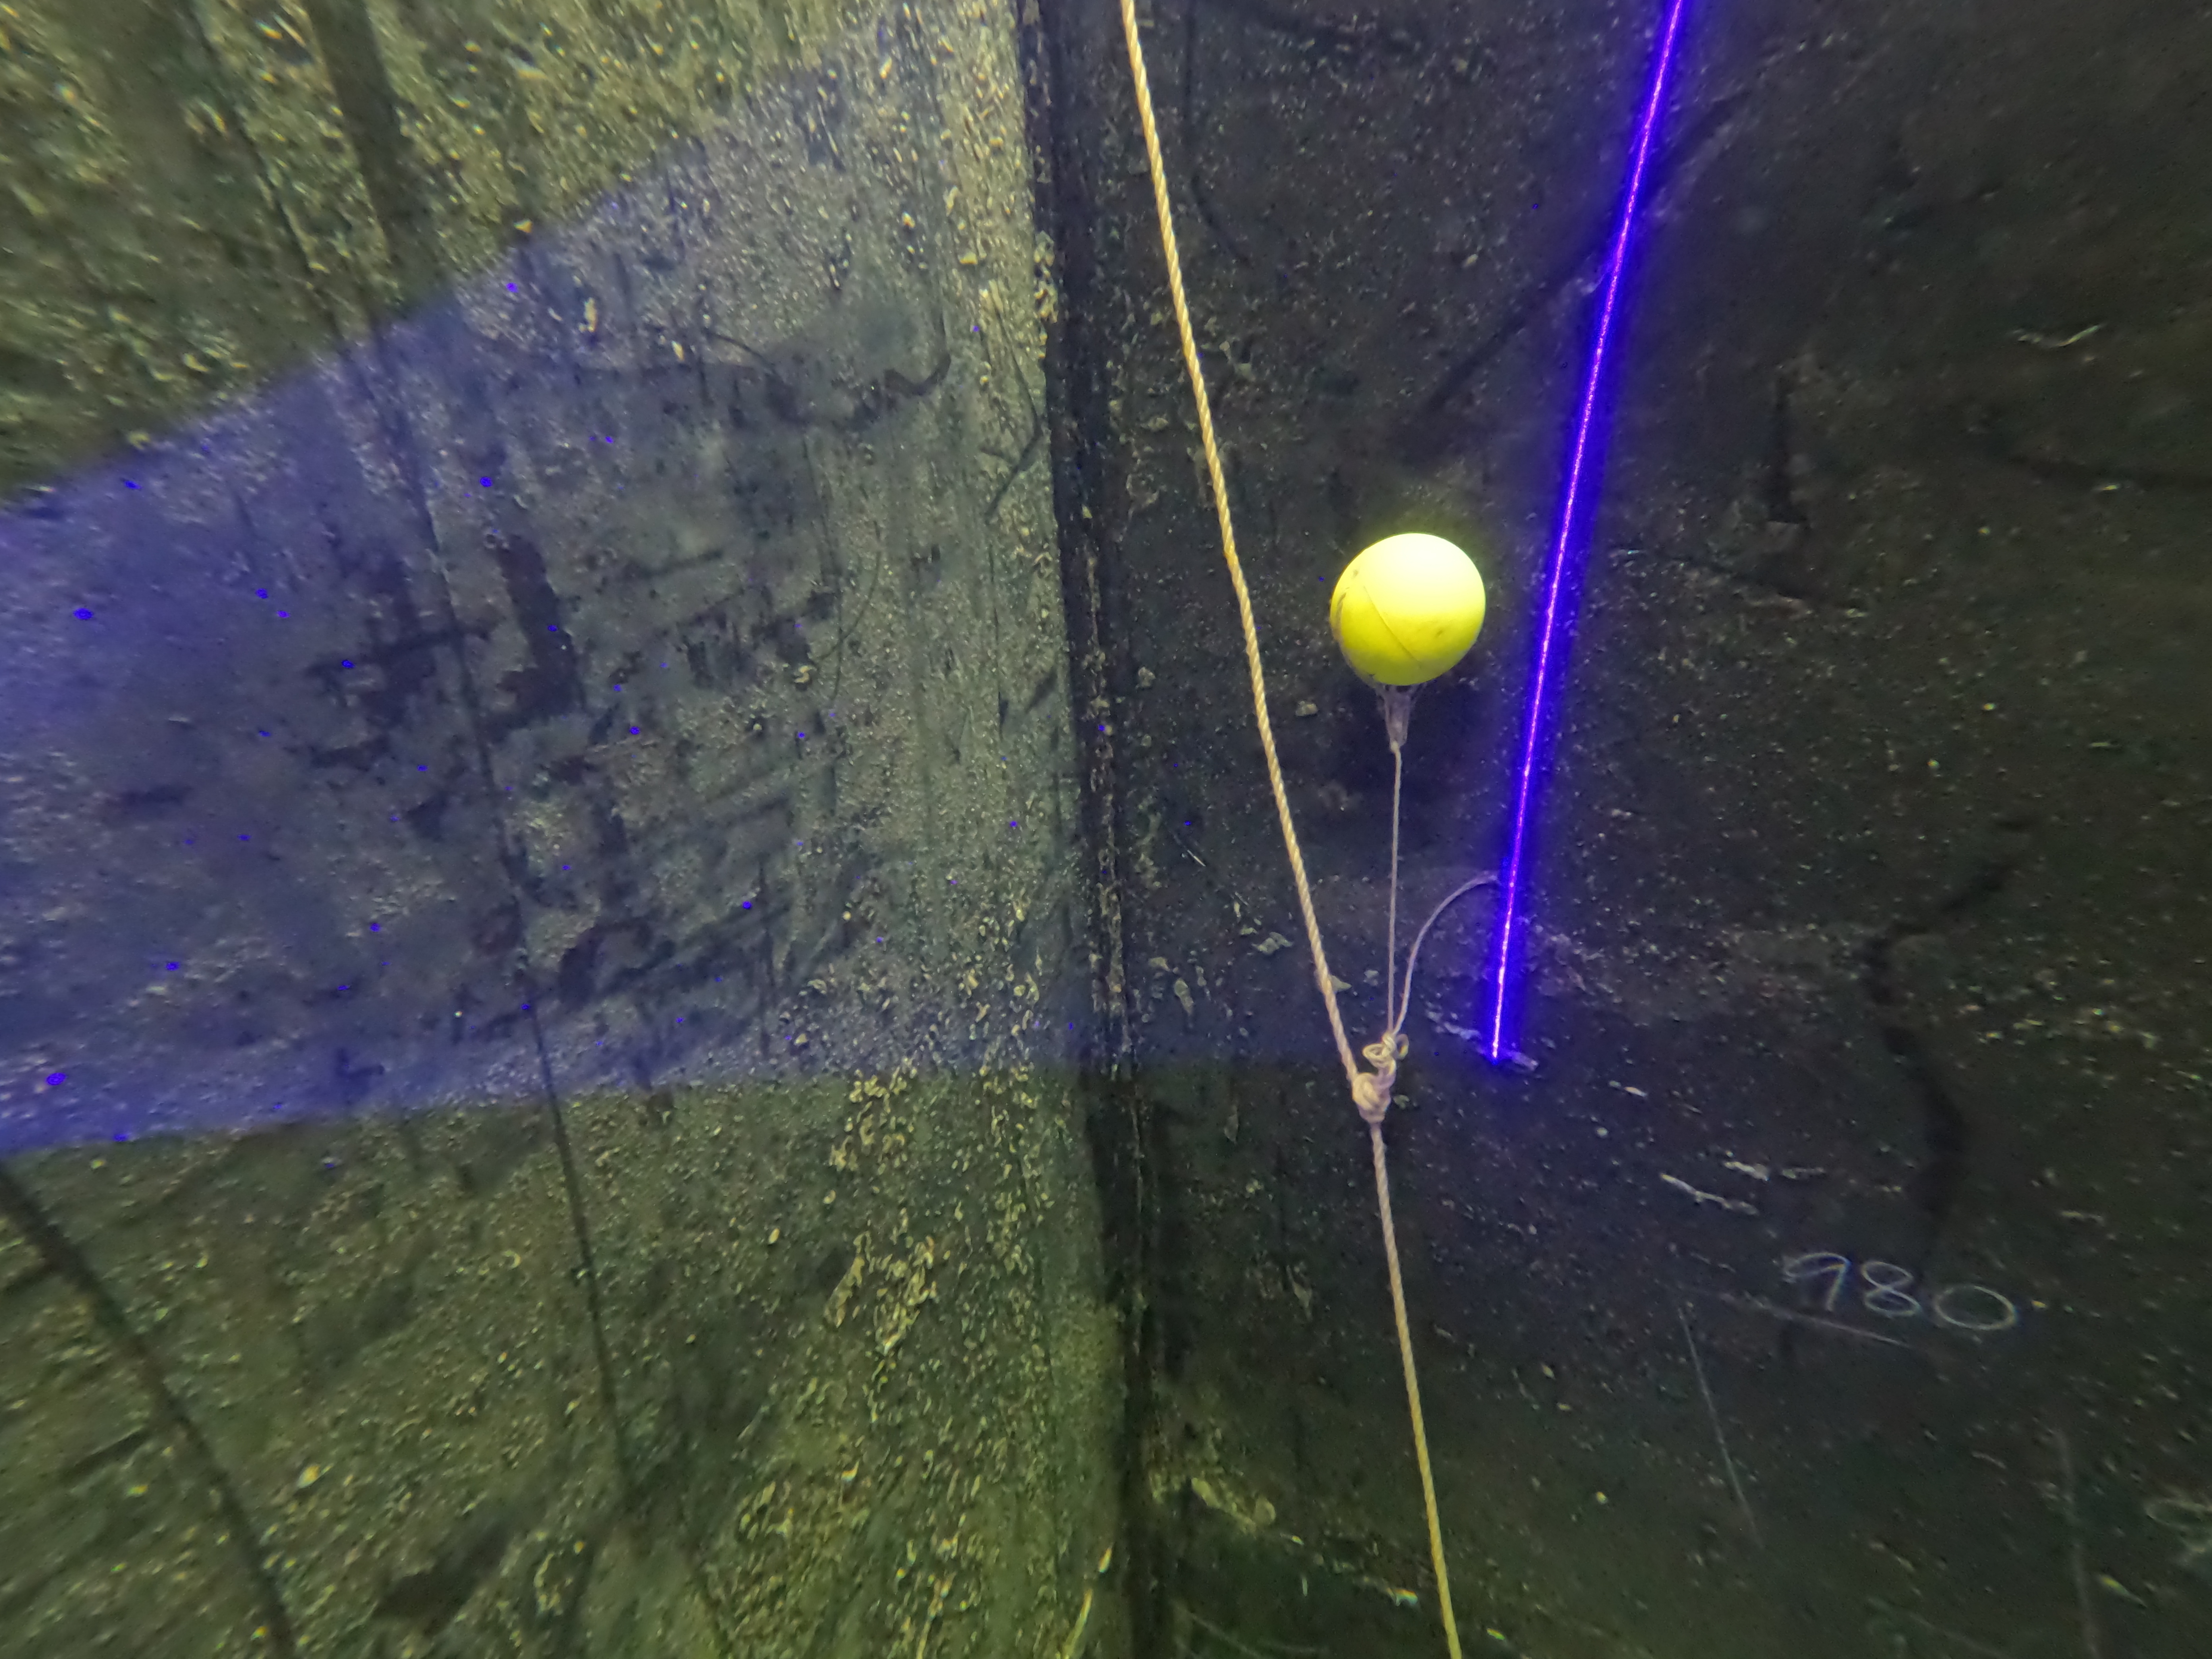

980

Supplement: Supplementary file 318 [file G0031111.pdf › 4/G0031111.pdf]

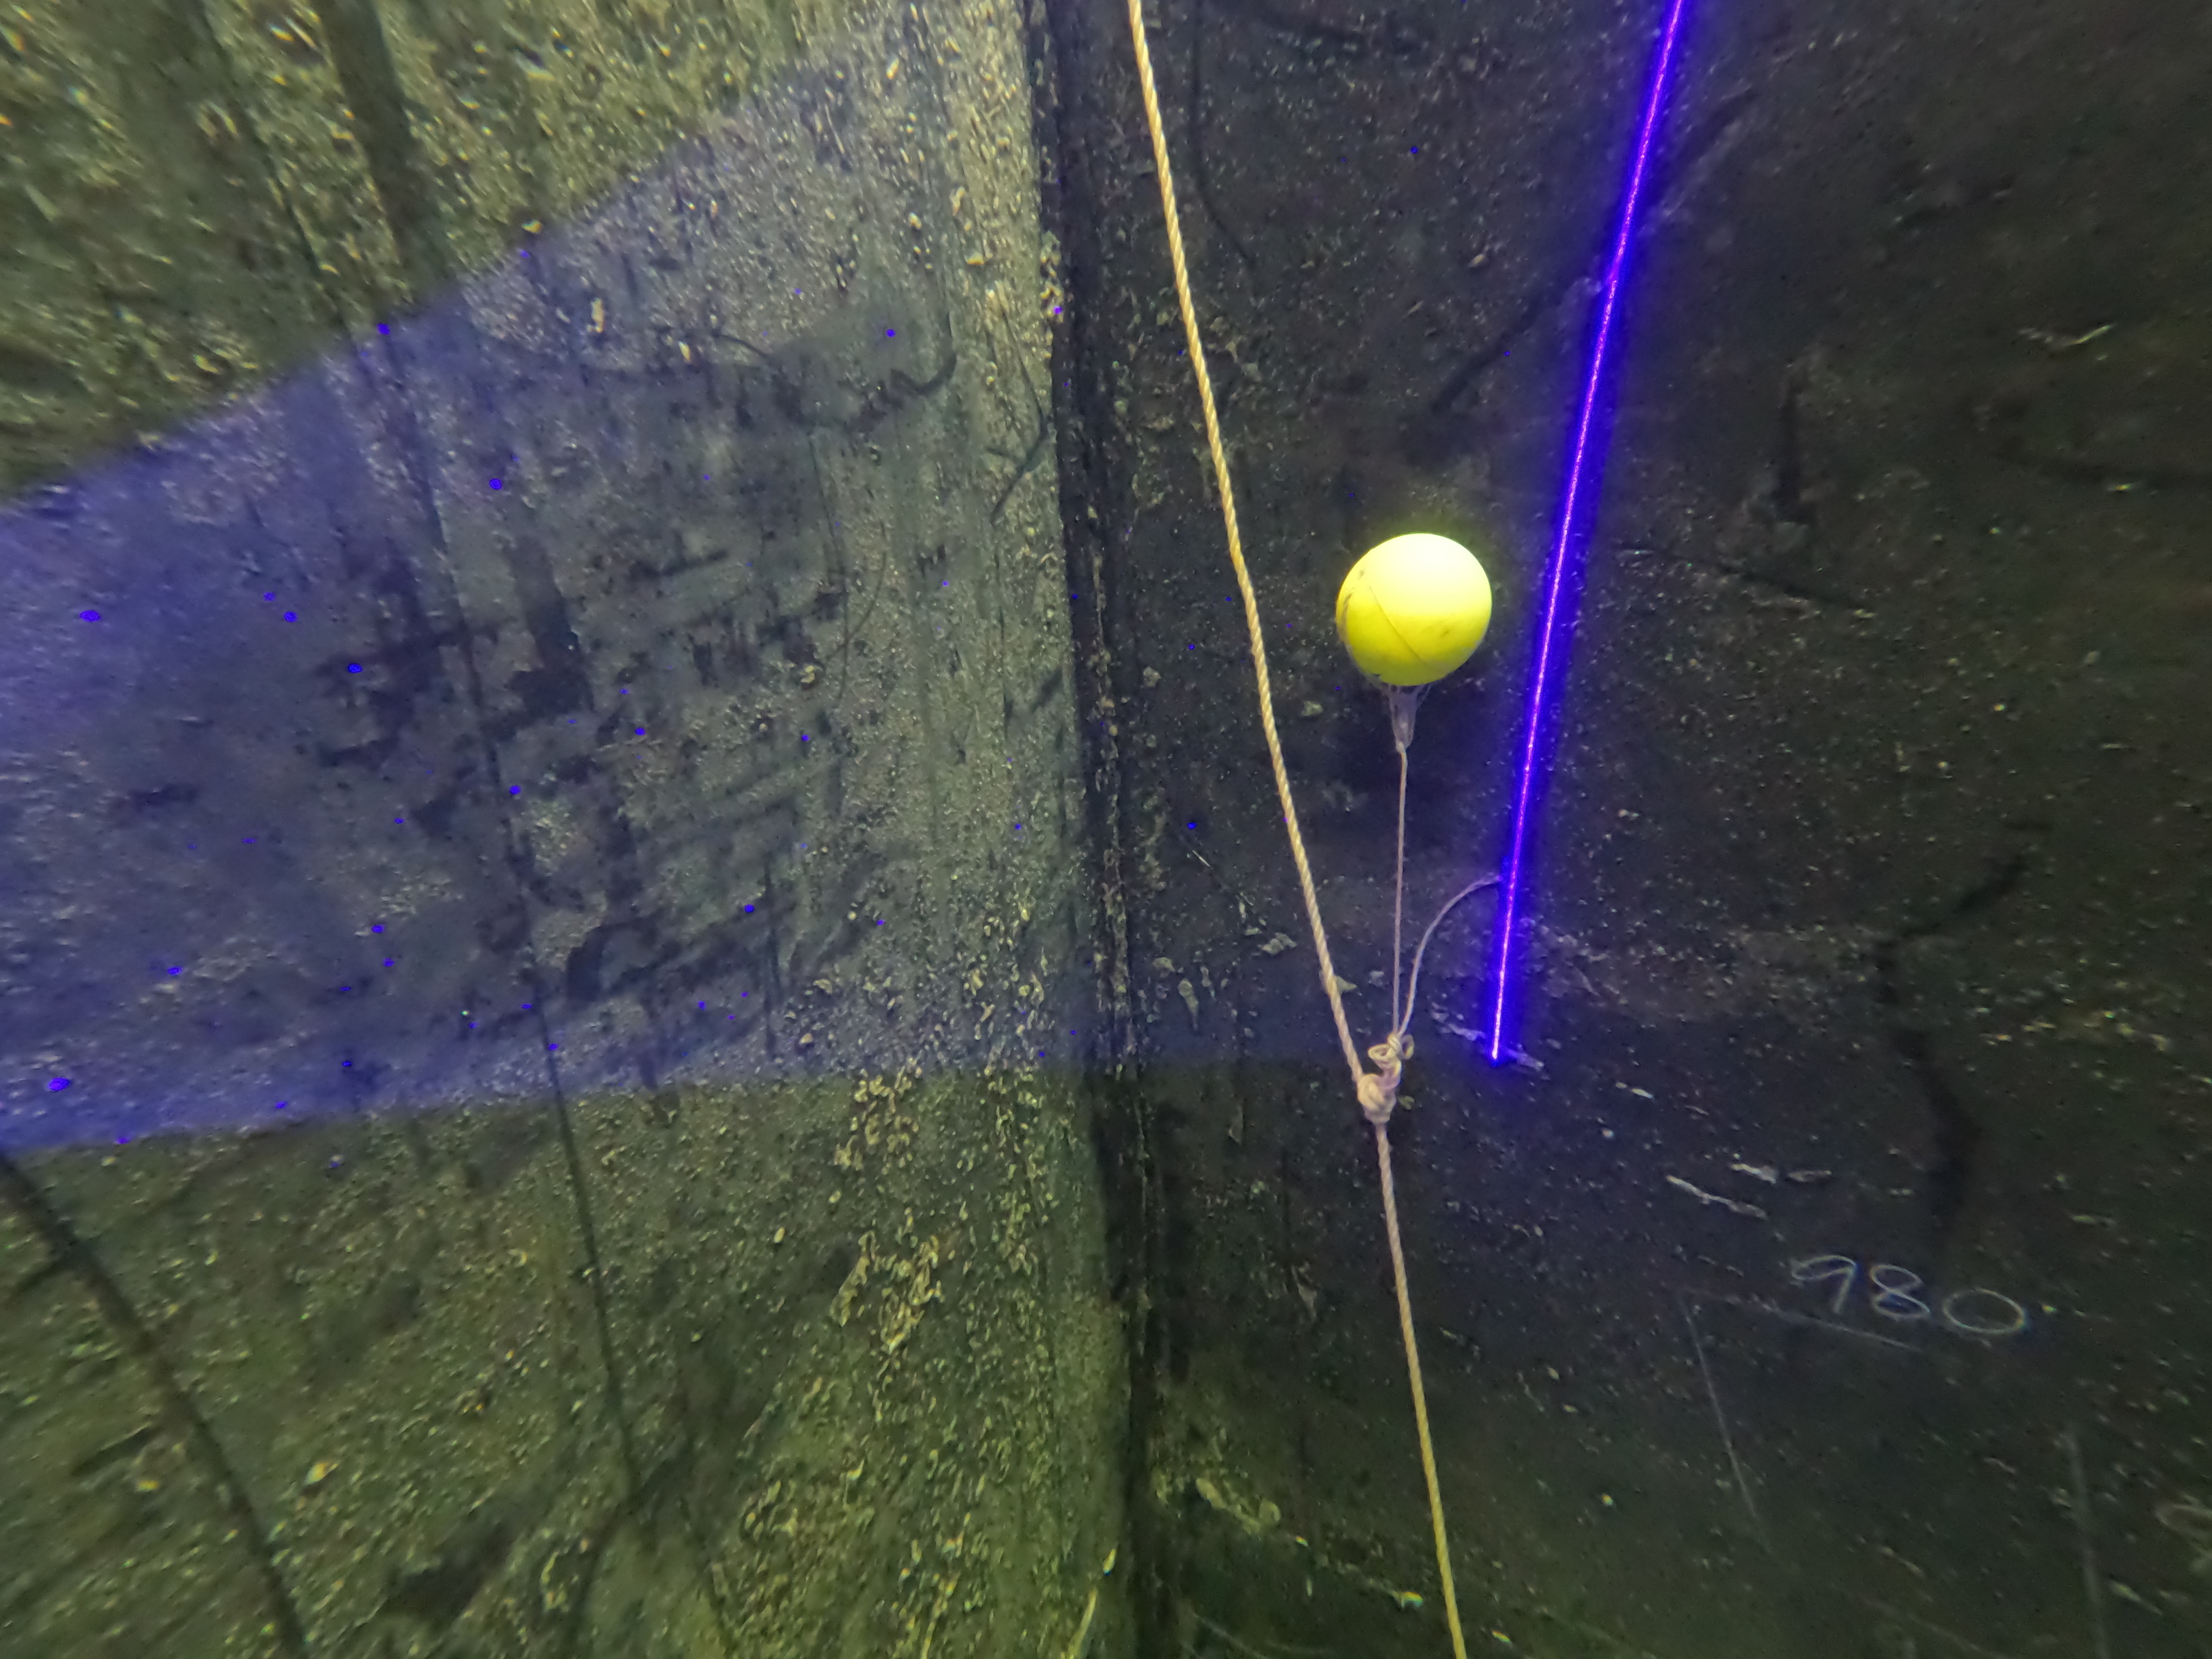

980

Supplement: Supplementary file 319 [file G0031112.pdf › 4/G0031112.pdf]

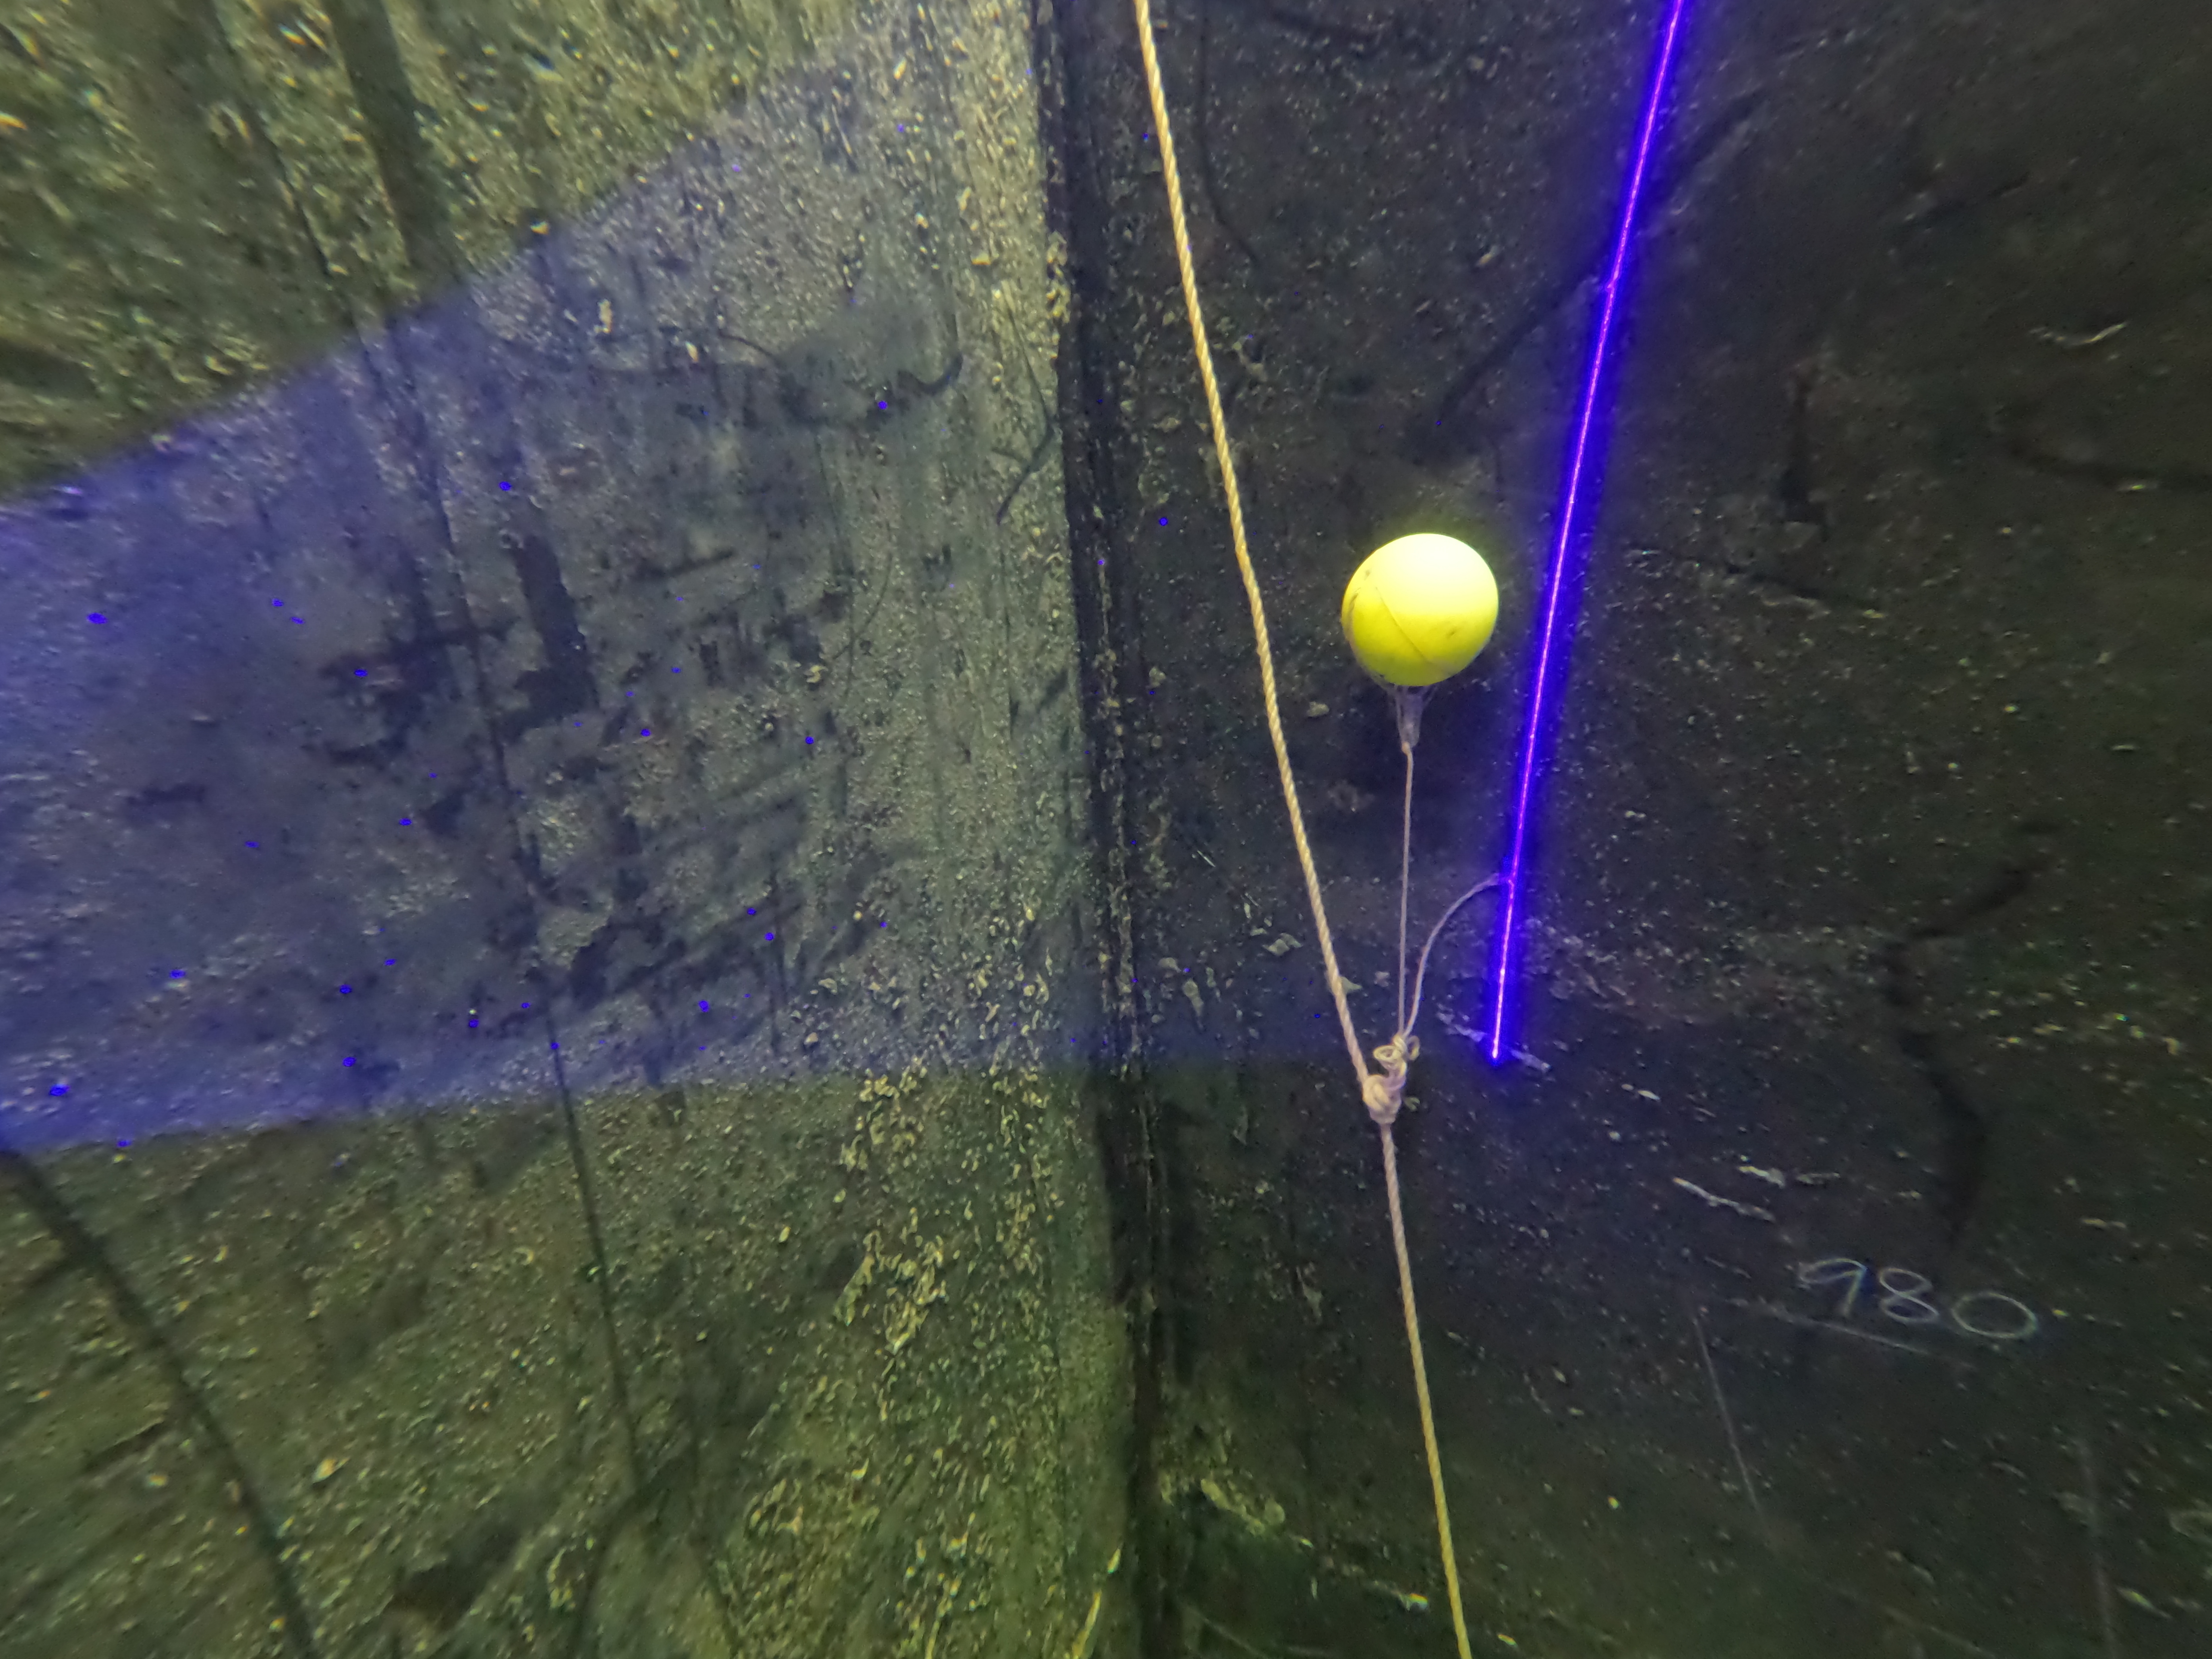

980

Supplement: Supplementary file 320 [file G0031113.pdf › 4/G0031113.pdf]

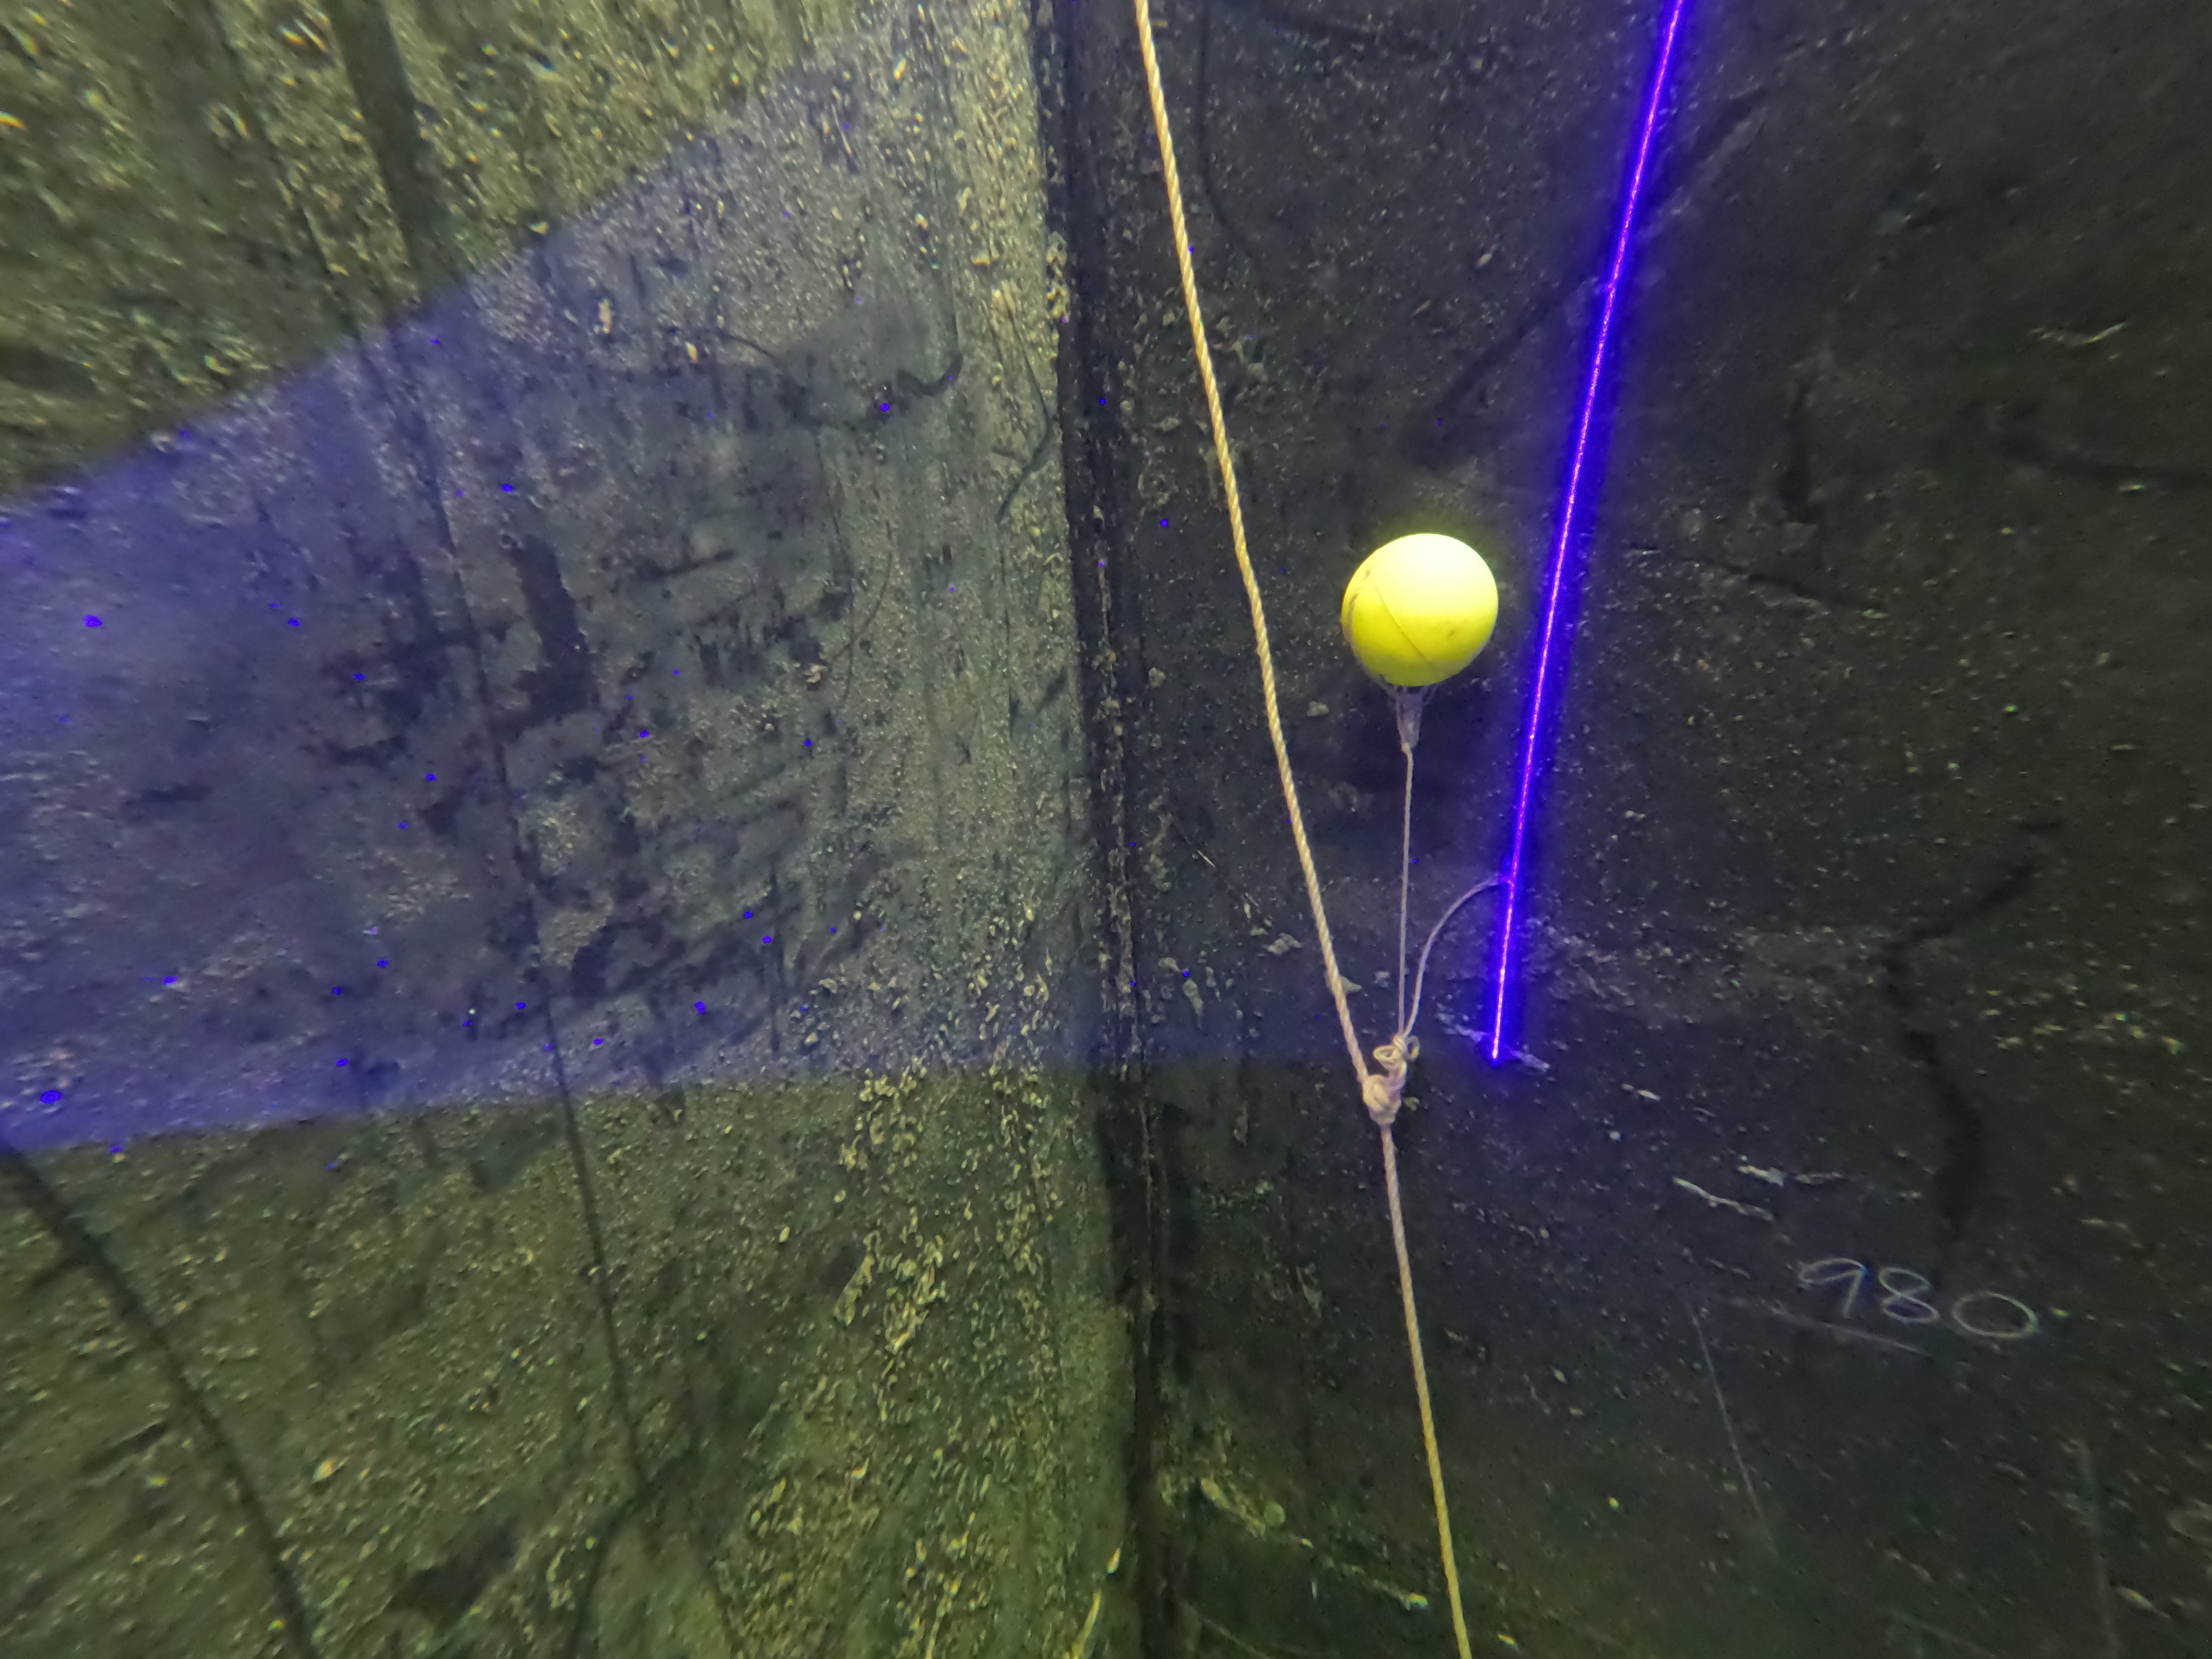

980

Supplement: Supplementary file 321 [file G0031114.pdf › 4/G0031114.pdf]

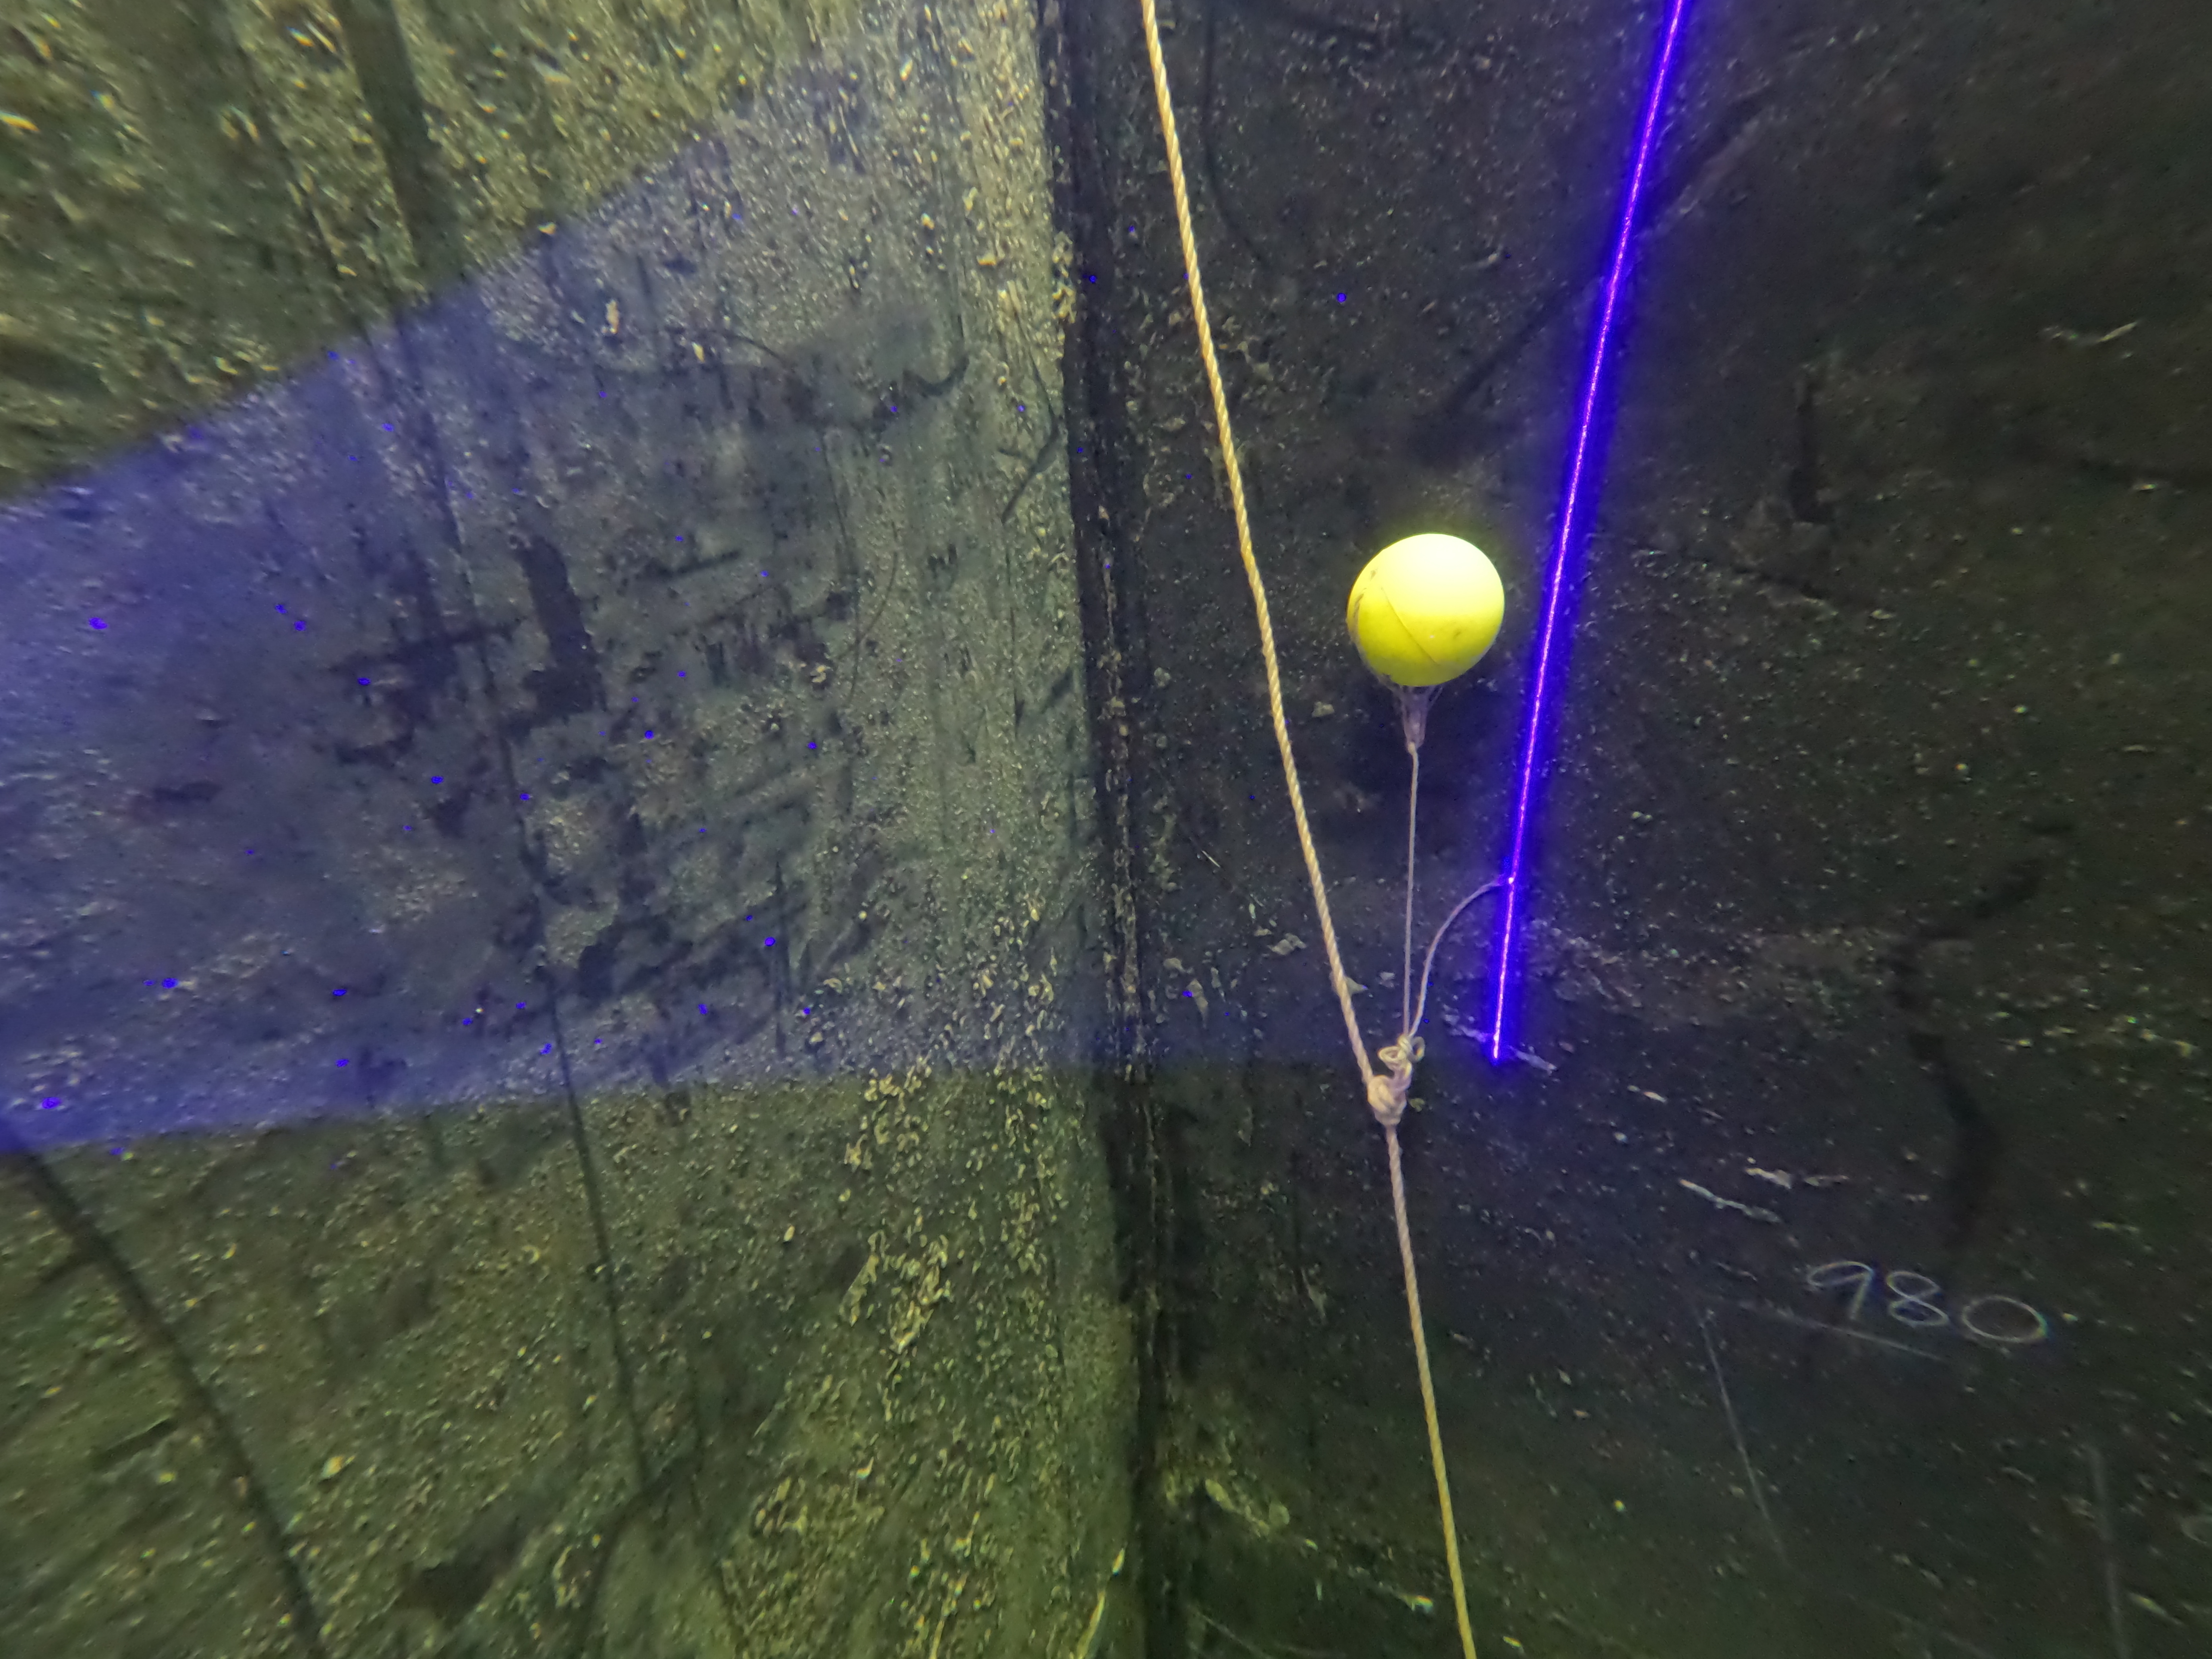

980

Supplement: Supplementary file 322 [file G0031115.pdf › 4/G0031115.pdf]

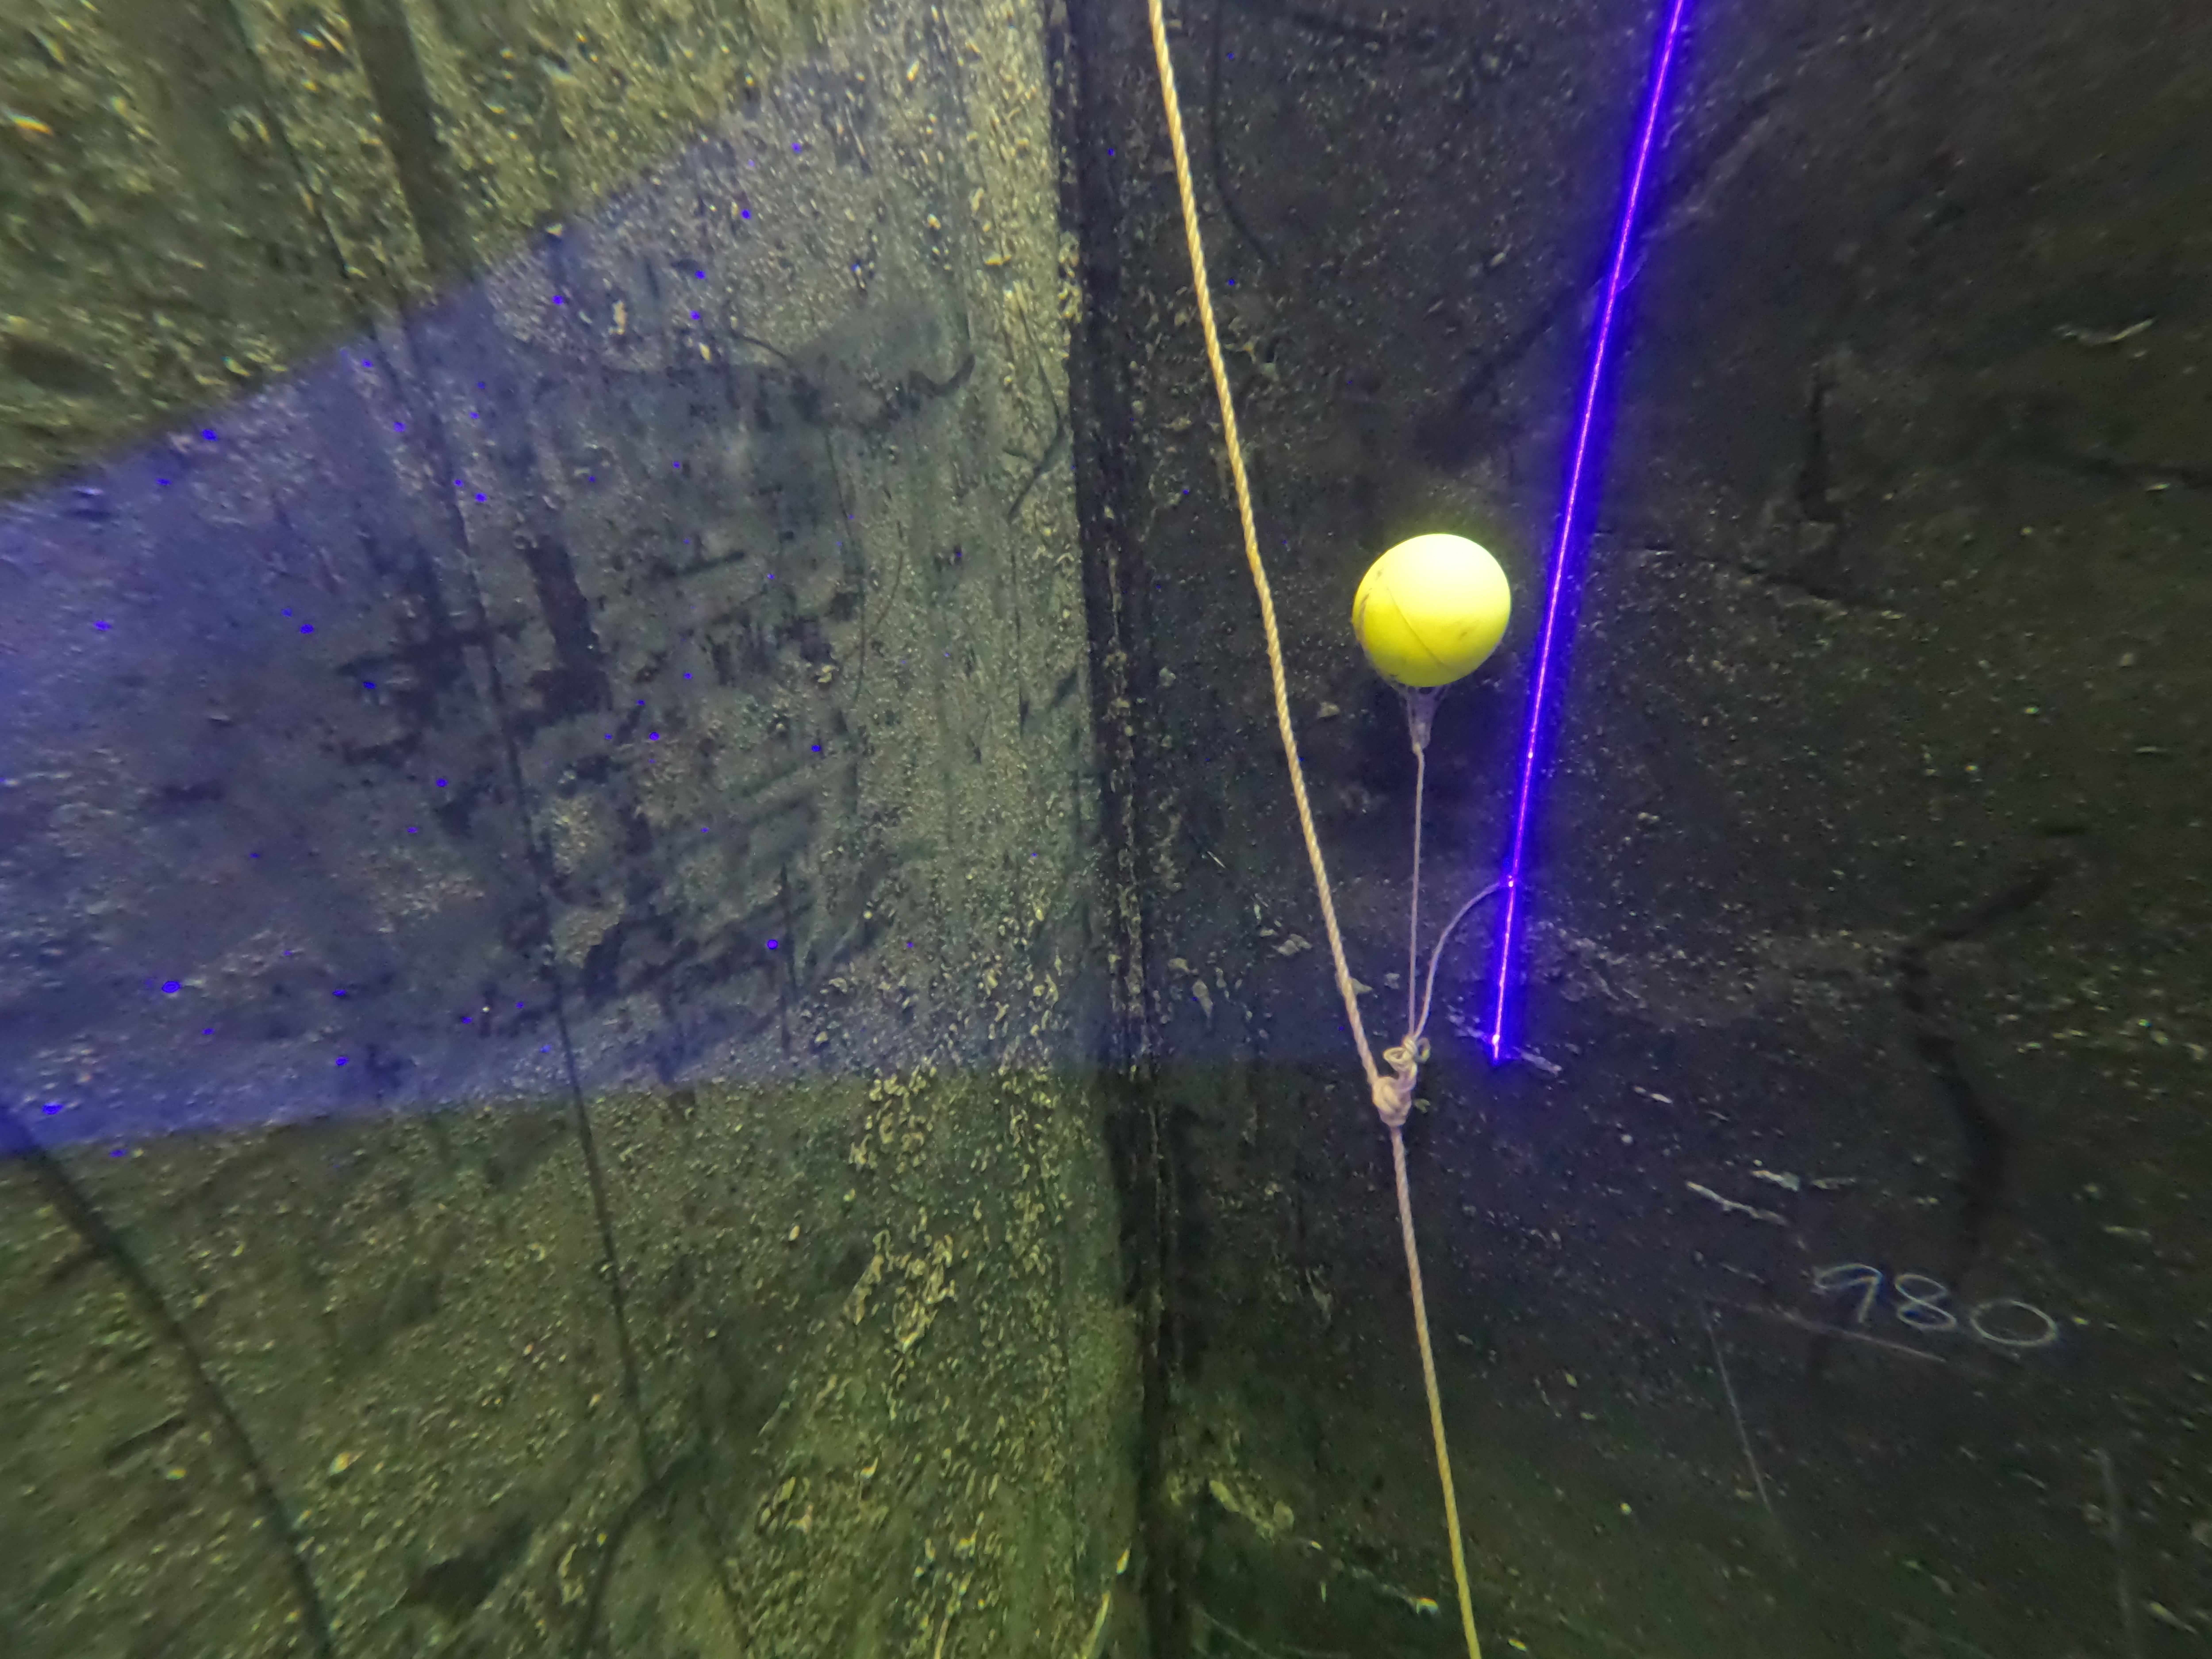

980

Supplement: Supplementary file 323 [file G0031116.pdf › 4/G0031116.pdf]

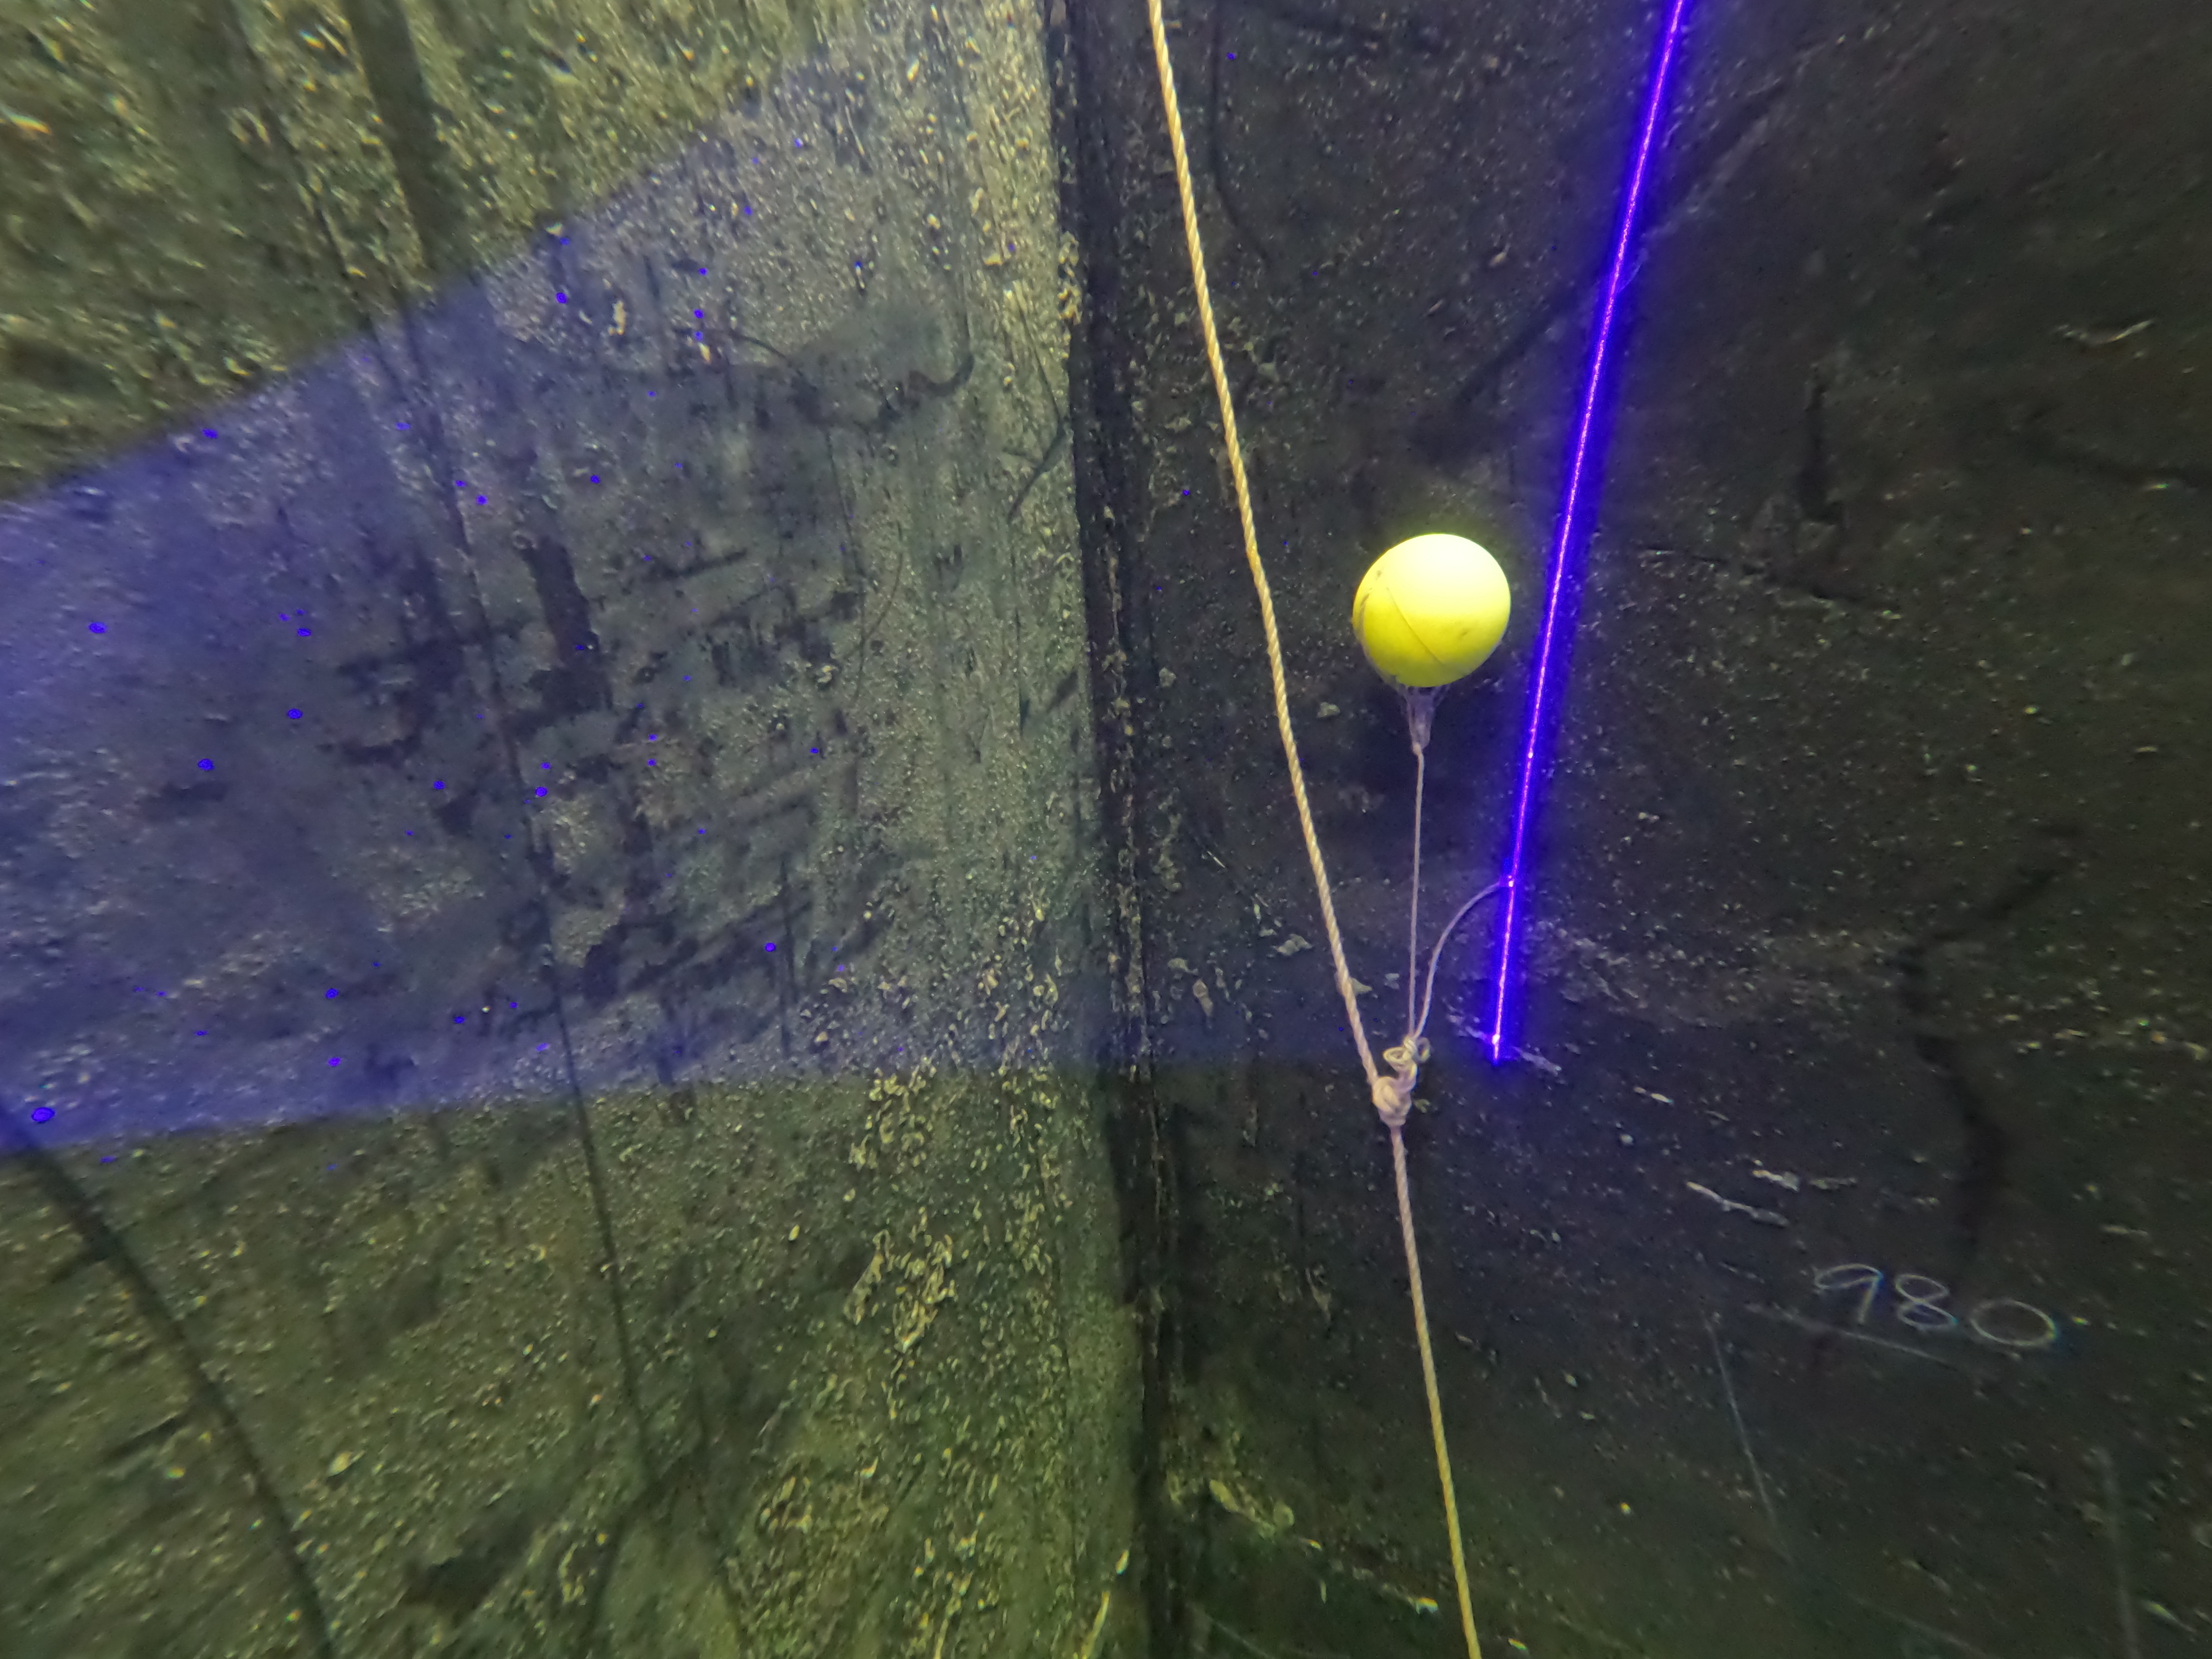

980

Supplement: Supplementary file 324 [file G0031117.pdf › 4/G0031117.pdf]

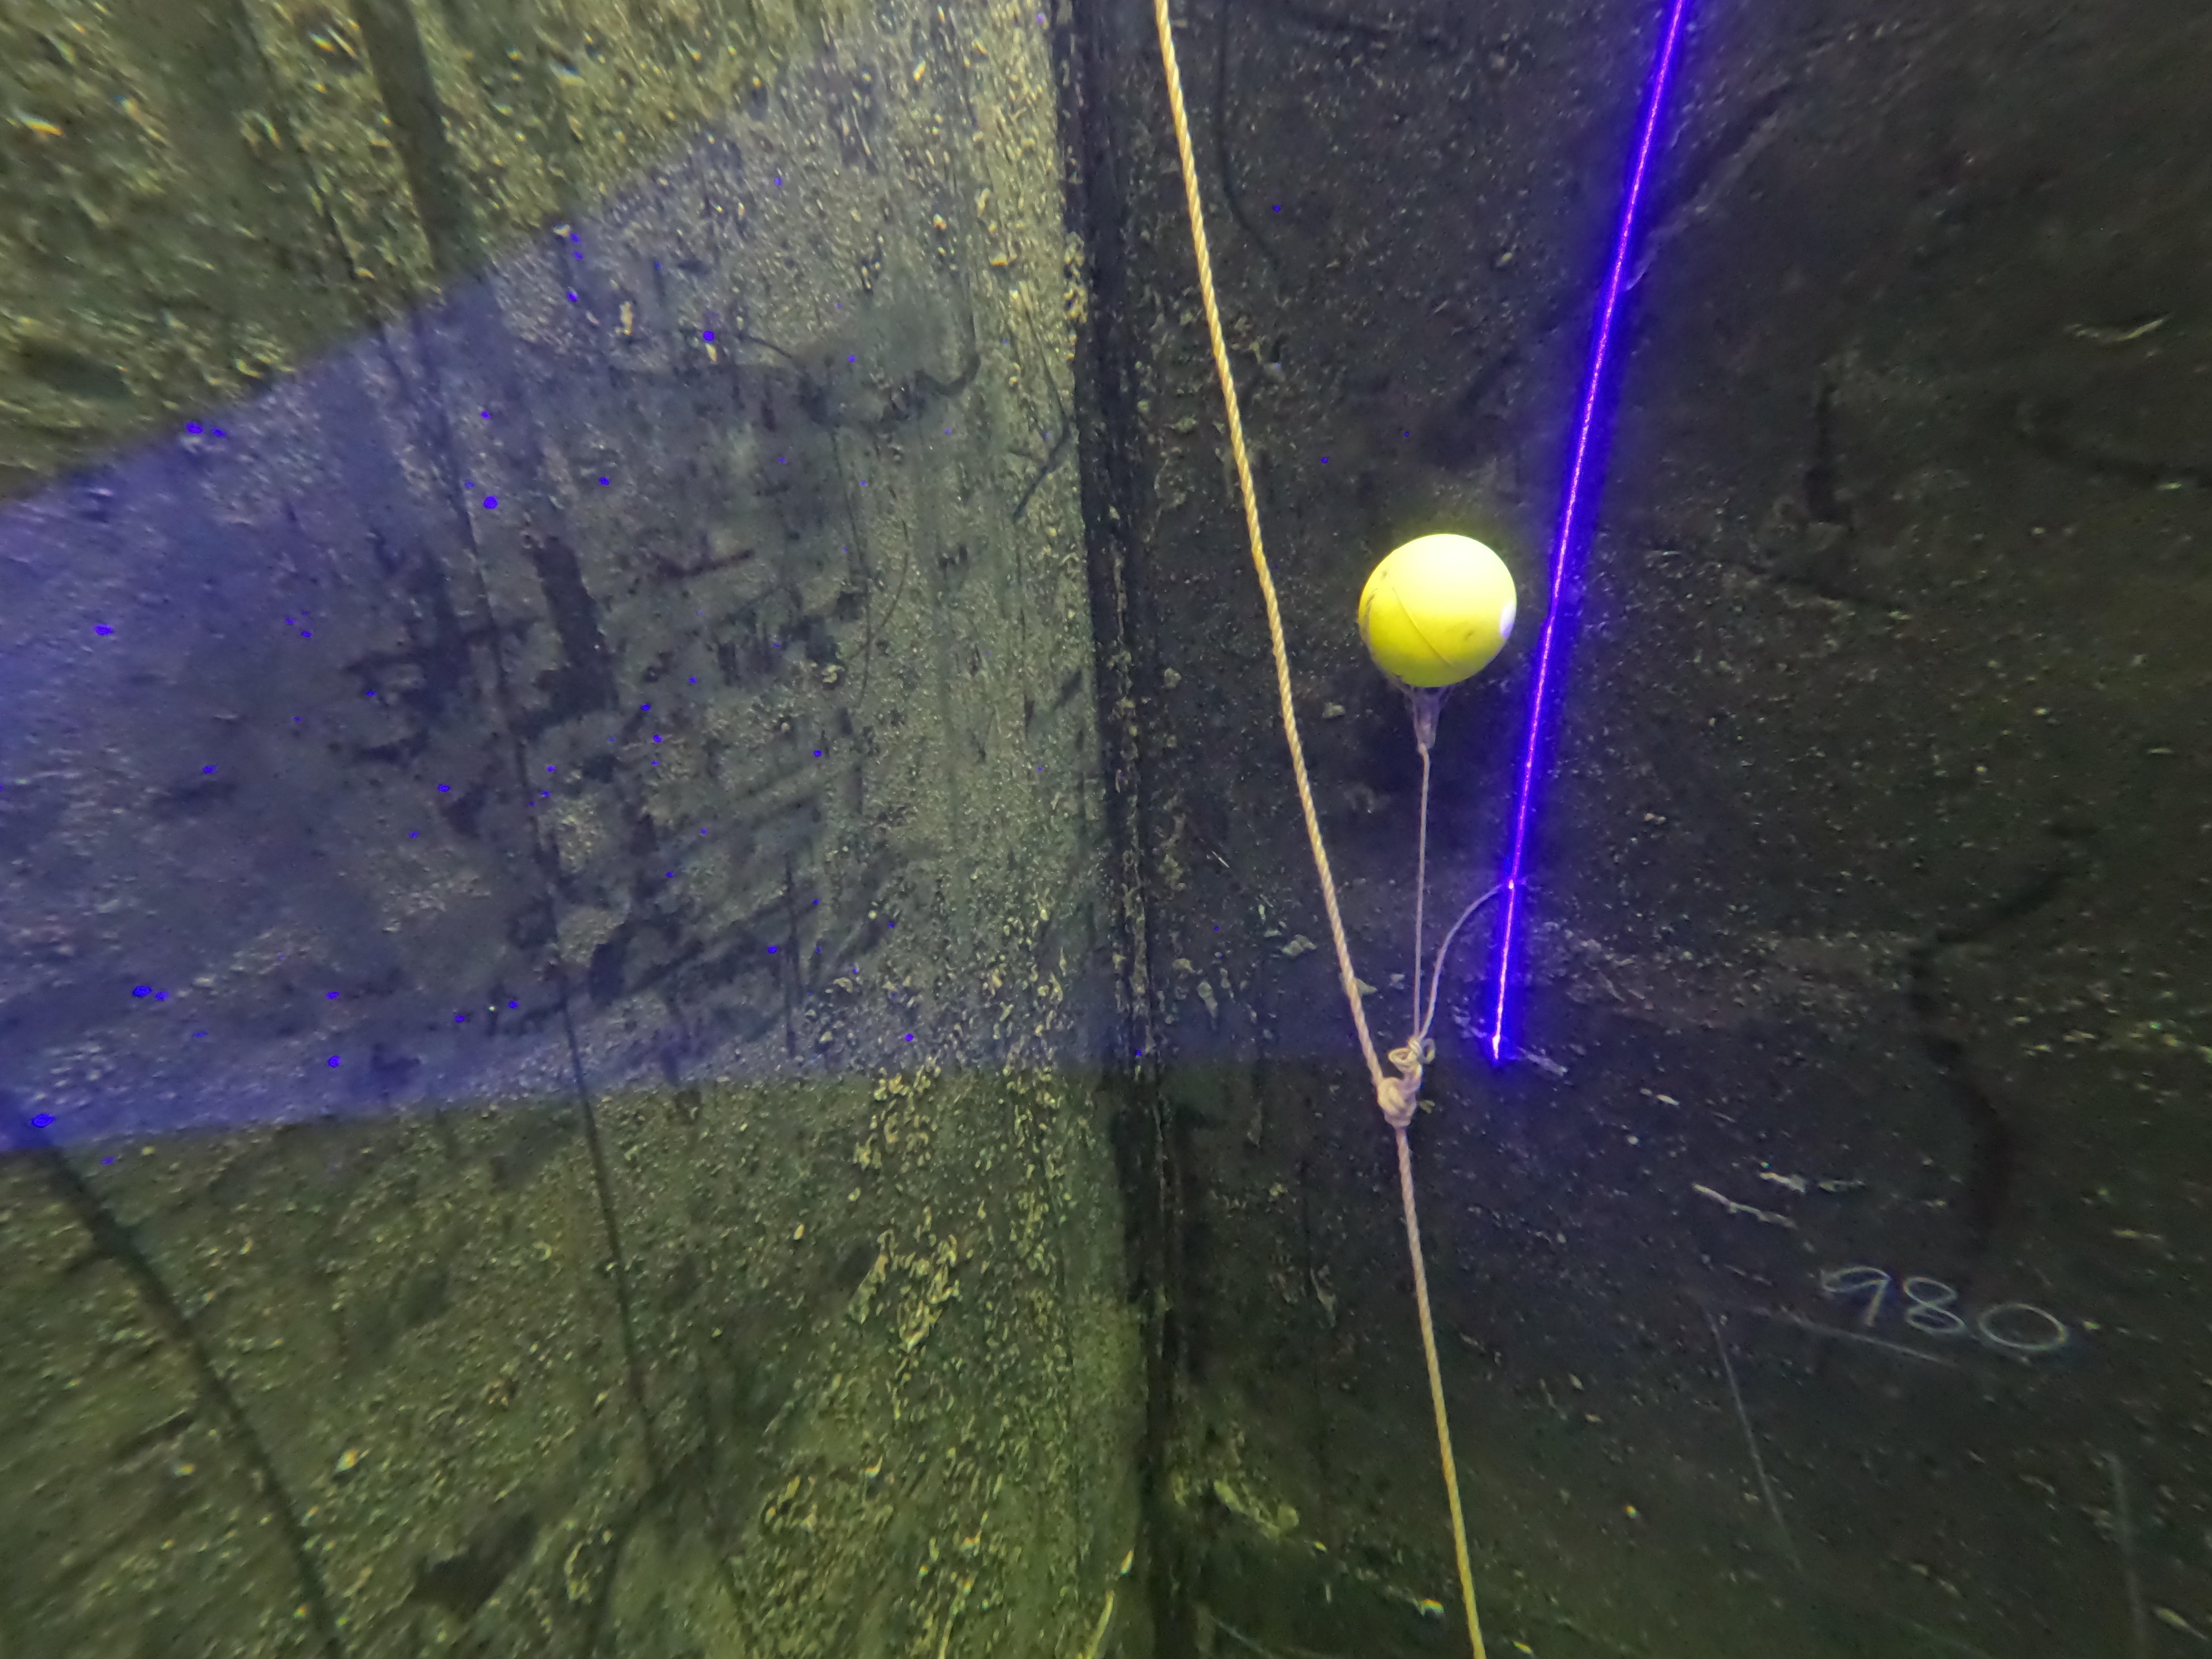

980

Supplement: Supplementary file 325 [file G0031118.pdf › 4/G0031118.pdf]

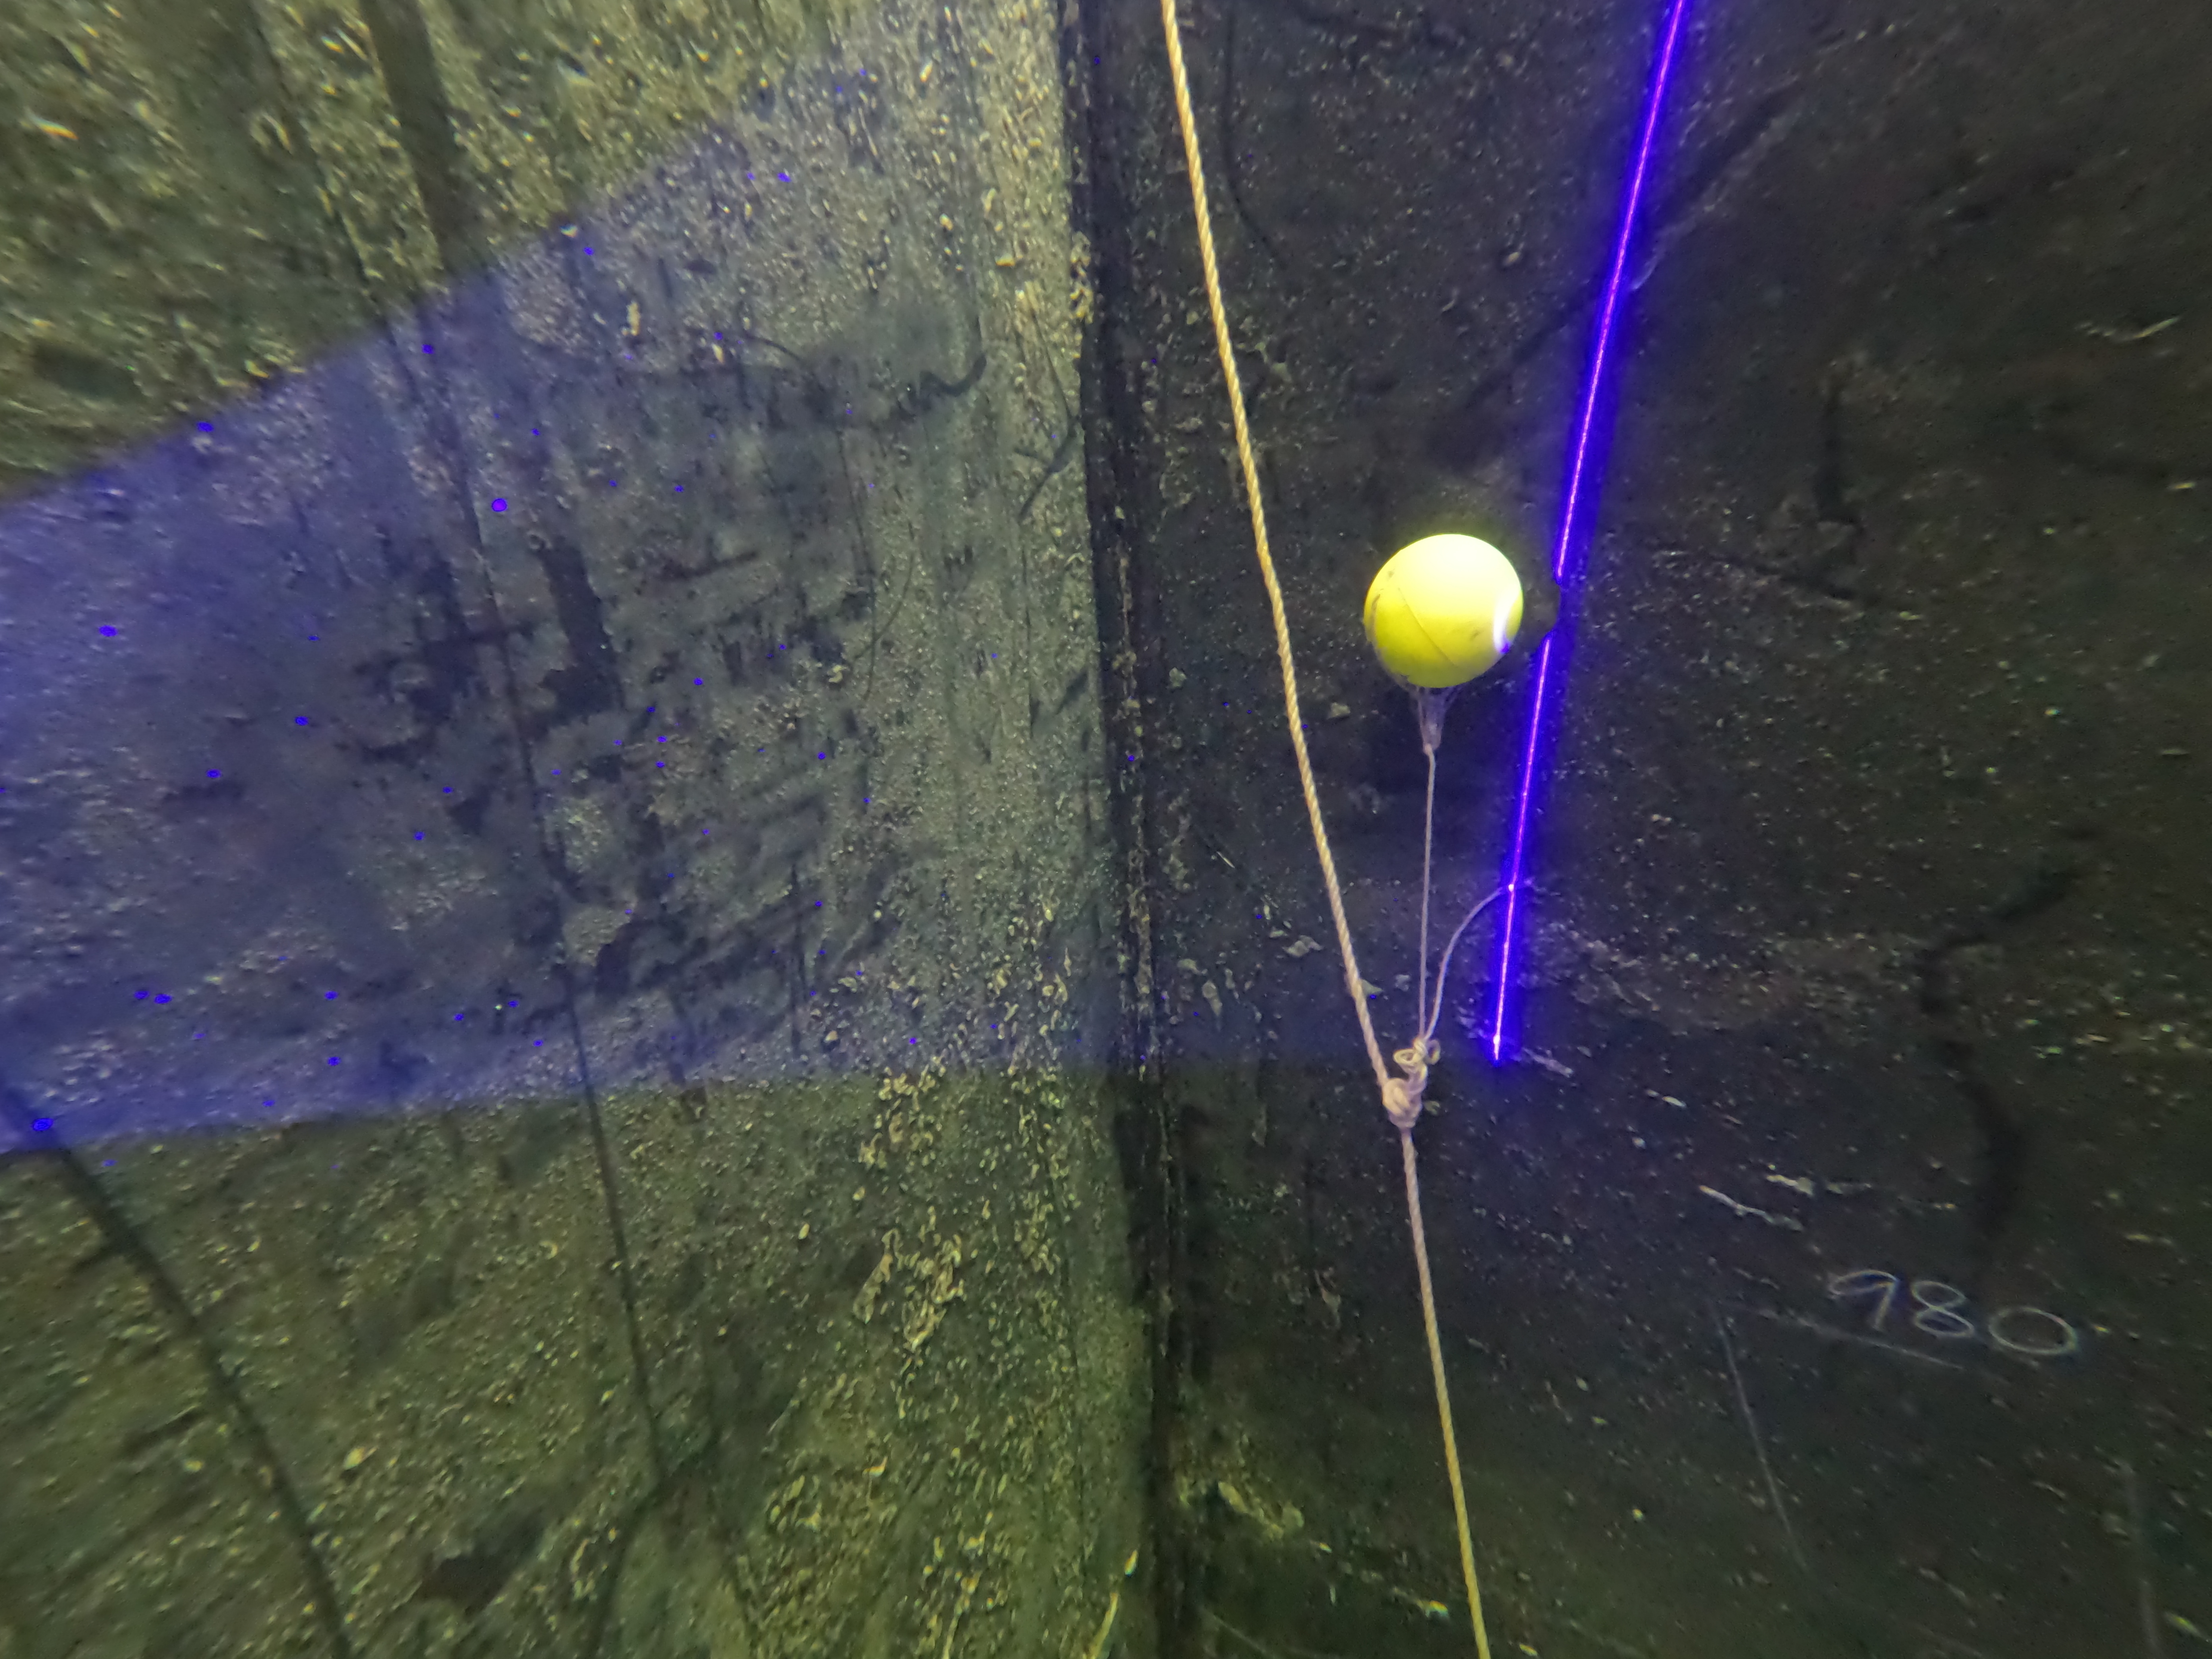

980

Supplement: Supplementary file 326 [file G0031119.pdf › 4/G0031119.pdf]

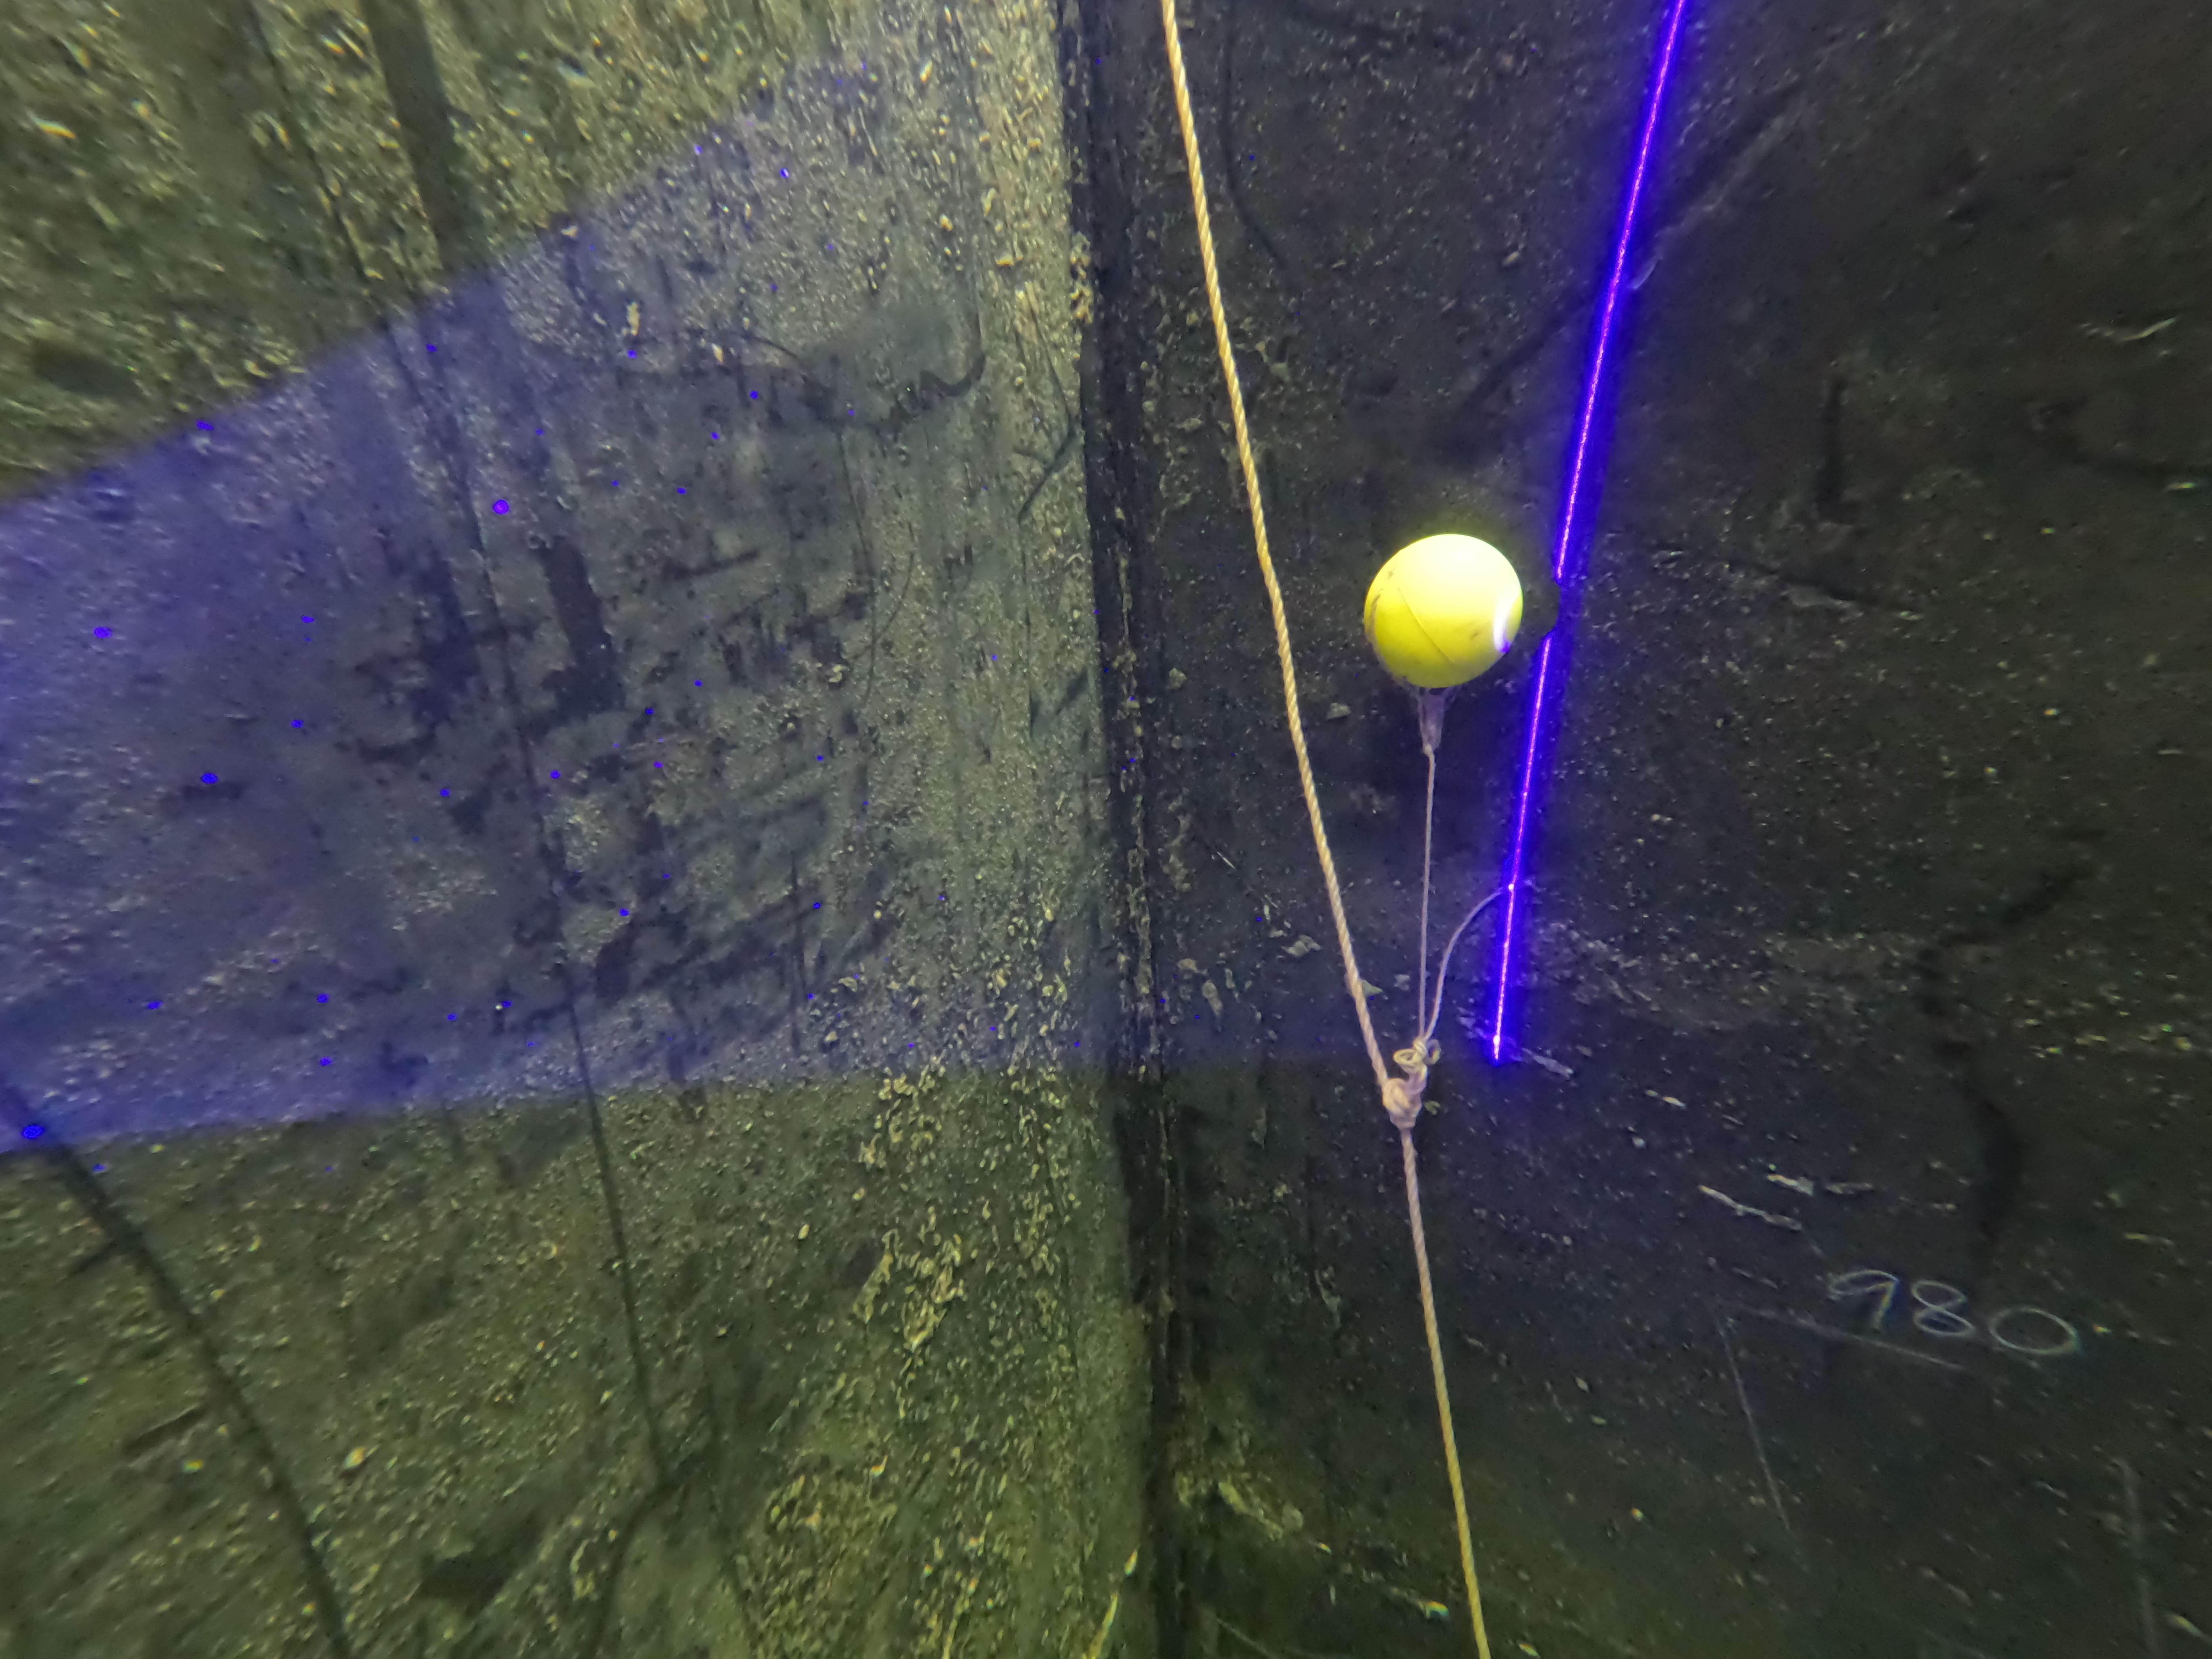

980

Supplement: Supplementary file 327 [file G0031120.pdf › 4/G0031120.pdf]

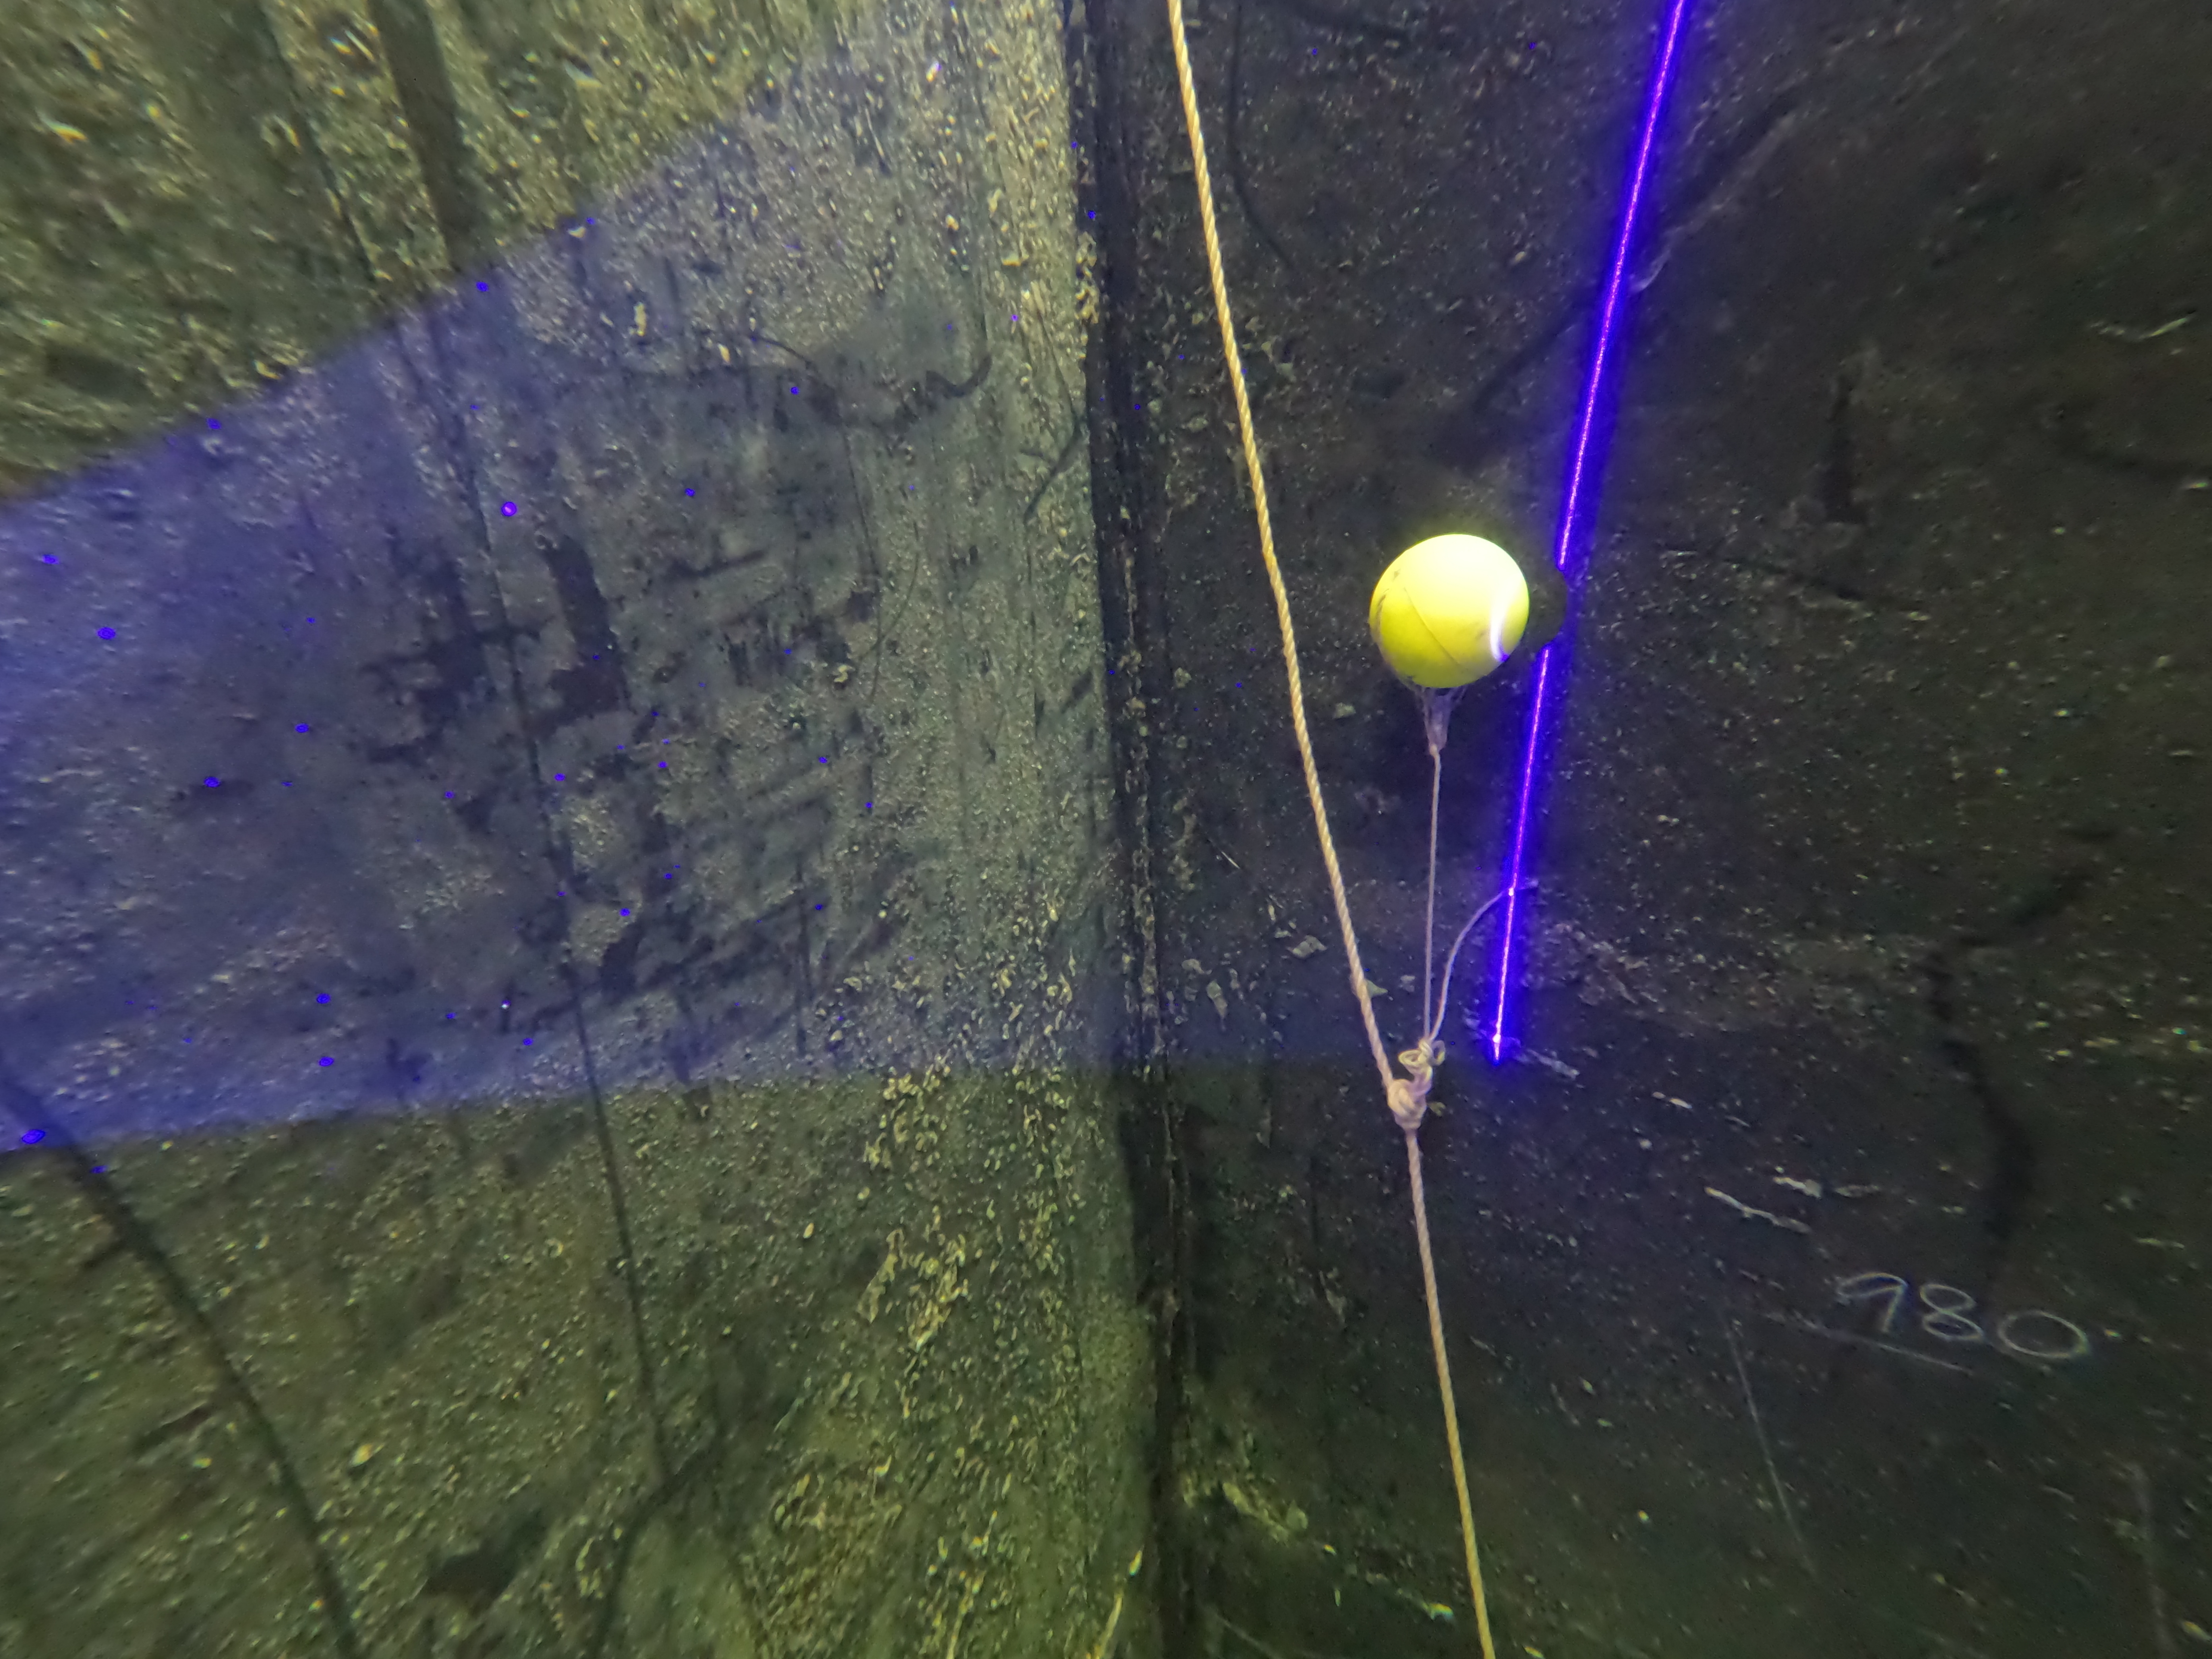

980

Supplement: Supplementary file 328 [file G0031121.pdf › 4/G0031121.pdf]

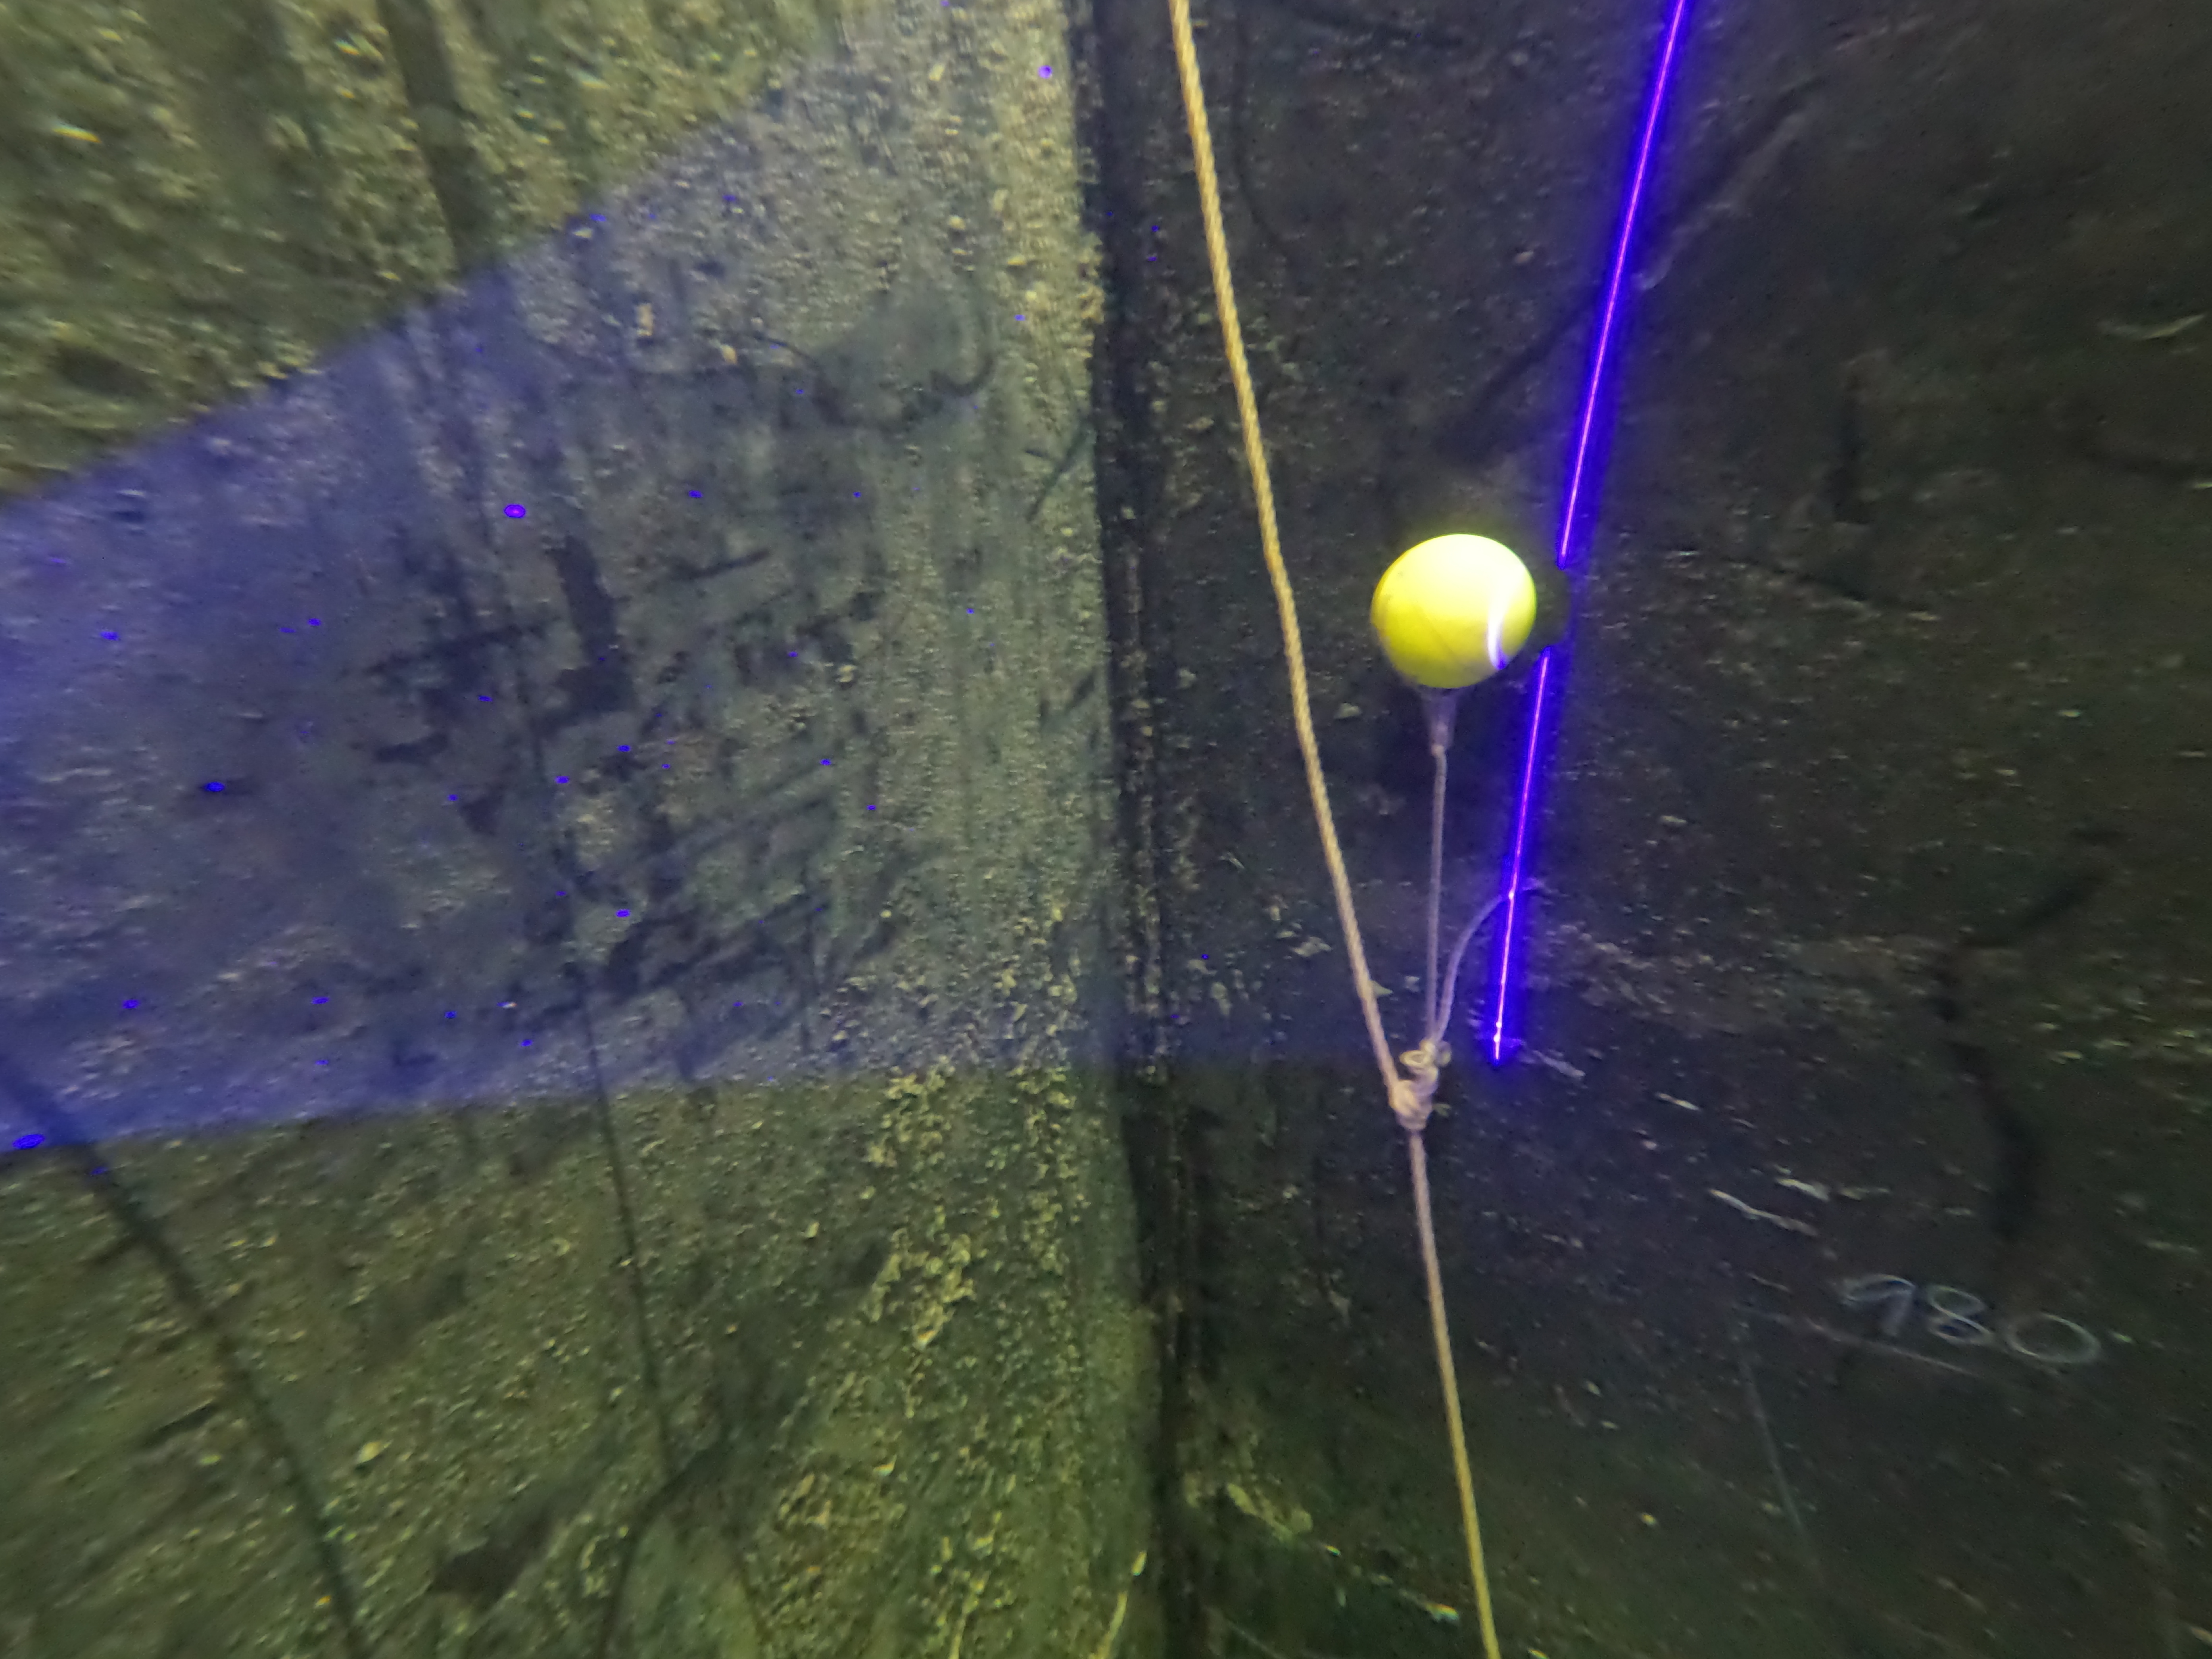

980

Supplement: Supplementary file 329 [file G0031122.pdf › 4/G0031122.pdf]

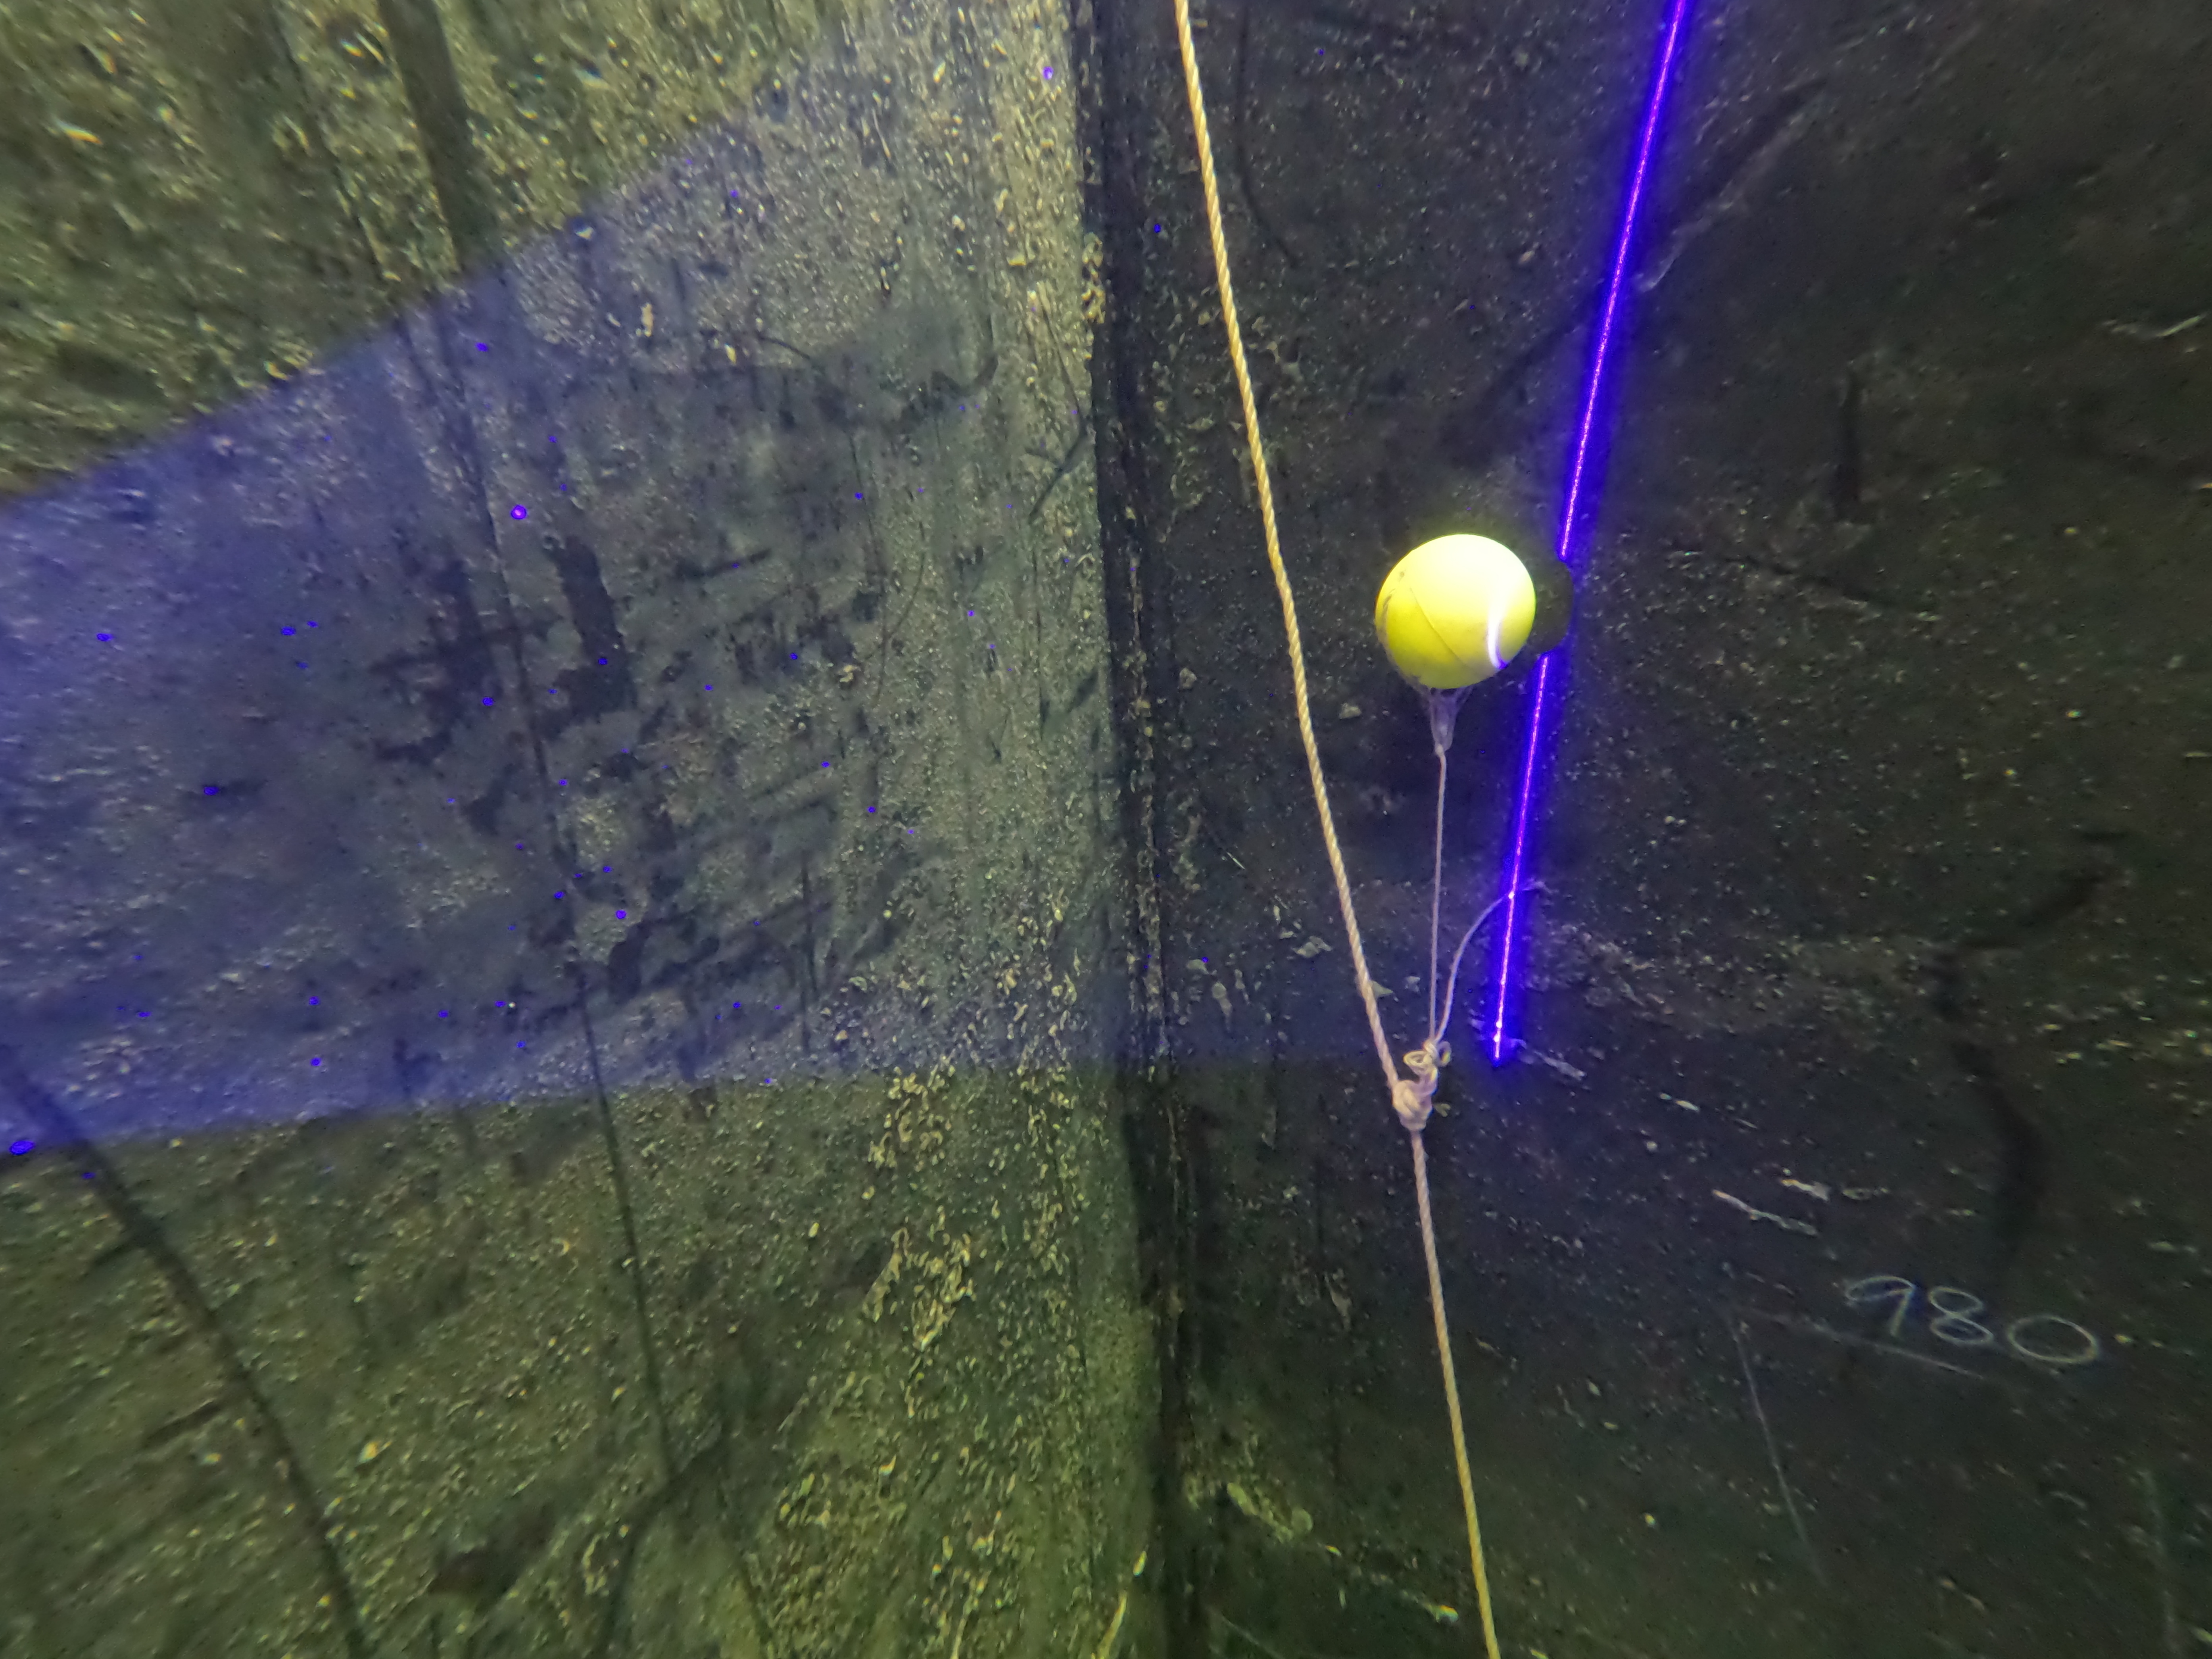

980

Supplement: Supplementary file 330 [file G0031123.pdf › 4/G0031123.pdf]

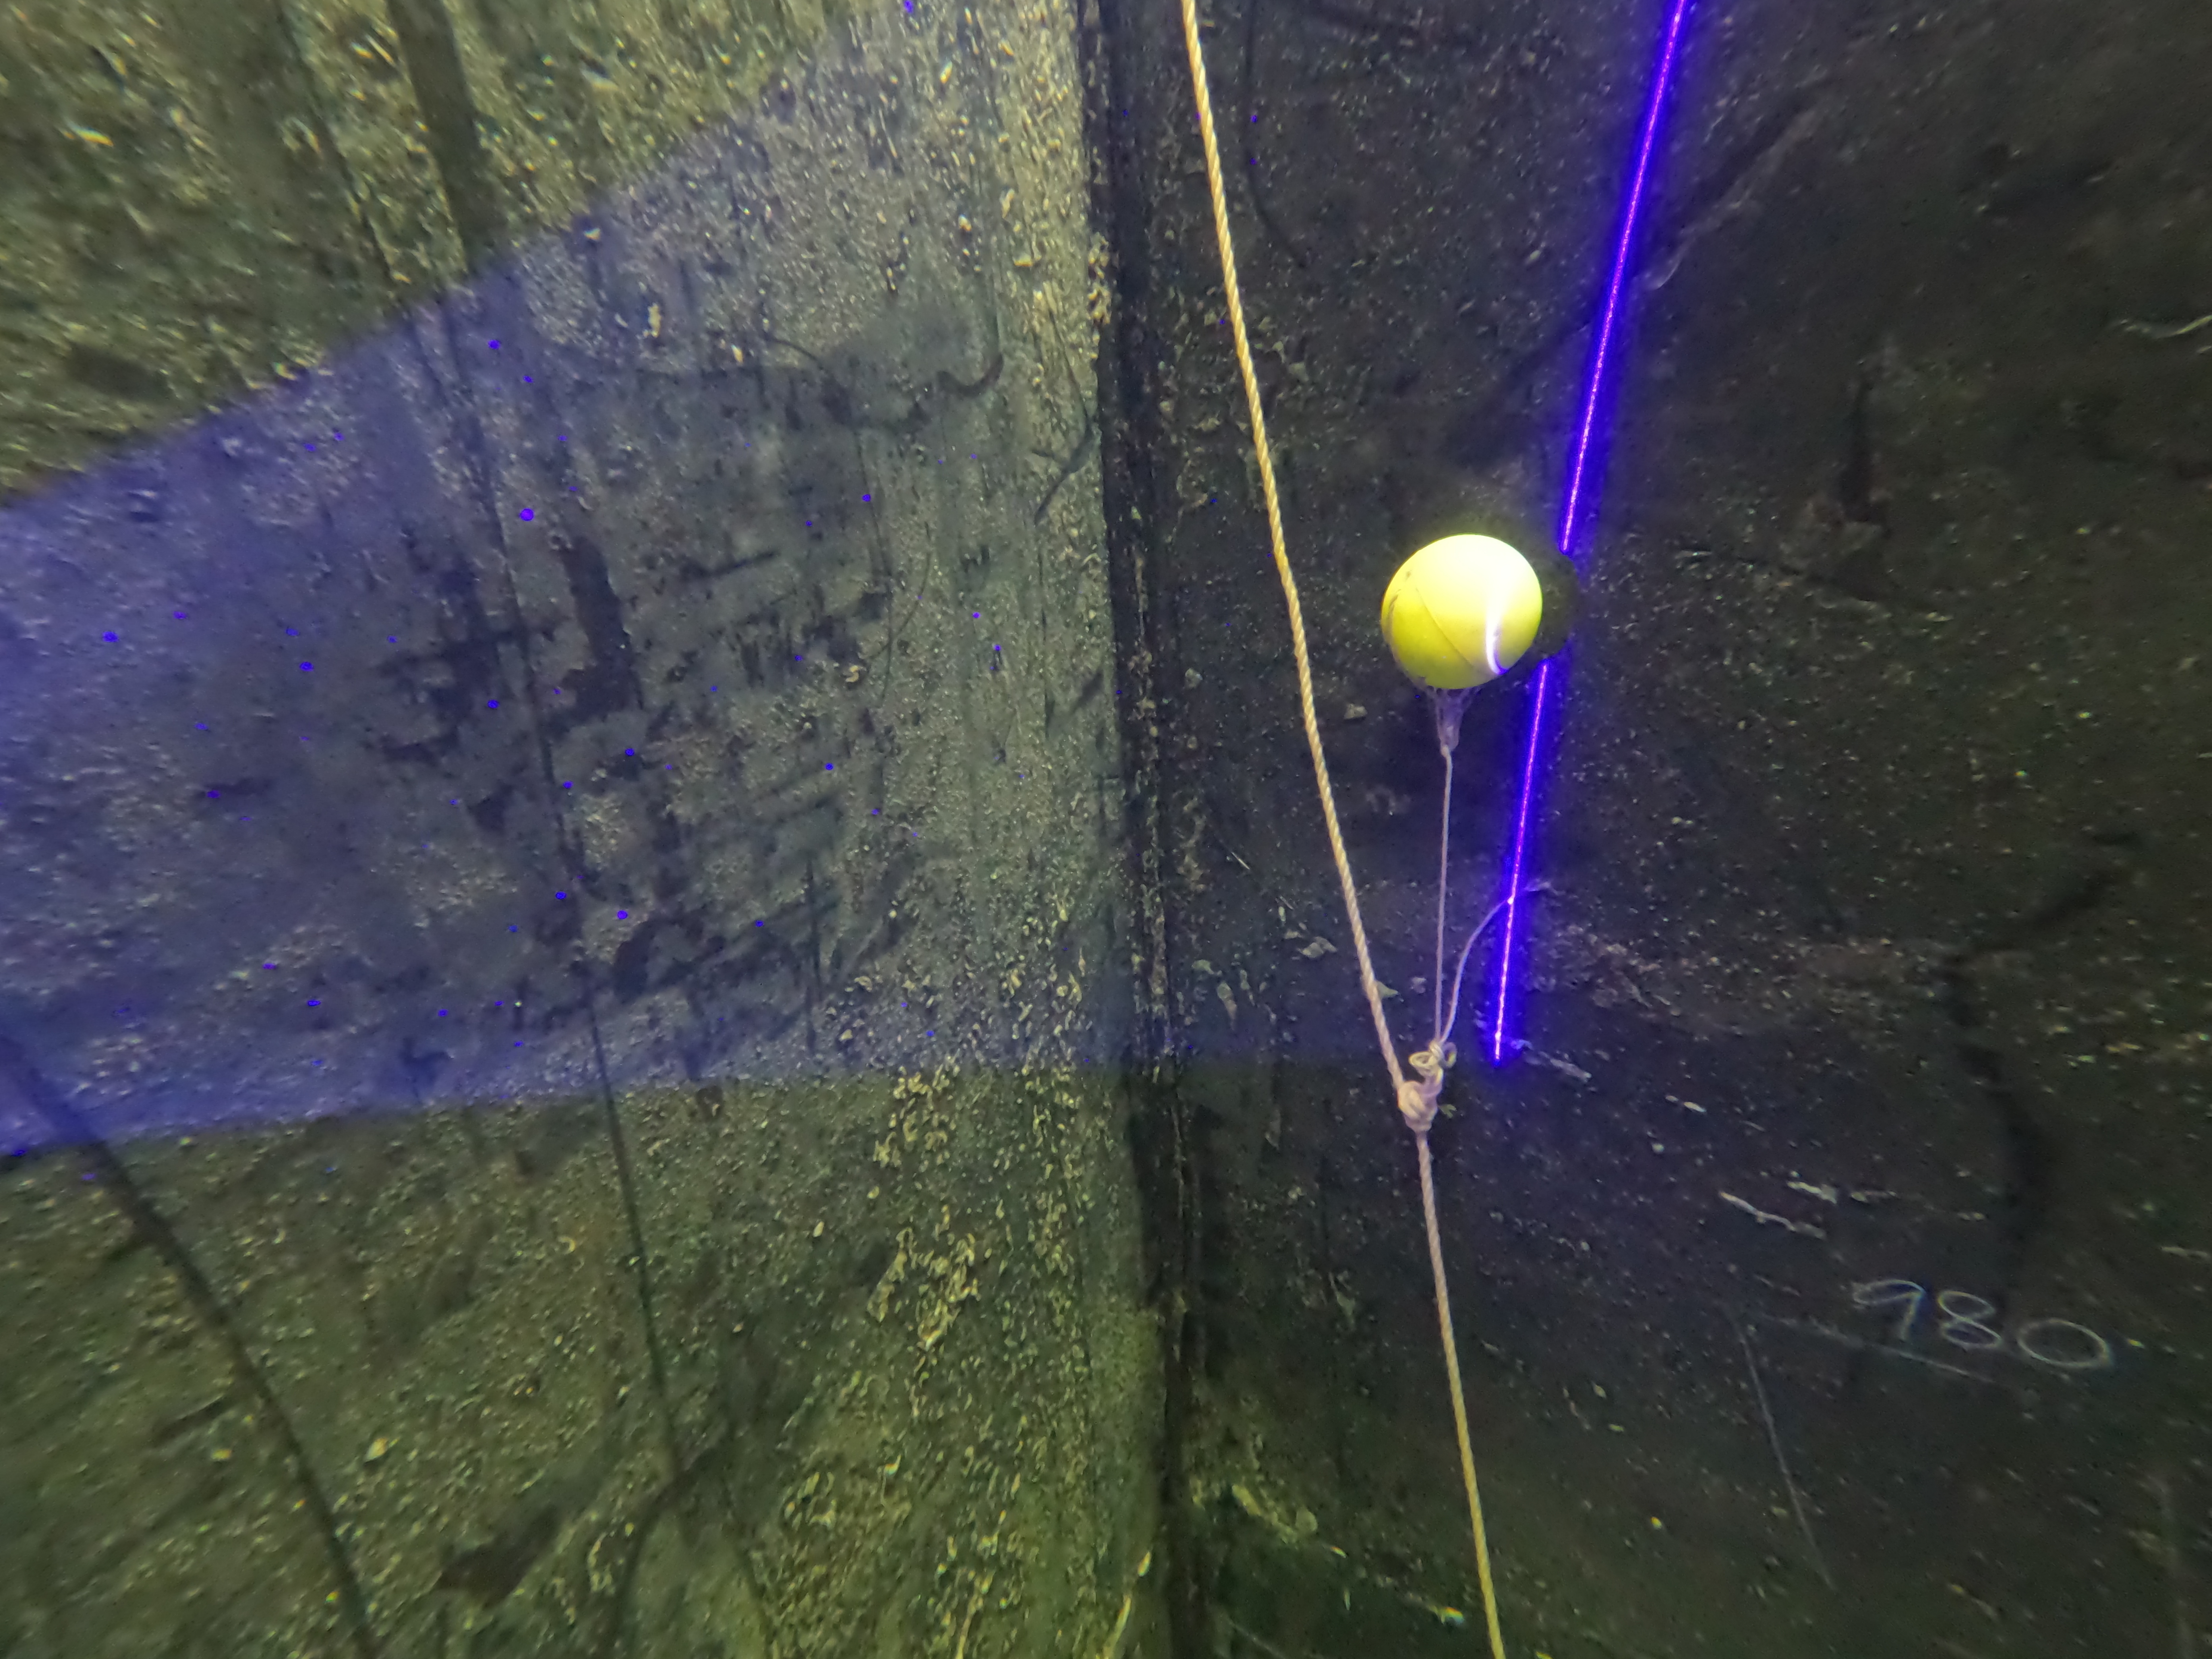

980

Supplement: Supplementary file 331 [file G0031124.pdf › 4/G0031124.pdf]

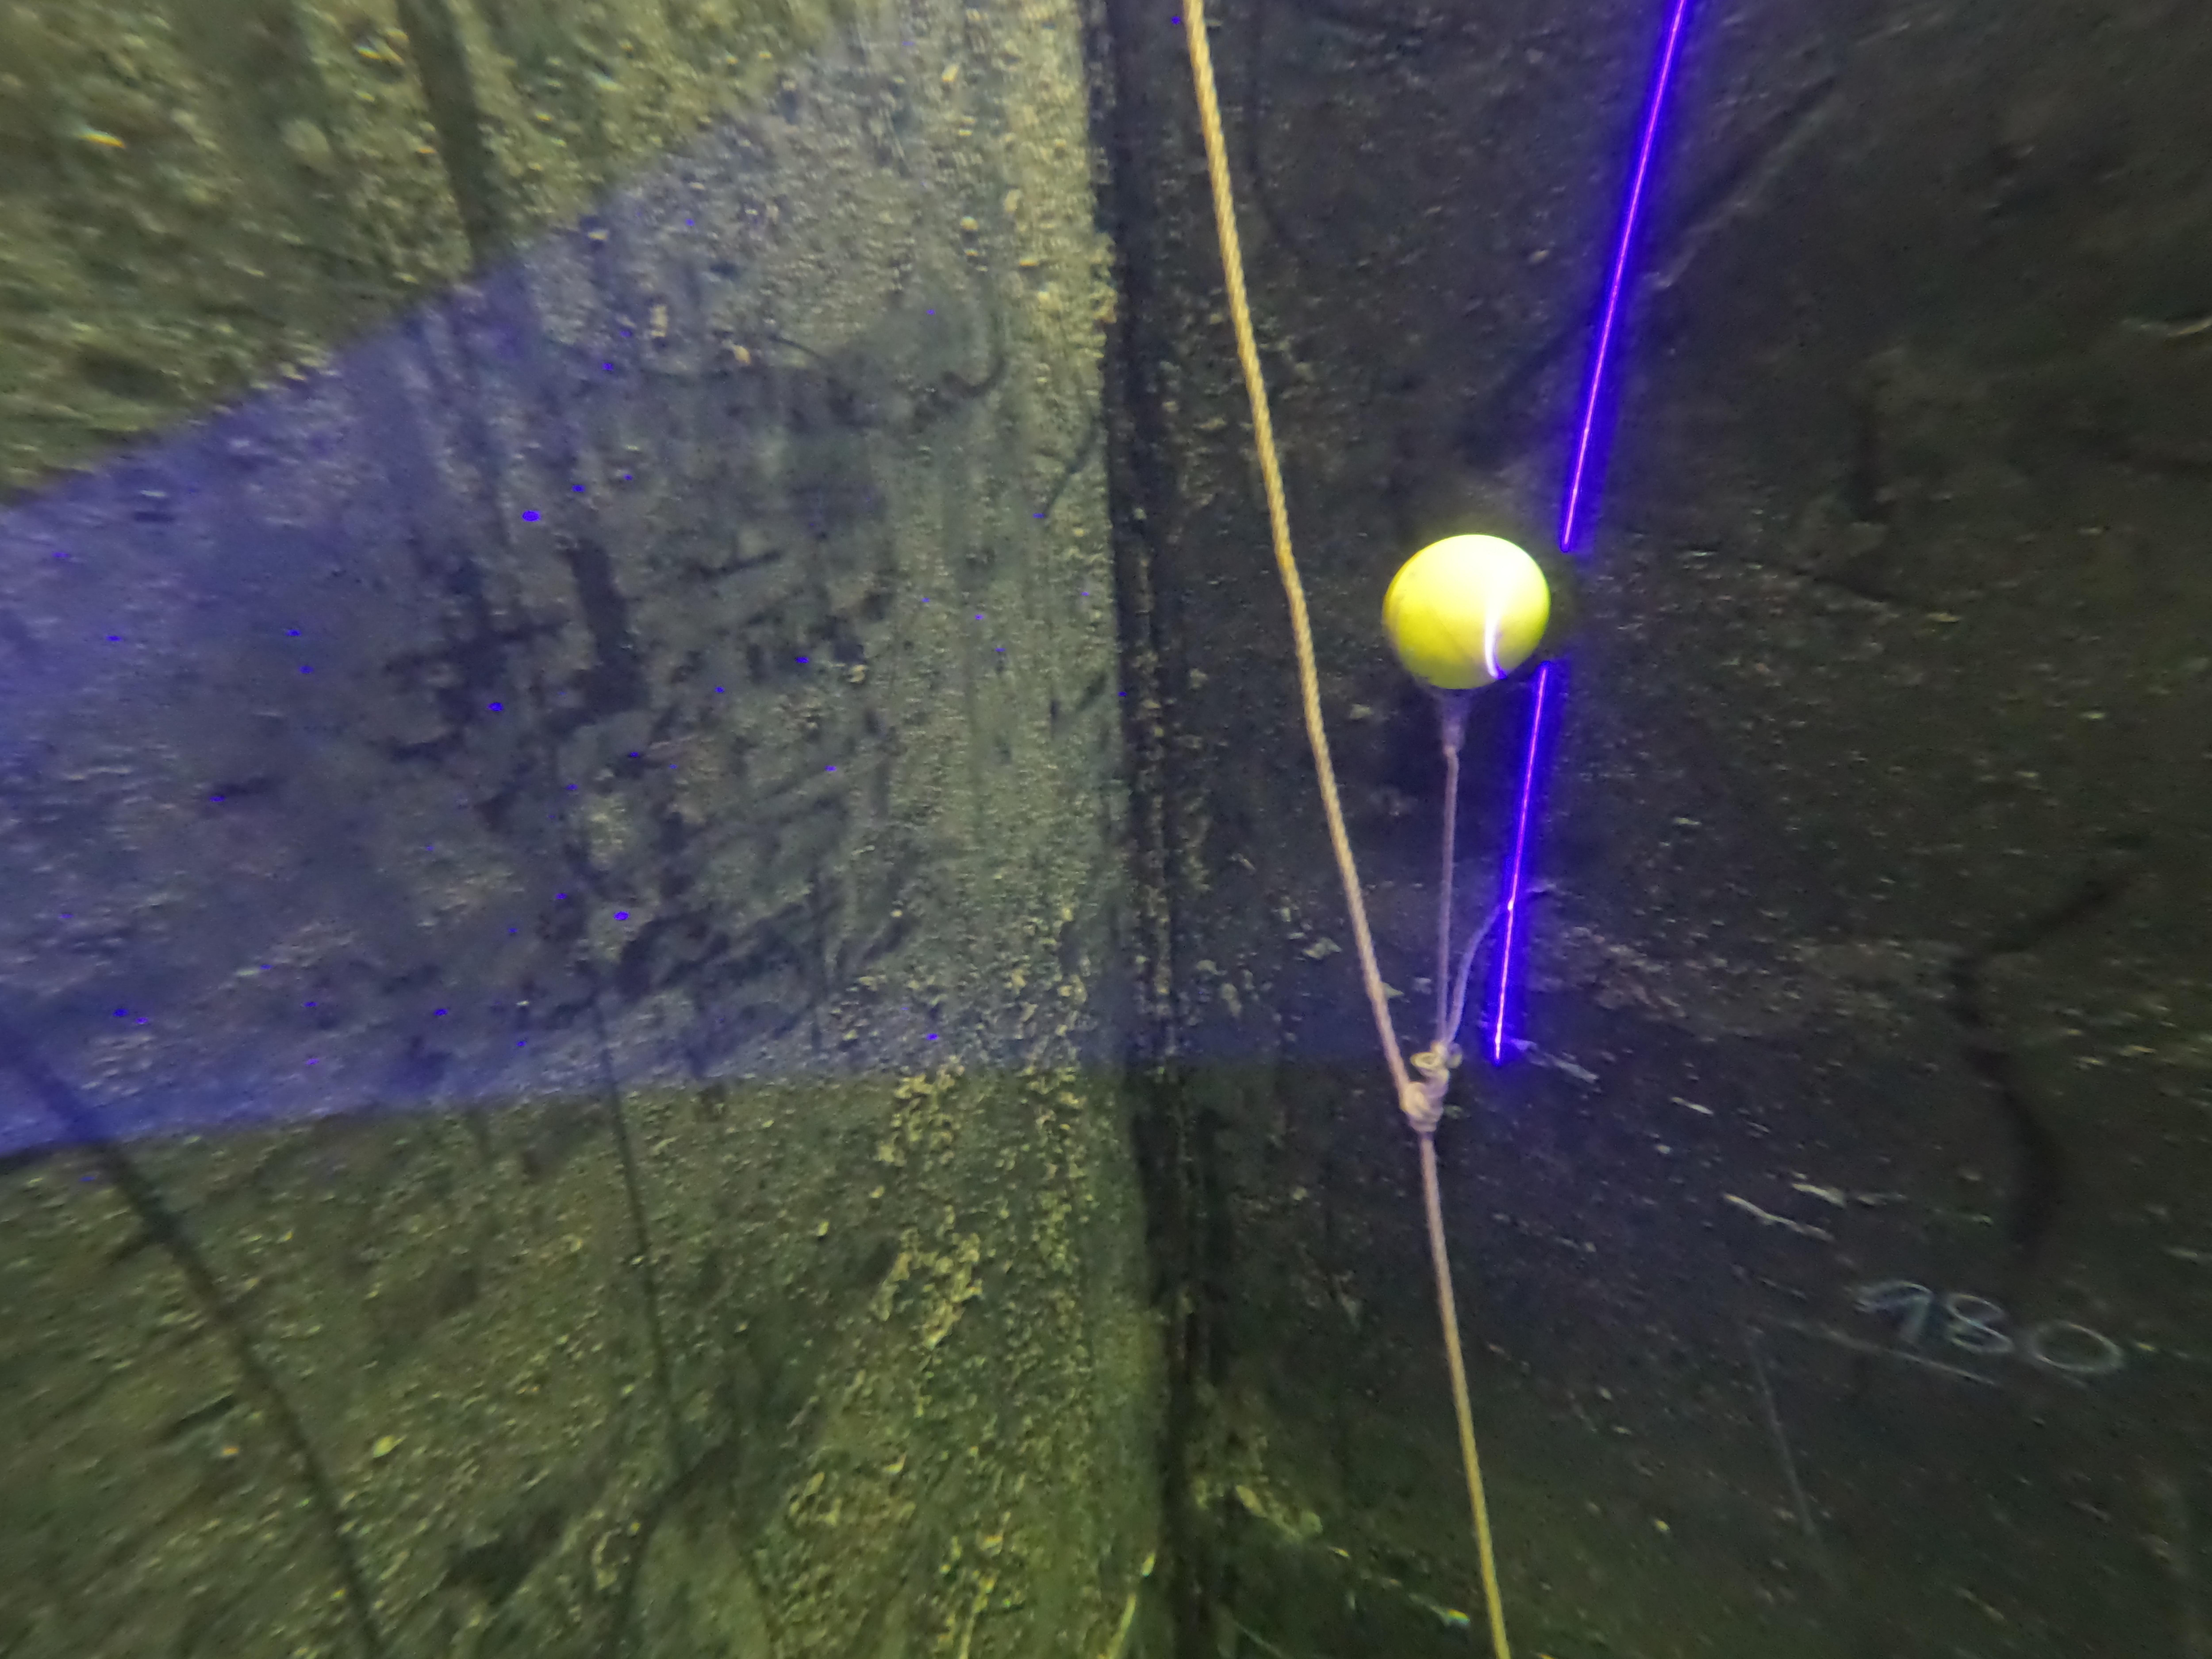

180

Supplement: Supplementary file 332 [file G0031125.pdf › 4/G0031125.pdf]

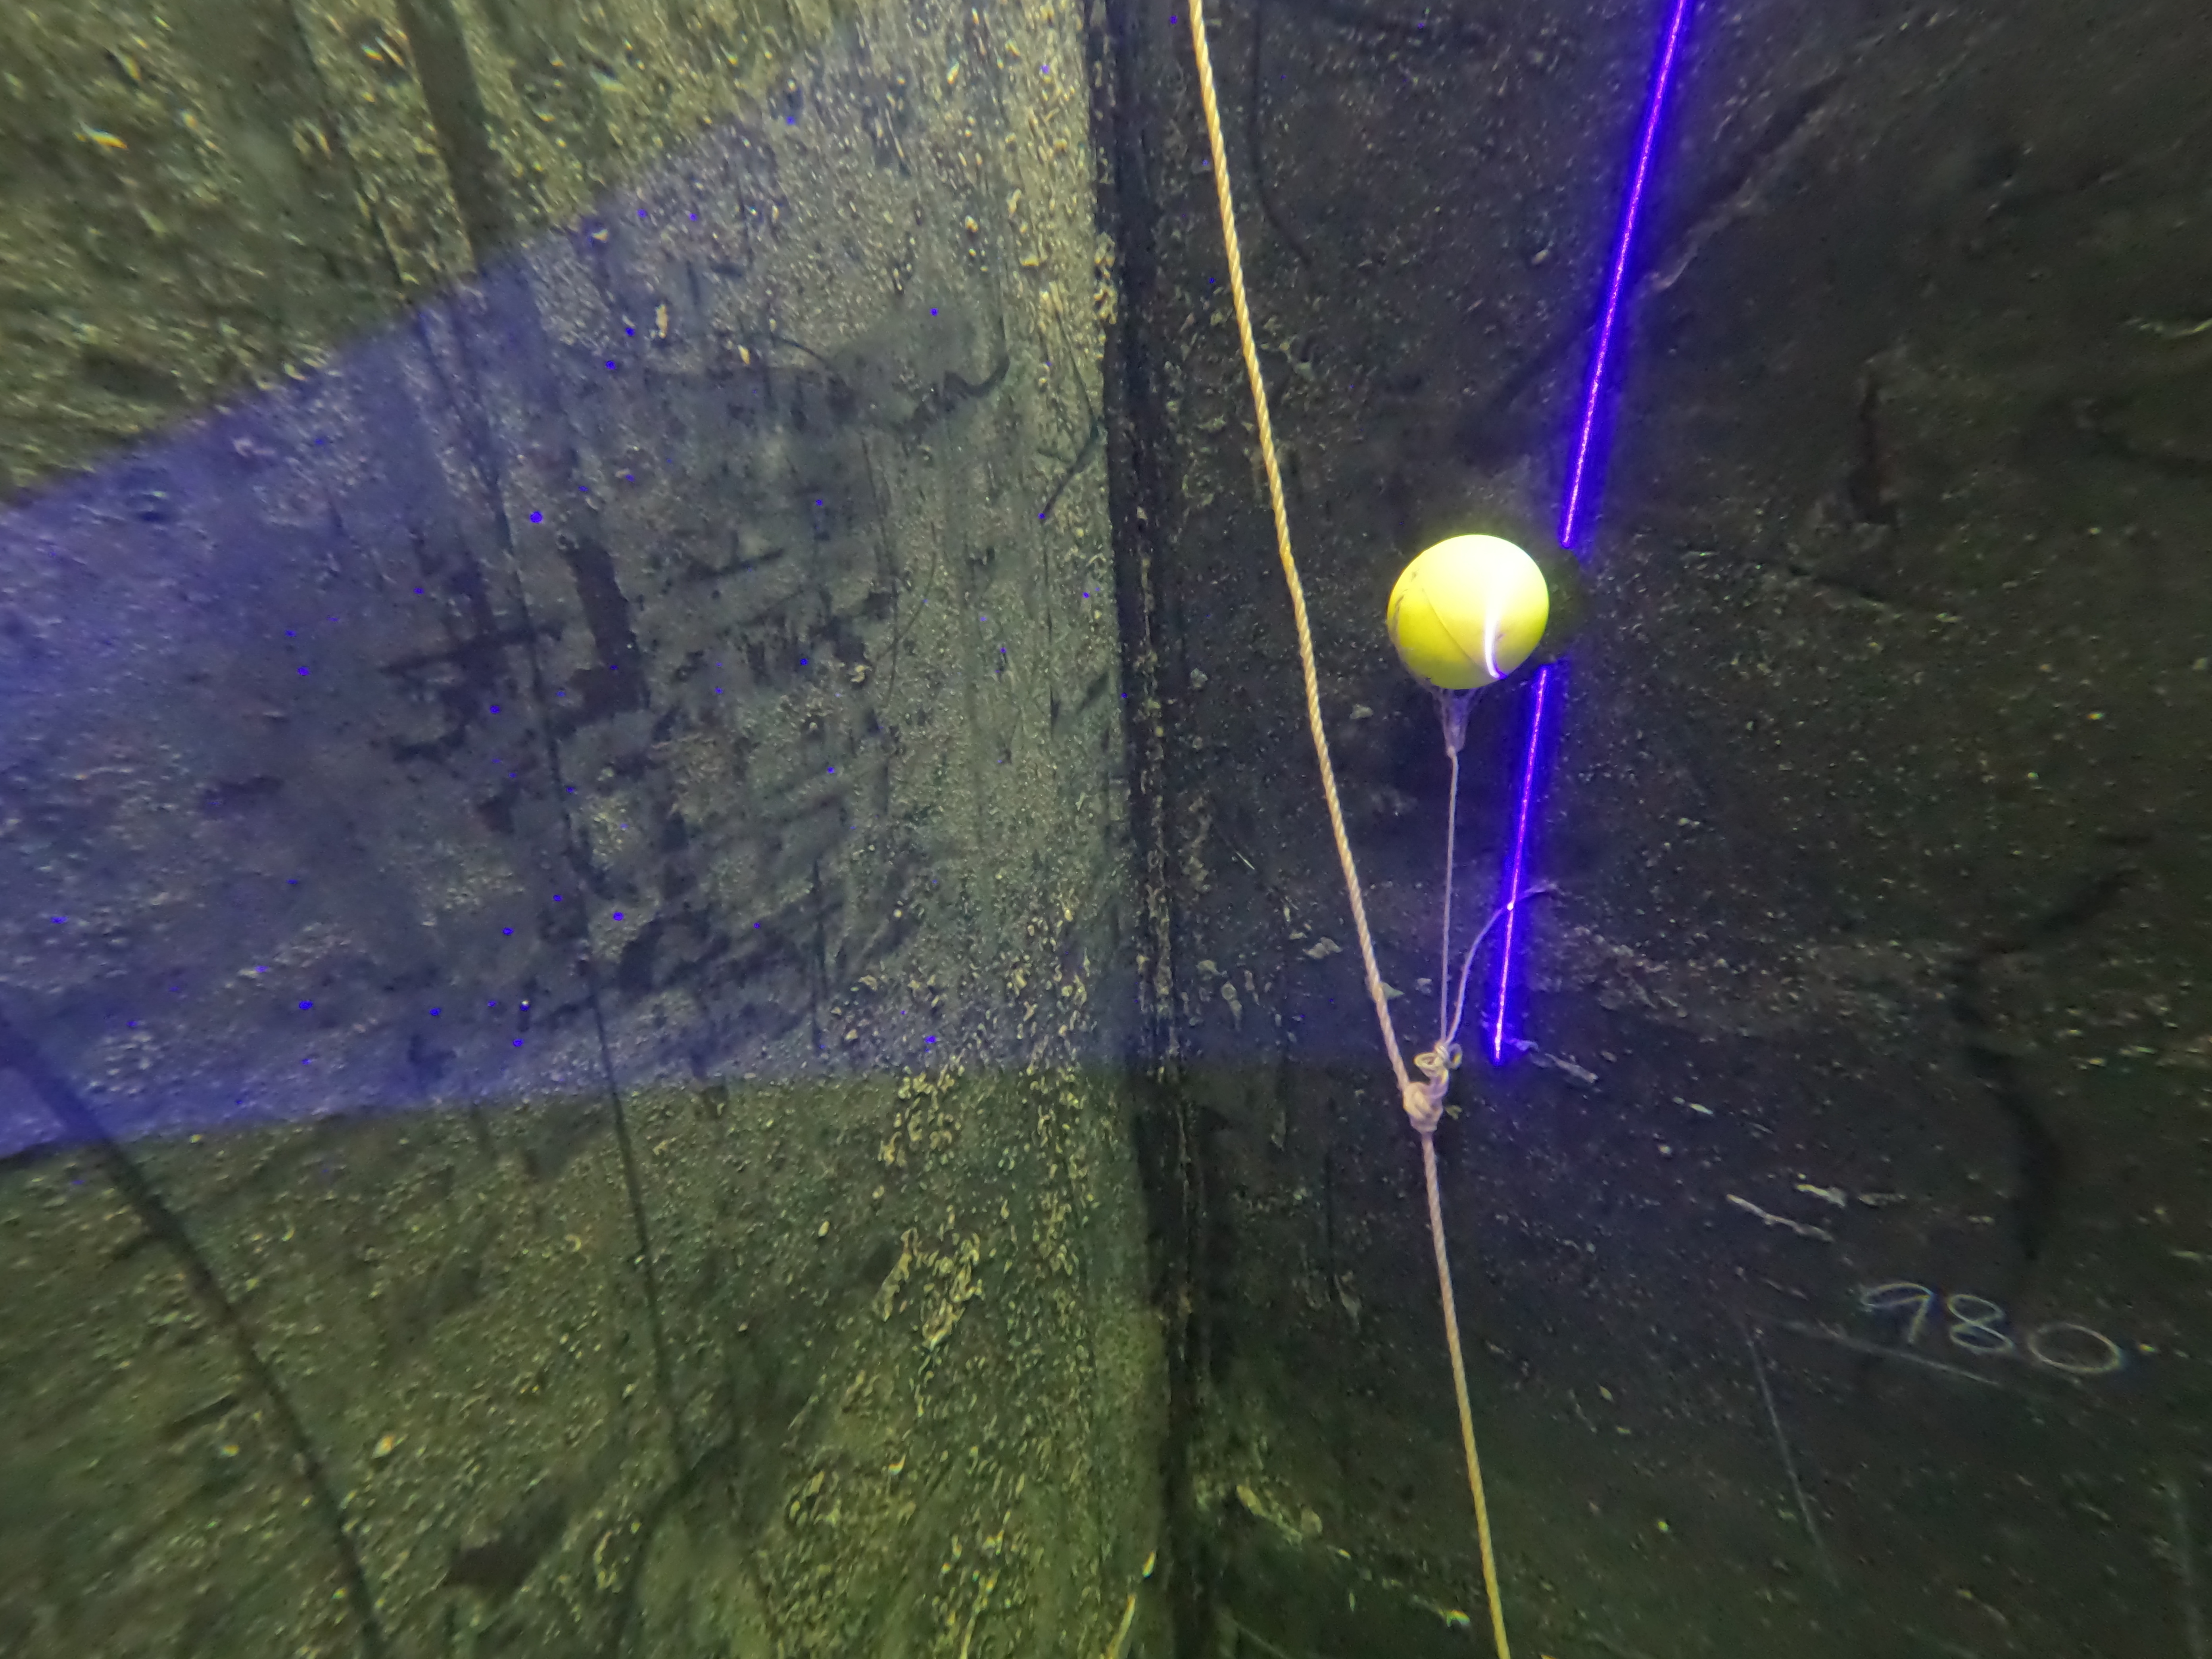

980

Supplement: Supplementary file 333 [file G0031126.pdf › 4/G0031126.pdf]

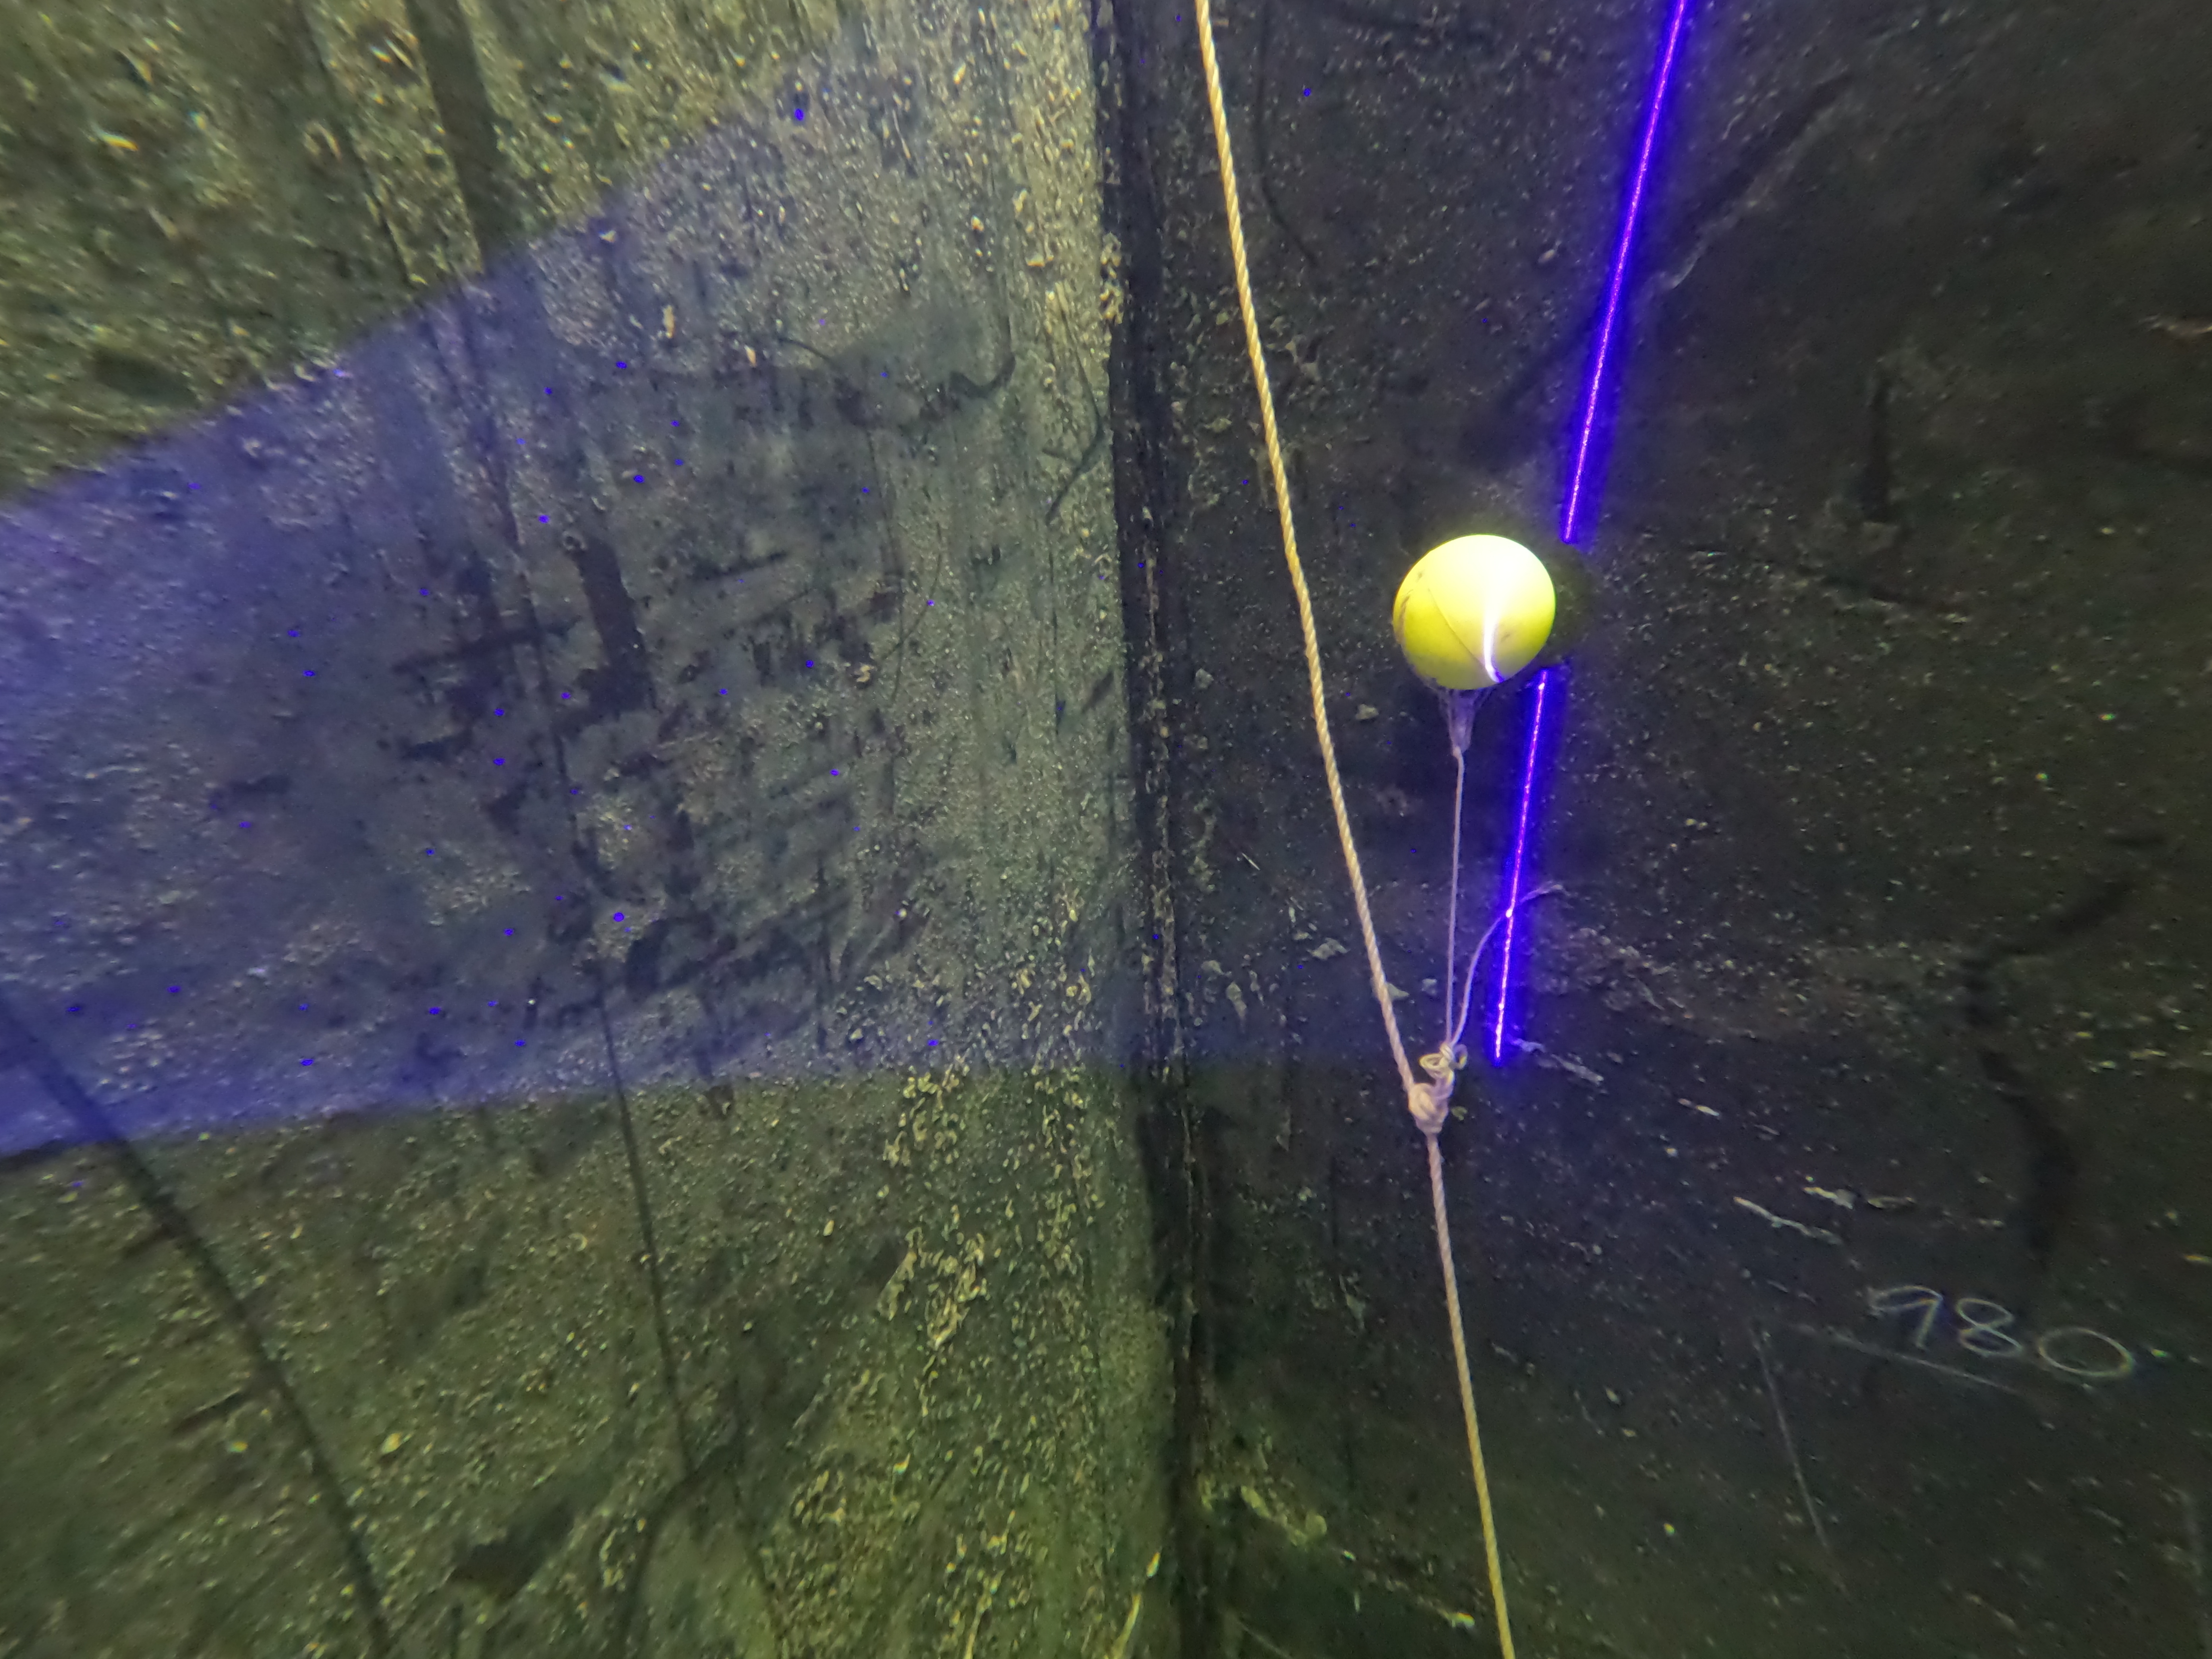

980

Supplement: Supplementary file 334 [file G0031127.pdf › 4/G0031127.pdf]

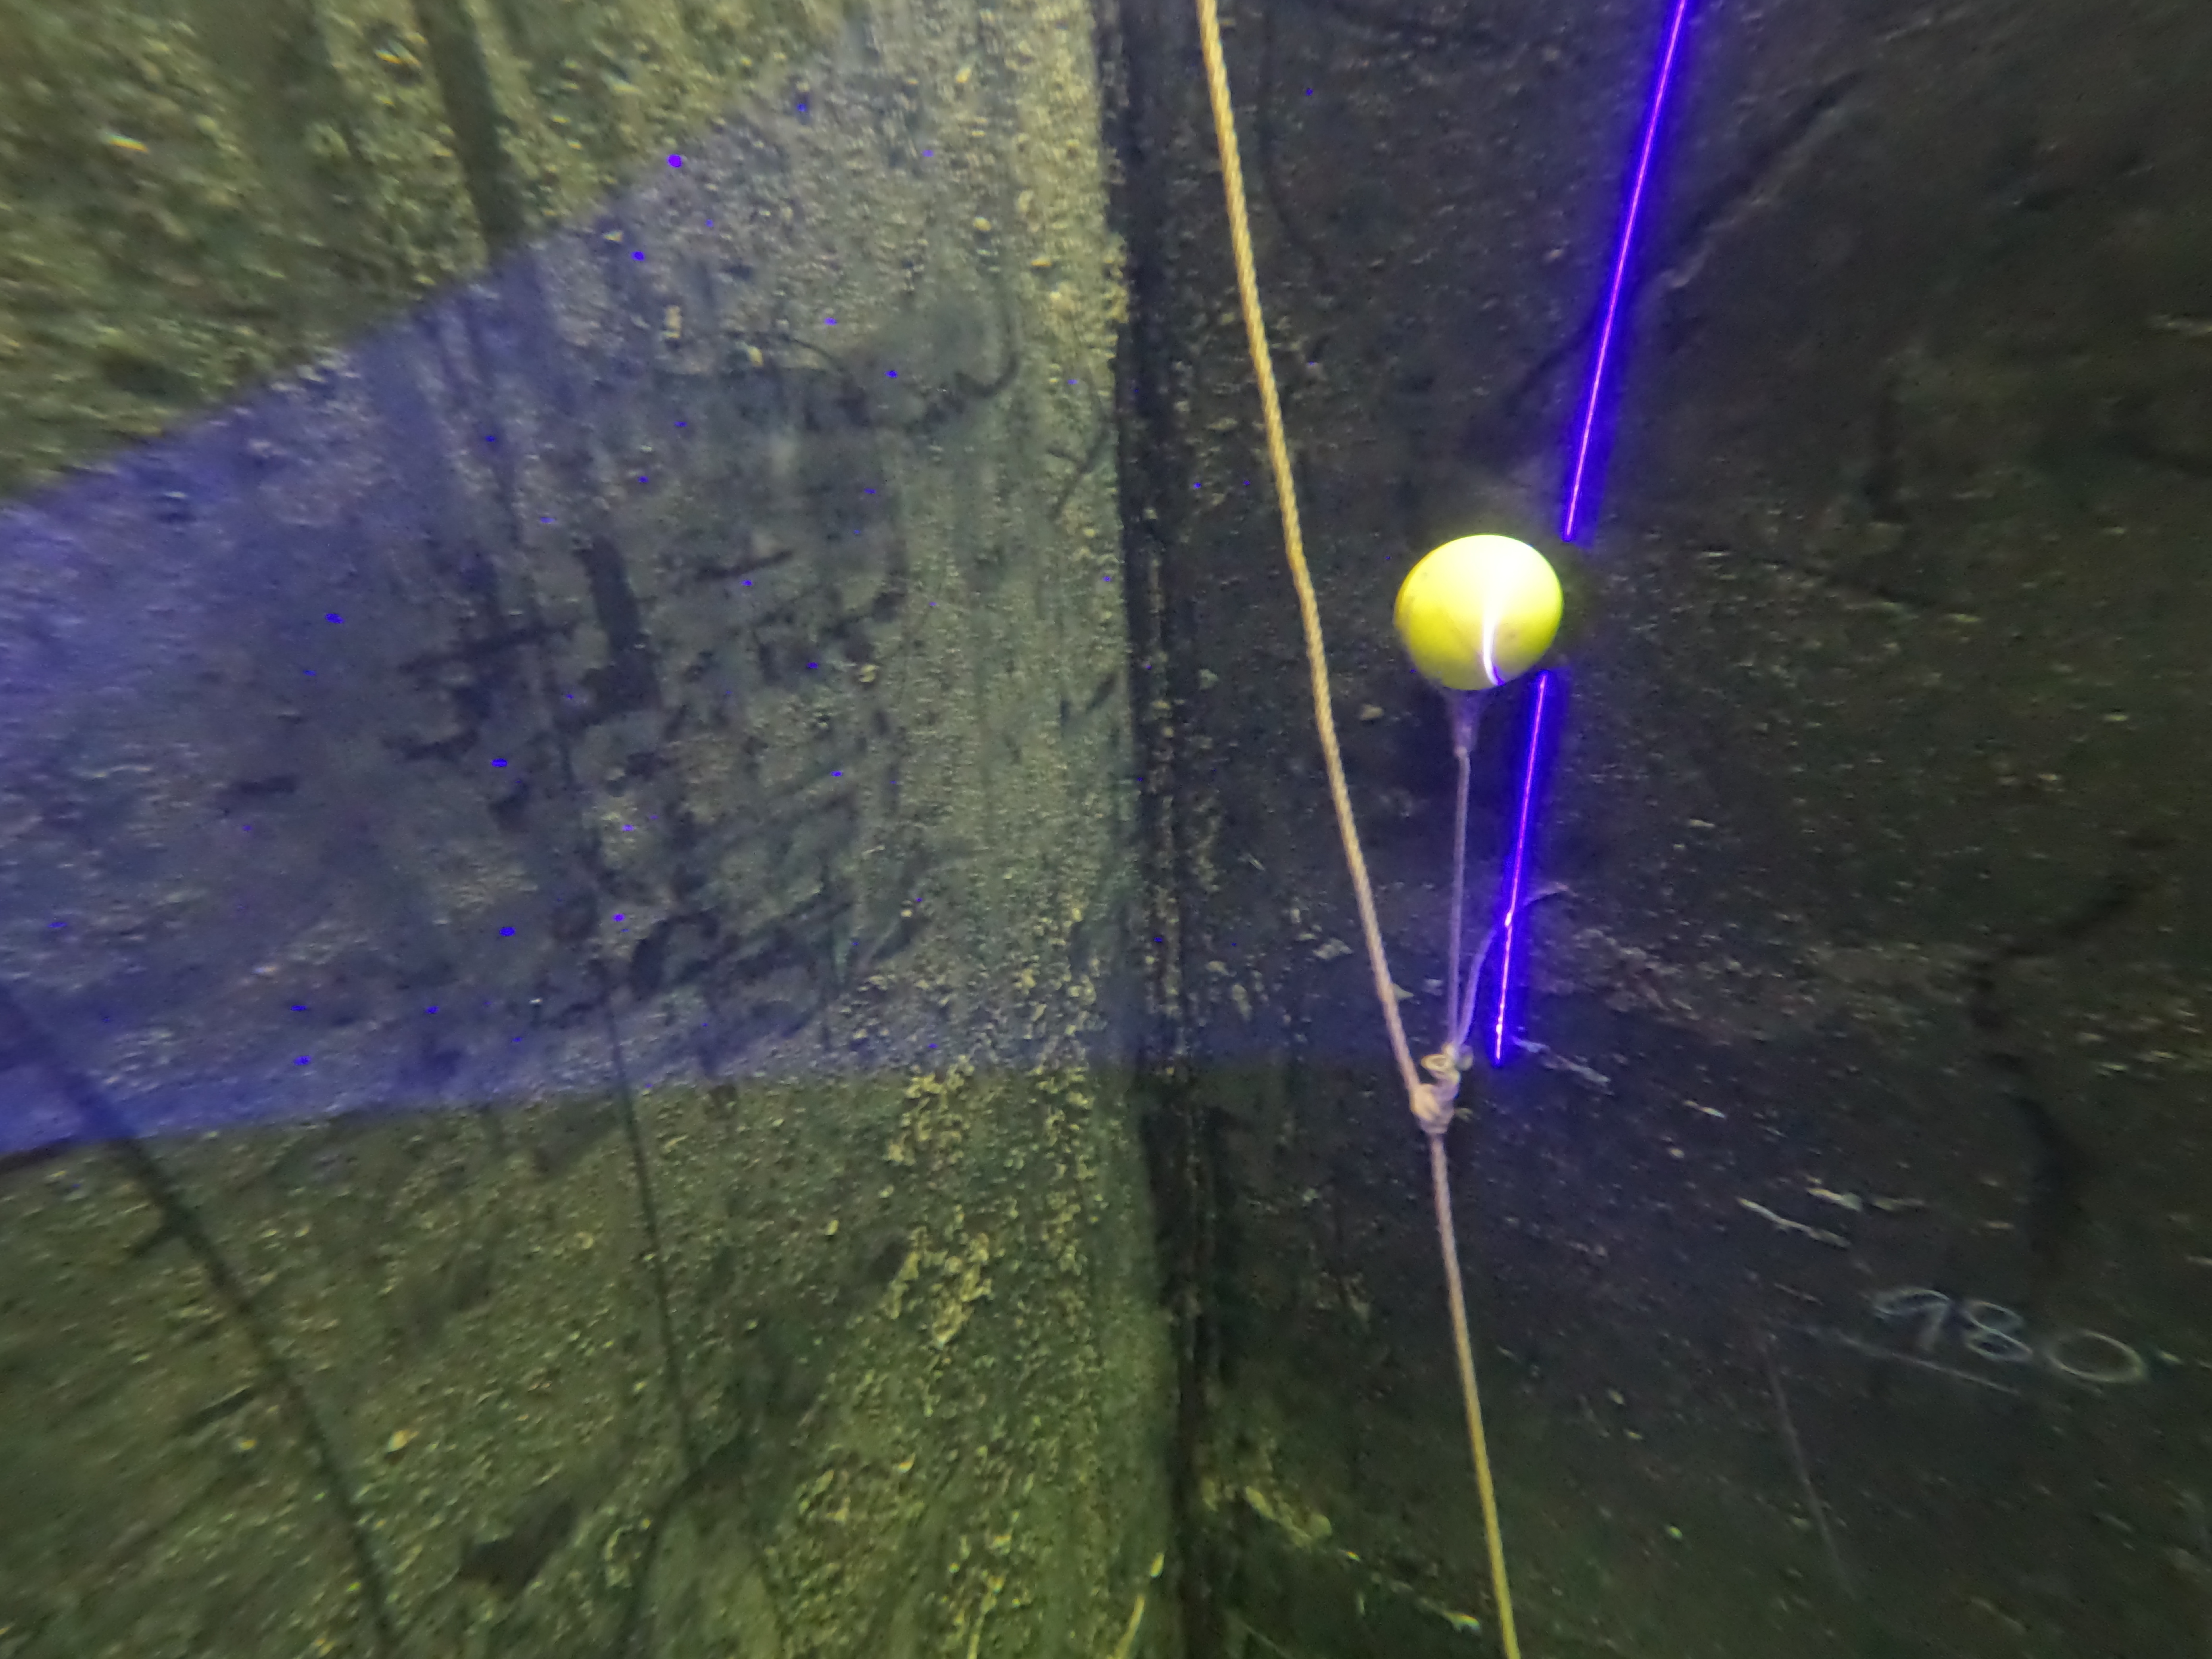

980

Supplement: Supplementary file 335 [file G0031128.pdf › 4/G0031128.pdf]

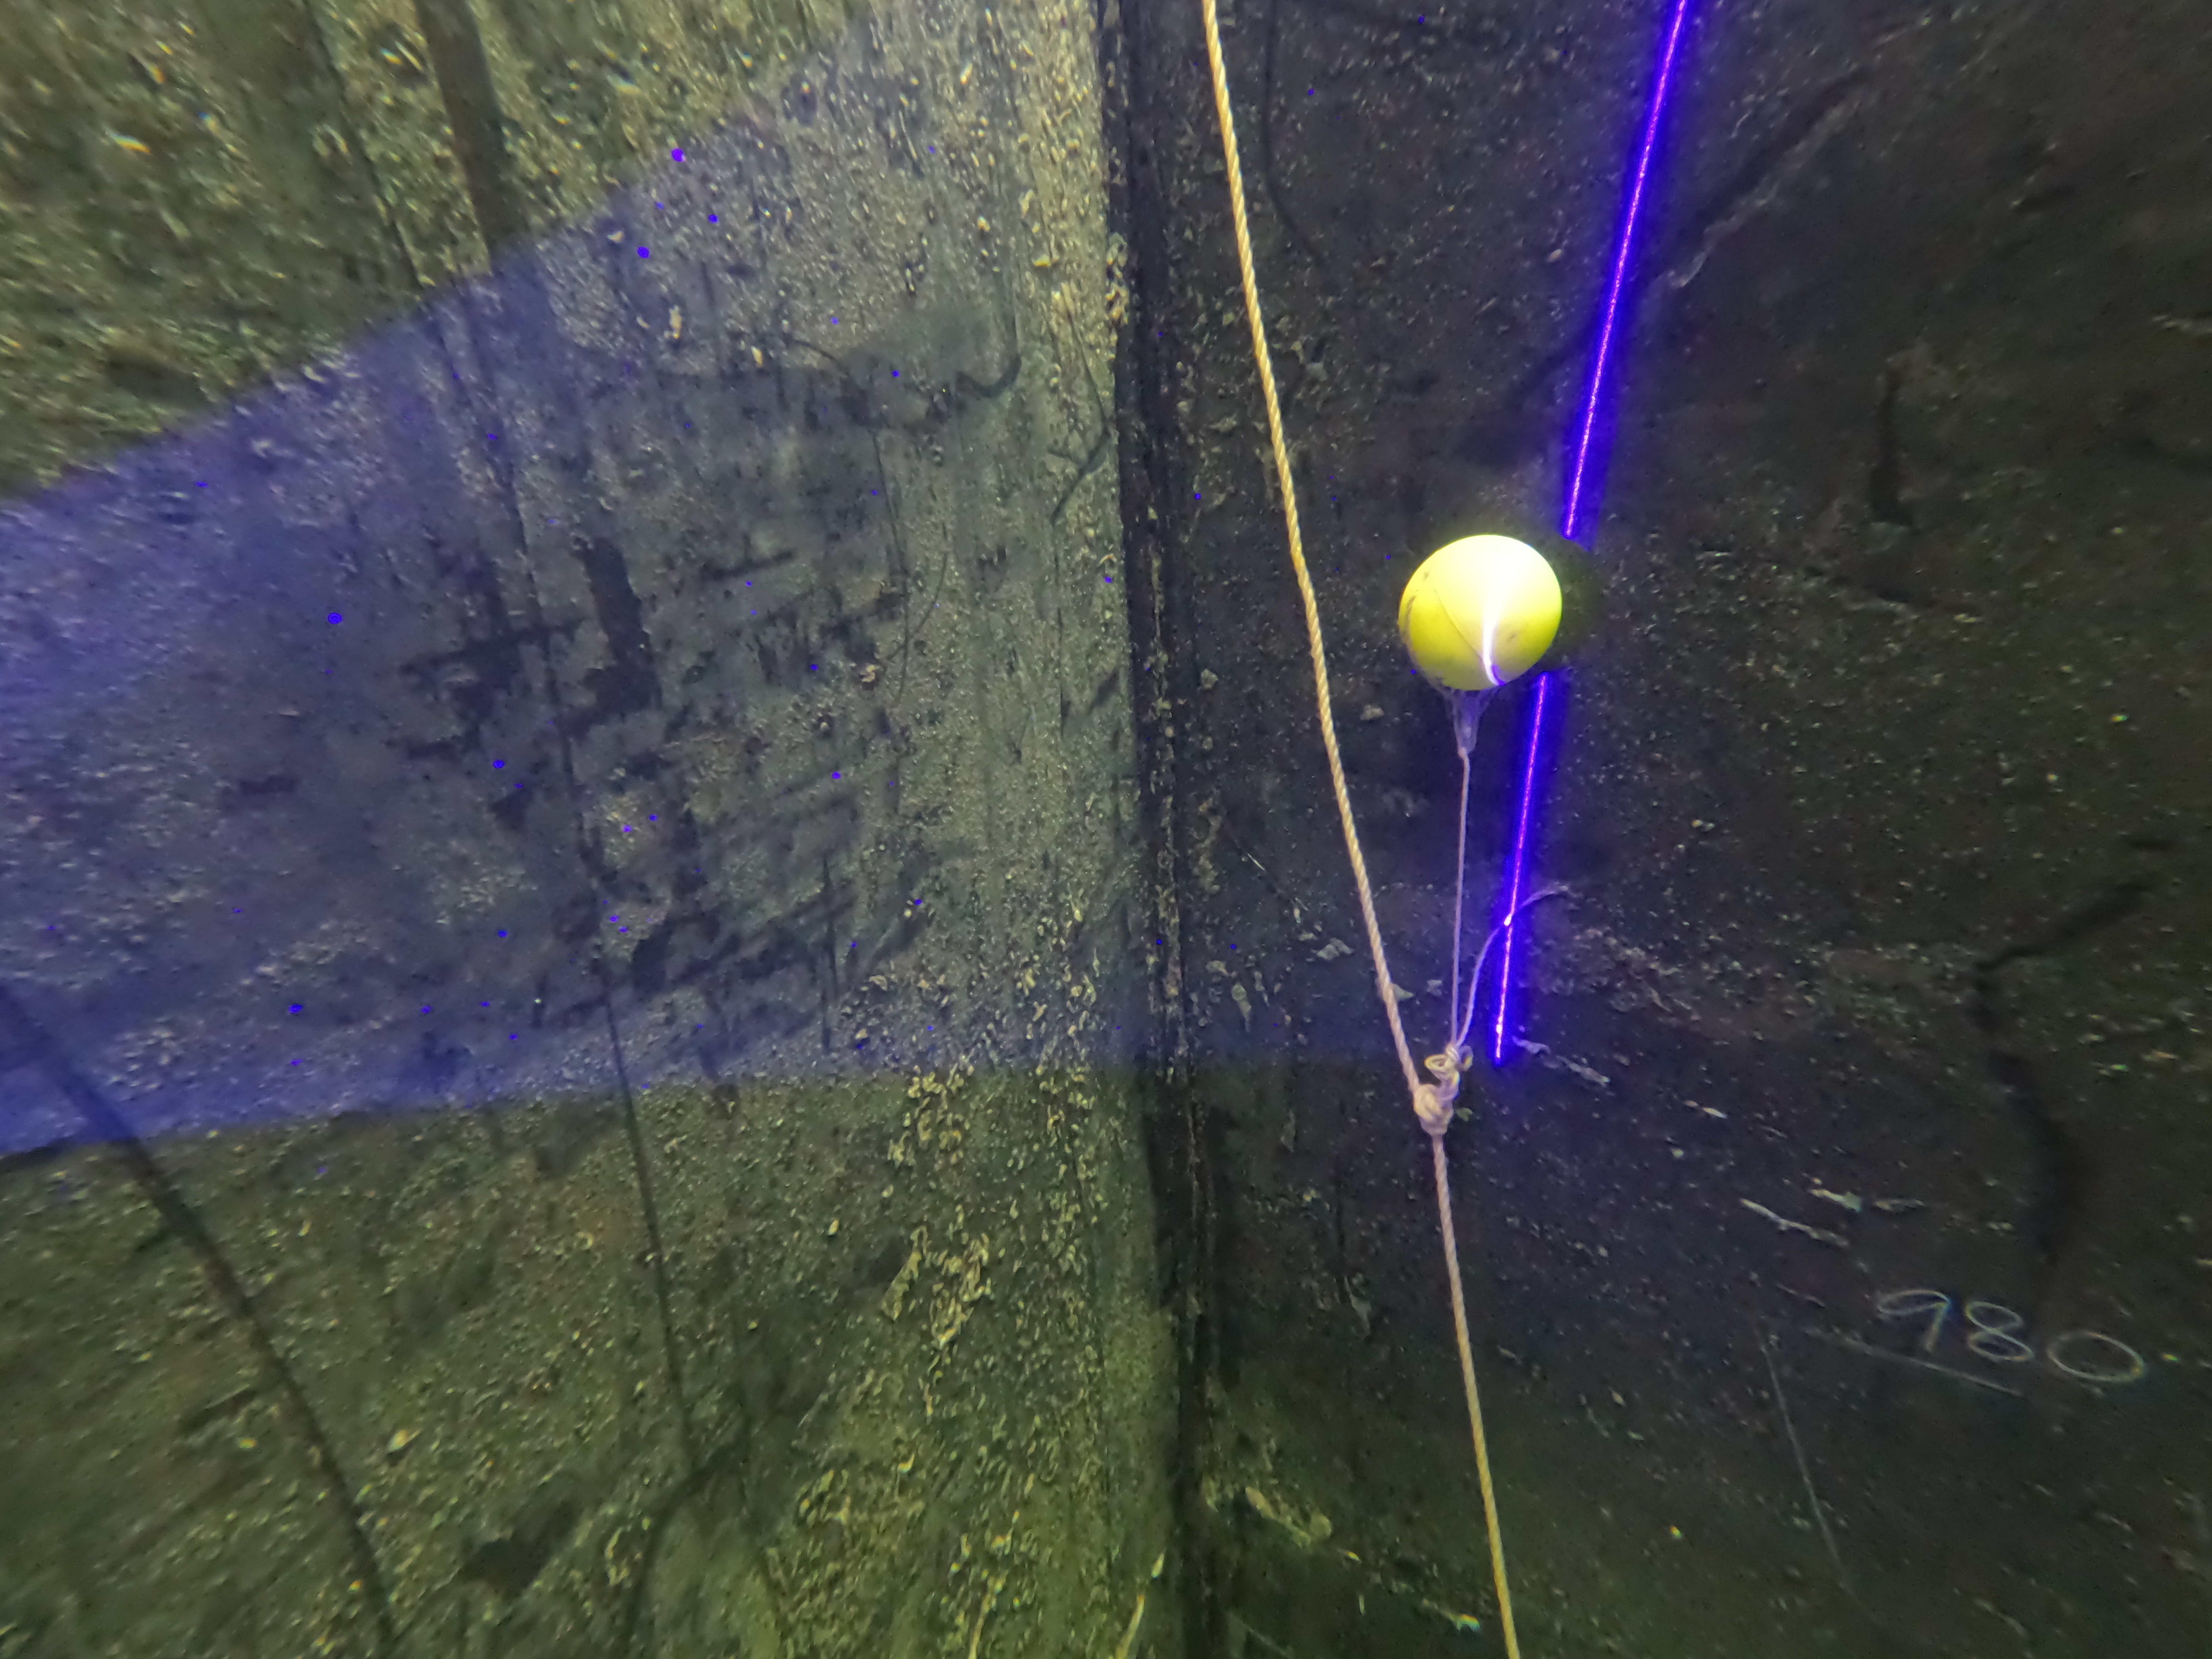

980

Supplement: Supplementary file 336 [file G0031129.pdf › 4/G0031129.pdf]

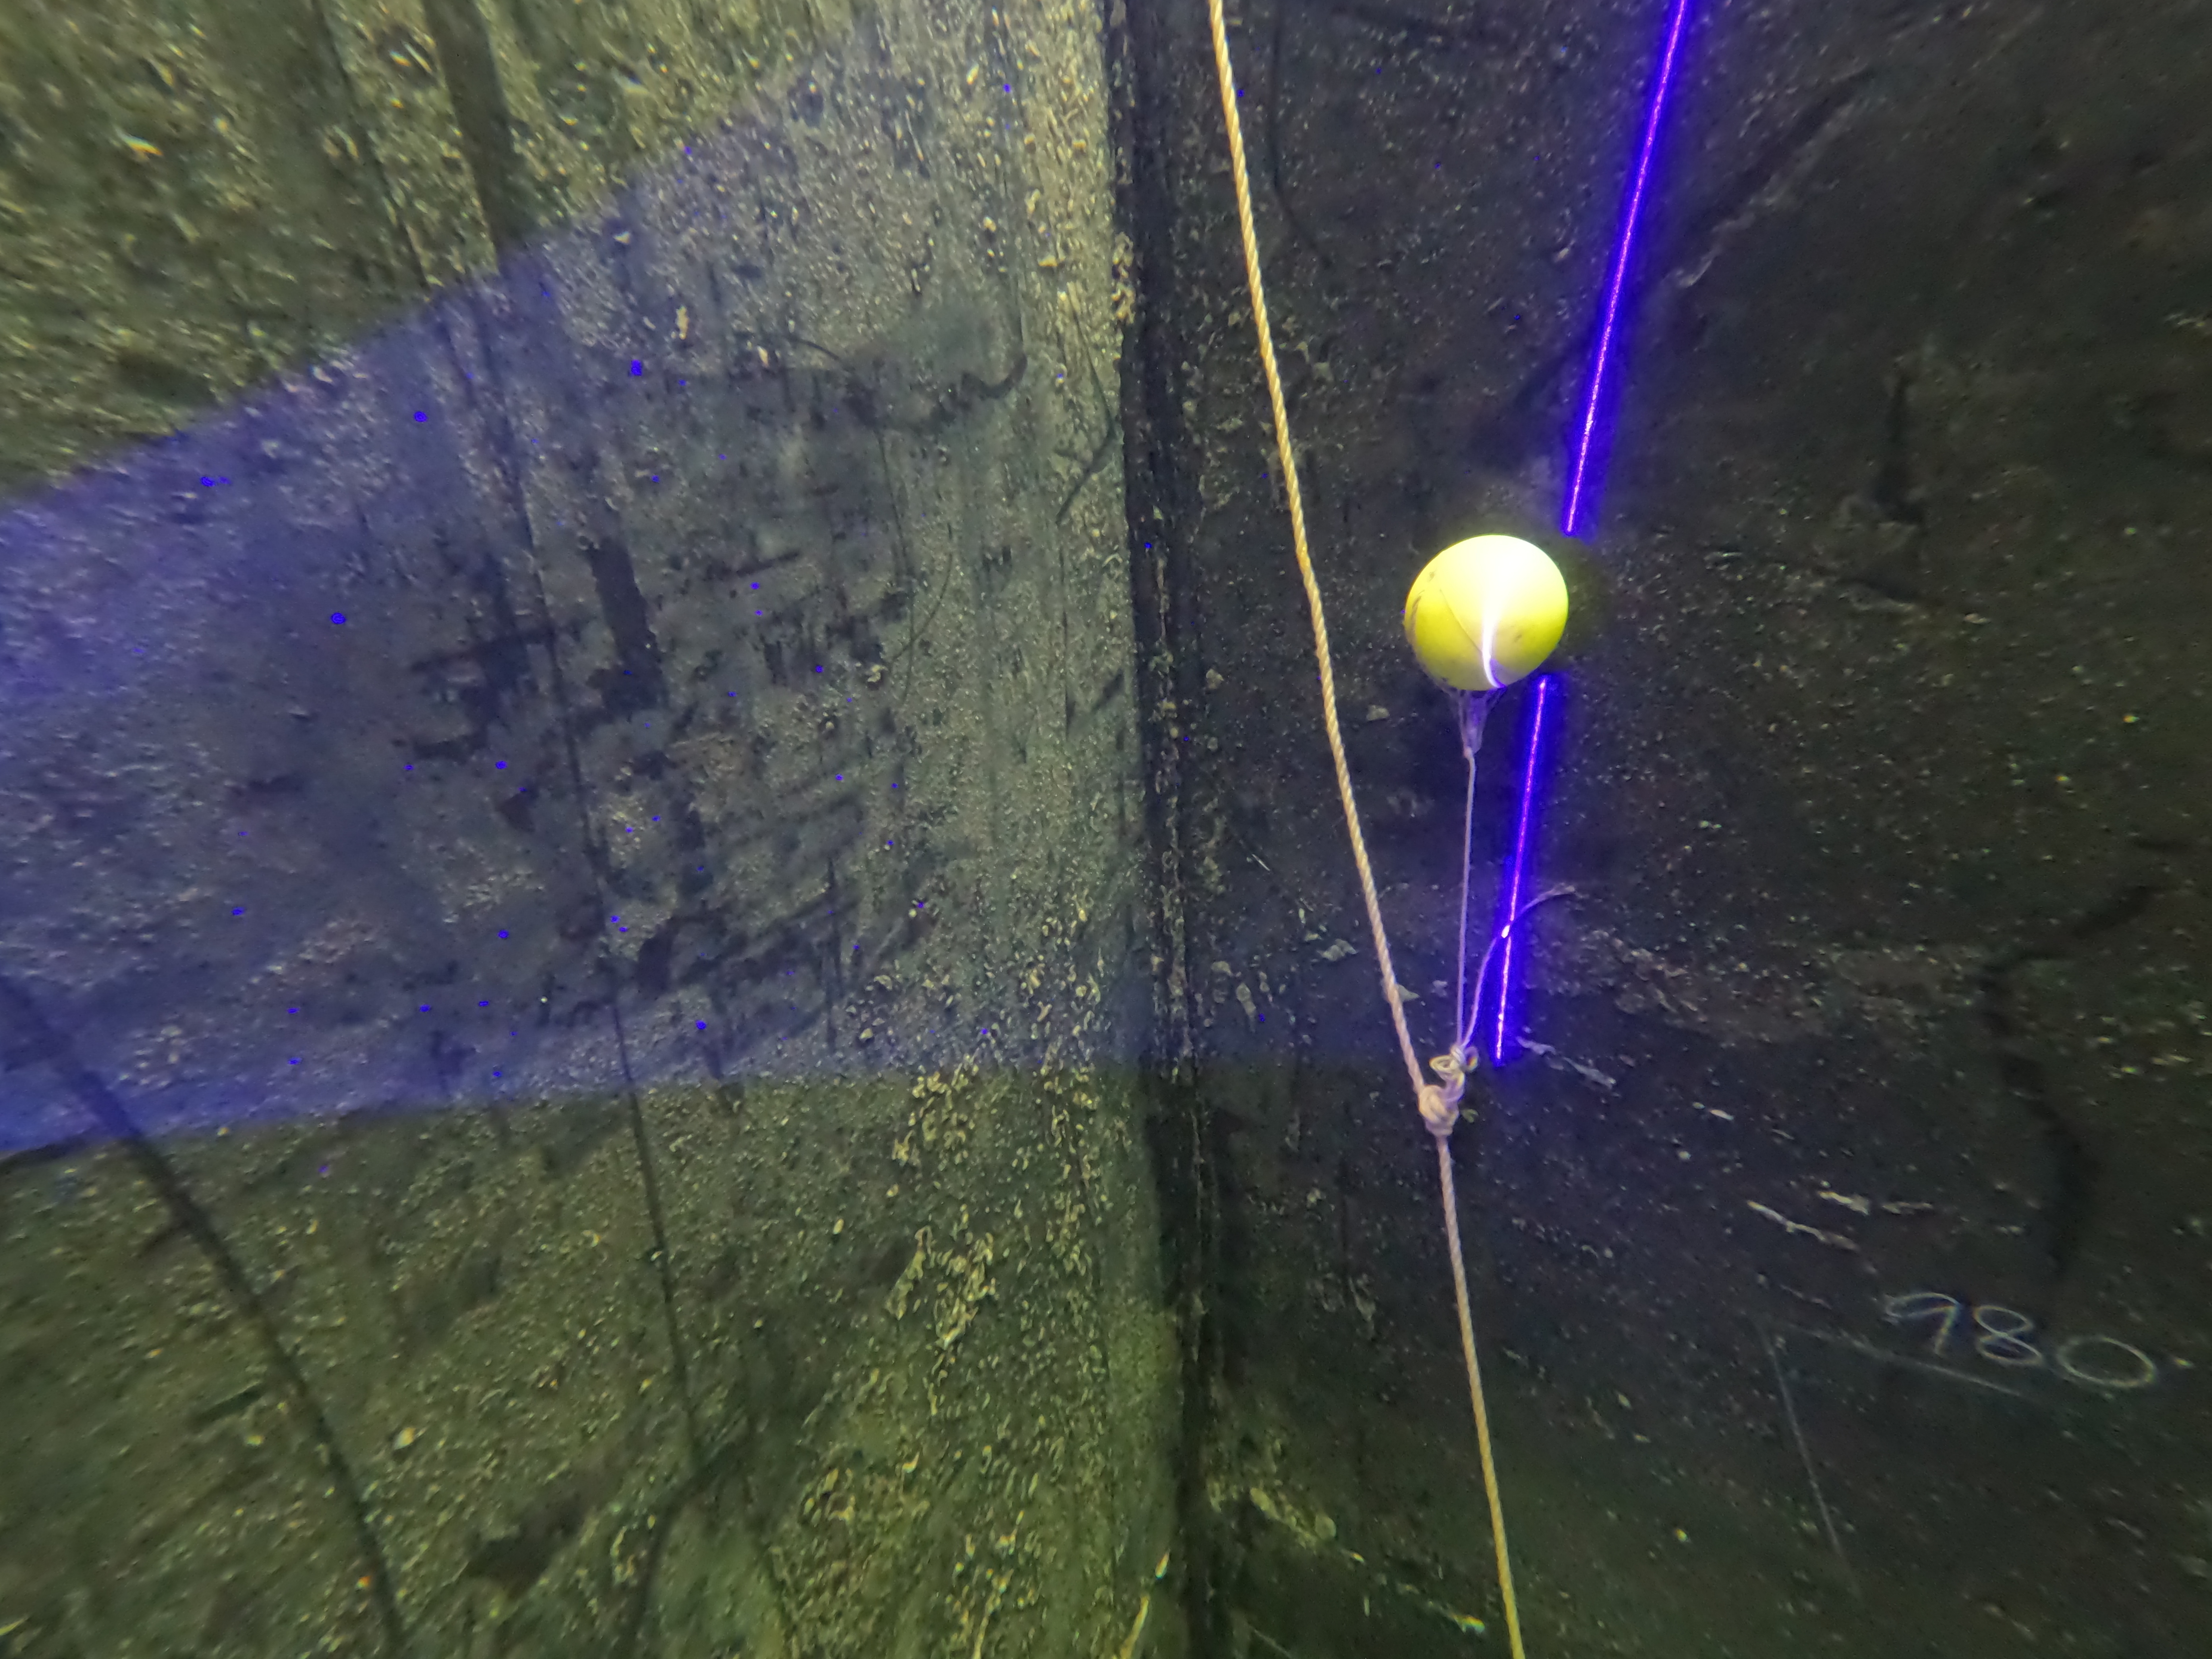

980

Supplement: Supplementary file 337 [file G0031130.pdf › 4/G0031130.pdf]

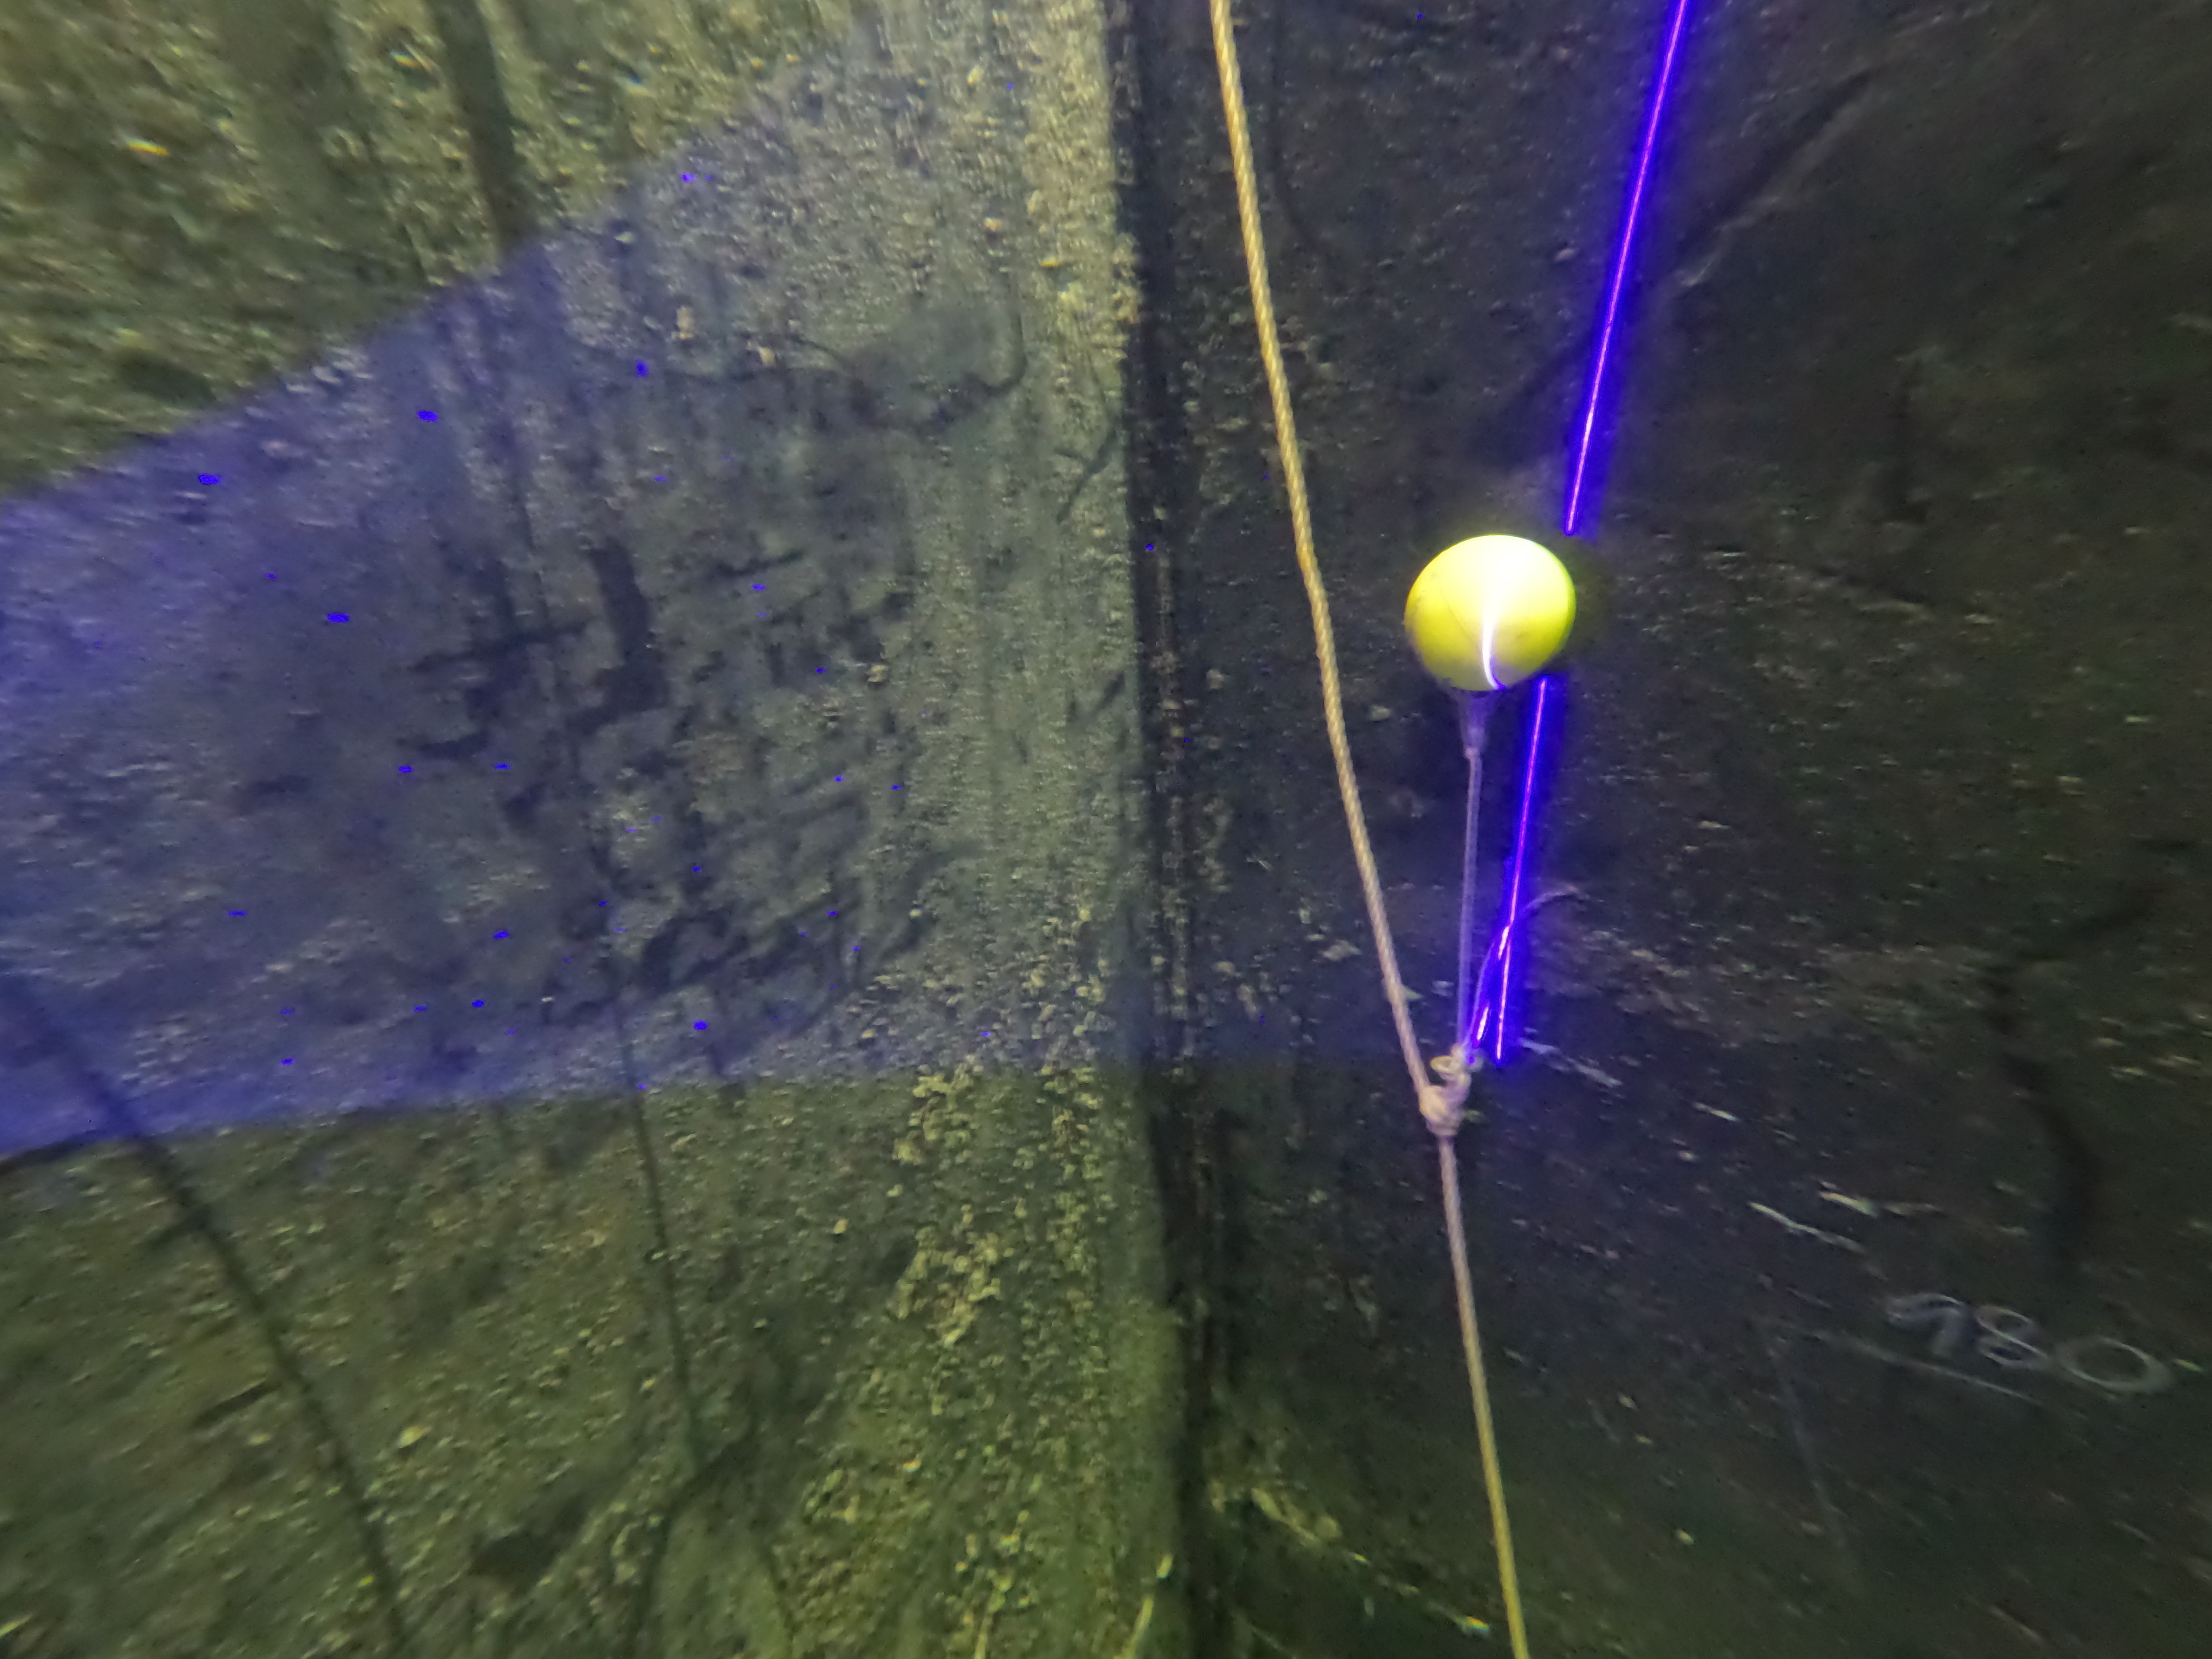

Supplement: Supplementary file 338 [file G0031131.pdf › 4/G0031131.pdf]

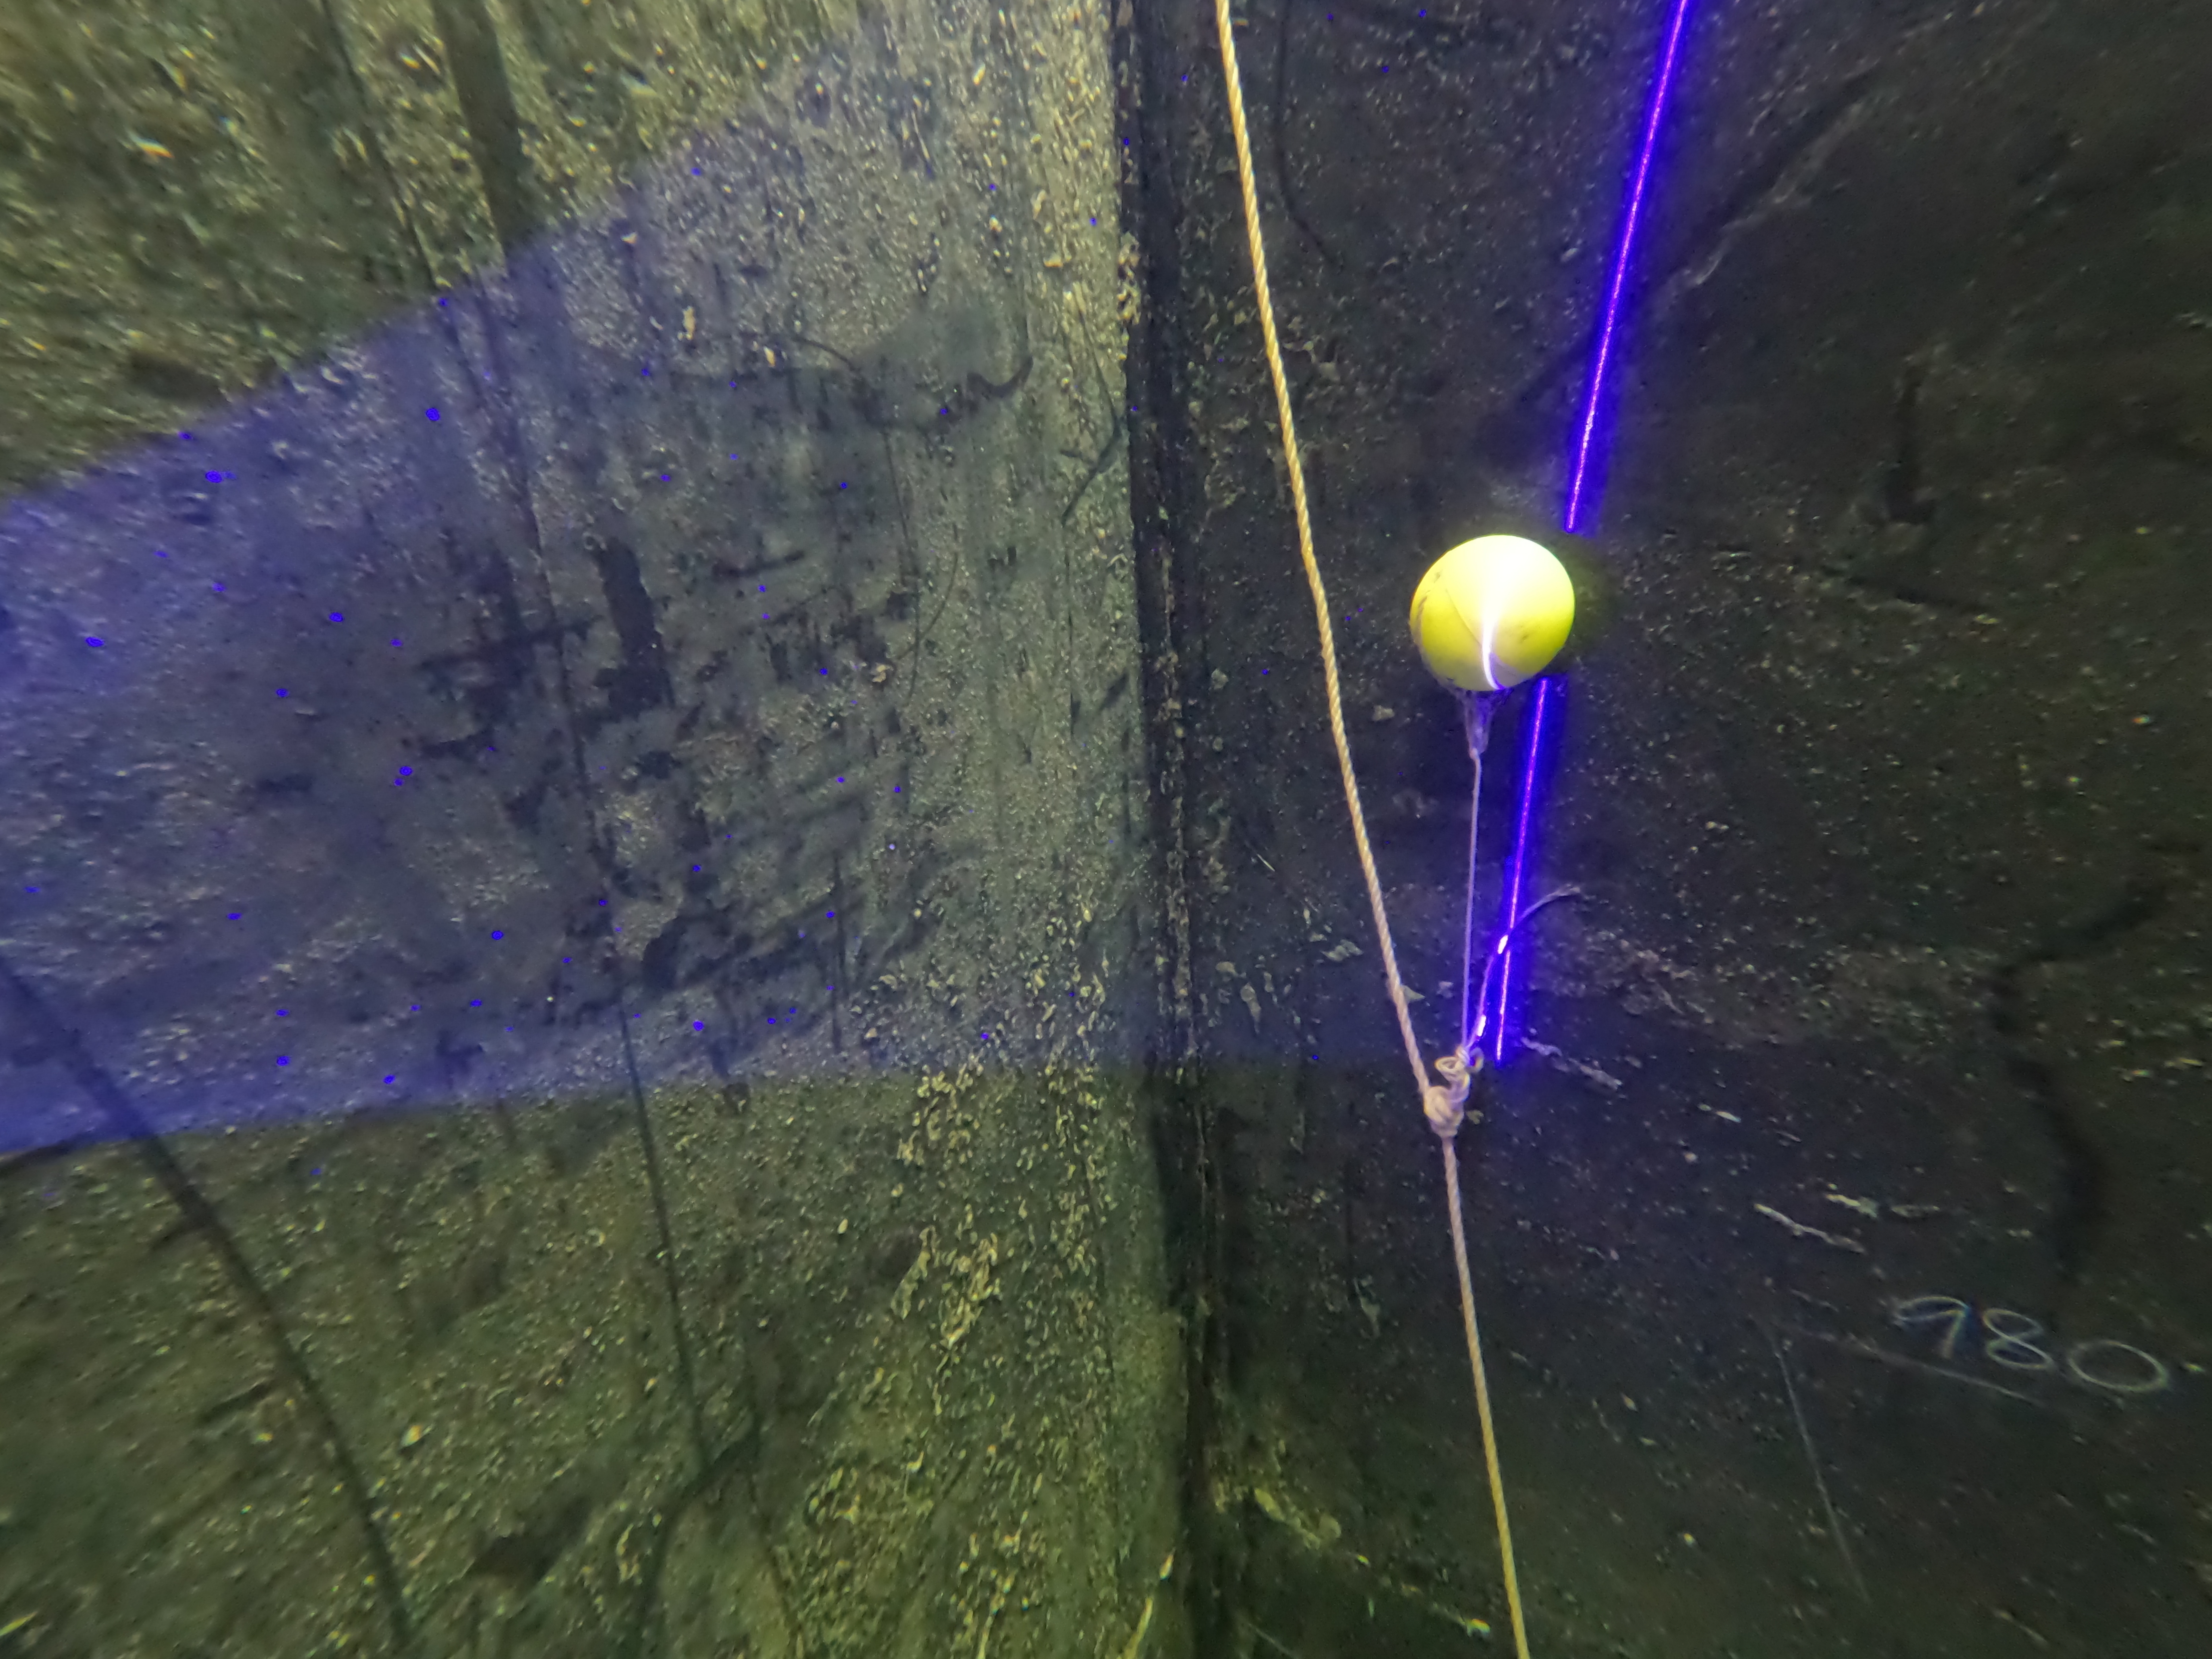

980

Supplement: Supplementary file 339 [file G0031132.pdf › 4/G0031132.pdf]

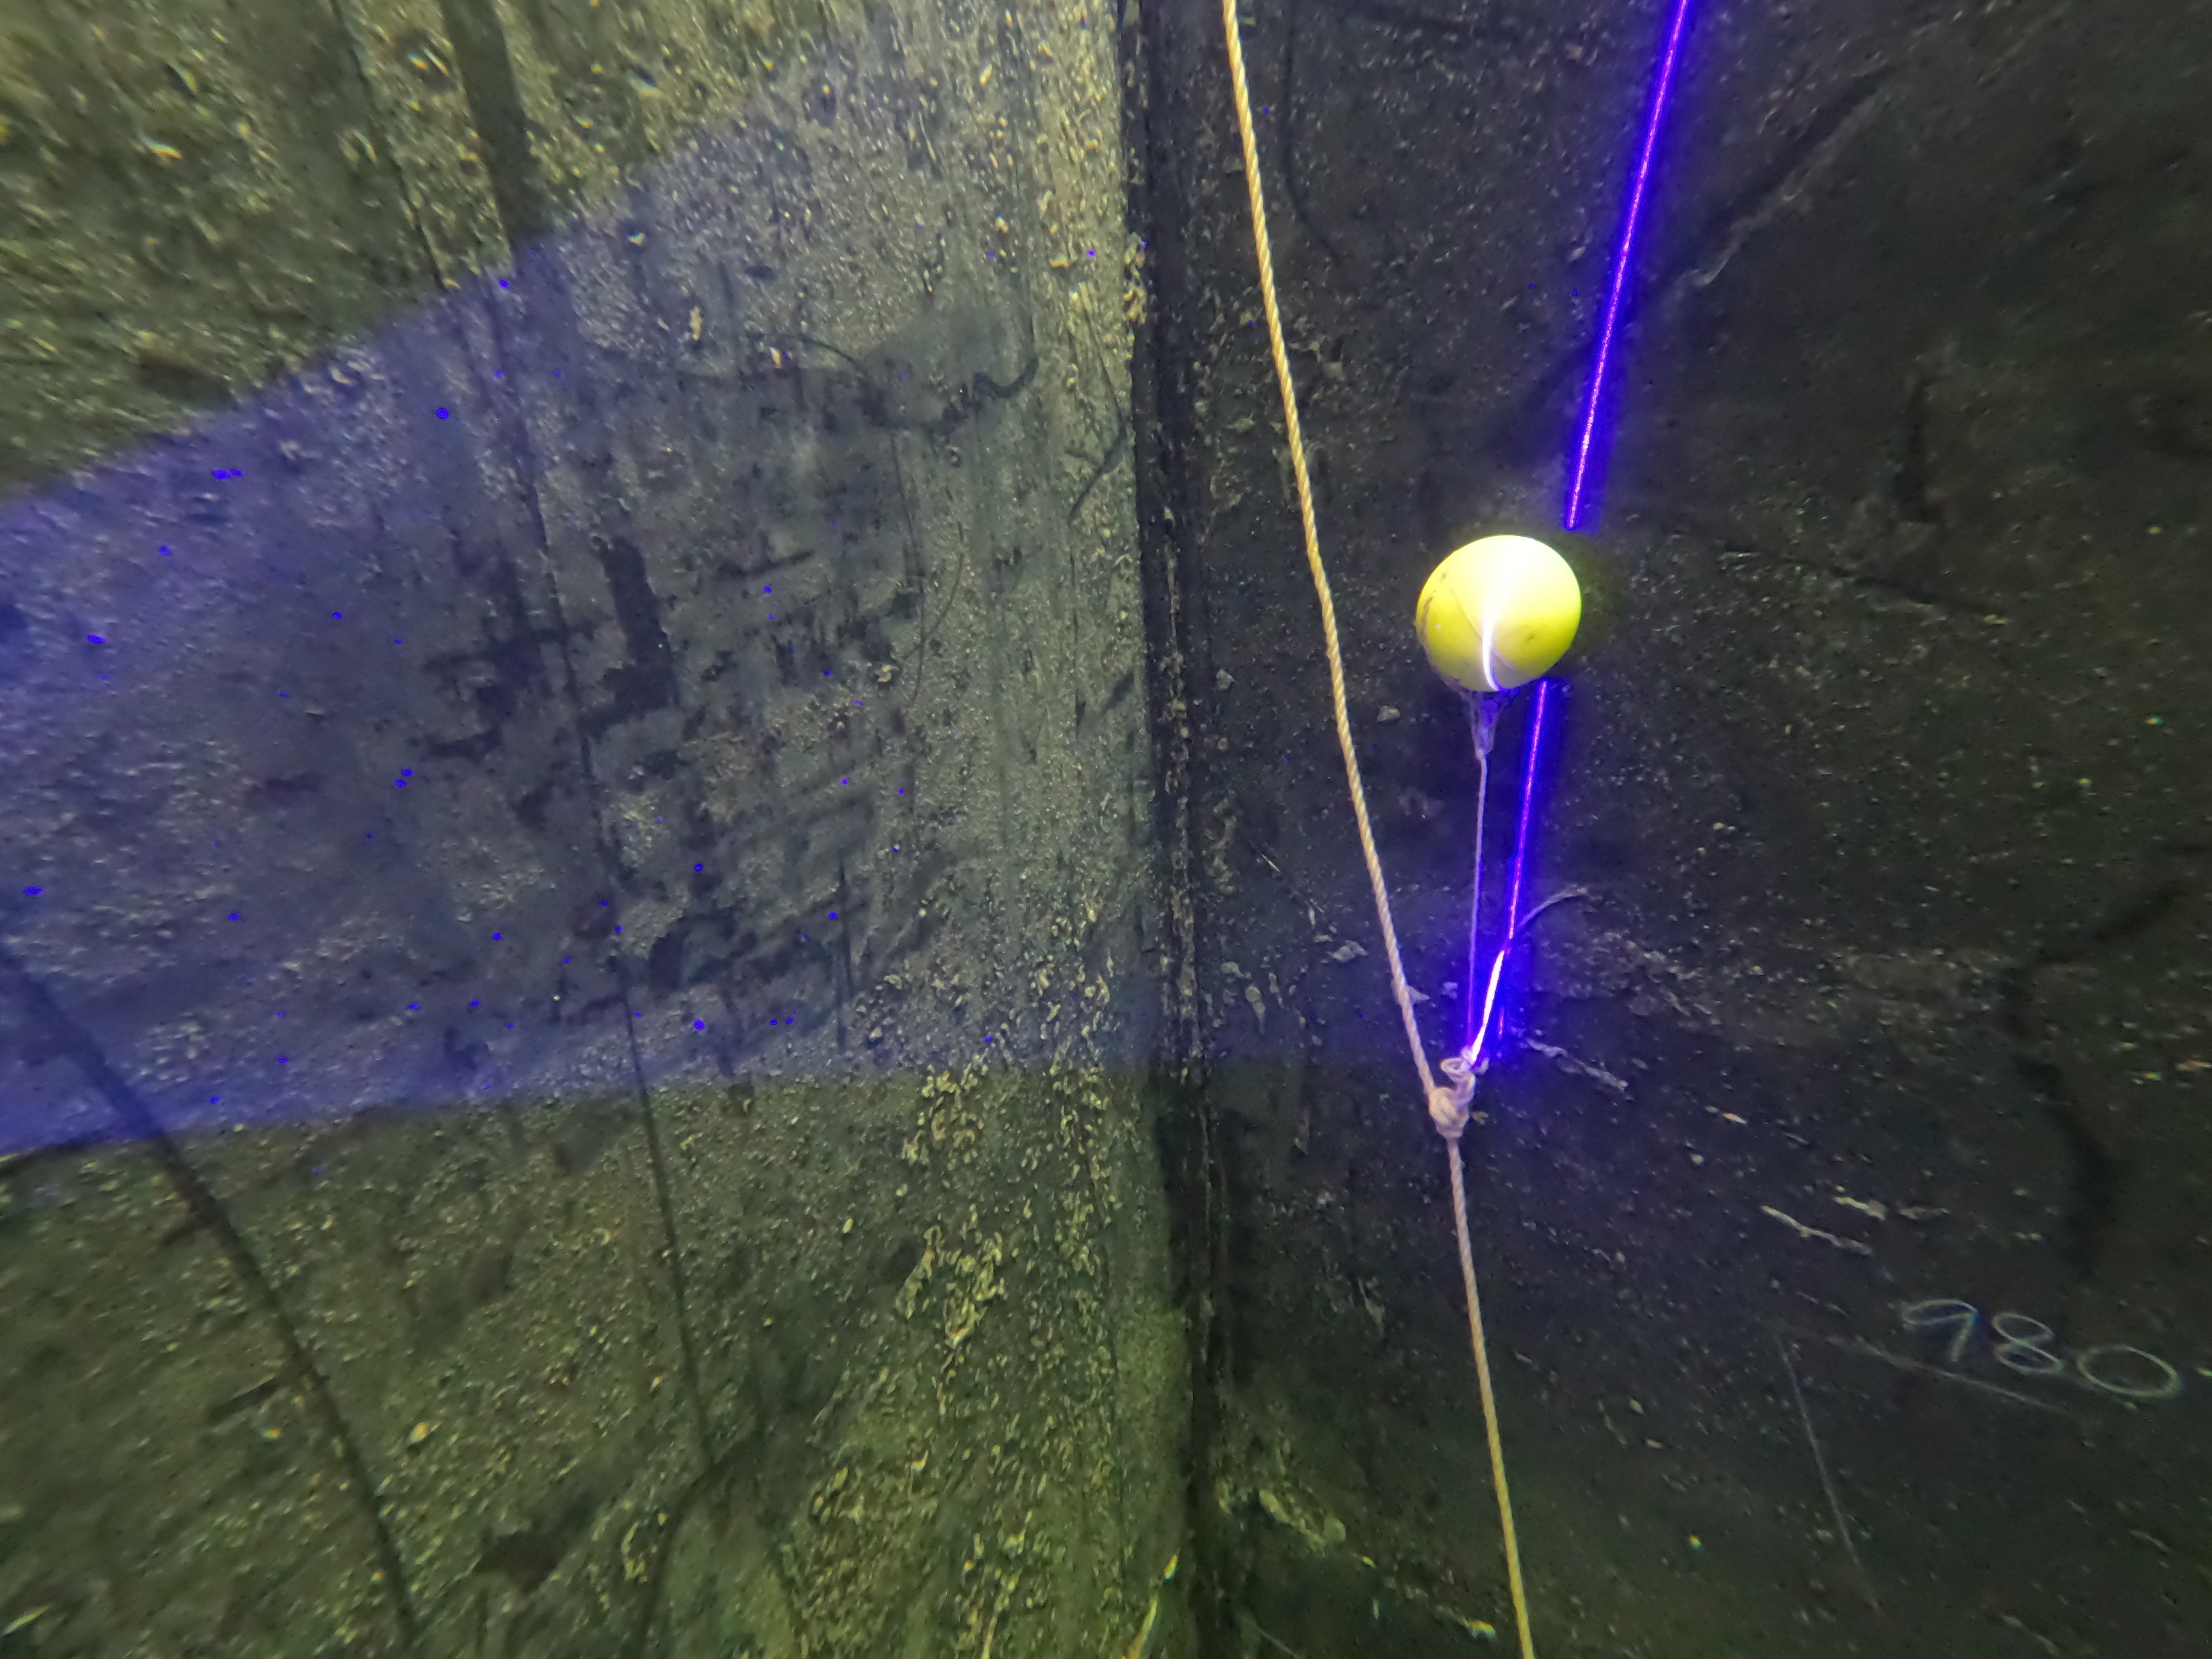

980

Supplement: Supplementary file 340 [file G0031133.pdf › 4/G0031133.pdf]

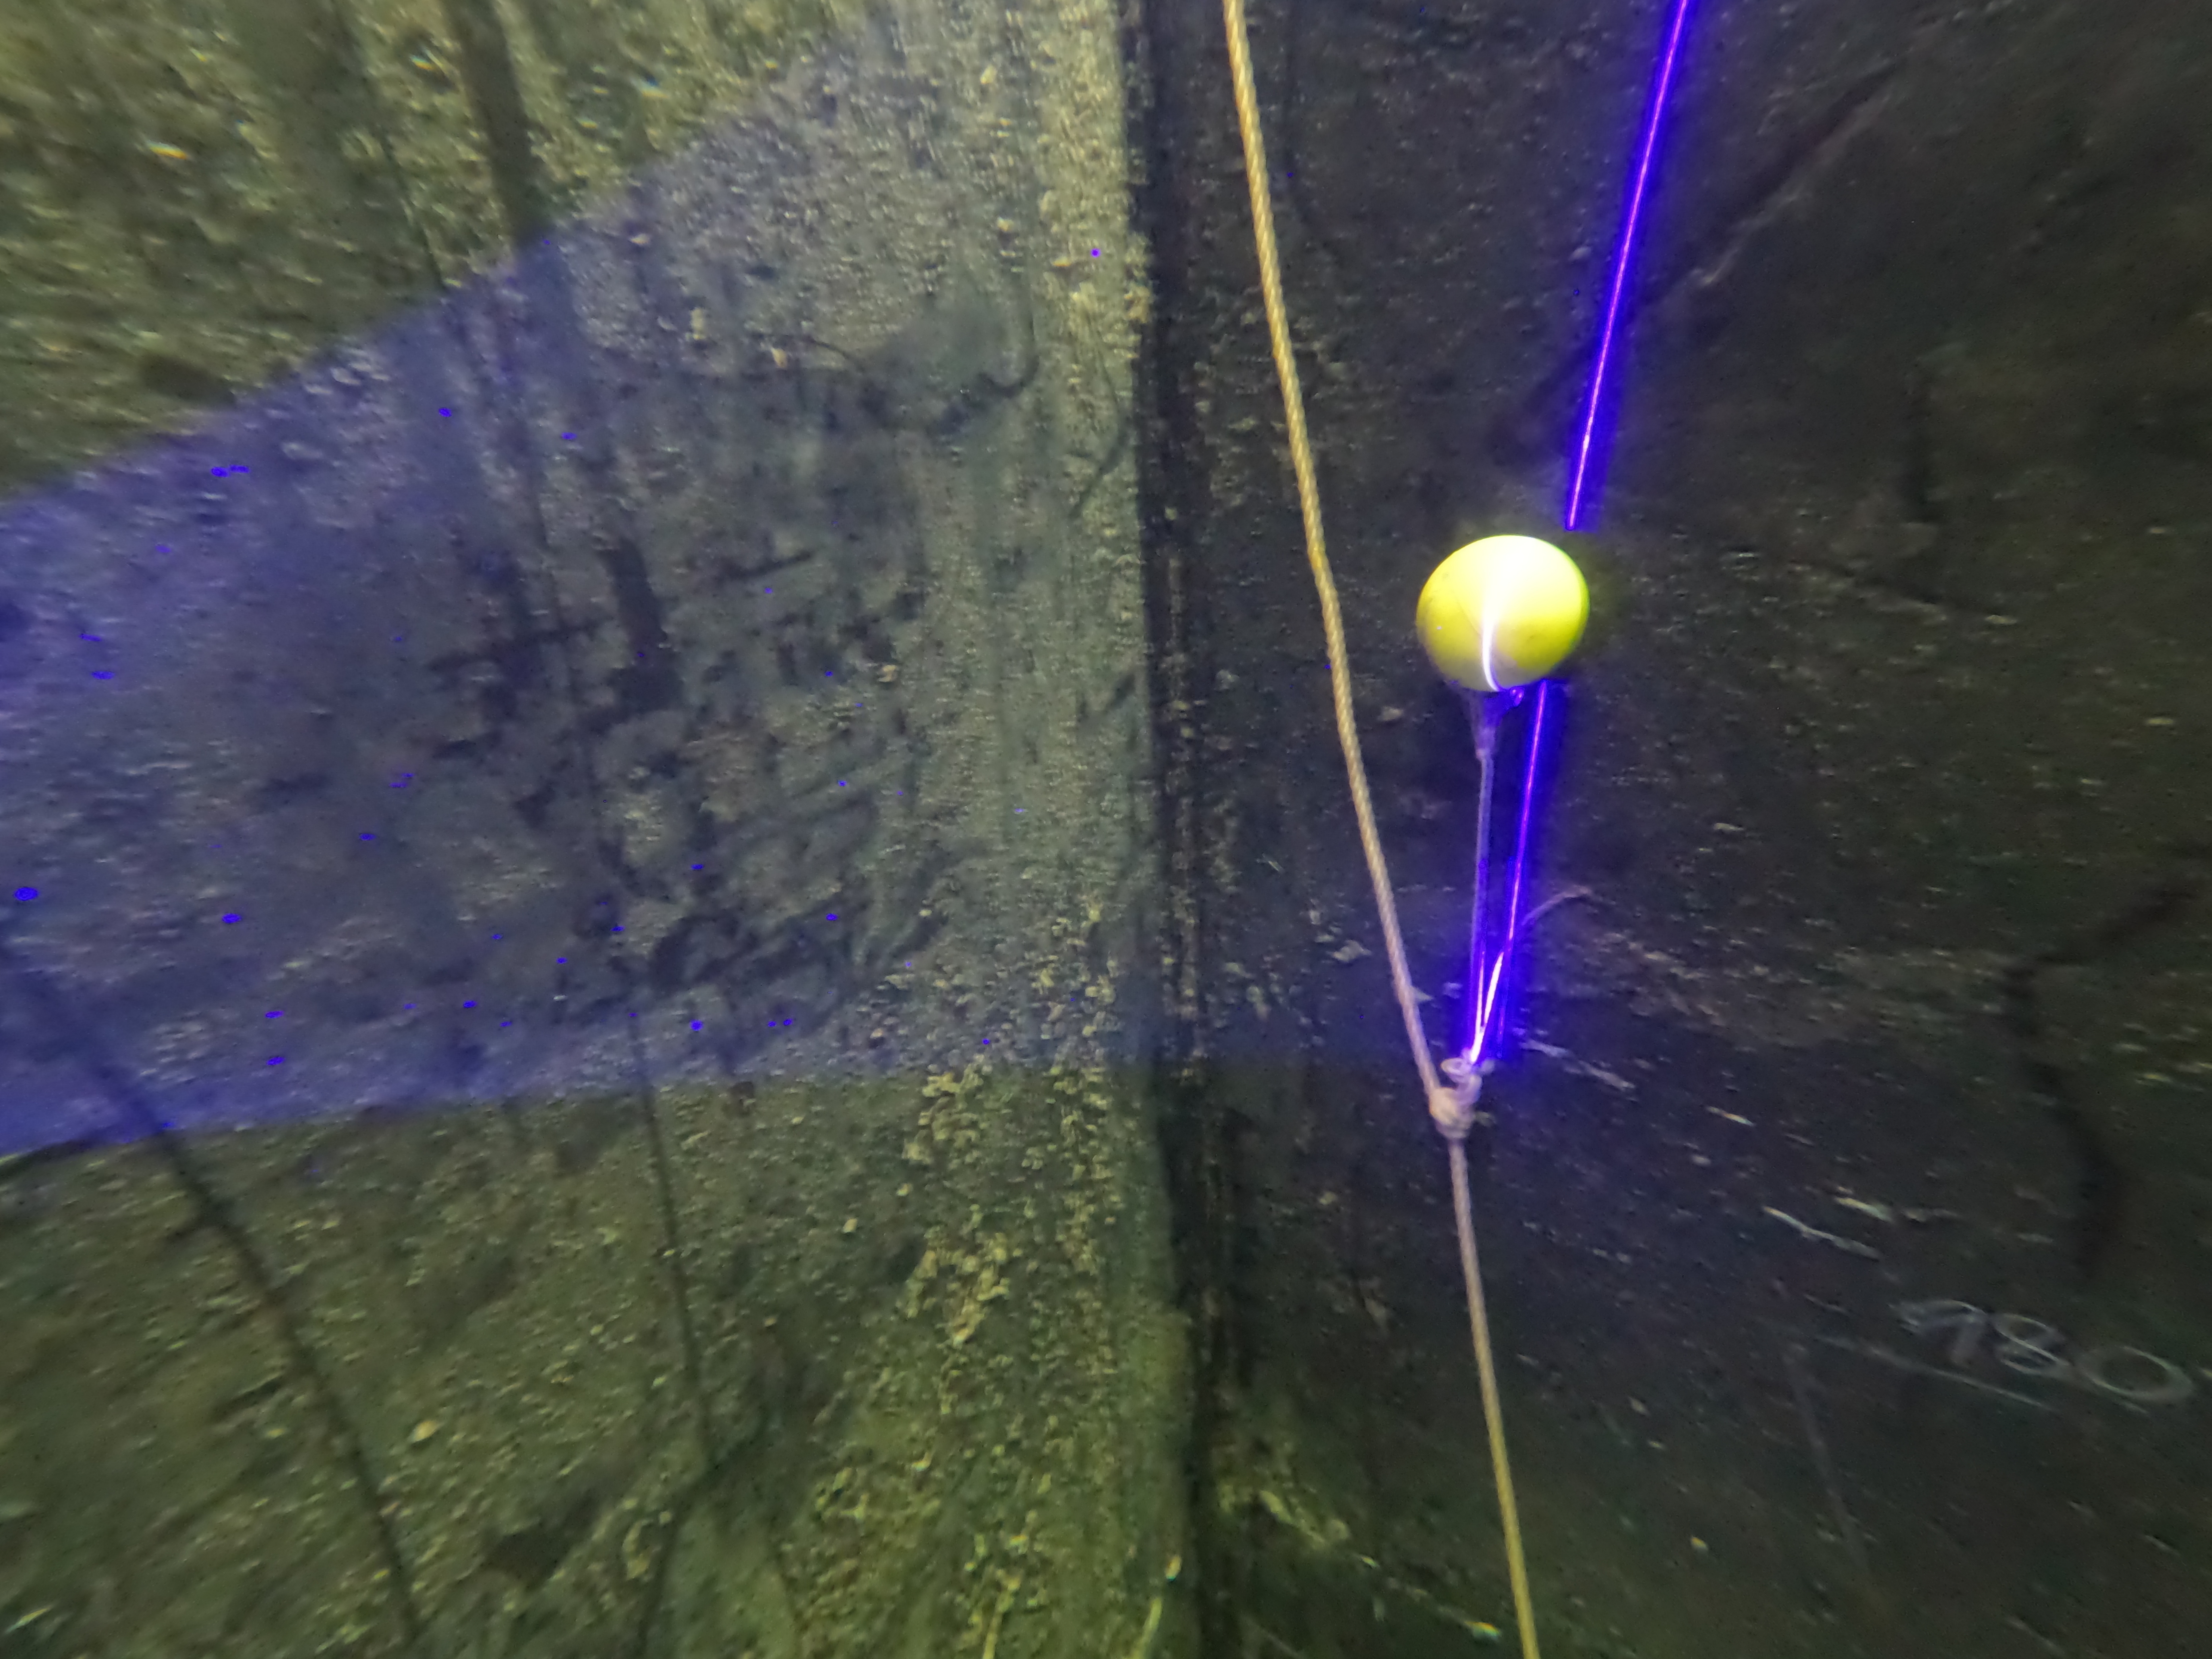

Supplement: Supplementary file 341 [file G0031134.pdf › 4/G0031134.pdf]

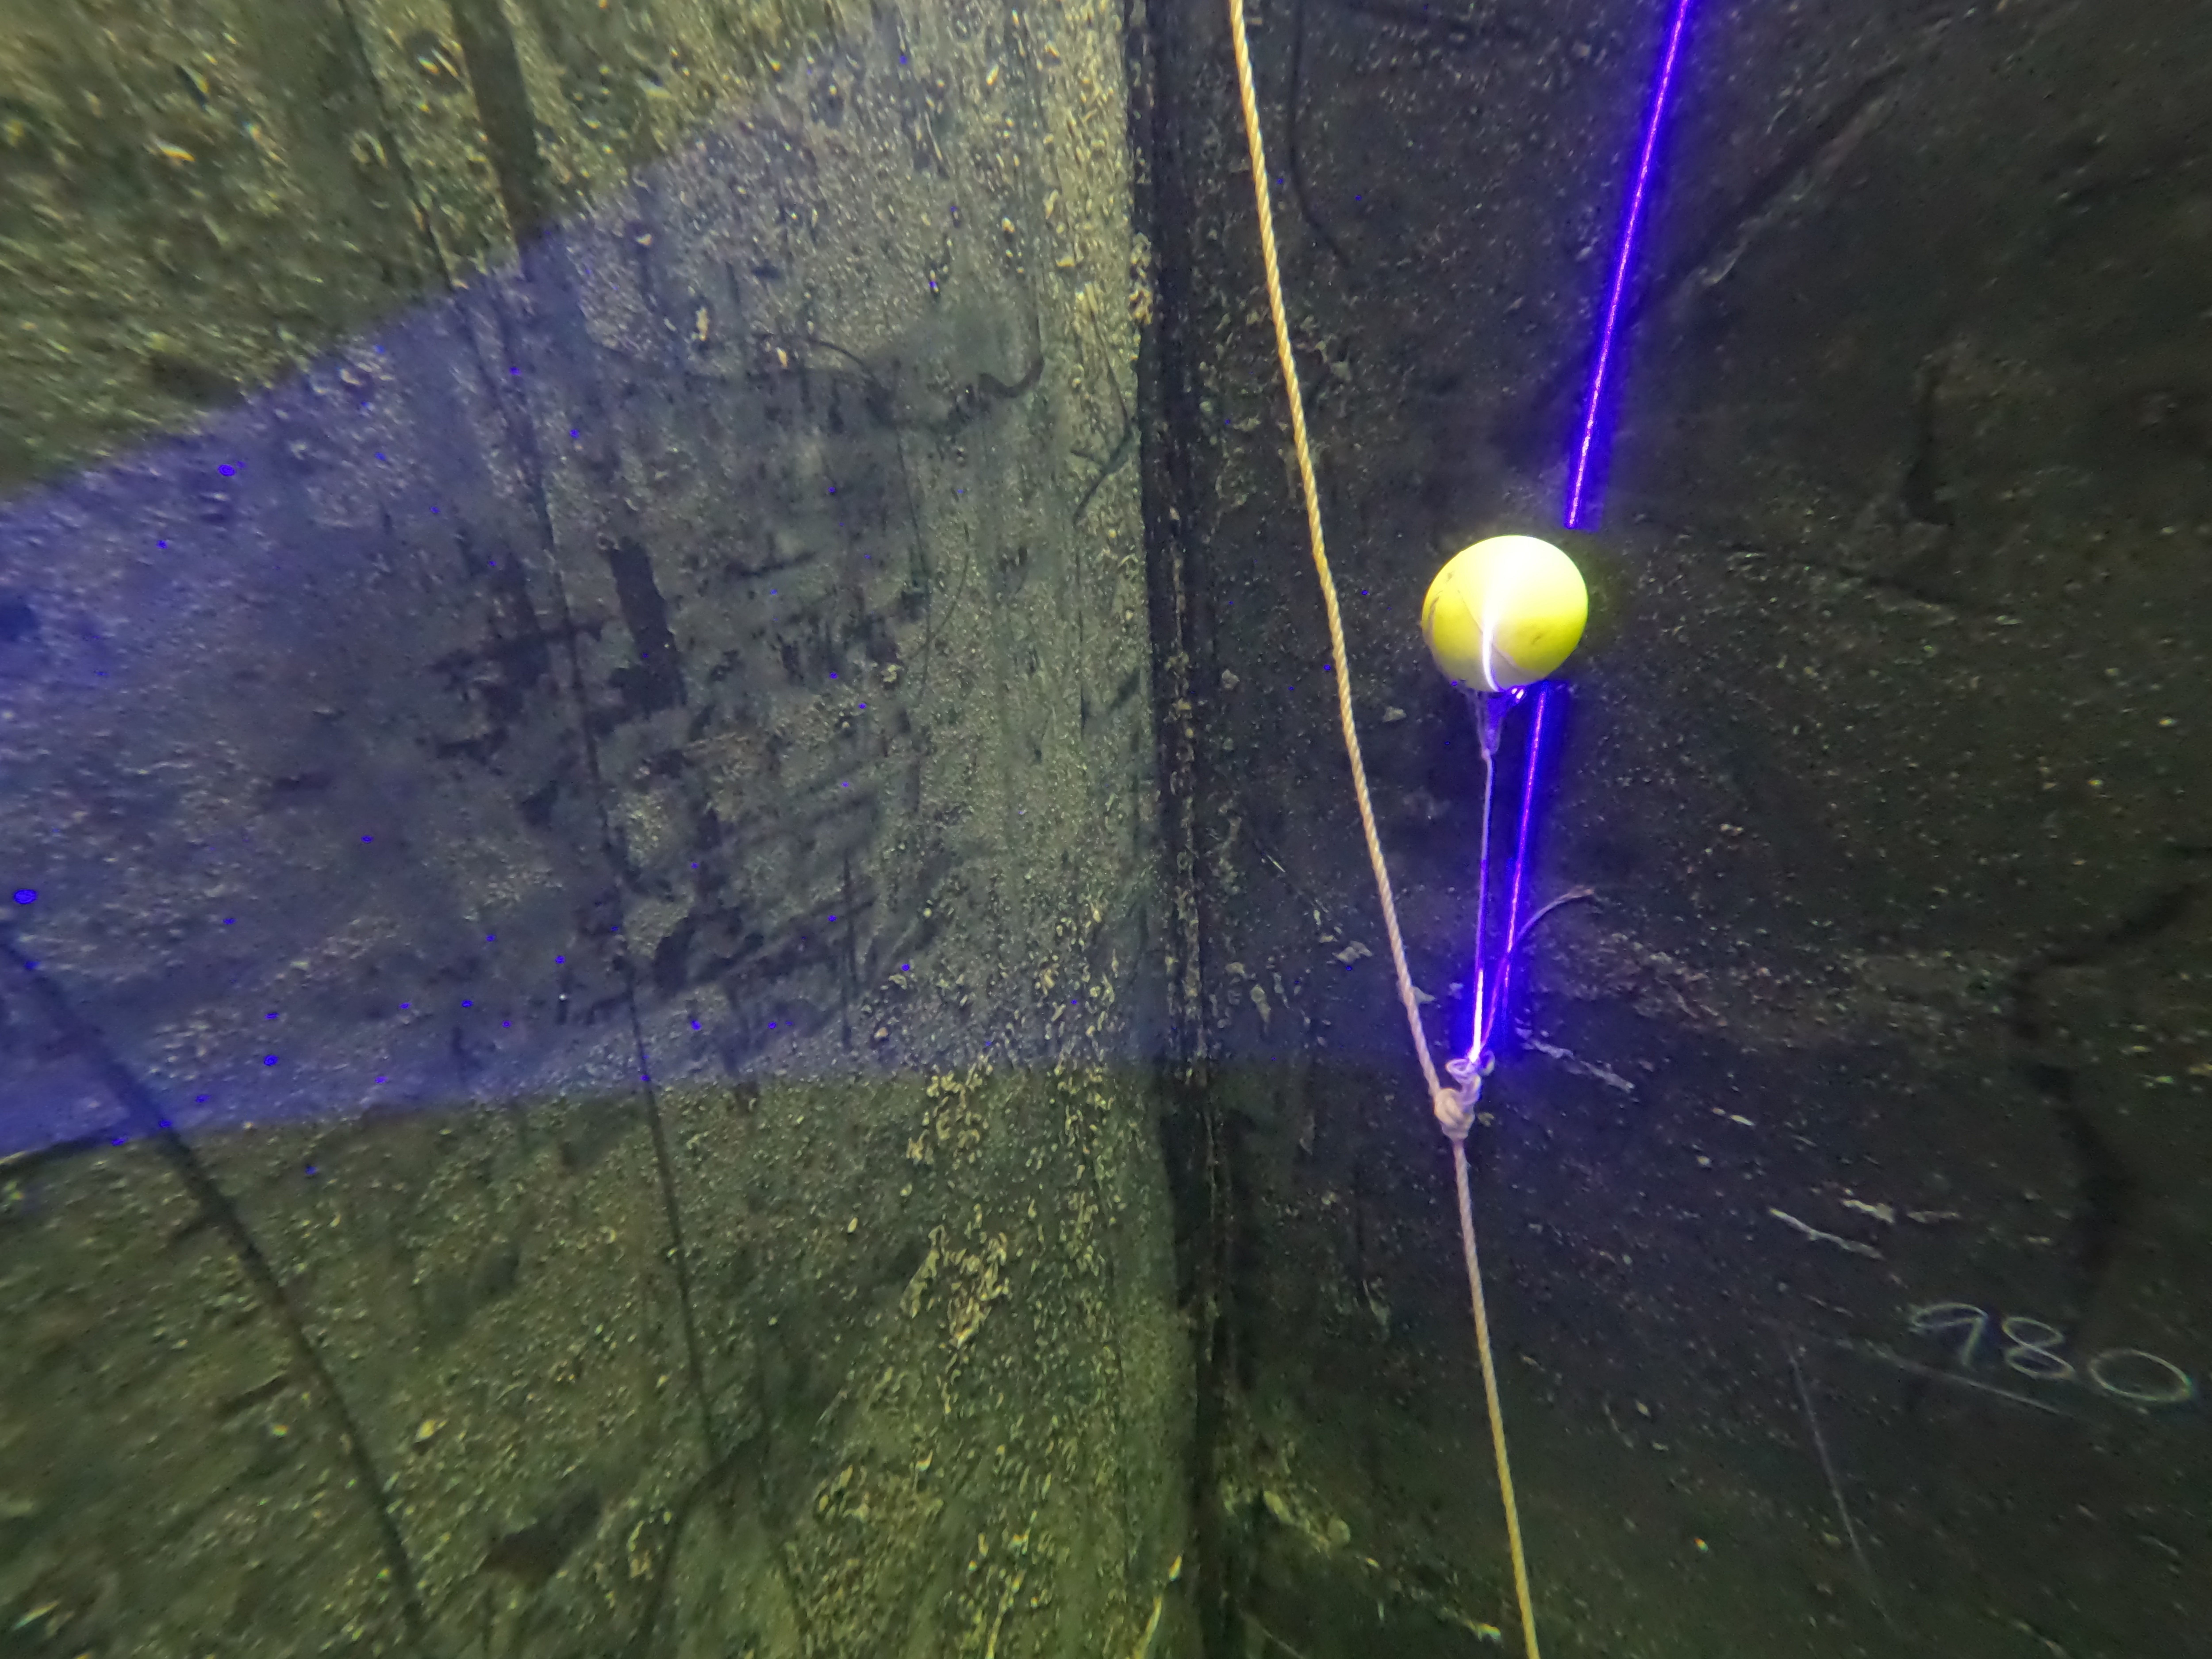

Supplement: Supplementary file 342 [file G0031135.pdf › 4/G0031135.pdf]

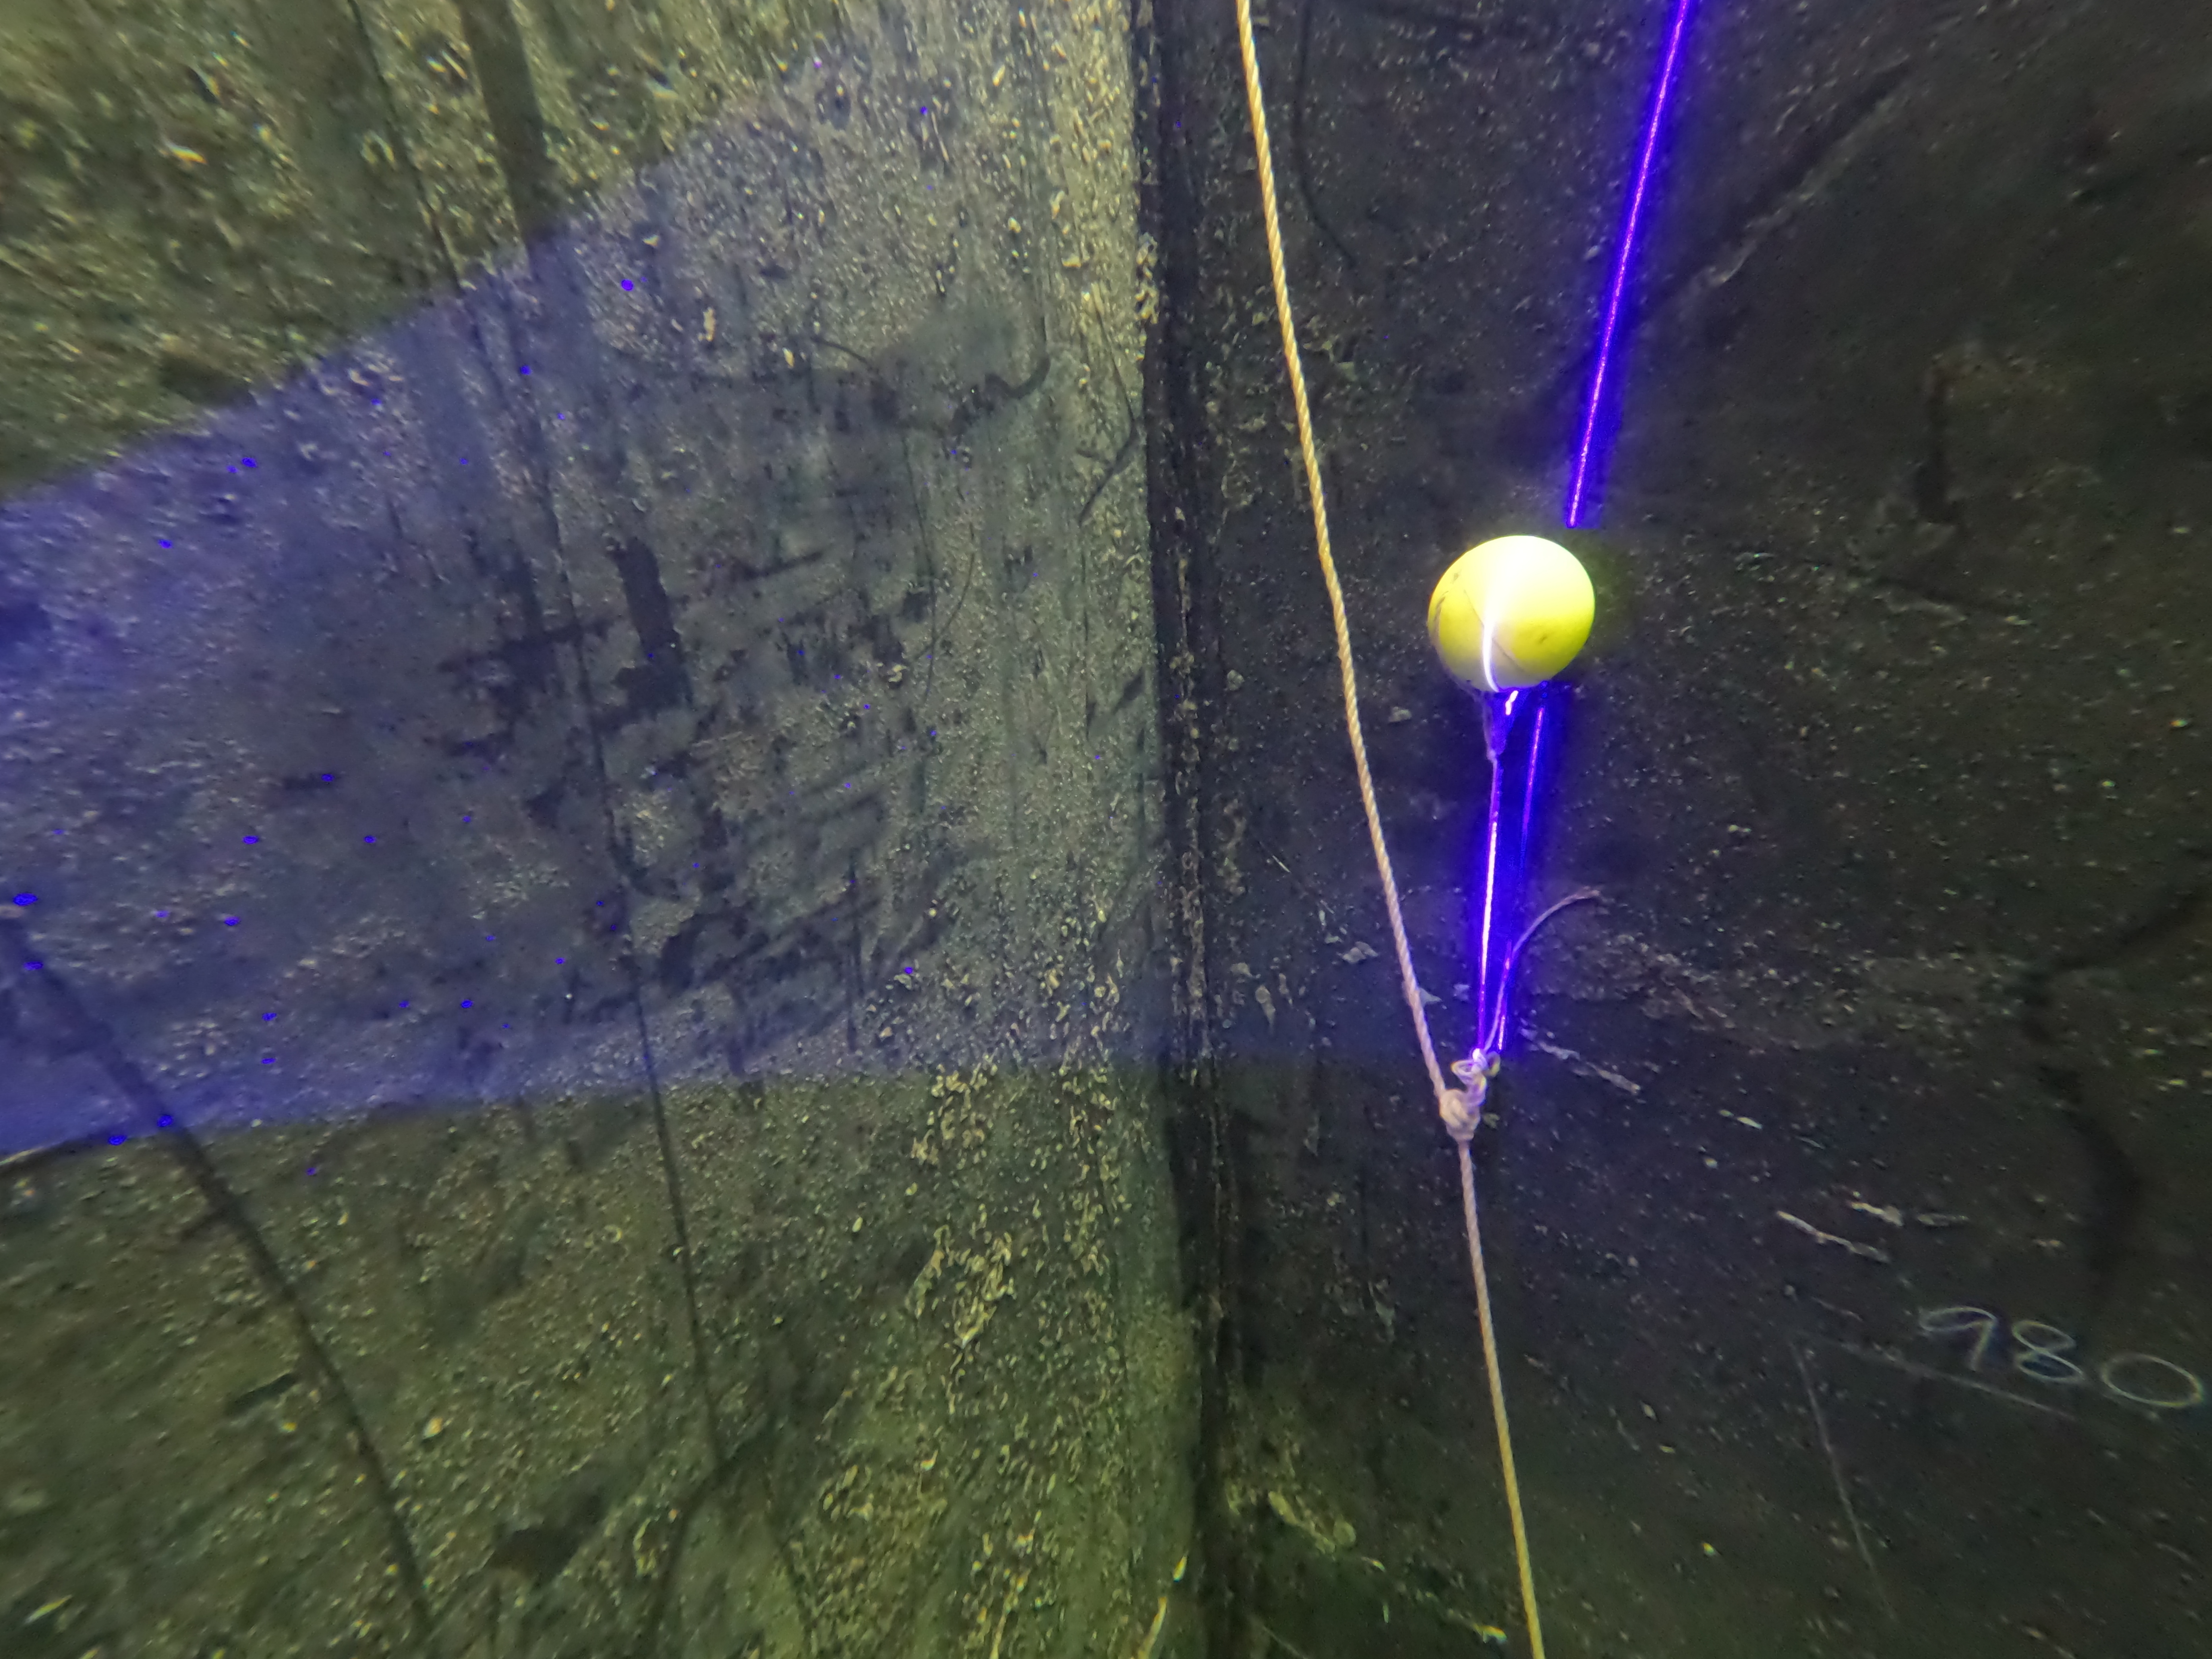

980

Supplement: Supplementary file 343 [file G0031136.pdf › 4/G0031136.pdf]

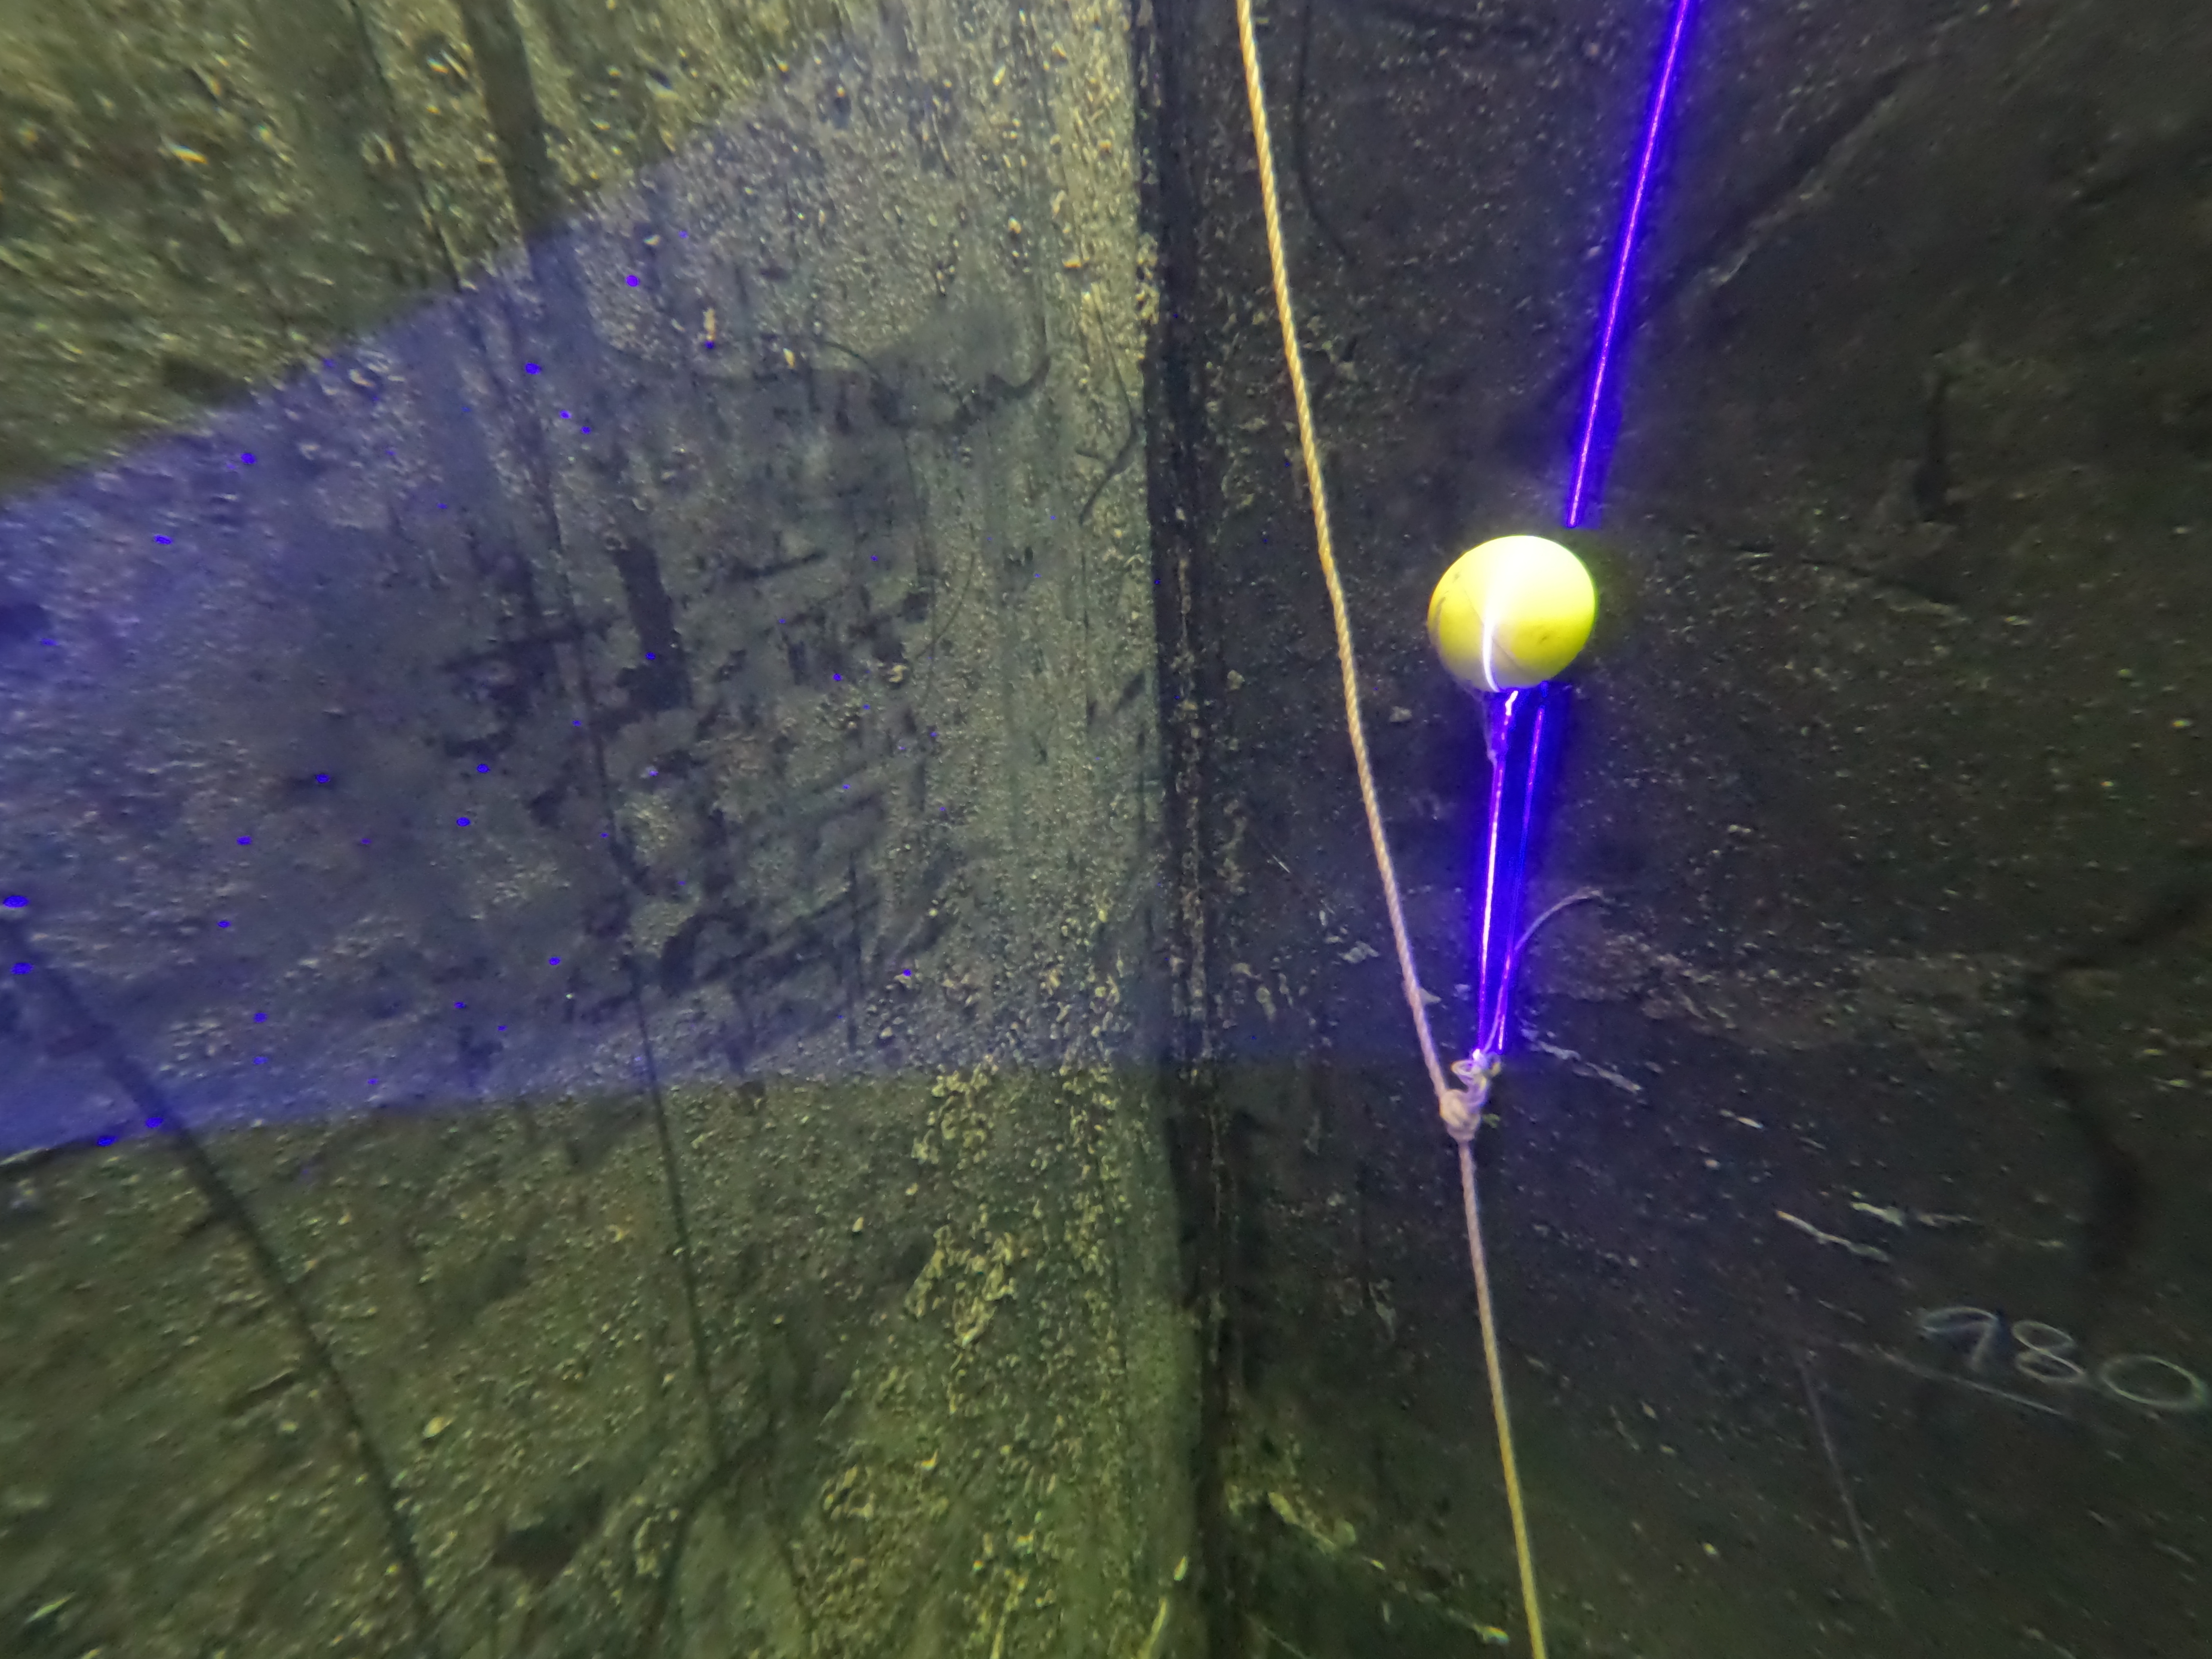

Supplement: Supplementary file 344 [file G0031137.pdf › 4/G0031137.pdf]

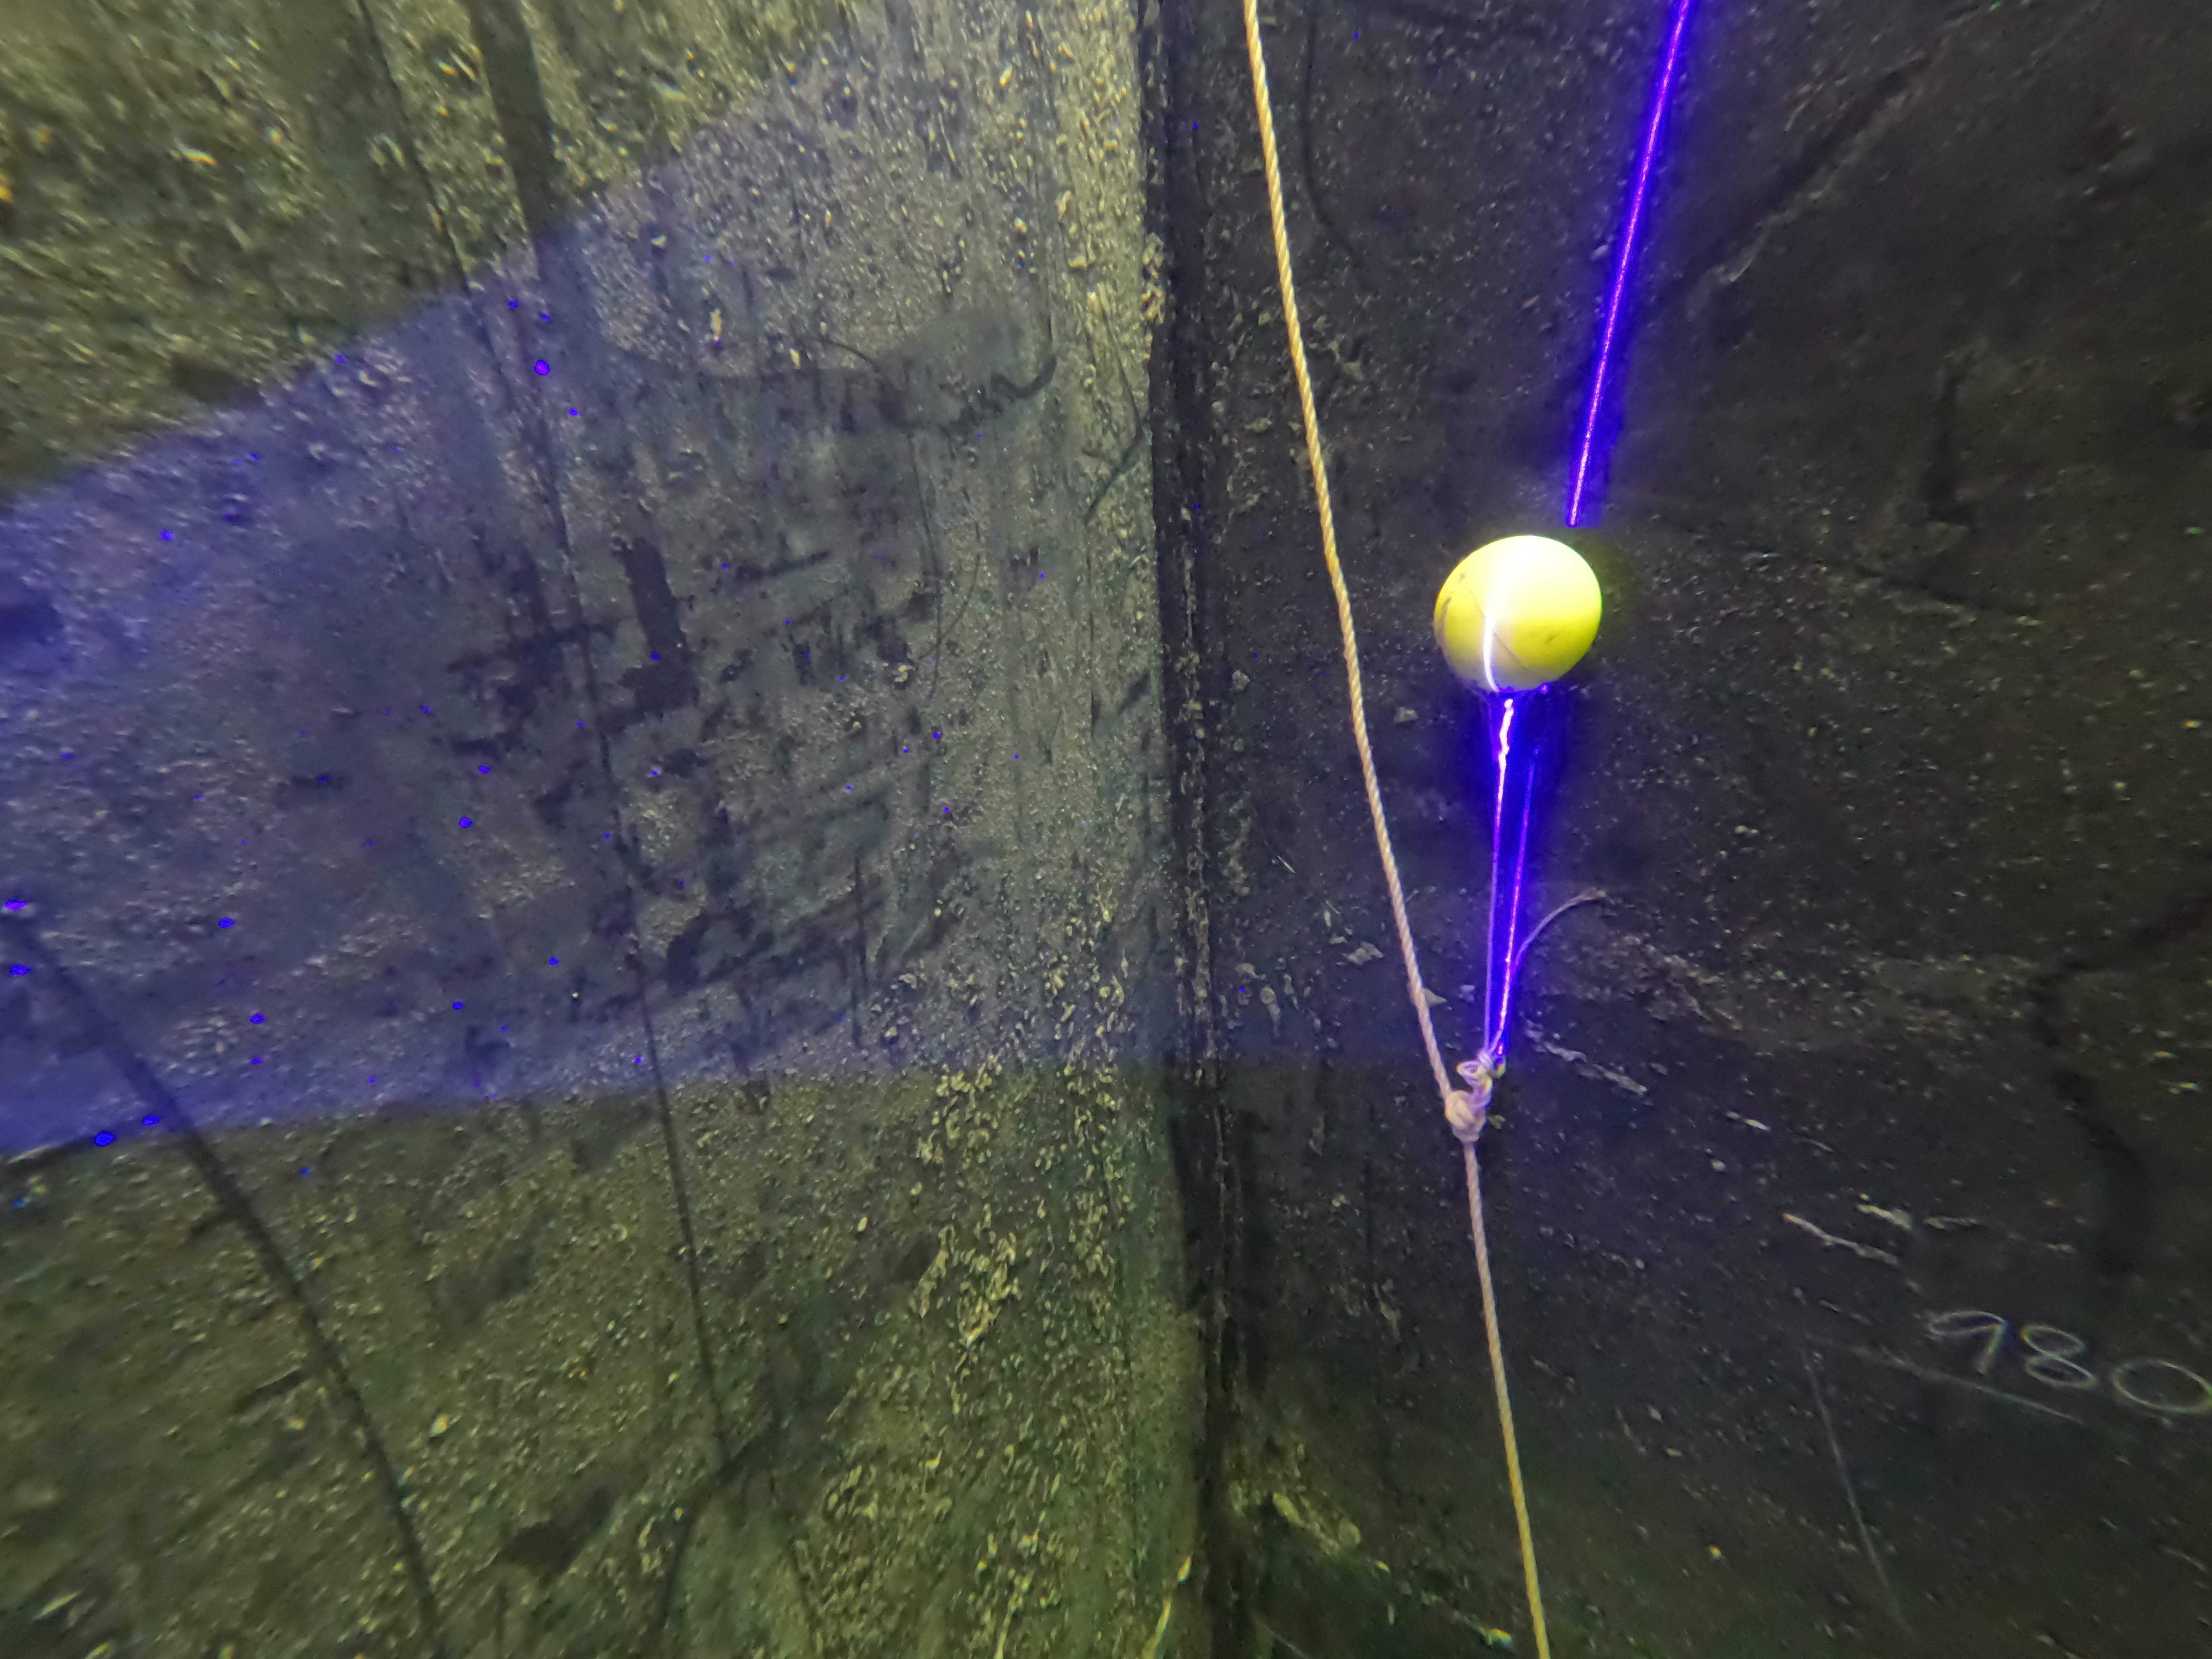

980

Supplement: Supplementary file 345 [file G0031138.pdf › 4/G0031138.pdf]

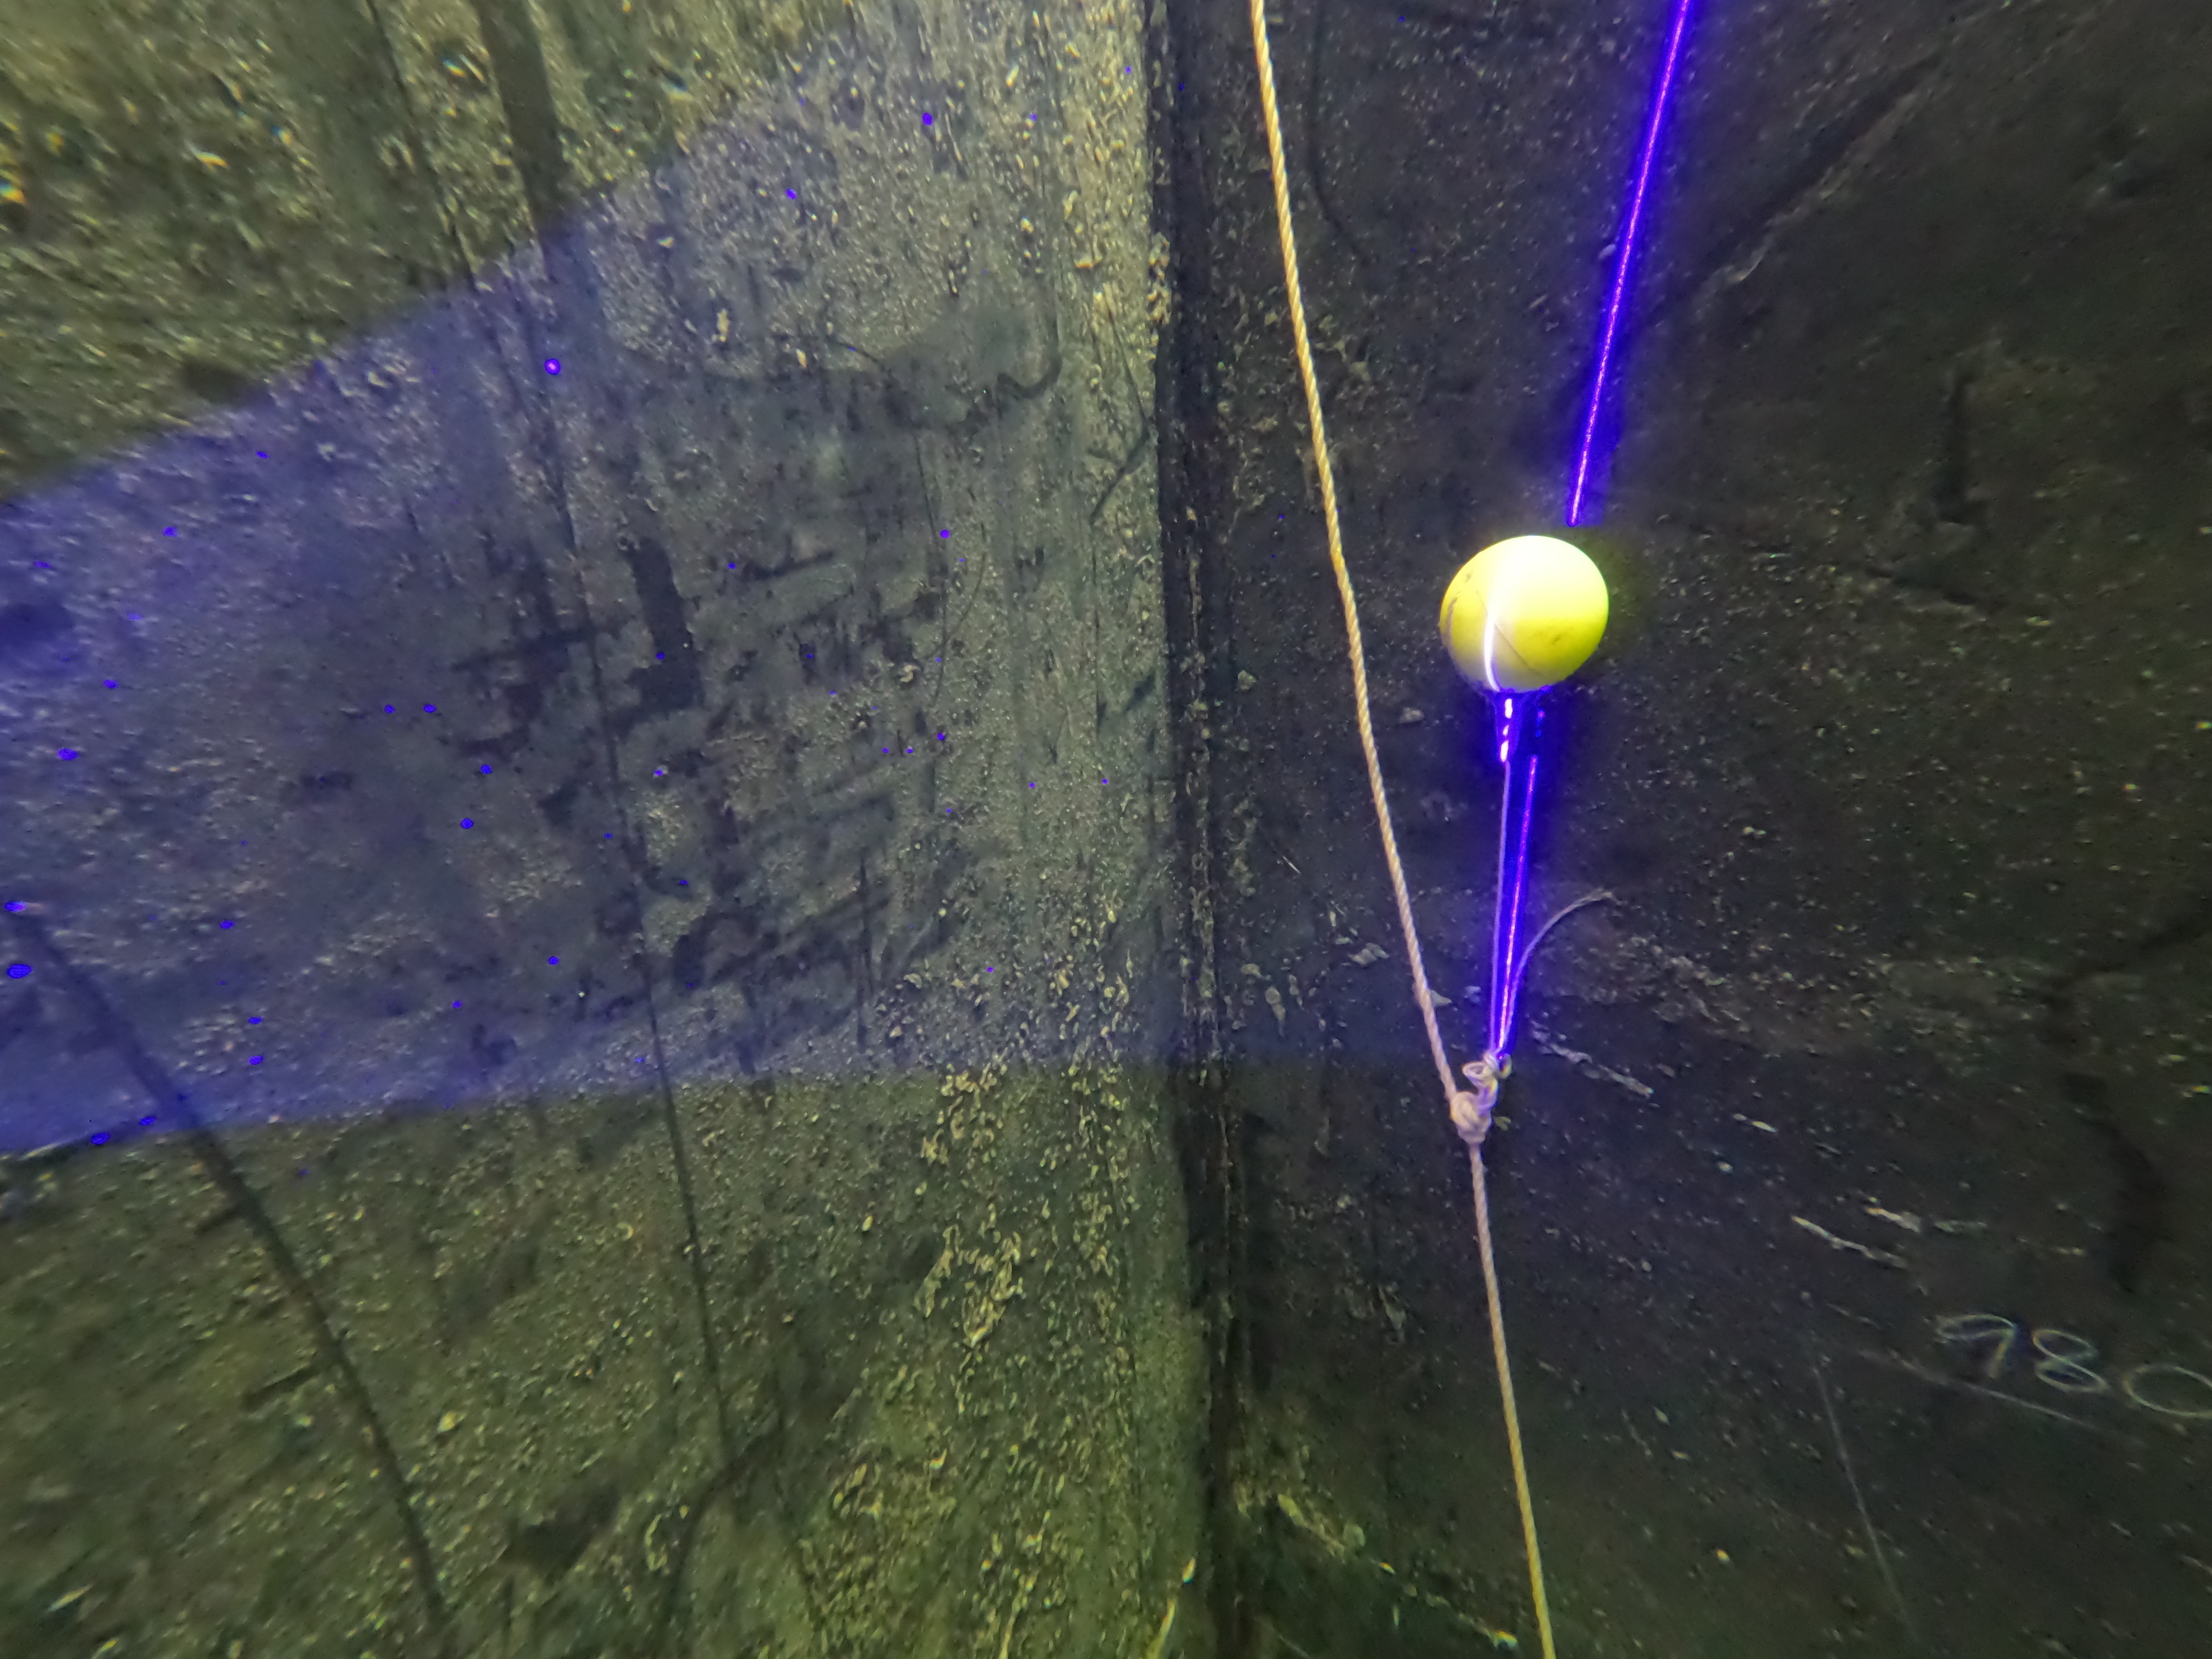

980

Supplement: Supplementary file 346 [file G0031139.pdf › 4/G0031139.pdf]

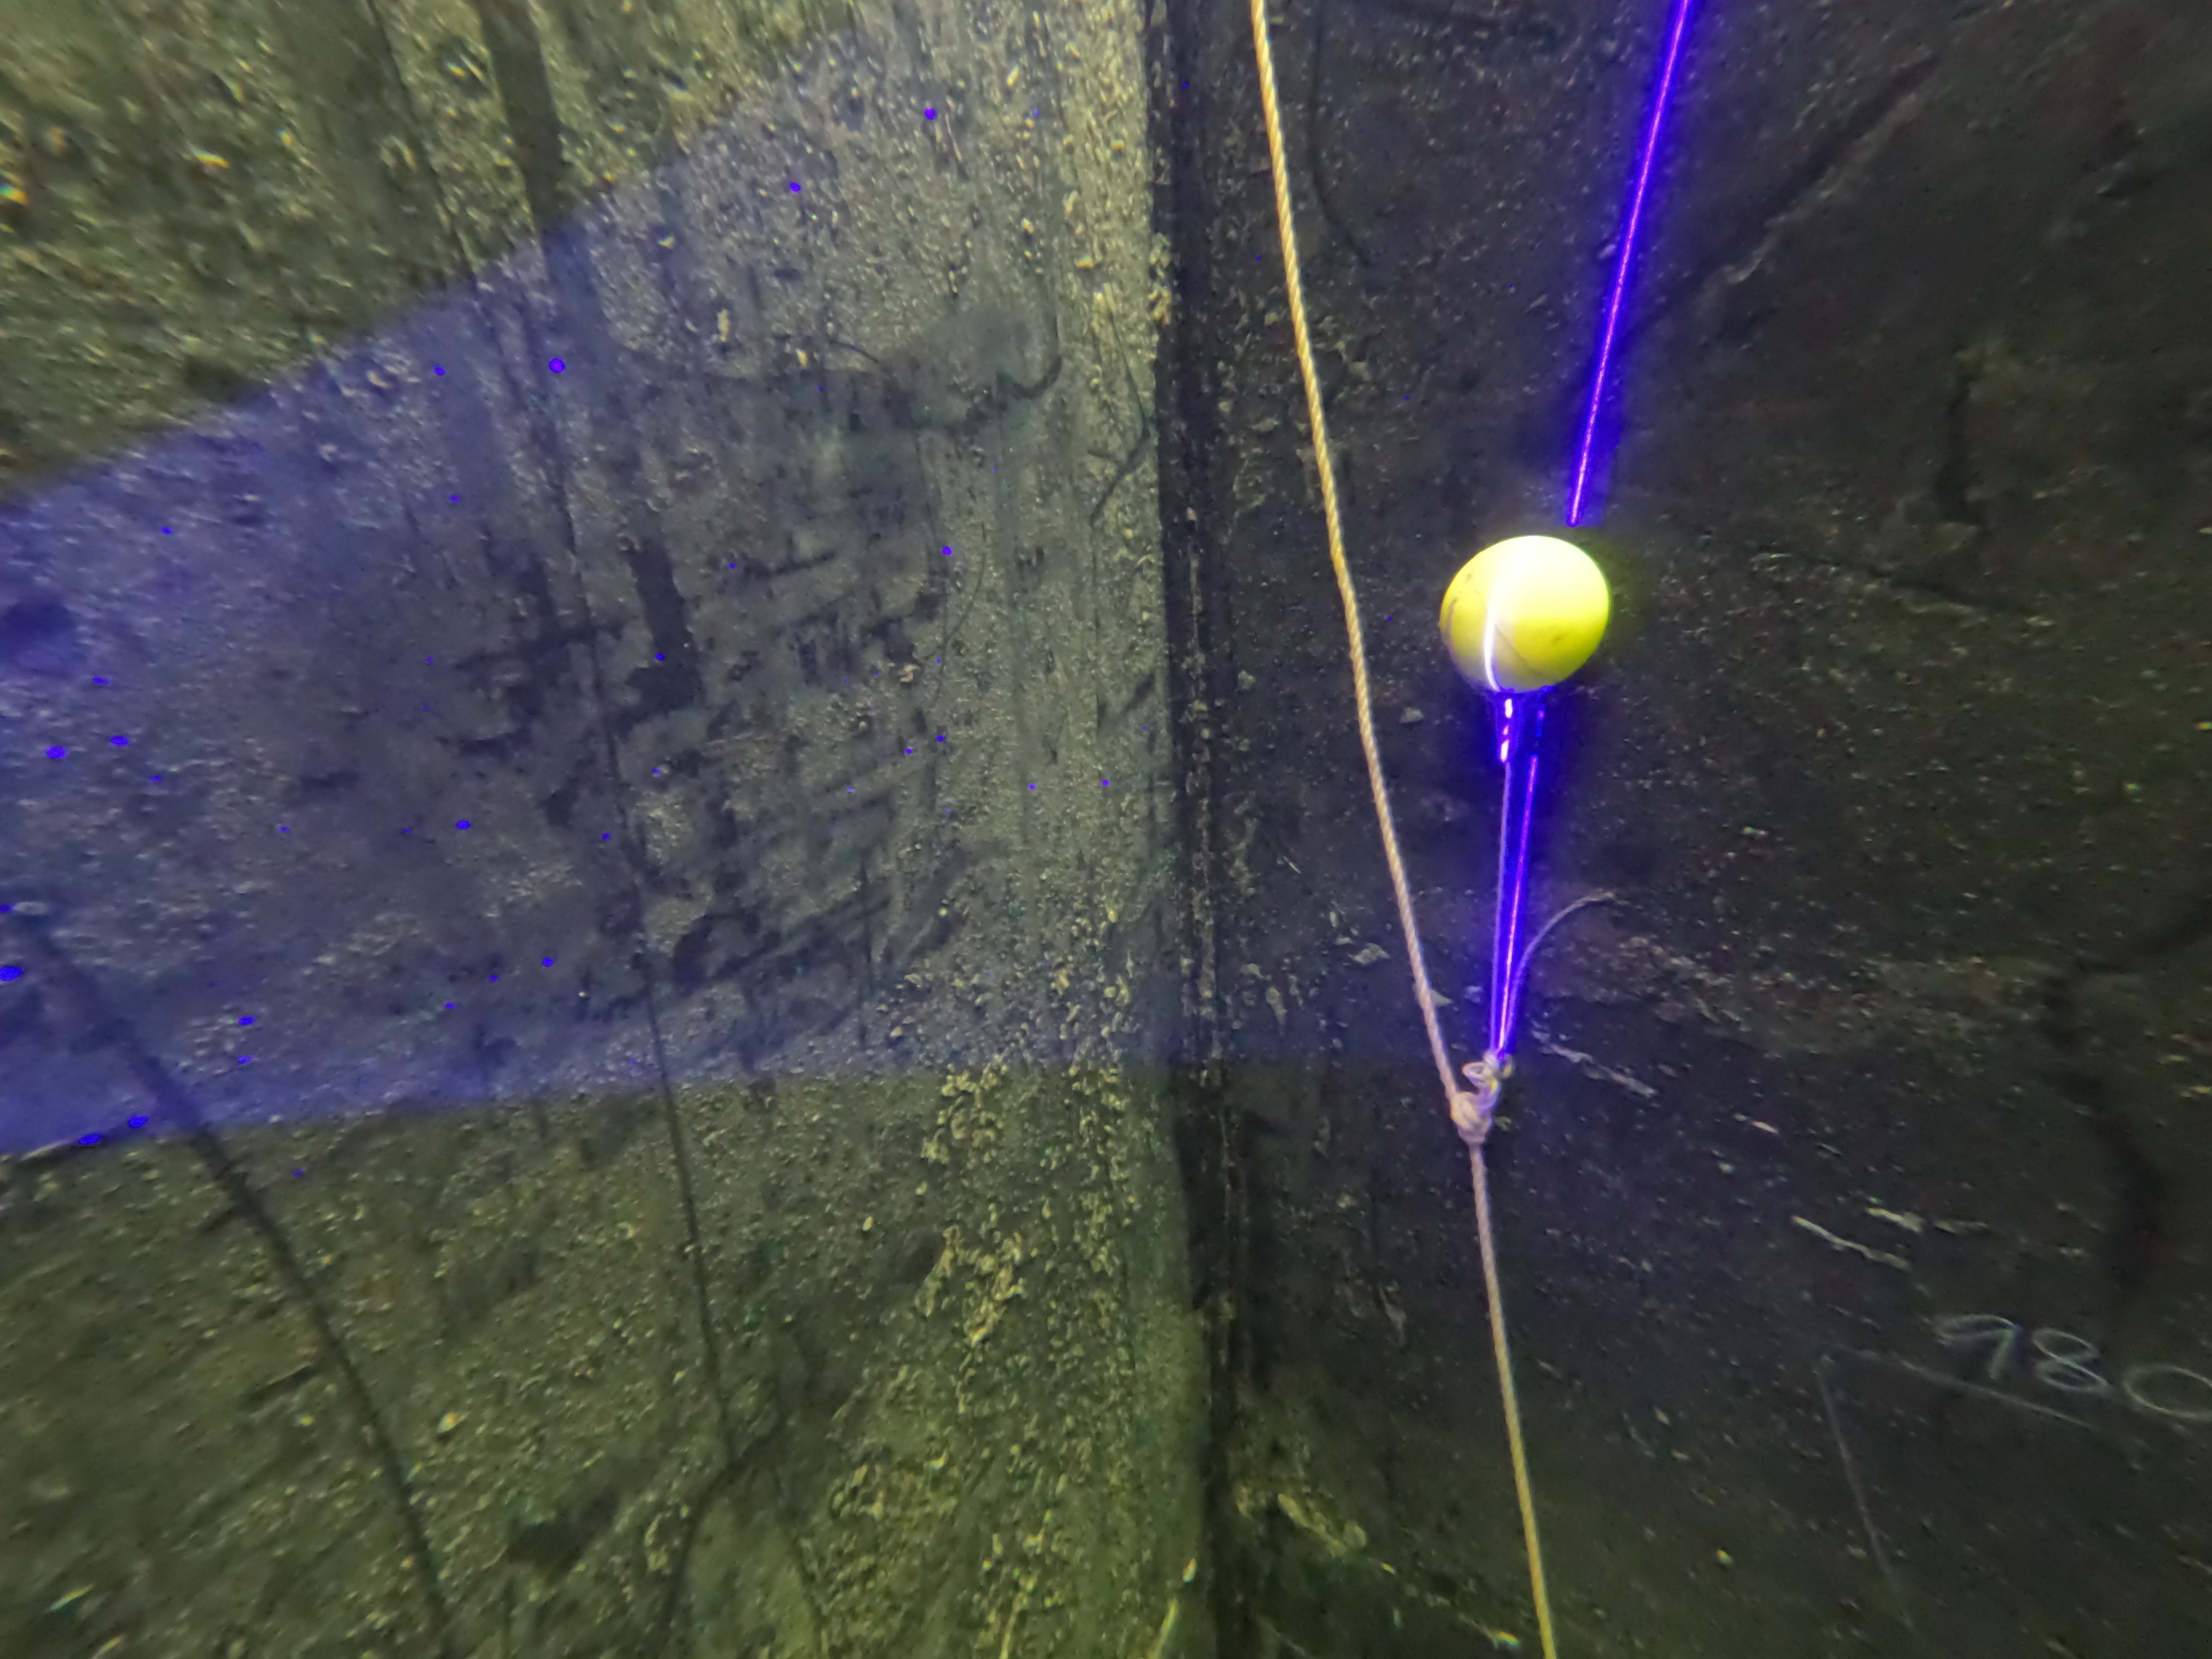

Supplement: Supplementary file 347 [file G0031140.pdf › 4/G0031140.pdf]

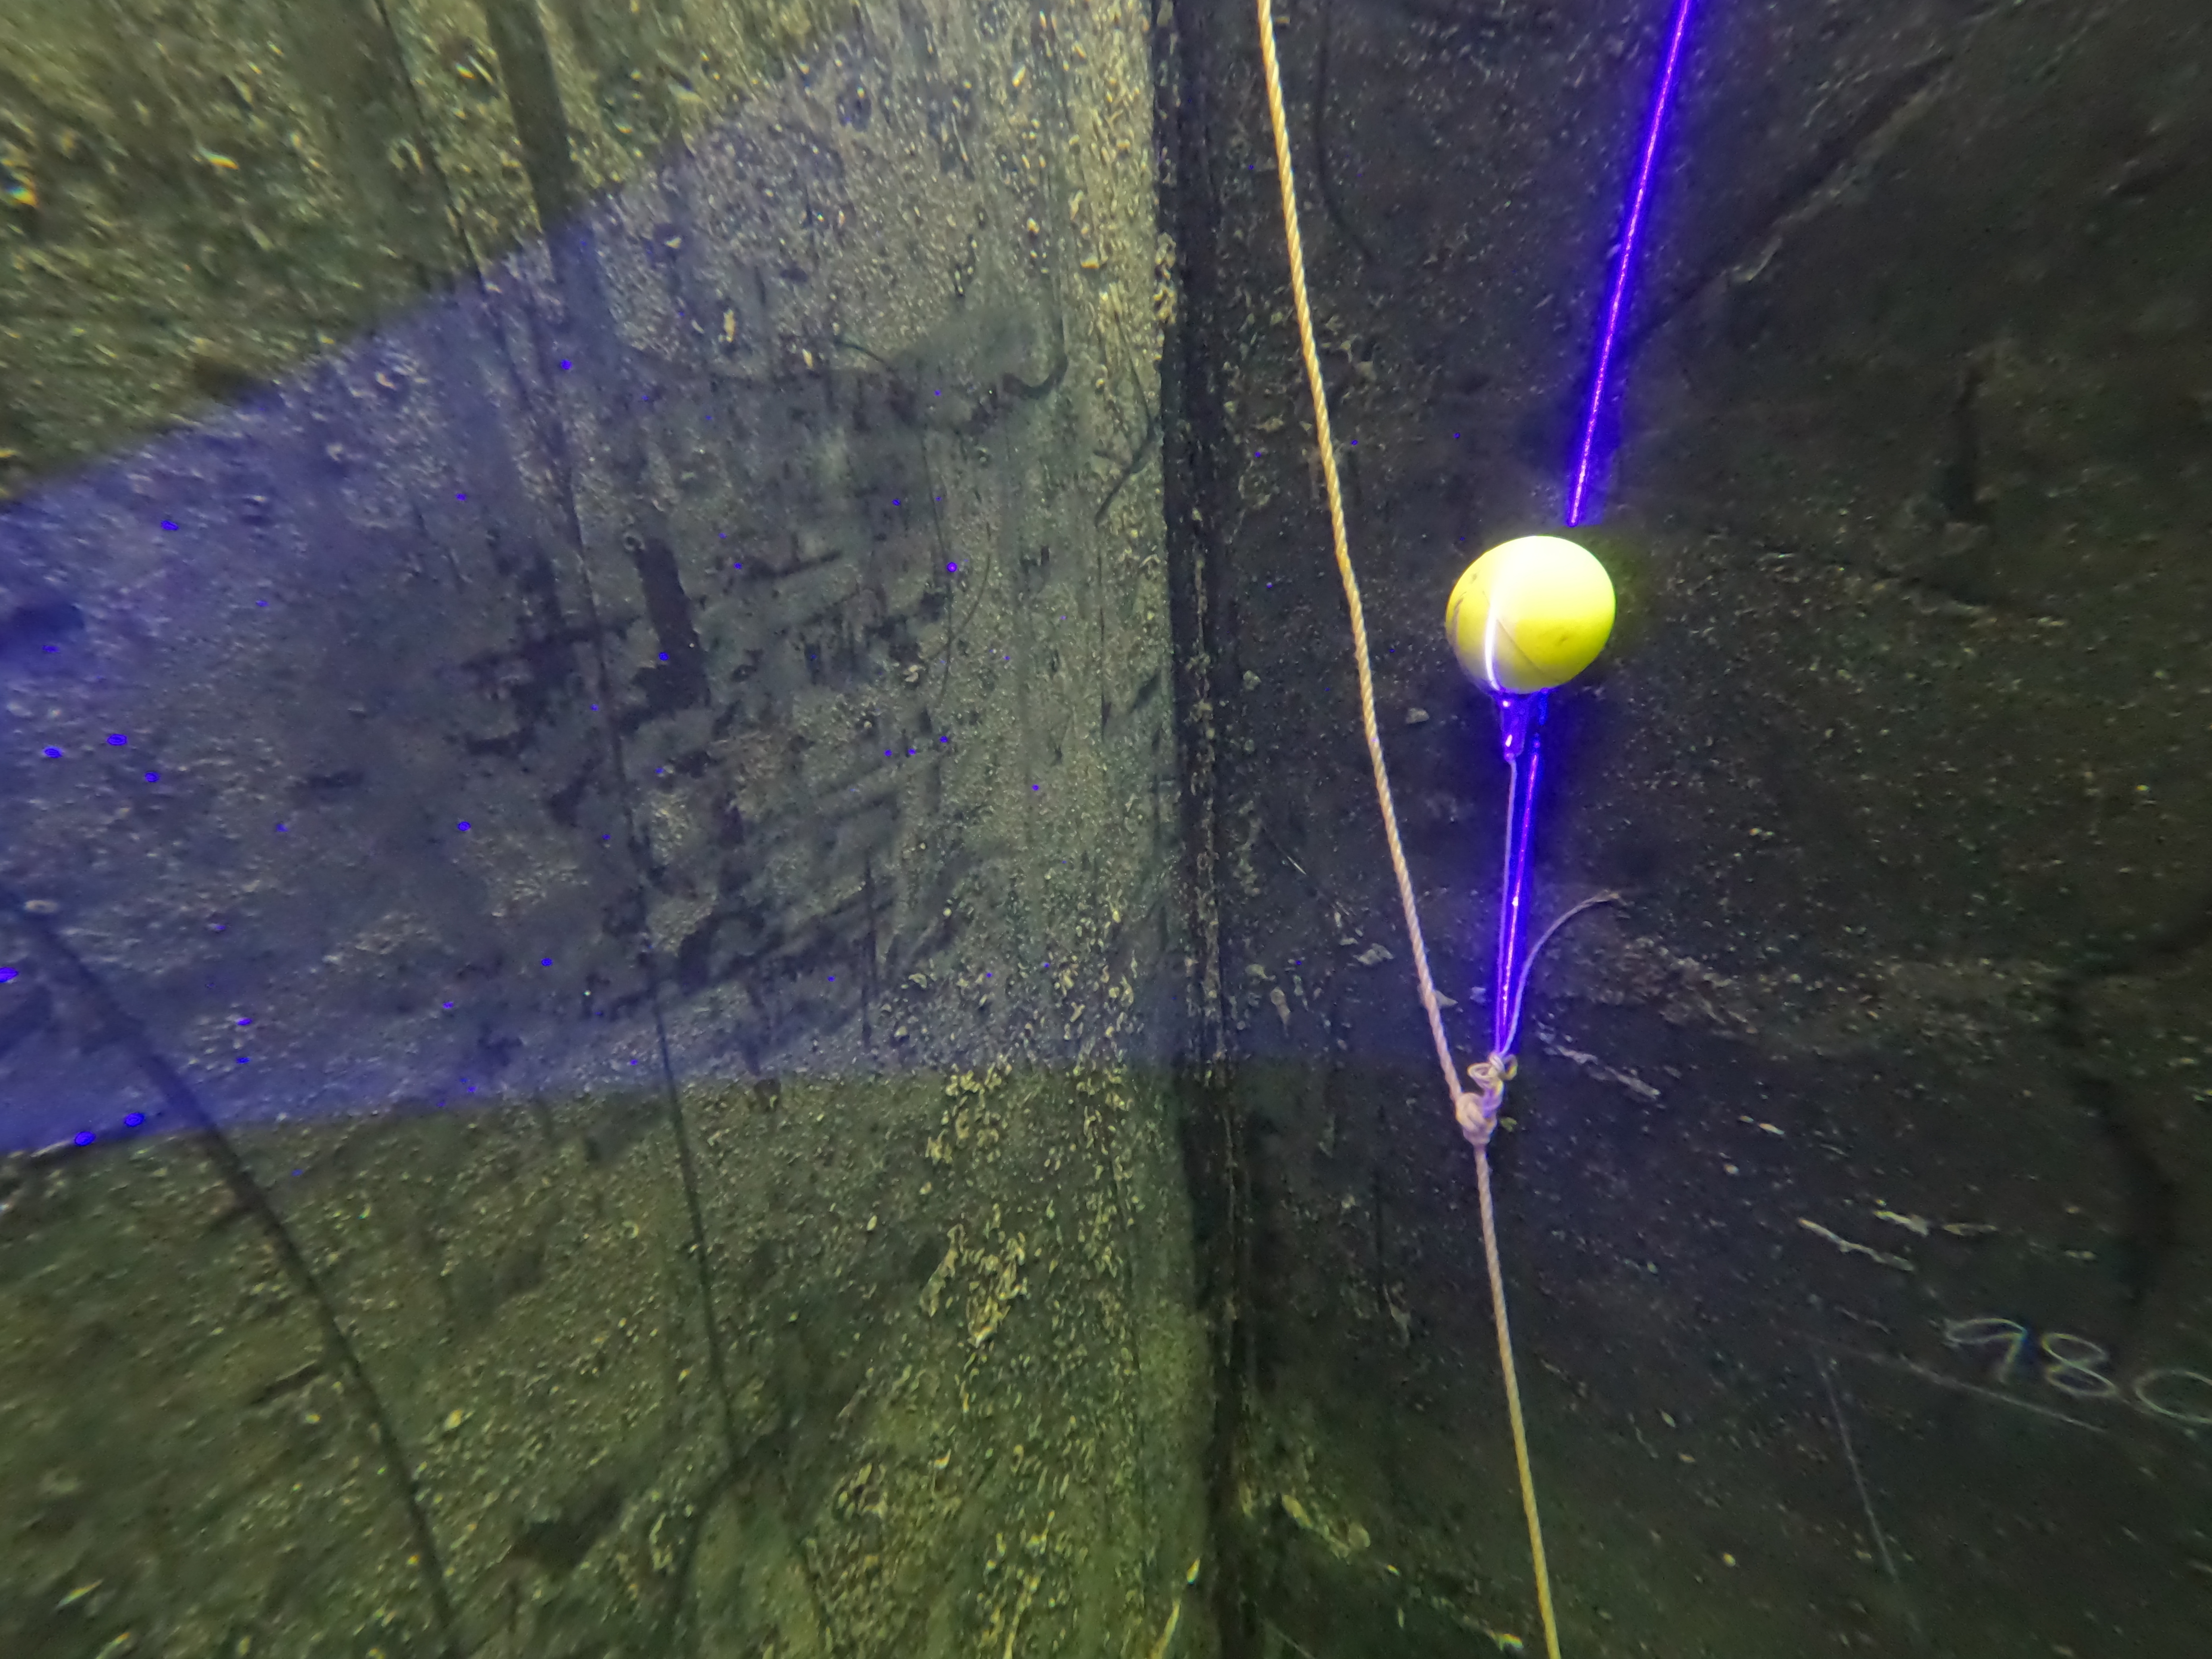

Supplement: Supplementary file 348 [file G0031141.pdf › 4/G0031141.pdf]

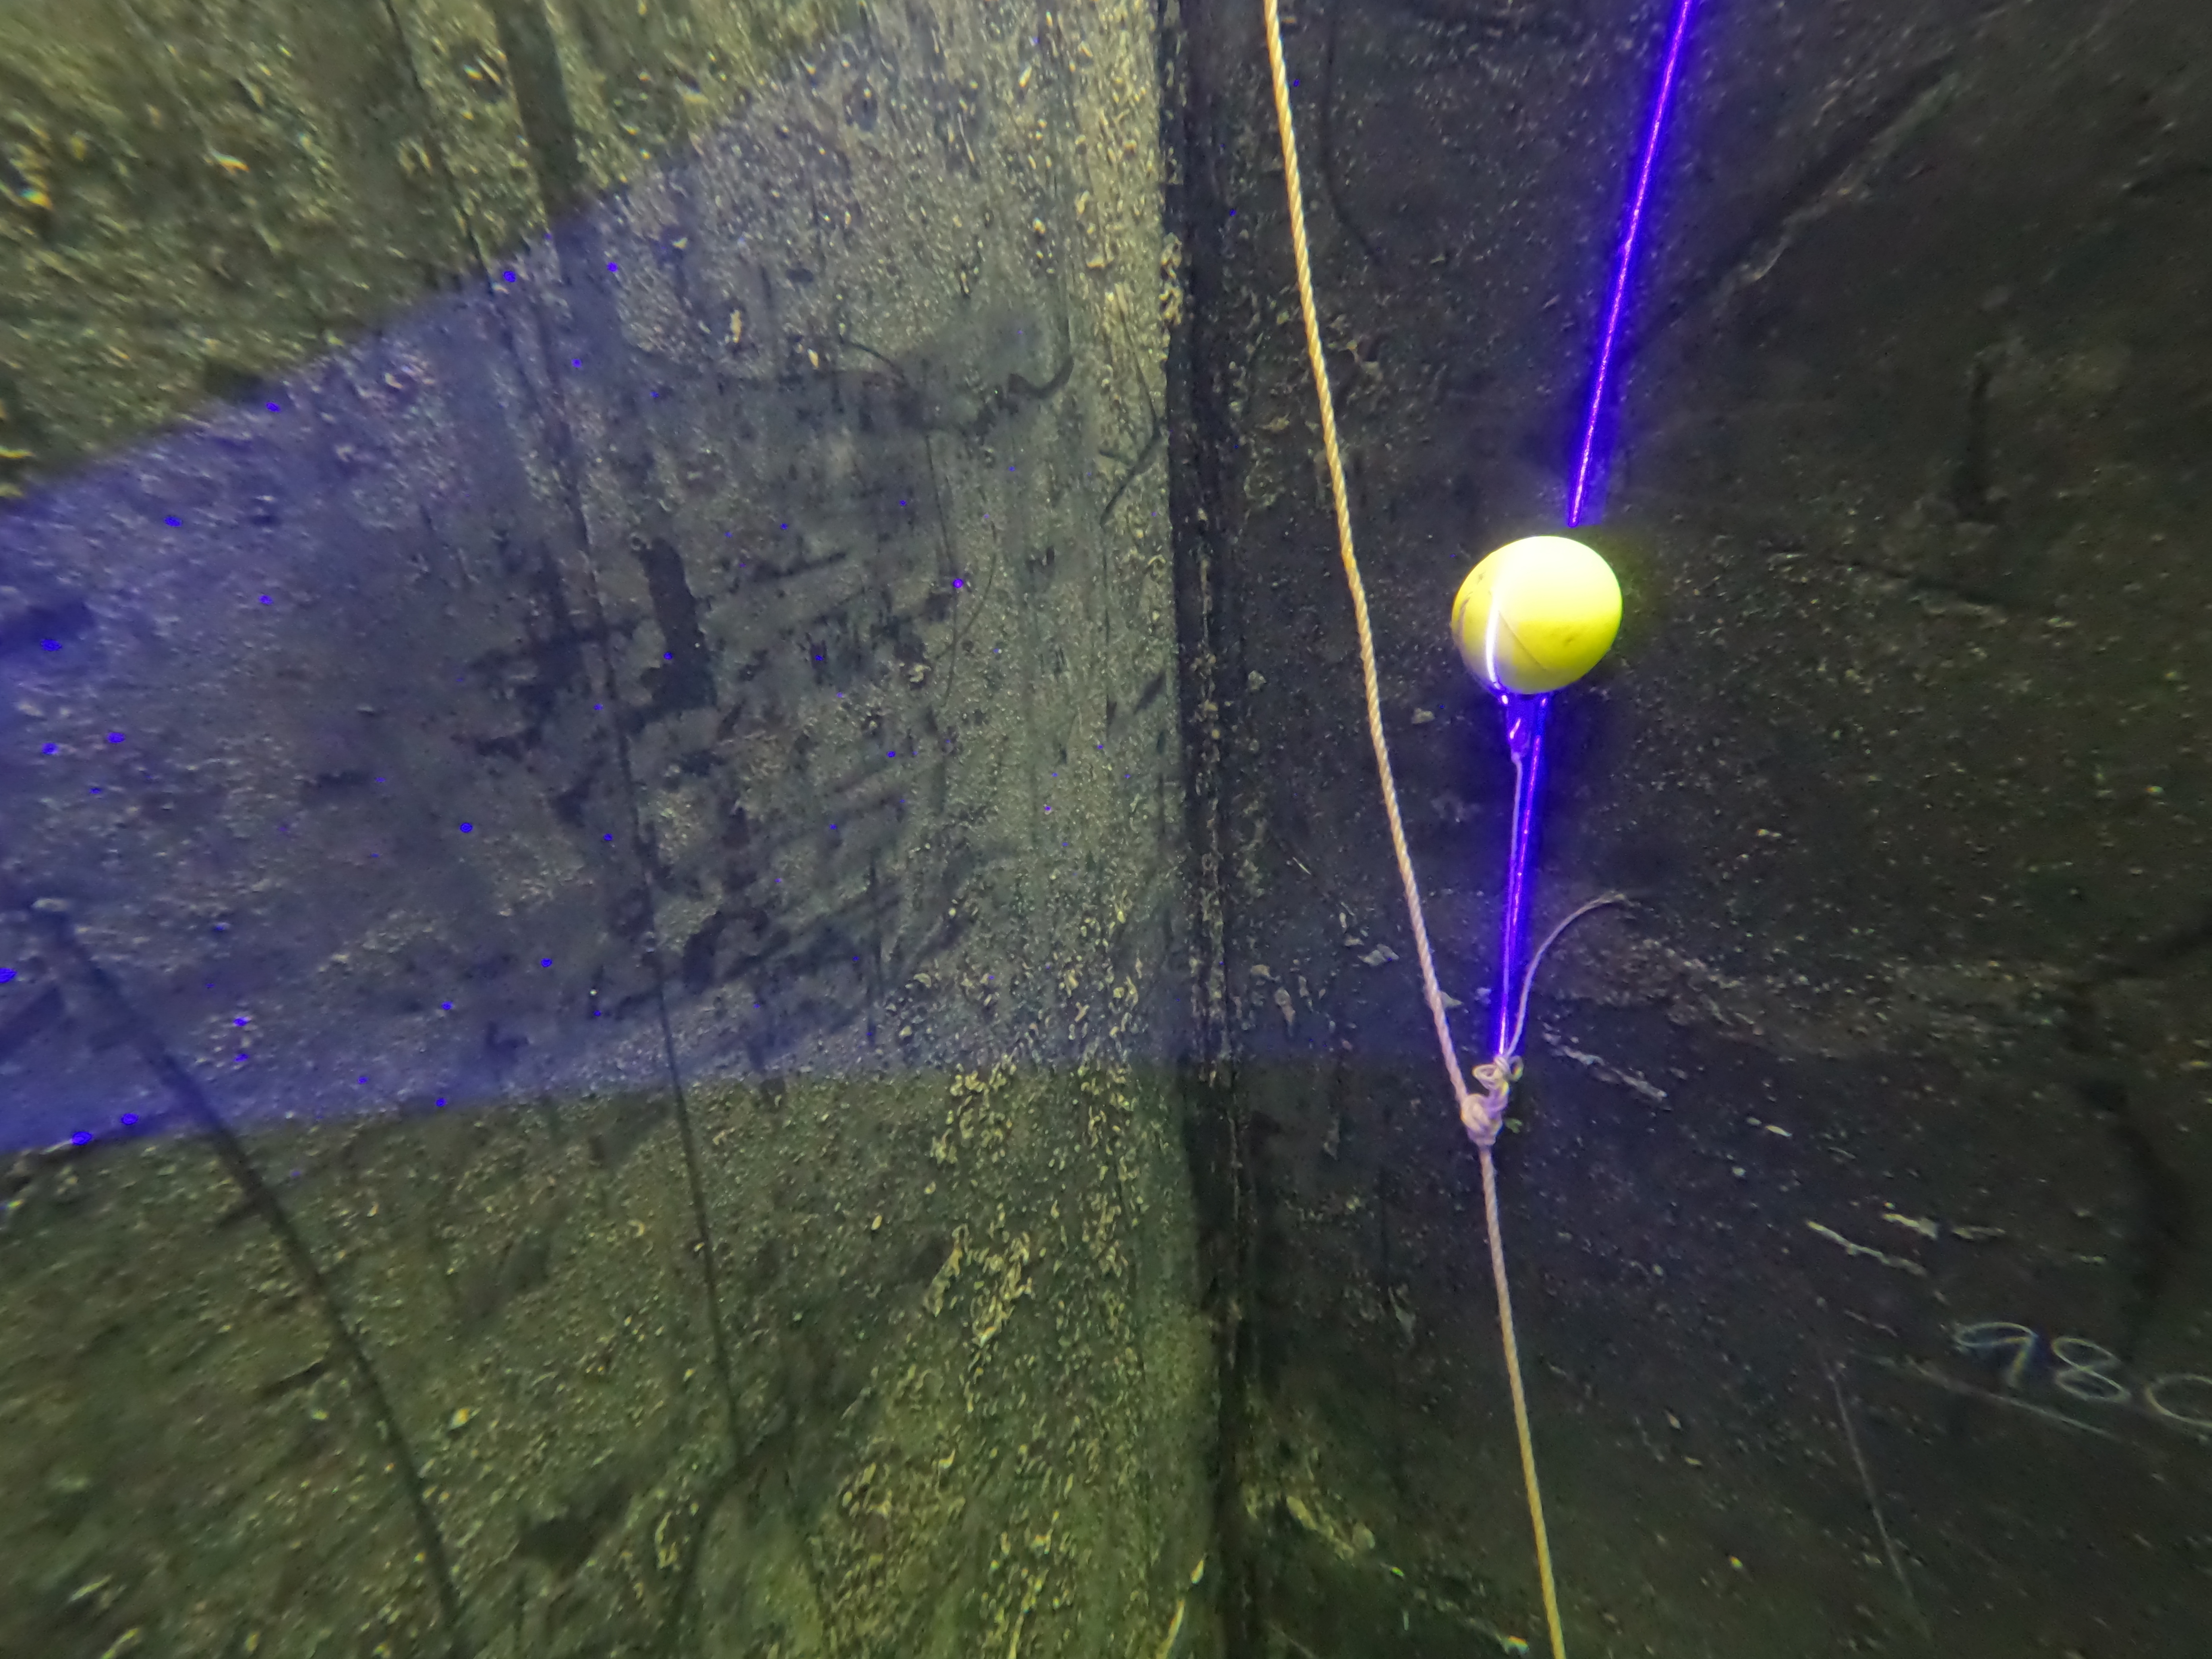

980

Supplement: Supplementary file 349 [file G0031142.pdf › 4/G0031142.pdf]

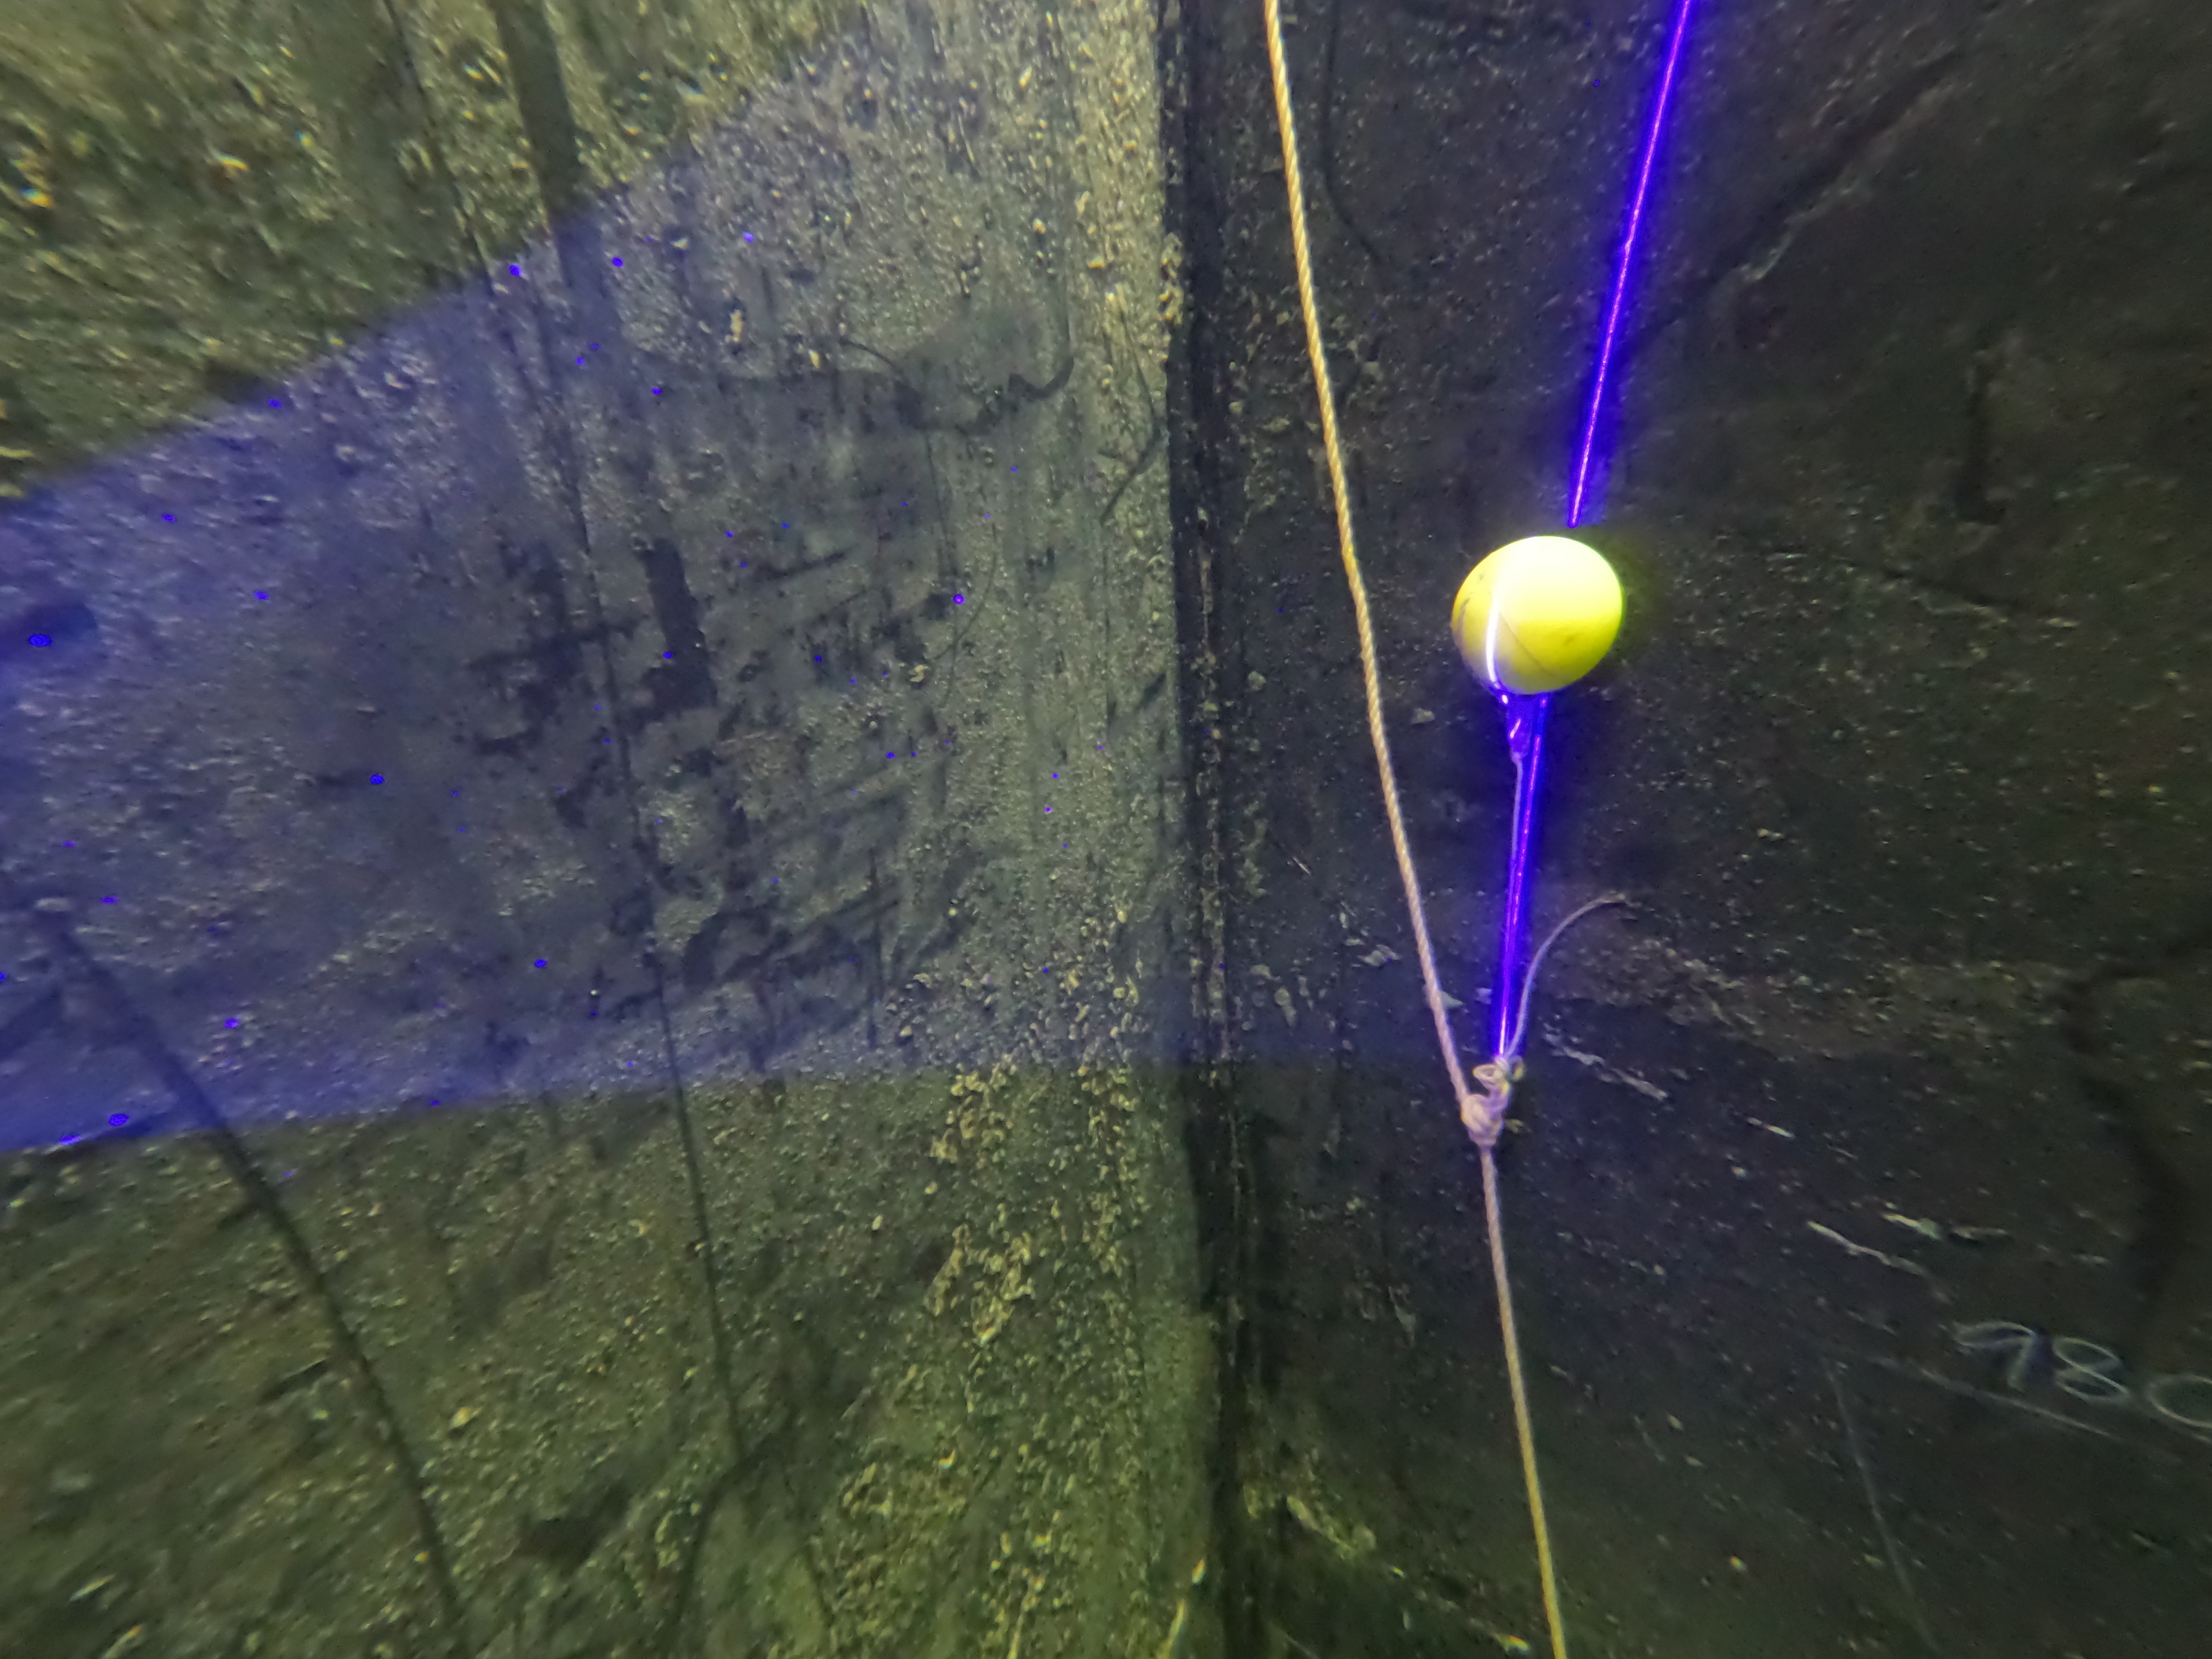

Supplement: Supplementary file 350 [file G0031143.pdf › 4/G0031143.pdf]

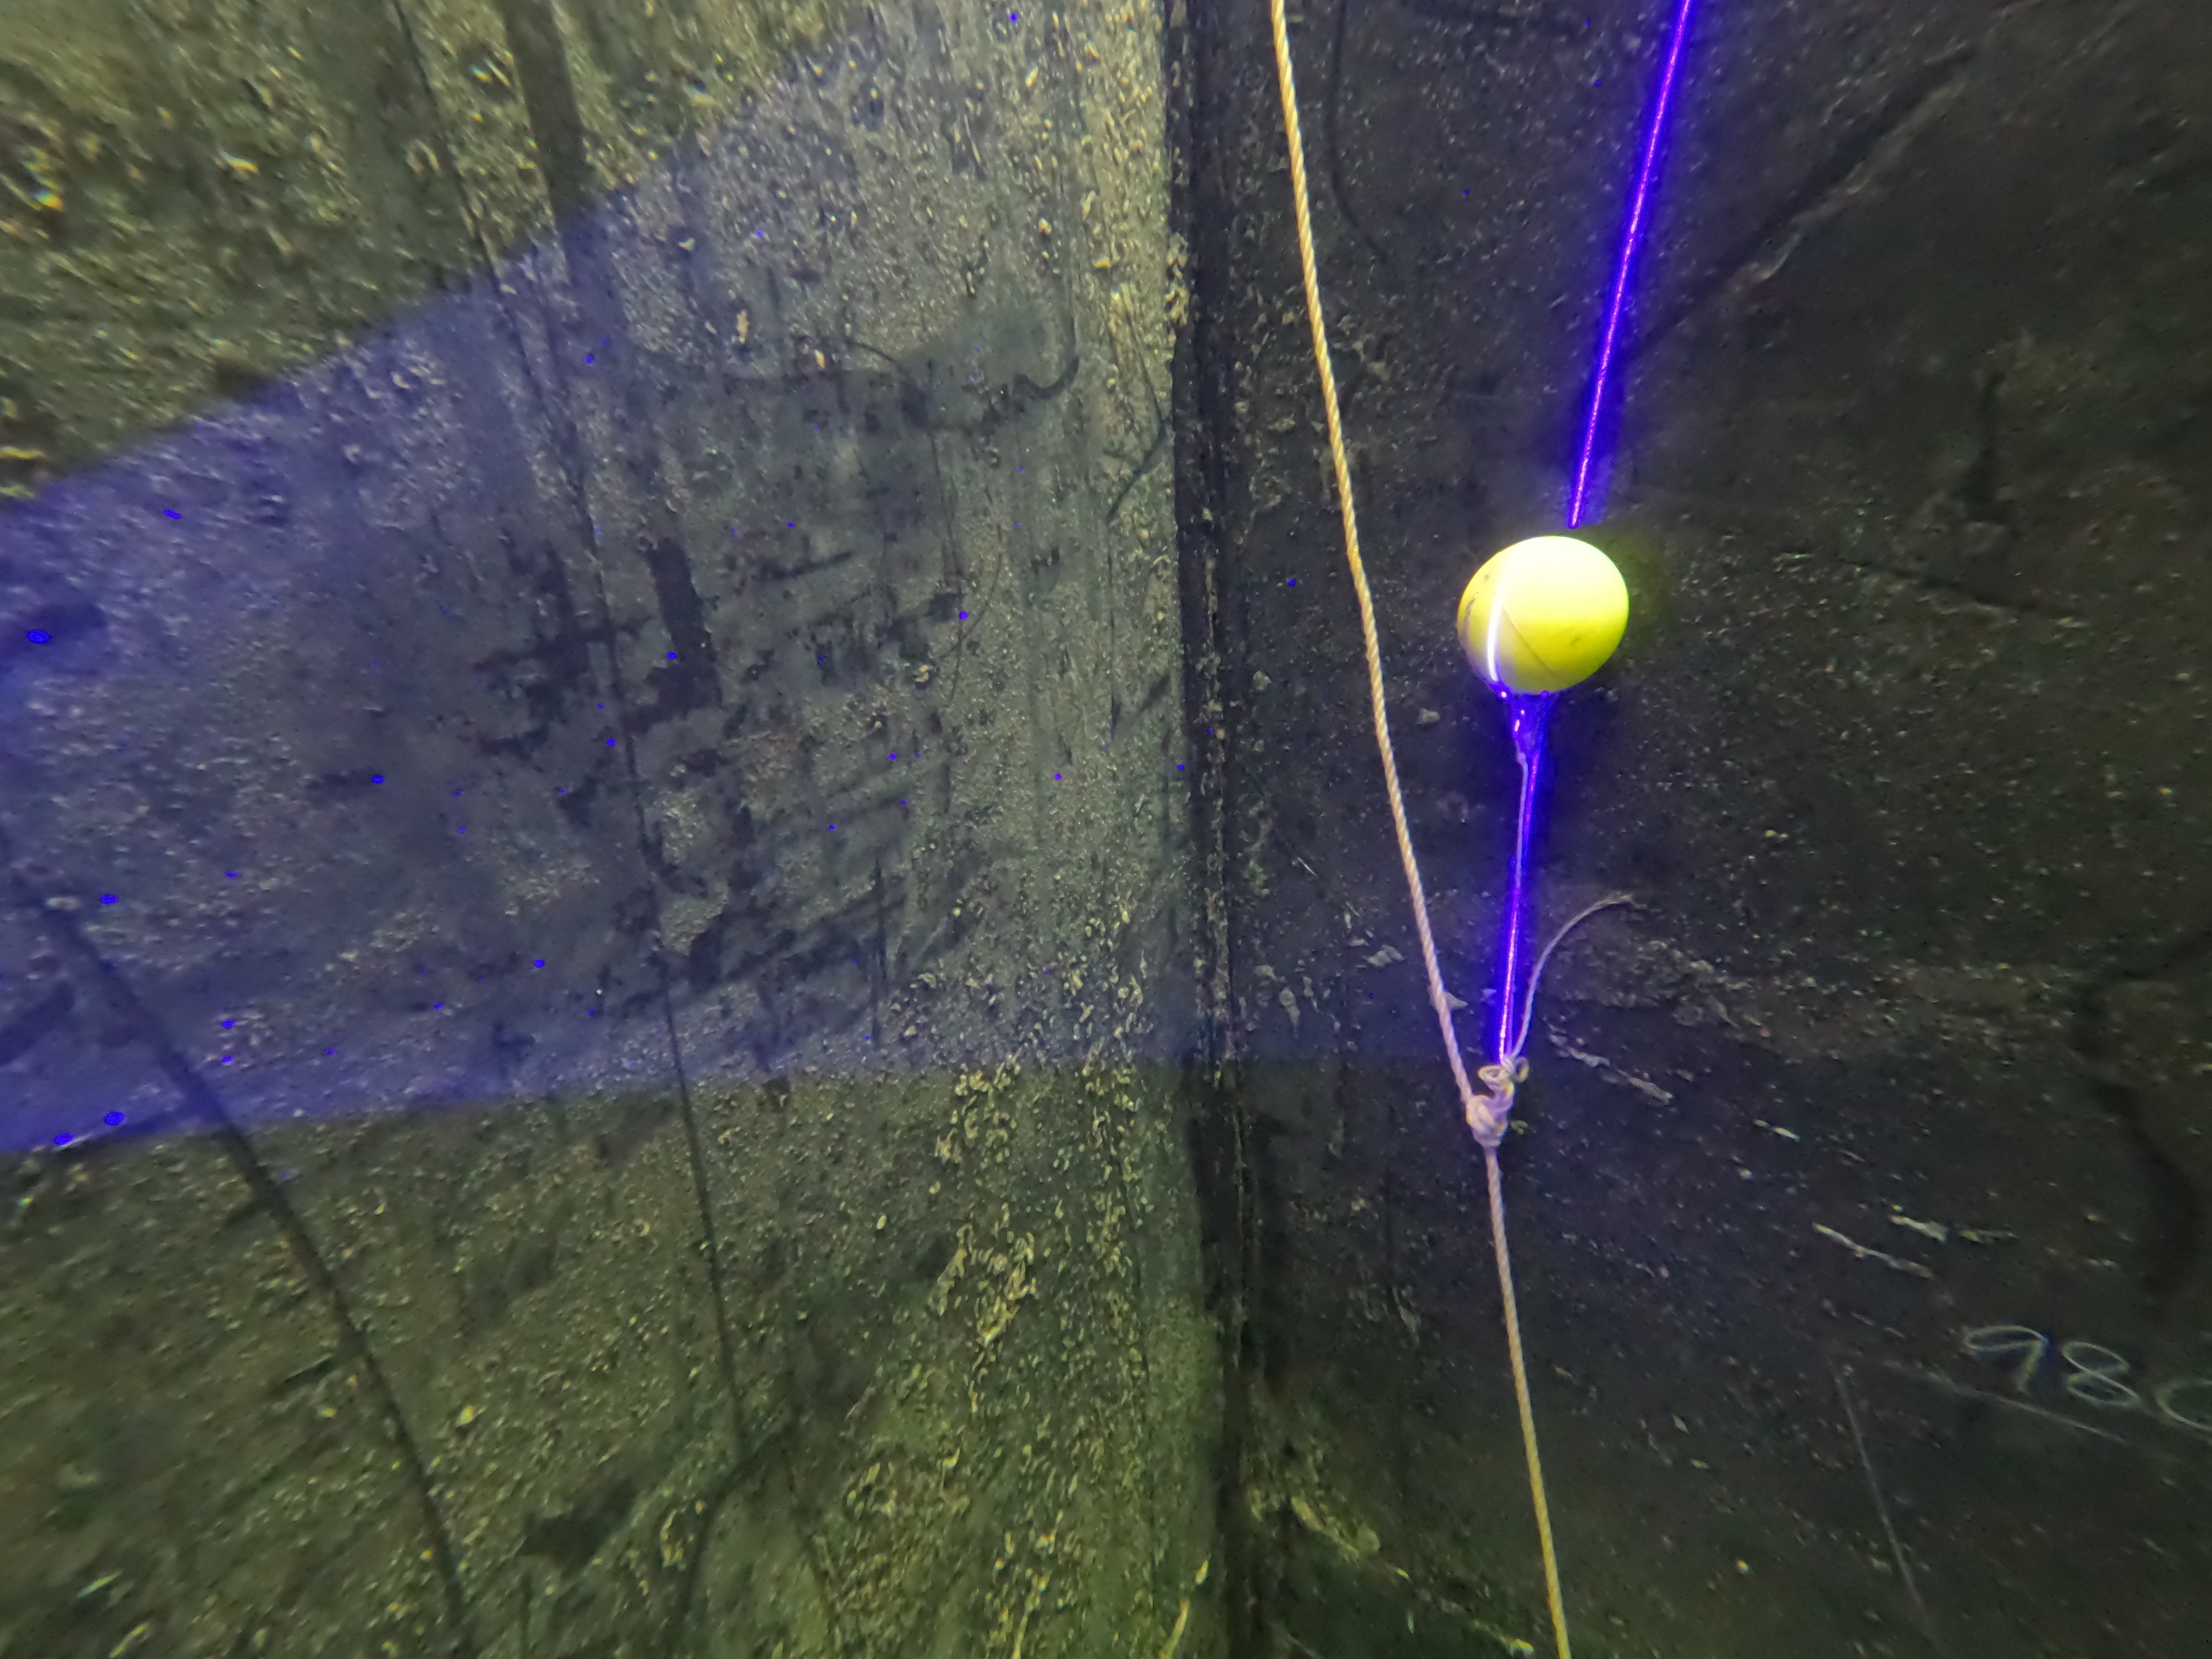

980

Supplement: Supplementary file 351 [file G0031144.pdf › 4/G0031144.pdf]

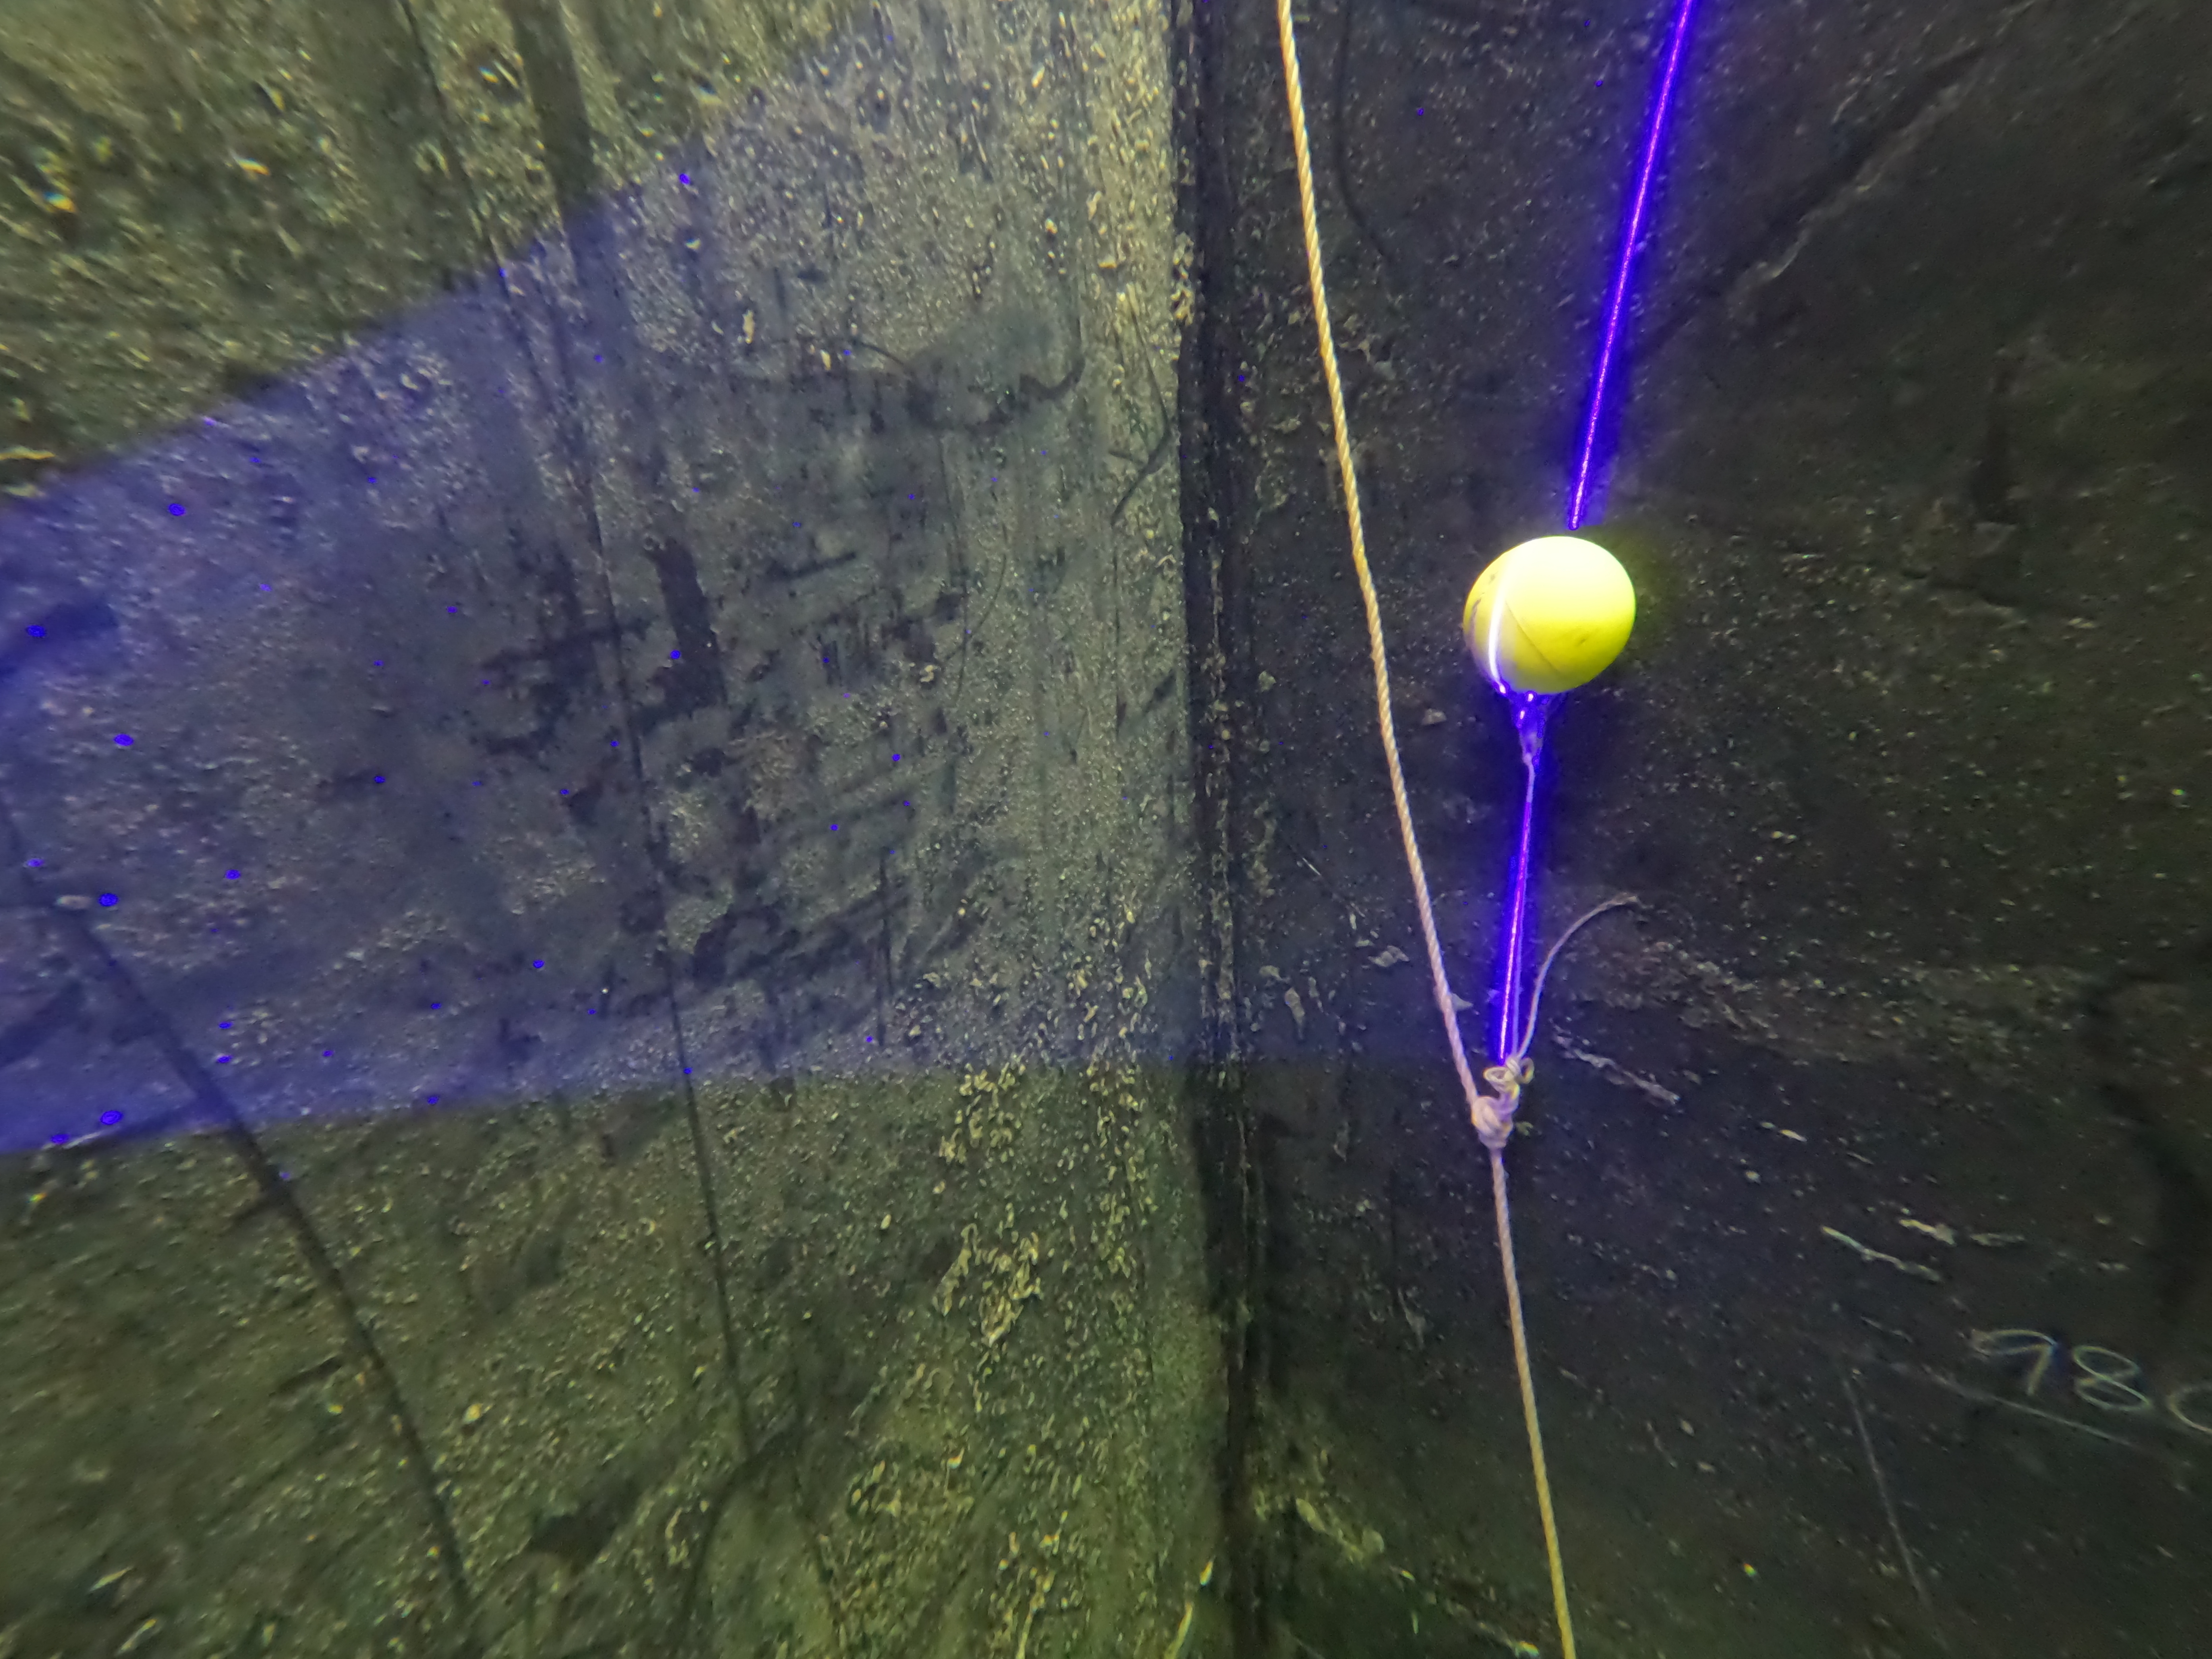

980

Supplement: Supplementary file 352 [file G0031145.pdf › 4/G0031145.pdf]

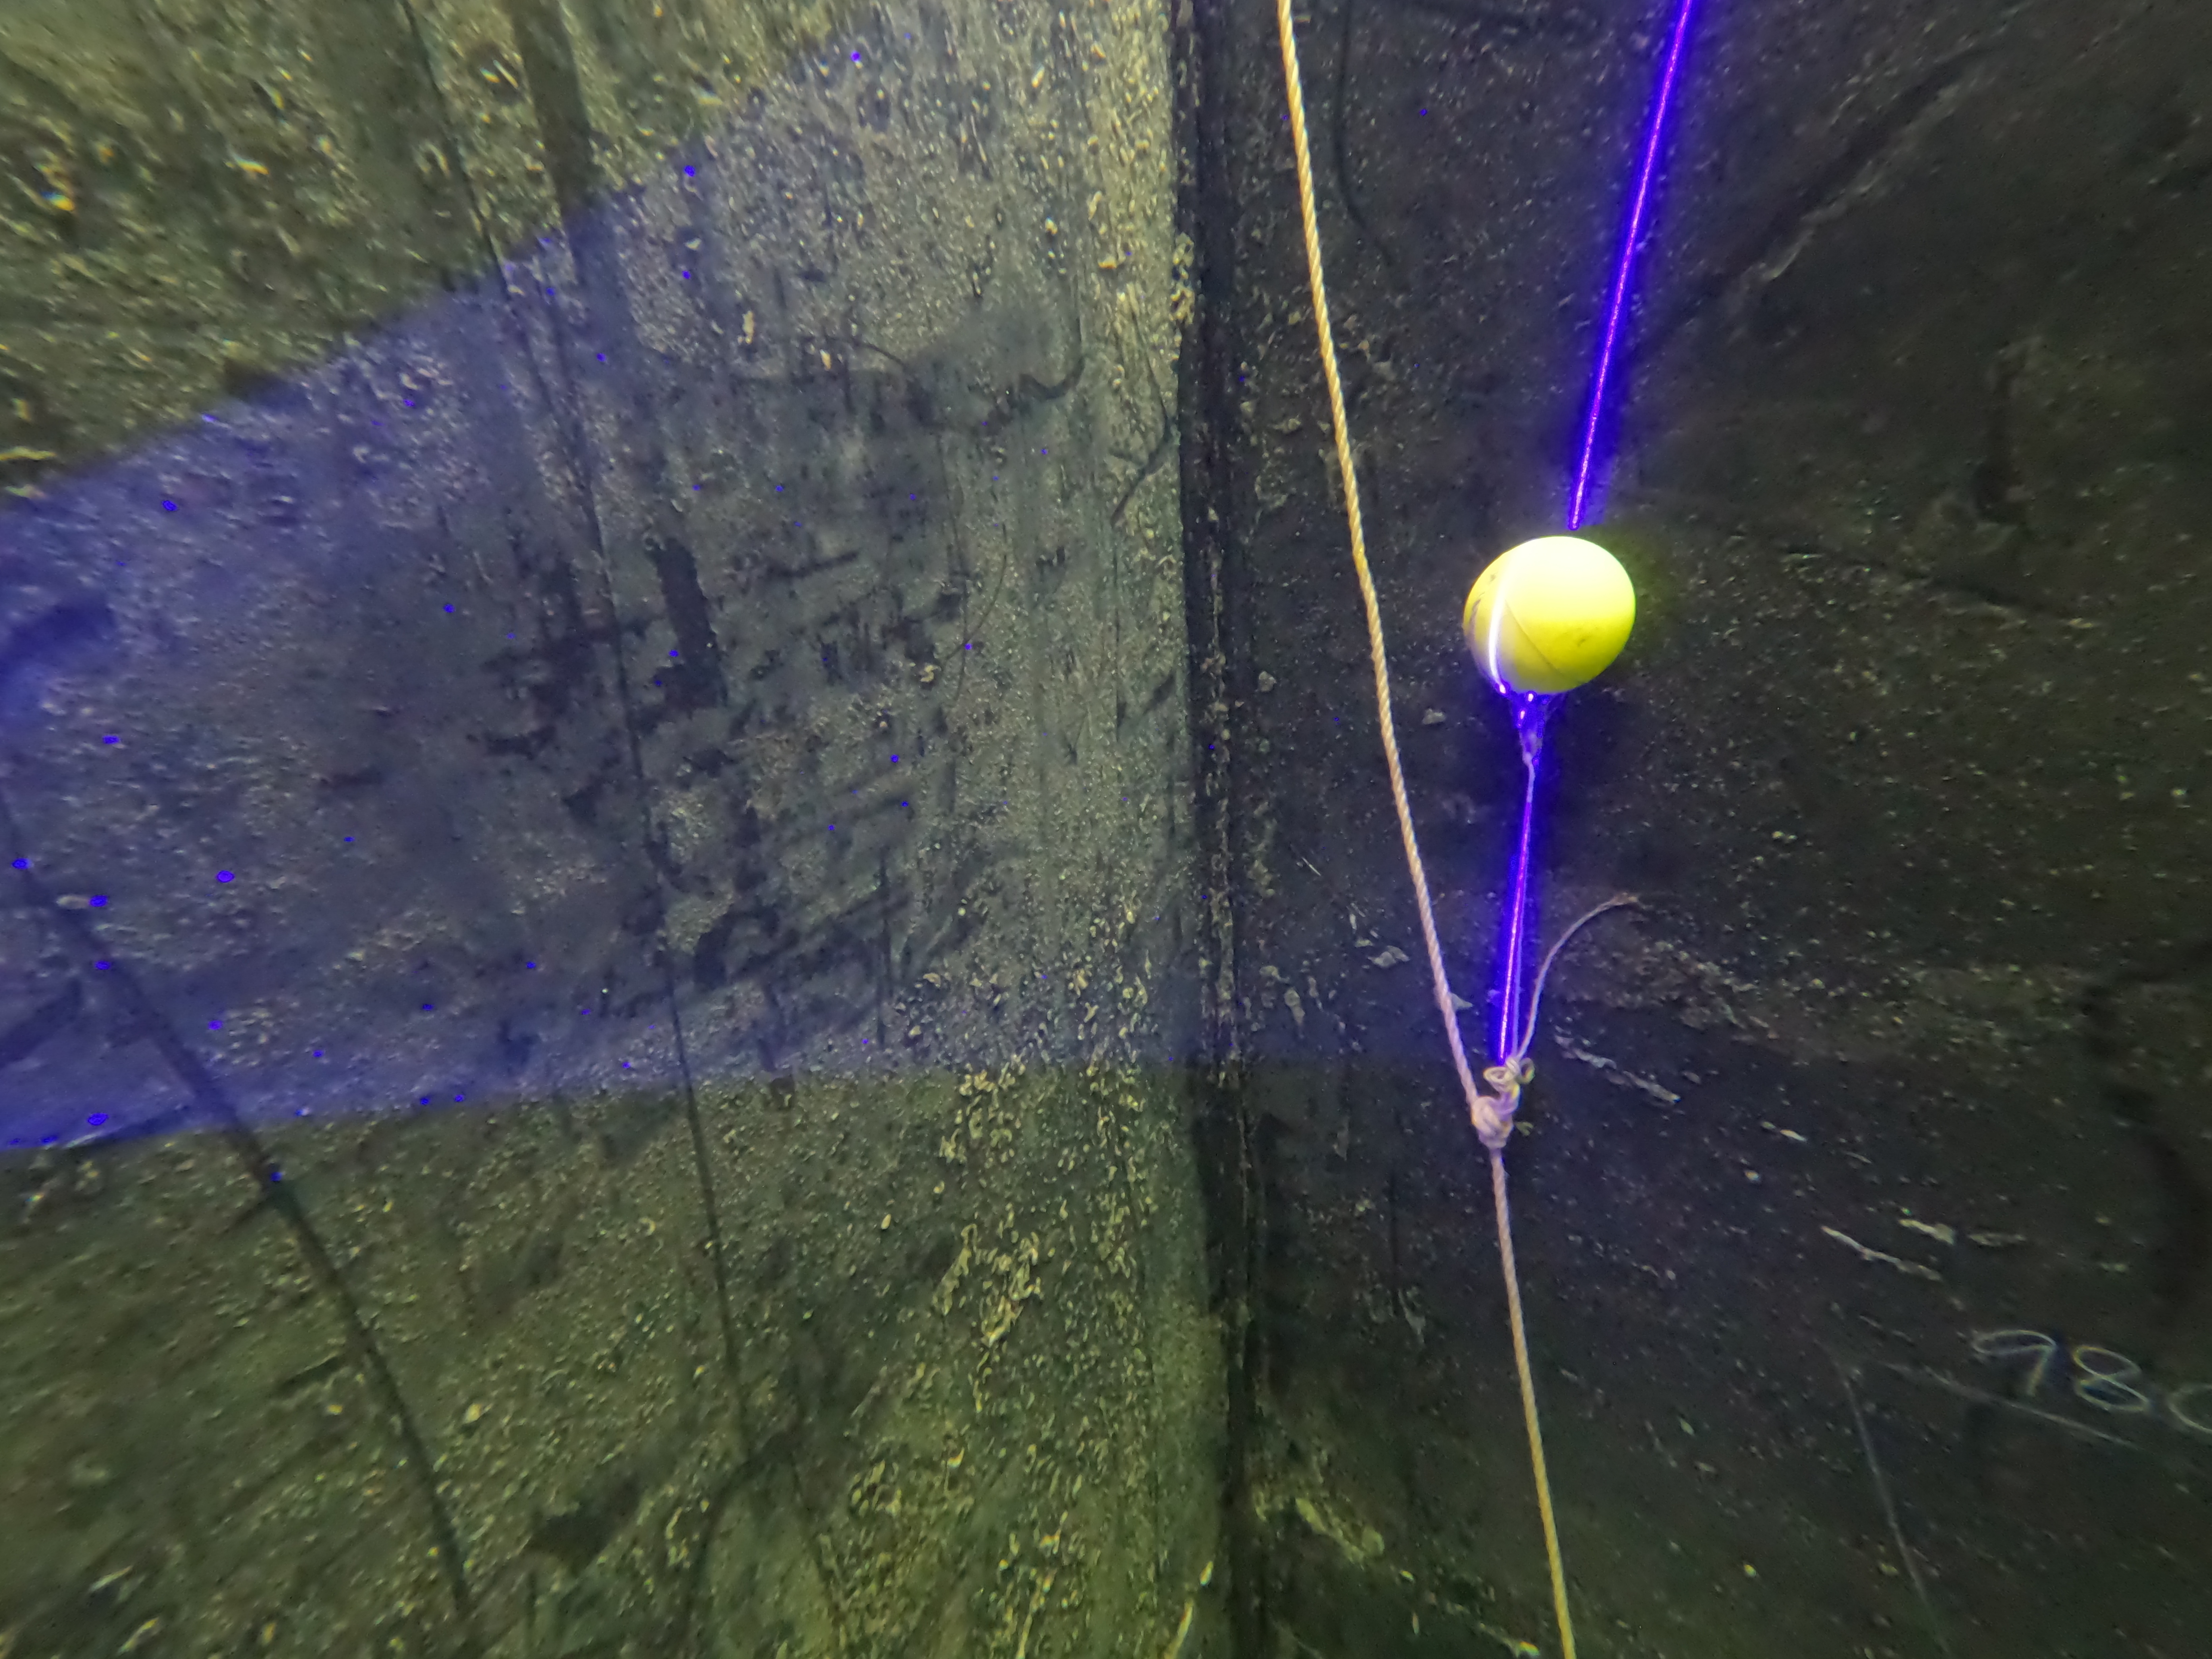

Supplement: Supplementary file 353 [file G0031146.pdf › 4/G0031146.pdf]

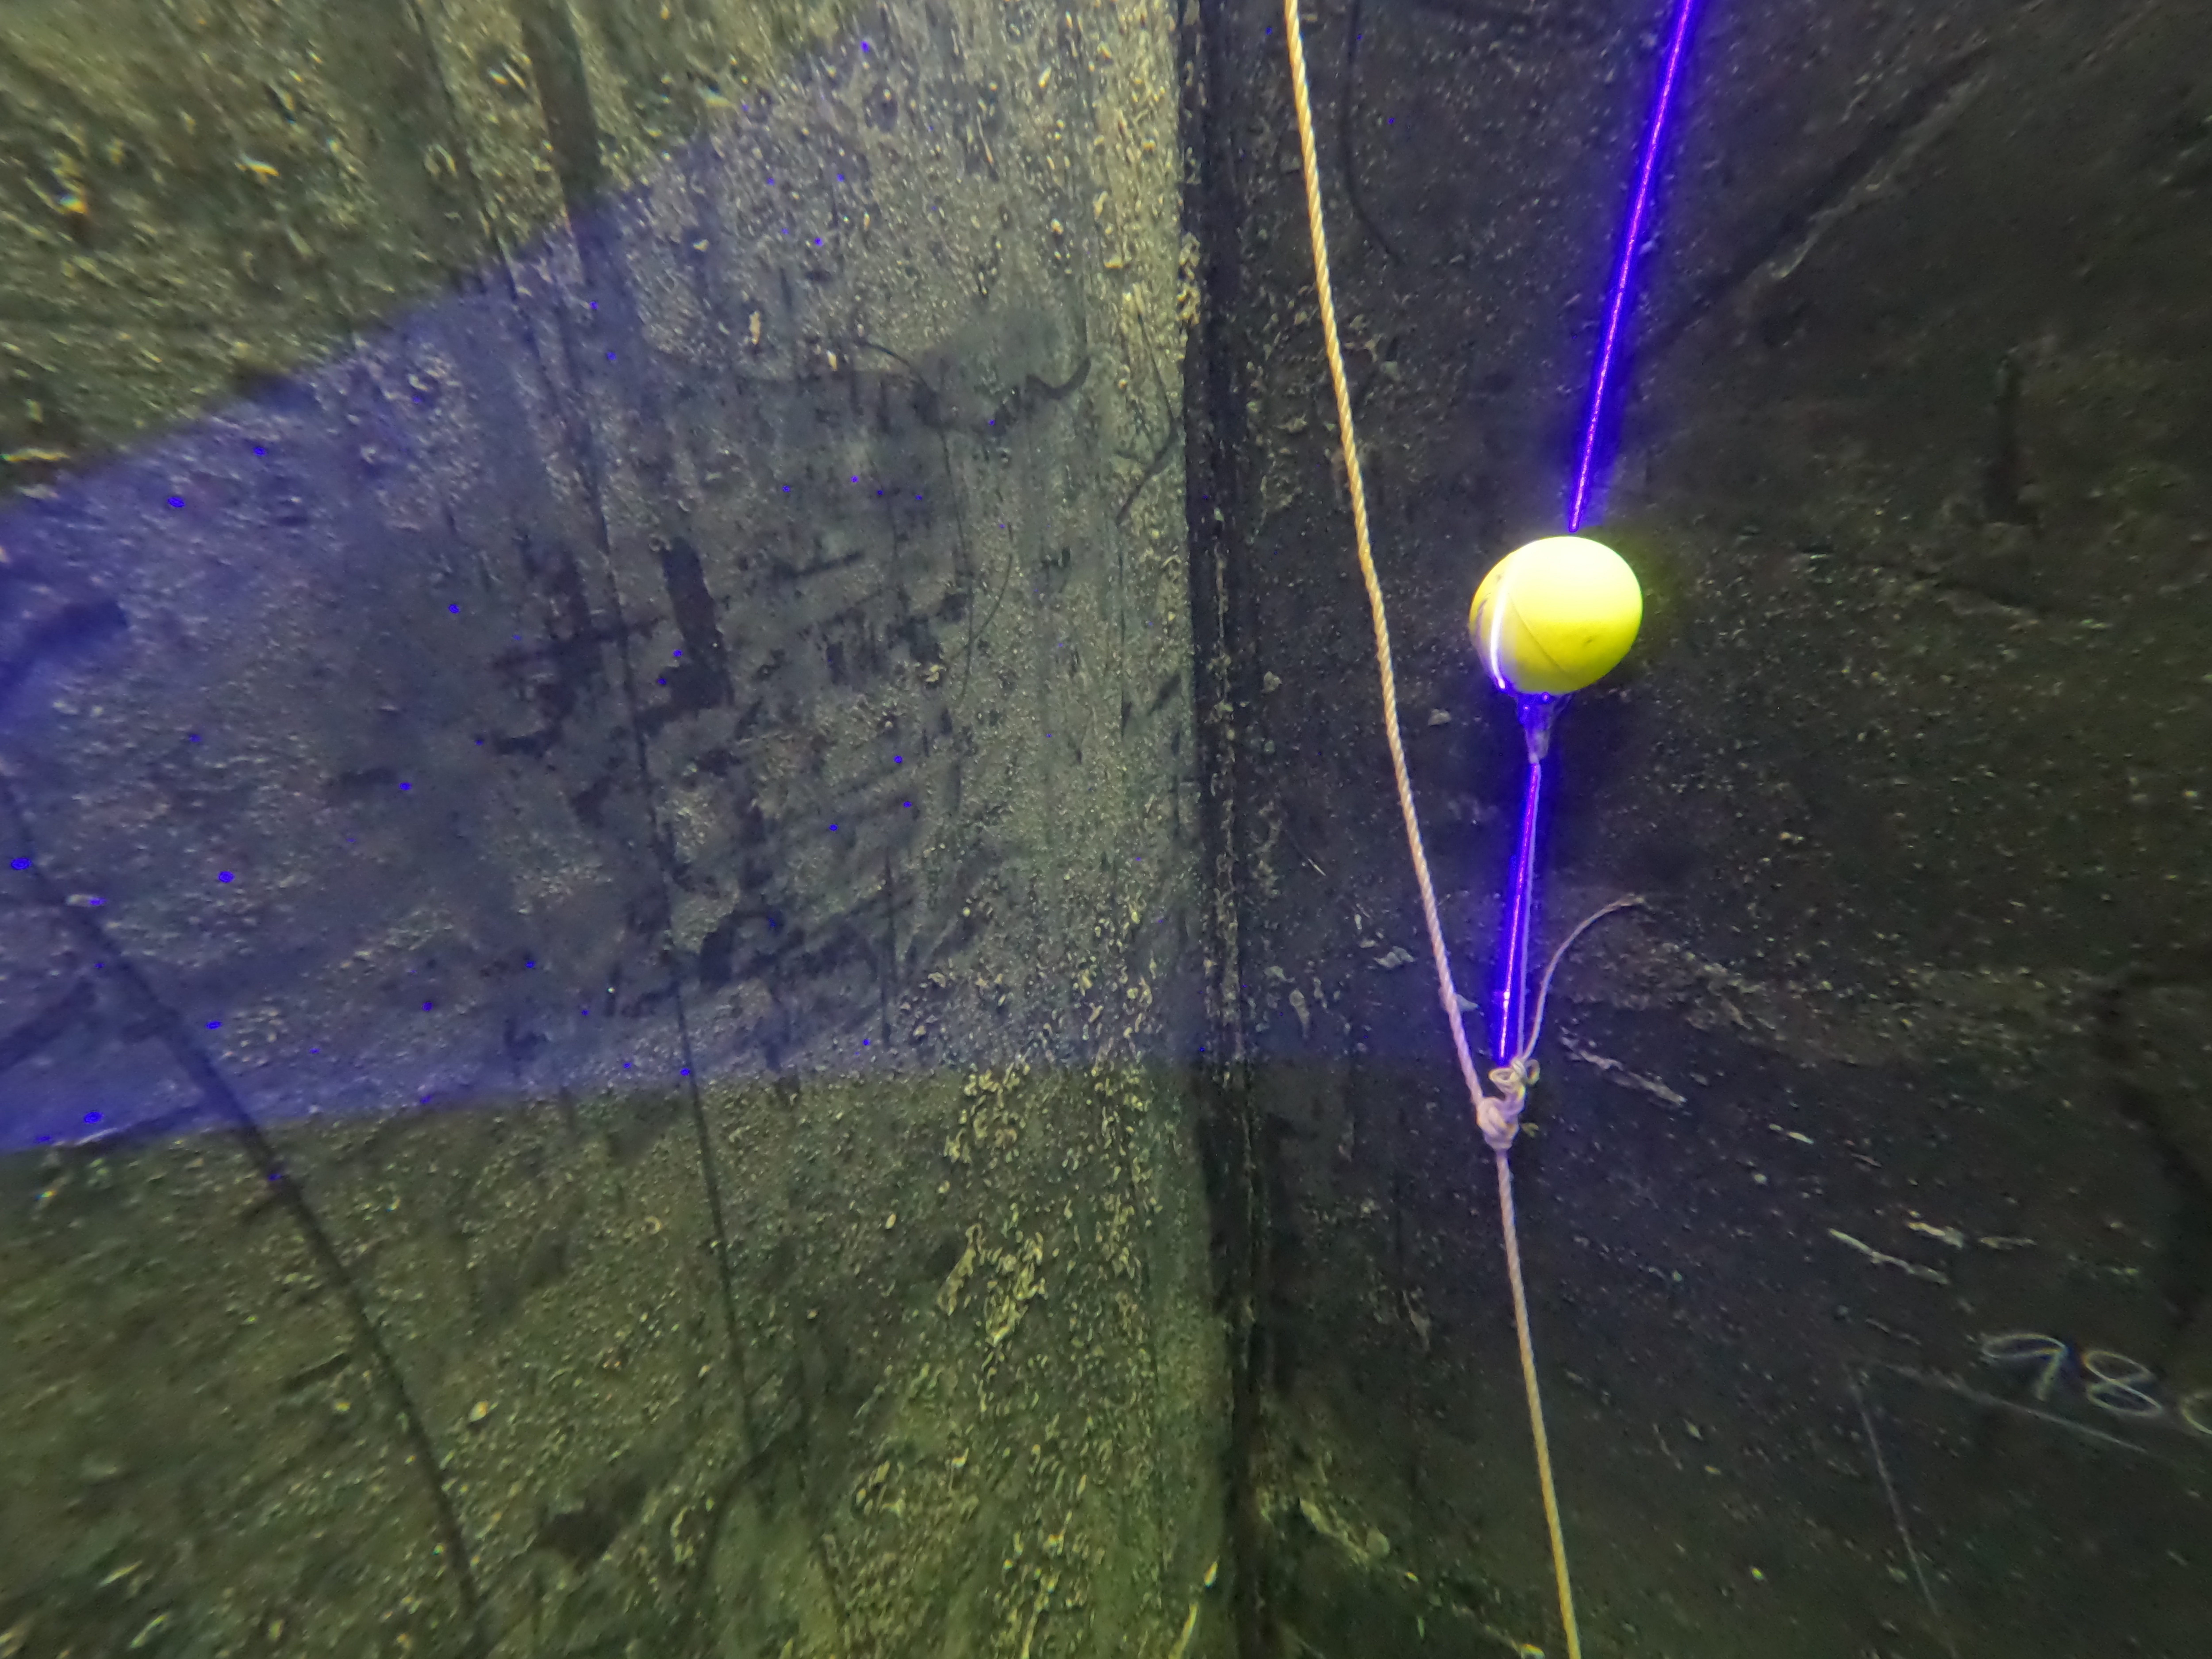

Supplement: Supplementary file 354 [file G0031147.pdf › 4/G0031147.pdf]

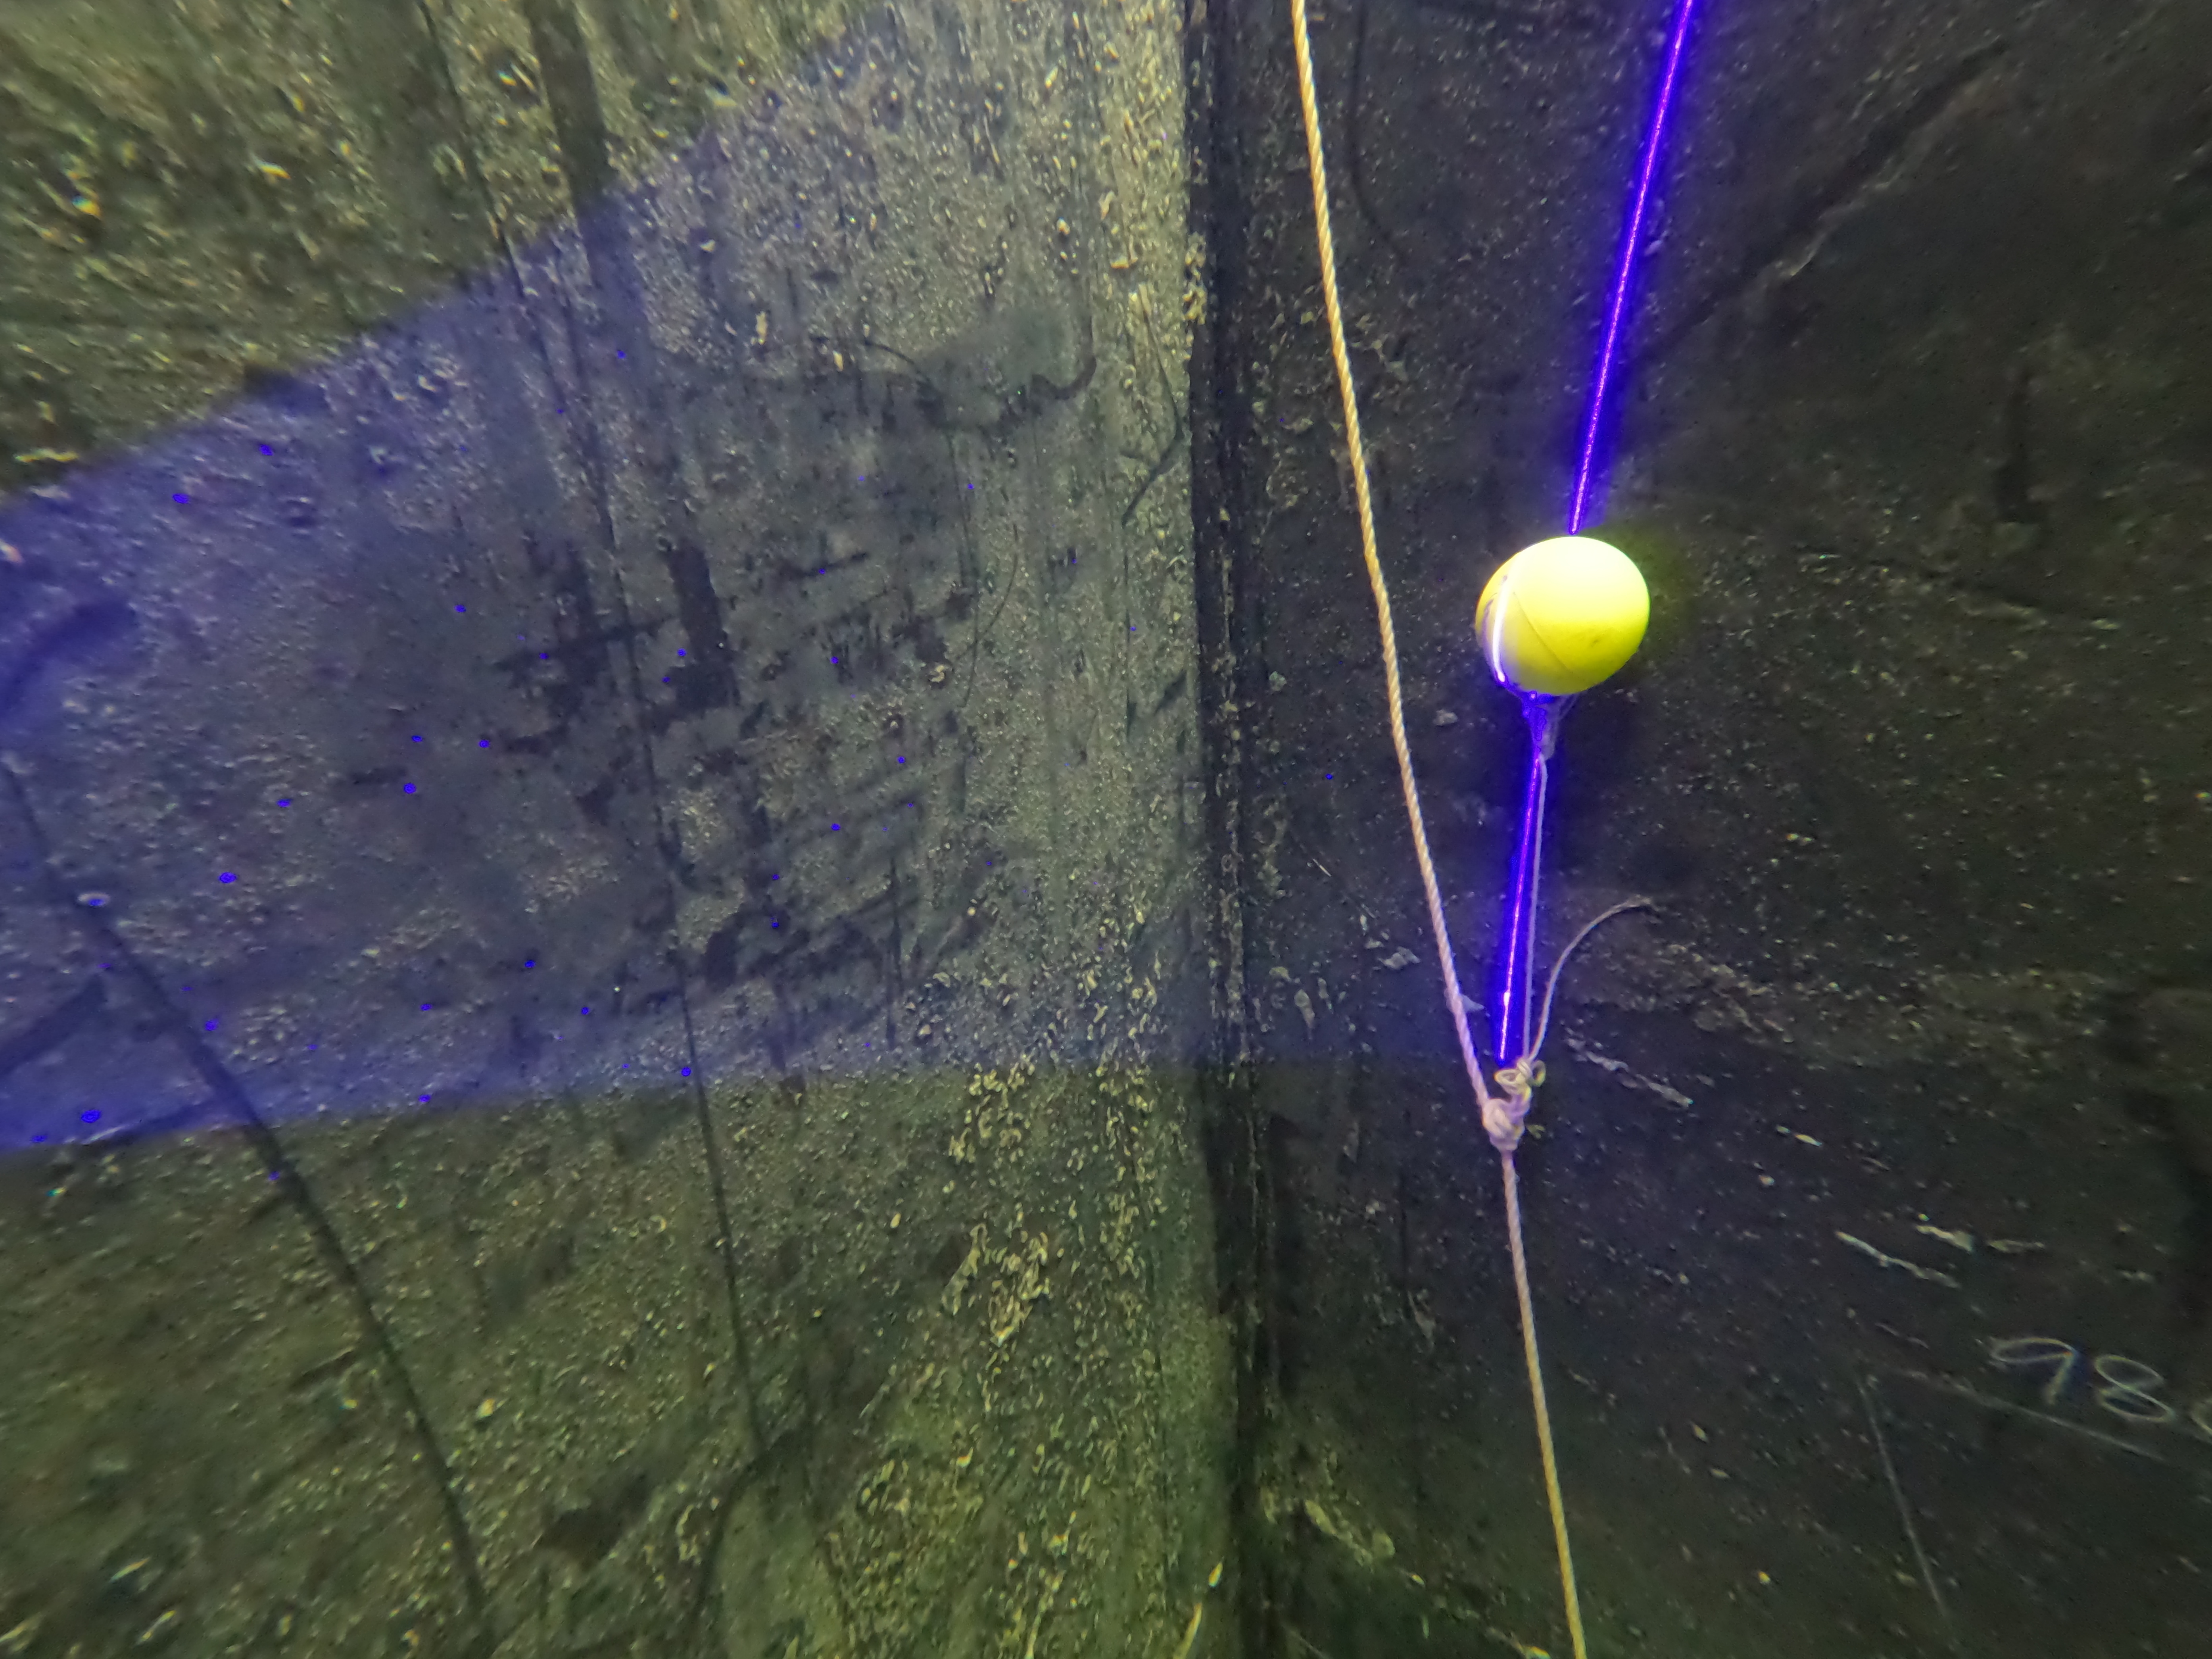

Supplement: Supplementary file 355 [file G0031148.pdf › 4/G0031148.pdf]

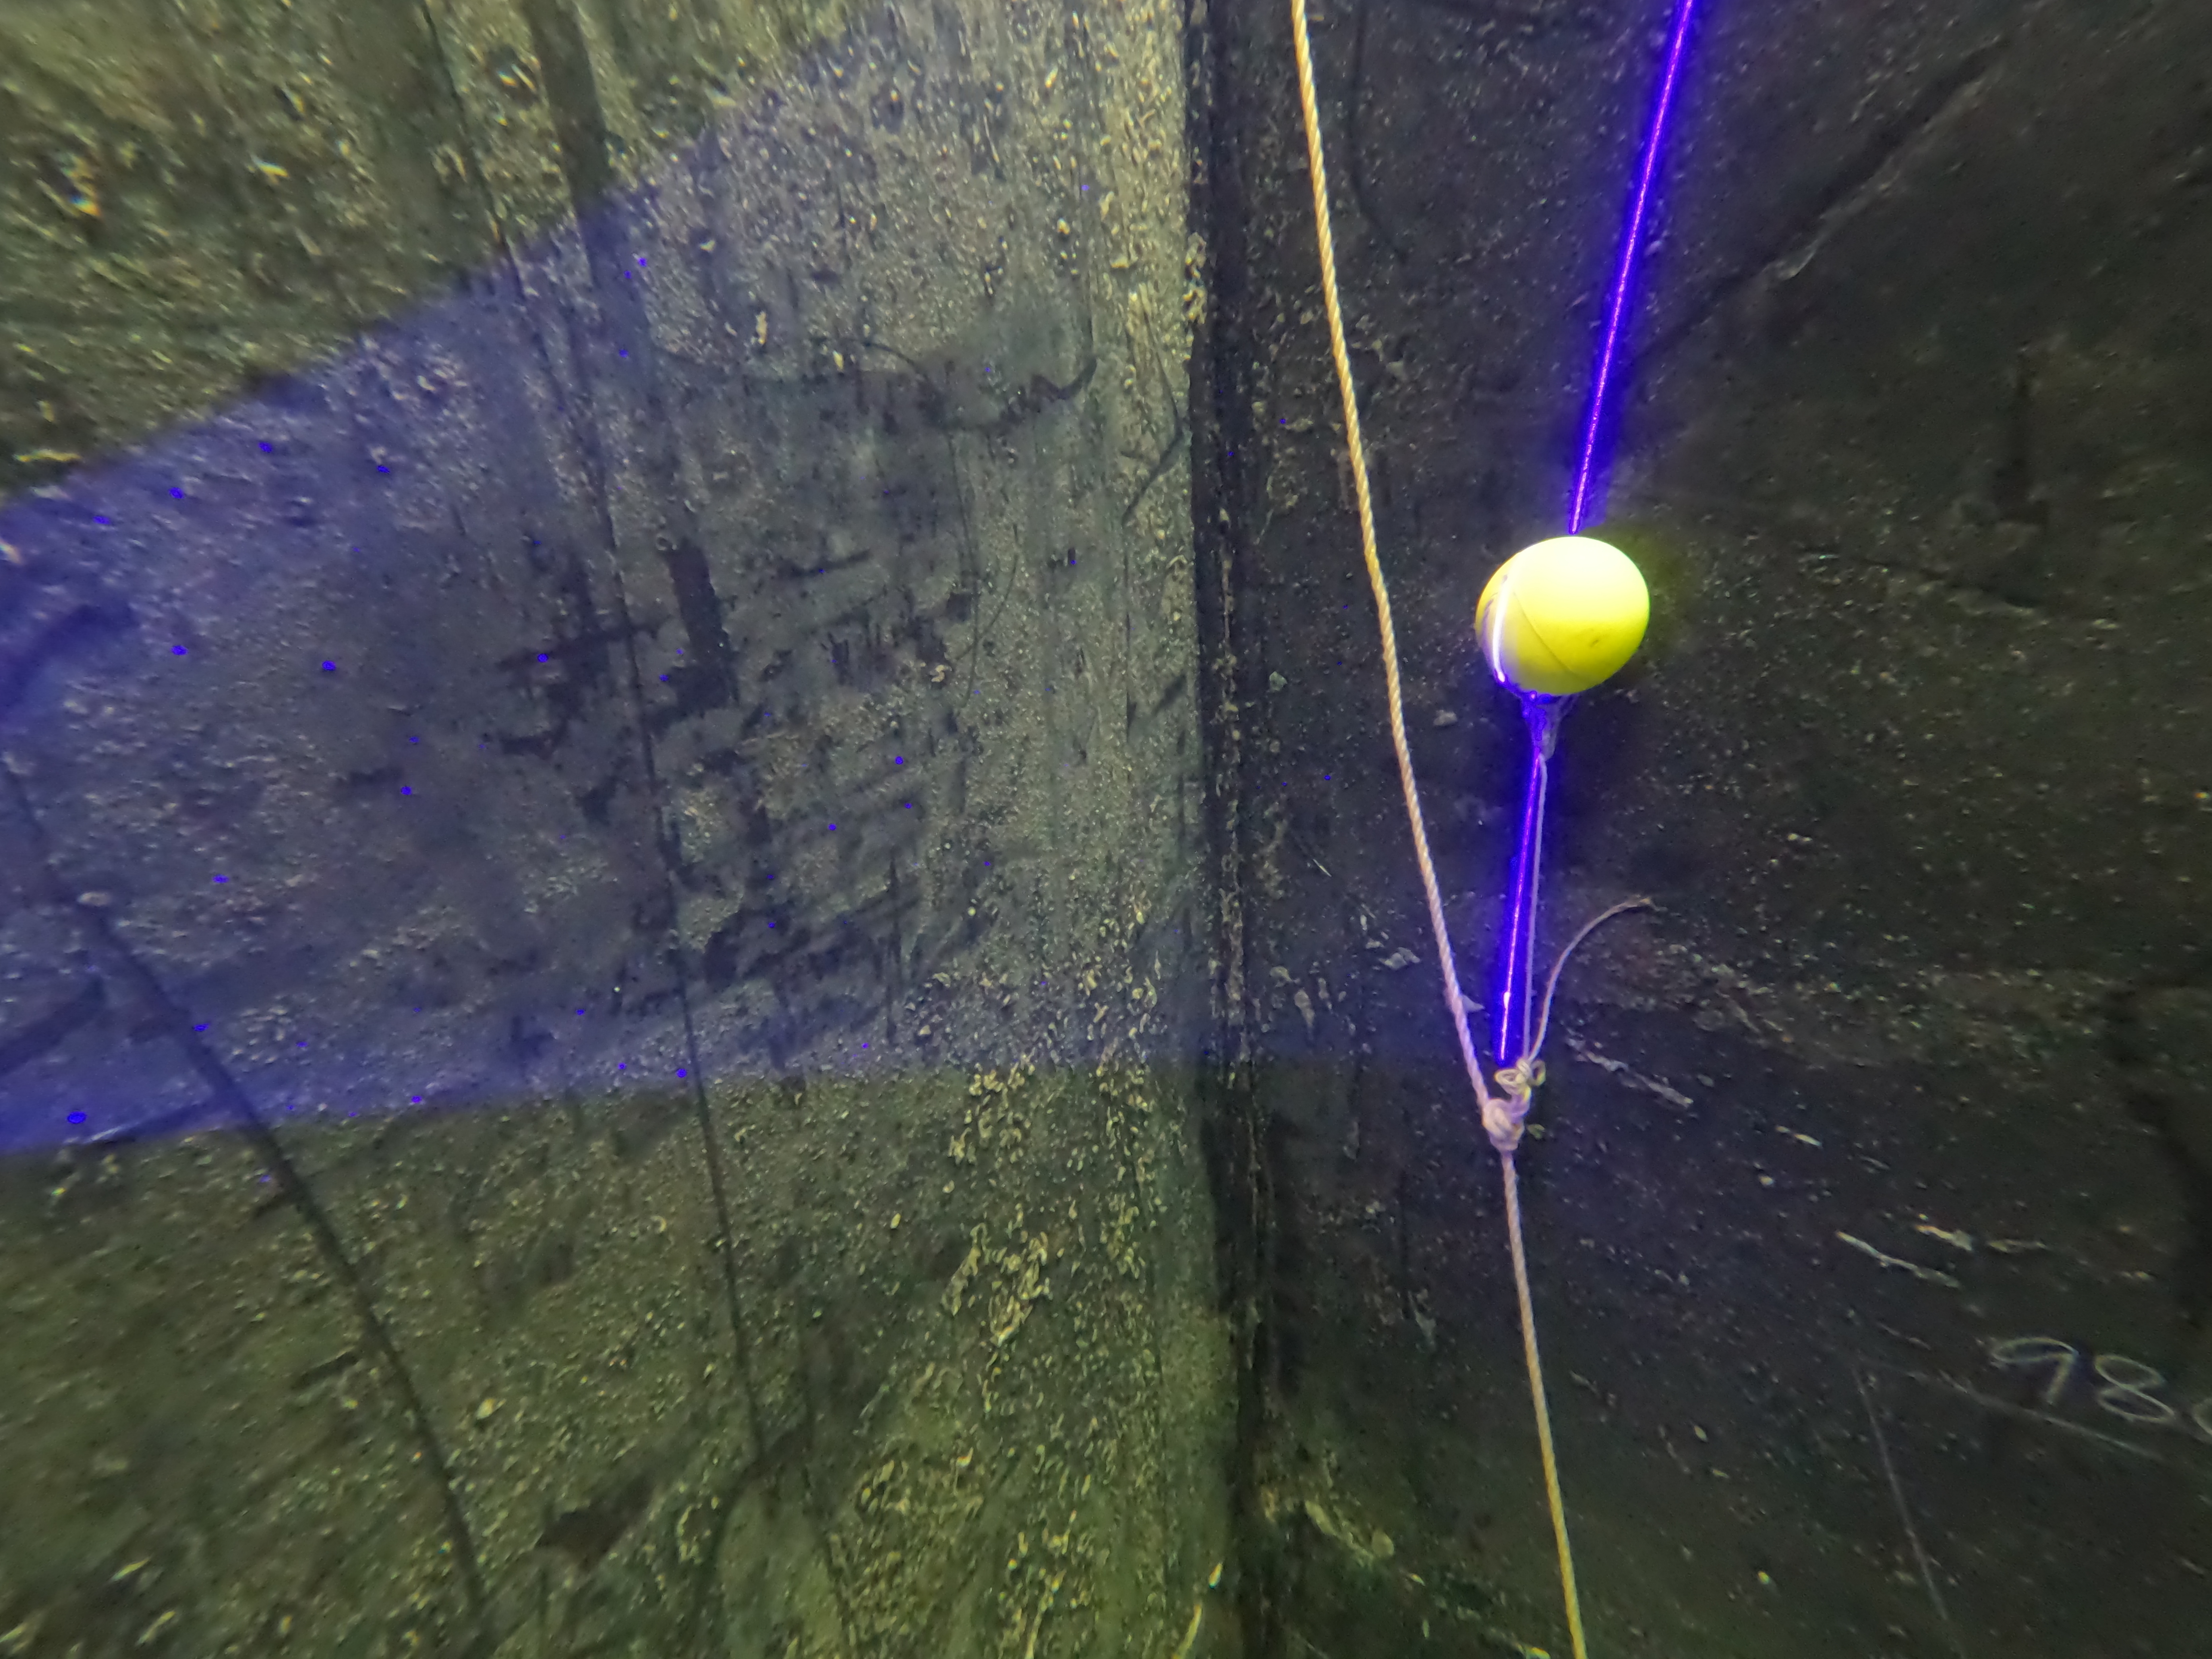

Supplement: Supplementary file 356 [file G0031149.pdf › 4/G0031149.pdf]

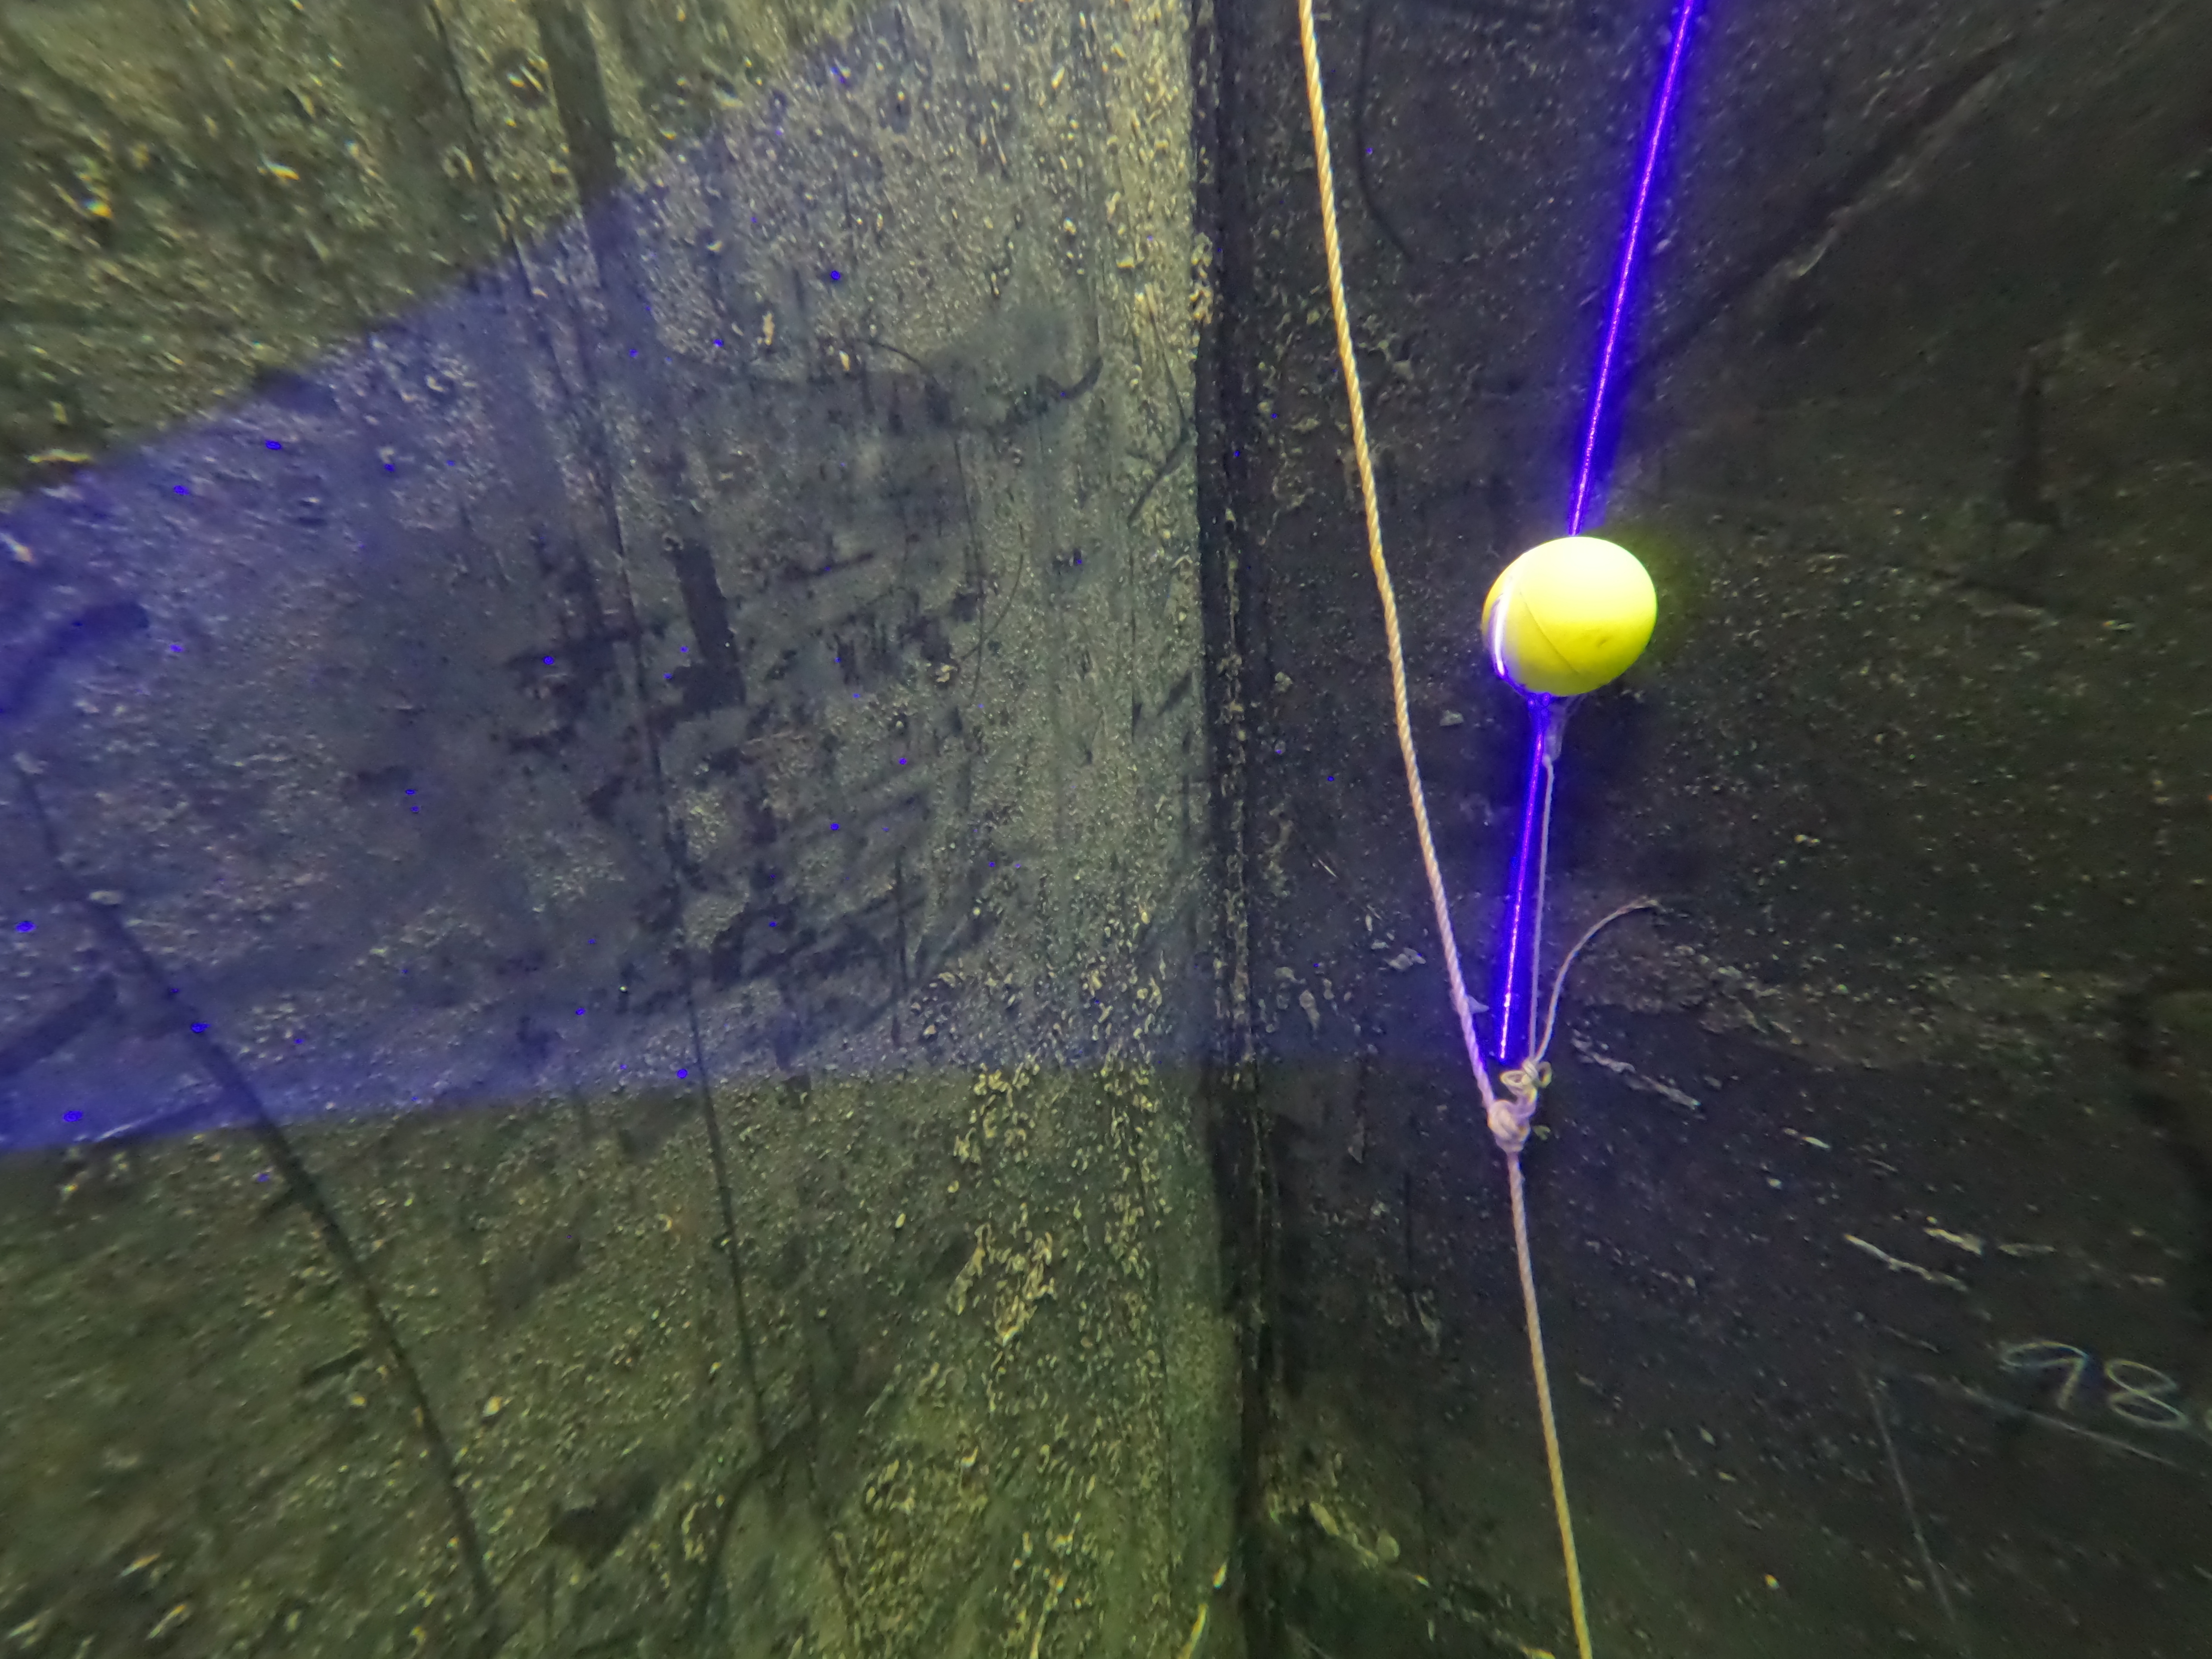

Supplement: Supplementary file 357 [file G0031150.pdf › 4/G0031150.pdf]

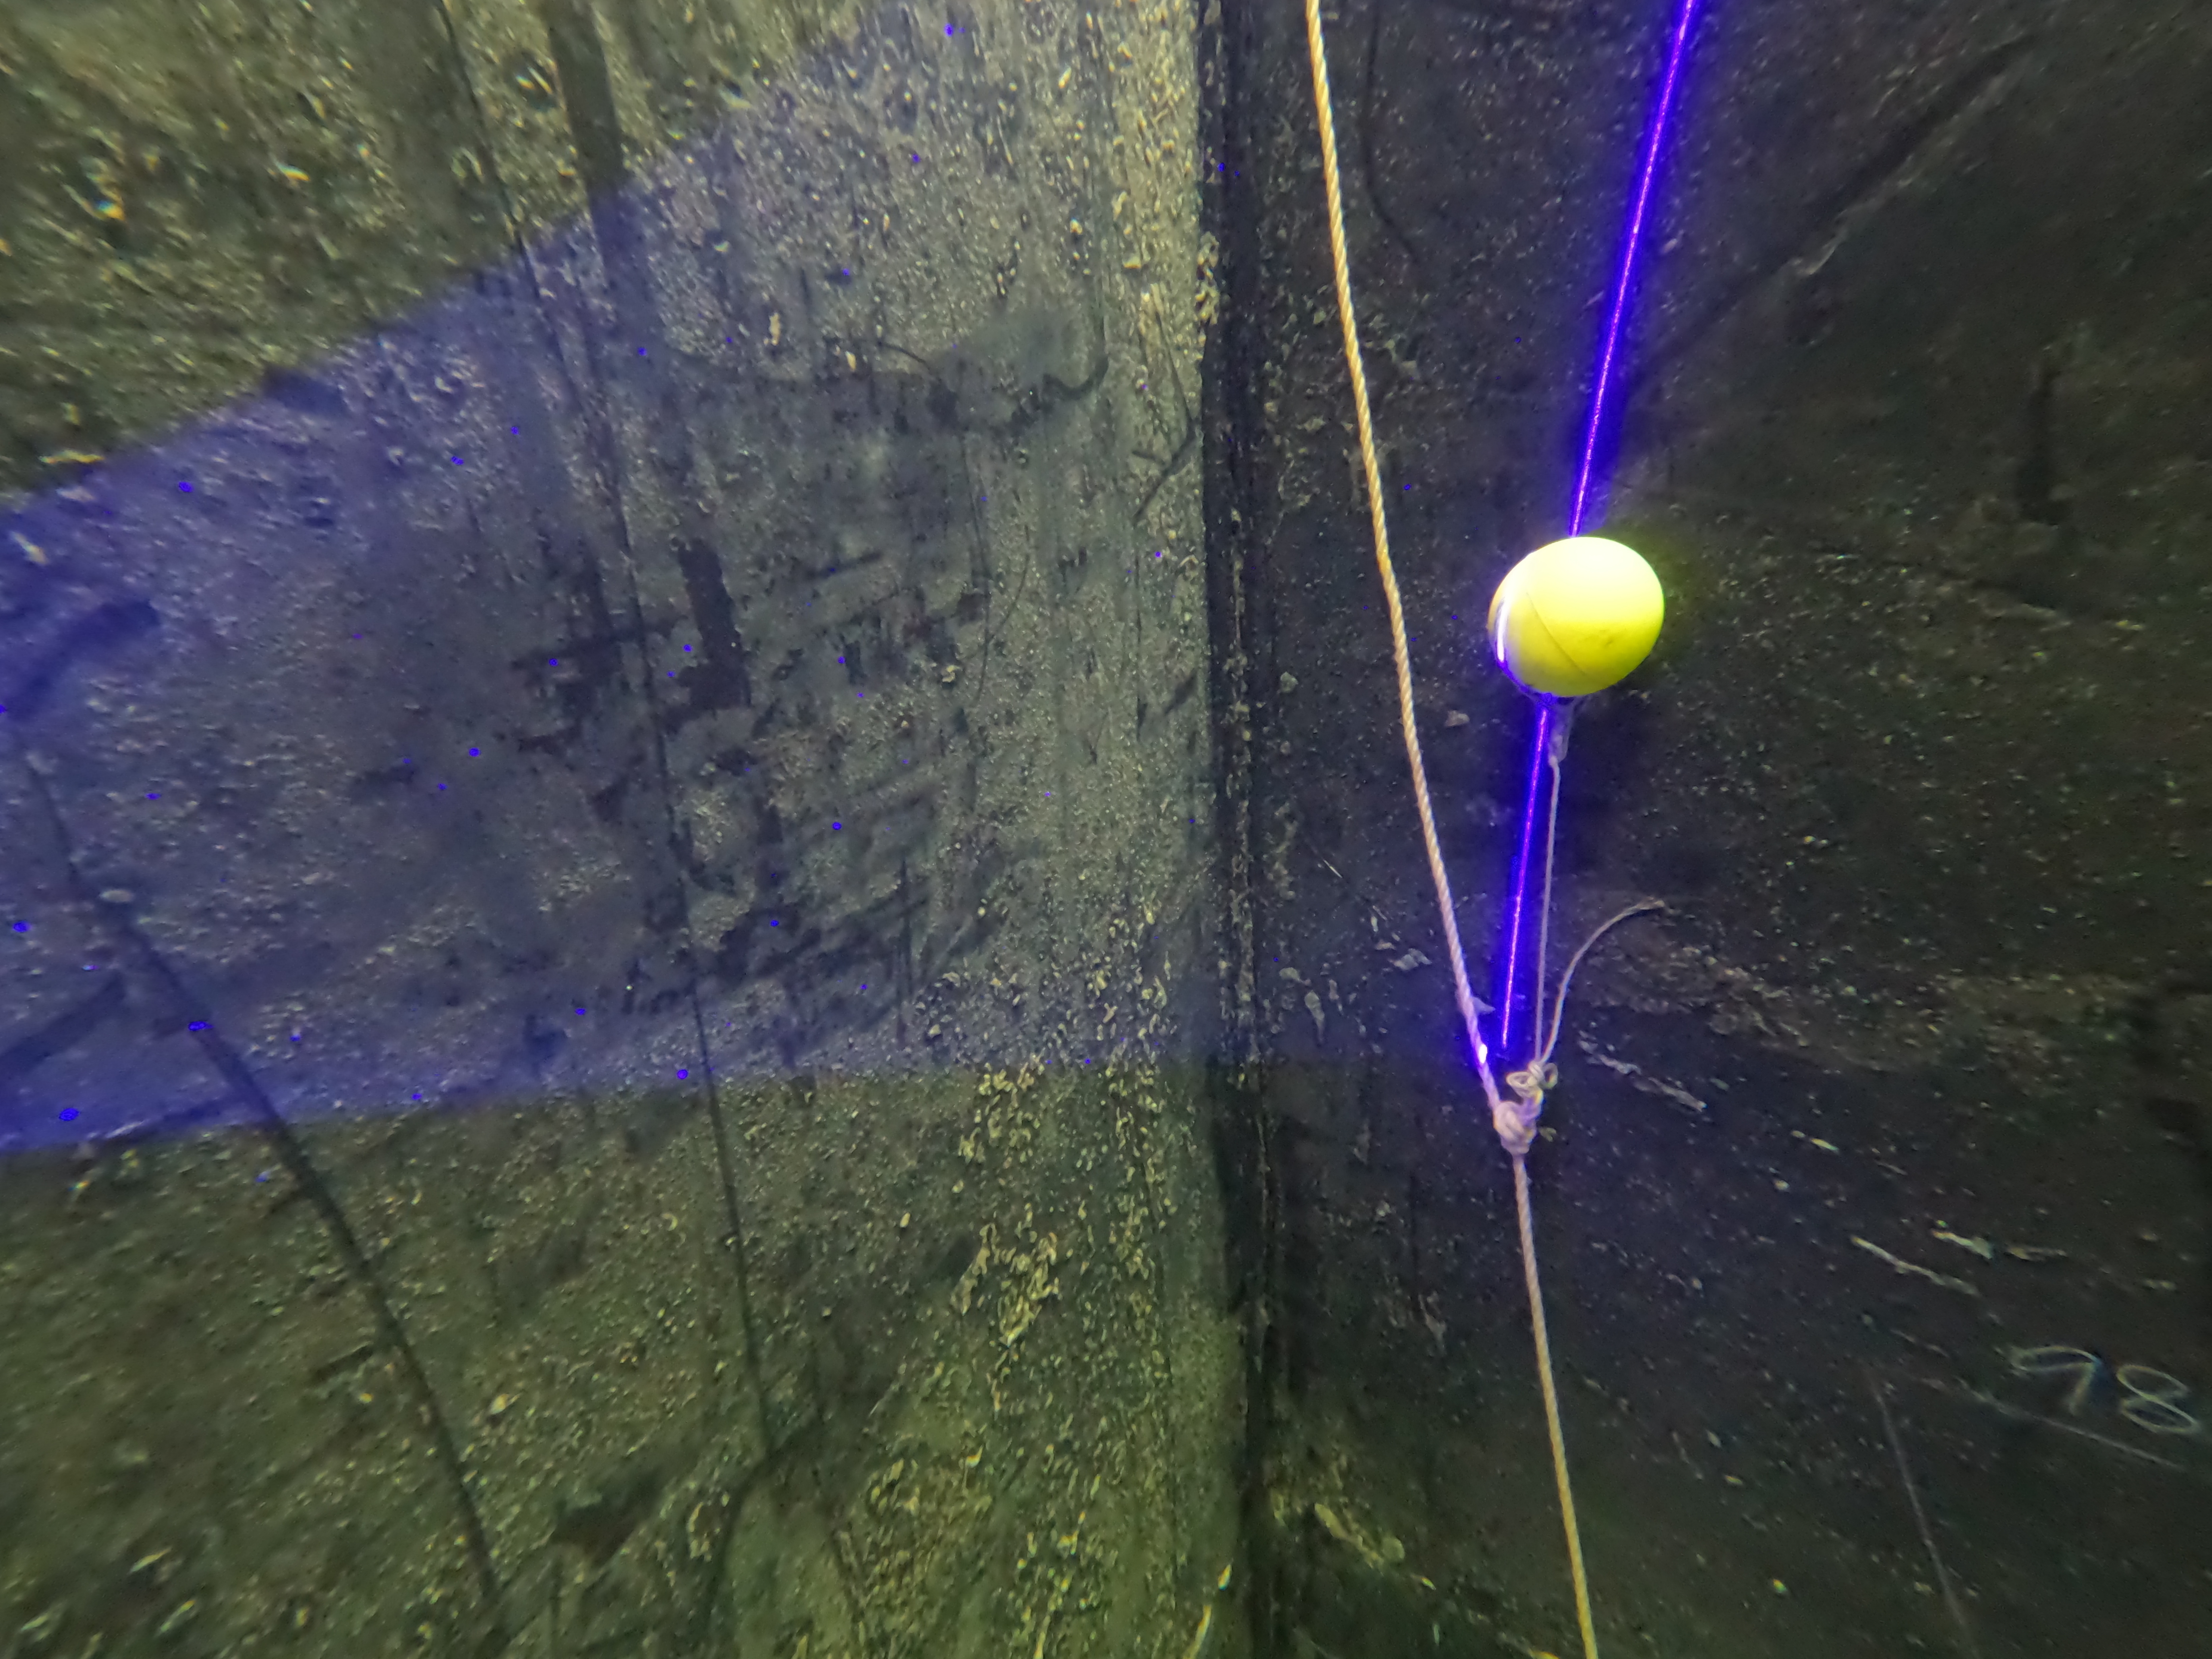

Supplement: Supplementary file 358 [file G0031151.pdf › 4/G0031151.pdf]

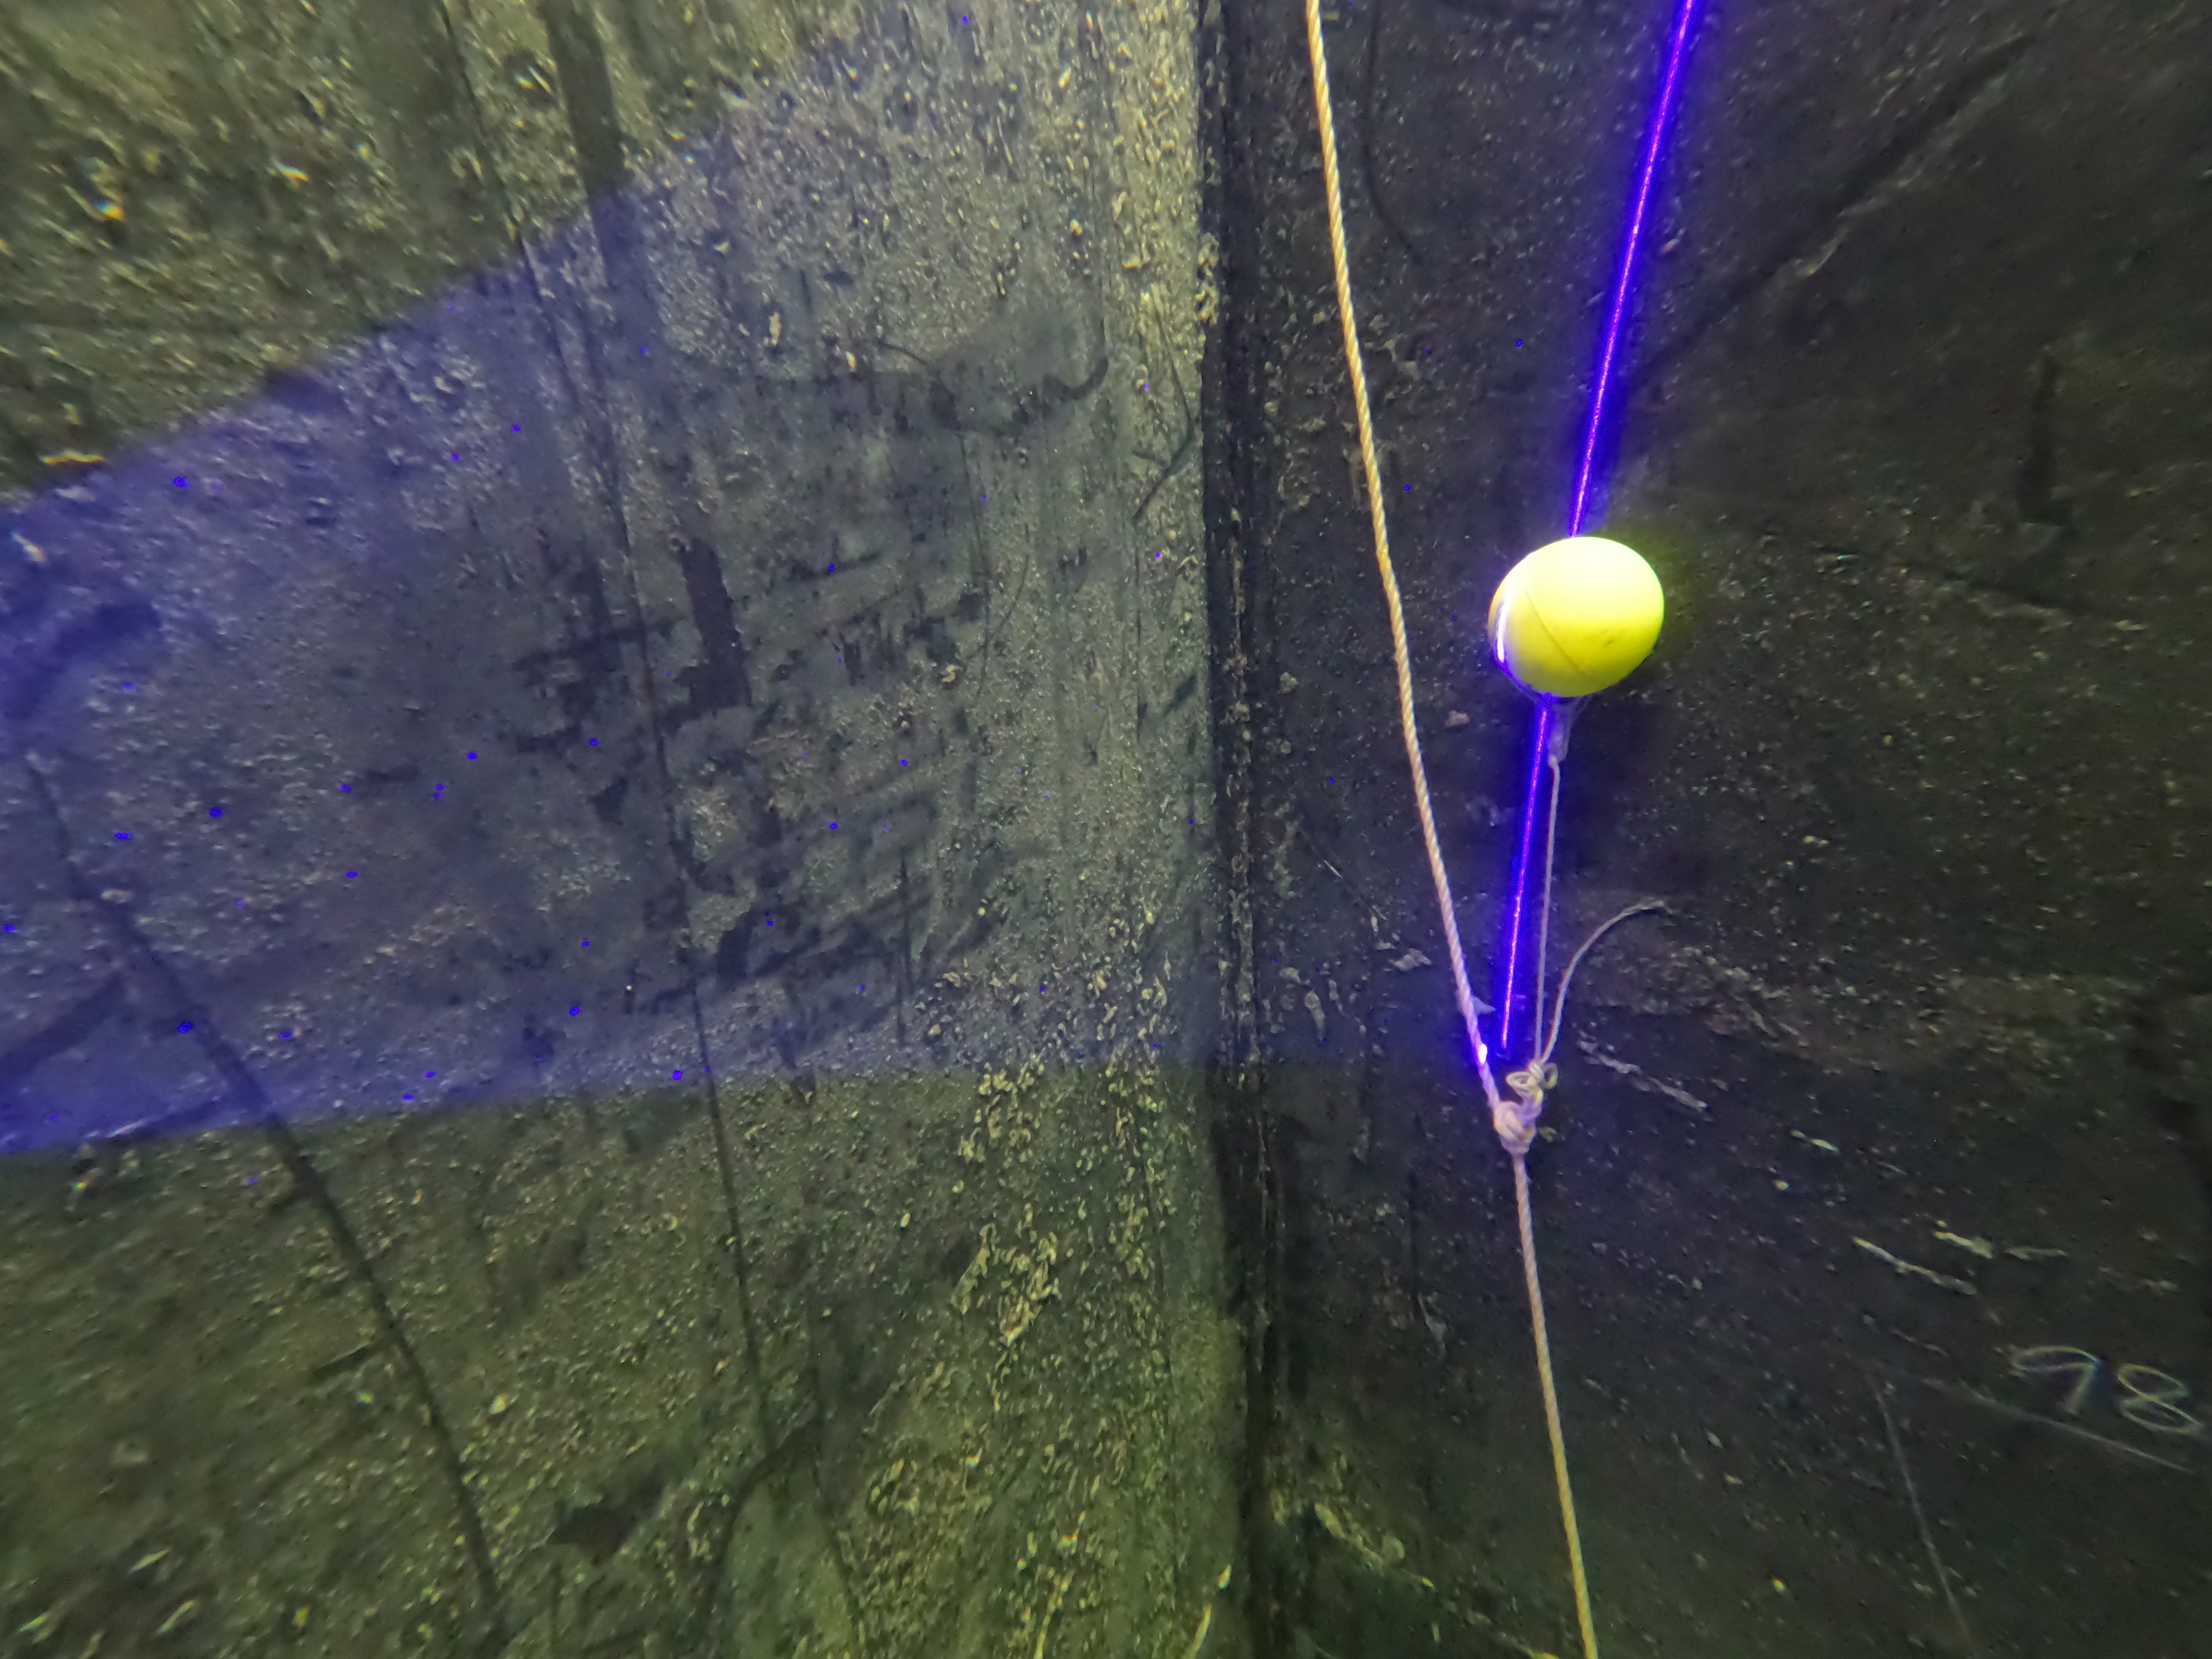

Supplement: Supplementary file 359 [file G0031152.pdf › 4/G0031152.pdf]

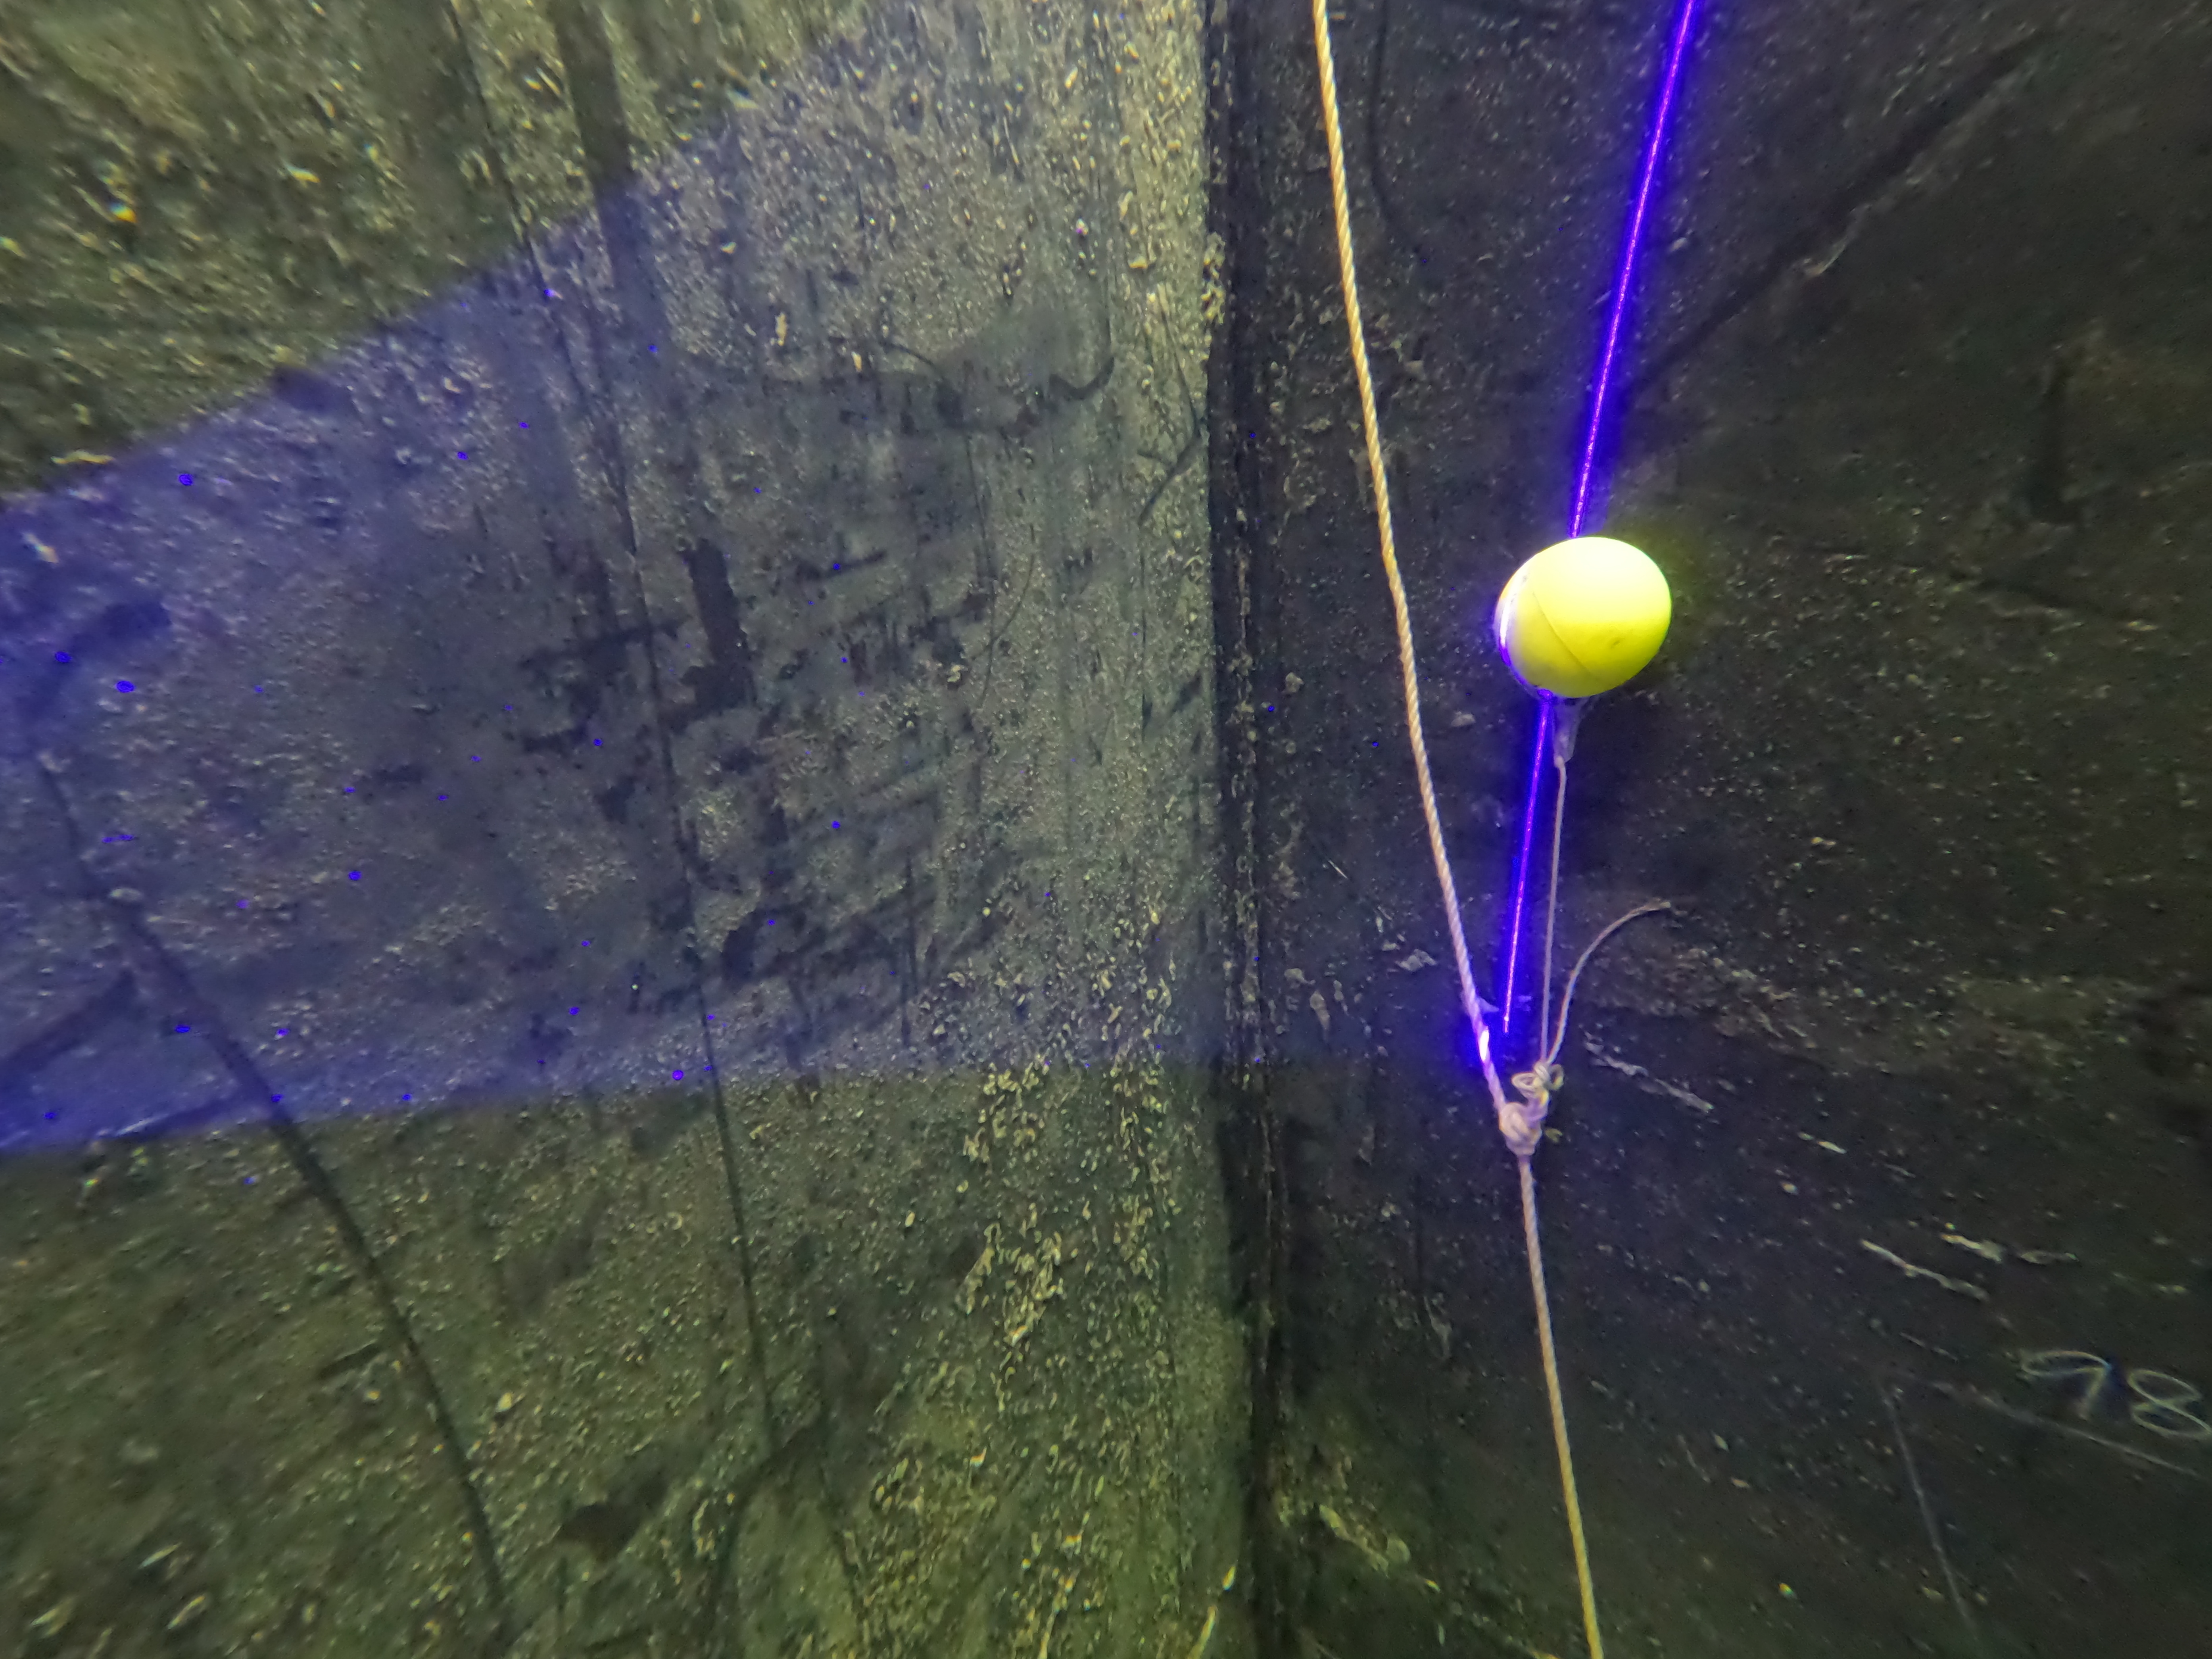

Supplement: Supplementary file 360 [file G0031153.pdf › 4/G0031153.pdf]

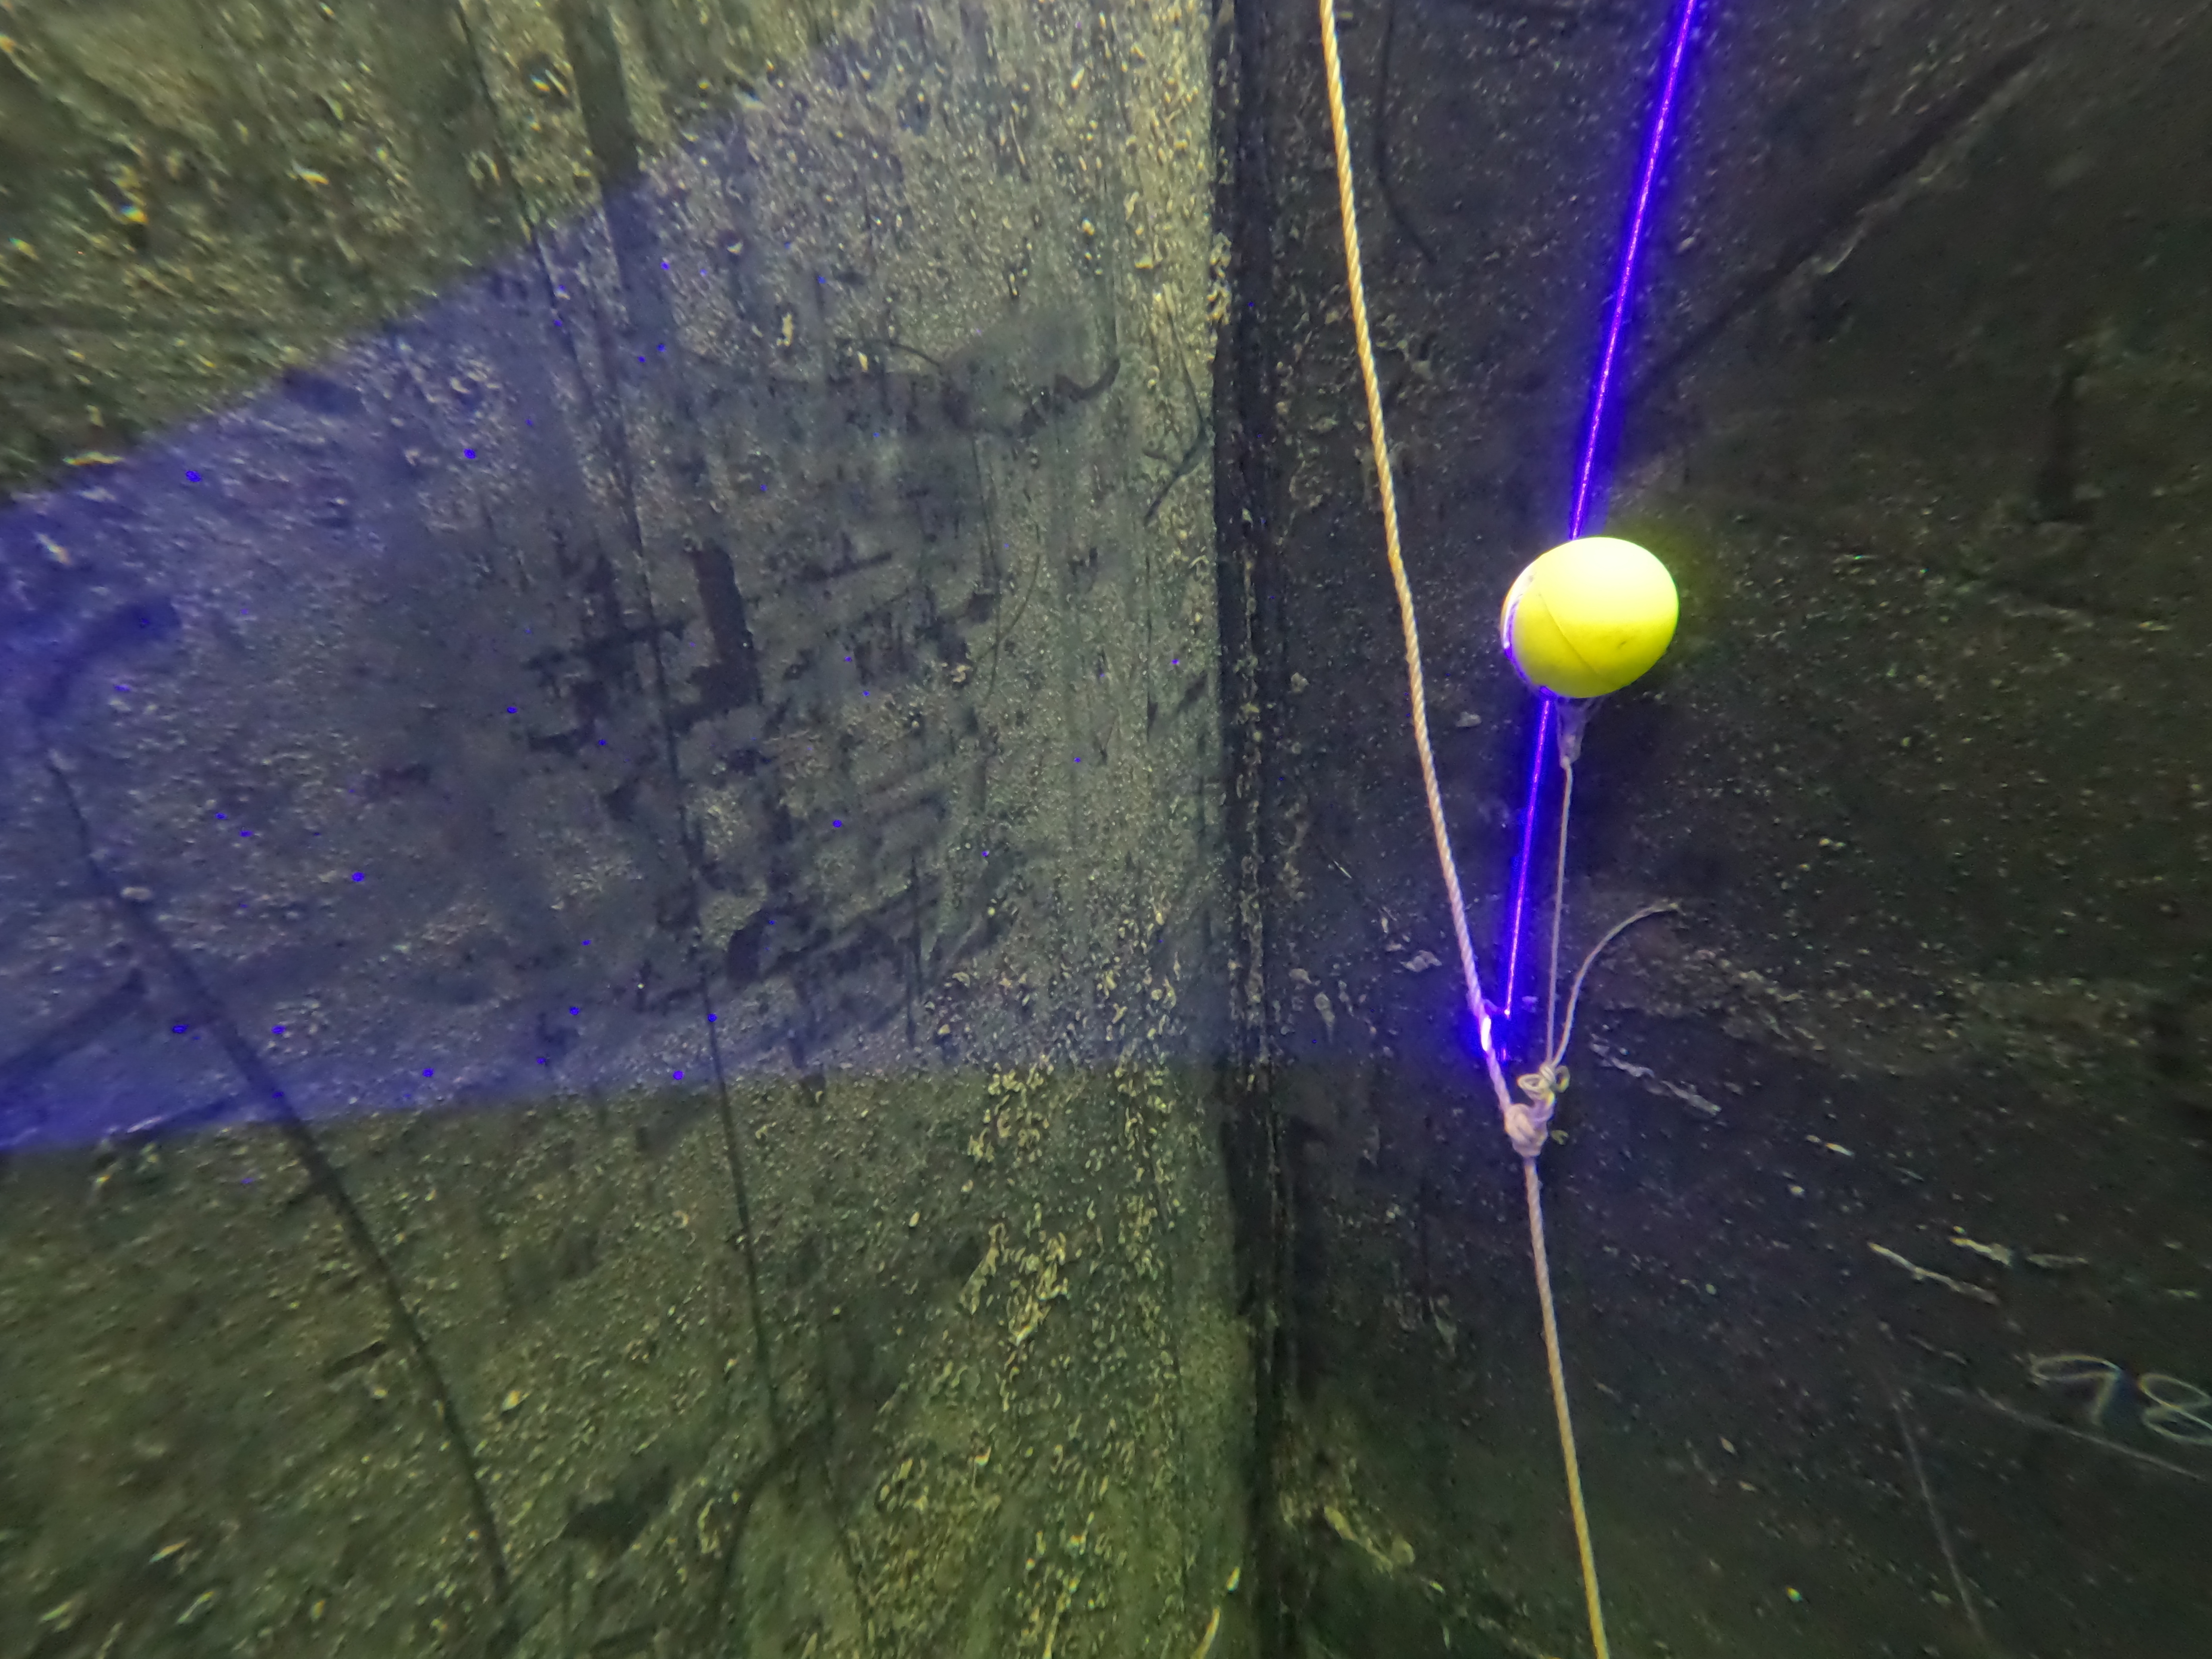

Supplement: Supplementary file 361 [file G0031154.pdf › 4/G0031154.pdf]

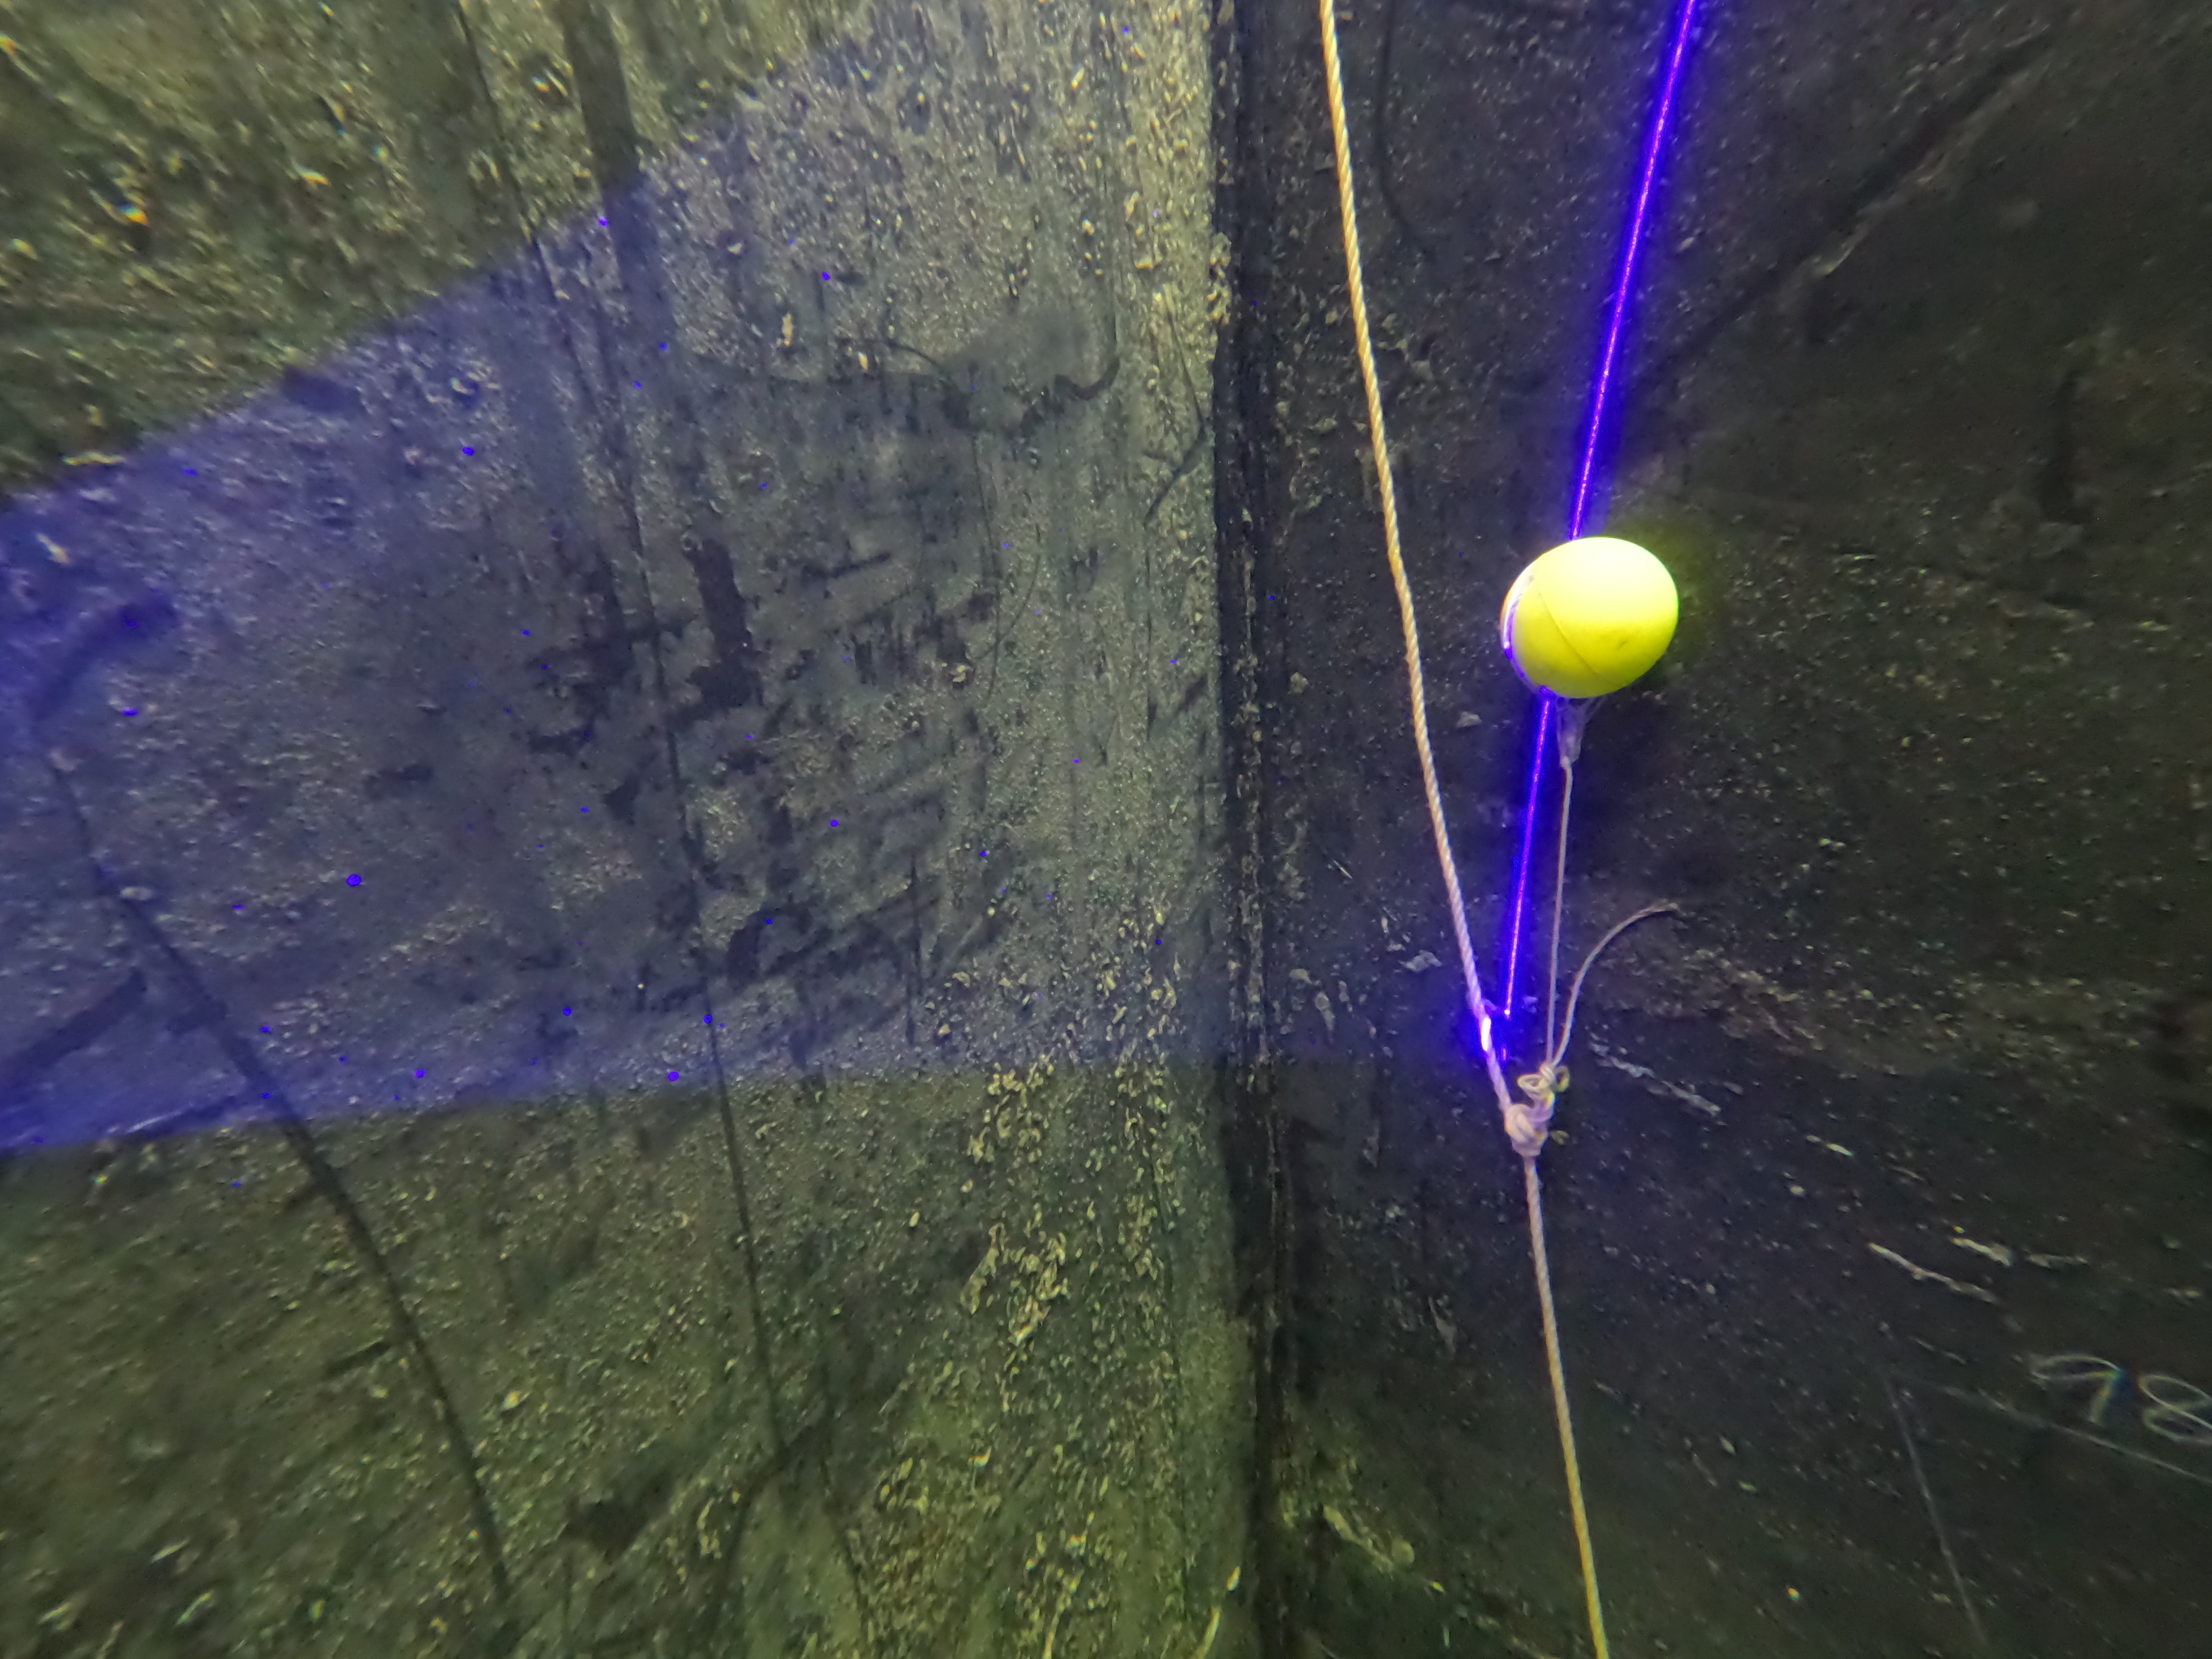

Supplement: Supplementary file 362 [file G0031155.pdf › 4/G0031155.pdf]

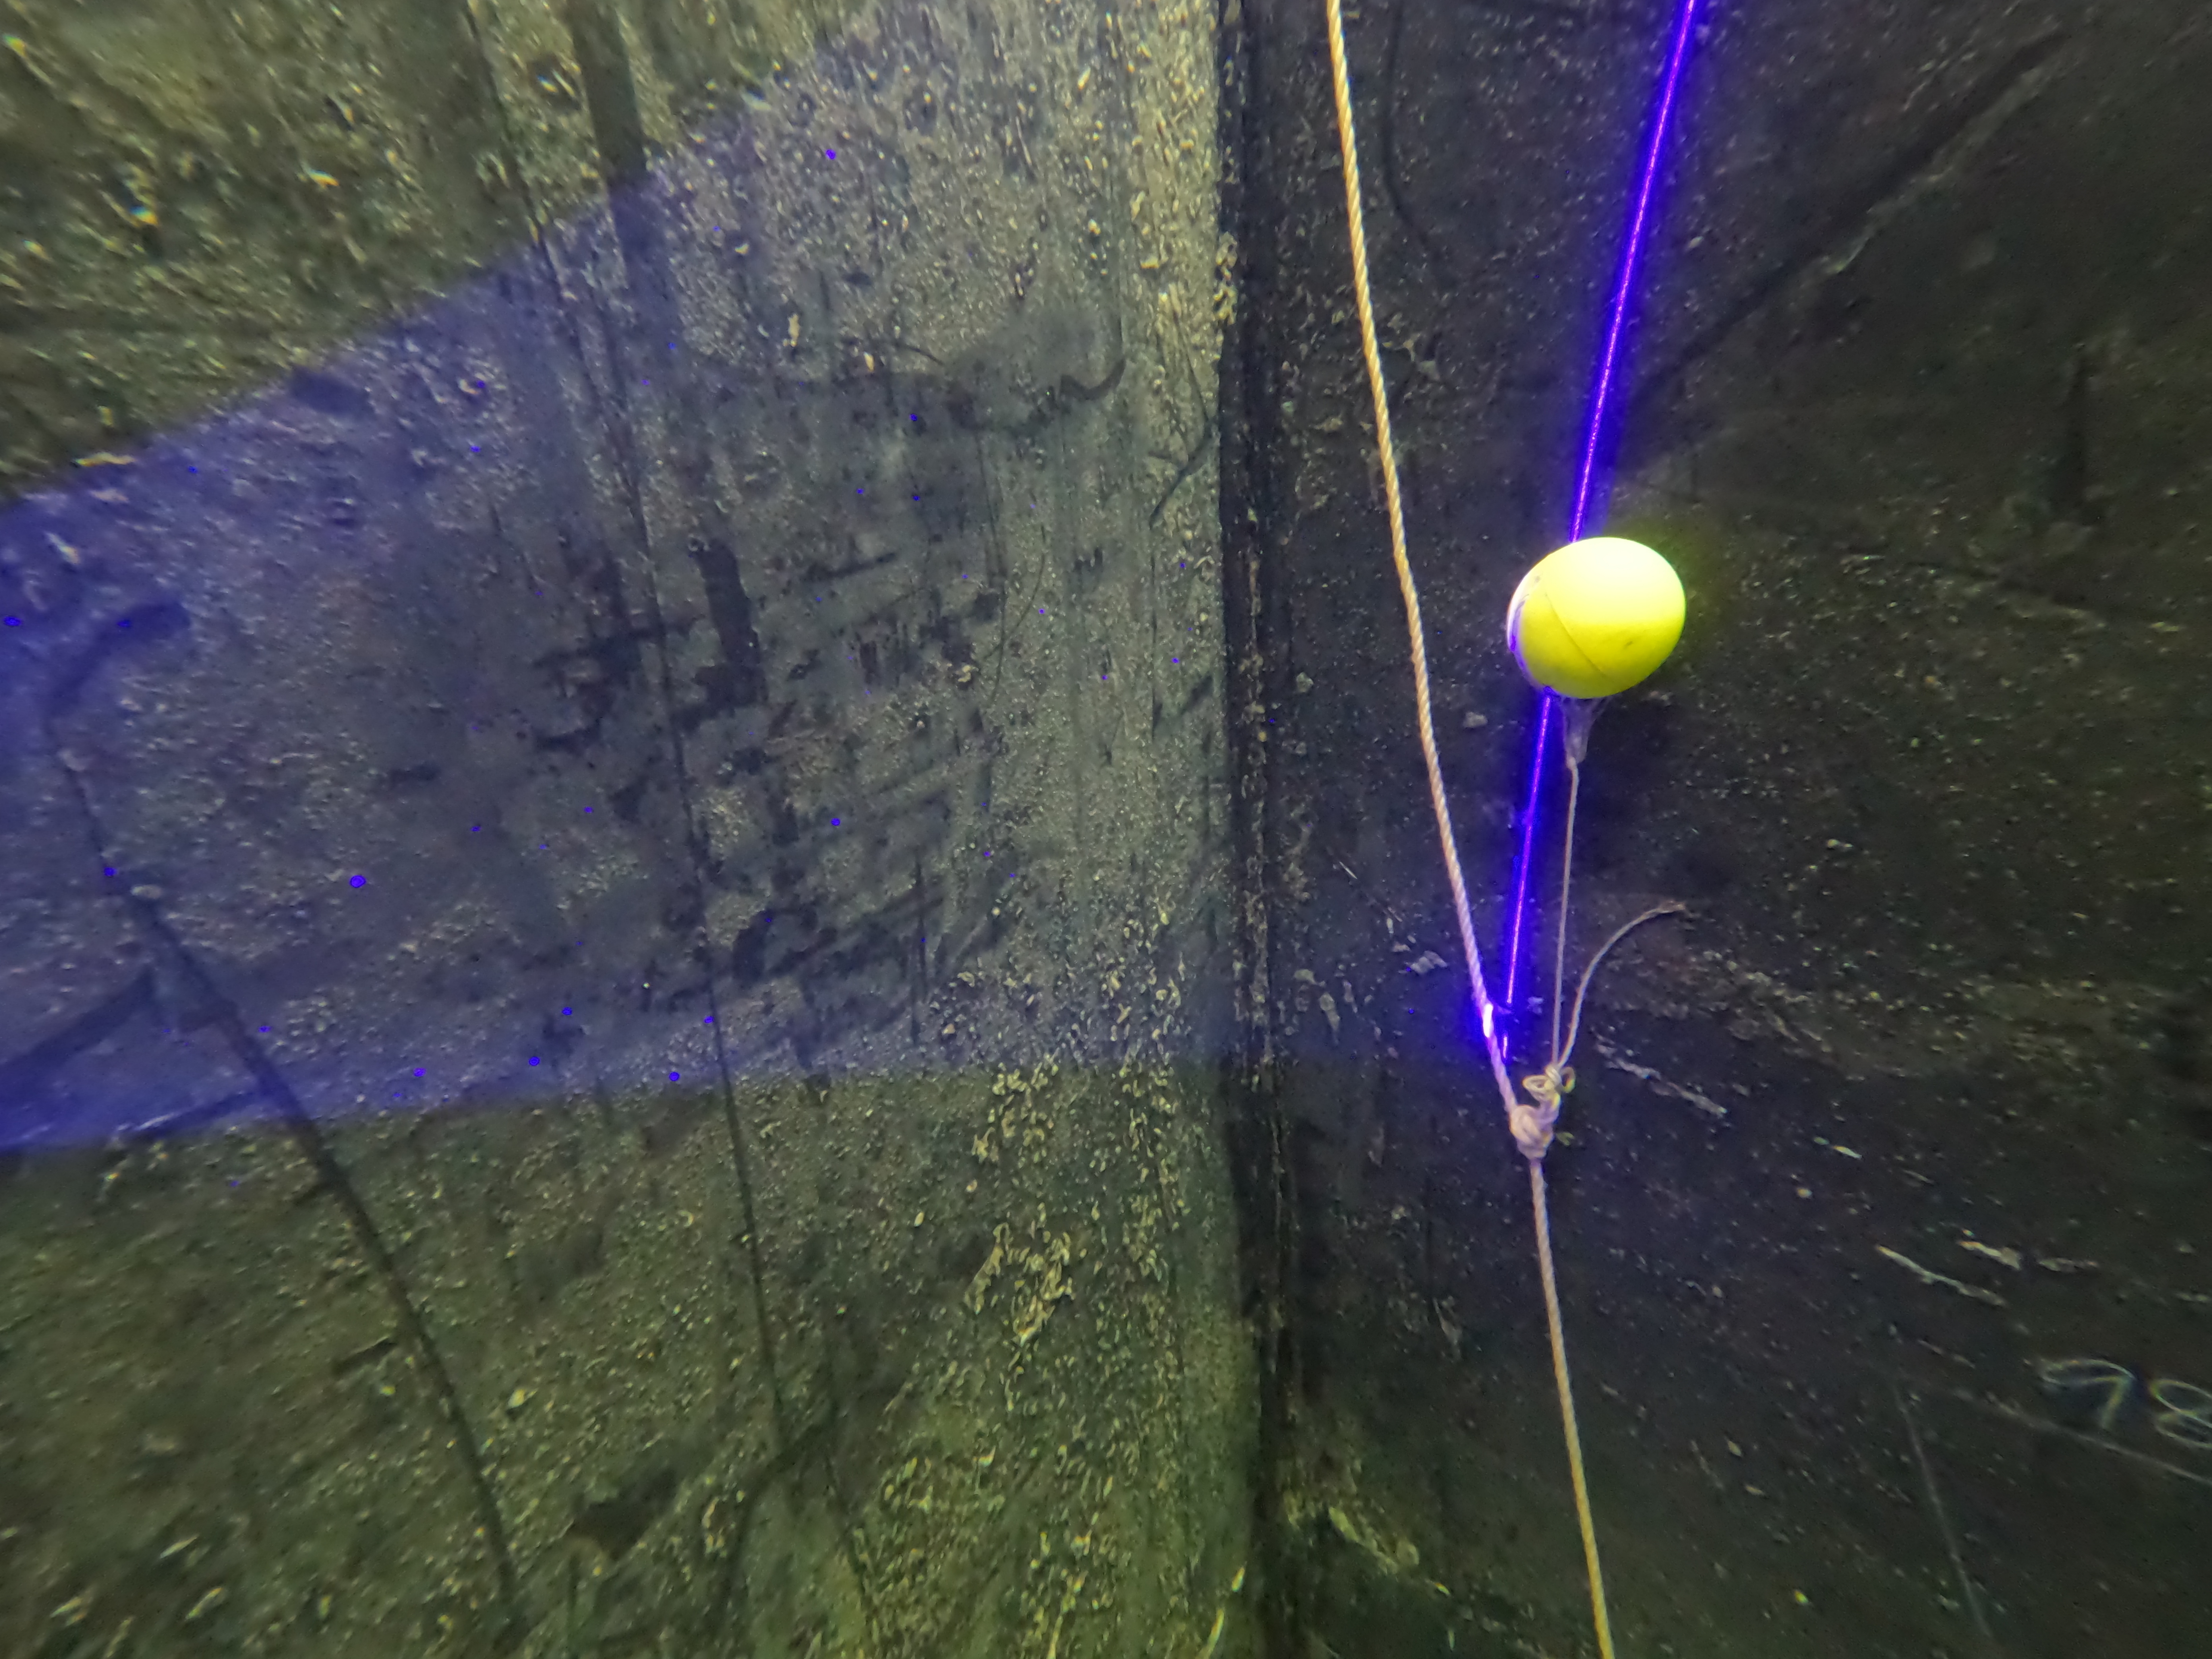

Supplement: Supplementary file 363 [file G0031156.pdf › 4/G0031156.pdf]

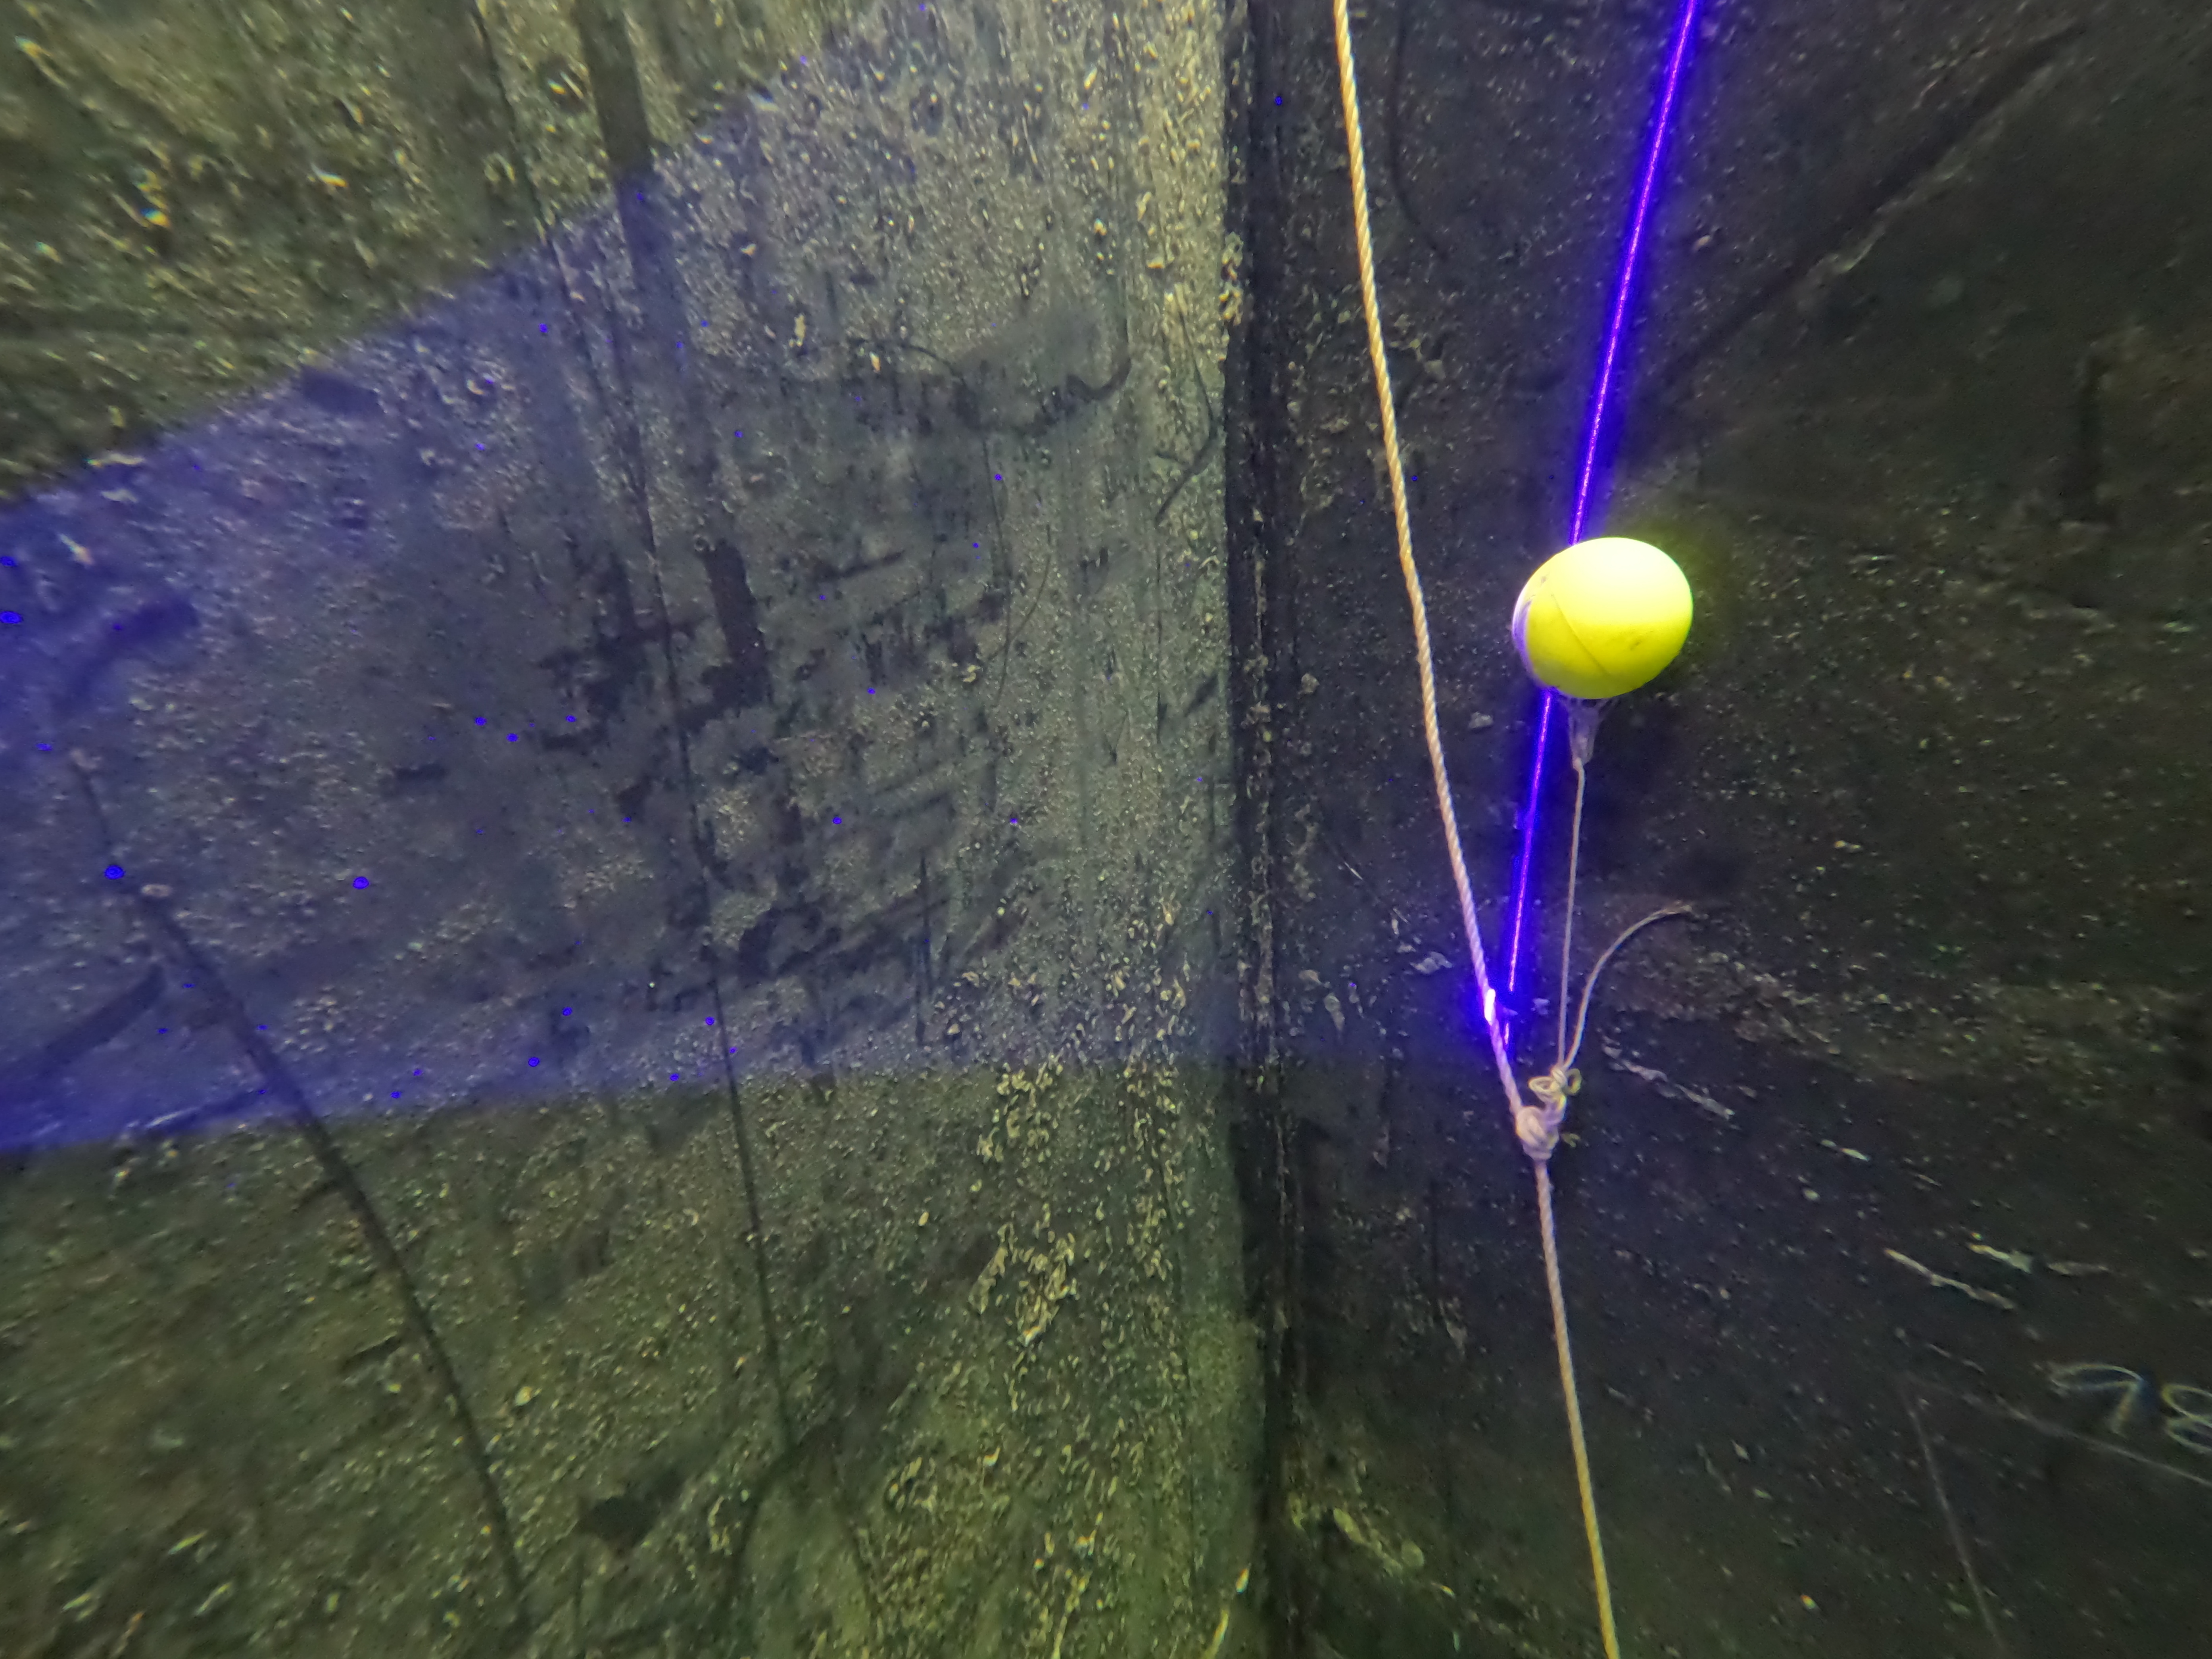

Supplement: Supplementary file 364 [file G0031157.pdf › 4/G0031157.pdf]

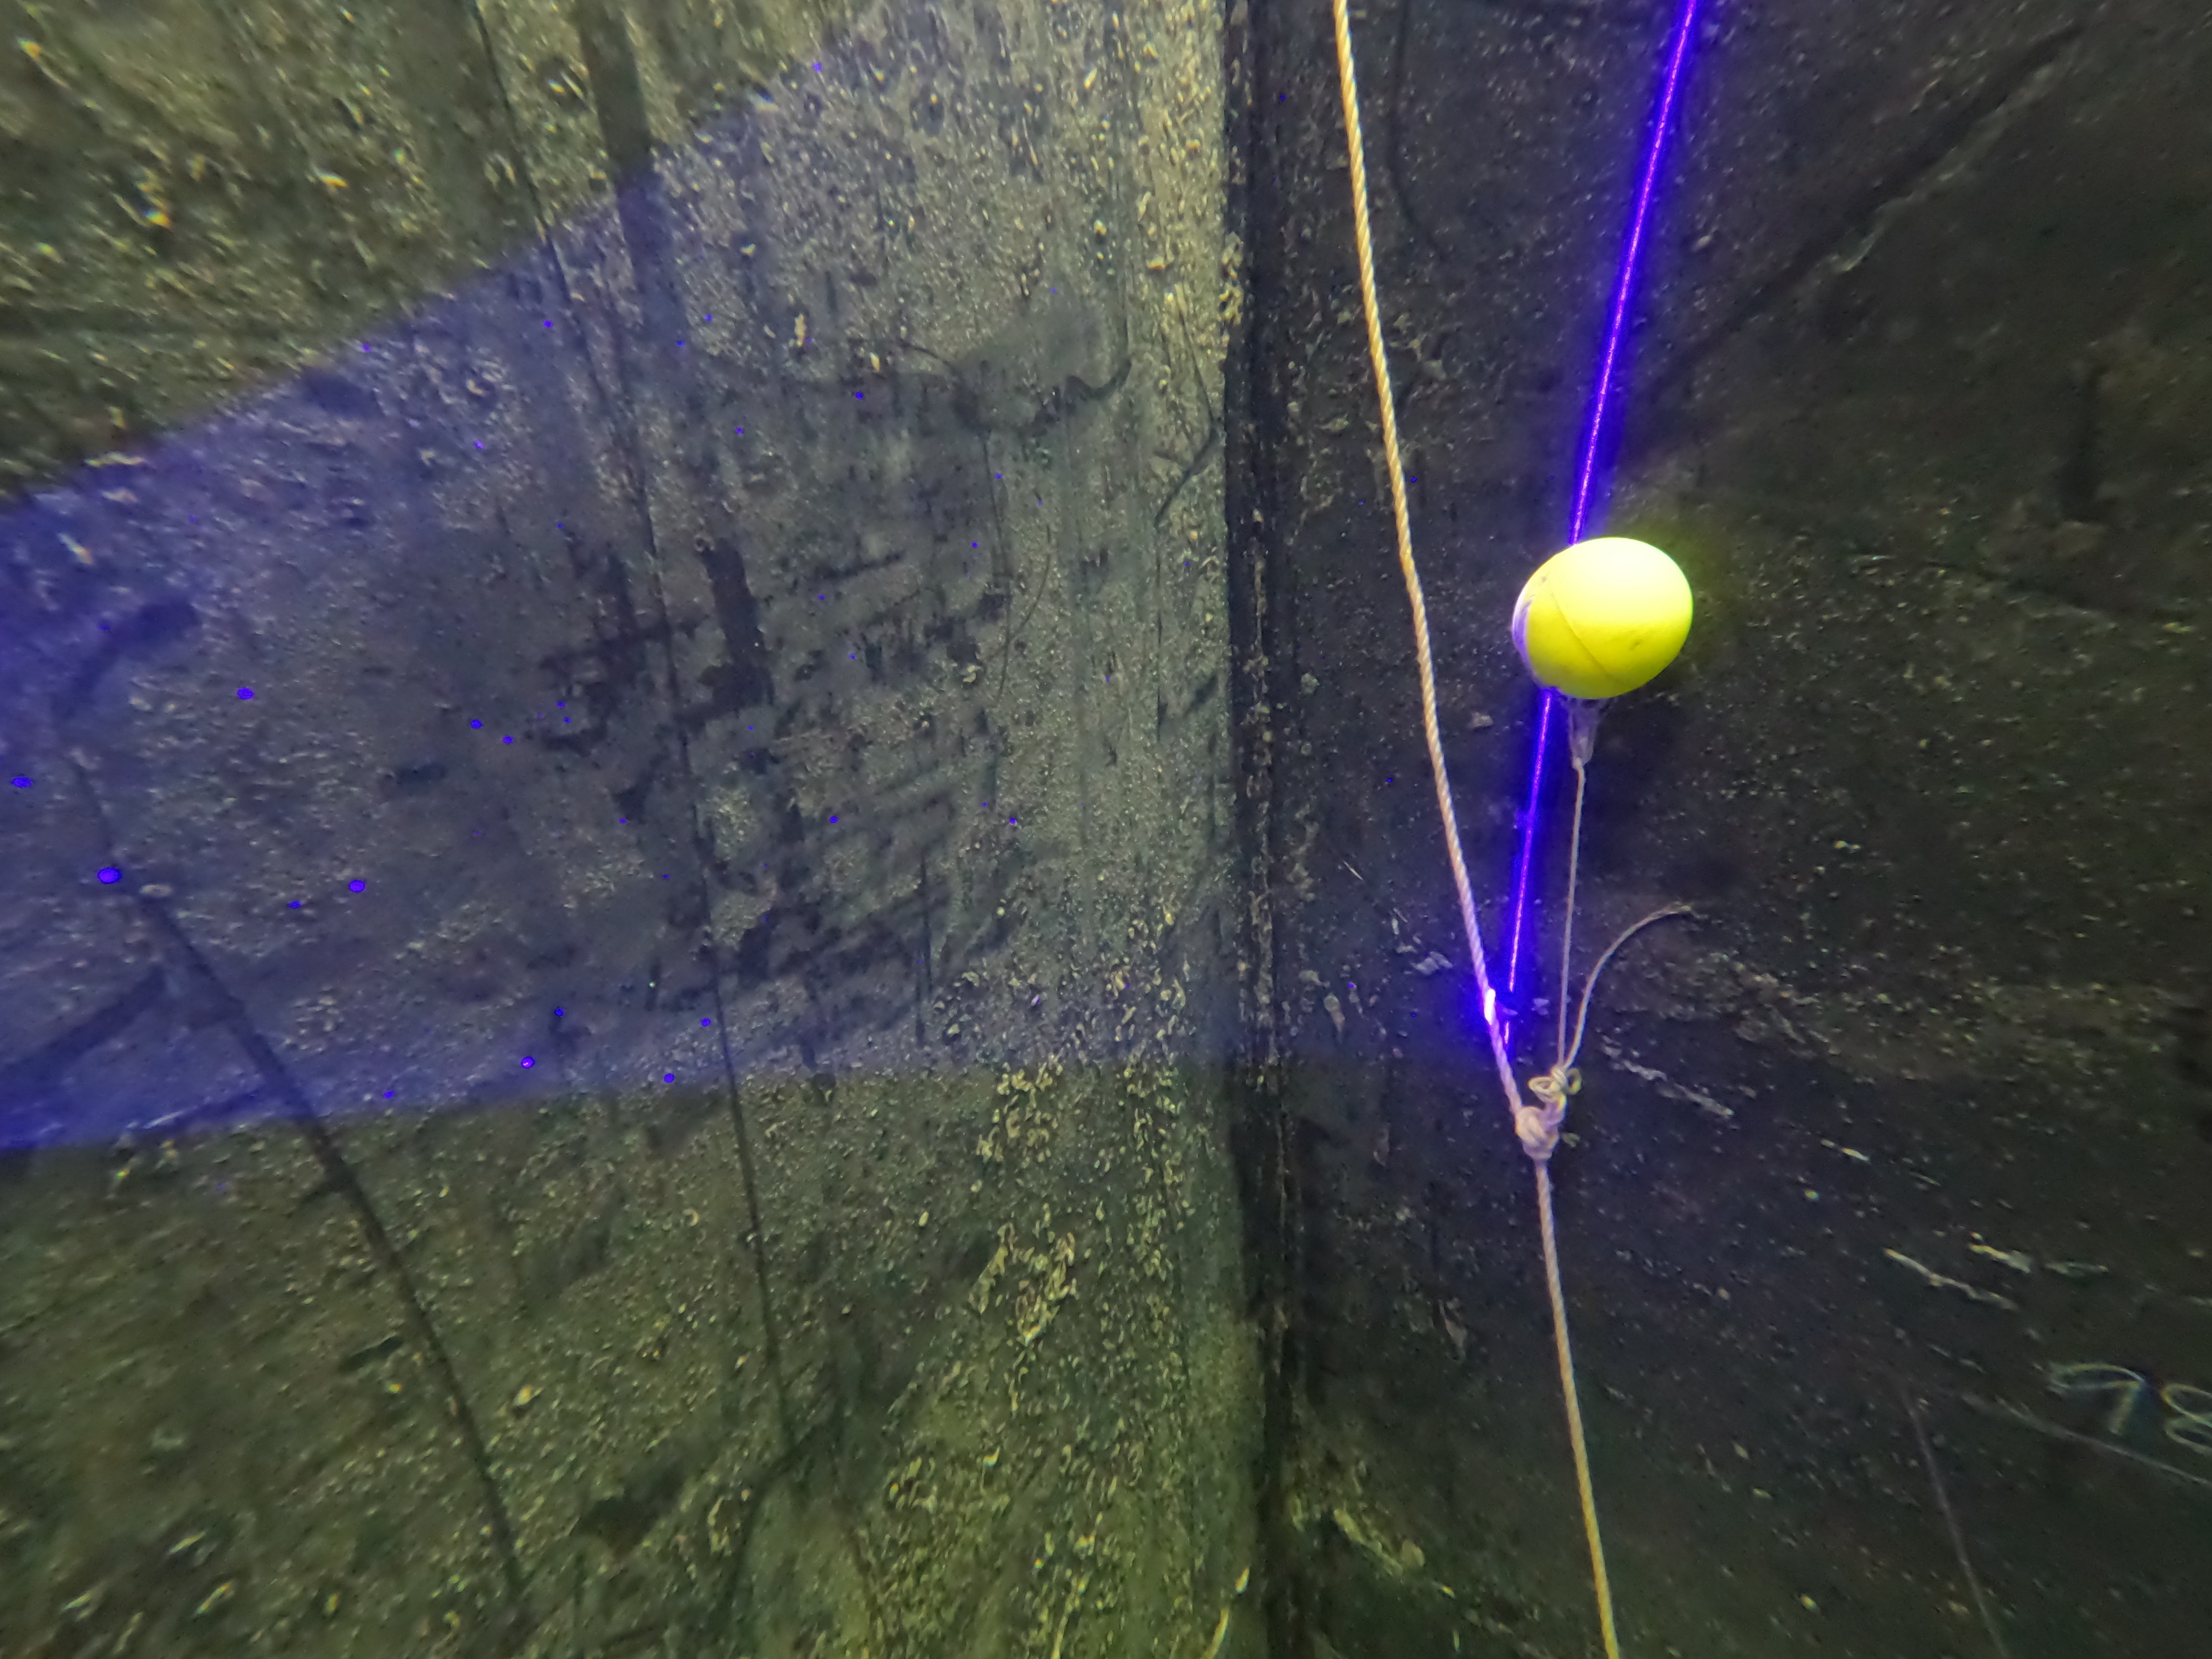

Supplement: Supplementary file 365 [file G0031158.pdf › 4/G0031158.pdf]

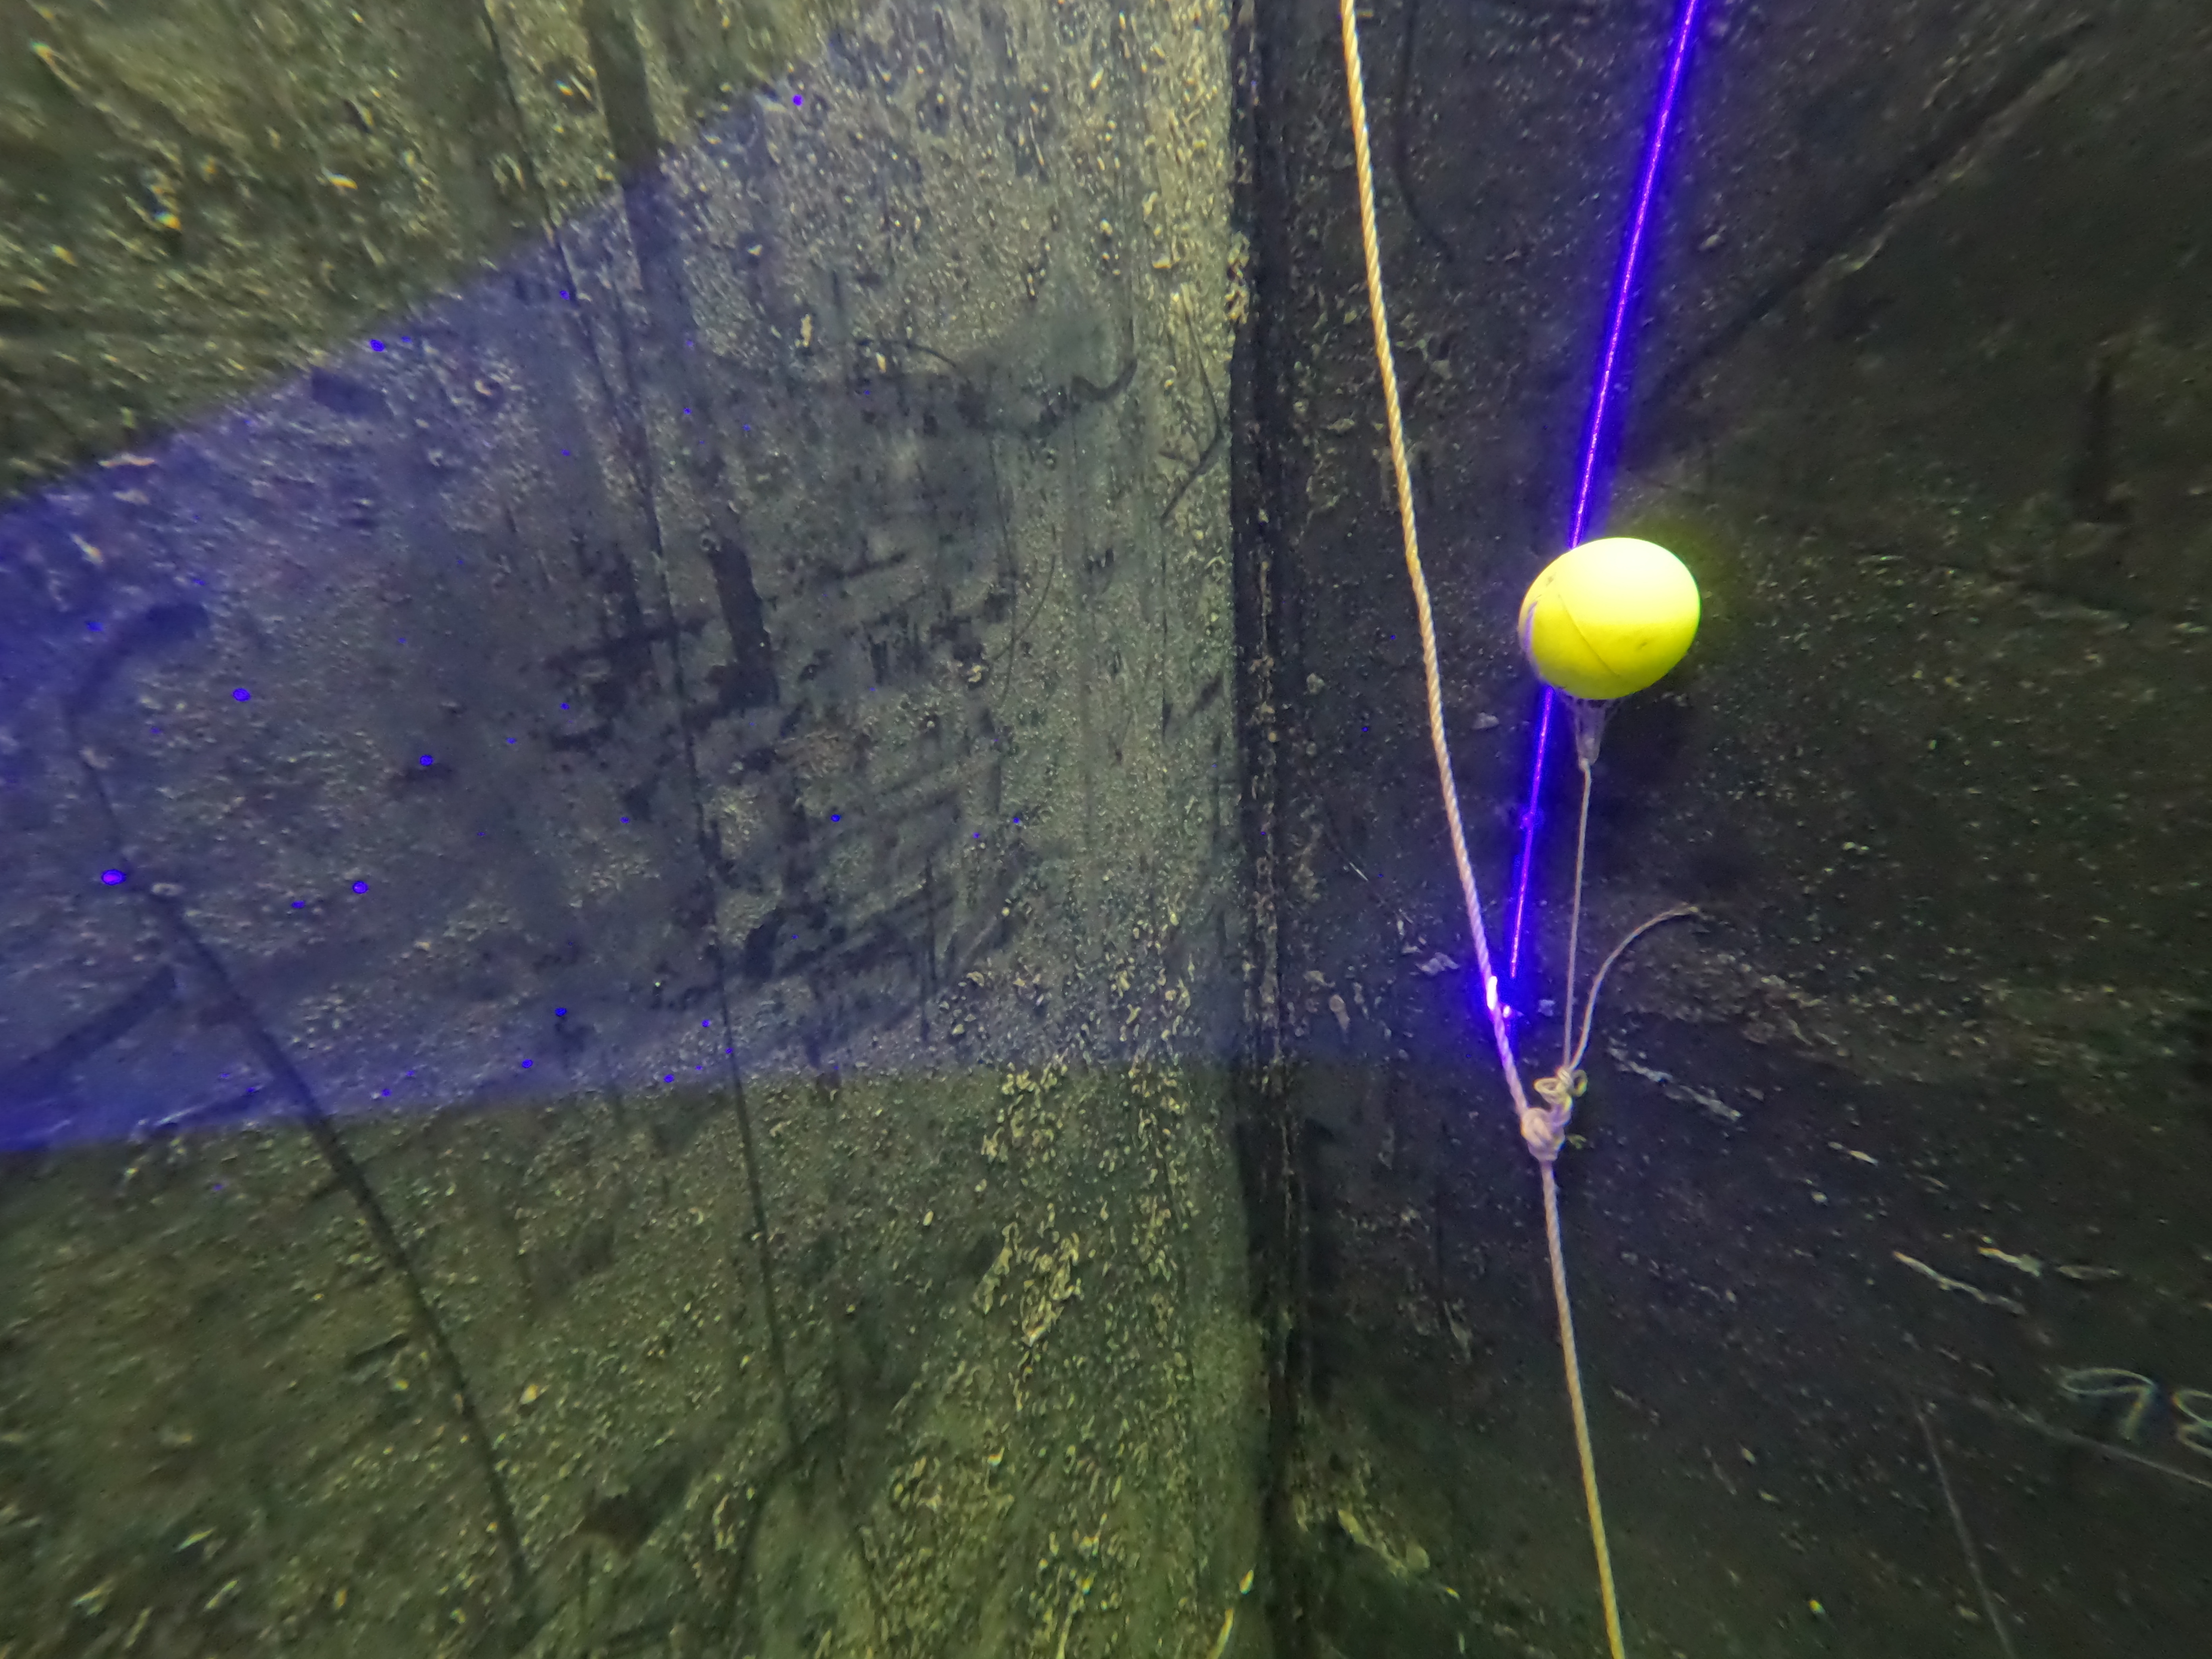

Supplement: Supplementary file 366 [file G0031159.pdf › 4/G0031159.pdf]

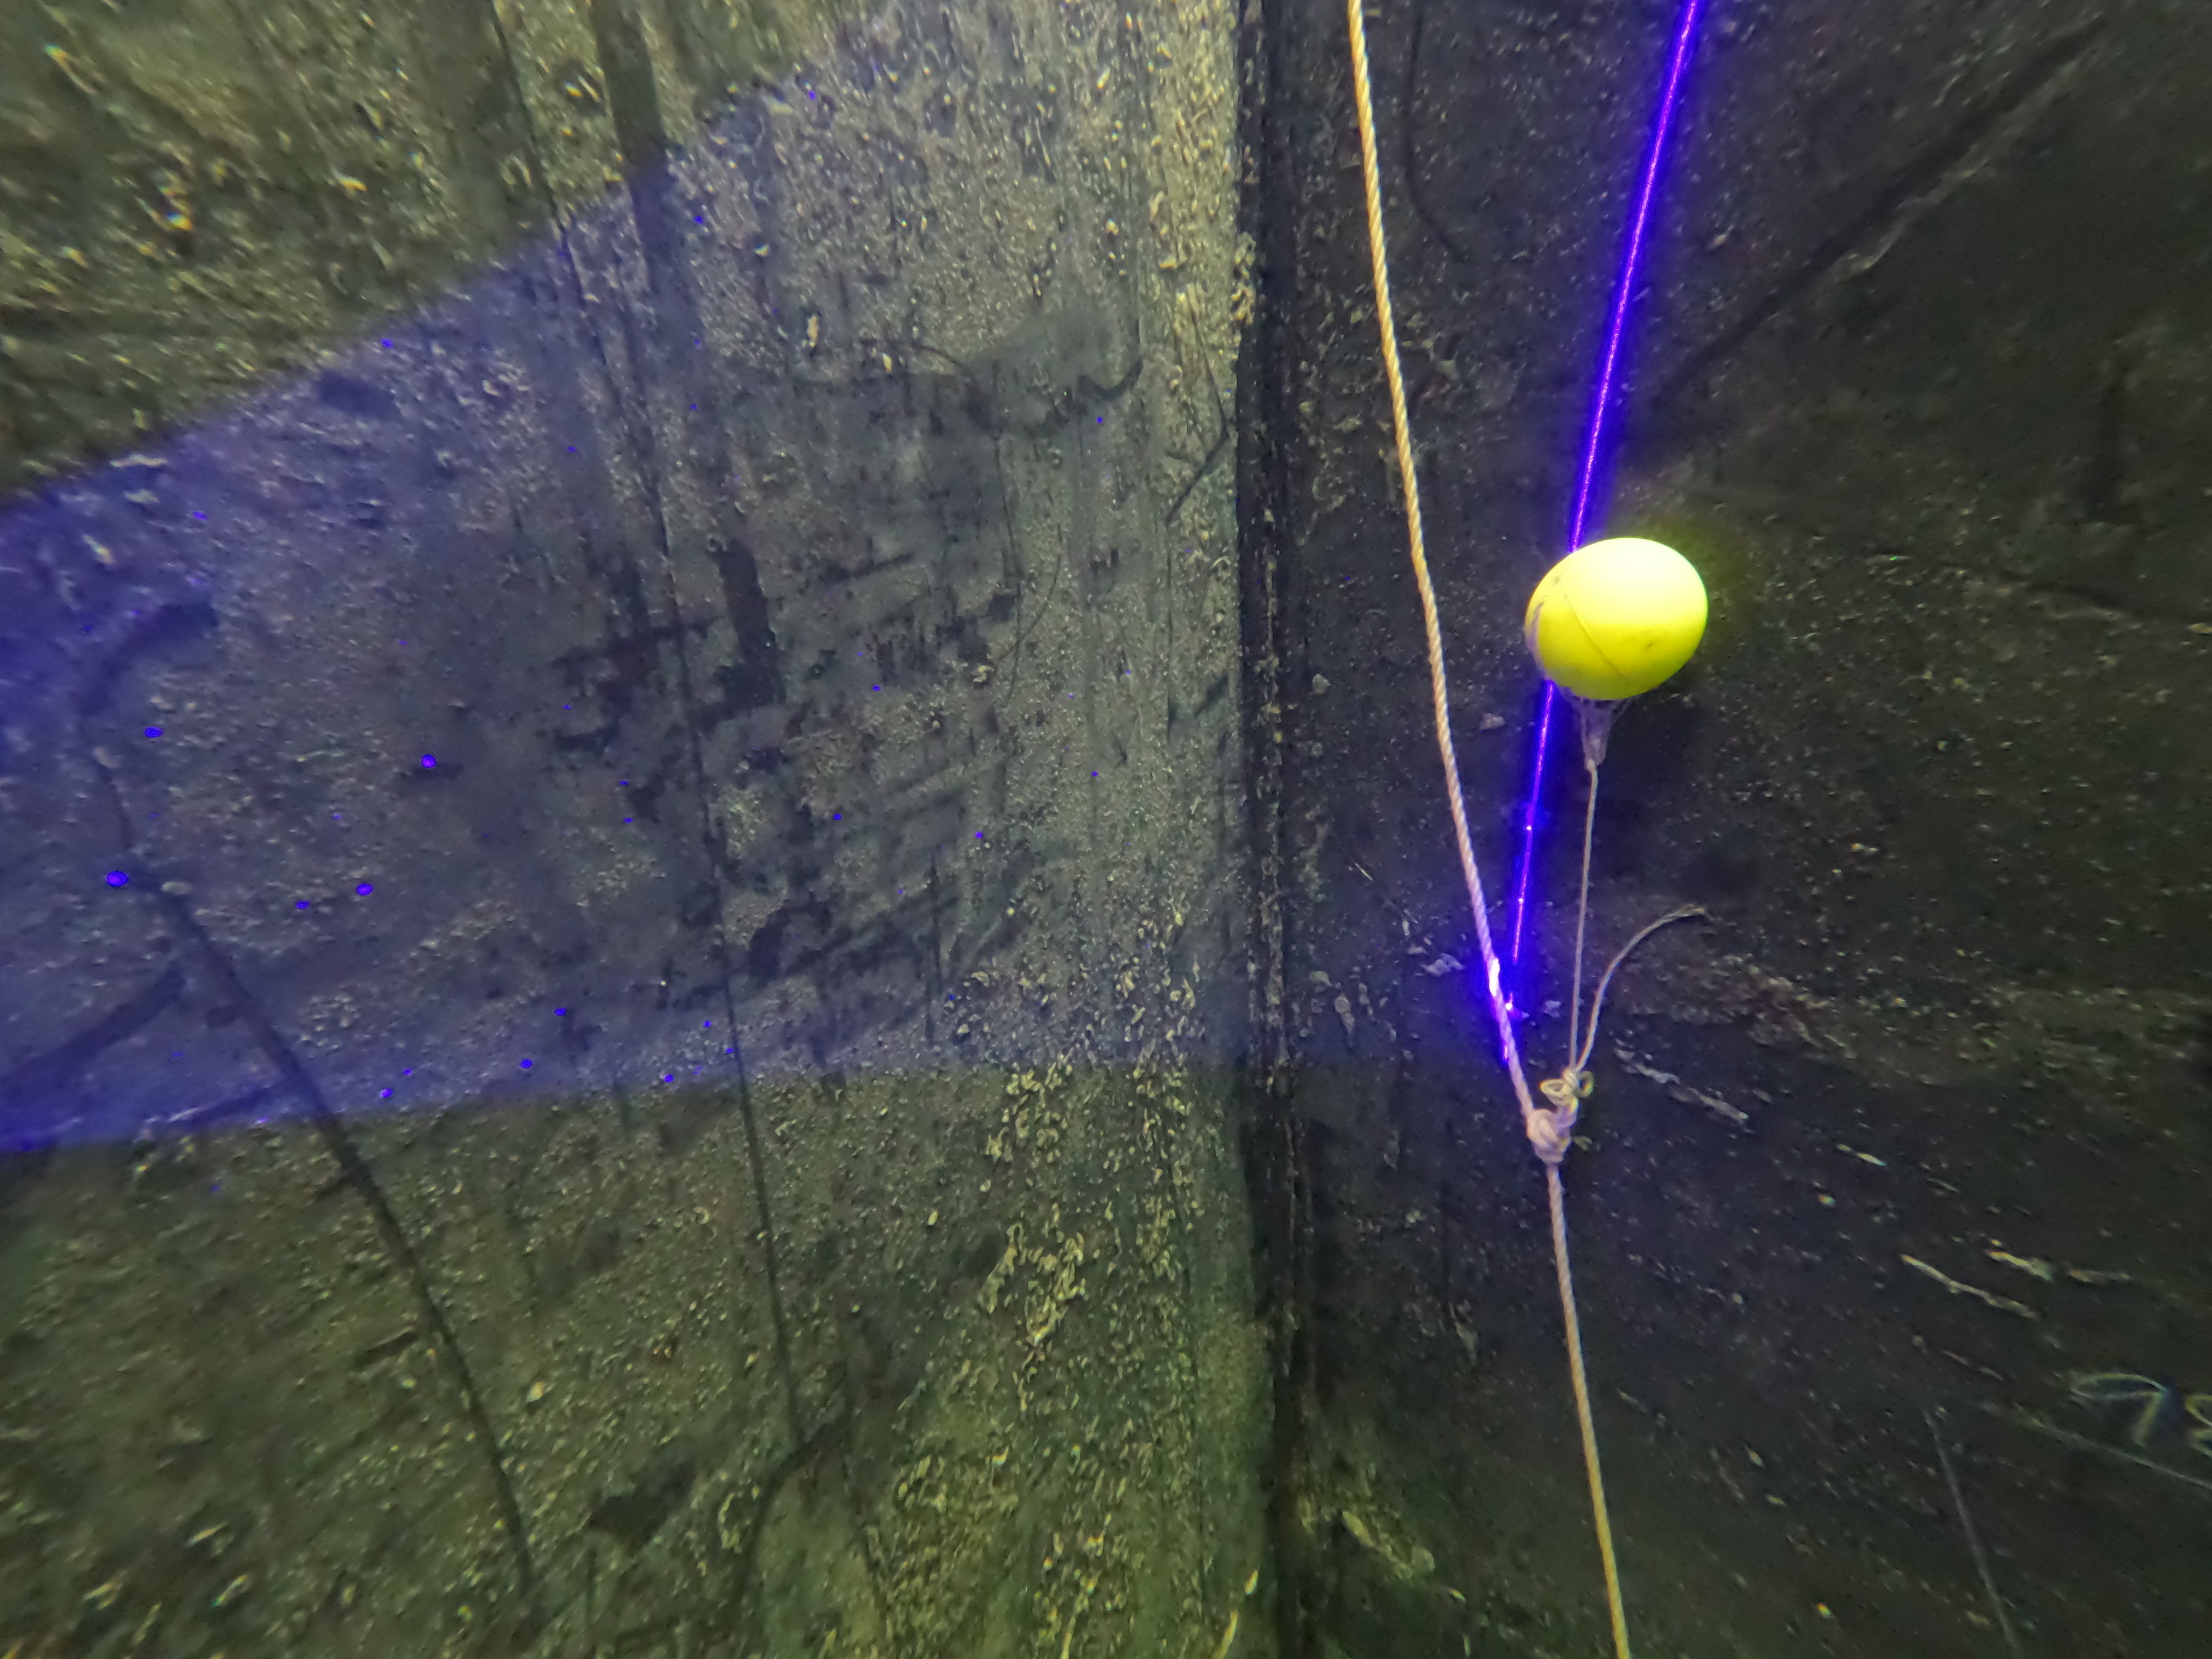

Supplement: Supplementary file 367 [file G0031160.pdf › 4/G0031160.pdf]

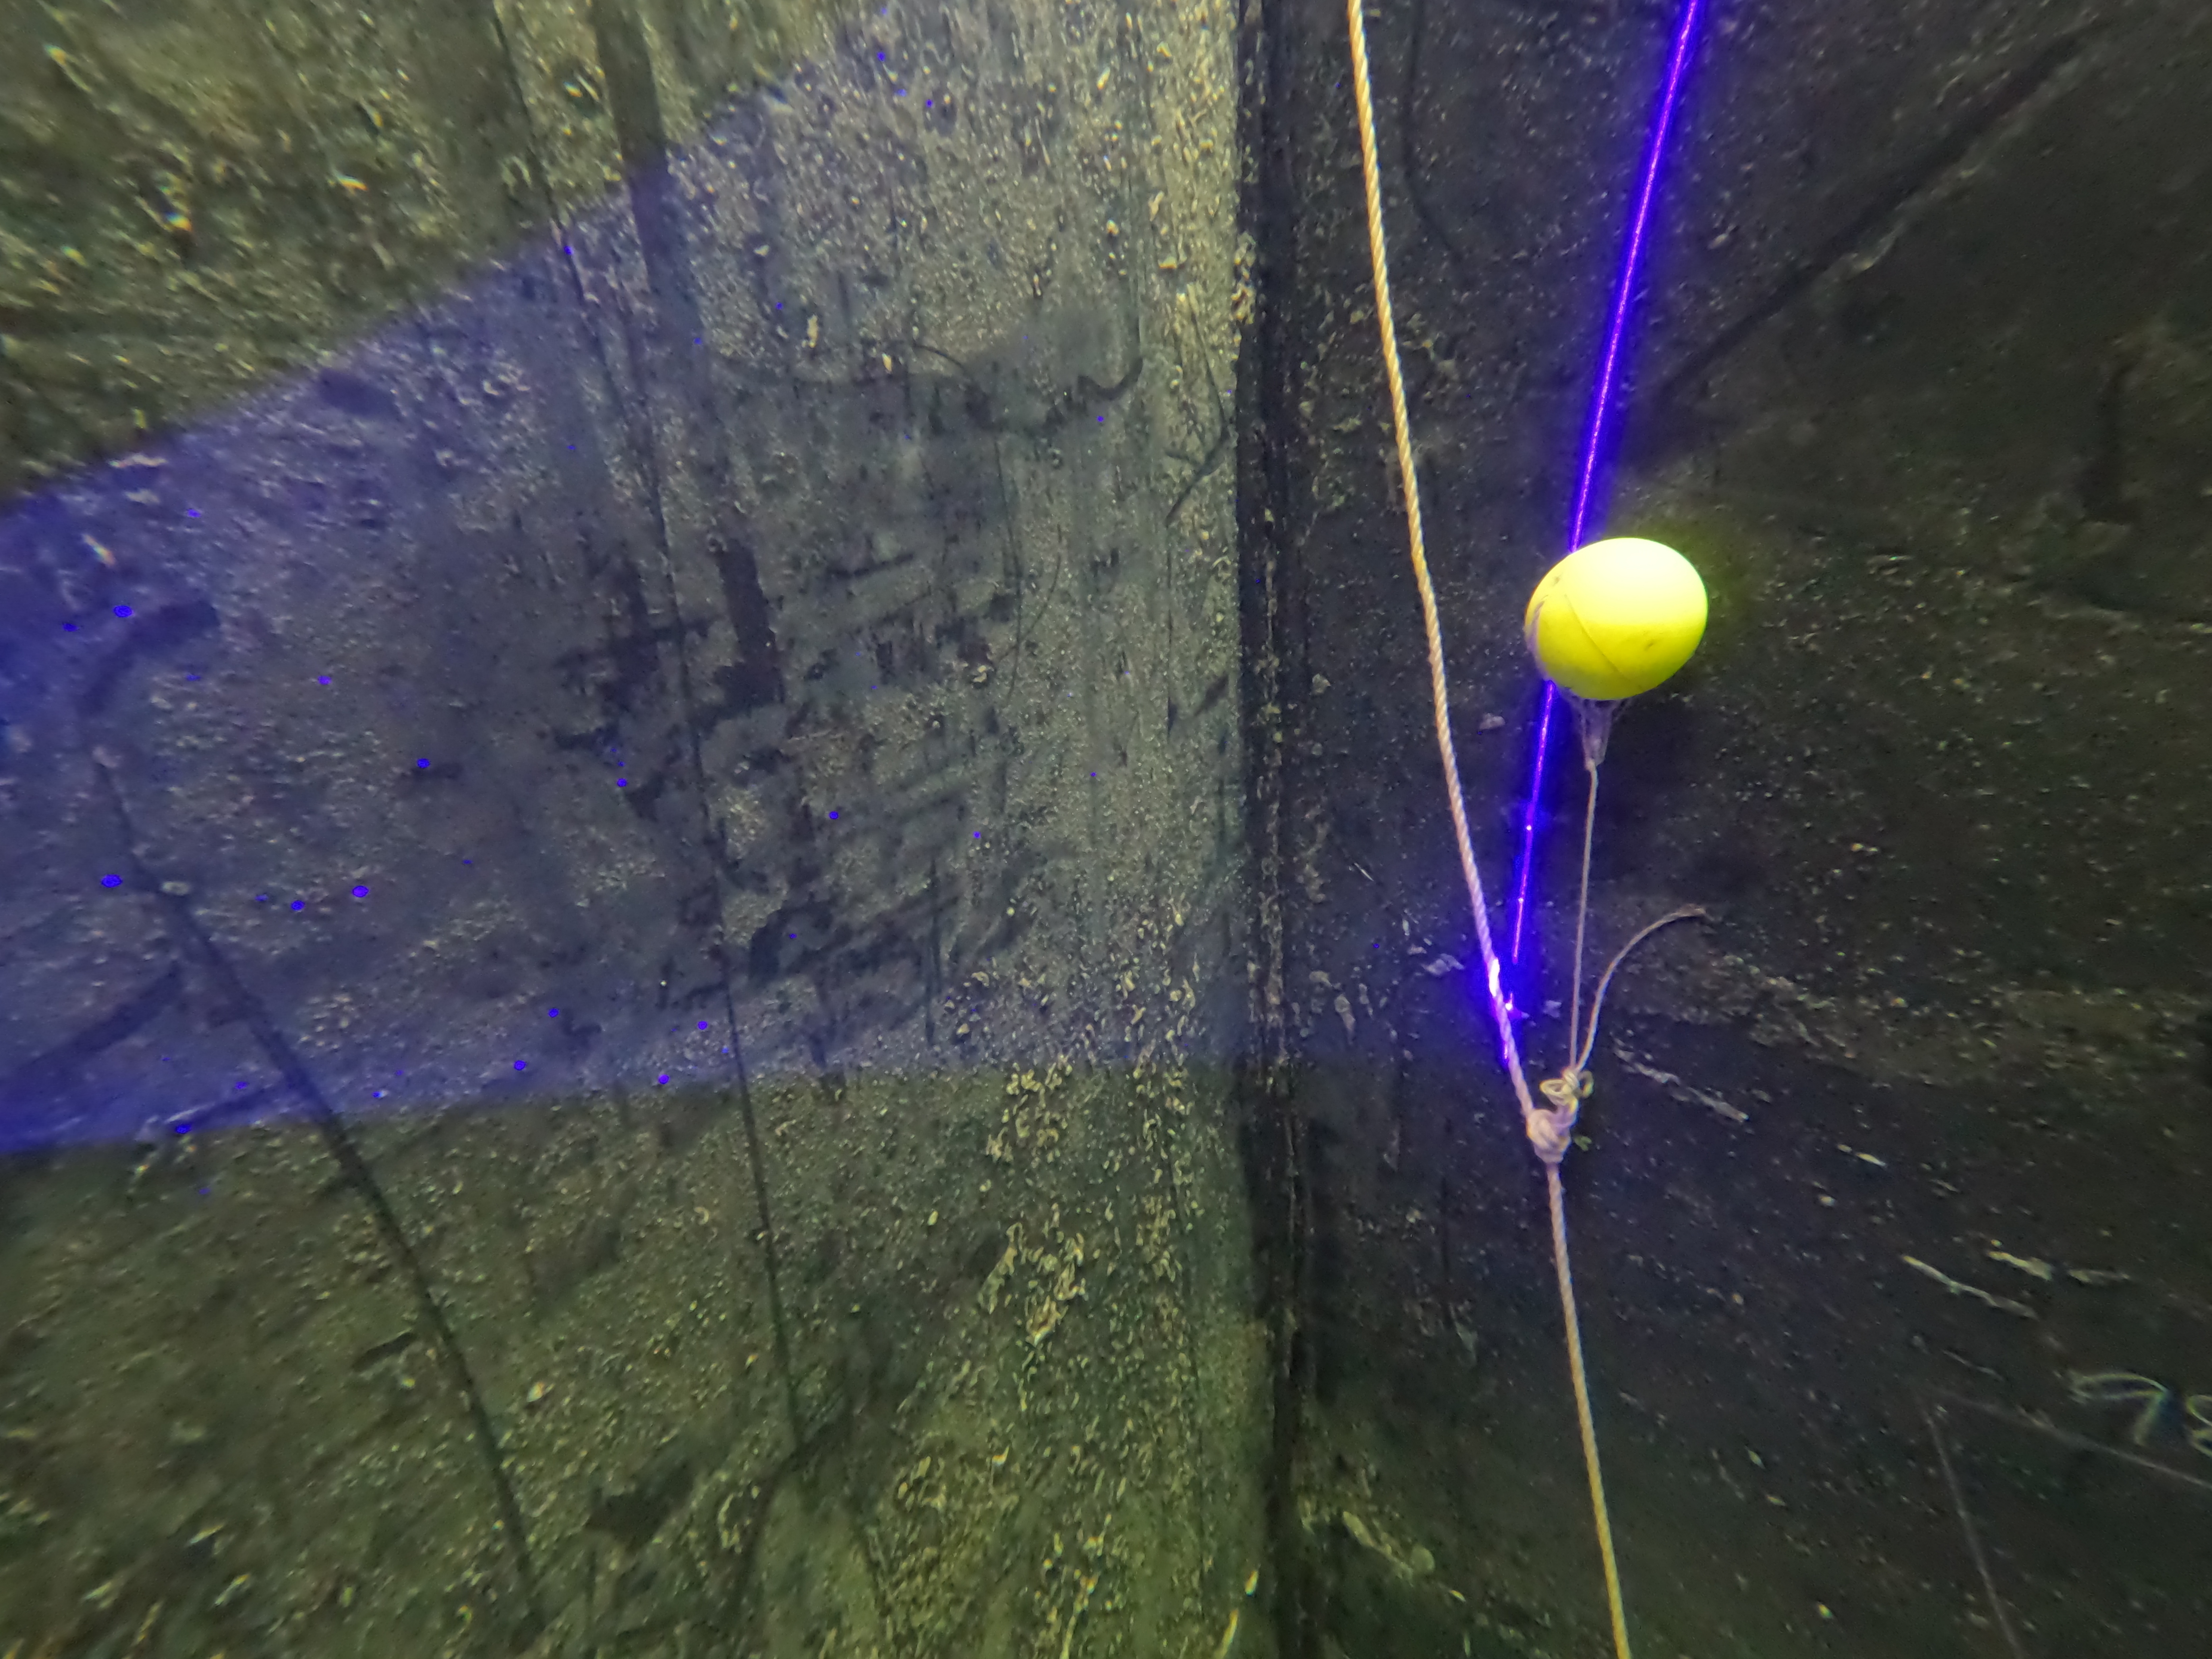

Supplement: Supplementary file 368 [file G0031161.pdf › 4/G0031161.pdf]

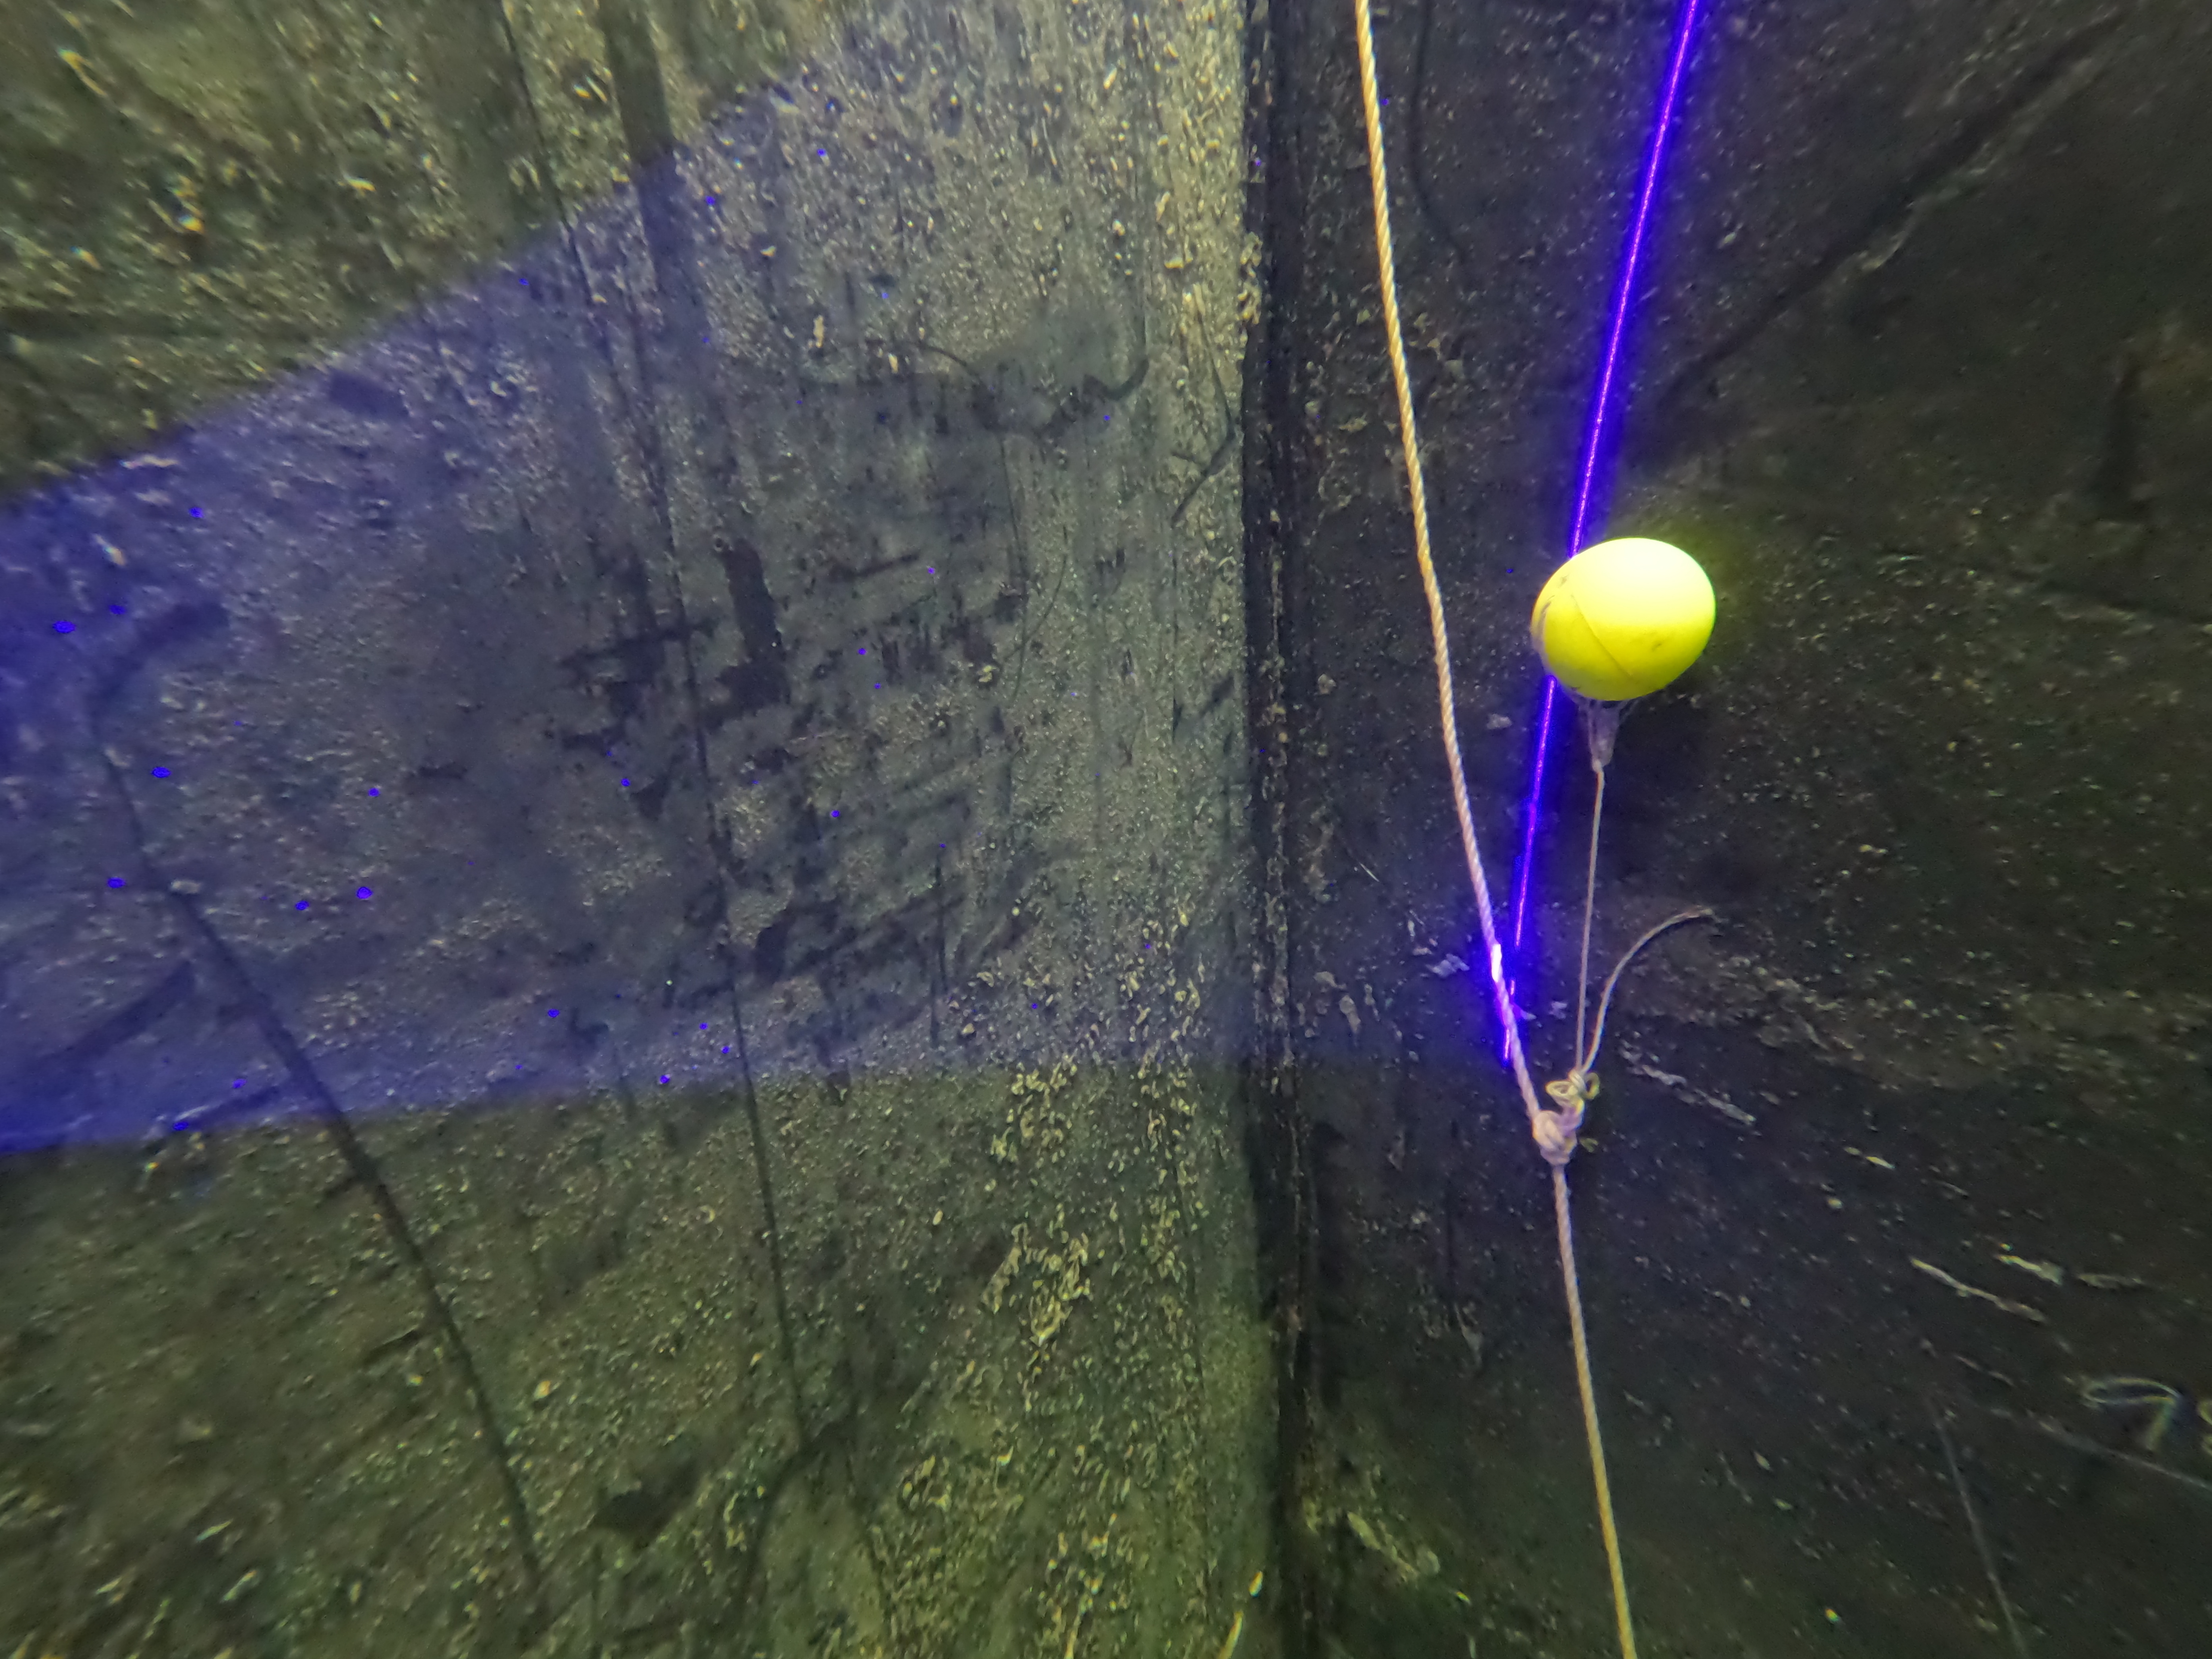

Supplement: Supplementary file 369 [file G0031162.pdf › 4/G0031162.pdf]

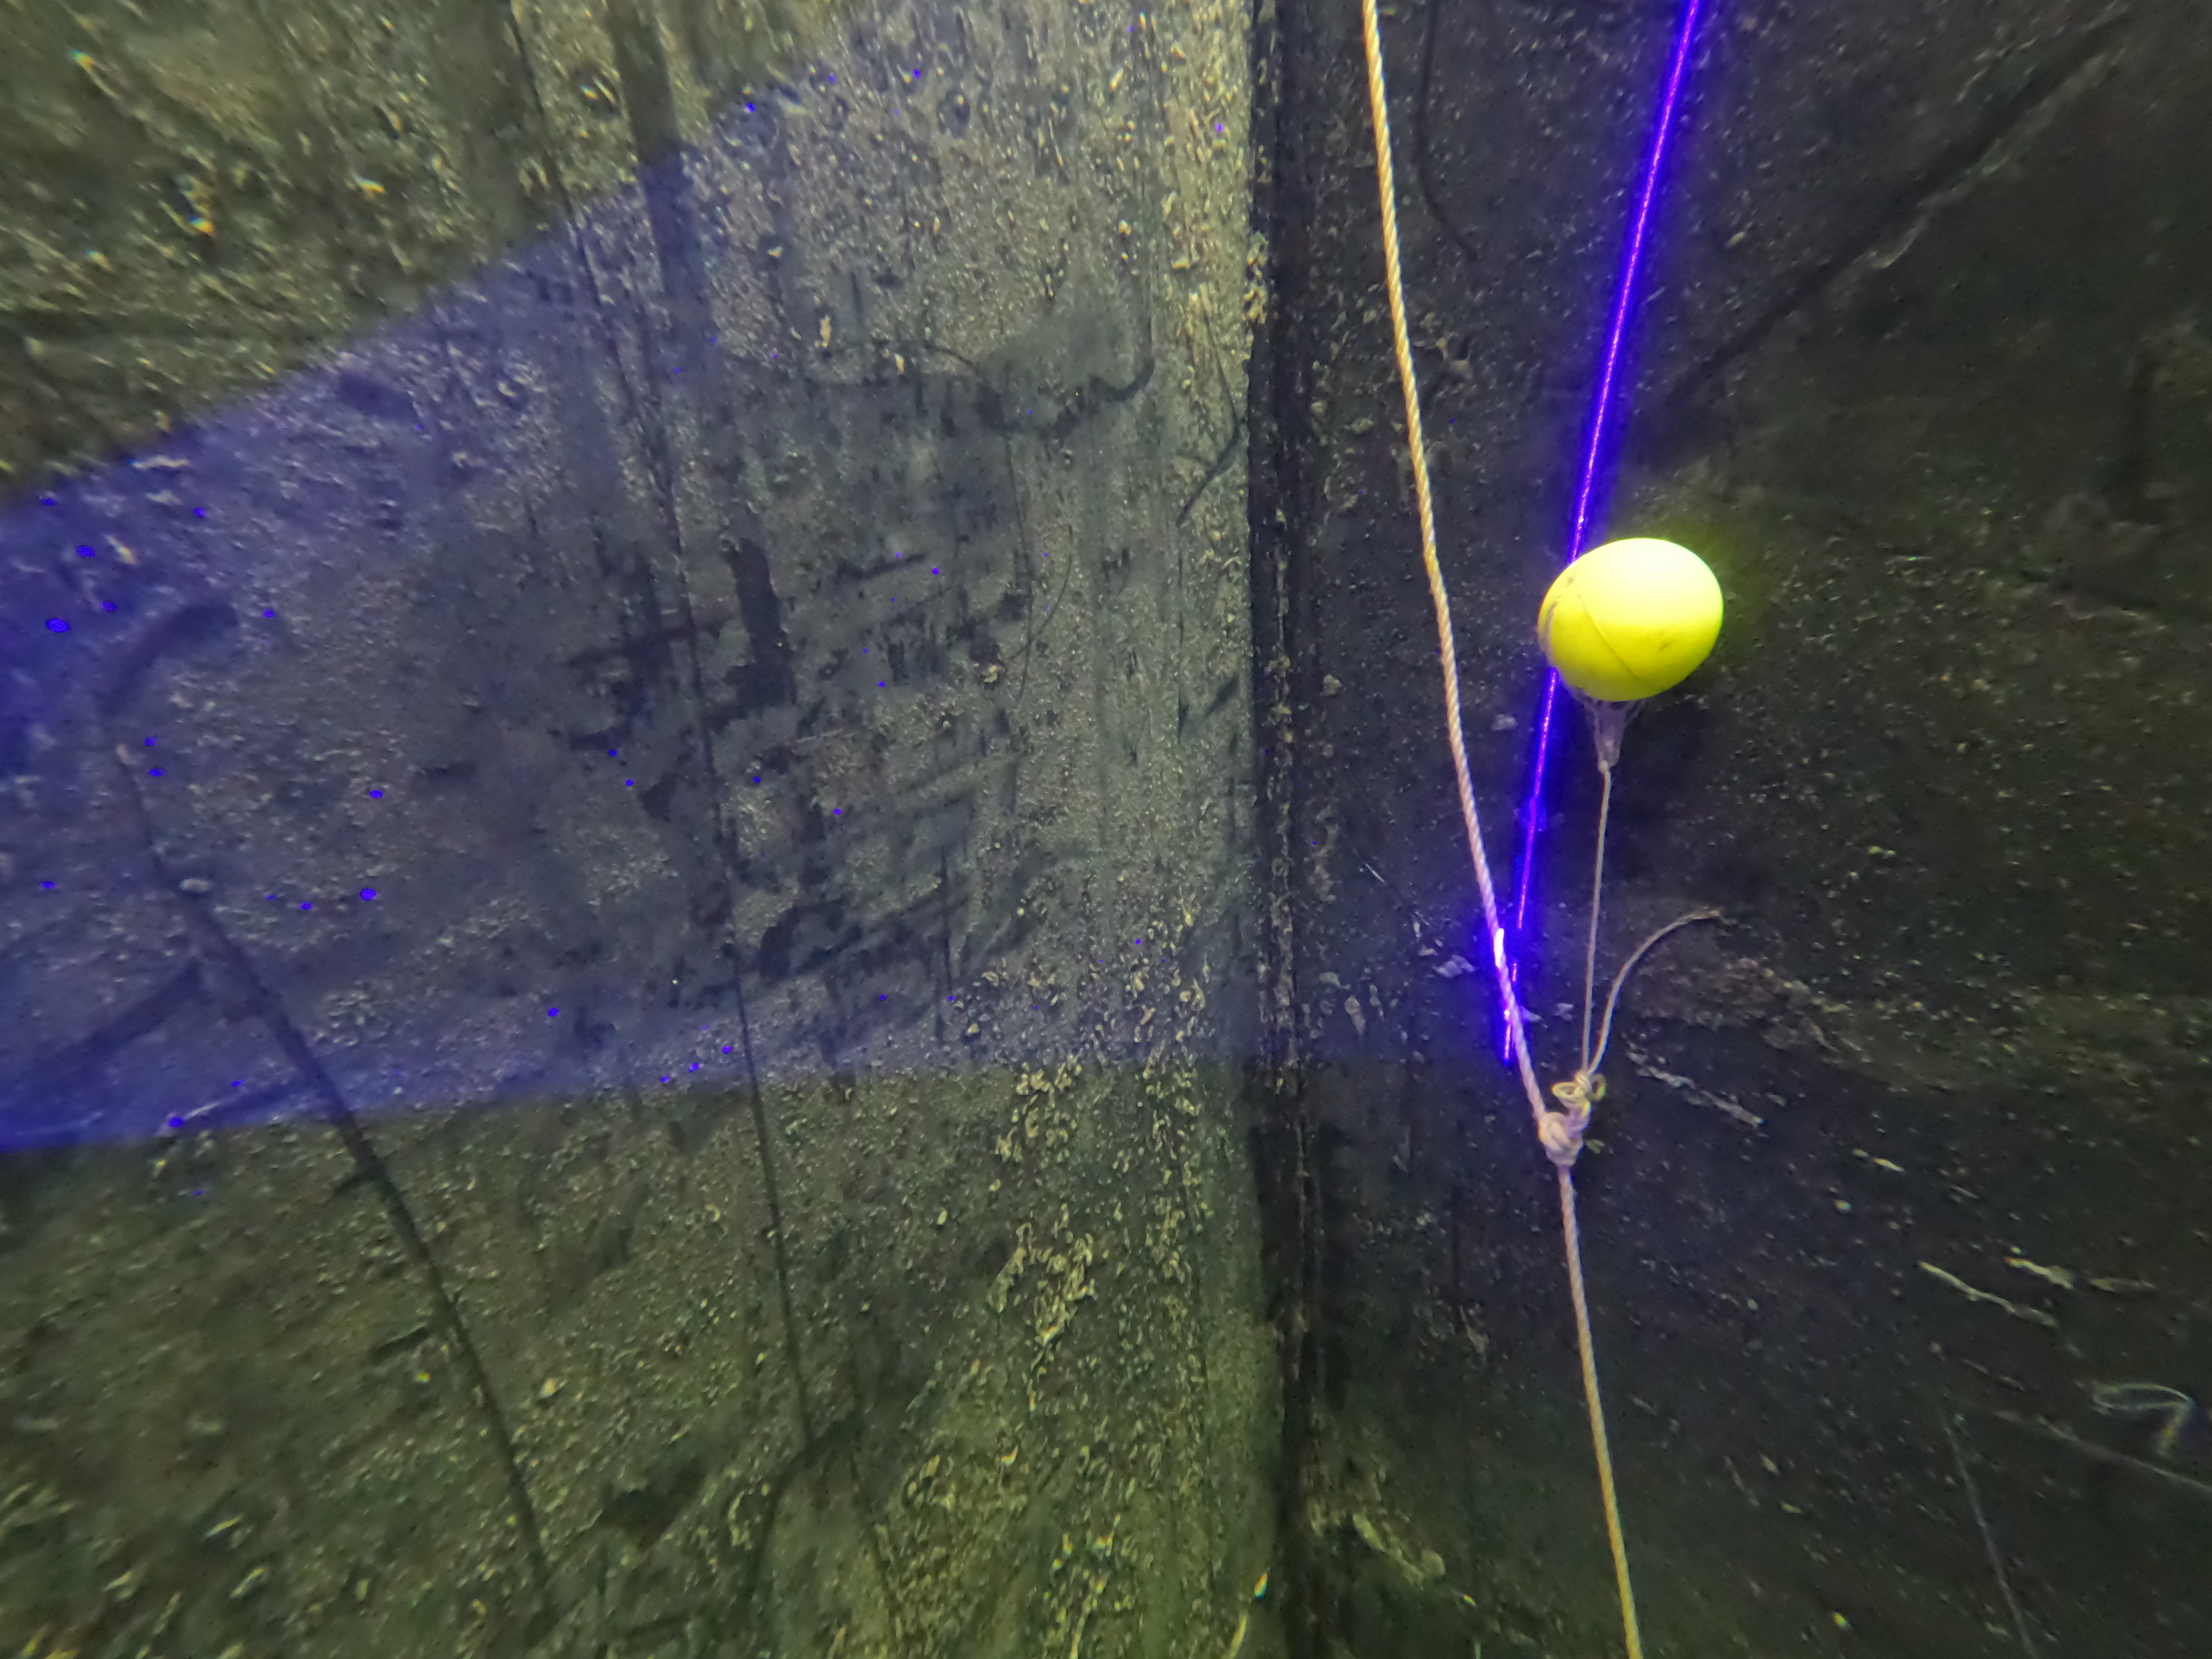

Supplement: Supplementary file 370 [file G0031163.pdf › 4/G0031163.pdf]

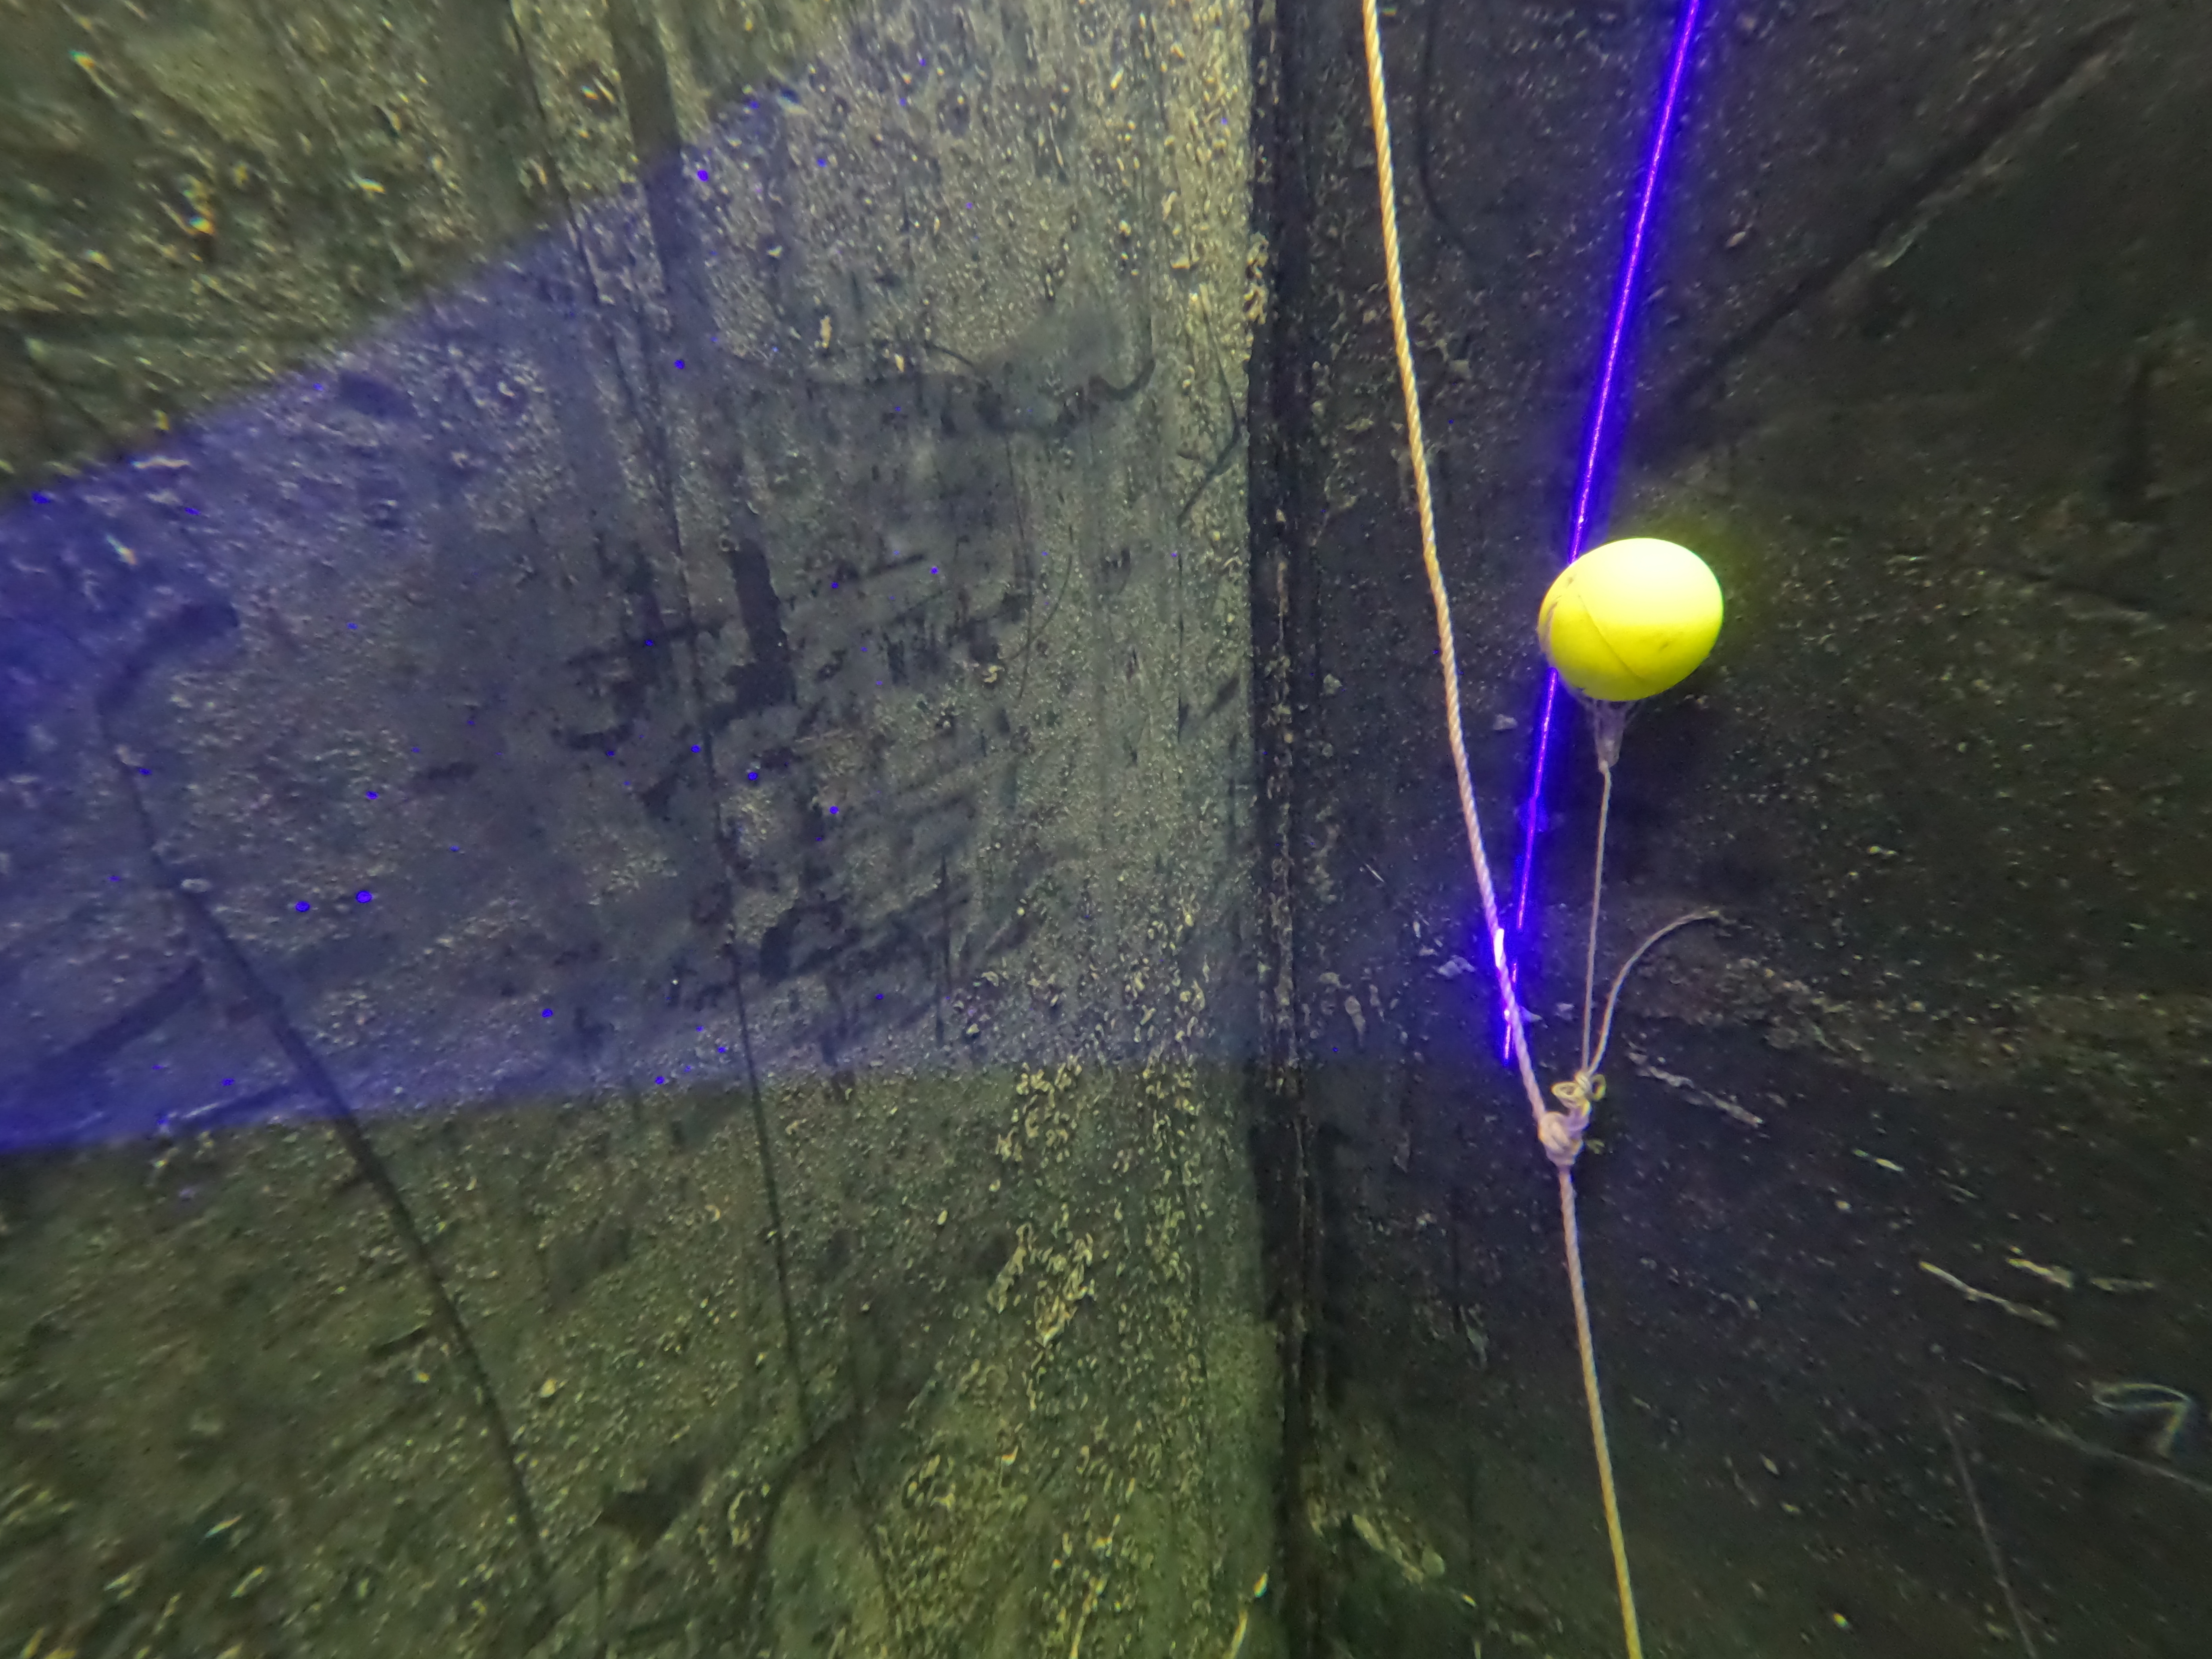

Supplement: Supplementary file 371 [file G0031164.pdf › 4/G0031164.pdf]

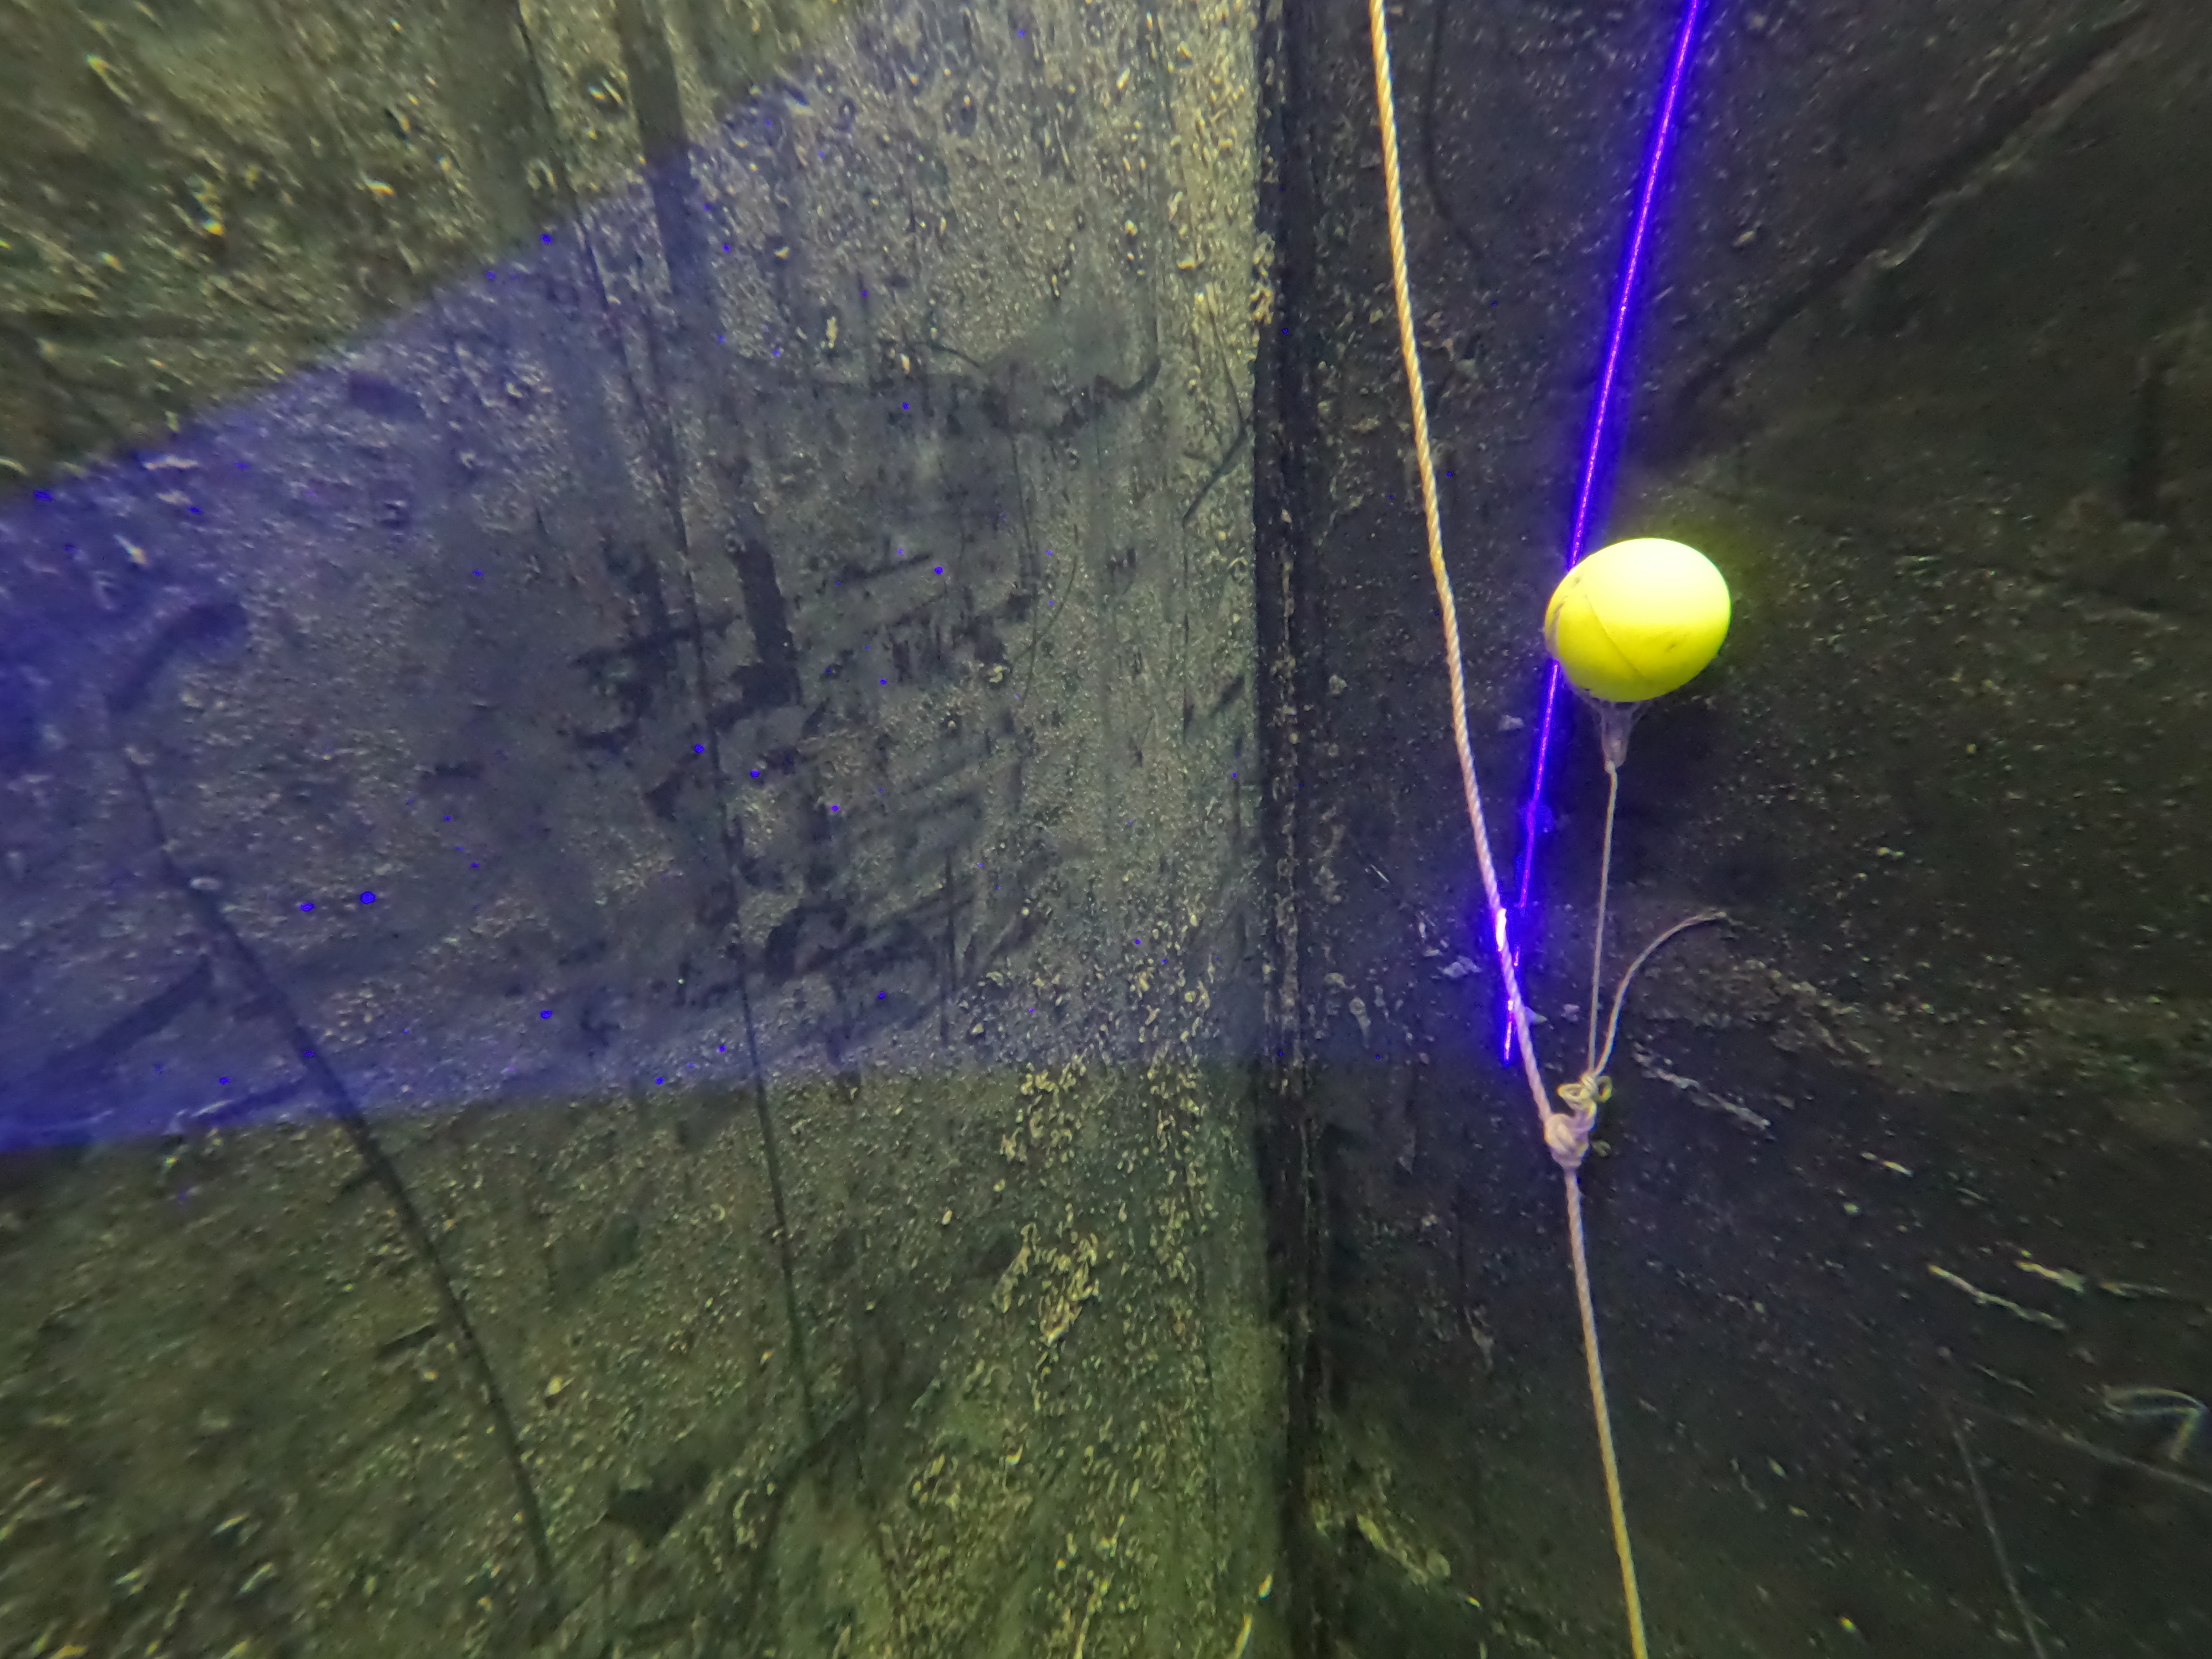

Supplement: Supplementary file 372 [file G0031165.pdf › 4/G0031165.pdf]

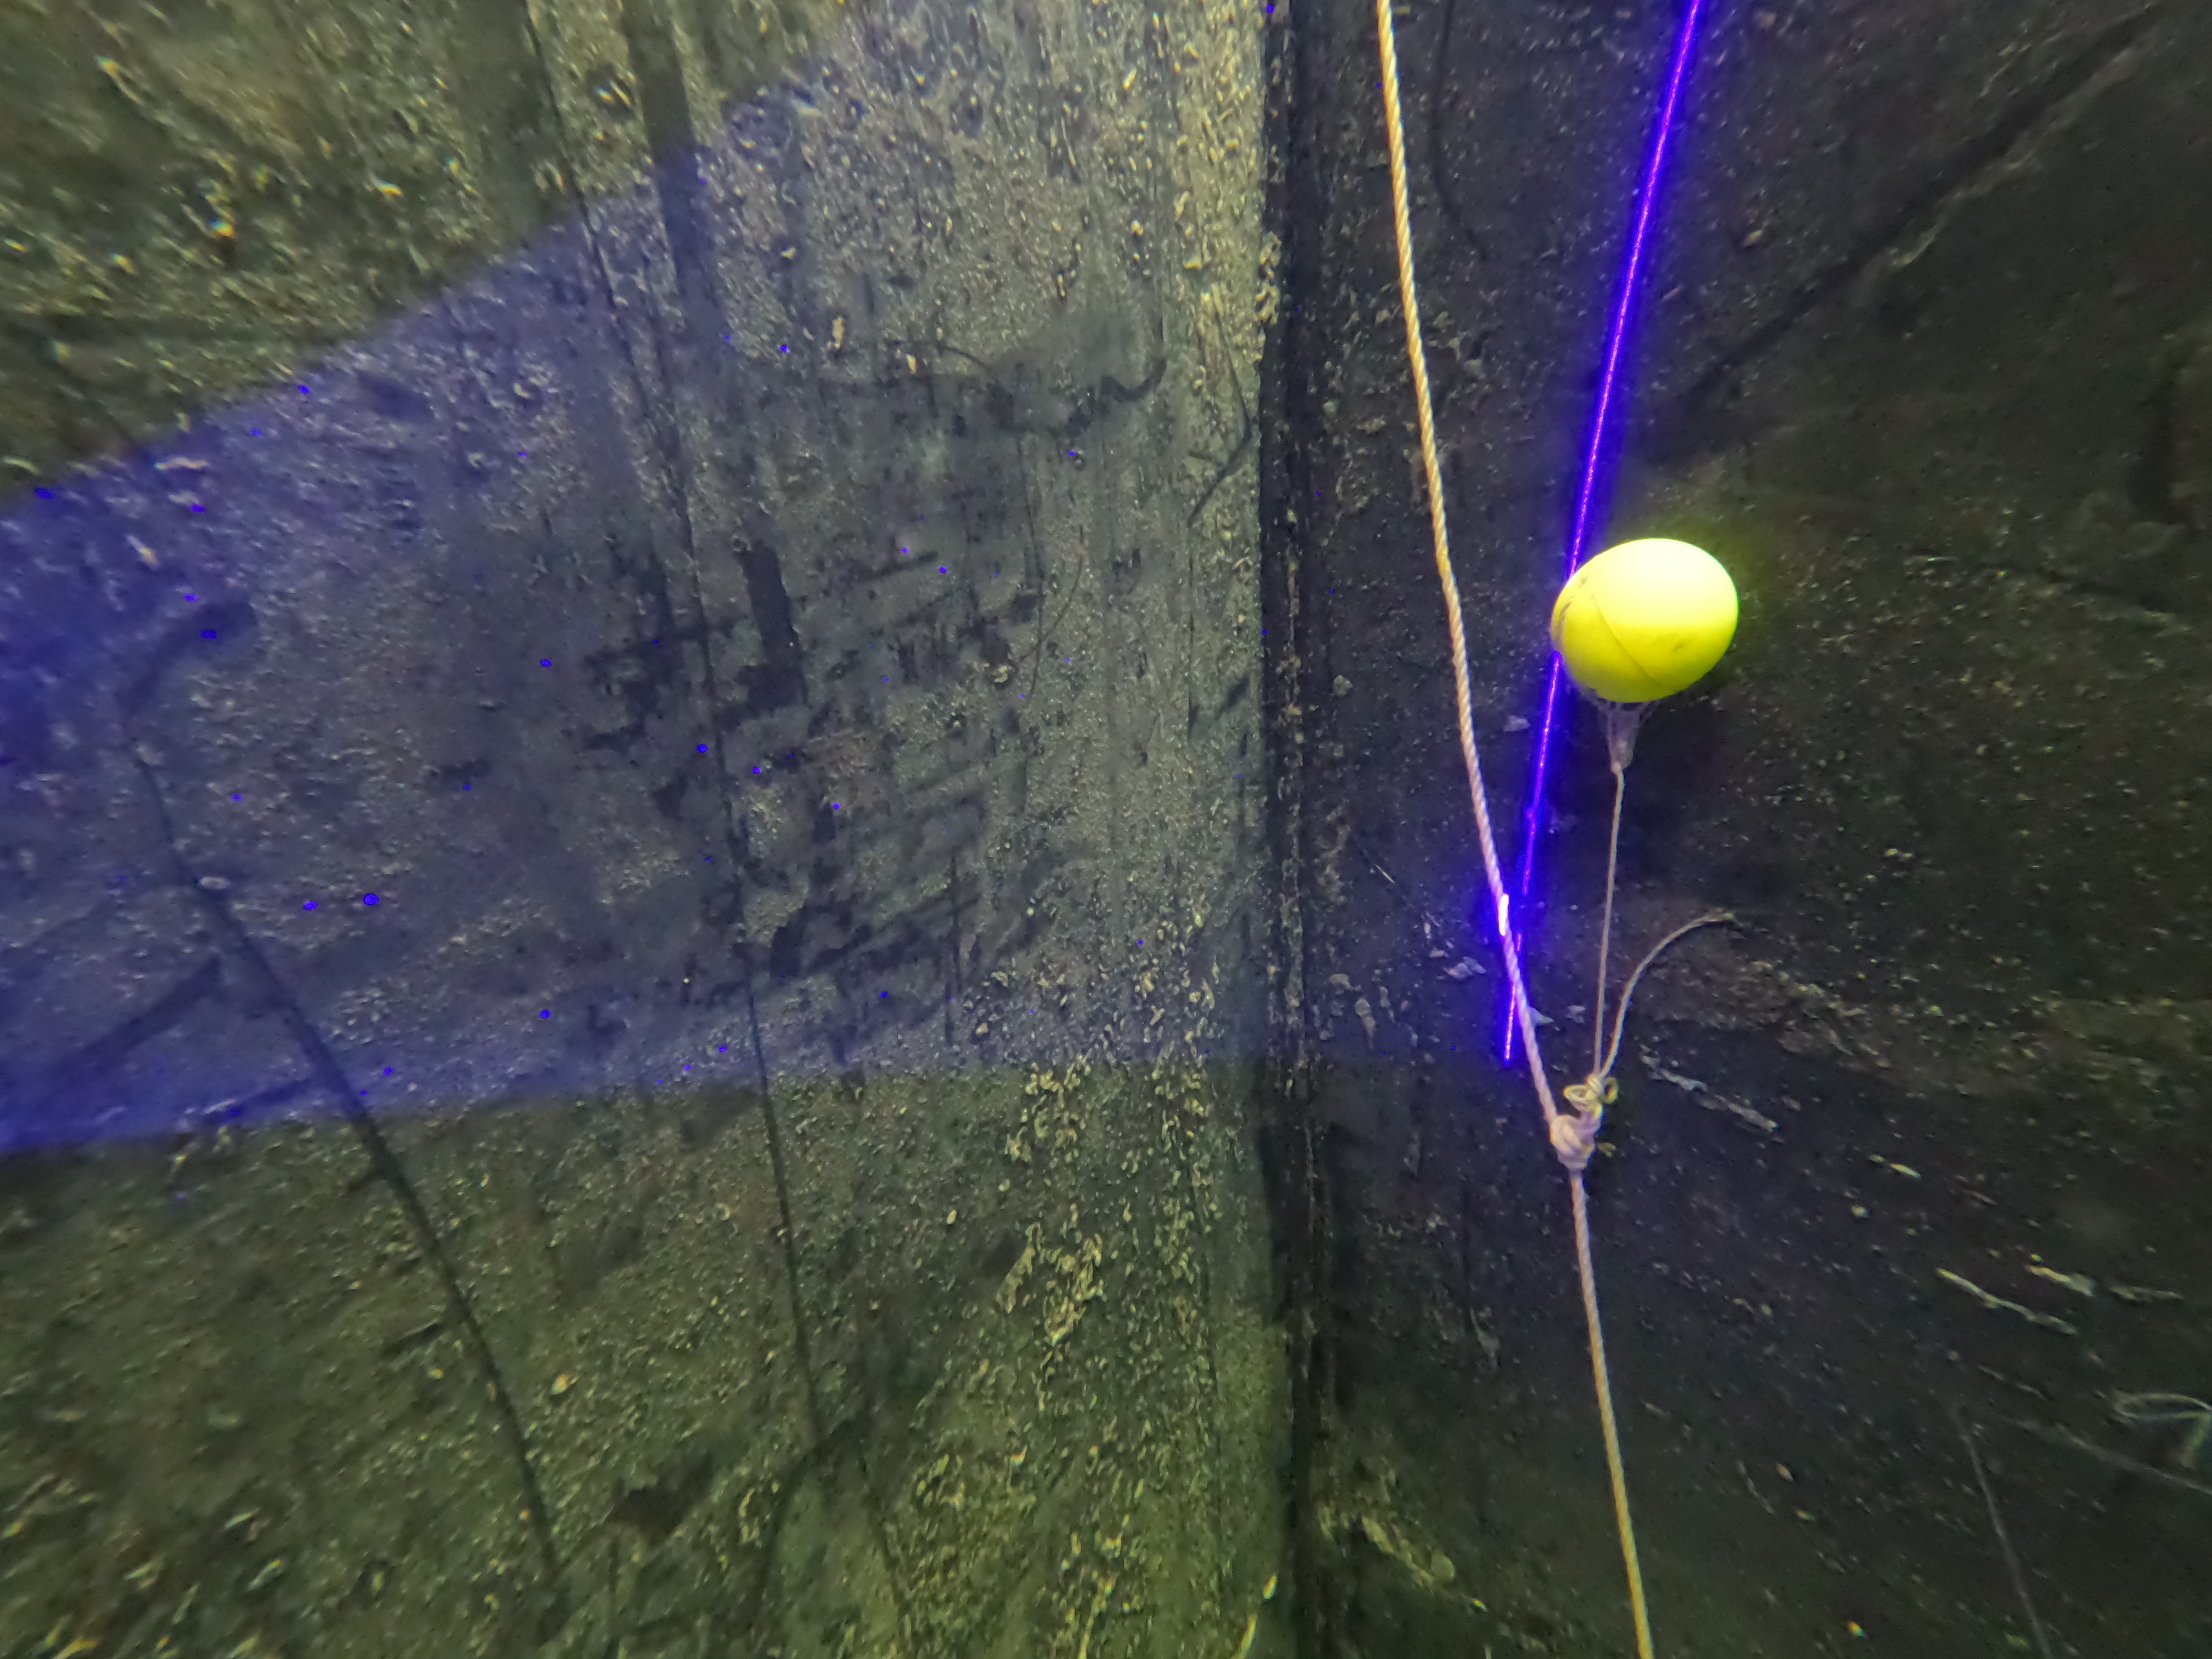

Supplement: Supplementary file 373 [file G0031166.pdf › 4/G0031166.pdf]

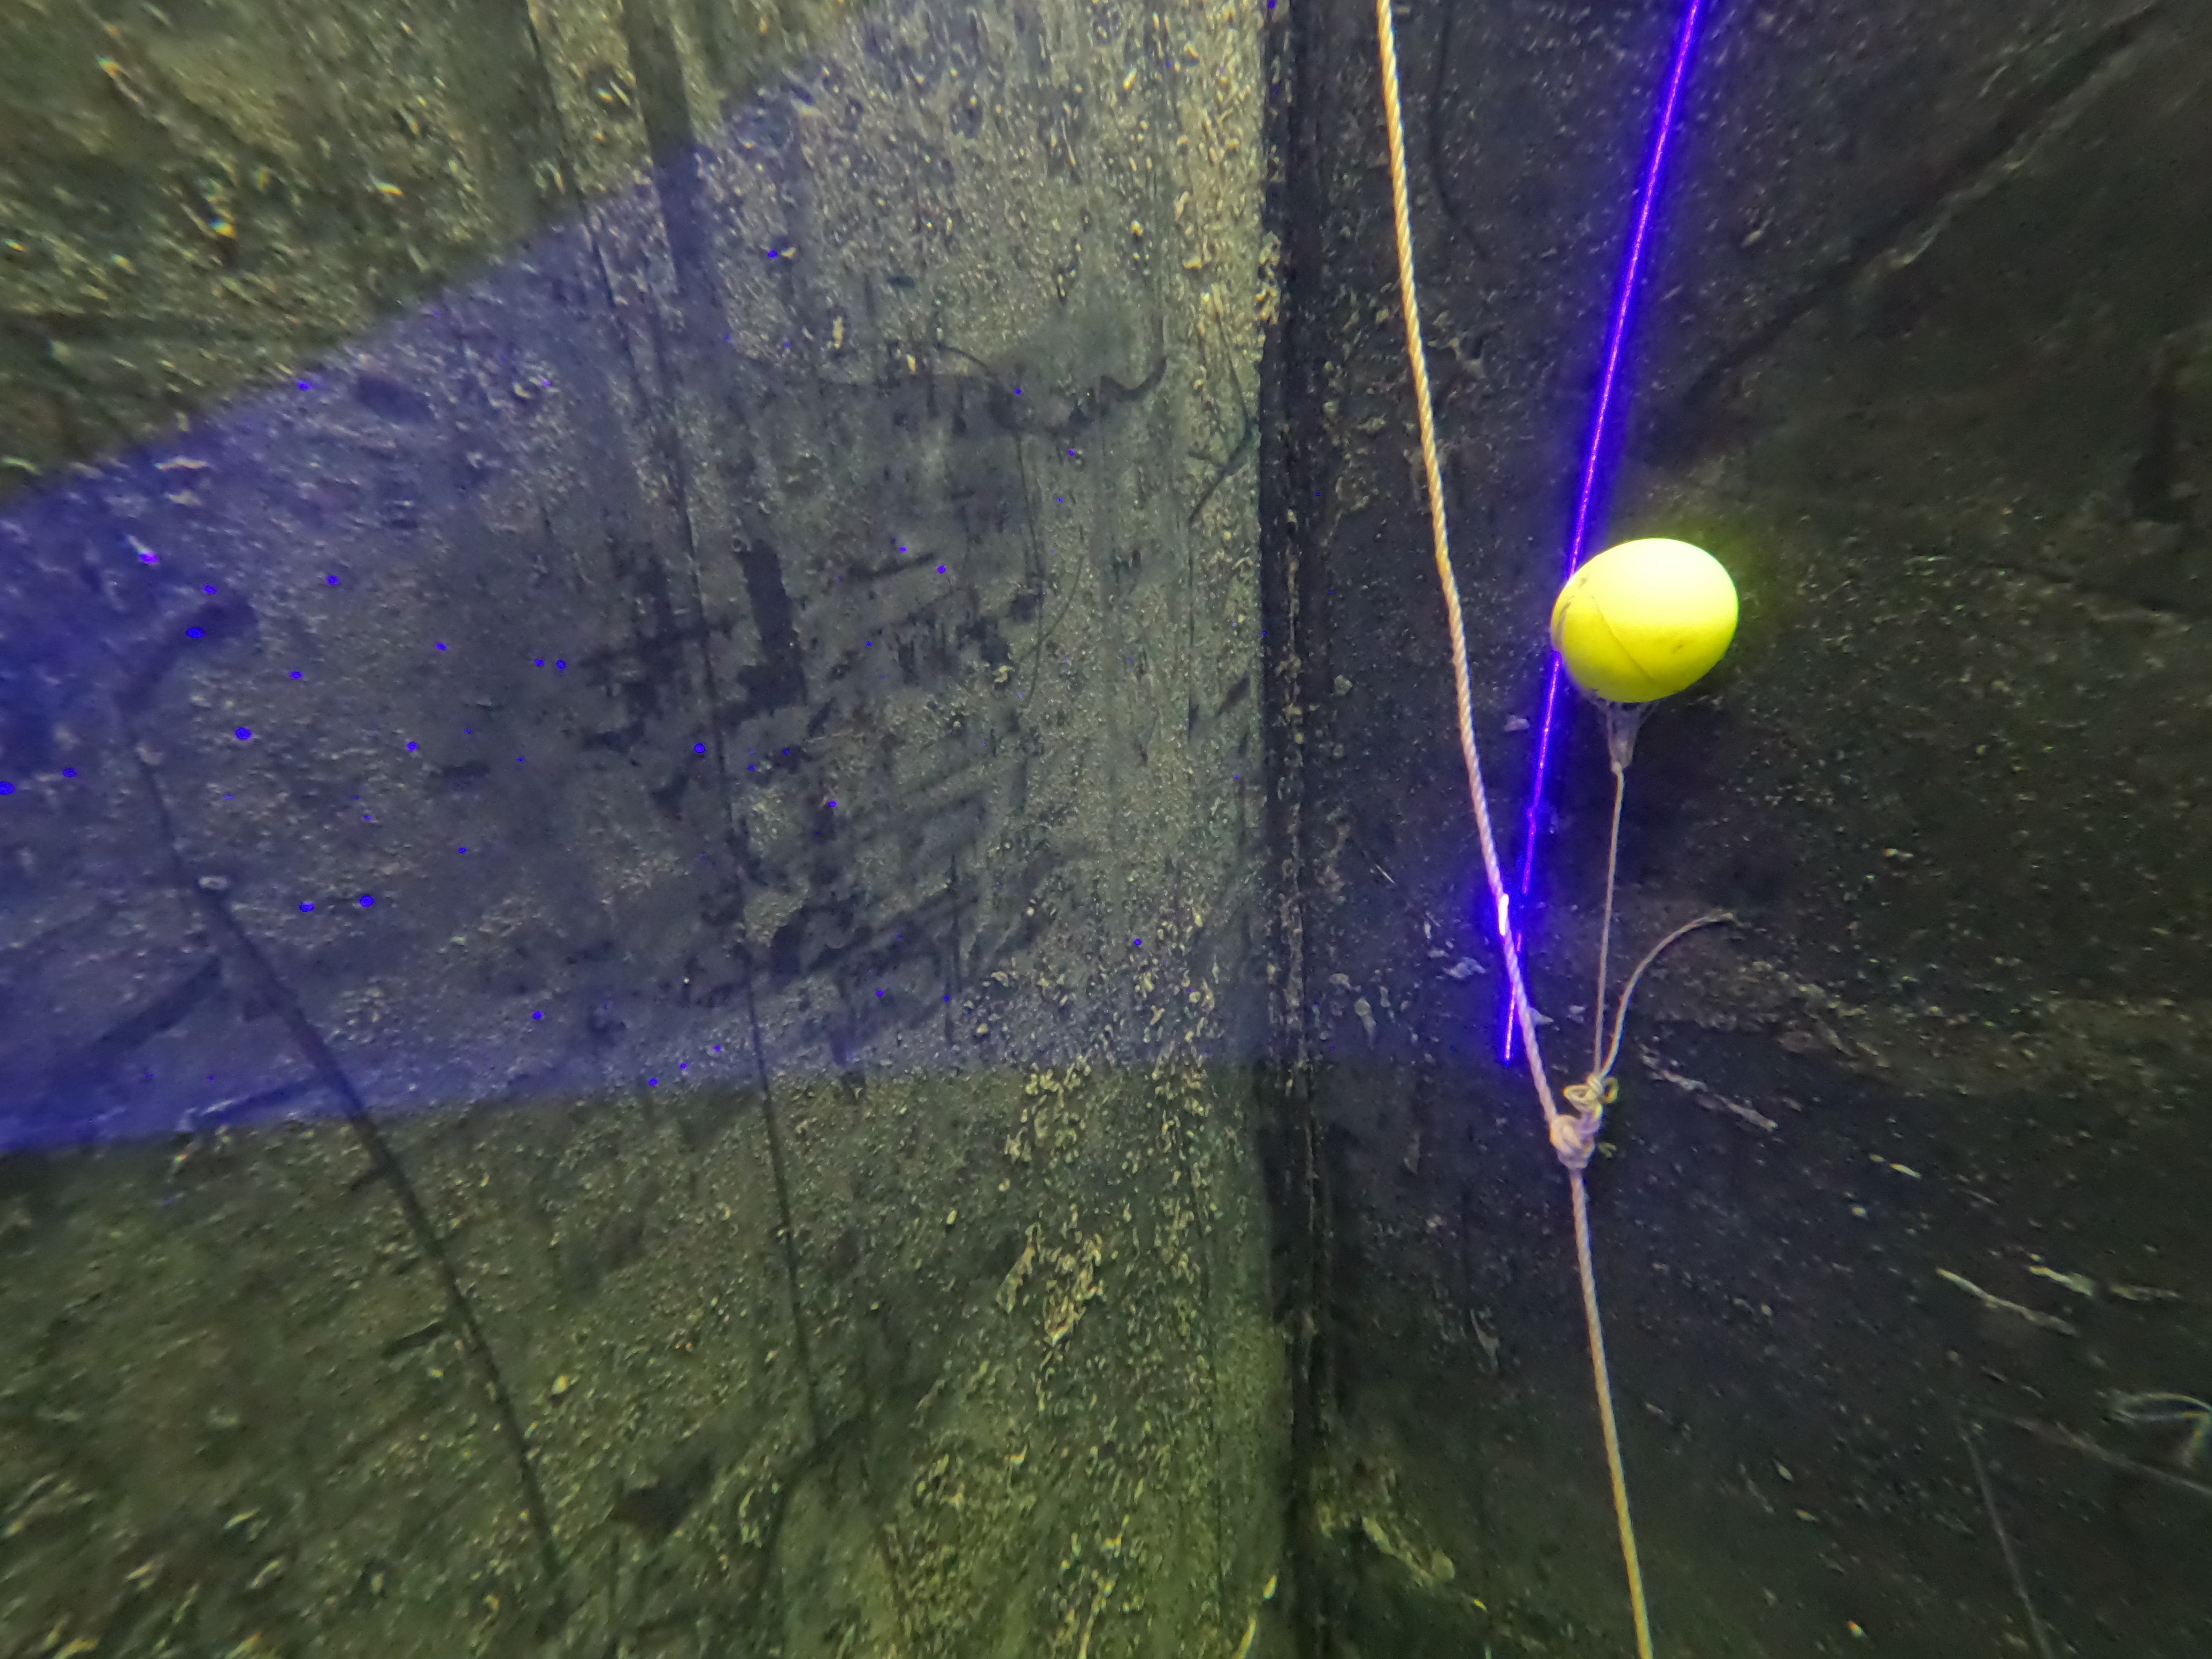

Supplement: Supplementary file 374 [file G0031167.pdf › 4/G0031167.pdf]

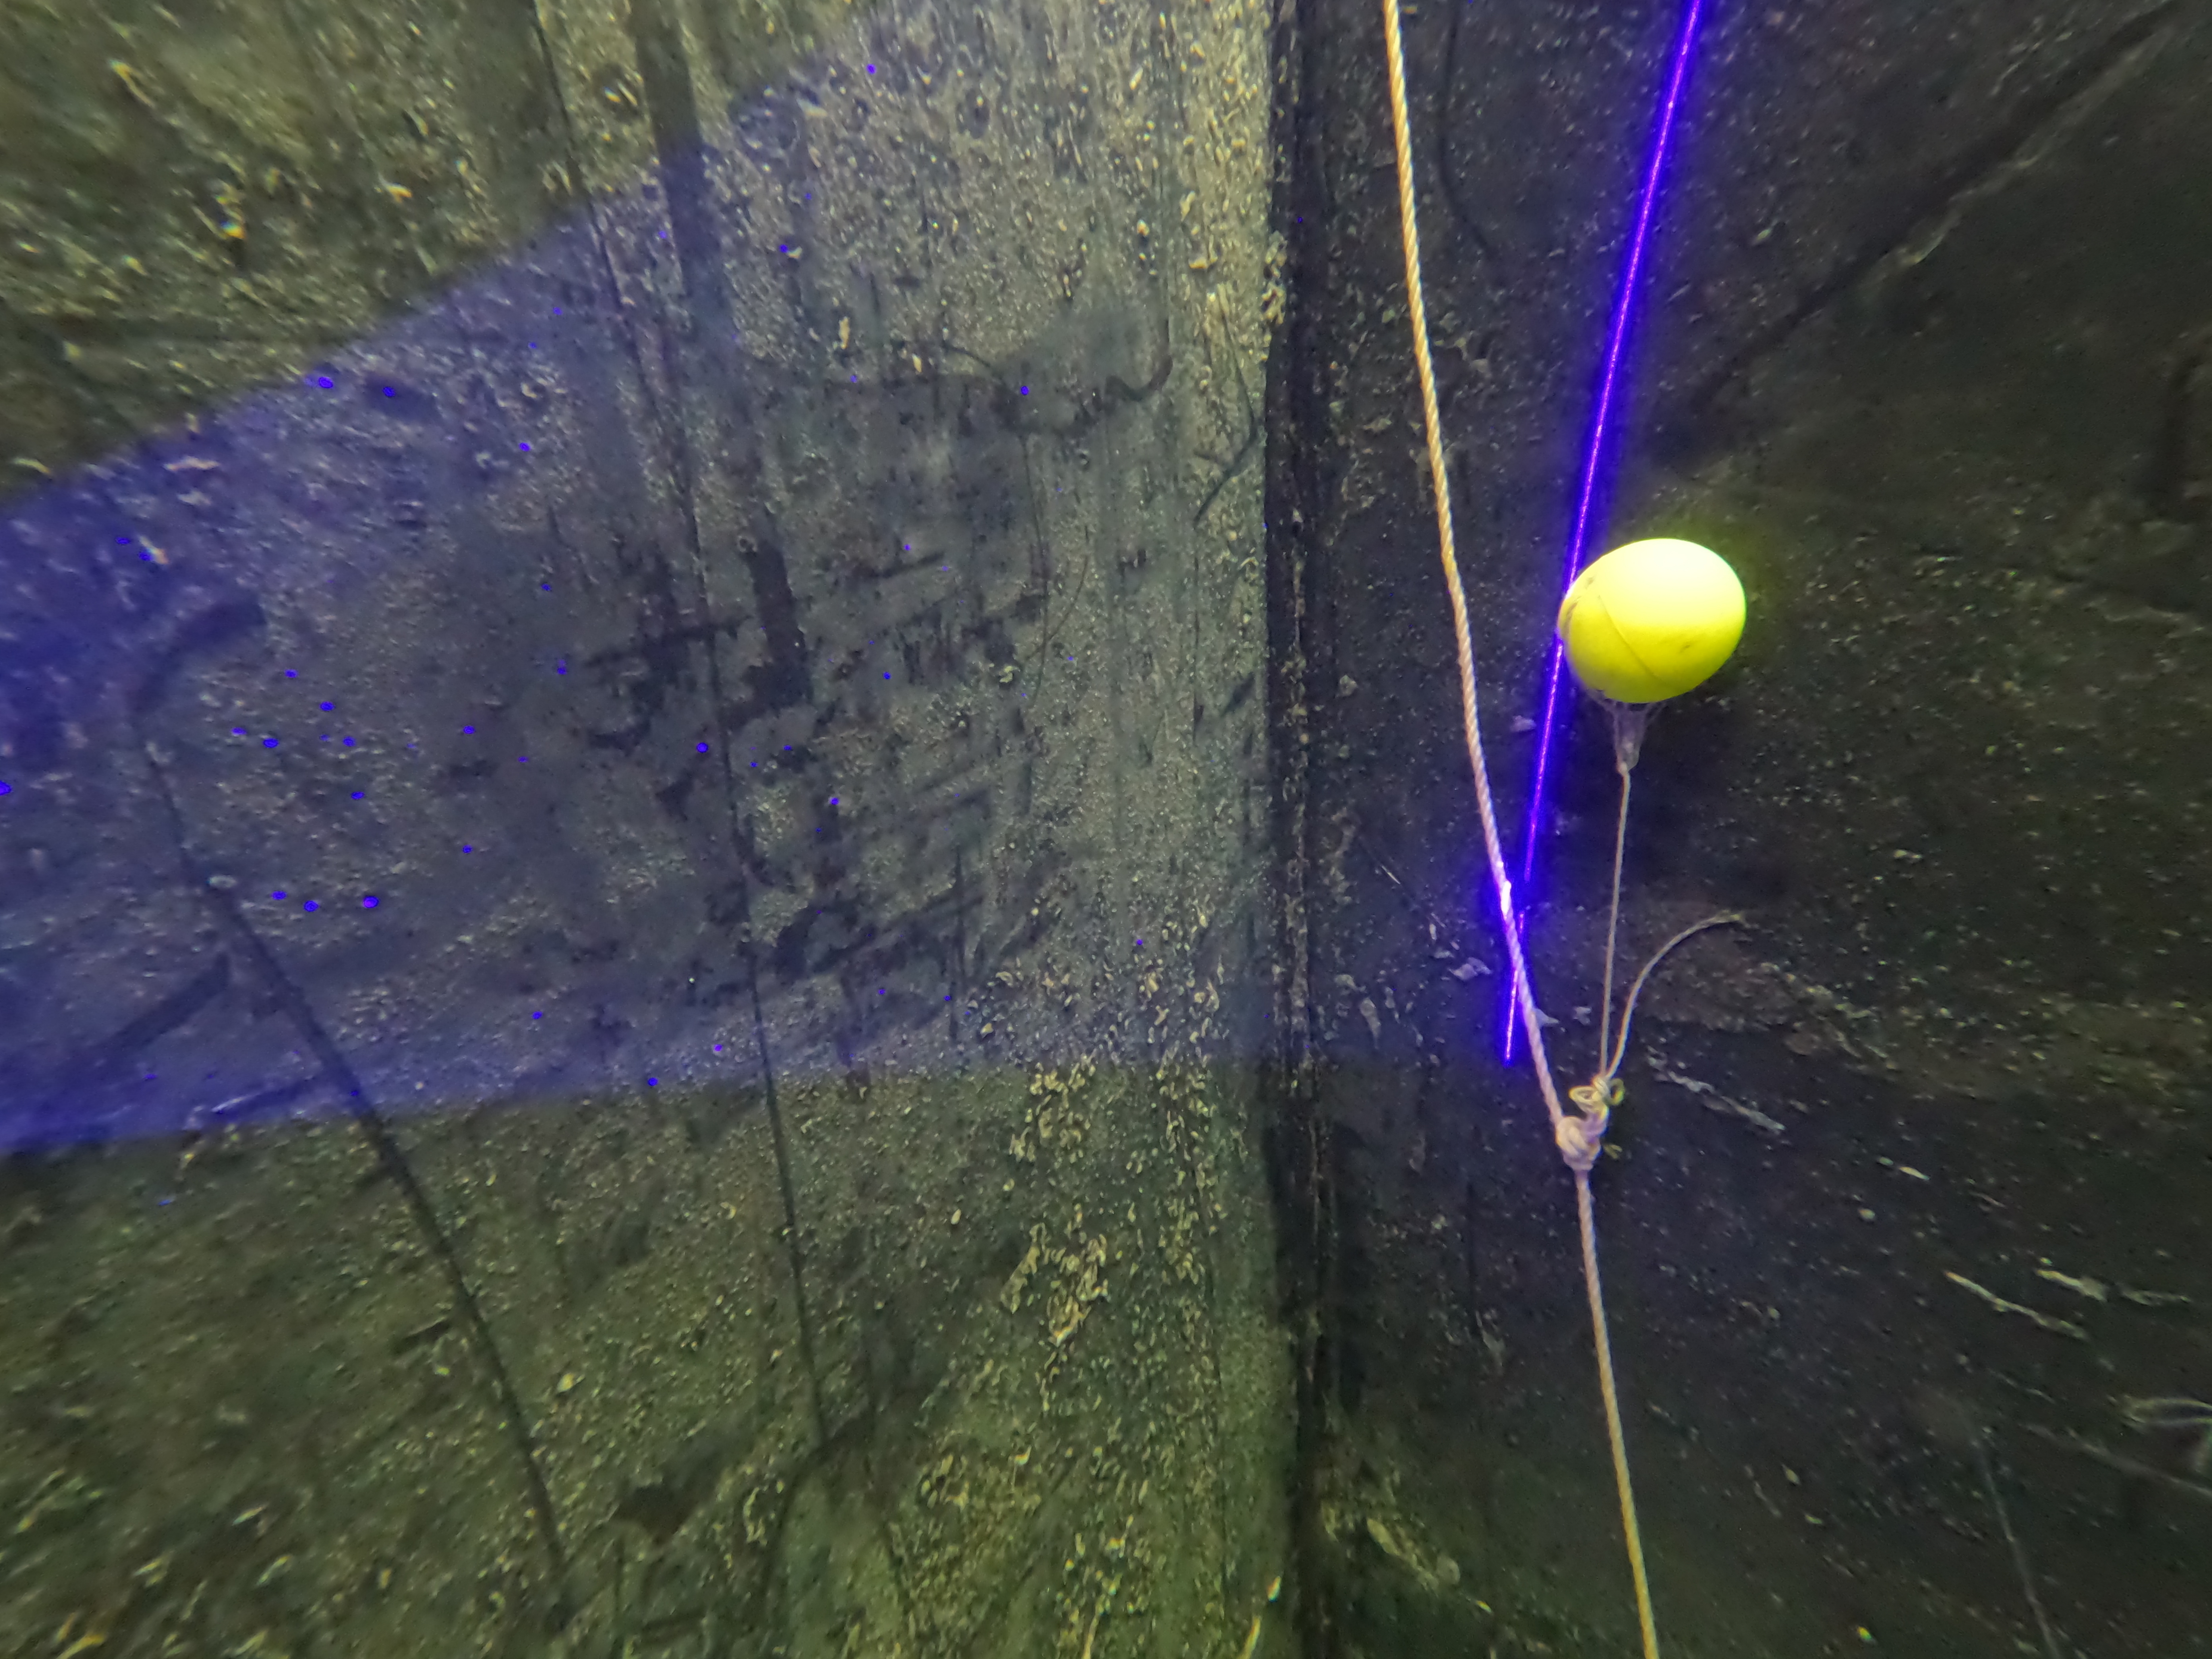

Supplement: Supplementary file 375 [file G0031168.pdf › 4/G0031168.pdf]

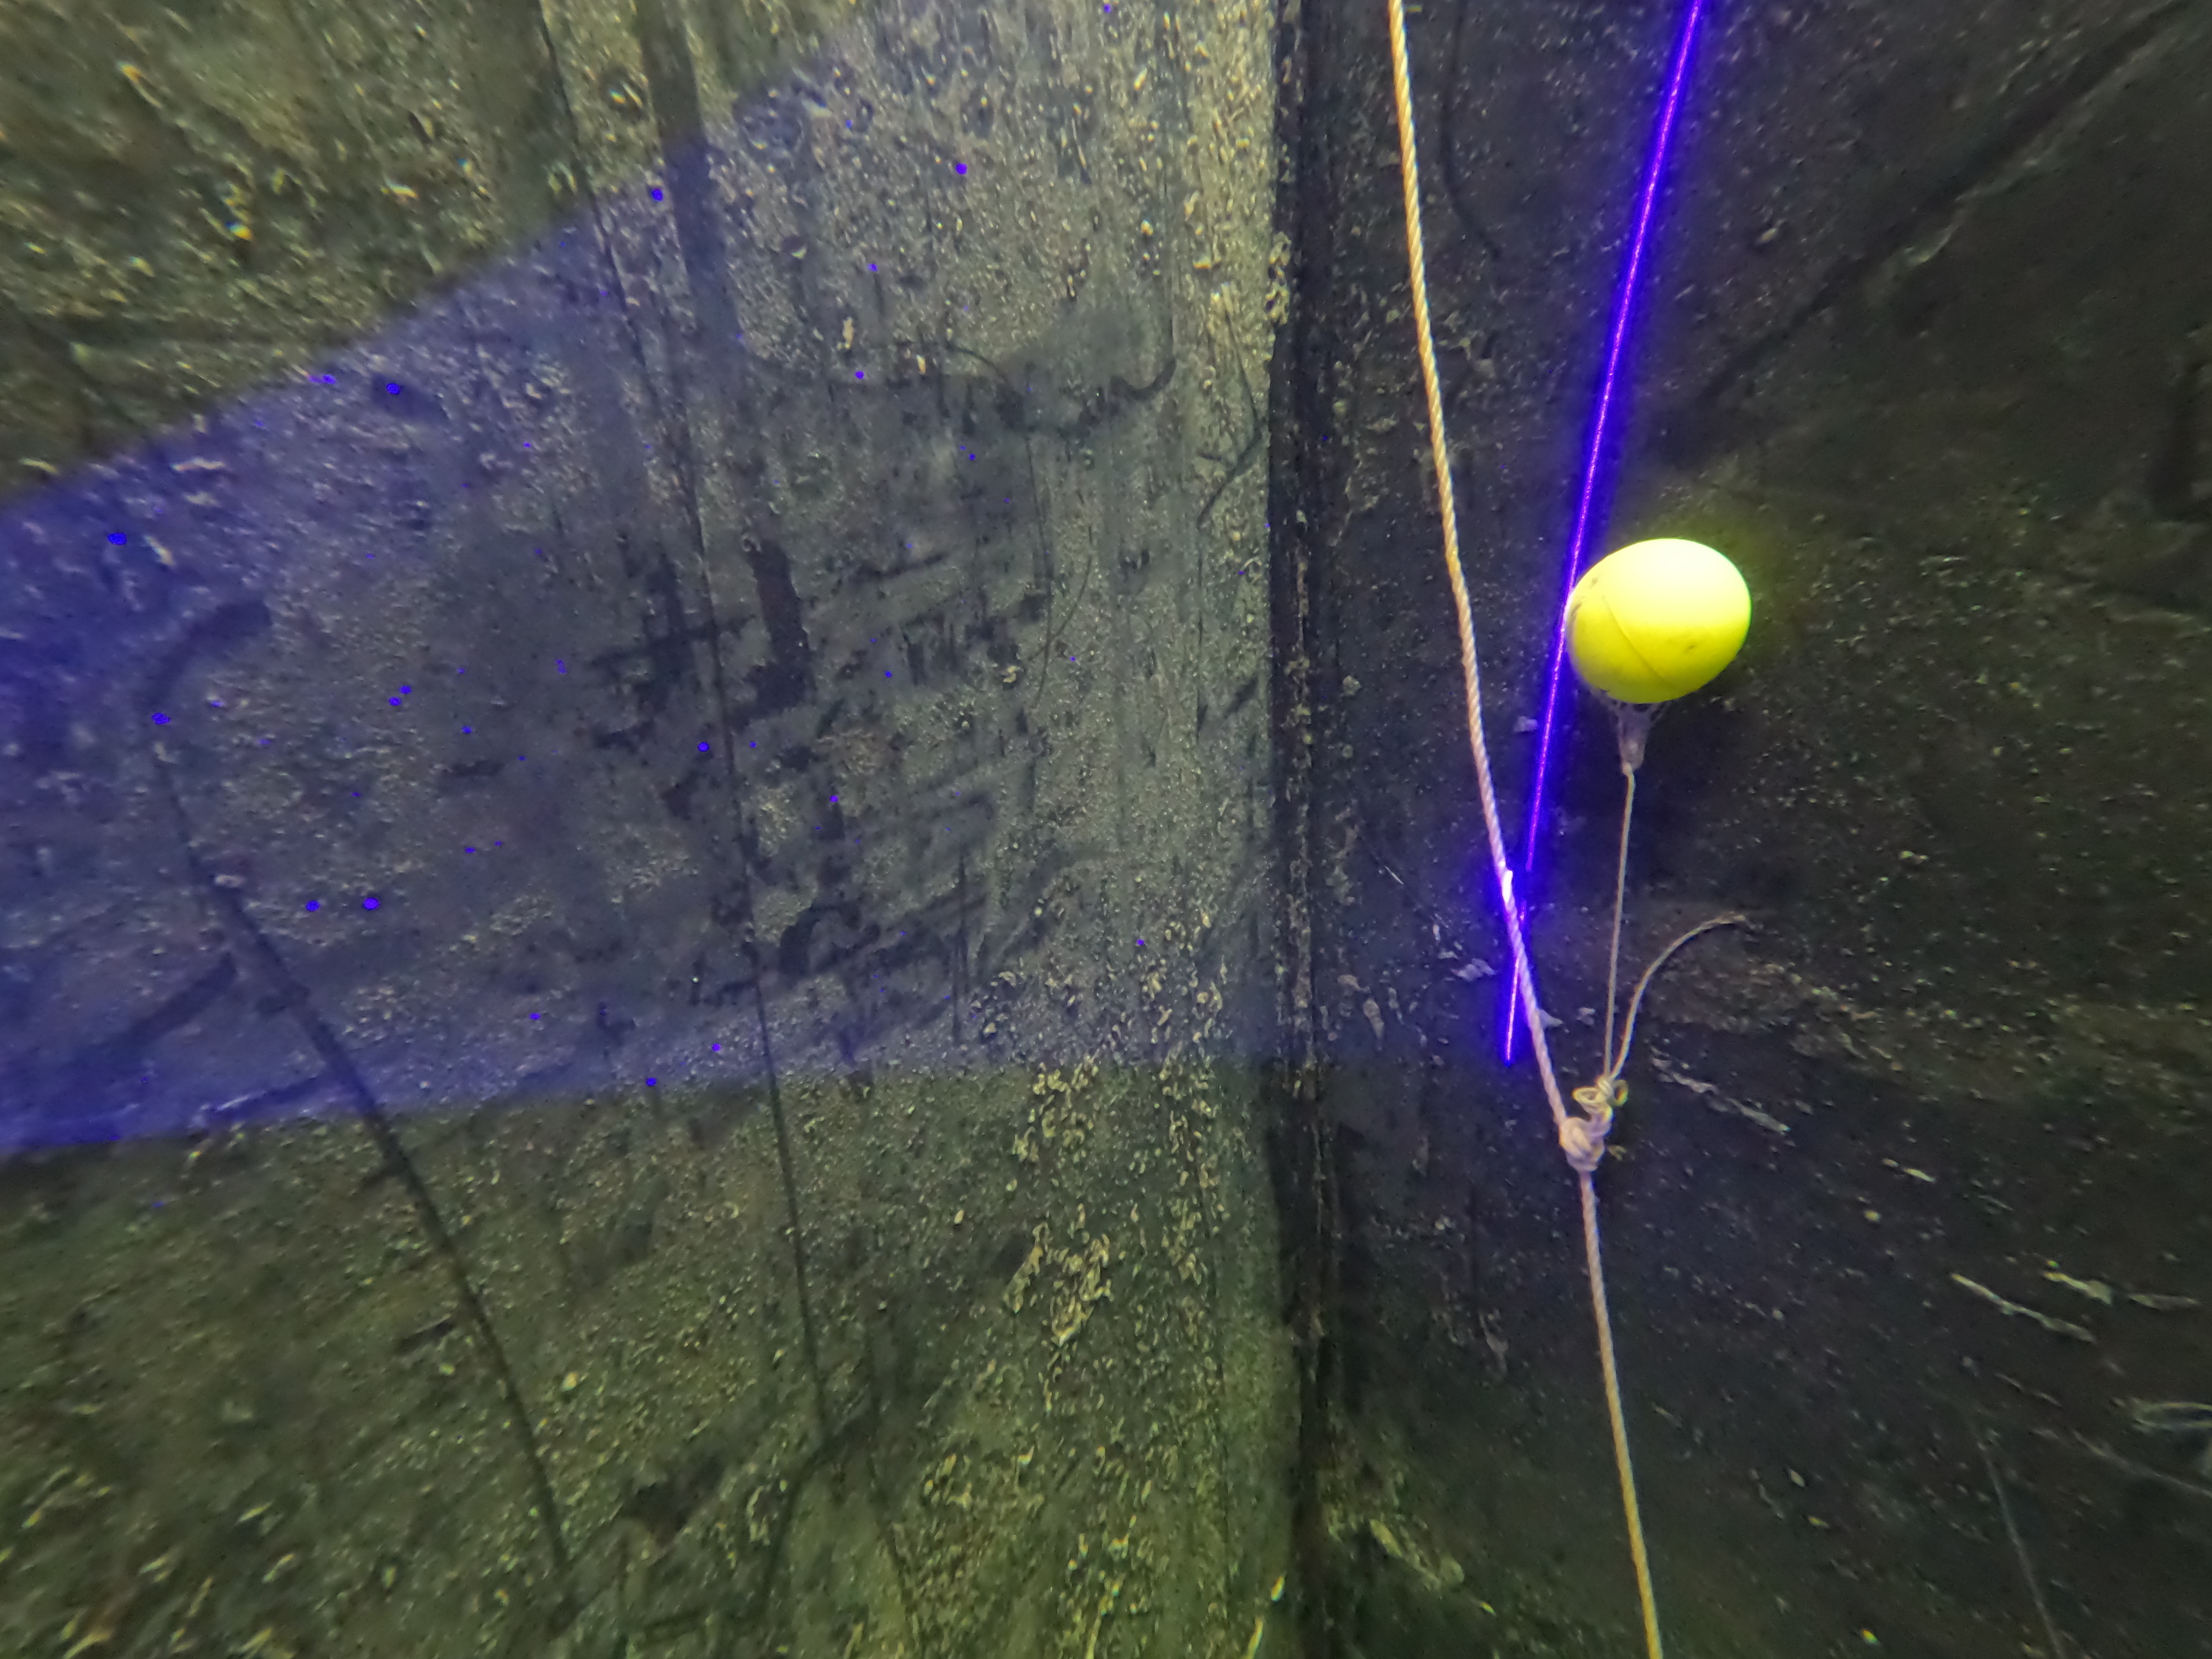

Supplement: Supplementary file 376 [file G0031169.pdf › 4/G0031169.pdf]

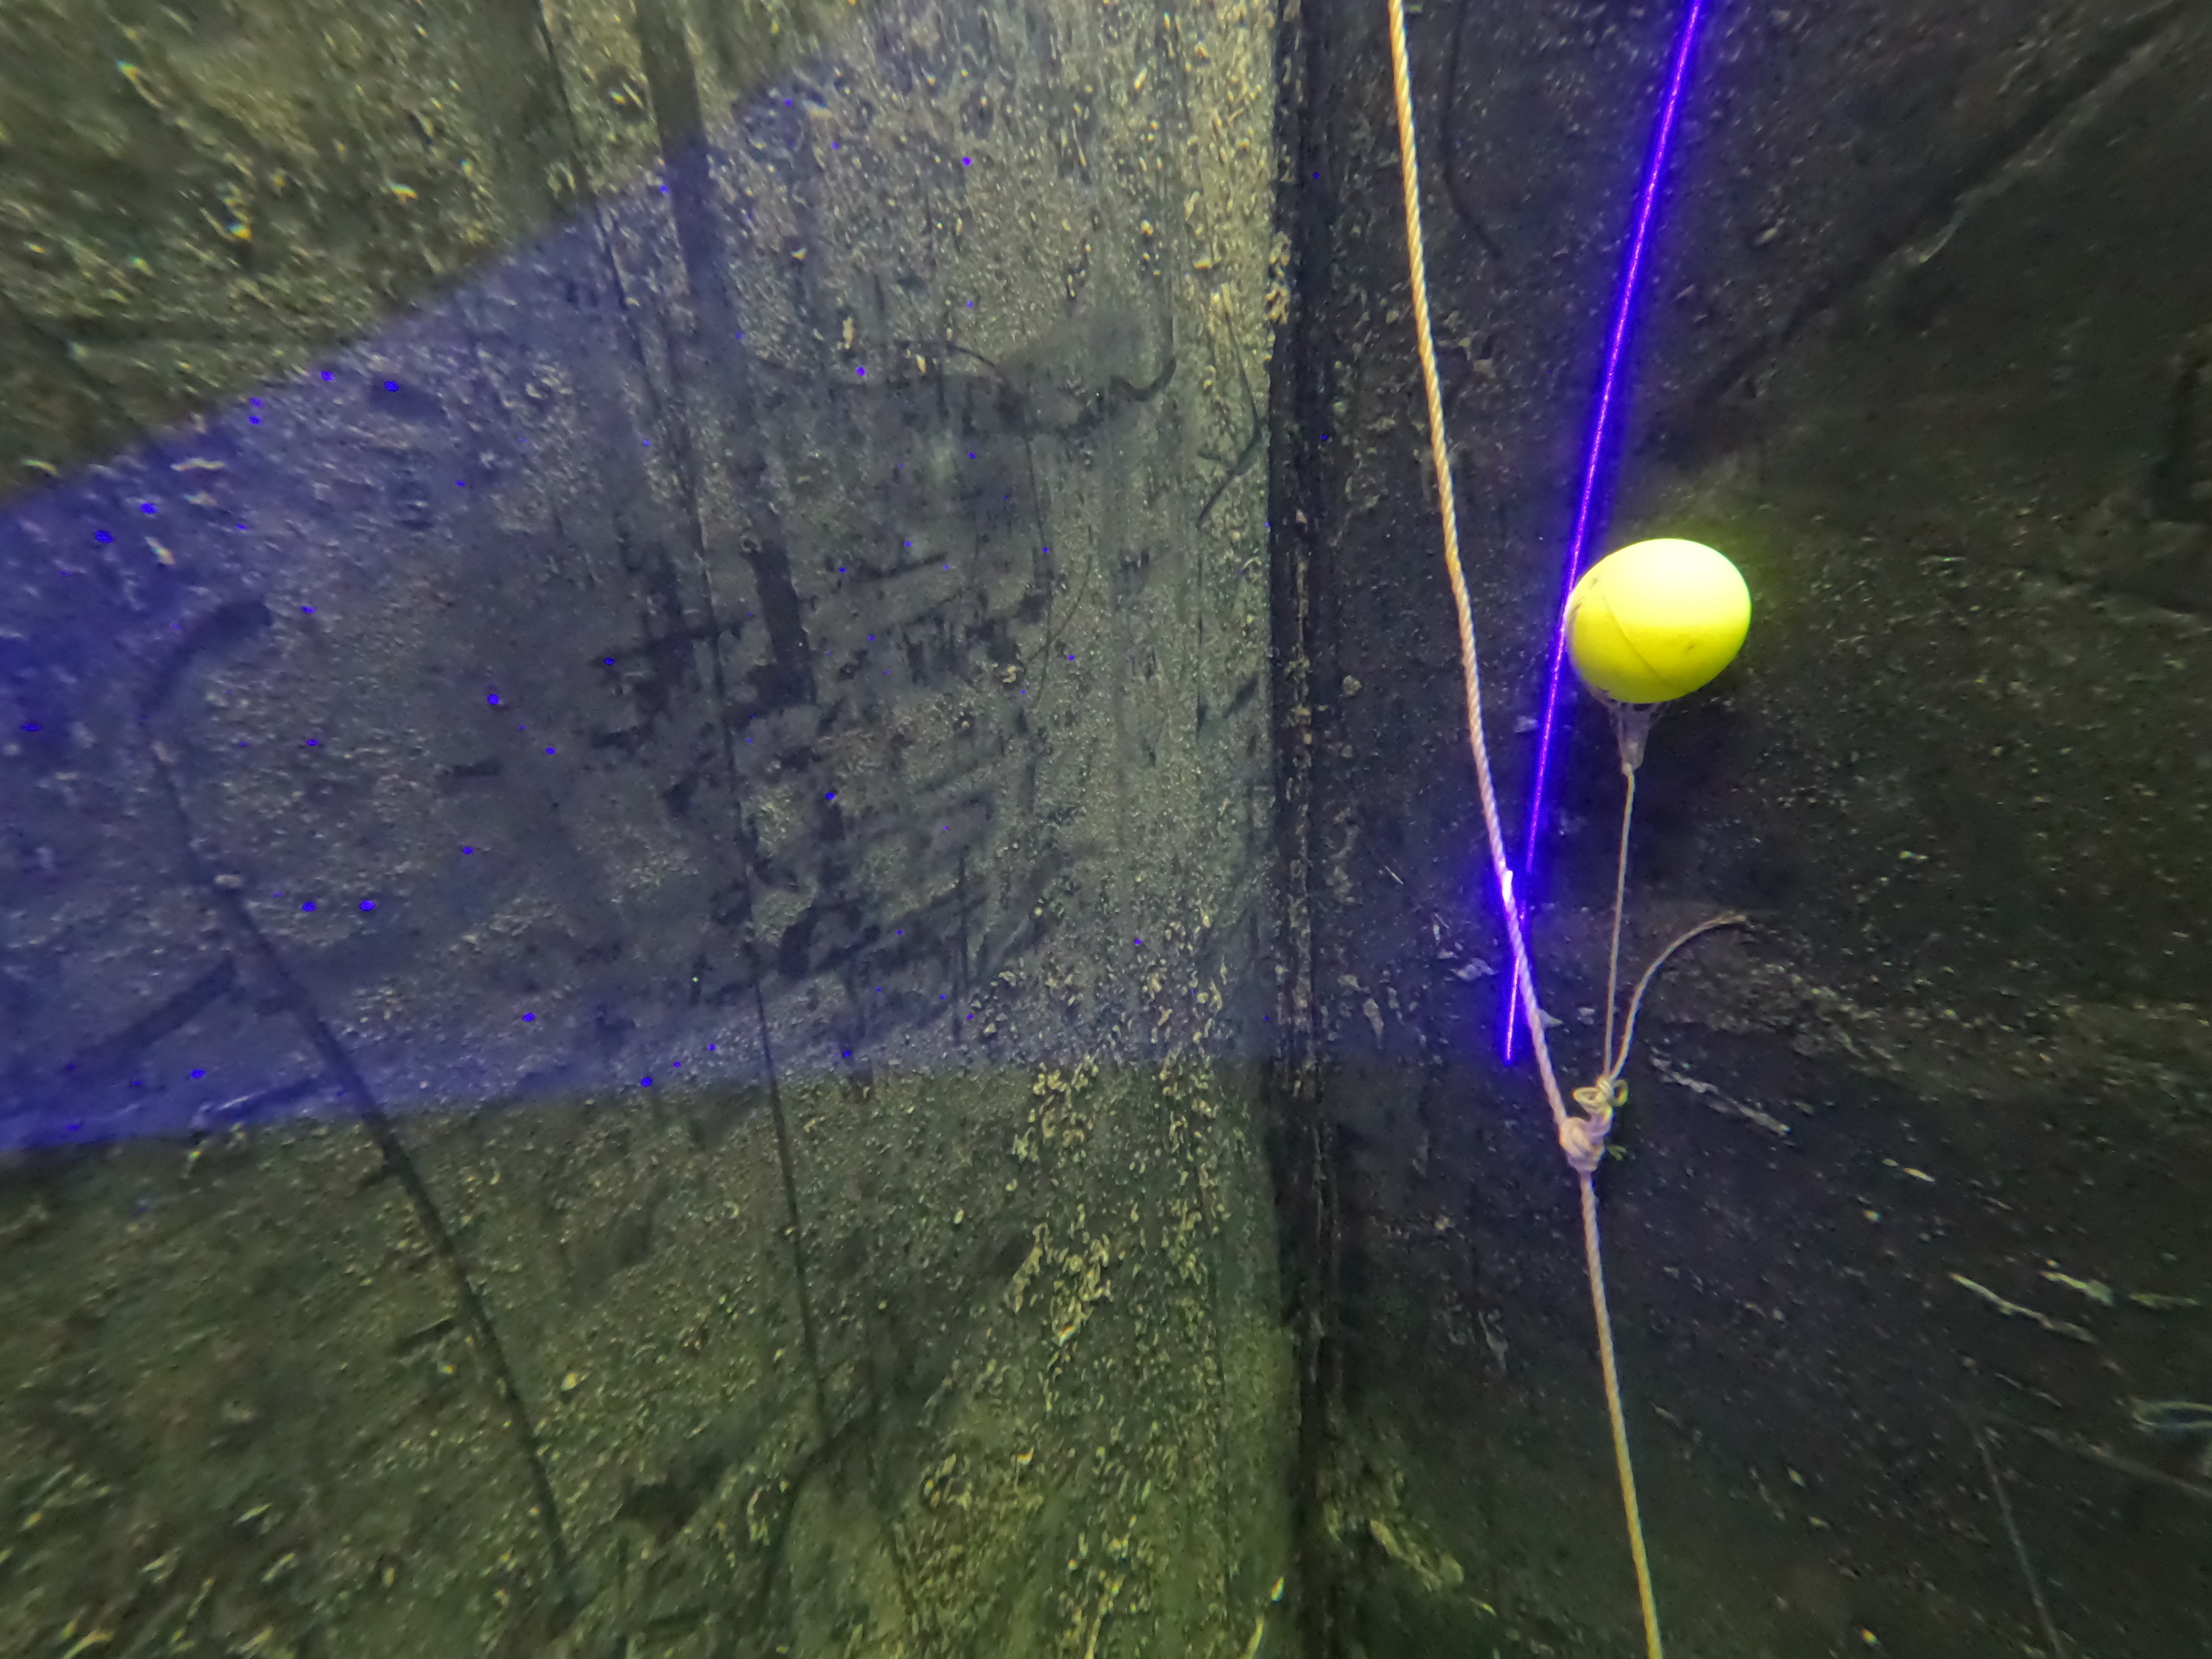

Supplement: Supplementary file 377 [file G0031170.pdf › 4/G0031170.pdf]

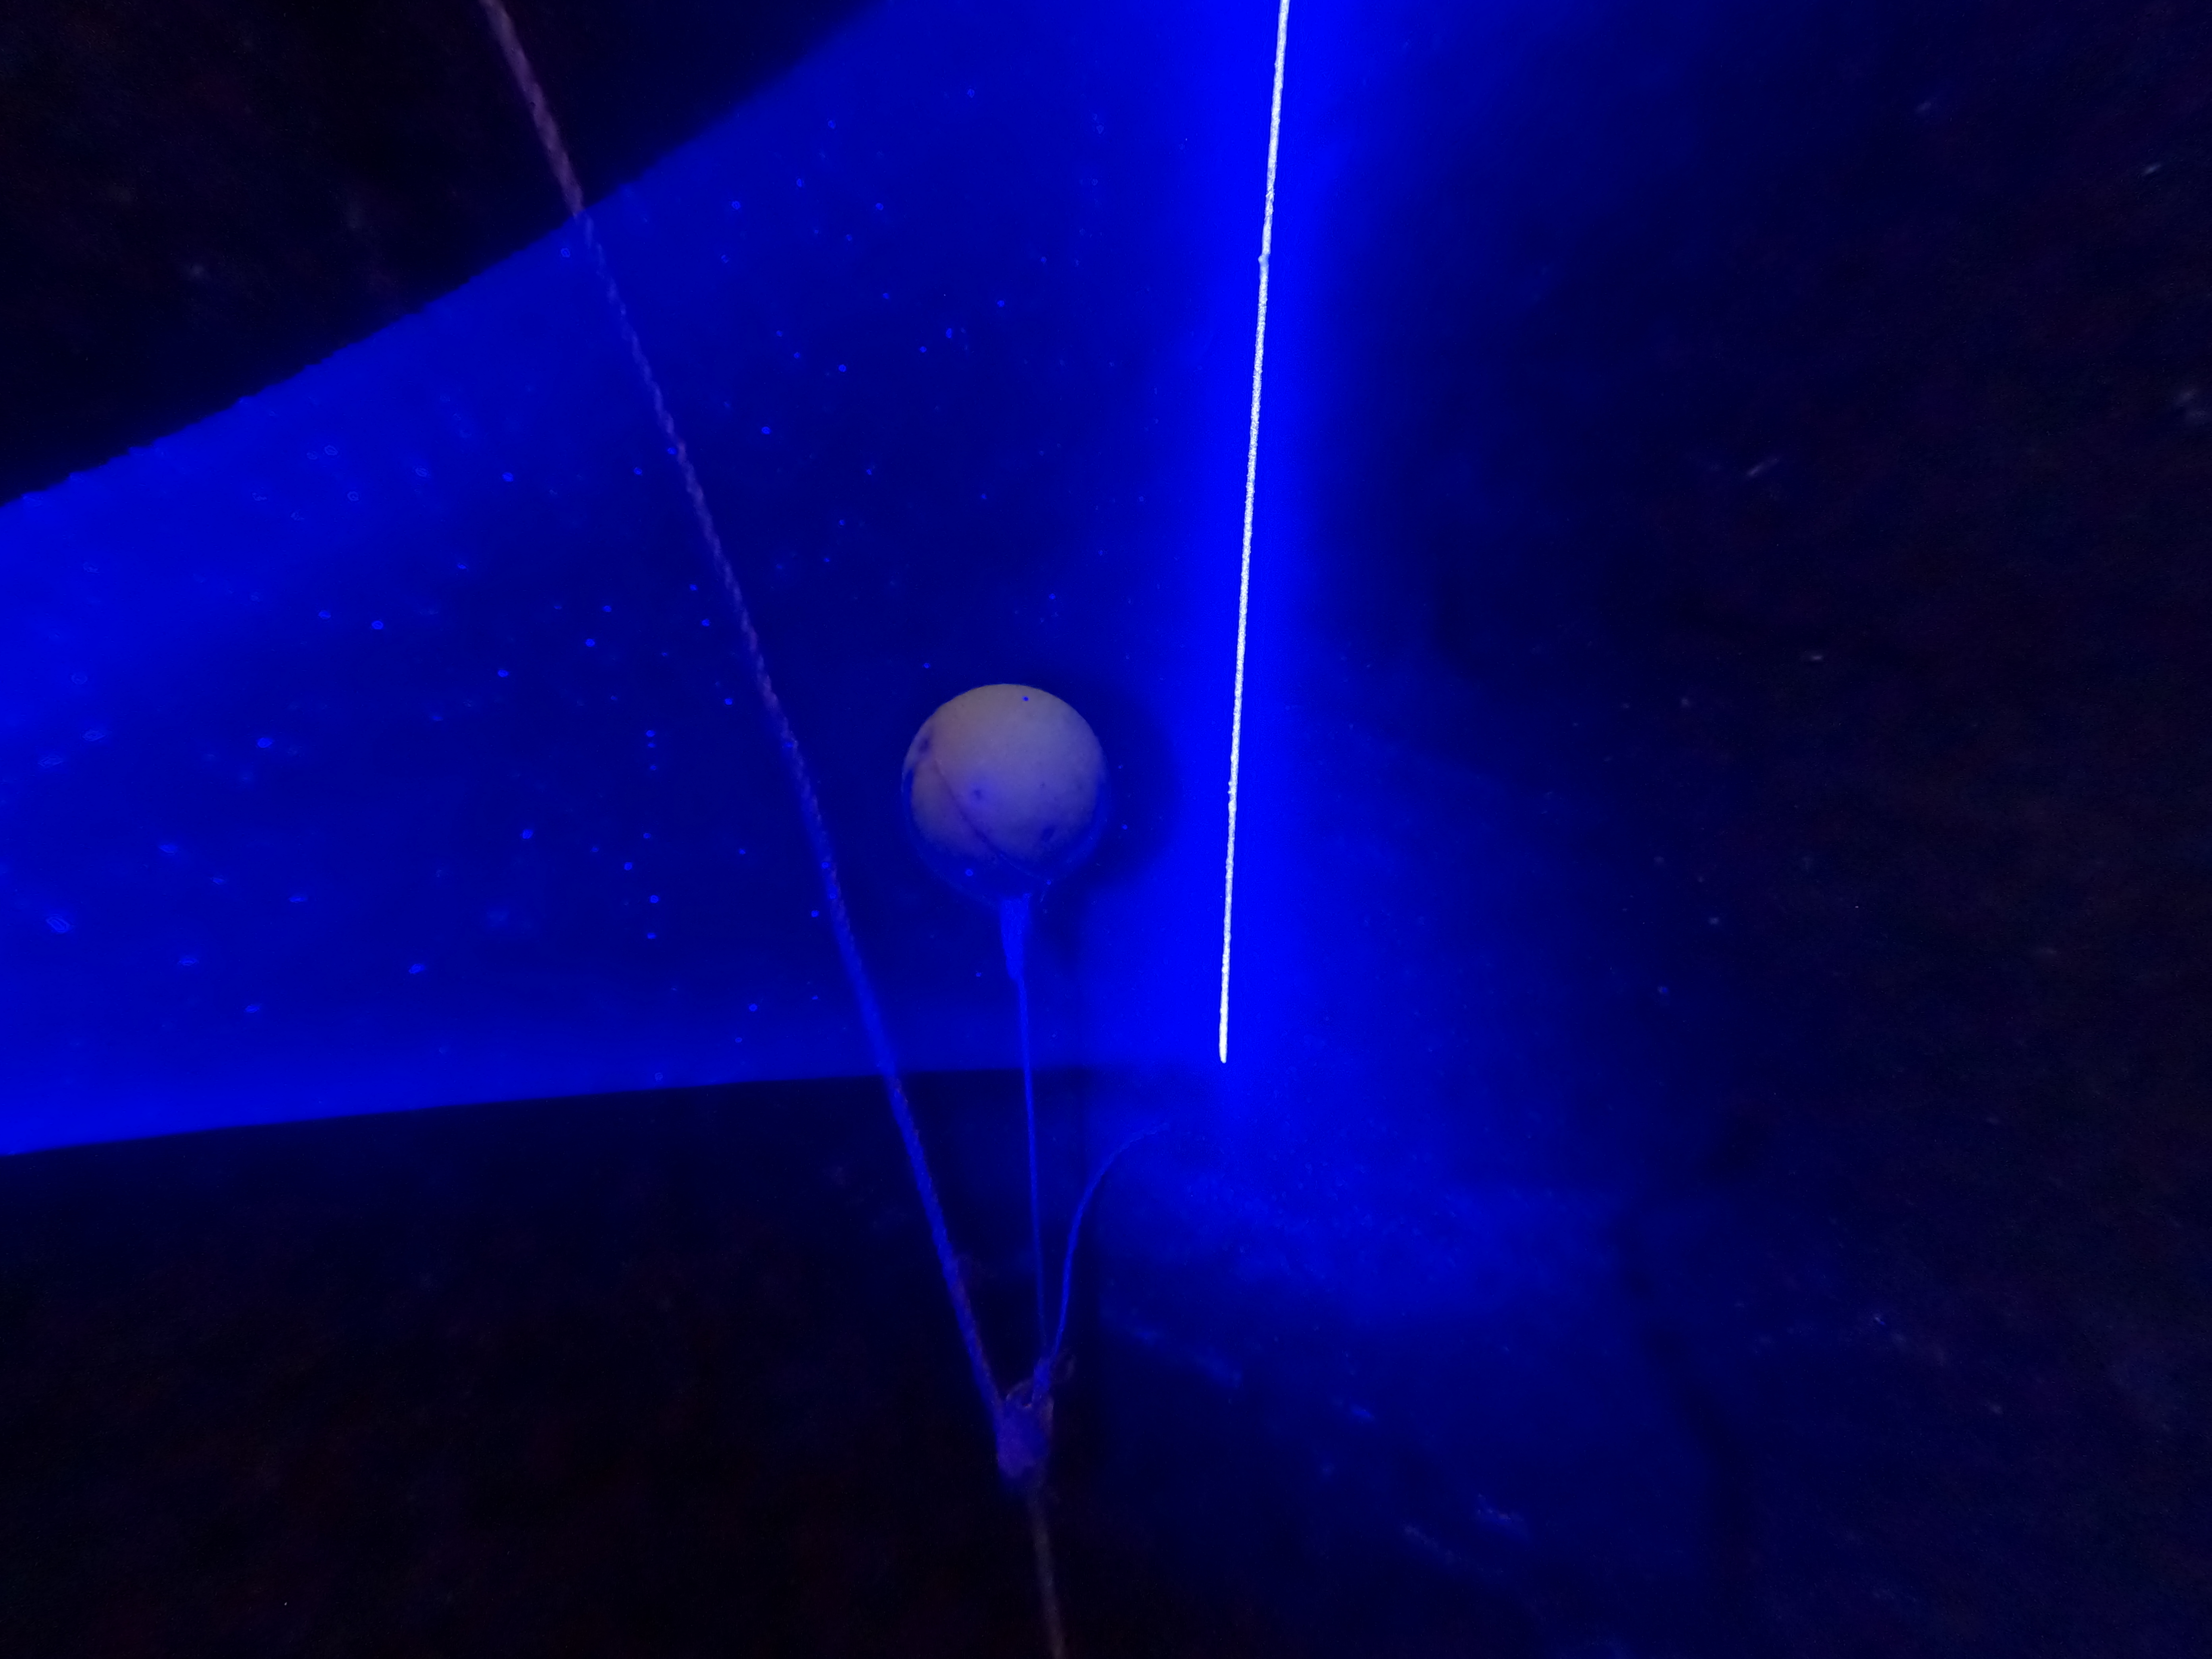

Supplement: Supplementary file 378 [file G0030678.pdf › 3/G0030678.pdf]

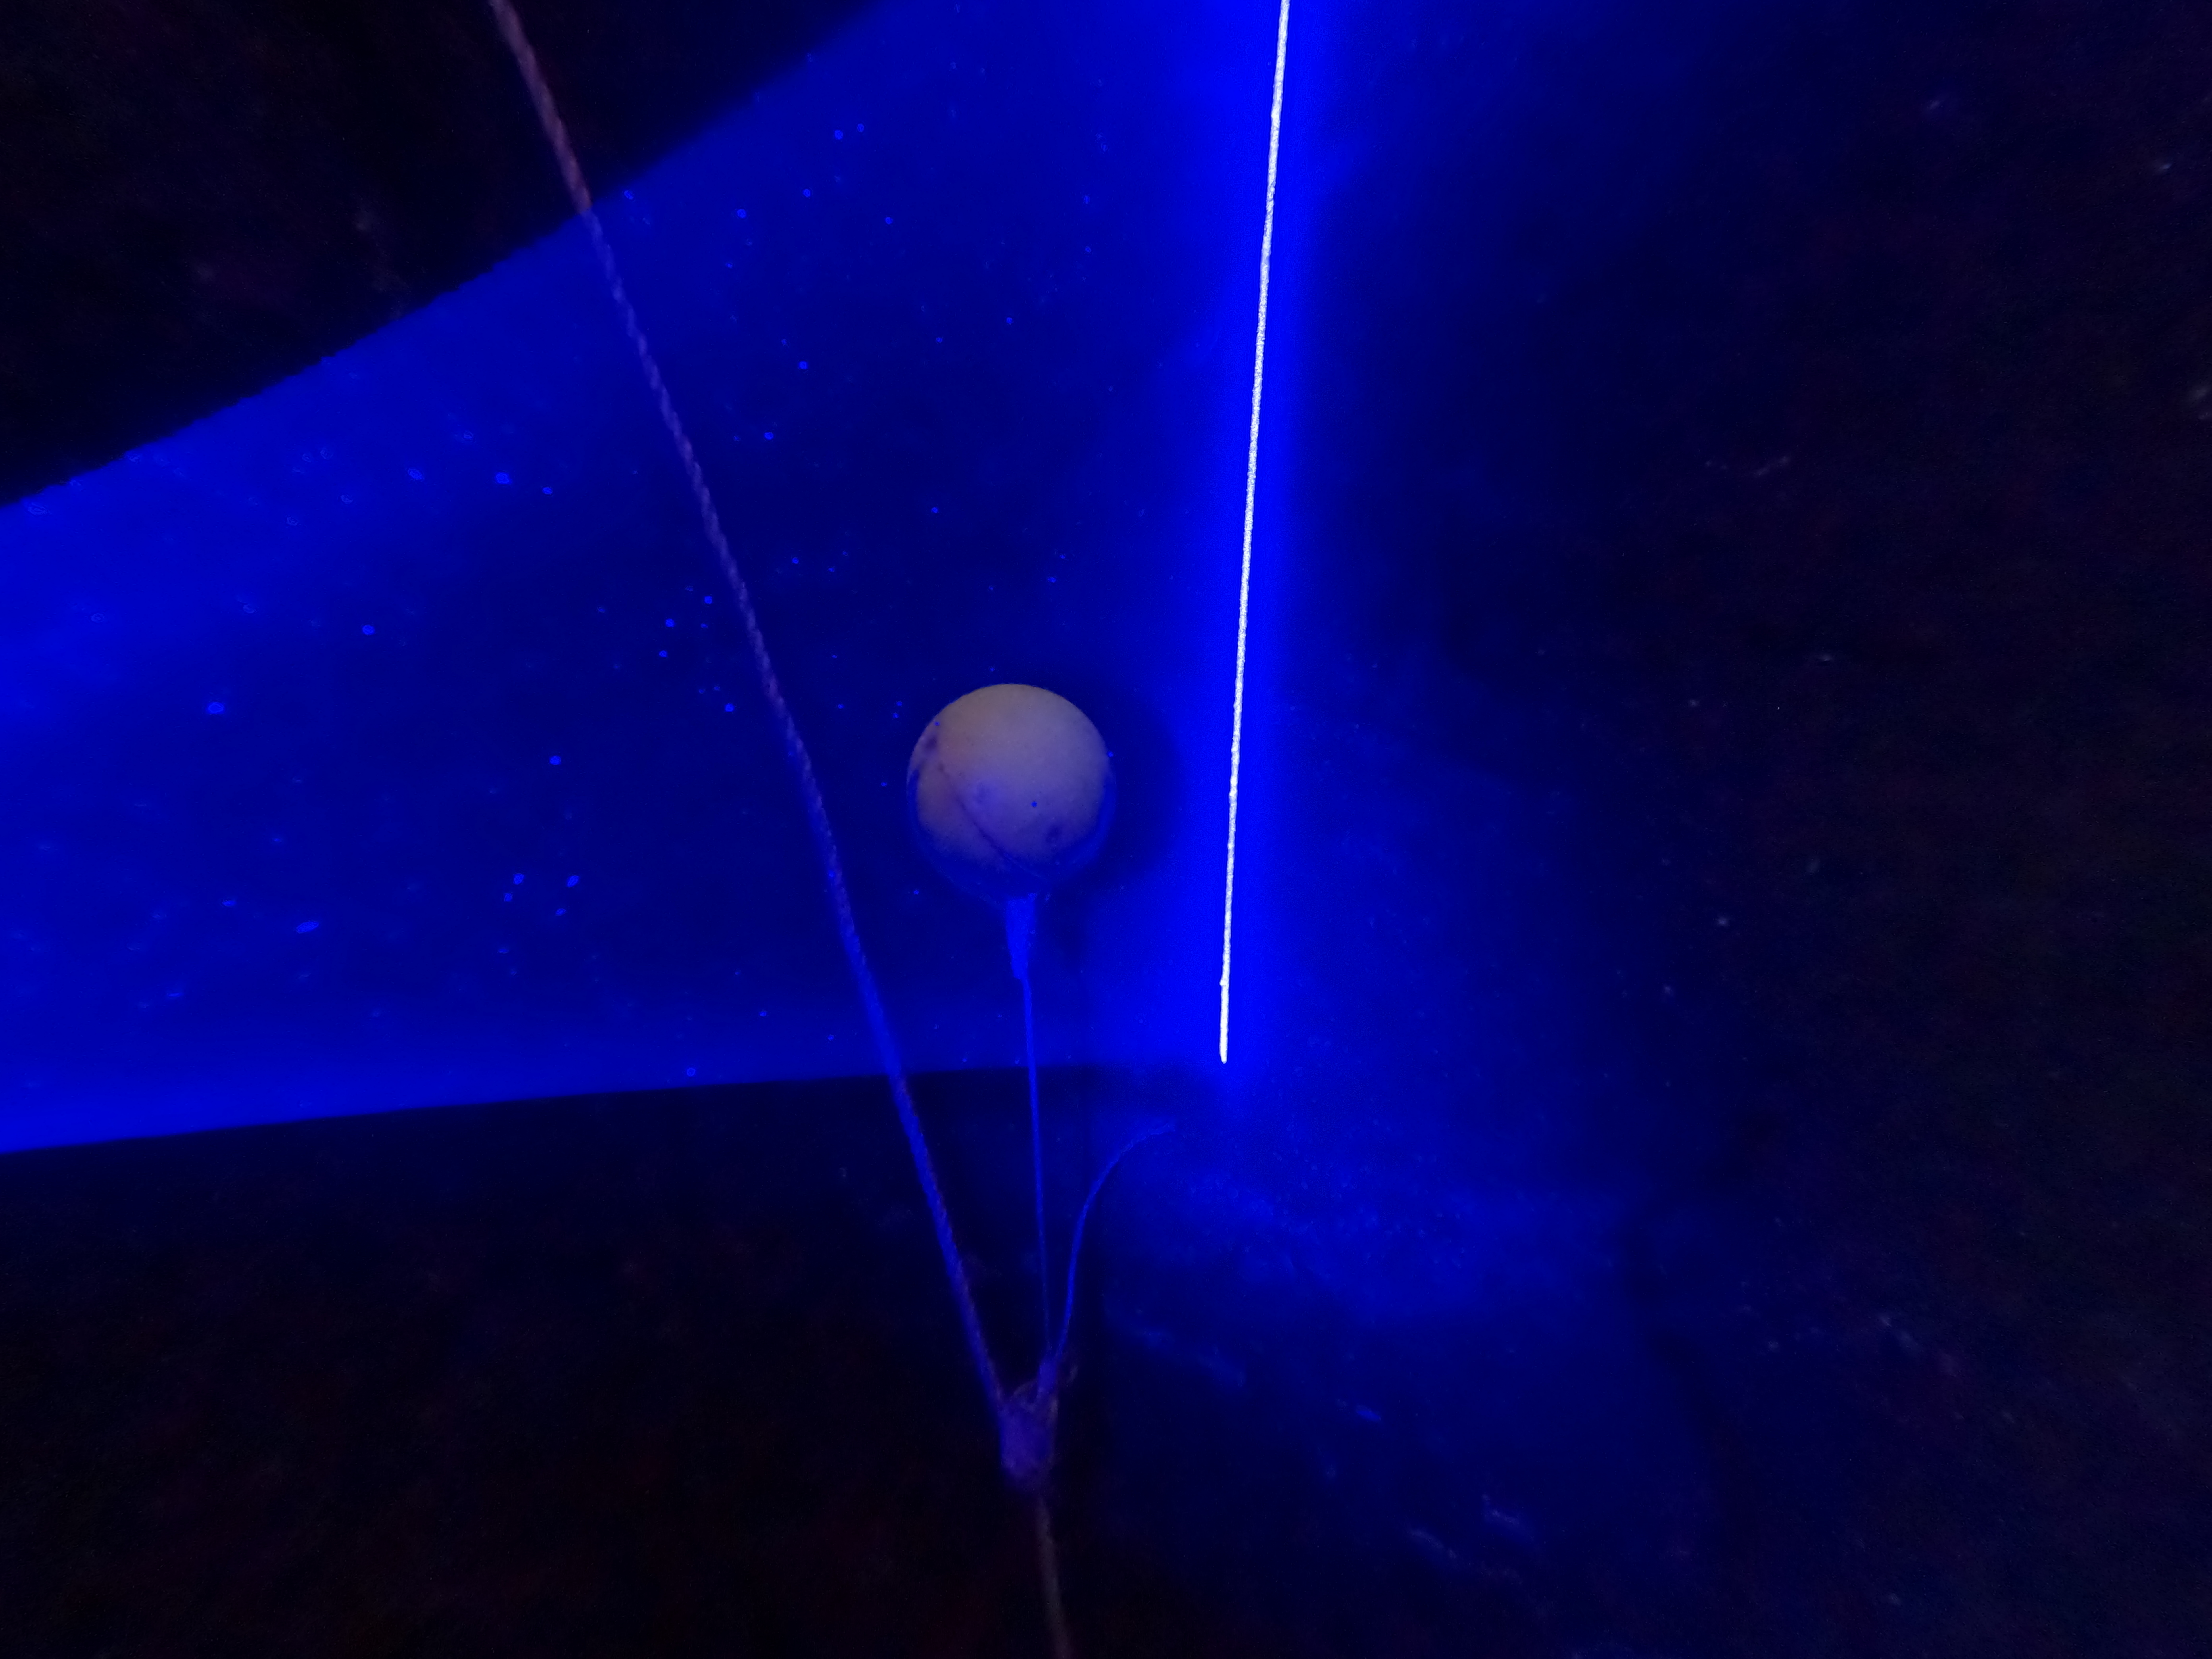

Supplement: Supplementary file 379 [file G0030679.pdf › 3/G0030679.pdf]

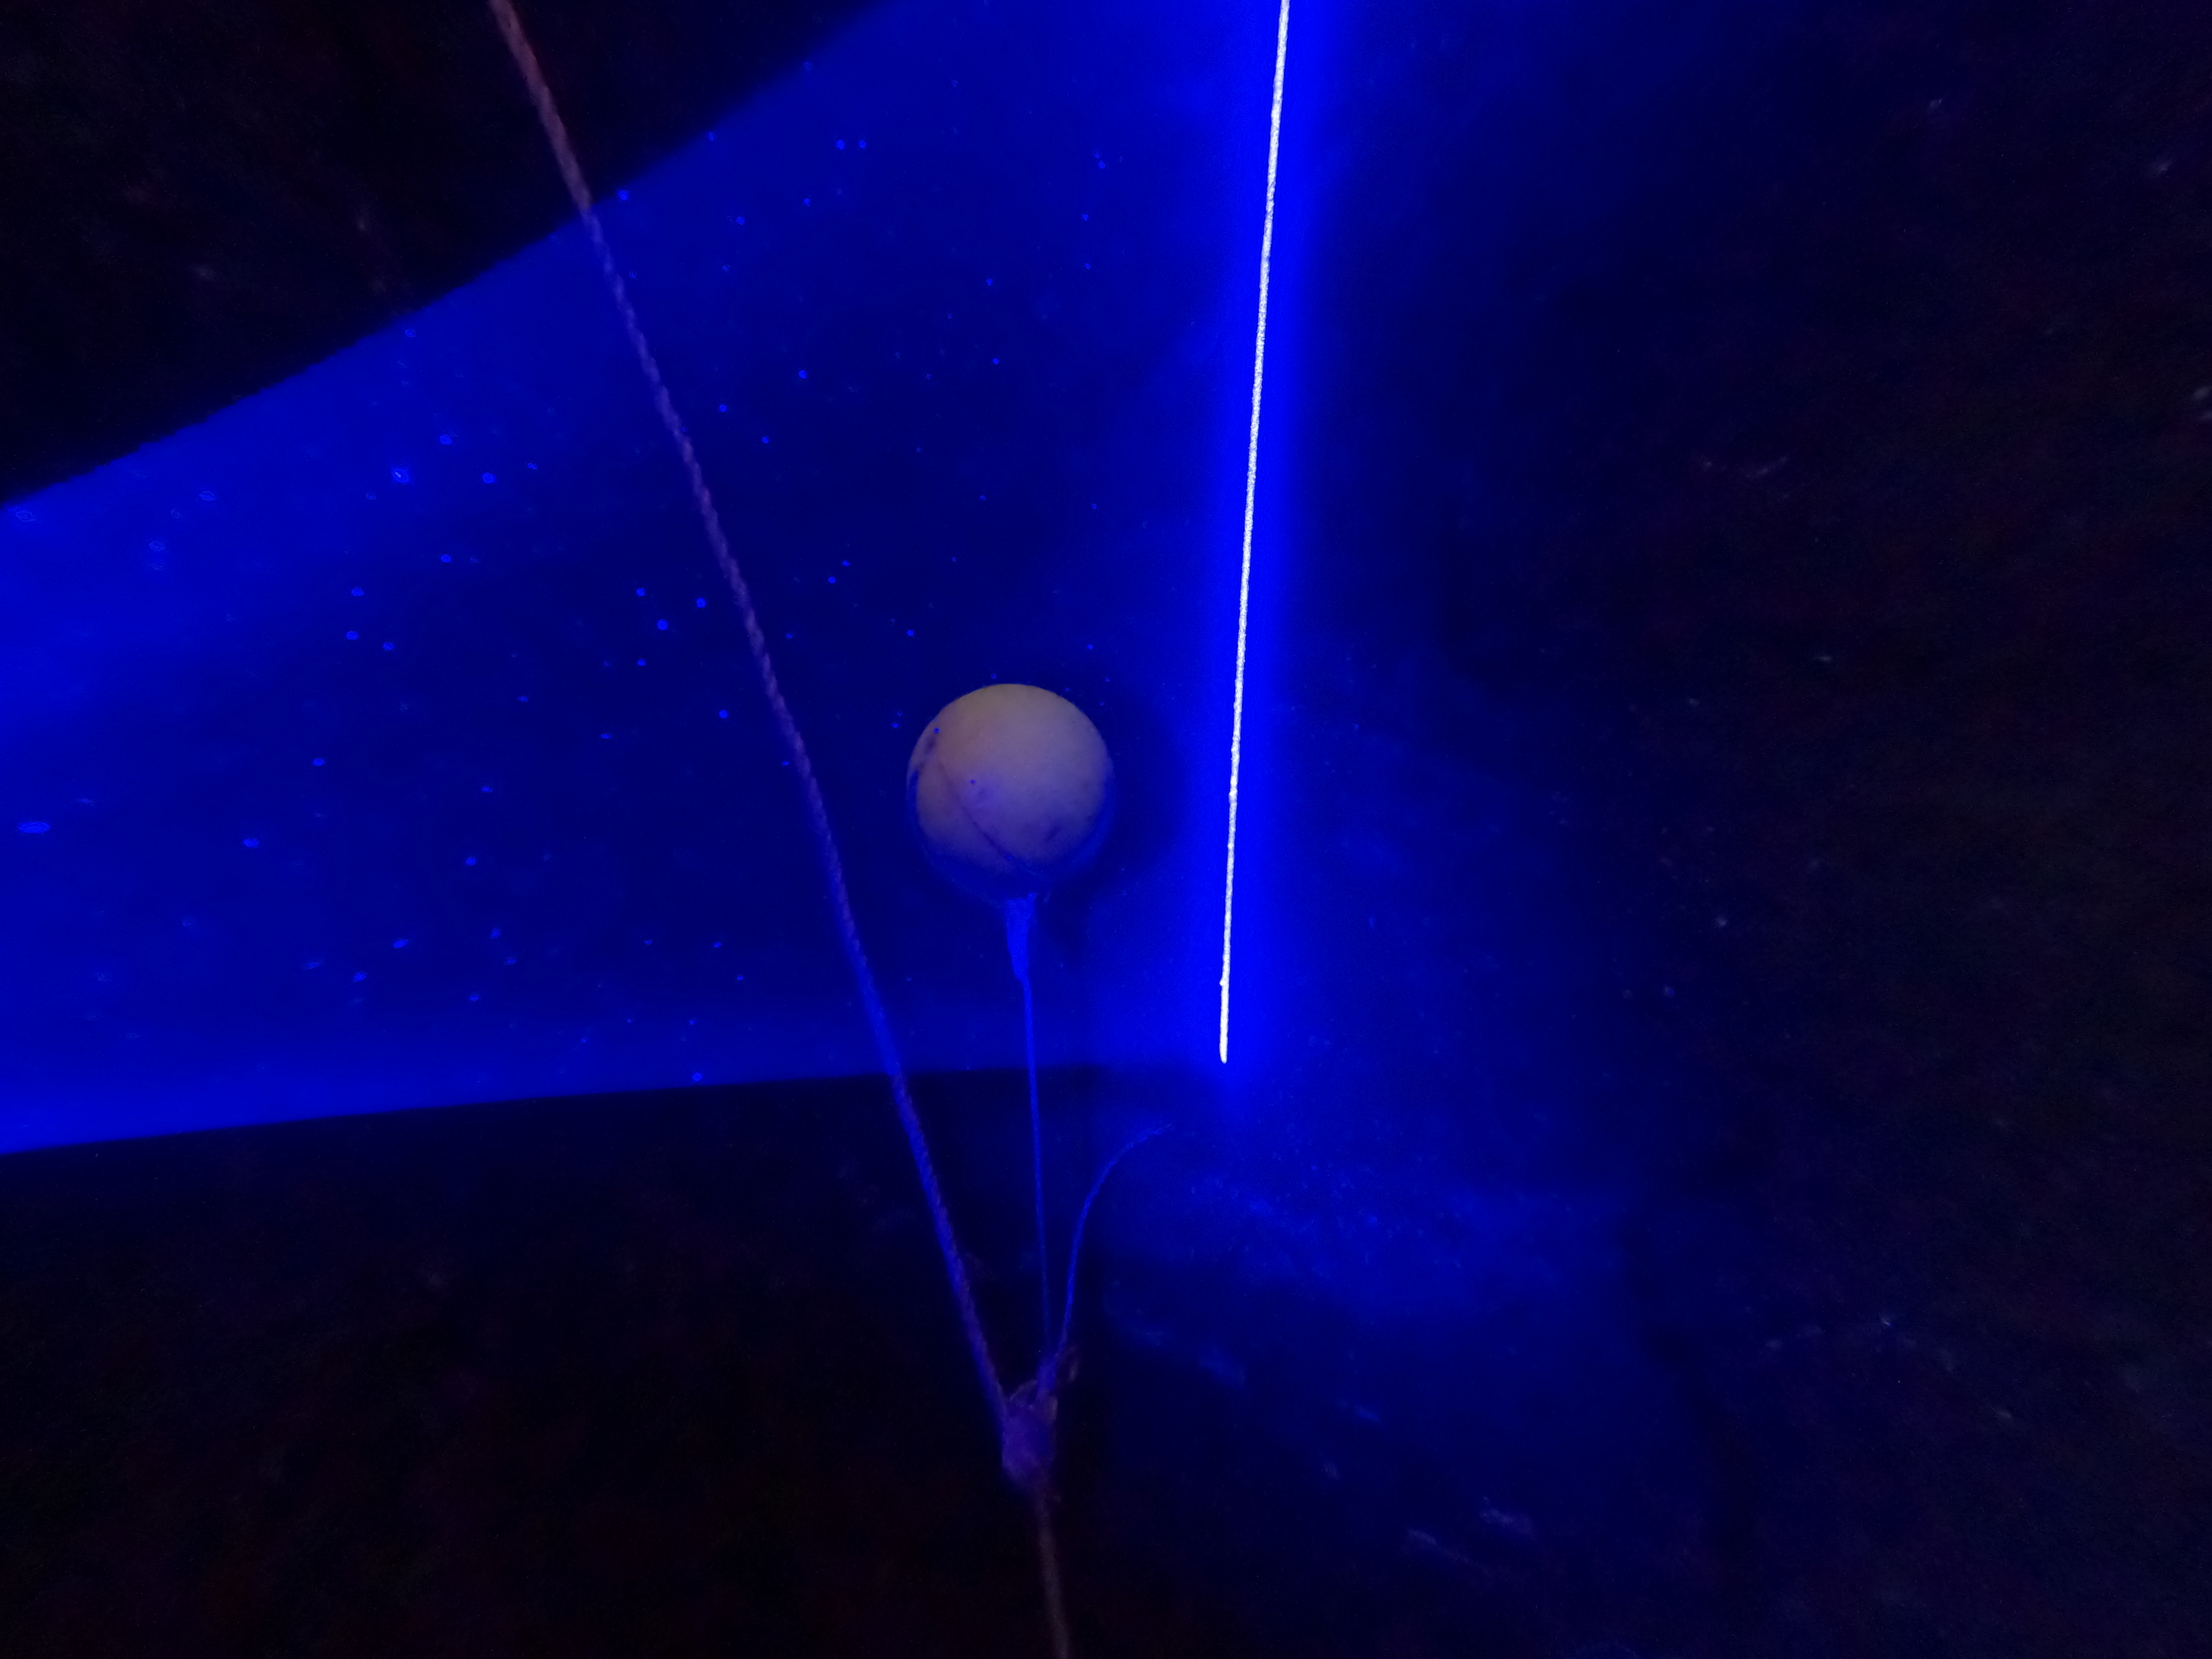

Supplement: Supplementary file 380 [file G0030680.pdf › 3/G0030680.pdf]

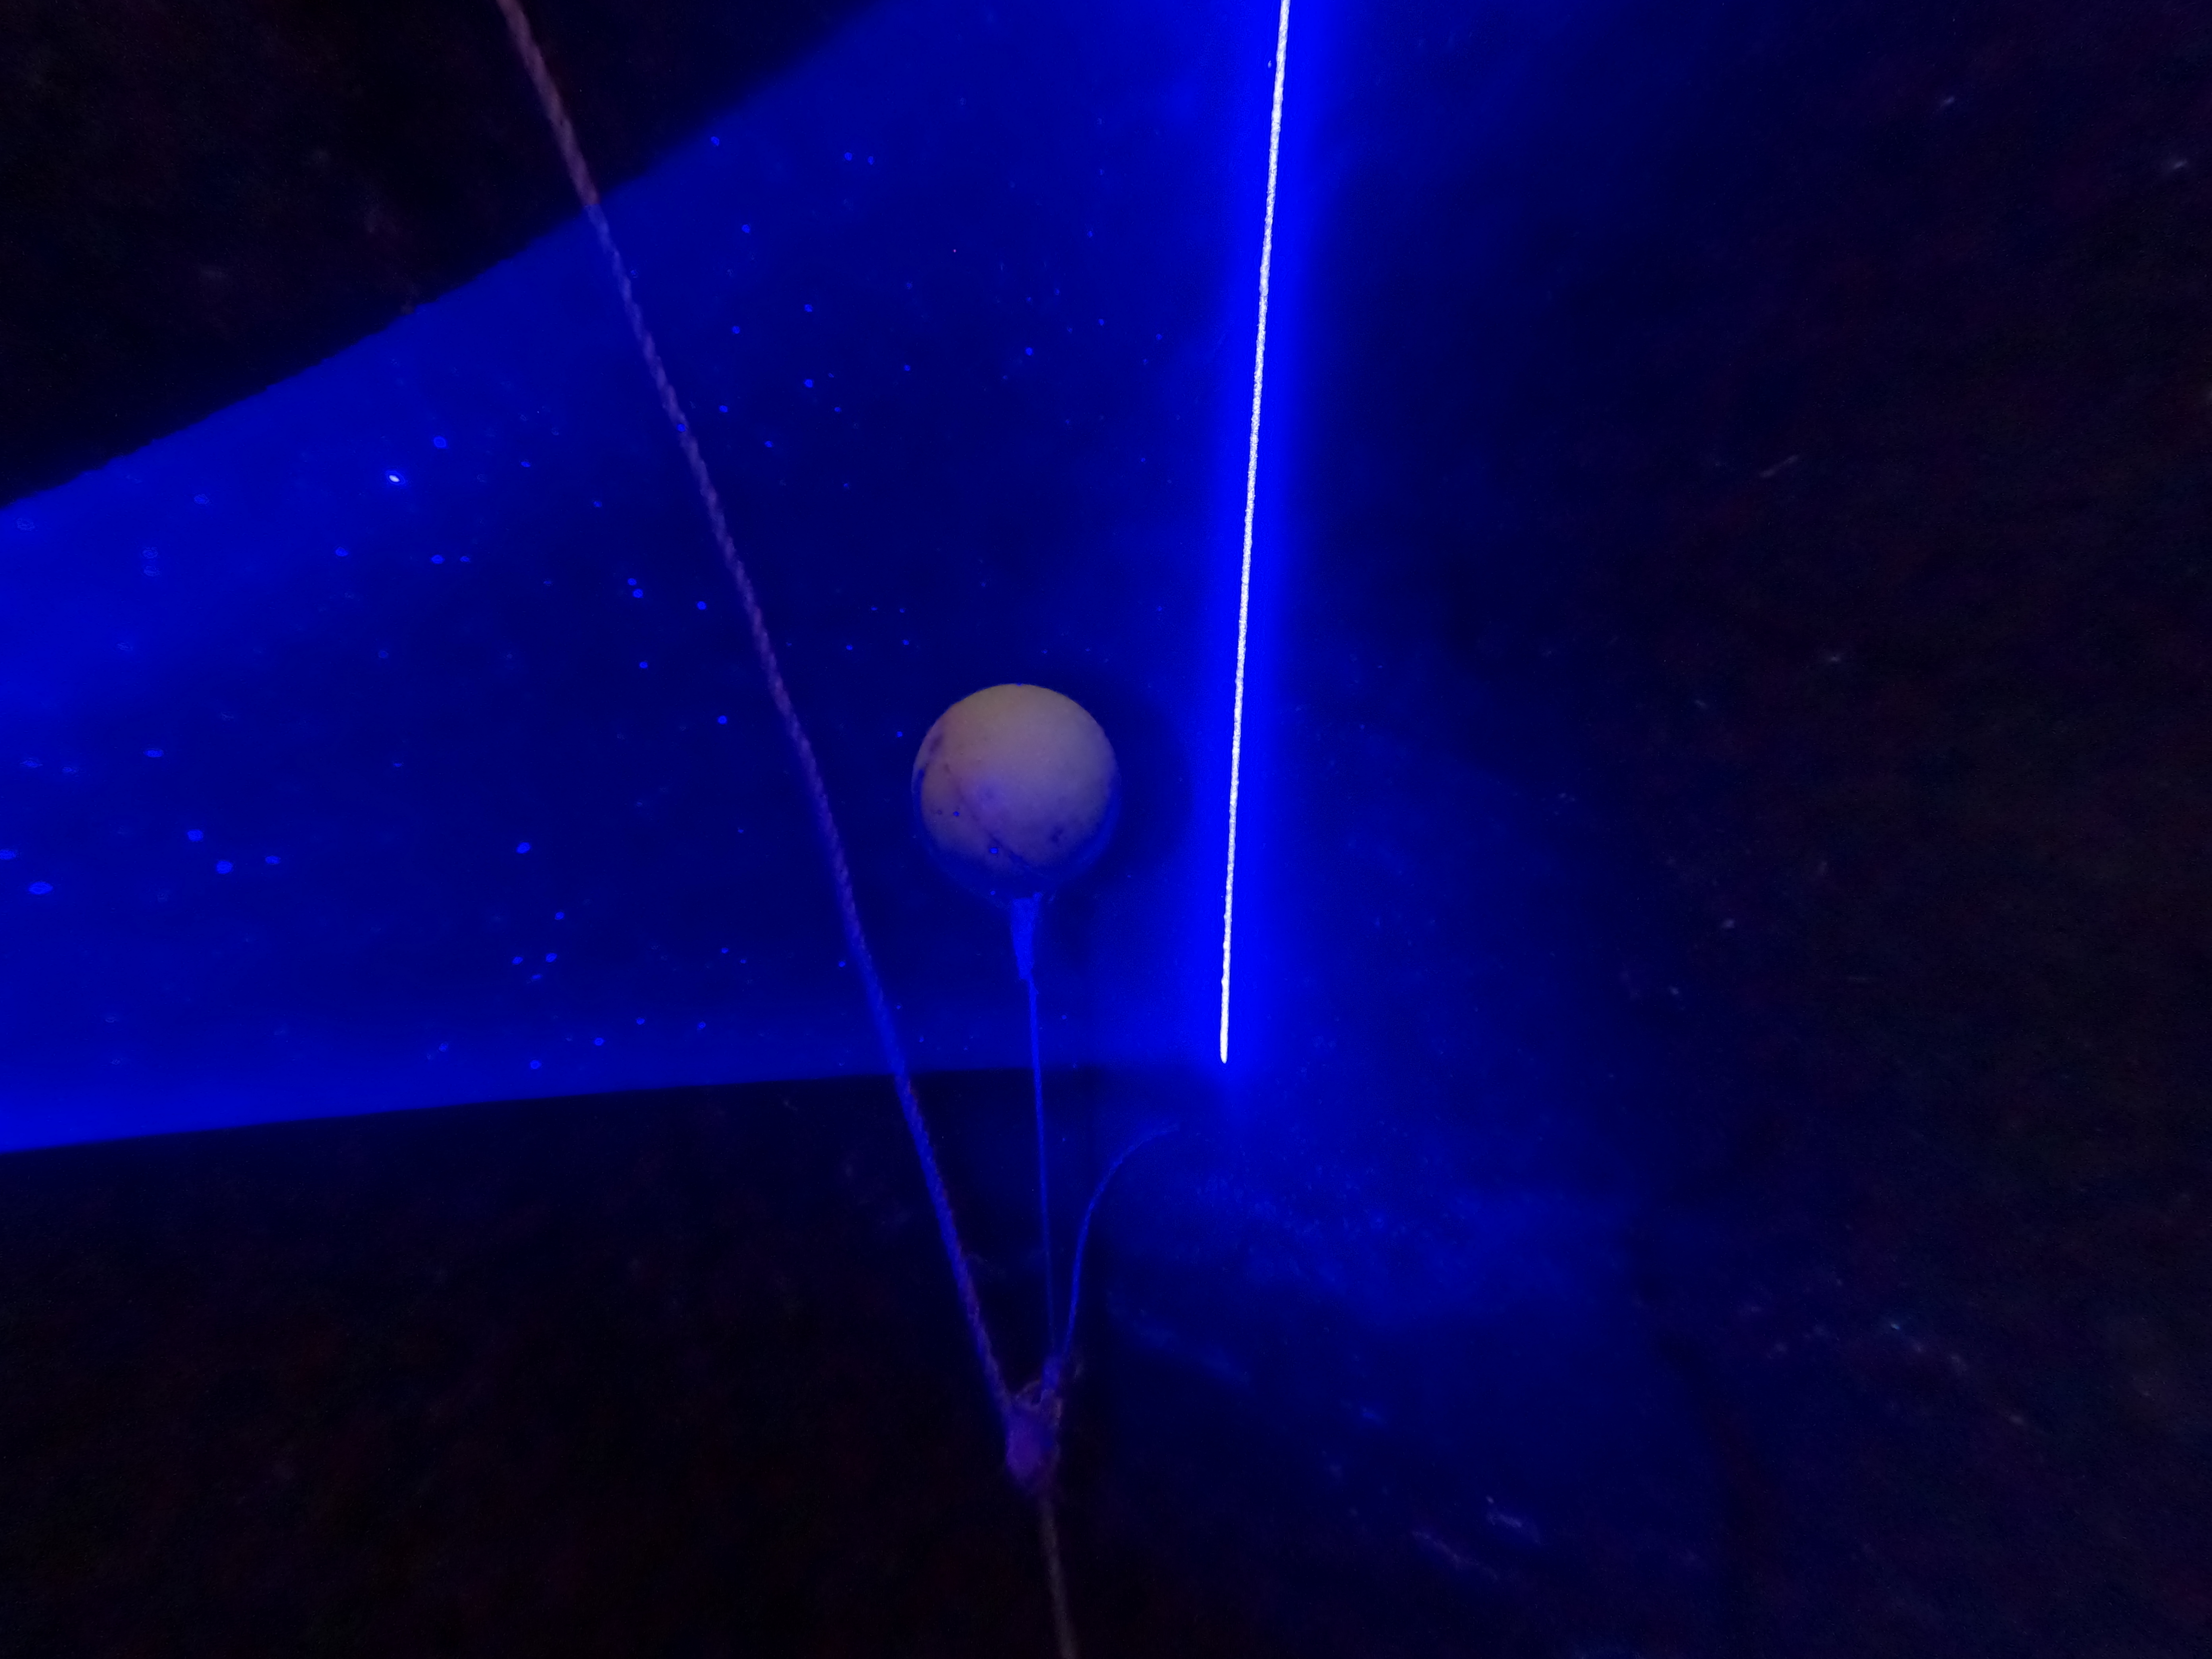

Supplement: Supplementary file 381 [file G0030681.pdf › 3/G0030681.pdf]

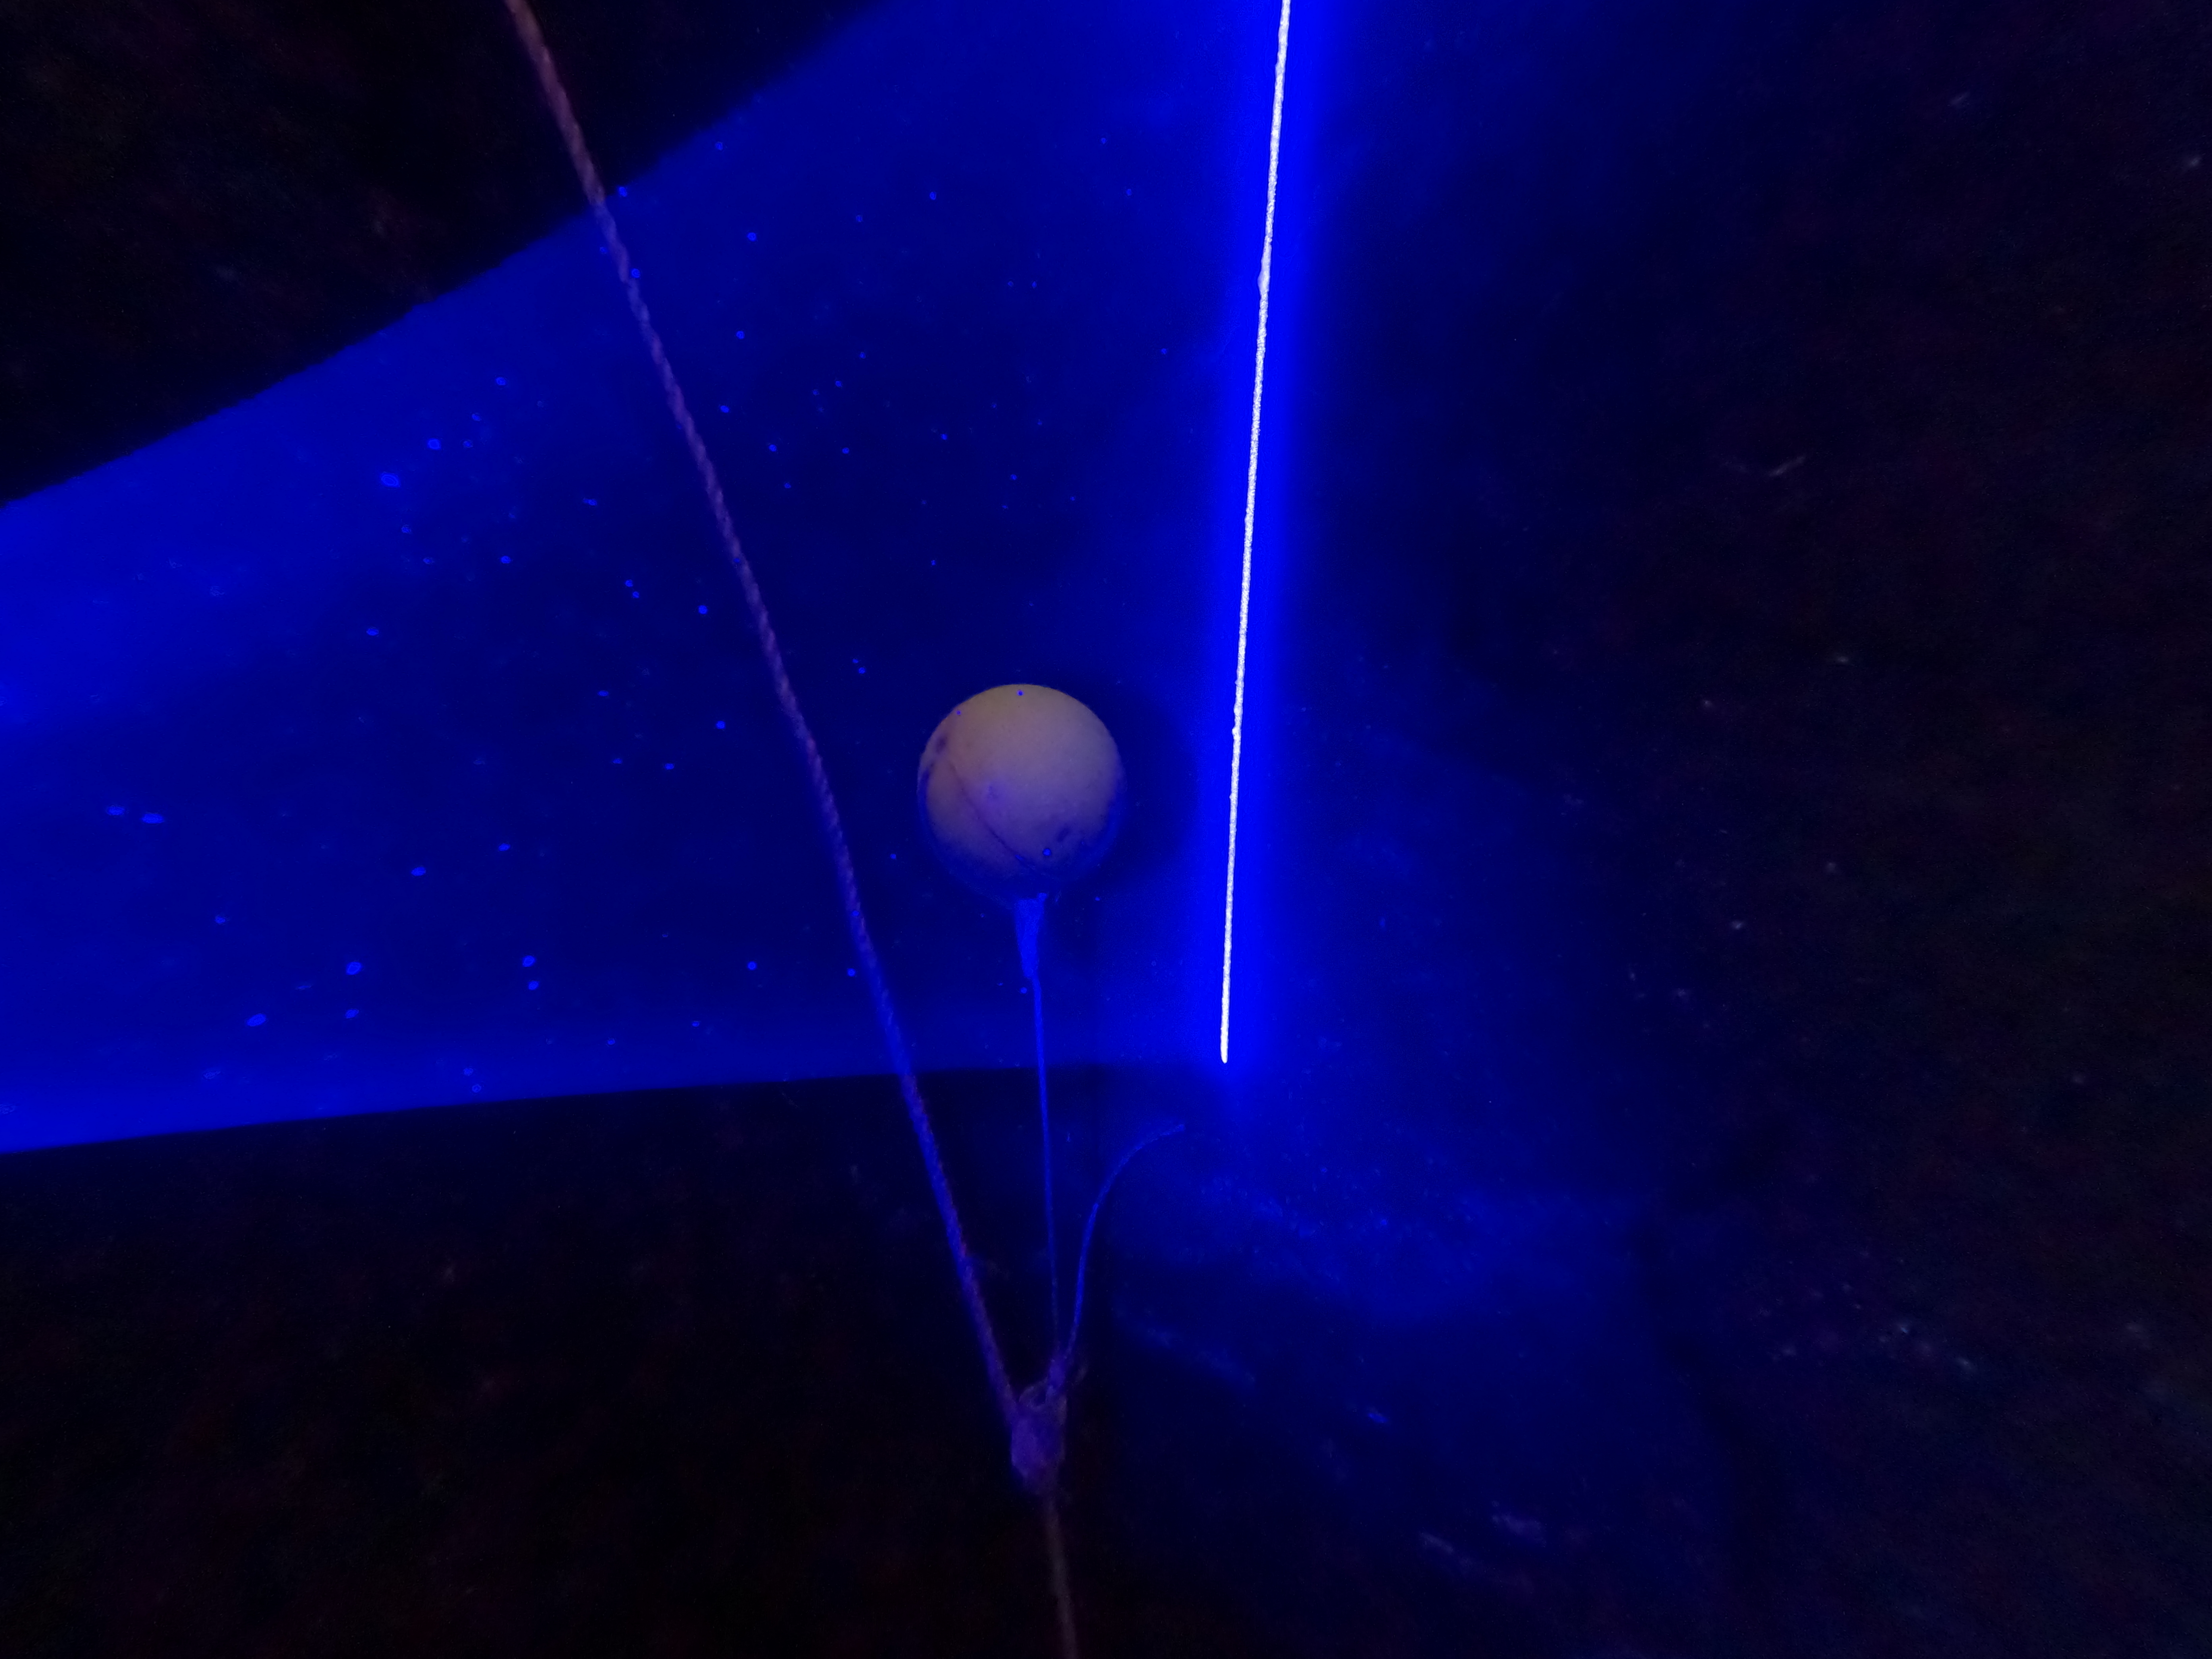

Supplement: Supplementary file 382 [file G0030682.pdf › 3/G0030682.pdf]

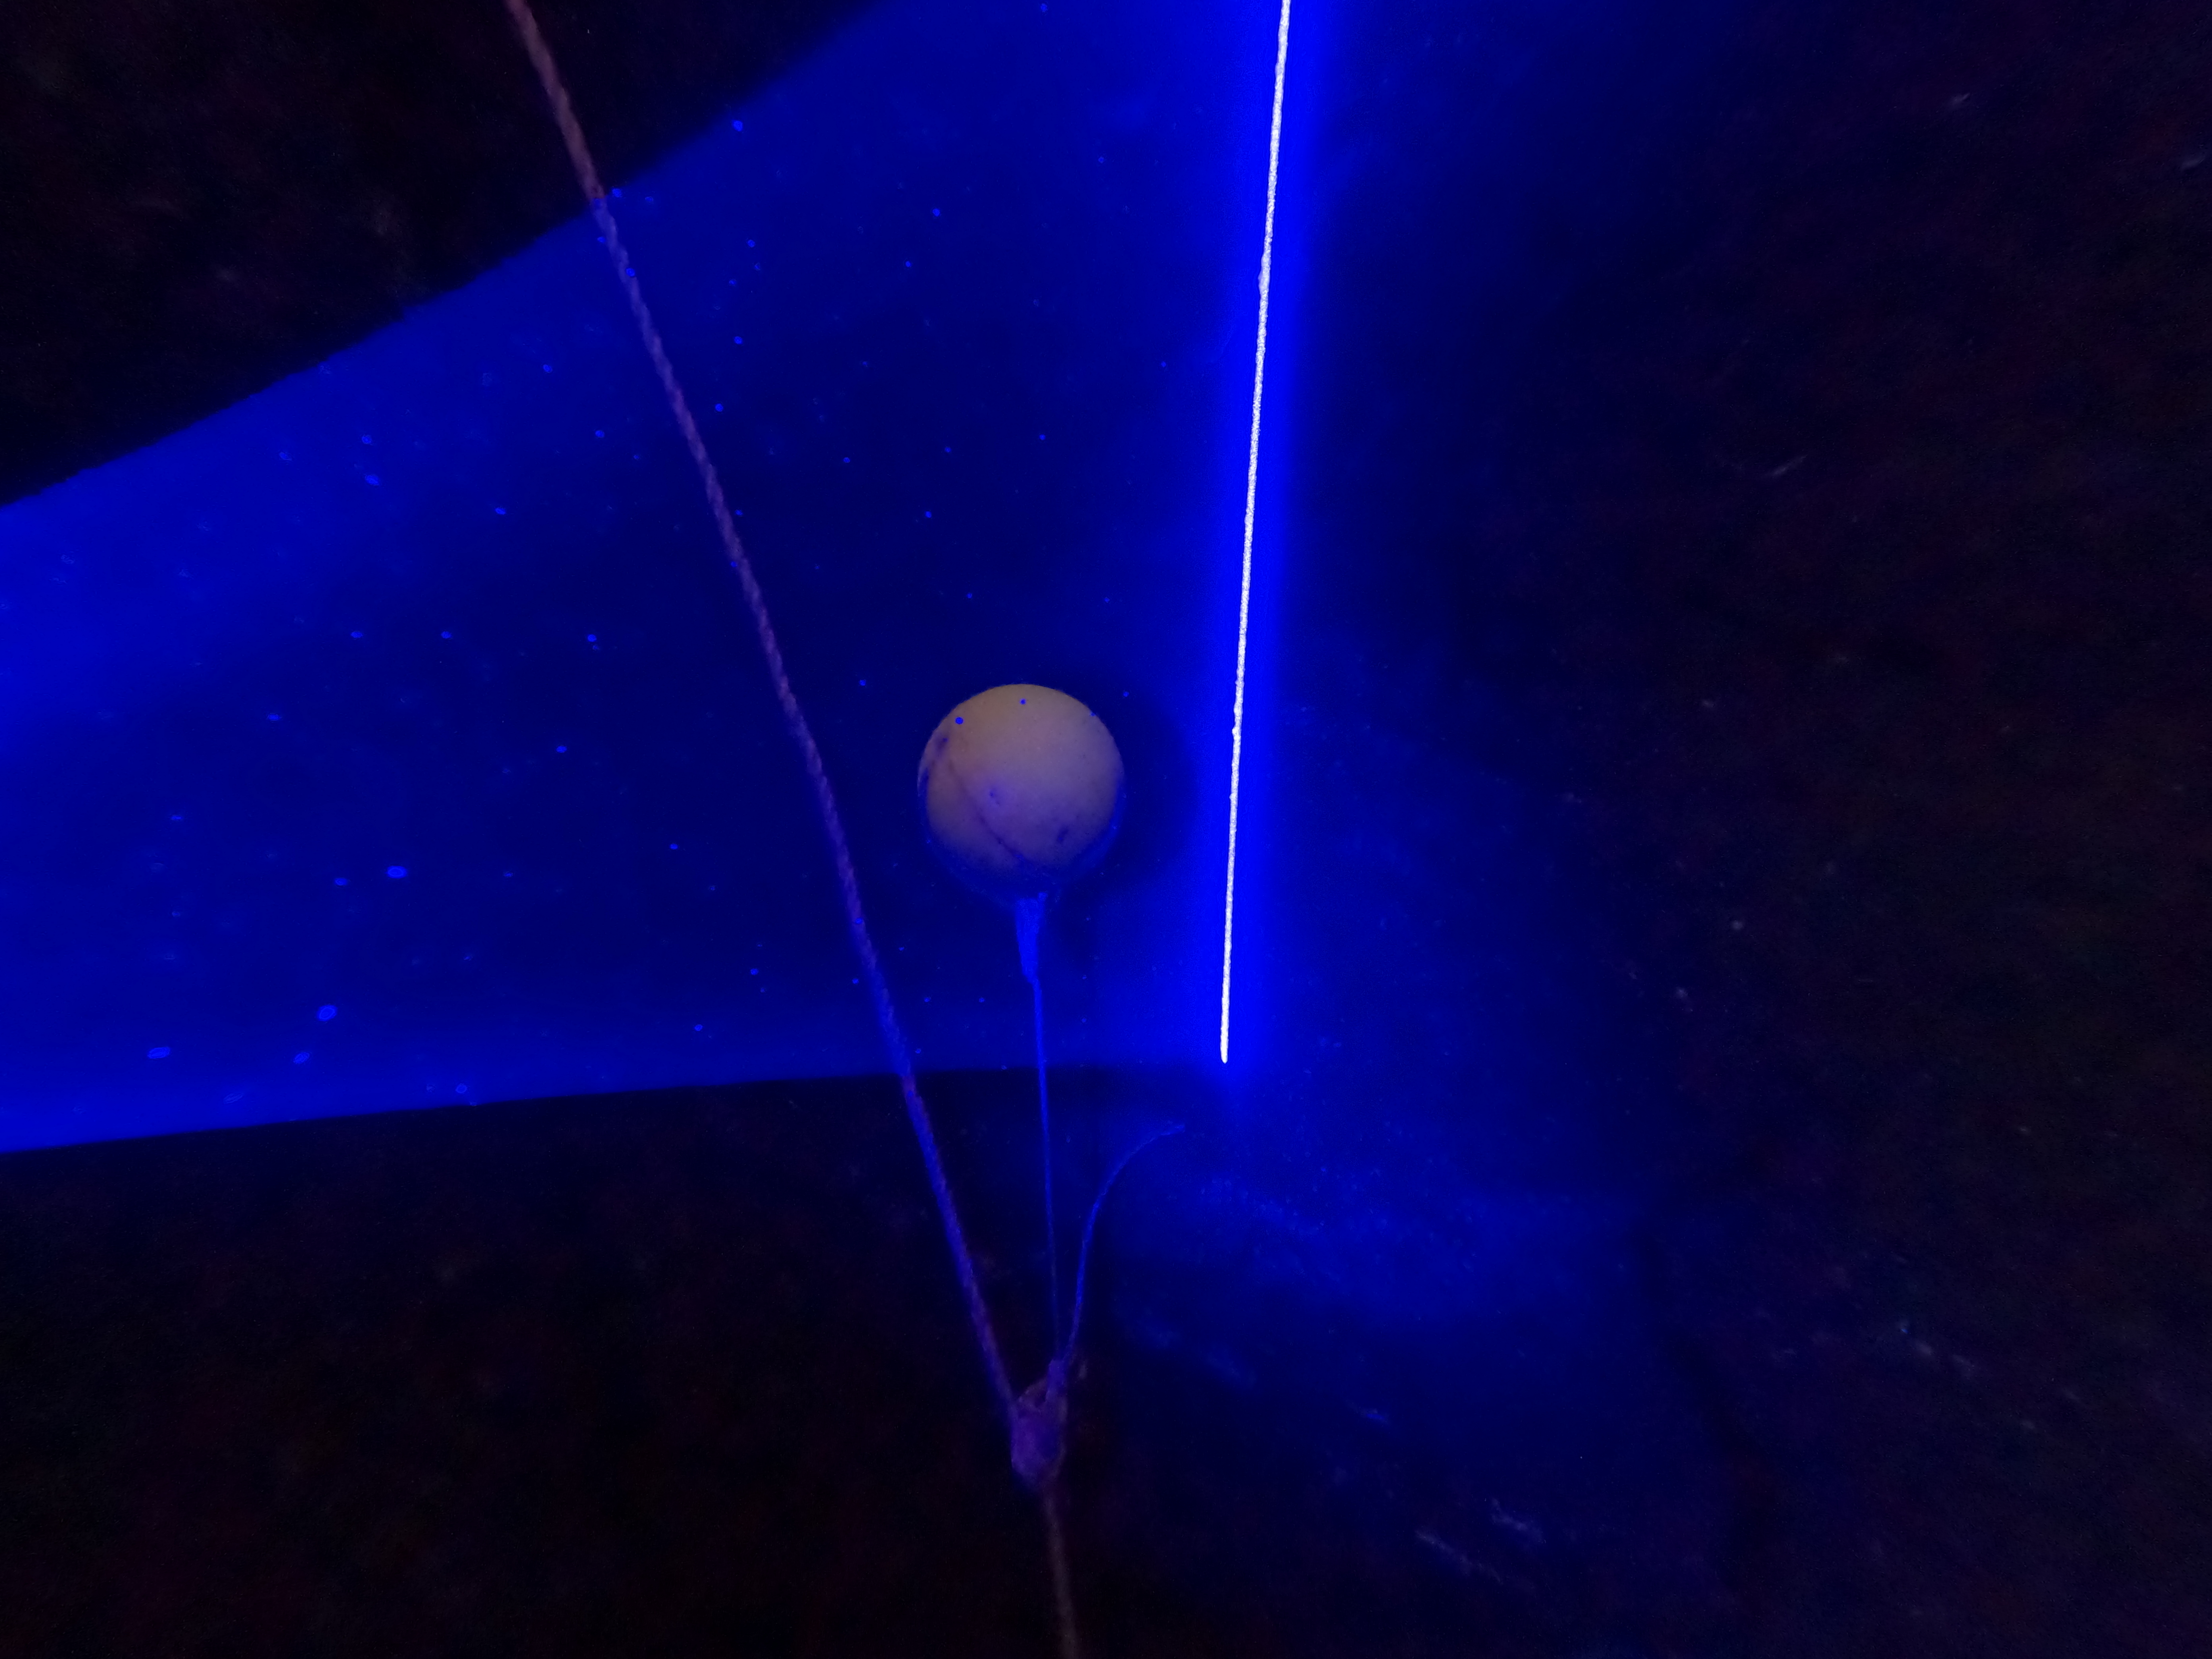

Supplement: Supplementary file 383 [file G0030683.pdf › 3/G0030683.pdf]

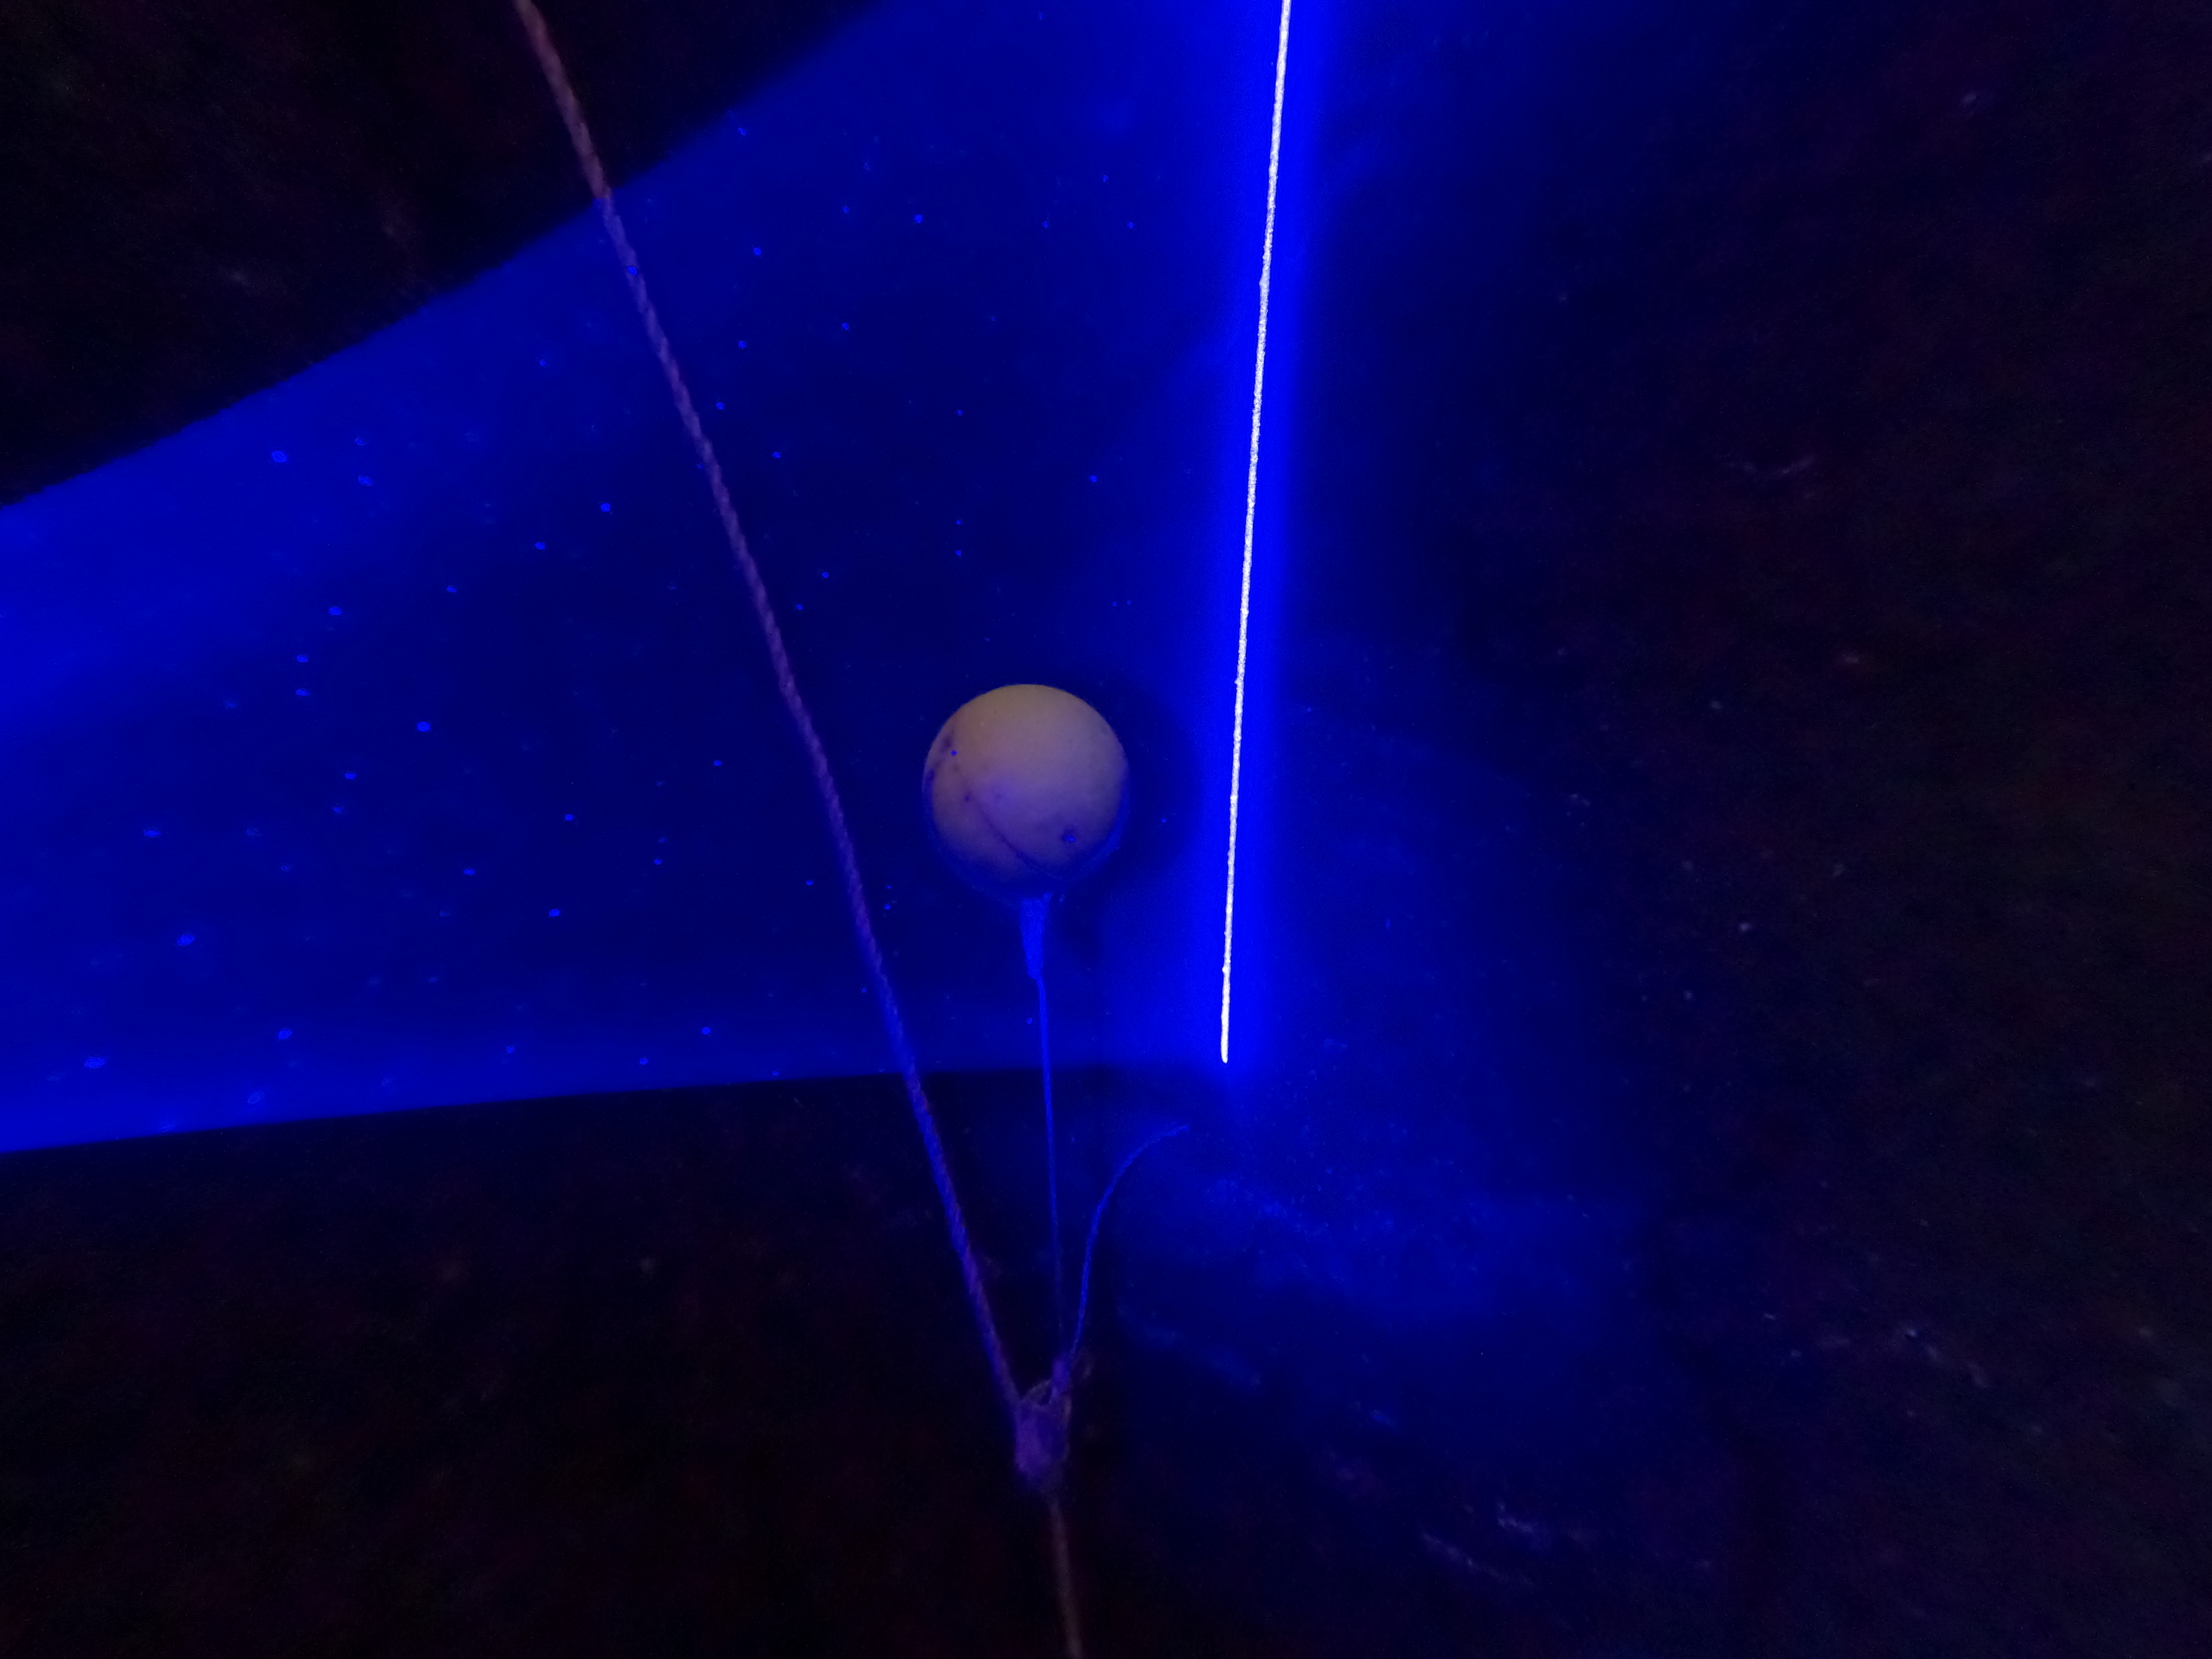

Supplement: Supplementary file 384 [file G0030684.pdf › 3/G0030684.pdf]

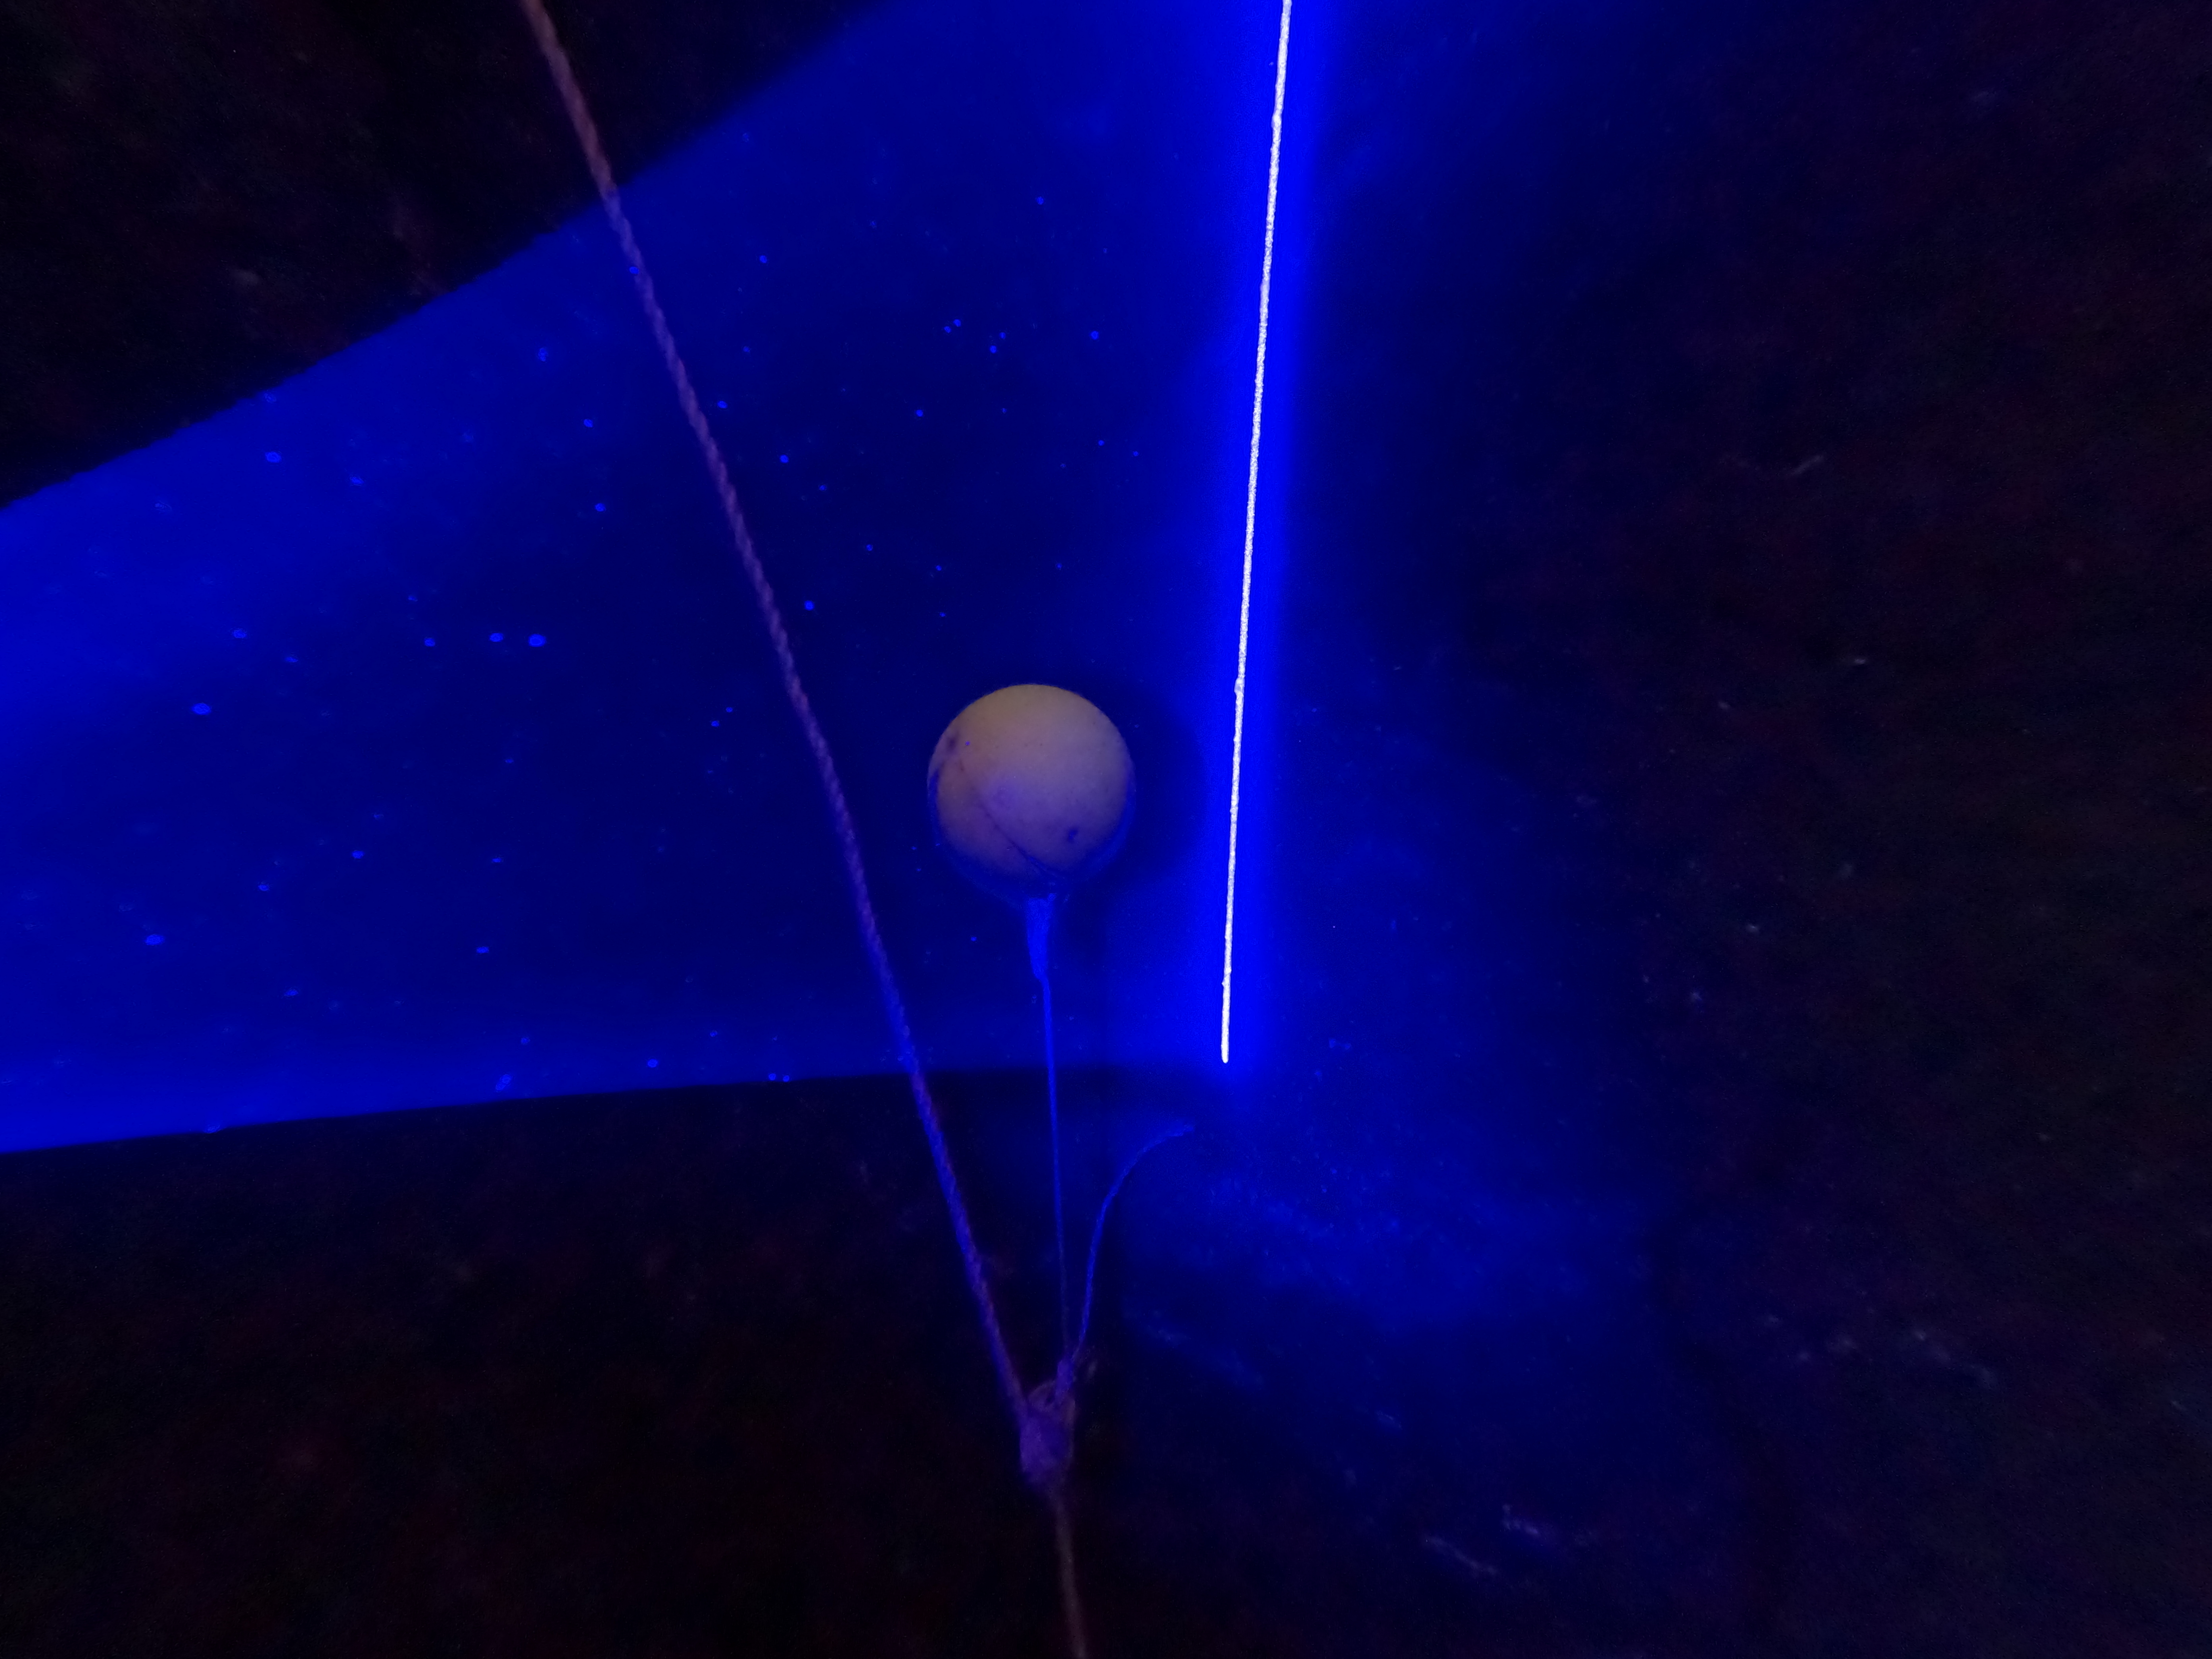

Supplement: Supplementary file 385 [file G0030685.pdf › 3/G0030685.pdf]

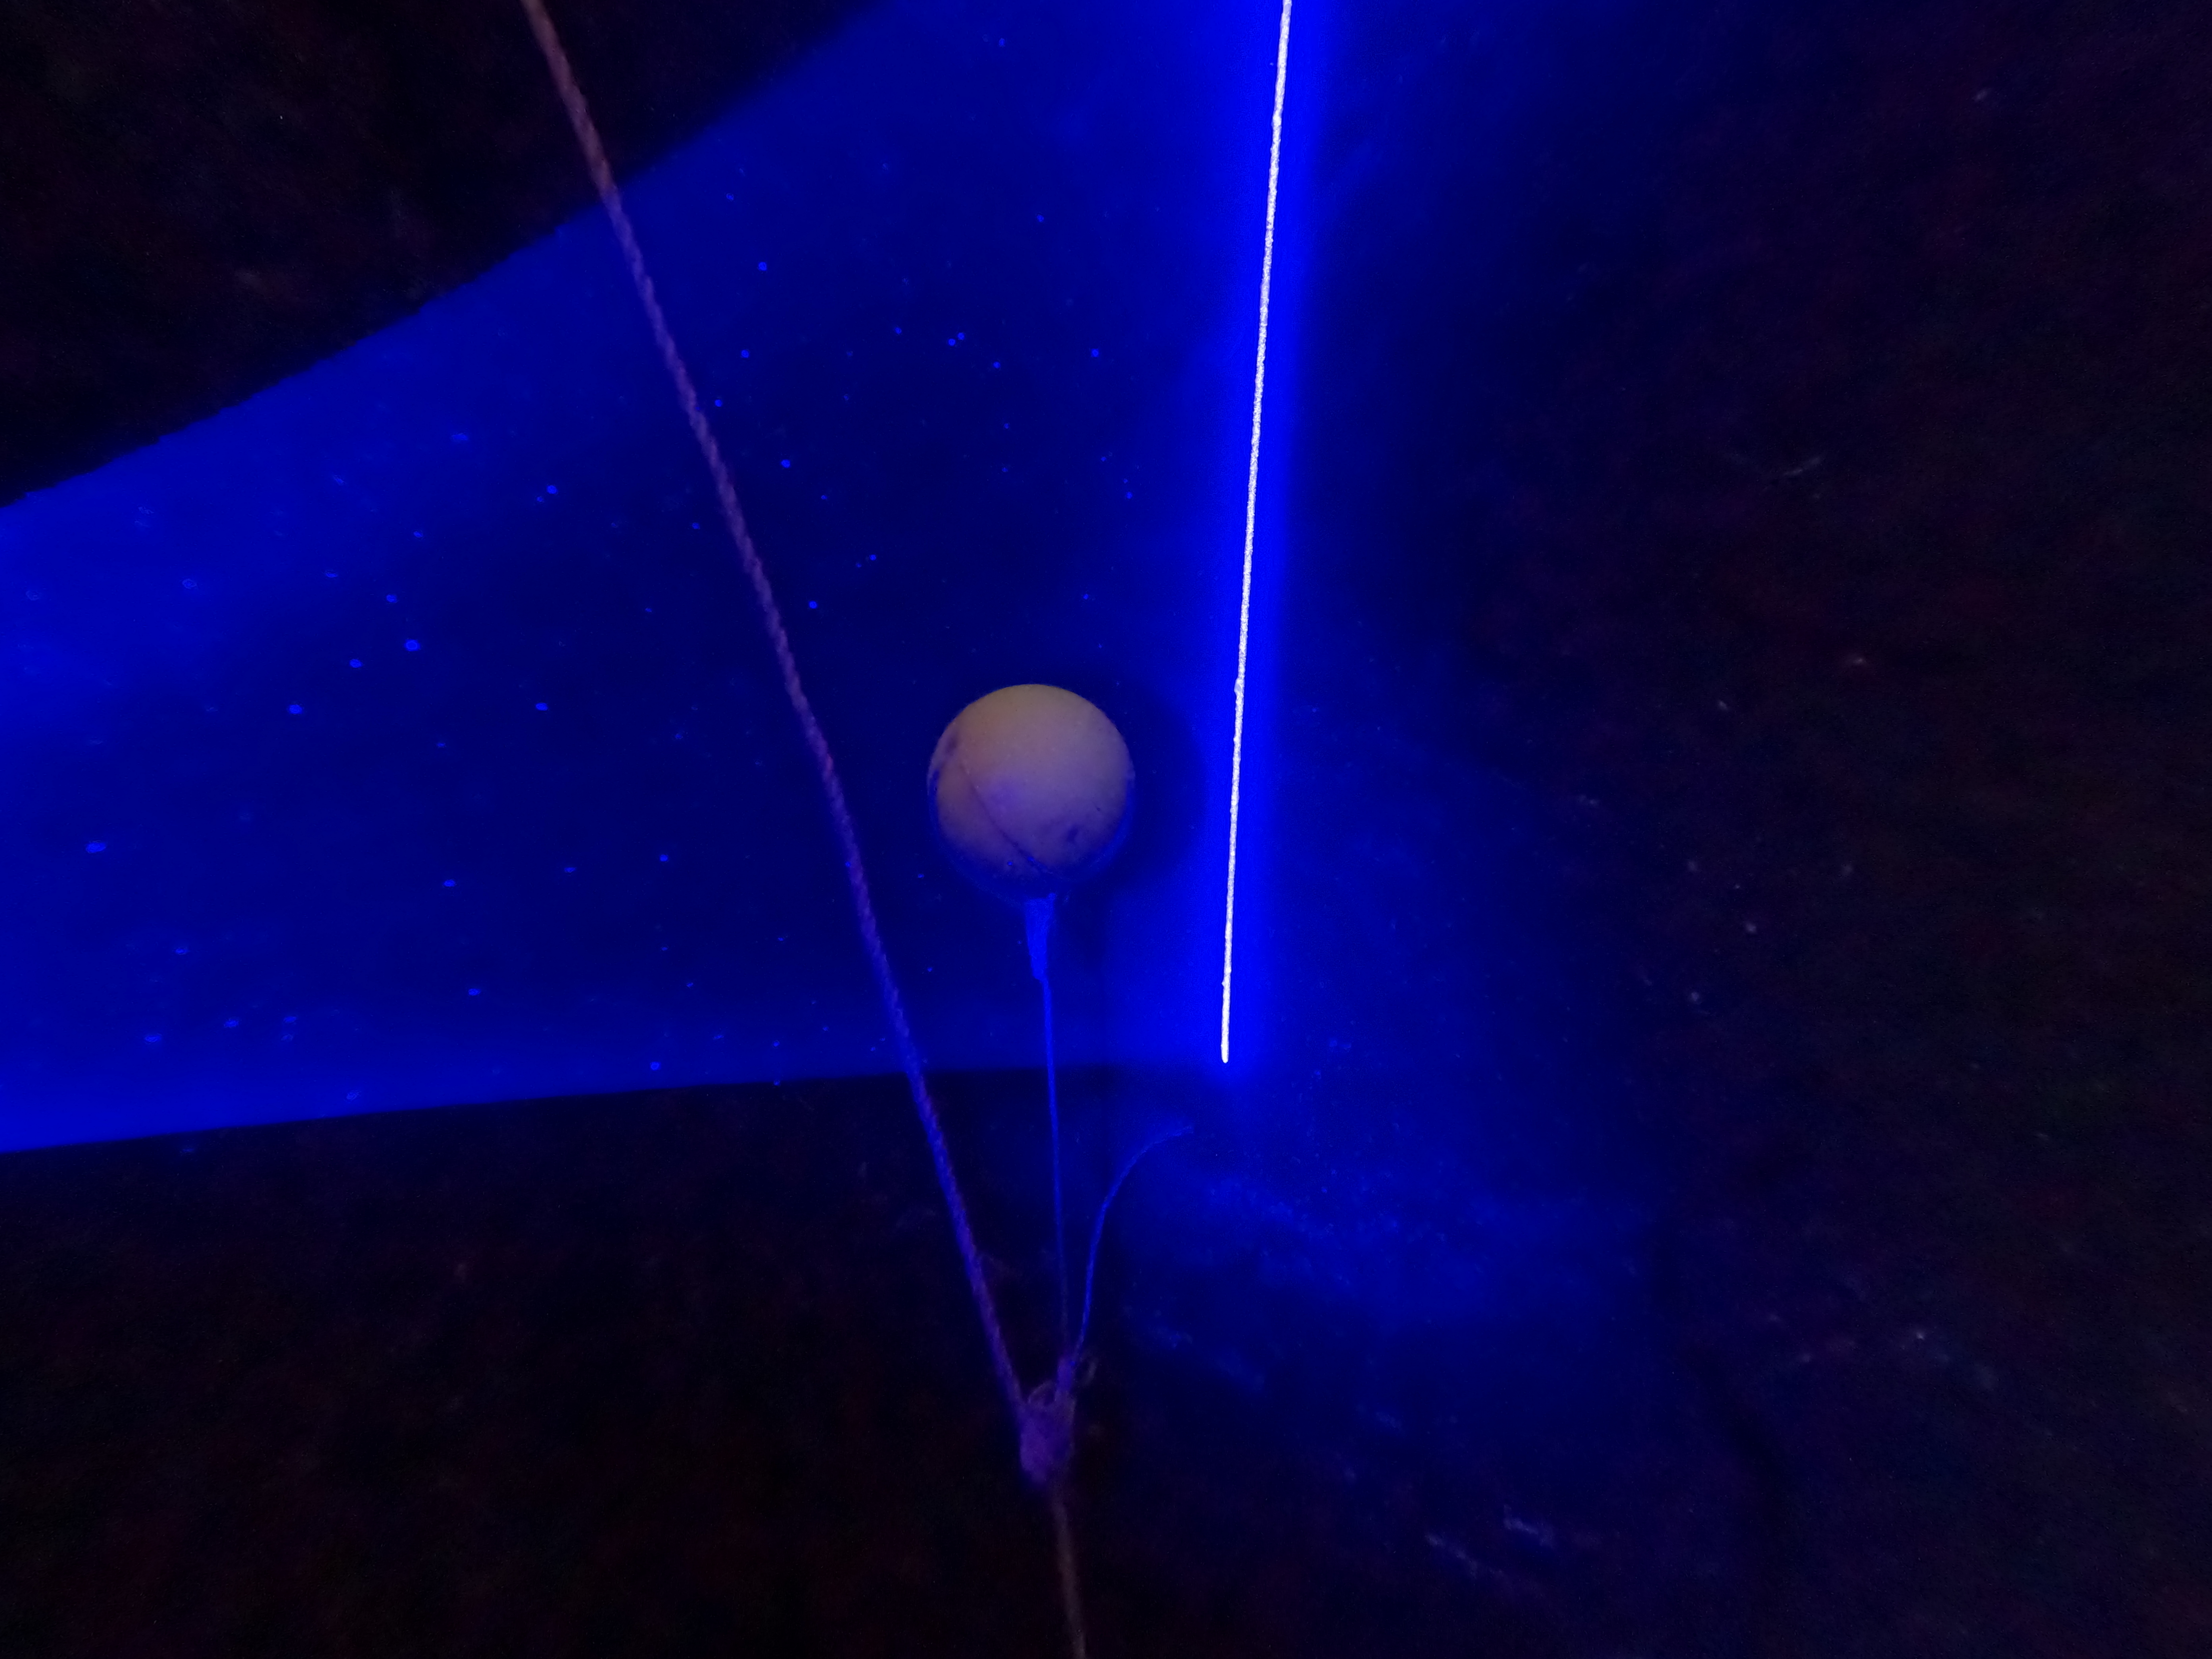

Supplement: Supplementary file 386 [file G0030686.pdf › 3/G0030686.pdf]

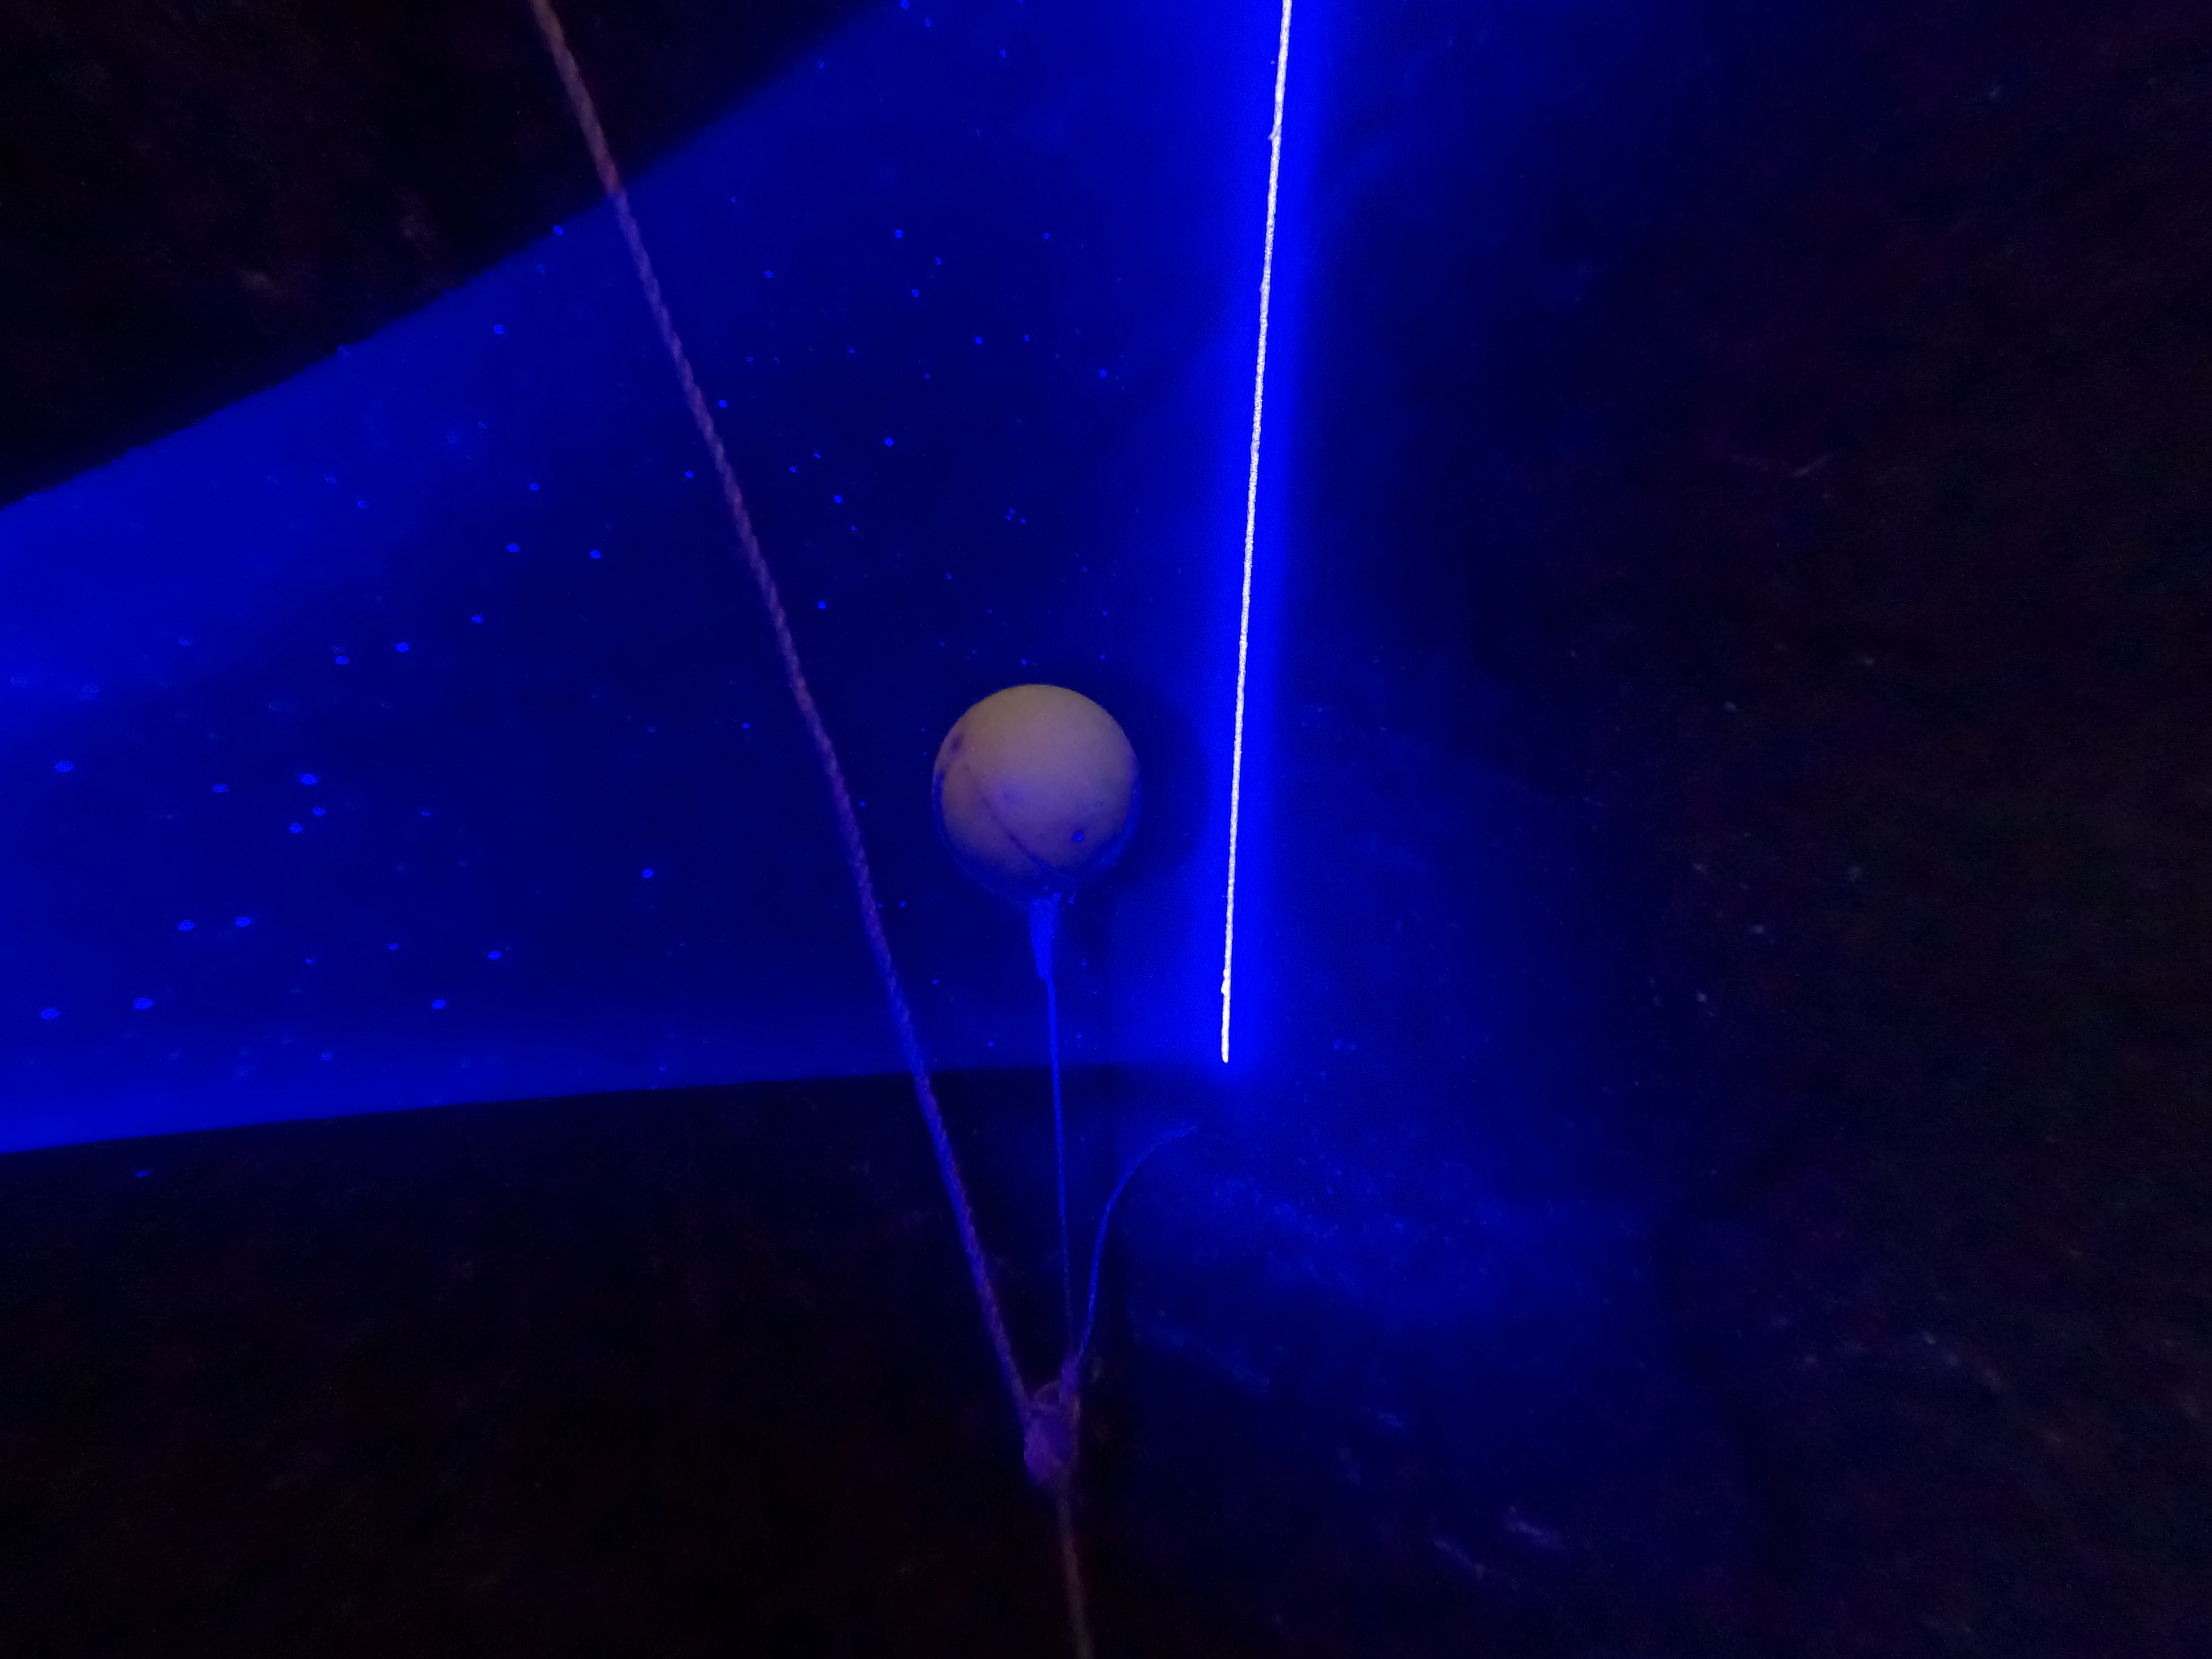

Supplement: Supplementary file 387 [file G0030687.pdf › 3/G0030687.pdf]

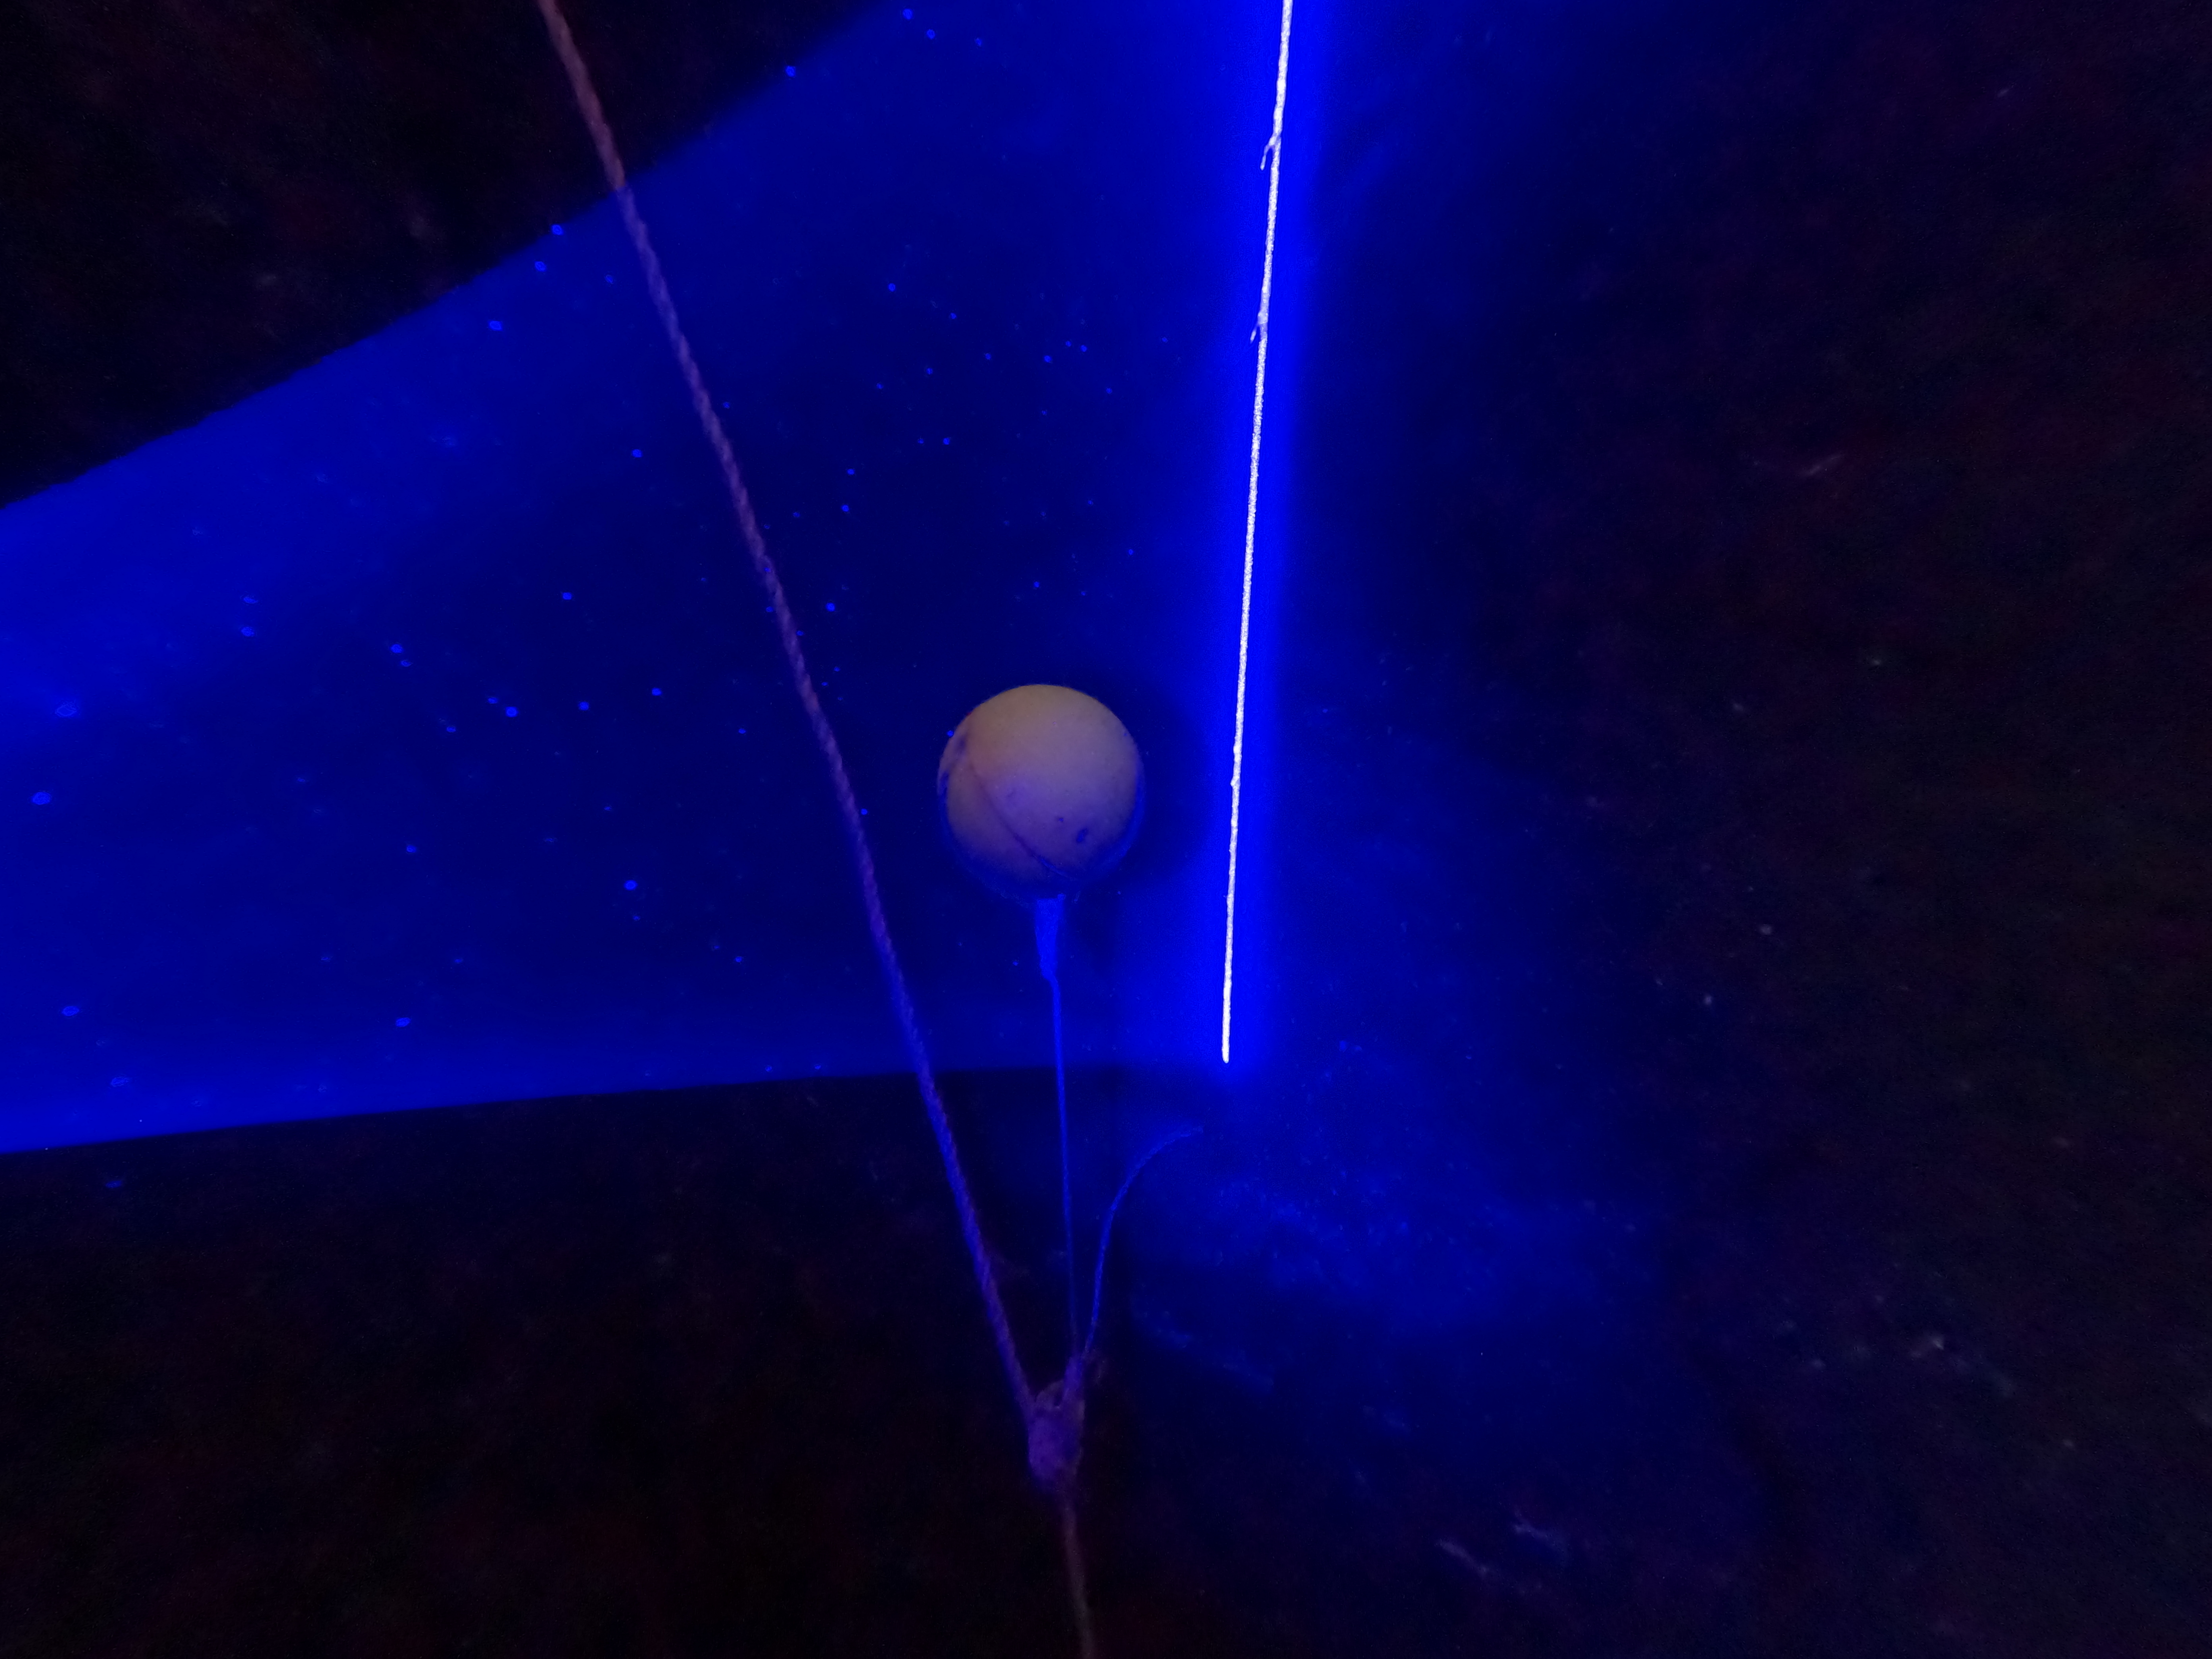

Supplement: Supplementary file 388 [file G0030688.pdf › 3/G0030688.pdf]

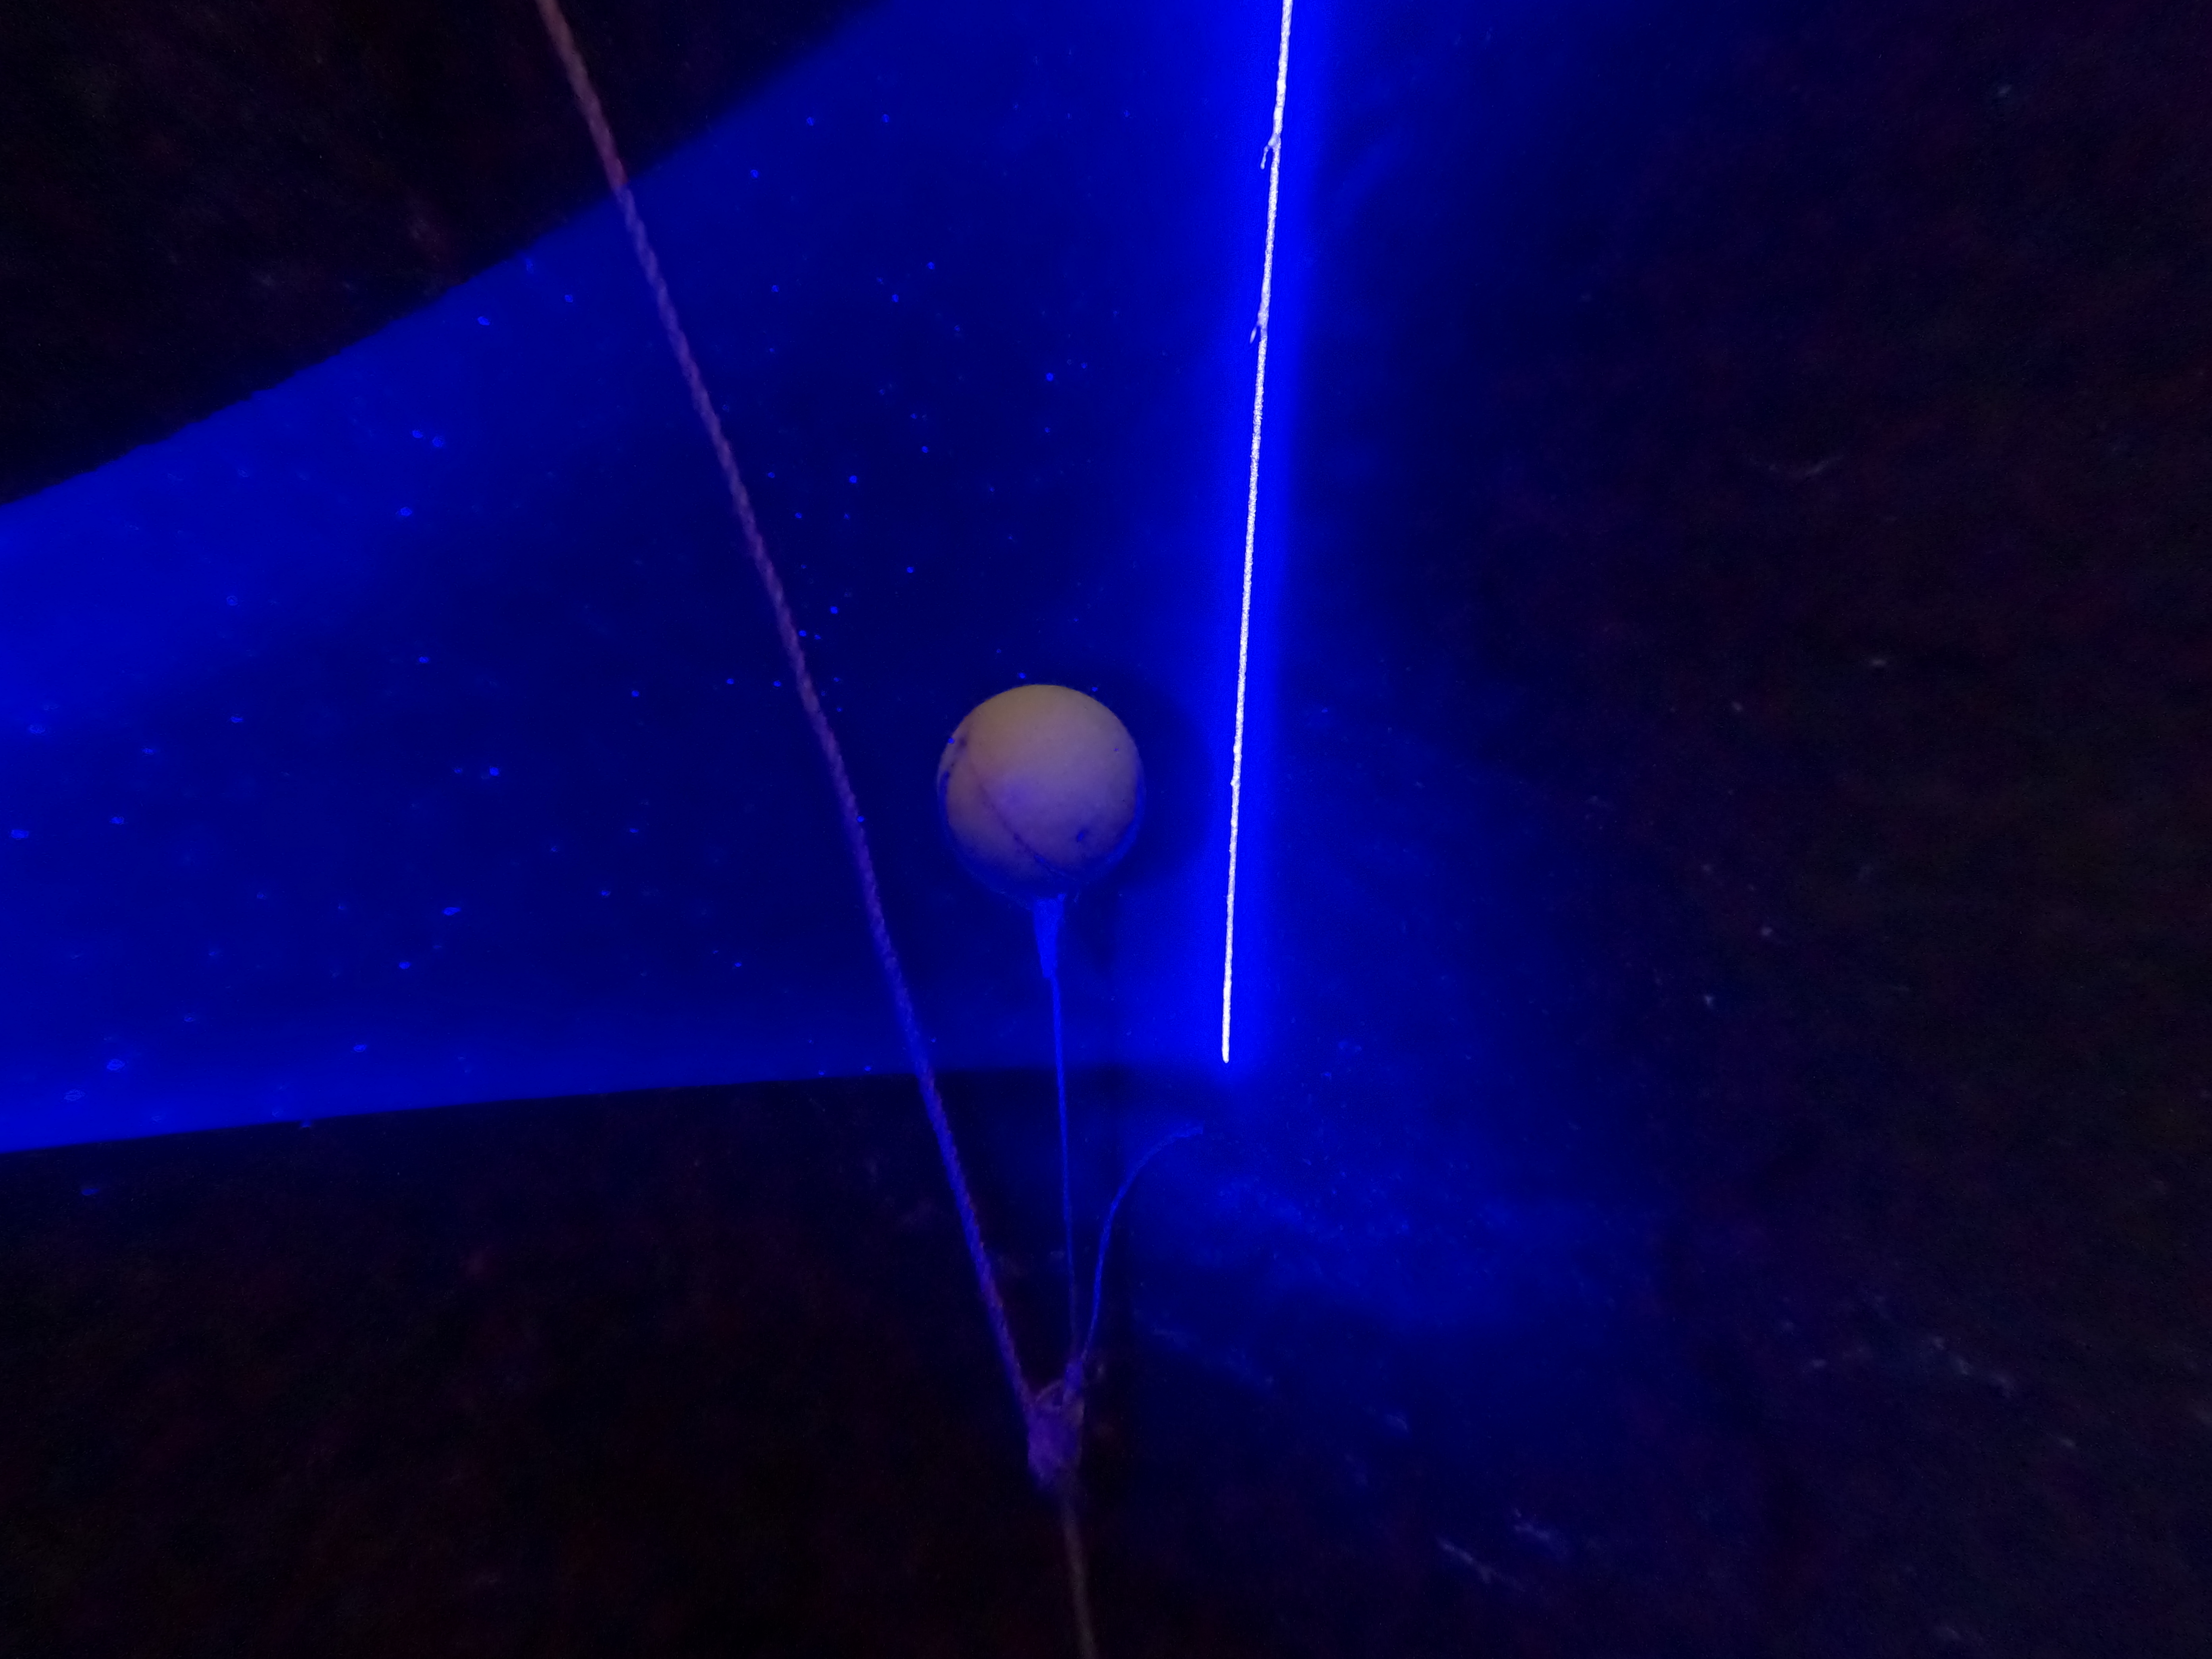

Supplement: Supplementary file 389 [file G0030689.pdf › 3/G0030689.pdf]

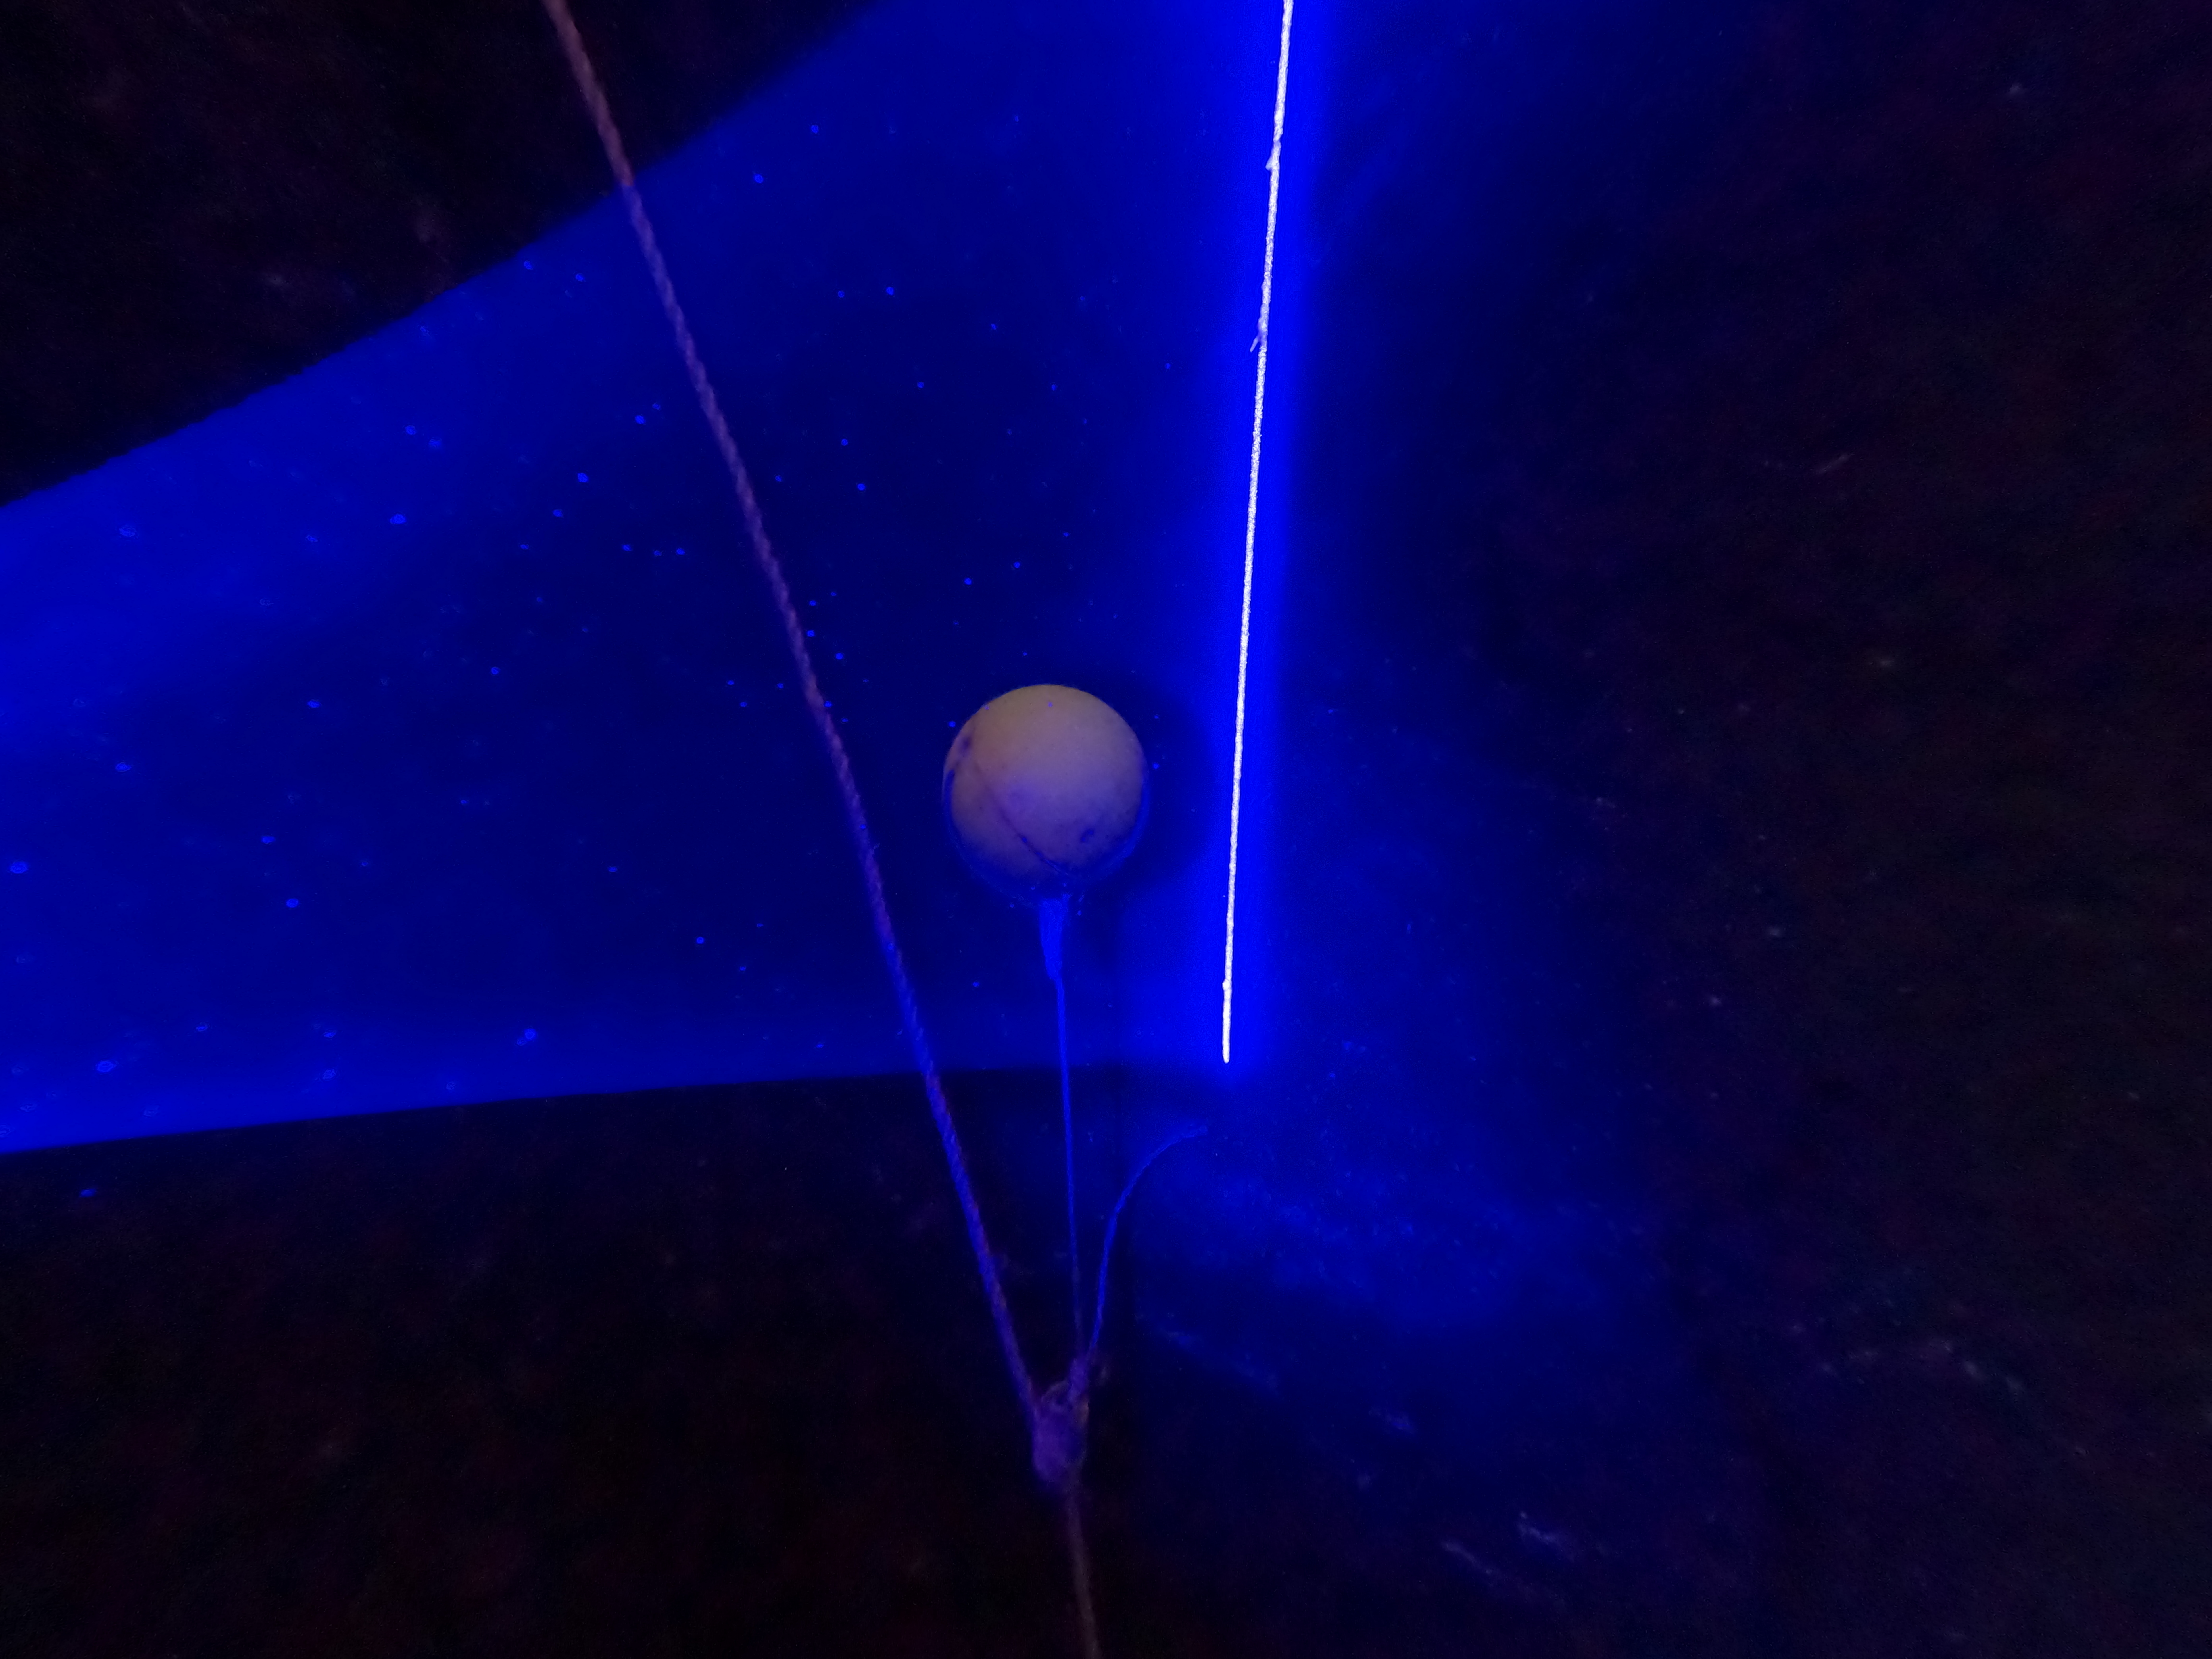

Supplement: Supplementary file 390 [file G0030690.pdf › 3/G0030690.pdf]

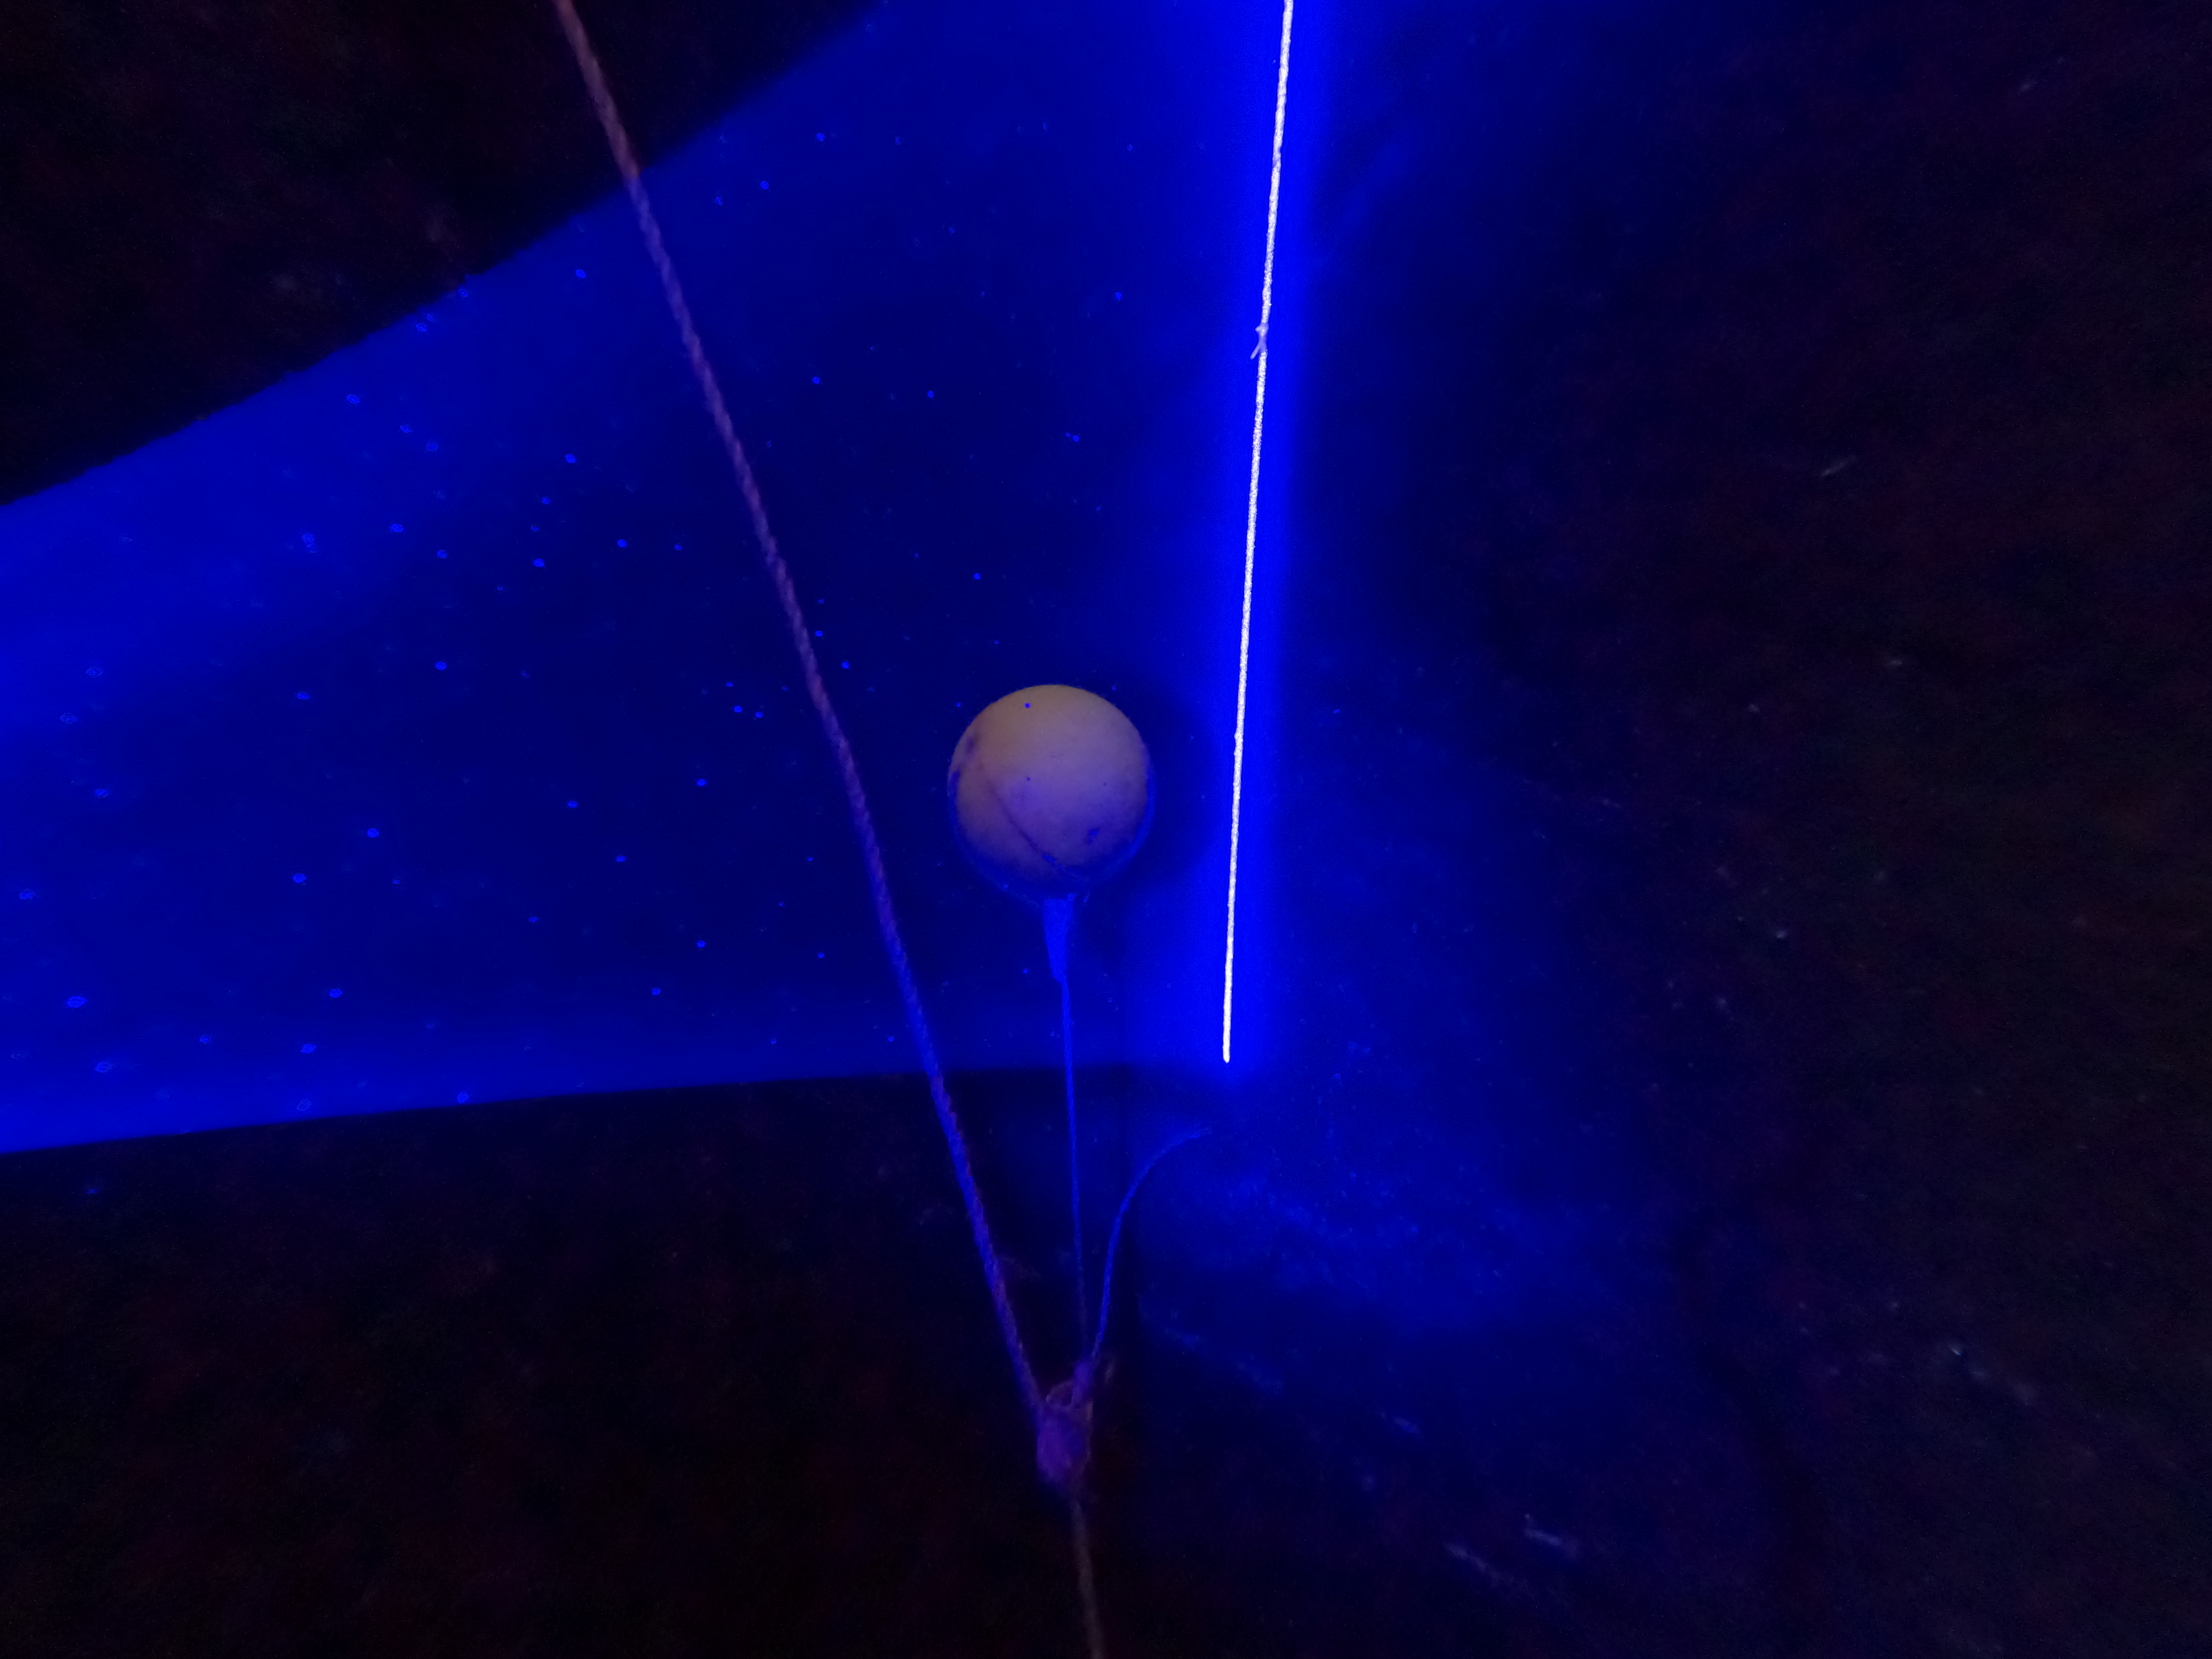

Supplement: Supplementary file 391 [file G0030691.pdf › 3/G0030691.pdf]

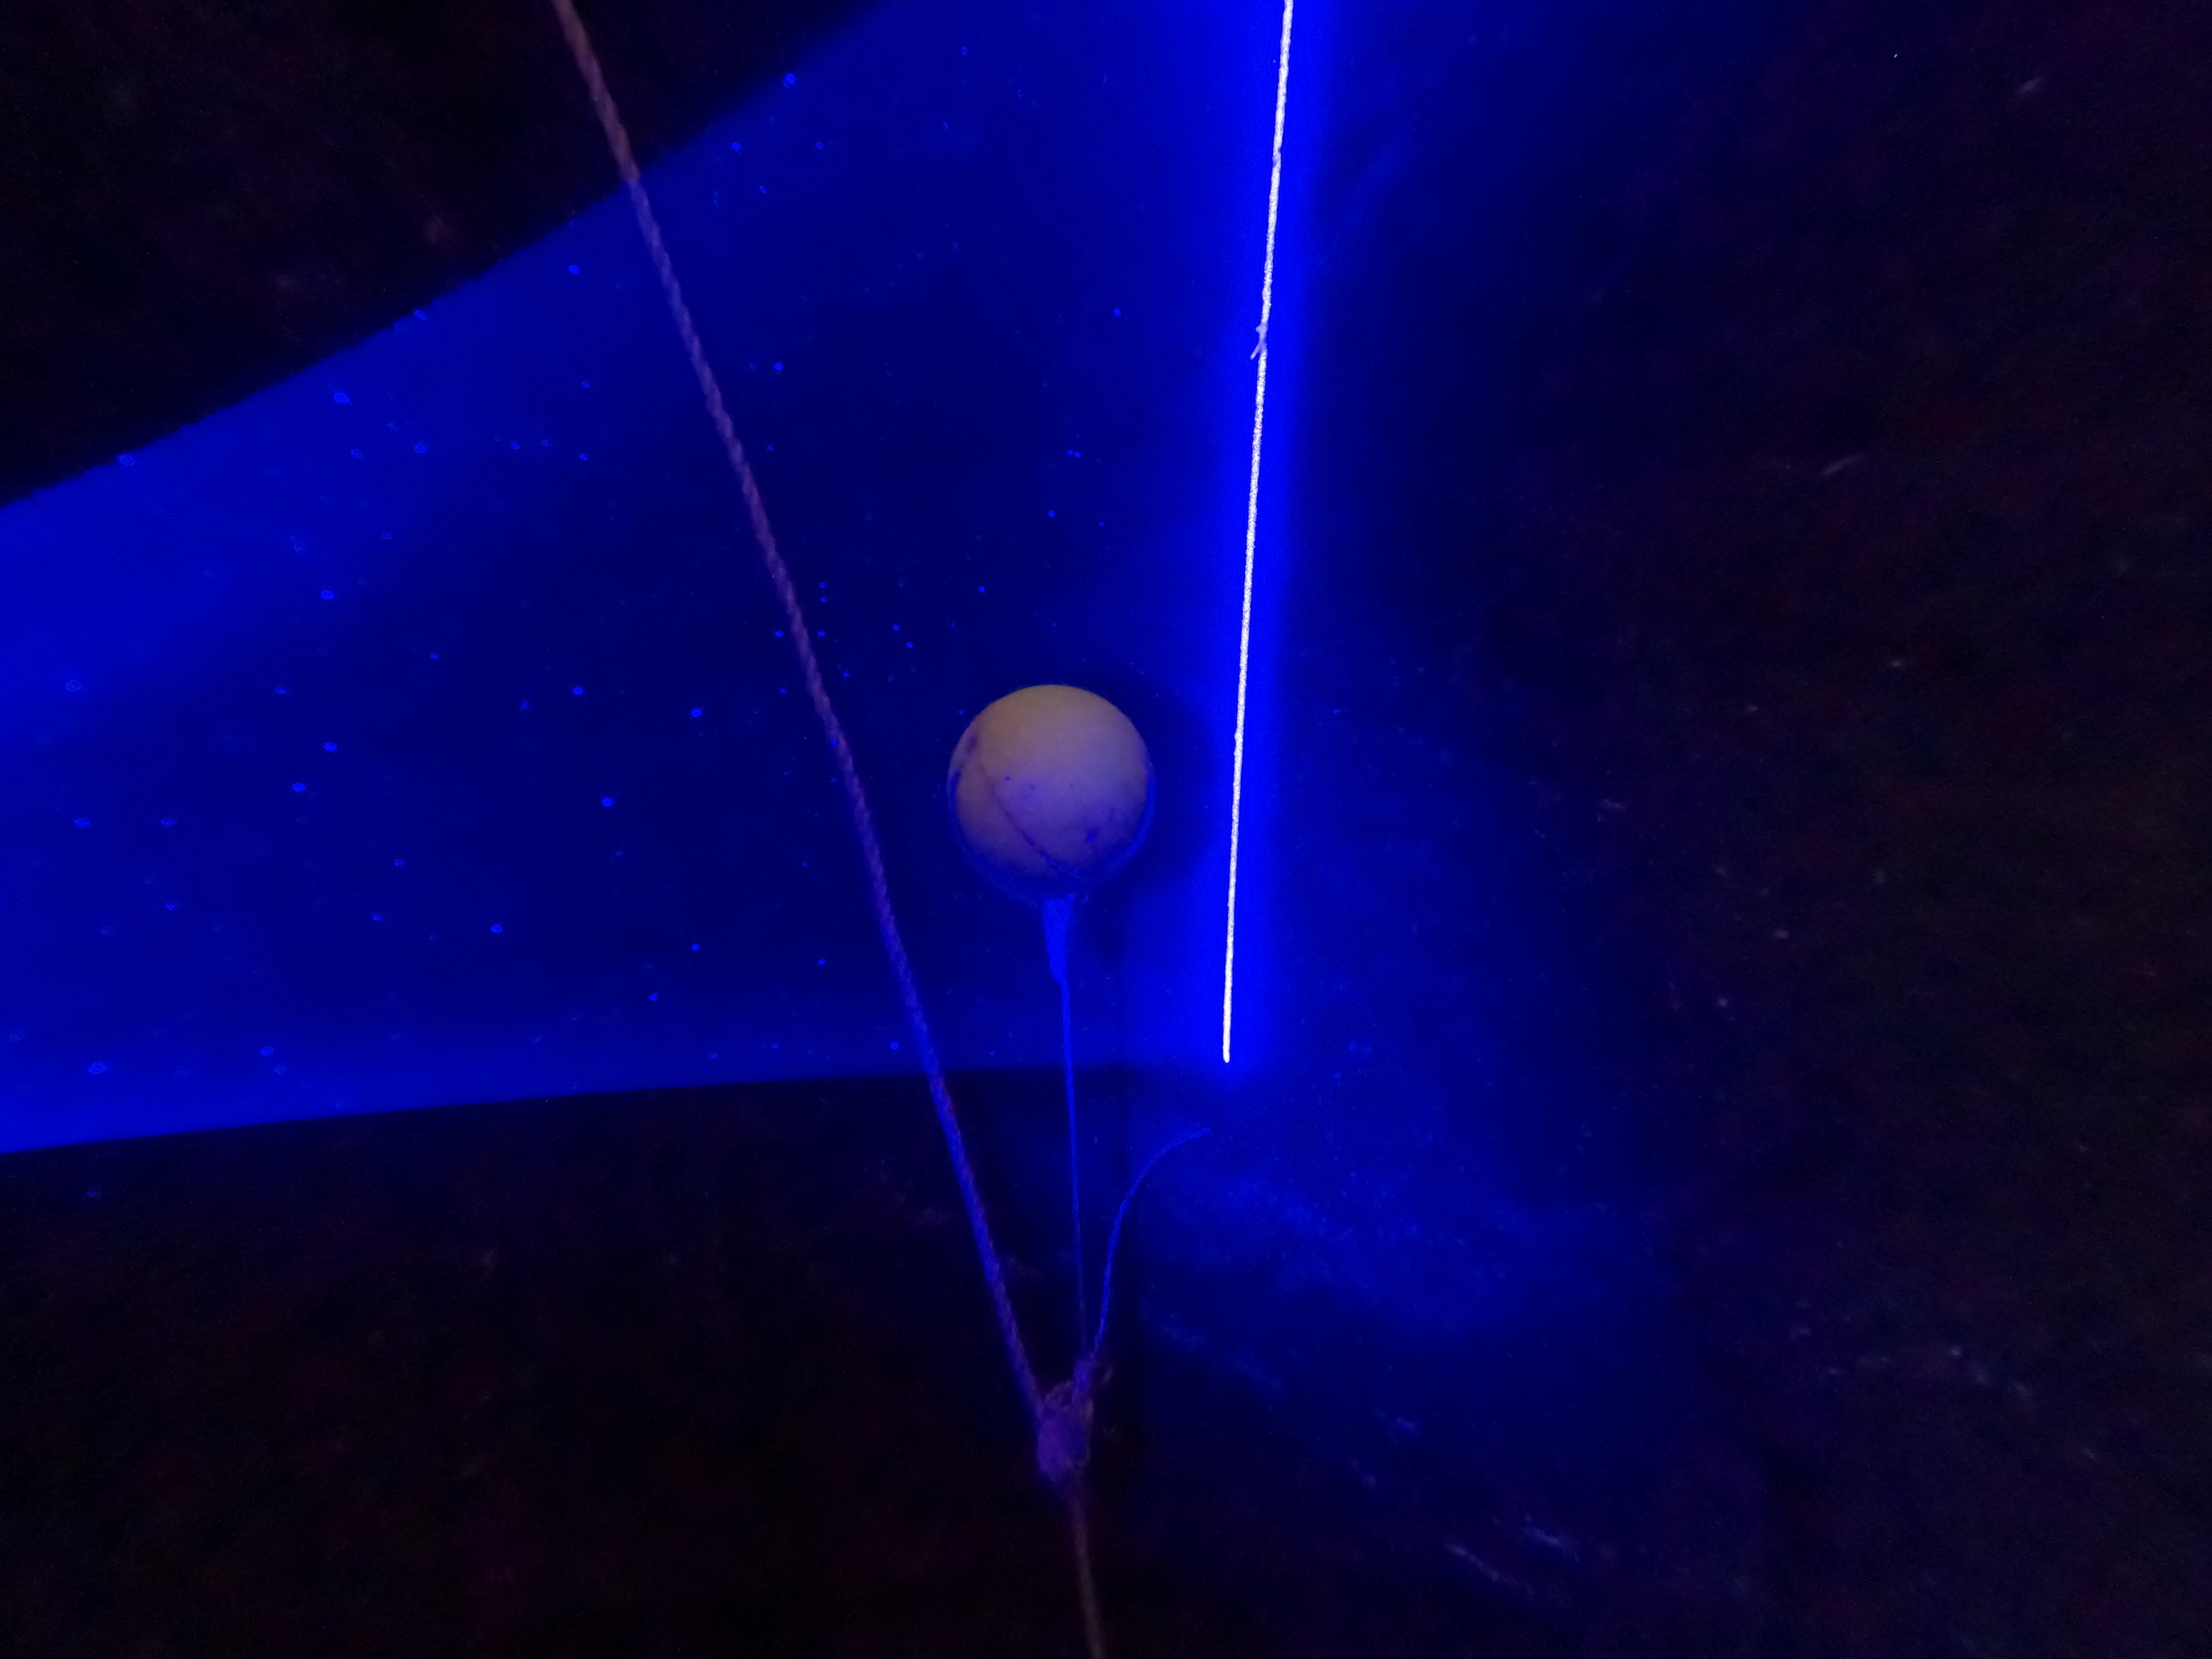

Supplement: Supplementary file 392 [file G0030692.pdf › 3/G0030692.pdf]

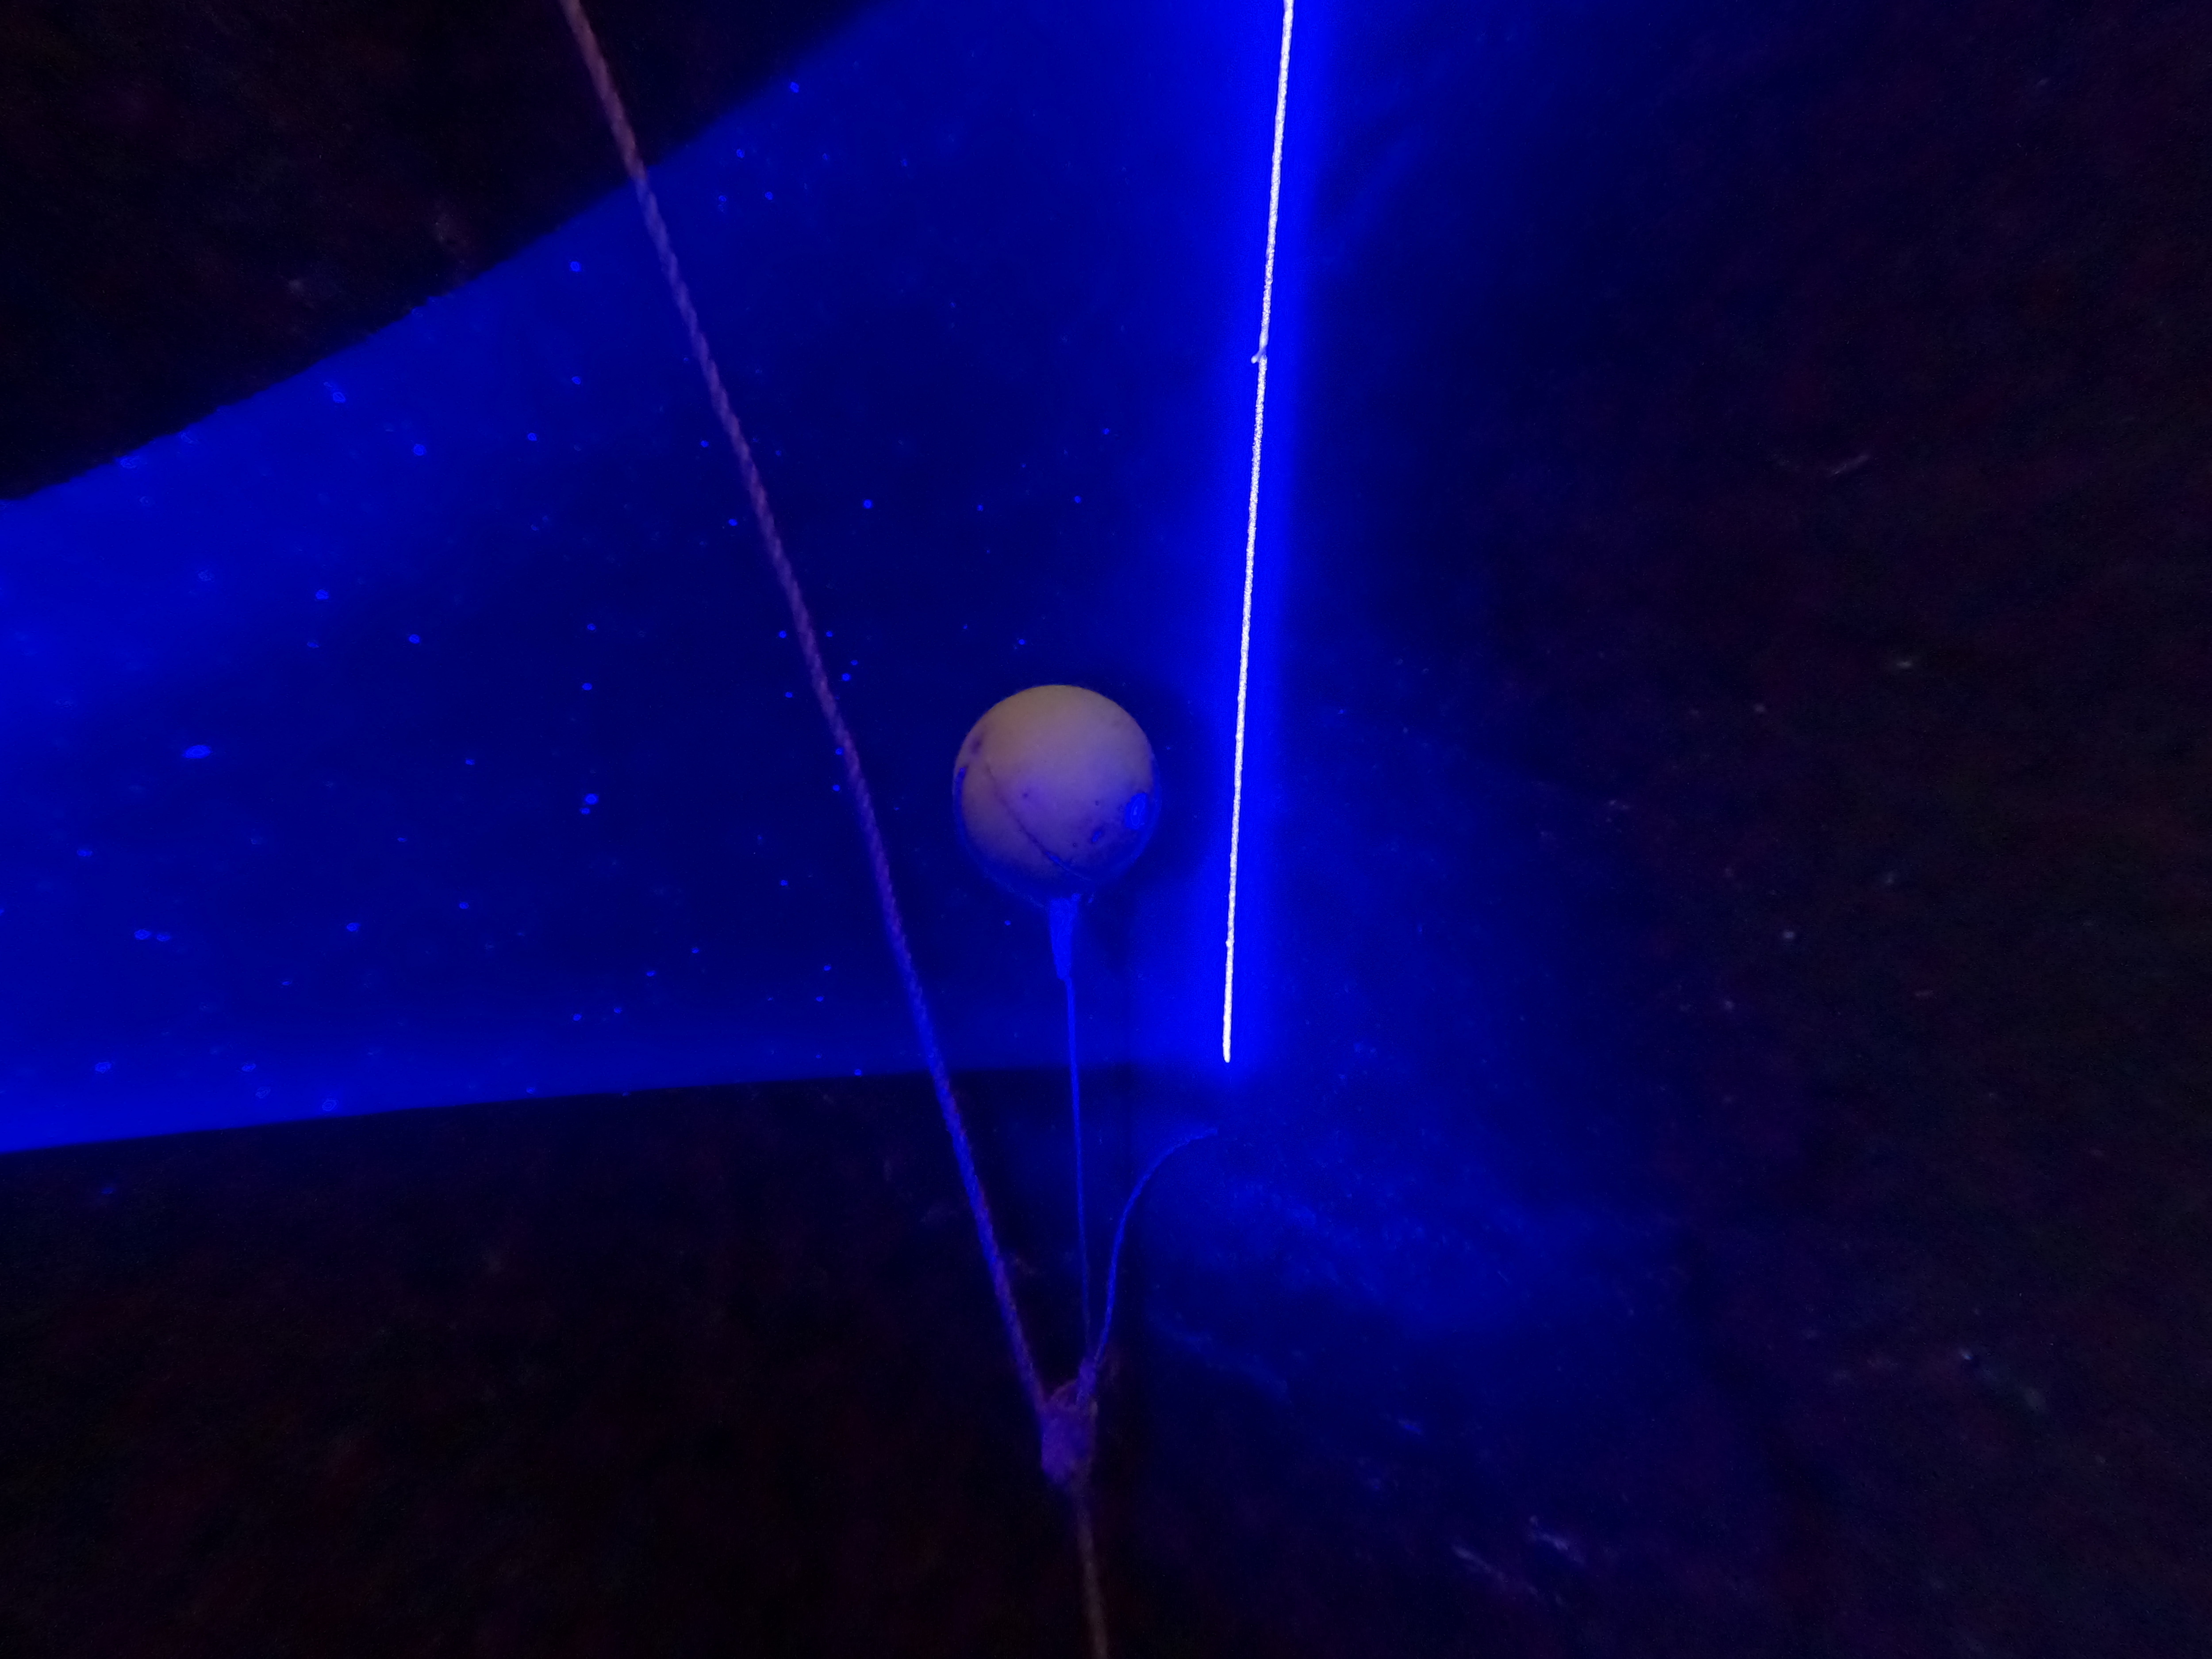

Supplement: Supplementary file 393 [file G0030693.pdf › 3/G0030693.pdf]

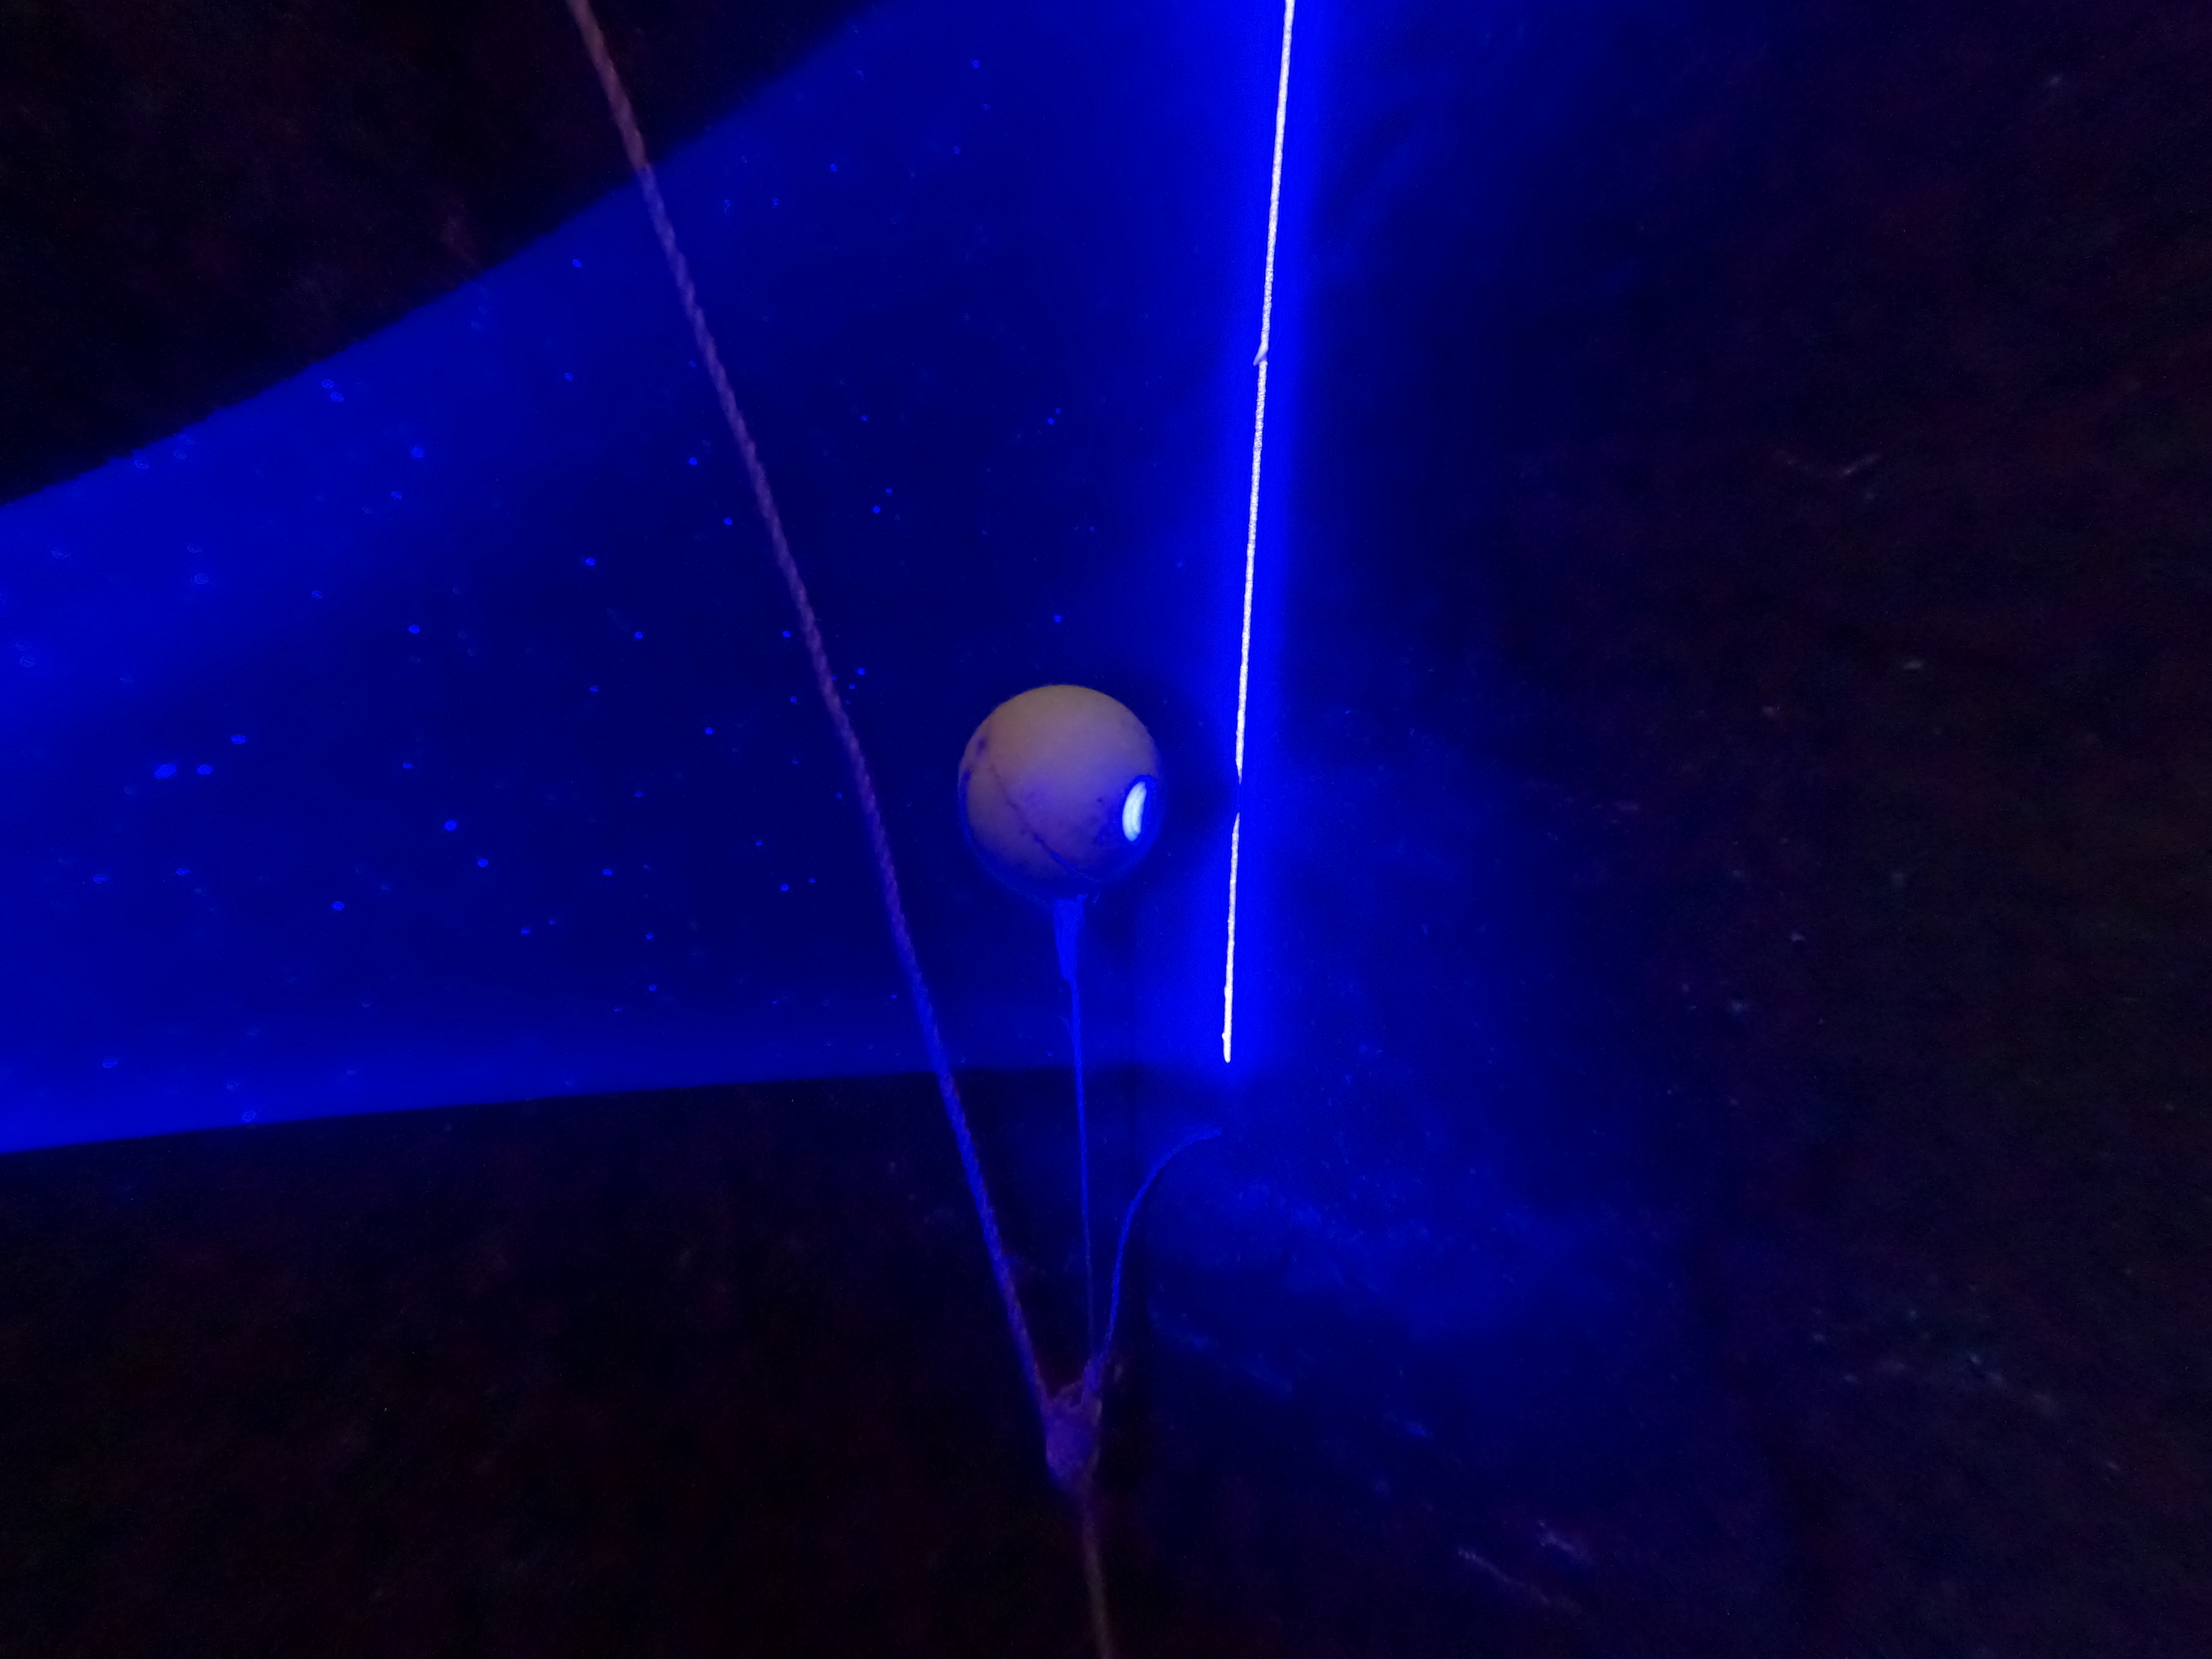

Supplement: Supplementary file 394 [file G0030694.pdf › 3/G0030694.pdf]

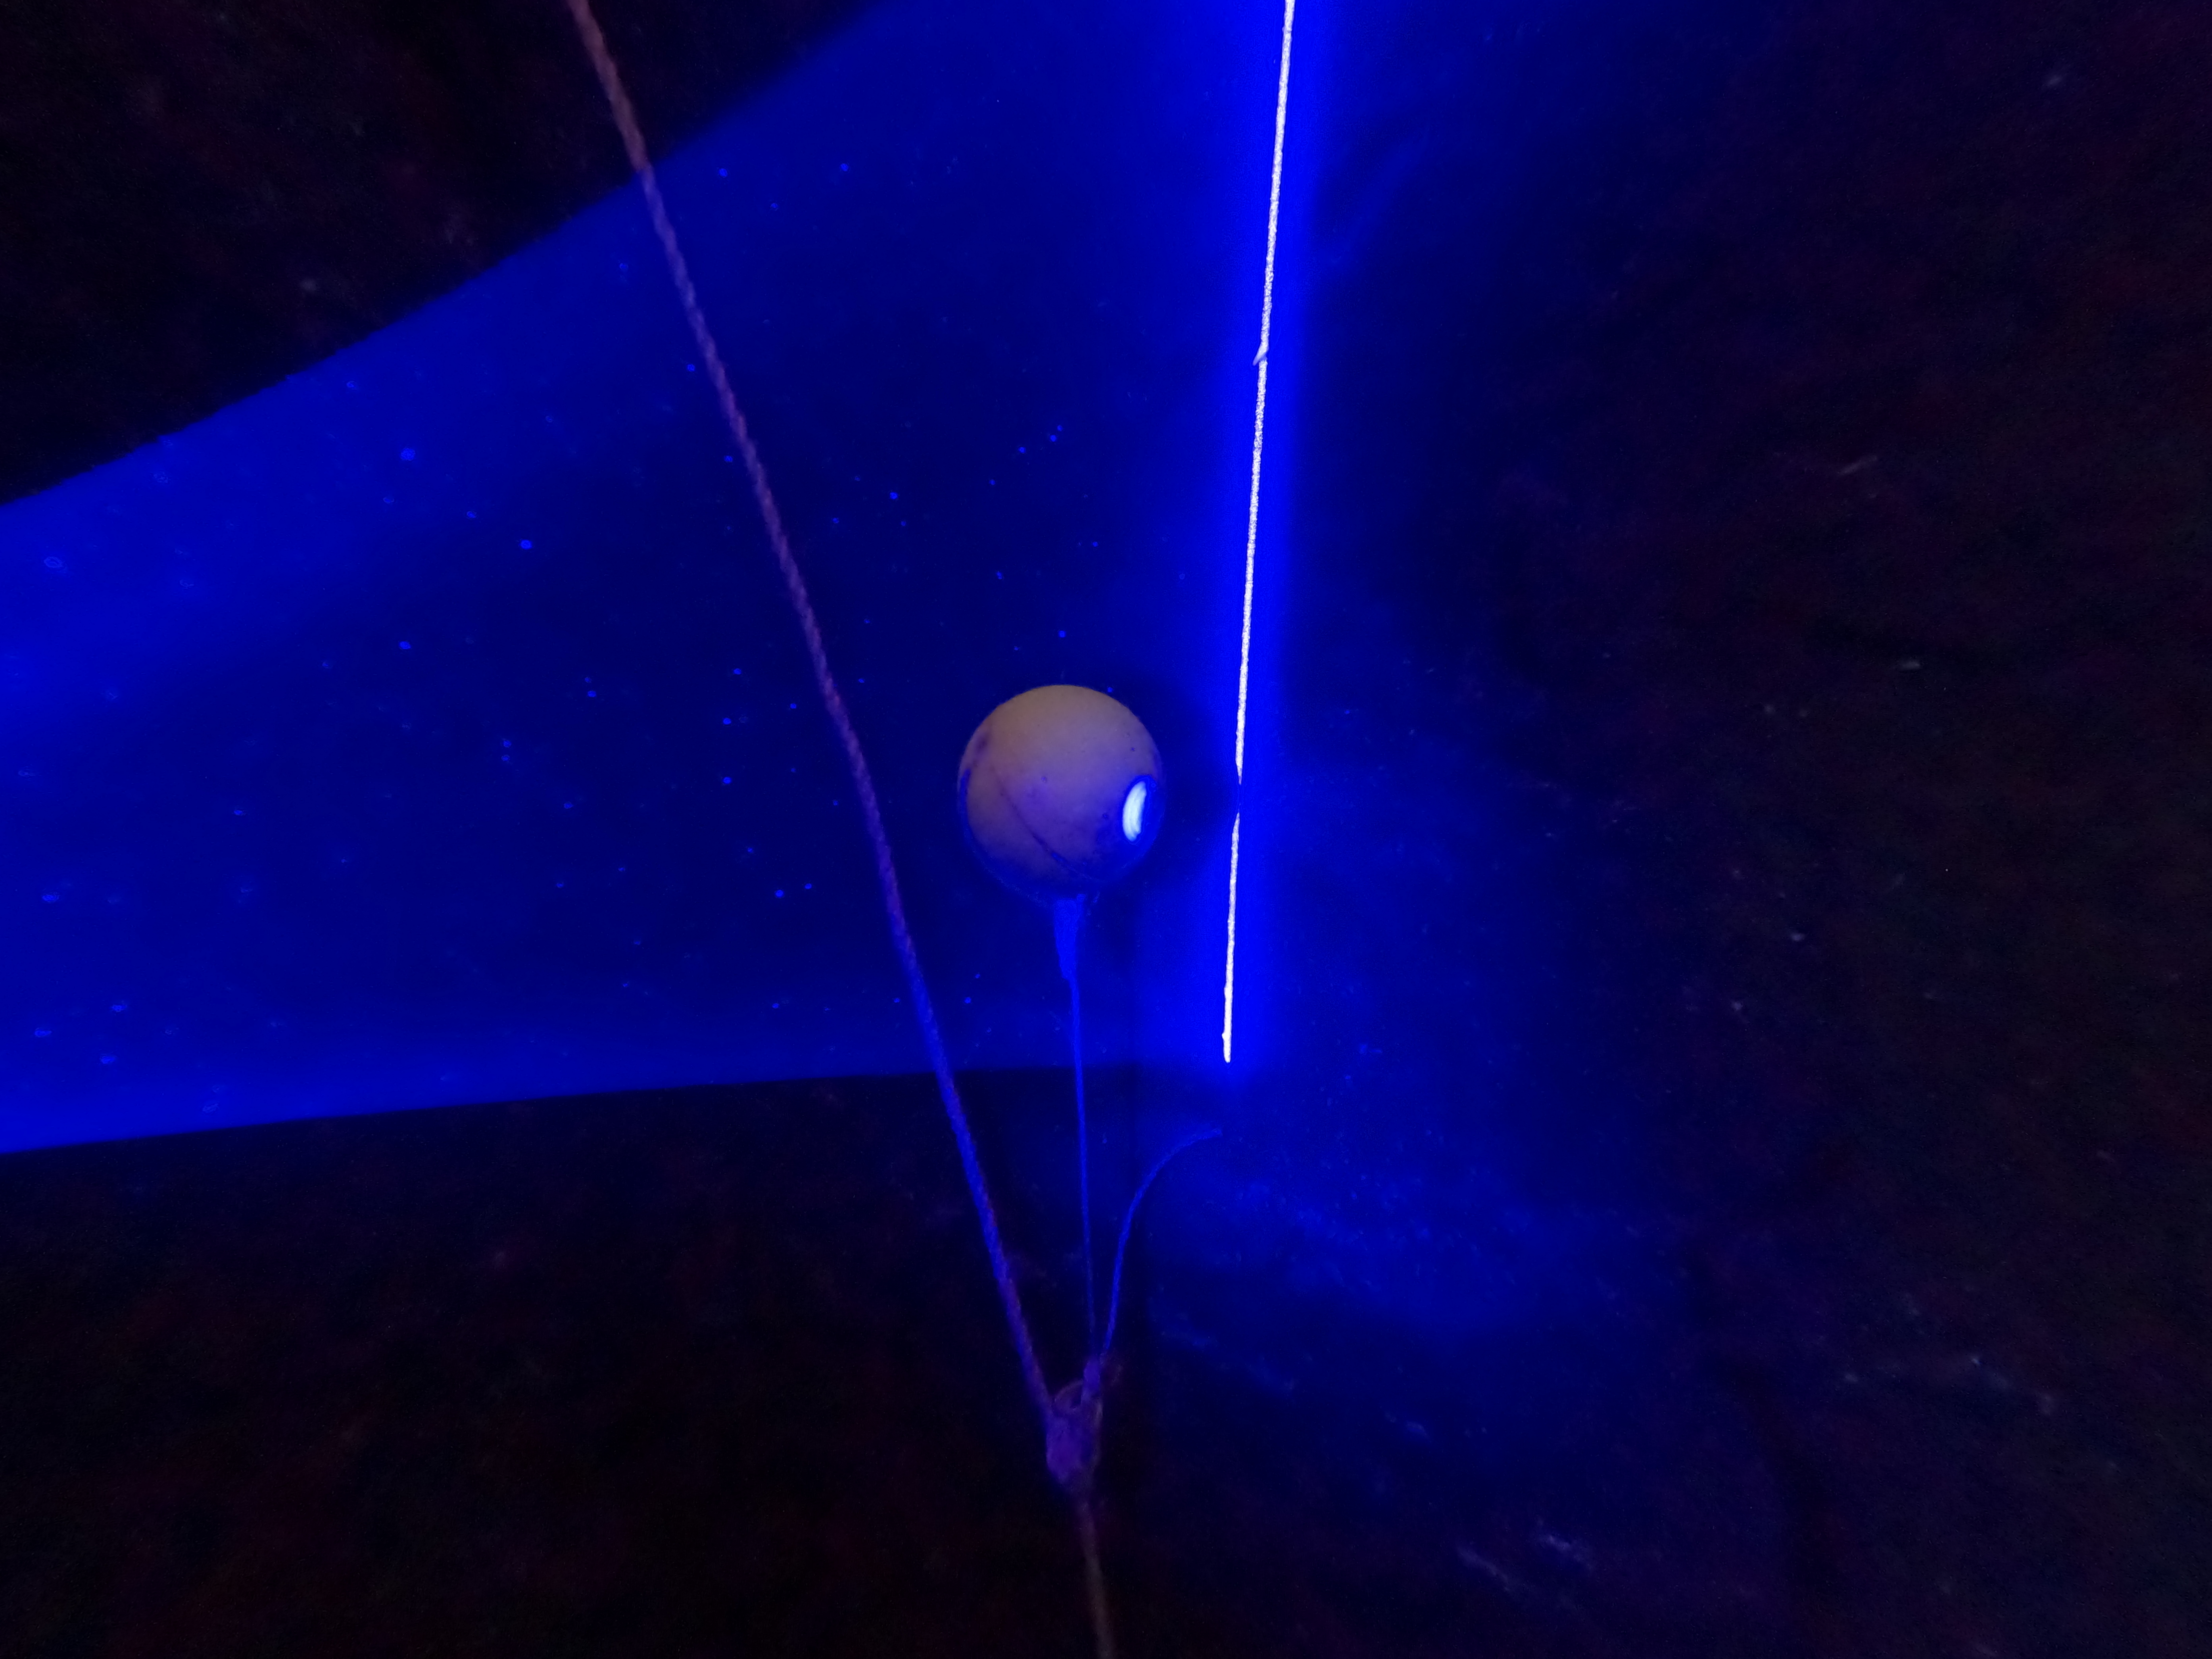

Supplement: Supplementary file 395 [file G0030695.pdf › 3/G0030695.pdf]

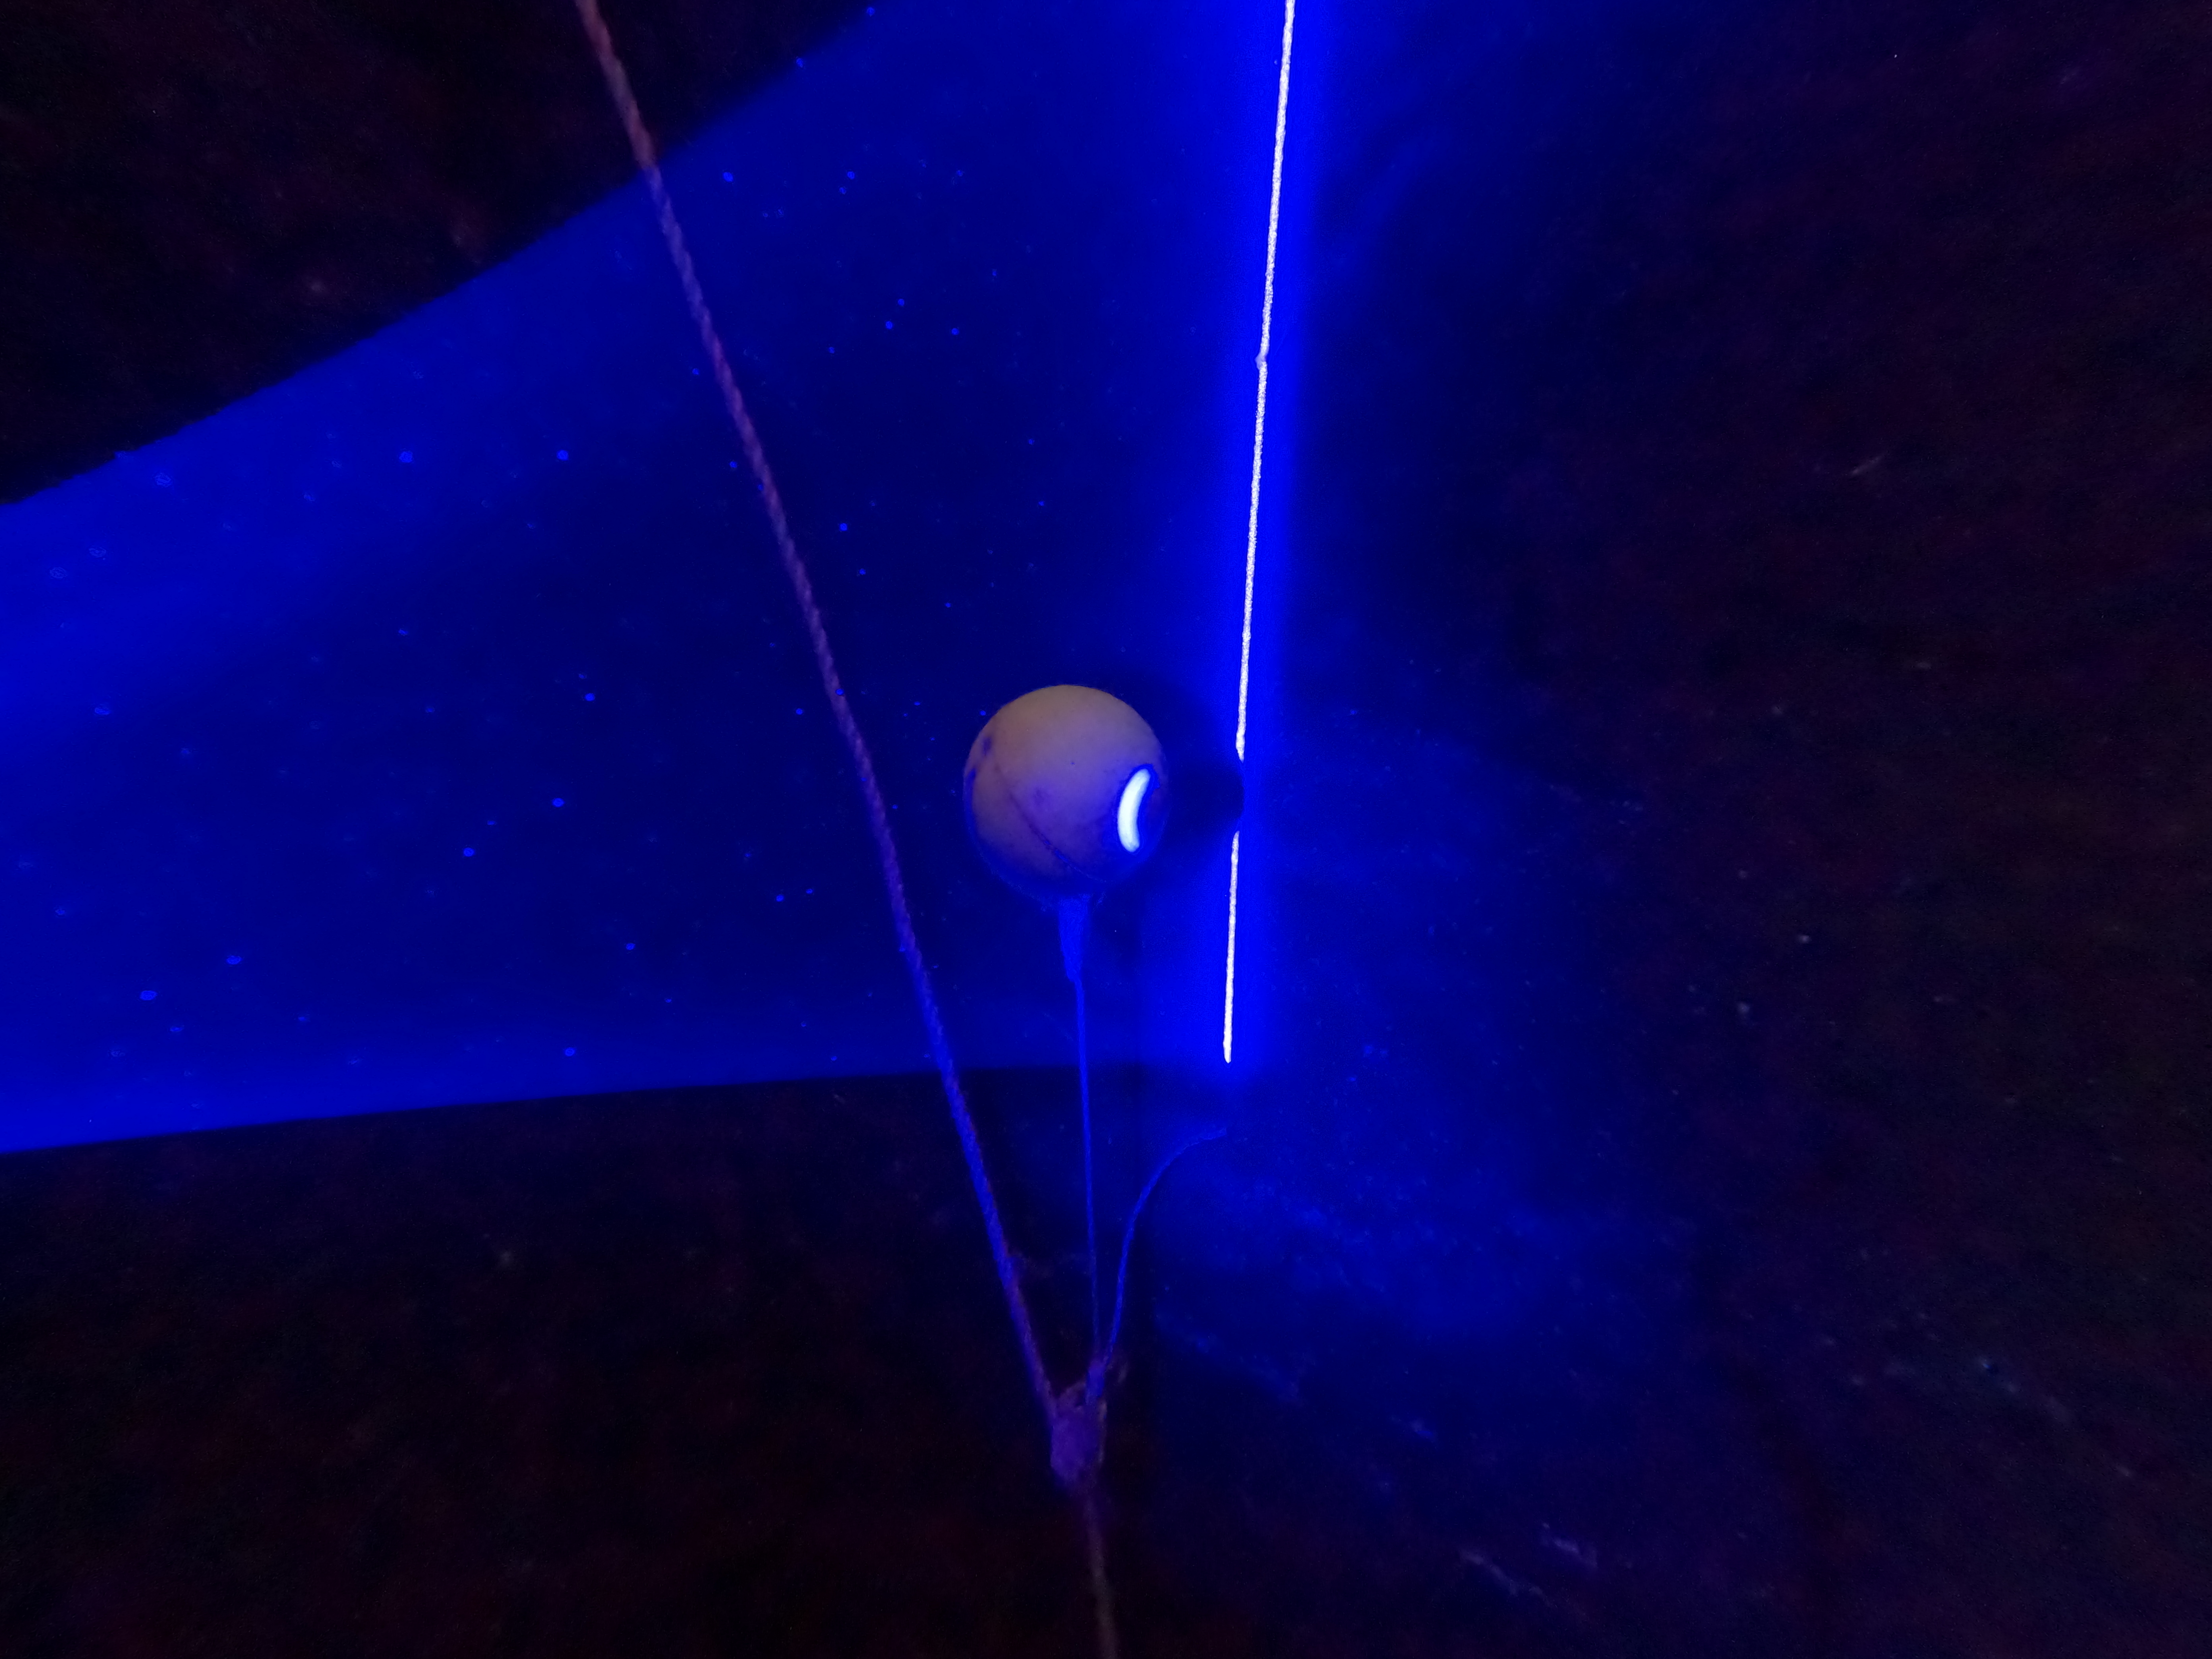

Supplement: Supplementary file 396 [file G0030696.pdf › 3/G0030696.pdf]

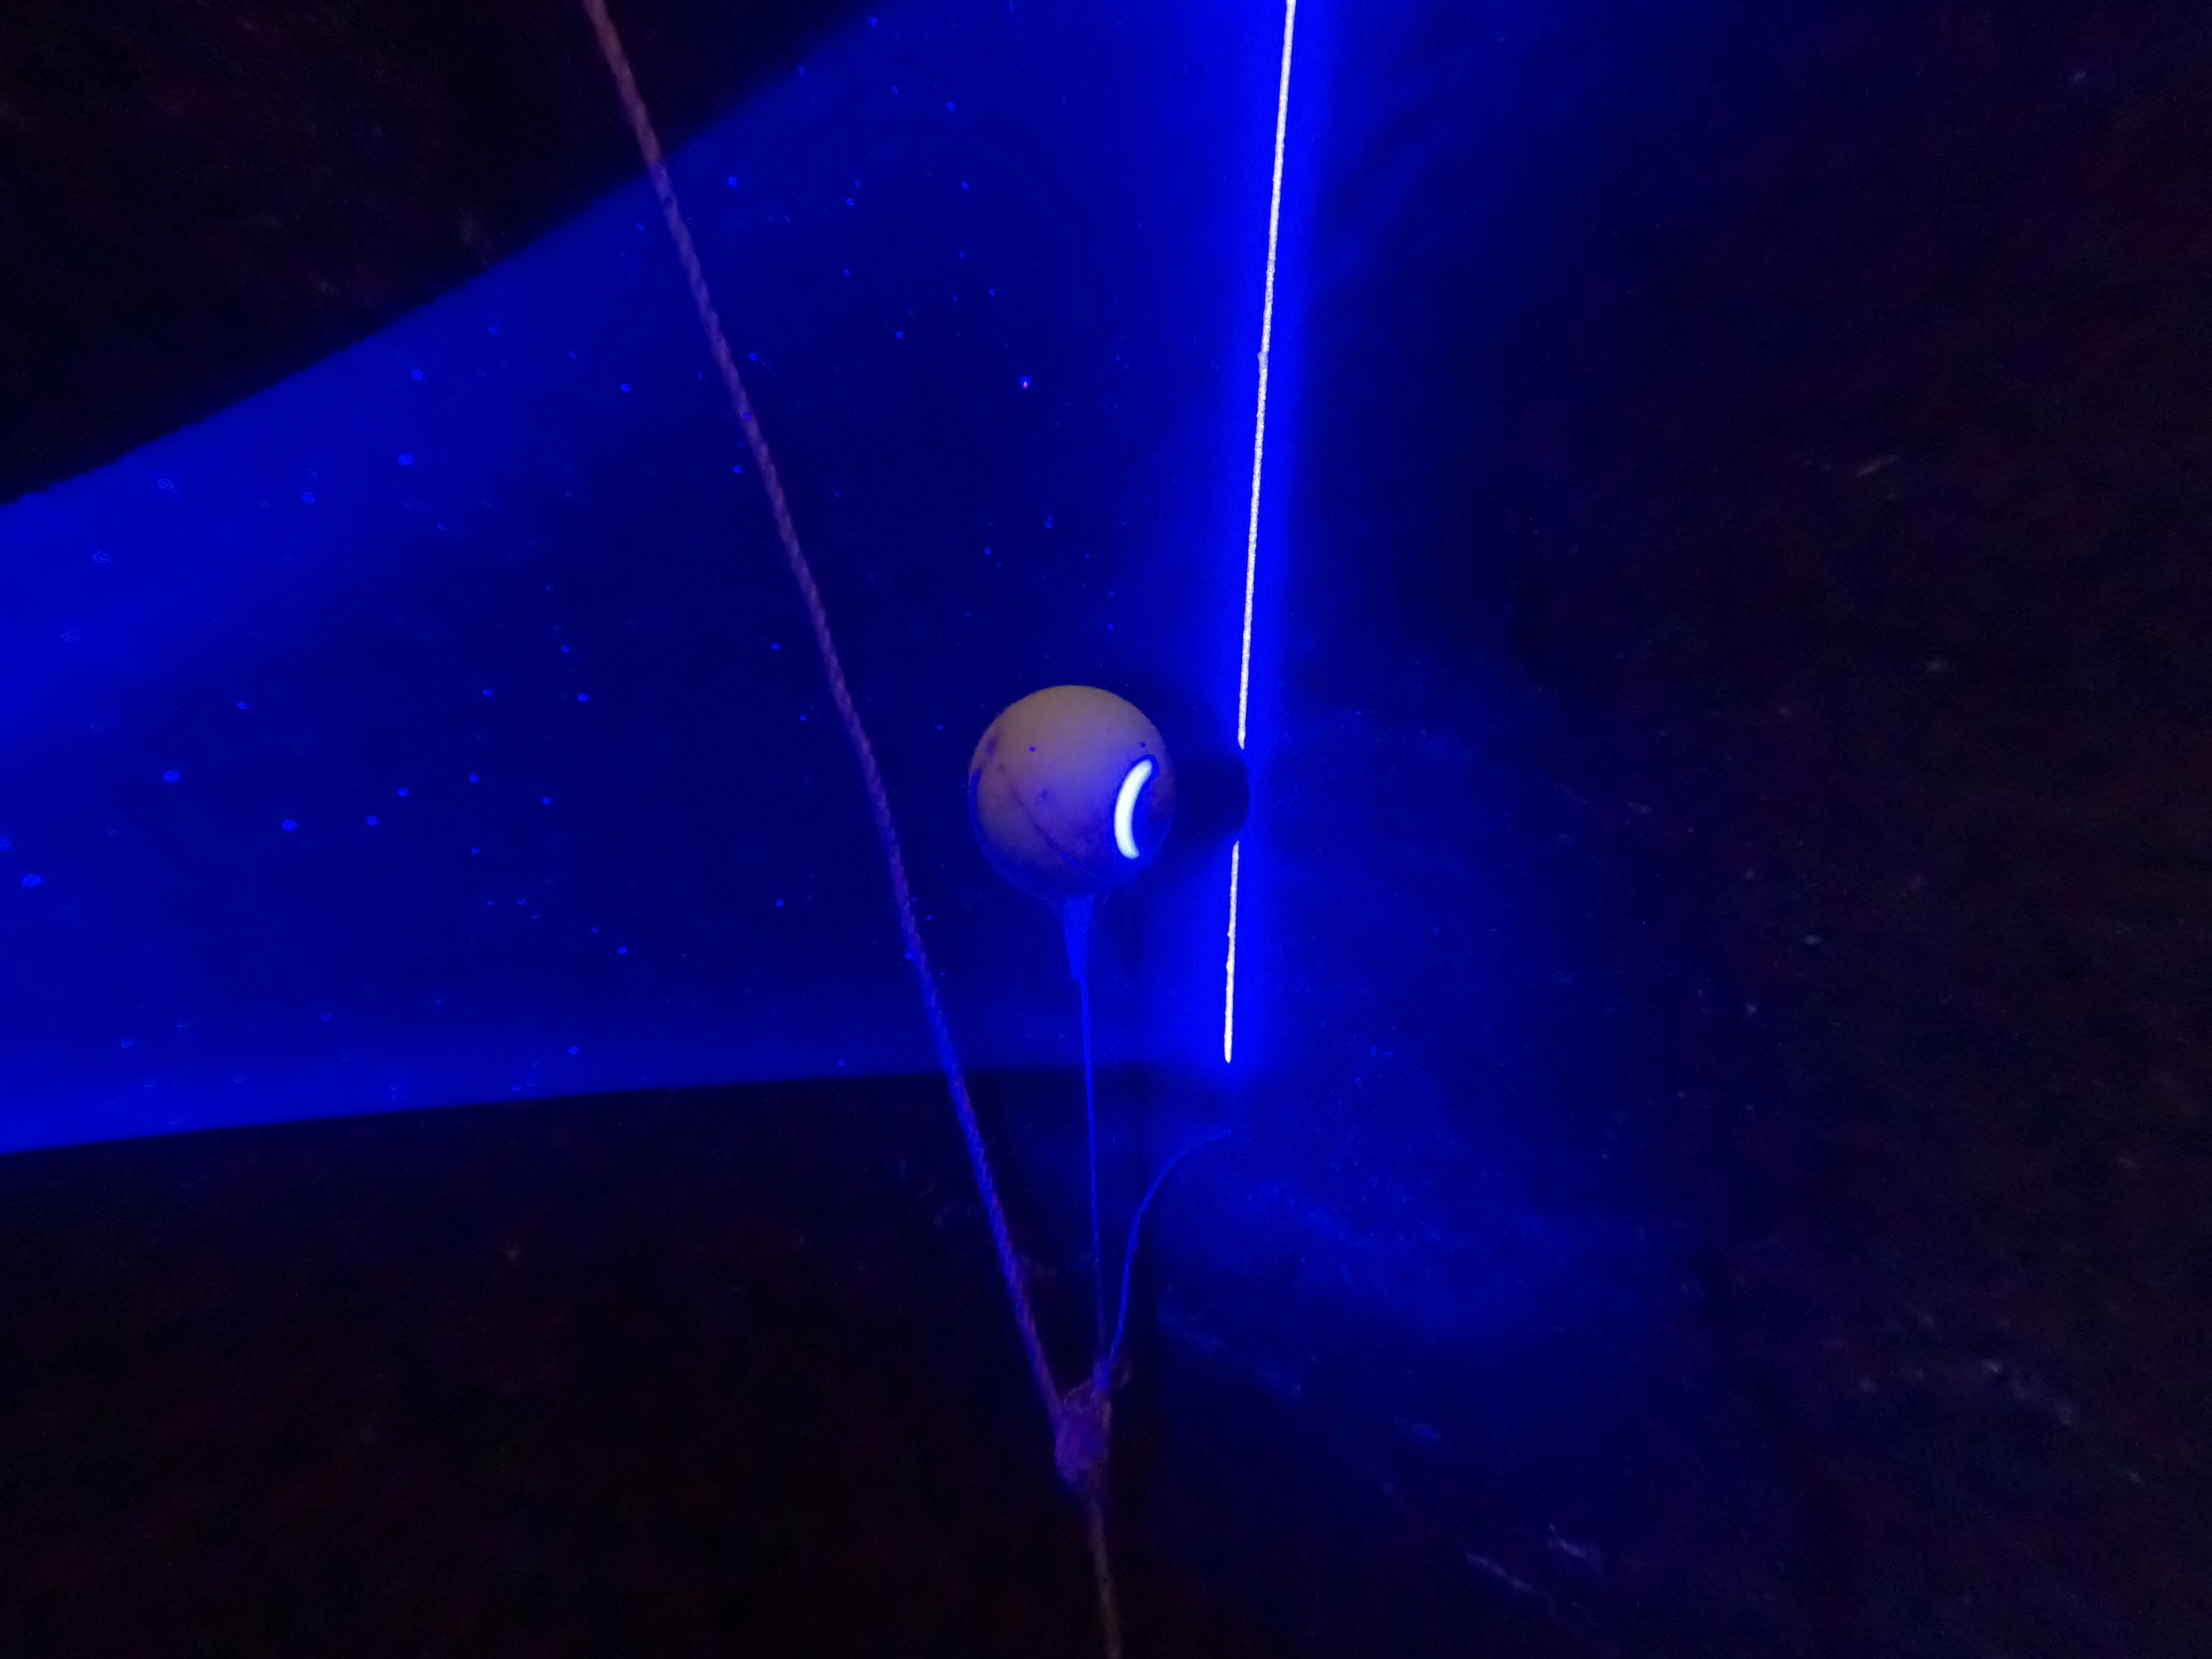

Supplement: Supplementary file 397 [file G0030697.pdf › 3/G0030697.pdf]

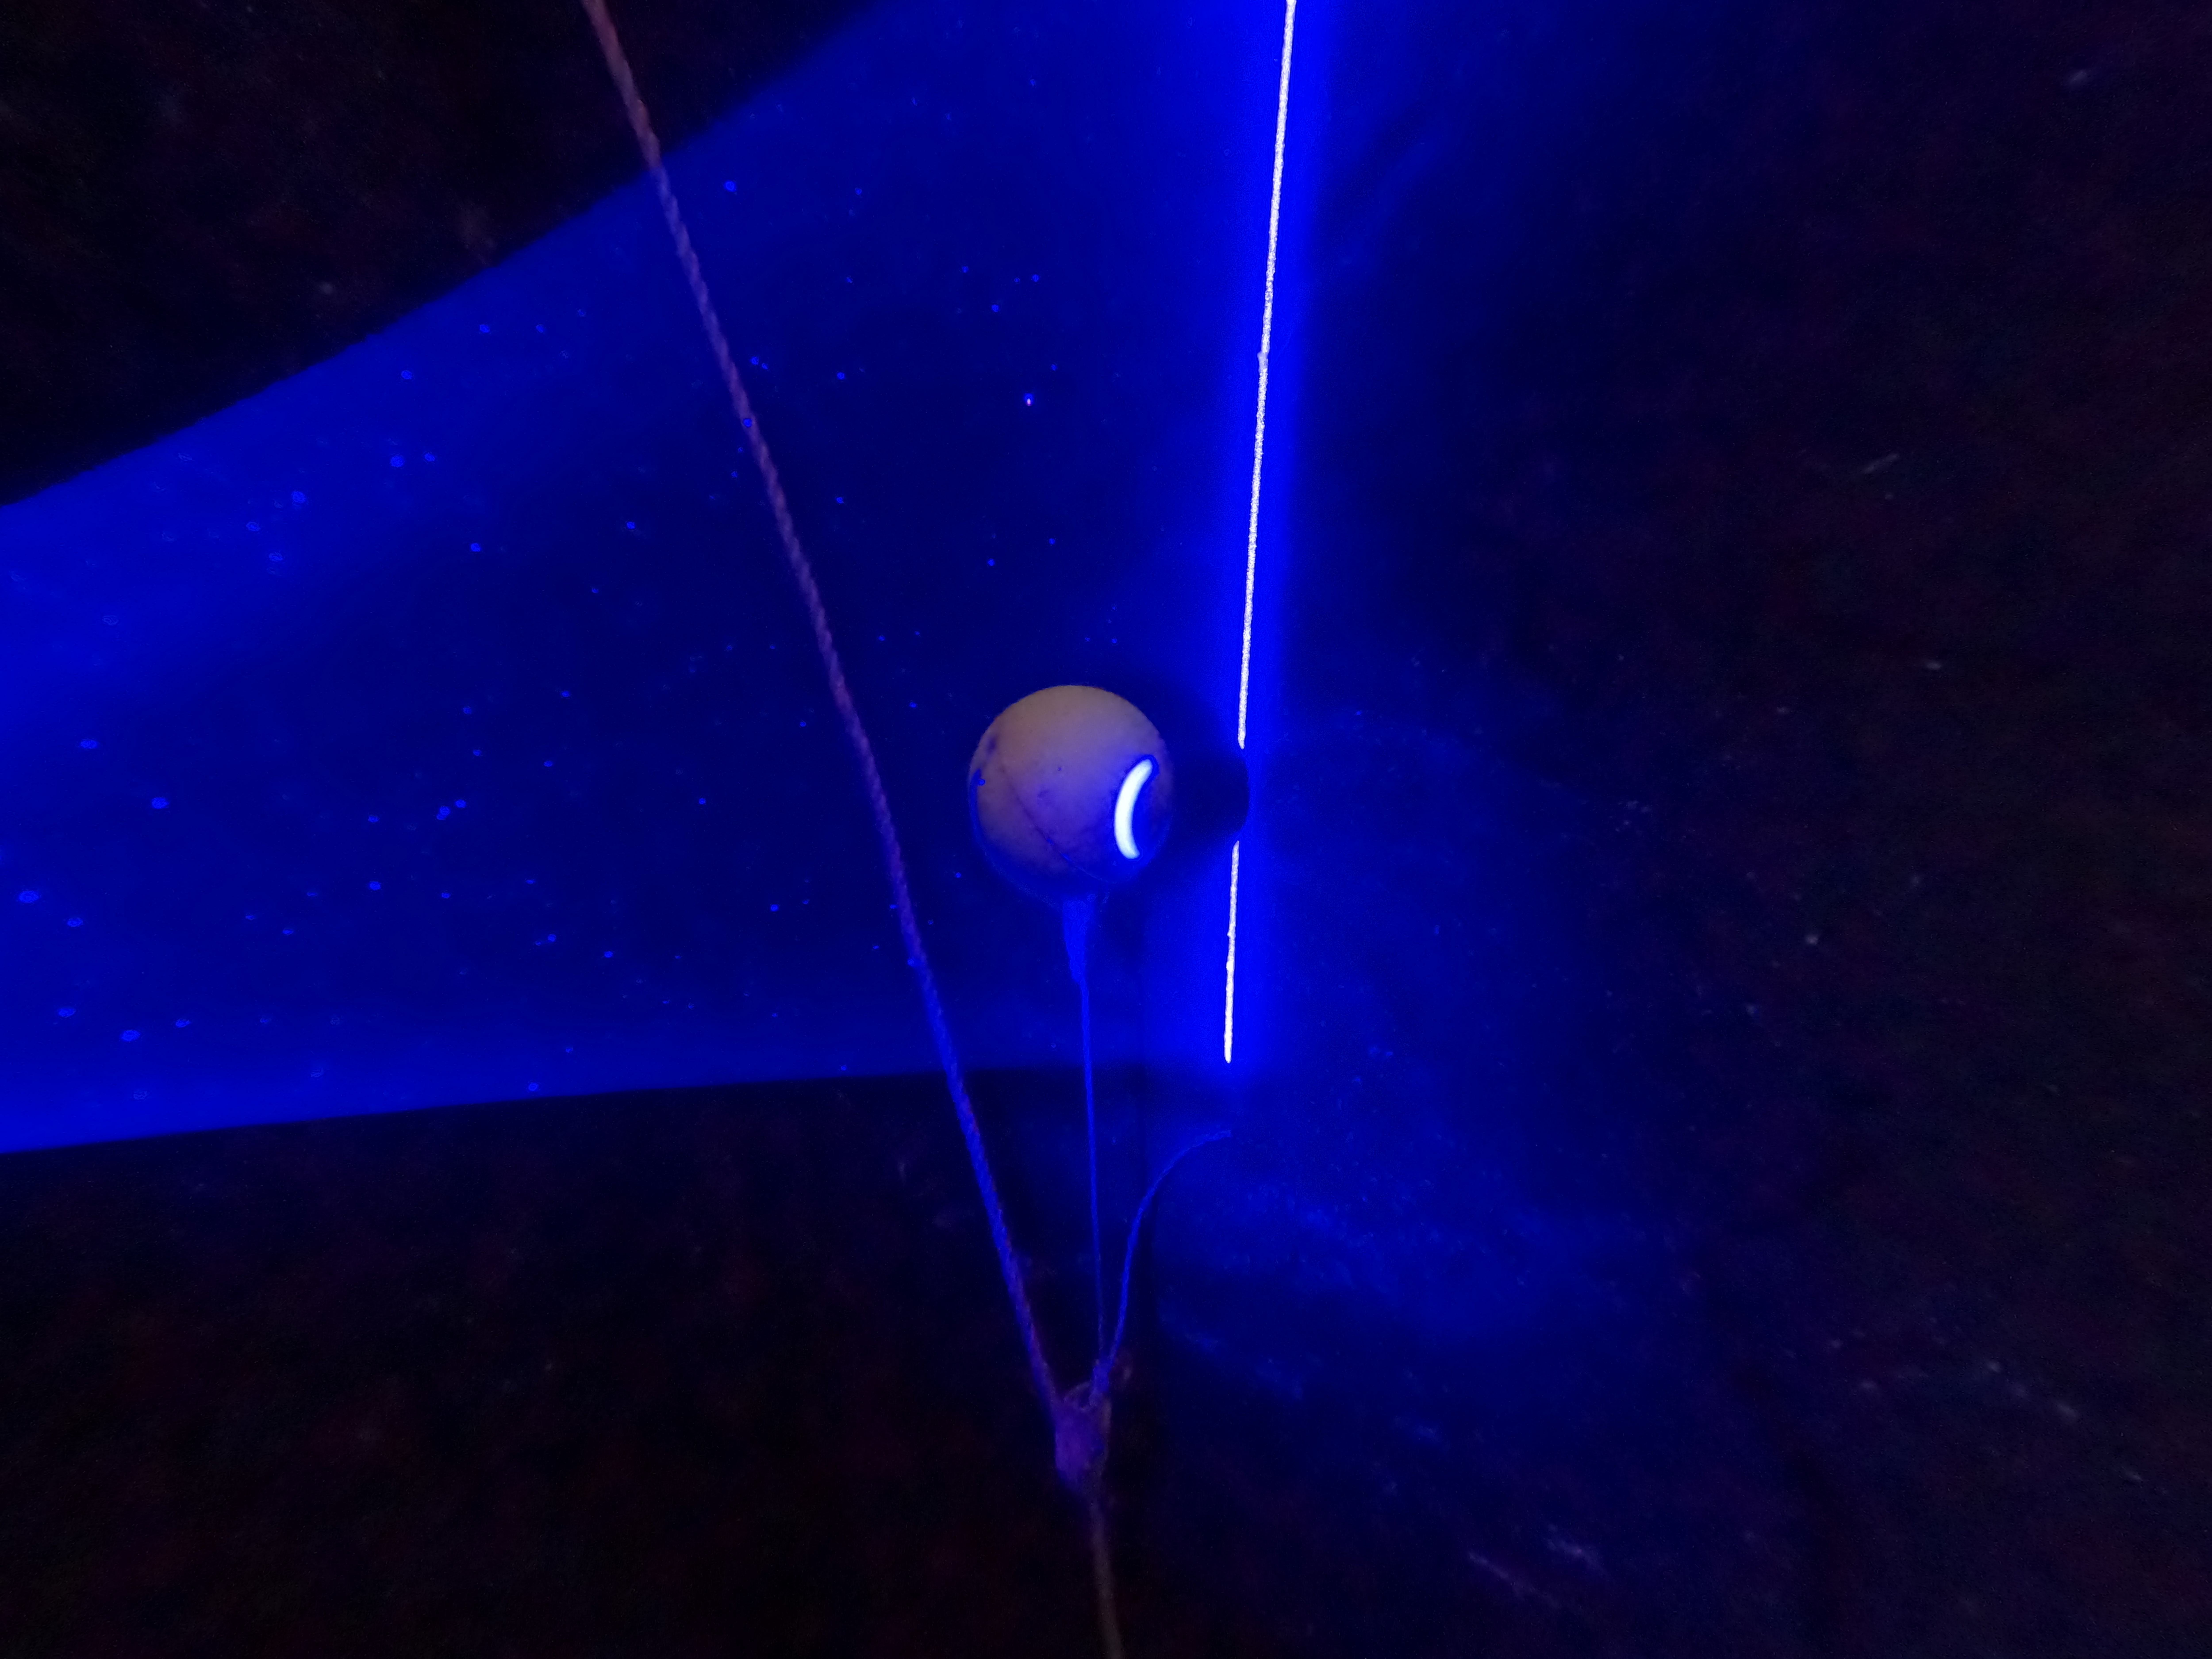

Supplement: Supplementary file 398 [file G0030698.pdf › 3/G0030698.pdf]

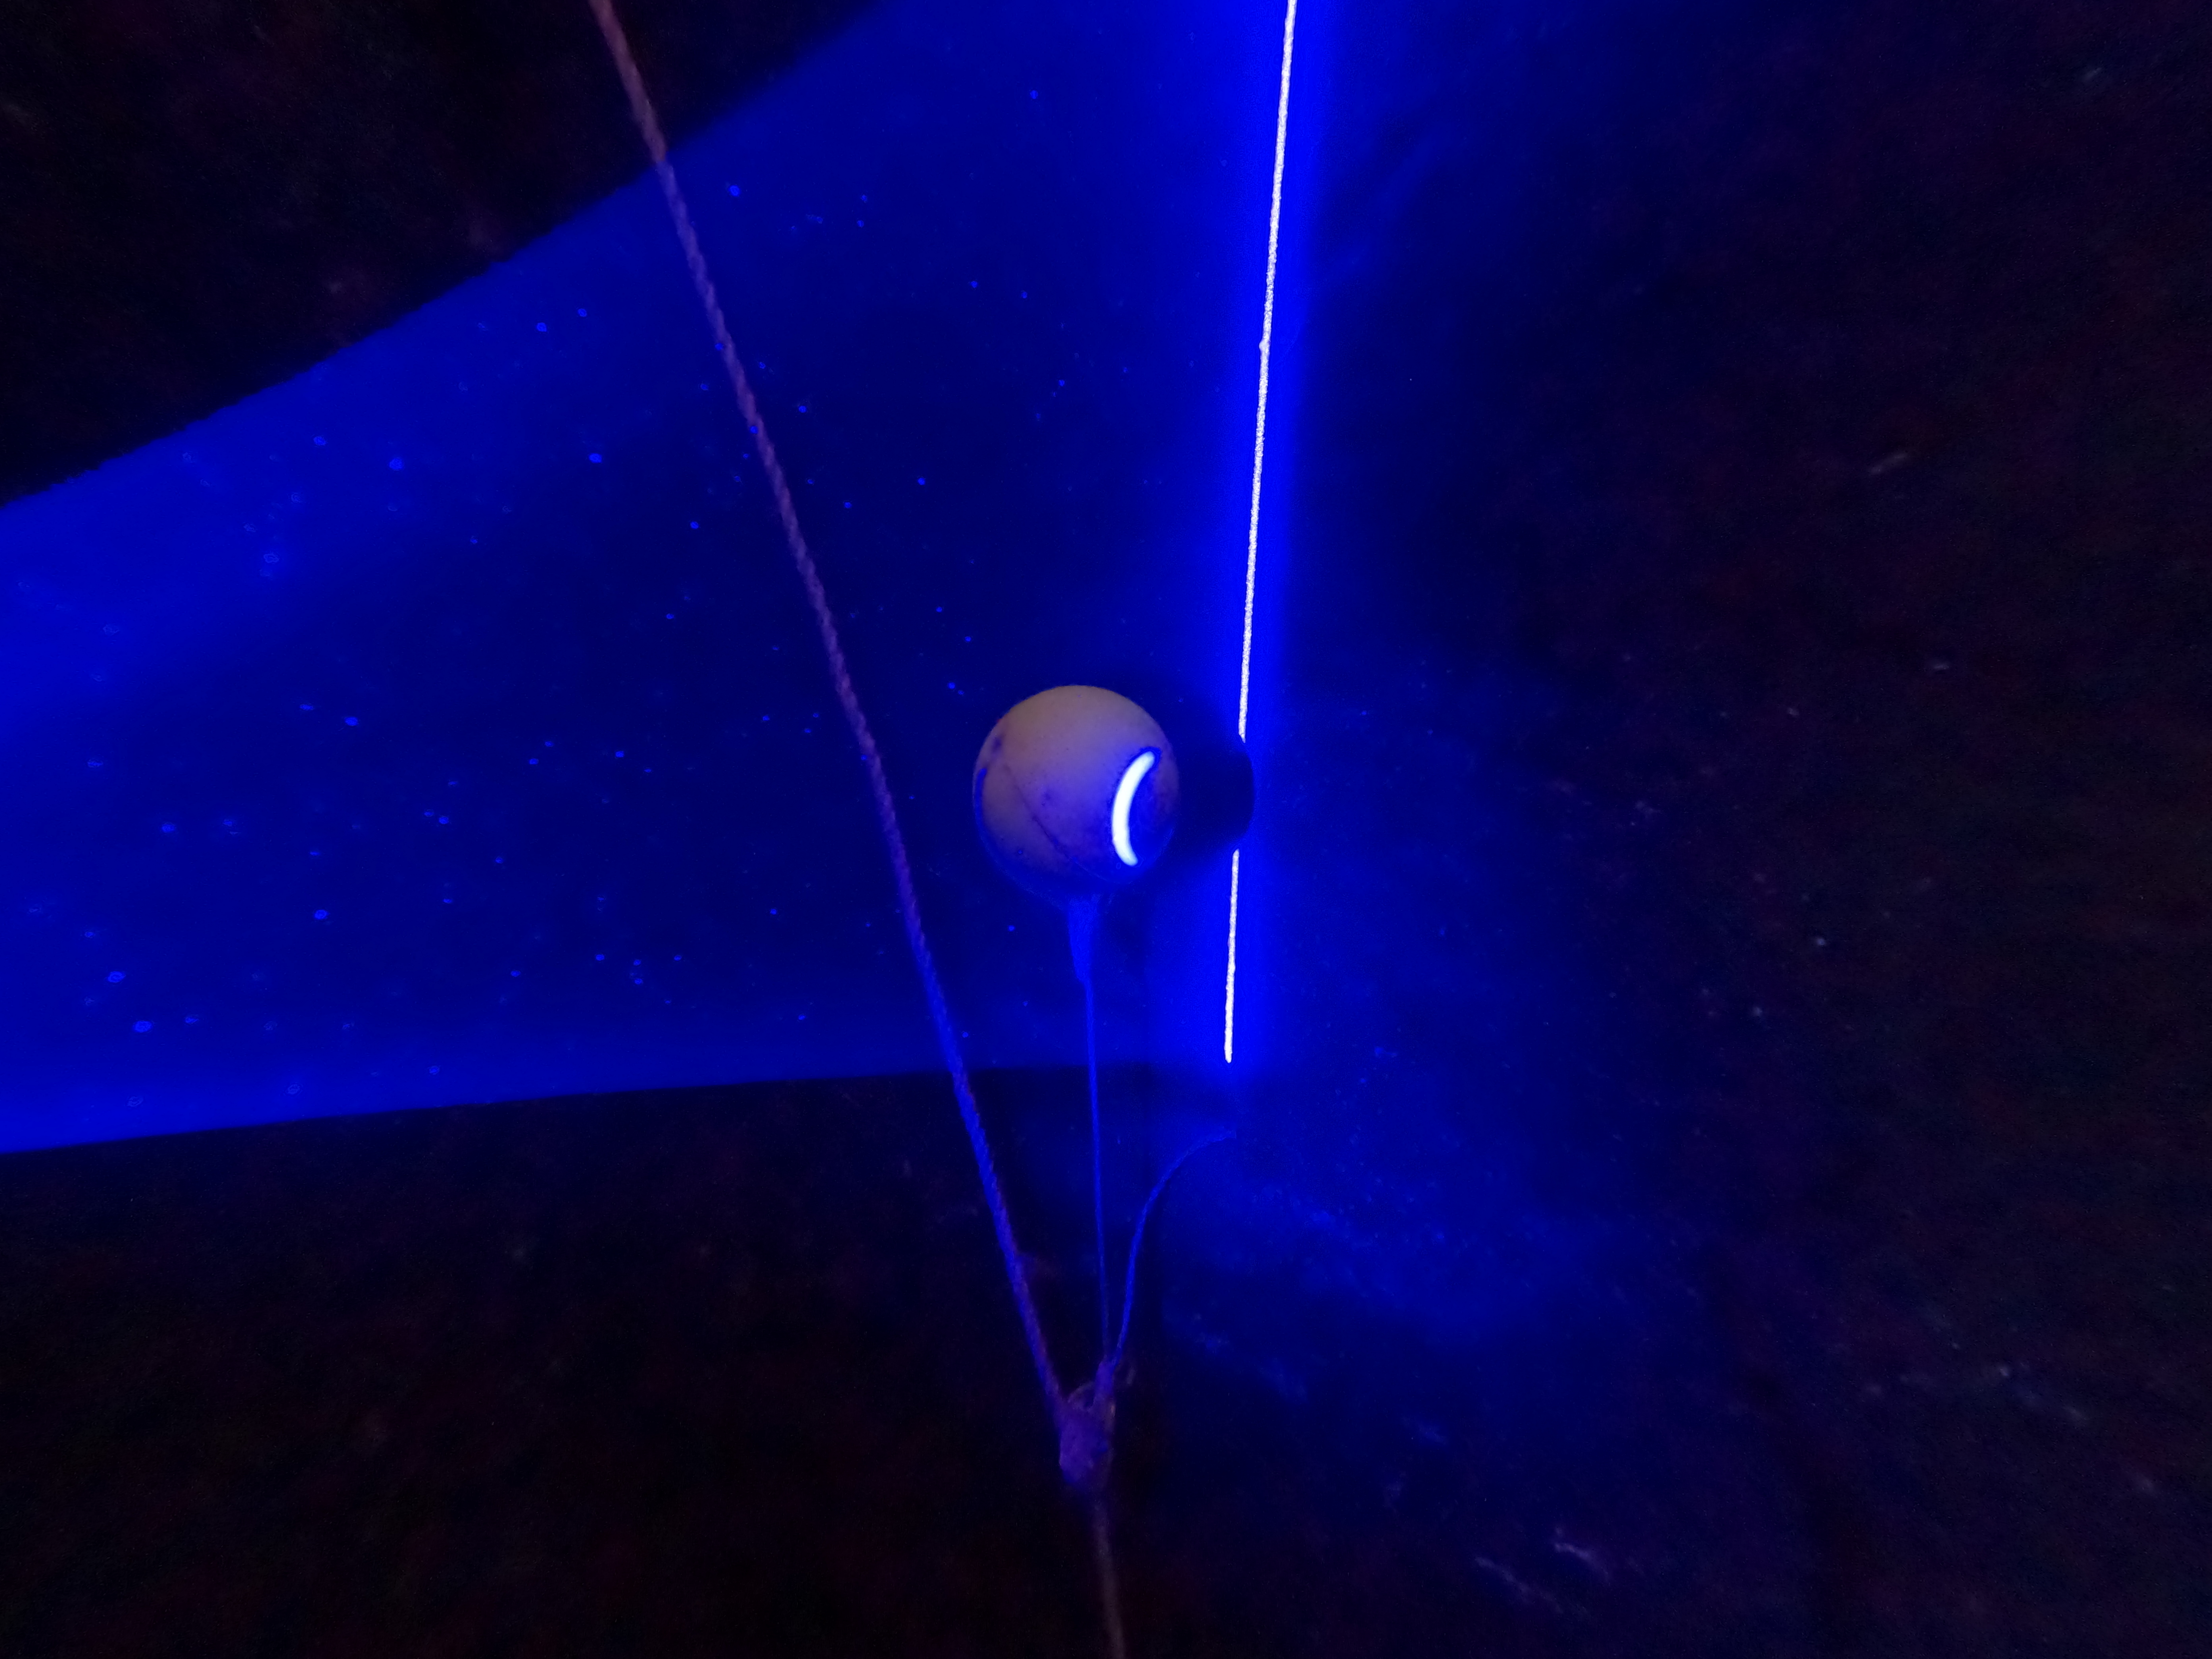

Supplement: Supplementary file 399 [file G0030699.pdf › 3/G0030699.pdf]

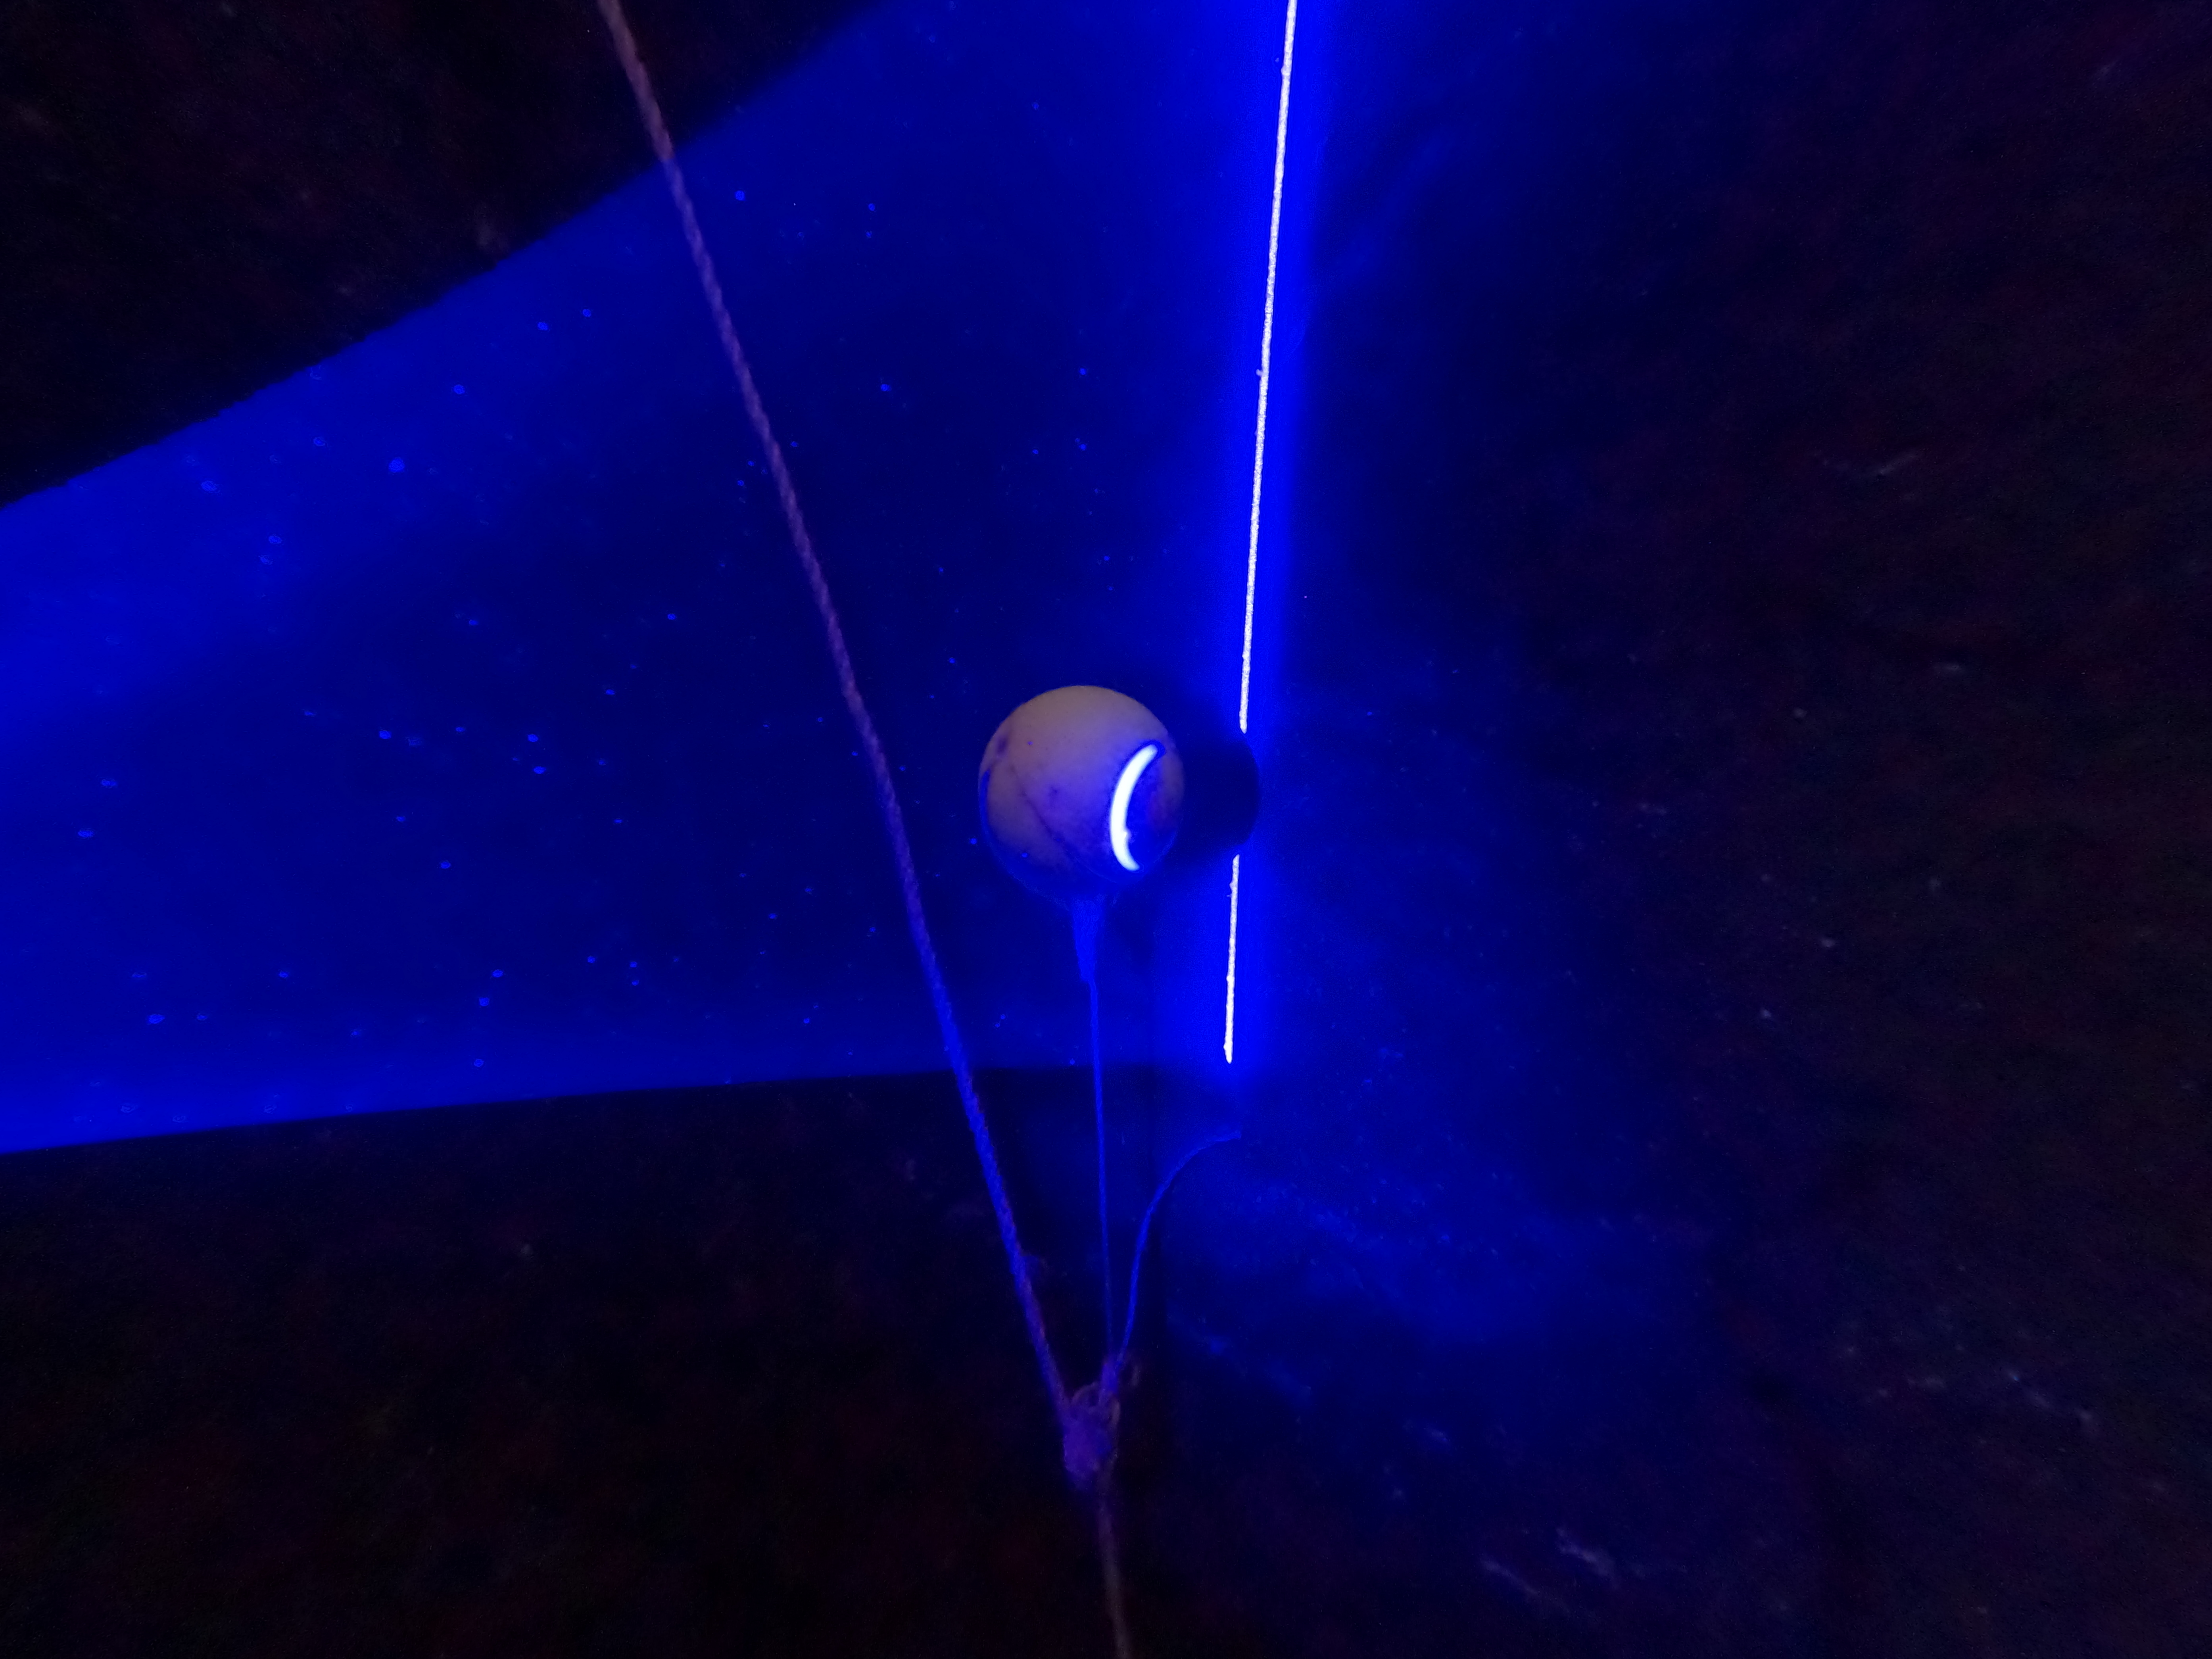

Supplement: Supplementary file 400 [file G0030700.pdf › 3/G0030700.pdf]
