# Supplementary figures and images for: 3D reconstruction of shallow sea environment using direct system calibration and faint laser line extraction (part 5 of 35)
Source: Research Square preprint supplement (doi:10.21203/rs.3.rs-5262658/v1), 2024-12-02

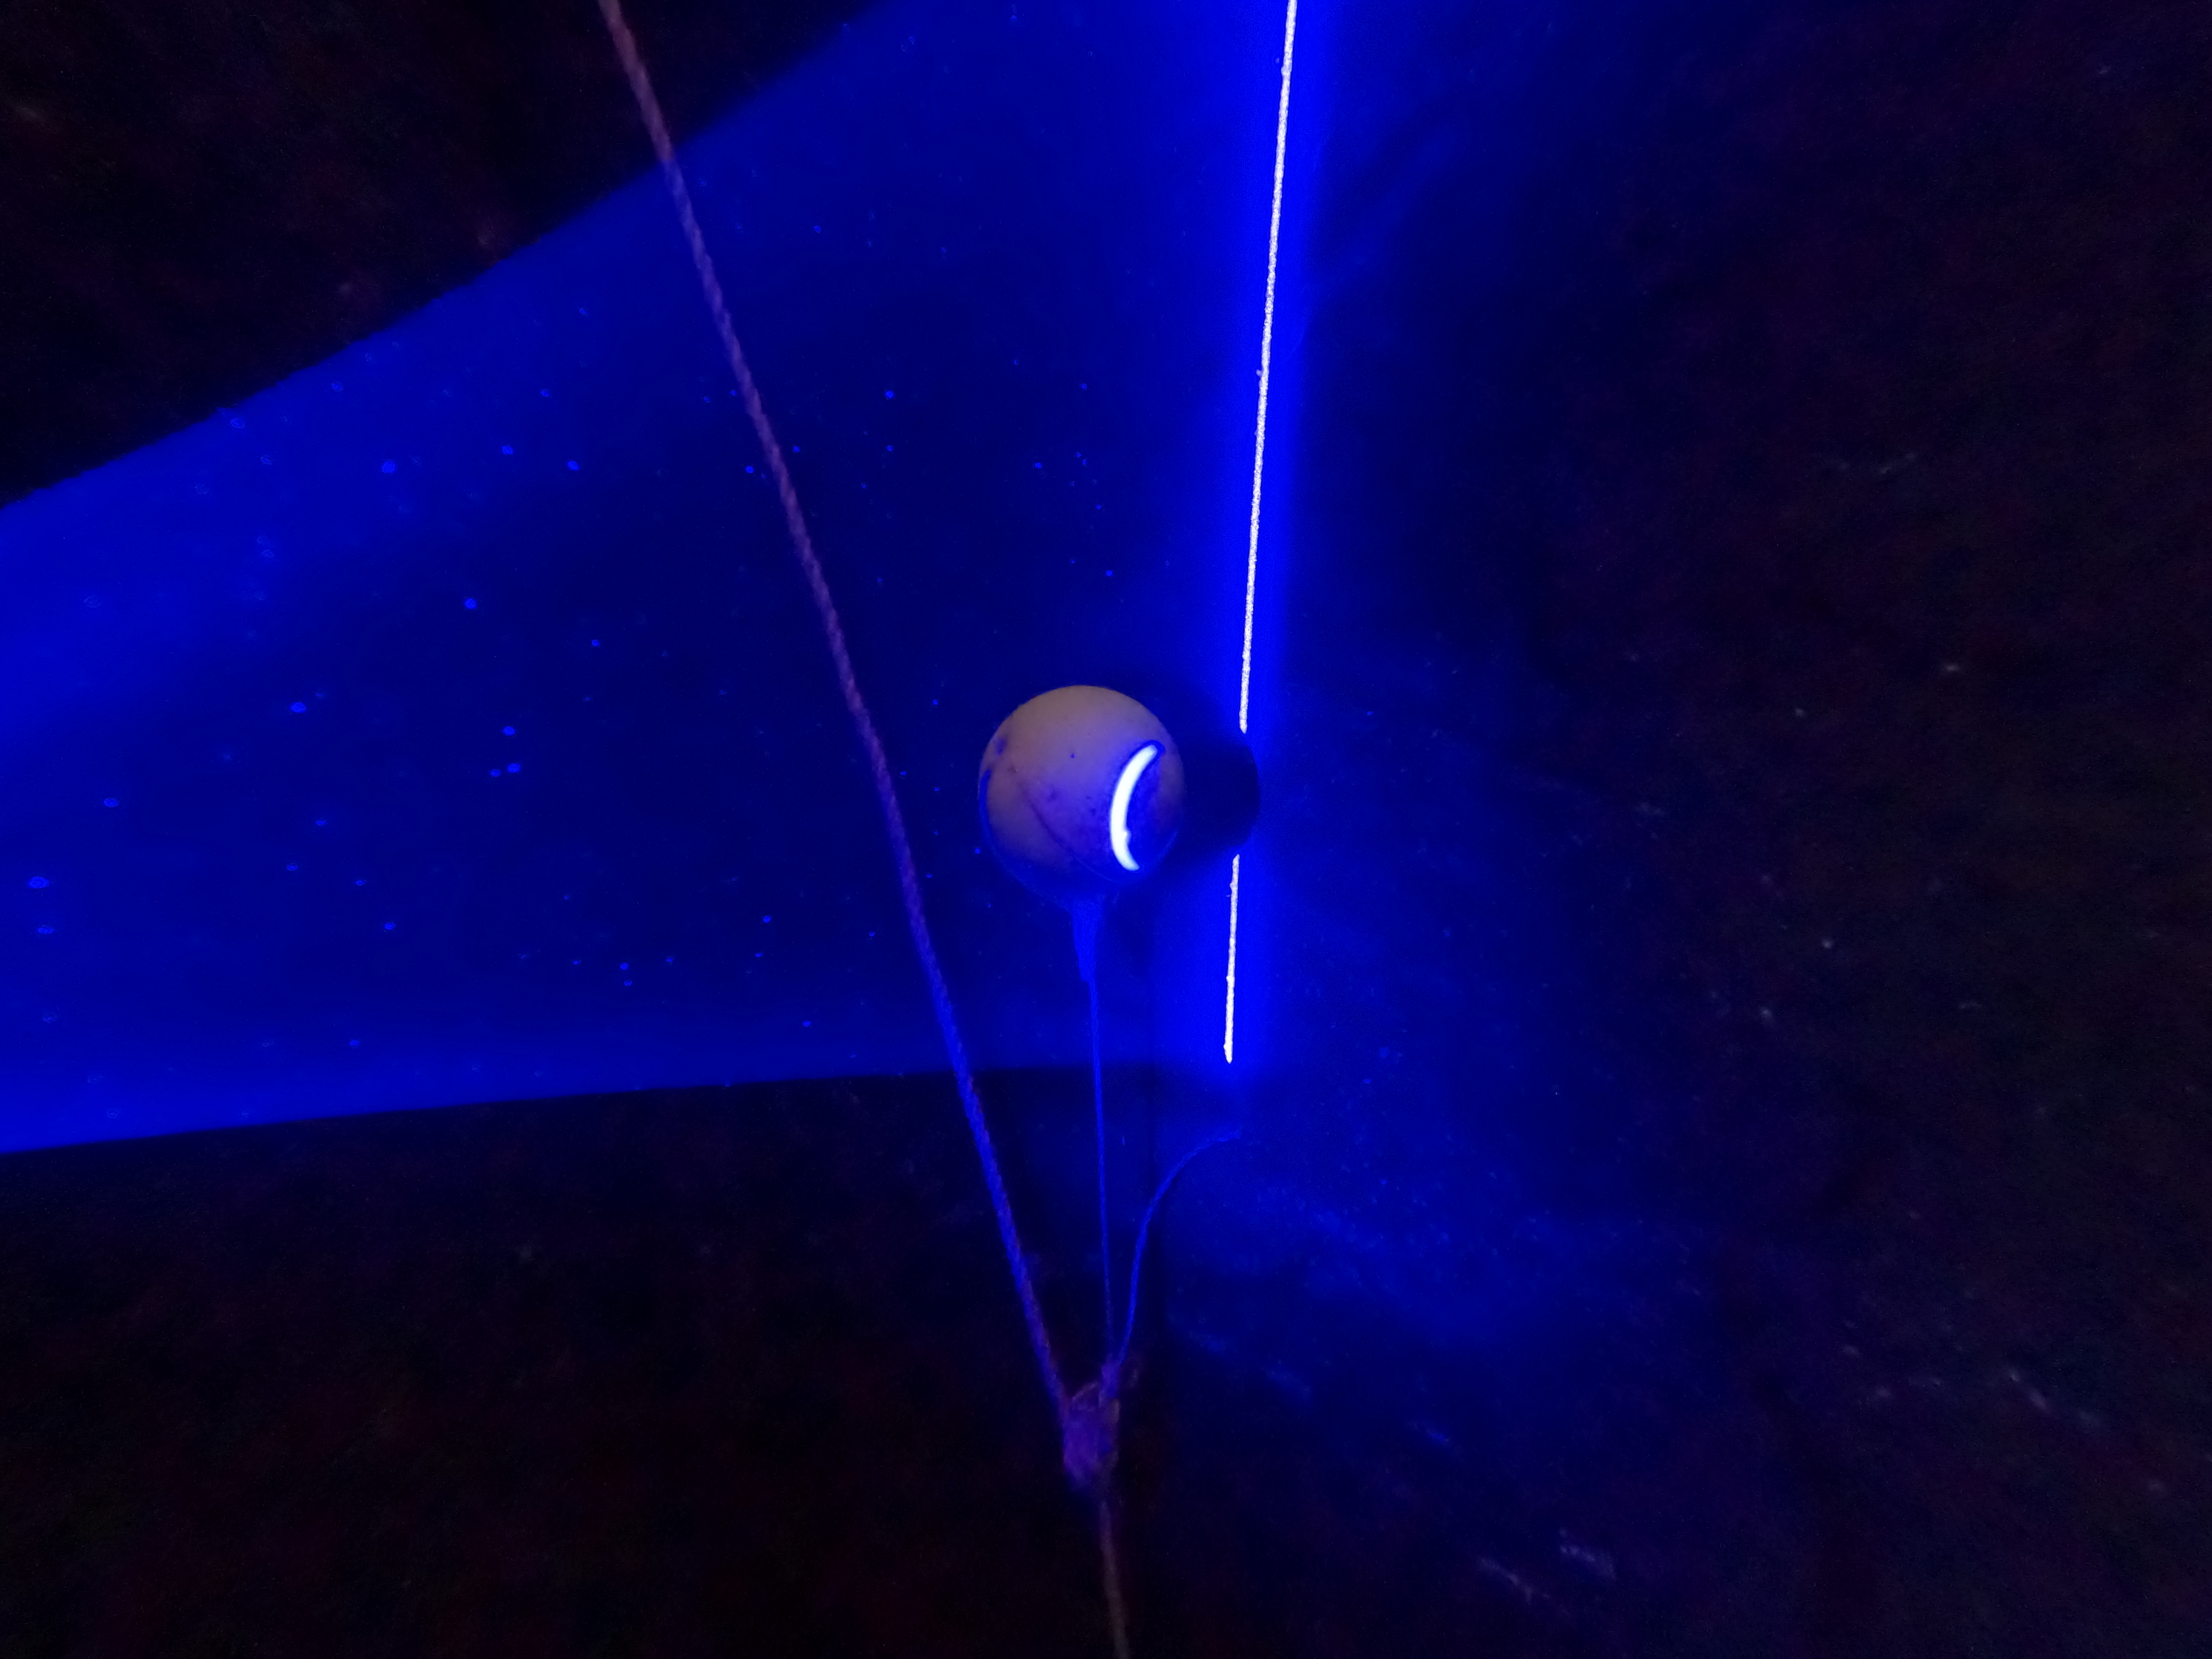

Supplement: Supplementary file 401 [file G0030701.pdf › 3/G0030701.pdf]

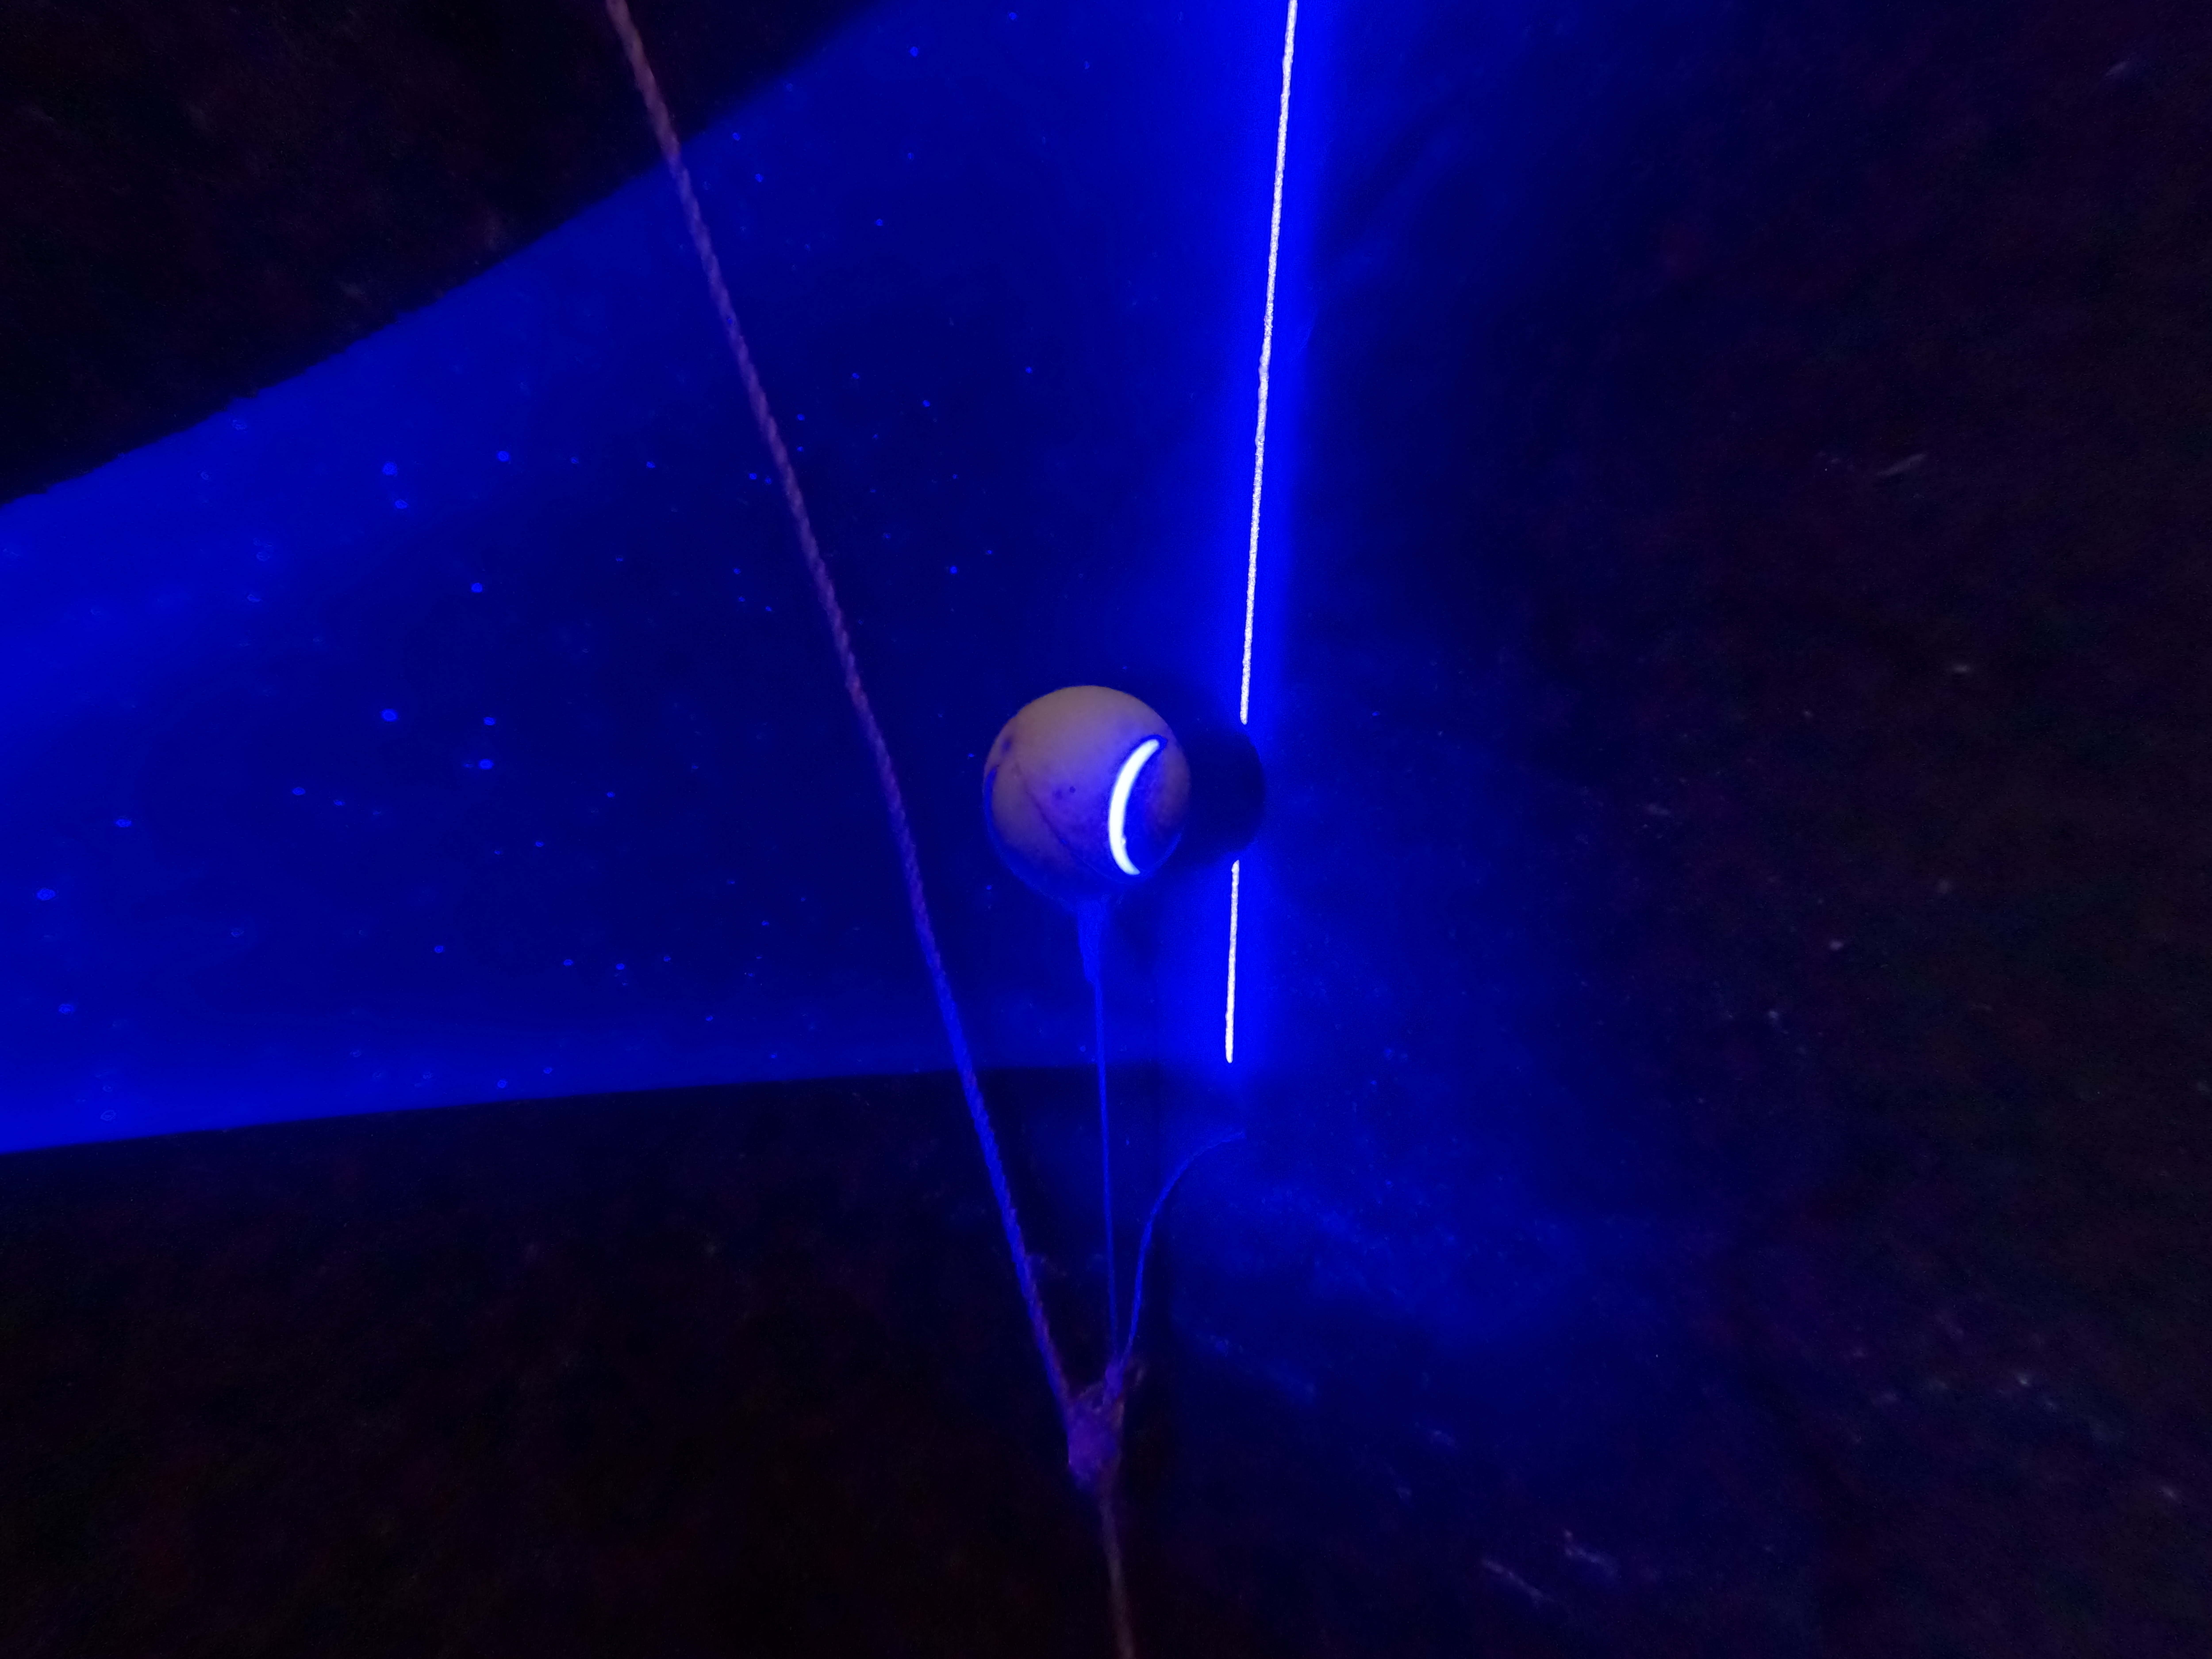

Supplement: Supplementary file 402 [file G0030702.pdf › 3/G0030702.pdf]

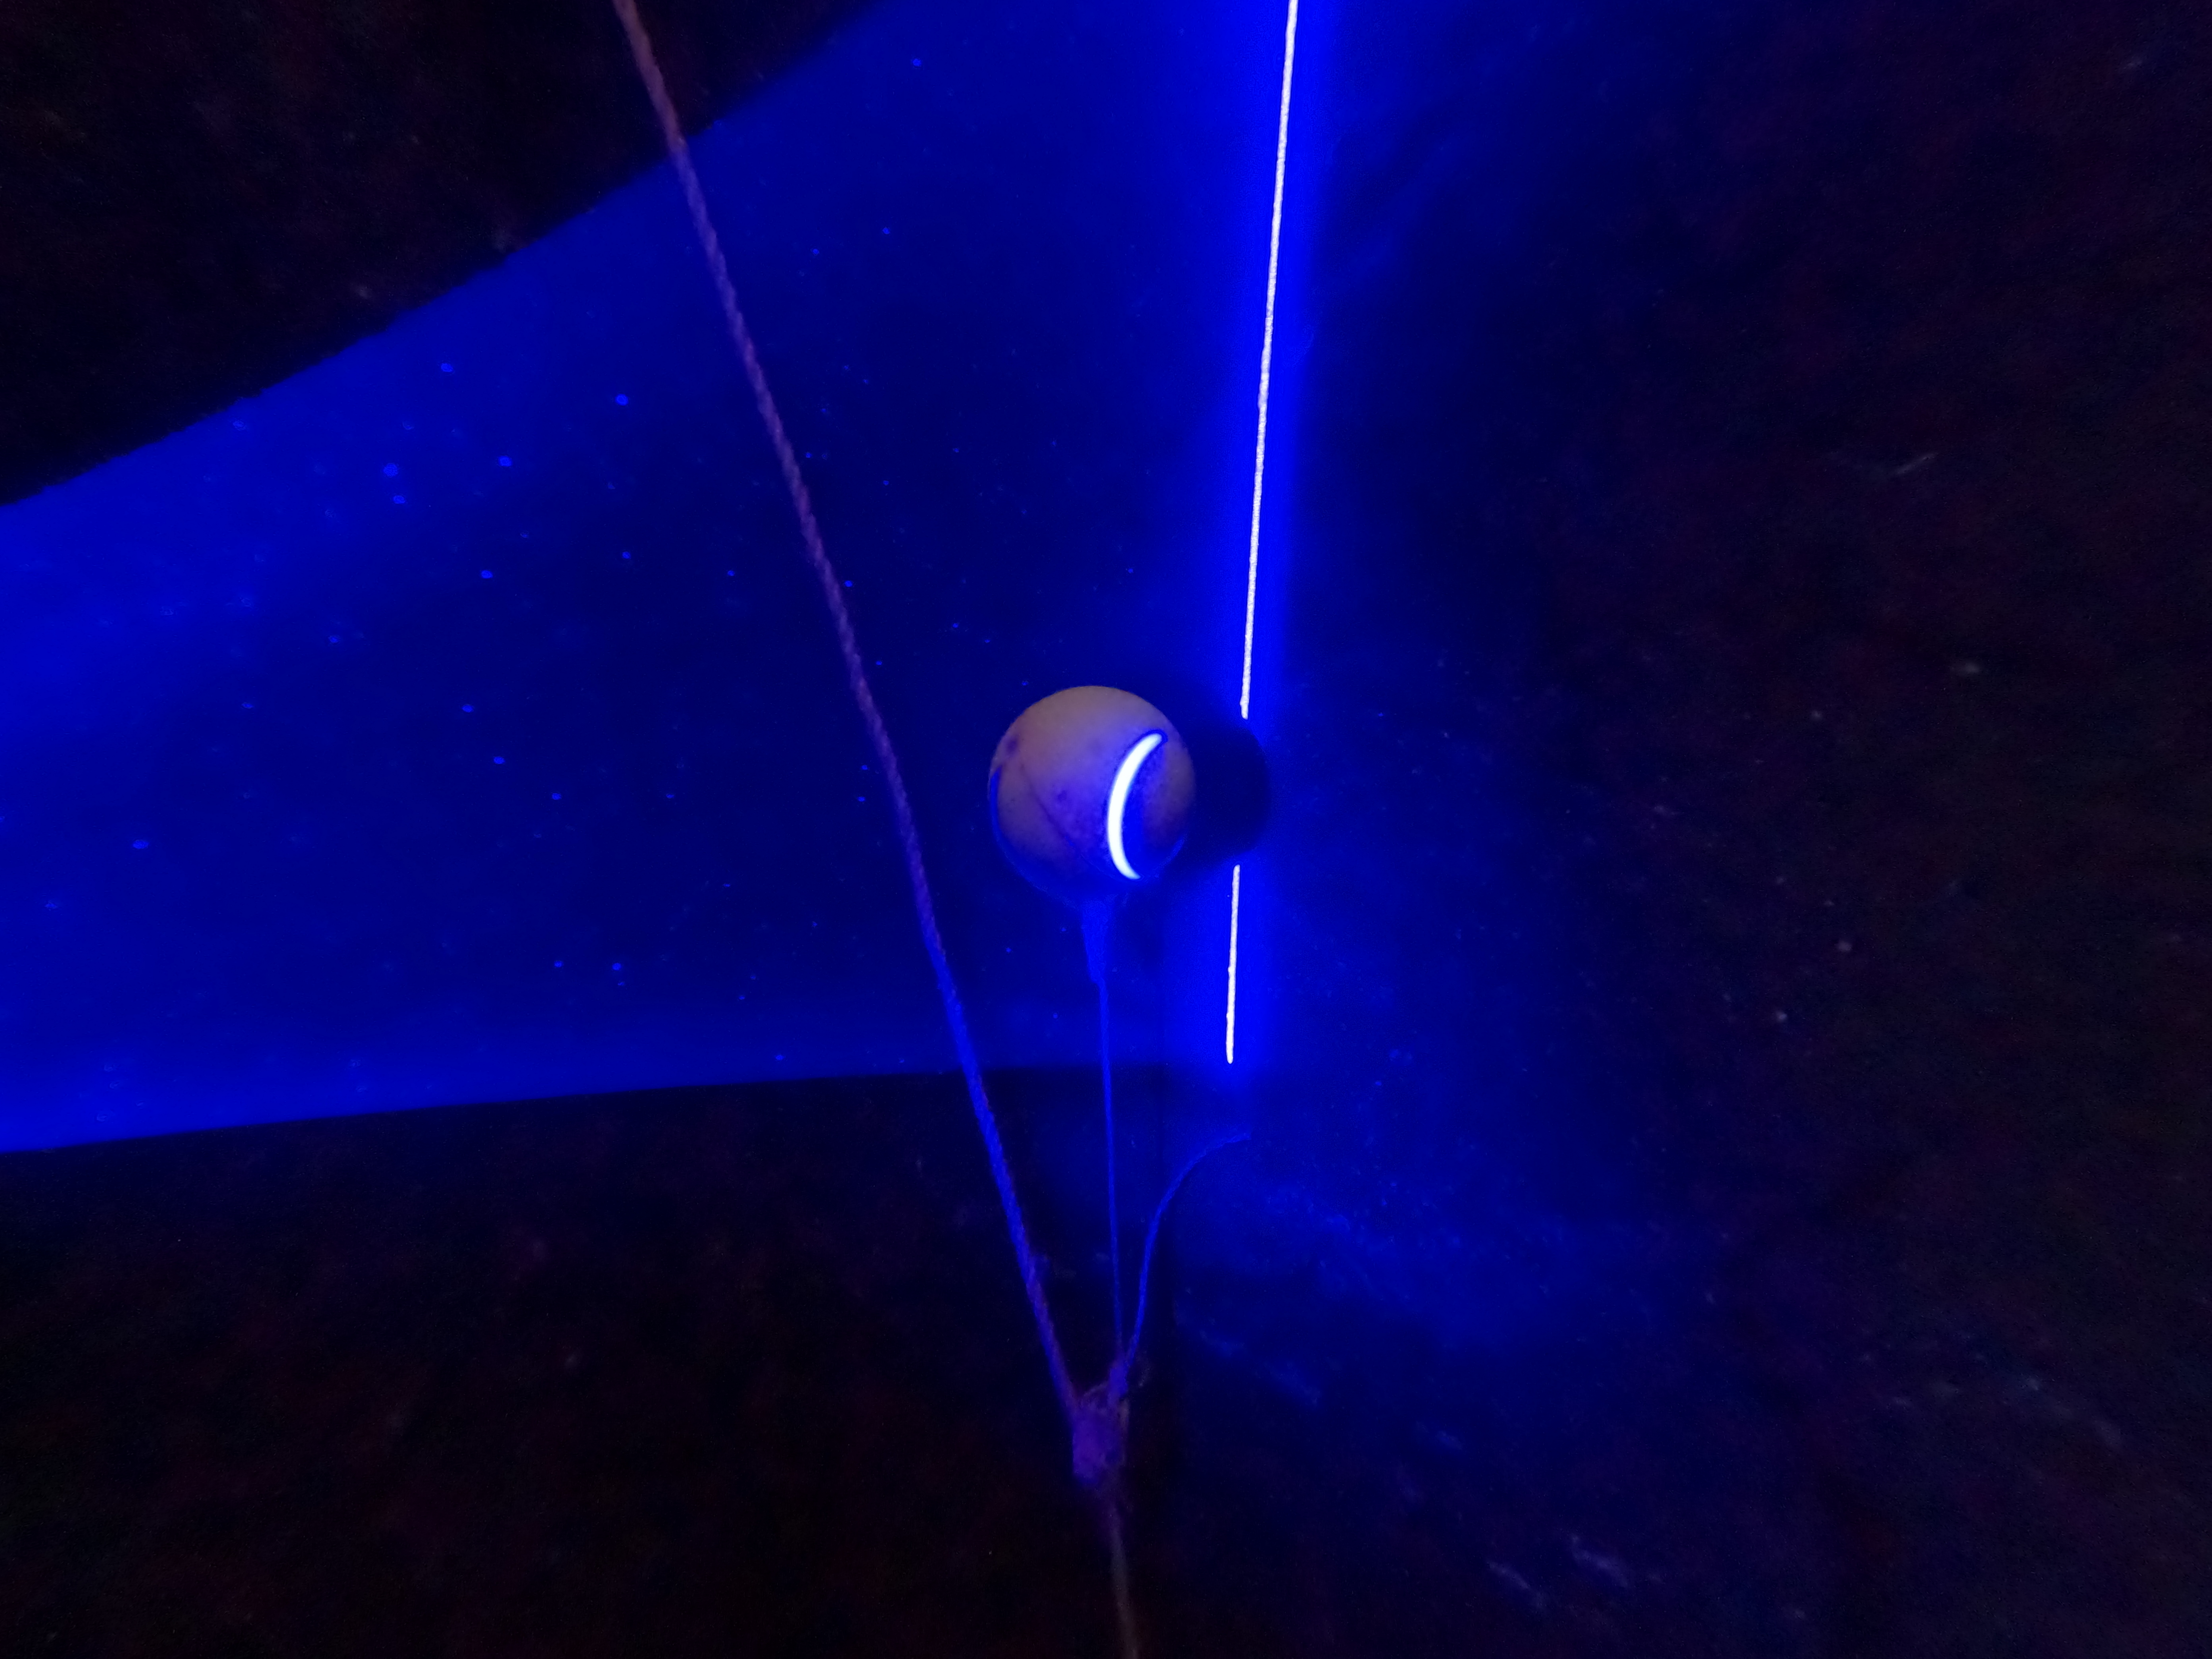

Supplement: Supplementary file 403 [file G0030703.pdf › 3/G0030703.pdf]

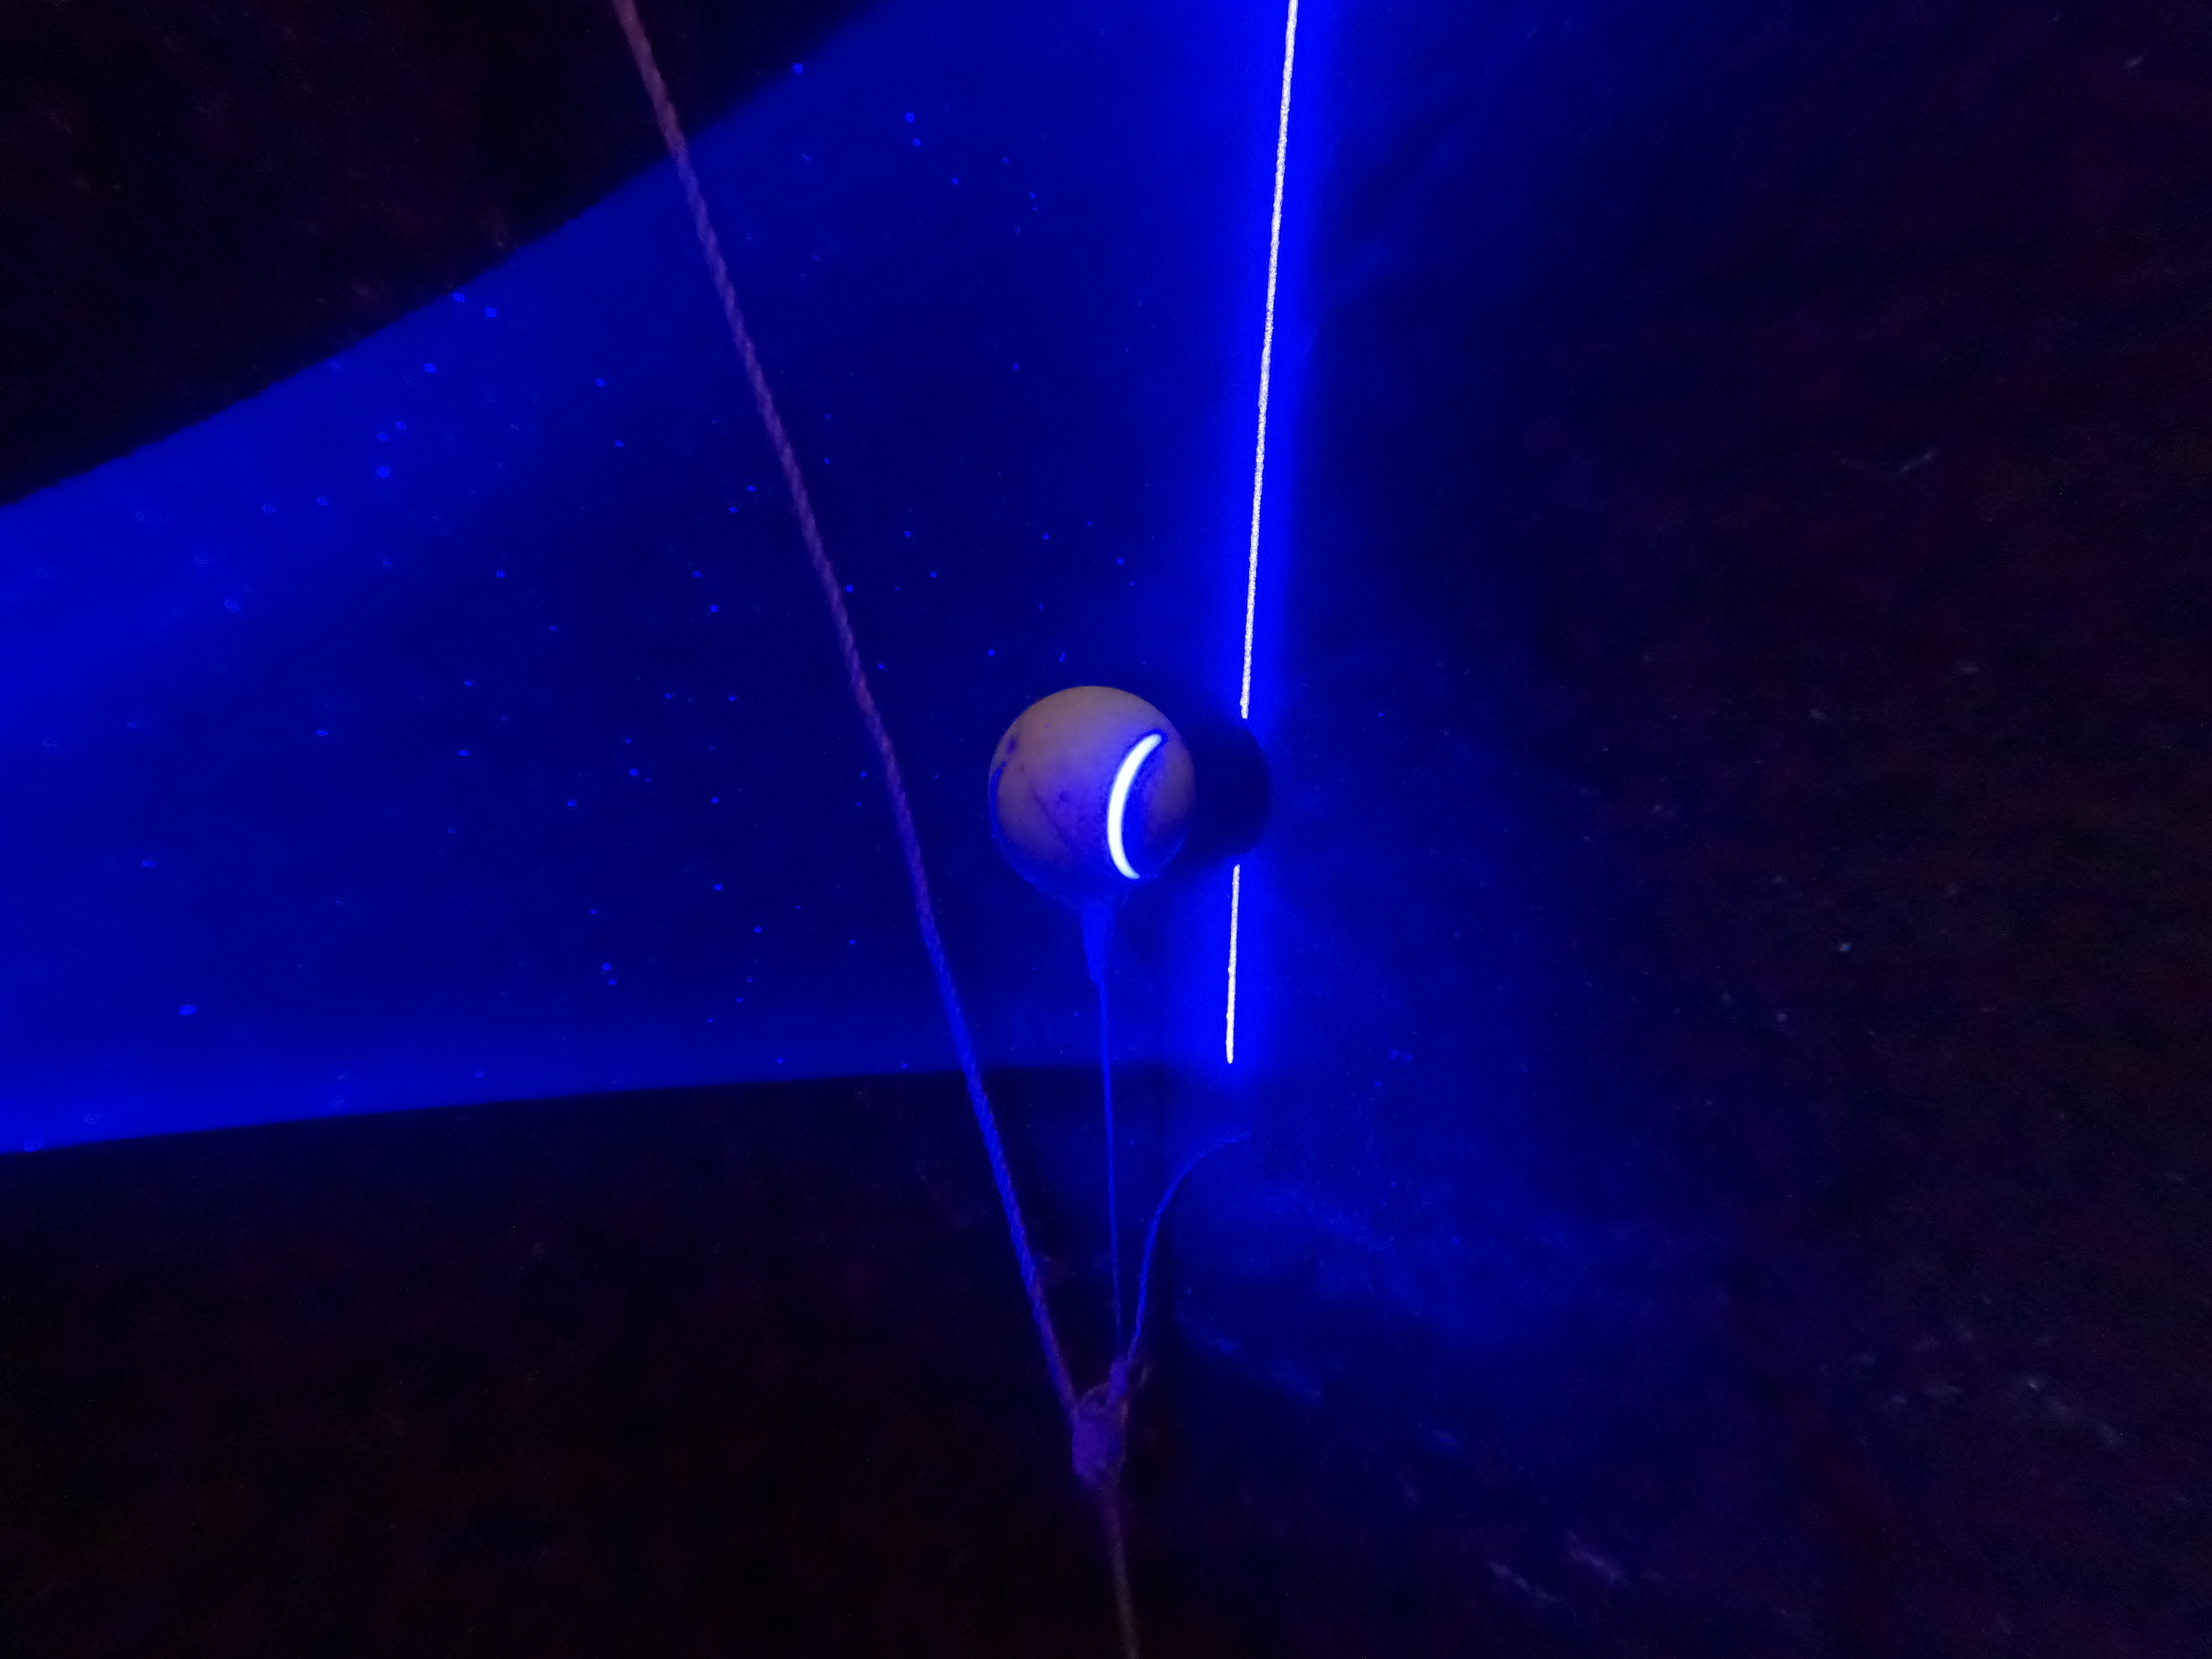

Supplement: Supplementary file 404 [file G0030704.pdf › 3/G0030704.pdf]

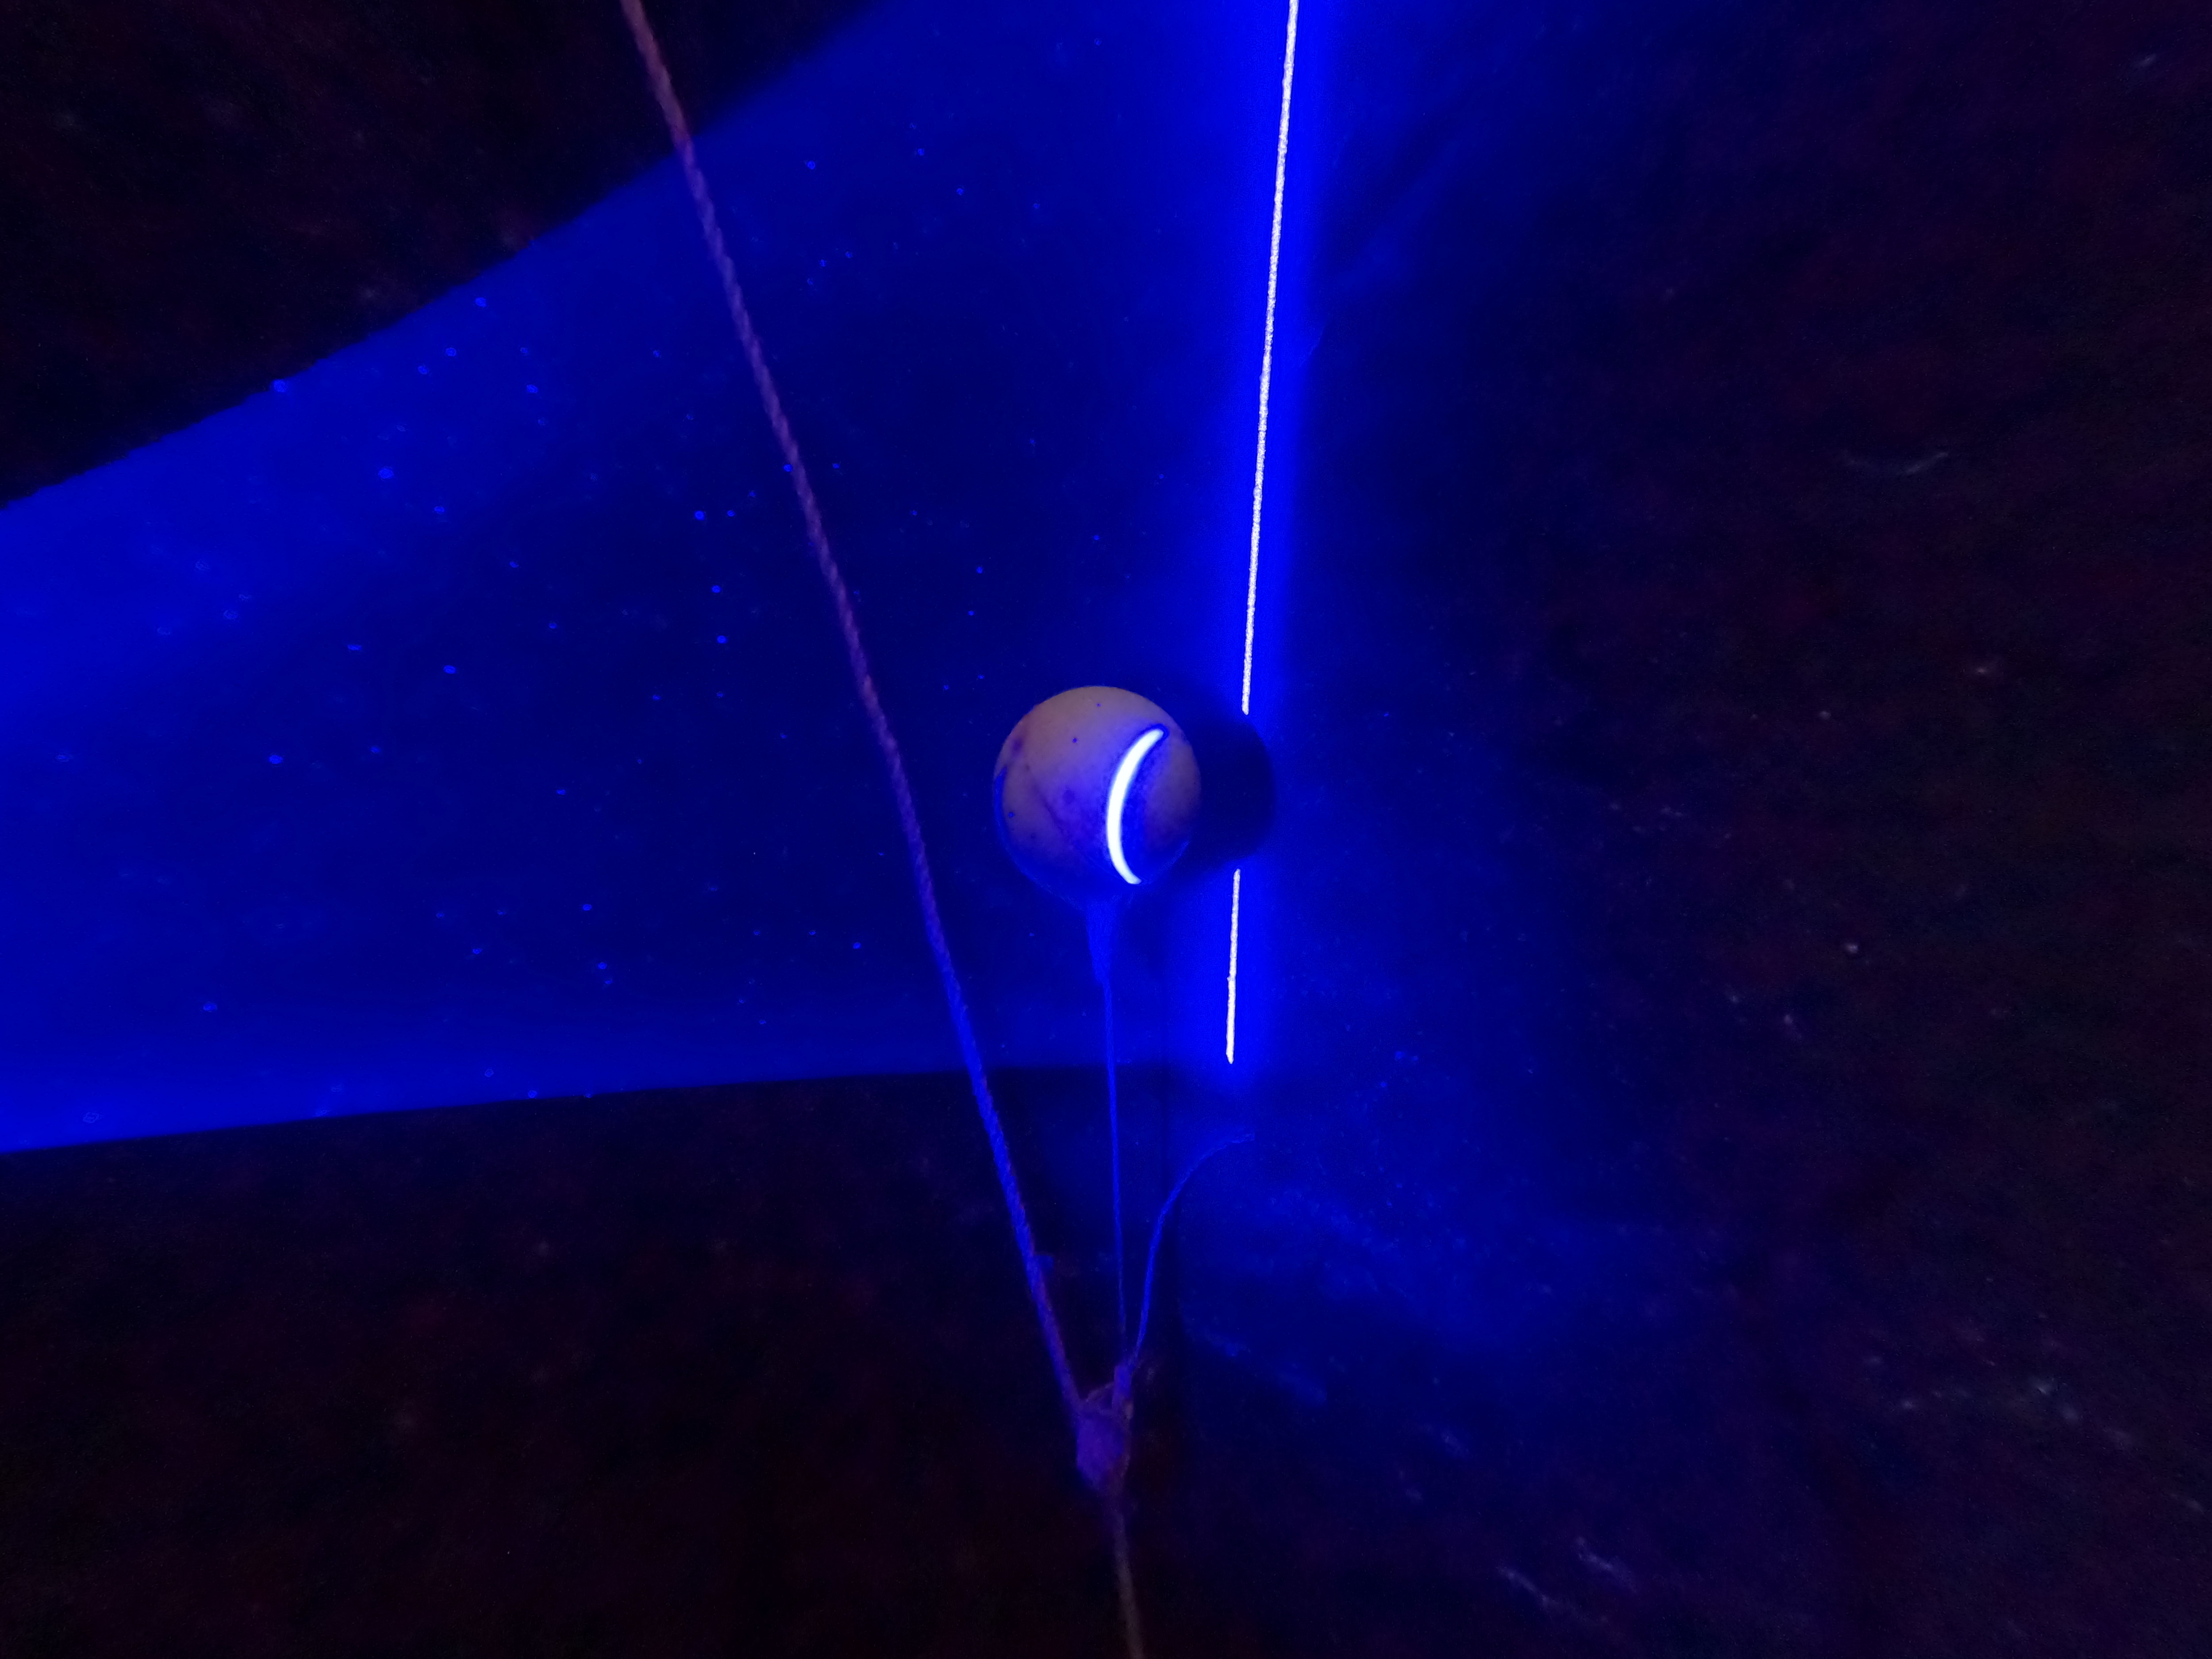

Supplement: Supplementary file 405 [file G0030705.pdf › 3/G0030705.pdf]

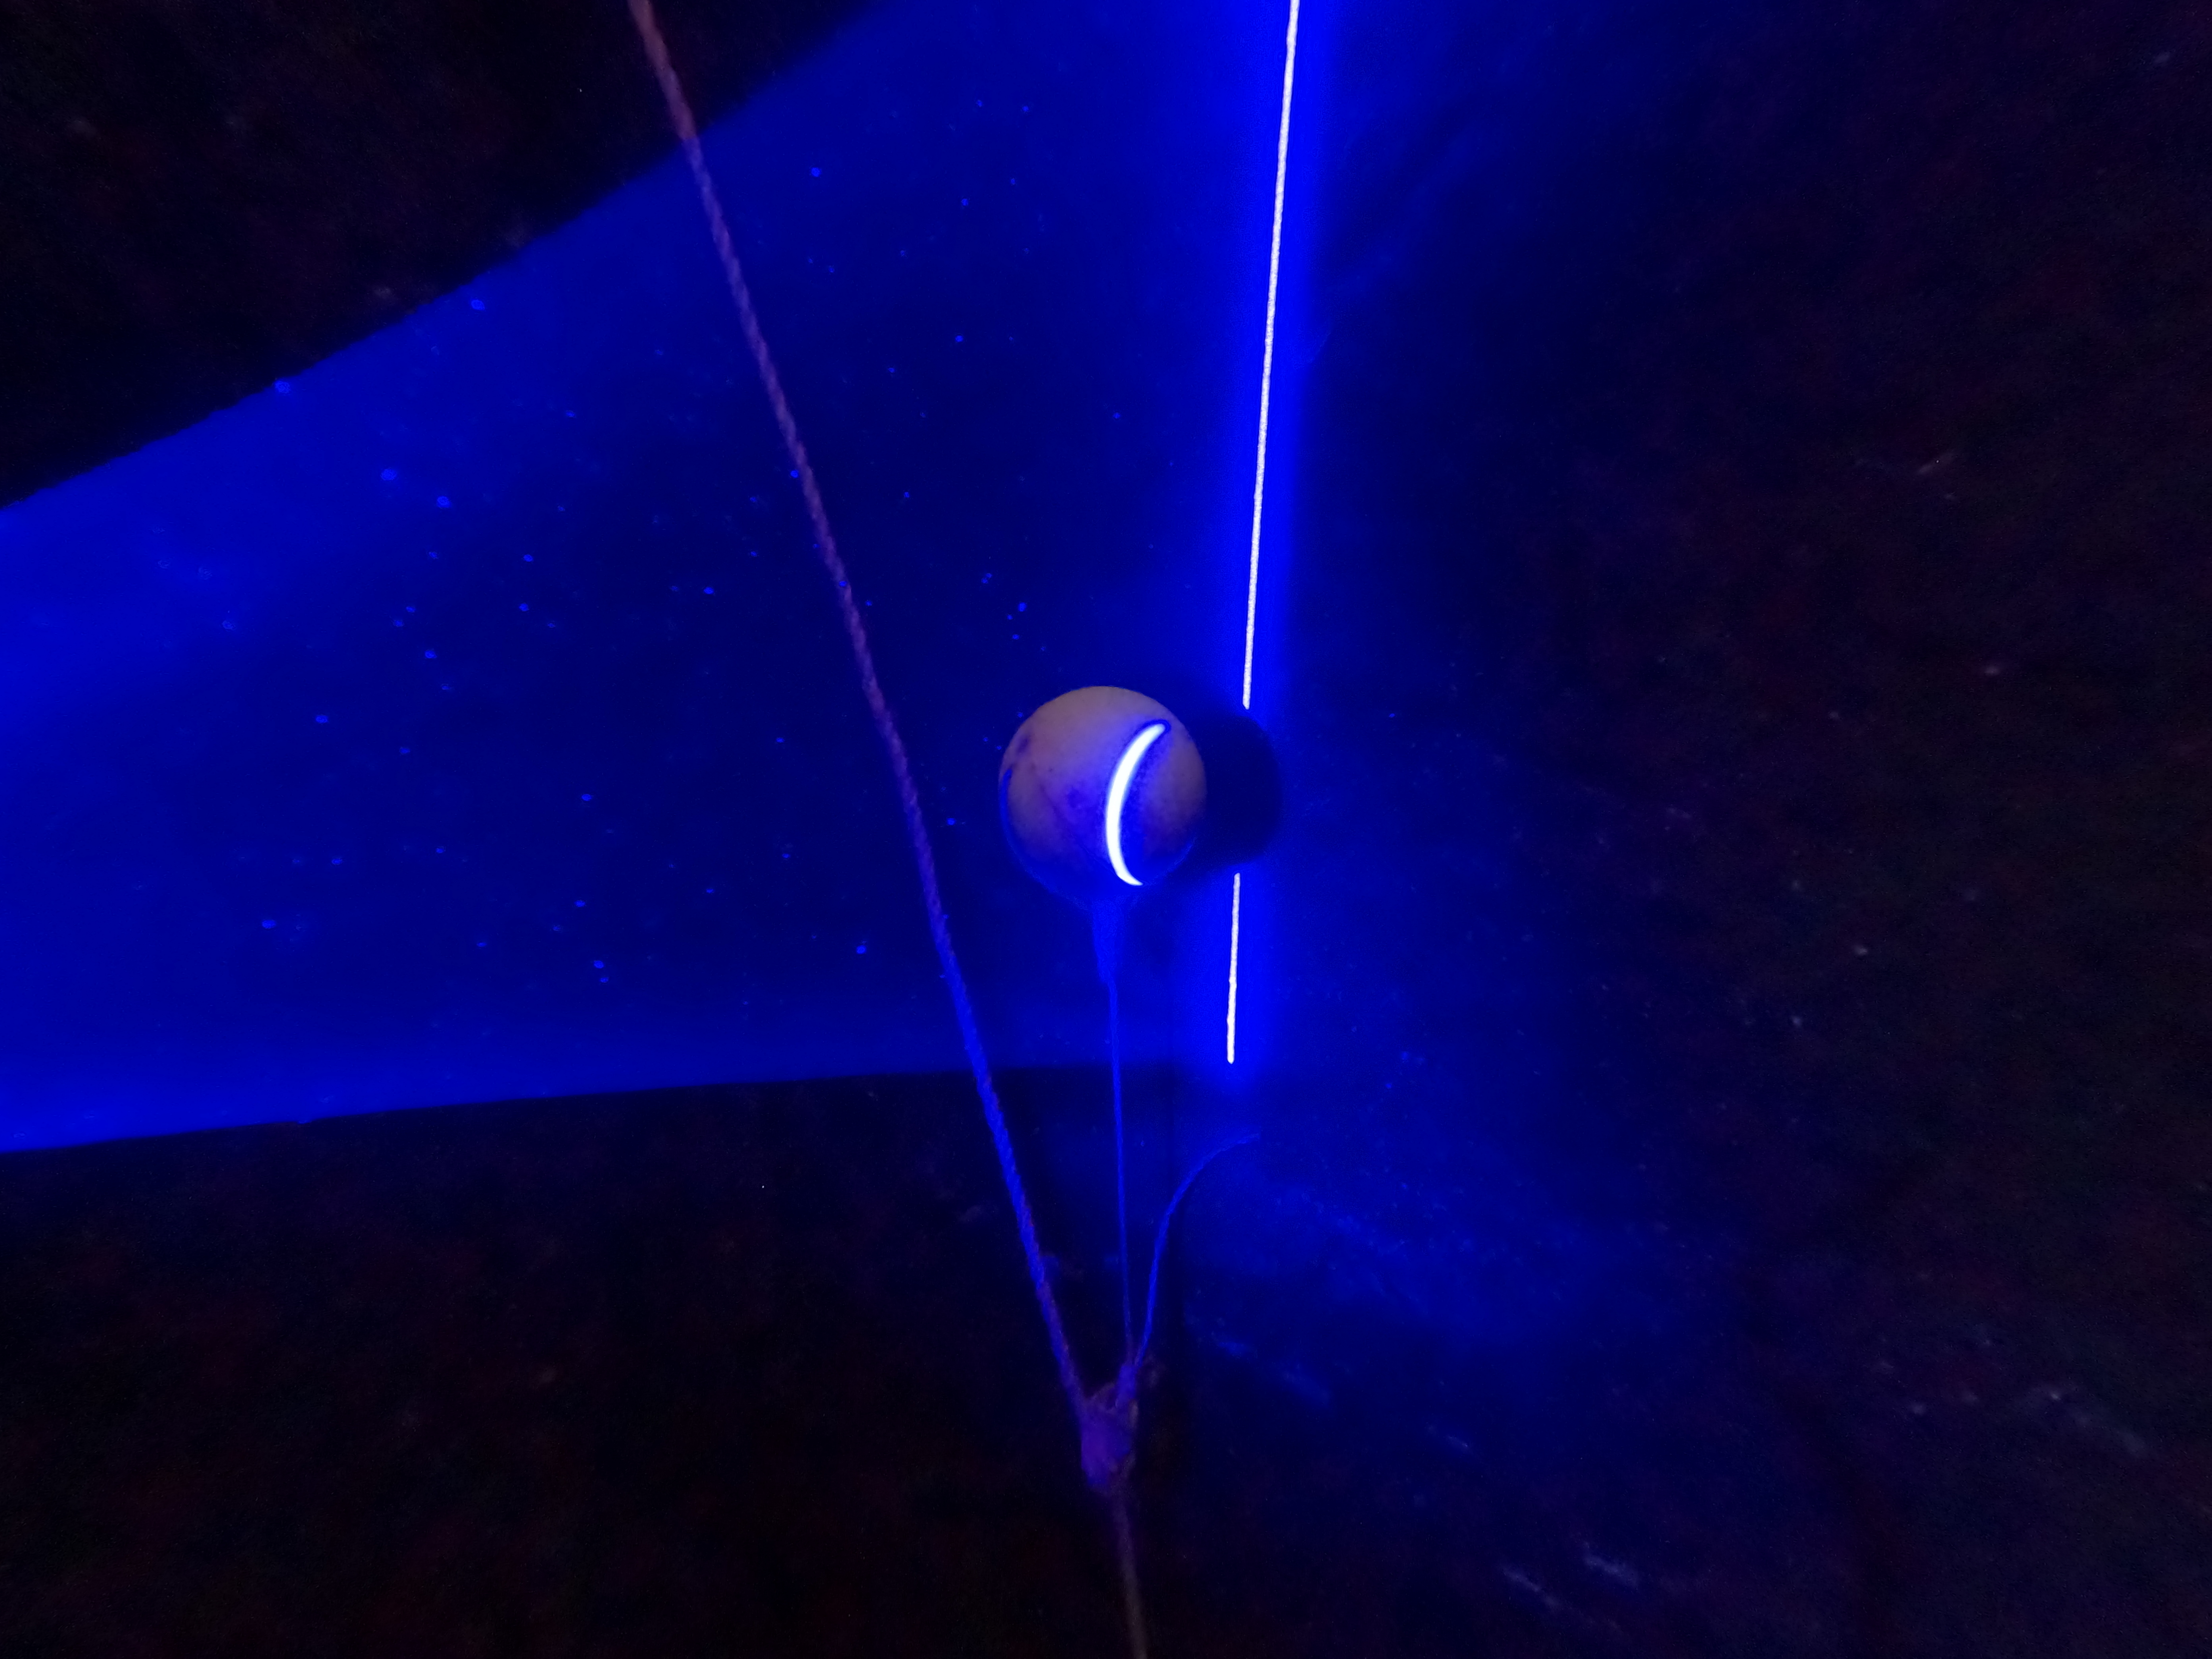

Supplement: Supplementary file 406 [file G0030706.pdf › 3/G0030706.pdf]

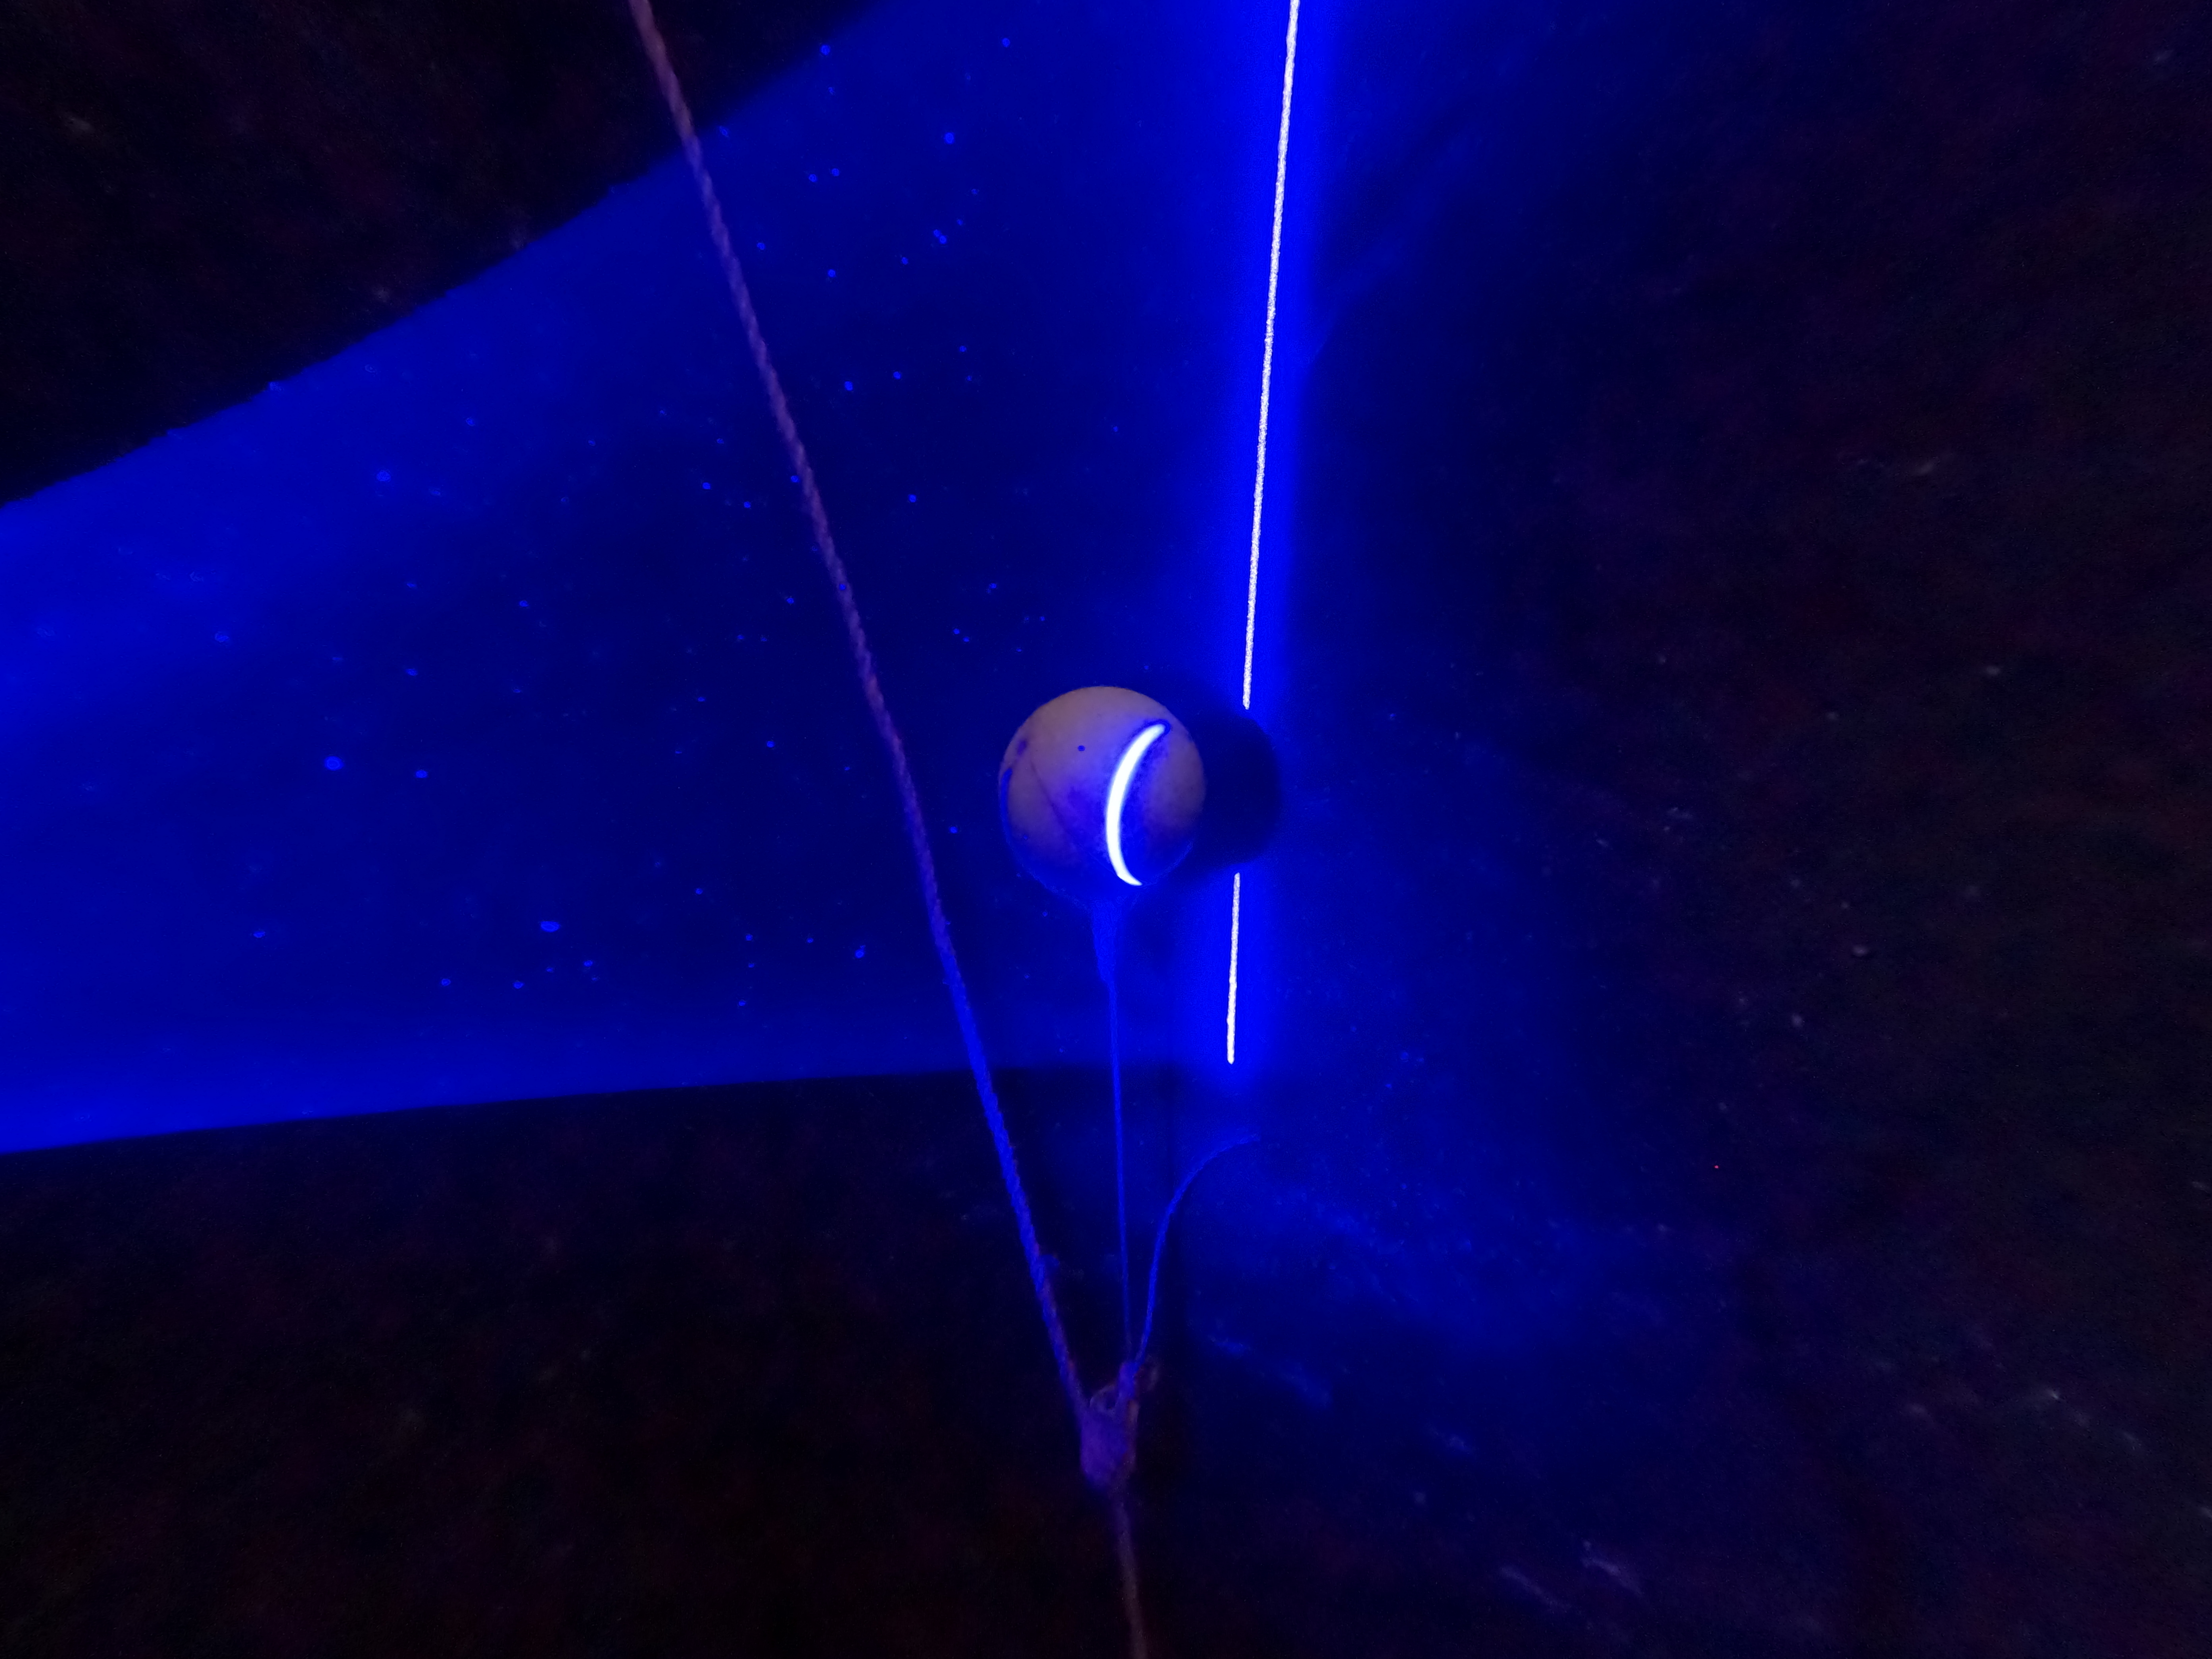

Supplement: Supplementary file 407 [file G0030707.pdf › 3/G0030707.pdf]

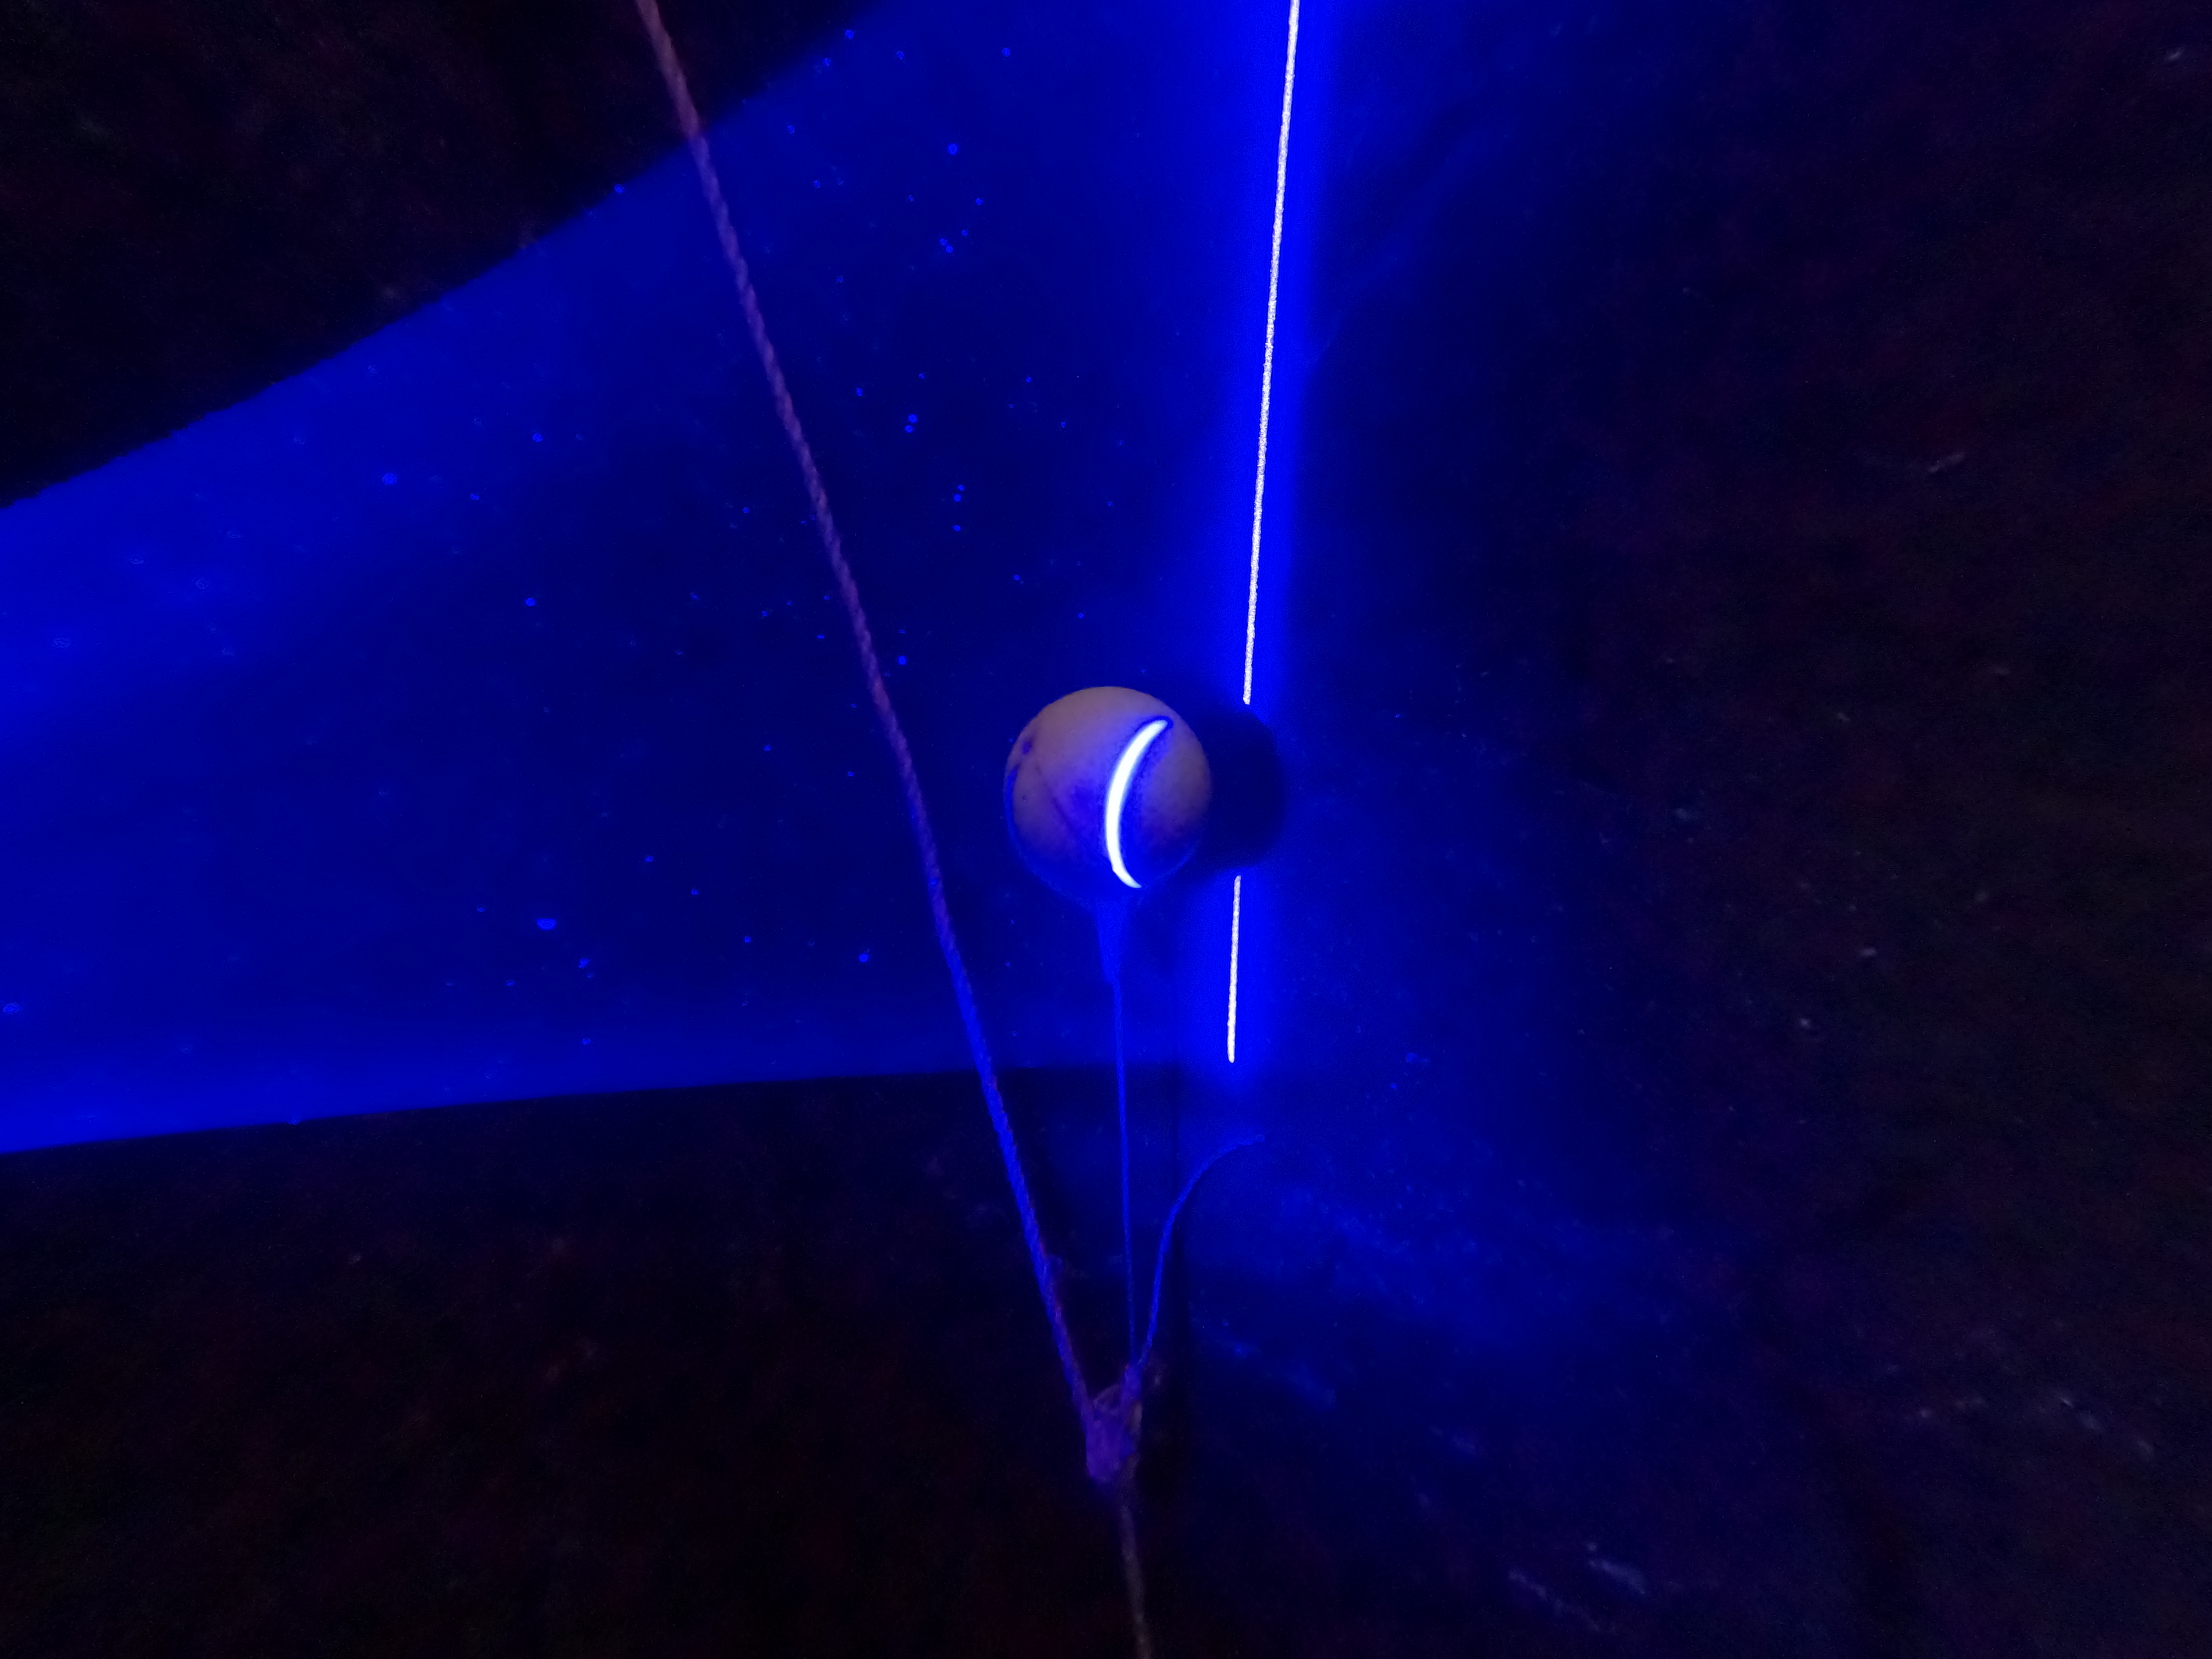

Supplement: Supplementary file 408 [file G0030708.pdf › 3/G0030708.pdf]

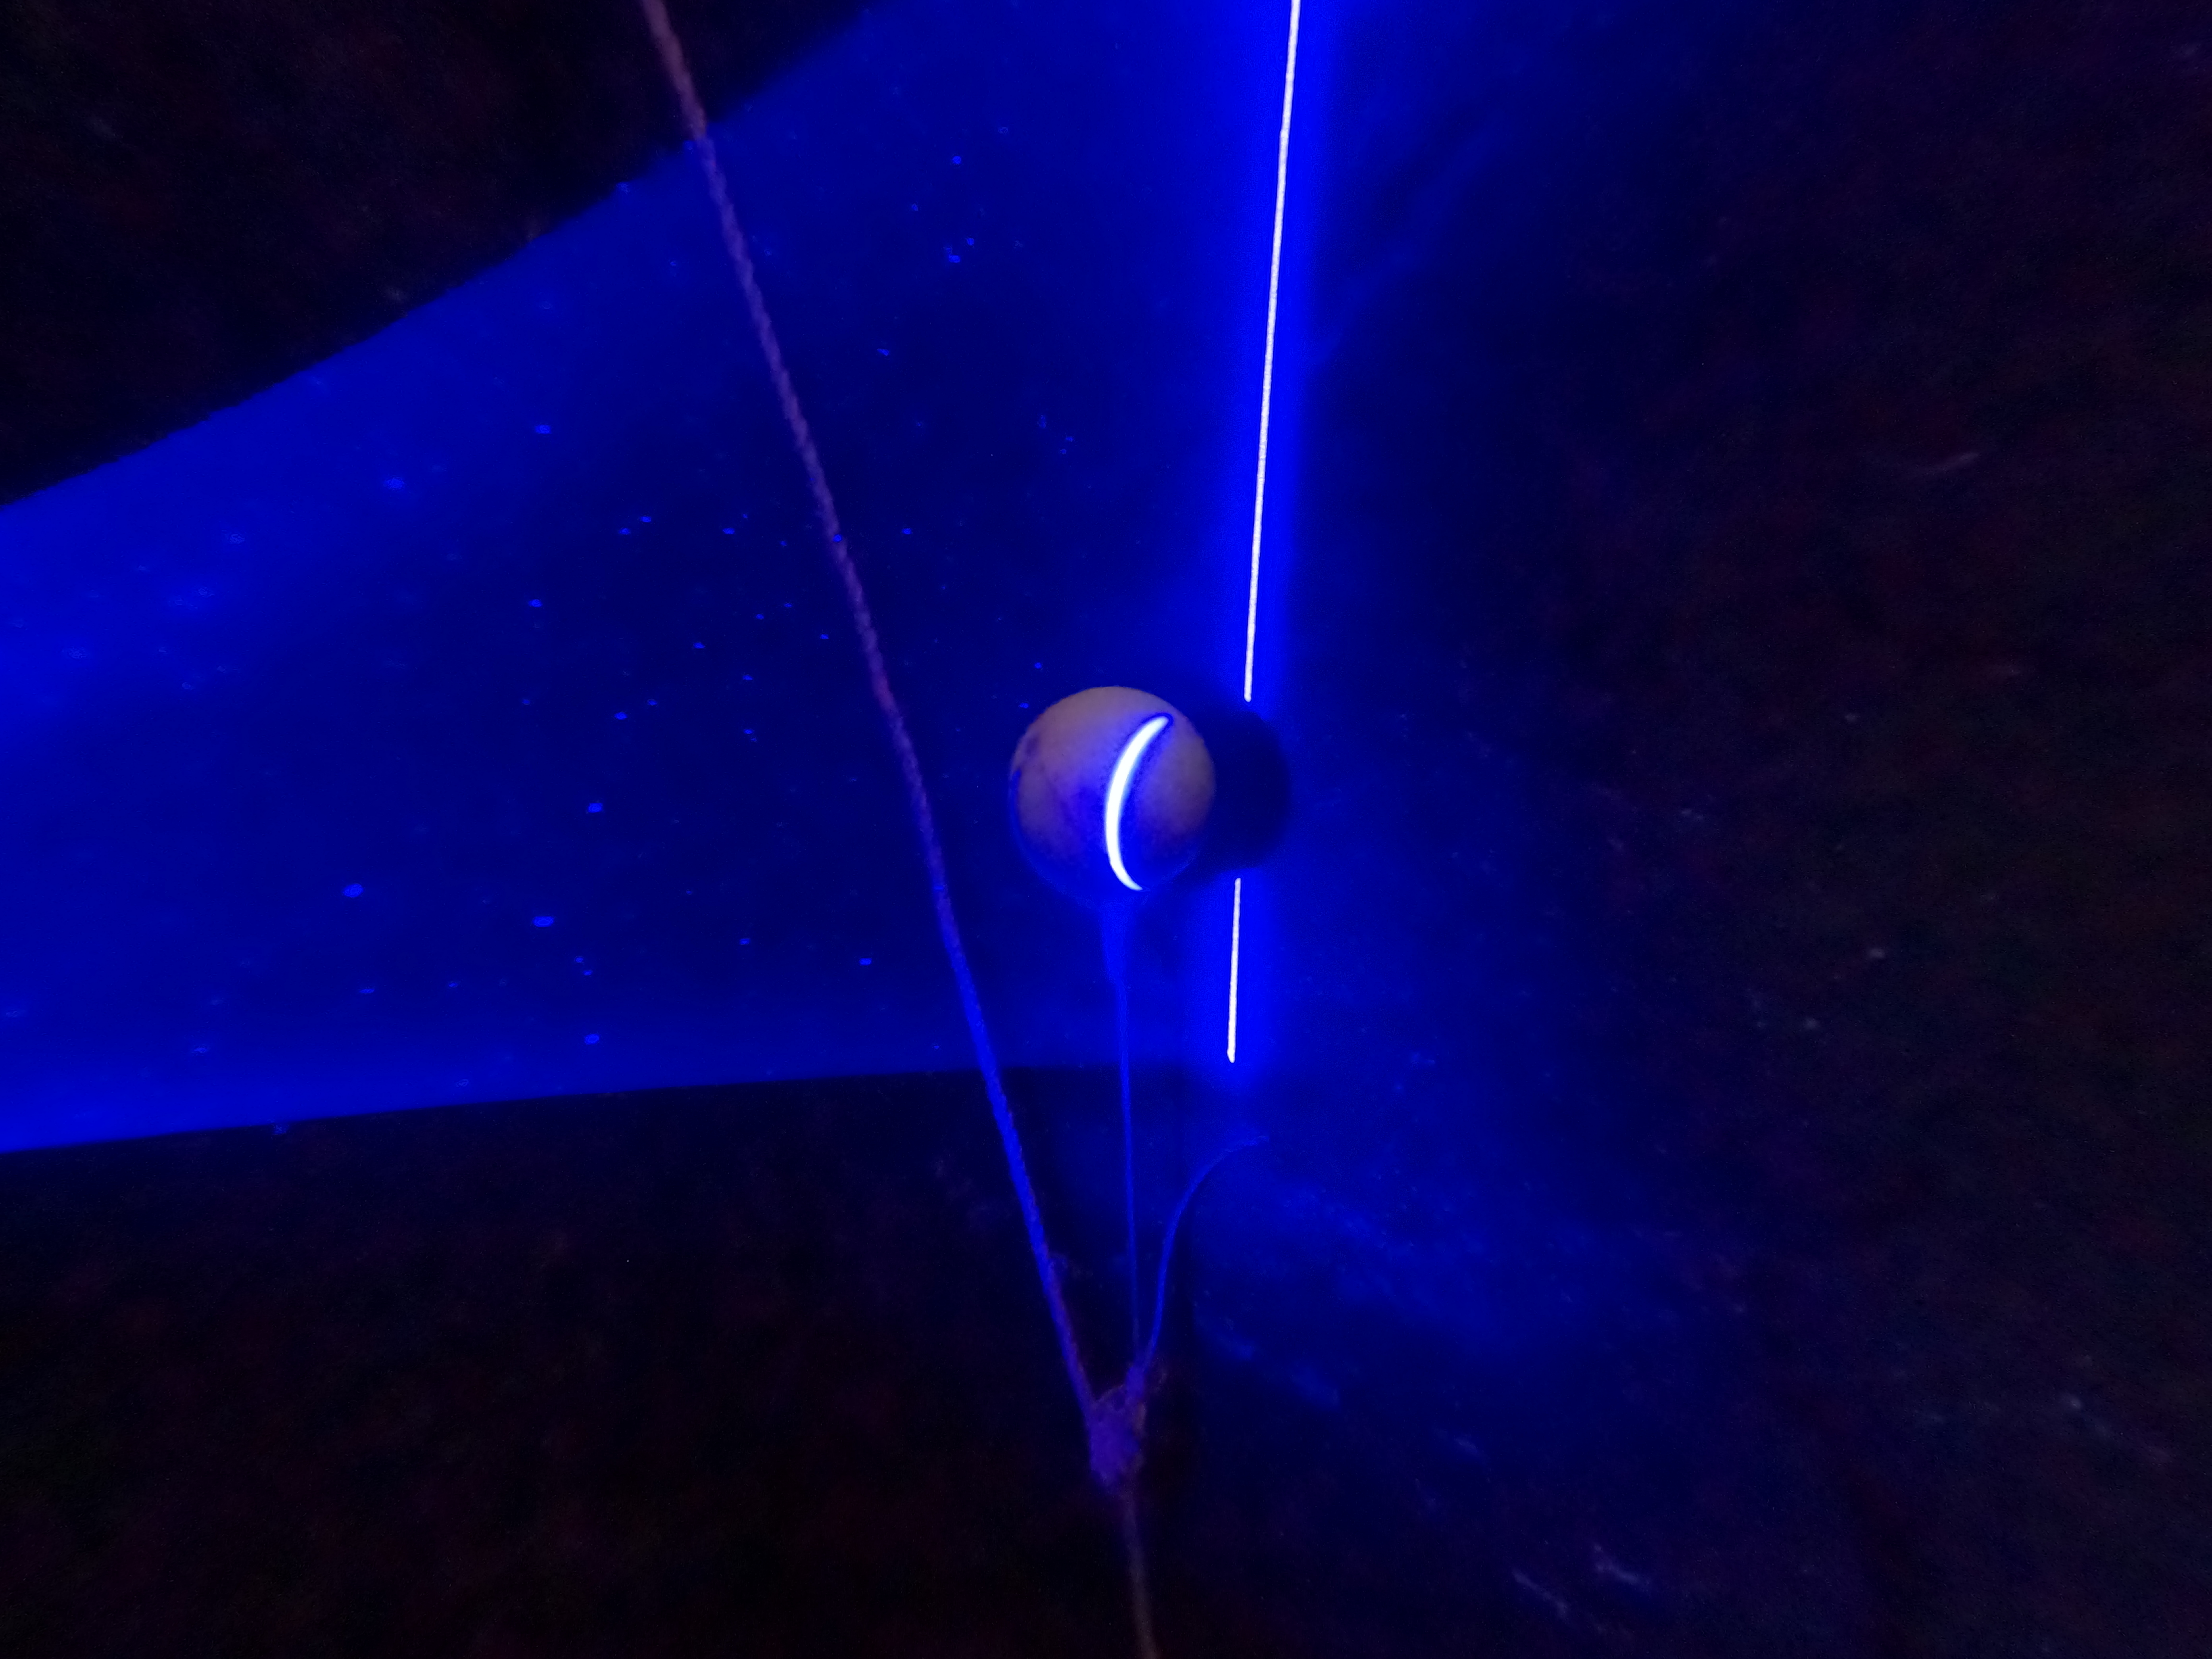

Supplement: Supplementary file 409 [file G0030709.pdf › 3/G0030709.pdf]

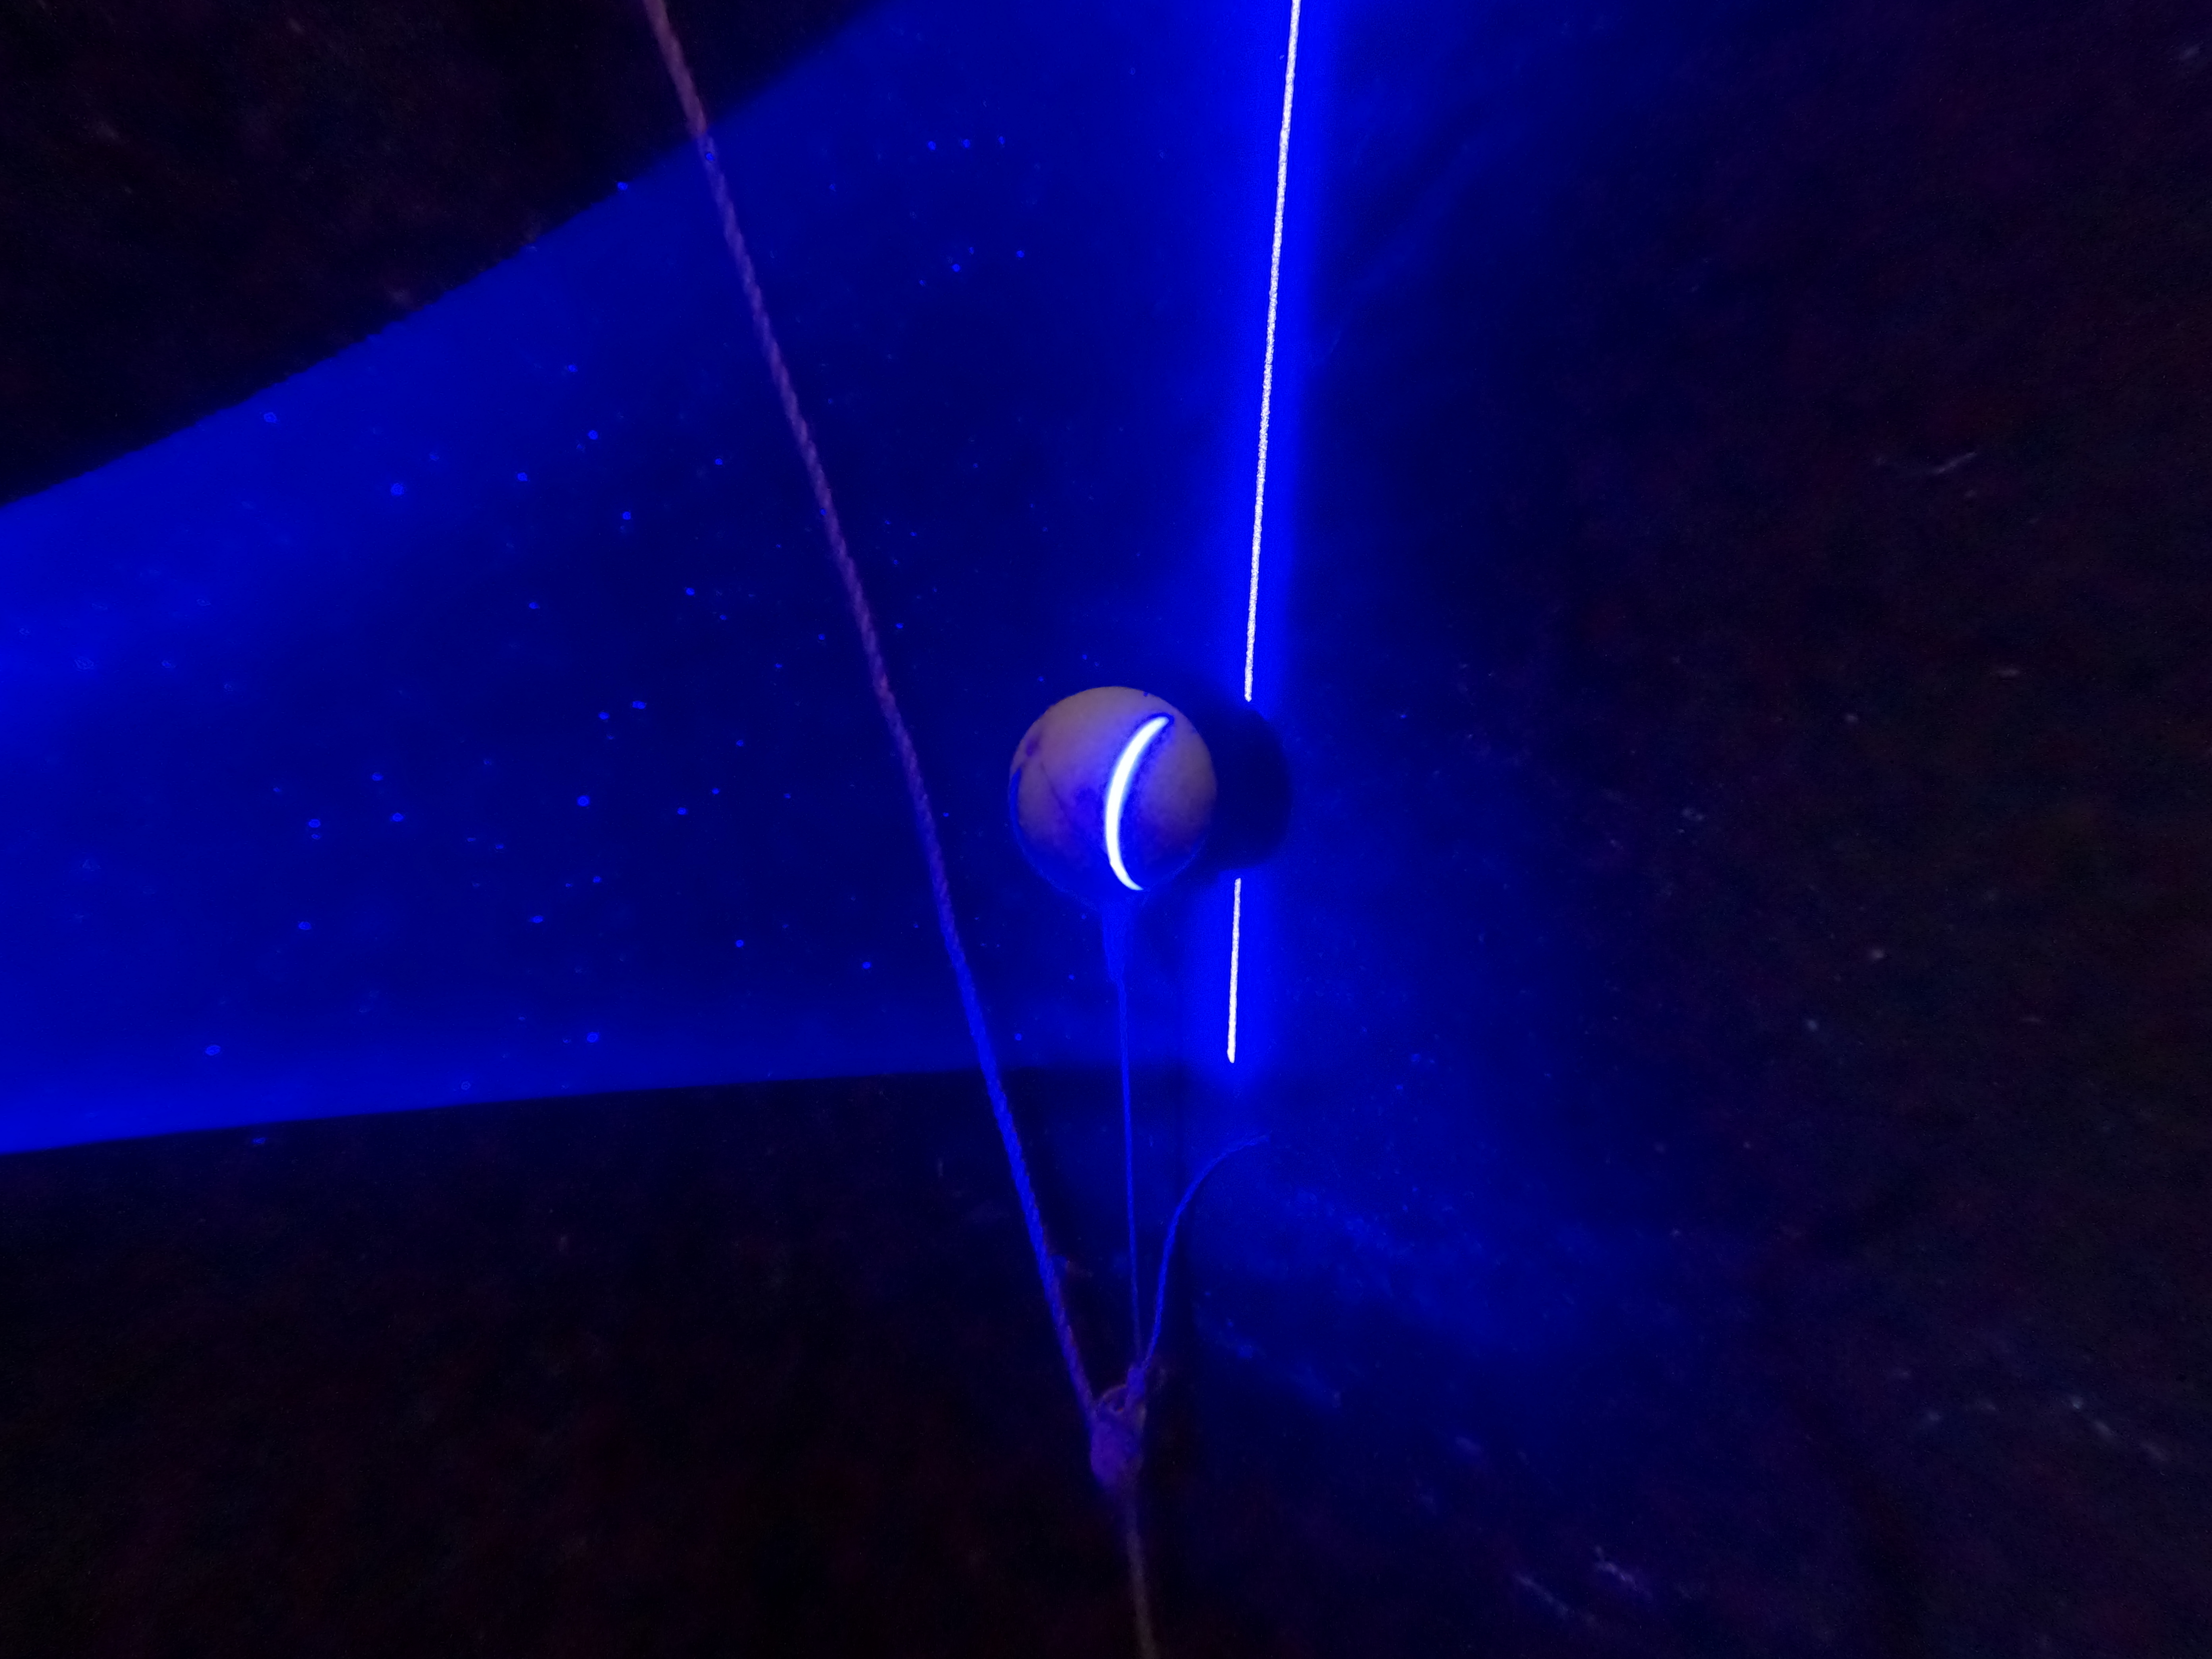

Supplement: Supplementary file 410 [file G0030710.pdf › 3/G0030710.pdf]

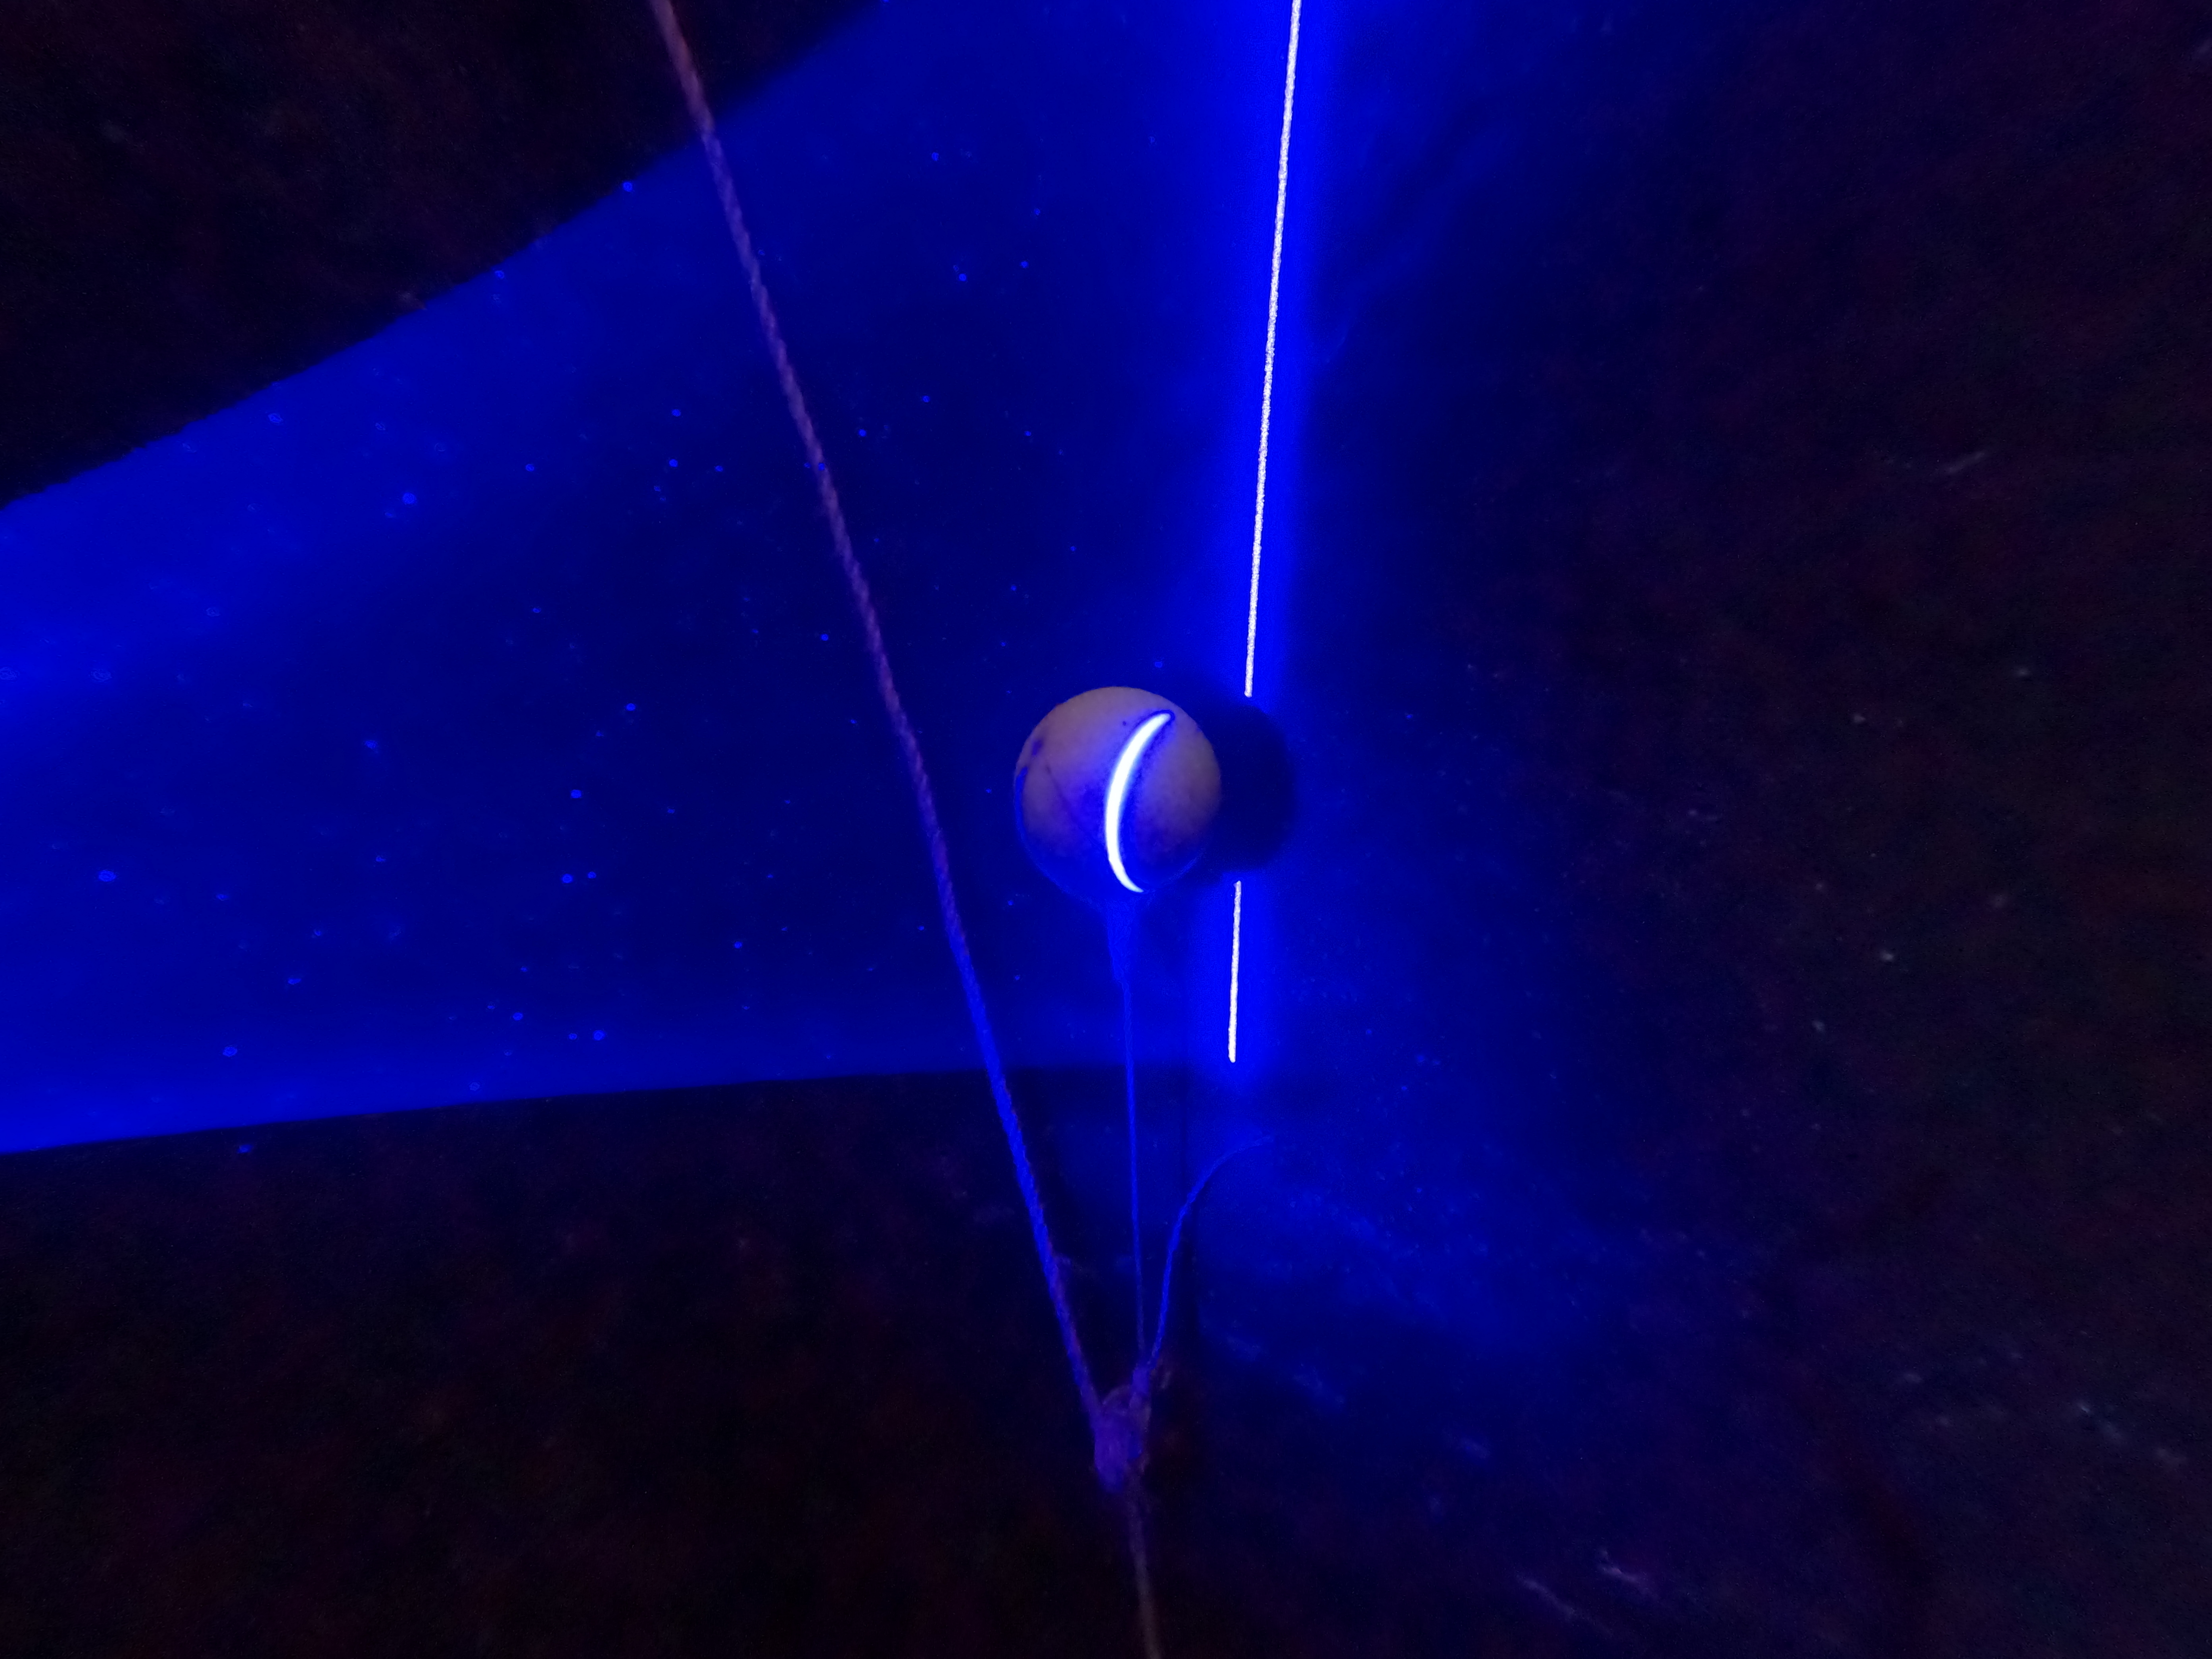

Supplement: Supplementary file 411 [file G0030711.pdf › 3/G0030711.pdf]

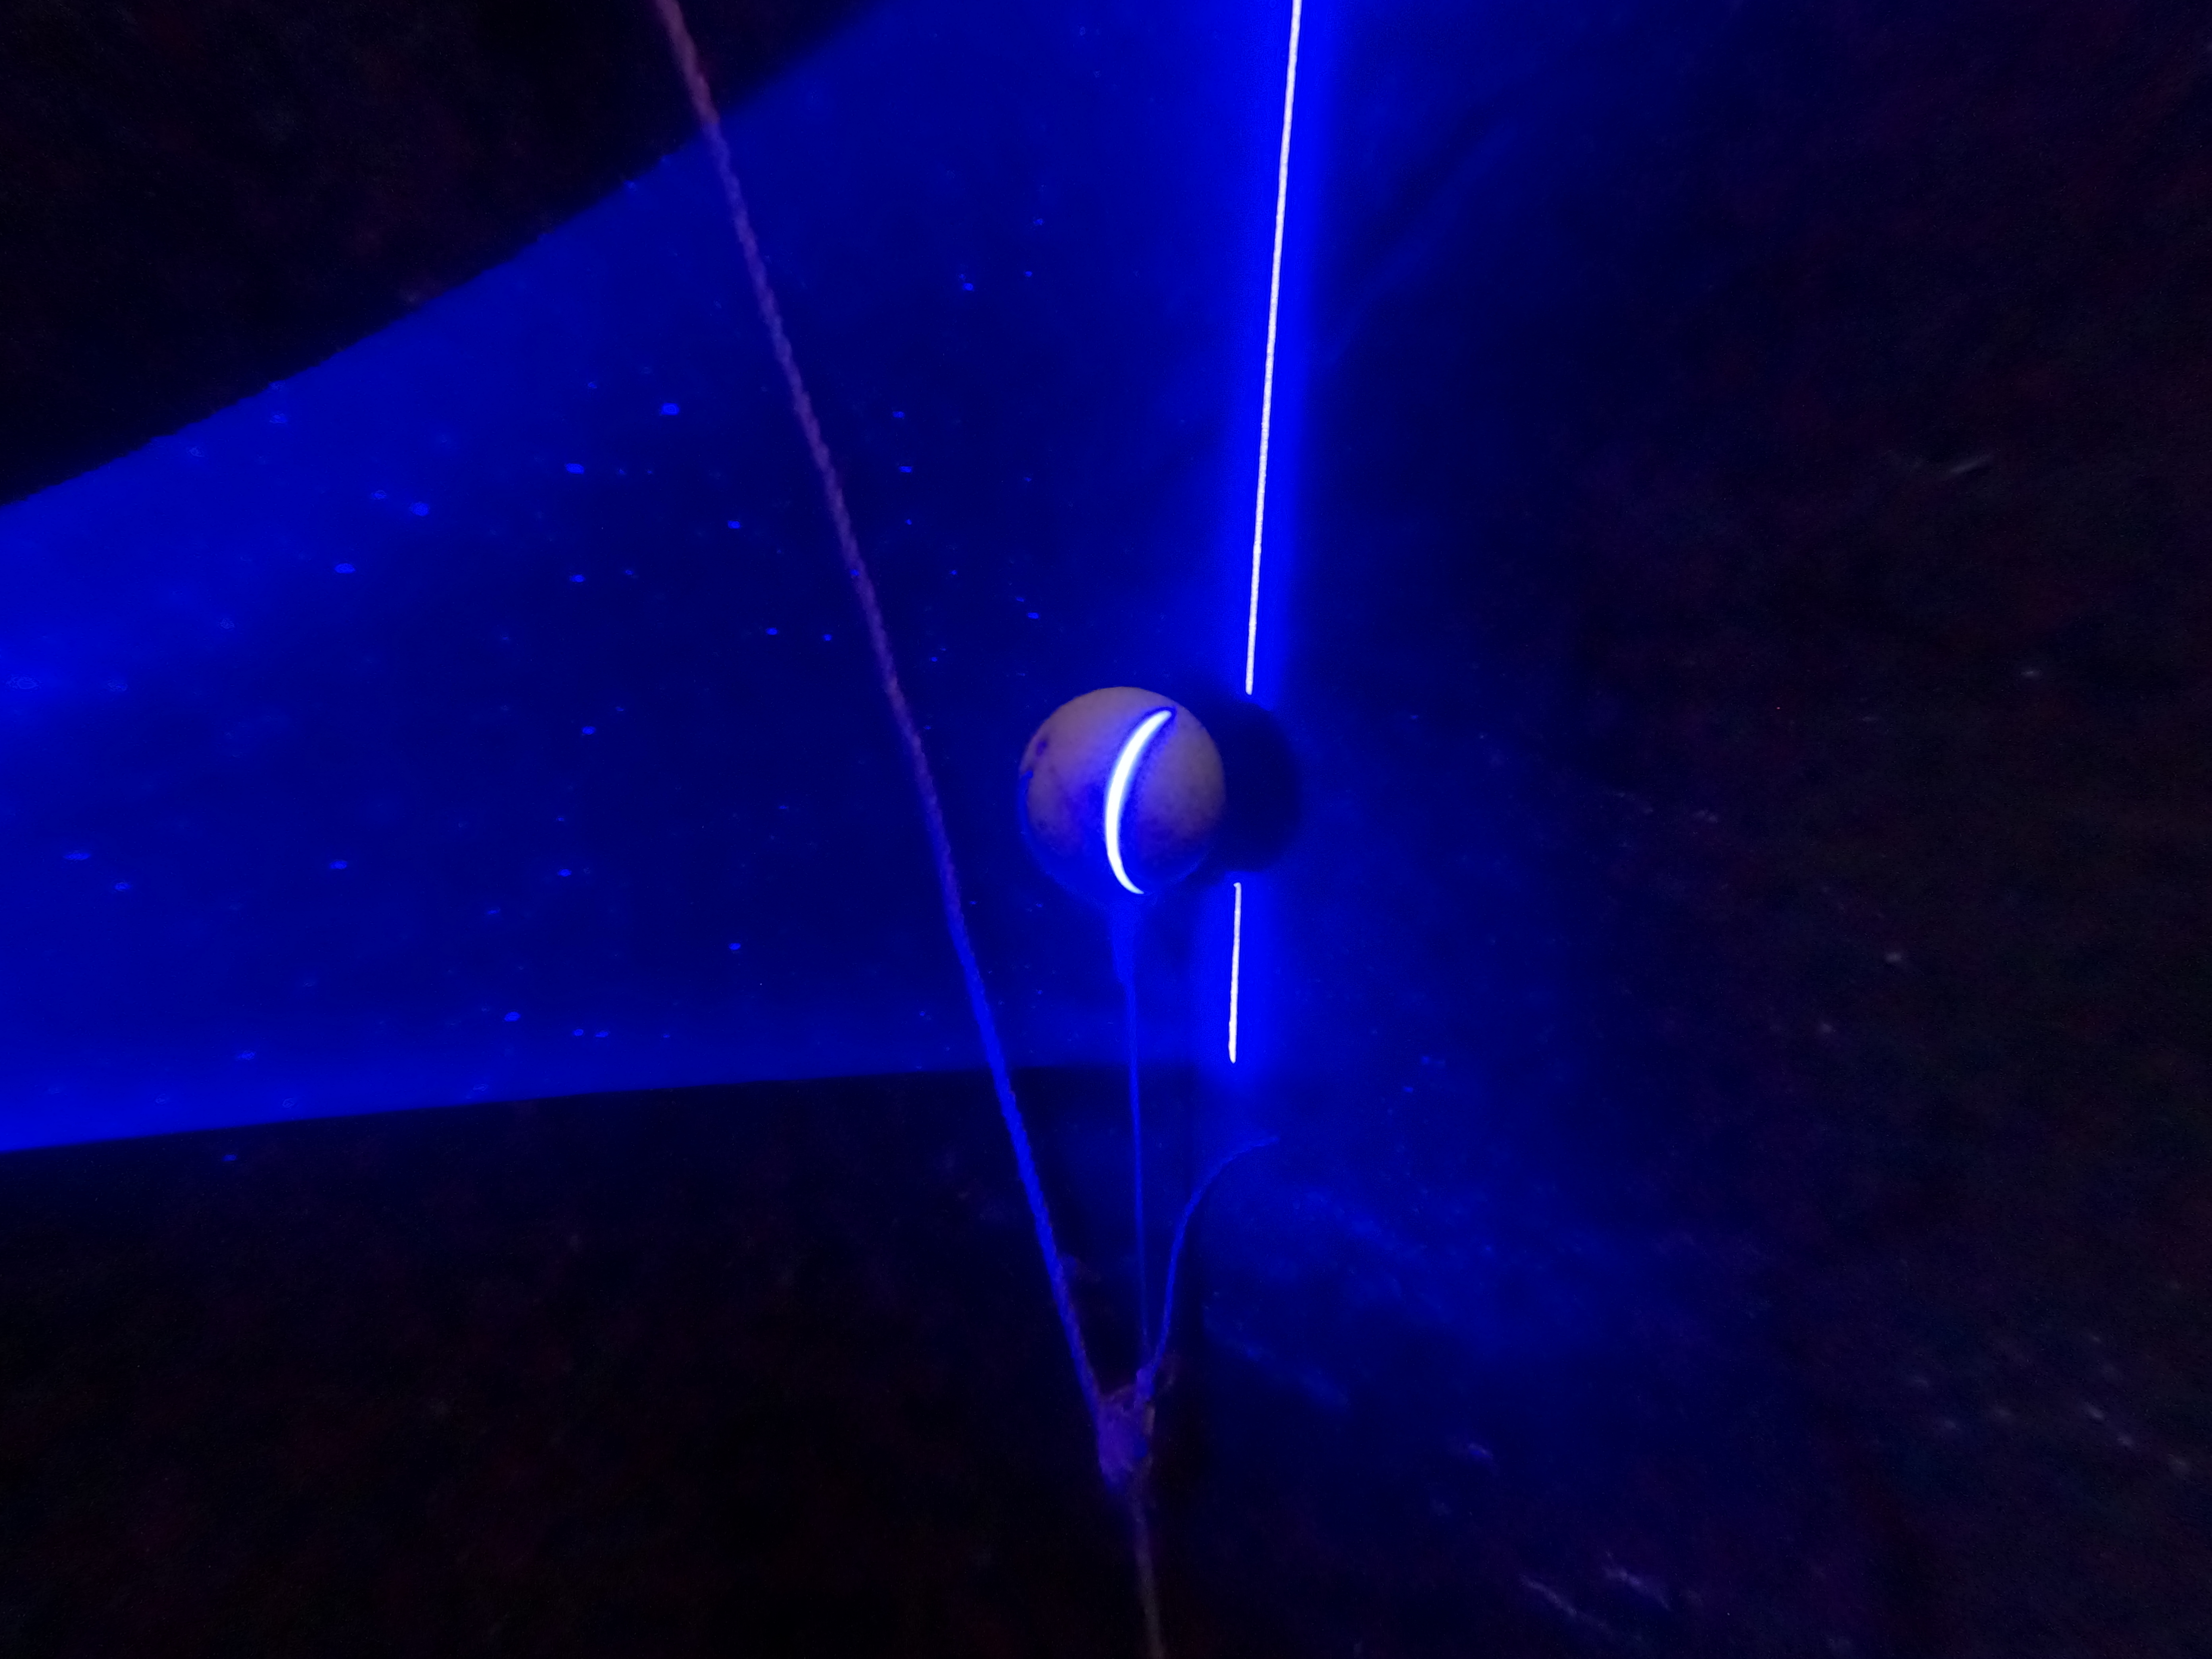

Supplement: Supplementary file 412 [file G0030712.pdf › 3/G0030712.pdf]

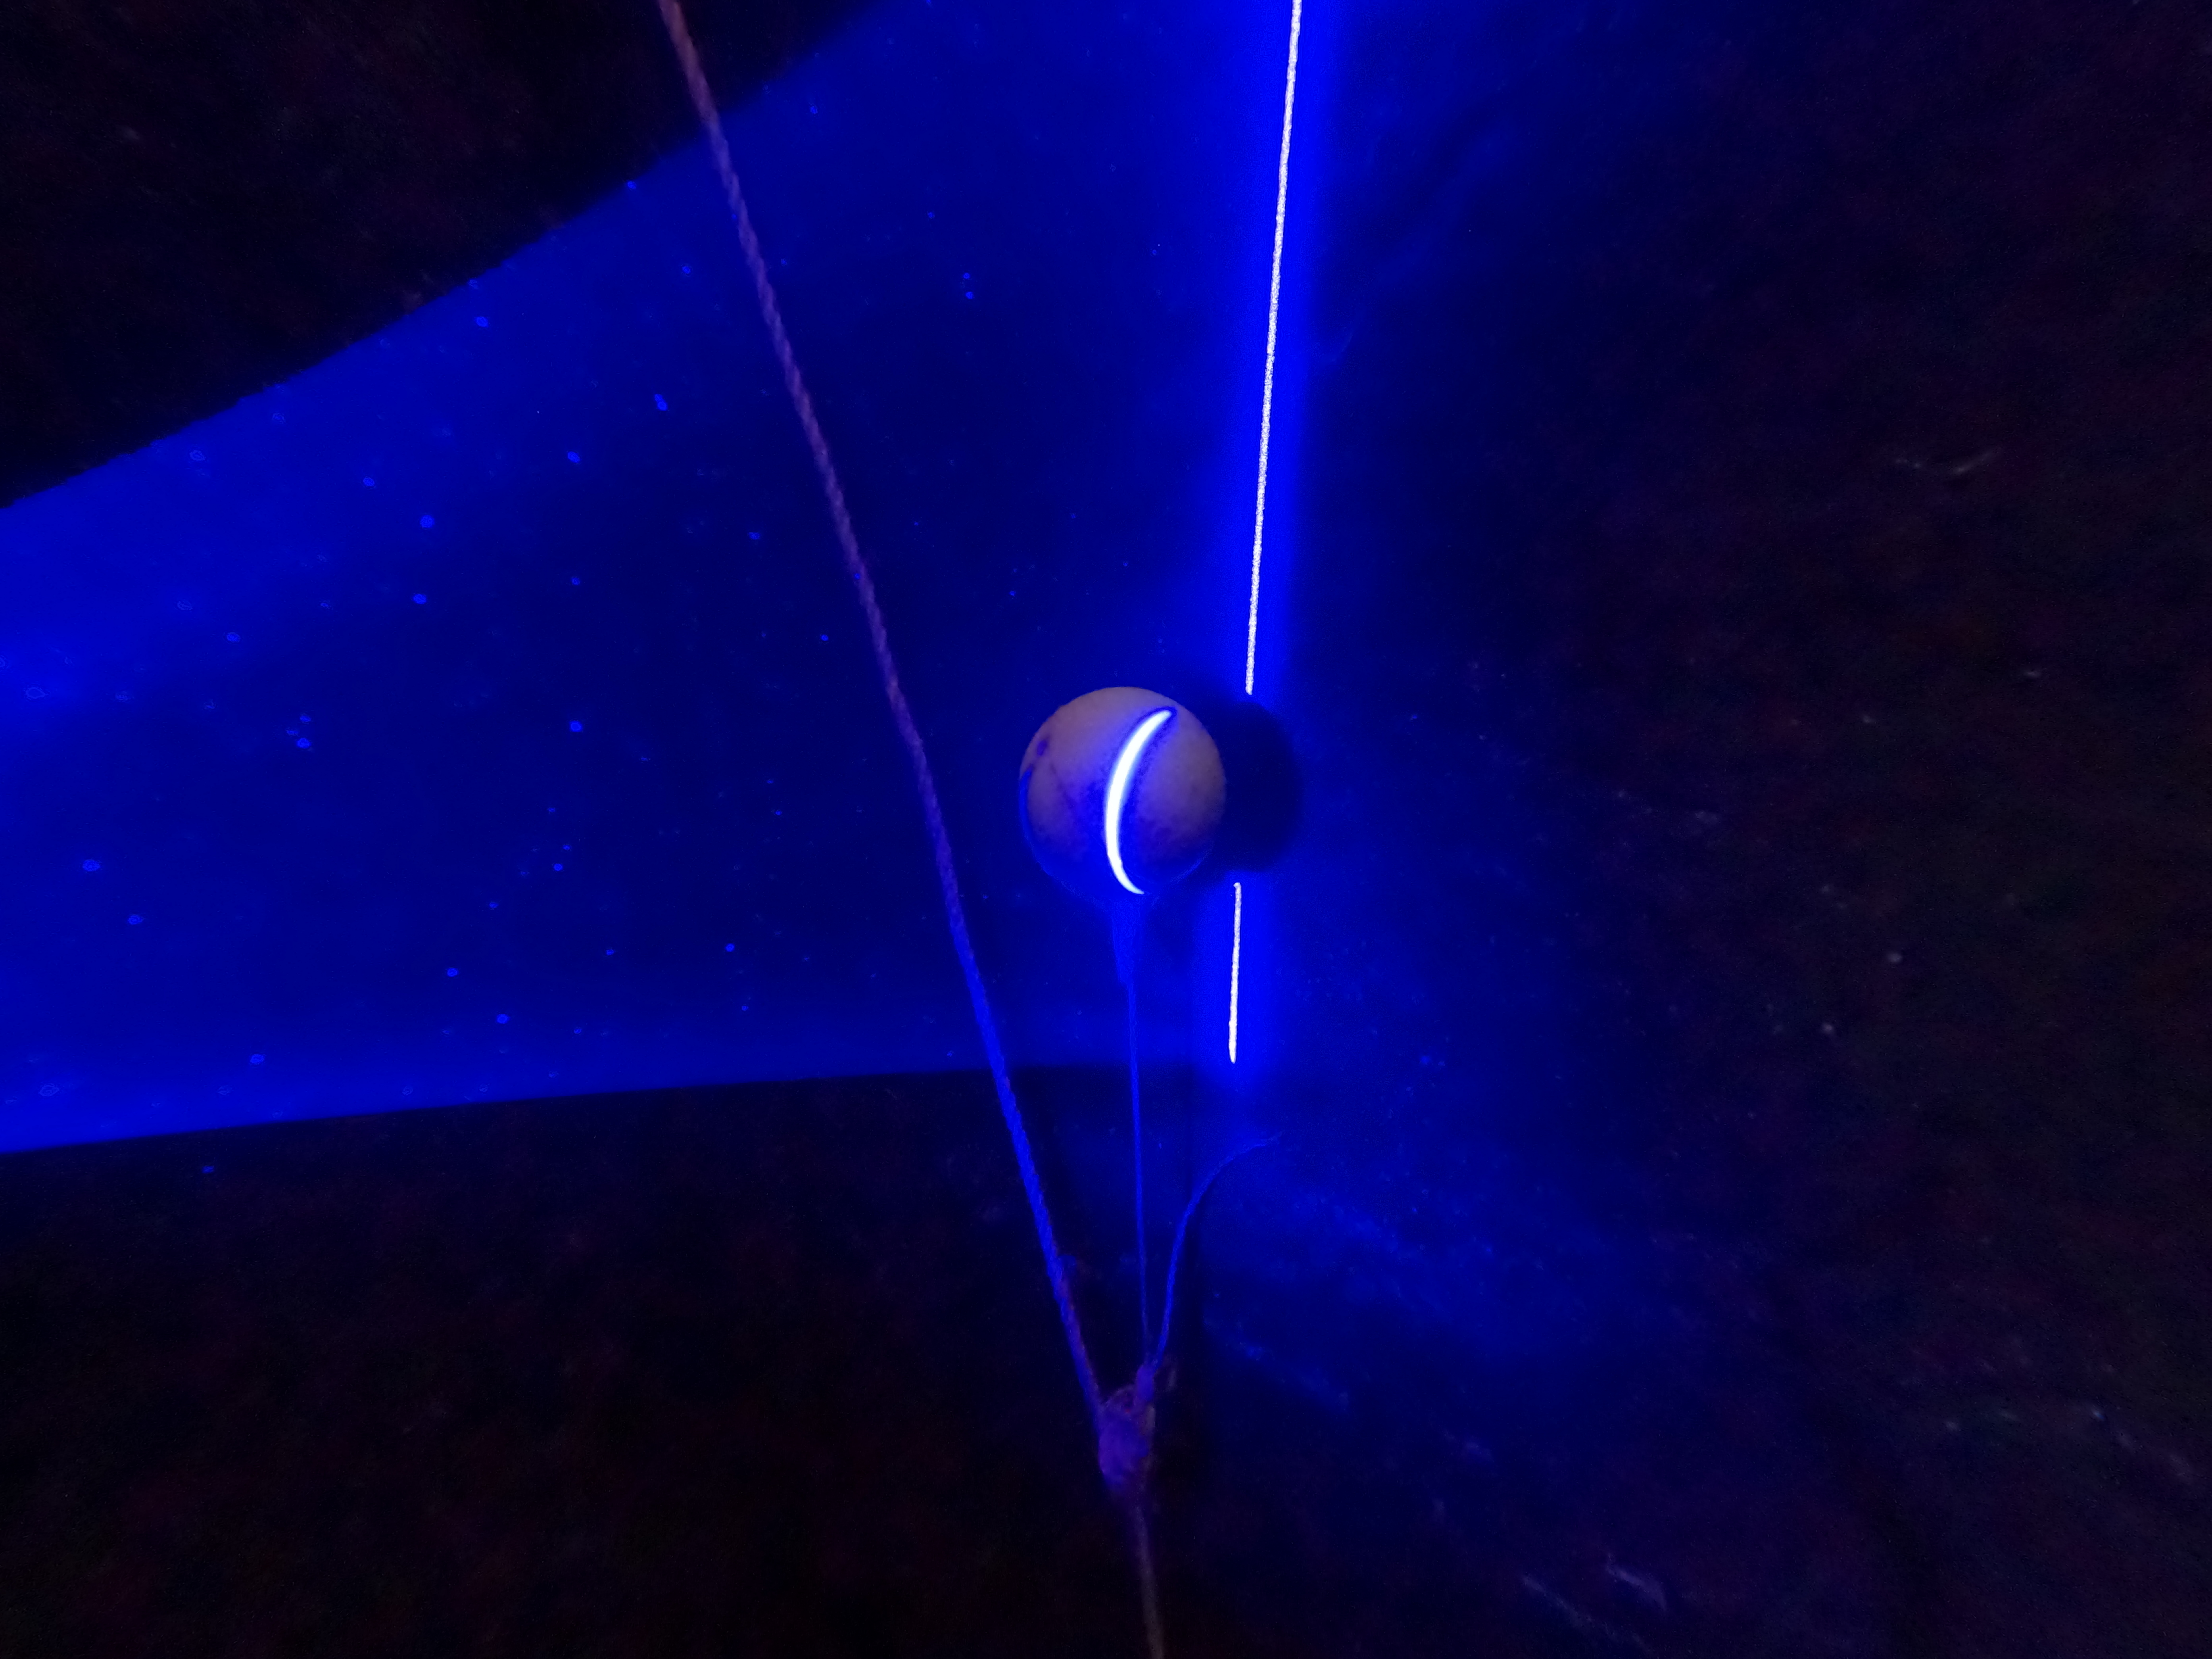

Supplement: Supplementary file 413 [file G0030713.pdf › 3/G0030713.pdf]

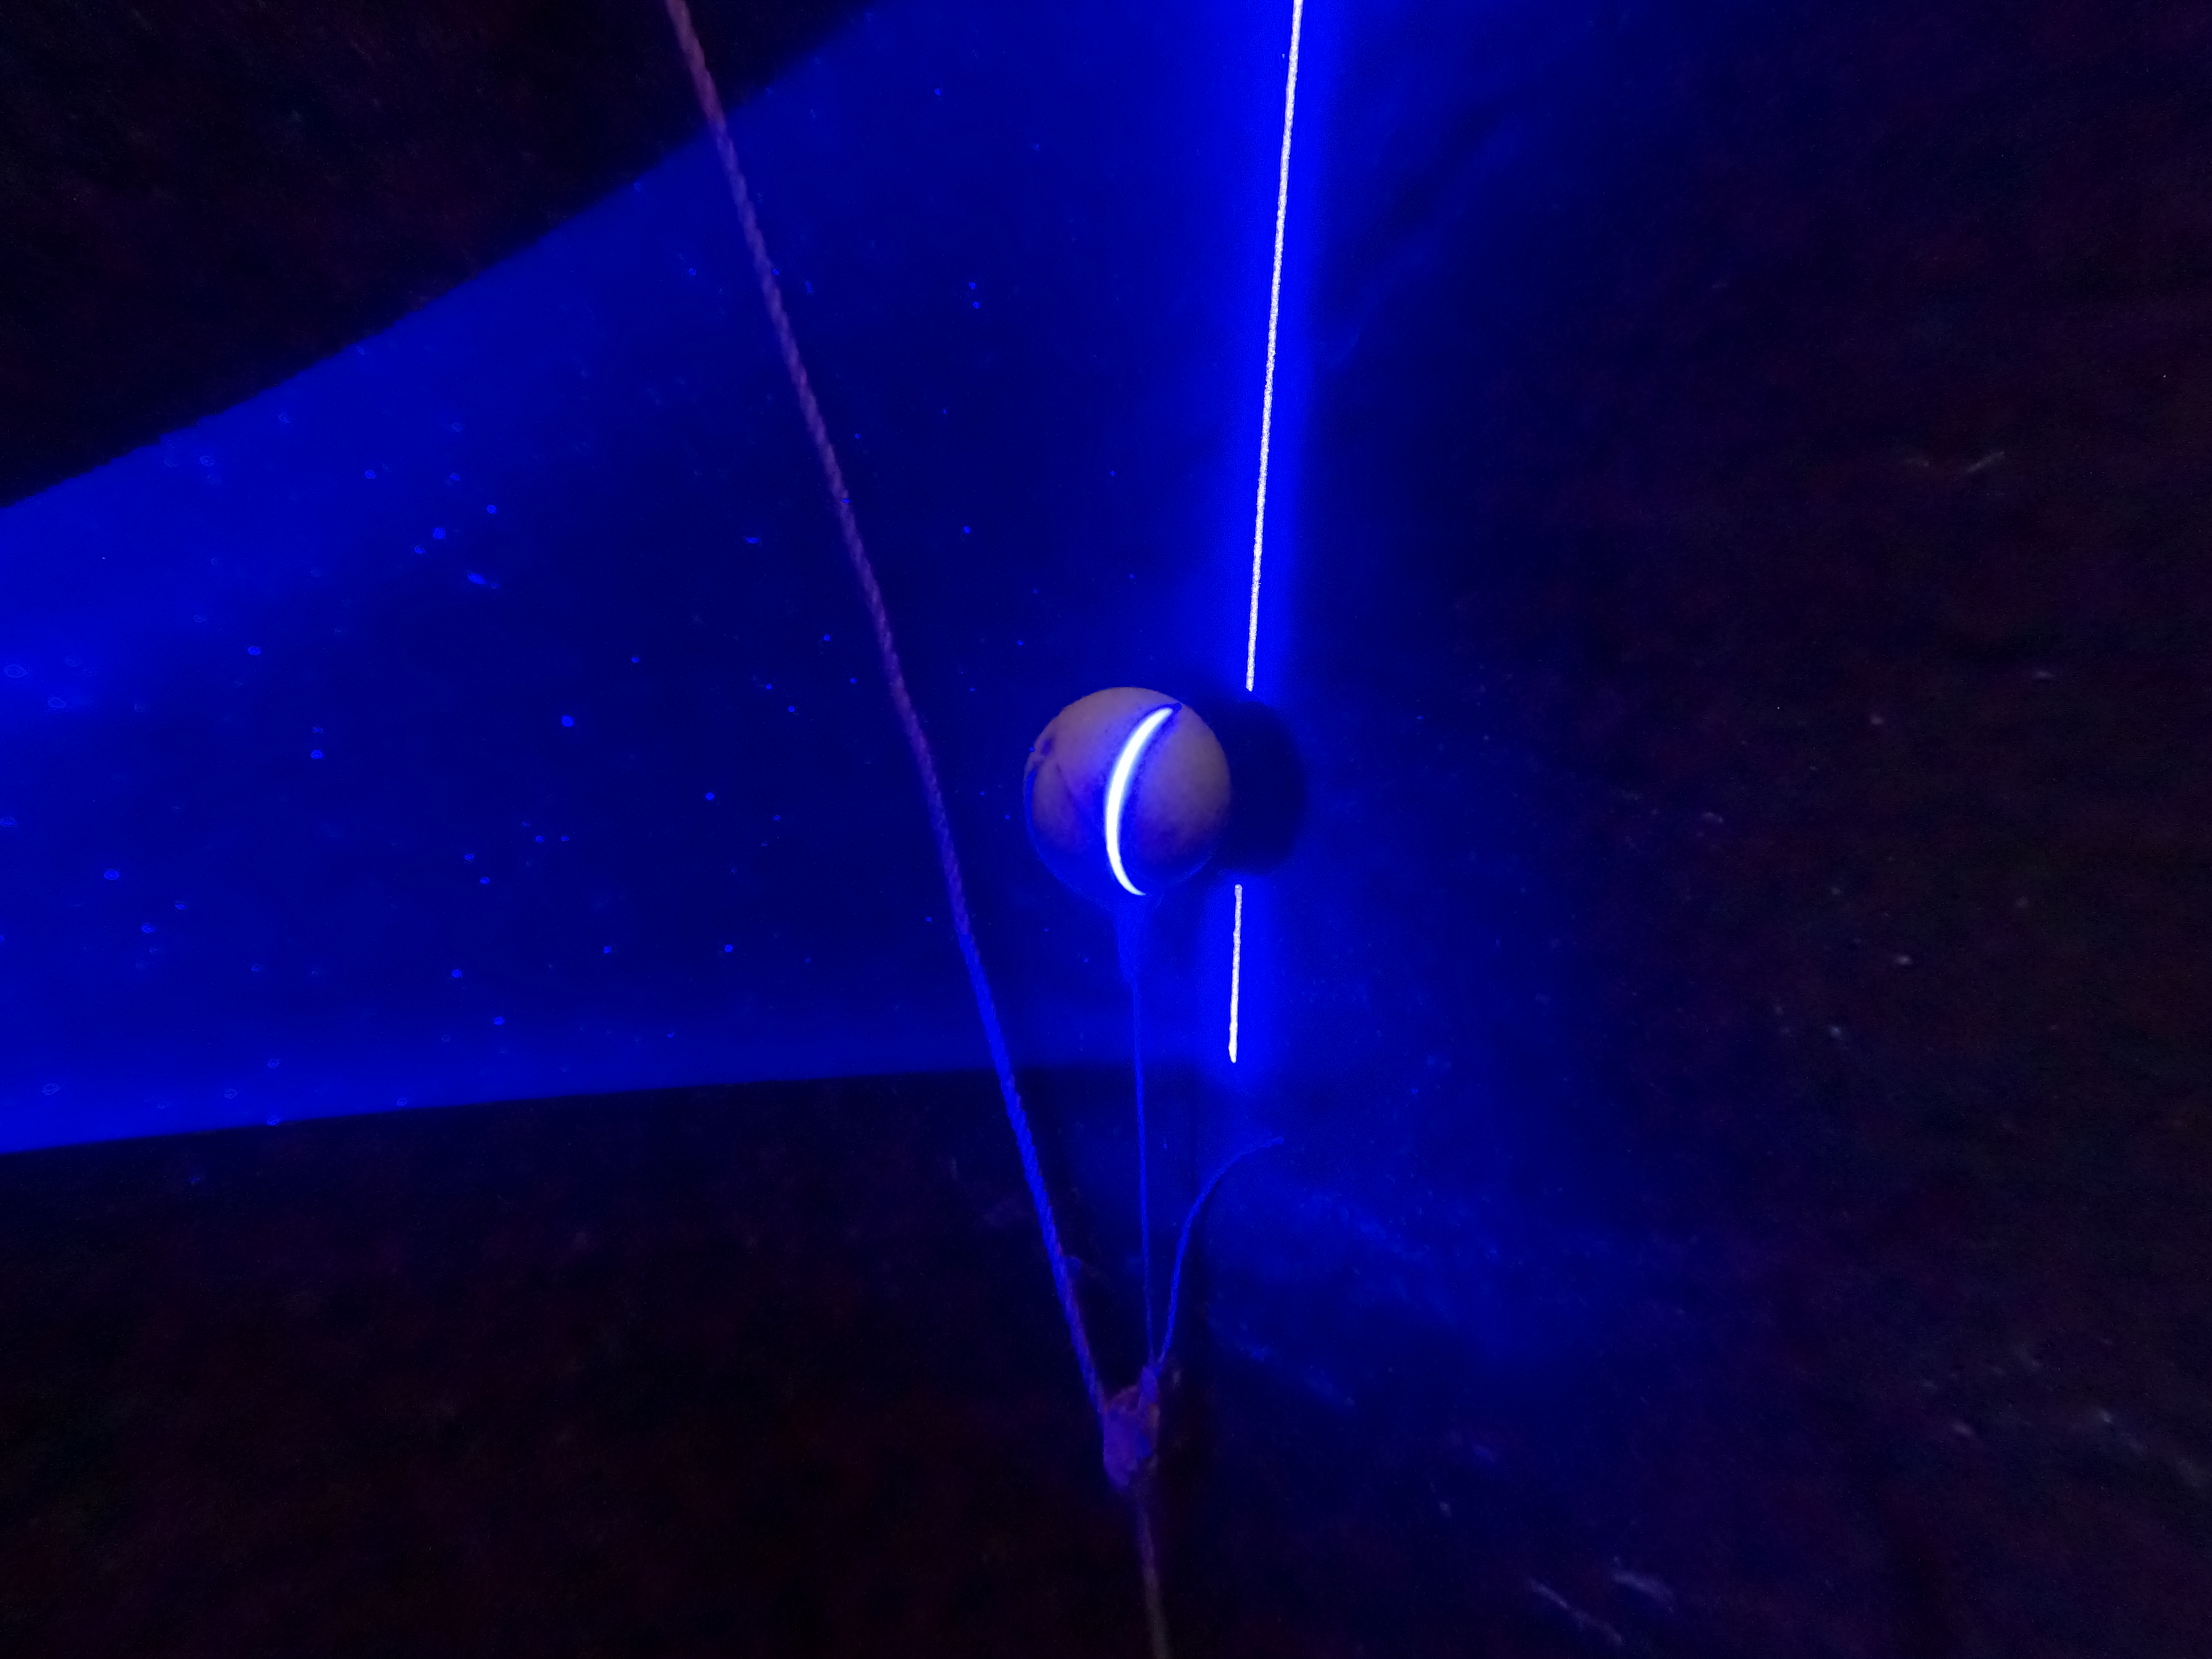

Supplement: Supplementary file 414 [file G0030714.pdf › 3/G0030714.pdf]

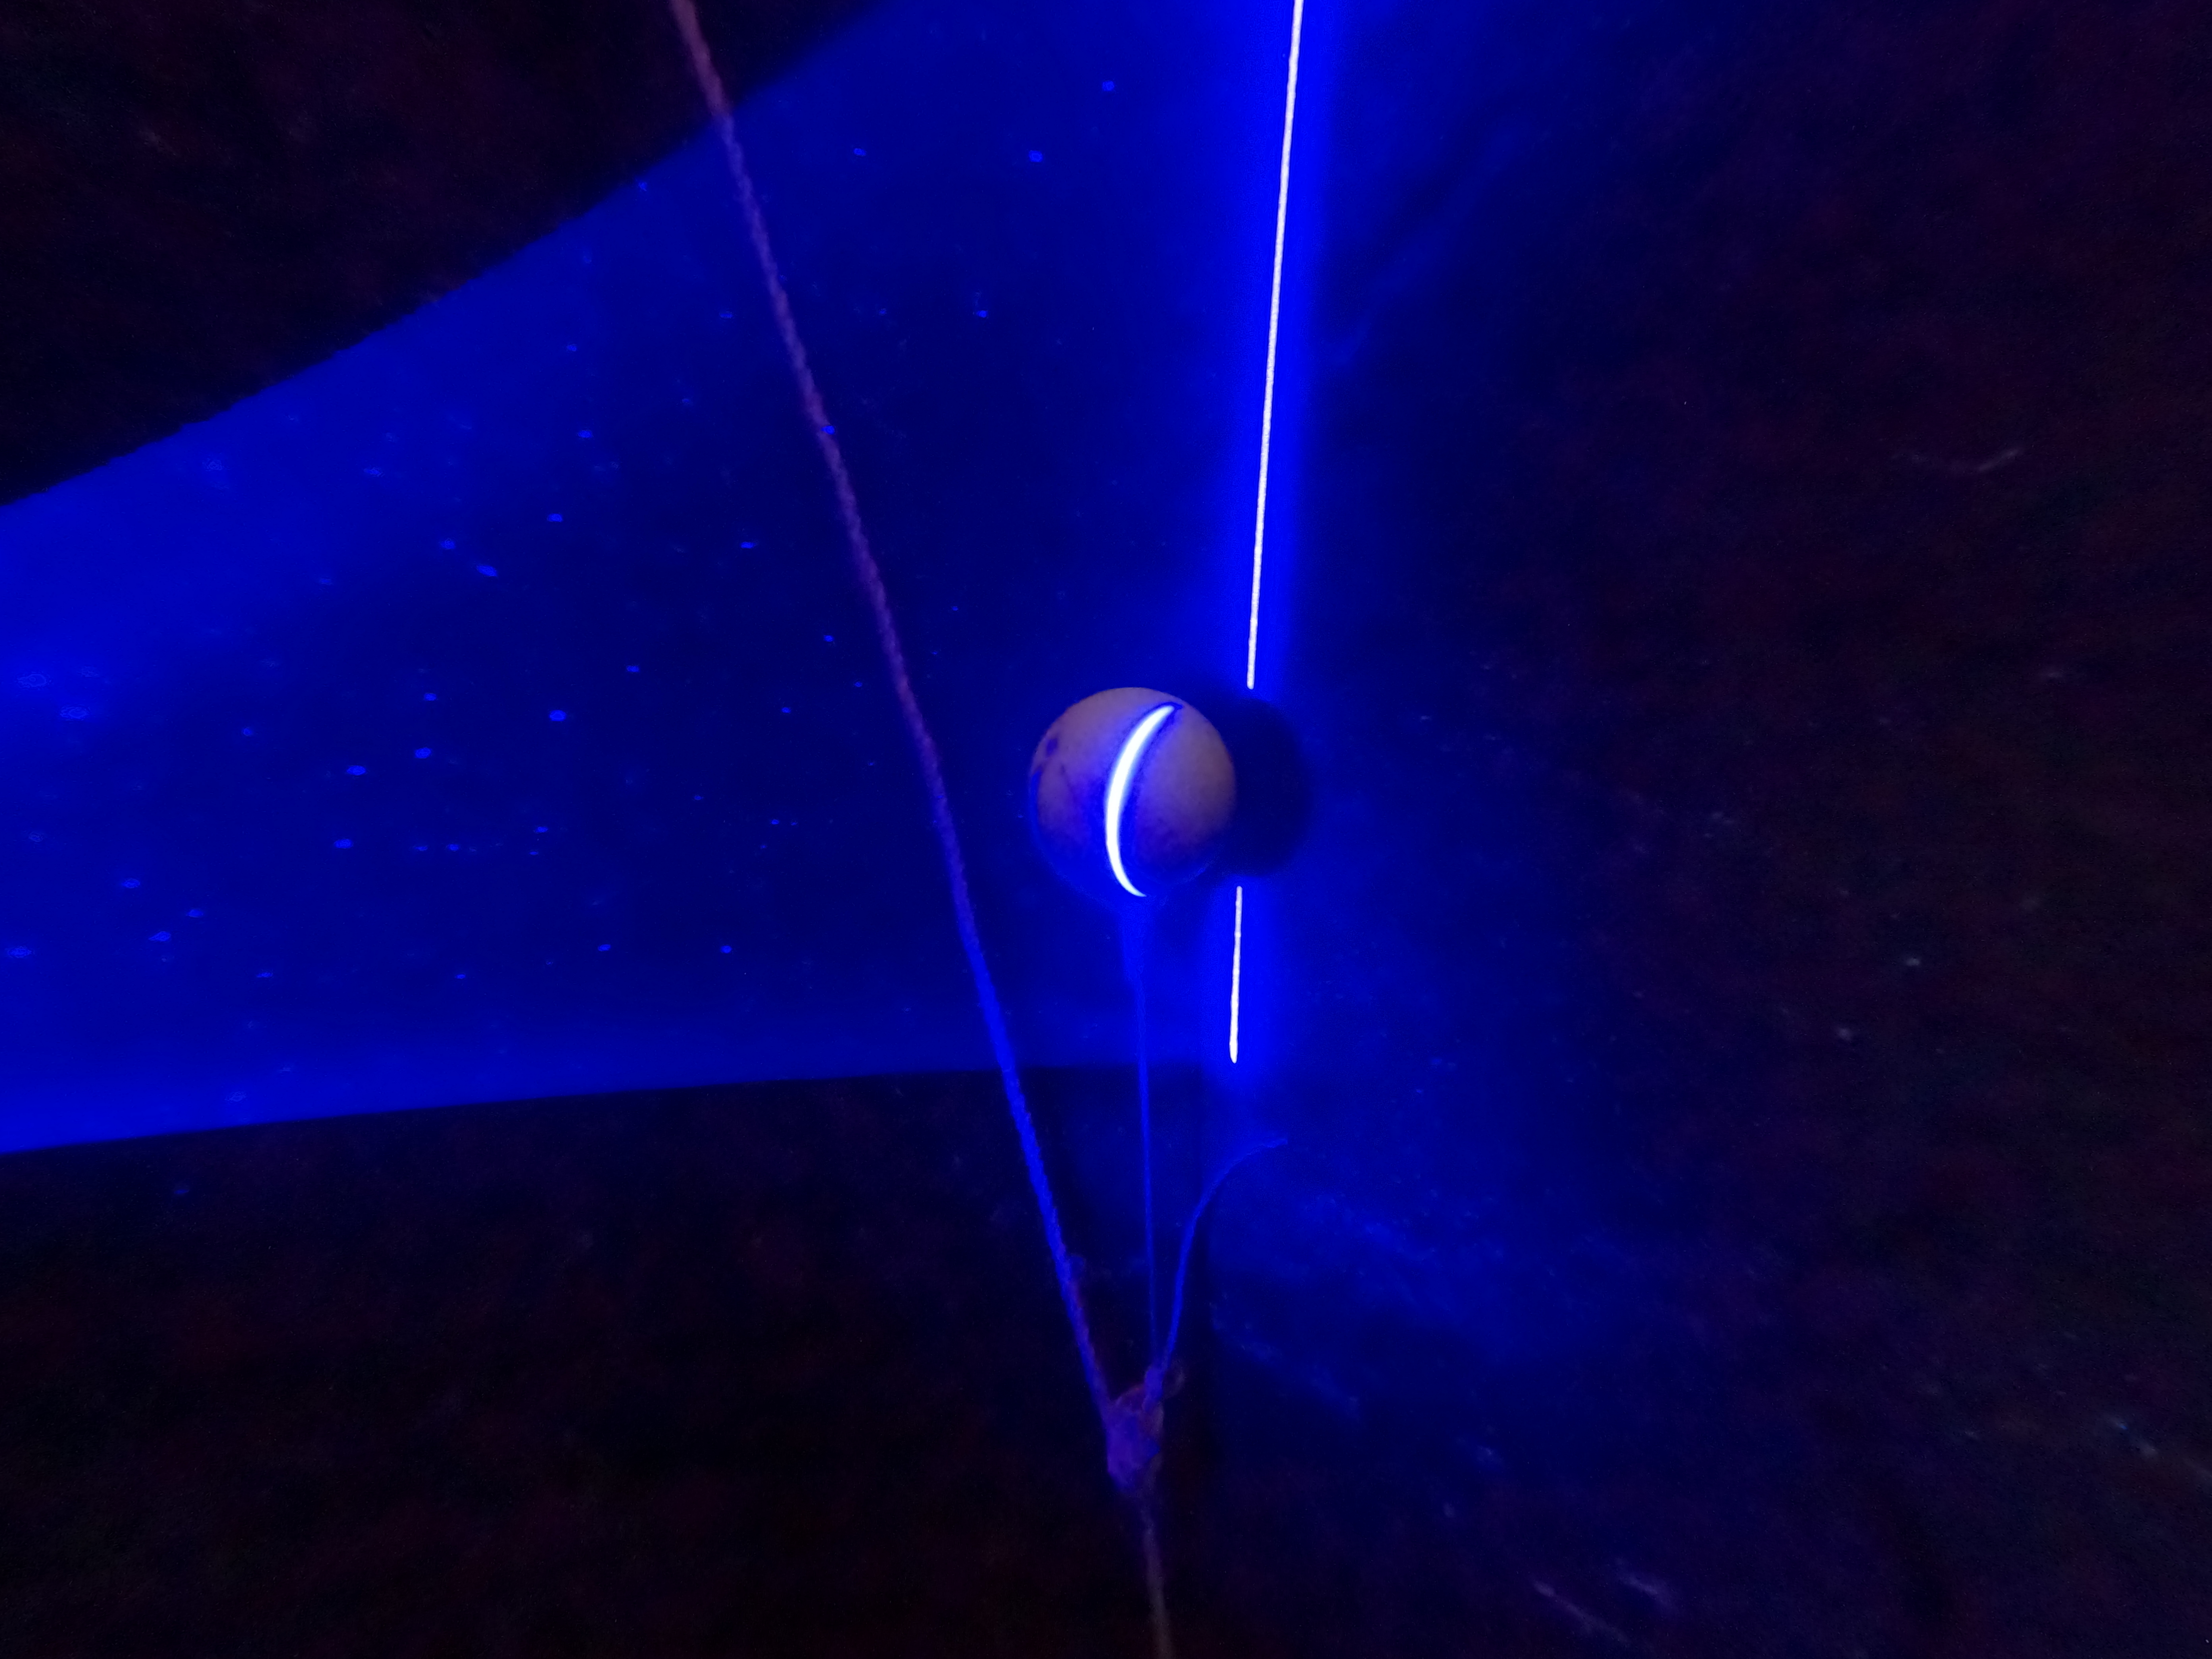

Supplement: Supplementary file 415 [file G0030715.pdf › 3/G0030715.pdf]

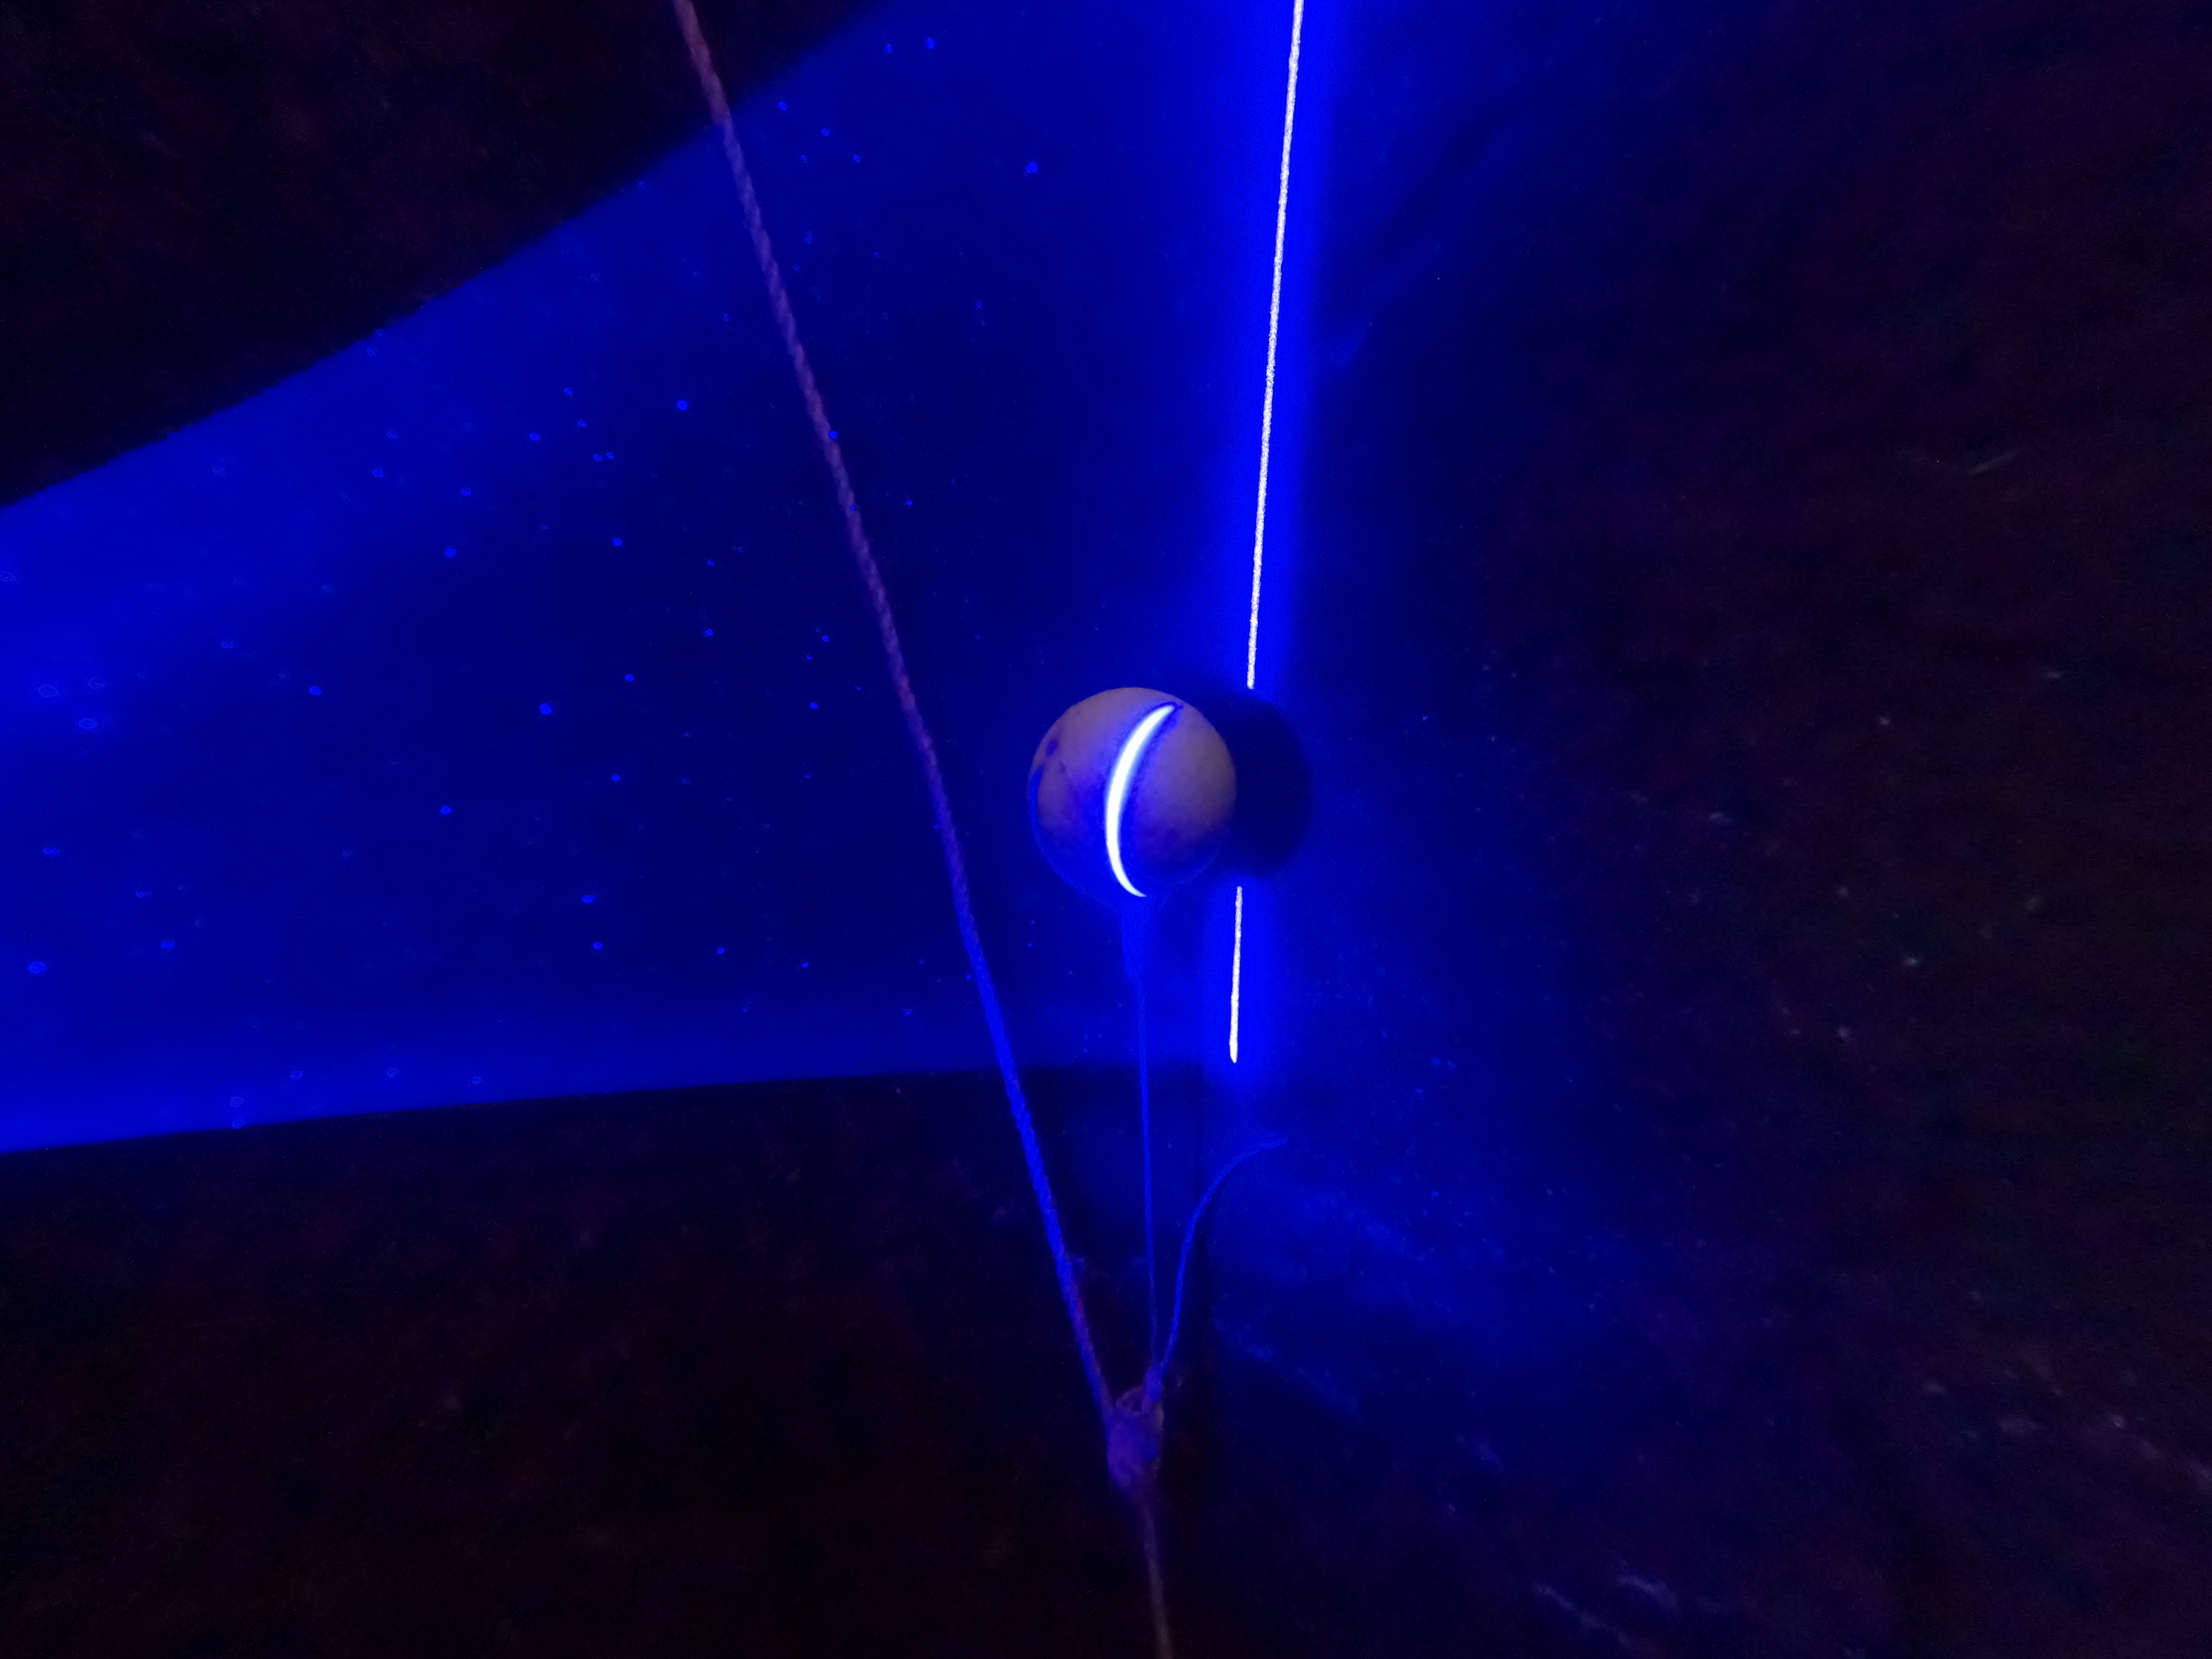

Supplement: Supplementary file 416 [file G0030716.pdf › 3/G0030716.pdf]

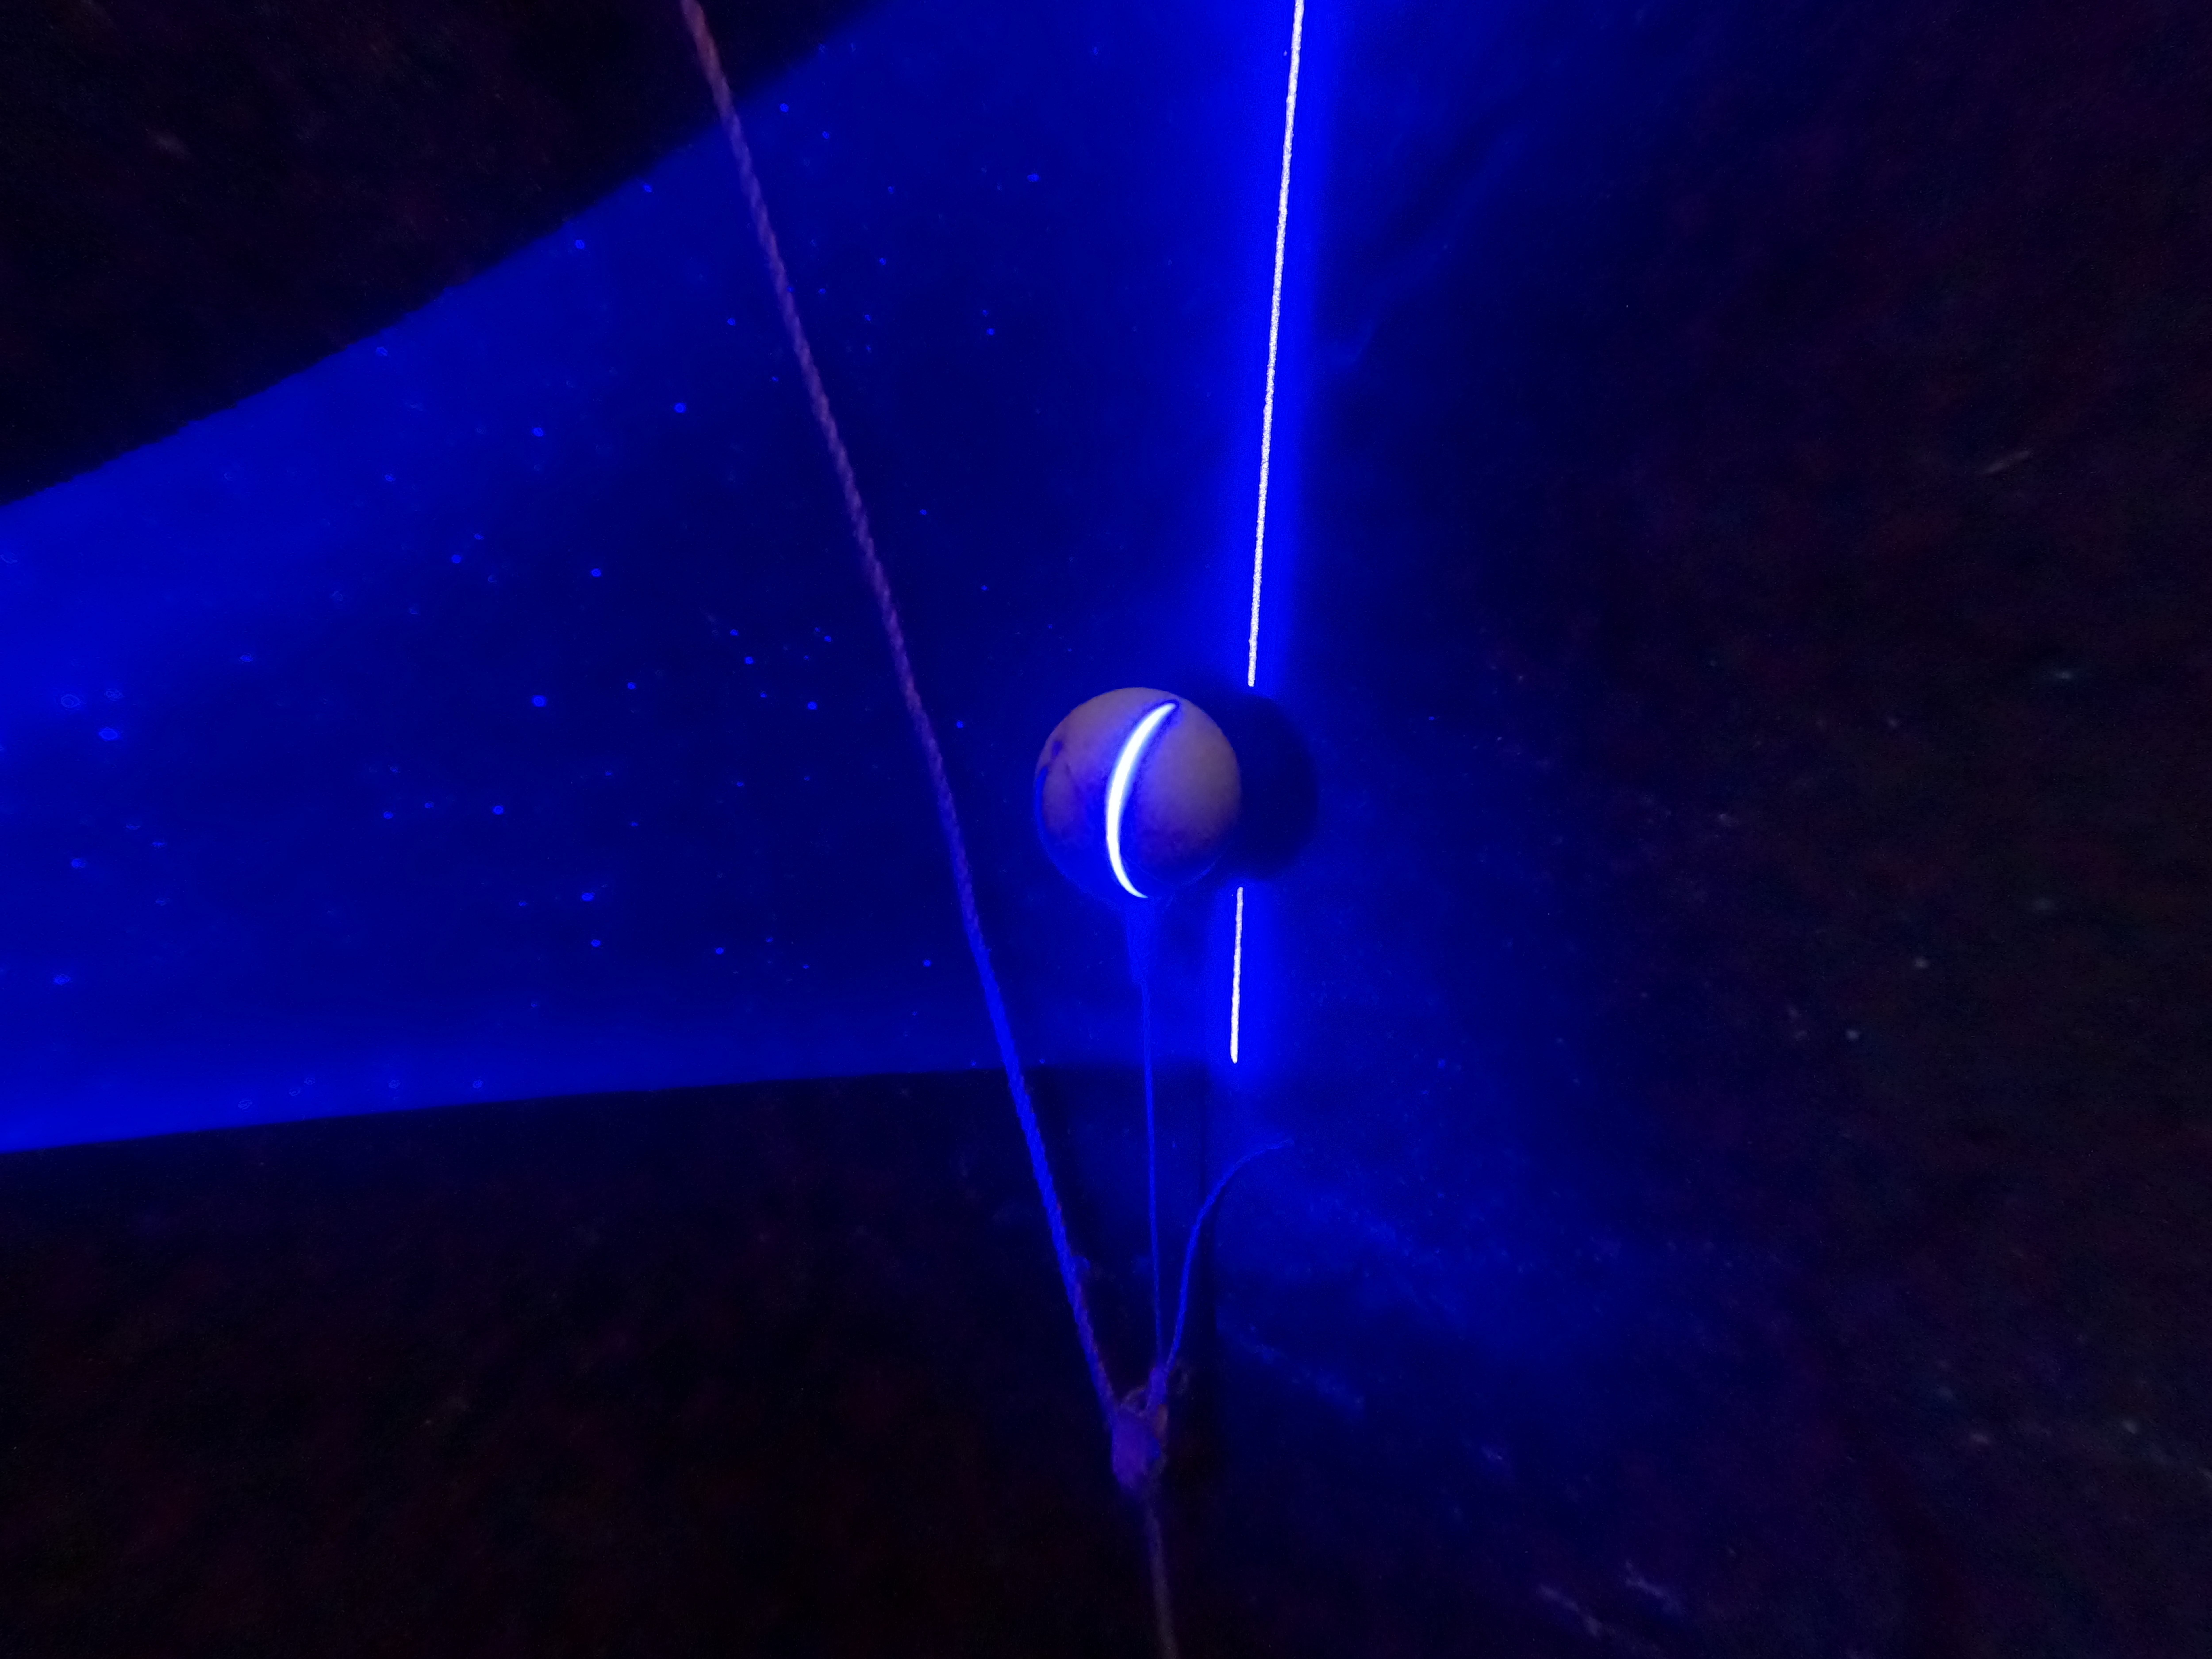

Supplement: Supplementary file 417 [file G0030717.pdf › 3/G0030717.pdf]

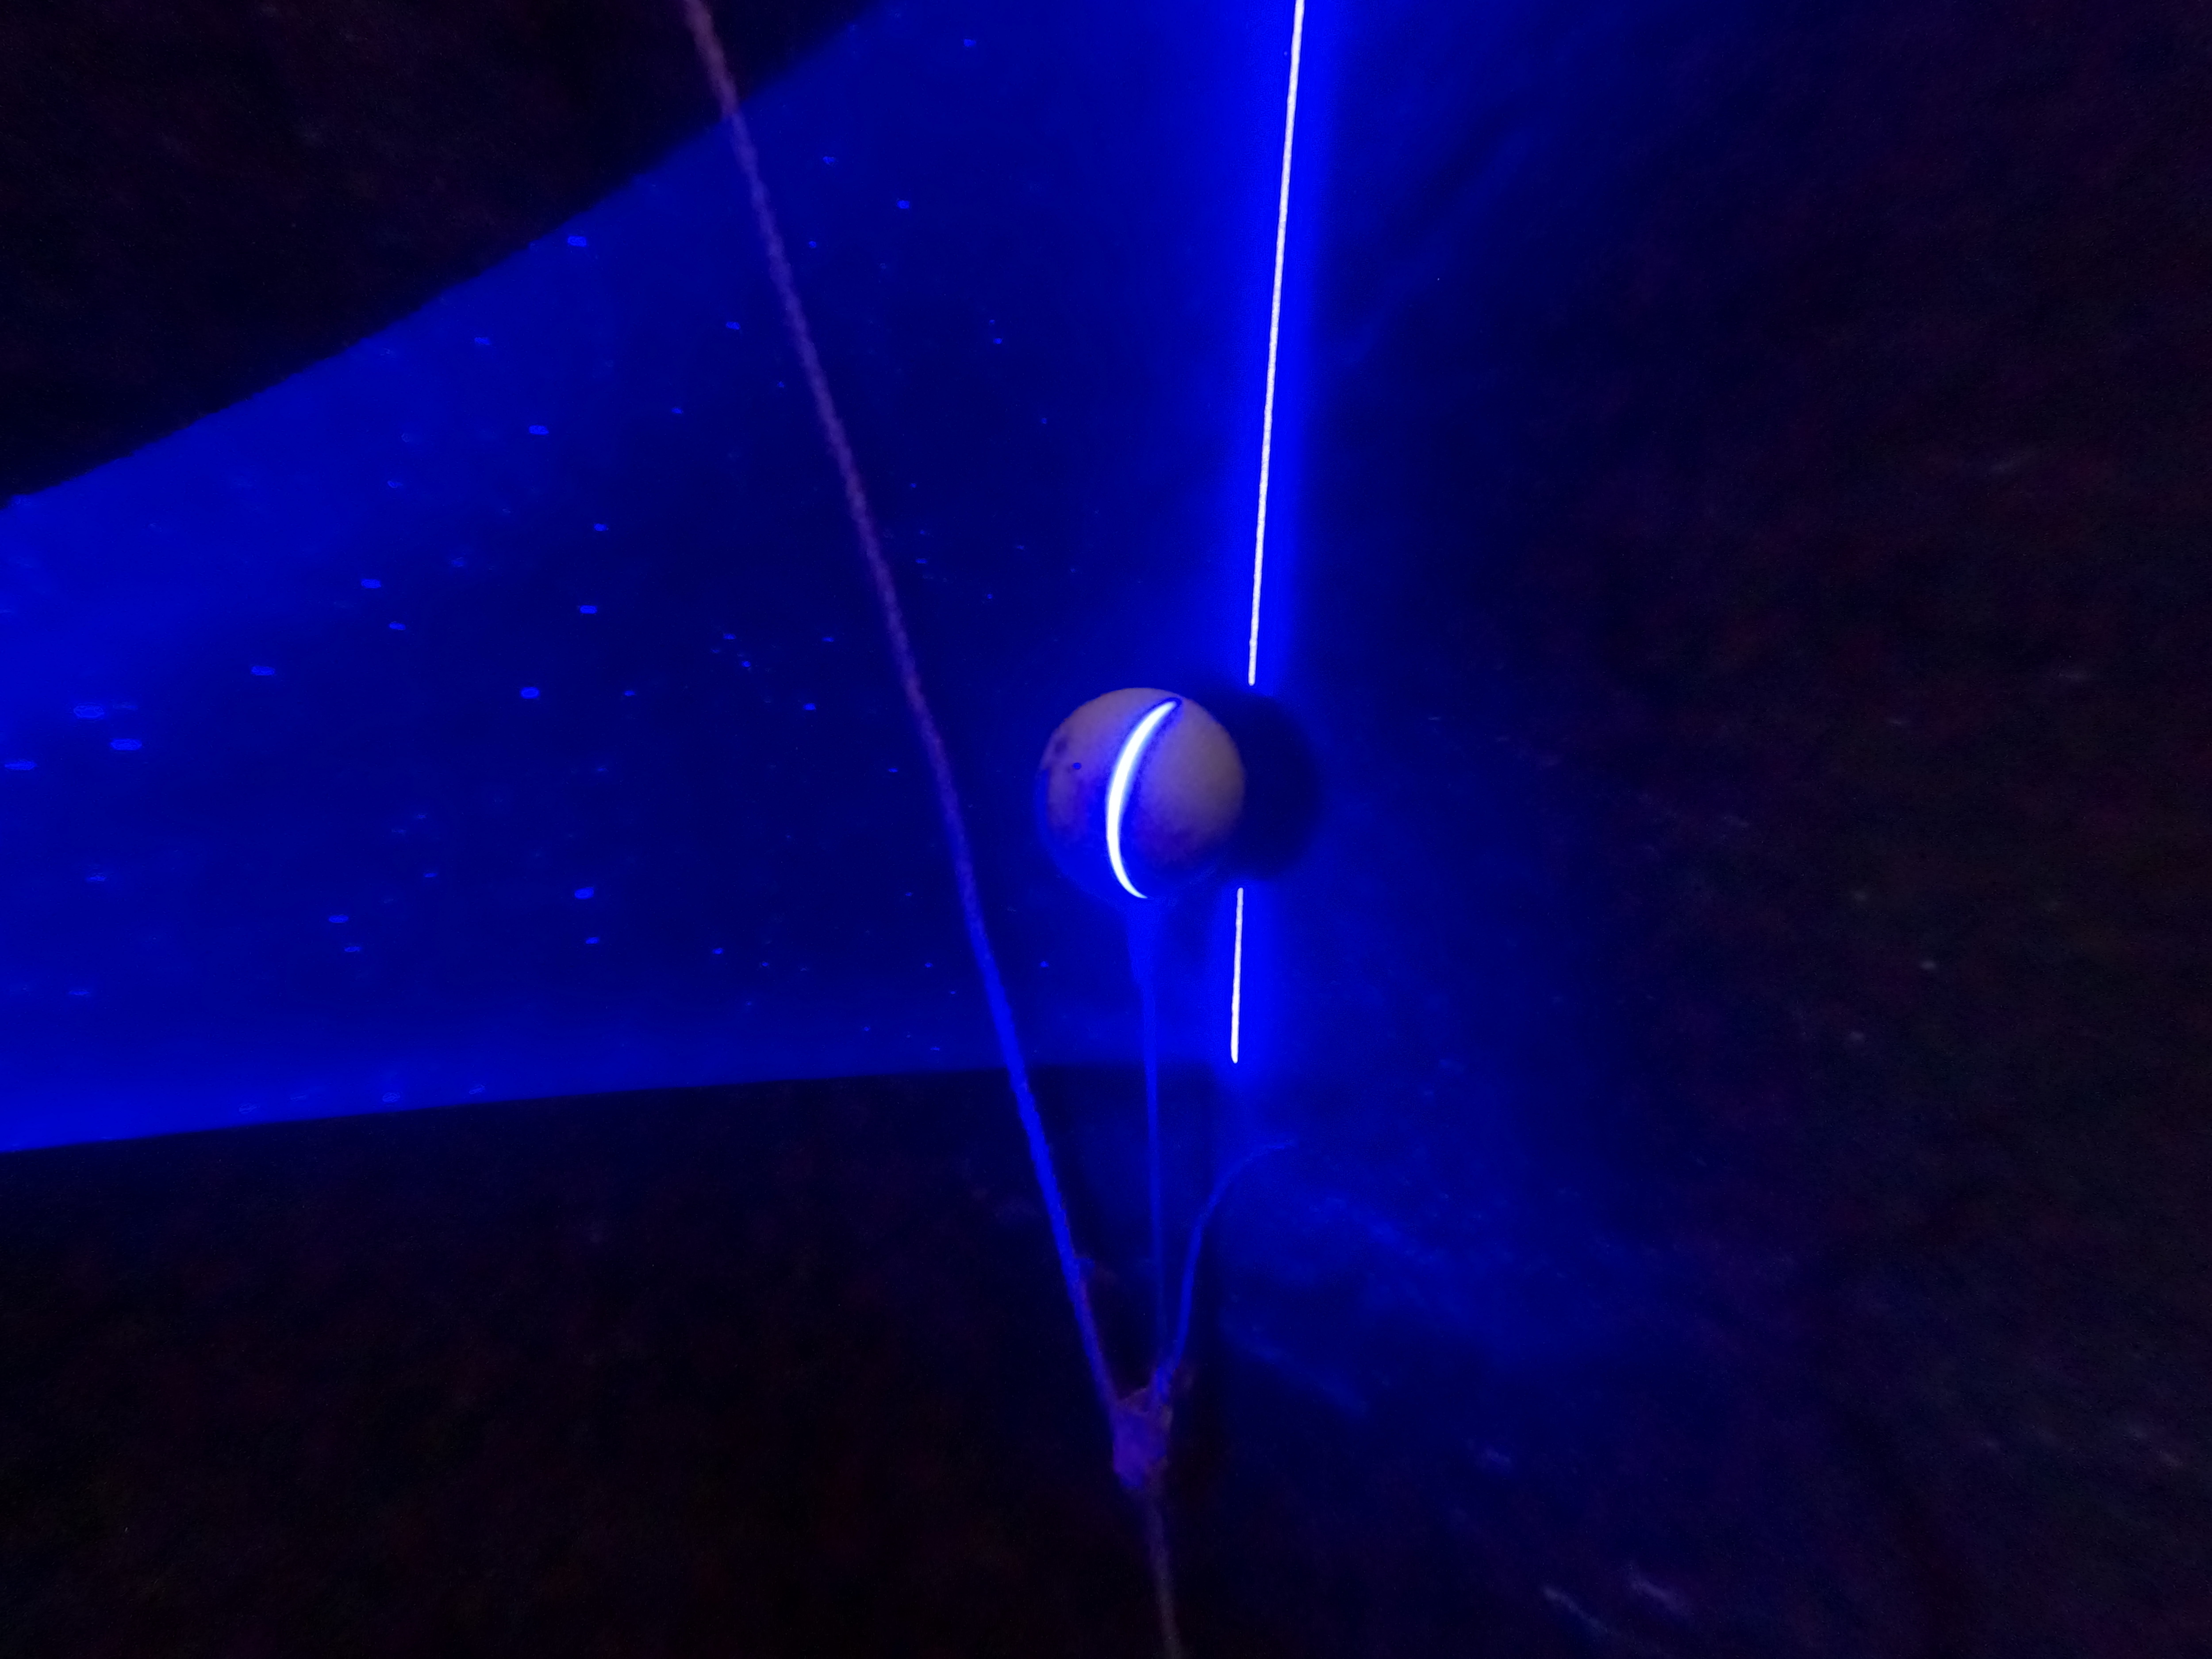

Supplement: Supplementary file 418 [file G0030718.pdf › 3/G0030718.pdf]

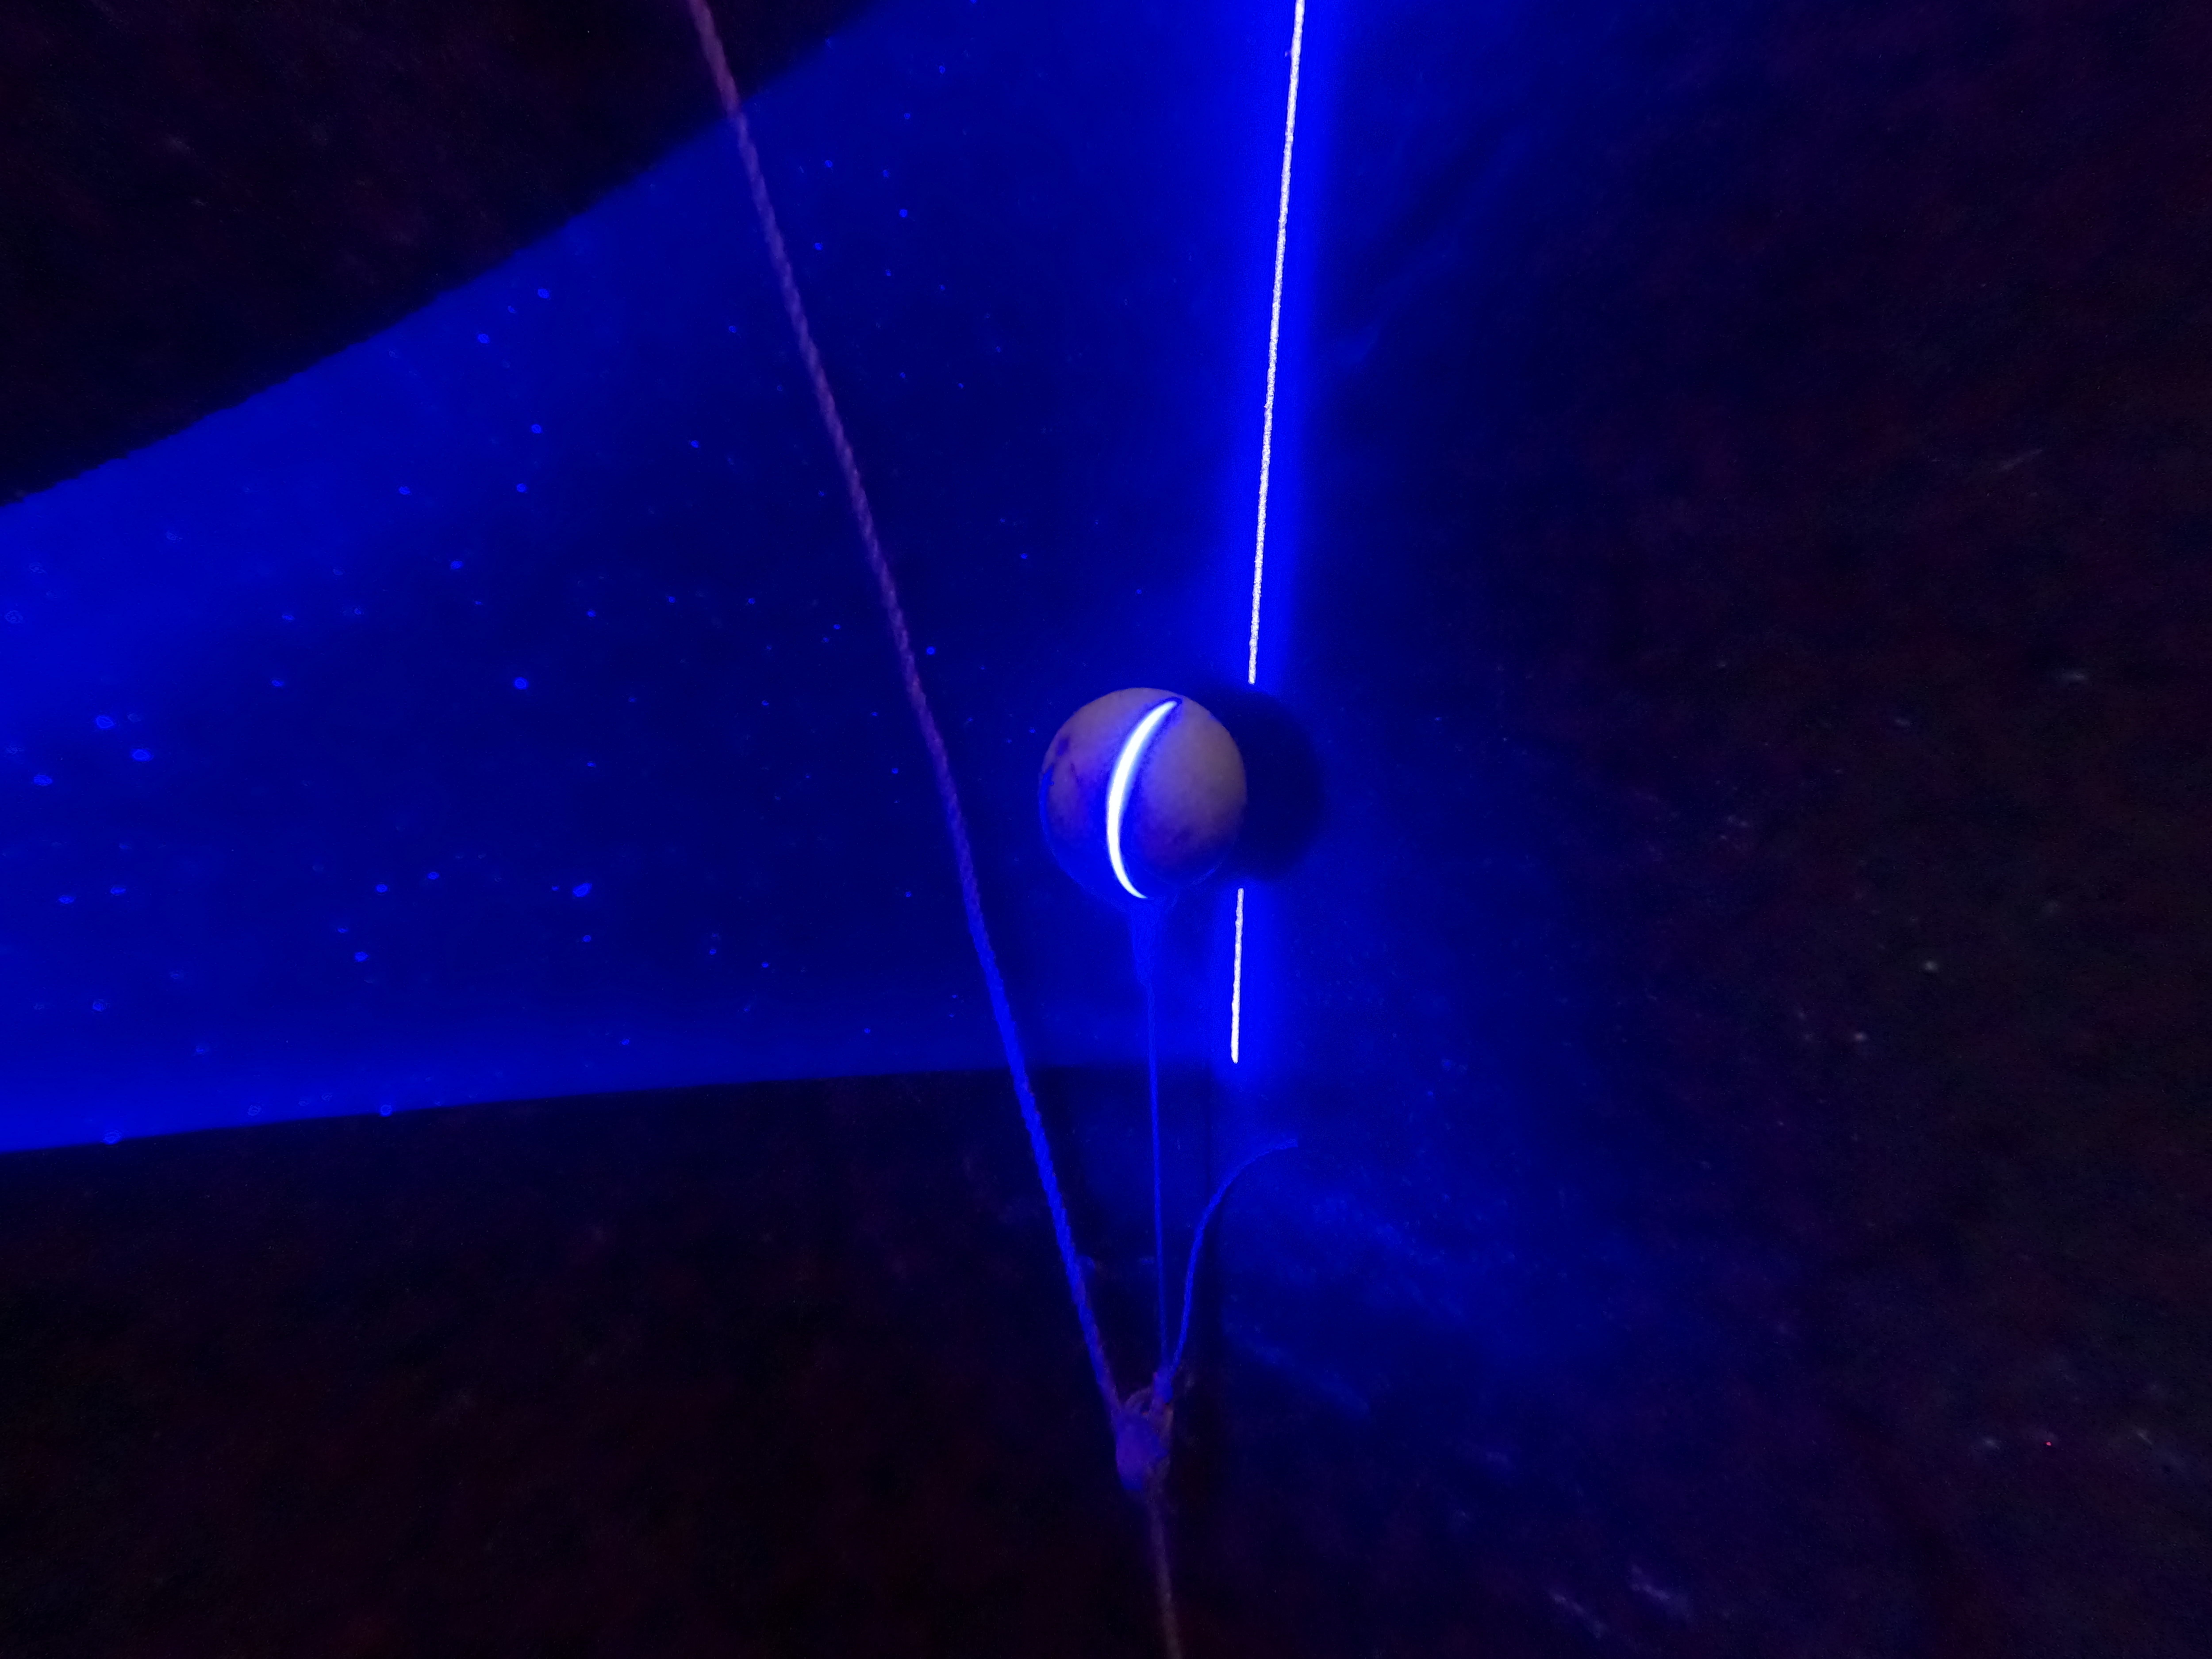

Supplement: Supplementary file 419 [file G0030719.pdf › 3/G0030719.pdf]

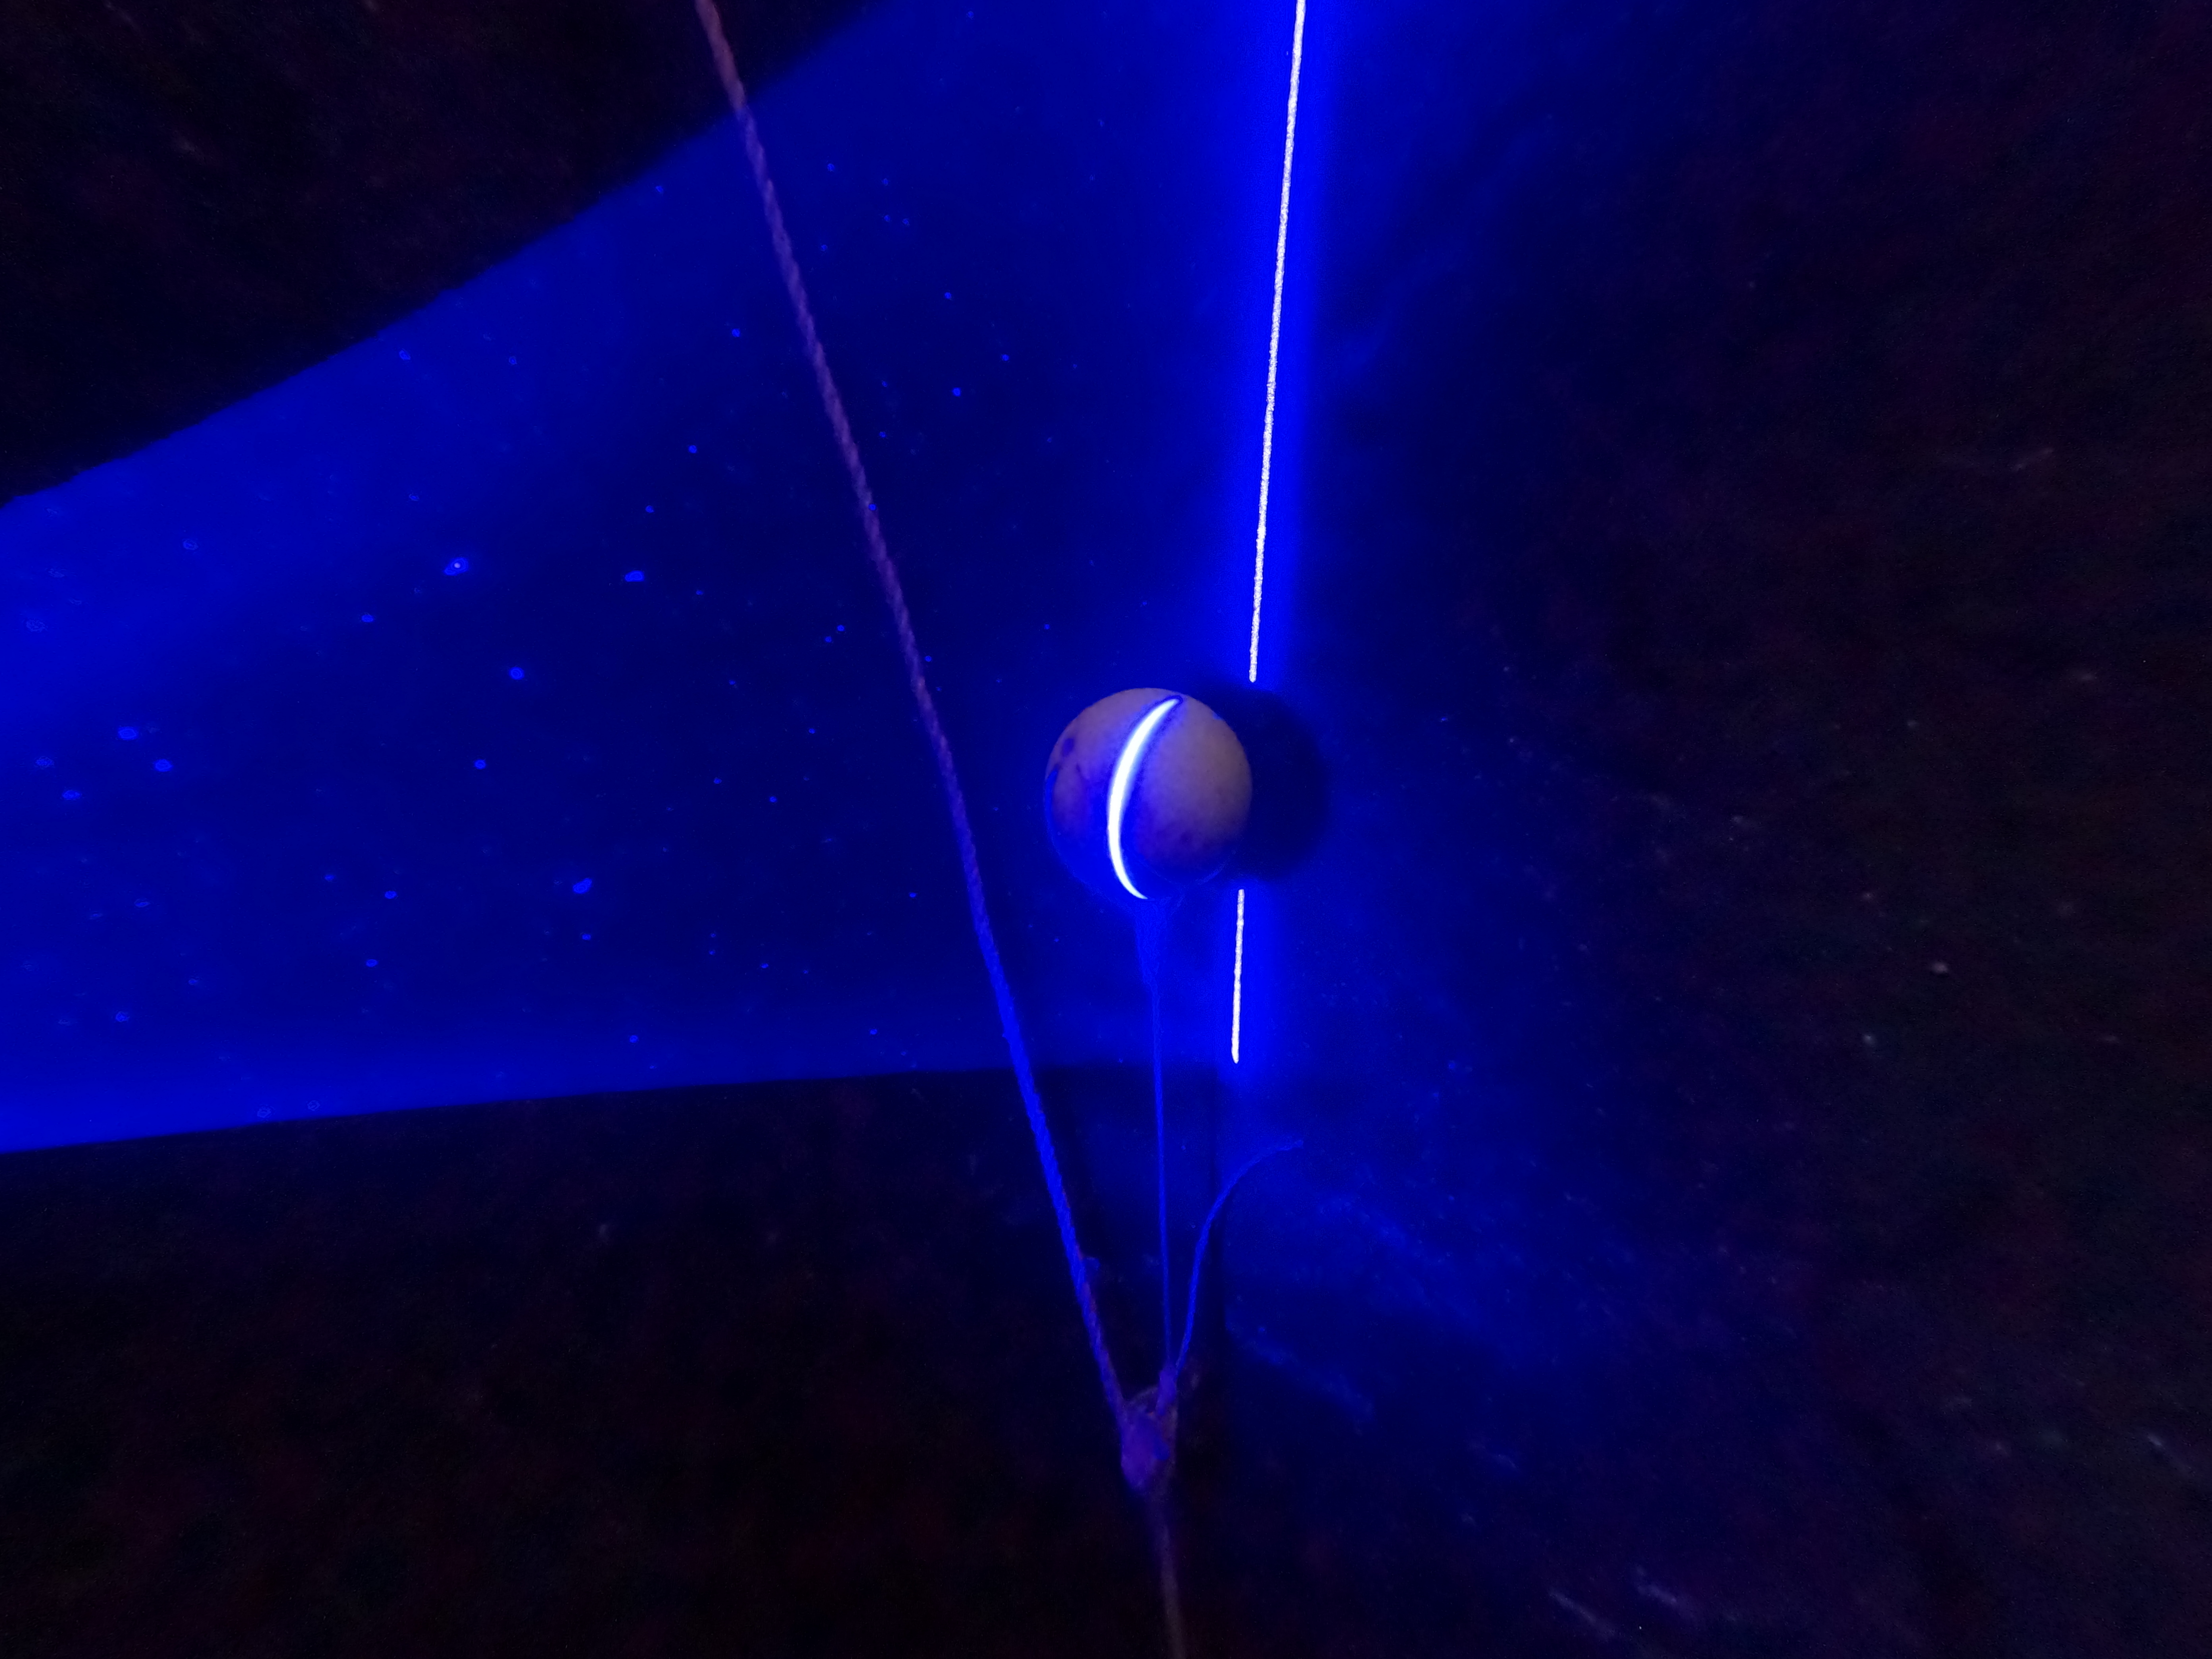

Supplement: Supplementary file 420 [file G0030720.pdf › 3/G0030720.pdf]

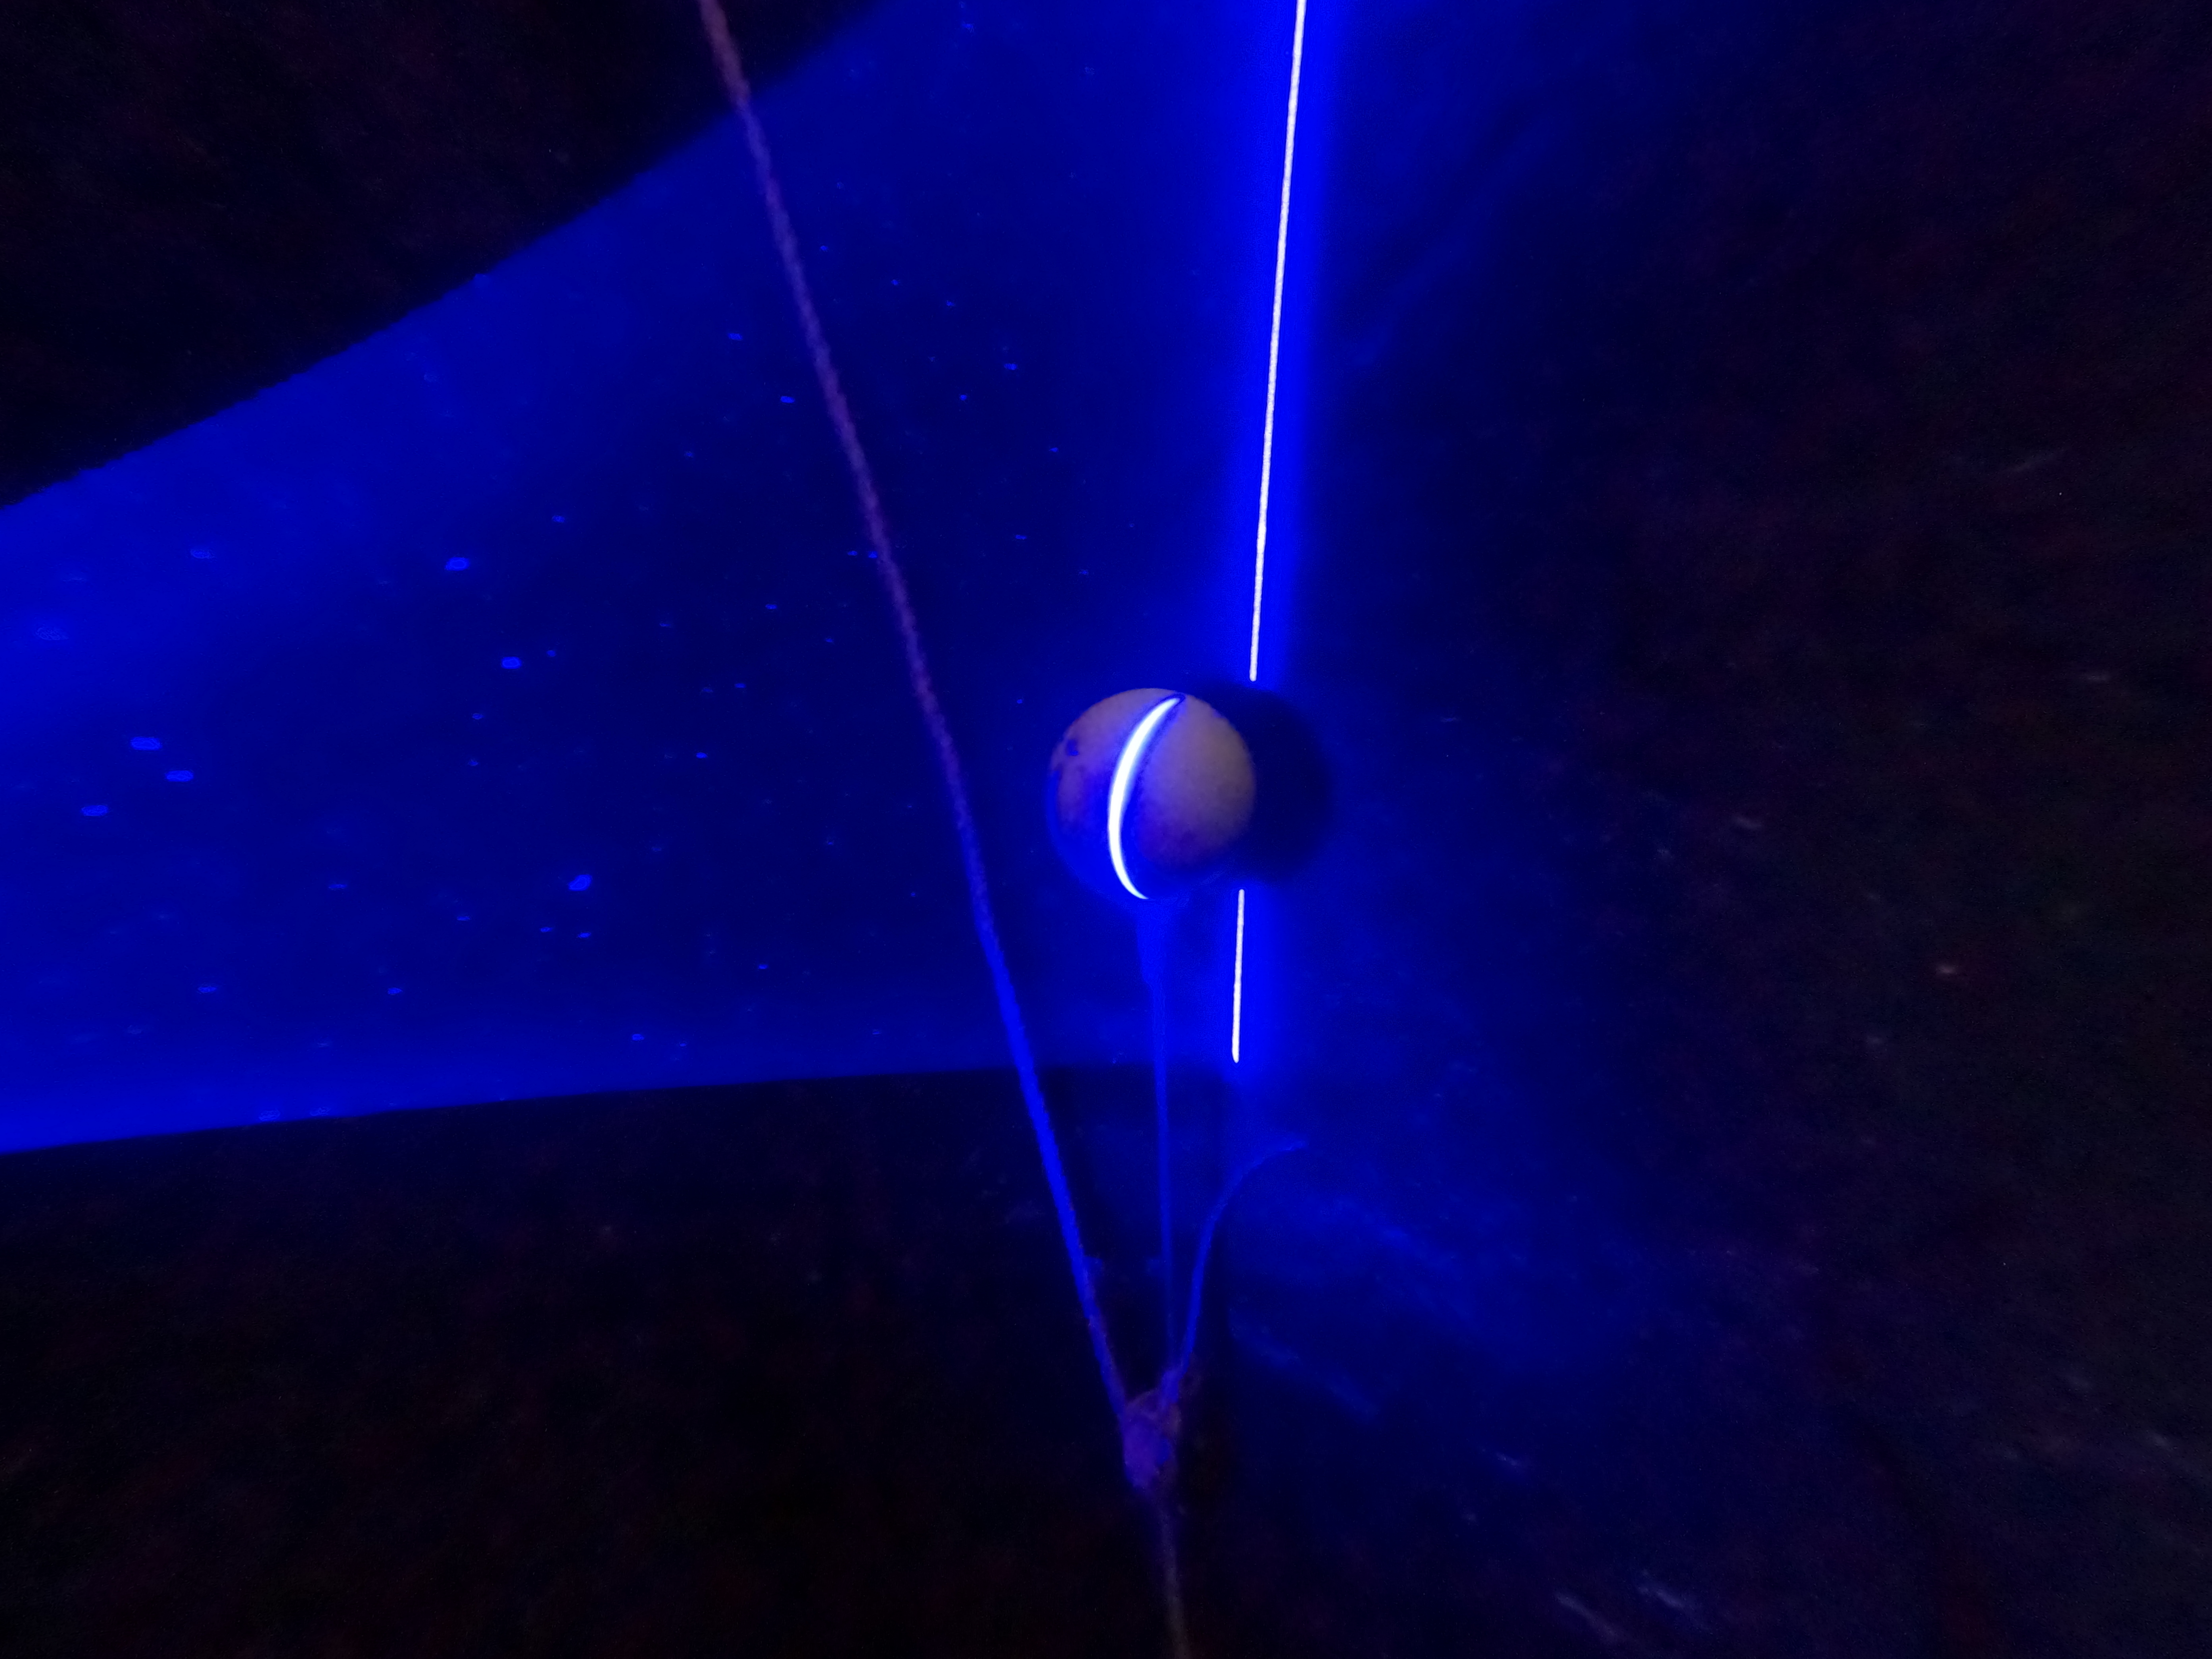

Supplement: Supplementary file 421 [file G0030721.pdf › 3/G0030721.pdf]

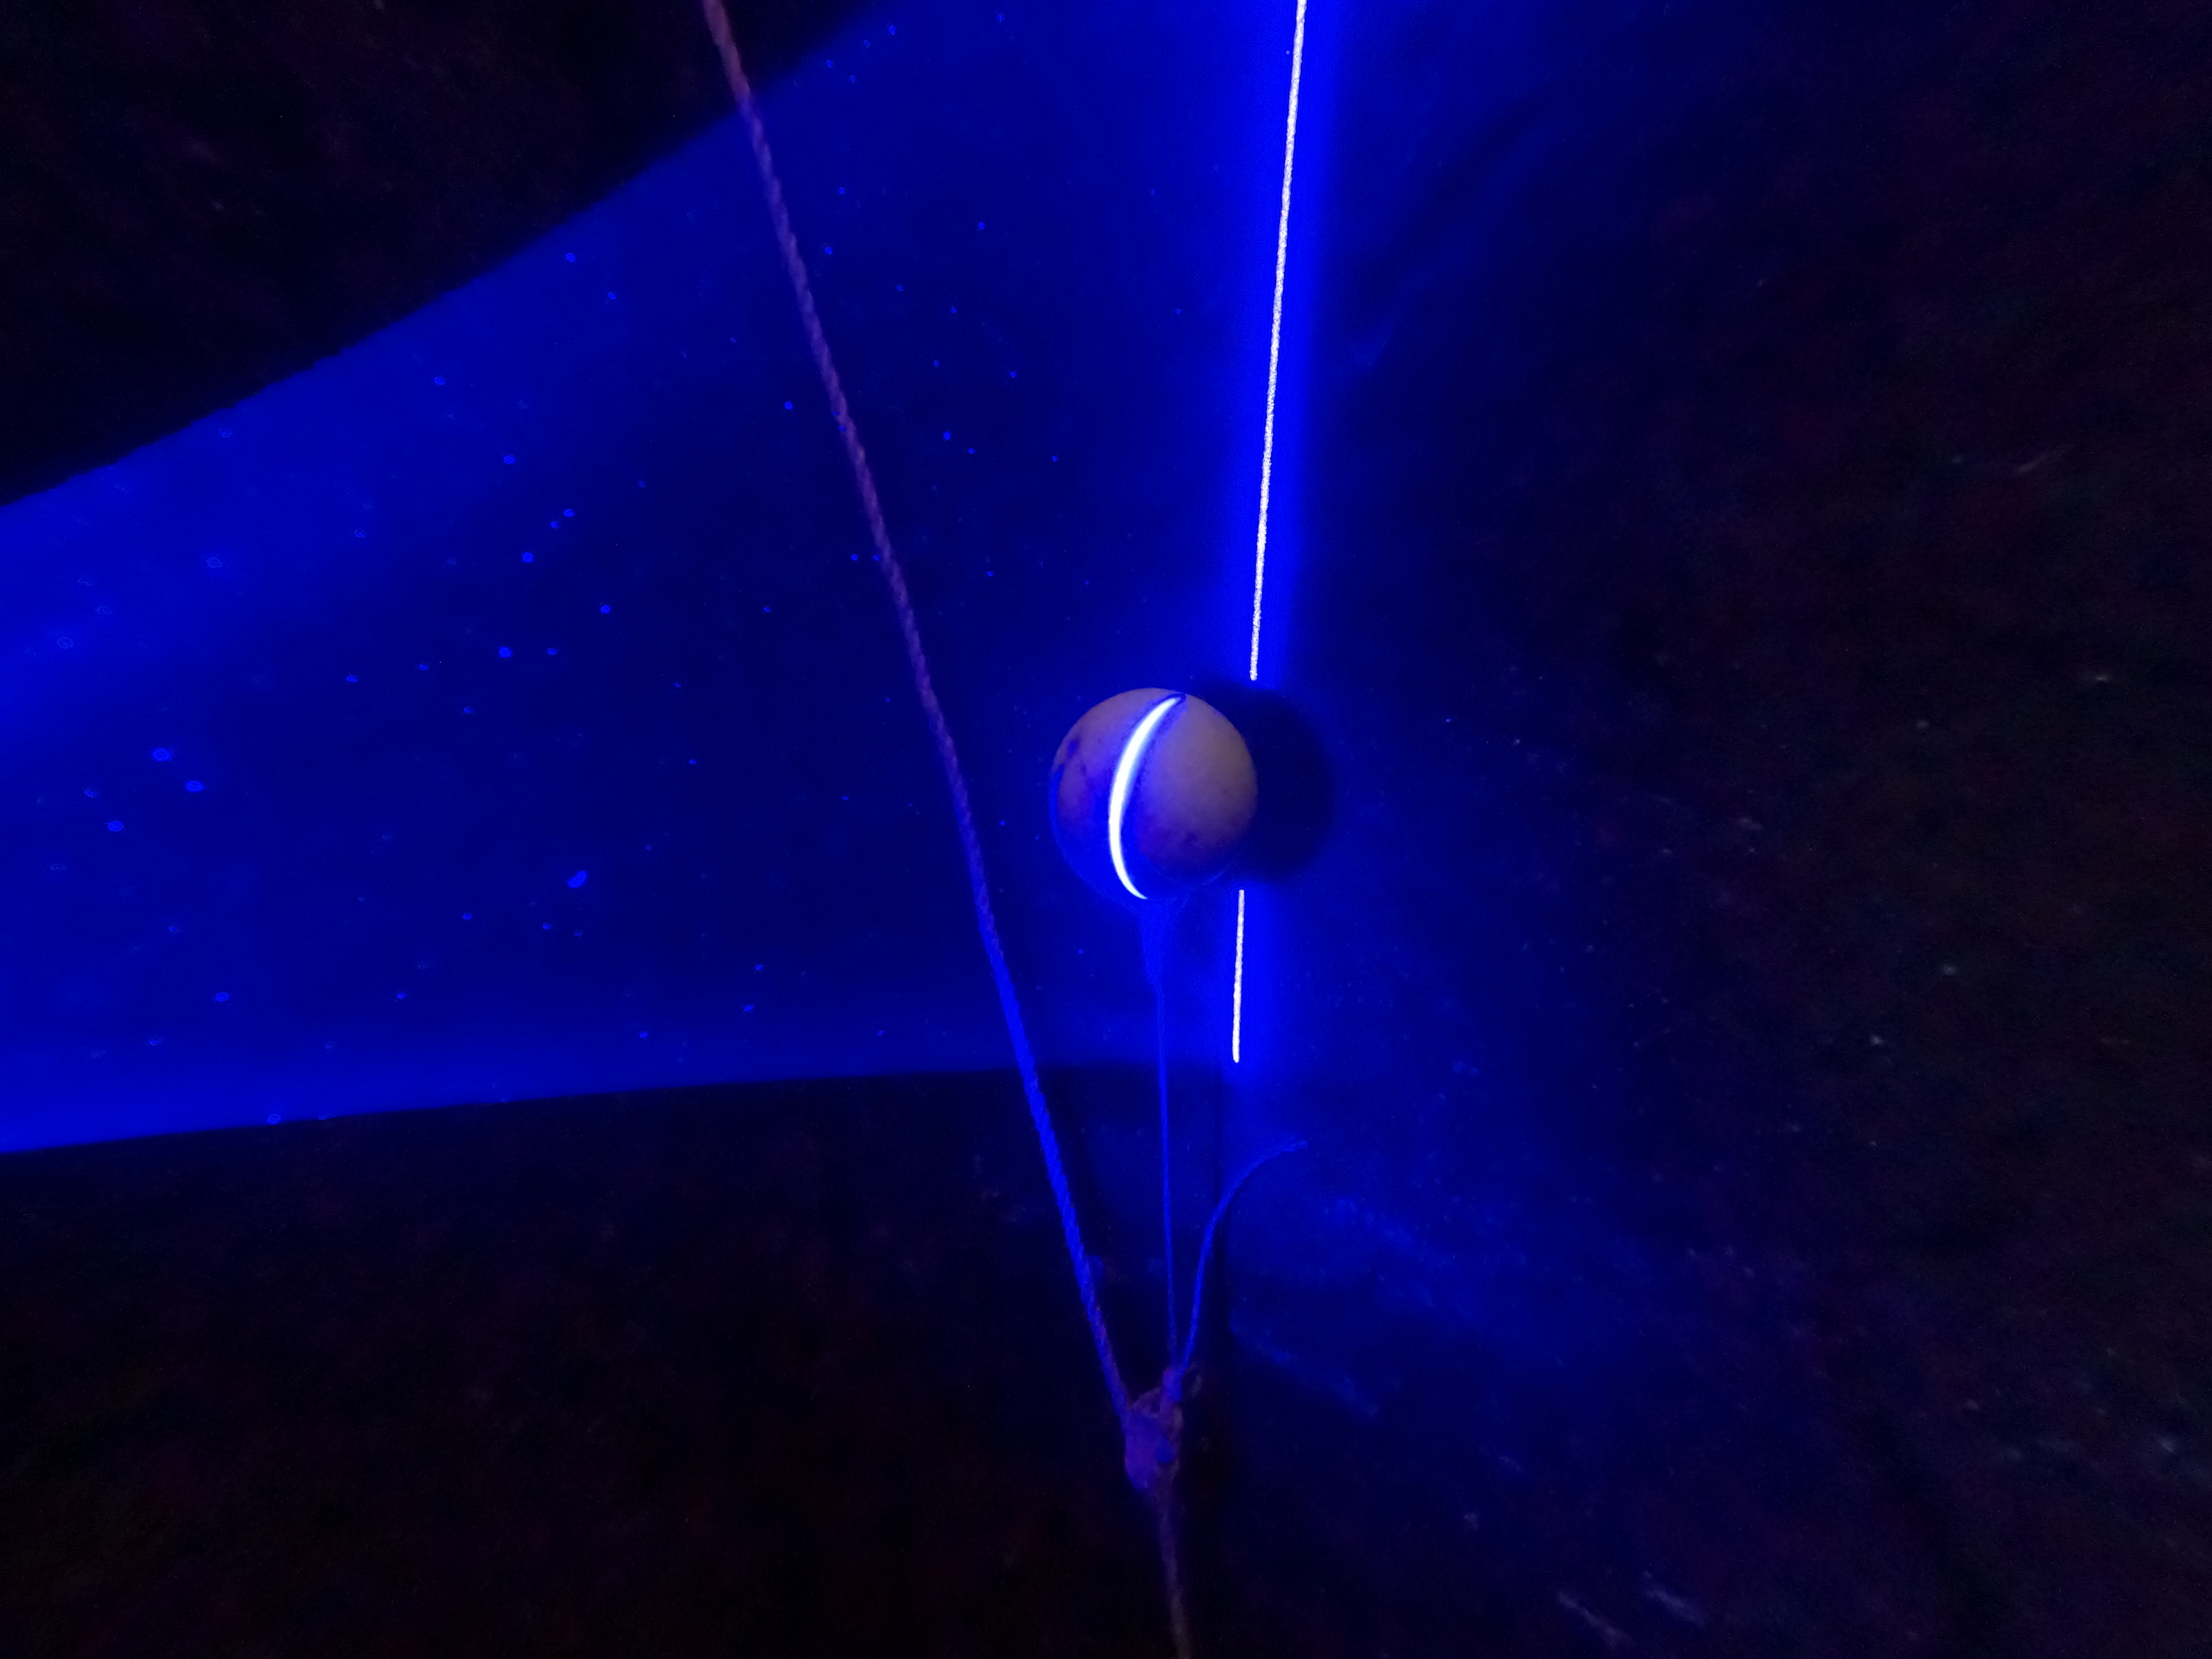

Supplement: Supplementary file 422 [file G0030722.pdf › 3/G0030722.pdf]

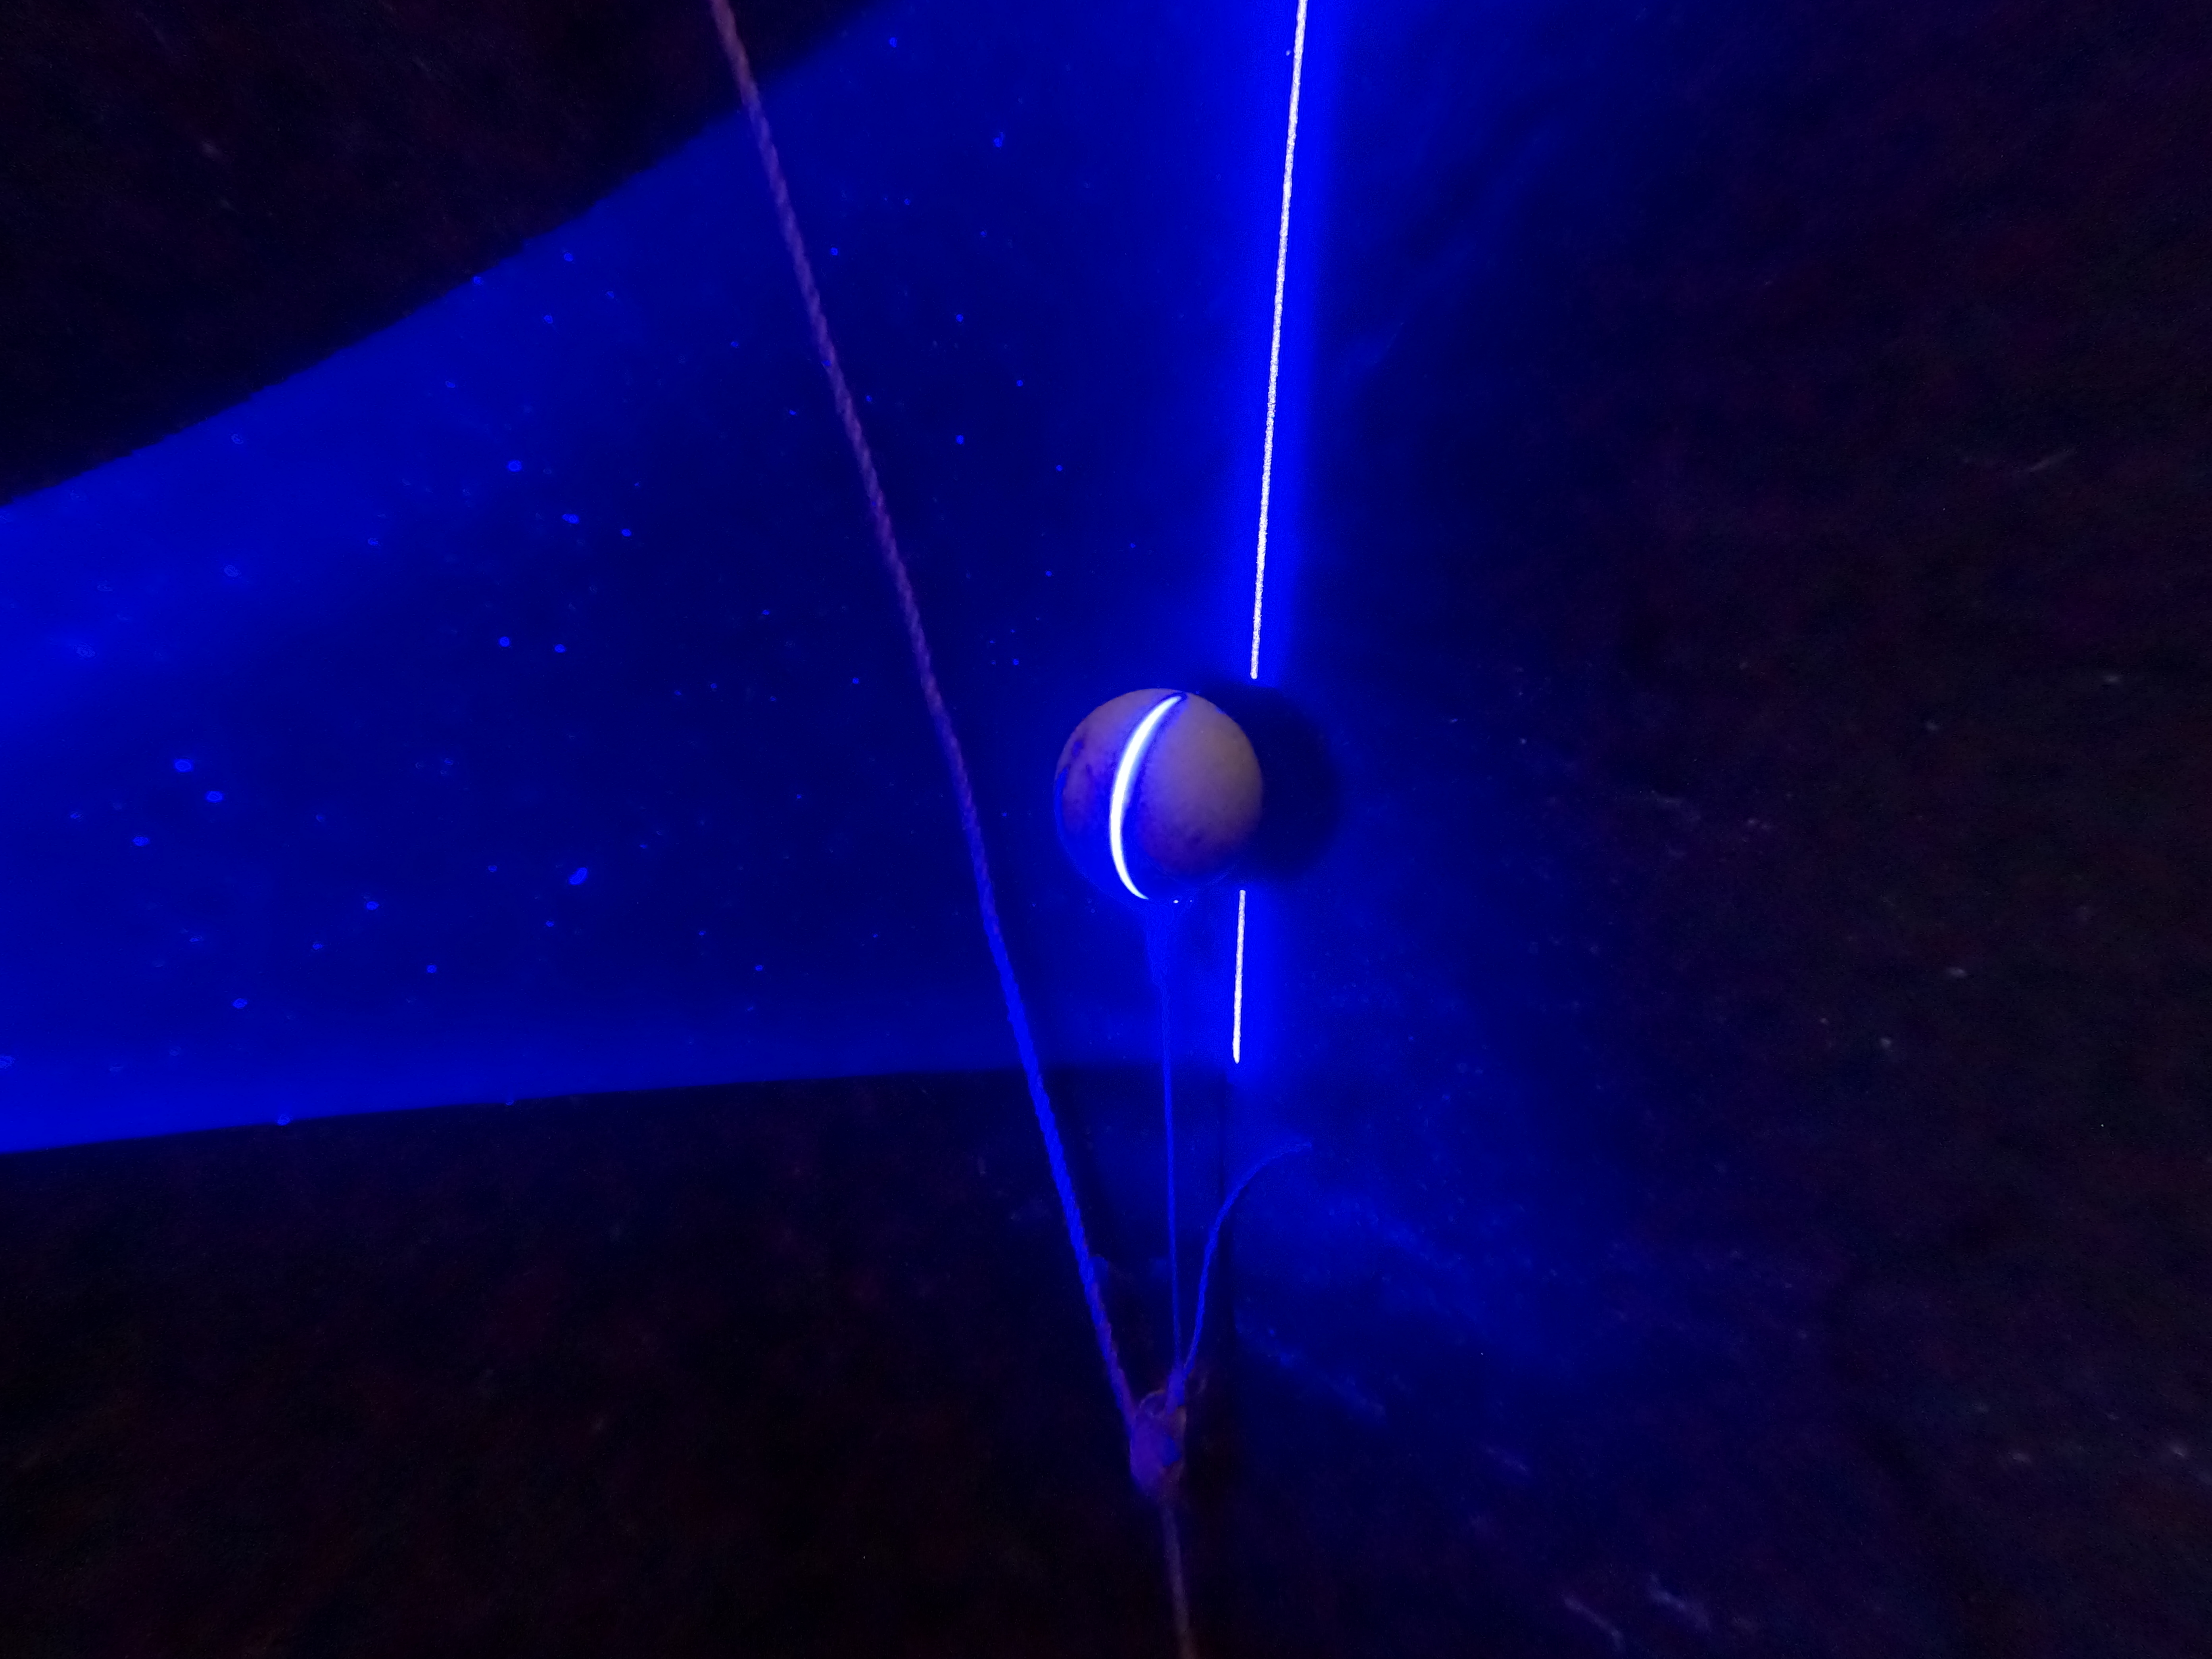

Supplement: Supplementary file 423 [file G0030723.pdf › 3/G0030723.pdf]

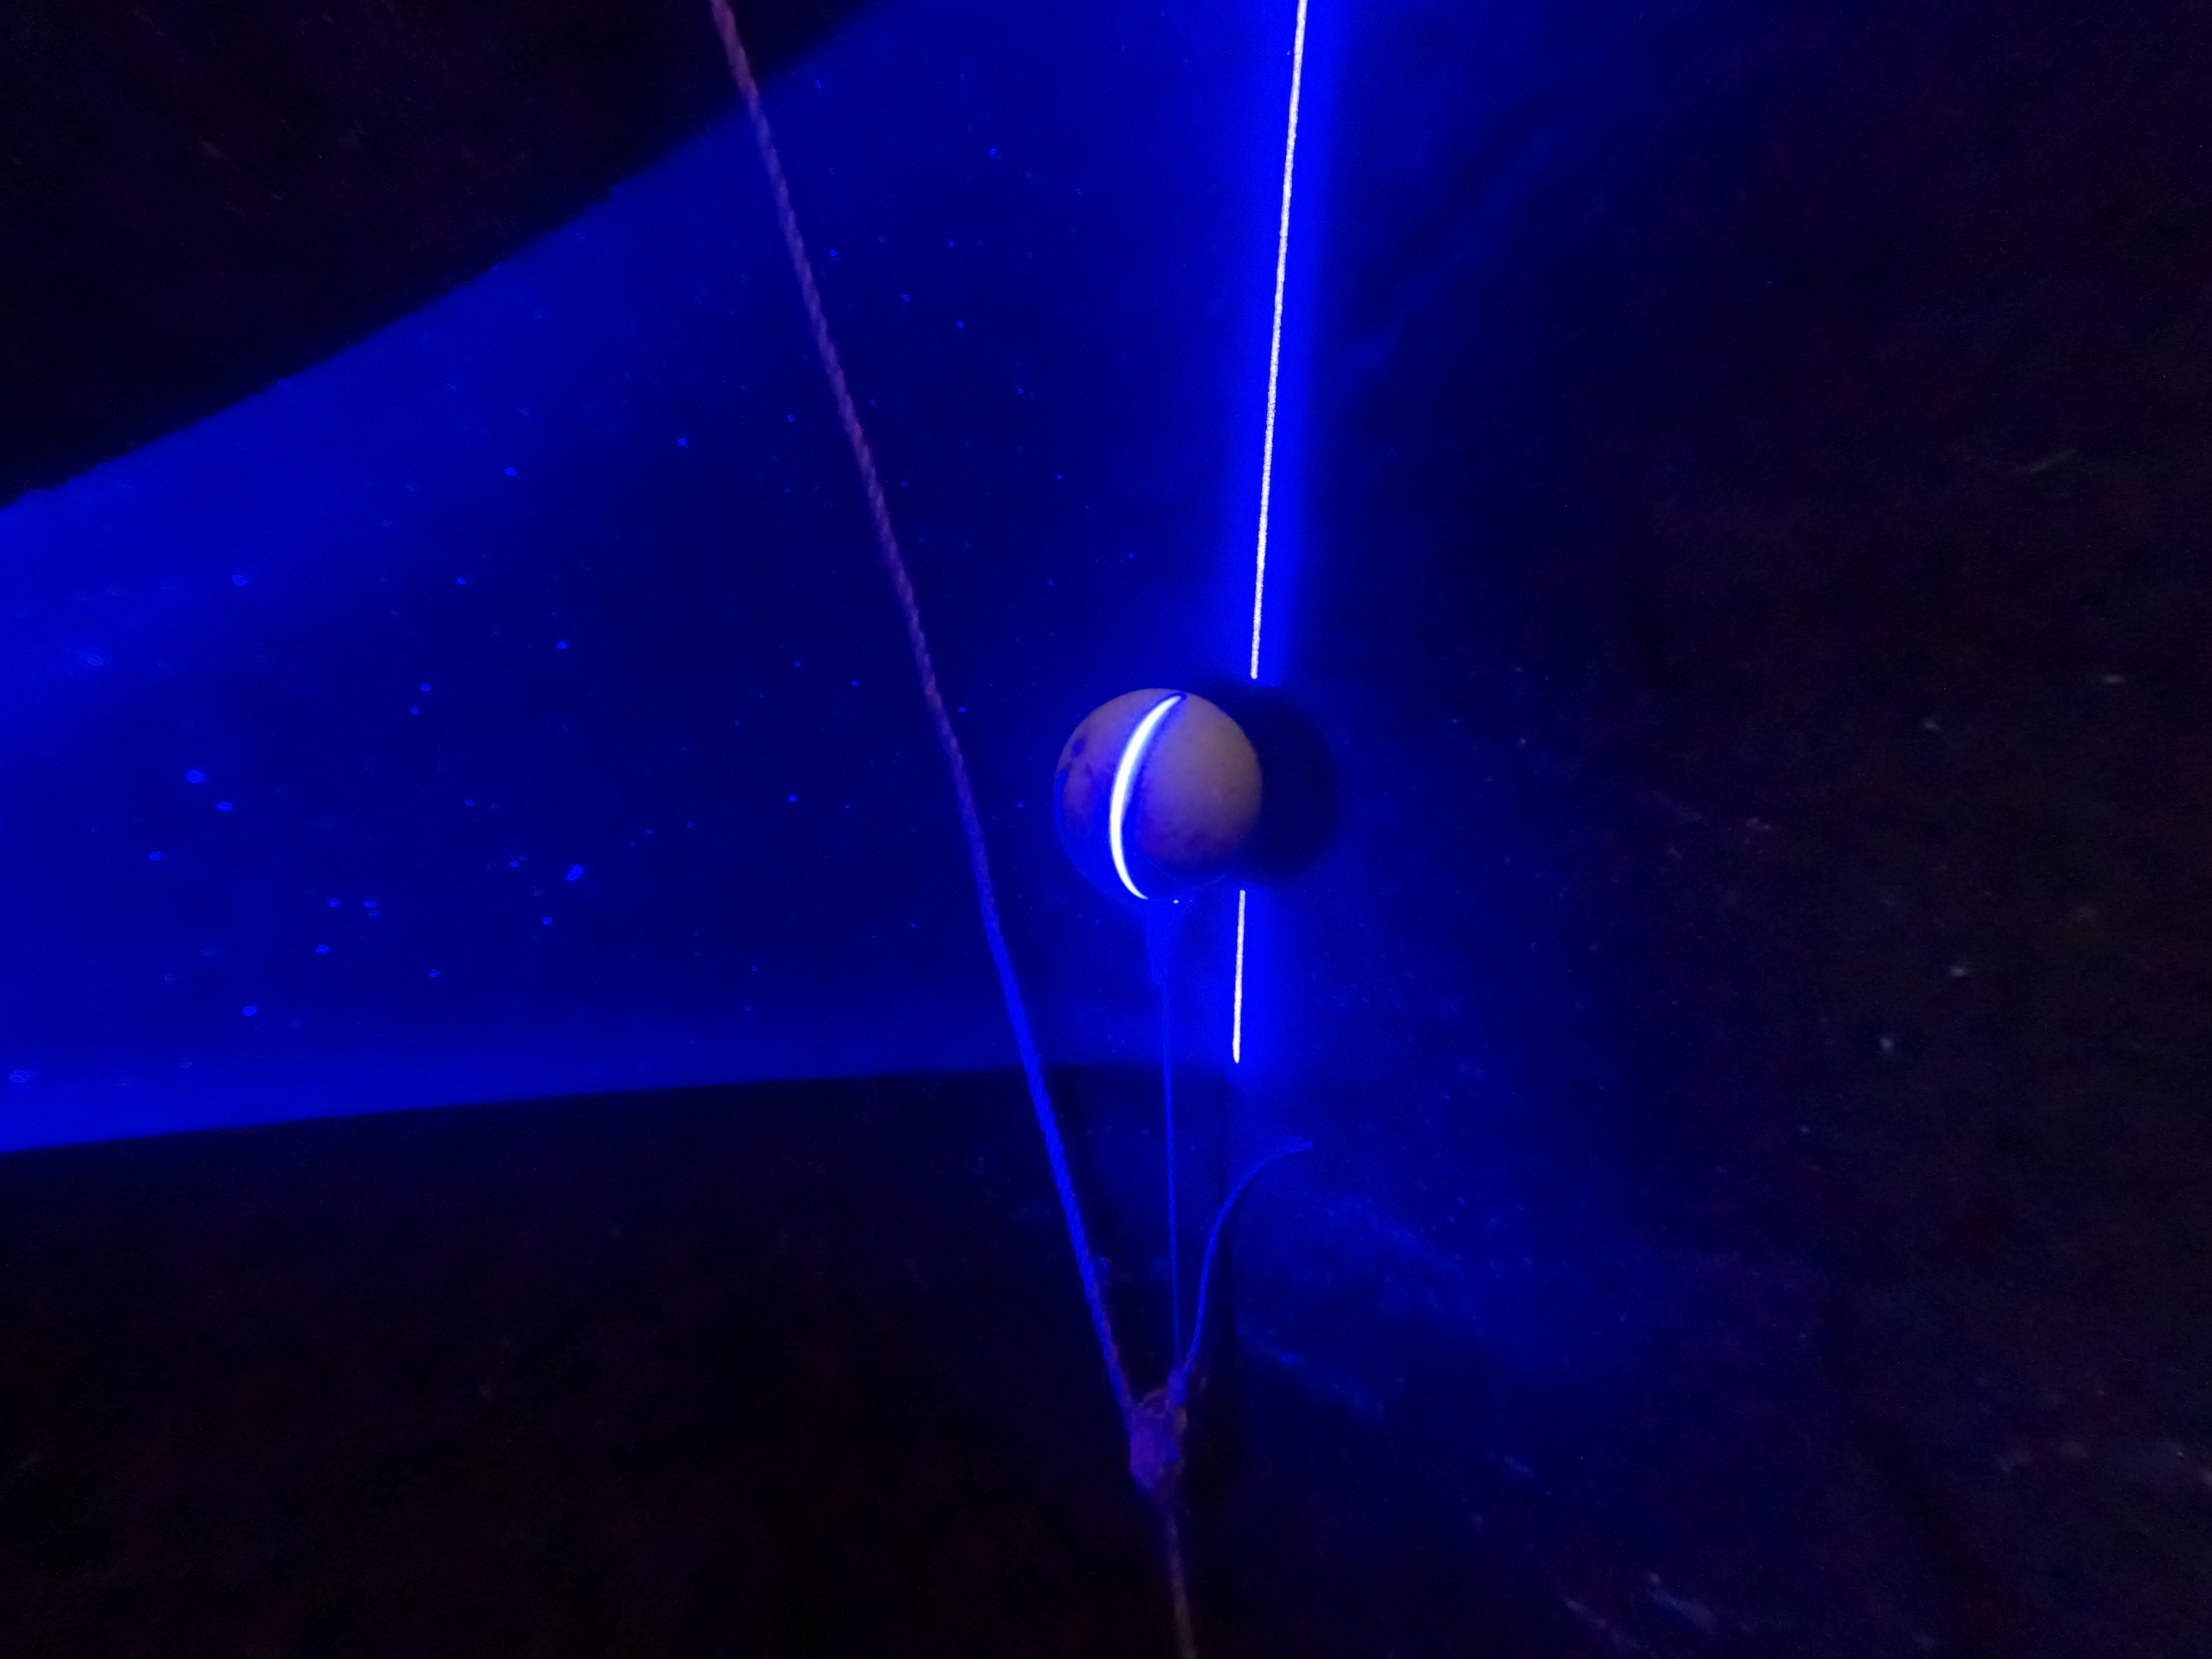

Supplement: Supplementary file 424 [file G0030724.pdf › 3/G0030724.pdf]

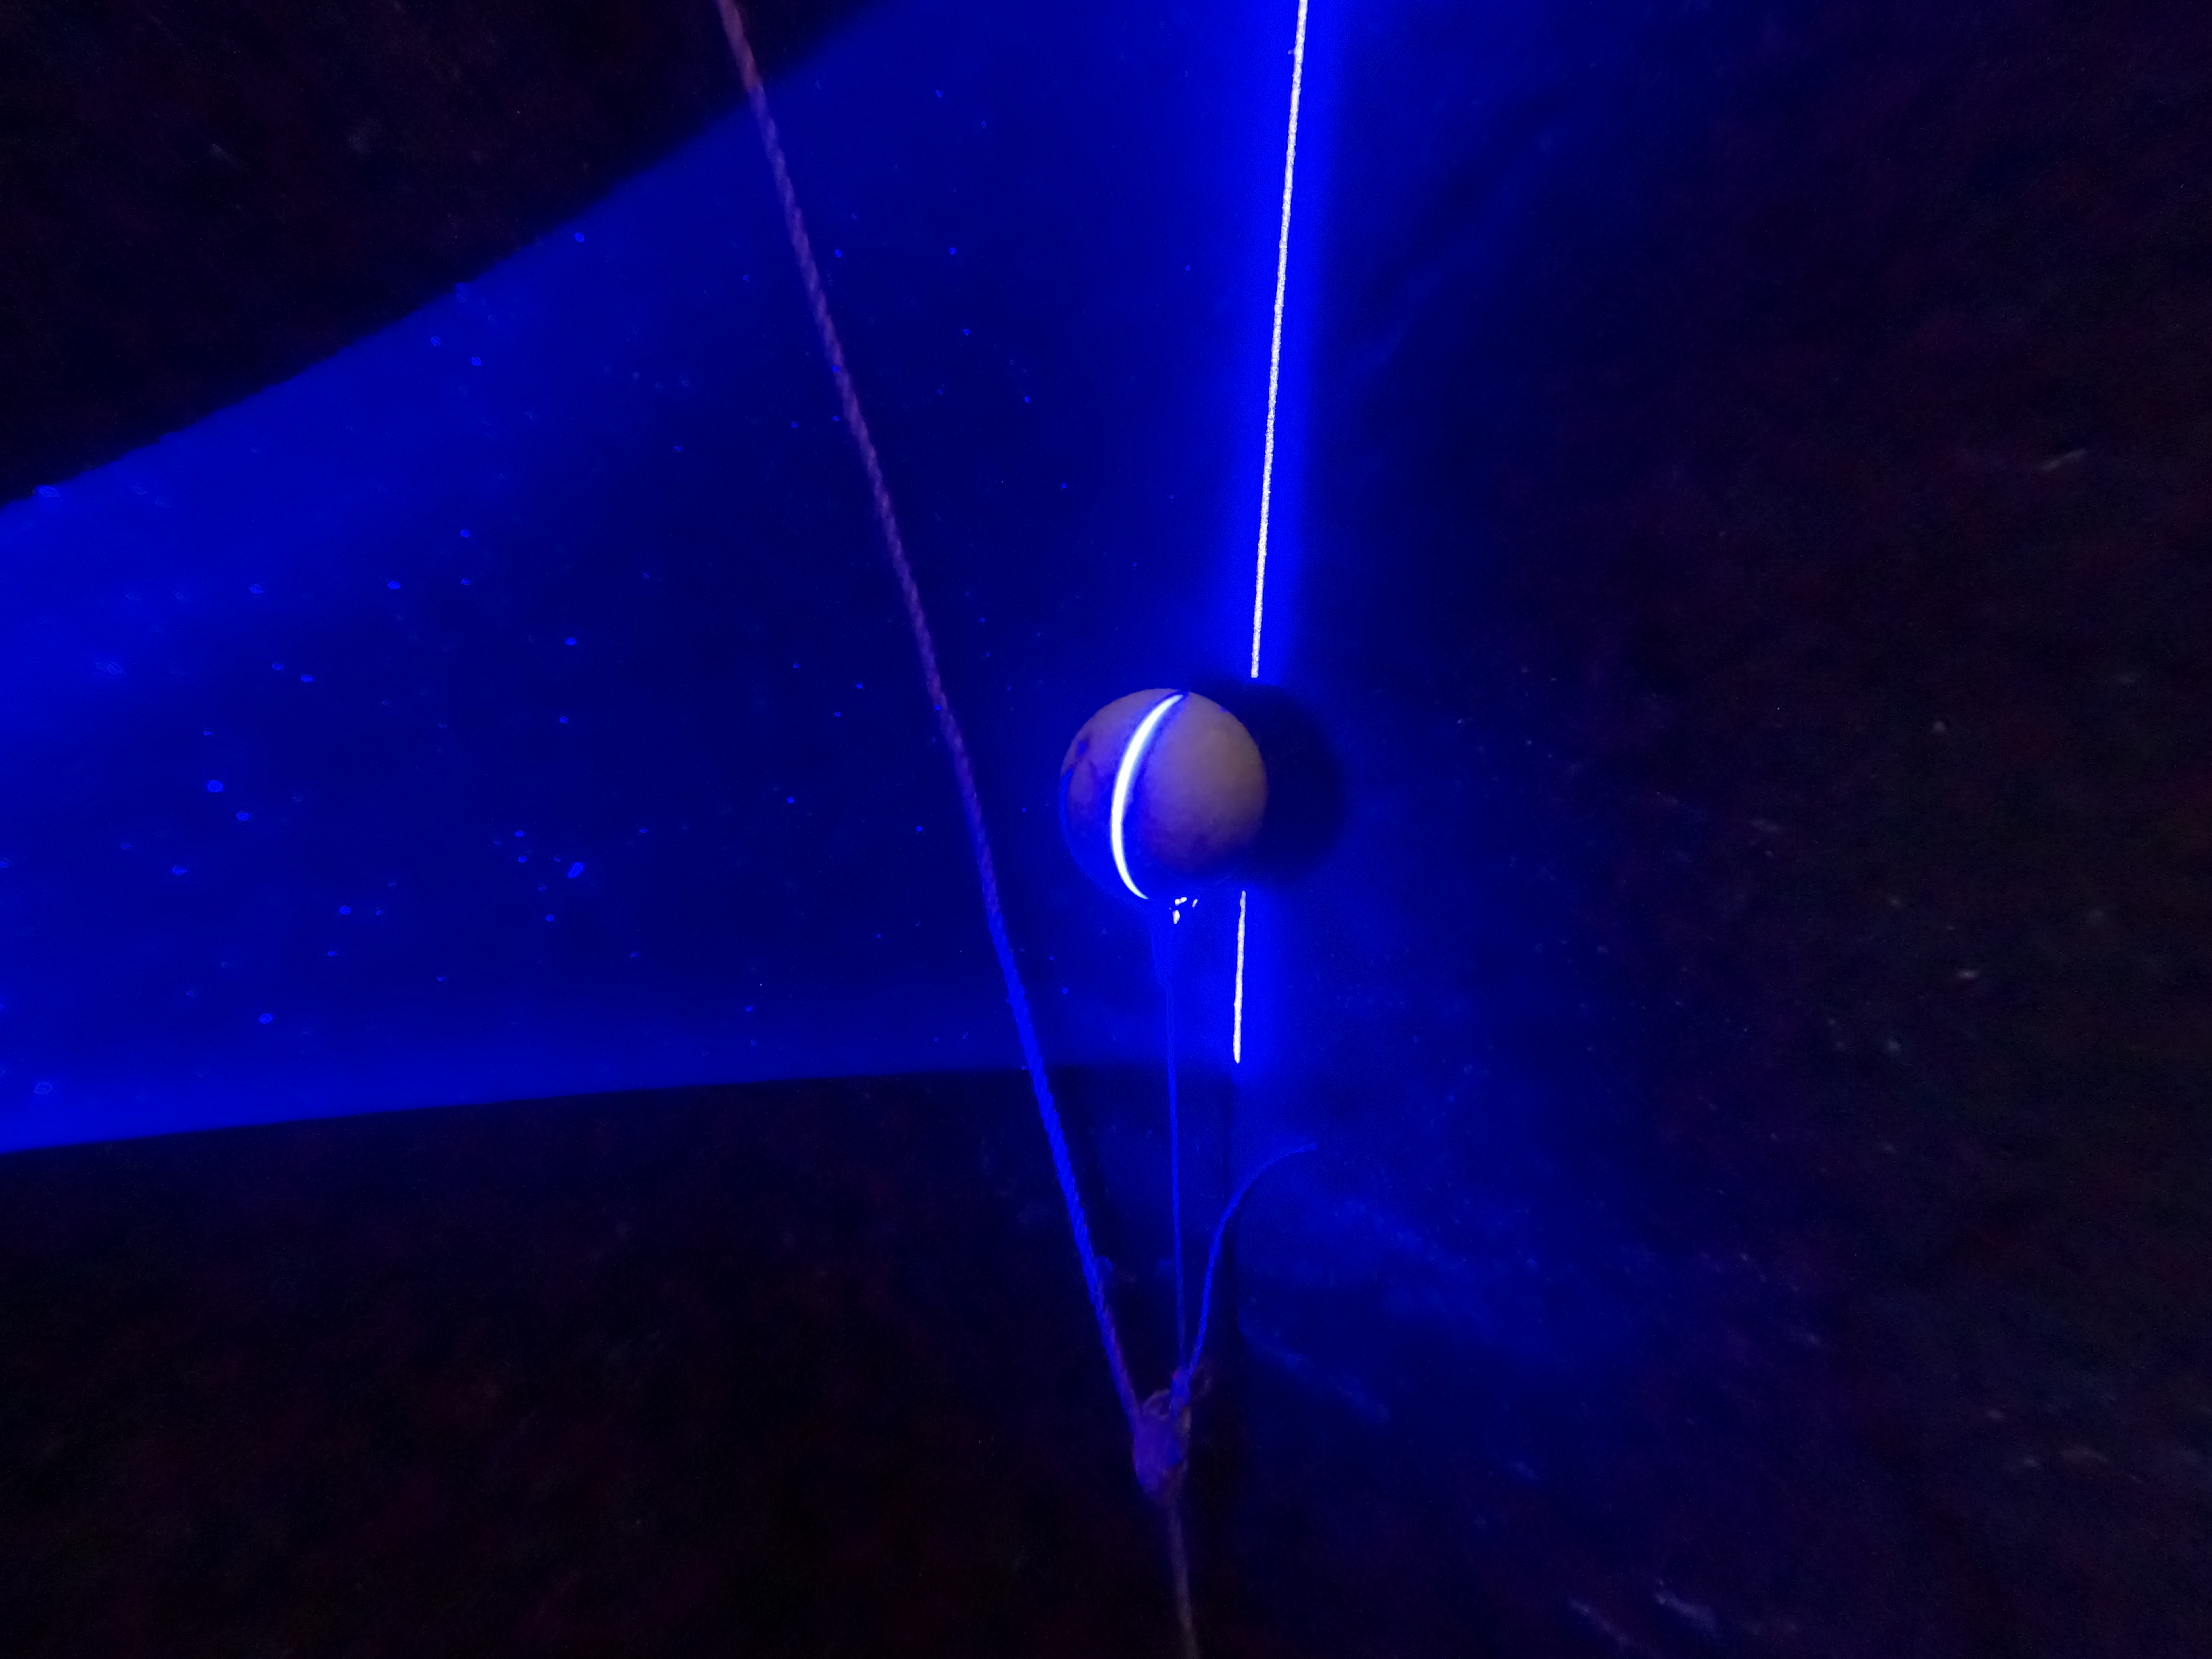

Supplement: Supplementary file 425 [file G0030725.pdf › 3/G0030725.pdf]

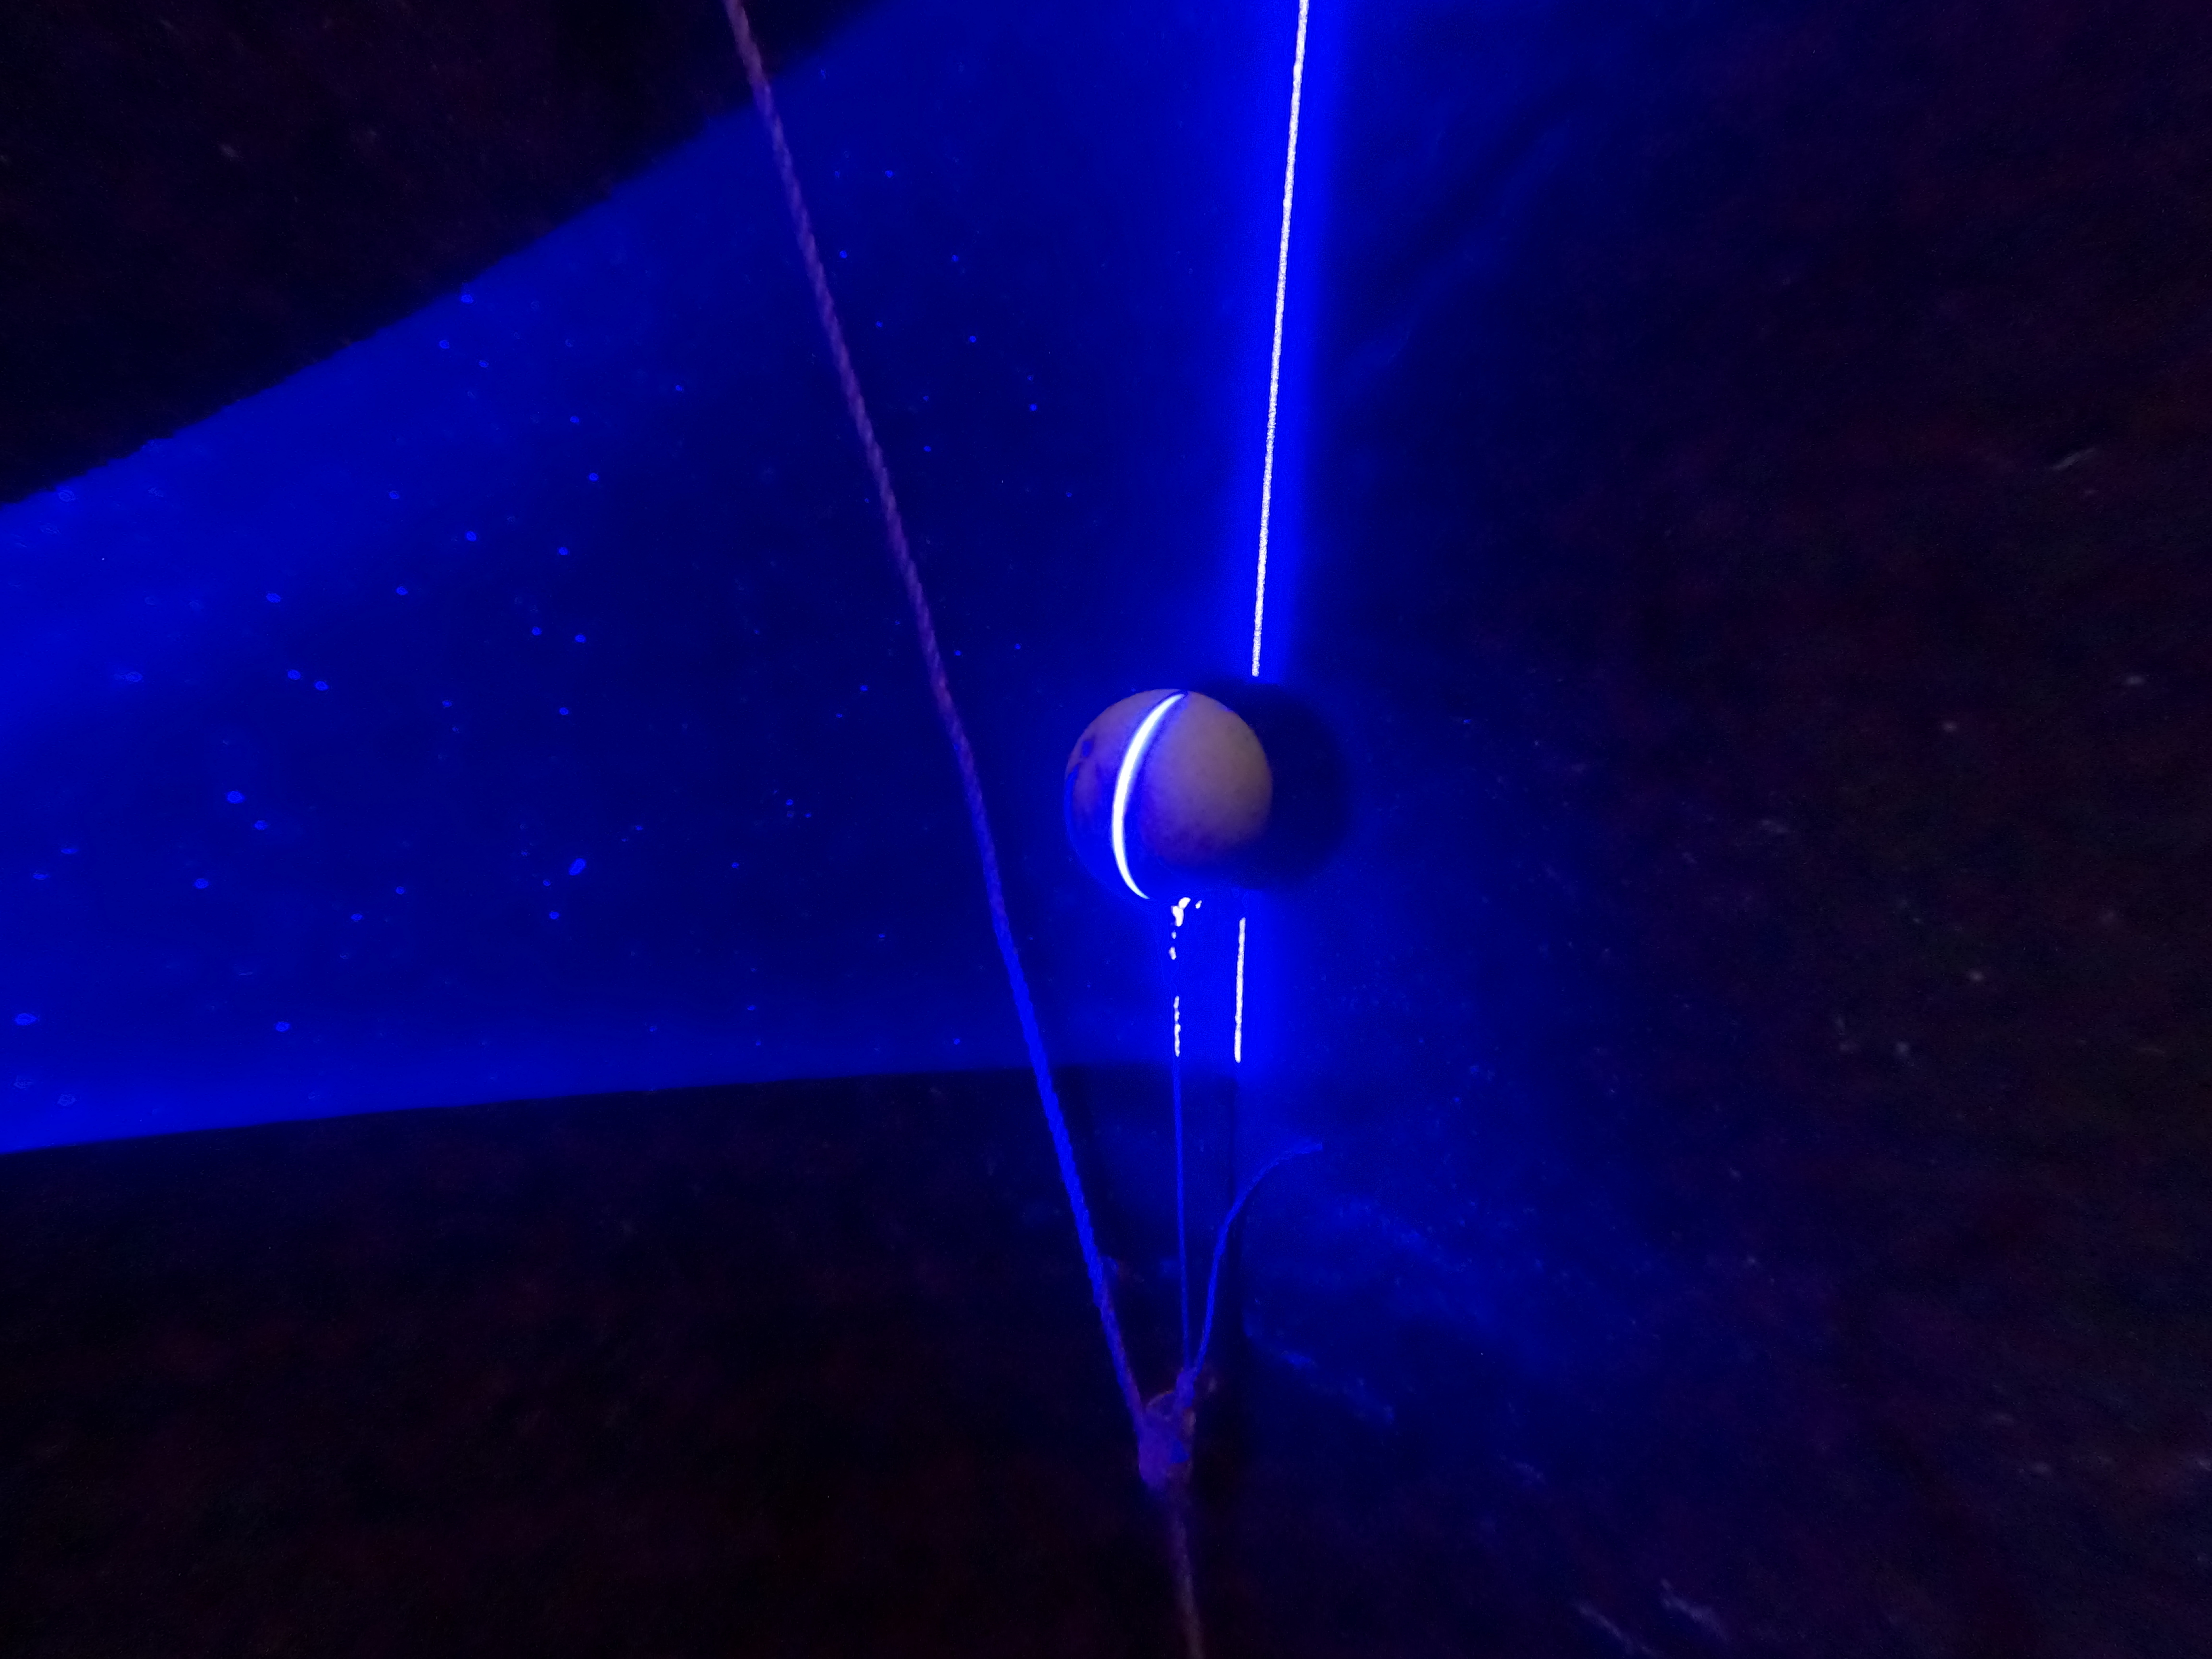

Supplement: Supplementary file 426 [file G0030726.pdf › 3/G0030726.pdf]

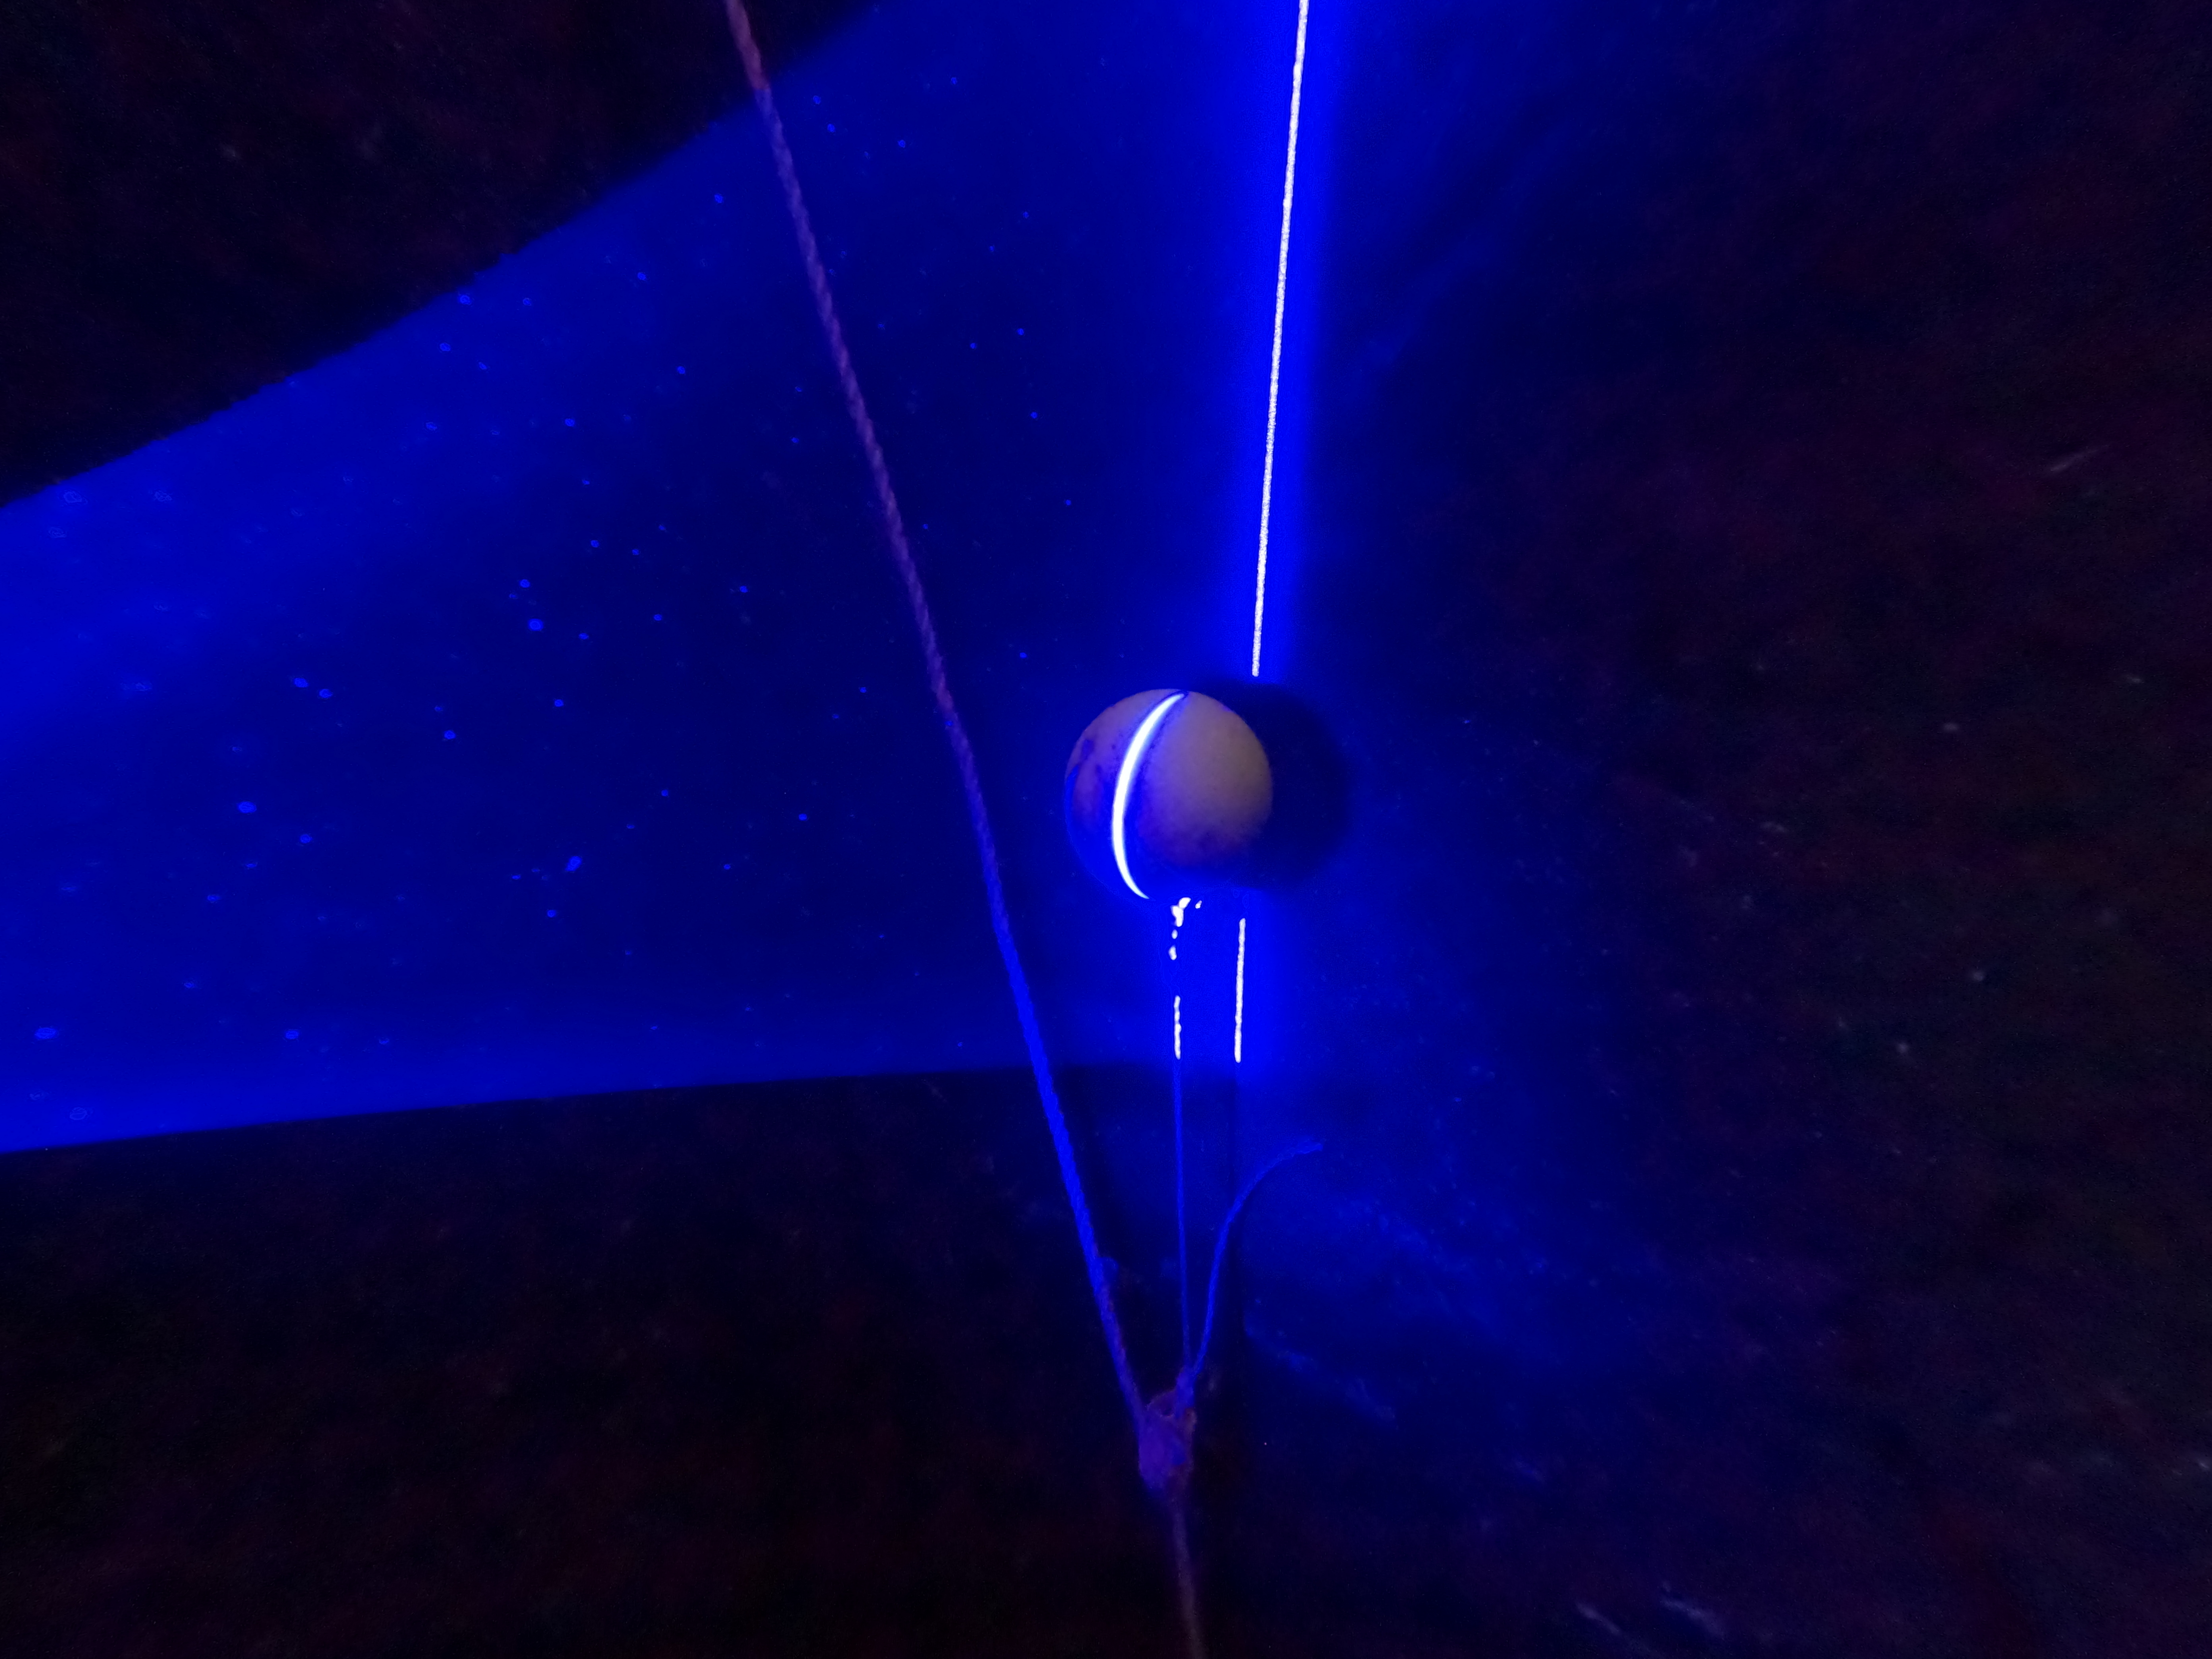

Supplement: Supplementary file 427 [file G0030727.pdf › 3/G0030727.pdf]

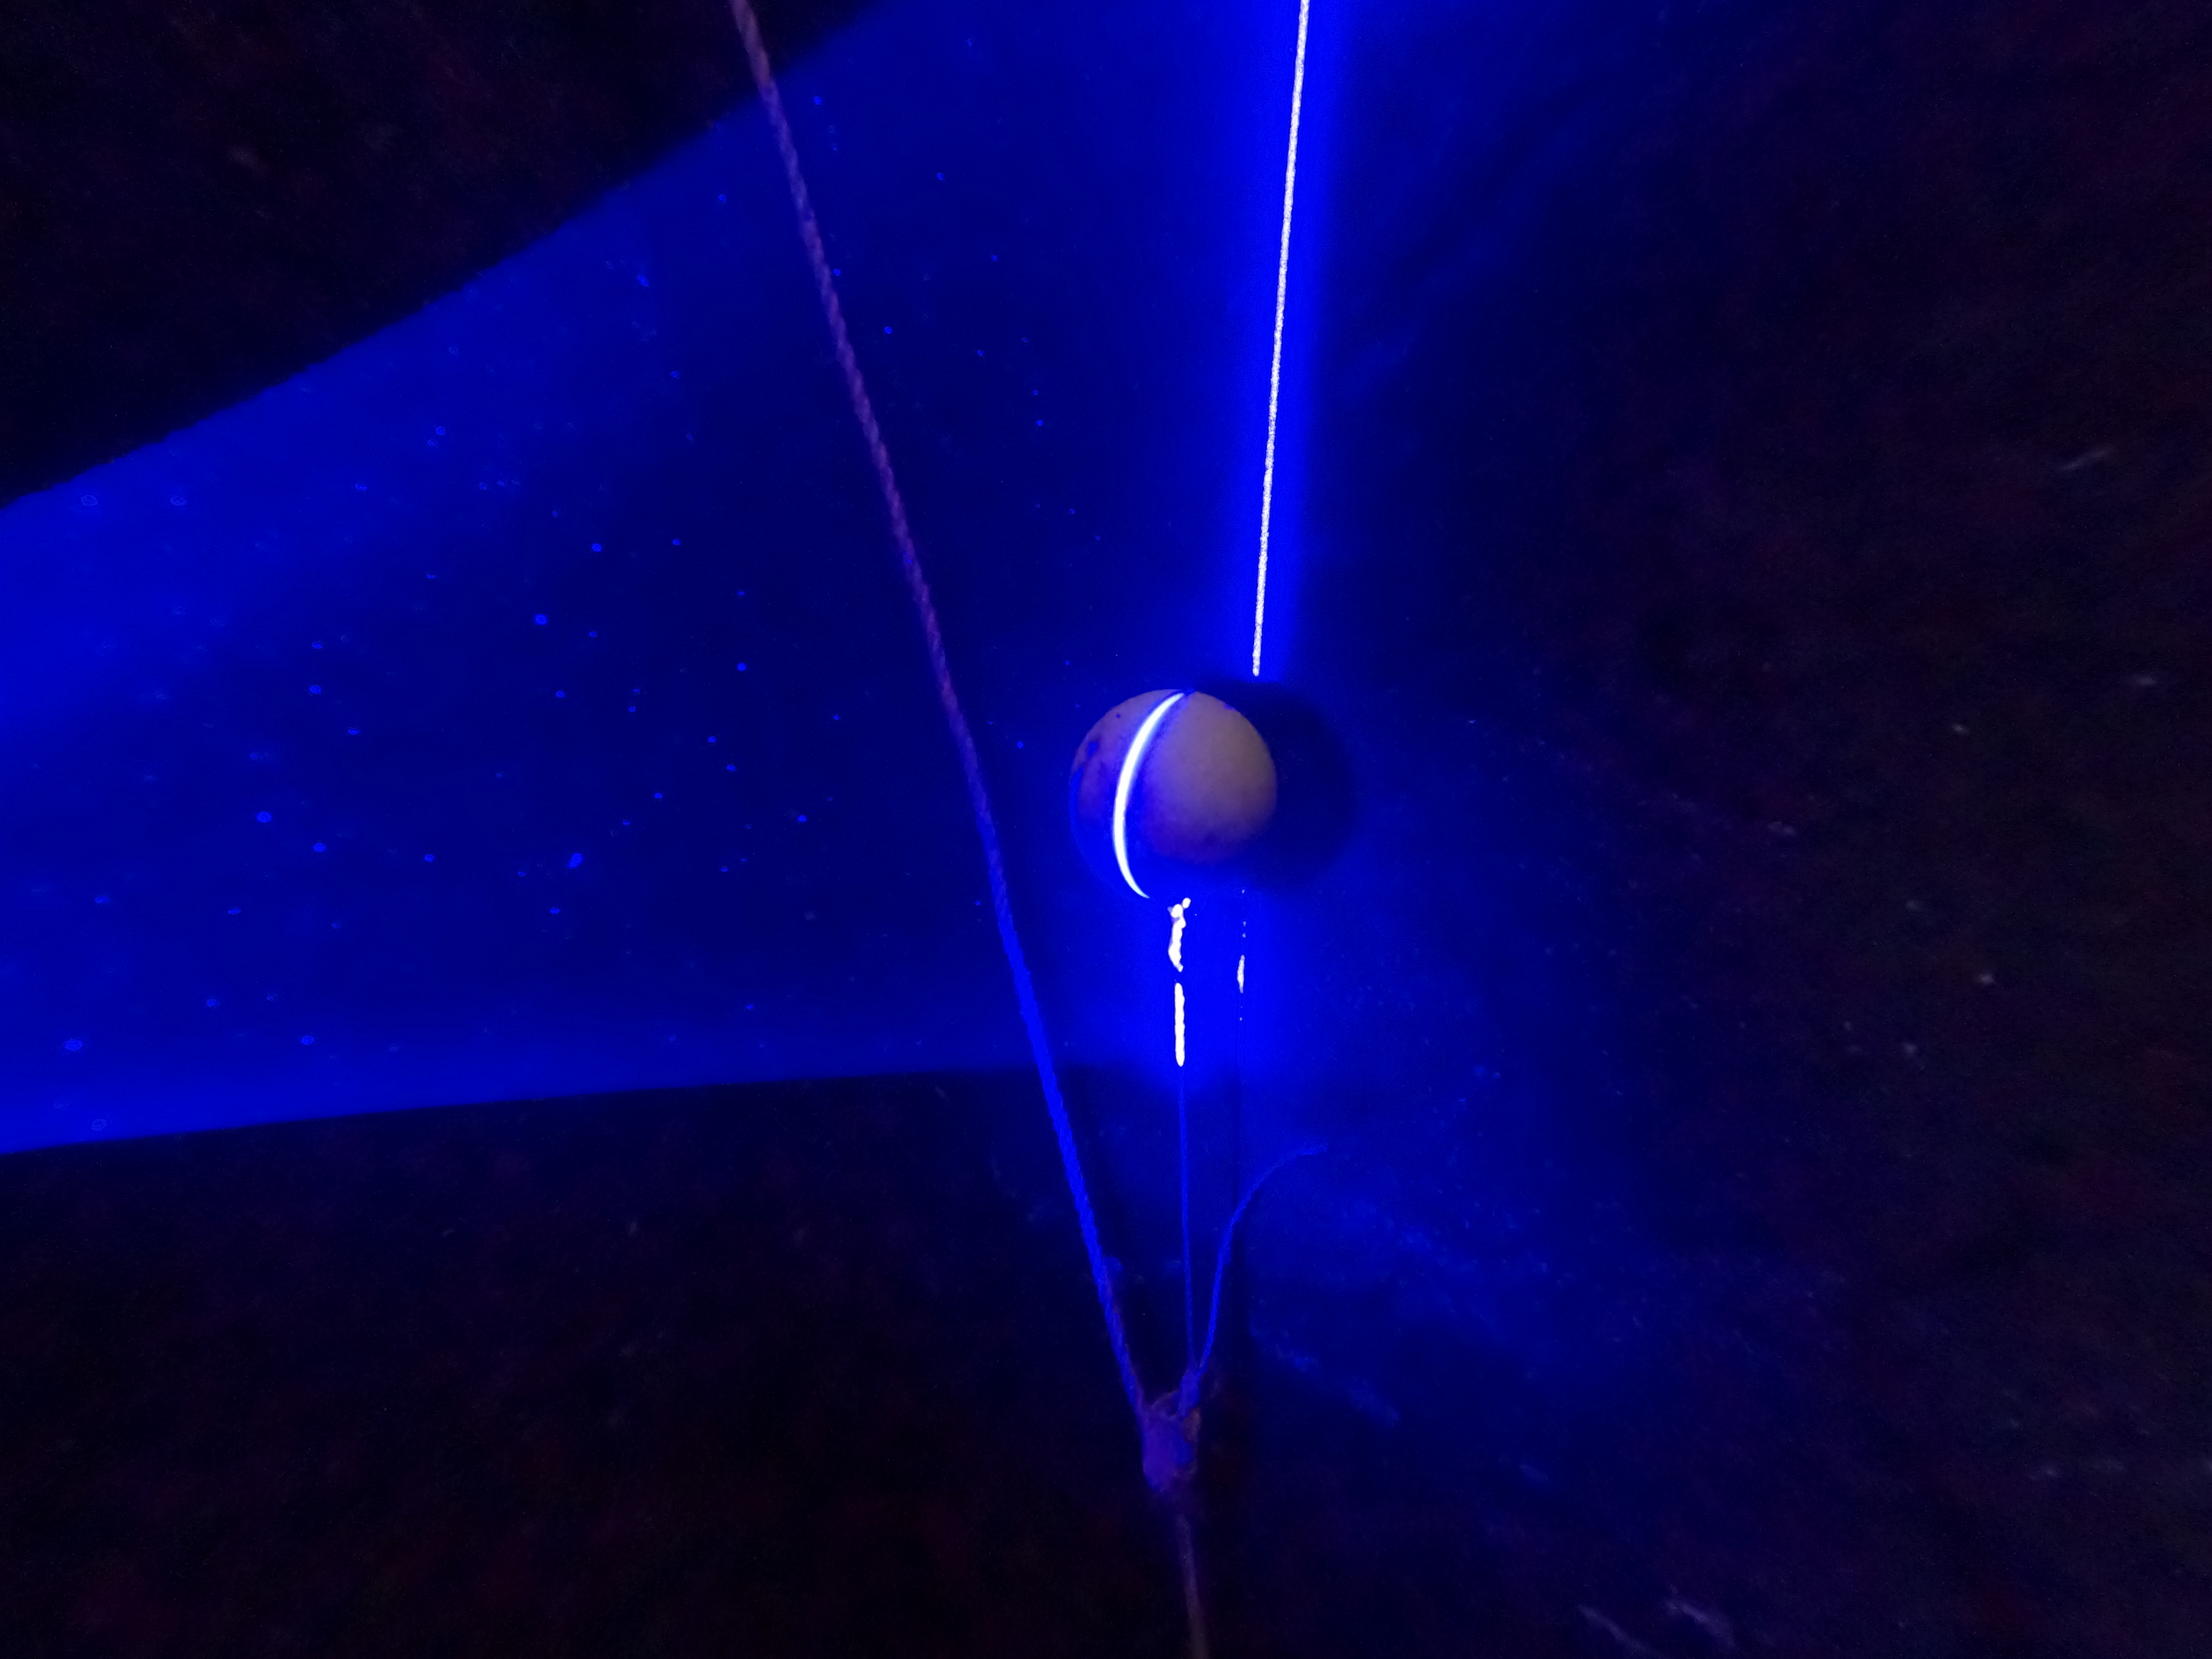

Supplement: Supplementary file 428 [file G0030728.pdf › 3/G0030728.pdf]

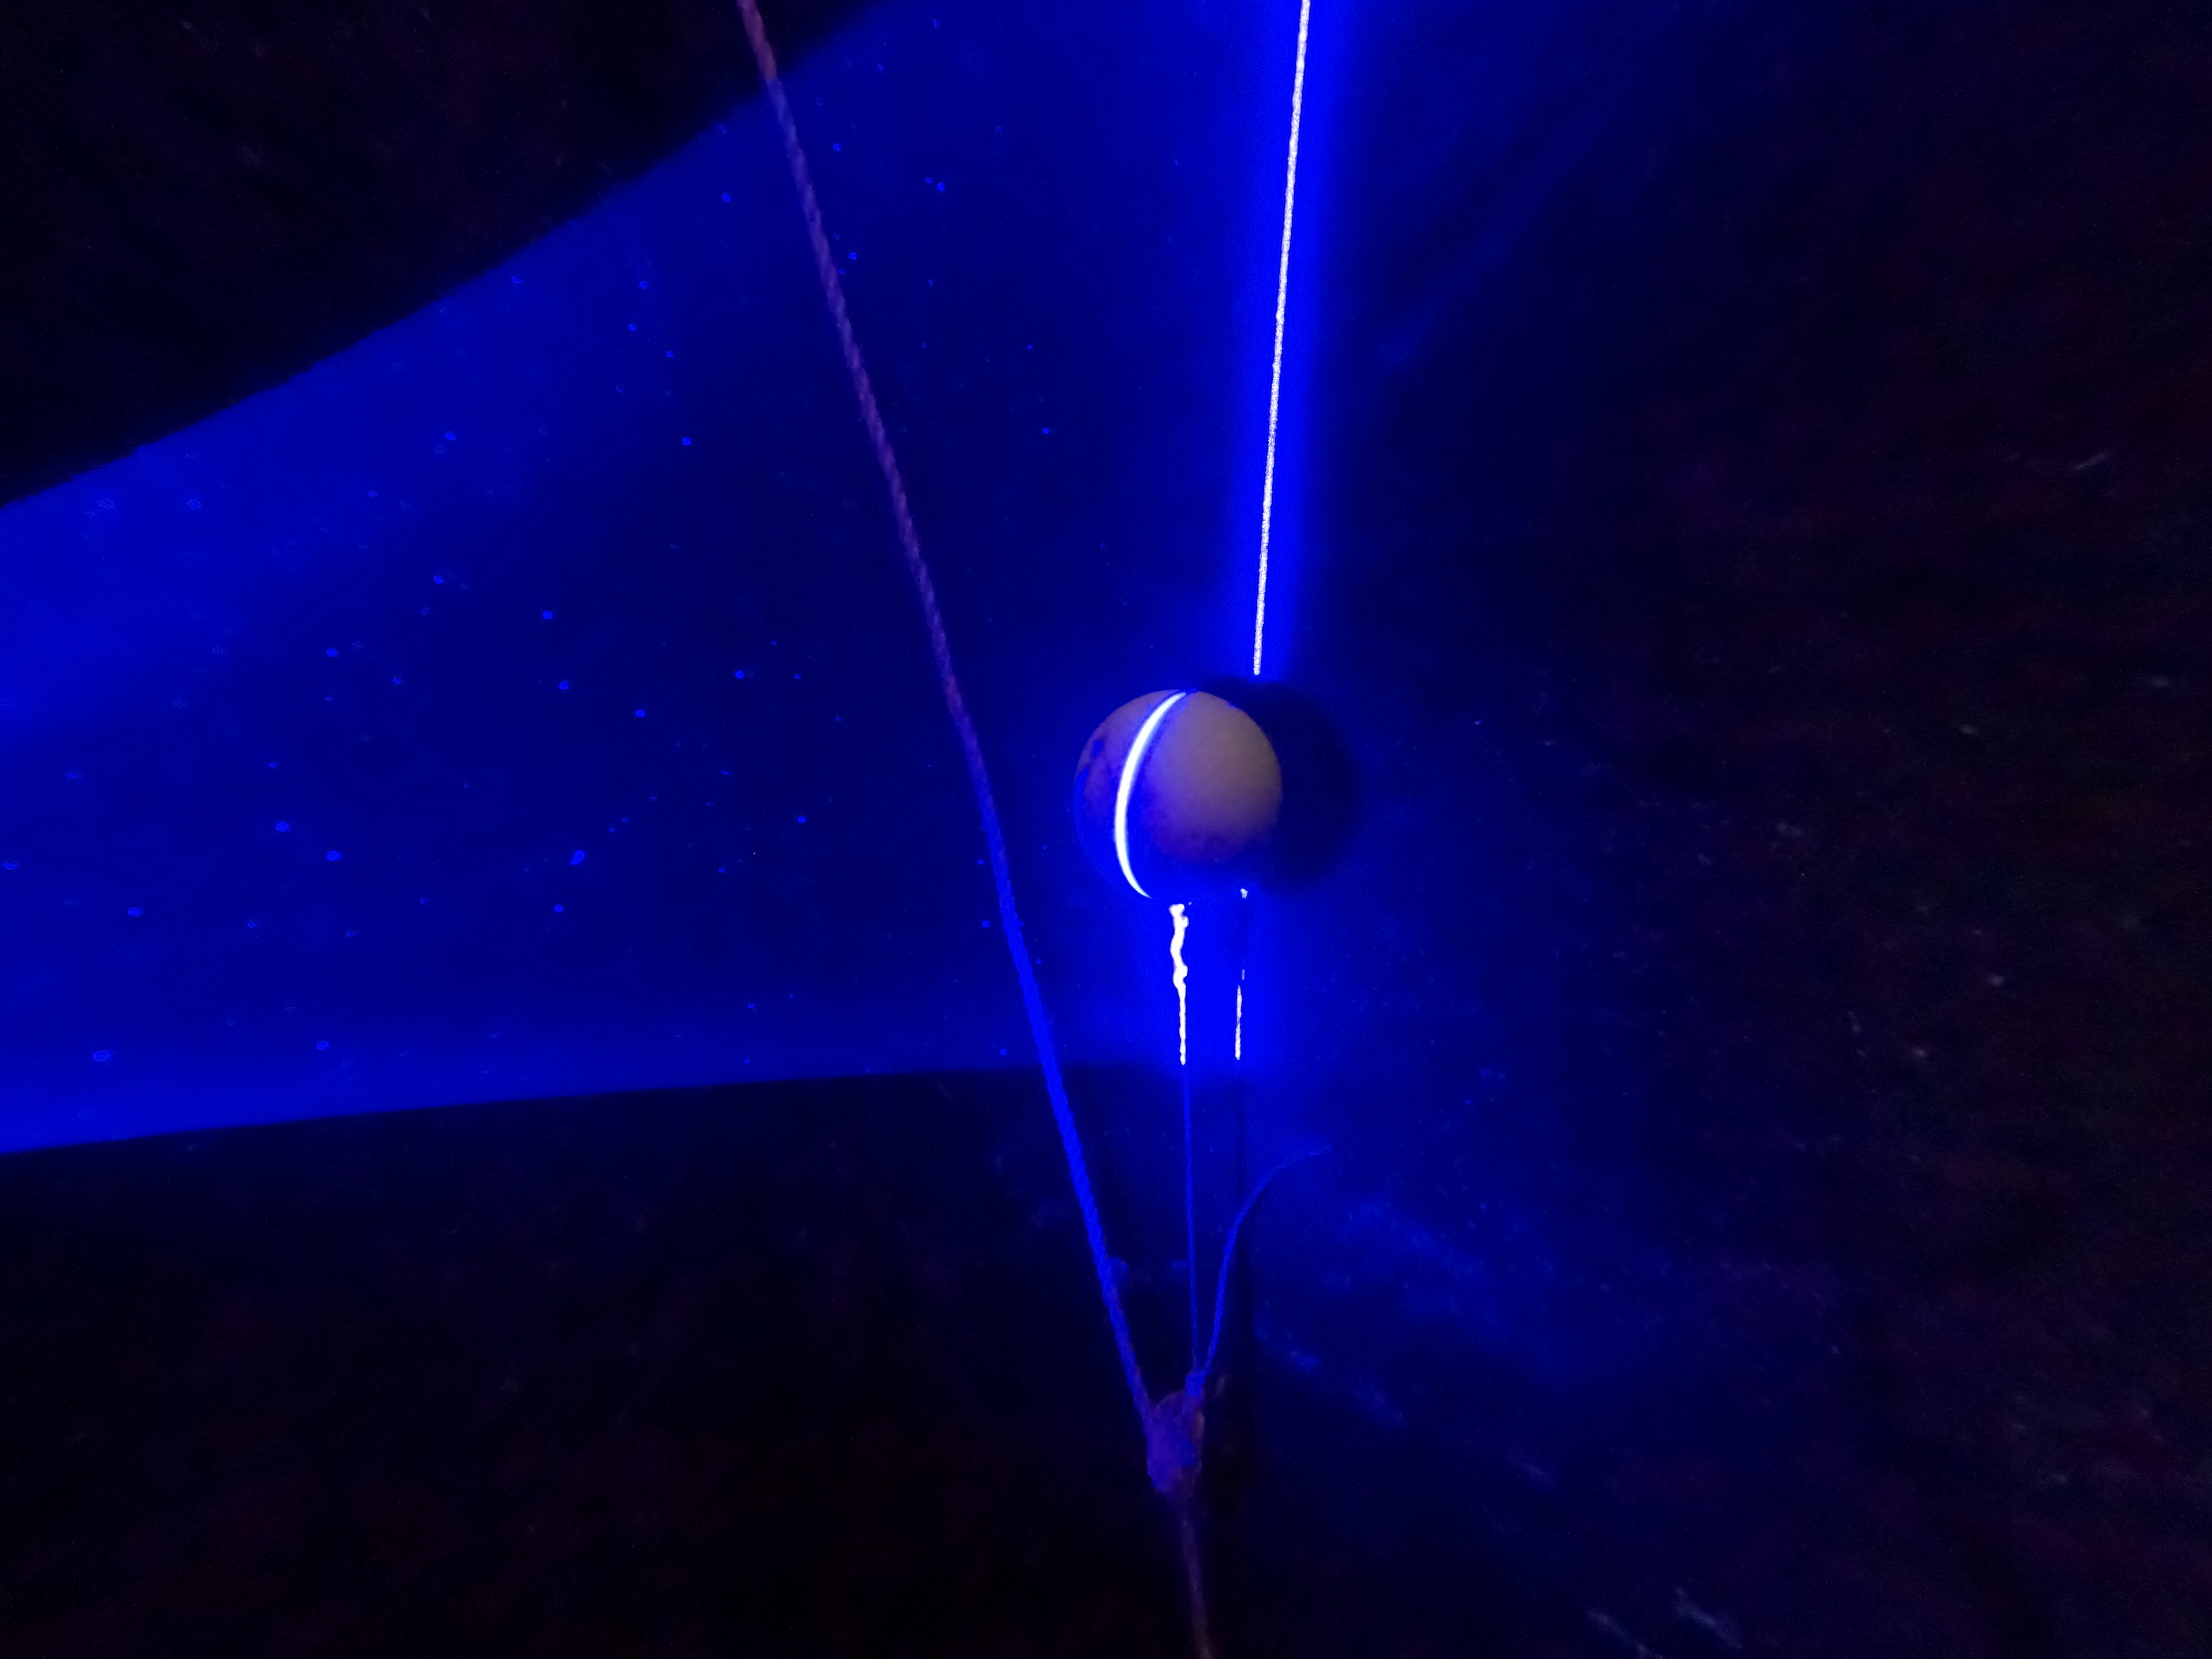

Supplement: Supplementary file 429 [file G0030729.pdf › 3/G0030729.pdf]

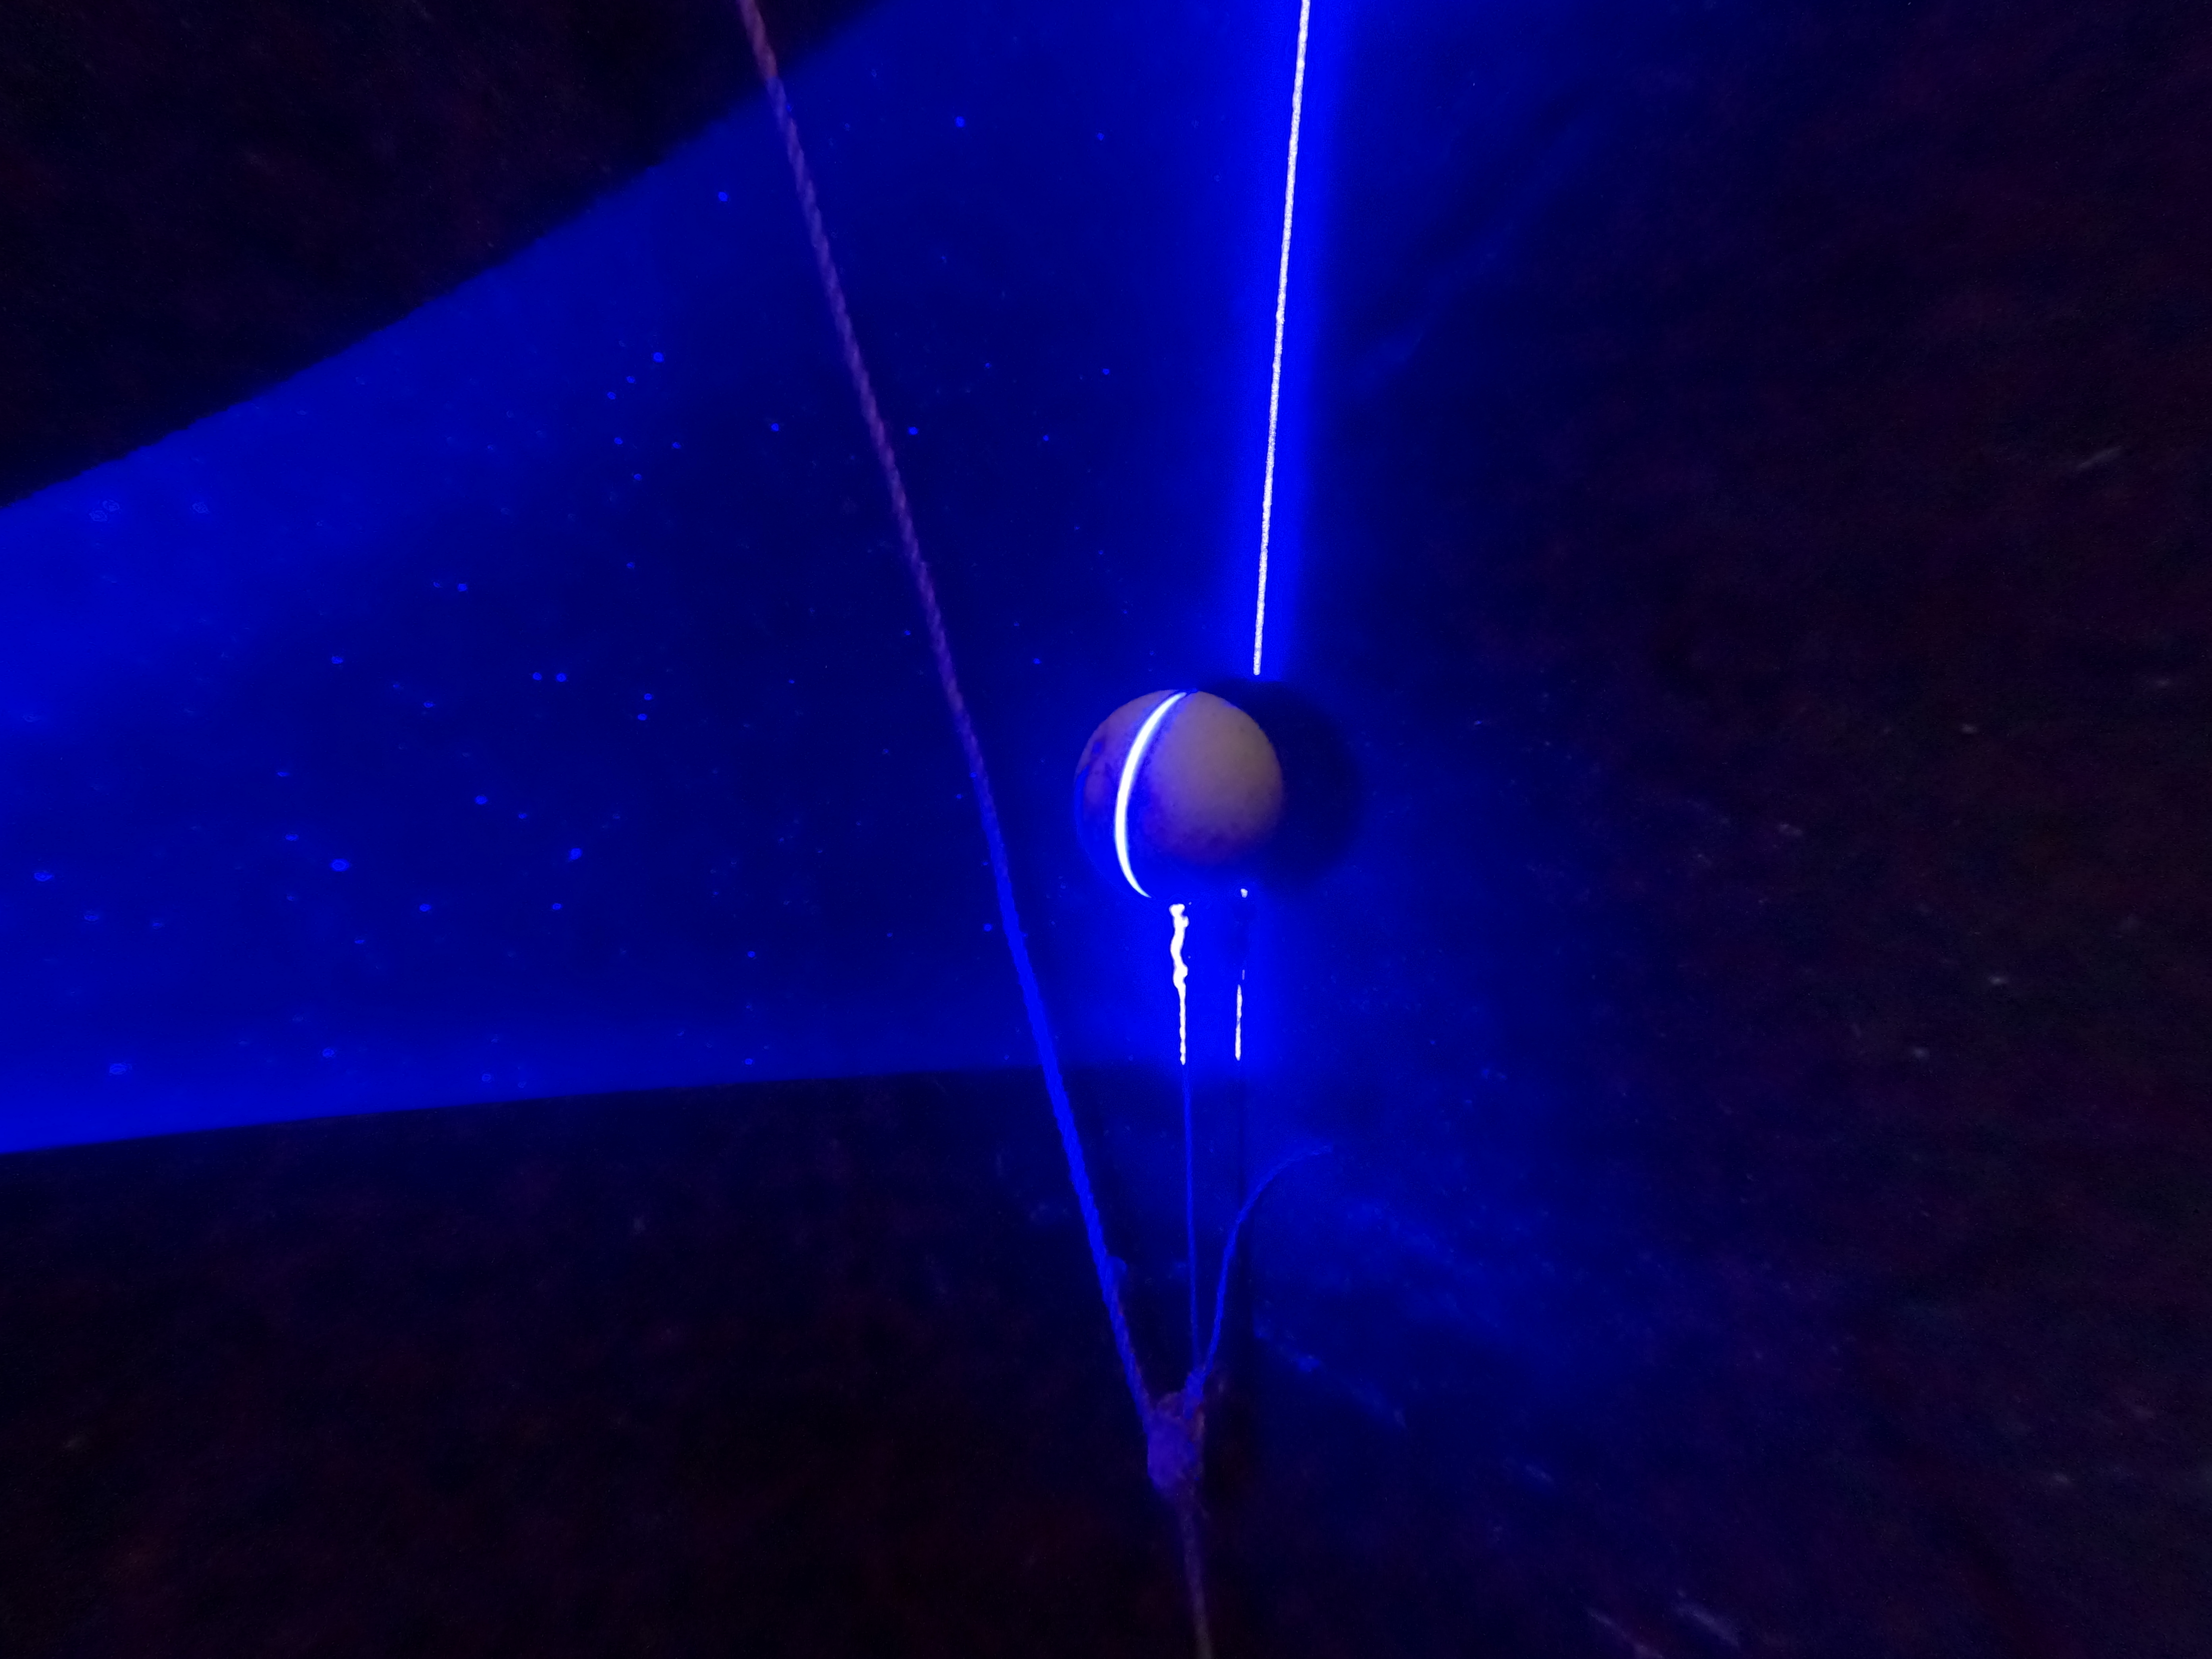

Supplement: Supplementary file 430 [file G0030730.pdf › 3/G0030730.pdf]

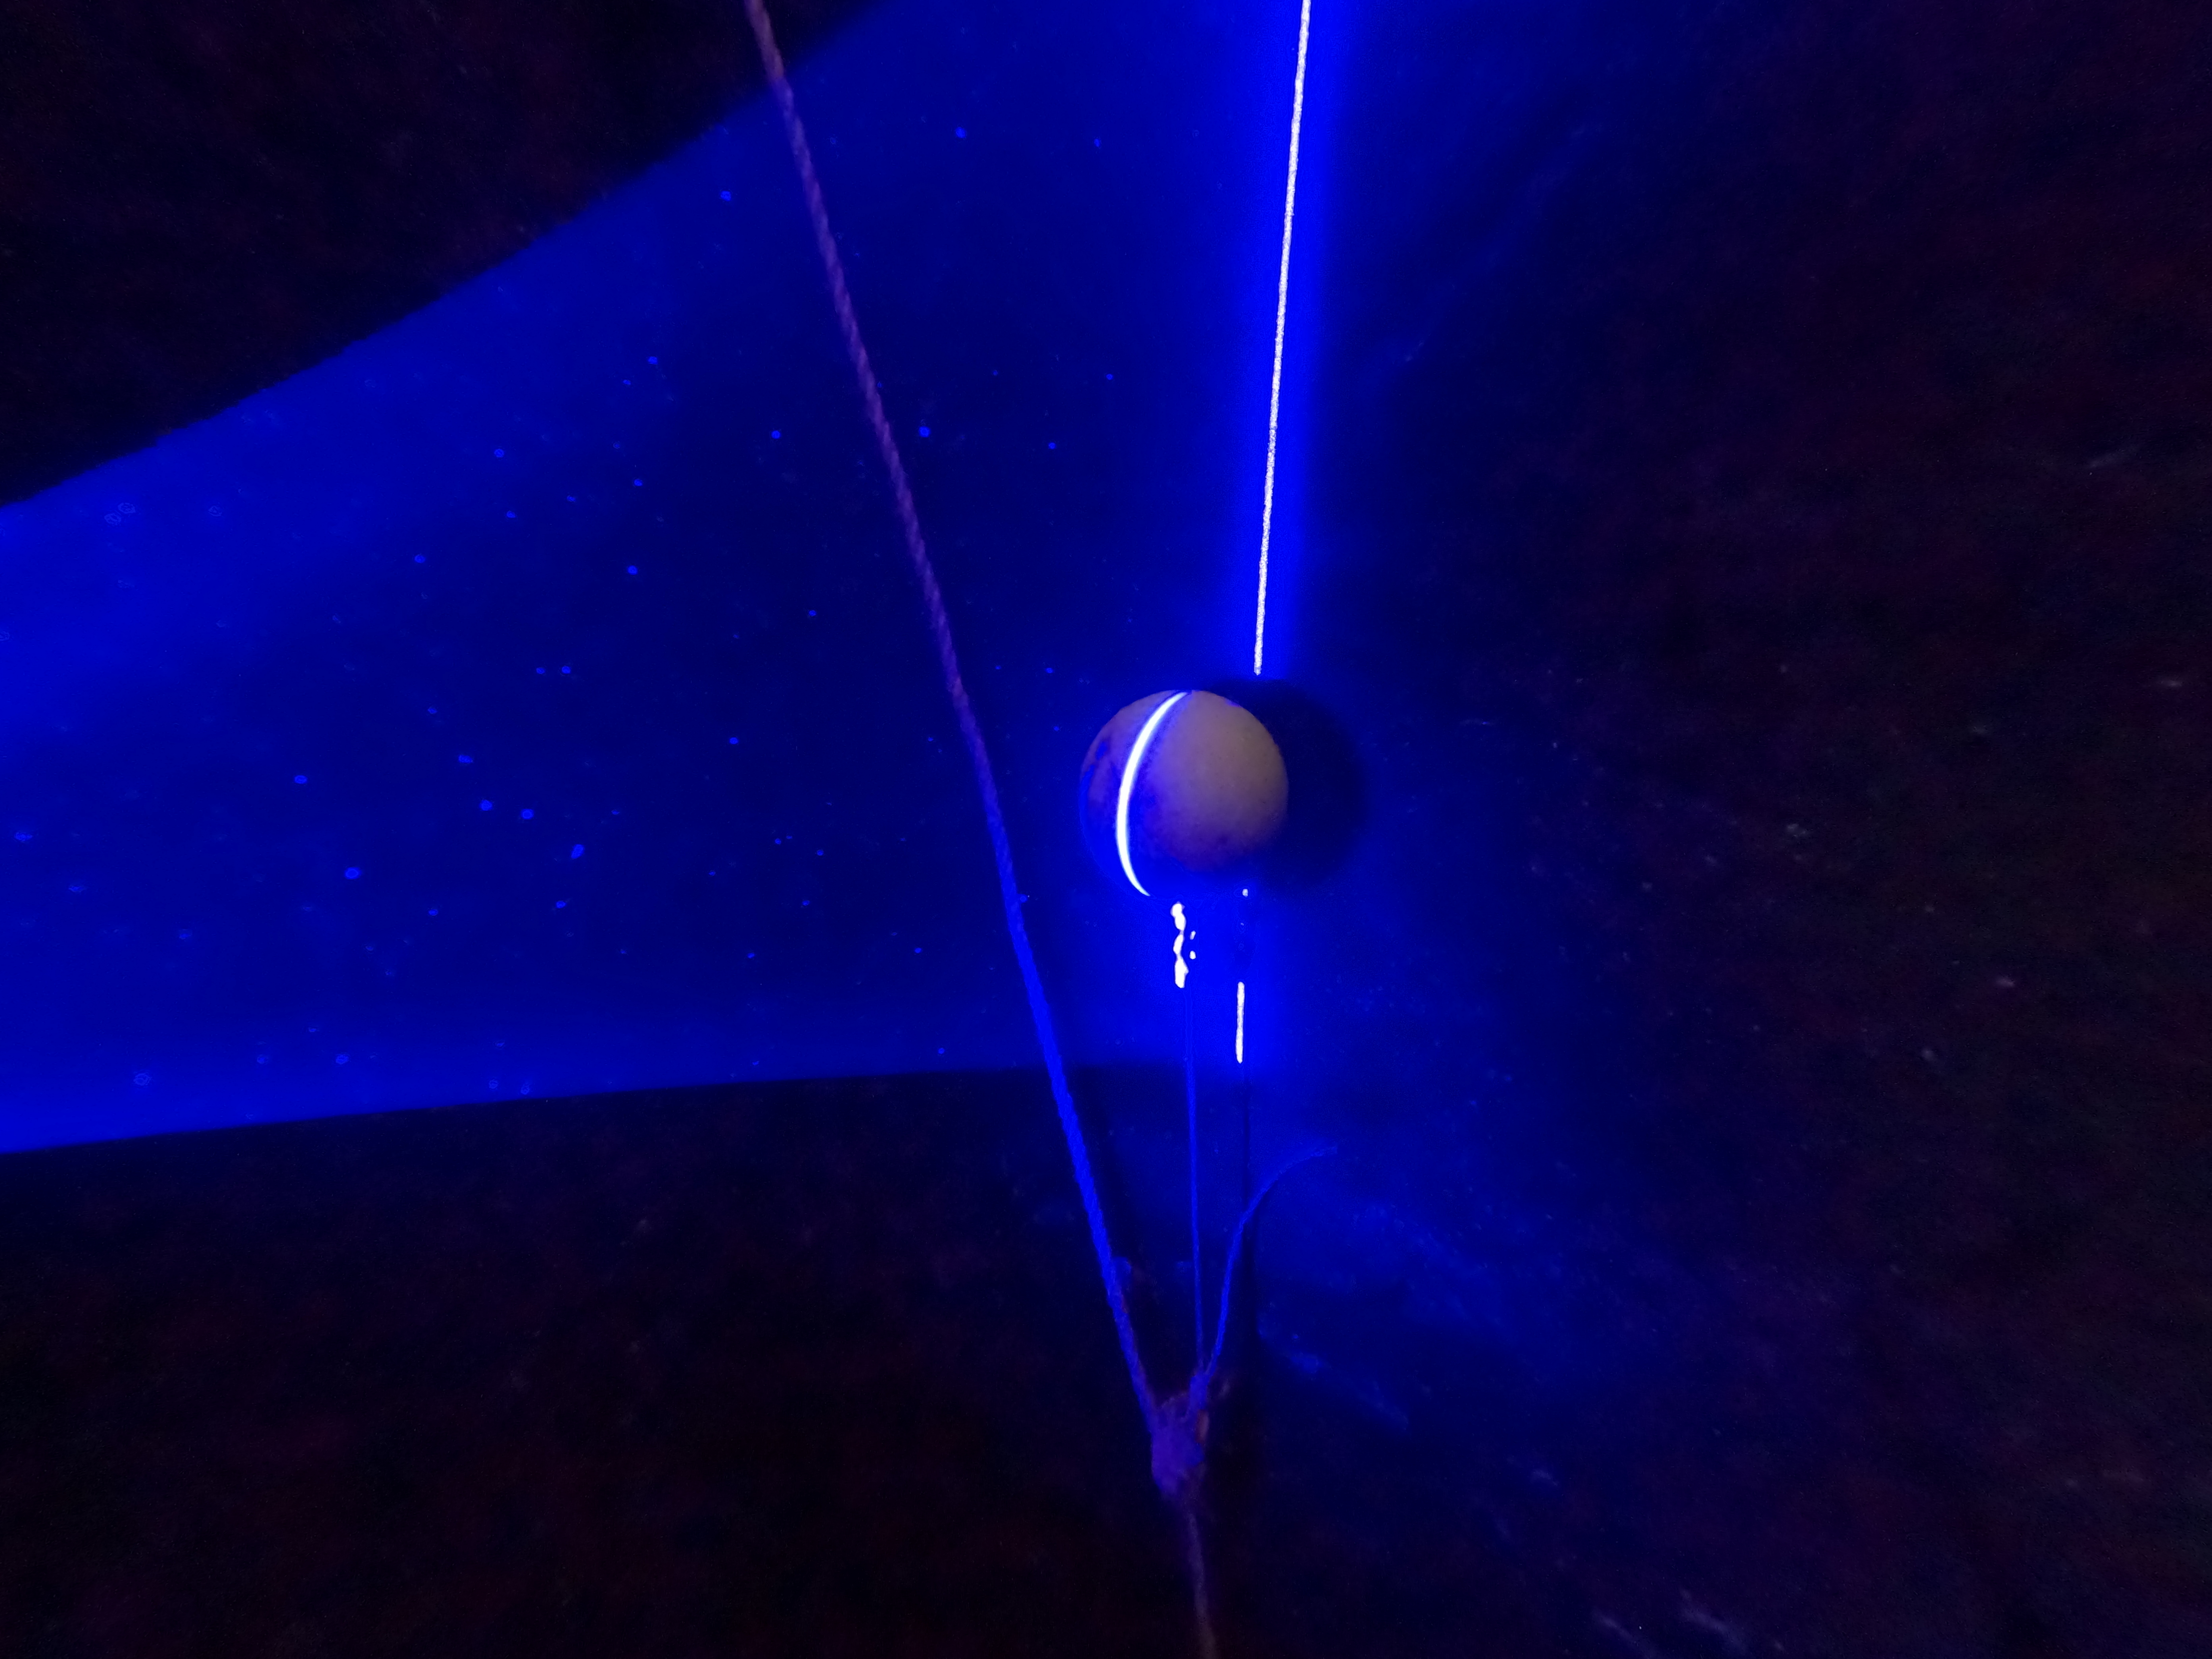

Supplement: Supplementary file 431 [file G0030731.pdf › 3/G0030731.pdf]

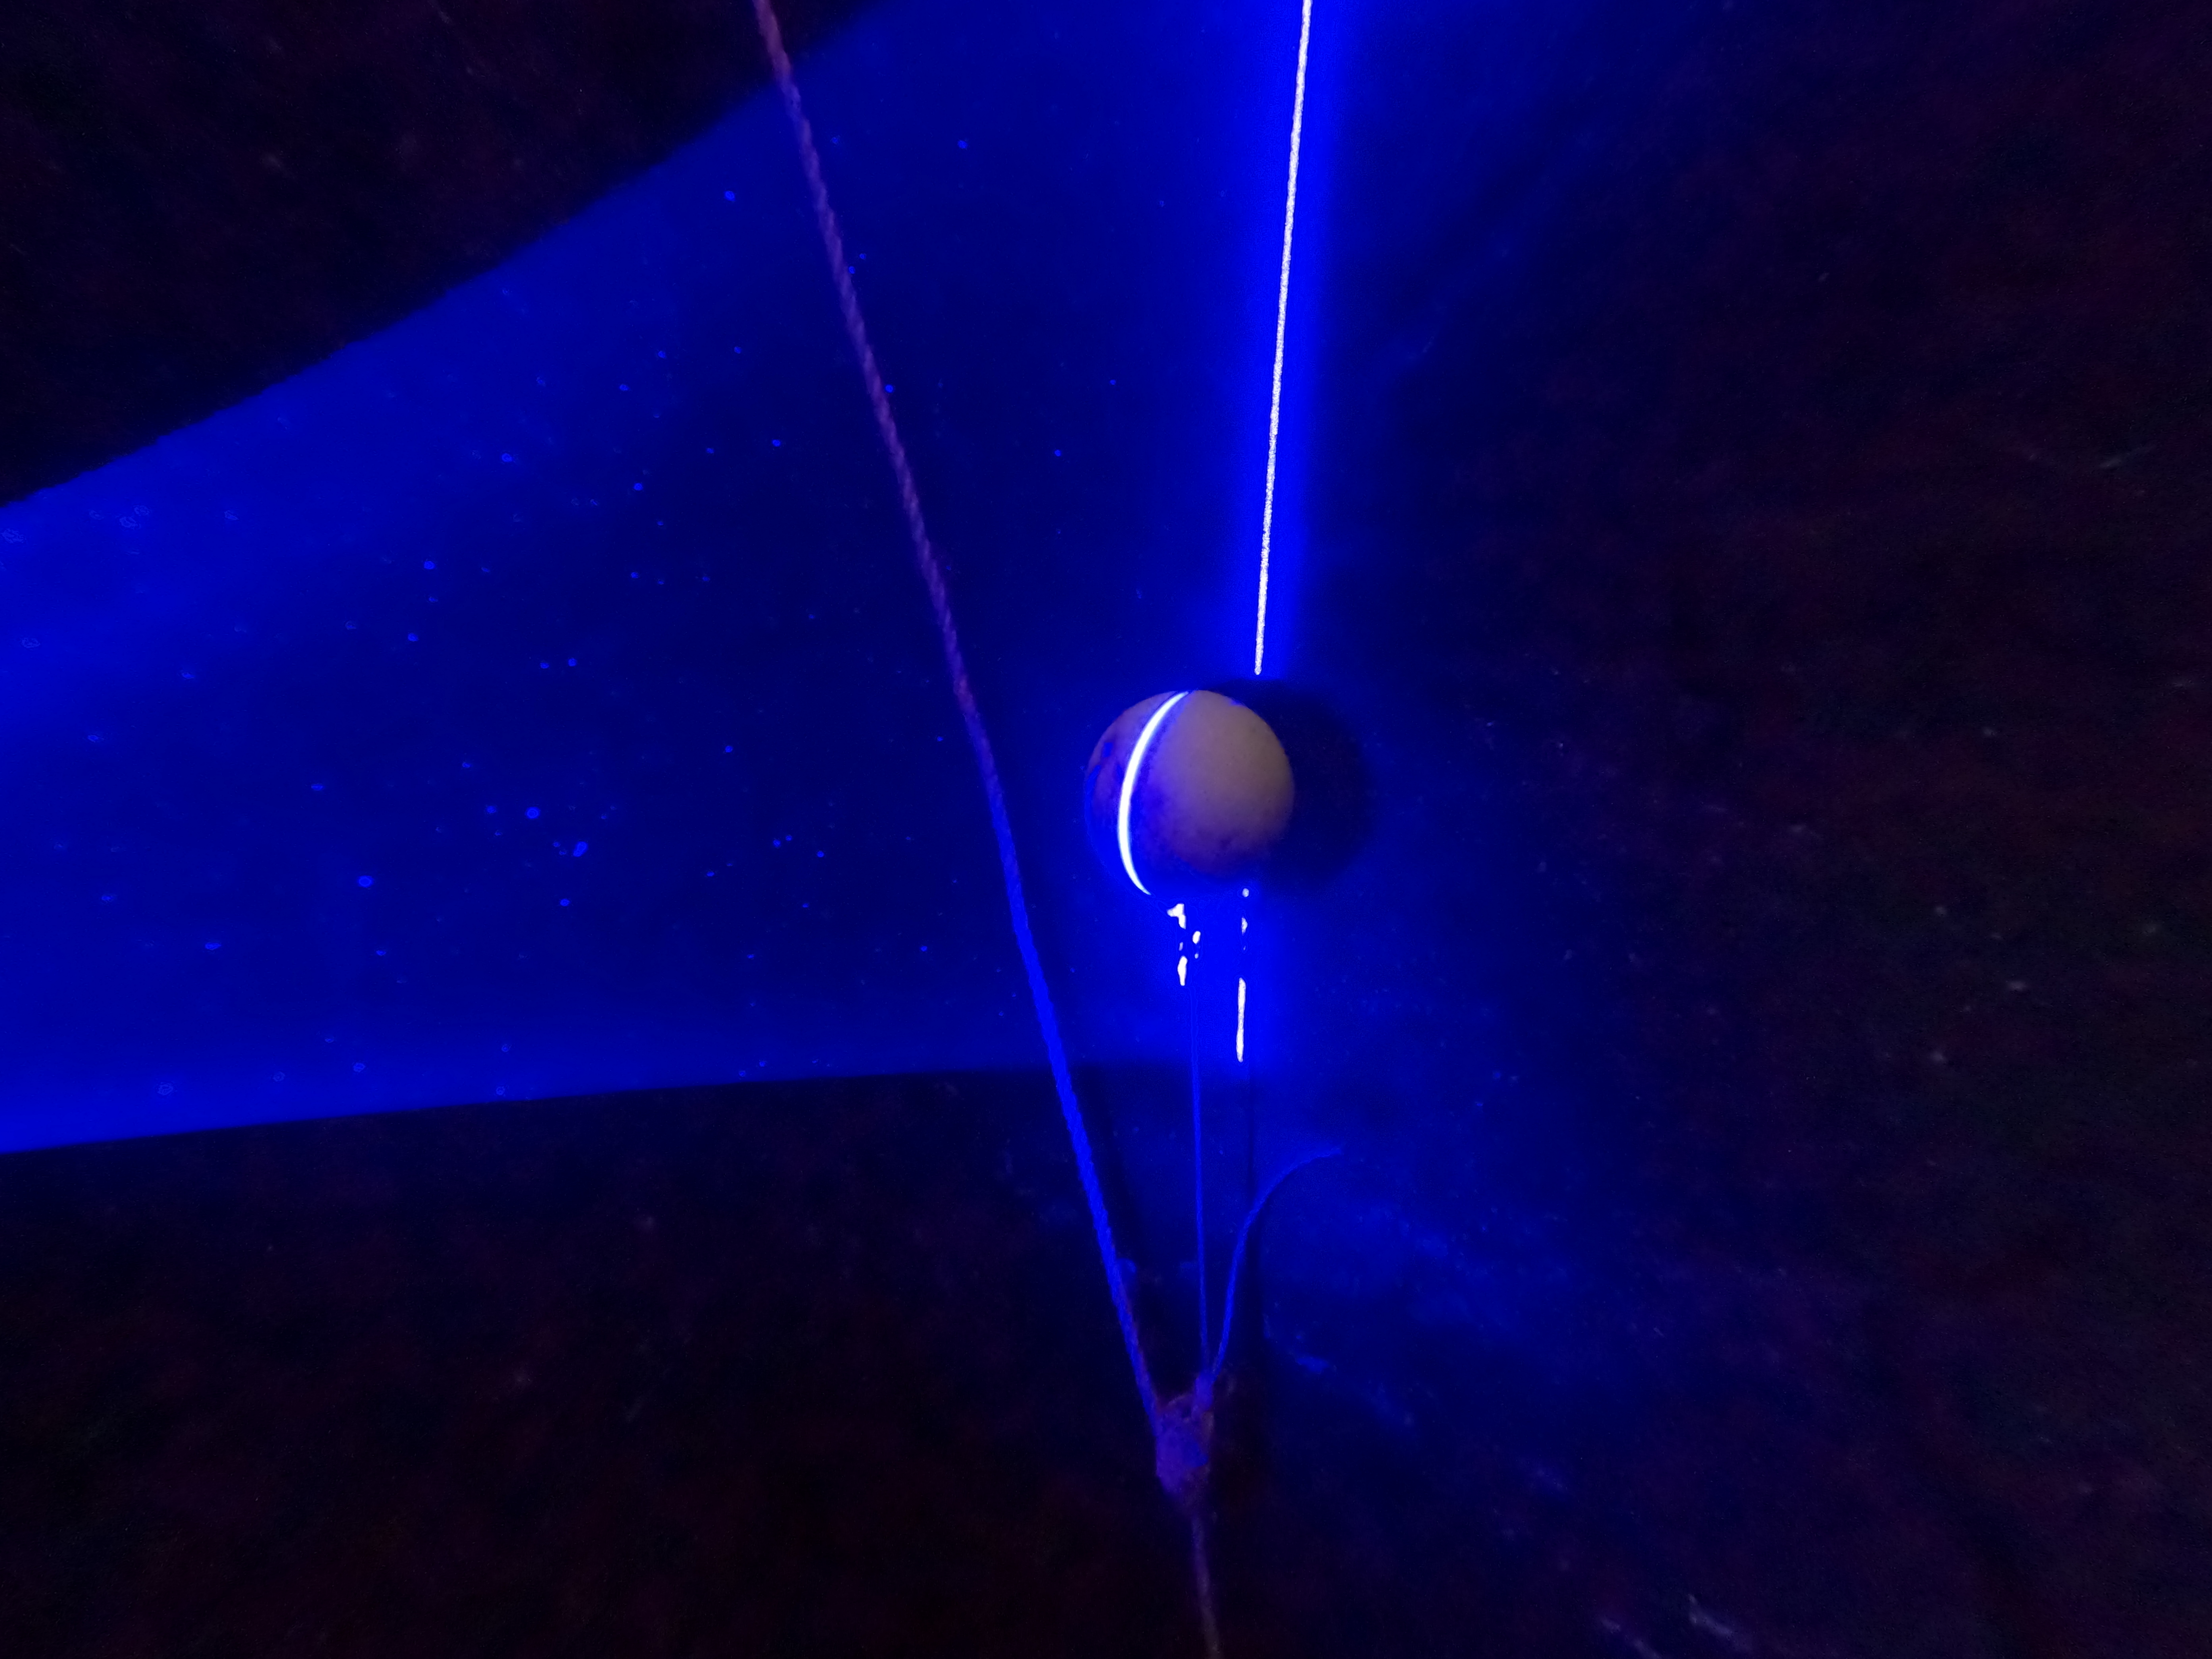

Supplement: Supplementary file 432 [file G0030732.pdf › 3/G0030732.pdf]

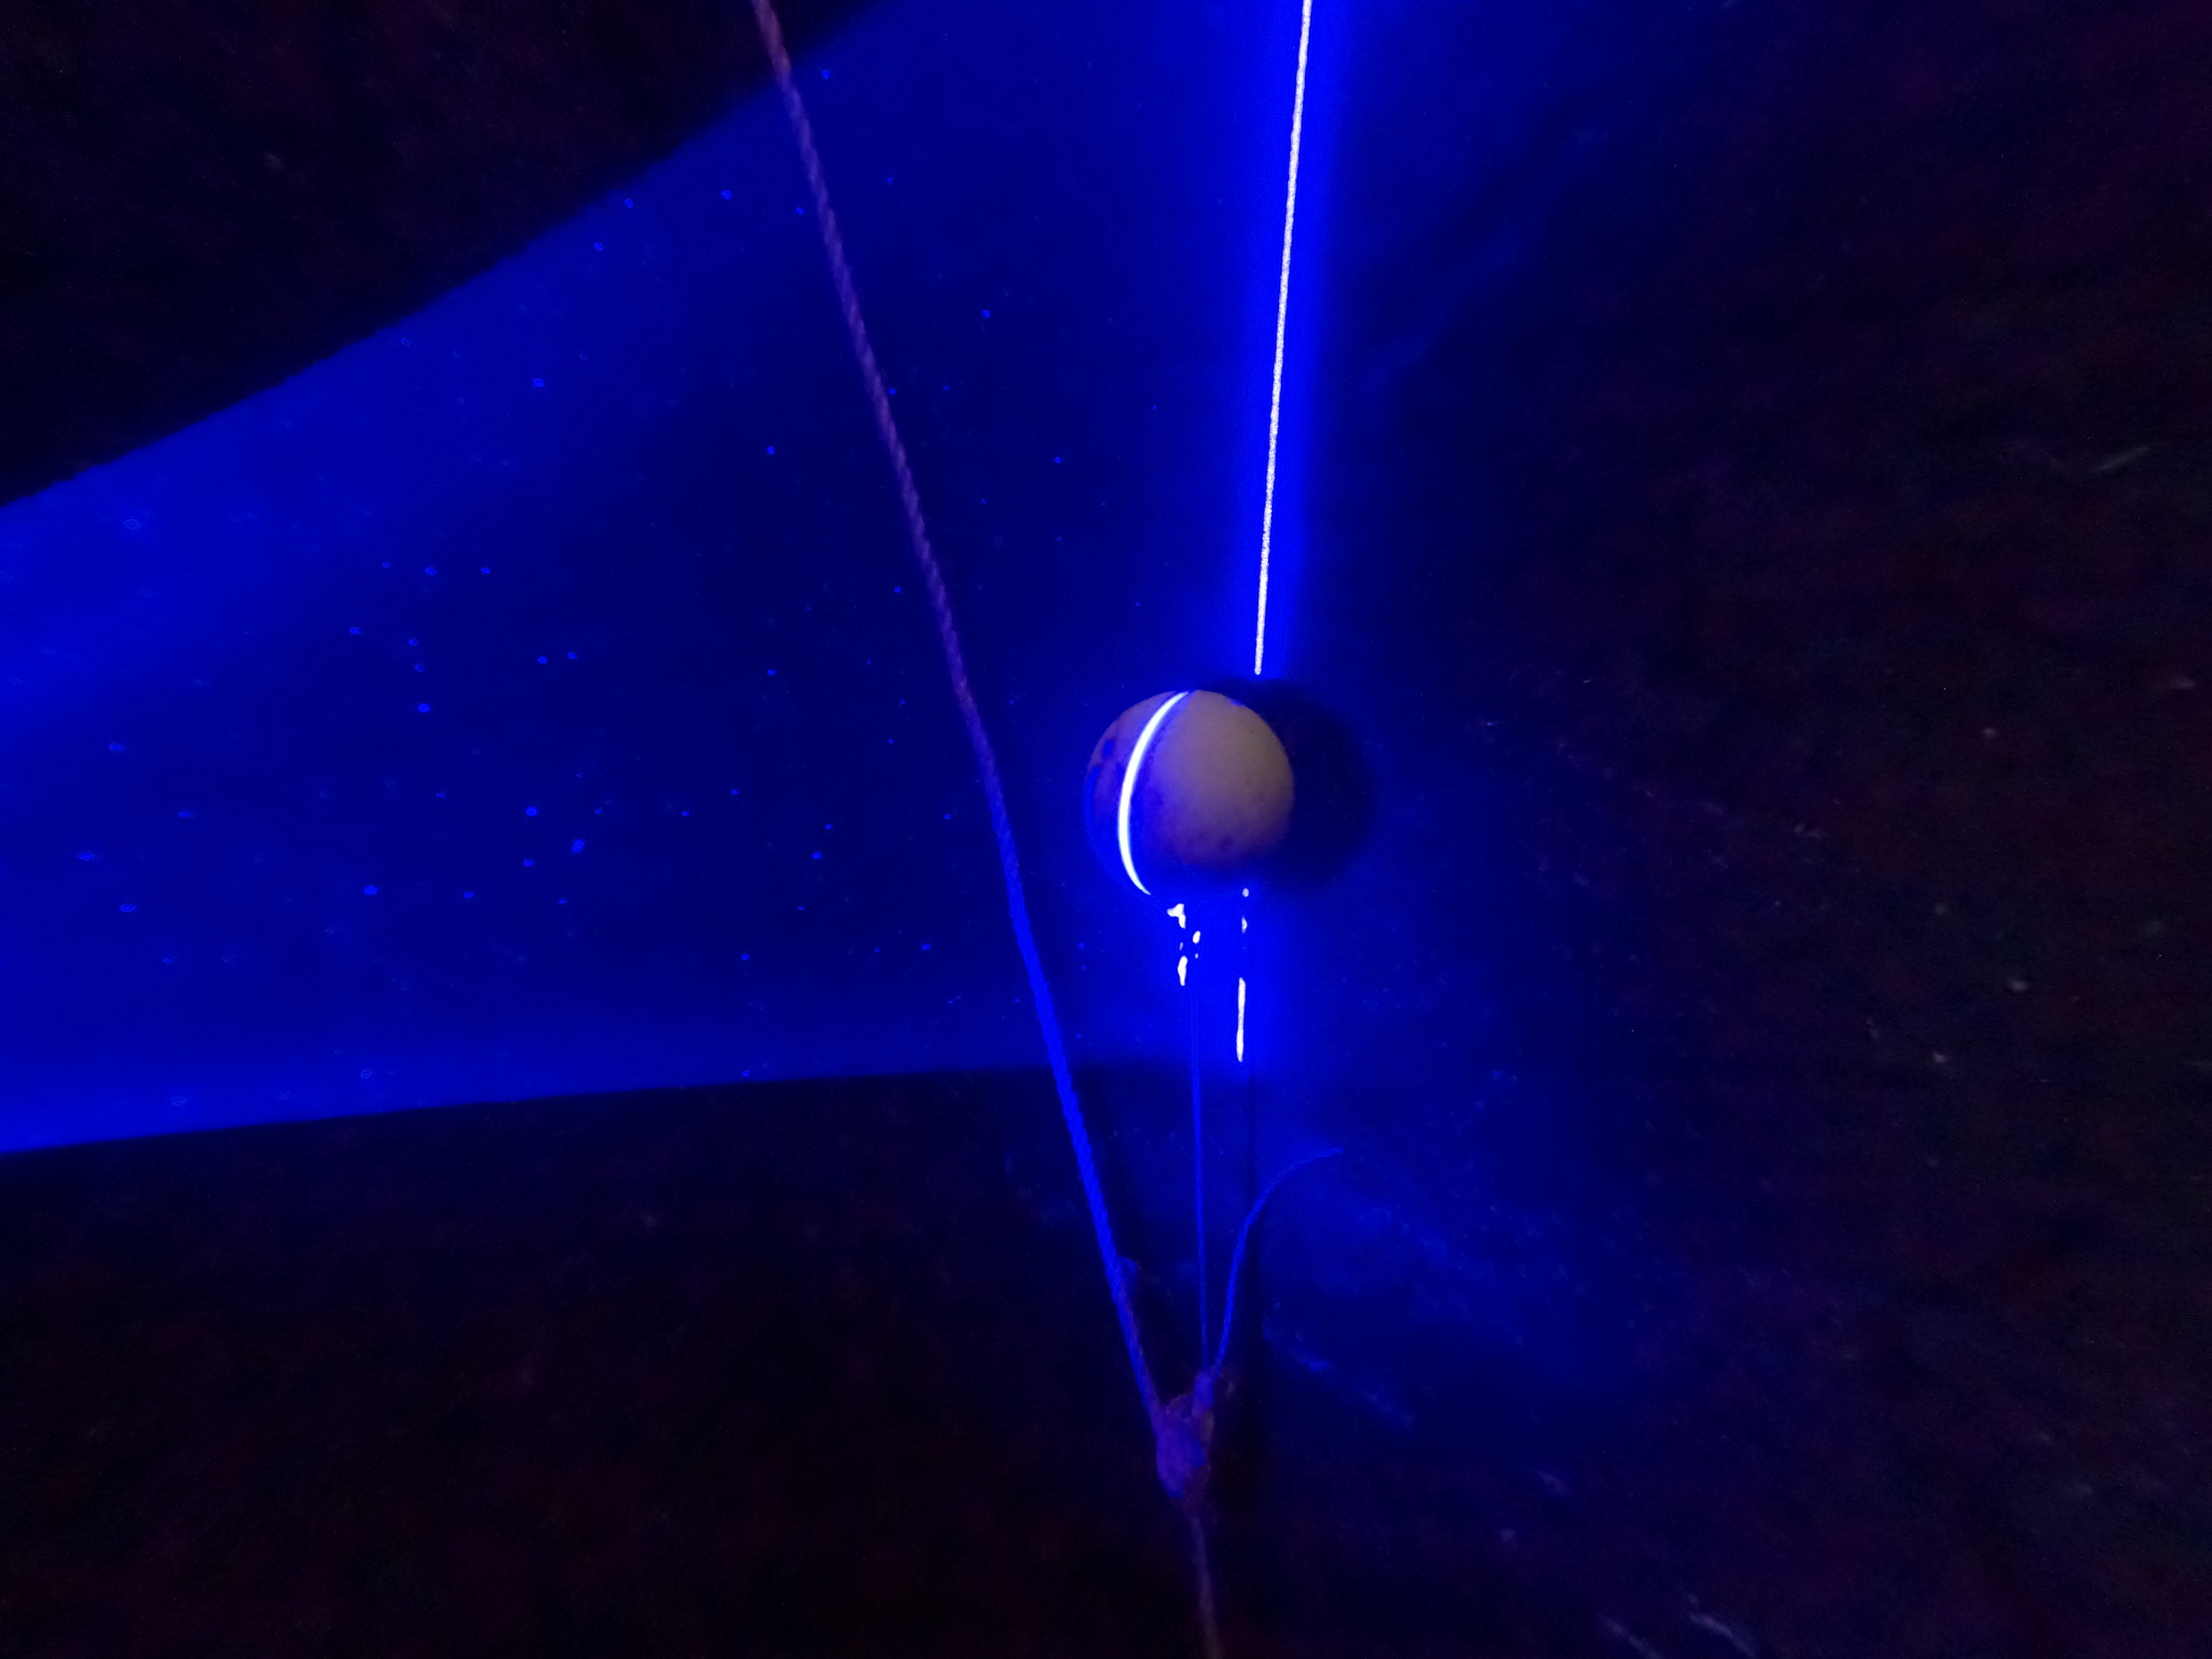

Supplement: Supplementary file 433 [file G0030733.pdf › 3/G0030733.pdf]

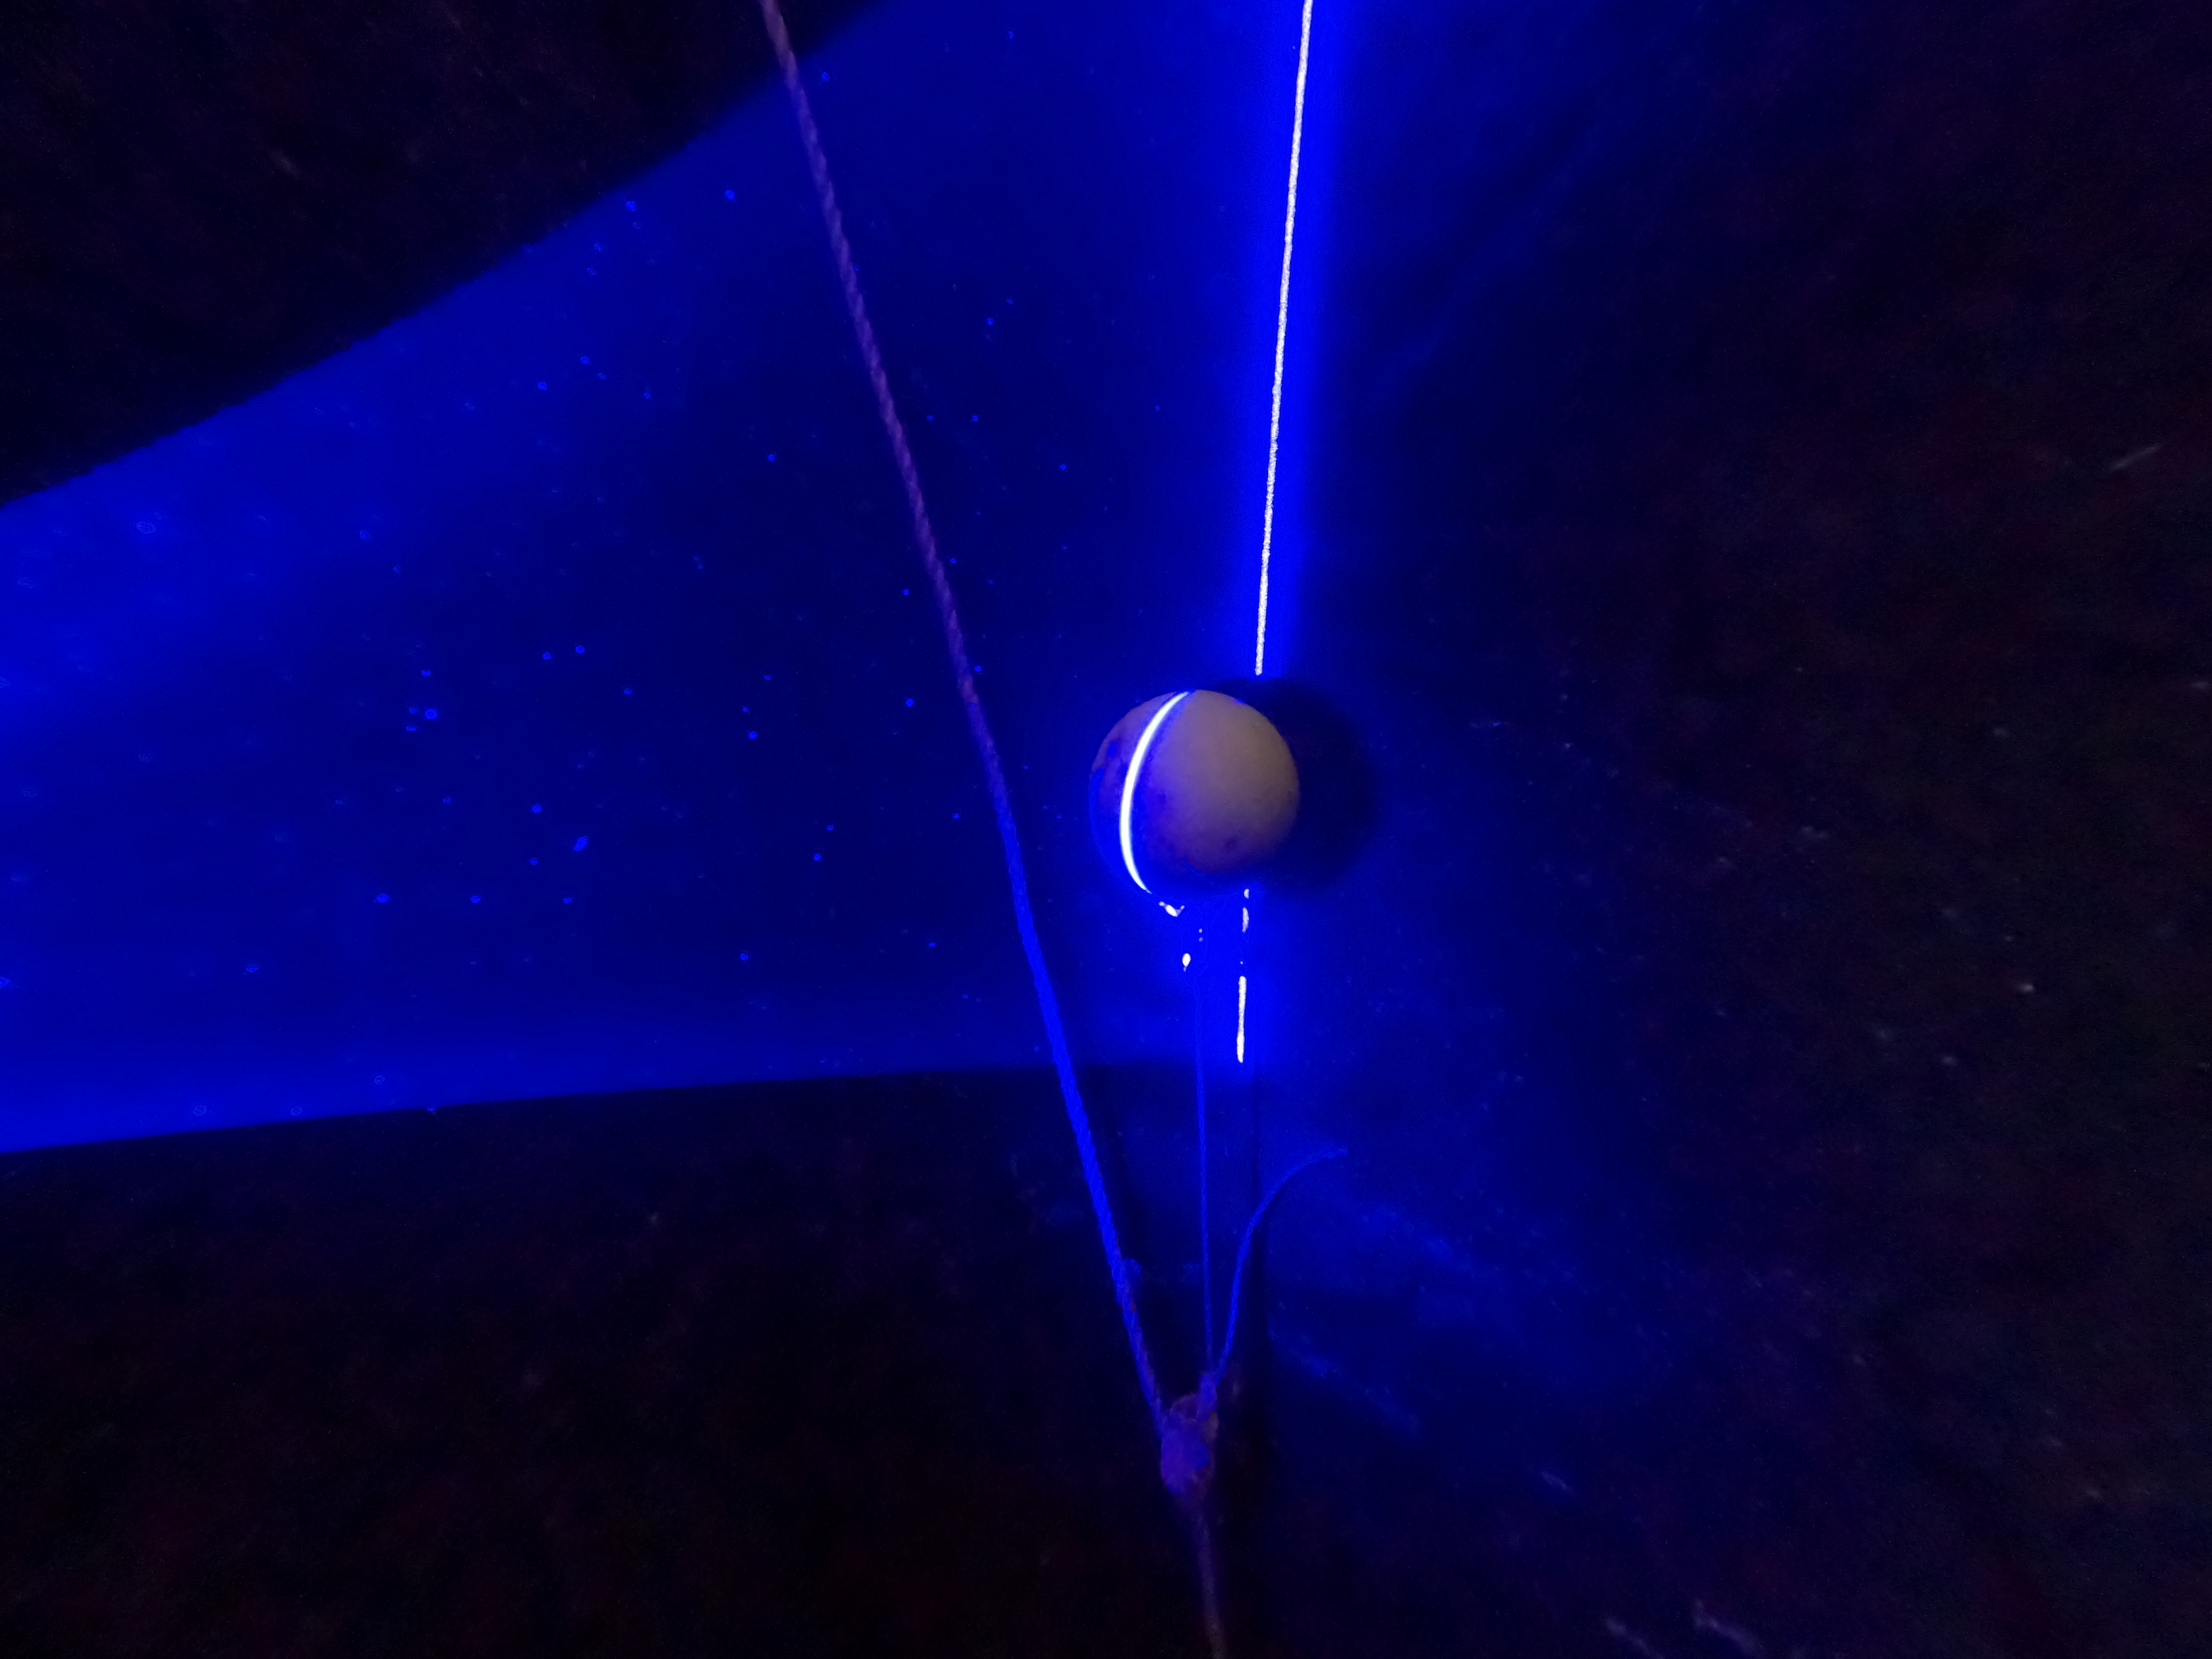

Supplement: Supplementary file 434 [file G0030734.pdf › 3/G0030734.pdf]

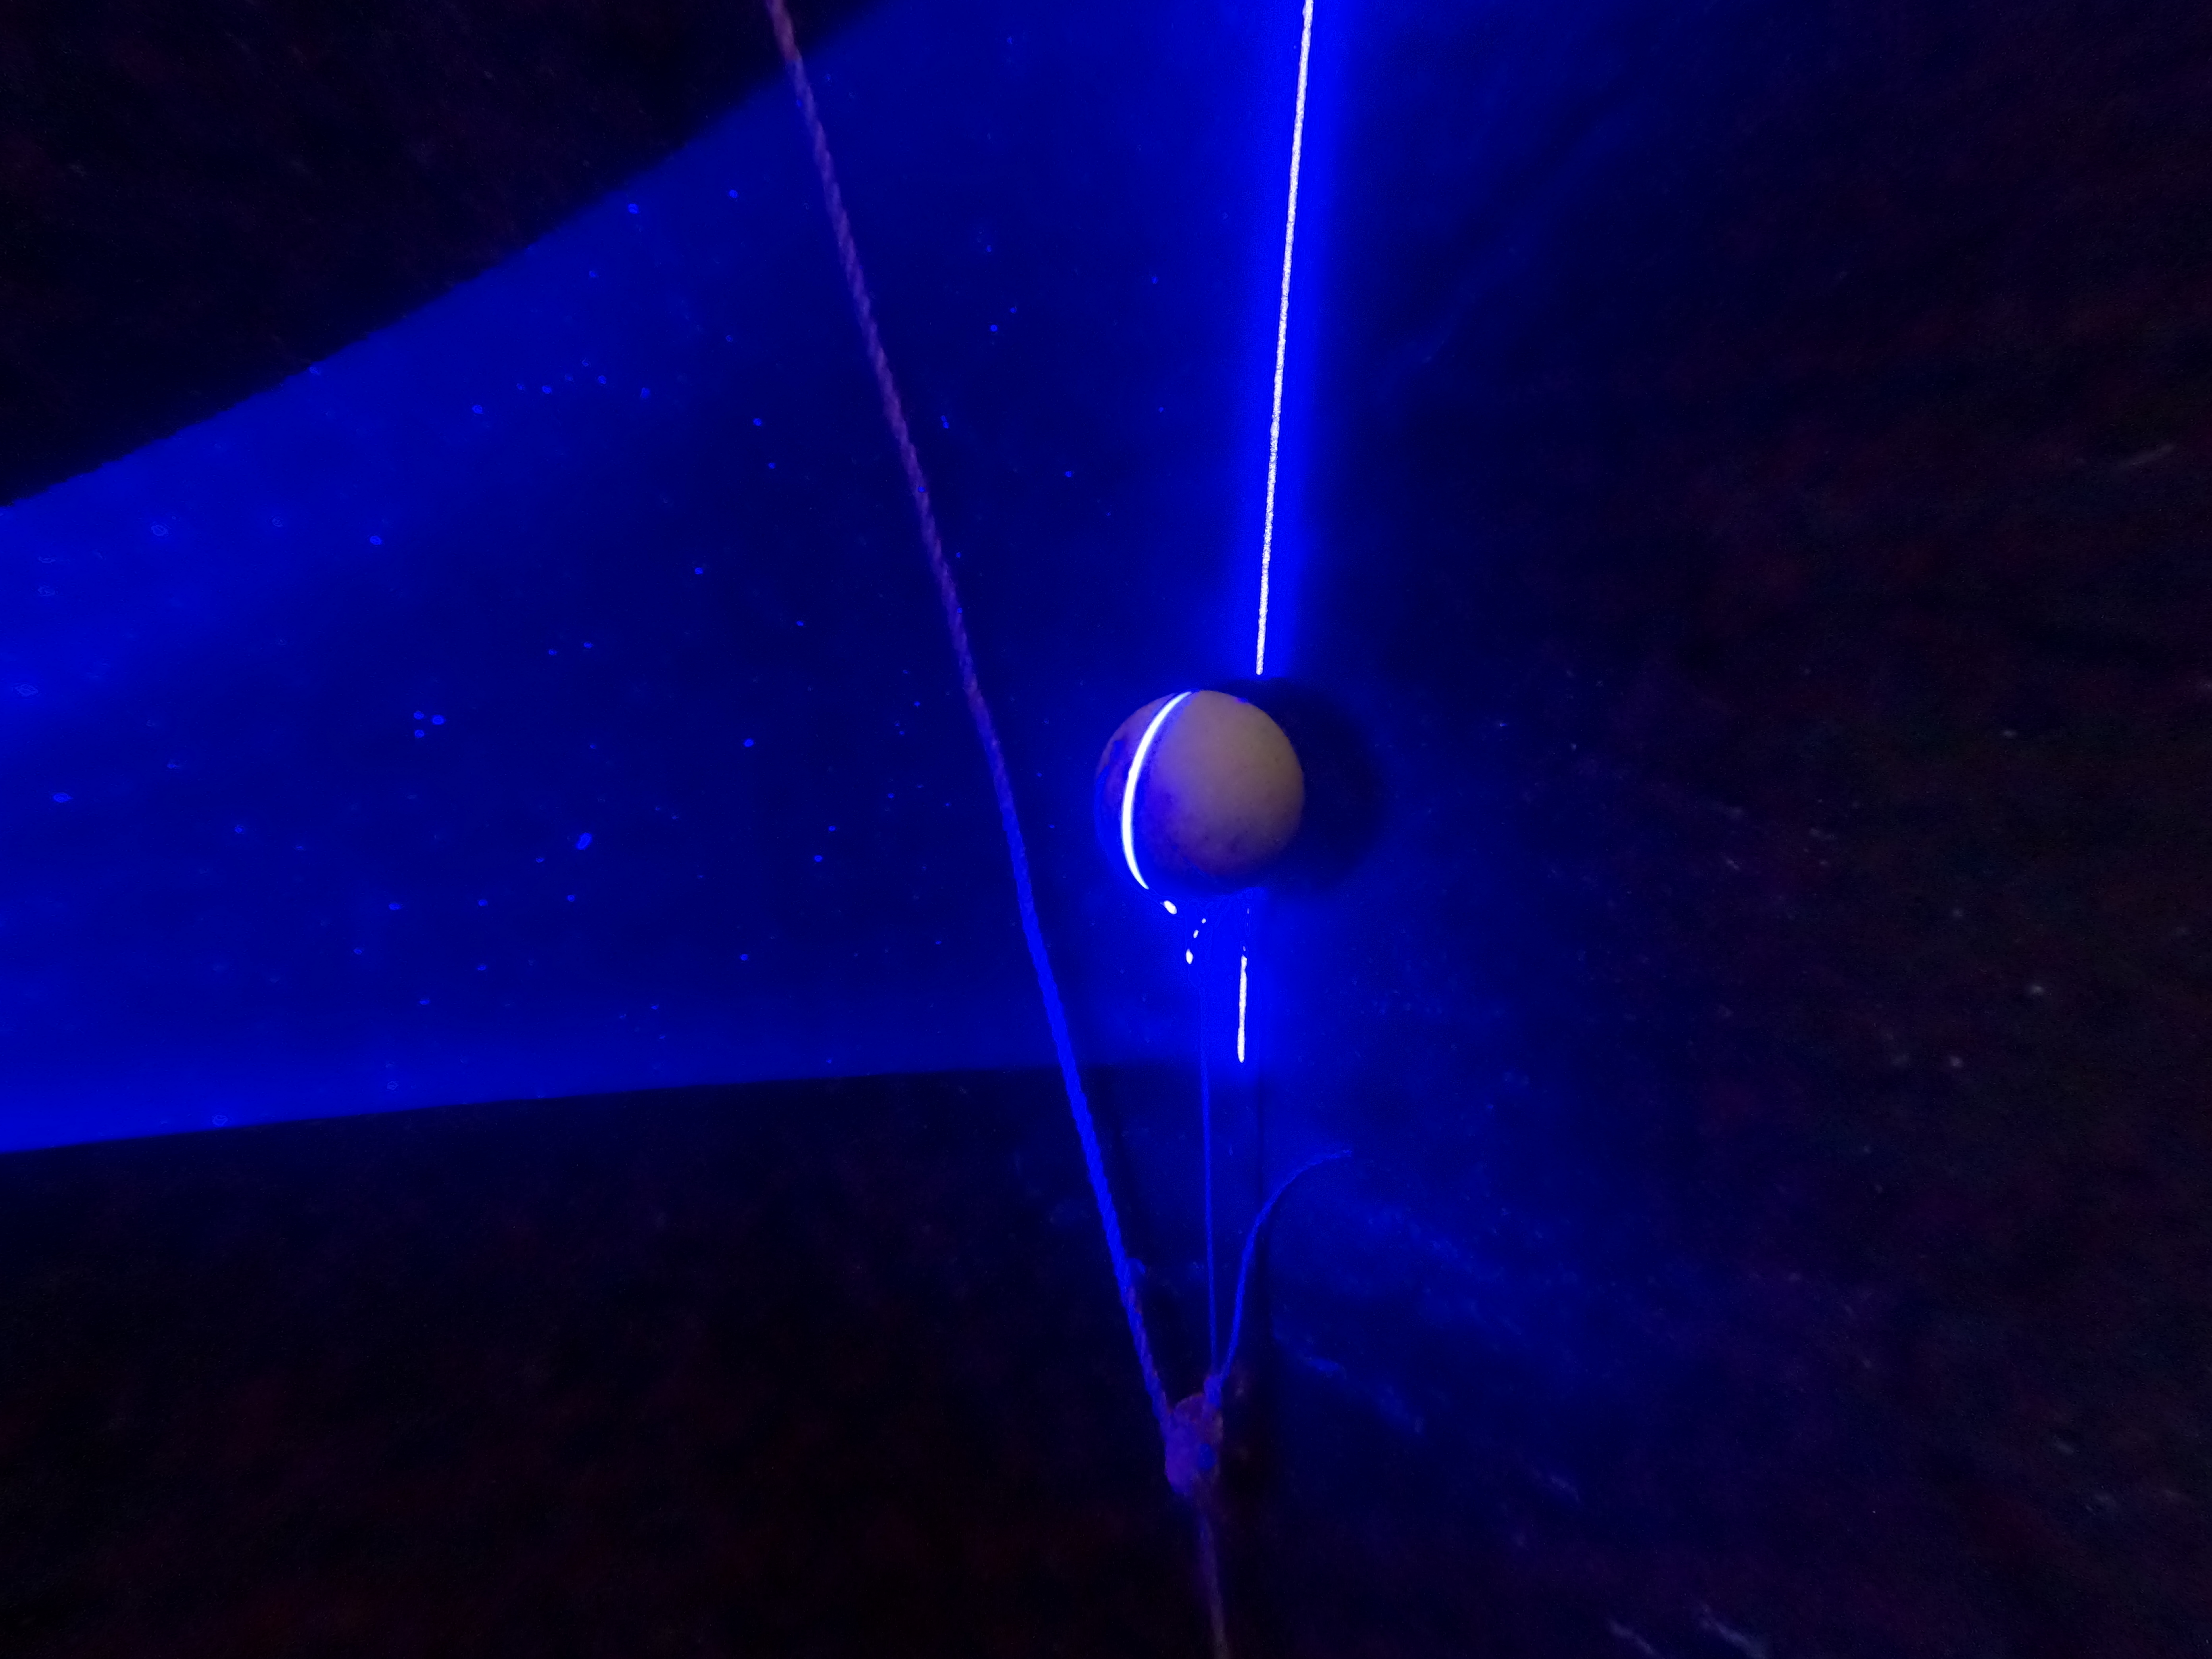

Supplement: Supplementary file 435 [file G0030735.pdf › 3/G0030735.pdf]

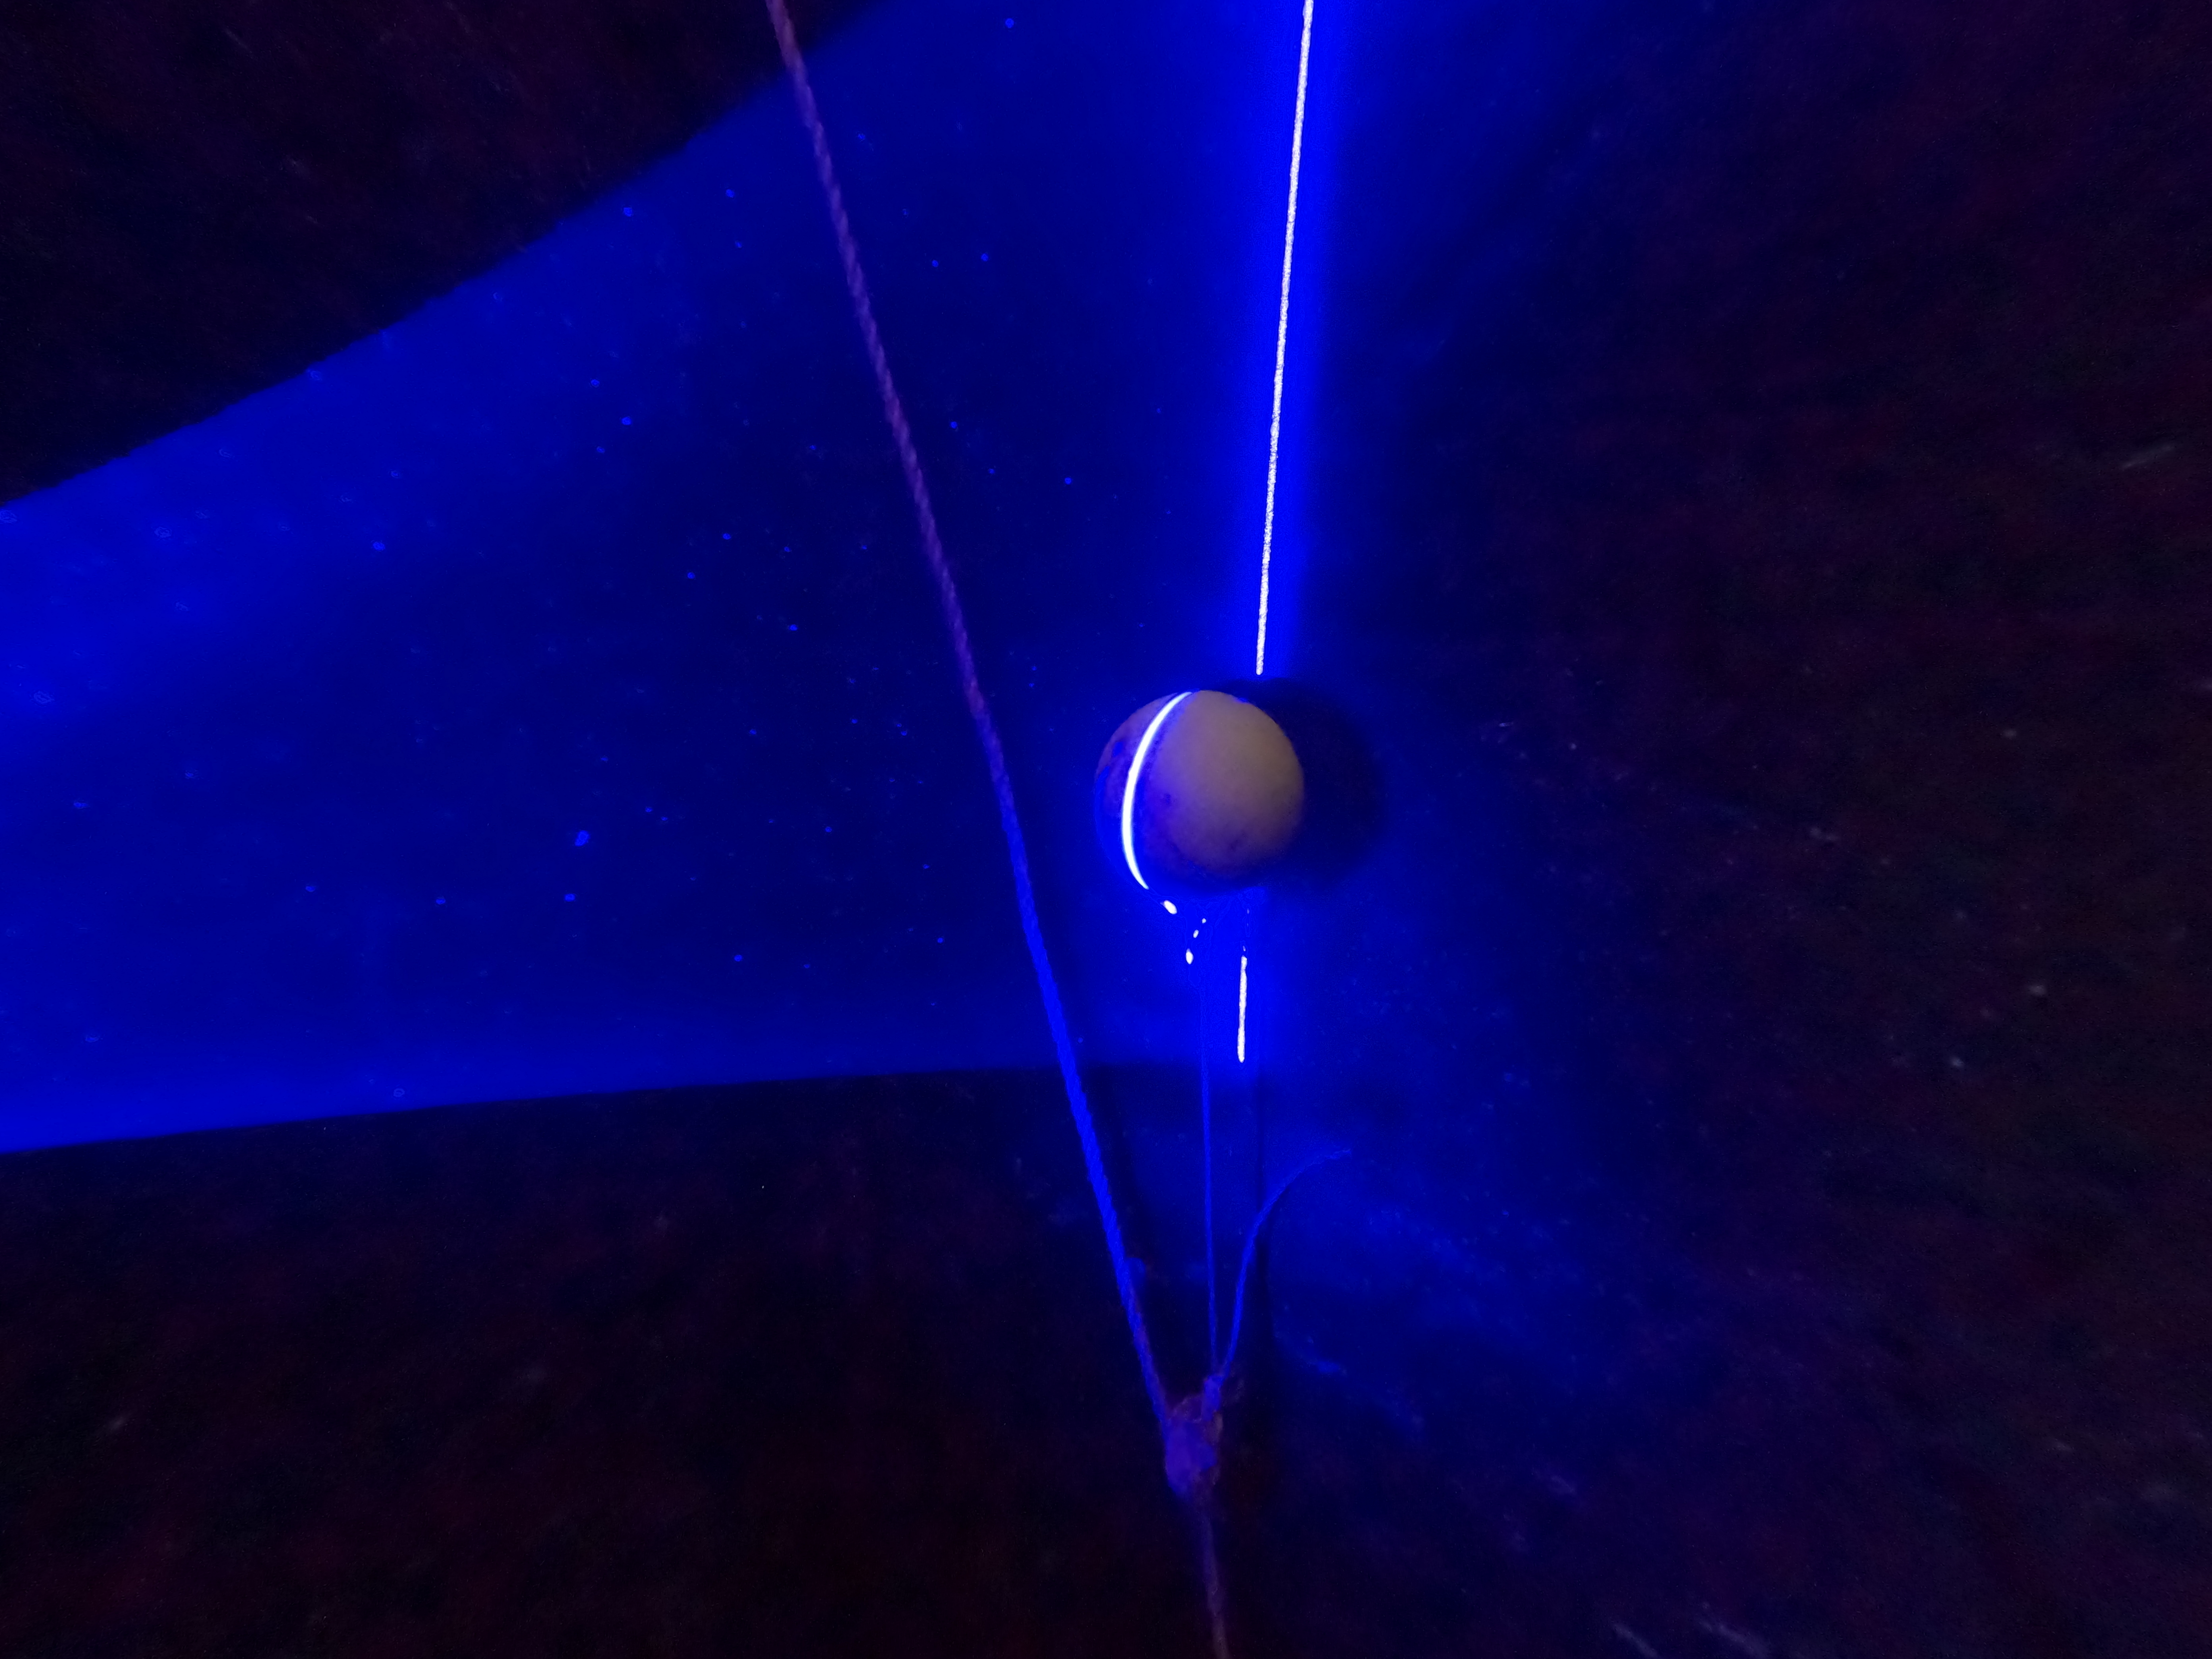

Supplement: Supplementary file 436 [file G0030736.pdf › 3/G0030736.pdf]

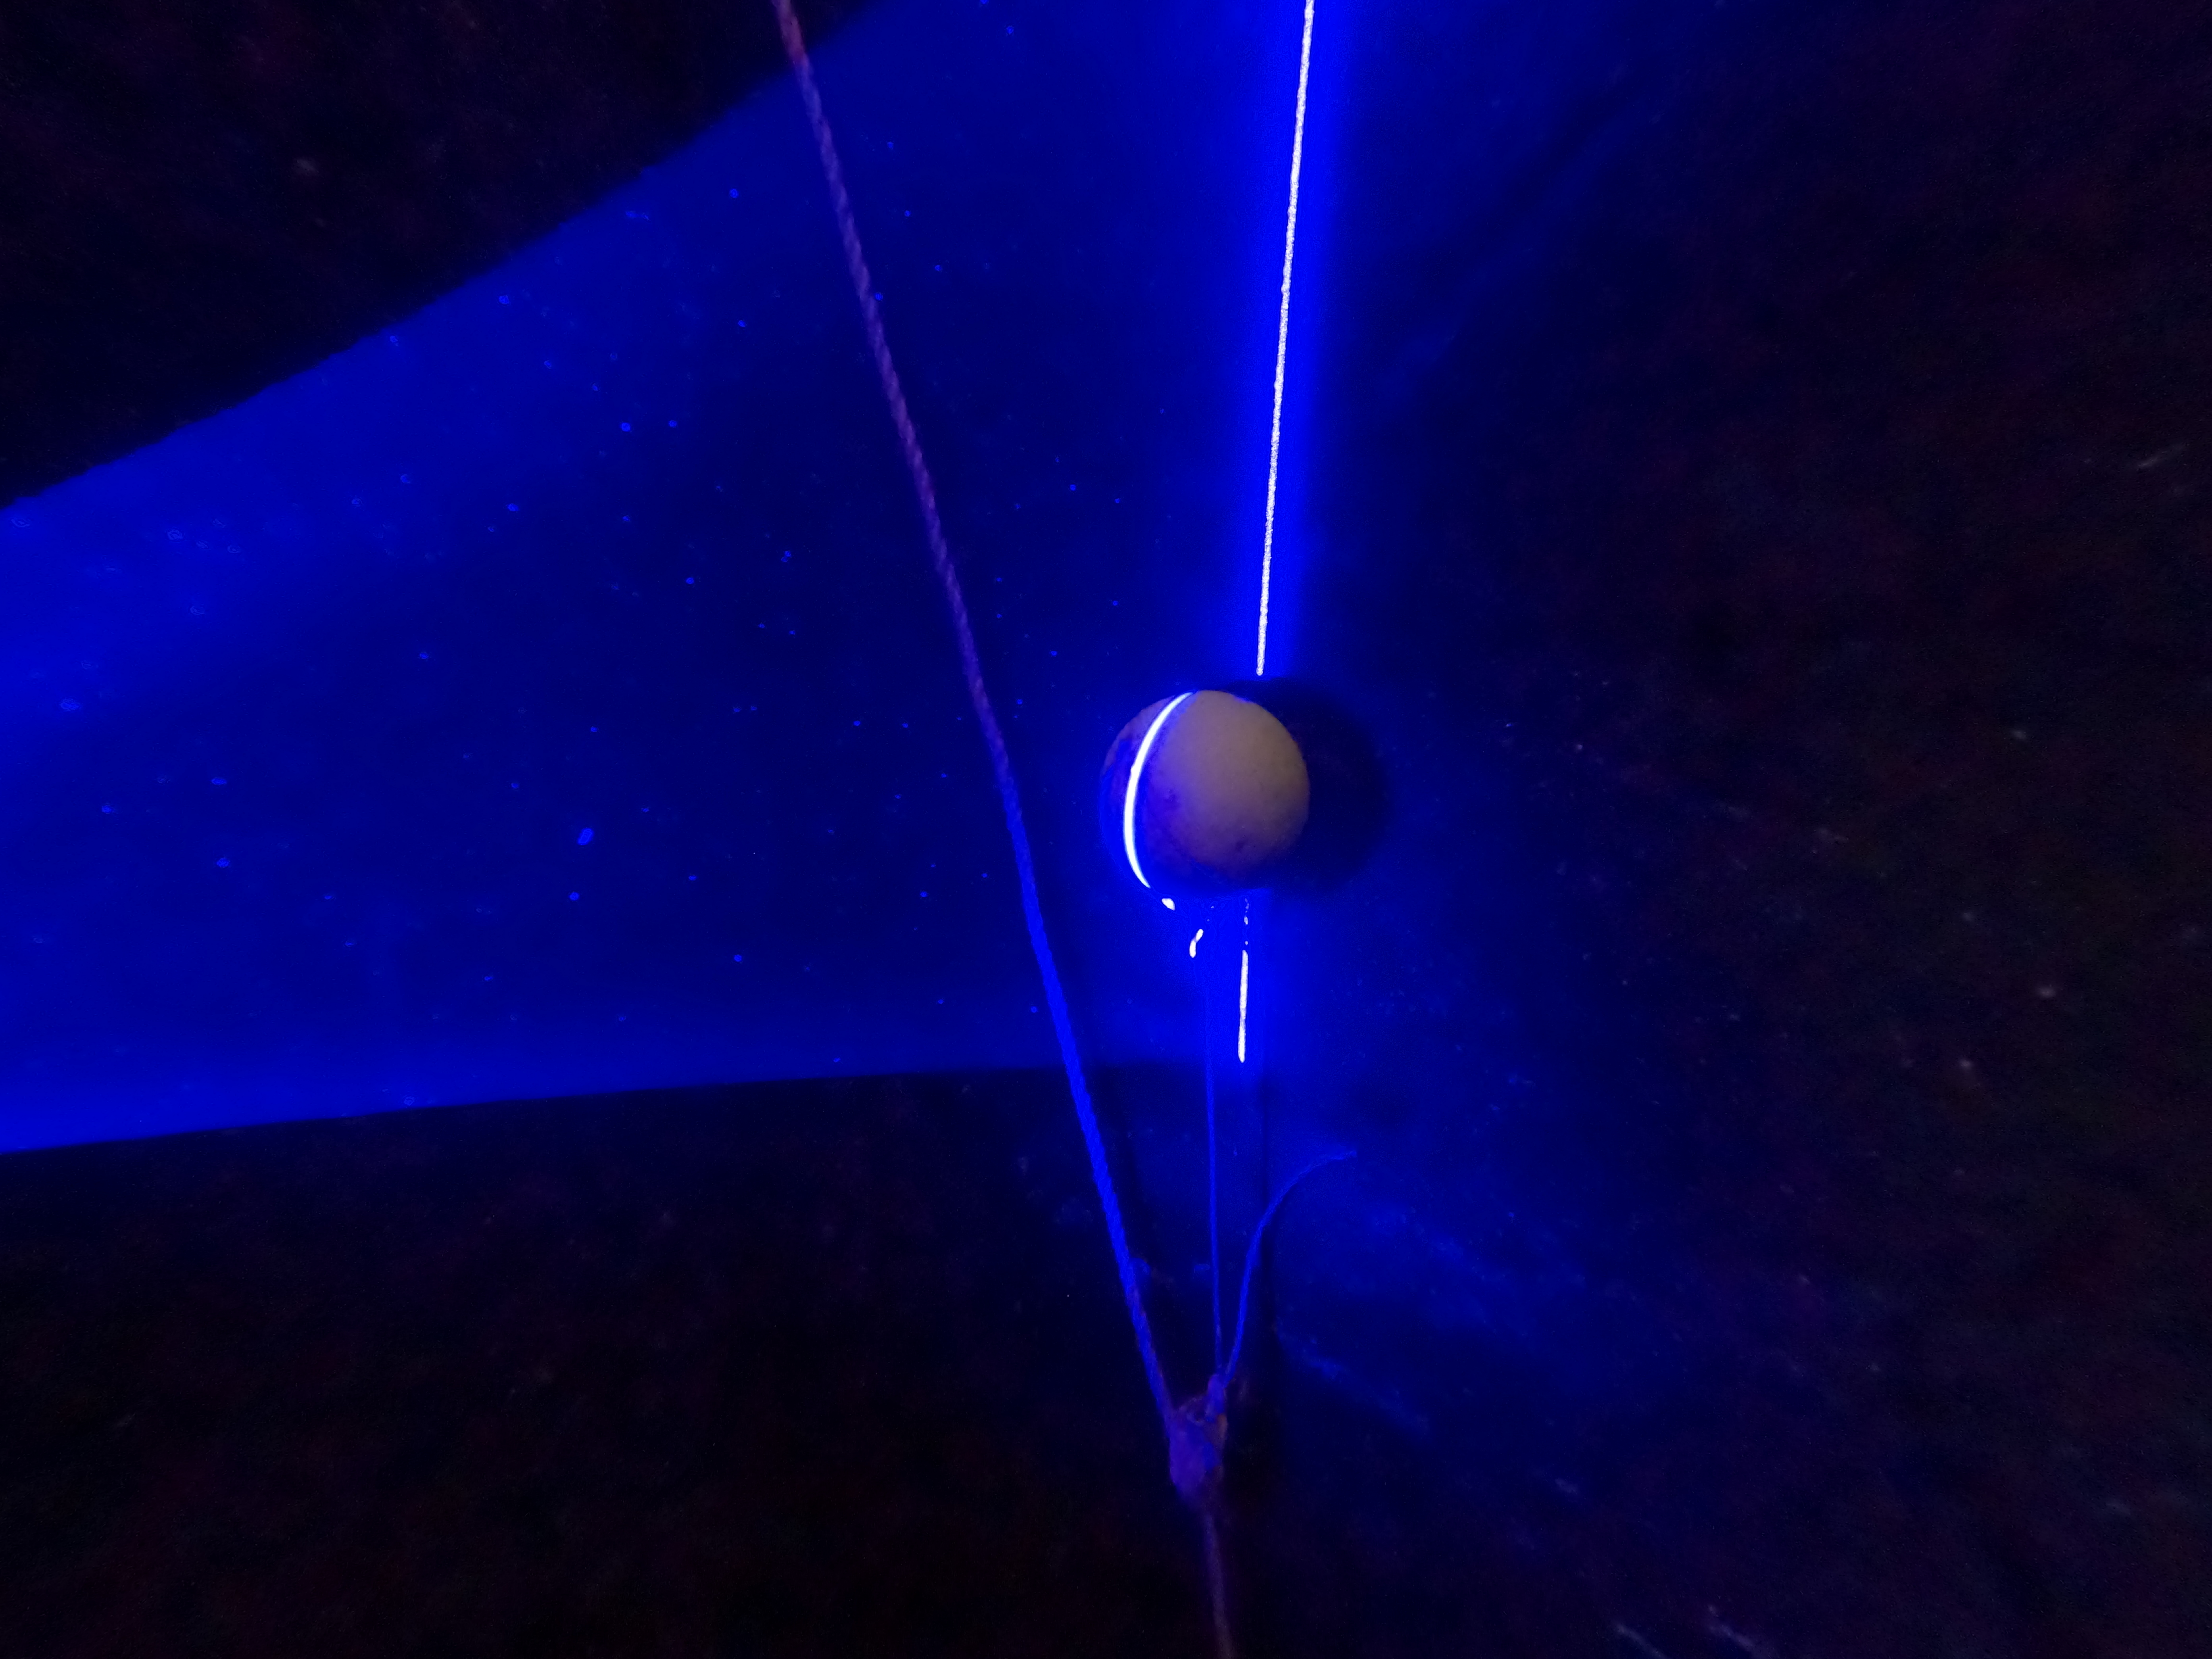

Supplement: Supplementary file 437 [file G0030737.pdf › 3/G0030737.pdf]

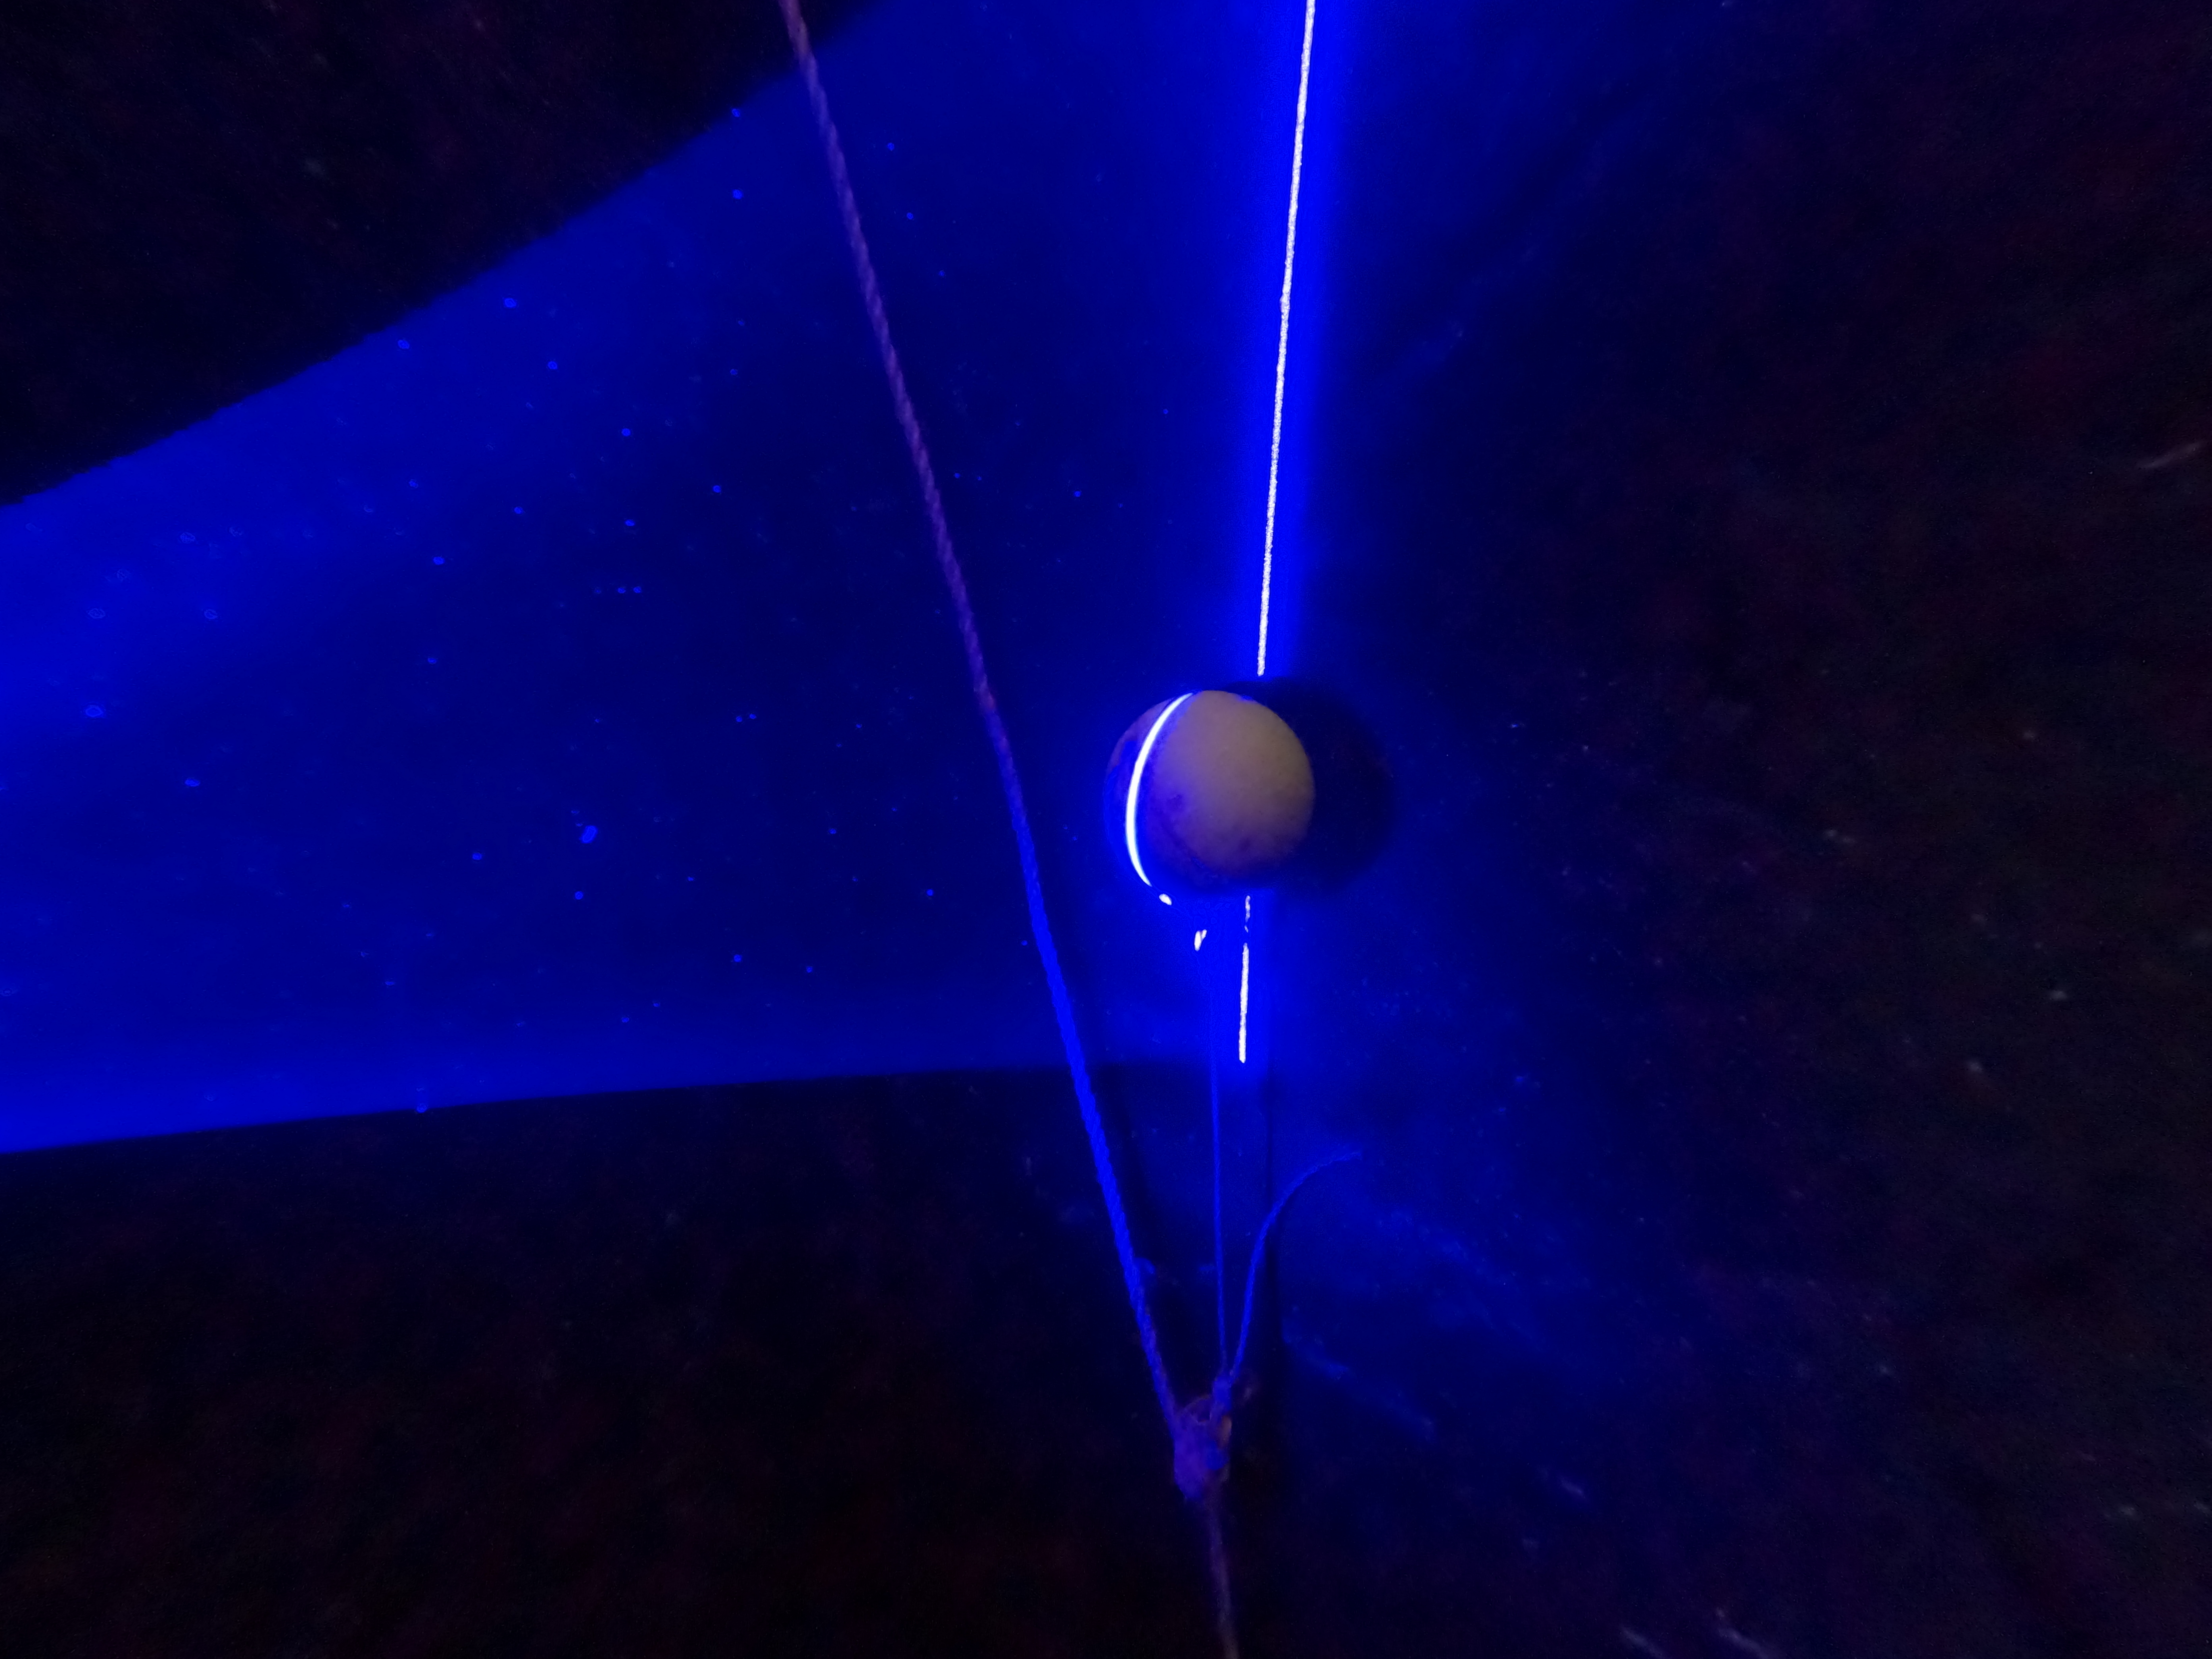

Supplement: Supplementary file 438 [file G0030738.pdf › 3/G0030738.pdf]

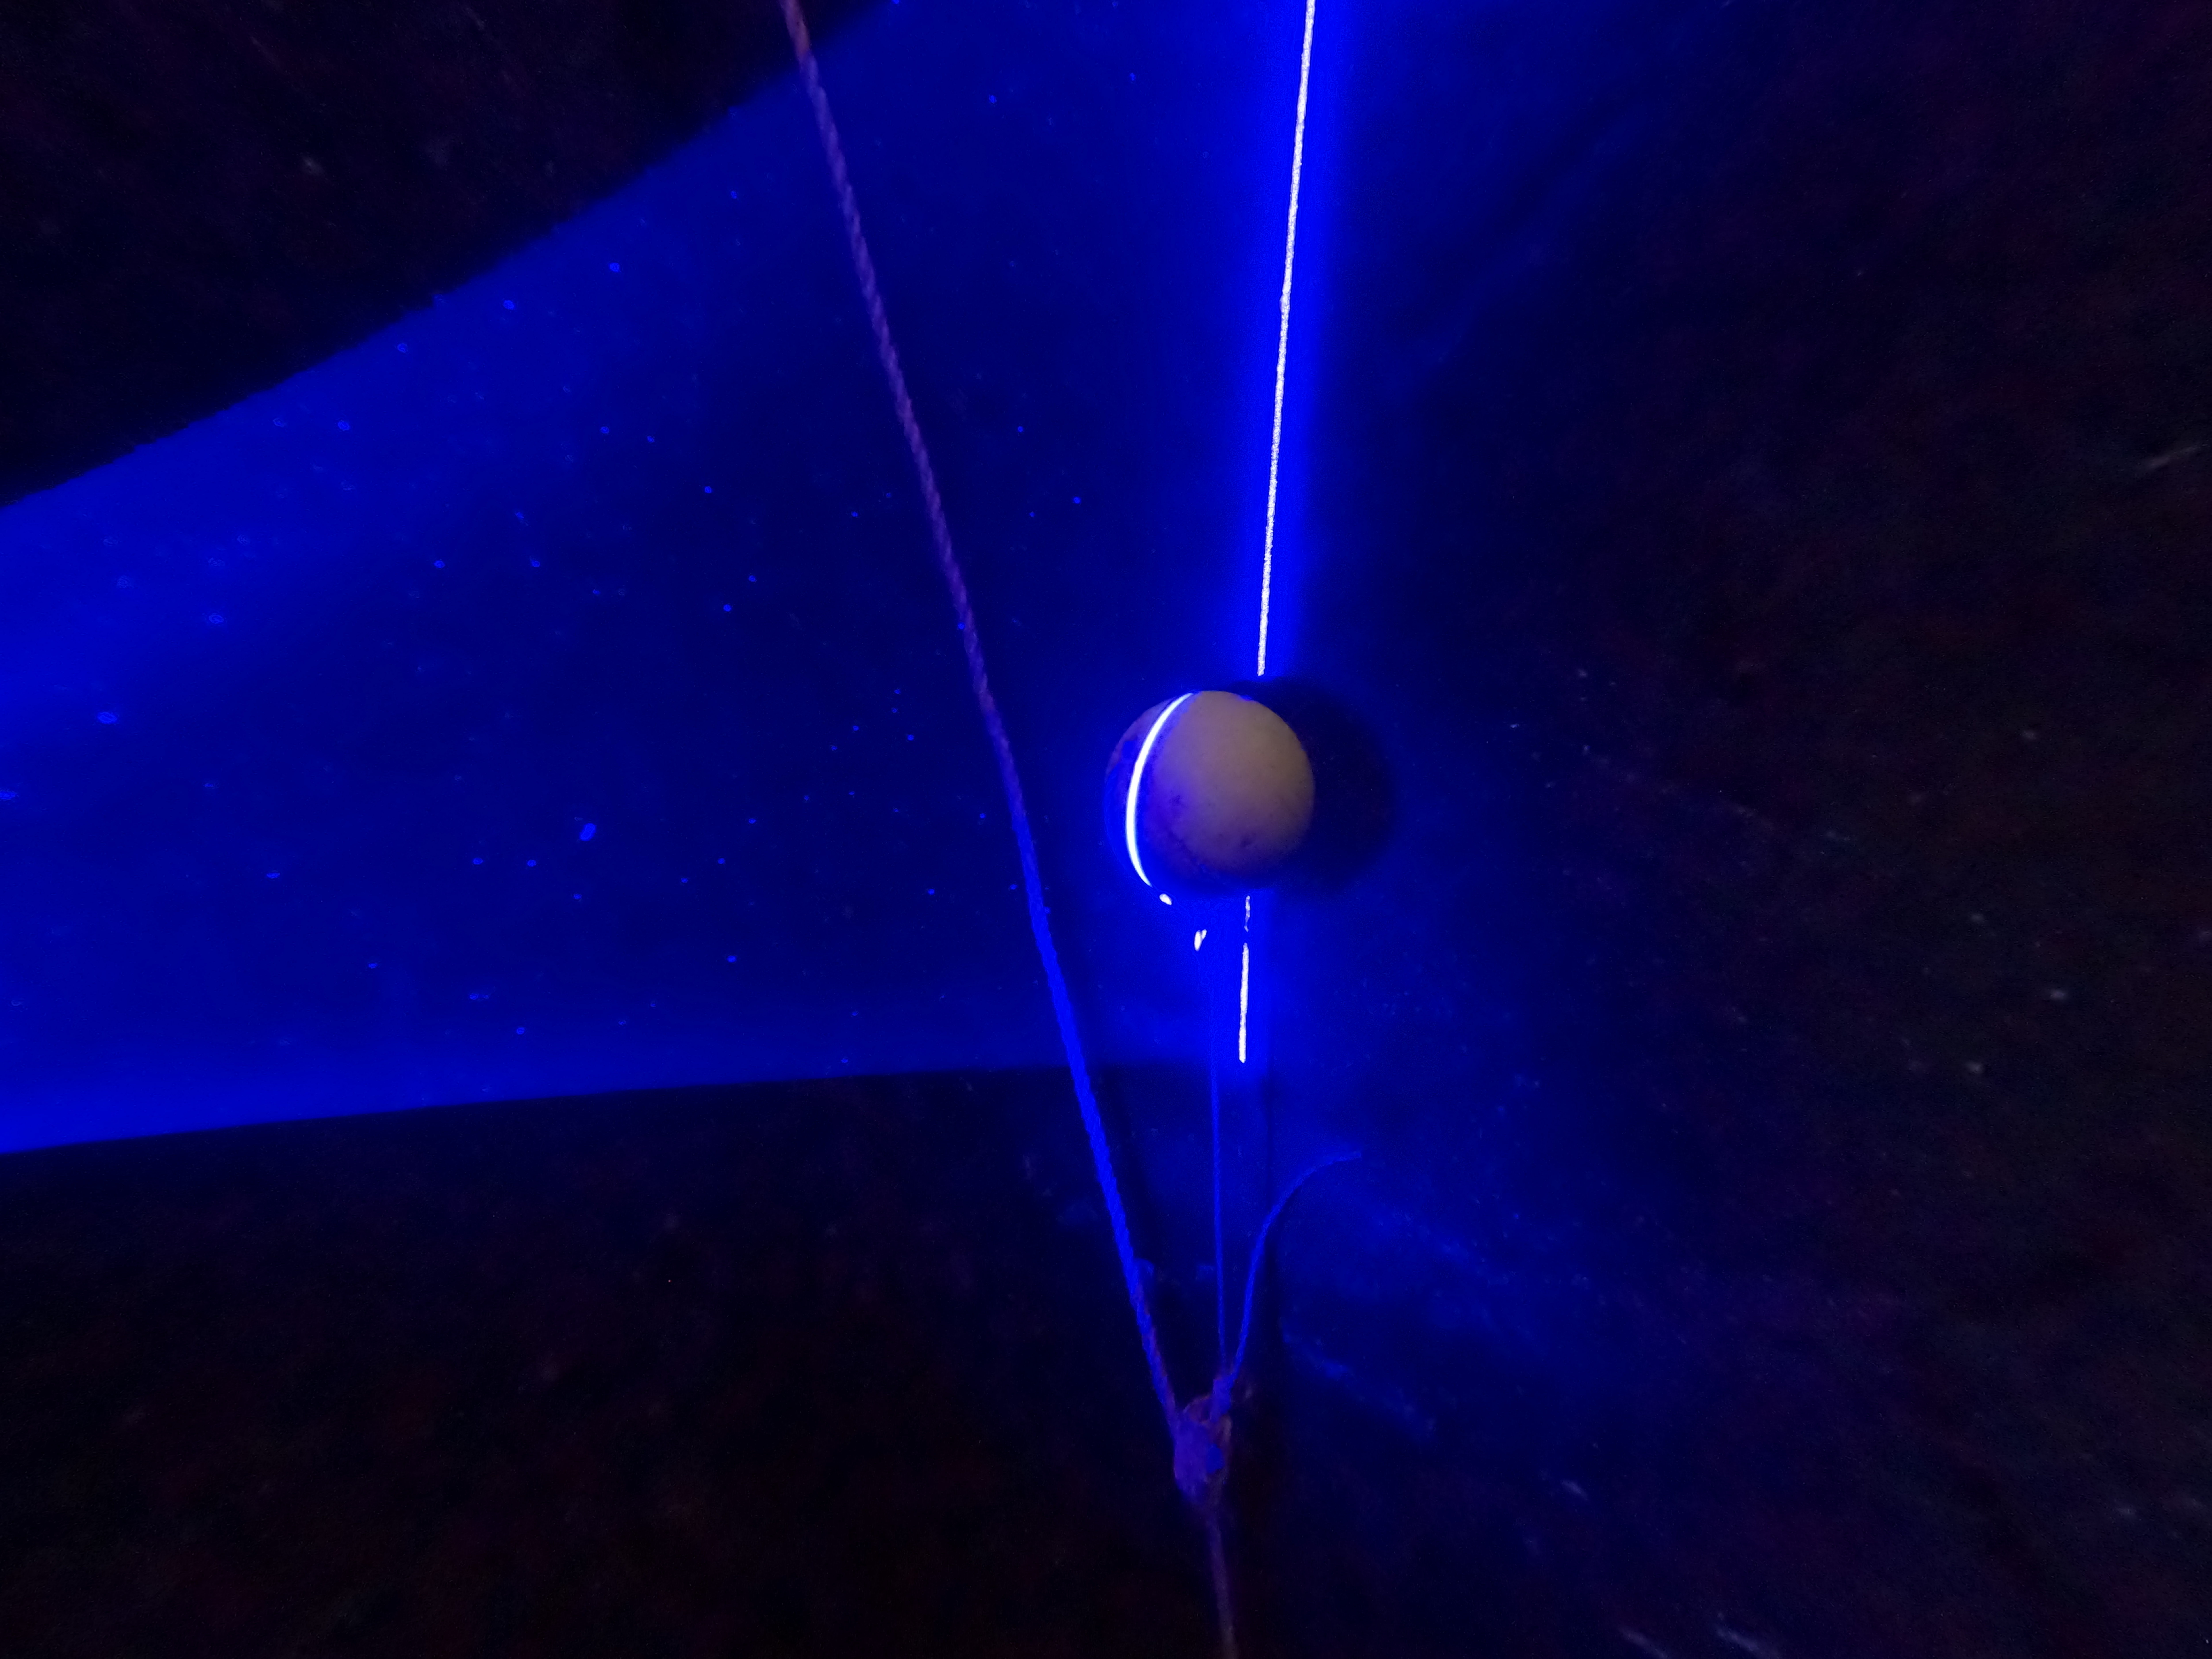

Supplement: Supplementary file 439 [file G0030739.pdf › 3/G0030739.pdf]

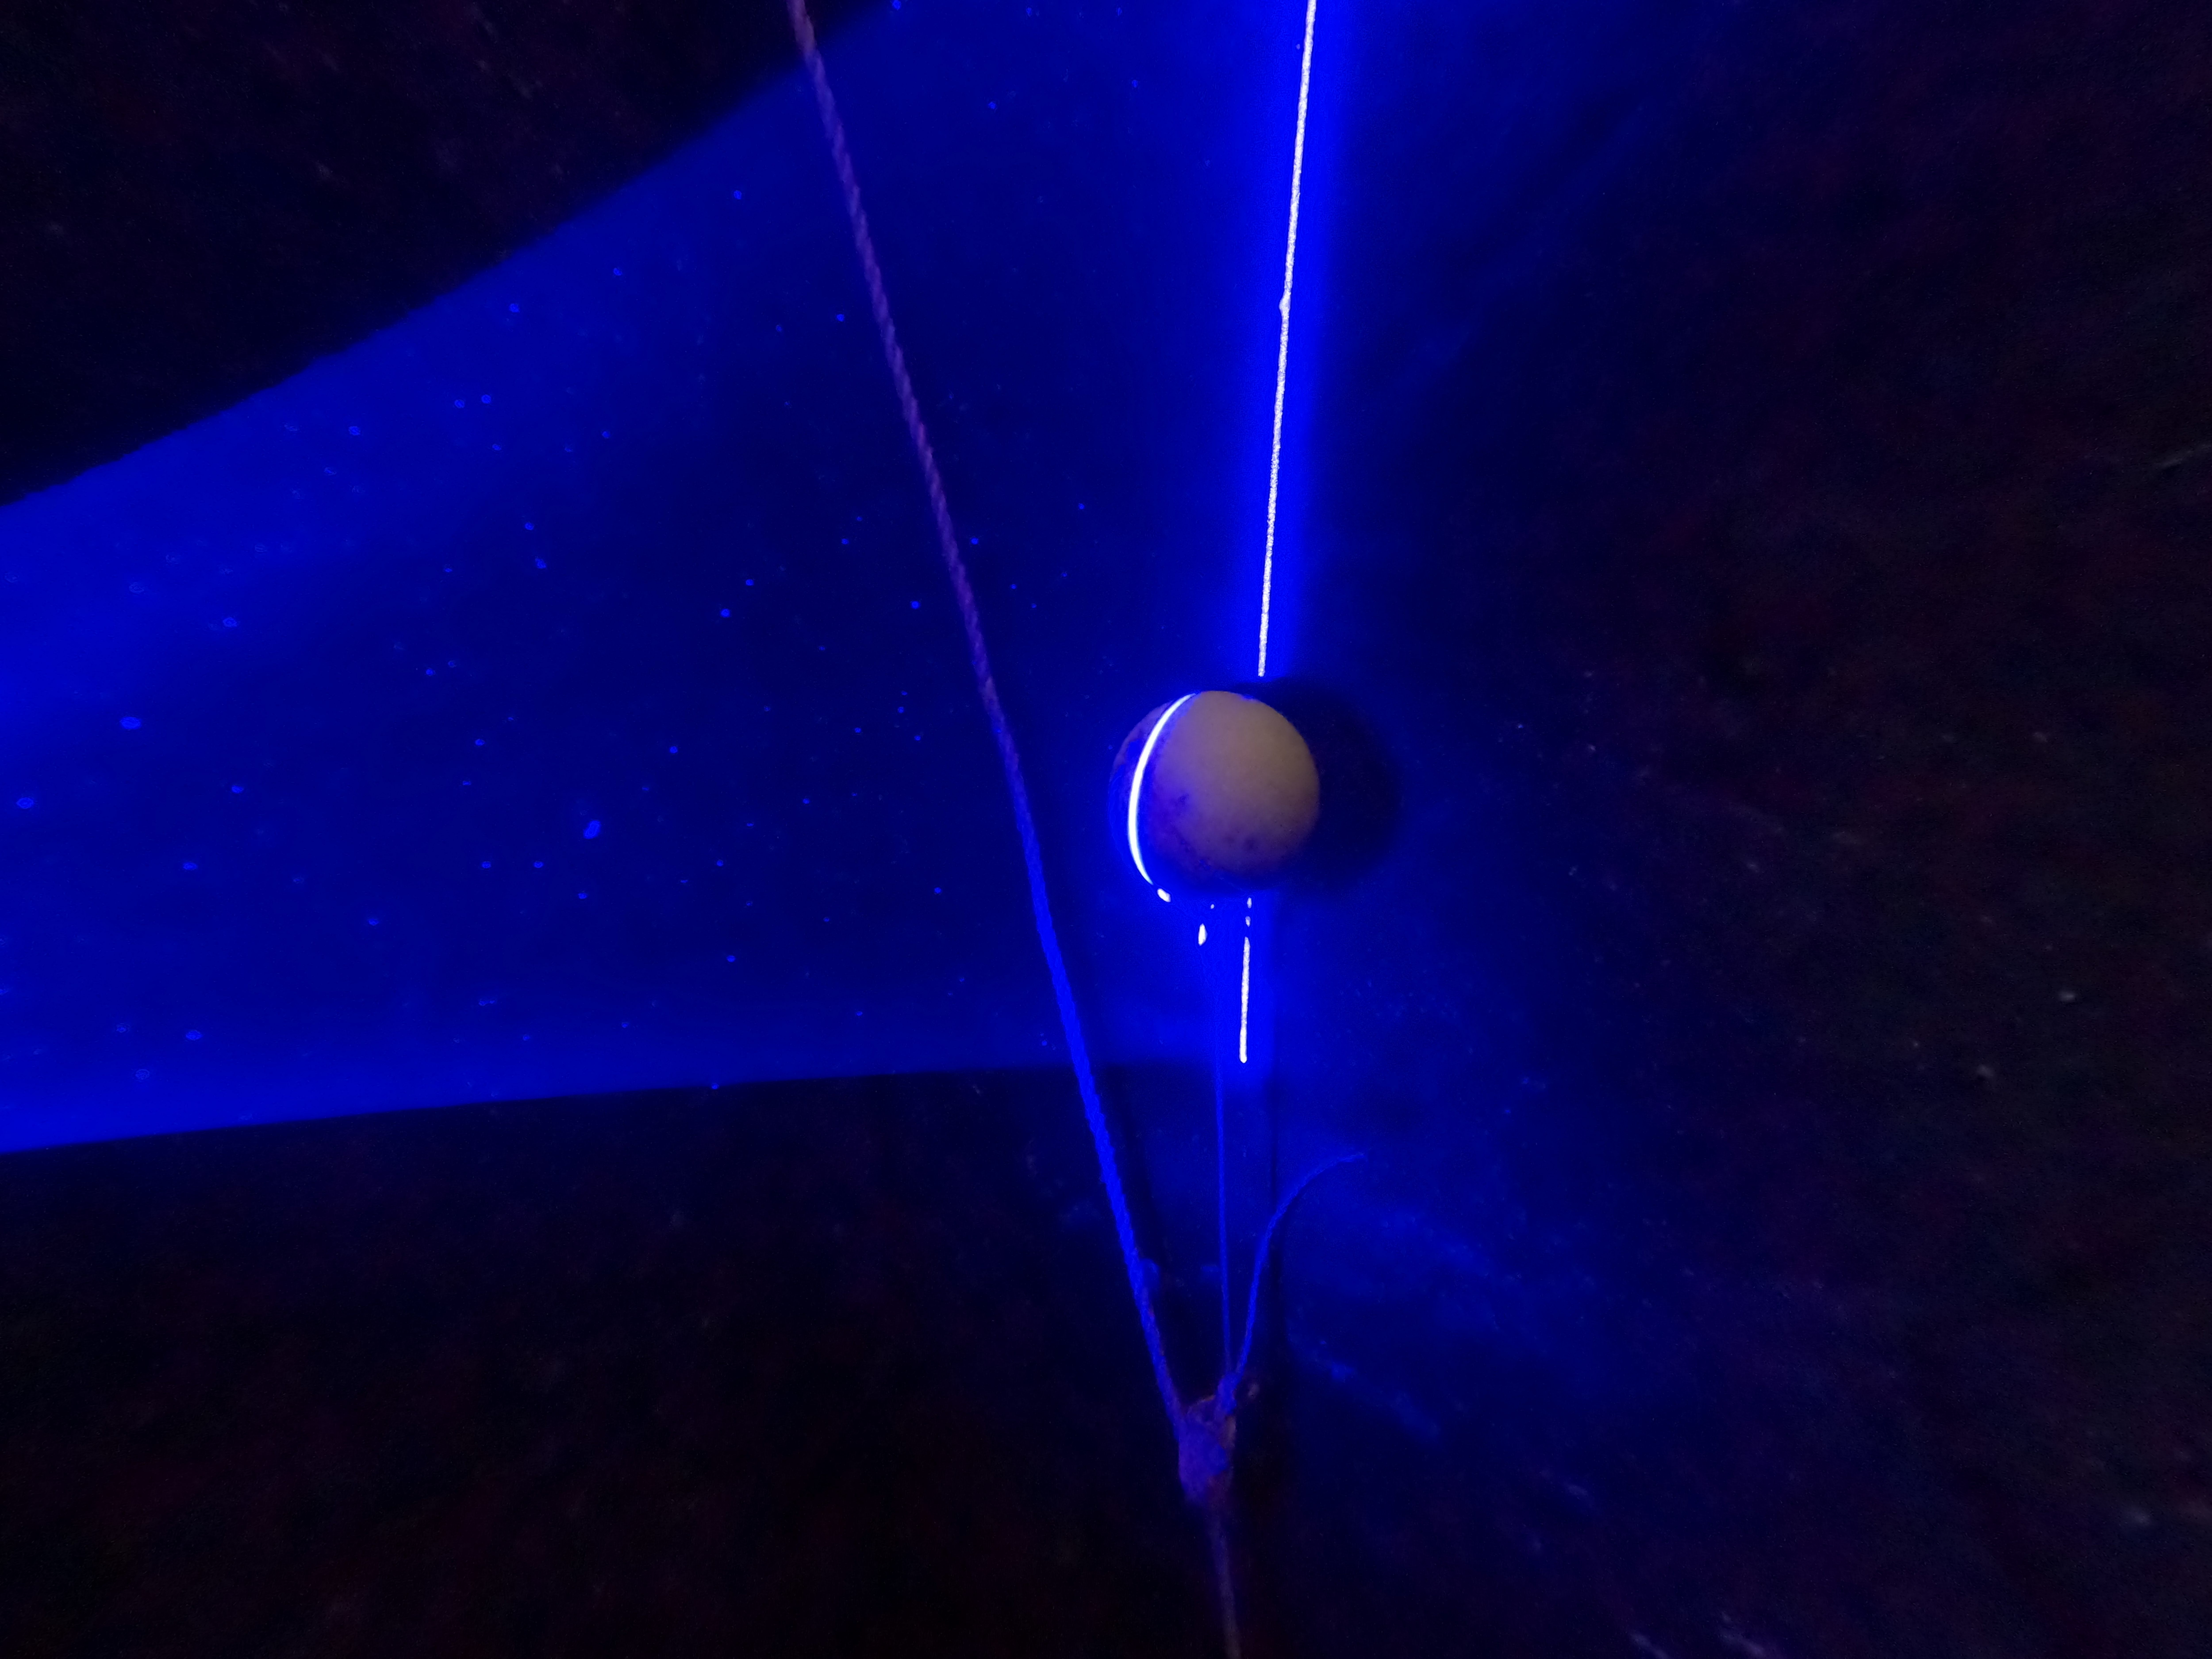

Supplement: Supplementary file 440 [file G0030740.pdf › 3/G0030740.pdf]

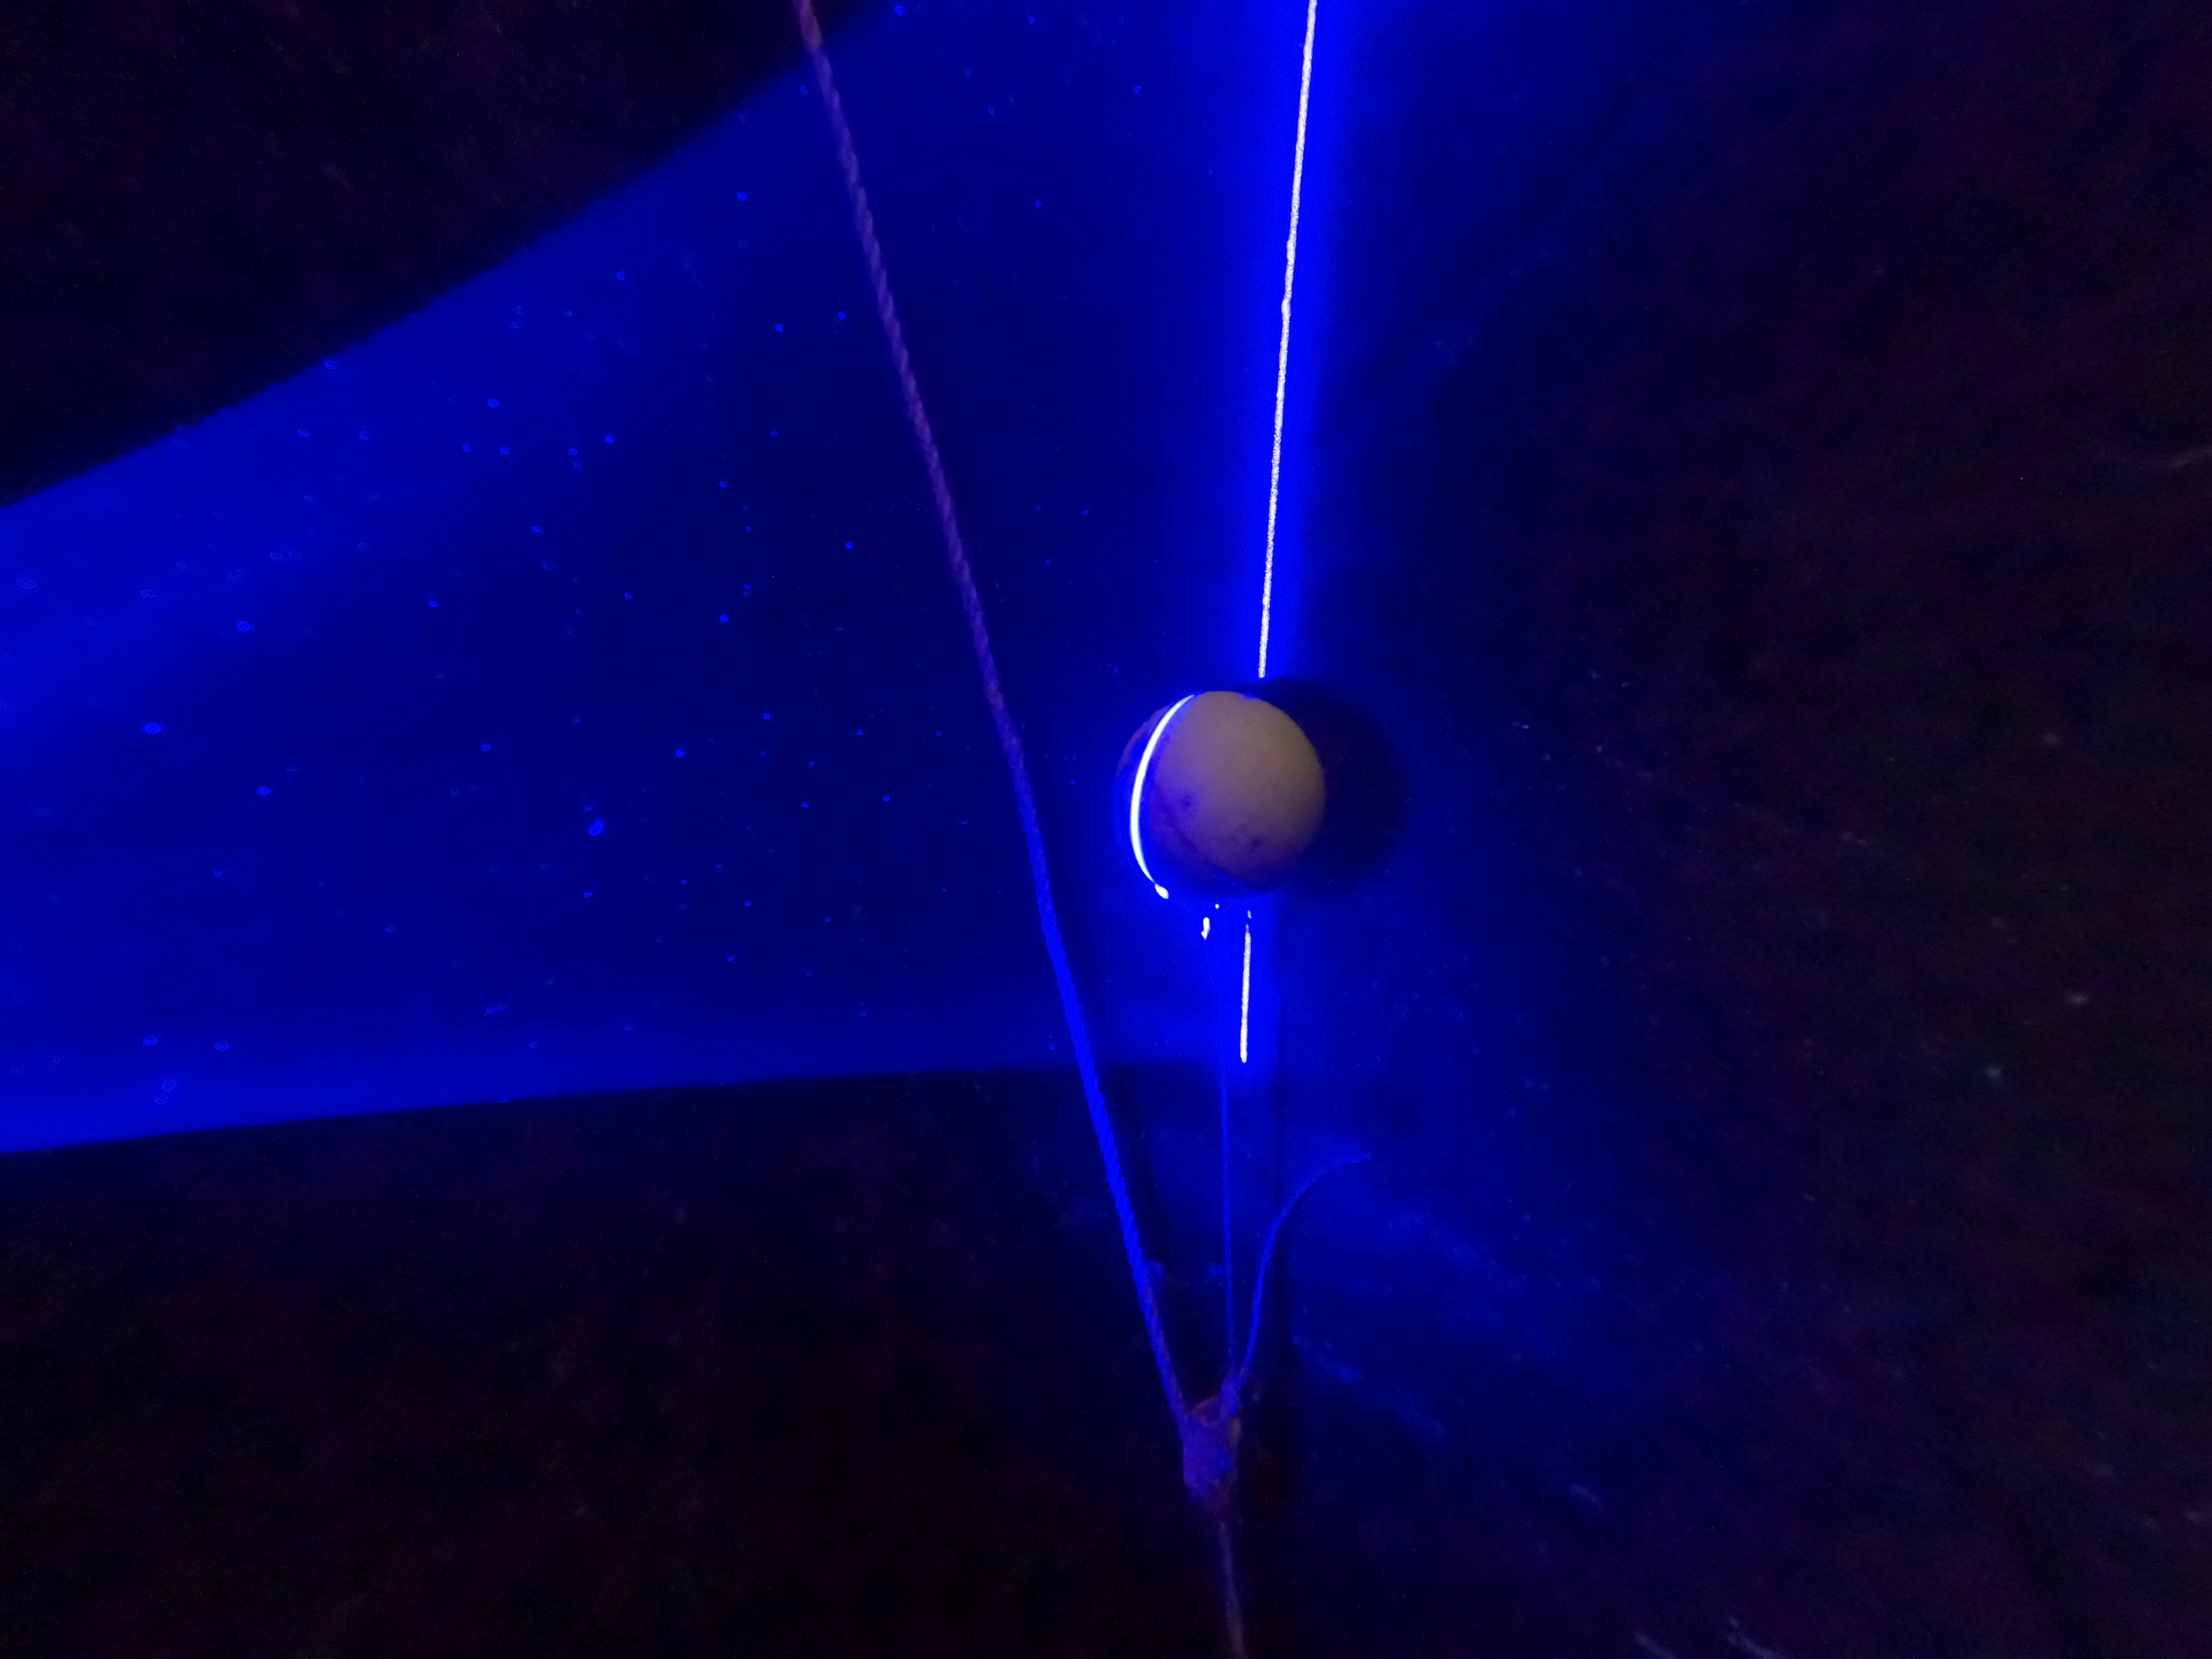

Supplement: Supplementary file 441 [file G0030741.pdf › 3/G0030741.pdf]

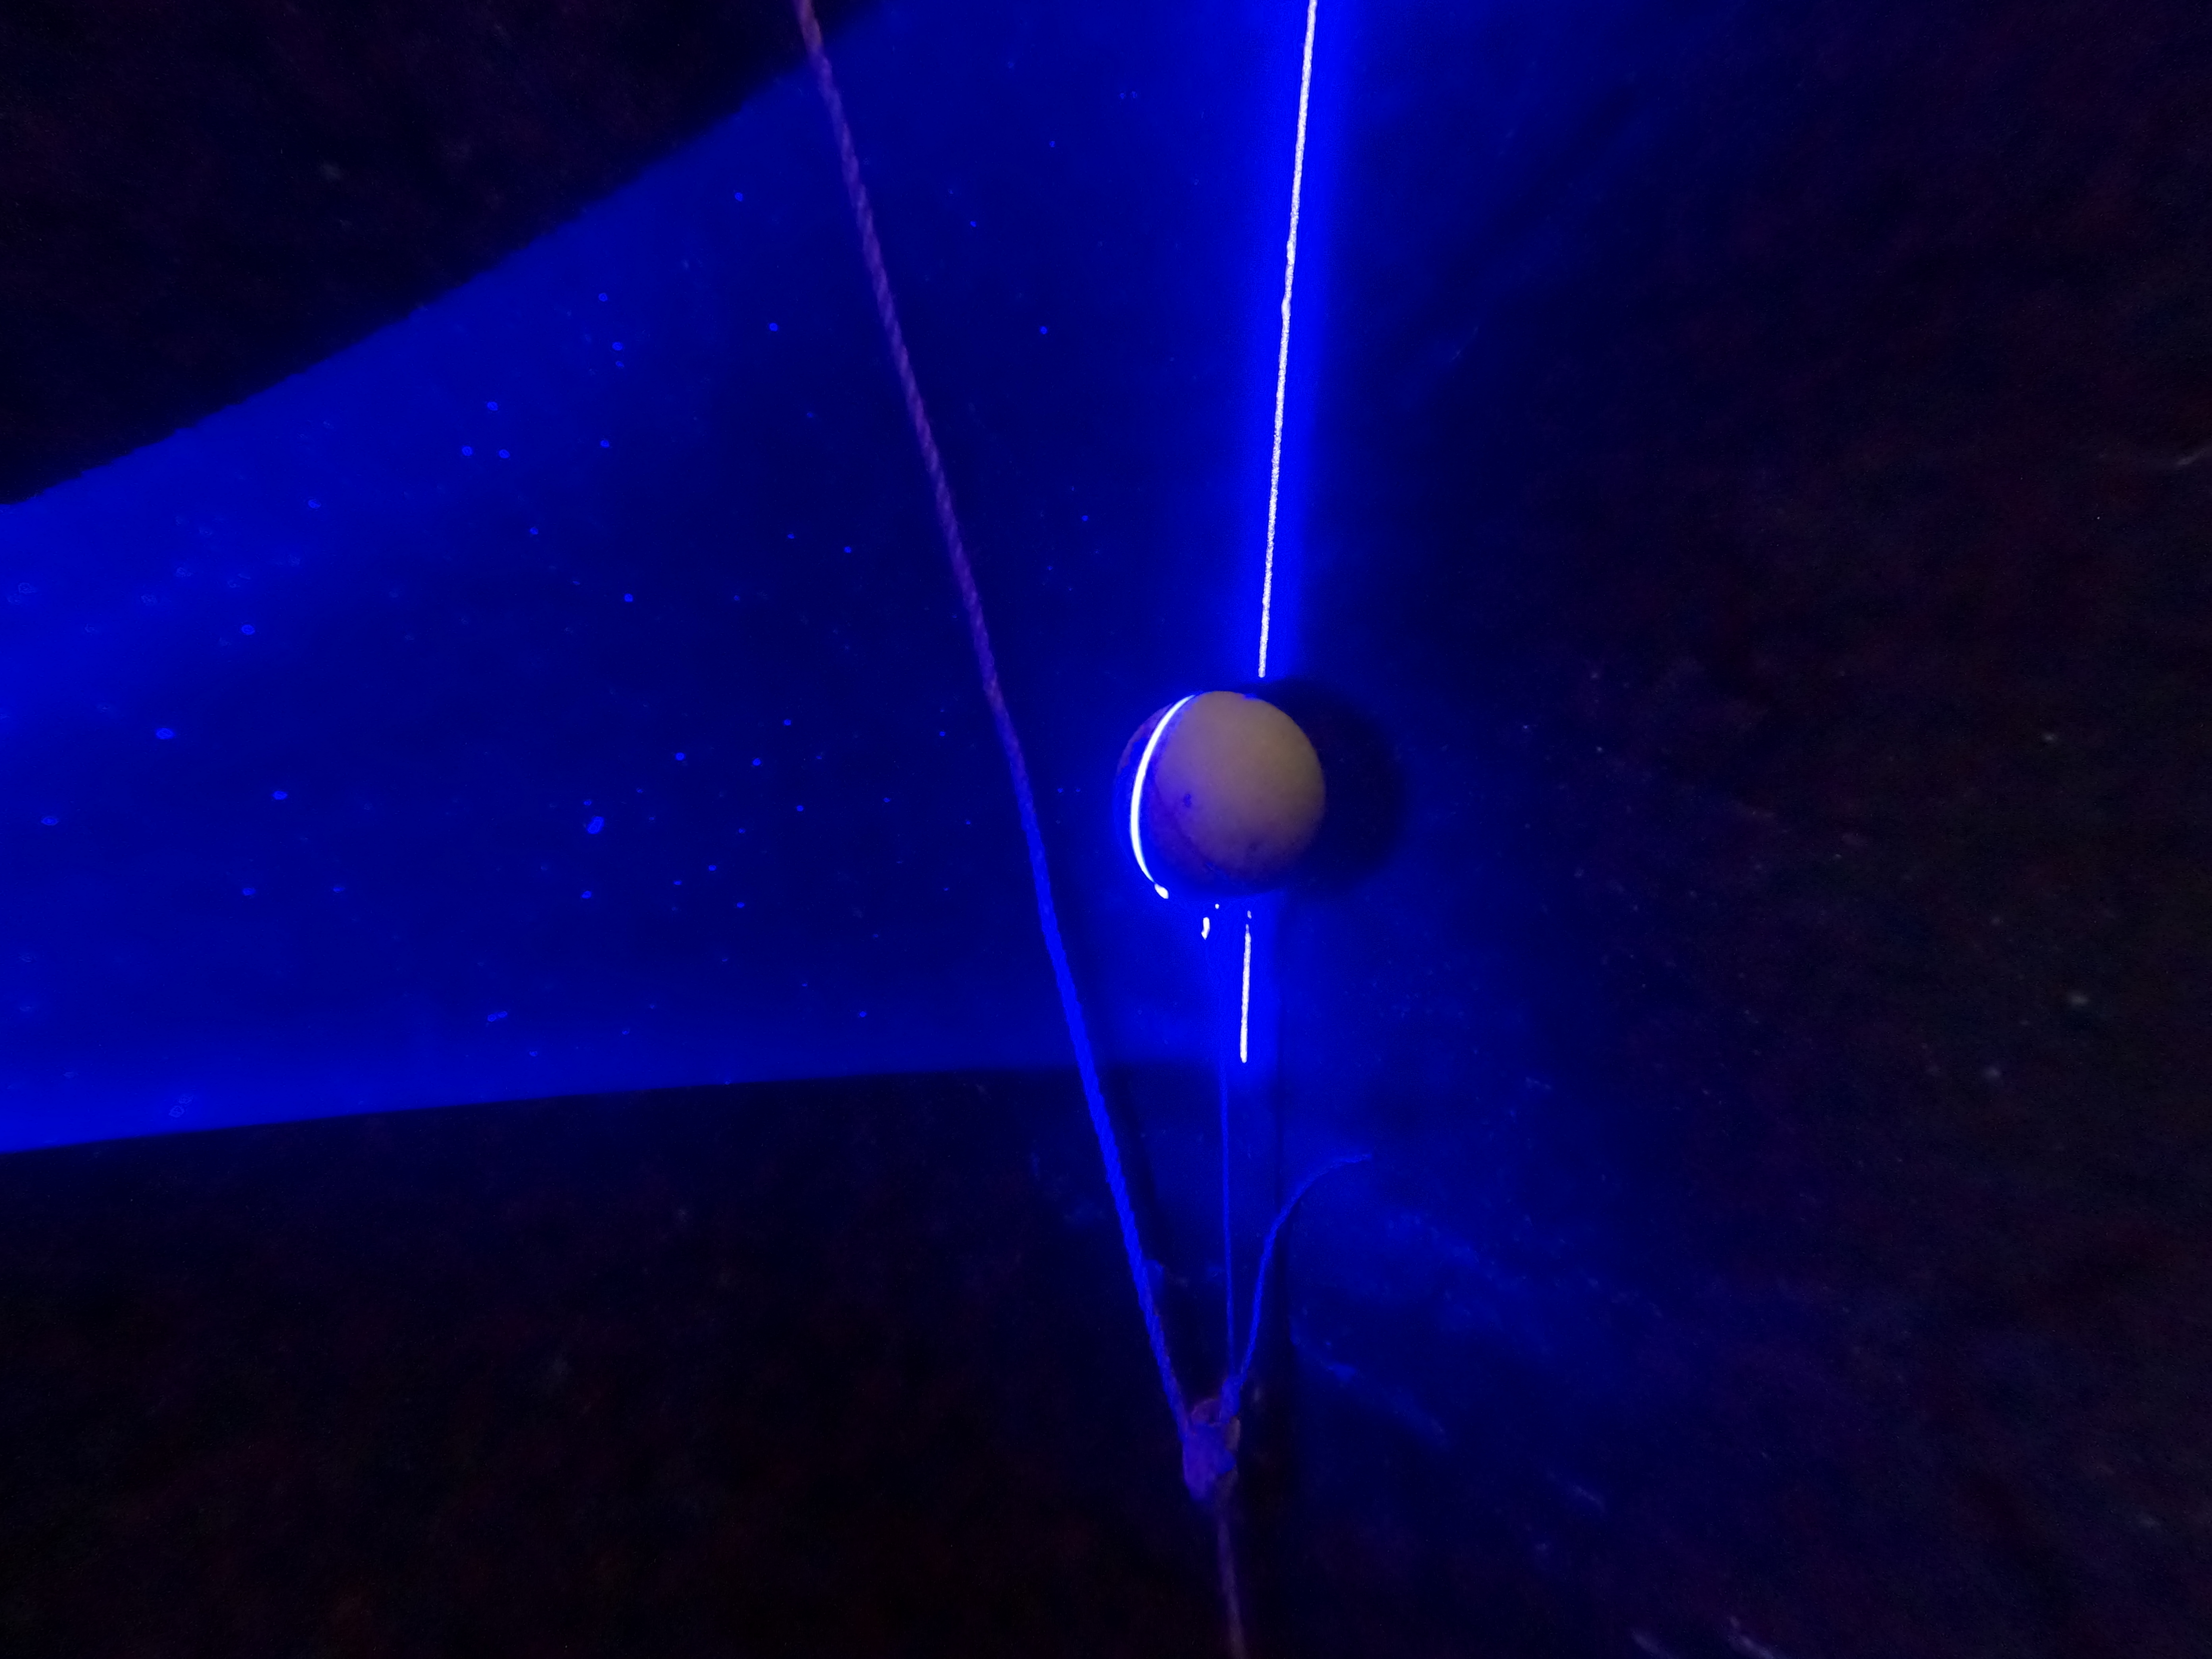

Supplement: Supplementary file 442 [file G0030742.pdf › 3/G0030742.pdf]

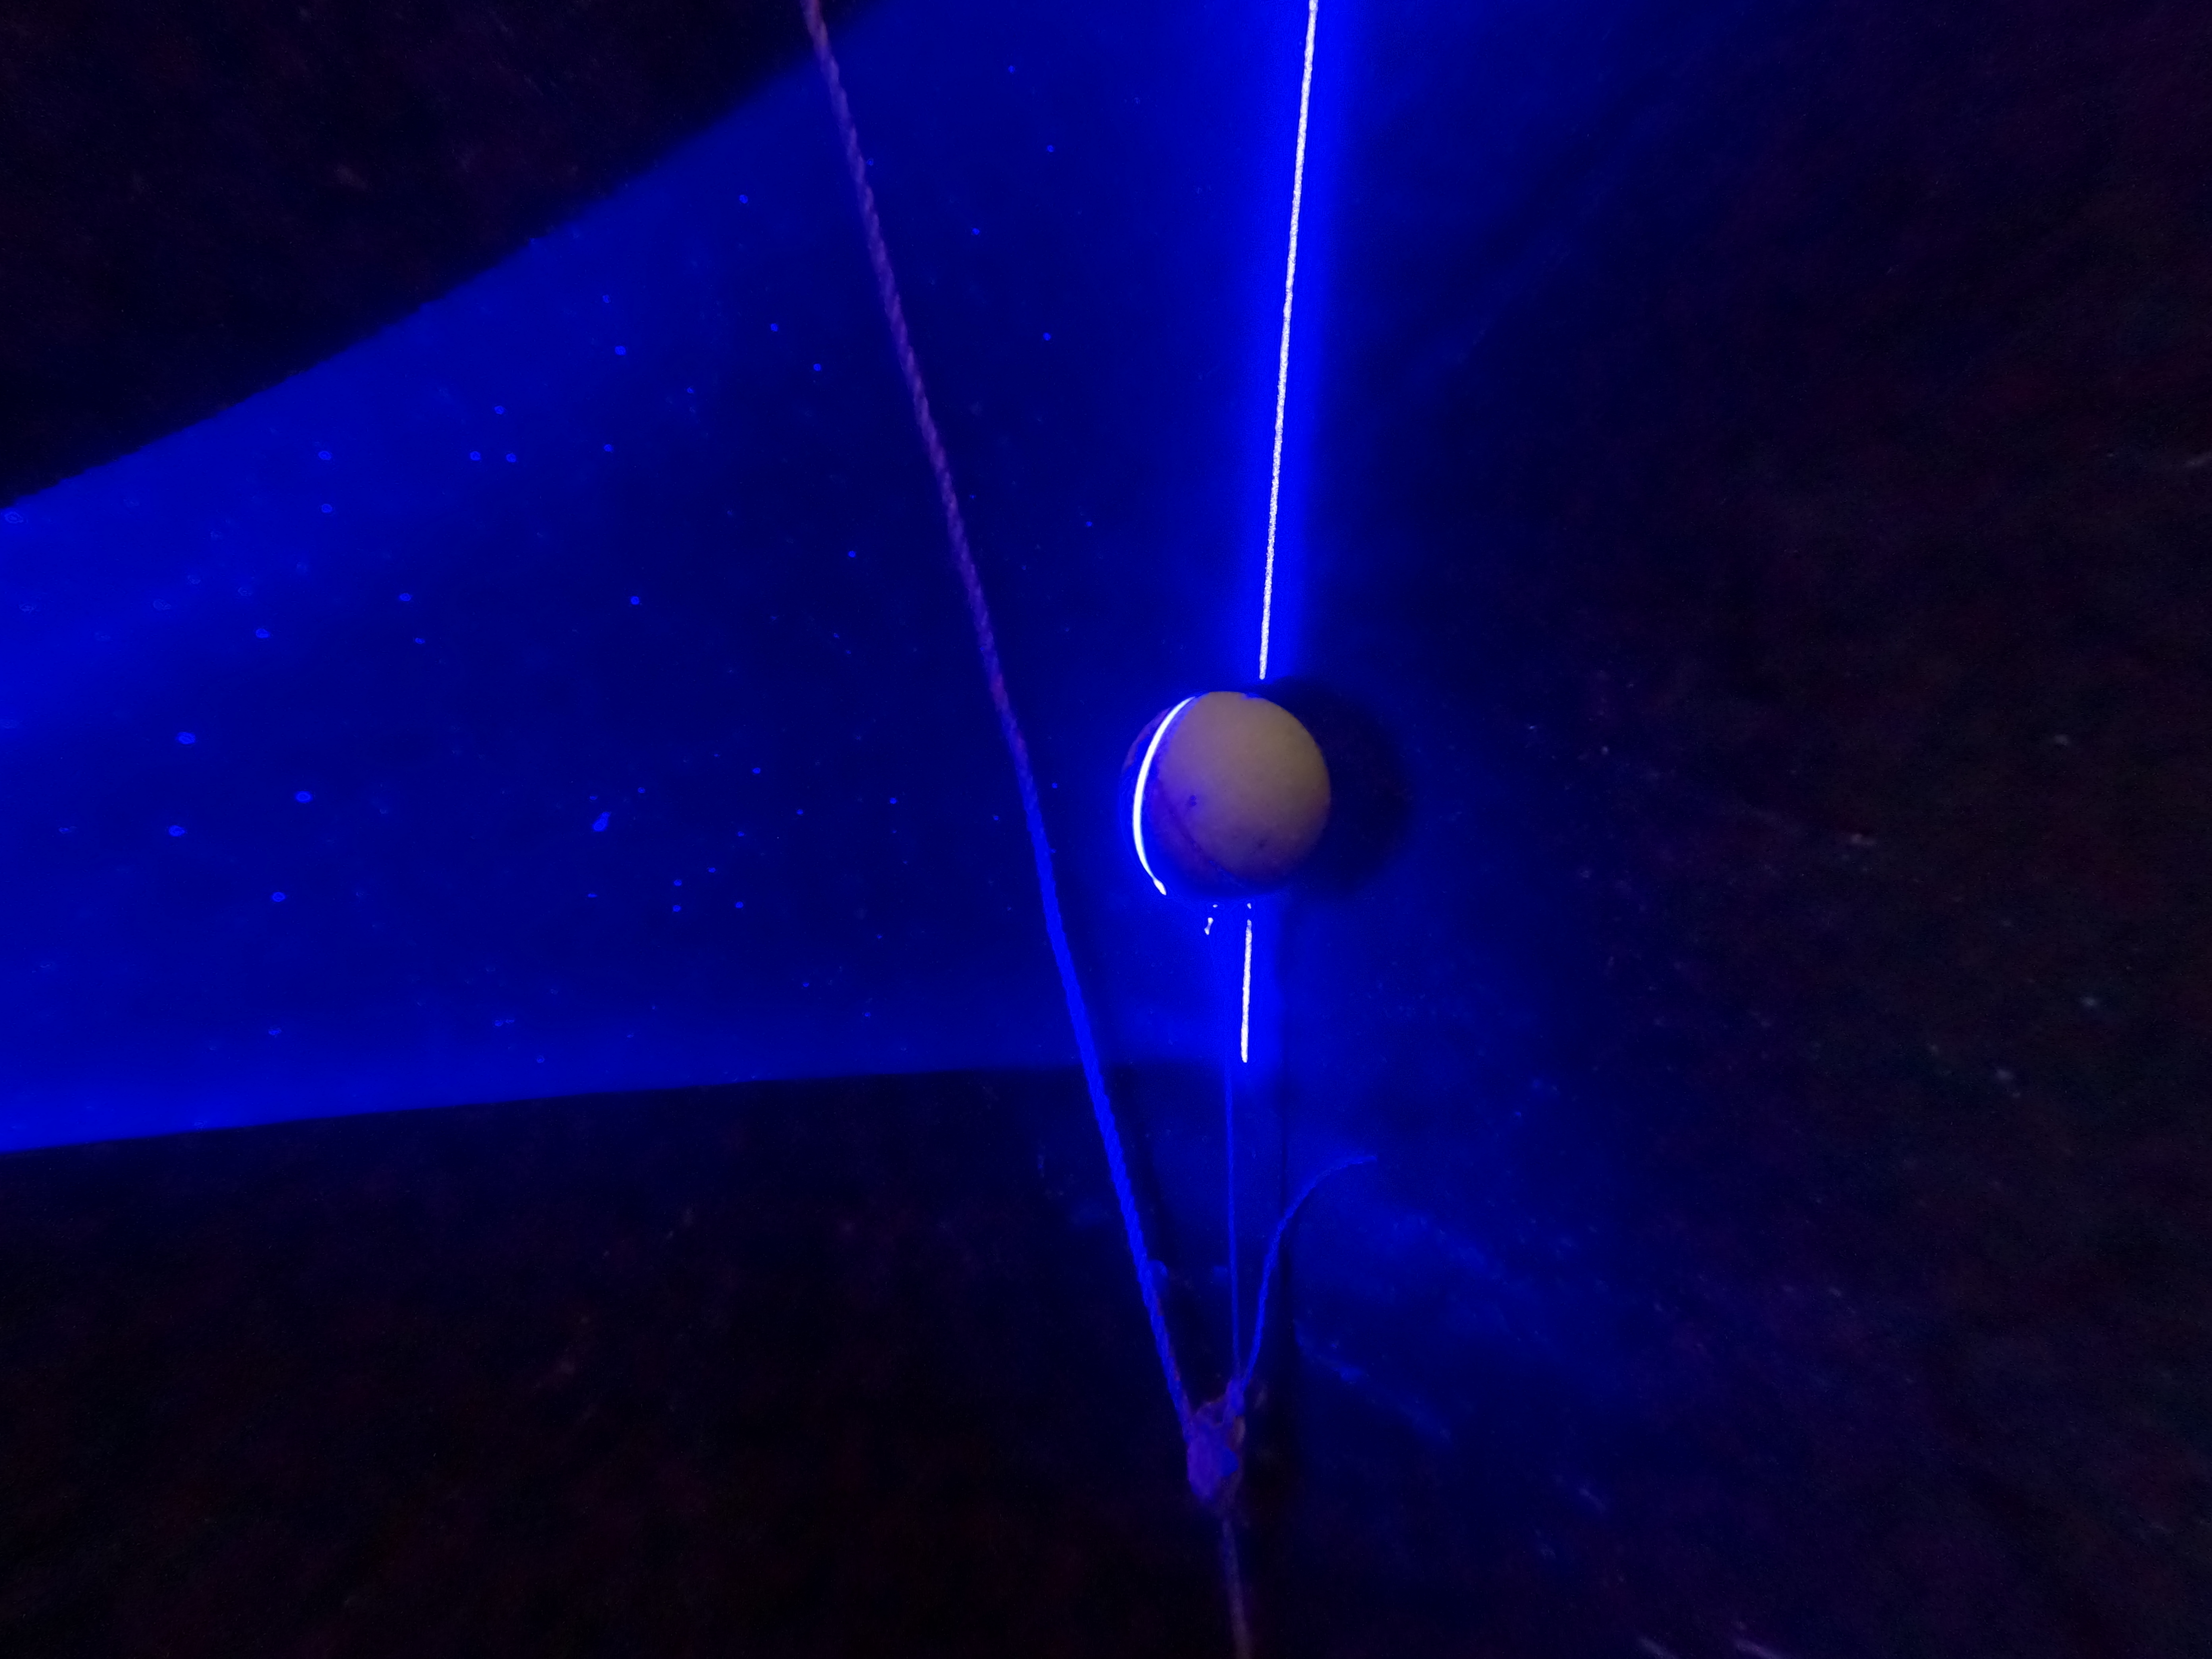

Supplement: Supplementary file 443 [file G0030743.pdf › 3/G0030743.pdf]

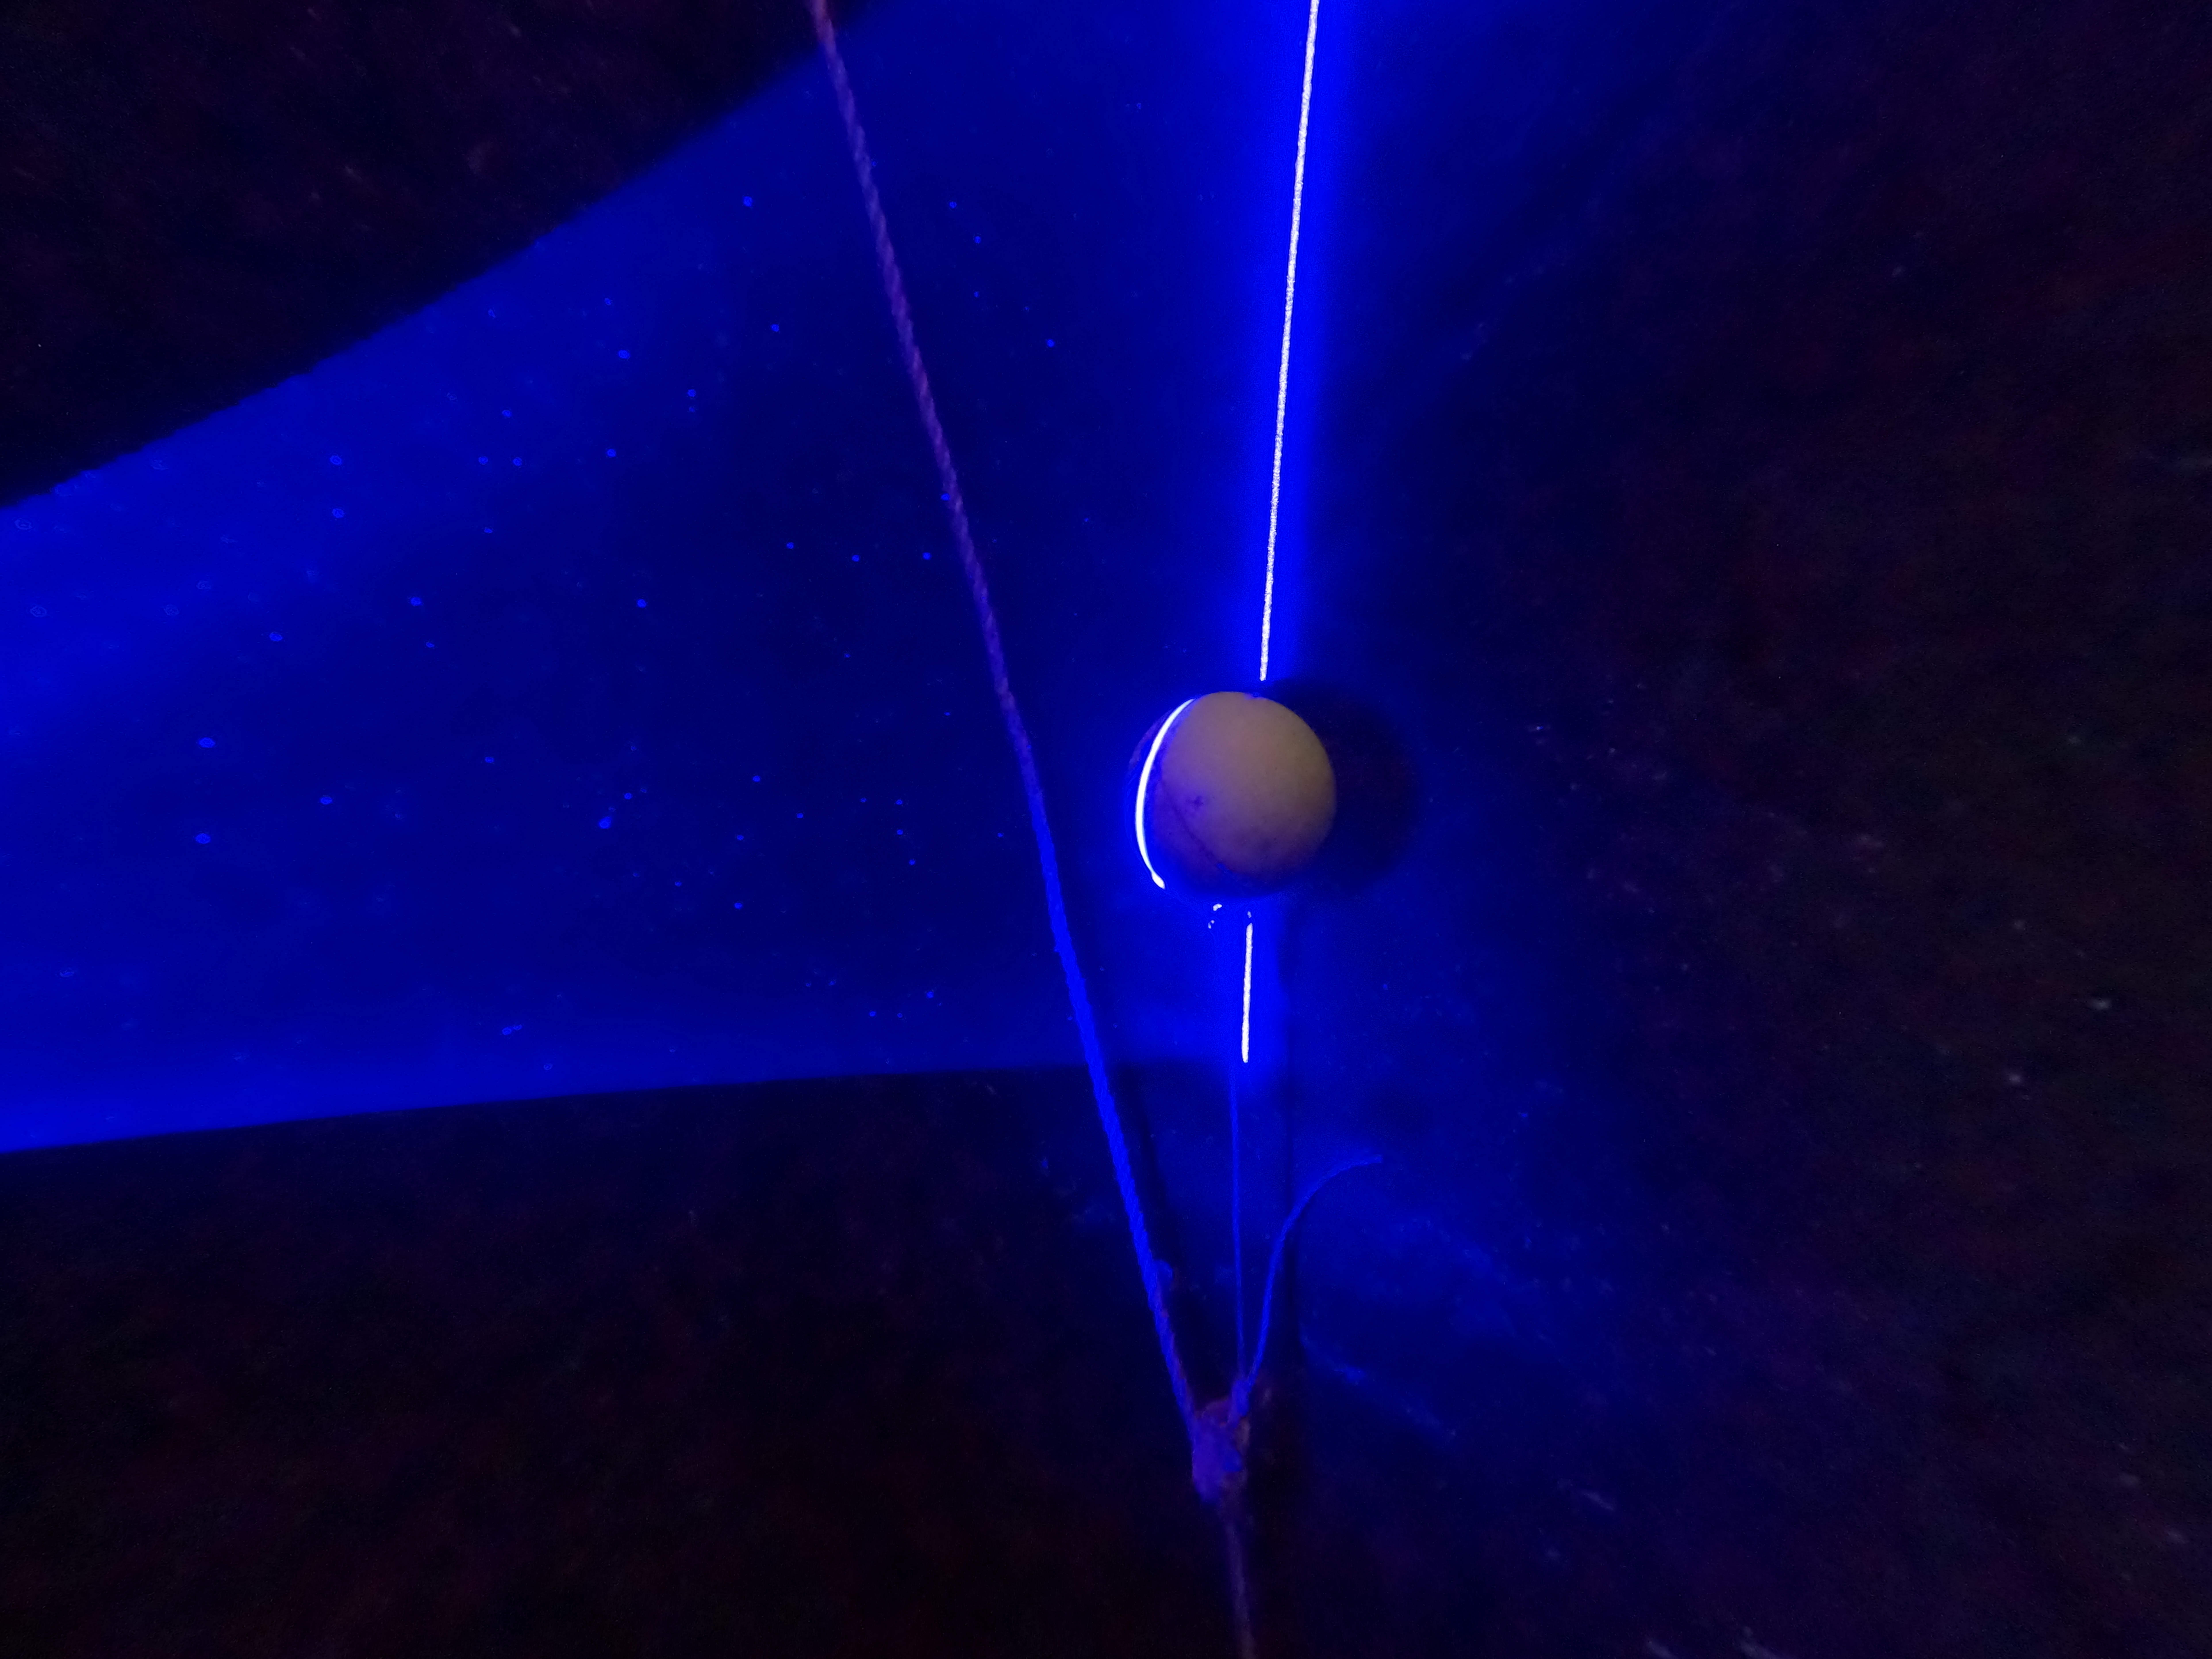

Supplement: Supplementary file 444 [file G0030744.pdf › 3/G0030744.pdf]

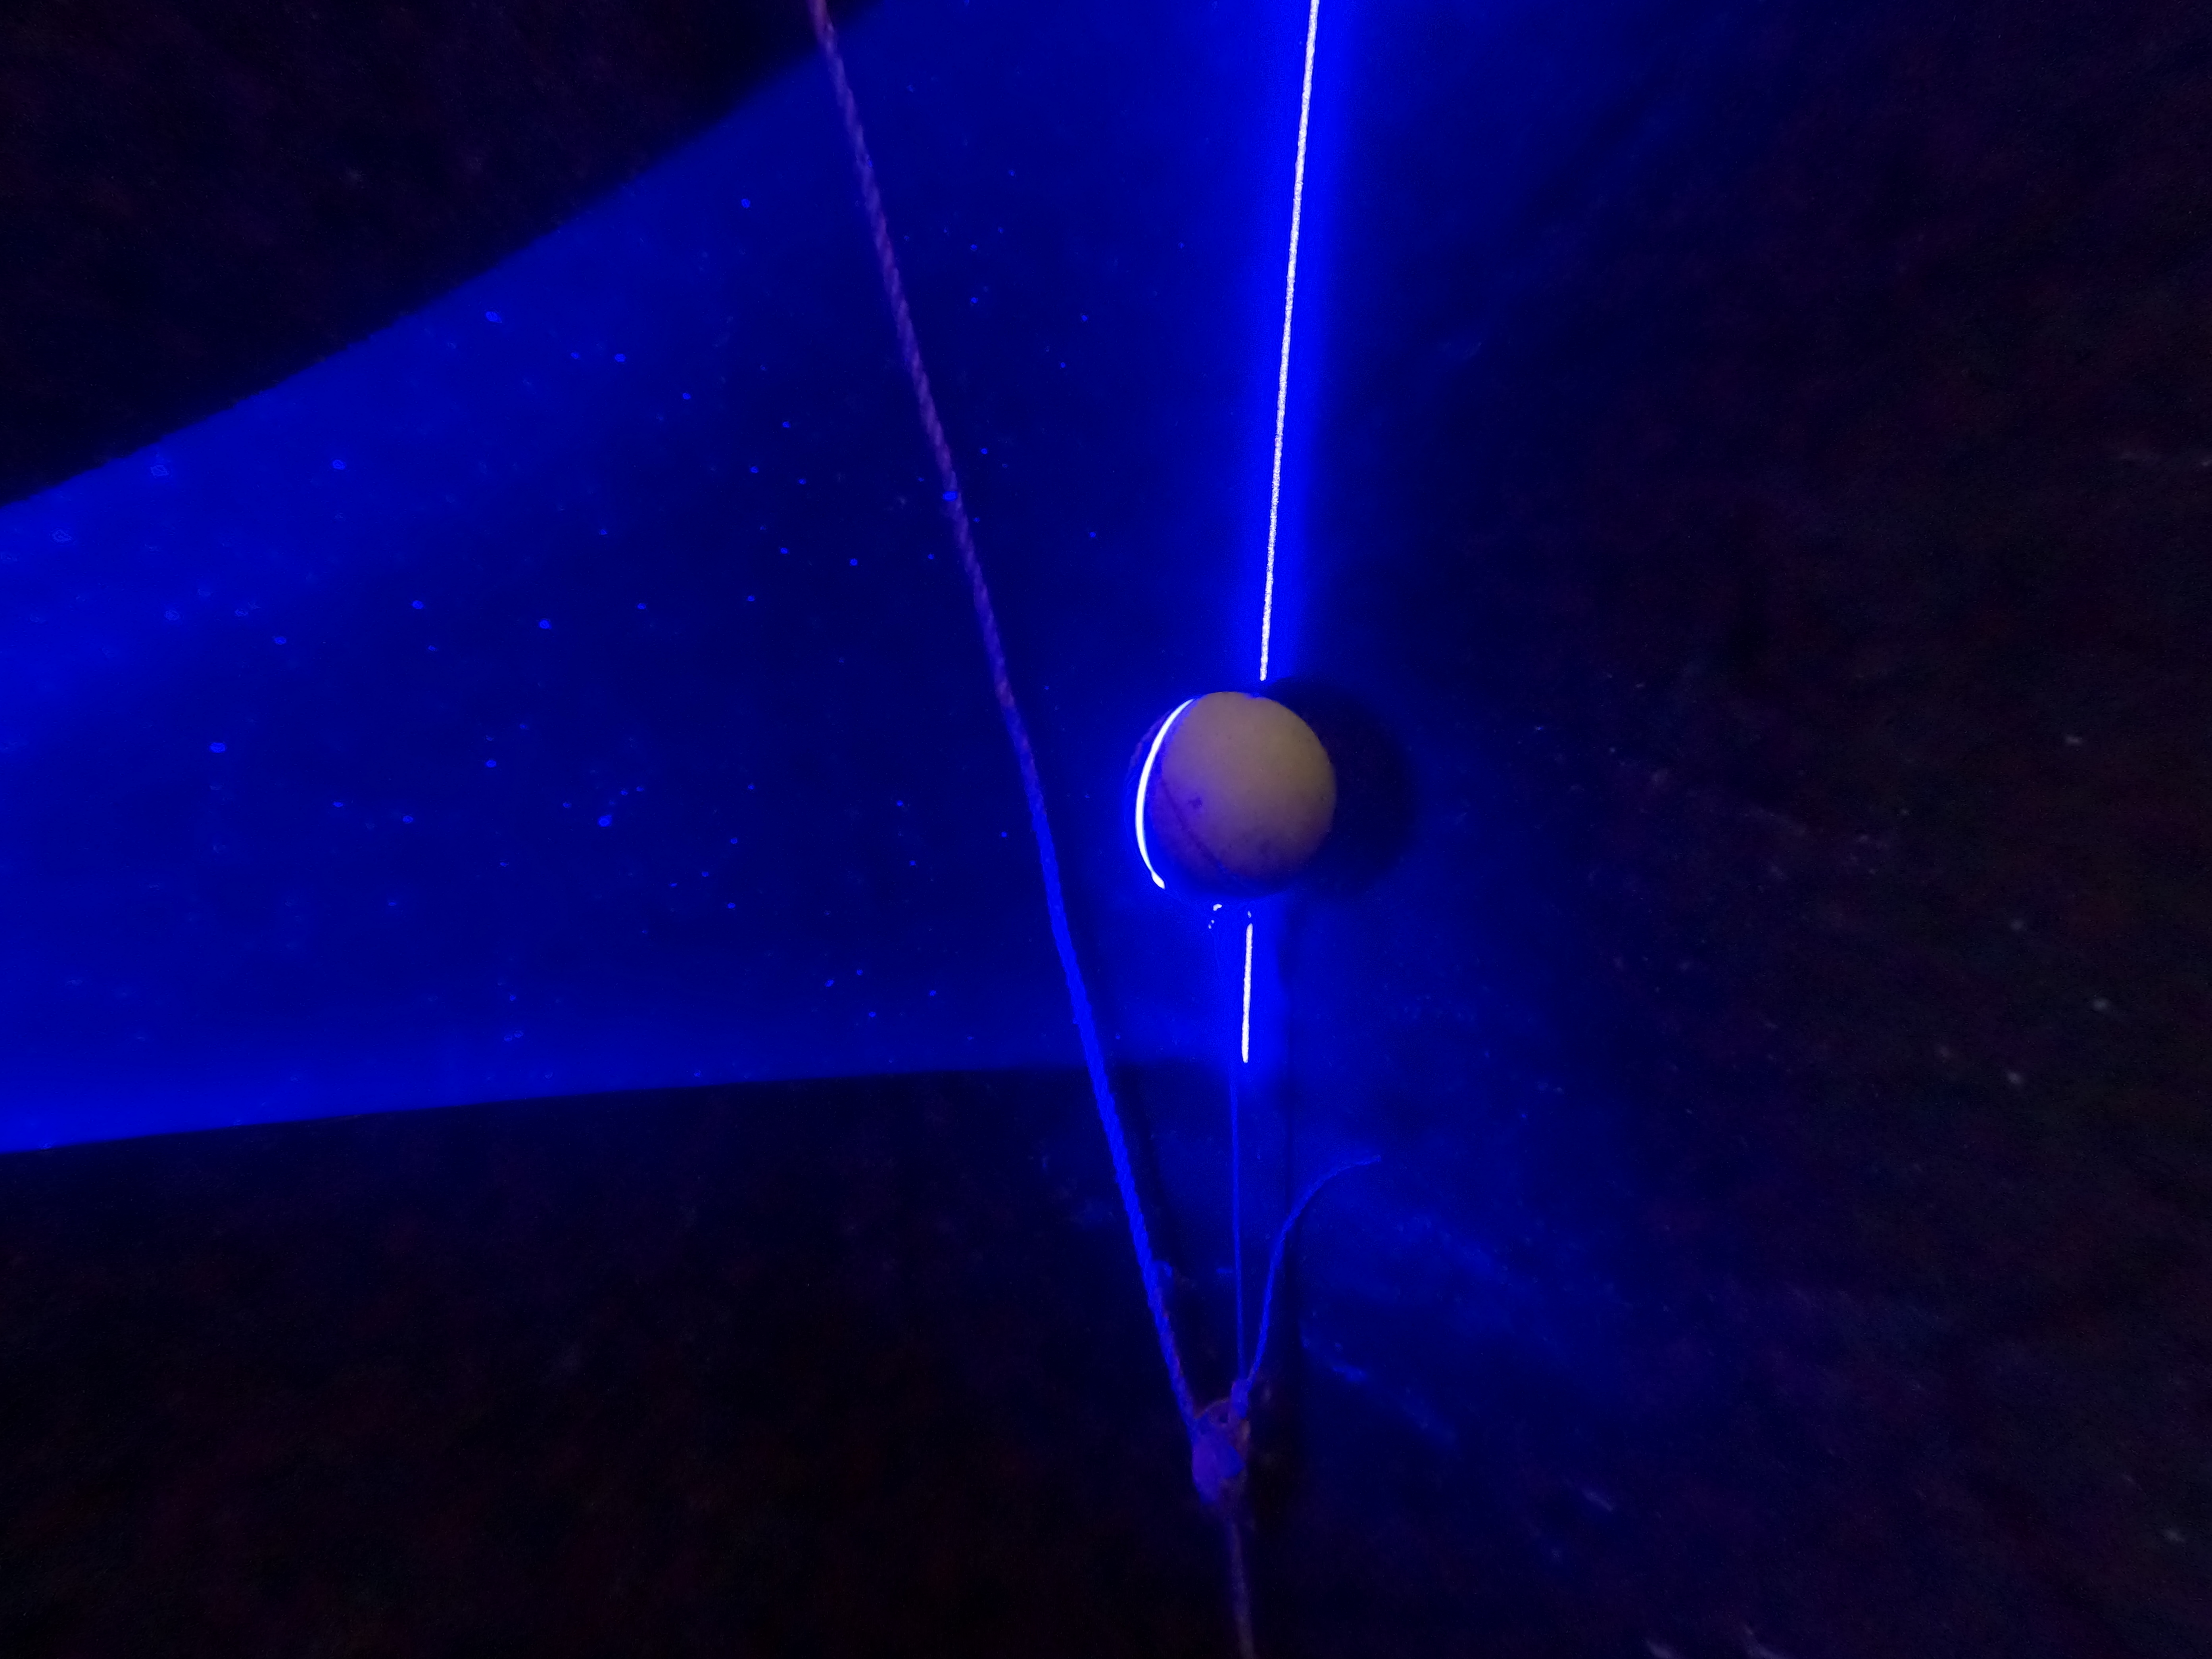

Supplement: Supplementary file 445 [file G0030745.pdf › 3/G0030745.pdf]

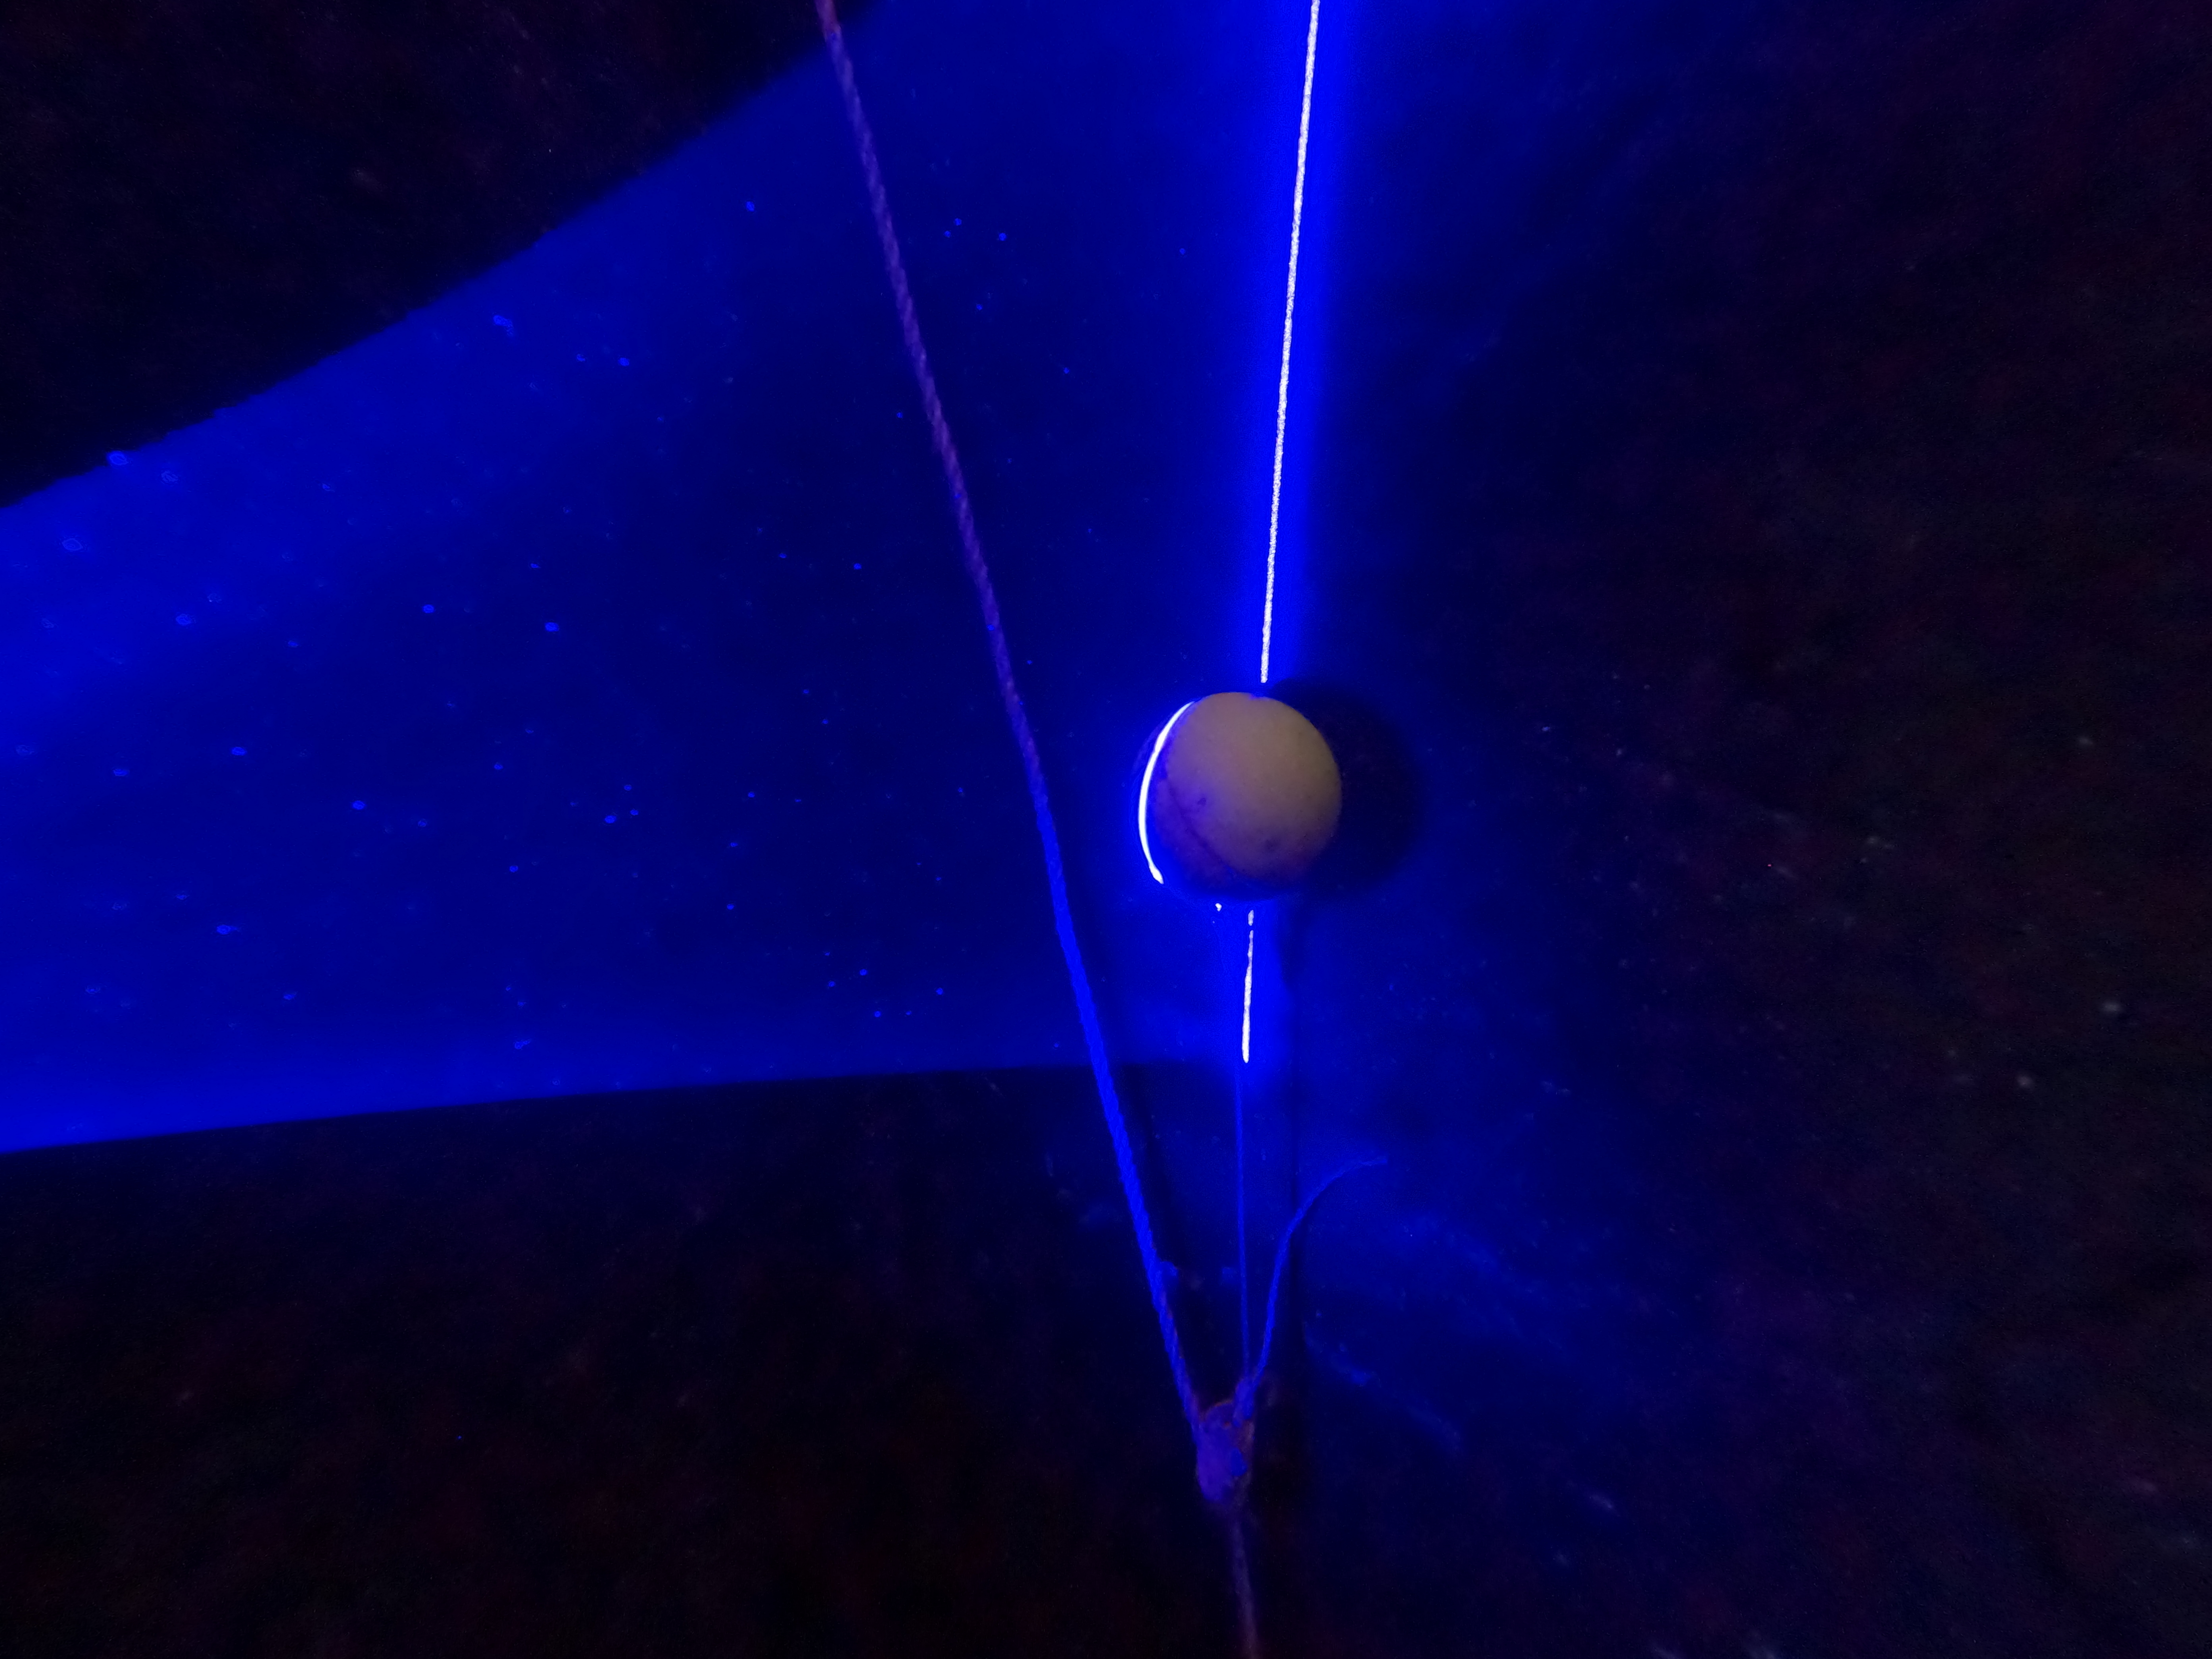

Supplement: Supplementary file 446 [file G0030746.pdf › 3/G0030746.pdf]

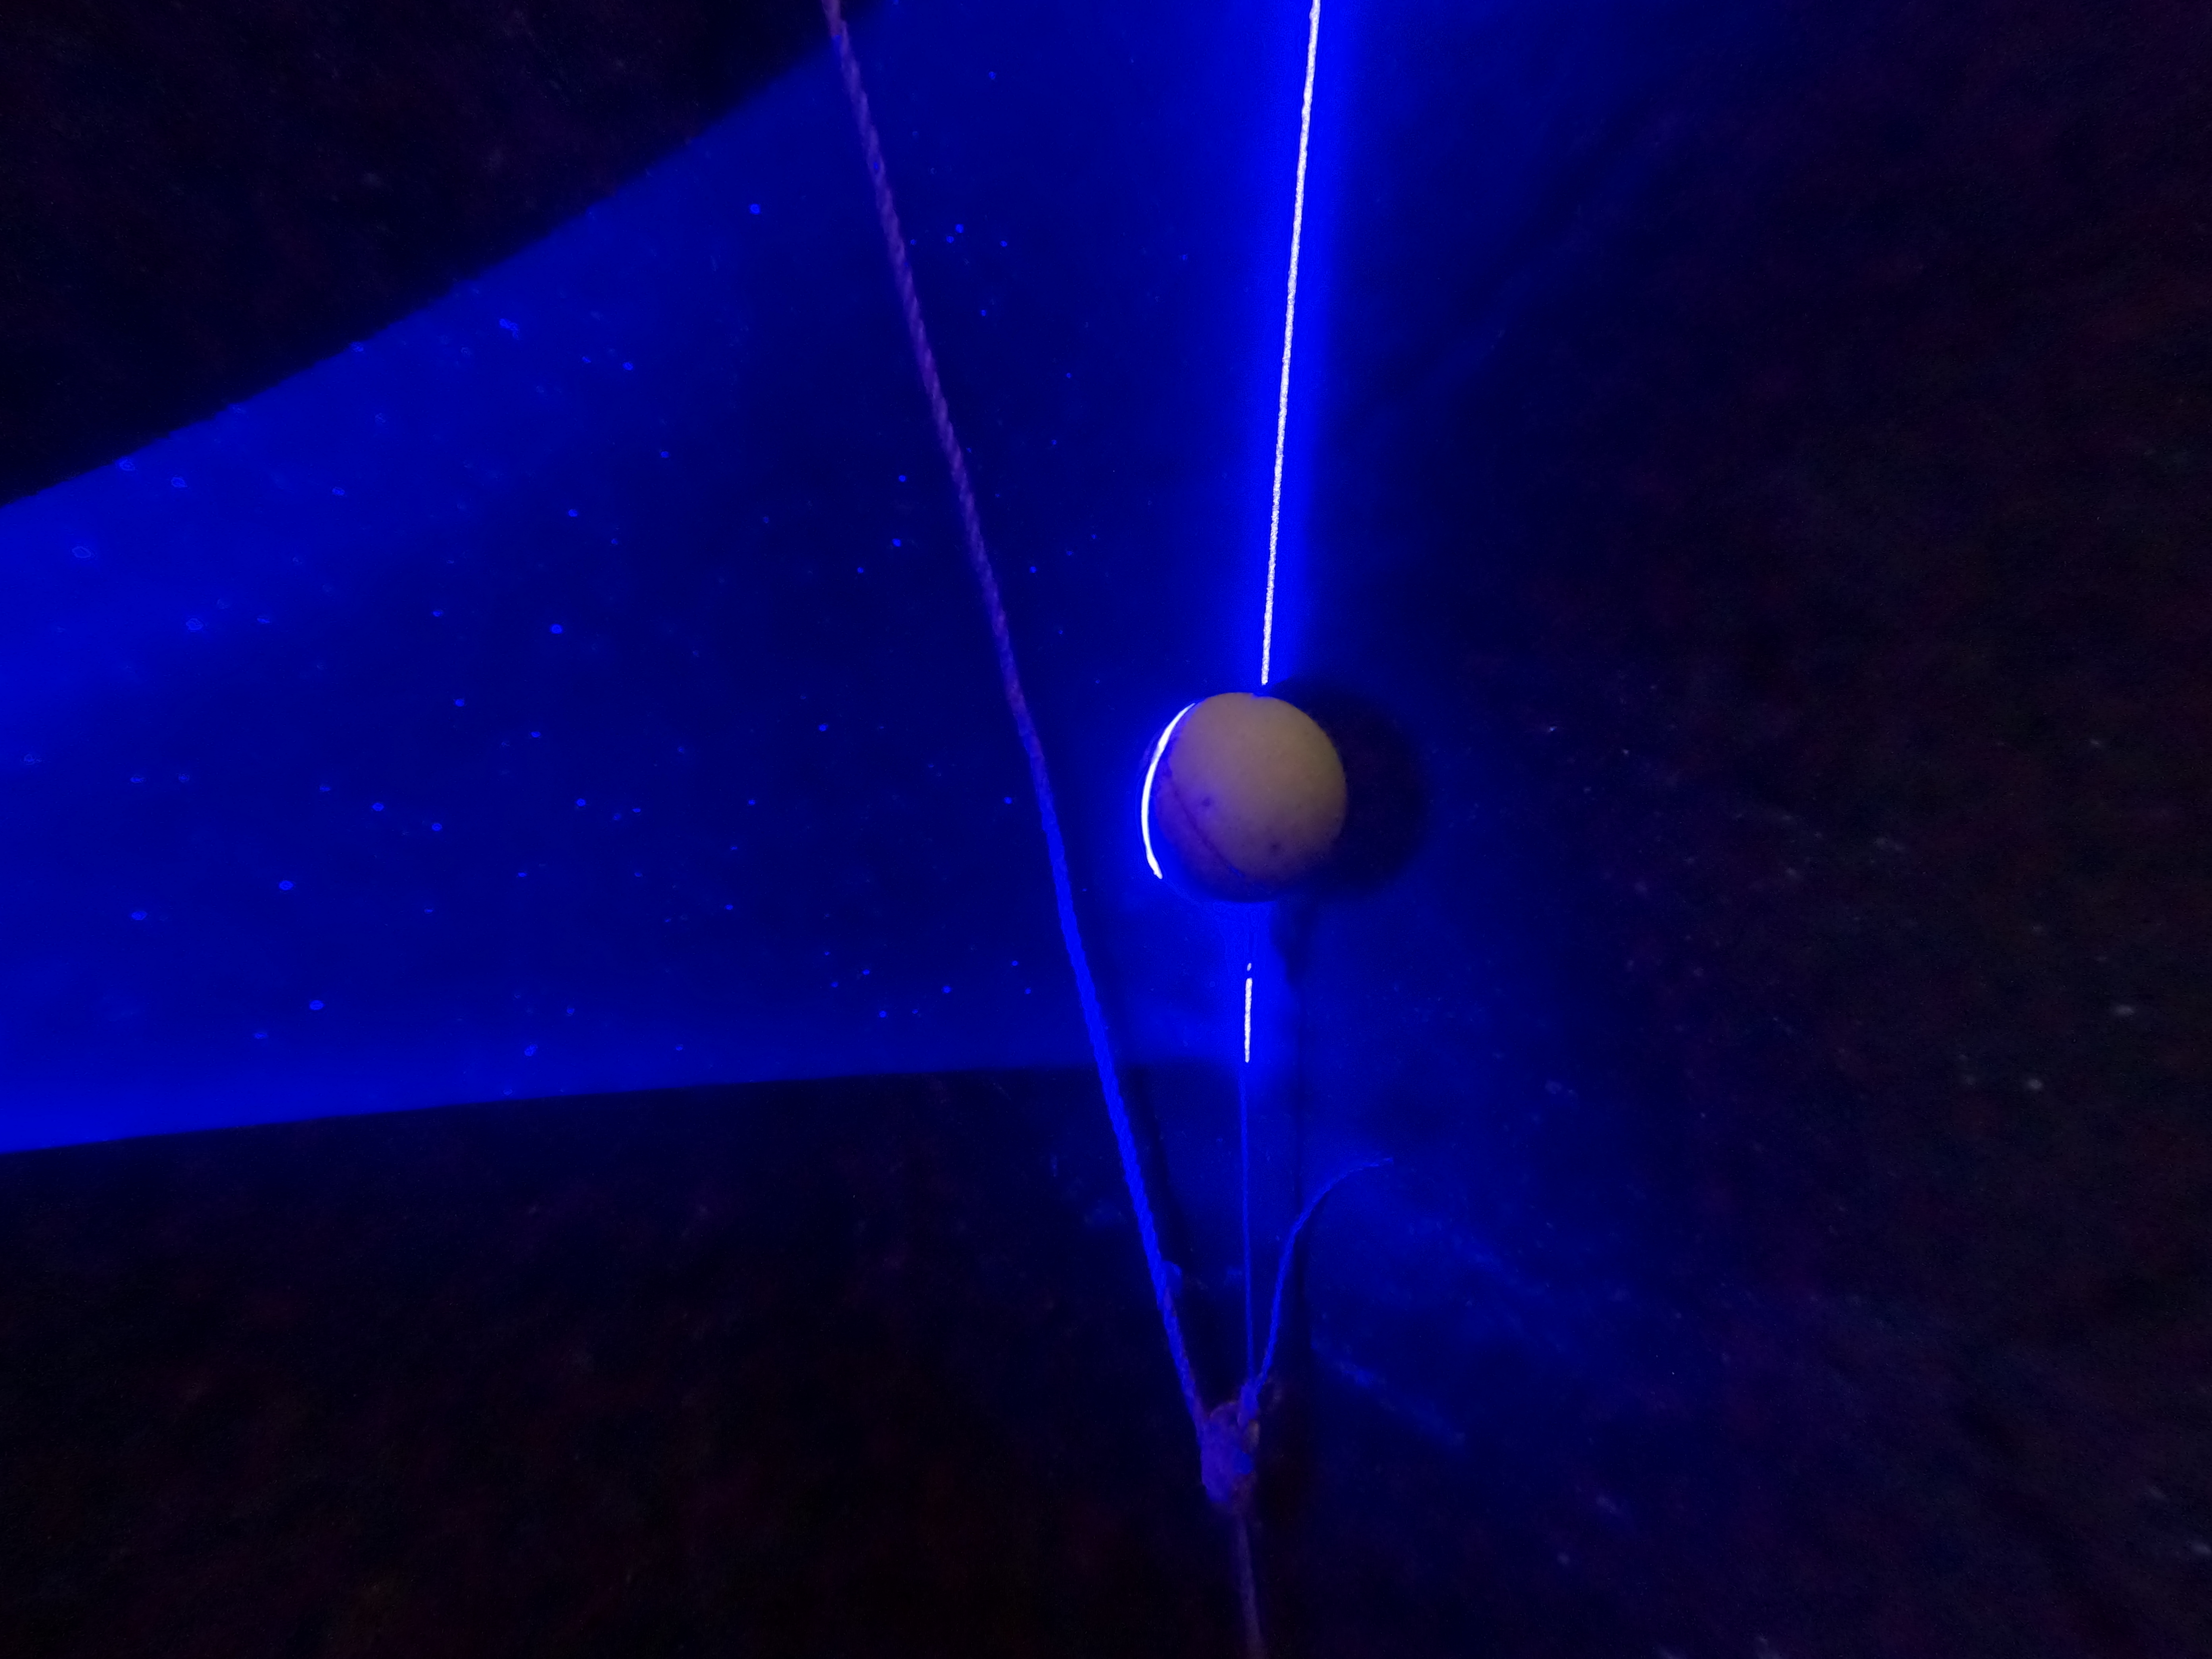

Supplement: Supplementary file 447 [file G0030747.pdf › 3/G0030747.pdf]

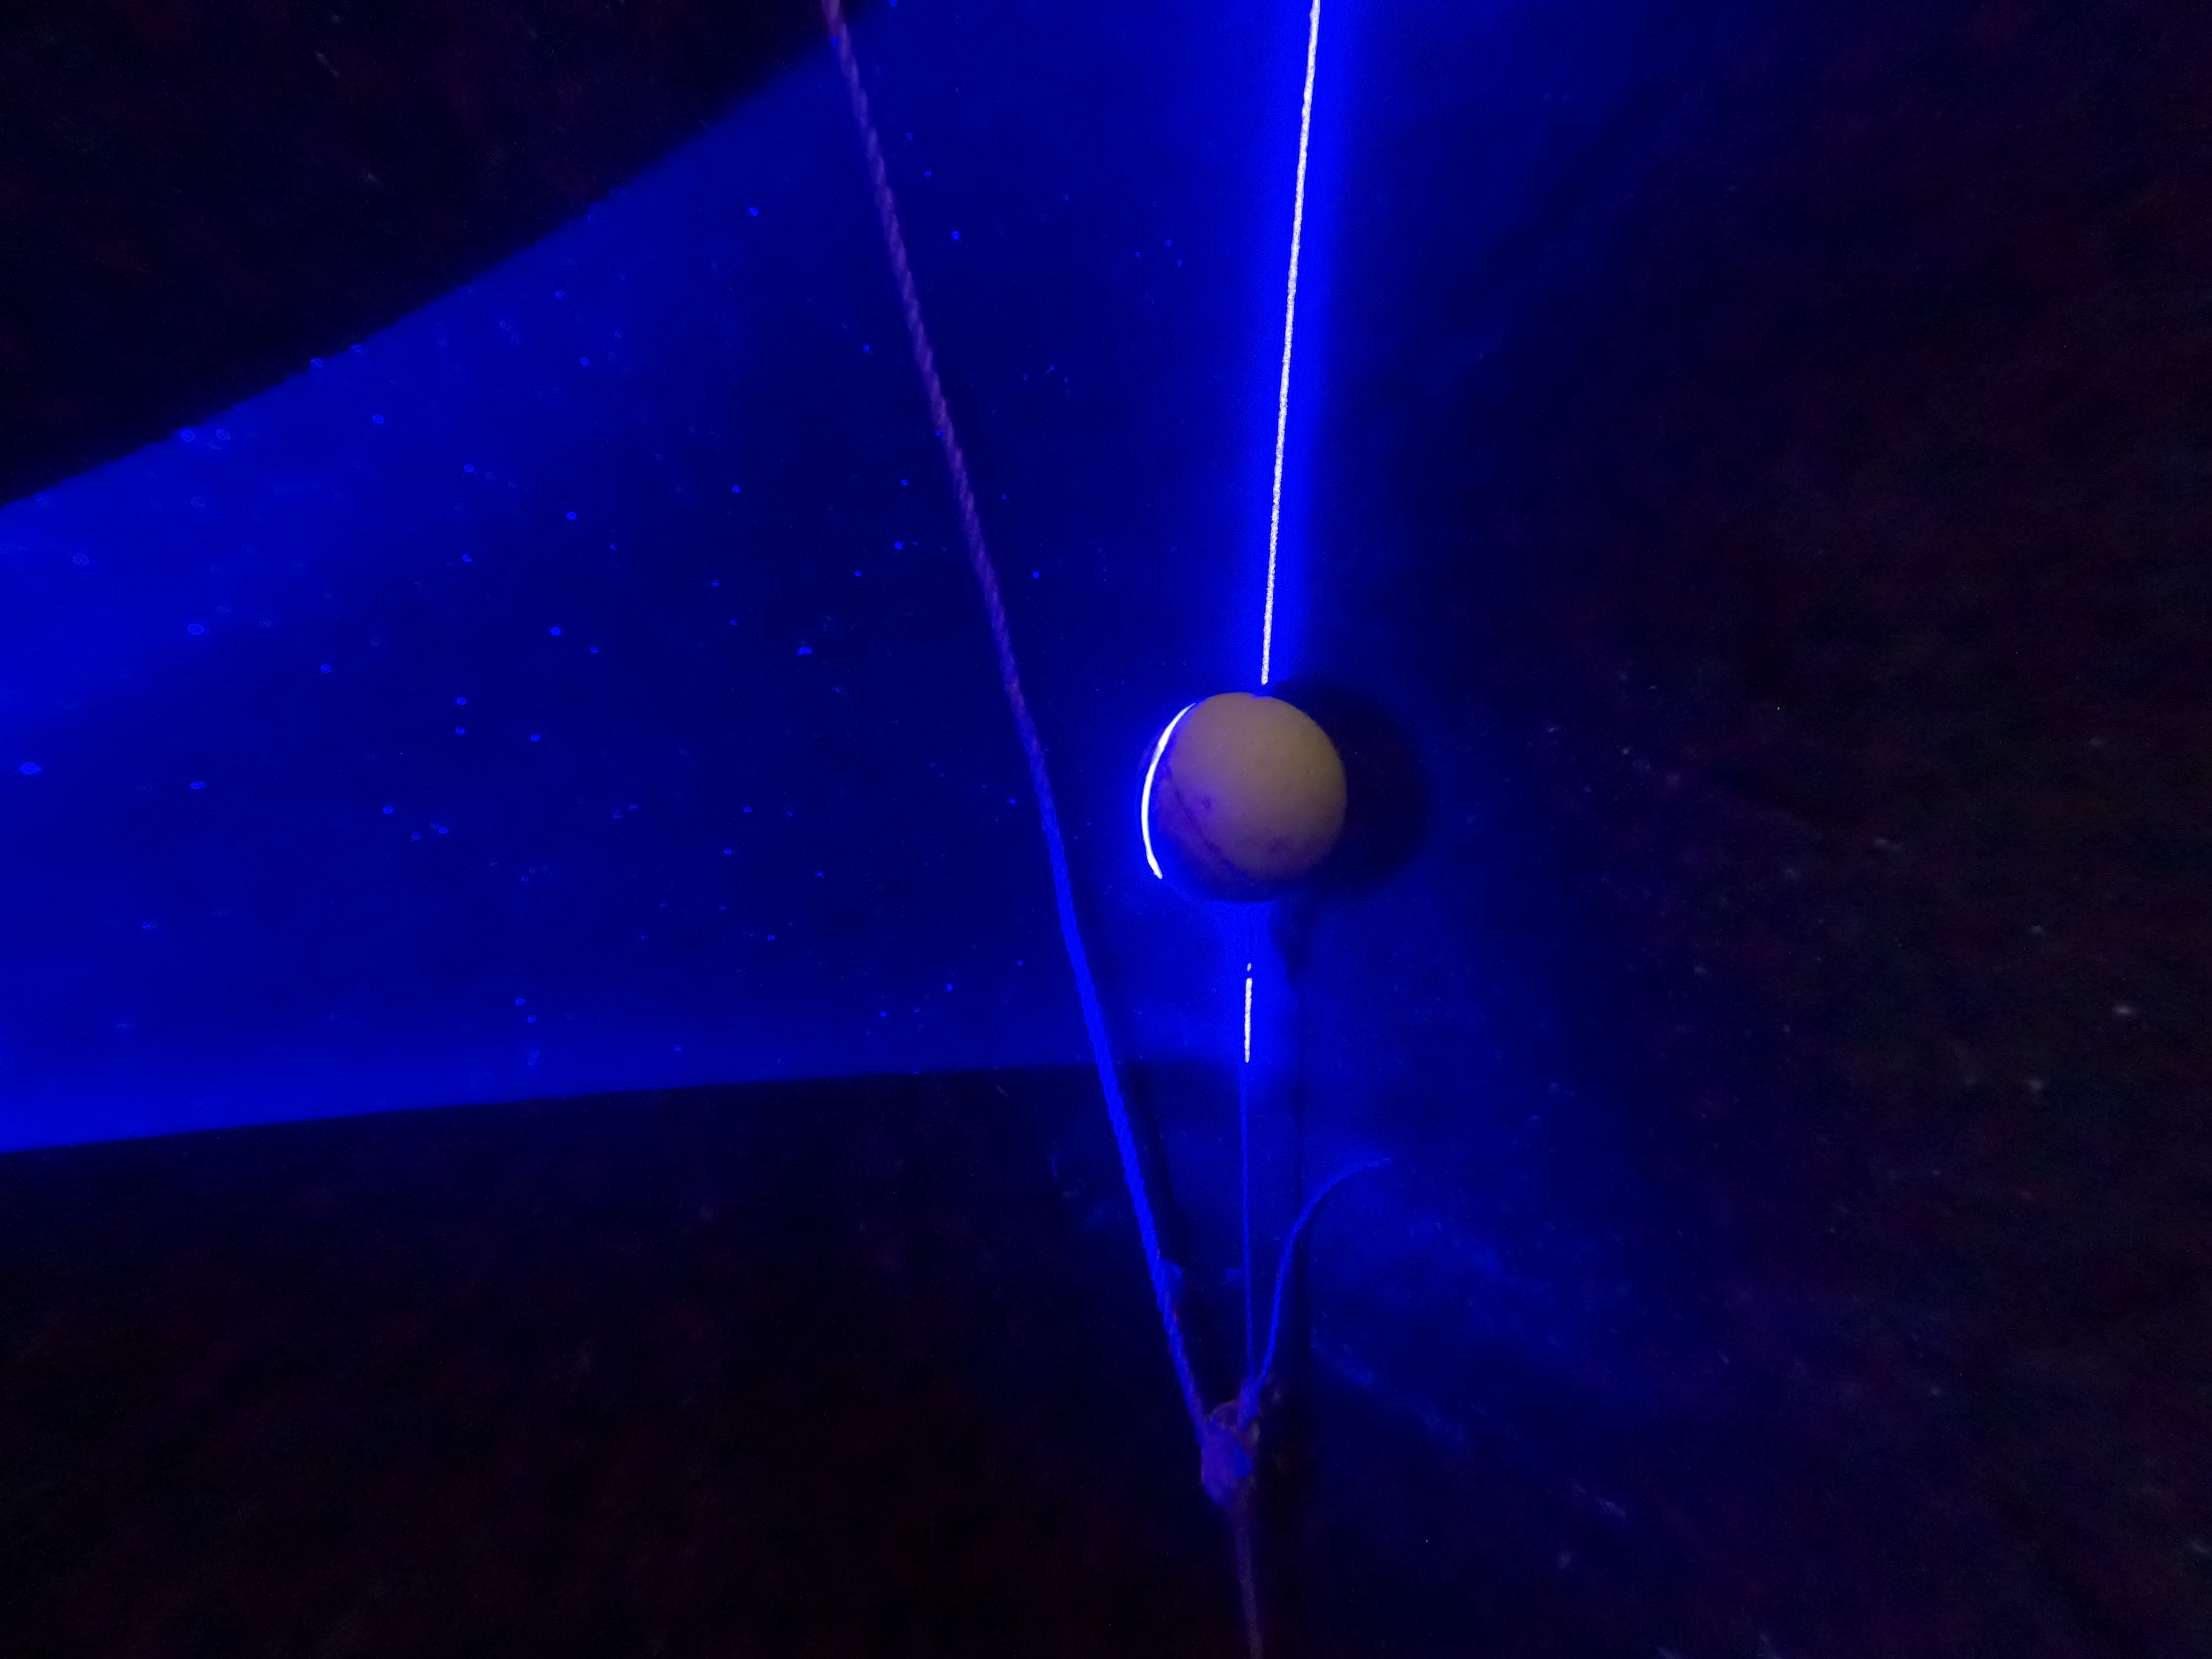

Supplement: Supplementary file 448 [file G0030748.pdf › 3/G0030748.pdf]

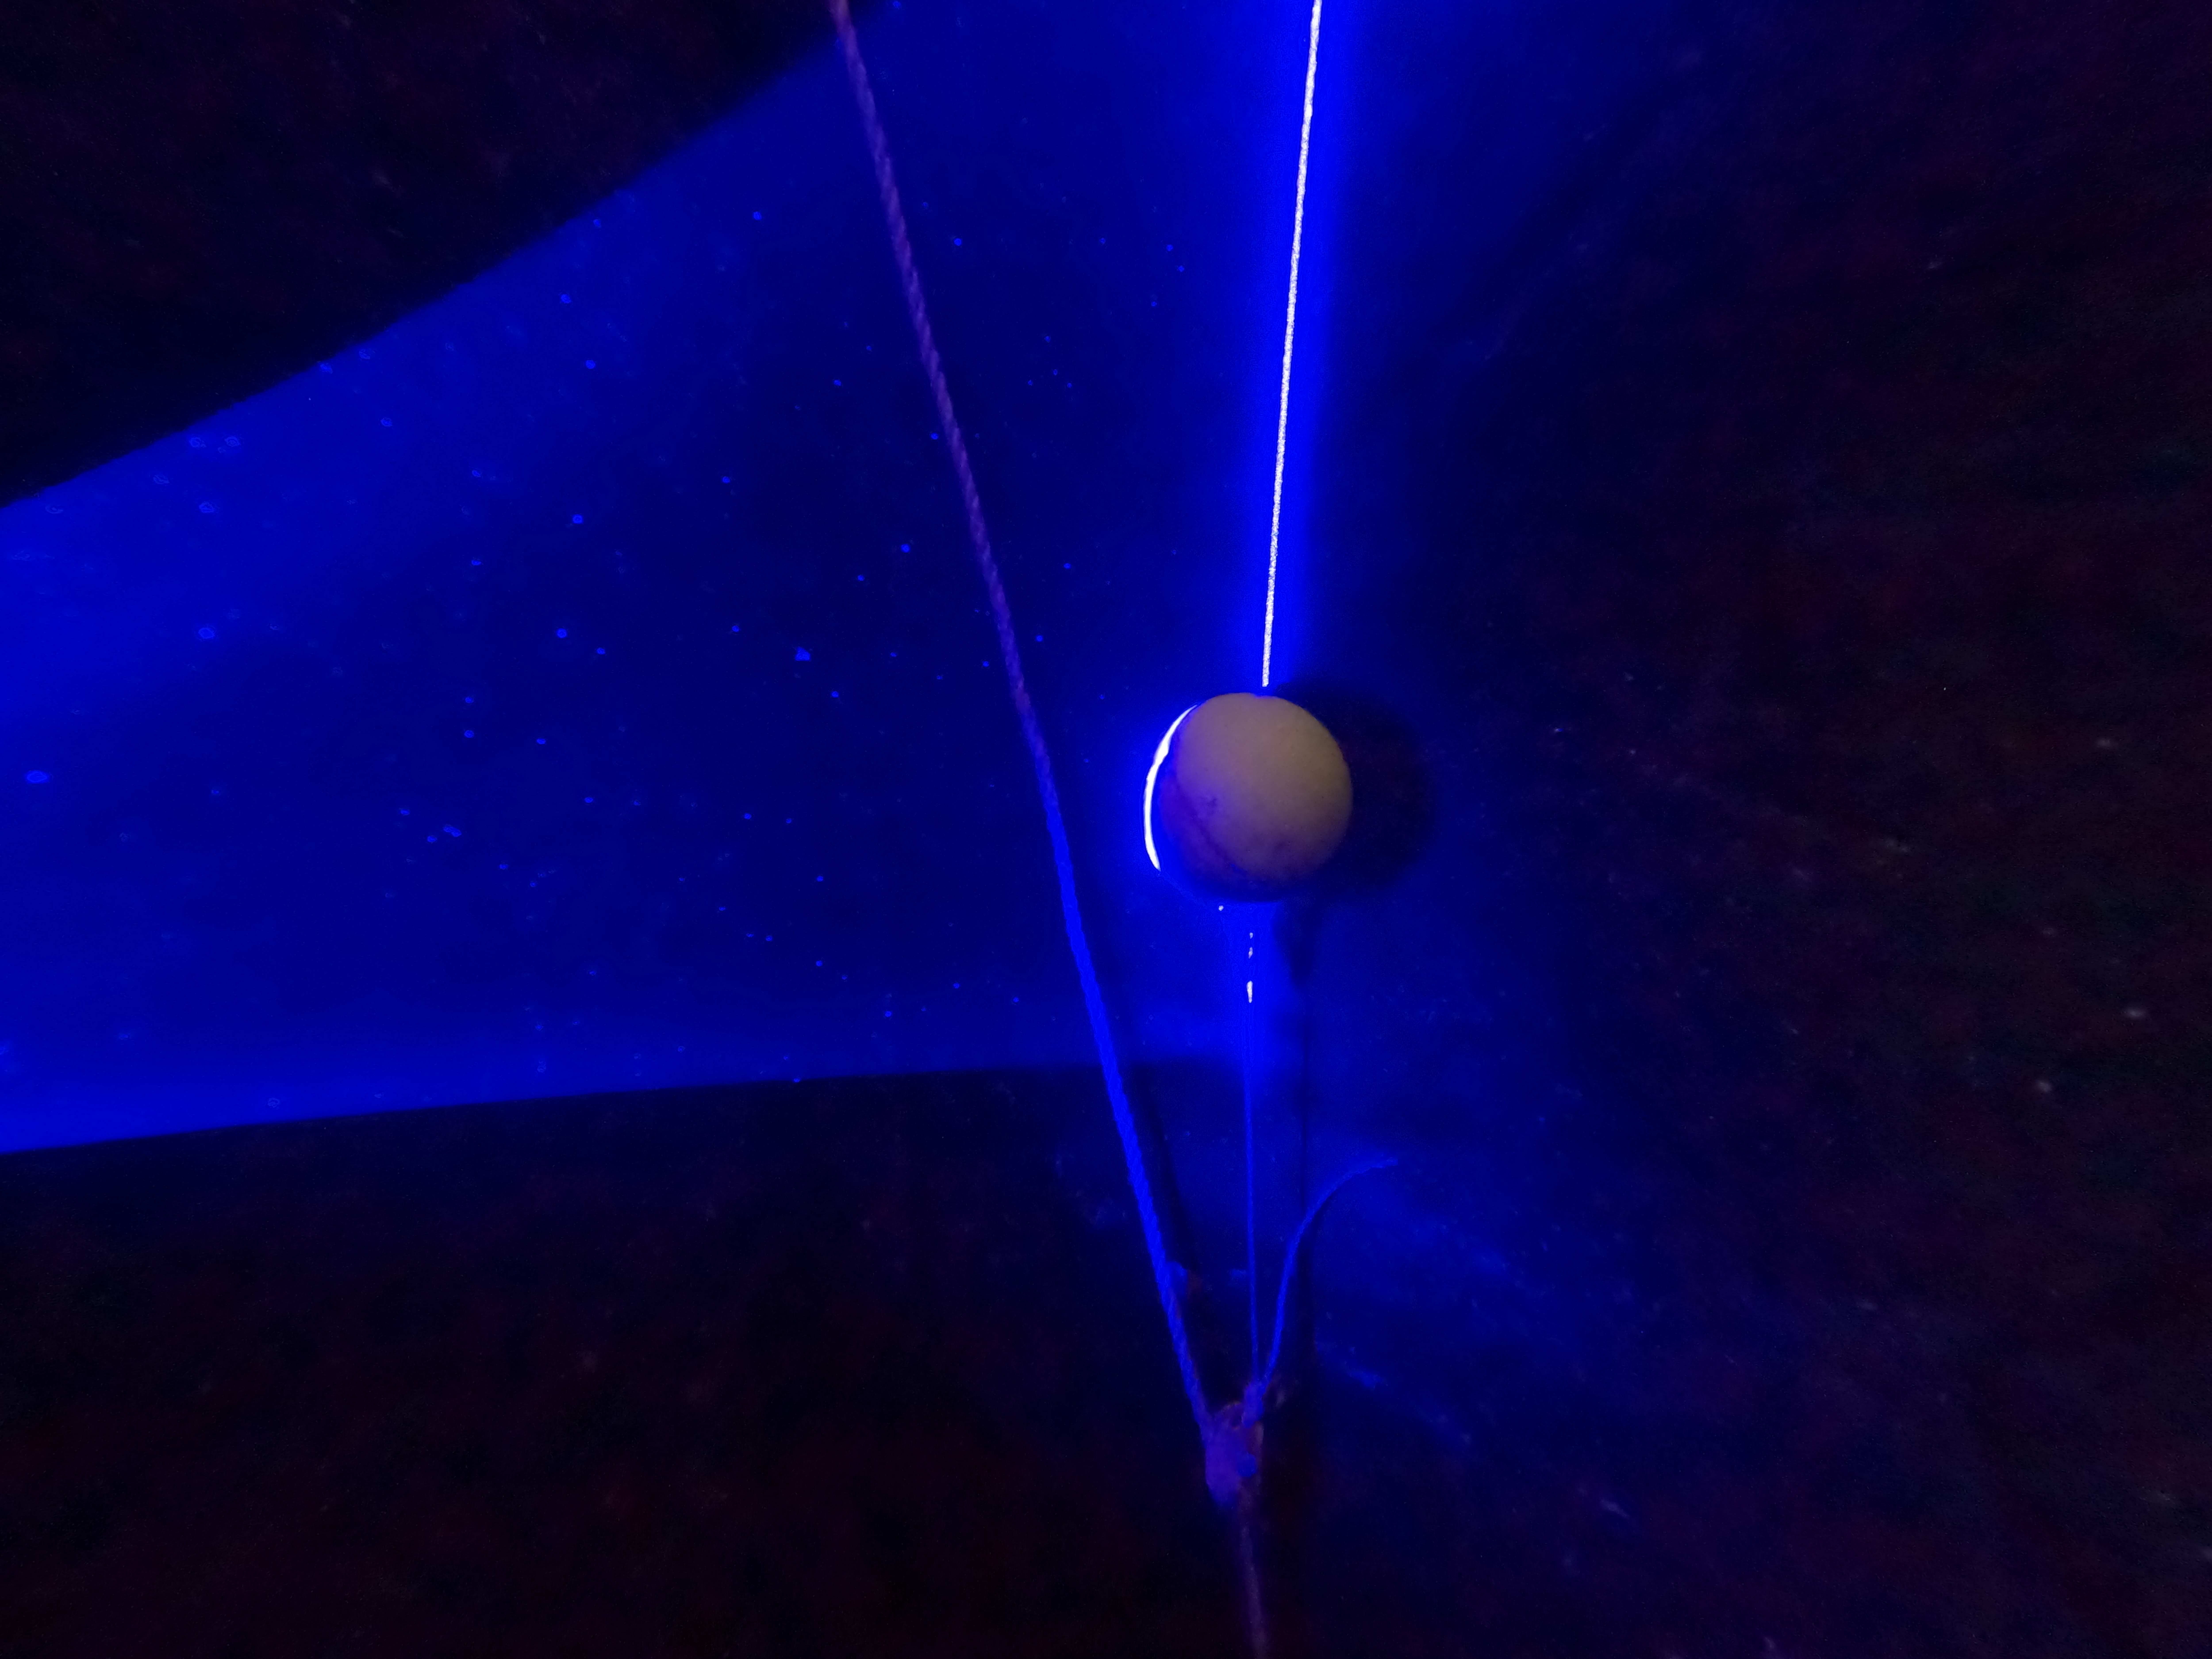

Supplement: Supplementary file 449 [file G0030749.pdf › 3/G0030749.pdf]

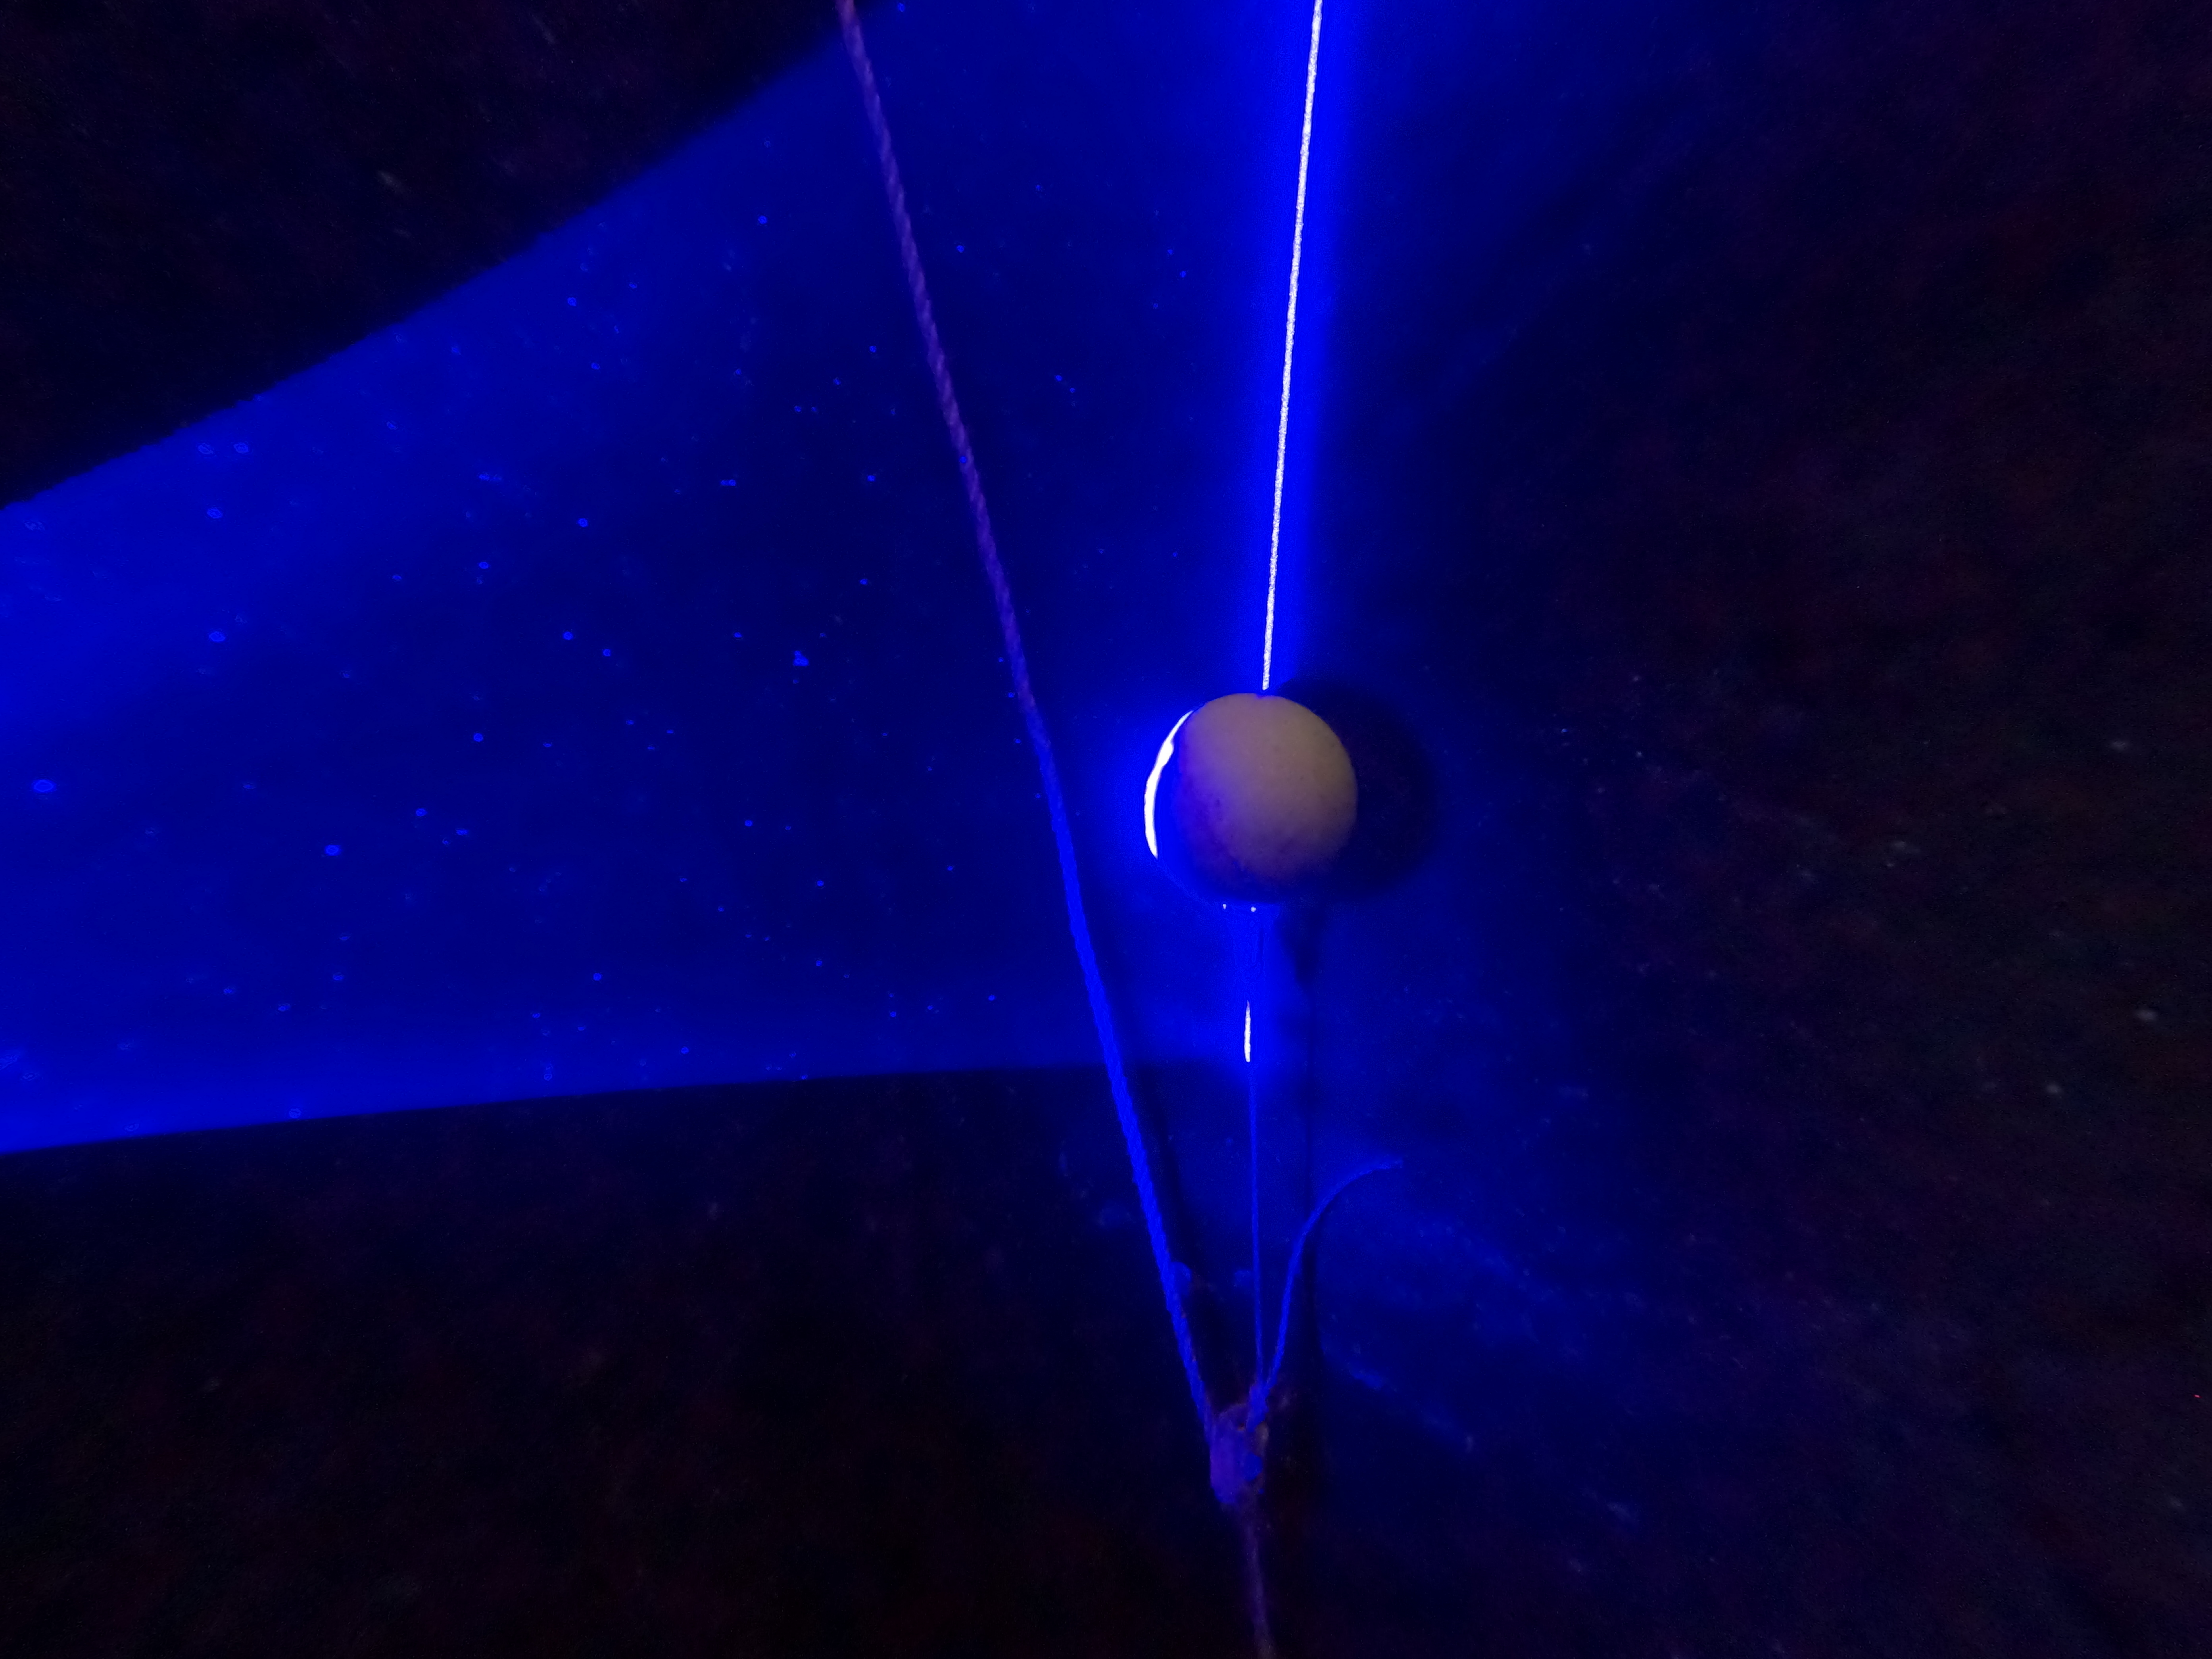

Supplement: Supplementary file 450 [file G0030750.pdf › 3/G0030750.pdf]

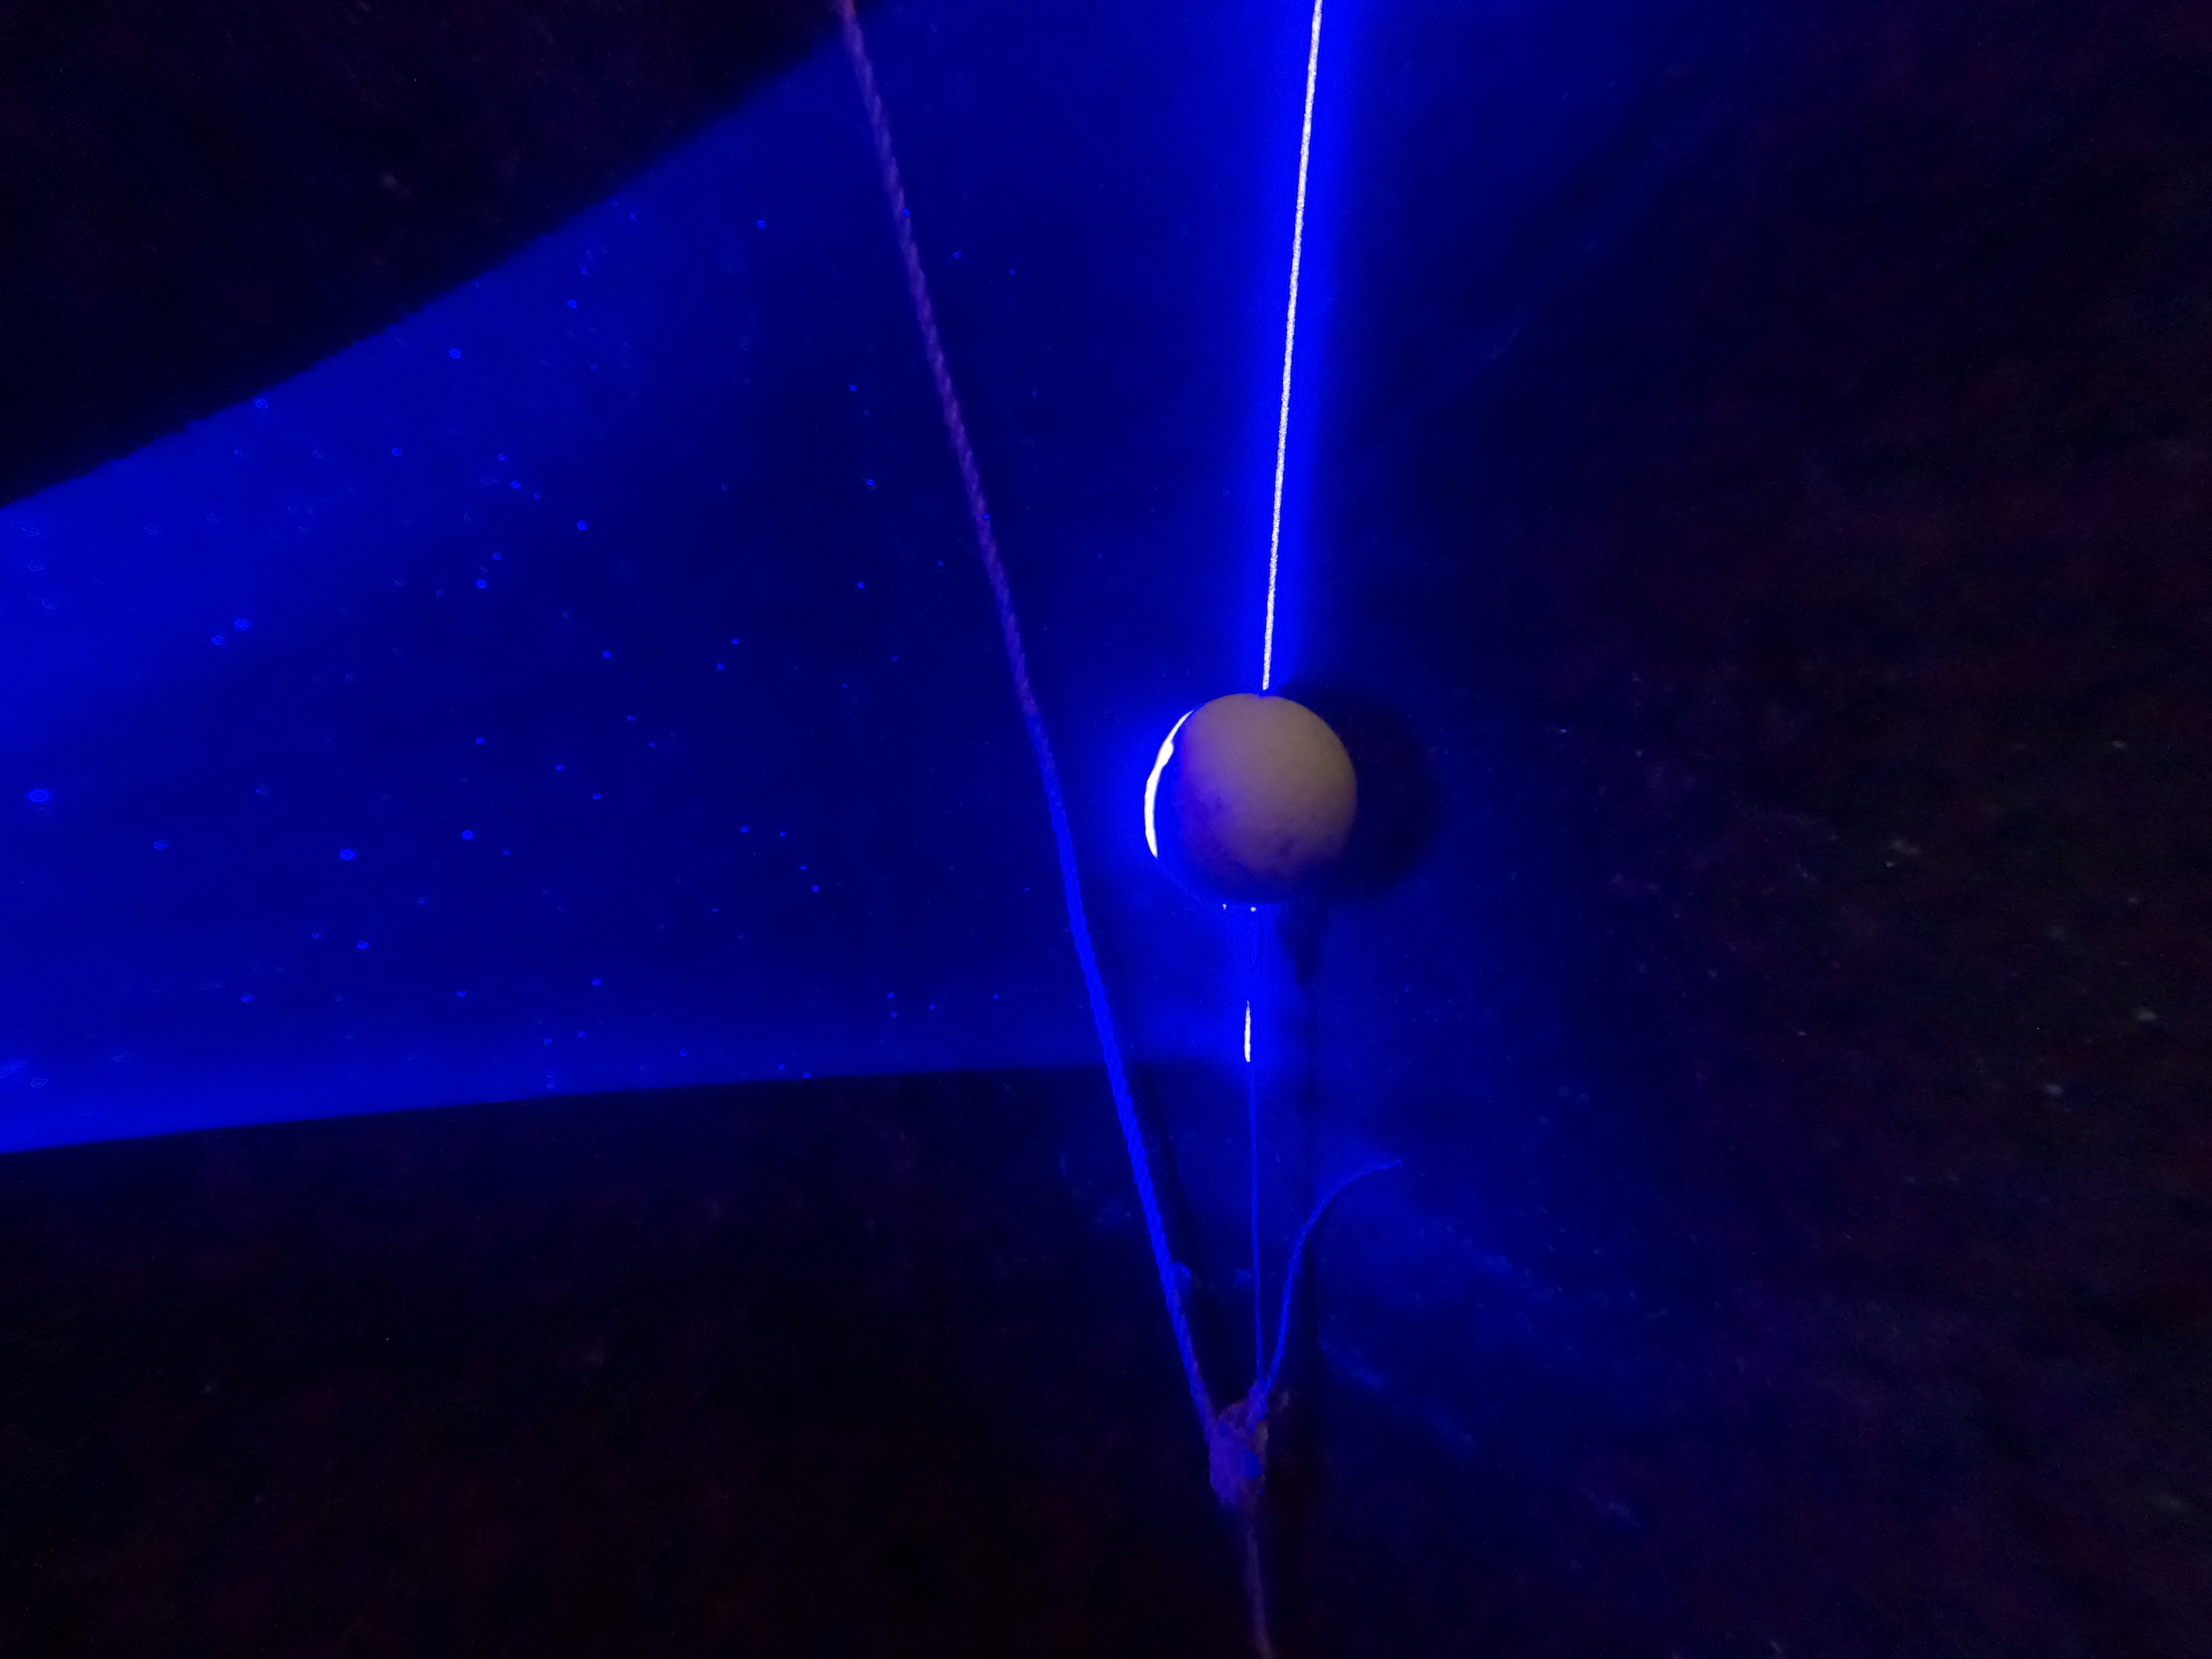

Supplement: Supplementary file 451 [file G0030751.pdf › 3/G0030751.pdf]

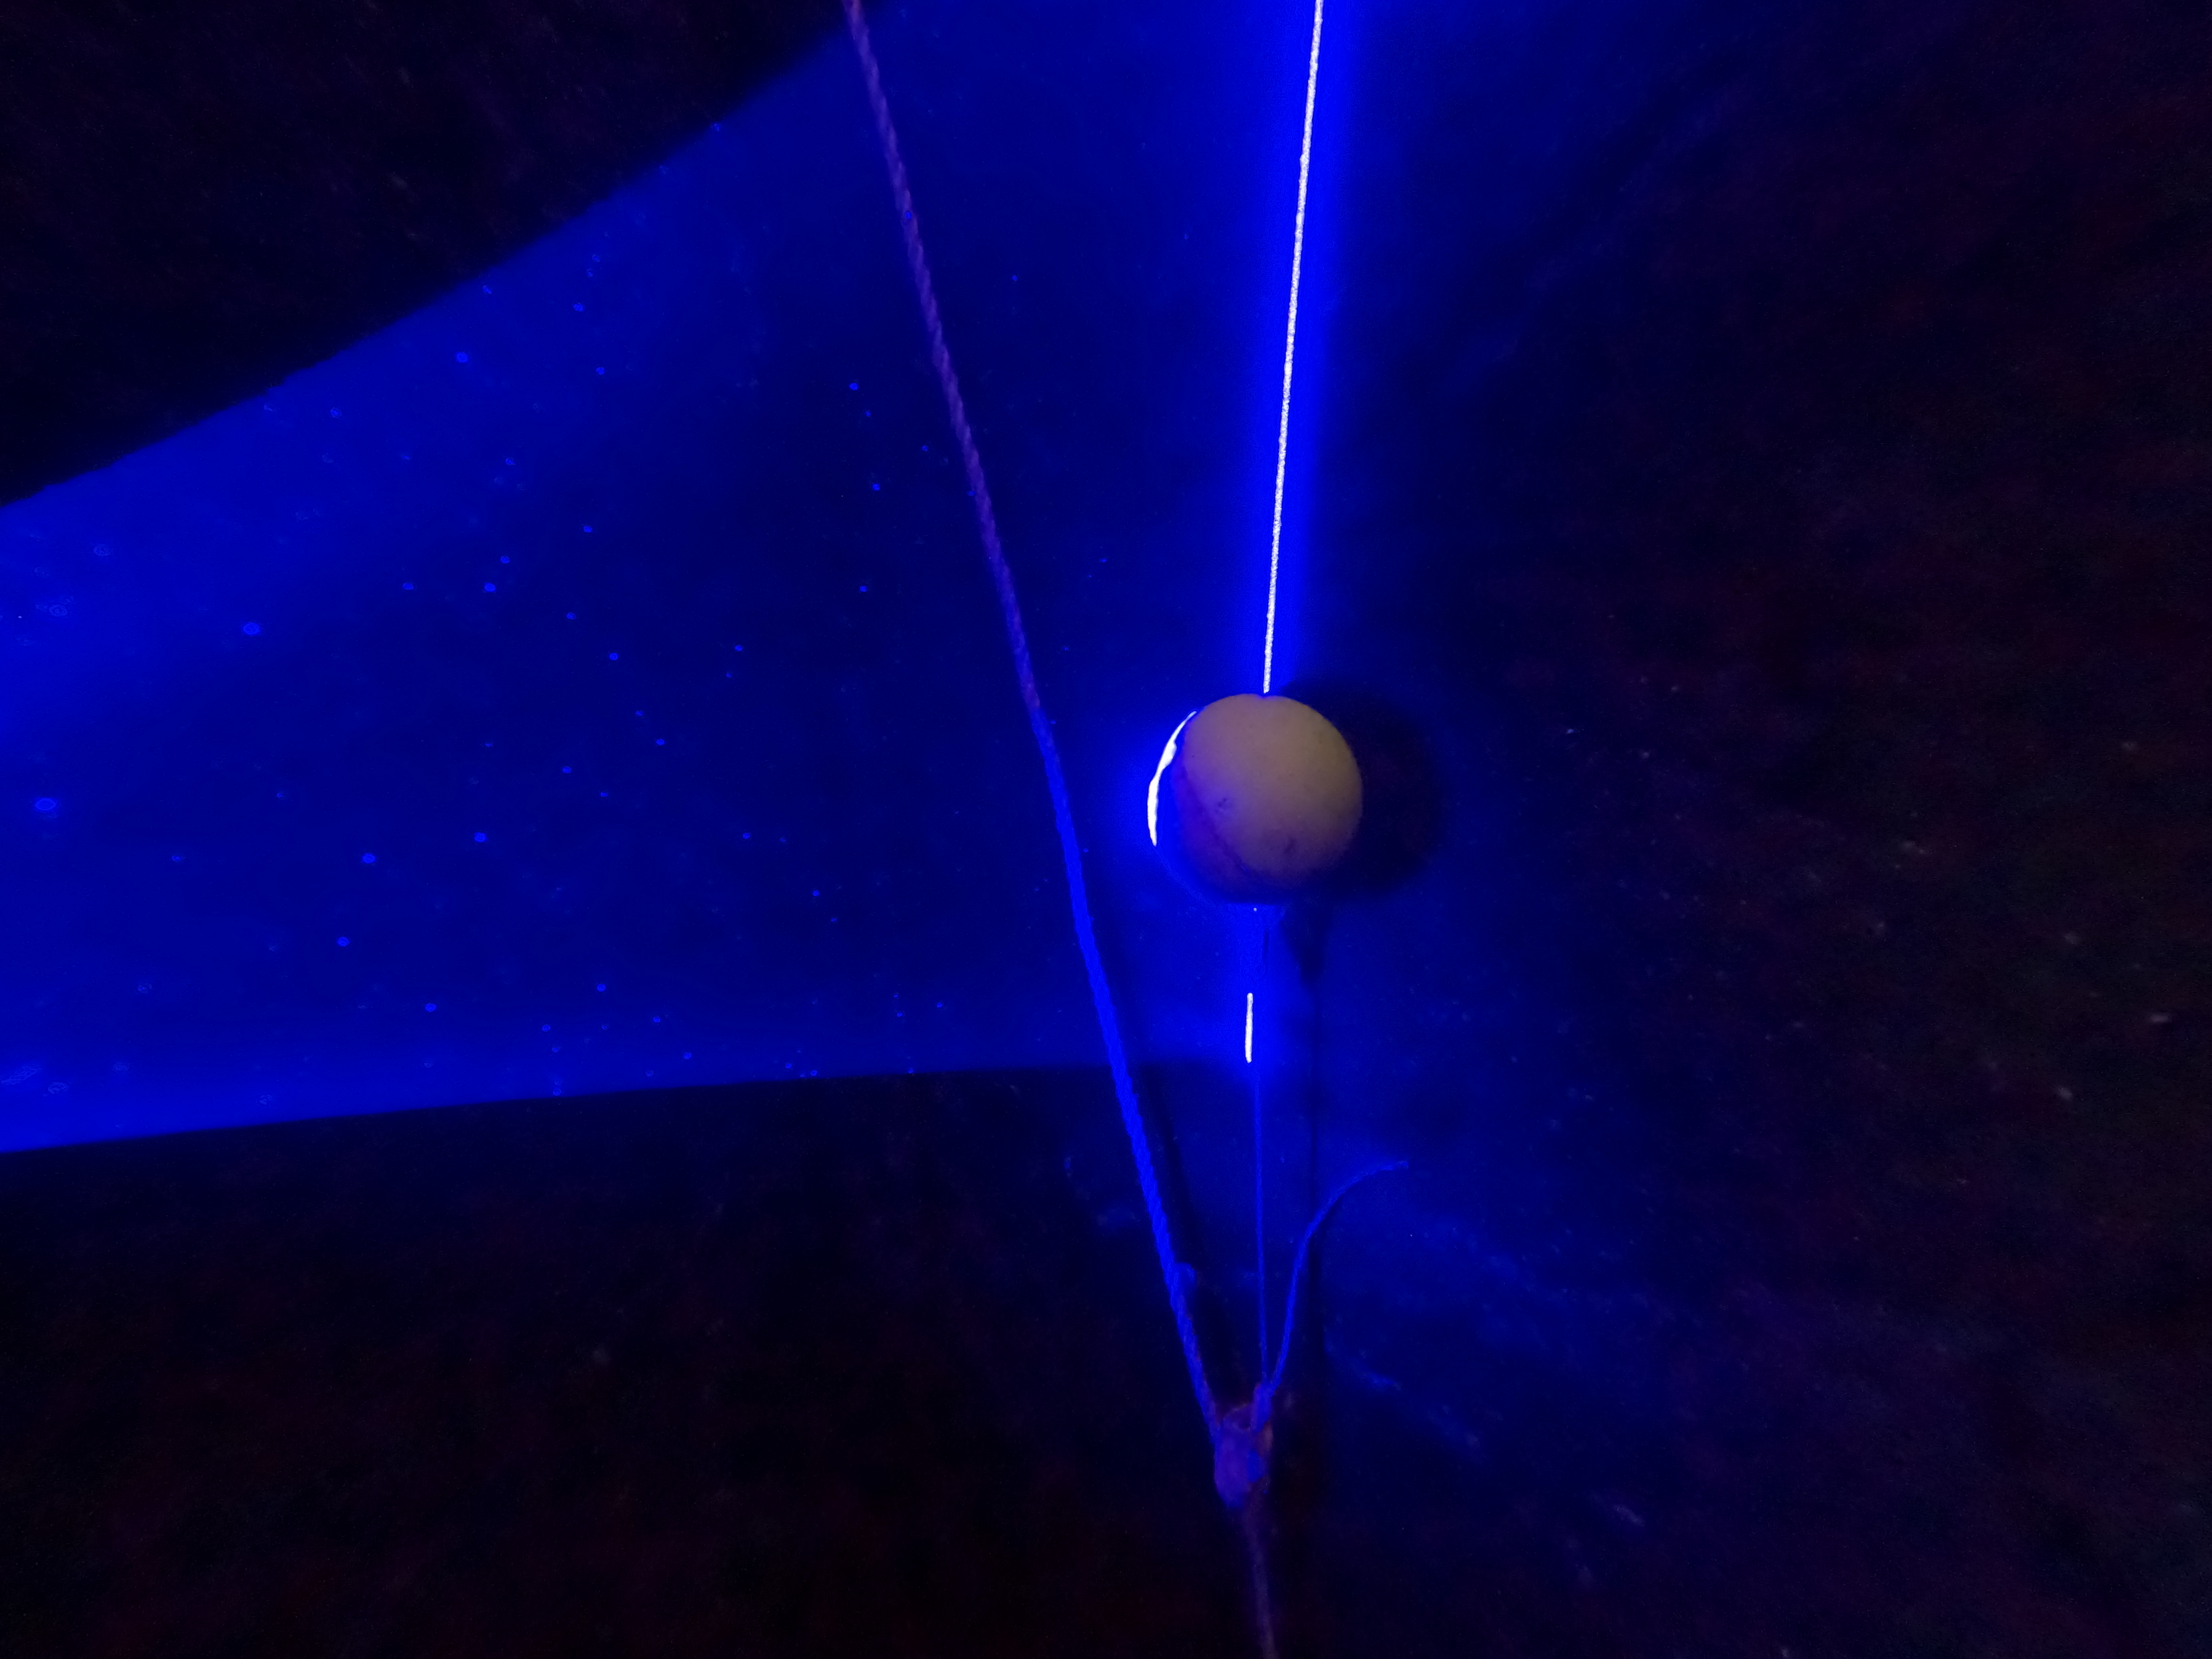

Supplement: Supplementary file 452 [file G0030752.pdf › 3/G0030752.pdf]

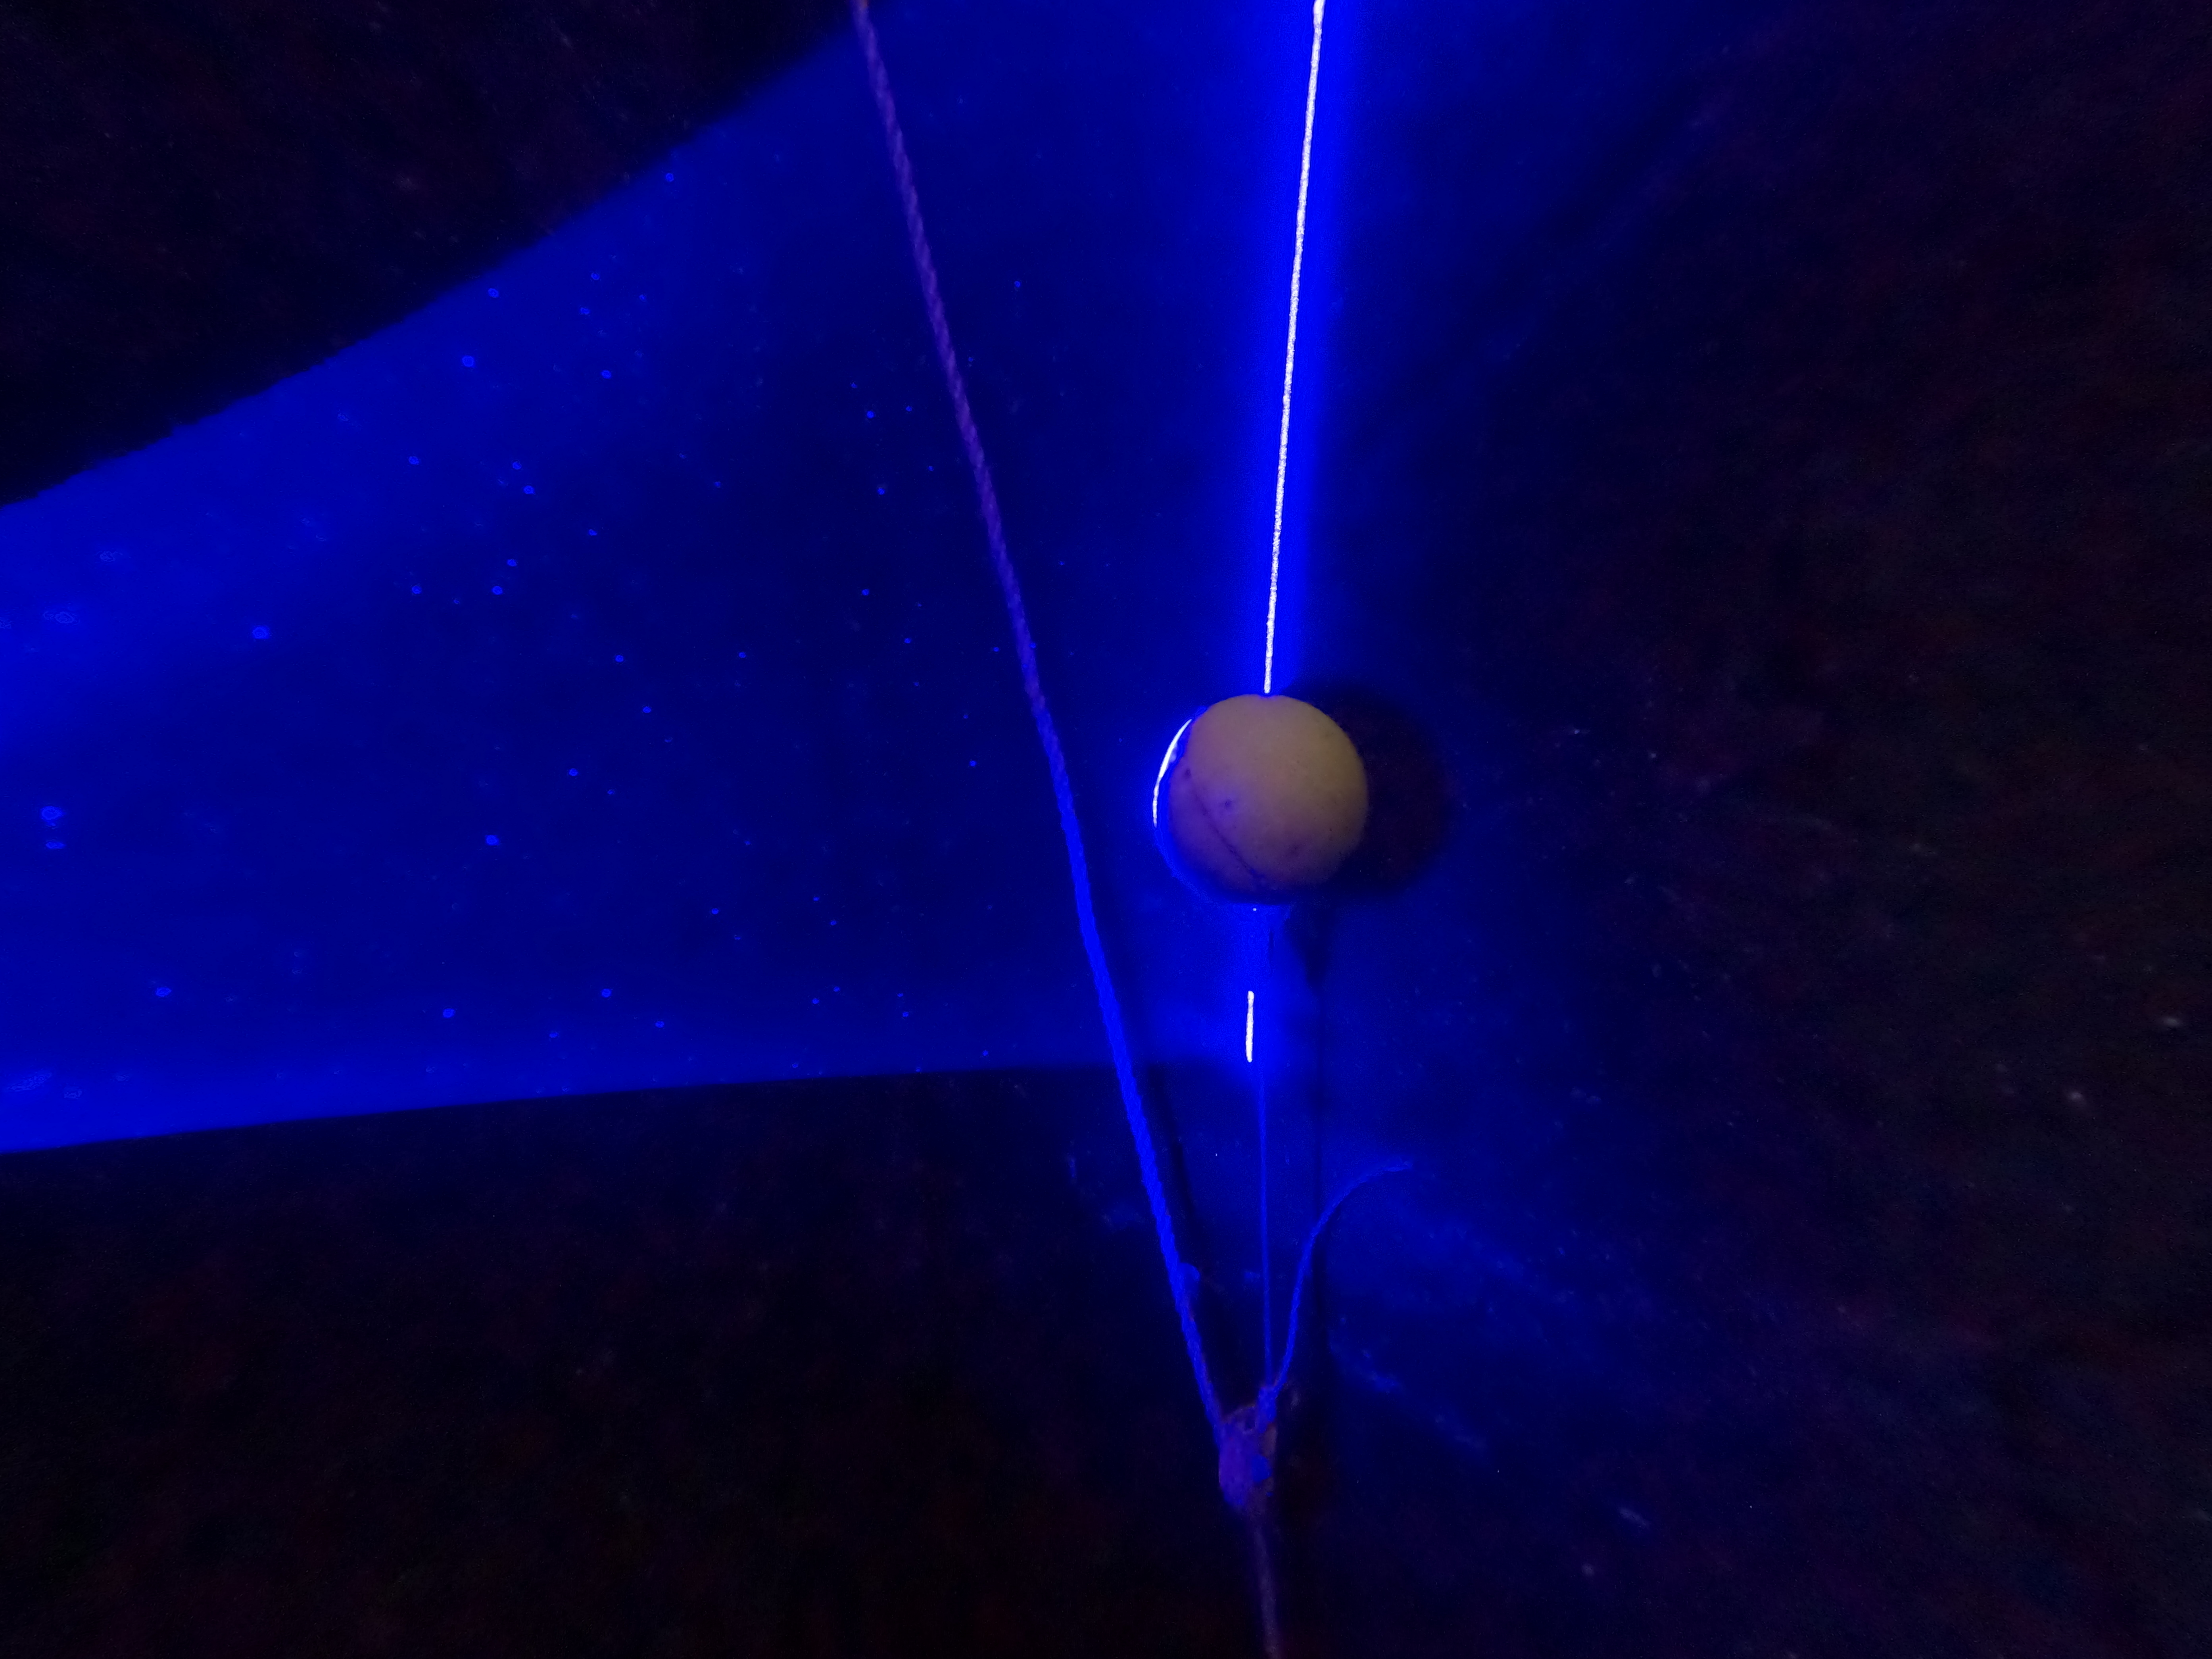

Supplement: Supplementary file 453 [file G0030753.pdf › 3/G0030753.pdf]

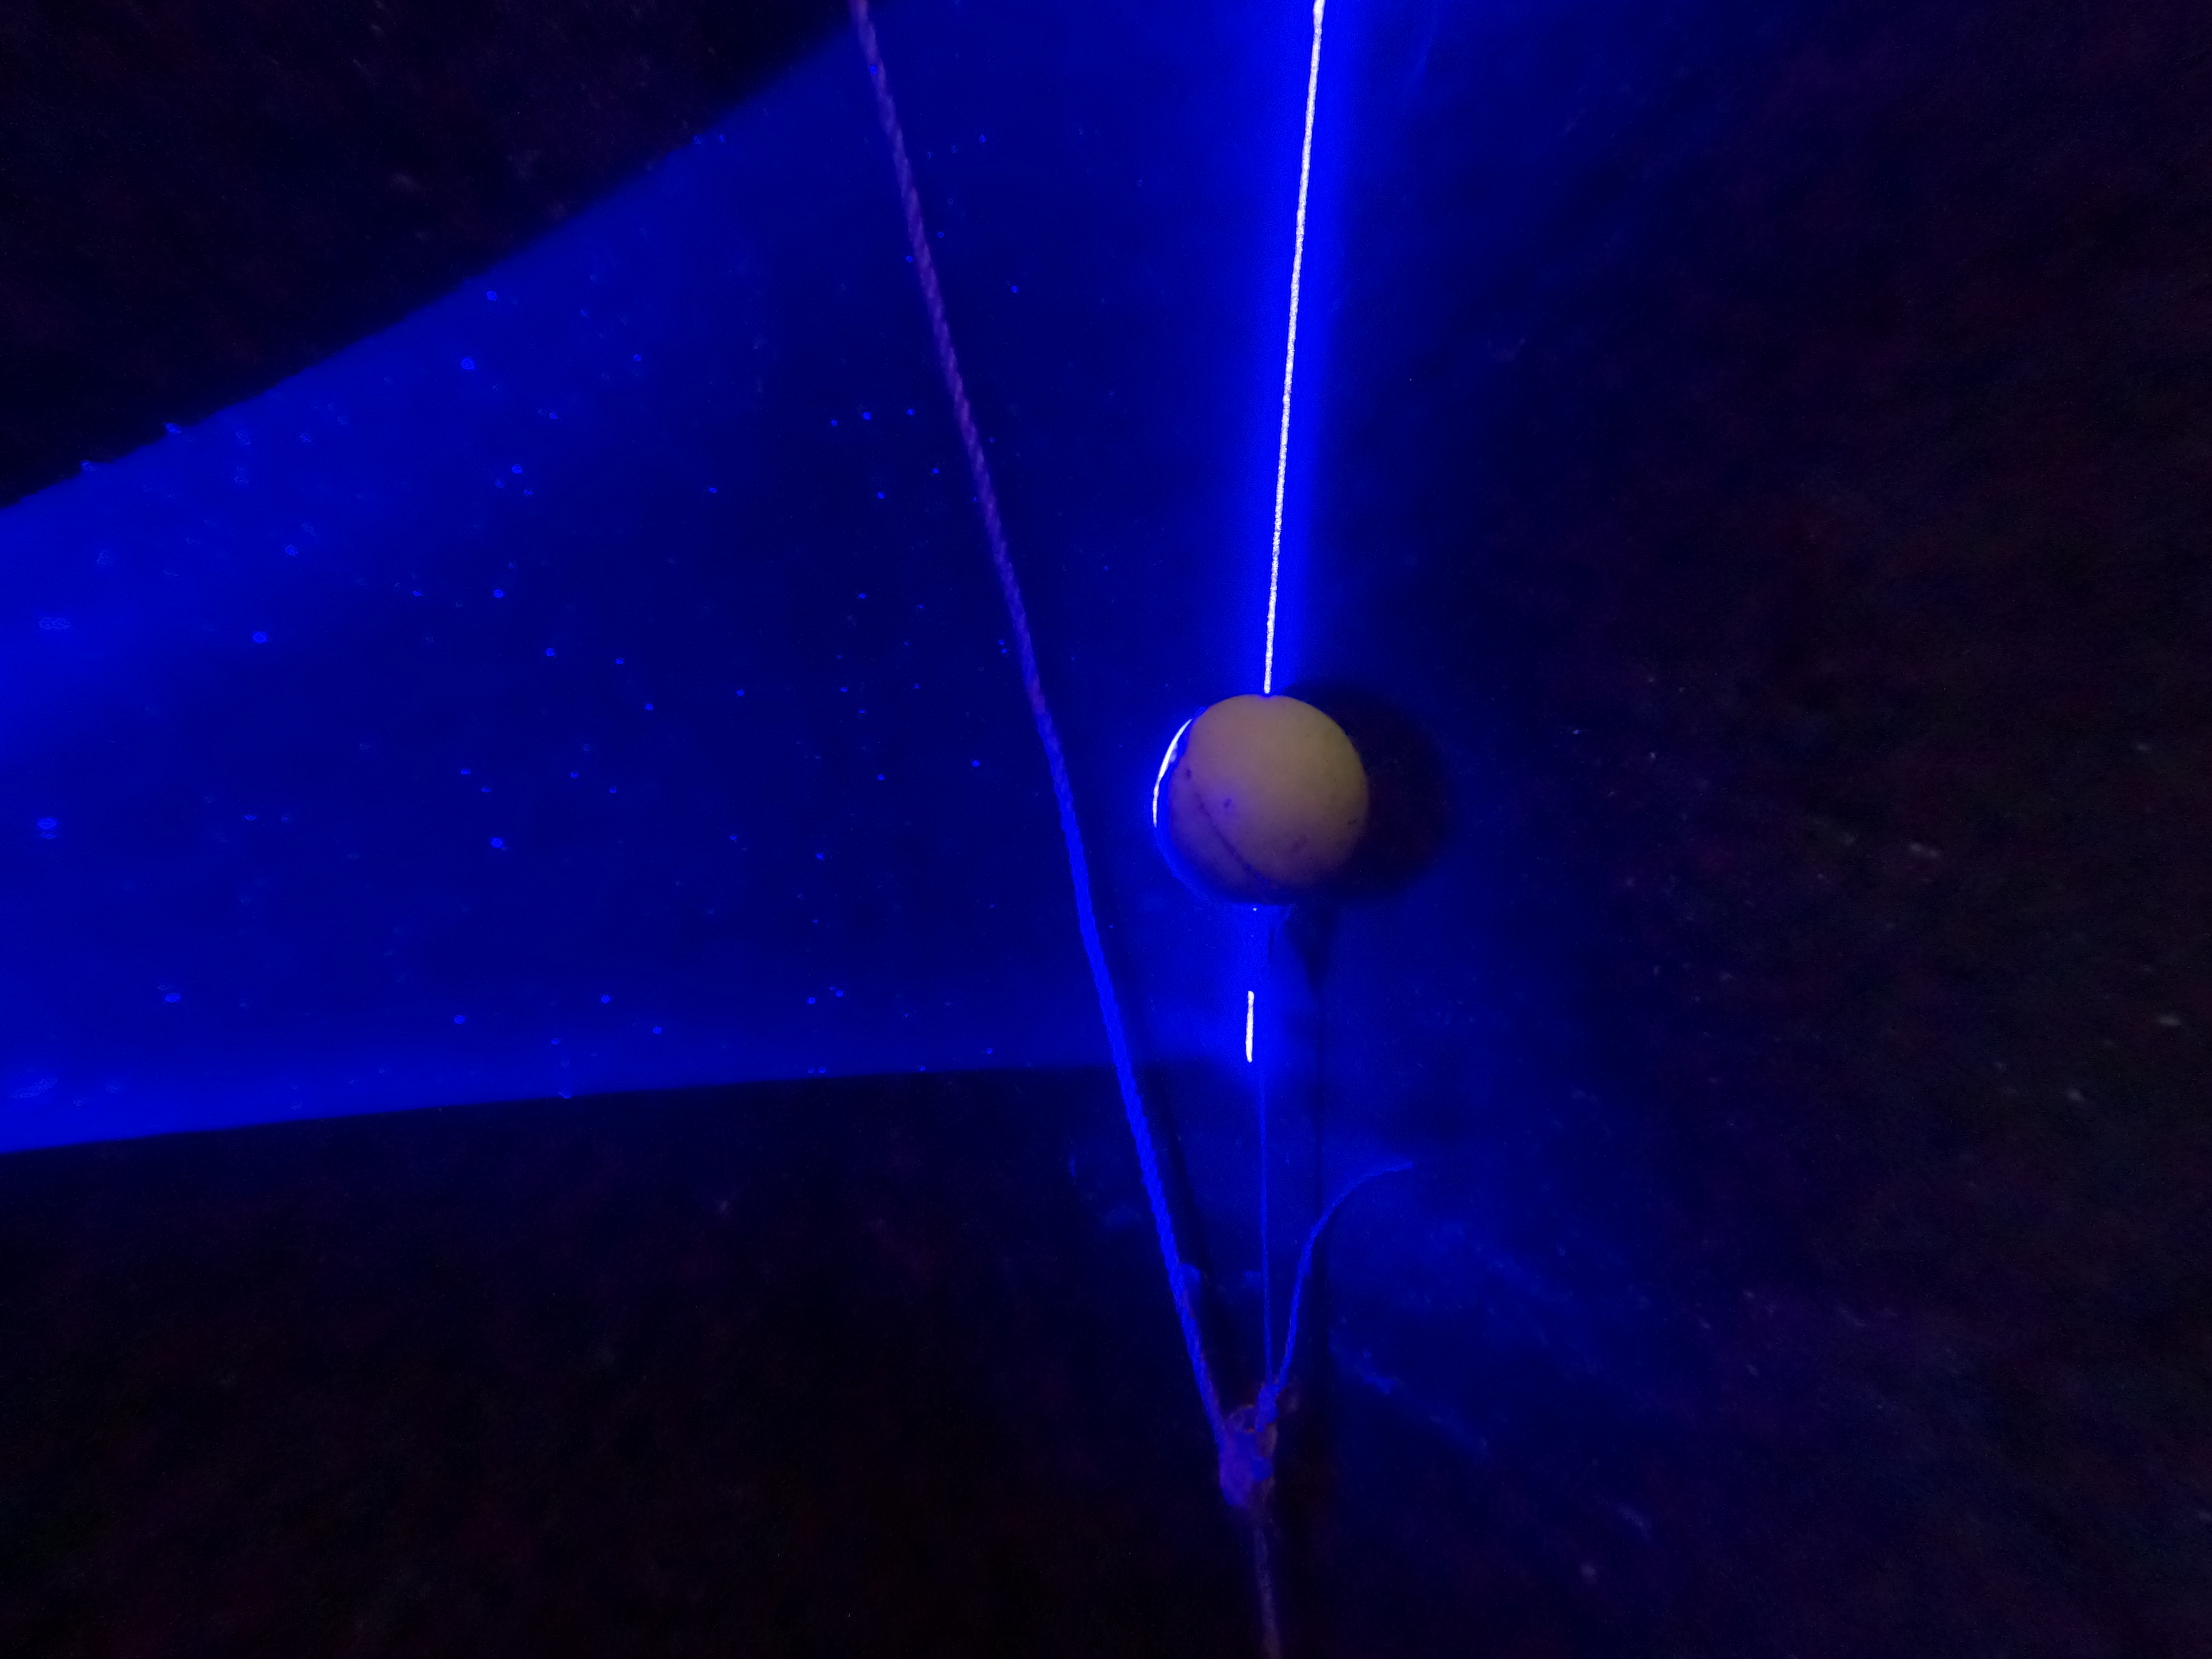

Supplement: Supplementary file 454 [file G0030754.pdf › 3/G0030754.pdf]

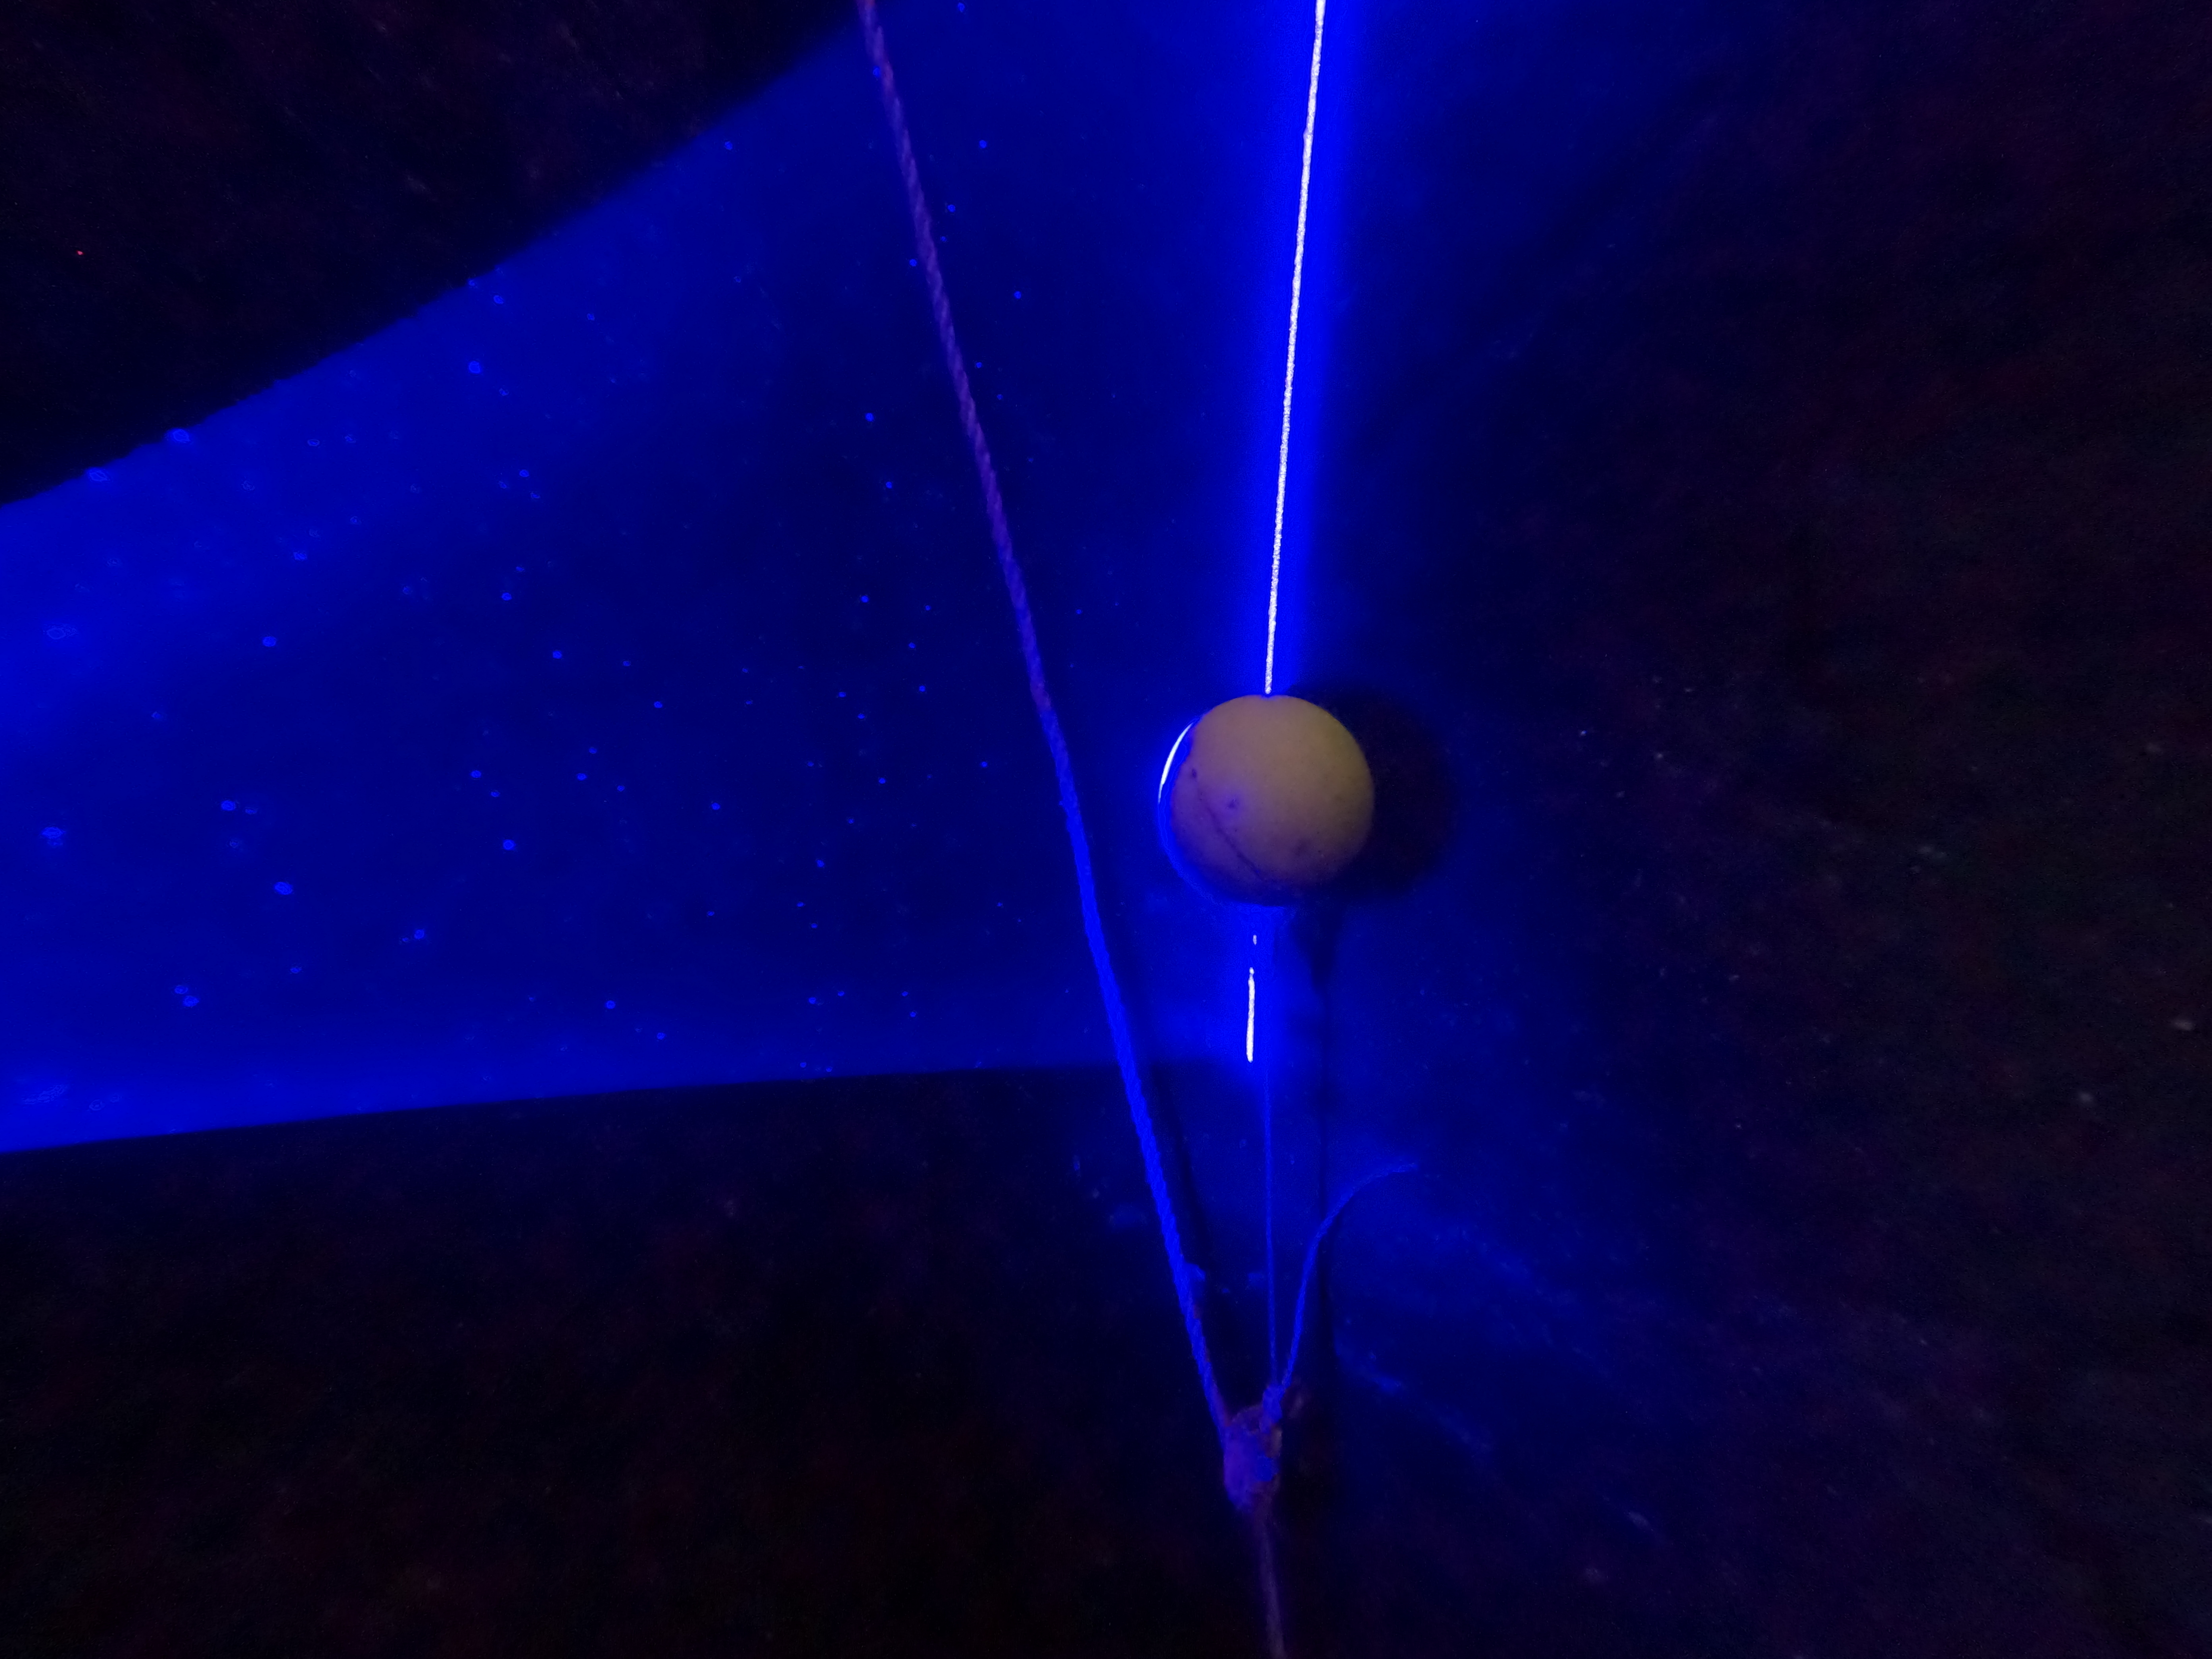

Supplement: Supplementary file 455 [file G0030755.pdf › 3/G0030755.pdf]

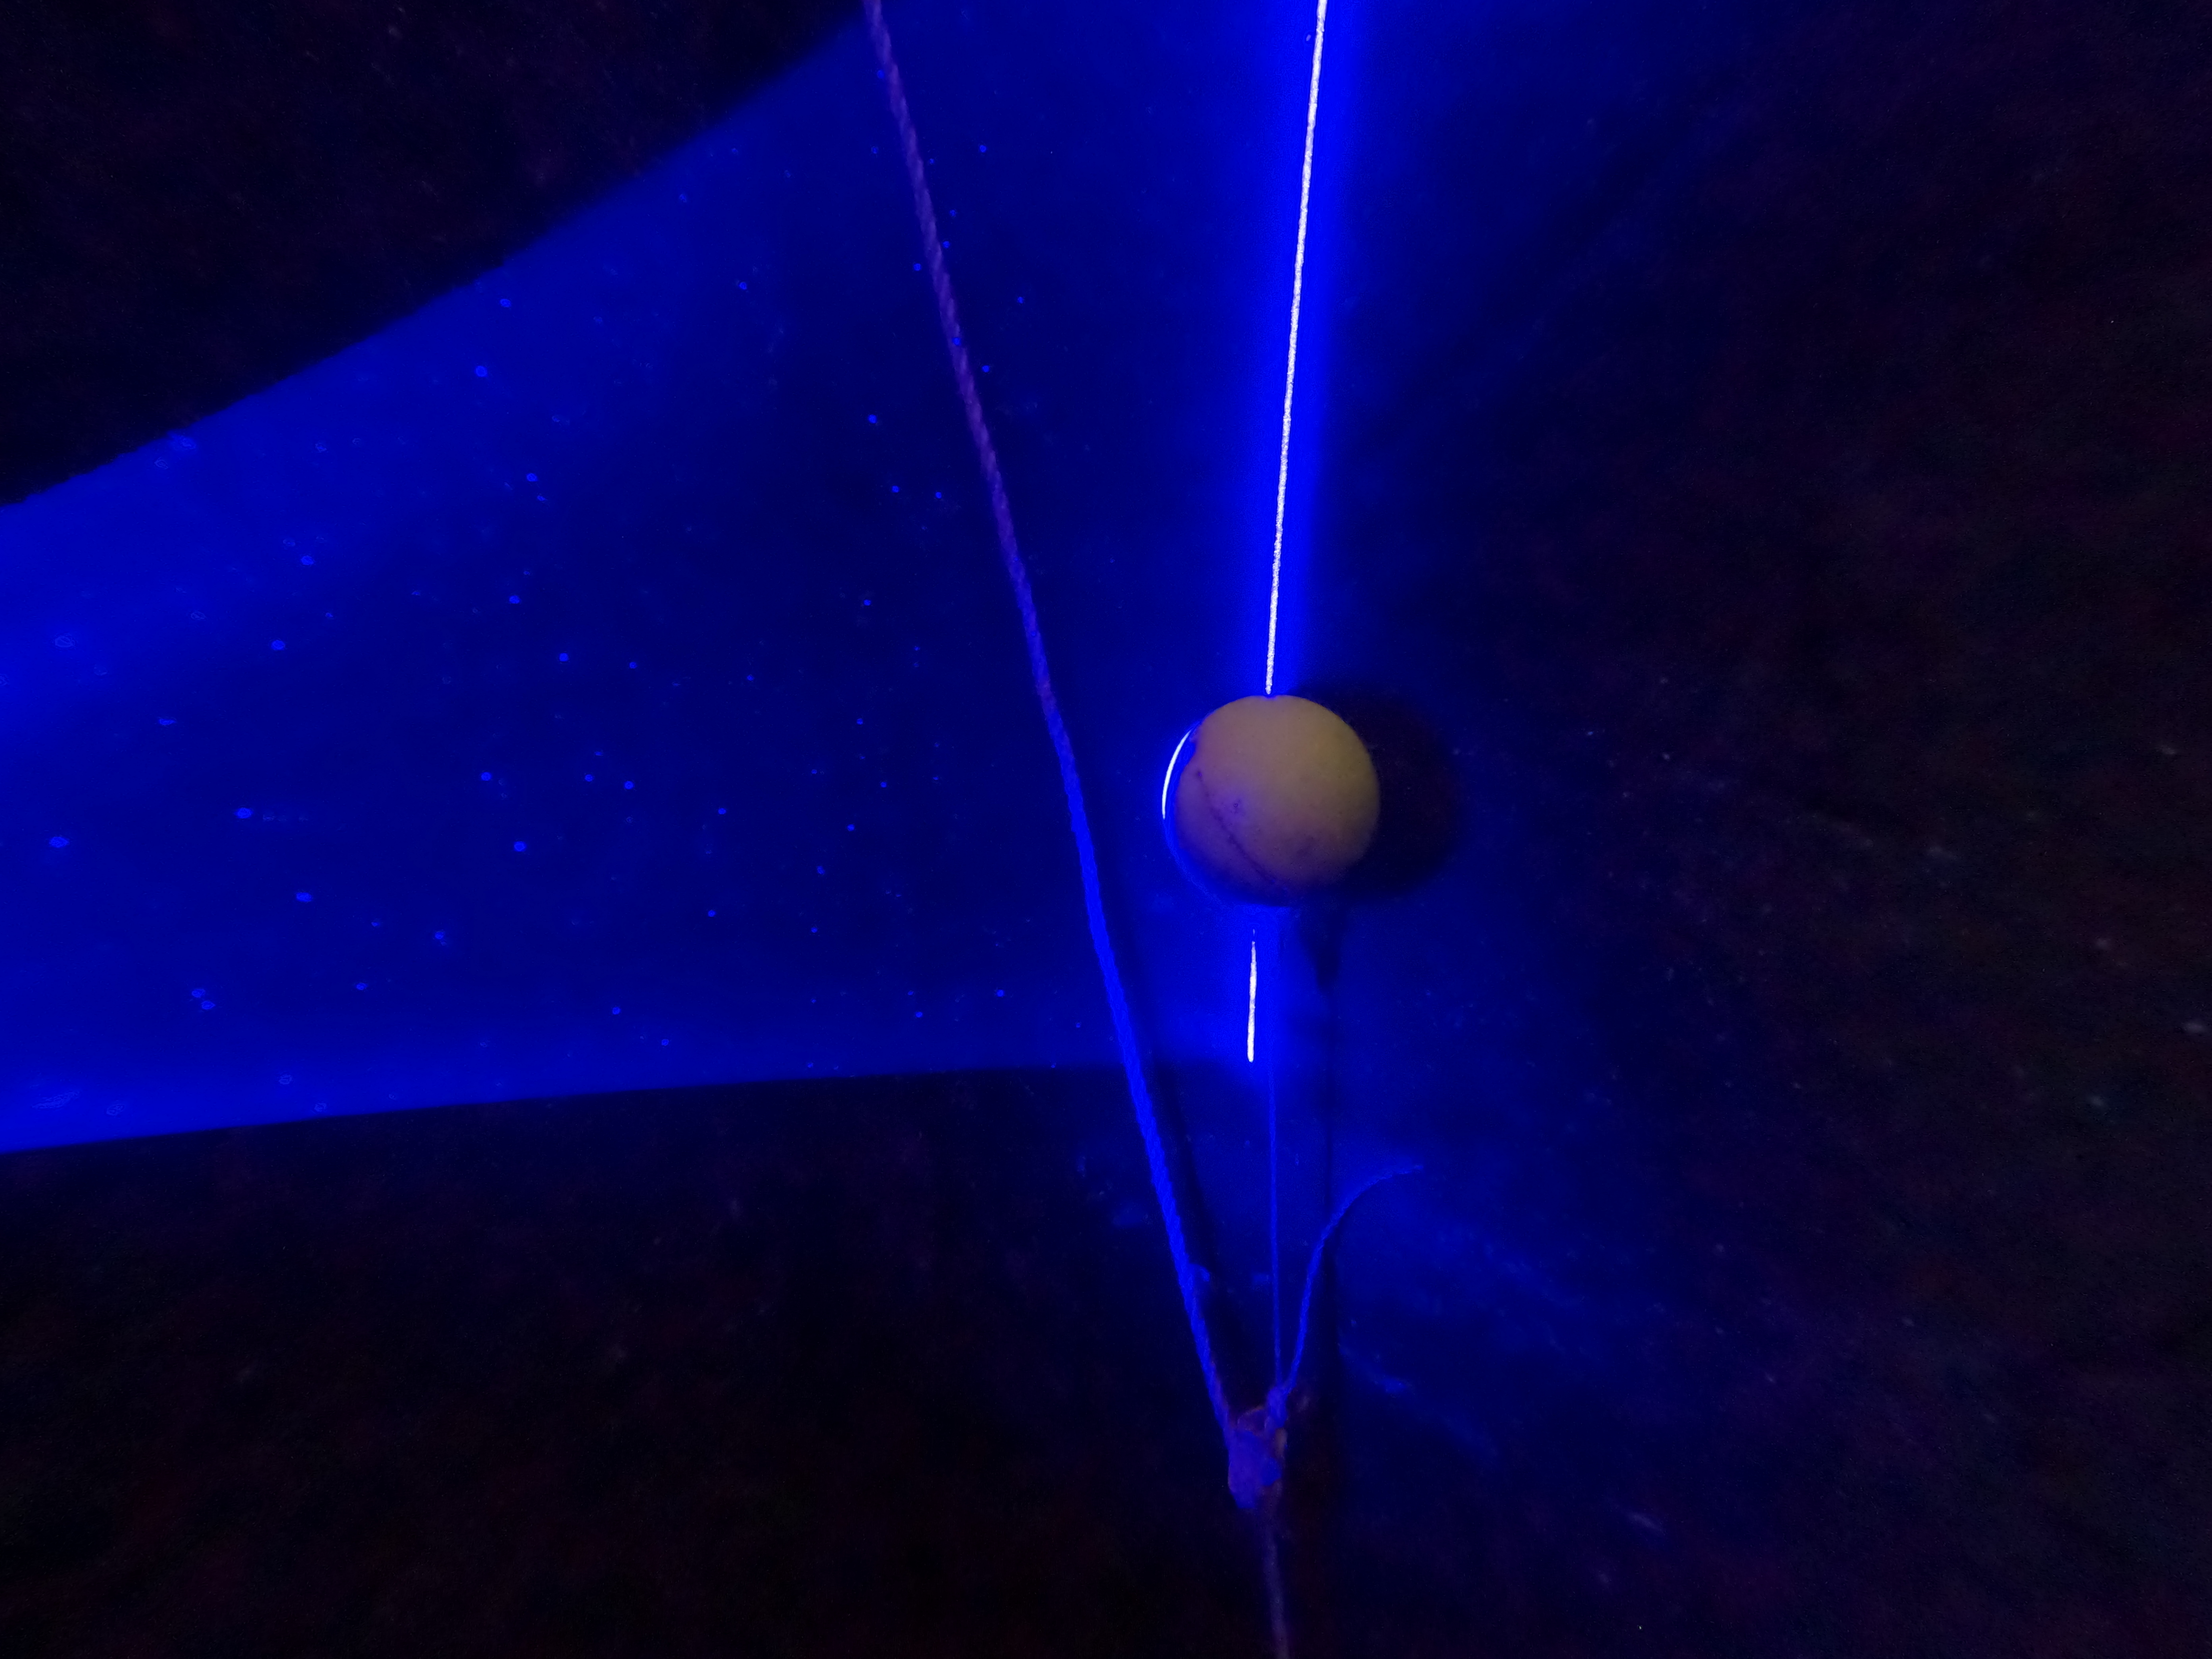

Supplement: Supplementary file 456 [file G0030756.pdf › 3/G0030756.pdf]

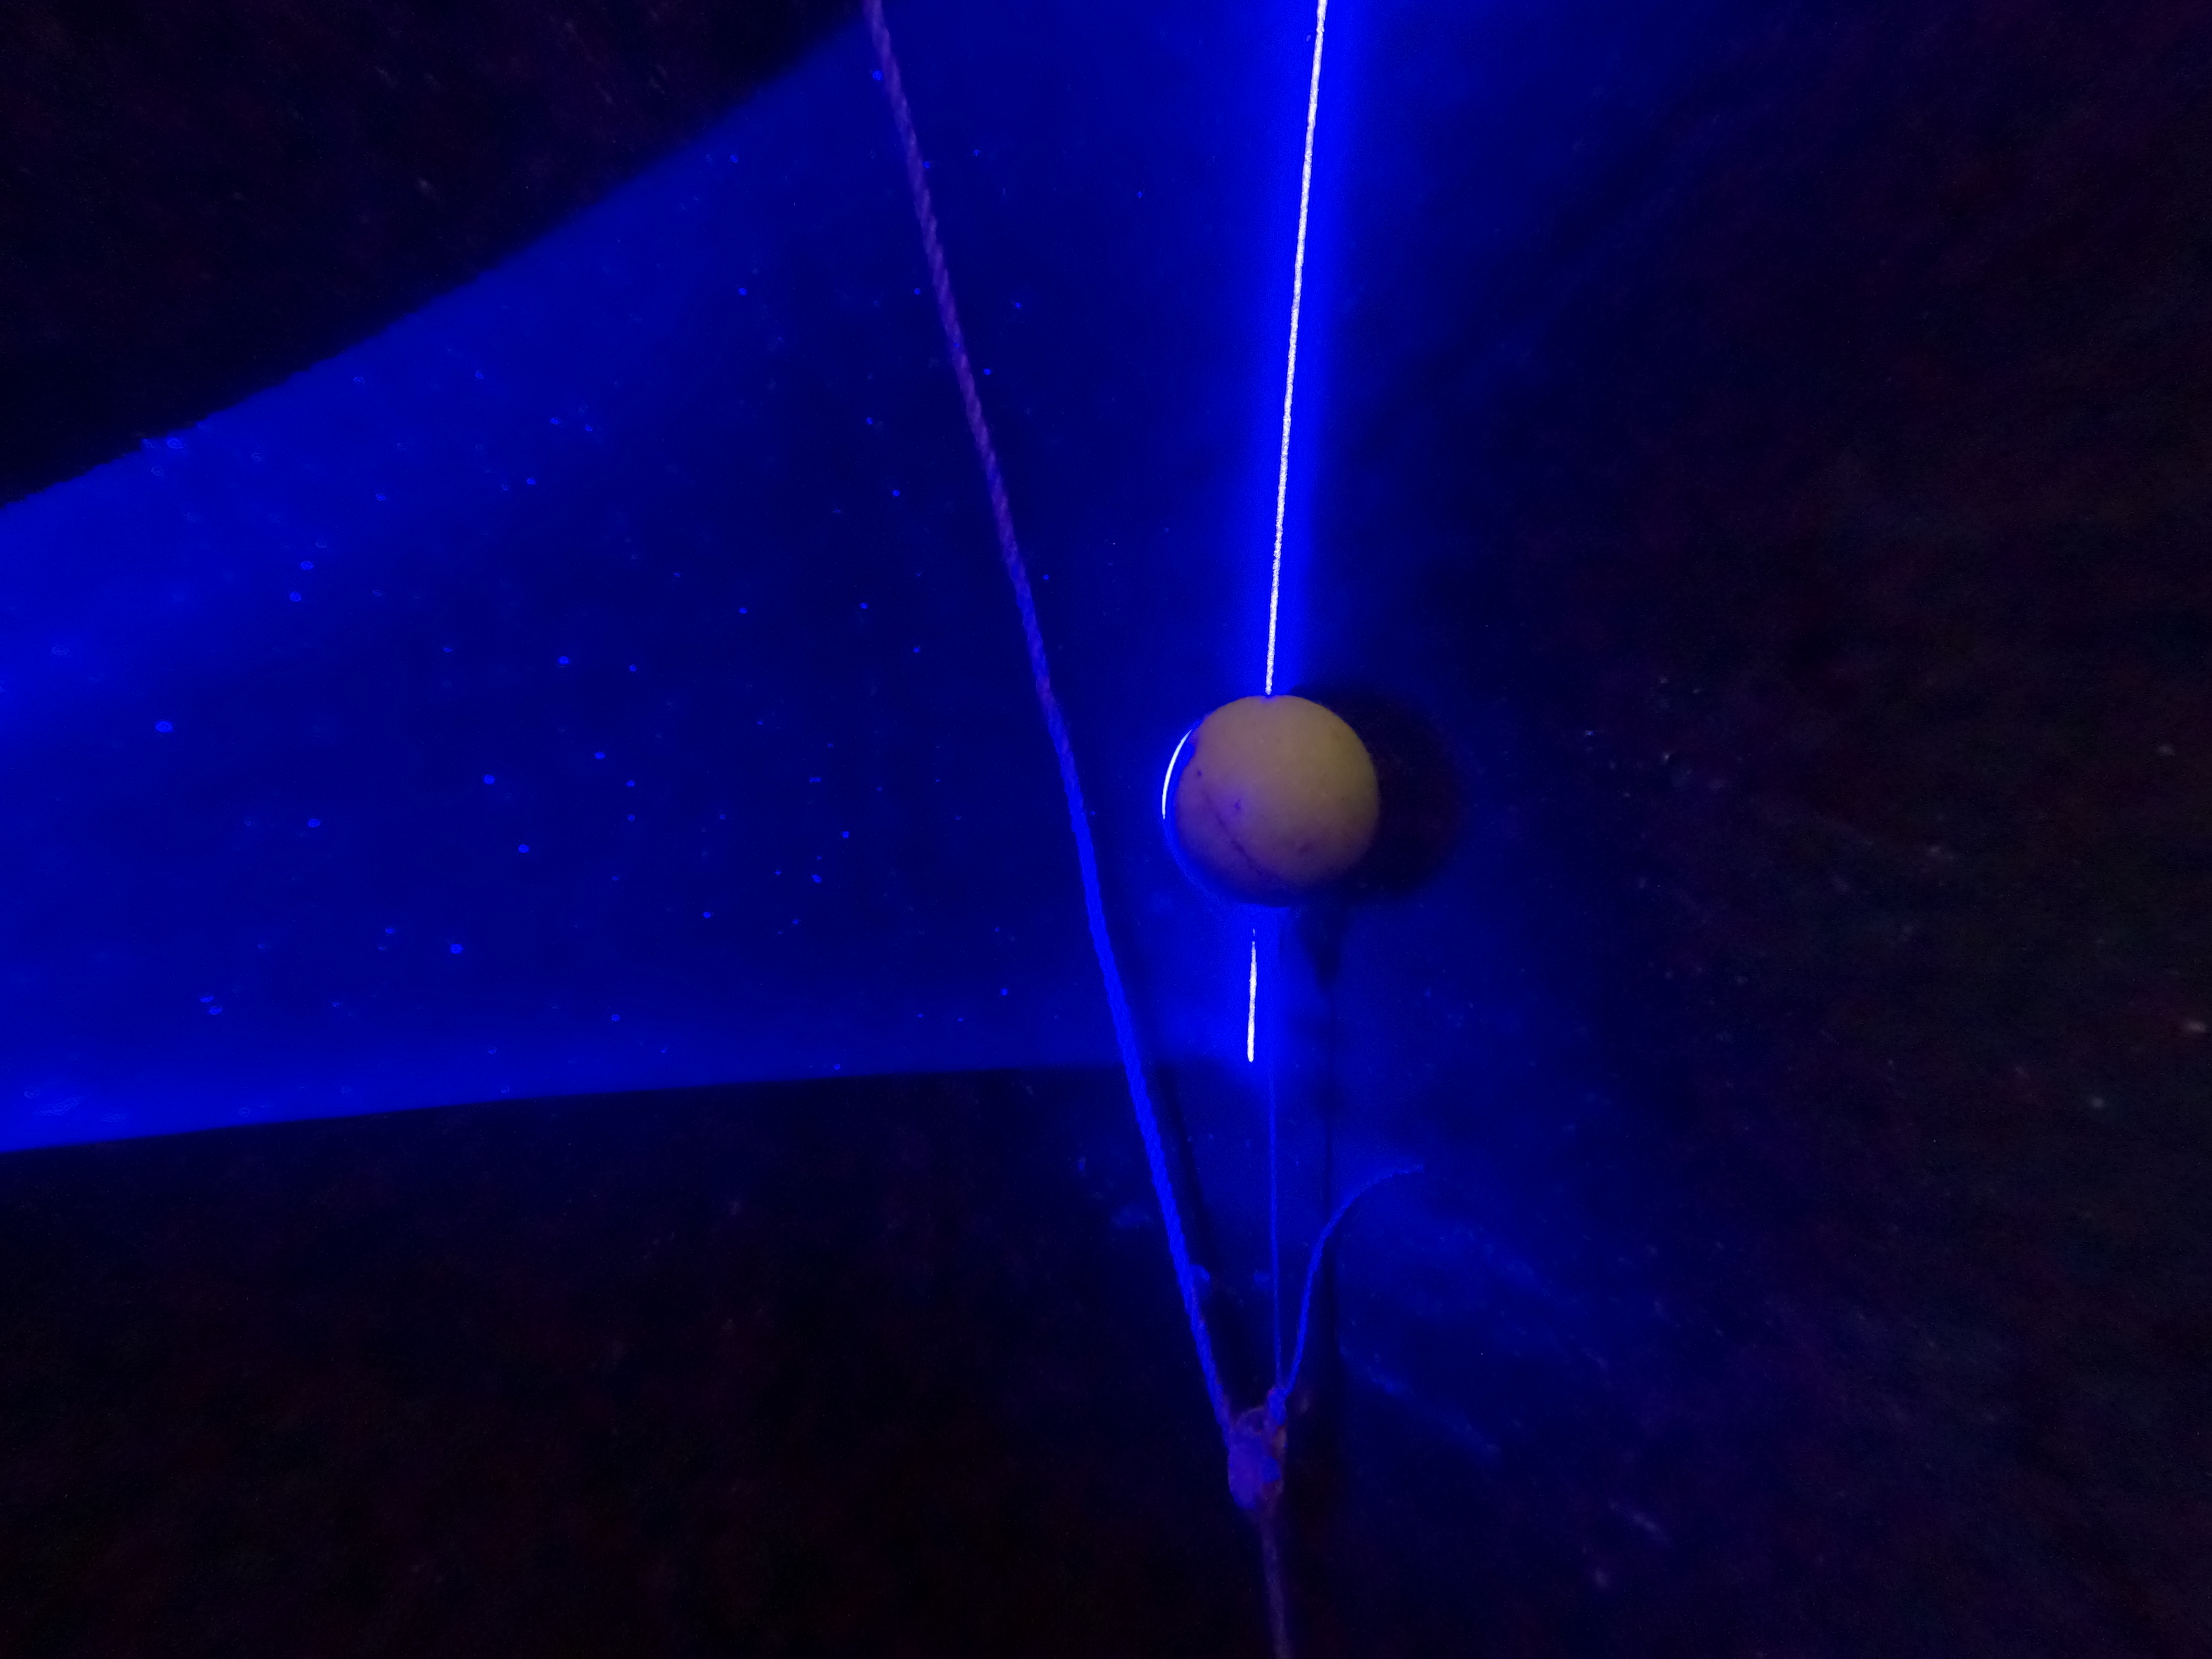

Supplement: Supplementary file 457 [file G0030757.pdf › 3/G0030757.pdf]

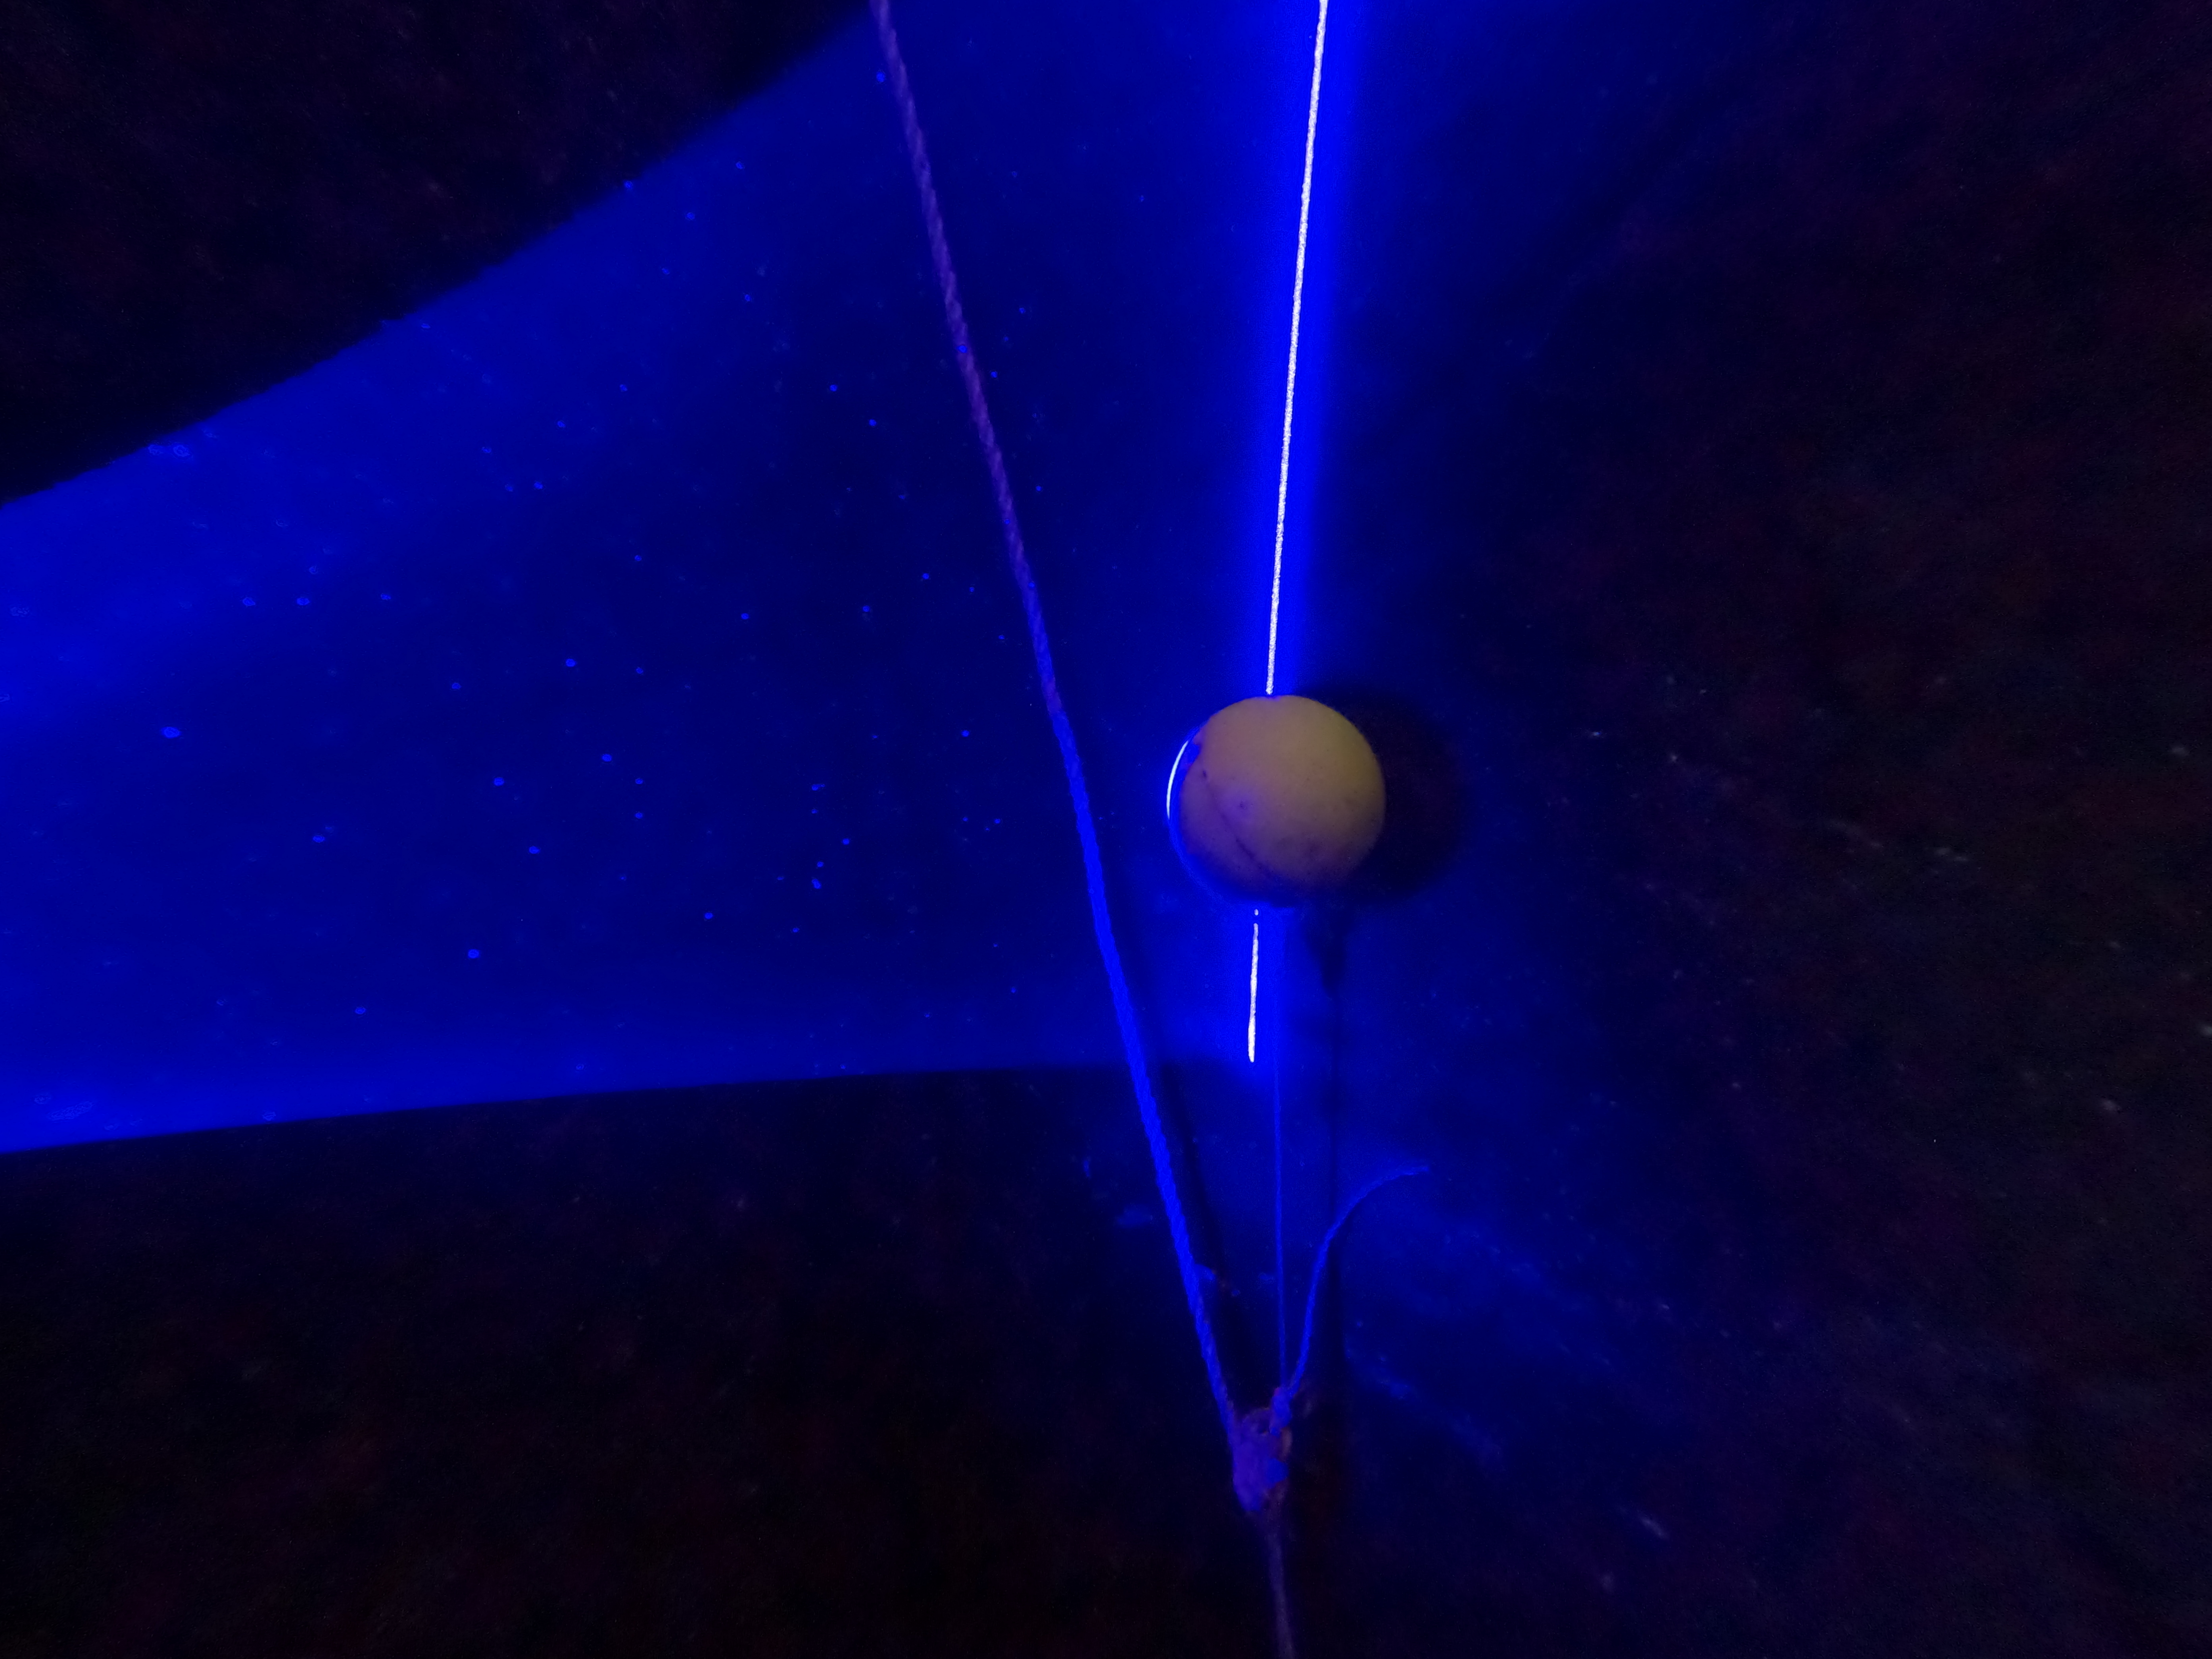

Supplement: Supplementary file 458 [file G0030758.pdf › 3/G0030758.pdf]

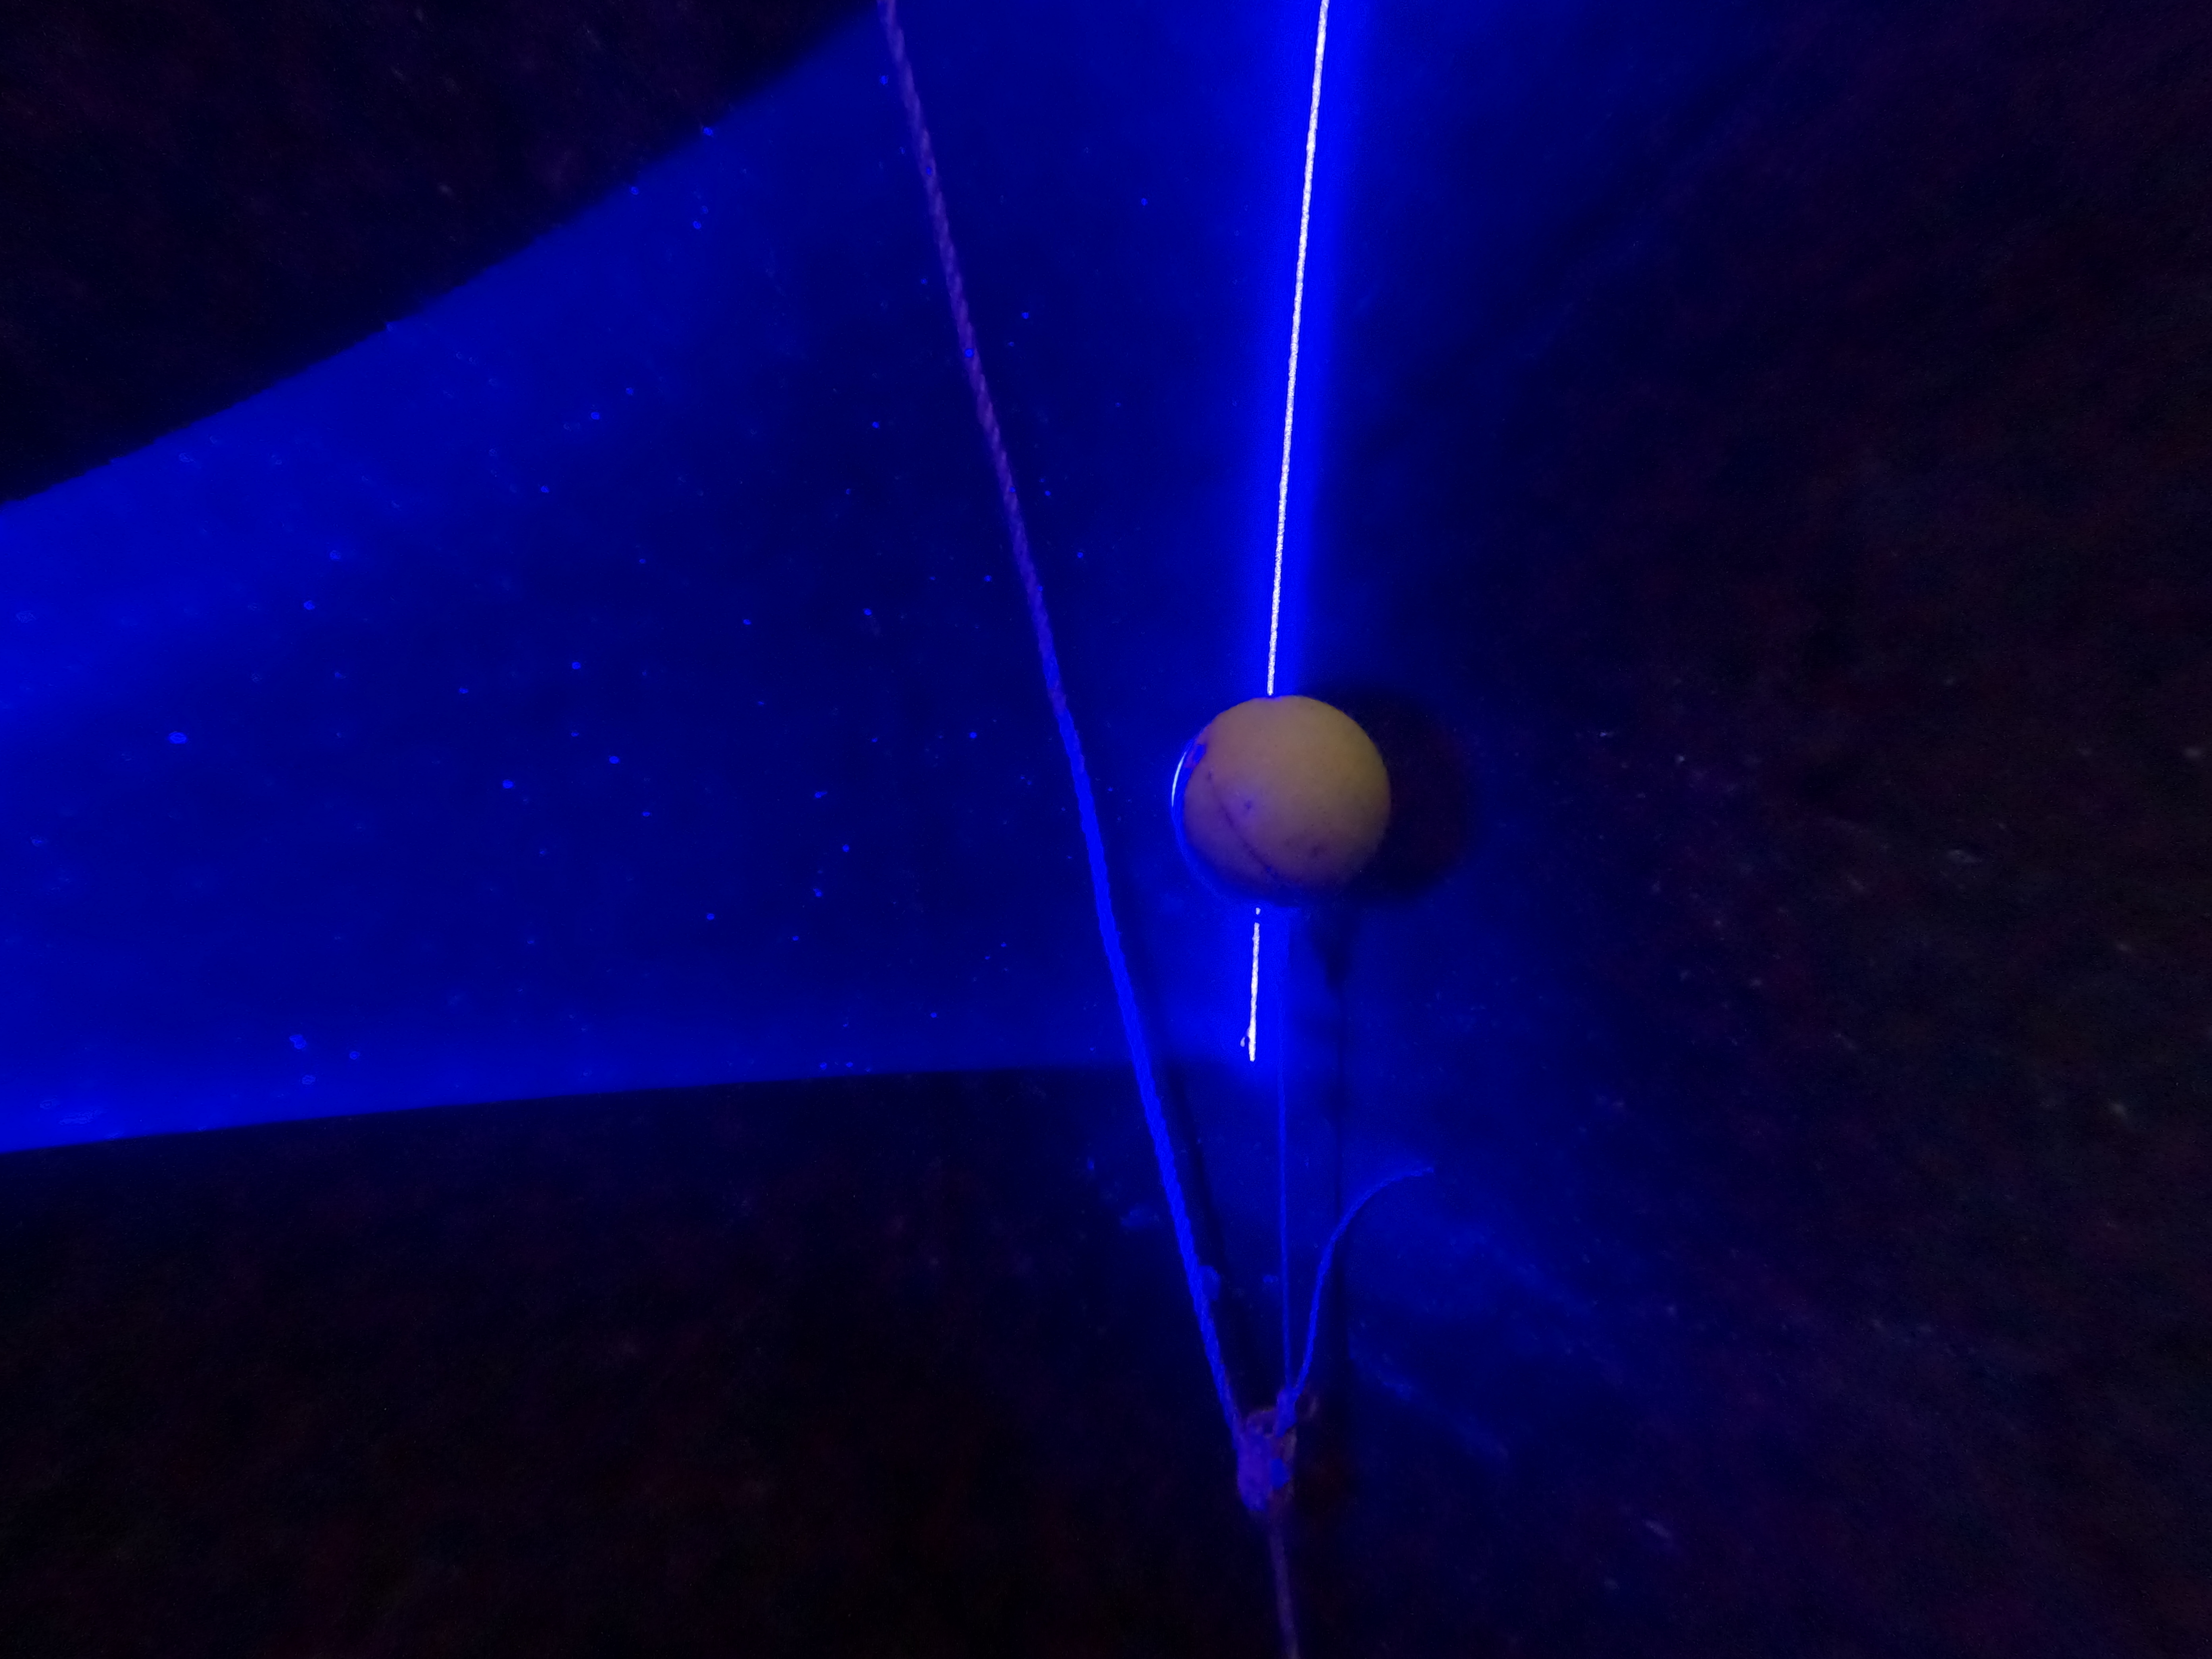

Supplement: Supplementary file 459 [file G0030759.pdf › 3/G0030759.pdf]

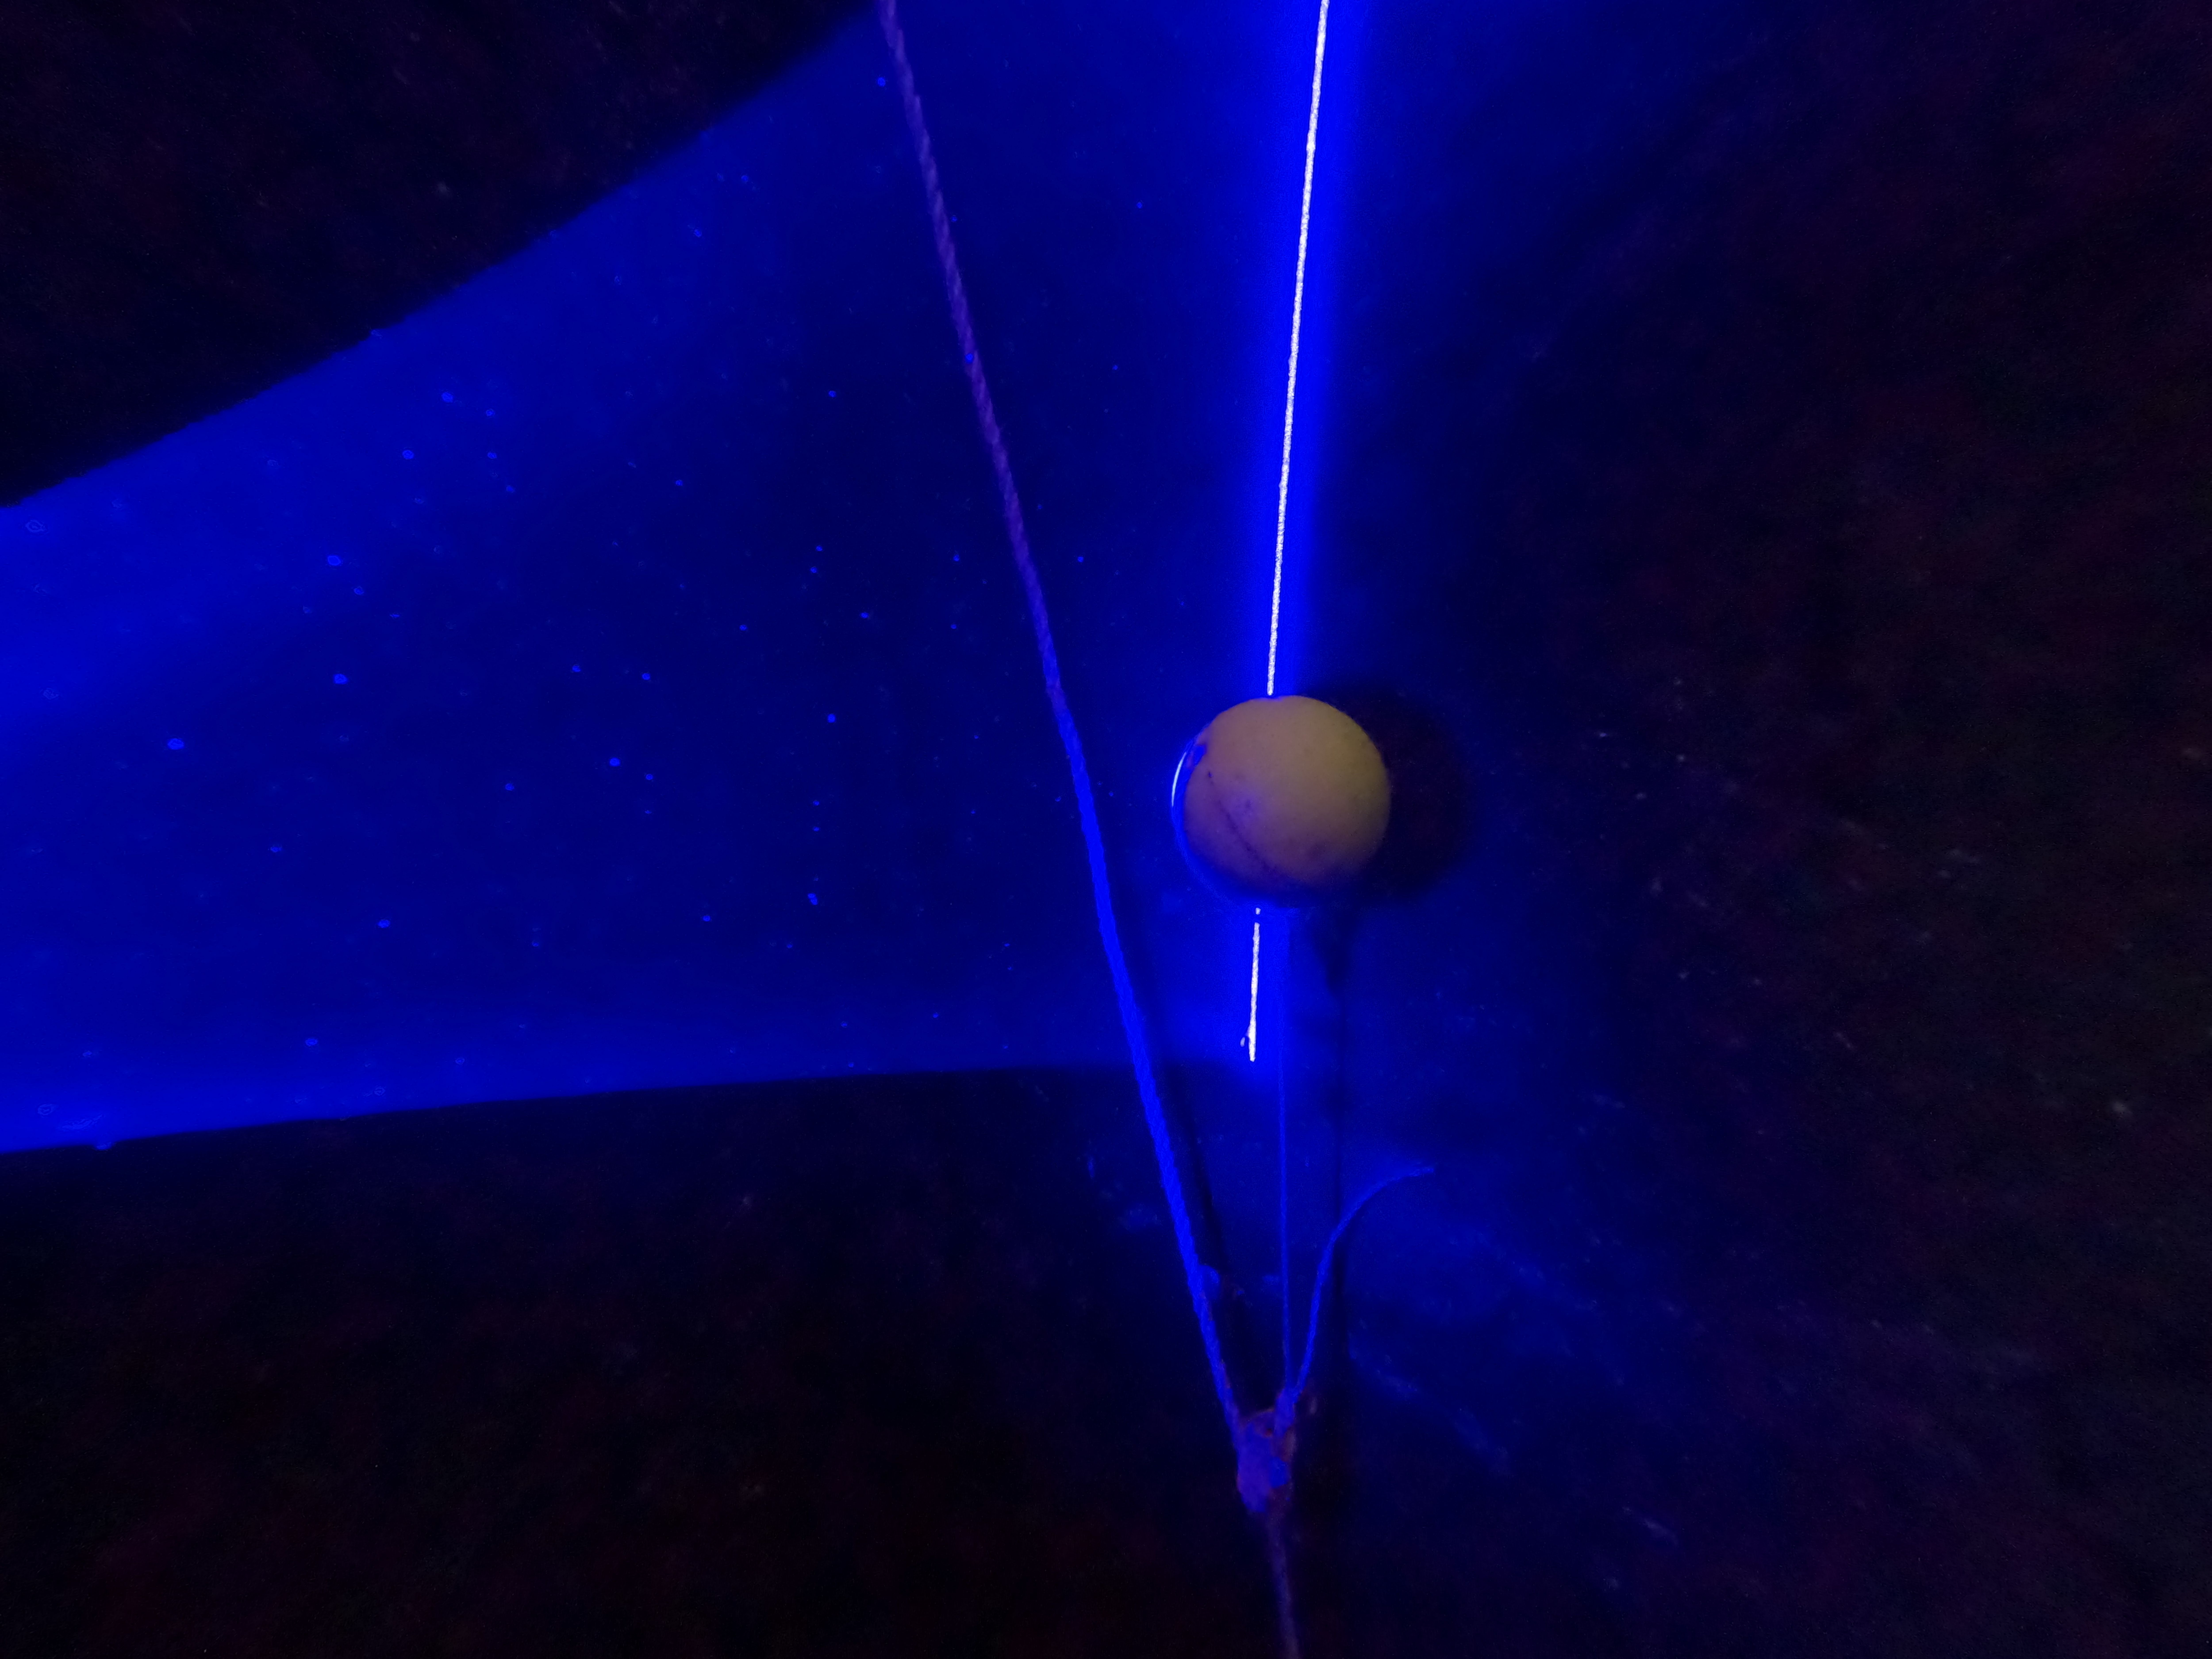

Supplement: Supplementary file 460 [file G0030760.pdf › 3/G0030760.pdf]

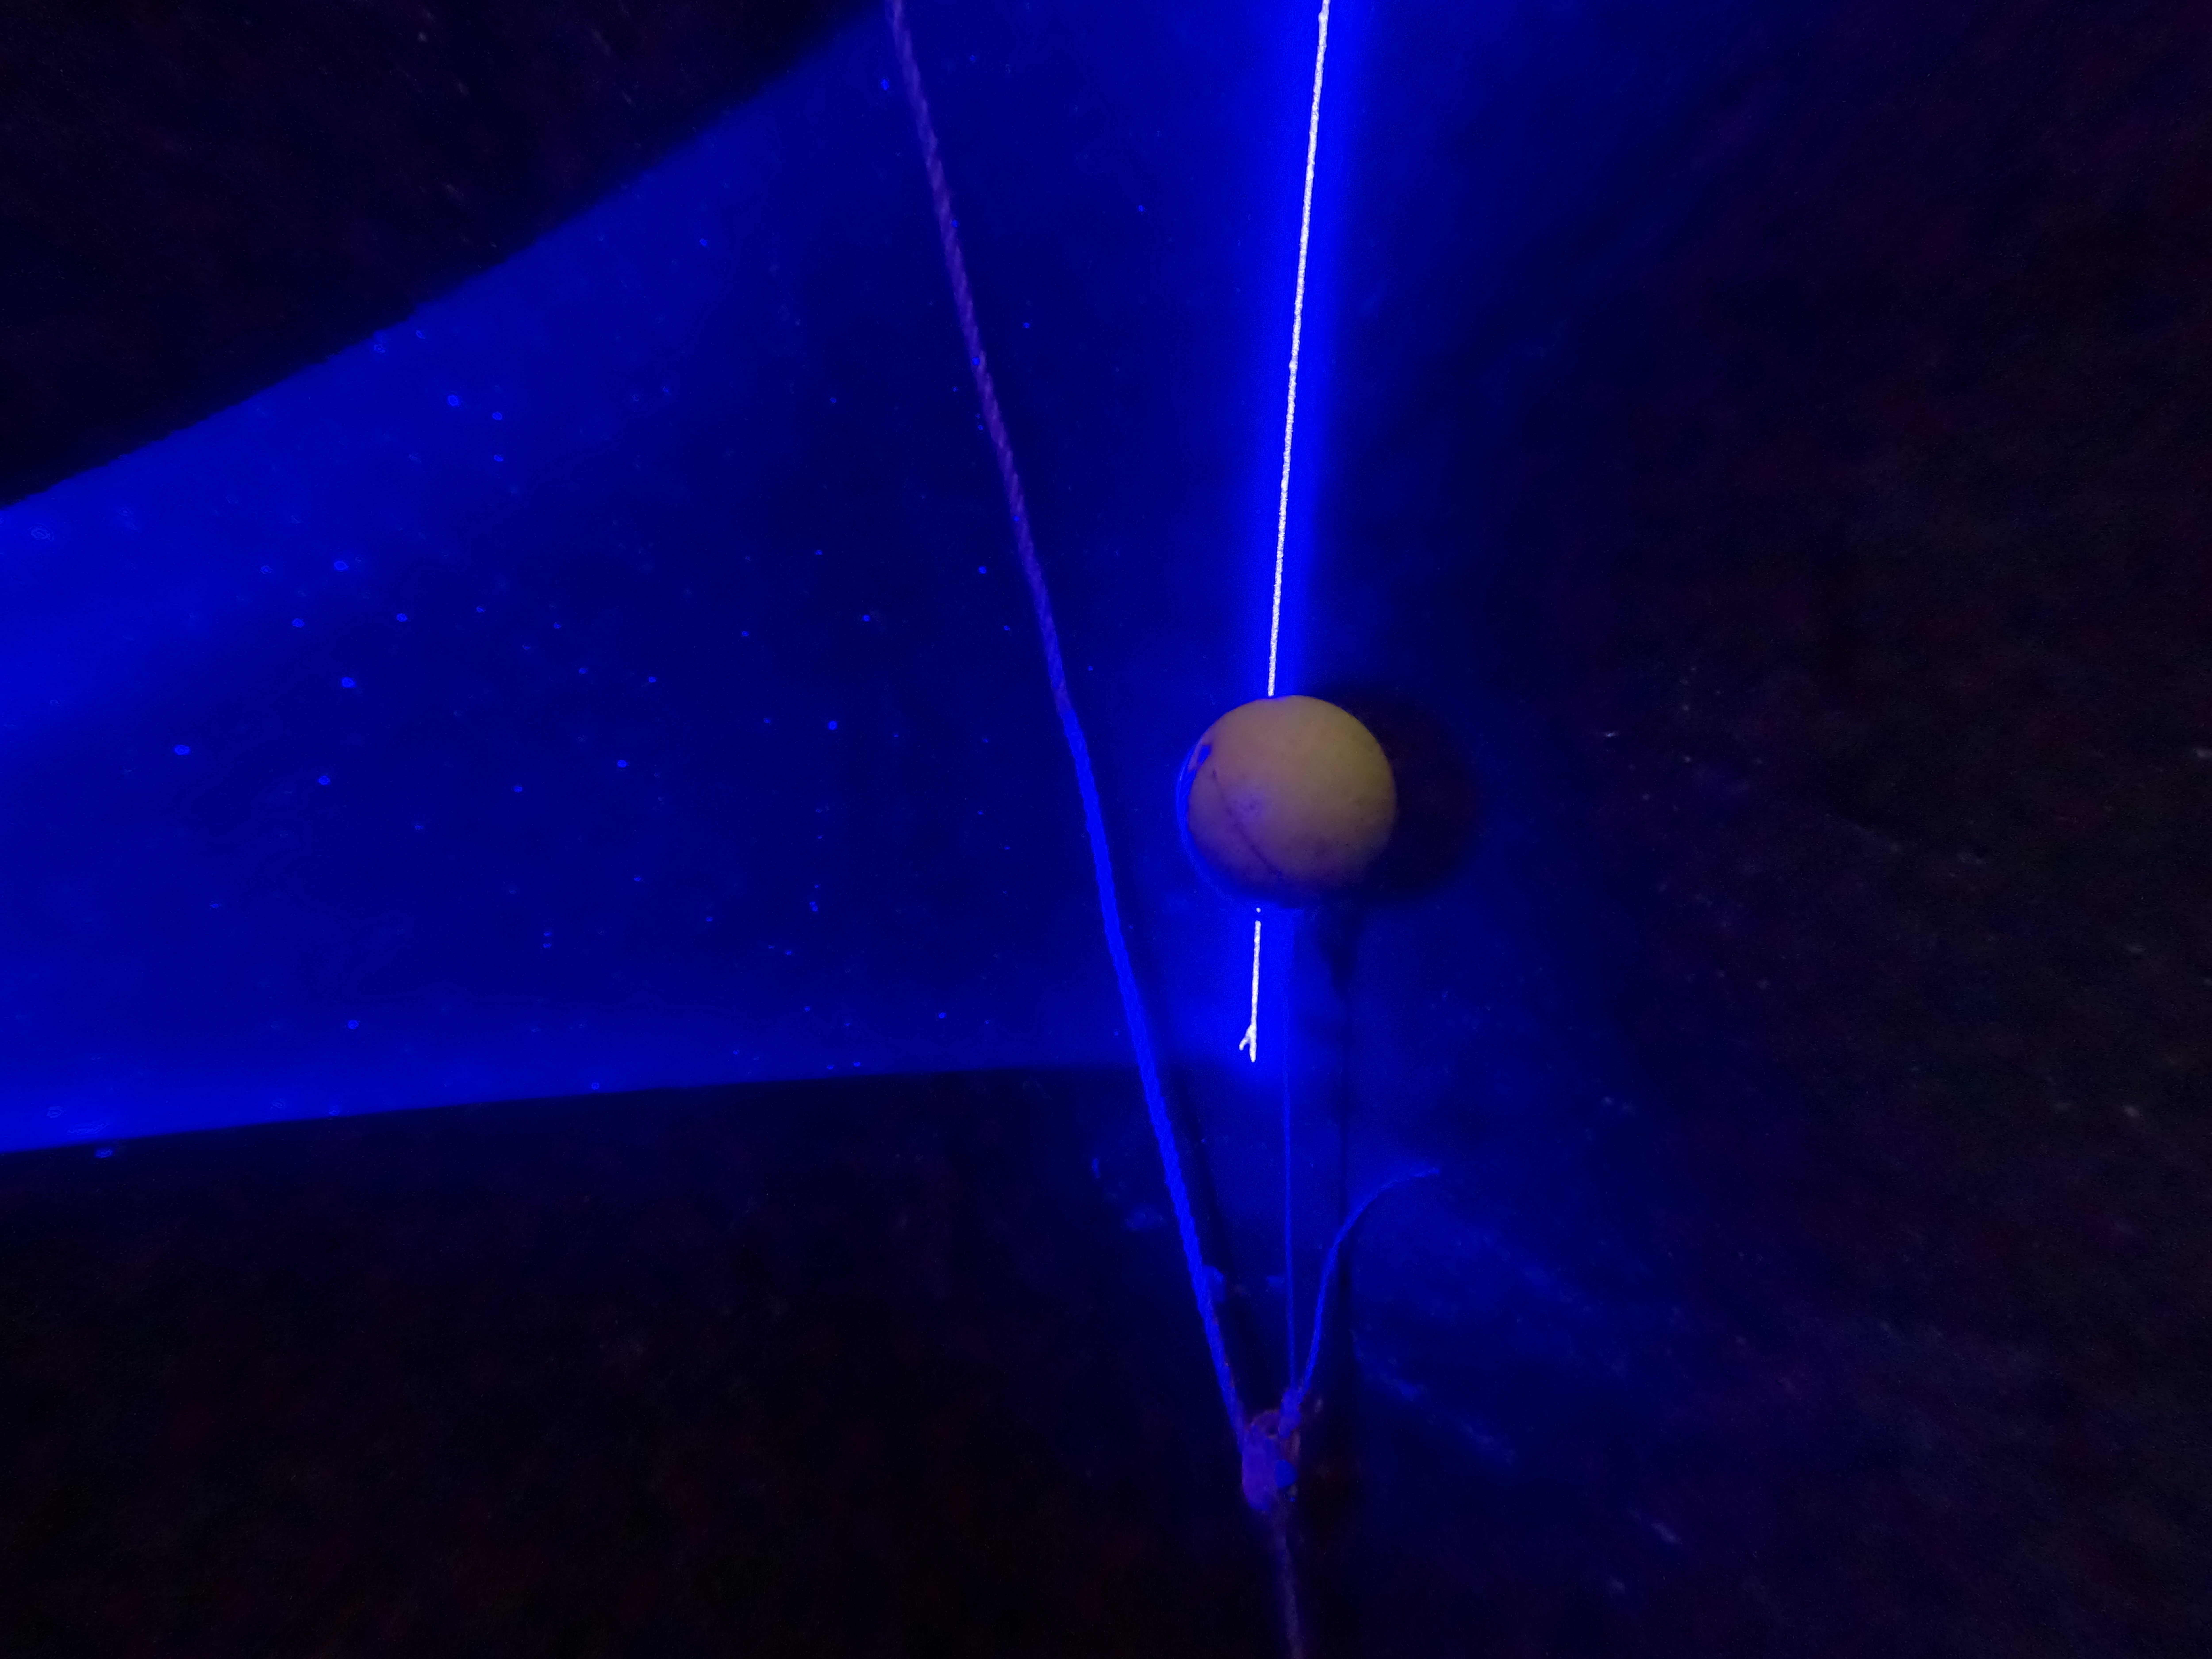

Supplement: Supplementary file 461 [file G0030761.pdf › 3/G0030761.pdf]

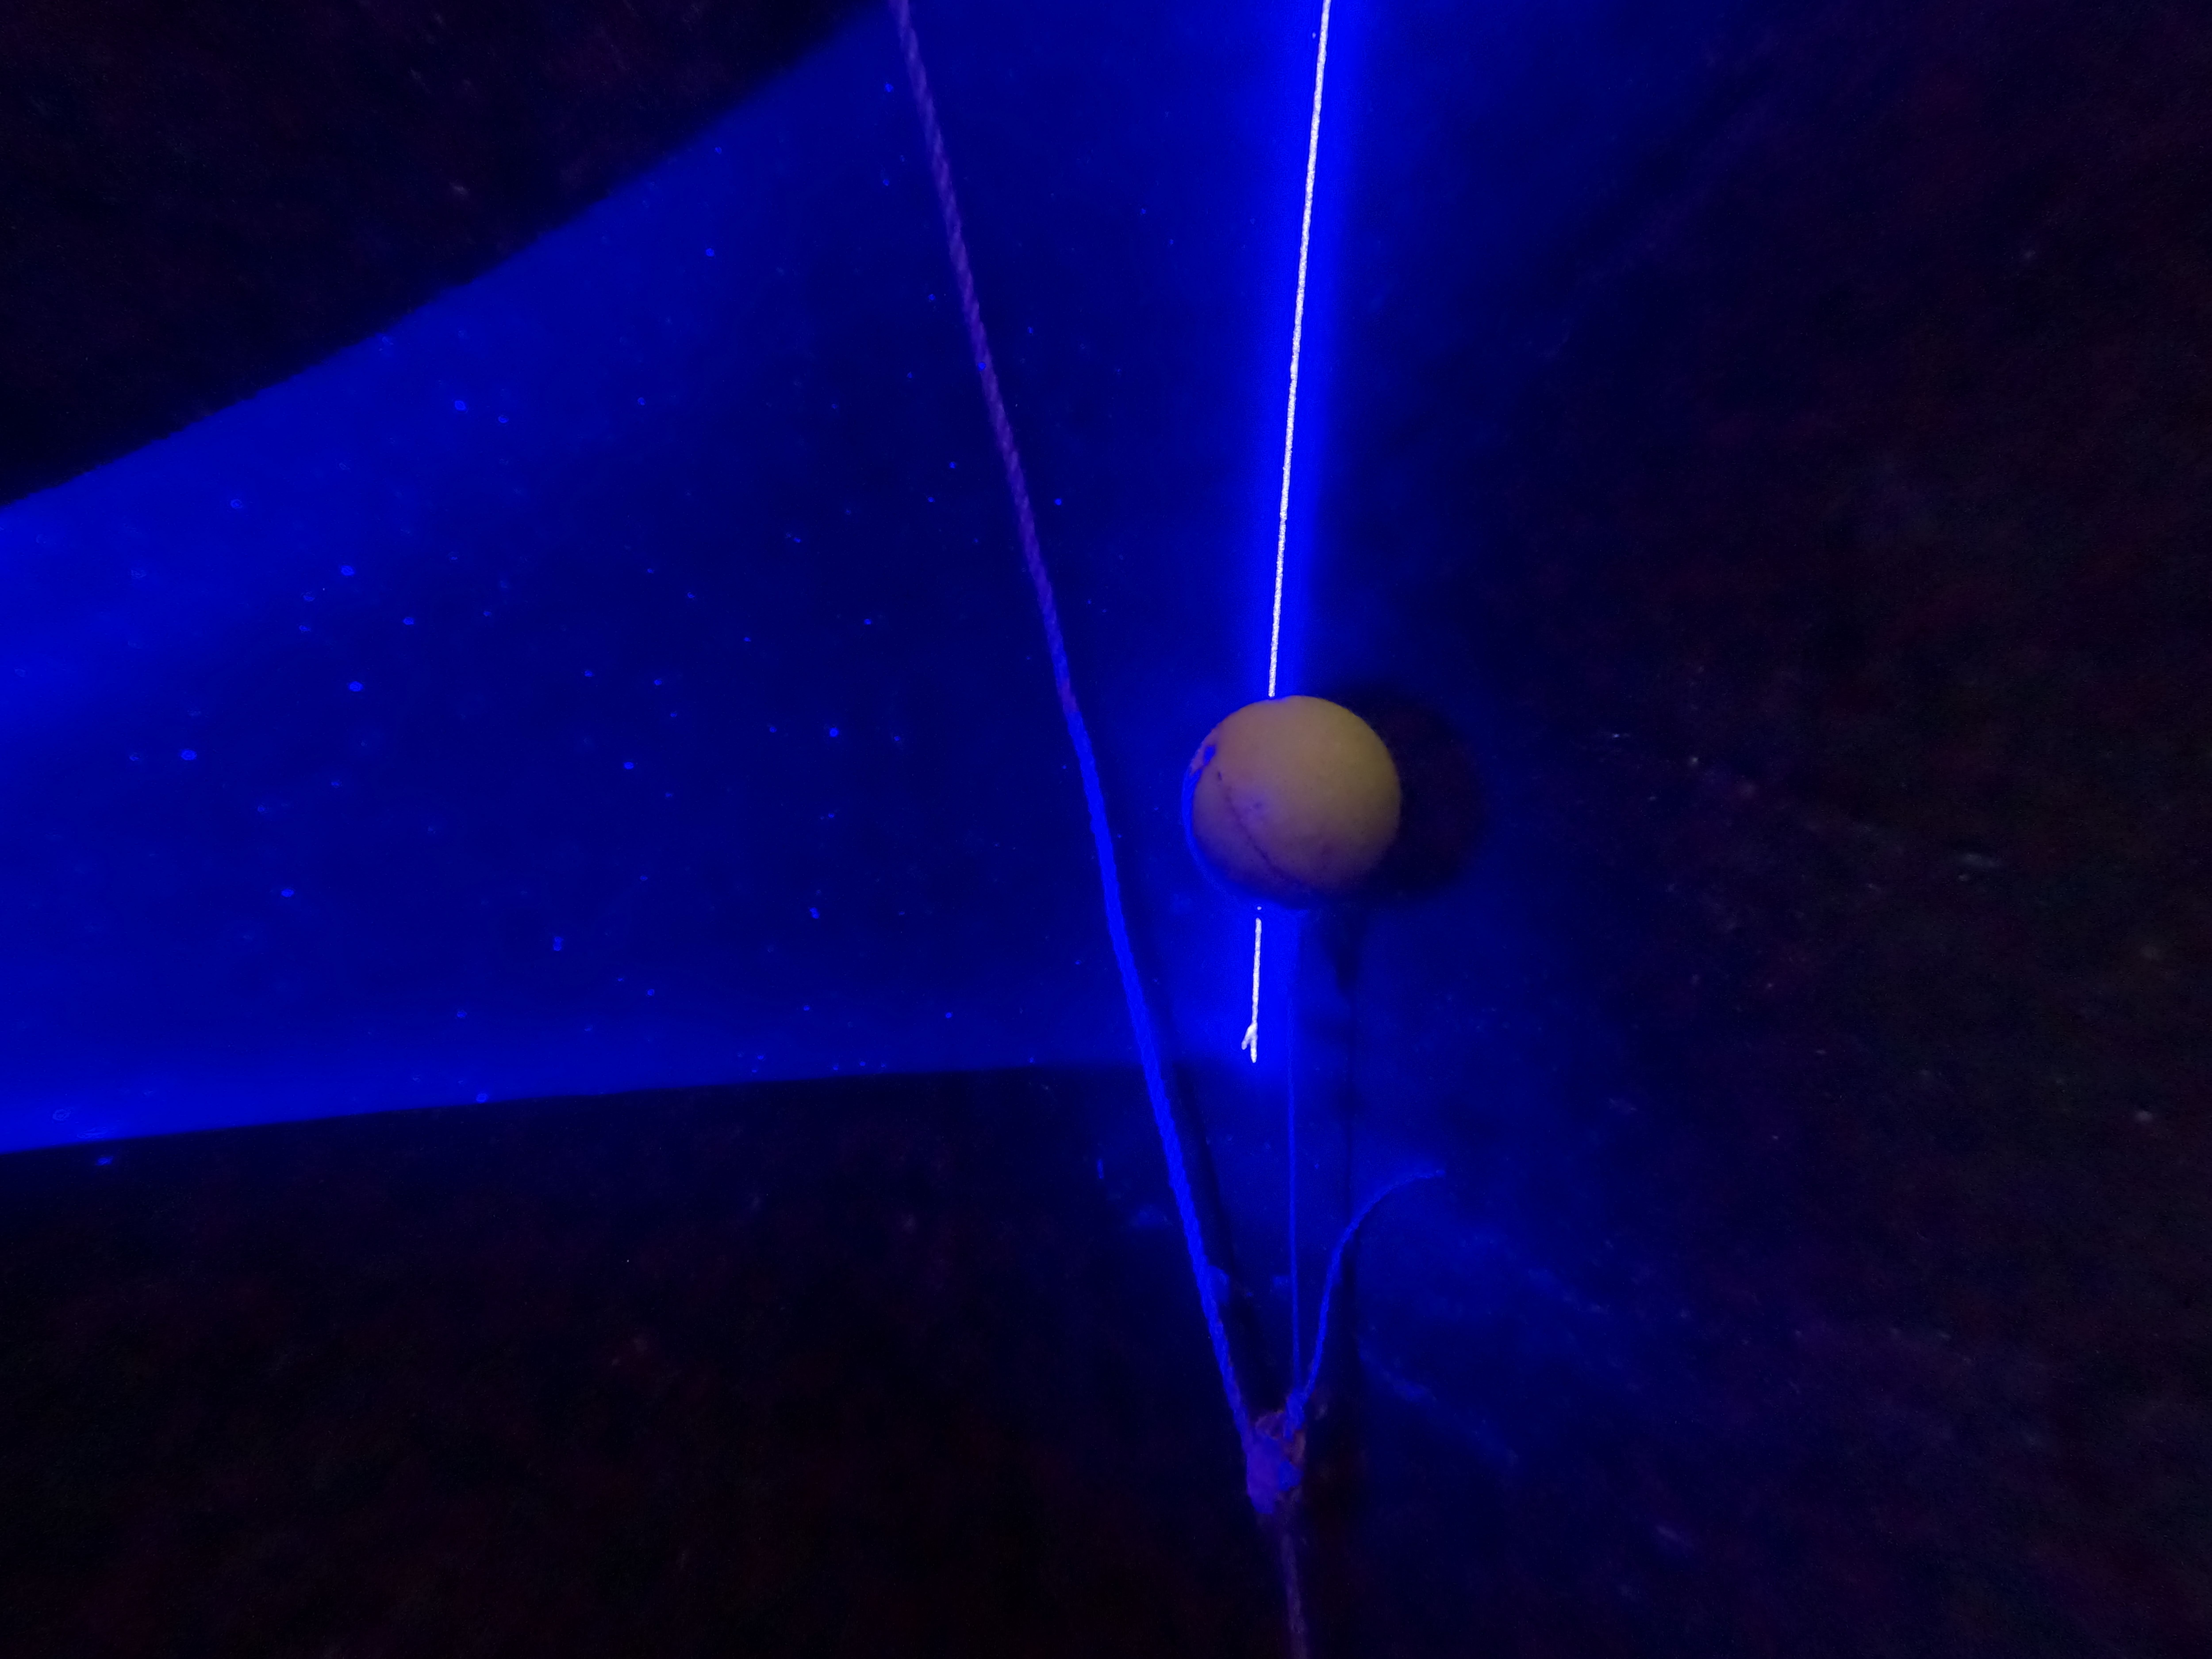

Supplement: Supplementary file 462 [file G0030762.pdf › 3/G0030762.pdf]

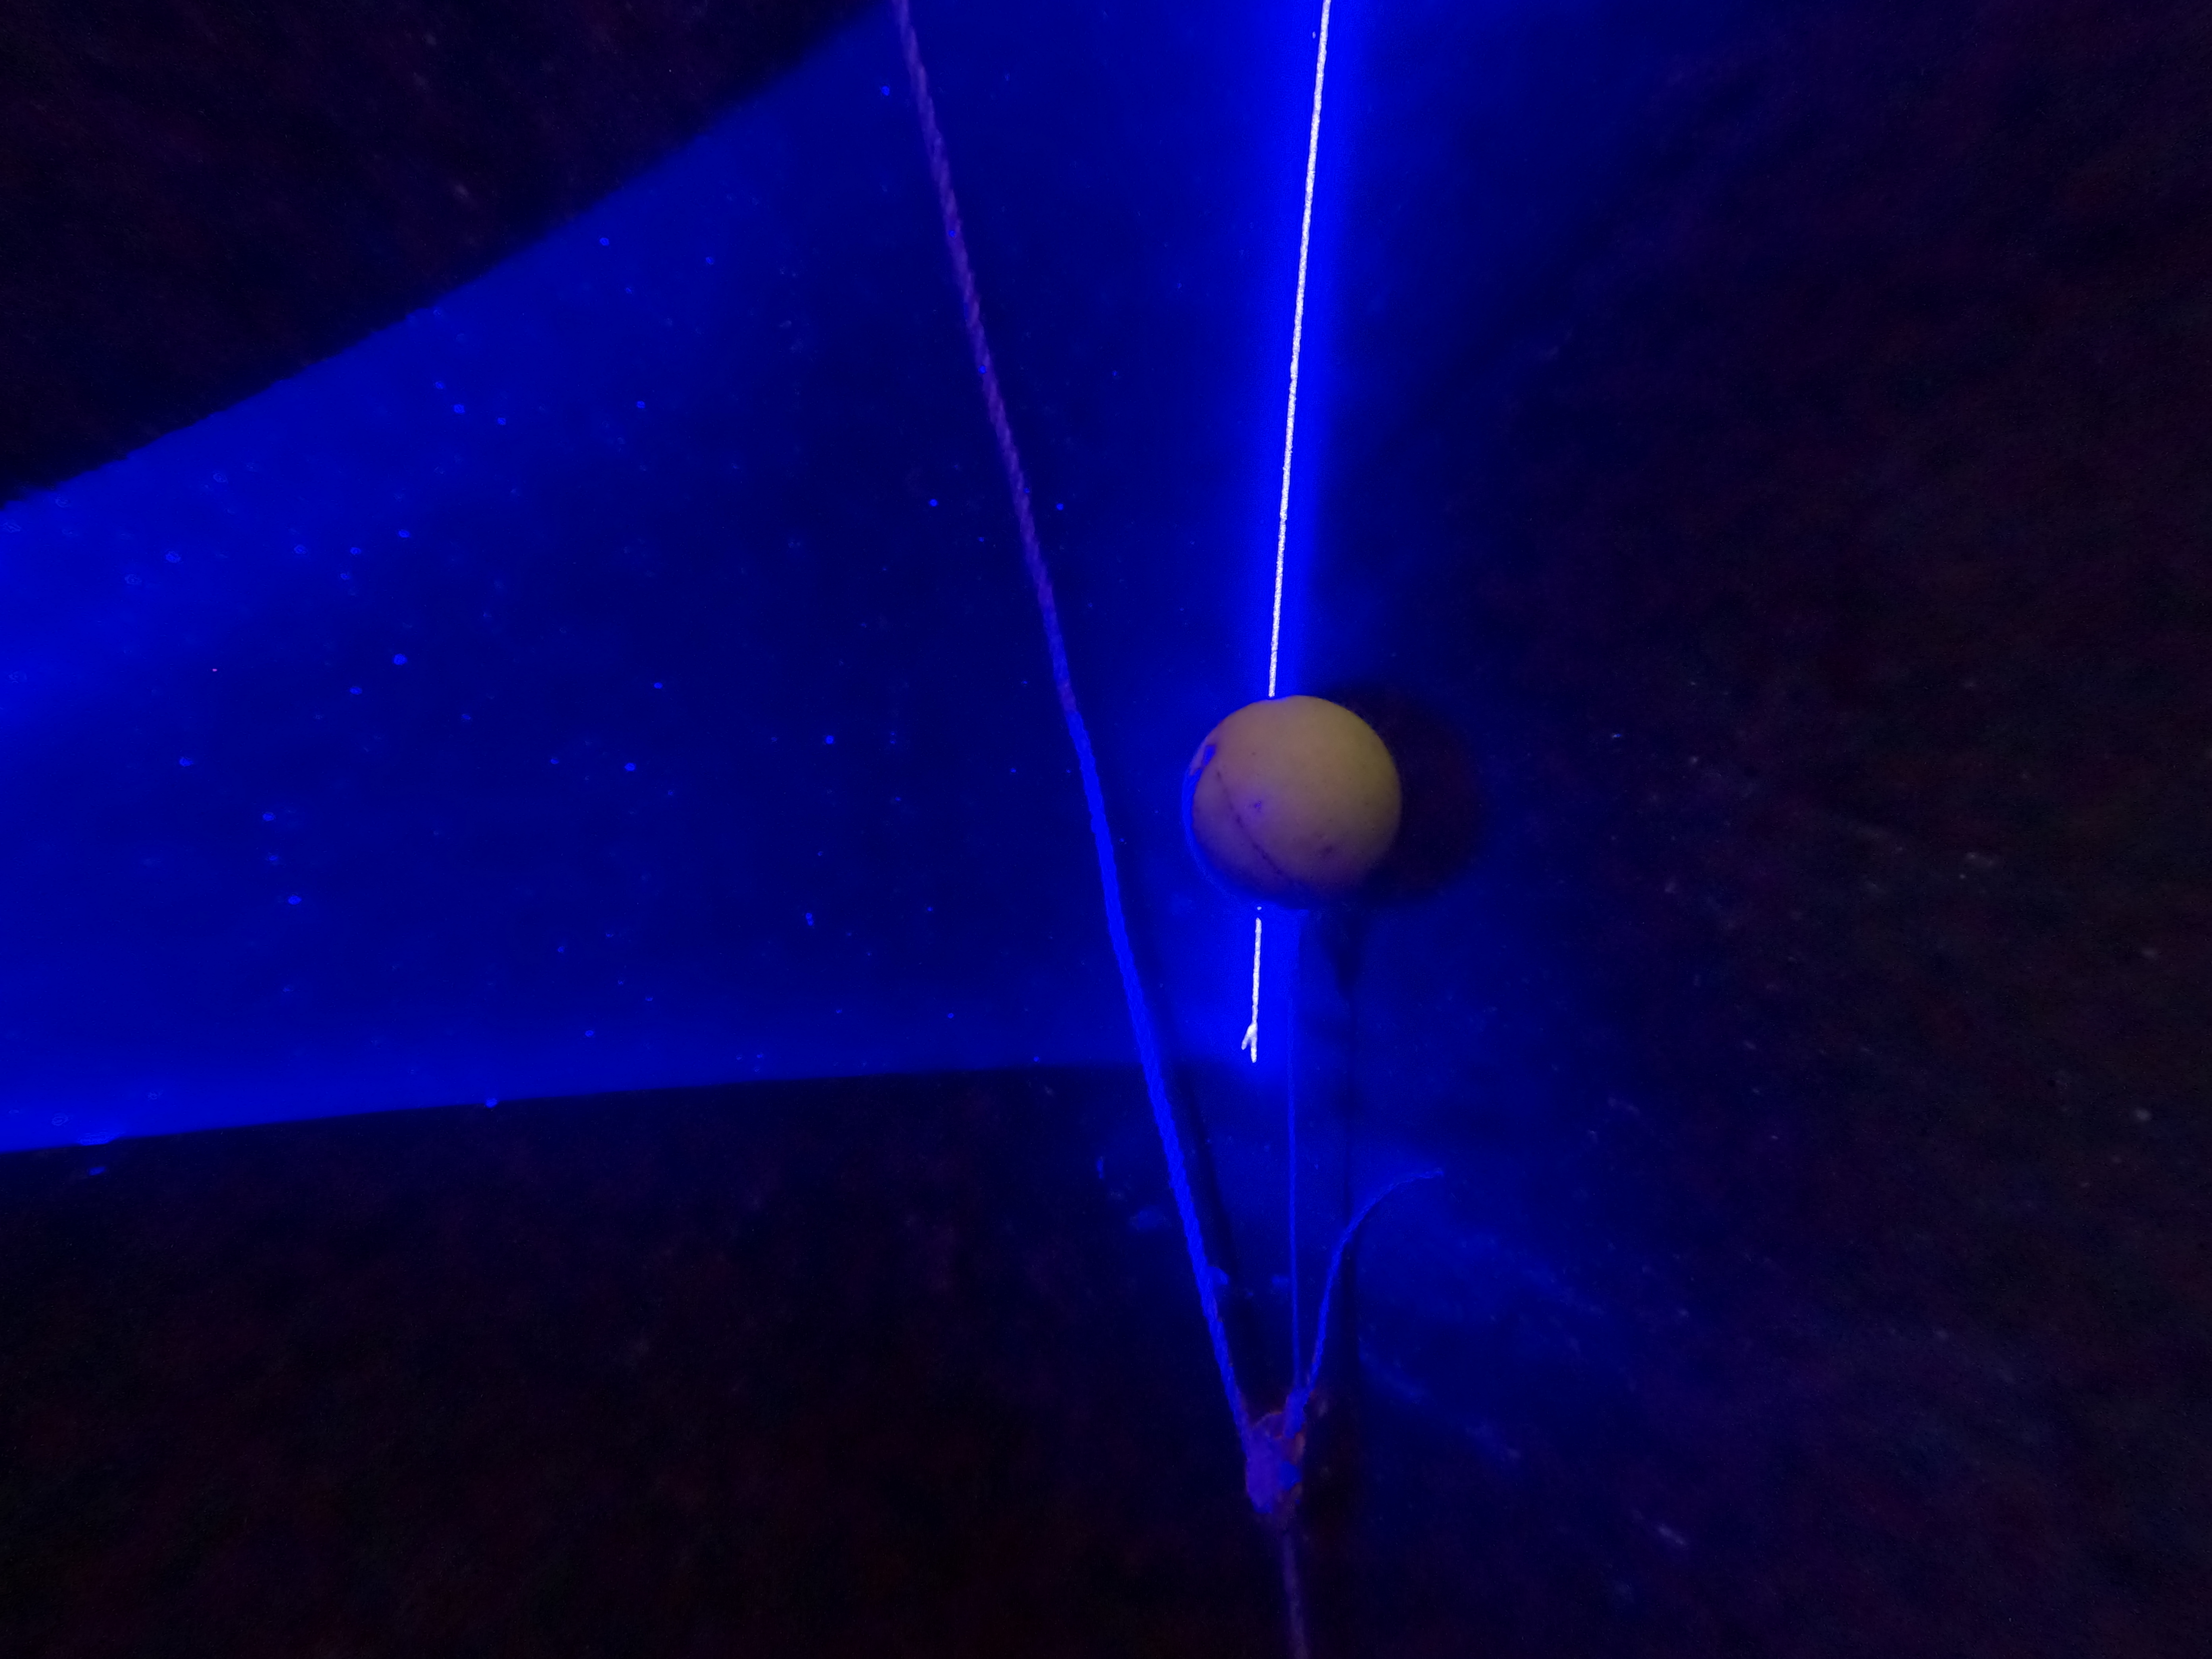

Supplement: Supplementary file 463 [file G0030763.pdf › 3/G0030763.pdf]

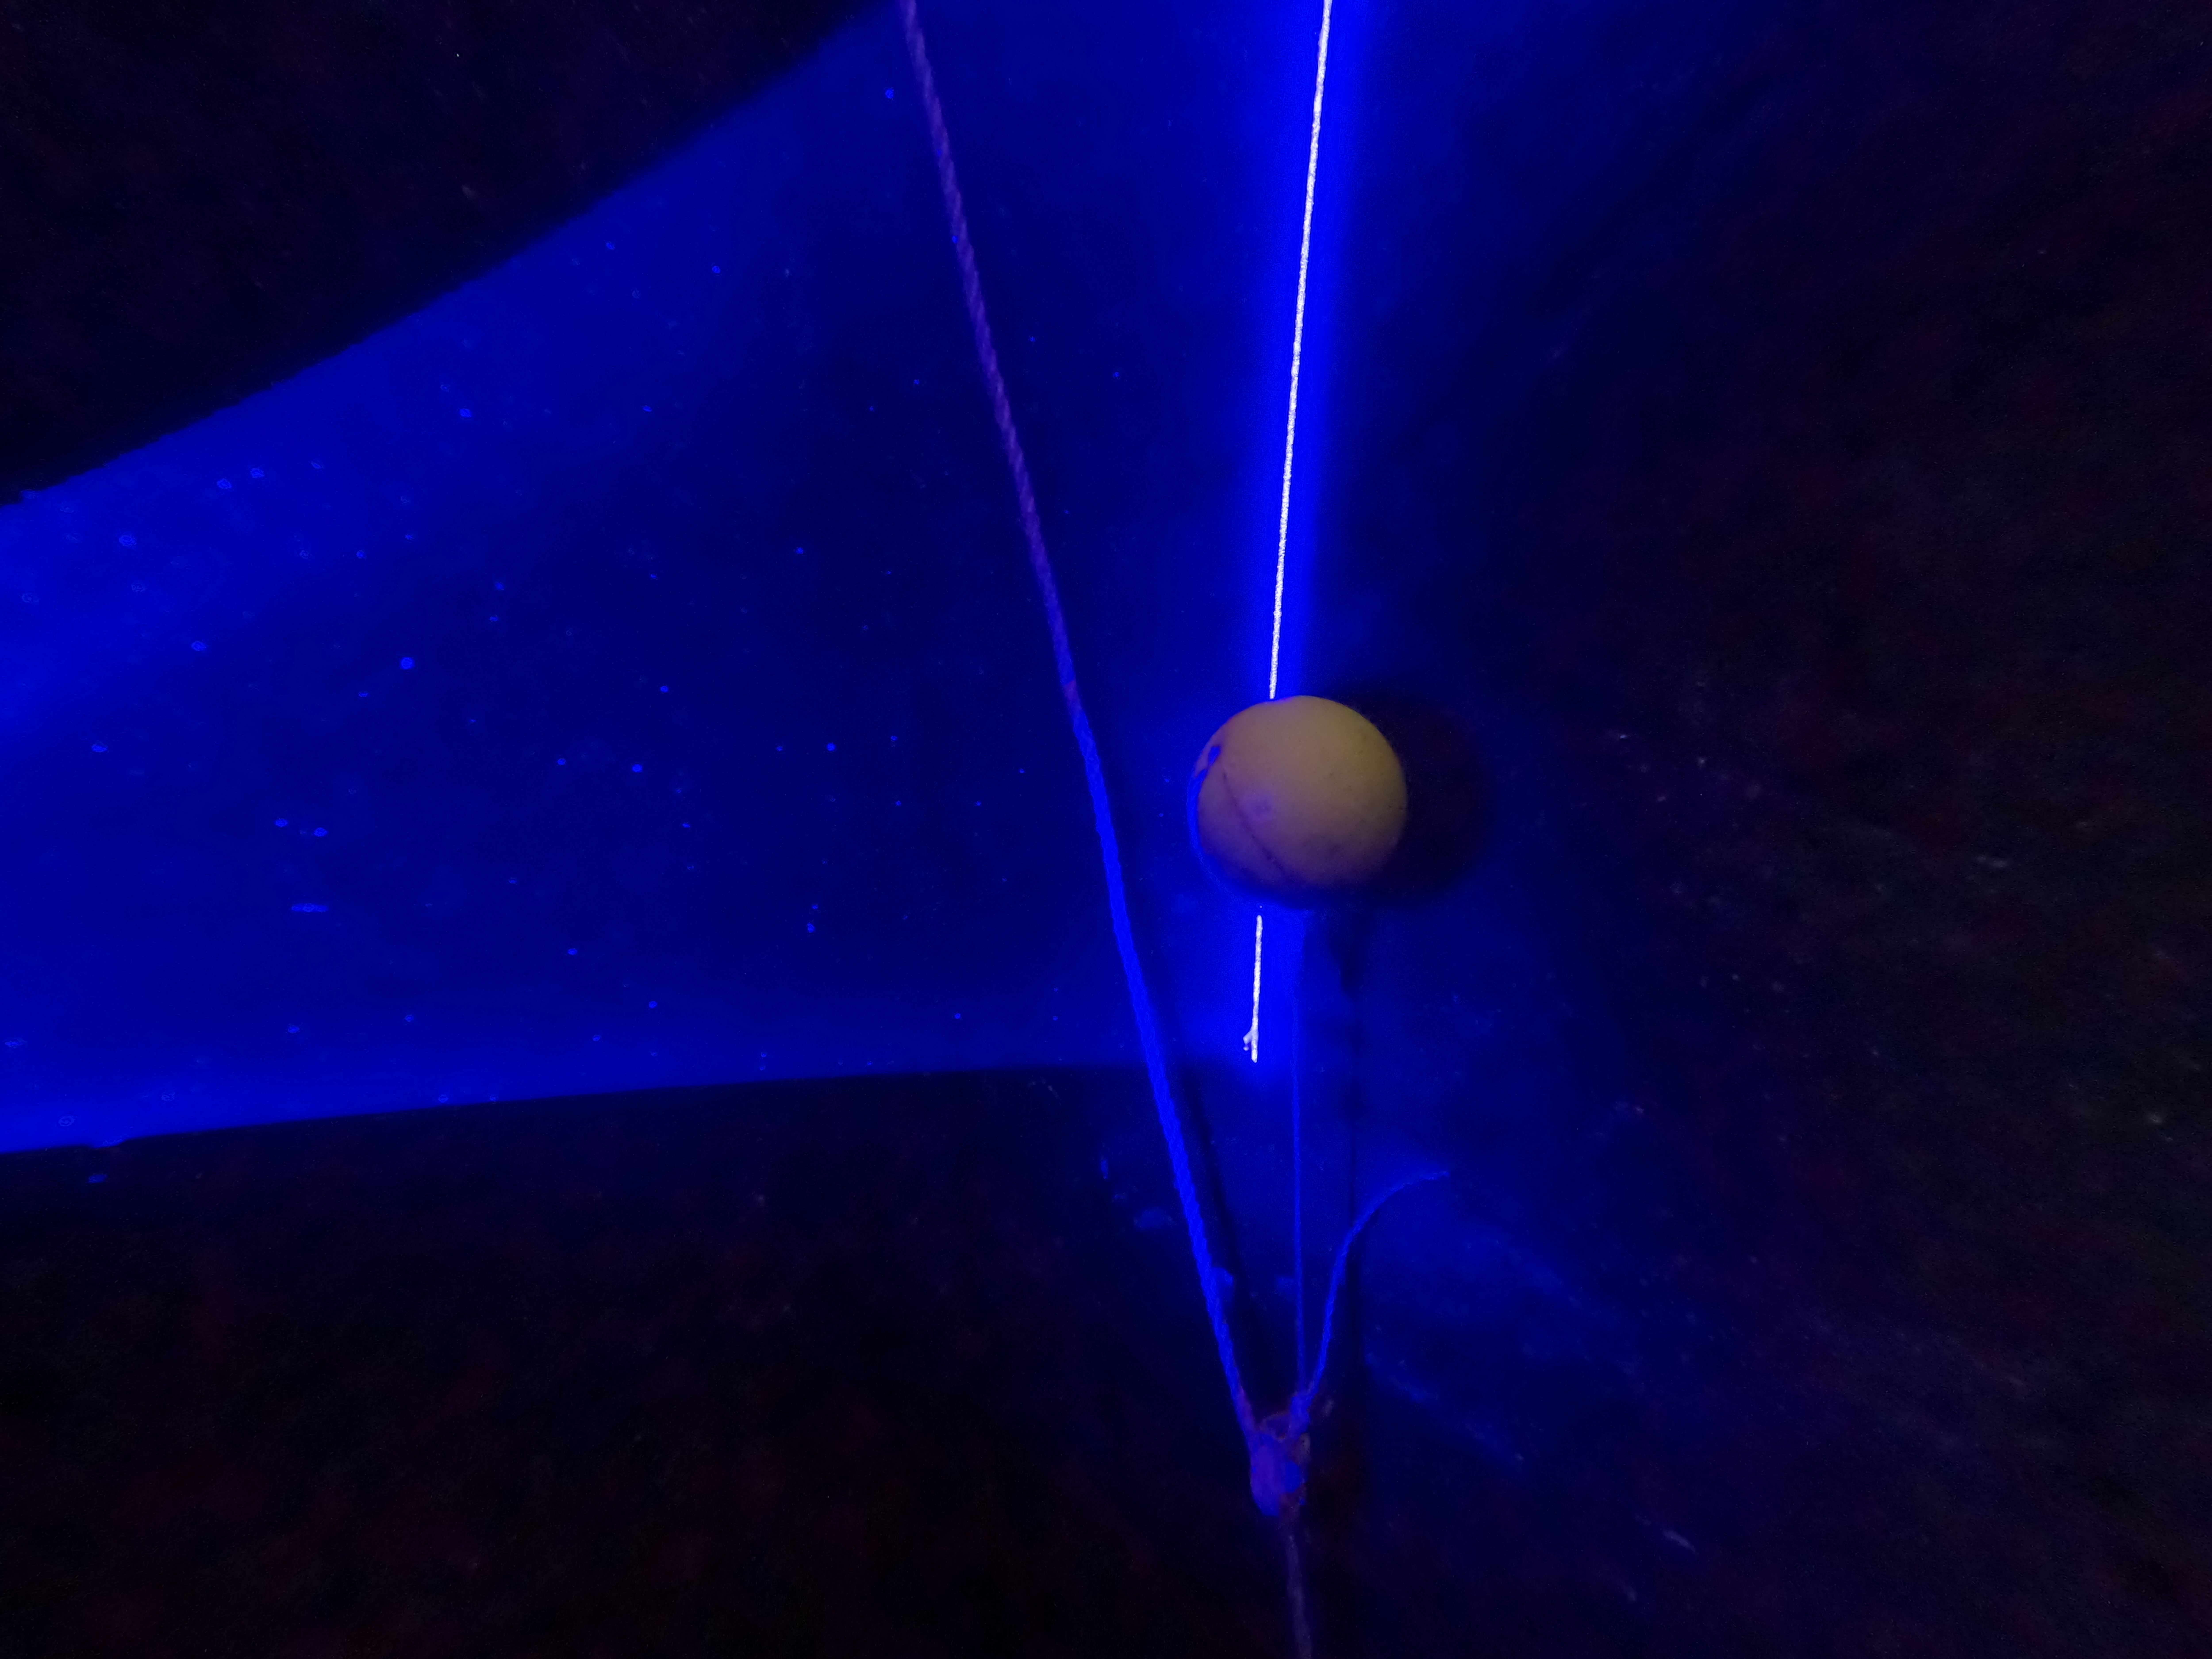

Supplement: Supplementary file 464 [file G0030764.pdf › 3/G0030764.pdf]

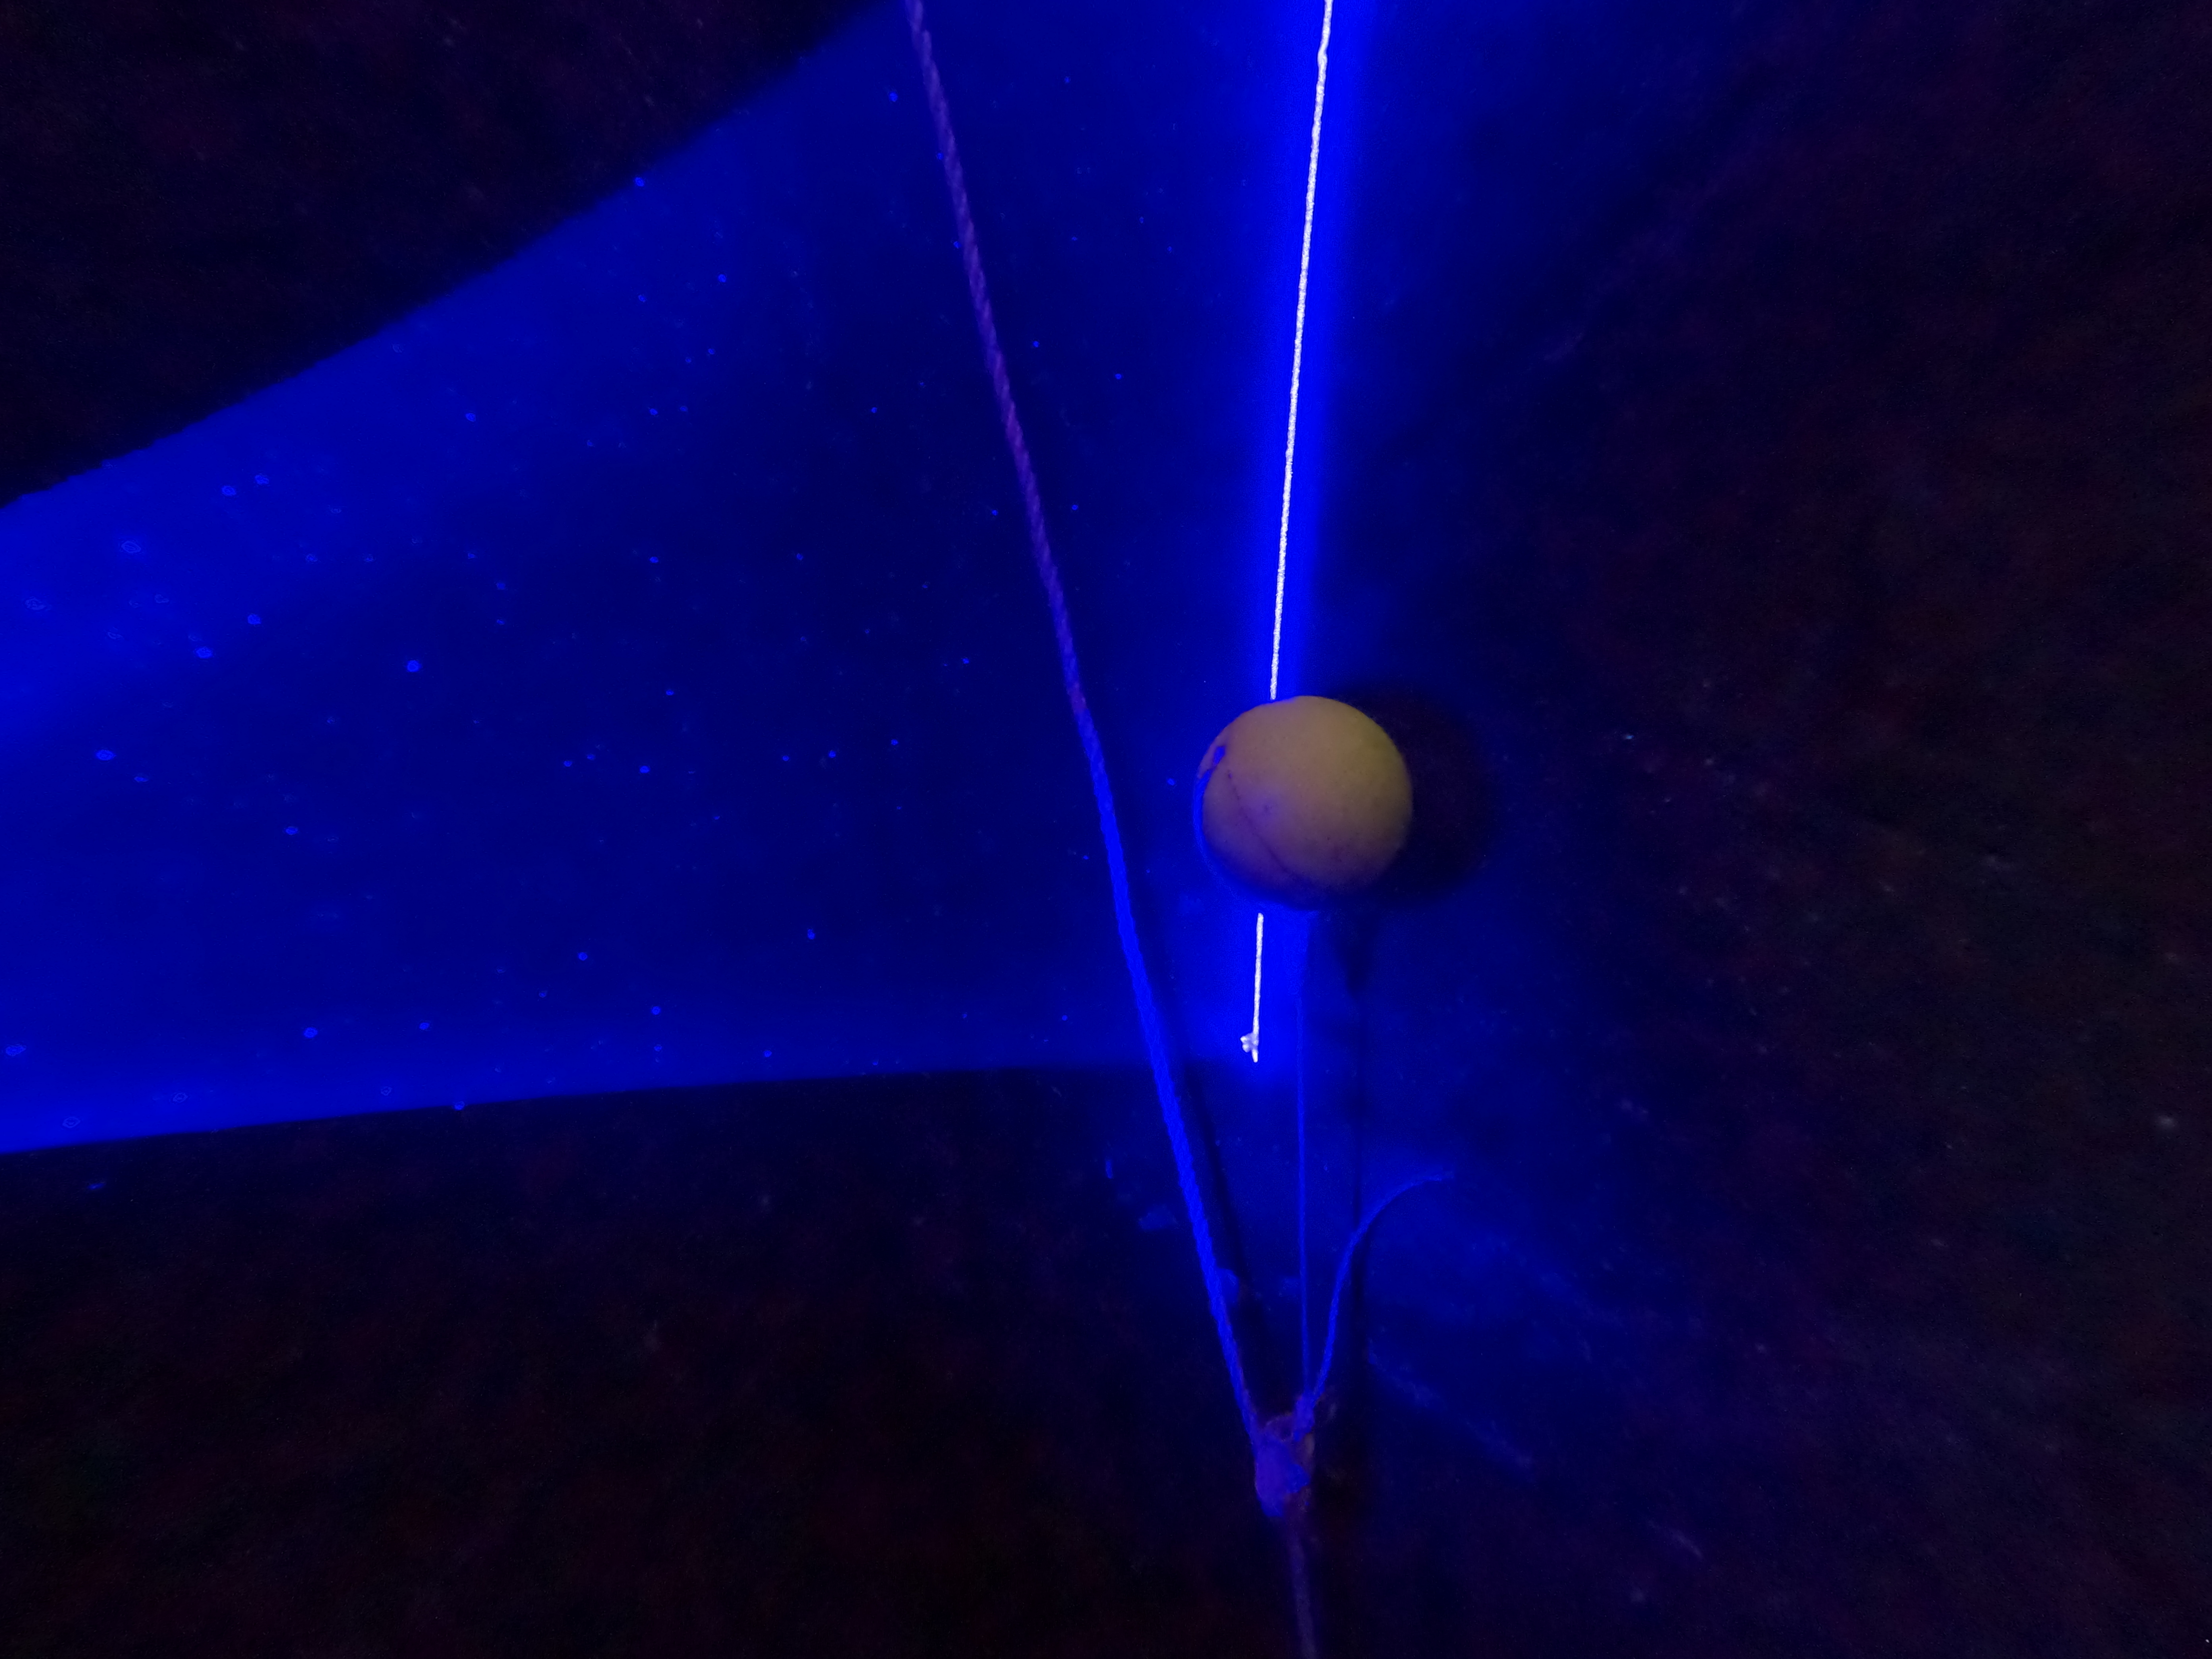

Supplement: Supplementary file 465 [file G0030765.pdf › 3/G0030765.pdf]

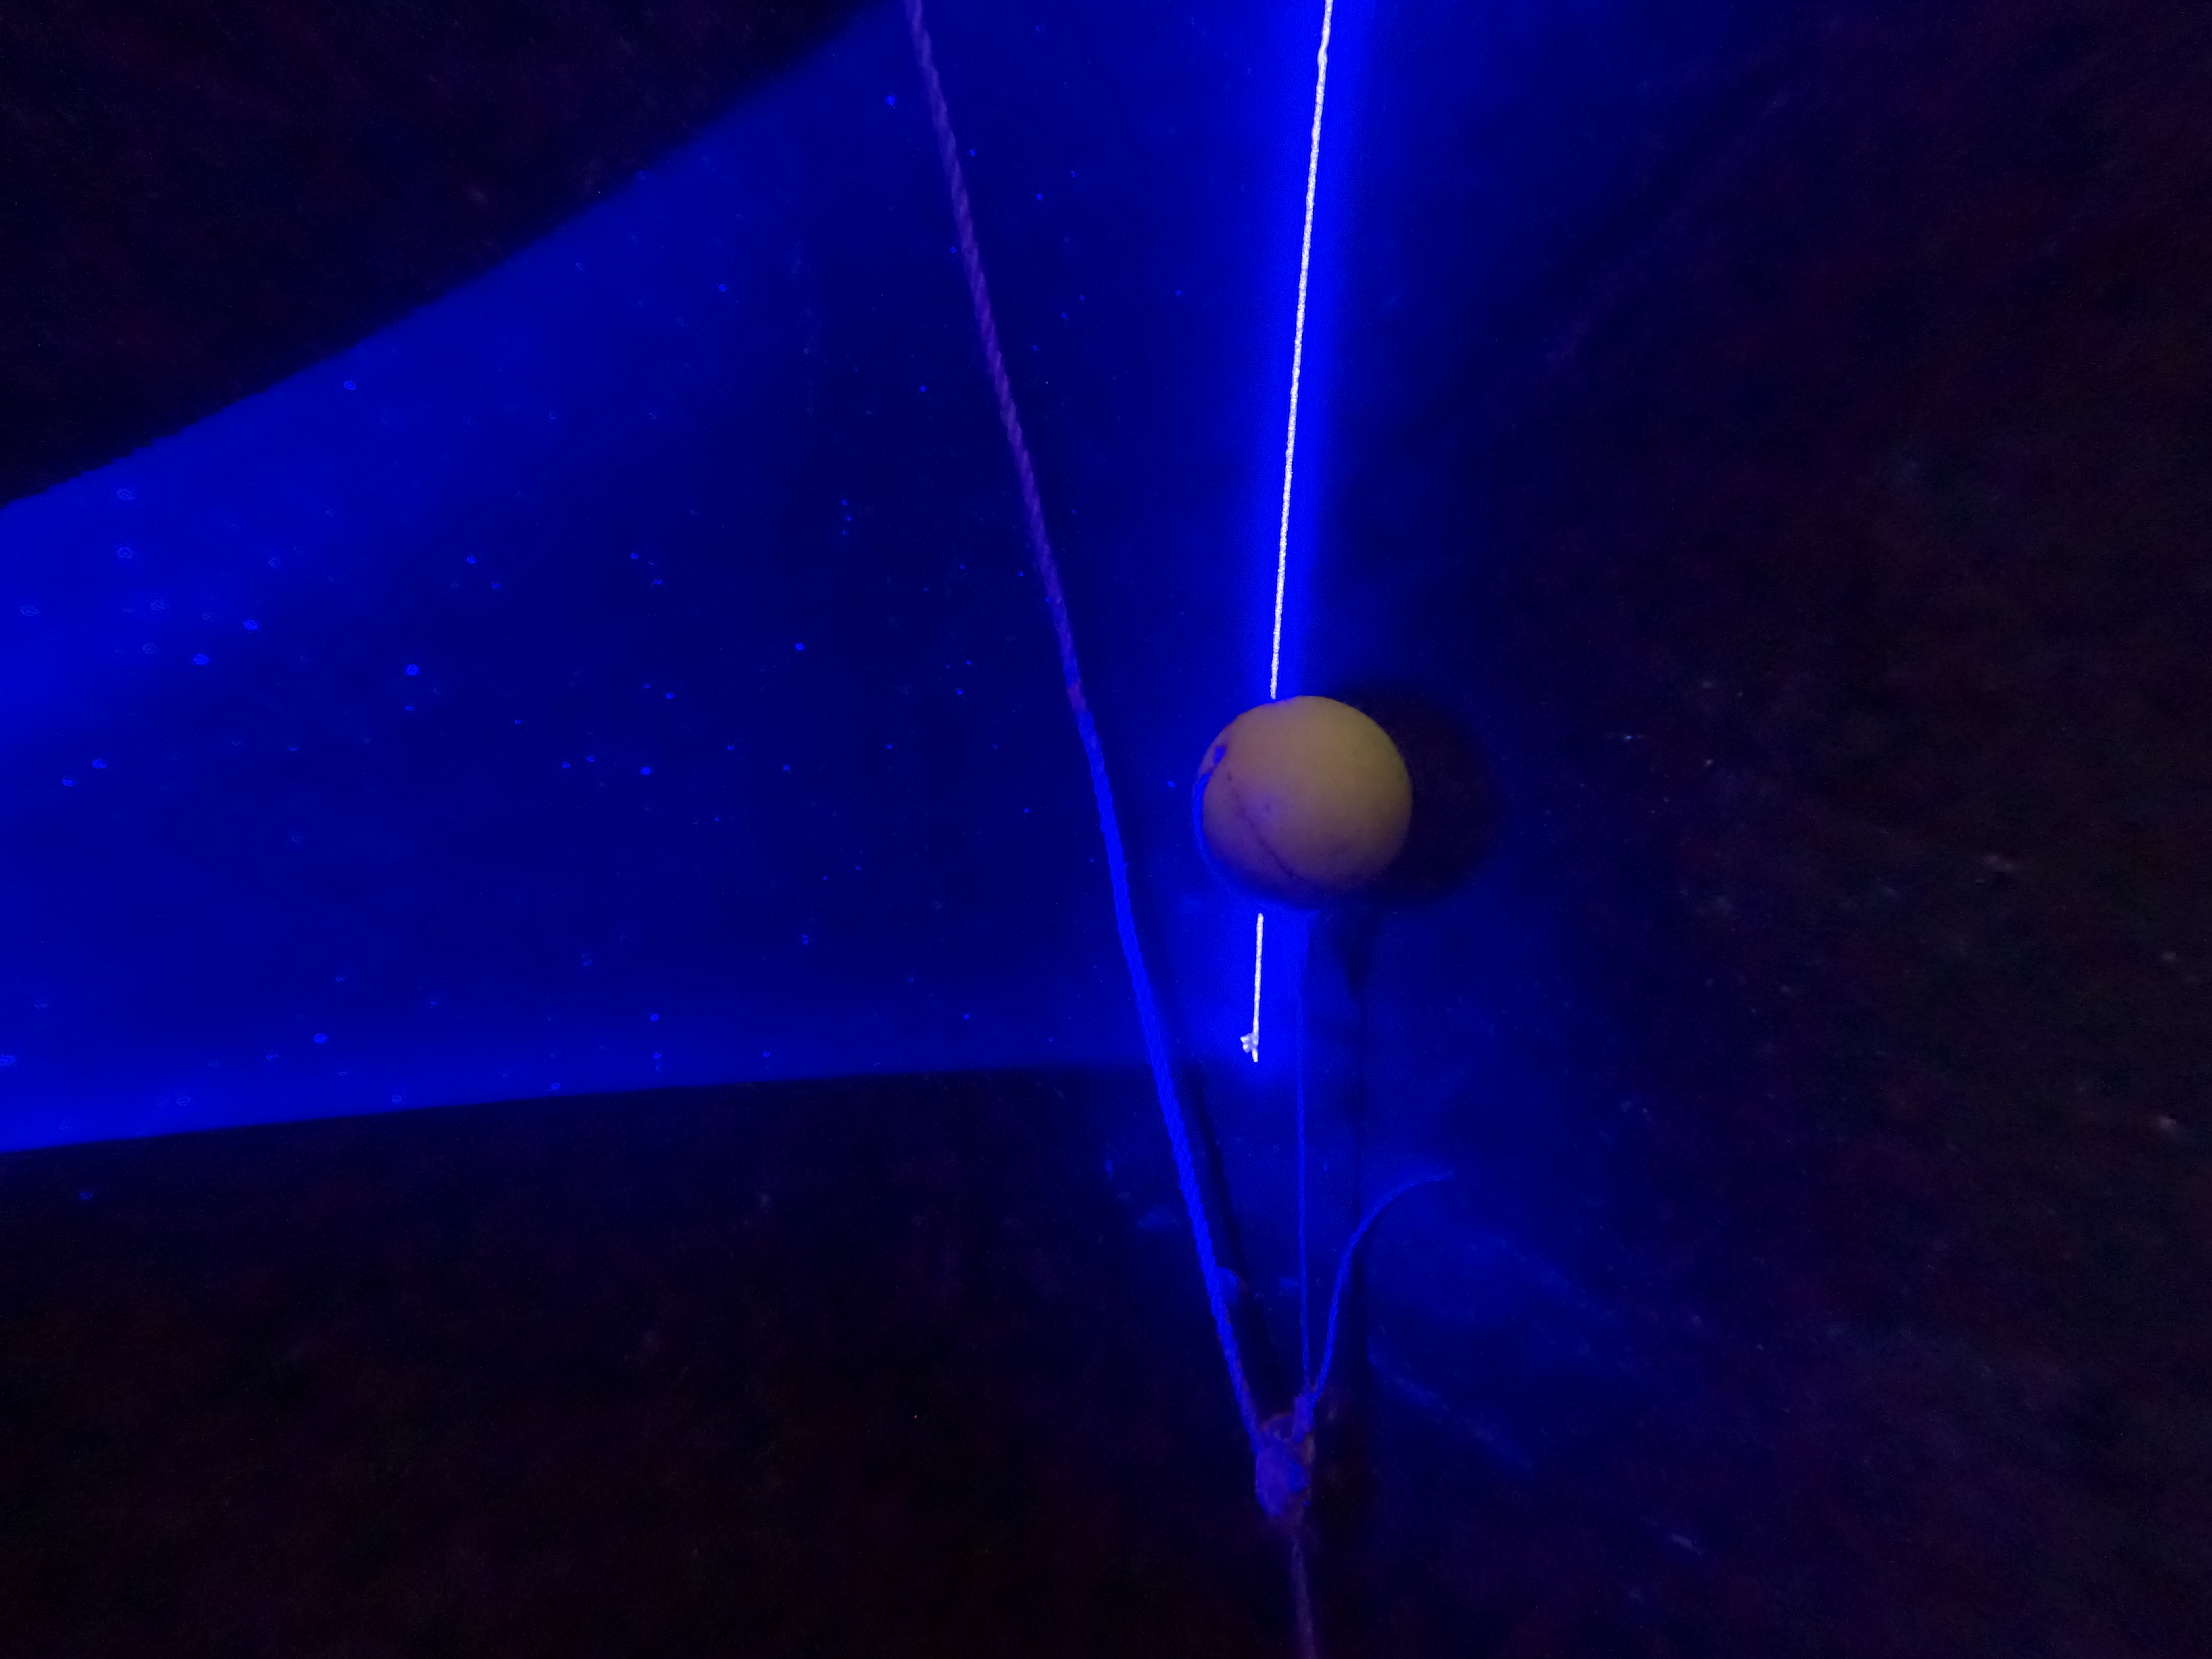

Supplement: Supplementary file 466 [file G0030766.pdf › 3/G0030766.pdf]

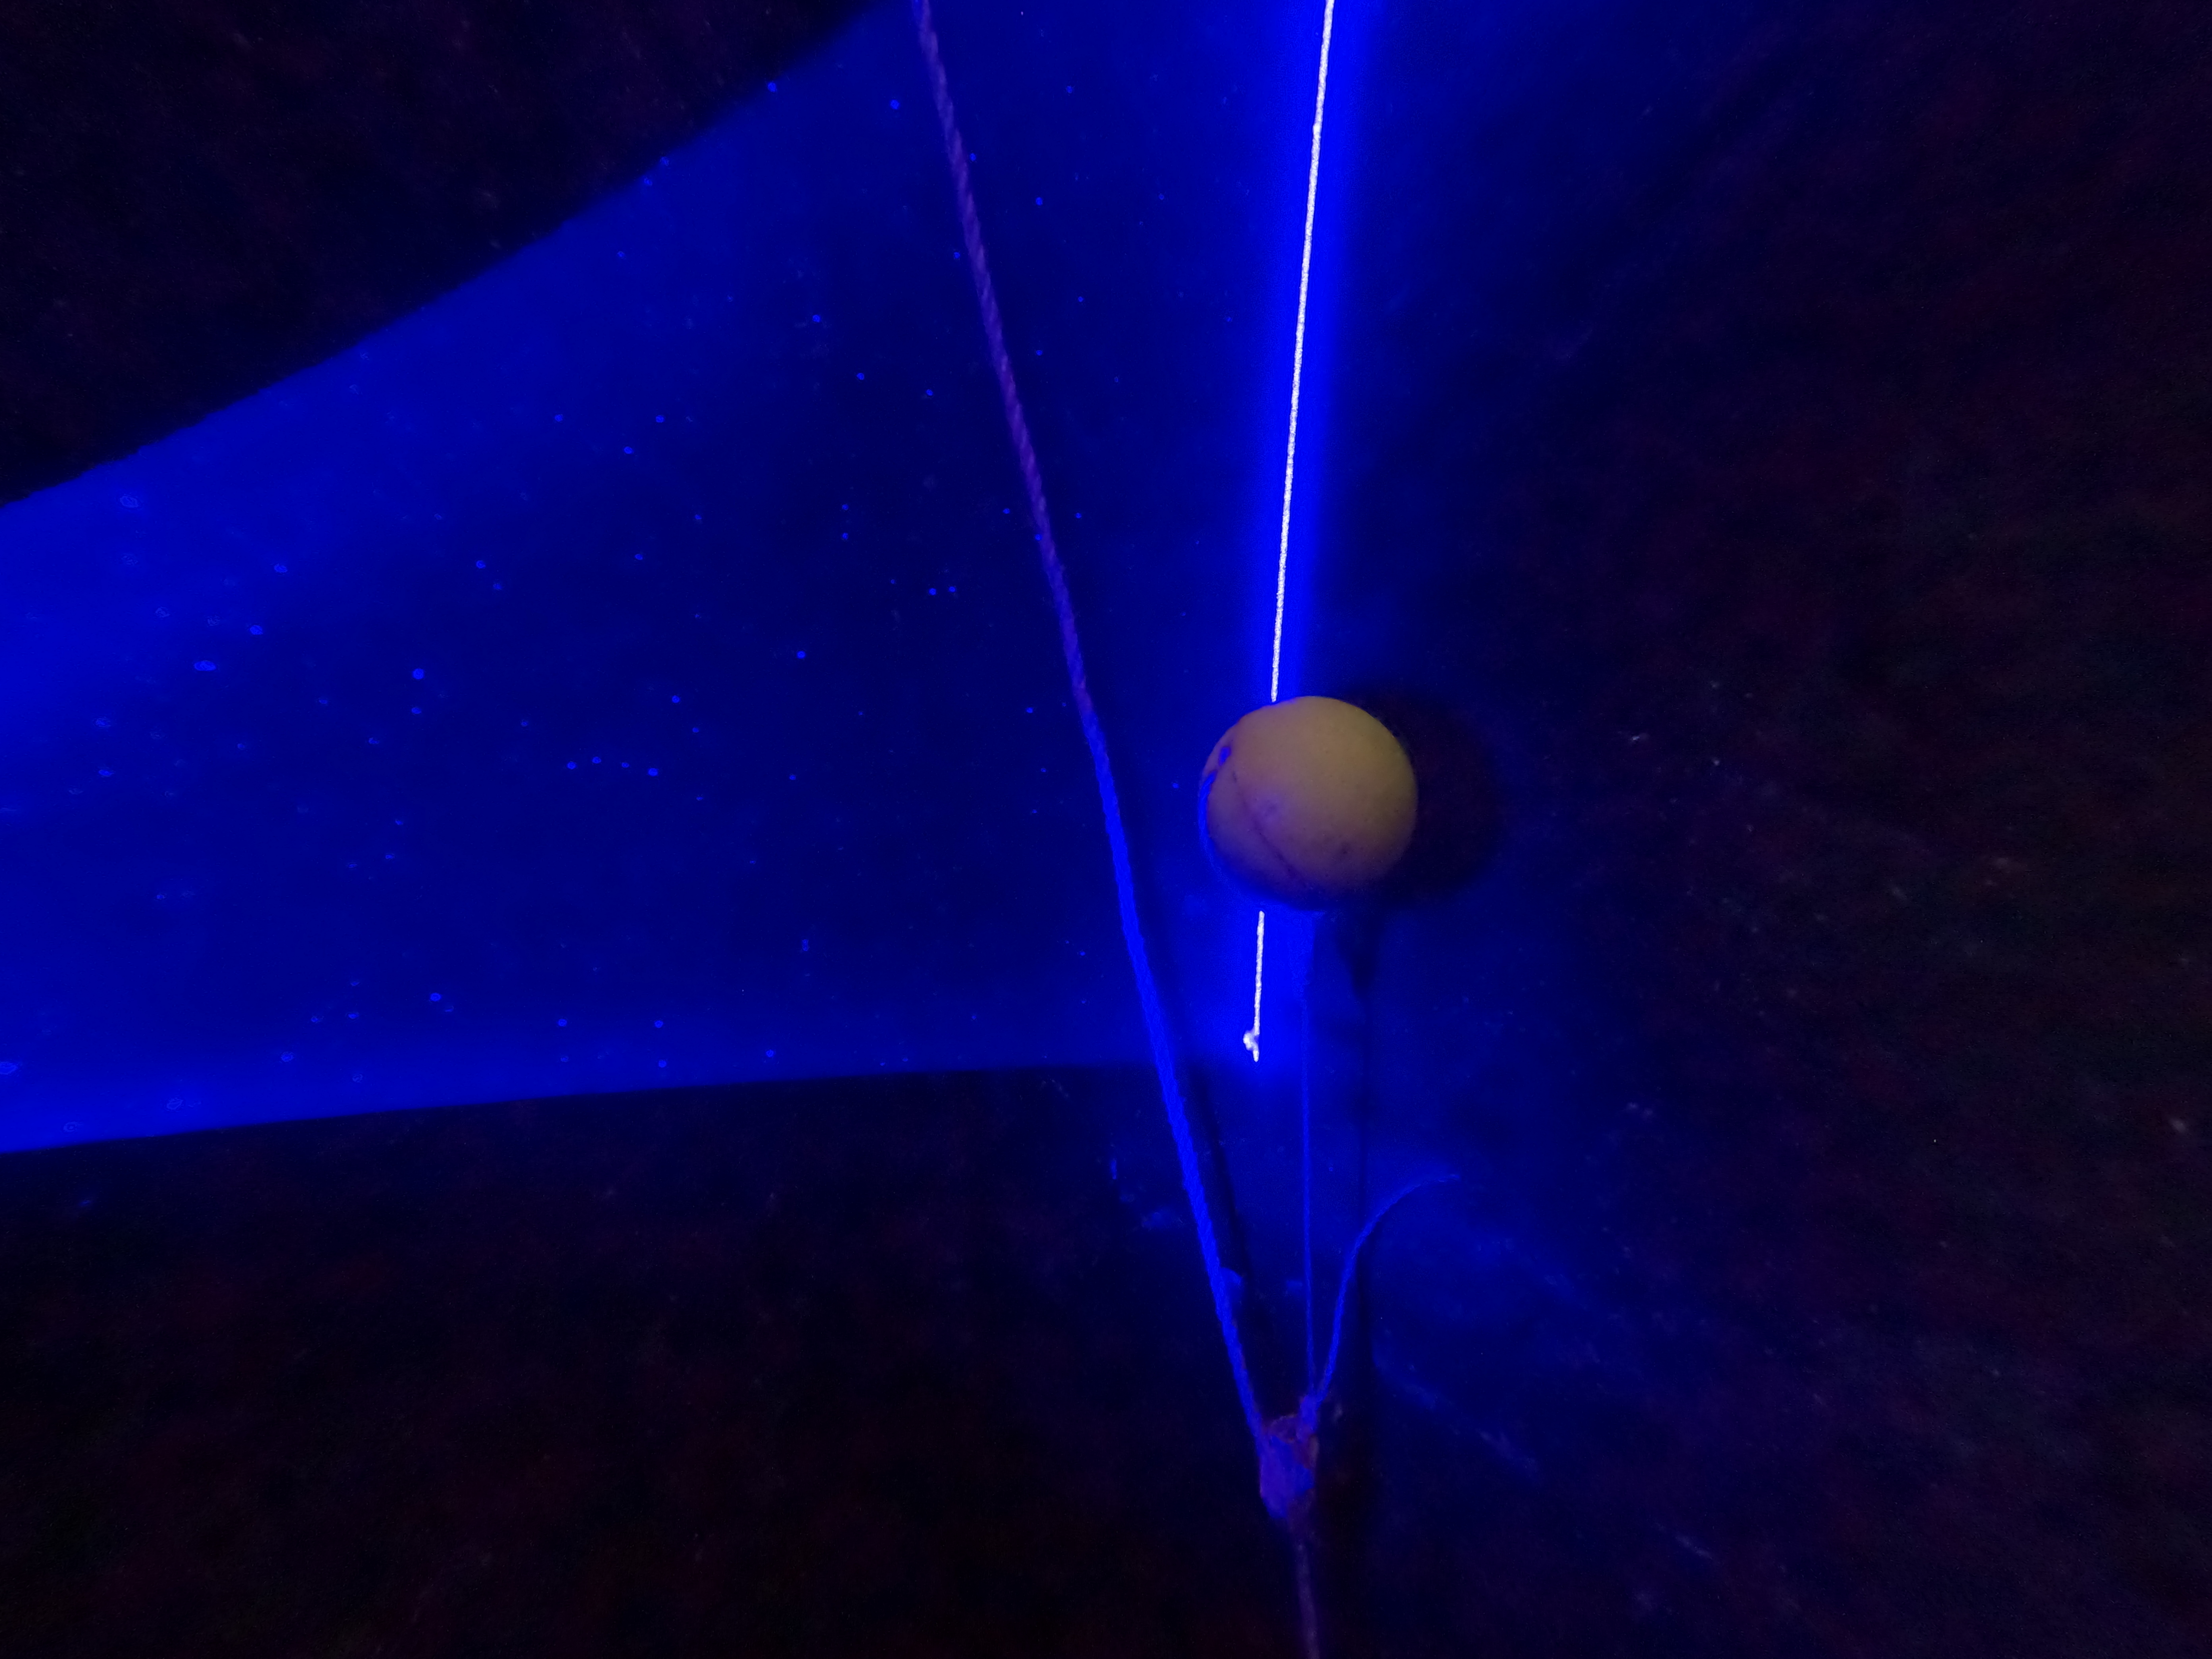

Supplement: Supplementary file 467 [file G0030767.pdf › 3/G0030767.pdf]

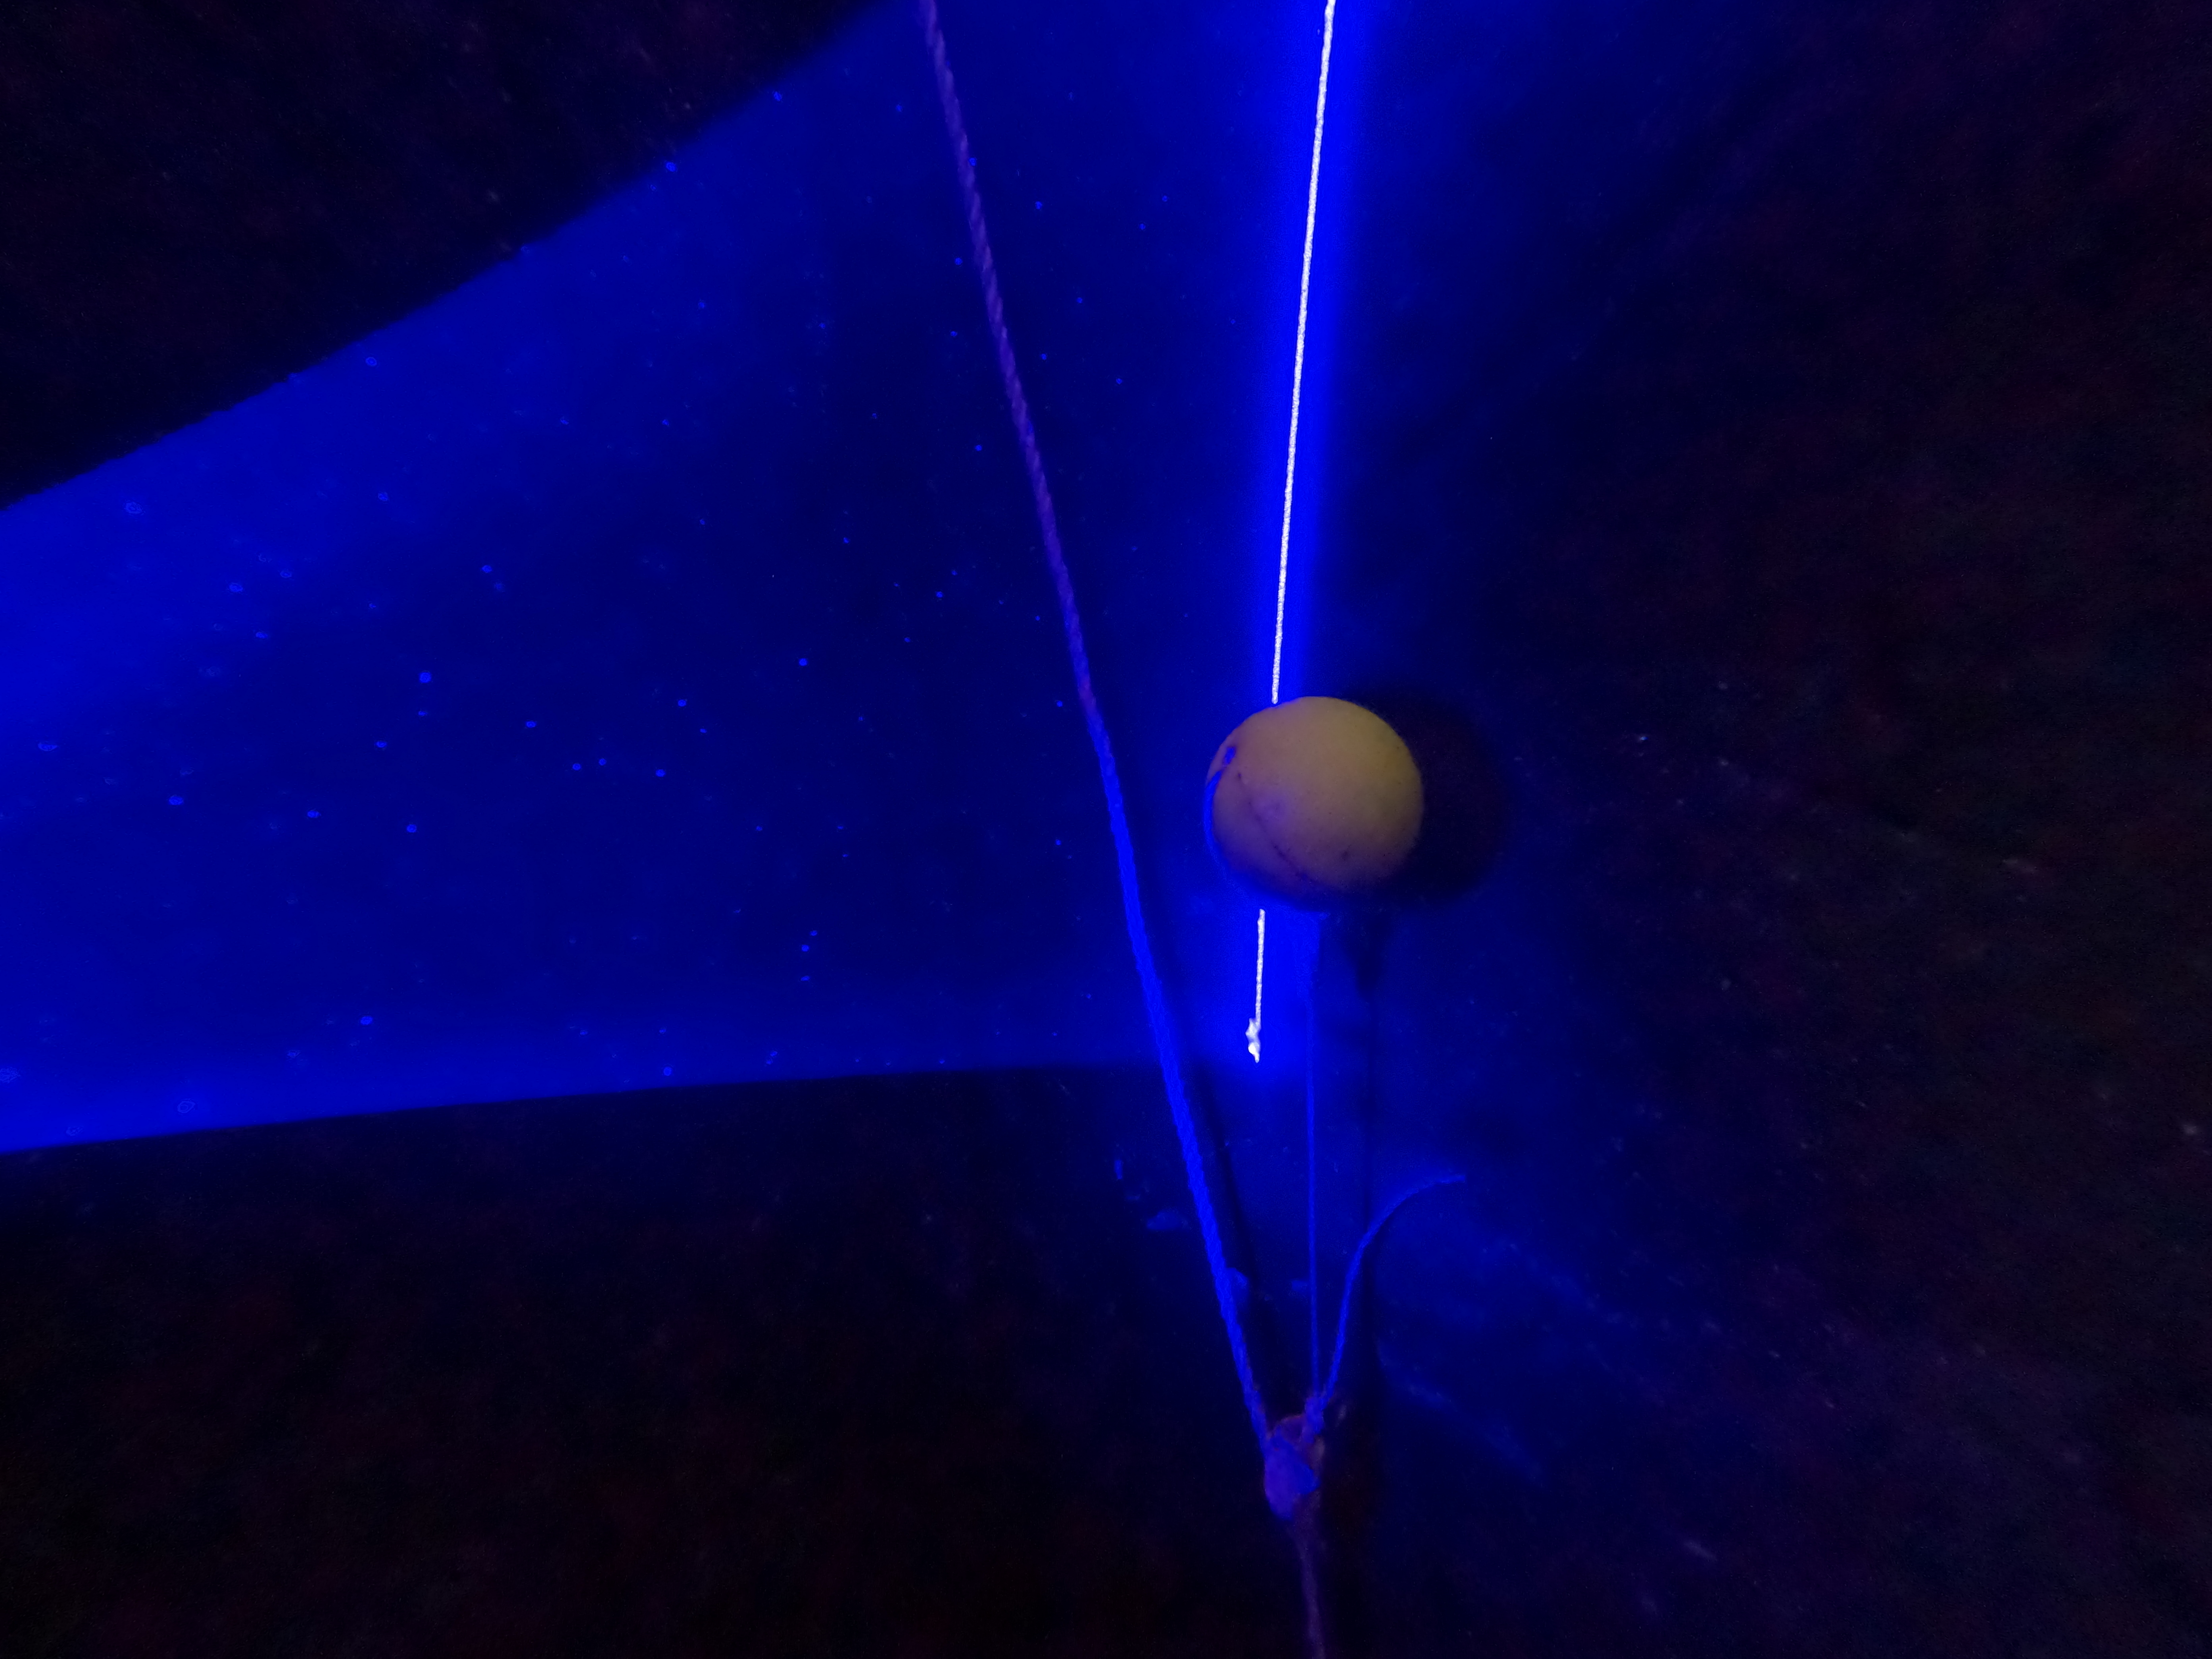

Supplement: Supplementary file 468 [file G0030768.pdf › 3/G0030768.pdf]

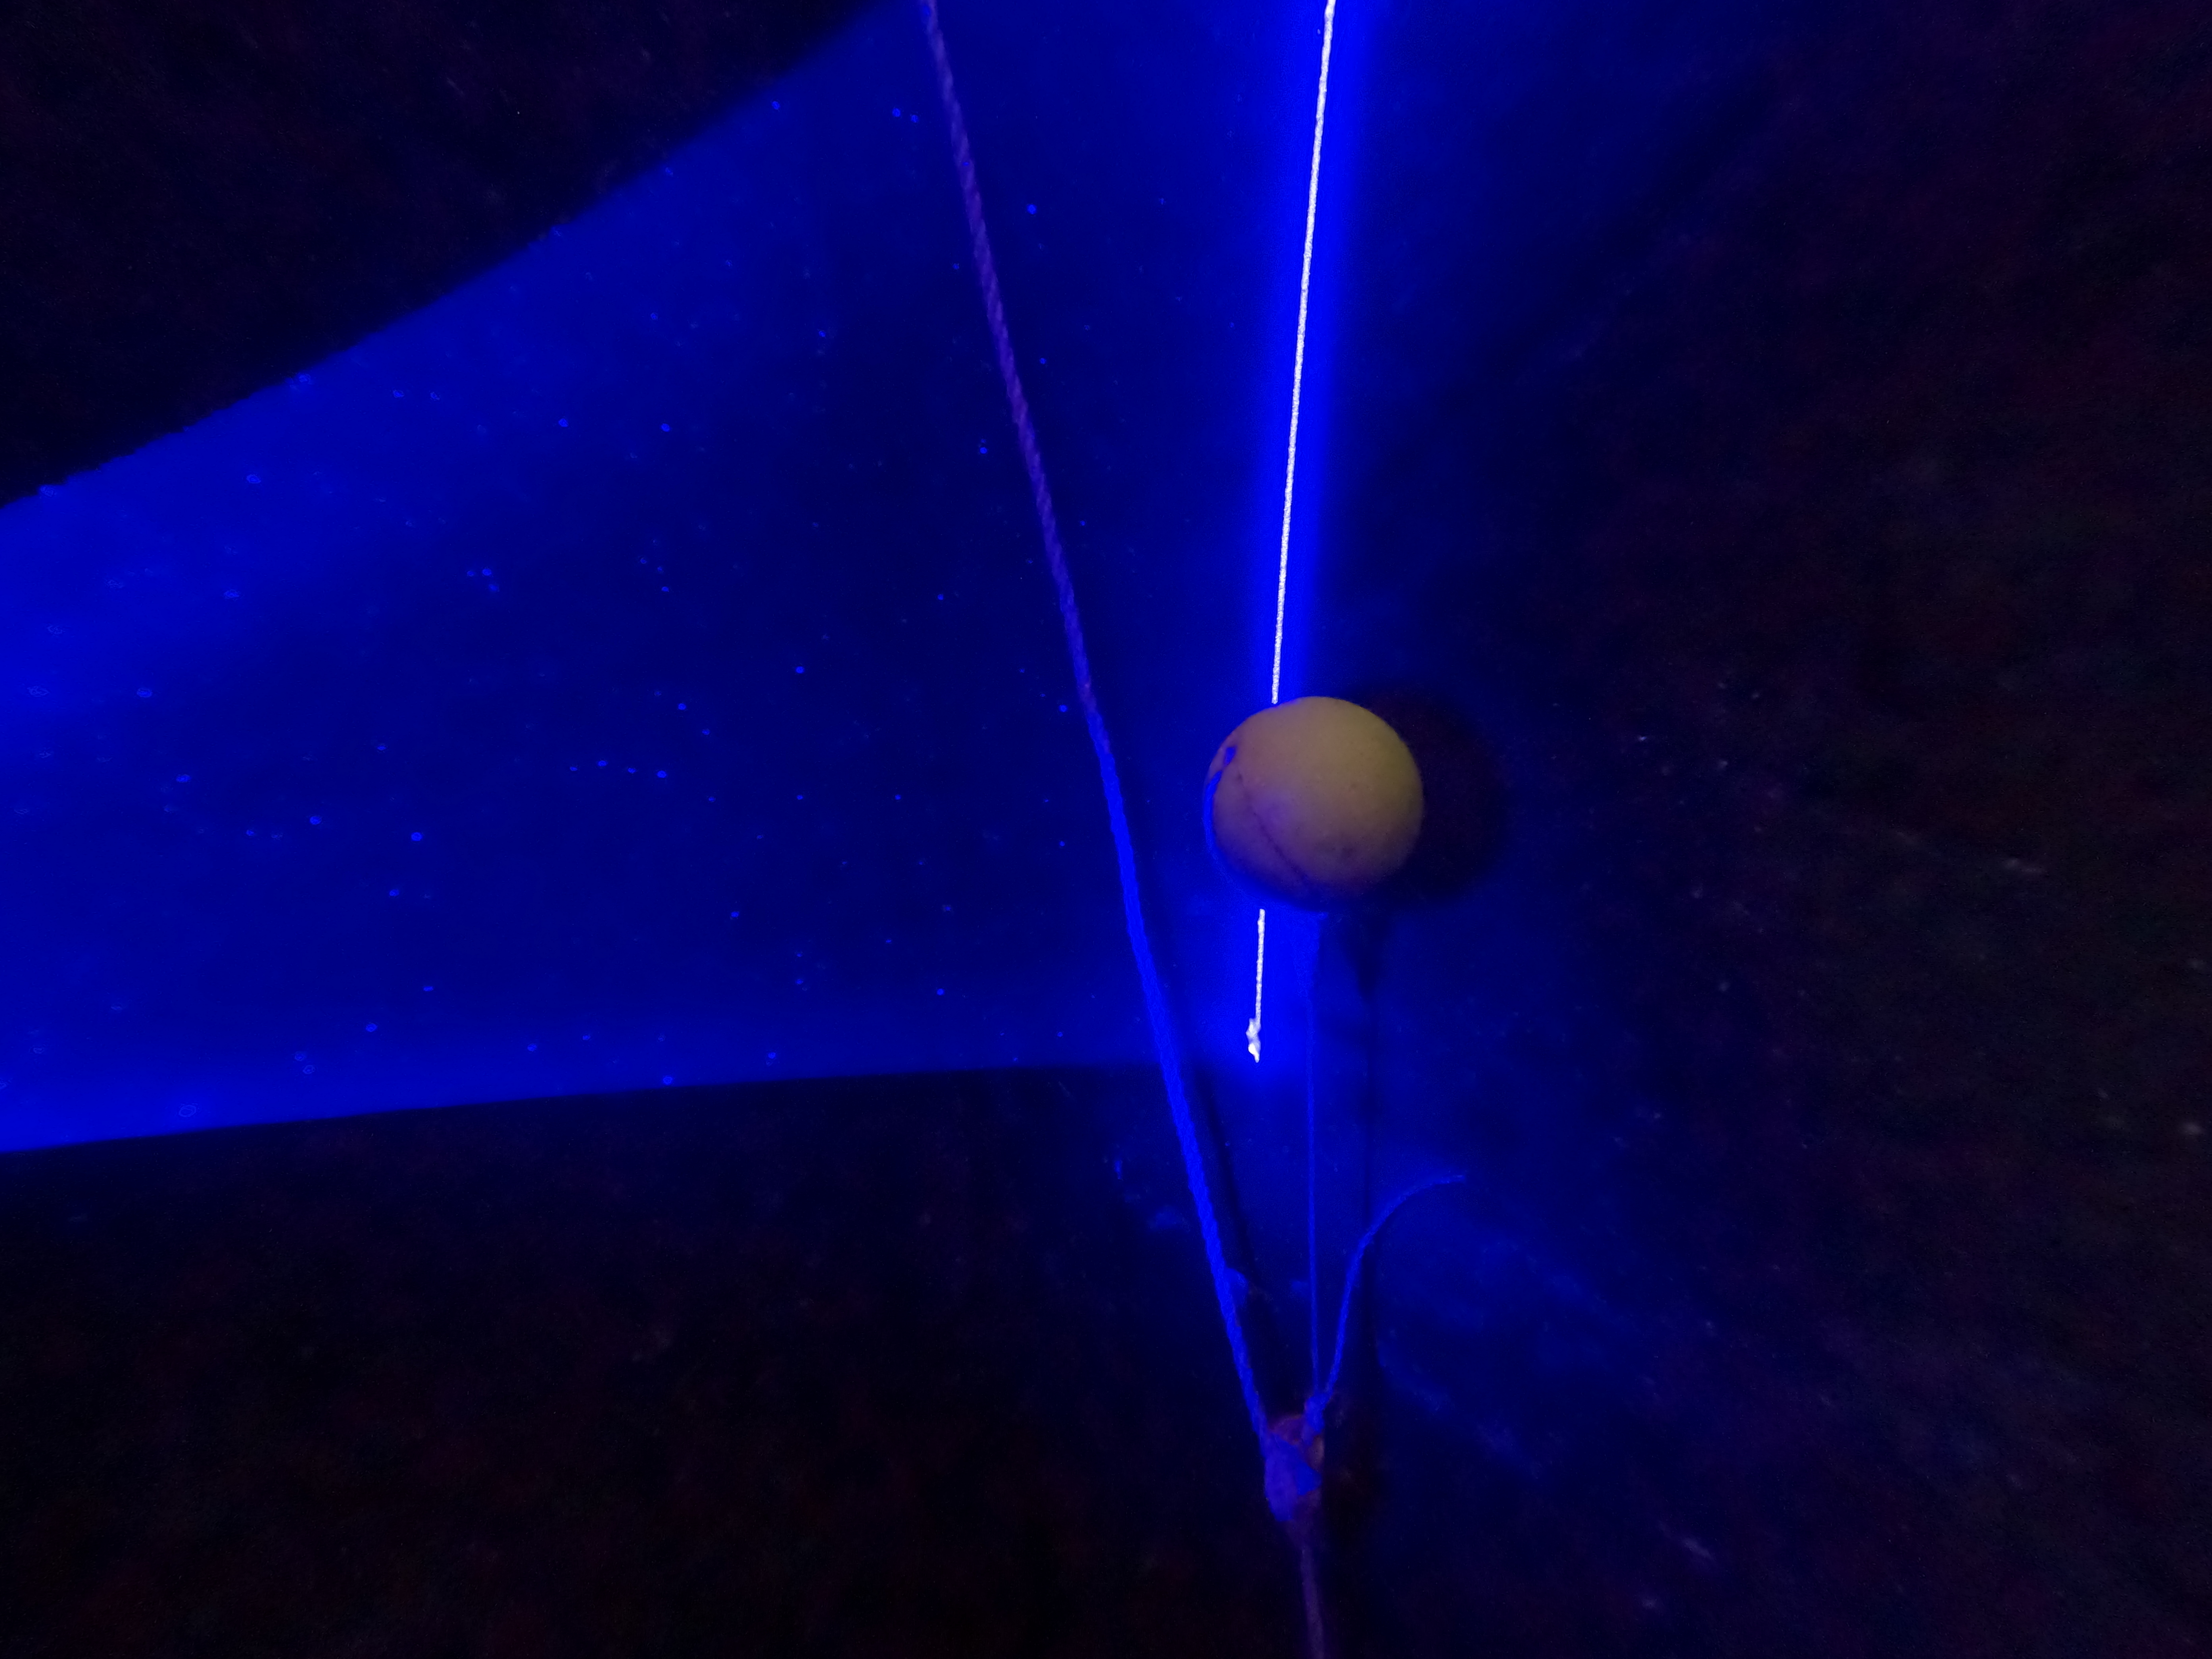

Supplement: Supplementary file 469 [file G0030769.pdf › 3/G0030769.pdf]

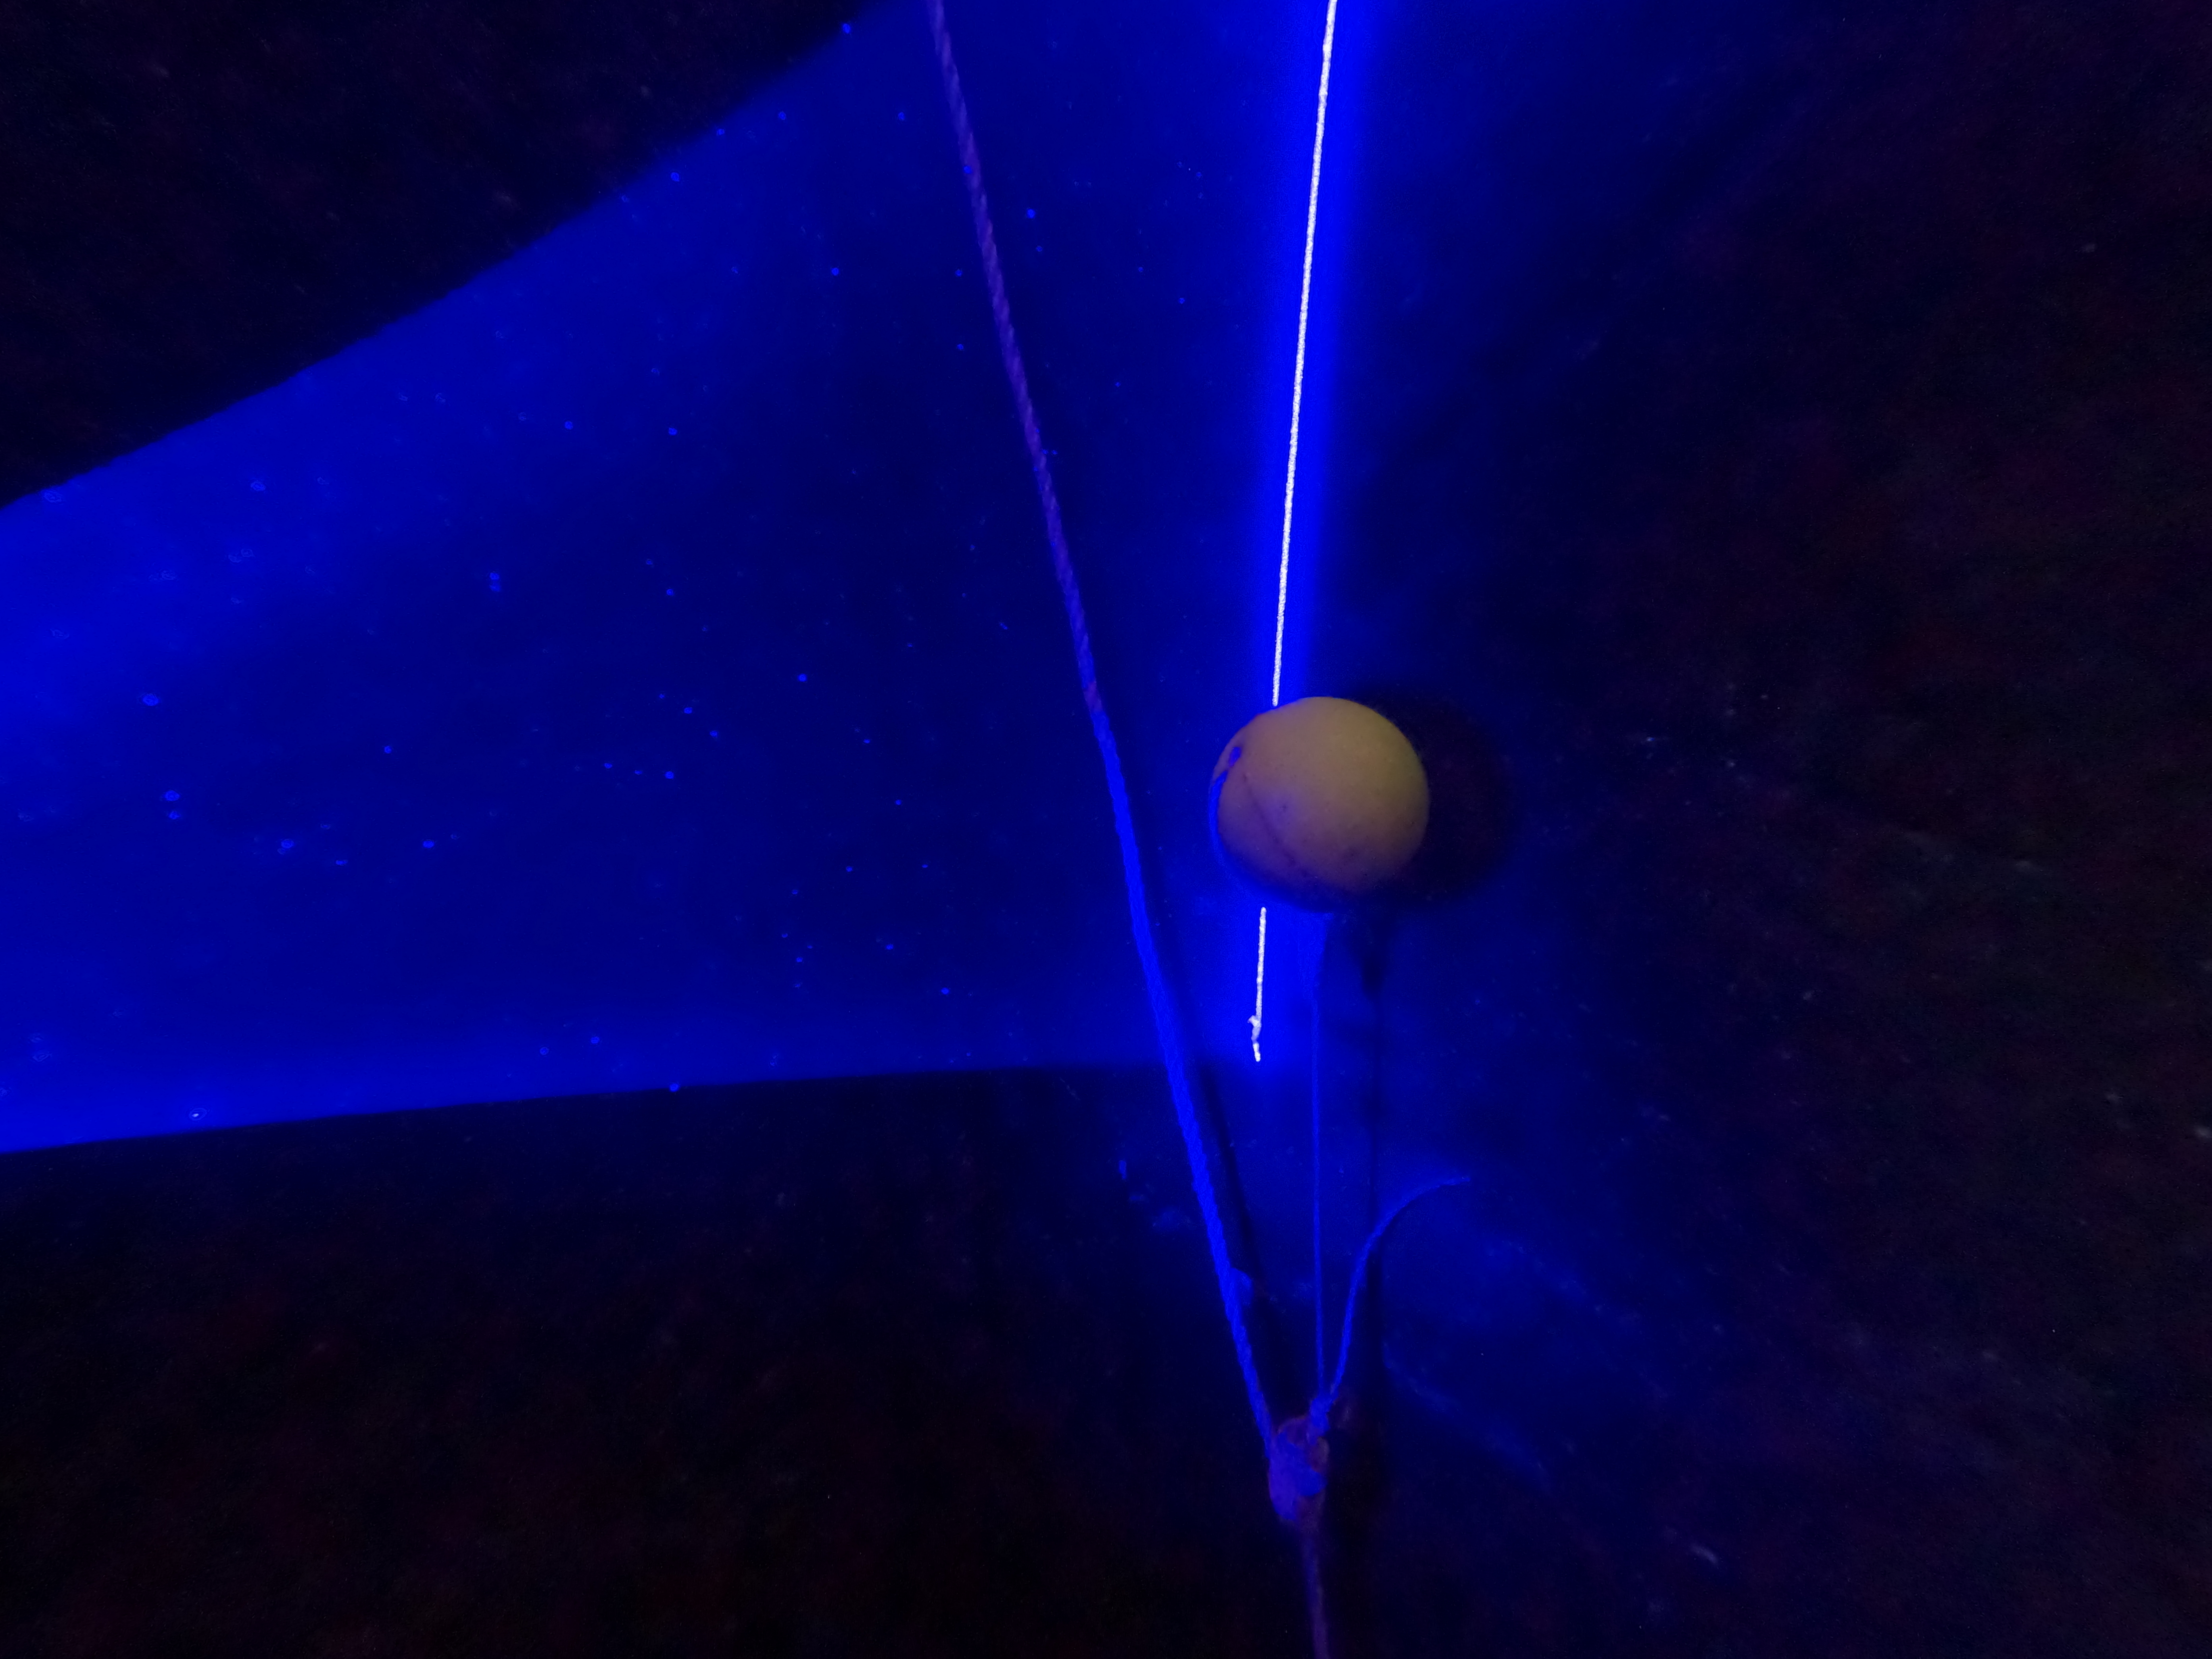

Supplement: Supplementary file 470 [file G0030770.pdf › 3/G0030770.pdf]

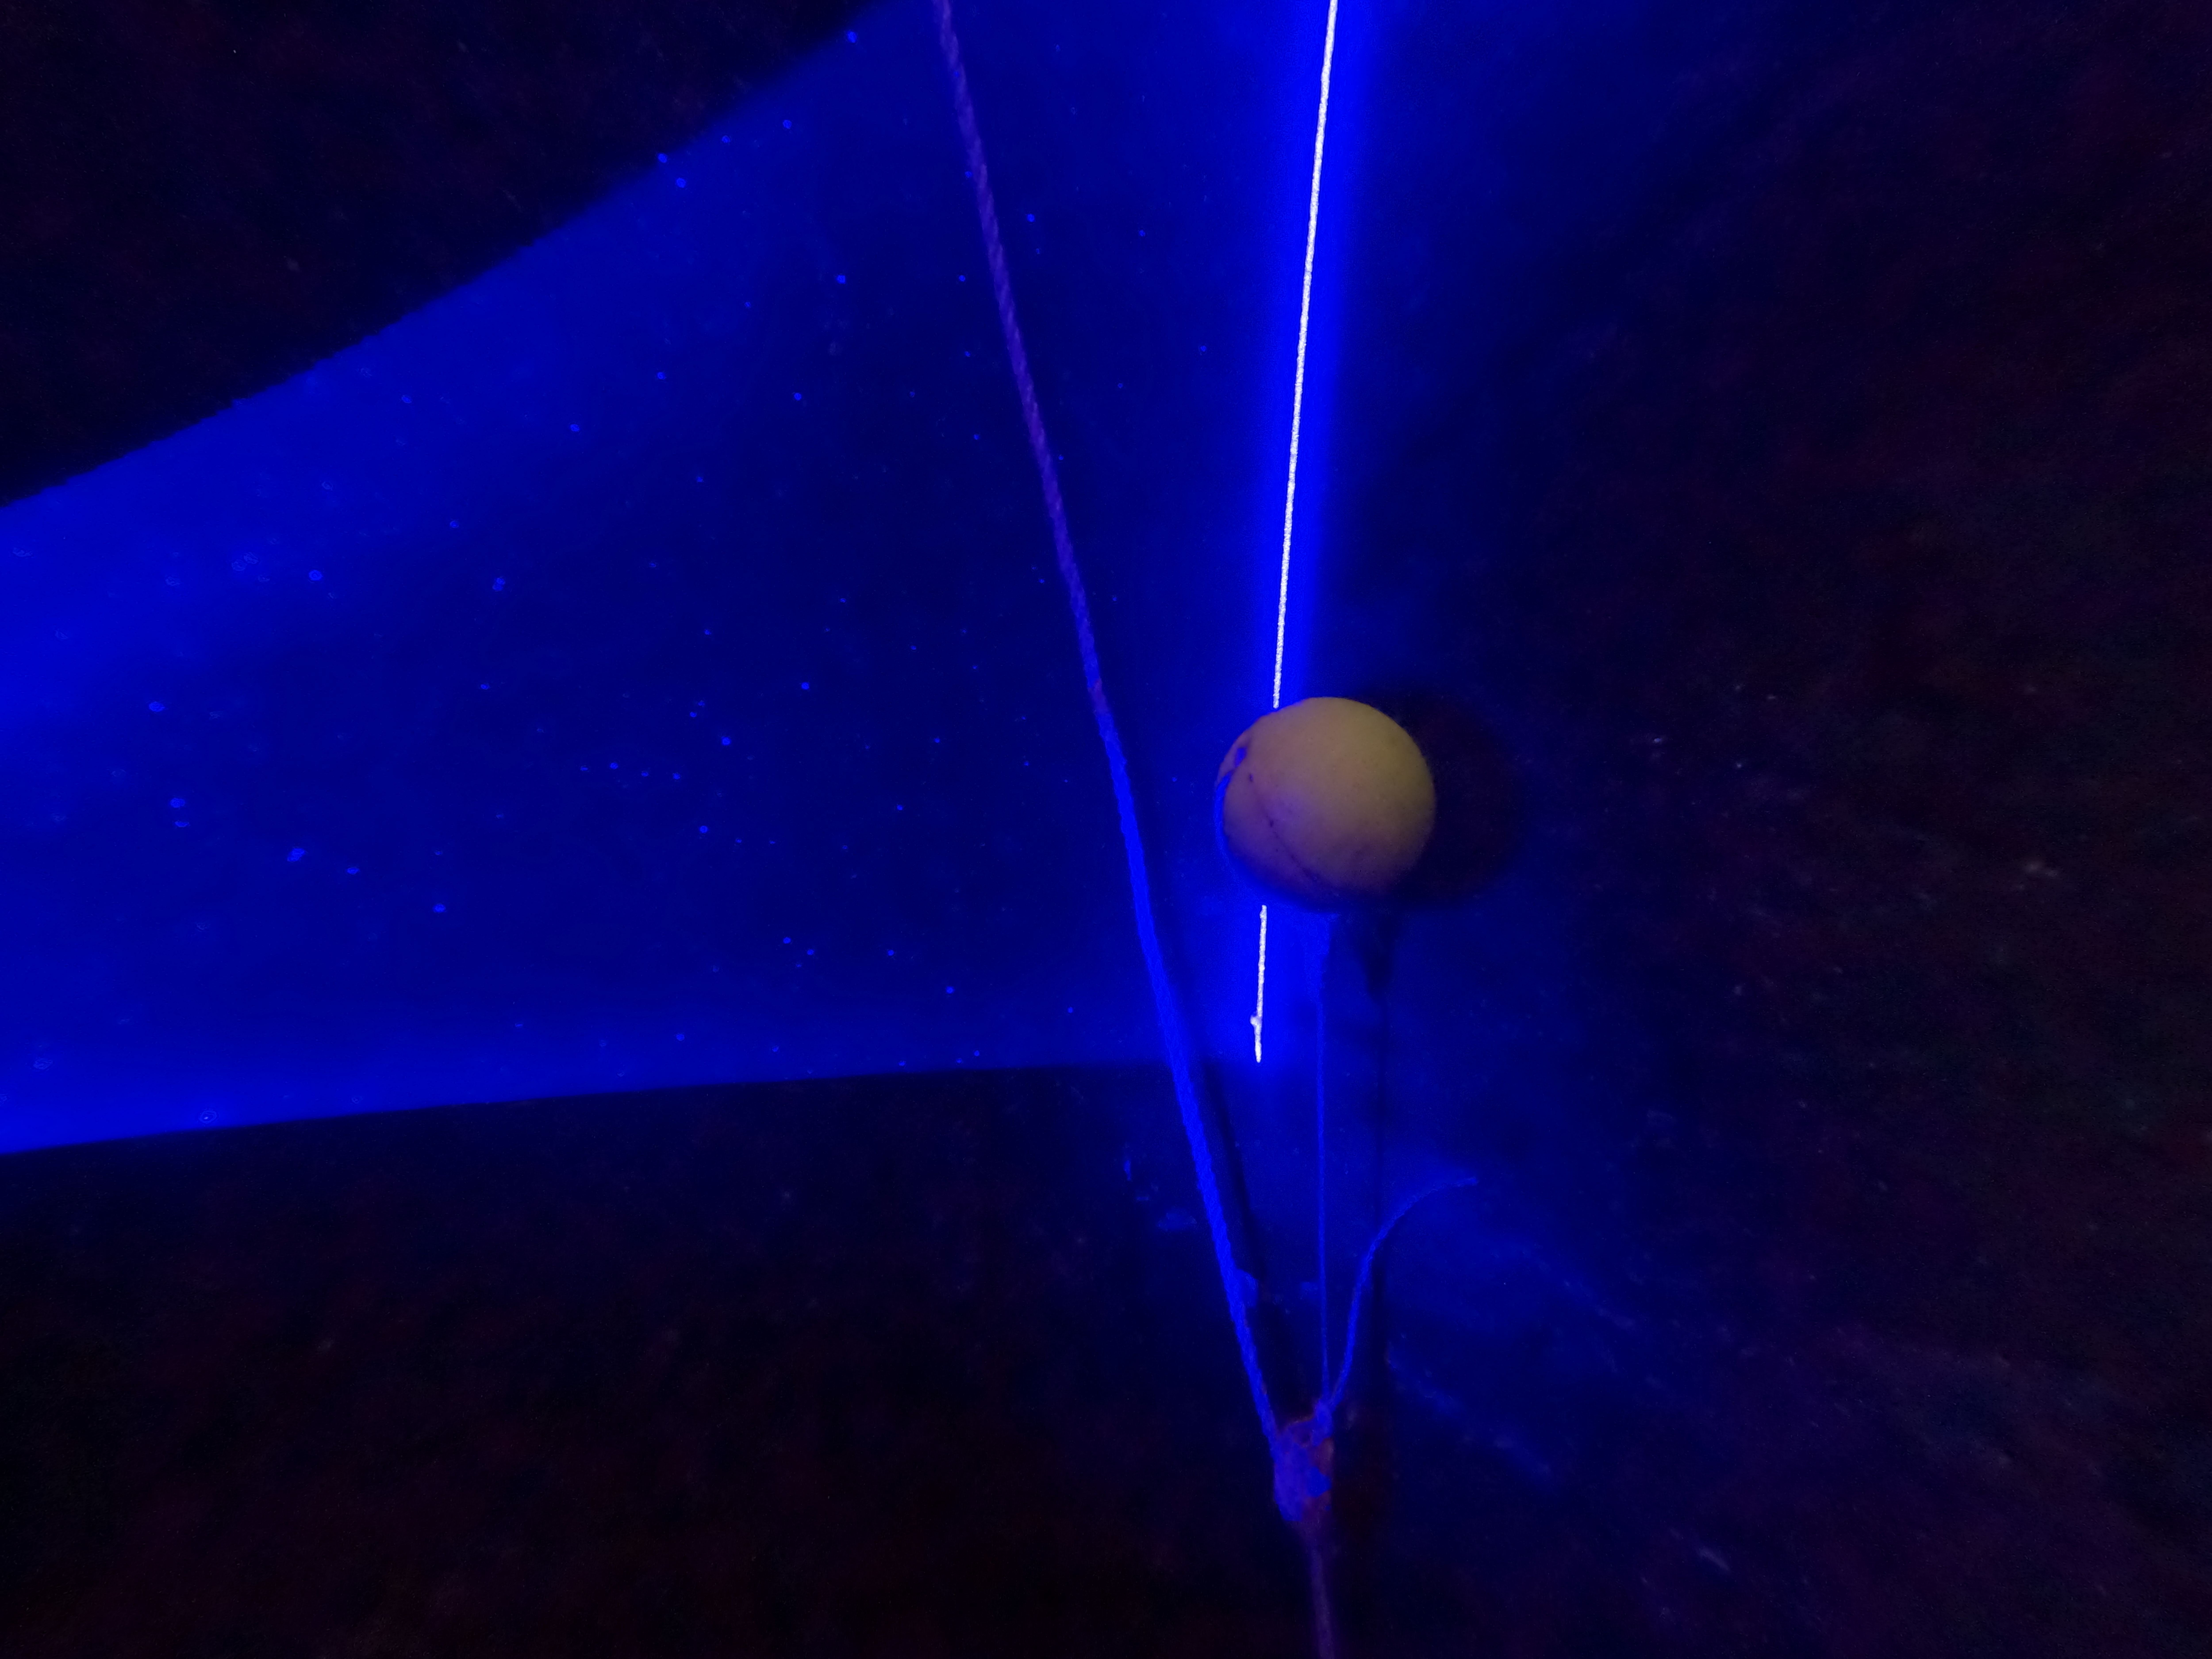

Supplement: Supplementary file 471 [file G0030771.pdf › 3/G0030771.pdf]

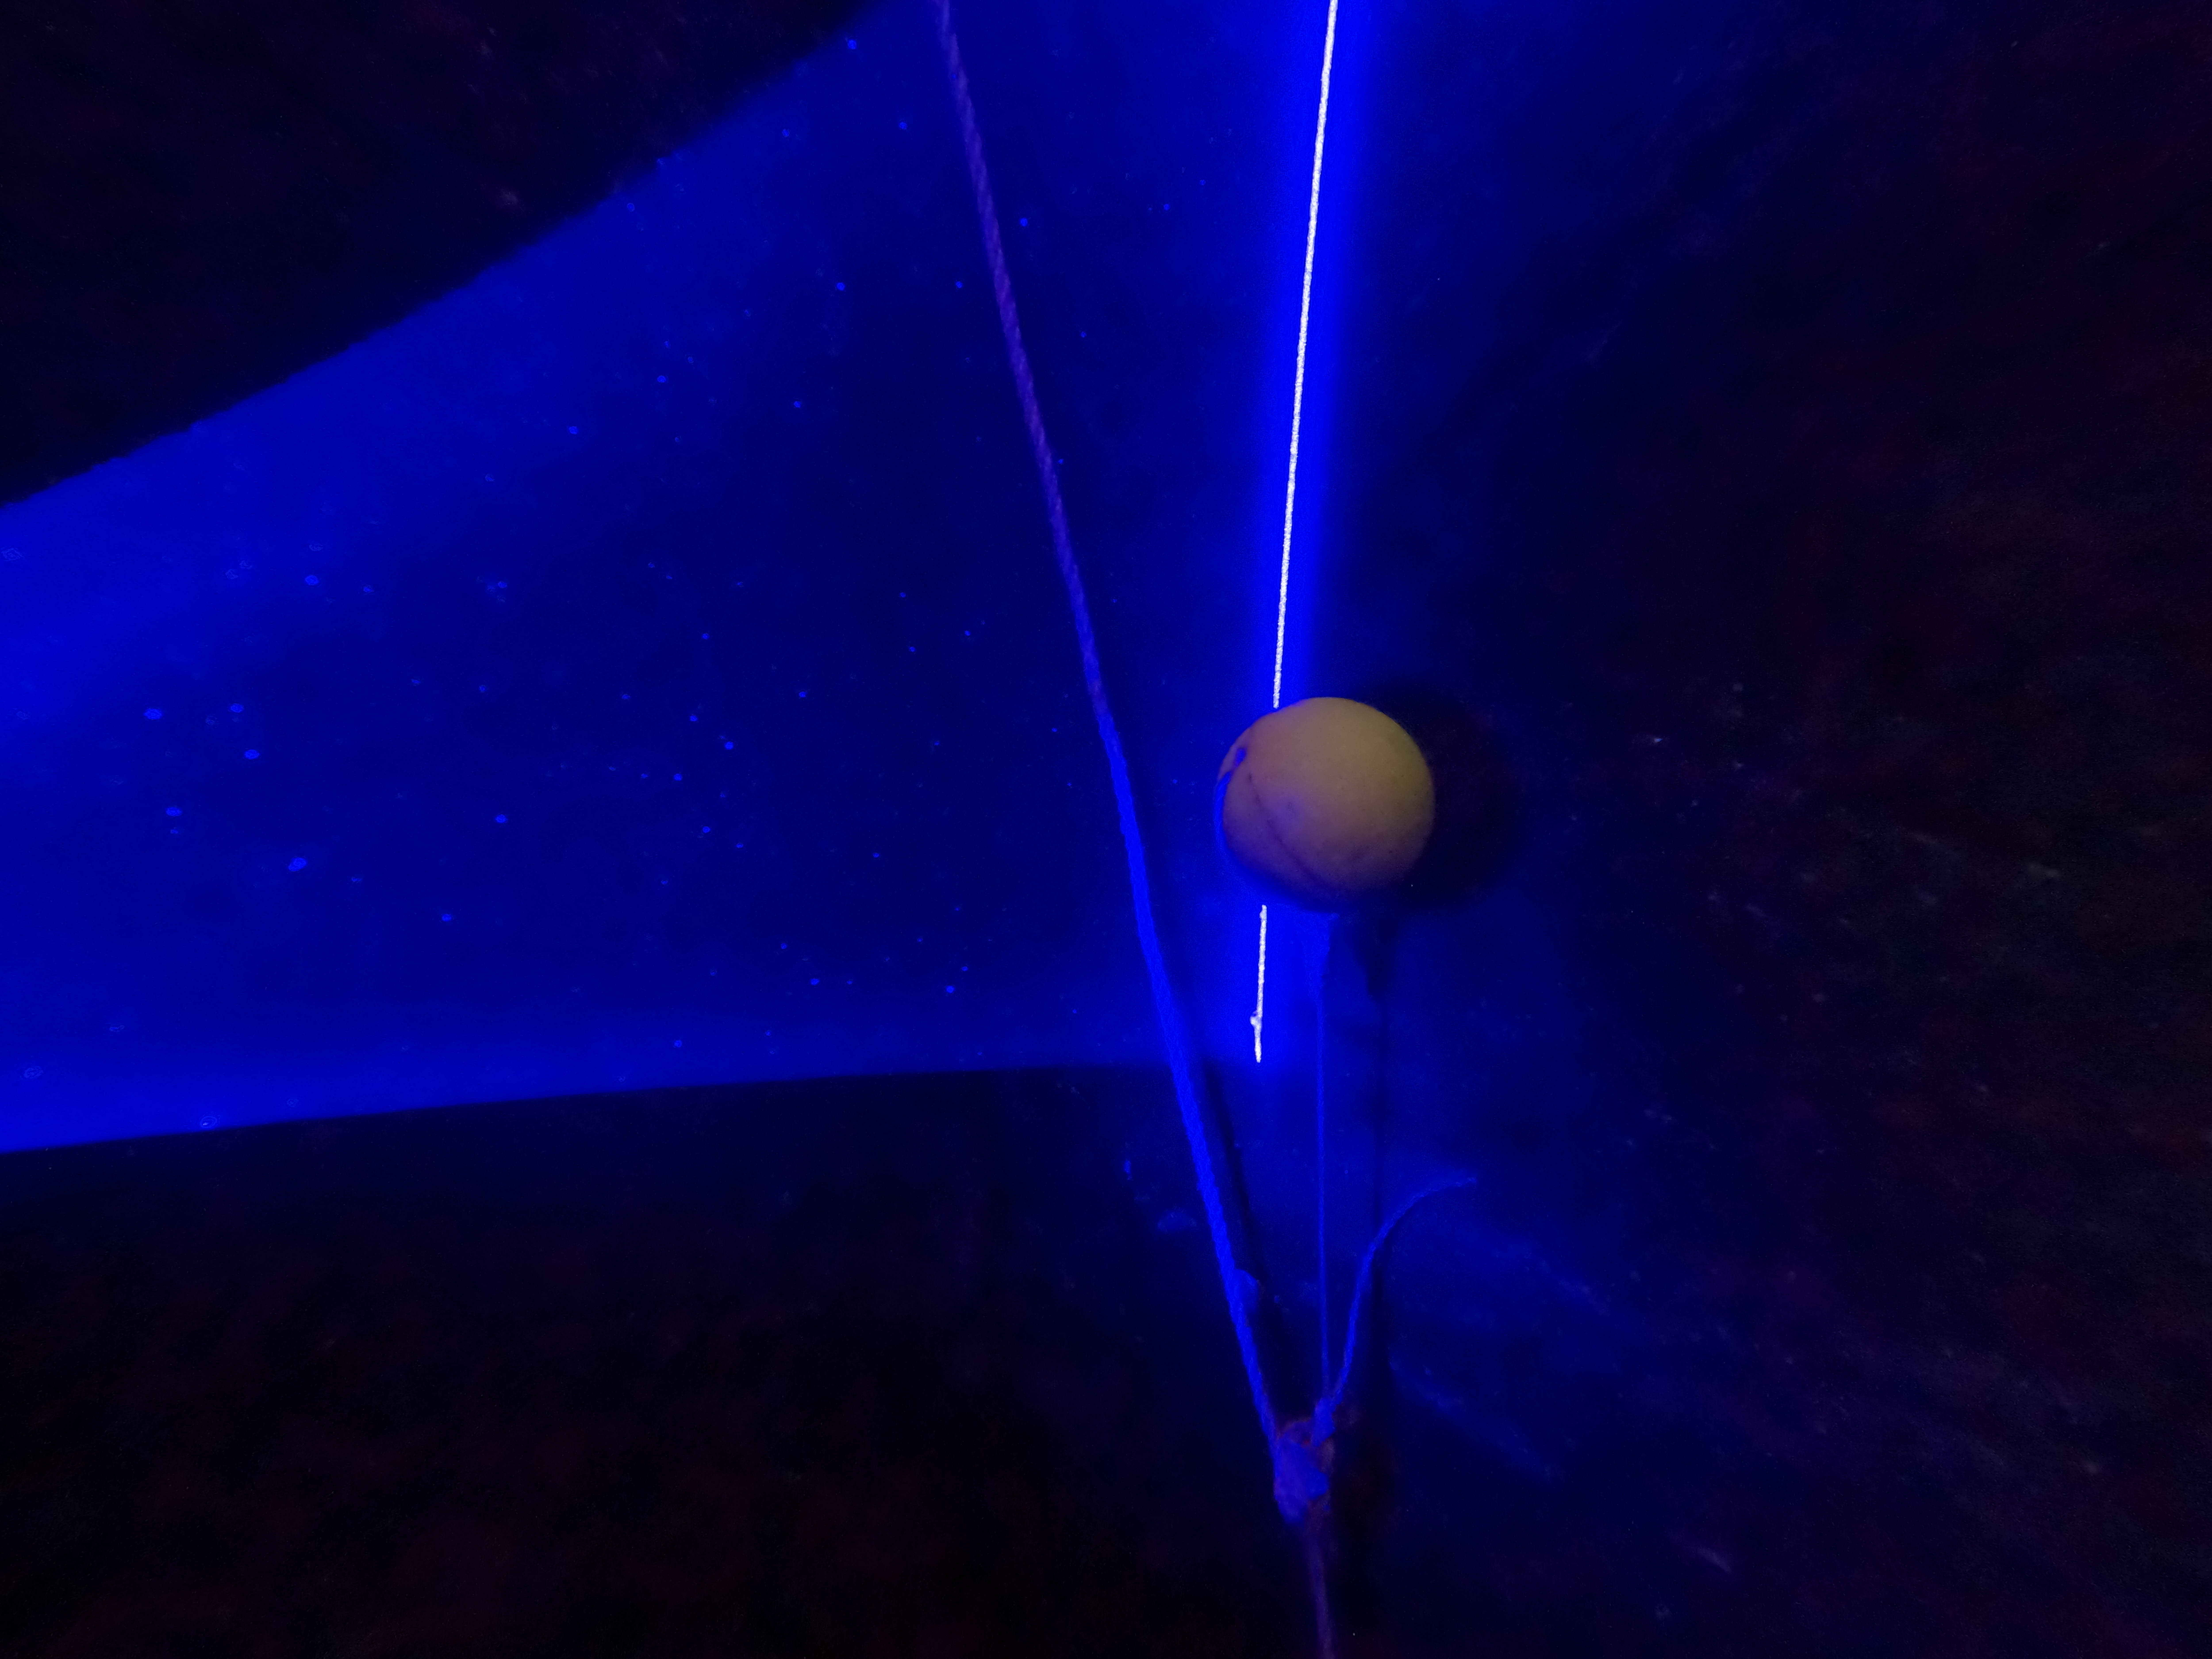

Supplement: Supplementary file 472 [file G0030772.pdf › 3/G0030772.pdf]

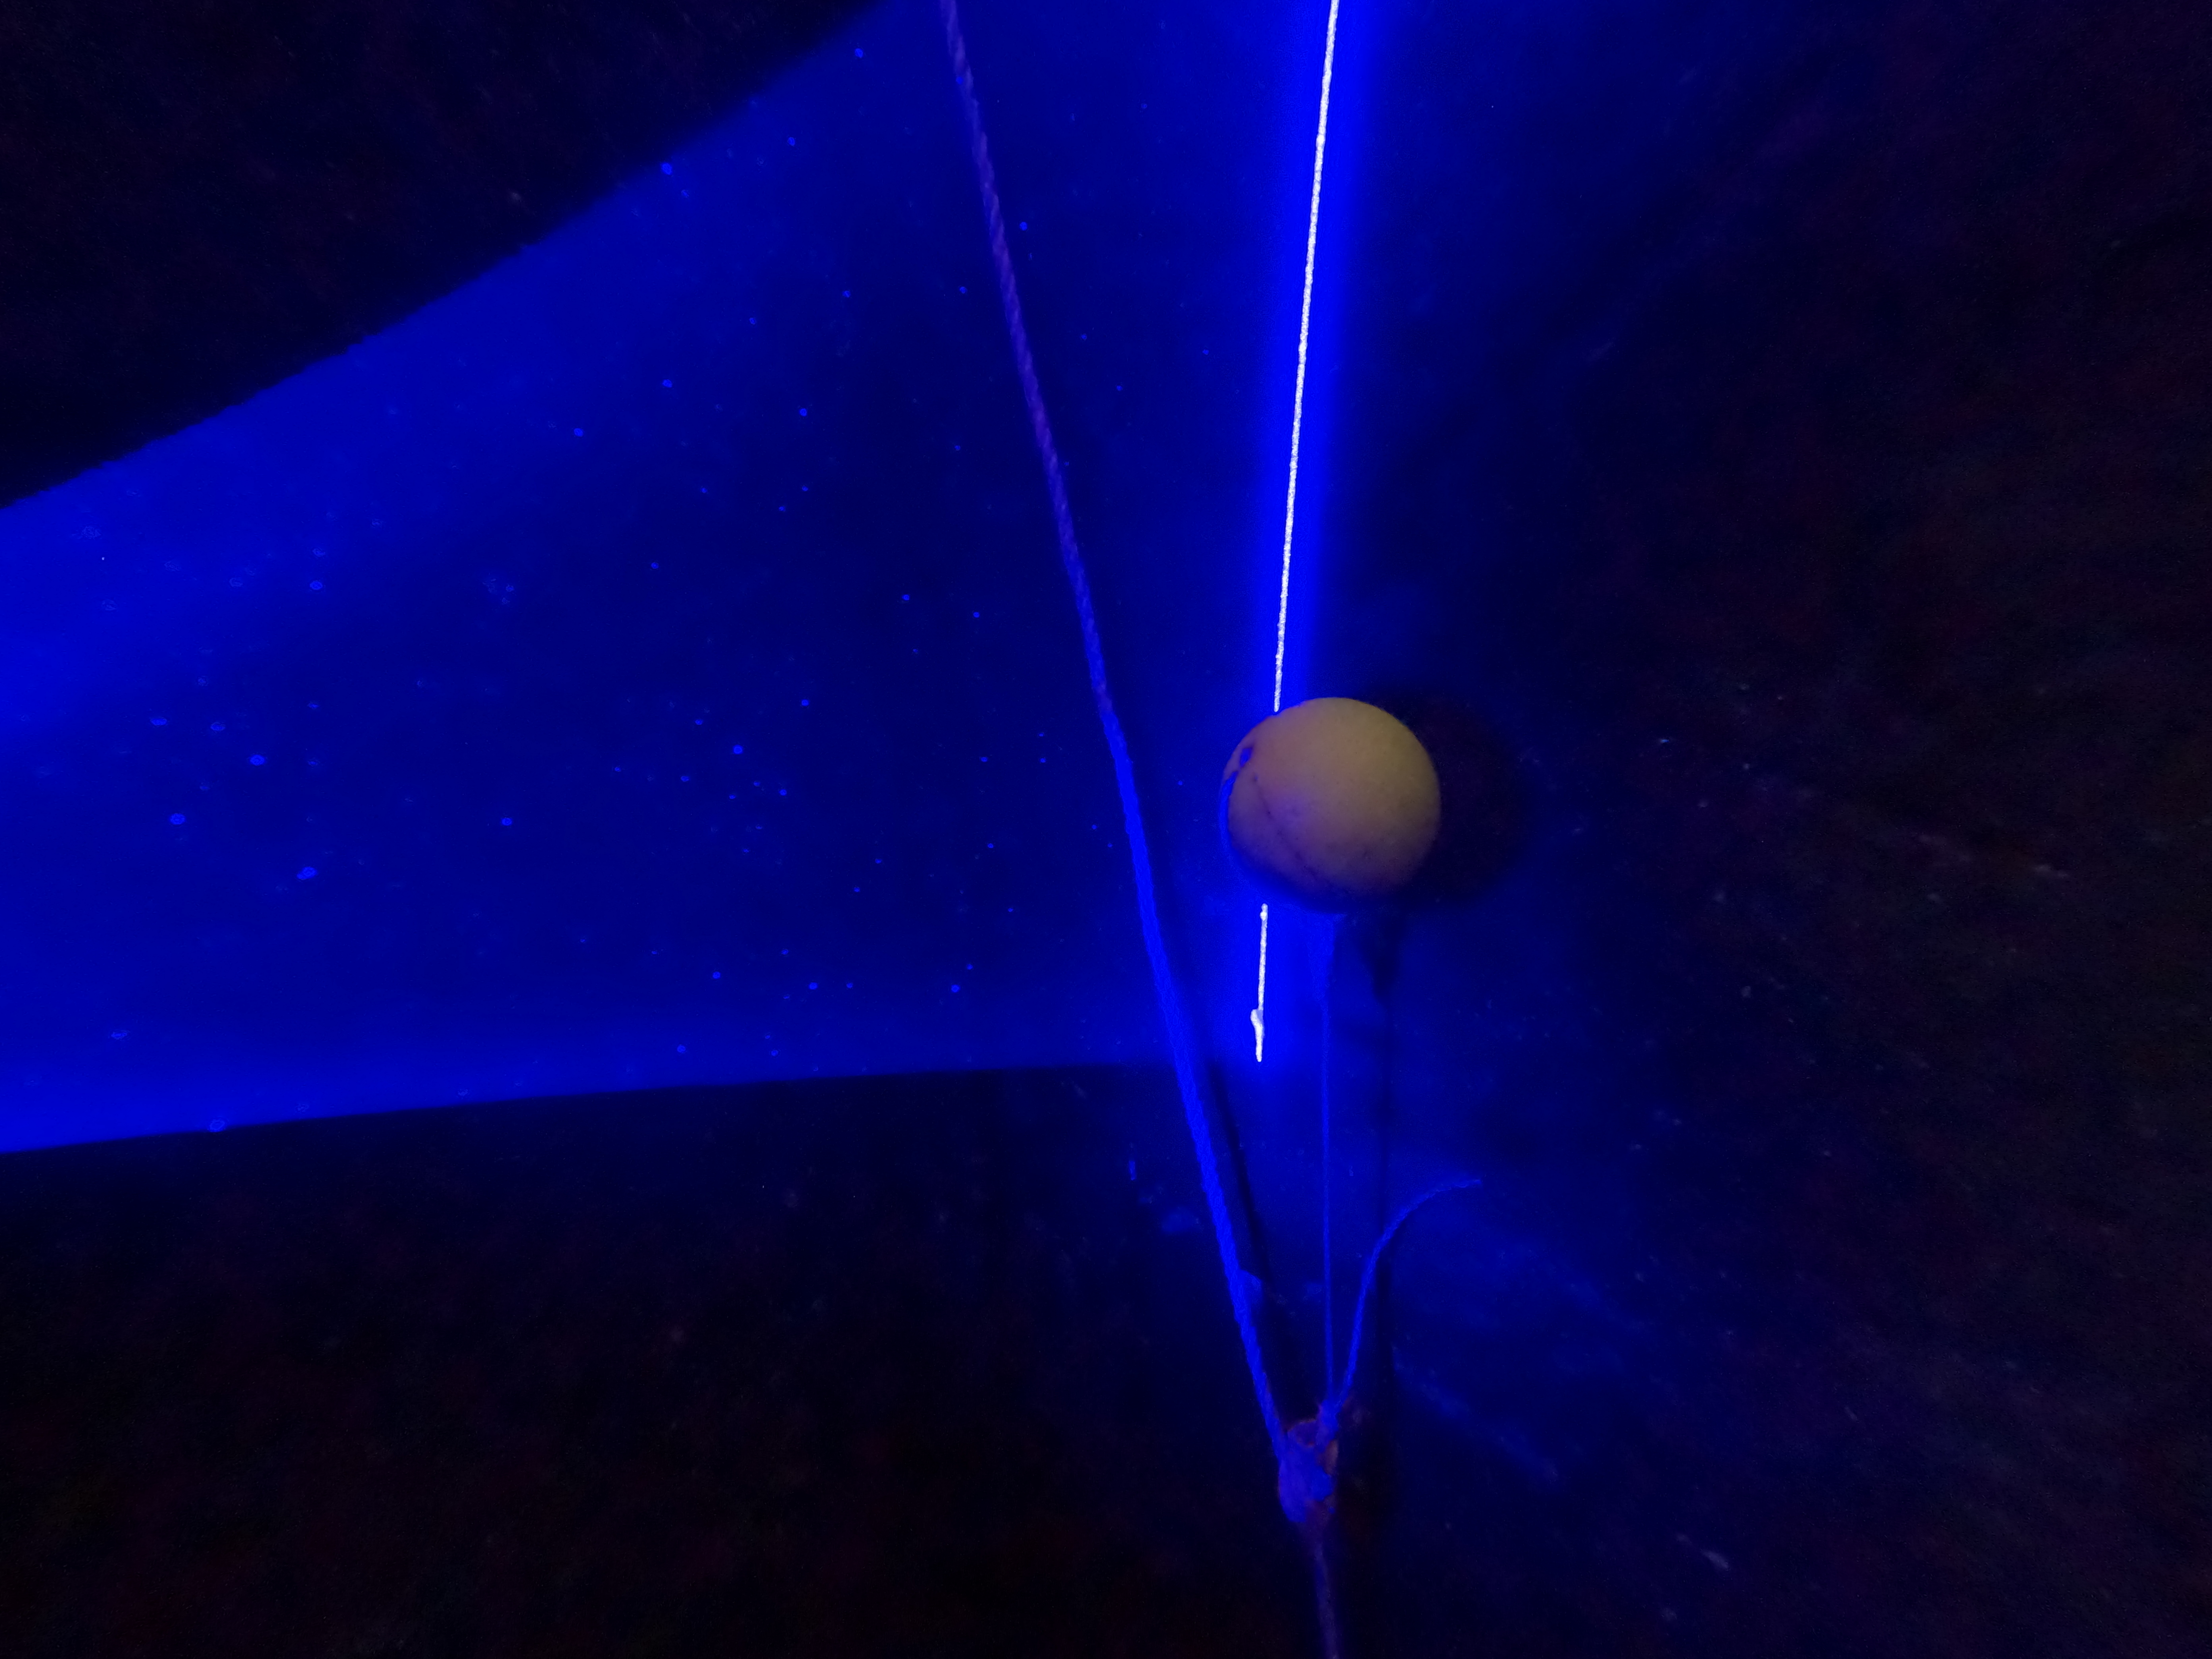

Supplement: Supplementary file 473 [file G0030773.pdf › 3/G0030773.pdf]

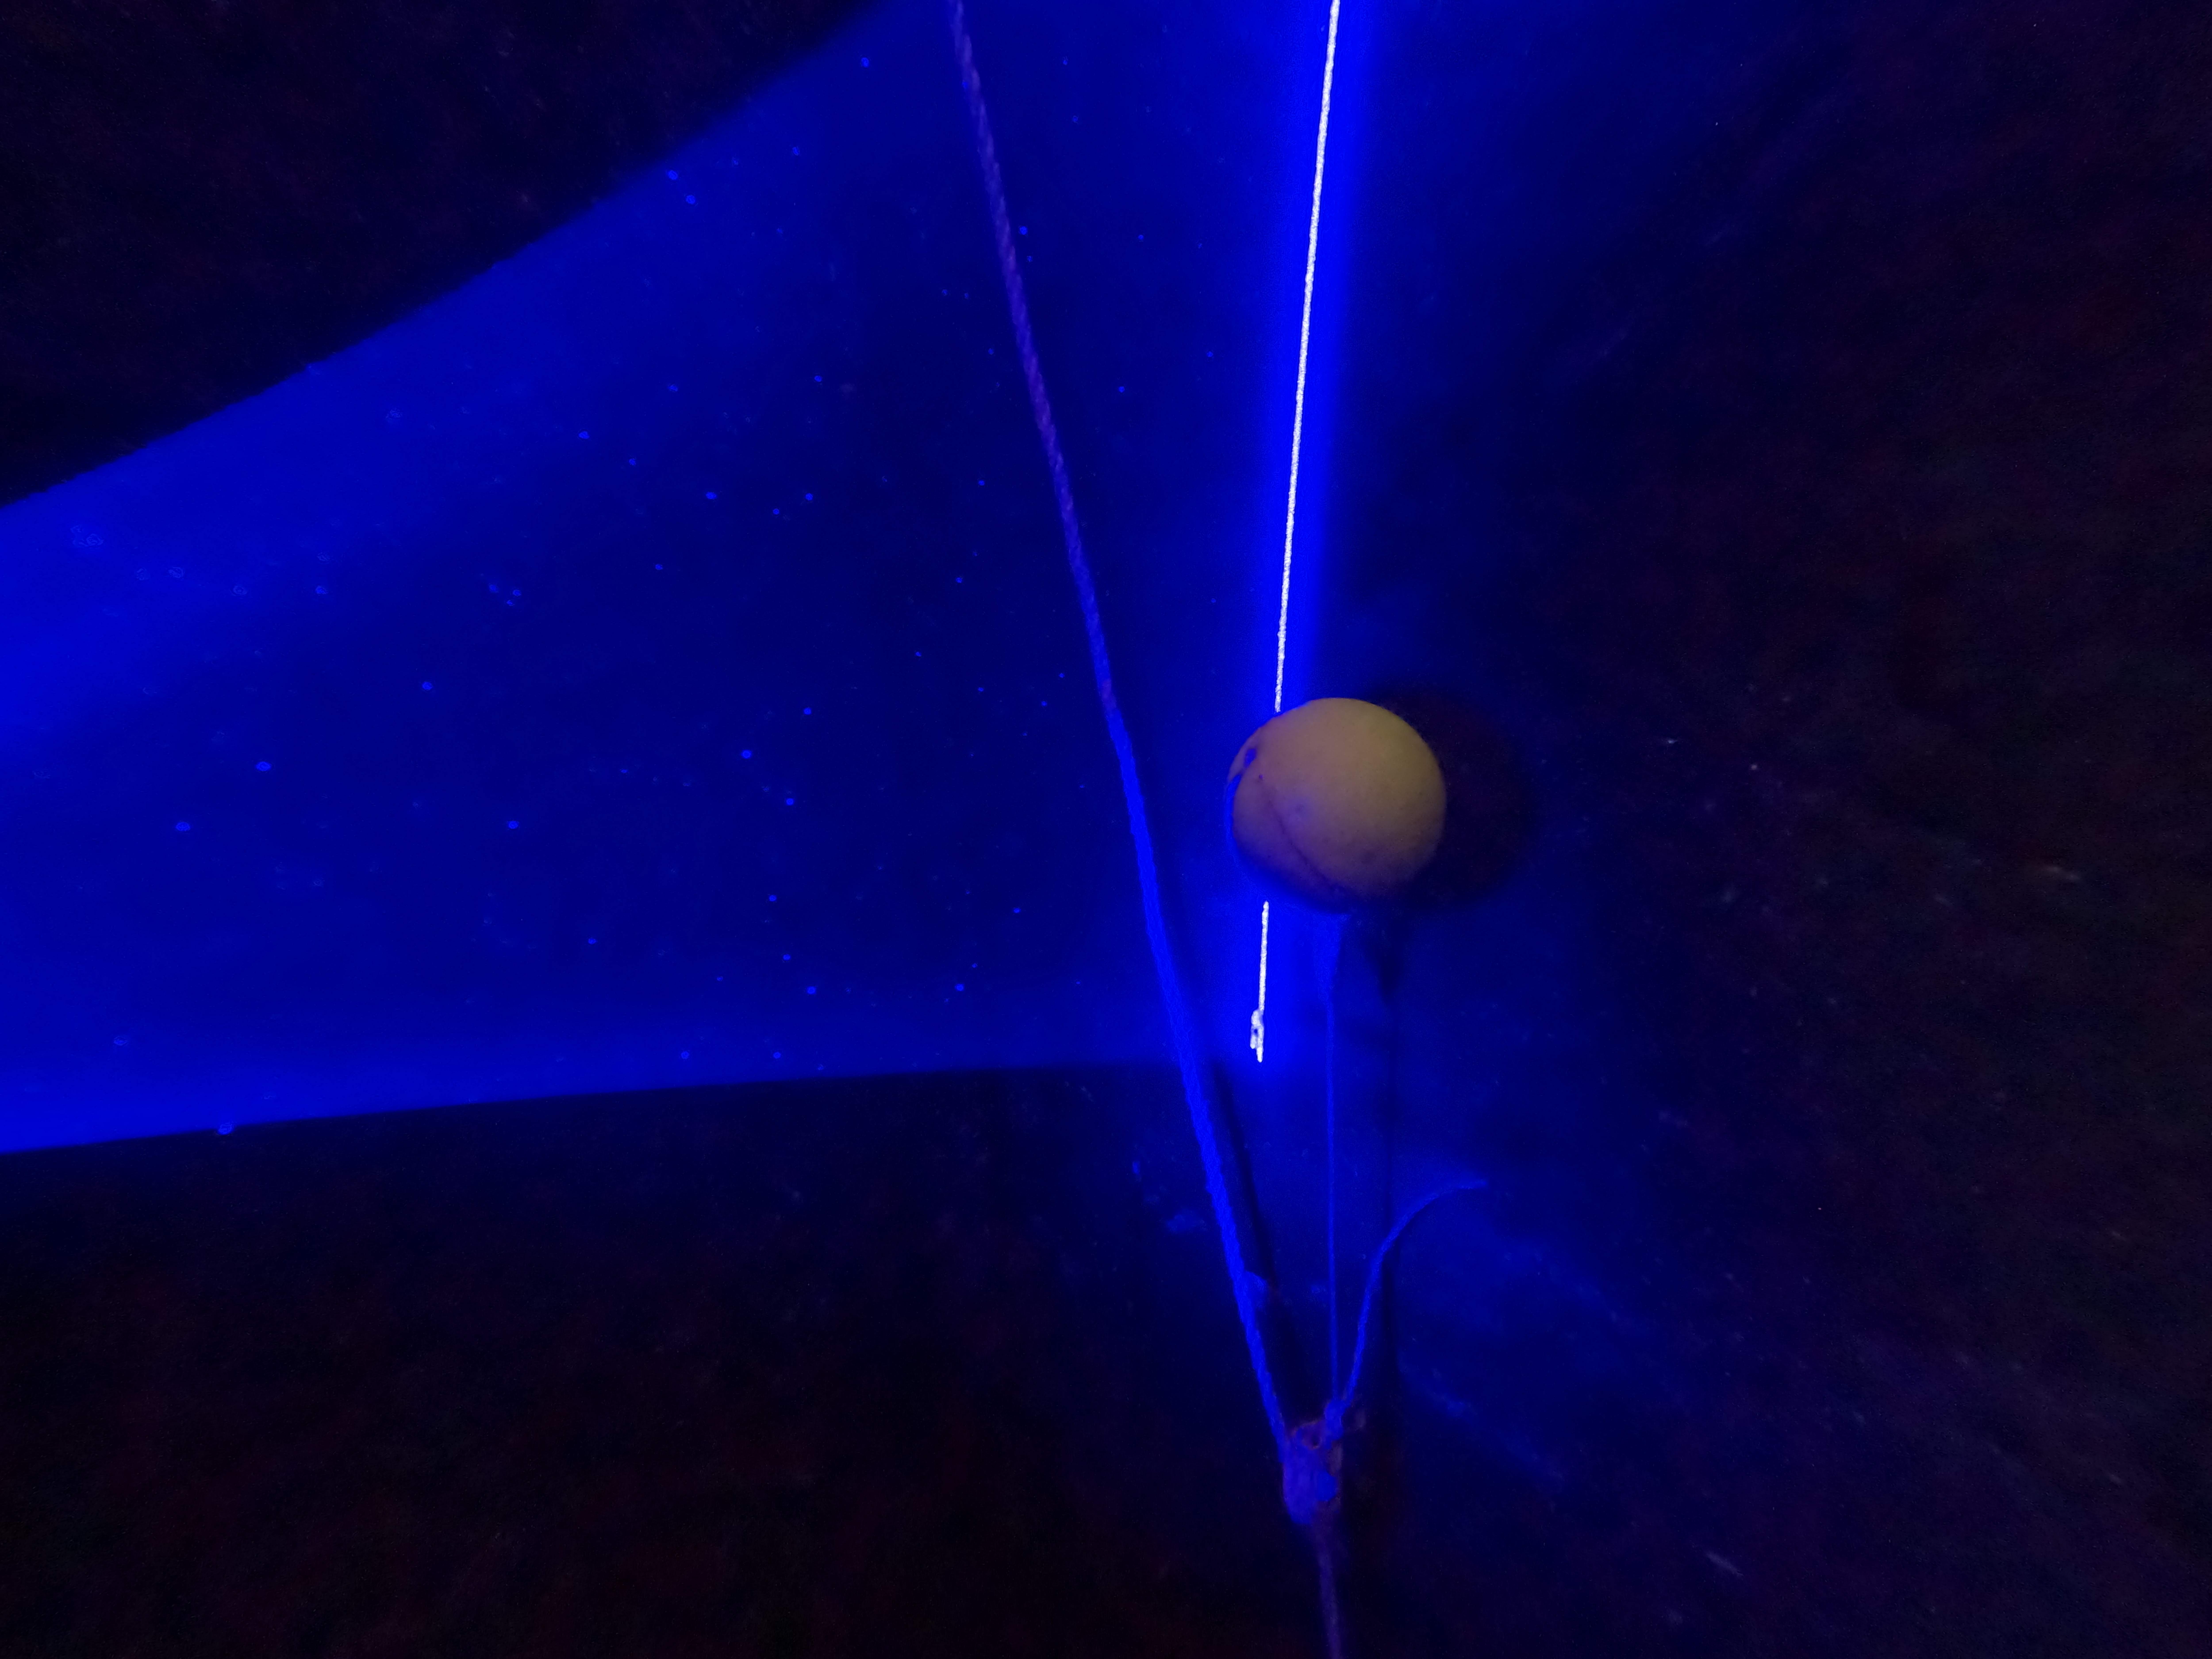

Supplement: Supplementary file 474 [file G0030774.pdf › 3/G0030774.pdf]

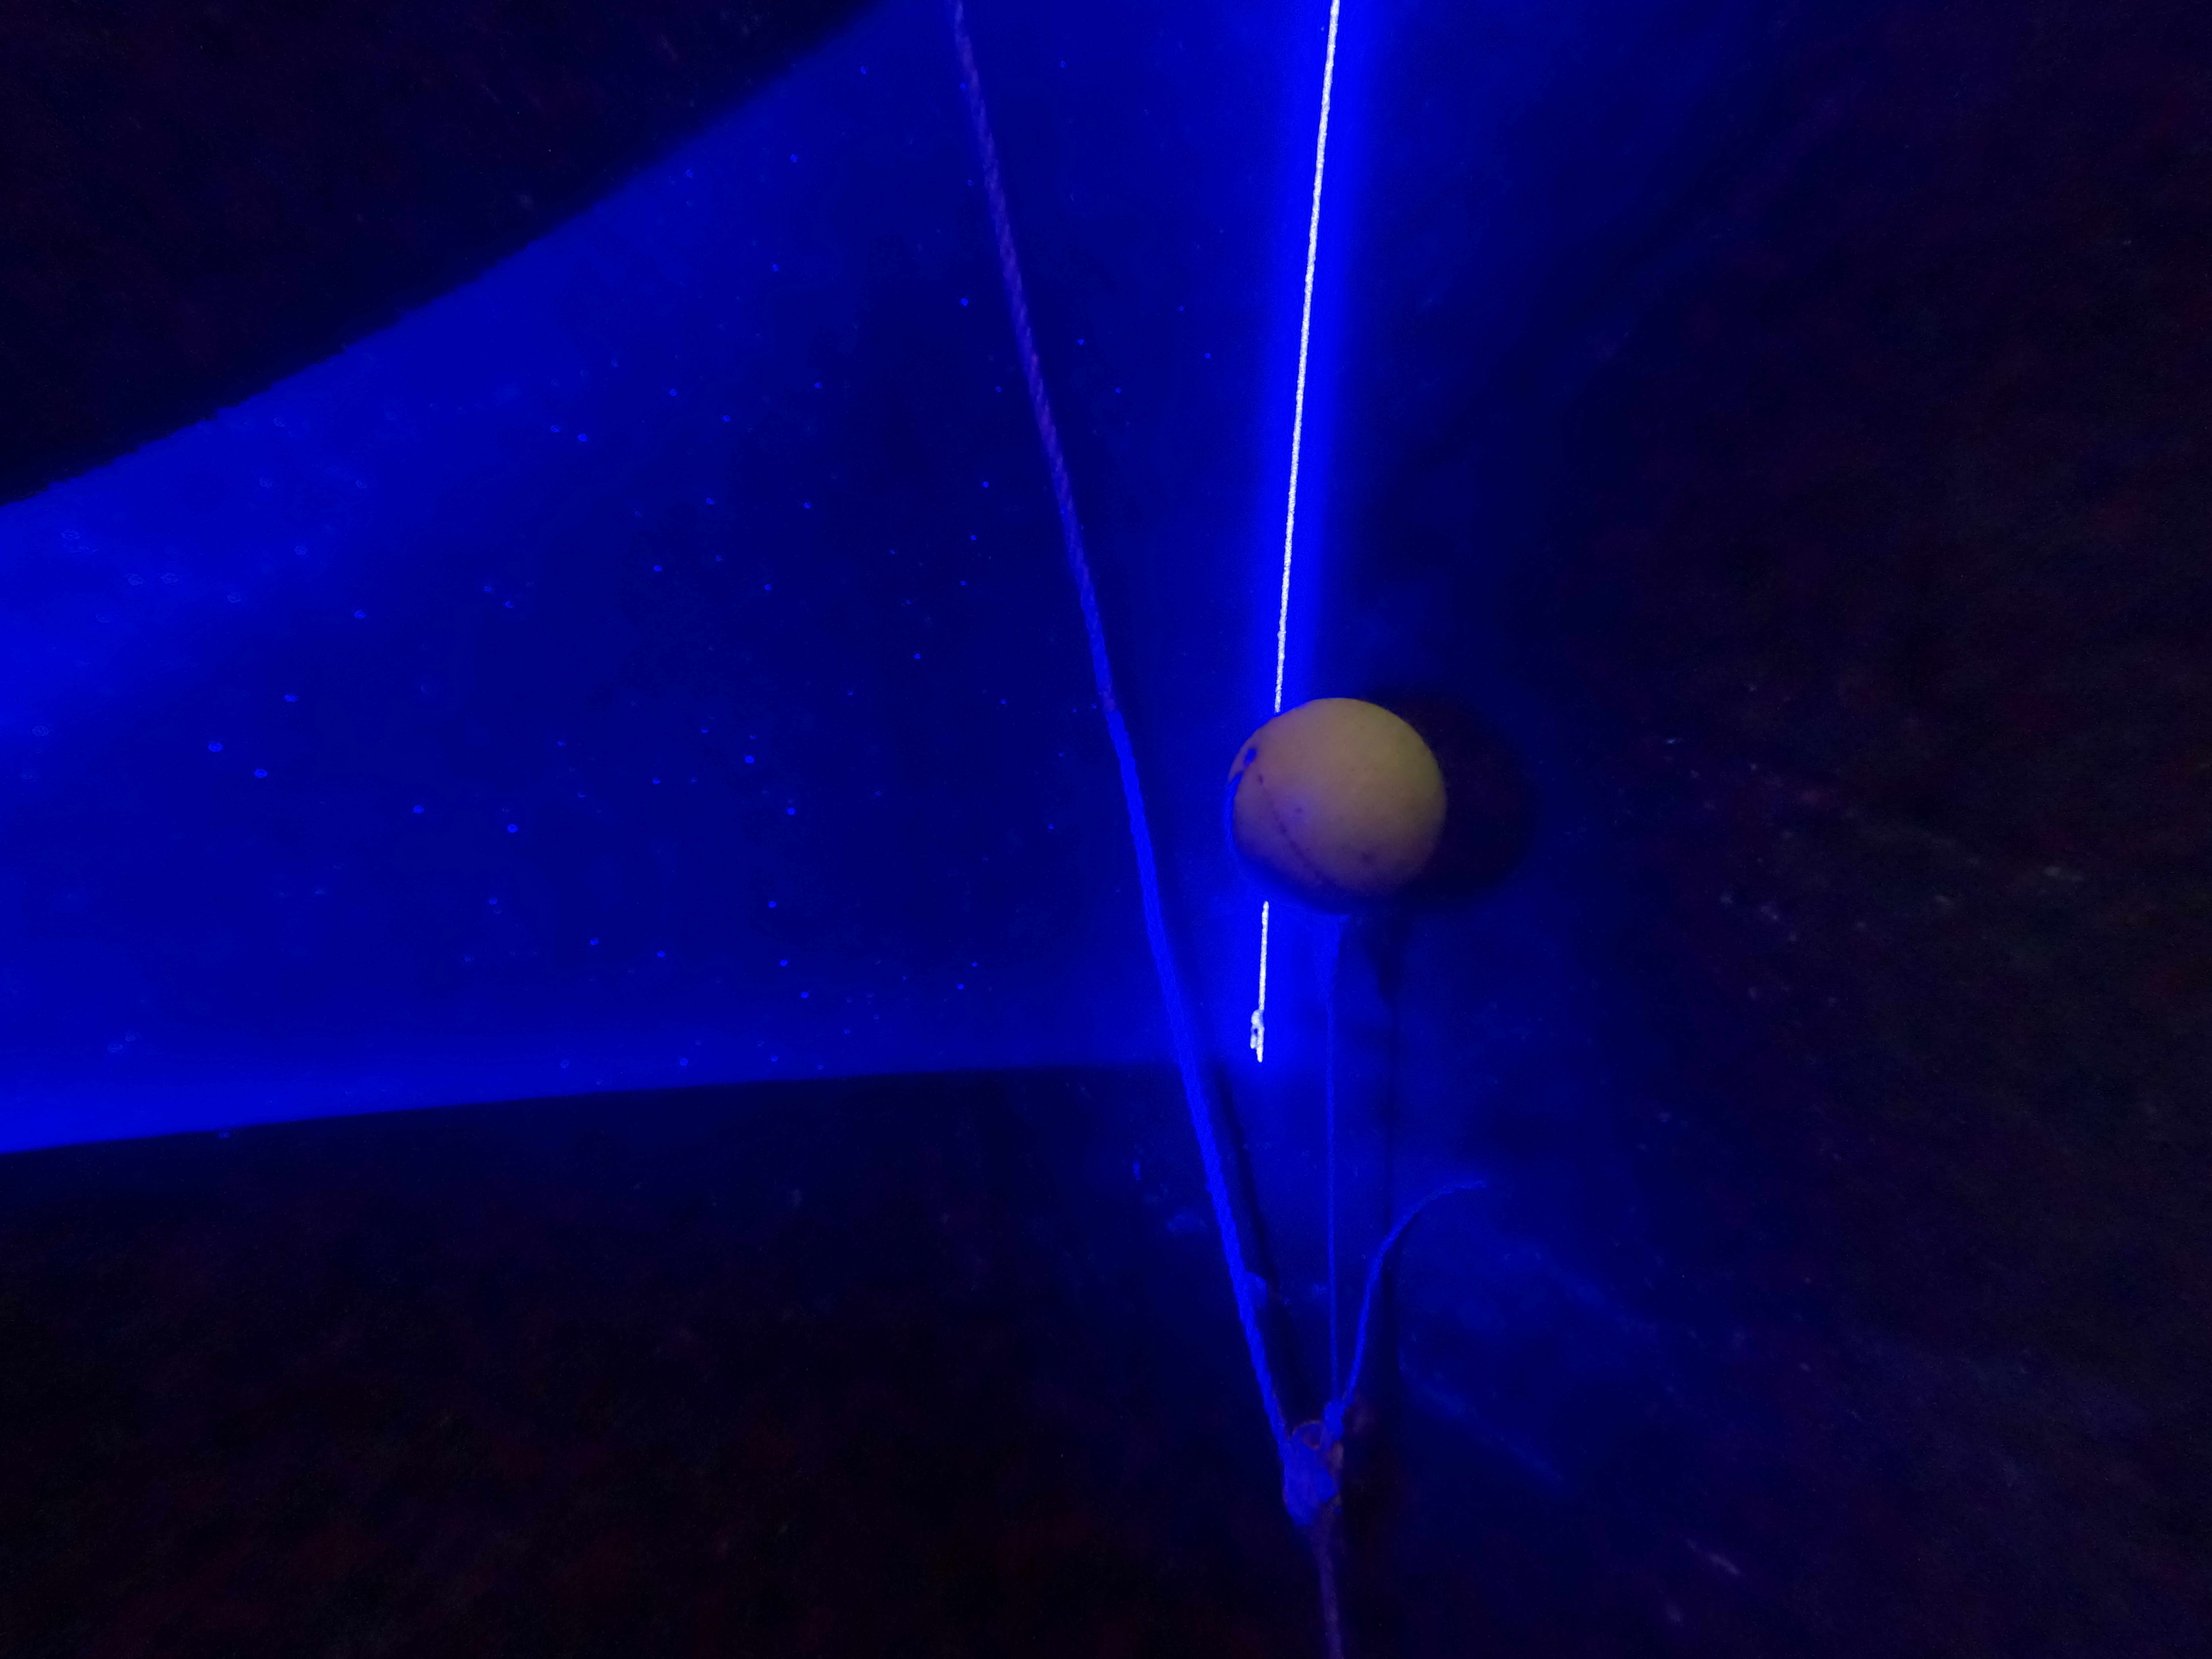

Supplement: Supplementary file 475 [file G0030775.pdf › 3/G0030775.pdf]

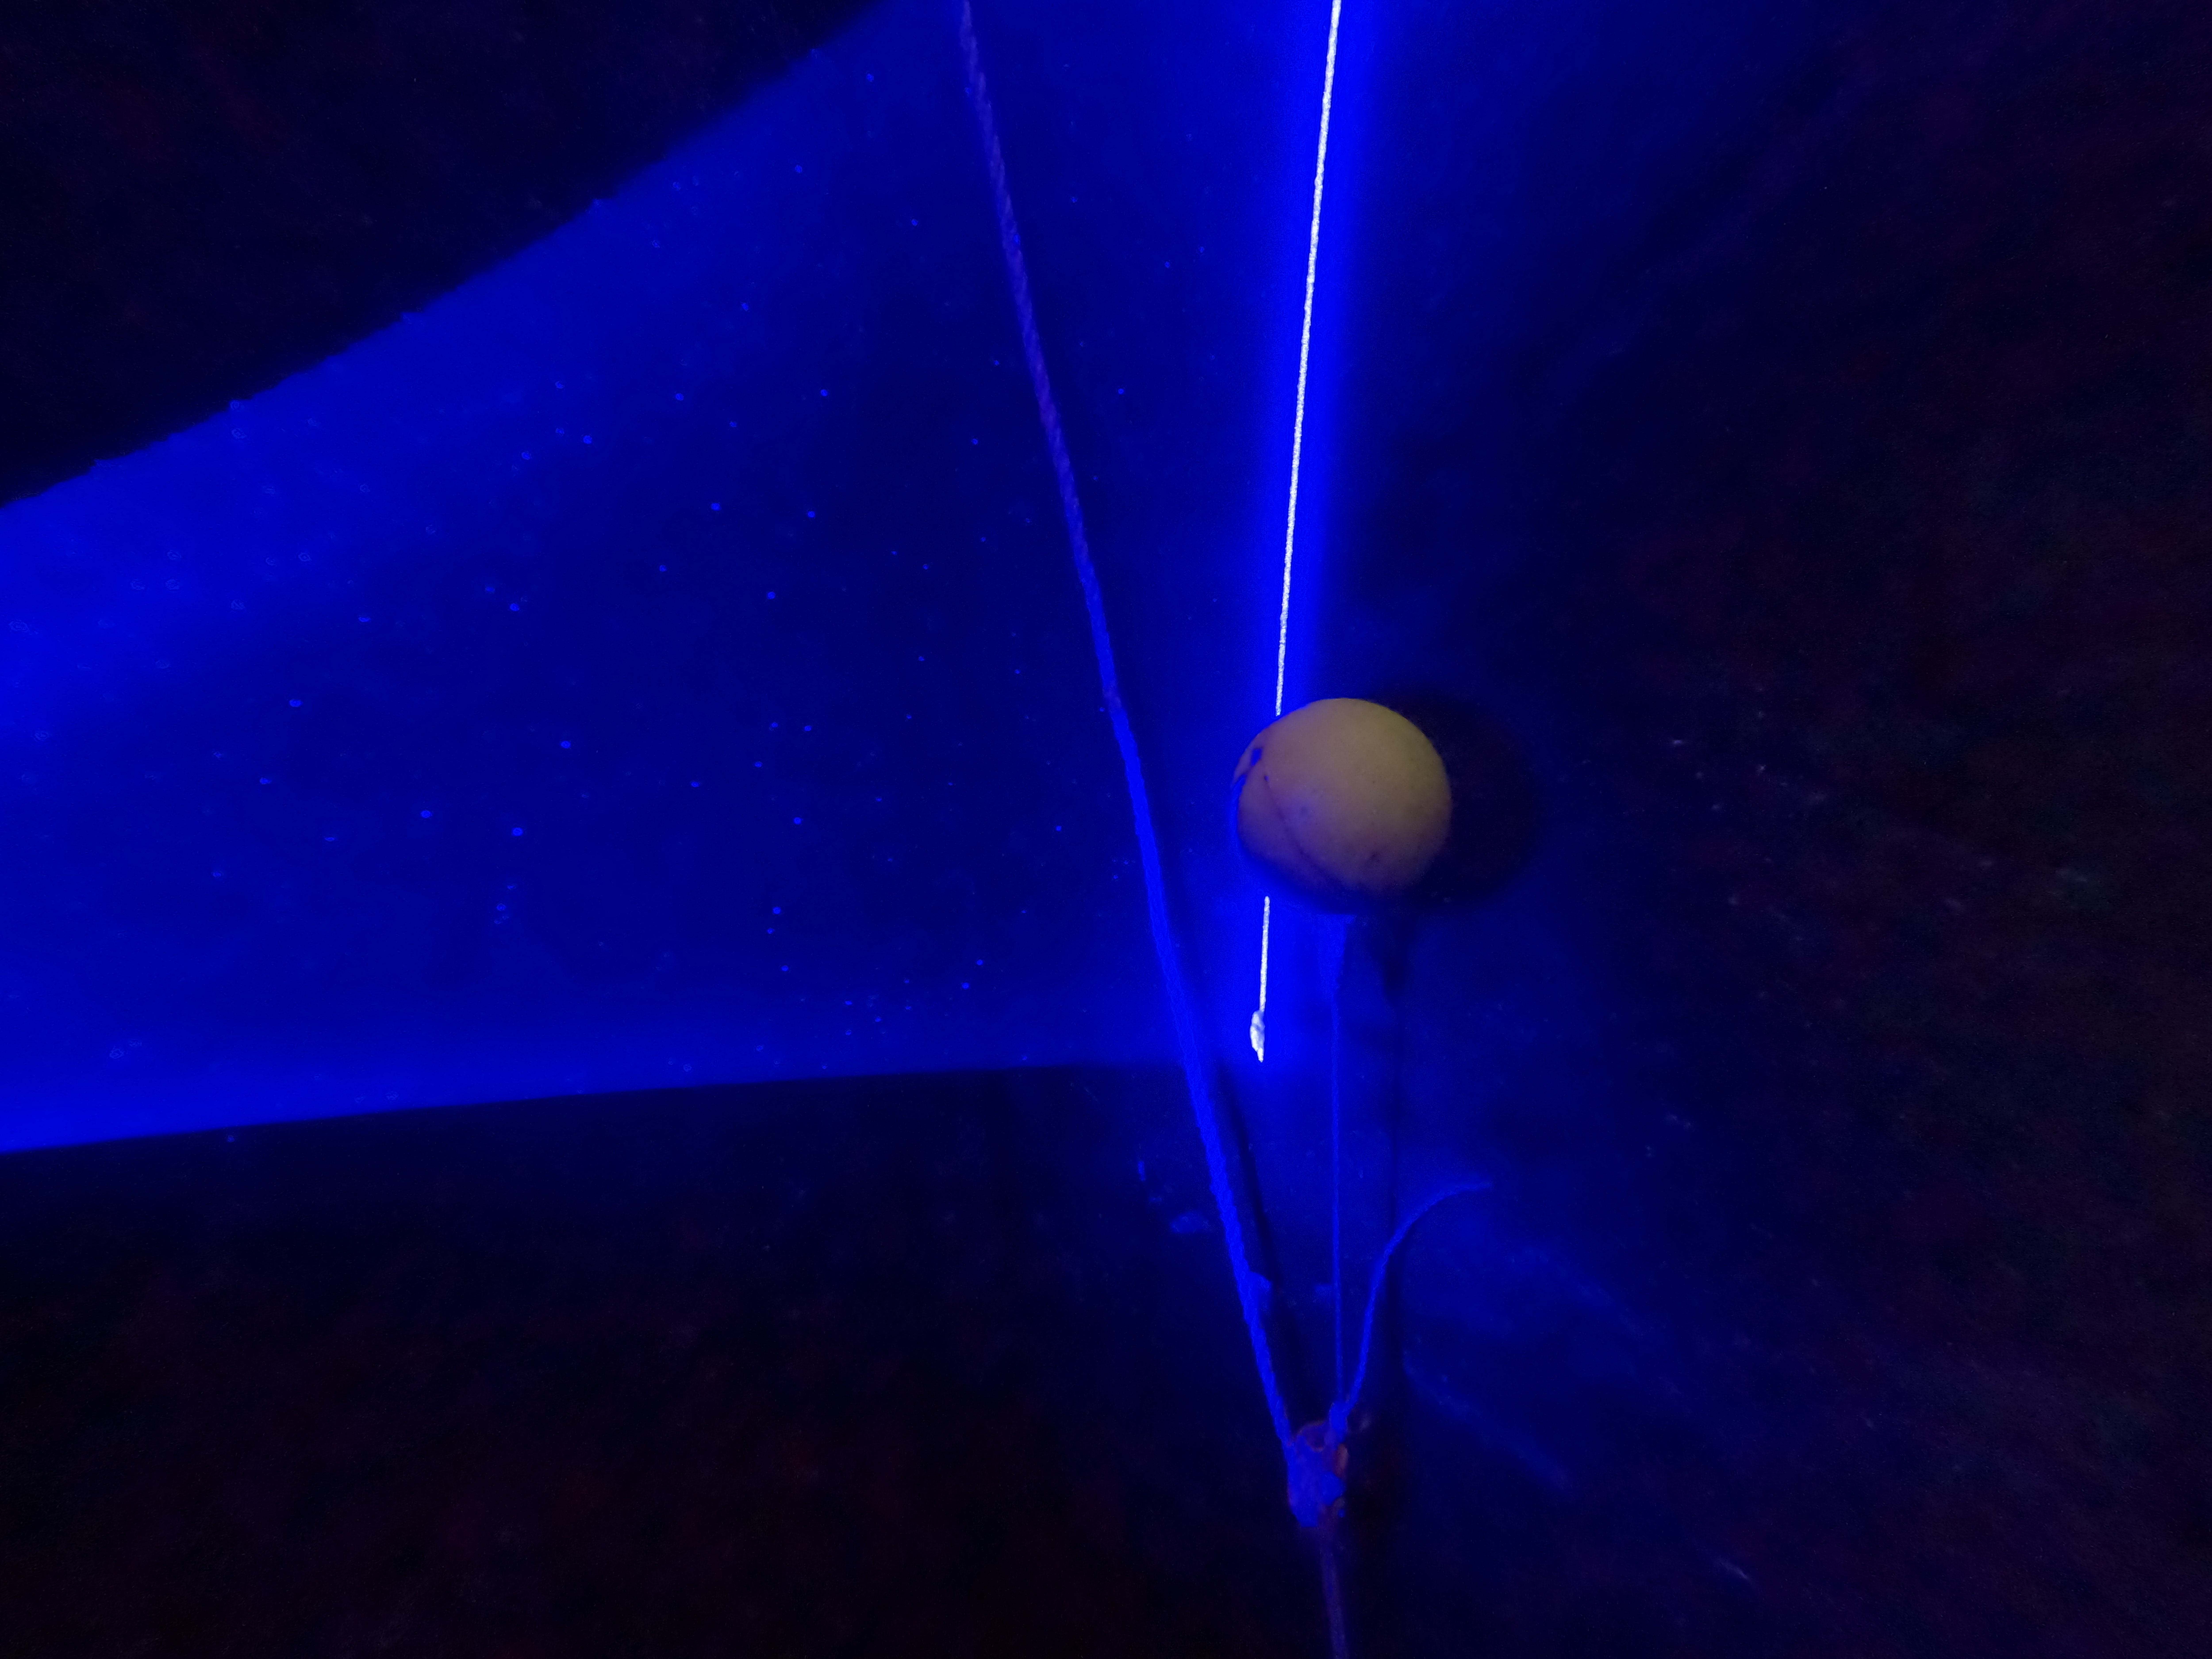

Supplement: Supplementary file 476 [file G0030776.pdf › 3/G0030776.pdf]

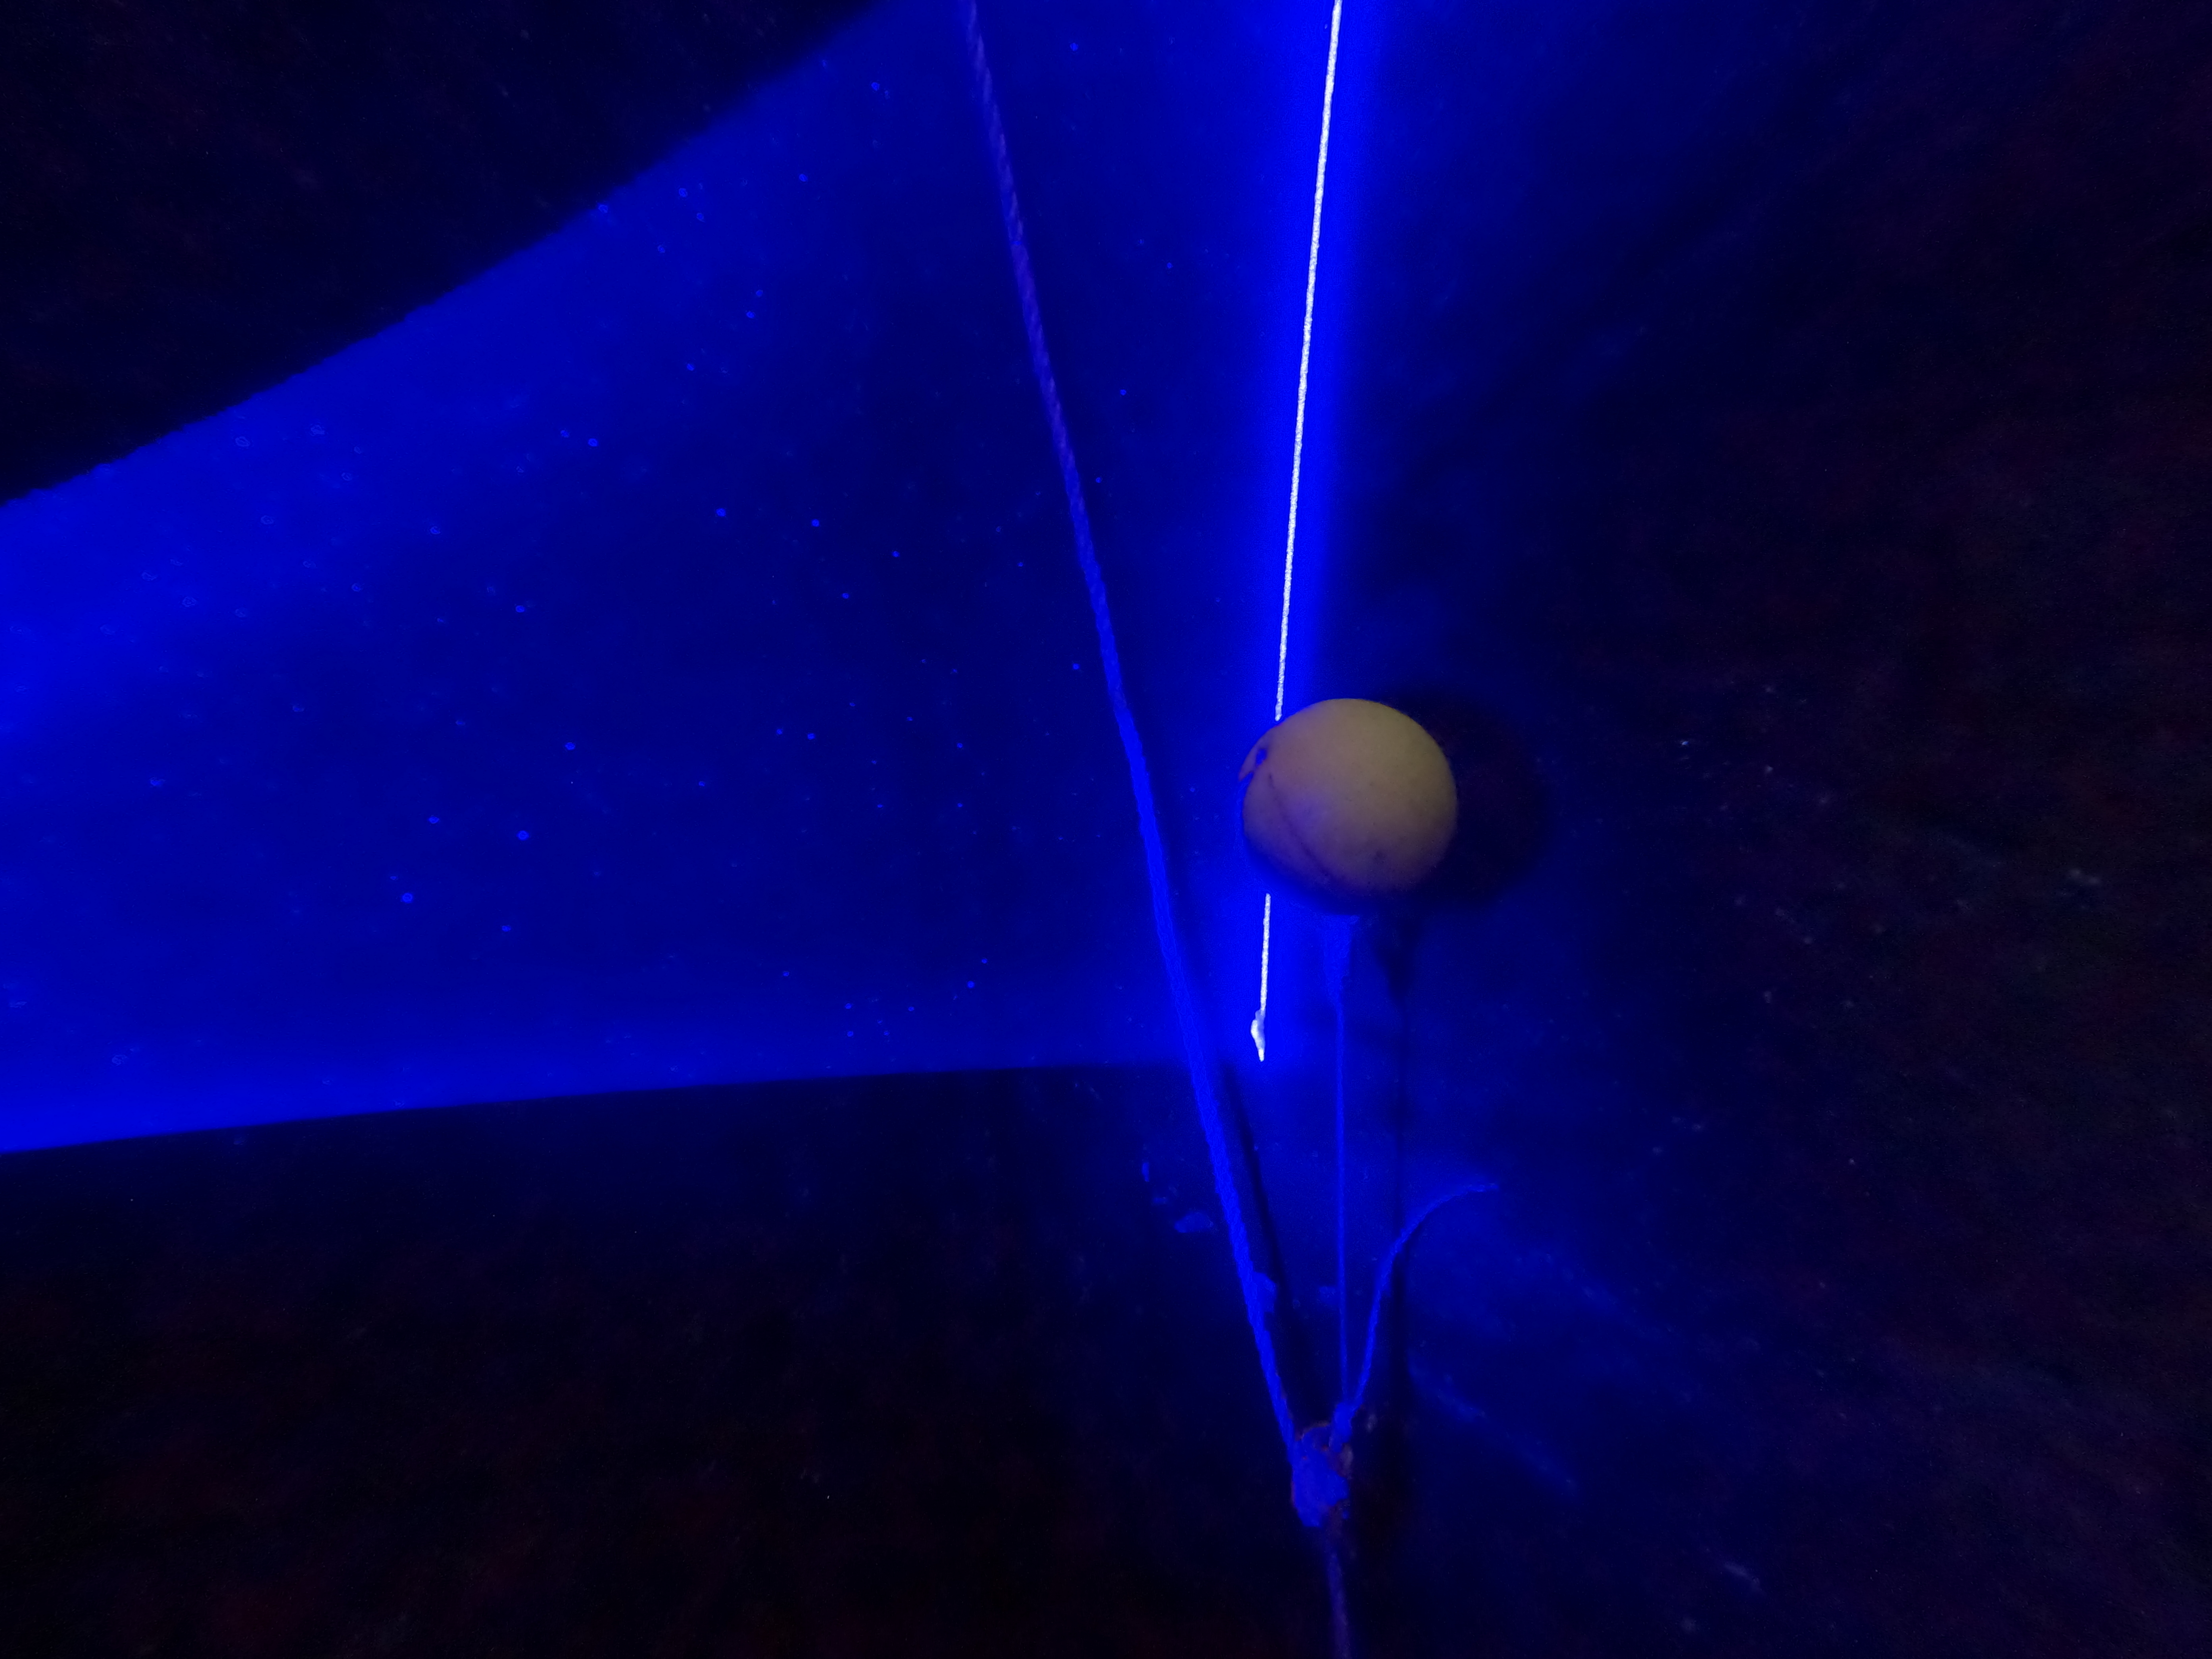

Supplement: Supplementary file 477 [file G0030777.pdf › 3/G0030777.pdf]

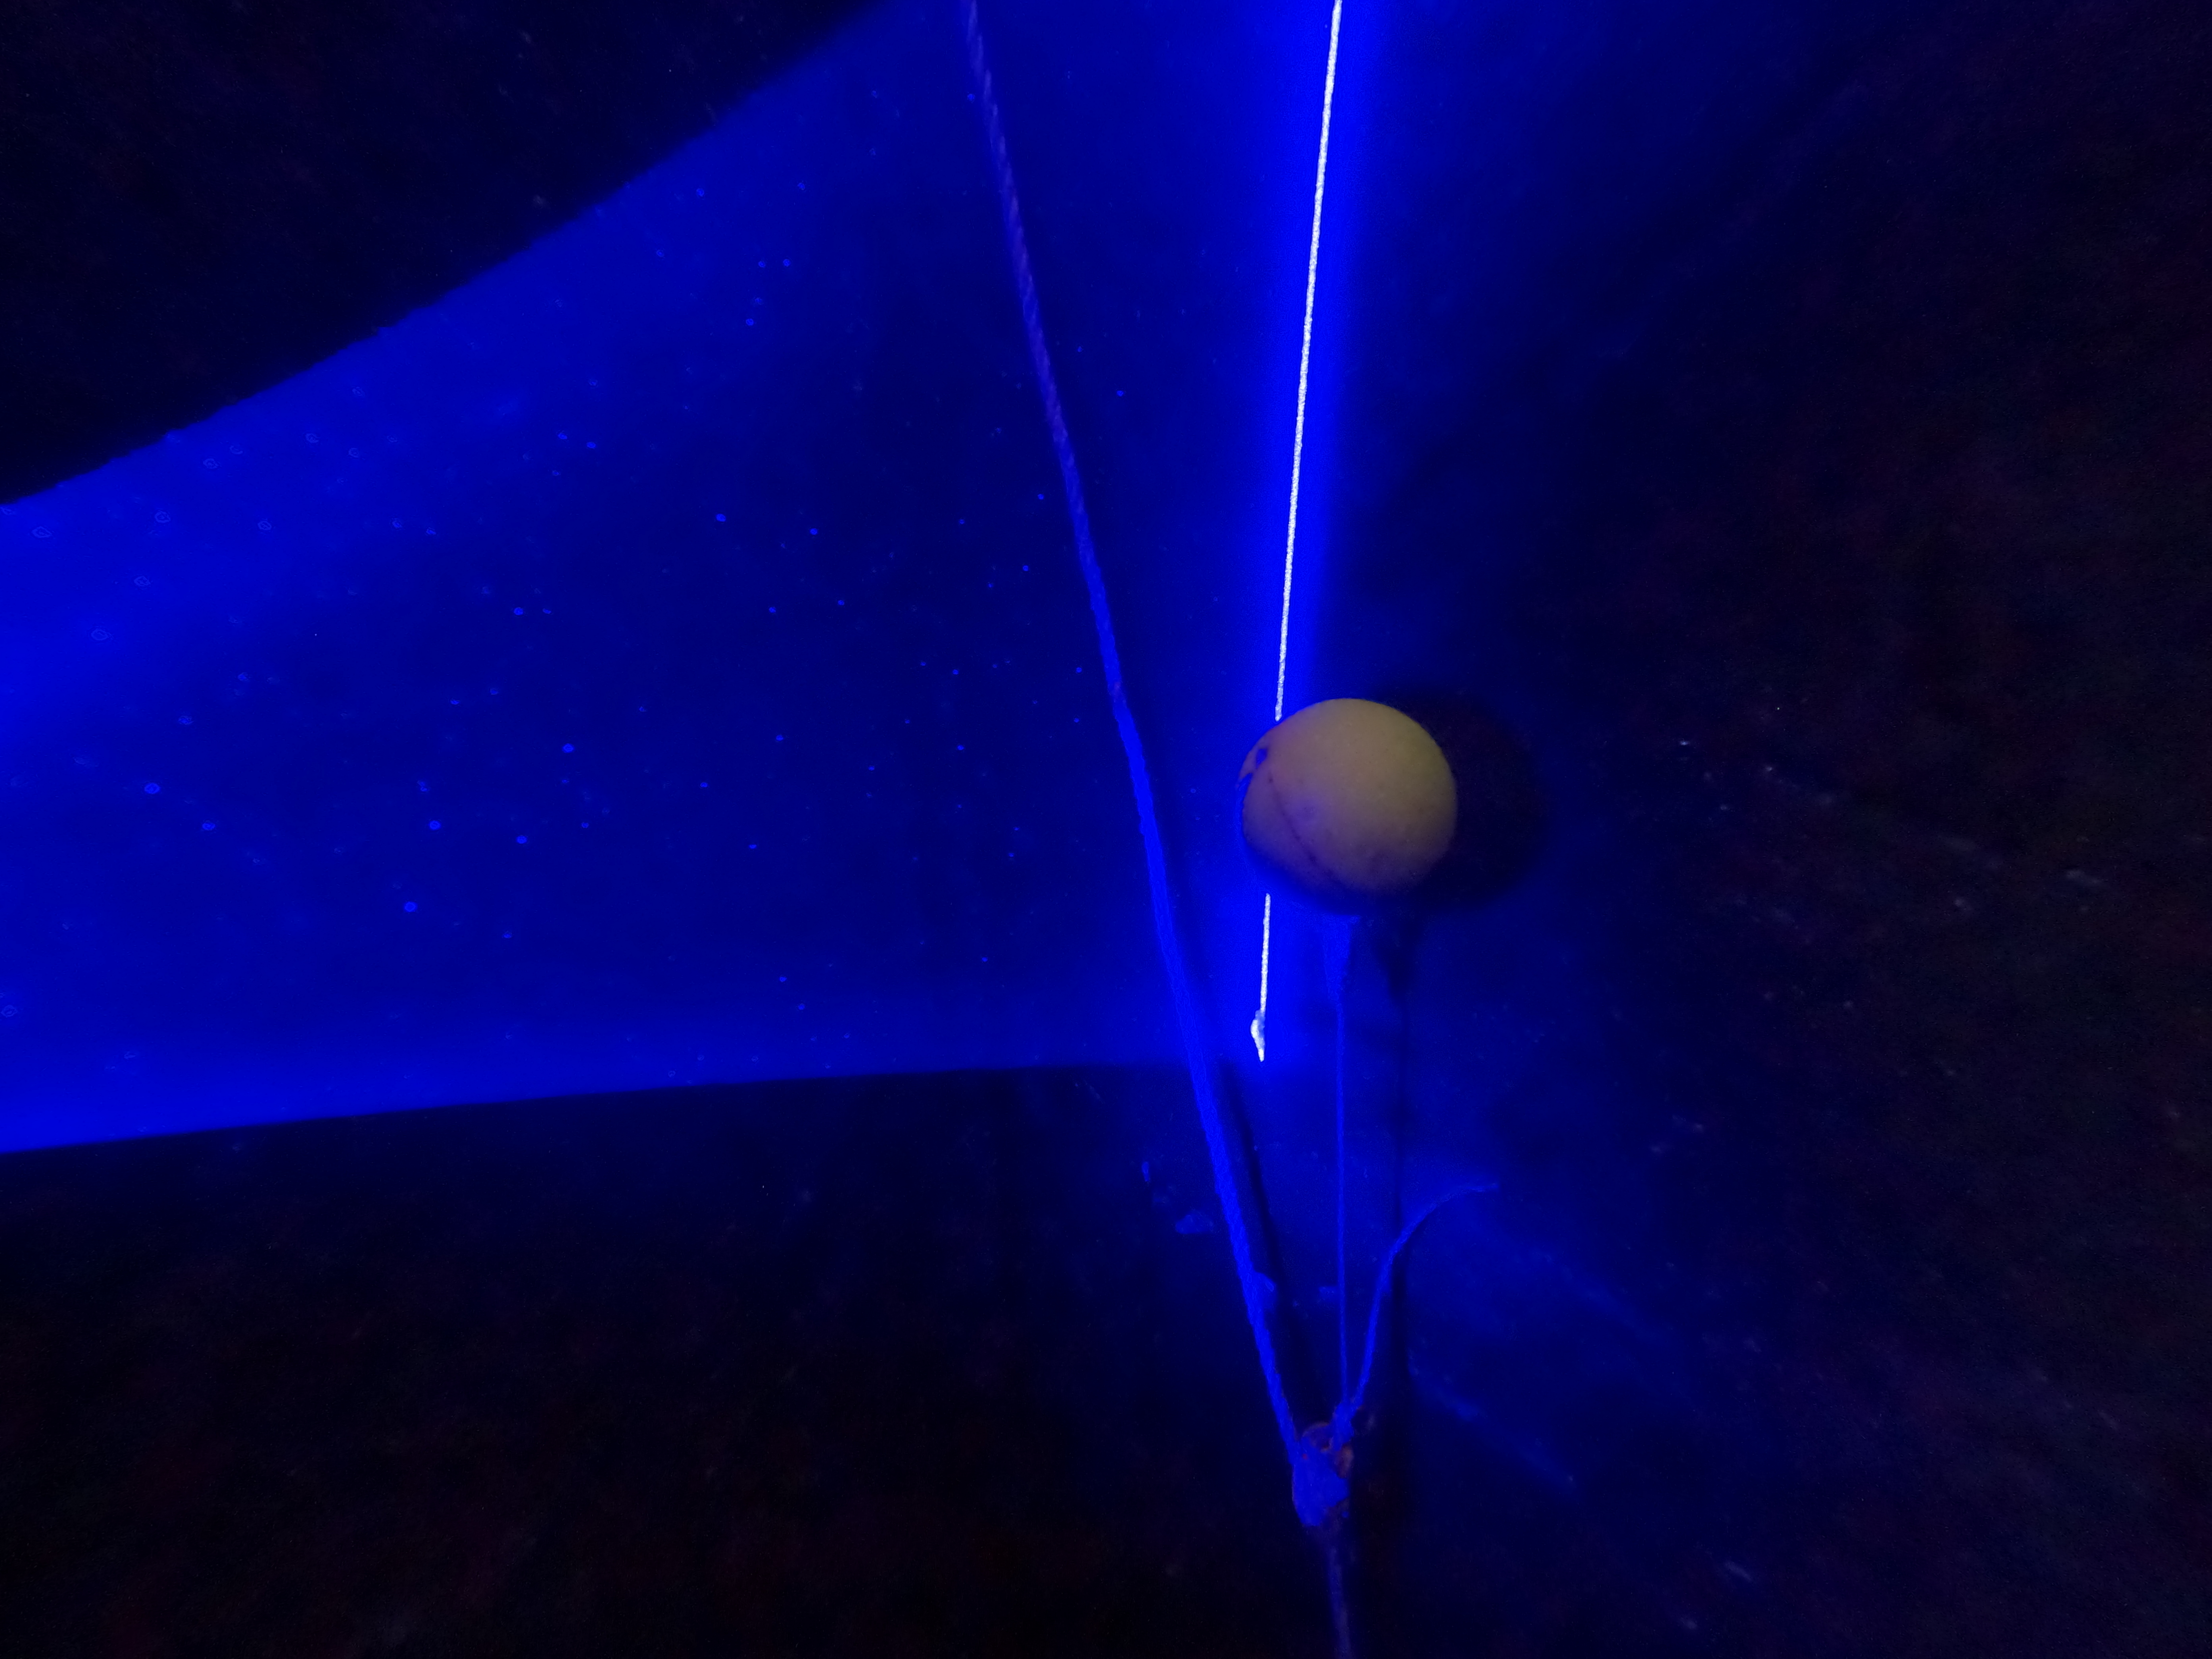

Supplement: Supplementary file 478 [file G0030778.pdf › 3/G0030778.pdf]

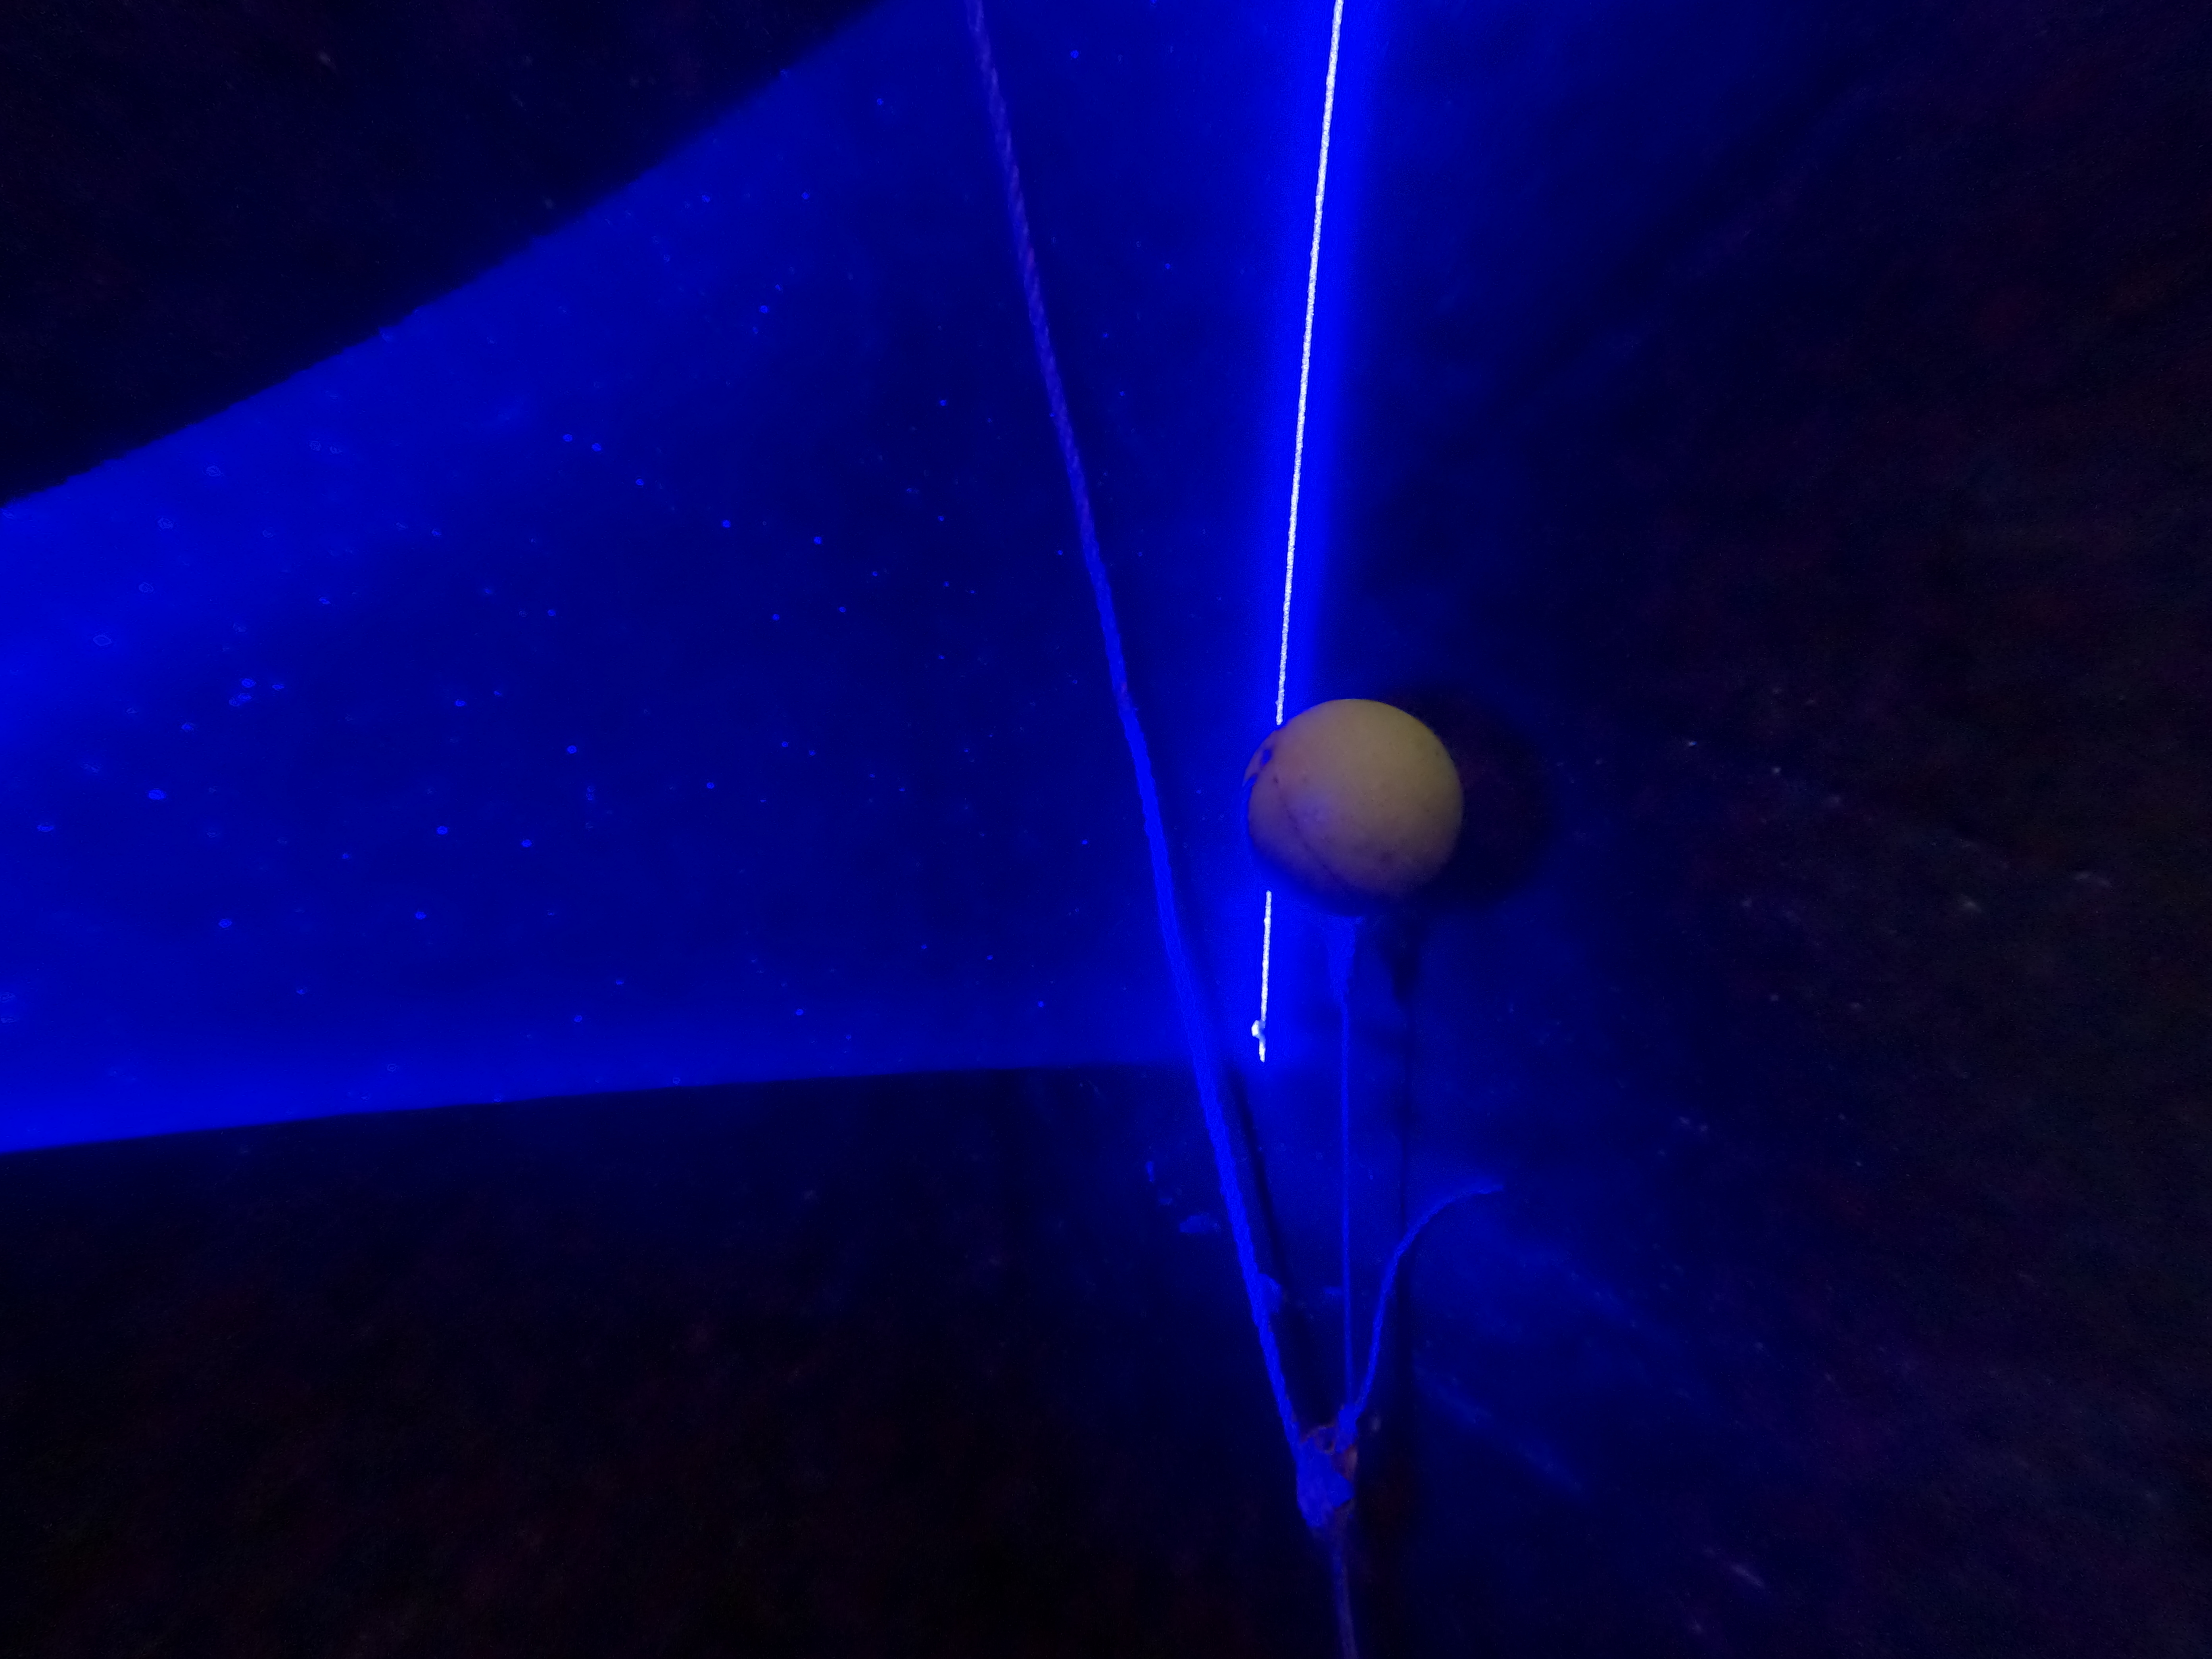

Supplement: Supplementary file 479 [file G0030779.pdf › 3/G0030779.pdf]

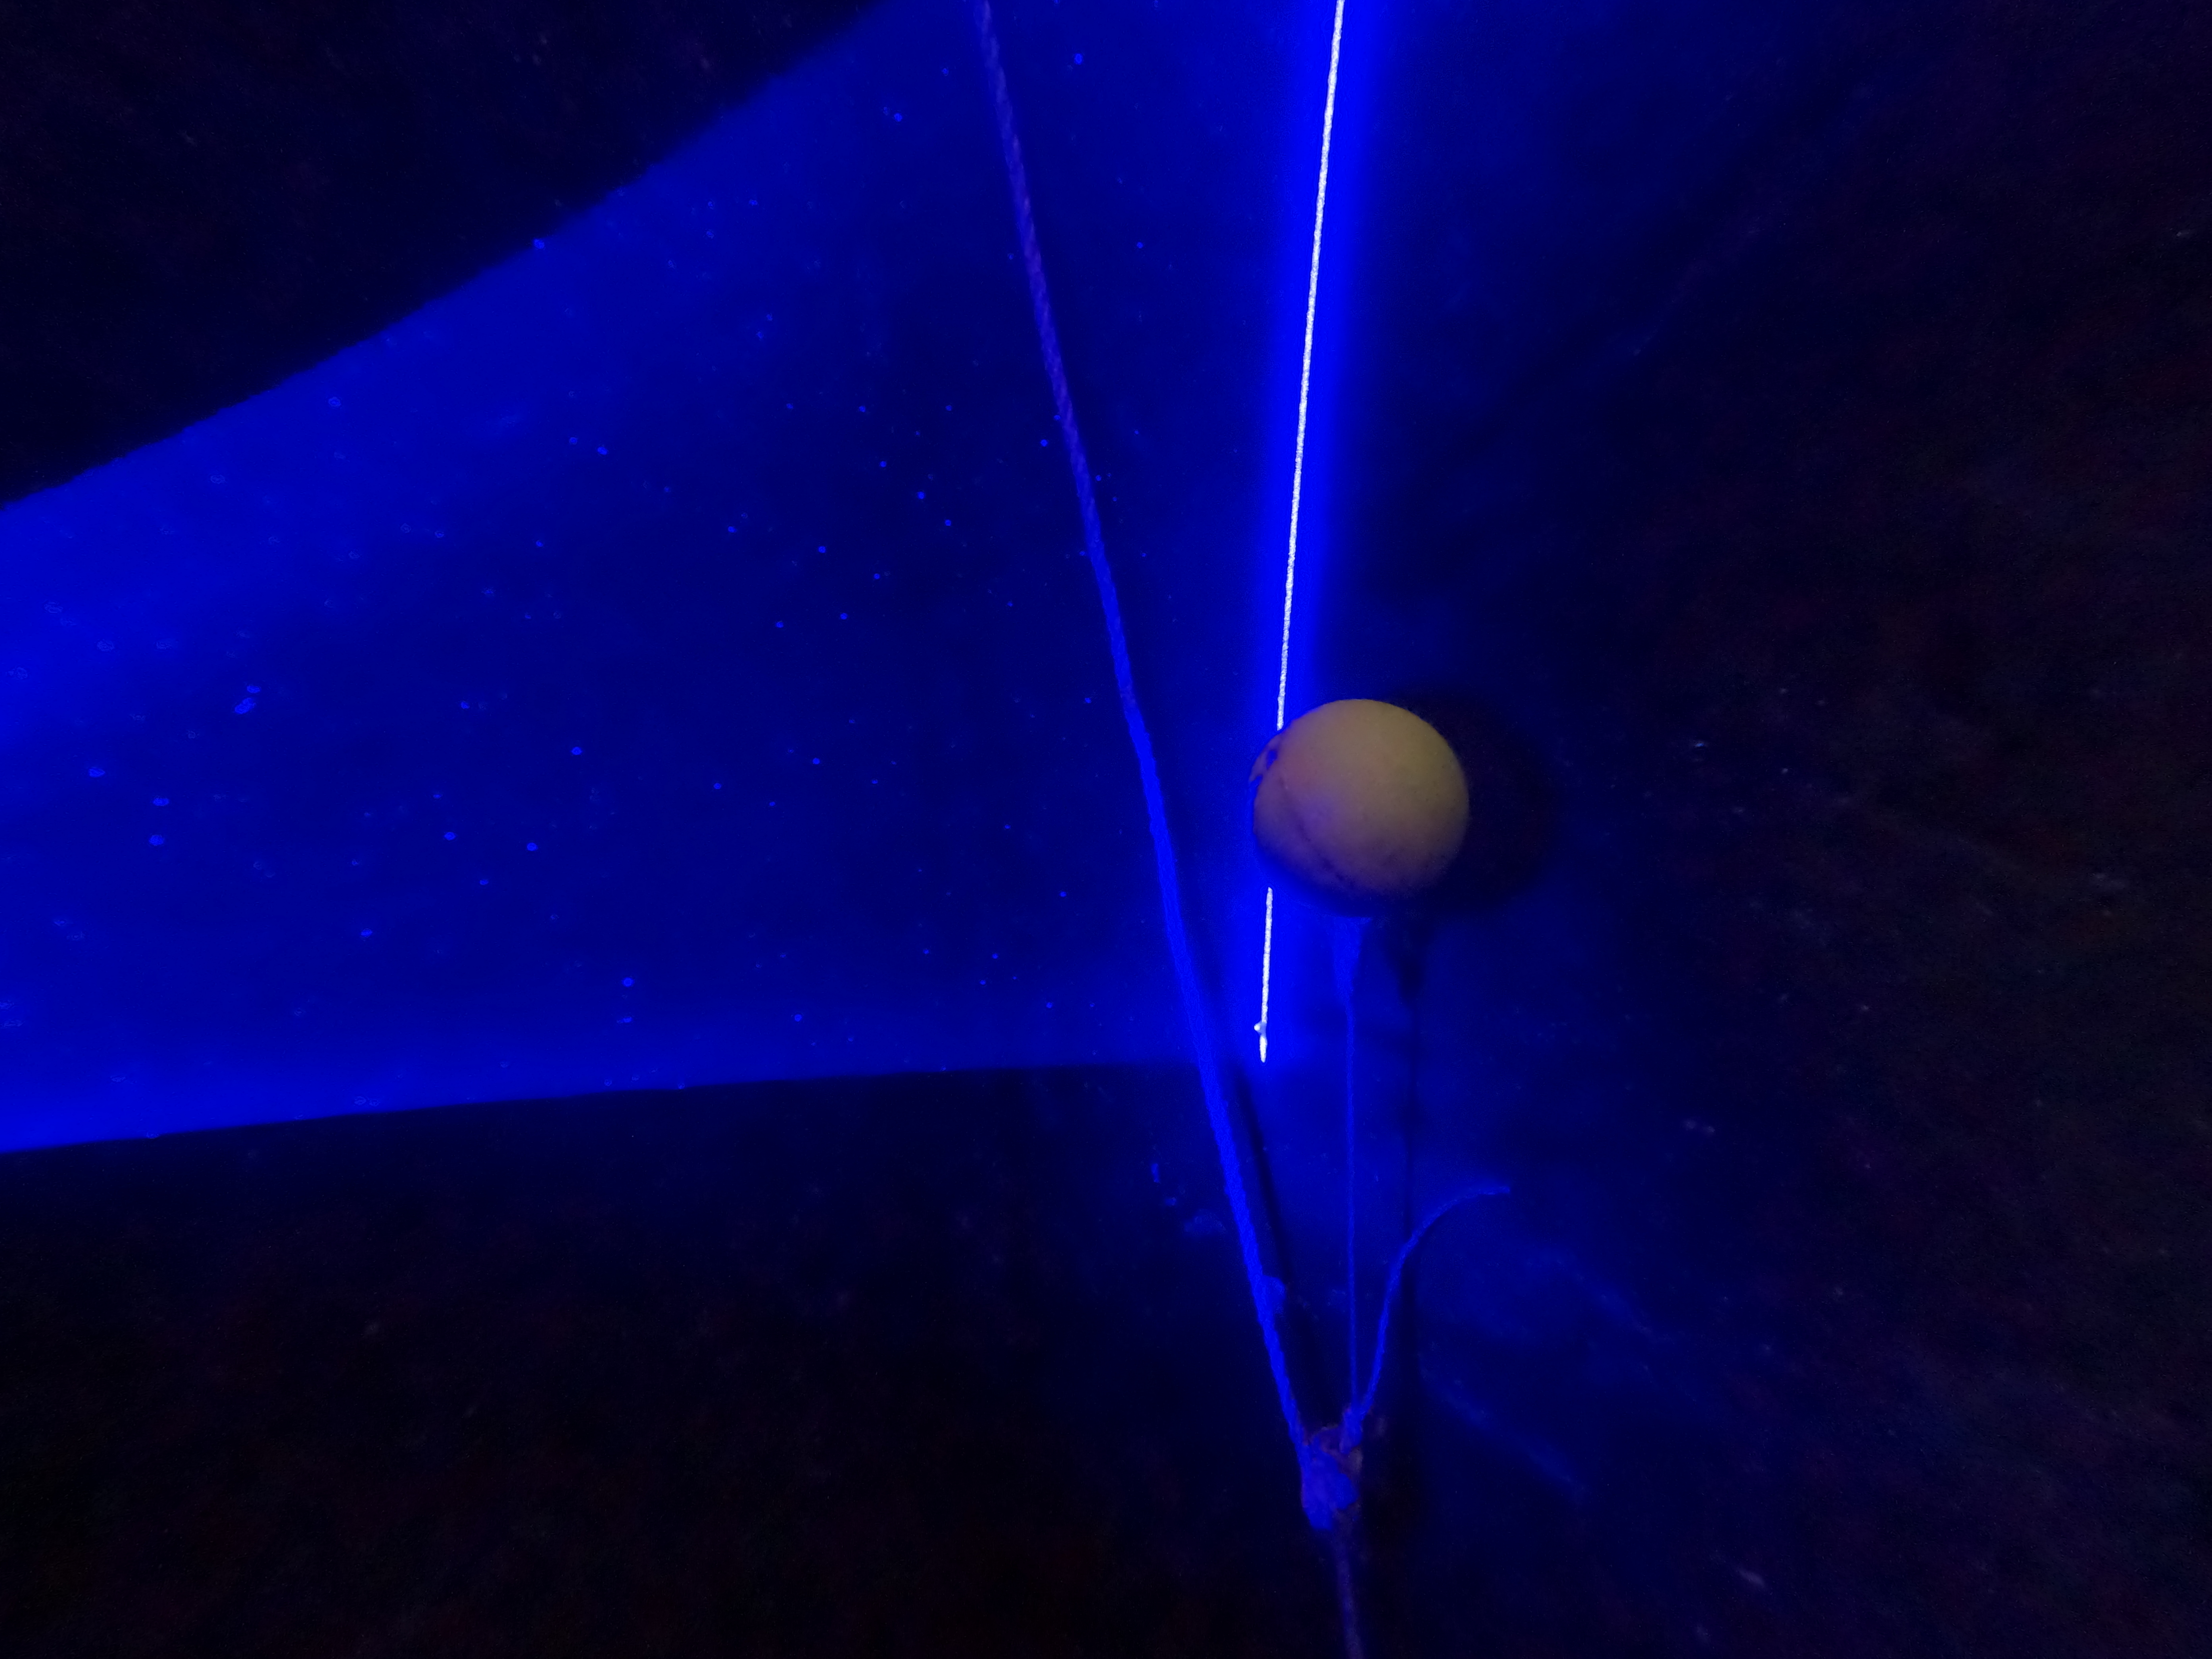

Supplement: Supplementary file 480 [file G0030780.pdf › 3/G0030780.pdf]

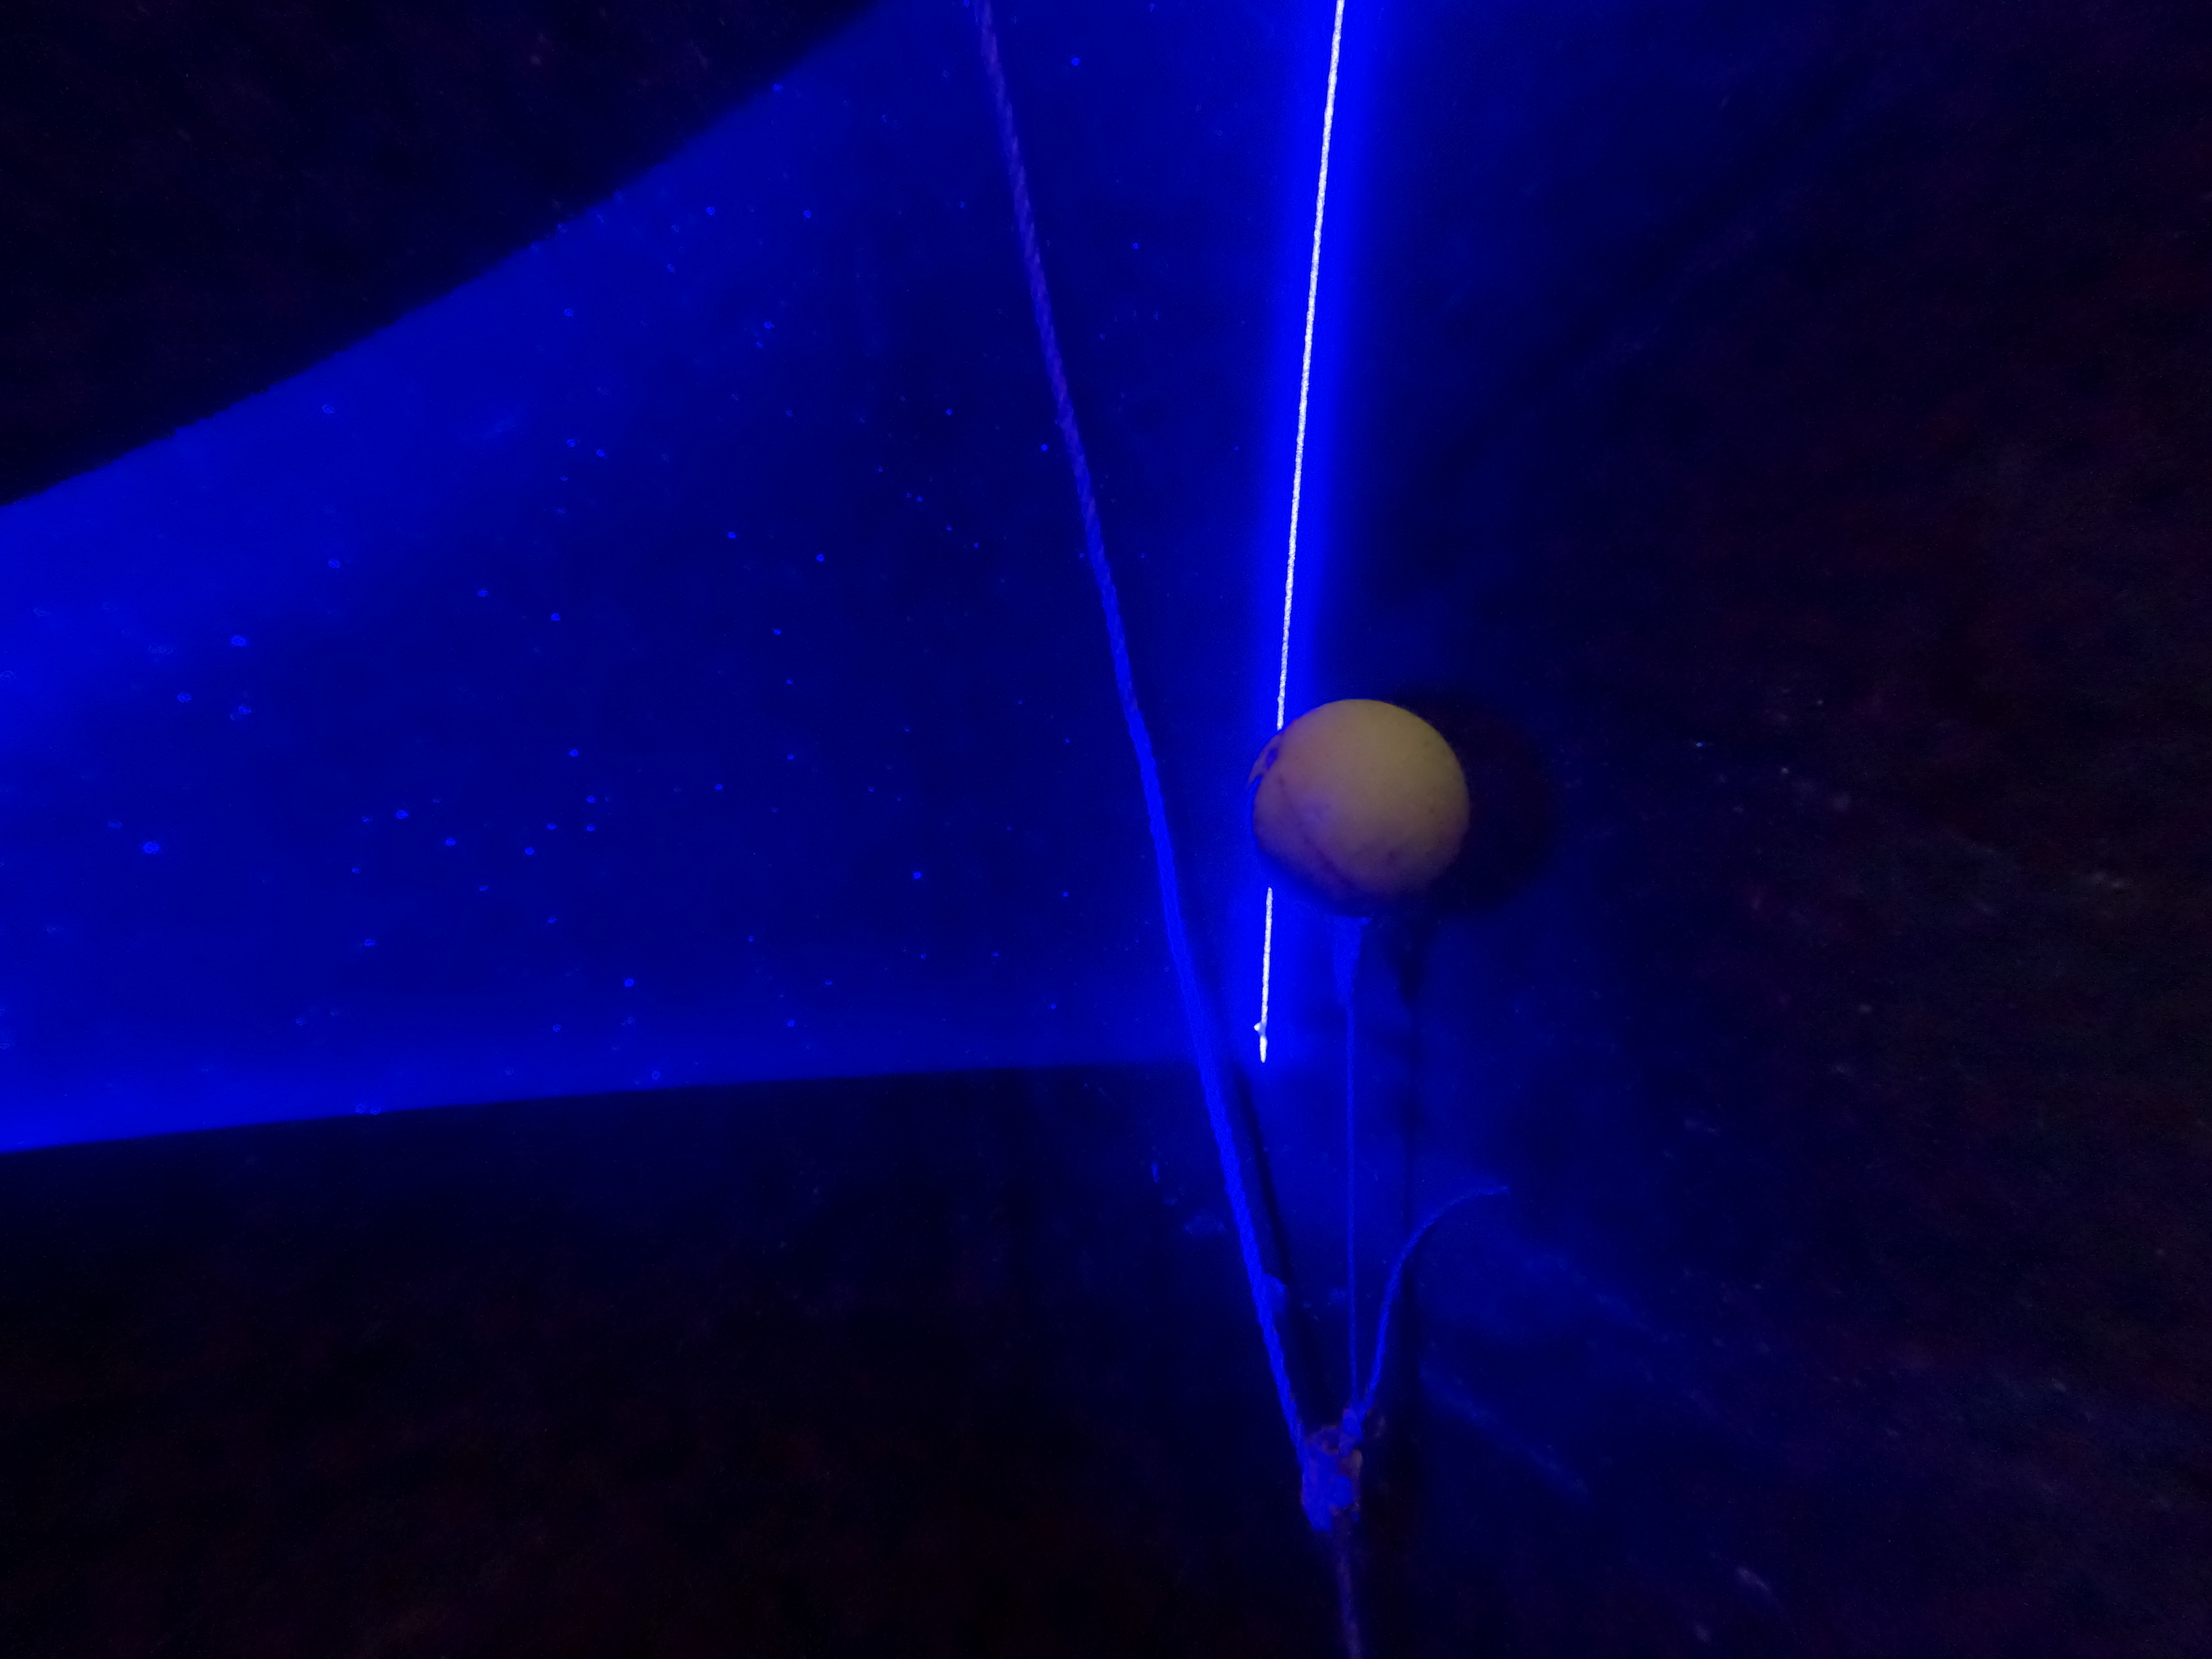

Supplement: Supplementary file 481 [file G0030781.pdf › 3/G0030781.pdf]

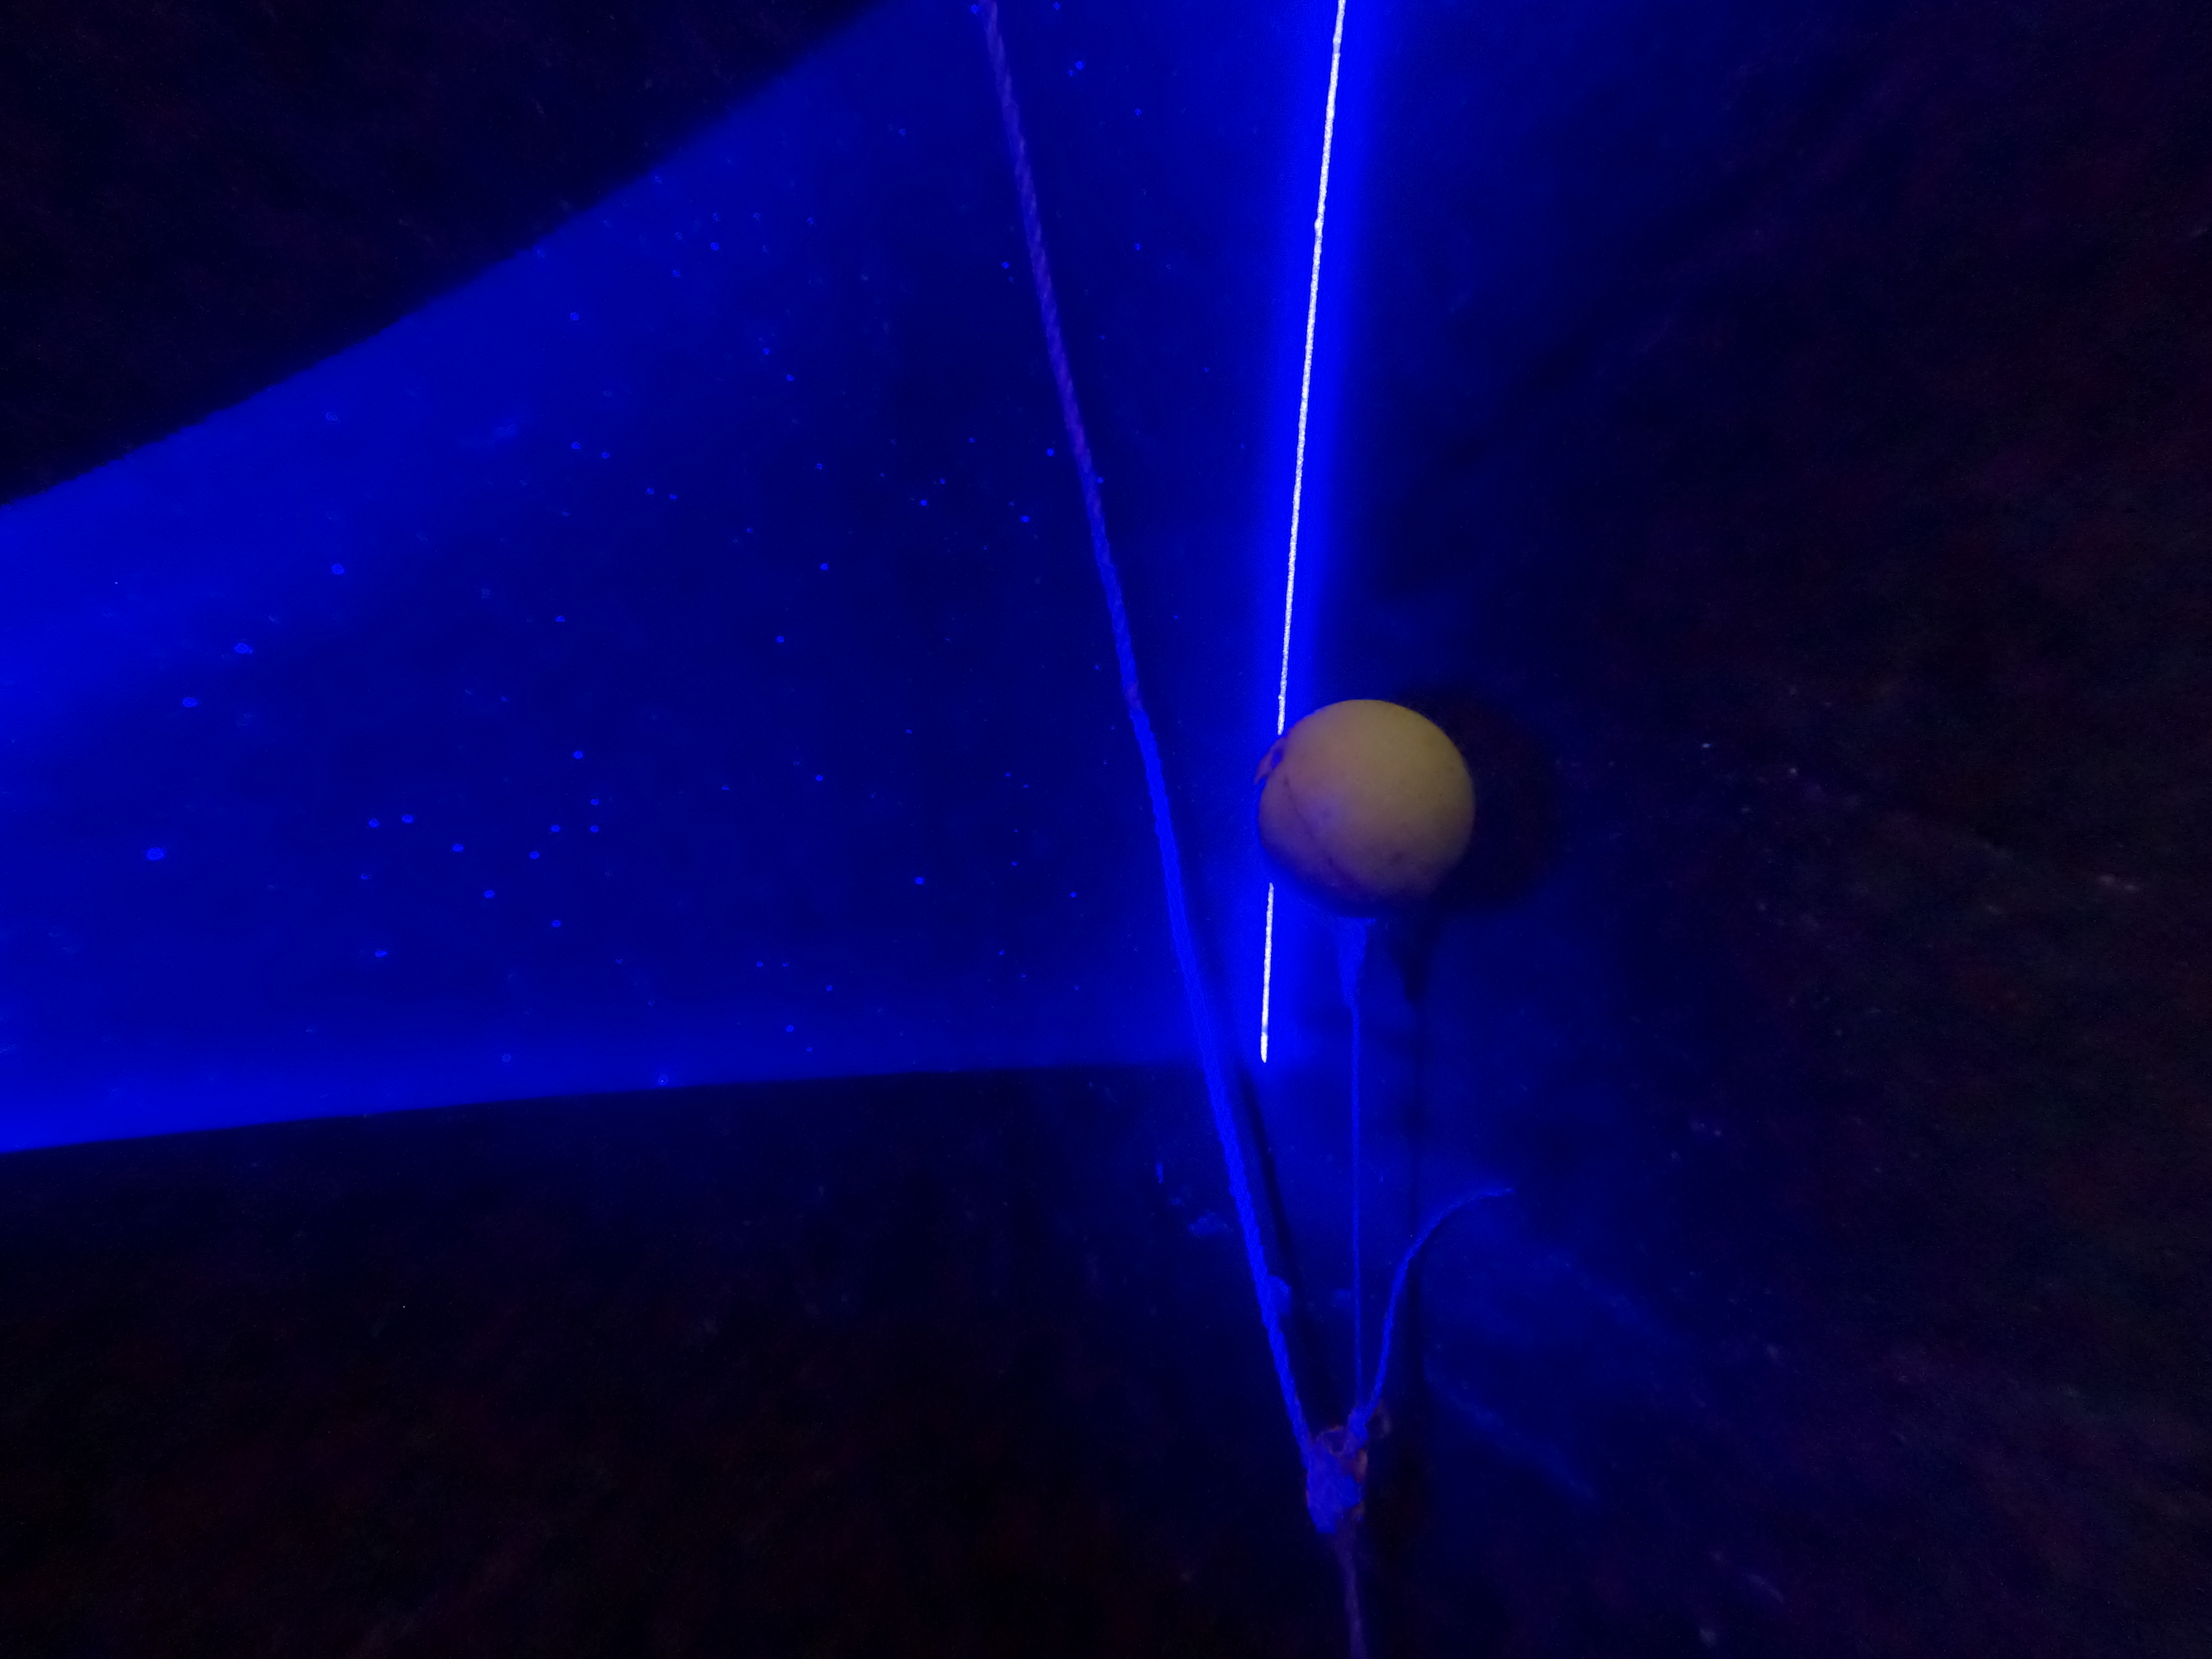

Supplement: Supplementary file 482 [file G0030782.pdf › 3/G0030782.pdf]

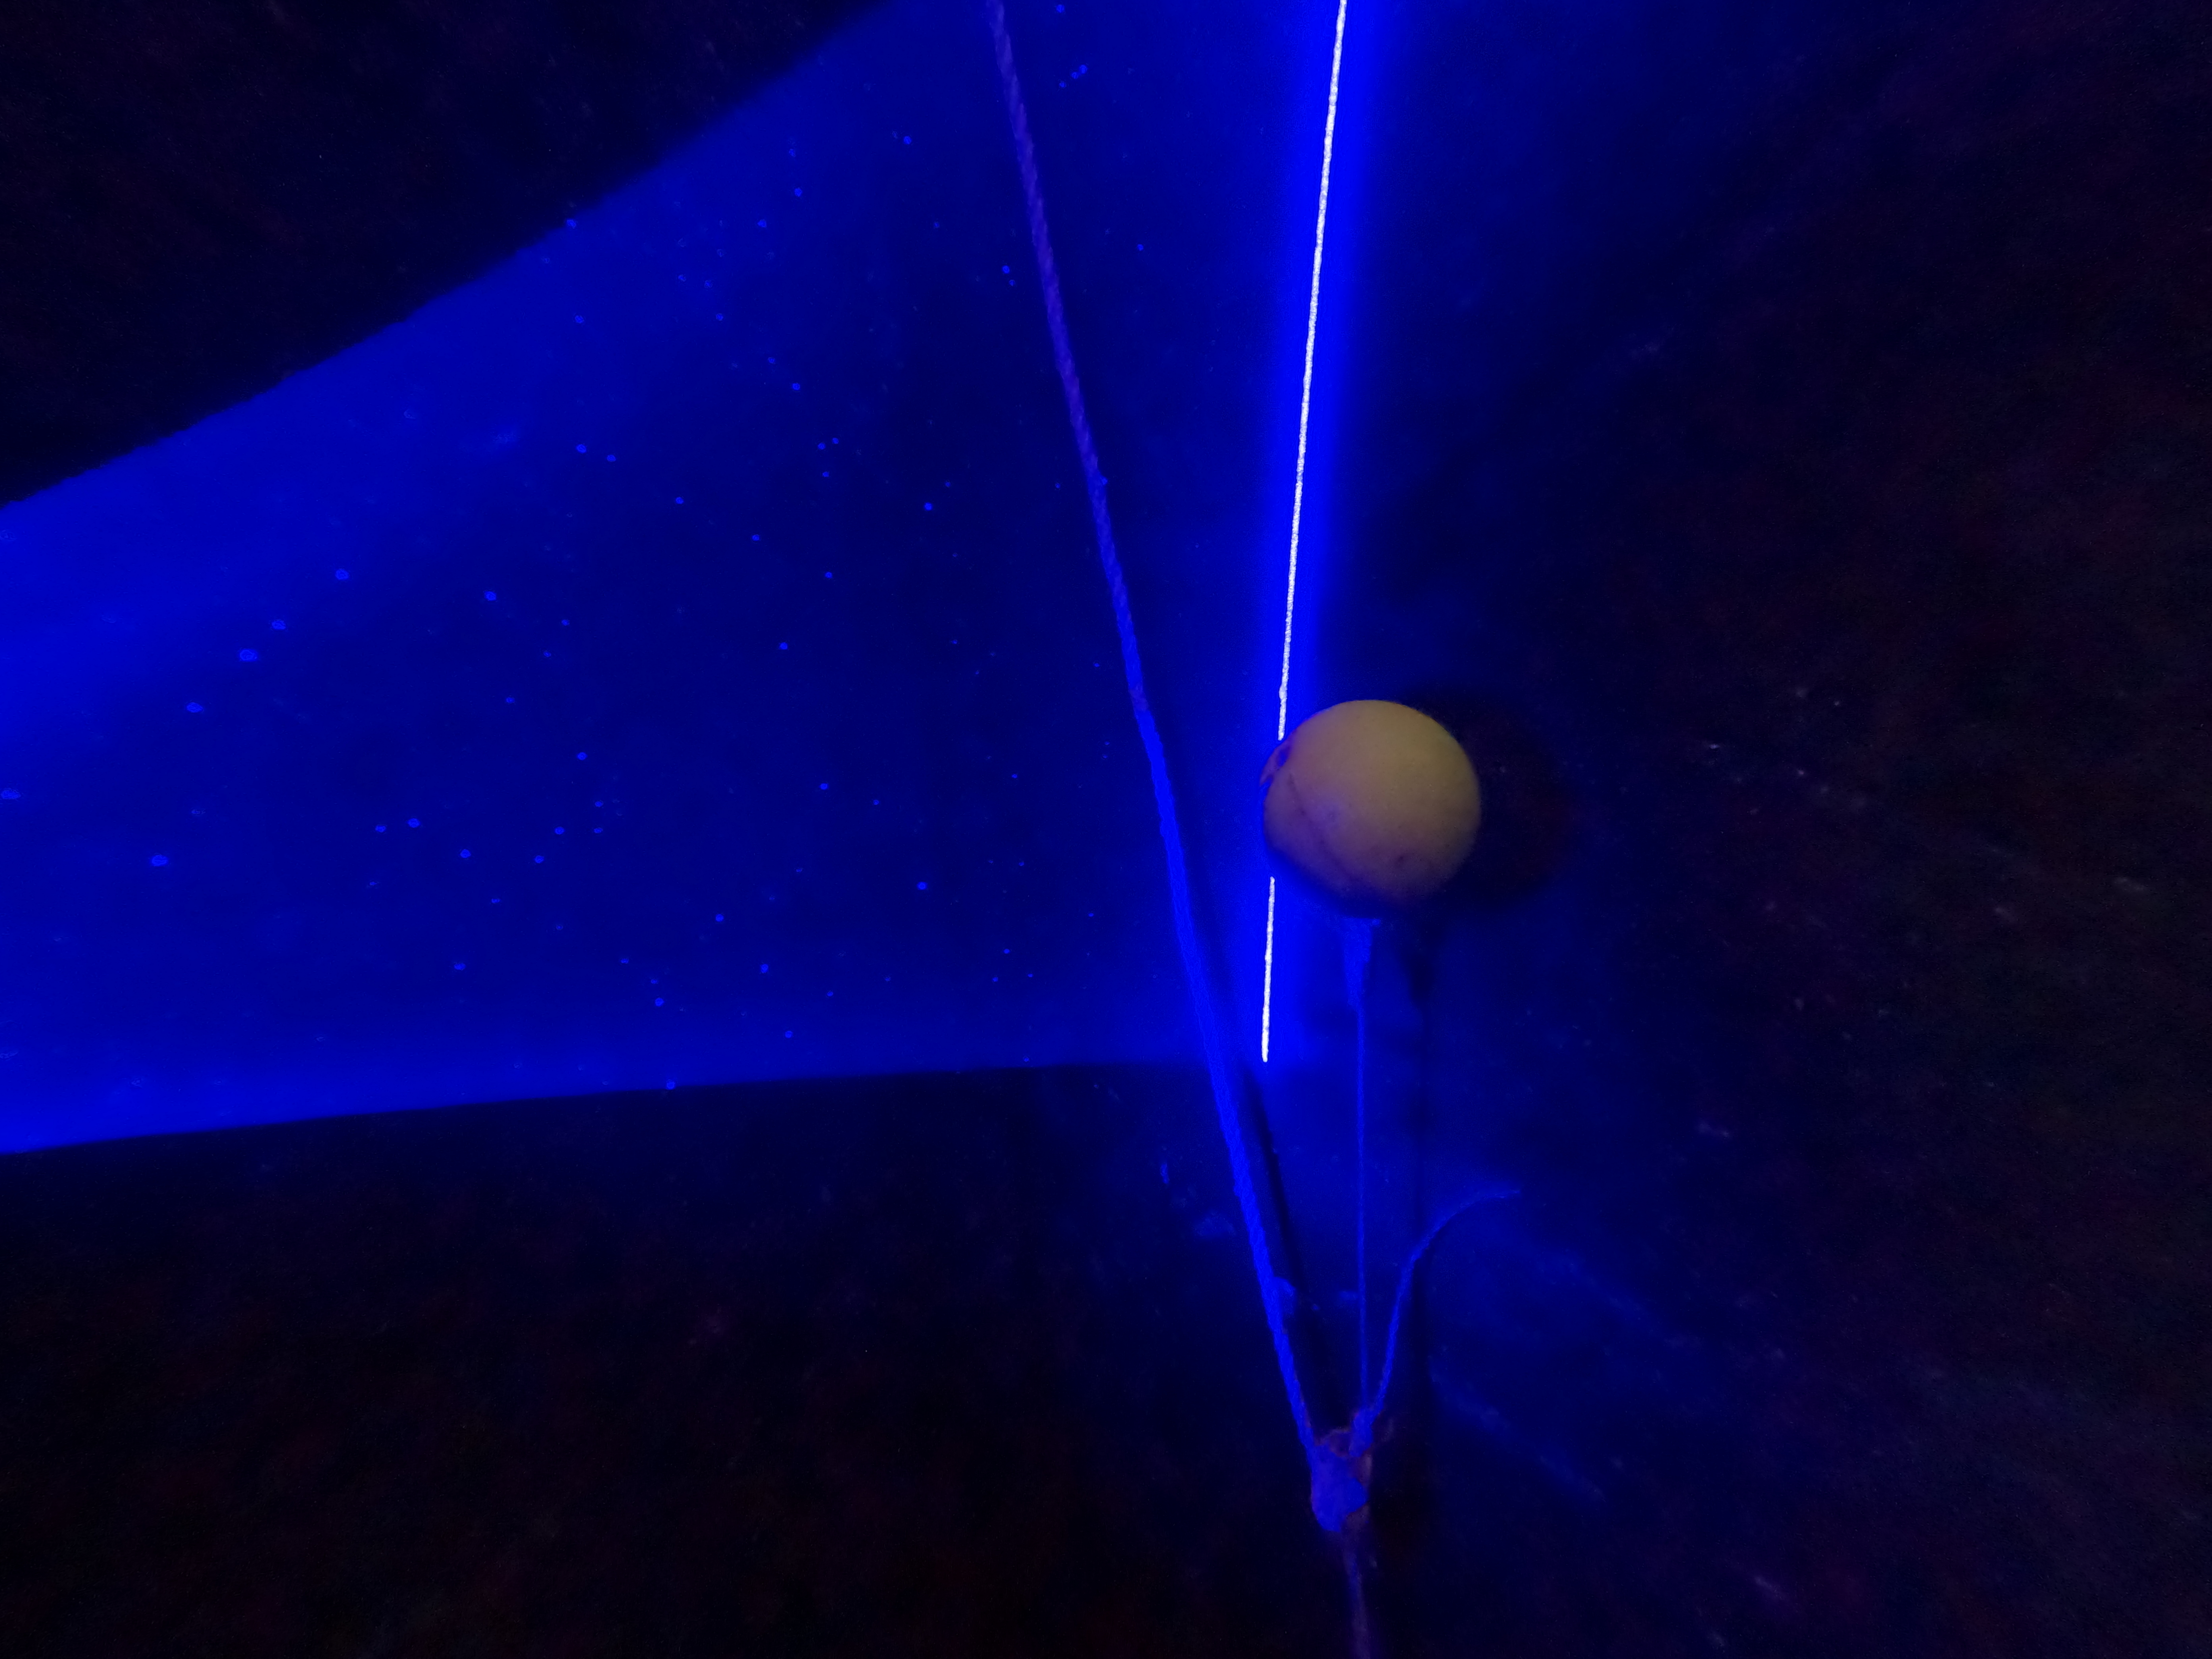

Supplement: Supplementary file 483 [file G0030783.pdf › 3/G0030783.pdf]

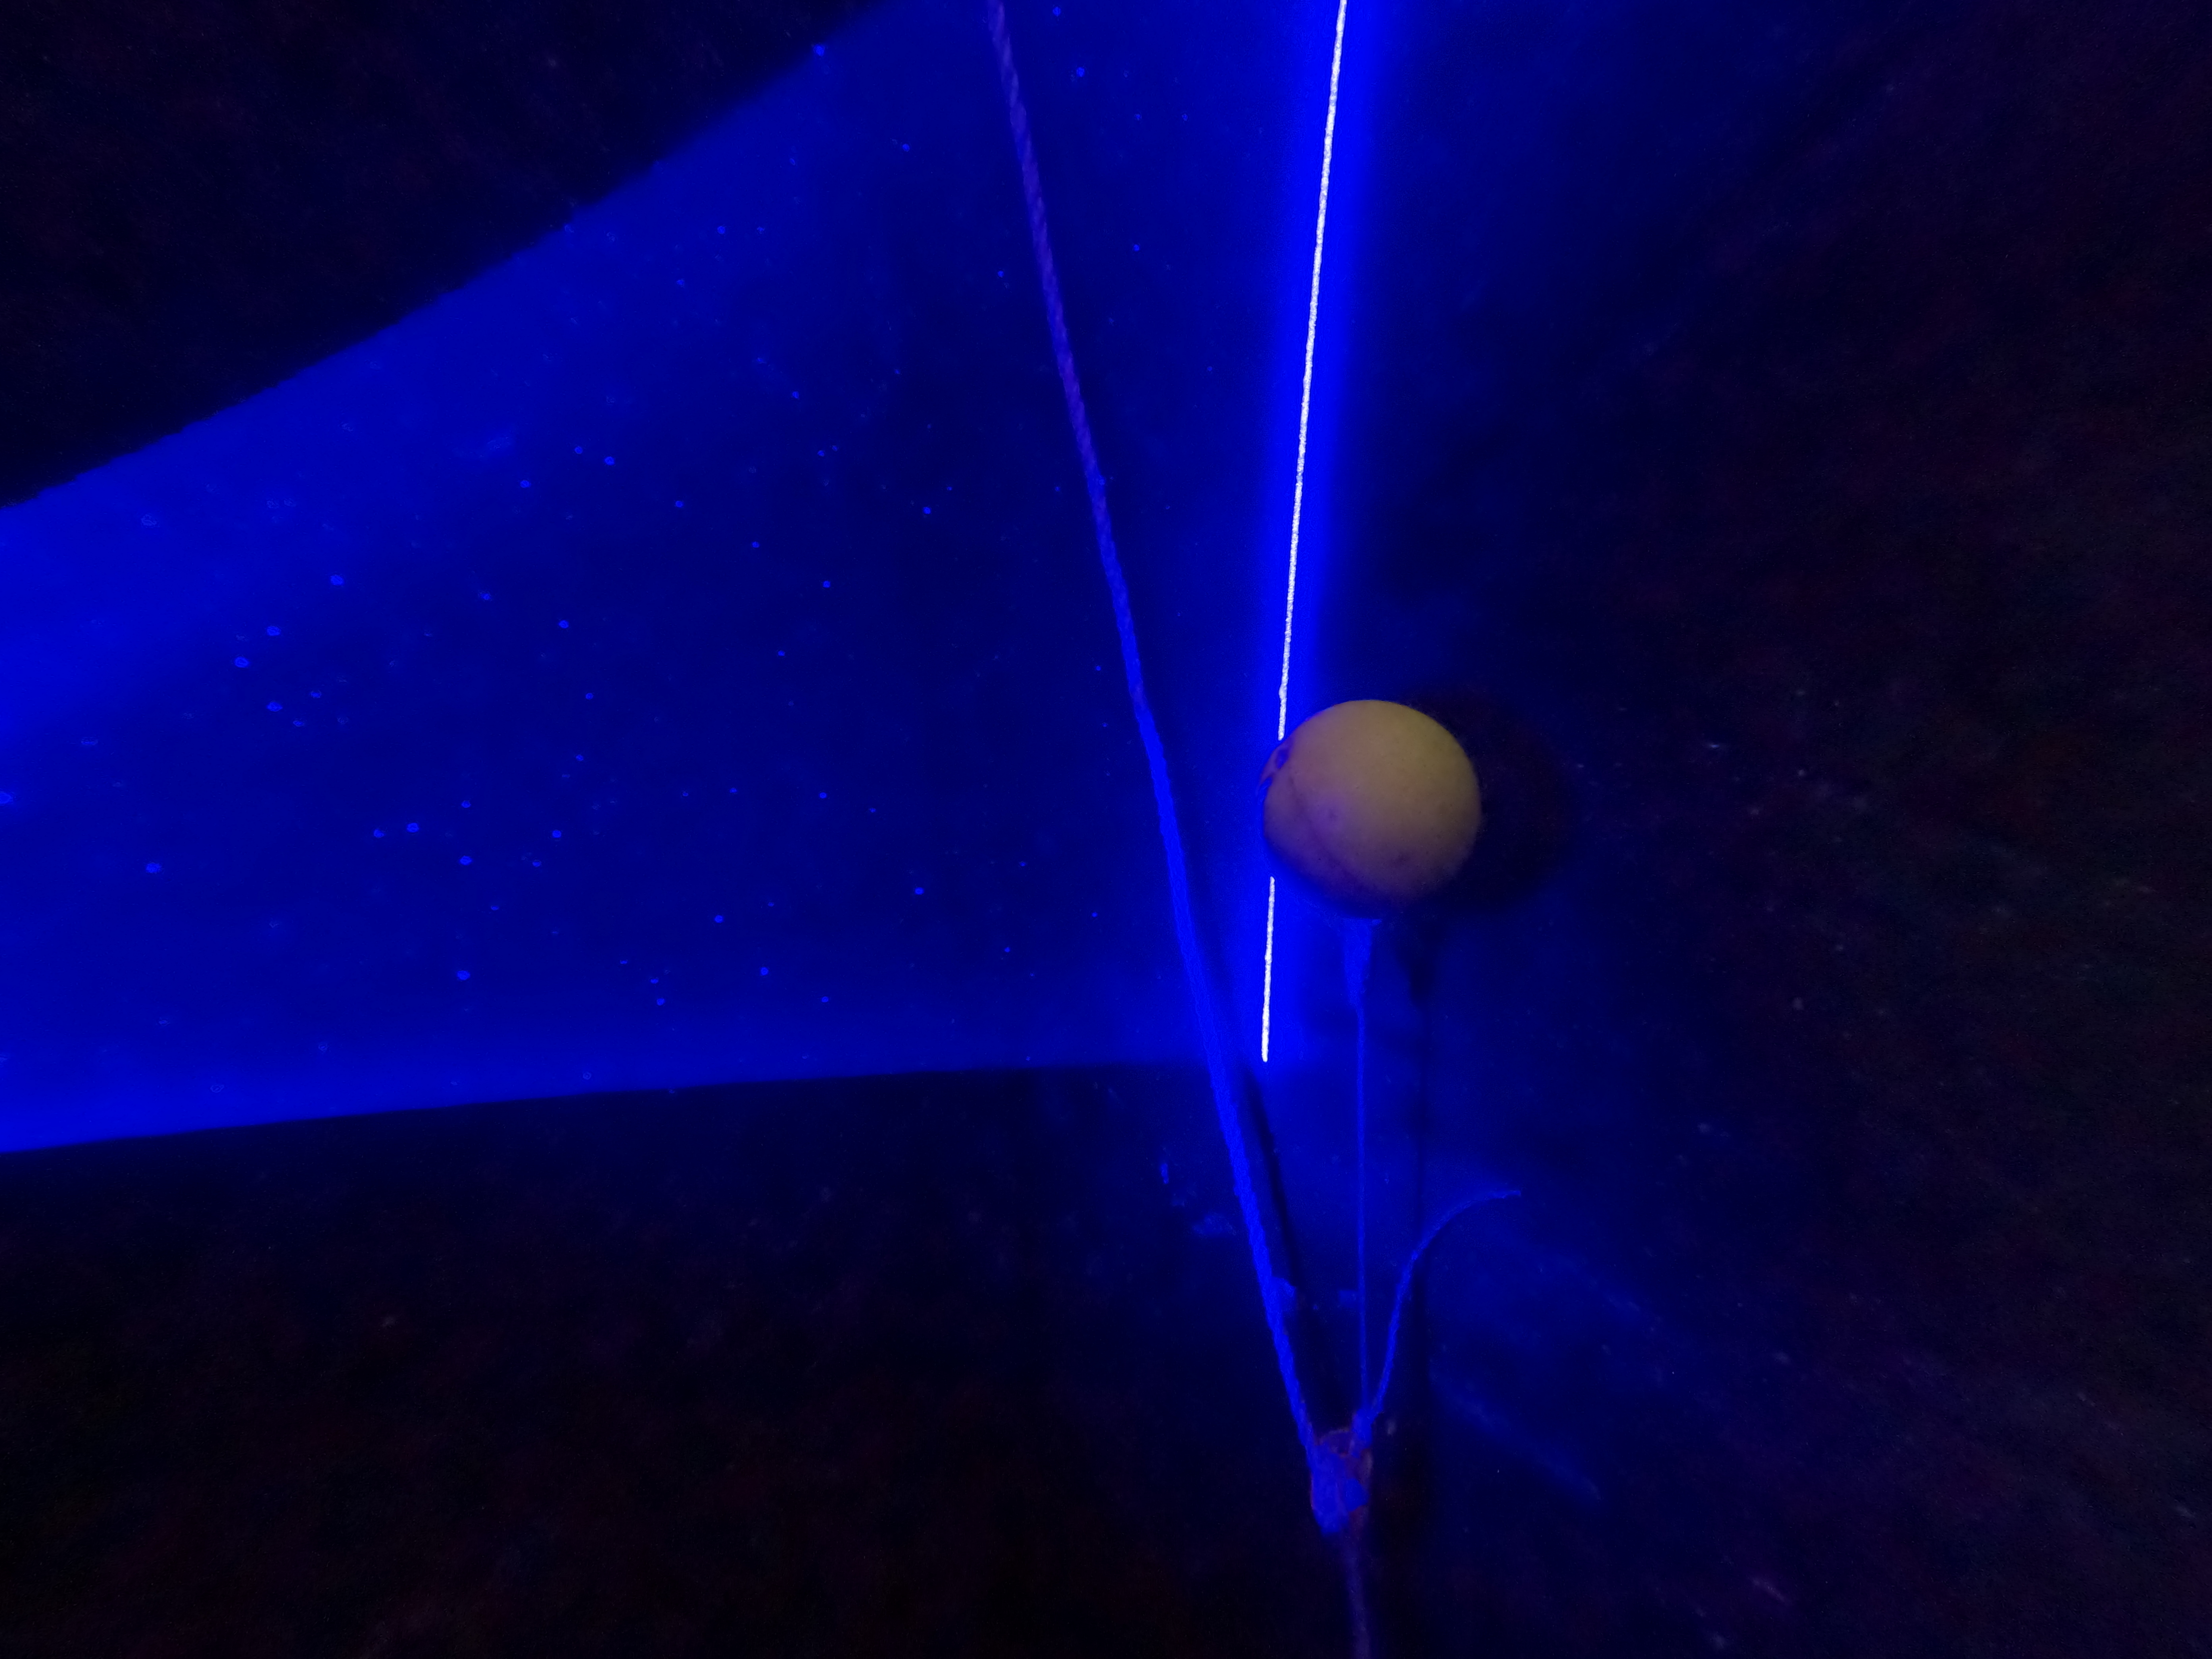

Supplement: Supplementary file 484 [file G0030784.pdf › 3/G0030784.pdf]

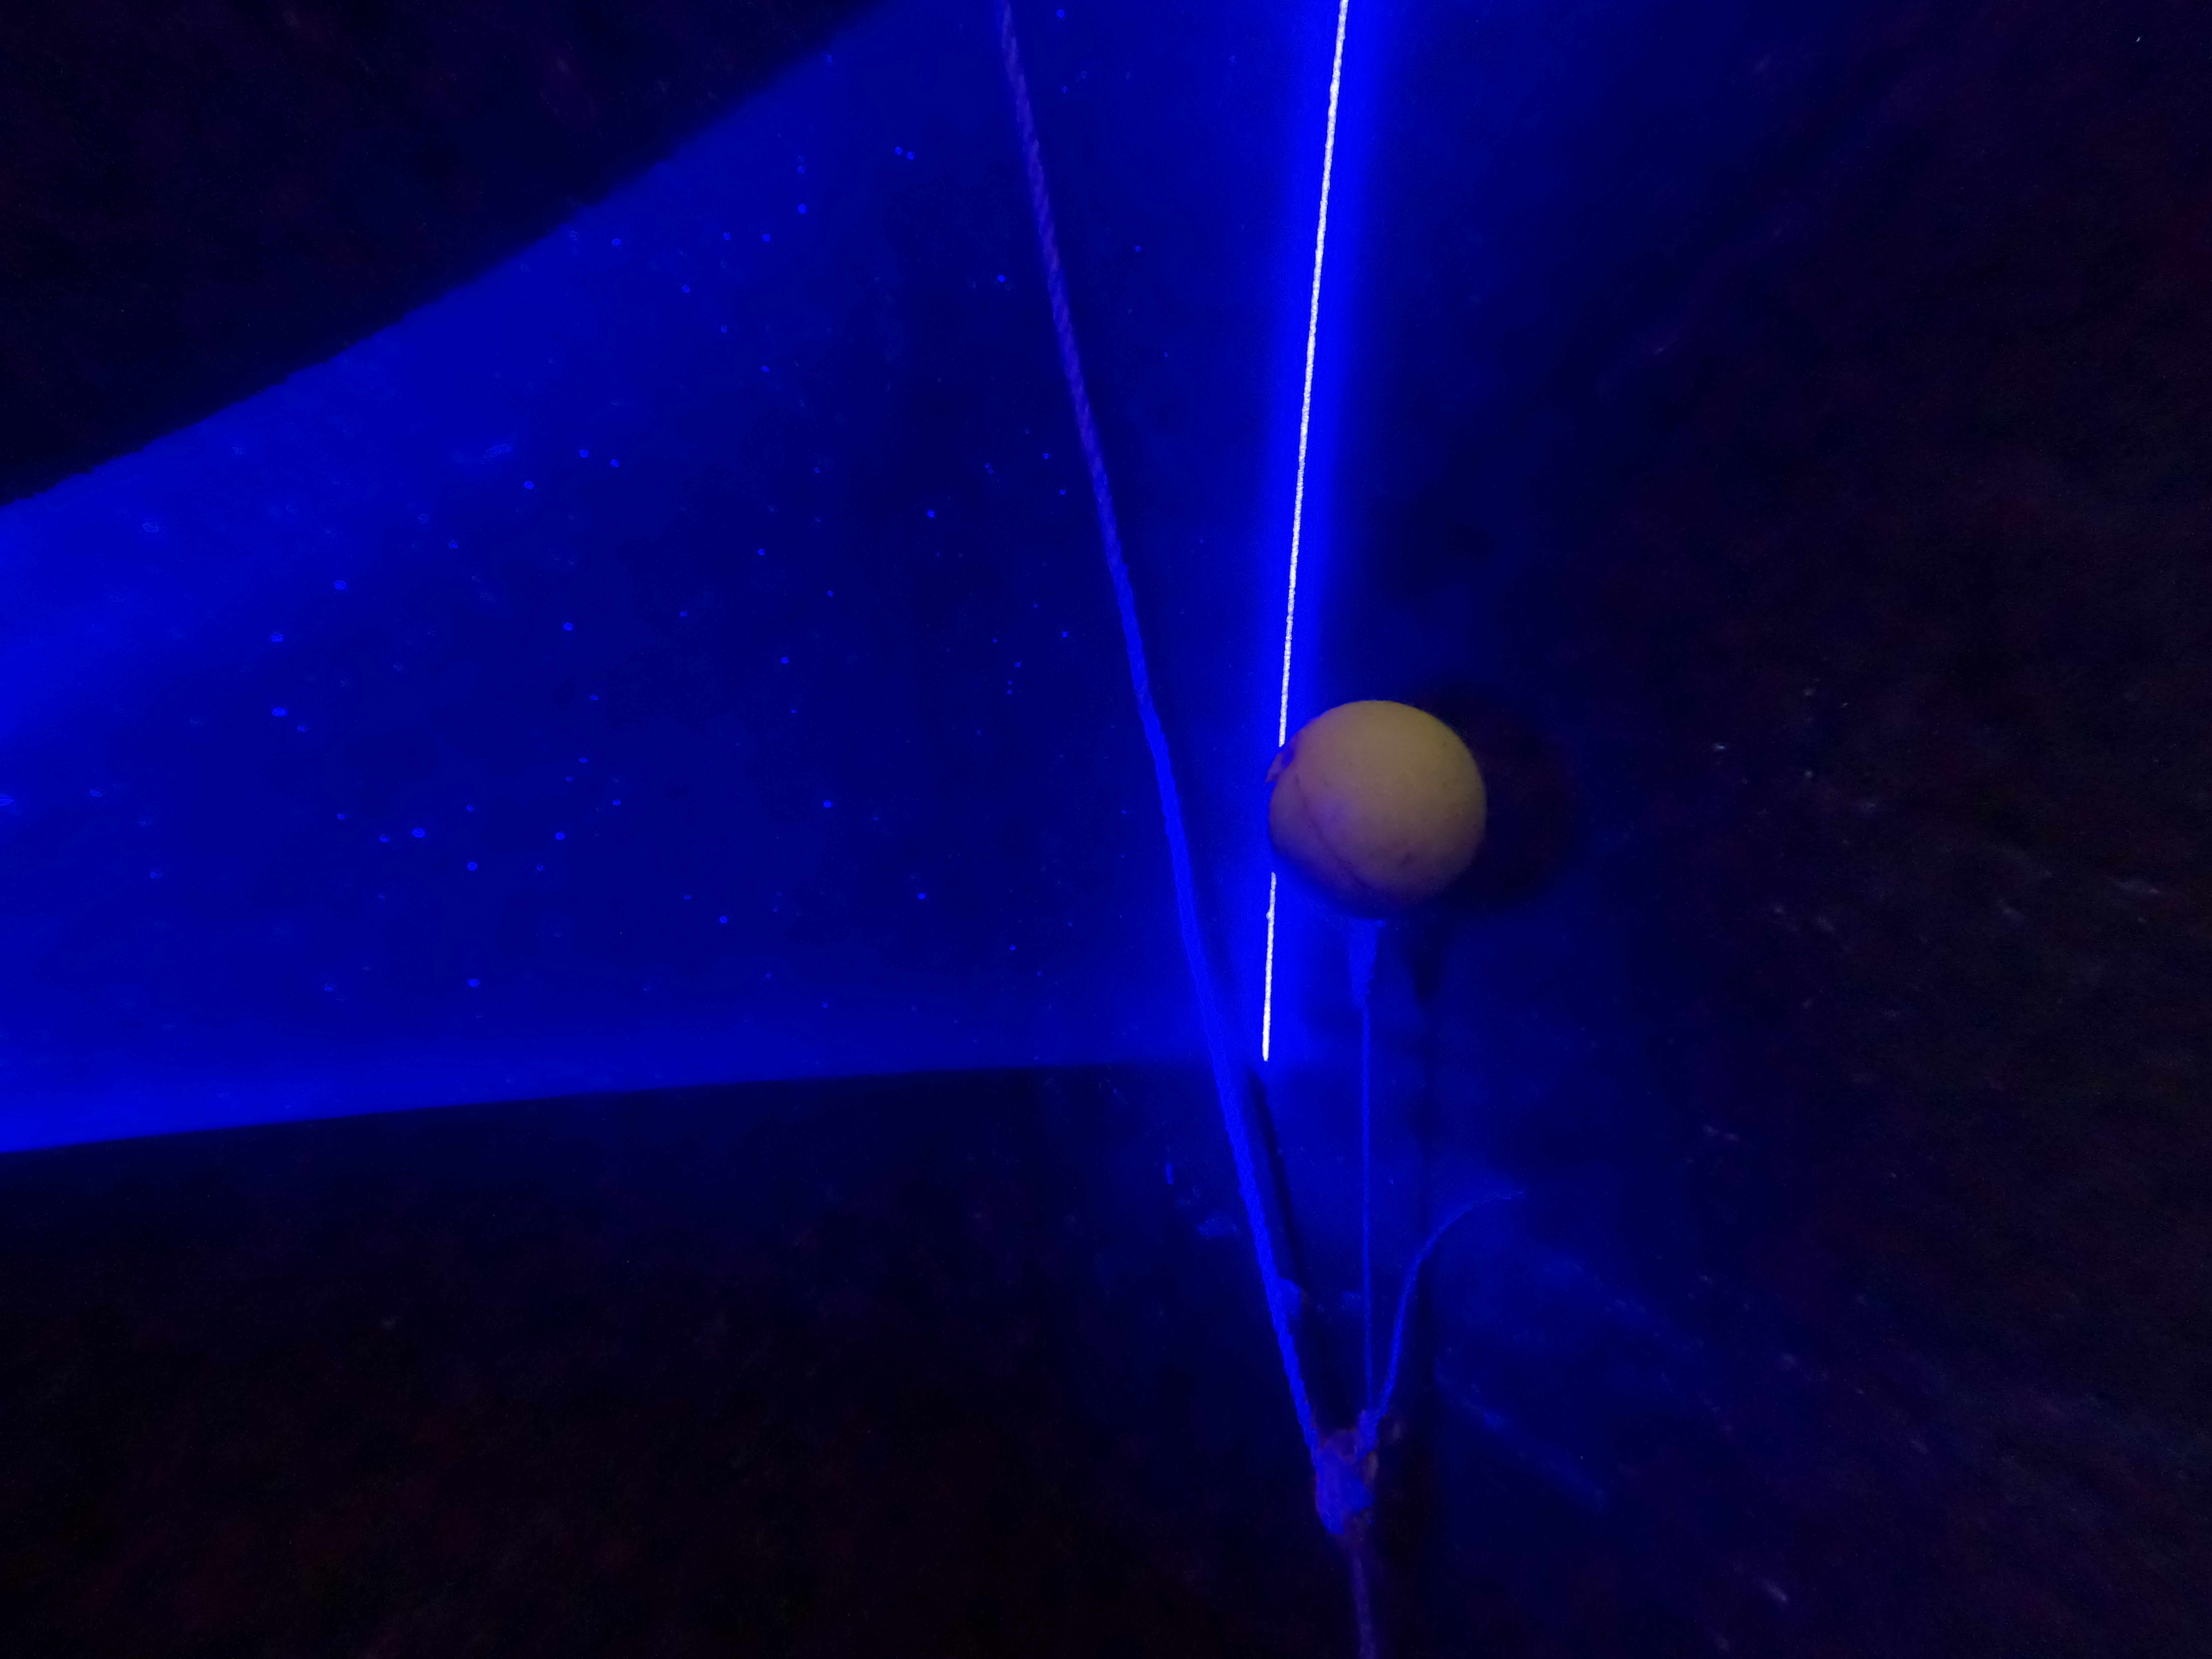

Supplement: Supplementary file 485 [file G0030785.pdf › 3/G0030785.pdf]

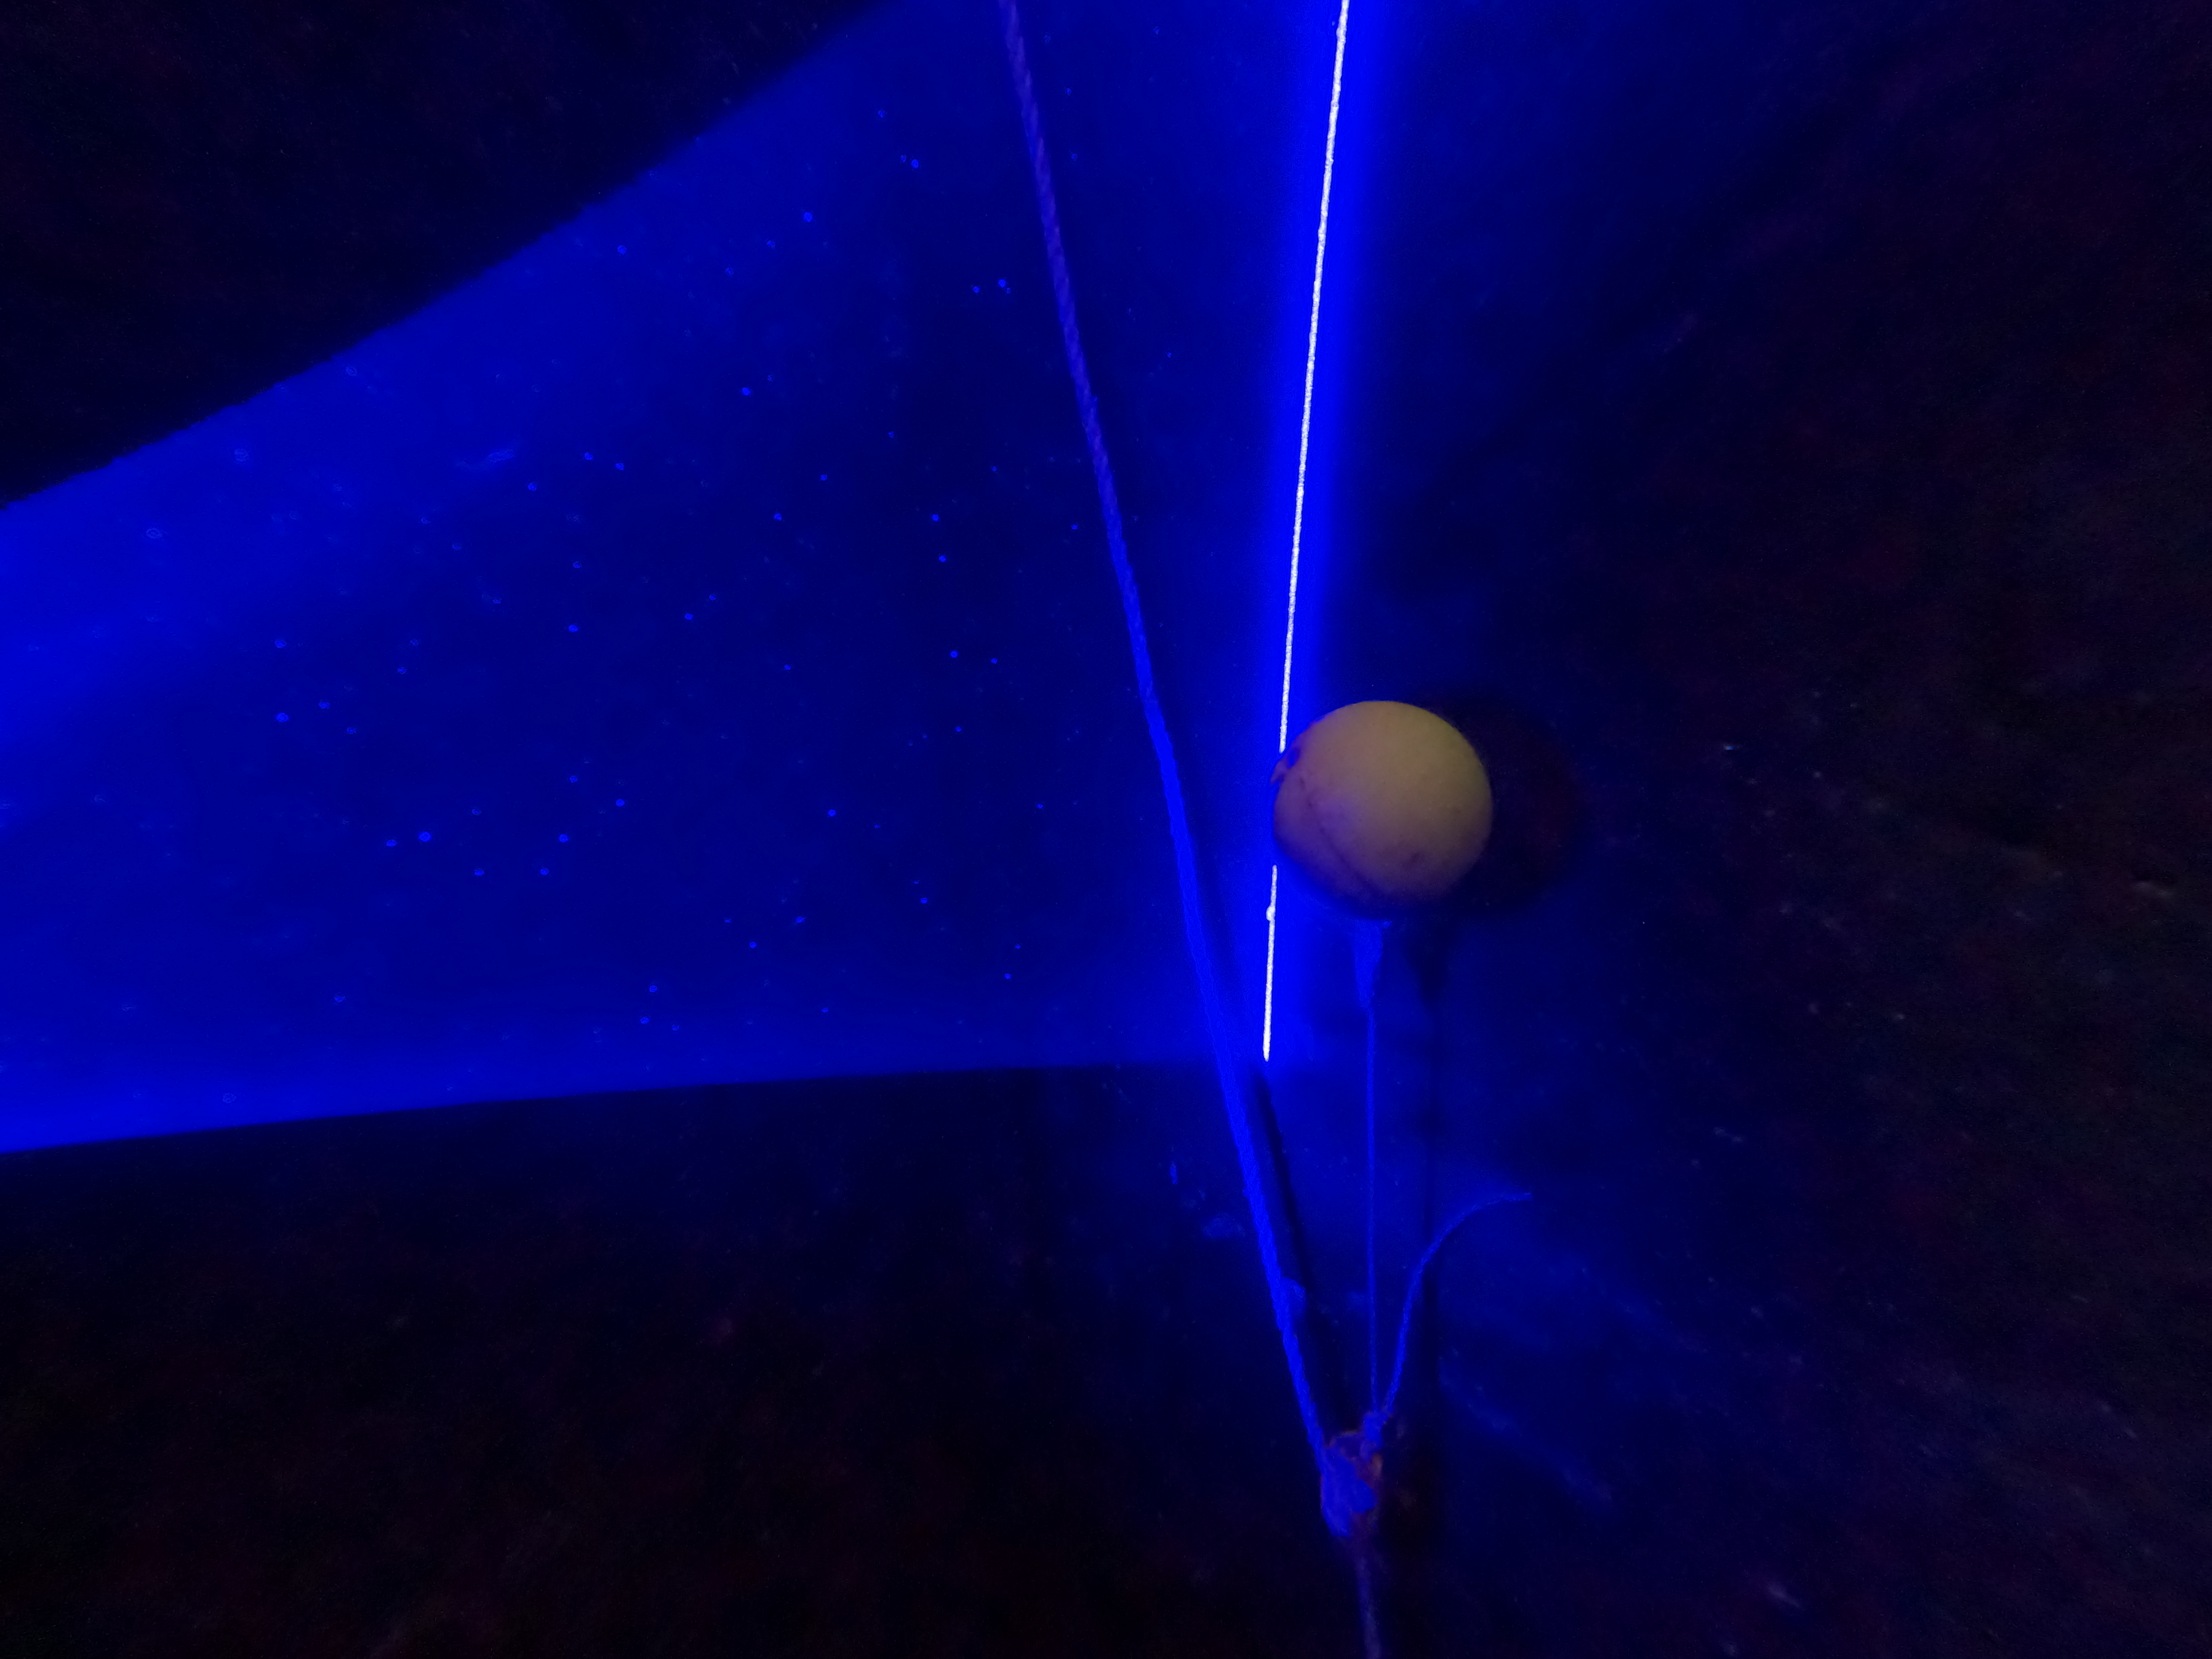

Supplement: Supplementary file 486 [file G0030786.pdf › 3/G0030786.pdf]

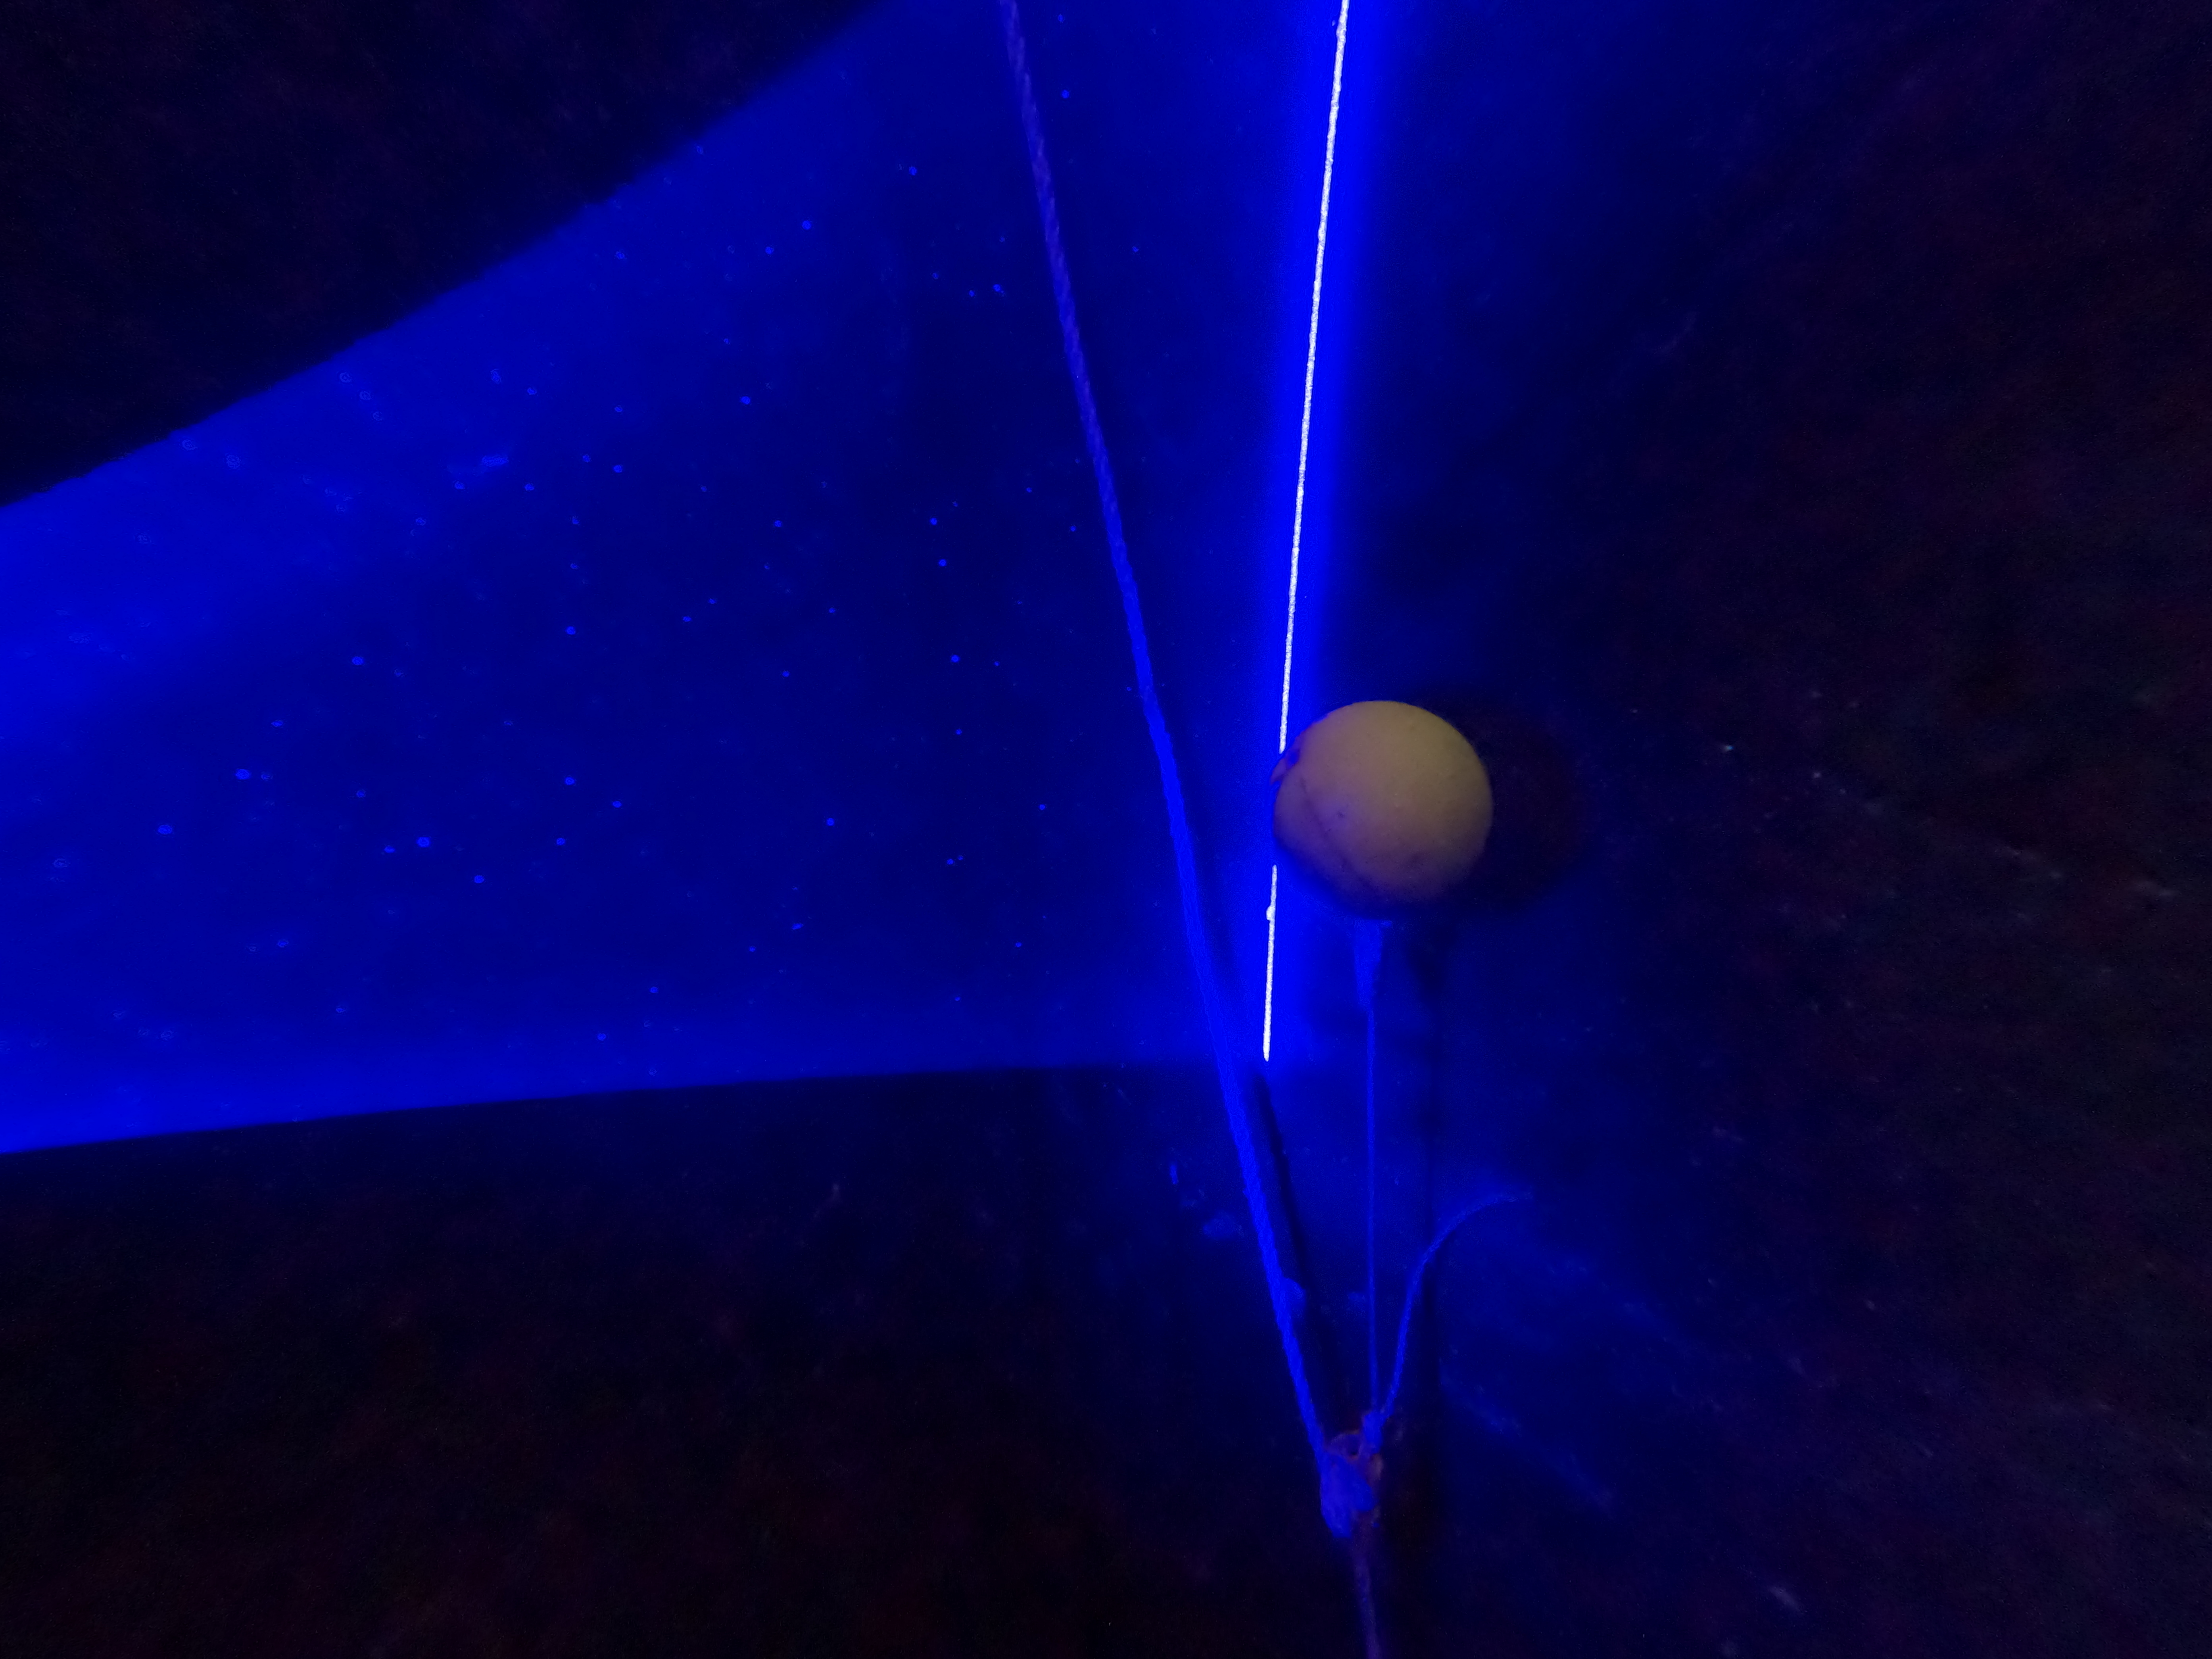

Supplement: Supplementary file 487 [file G0030787.pdf › 3/G0030787.pdf]

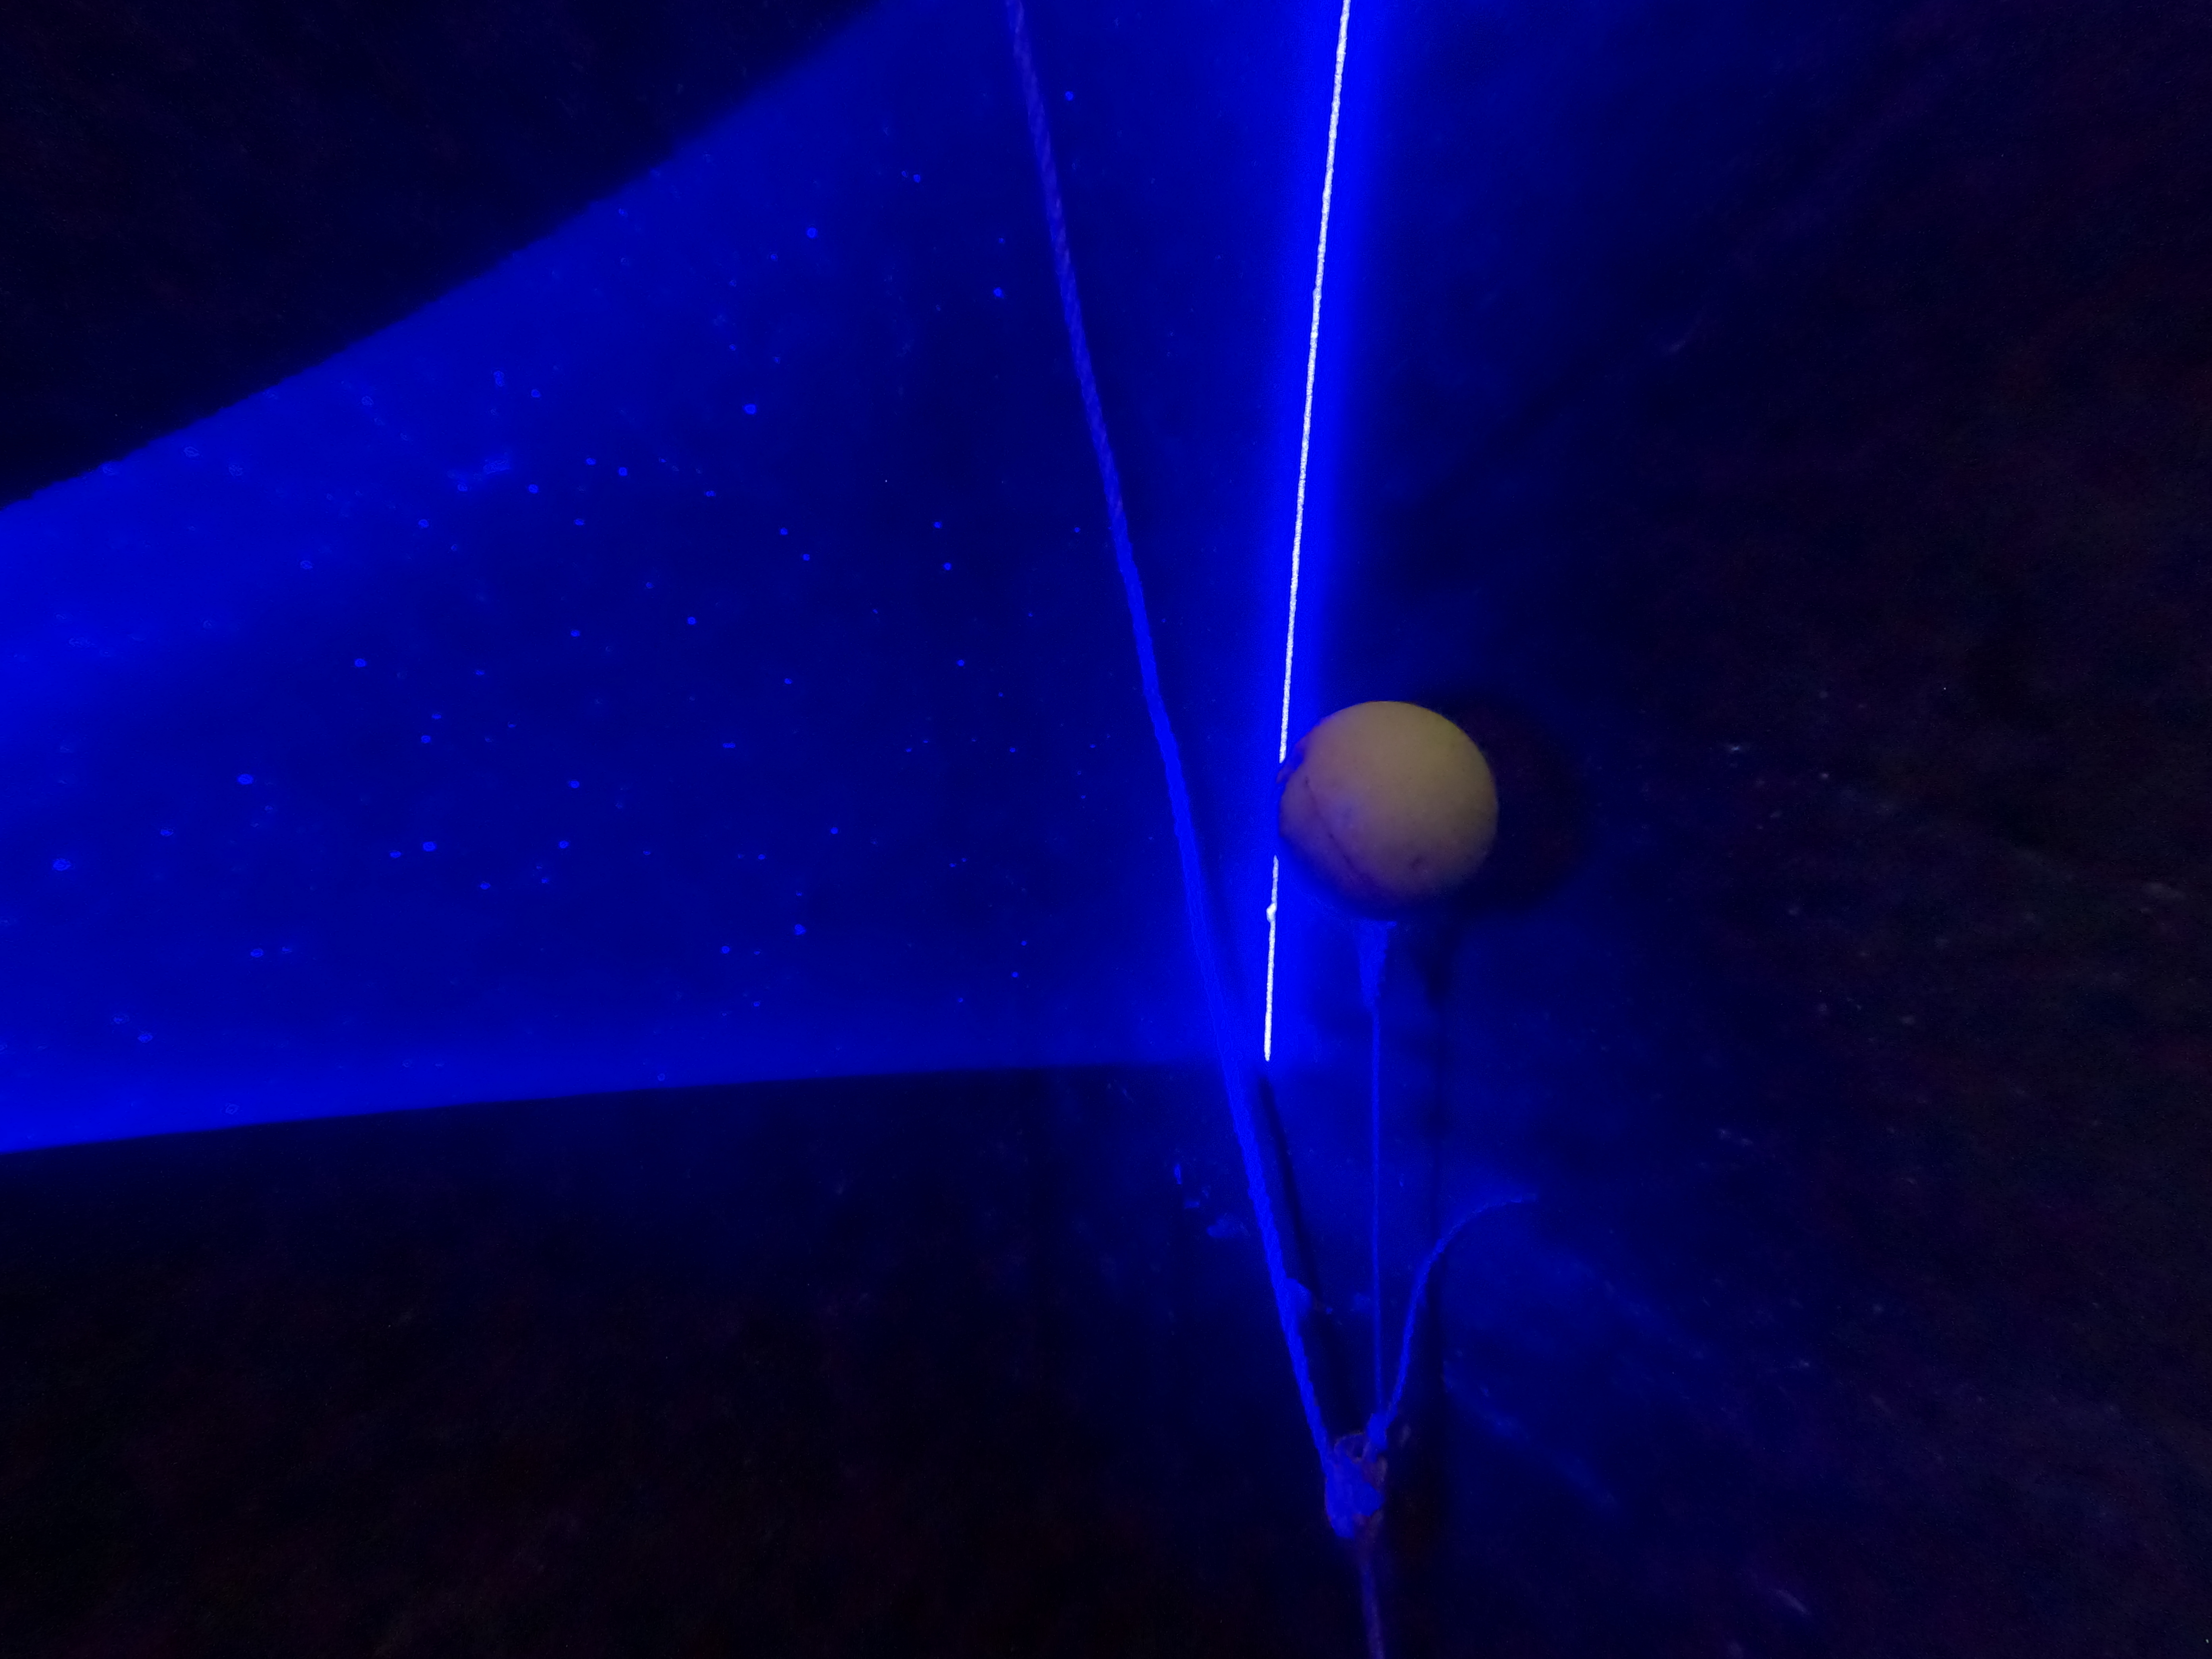

Supplement: Supplementary file 488 [file G0030788.pdf › 3/G0030788.pdf]

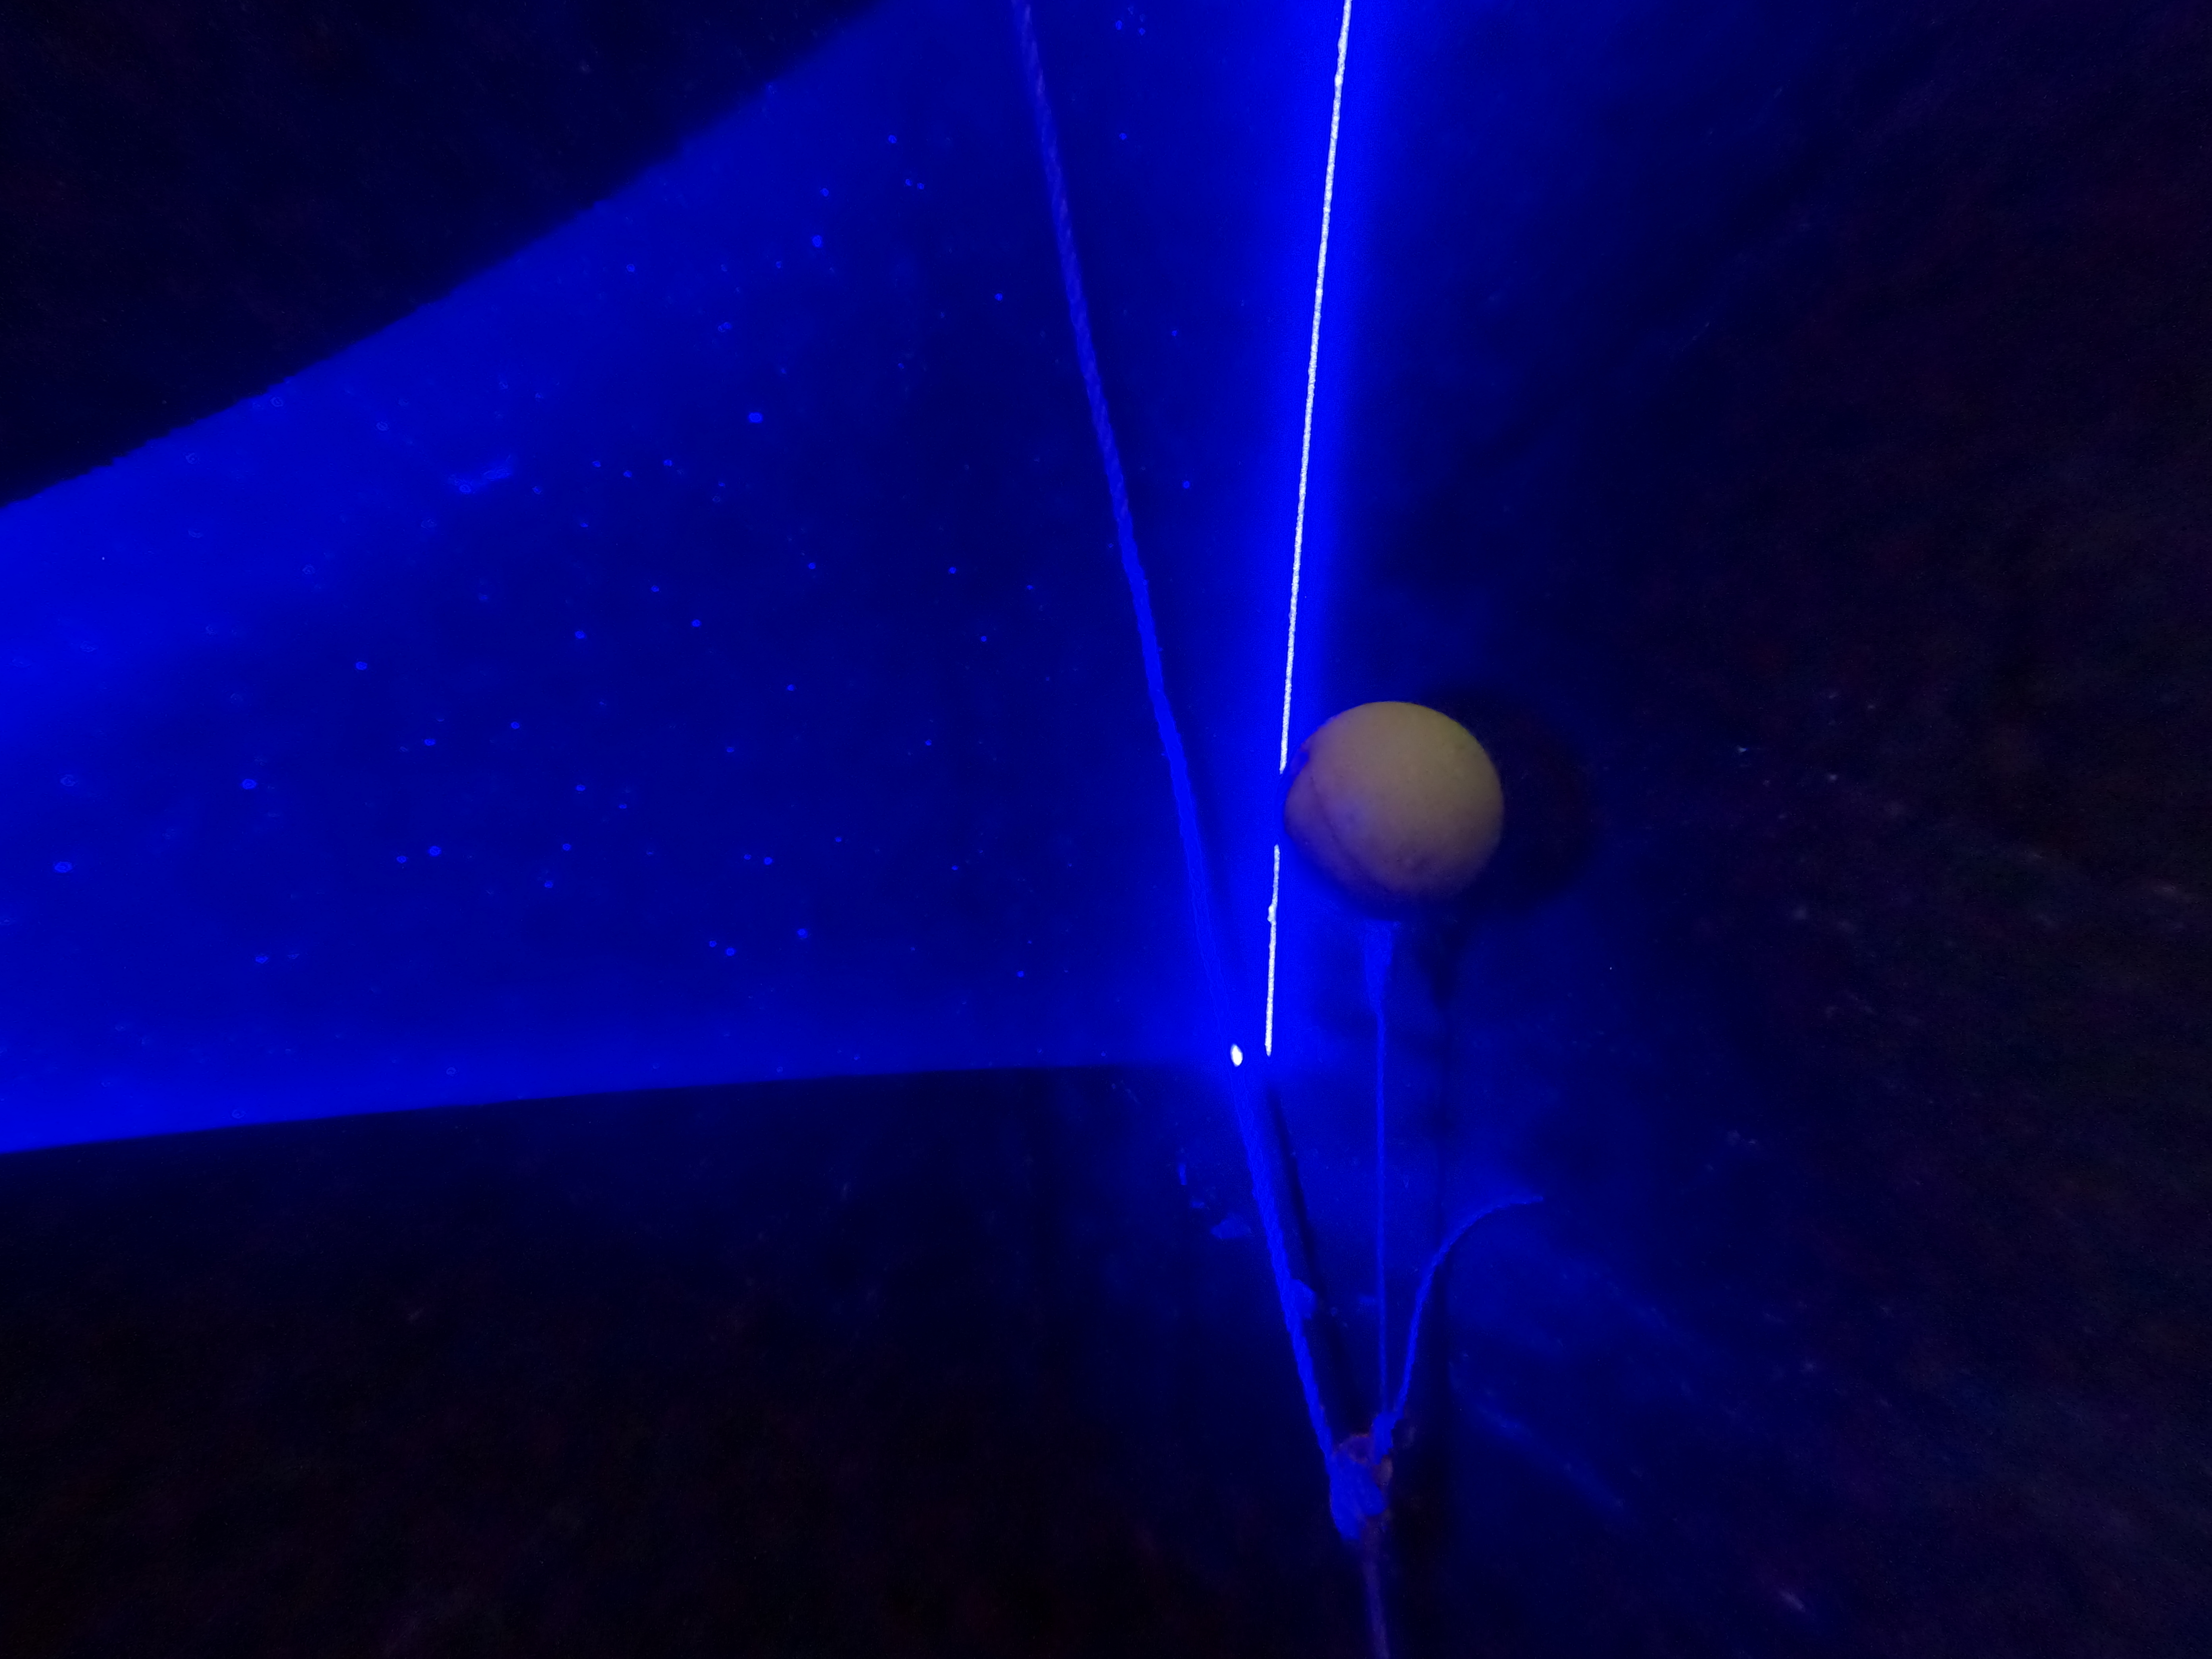

Supplement: Supplementary file 489 [file G0030789.pdf › 3/G0030789.pdf]

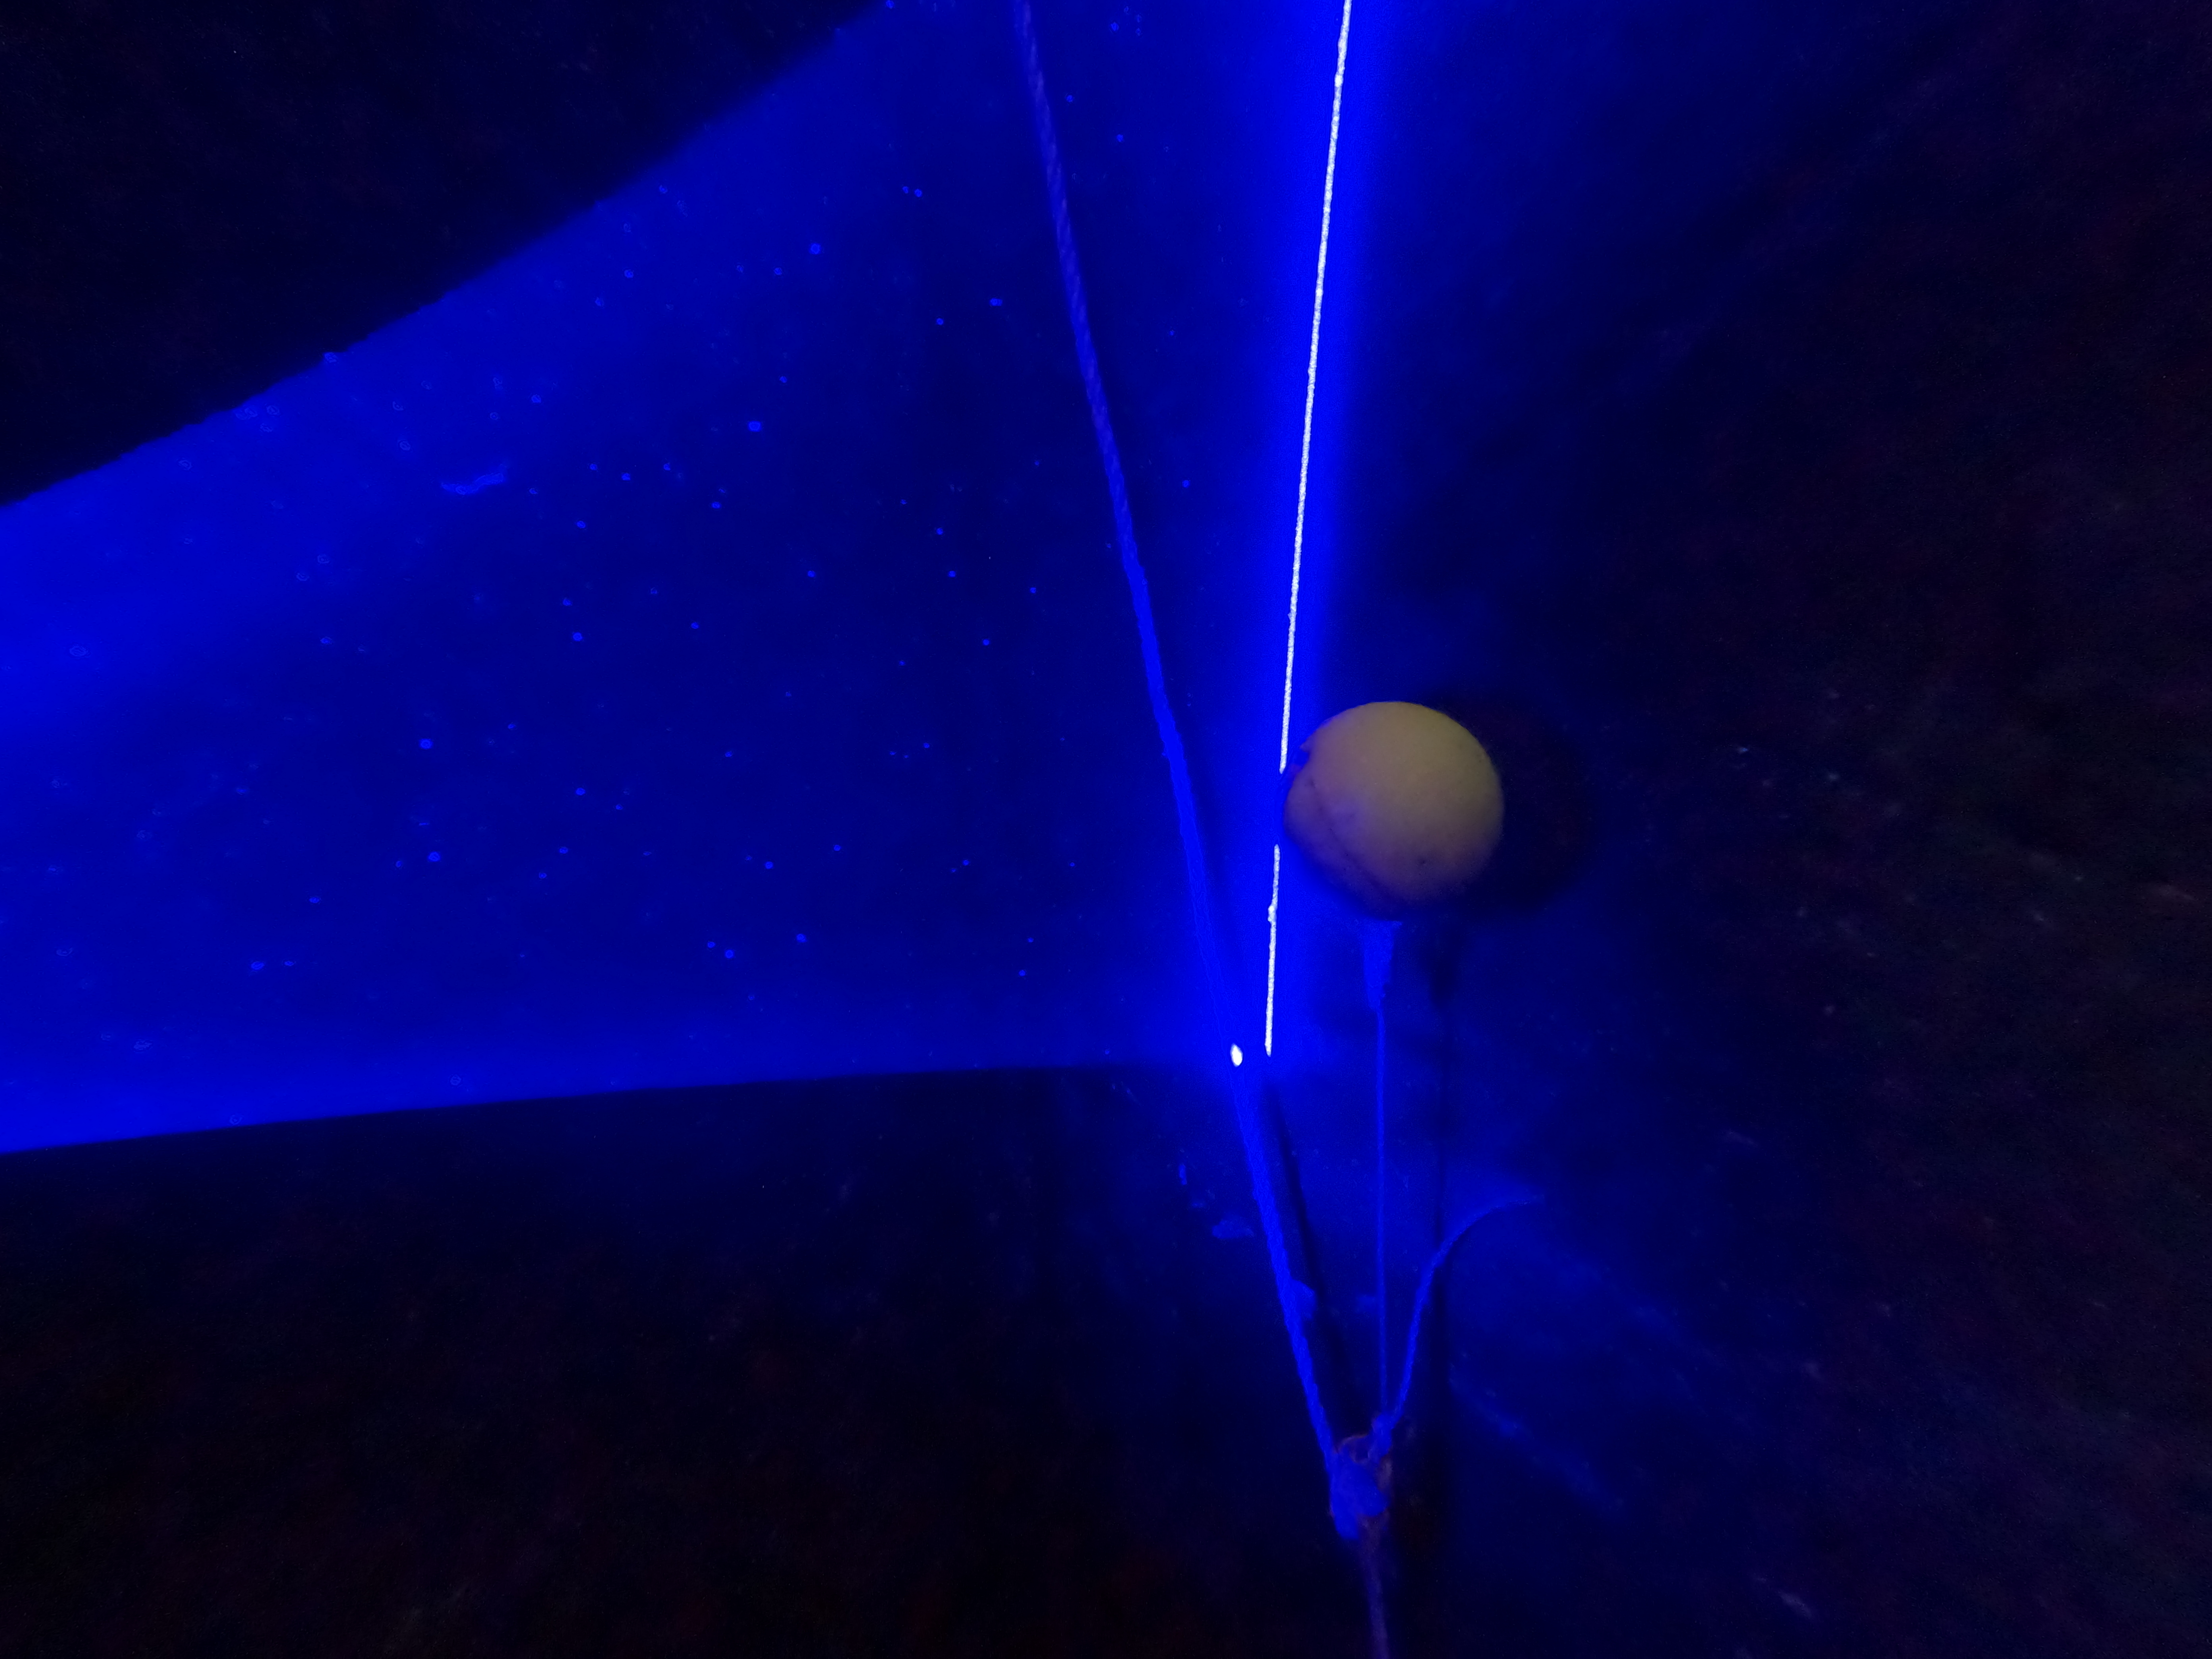

Supplement: Supplementary file 490 [file G0030790.pdf › 3/G0030790.pdf]

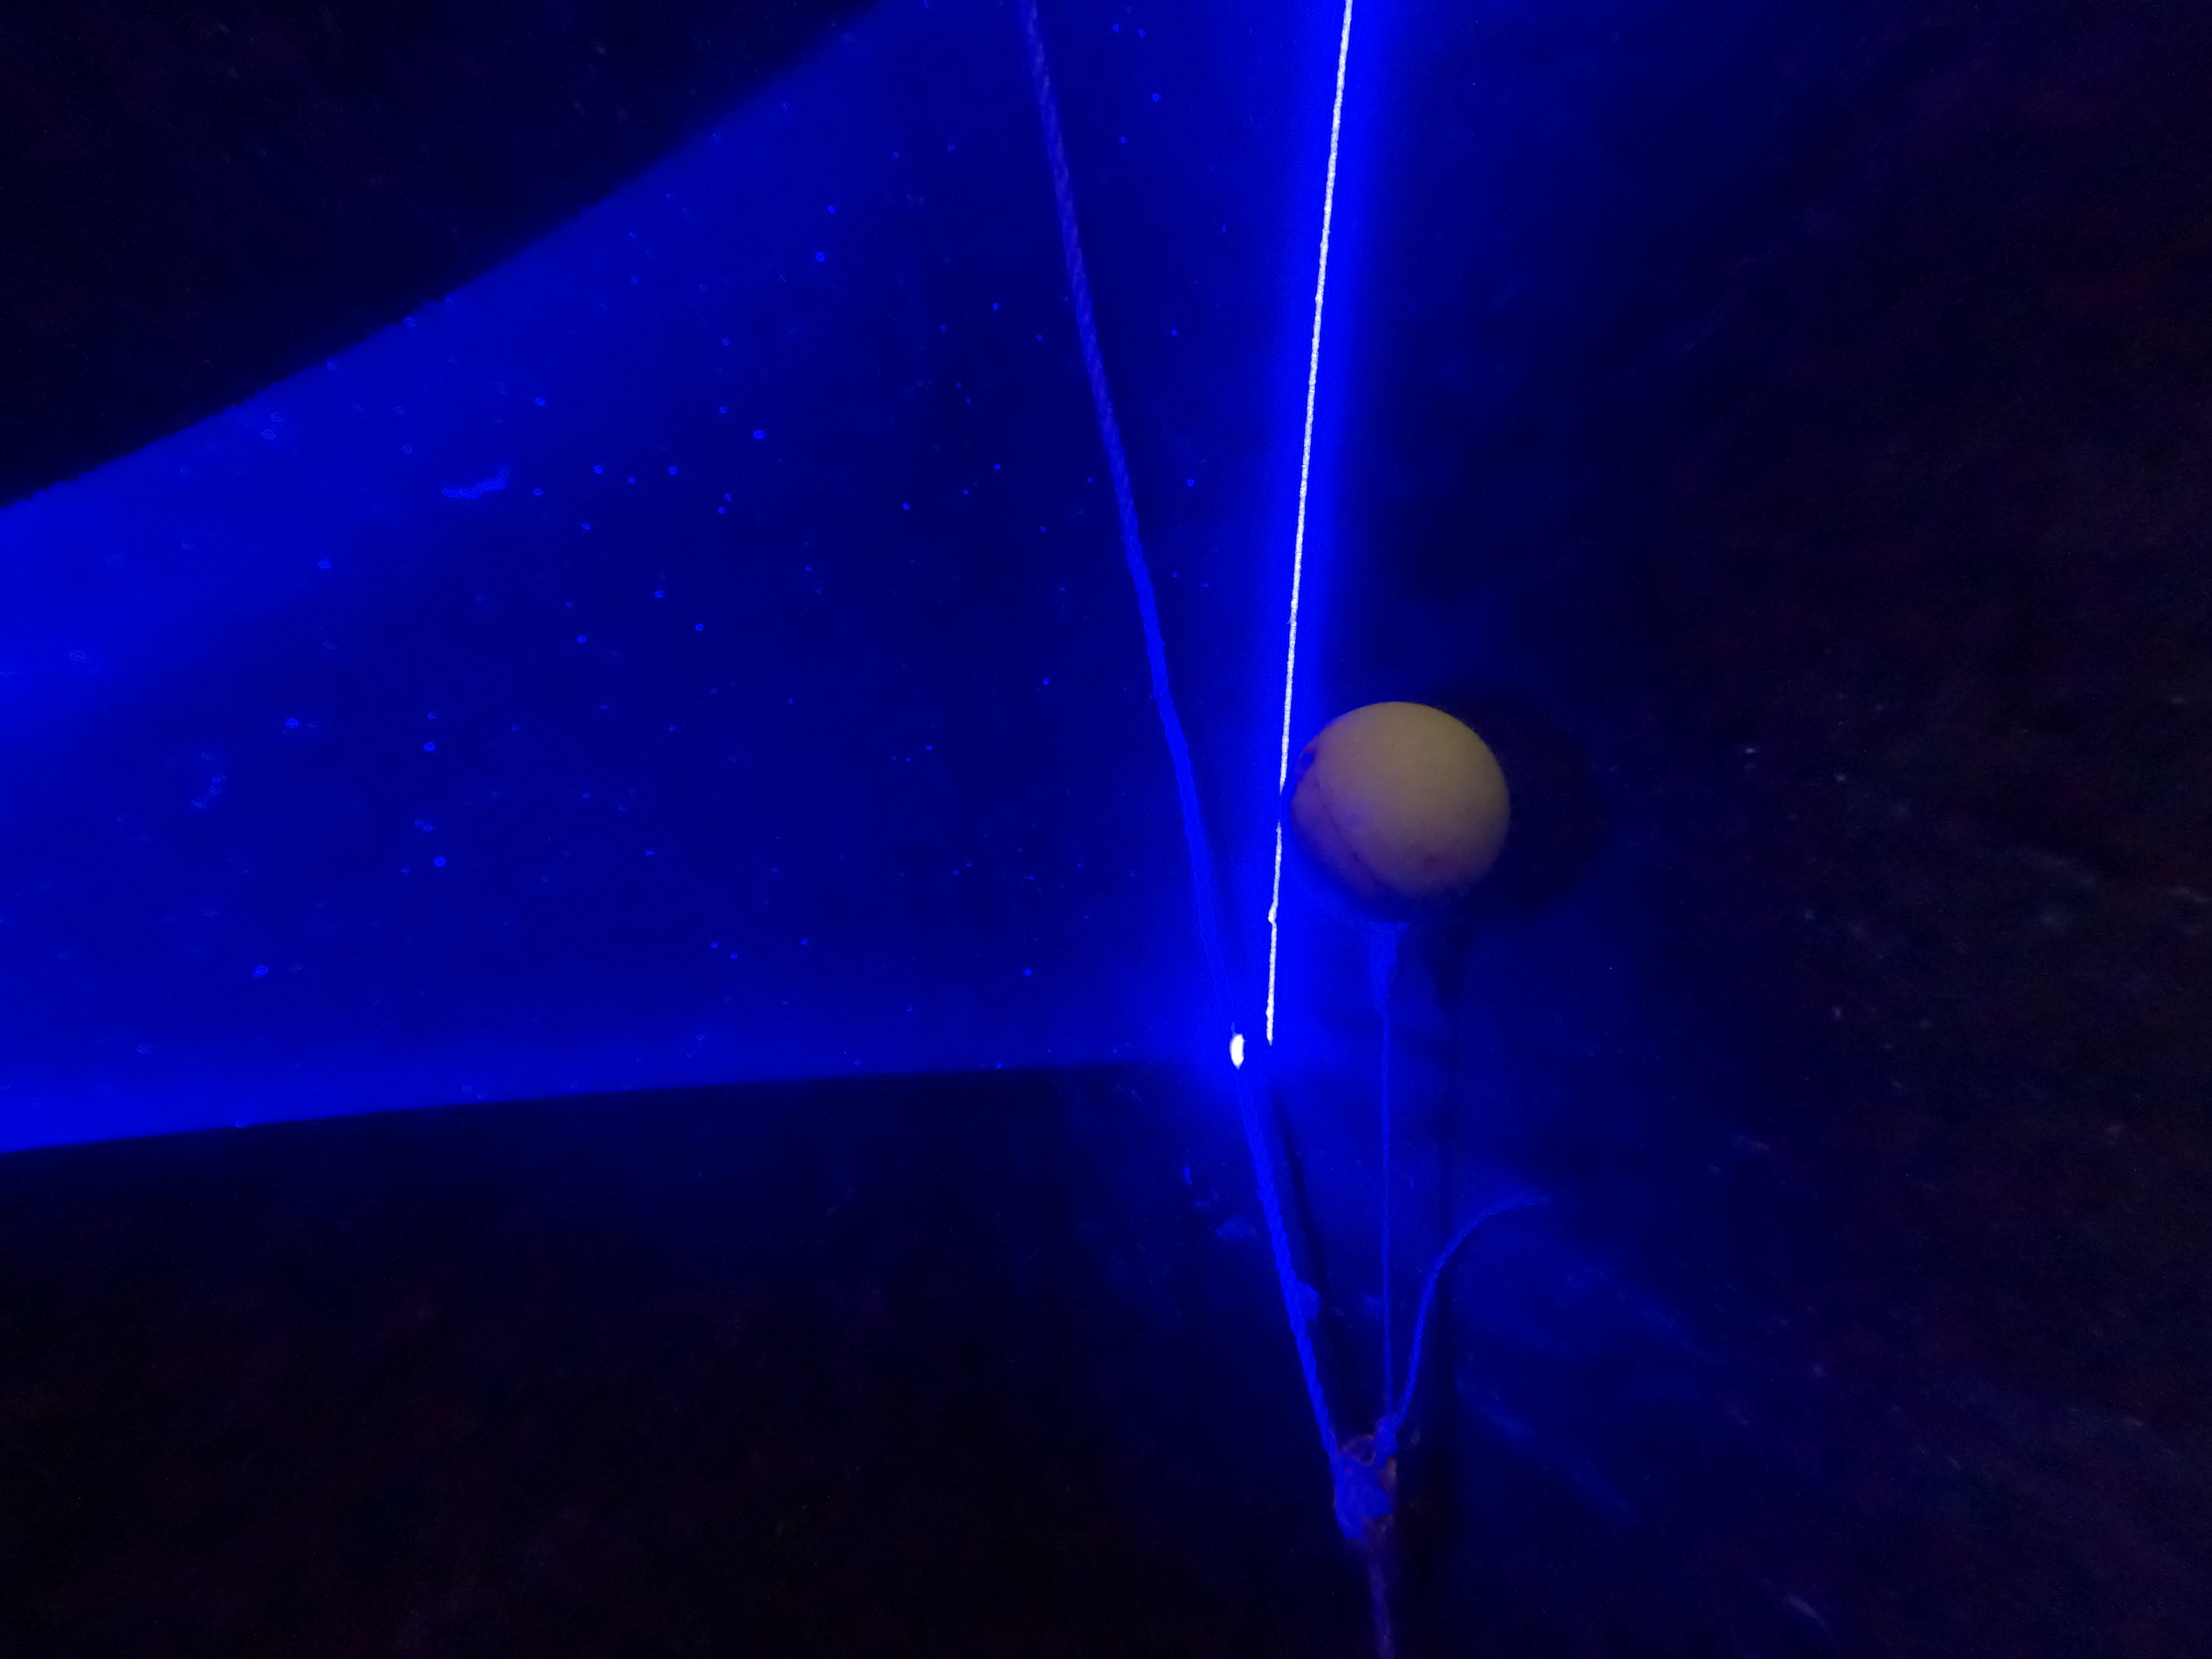

Supplement: Supplementary file 491 [file G0030791.pdf › 3/G0030791.pdf]

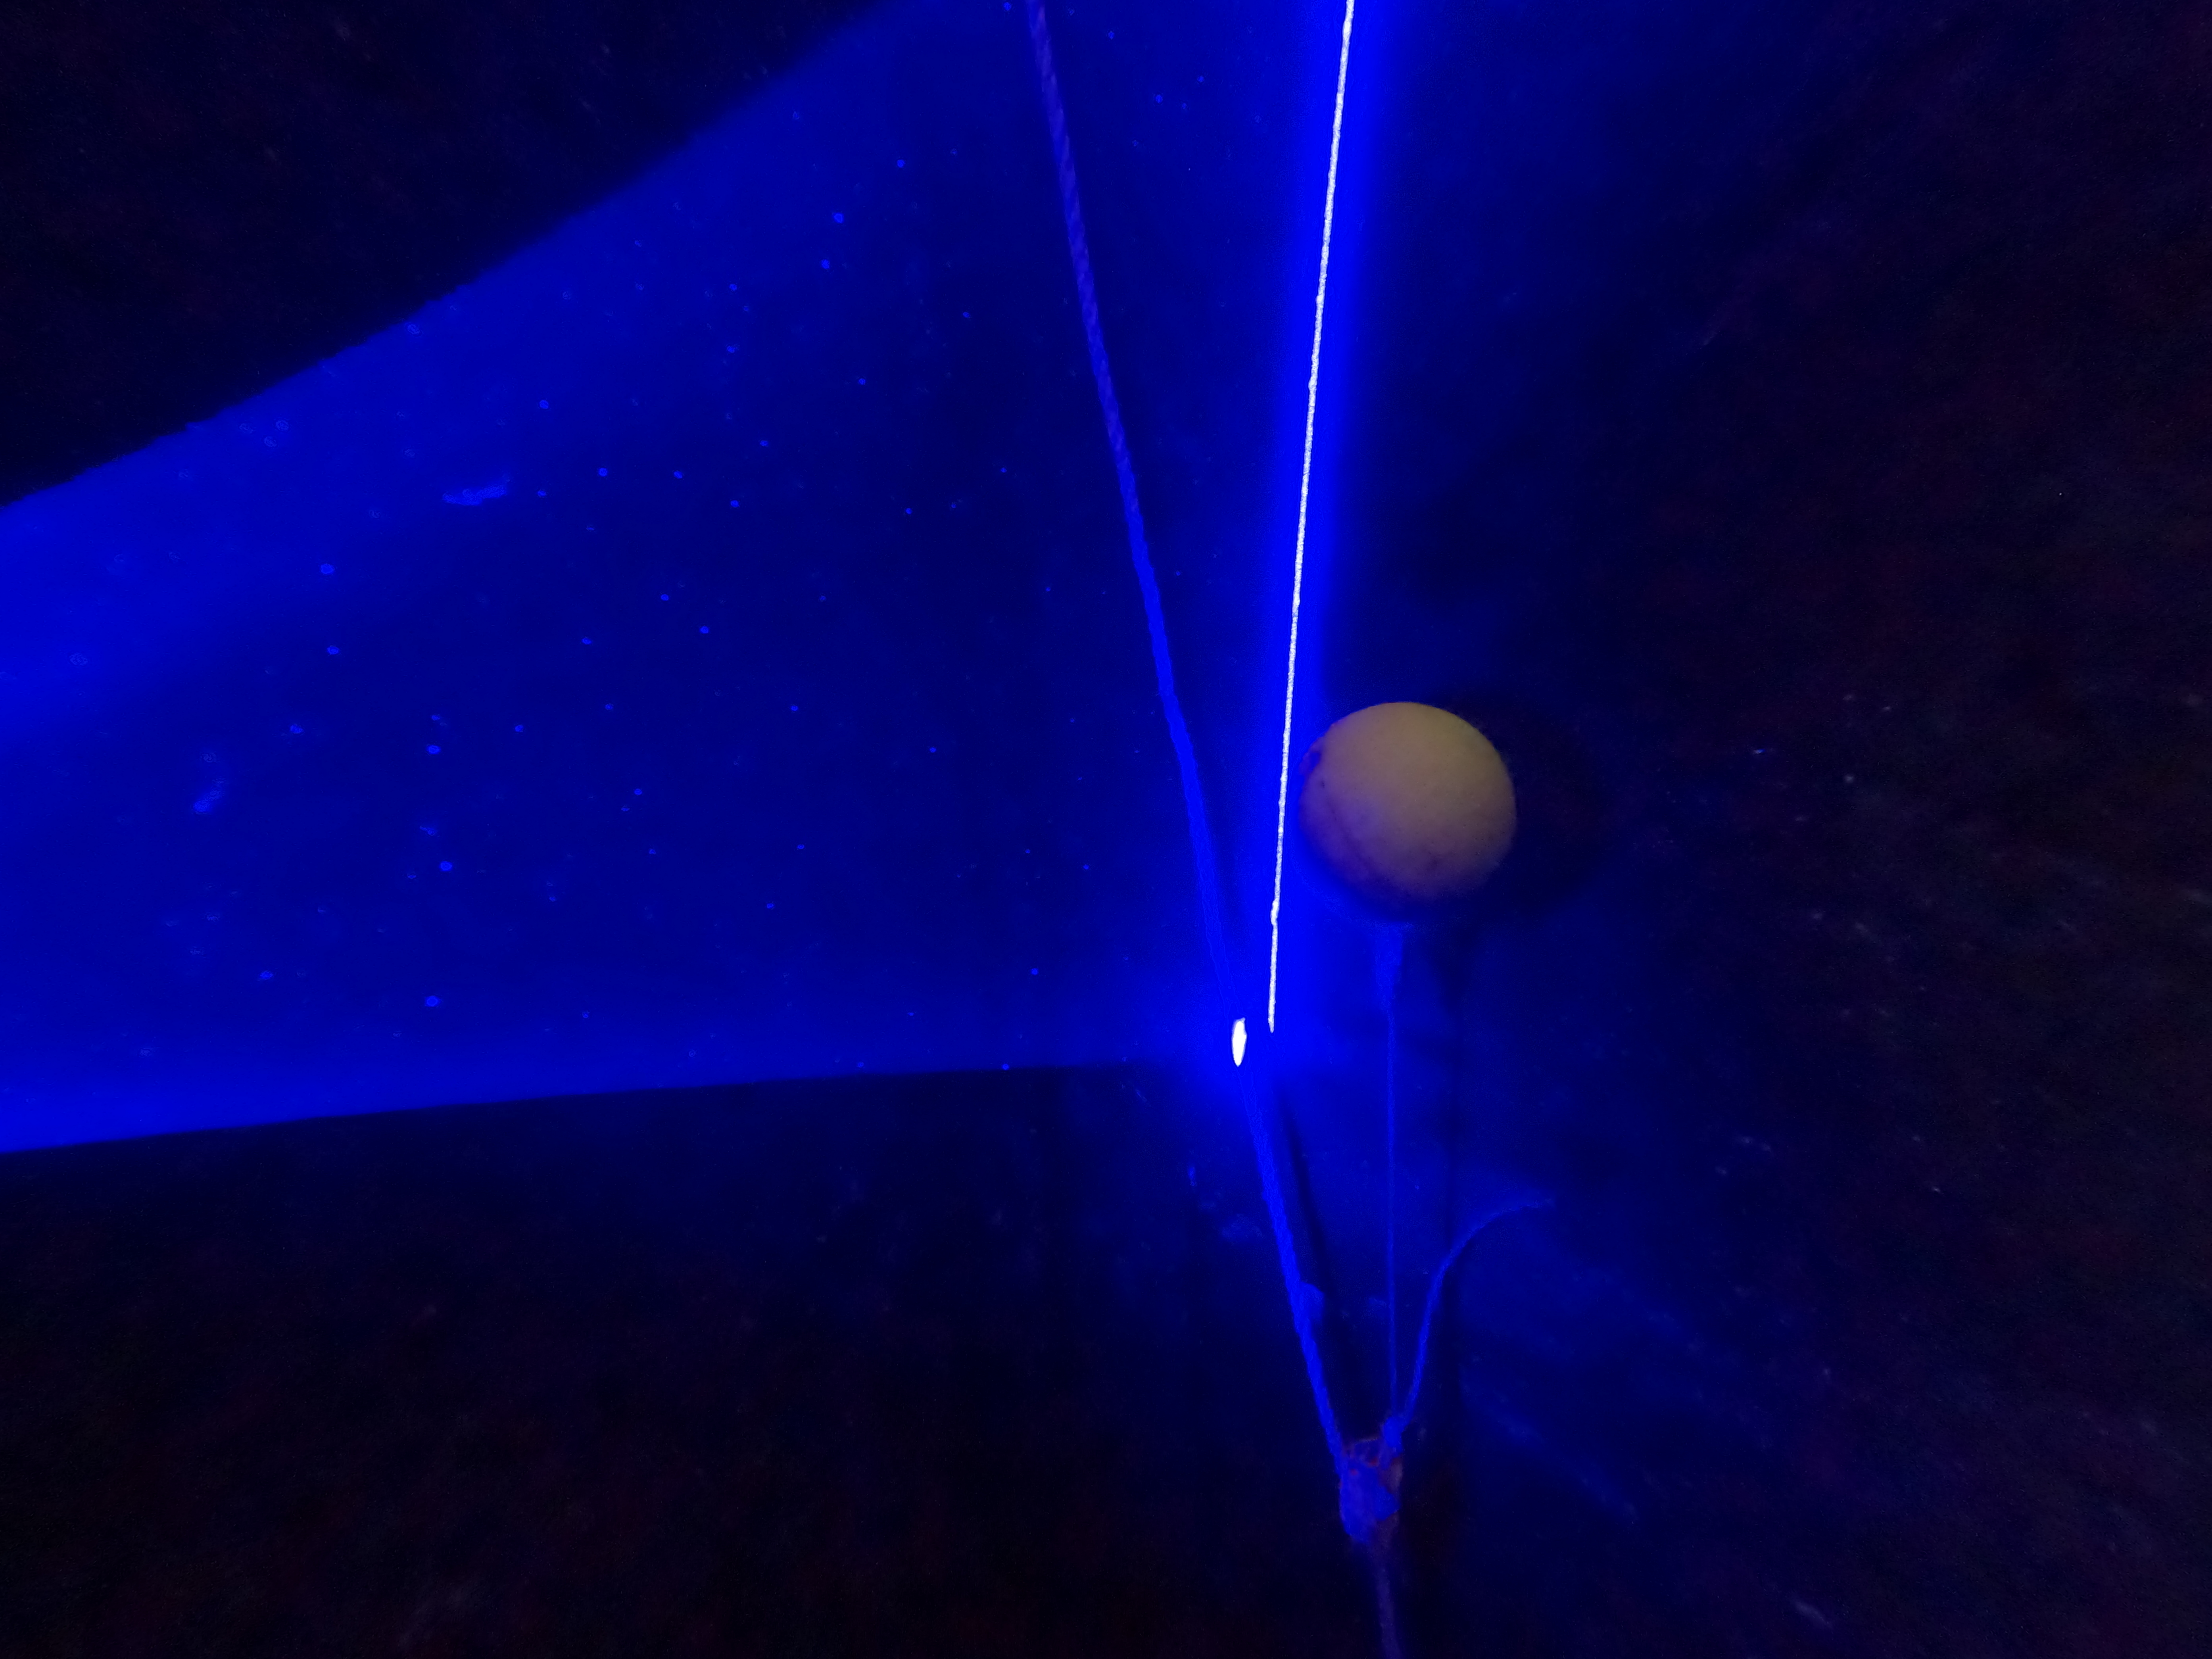

Supplement: Supplementary file 492 [file G0030792.pdf › 3/G0030792.pdf]

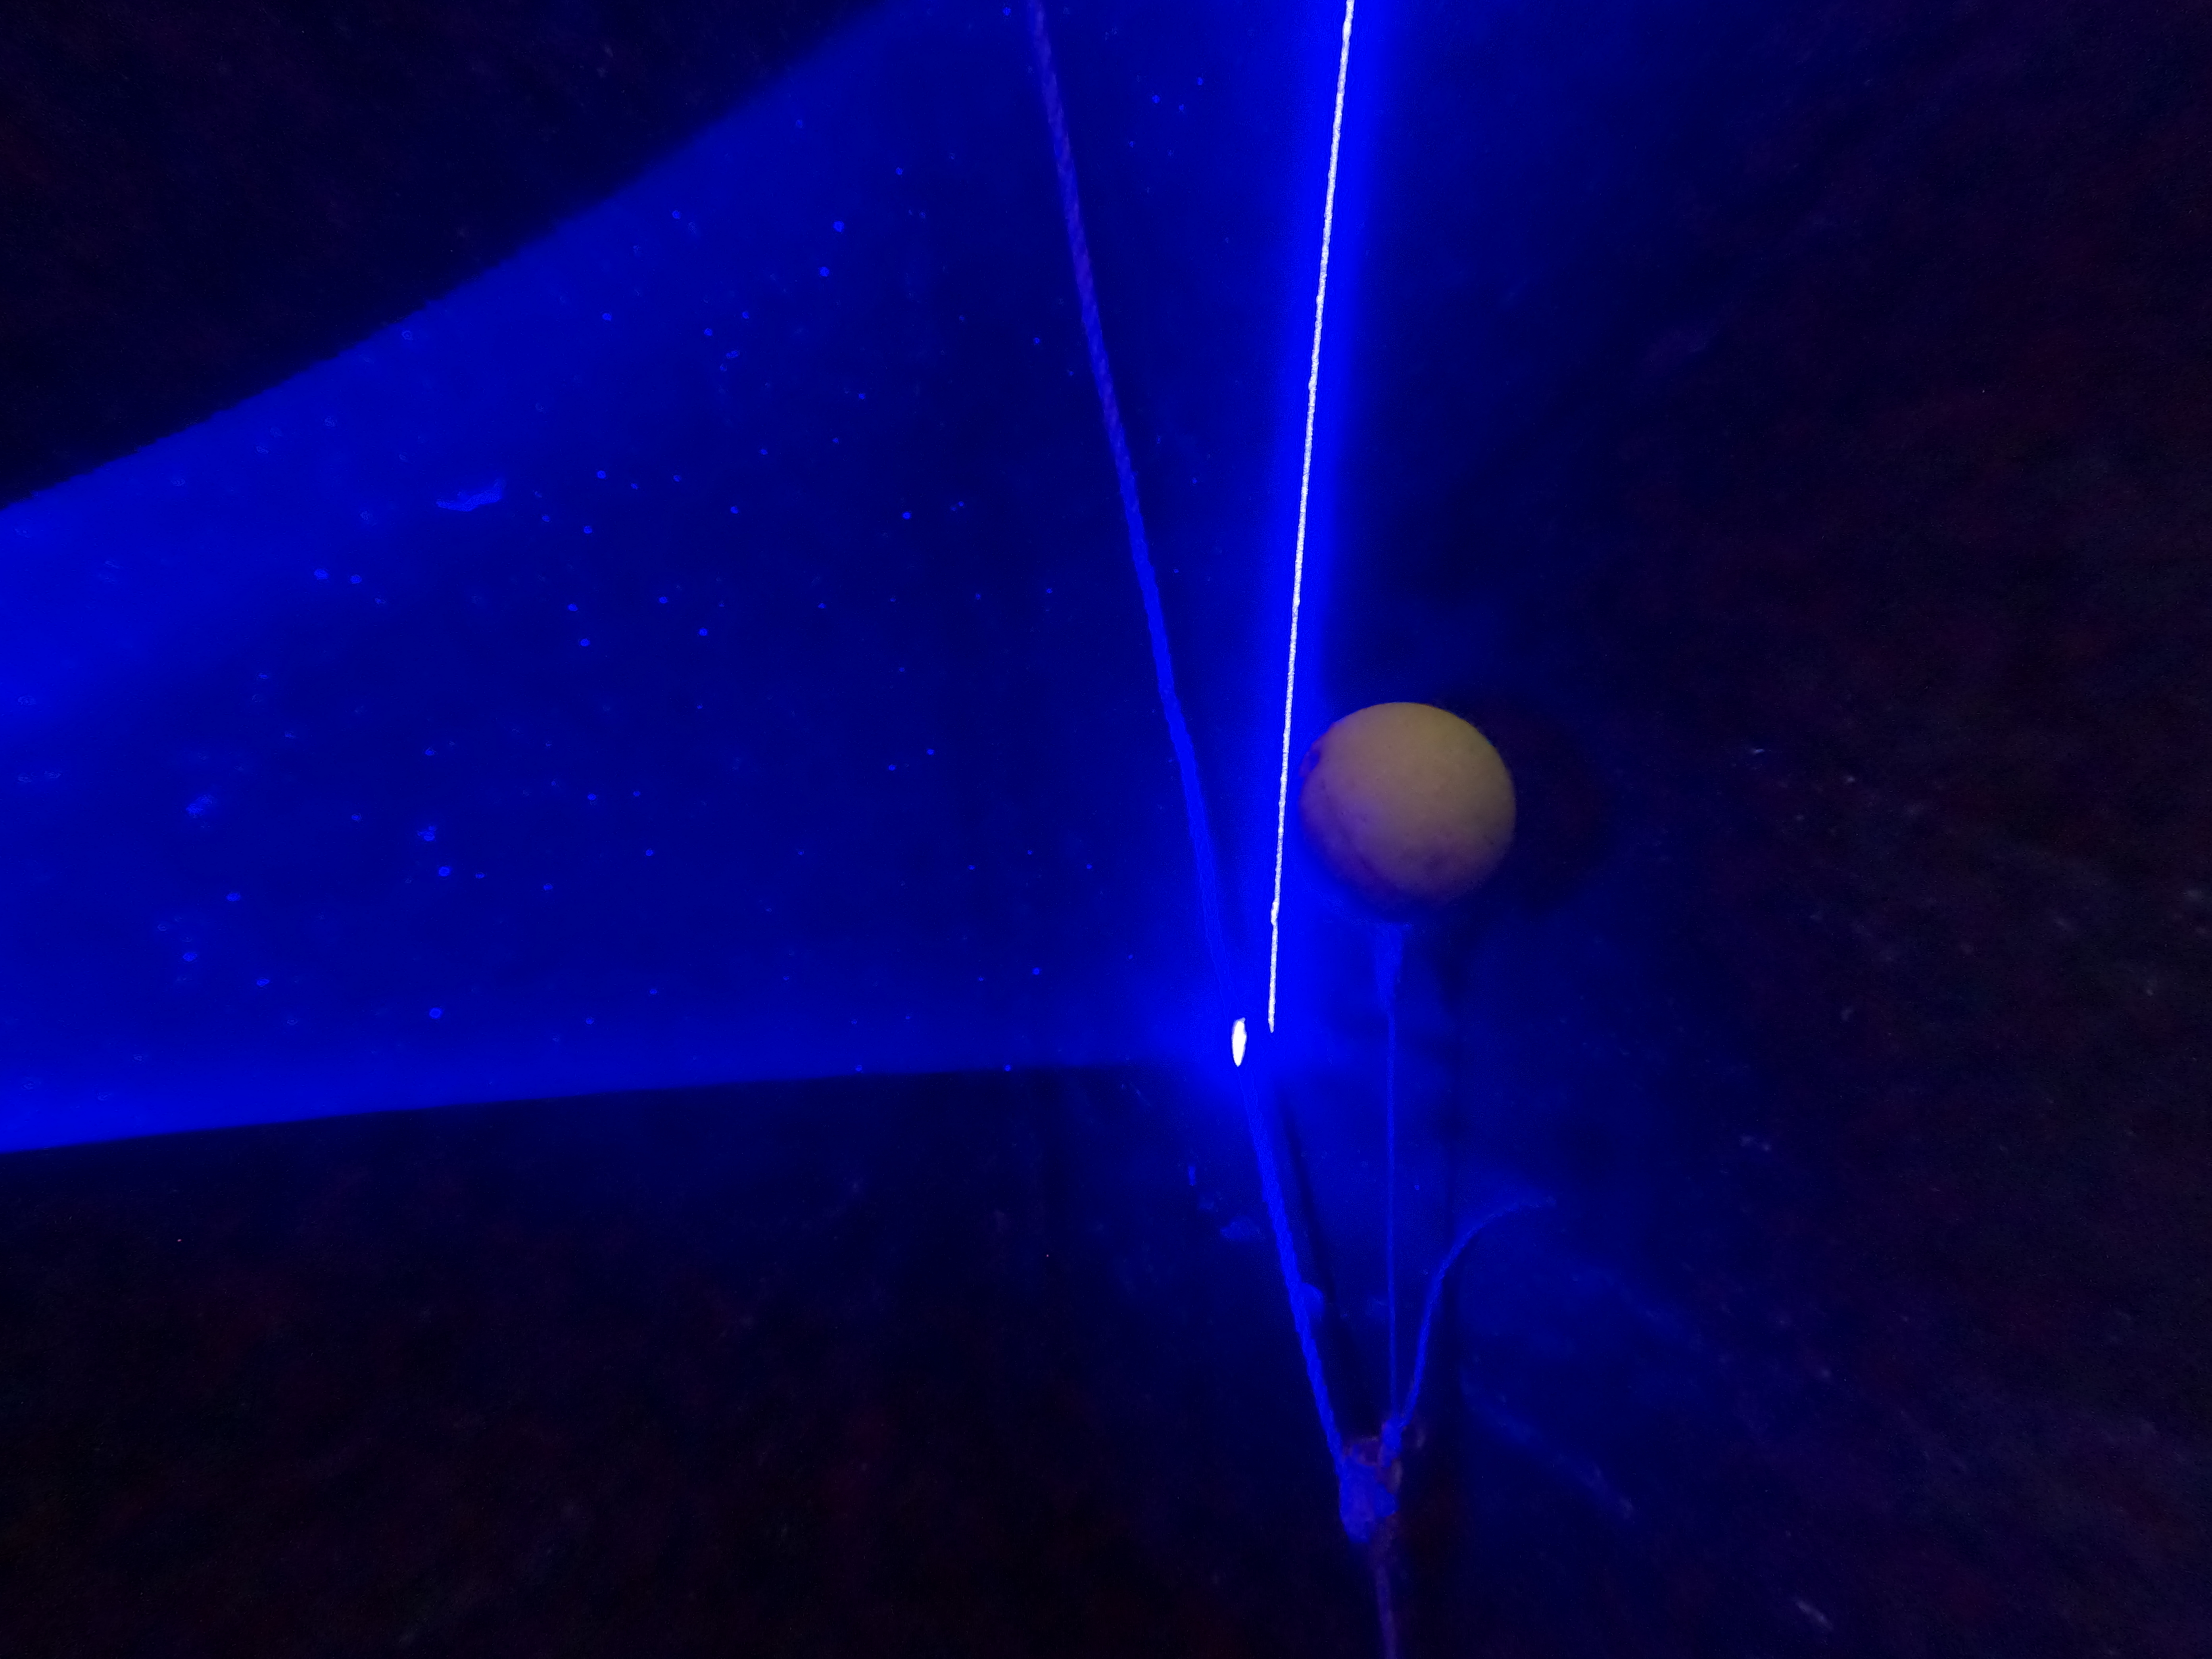

Supplement: Supplementary file 493 [file G0030793.pdf › 3/G0030793.pdf]

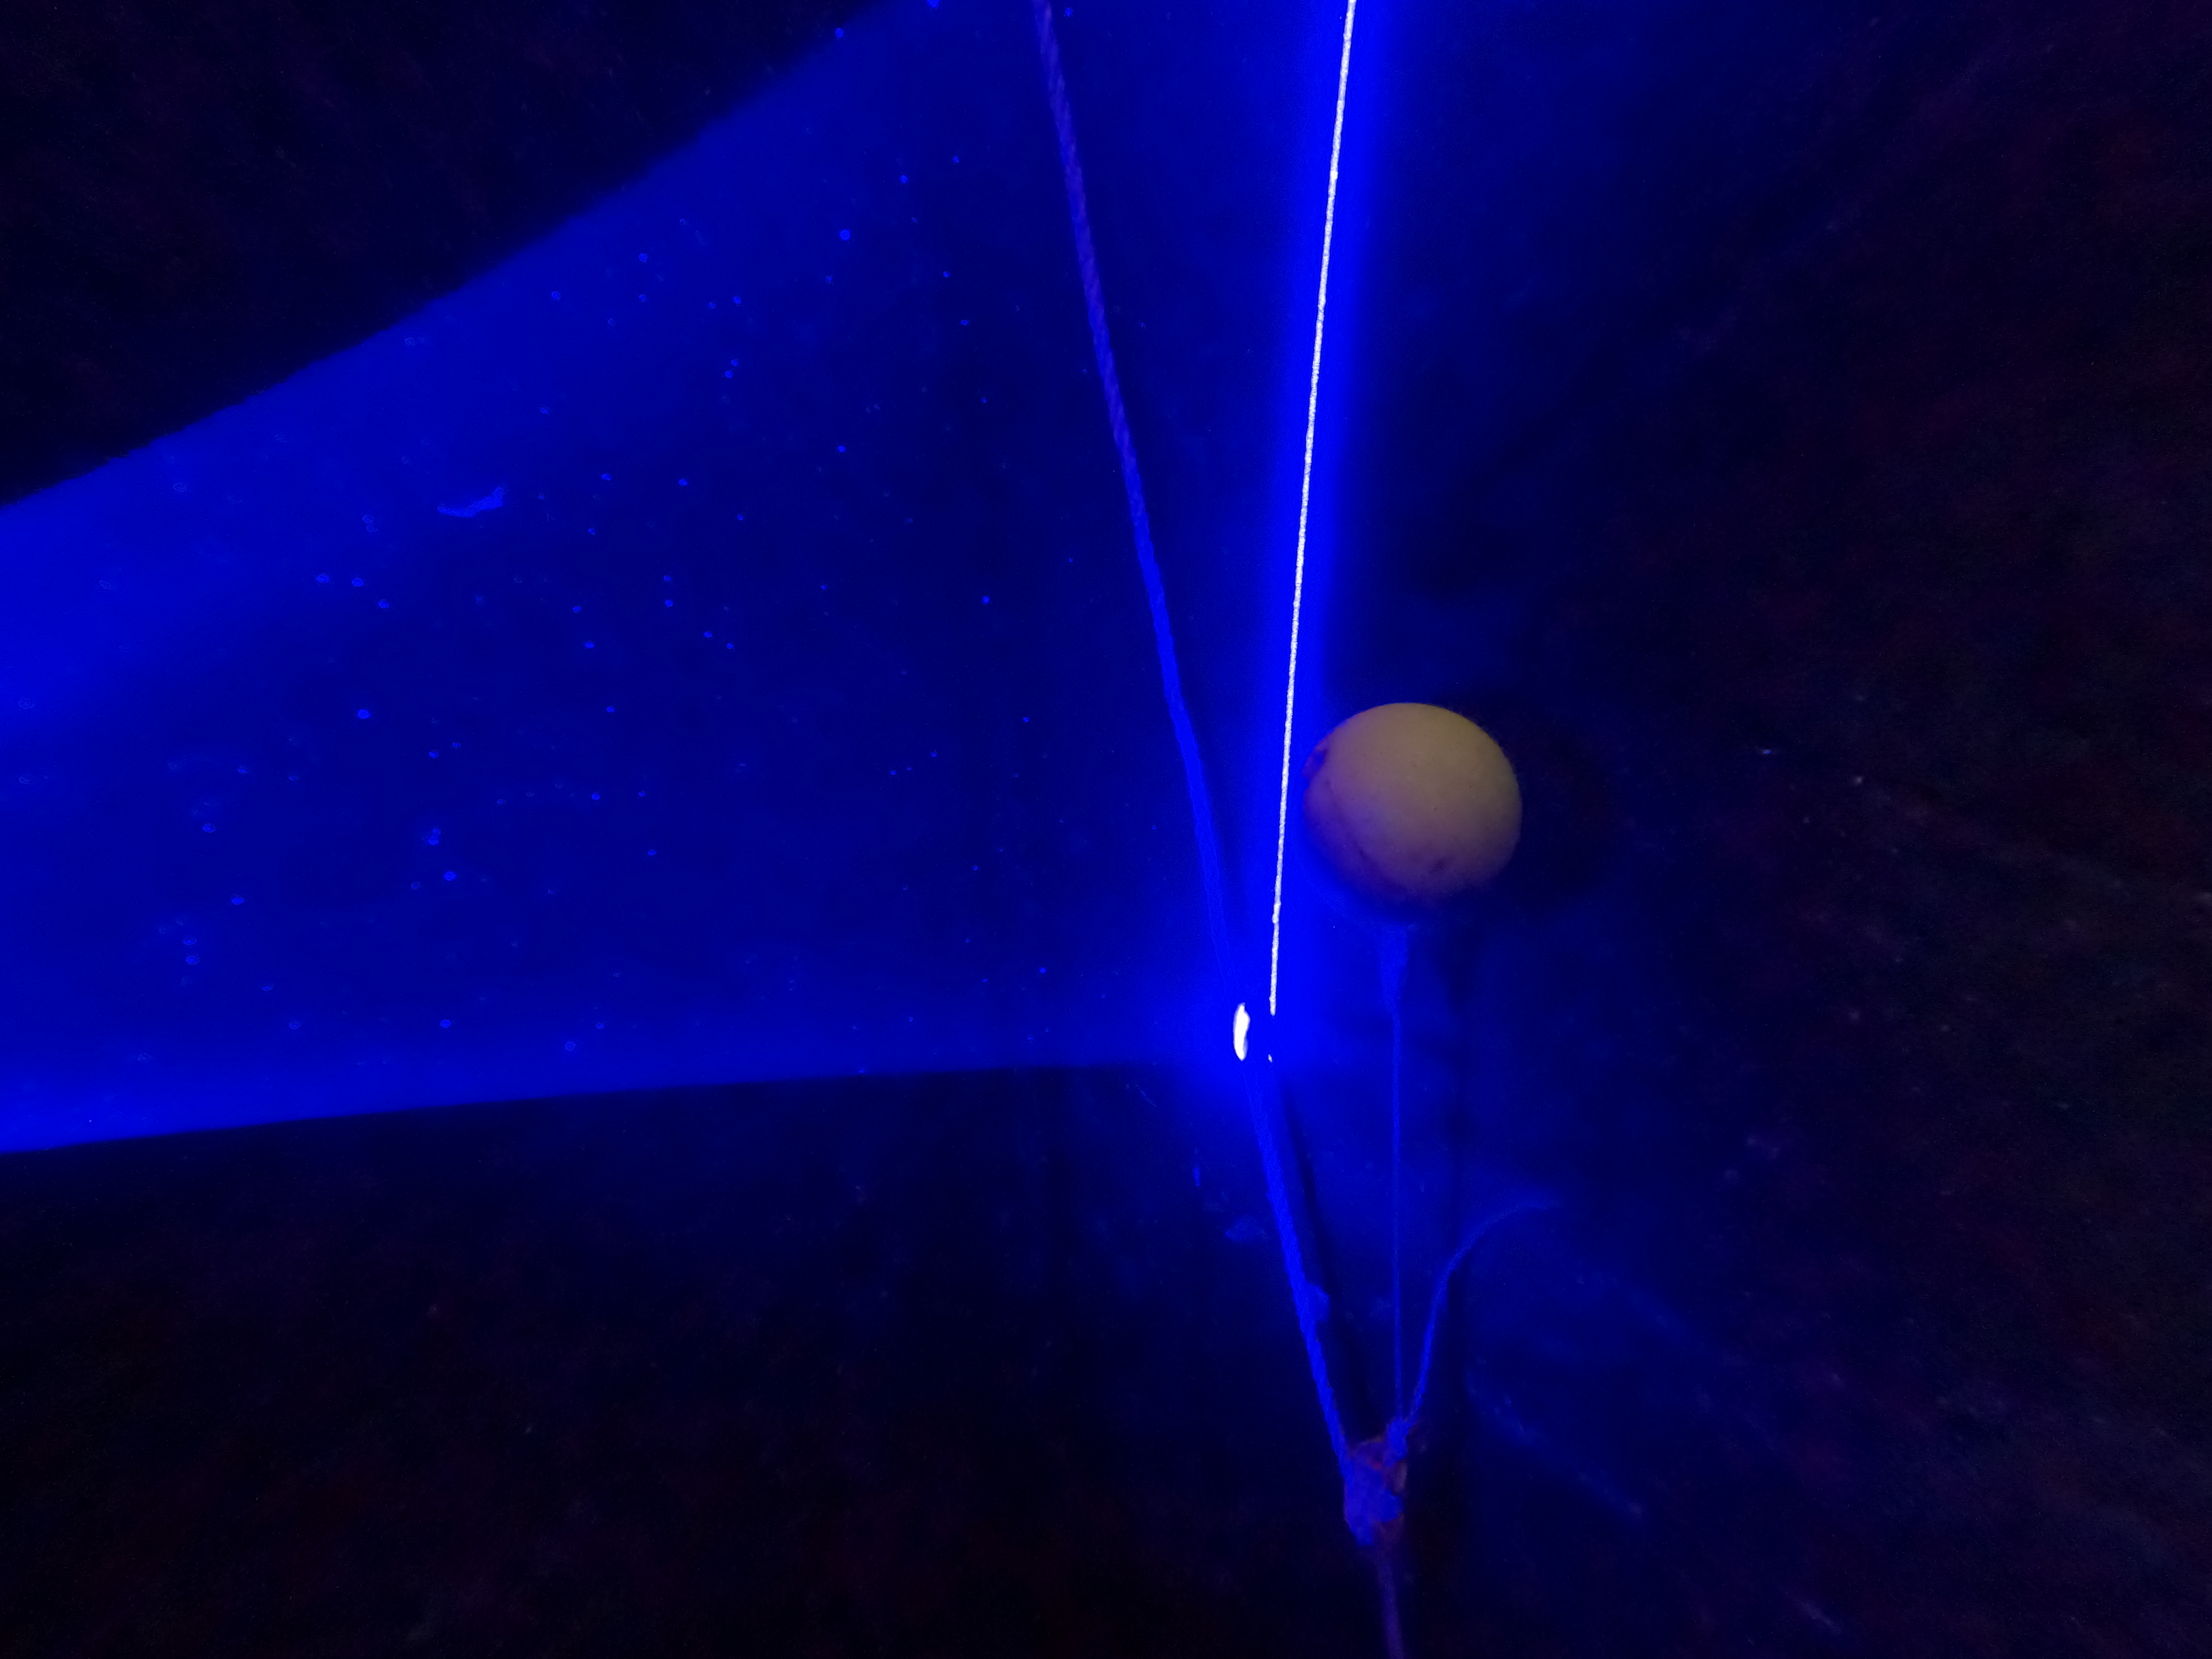

Supplement: Supplementary file 494 [file G0030794.pdf › 3/G0030794.pdf]

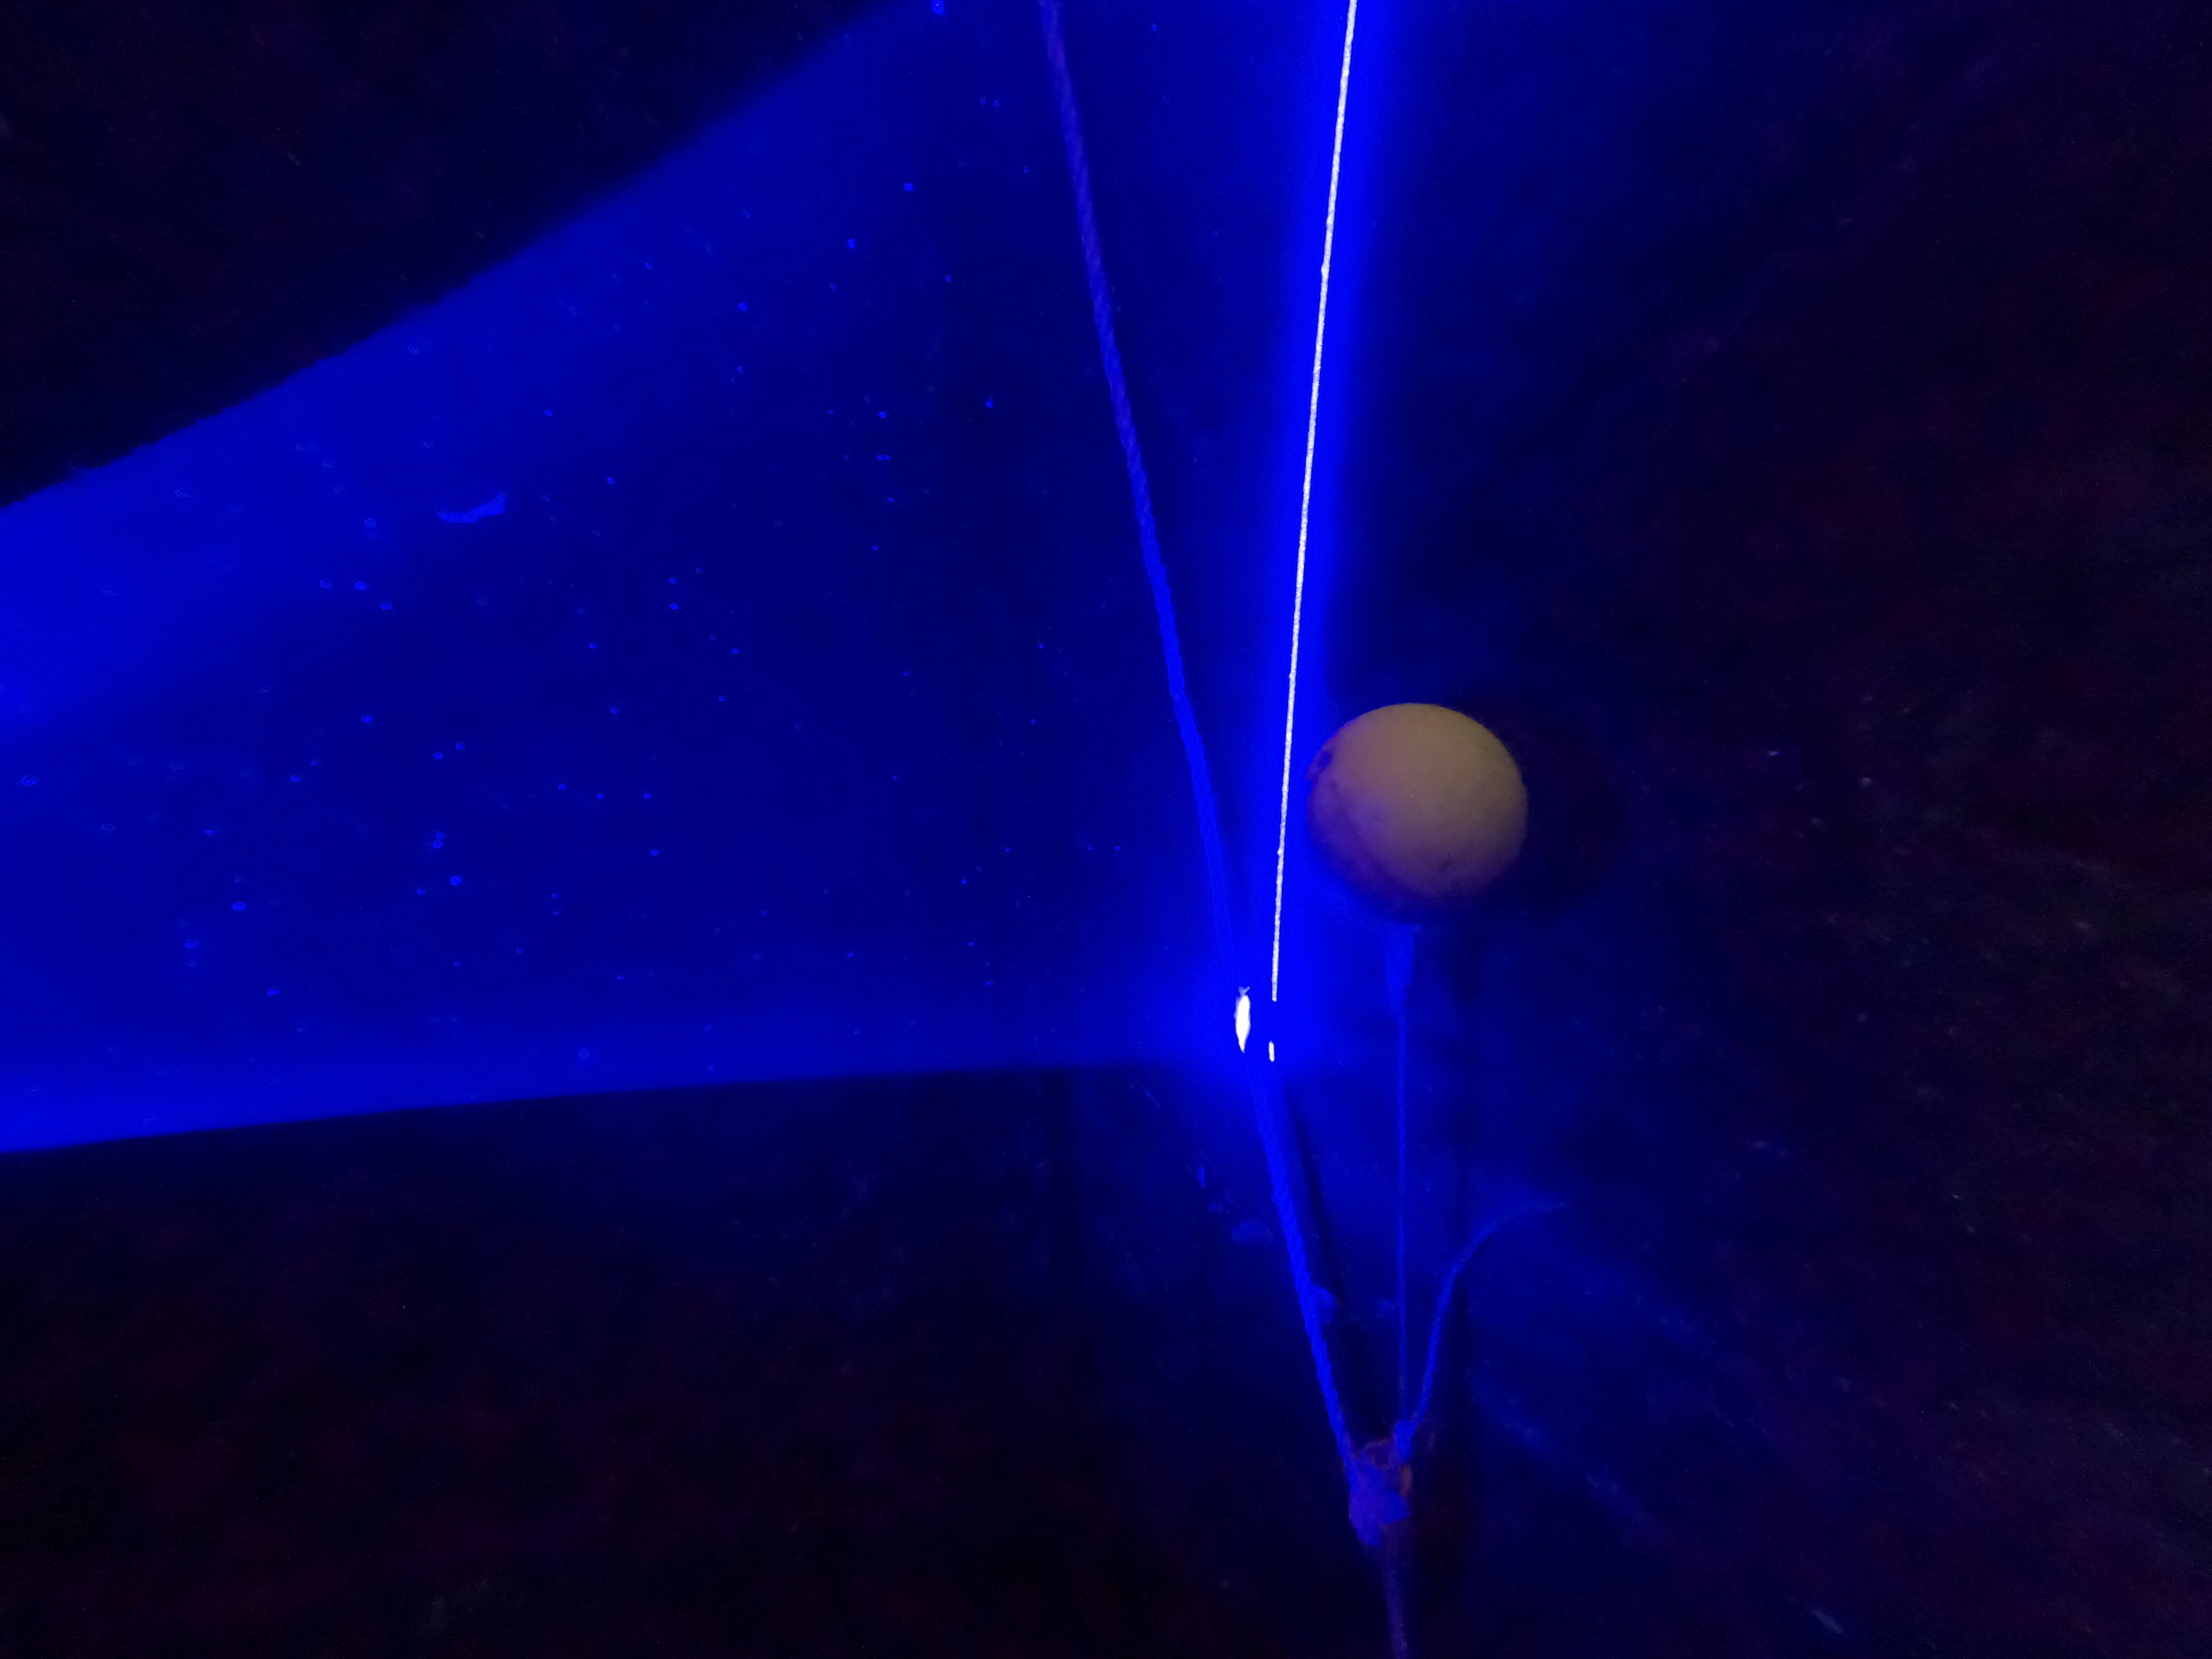

Supplement: Supplementary file 495 [file G0030795.pdf › 3/G0030795.pdf]

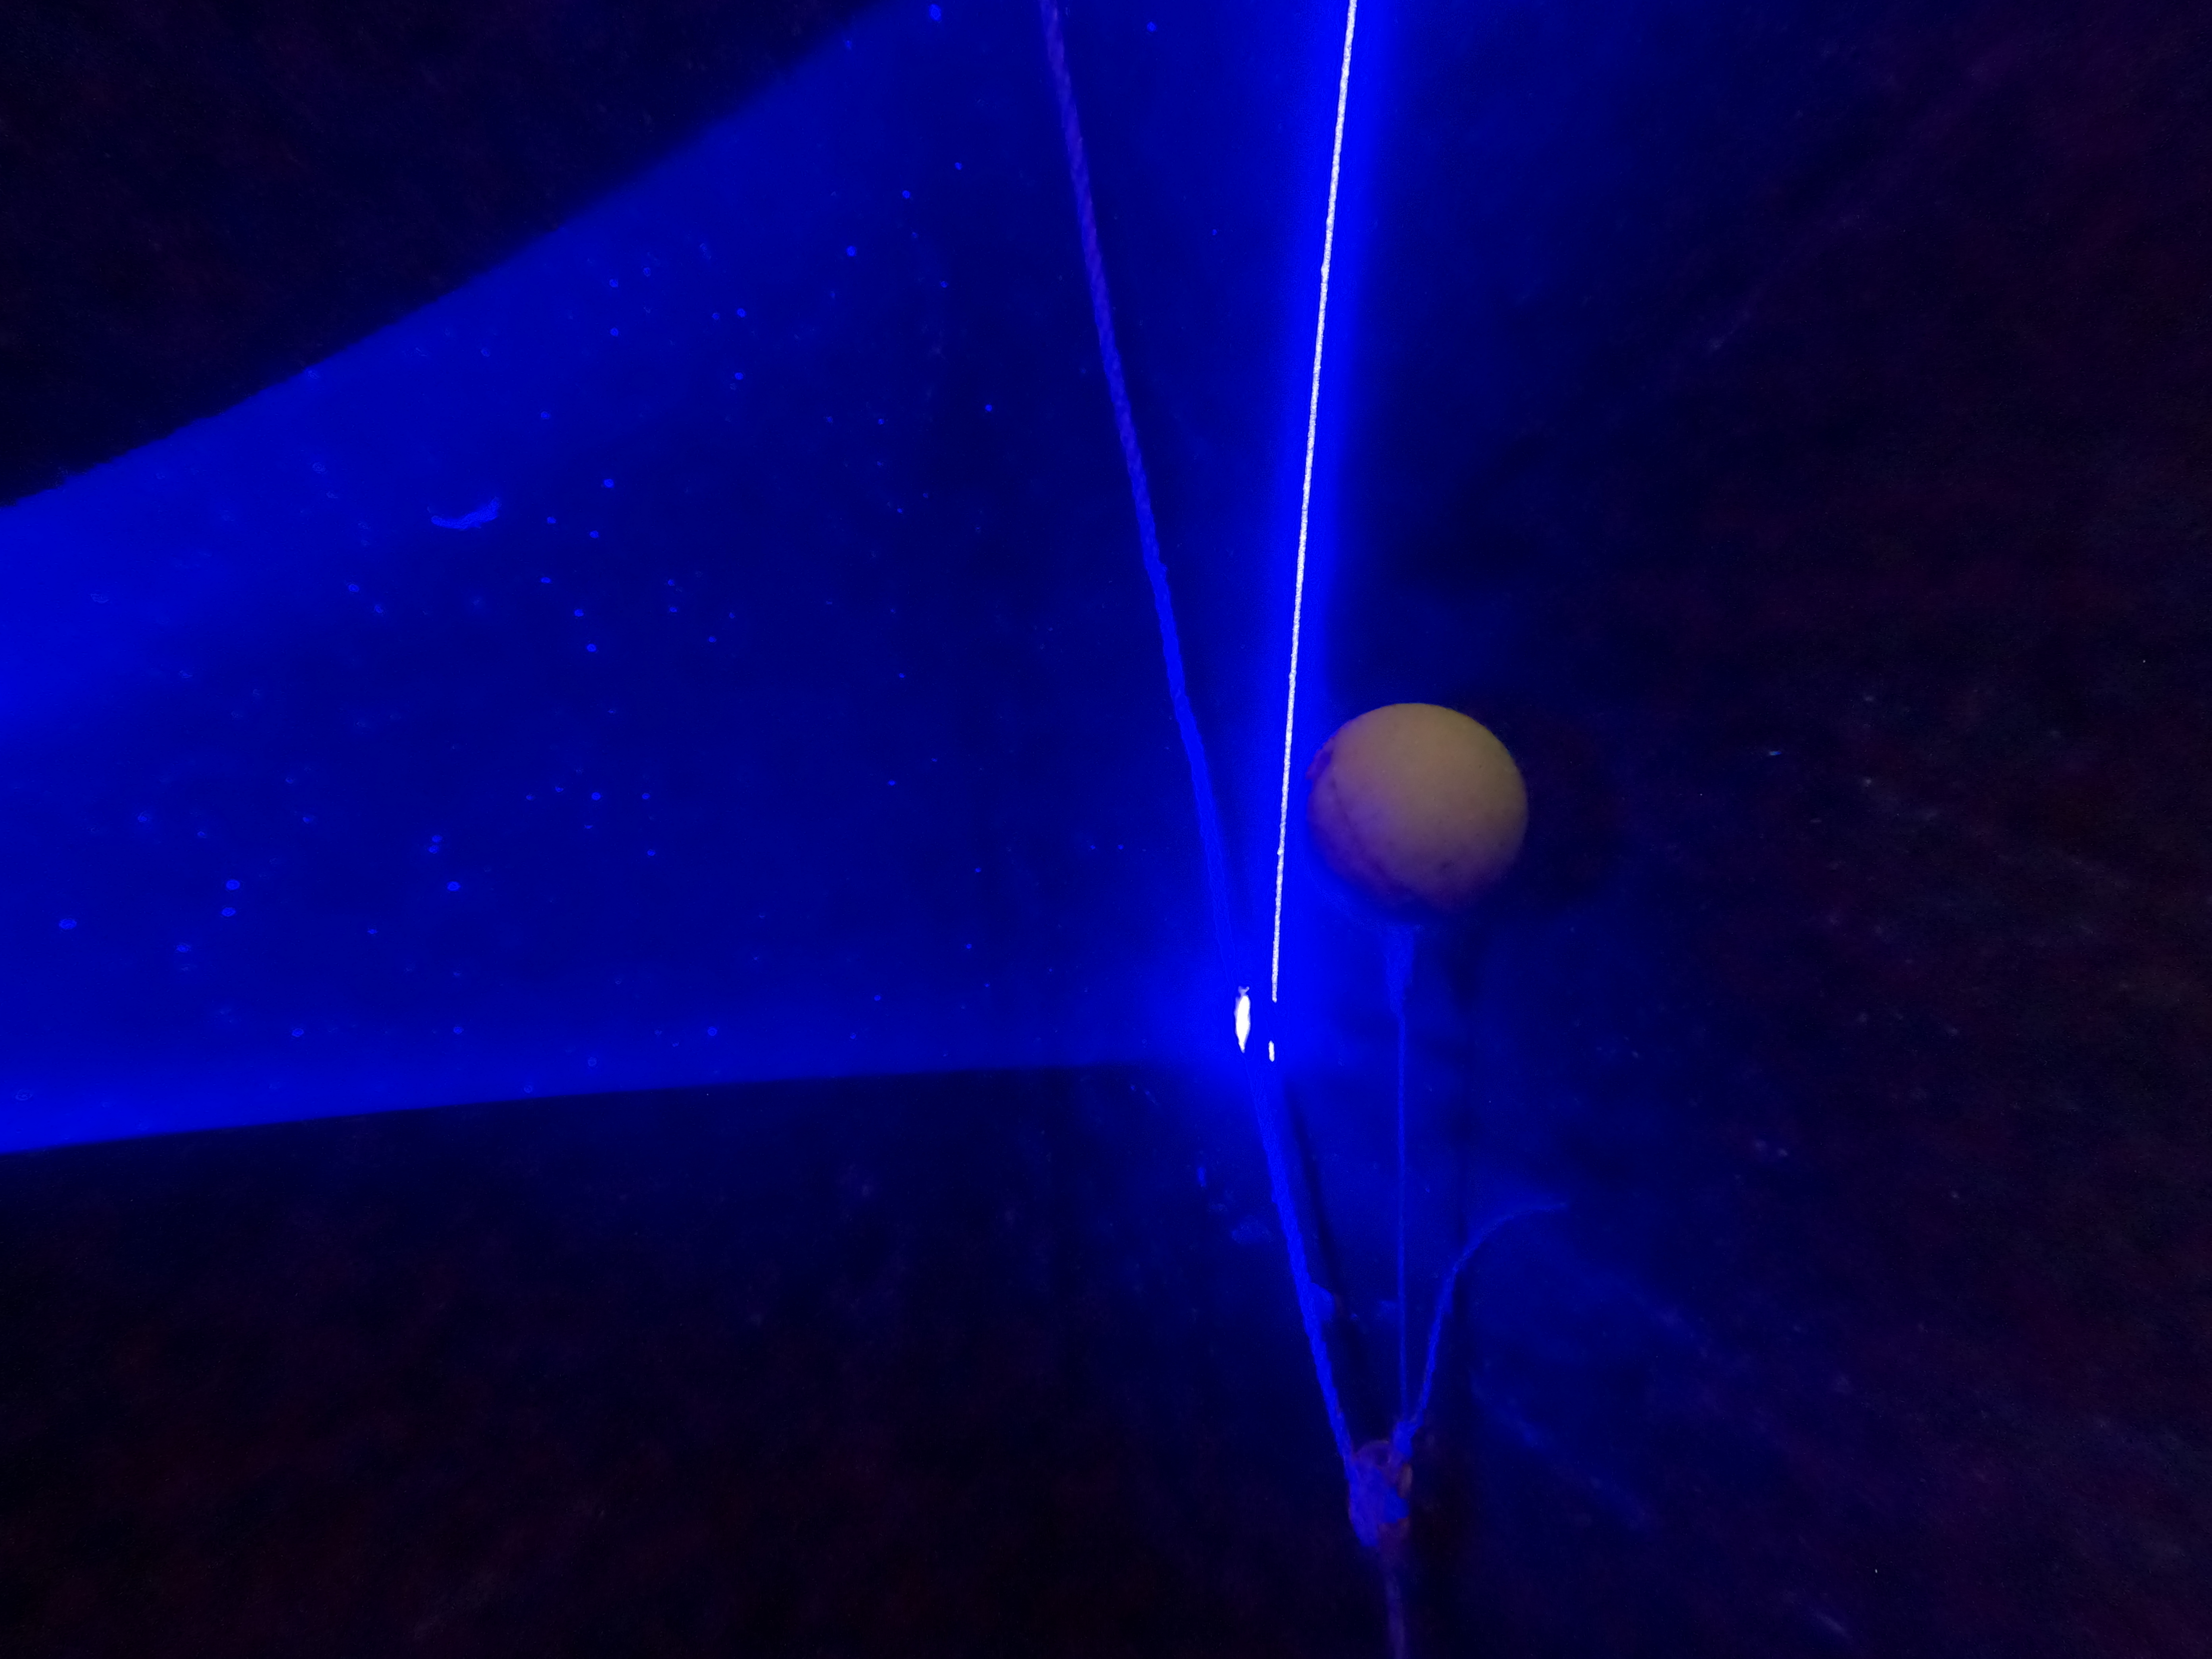

Supplement: Supplementary file 496 [file G0030796.pdf › 3/G0030796.pdf]

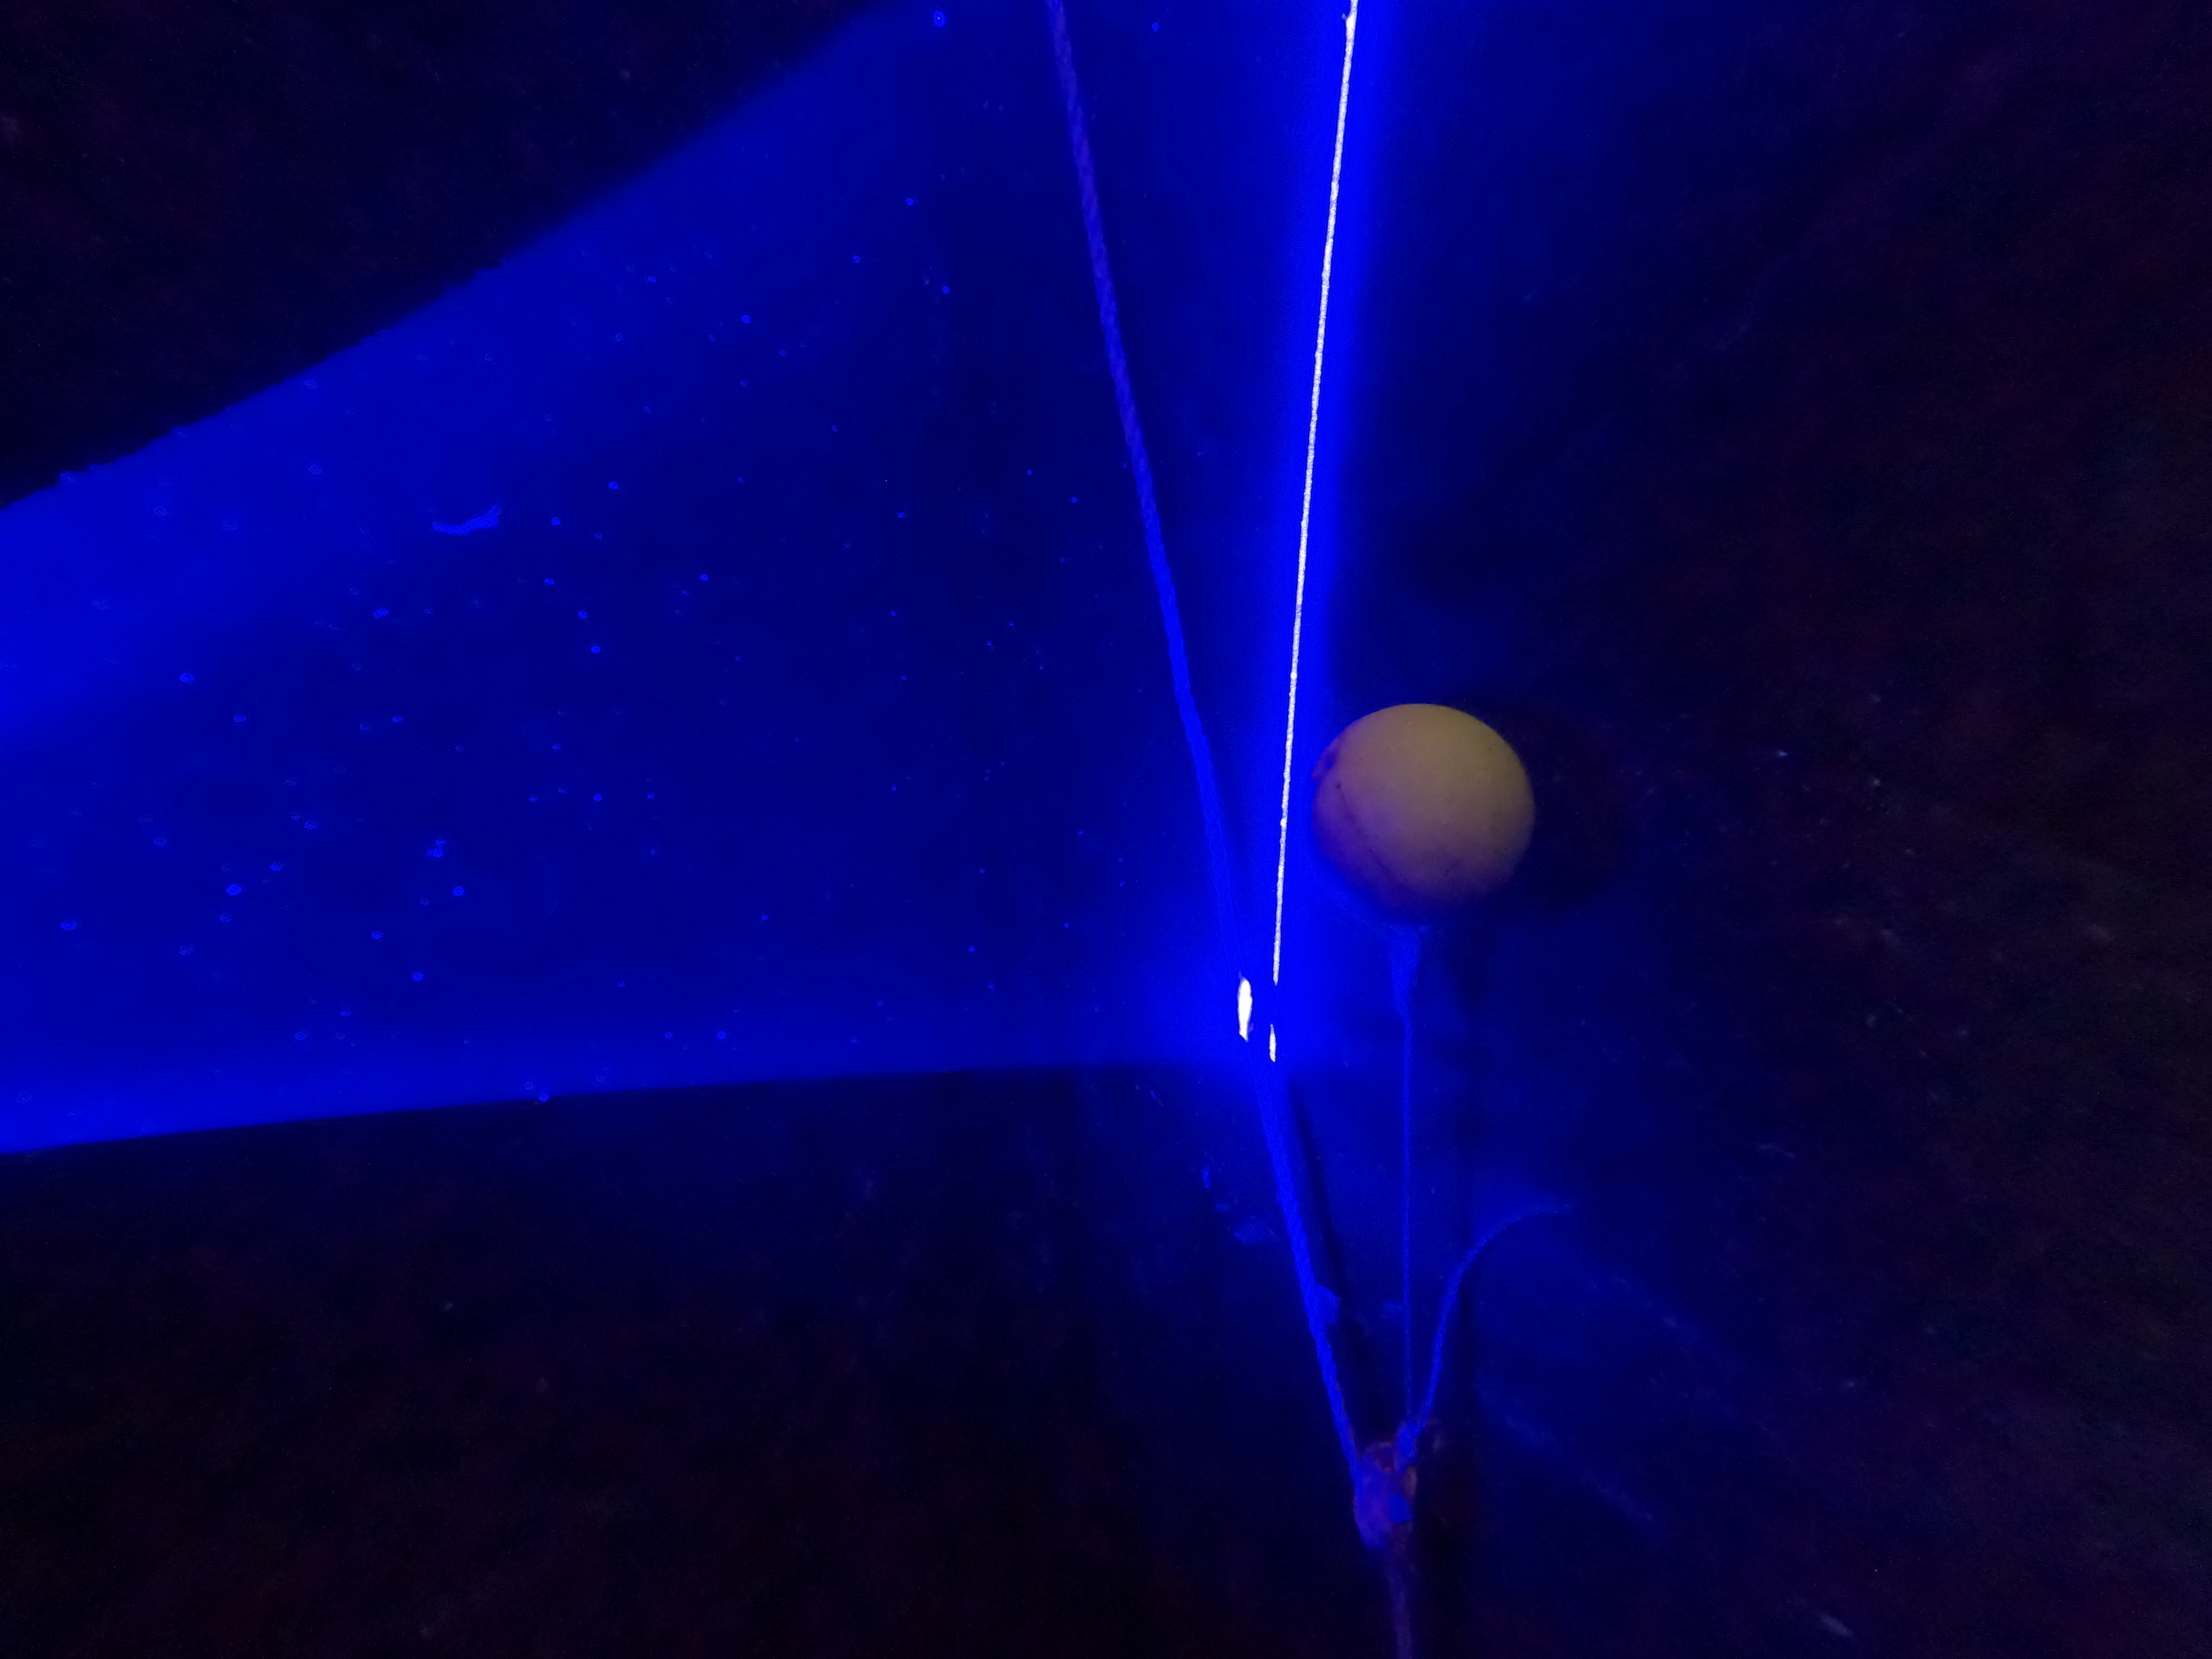

Supplement: Supplementary file 497 [file G0030797.pdf › 3/G0030797.pdf]

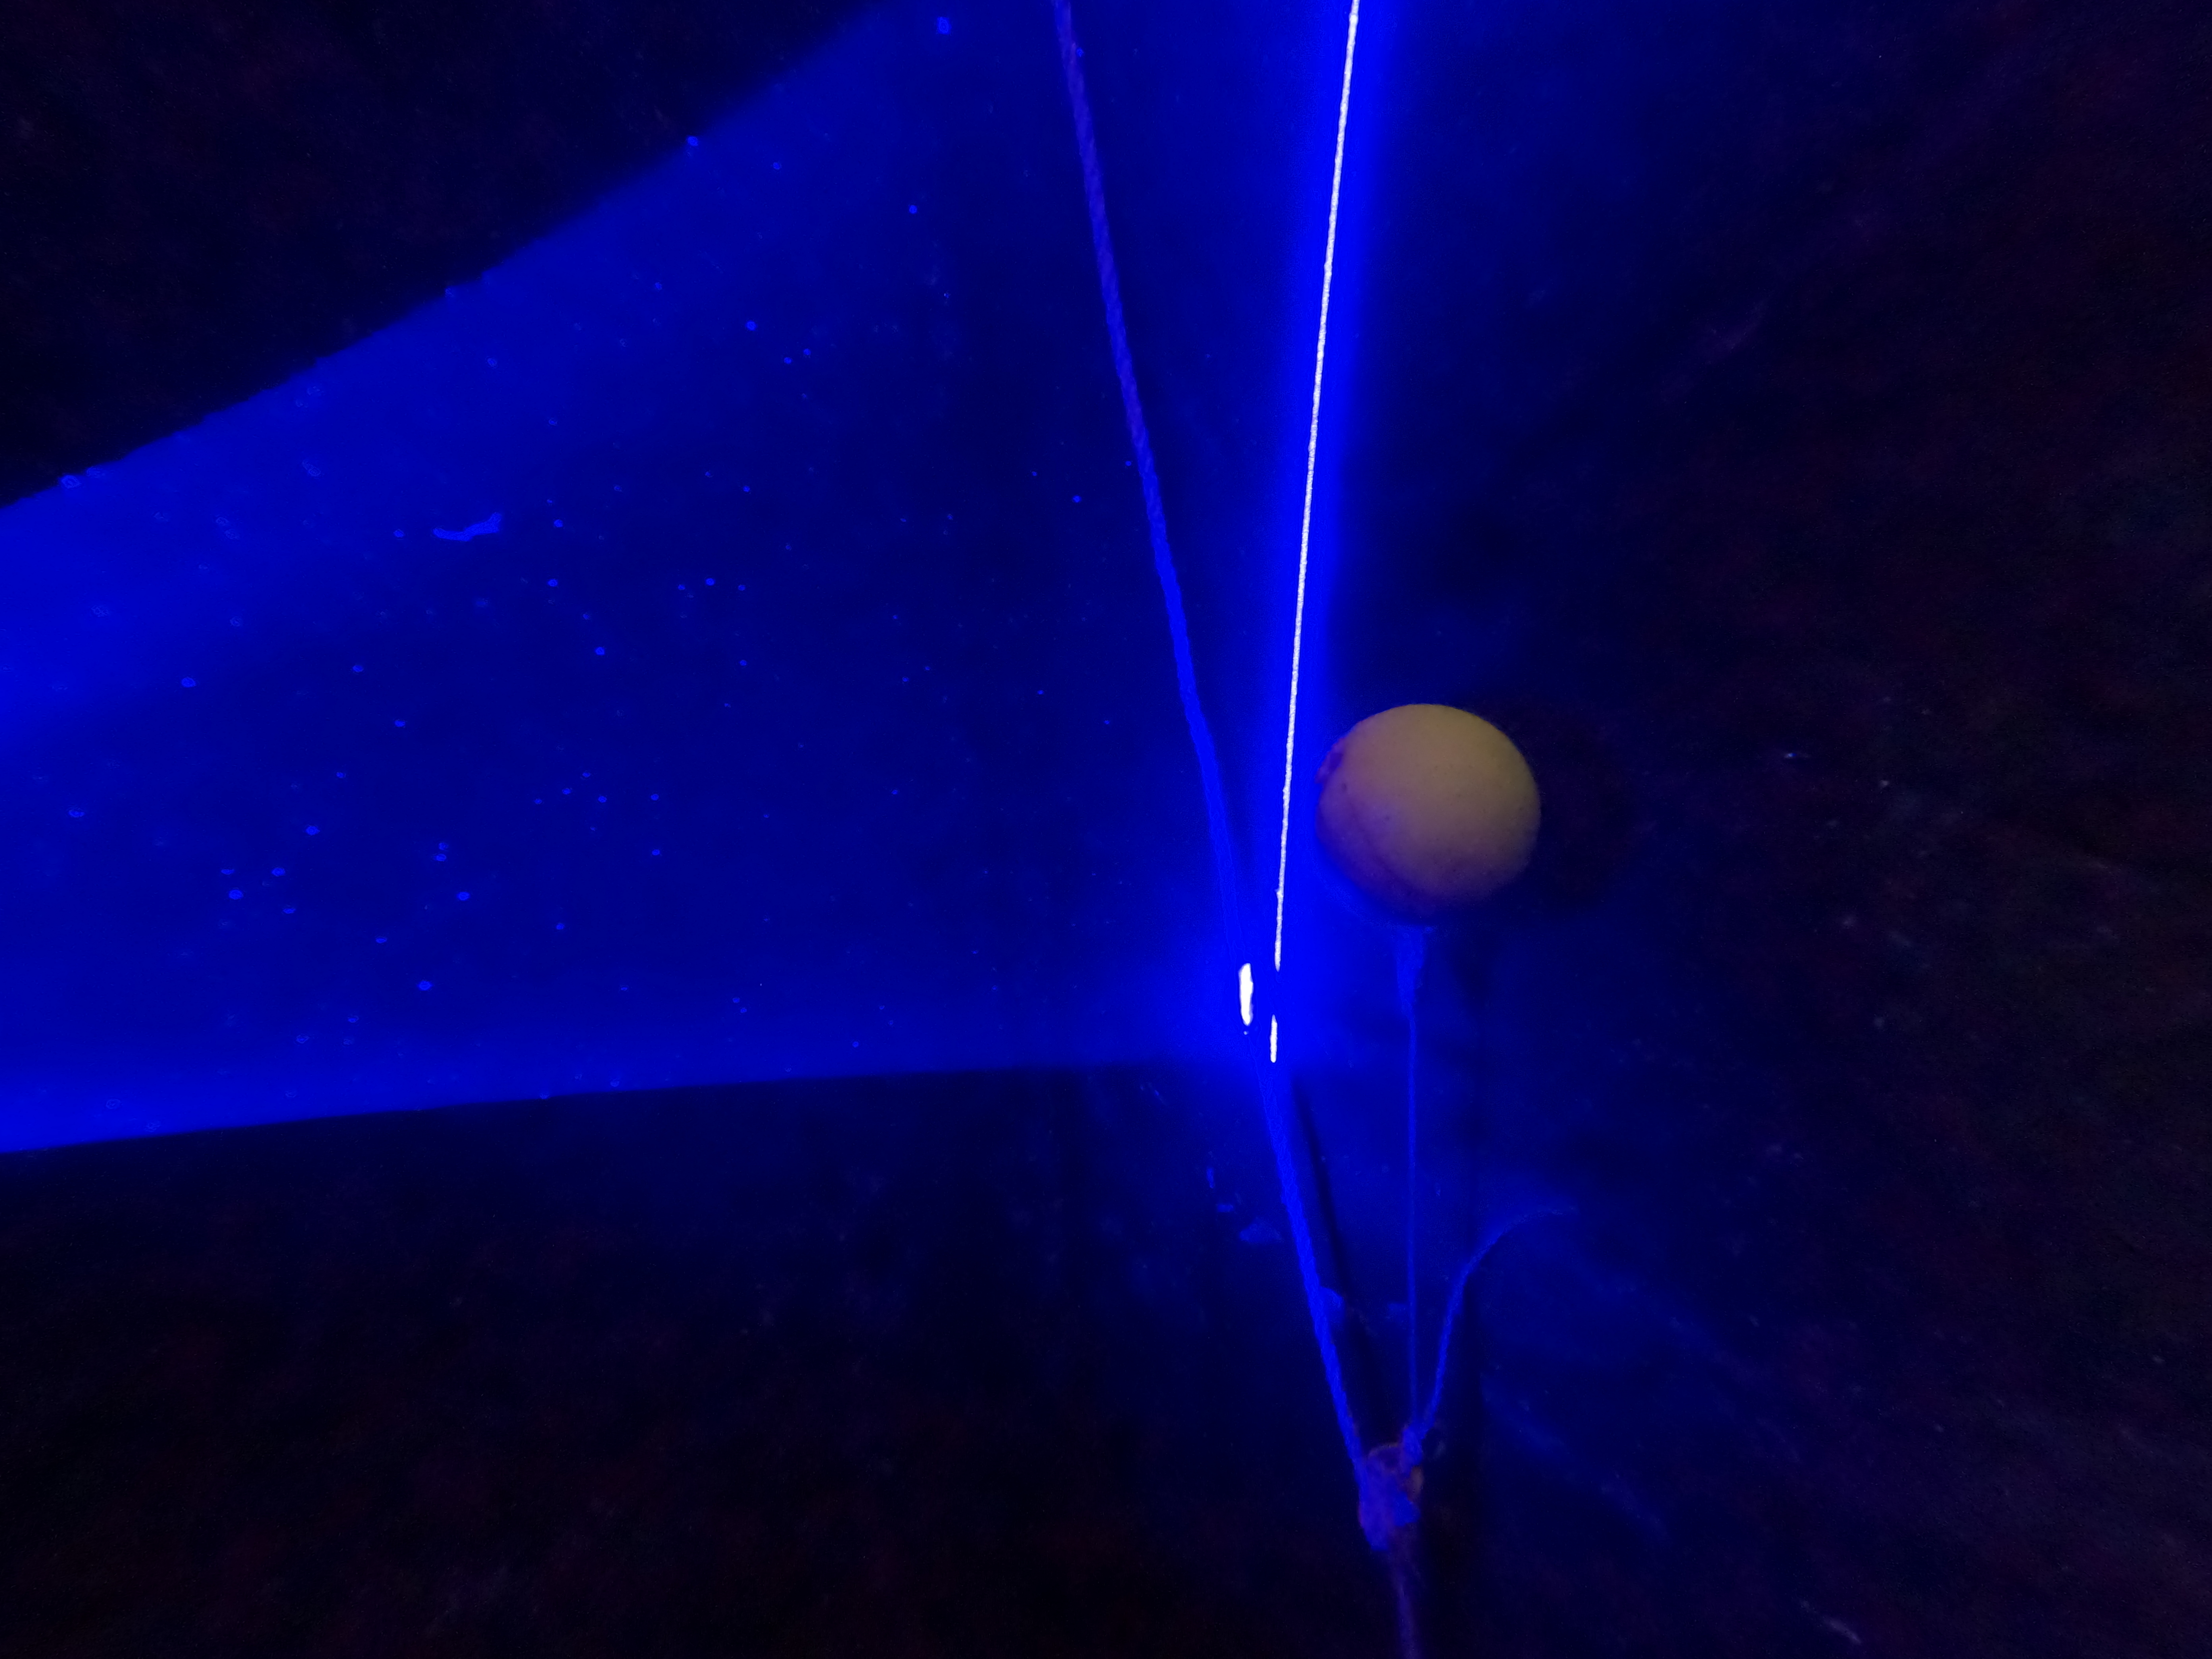

Supplement: Supplementary file 498 [file G0030798.pdf › 3/G0030798.pdf]

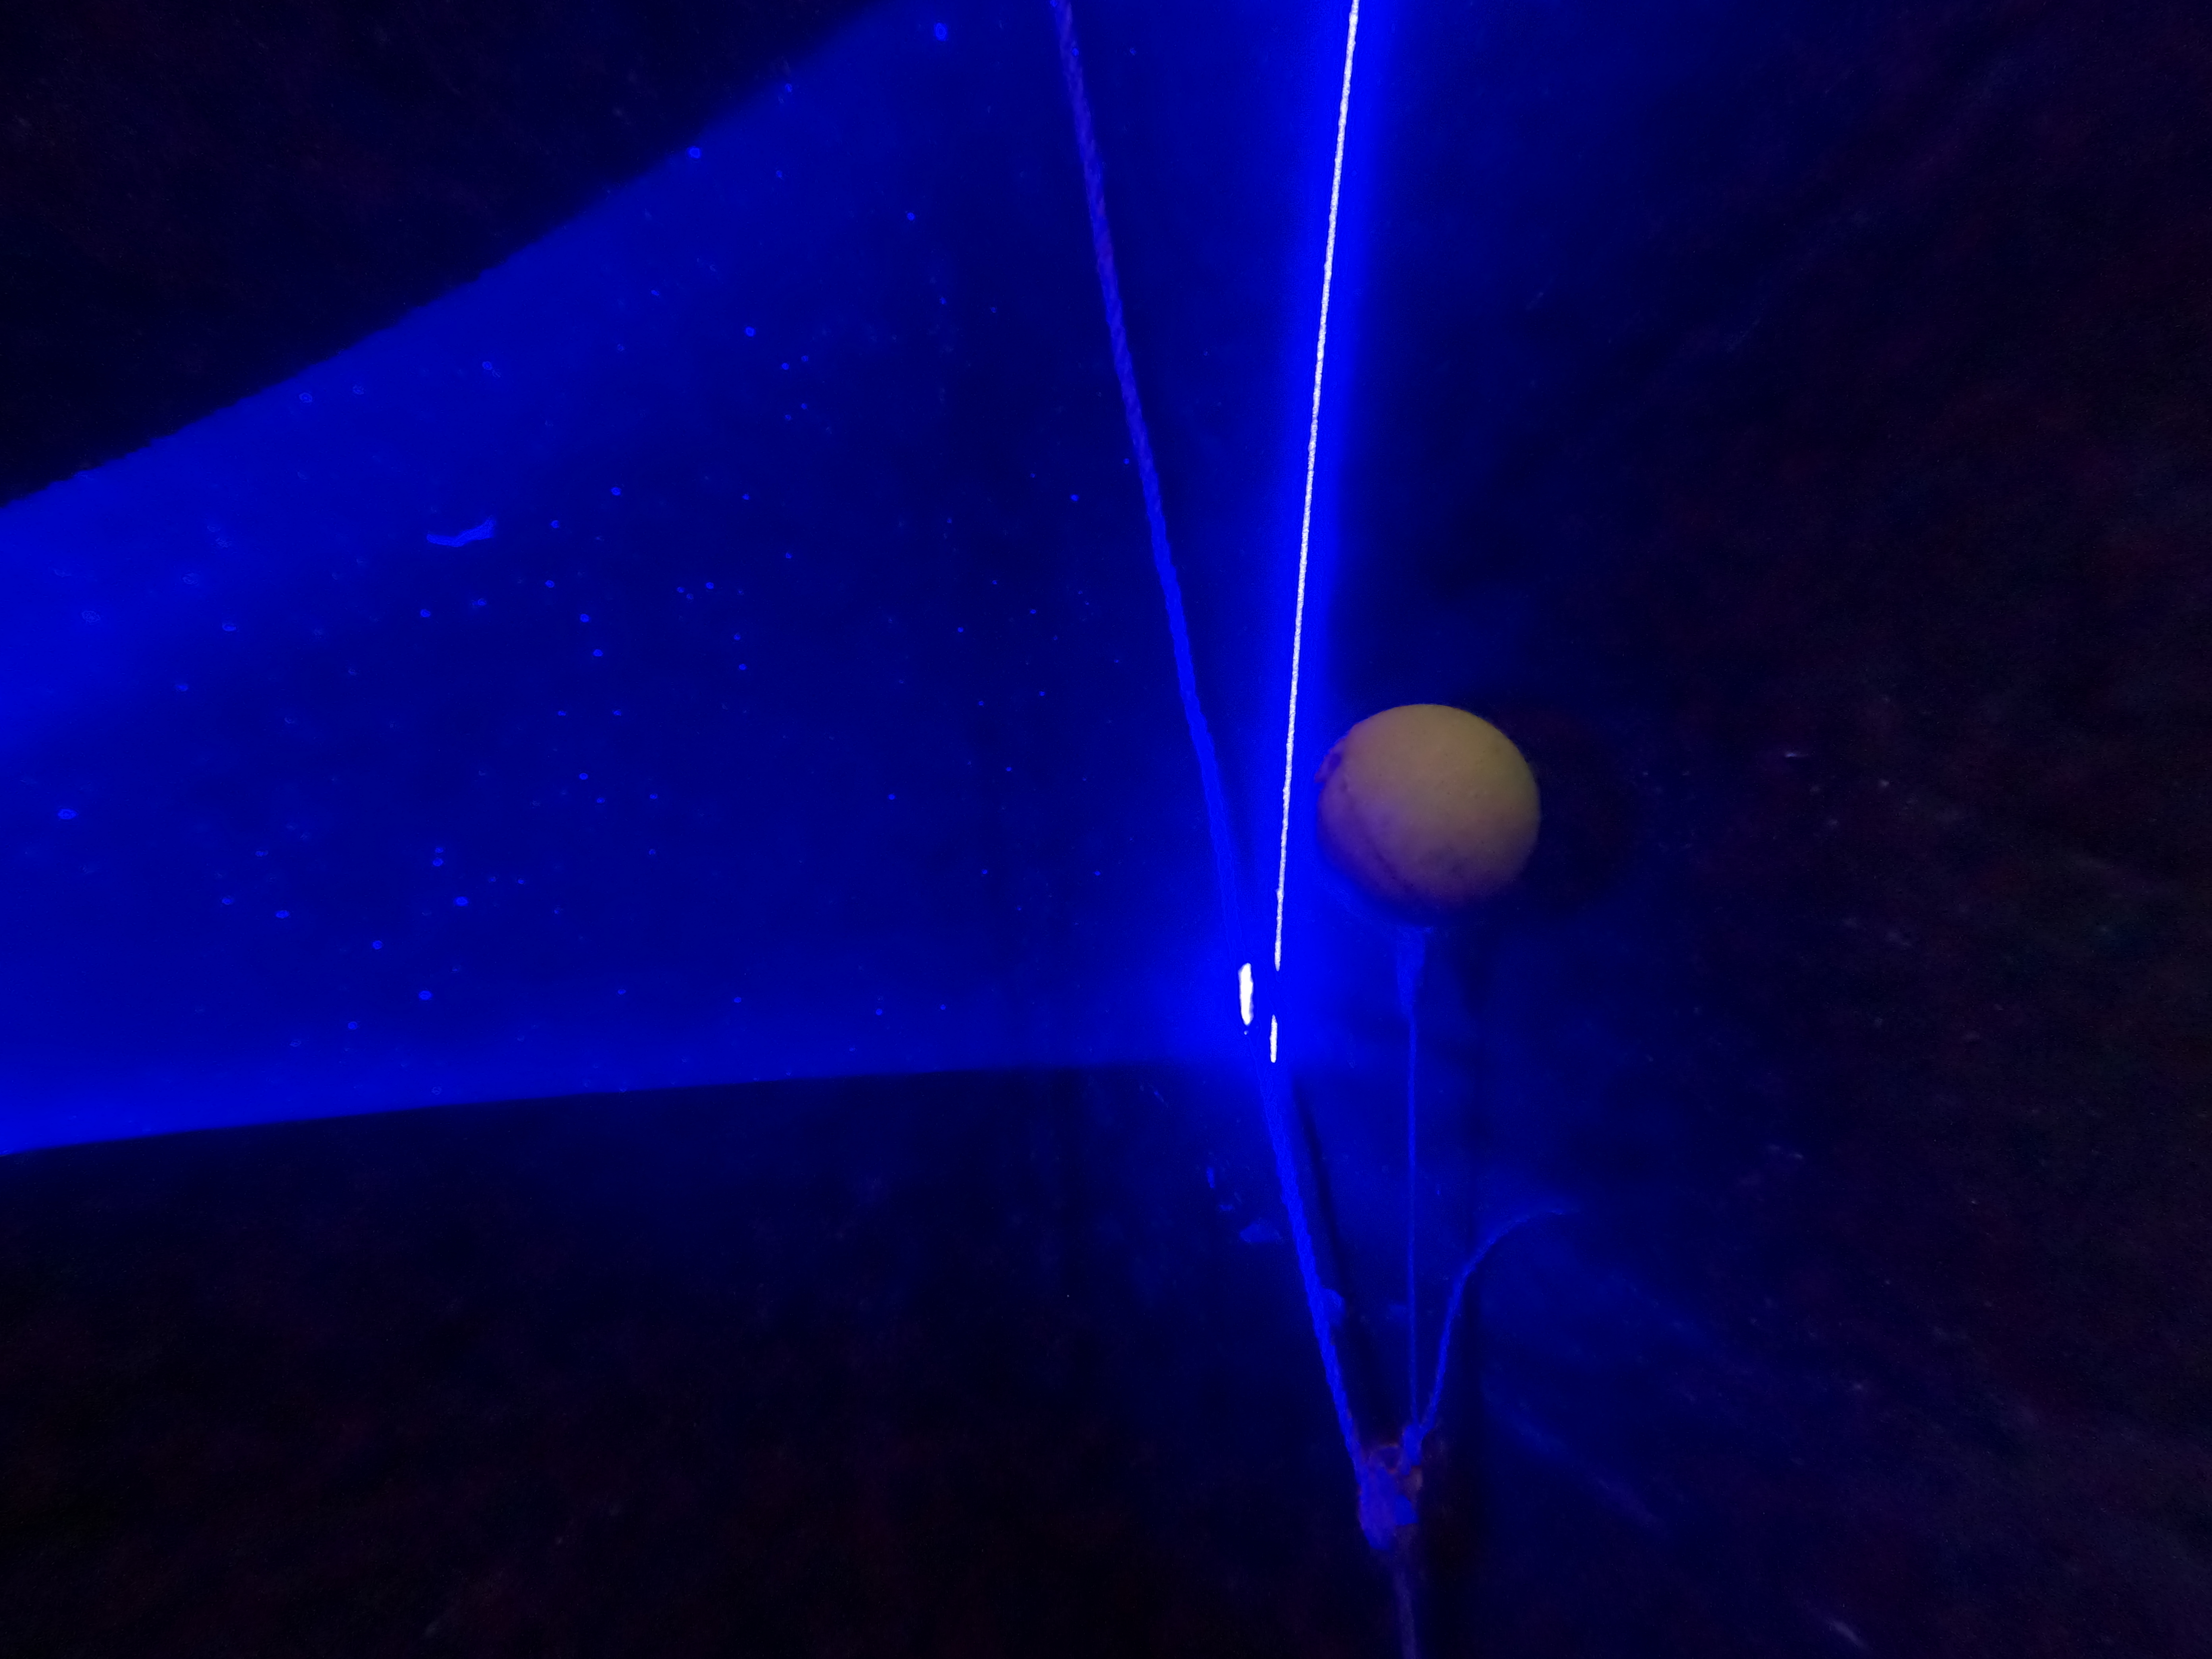

Supplement: Supplementary file 499 [file G0030799.pdf › 3/G0030799.pdf]

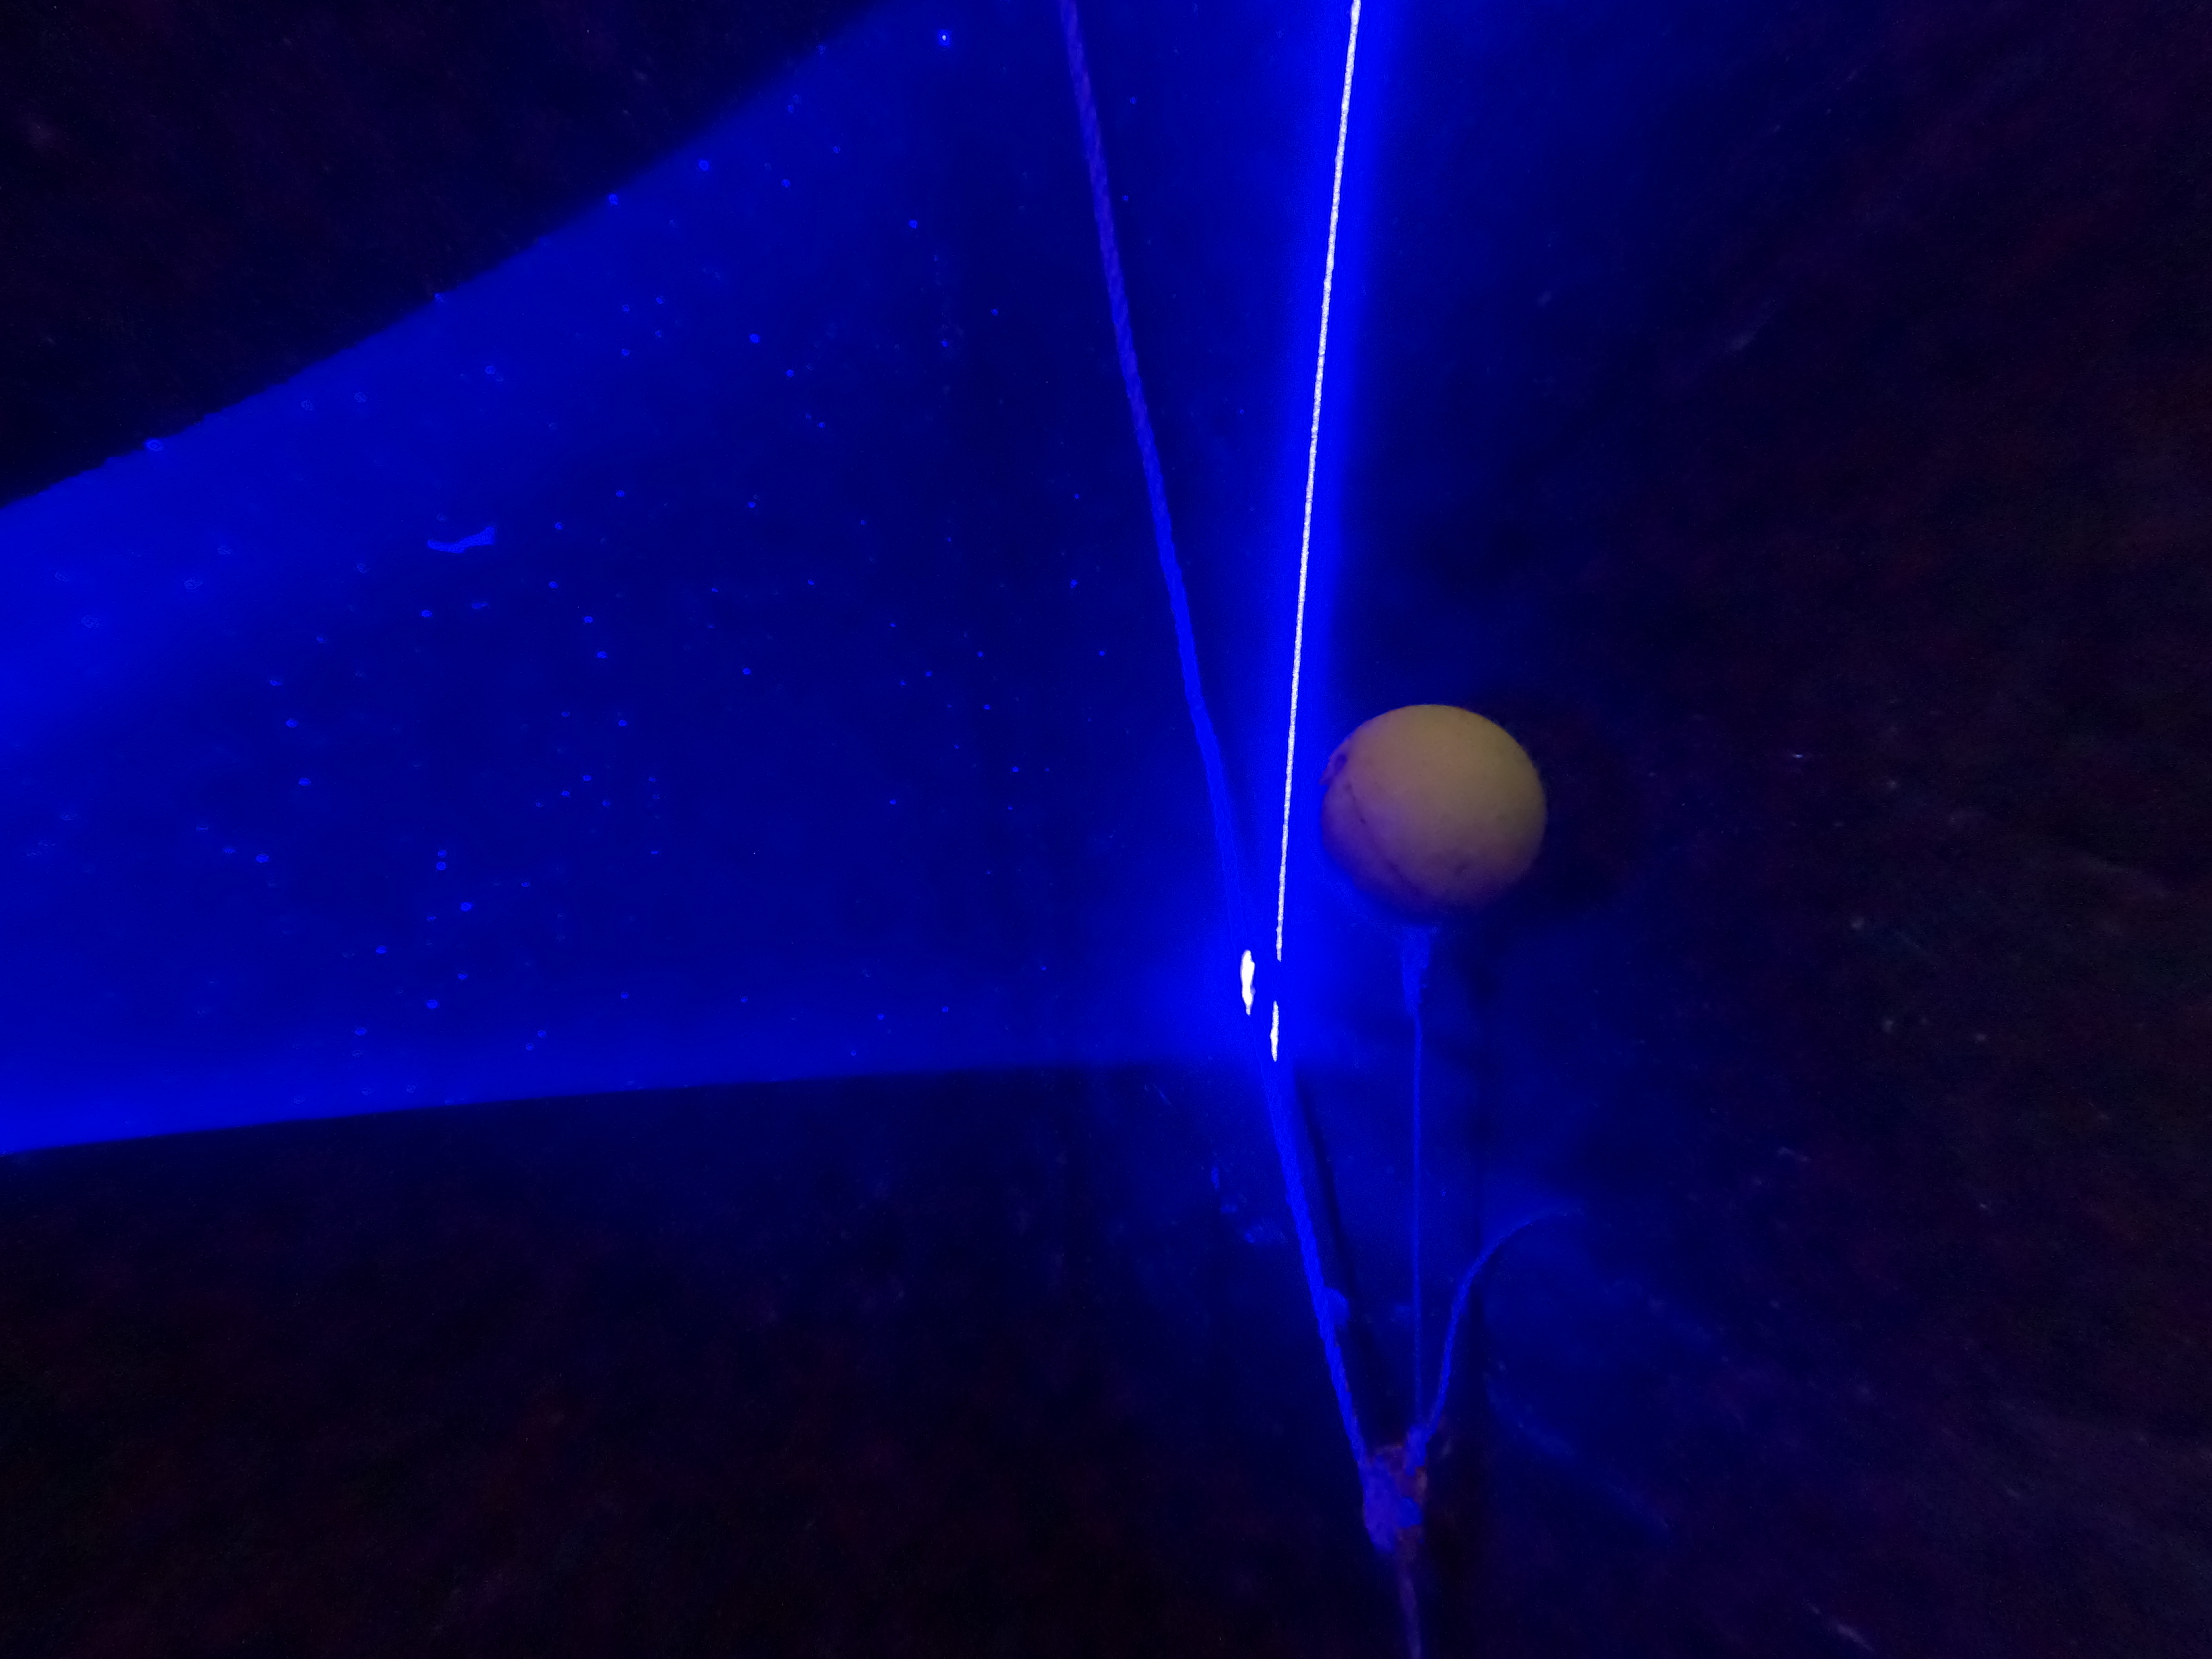

Supplement: Supplementary file 500 [file G0030800.pdf › 3/G0030800.pdf]
