# Supplementary figures and images for: 3D reconstruction of shallow sea environment using direct system calibration and faint laser line extraction (part 6 of 35)
Source: Research Square preprint supplement (doi:10.21203/rs.3.rs-5262658/v1), 2024-12-02

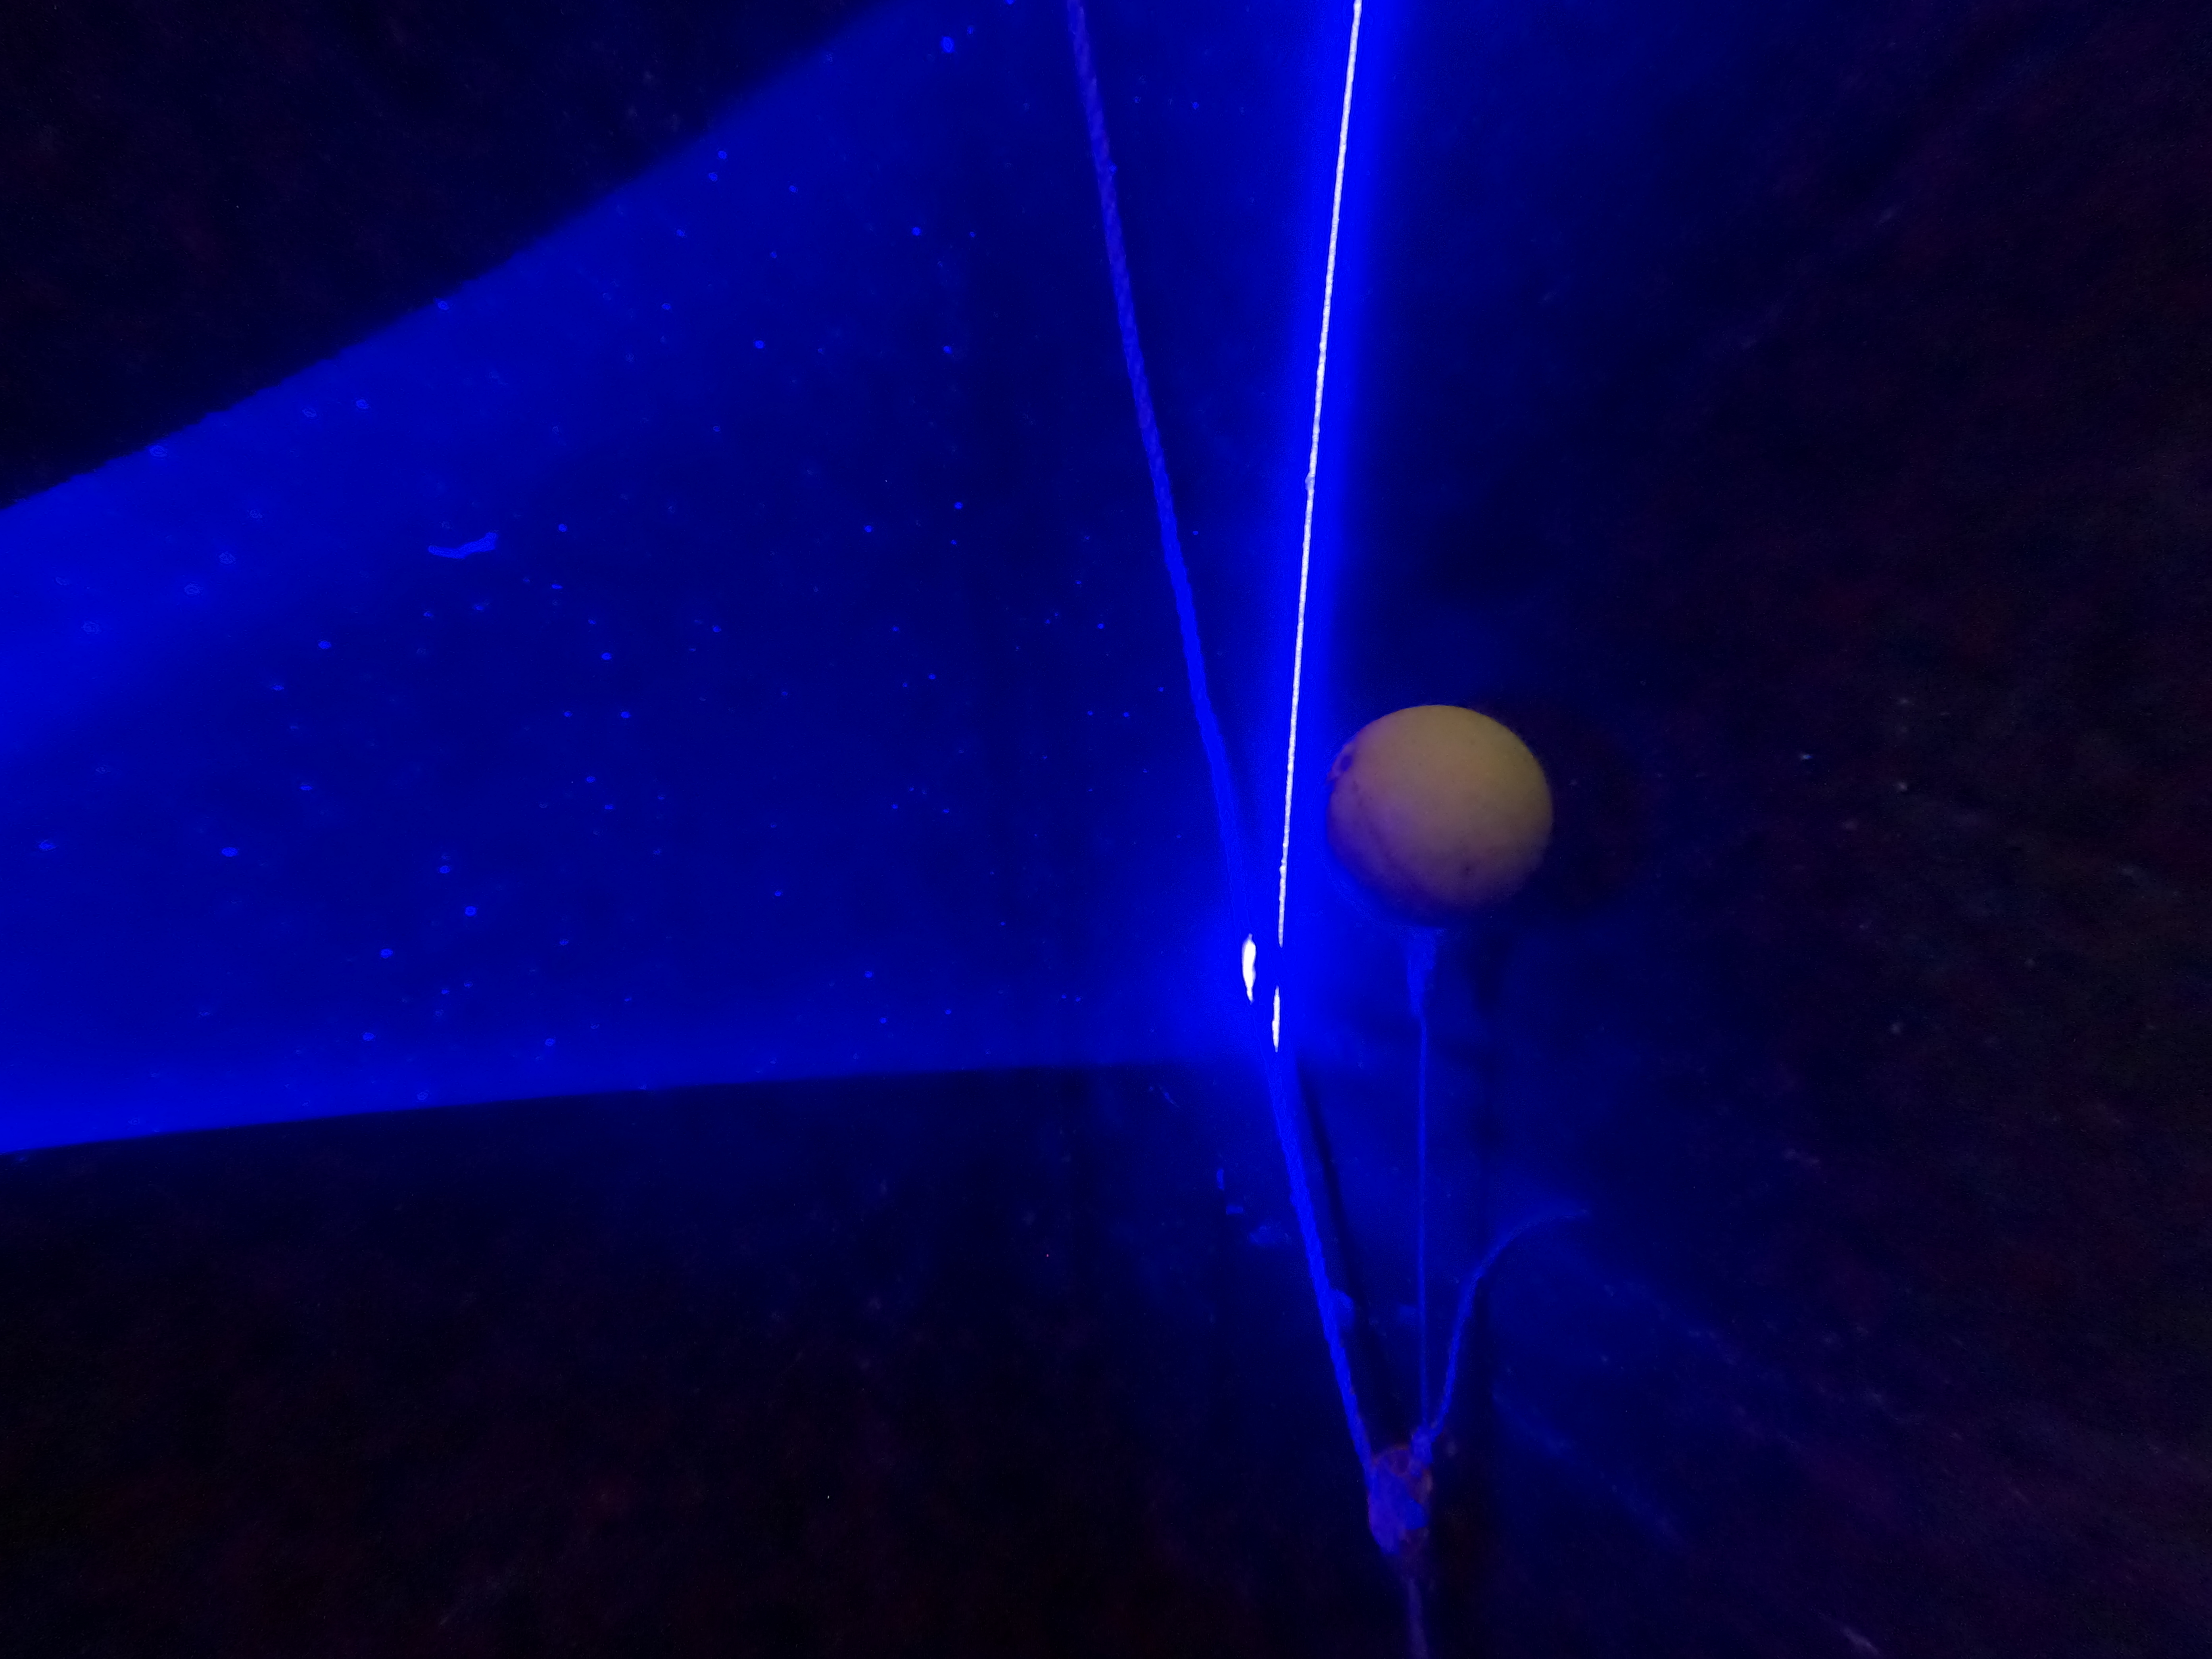

Supplement: Supplementary file 501 [file G0030801.pdf › 3/G0030801.pdf]

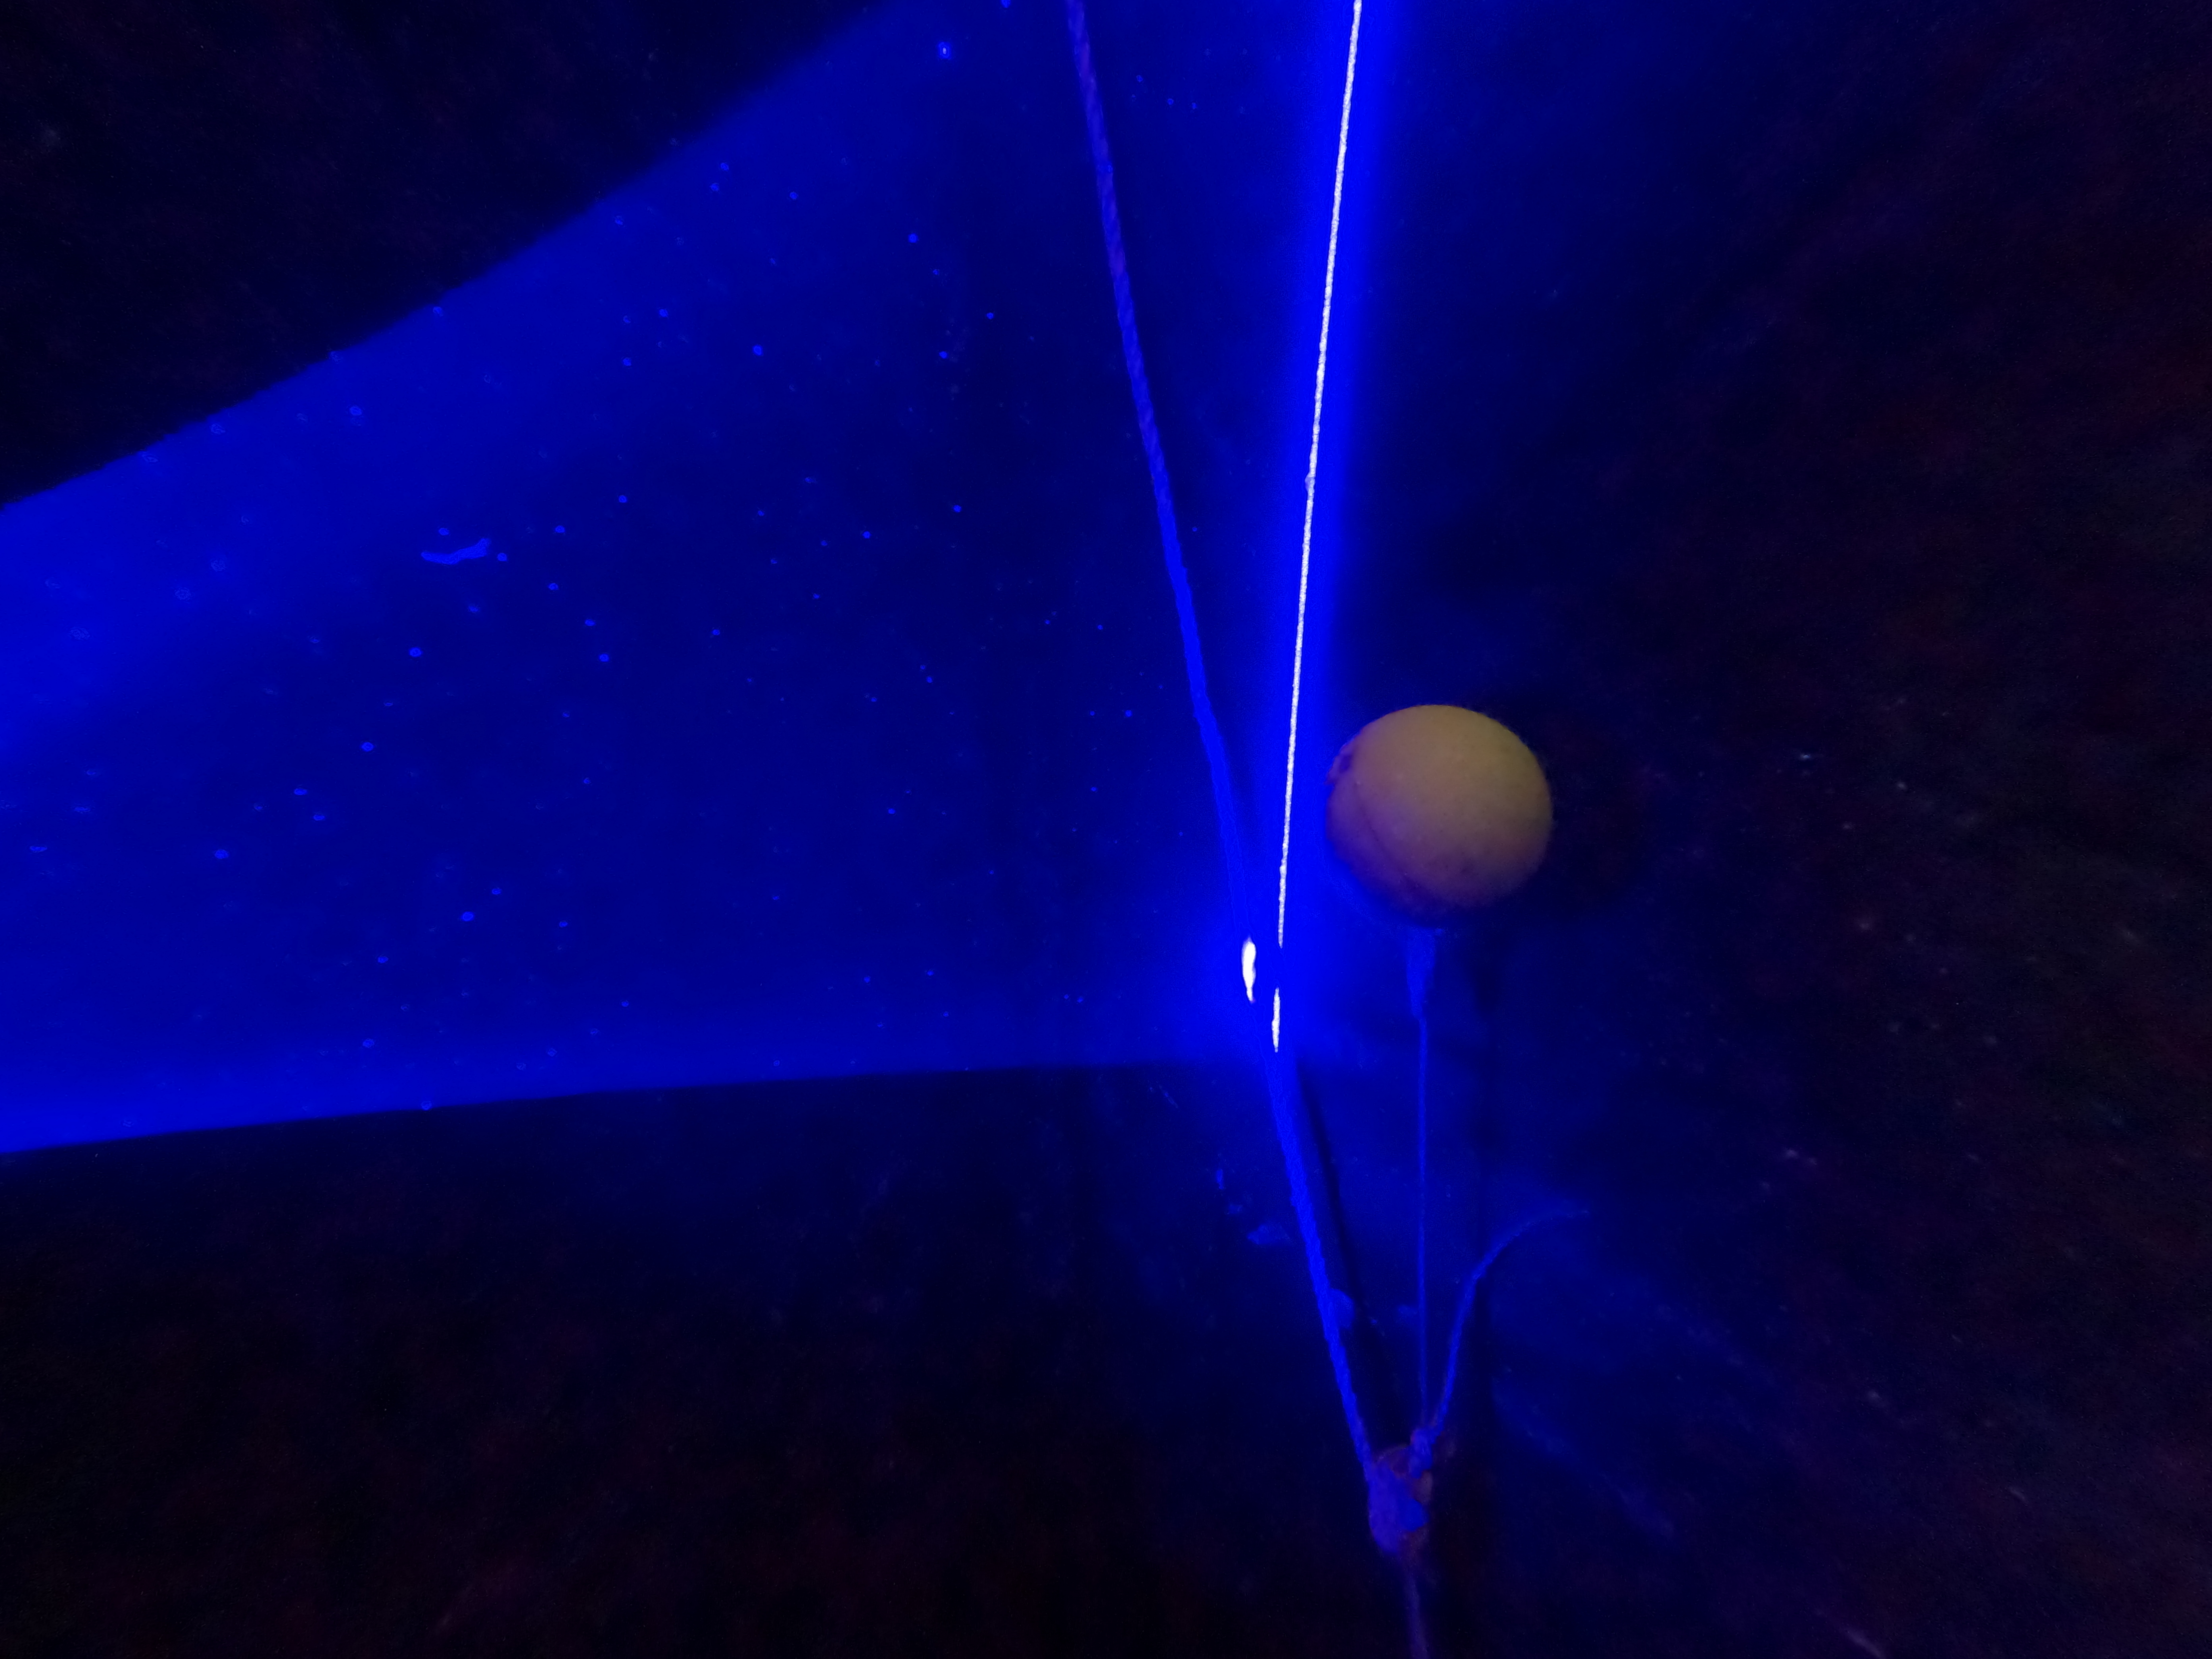

Supplement: Supplementary file 502 [file G0030802.pdf › 3/G0030802.pdf]

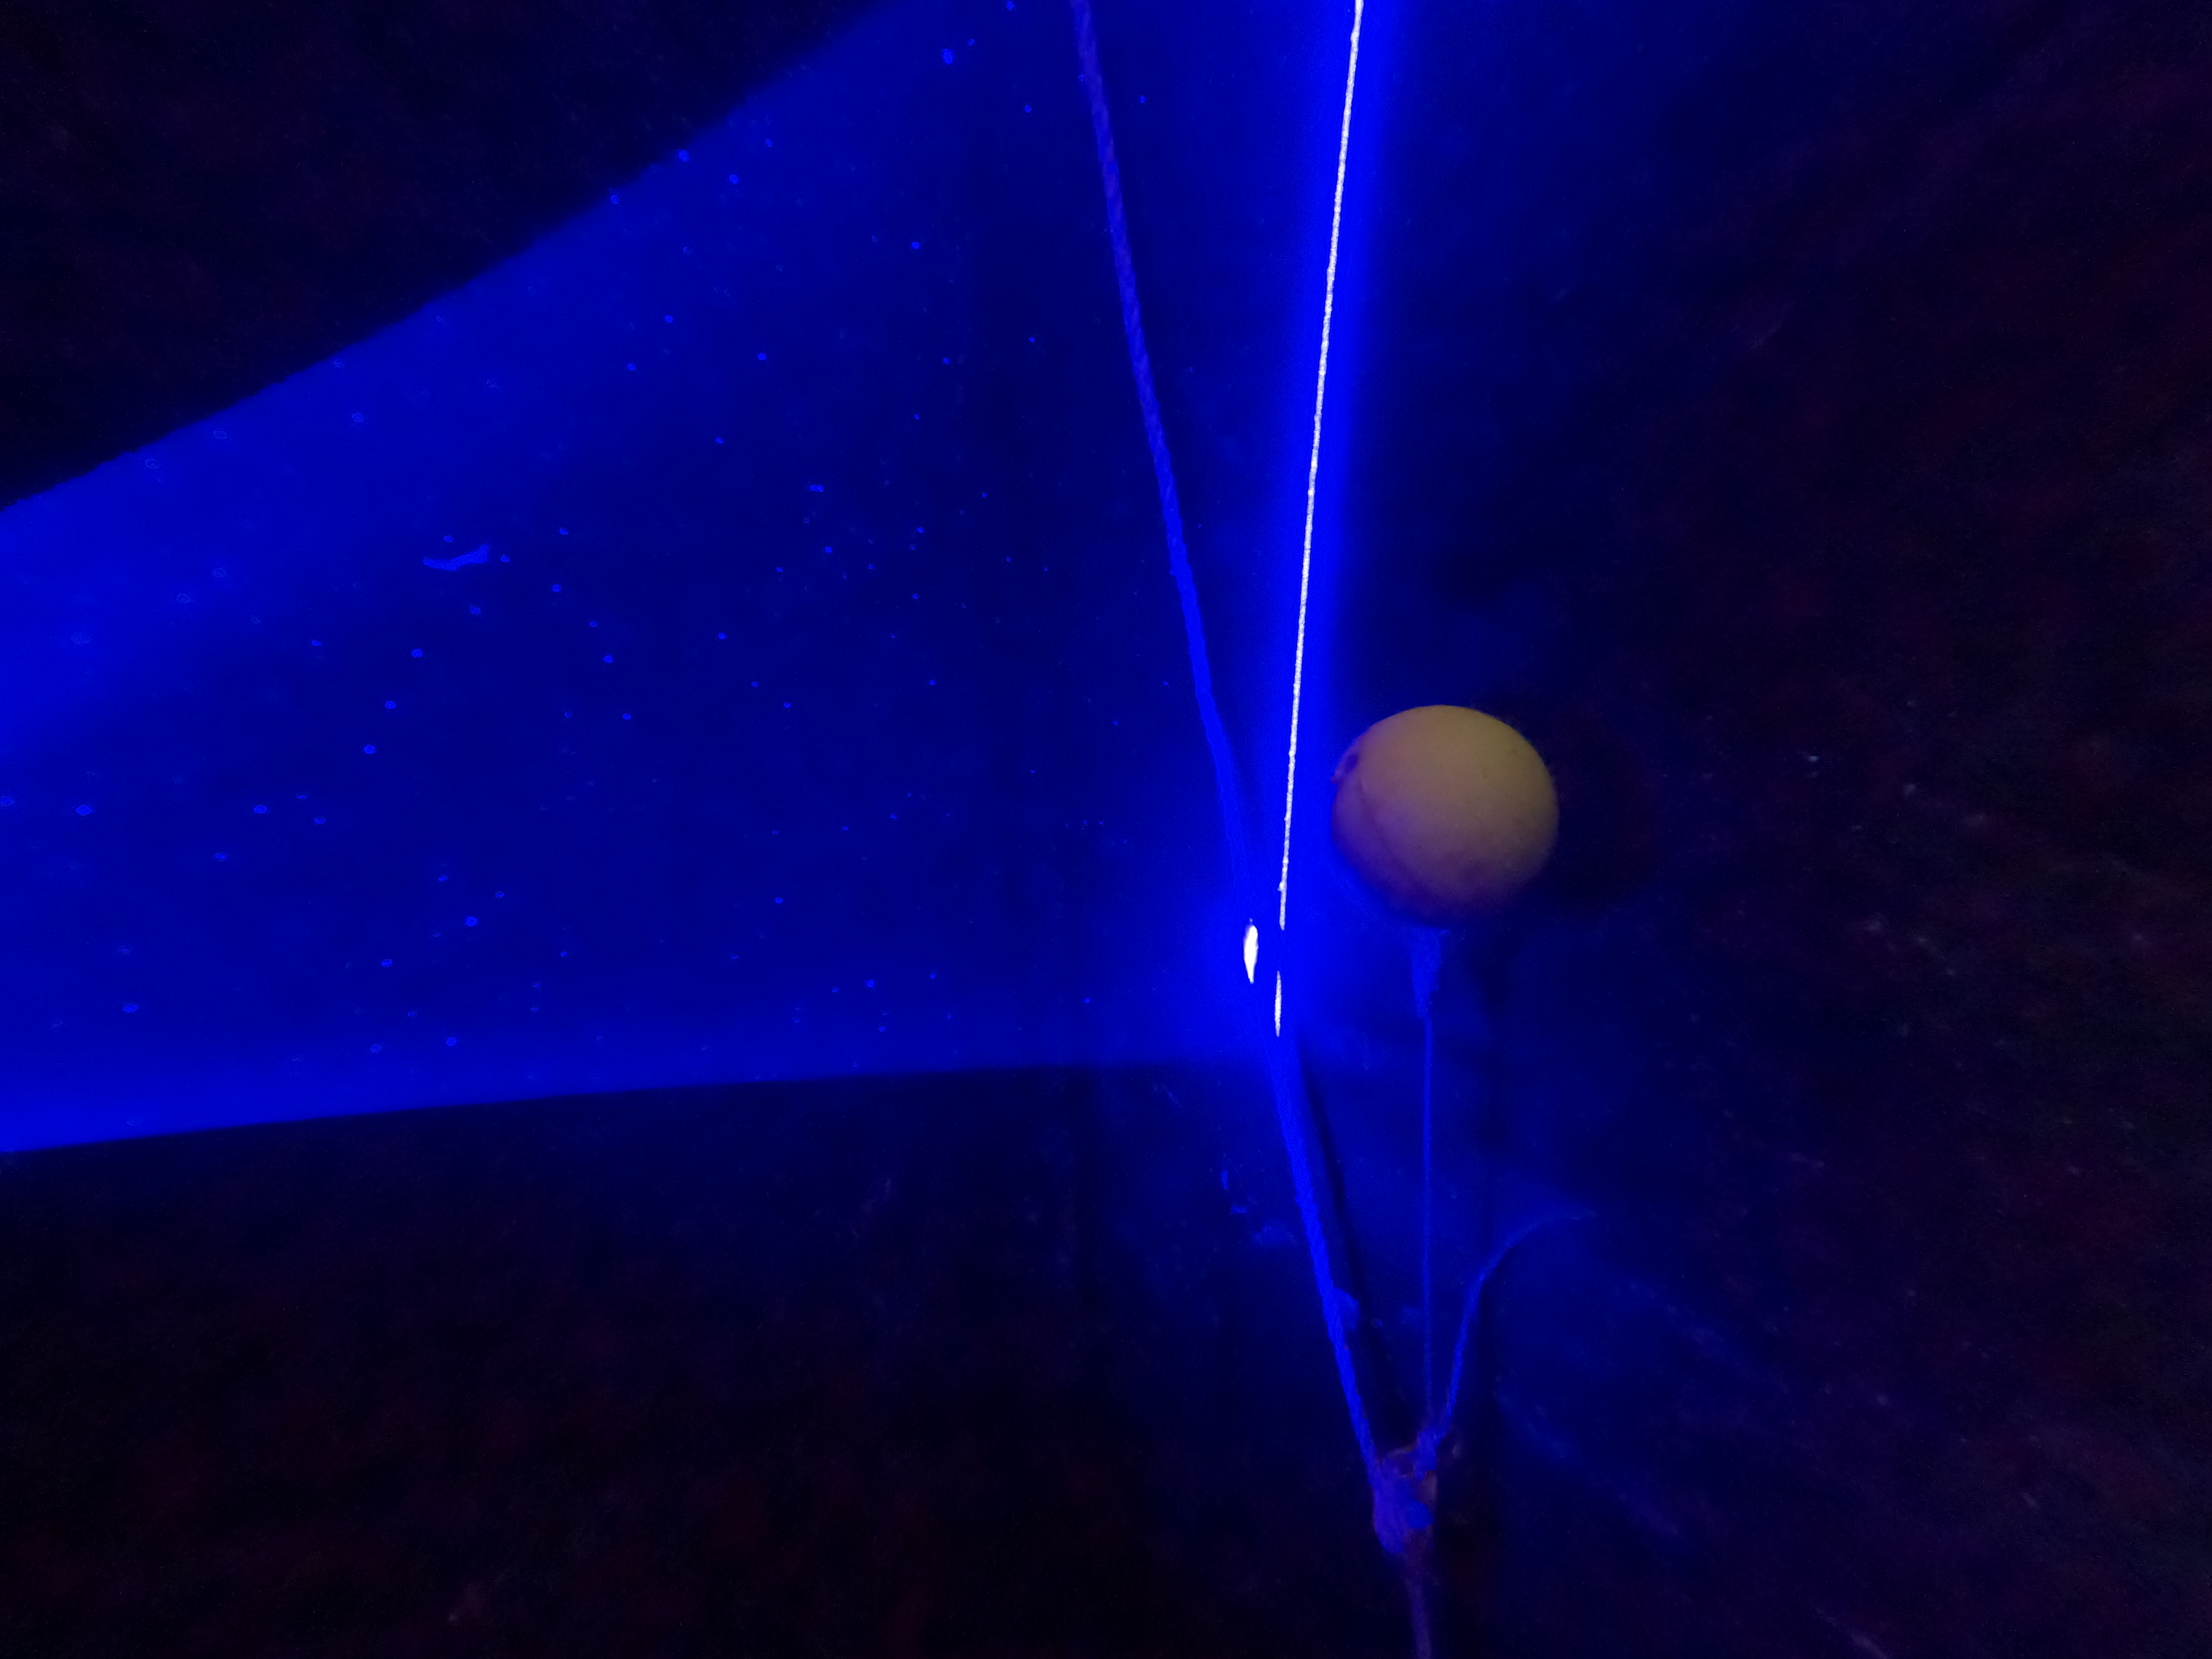

Supplement: Supplementary file 503 [file G0030803.pdf › 3/G0030803.pdf]

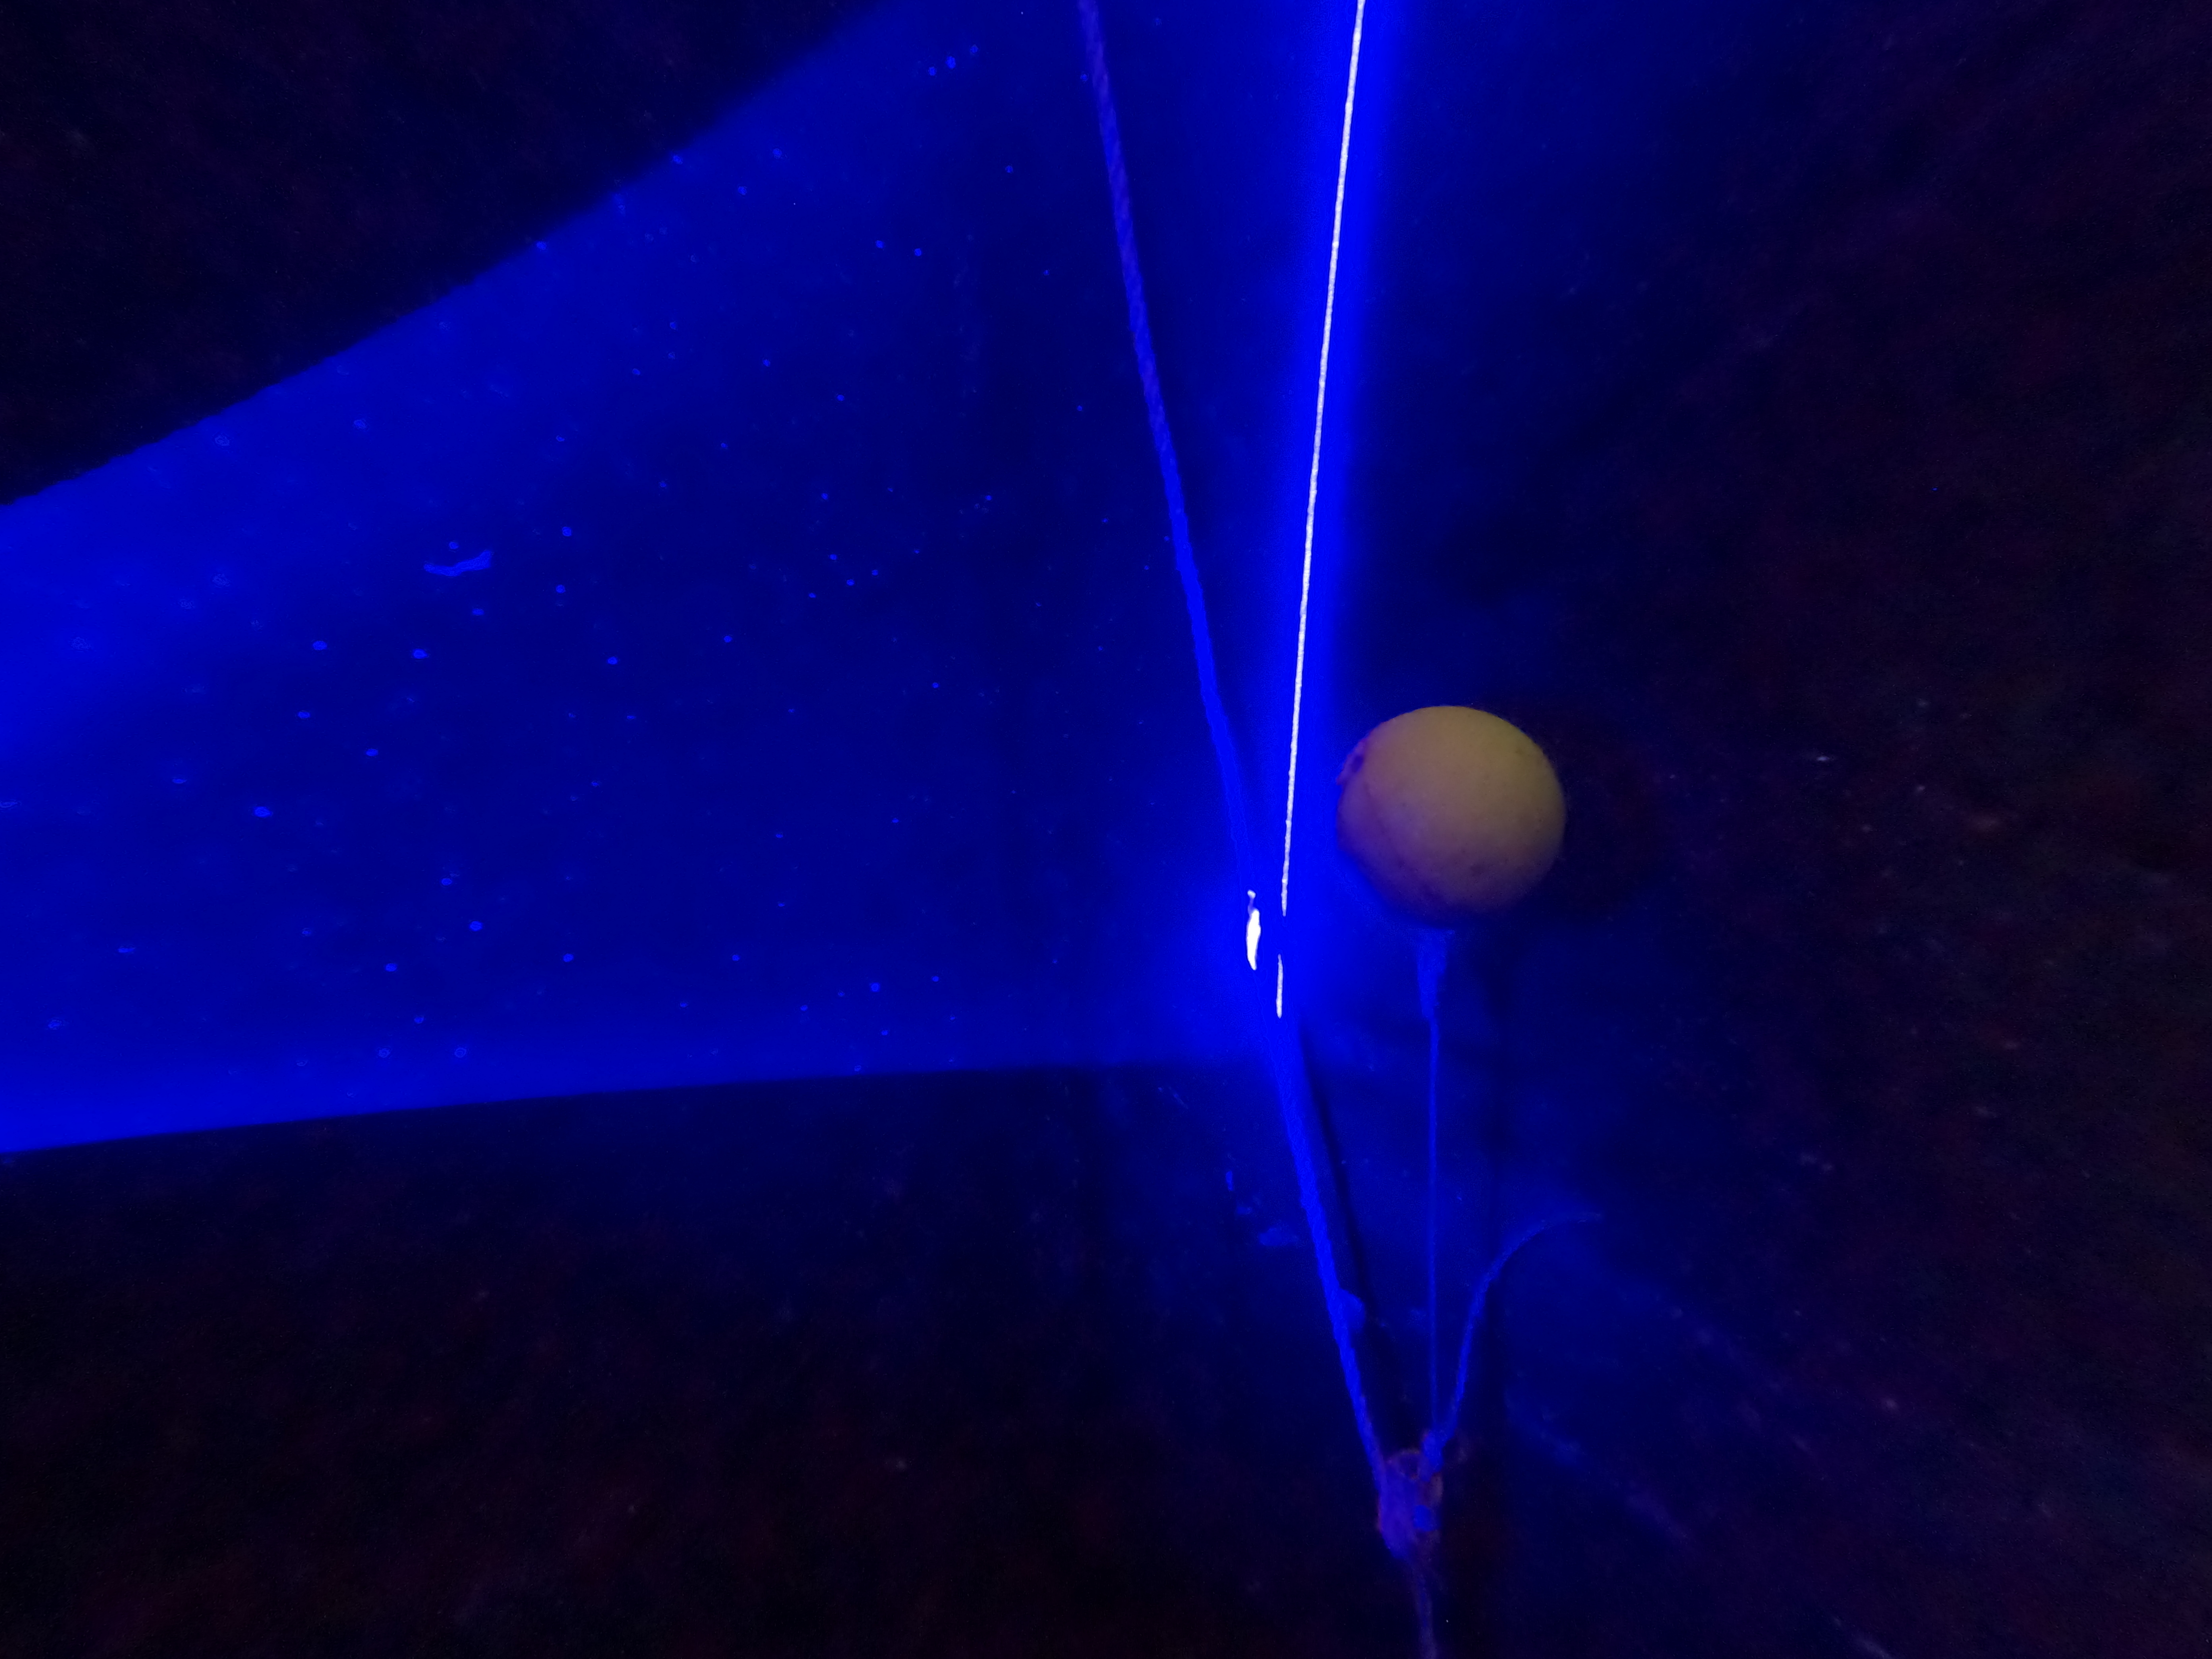

Supplement: Supplementary file 504 [file G0030804.pdf › 3/G0030804.pdf]

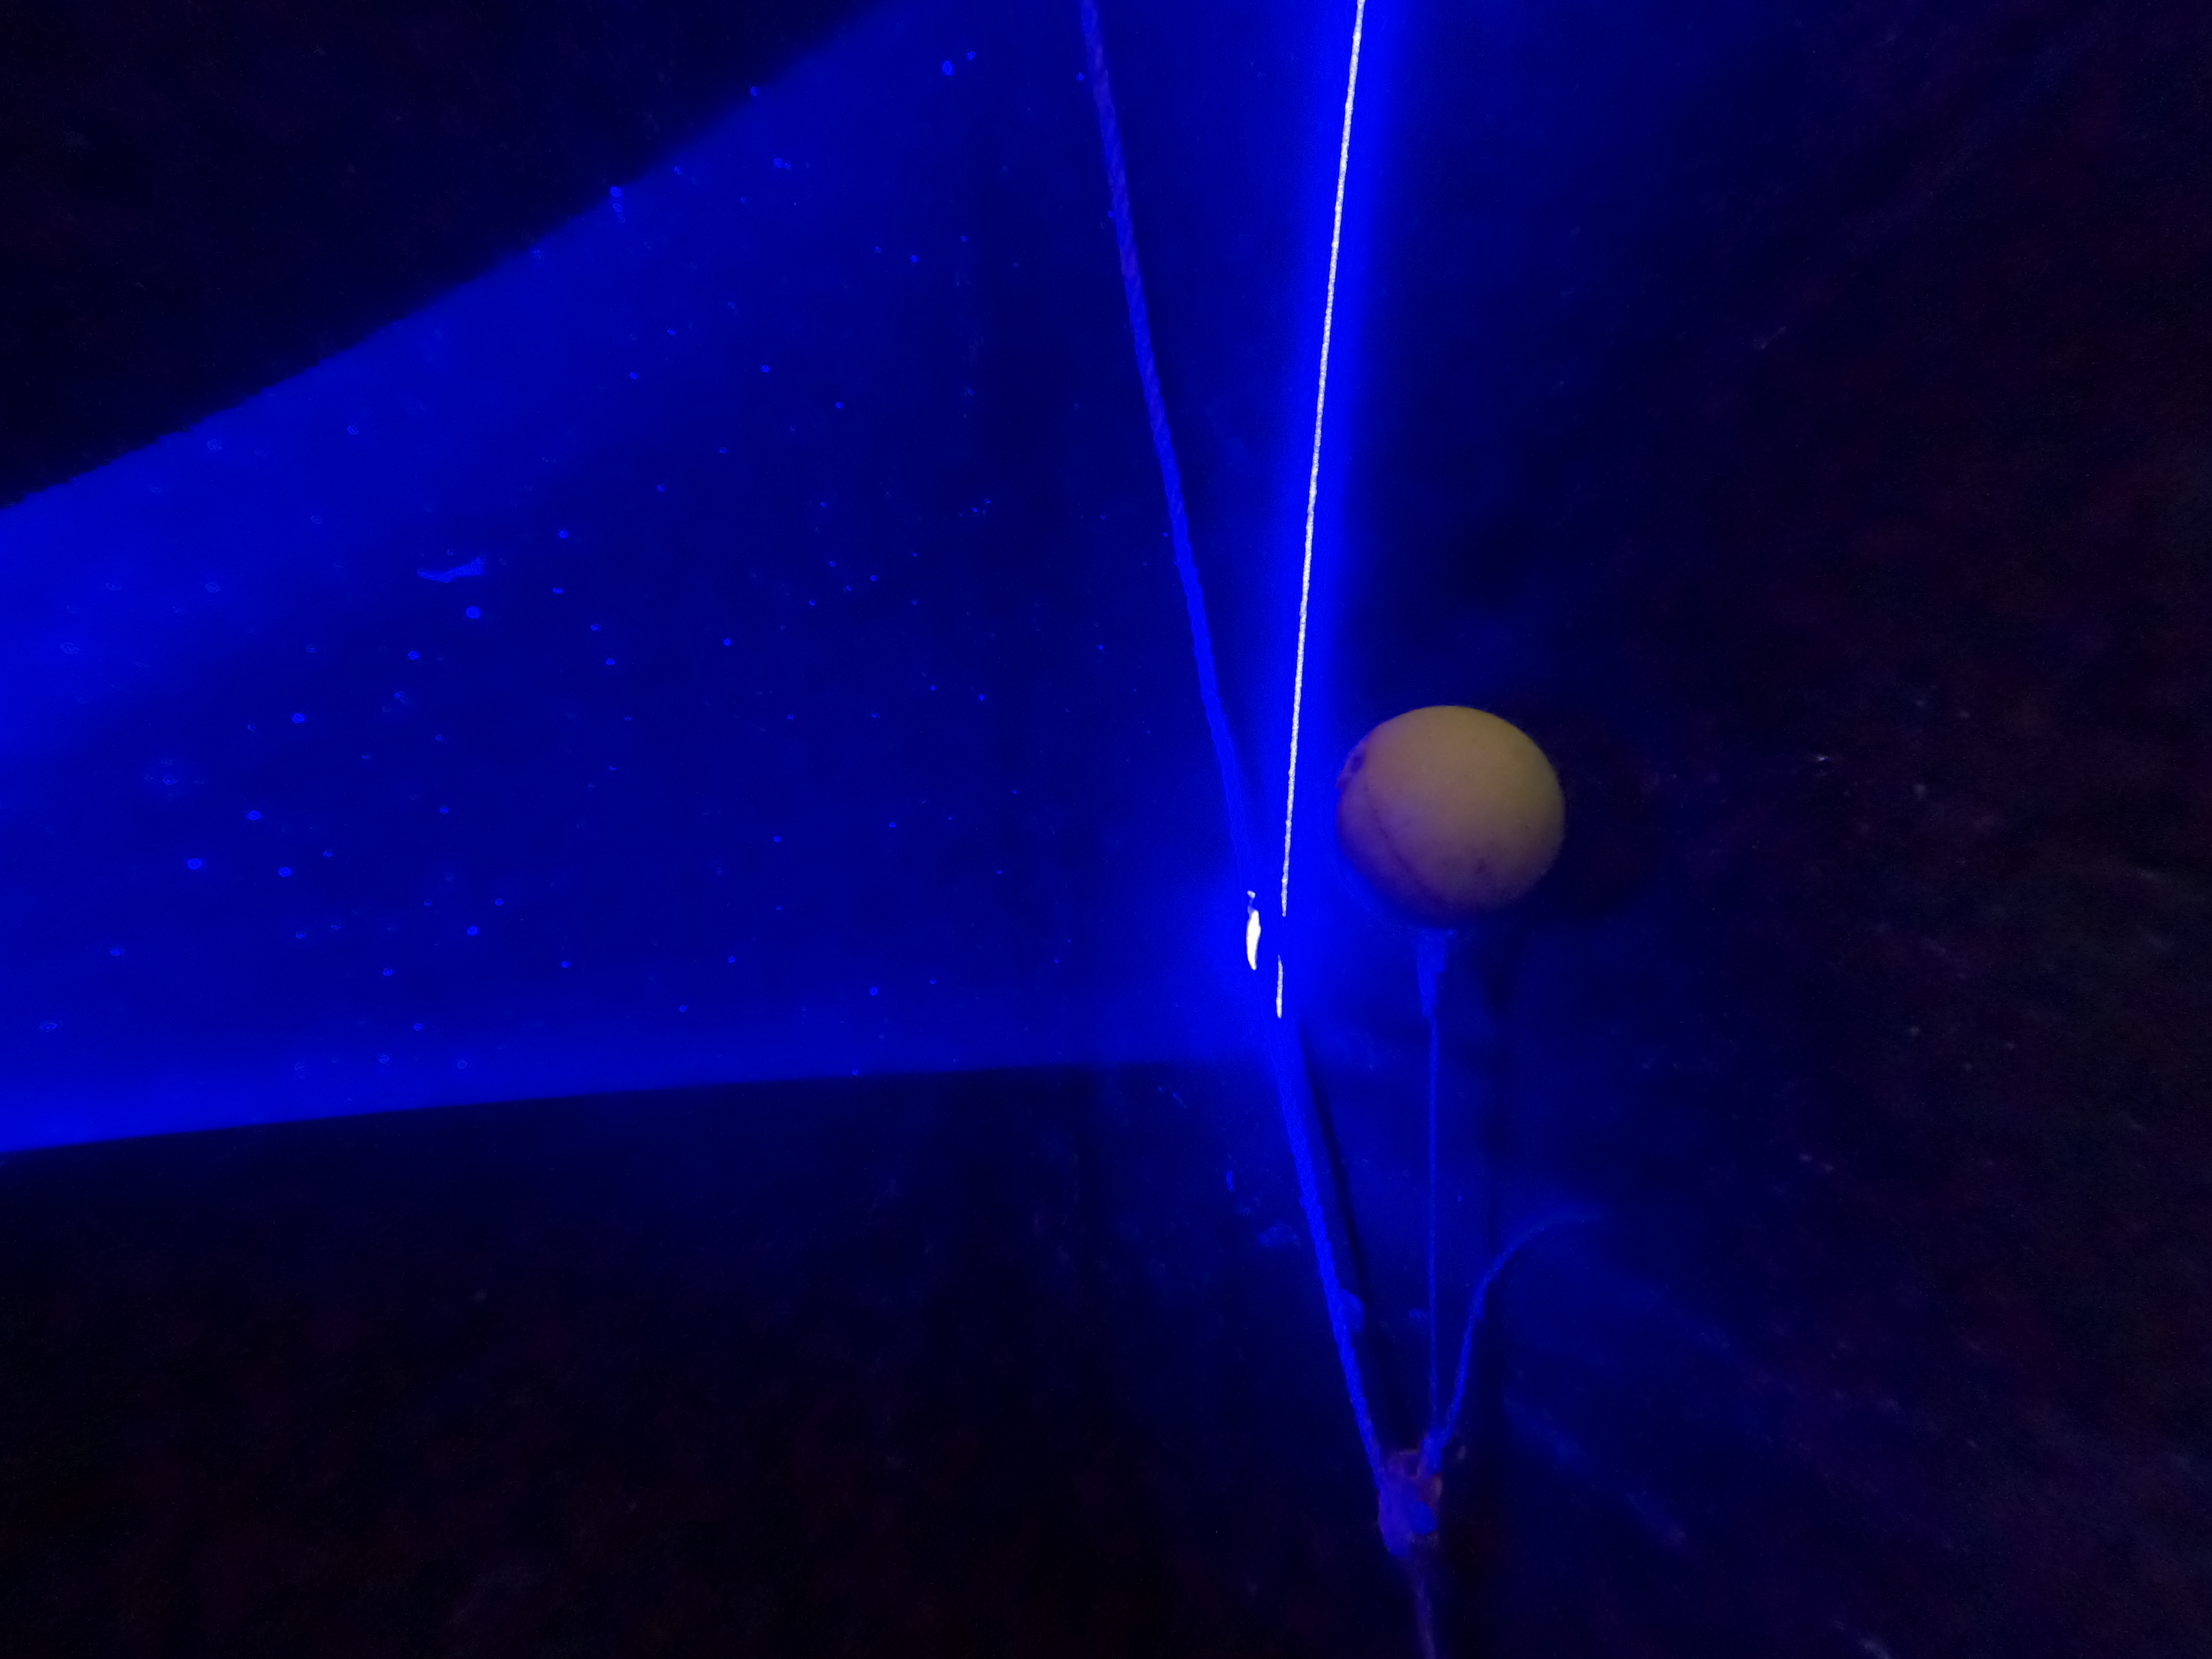

Supplement: Supplementary file 505 [file G0030805.pdf › 3/G0030805.pdf]

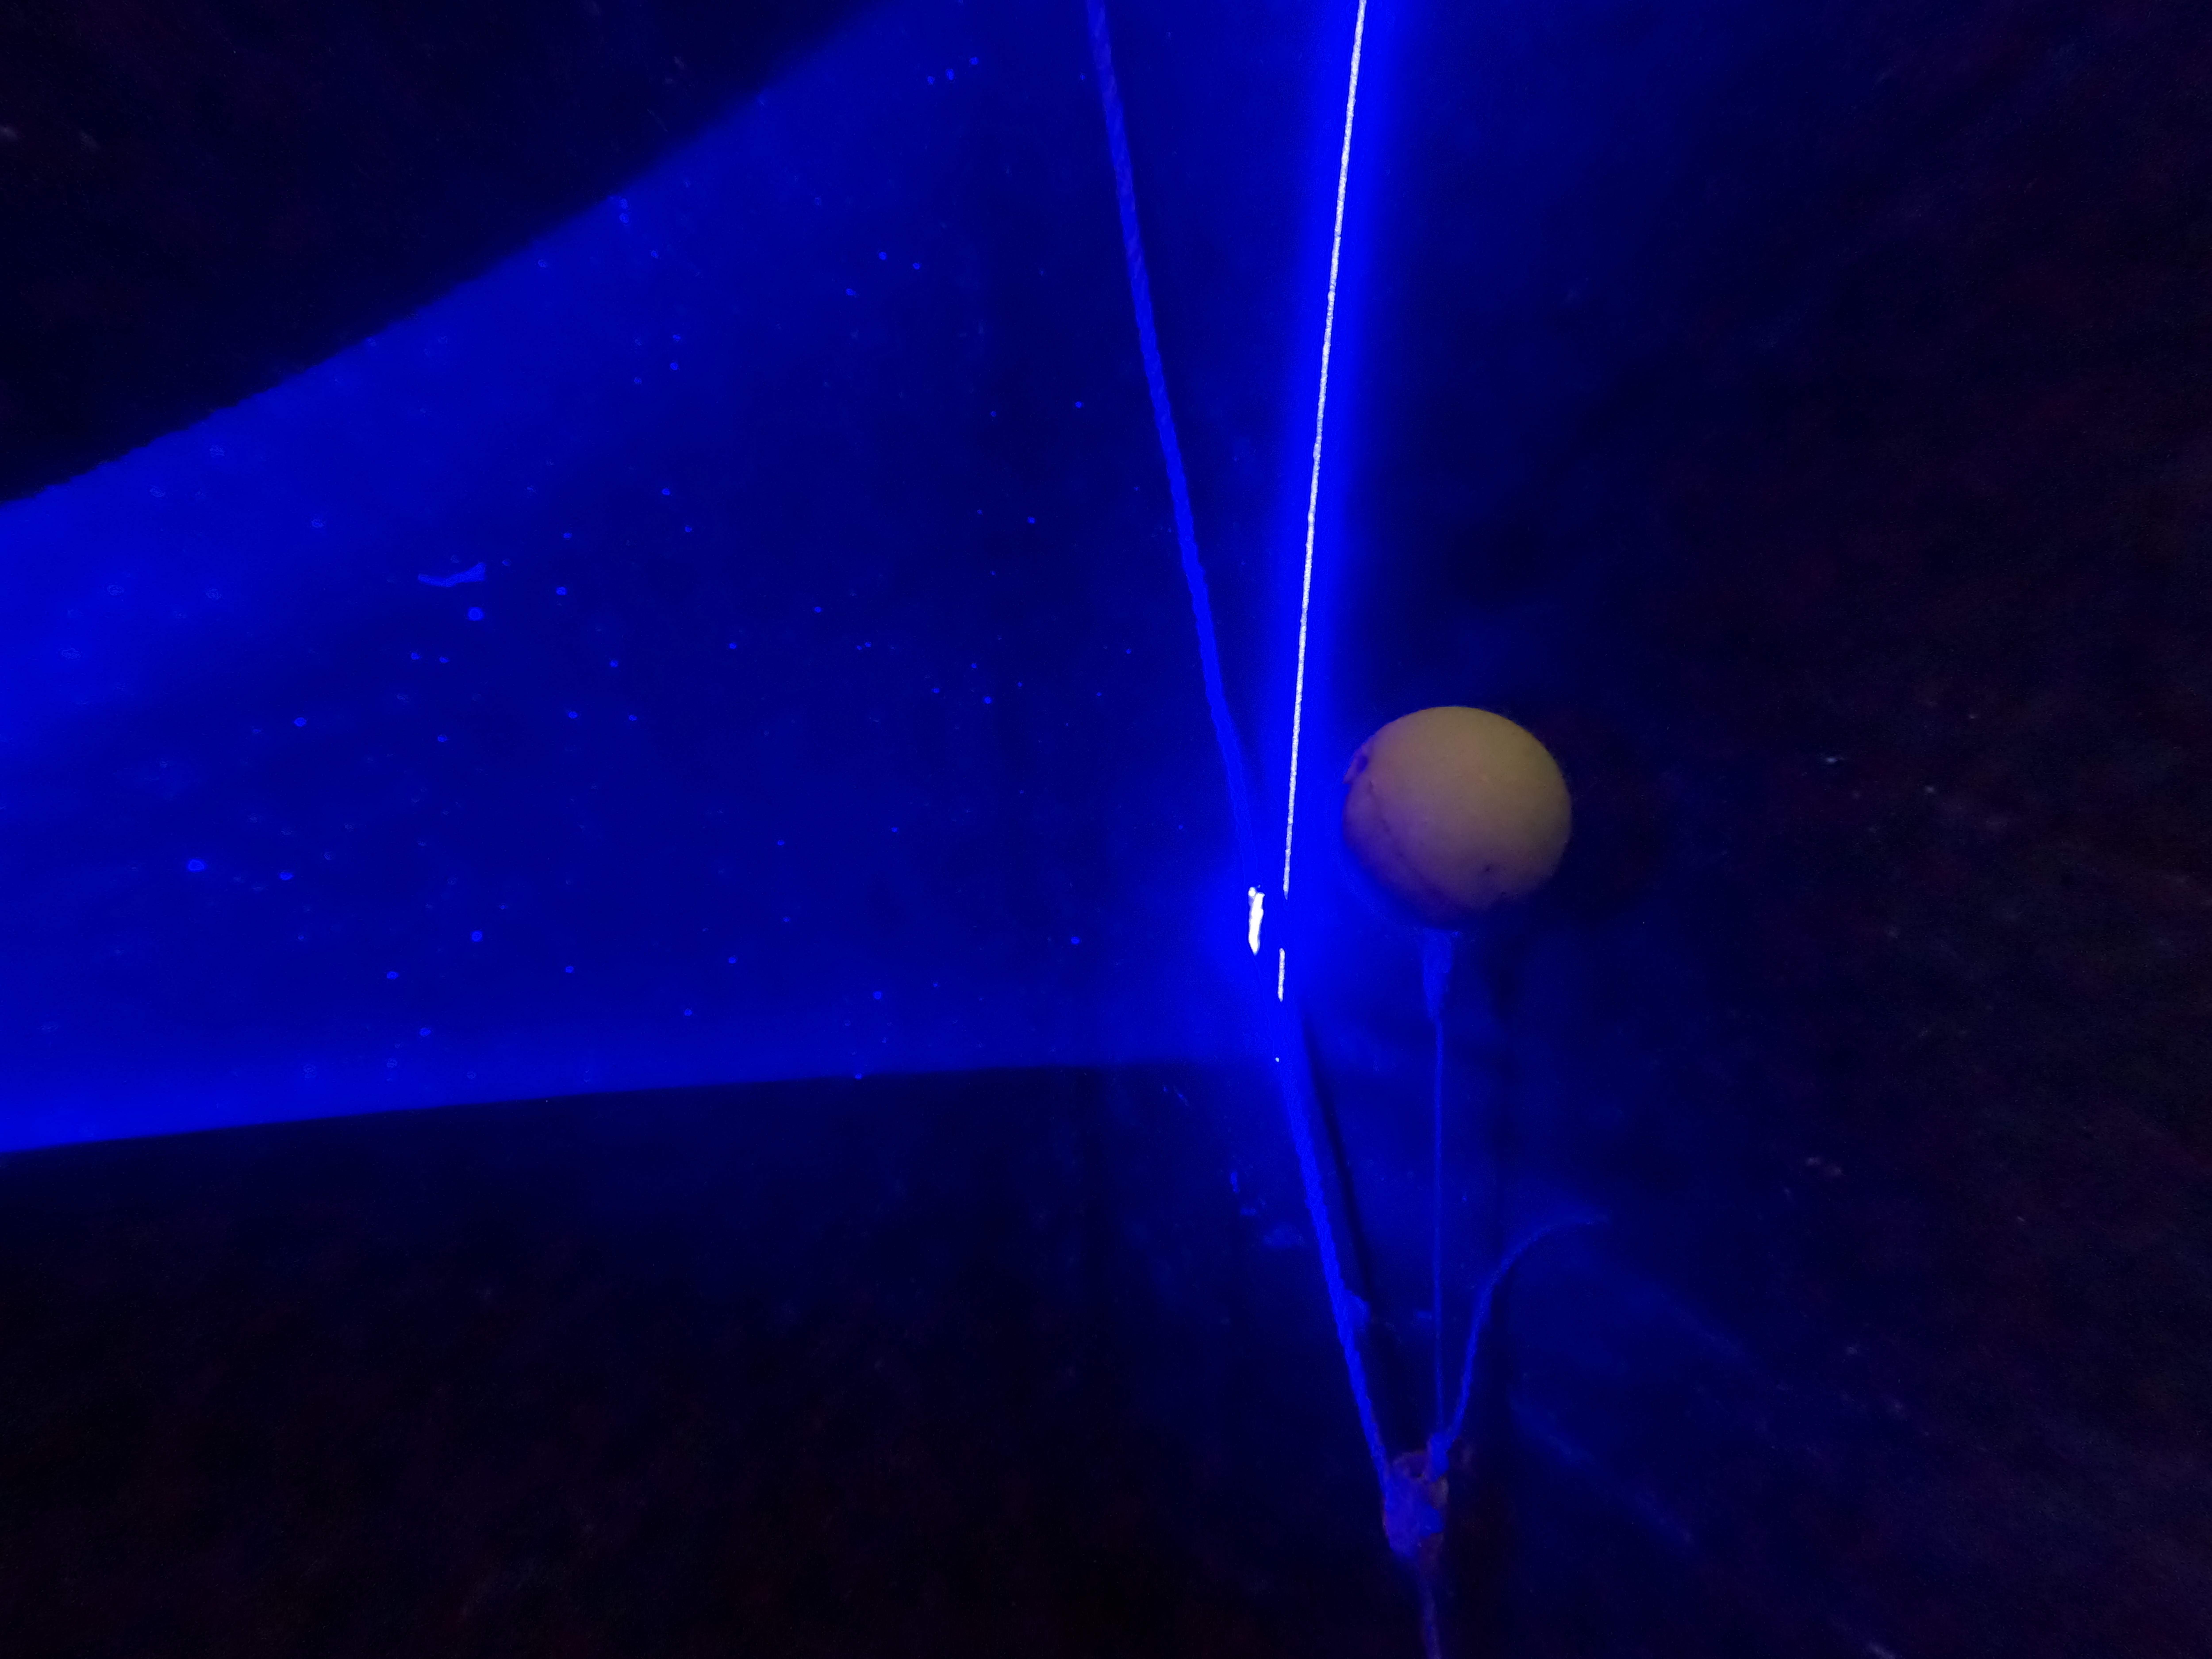

Supplement: Supplementary file 506 [file G0030806.pdf › 3/G0030806.pdf]

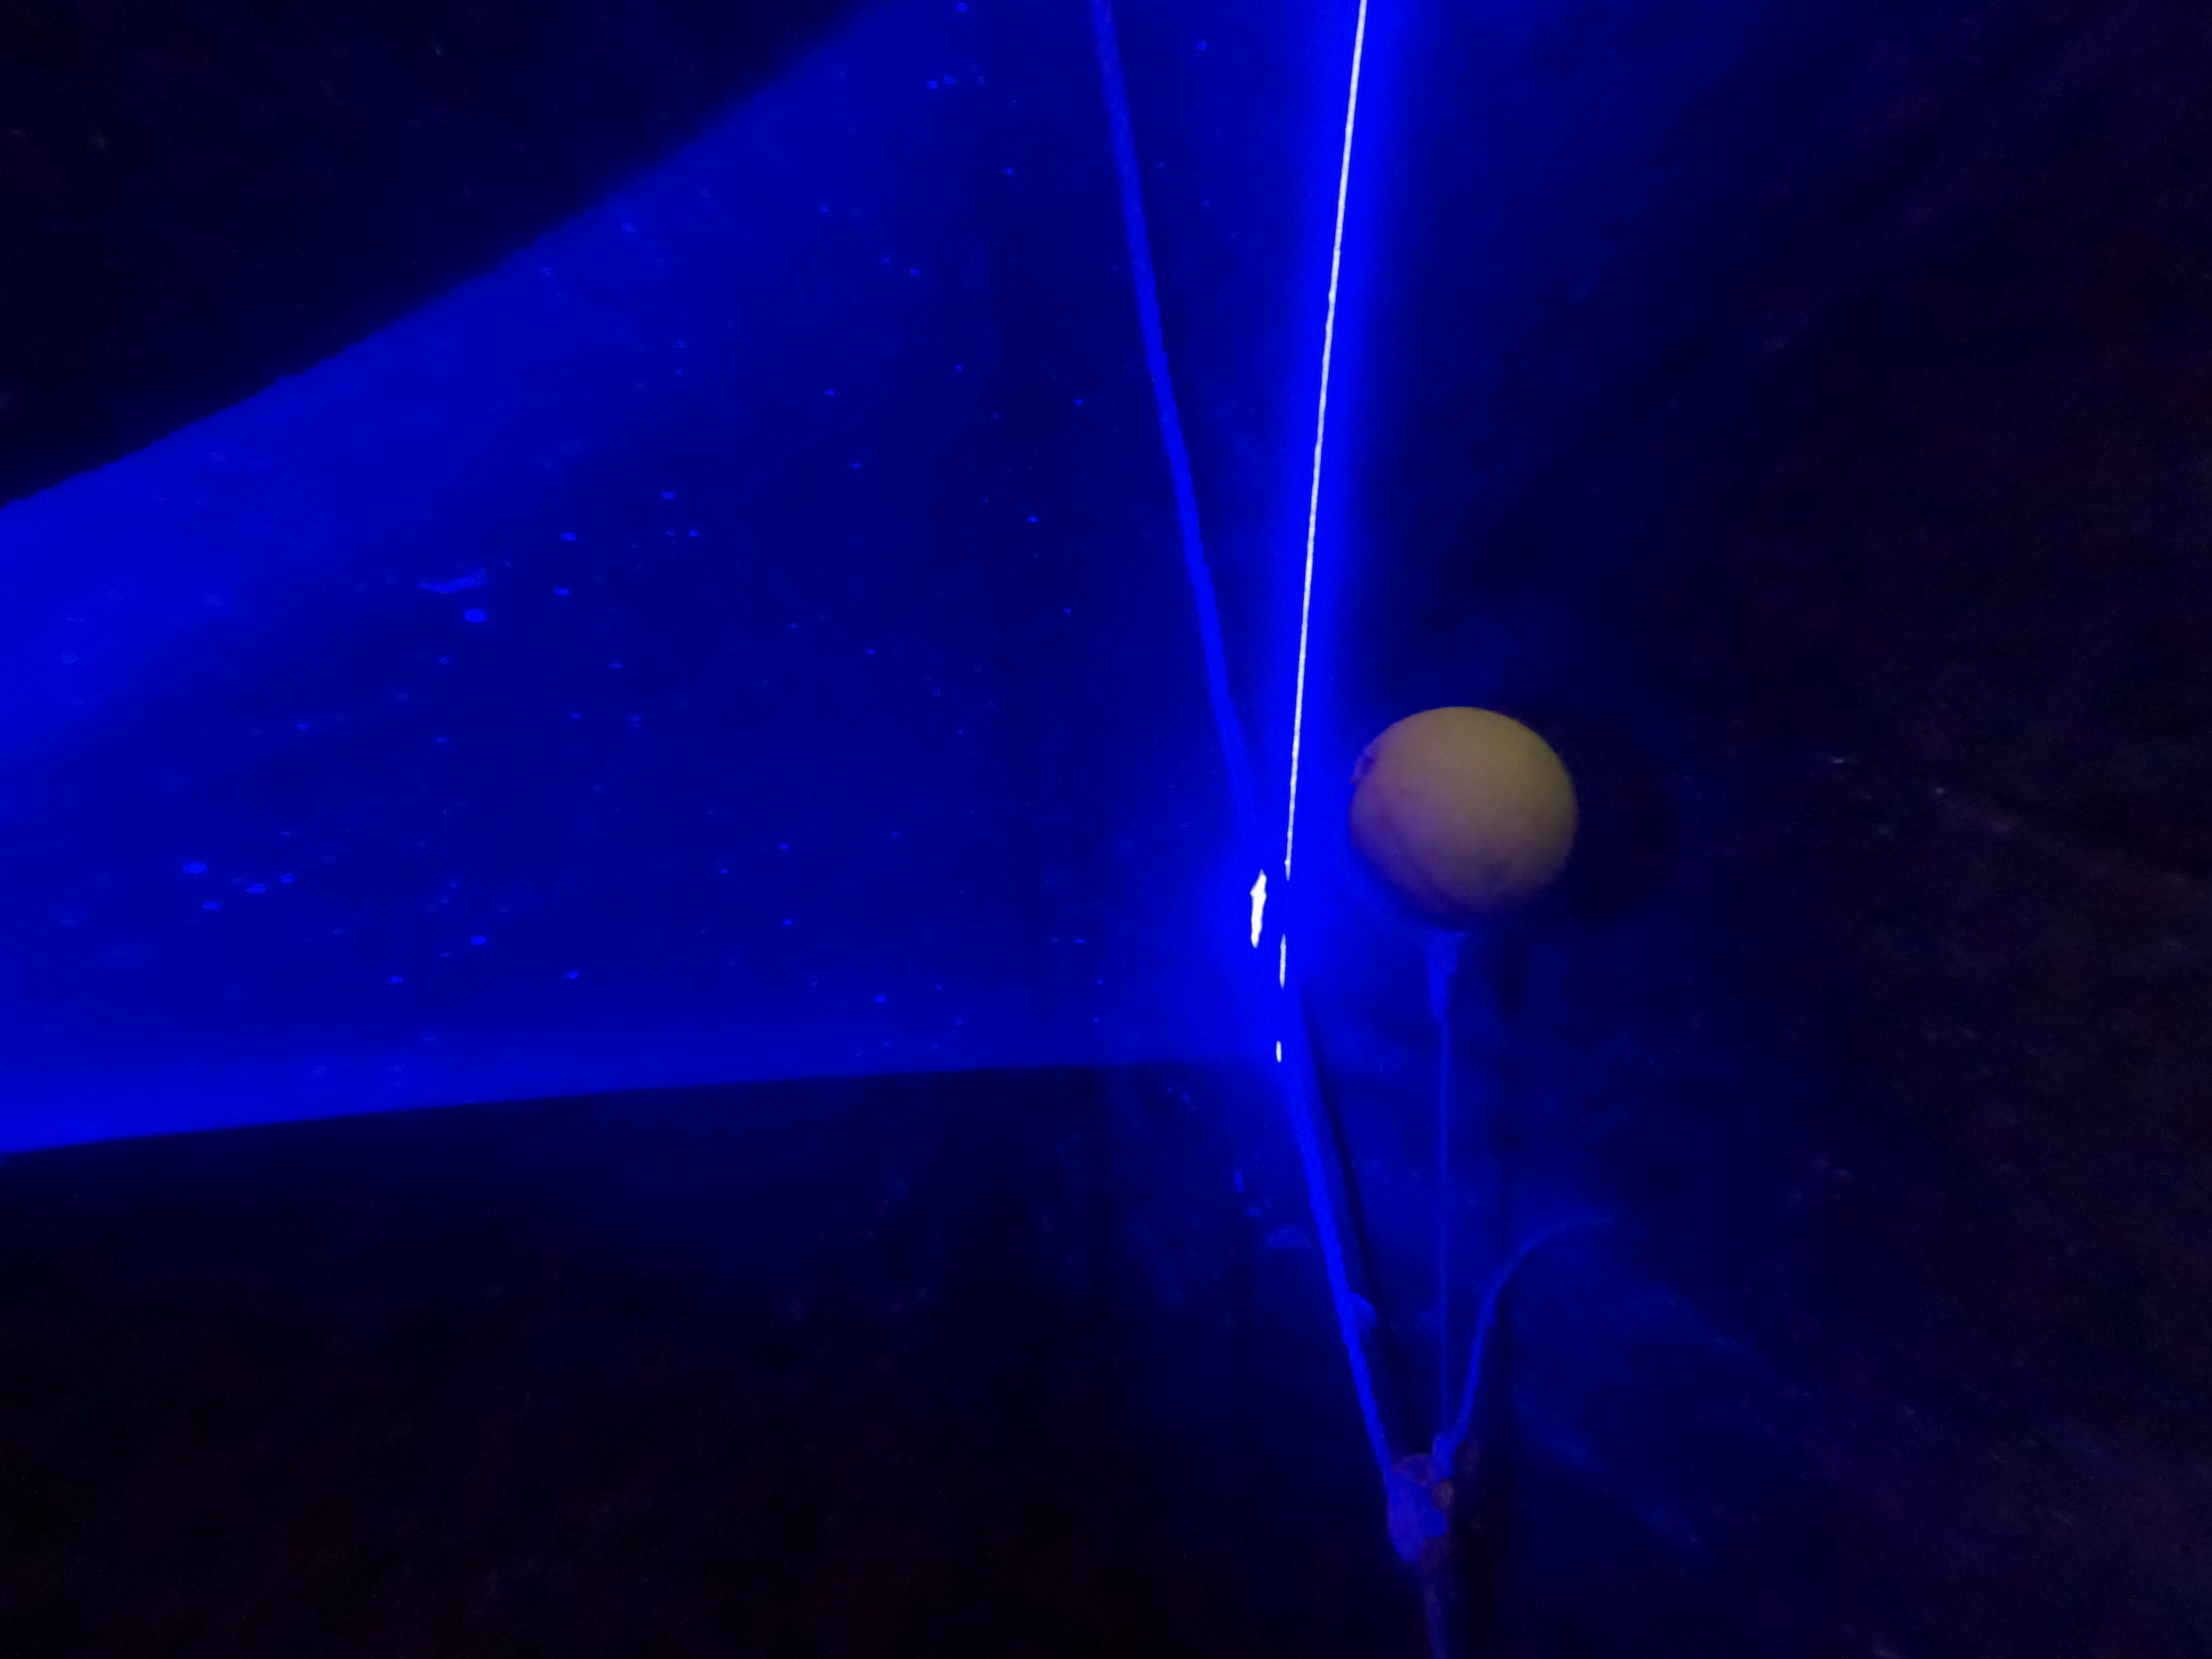

Supplement: Supplementary file 507 [file G0030807.pdf › 3/G0030807.pdf]

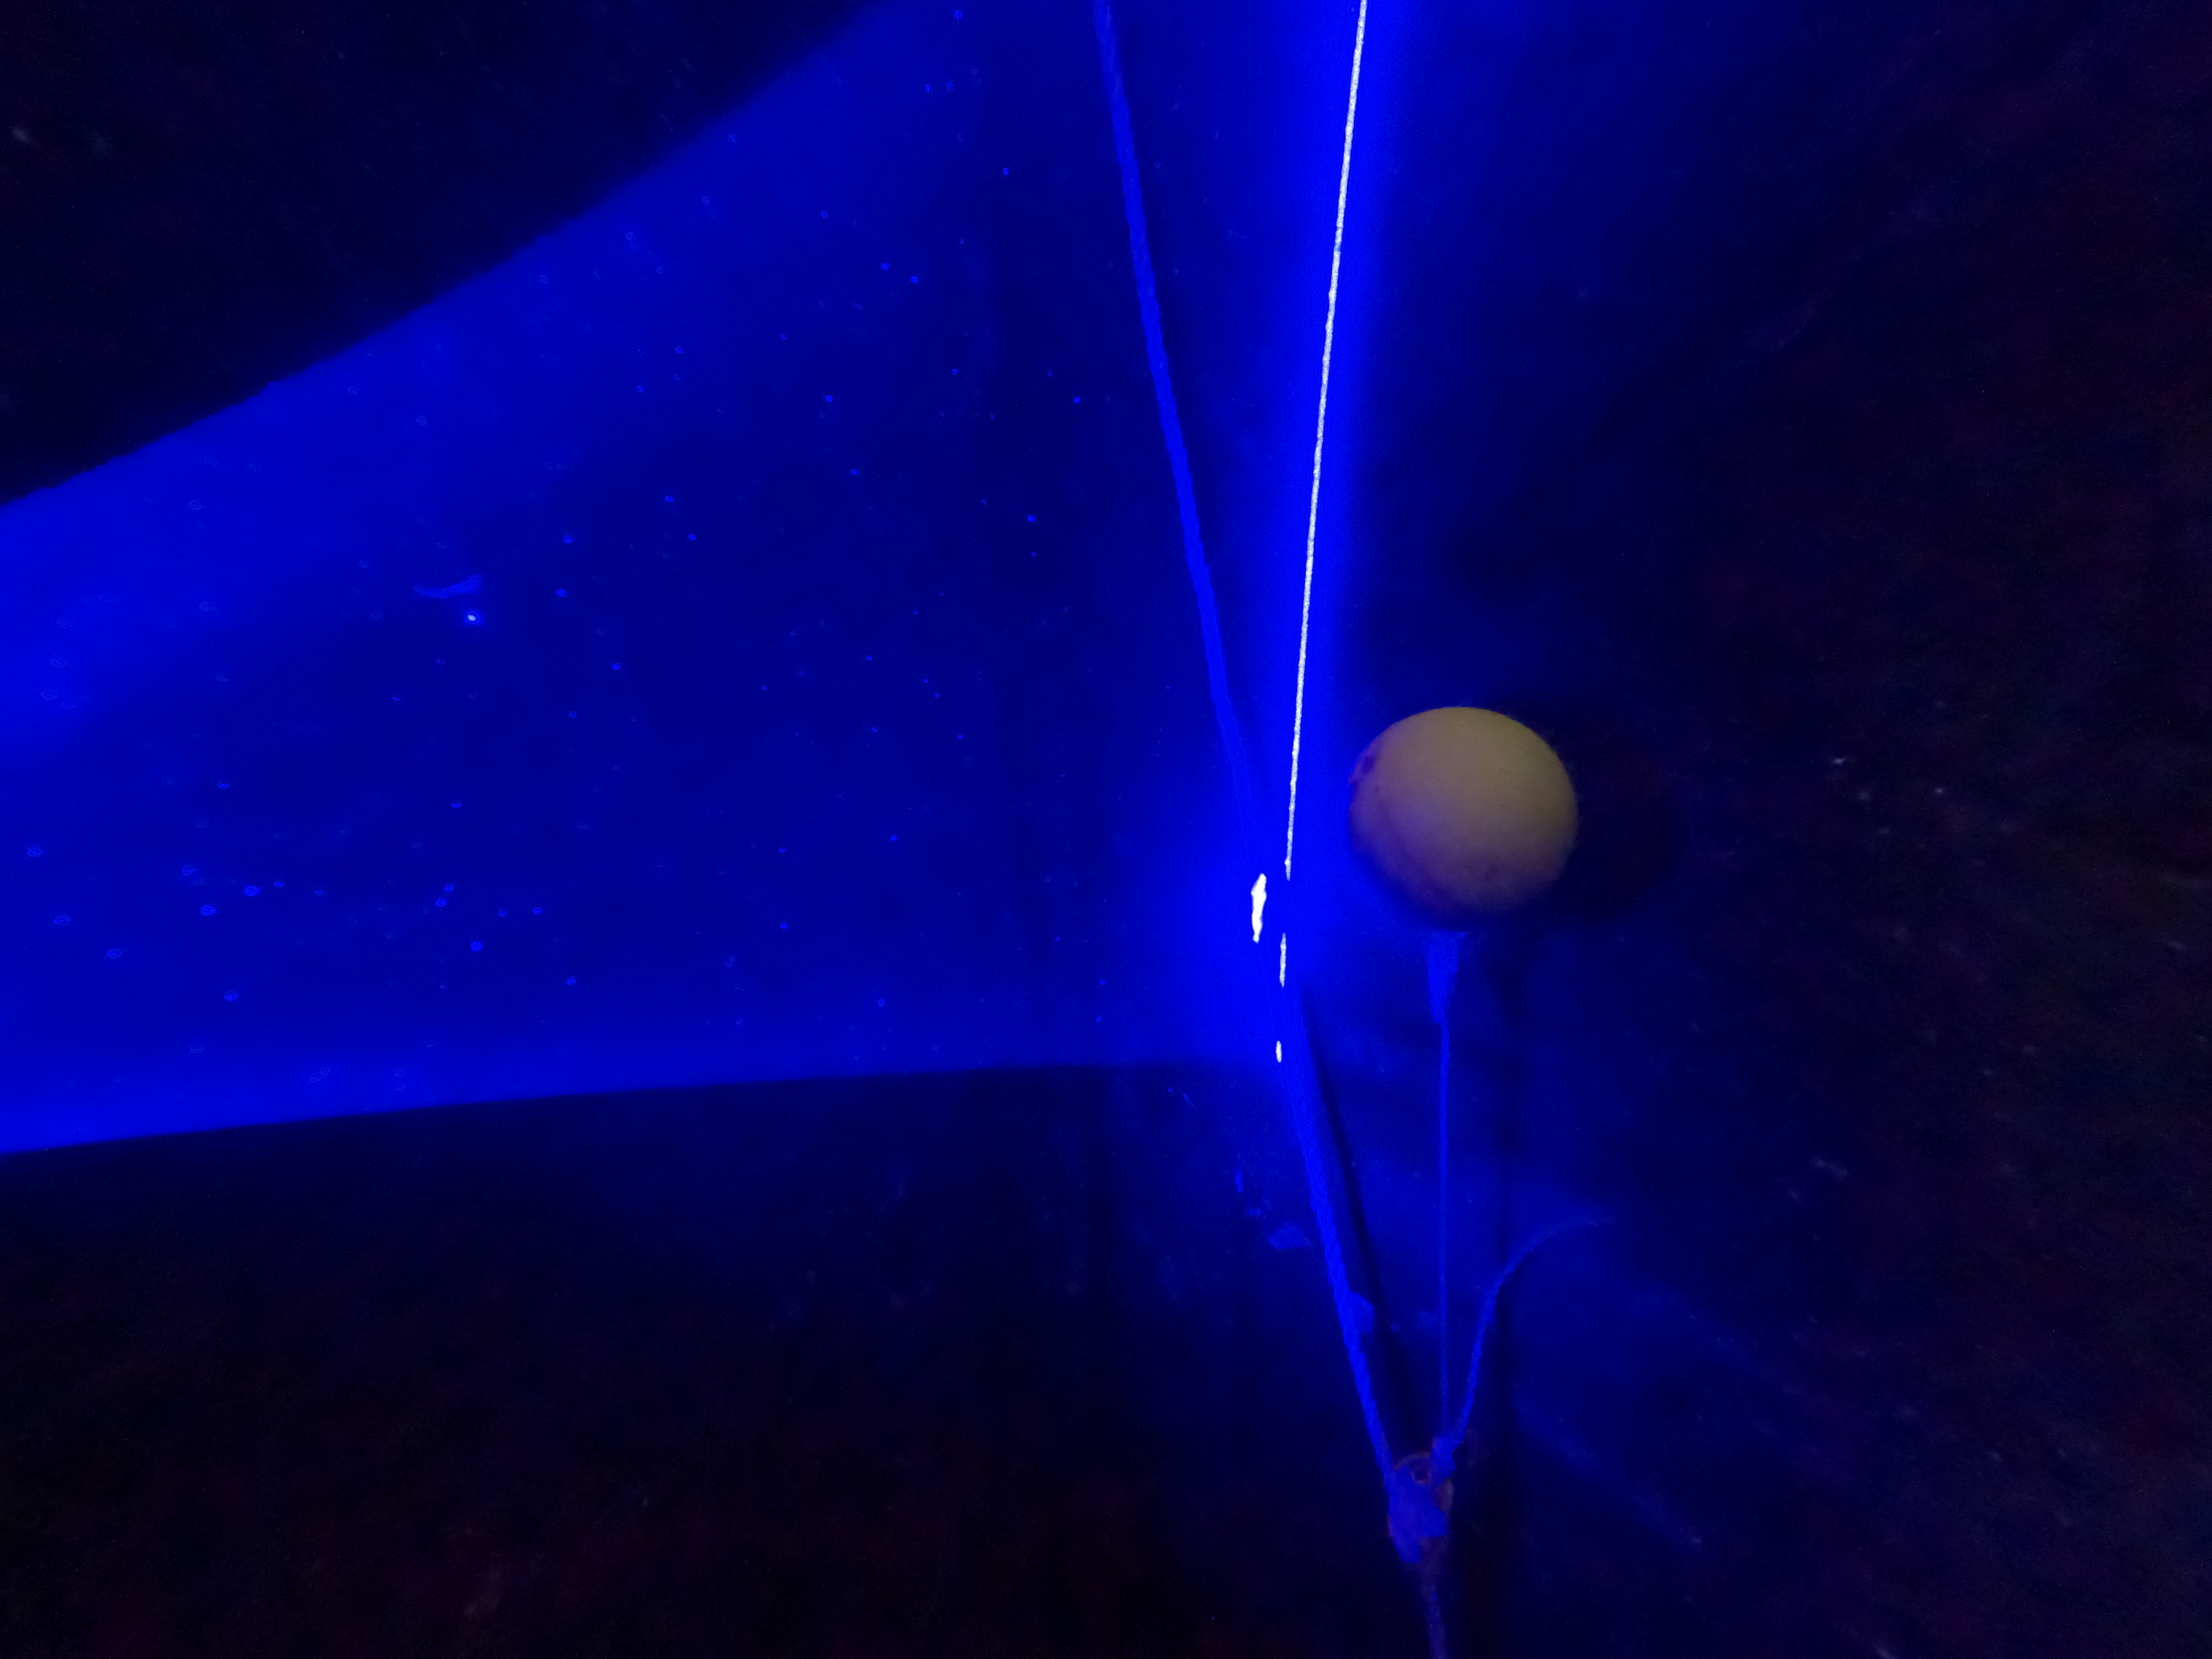

Supplement: Supplementary file 508 [file G0030808.pdf › 3/G0030808.pdf]

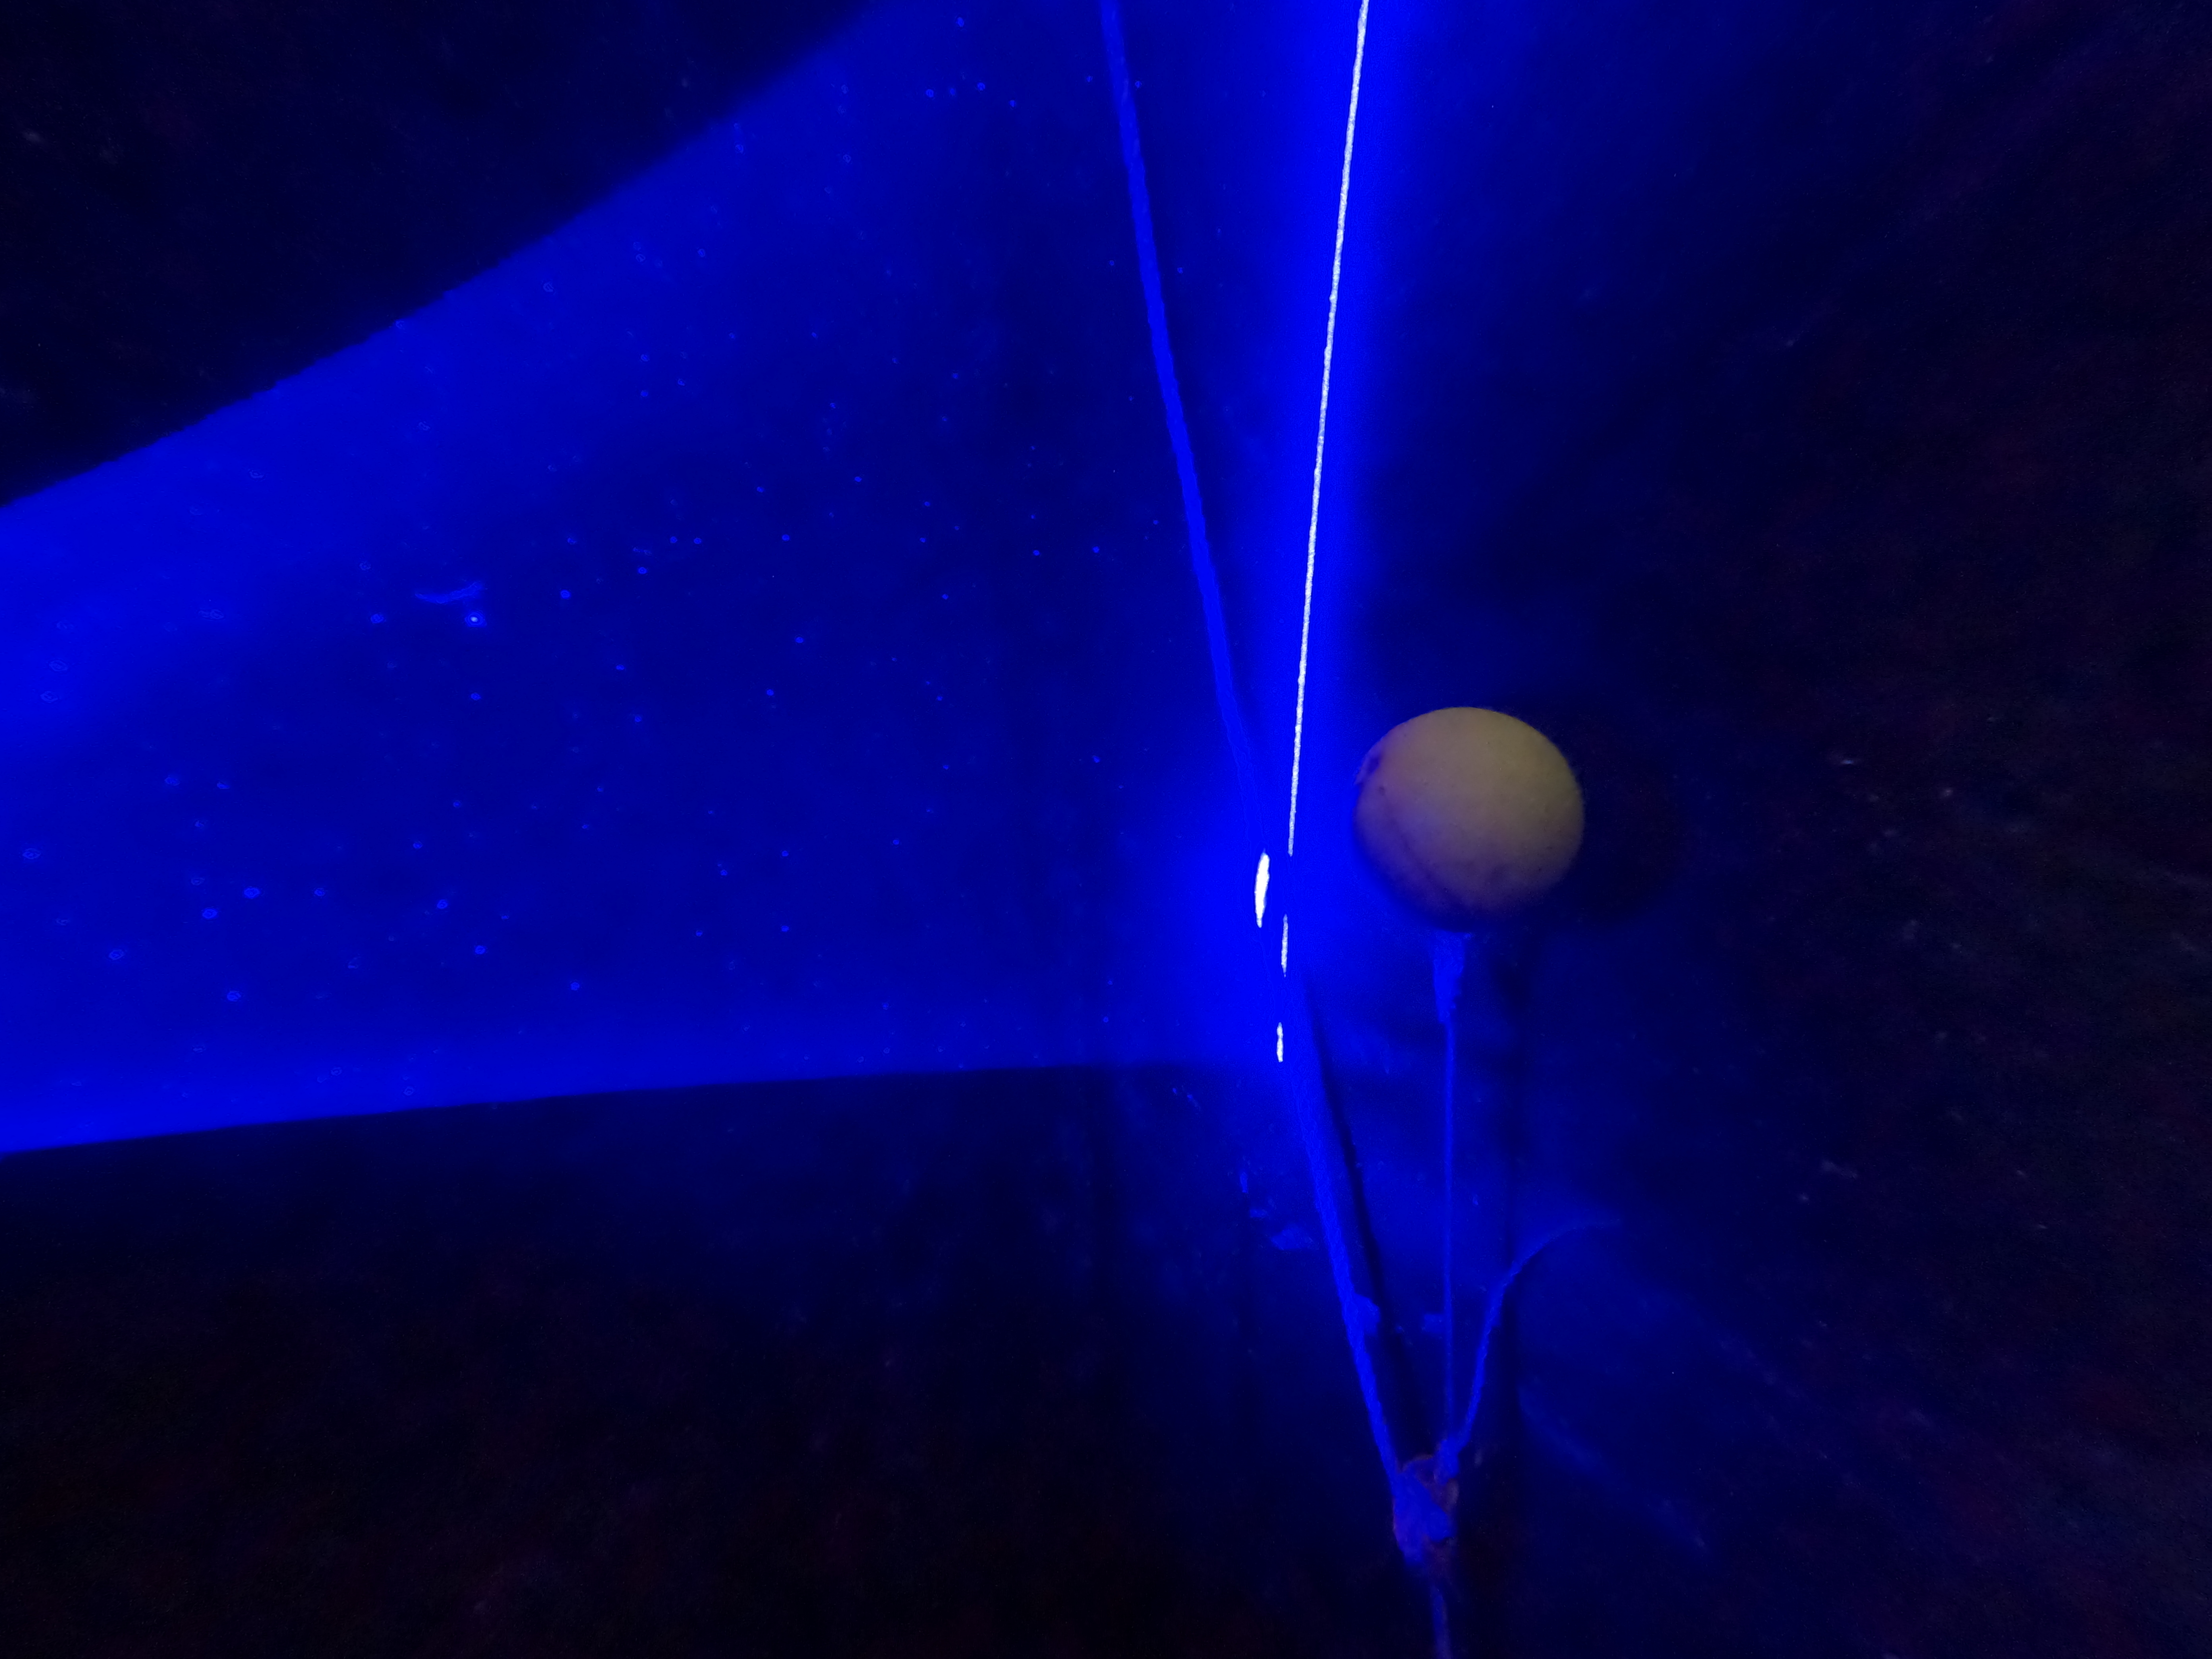

Supplement: Supplementary file 509 [file G0030809.pdf › 3/G0030809.pdf]

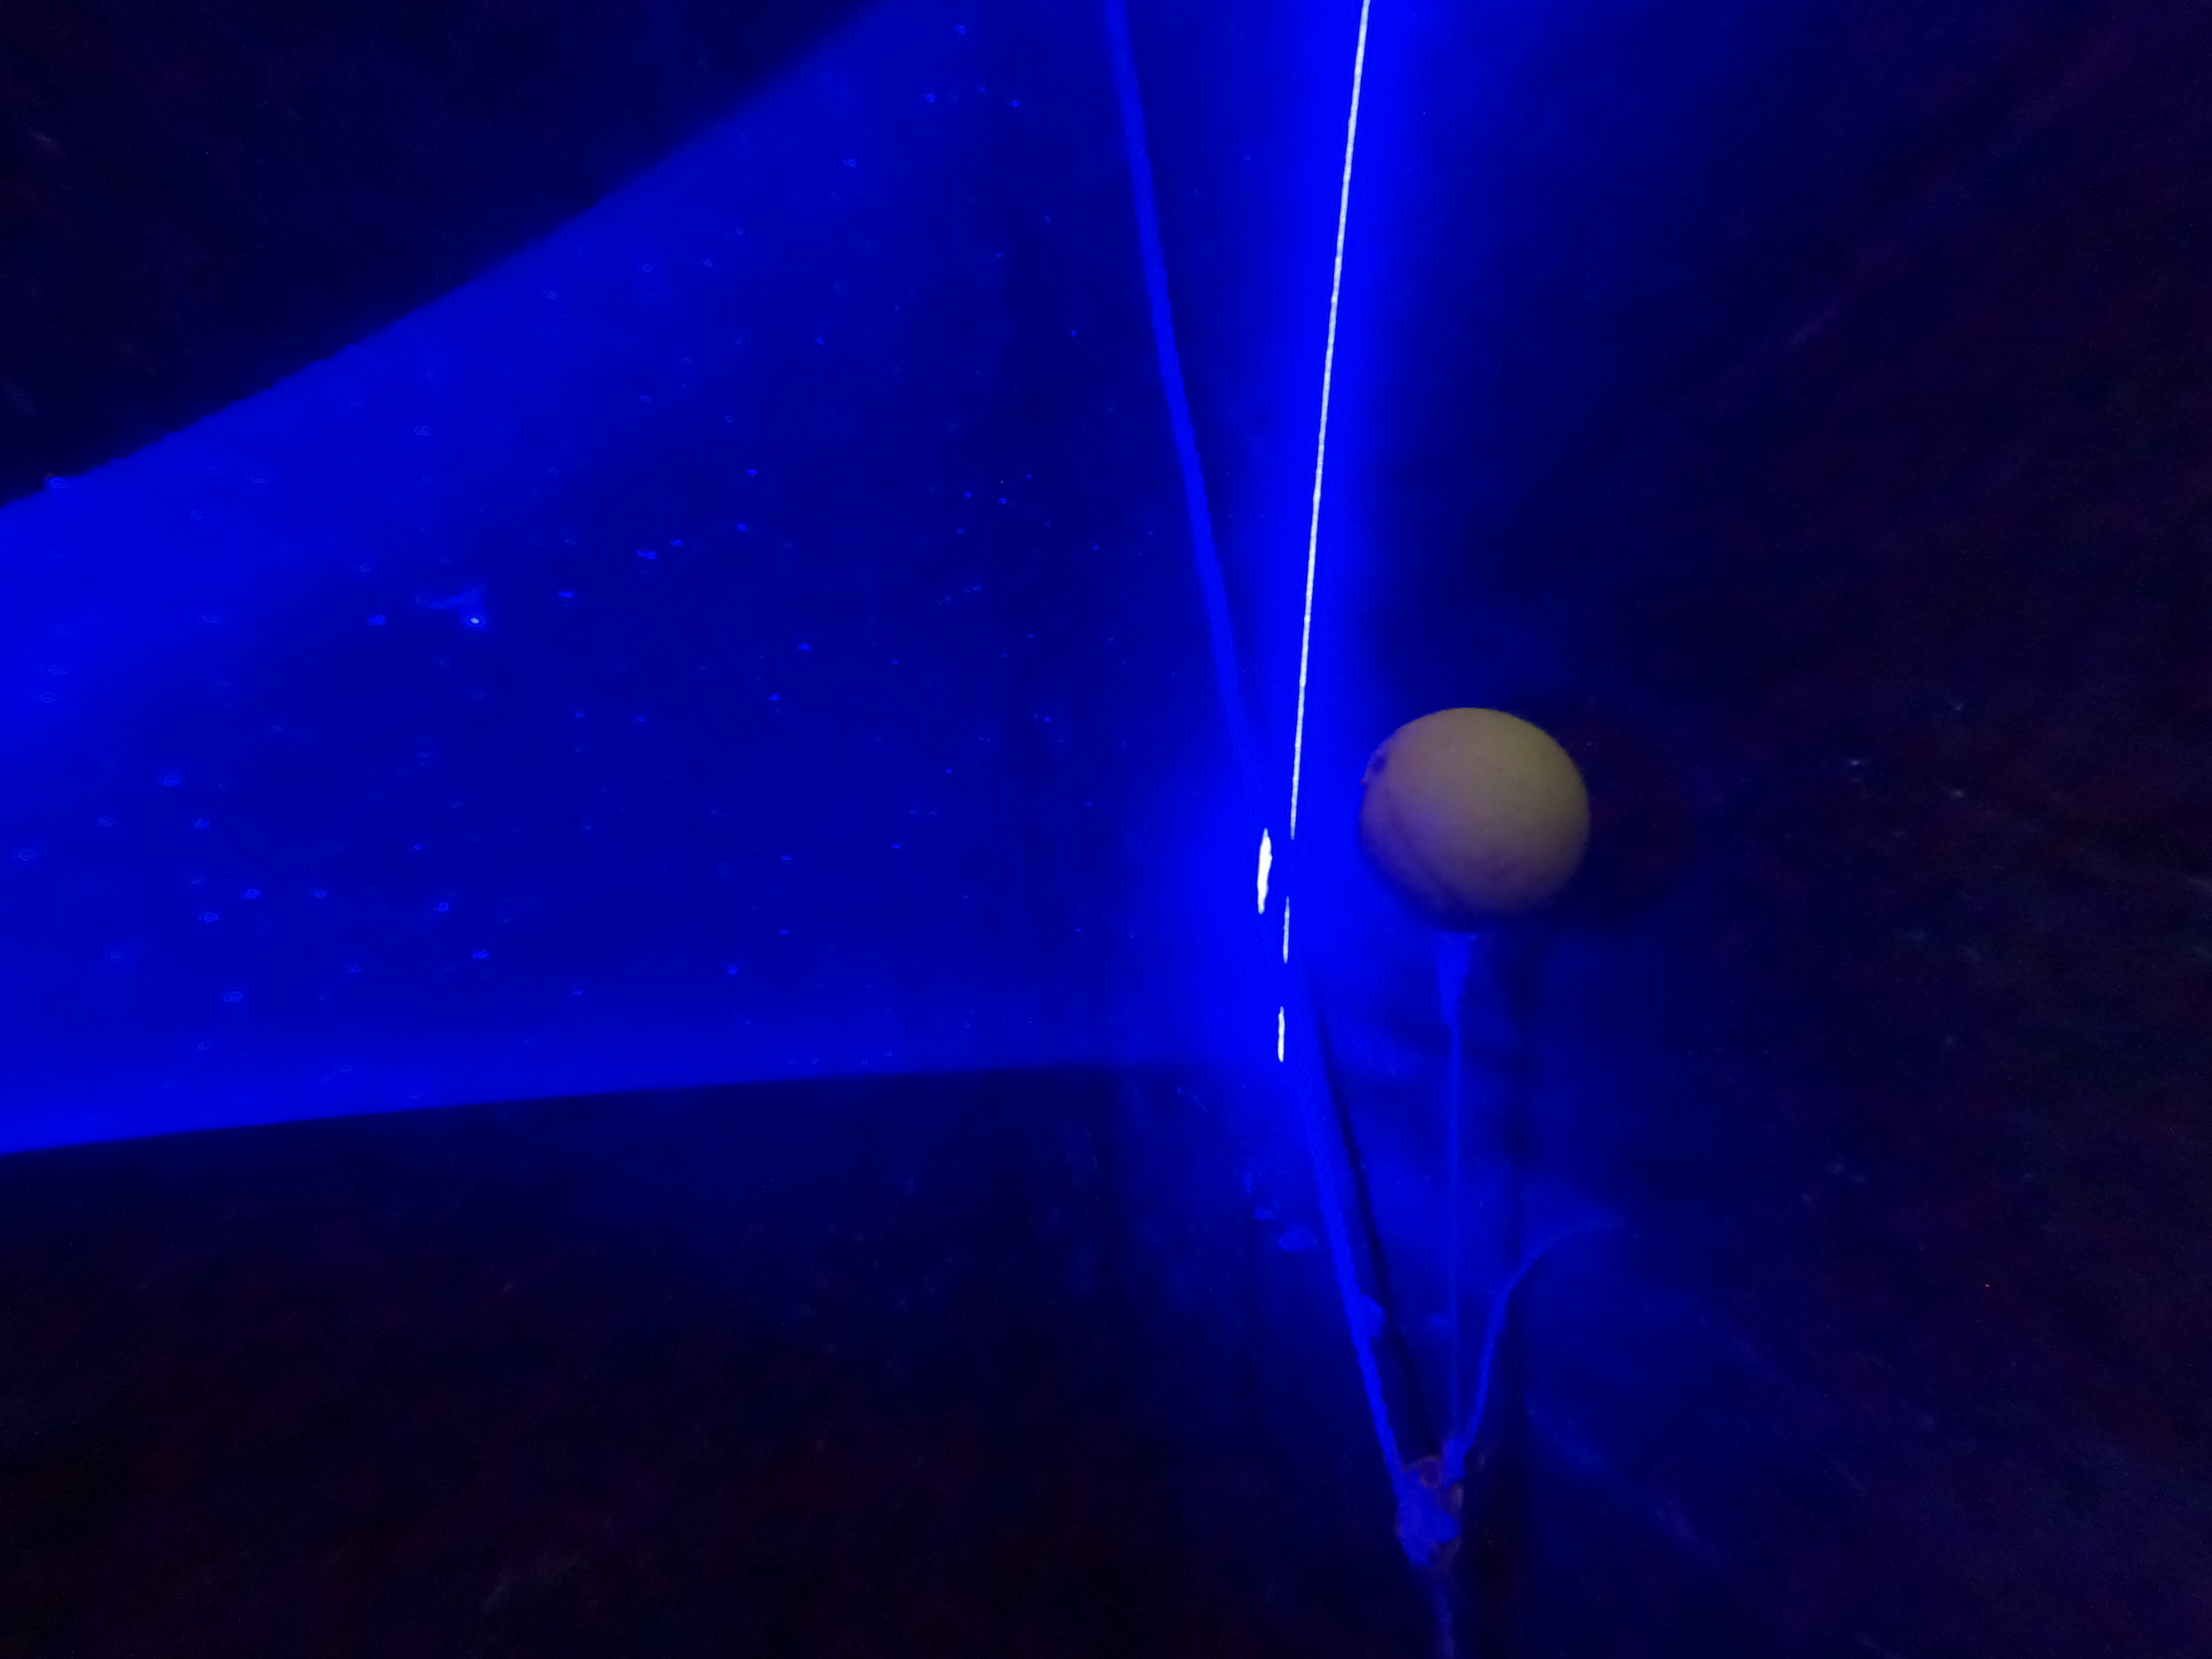

Supplement: Supplementary file 510 [file G0030810.pdf › 3/G0030810.pdf]

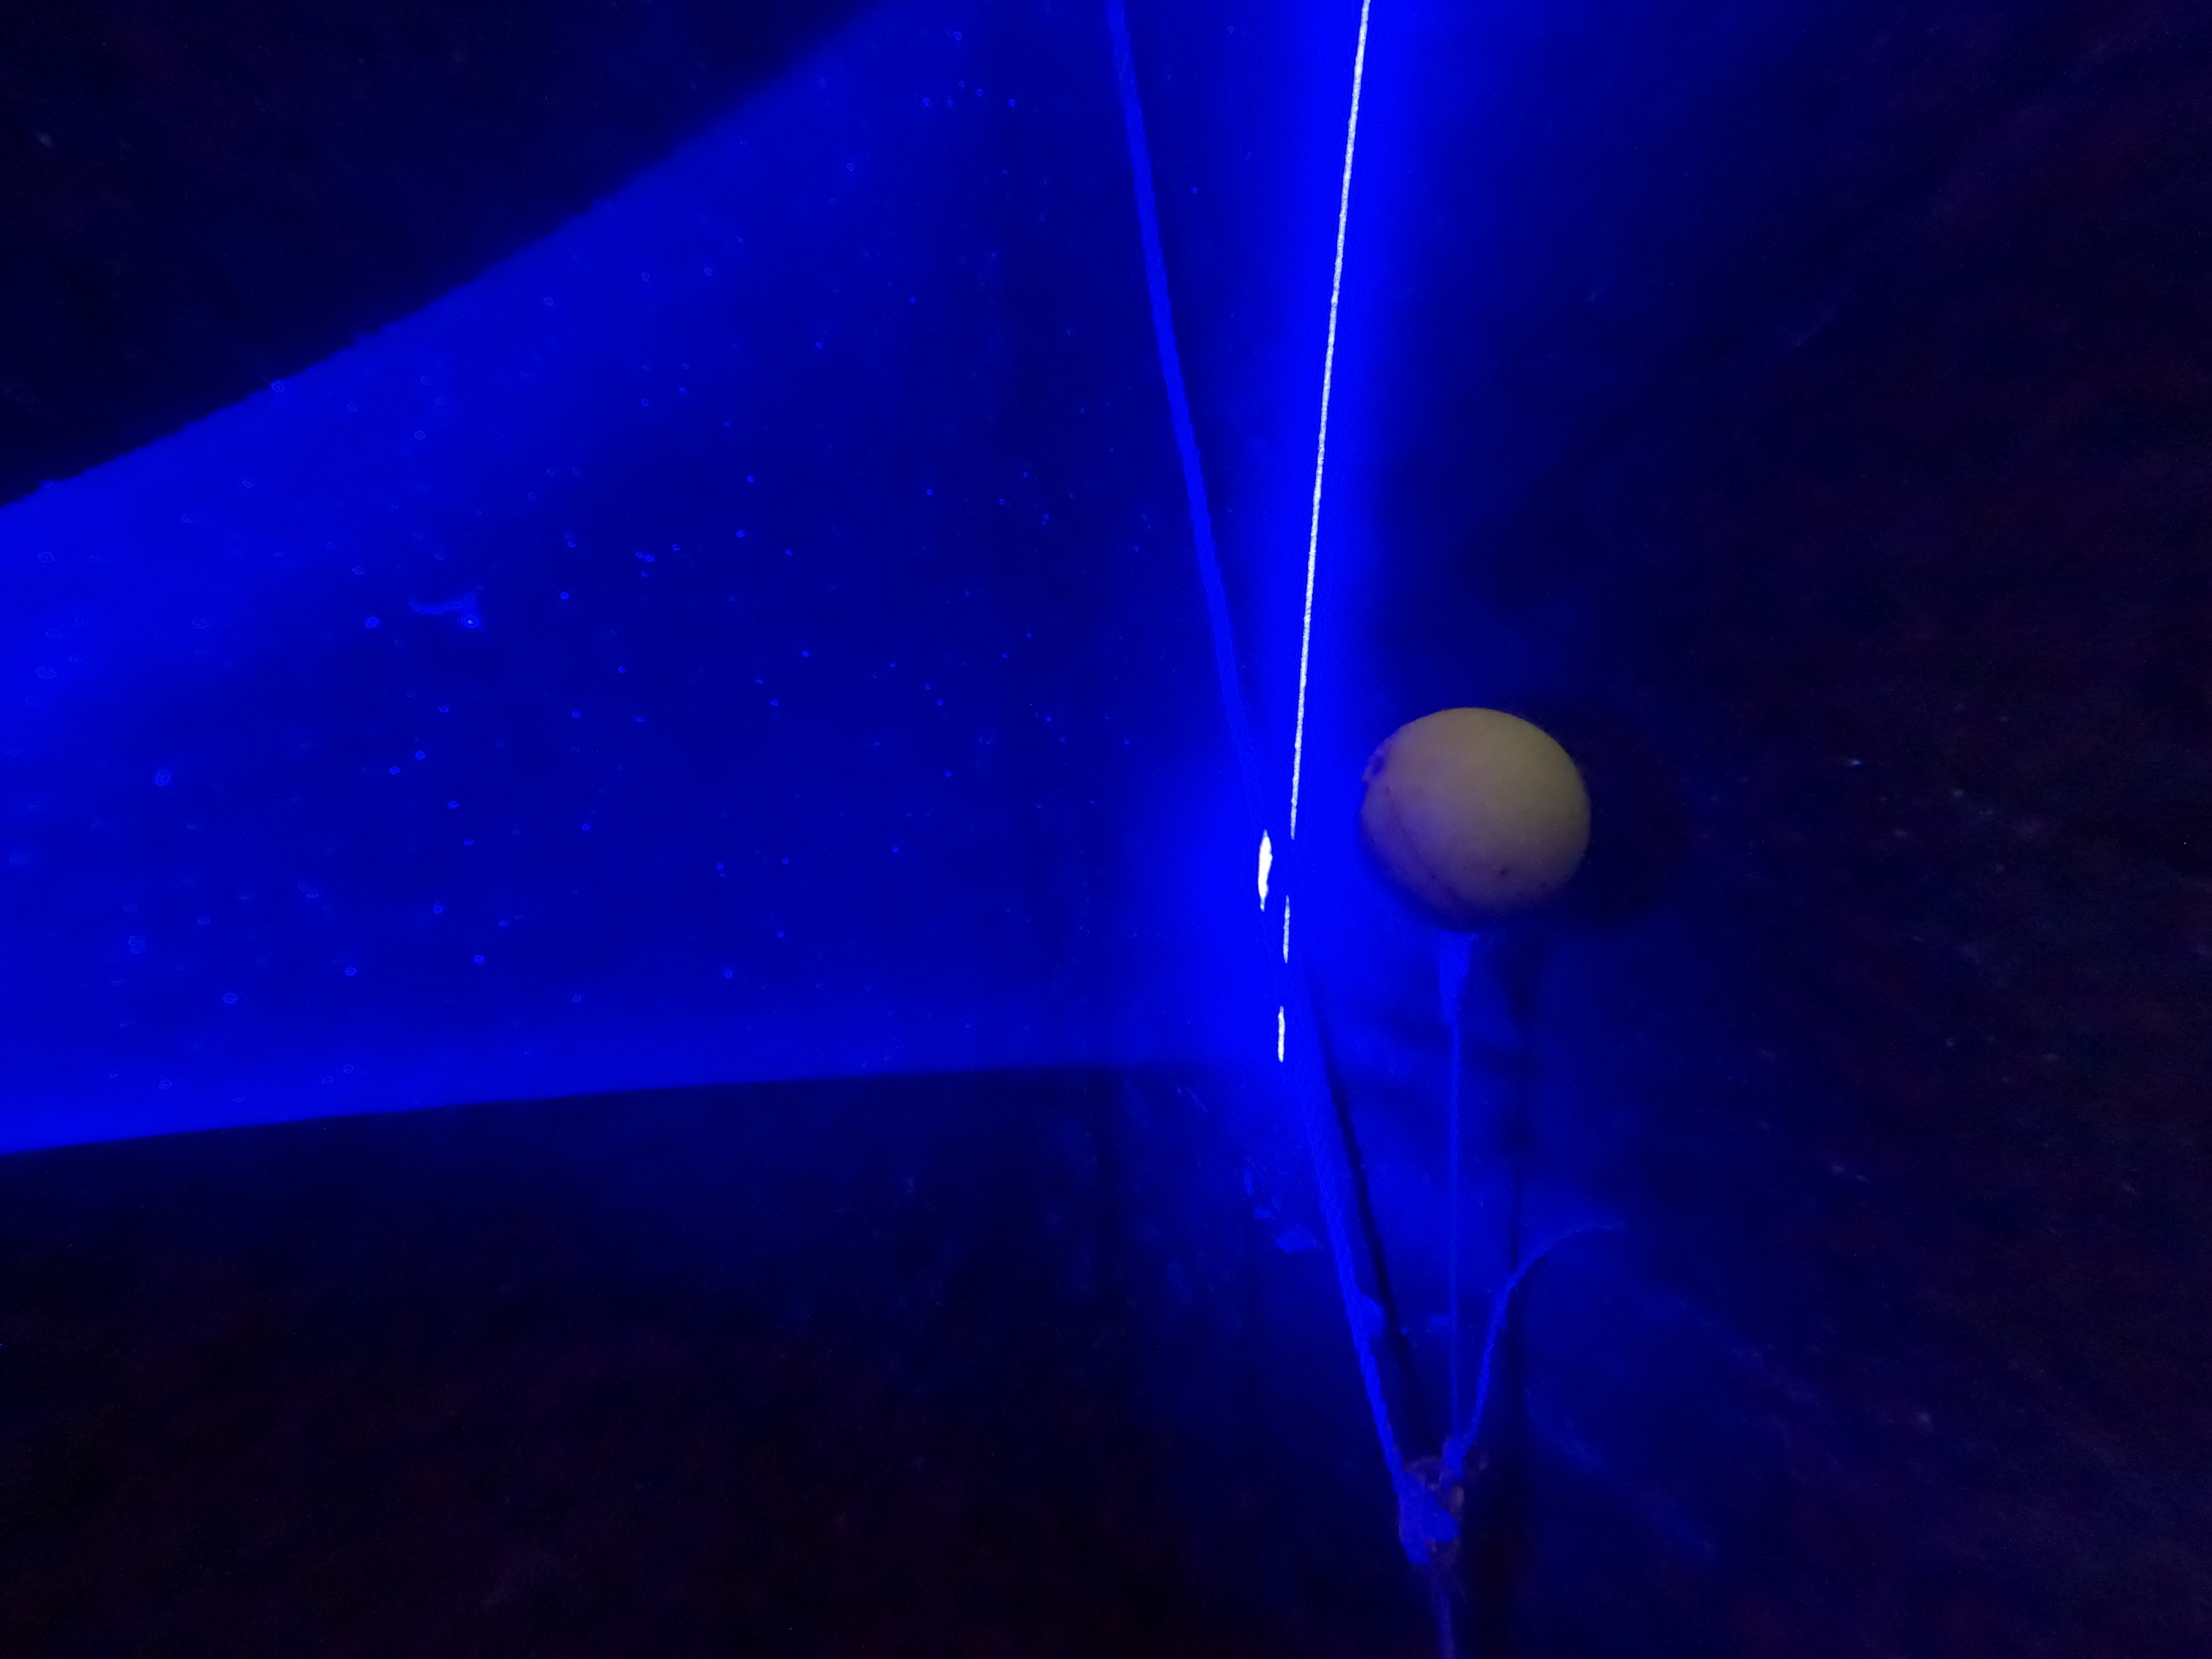

Supplement: Supplementary file 511 [file G0030811.pdf › 3/G0030811.pdf]

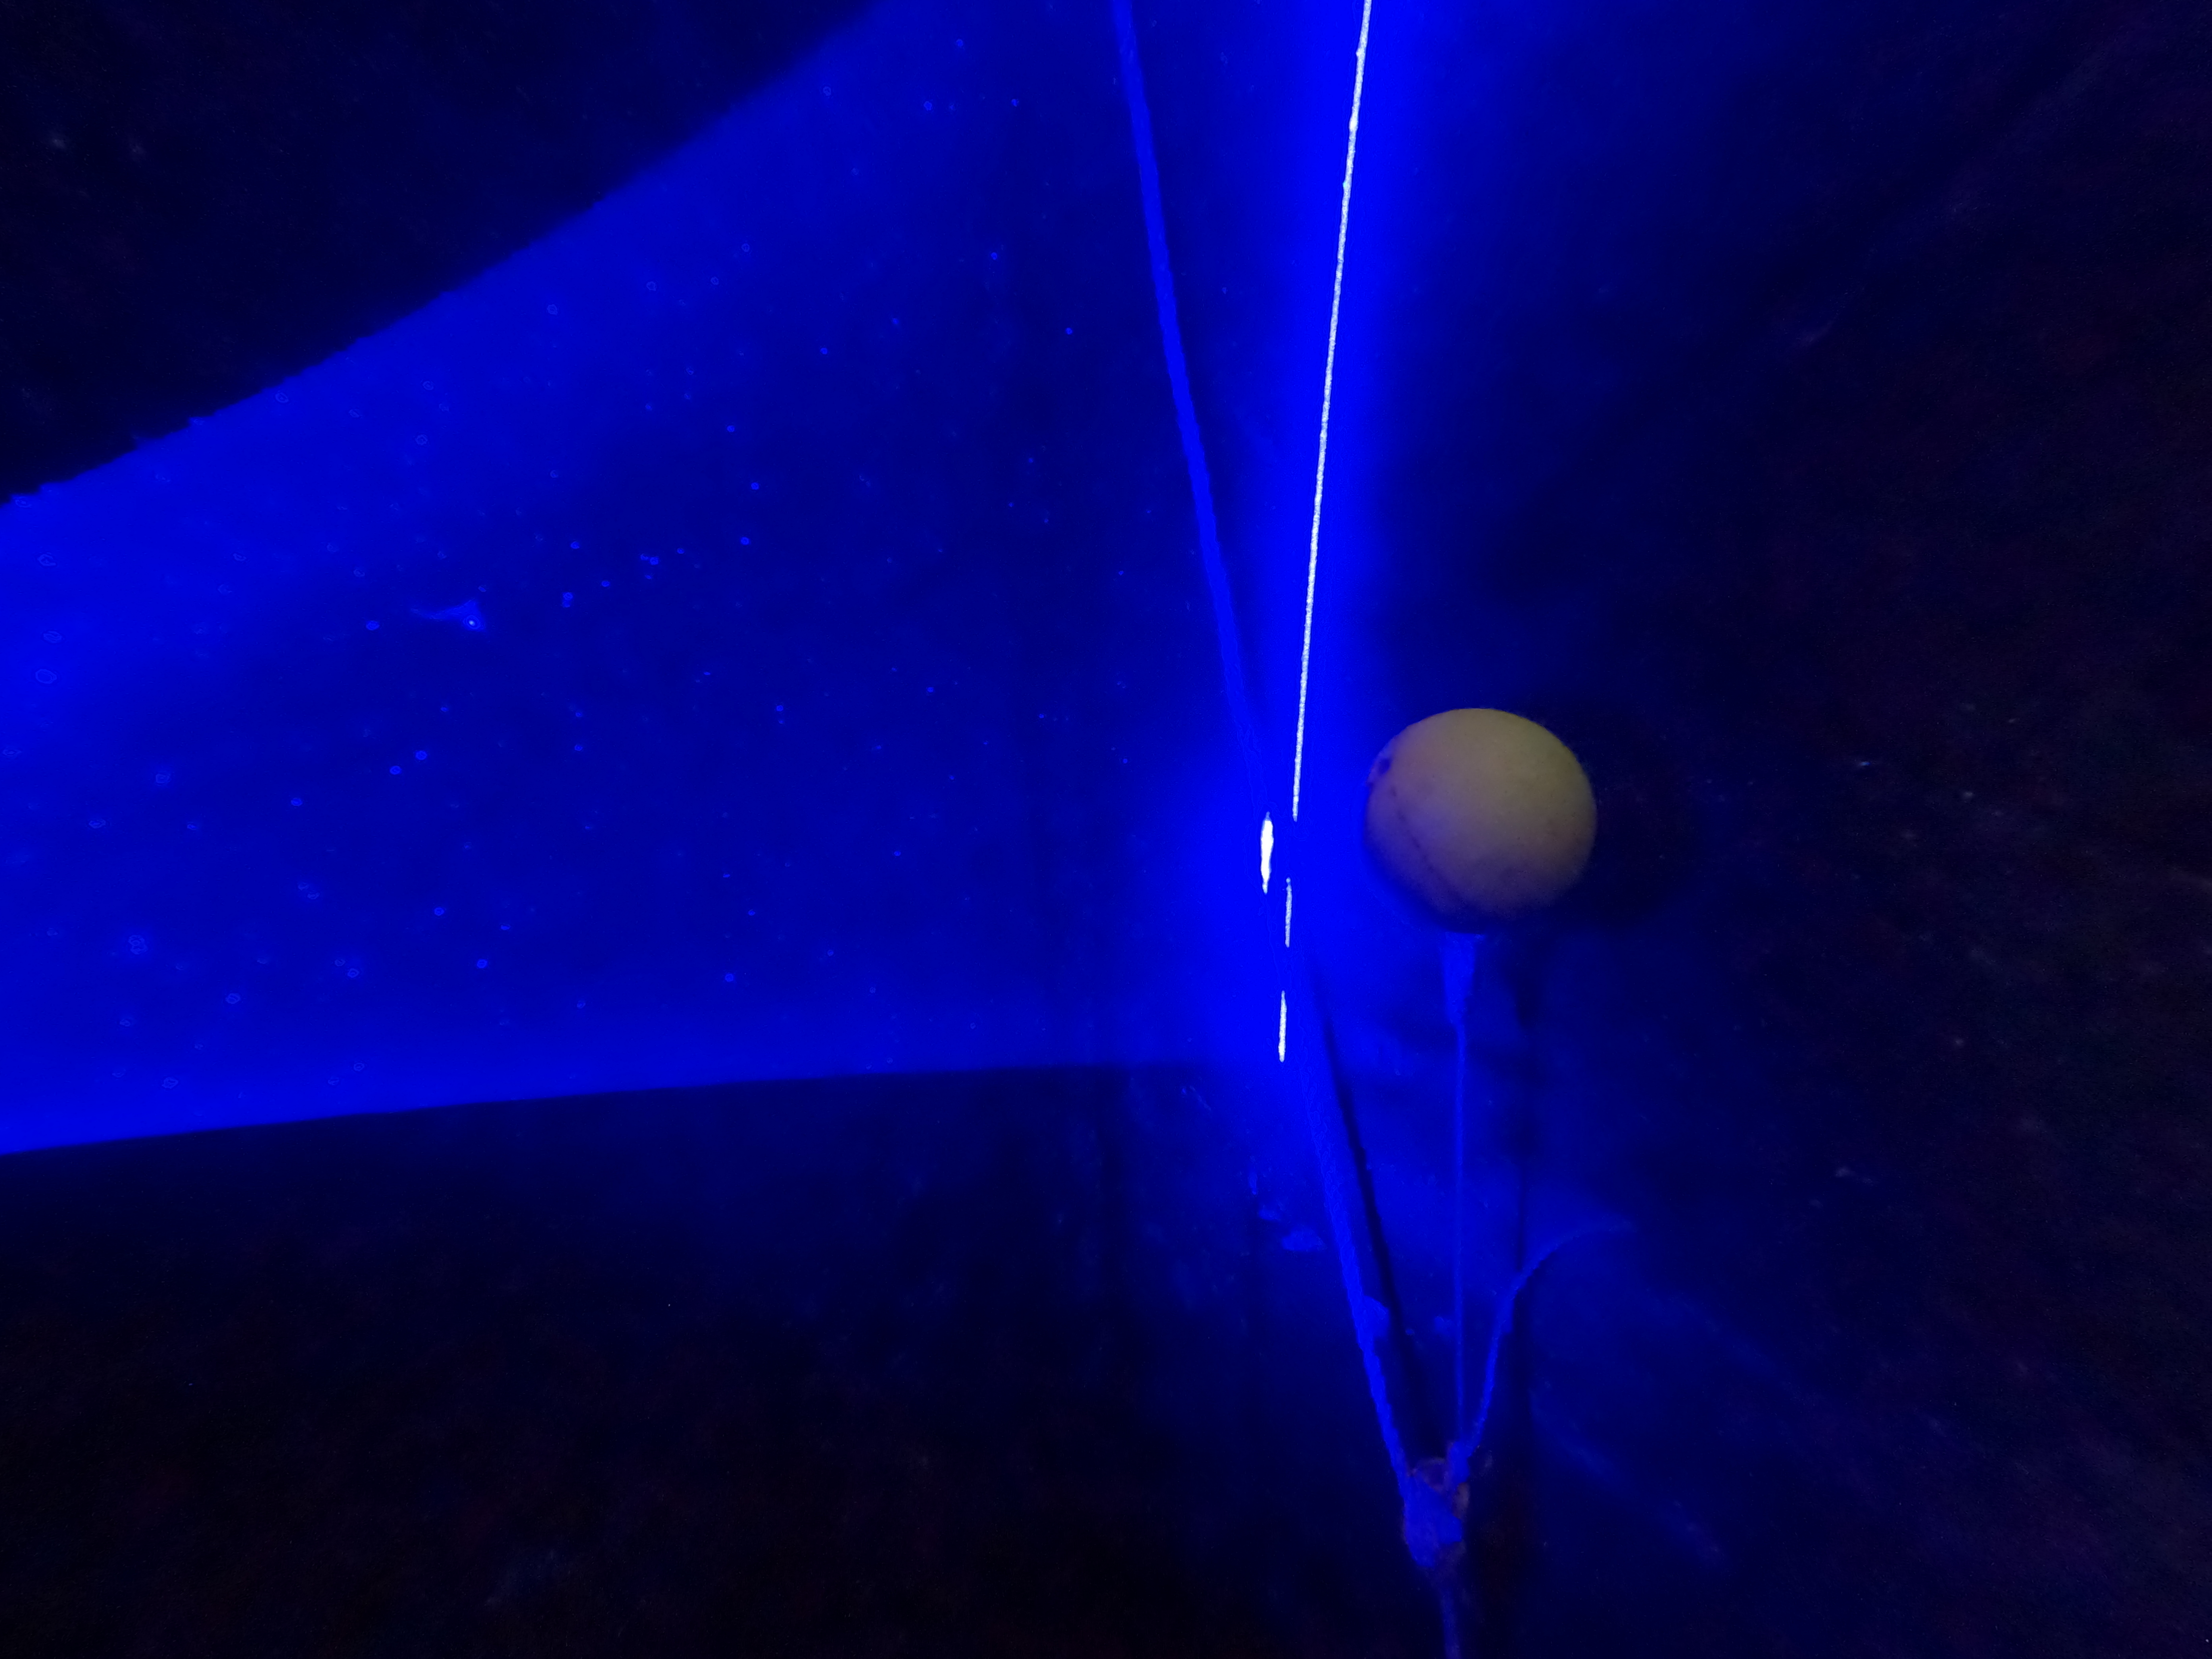

Supplement: Supplementary file 512 [file G0030812.pdf › 3/G0030812.pdf]

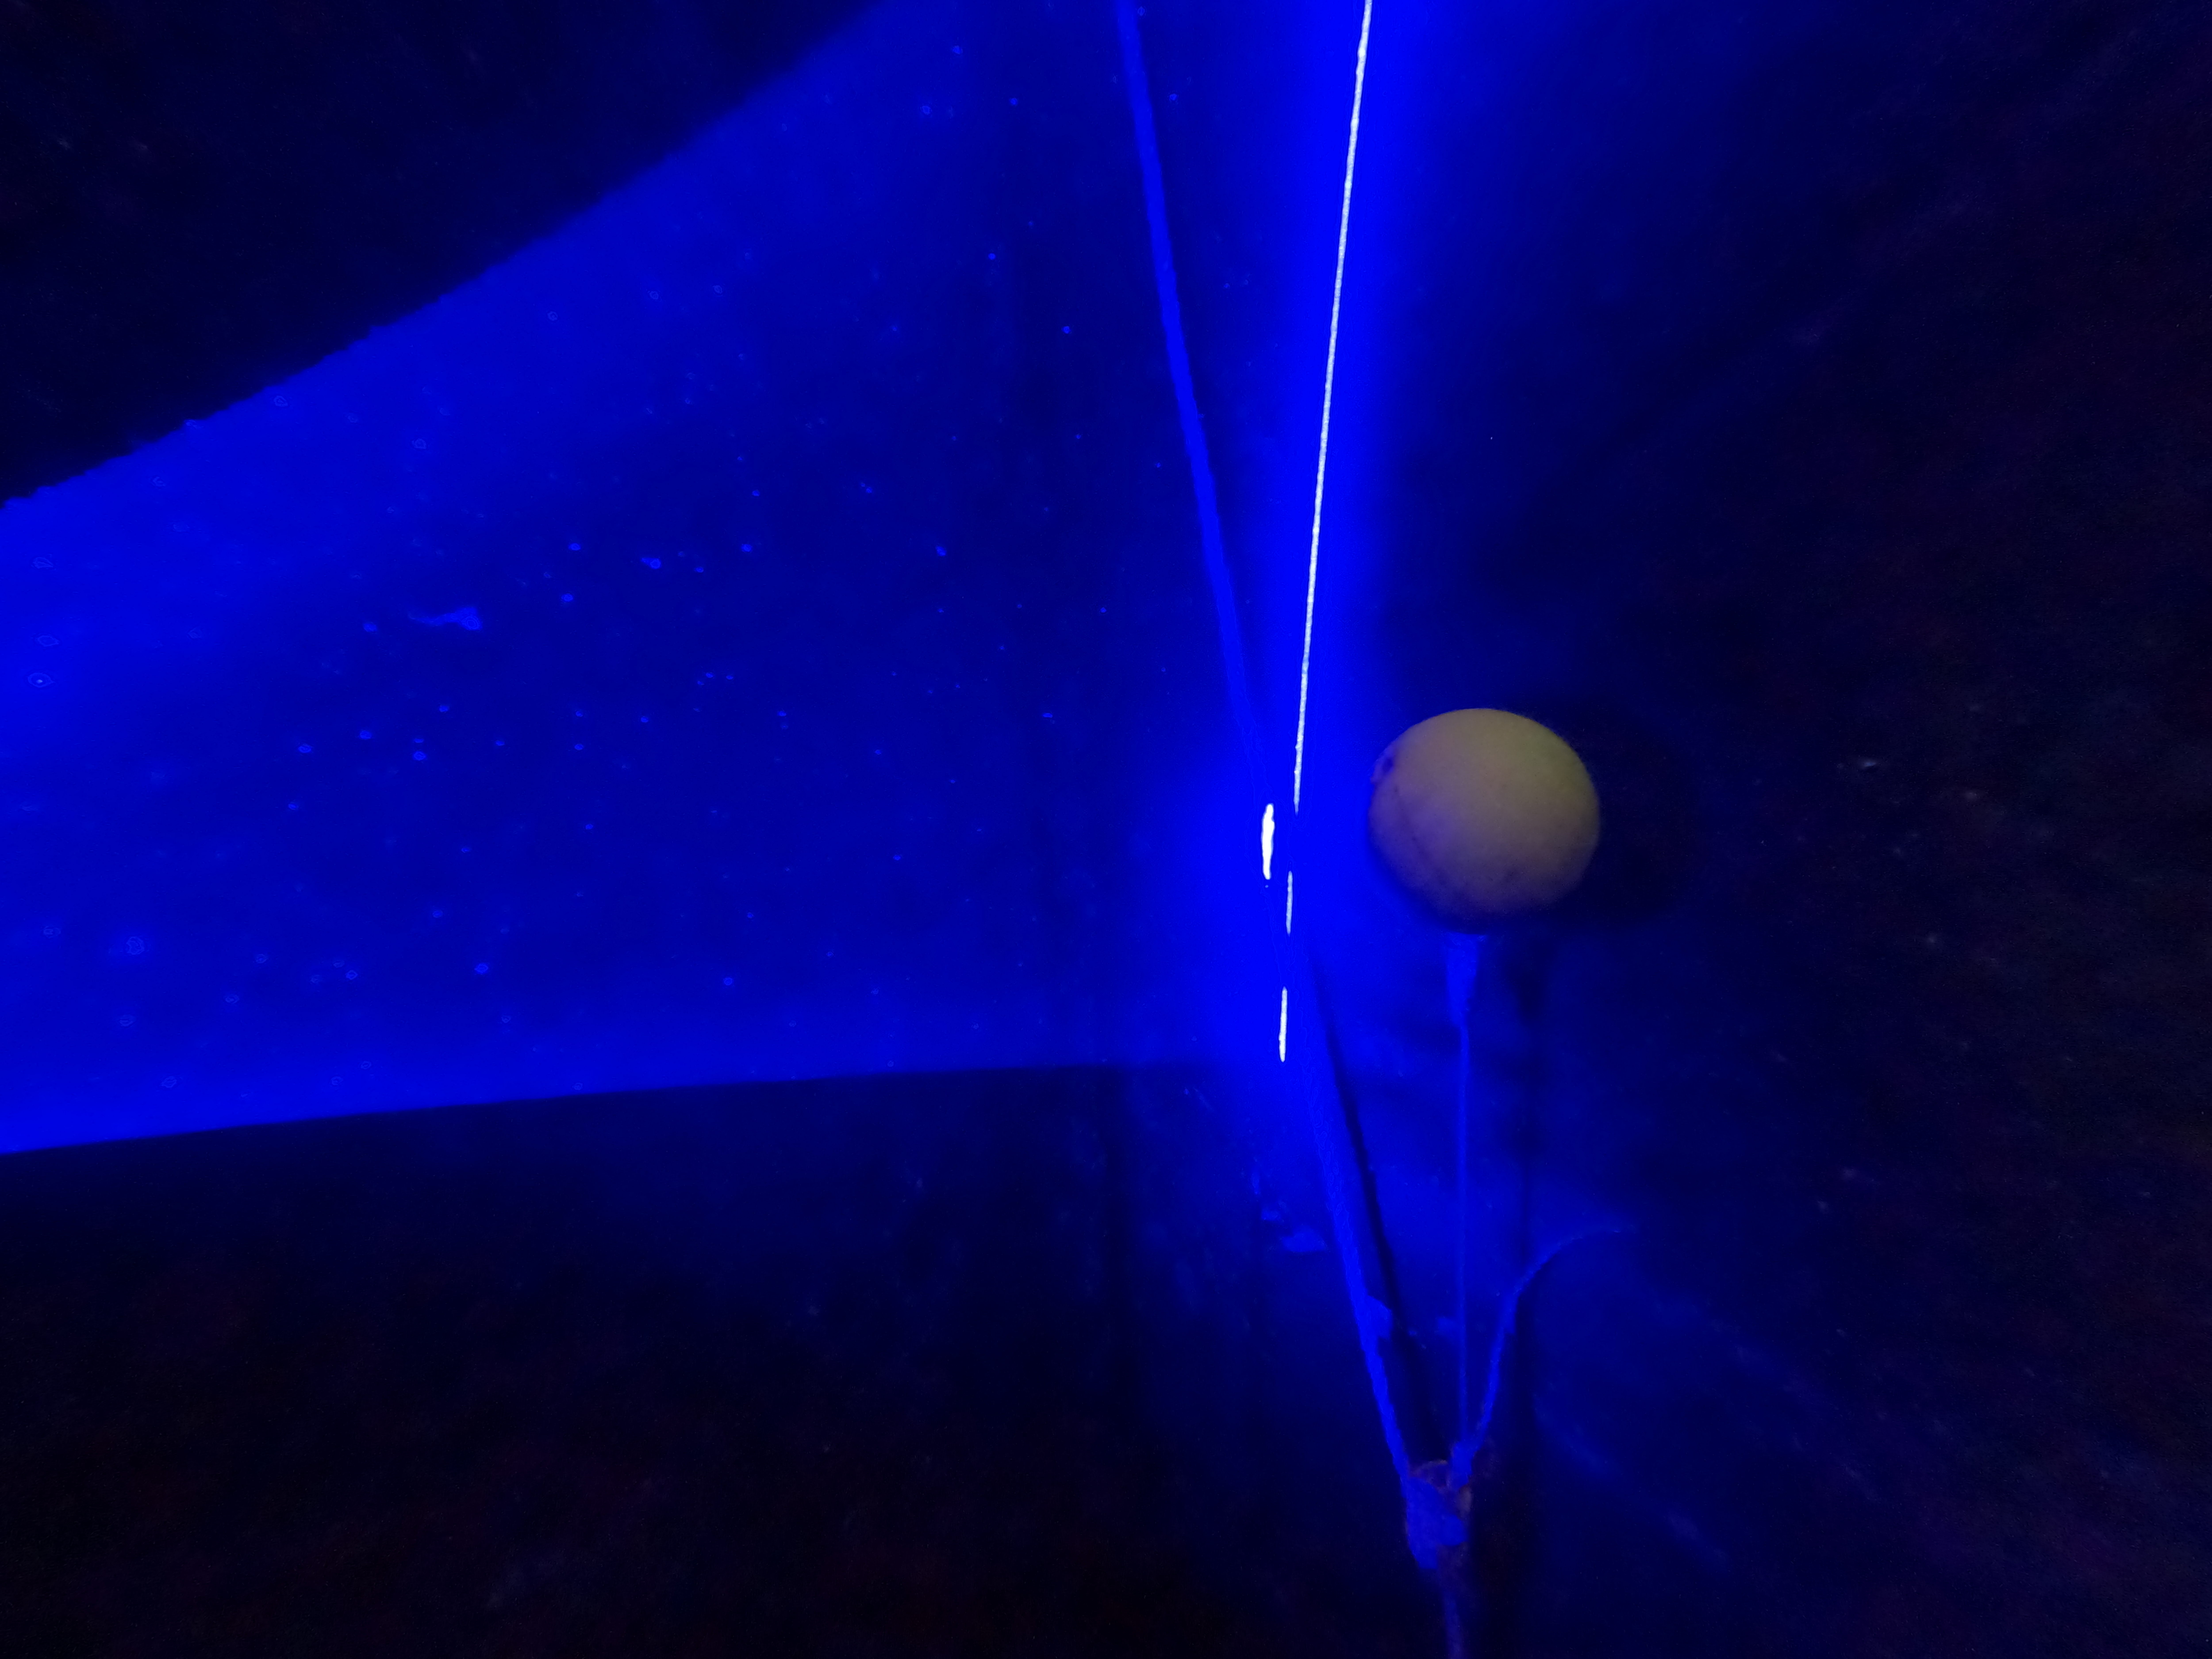

Supplement: Supplementary file 513 [file G0030813.pdf › 3/G0030813.pdf]

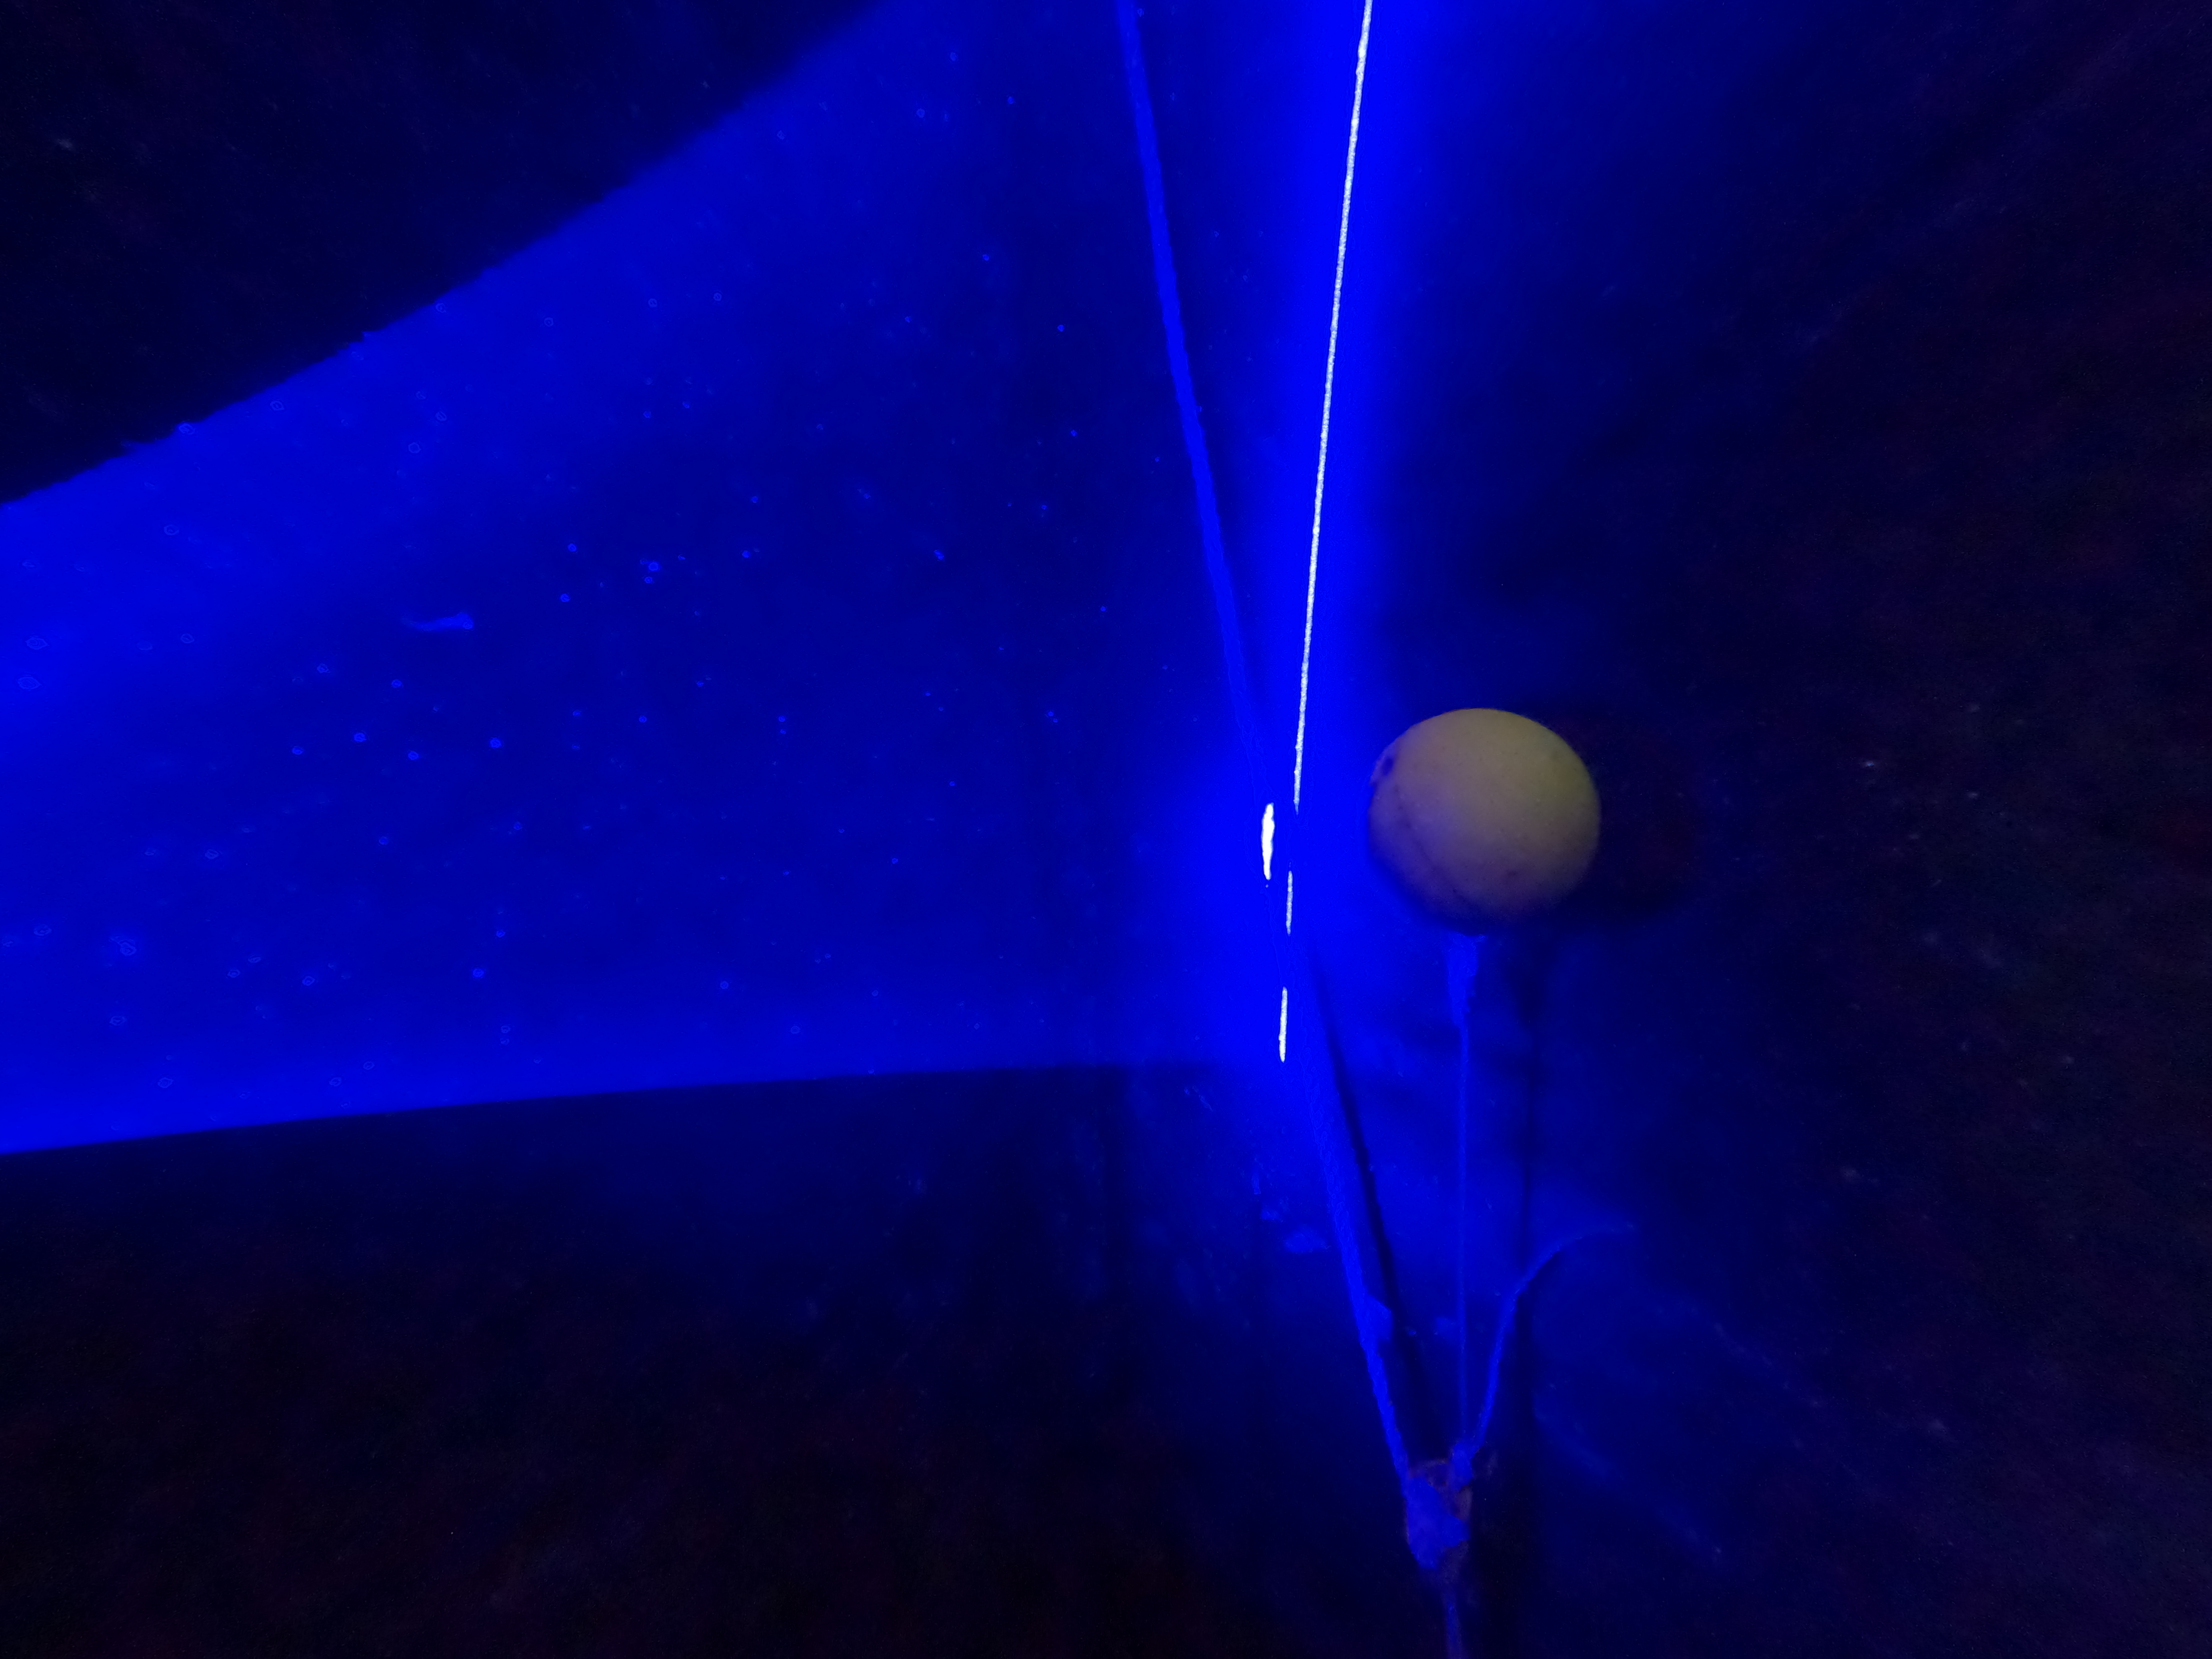

Supplement: Supplementary file 514 [file G0030814.pdf › 3/G0030814.pdf]

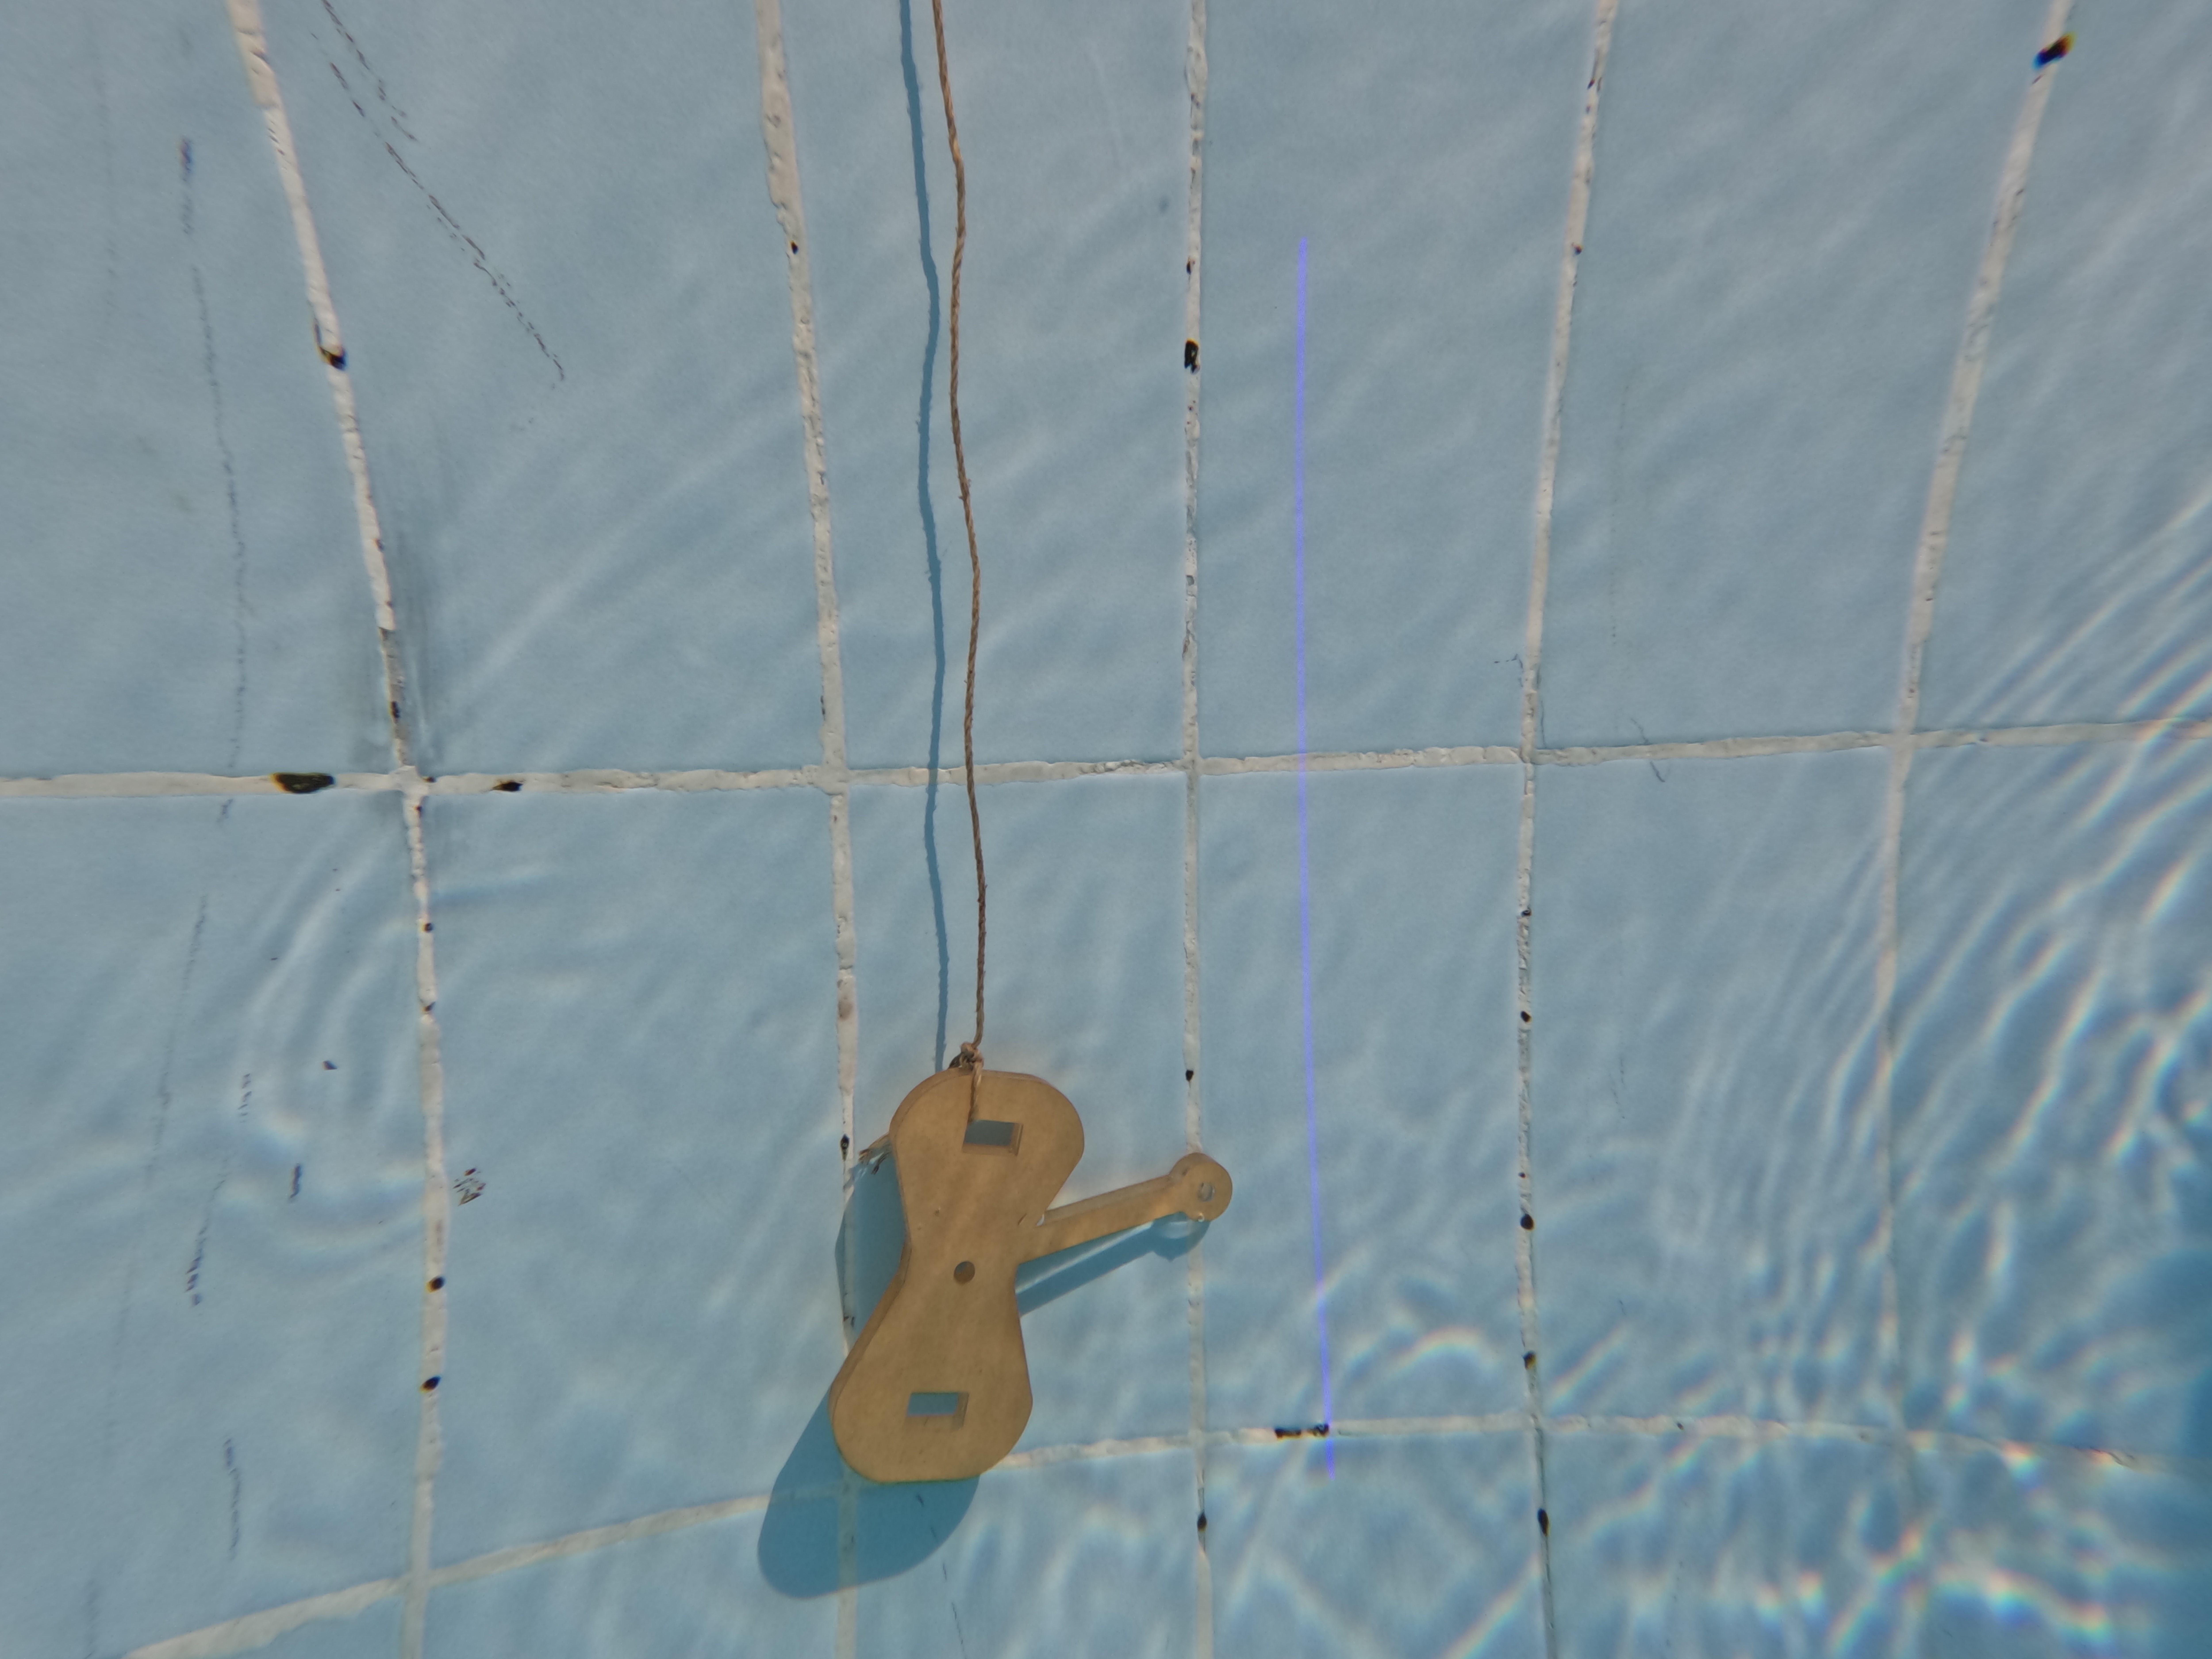

Supplement: Supplementary file 515 [file G0018860.pdf › Level_6_1/G0018860.pdf]

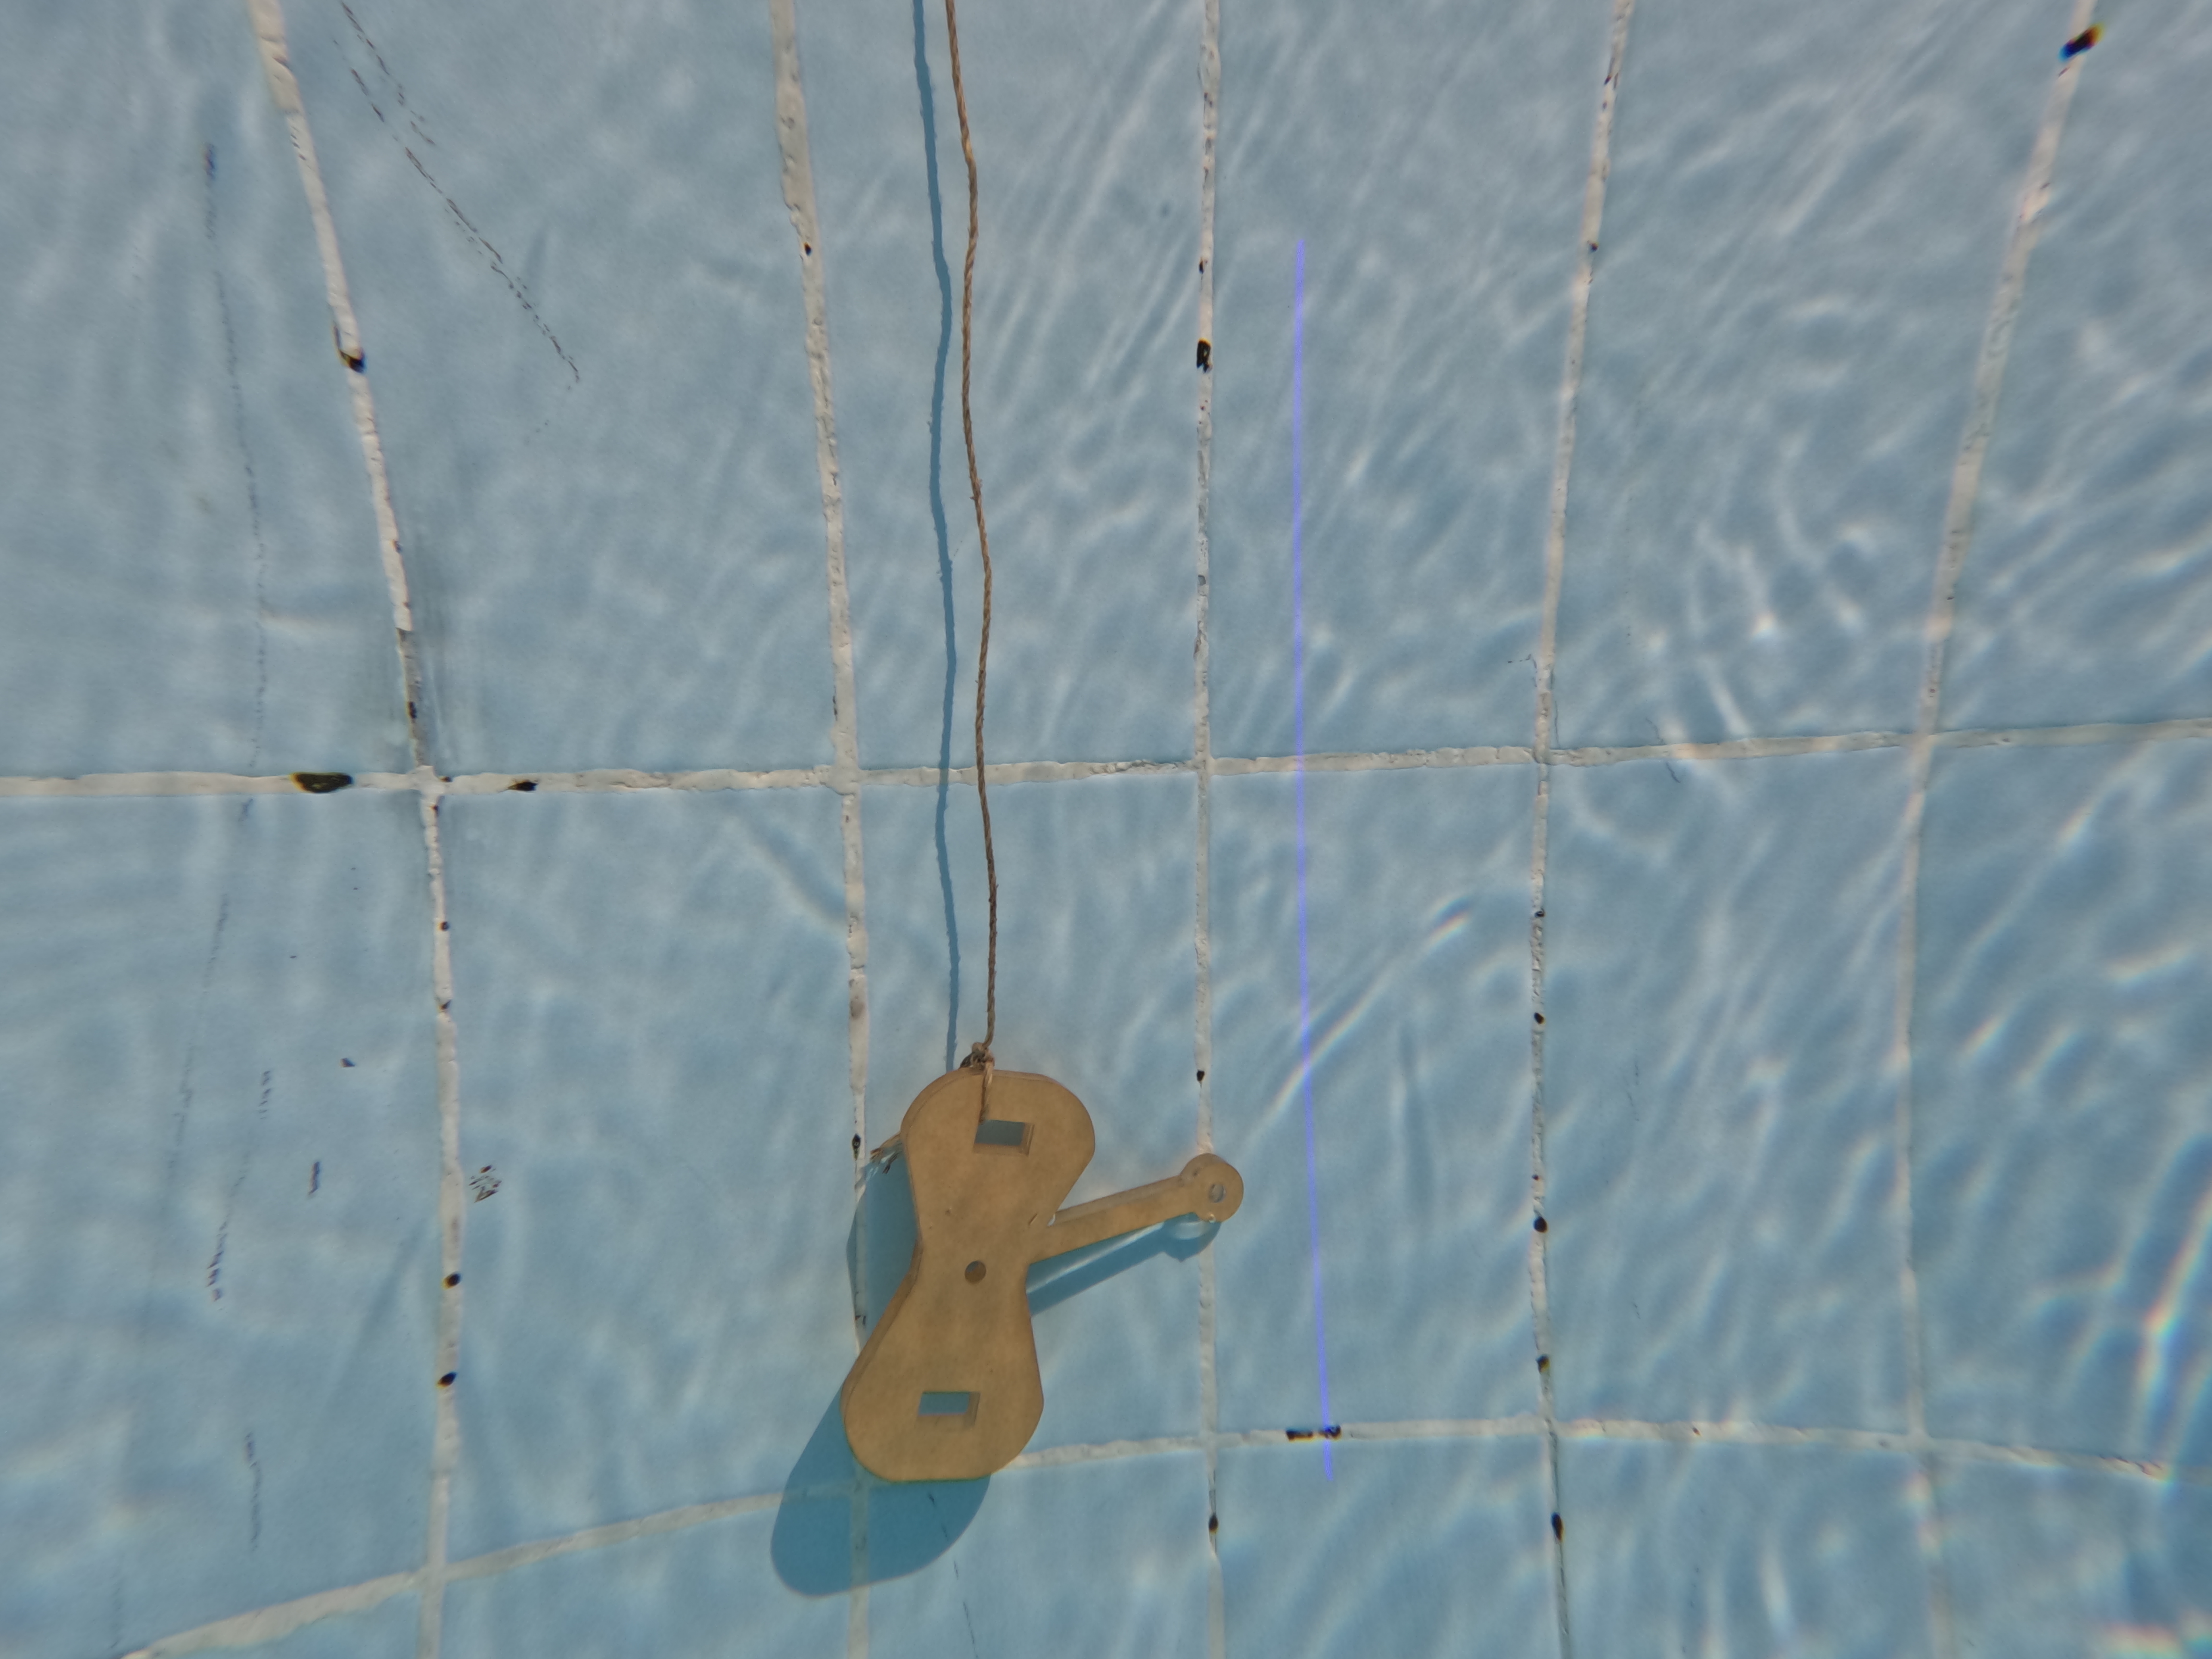

Supplement: Supplementary file 516 [file G0018861.pdf › Level_6_1/G0018861.pdf]

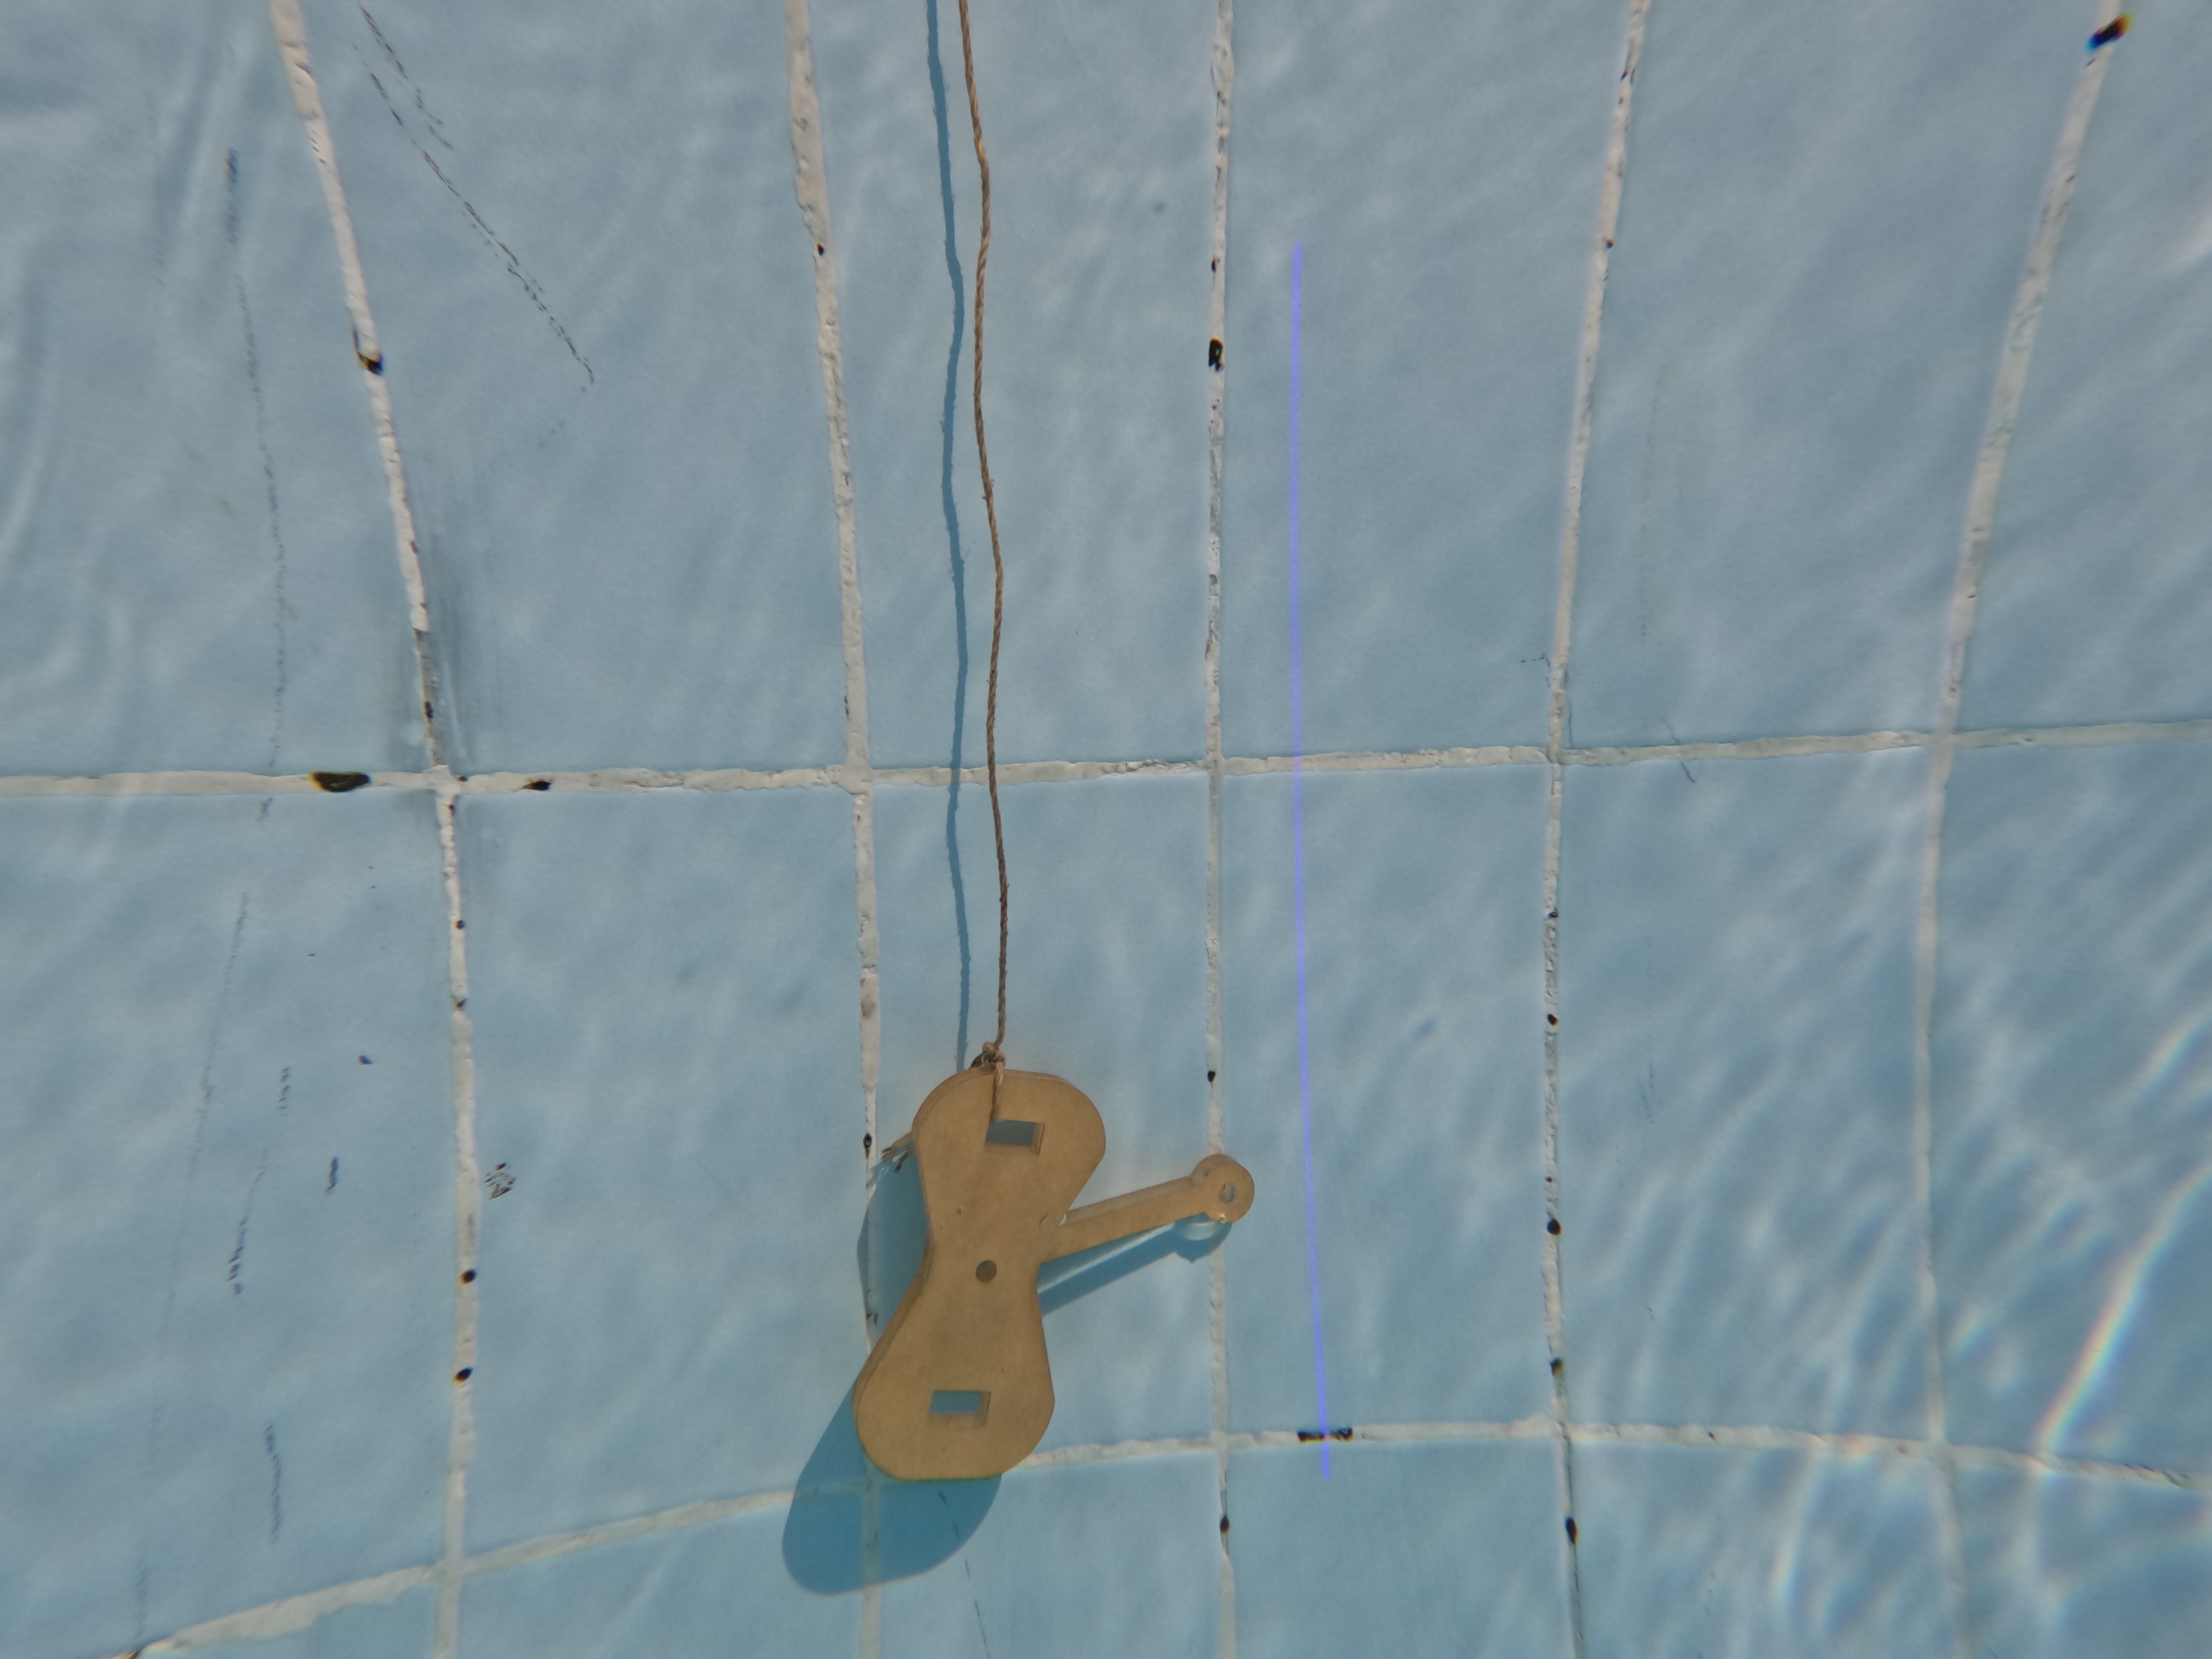

Supplement: Supplementary file 517 [file G0018862.pdf › Level_6_1/G0018862.pdf]

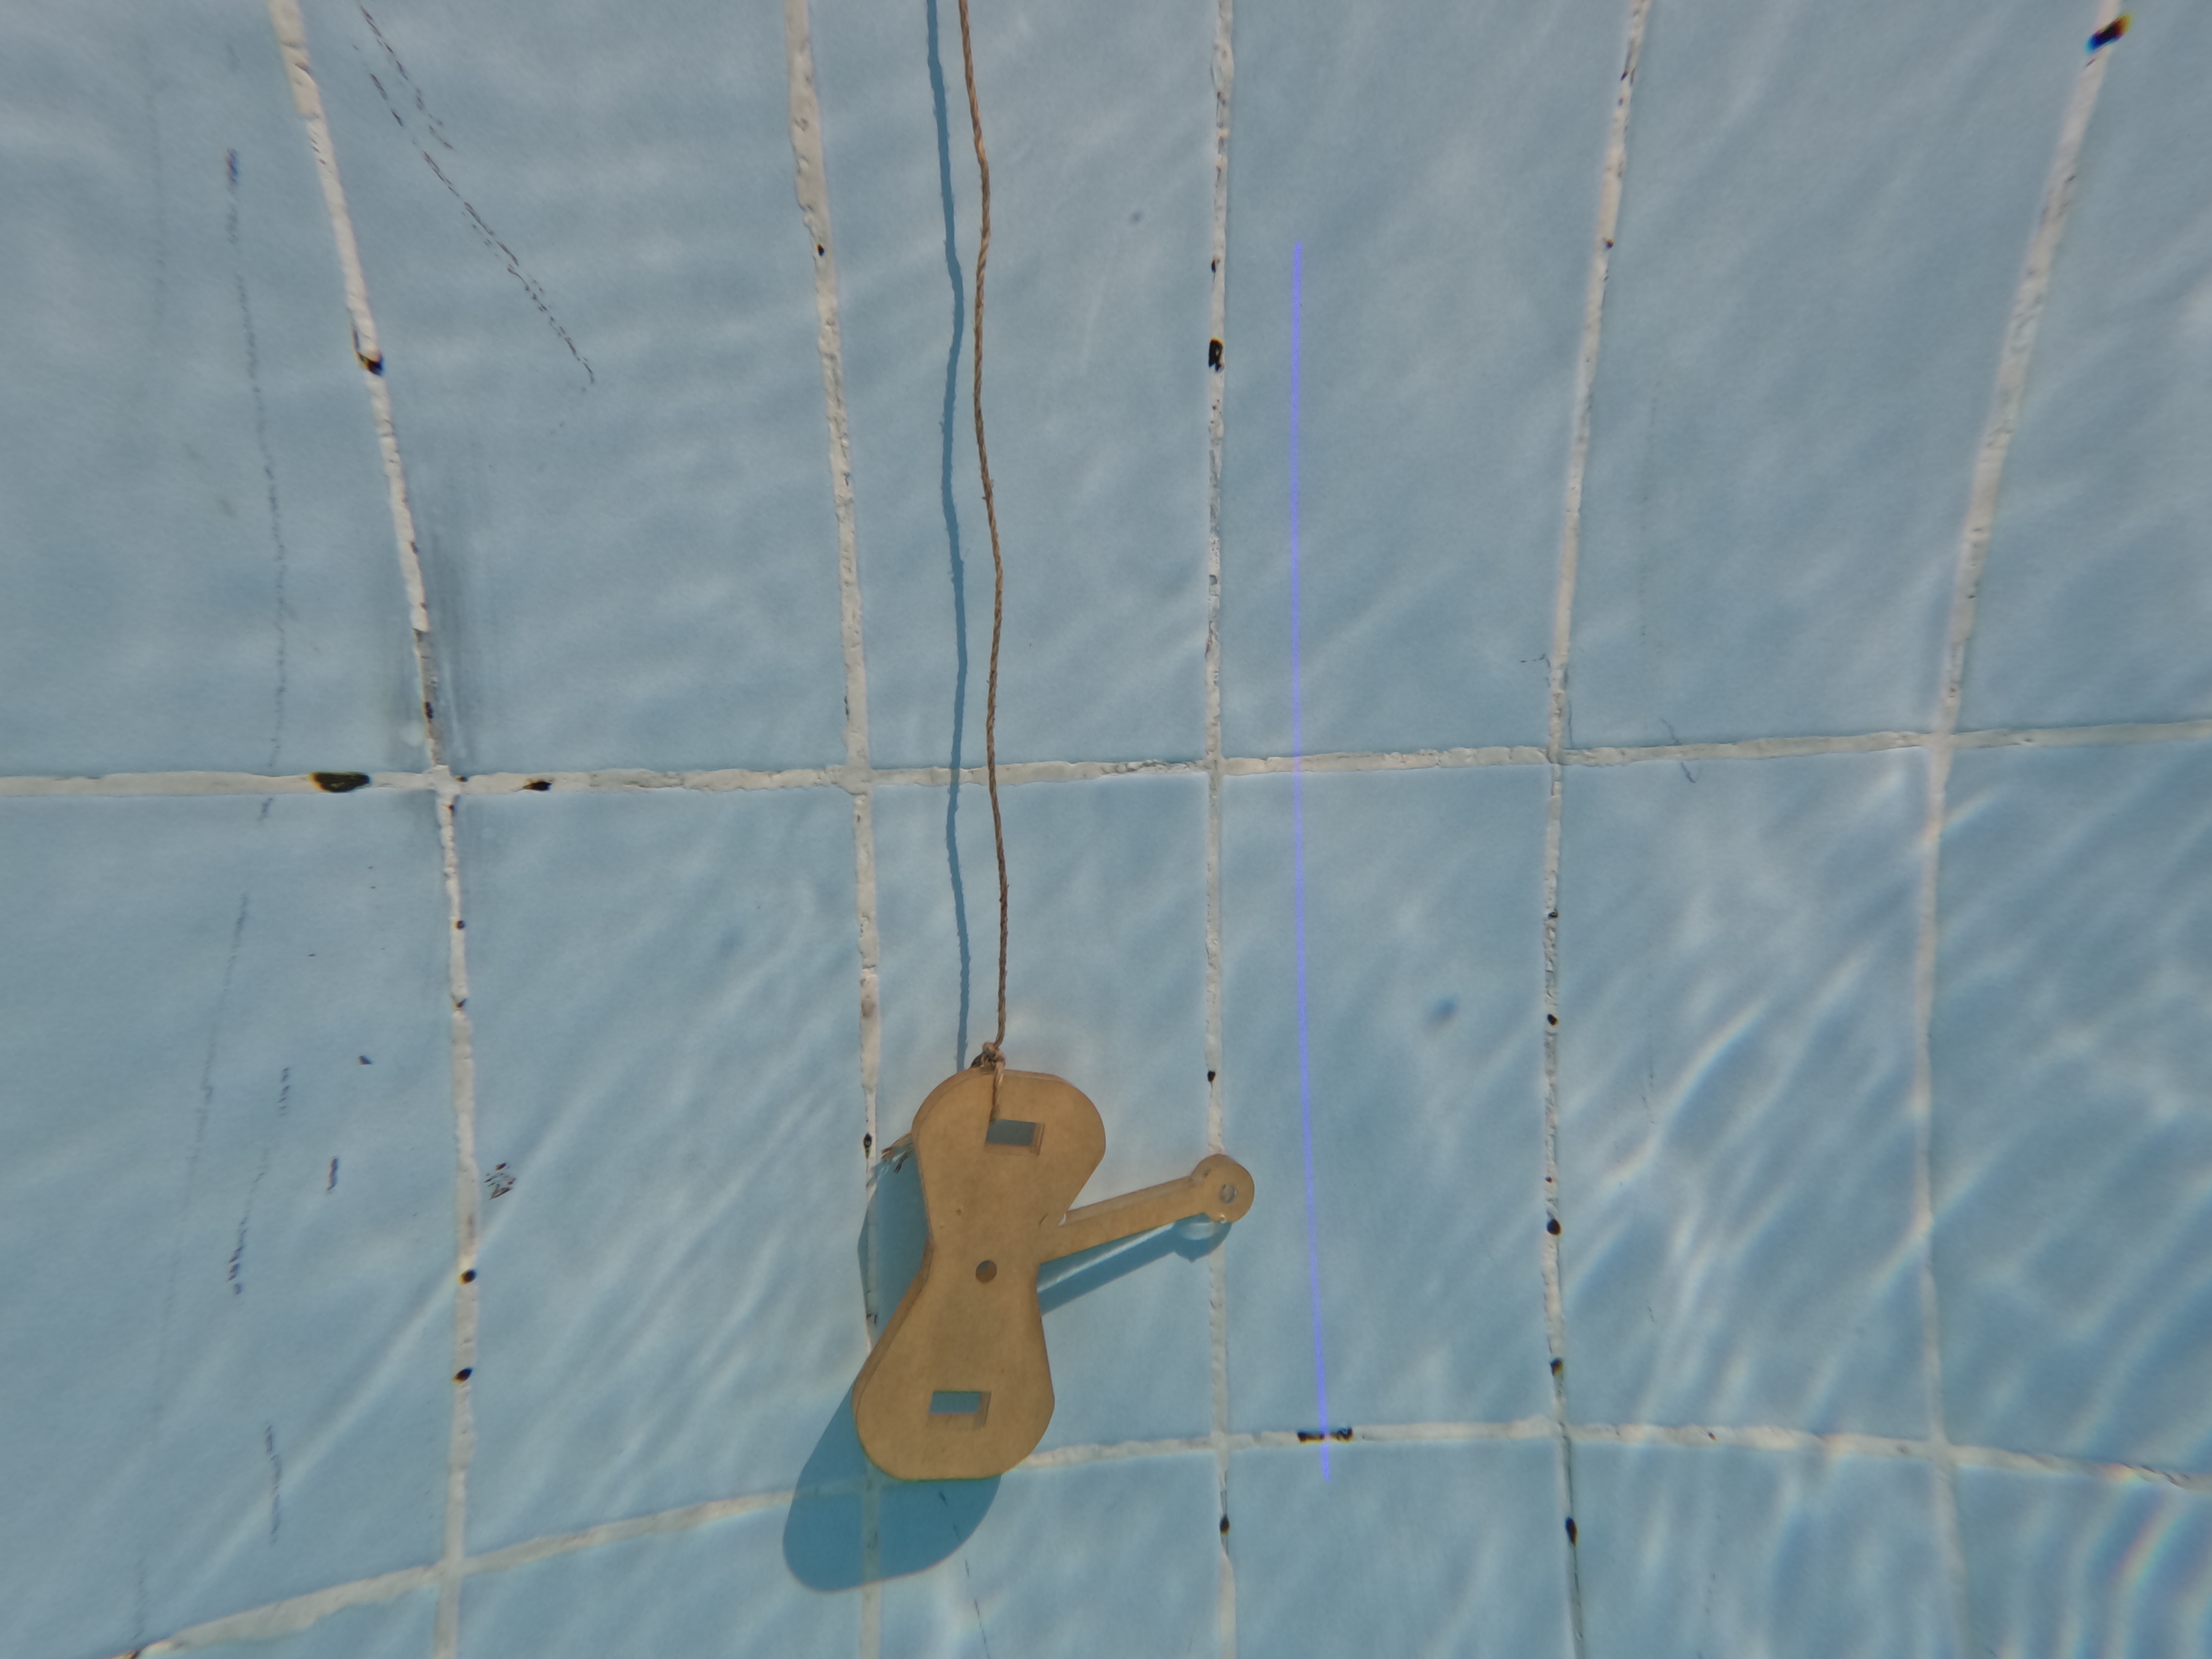

Supplement: Supplementary file 518 [file G0018863.pdf › Level_6_1/G0018863.pdf]

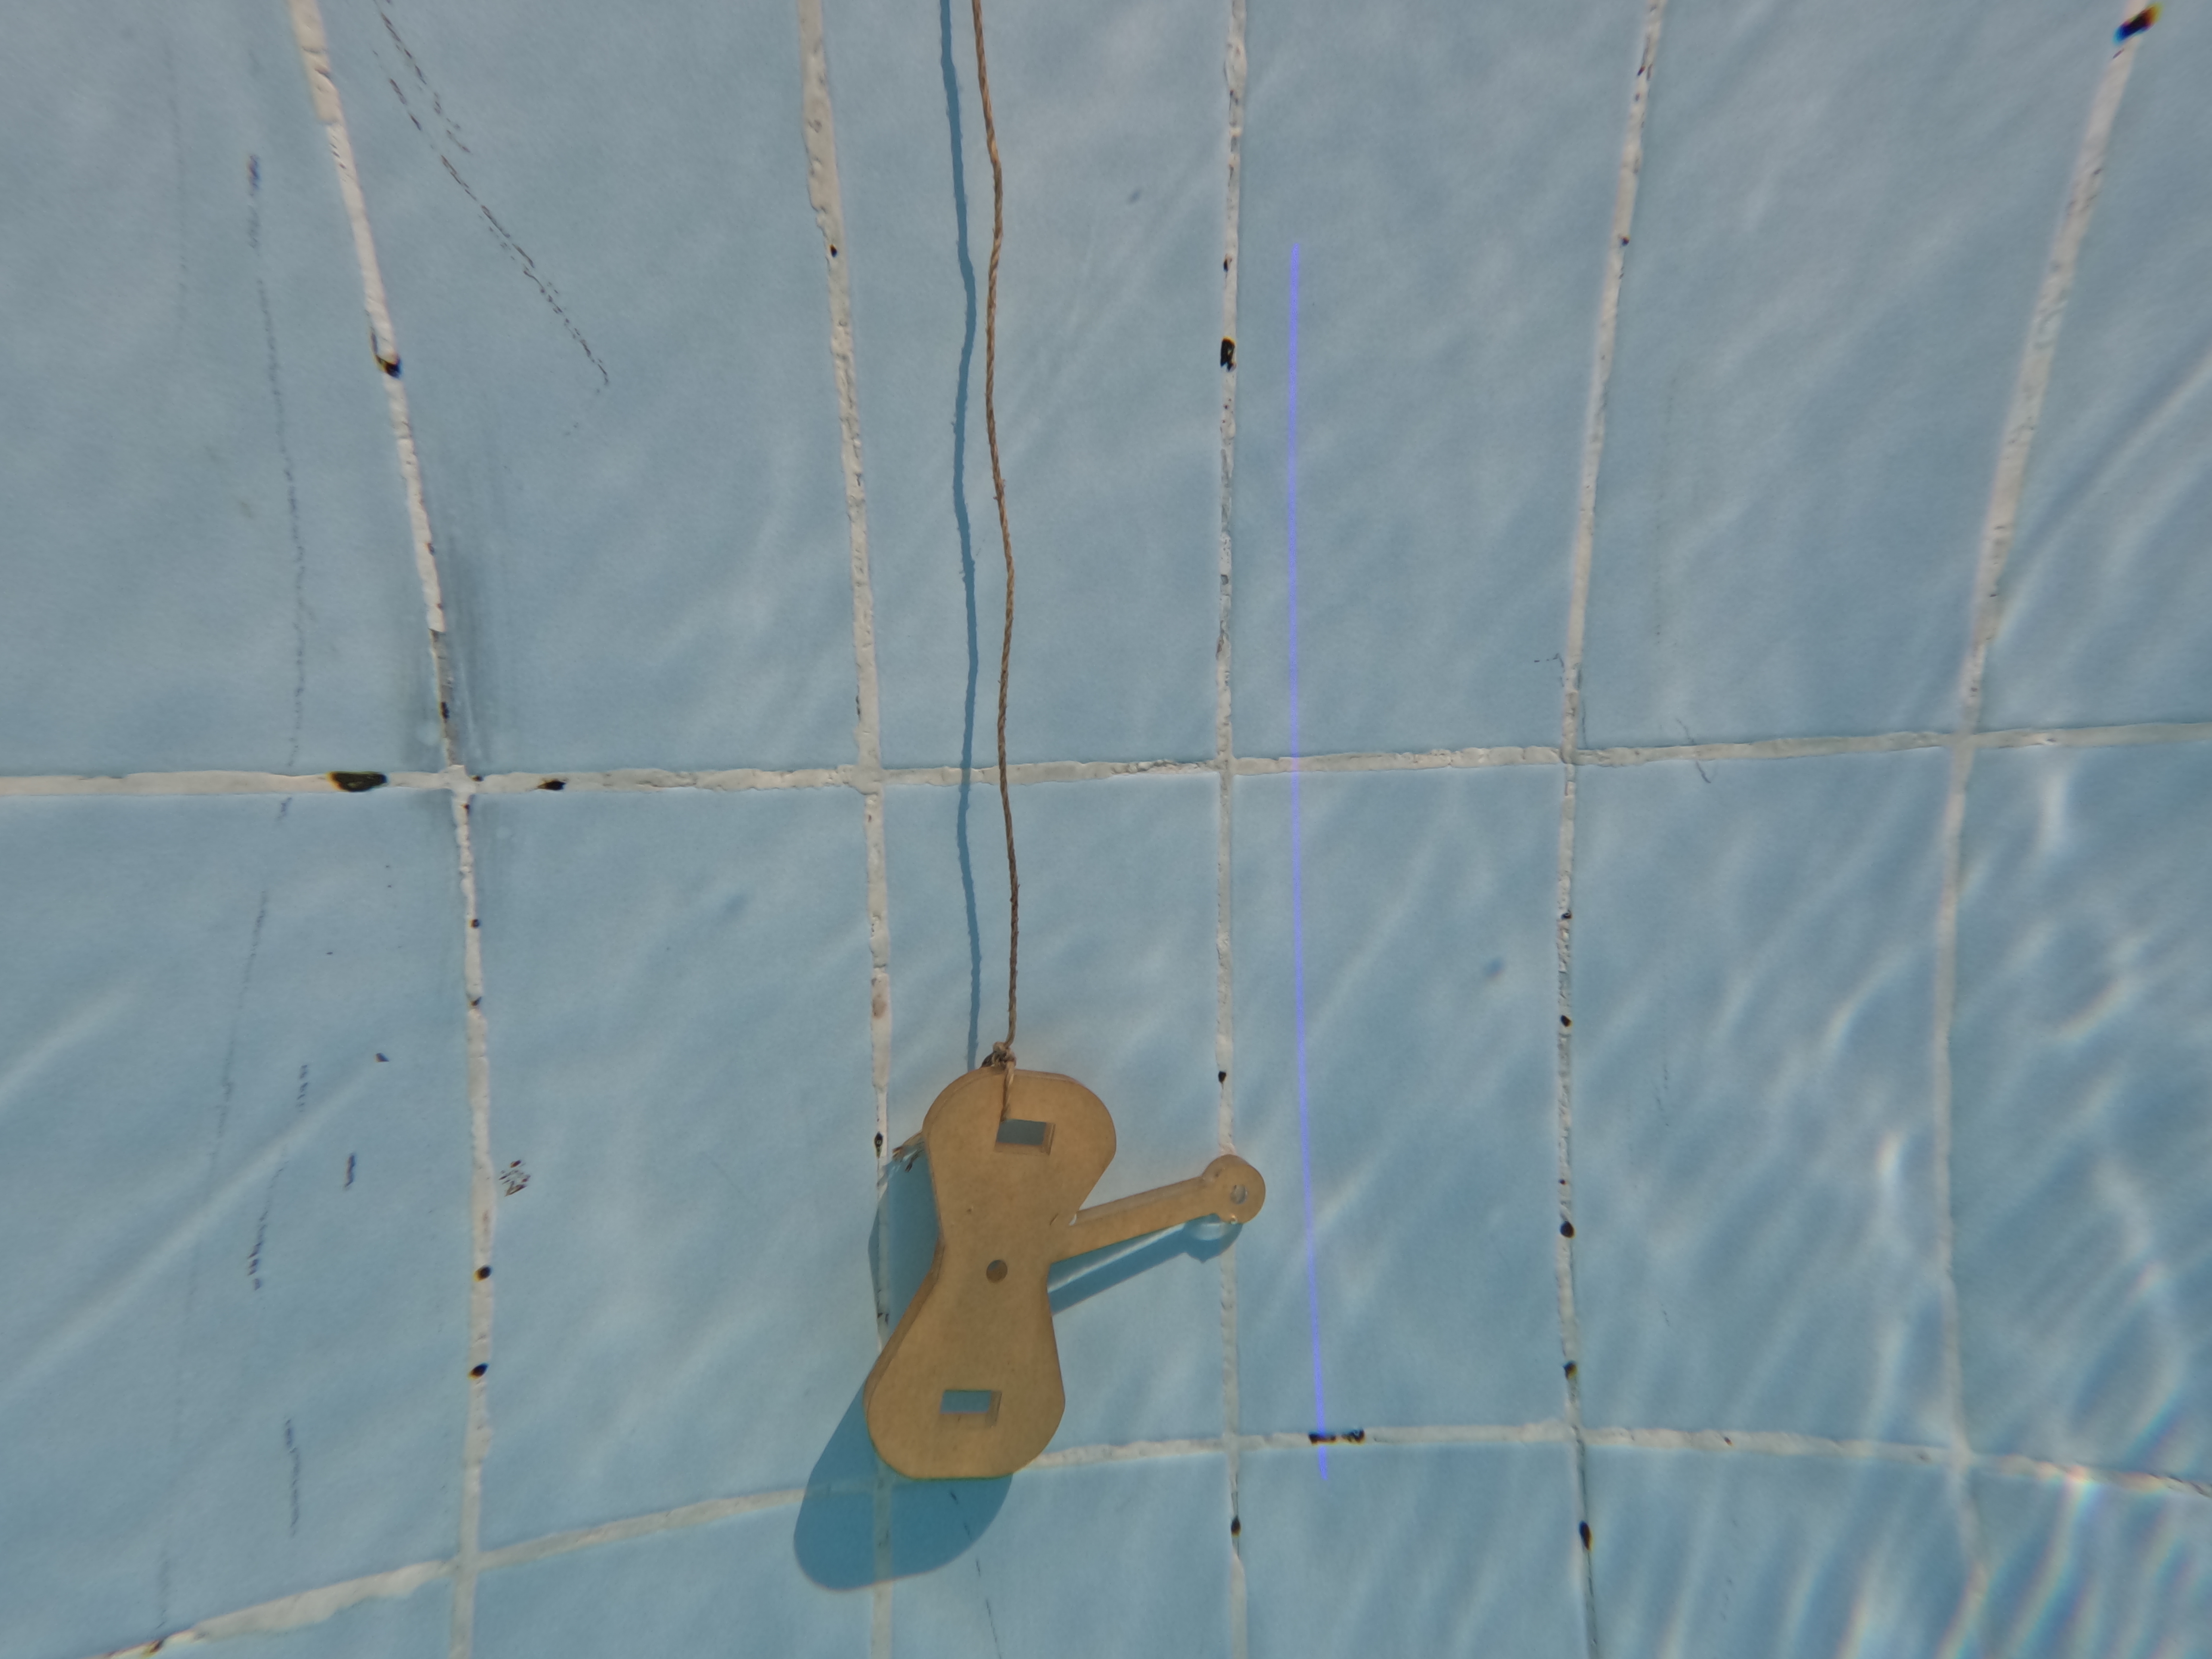

Supplement: Supplementary file 519 [file G0018864.pdf › Level_6_1/G0018864.pdf]

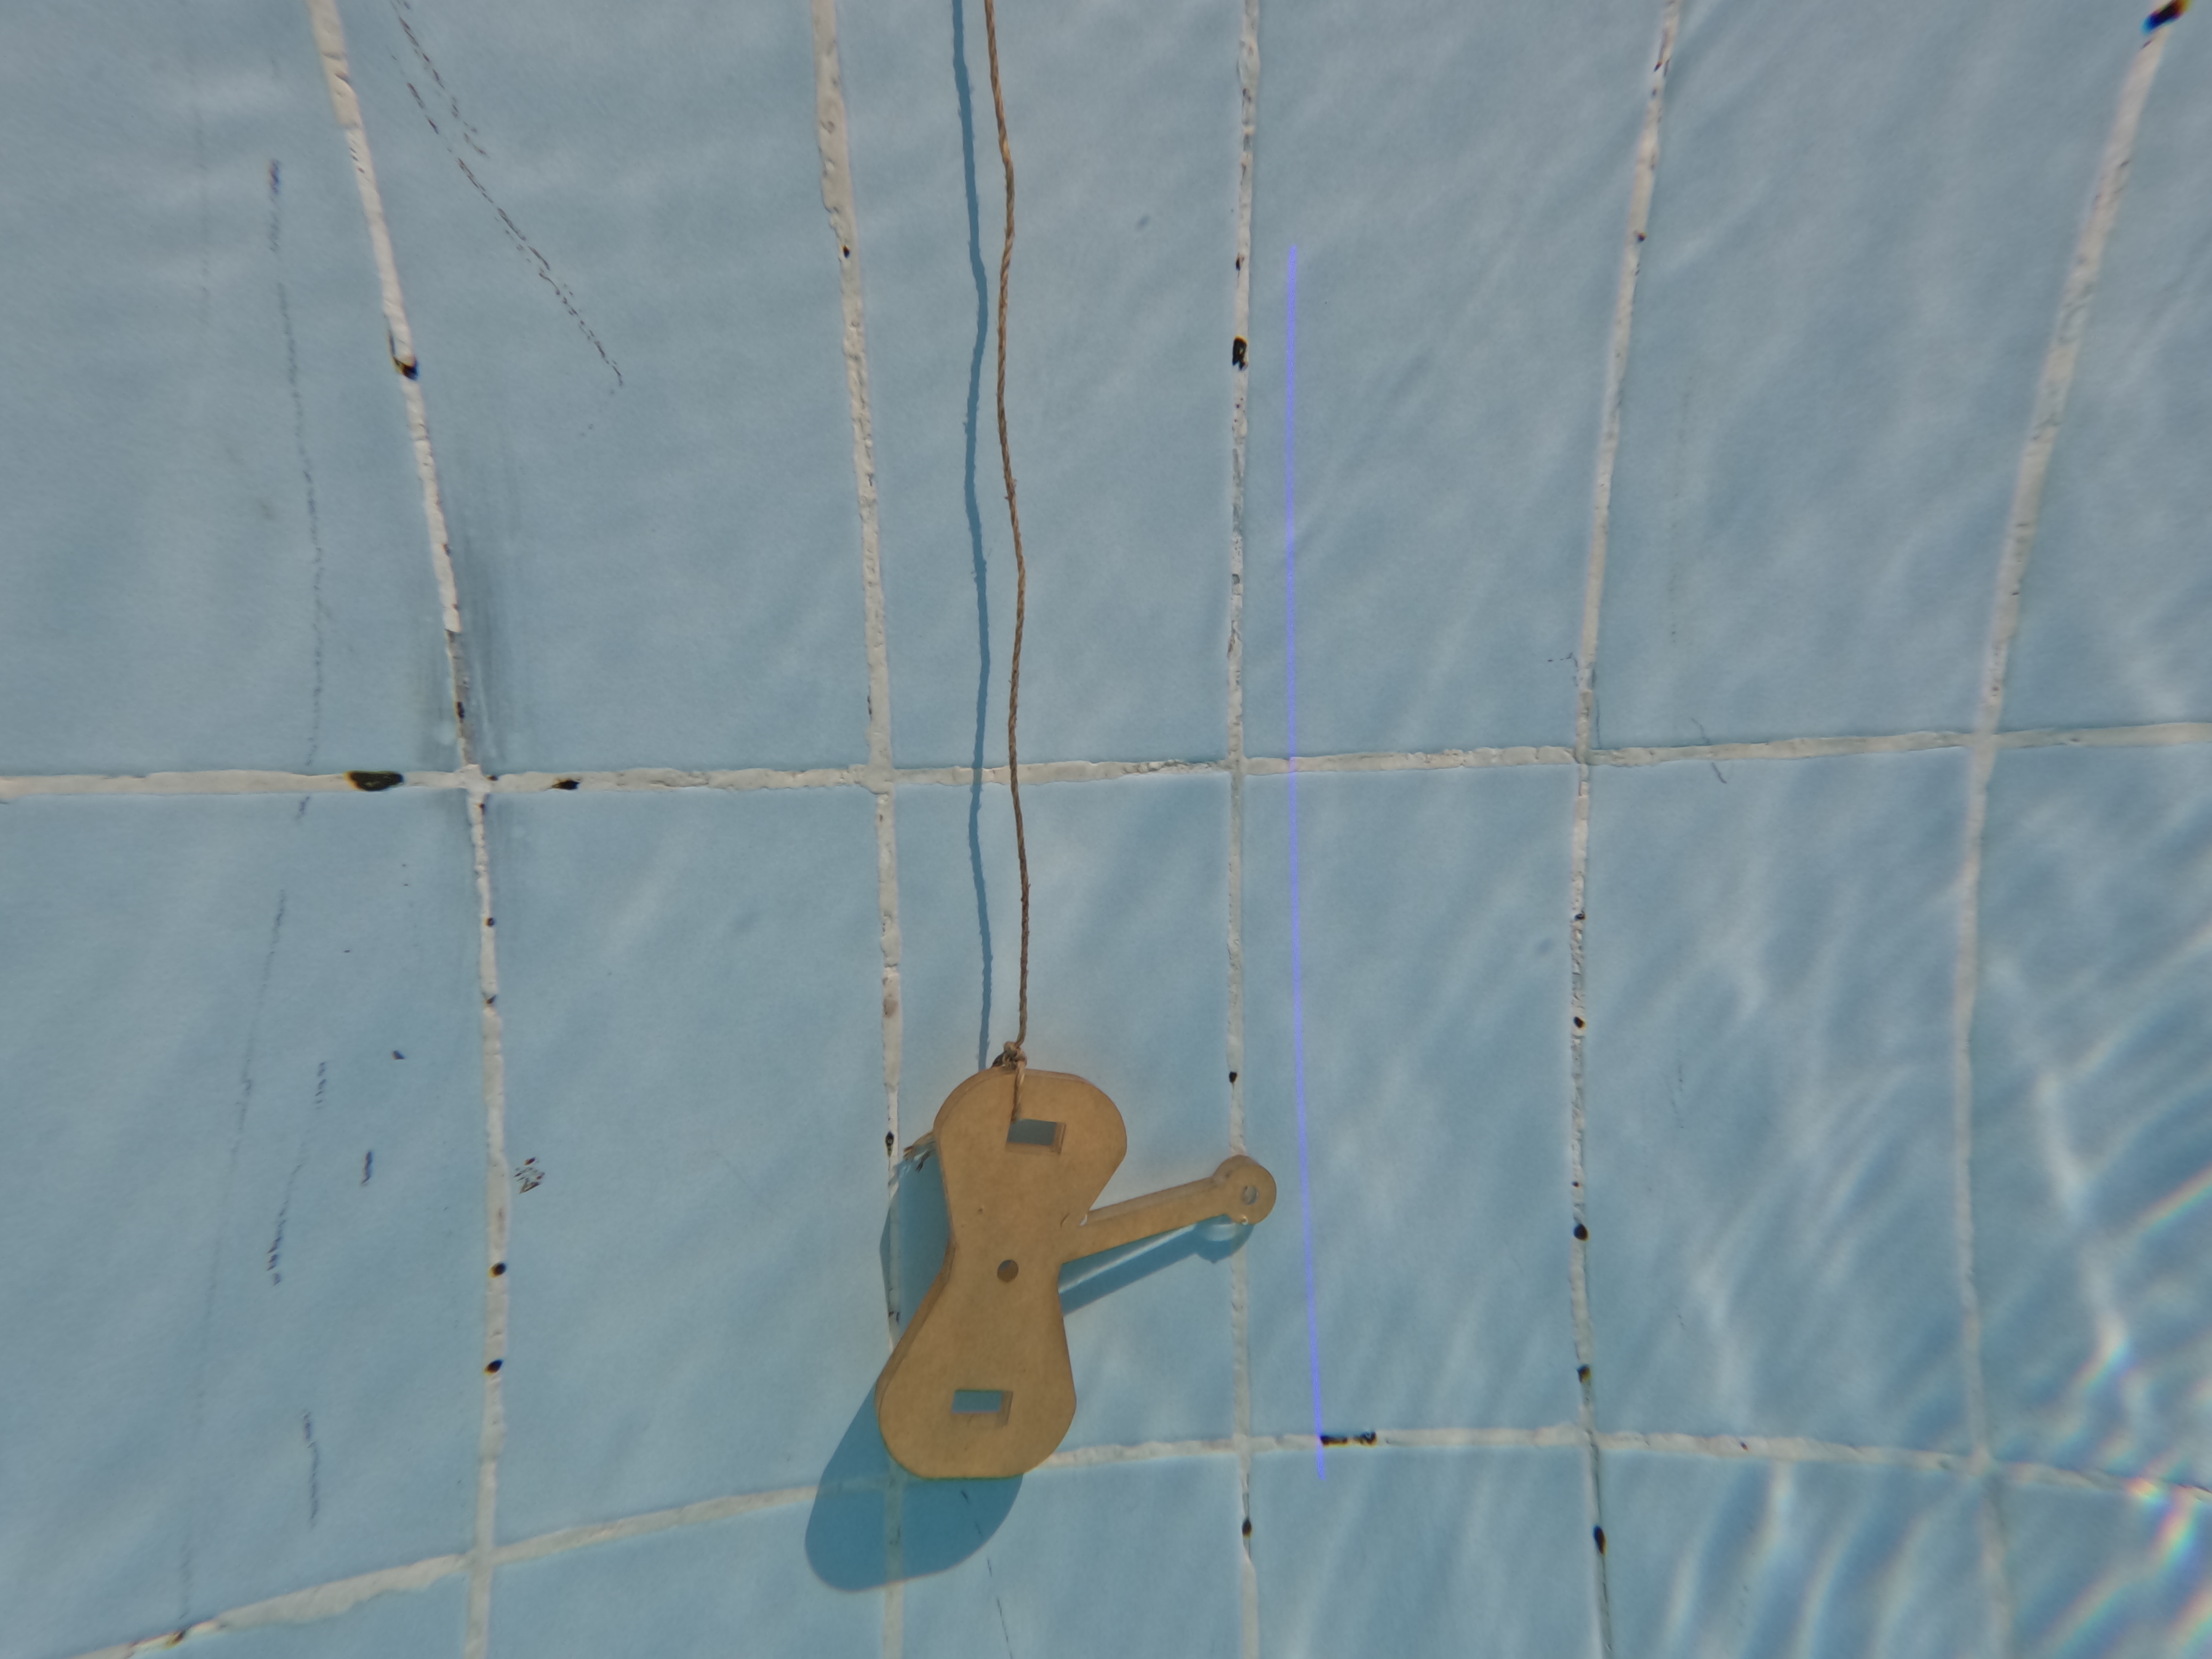

Supplement: Supplementary file 520 [file G0018865.pdf › Level_6_1/G0018865.pdf]

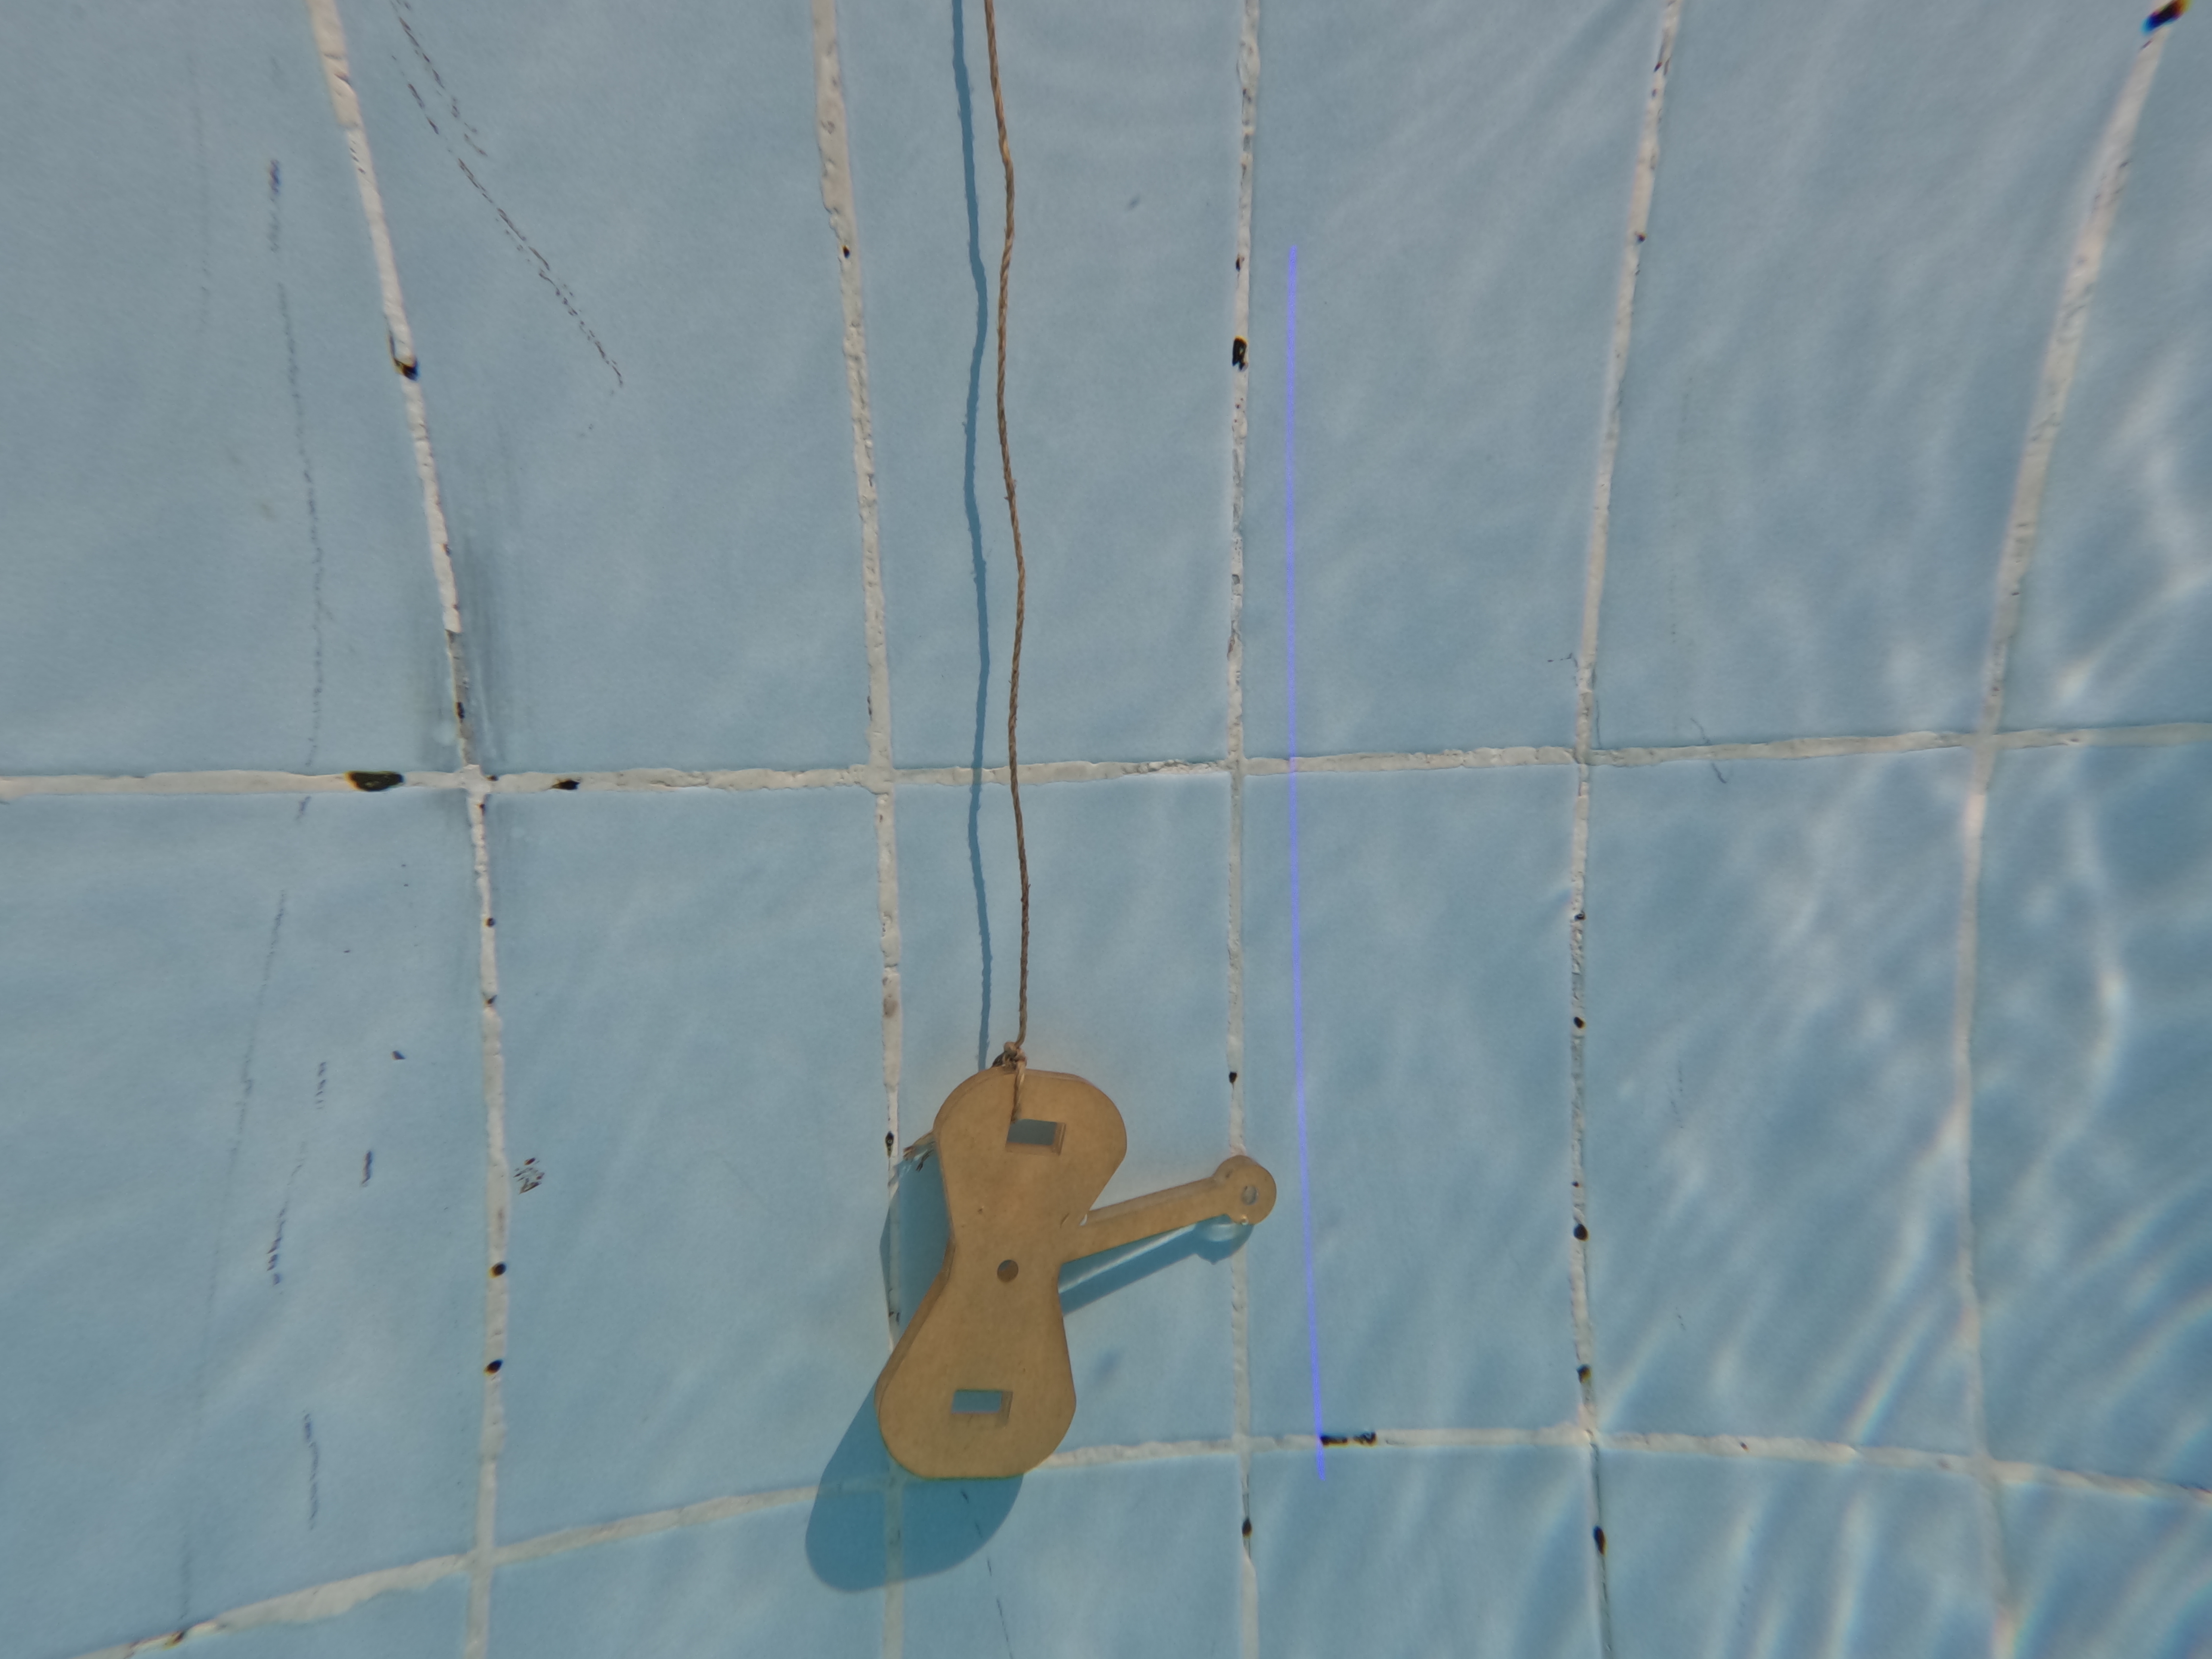

Supplement: Supplementary file 521 [file G0018866.pdf › Level_6_1/G0018866.pdf]

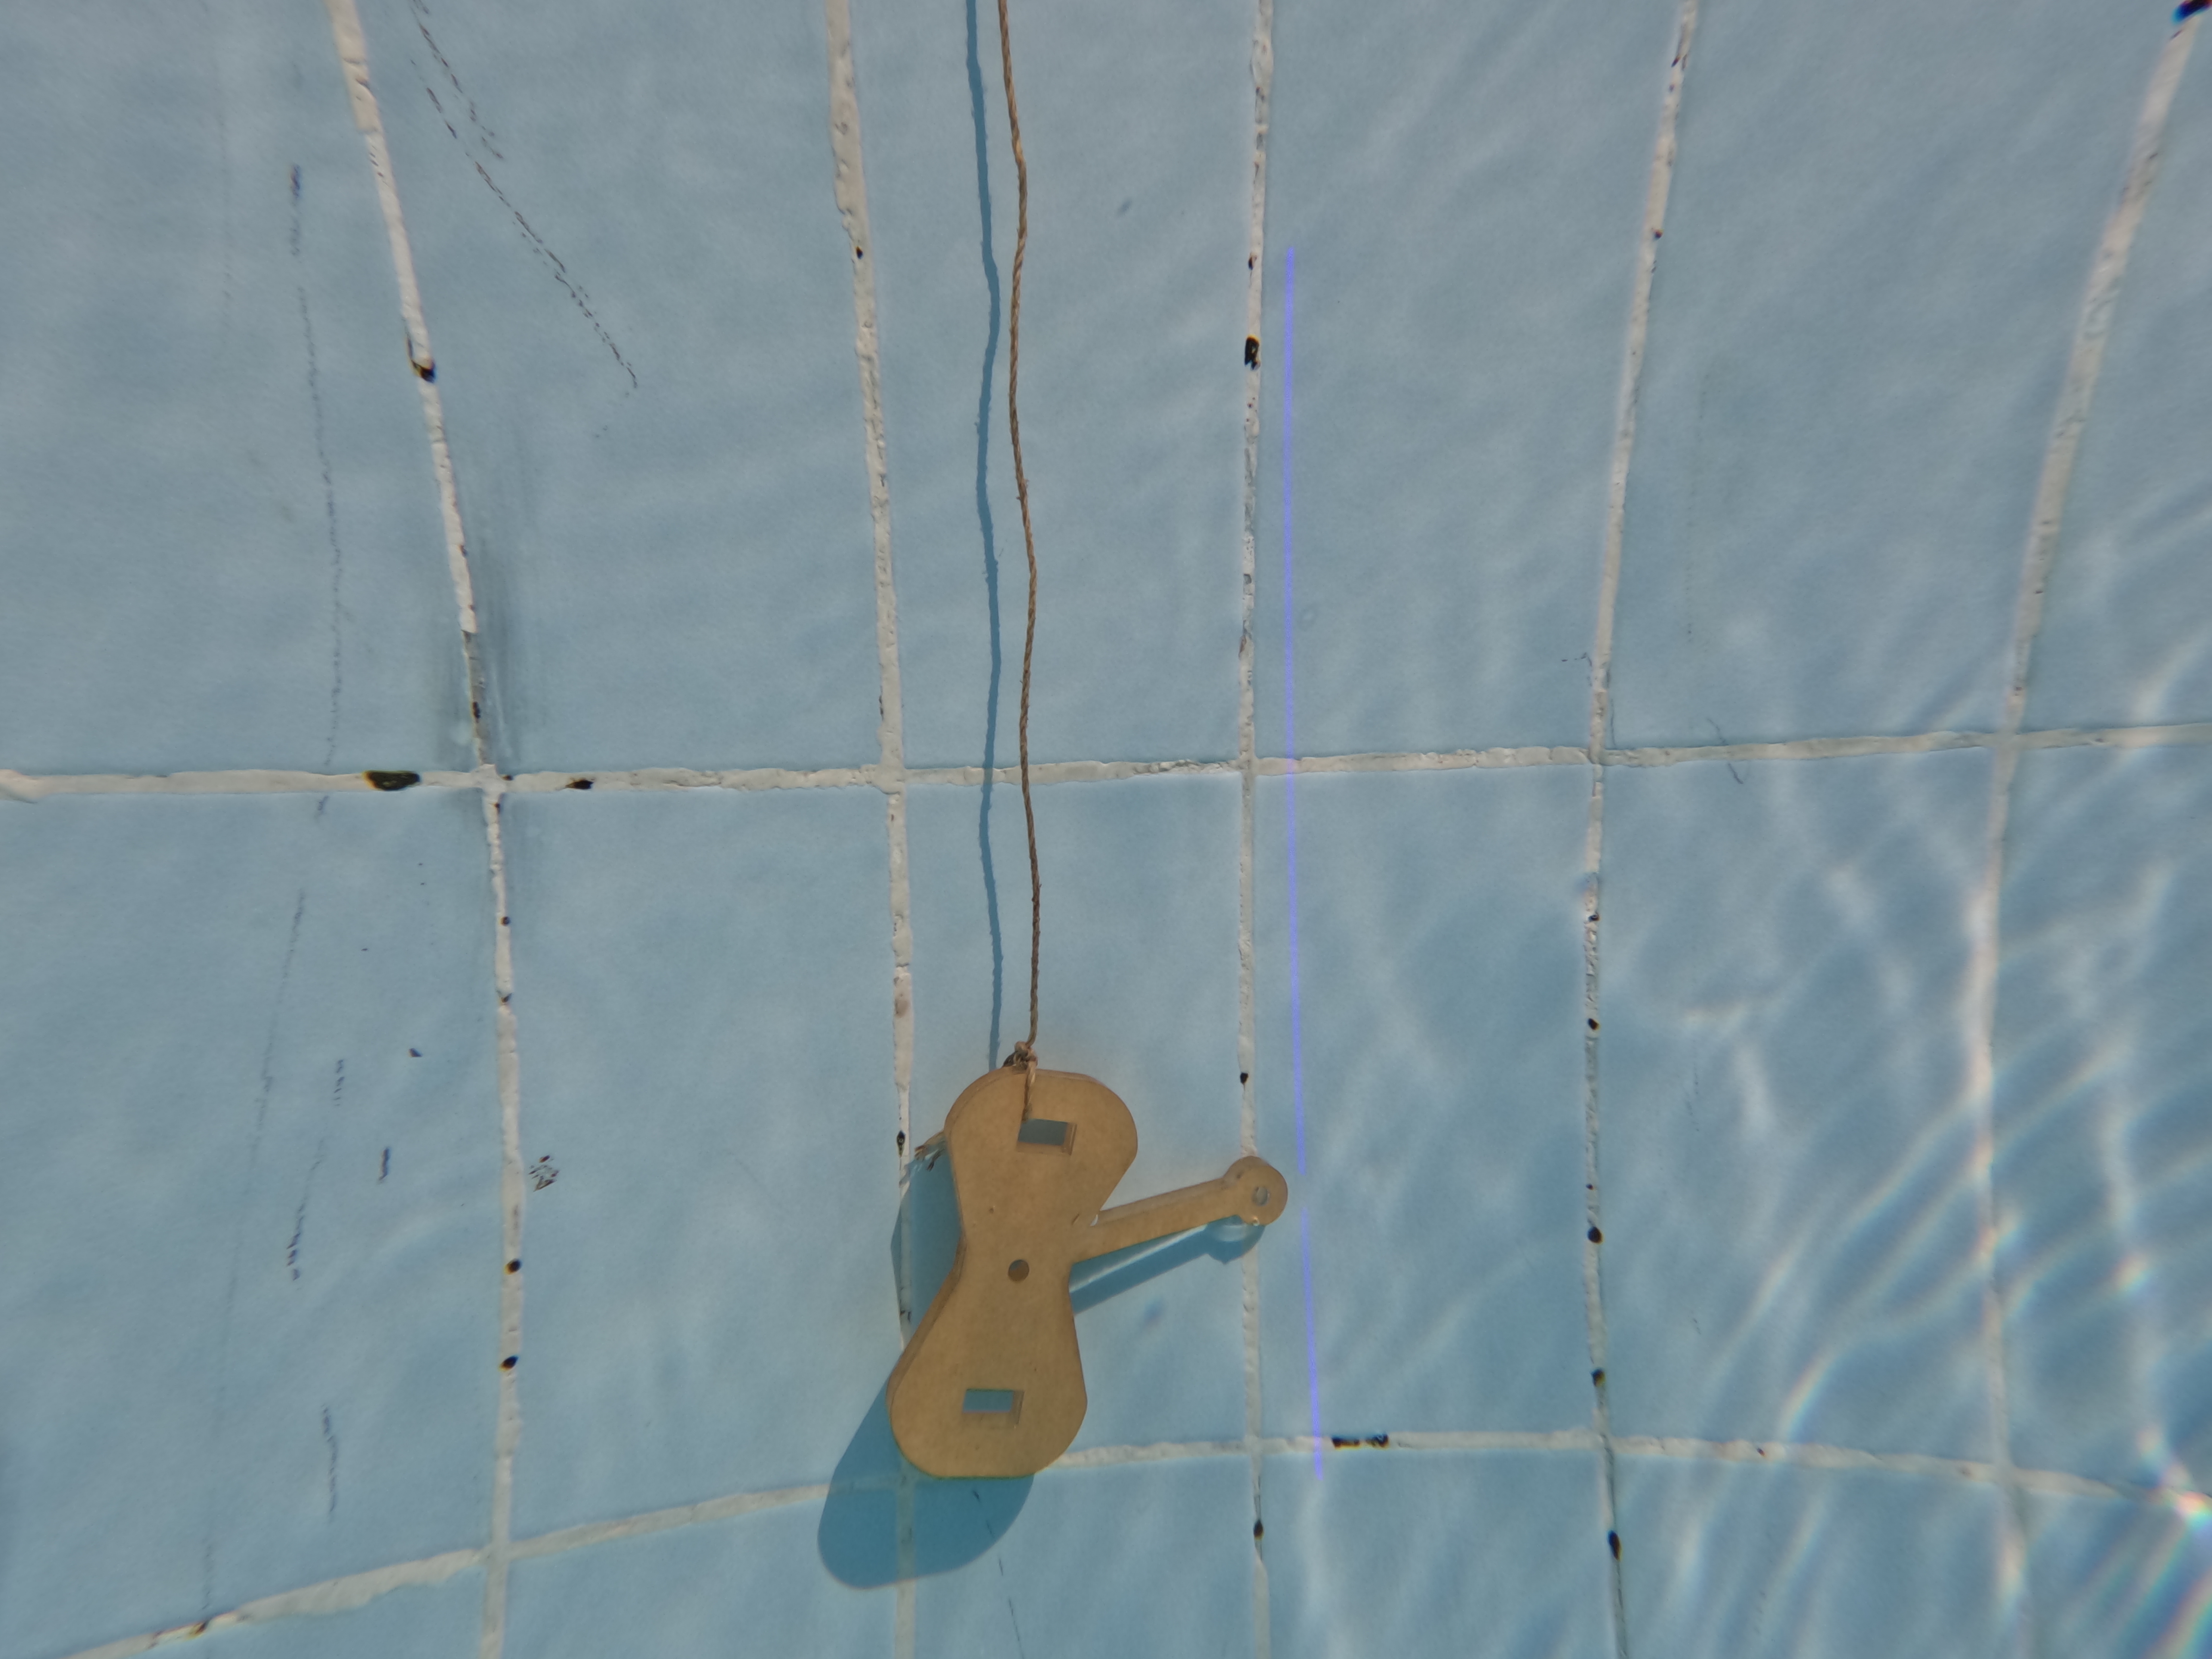

Supplement: Supplementary file 522 [file G0018867.pdf › Level_6_1/G0018867.pdf]

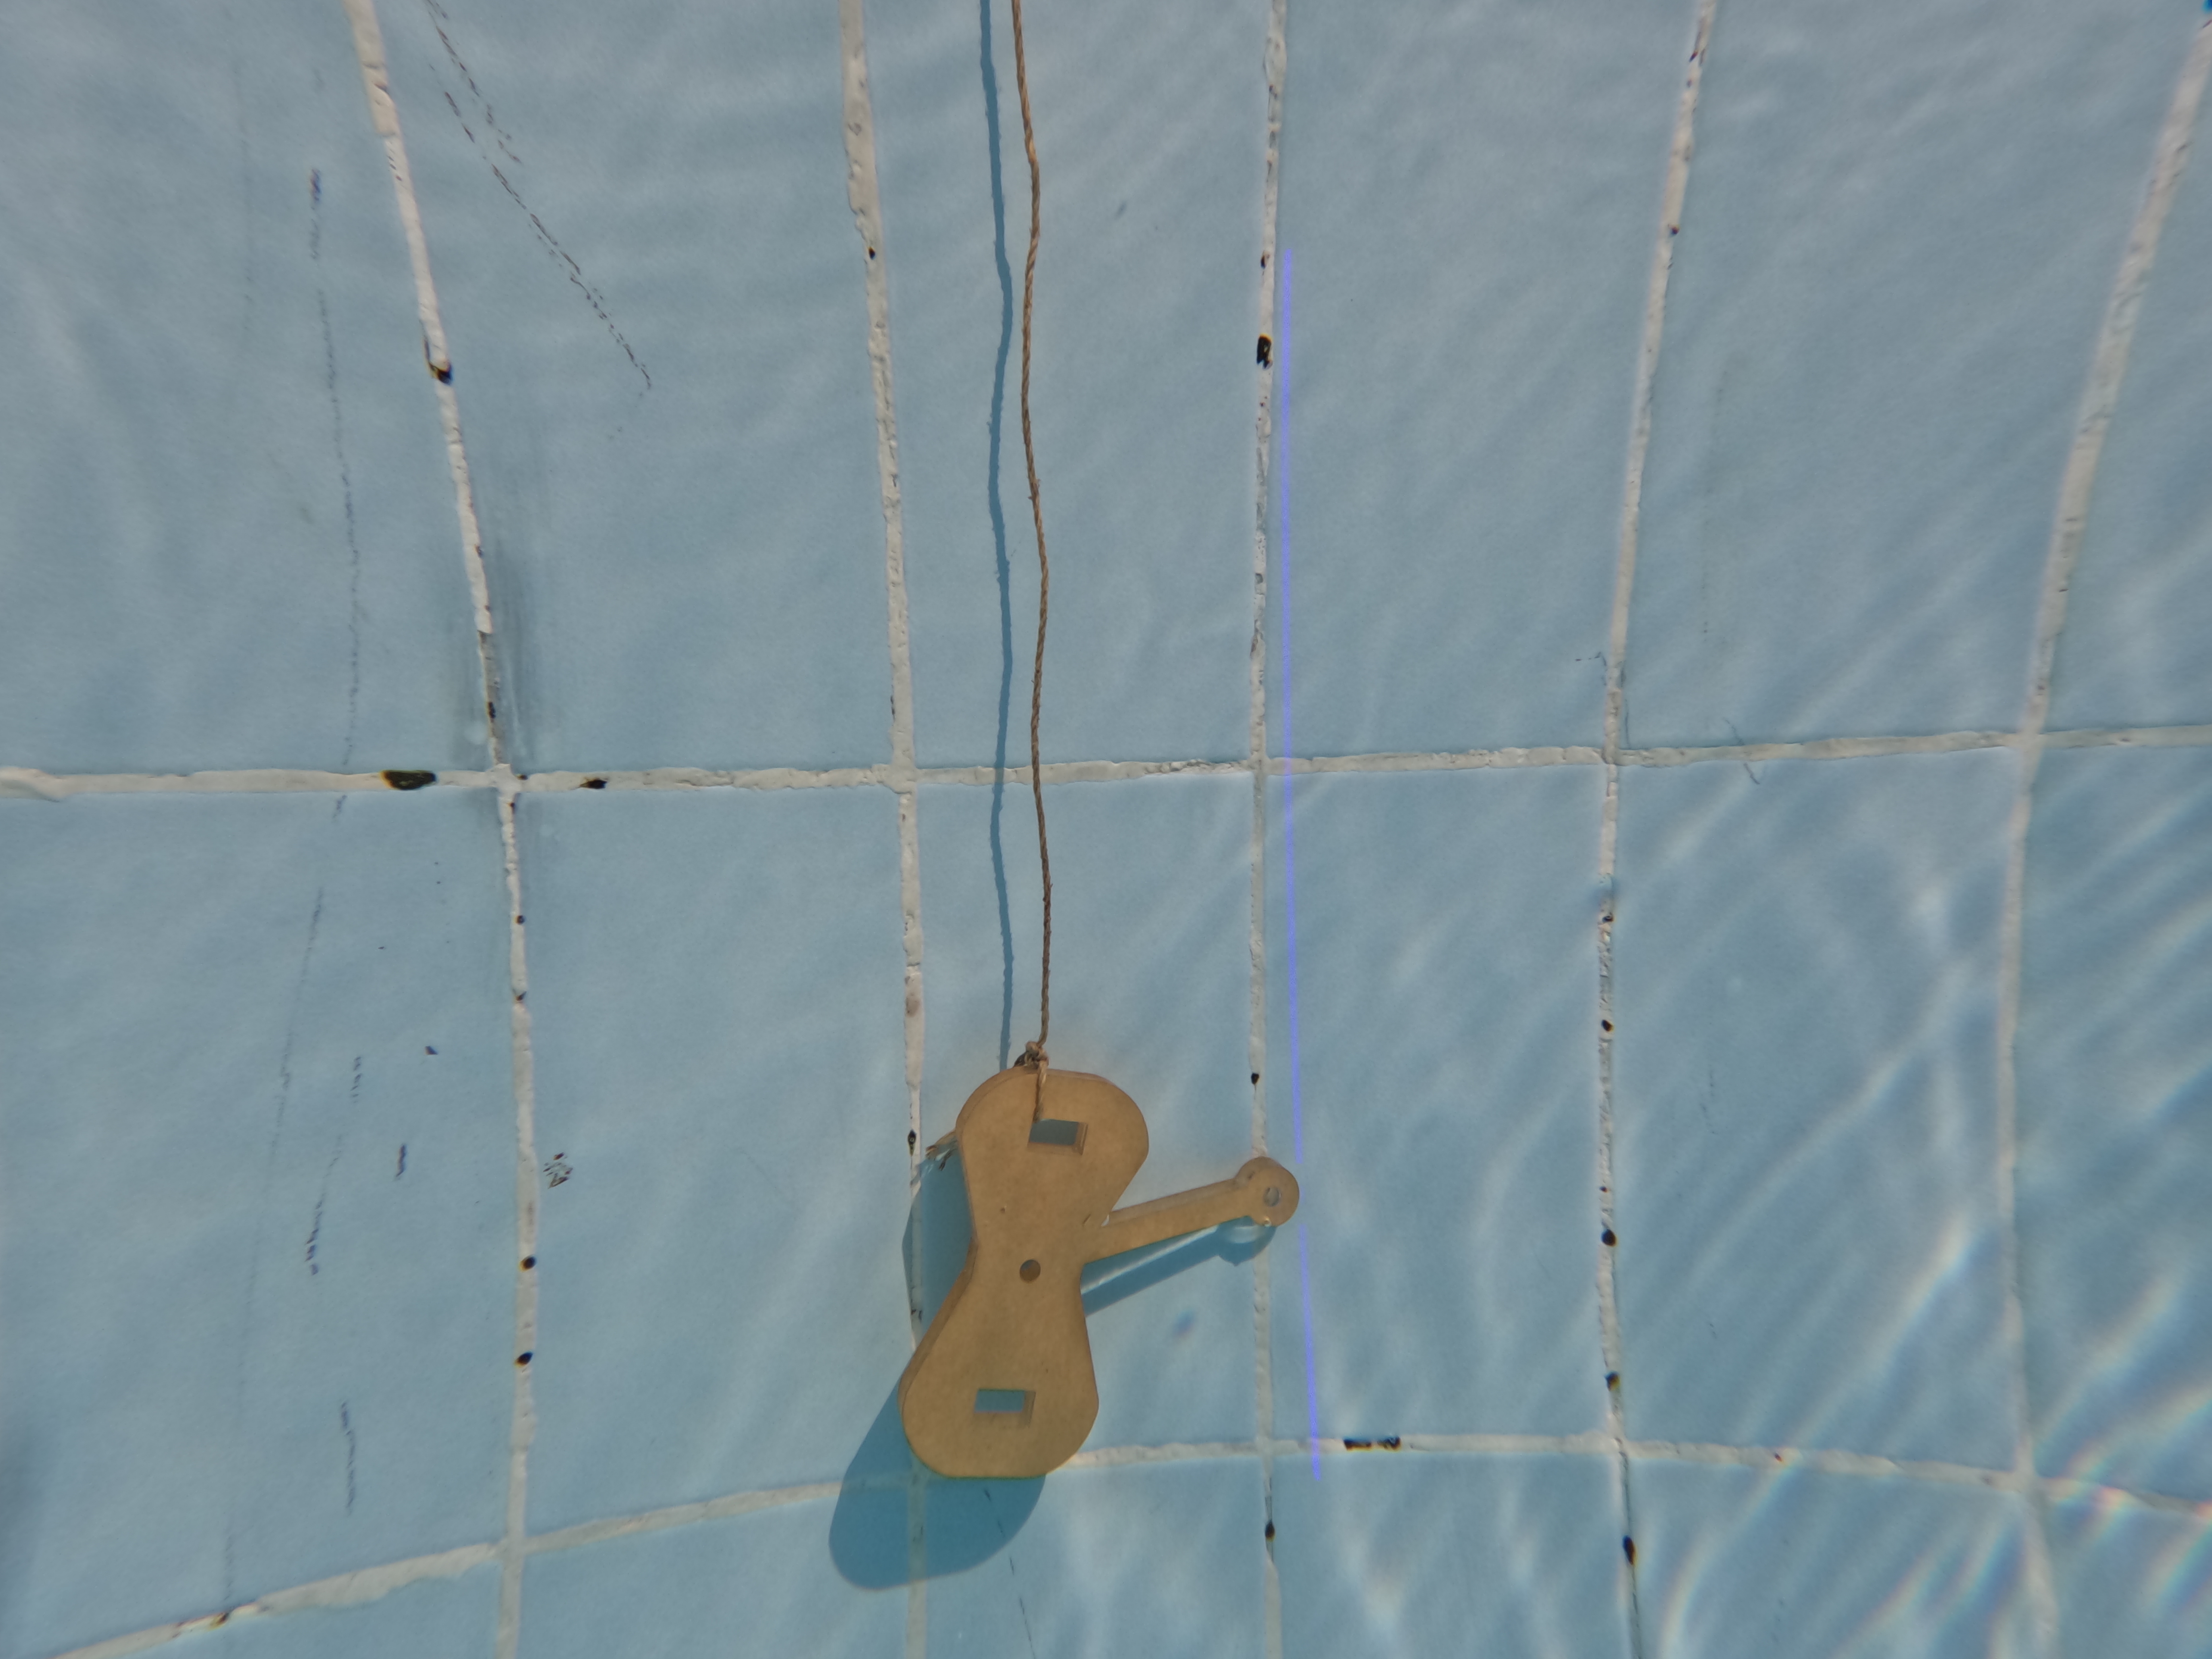

Supplement: Supplementary file 523 [file G0018868.pdf › Level_6_1/G0018868.pdf]

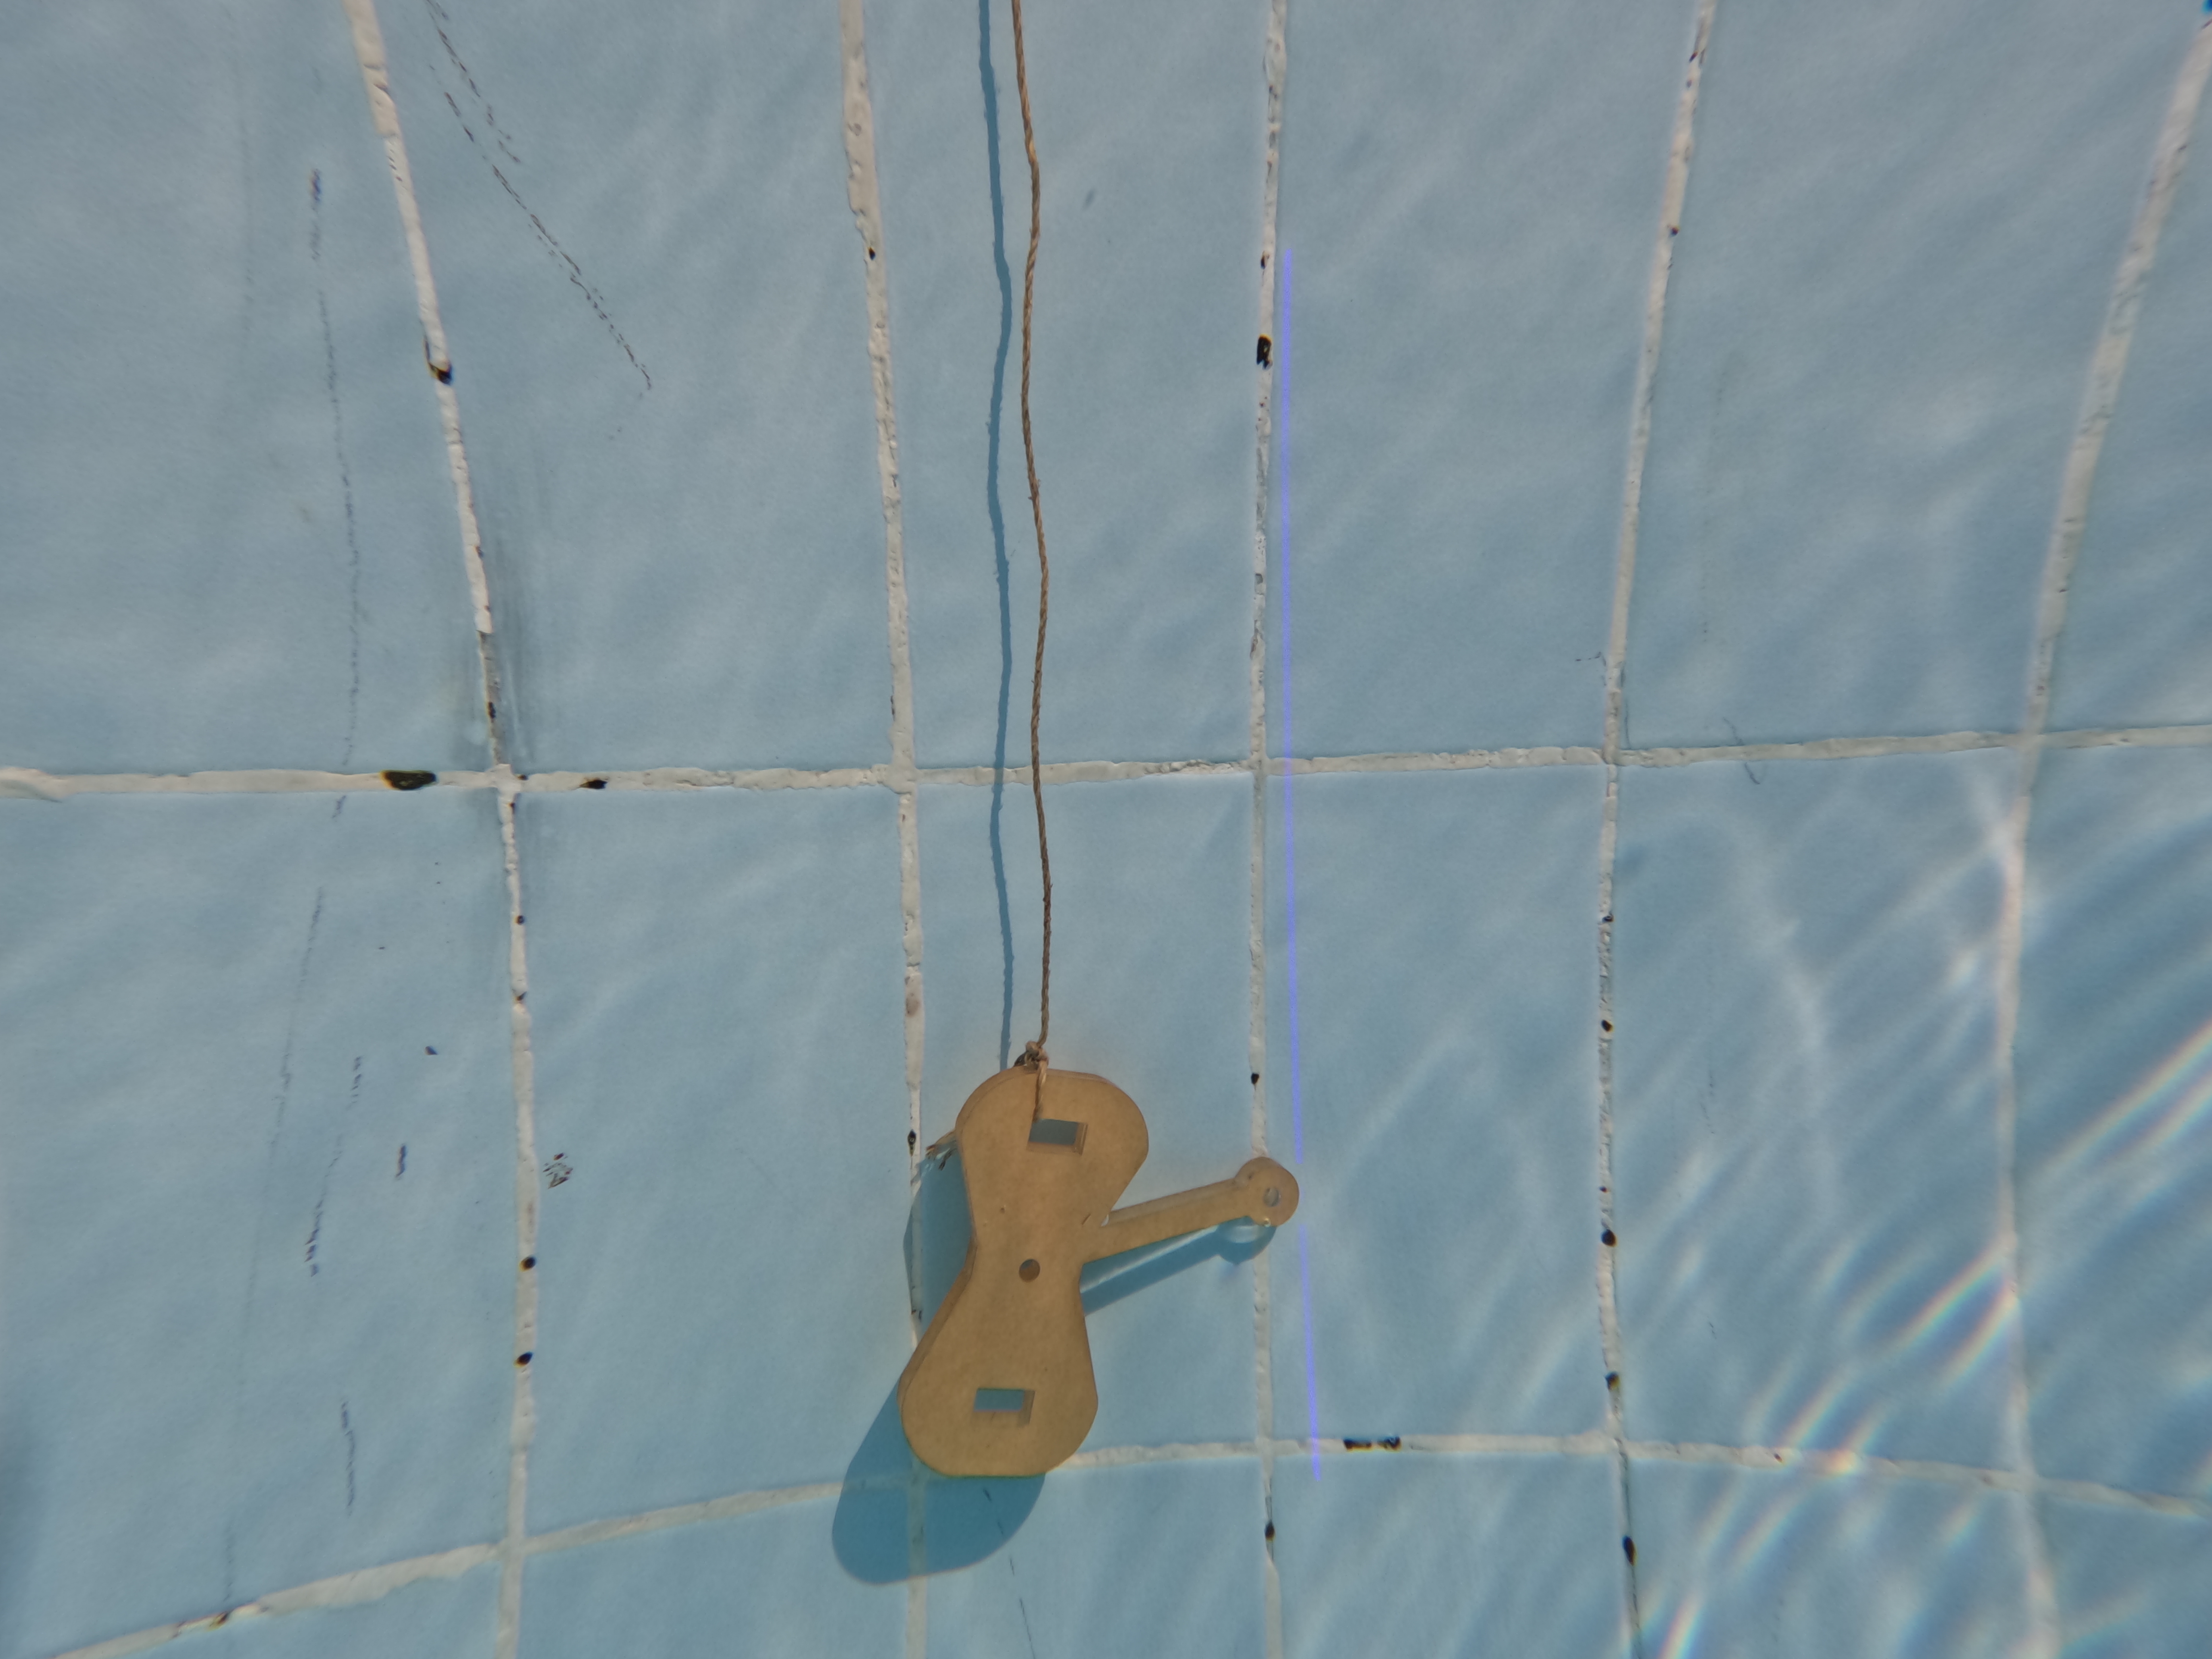

Supplement: Supplementary file 524 [file G0018869.pdf › Level_6_1/G0018869.pdf]

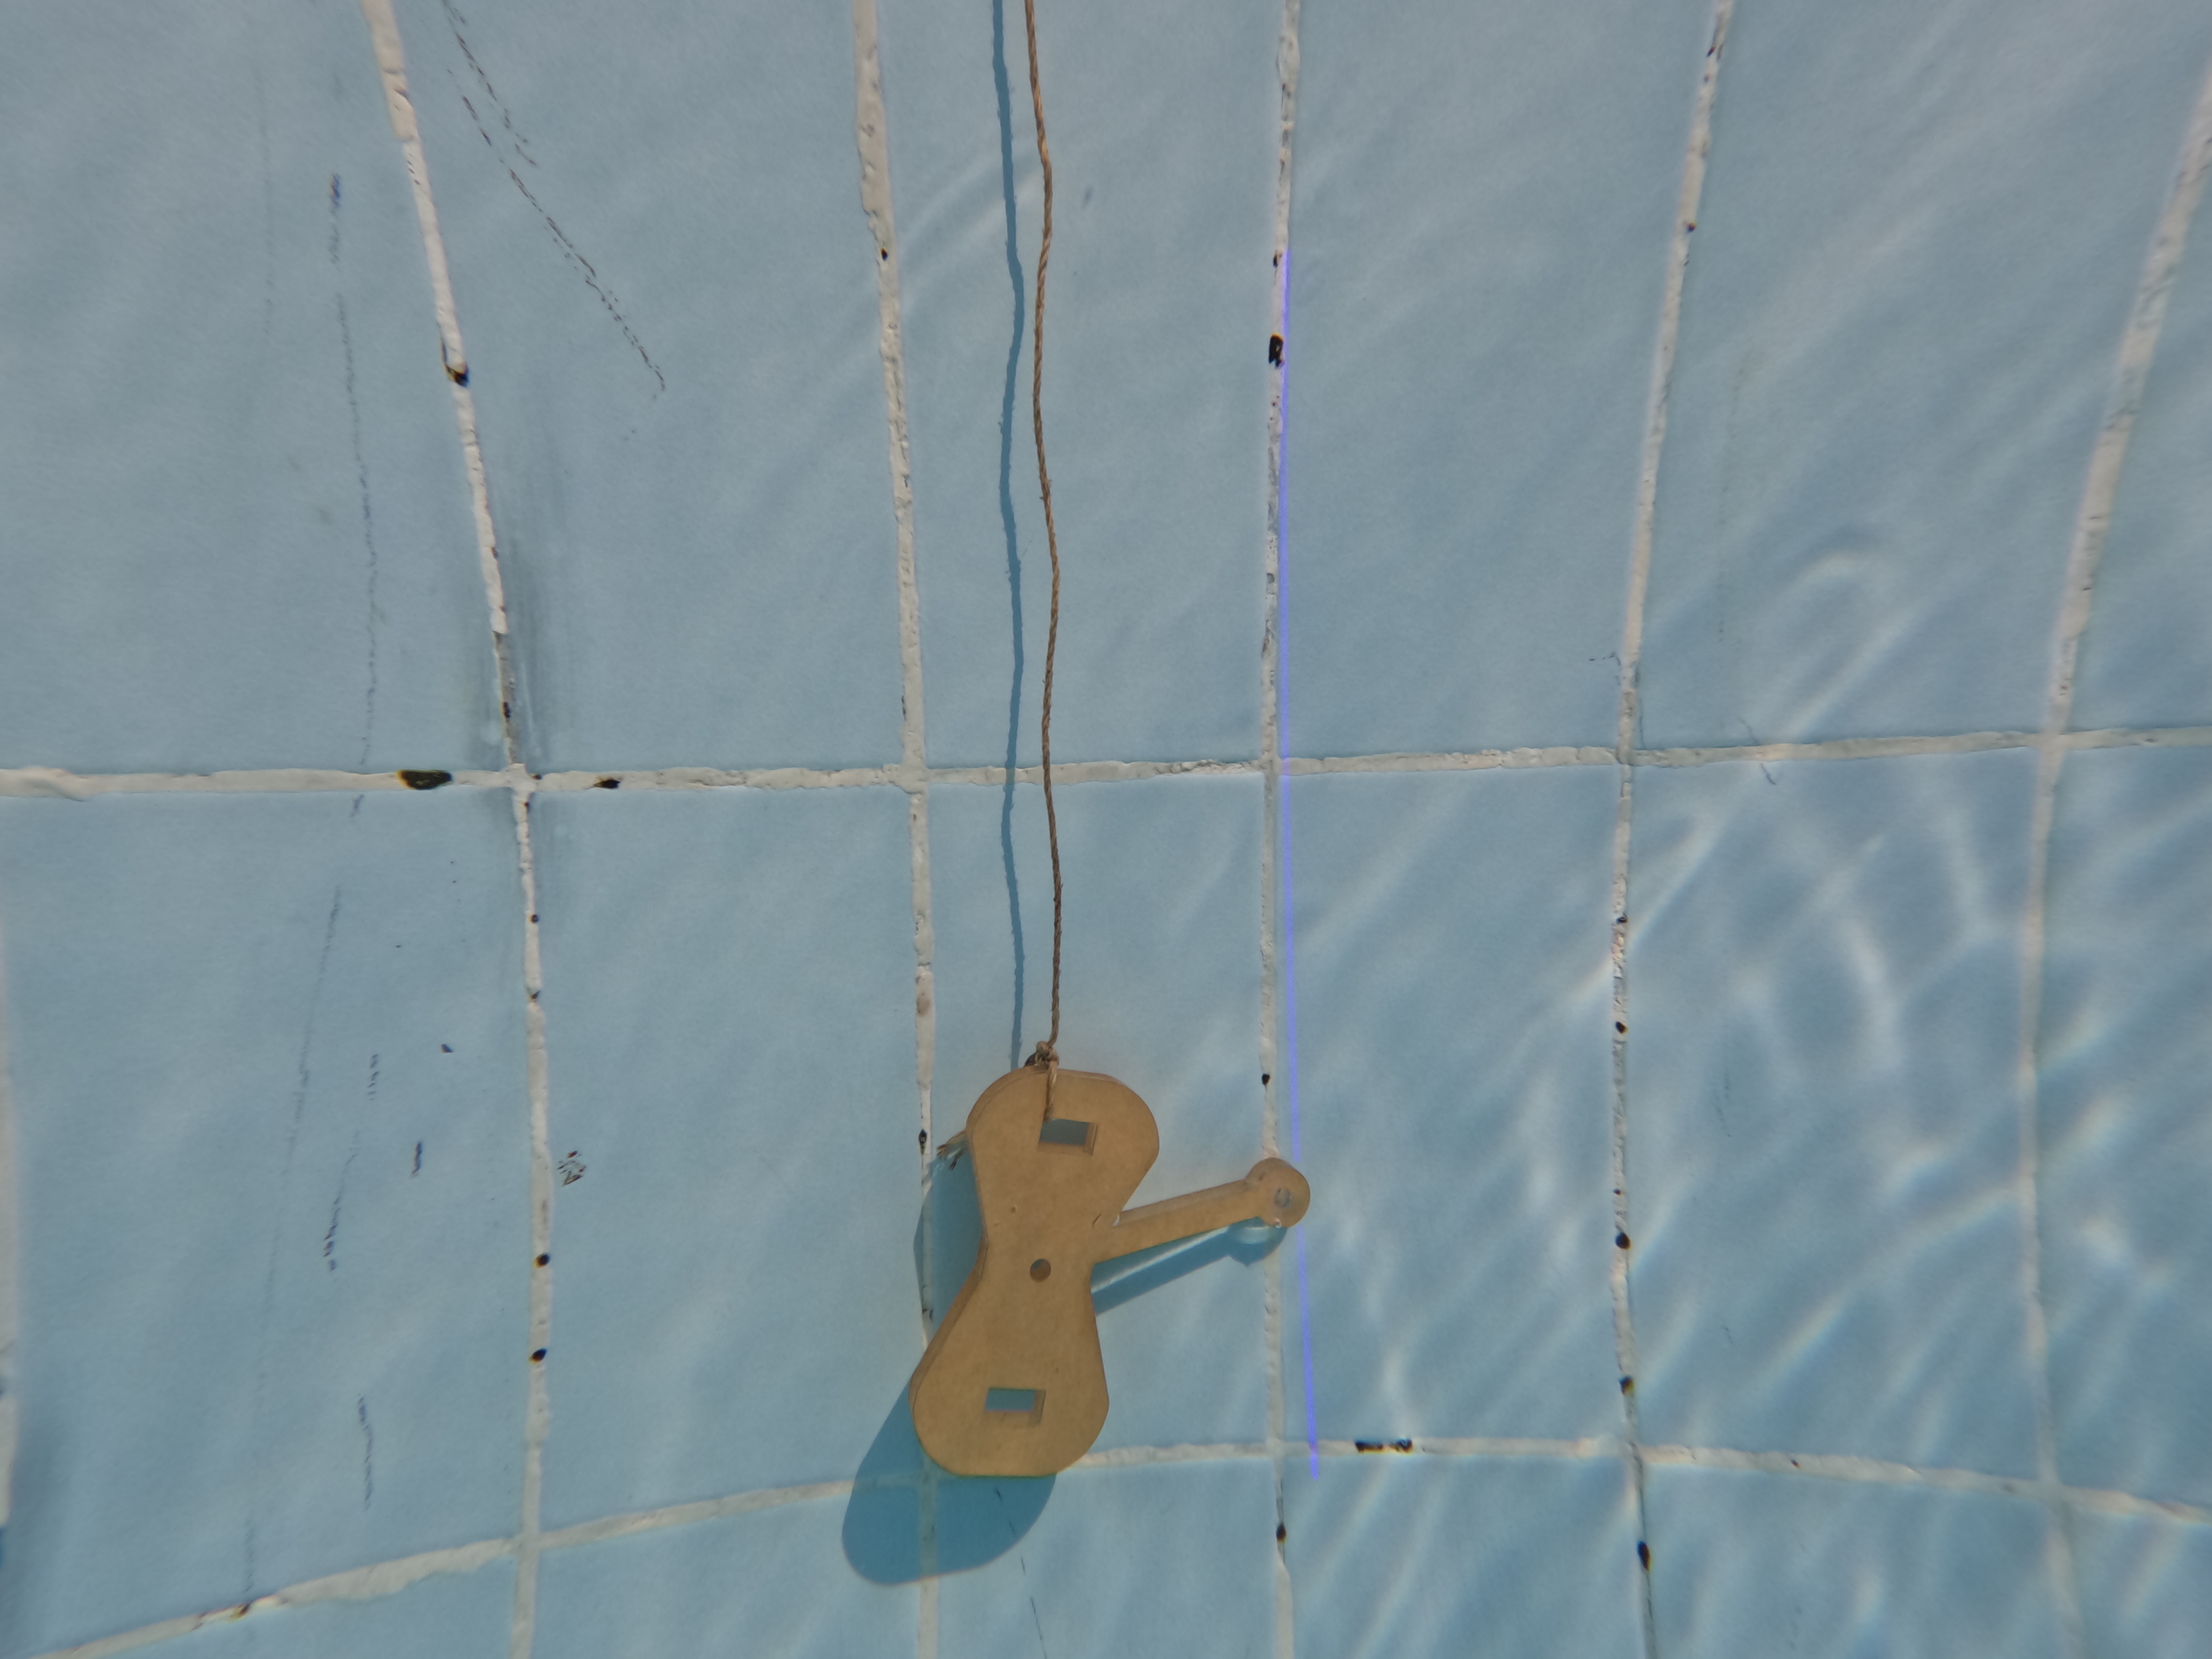

Supplement: Supplementary file 525 [file G0018870.pdf › Level_6_1/G0018870.pdf]

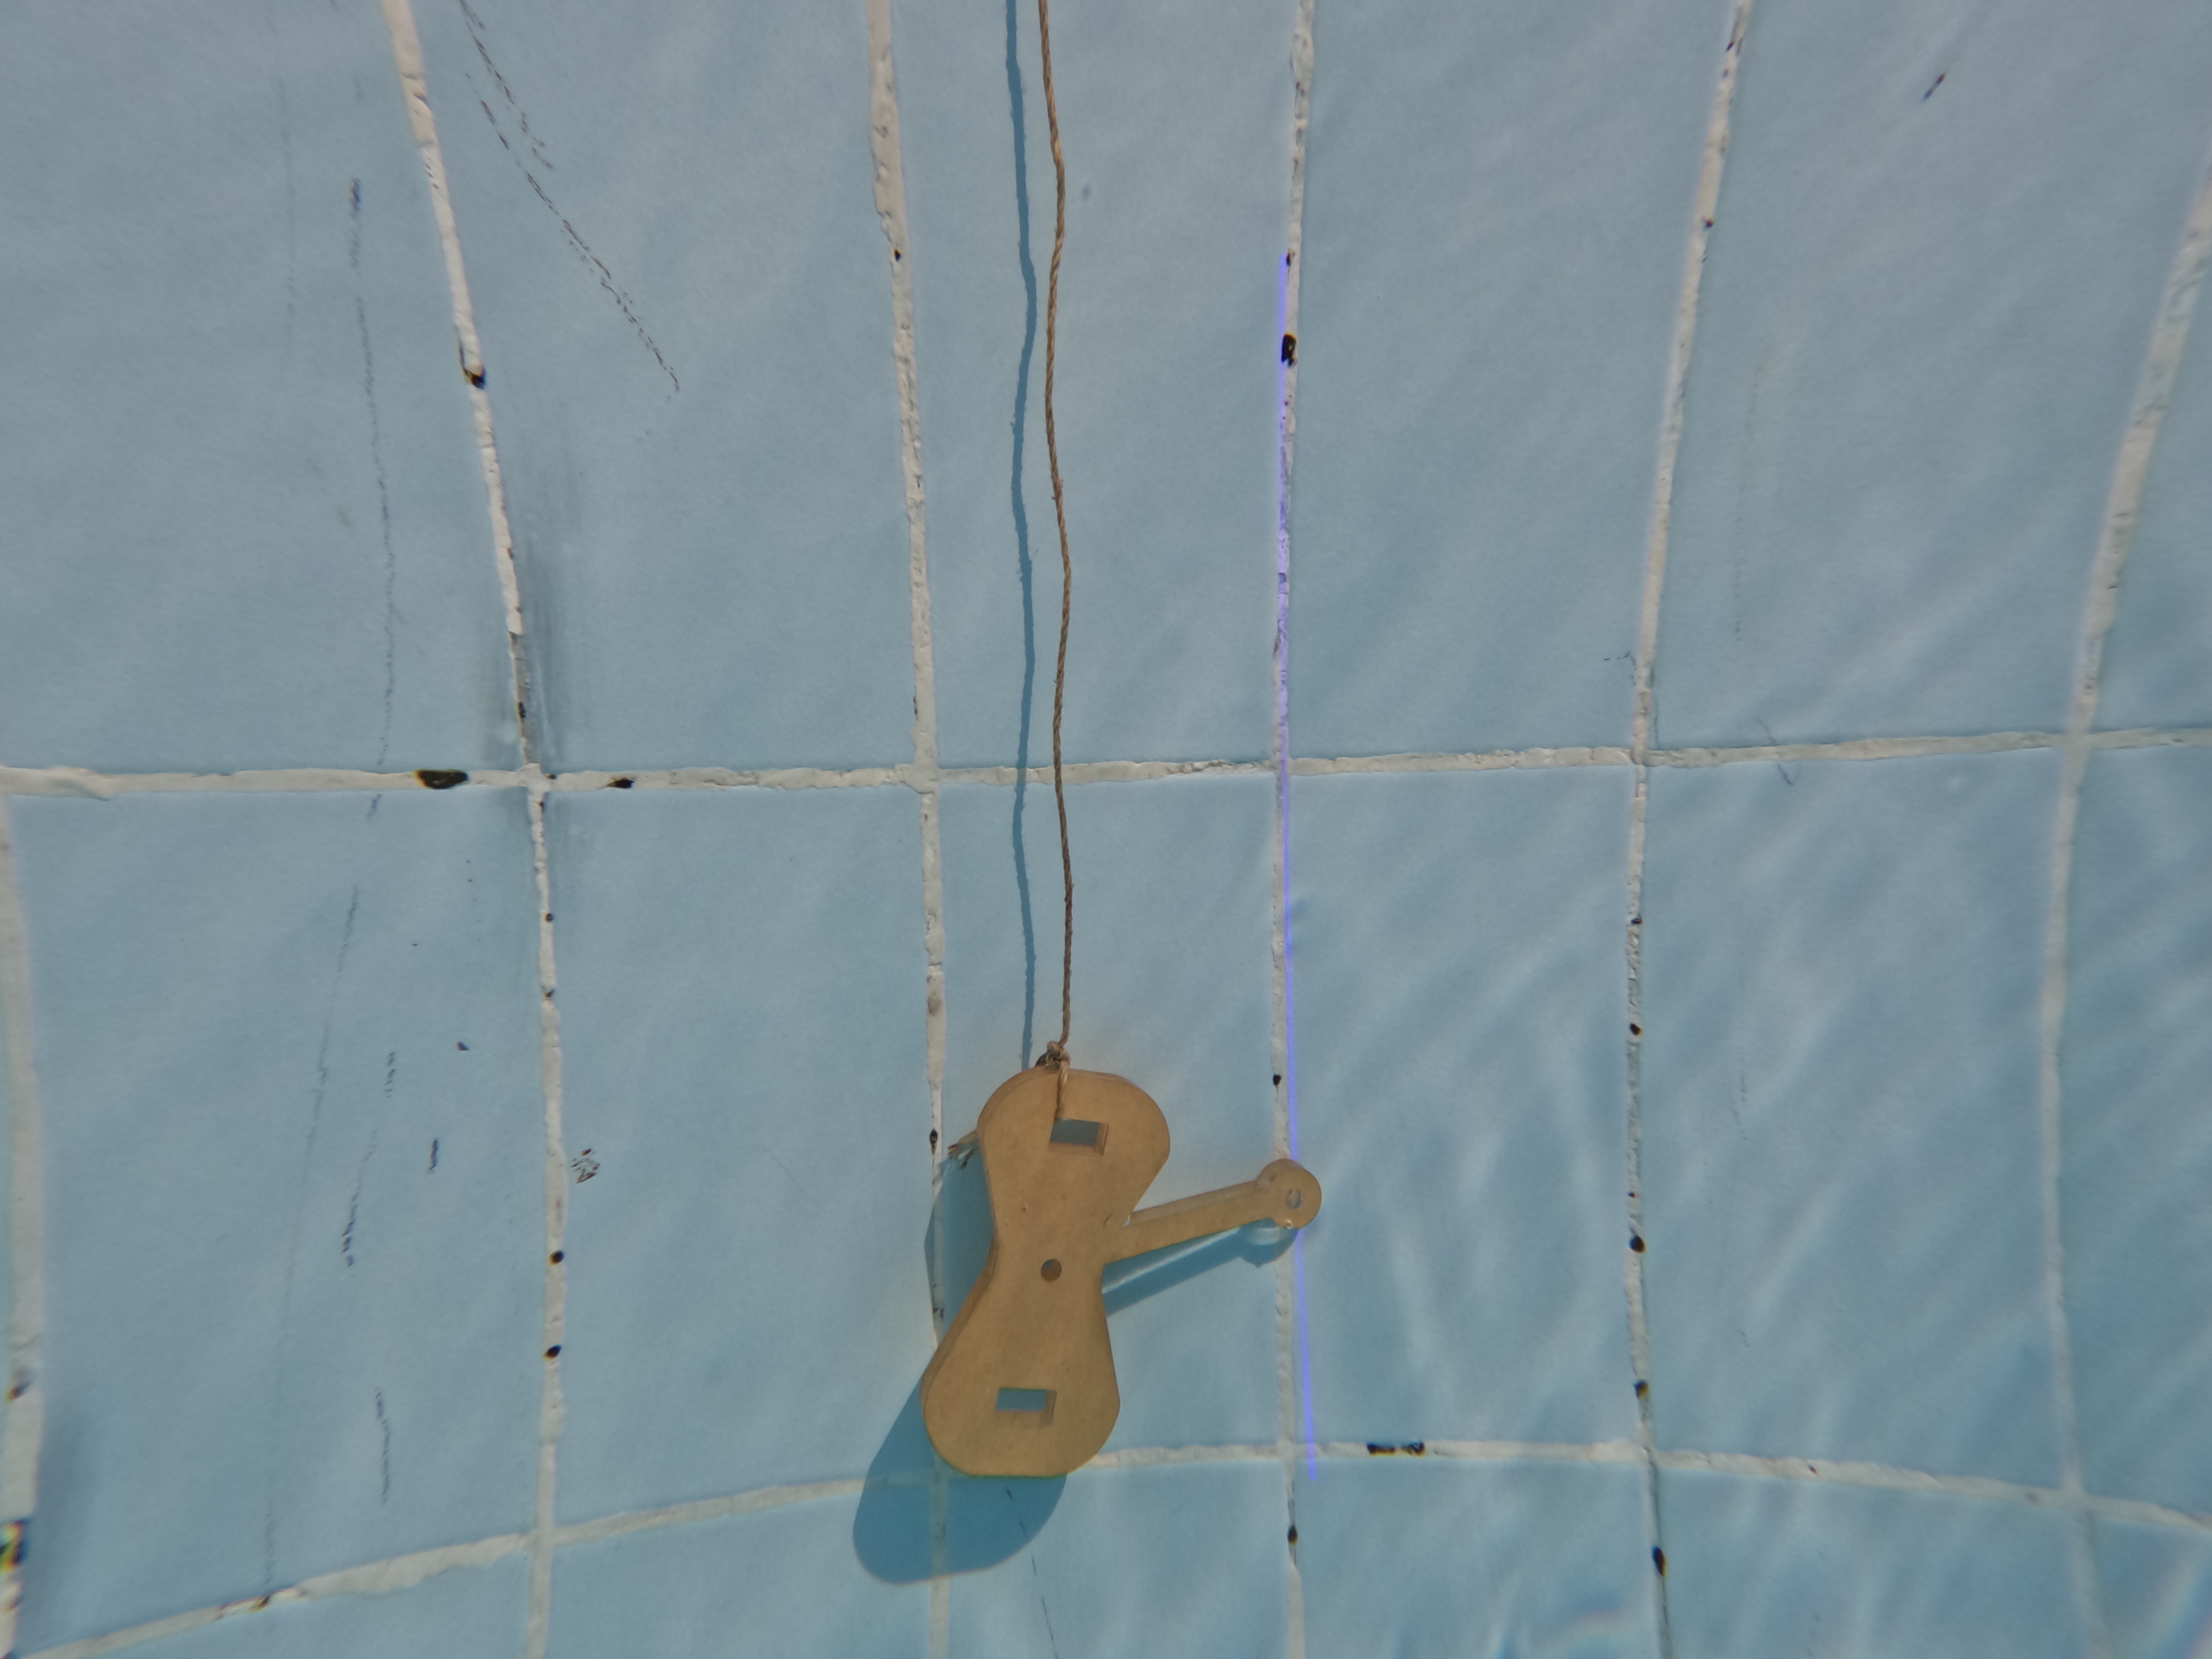

Supplement: Supplementary file 526 [file G0018871.pdf › Level_6_1/G0018871.pdf]

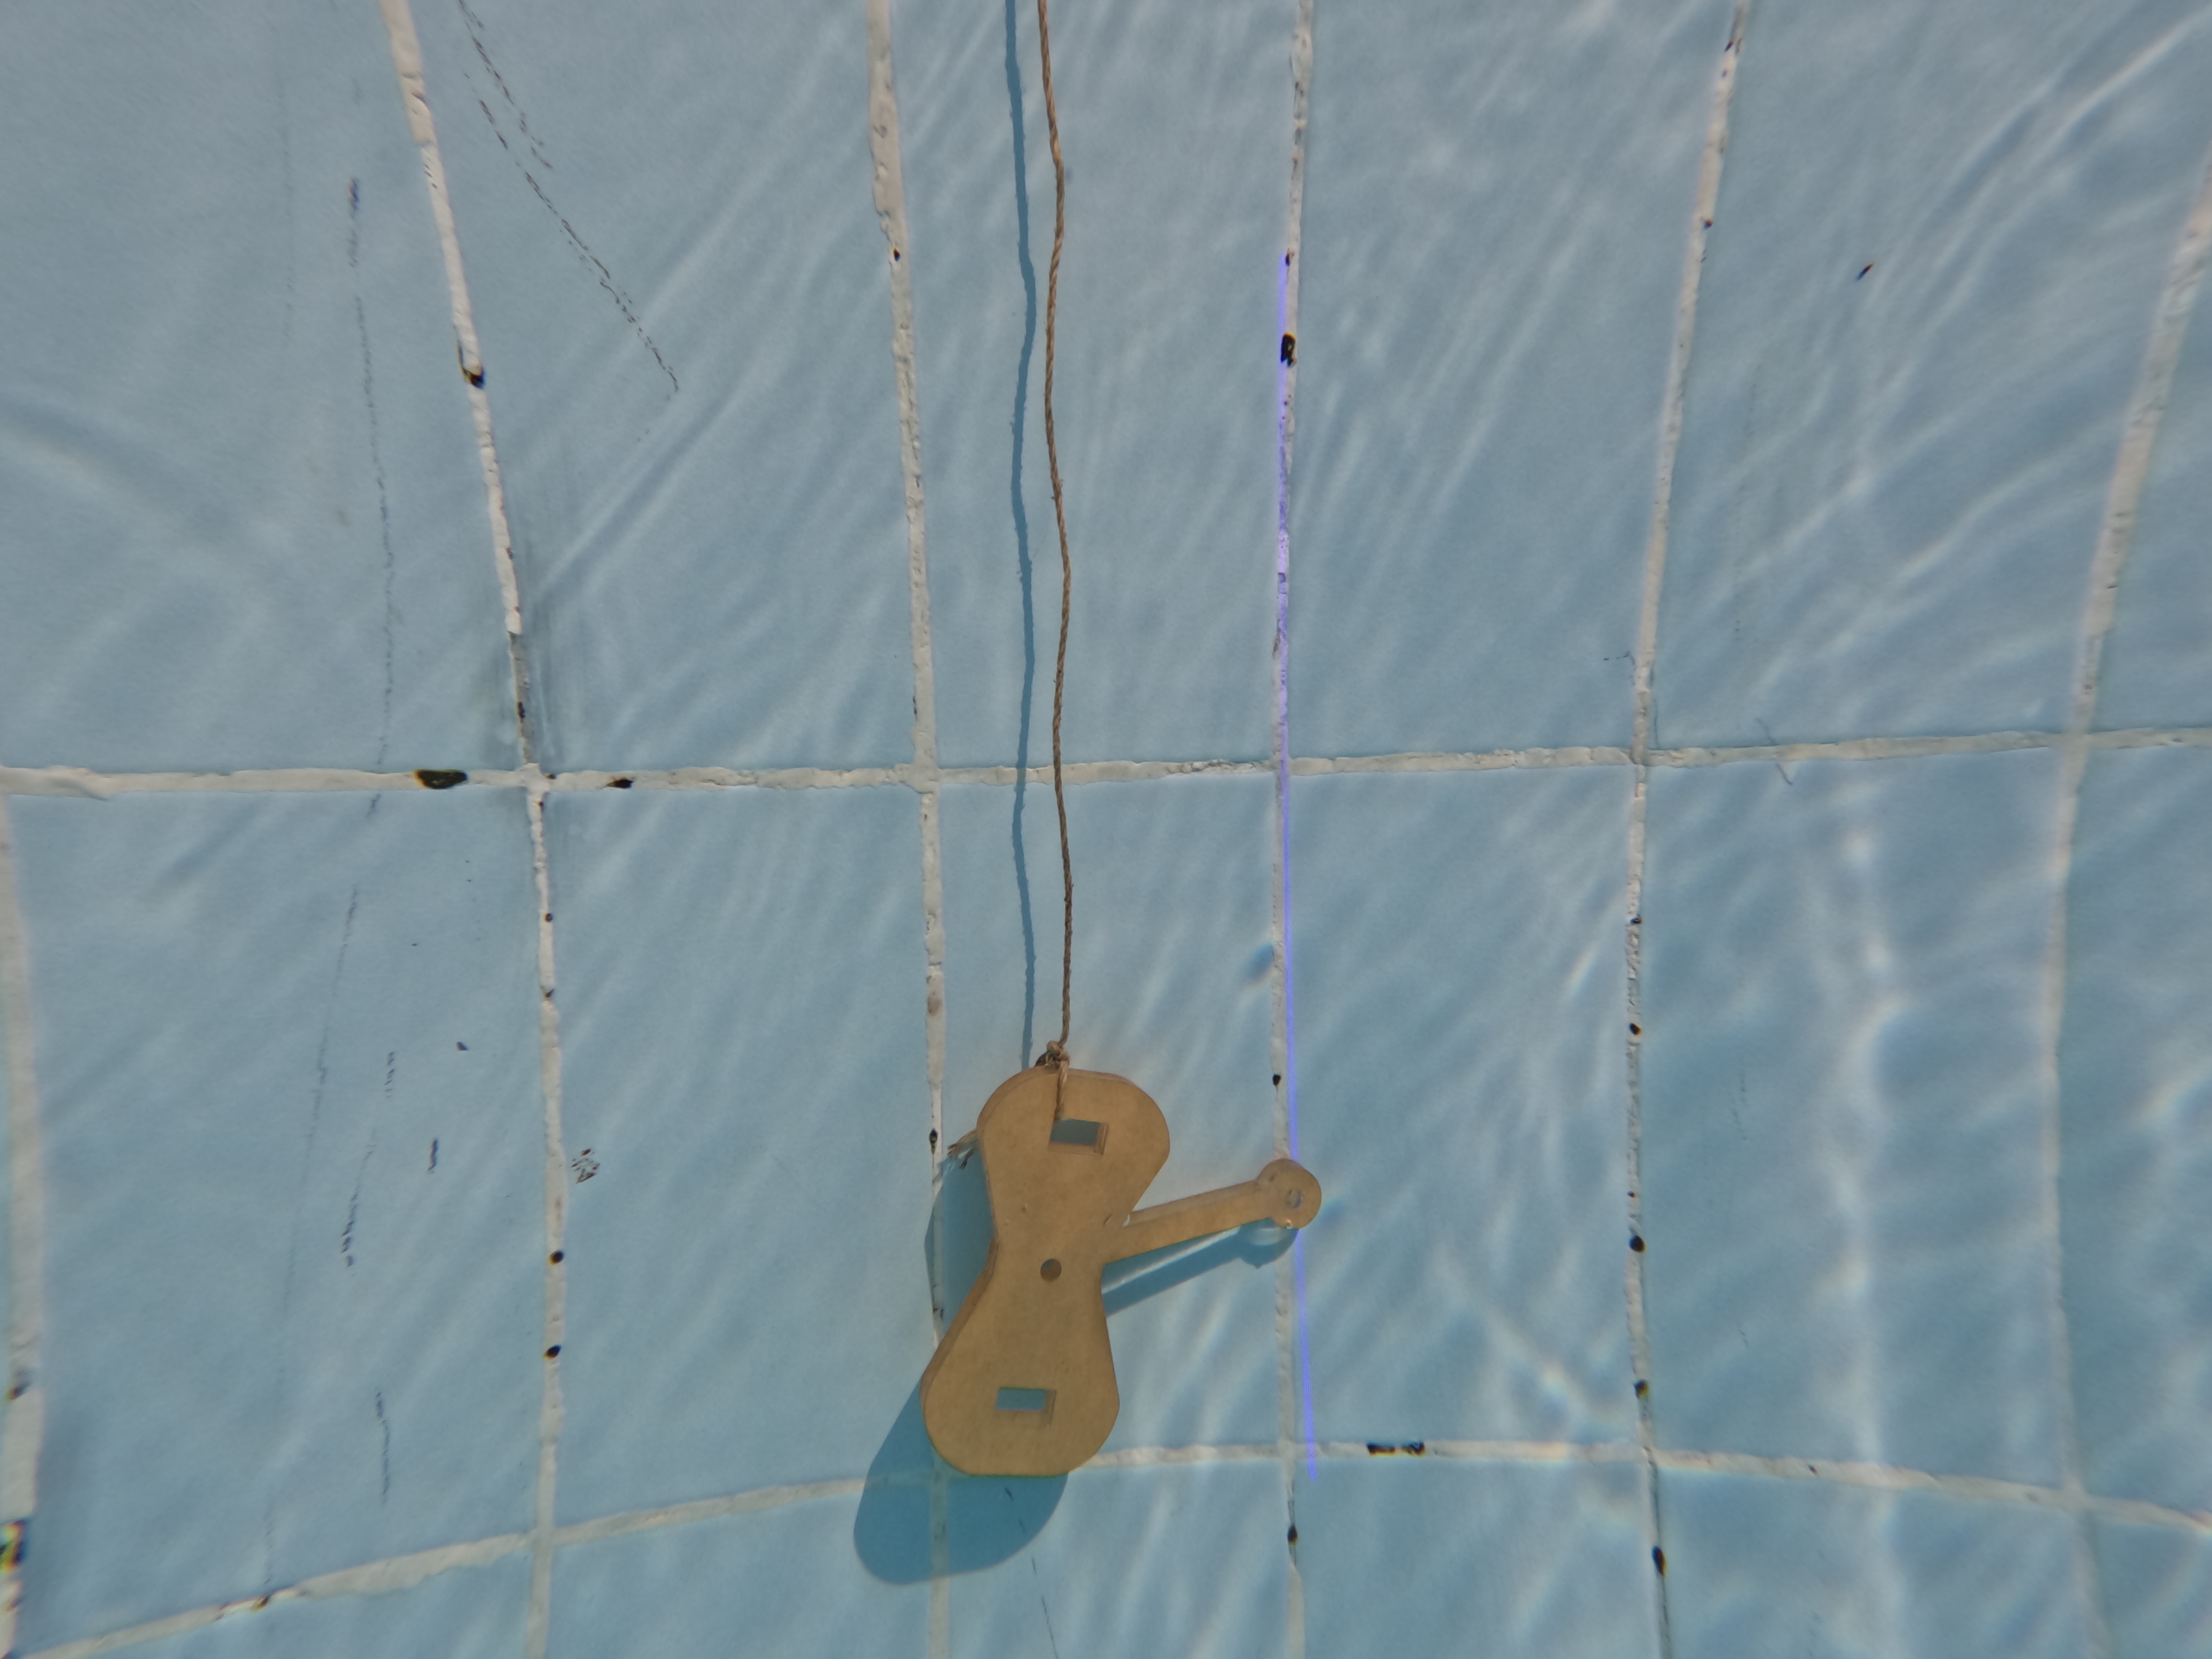

Supplement: Supplementary file 527 [file G0018872.pdf › Level_6_1/G0018872.pdf]

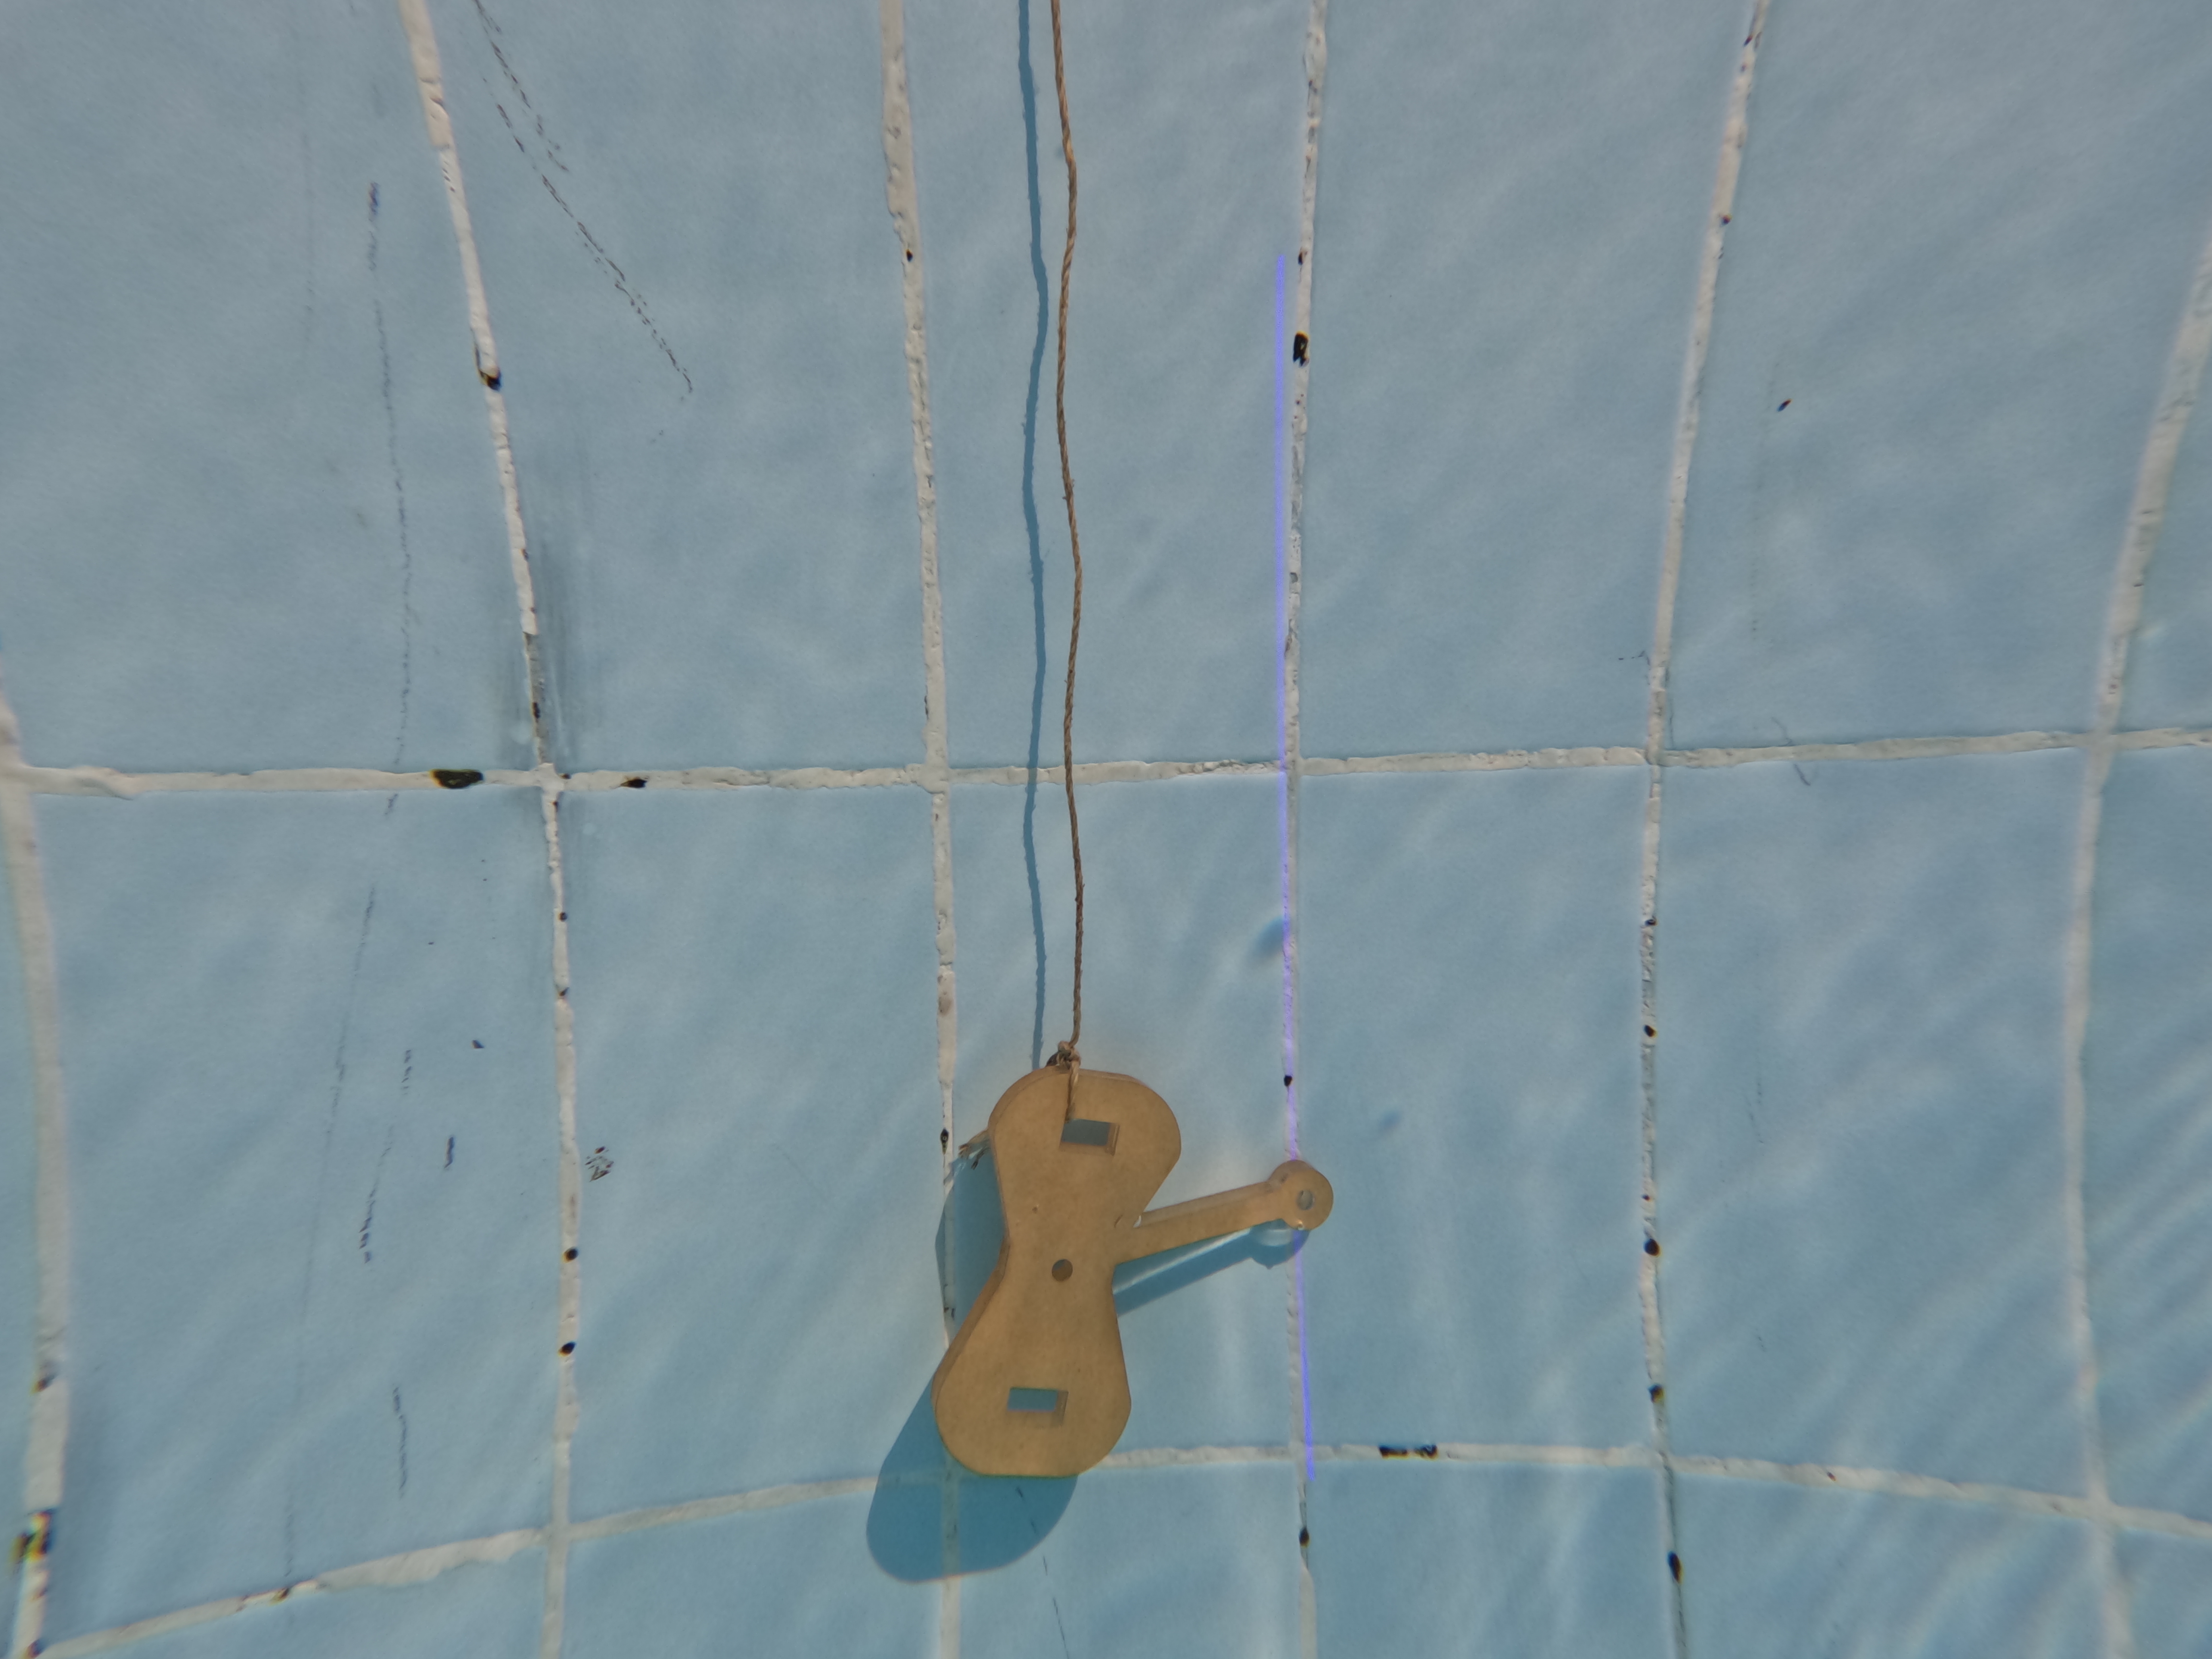

Supplement: Supplementary file 528 [file G0018873.pdf › Level_6_1/G0018873.pdf]

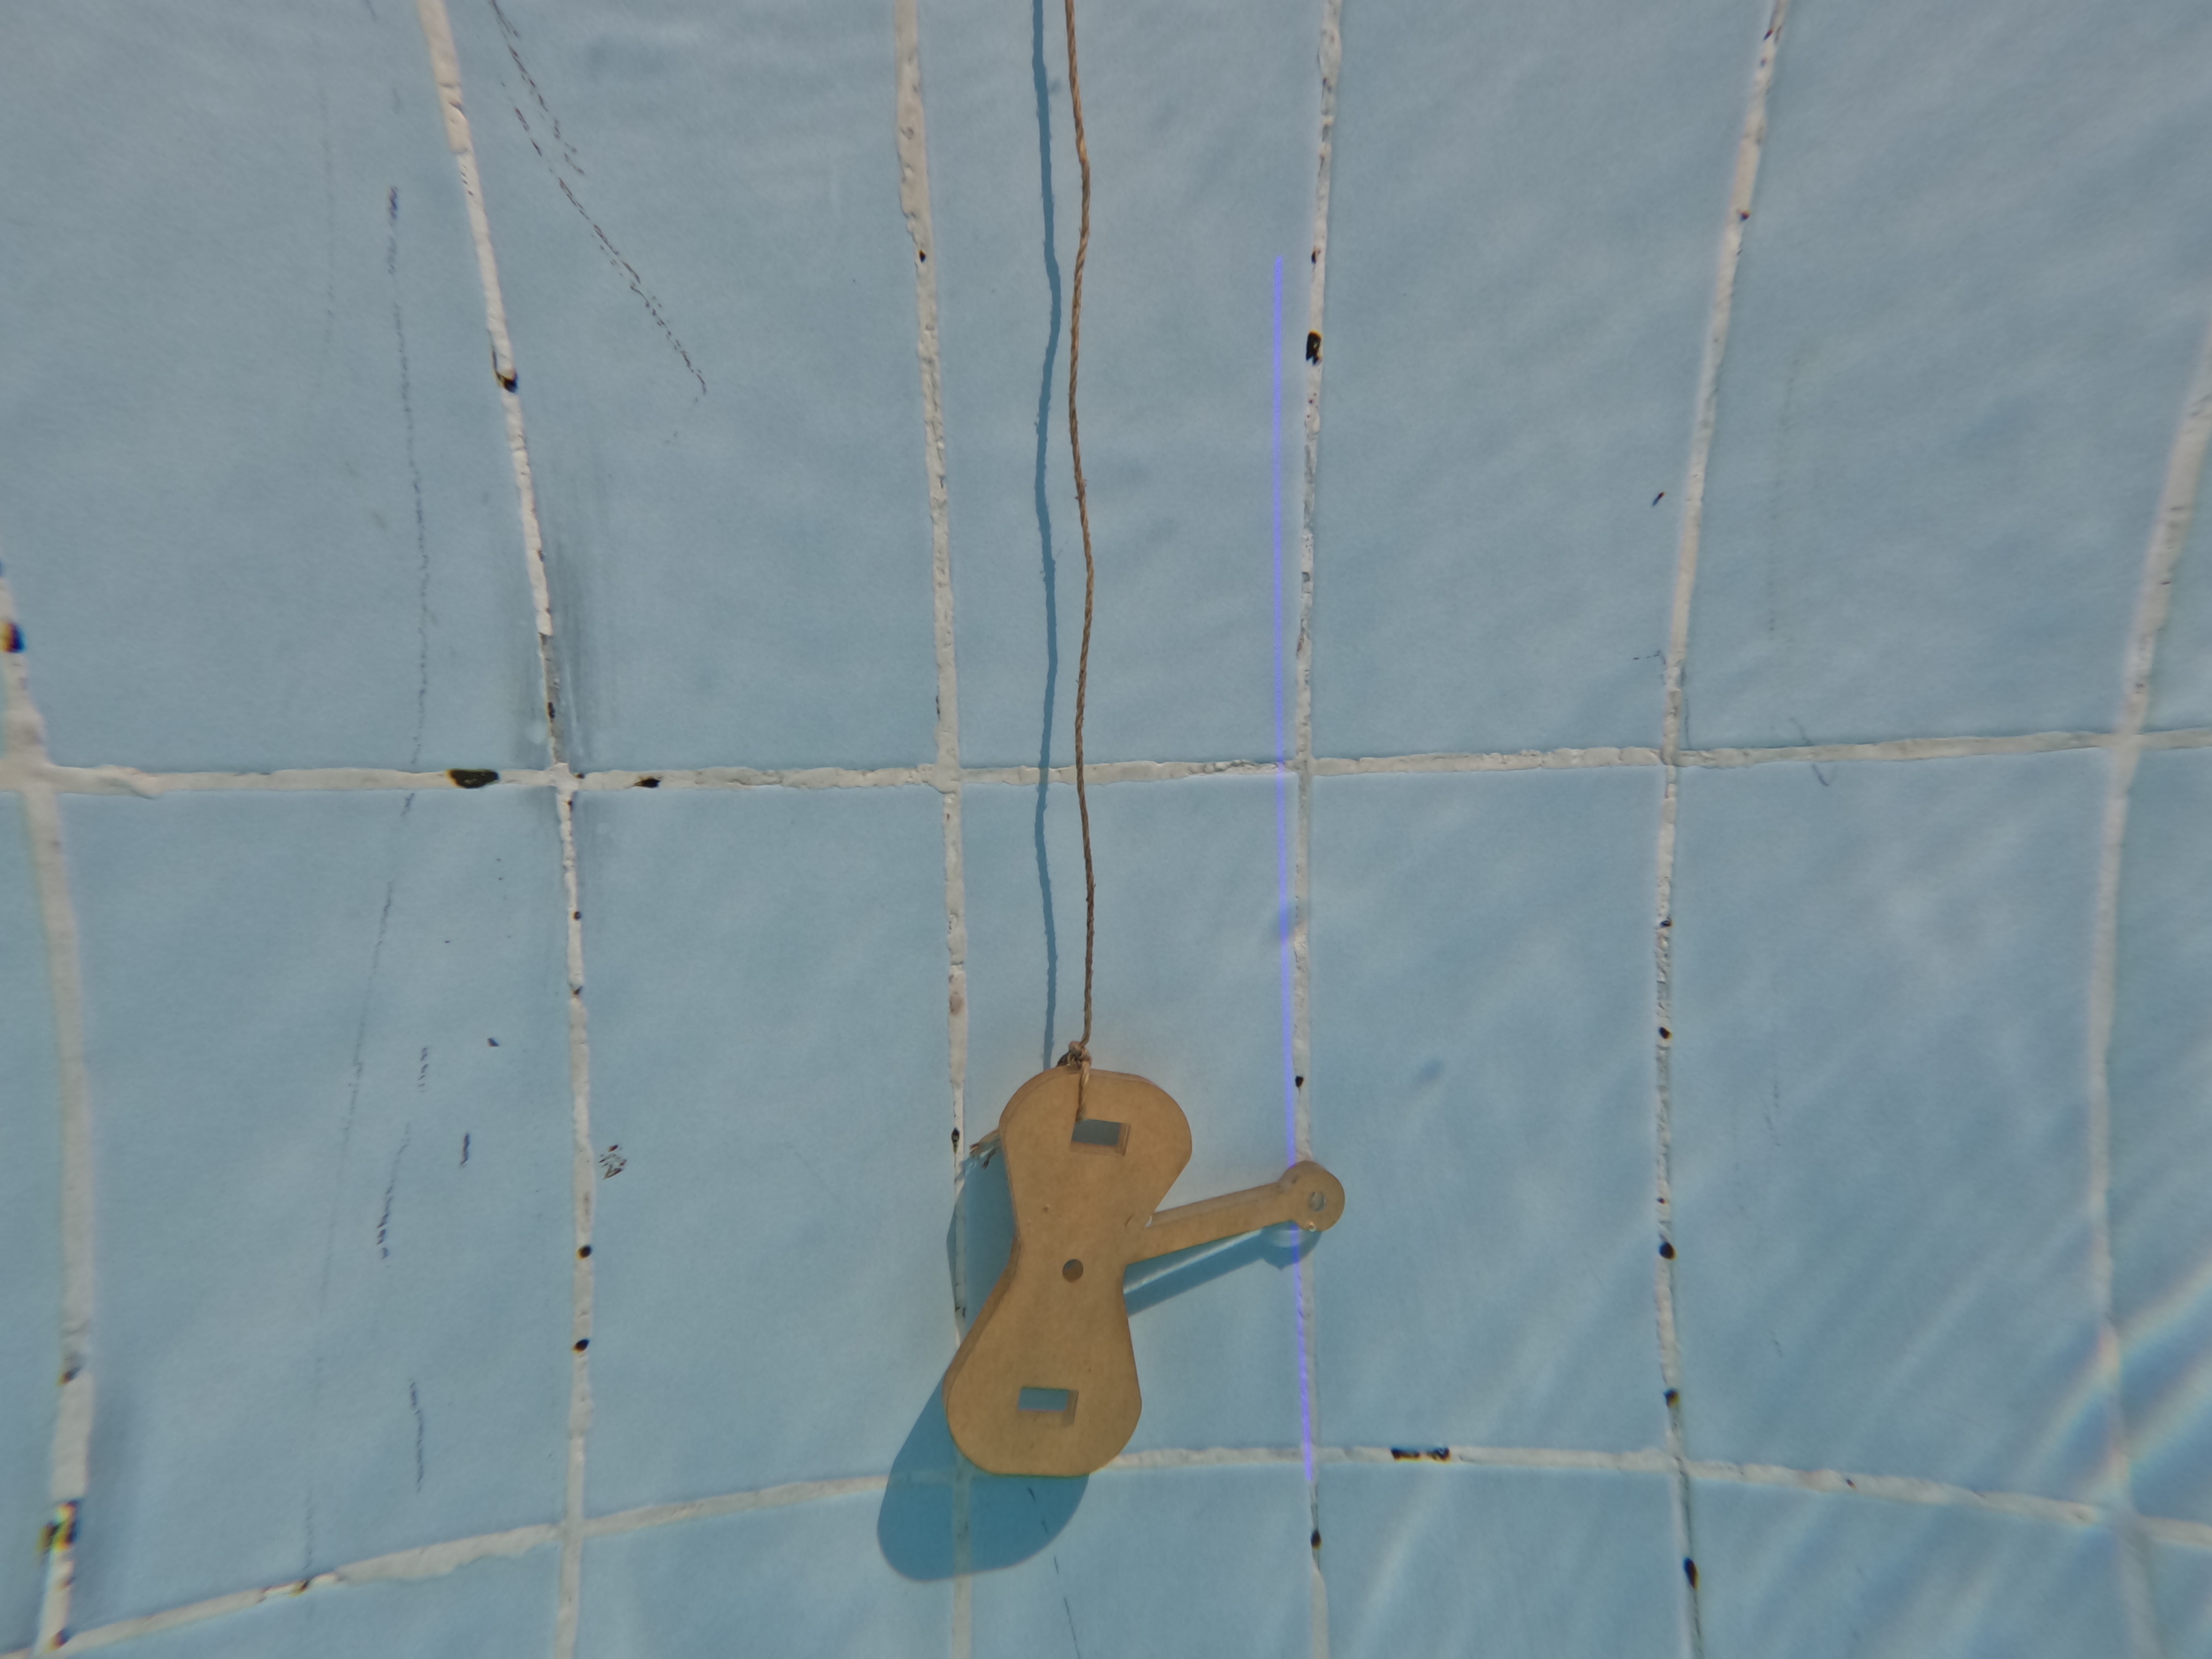

Supplement: Supplementary file 529 [file G0018874.pdf › Level_6_1/G0018874.pdf]

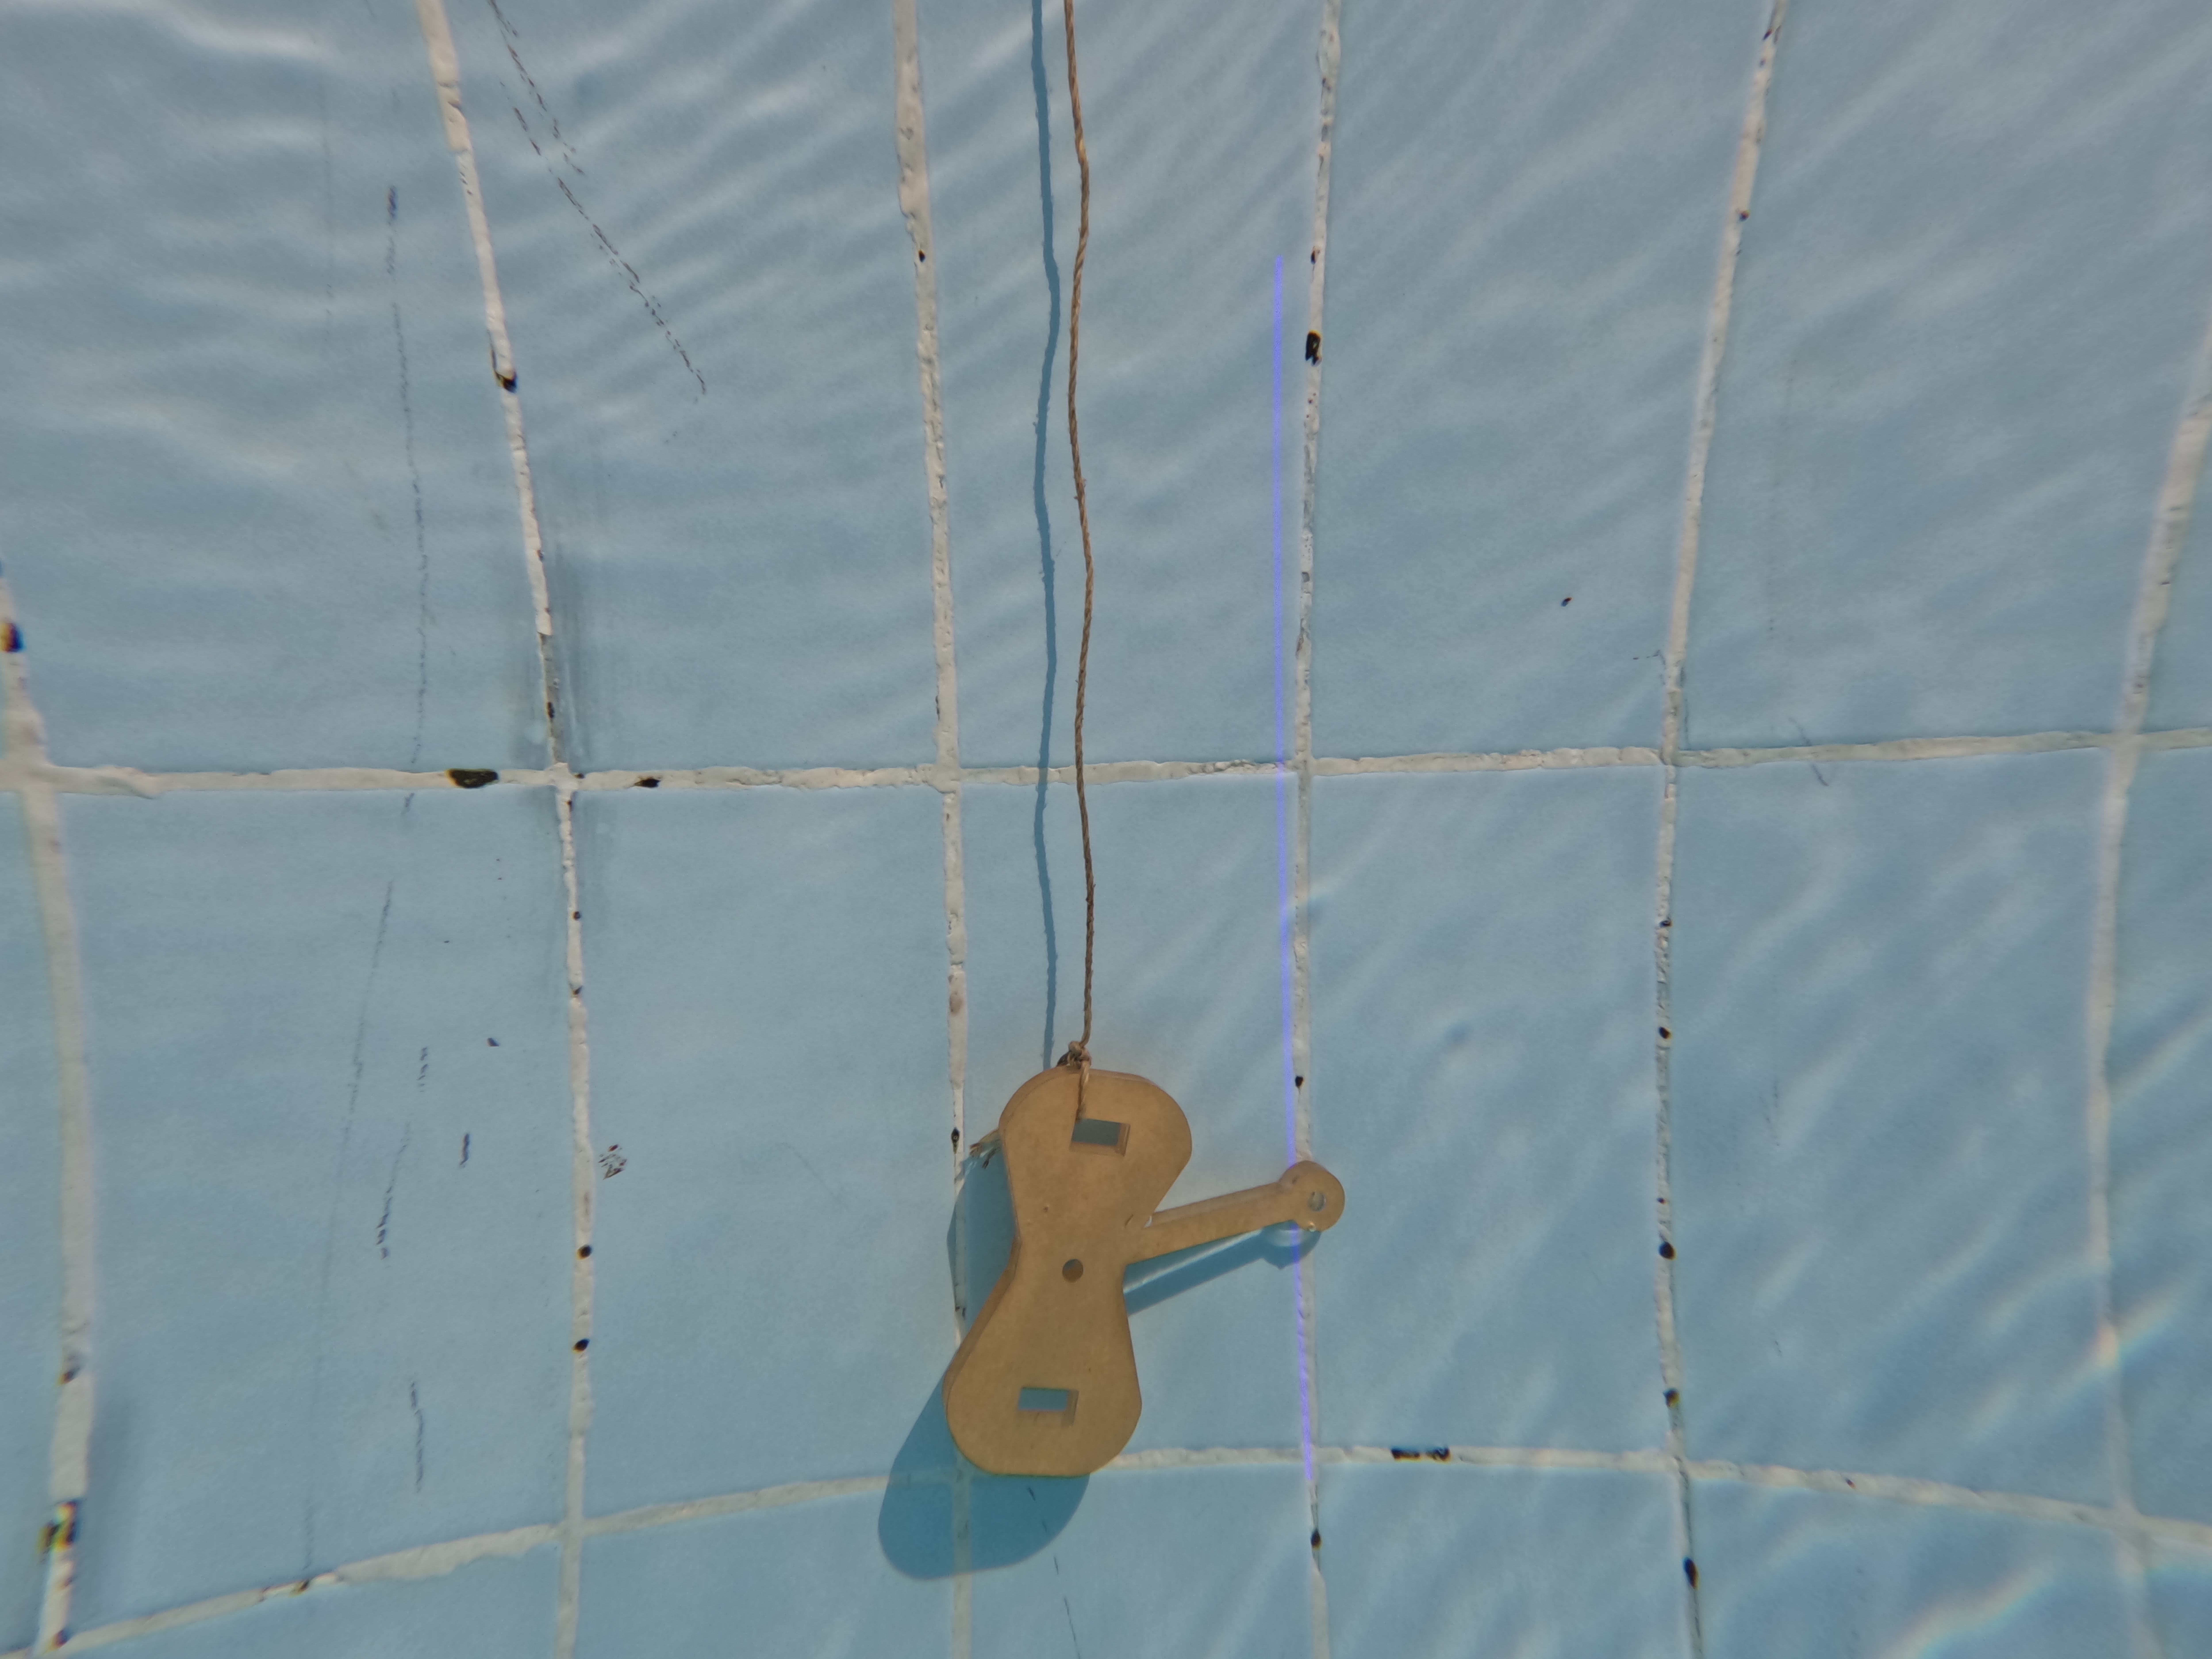

Supplement: Supplementary file 530 [file G0018875.pdf › Level_6_1/G0018875.pdf]

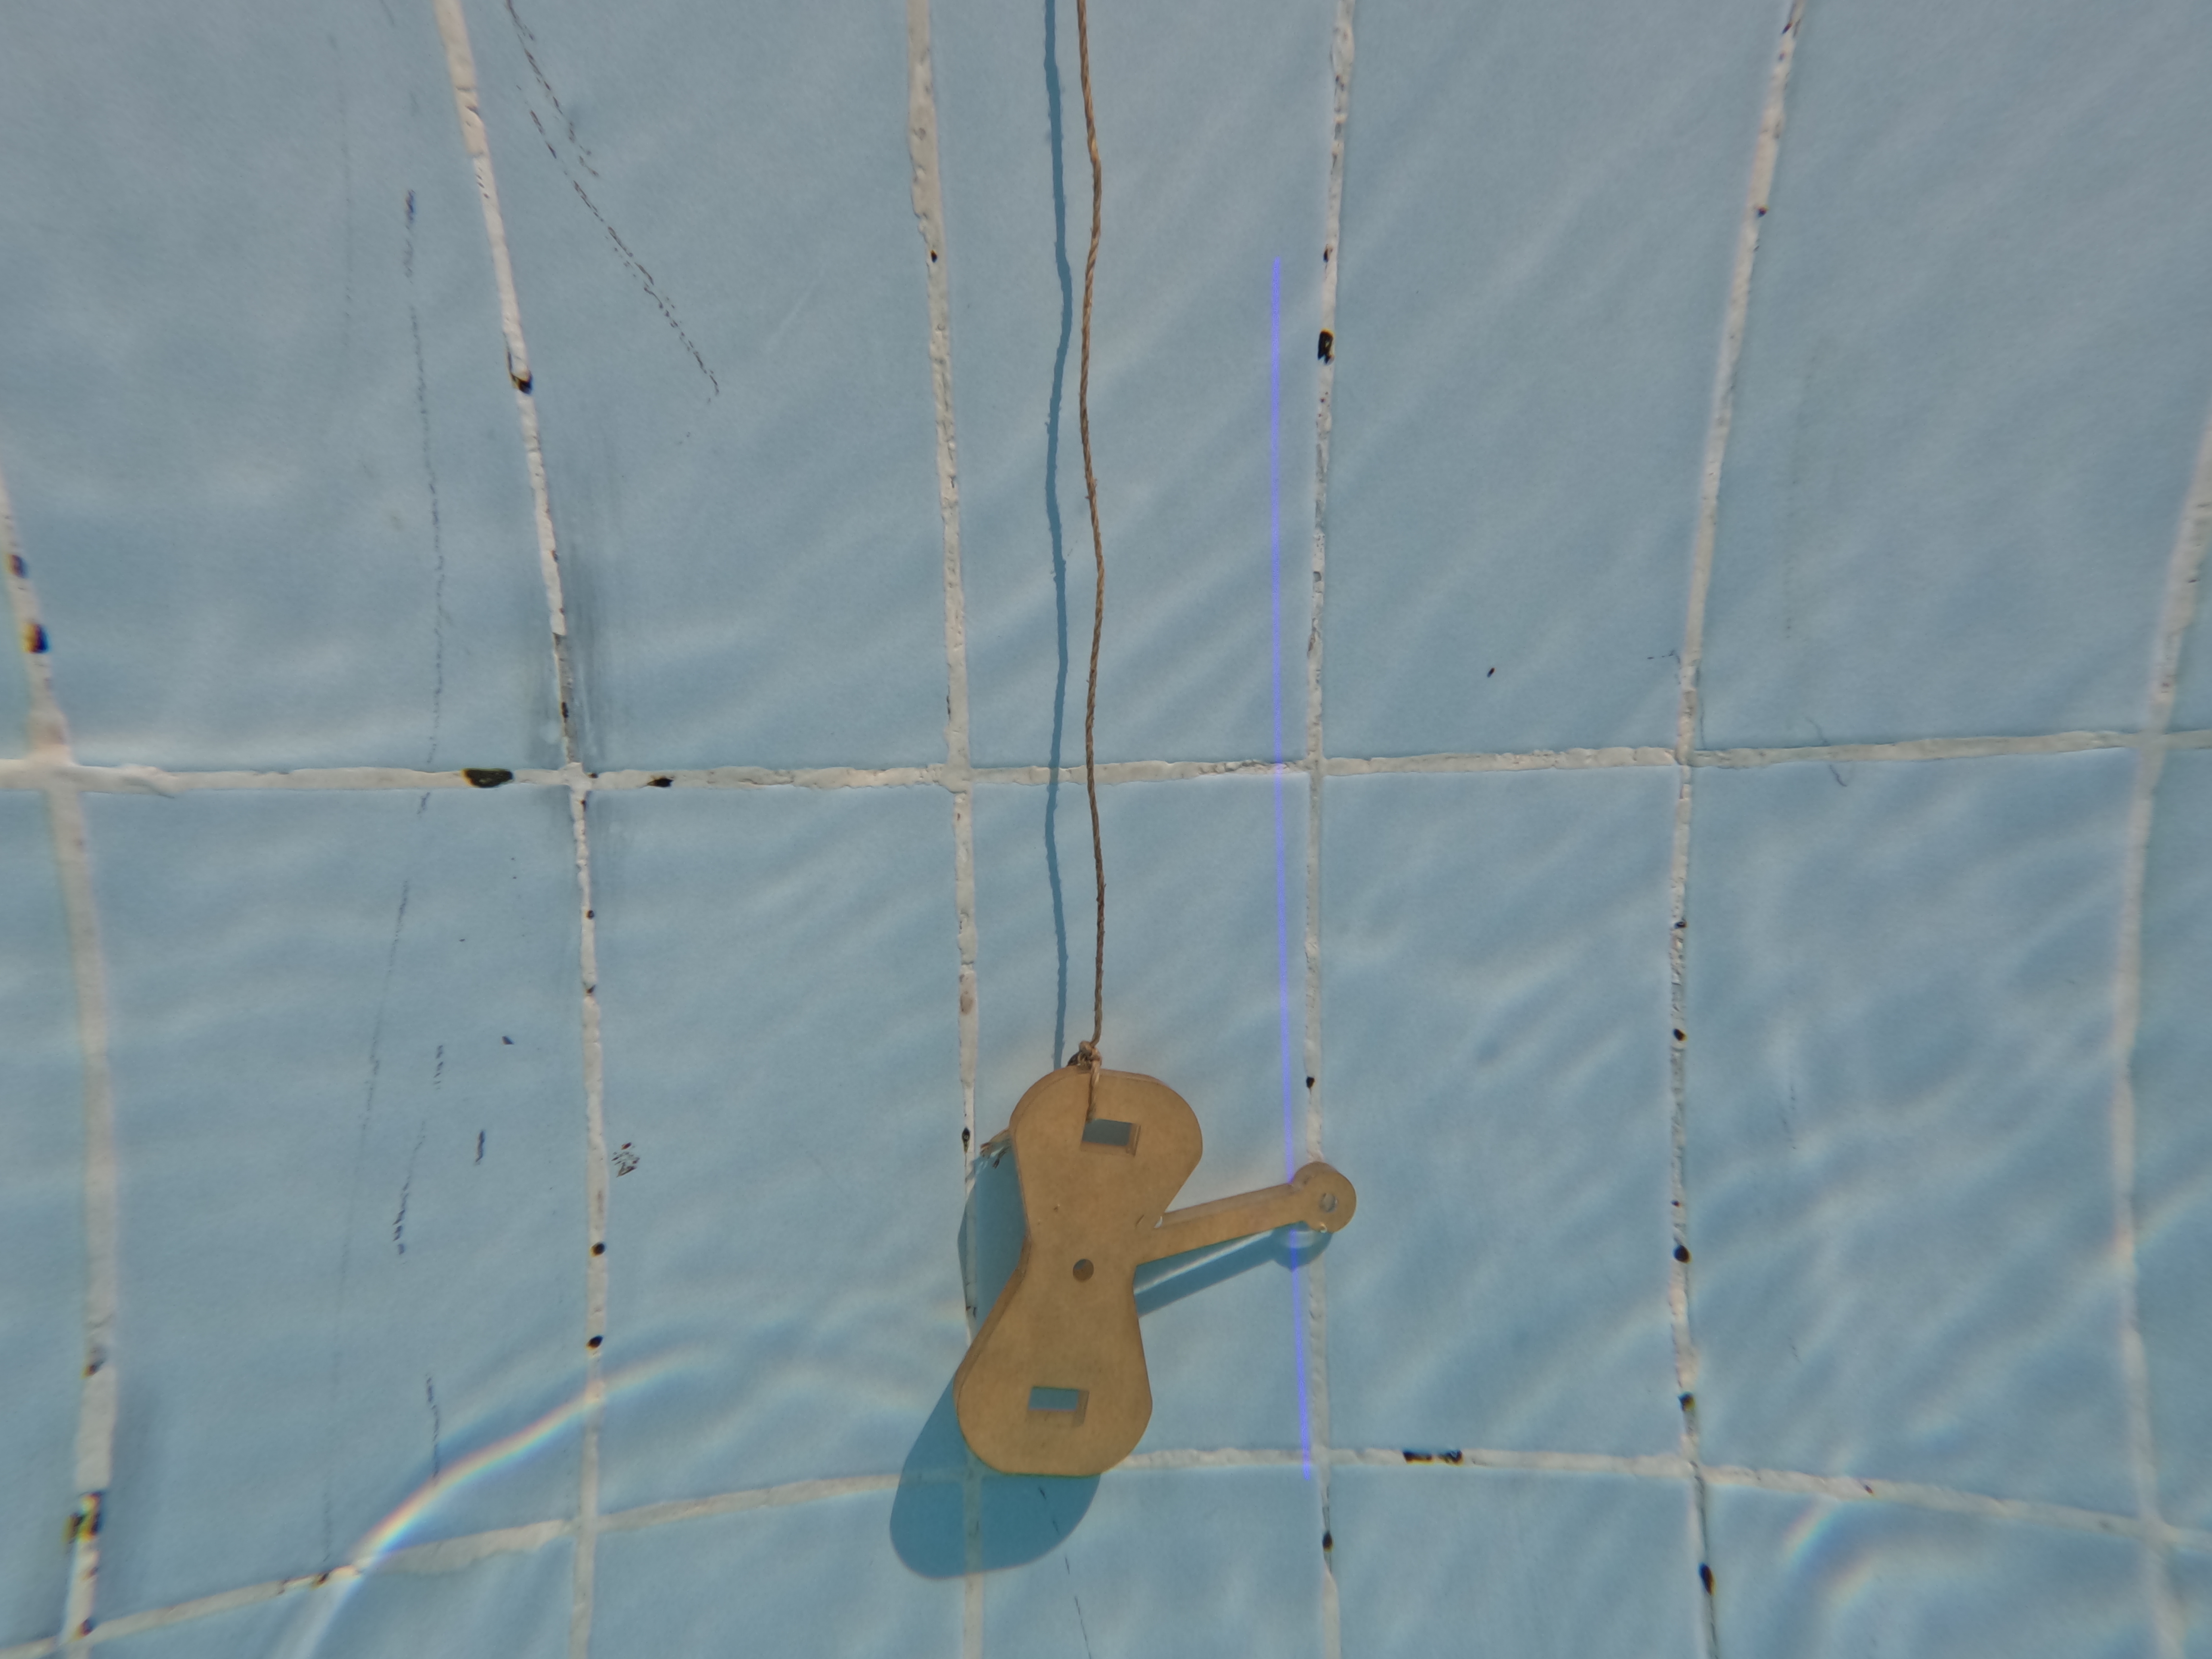

Supplement: Supplementary file 531 [file G0018876.pdf › Level_6_1/G0018876.pdf]

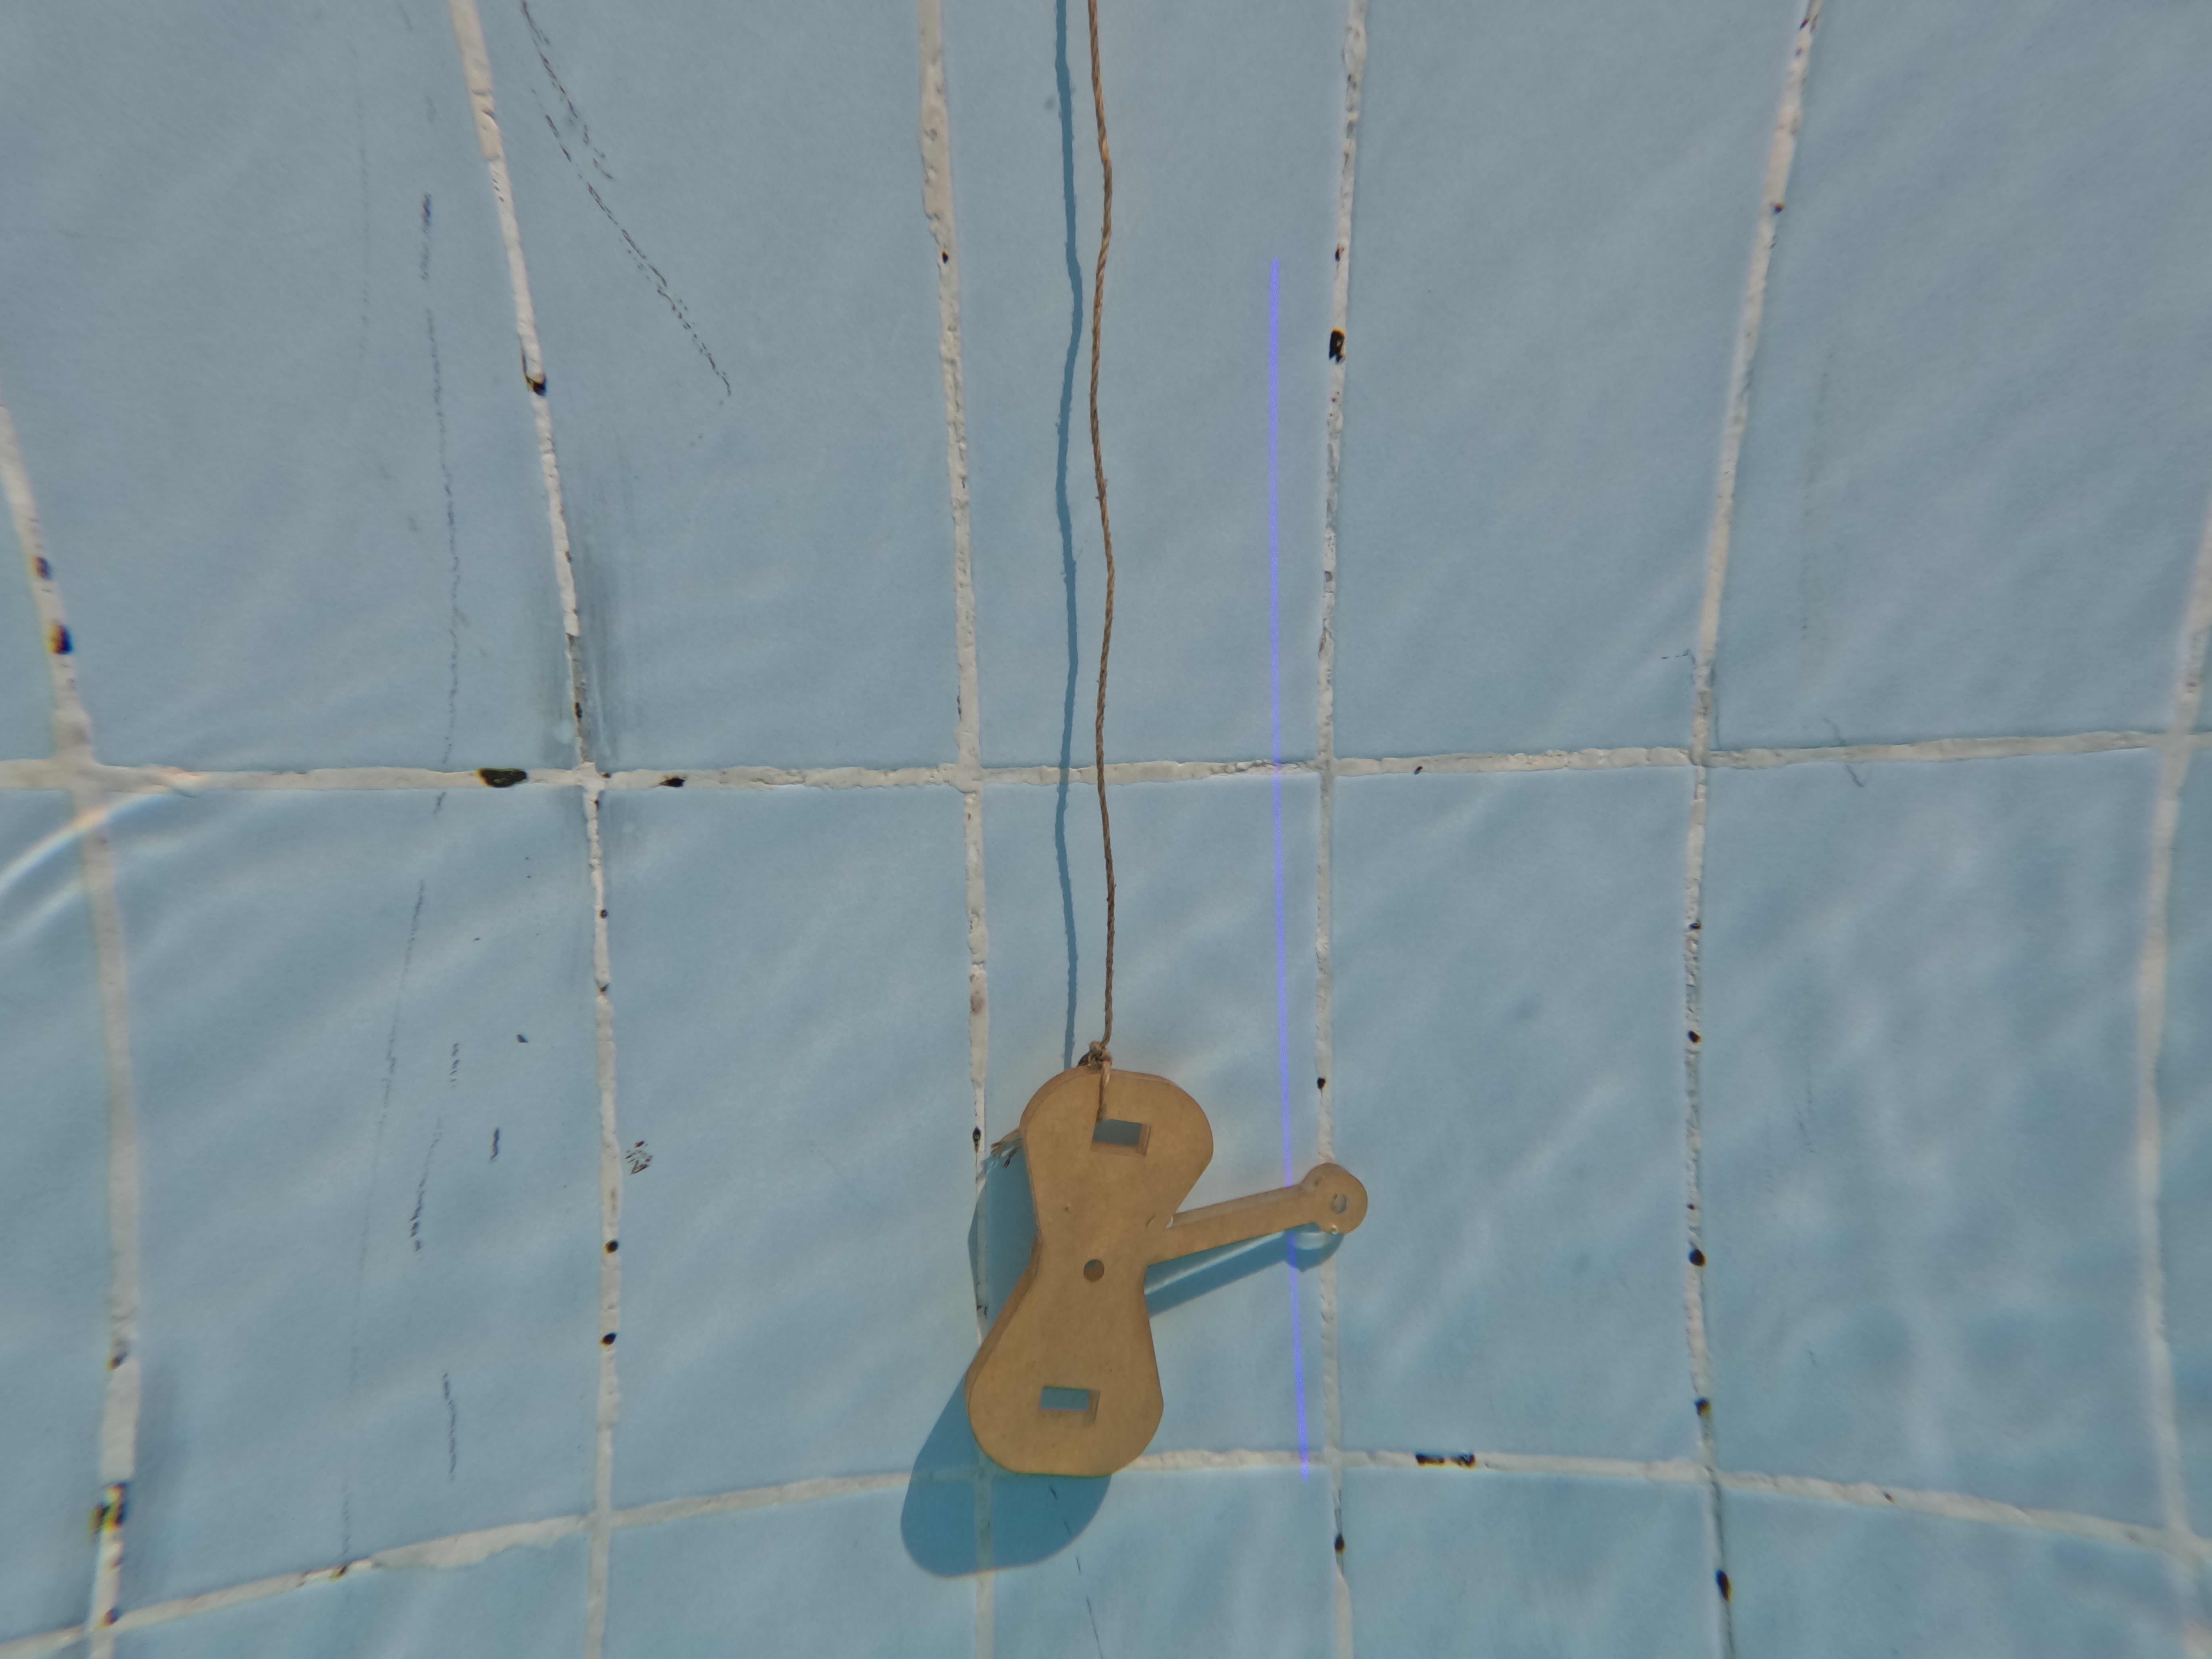

Supplement: Supplementary file 532 [file G0018877.pdf › Level_6_1/G0018877.pdf]

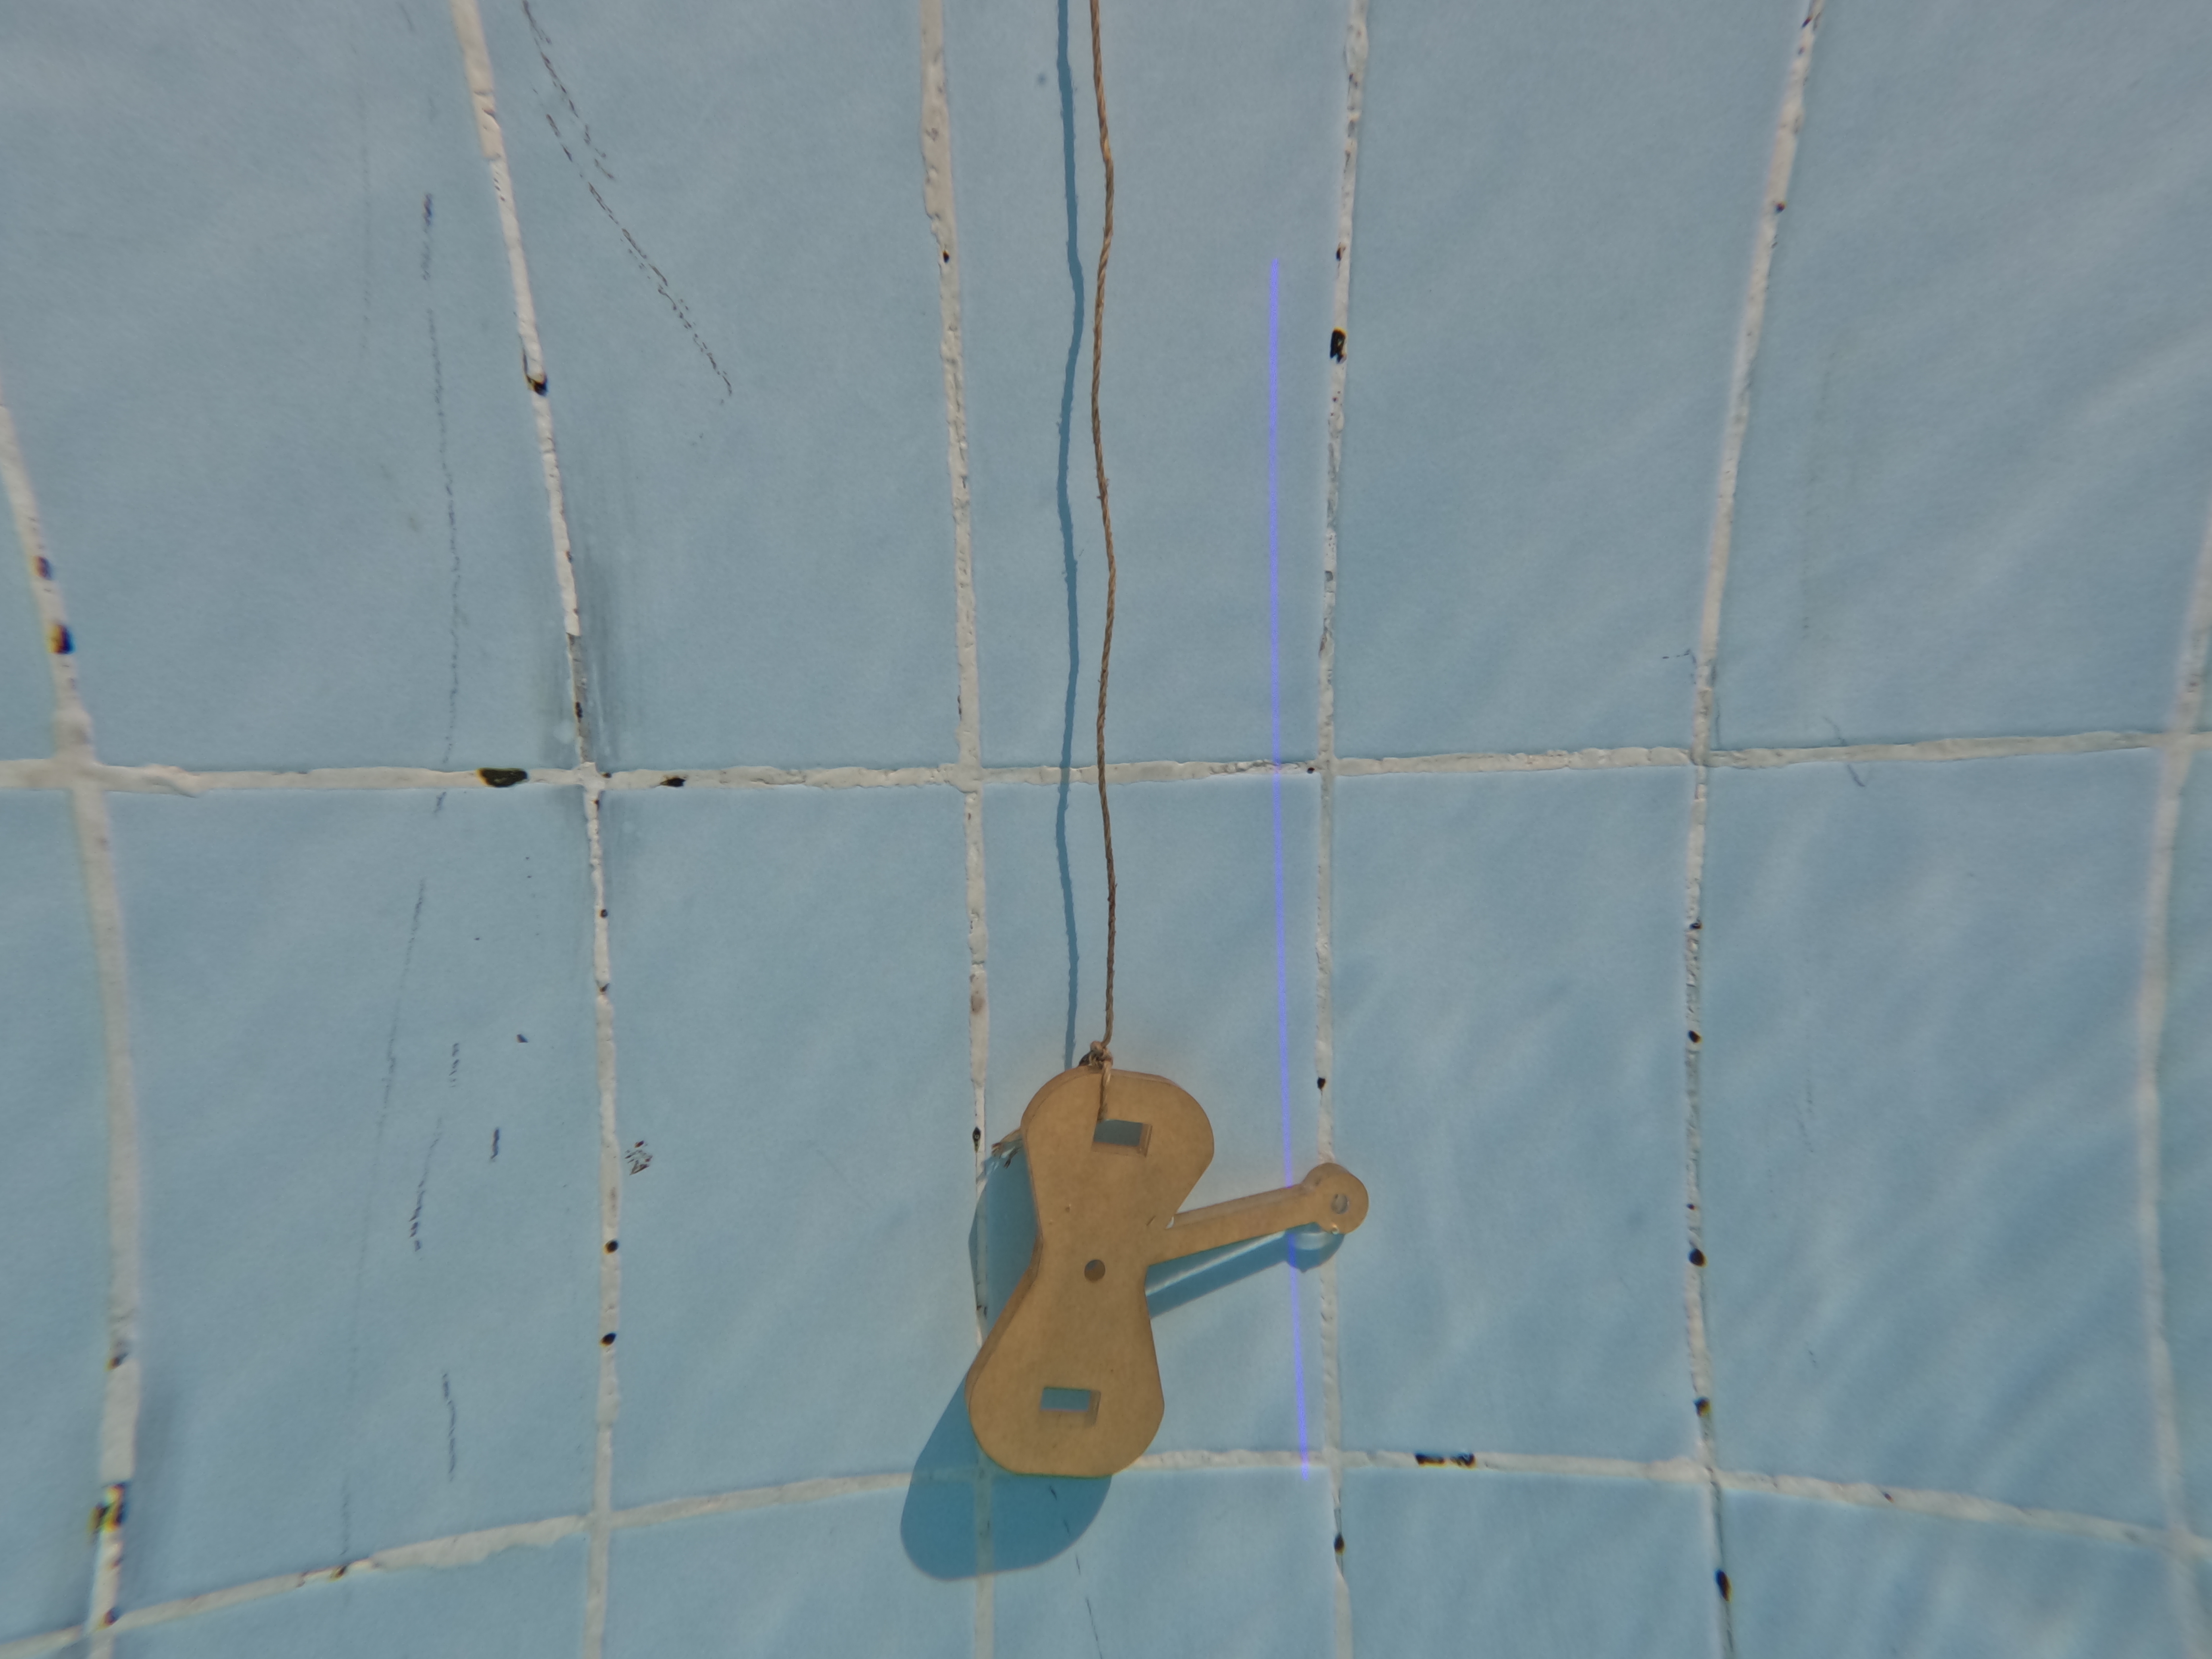

Supplement: Supplementary file 533 [file G0018878.pdf › Level_6_1/G0018878.pdf]

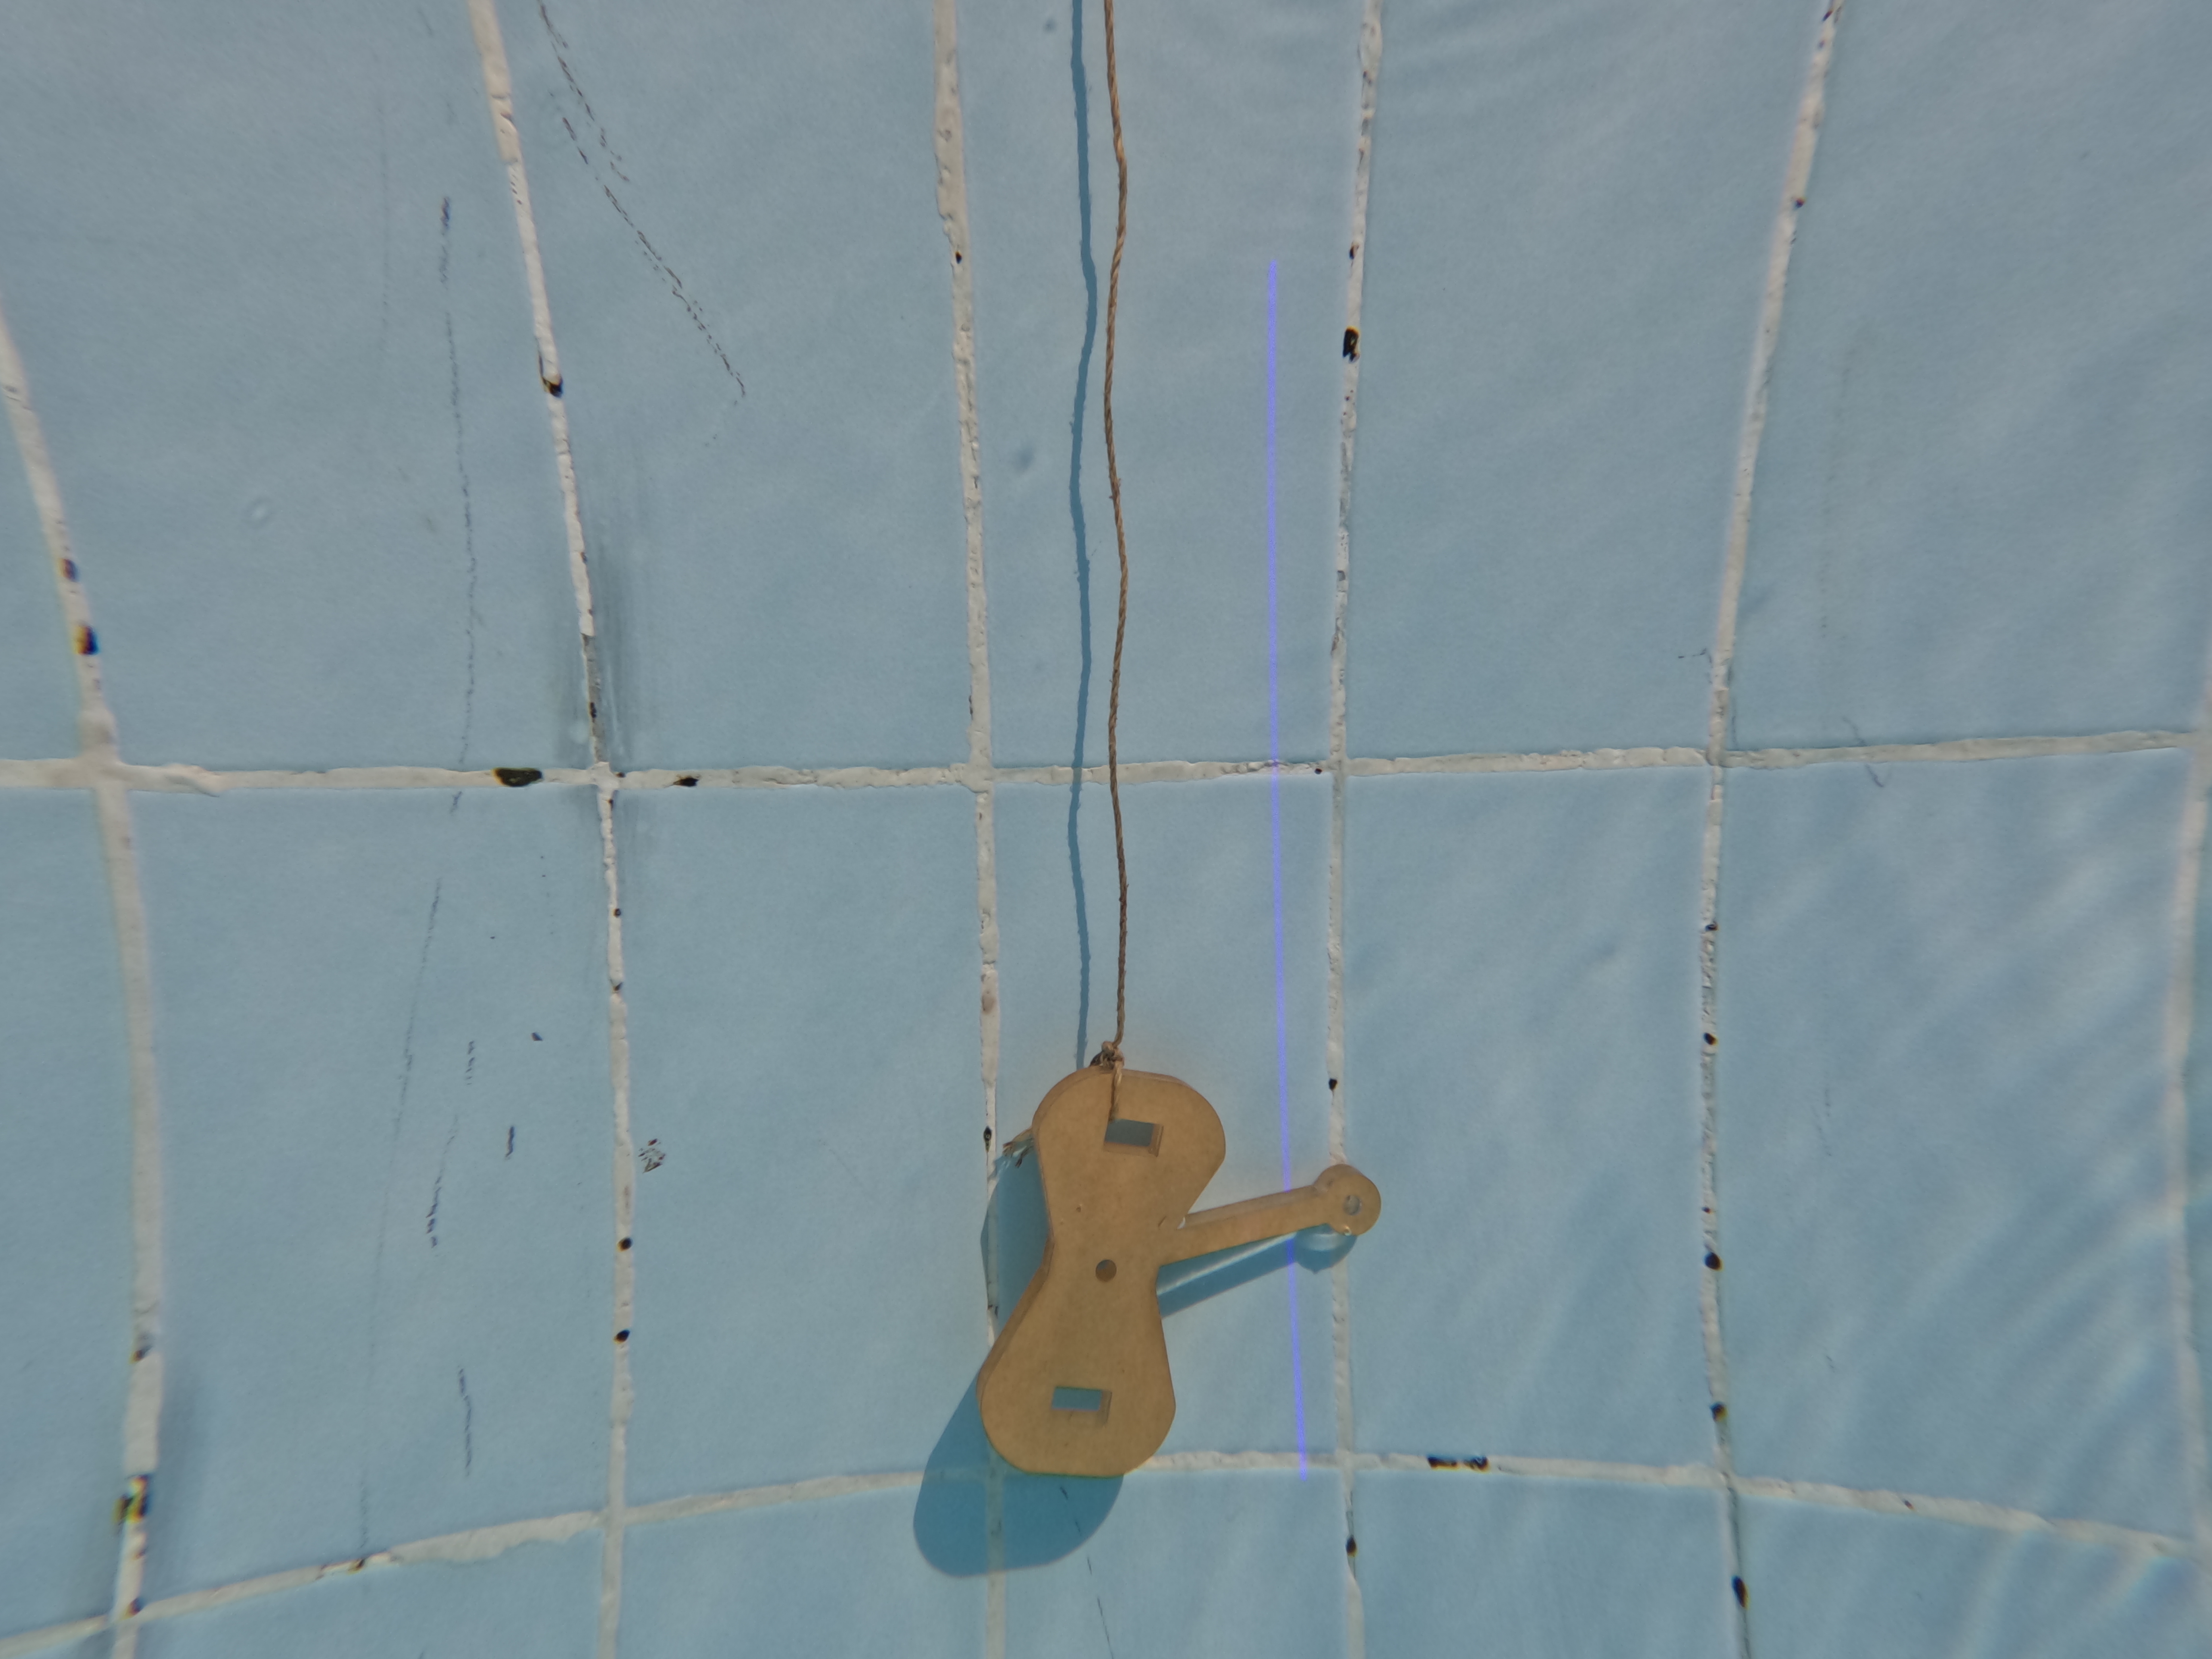

Supplement: Supplementary file 534 [file G0018879.pdf › Level_6_1/G0018879.pdf]

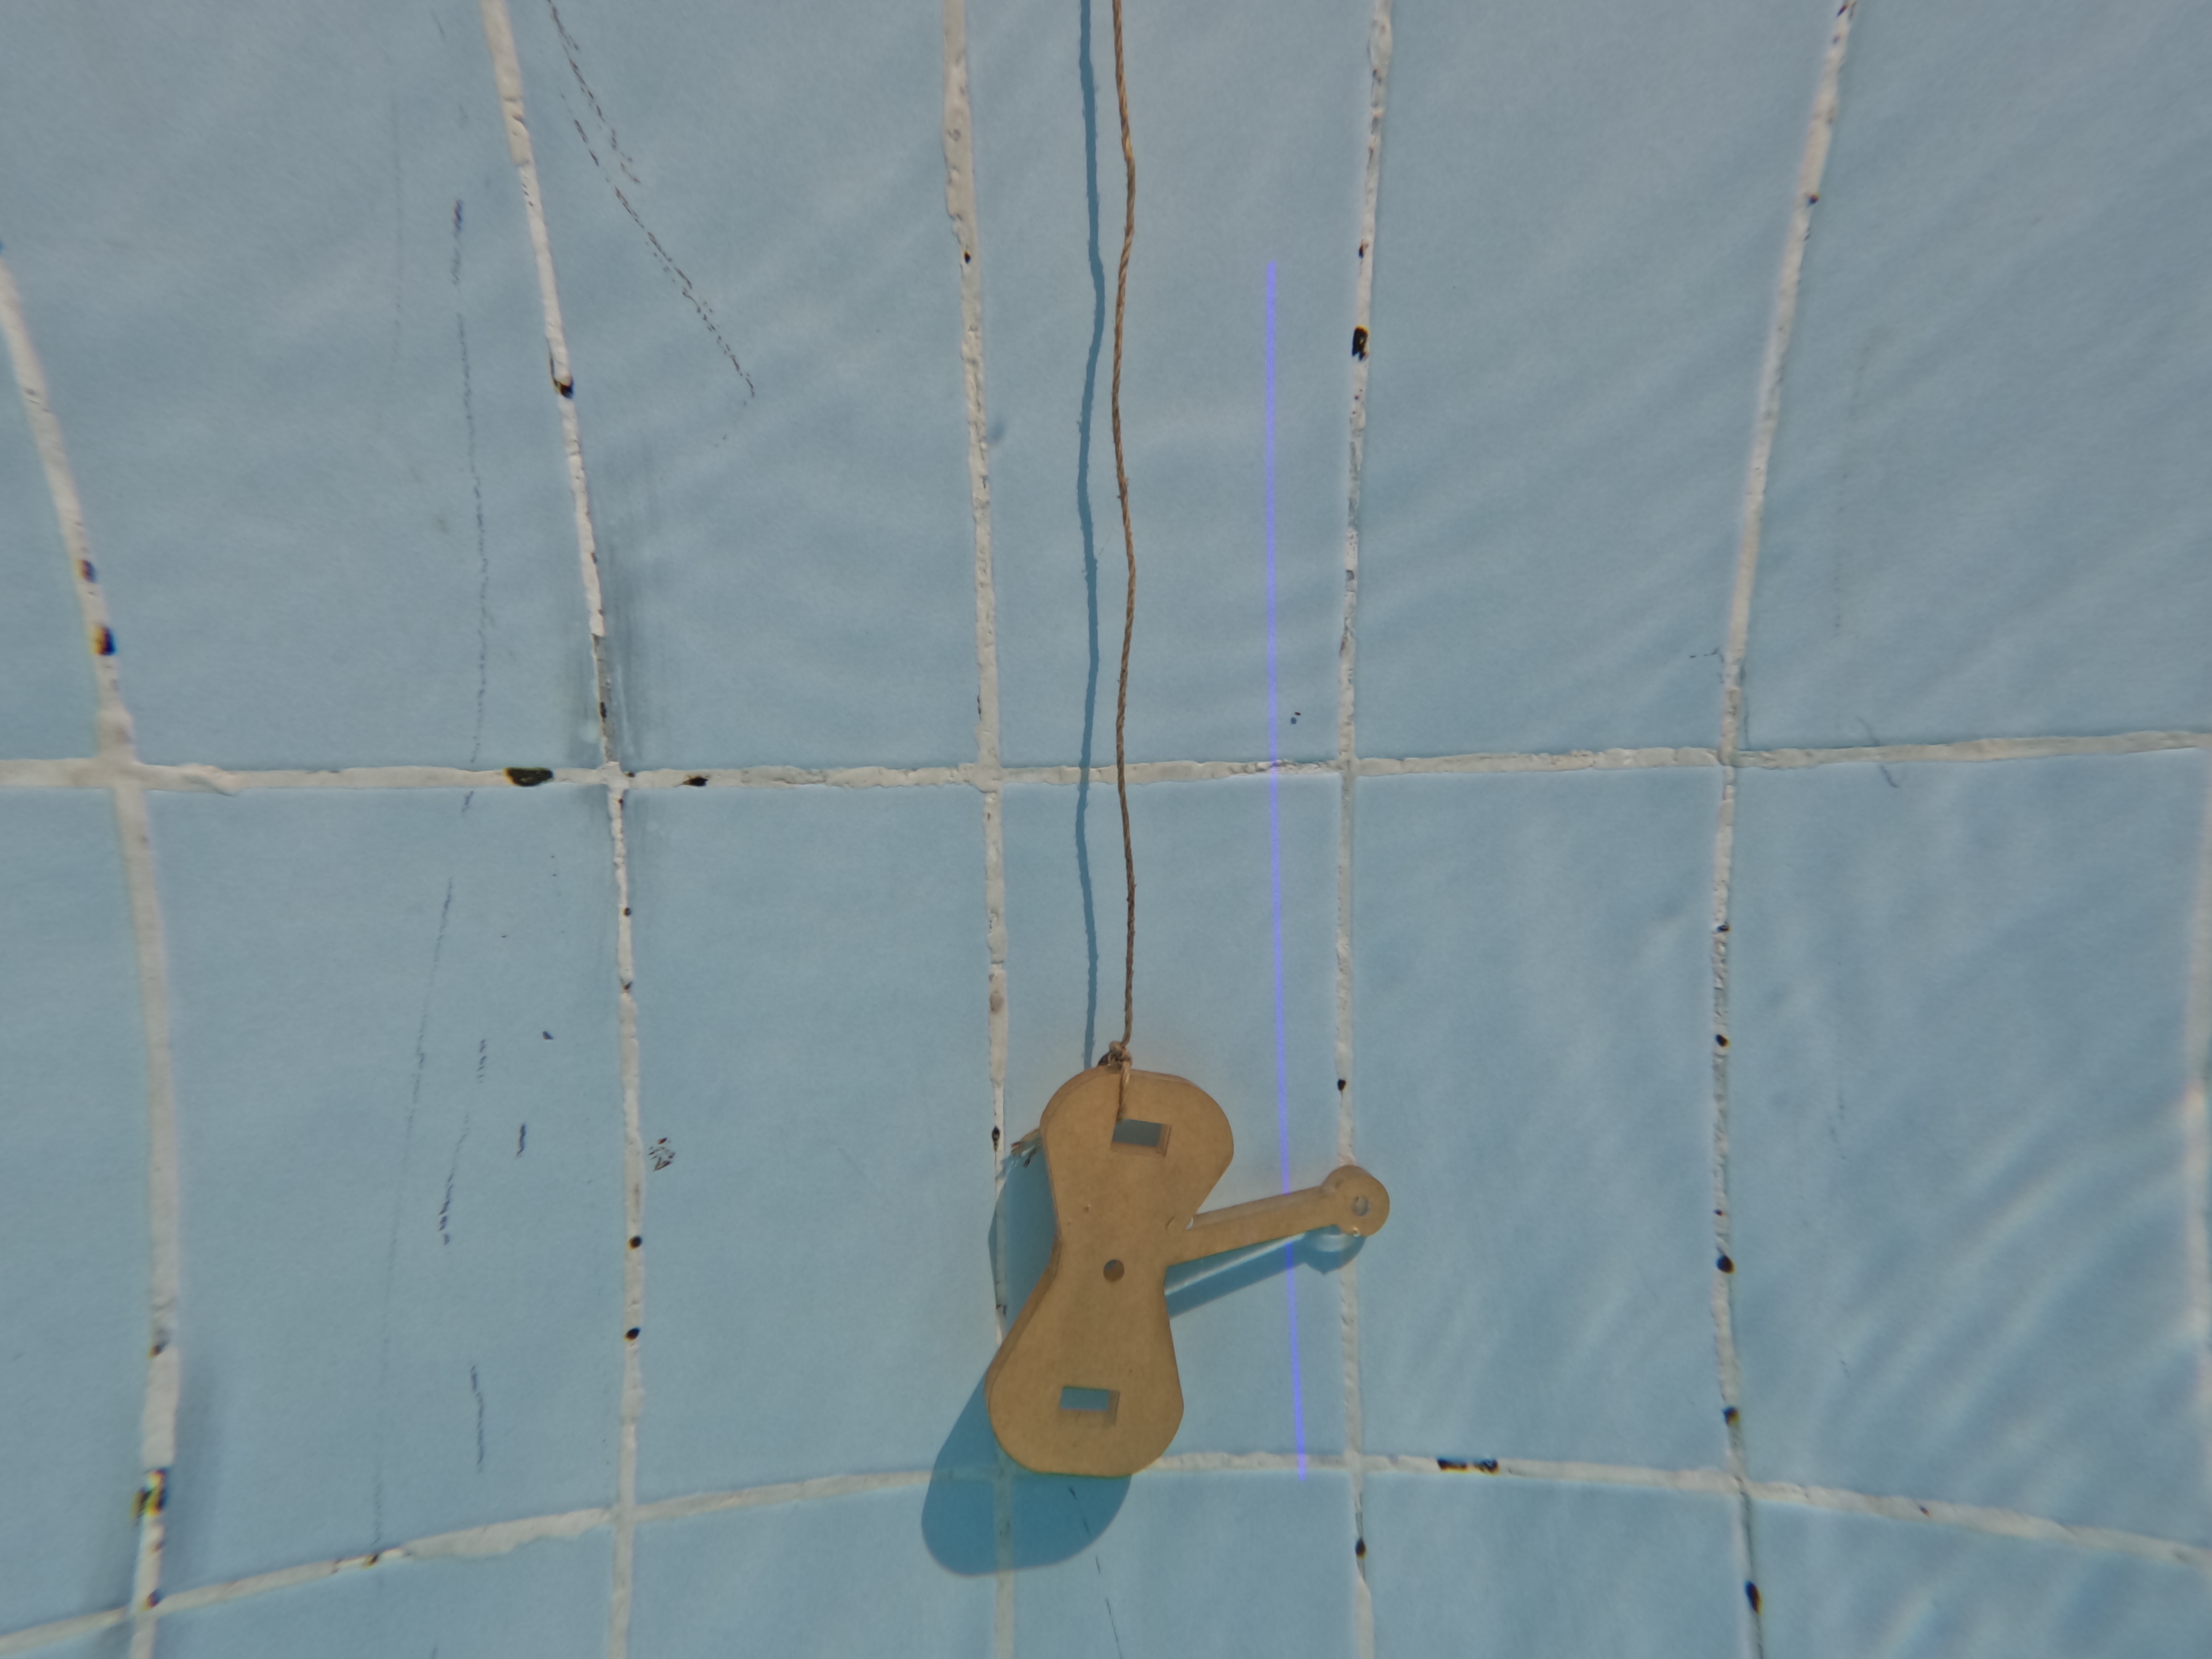

Supplement: Supplementary file 535 [file G0018880.pdf › Level_6_1/G0018880.pdf]

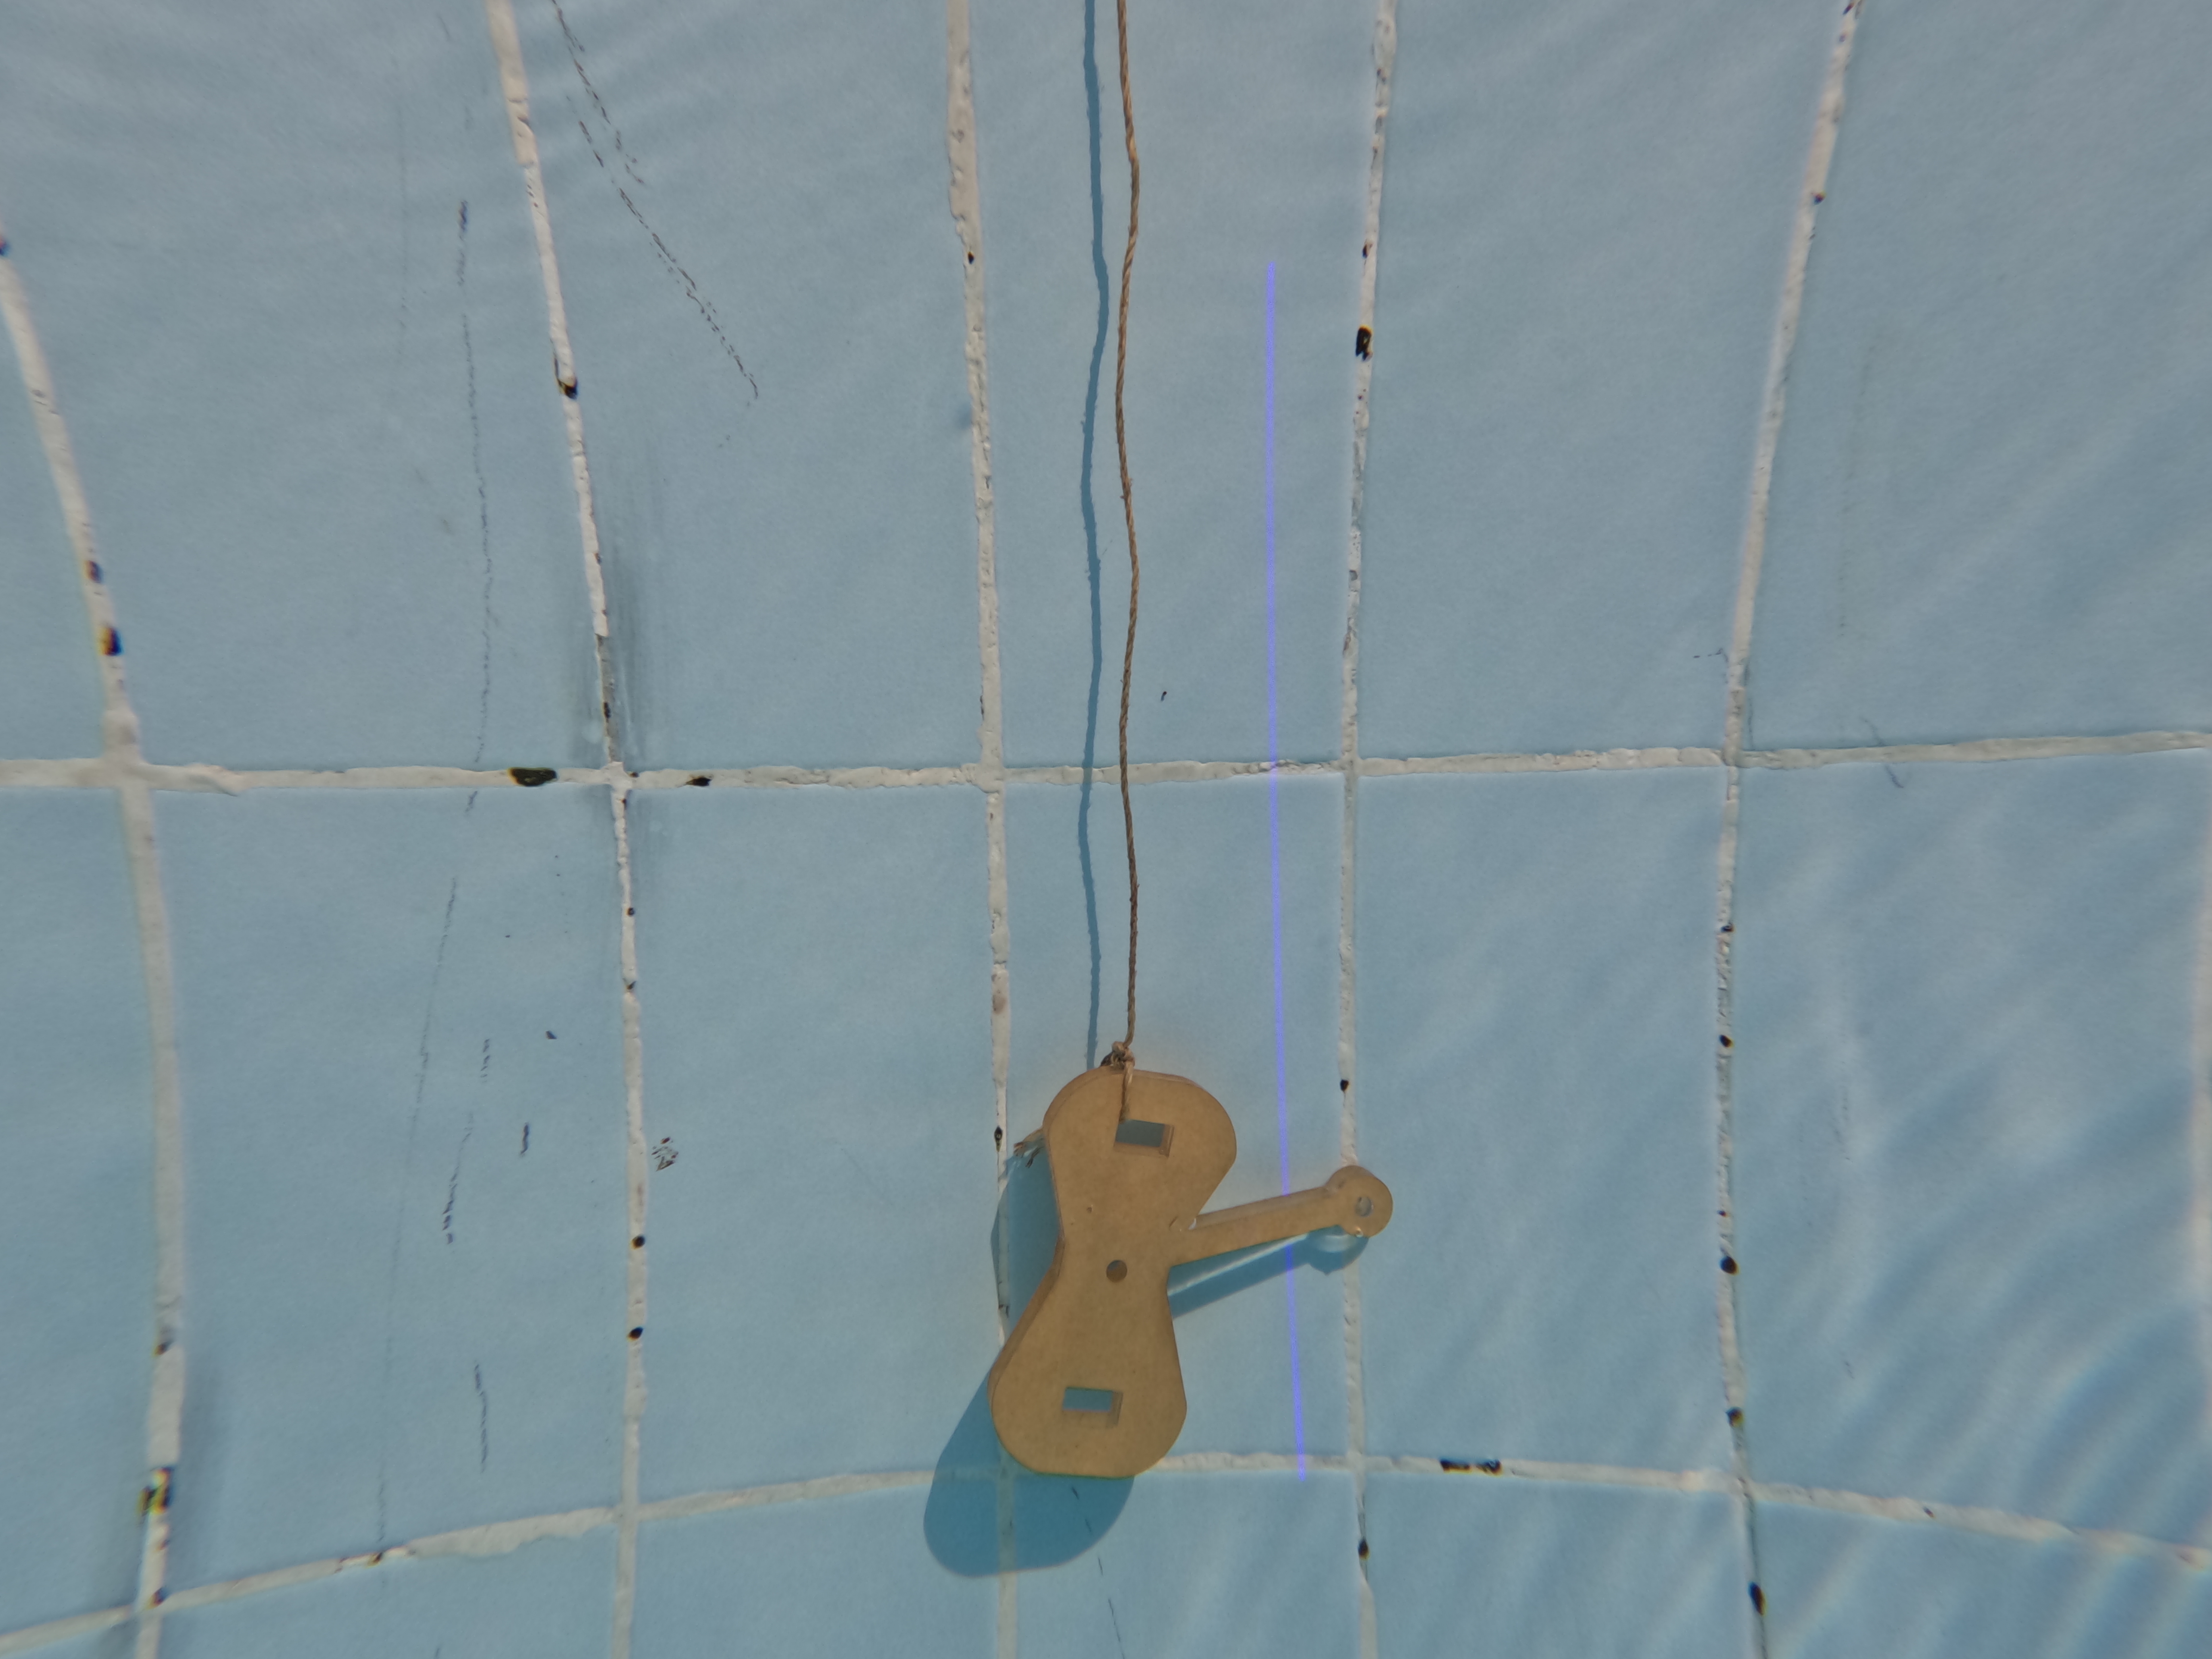

Supplement: Supplementary file 536 [file G0018881.pdf › Level_6_1/G0018881.pdf]

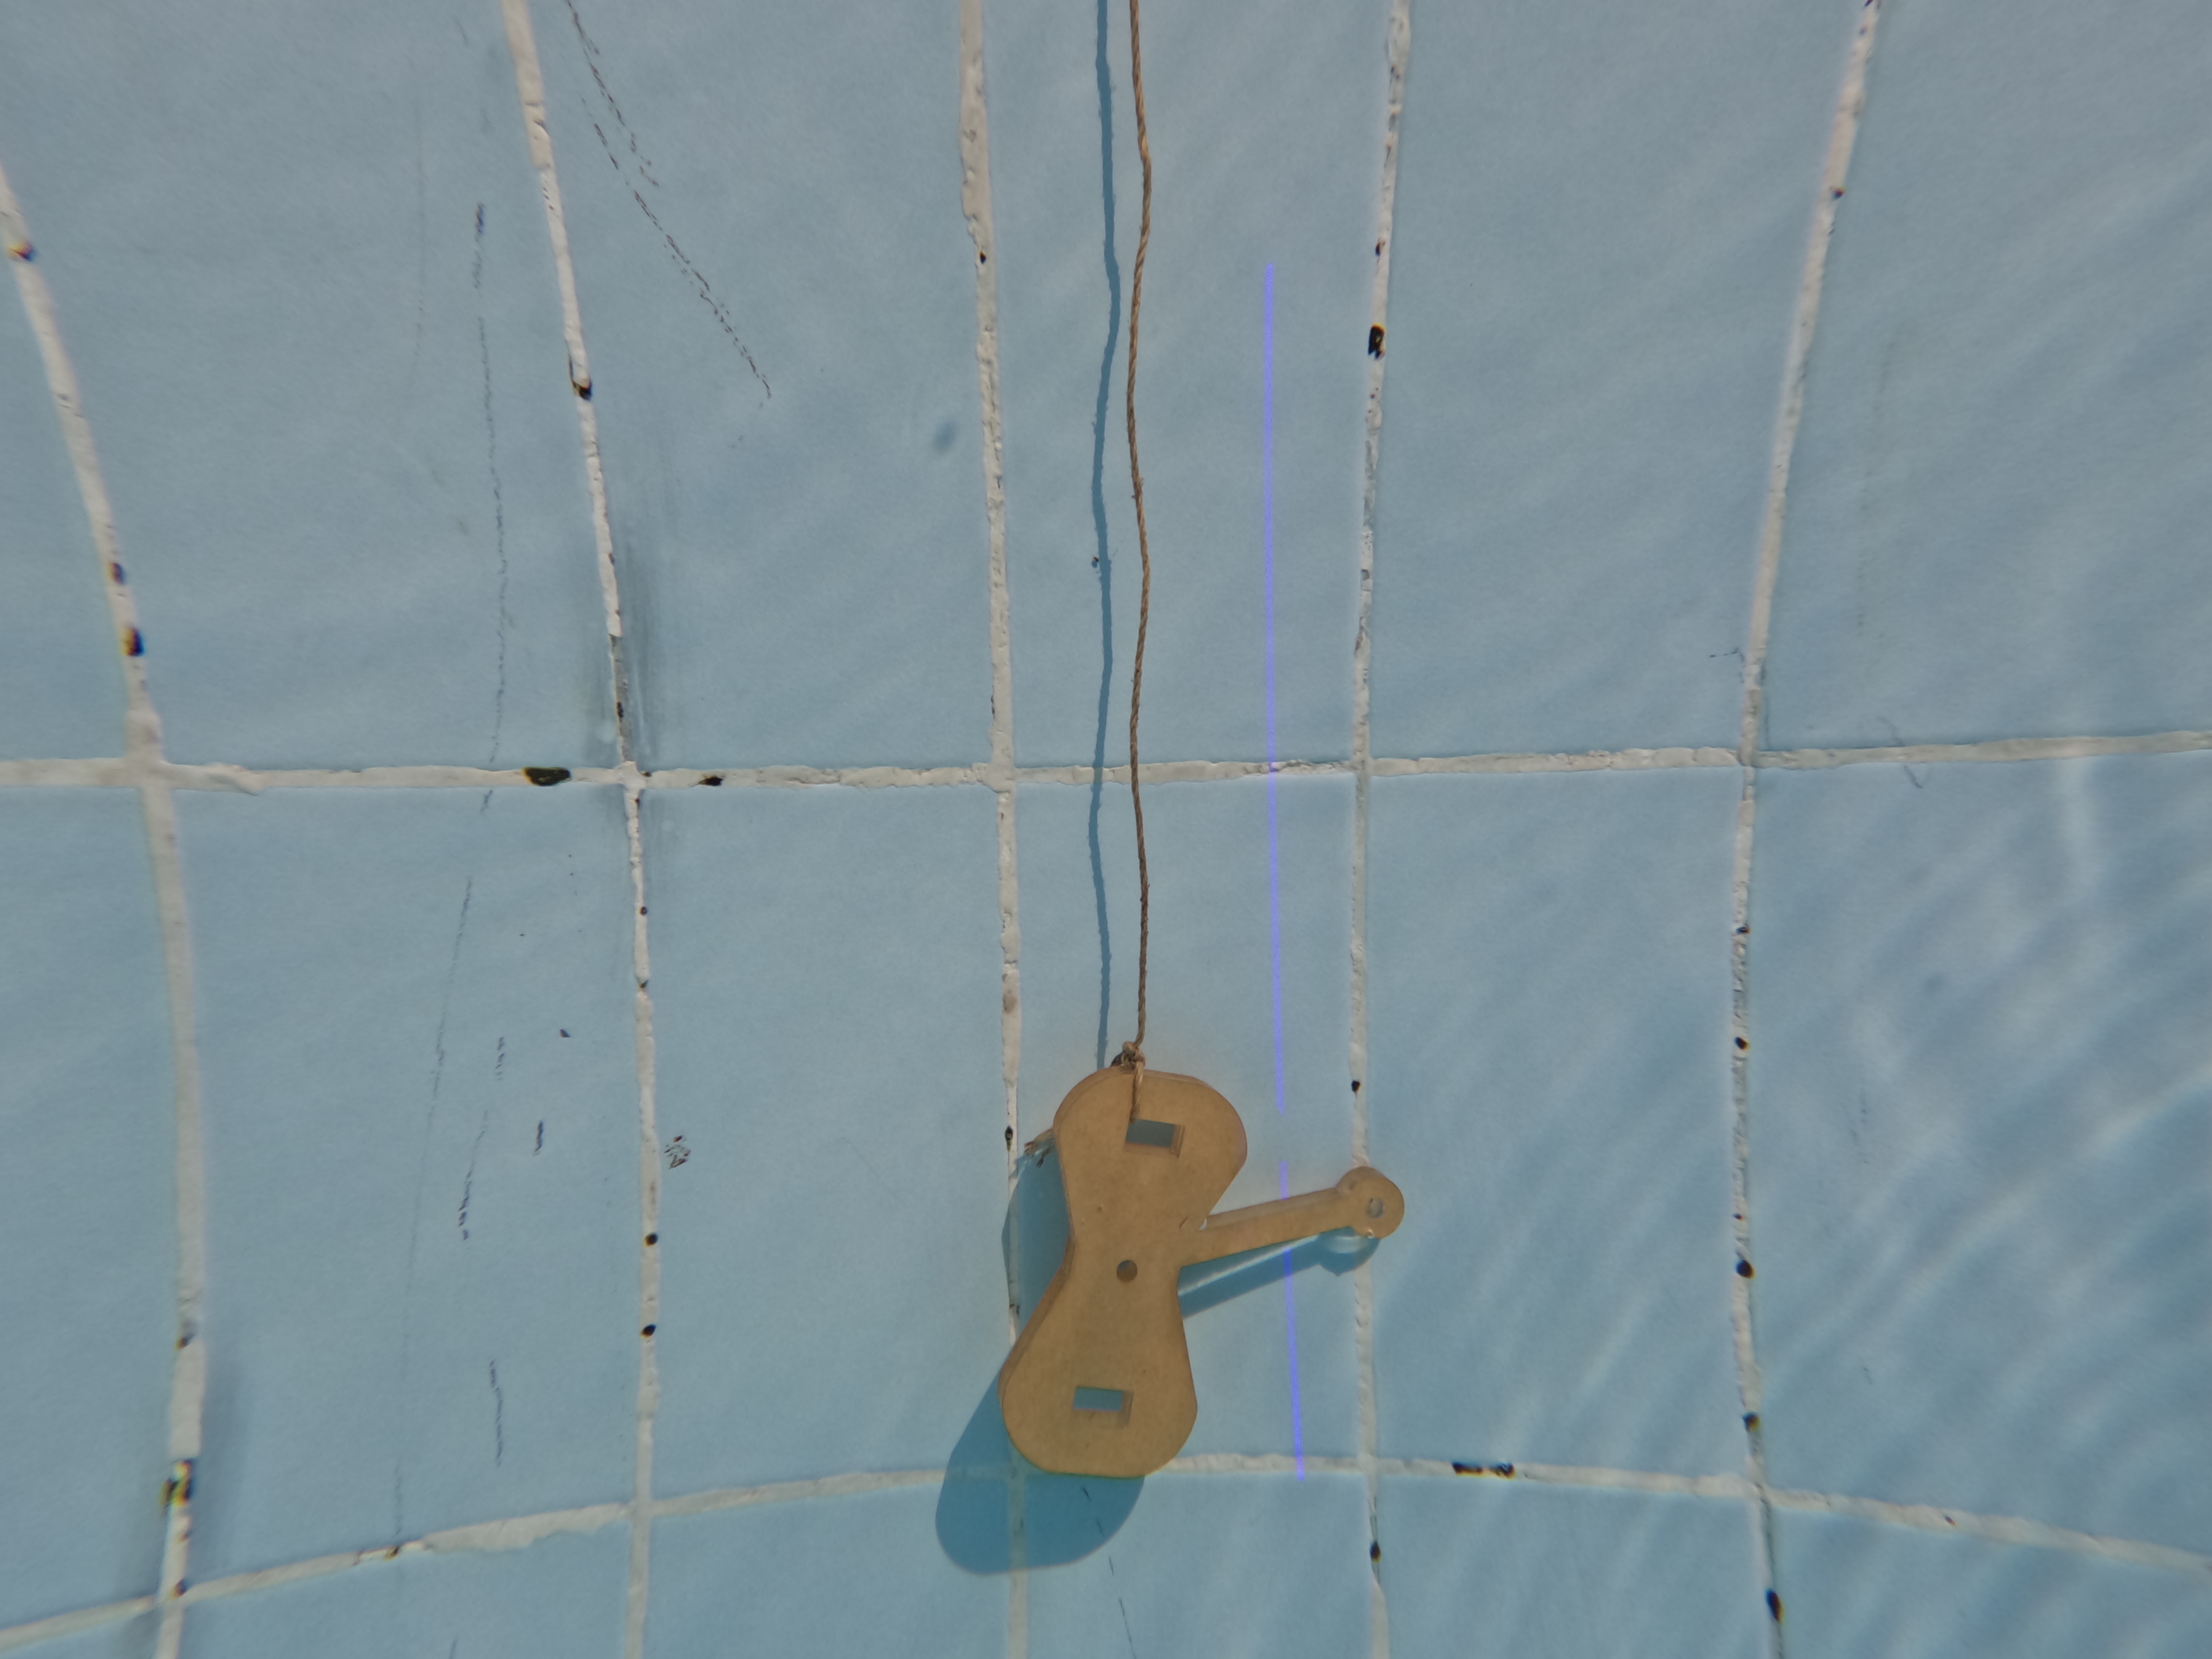

Supplement: Supplementary file 537 [file G0018882.pdf › Level_6_1/G0018882.pdf]

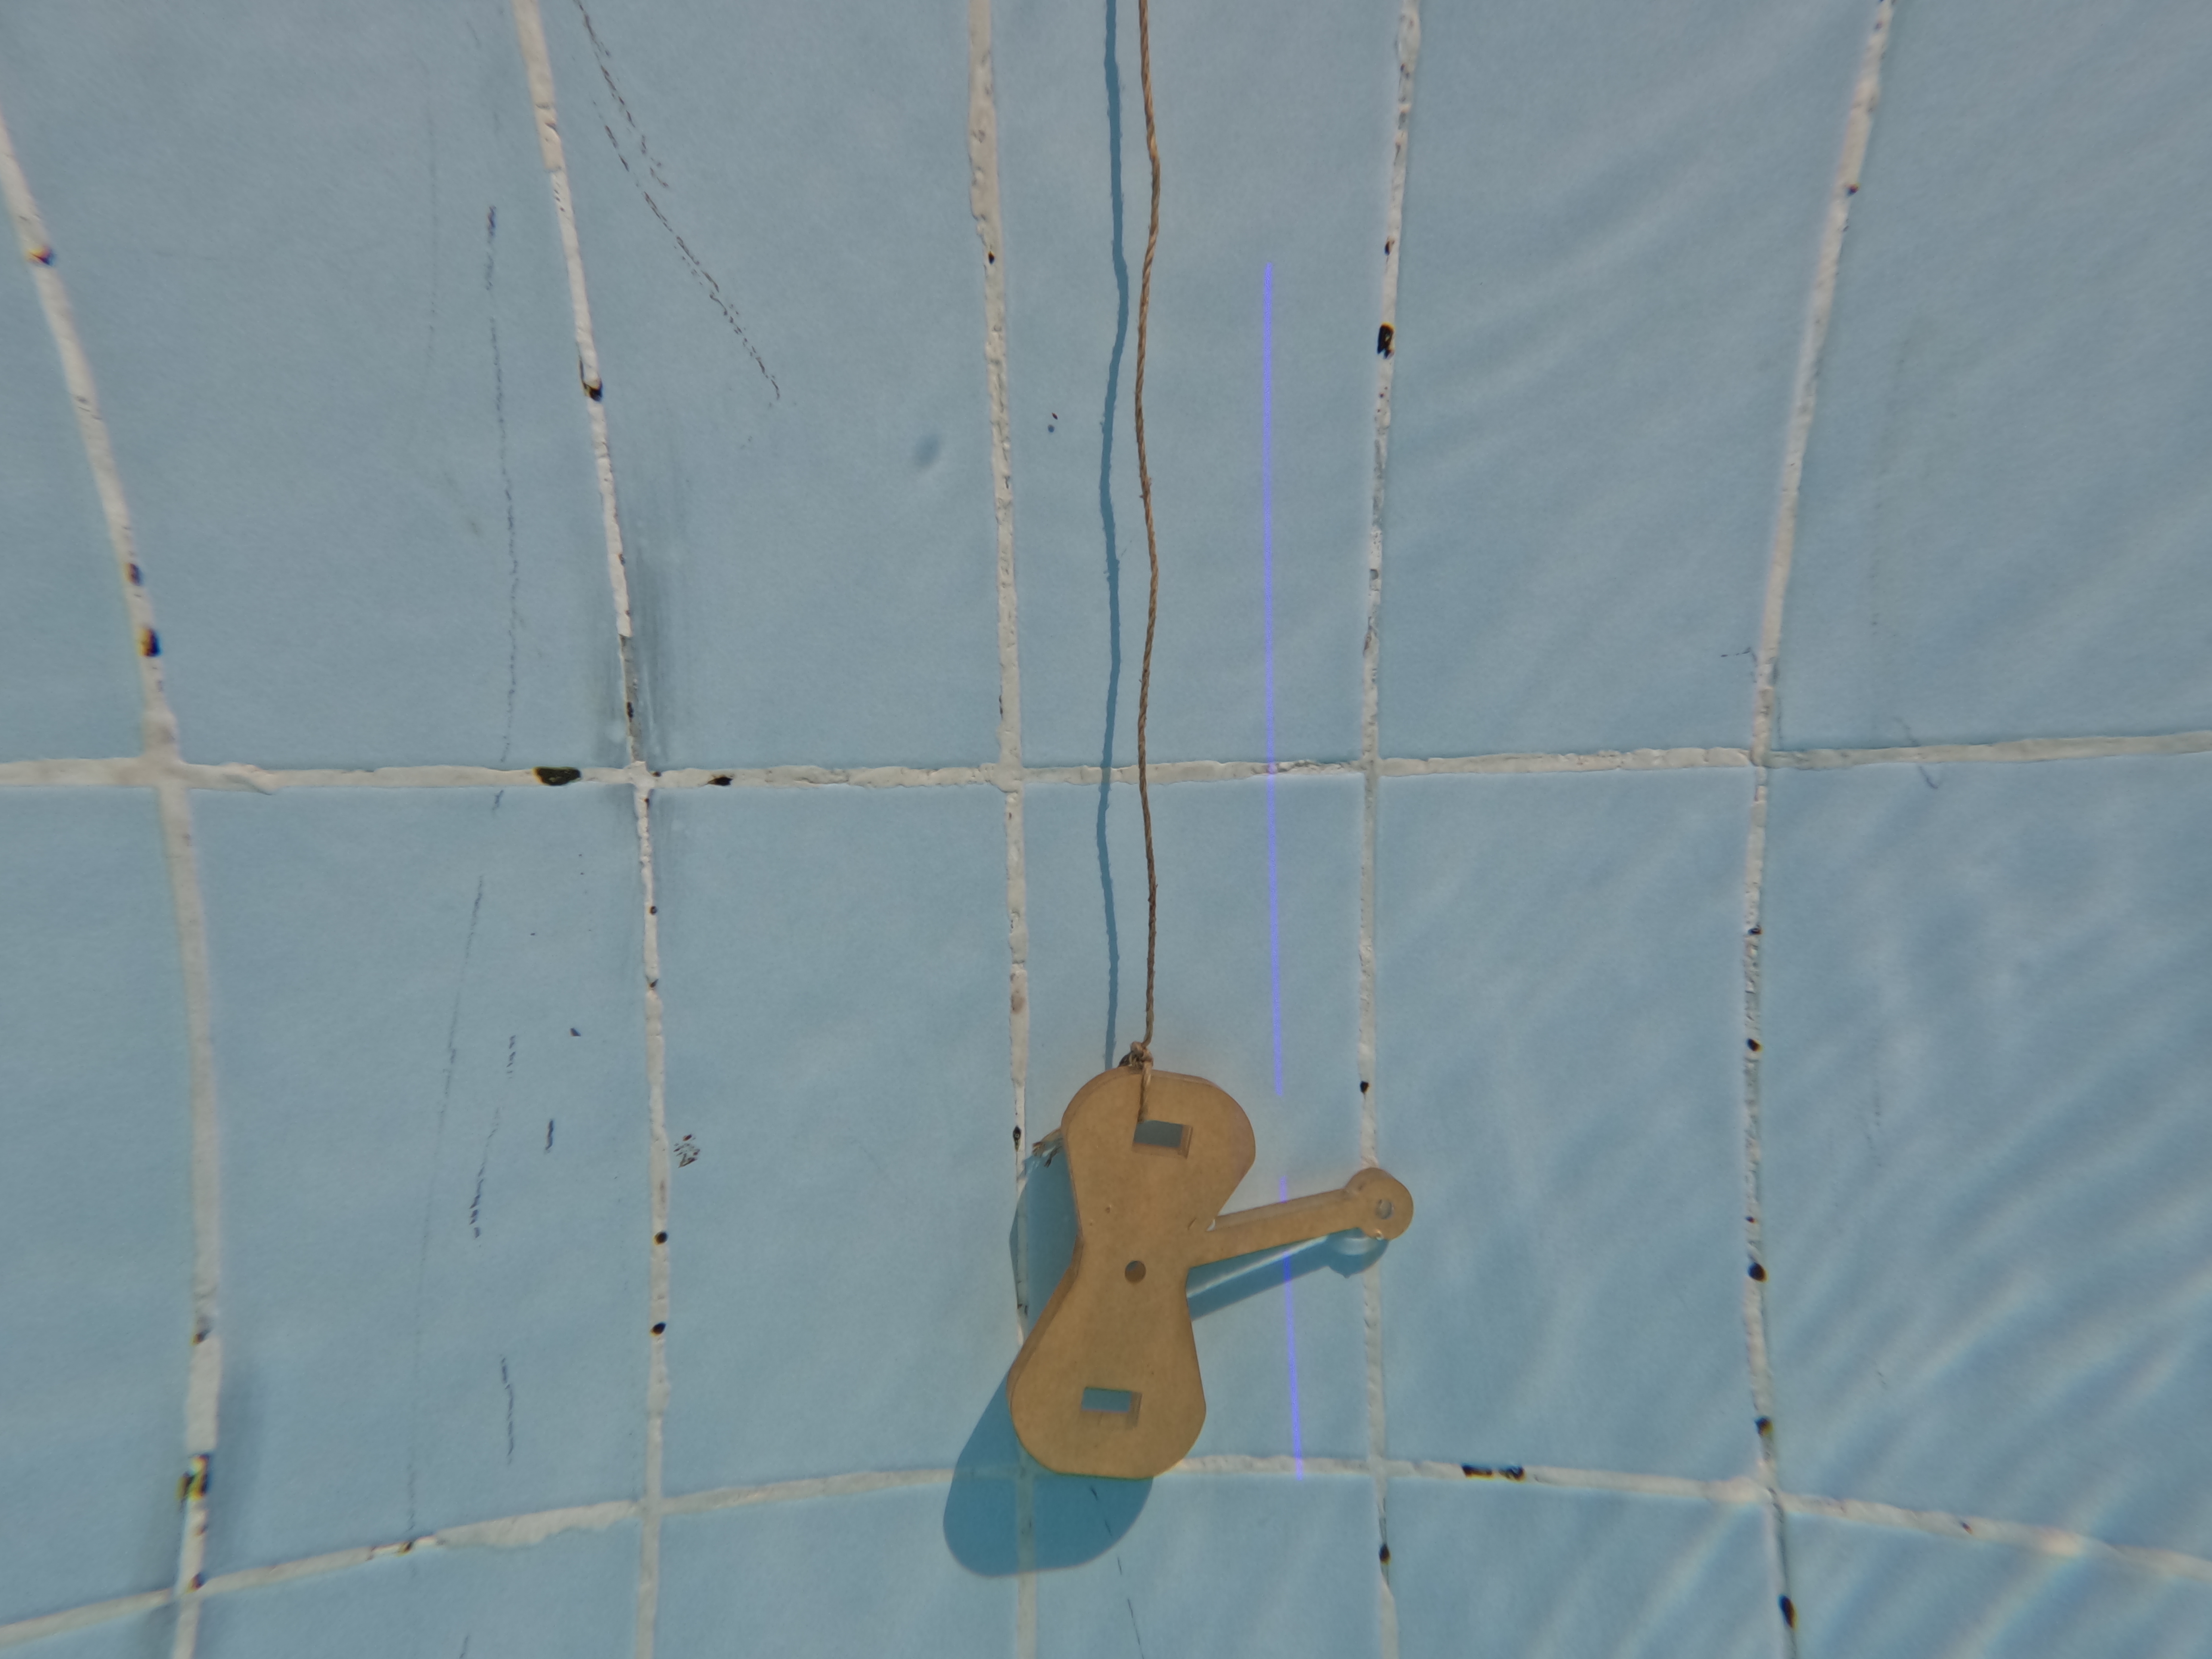

Supplement: Supplementary file 538 [file G0018883.pdf › Level_6_1/G0018883.pdf]

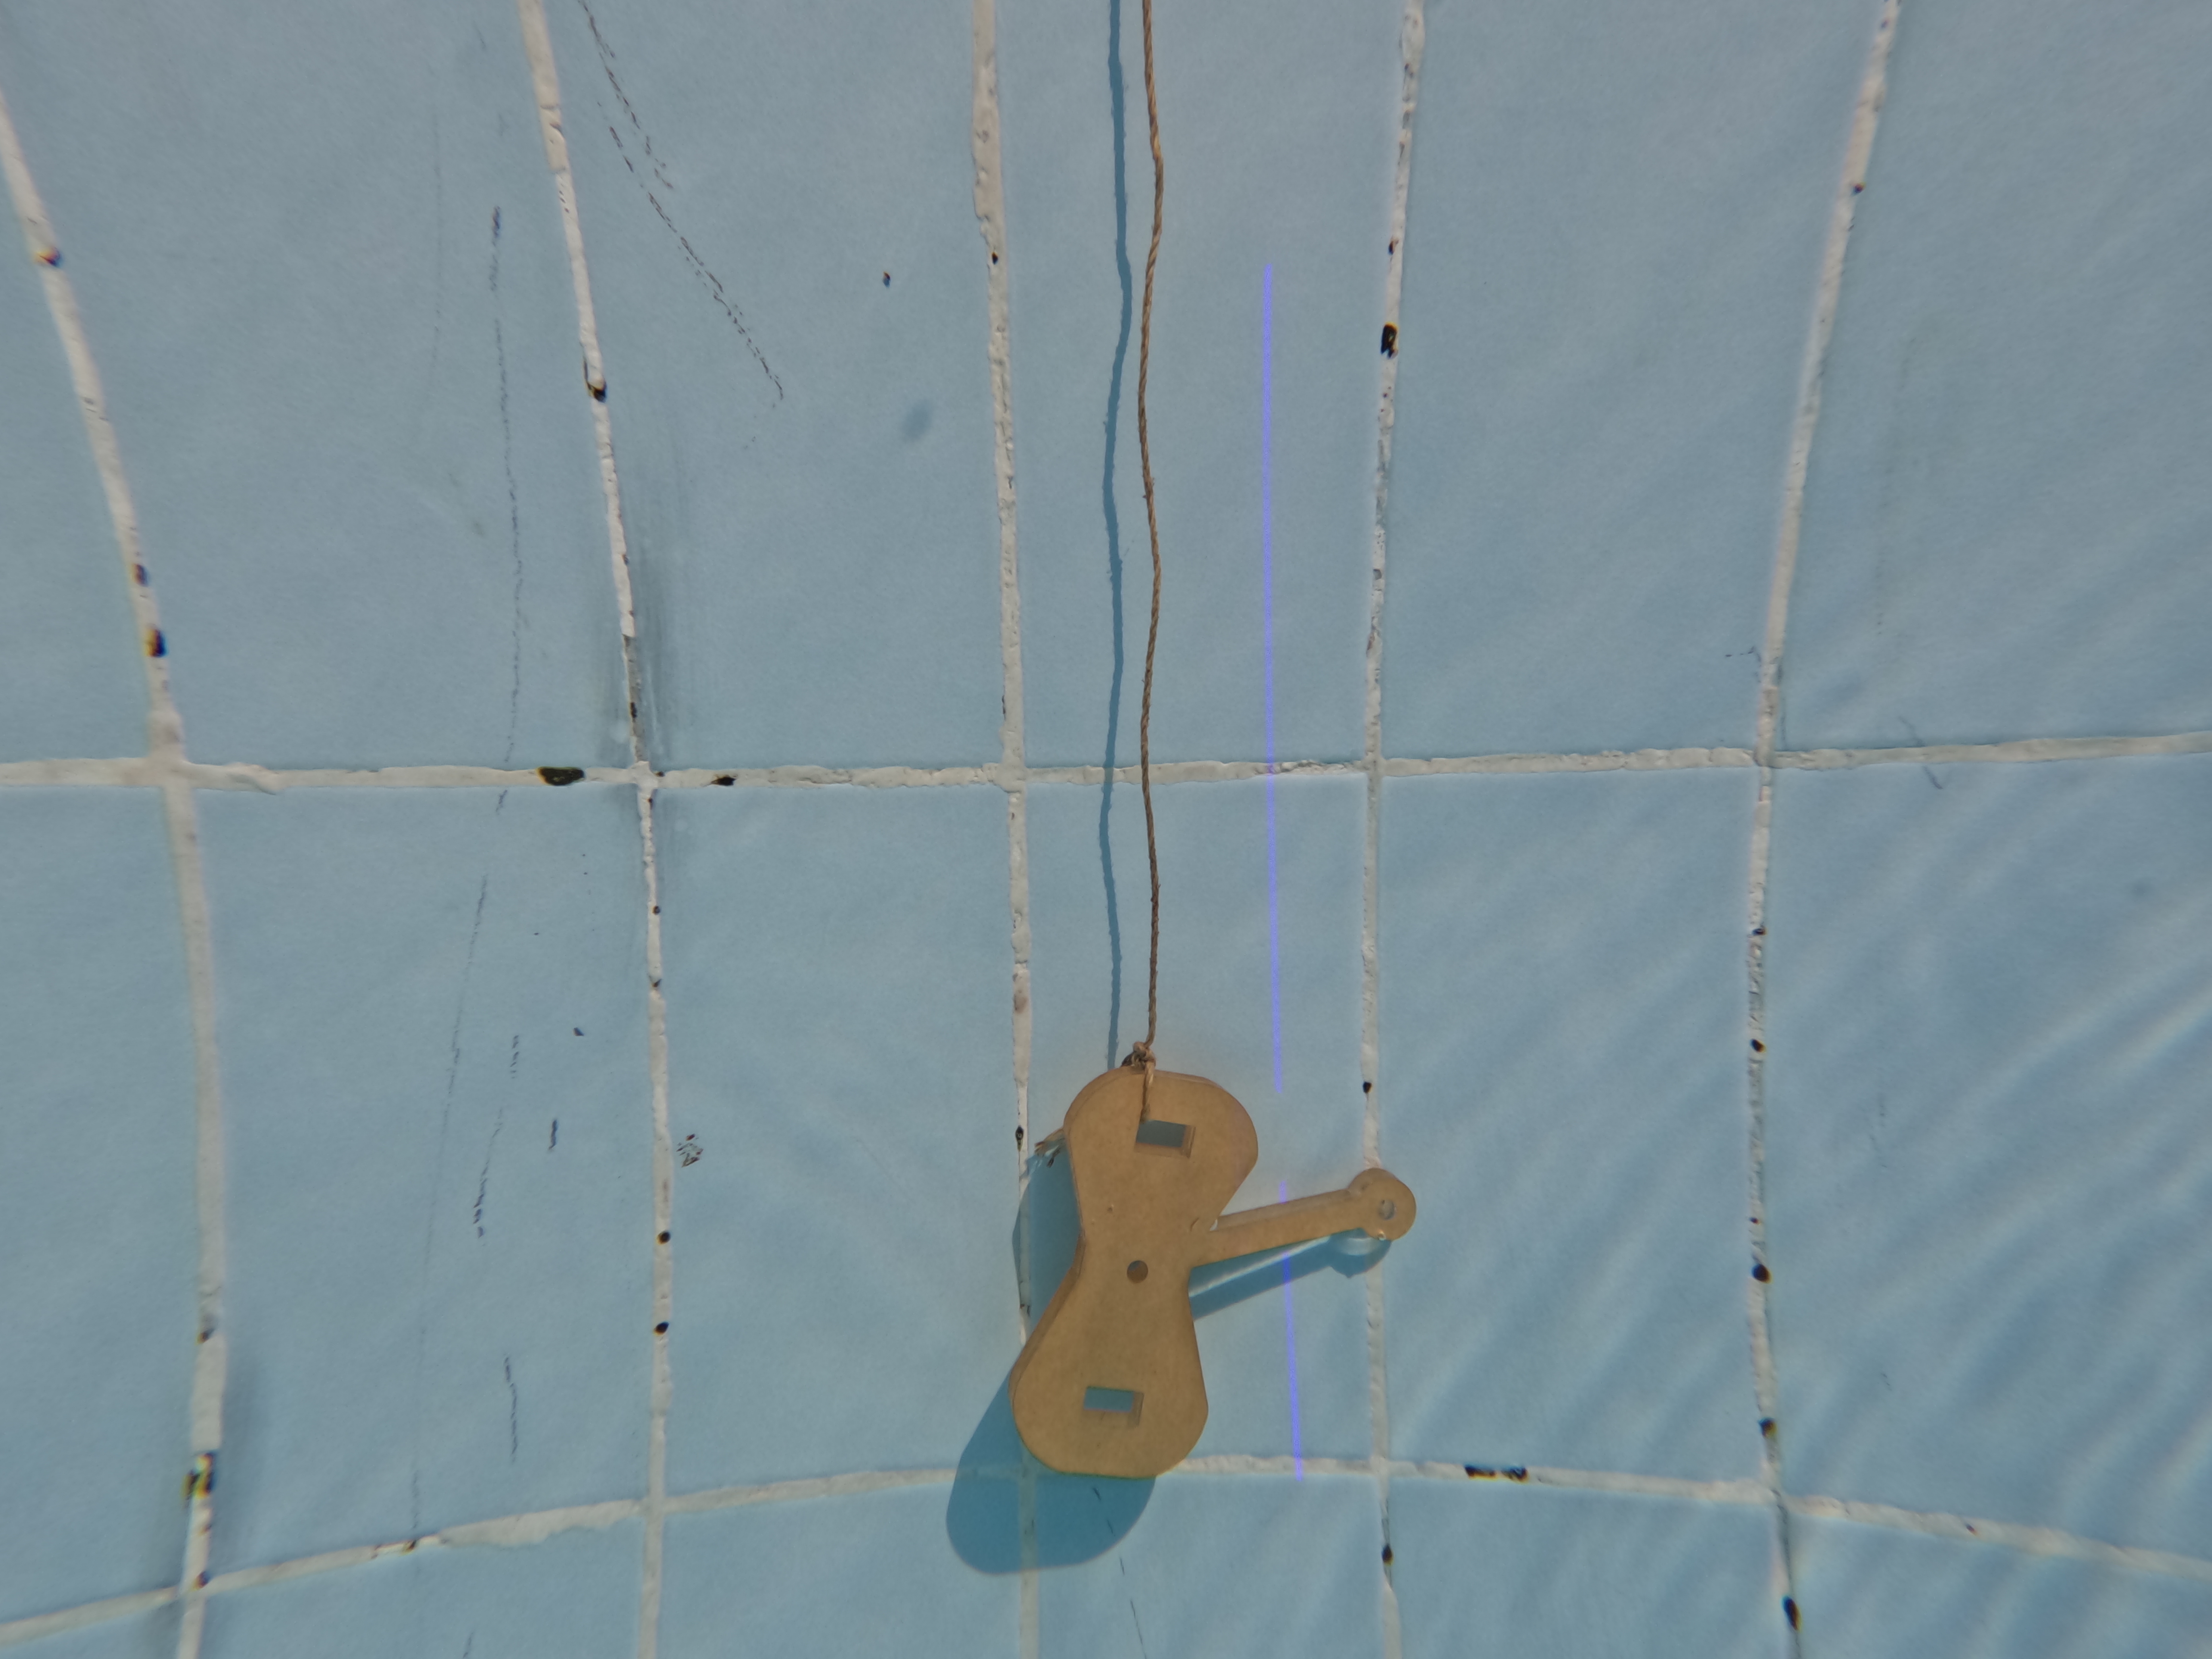

Supplement: Supplementary file 539 [file G0018884.pdf › Level_6_1/G0018884.pdf]

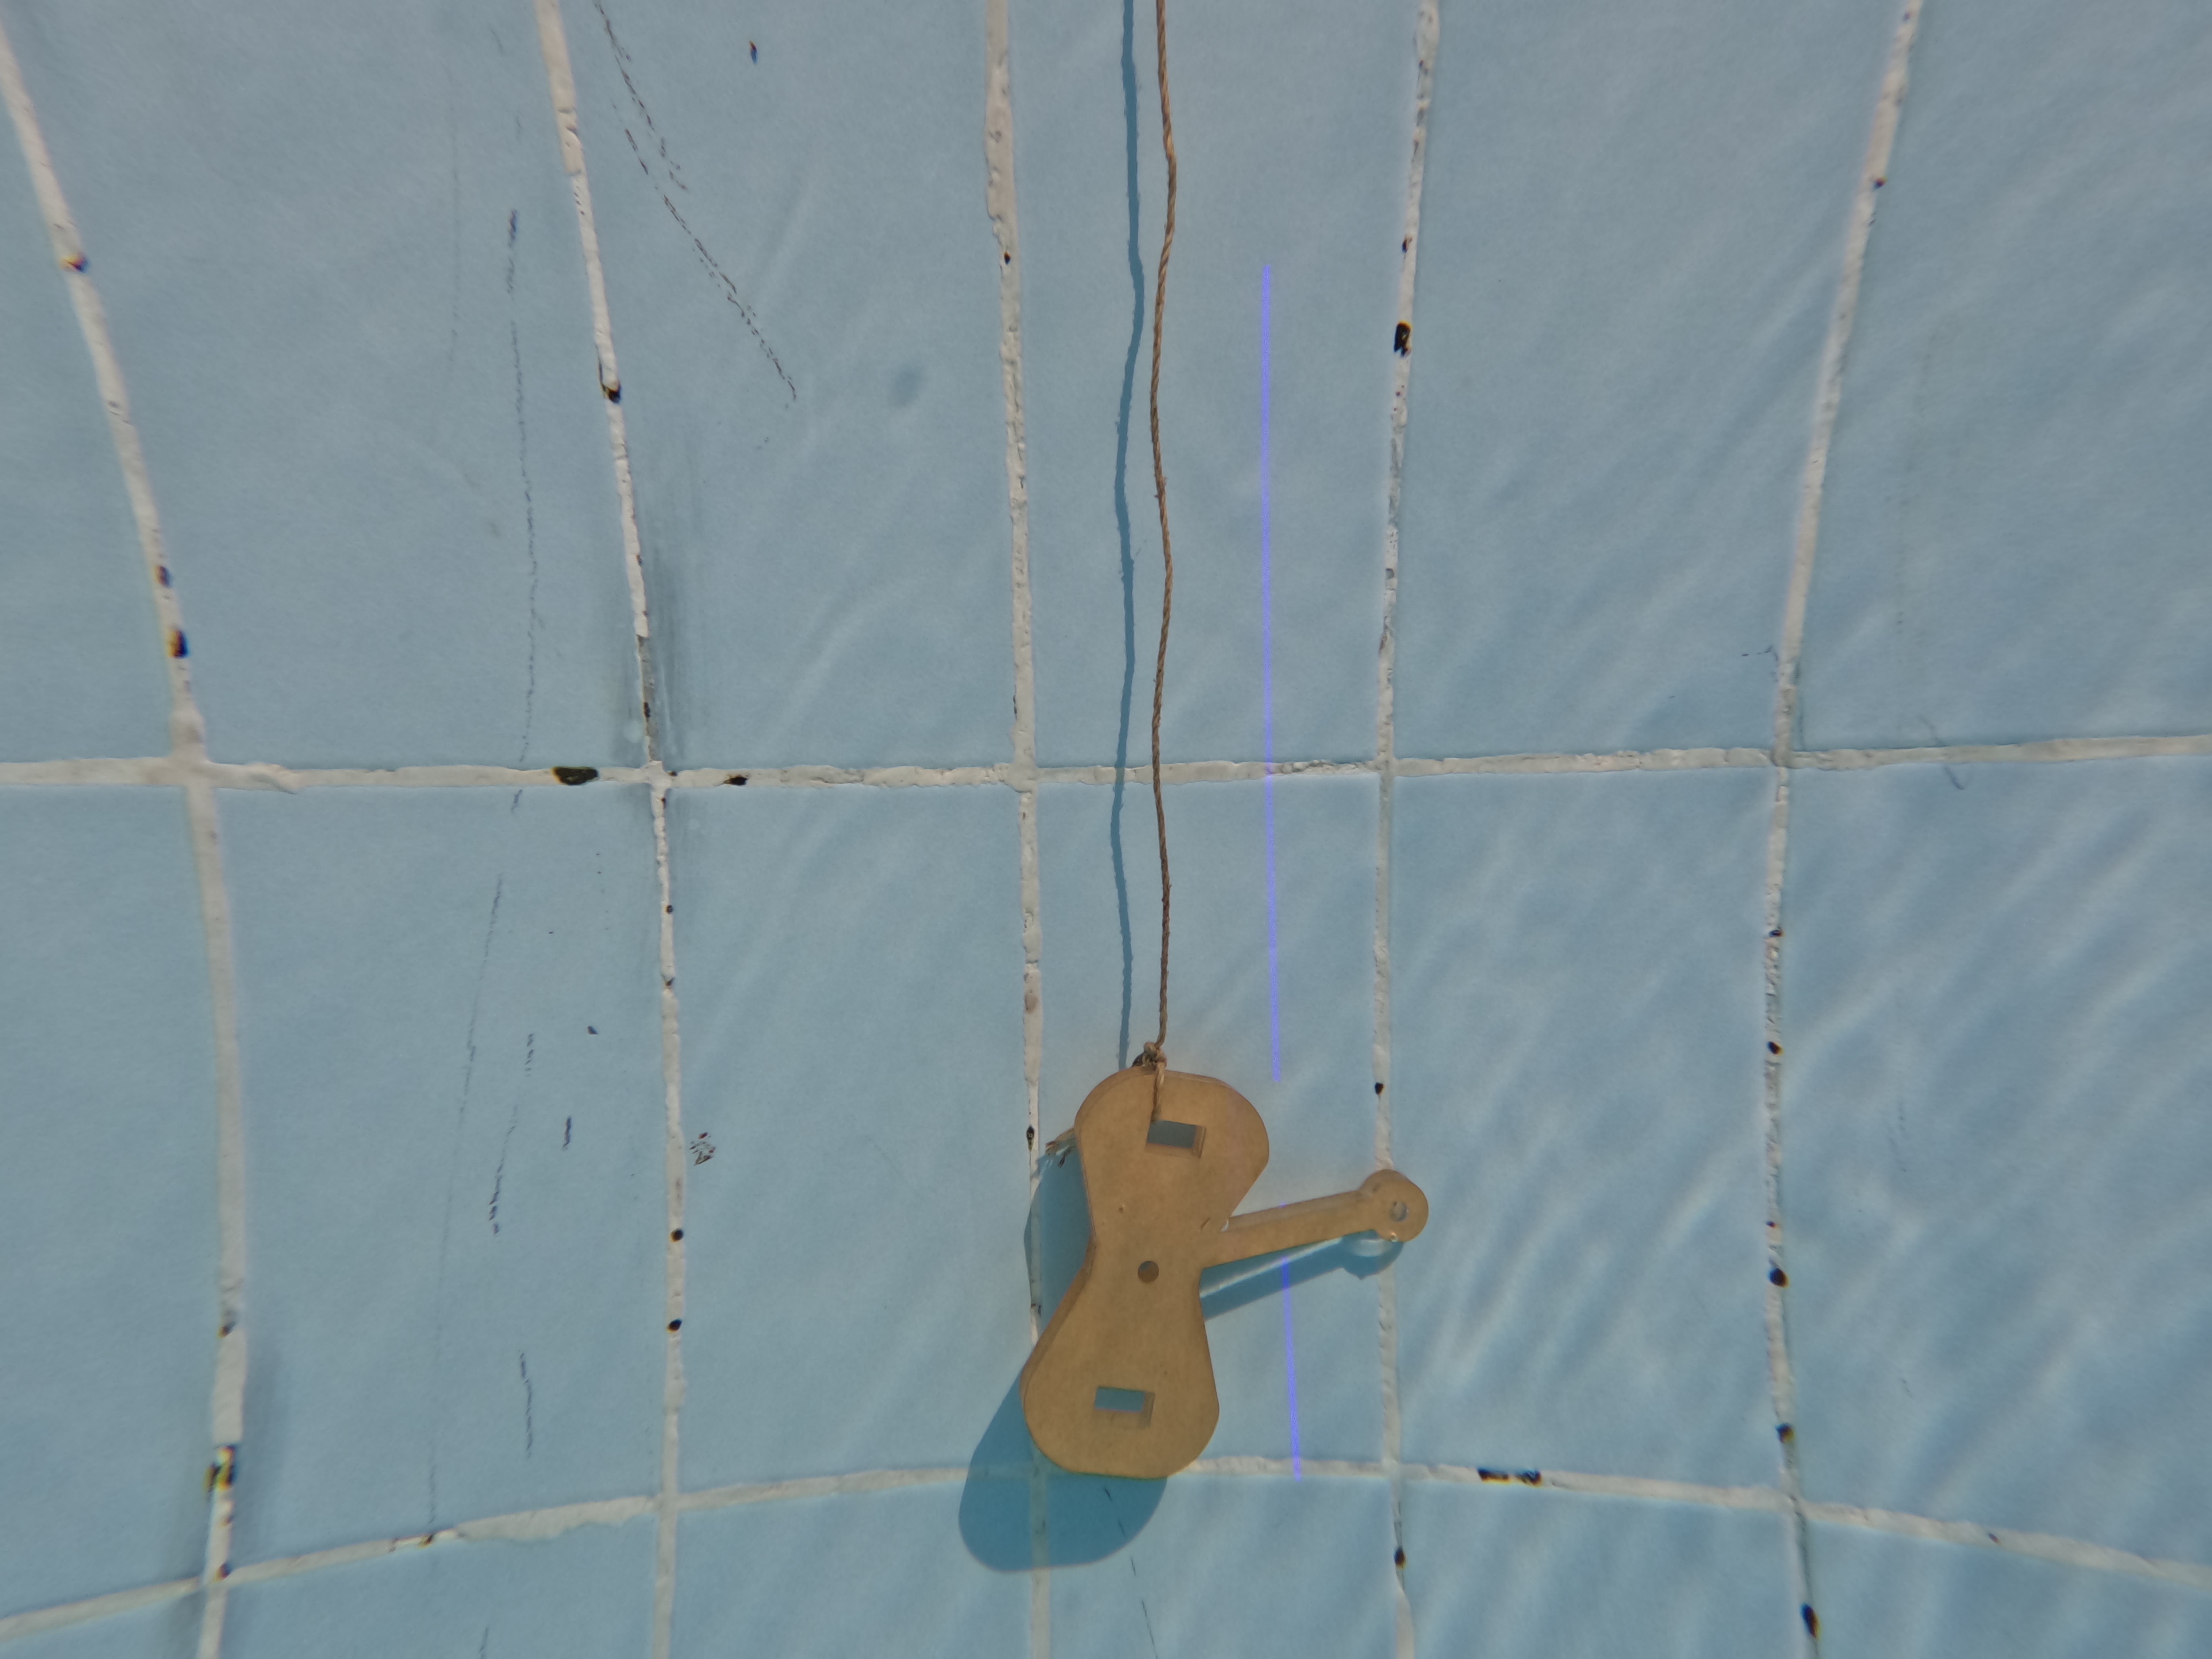

Supplement: Supplementary file 540 [file G0018885.pdf › Level_6_1/G0018885.pdf]

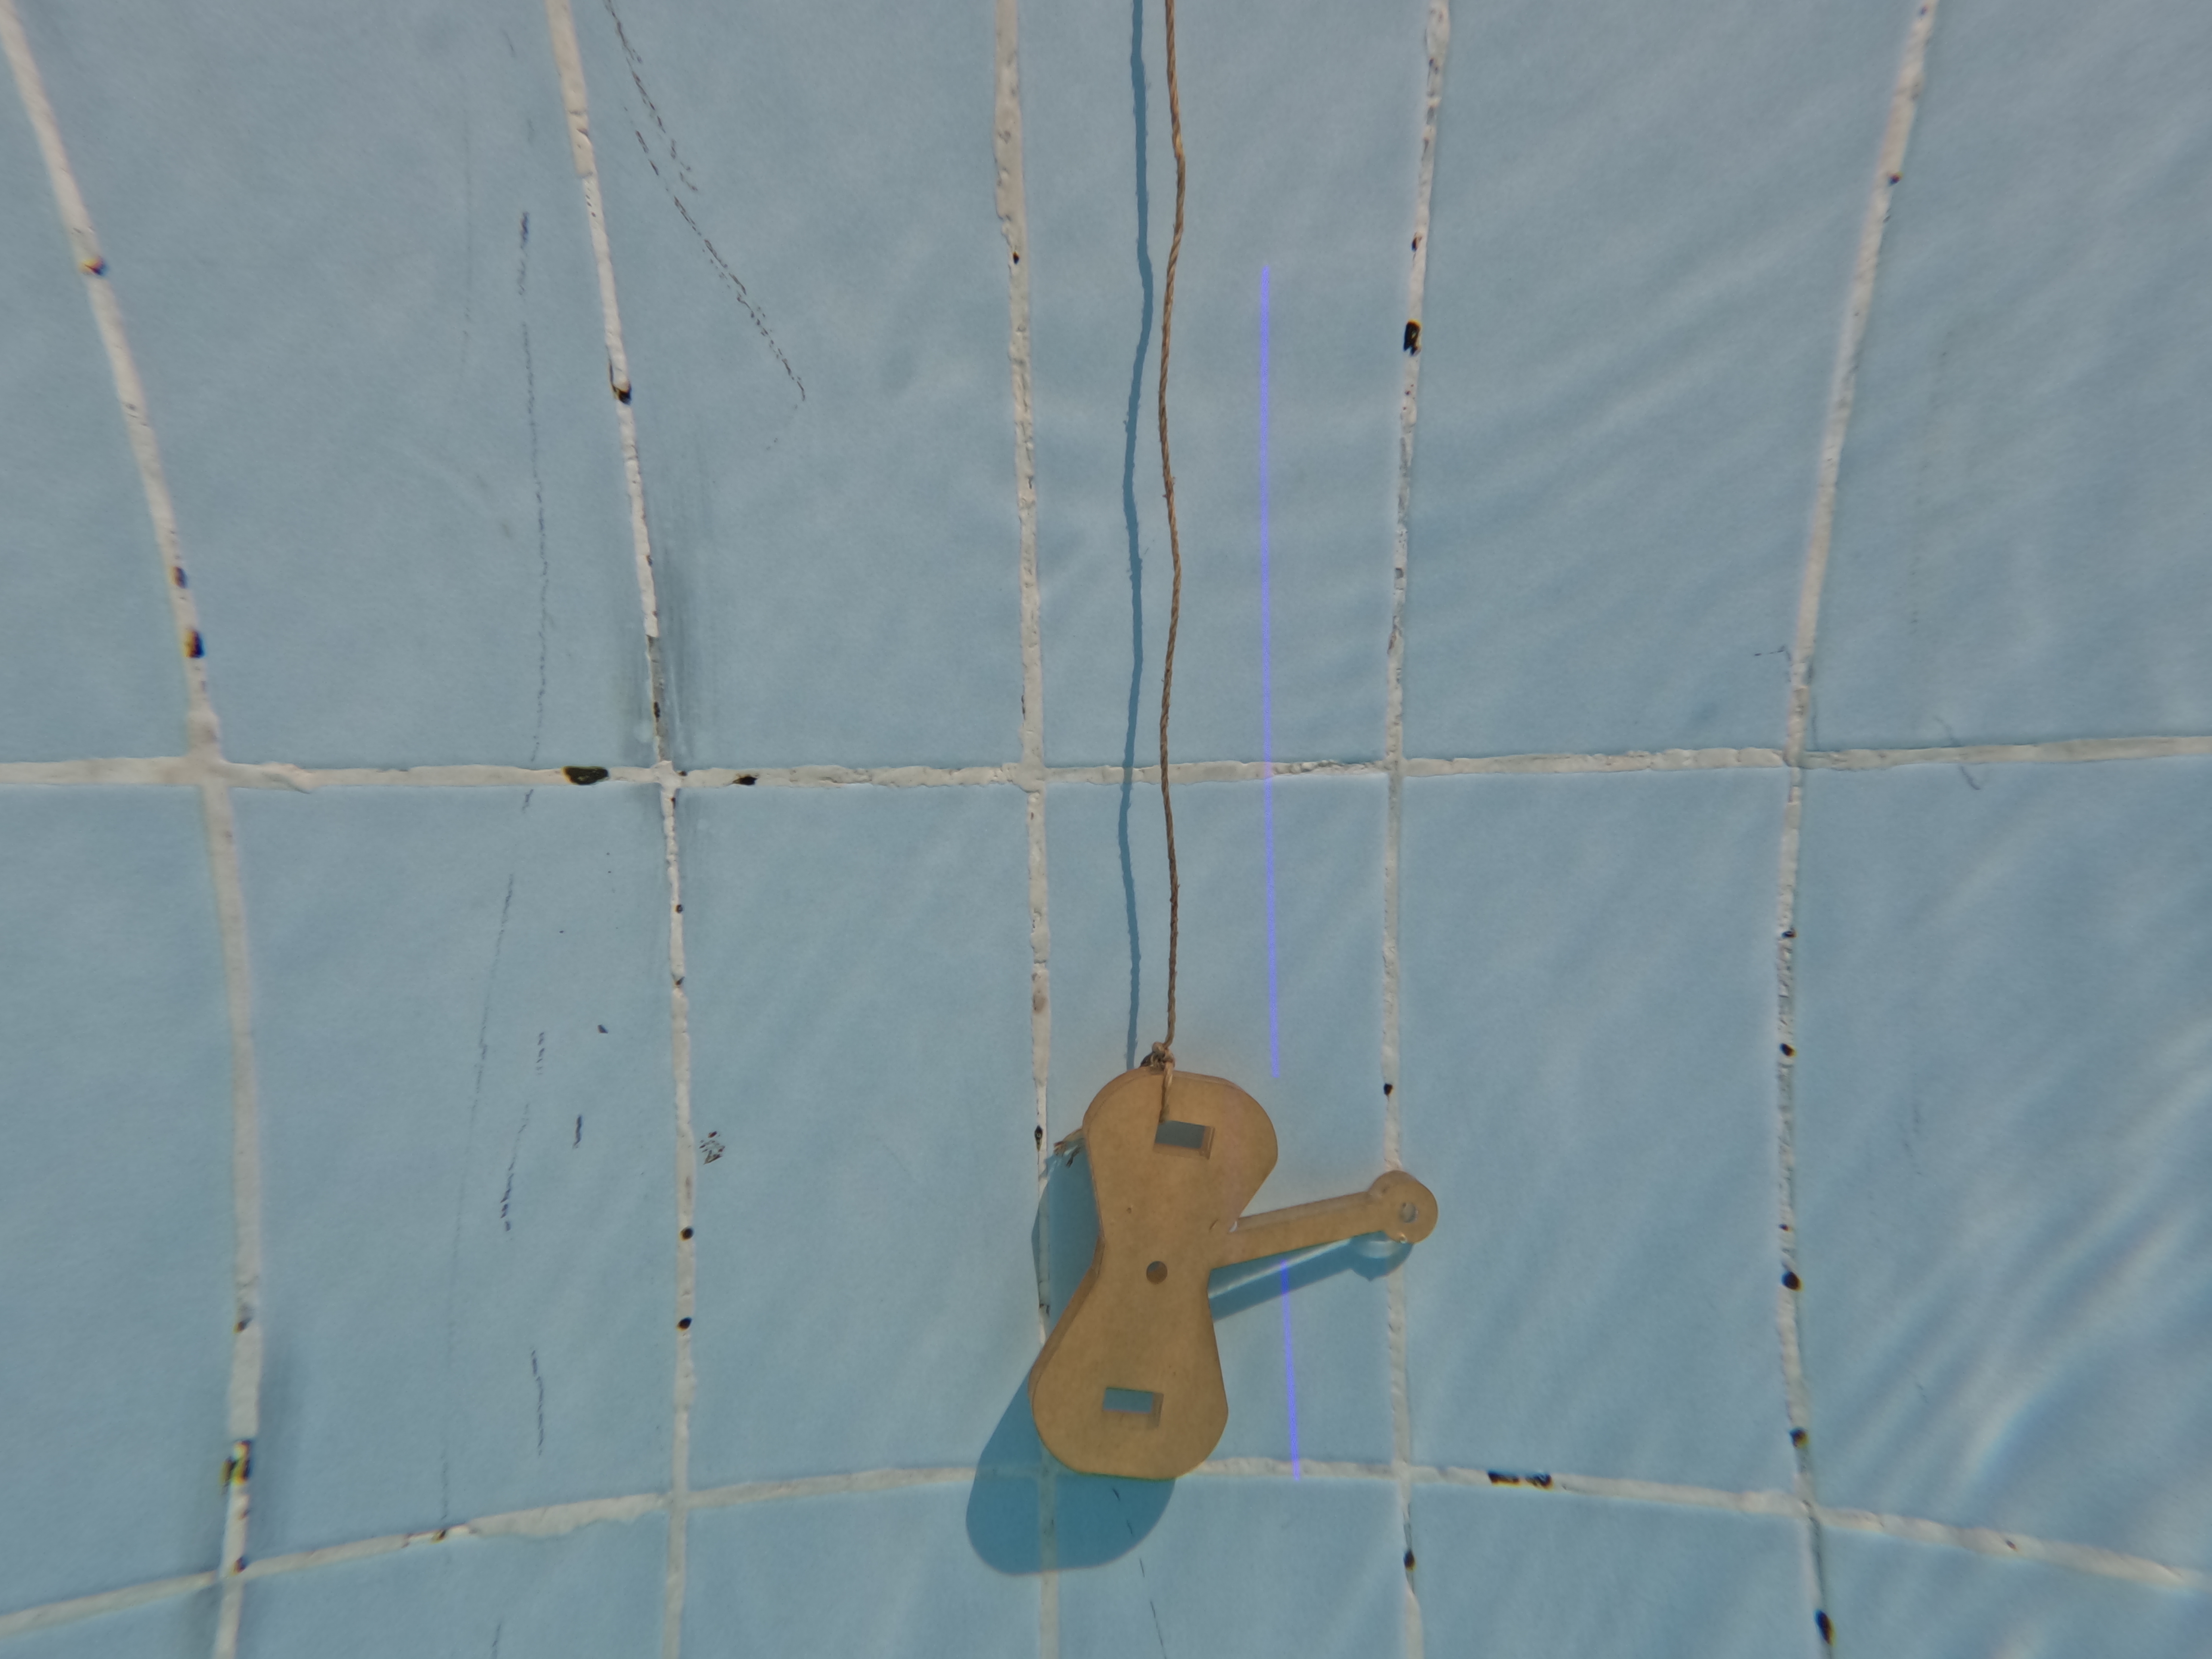

Supplement: Supplementary file 541 [file G0018886.pdf › Level_6_1/G0018886.pdf]

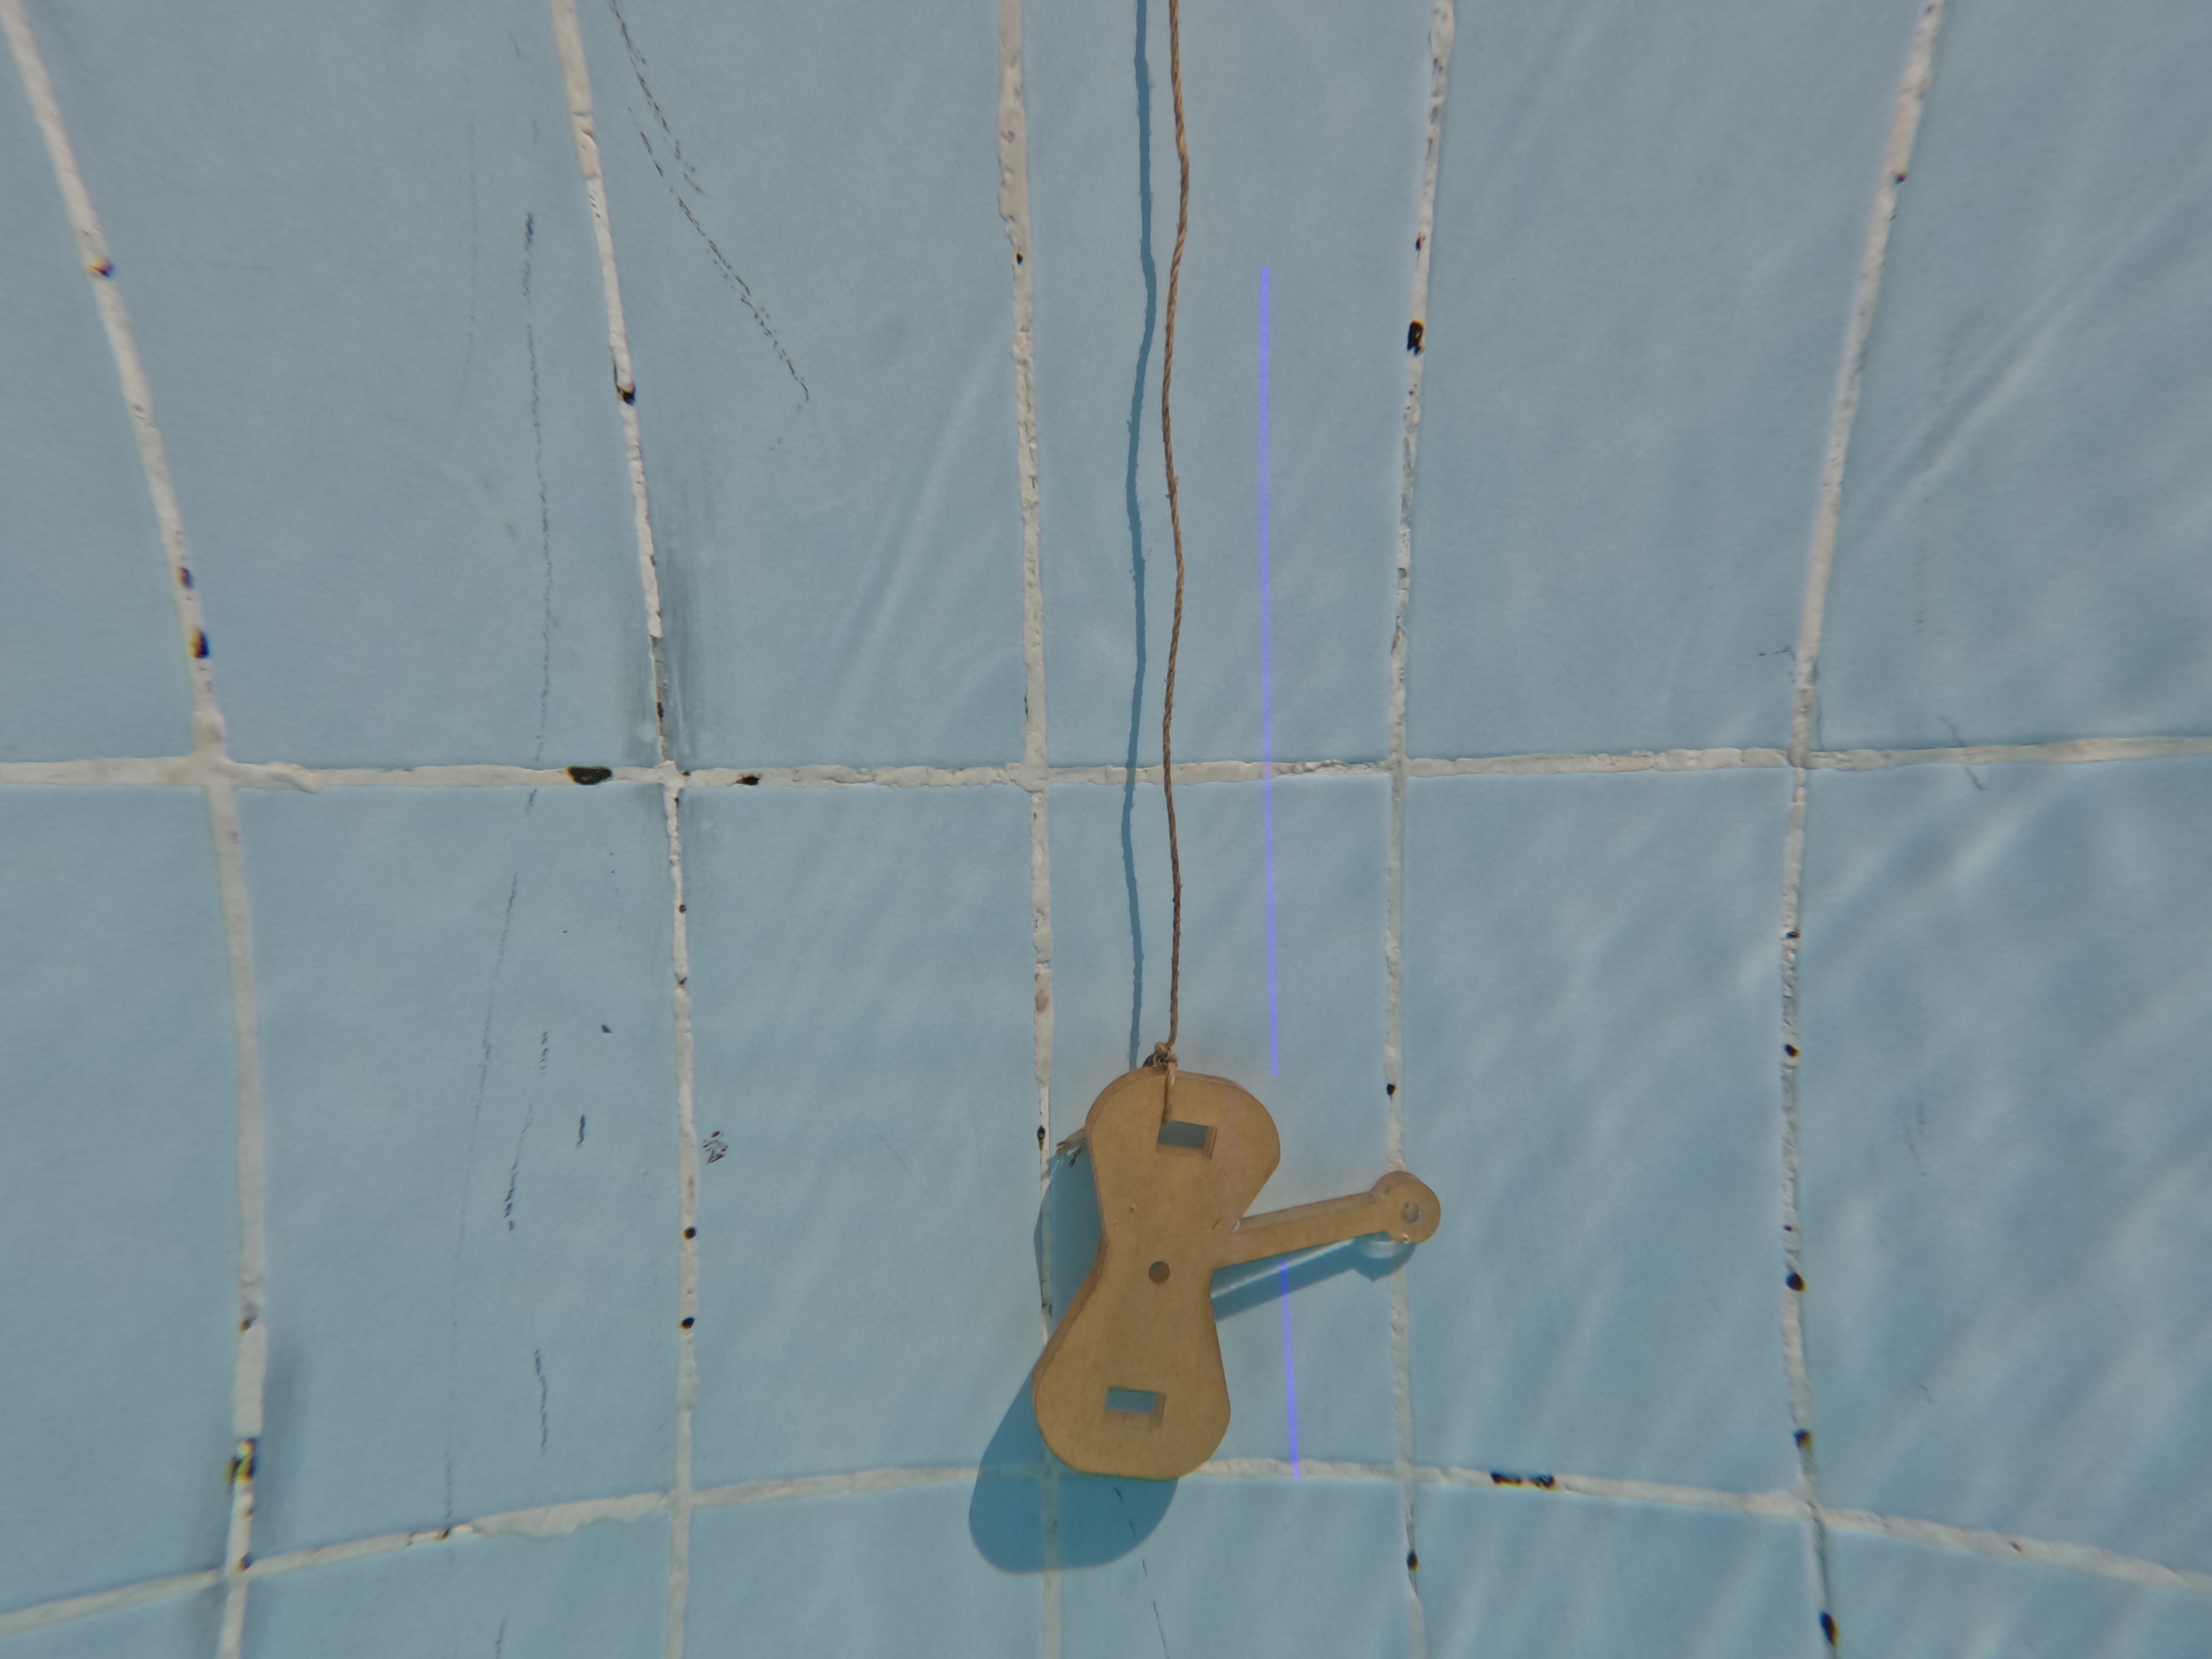

Supplement: Supplementary file 542 [file G0018887.pdf › Level_6_1/G0018887.pdf]

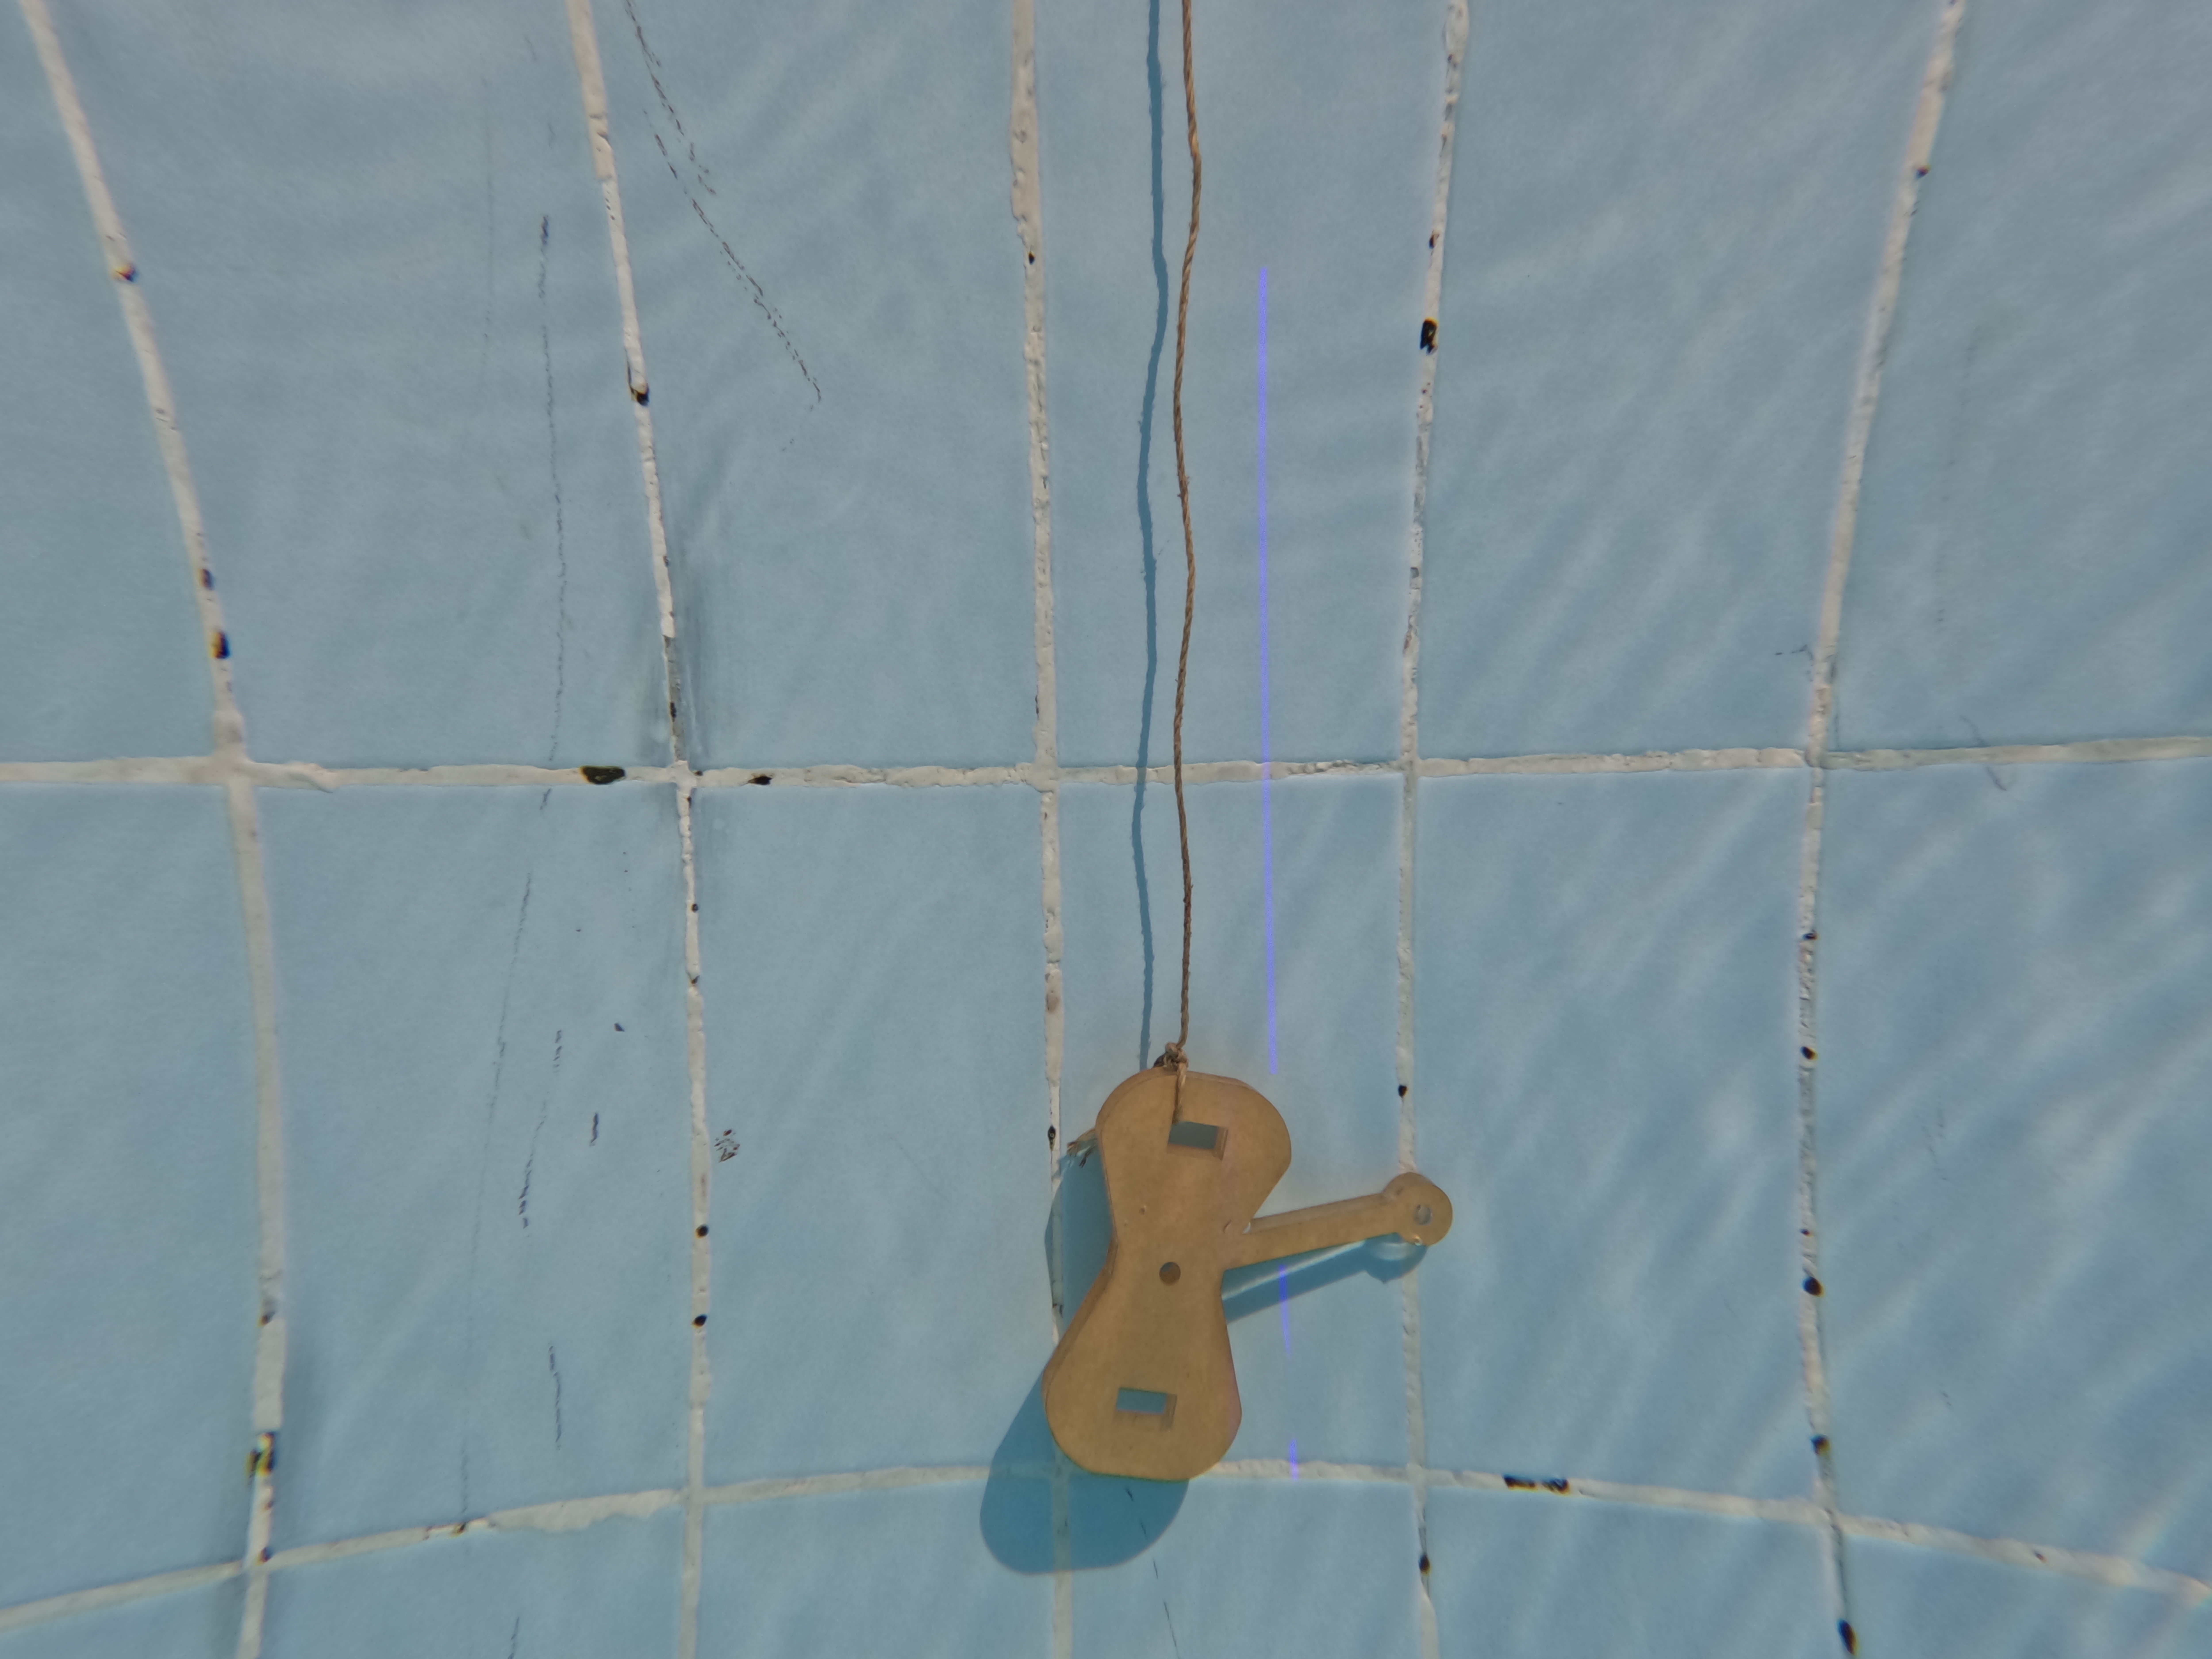

Supplement: Supplementary file 543 [file G0018888.pdf › Level_6_1/G0018888.pdf]

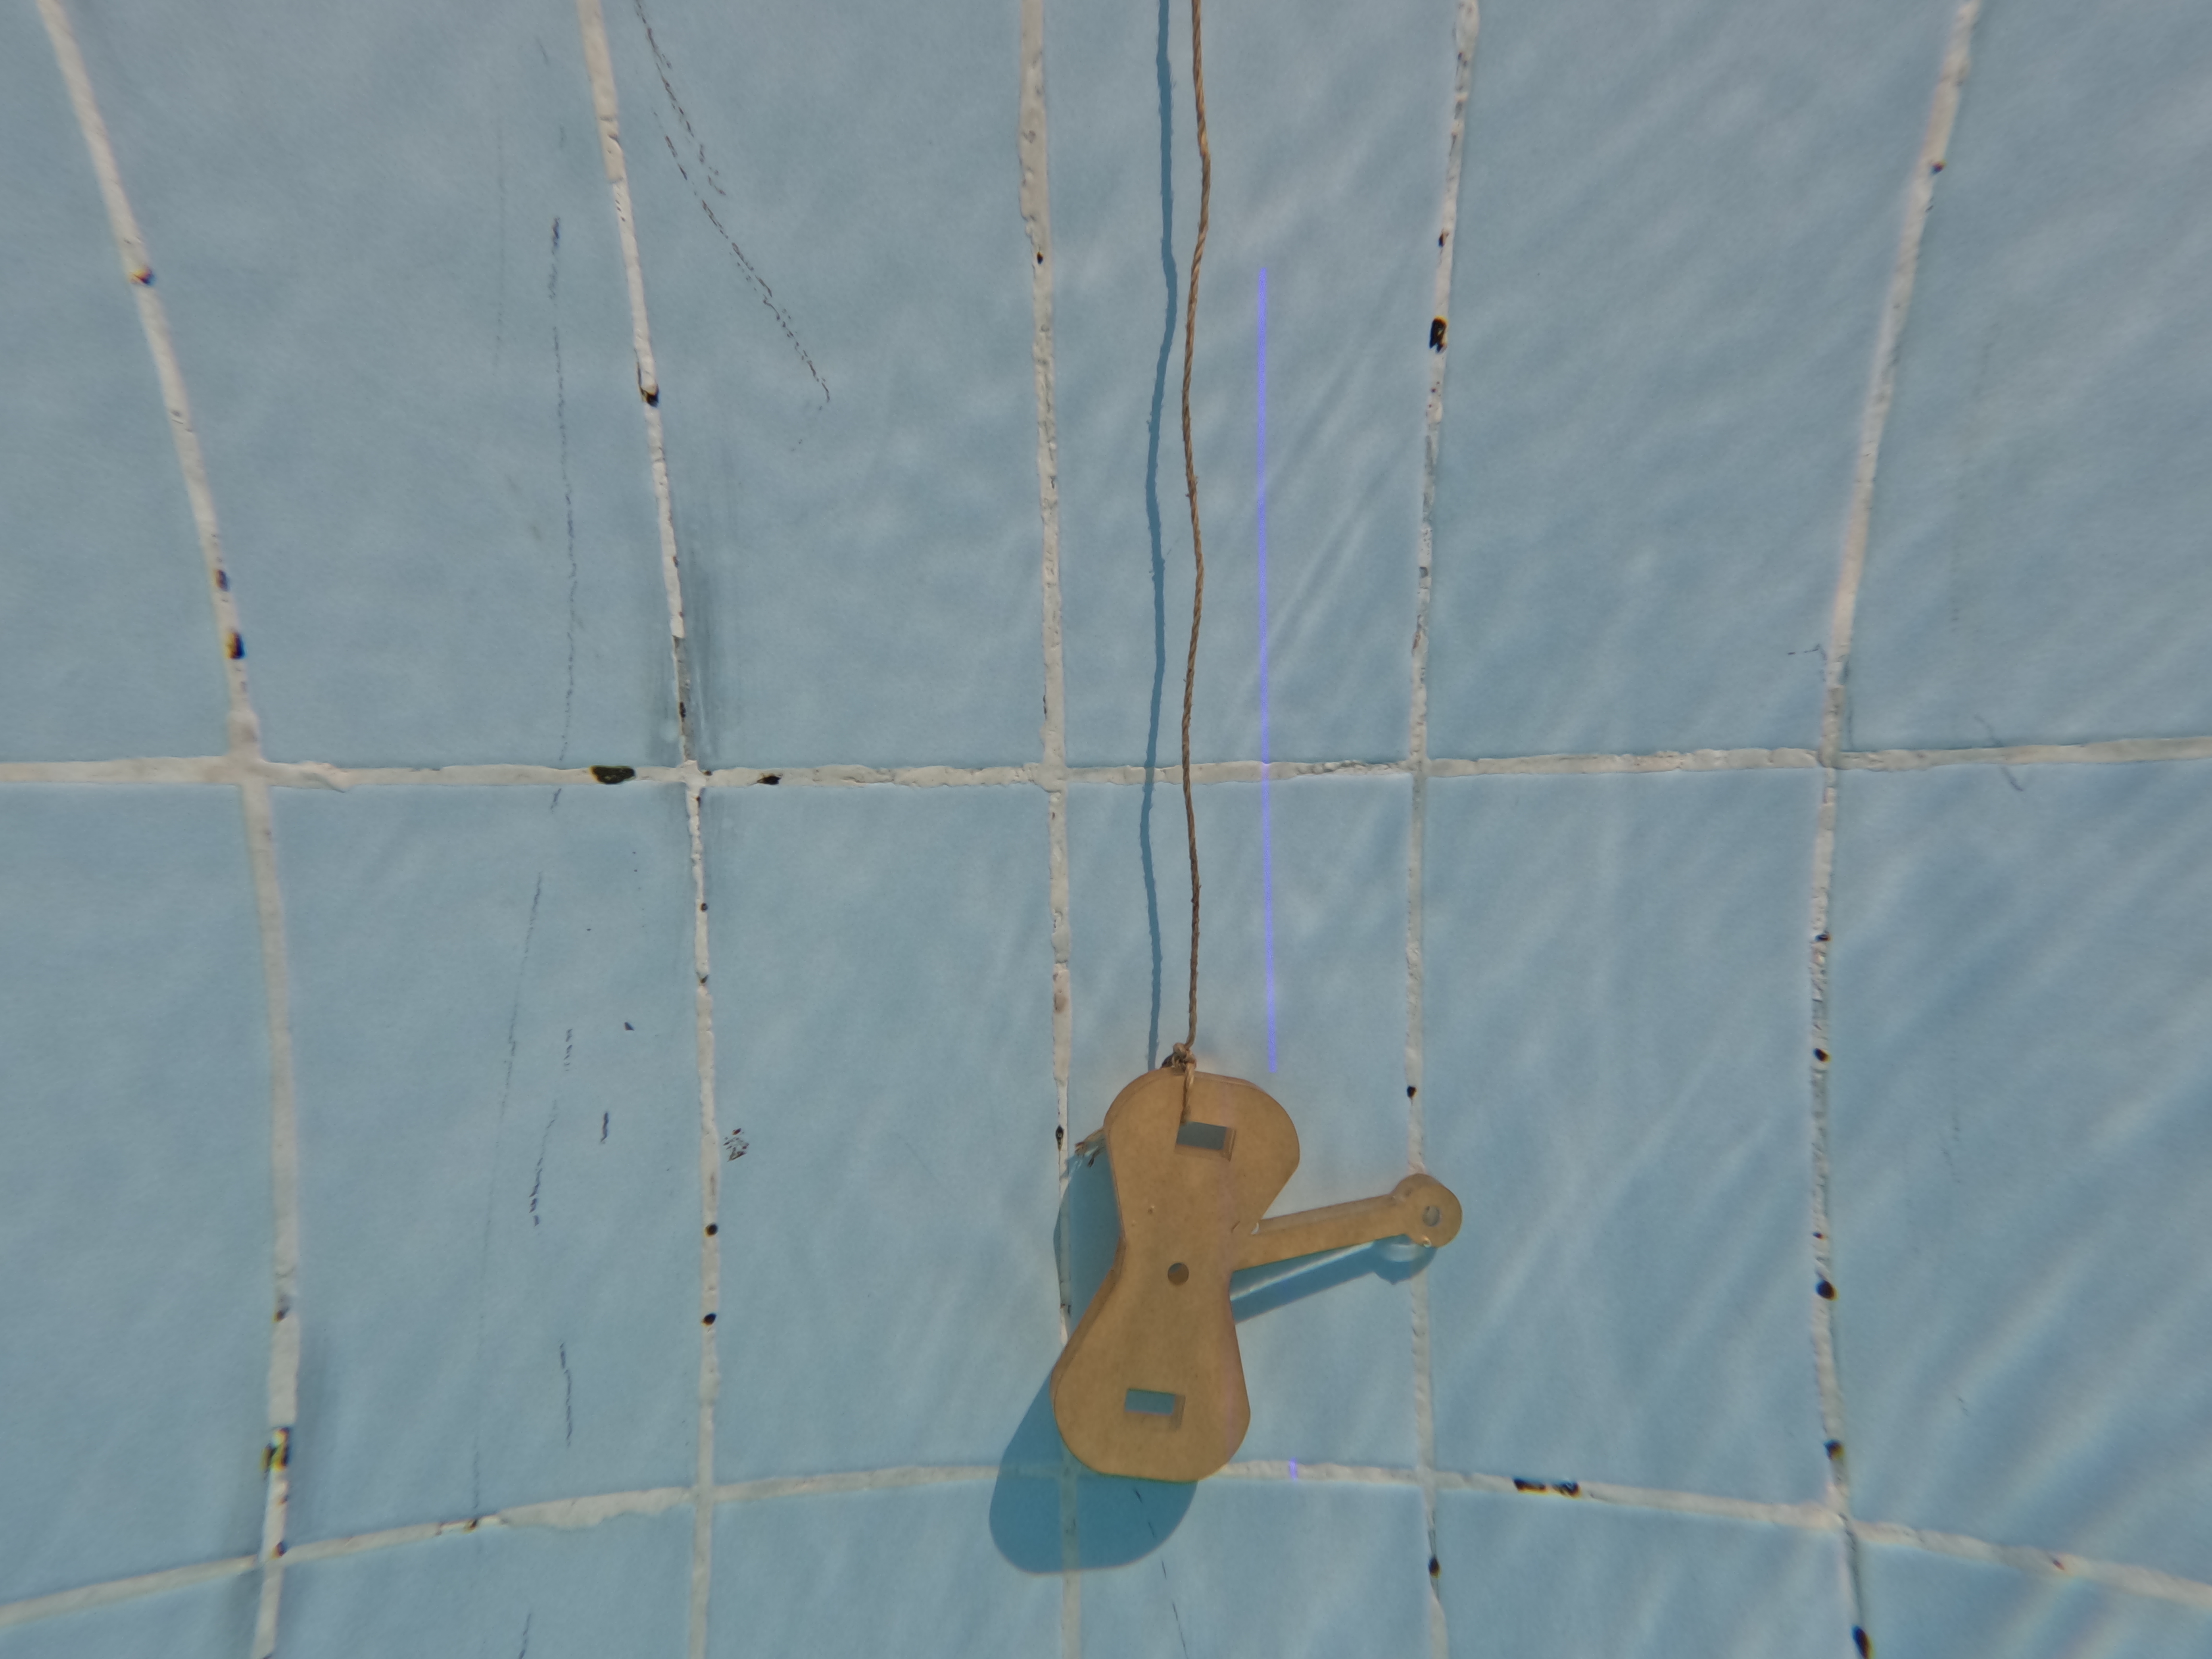

Supplement: Supplementary file 544 [file G0018889.pdf › Level_6_1/G0018889.pdf]

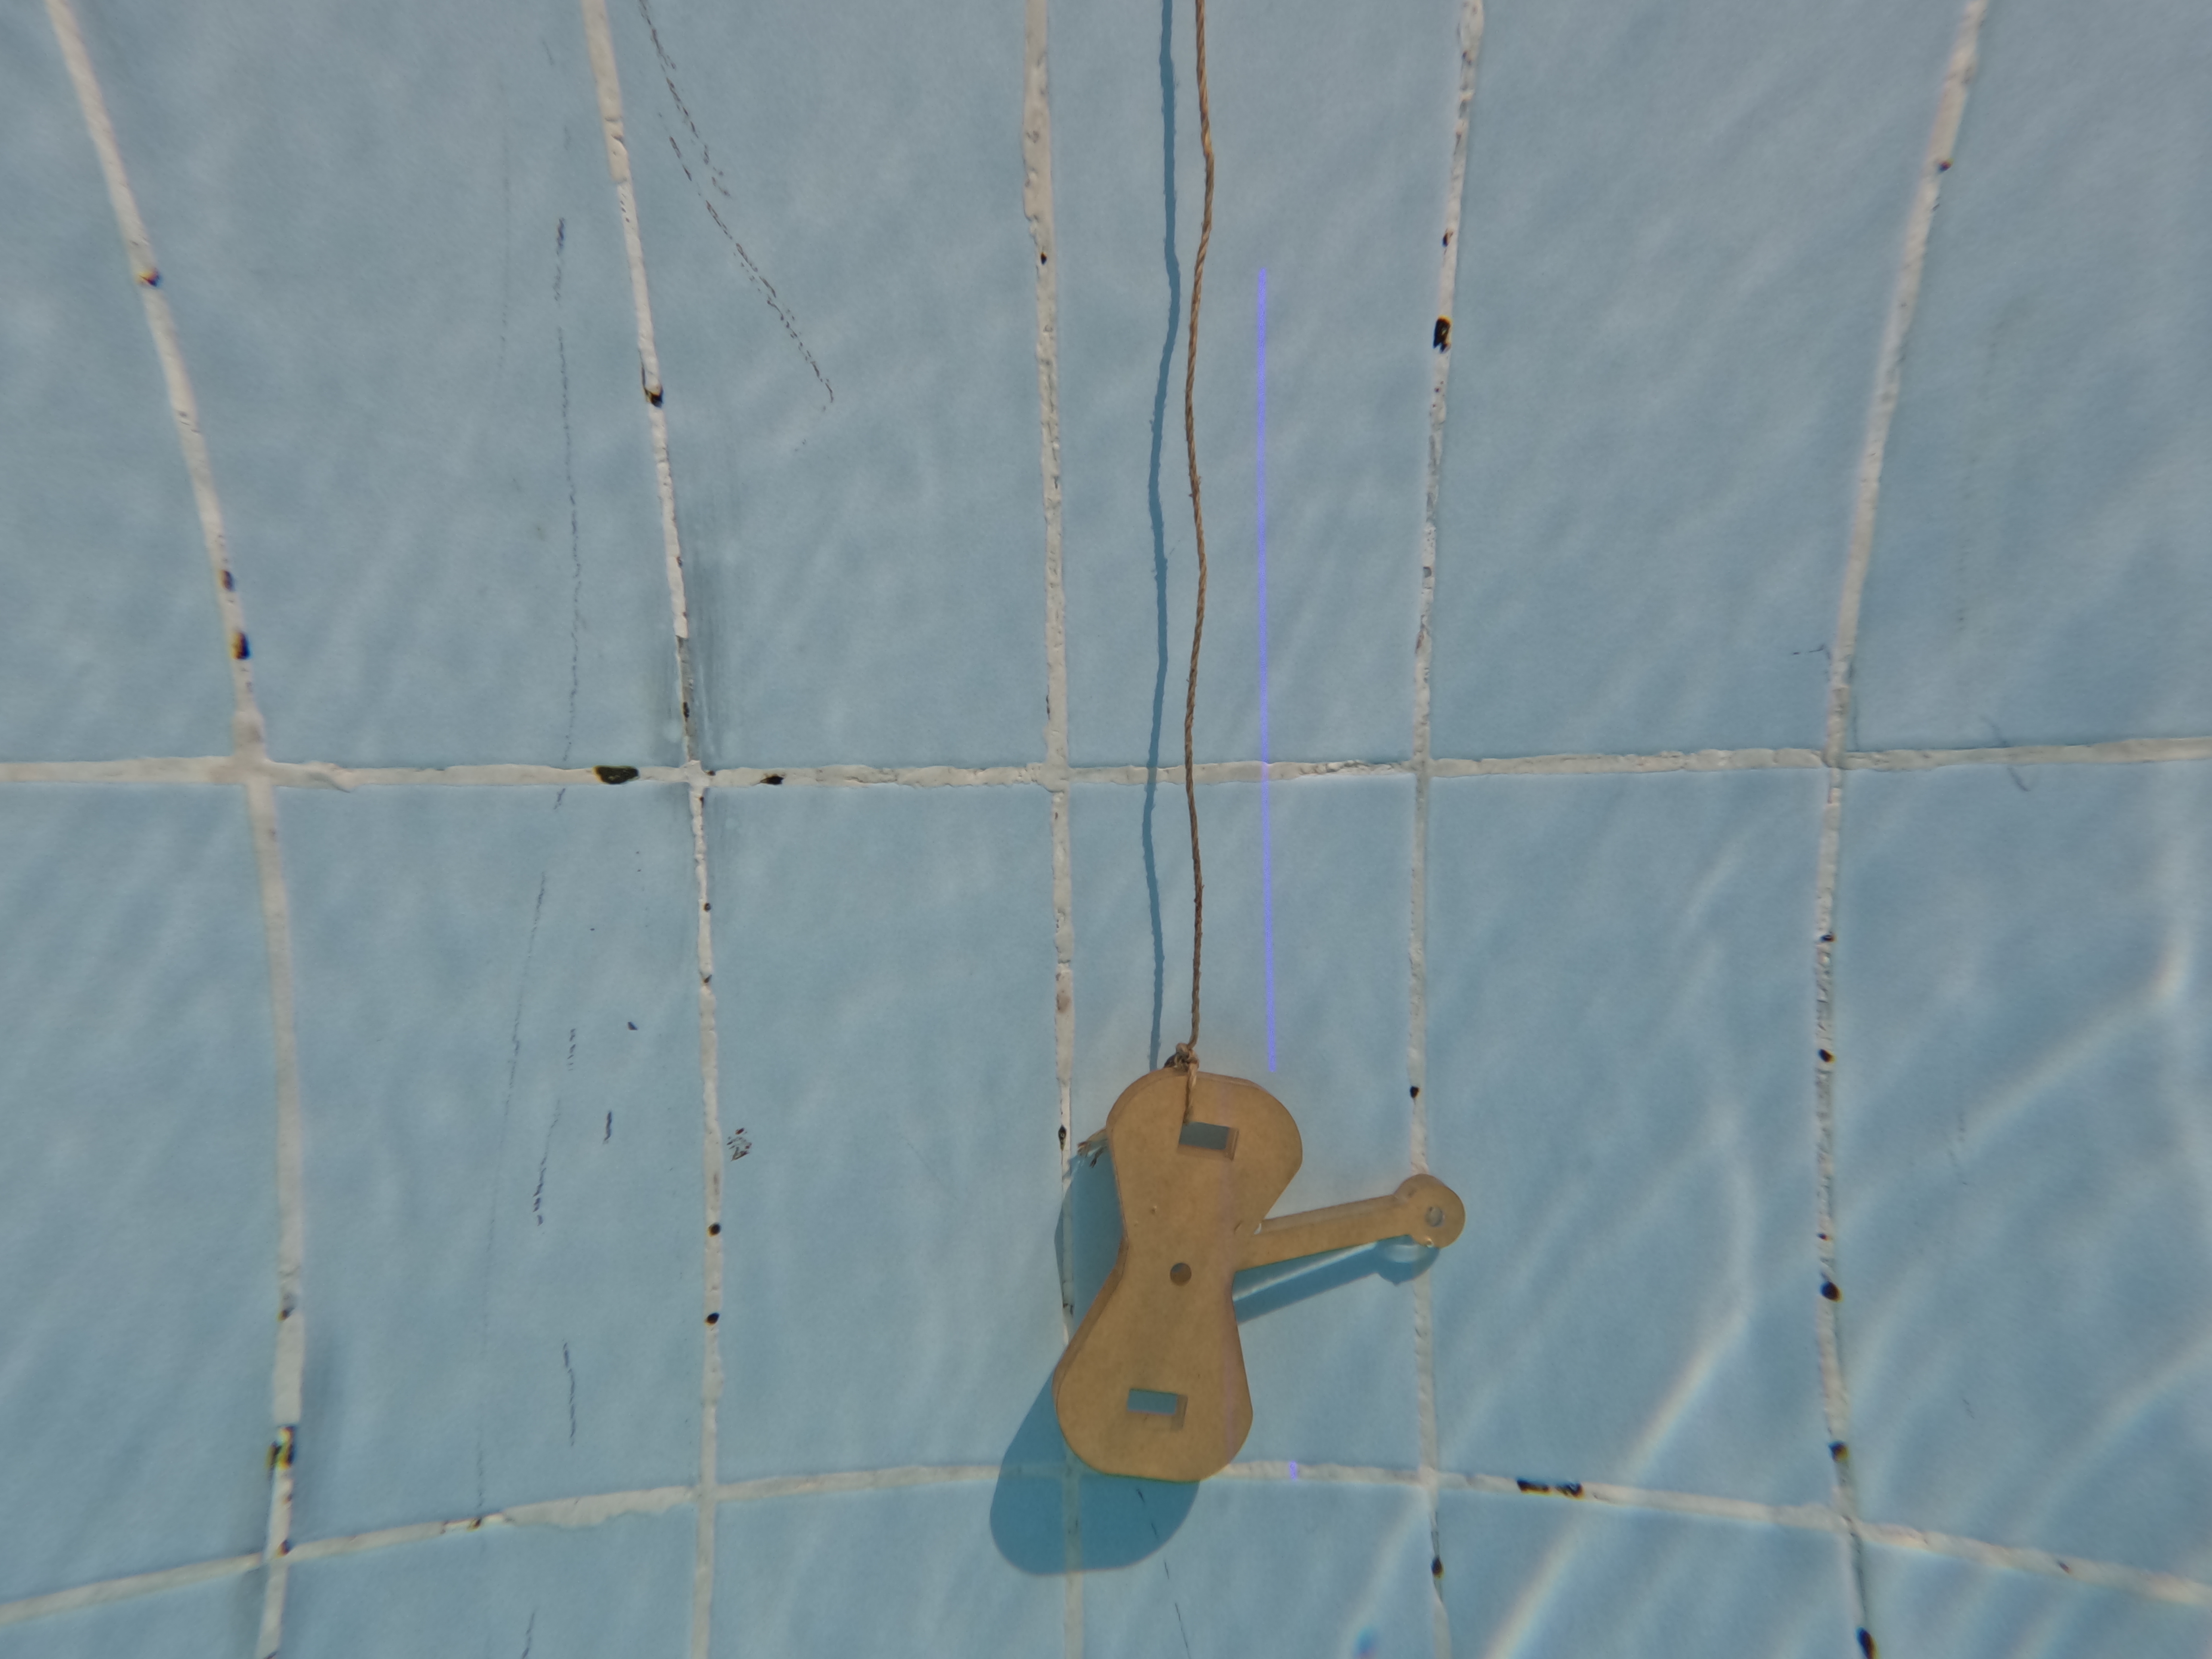

Supplement: Supplementary file 545 [file G0018890.pdf › Level_6_1/G0018890.pdf]

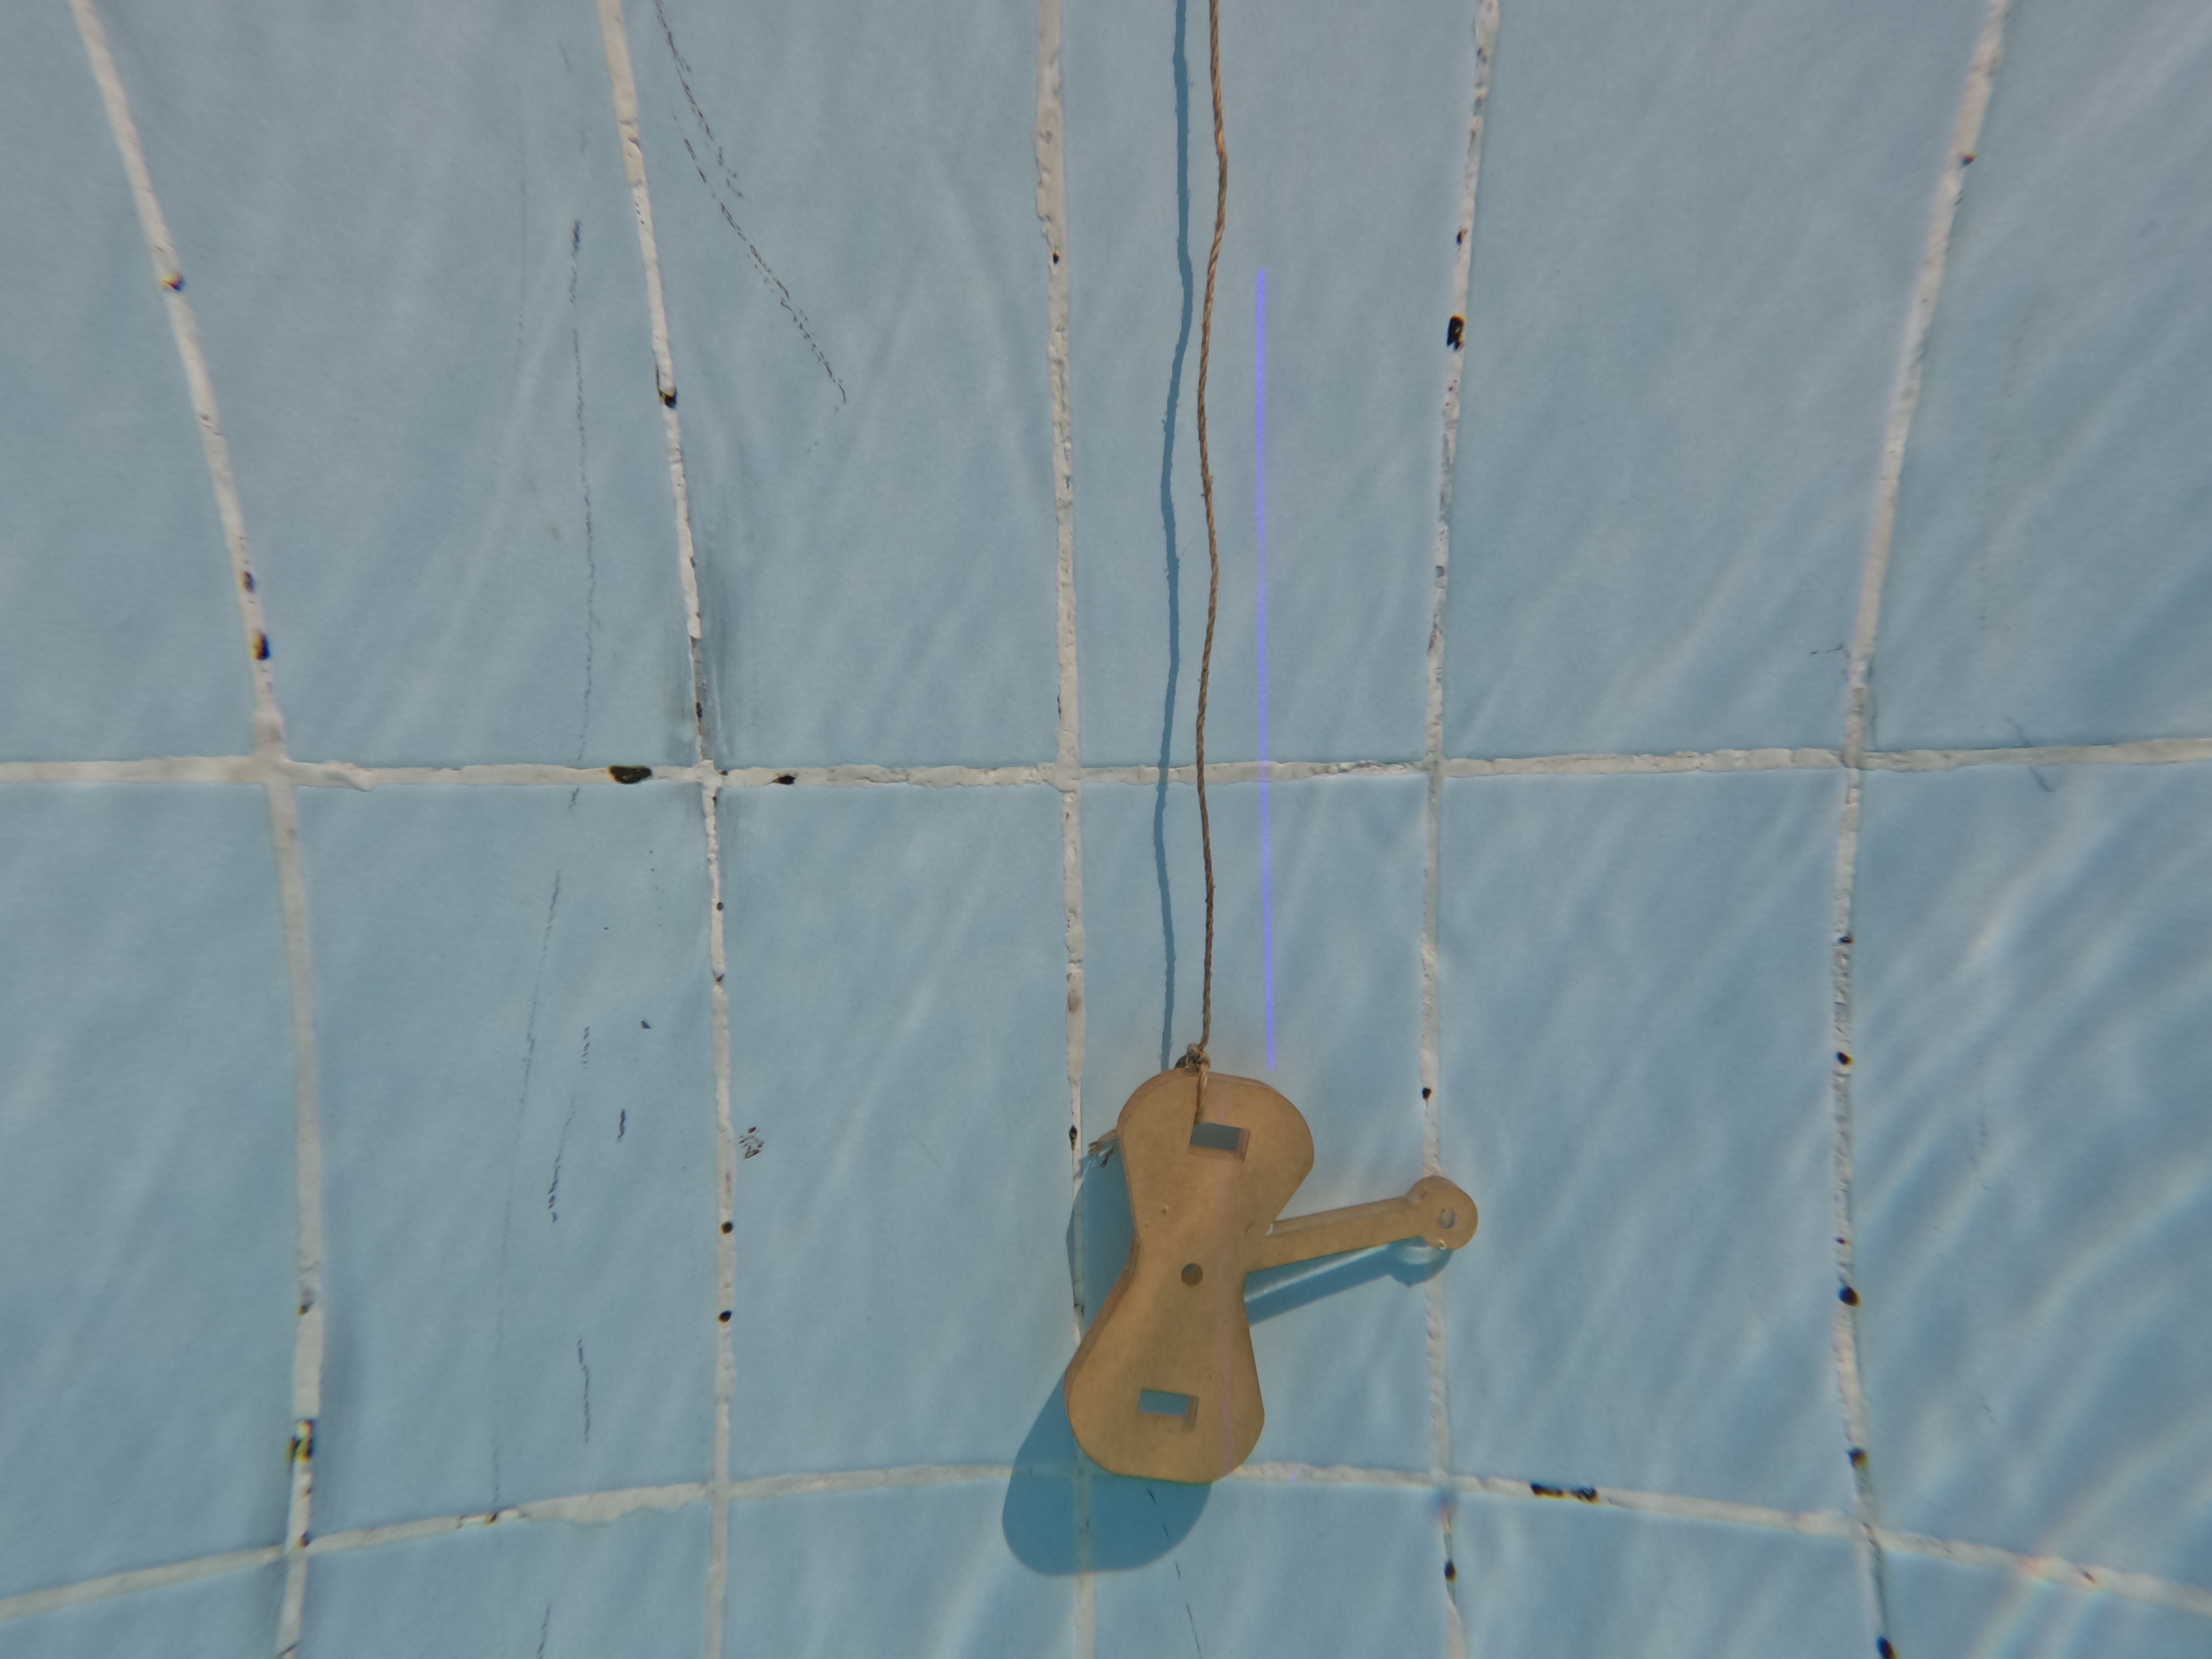

Supplement: Supplementary file 546 [file G0018891.pdf › Level_6_1/G0018891.pdf]

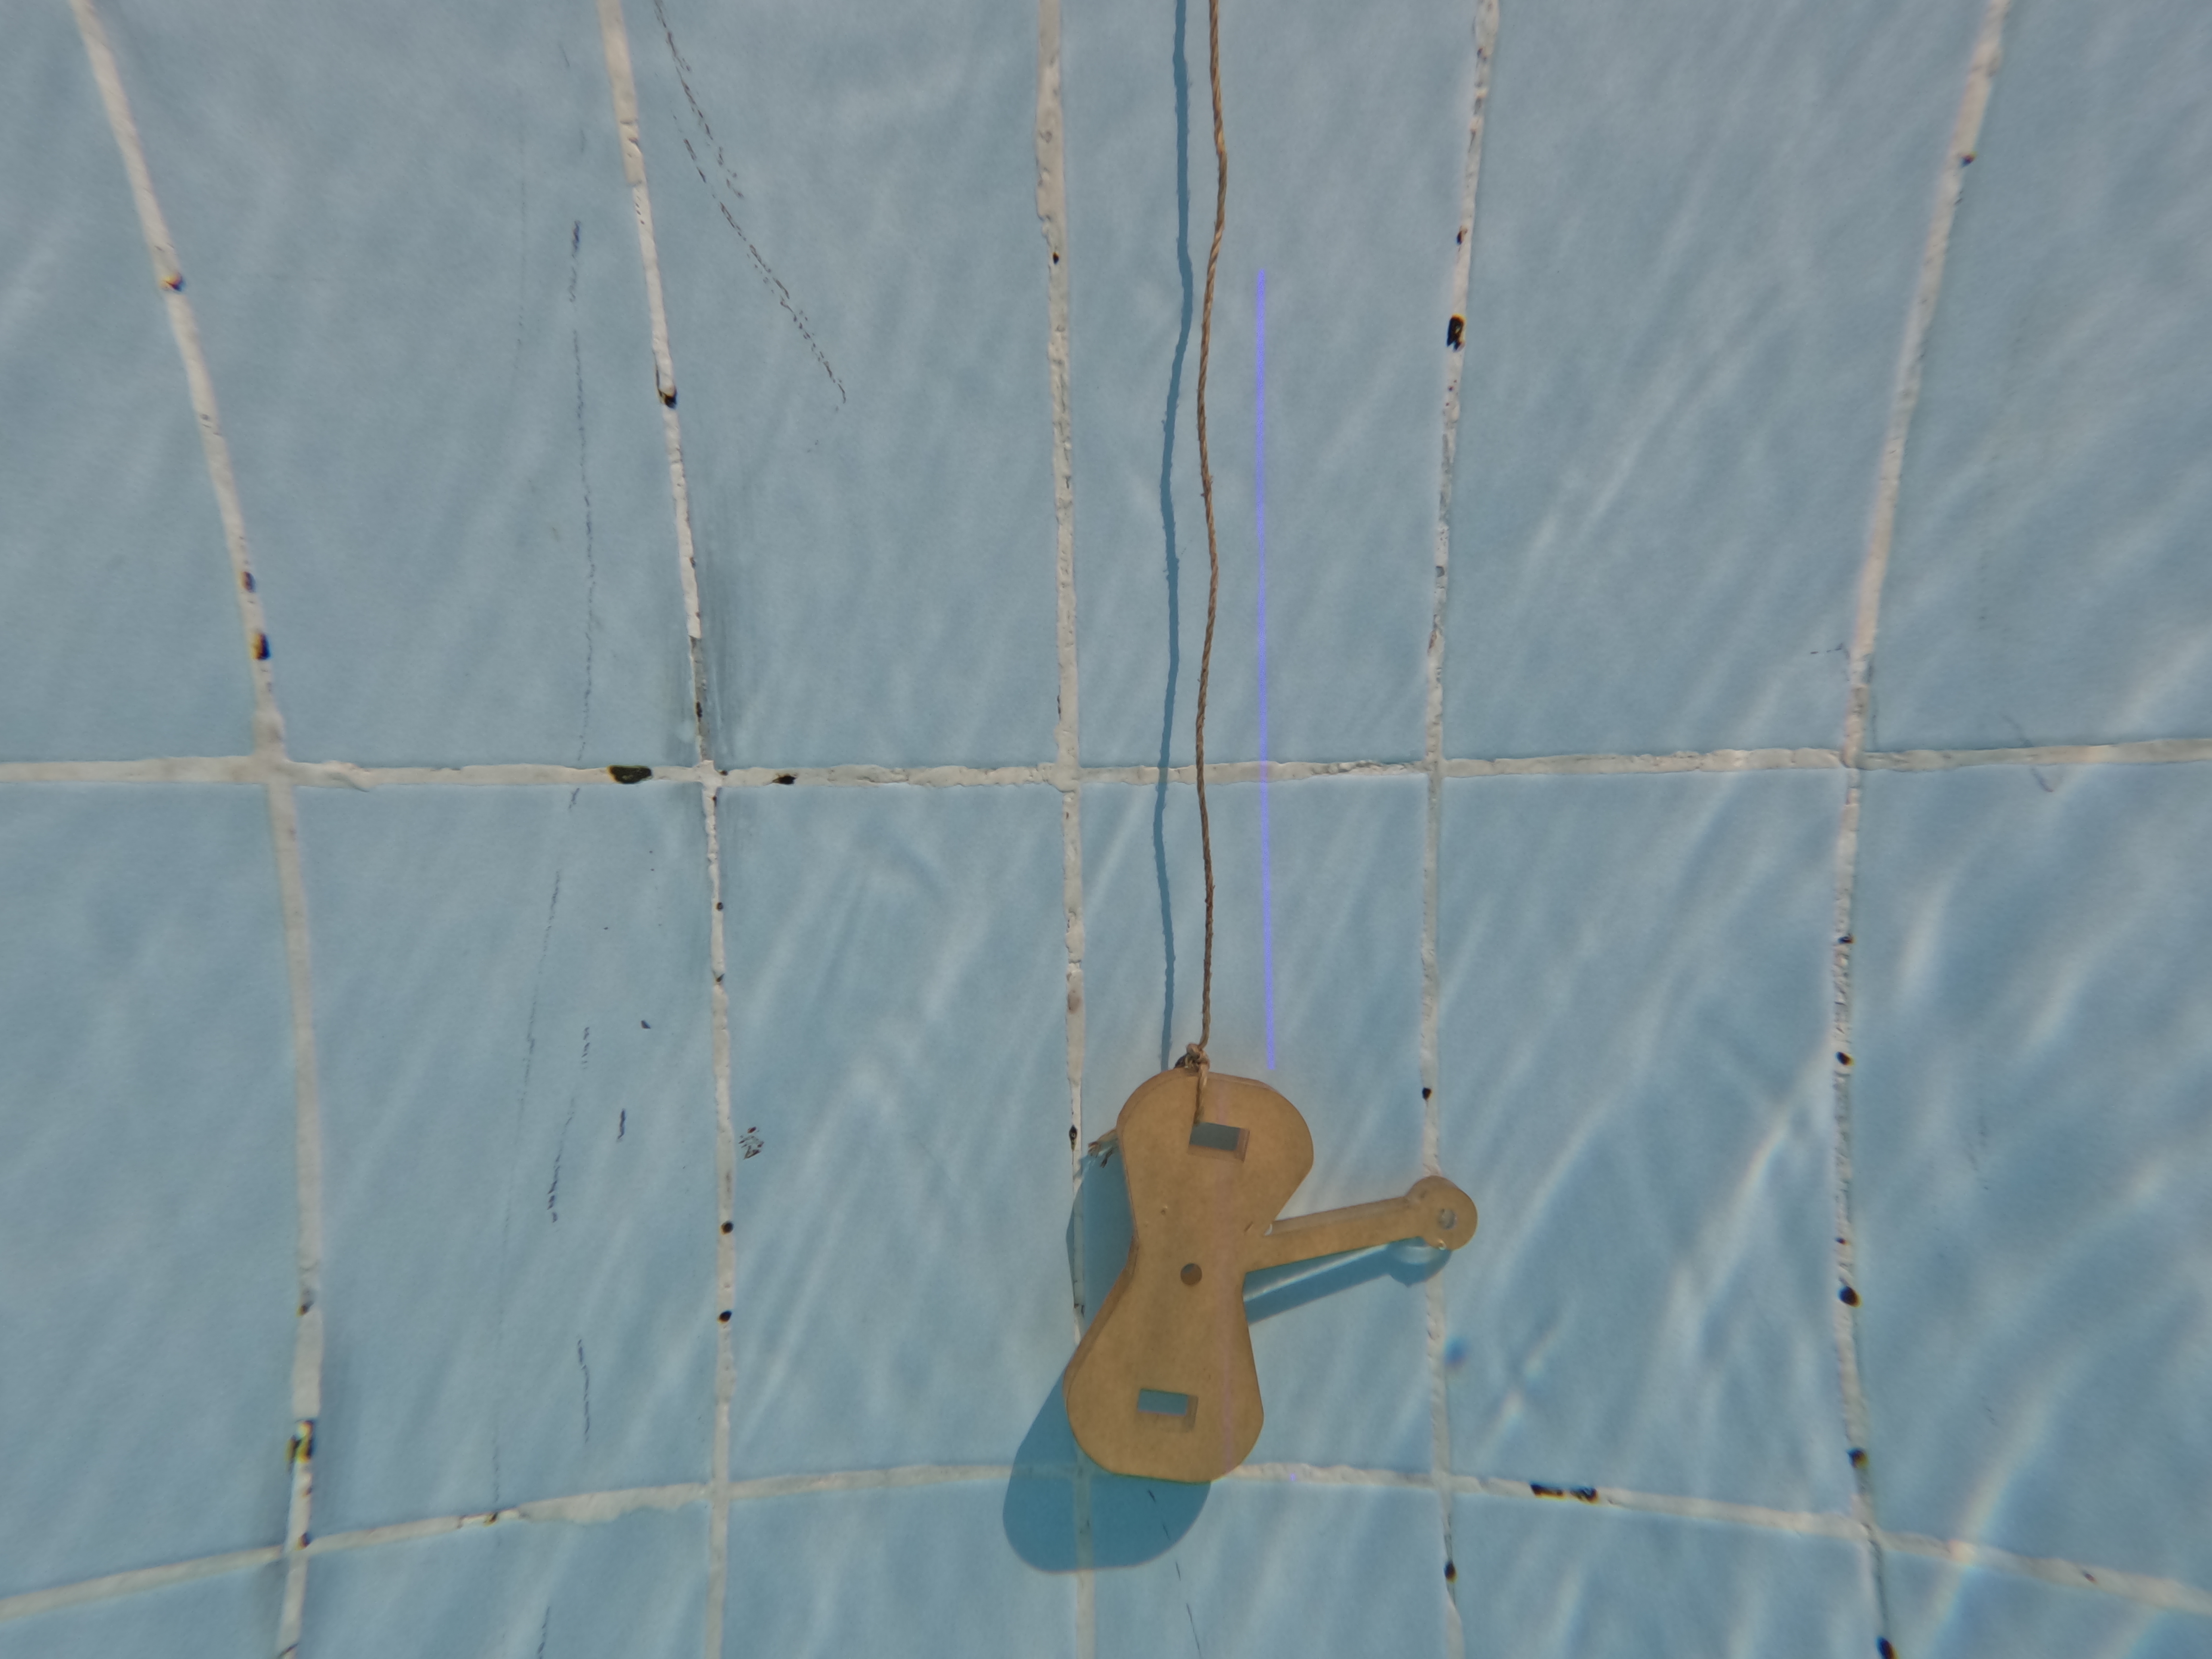

Supplement: Supplementary file 547 [file G0018892.pdf › Level_6_1/G0018892.pdf]

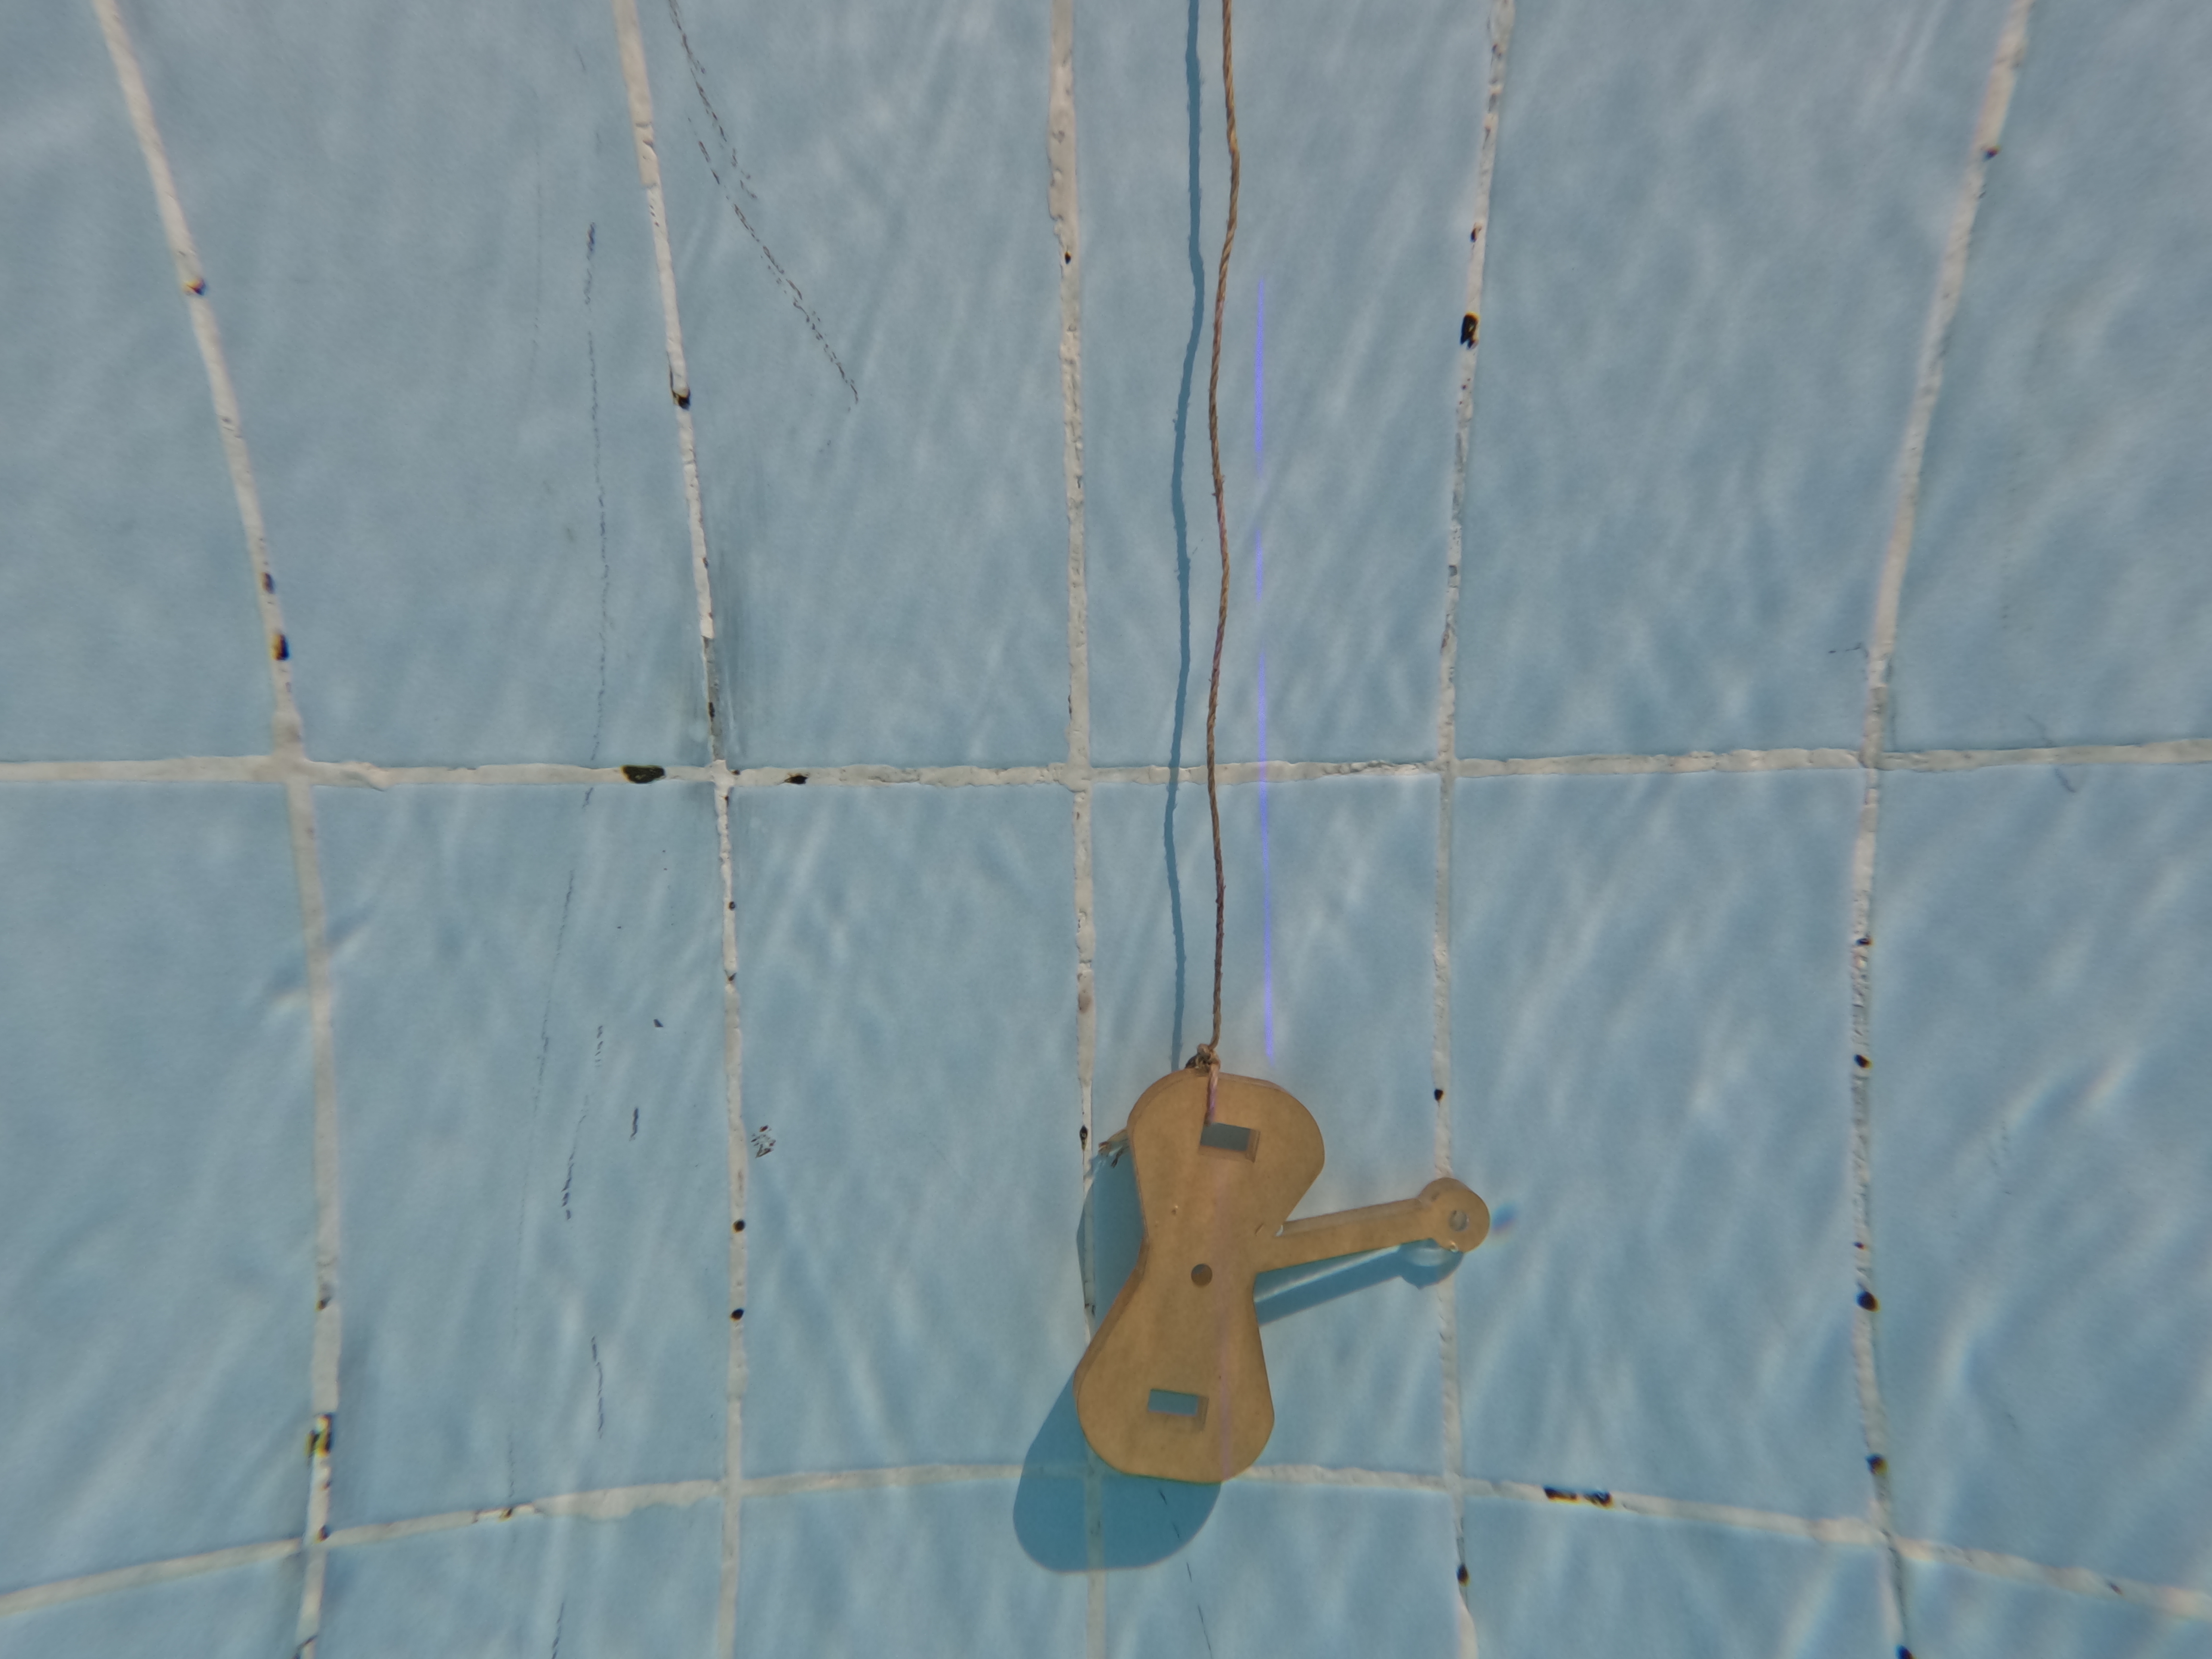

Supplement: Supplementary file 548 [file G0018893.pdf › Level_6_1/G0018893.pdf]

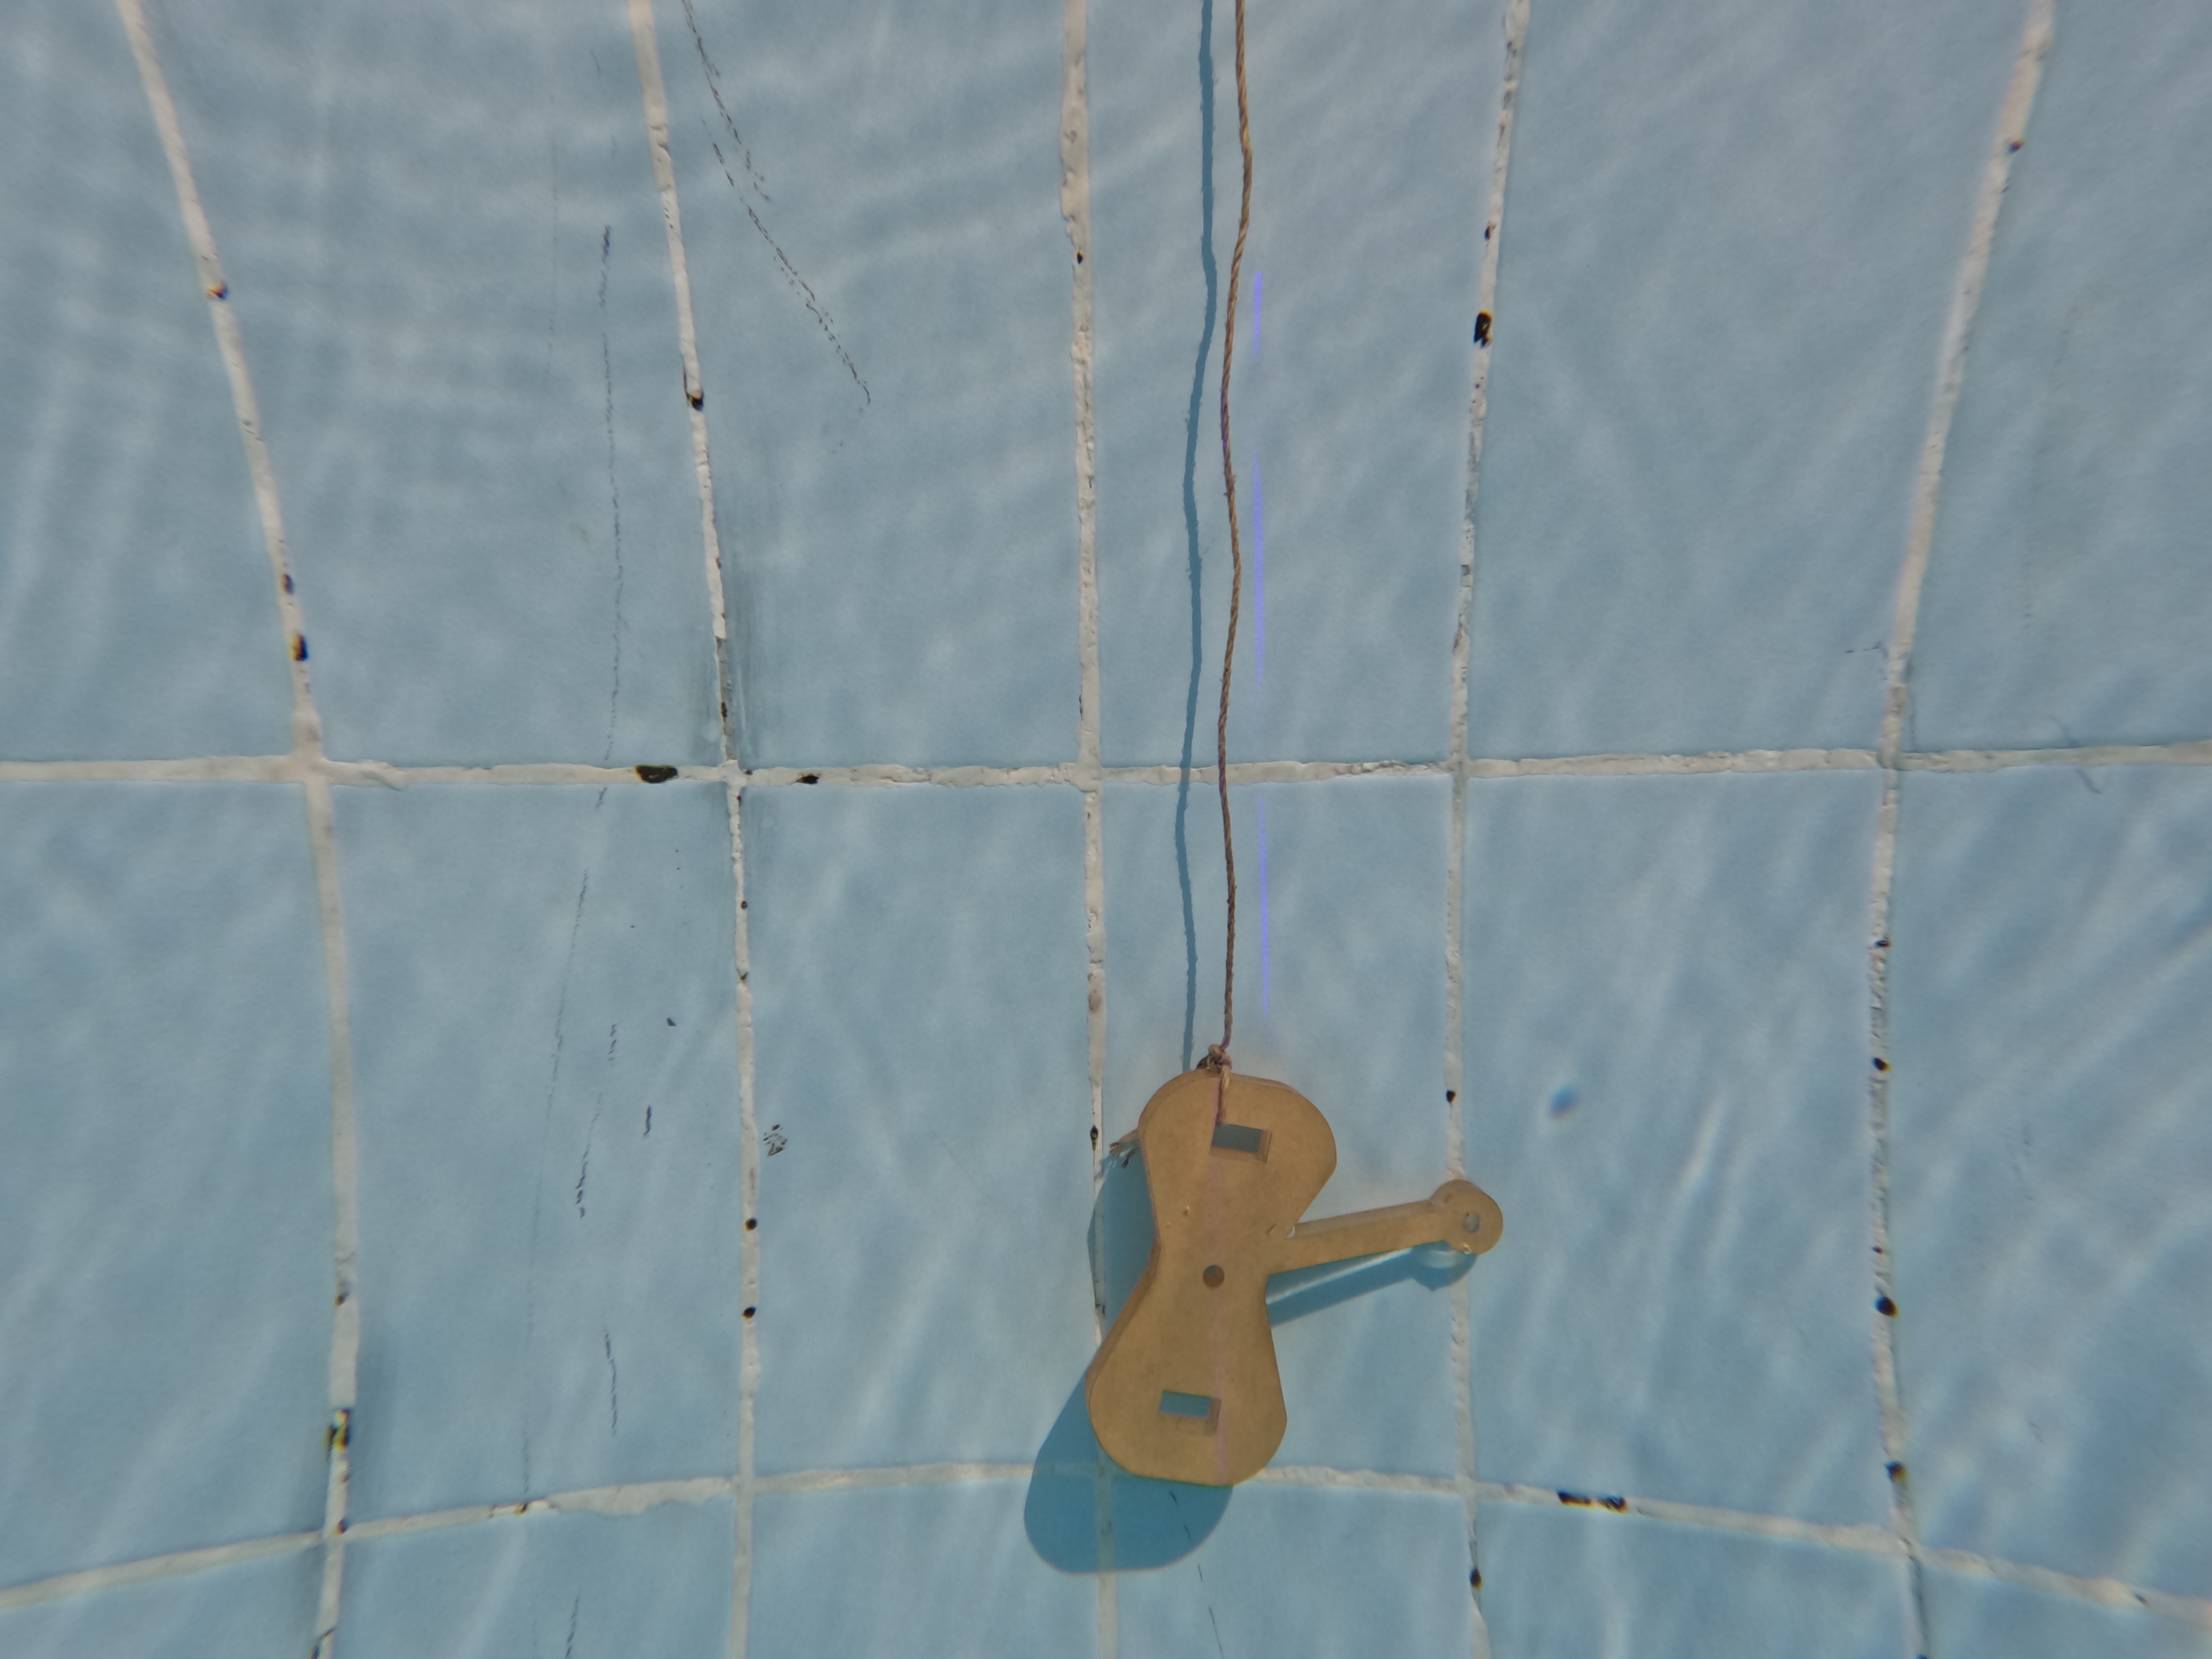

Supplement: Supplementary file 549 [file G0018894.pdf › Level_6_1/G0018894.pdf]

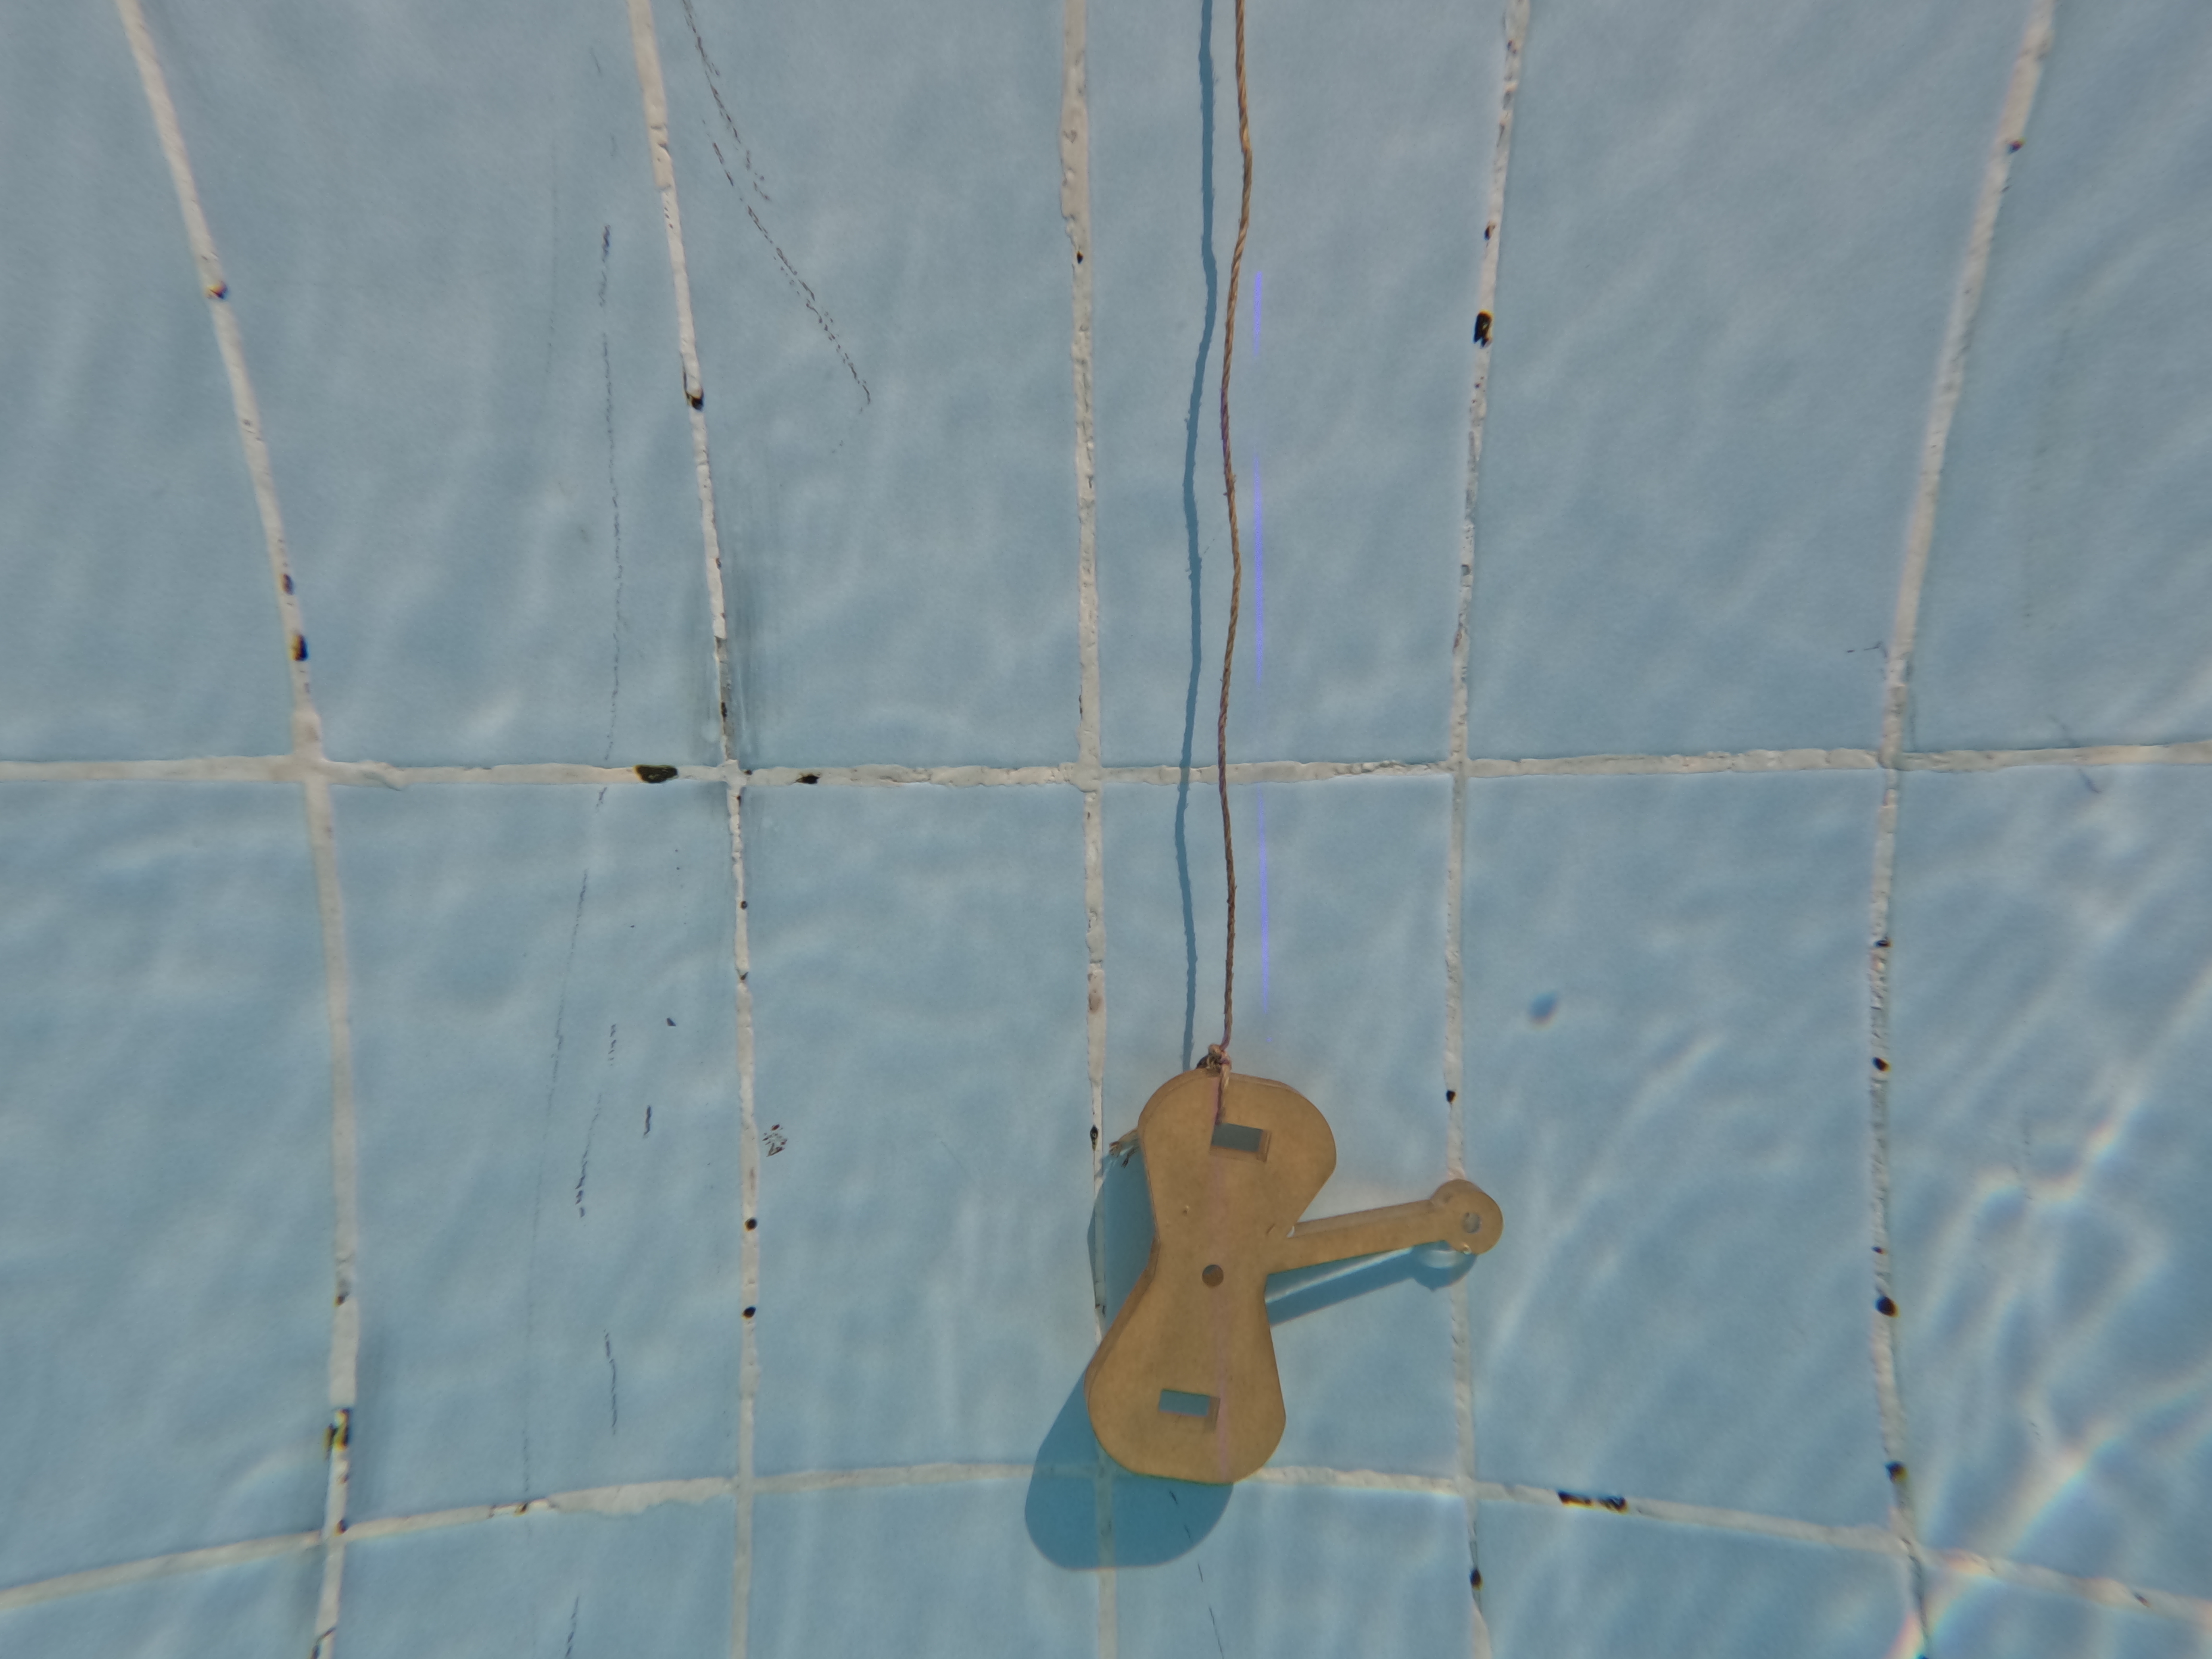

Supplement: Supplementary file 550 [file G0018895.pdf › Level_6_1/G0018895.pdf]

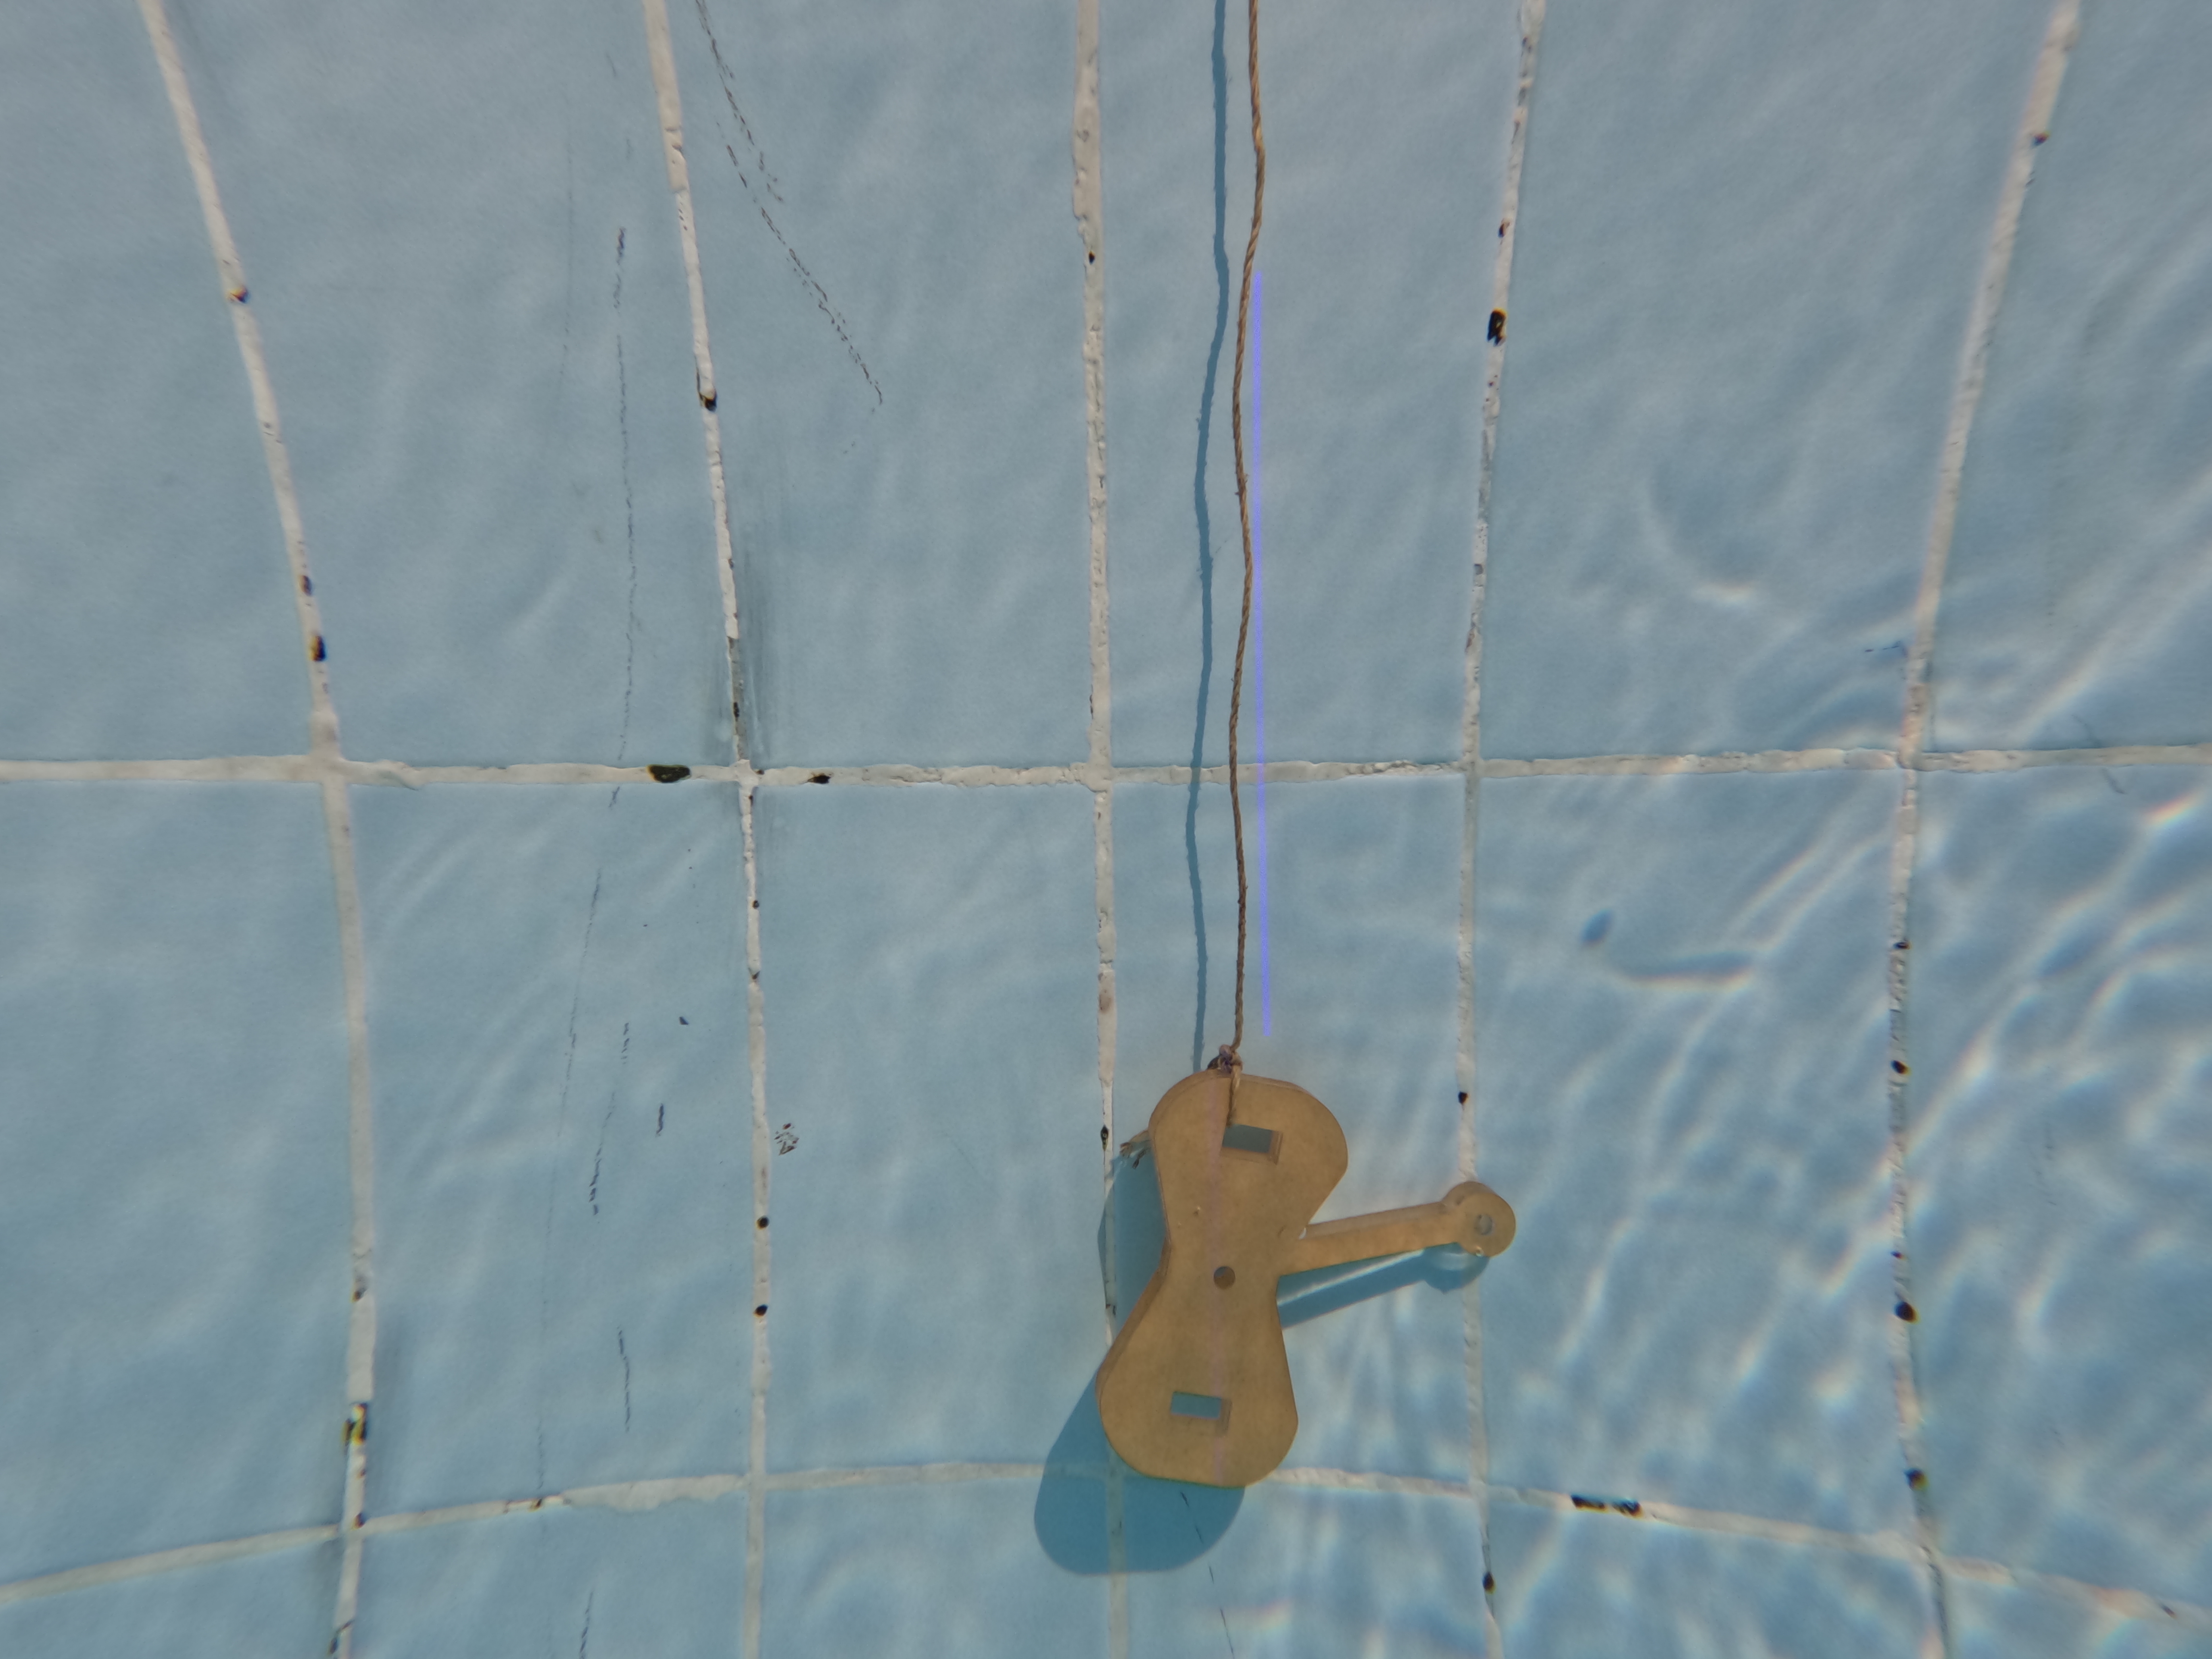

Supplement: Supplementary file 551 [file G0018896.pdf › Level_6_1/G0018896.pdf]

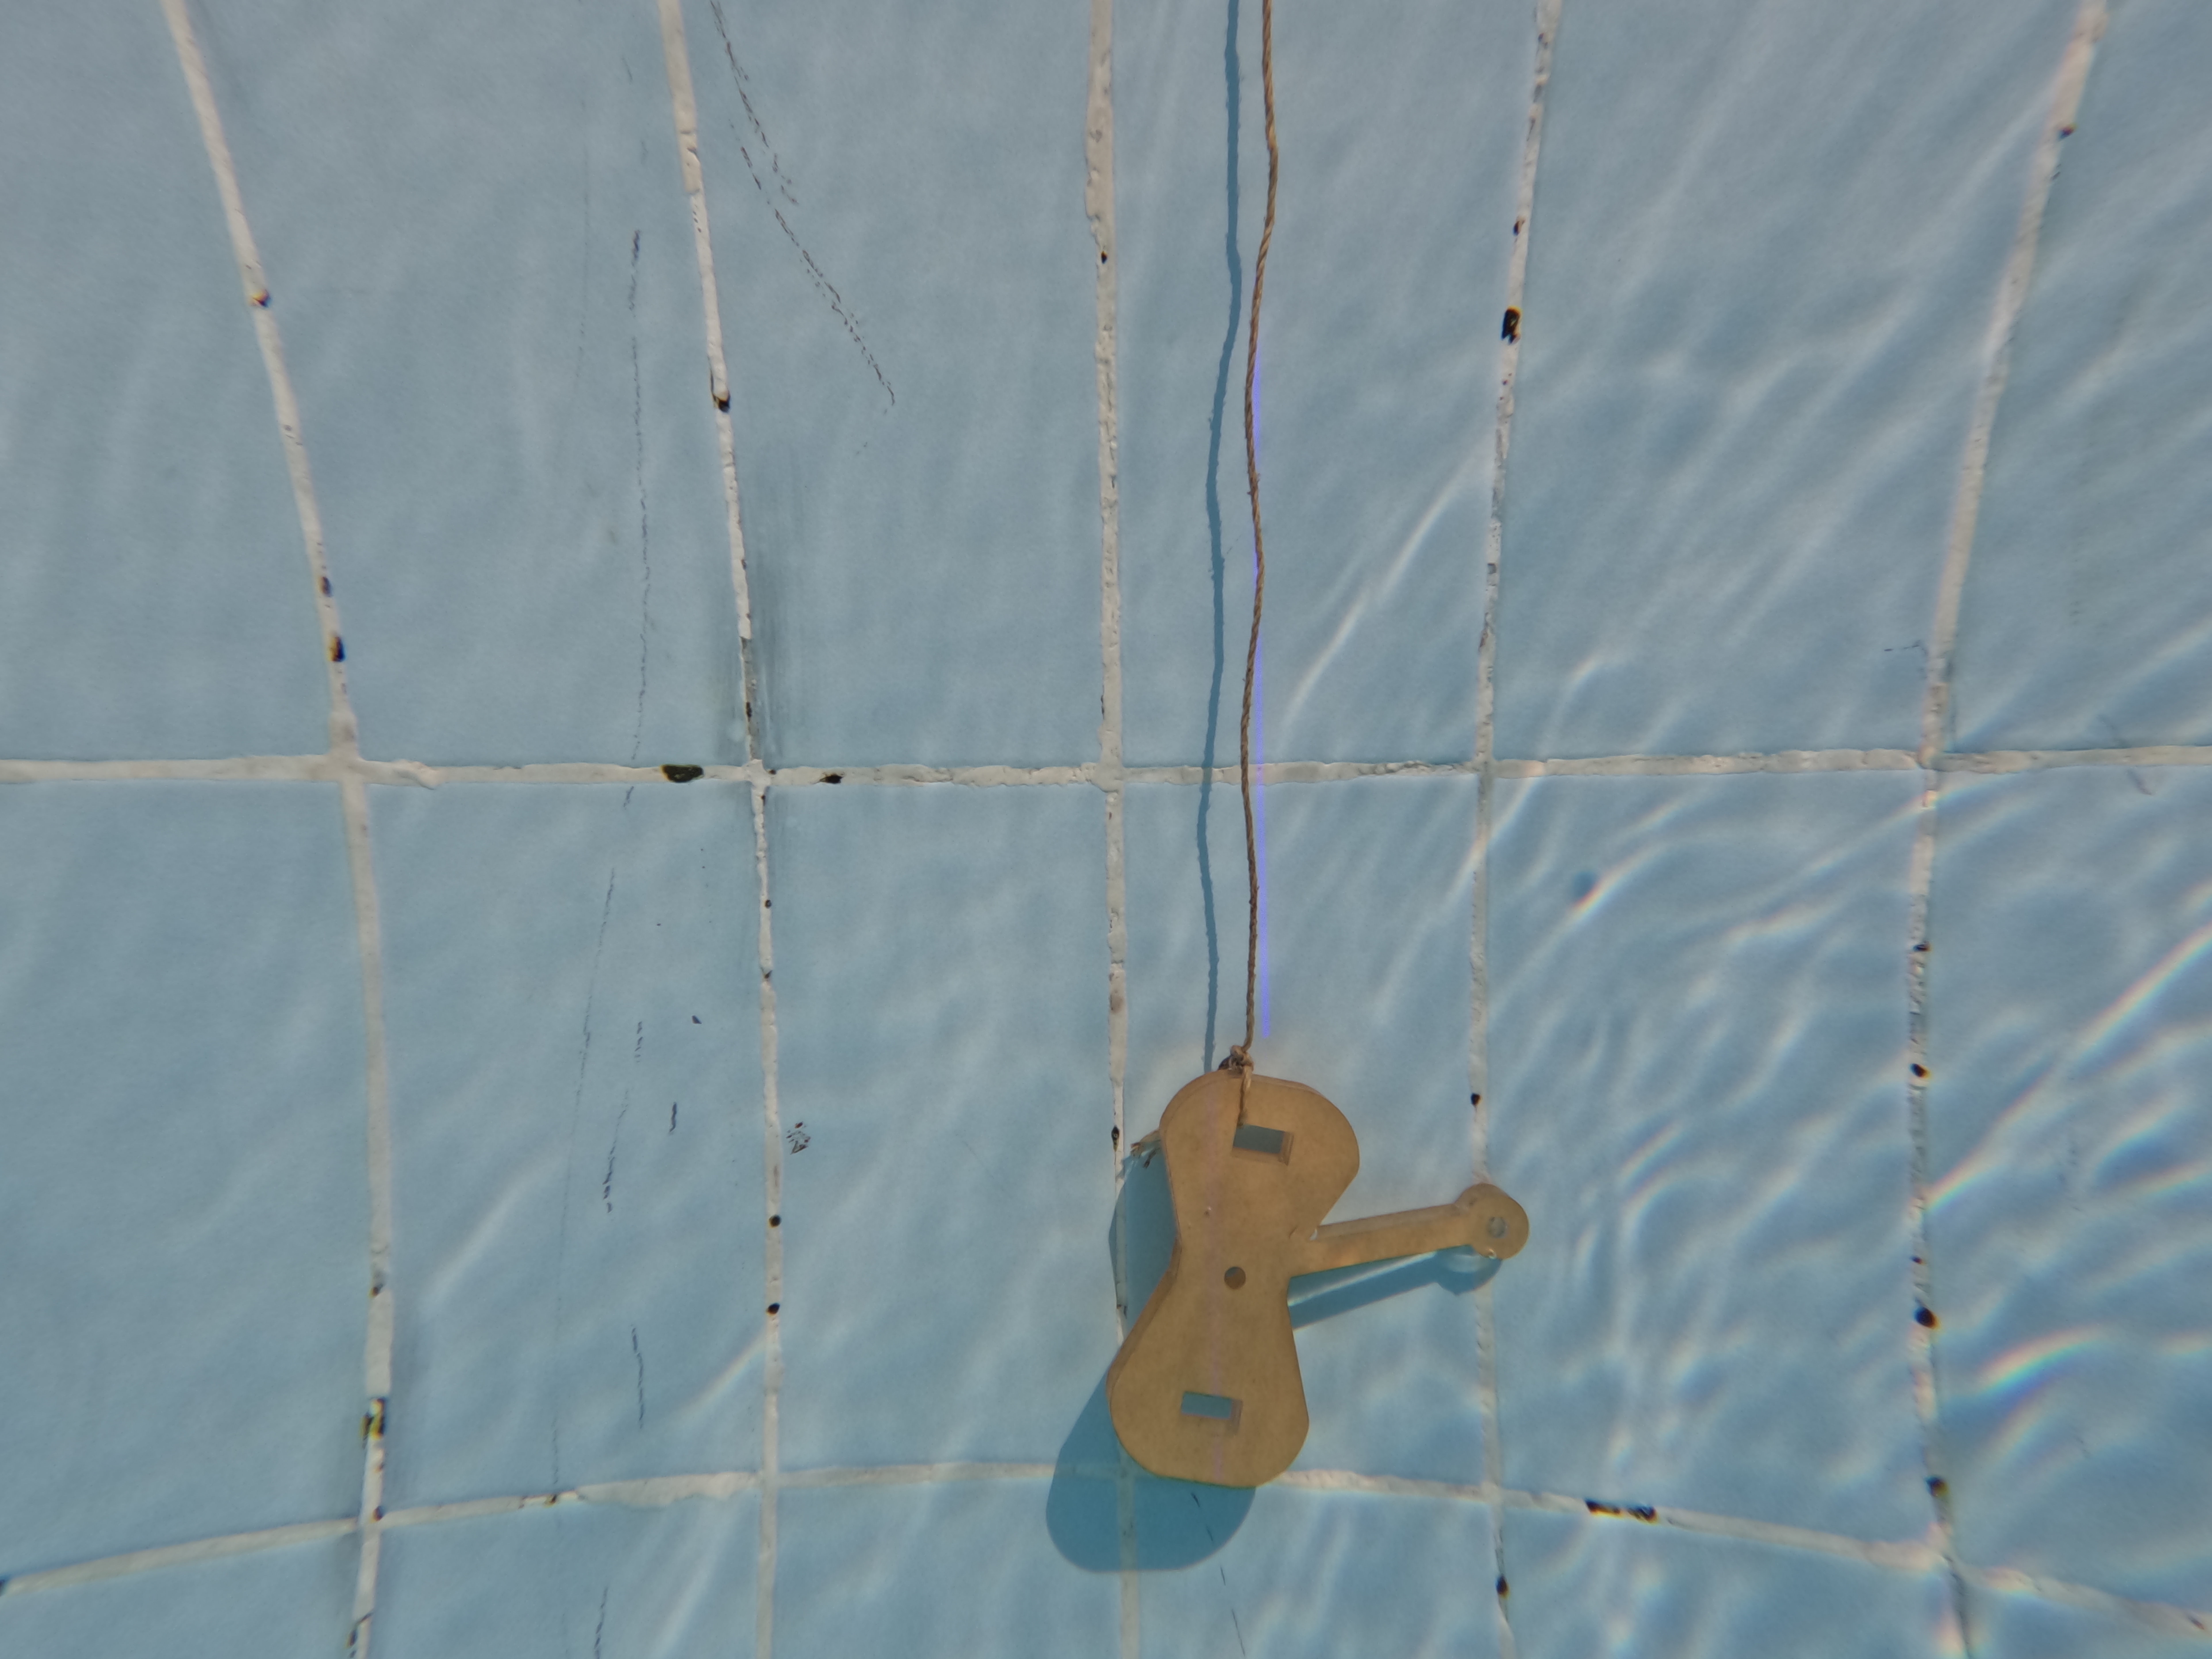

Supplement: Supplementary file 552 [file G0018897.pdf › Level_6_1/G0018897.pdf]

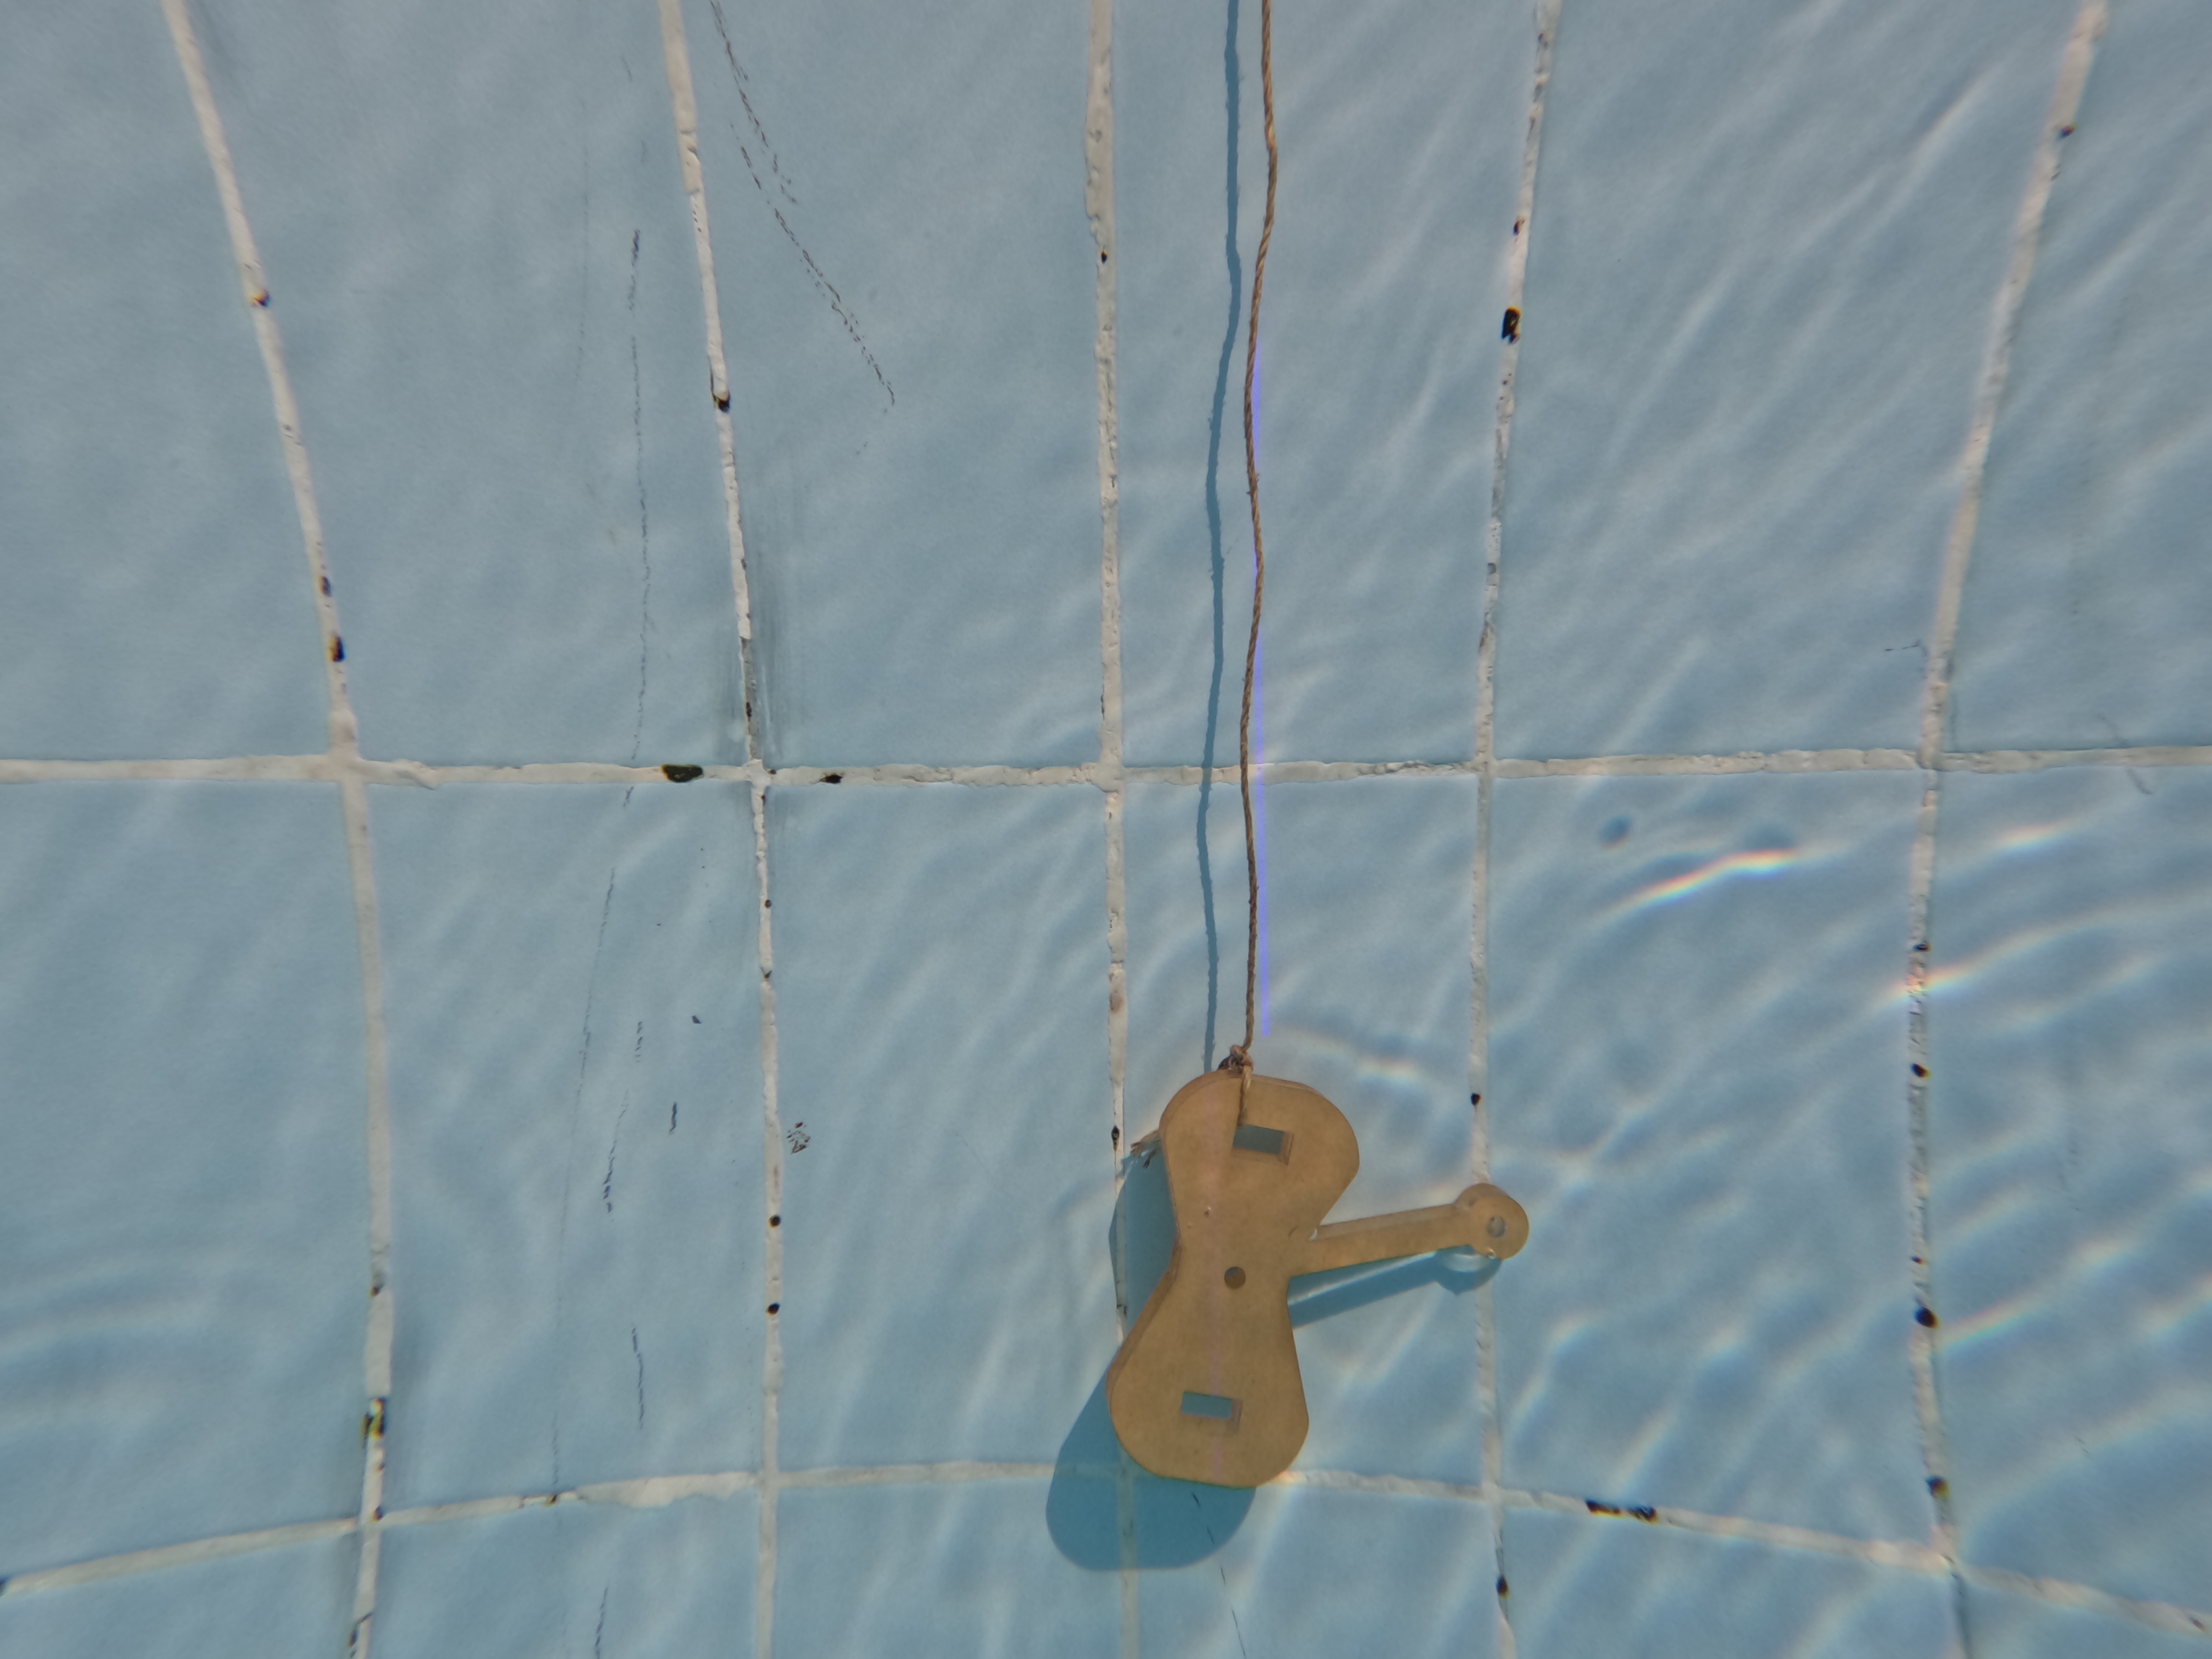

Supplement: Supplementary file 553 [file G0018898.pdf › Level_6_1/G0018898.pdf]

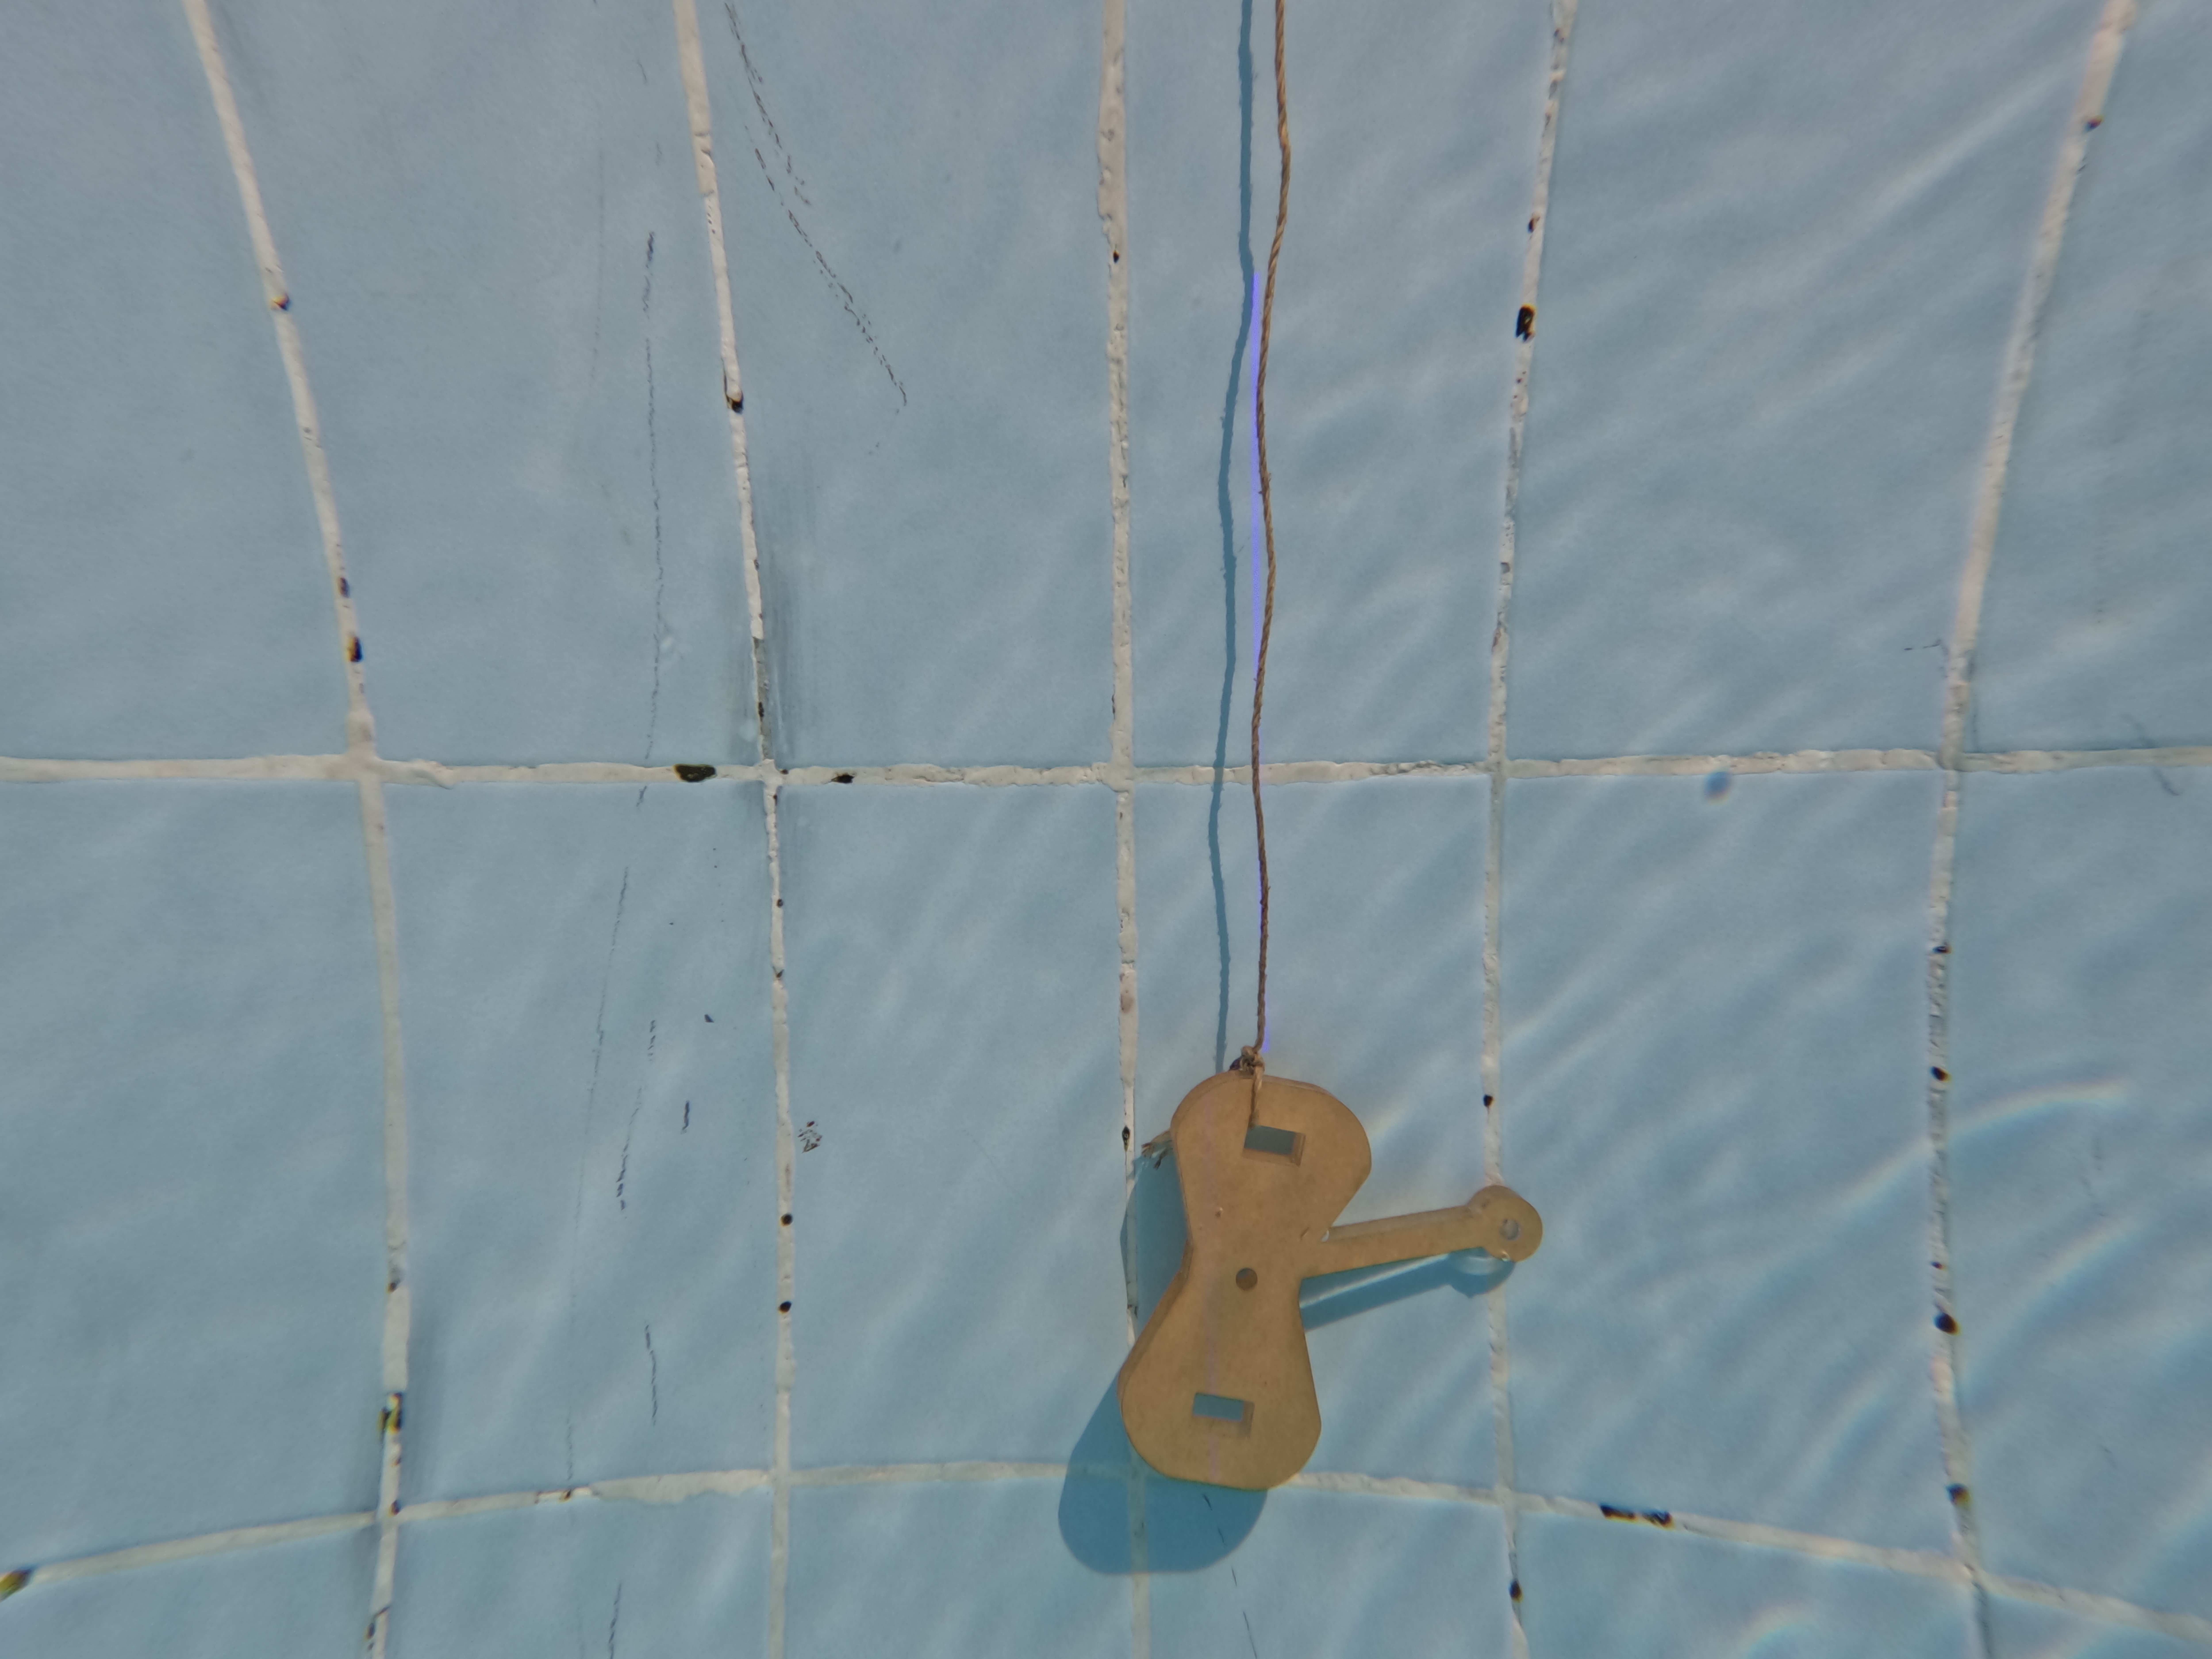

Supplement: Supplementary file 554 [file G0018899.pdf › Level_6_1/G0018899.pdf]

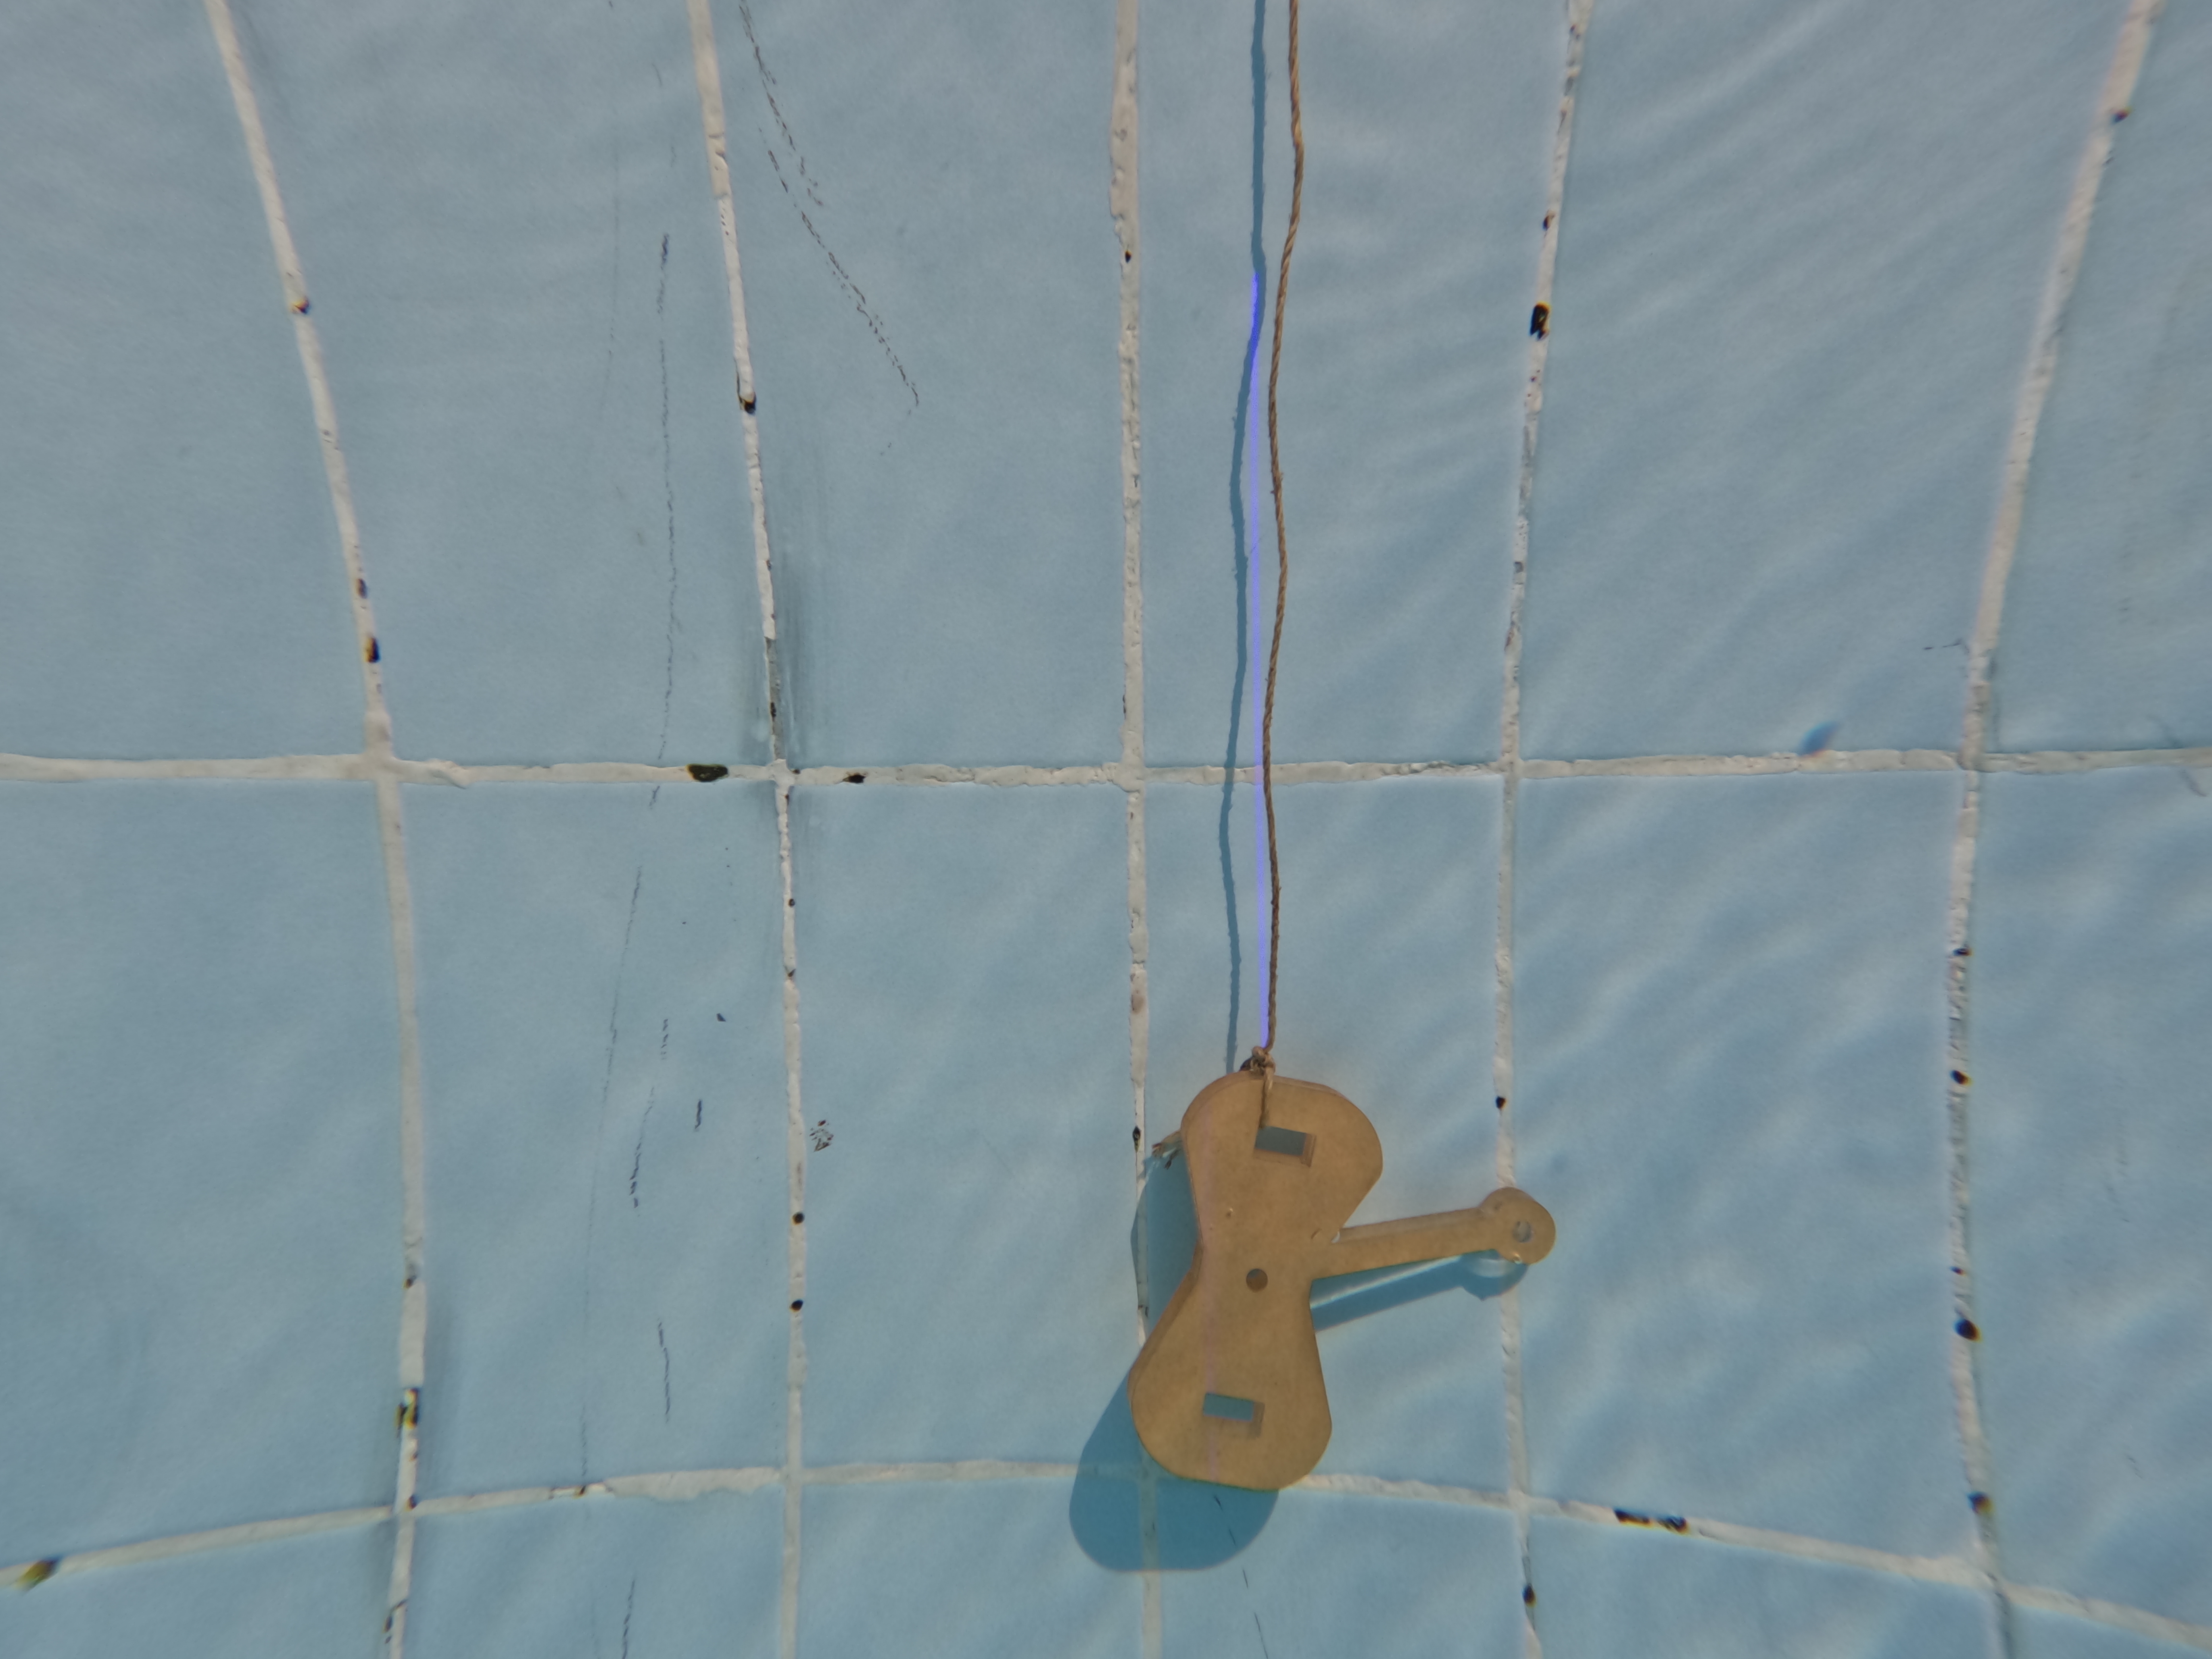

Supplement: Supplementary file 555 [file G0018900.pdf › Level_6_1/G0018900.pdf]

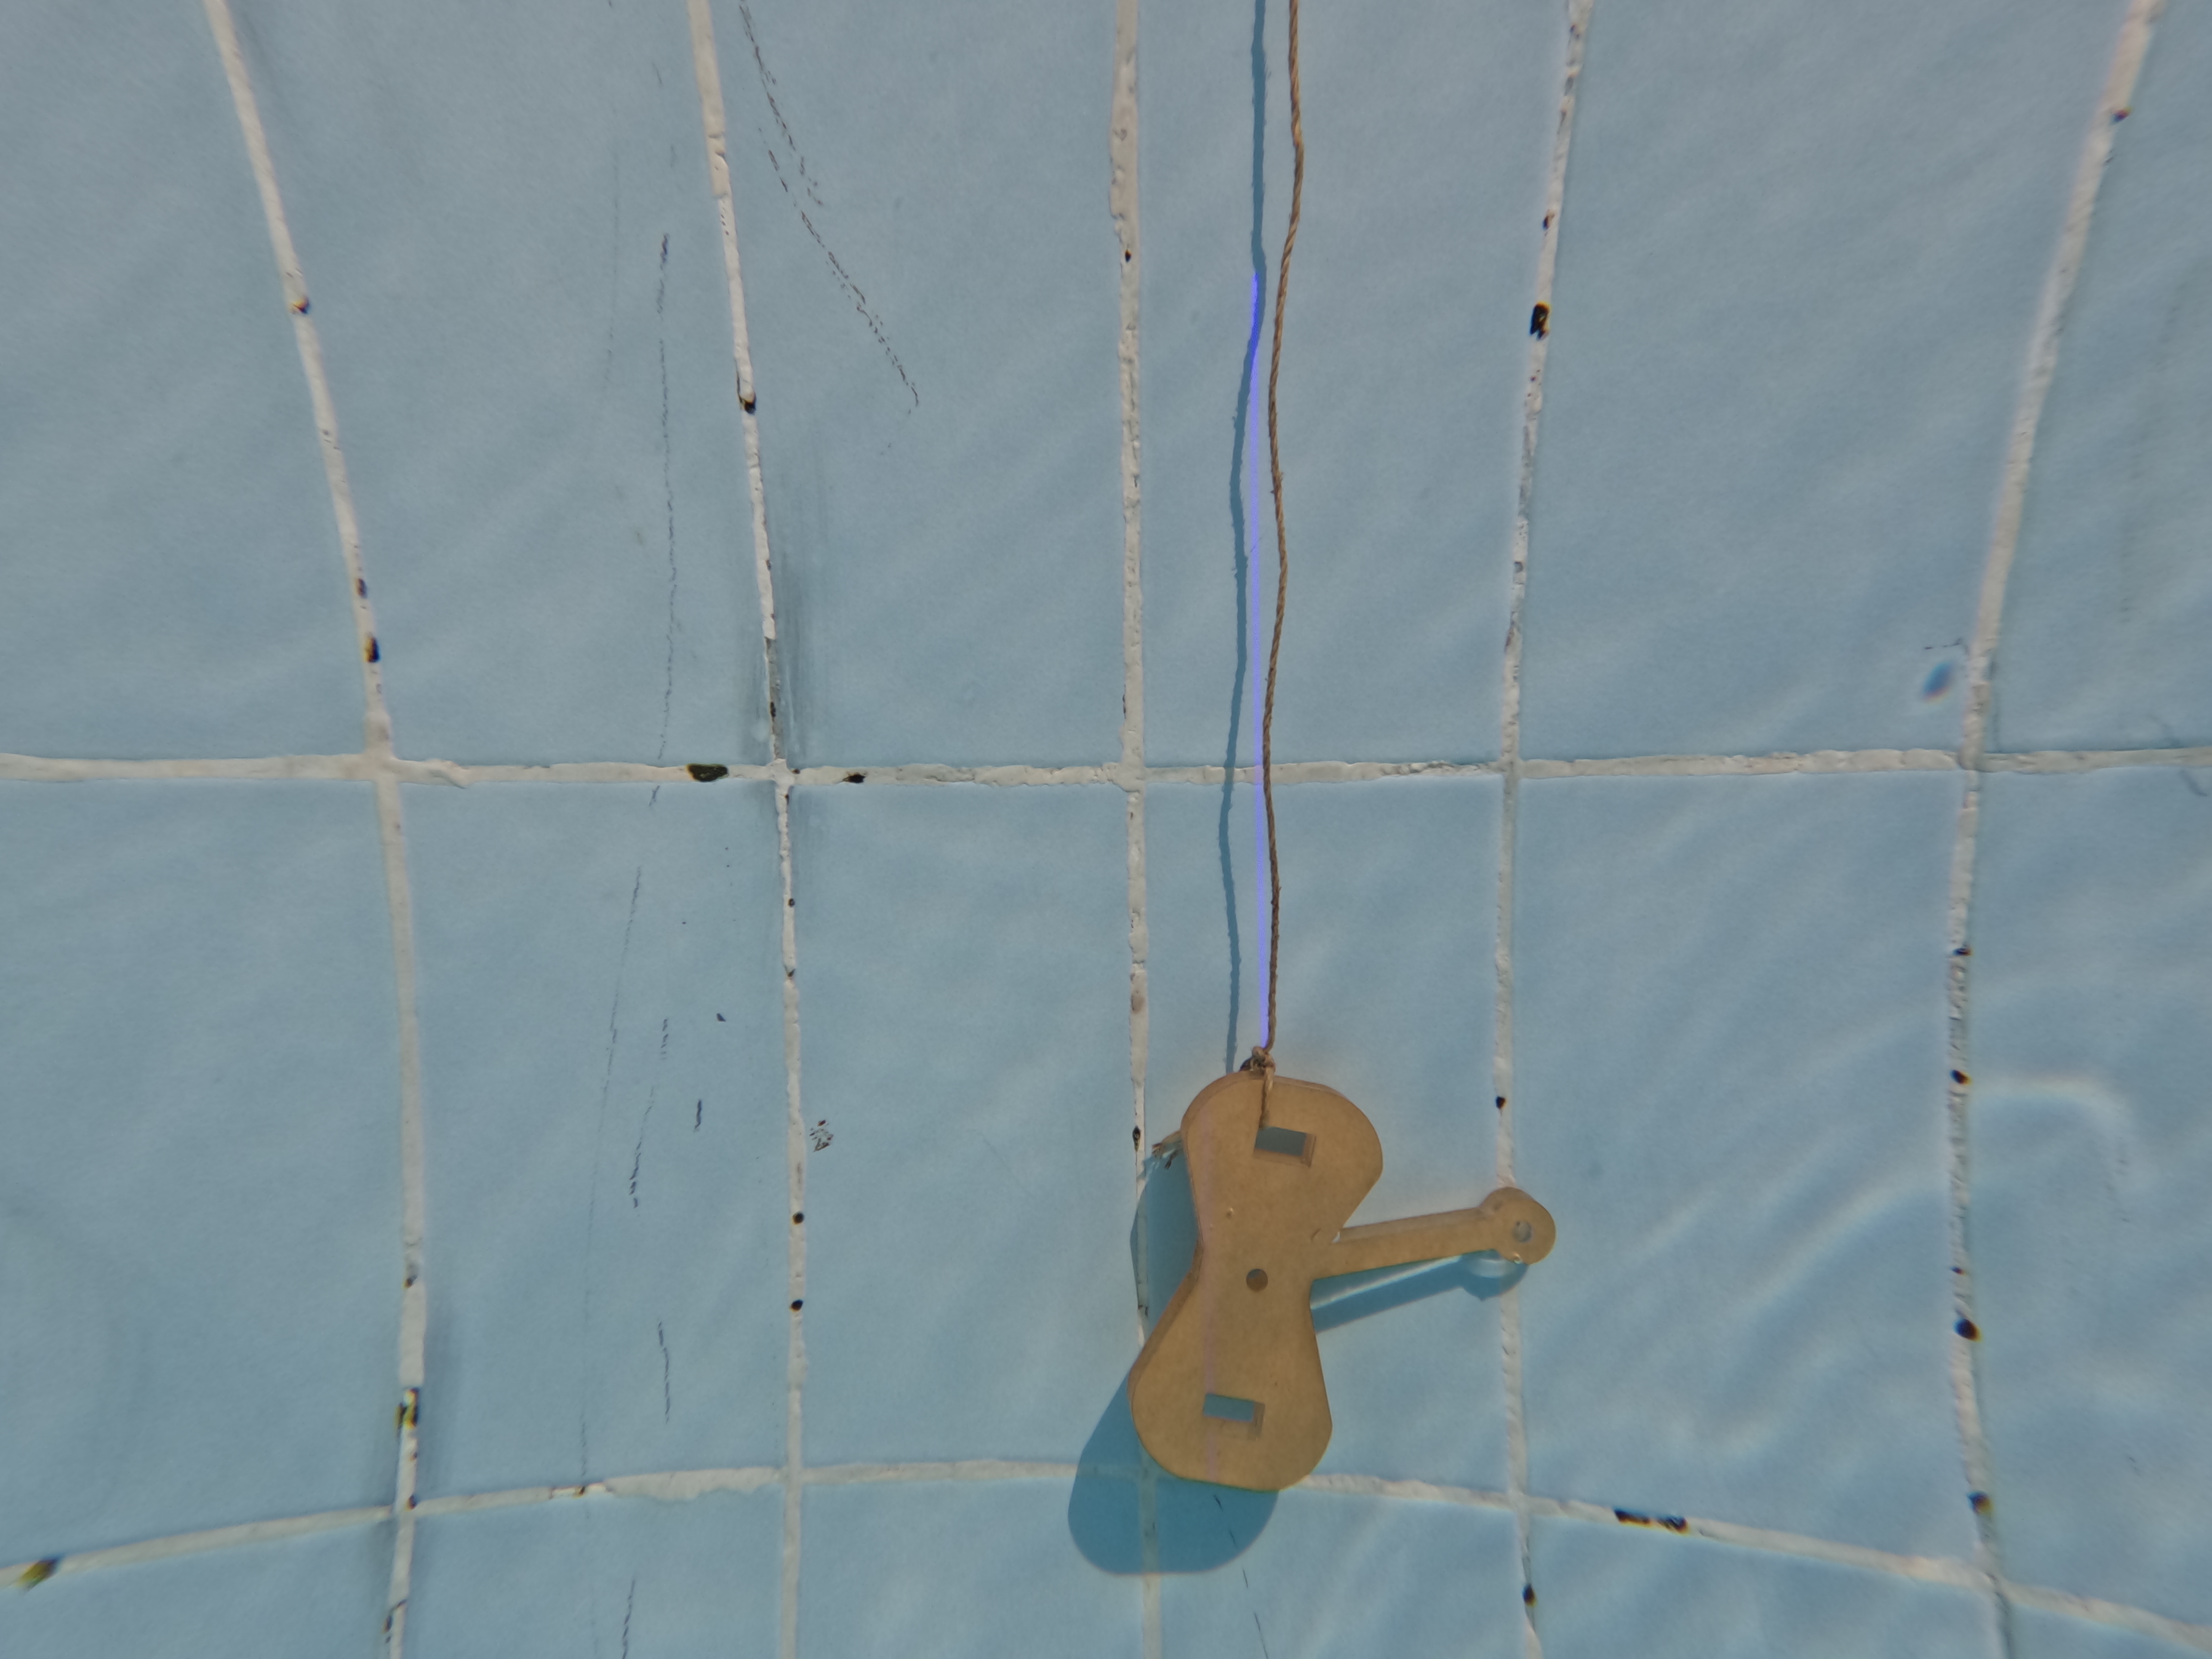

Supplement: Supplementary file 556 [file G0018901.pdf › Level_6_1/G0018901.pdf]

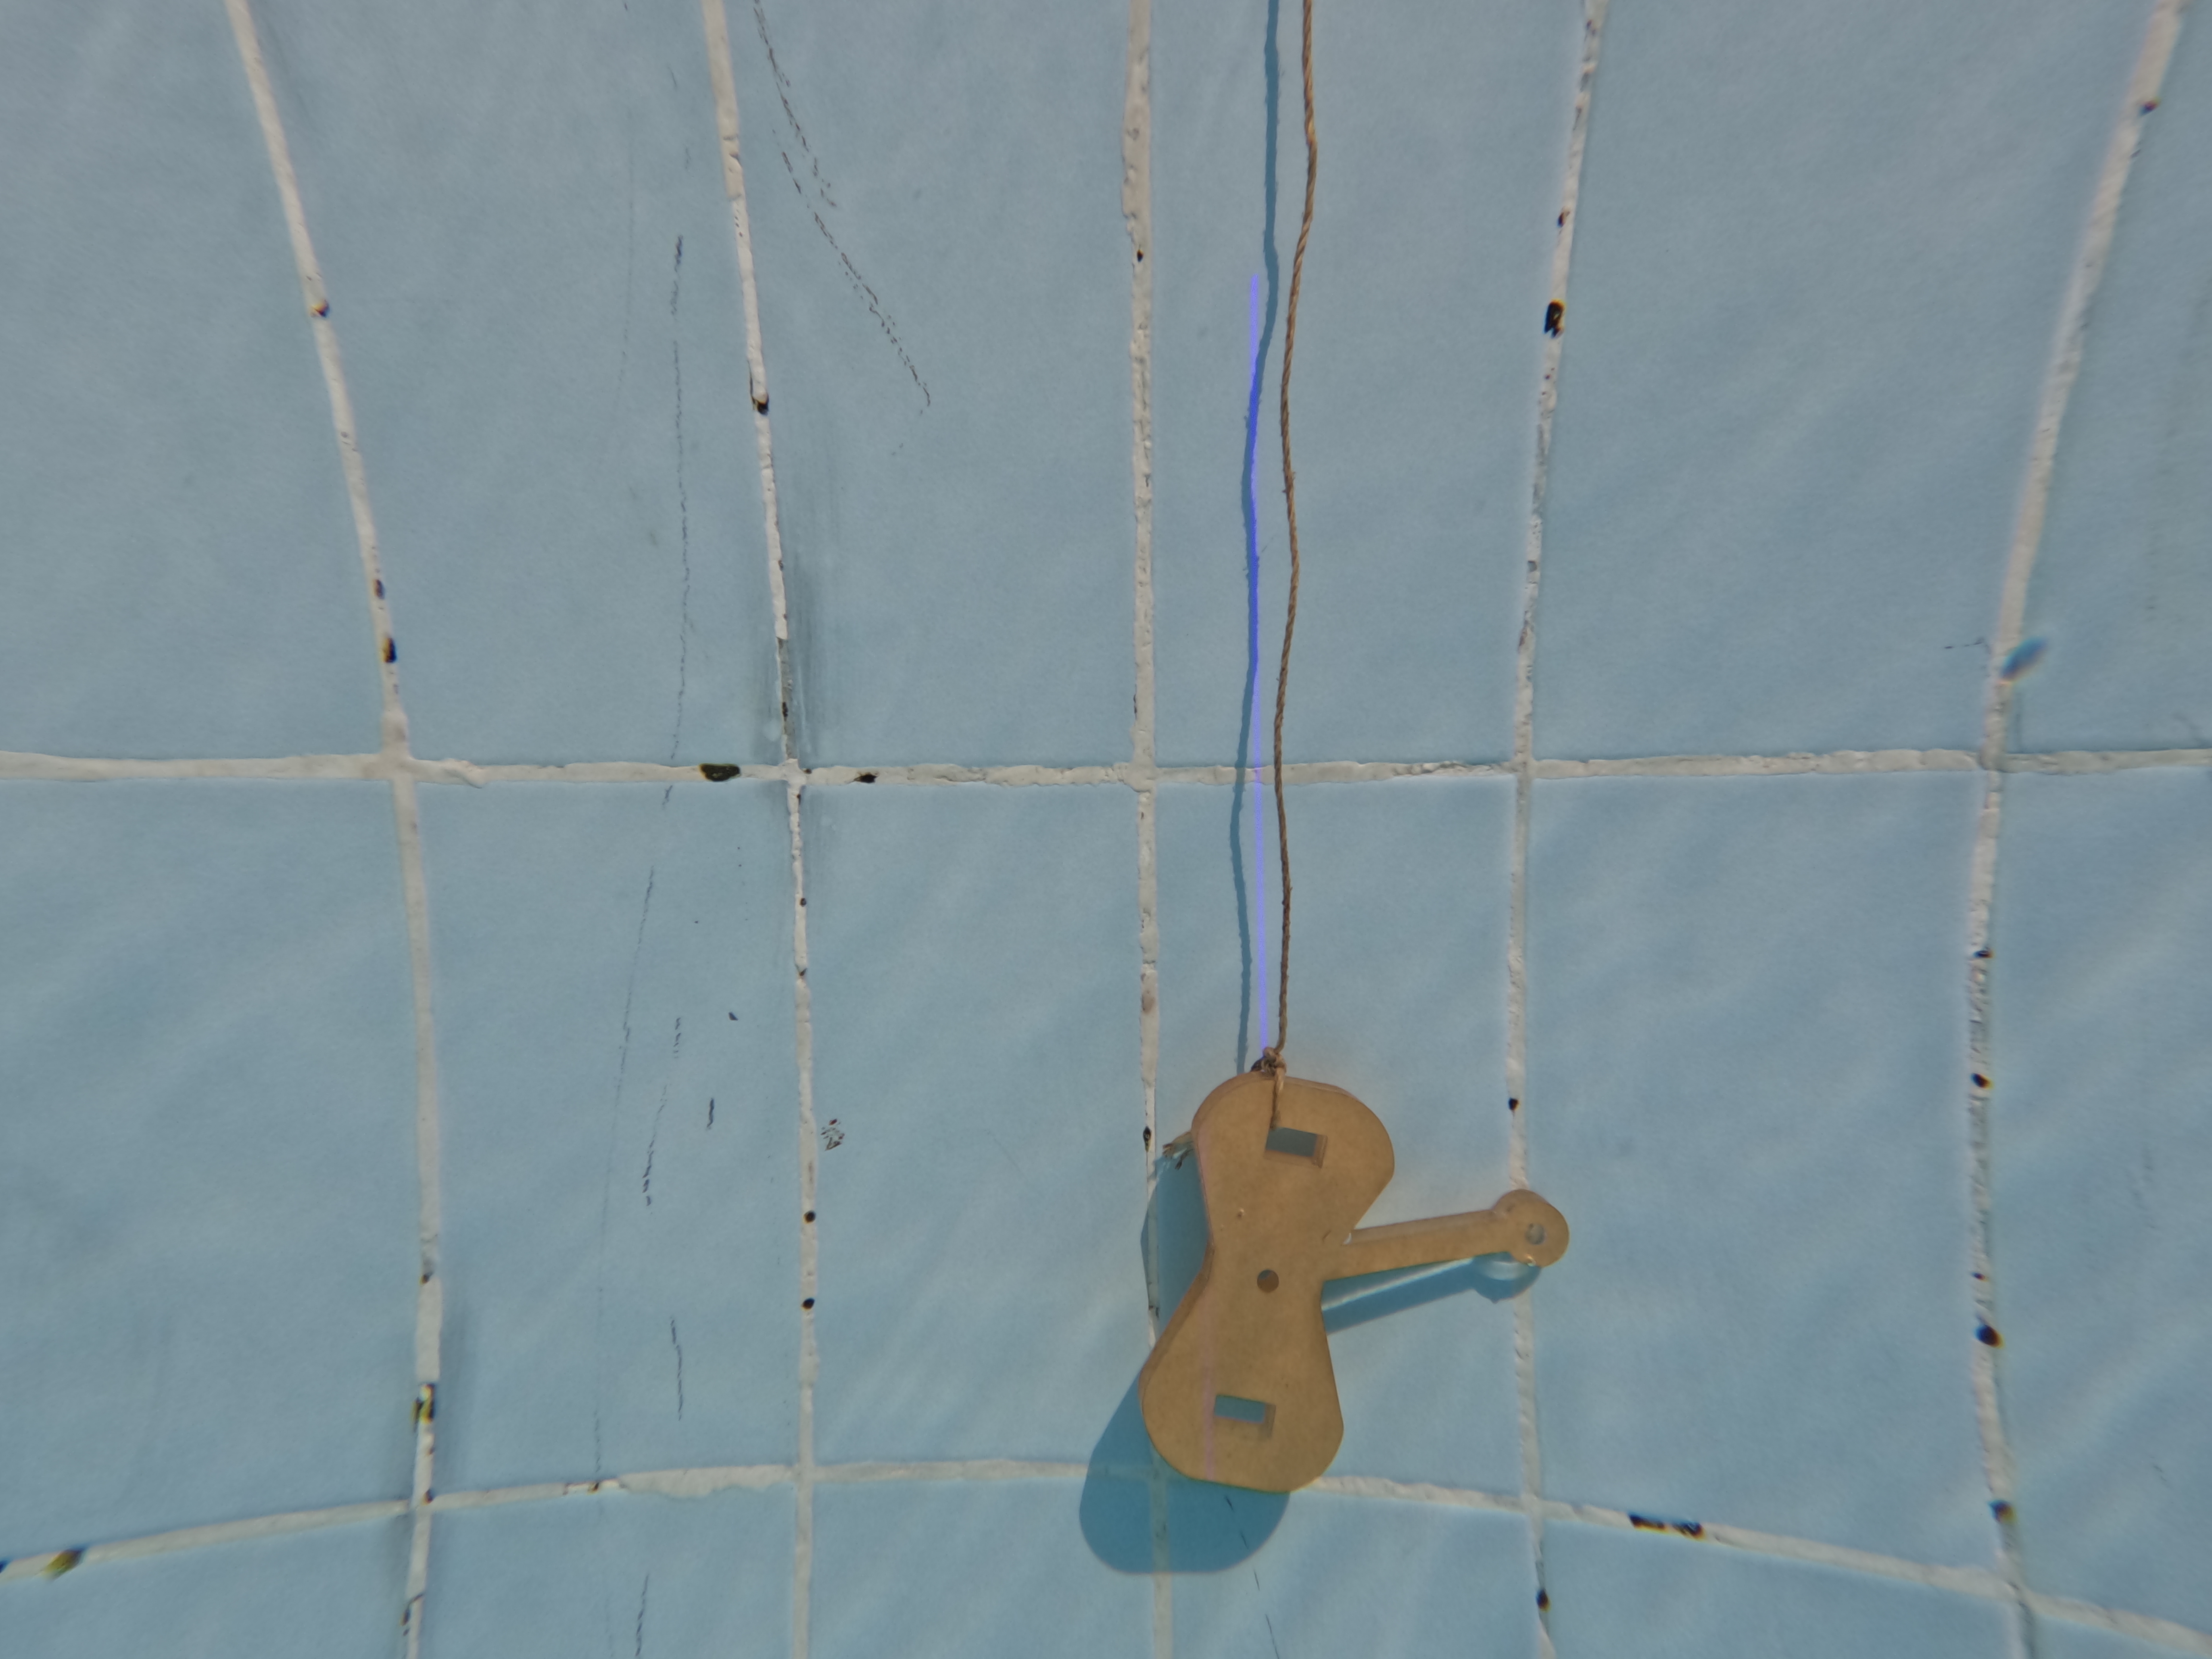

Supplement: Supplementary file 557 [file G0018902.pdf › Level_6_1/G0018902.pdf]

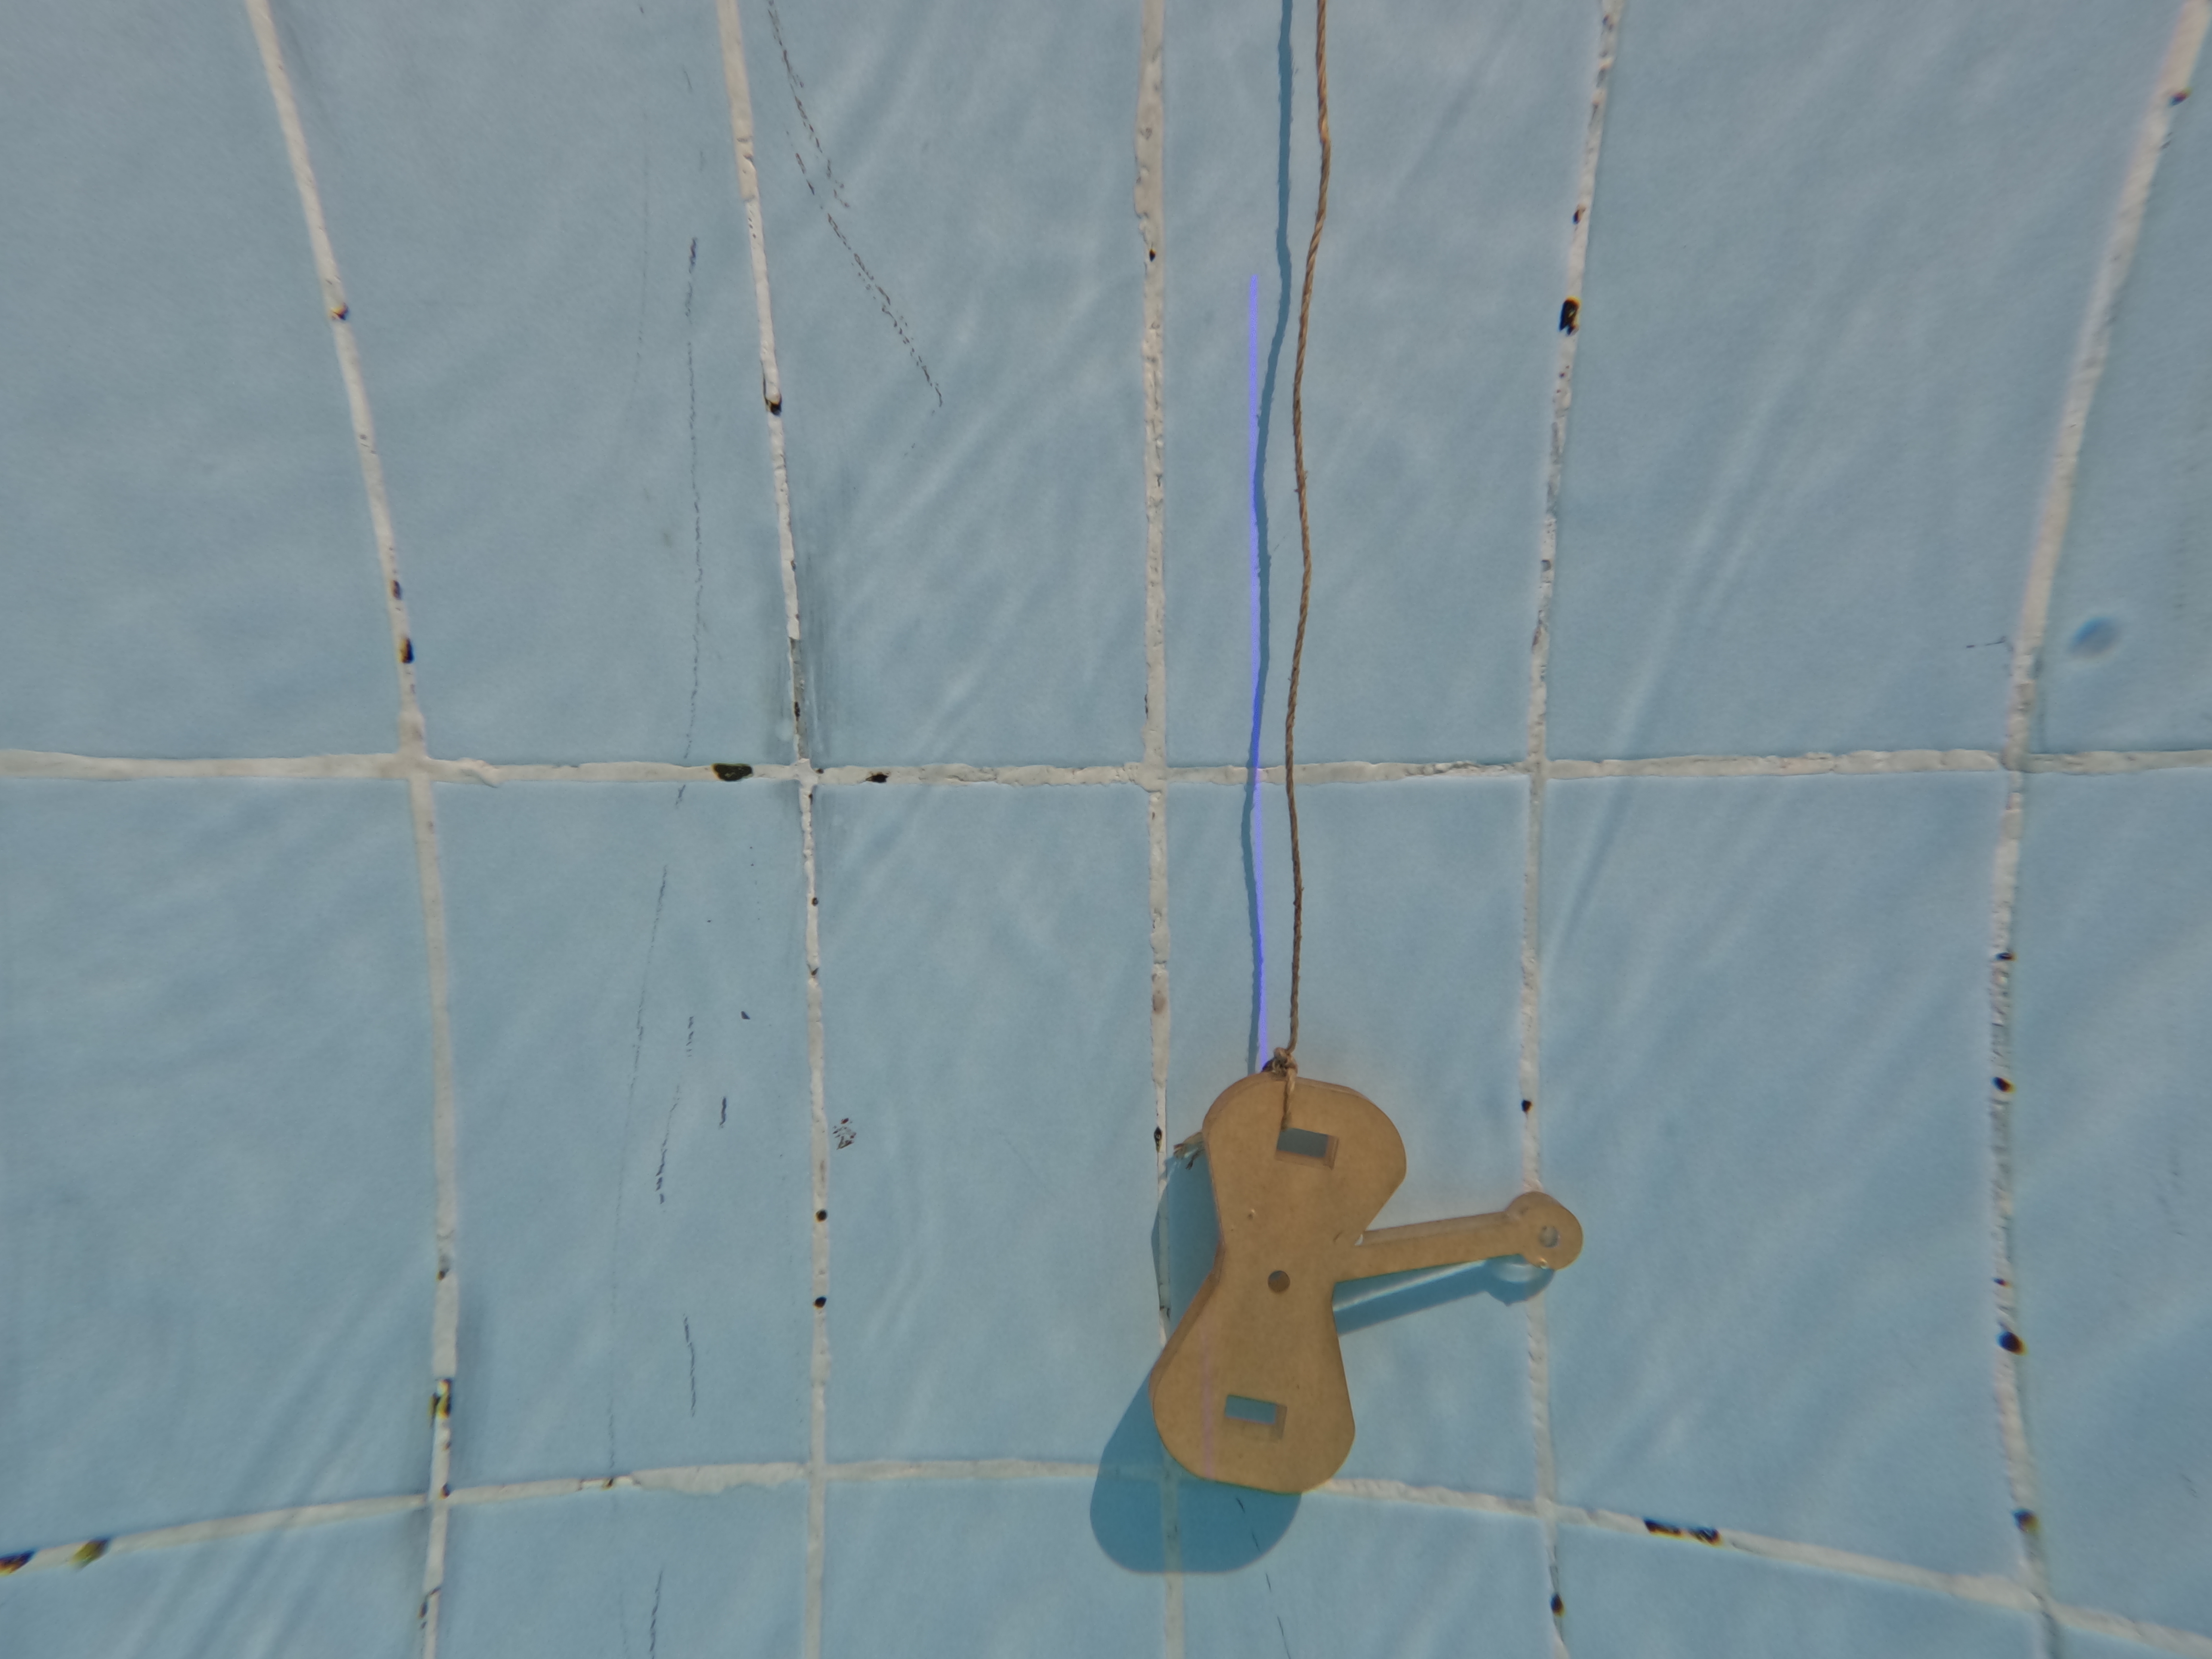

Supplement: Supplementary file 558 [file G0018903.pdf › Level_6_1/G0018903.pdf]

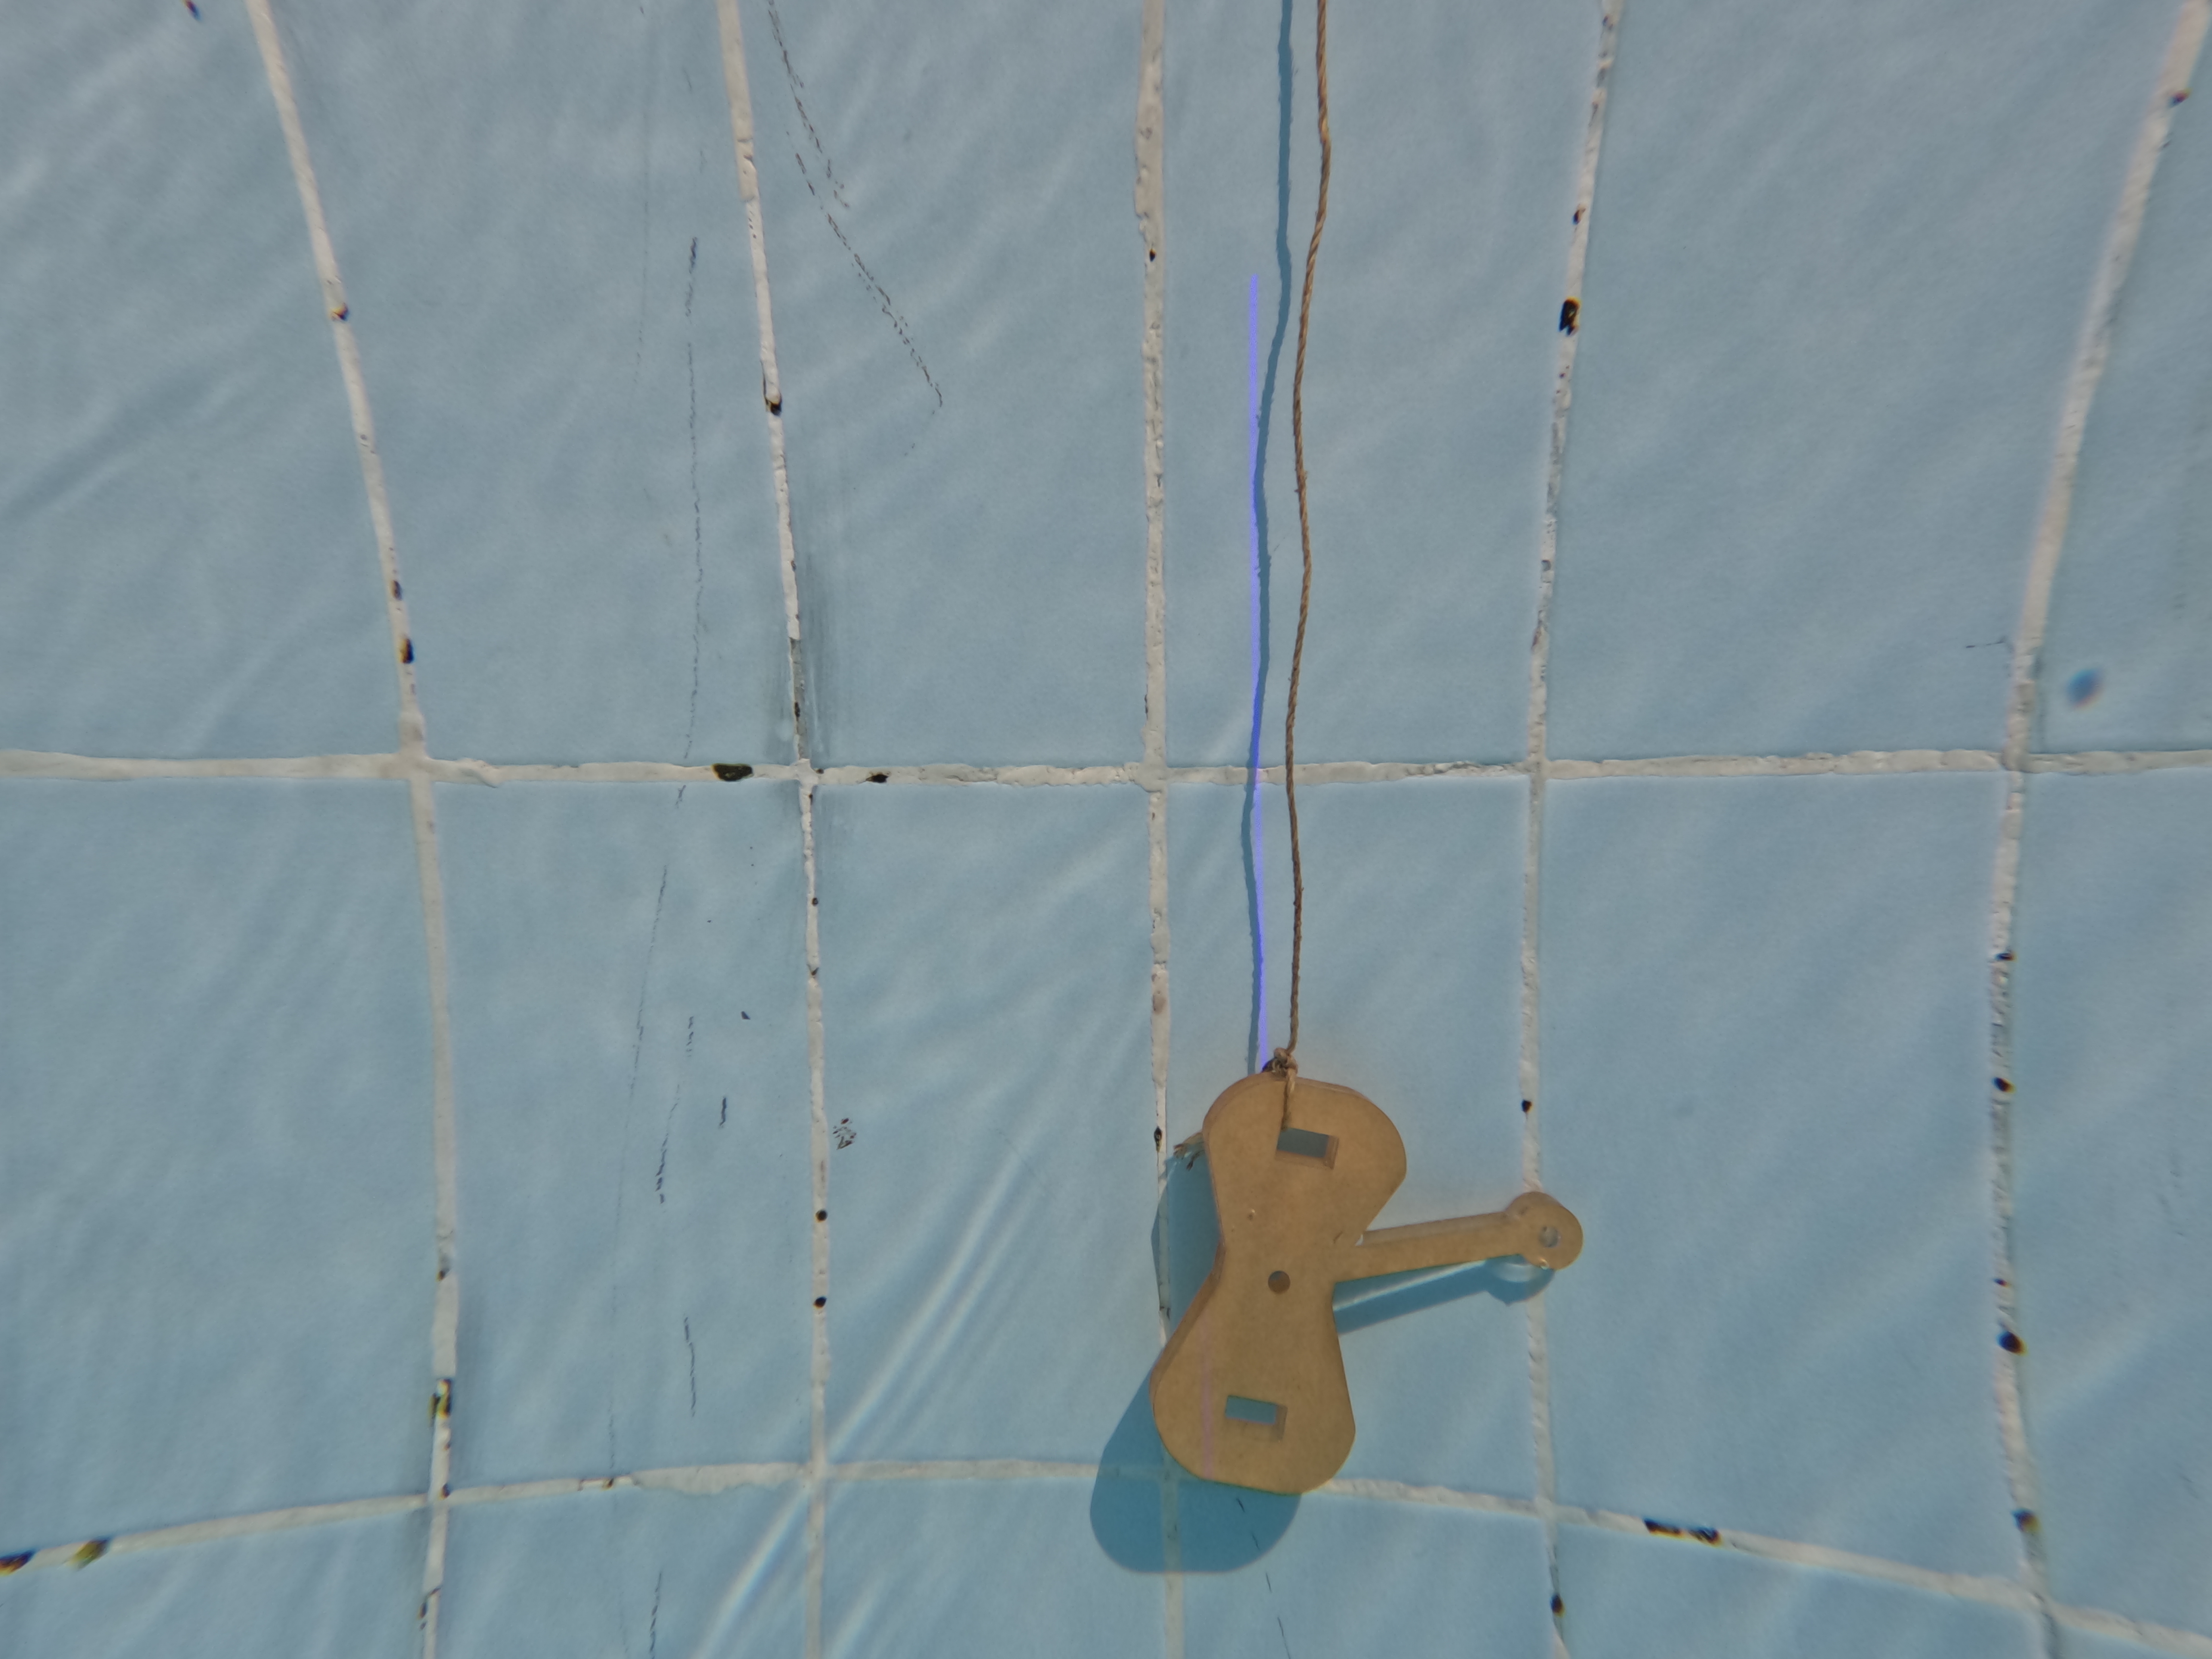

Supplement: Supplementary file 559 [file G0018904.pdf › Level_6_1/G0018904.pdf]

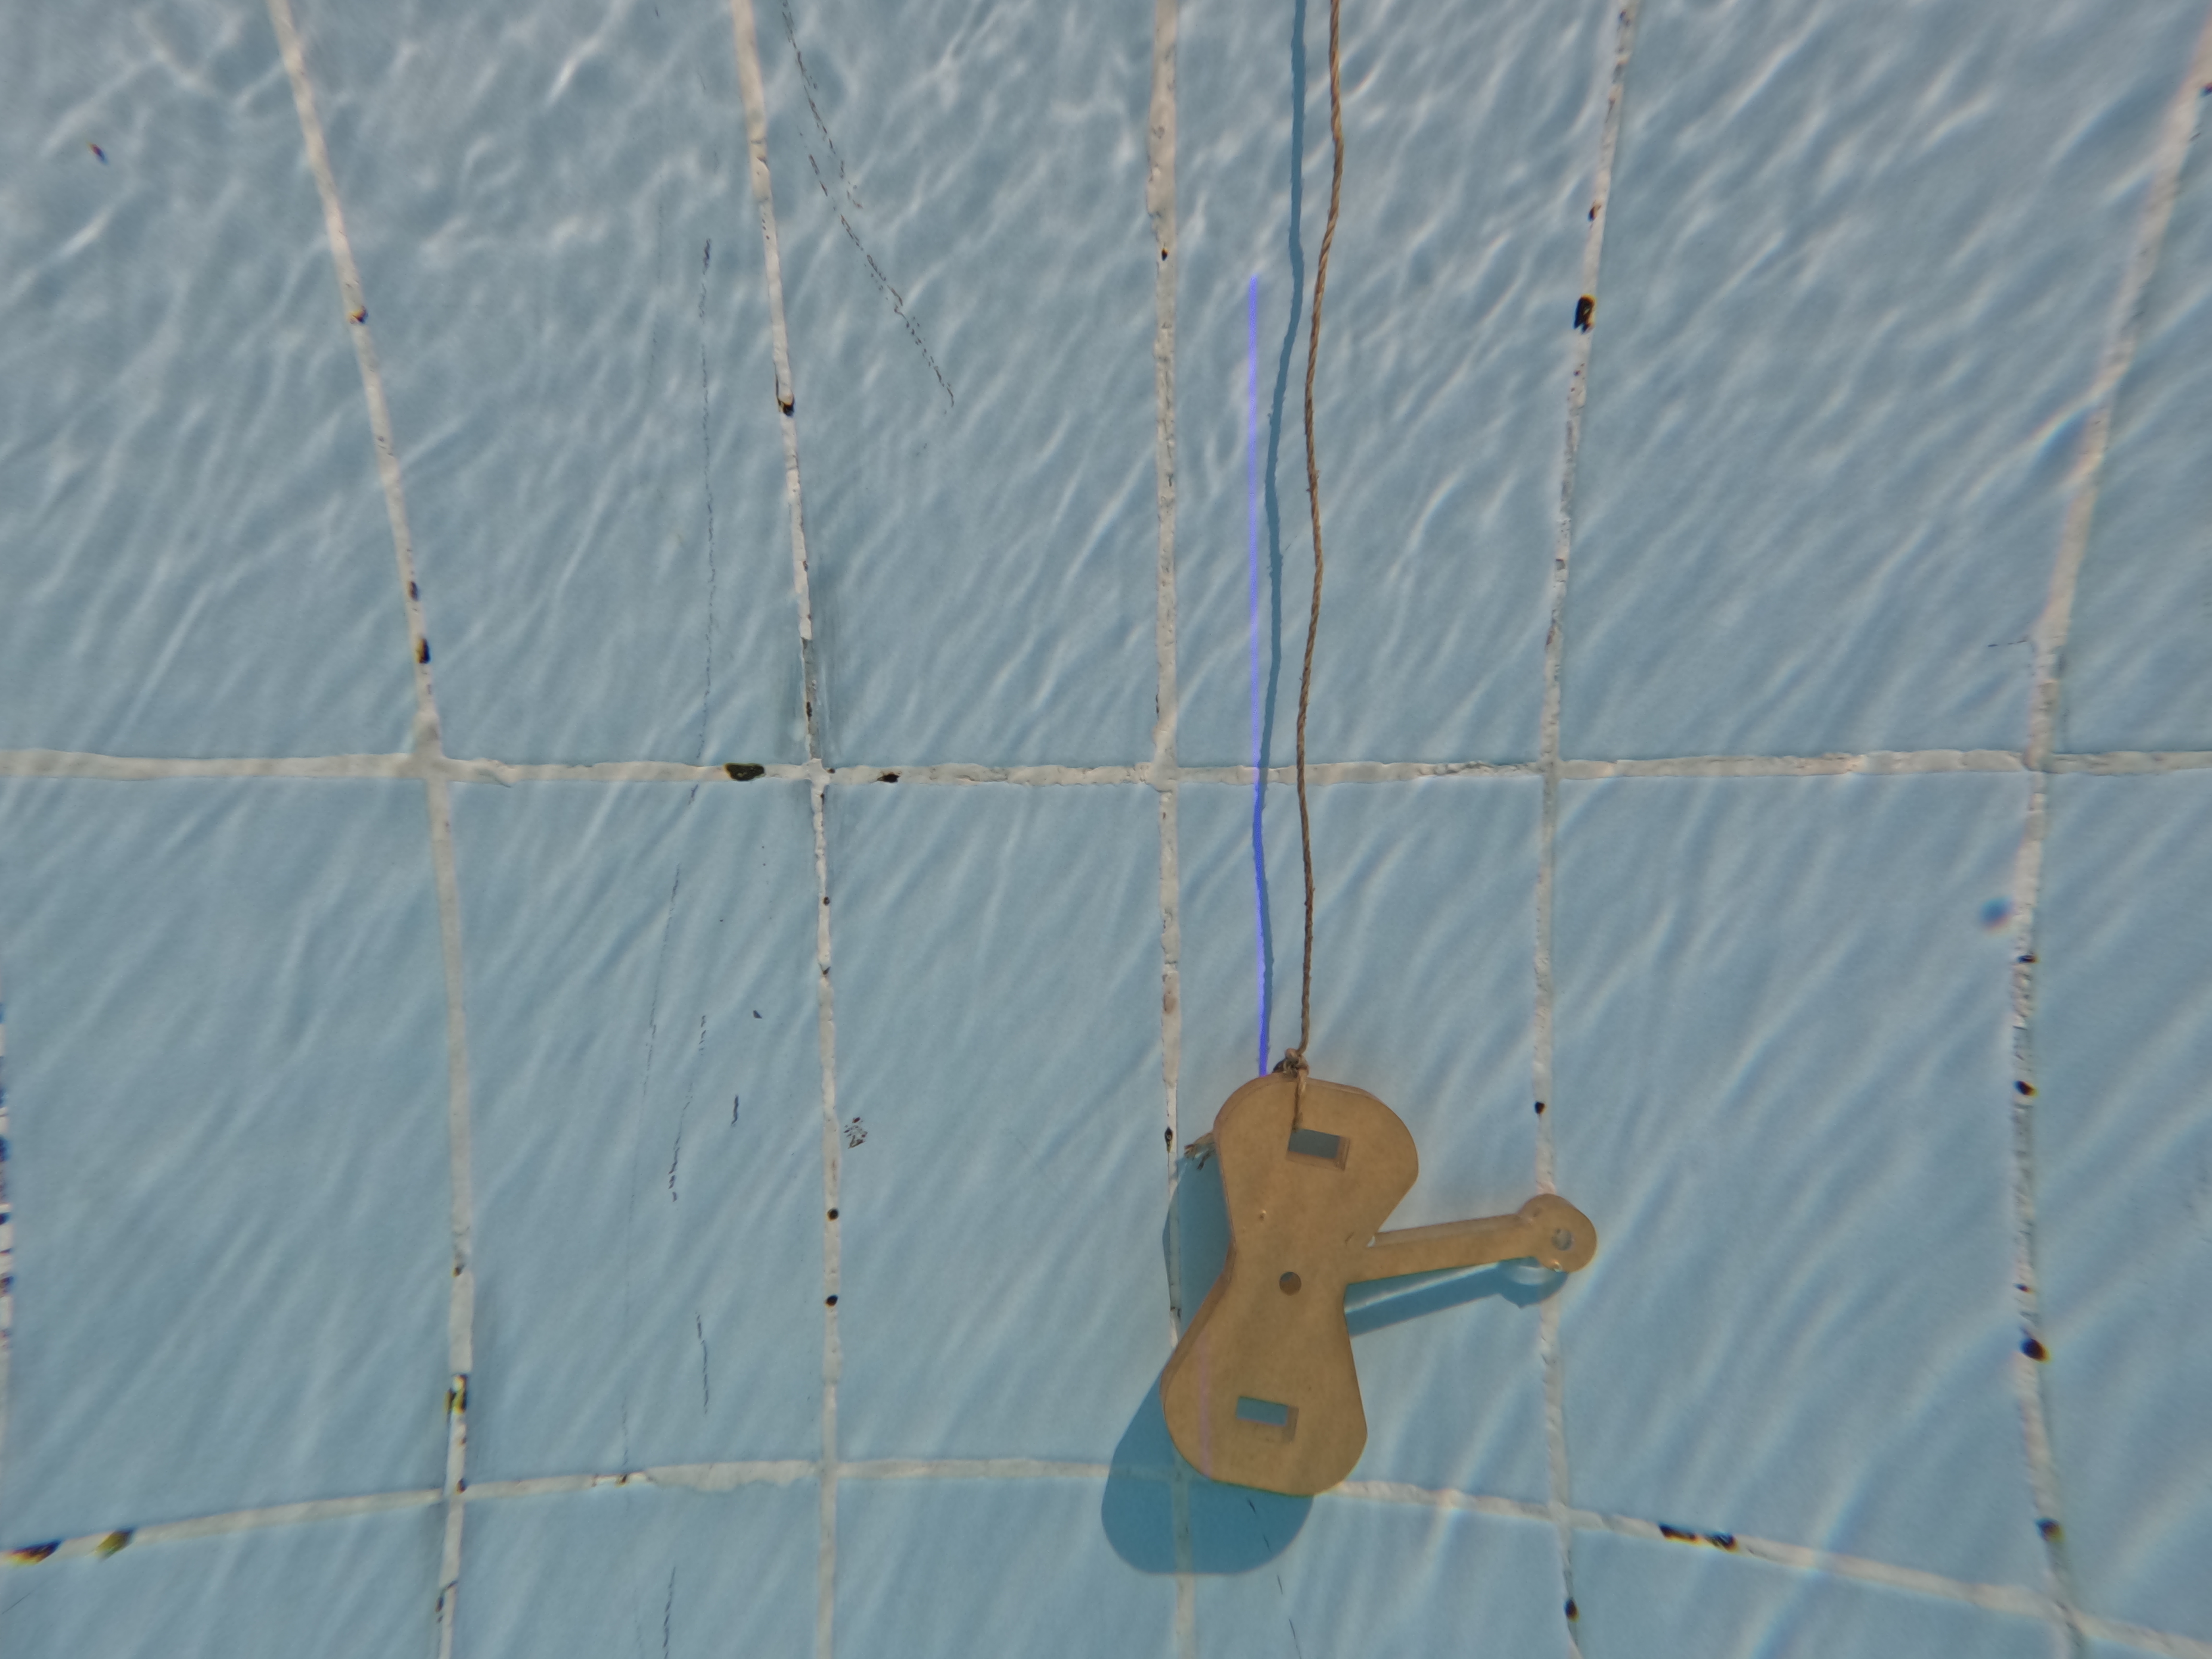

Supplement: Supplementary file 560 [file G0018905.pdf › Level_6_1/G0018905.pdf]

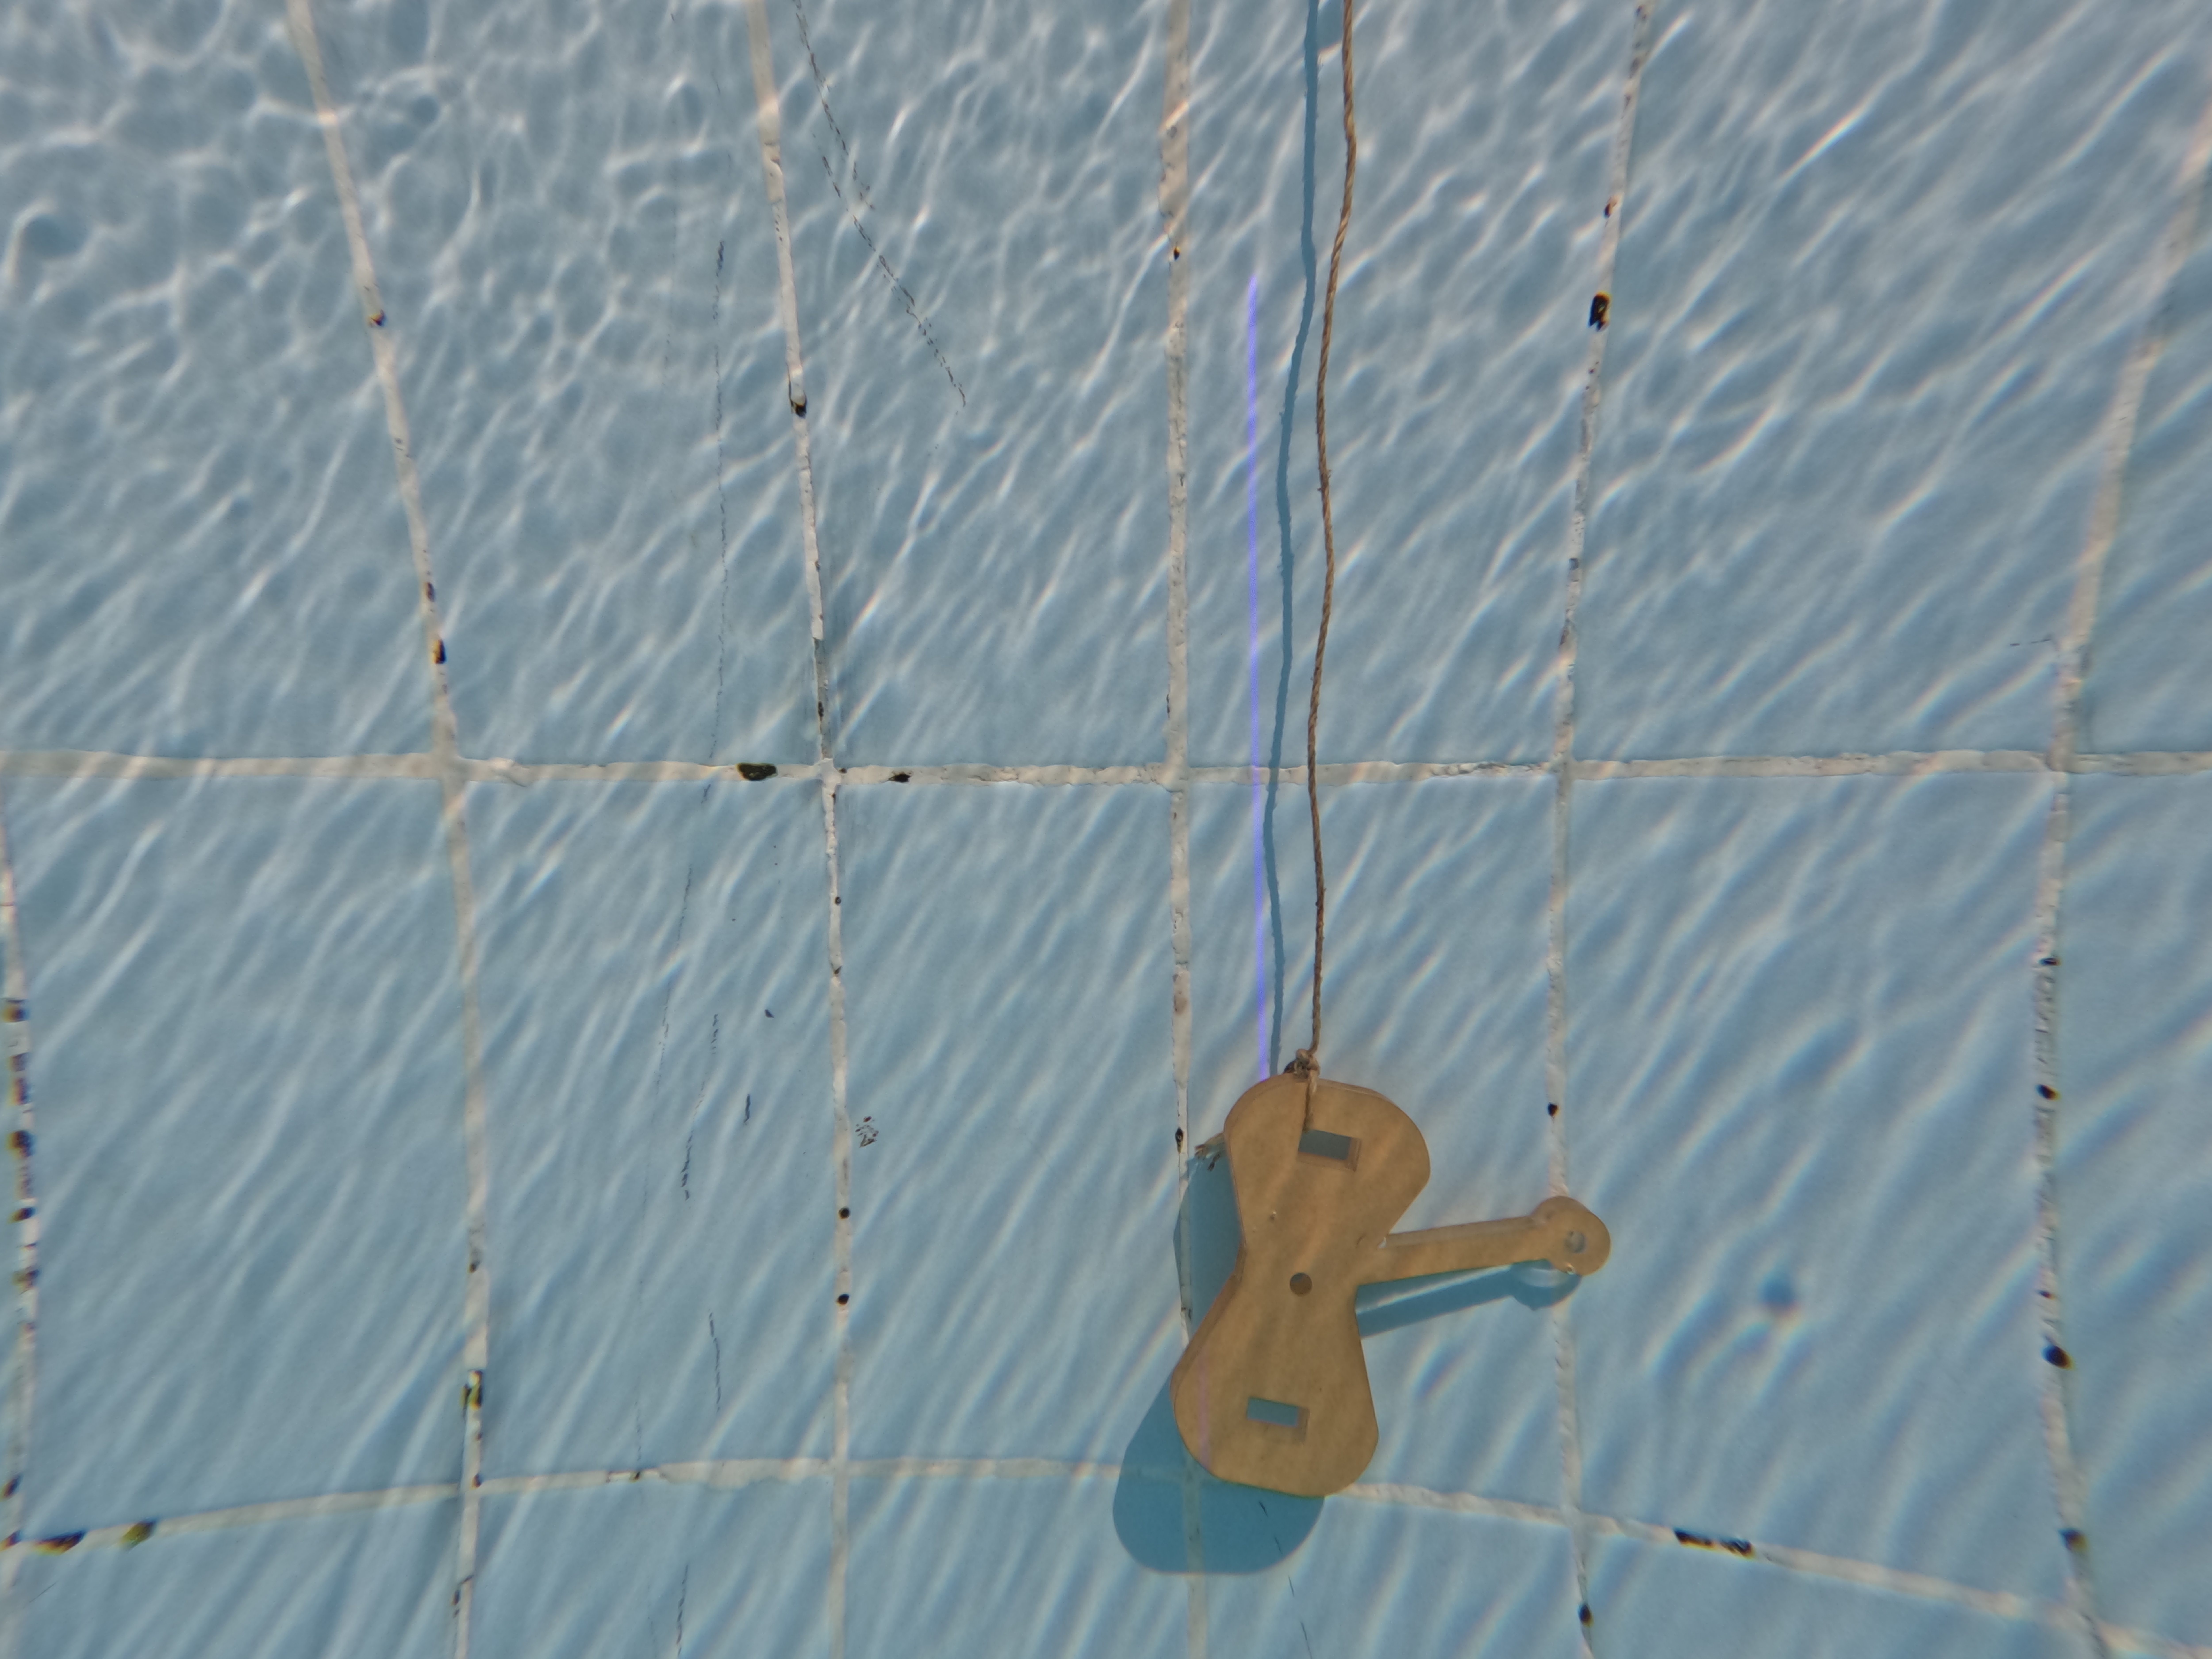

Supplement: Supplementary file 561 [file G0018906.pdf › Level_6_1/G0018906.pdf]

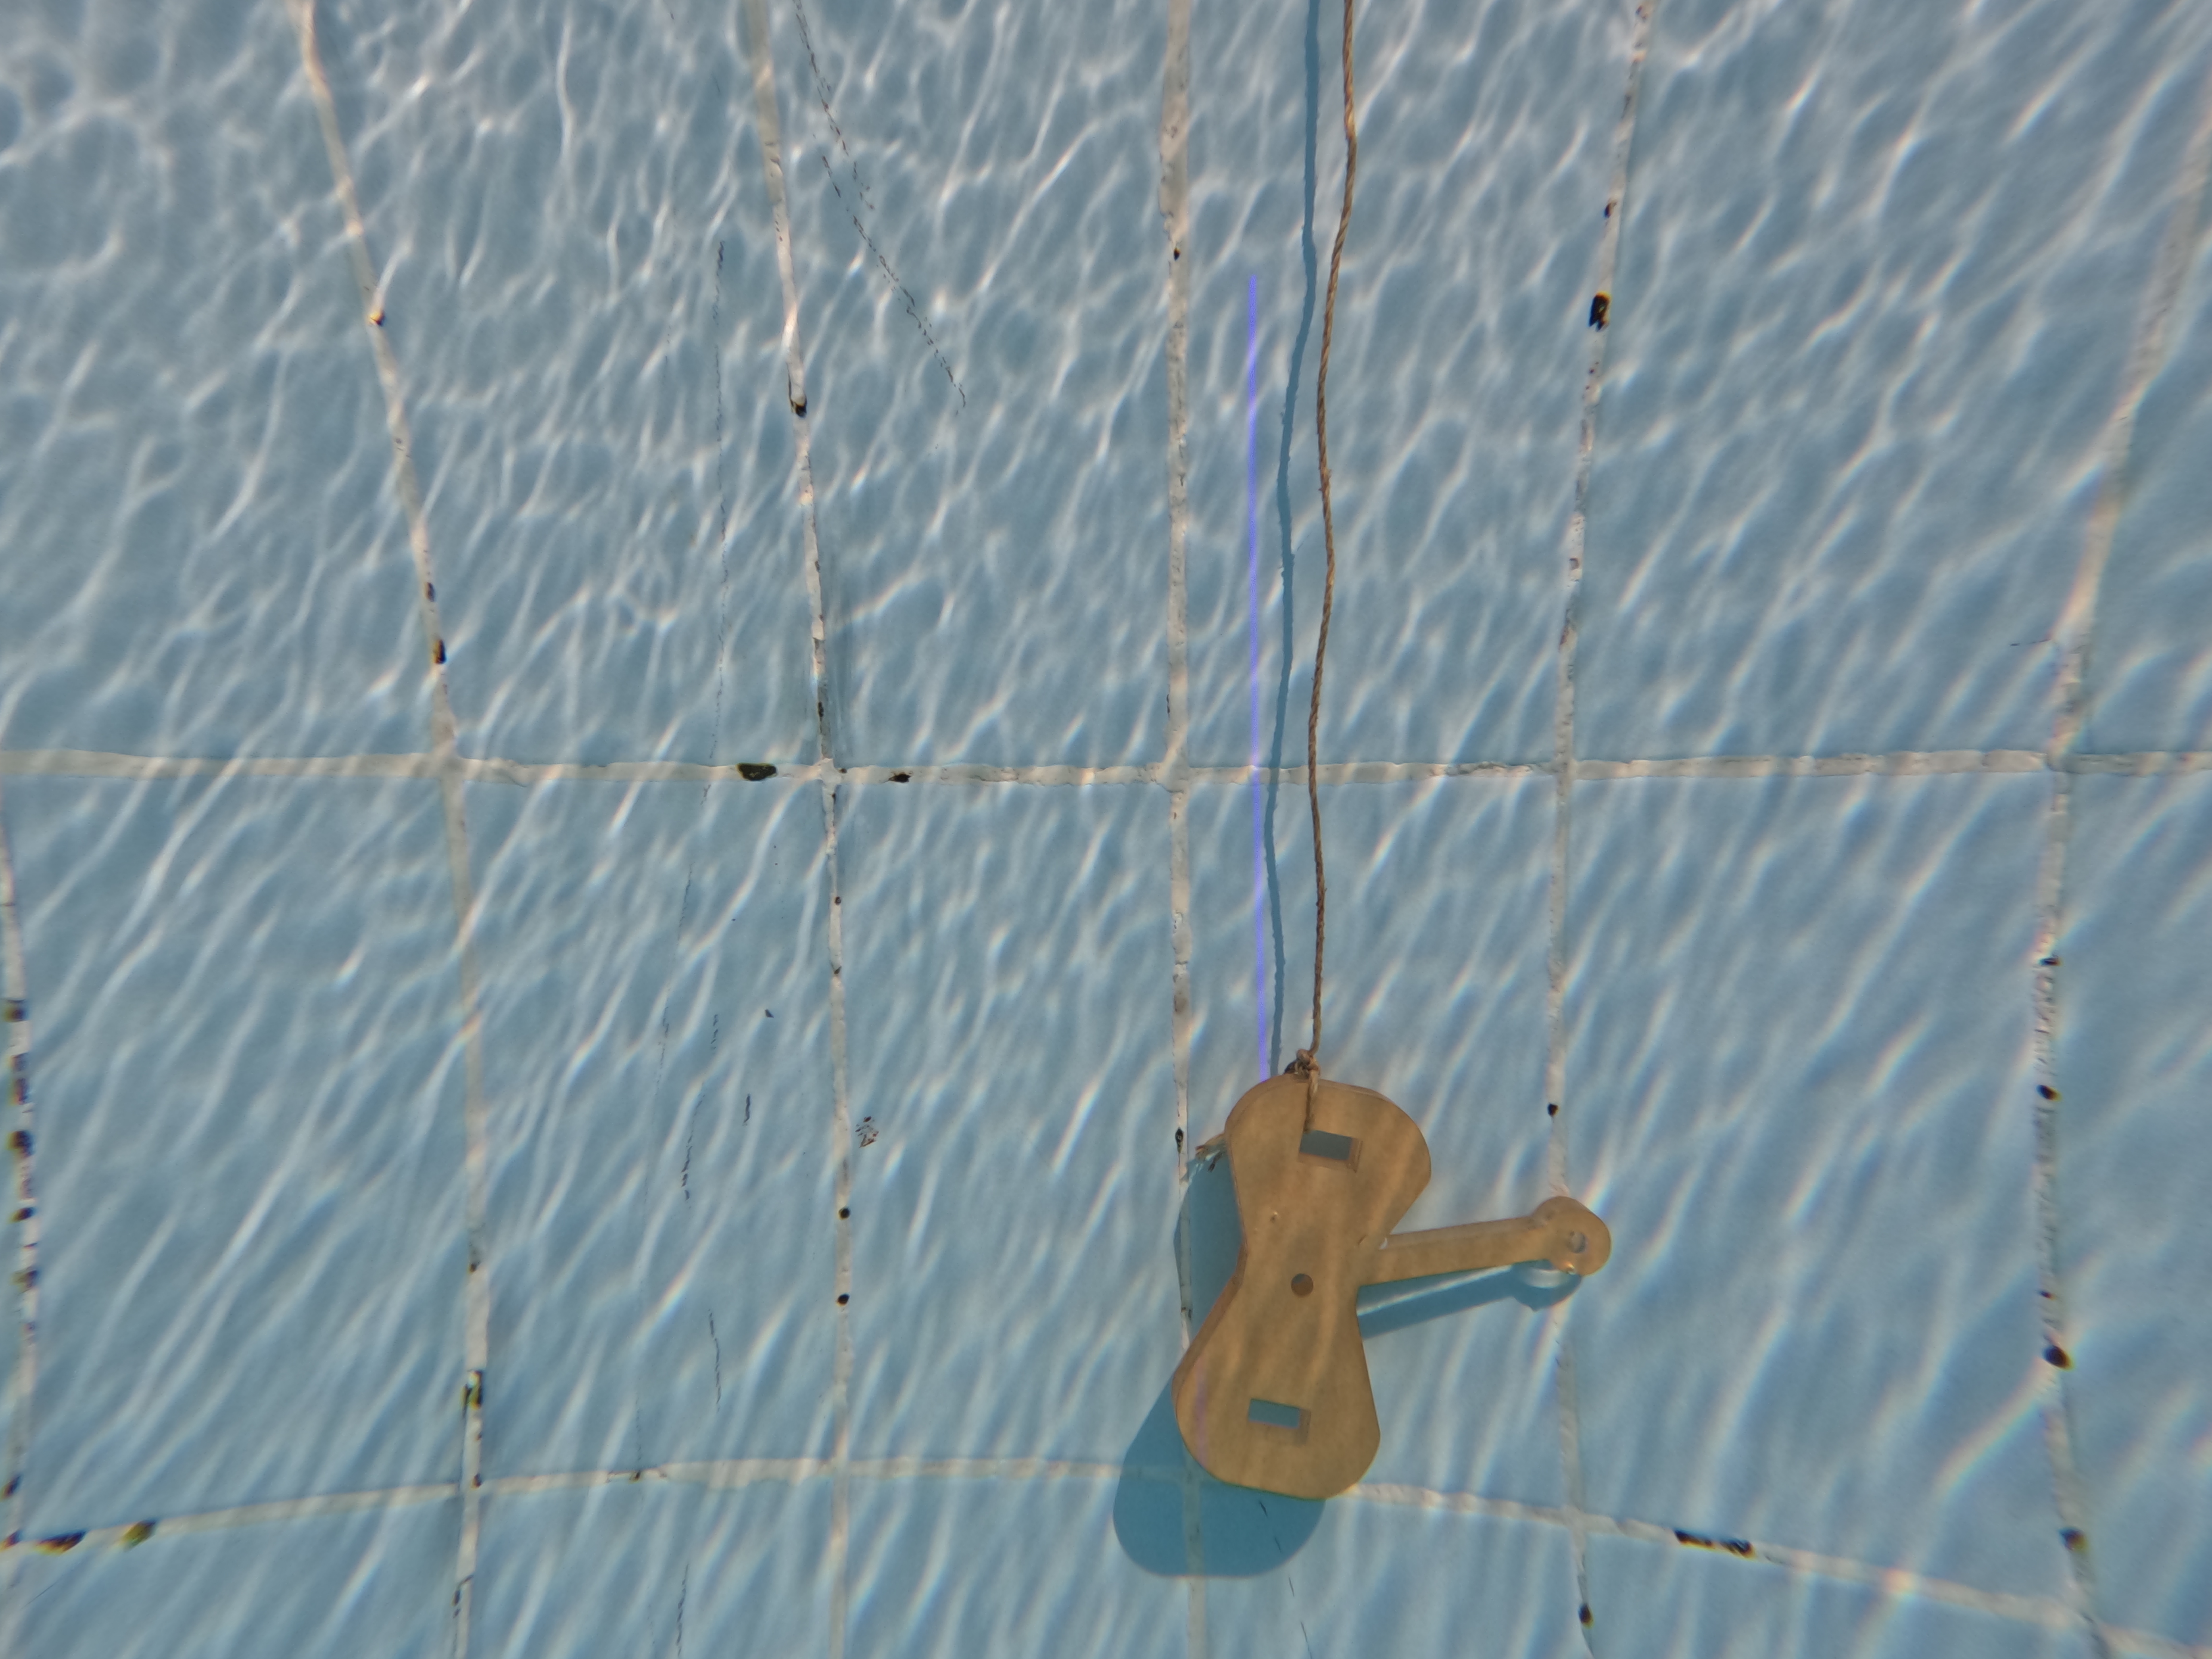

Supplement: Supplementary file 562 [file G0018907.pdf › Level_6_1/G0018907.pdf]

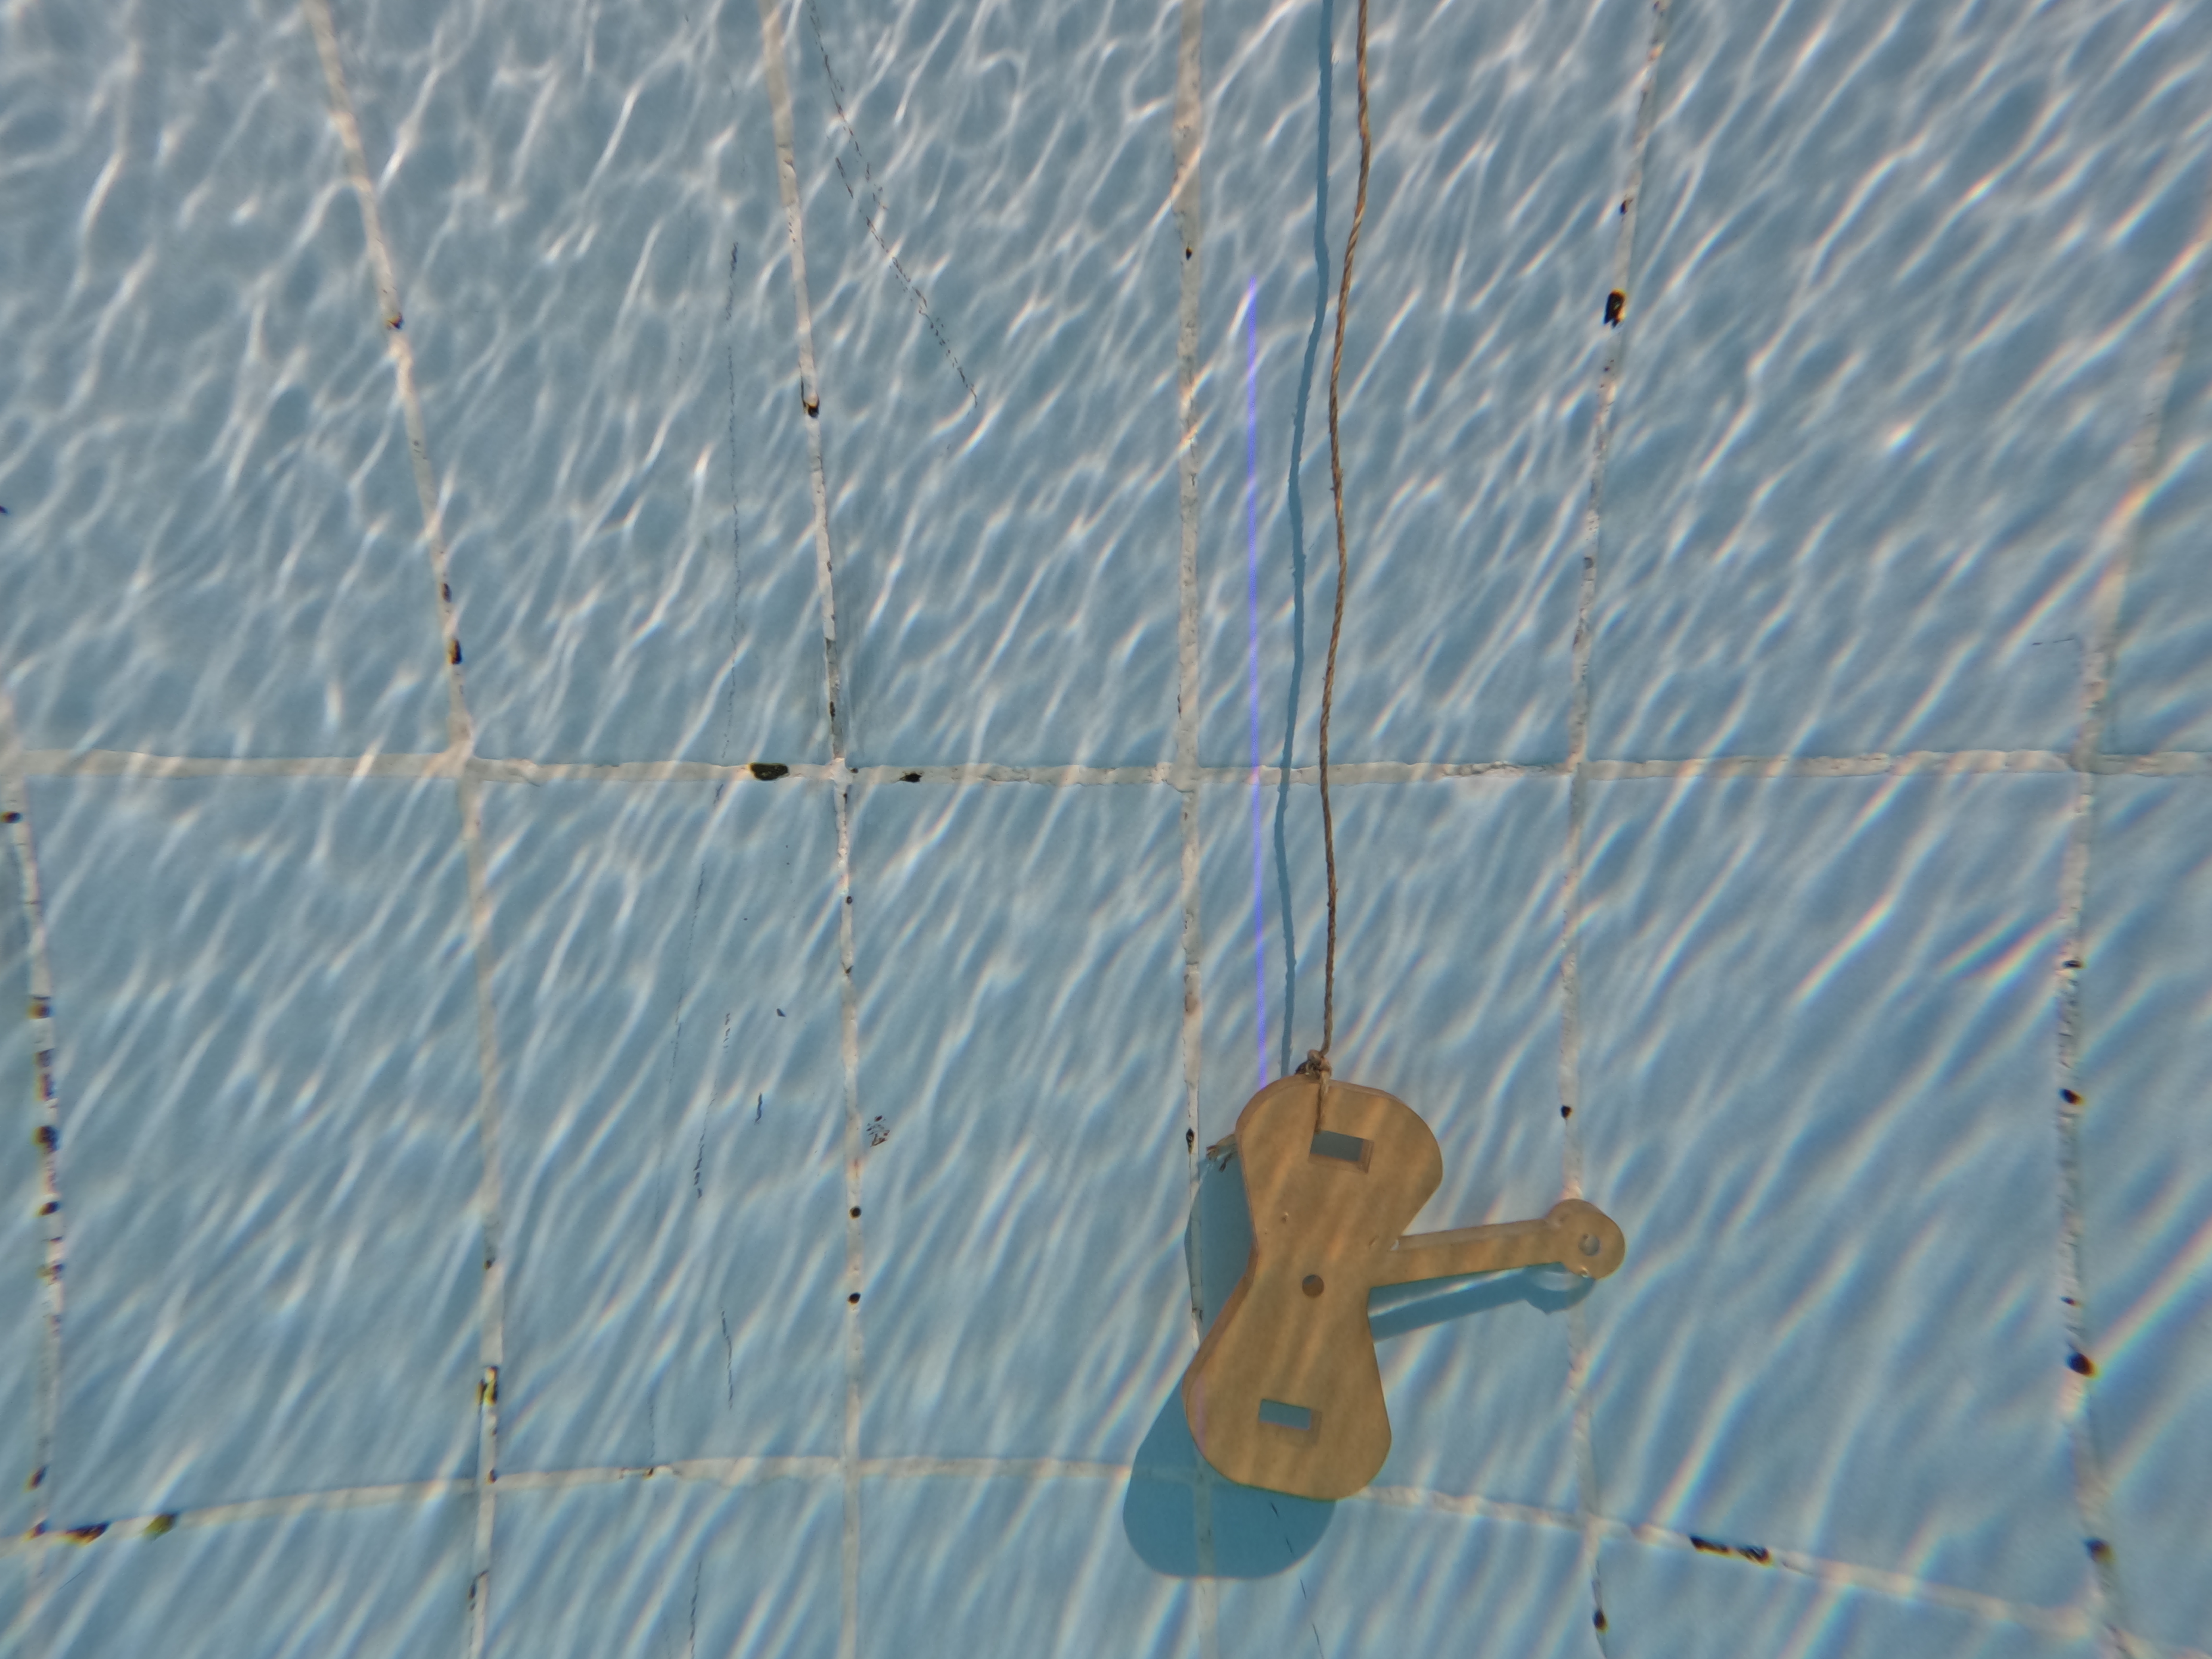

Supplement: Supplementary file 563 [file G0018908.pdf › Level_6_1/G0018908.pdf]

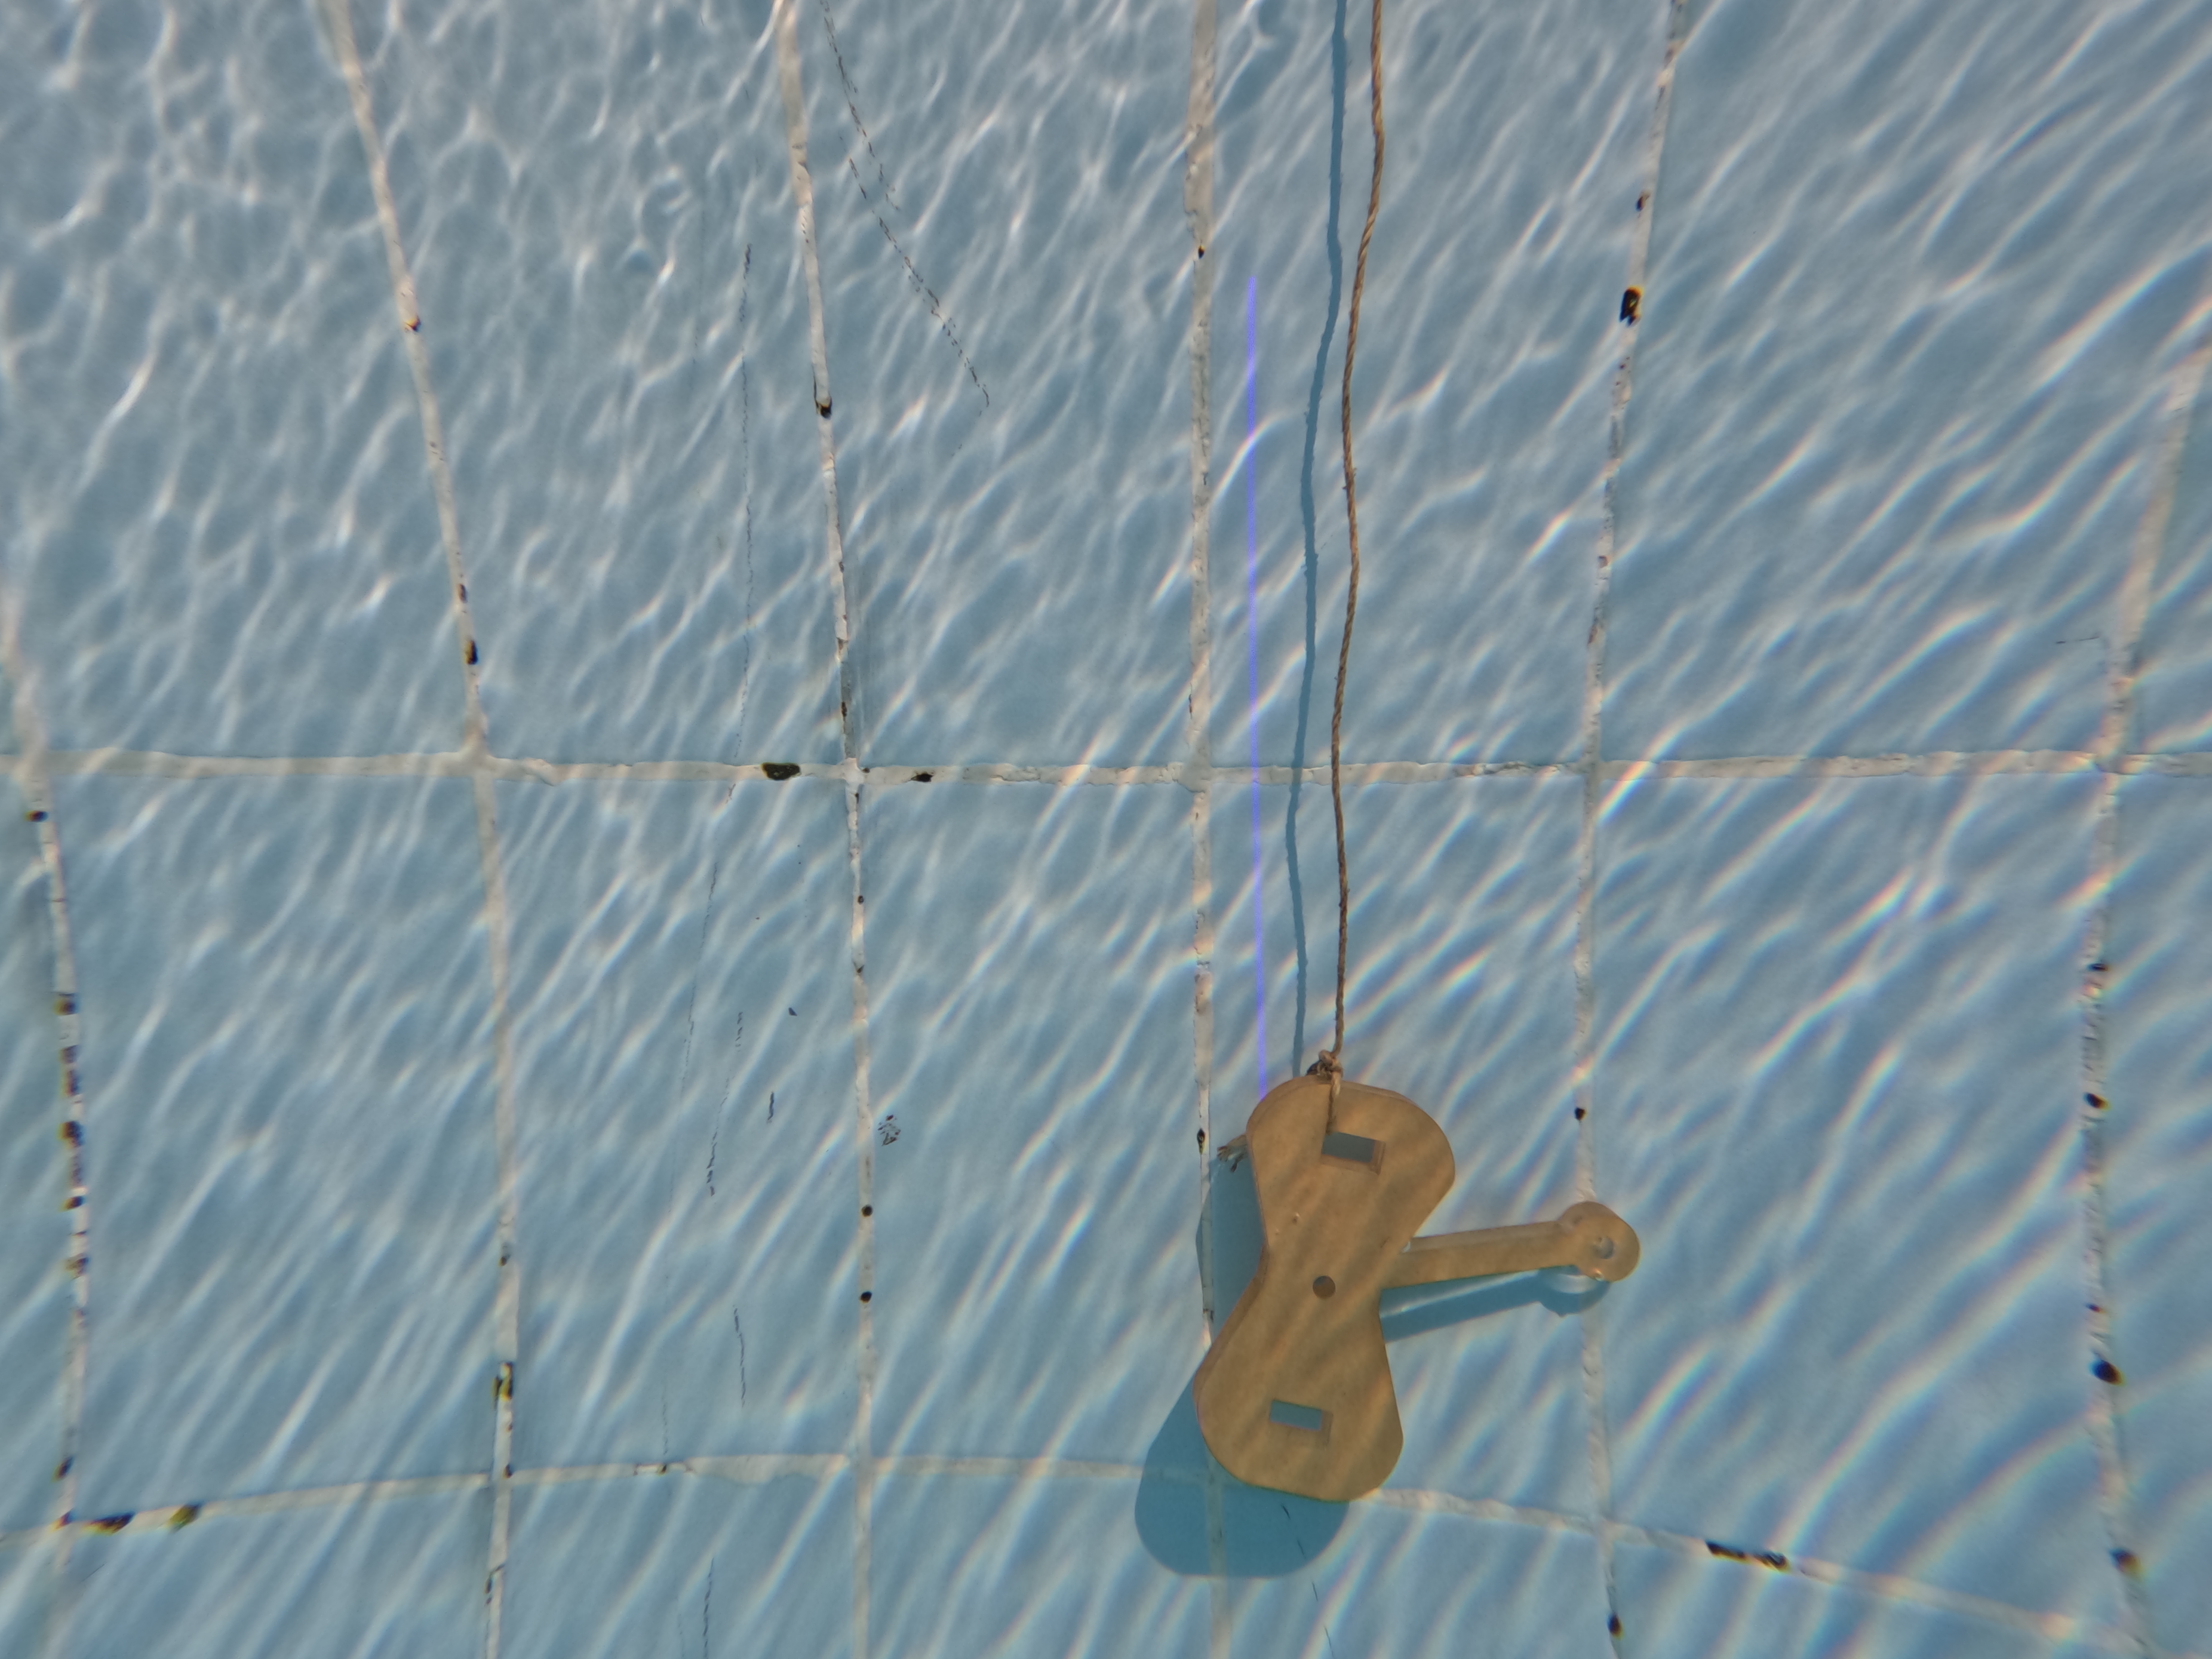

Supplement: Supplementary file 564 [file G0018909.pdf › Level_6_1/G0018909.pdf]

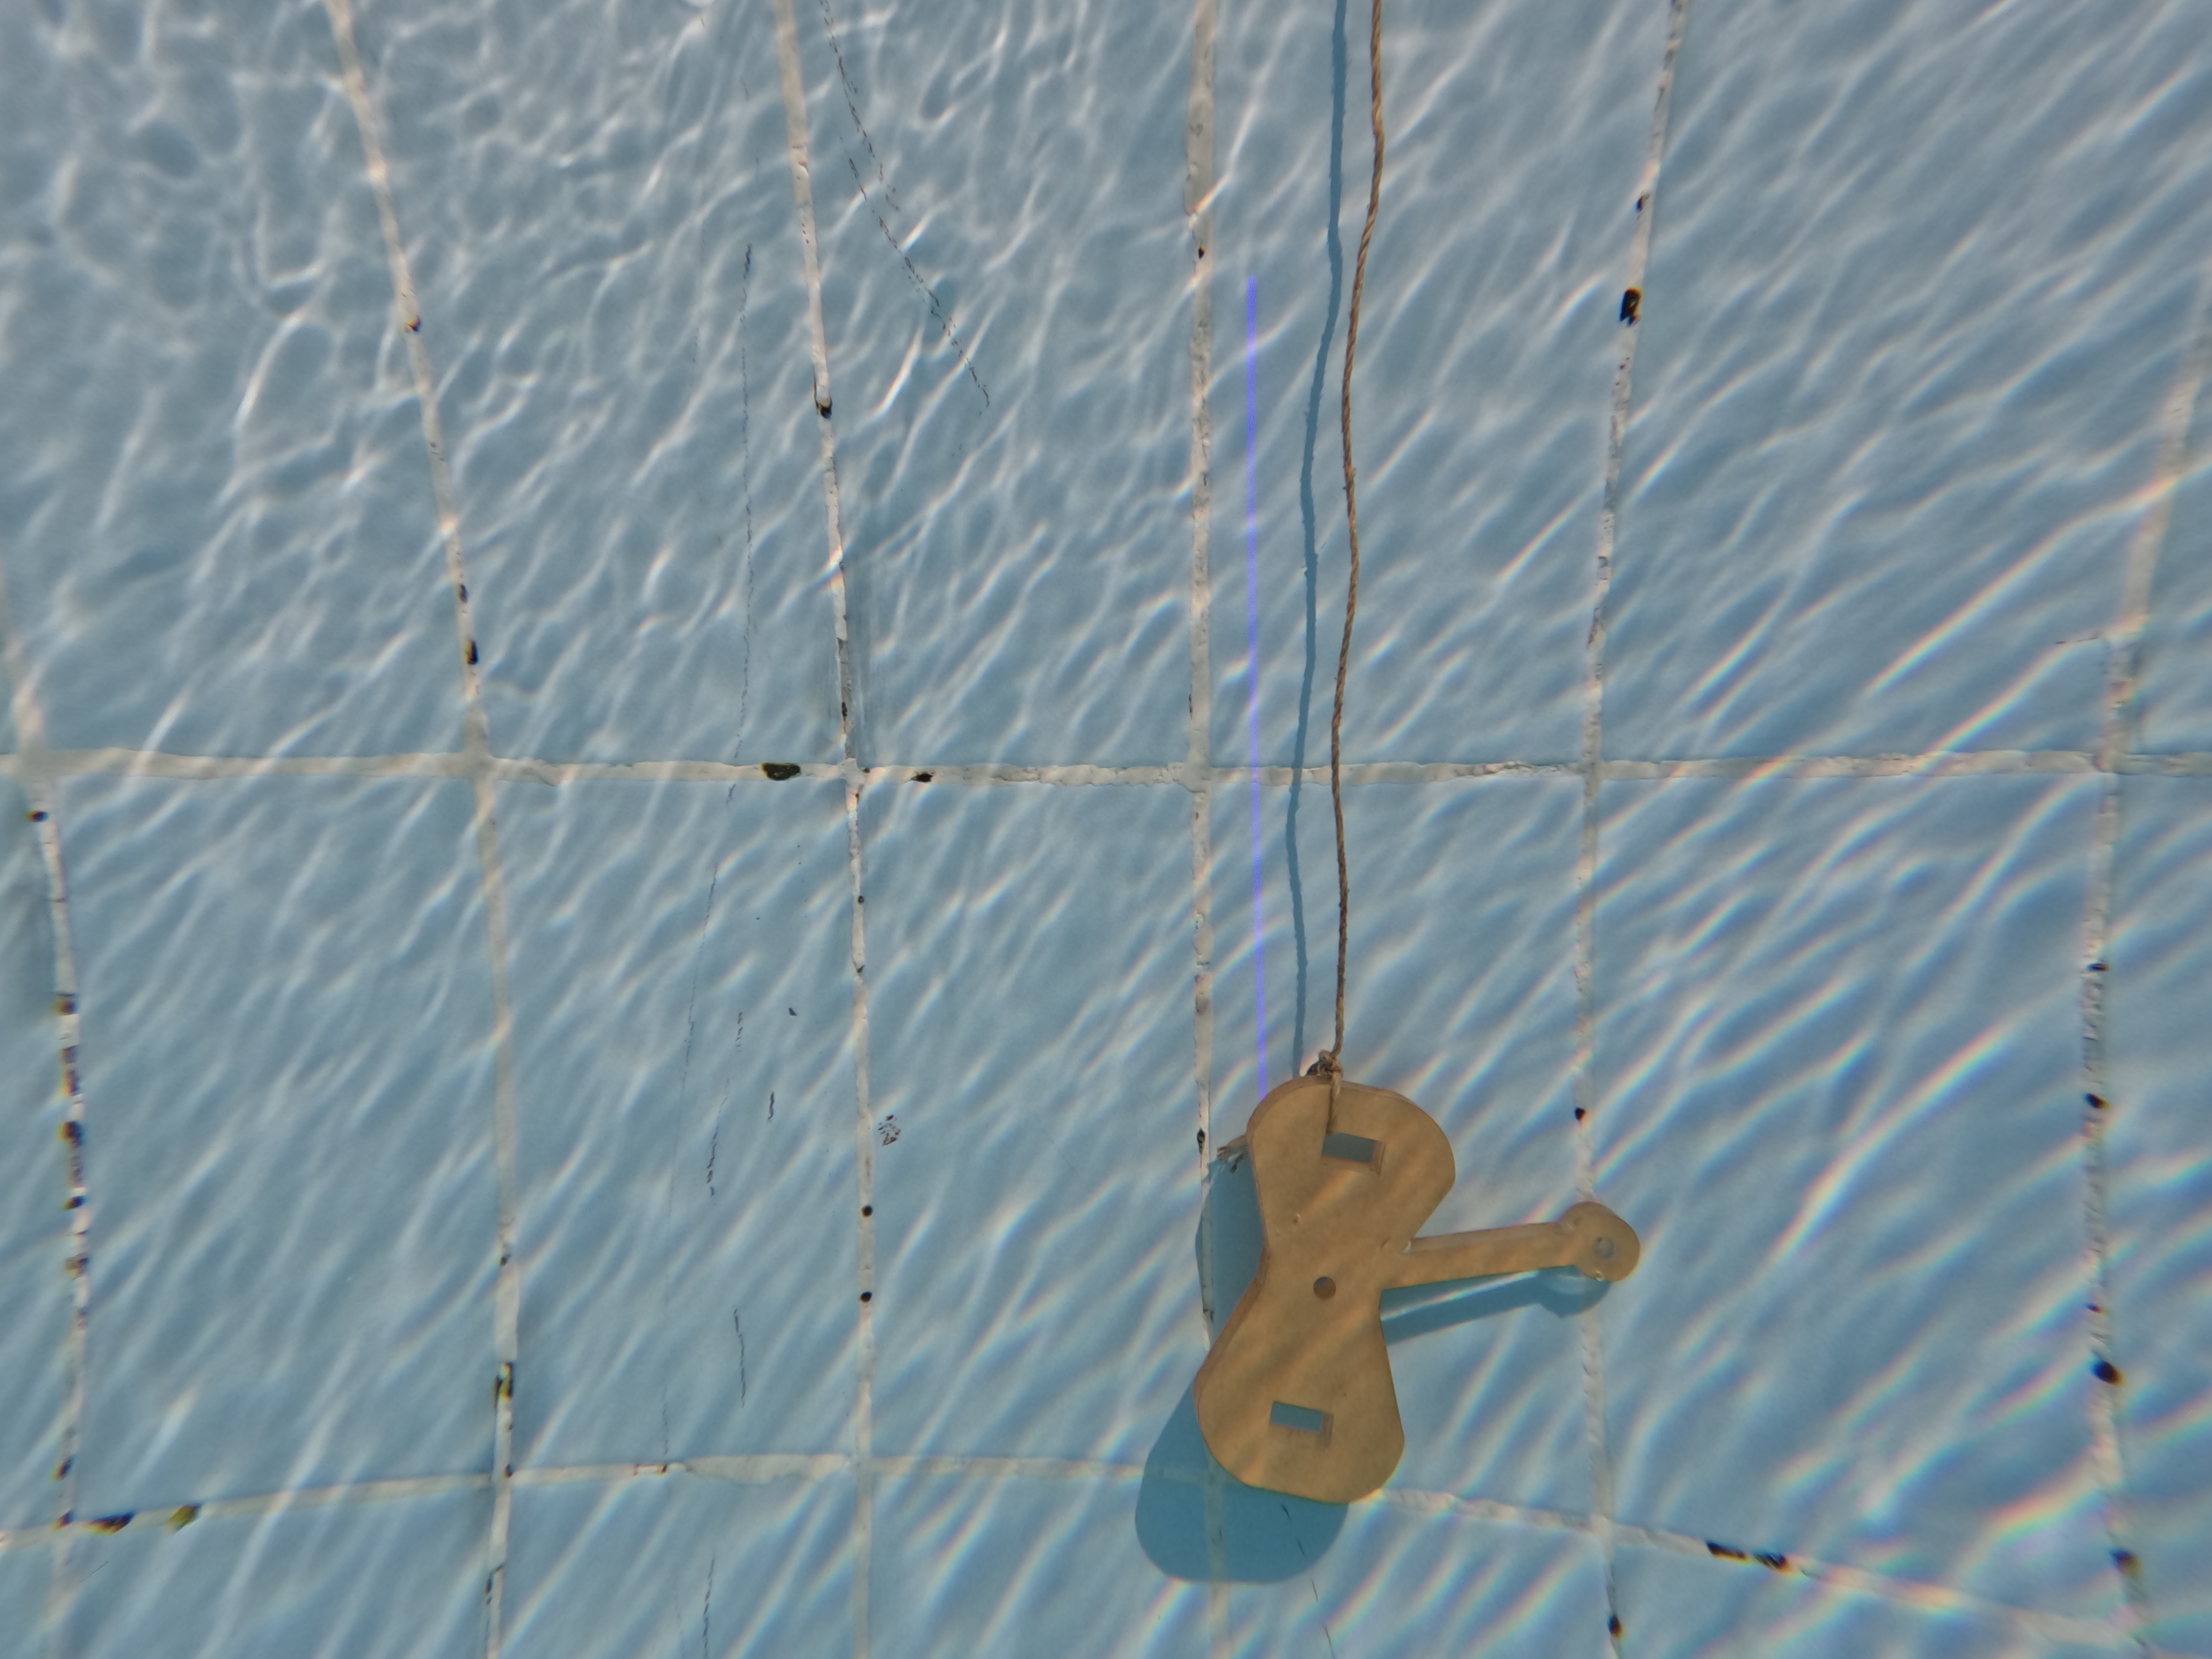

Supplement: Supplementary file 565 [file G0018910.pdf › Level_6_1/G0018910.pdf]

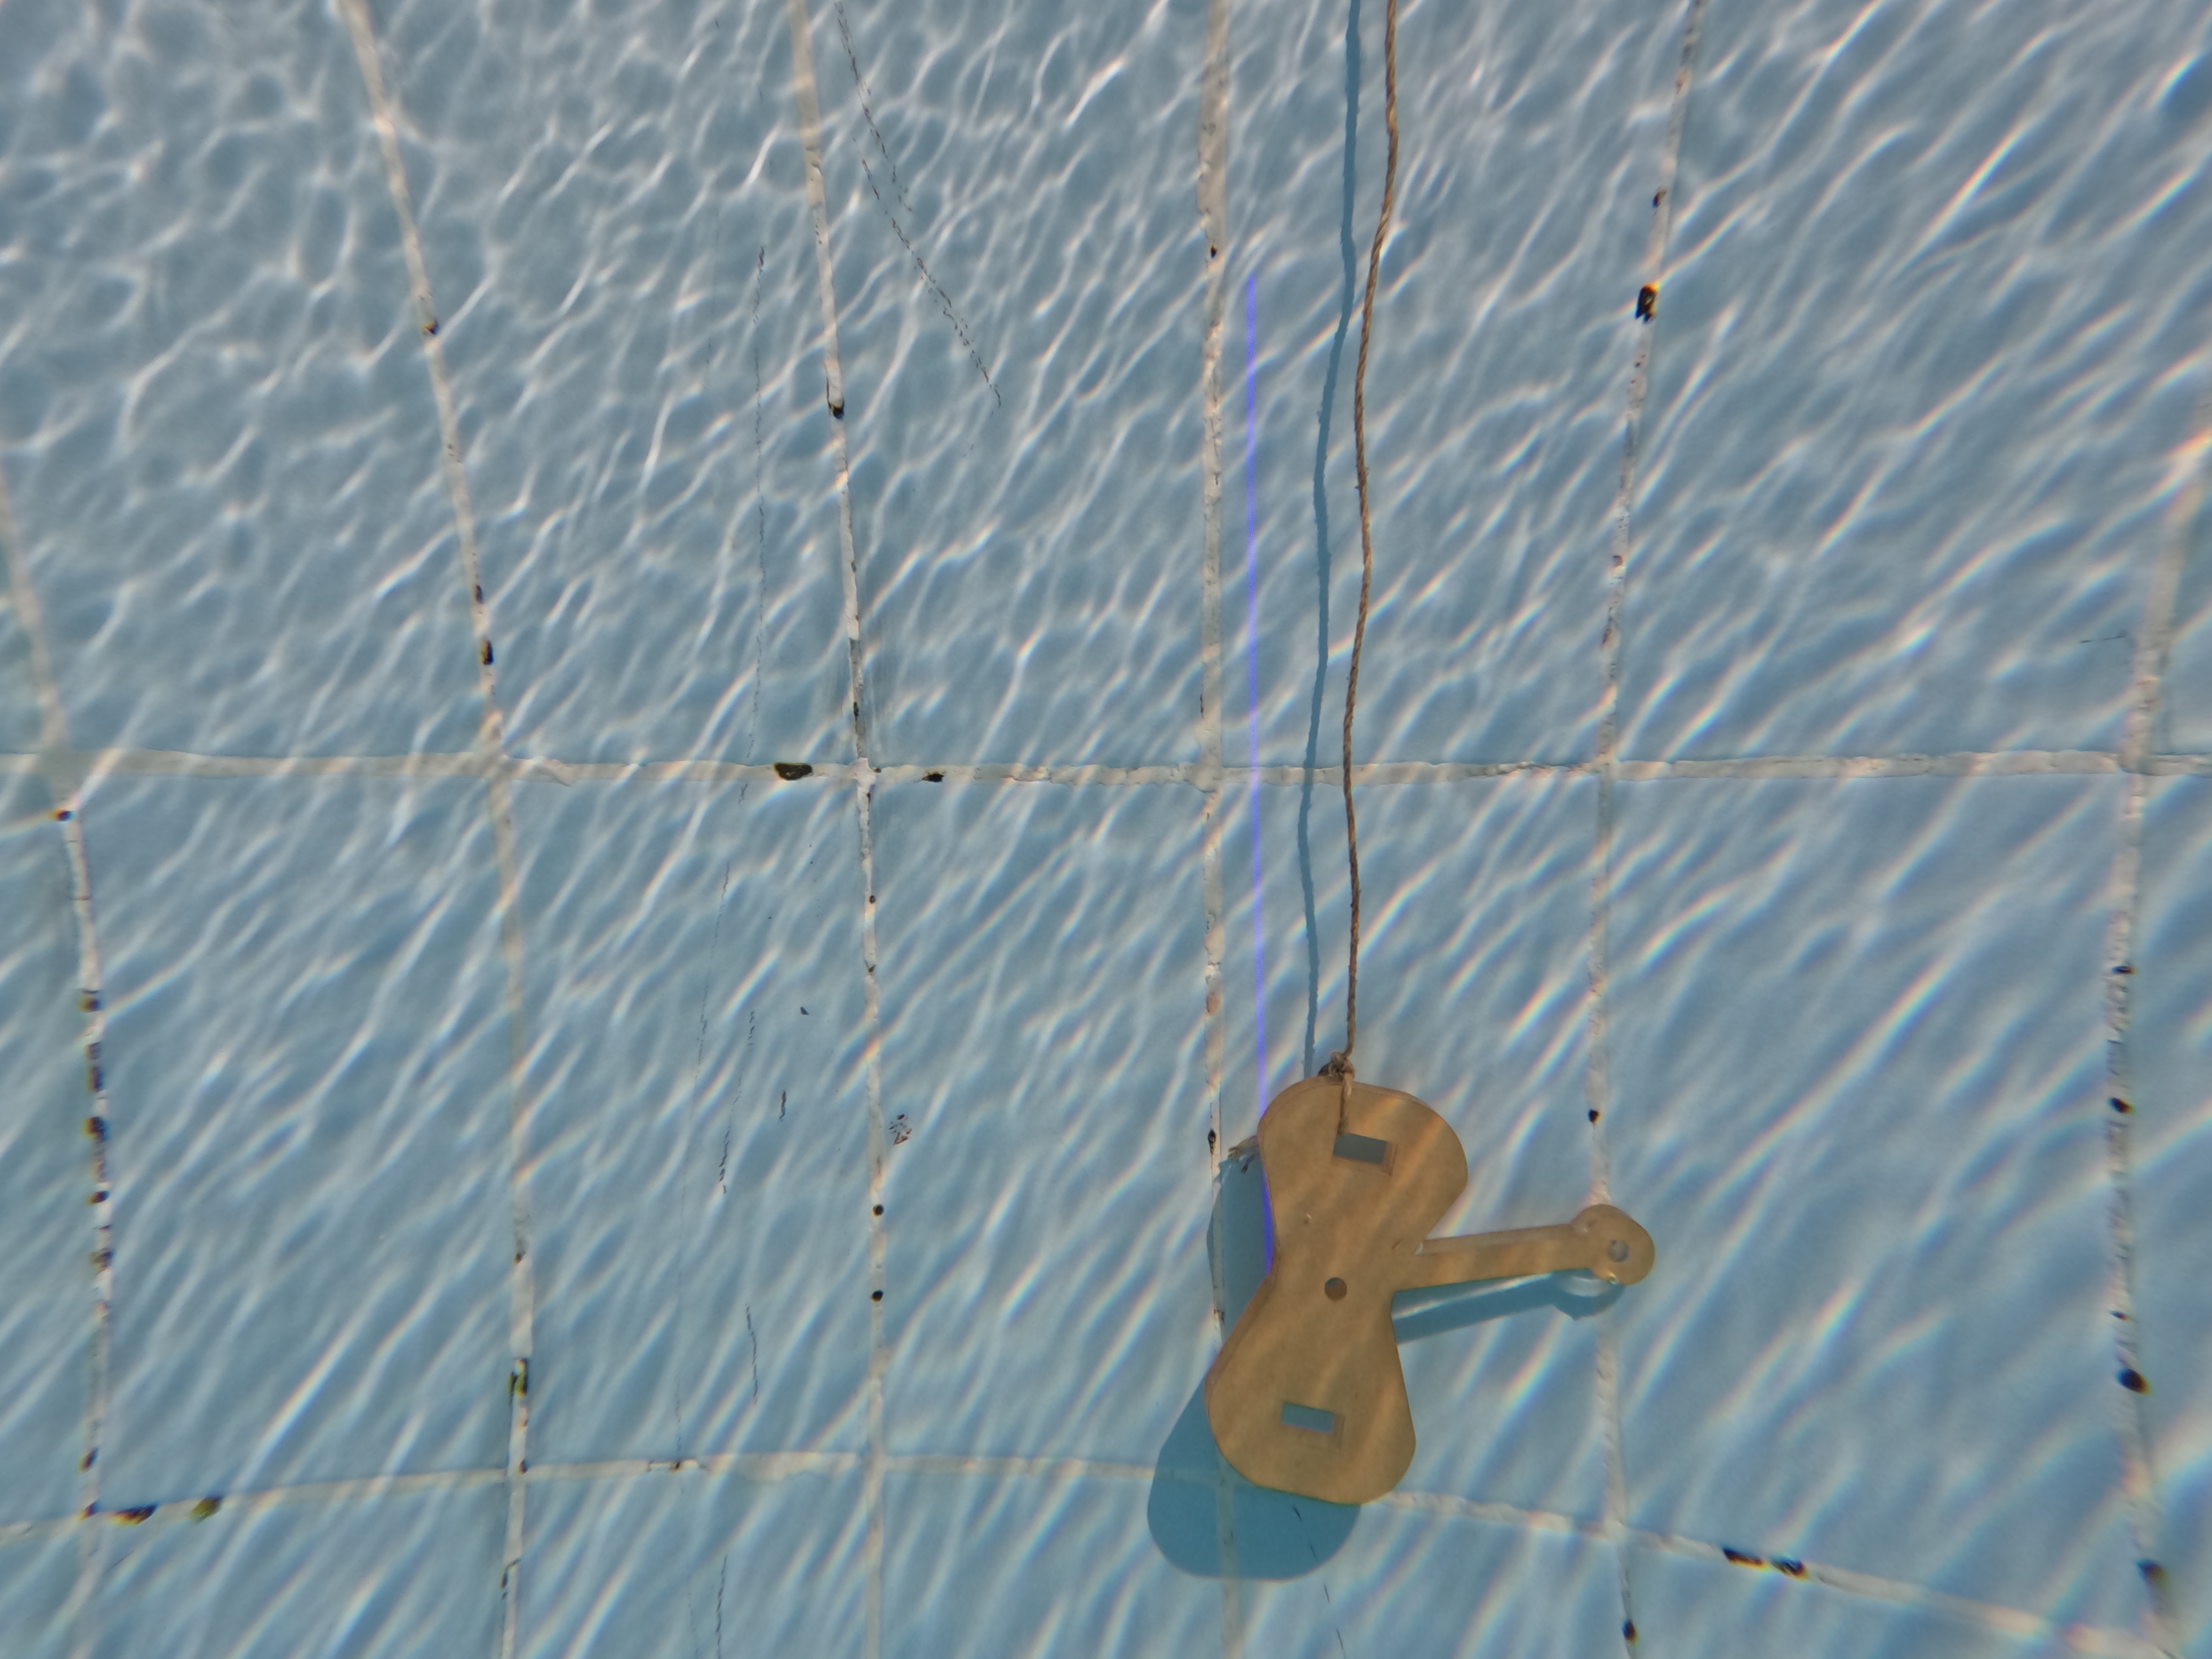

Supplement: Supplementary file 566 [file G0018911.pdf › Level_6_1/G0018911.pdf]

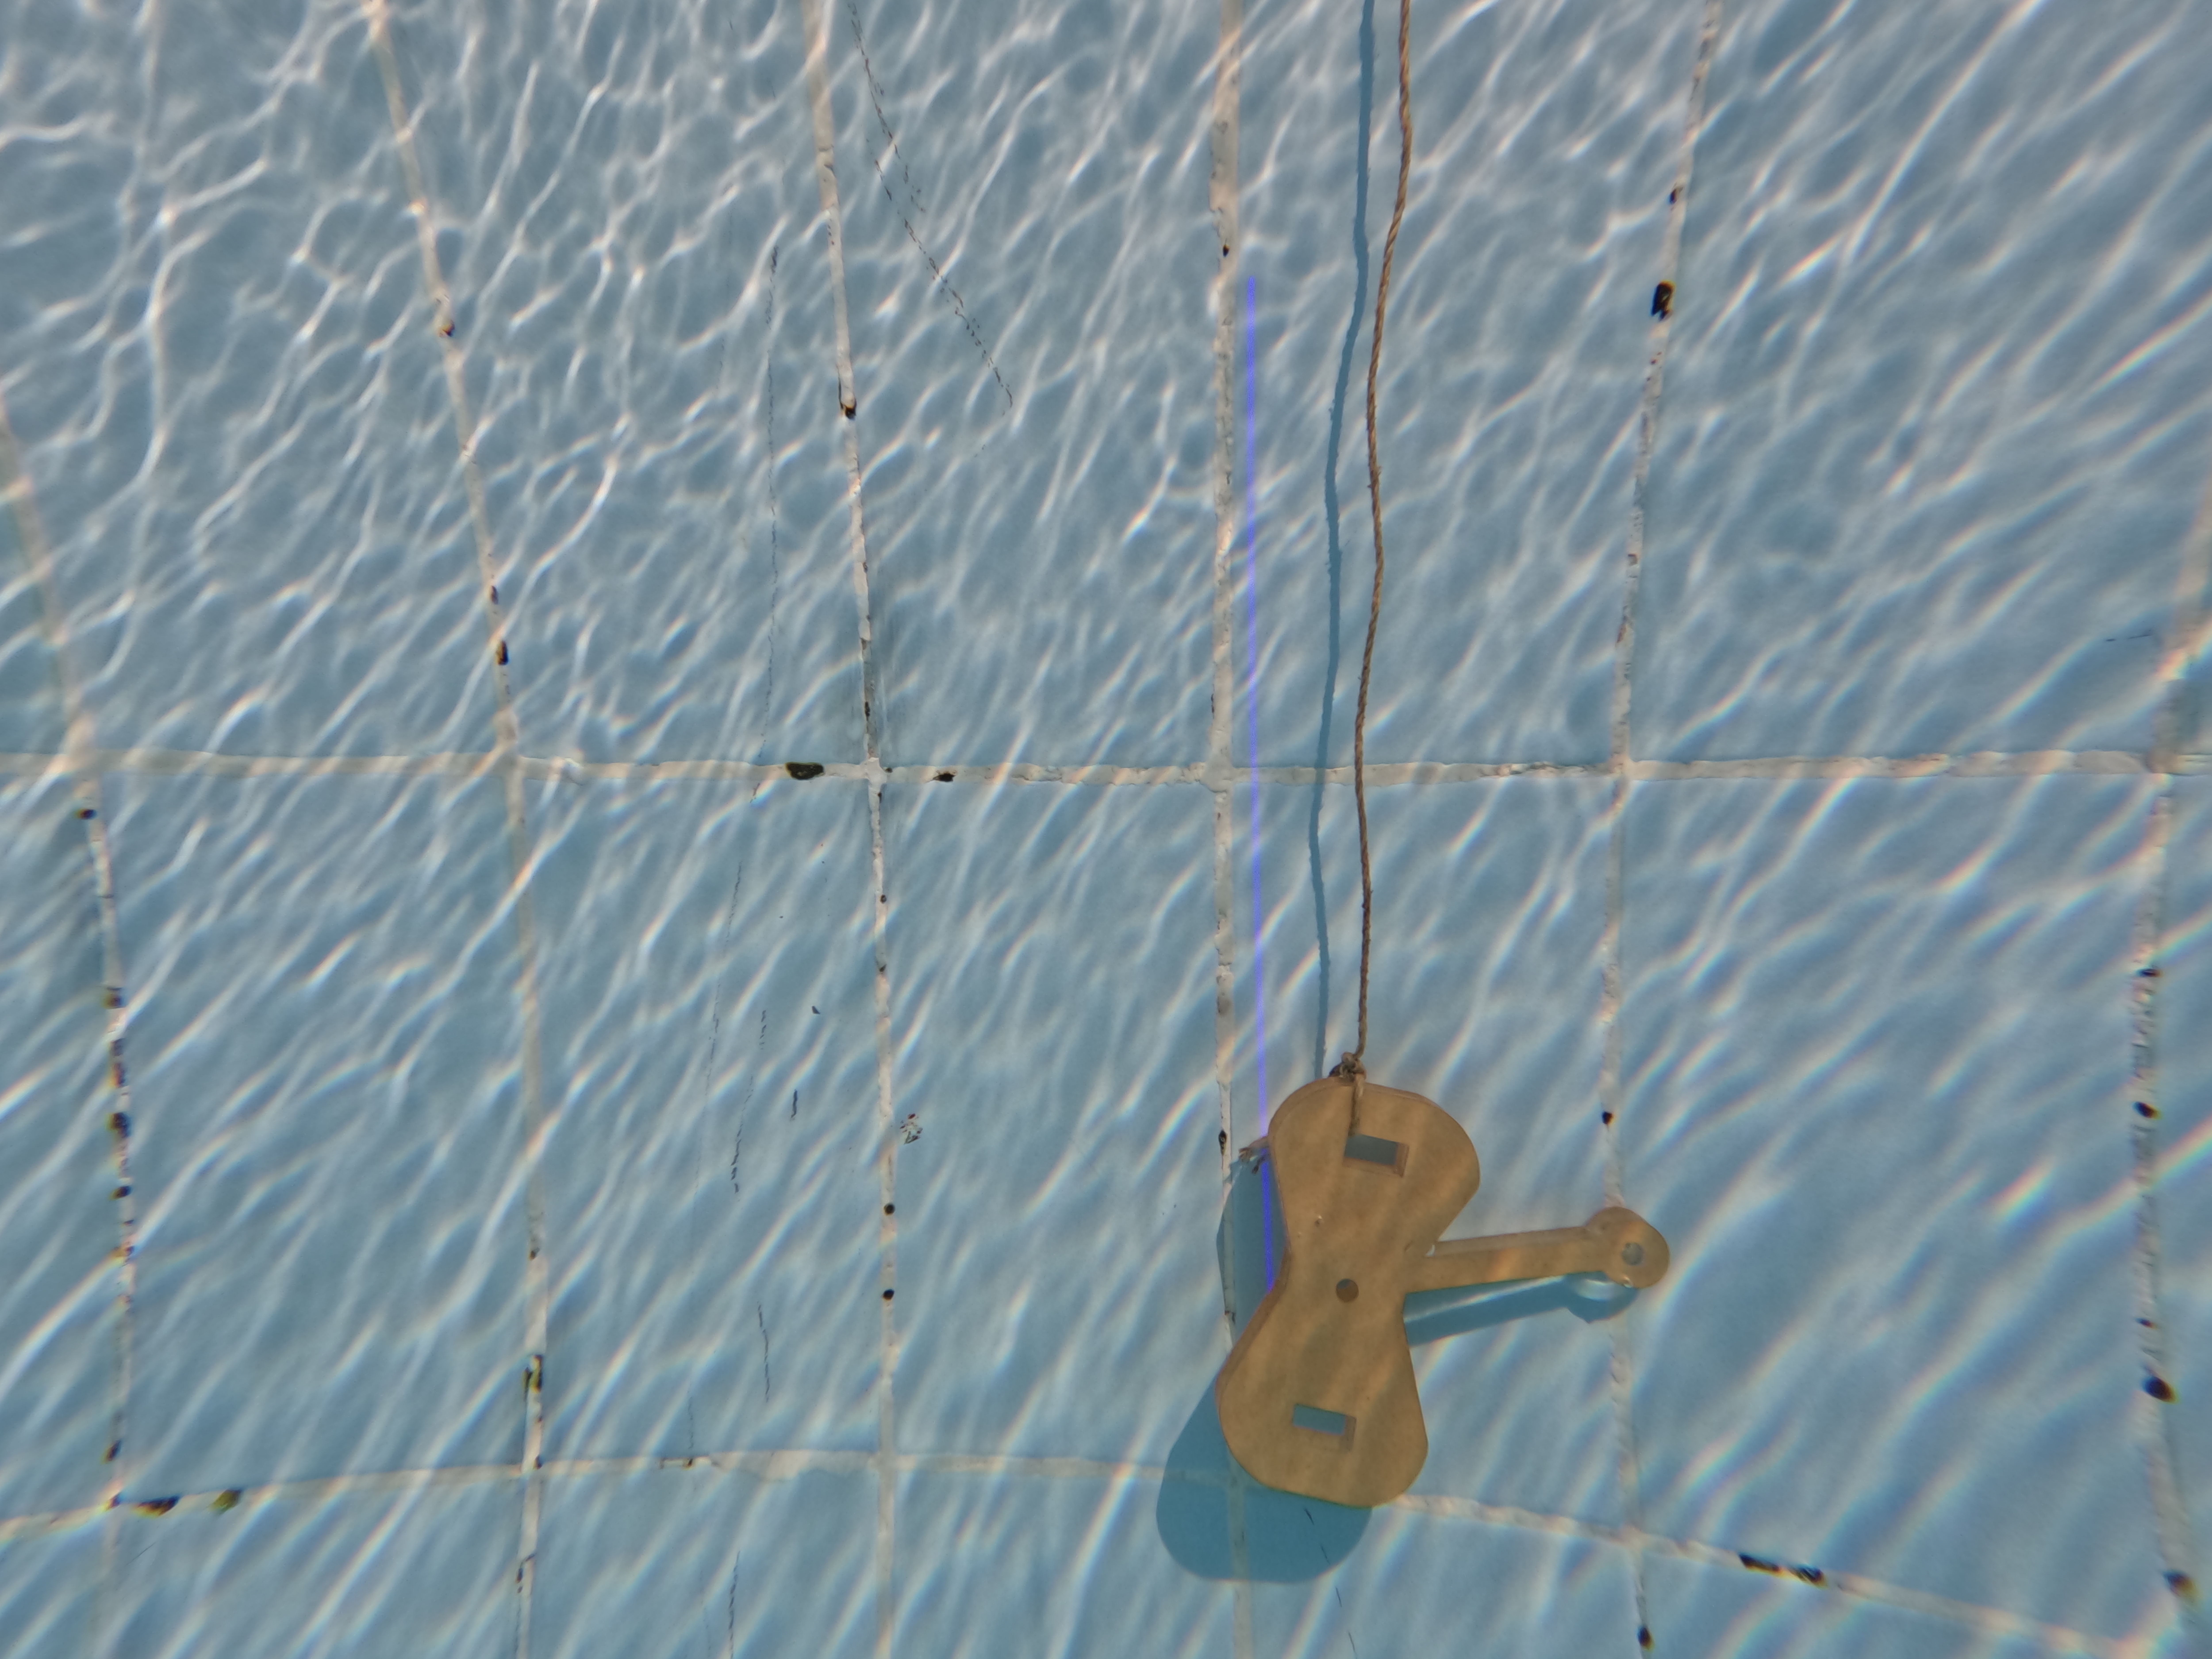

Supplement: Supplementary file 567 [file G0018912.pdf › Level_6_1/G0018912.pdf]

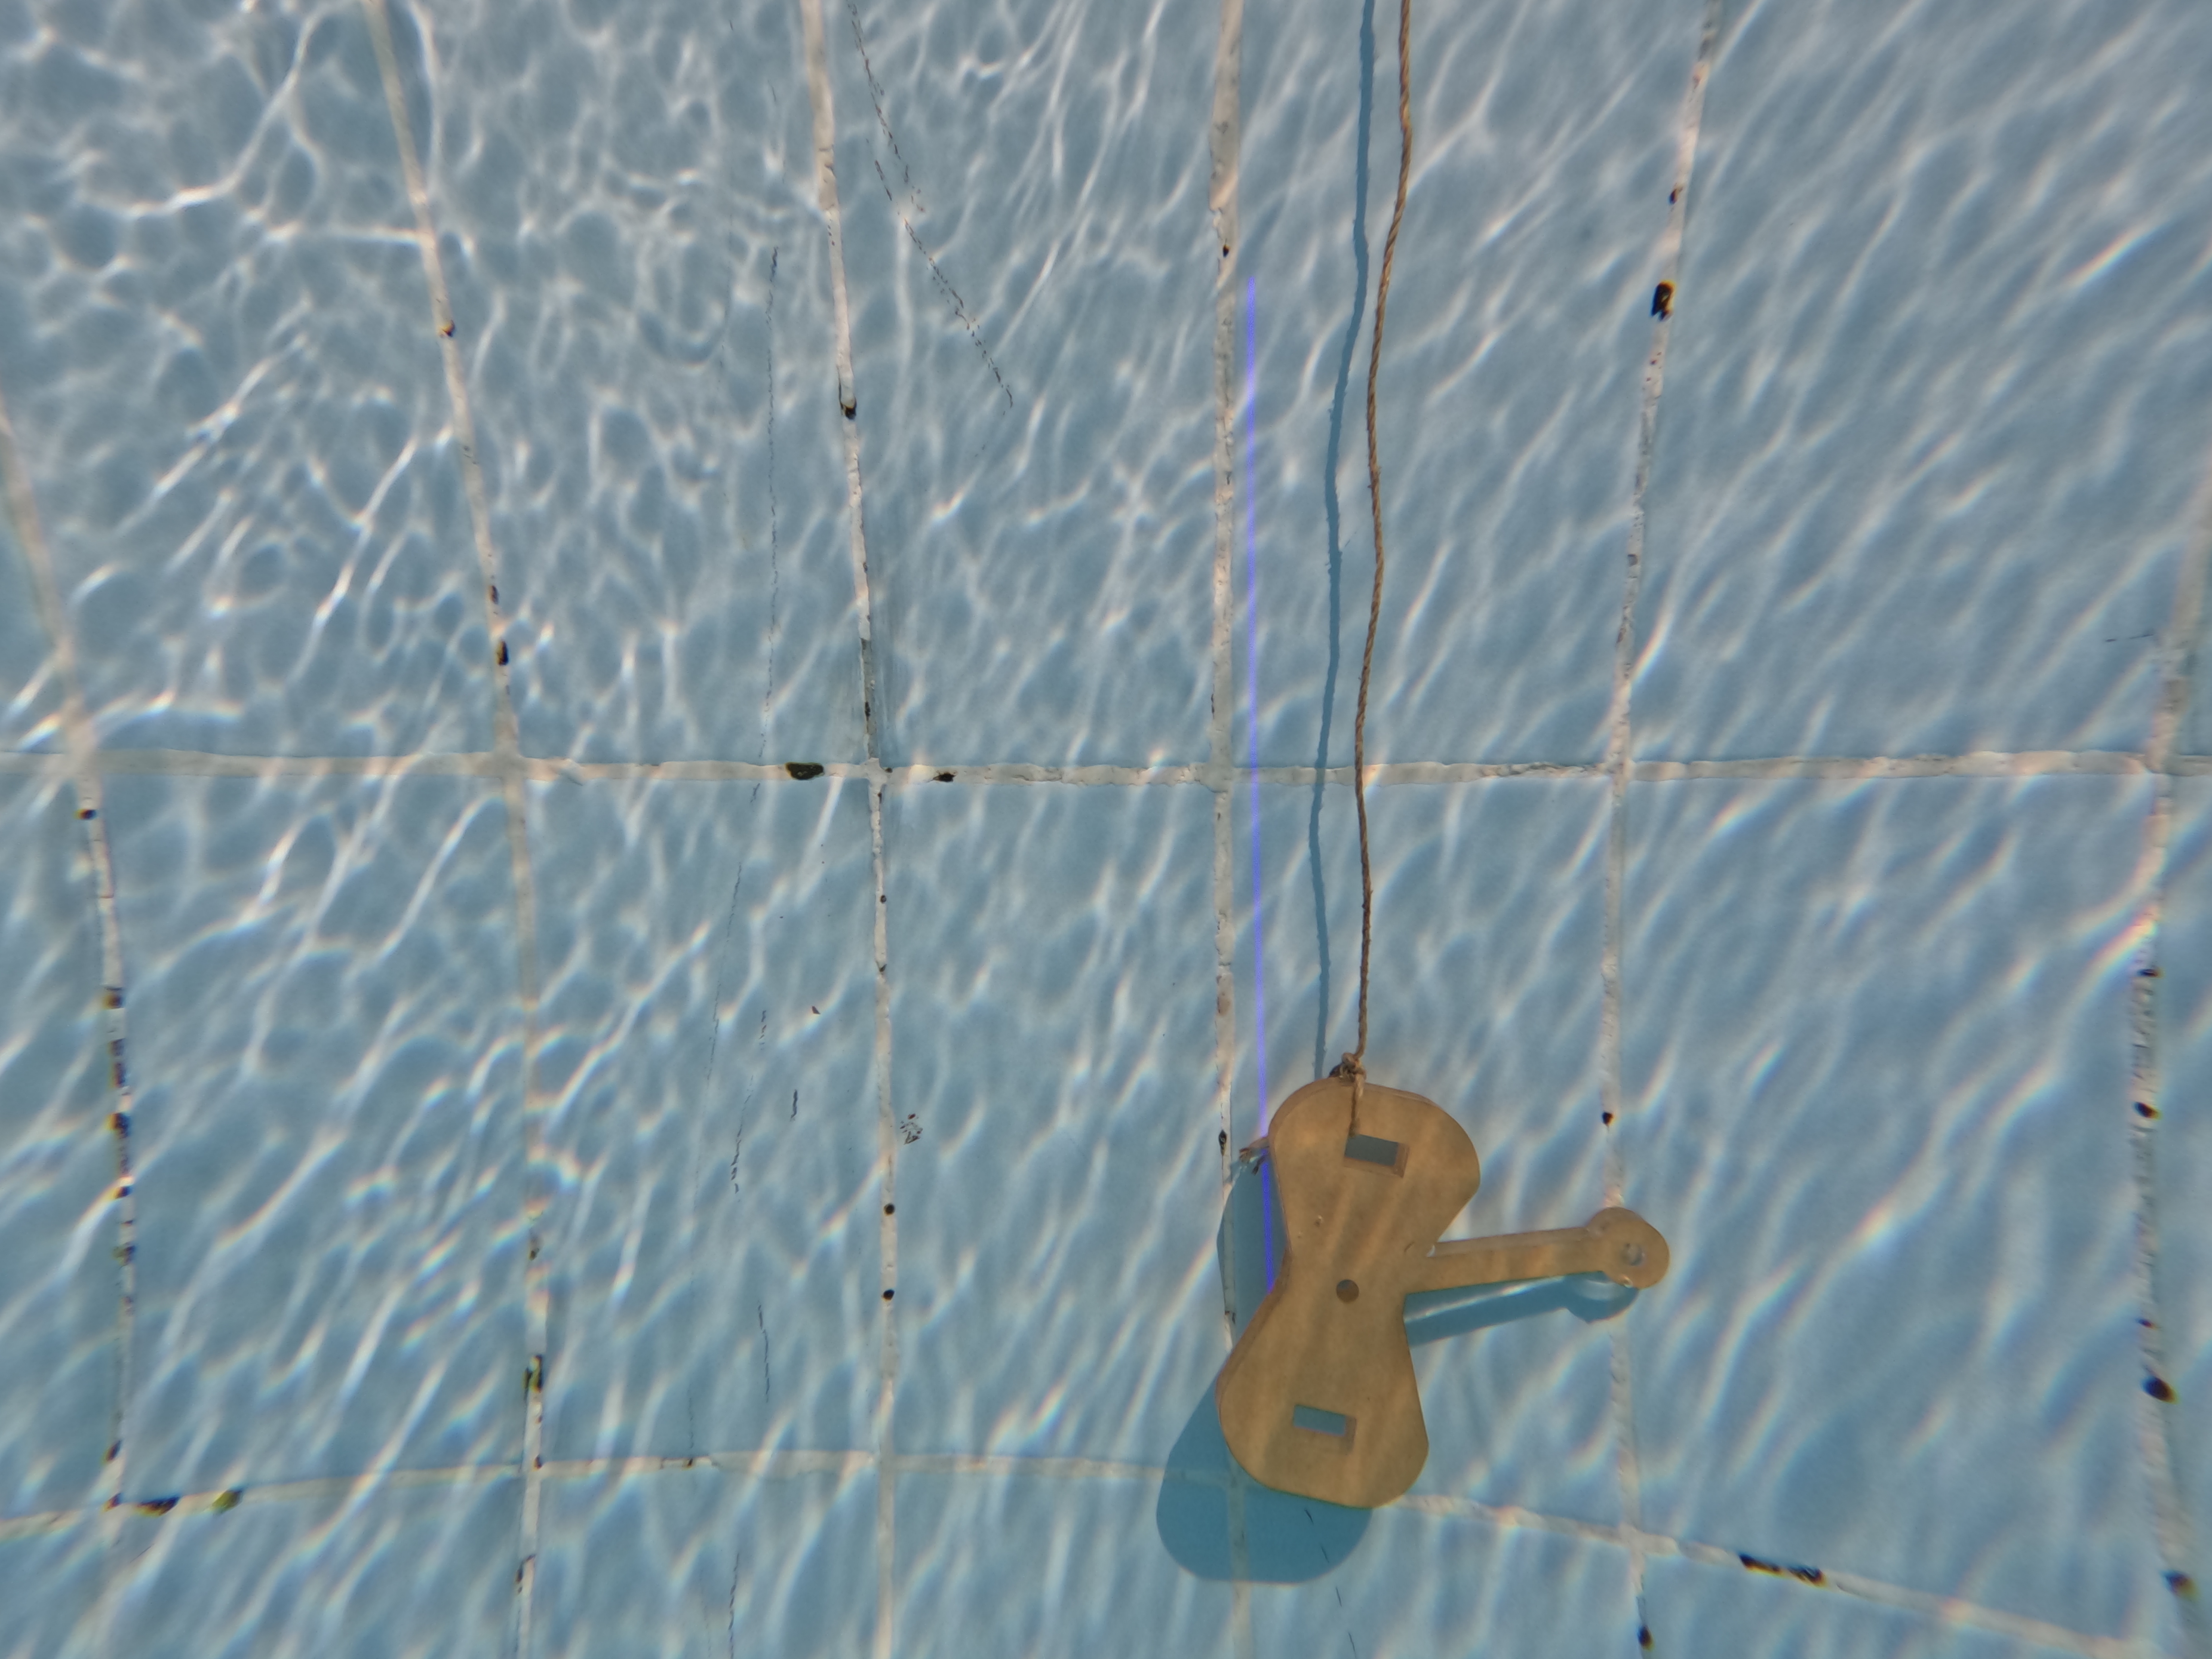

Supplement: Supplementary file 568 [file G0018913.pdf › Level_6_1/G0018913.pdf]

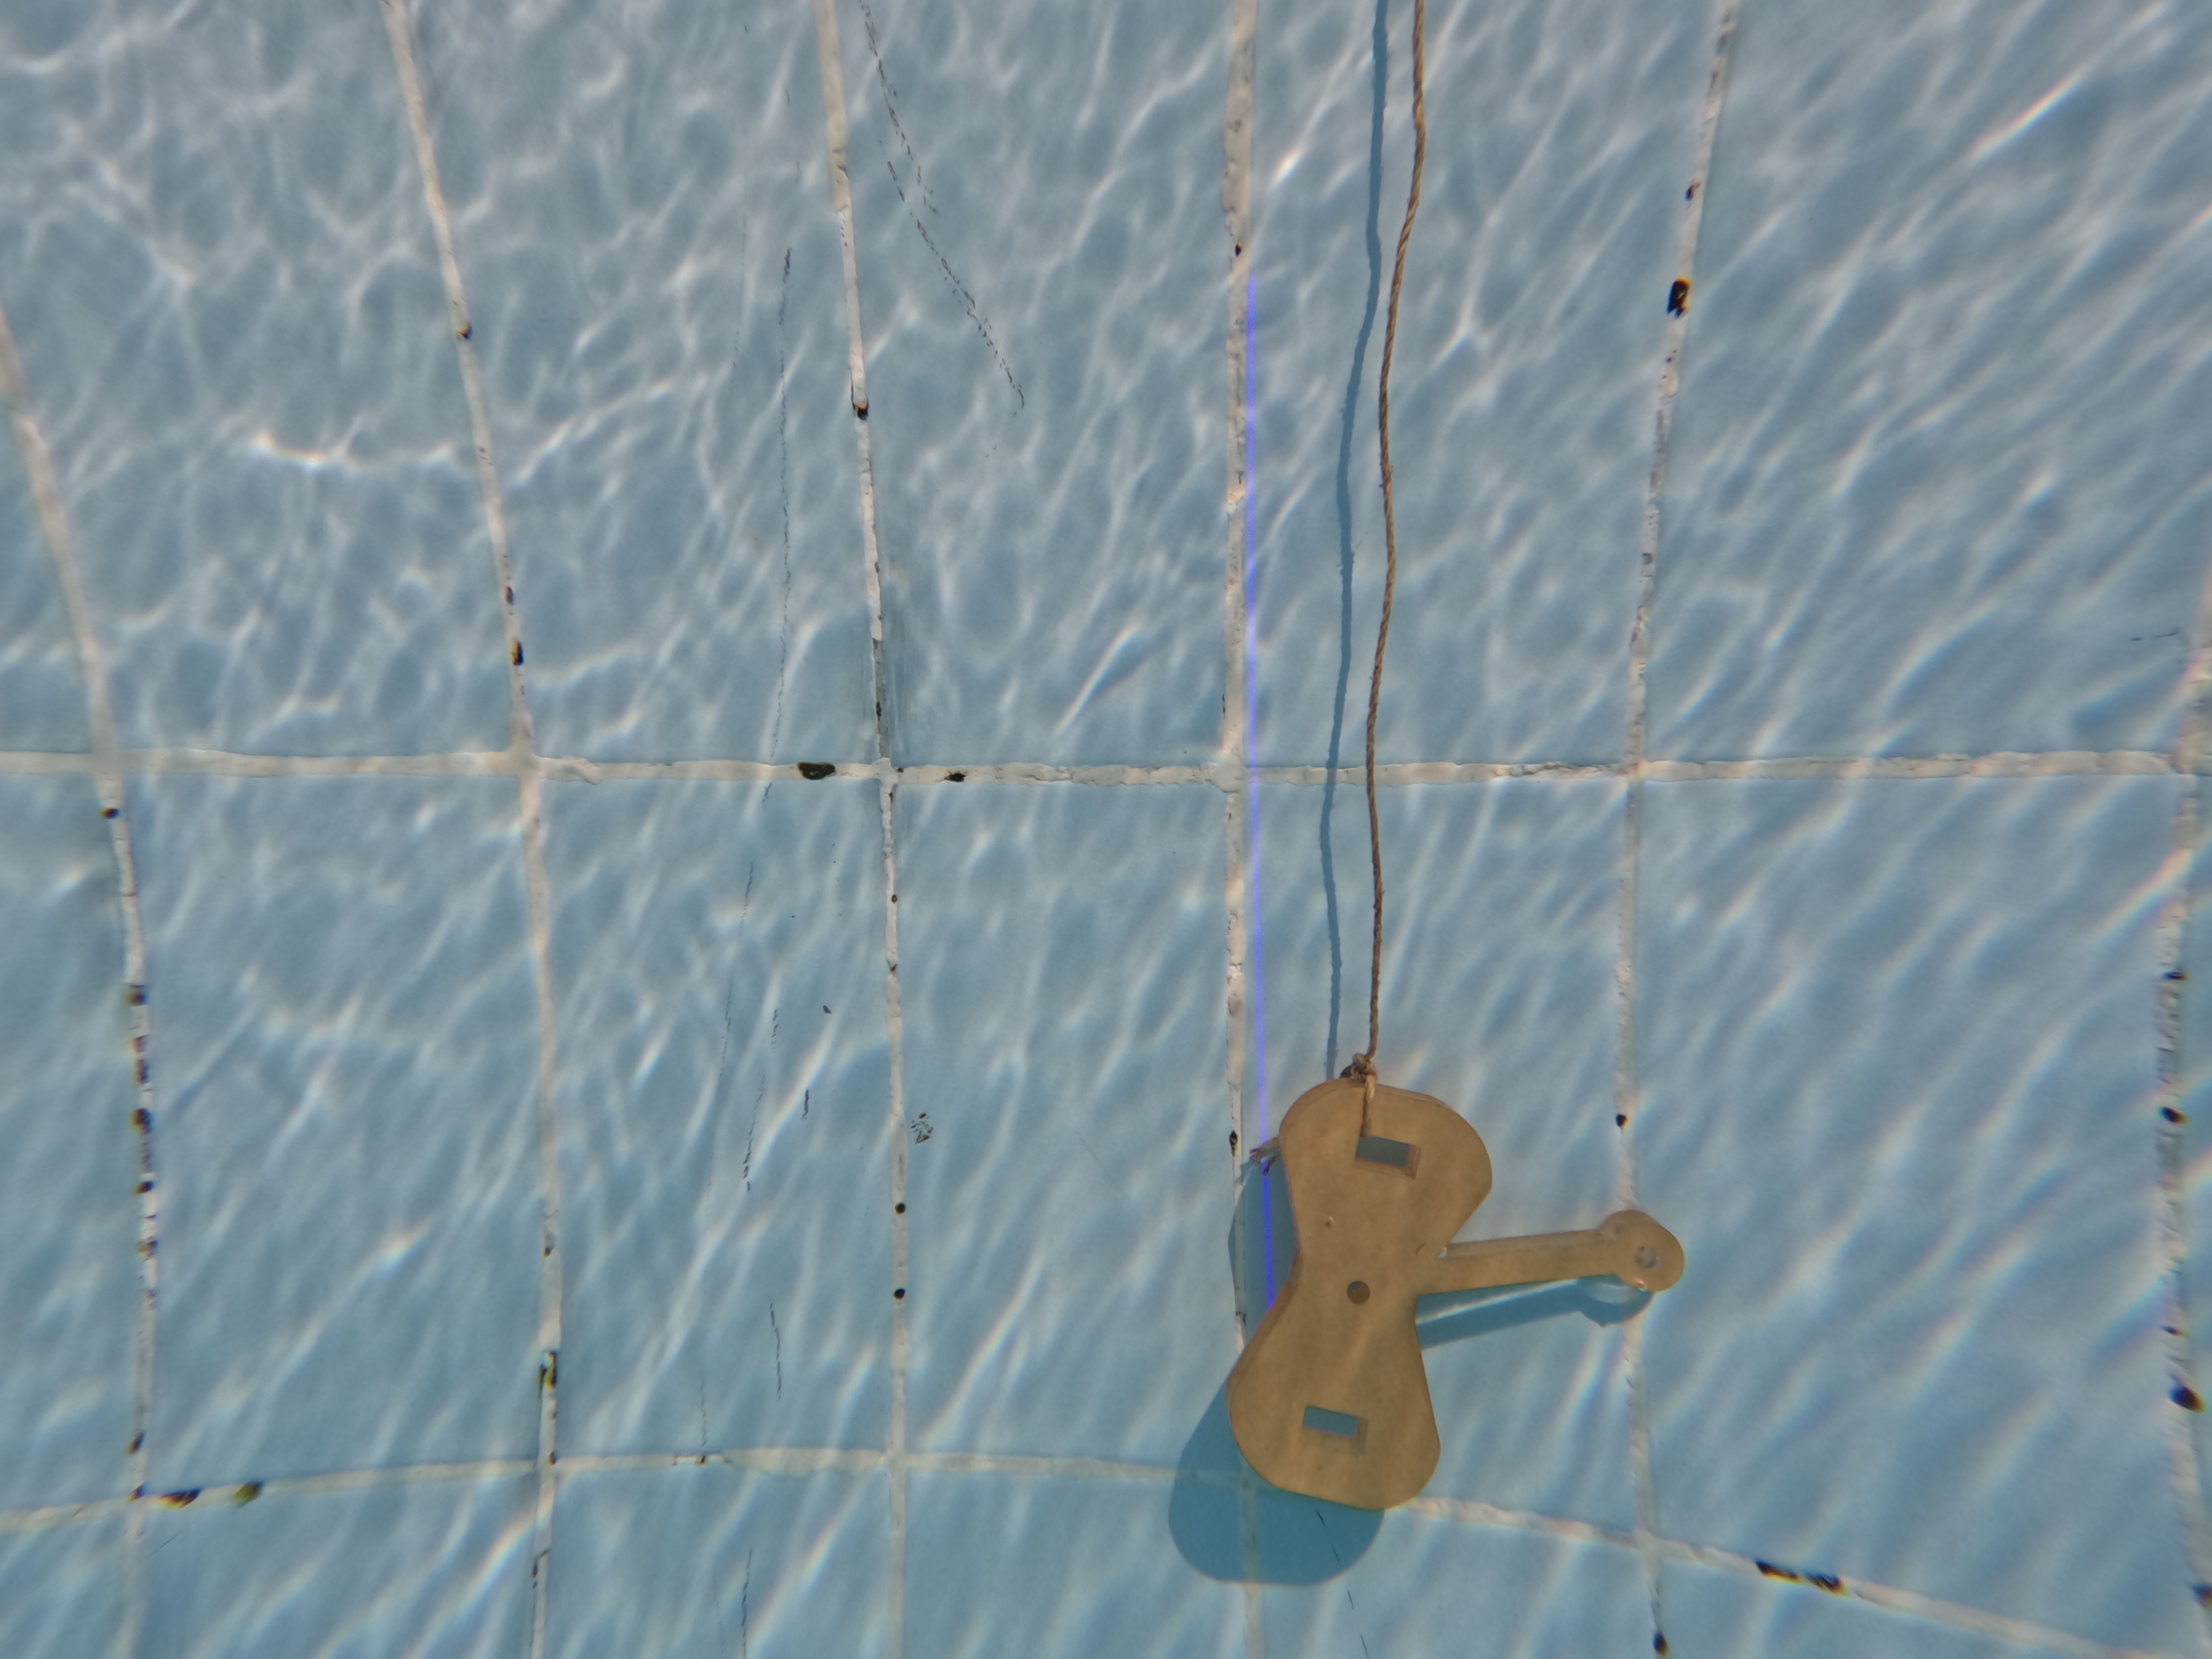

Supplement: Supplementary file 569 [file G0018914.pdf › Level_6_1/G0018914.pdf]

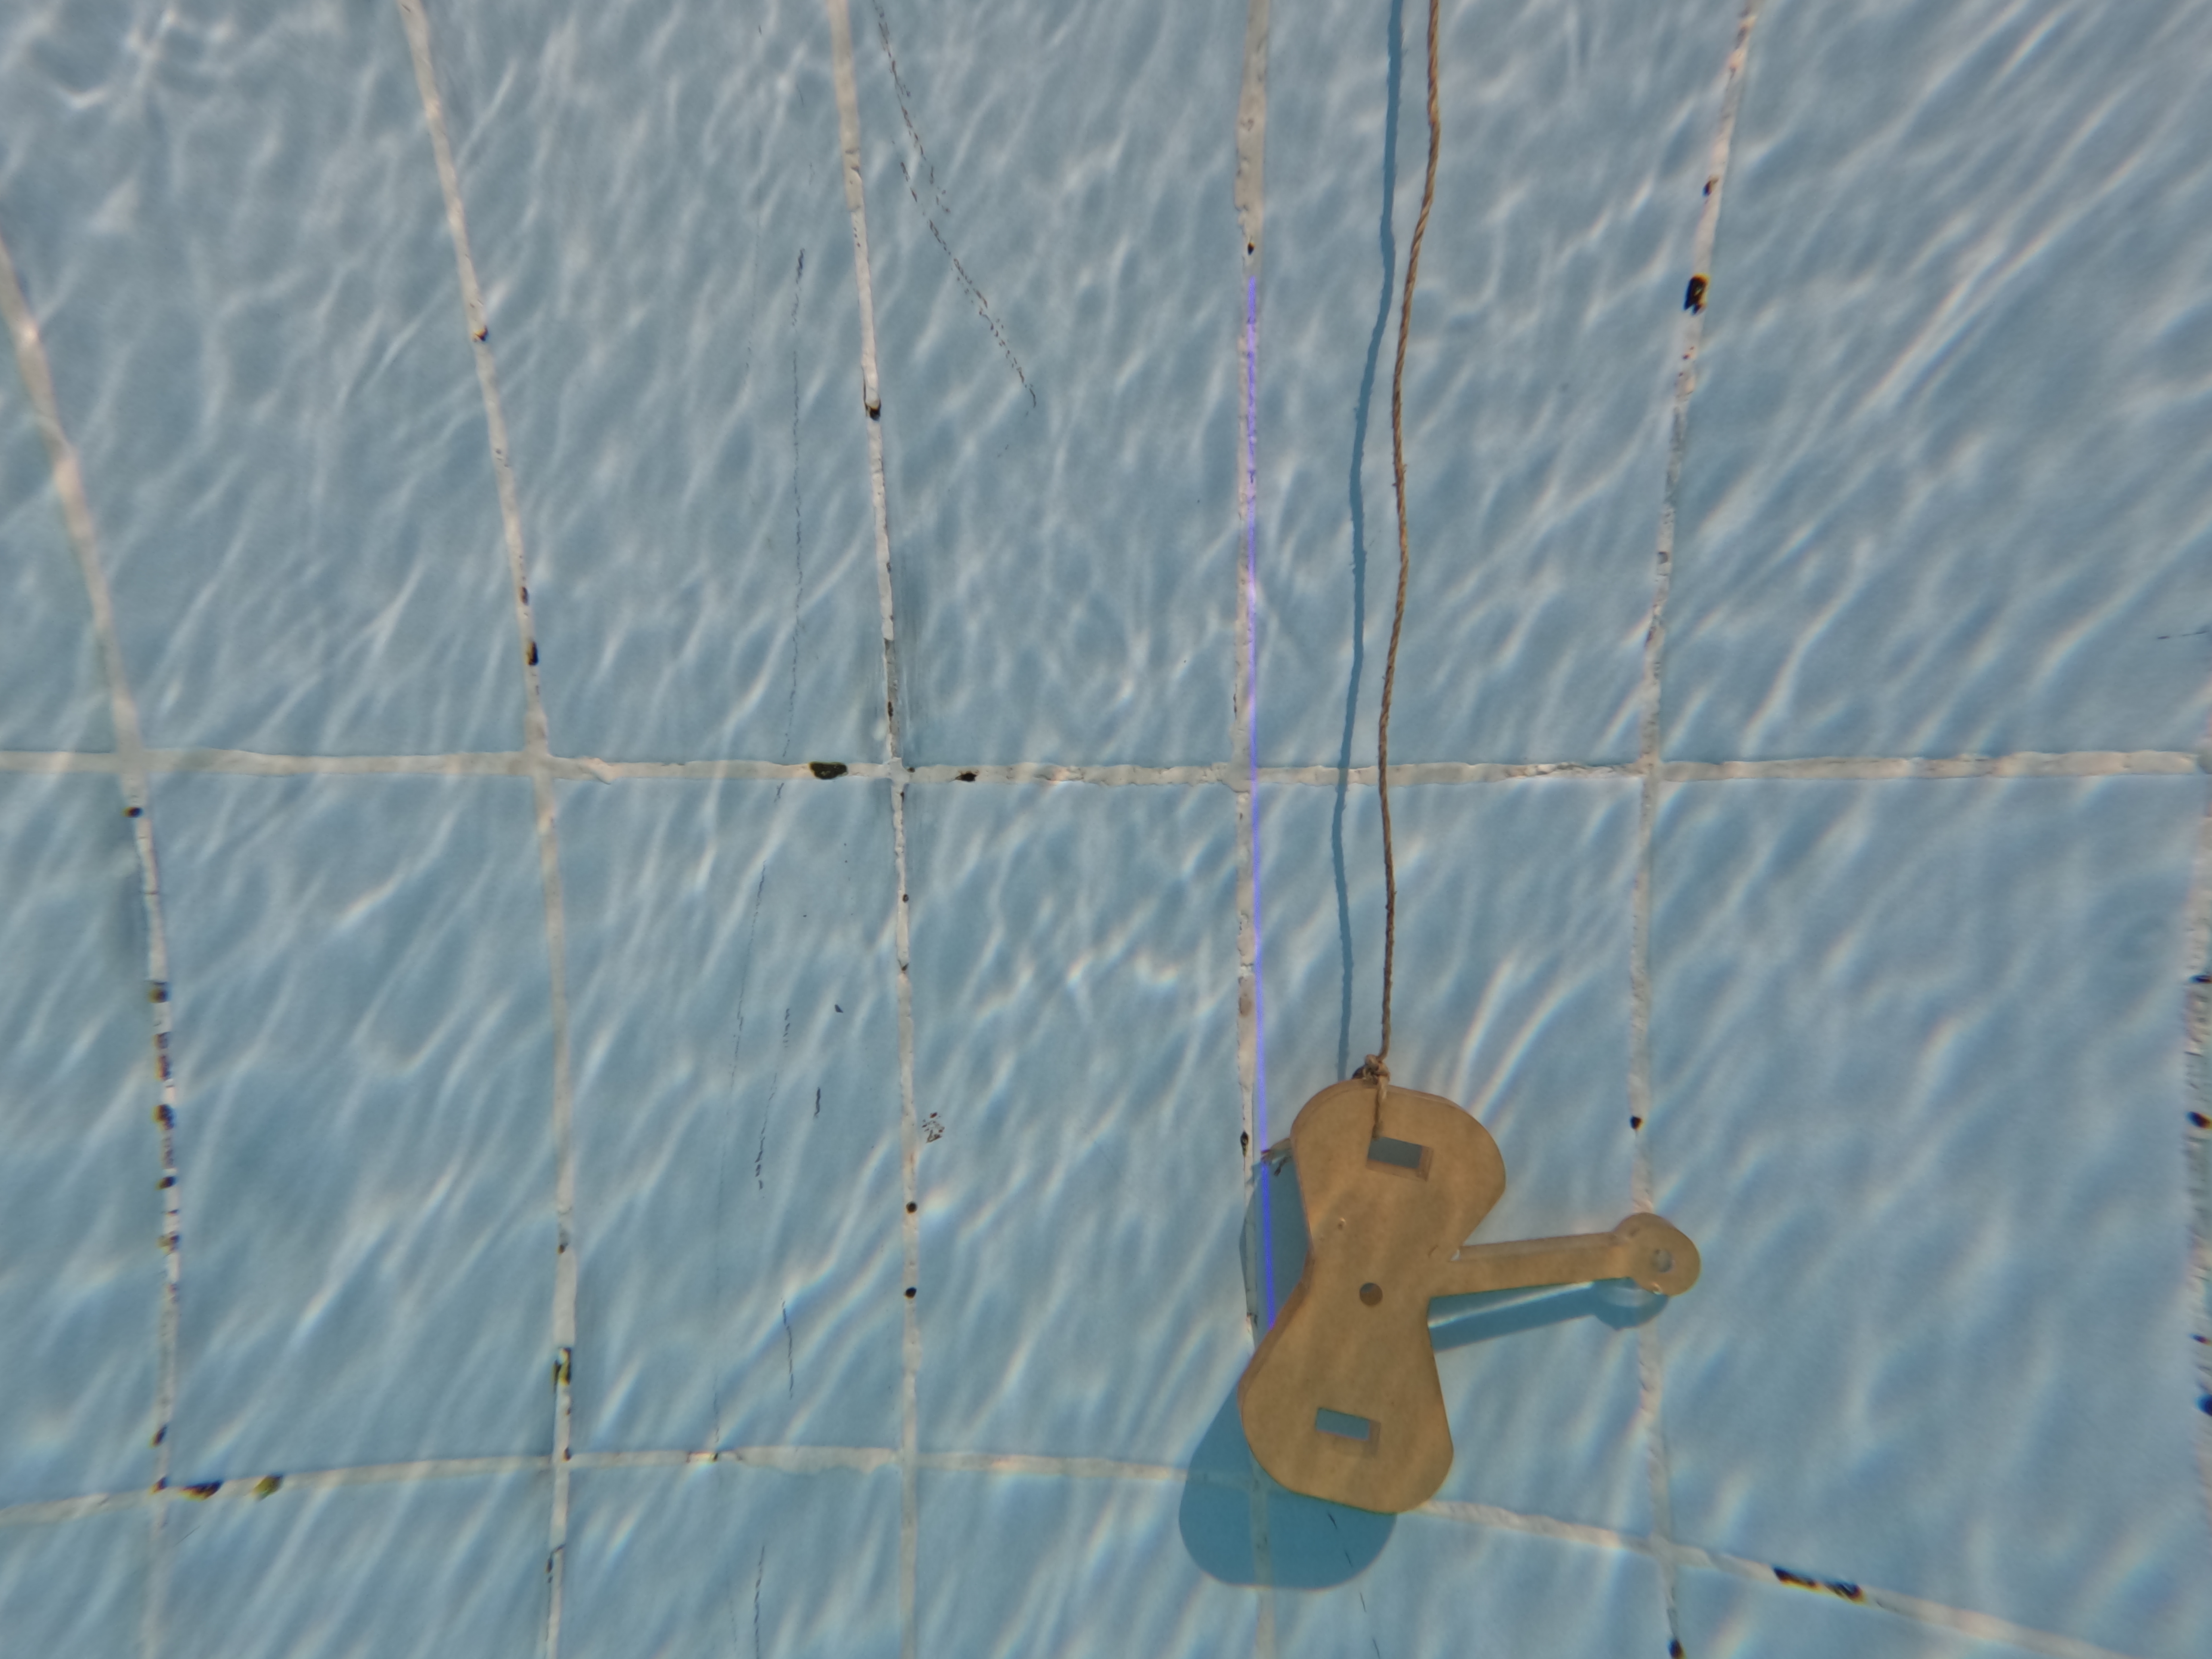

Supplement: Supplementary file 570 [file G0018915.pdf › Level_6_1/G0018915.pdf]

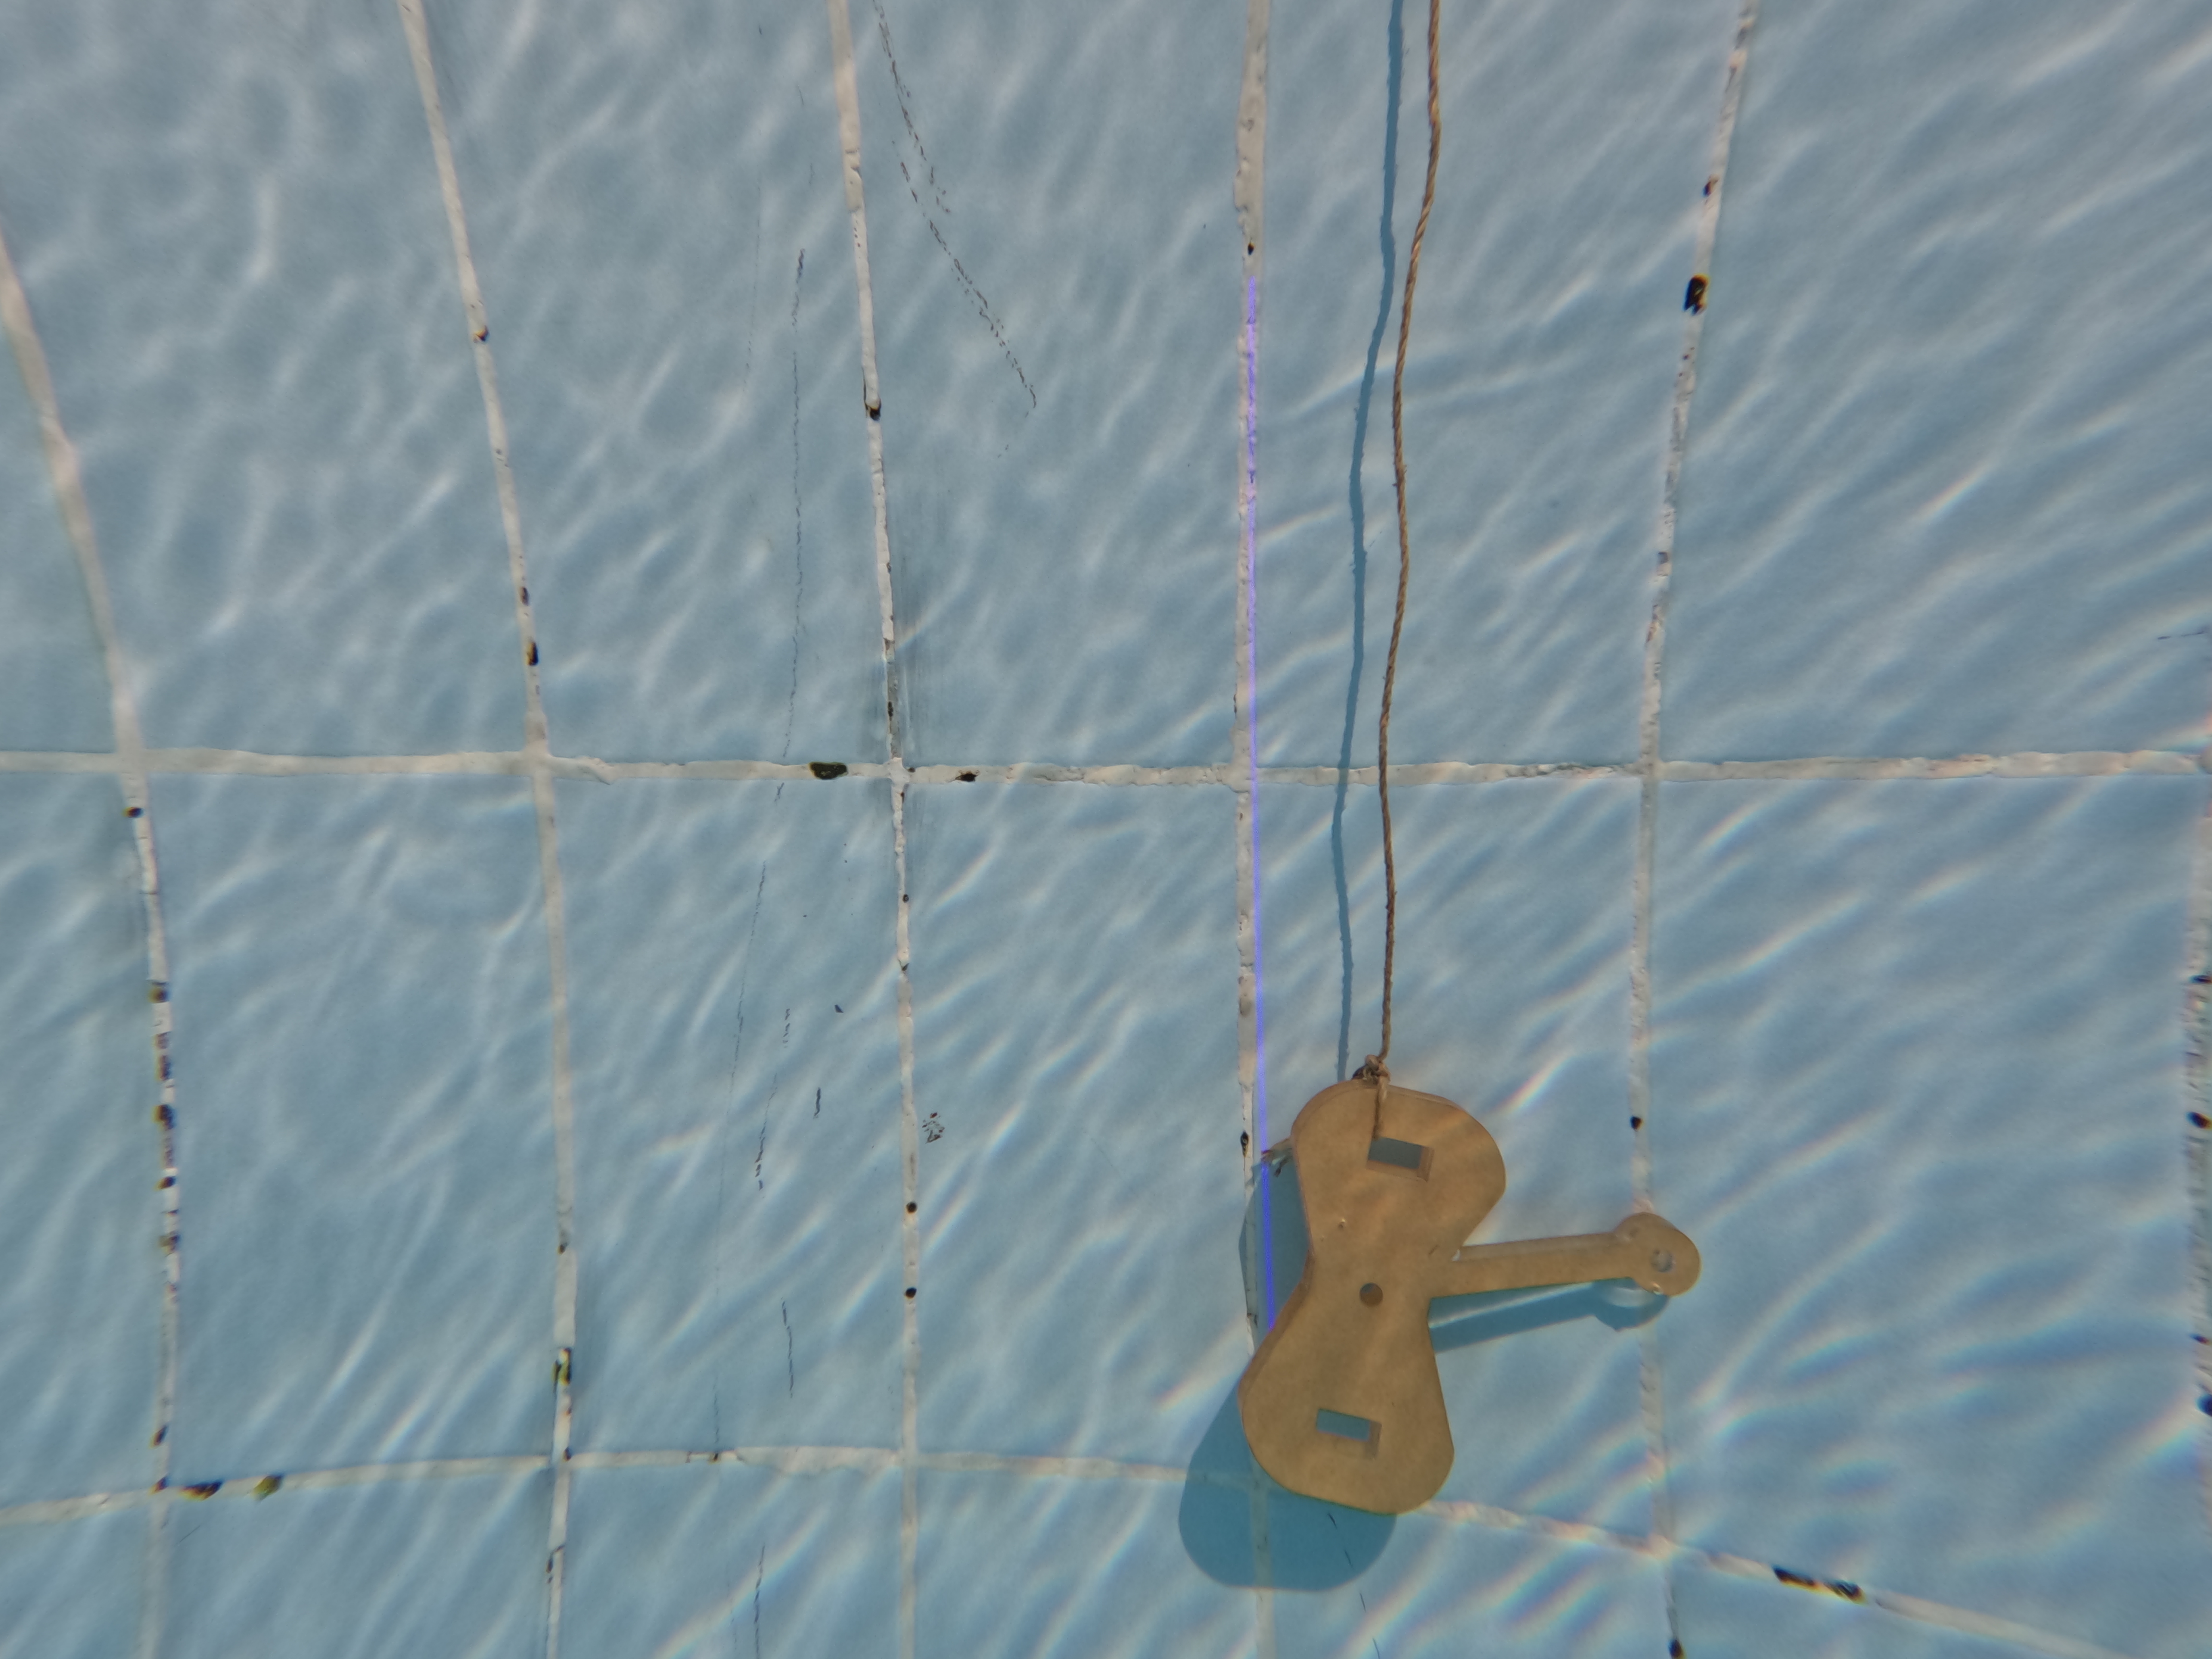

Supplement: Supplementary file 571 [file G0018916.pdf › Level_6_1/G0018916.pdf]

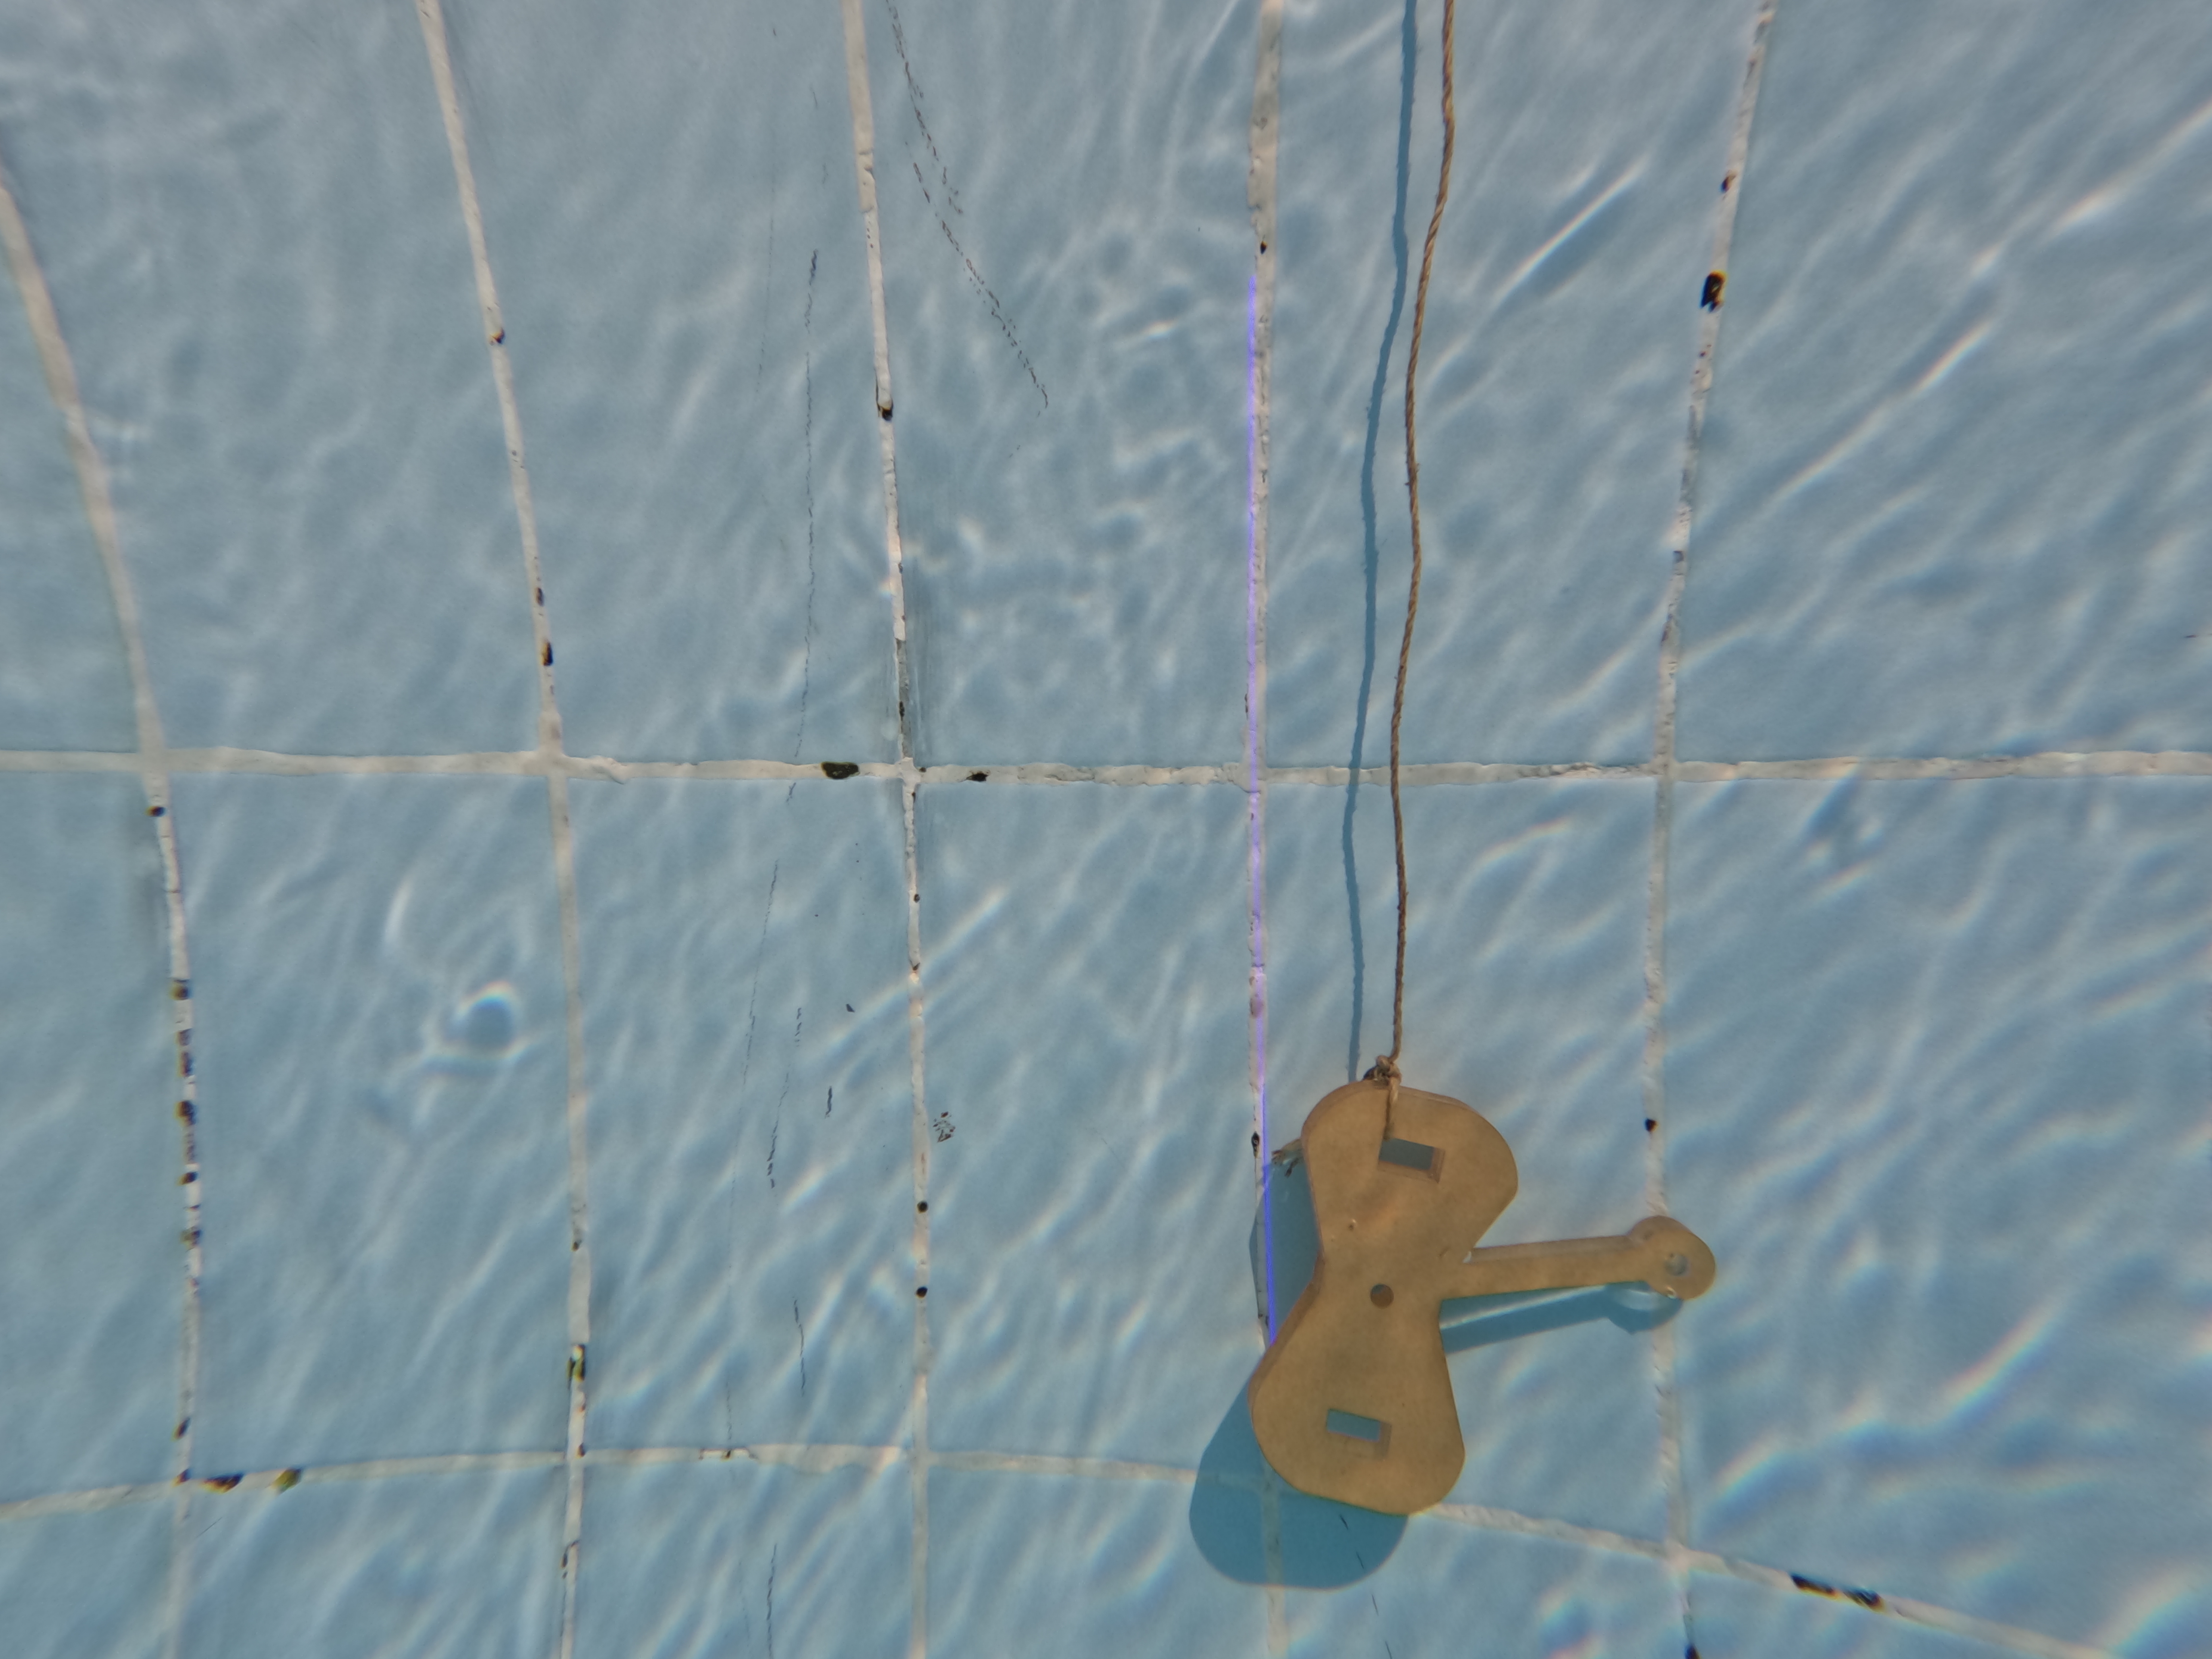

Supplement: Supplementary file 572 [file G0018917.pdf › Level_6_1/G0018917.pdf]

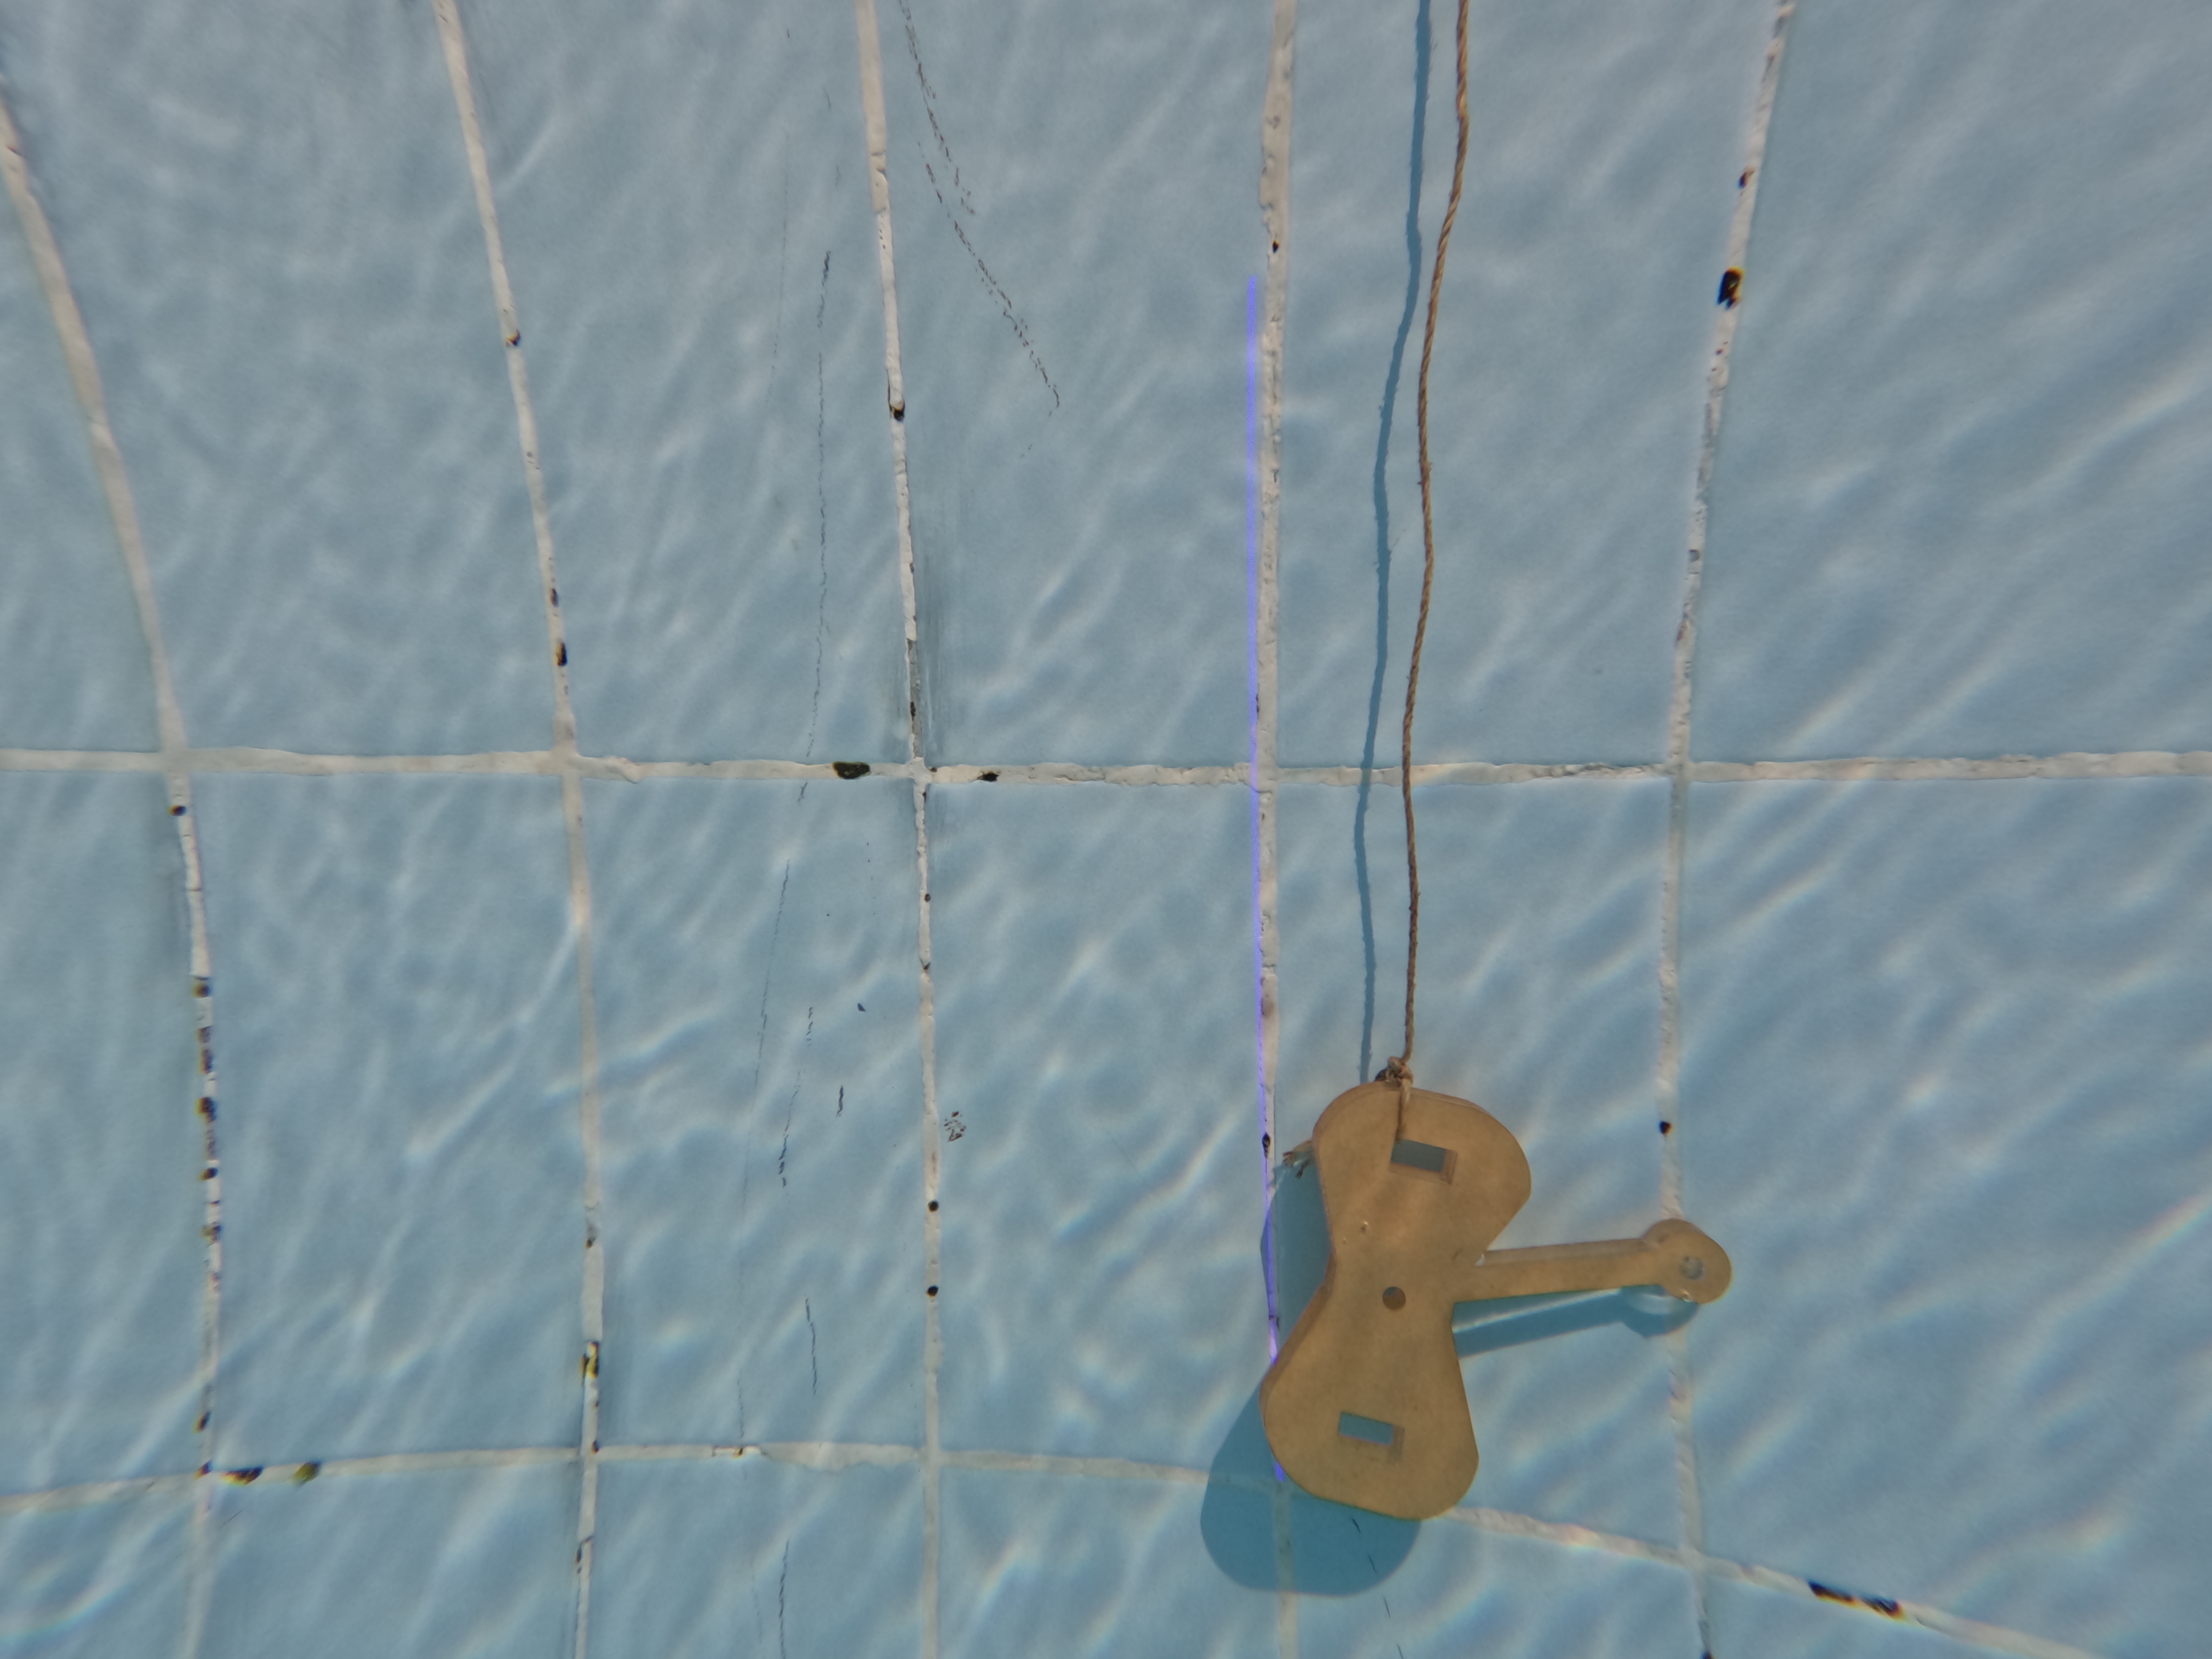

Supplement: Supplementary file 573 [file G0018918.pdf › Level_6_1/G0018918.pdf]

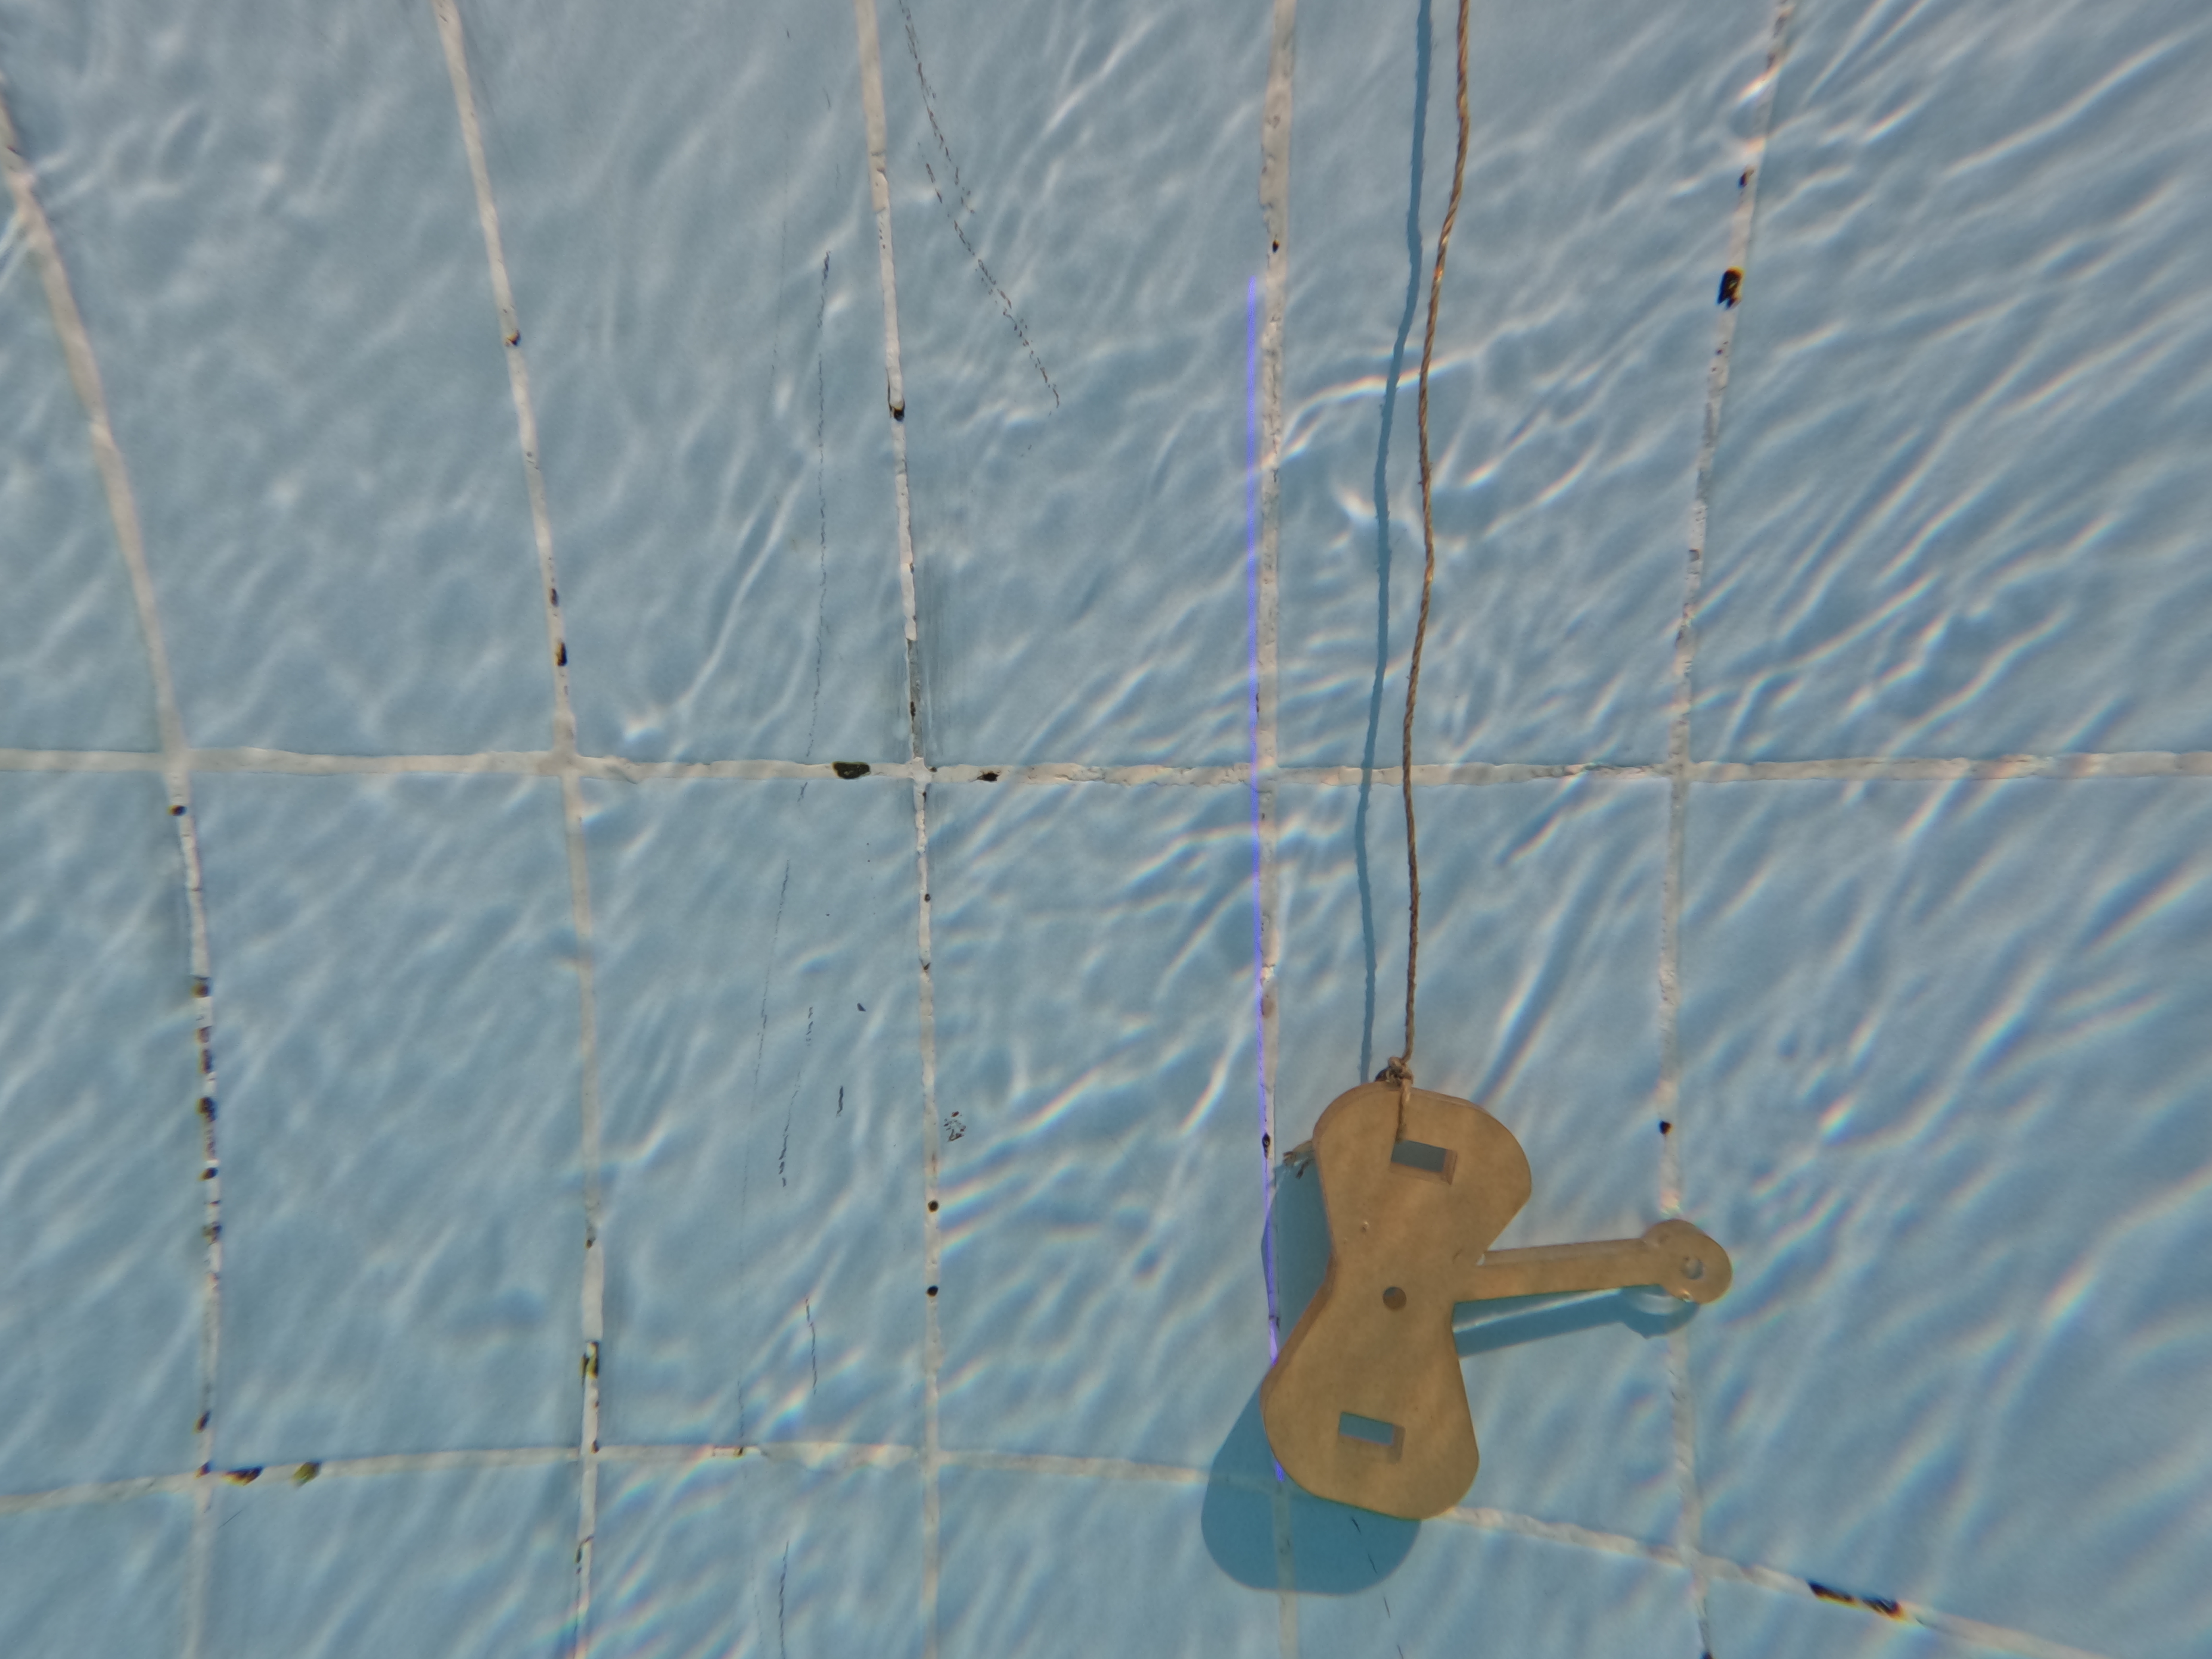

Supplement: Supplementary file 574 [file G0018919.pdf › Level_6_1/G0018919.pdf]

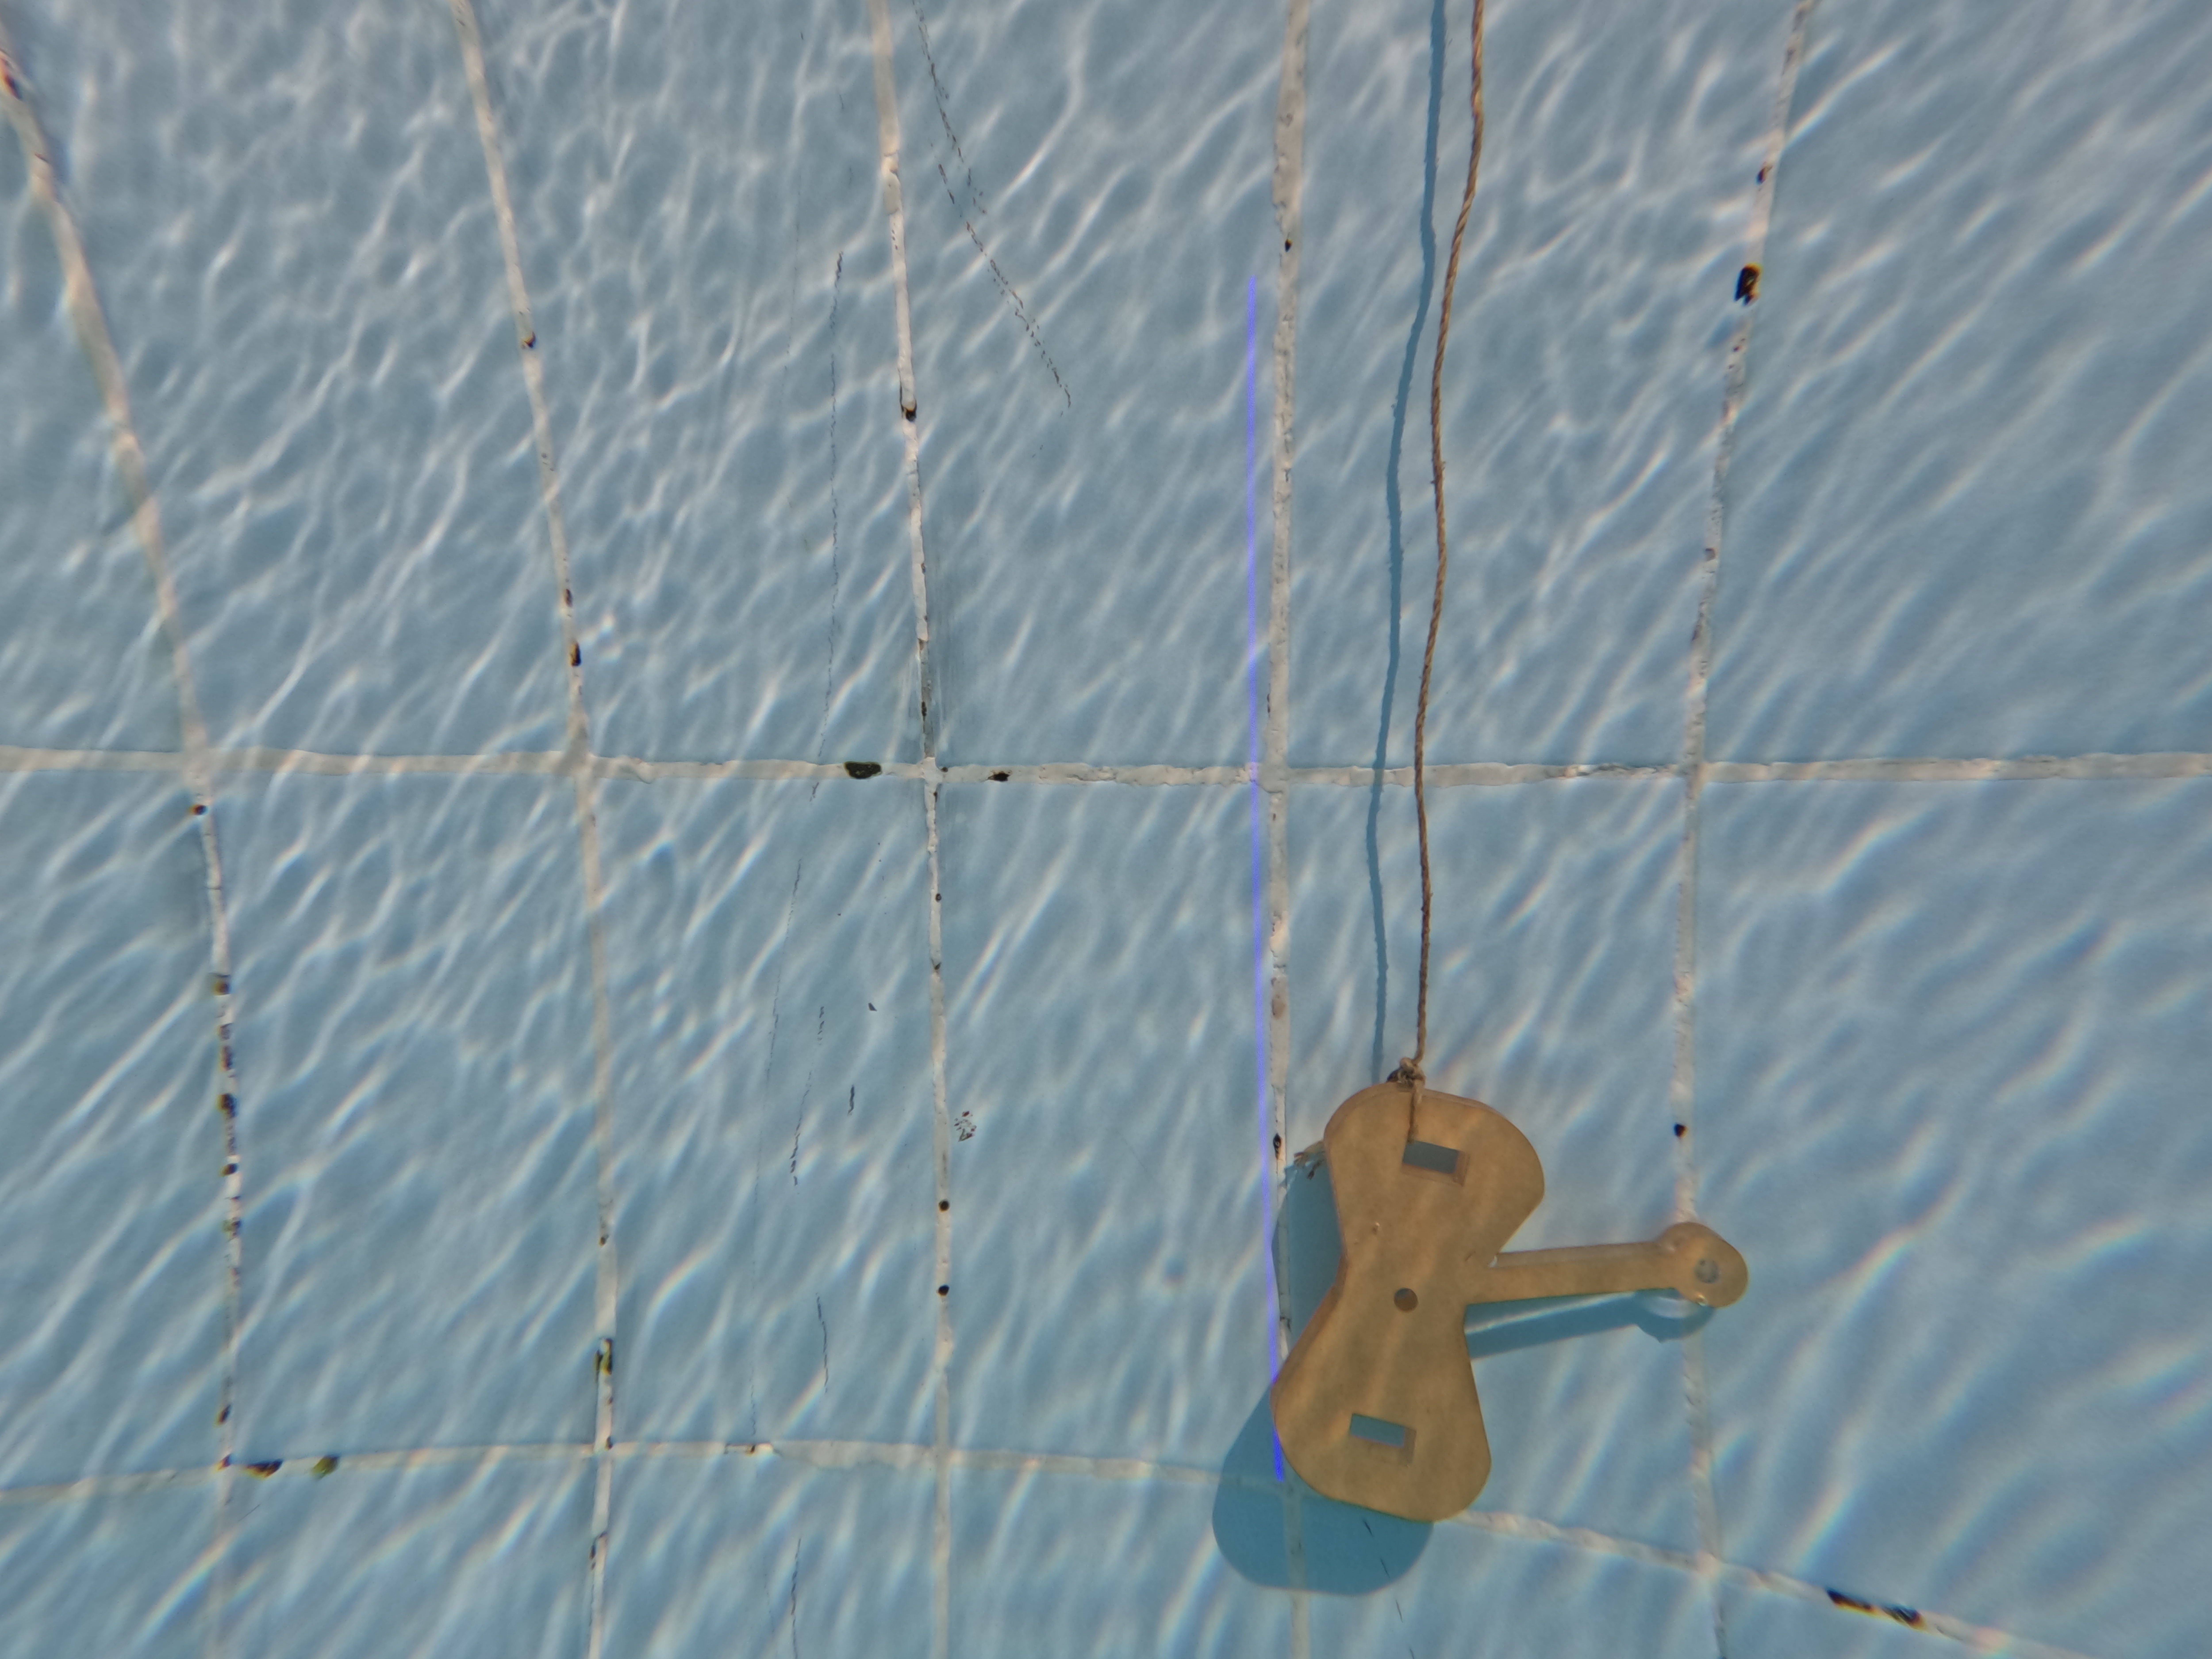

Supplement: Supplementary file 575 [file G0018920.pdf › Level_6_1/G0018920.pdf]

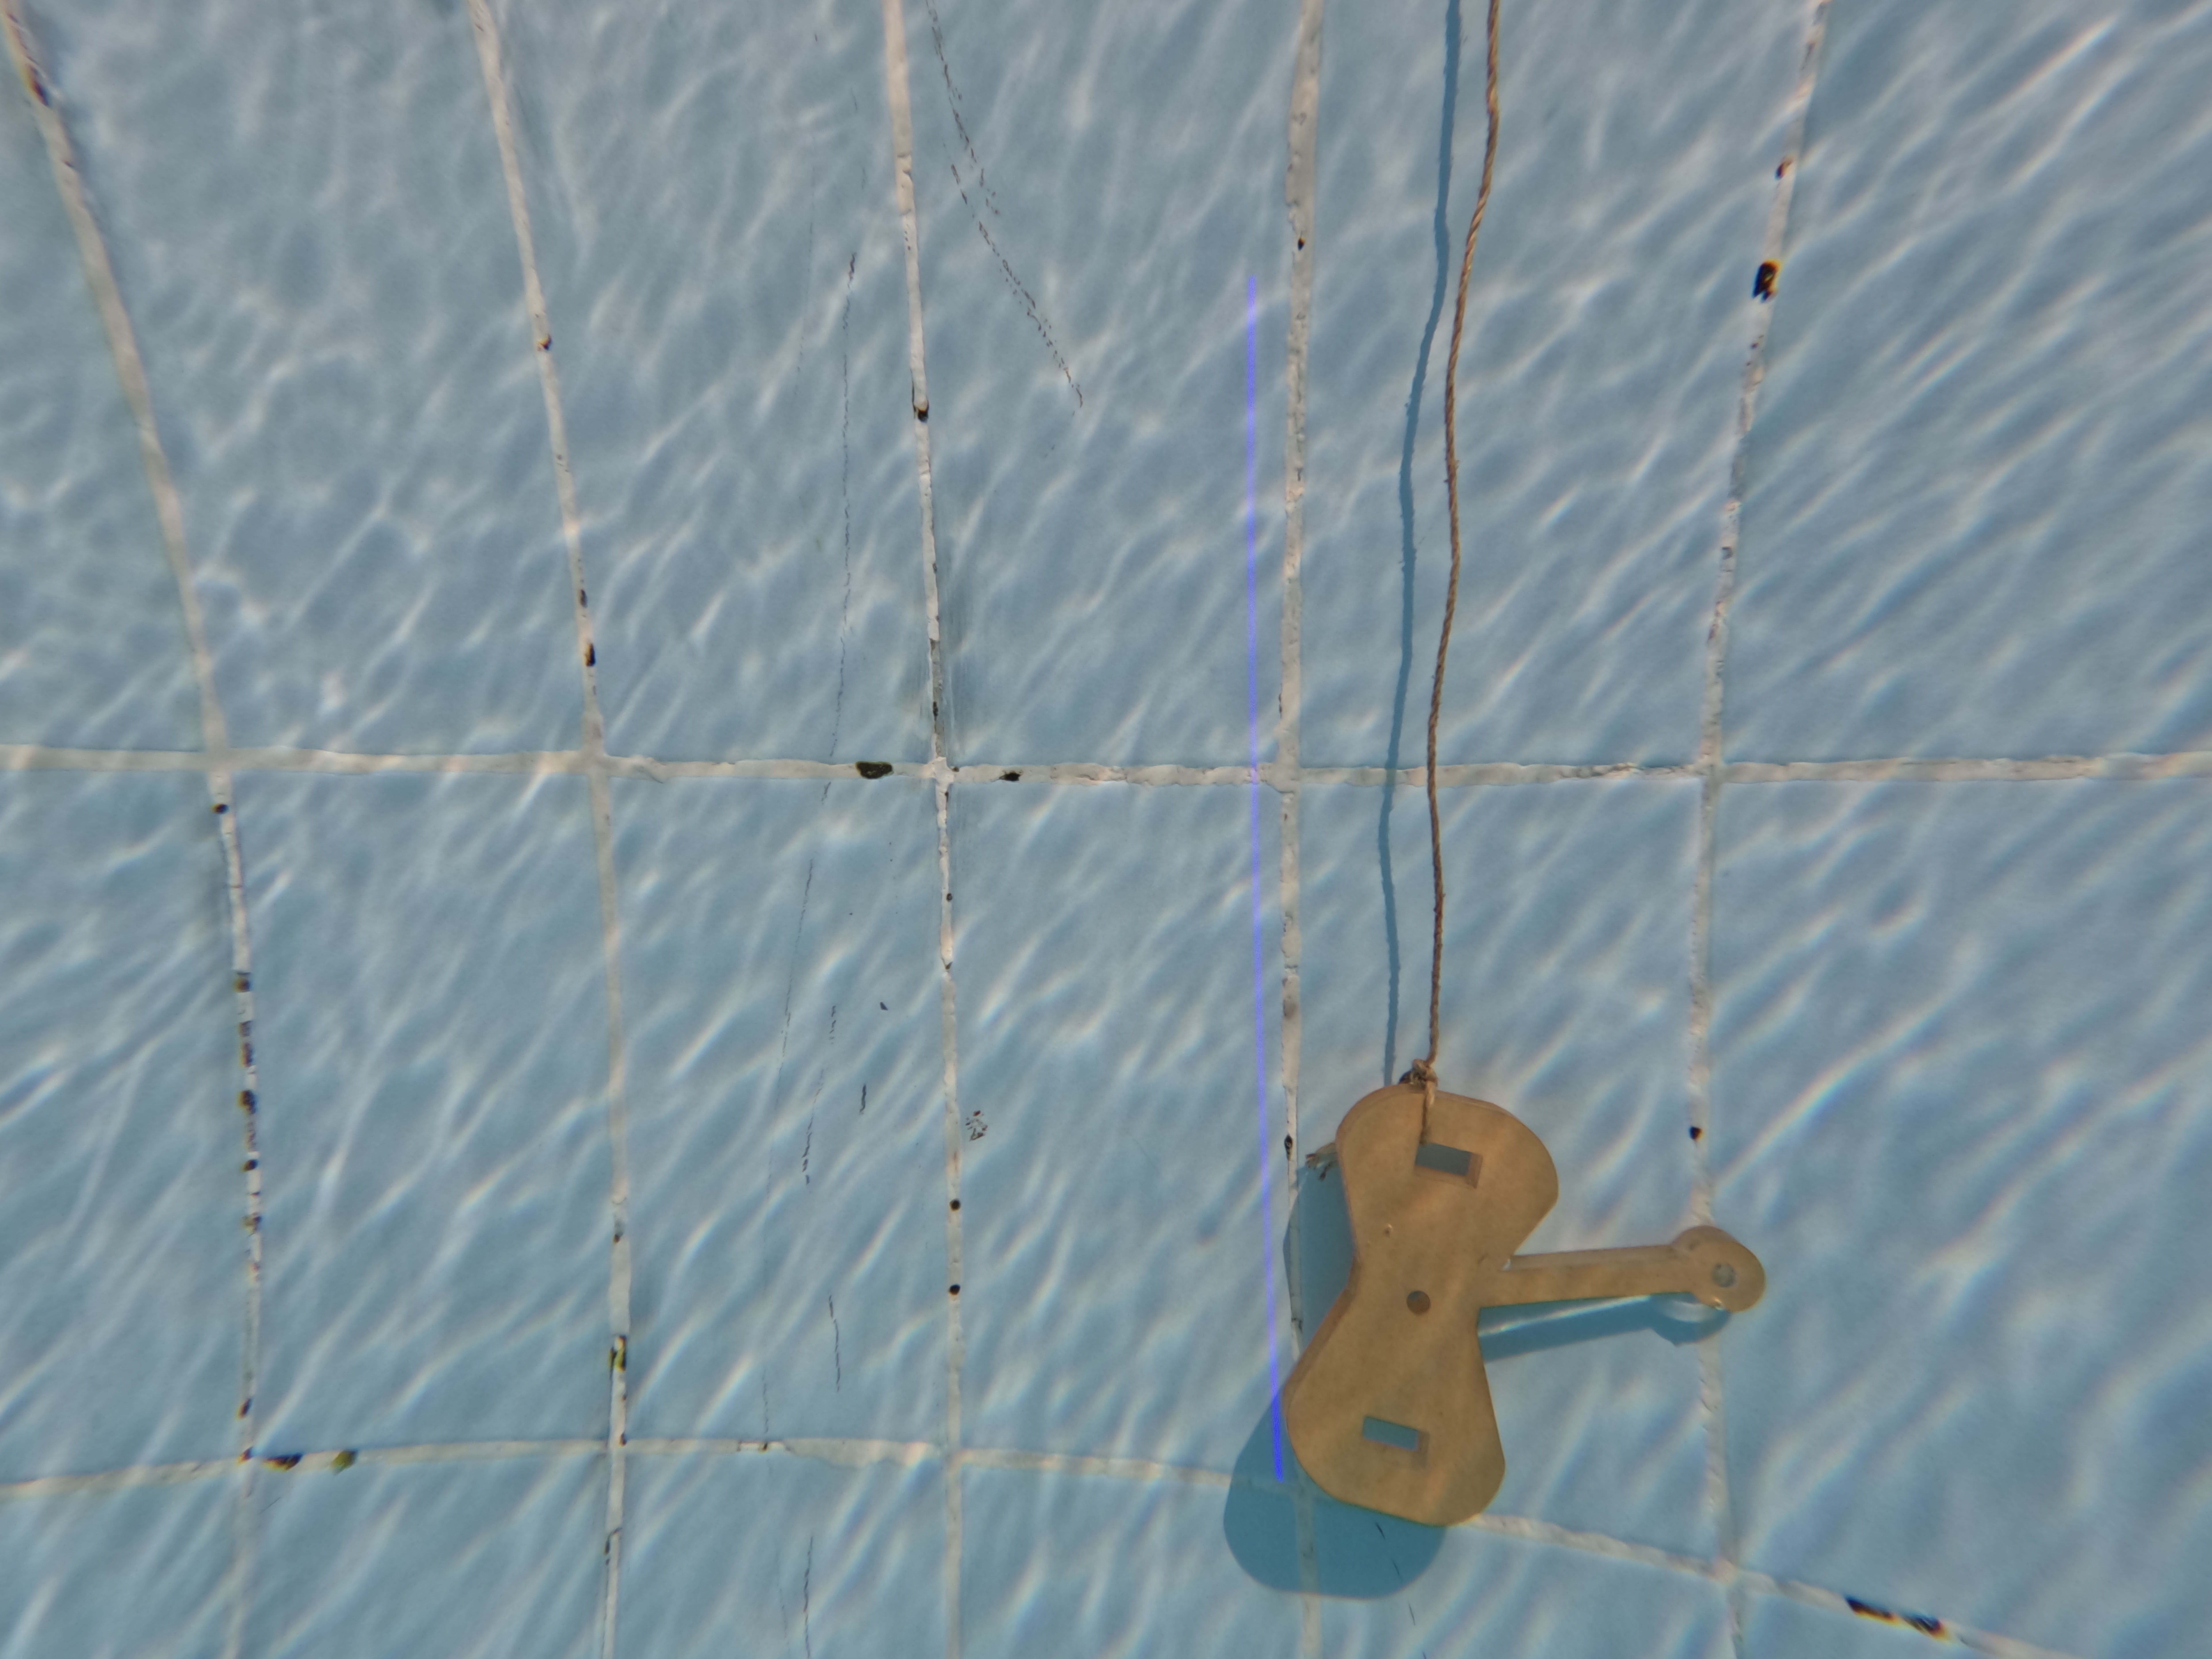

Supplement: Supplementary file 576 [file G0018921.pdf › Level_6_1/G0018921.pdf]

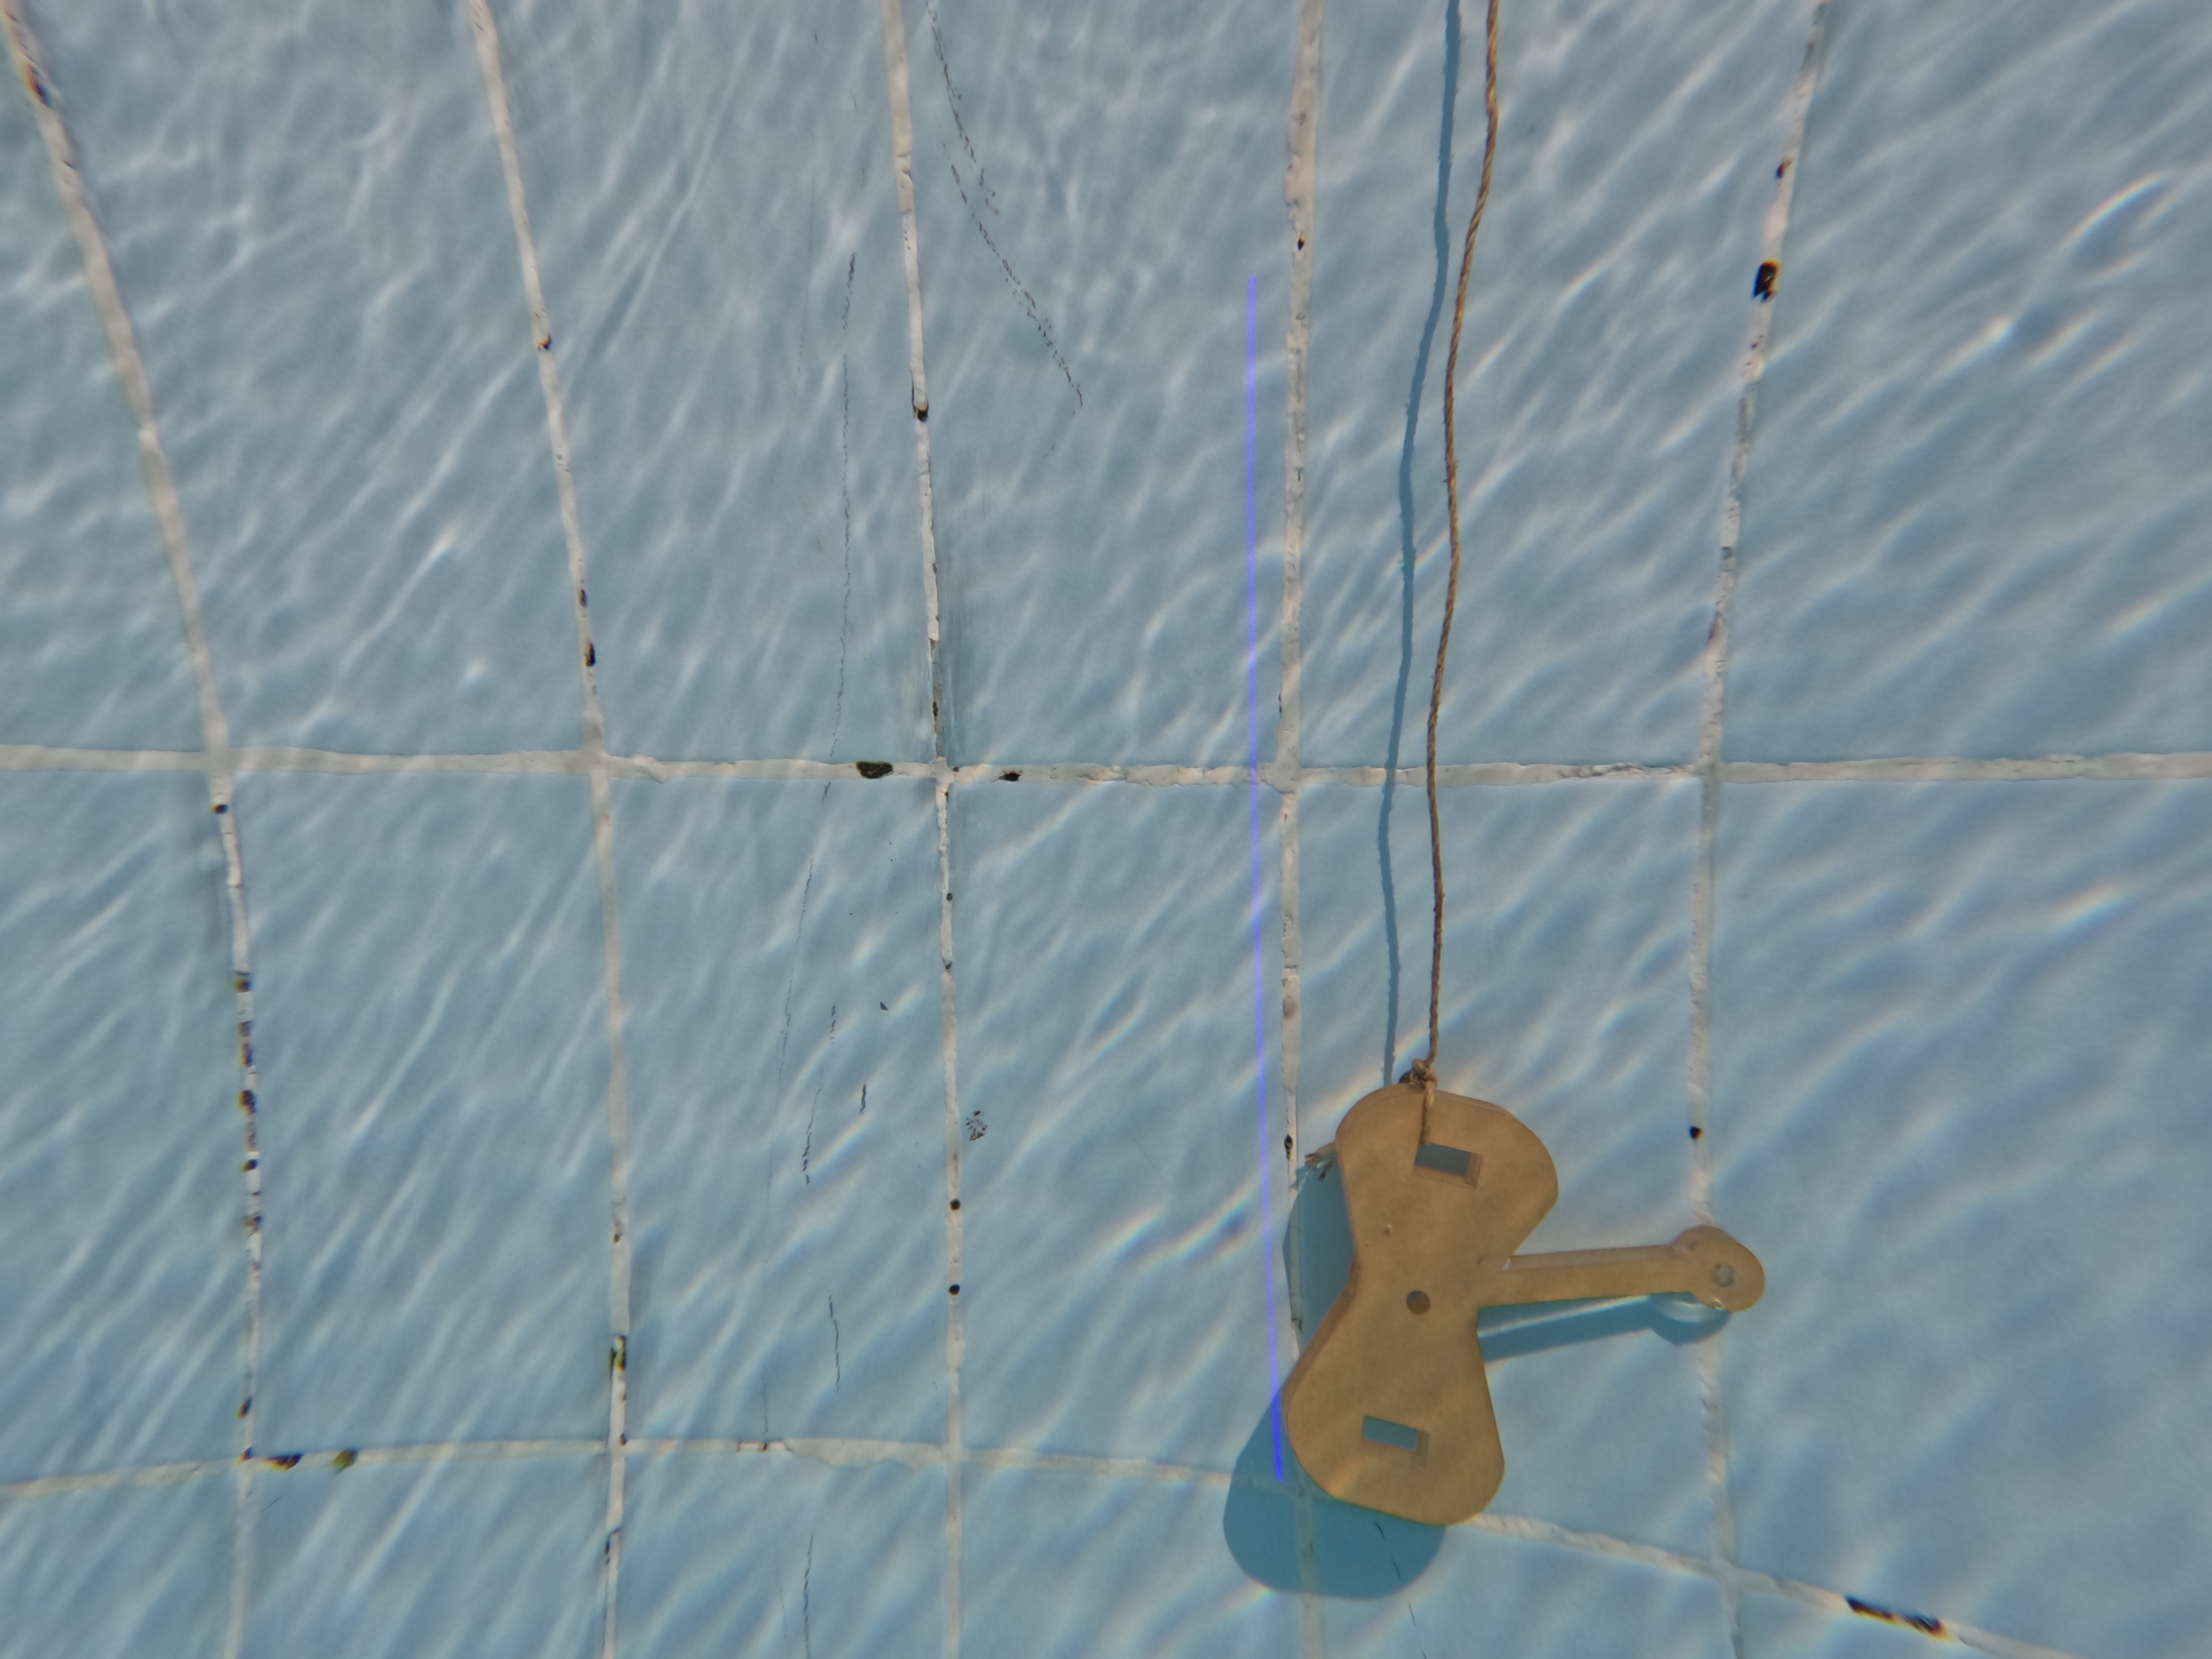

Supplement: Supplementary file 577 [file G0018922.pdf › Level_6_1/G0018922.pdf]

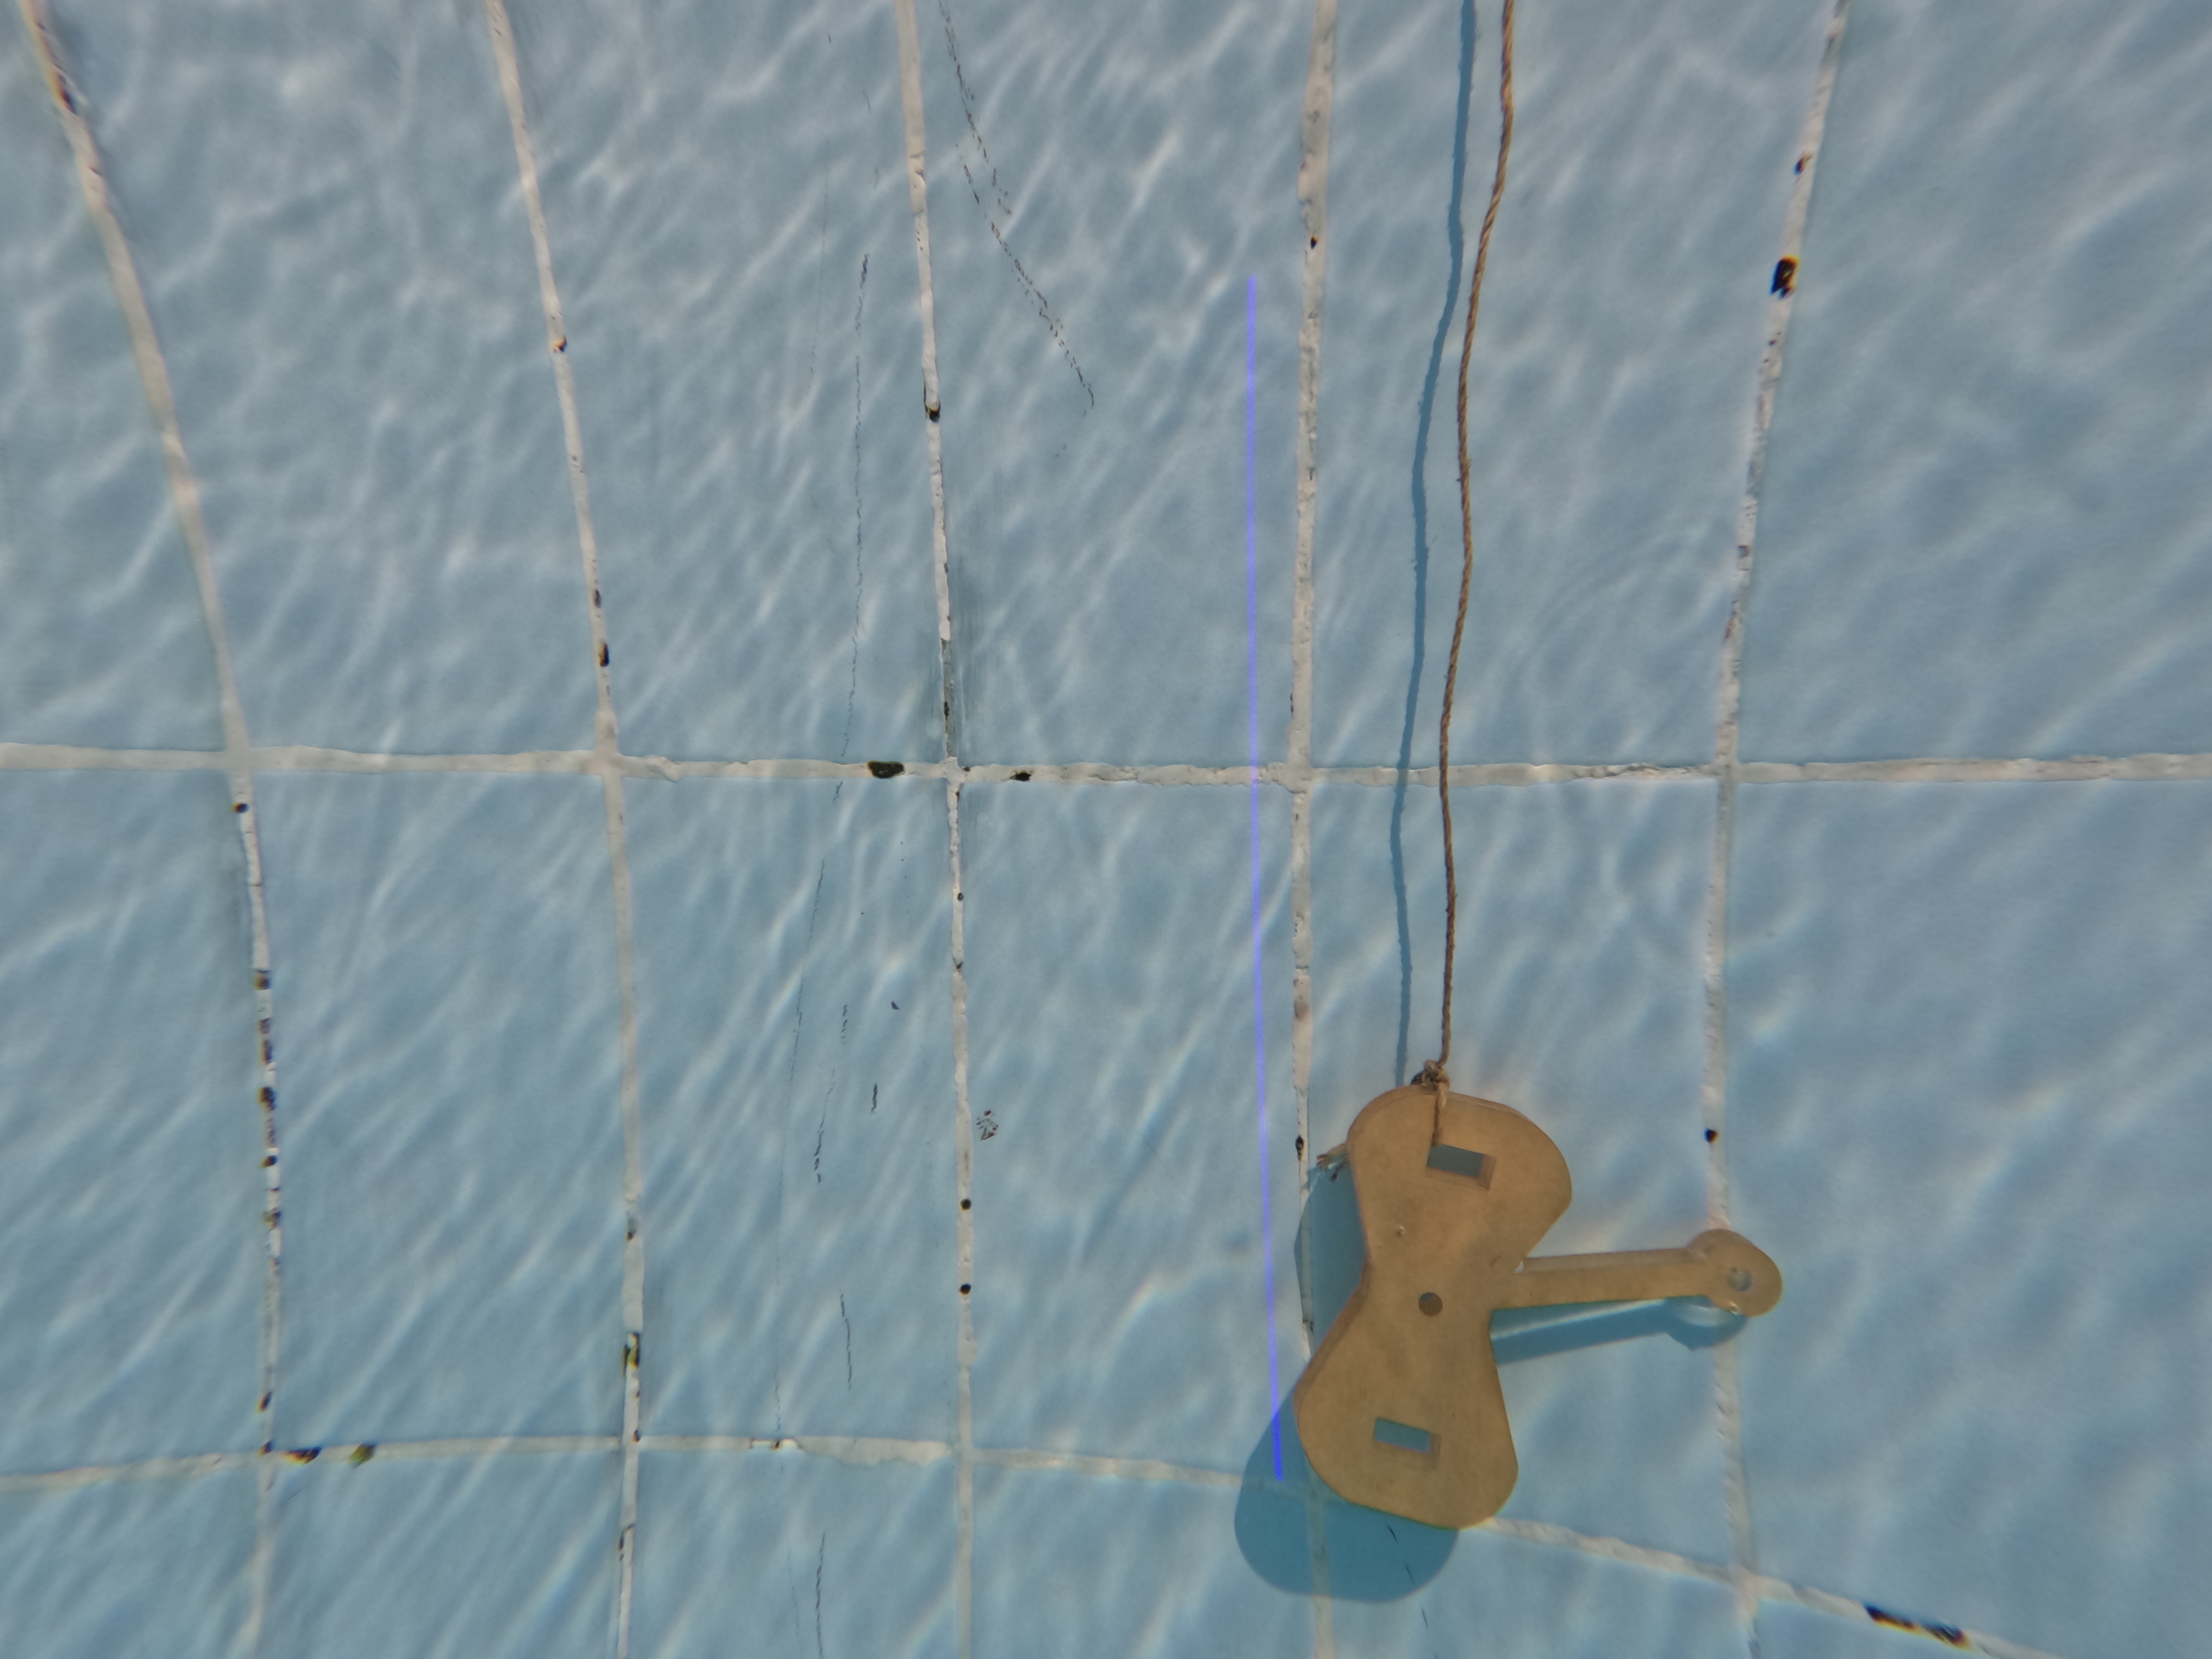

Supplement: Supplementary file 578 [file G0018923.pdf › Level_6_1/G0018923.pdf]

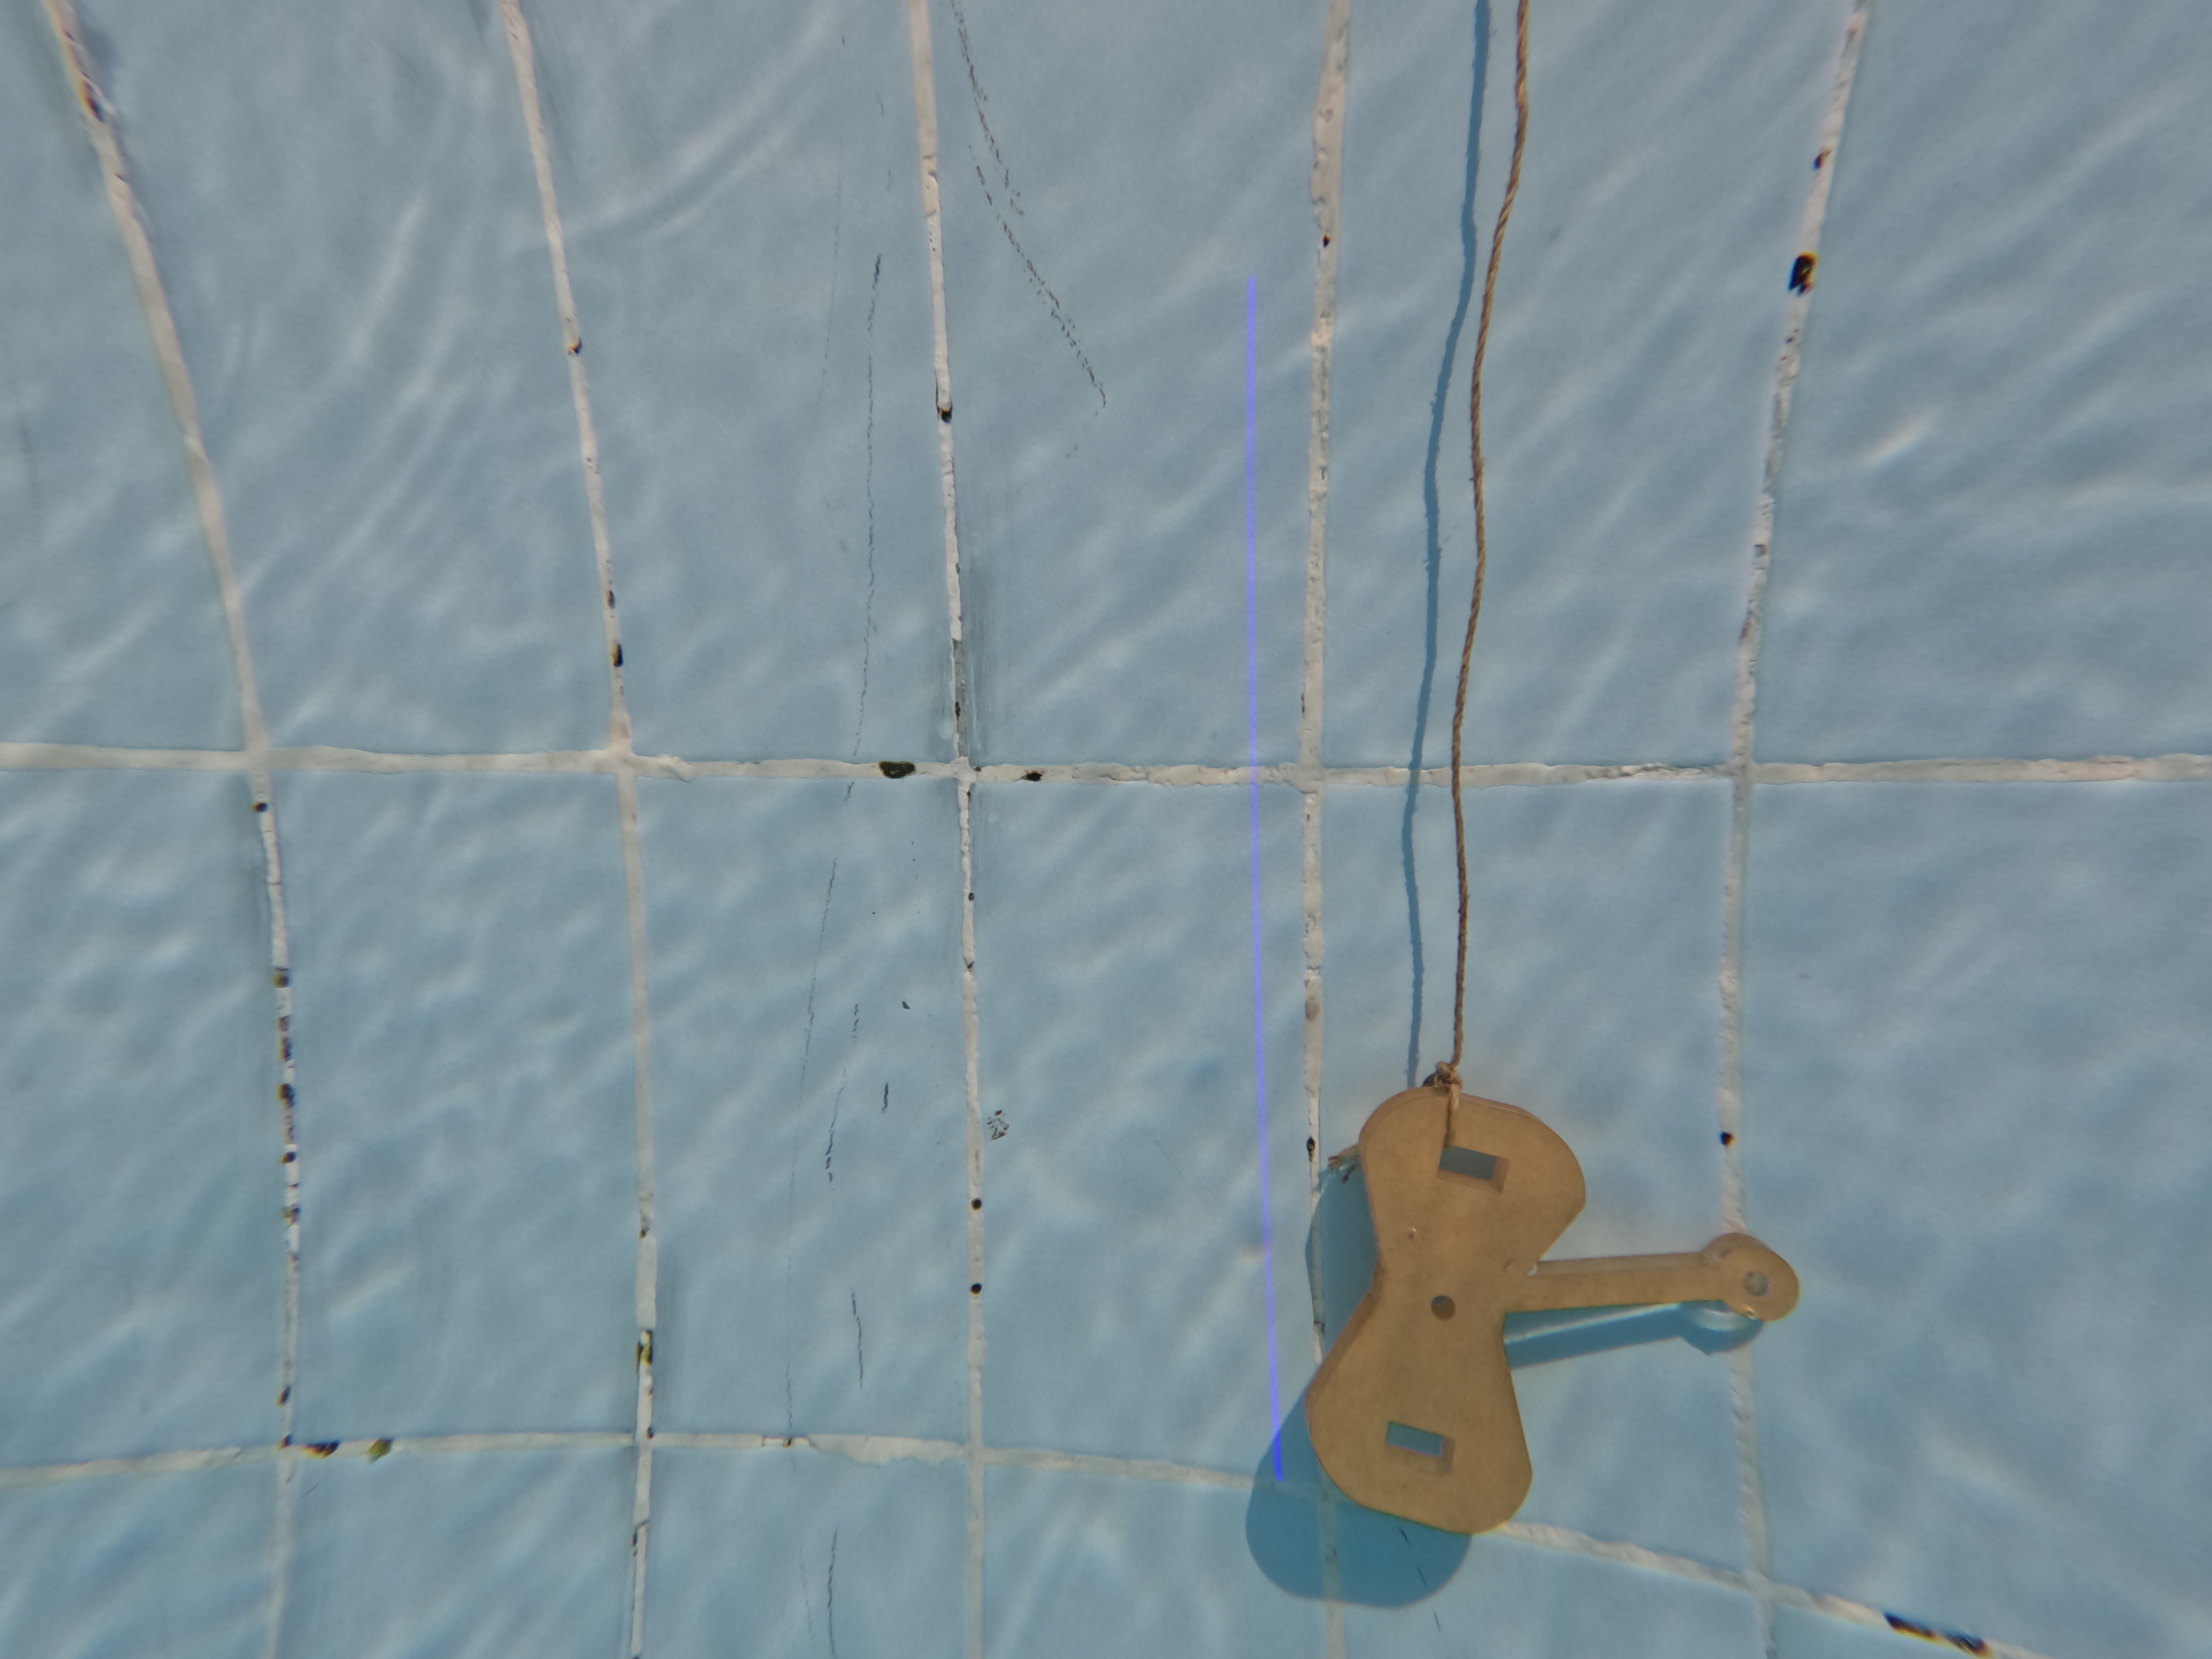

Supplement: Supplementary file 579 [file G0018924.pdf › Level_6_1/G0018924.pdf]

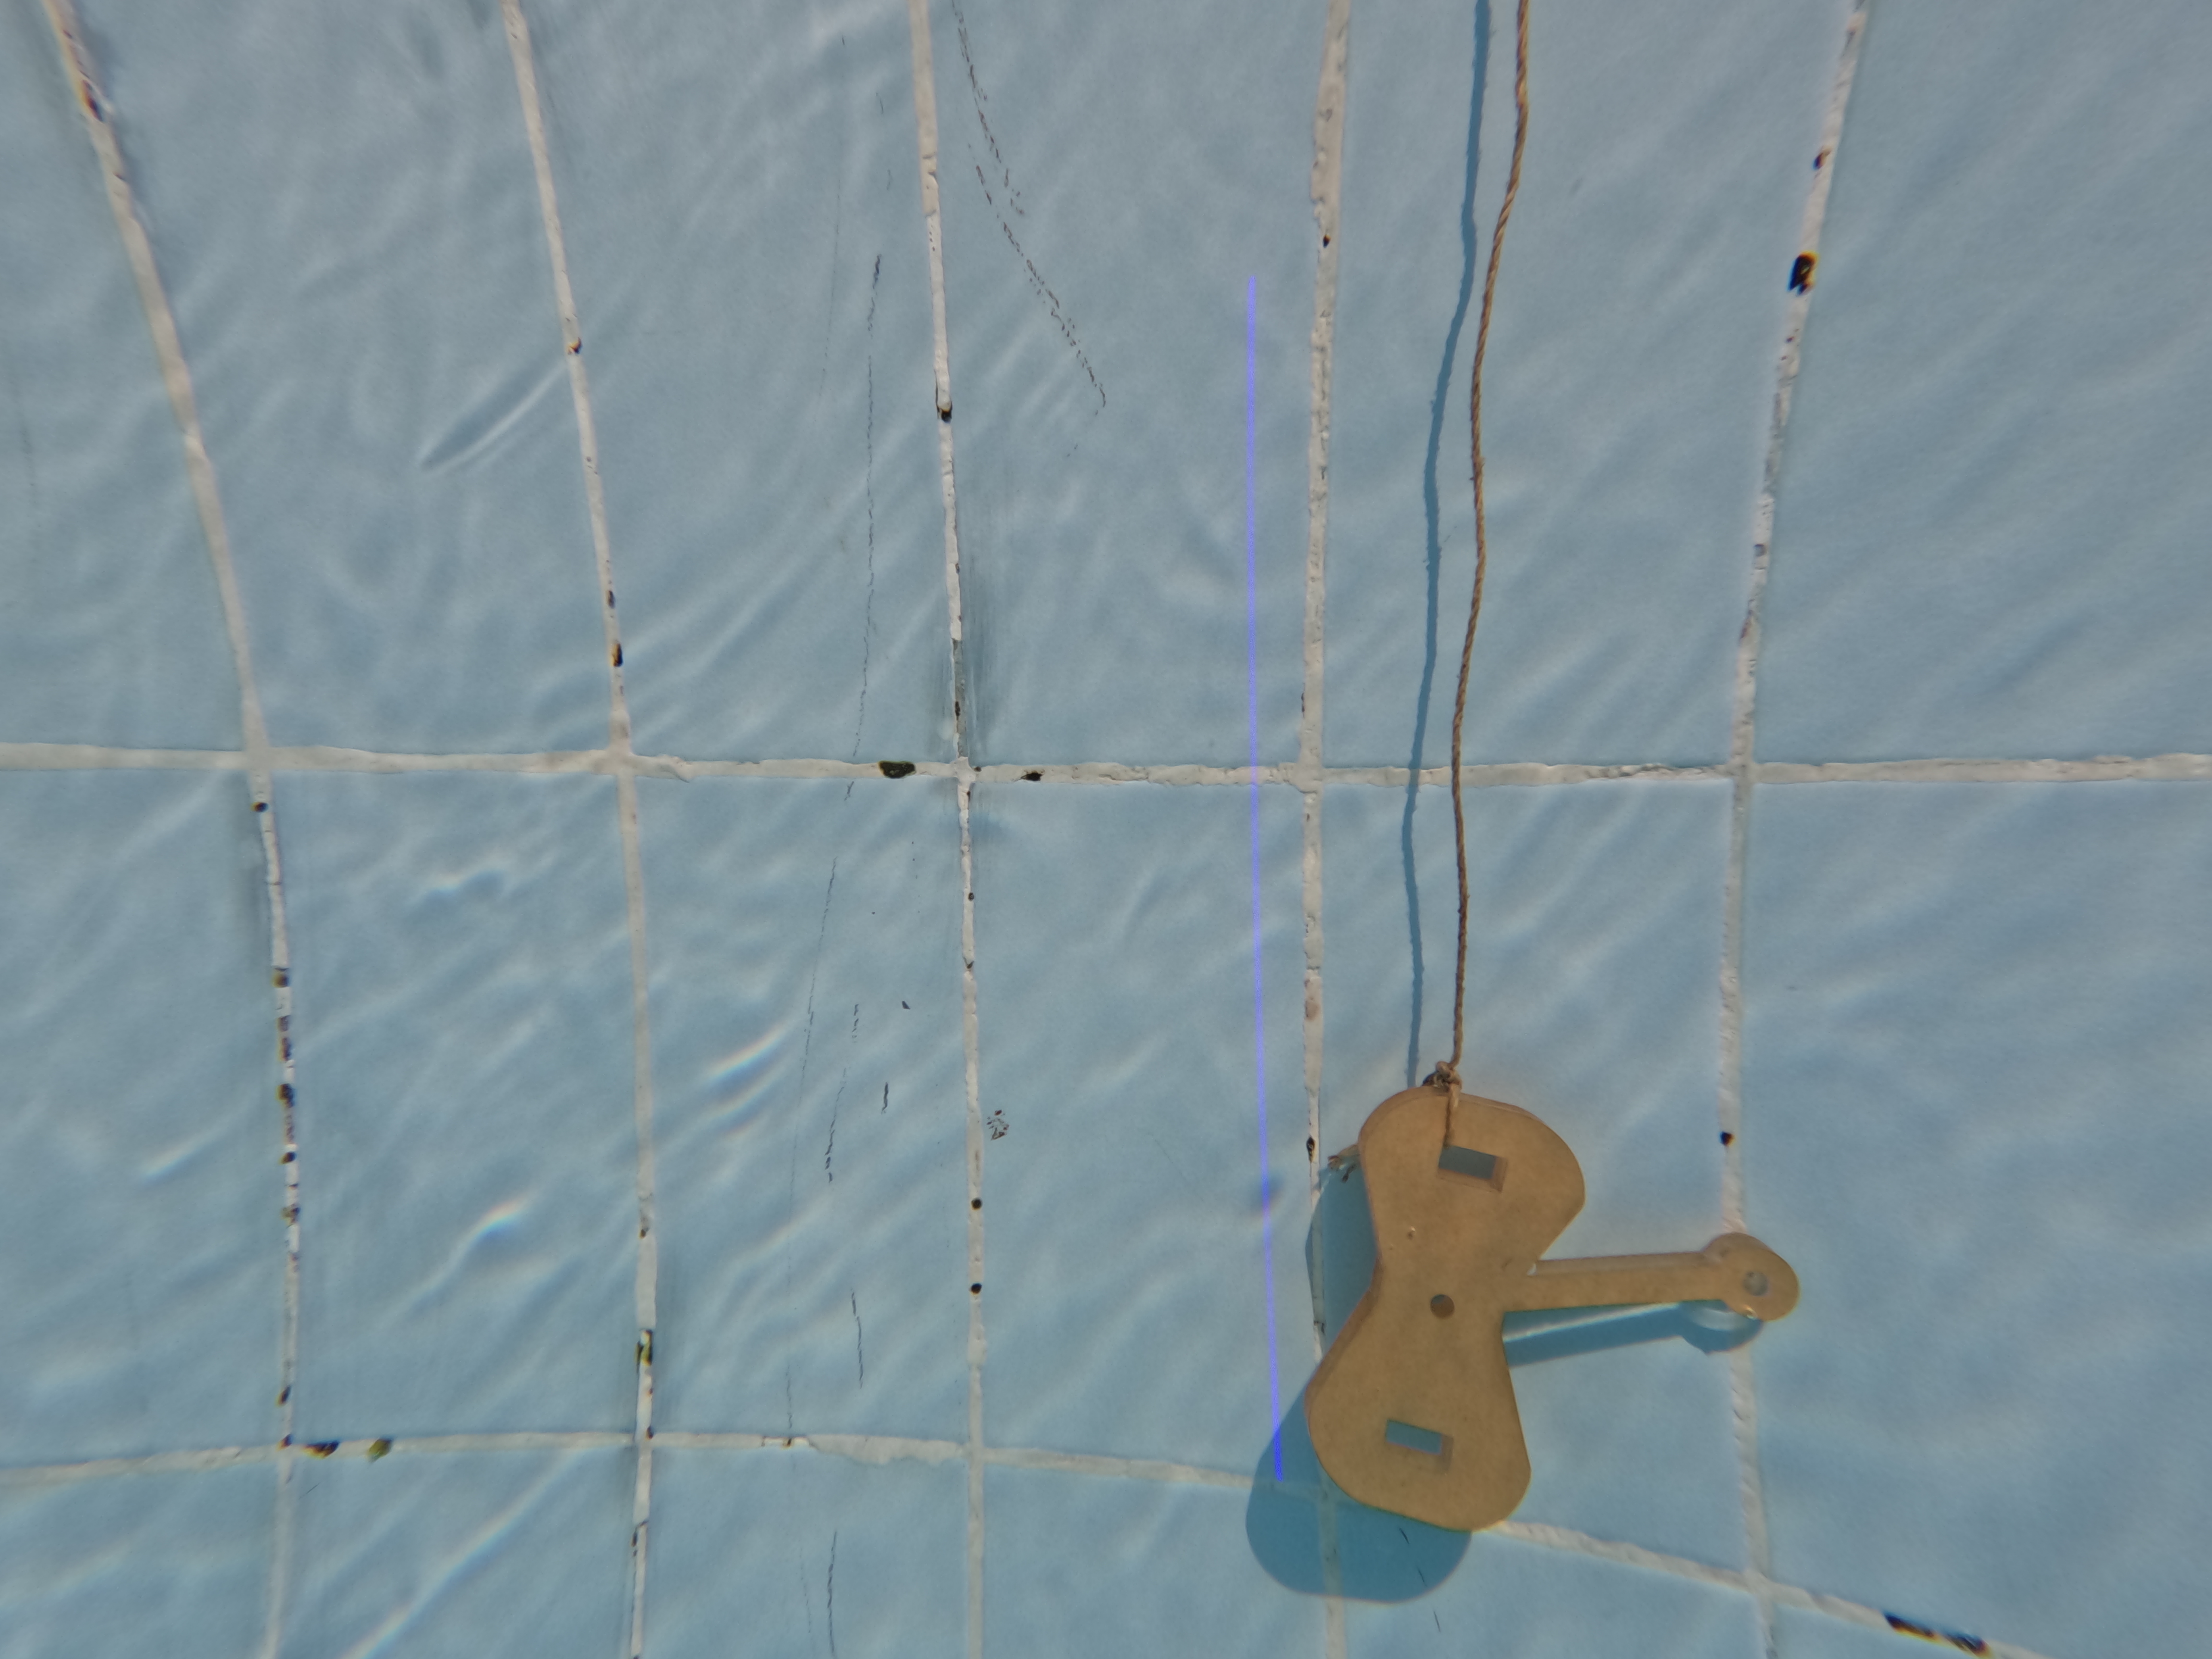

Supplement: Supplementary file 580 [file G0018925.pdf › Level_6_1/G0018925.pdf]

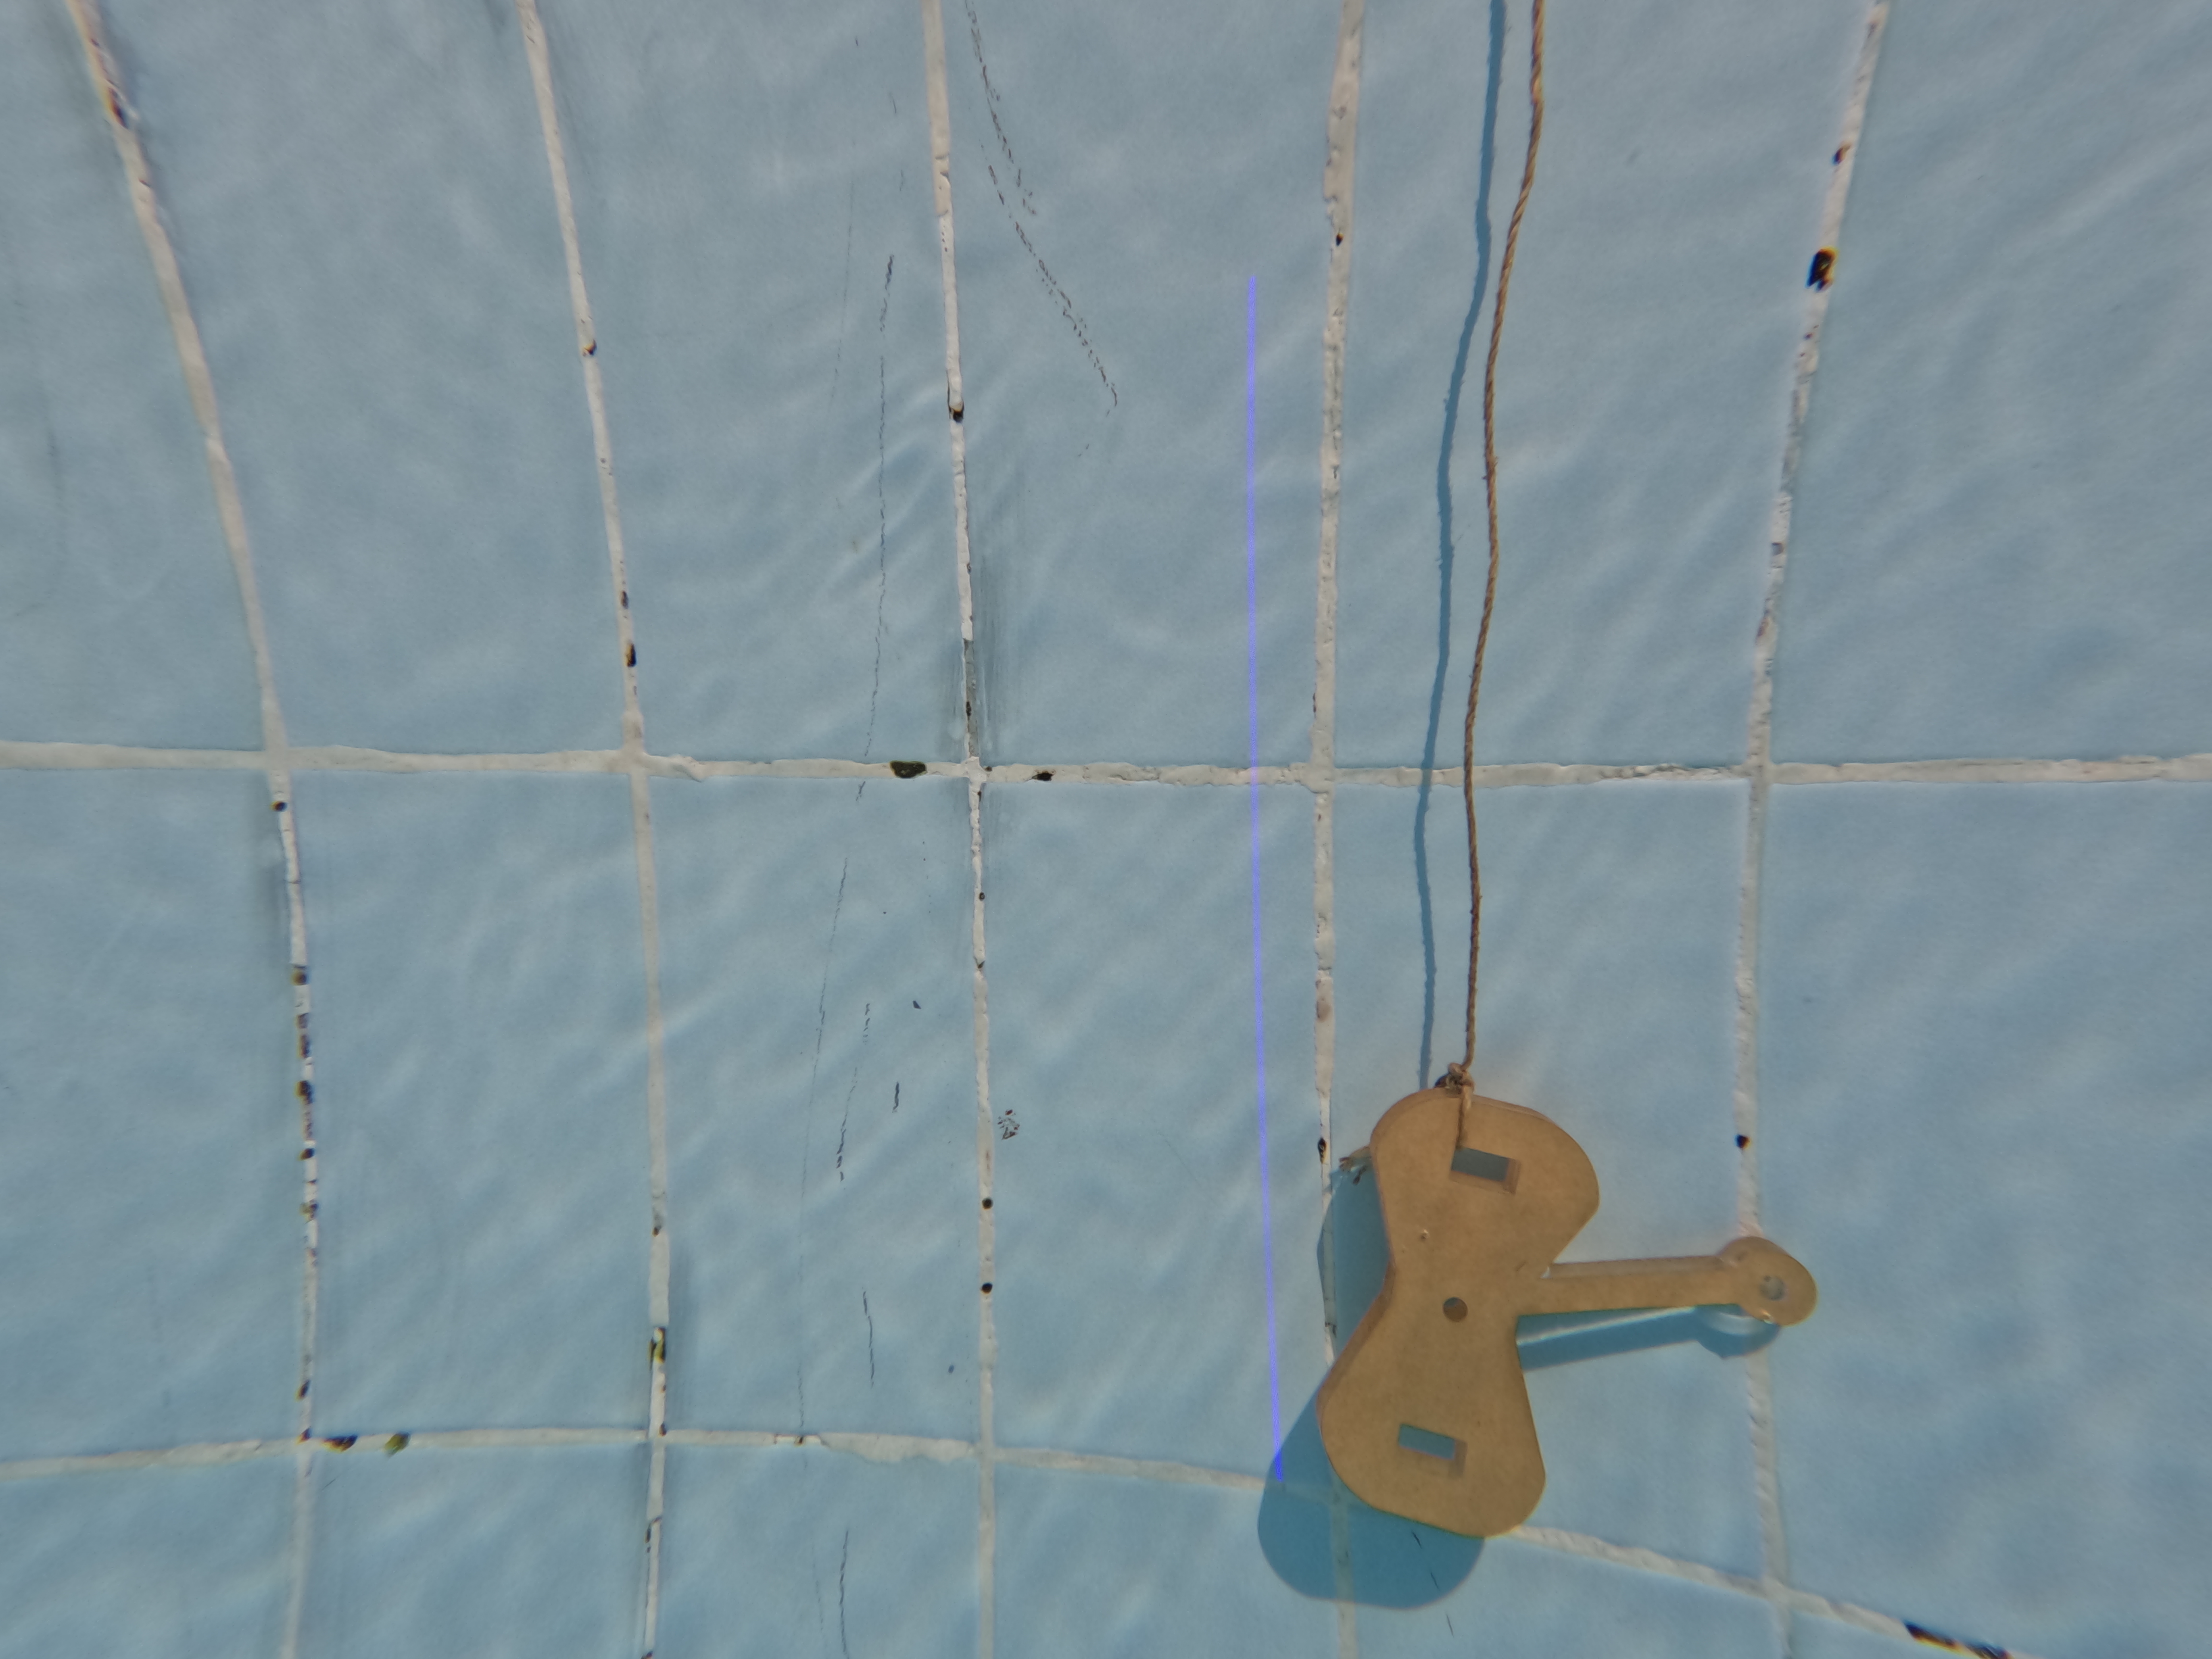

Supplement: Supplementary file 581 [file G0018926.pdf › Level_6_1/G0018926.pdf]

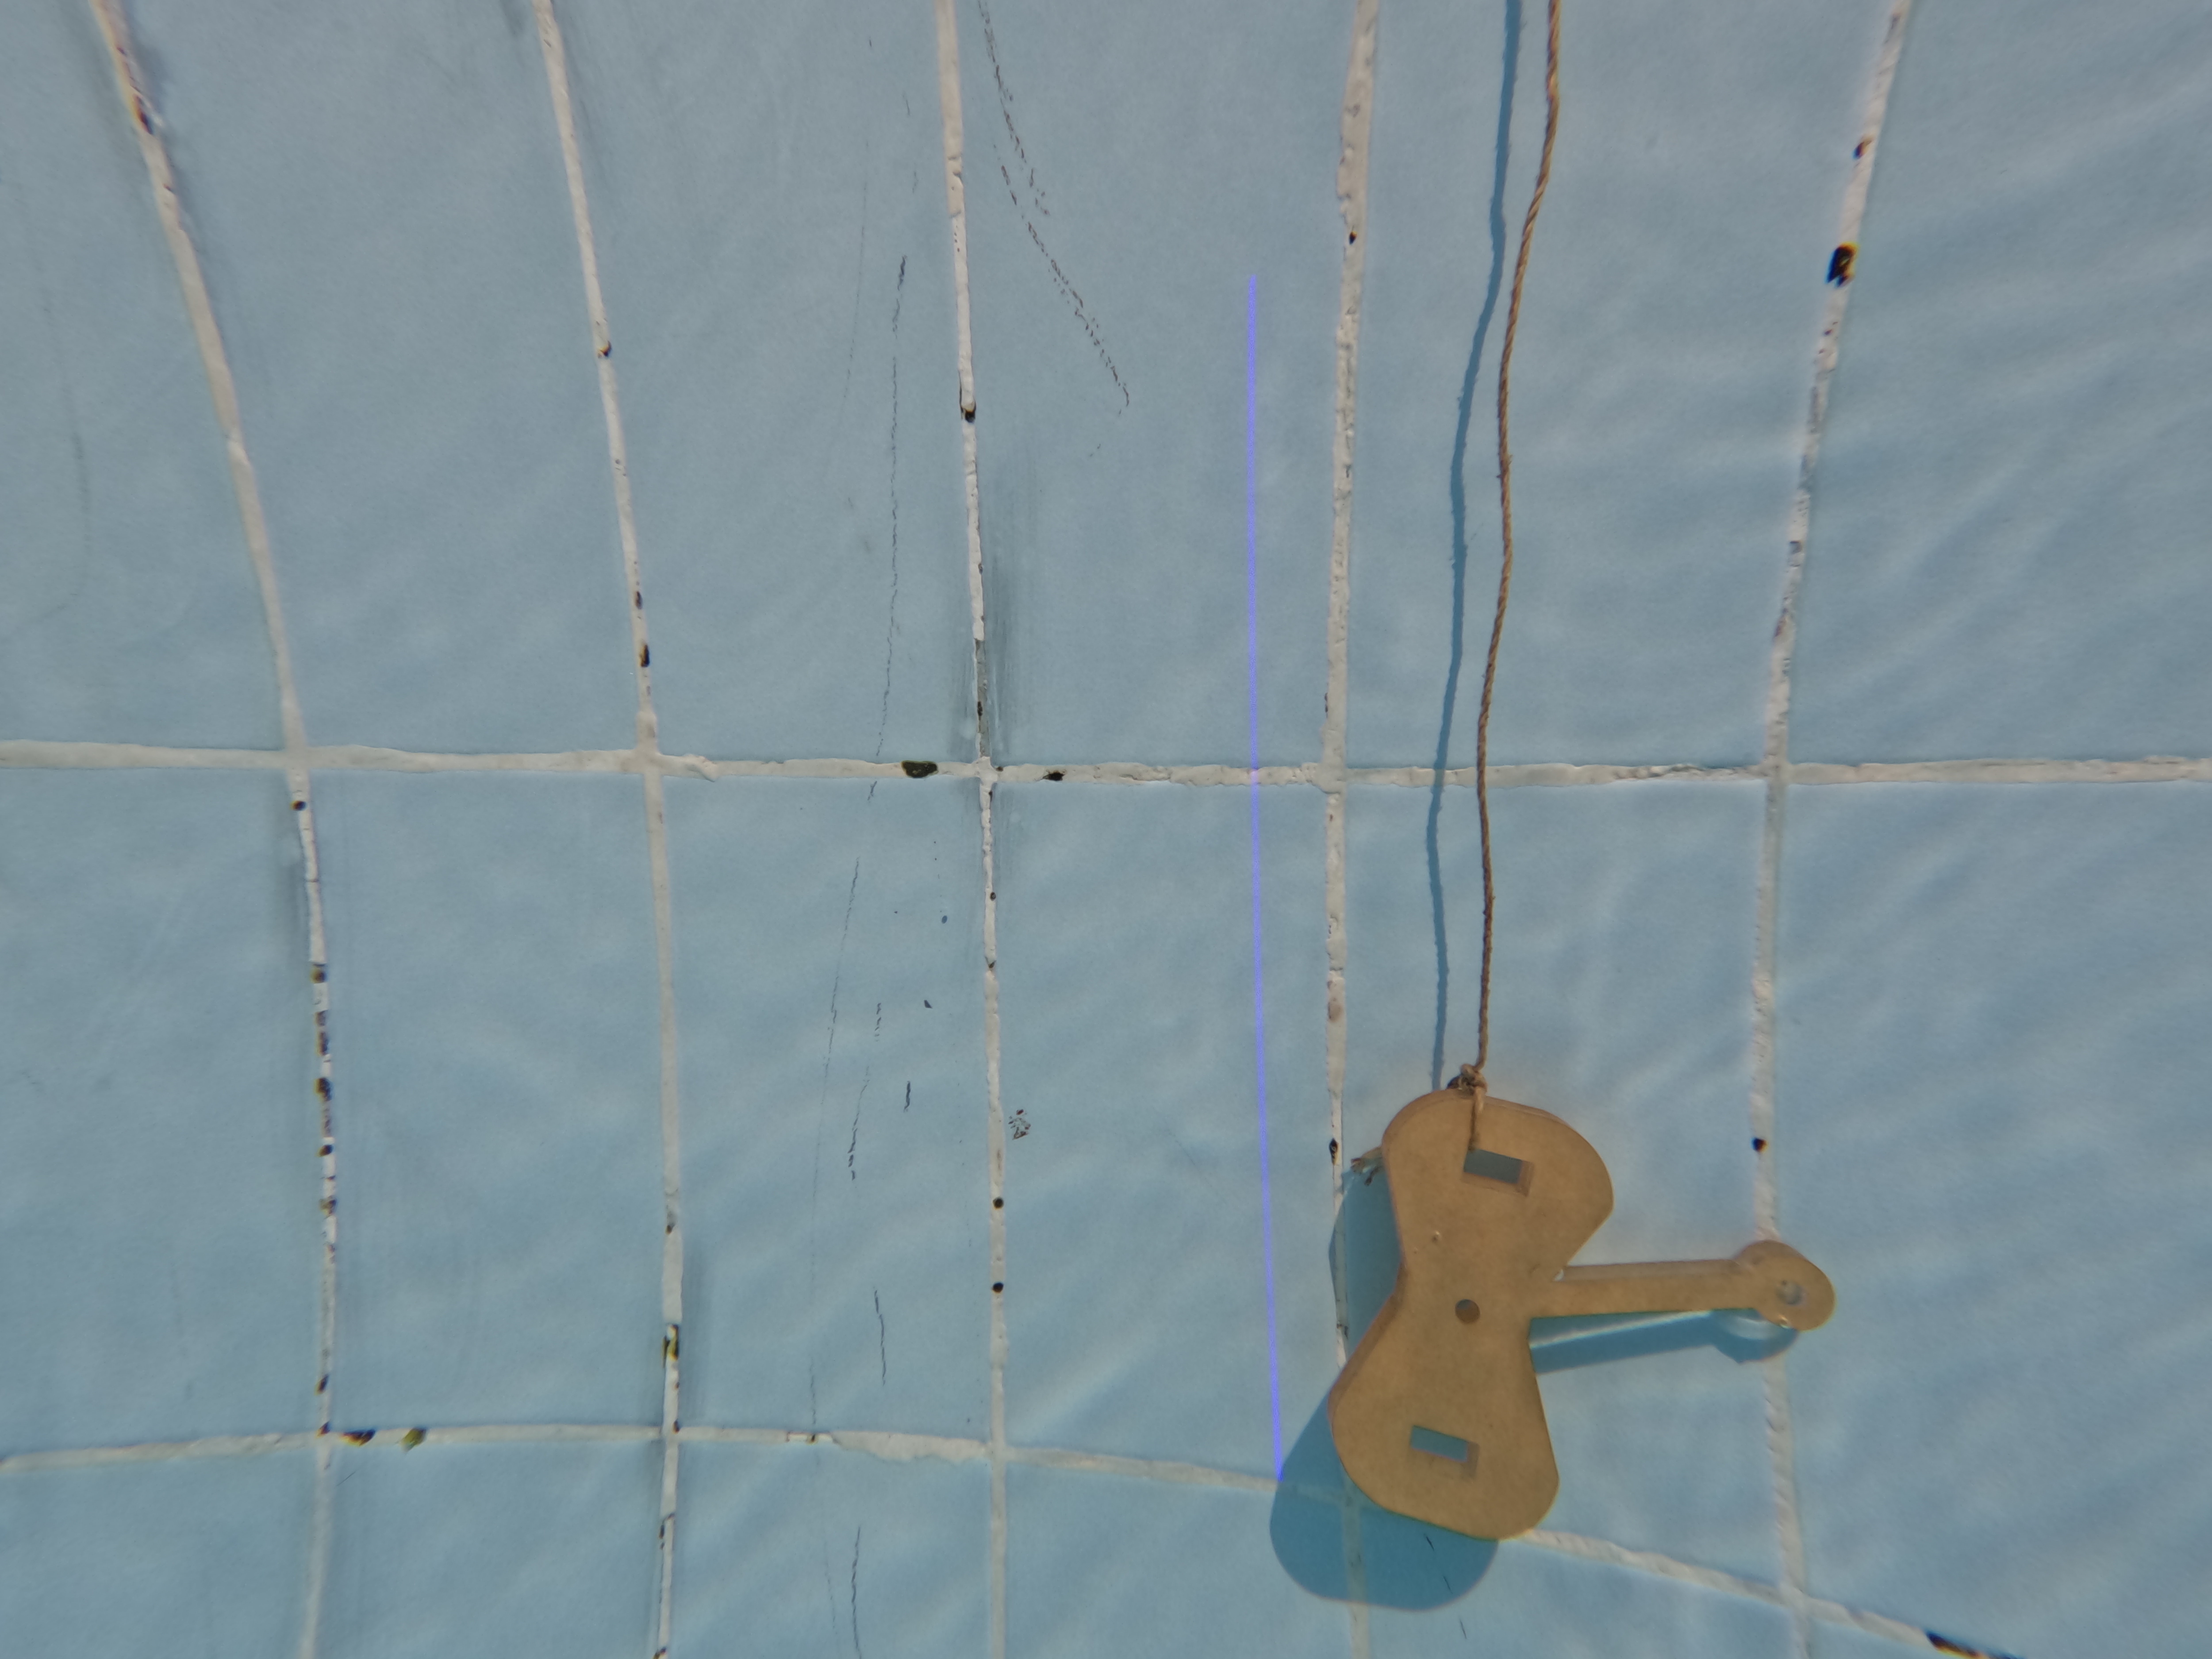

Supplement: Supplementary file 582 [file G0018927.pdf › Level_6_1/G0018927.pdf]

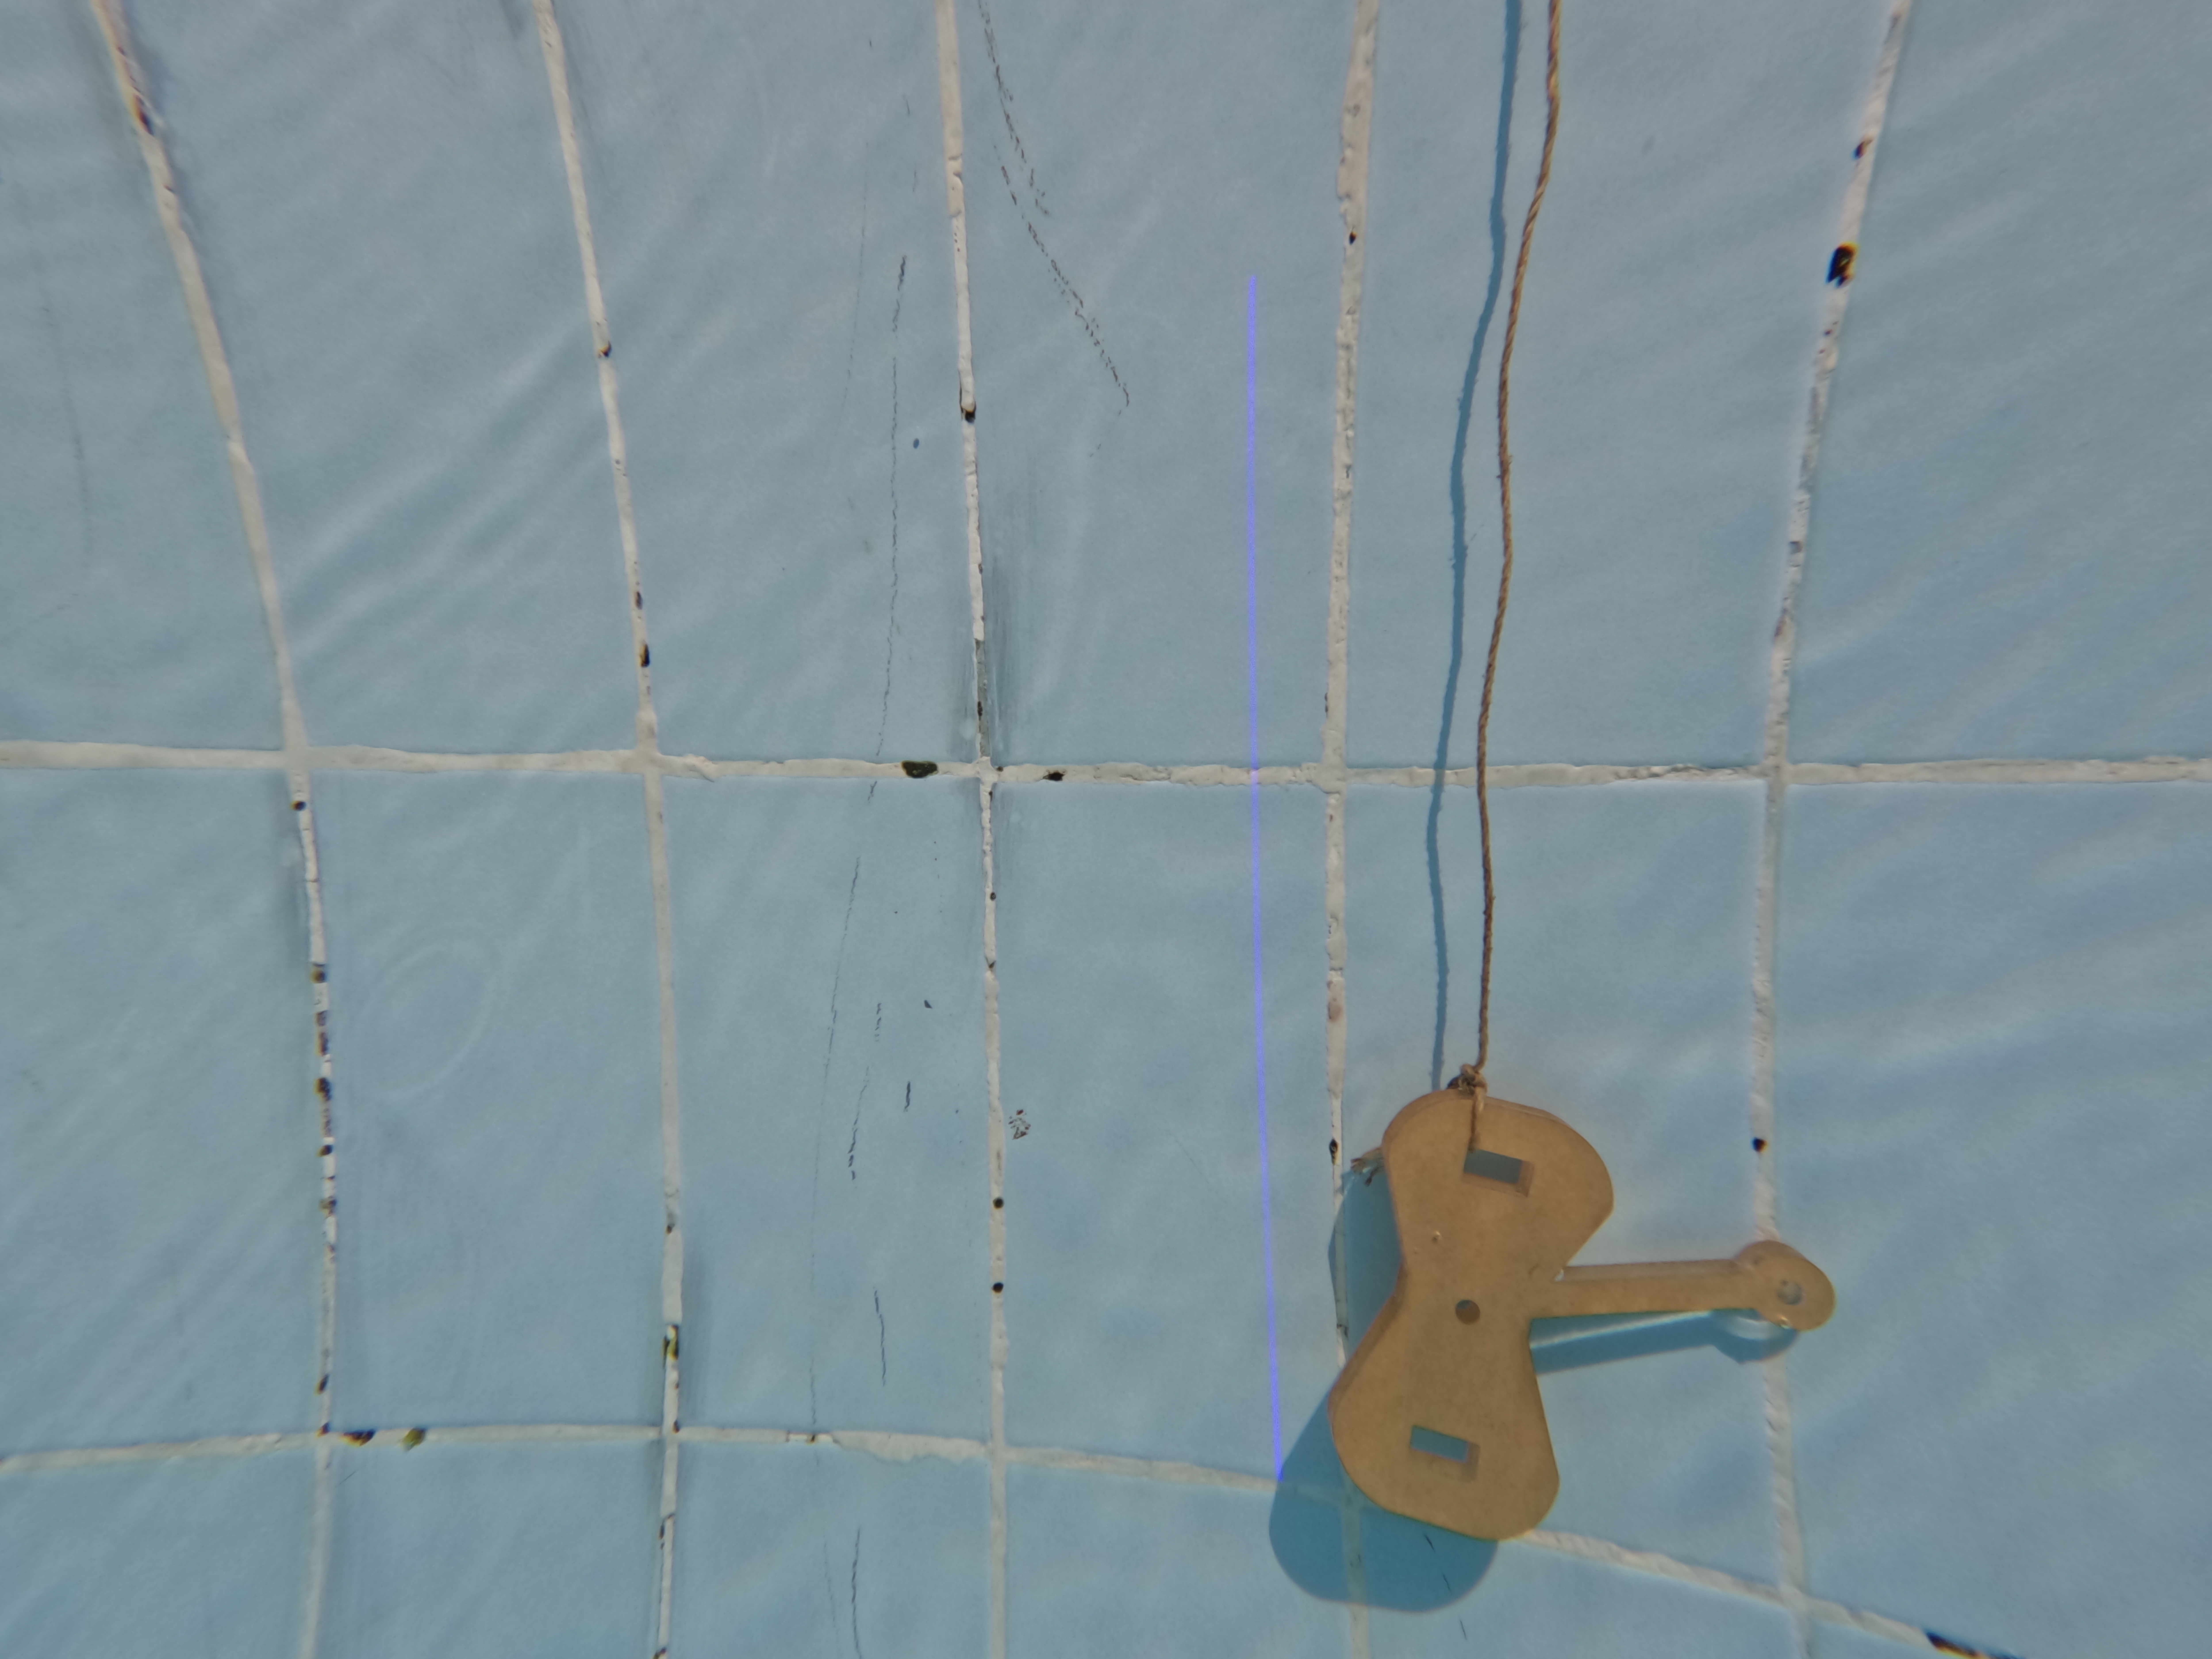

Supplement: Supplementary file 583 [file G0018928.pdf › Level_6_1/G0018928.pdf]

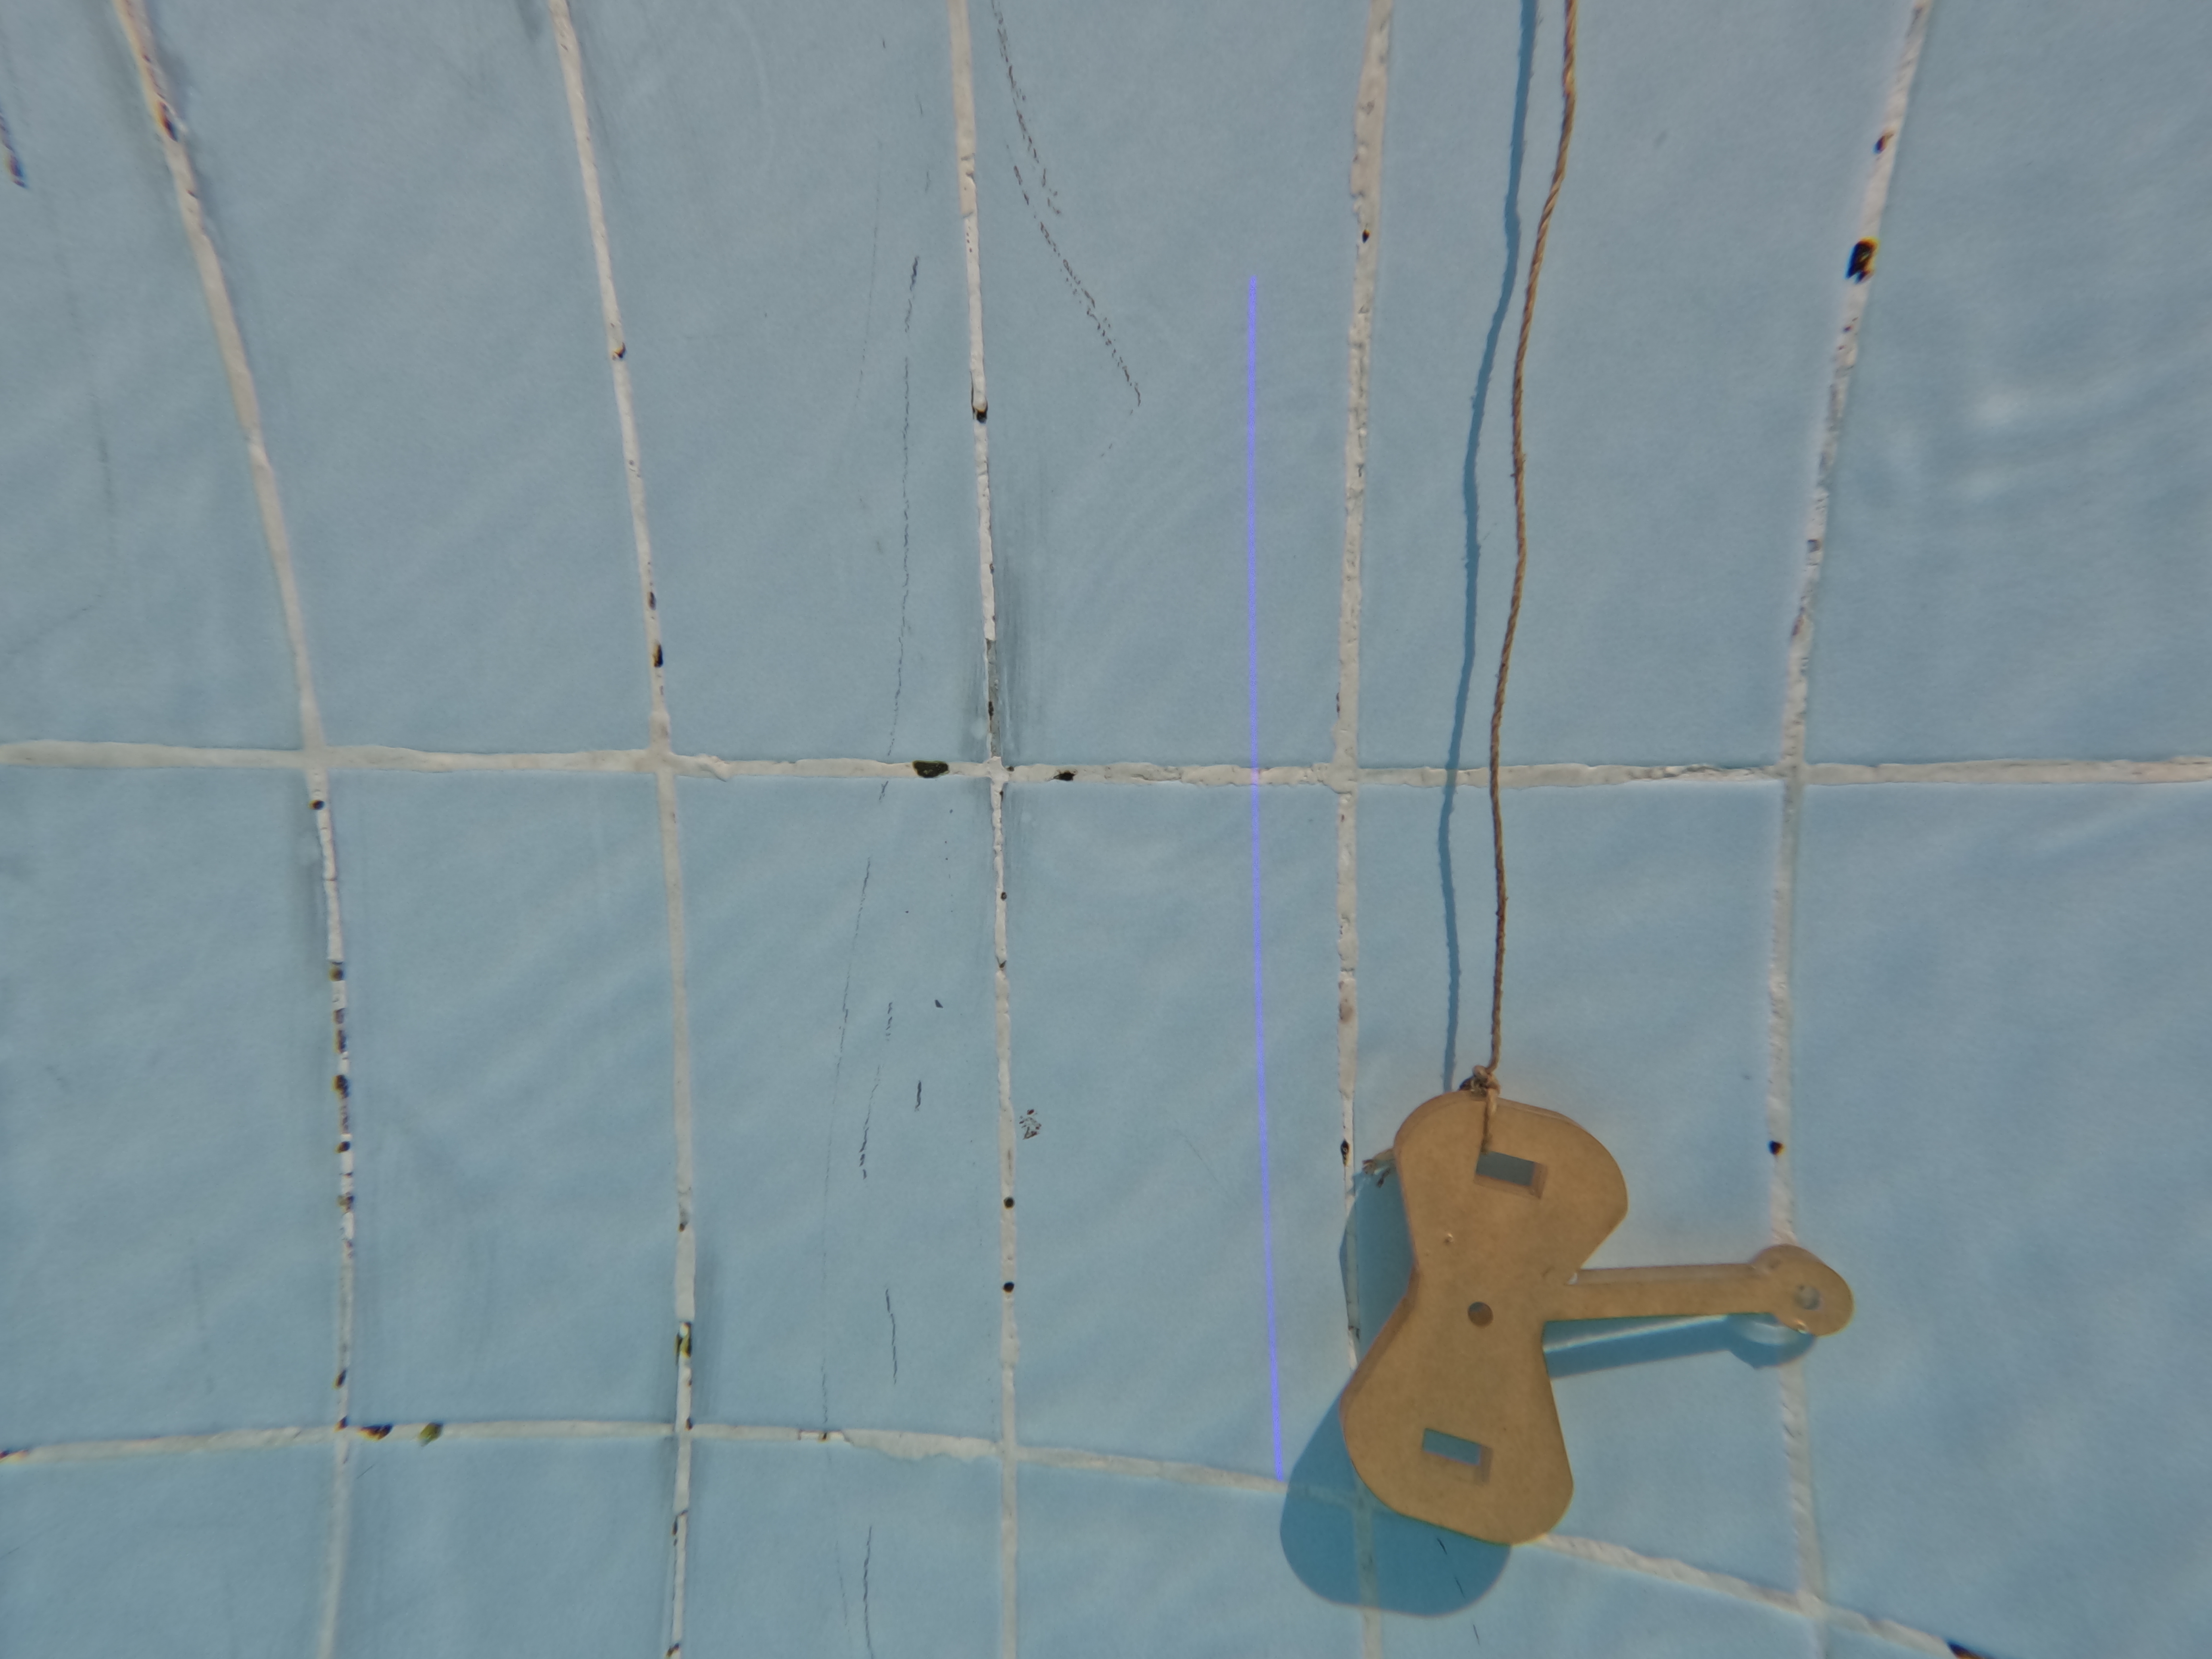

Supplement: Supplementary file 584 [file G0018929.pdf › Level_6_1/G0018929.pdf]

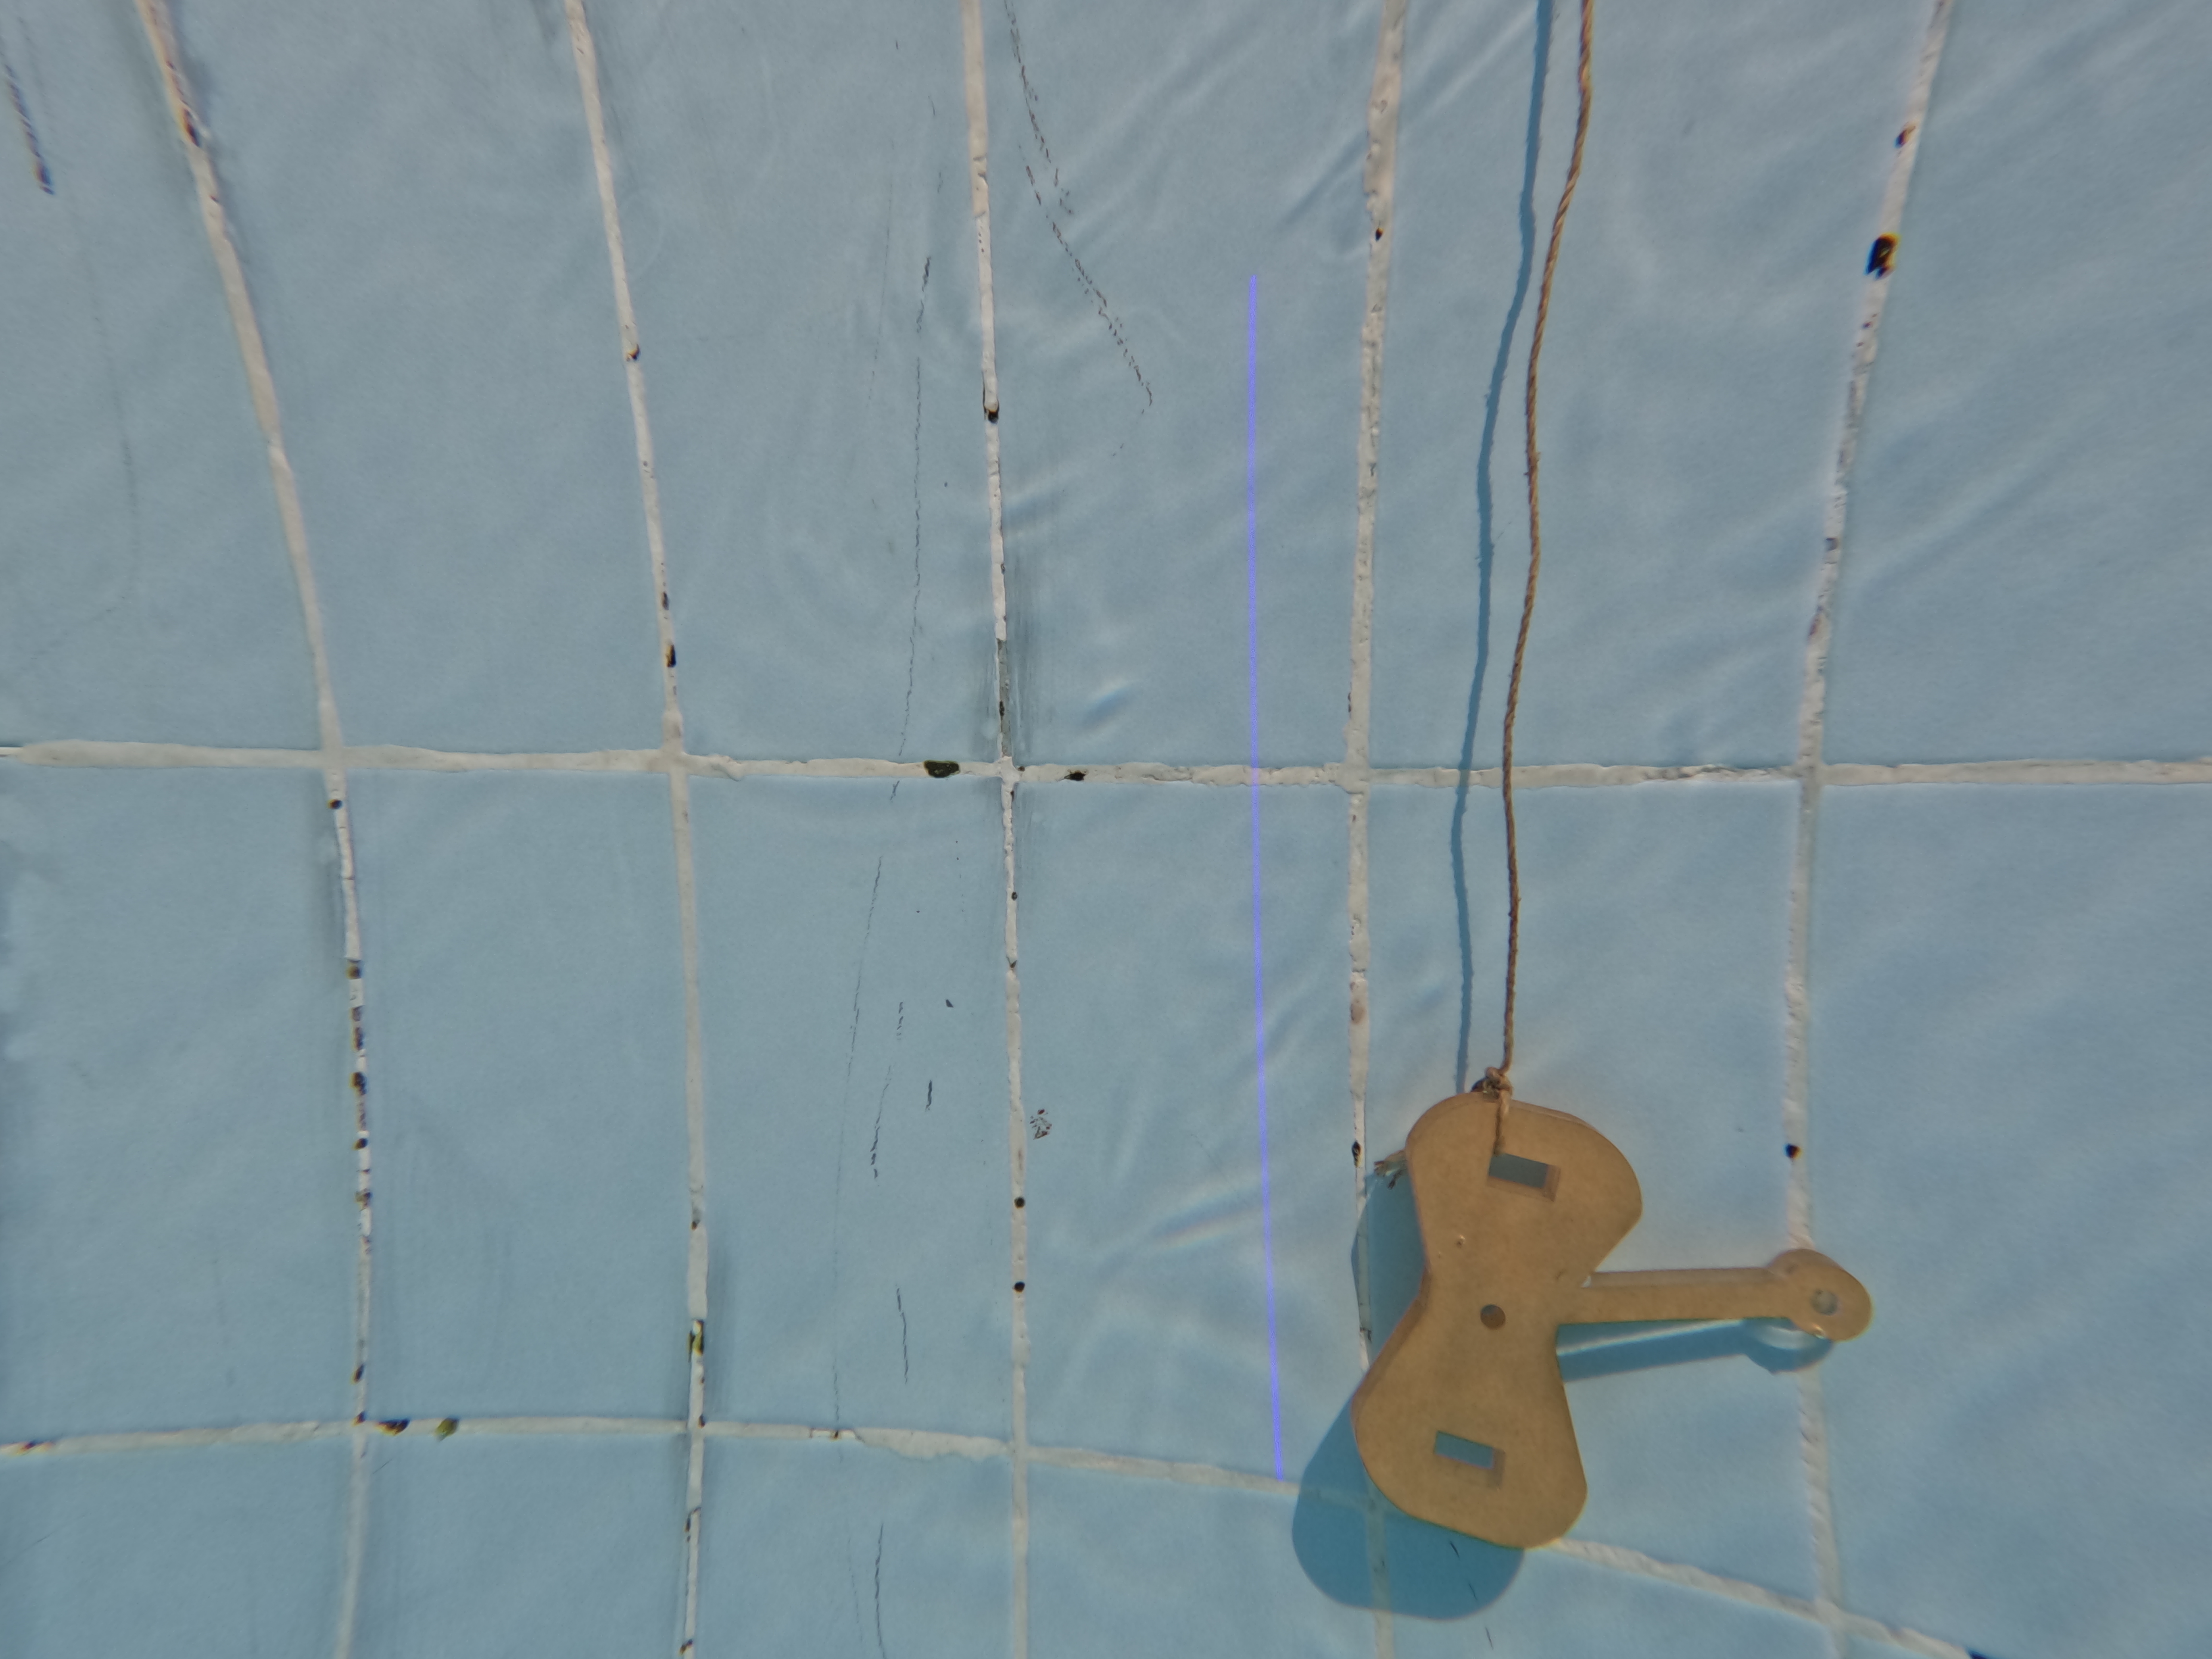

Supplement: Supplementary file 585 [file G0018930.pdf › Level_6_1/G0018930.pdf]

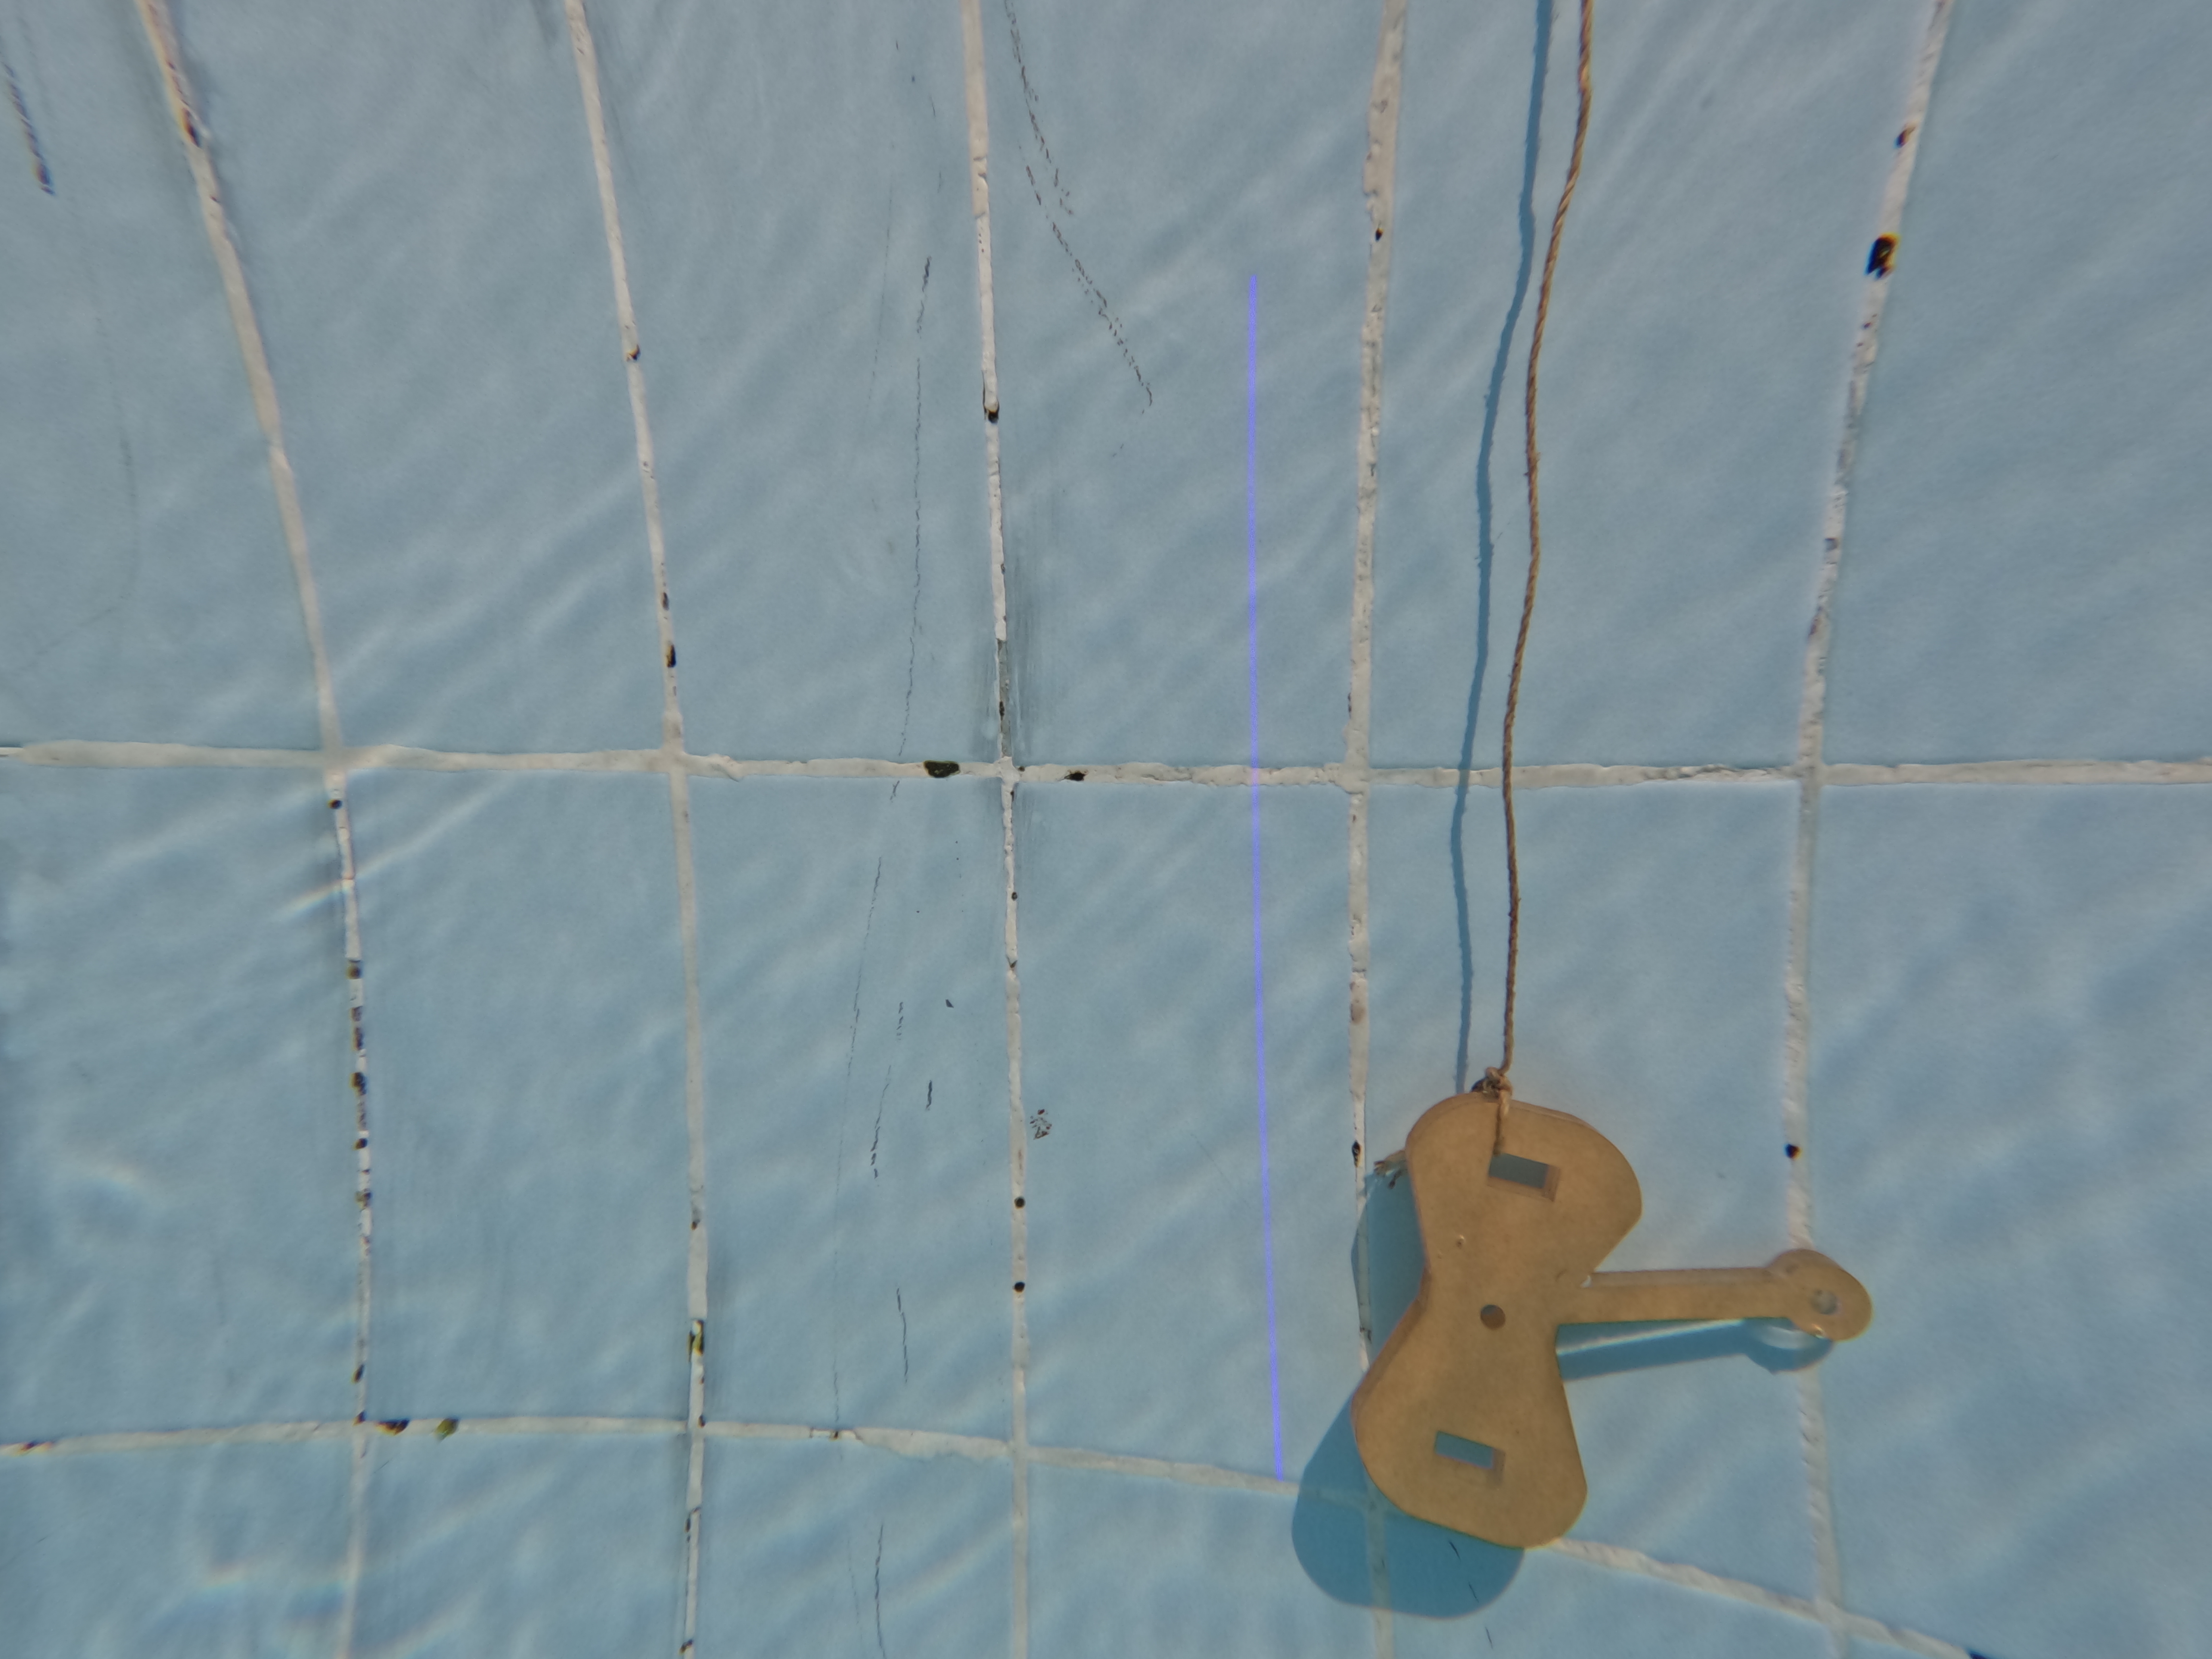

Supplement: Supplementary file 586 [file G0018931.pdf › Level_6_1/G0018931.pdf]

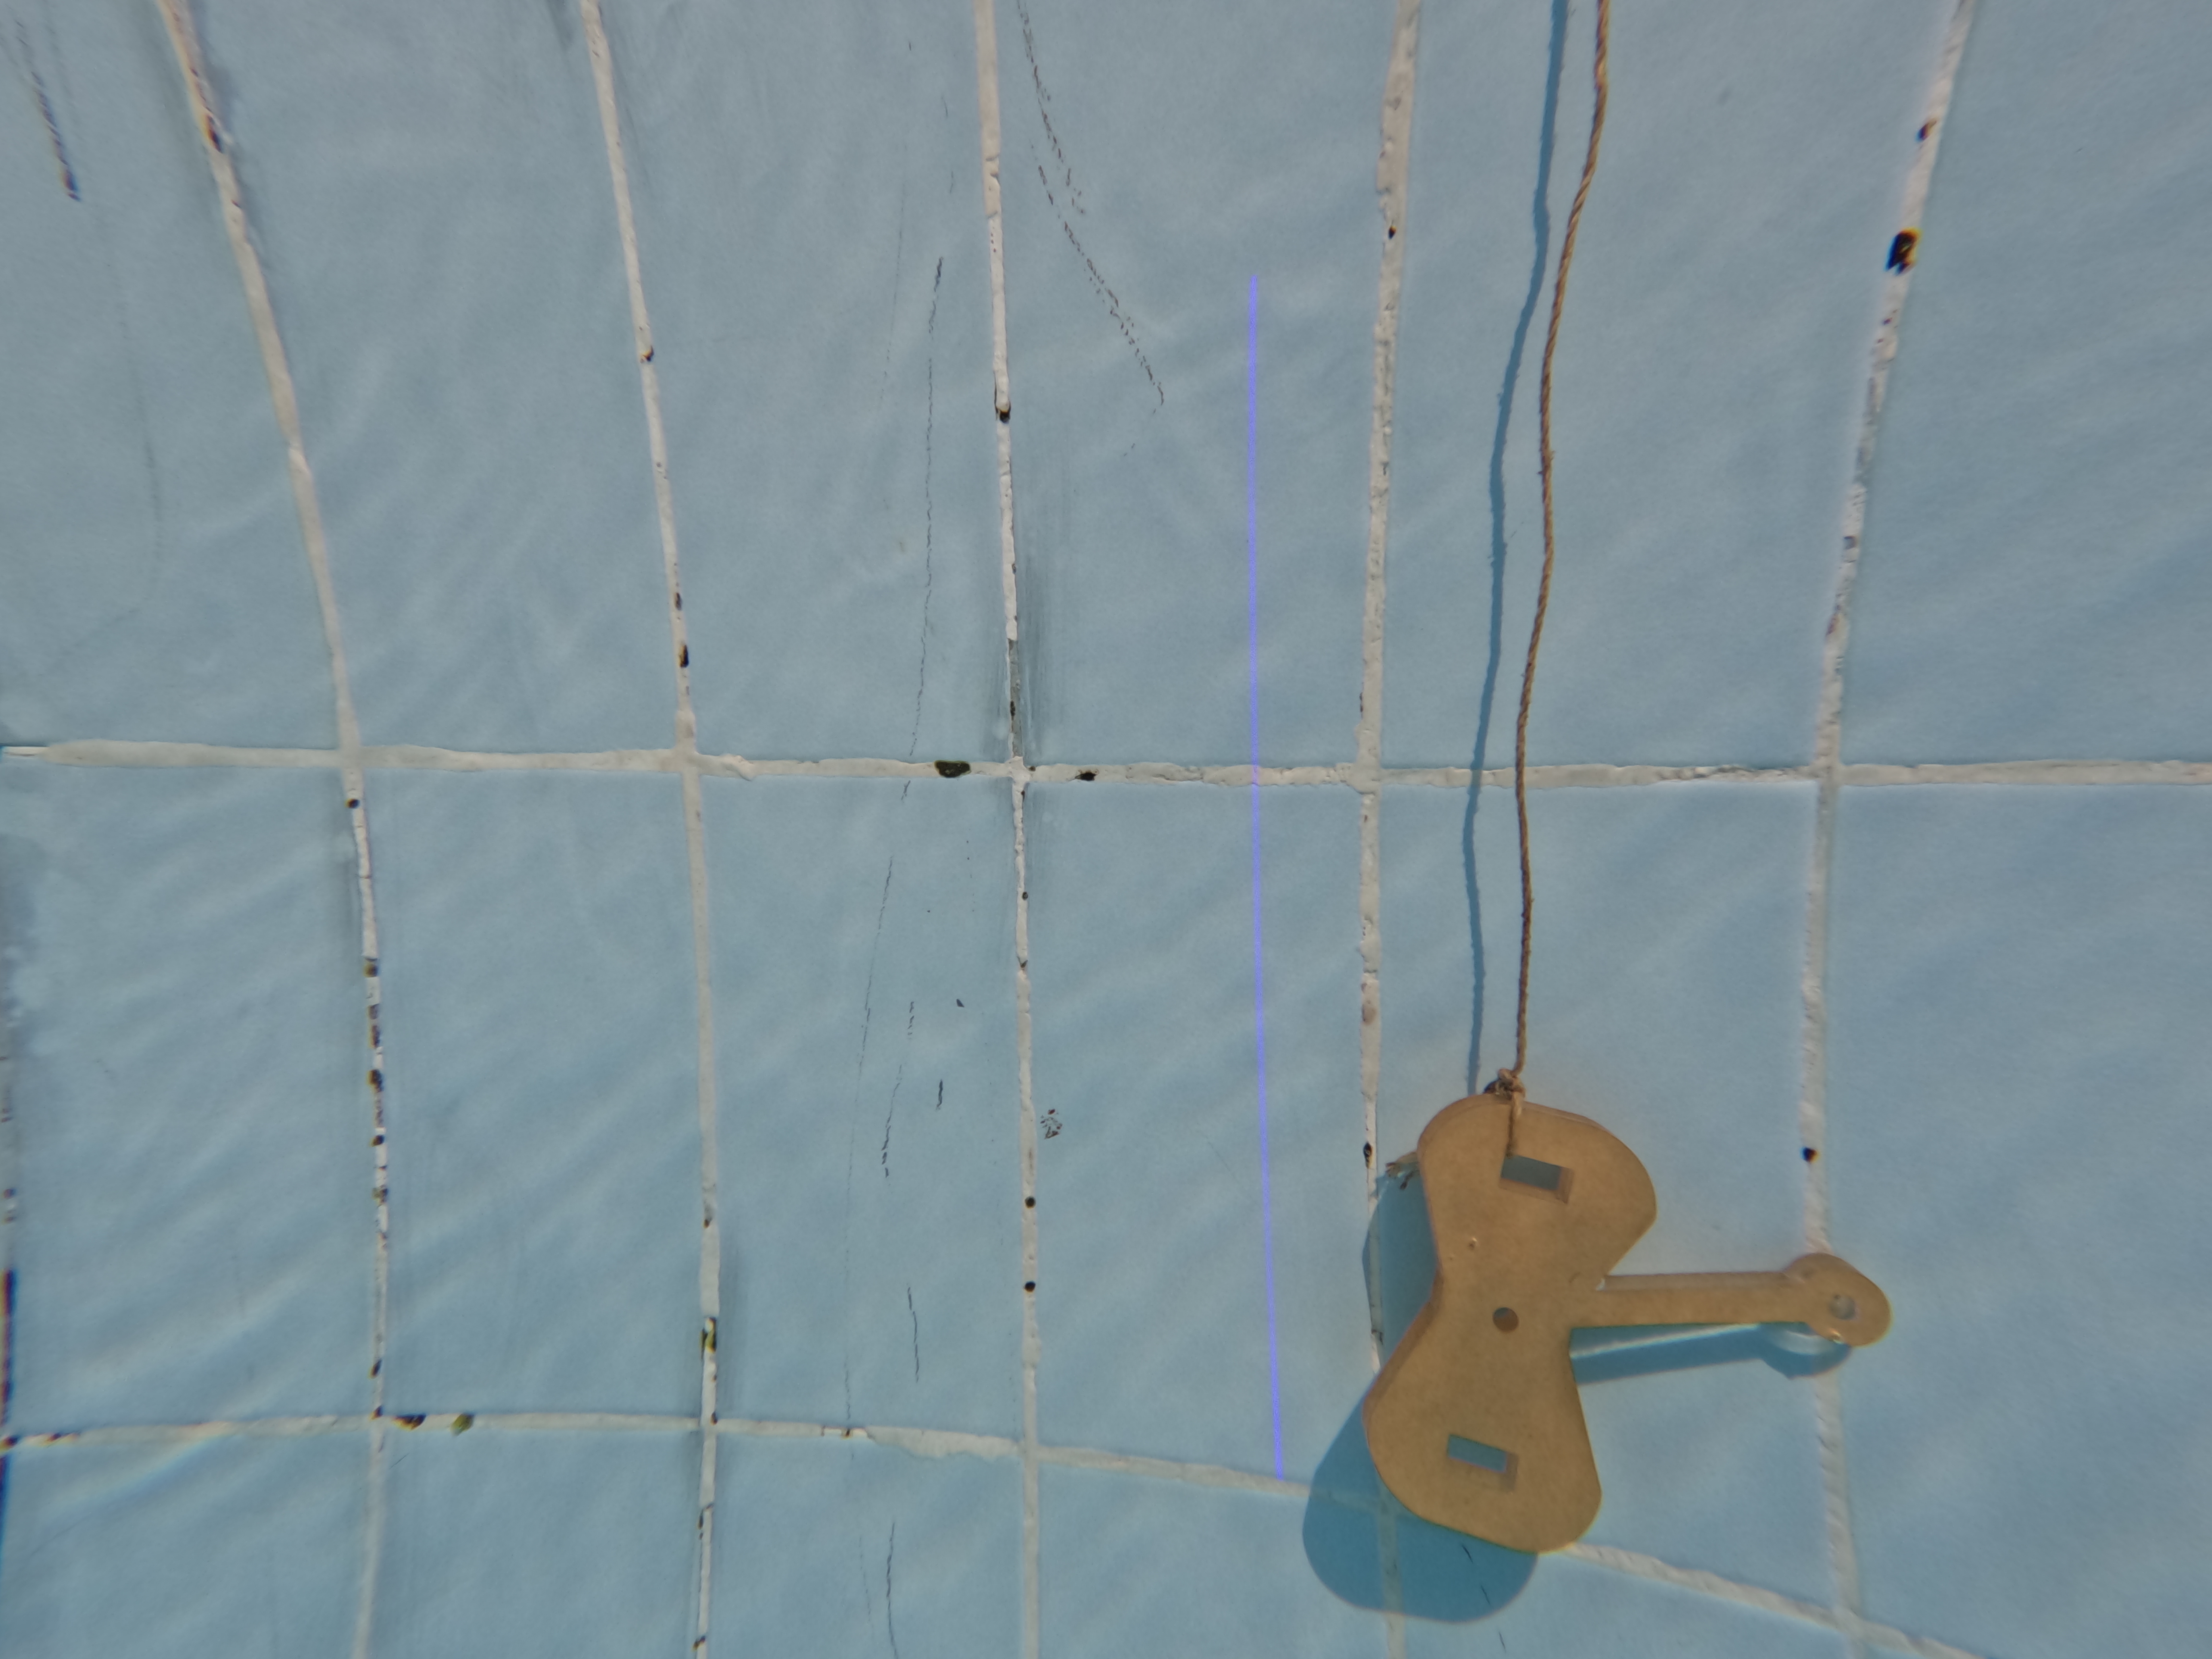

Supplement: Supplementary file 587 [file G0018932.pdf › Level_6_1/G0018932.pdf]

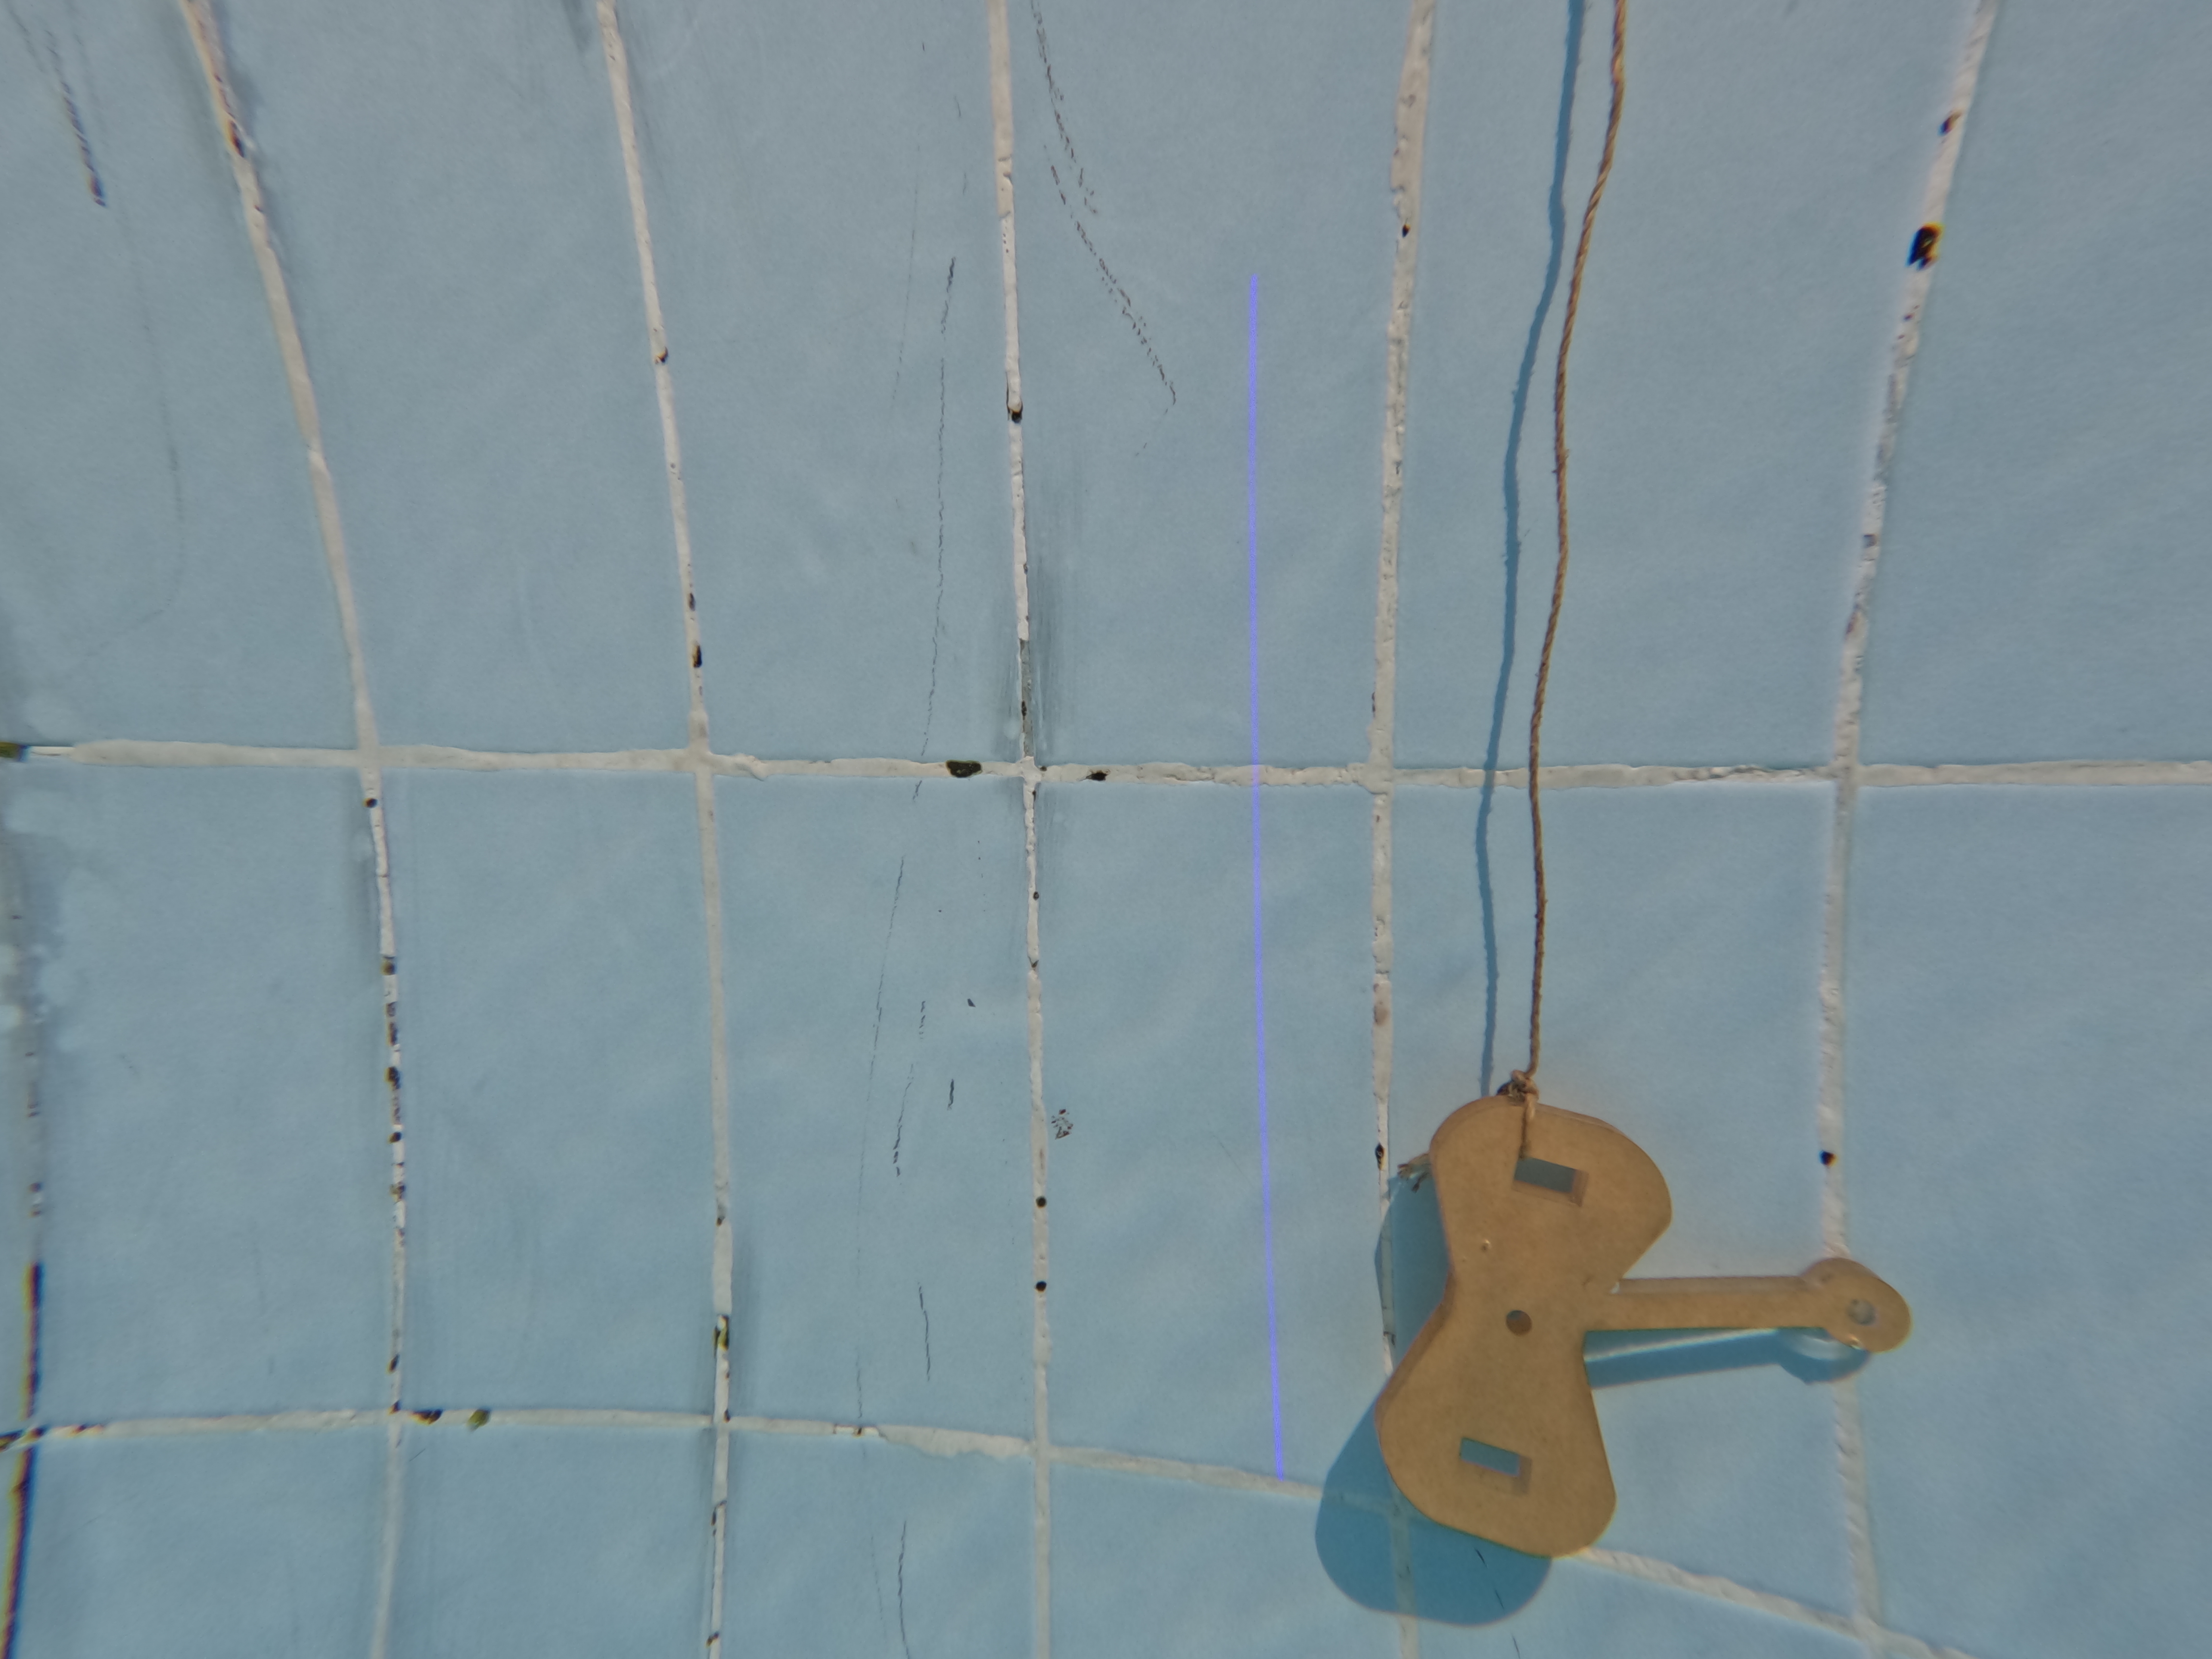

Supplement: Supplementary file 588 [file G0018933.pdf › Level_6_1/G0018933.pdf]

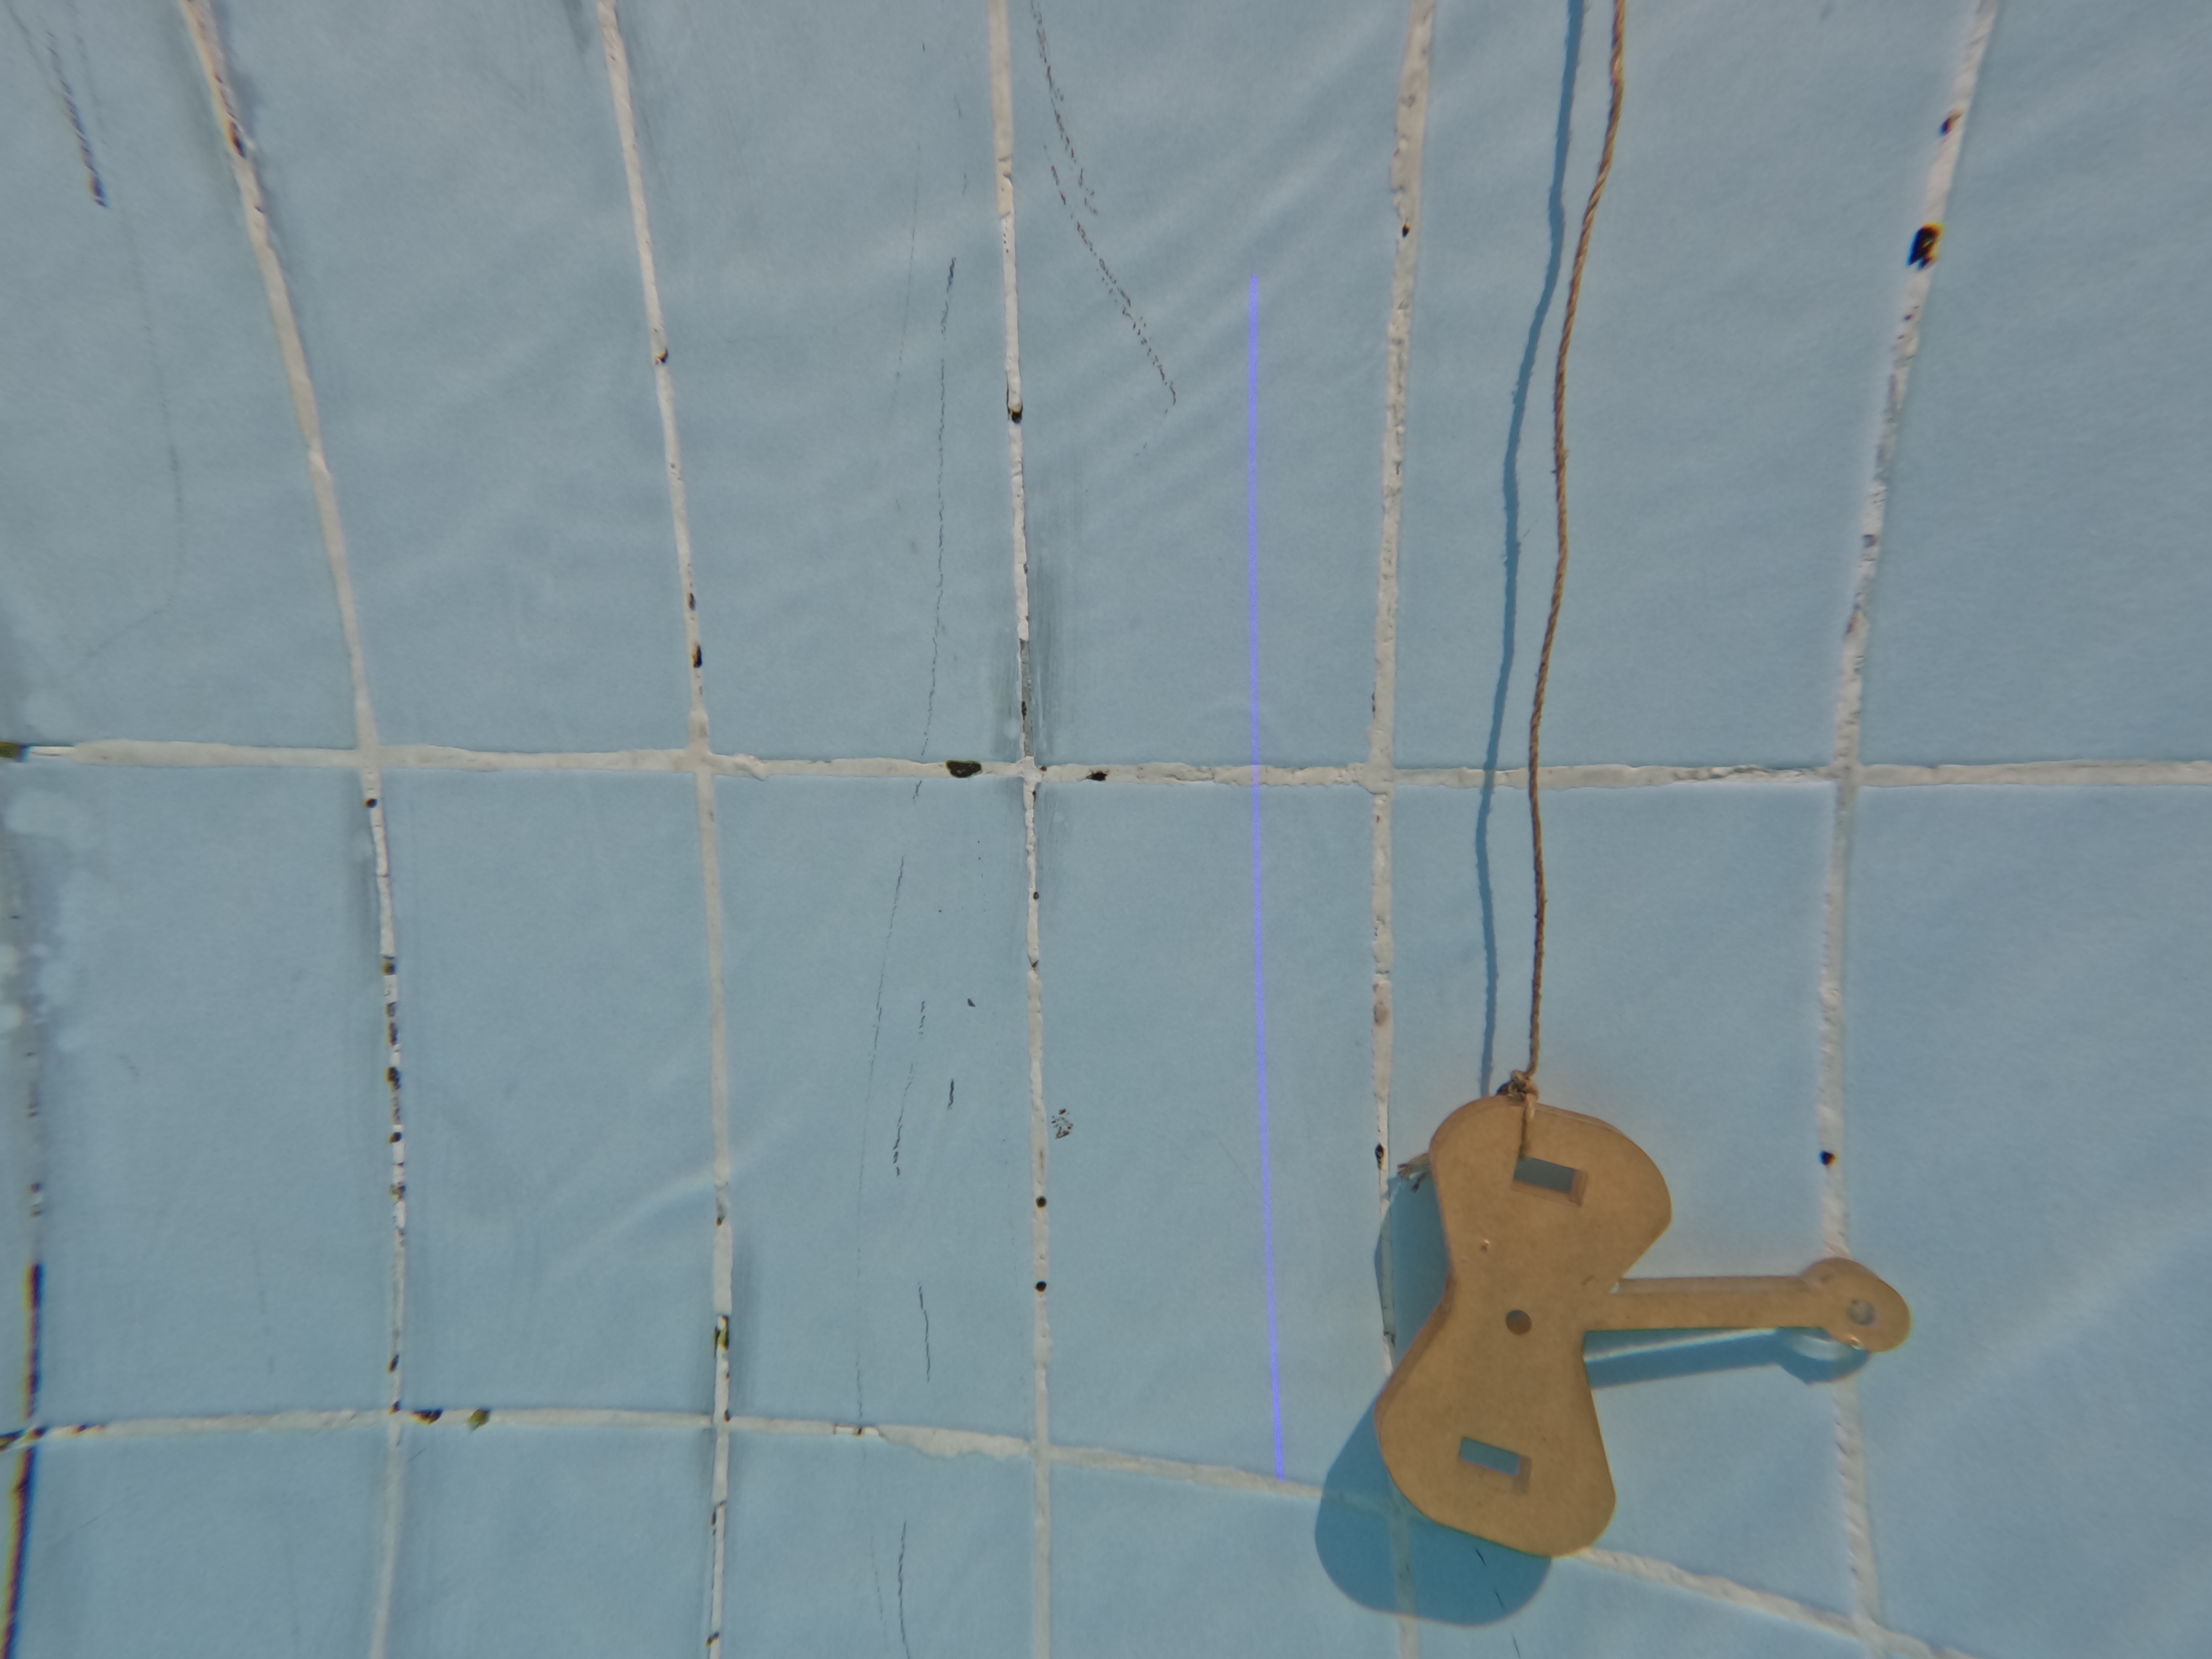

Supplement: Supplementary file 589 [file G0018934.pdf › Level_6_1/G0018934.pdf]

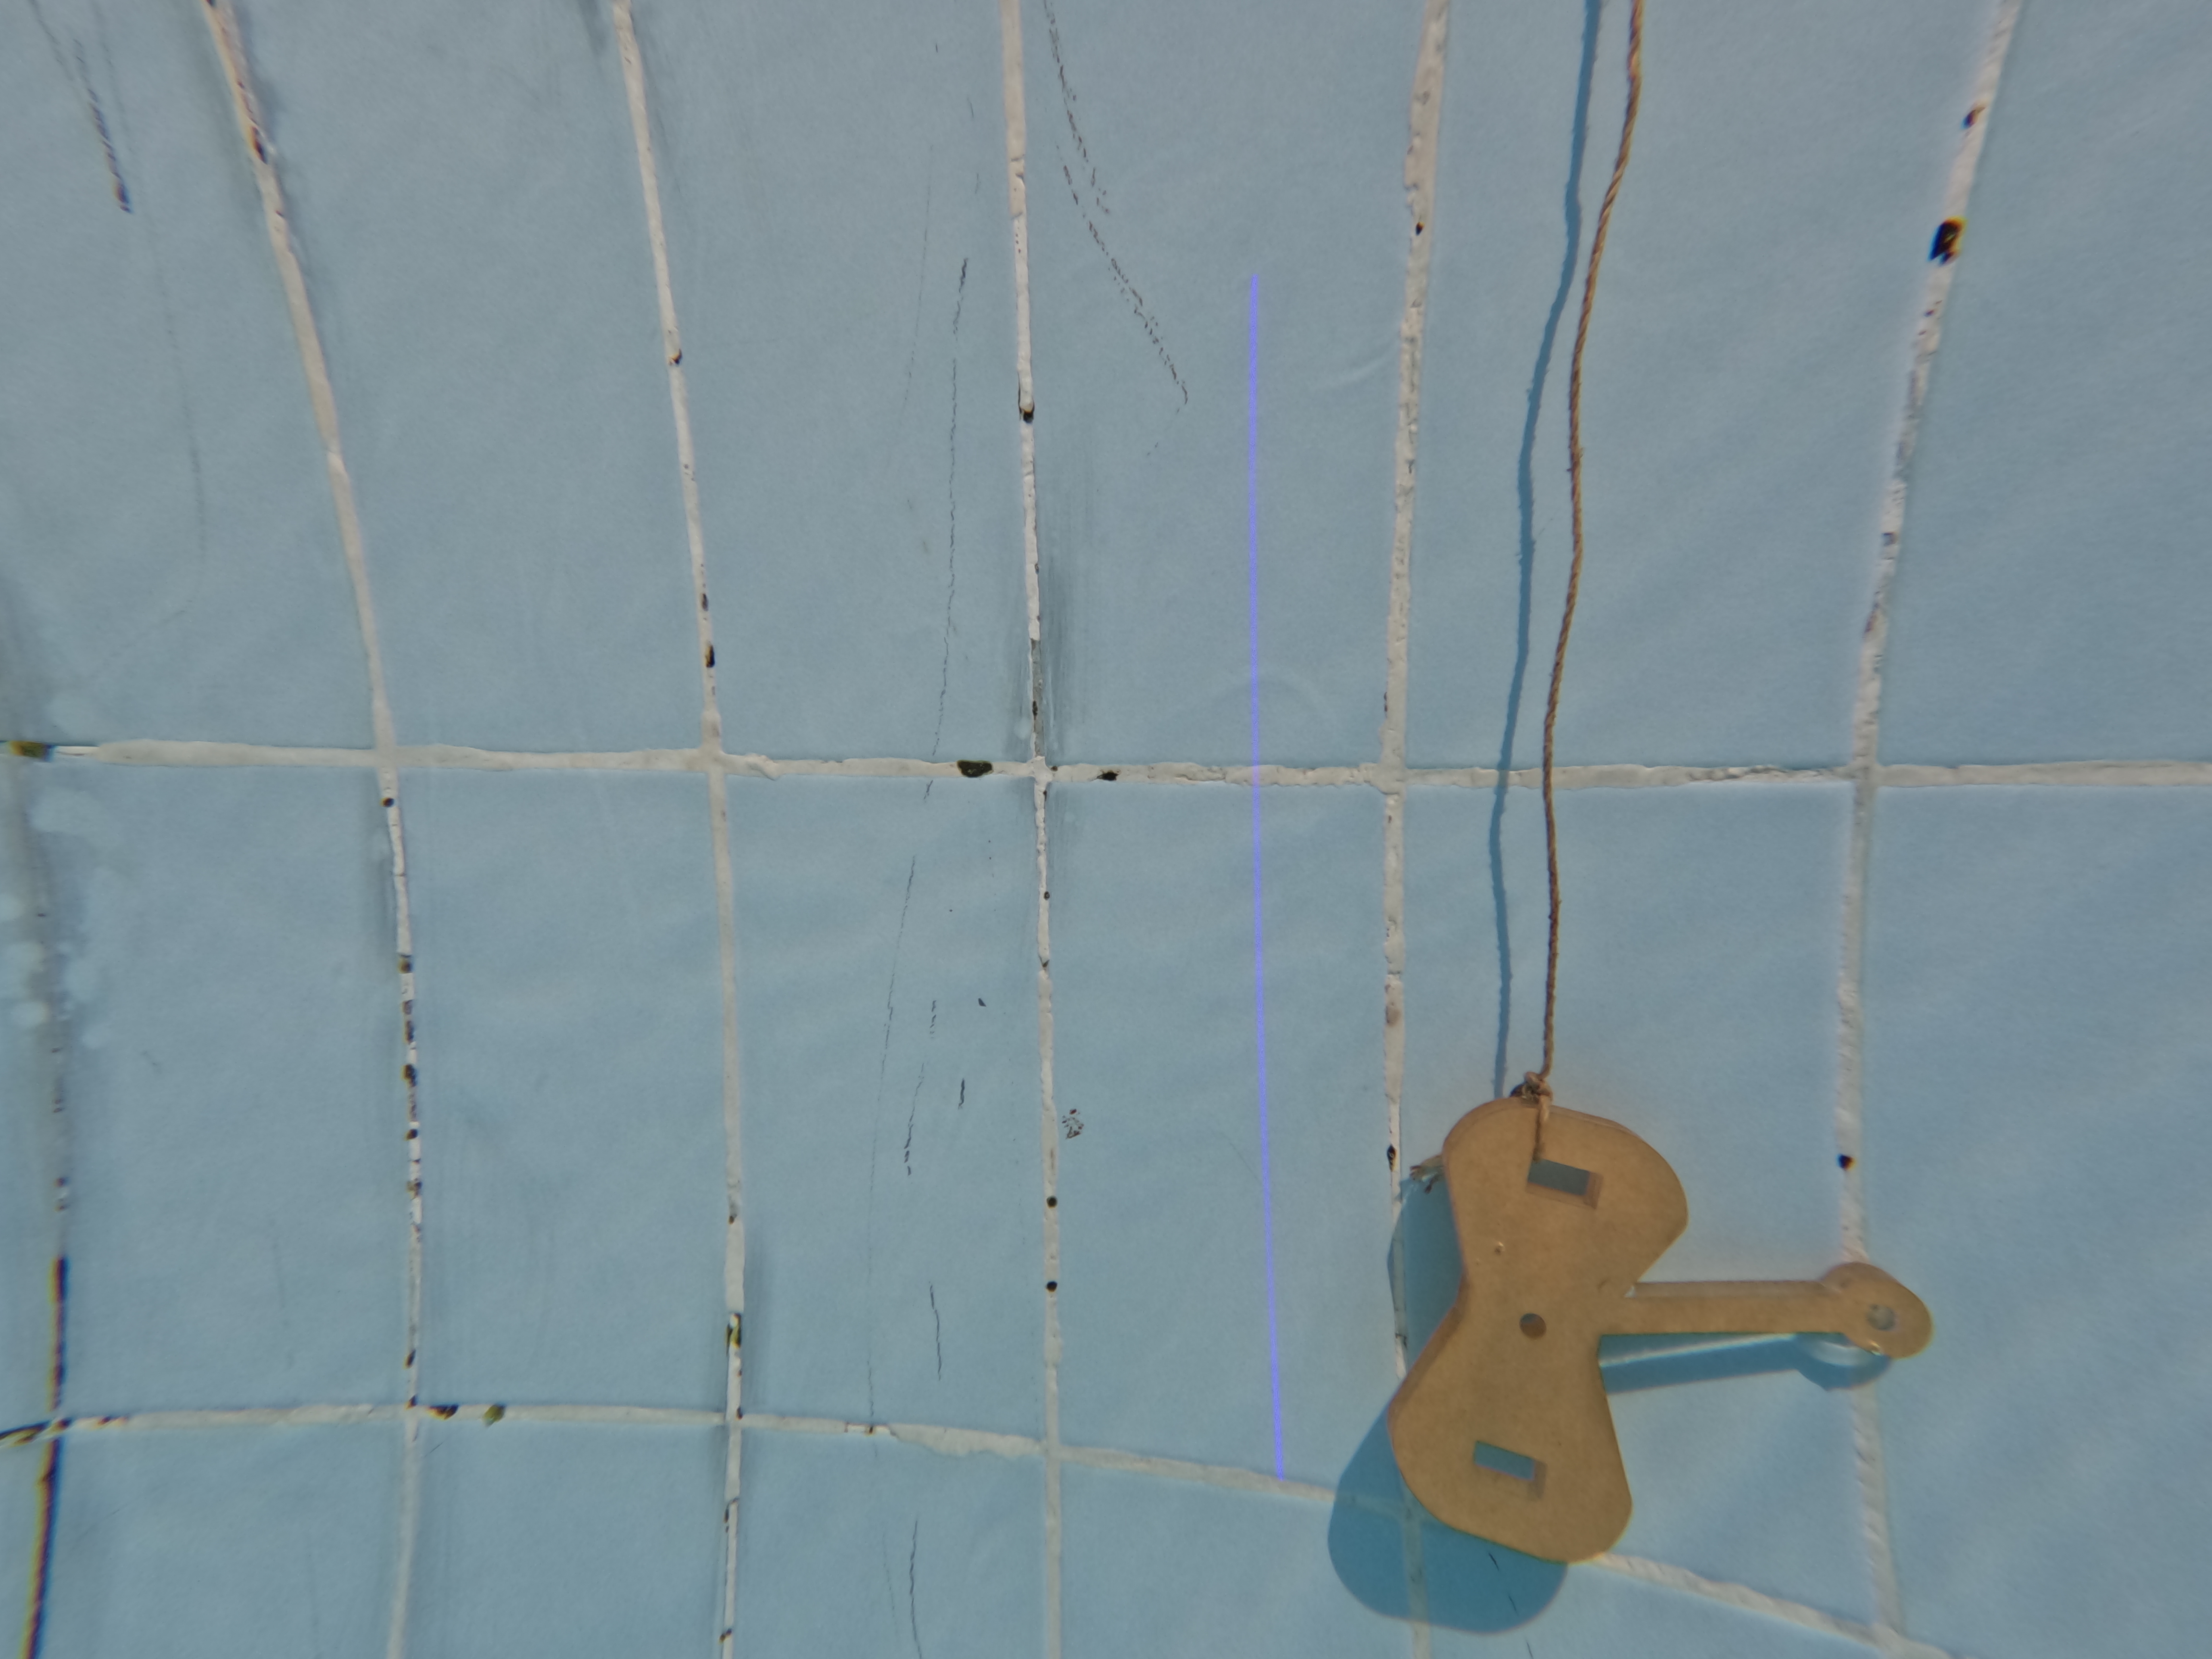

Supplement: Supplementary file 590 [file G0018935.pdf › Level_6_1/G0018935.pdf]

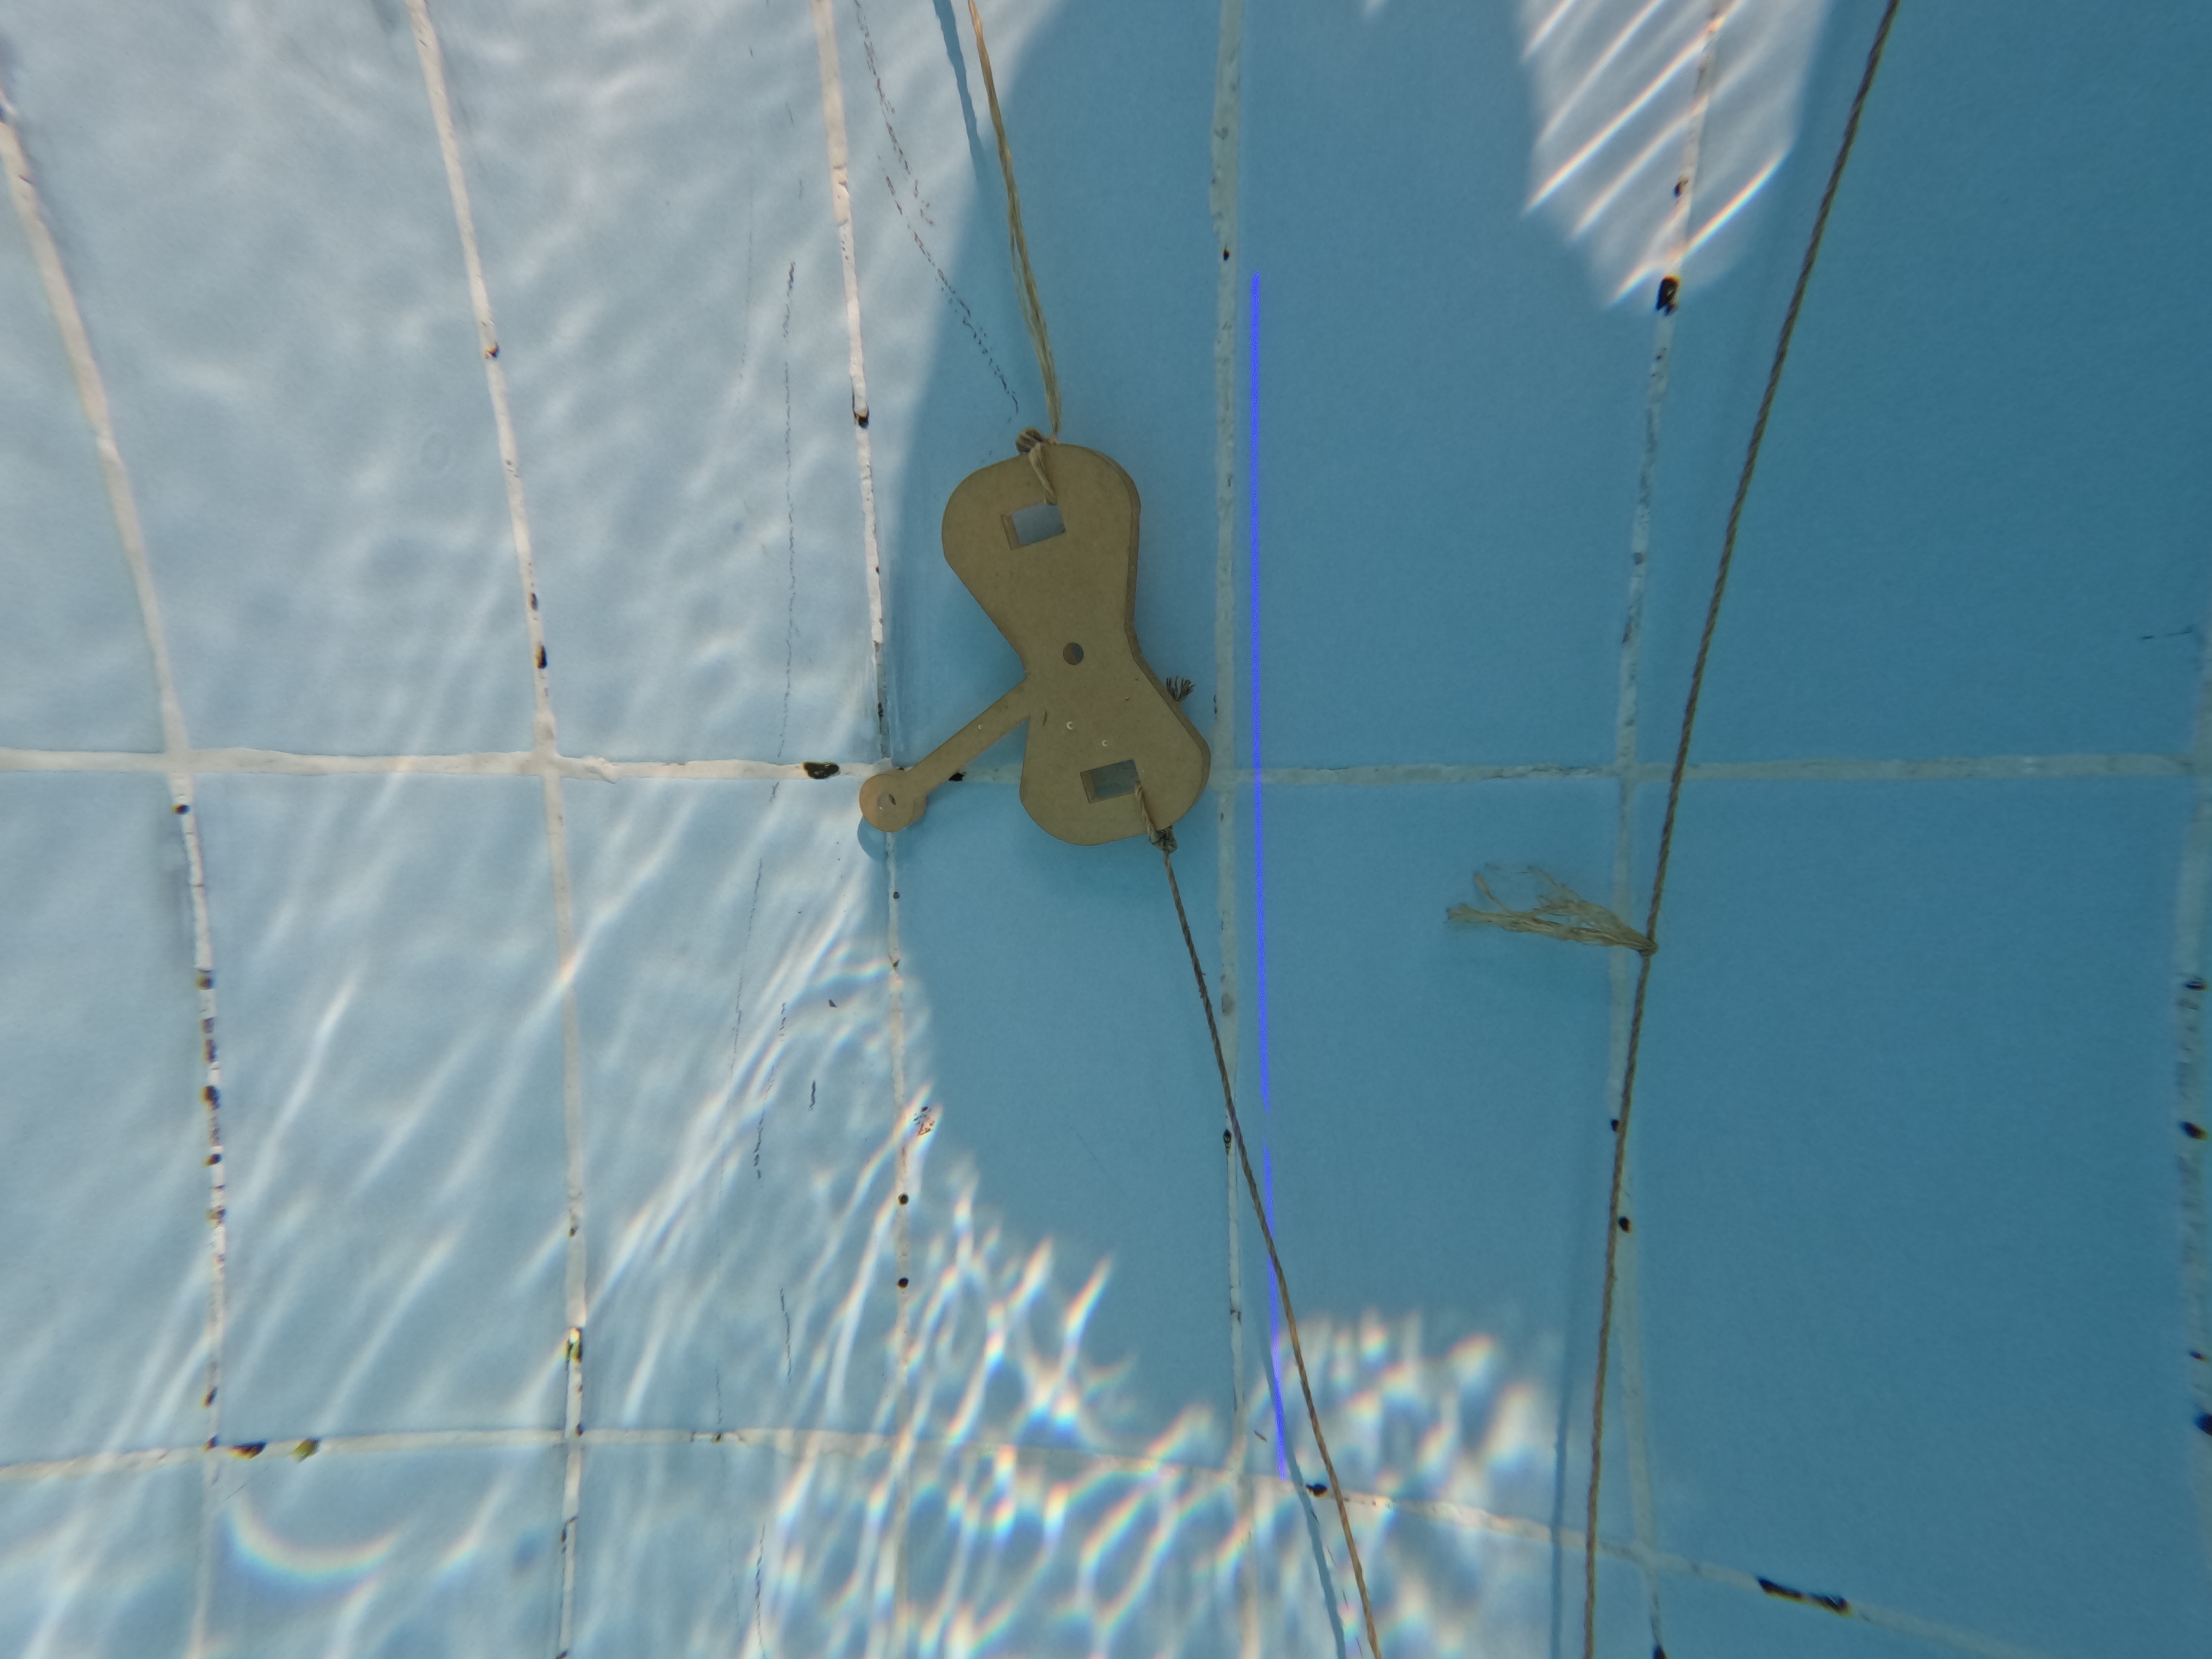

Supplement: Supplementary file 591 [file G0019605.pdf › Level_5_1/G0019605.pdf]

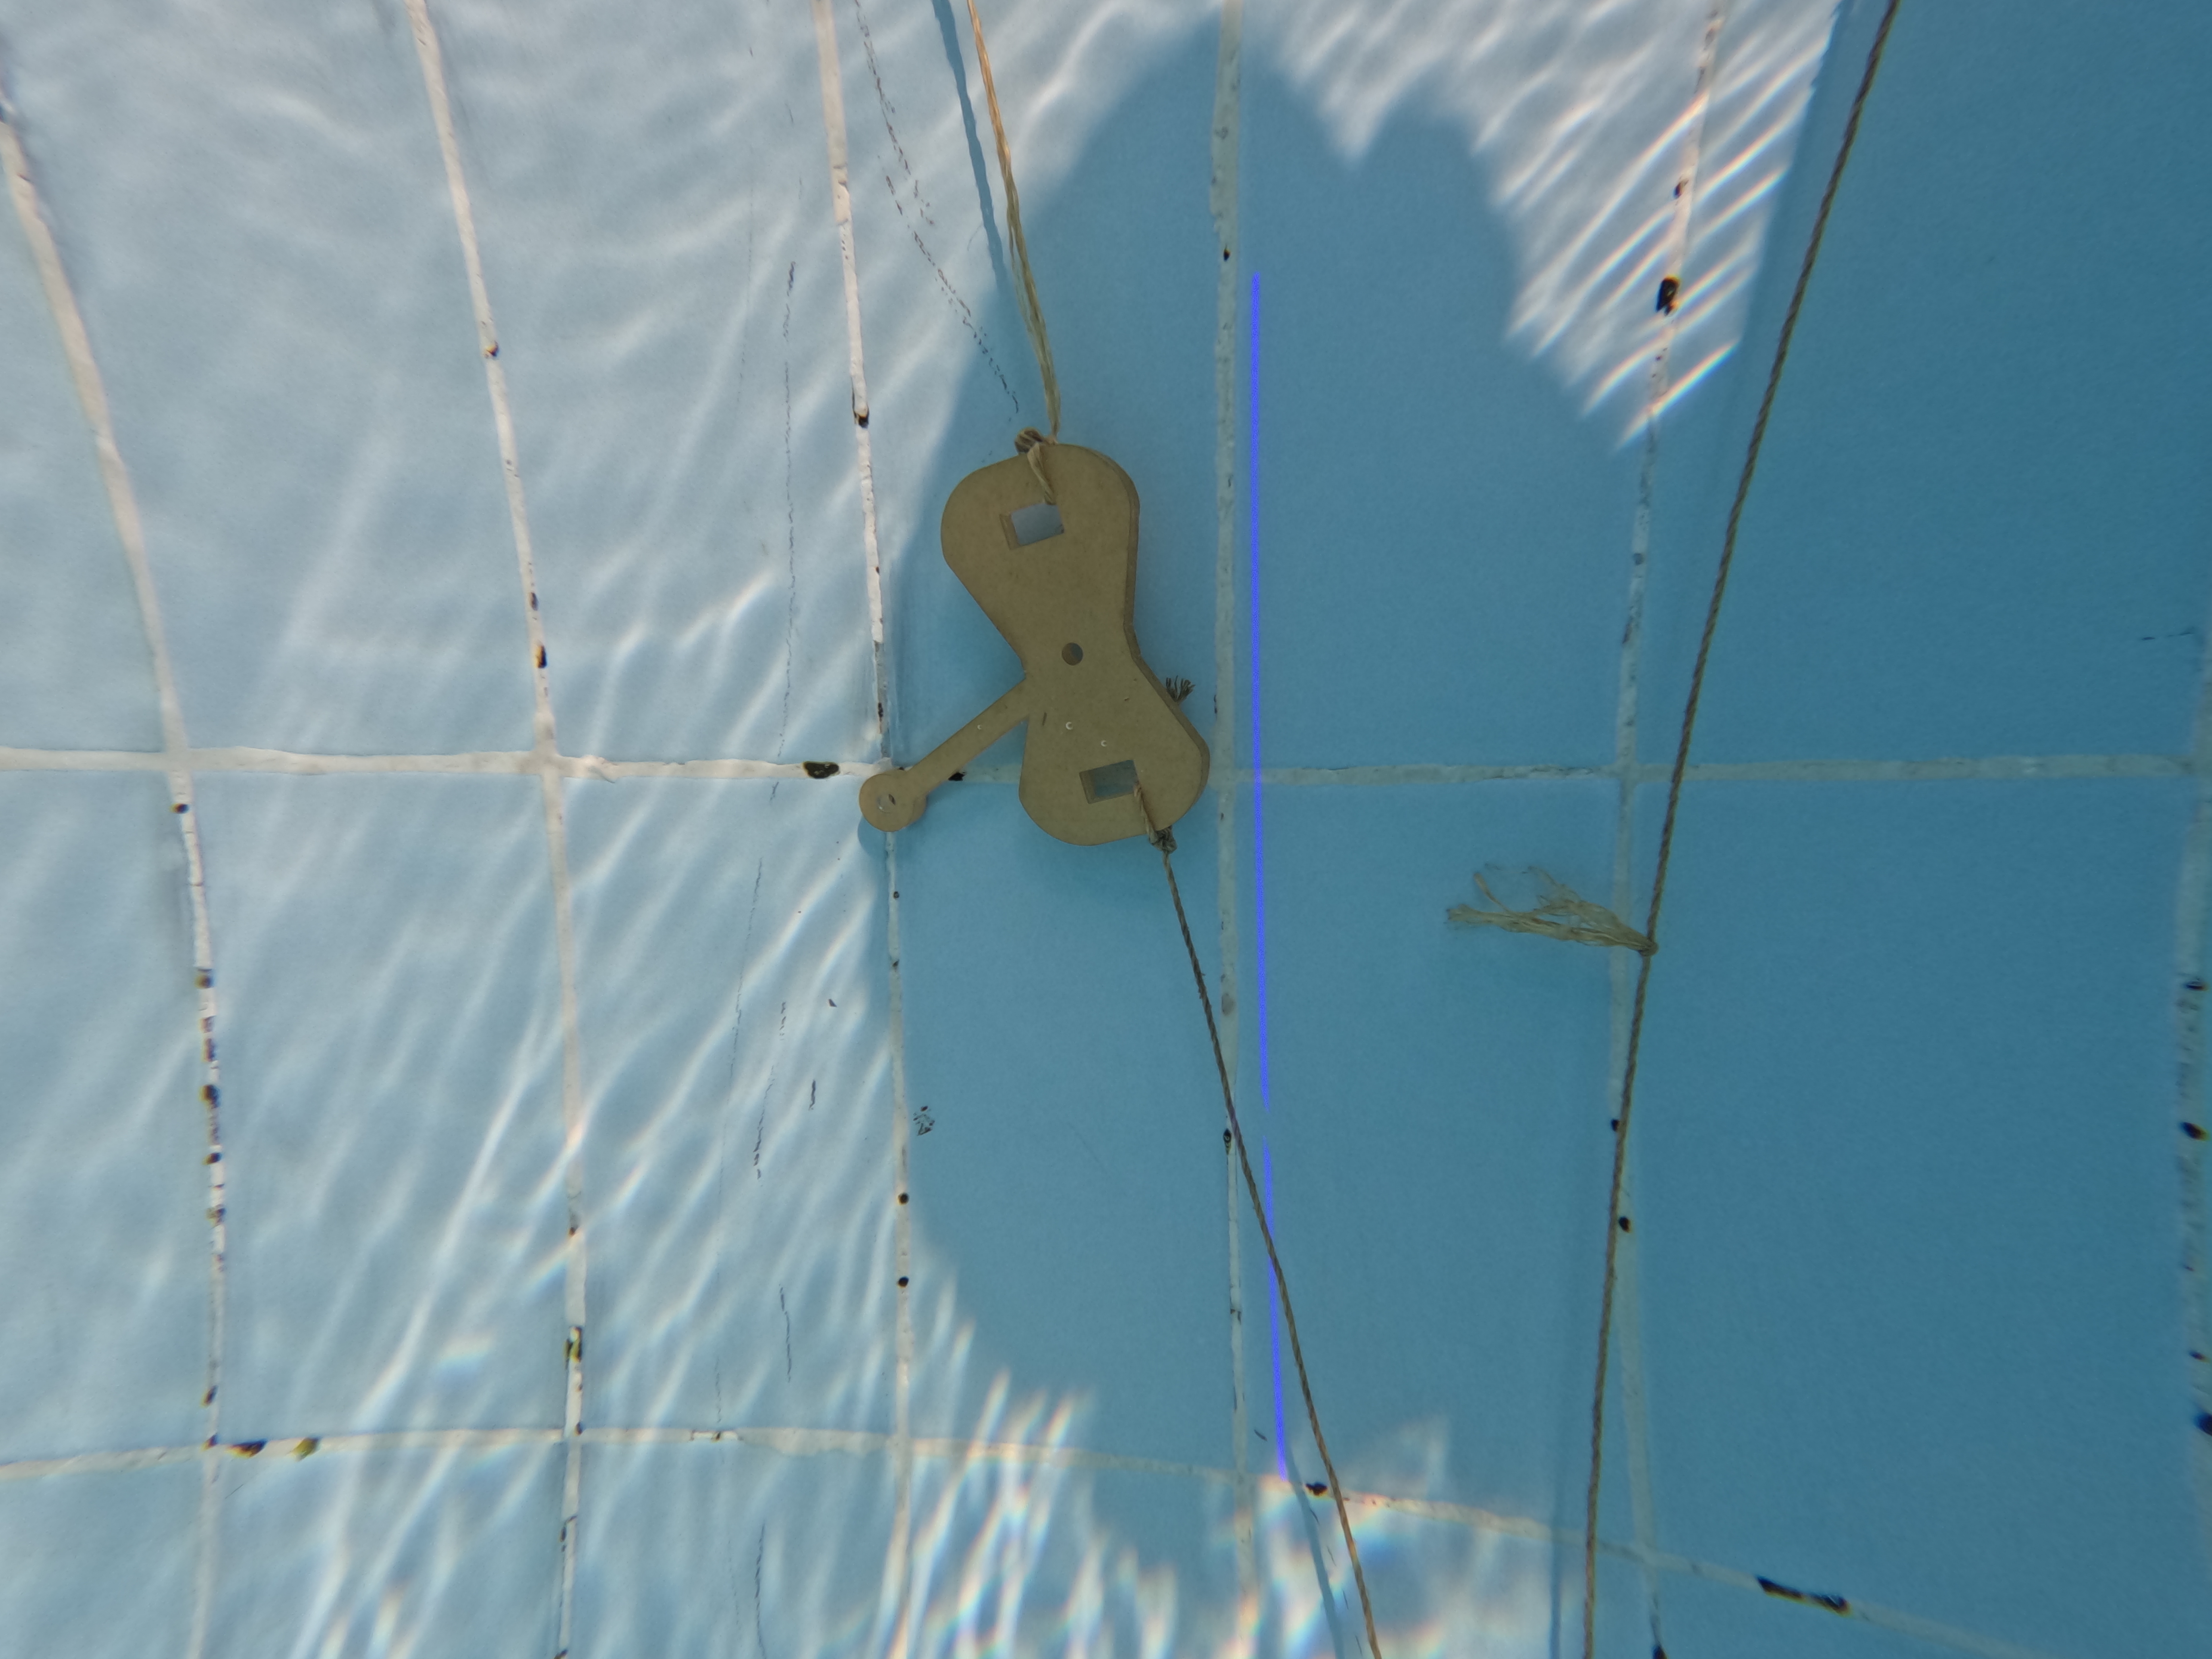

Supplement: Supplementary file 592 [file G0019606.pdf › Level_5_1/G0019606.pdf]

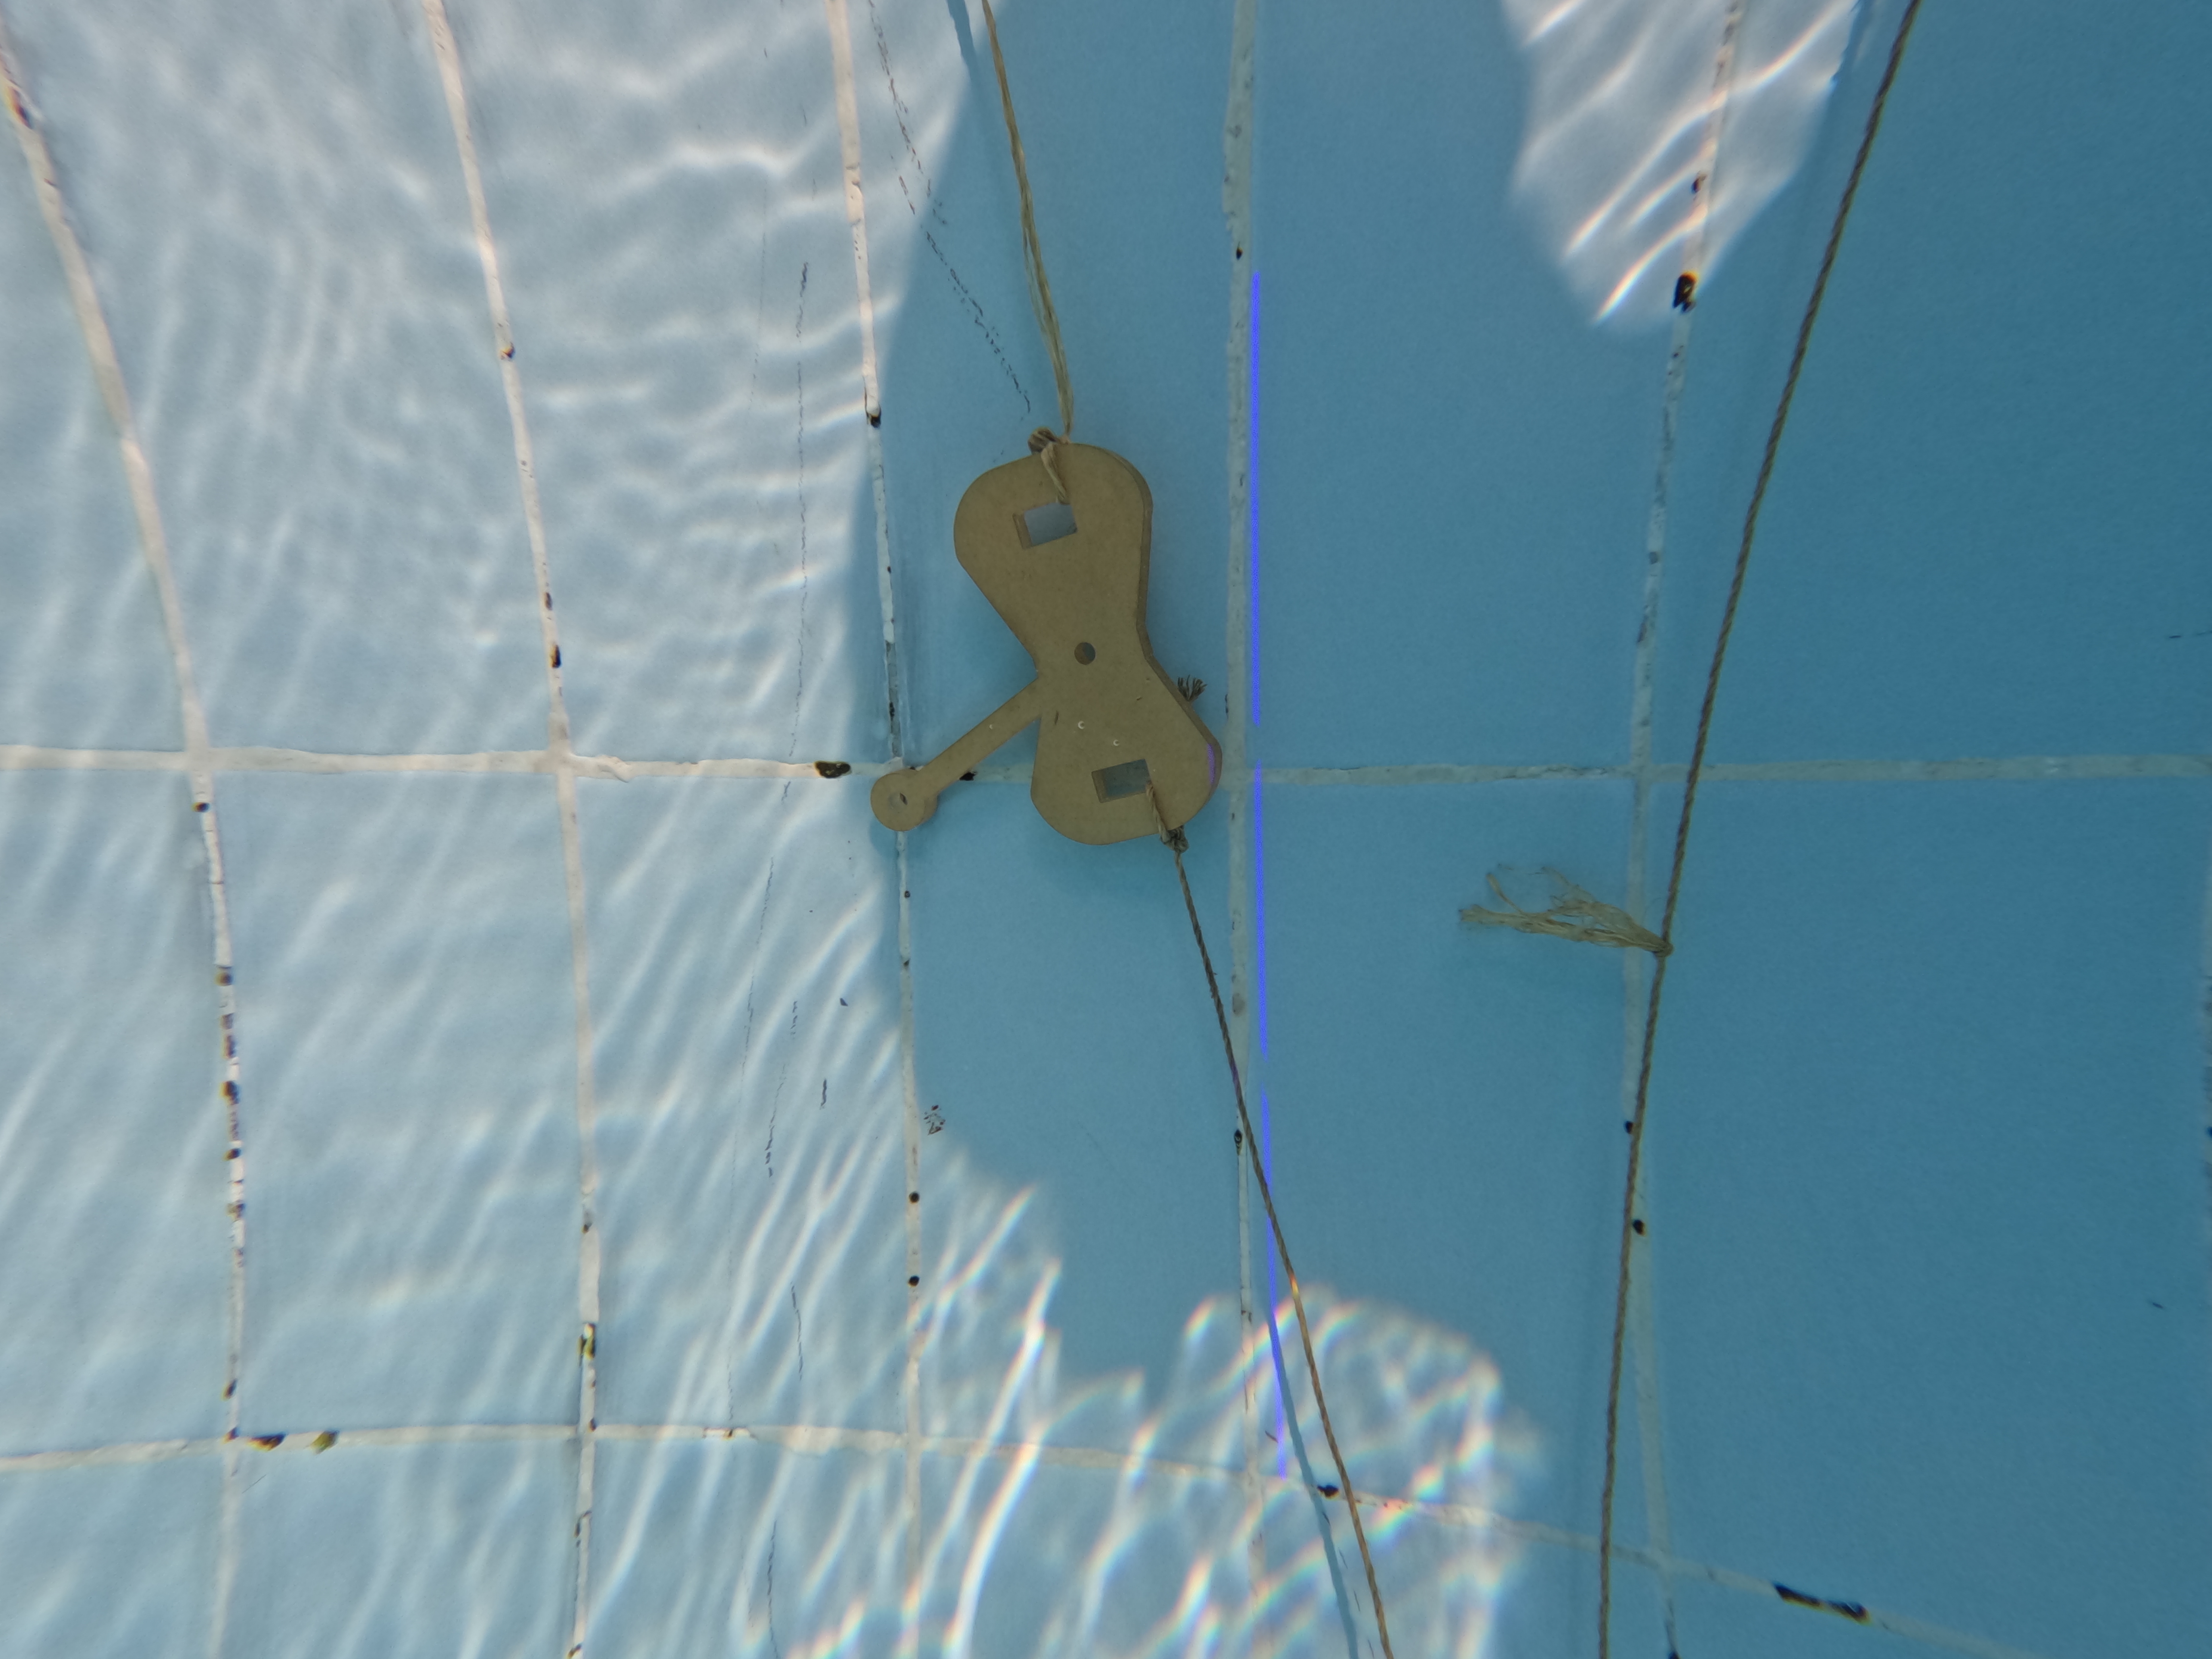

Supplement: Supplementary file 593 [file G0019607.pdf › Level_5_1/G0019607.pdf]

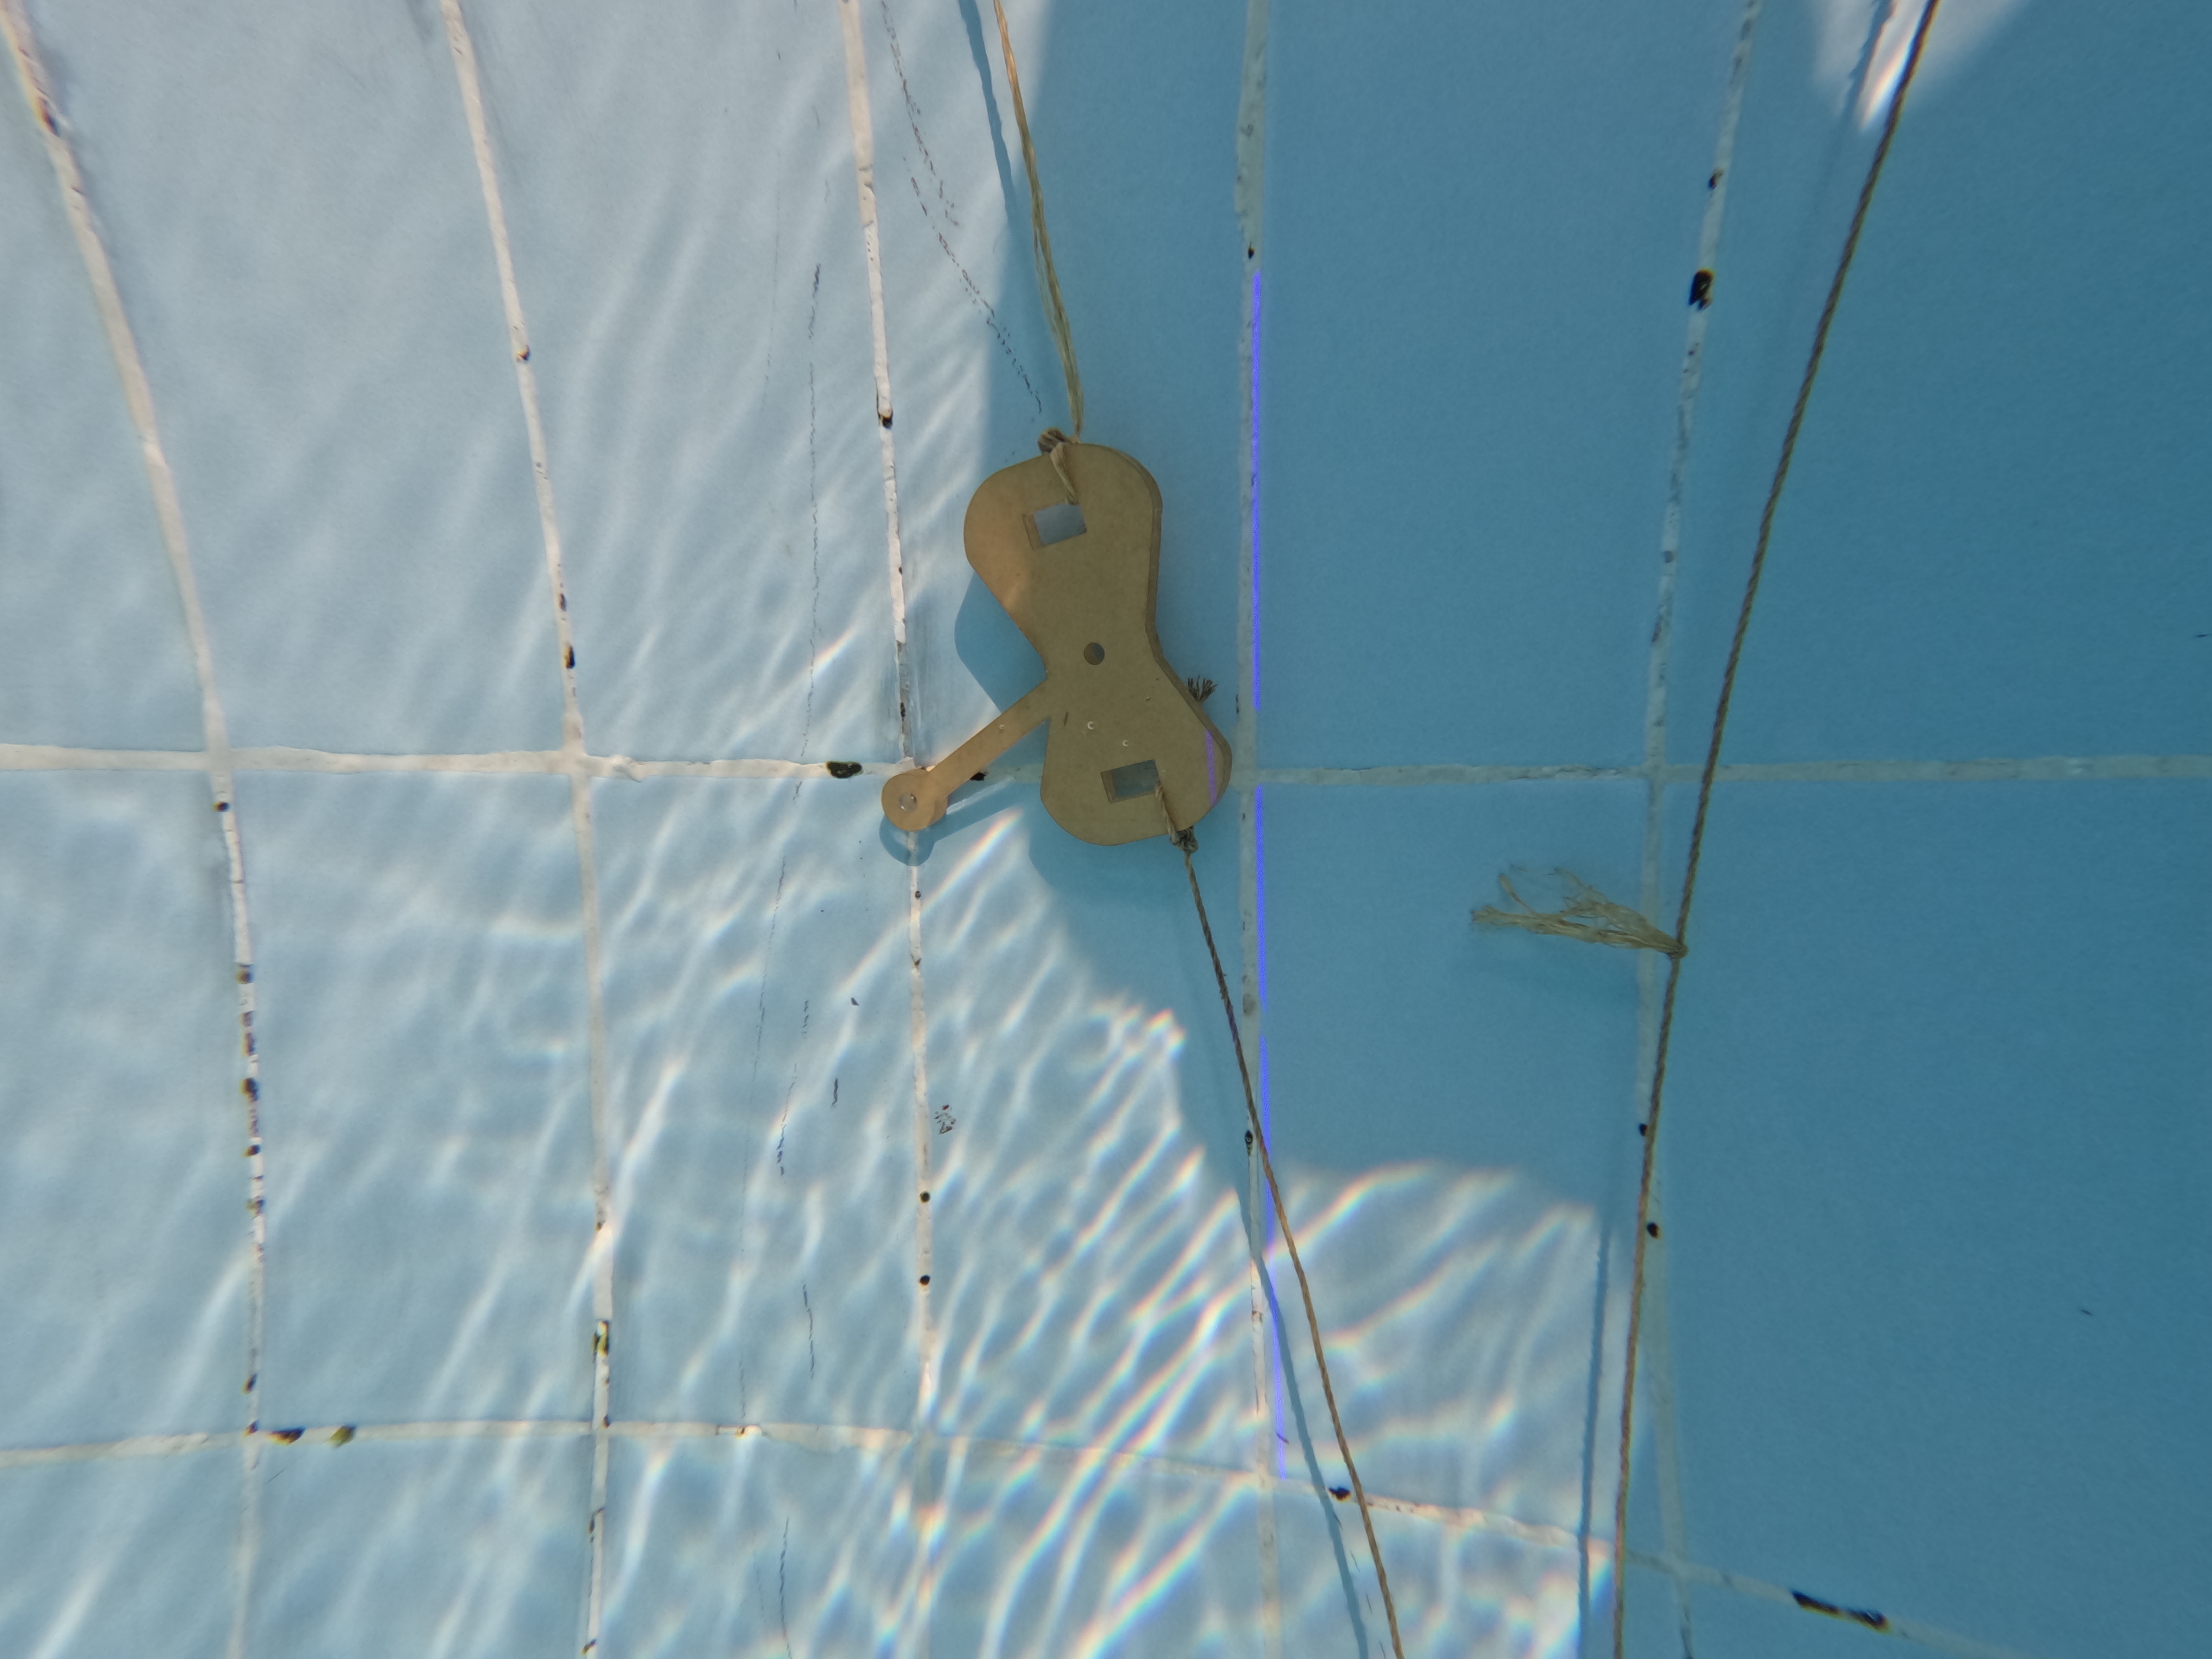

Supplement: Supplementary file 594 [file G0019608.pdf › Level_5_1/G0019608.pdf]

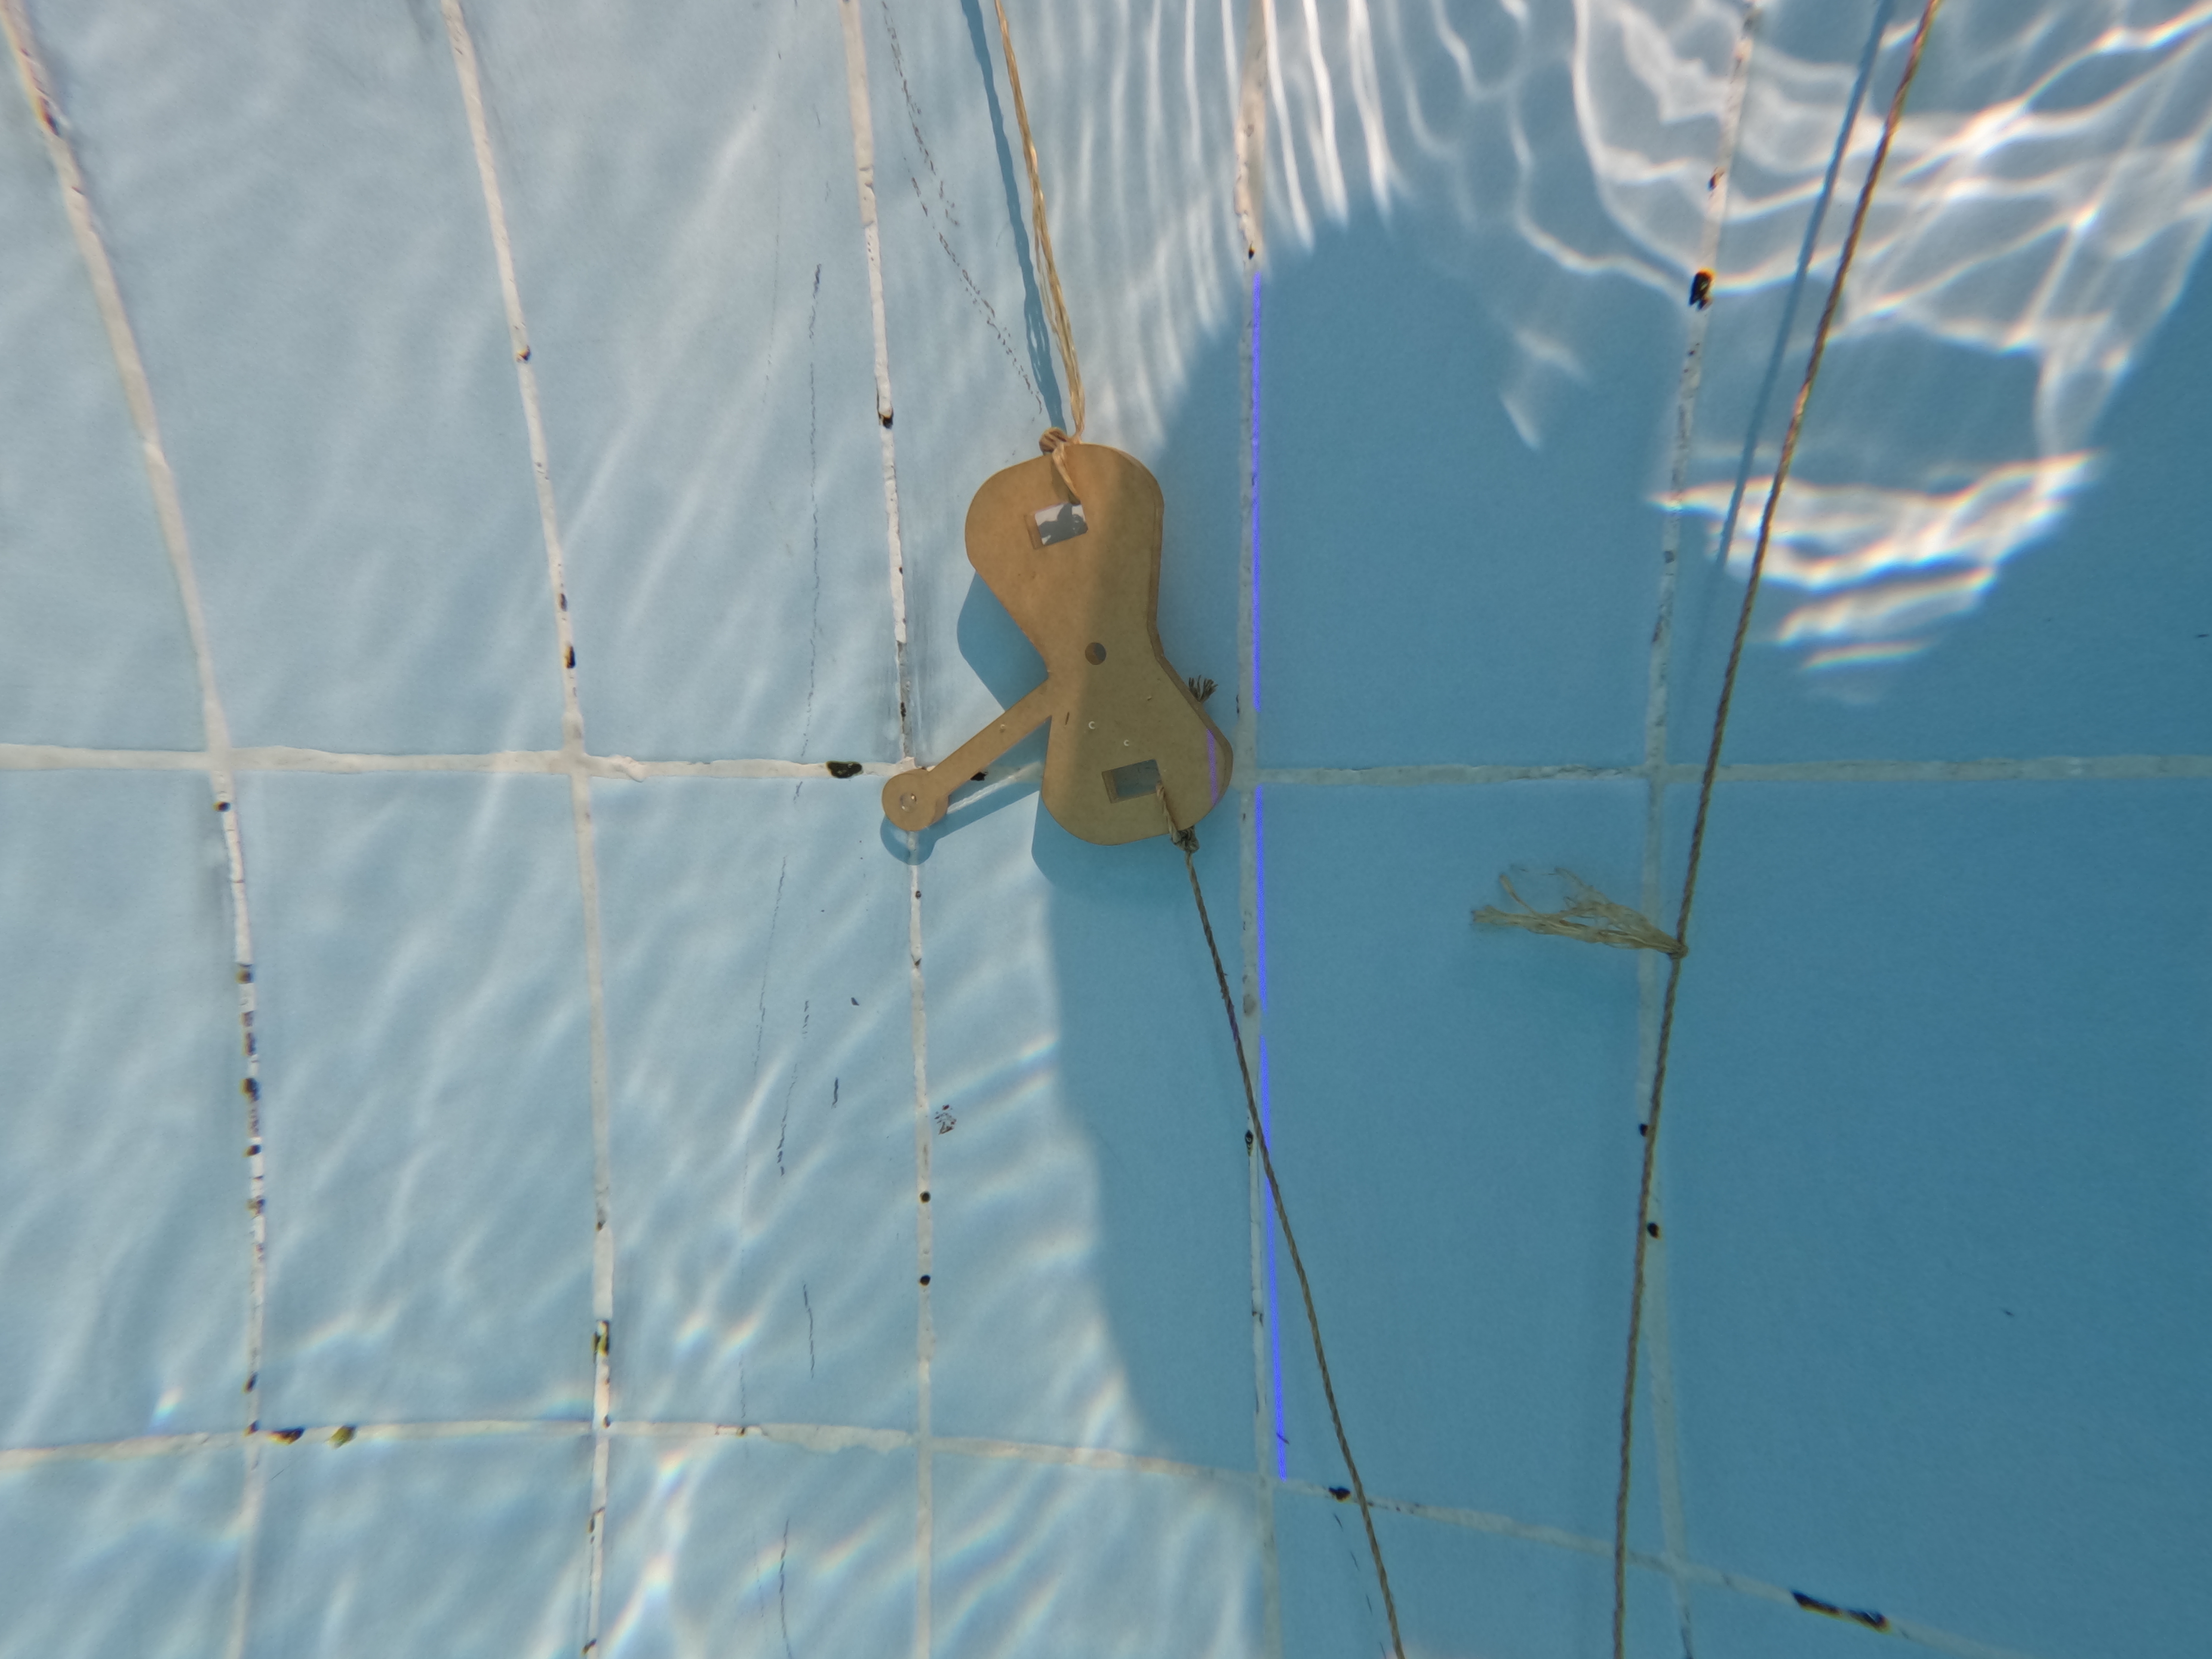

Supplement: Supplementary file 595 [file G0019609.pdf › Level_5_1/G0019609.pdf]

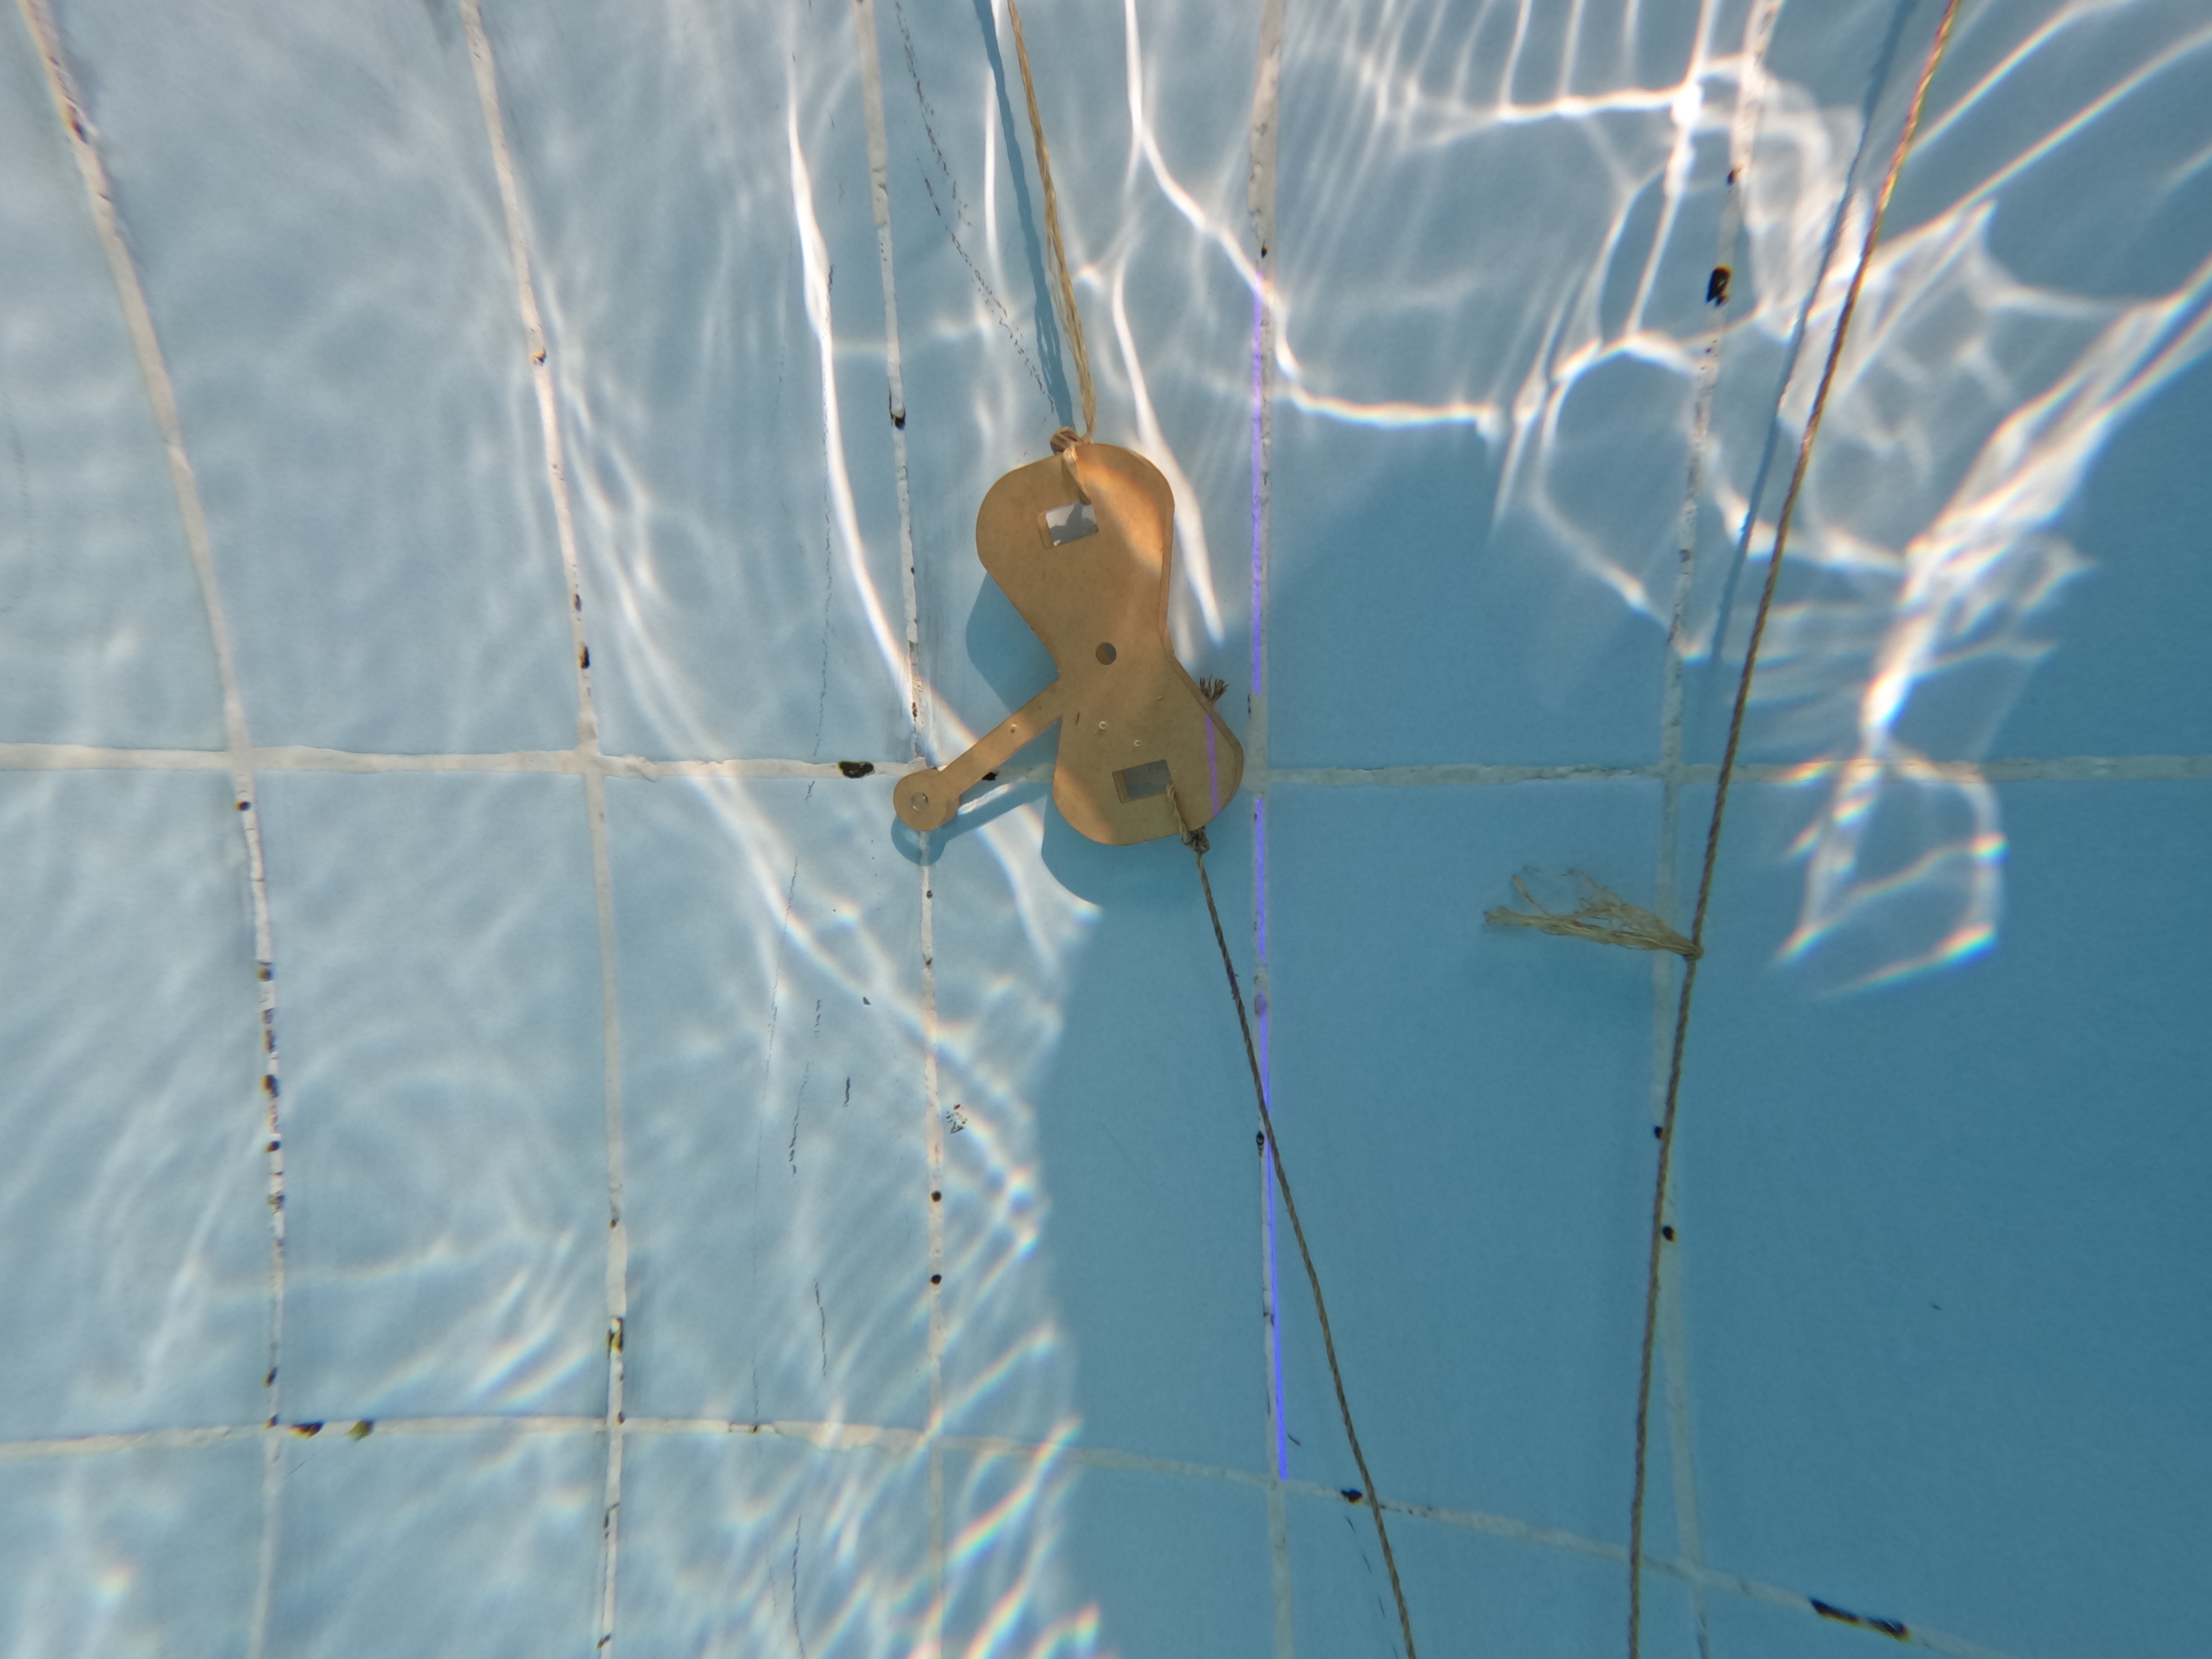

Supplement: Supplementary file 596 [file G0019610.pdf › Level_5_1/G0019610.pdf]

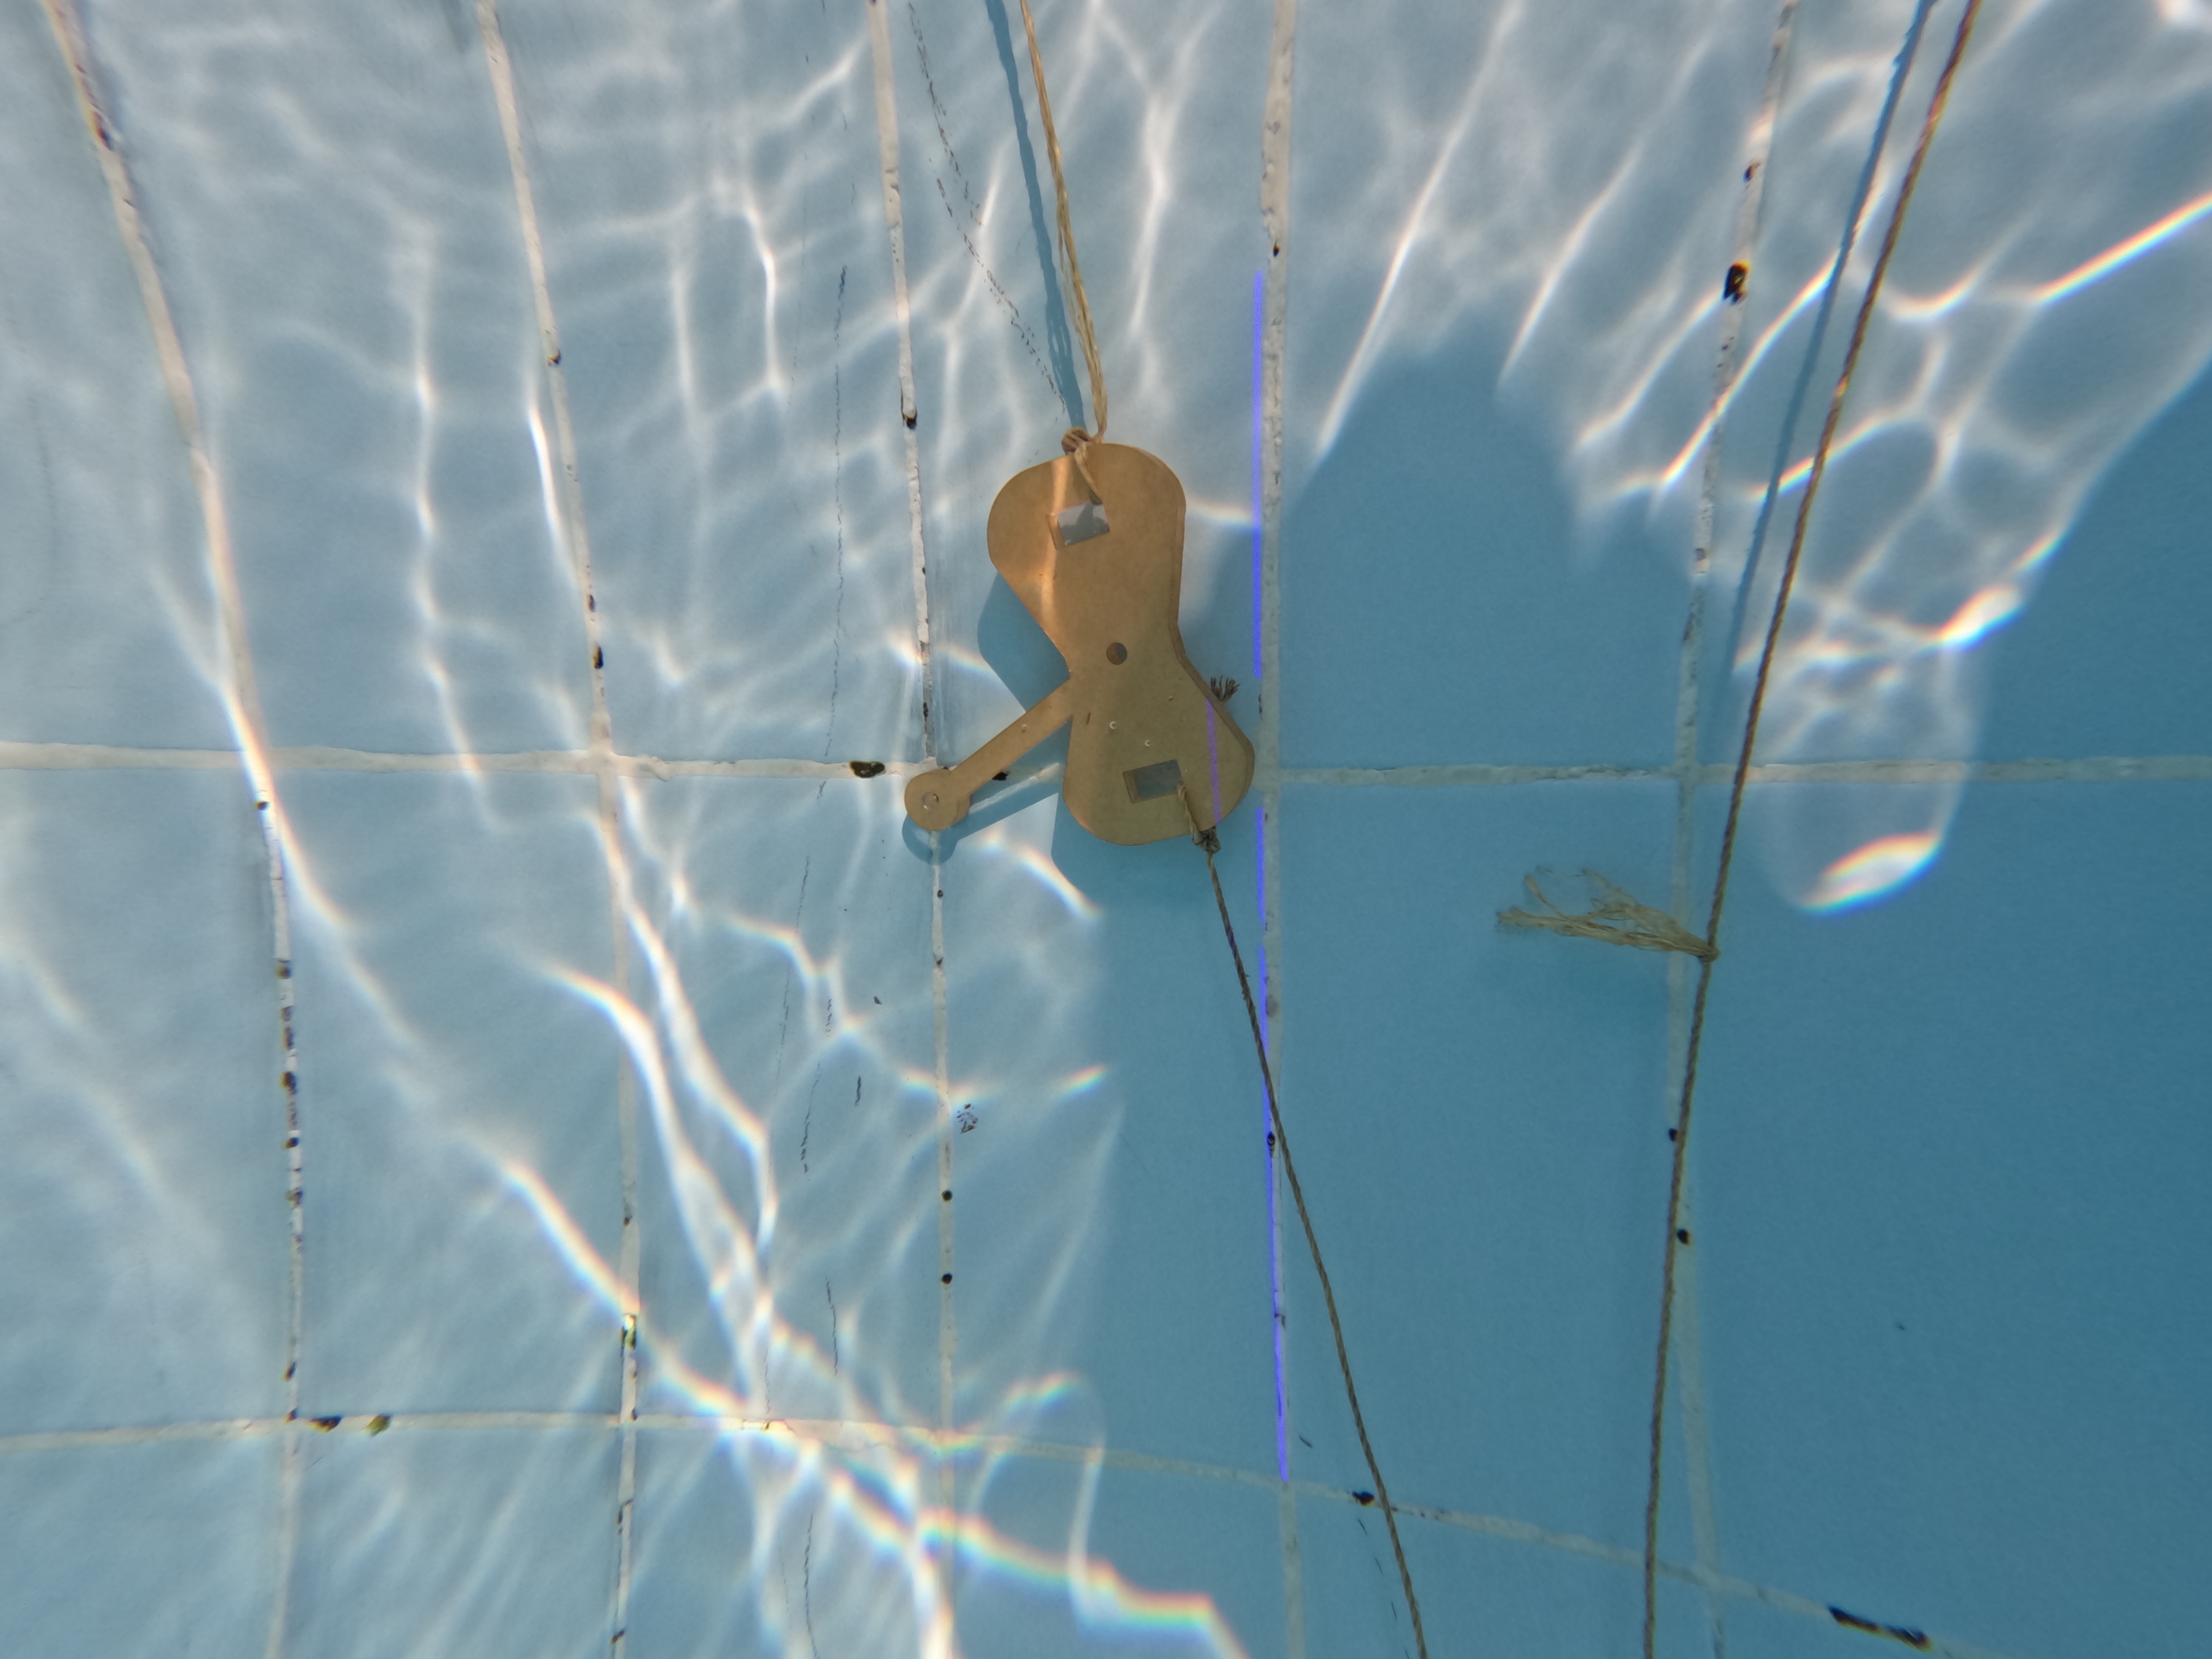

Supplement: Supplementary file 597 [file G0019611.pdf › Level_5_1/G0019611.pdf]

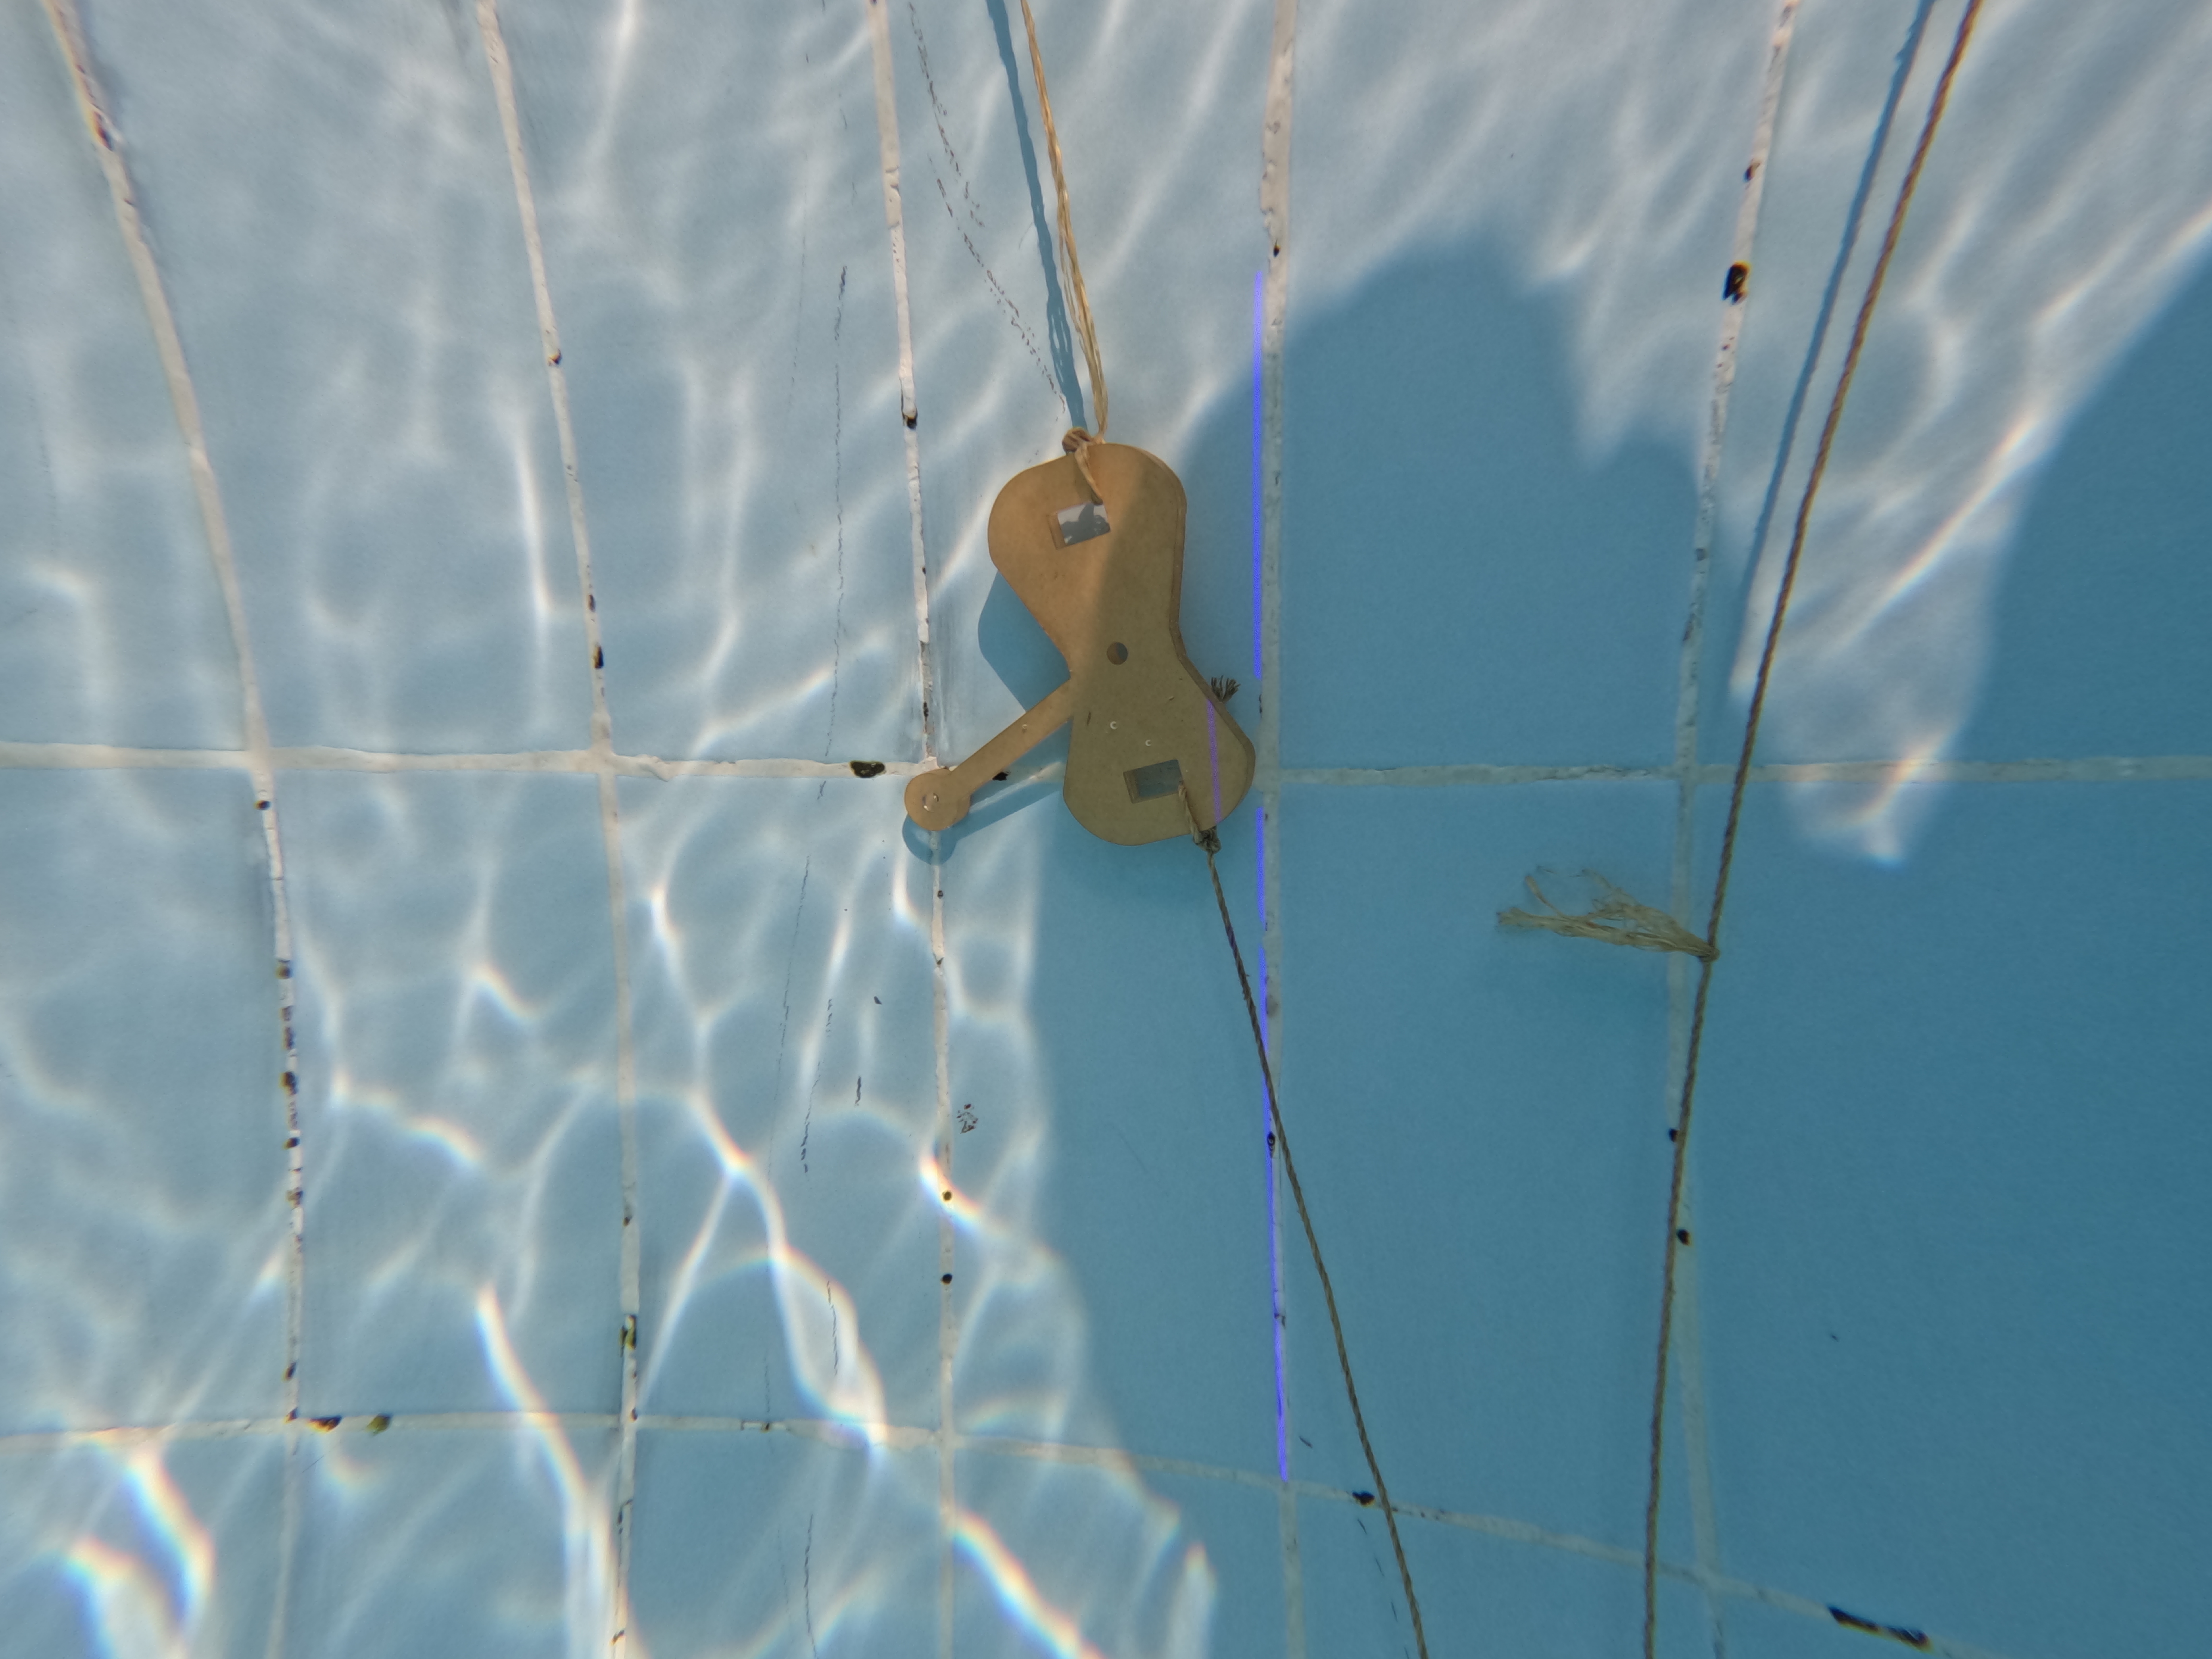

Supplement: Supplementary file 598 [file G0019612.pdf › Level_5_1/G0019612.pdf]

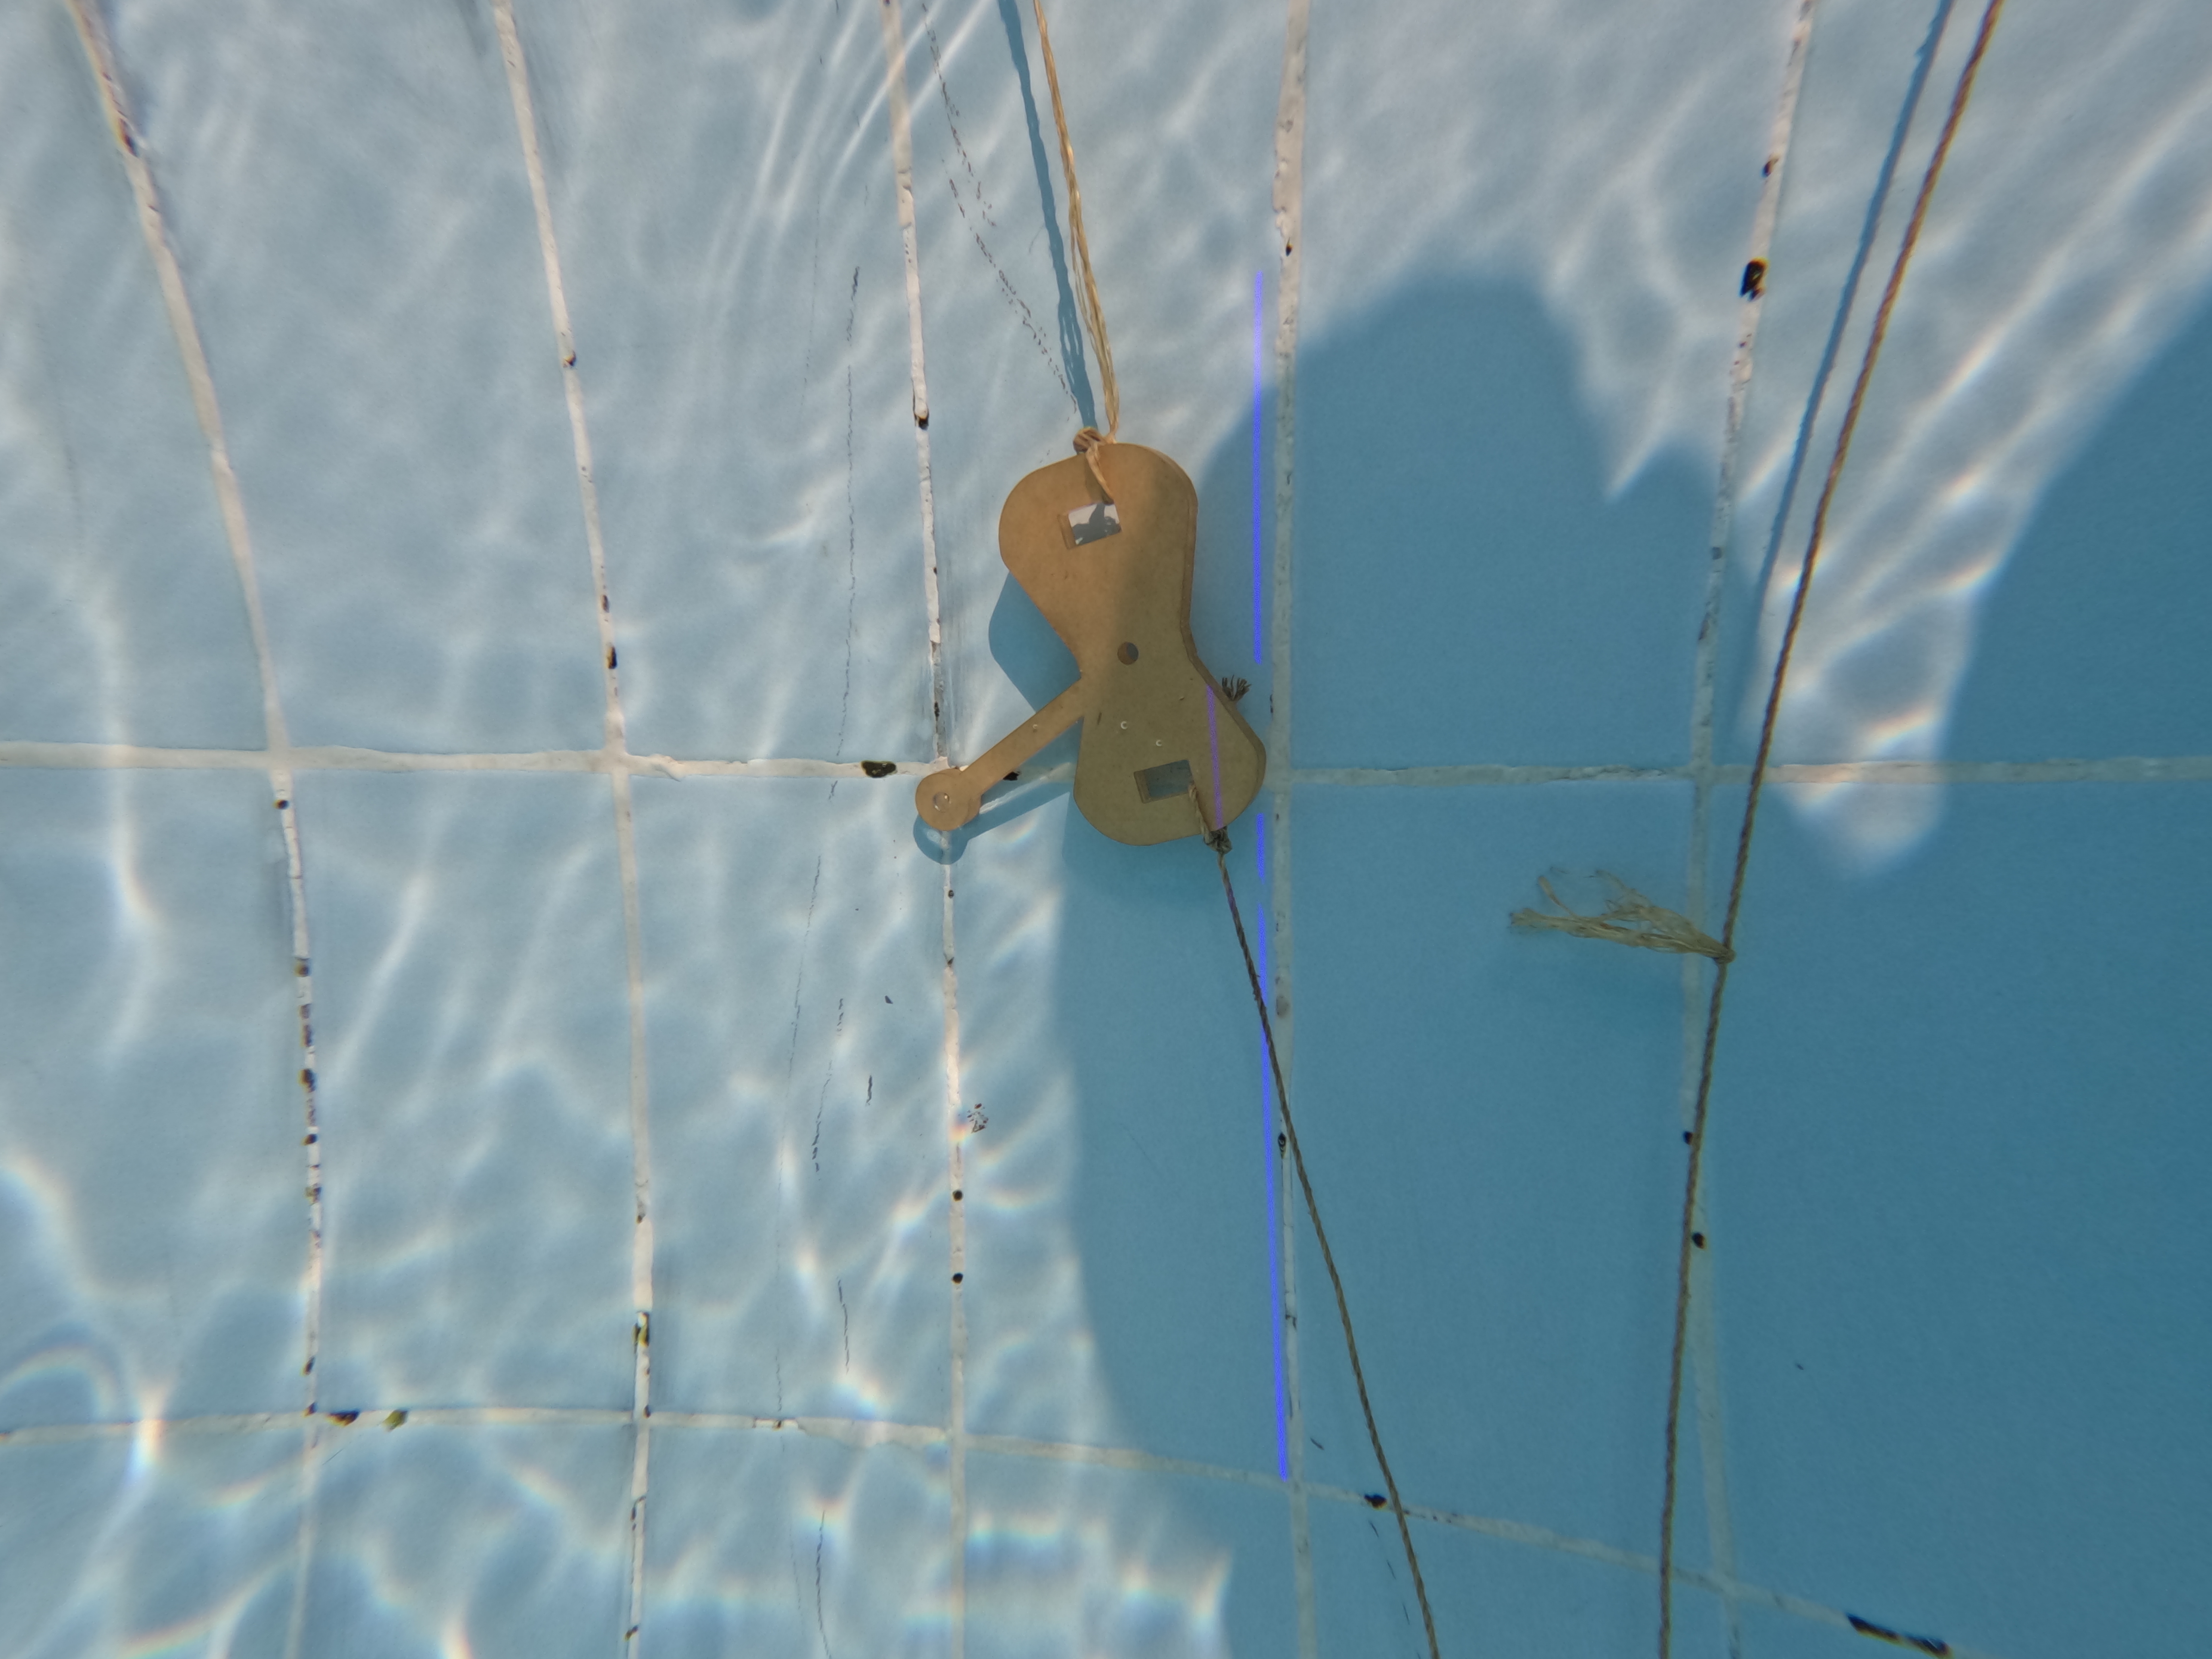

Supplement: Supplementary file 599 [file G0019613.pdf › Level_5_1/G0019613.pdf]

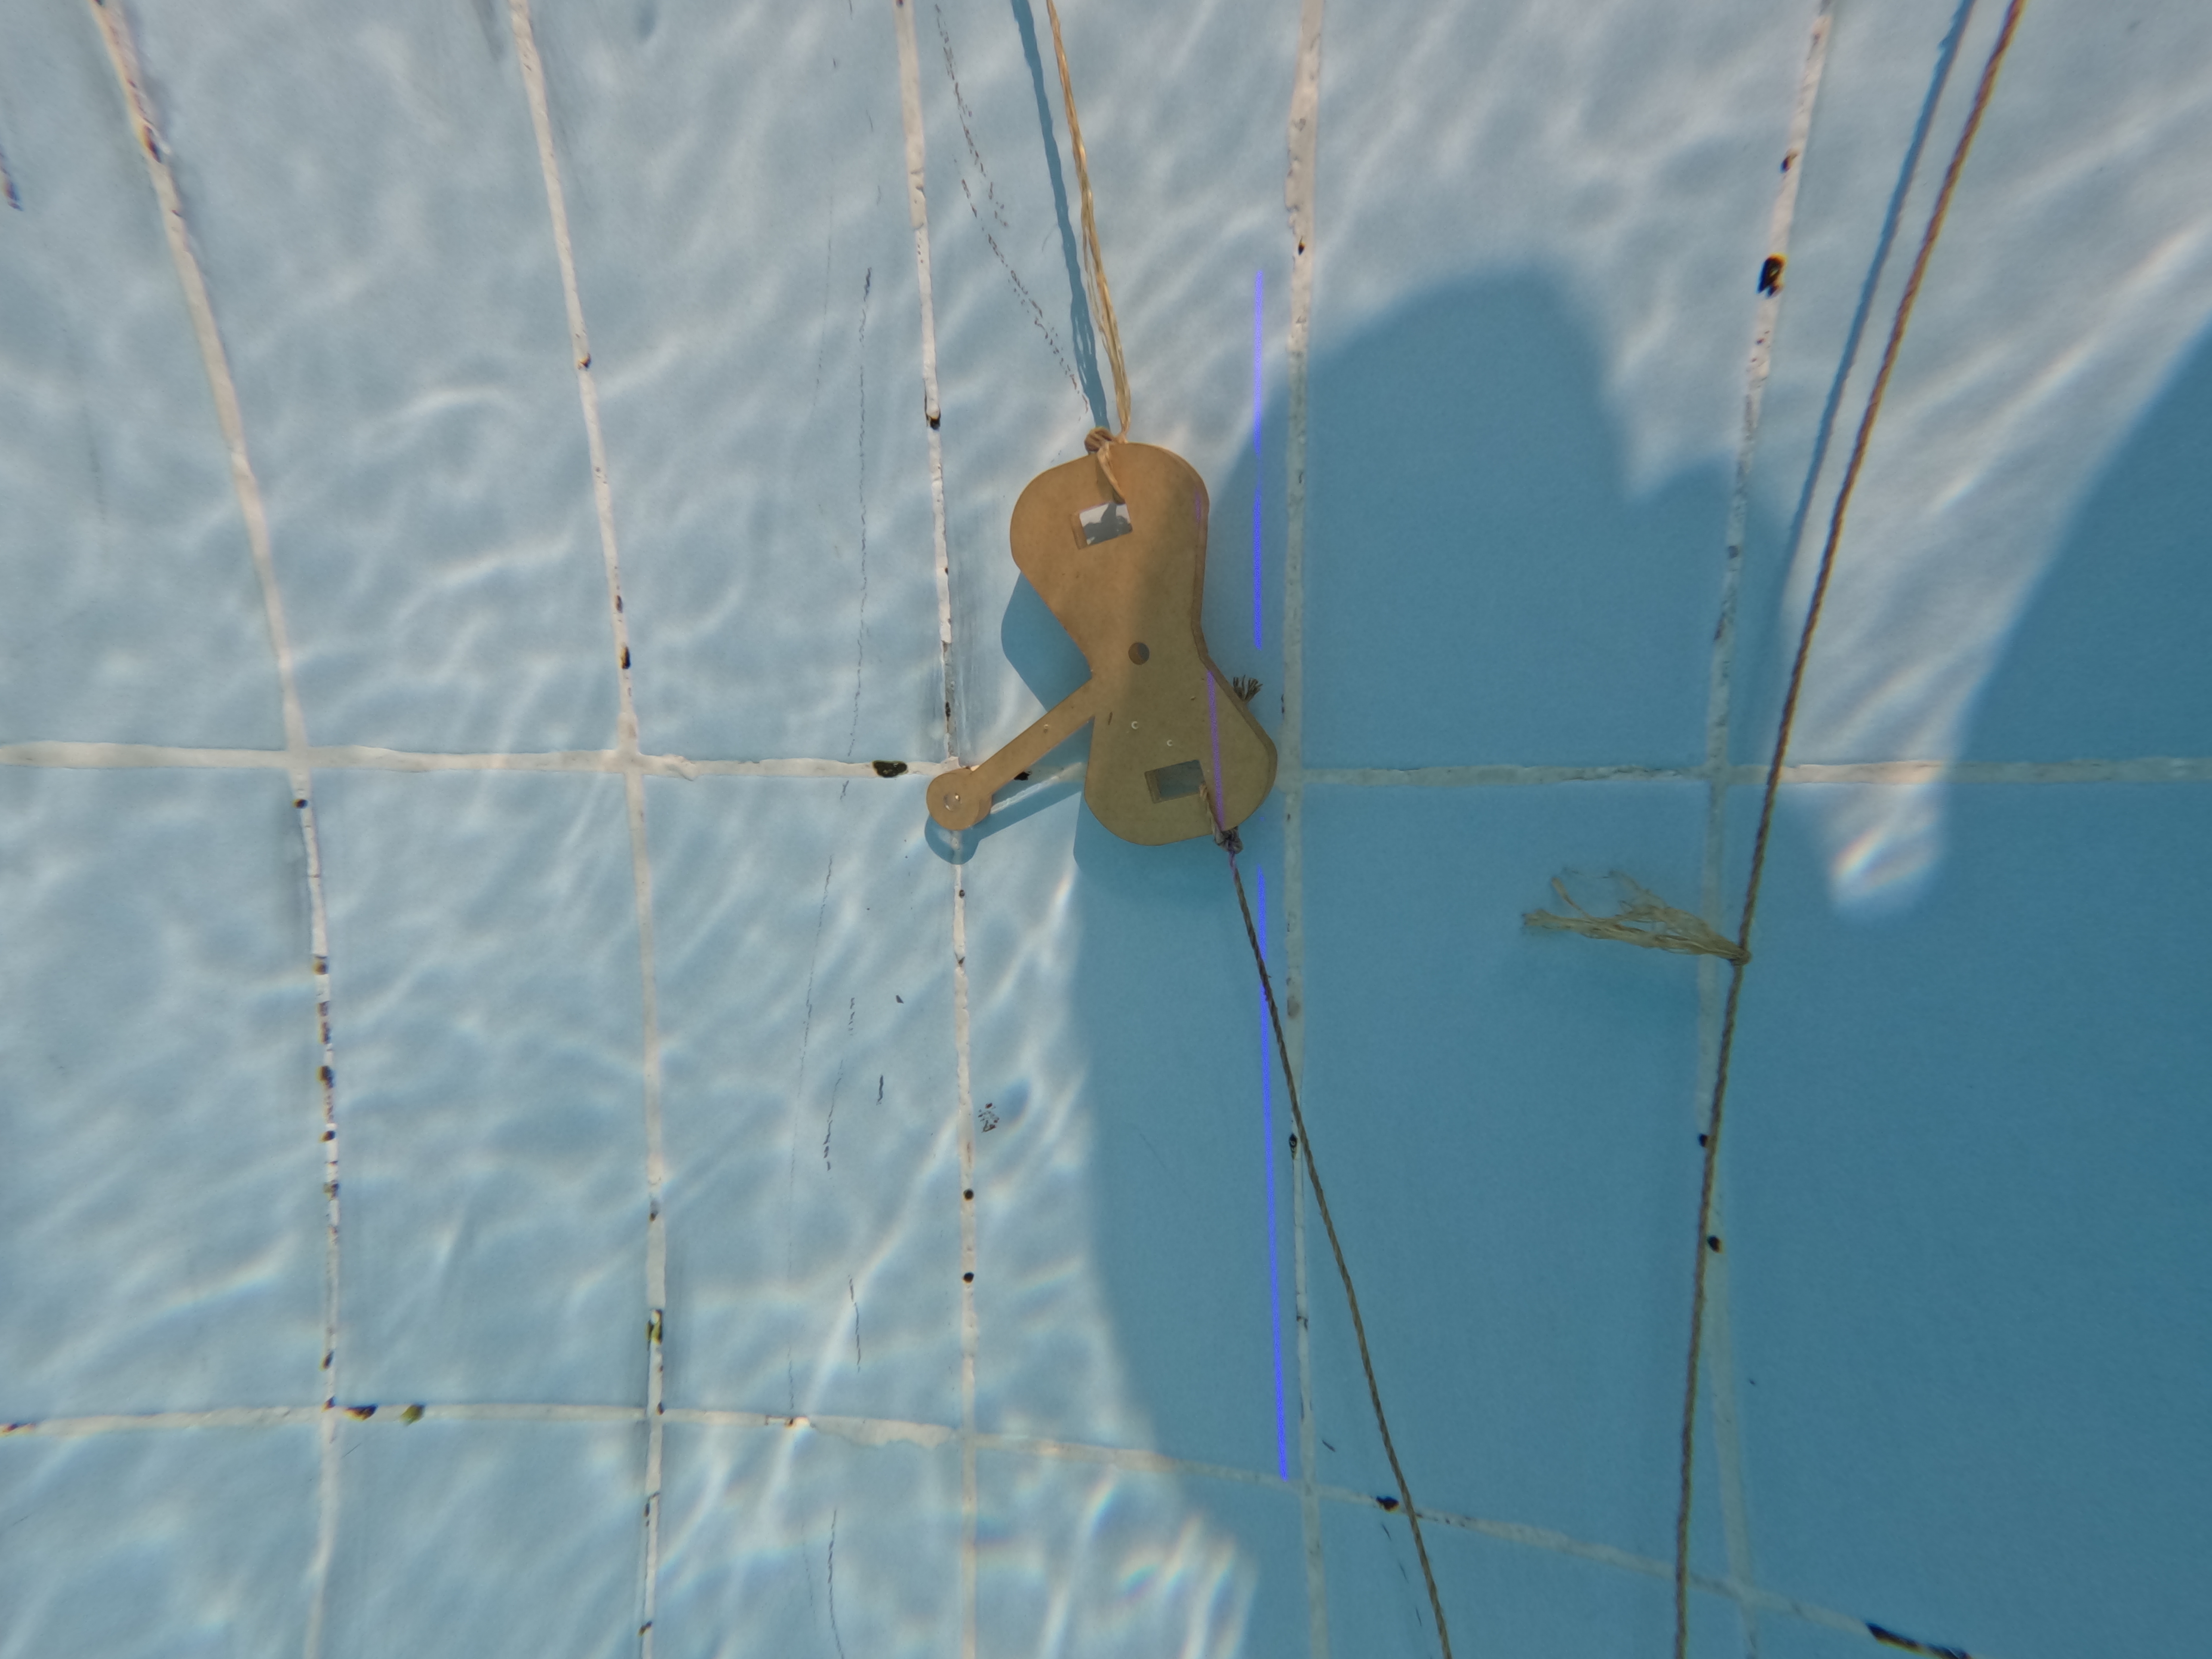

Supplement: Supplementary file 600 [file G0019614.pdf › Level_5_1/G0019614.pdf]
