# Supplementary figures and images for: 3D reconstruction of shallow sea environment using direct system calibration and faint laser line extraction (part 7 of 35)
Source: Research Square preprint supplement (doi:10.21203/rs.3.rs-5262658/v1), 2024-12-02

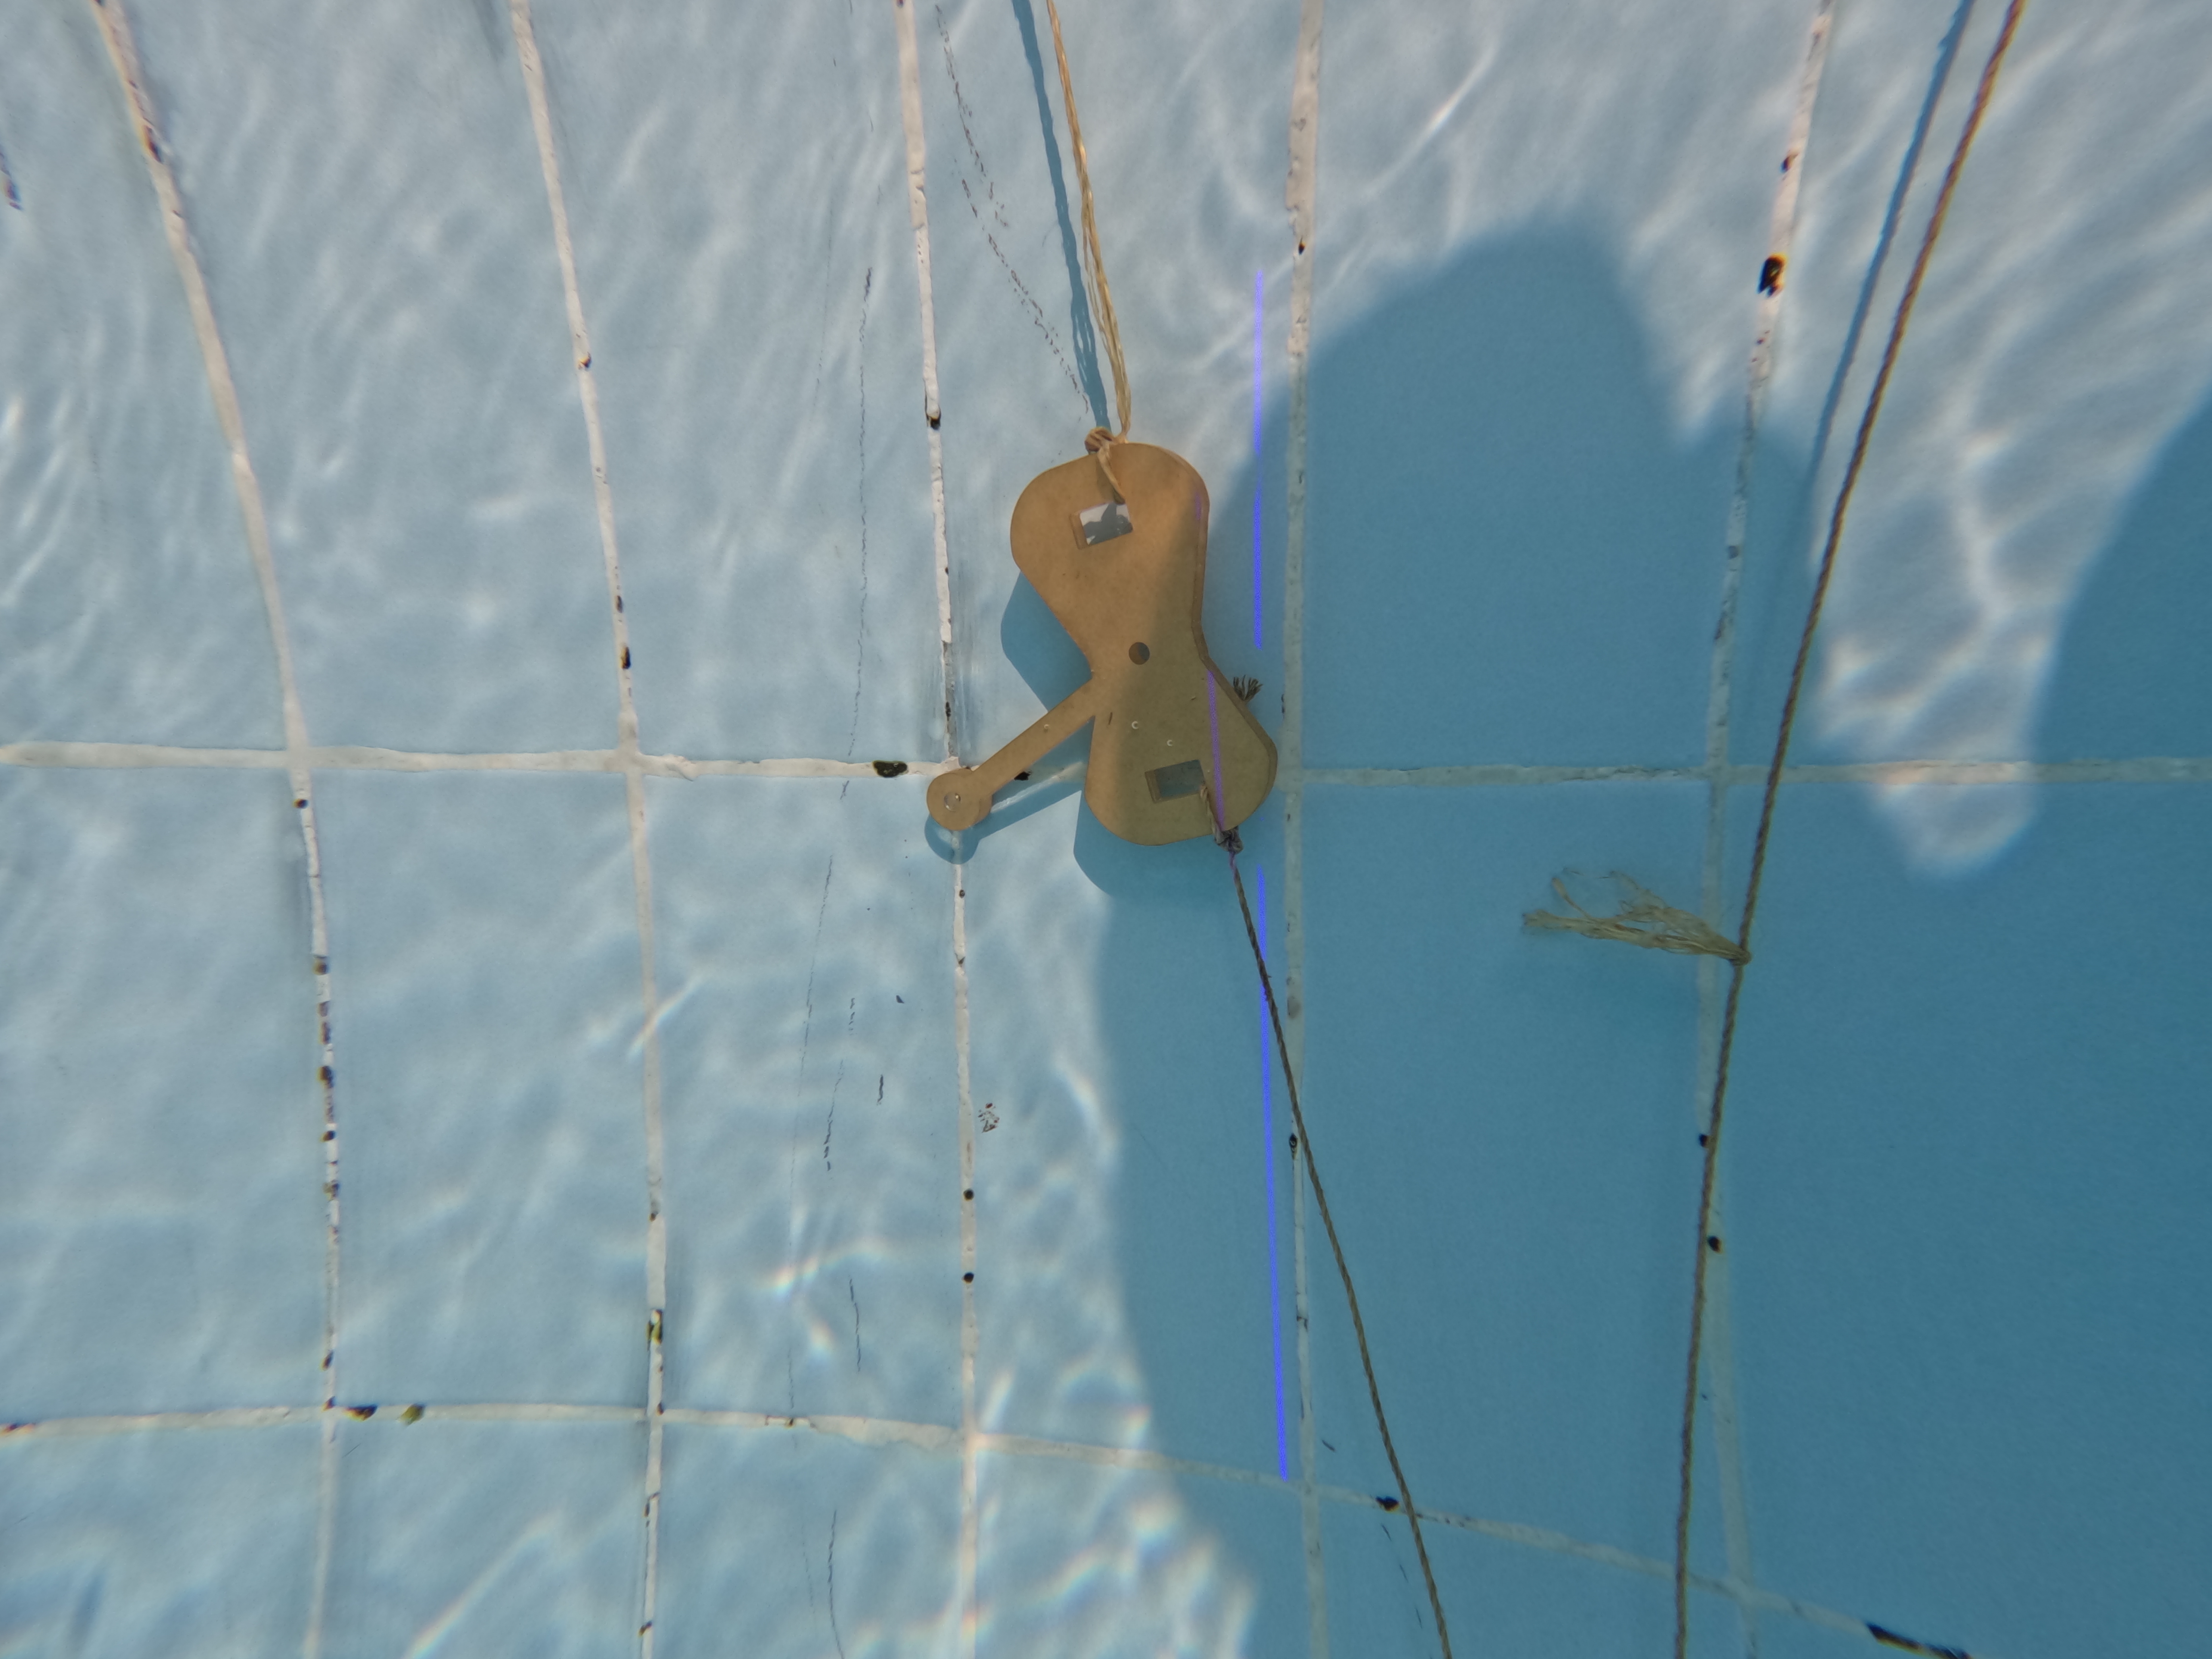

Supplement: Supplementary file 601 [file G0019615.pdf › Level_5_1/G0019615.pdf]

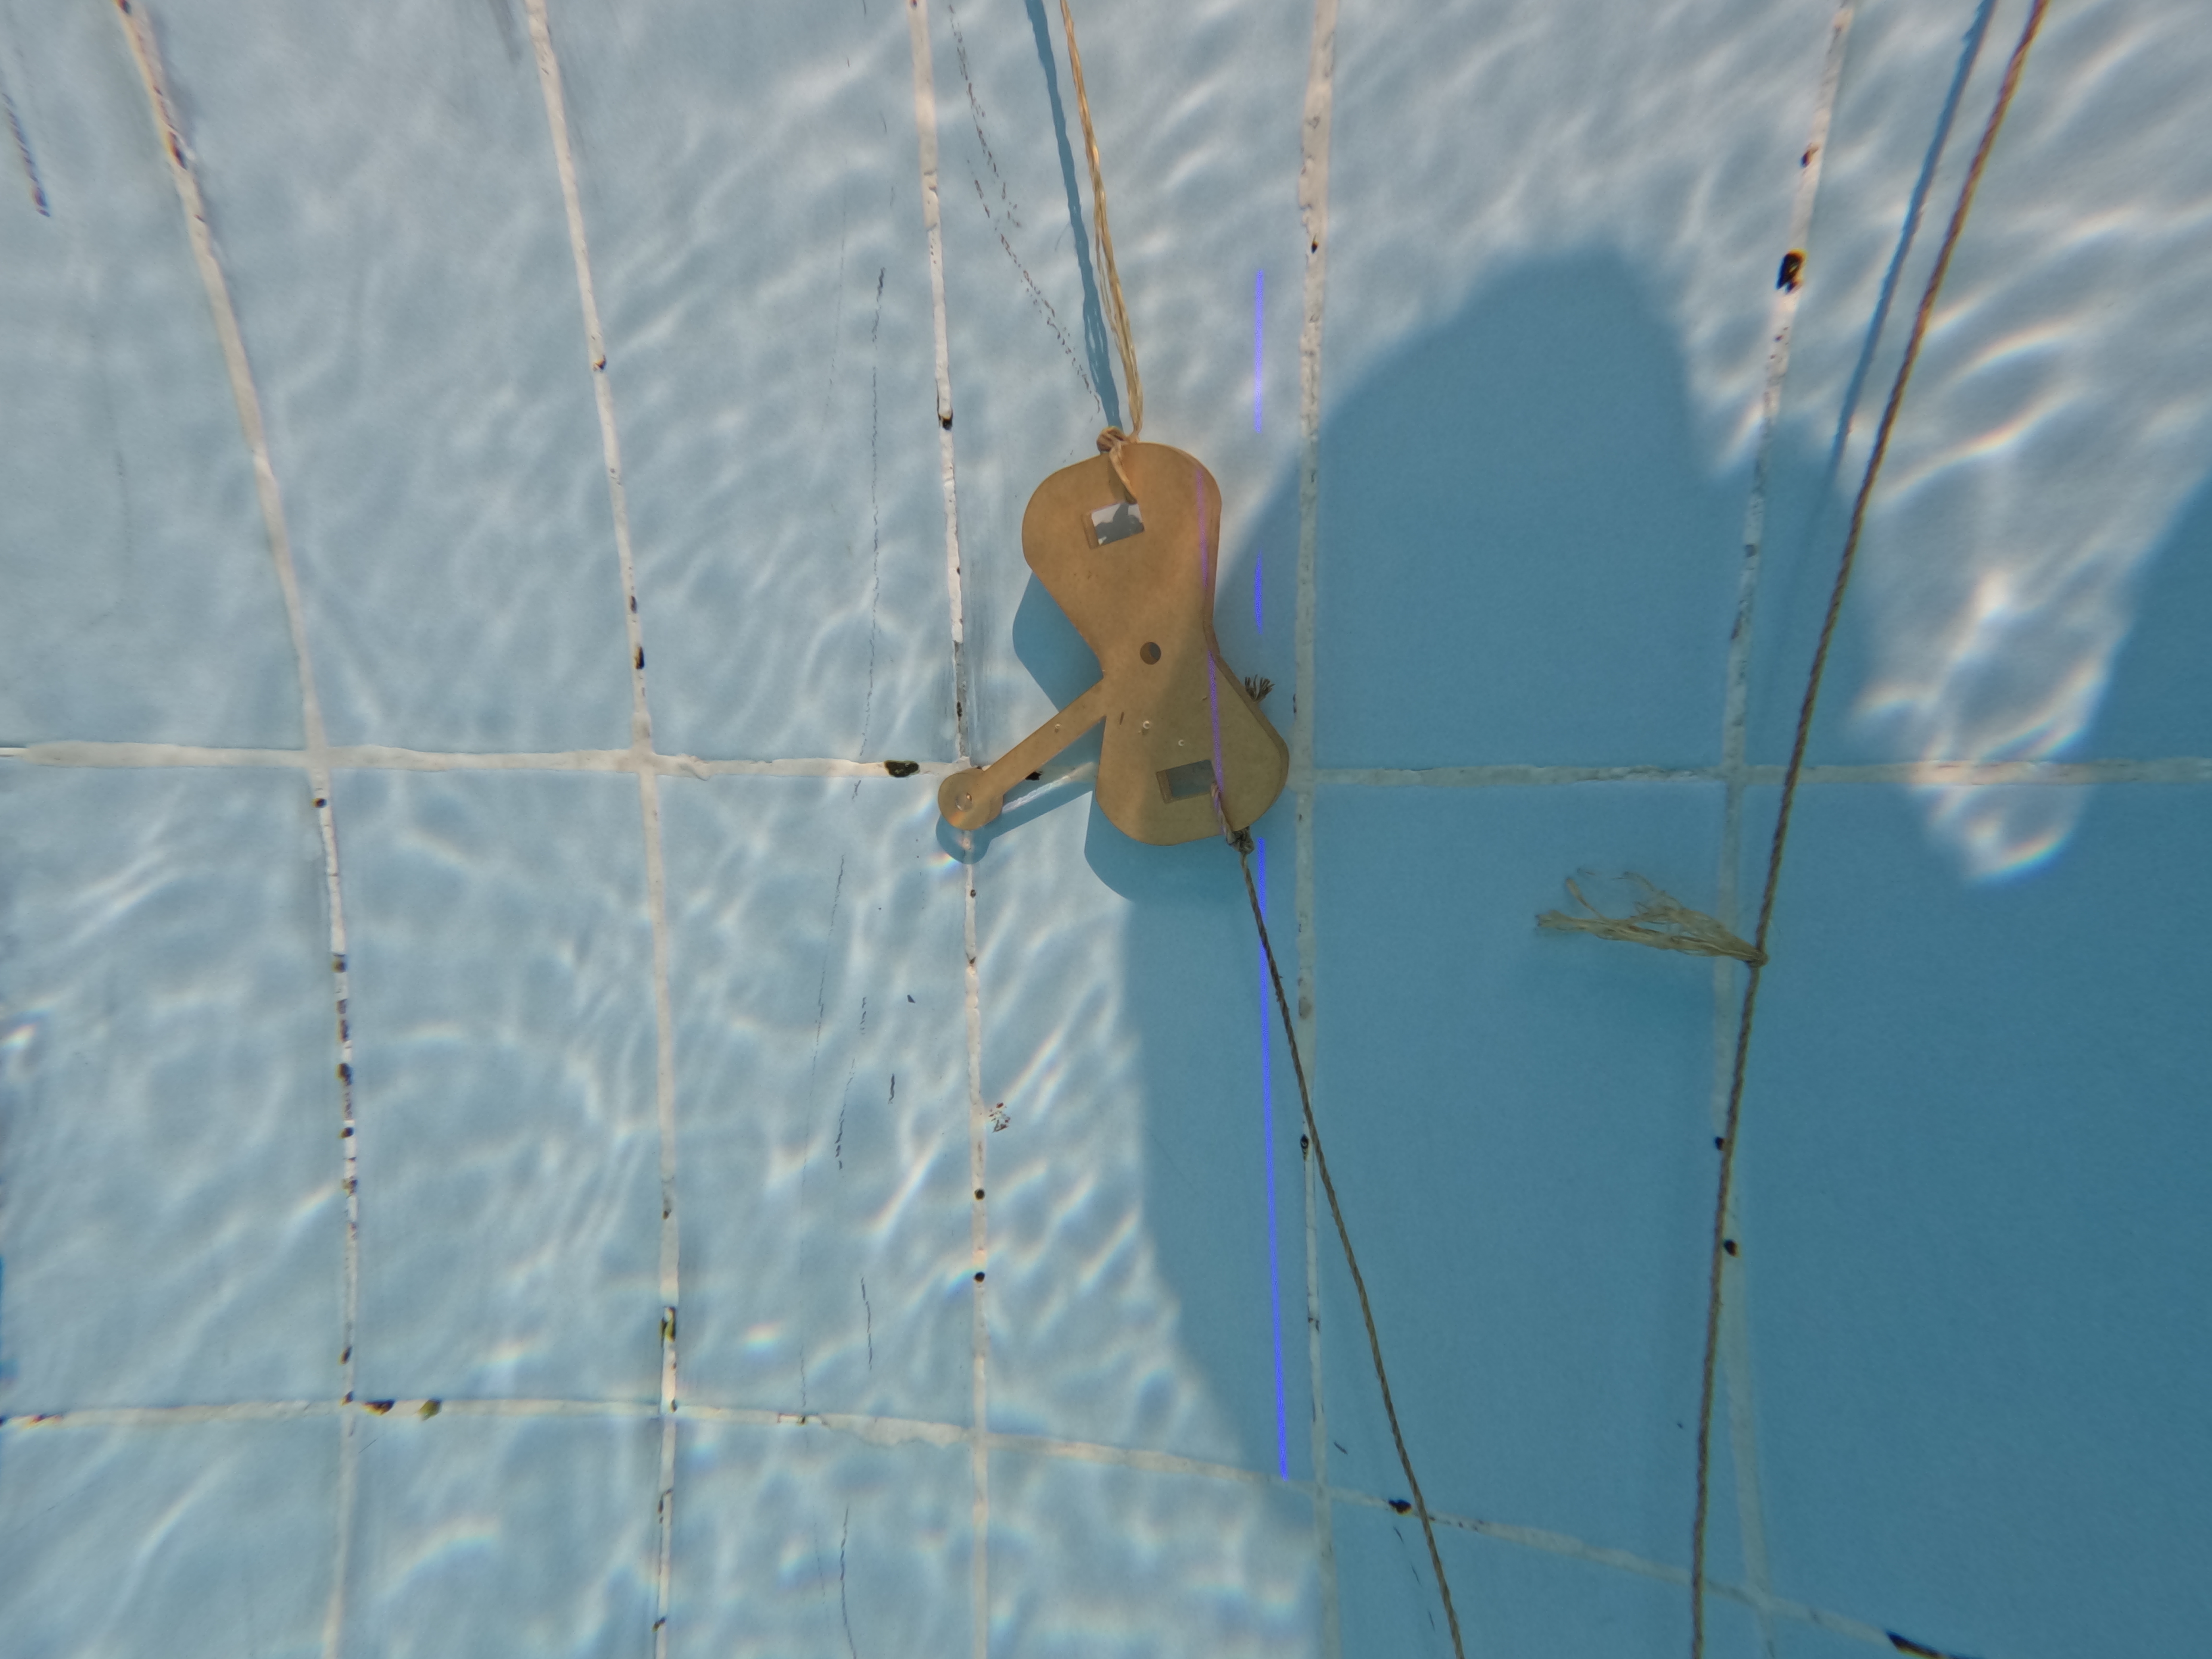

Supplement: Supplementary file 602 [file G0019616.pdf › Level_5_1/G0019616.pdf]

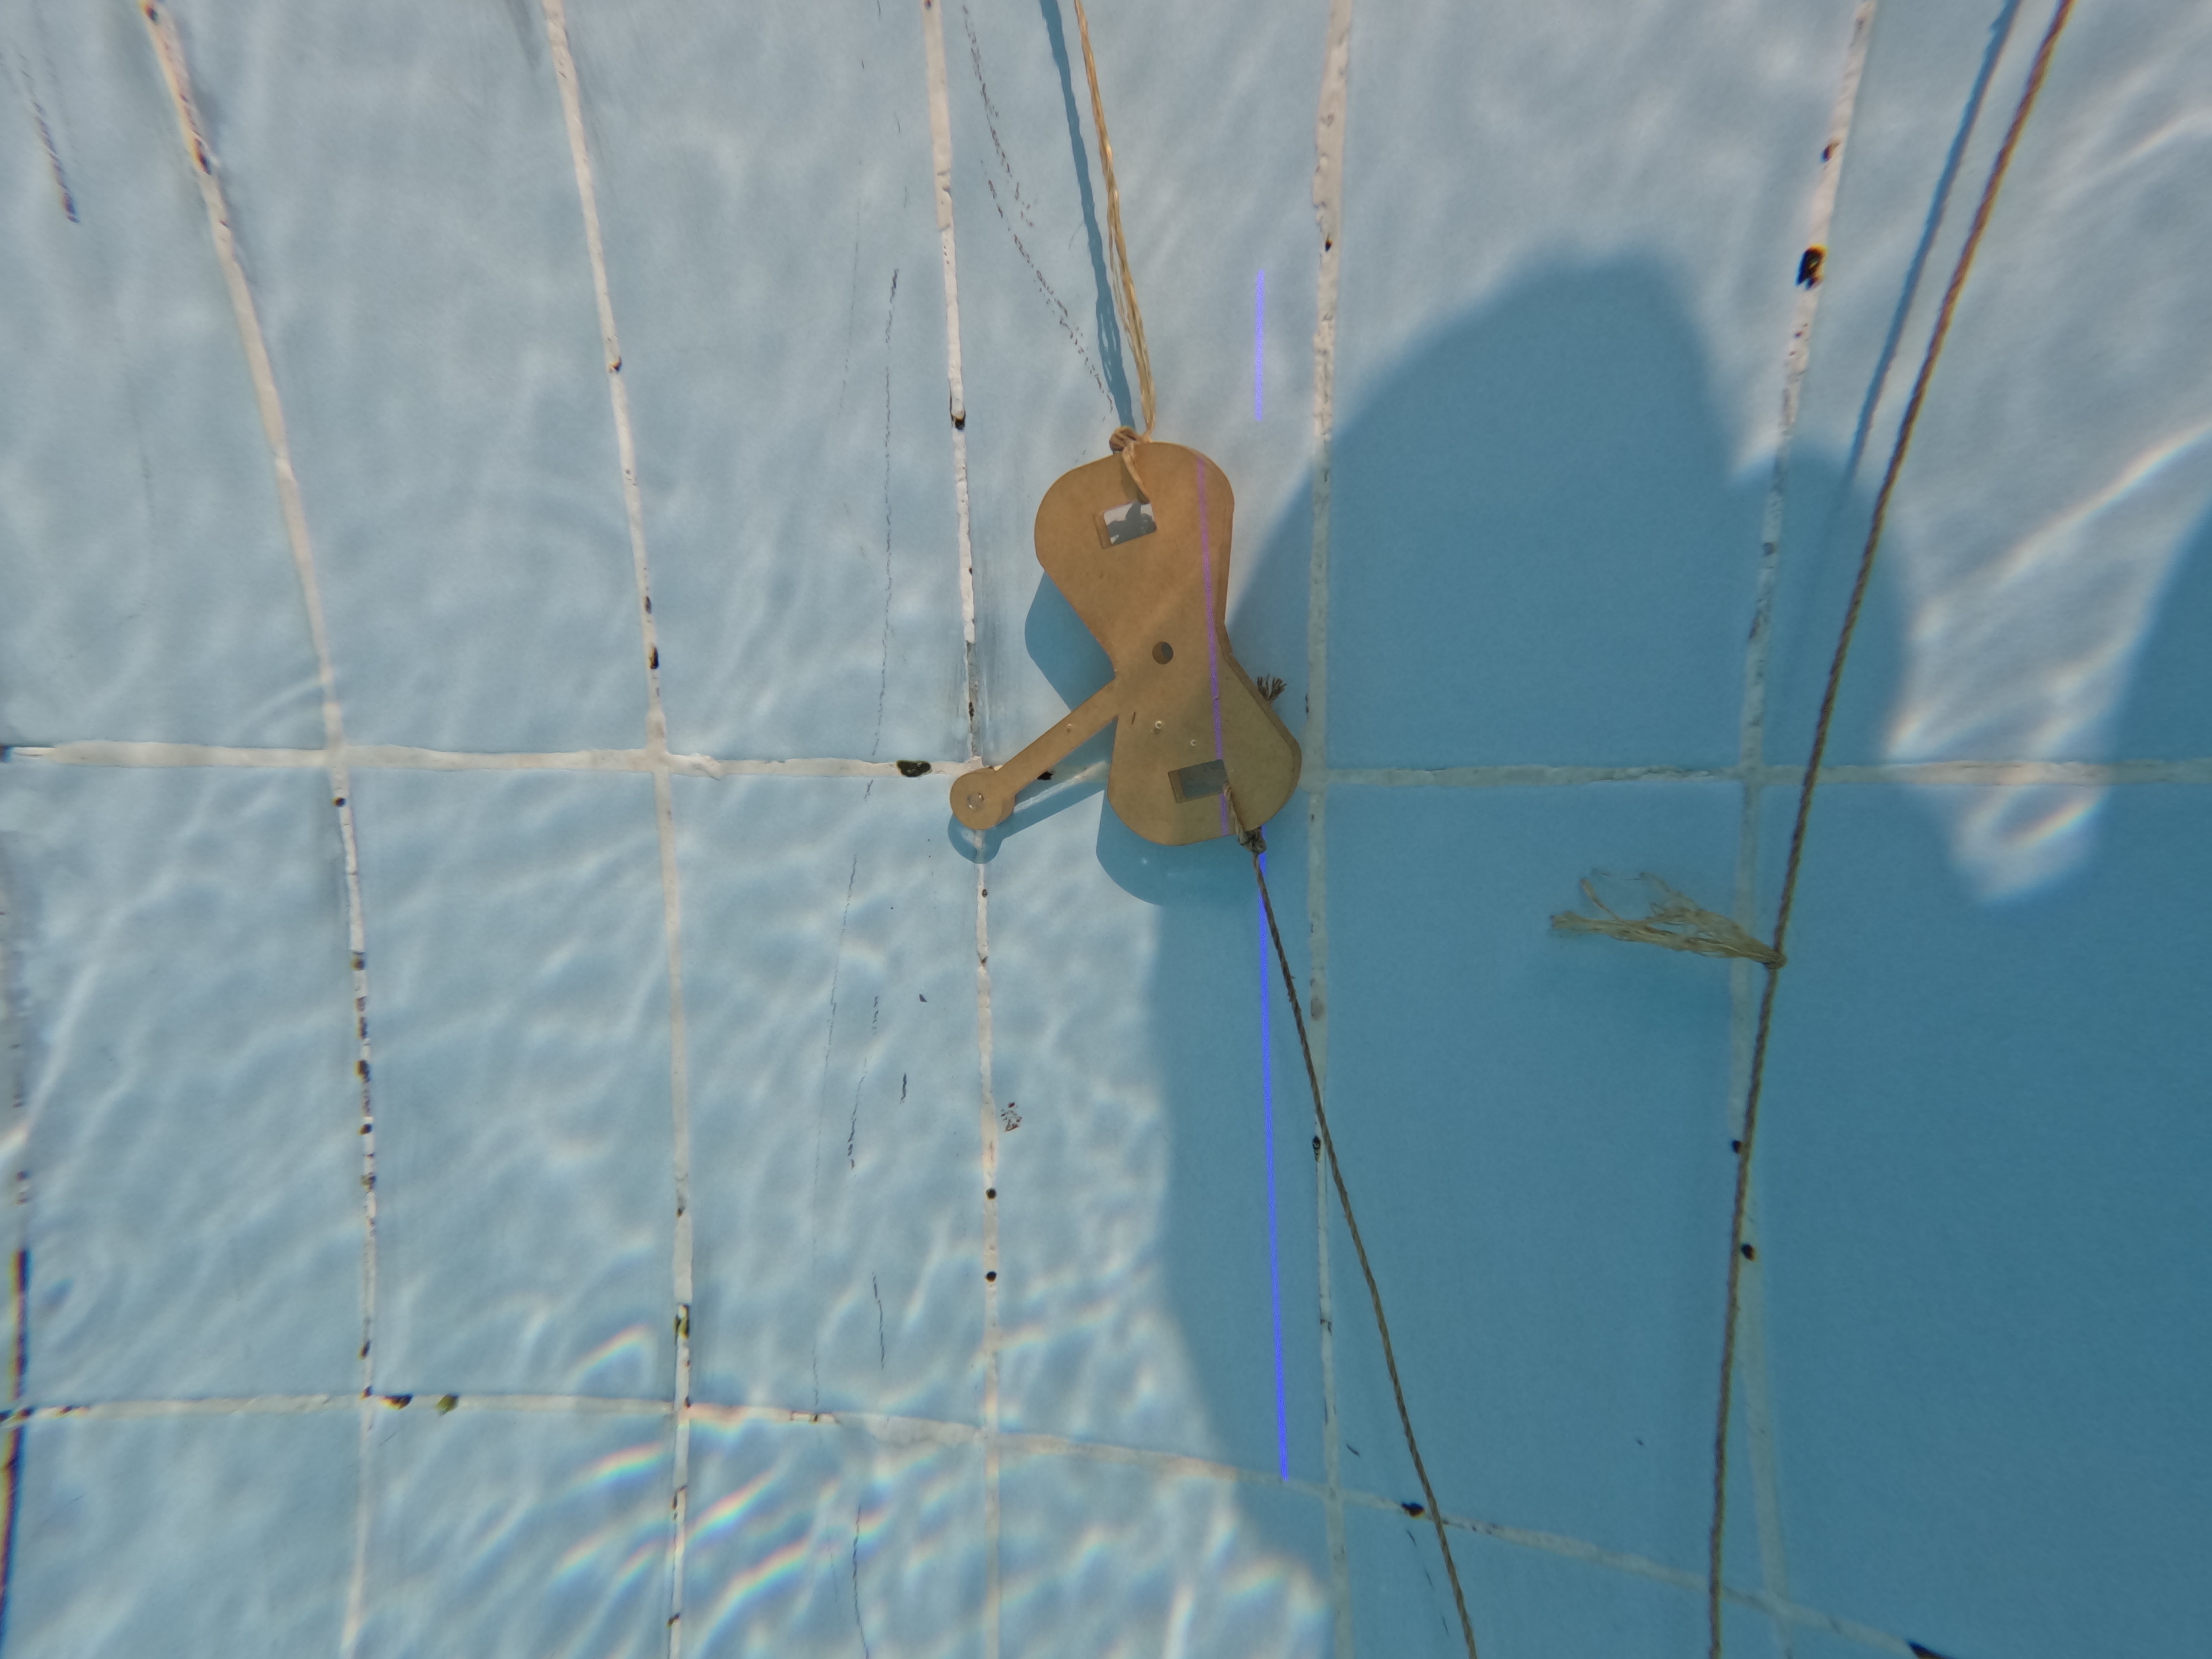

Supplement: Supplementary file 603 [file G0019617.pdf › Level_5_1/G0019617.pdf]

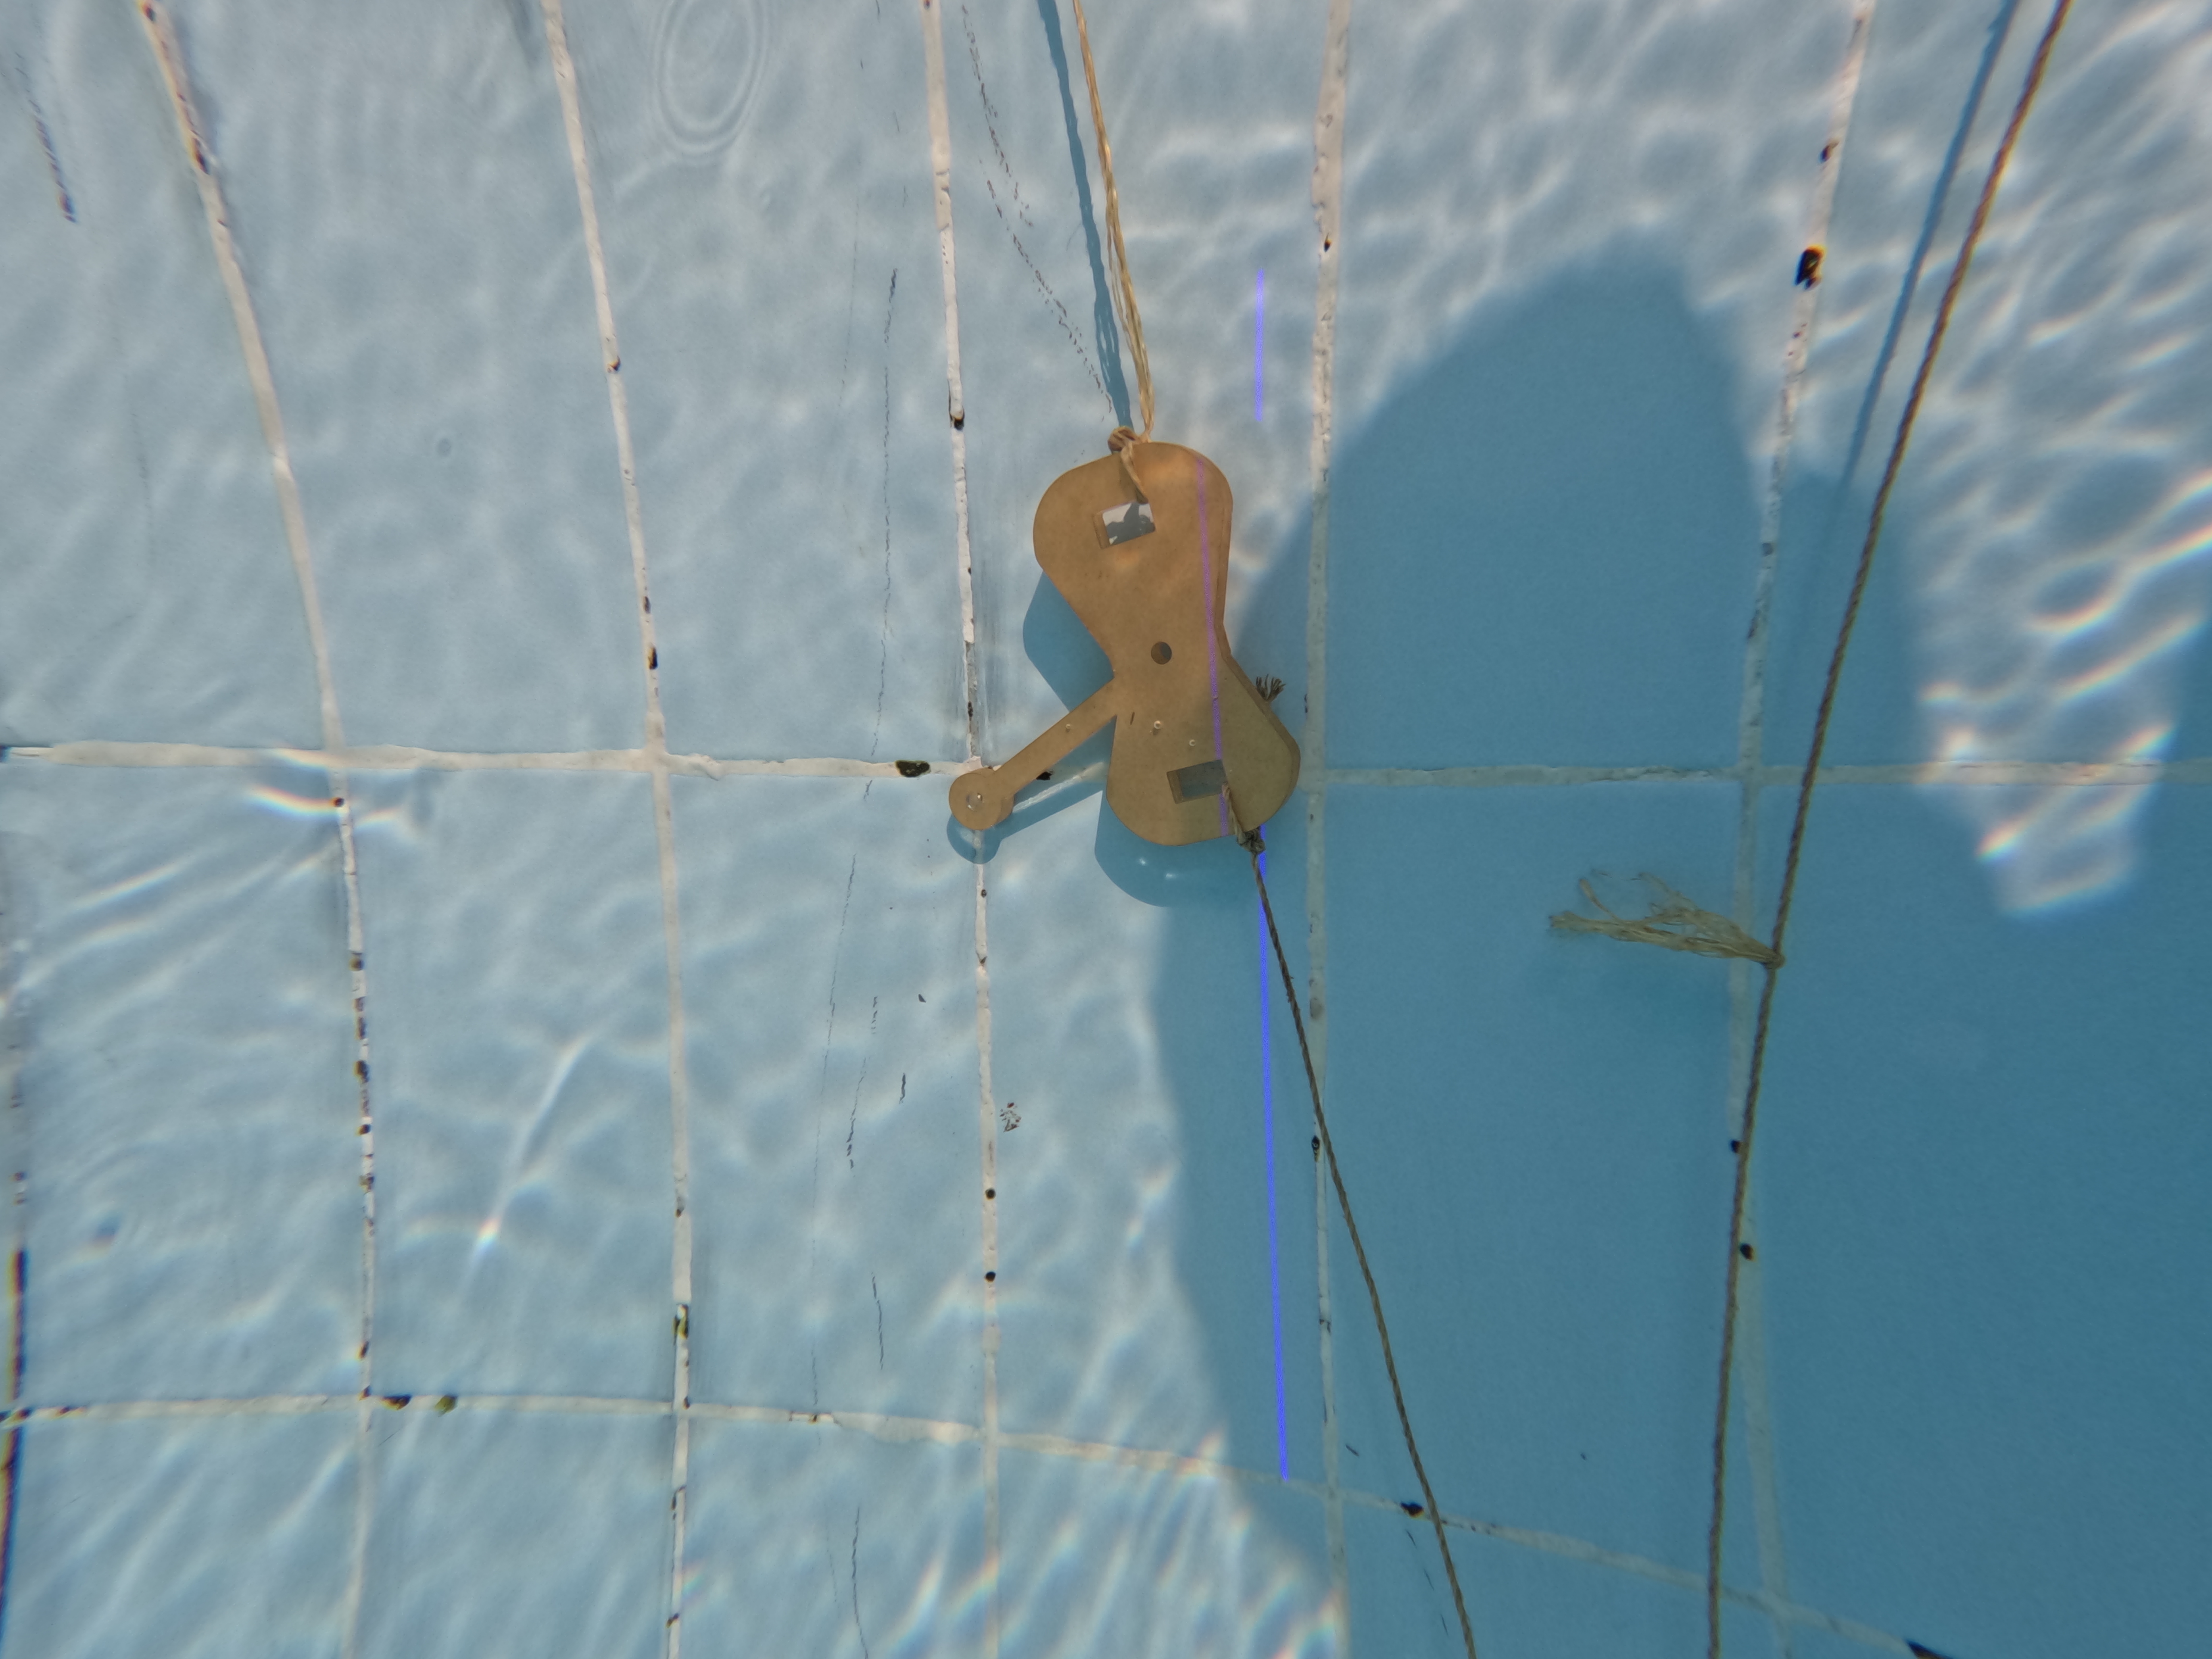

Supplement: Supplementary file 604 [file G0019618.pdf › Level_5_1/G0019618.pdf]

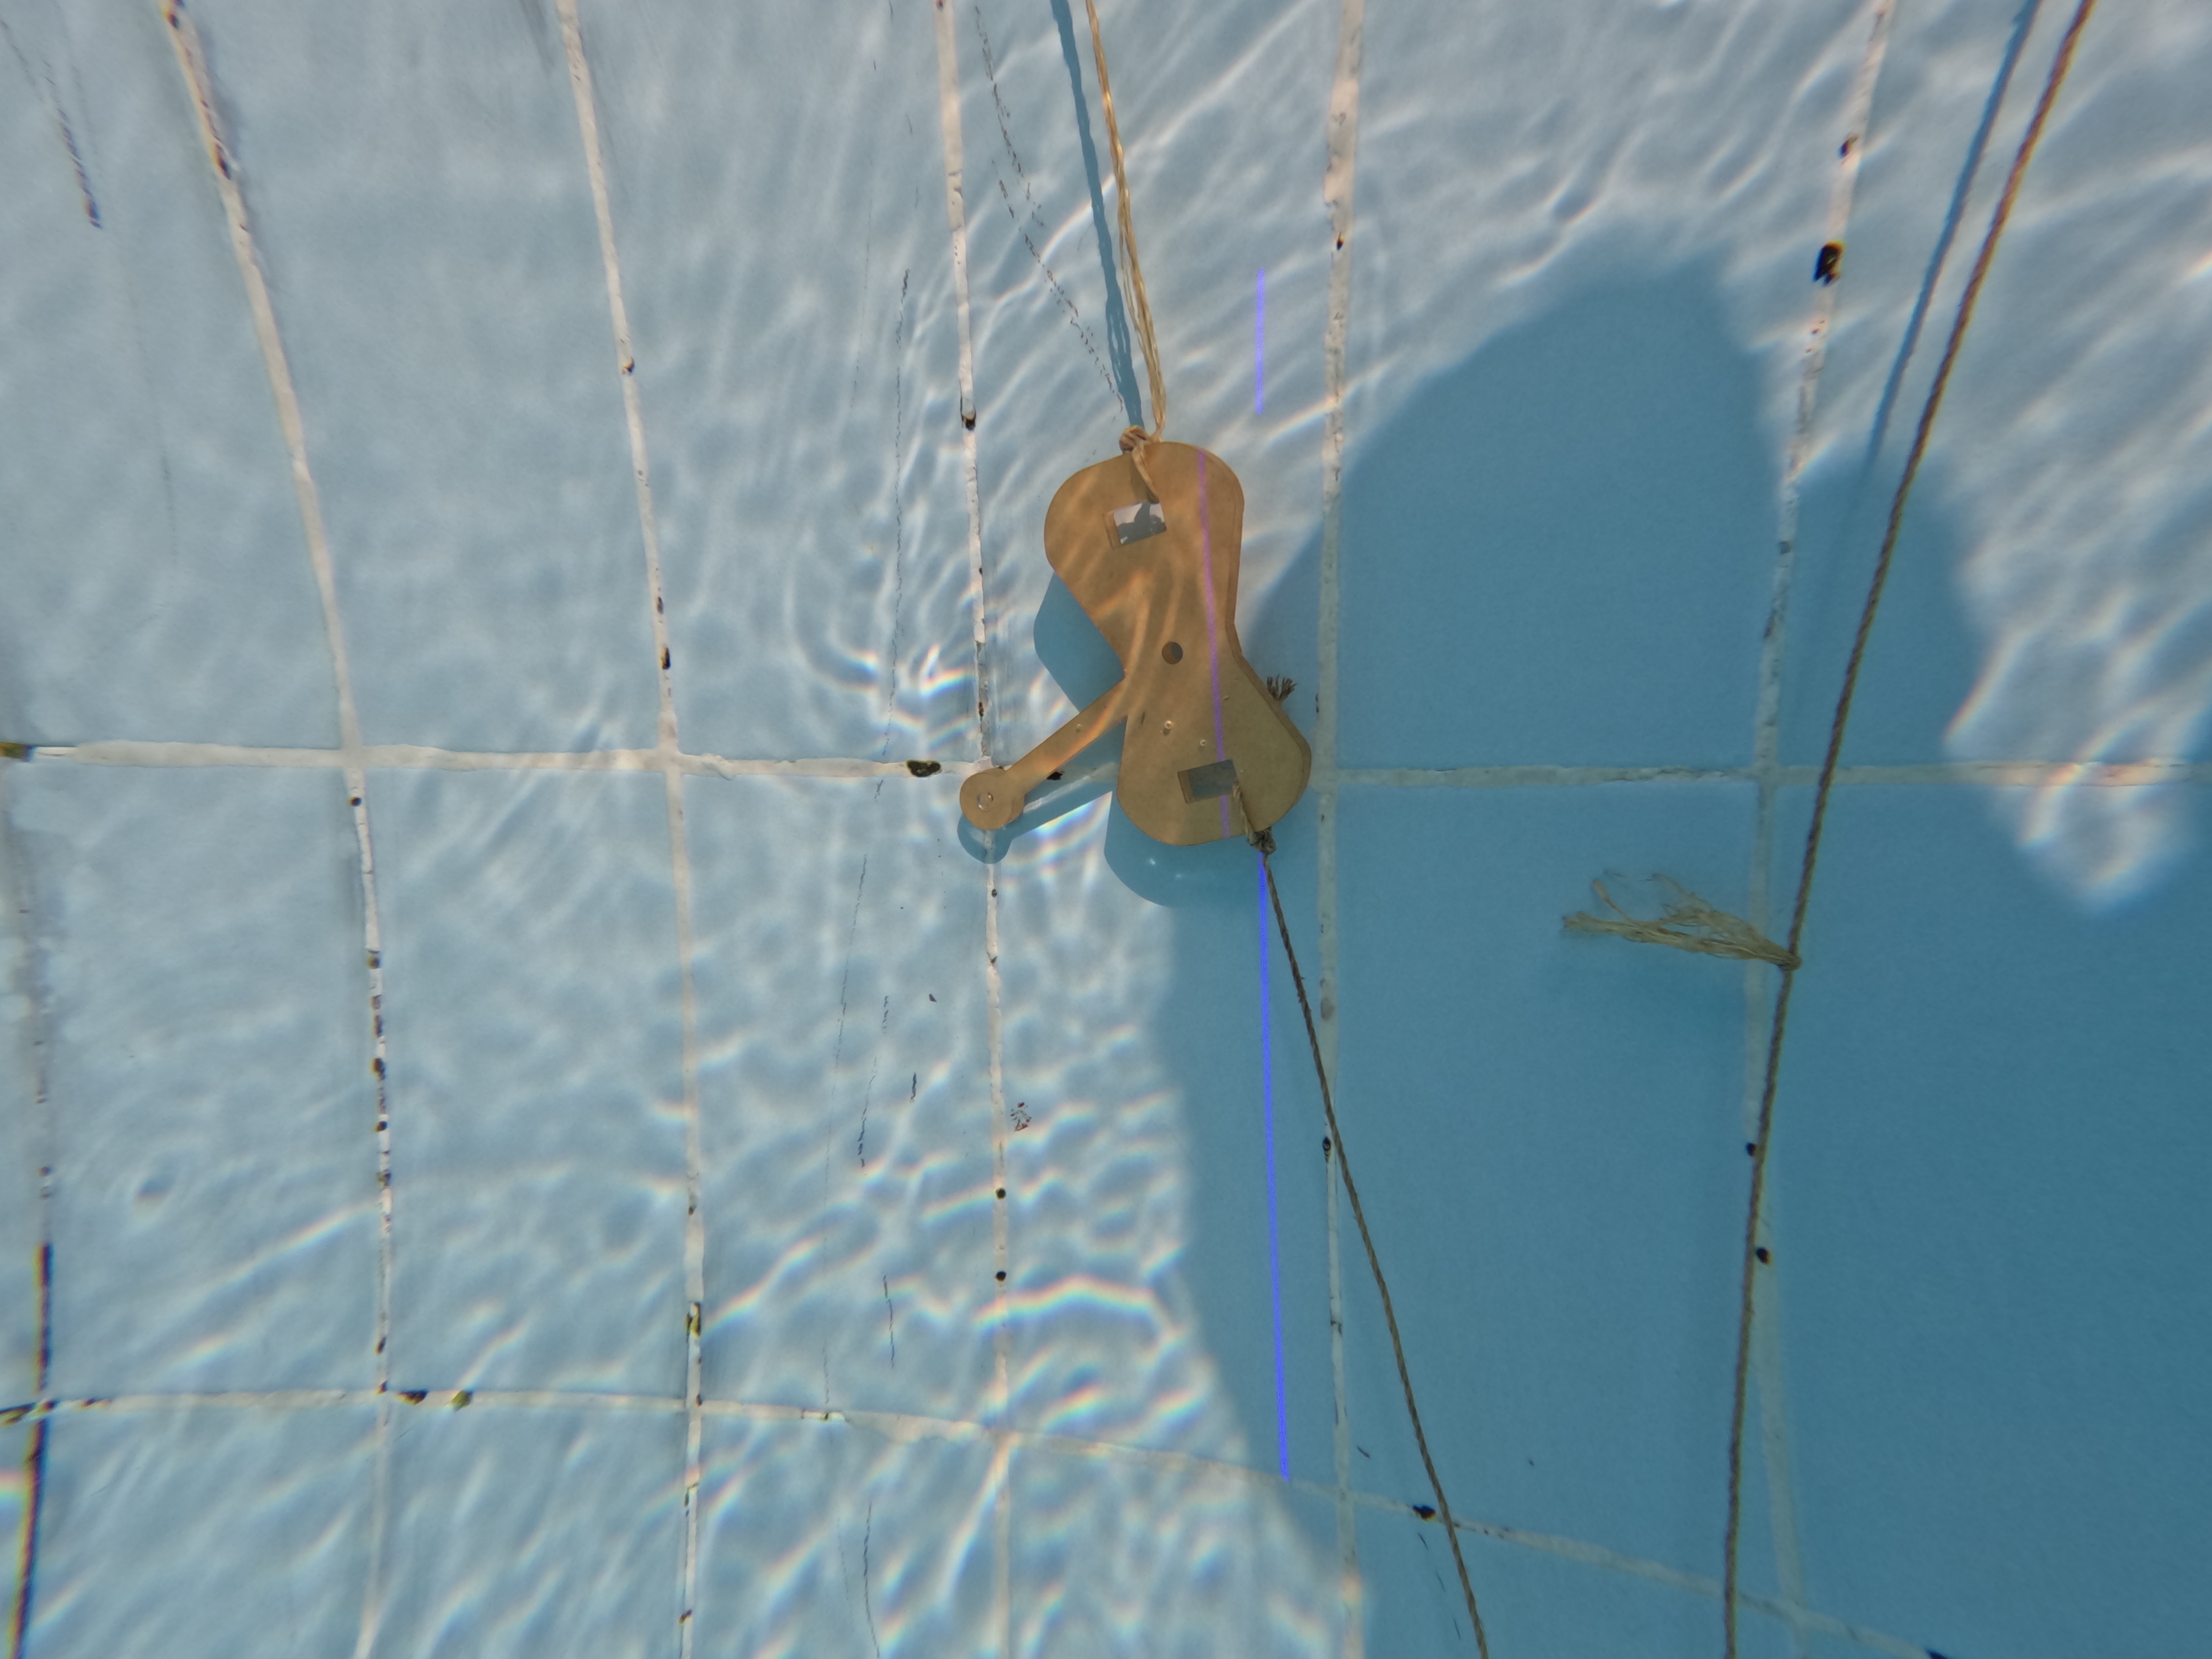

Supplement: Supplementary file 605 [file G0019619.pdf › Level_5_1/G0019619.pdf]

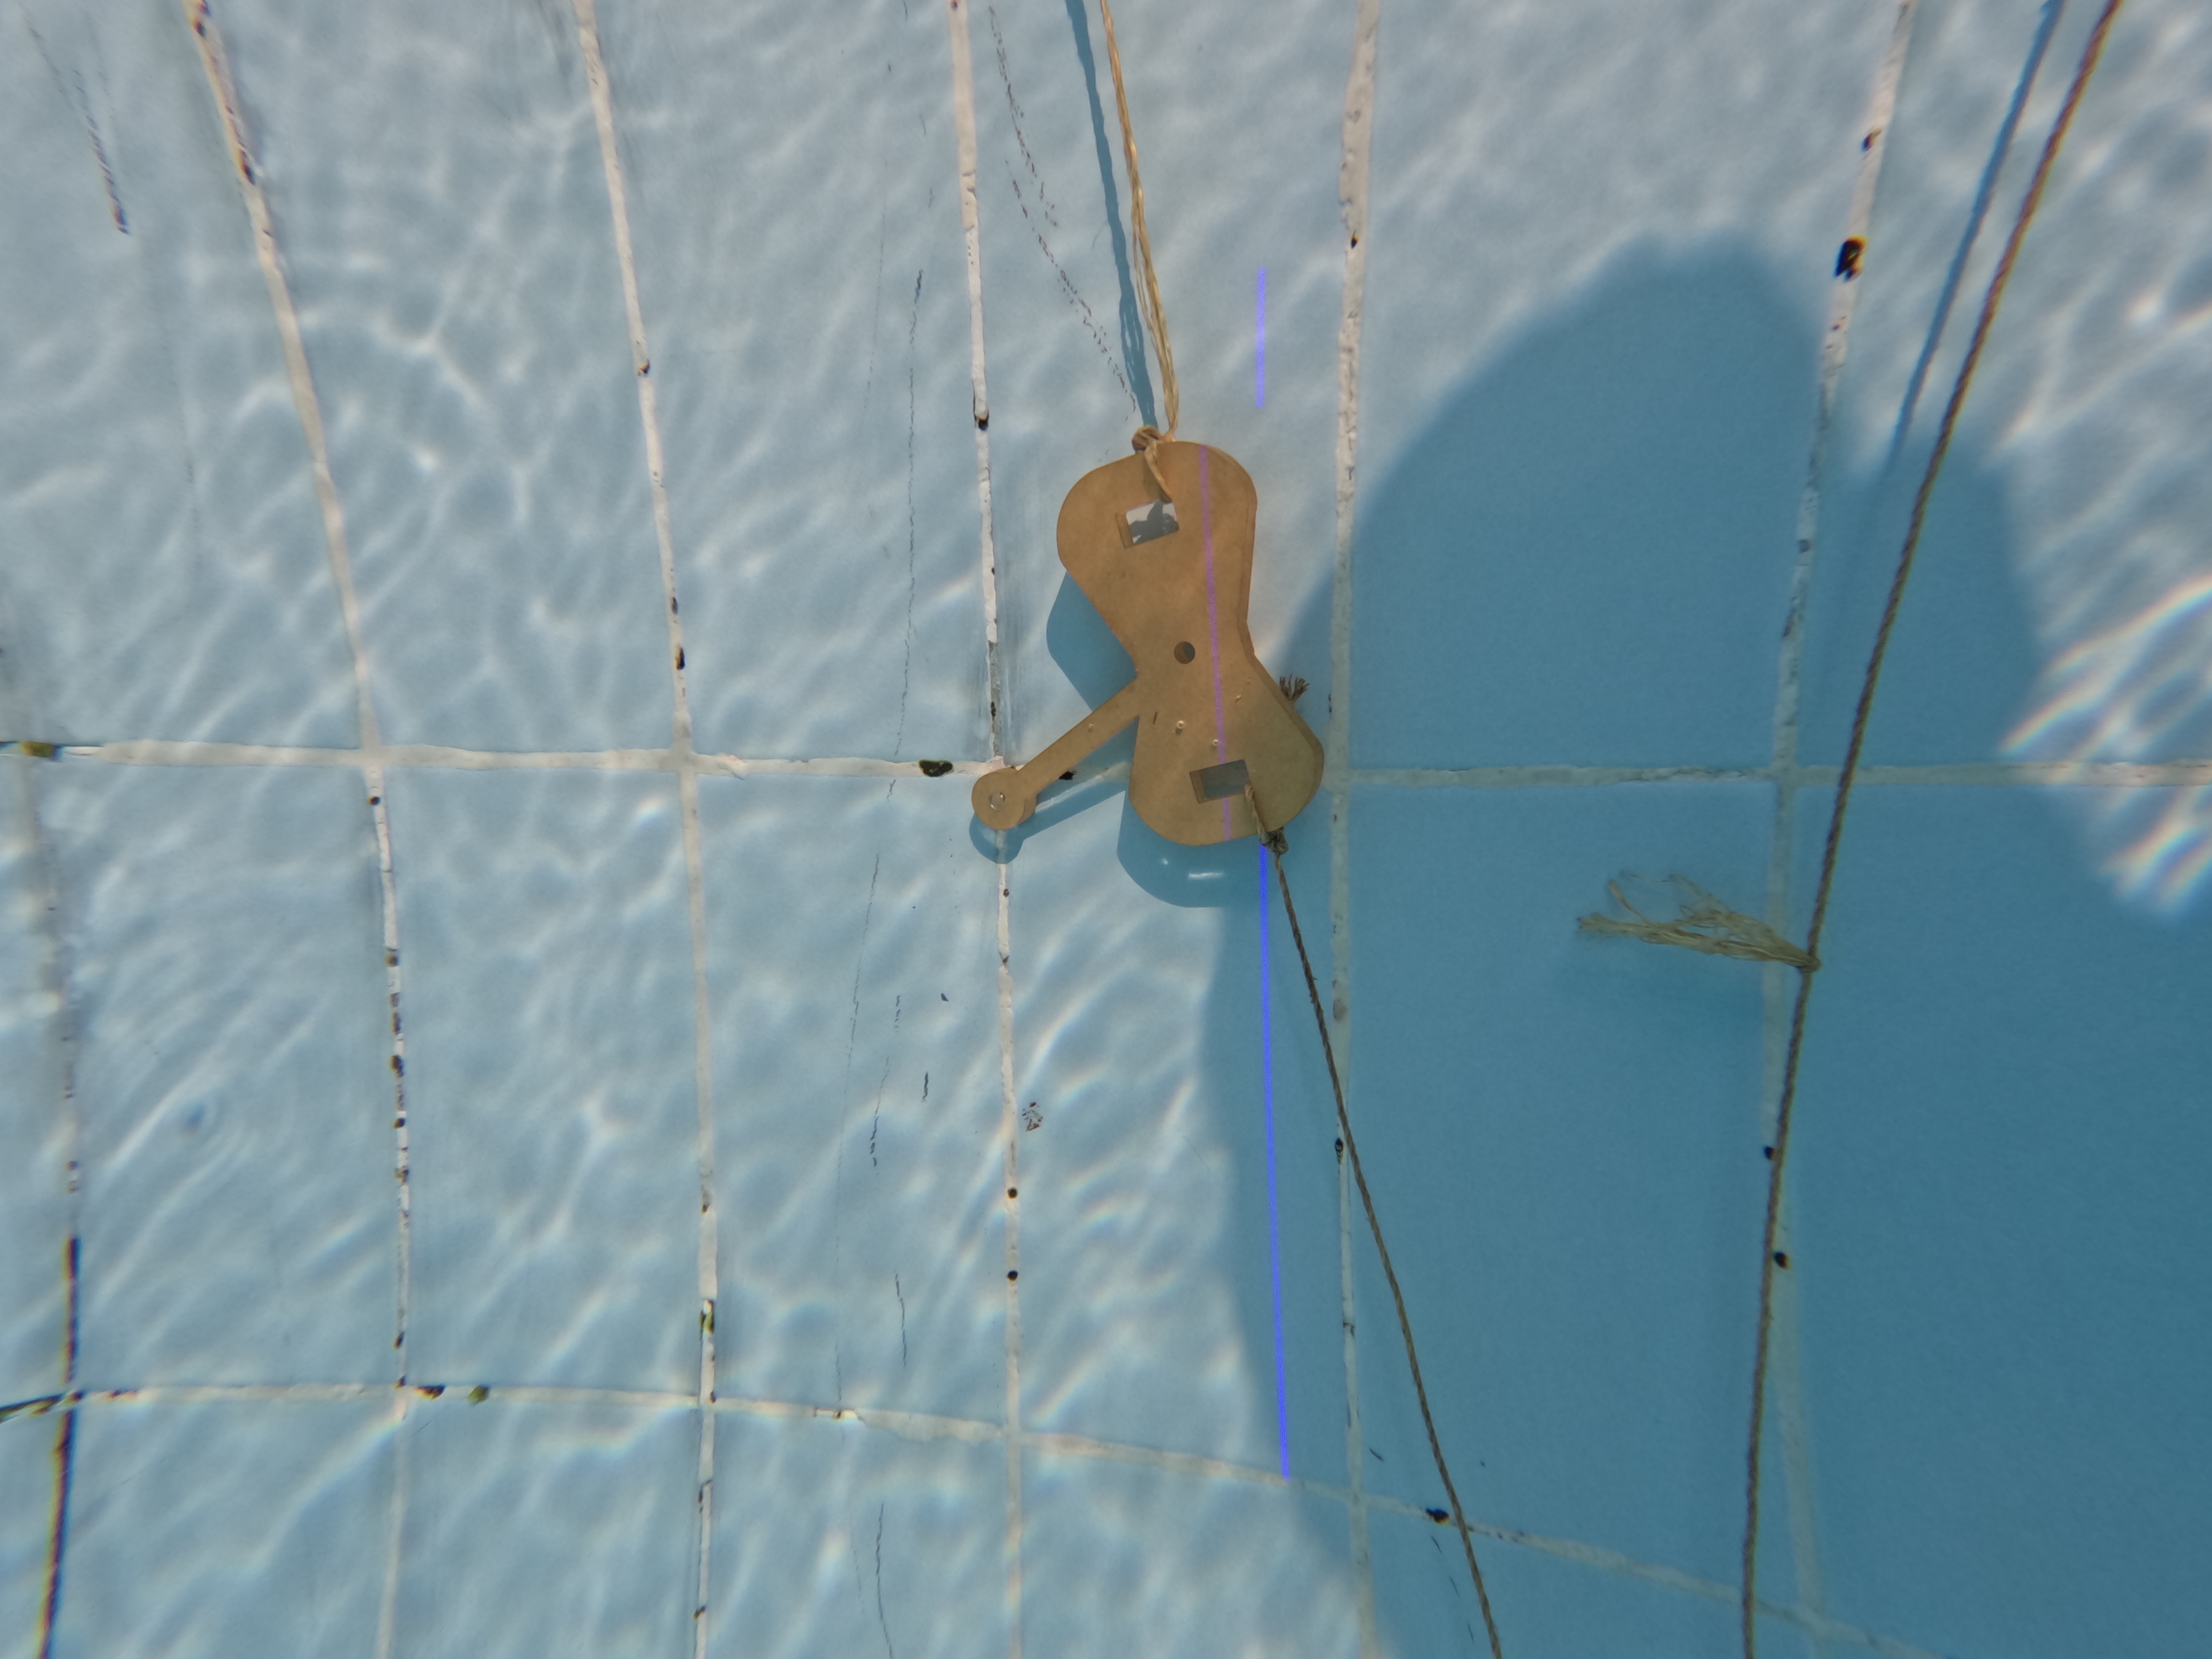

Supplement: Supplementary file 606 [file G0019620.pdf › Level_5_1/G0019620.pdf]

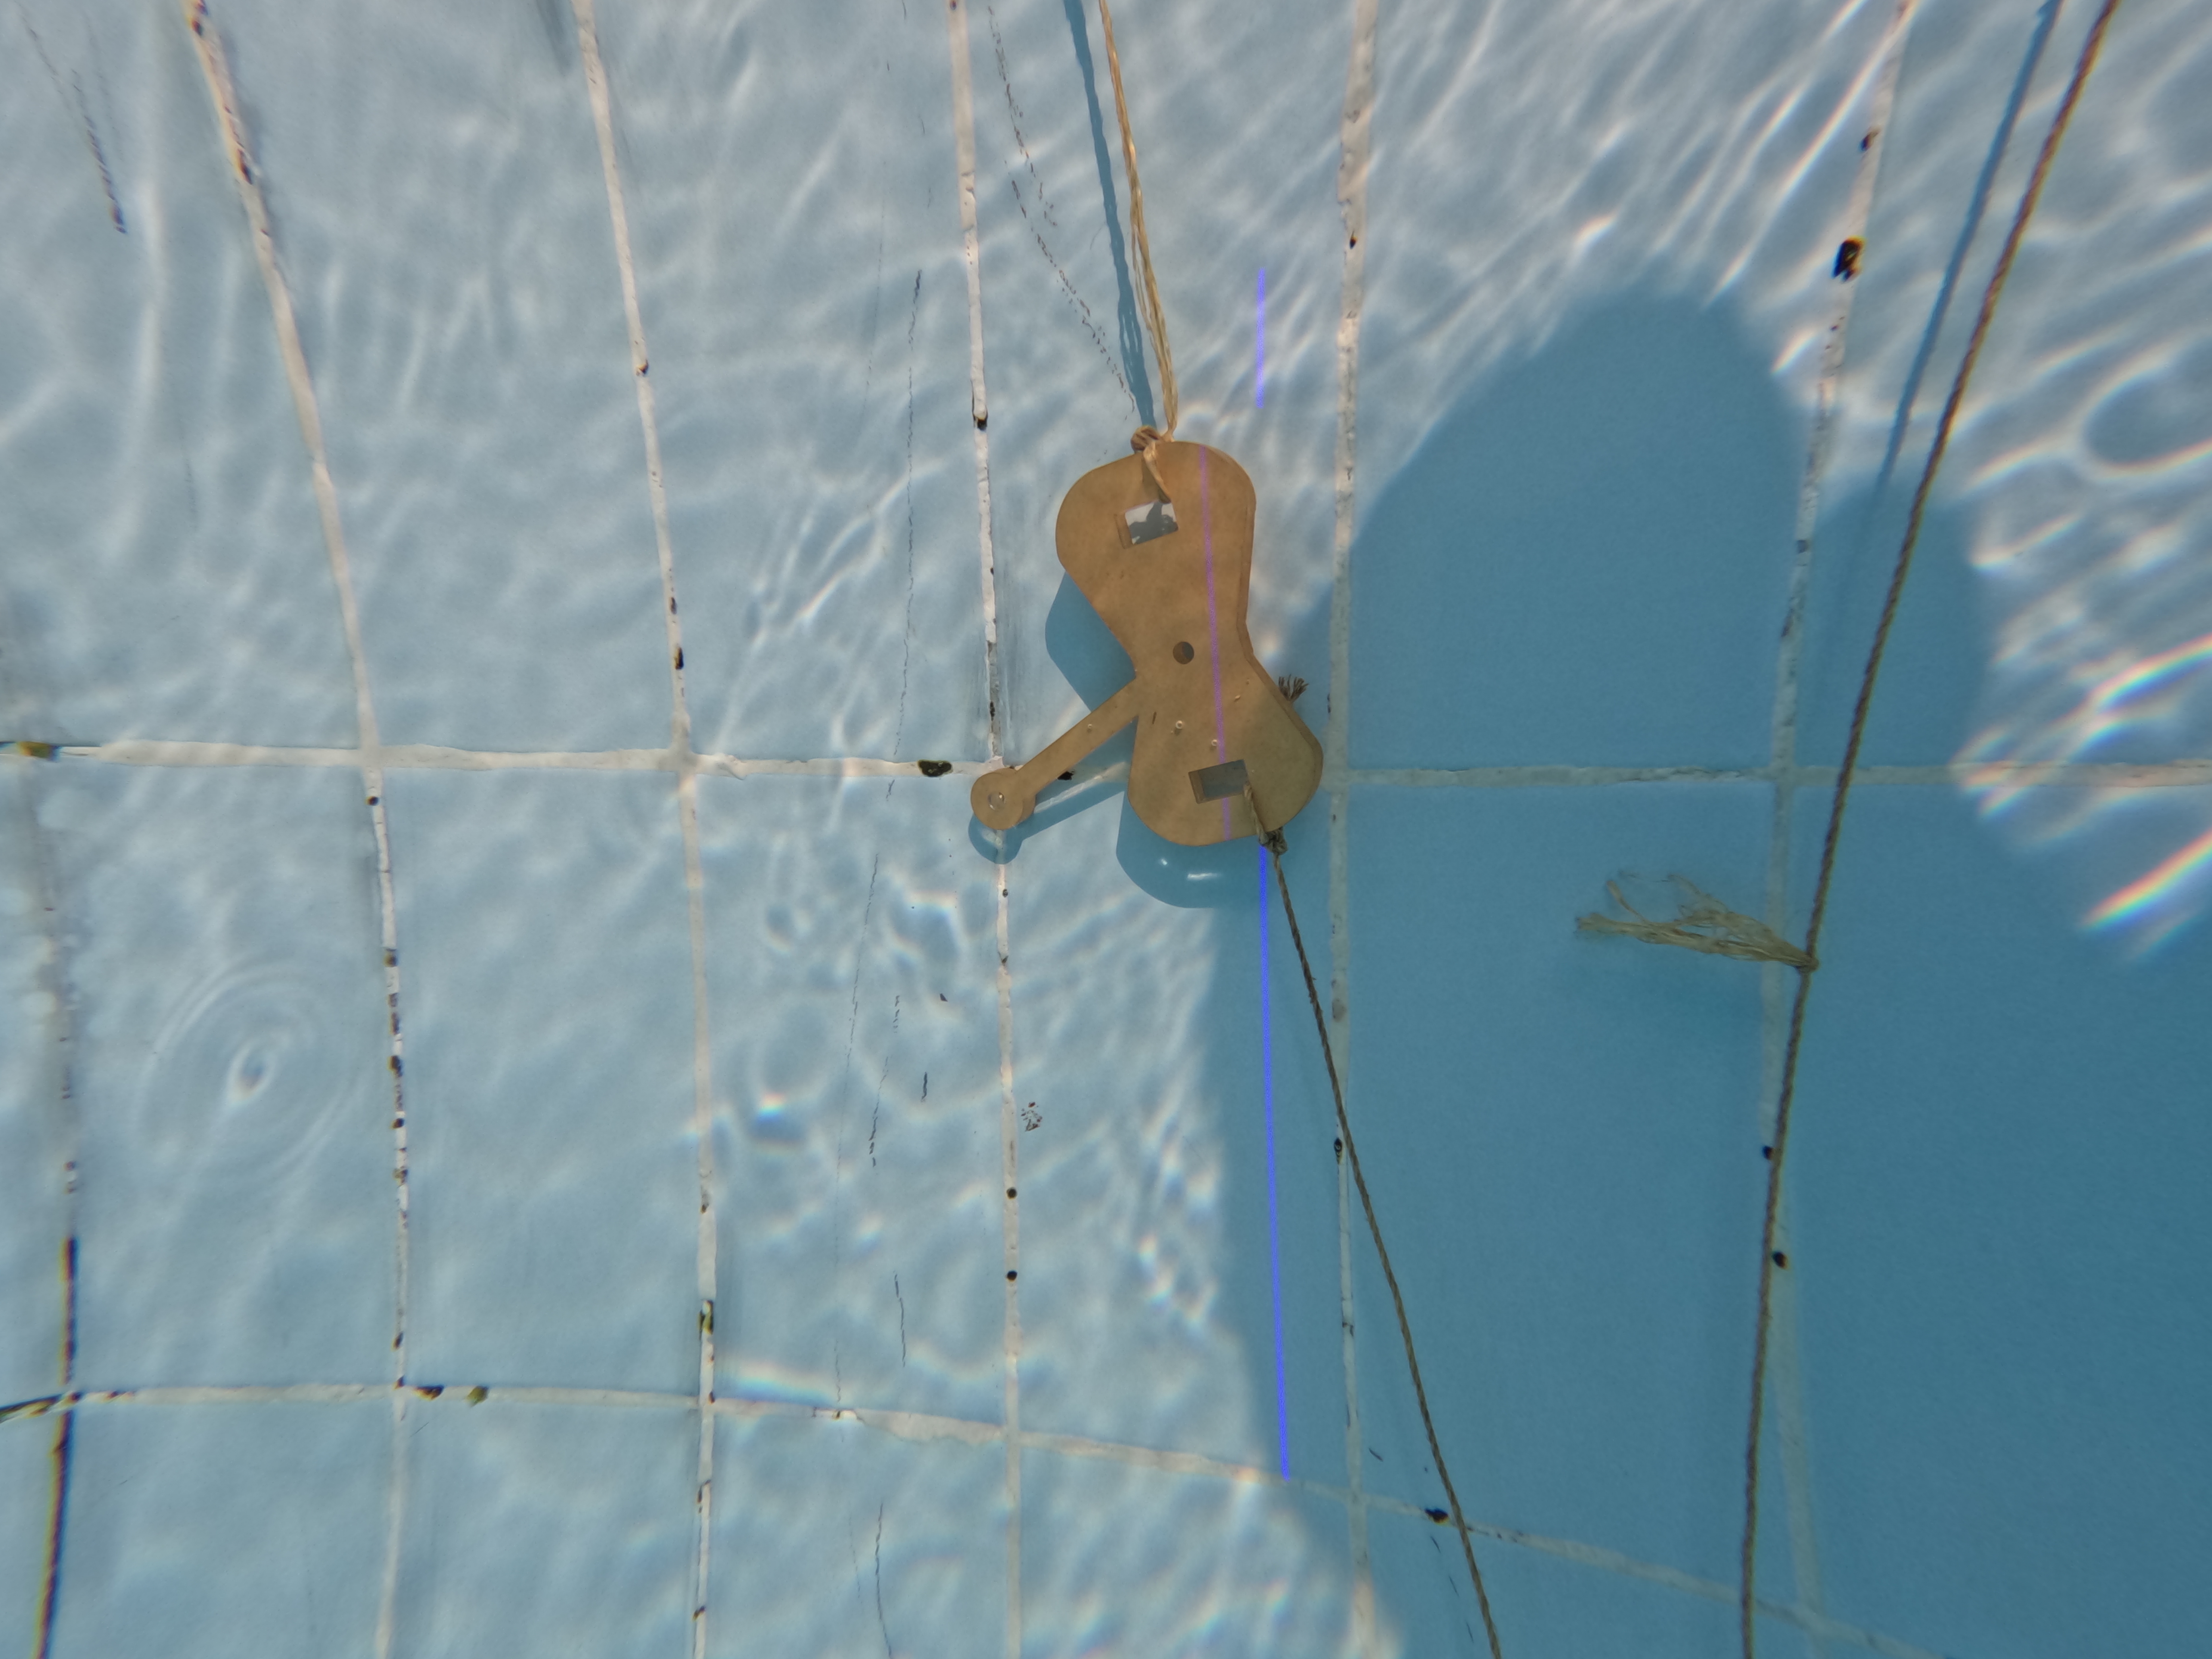

Supplement: Supplementary file 607 [file G0019621.pdf › Level_5_1/G0019621.pdf]

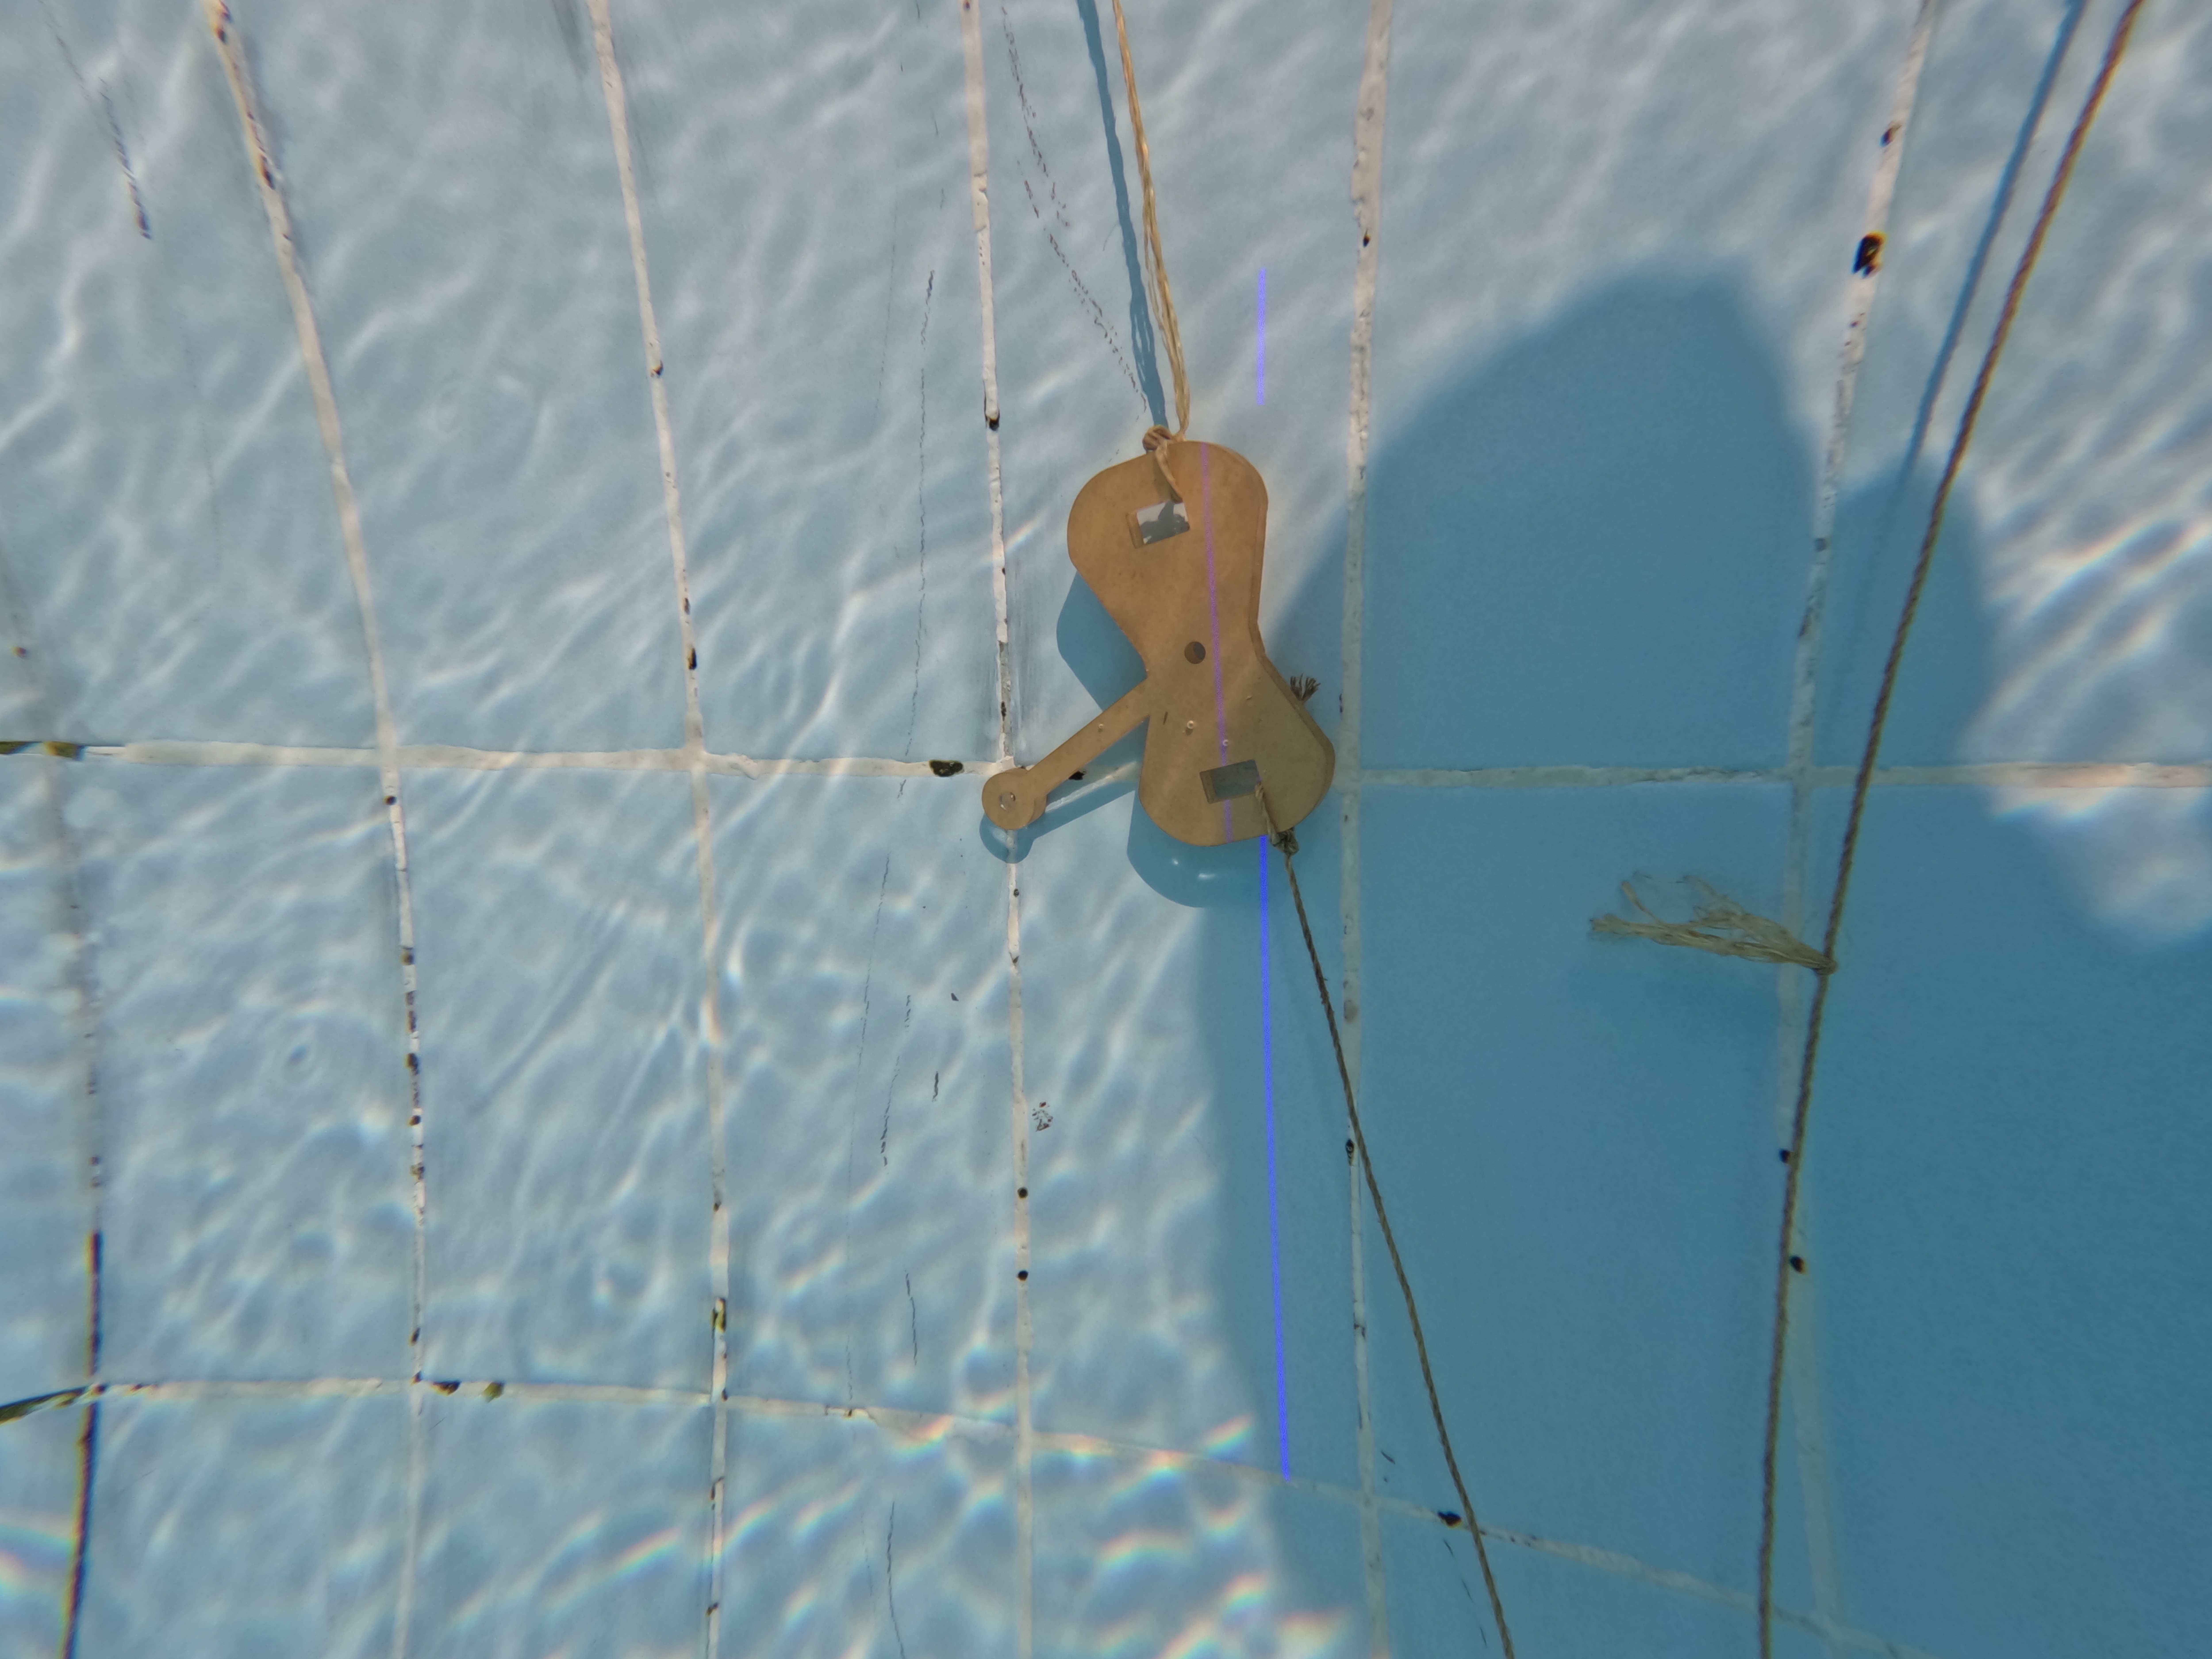

Supplement: Supplementary file 608 [file G0019622.pdf › Level_5_1/G0019622.pdf]

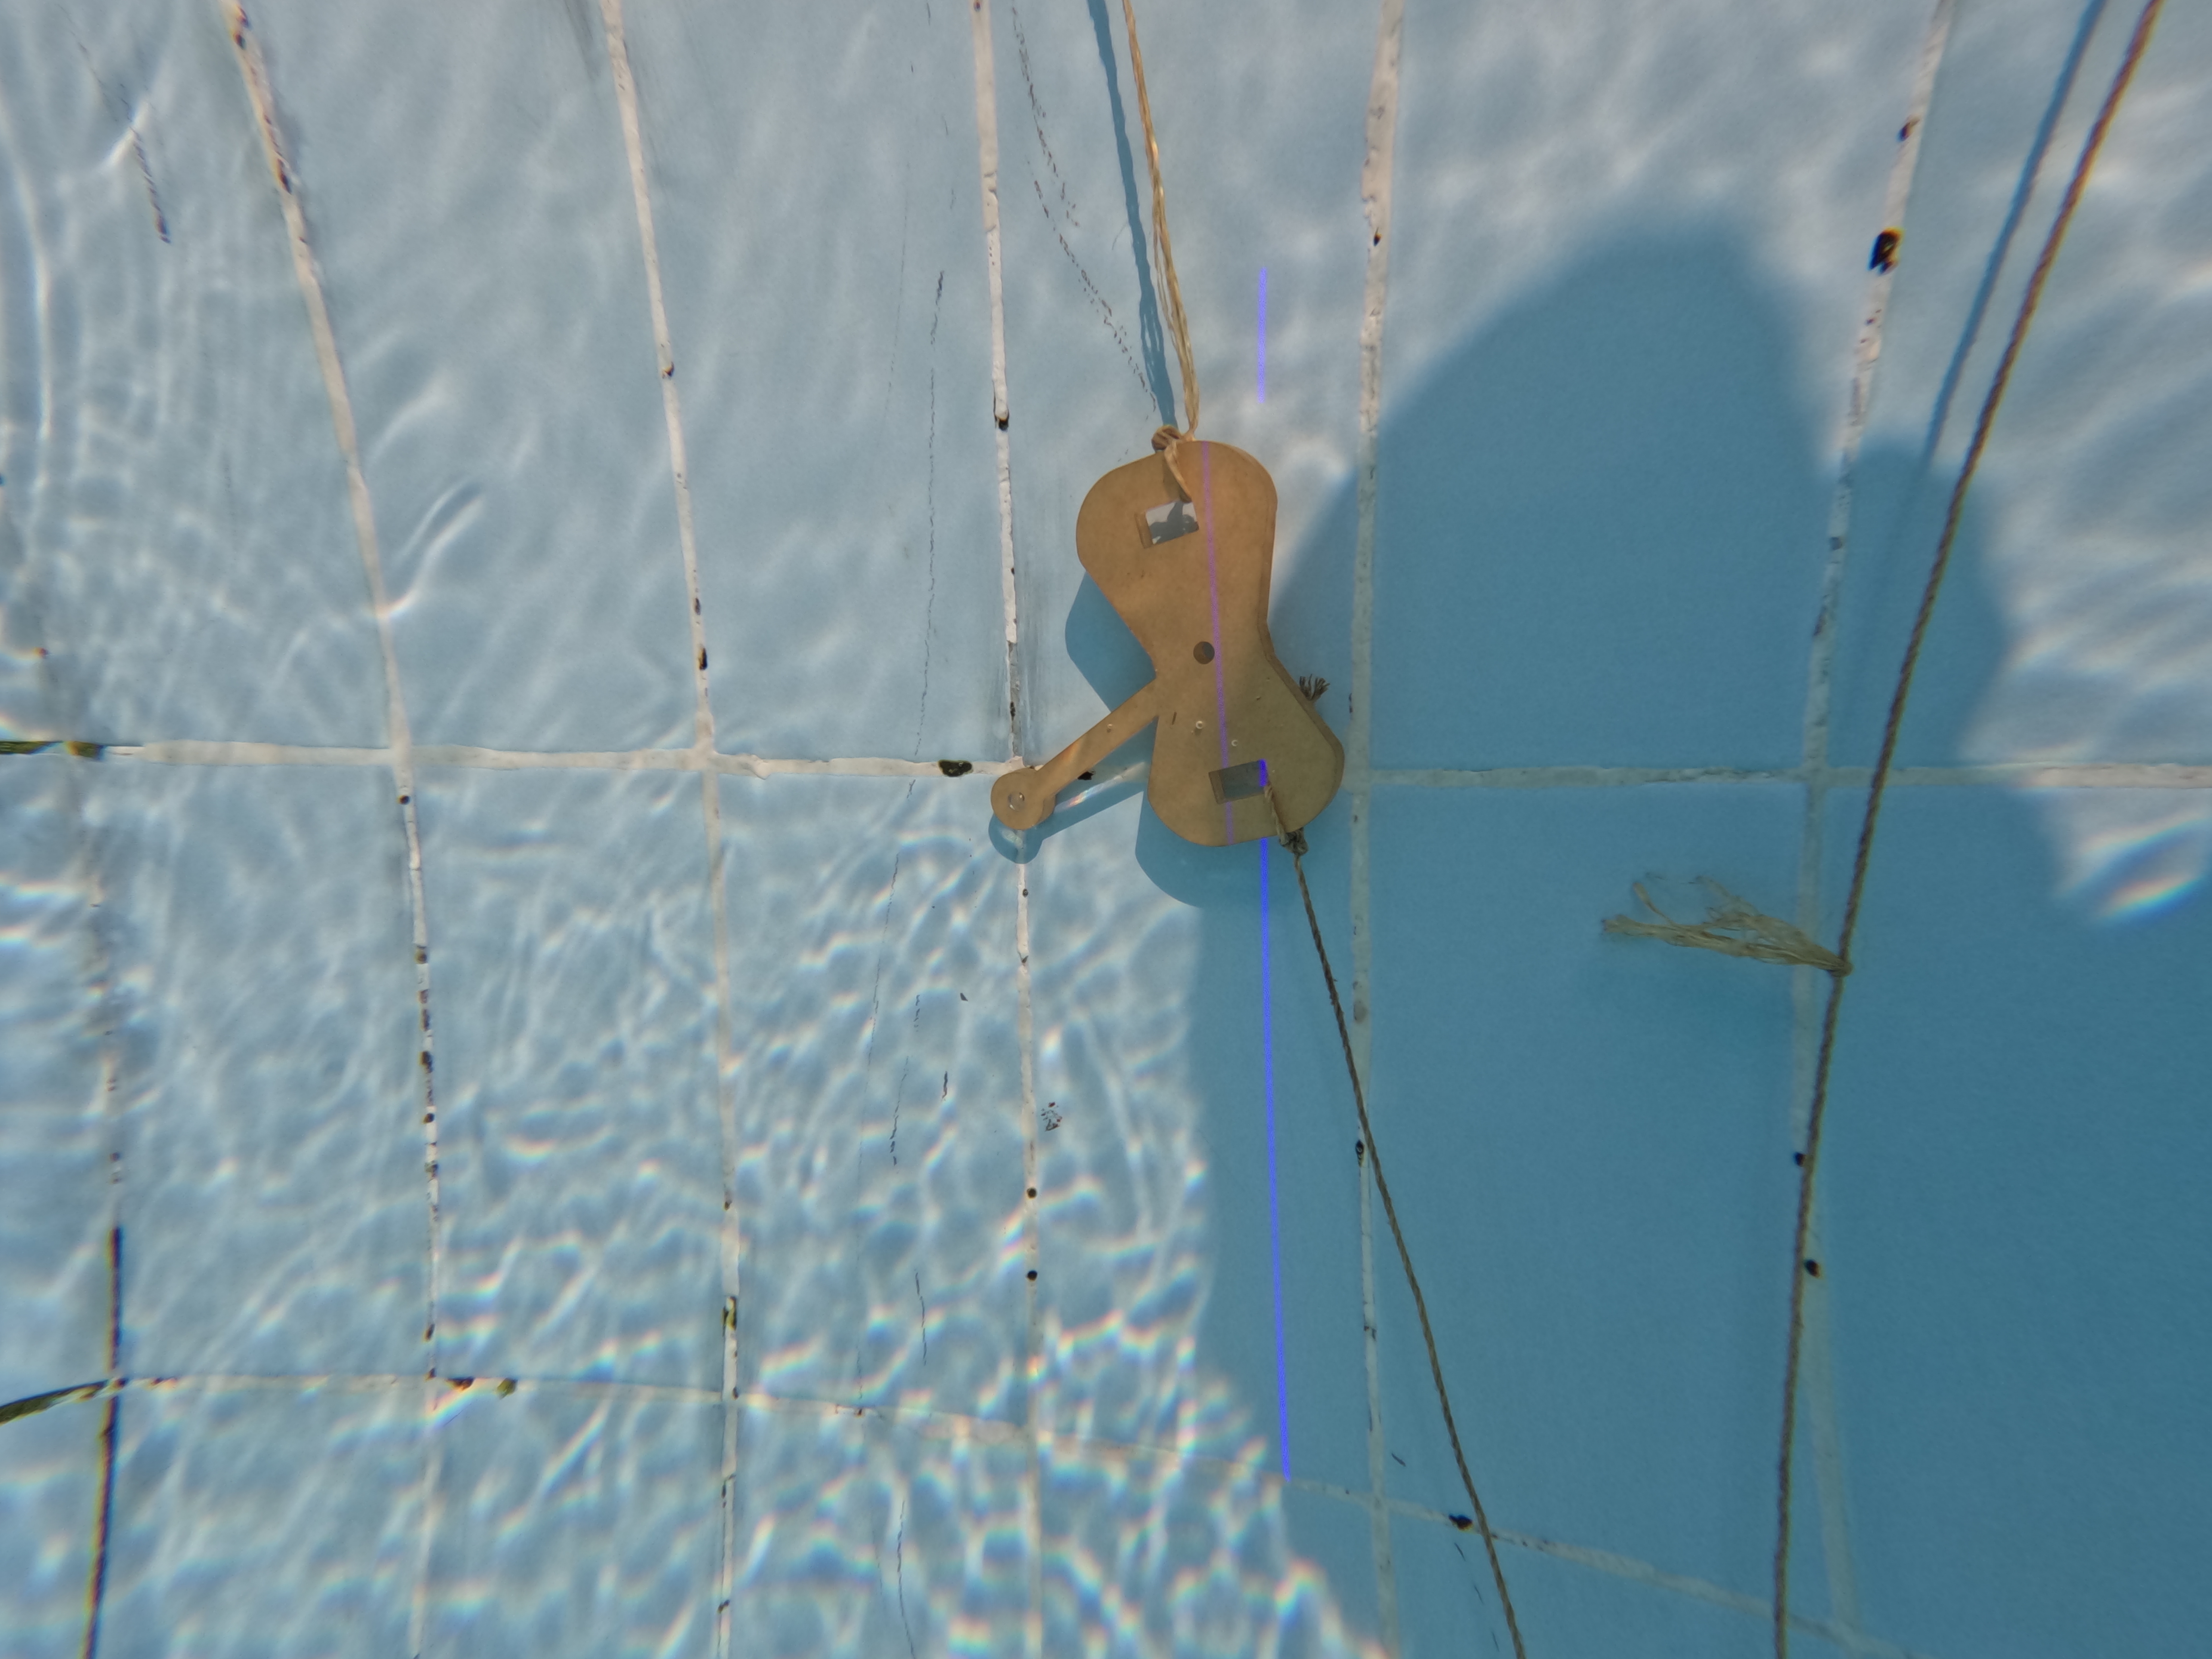

Supplement: Supplementary file 609 [file G0019623.pdf › Level_5_1/G0019623.pdf]

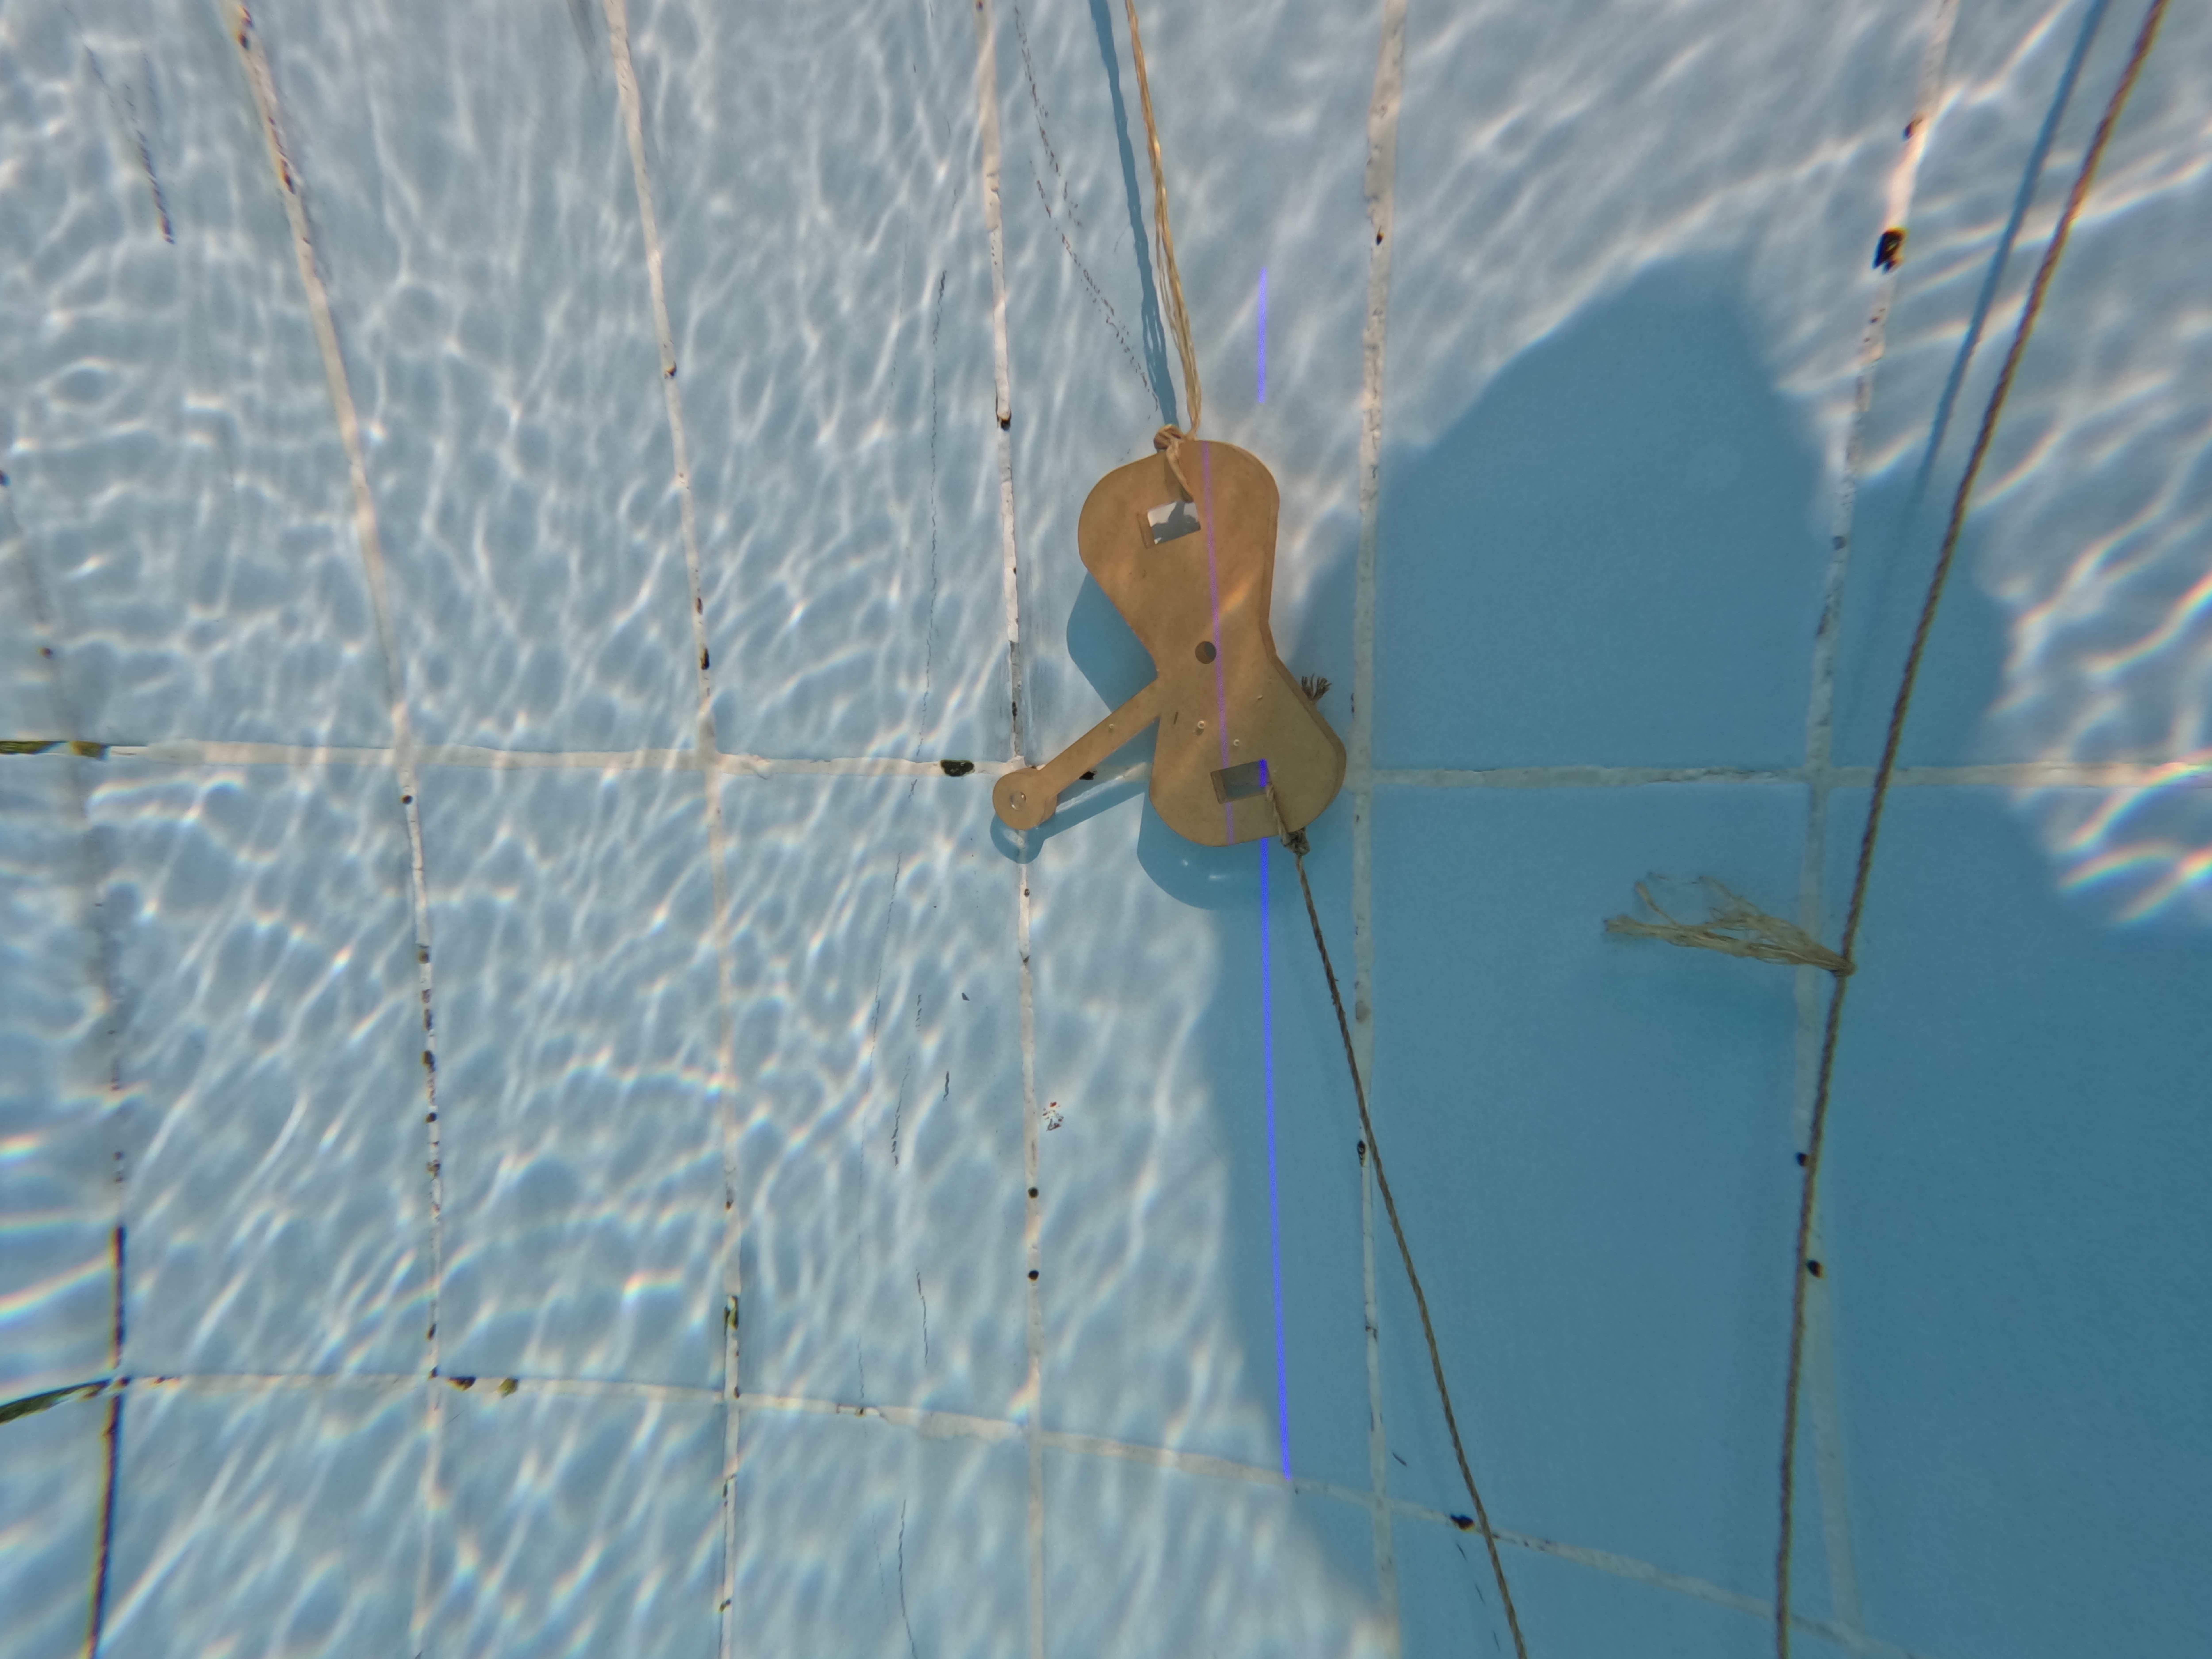

Supplement: Supplementary file 610 [file G0019624.pdf › Level_5_1/G0019624.pdf]

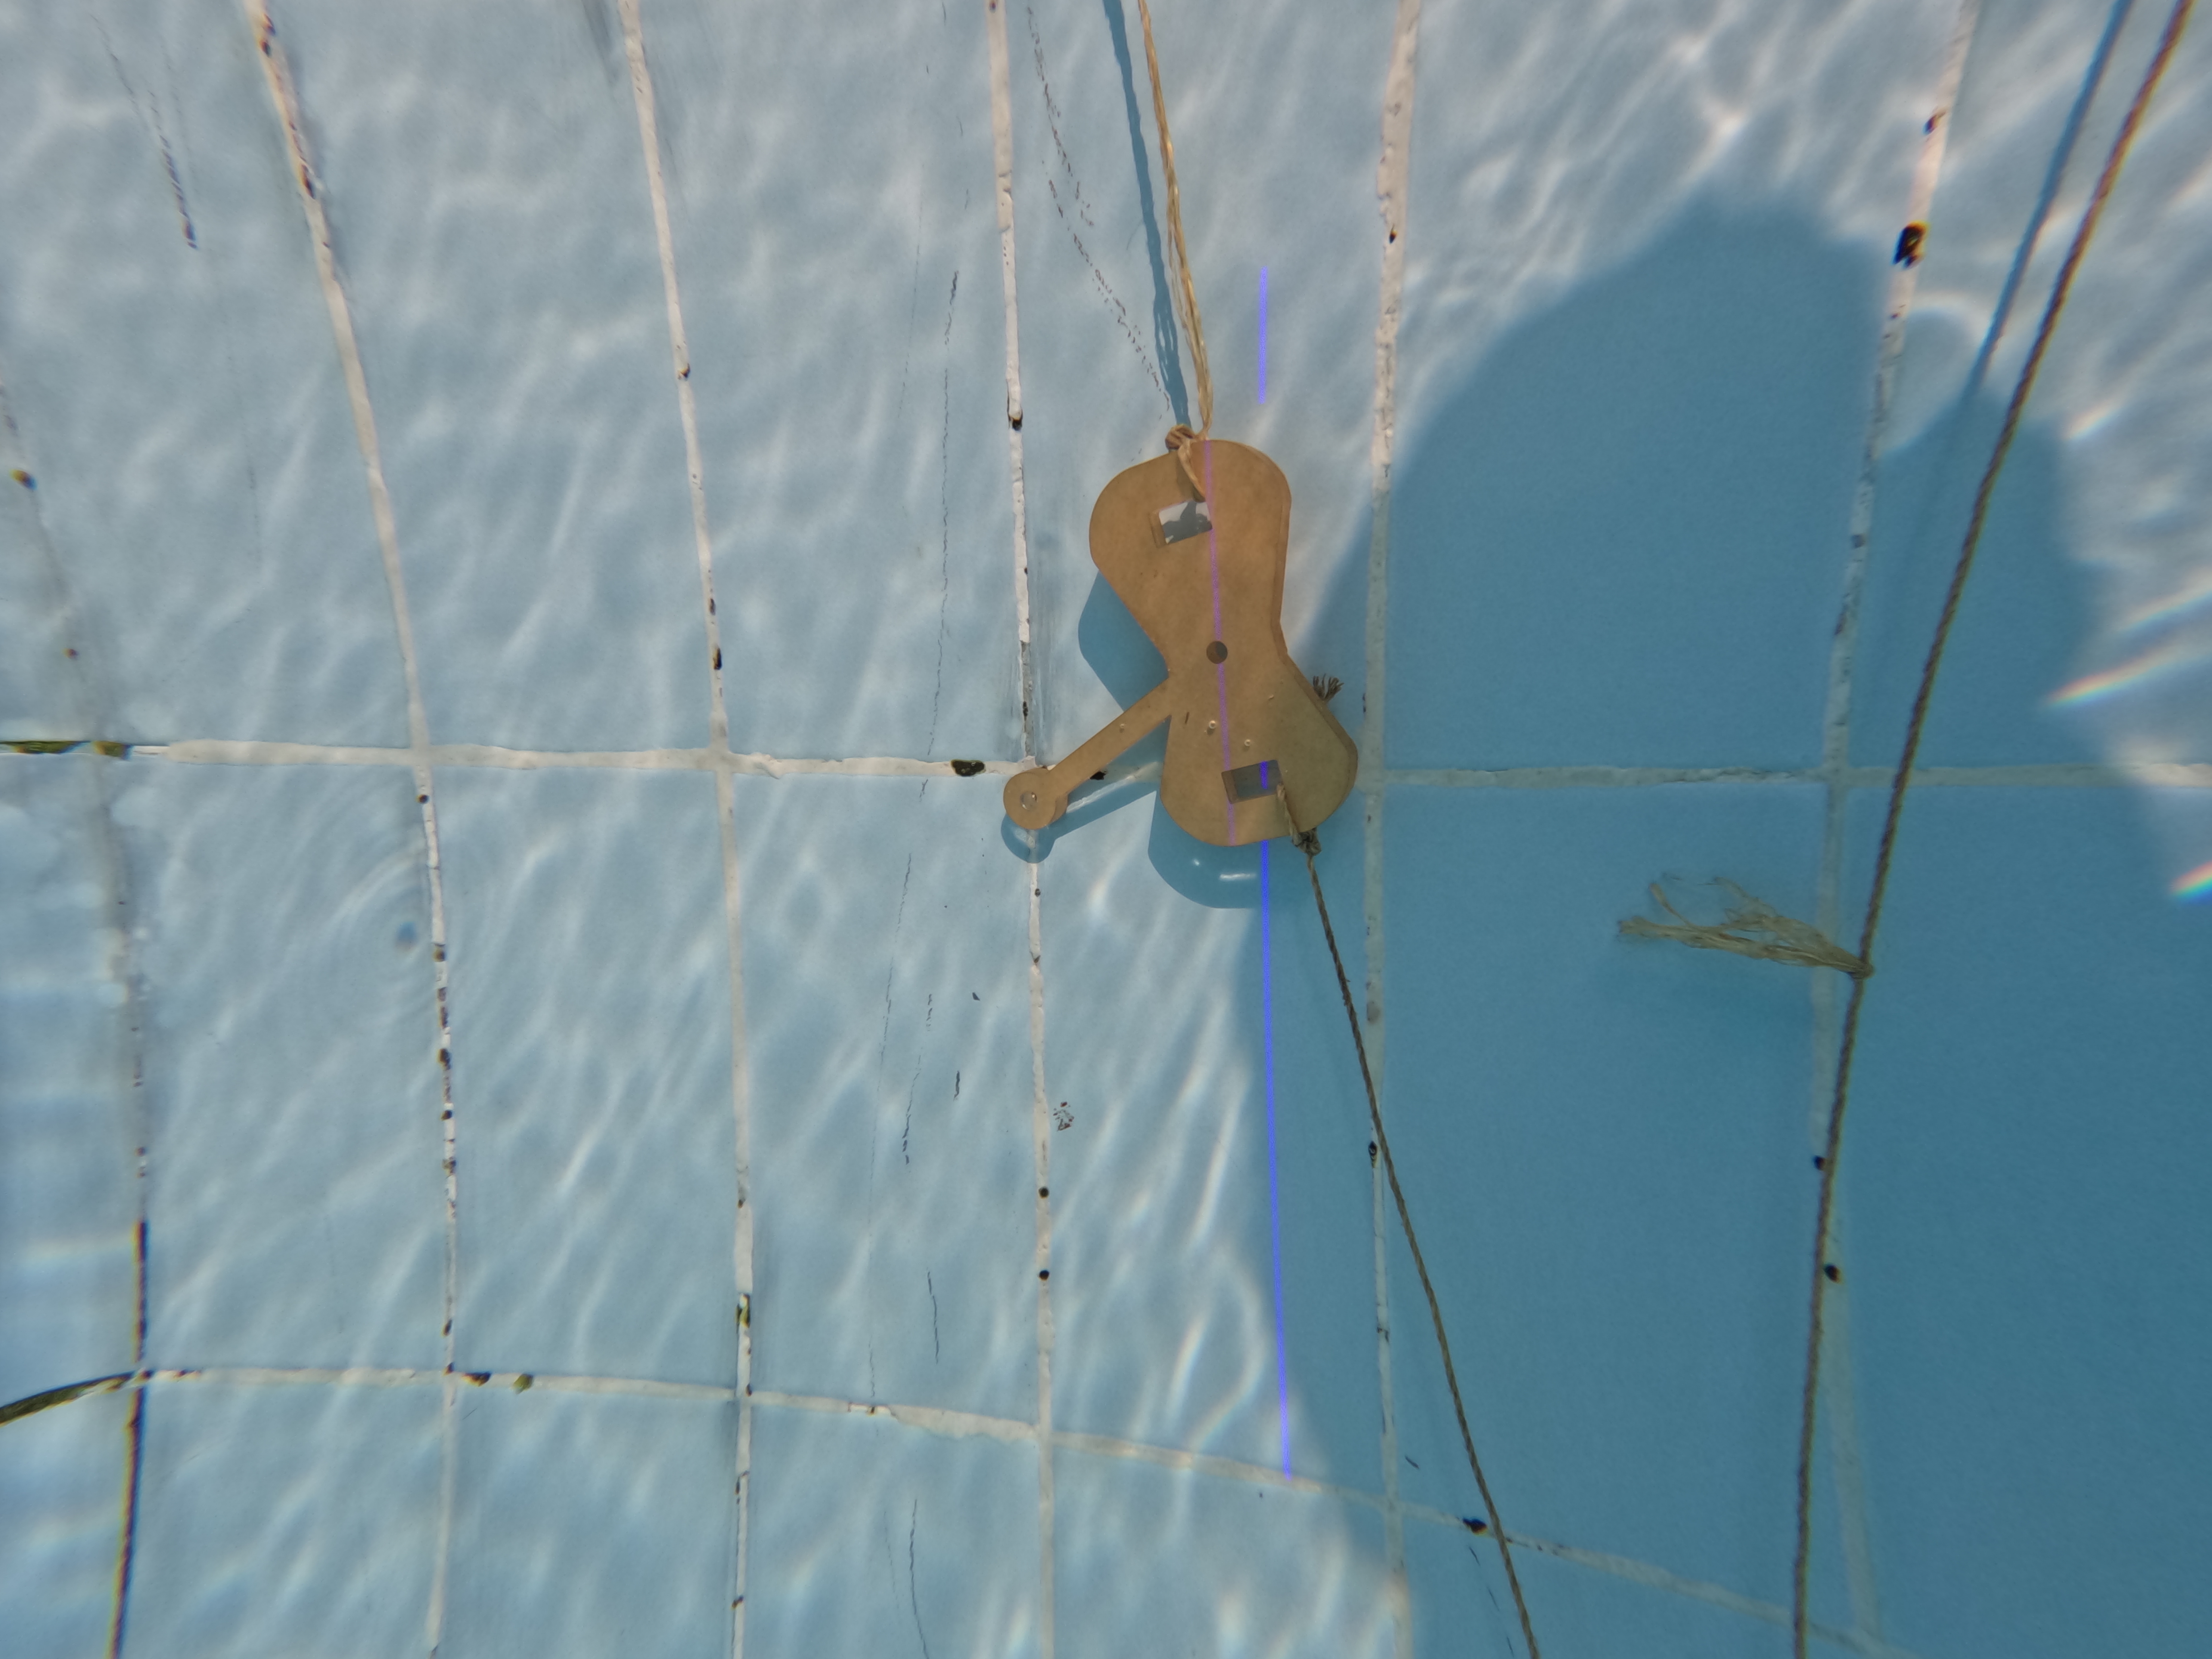

Supplement: Supplementary file 611 [file G0019625.pdf › Level_5_1/G0019625.pdf]

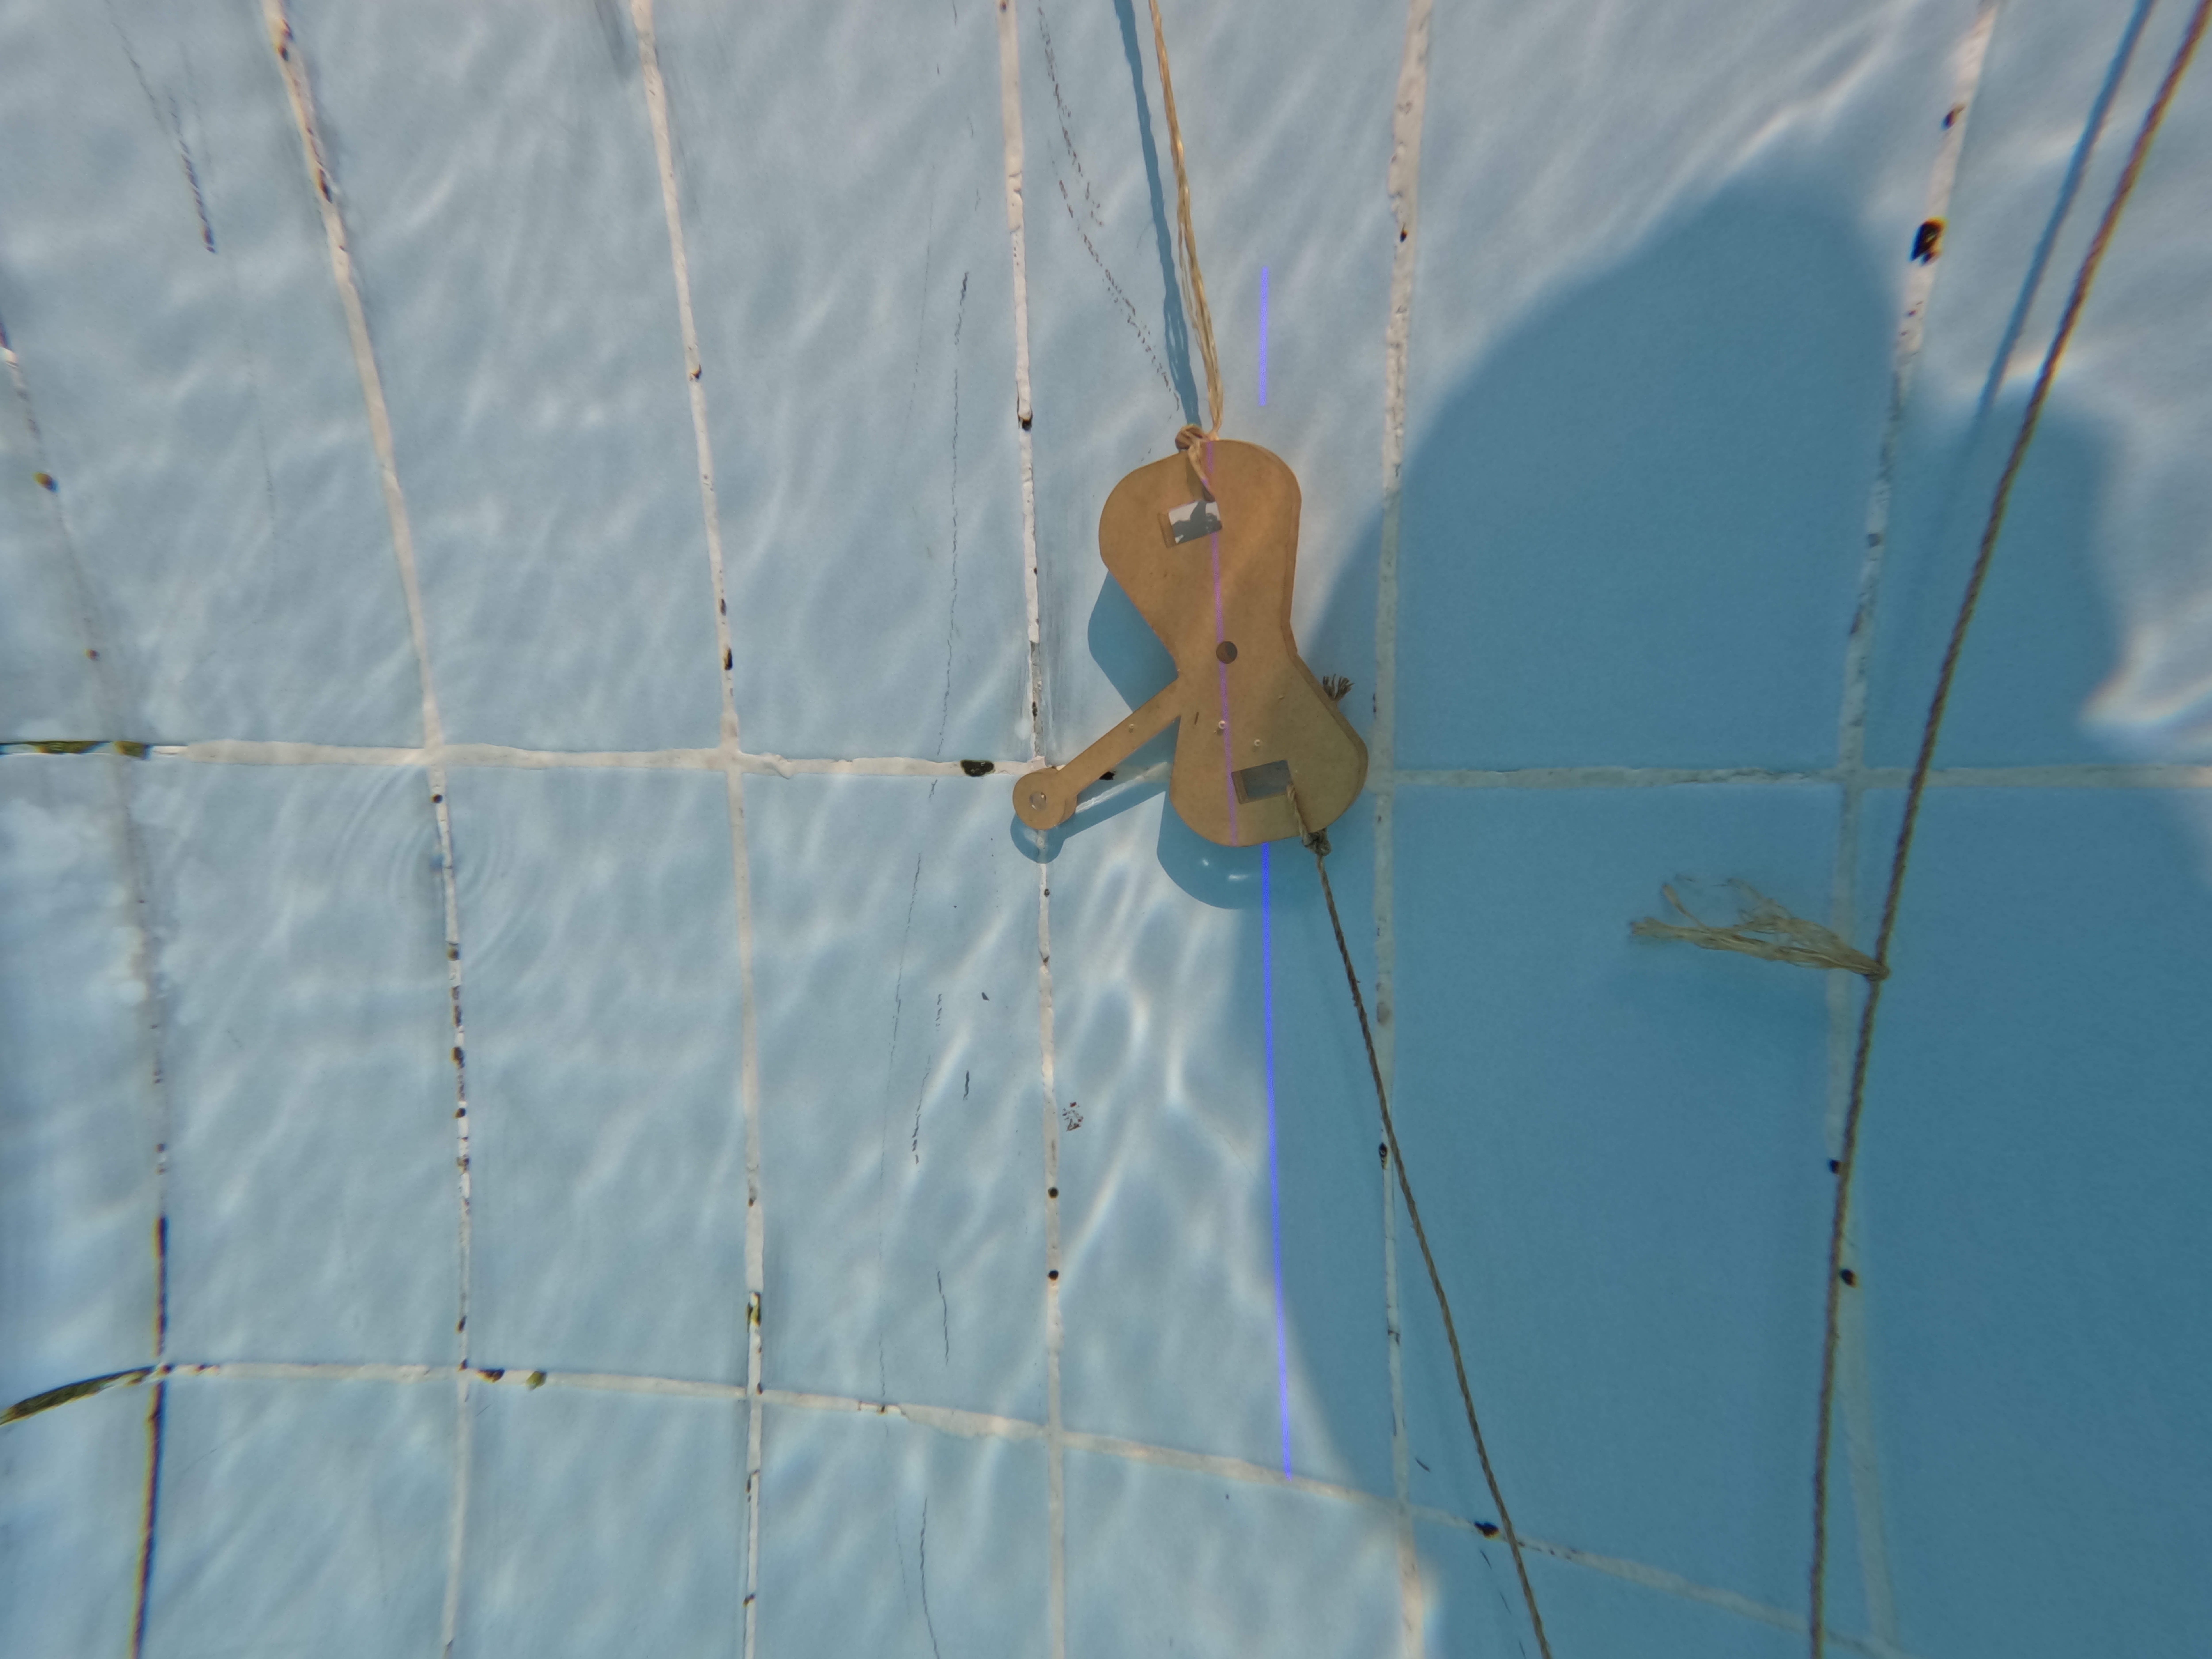

Supplement: Supplementary file 612 [file G0019626.pdf › Level_5_1/G0019626.pdf]

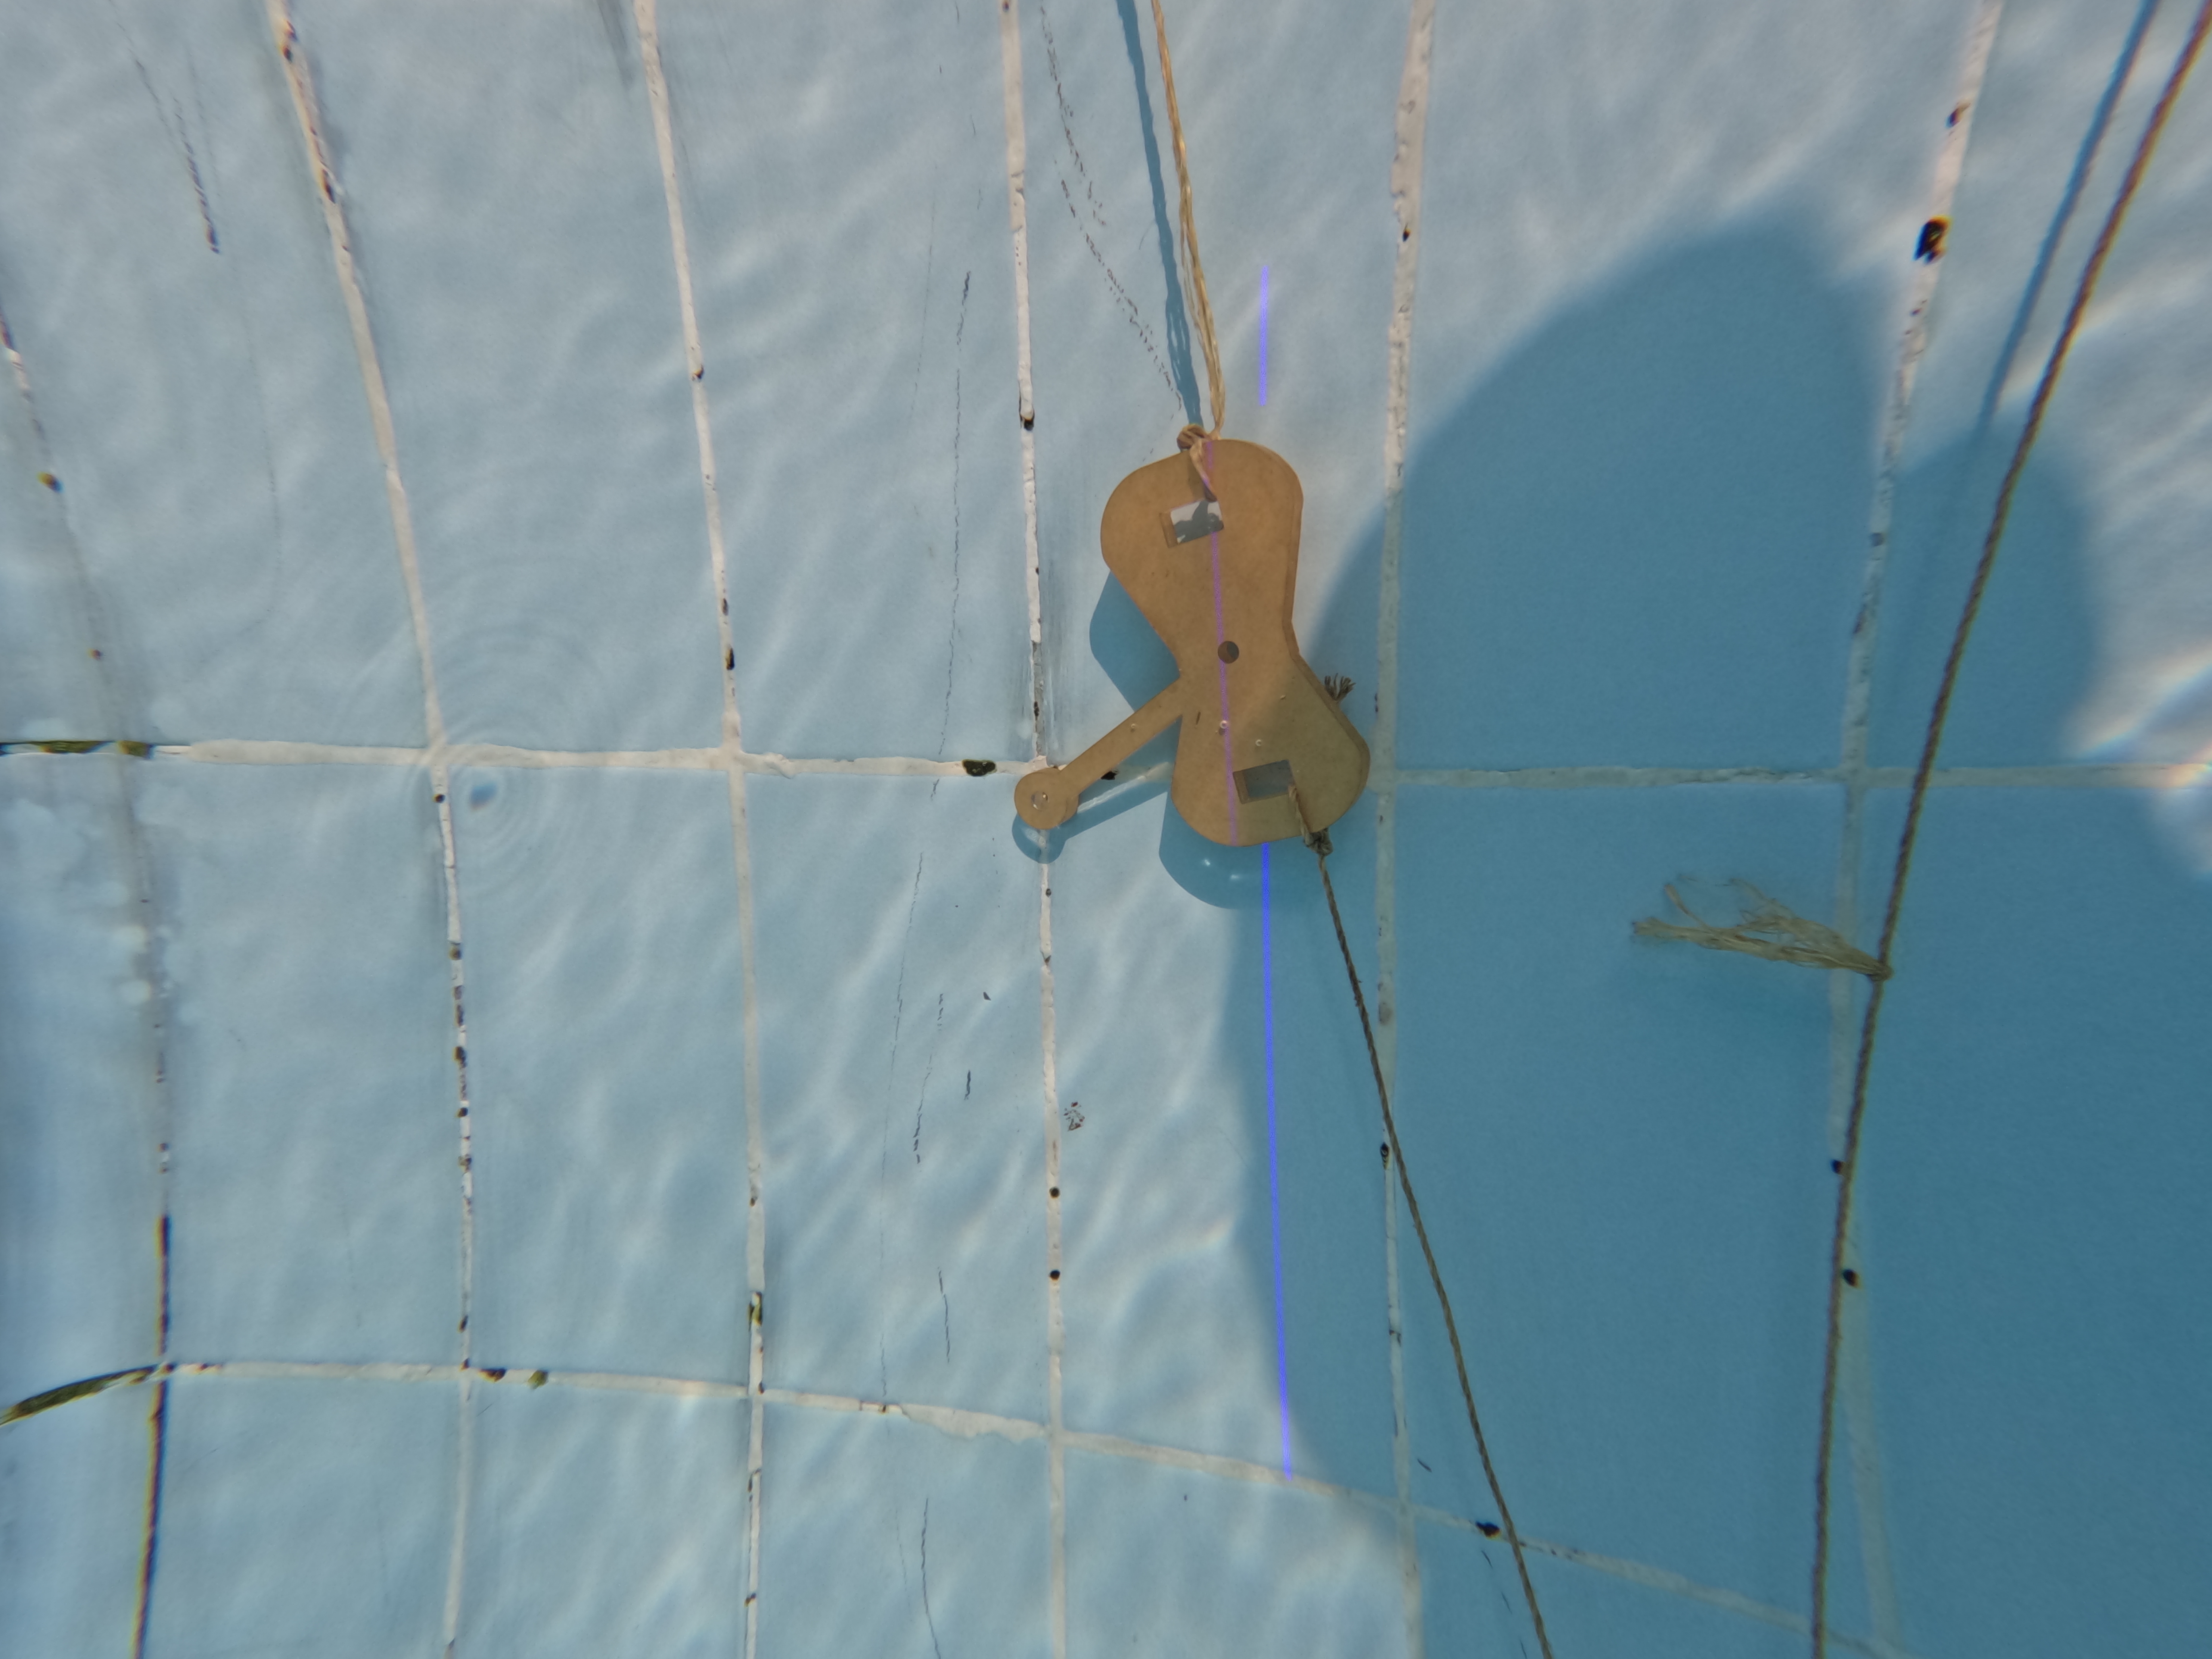

Supplement: Supplementary file 613 [file G0019627.pdf › Level_5_1/G0019627.pdf]

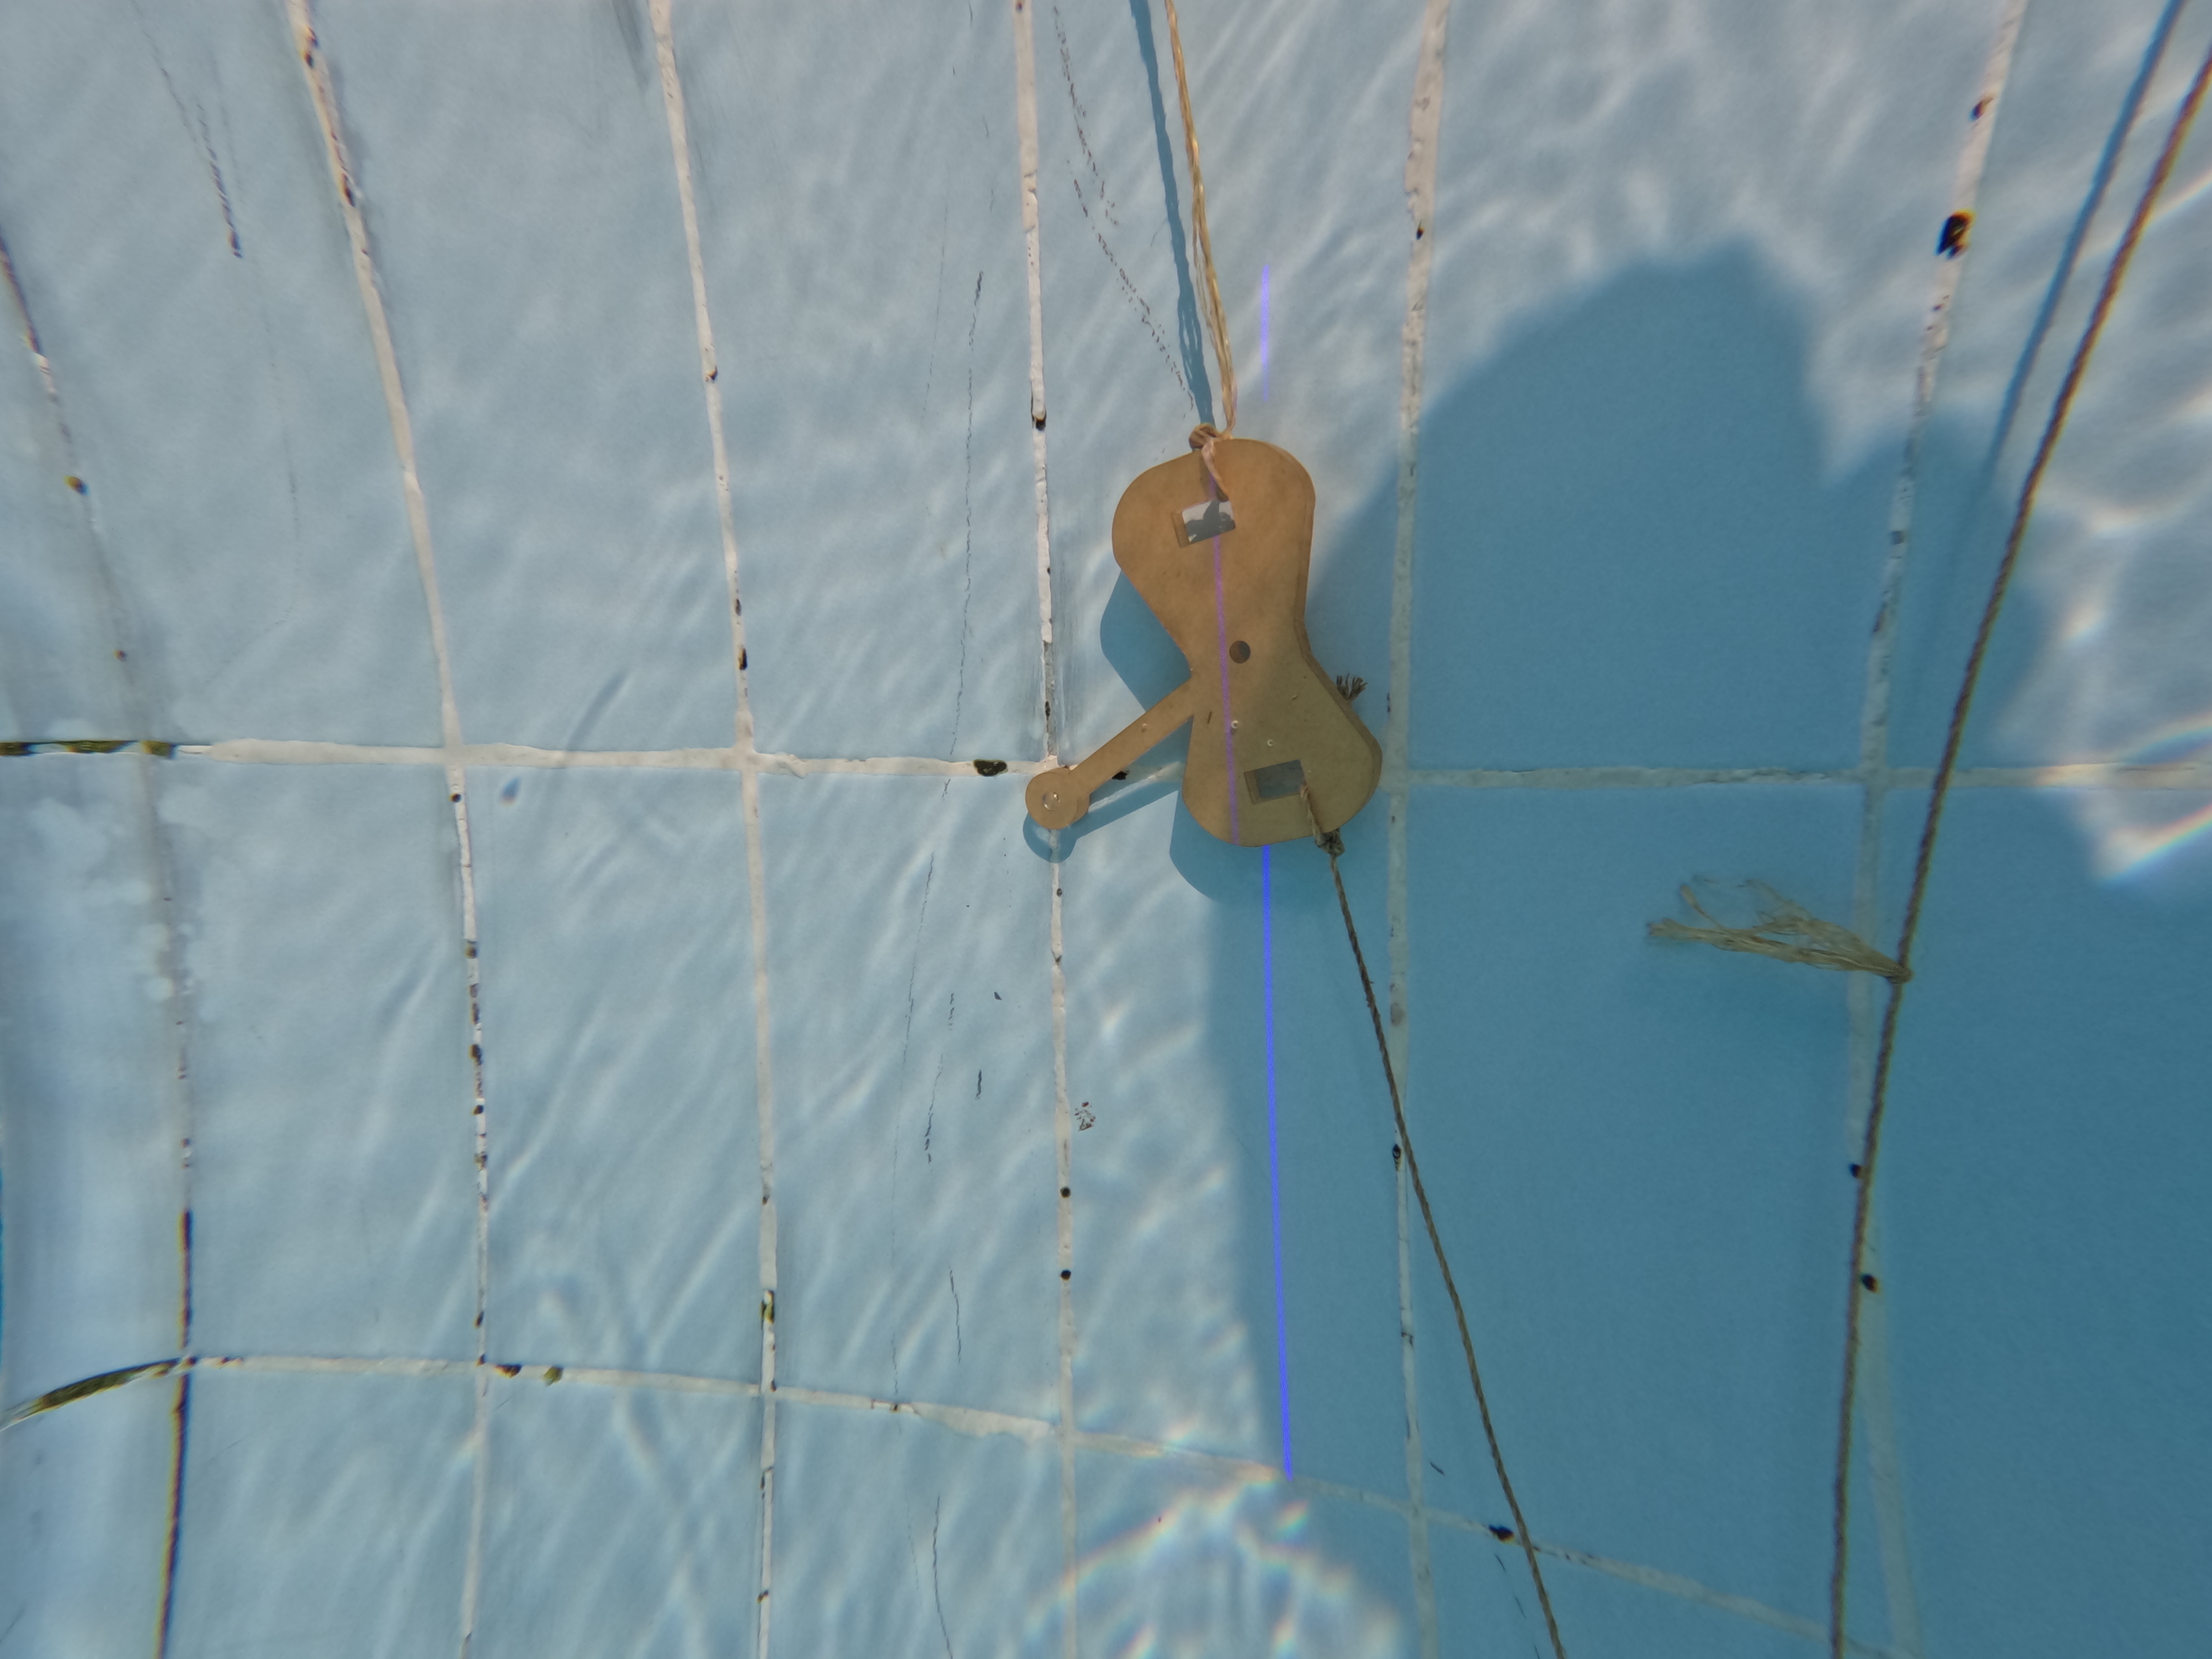

Supplement: Supplementary file 614 [file G0019628.pdf › Level_5_1/G0019628.pdf]

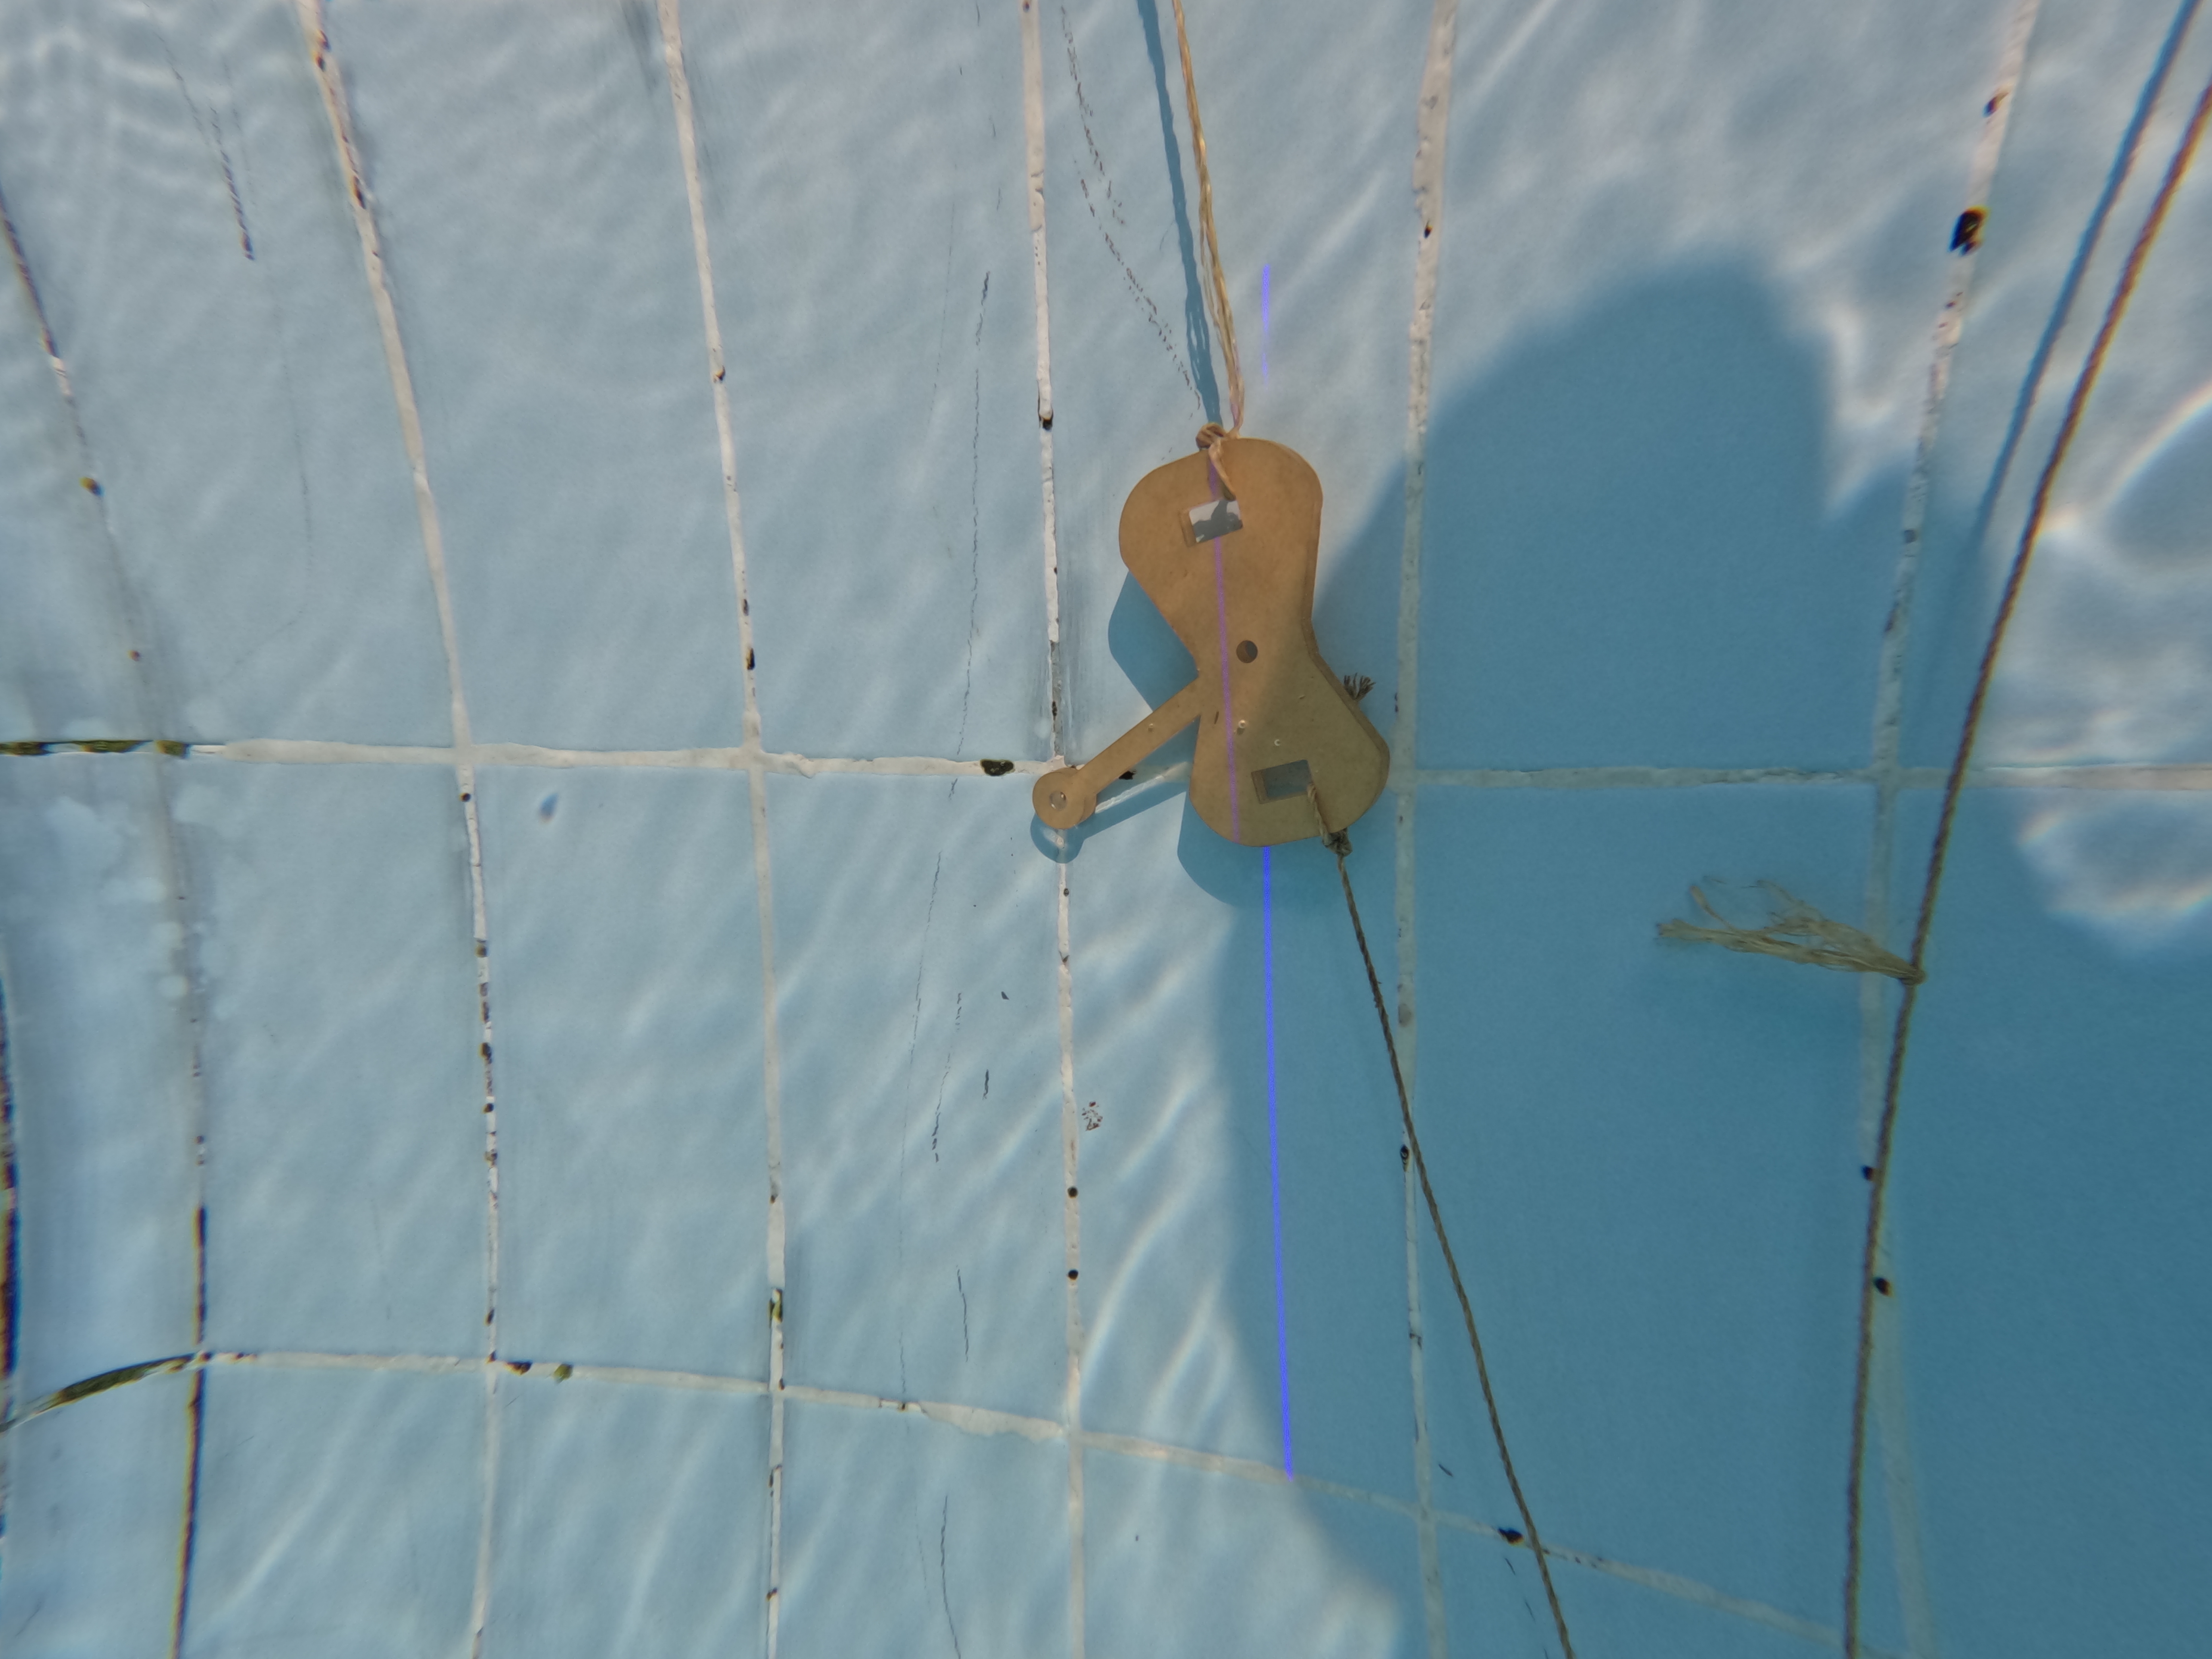

Supplement: Supplementary file 615 [file G0019629.pdf › Level_5_1/G0019629.pdf]

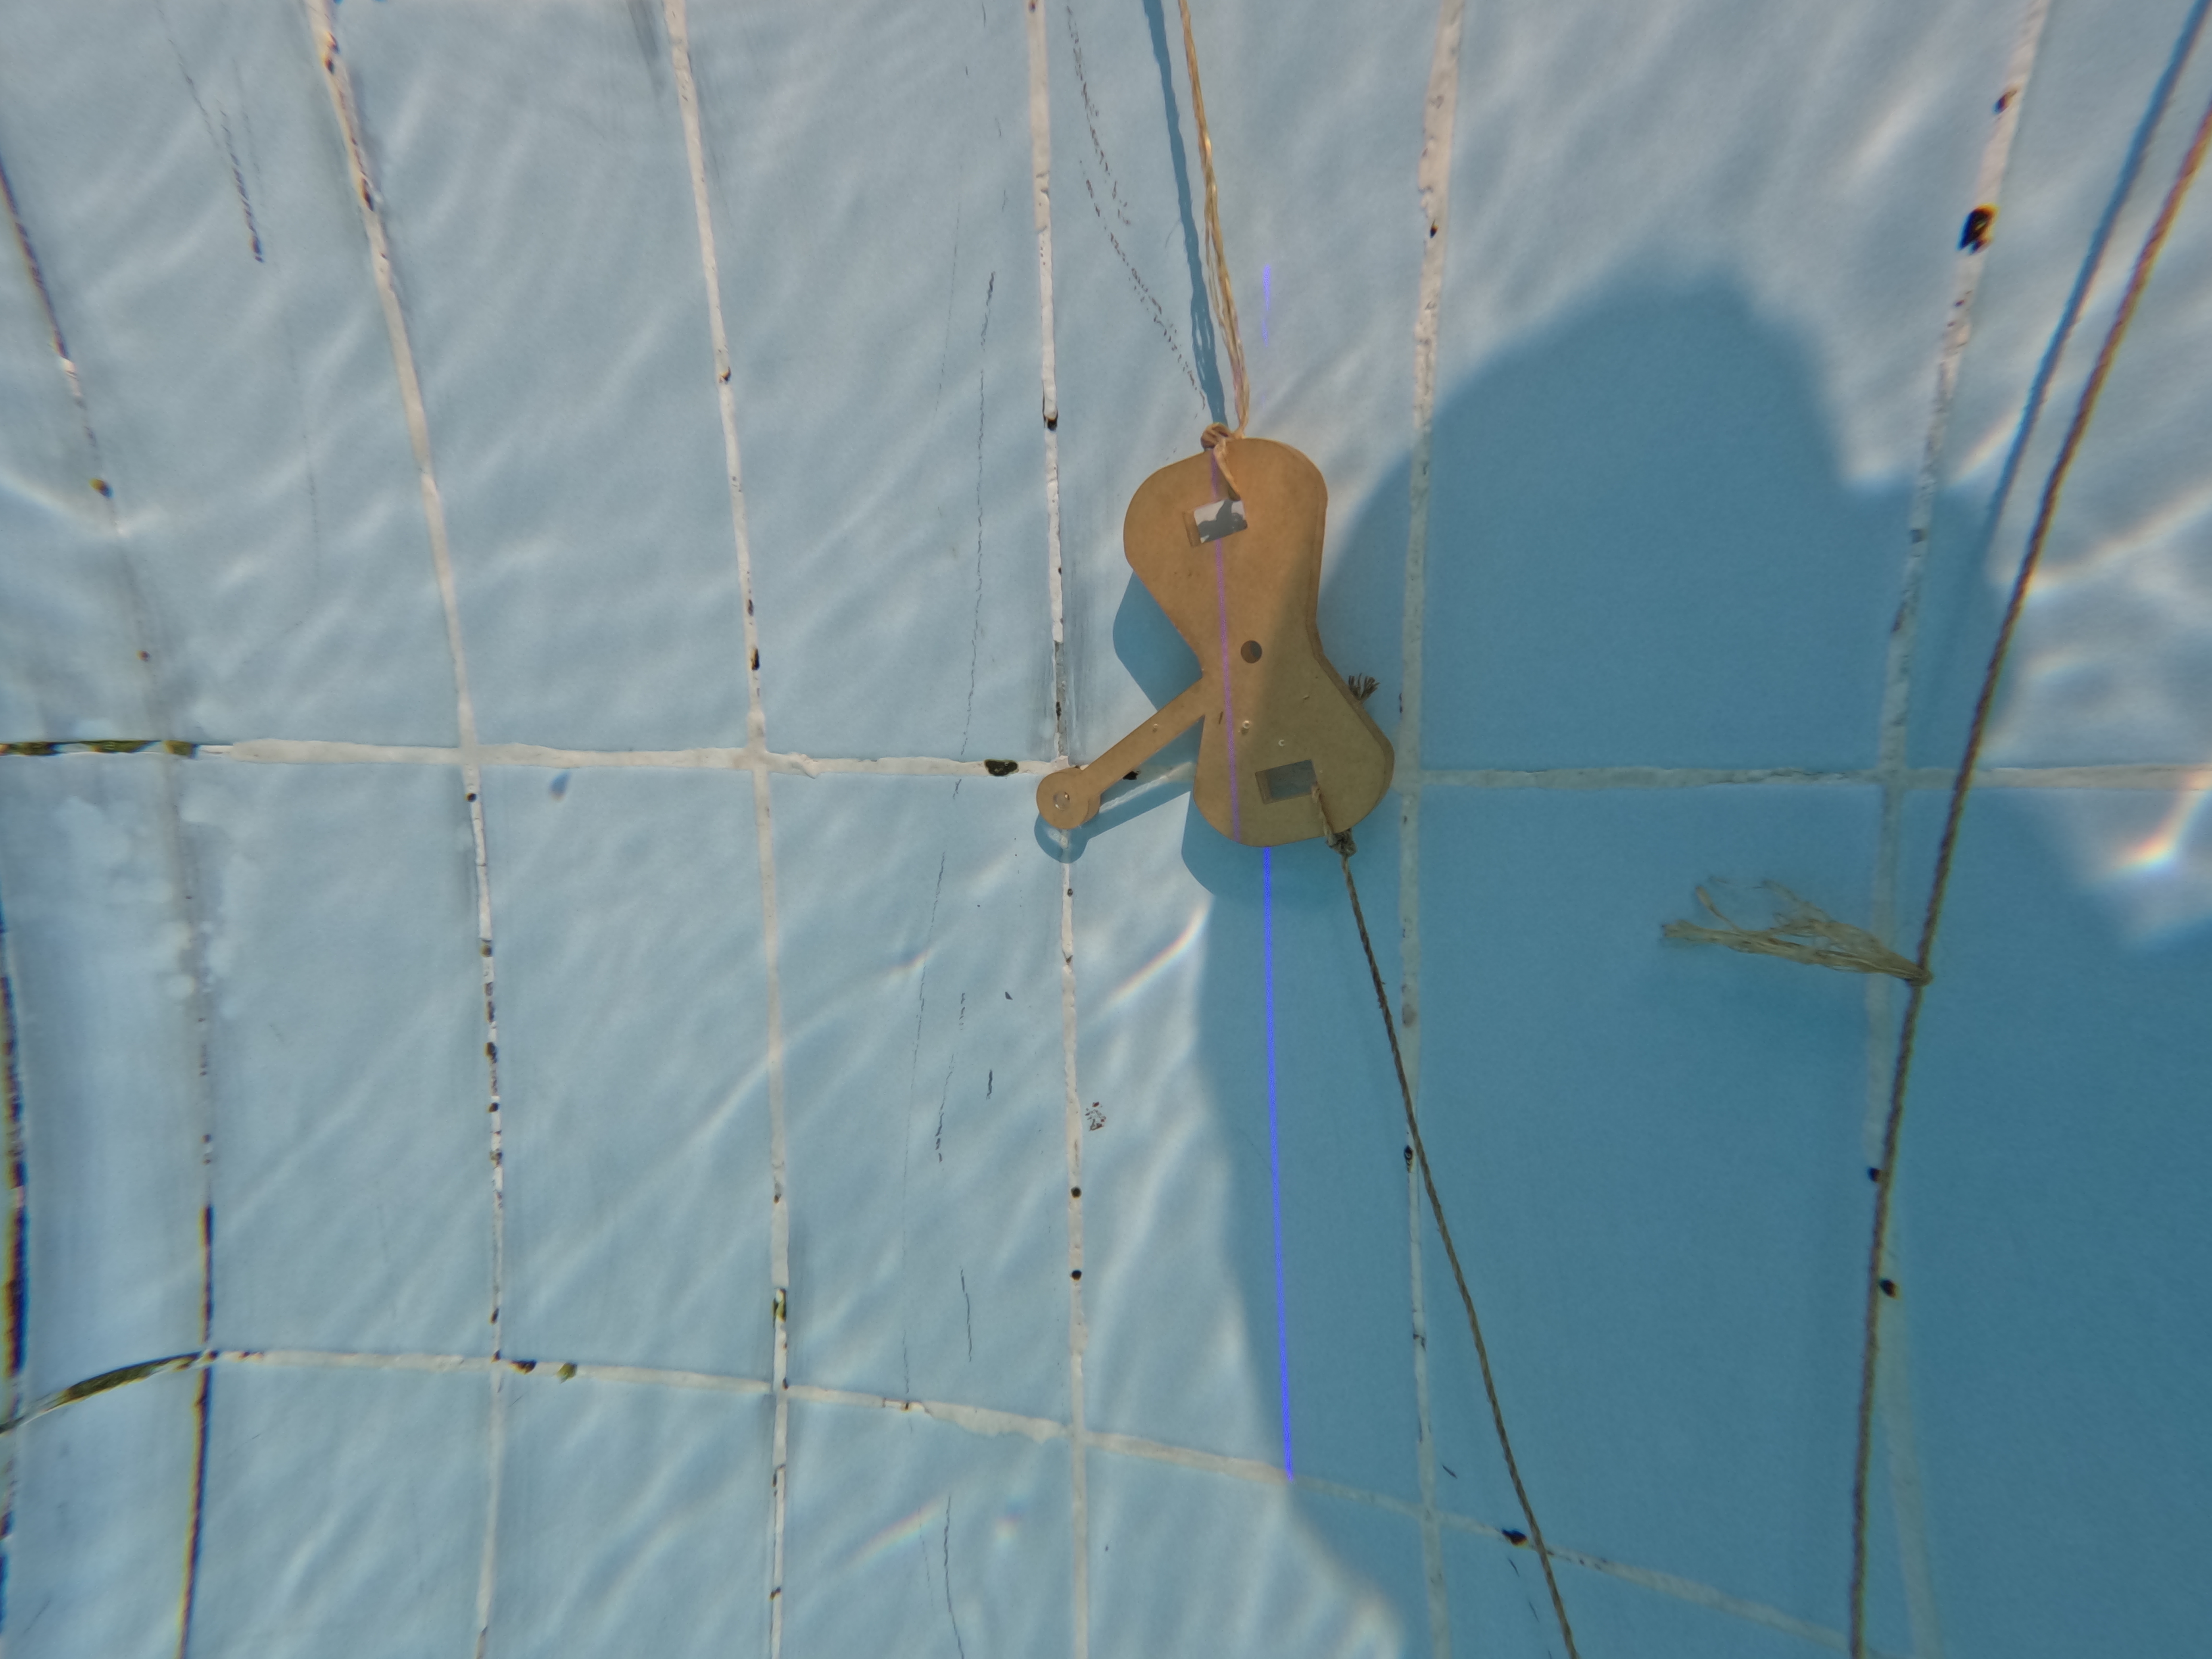

Supplement: Supplementary file 616 [file G0019630.pdf › Level_5_1/G0019630.pdf]

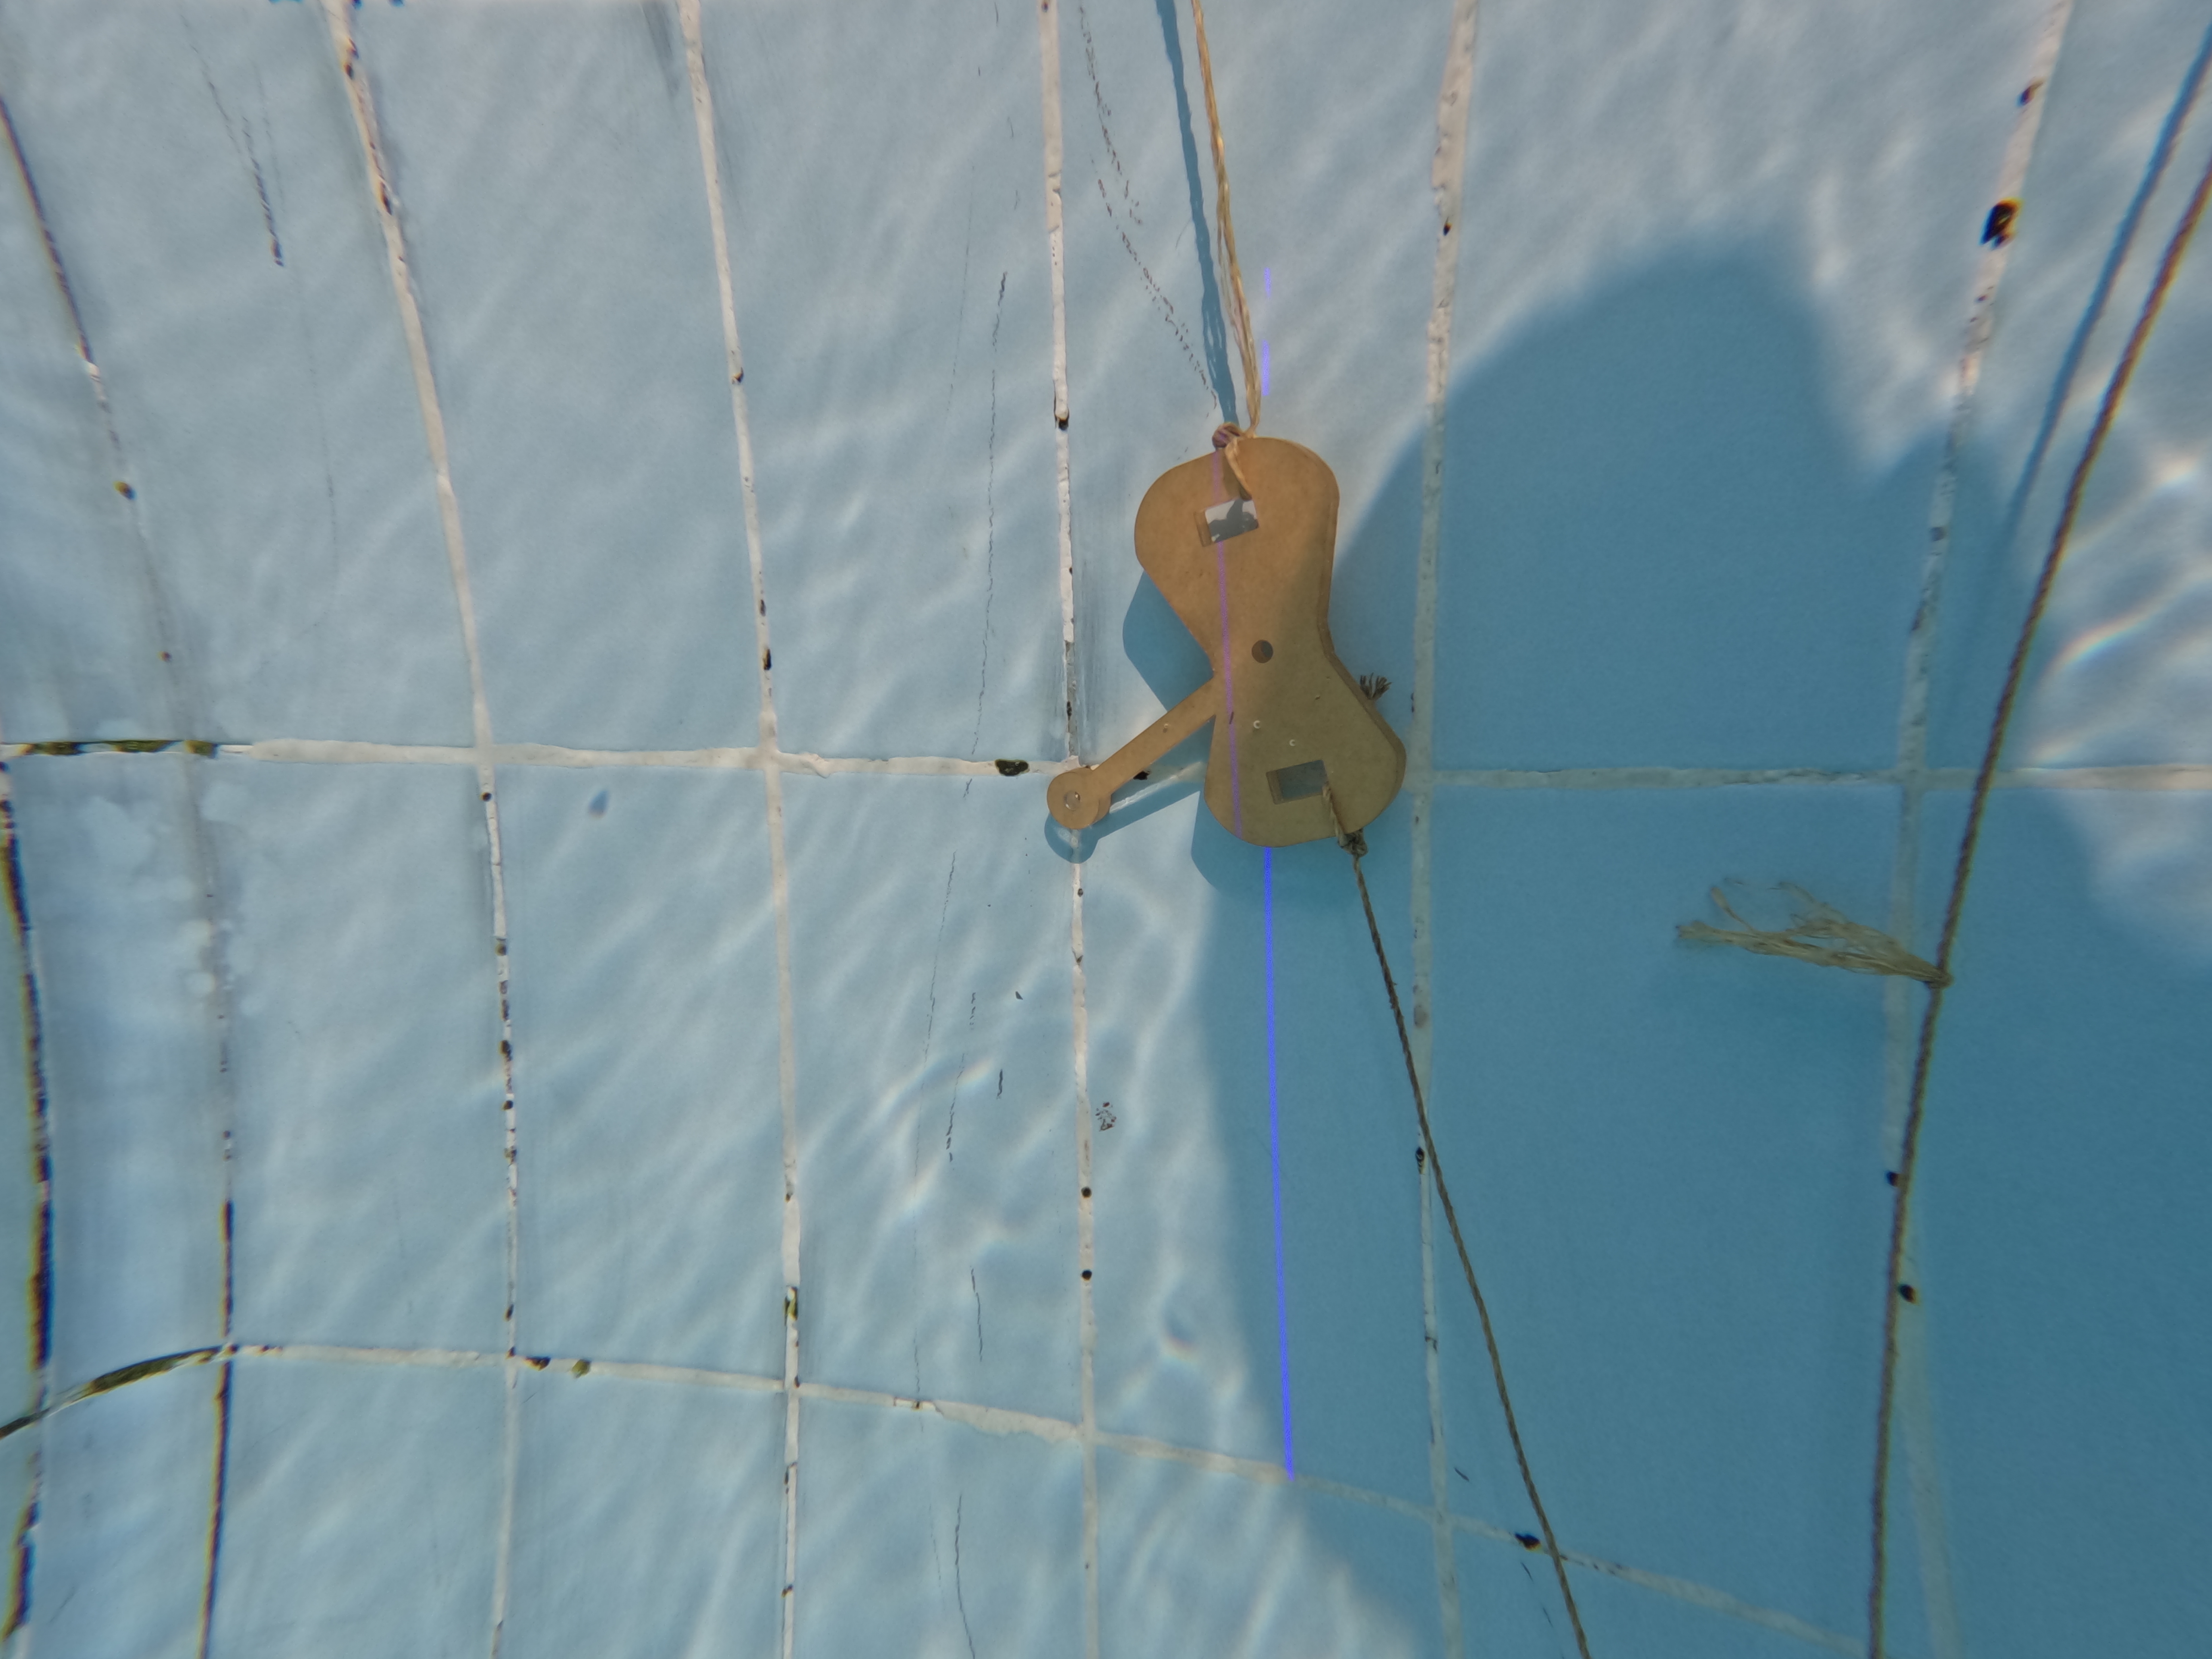

Supplement: Supplementary file 617 [file G0019631.pdf › Level_5_1/G0019631.pdf]

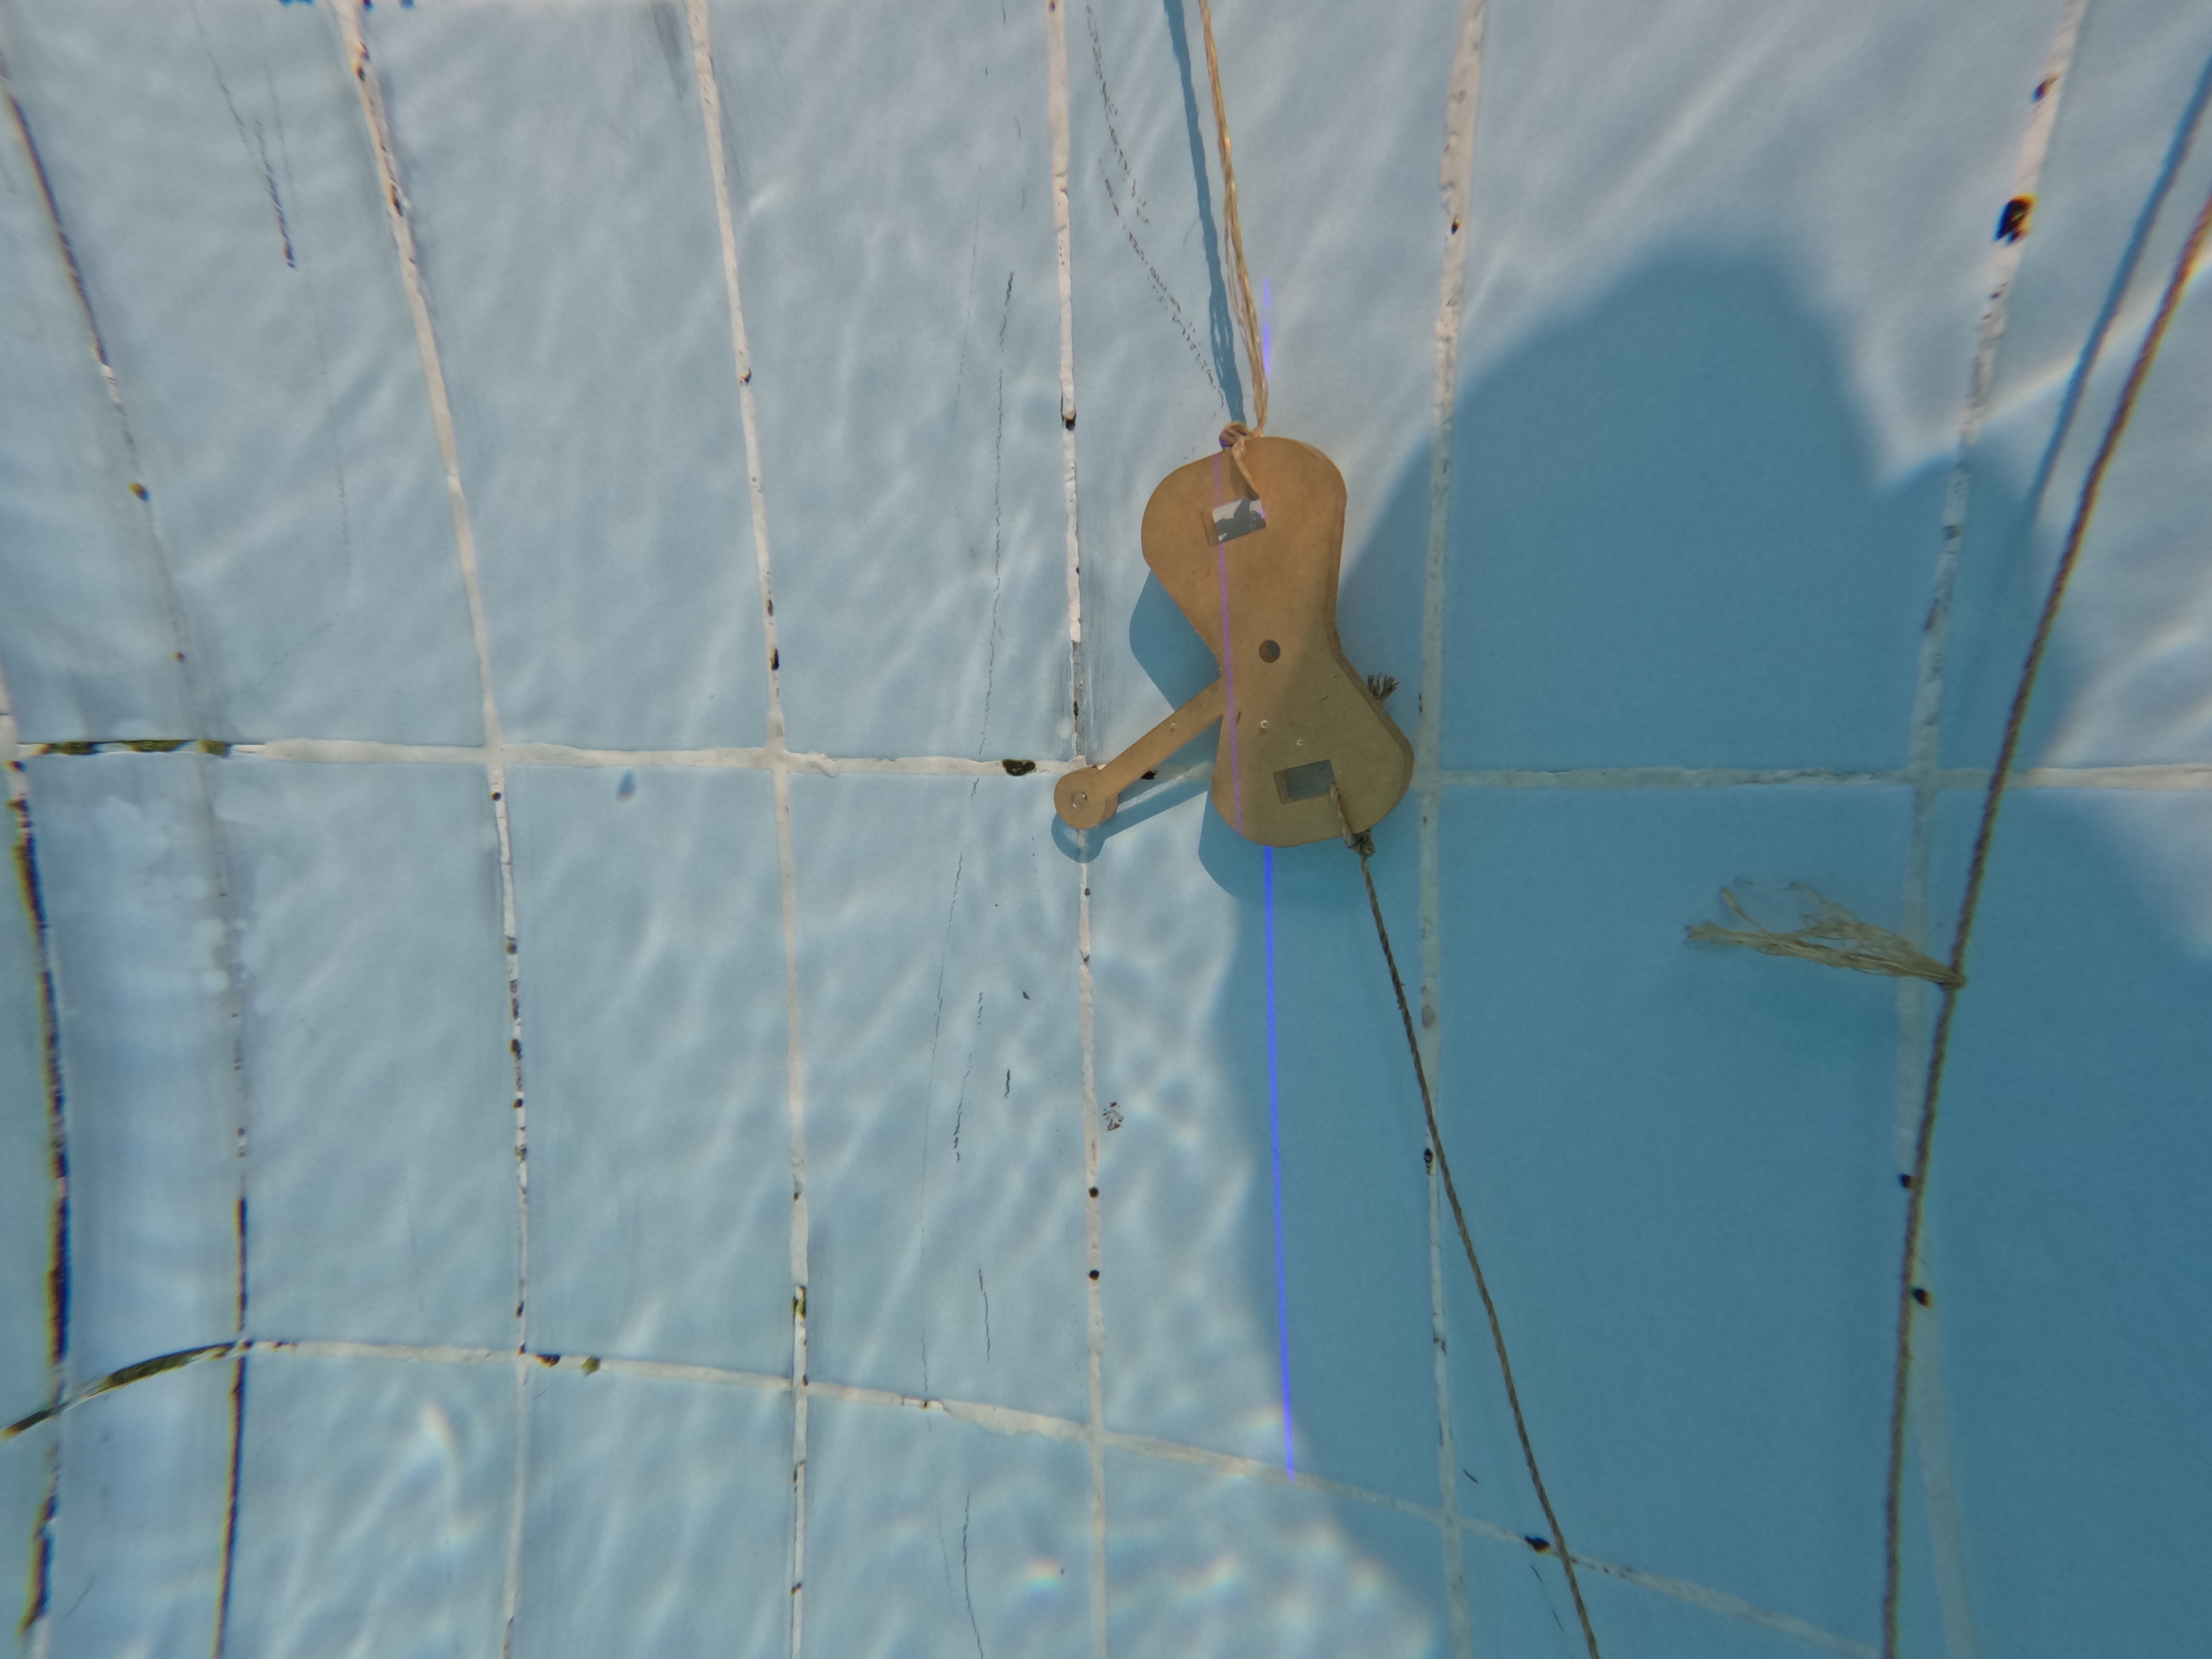

Supplement: Supplementary file 618 [file G0019632.pdf › Level_5_1/G0019632.pdf]

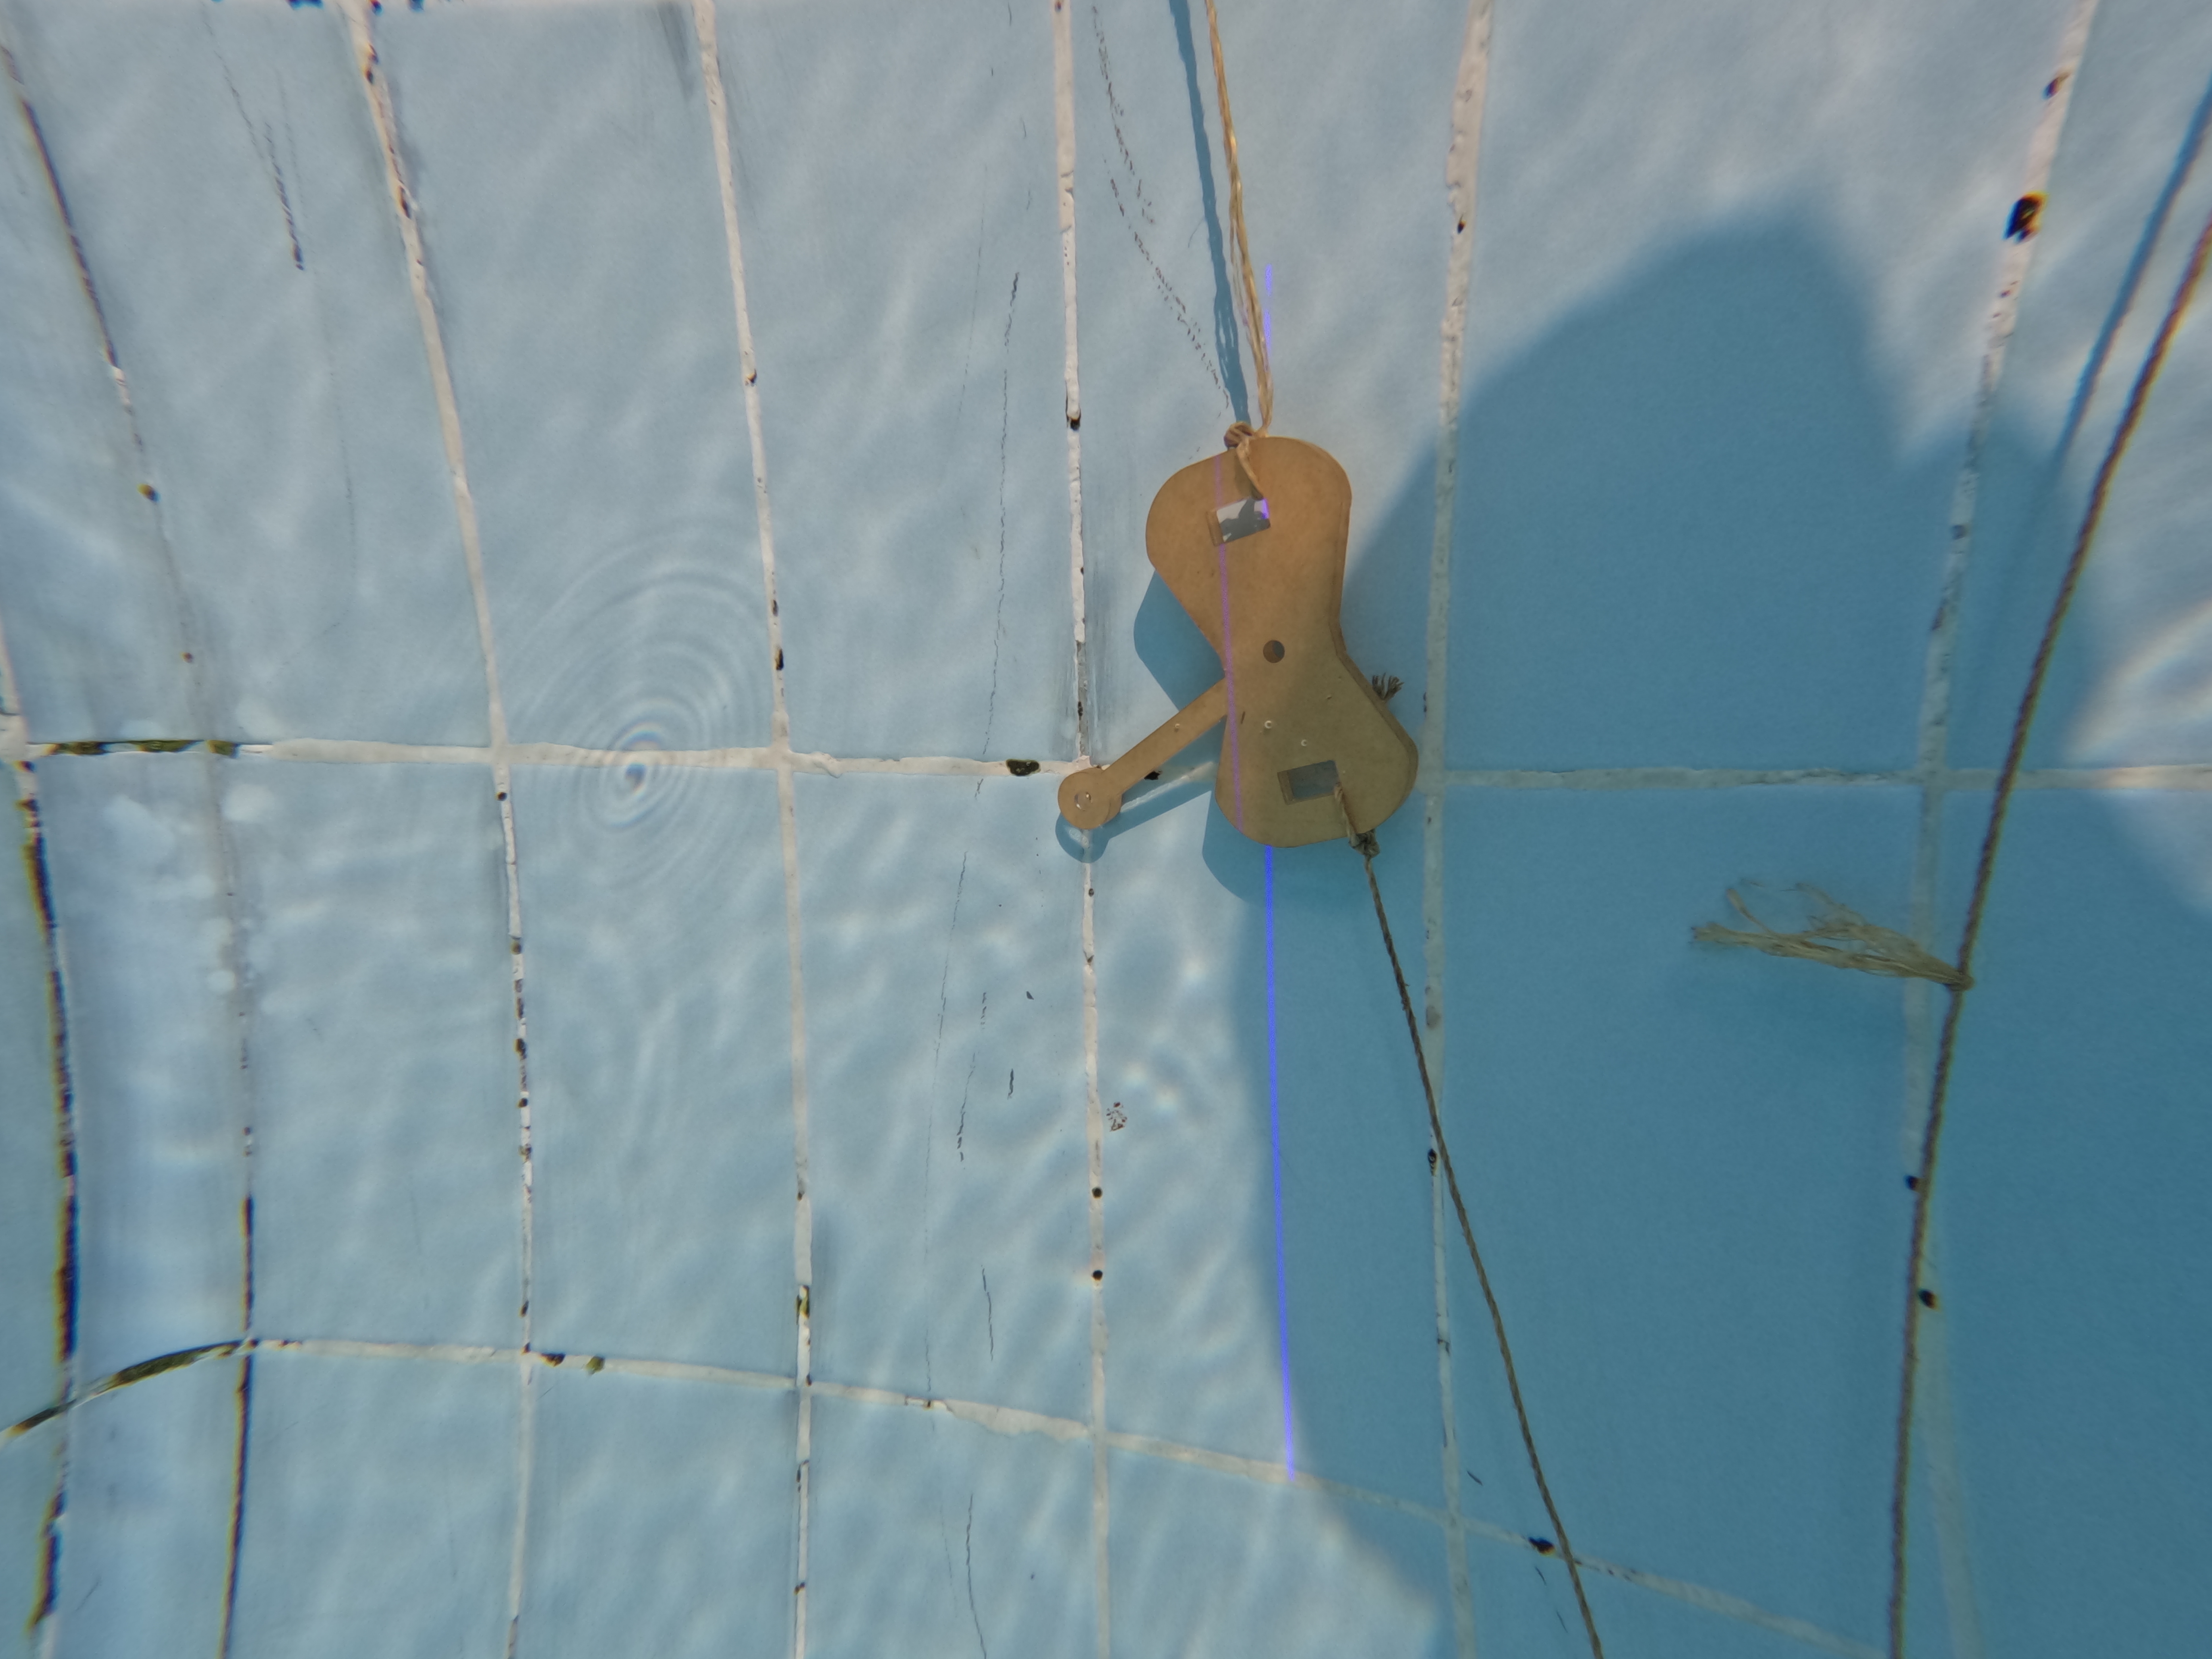

Supplement: Supplementary file 619 [file G0019633.pdf › Level_5_1/G0019633.pdf]

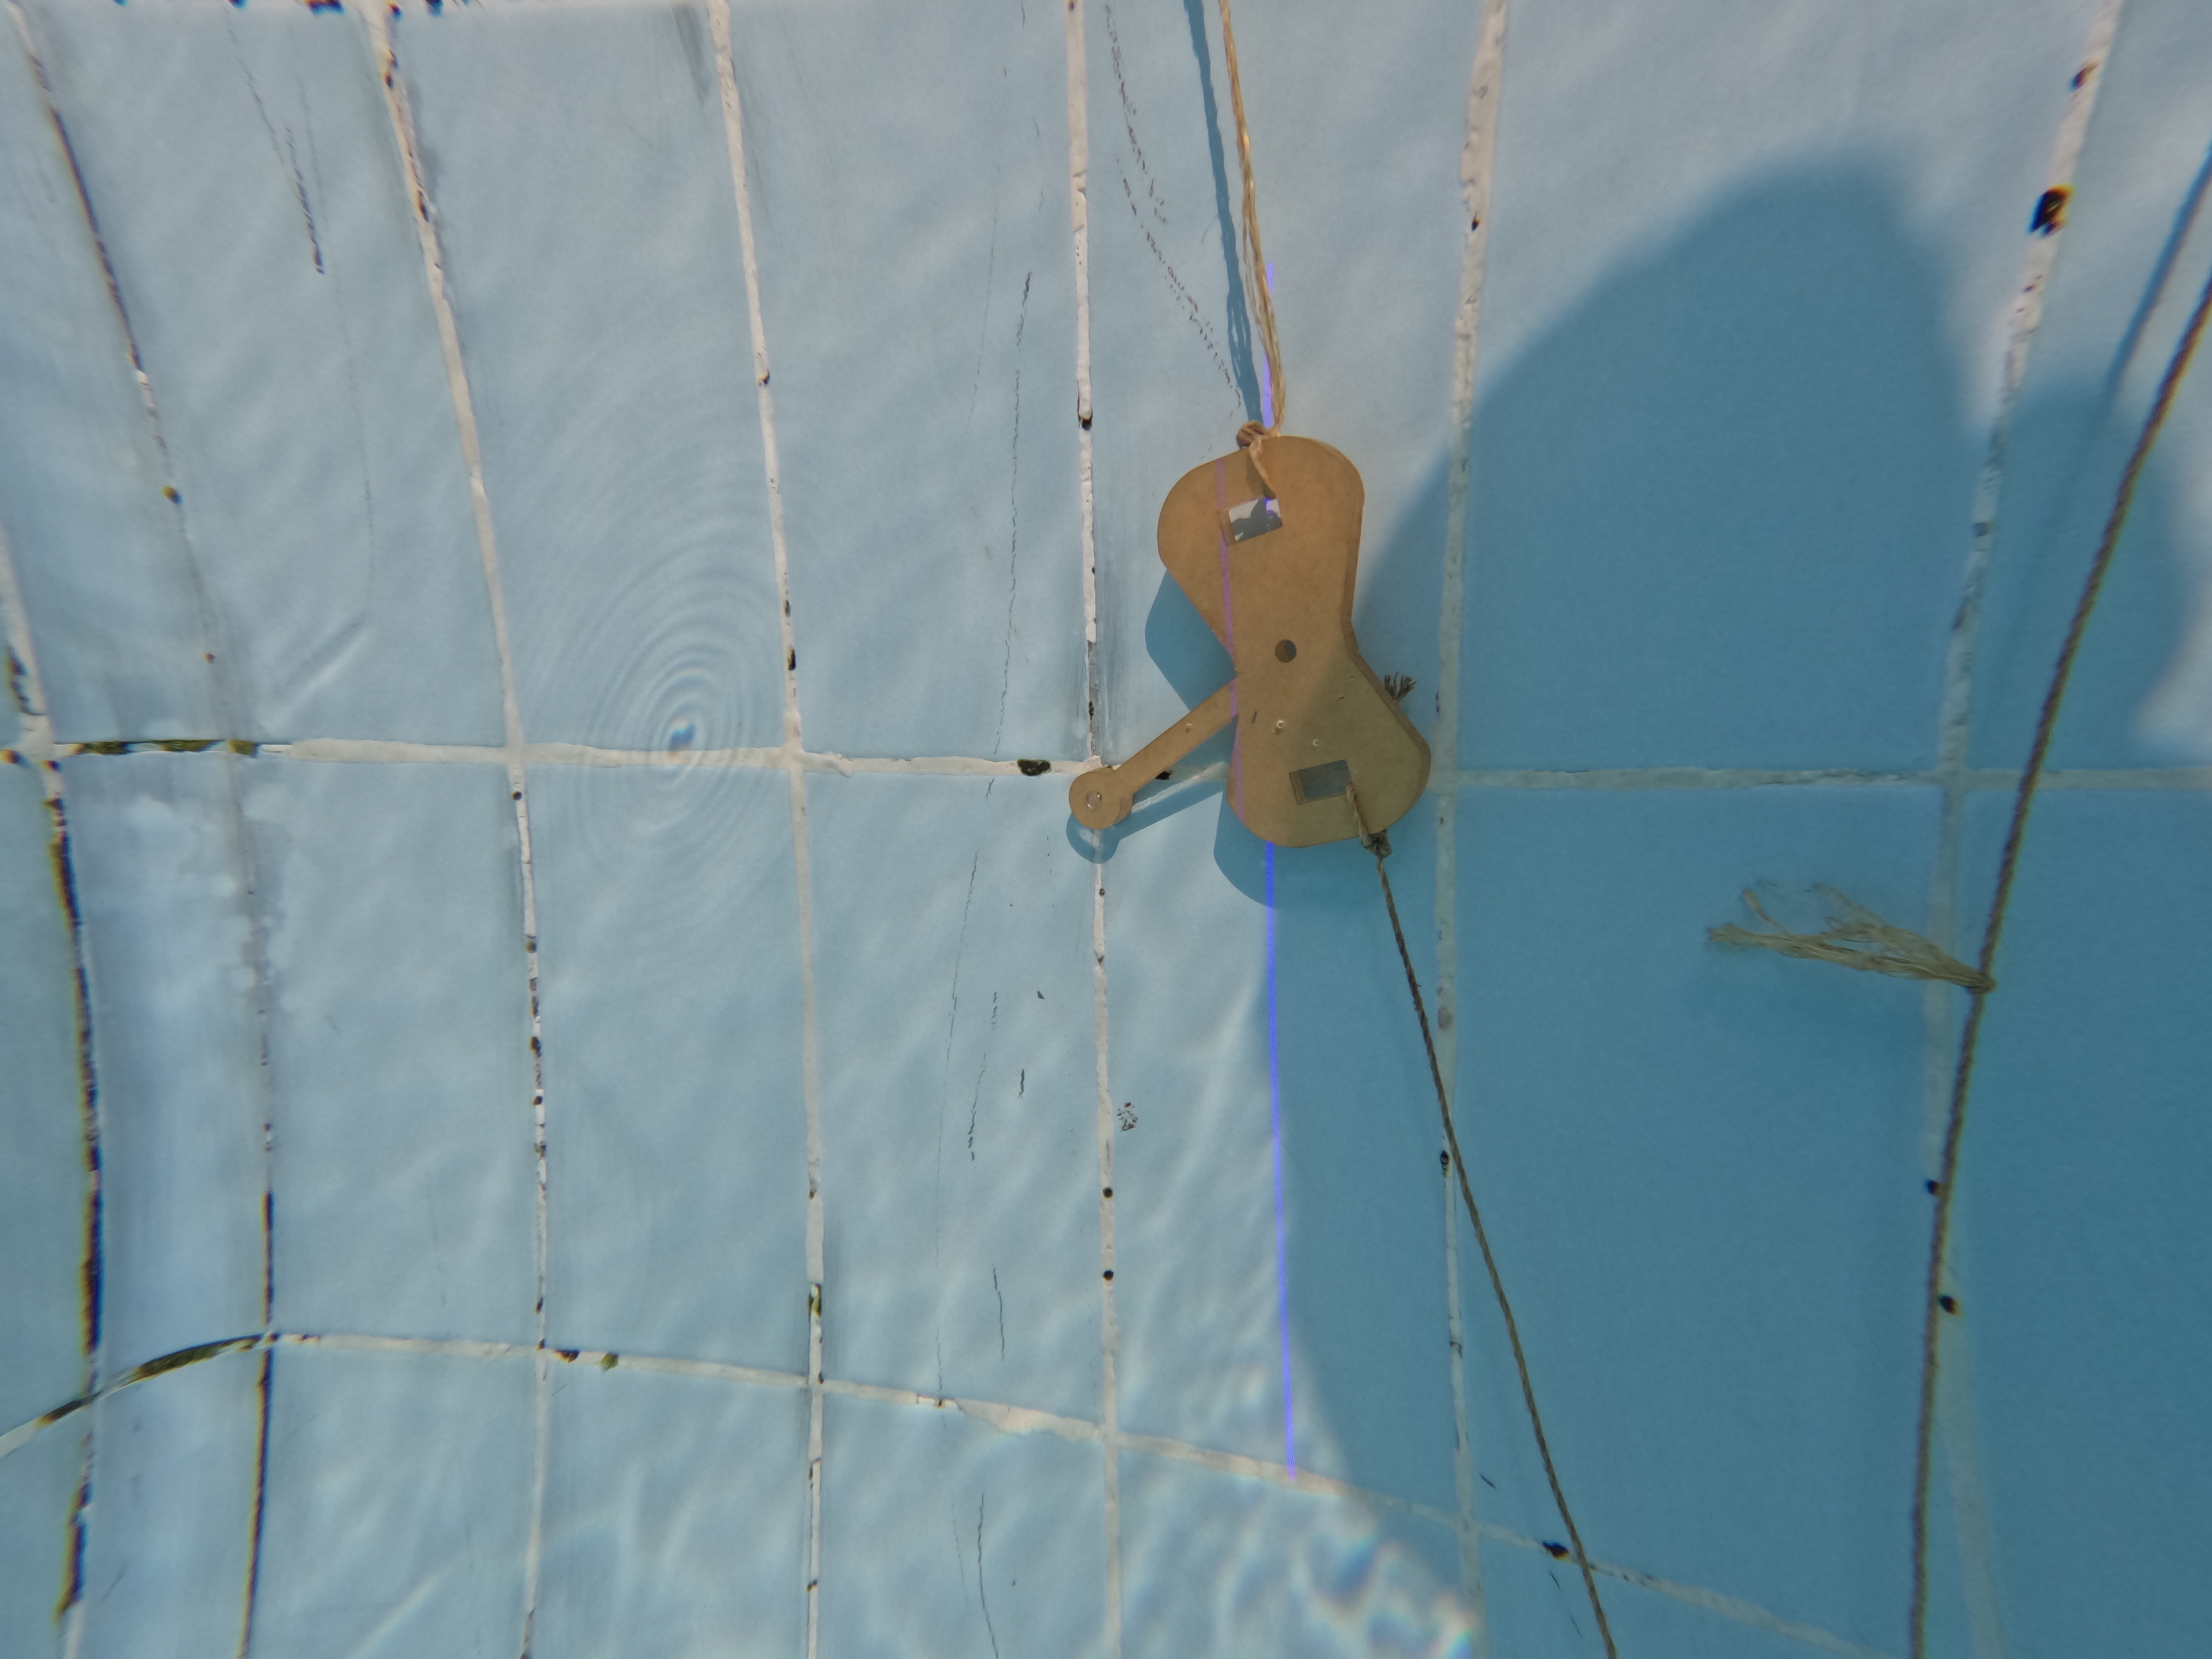

Supplement: Supplementary file 620 [file G0019634.pdf › Level_5_1/G0019634.pdf]

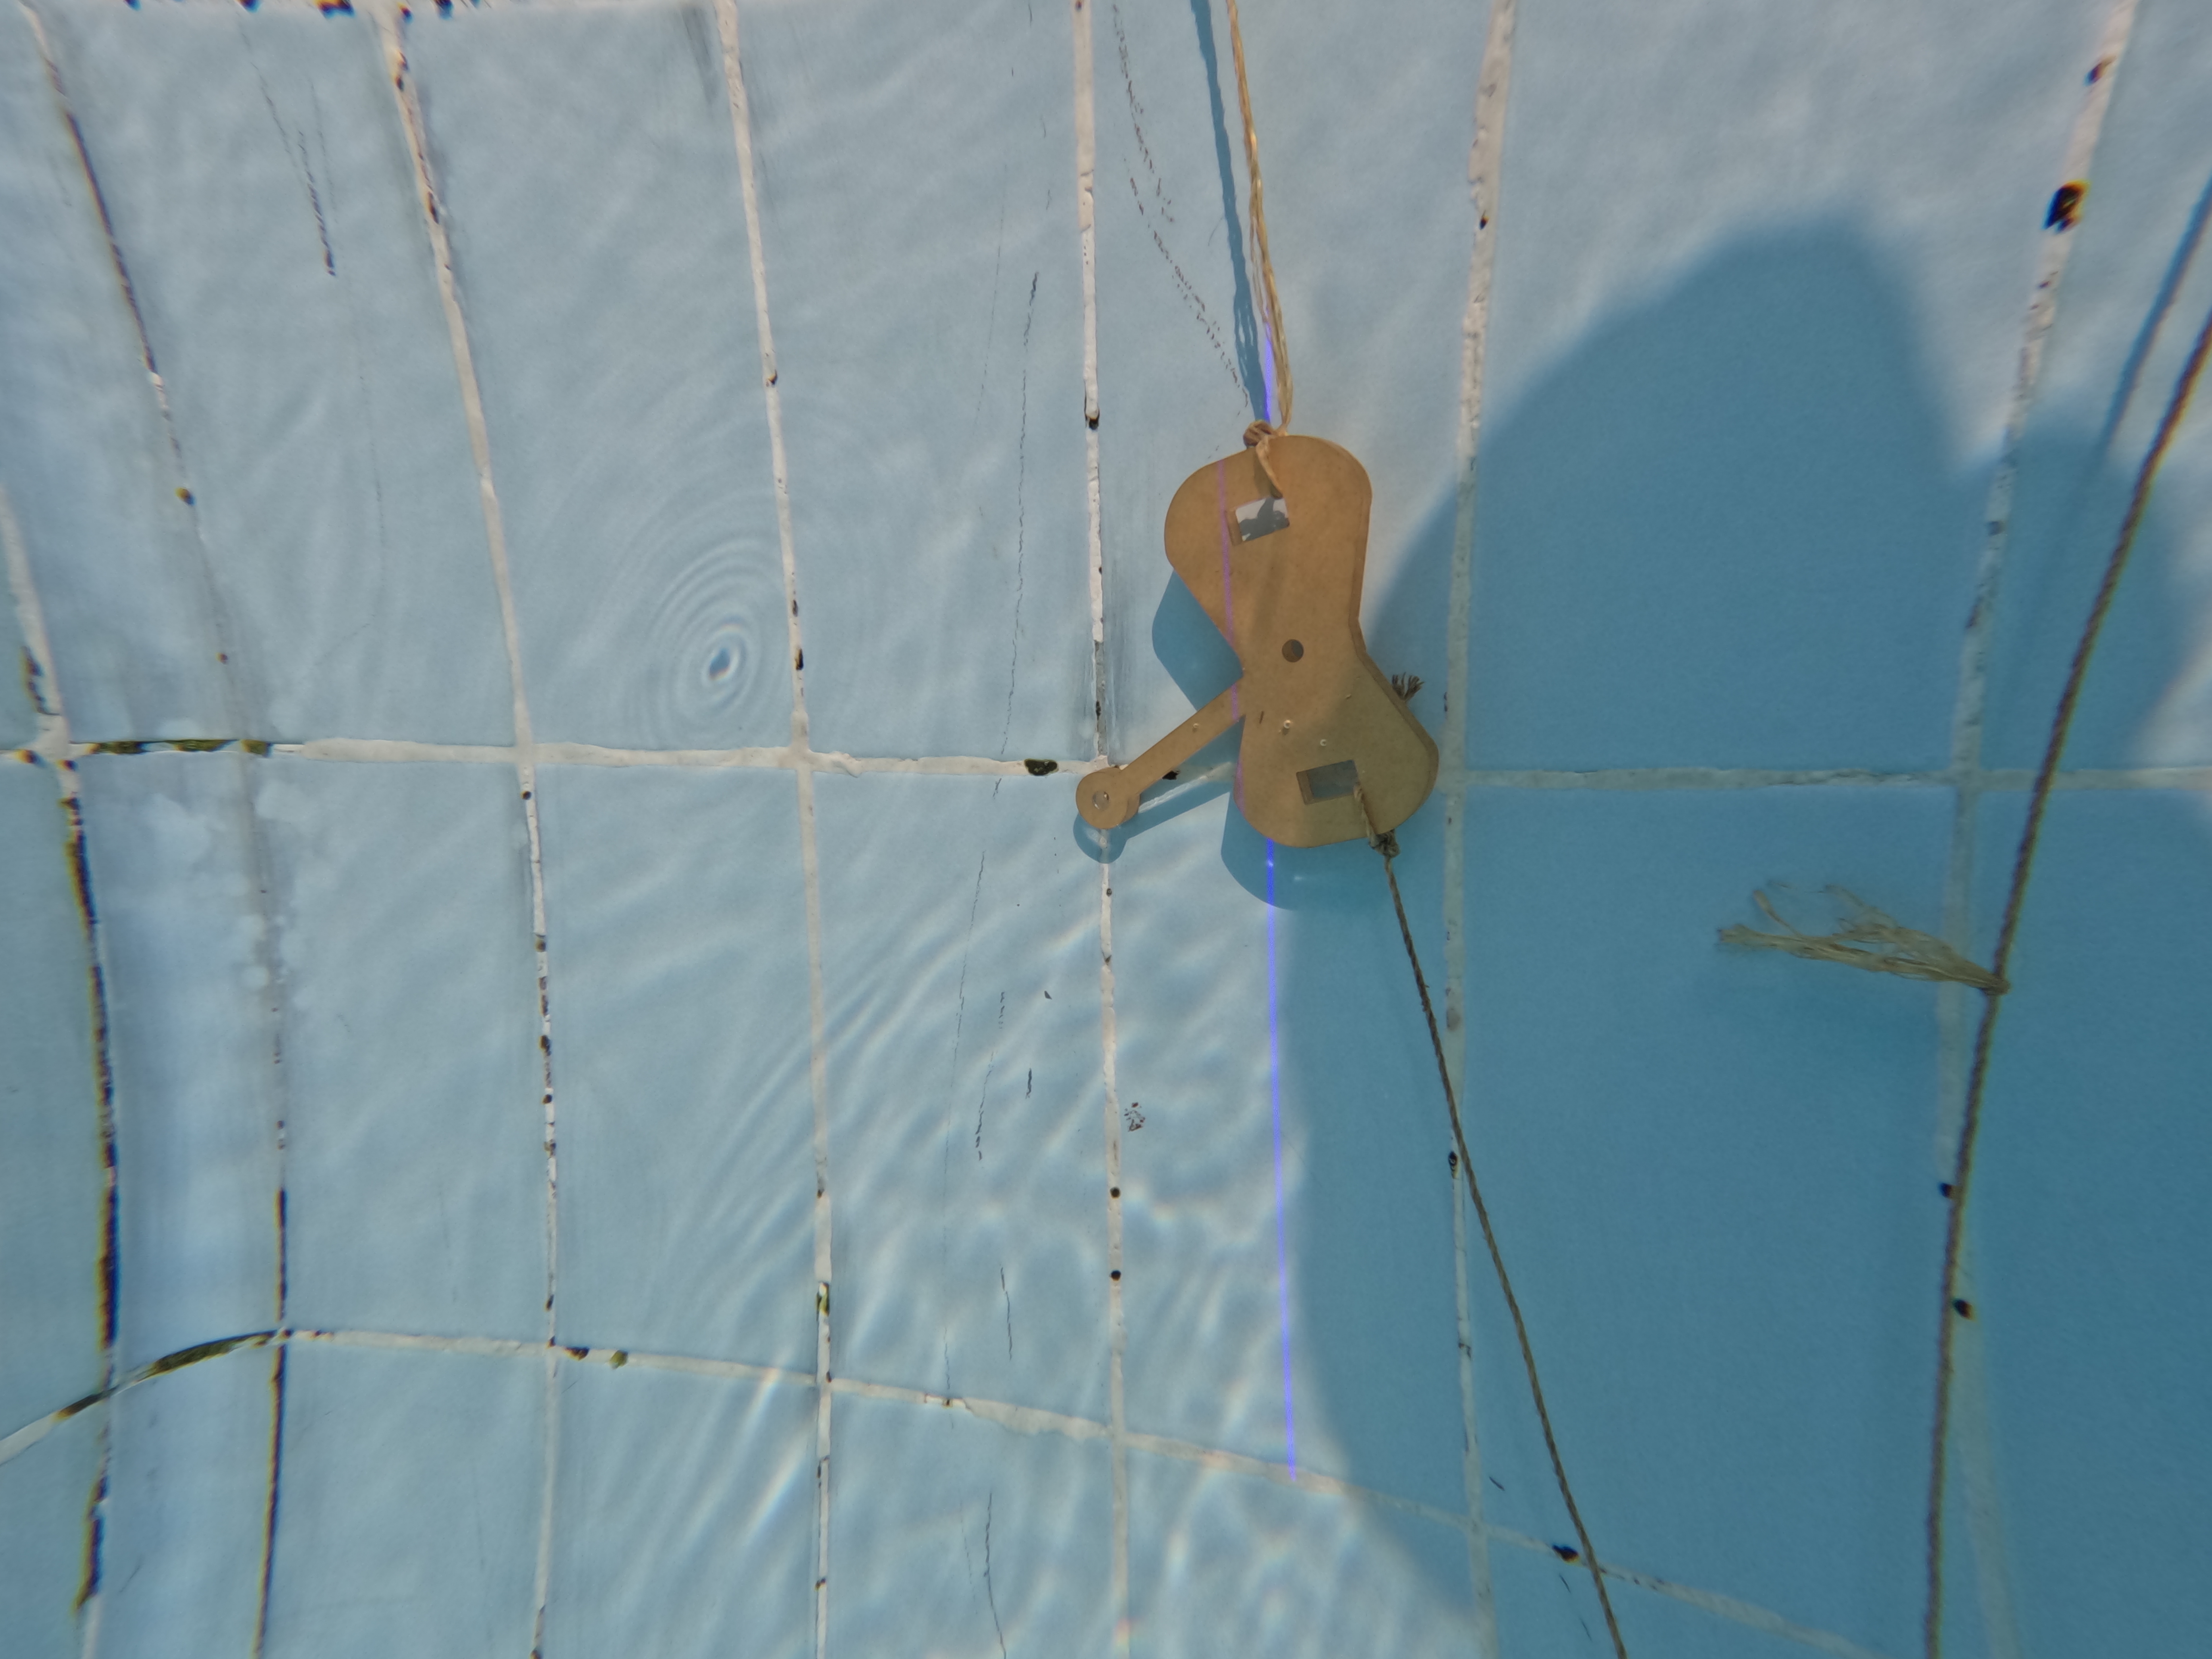

Supplement: Supplementary file 621 [file G0019635.pdf › Level_5_1/G0019635.pdf]

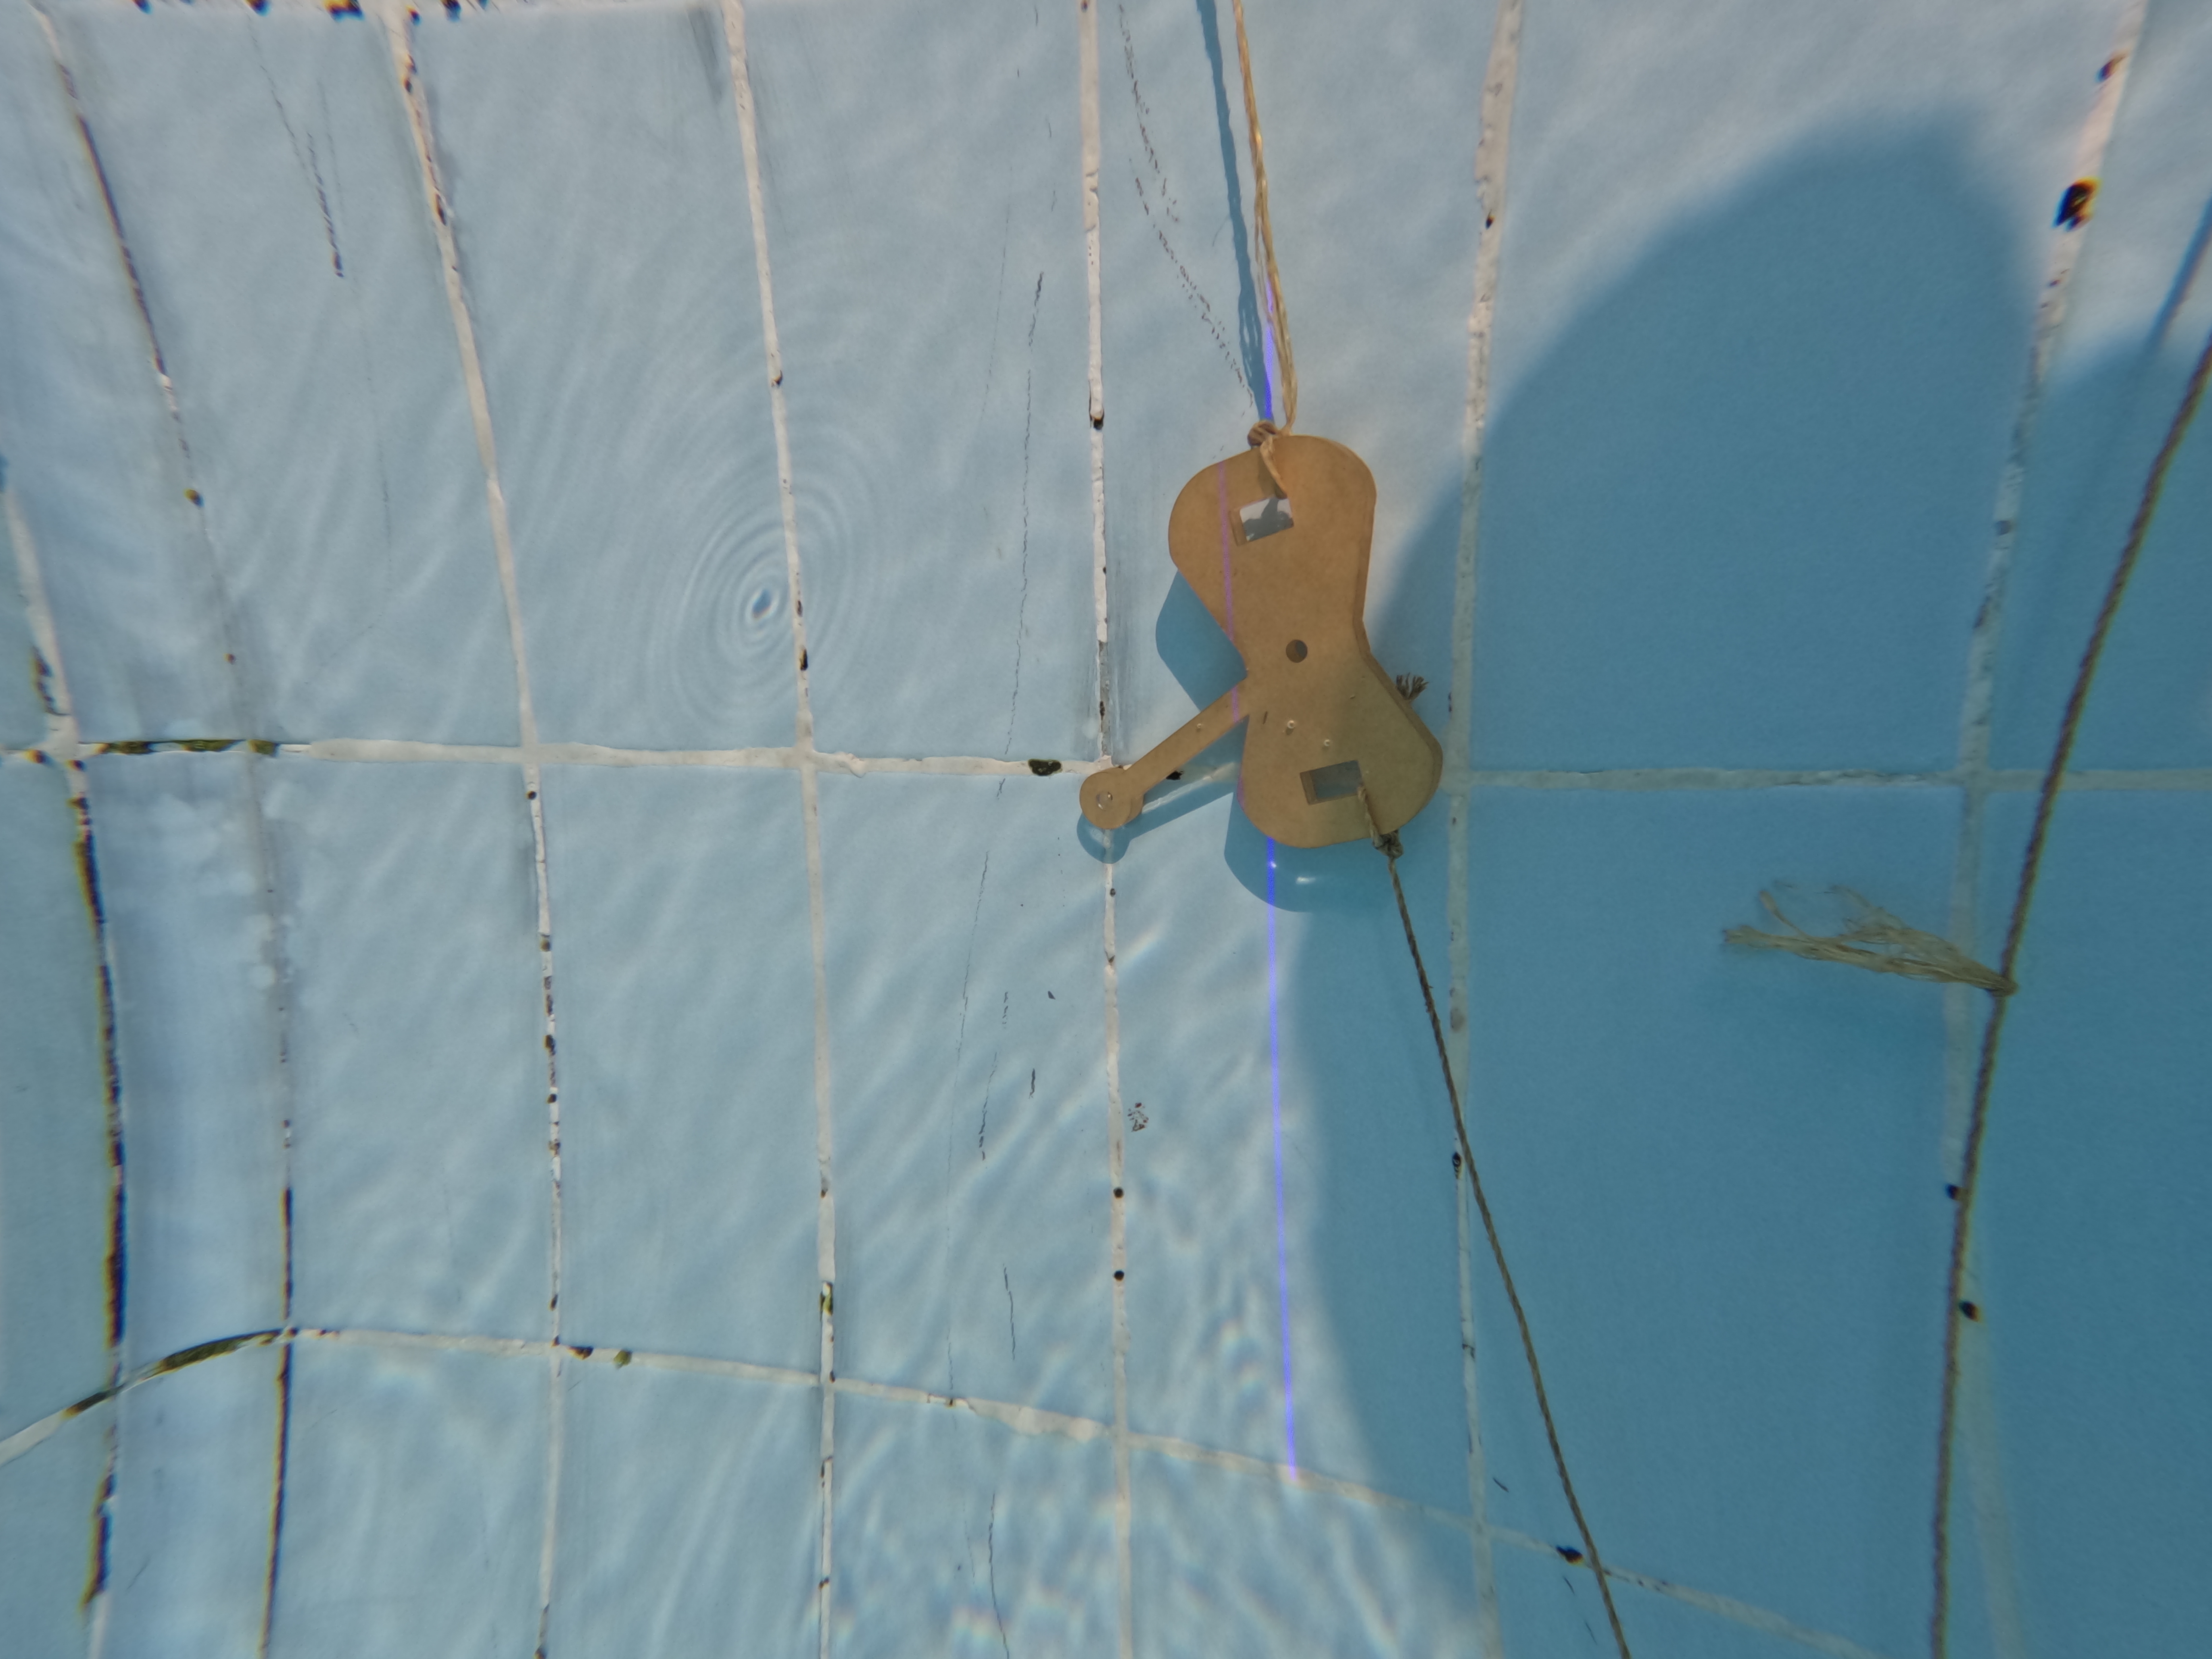

Supplement: Supplementary file 622 [file G0019636.pdf › Level_5_1/G0019636.pdf]

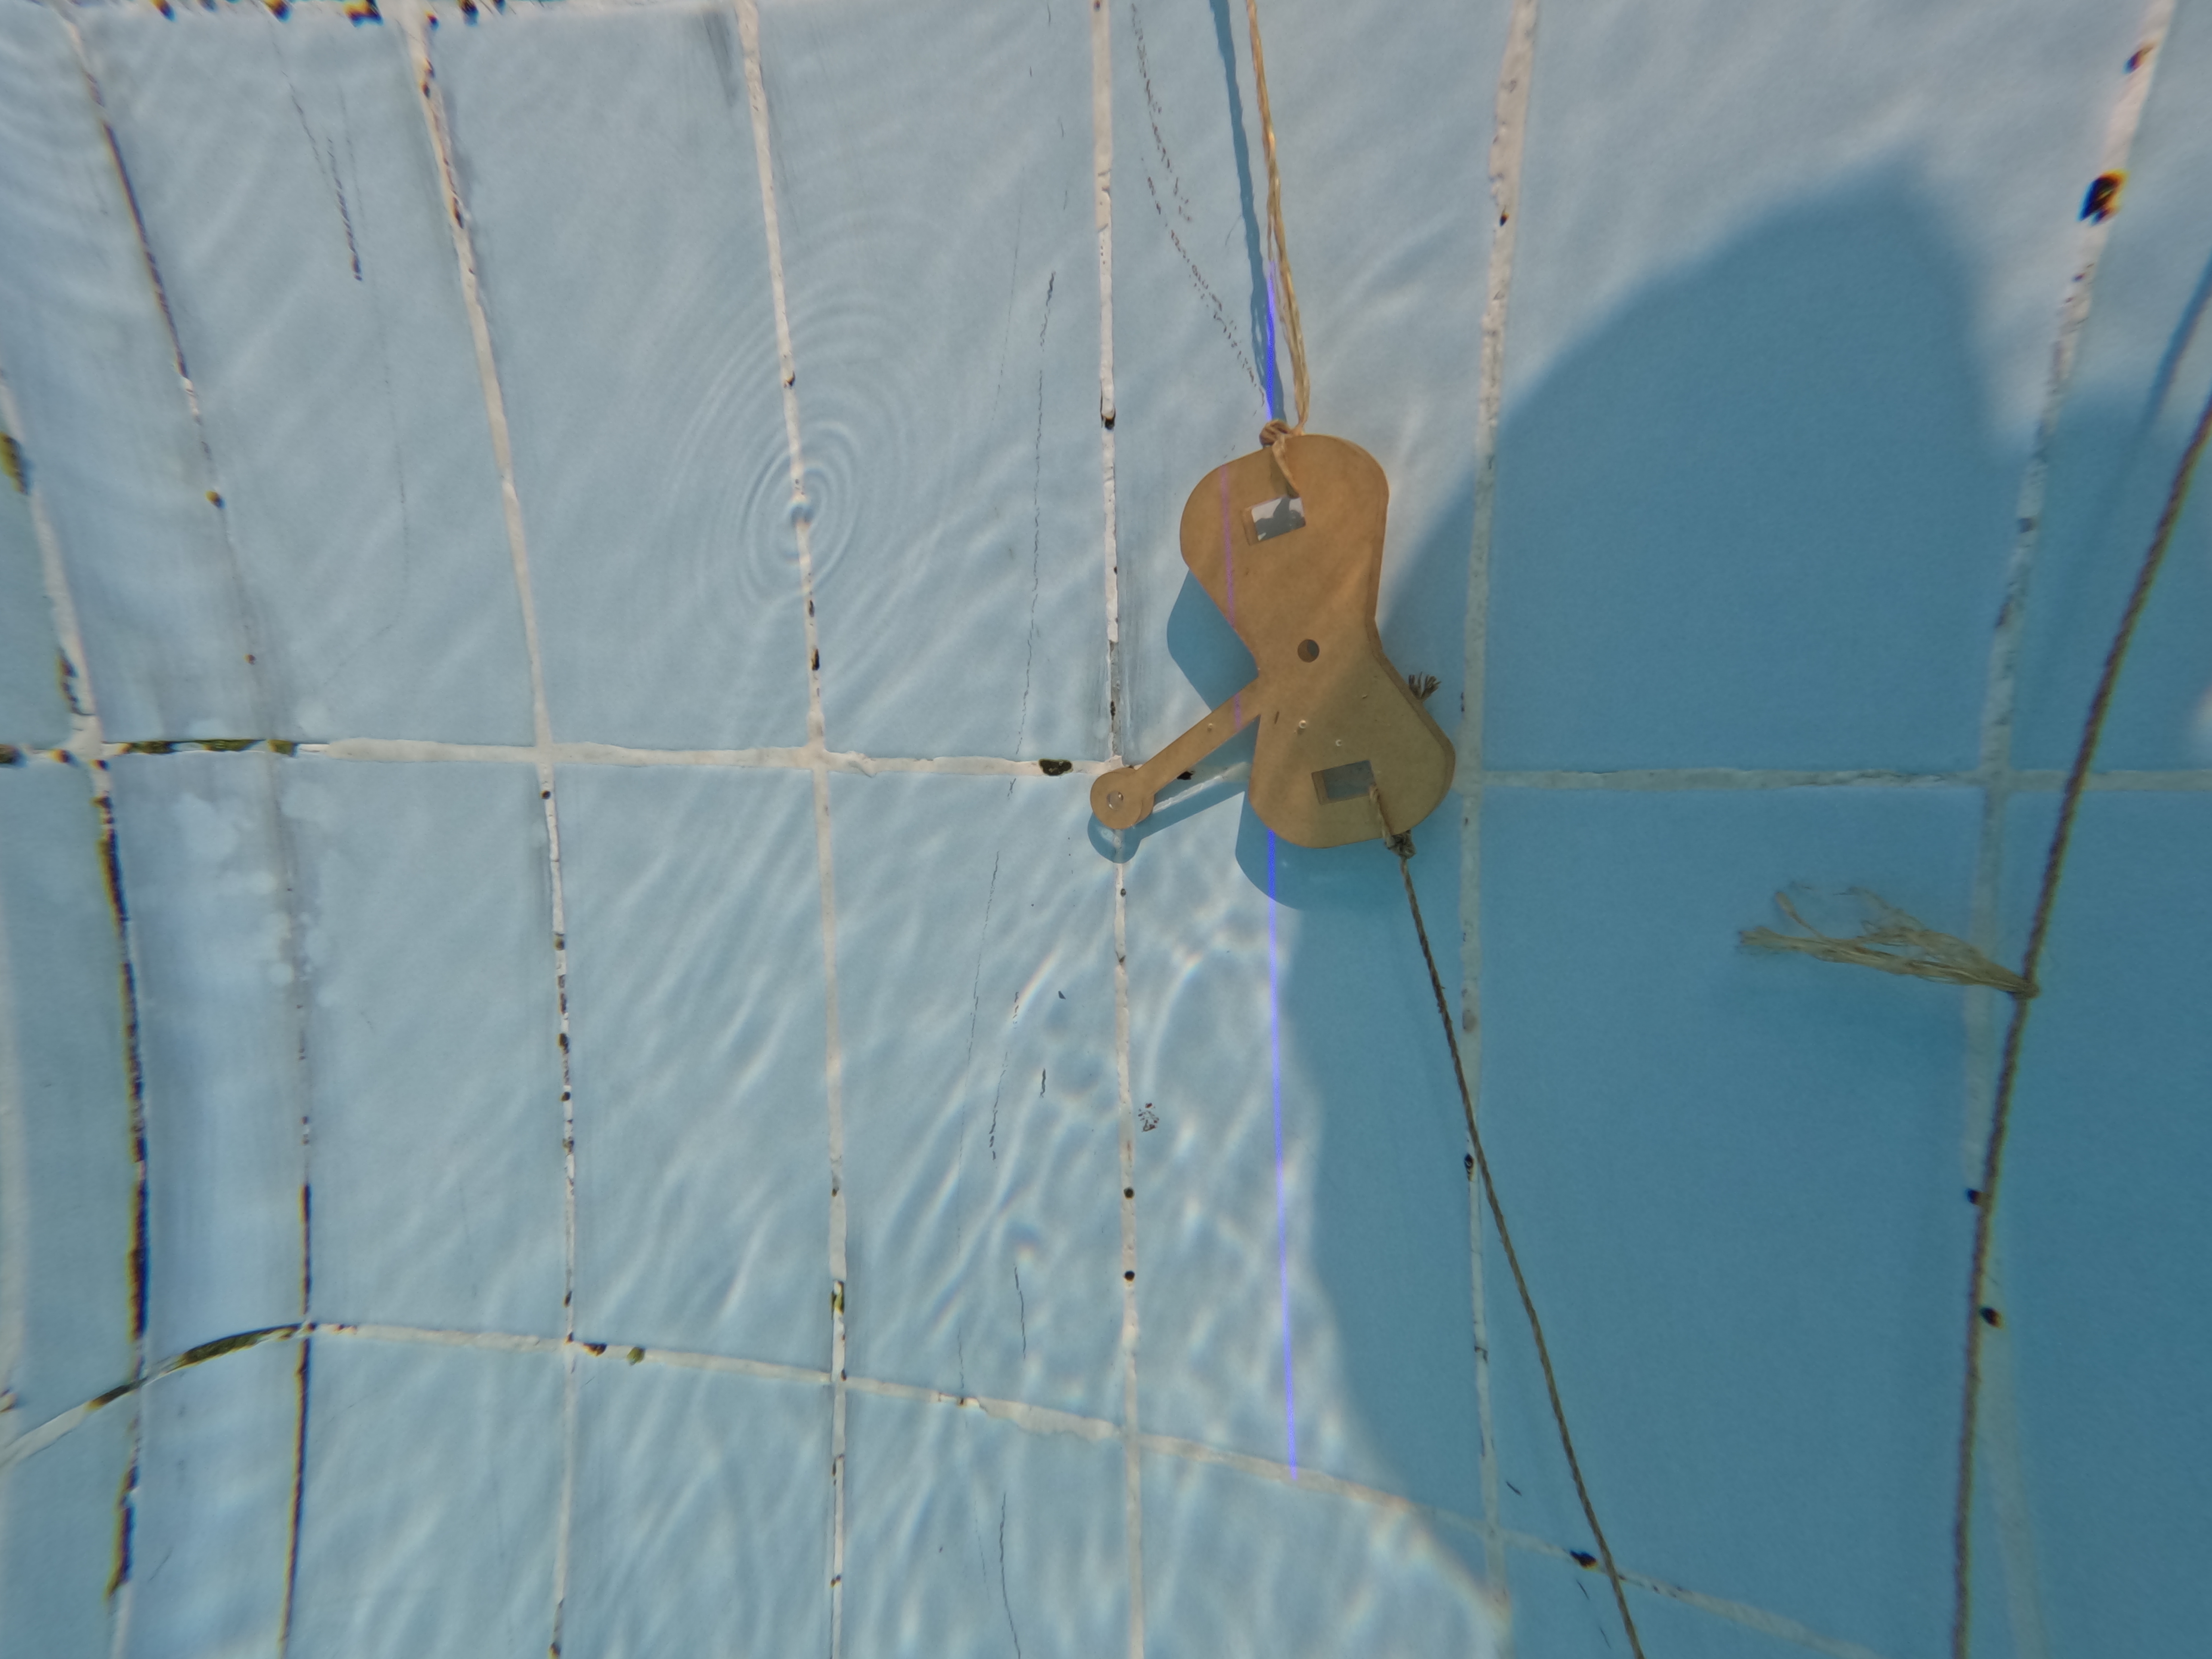

Supplement: Supplementary file 623 [file G0019637.pdf › Level_5_1/G0019637.pdf]

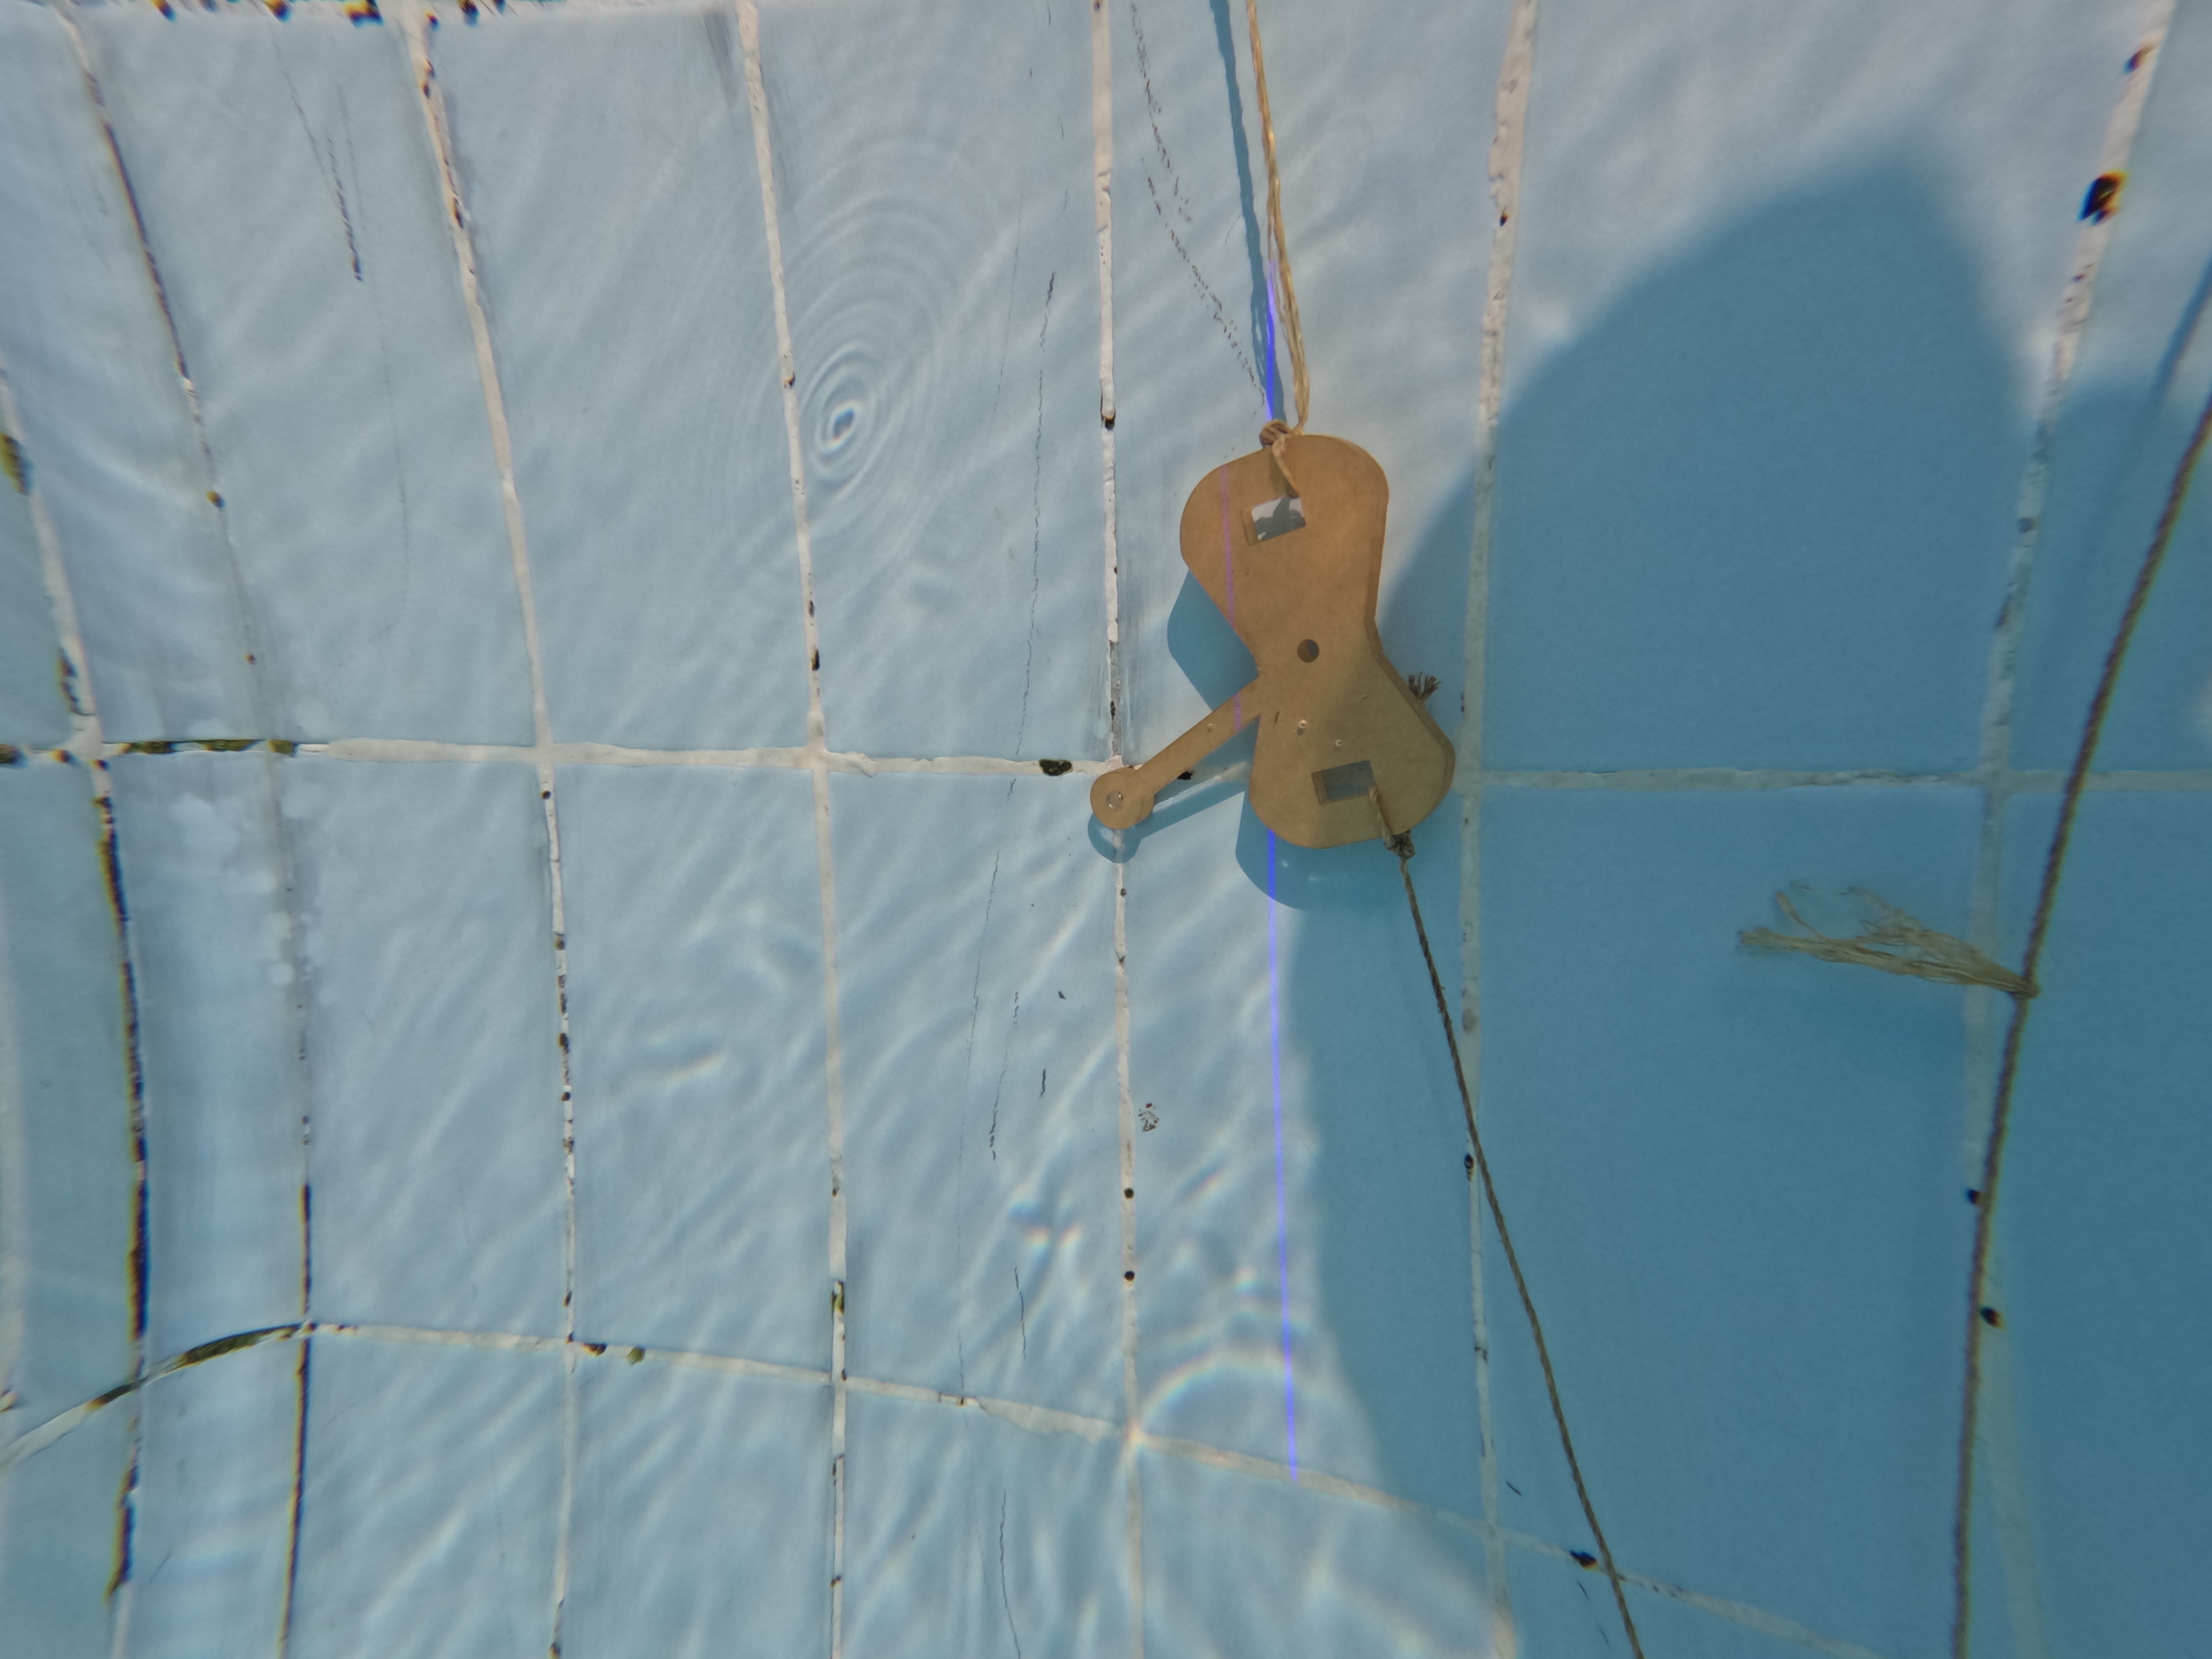

Supplement: Supplementary file 624 [file G0019638.pdf › Level_5_1/G0019638.pdf]

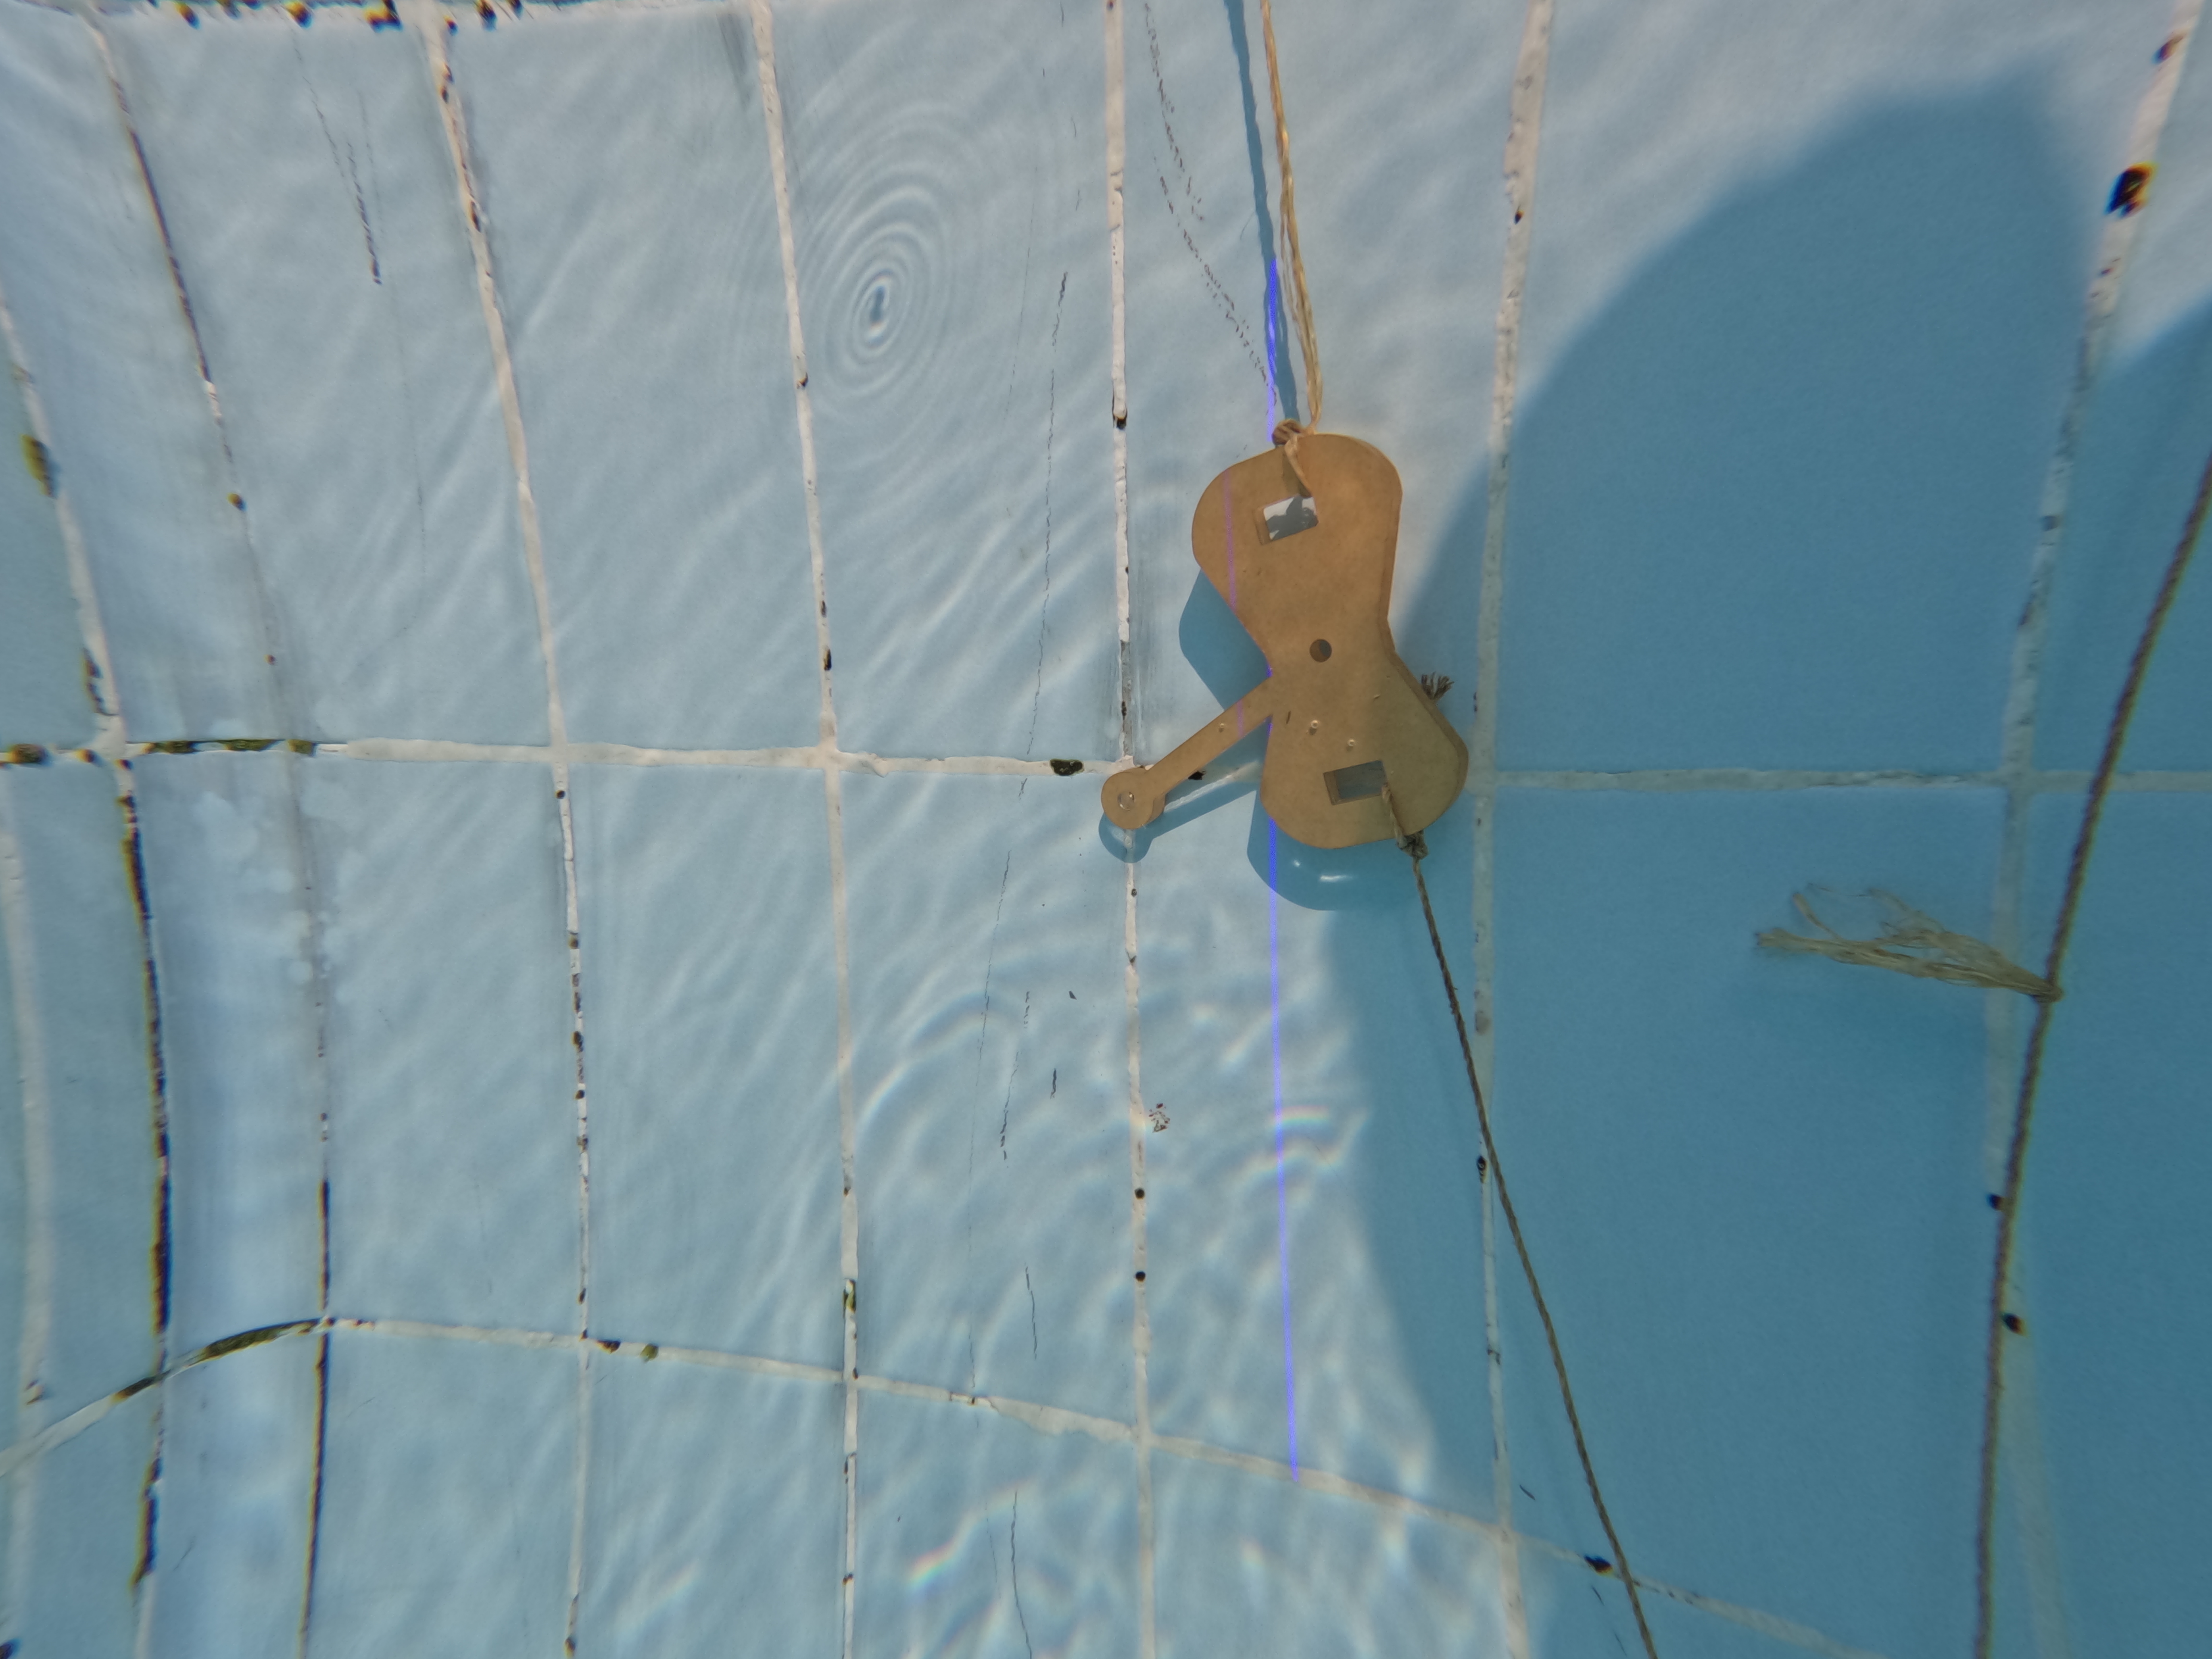

Supplement: Supplementary file 625 [file G0019639.pdf › Level_5_1/G0019639.pdf]

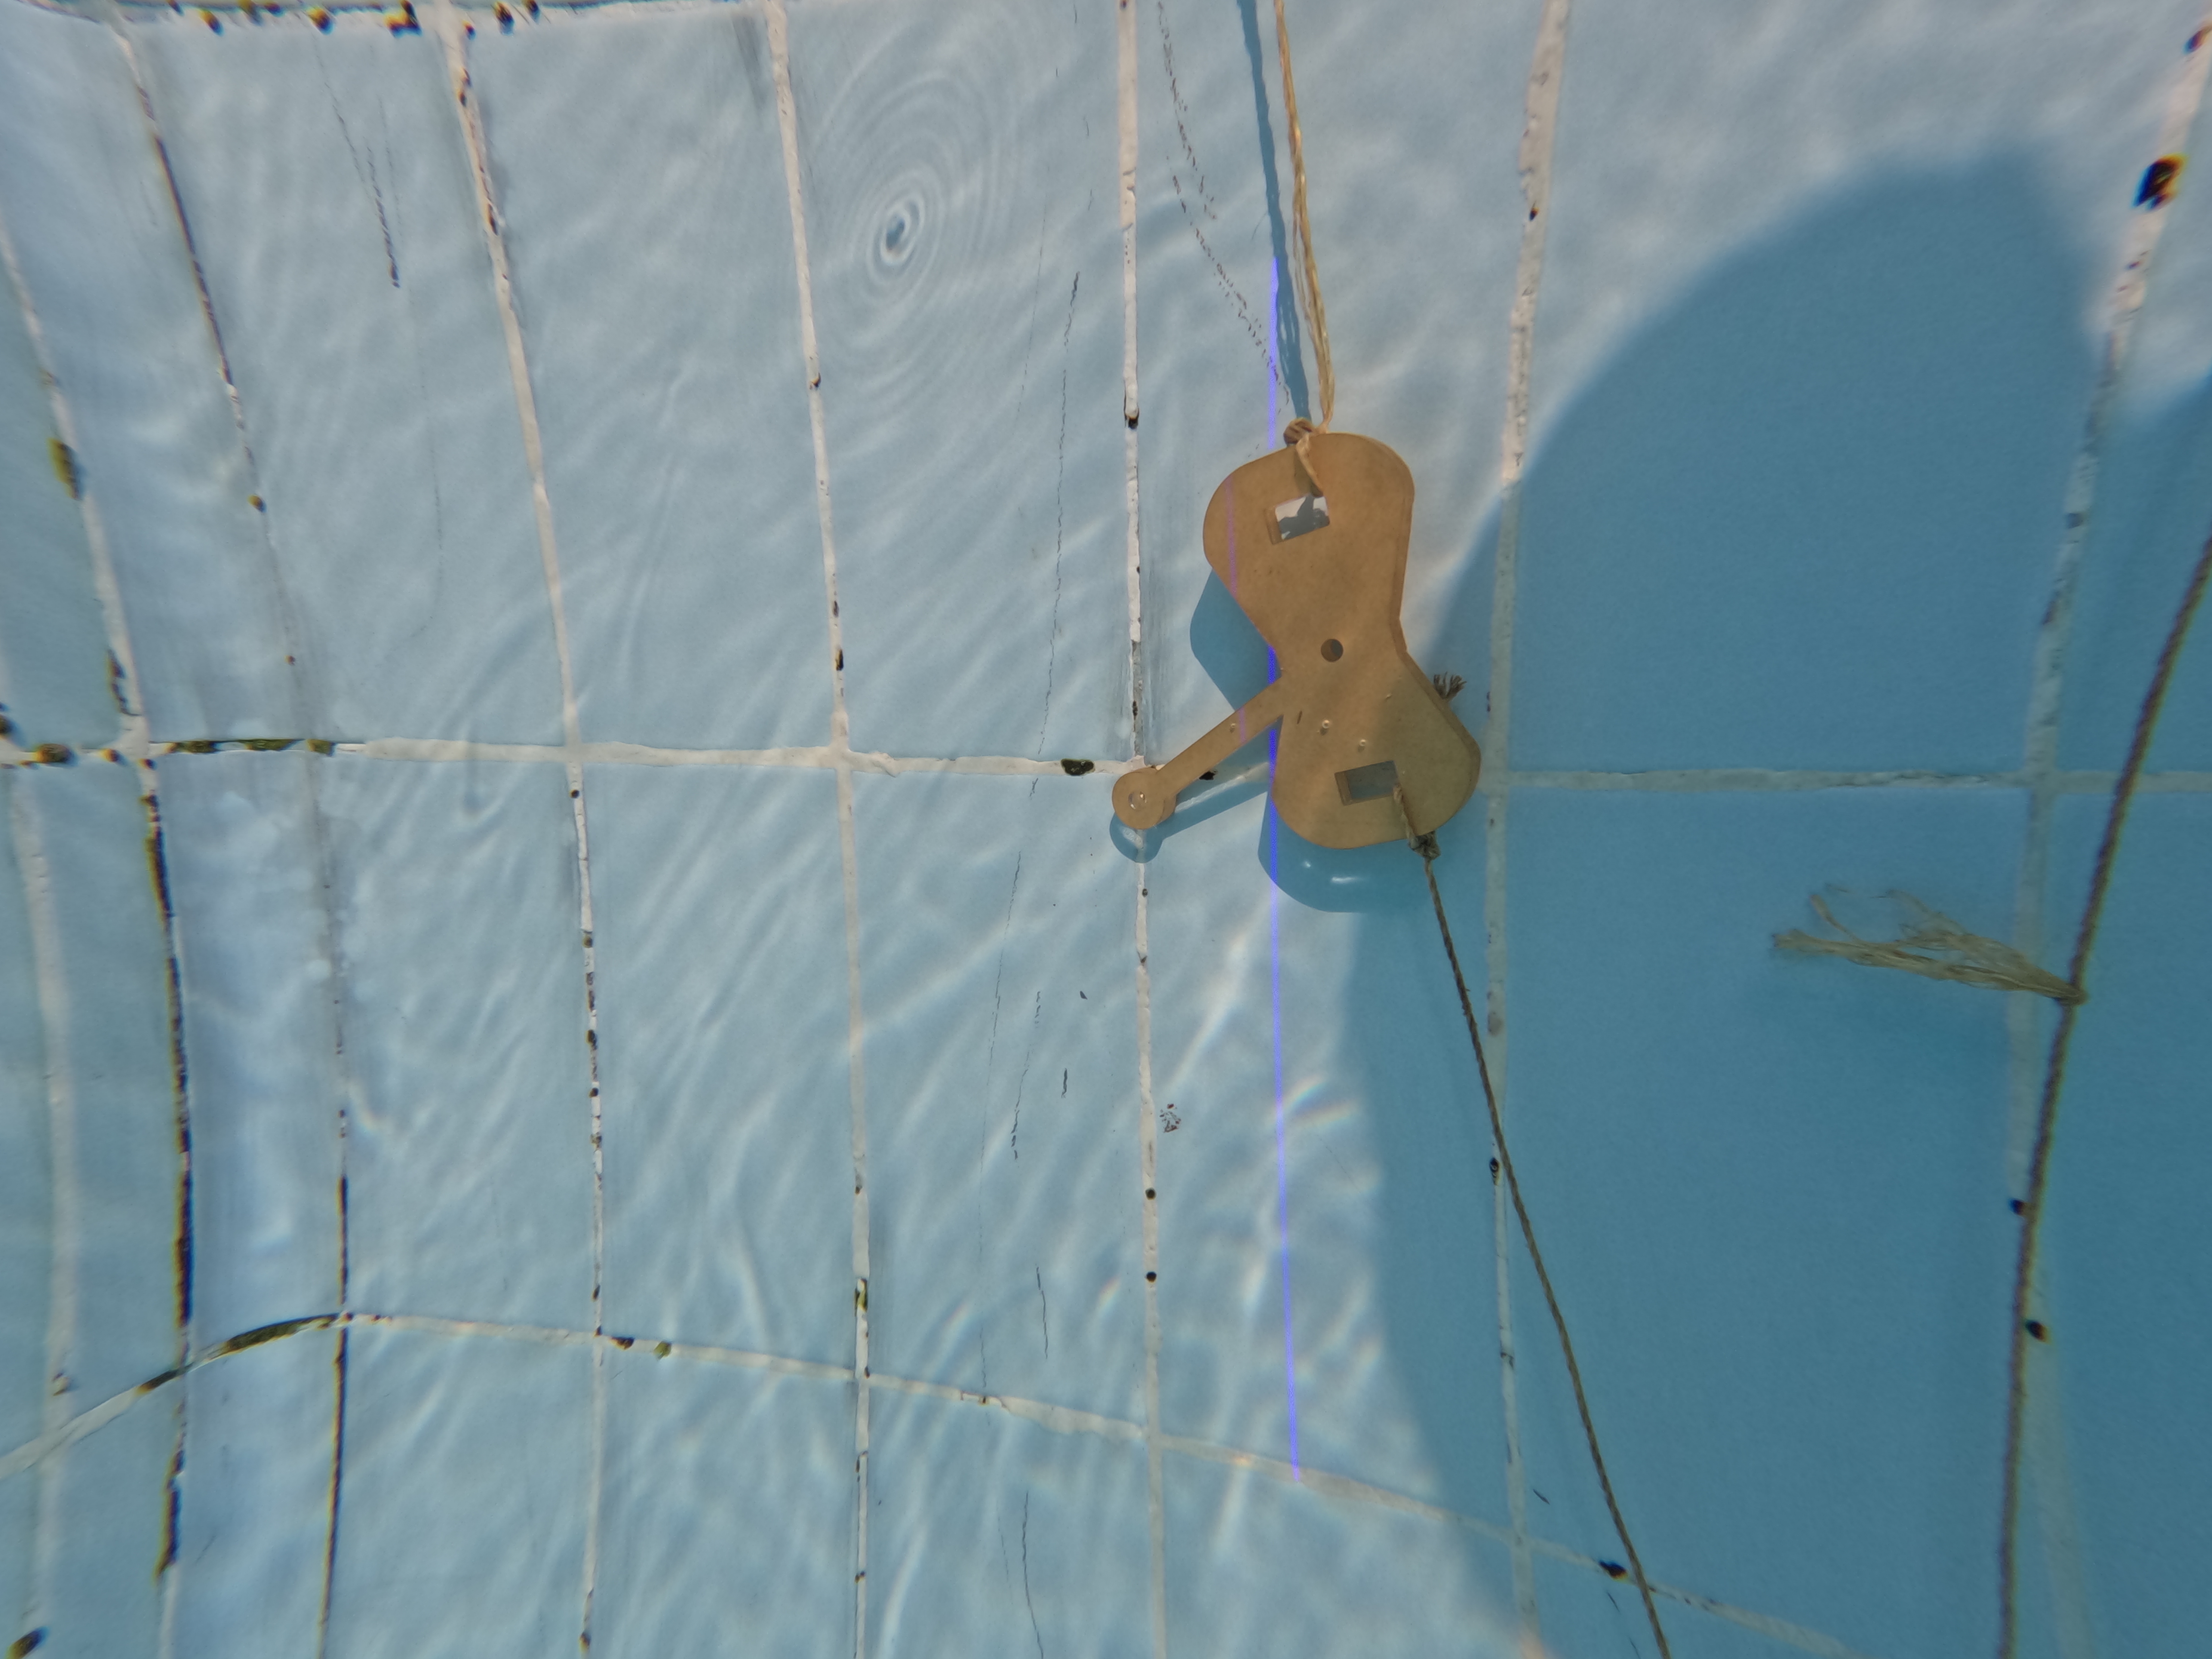

Supplement: Supplementary file 626 [file G0019640.pdf › Level_5_1/G0019640.pdf]

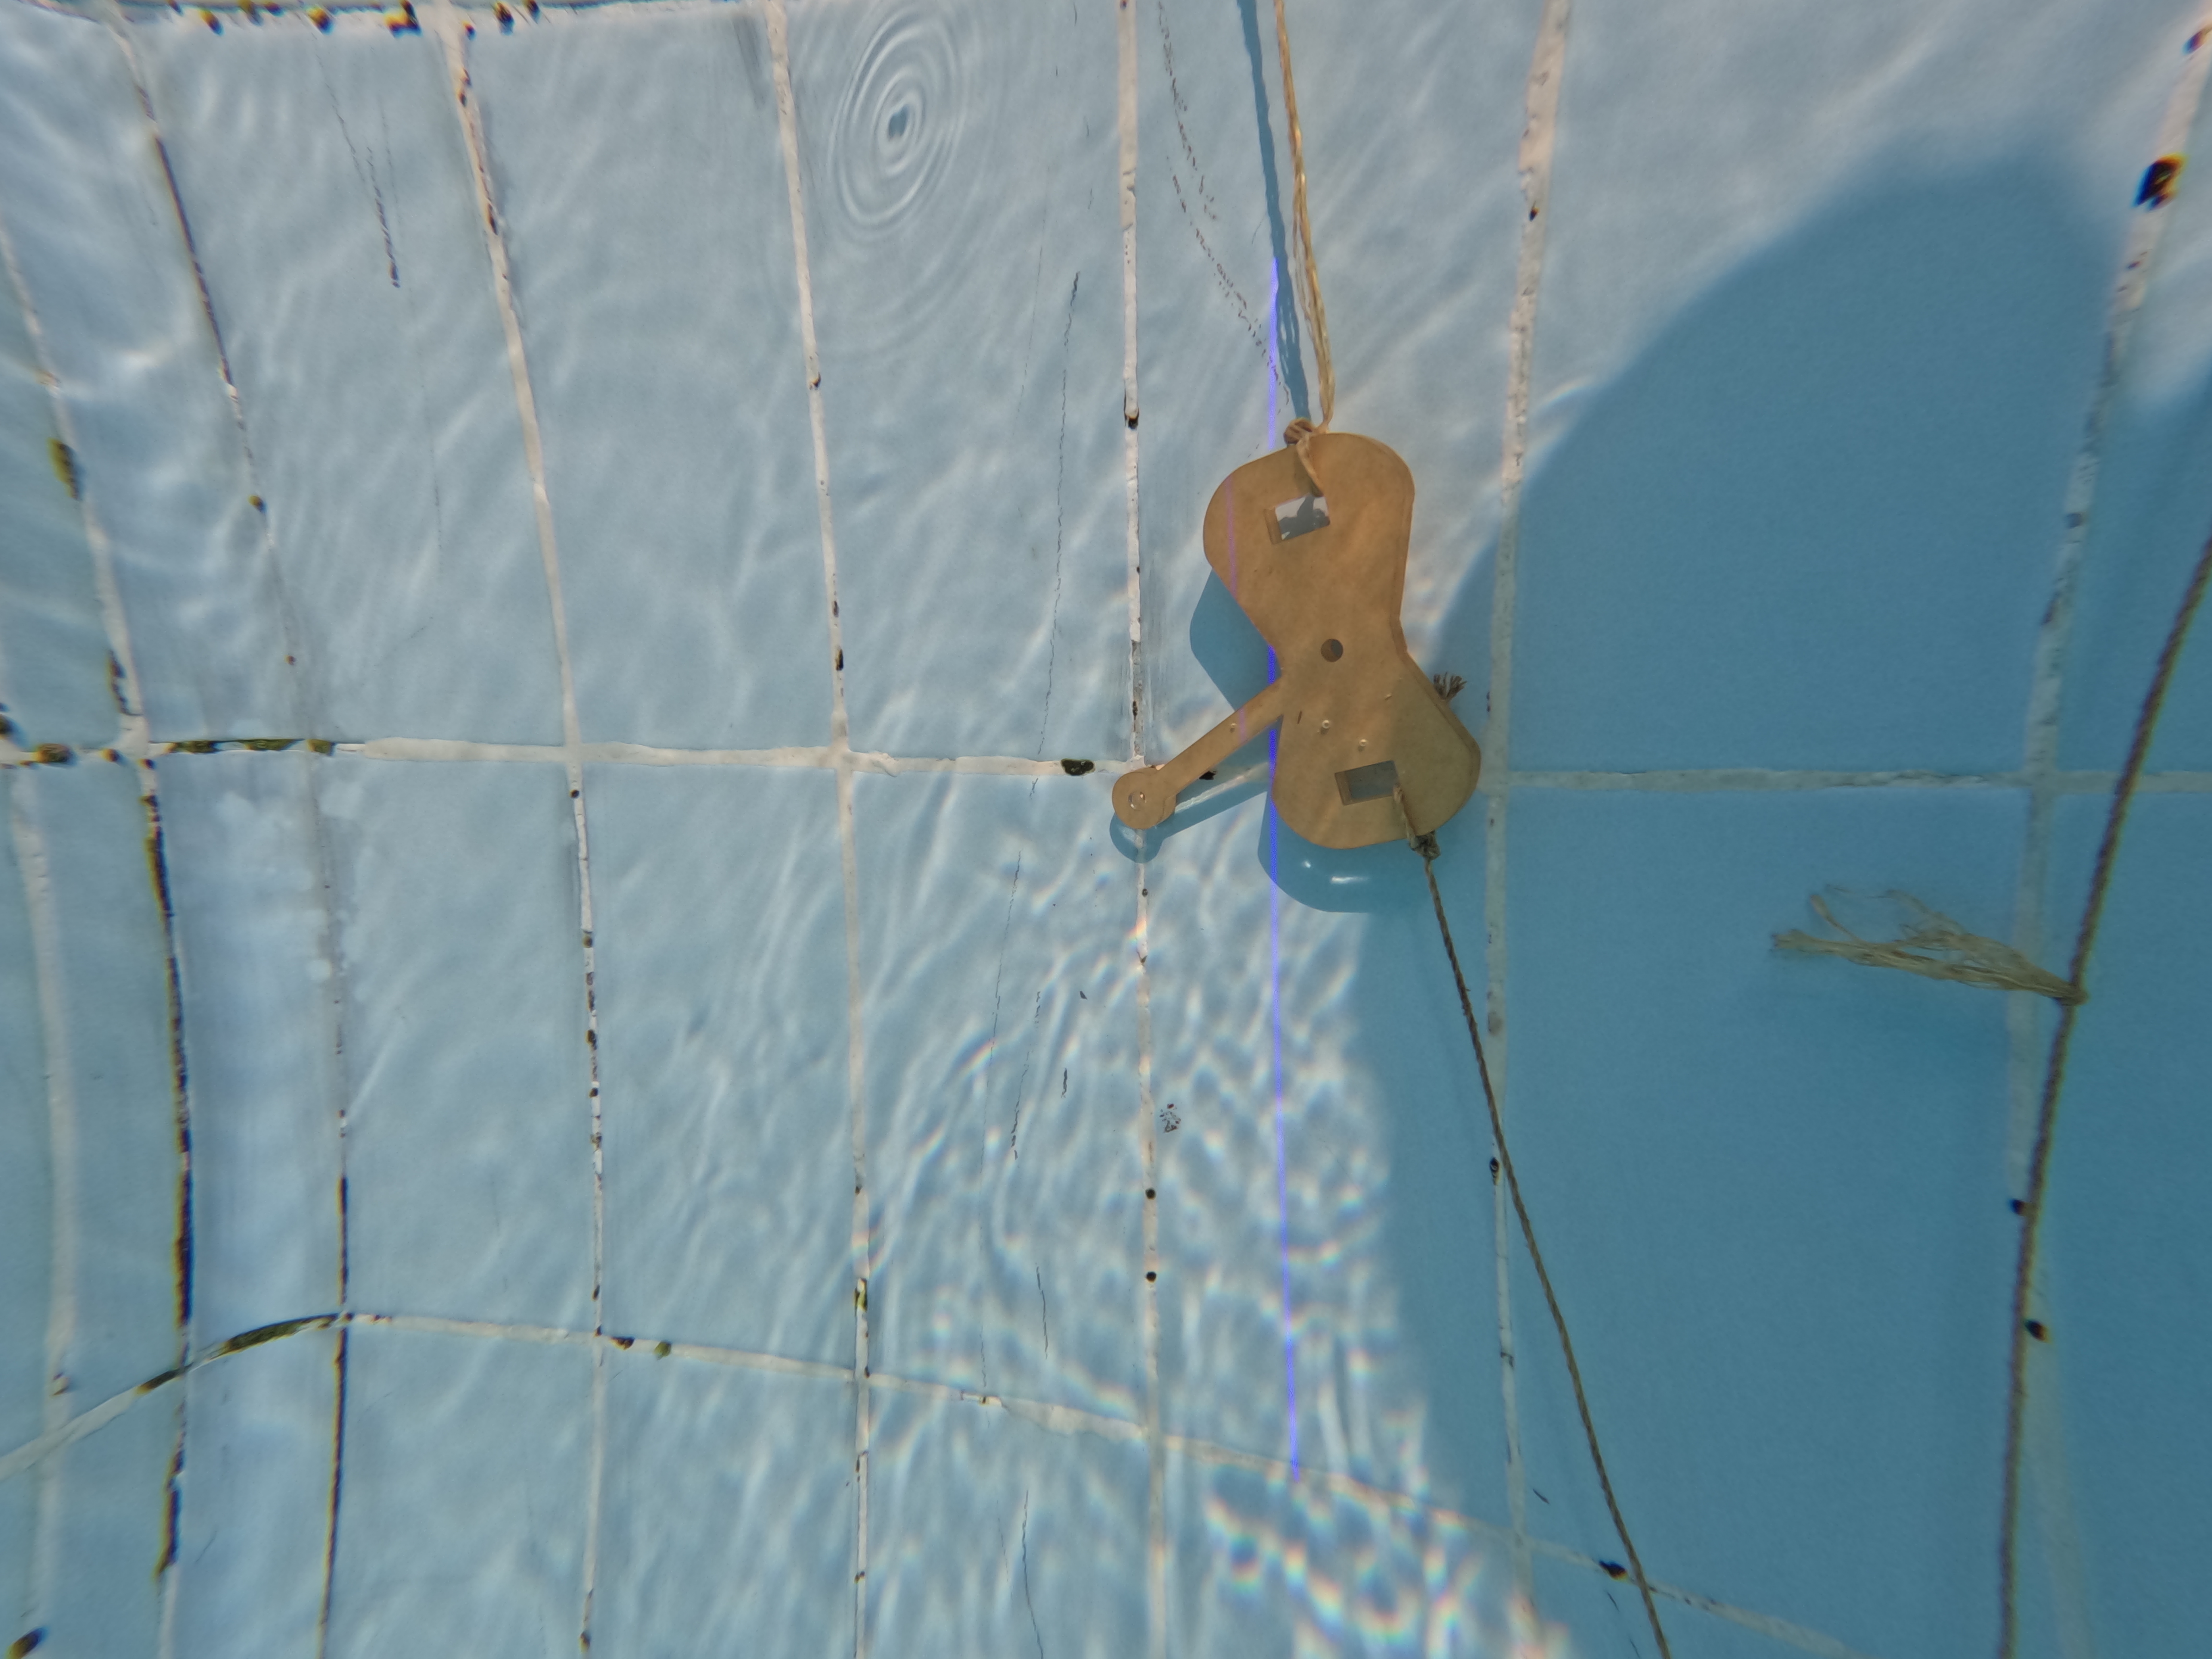

Supplement: Supplementary file 627 [file G0019641.pdf › Level_5_1/G0019641.pdf]

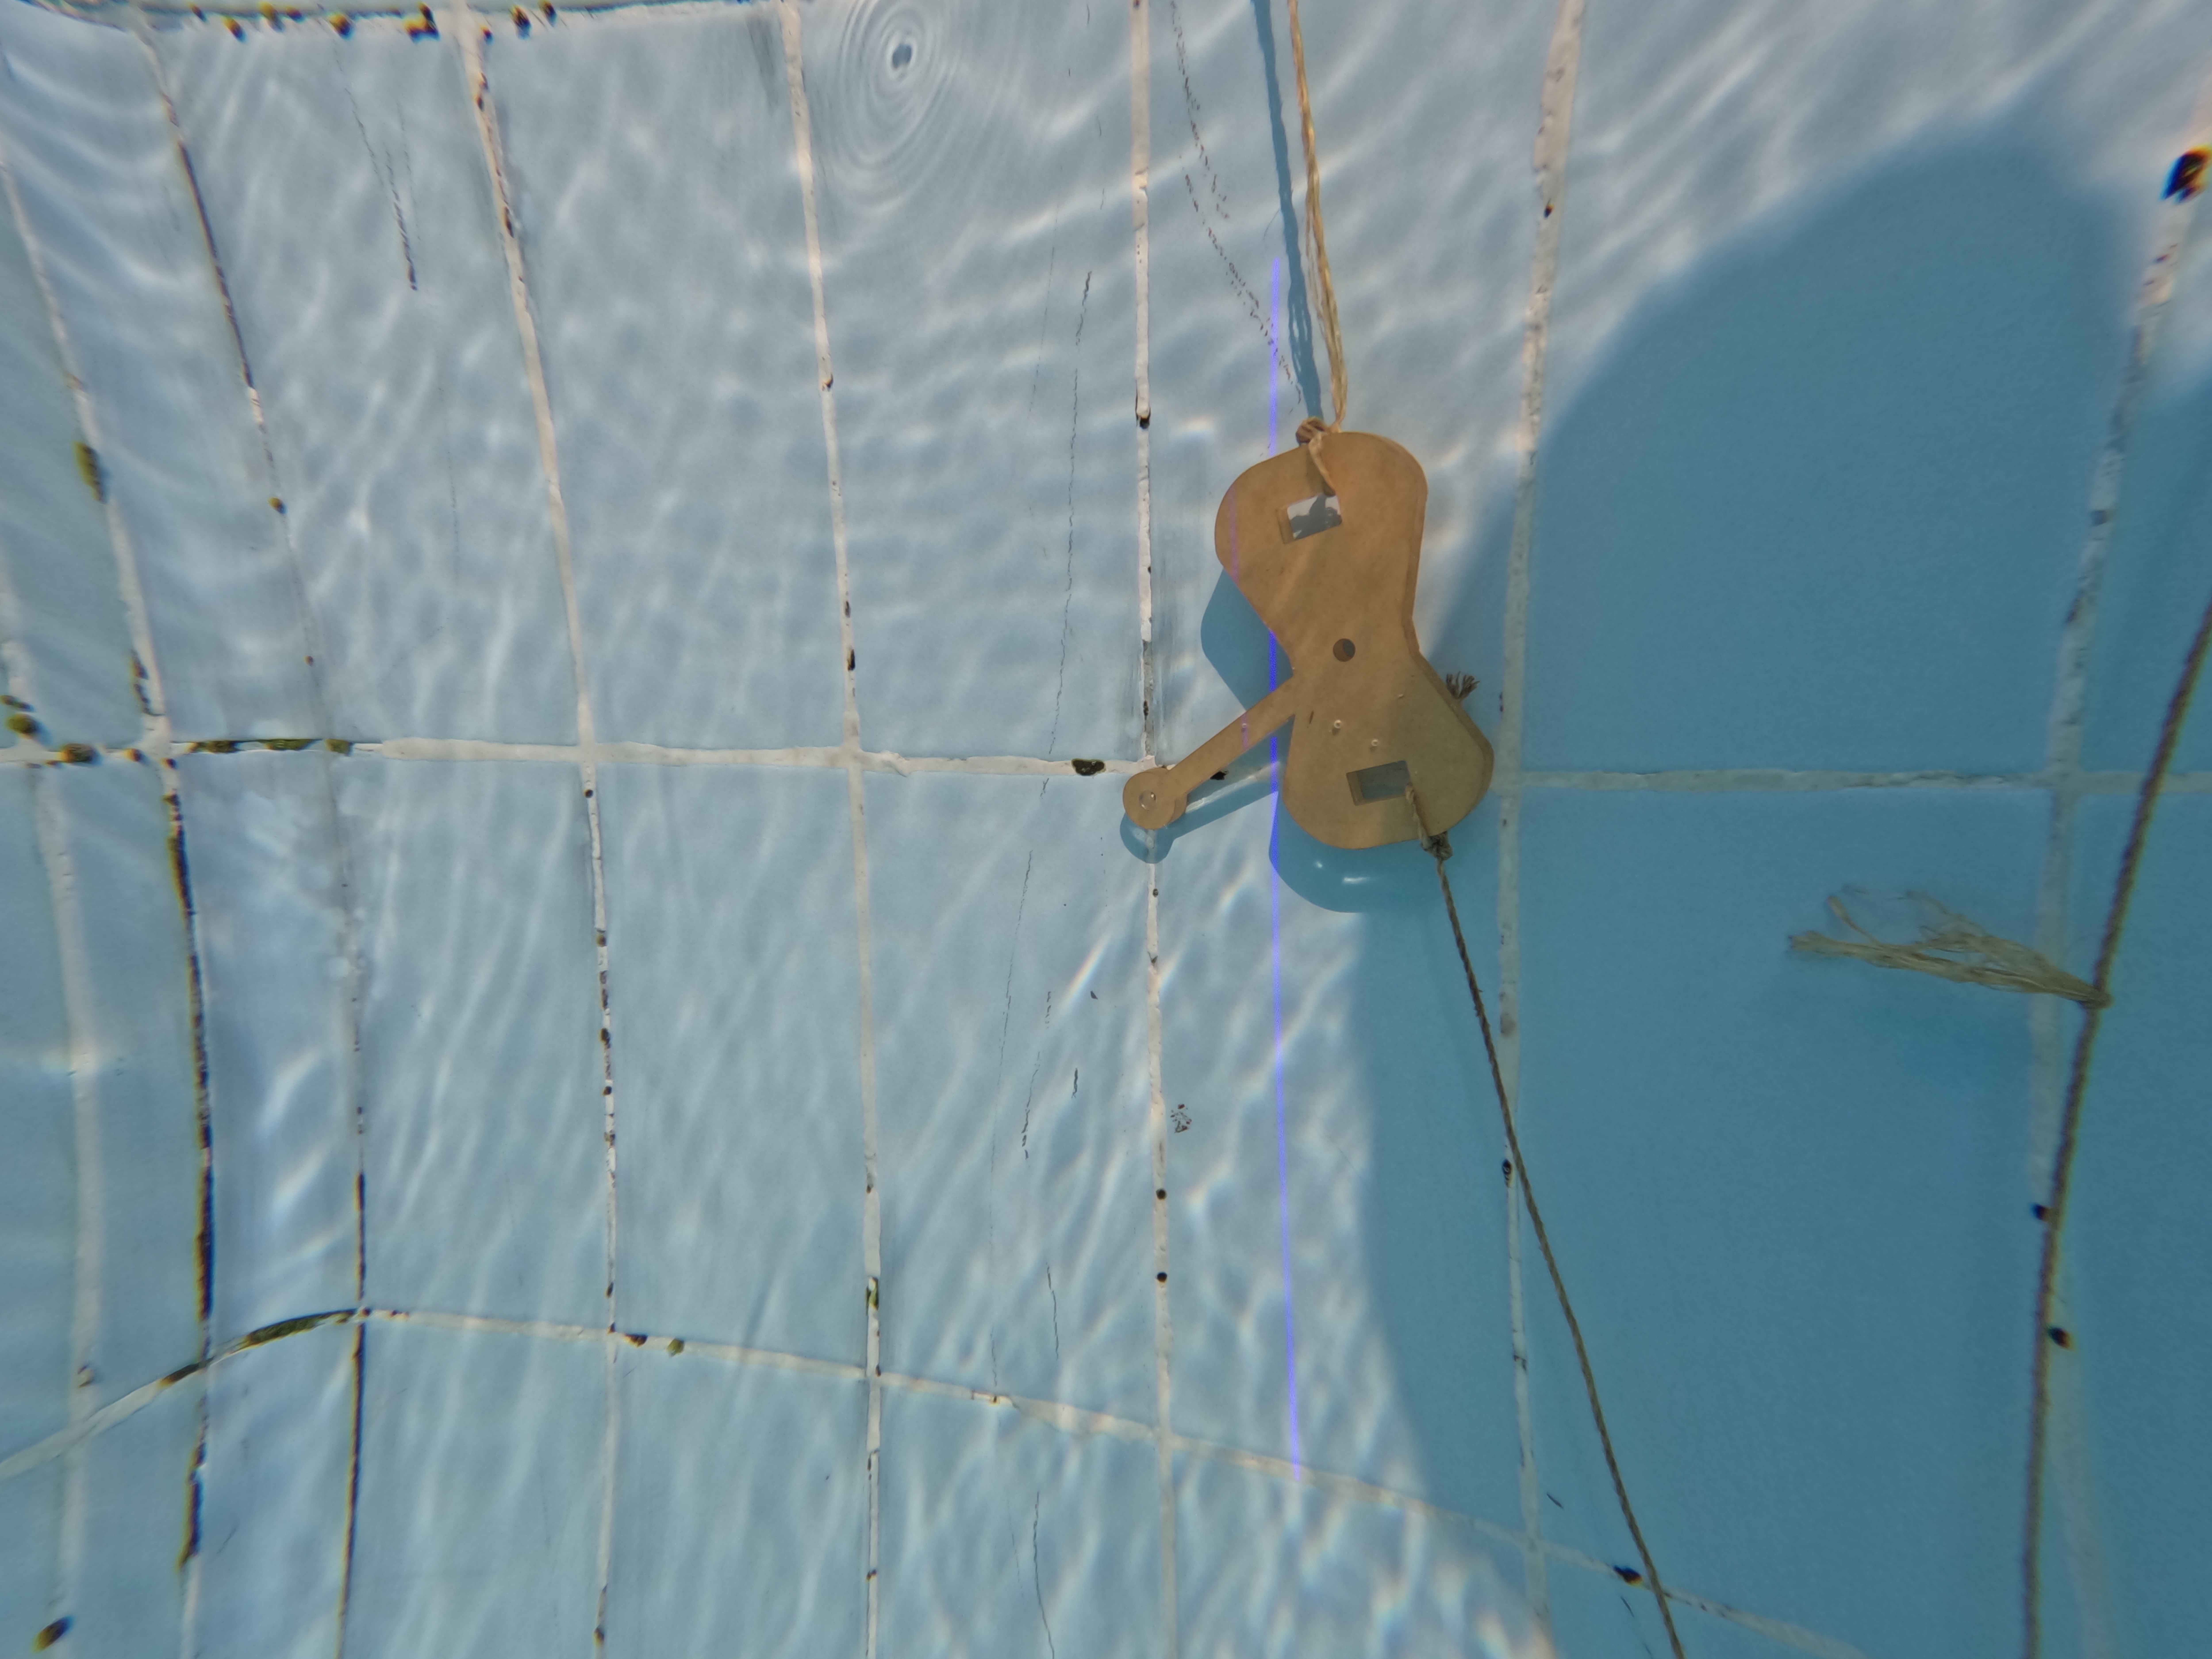

Supplement: Supplementary file 628 [file G0019642.pdf › Level_5_1/G0019642.pdf]

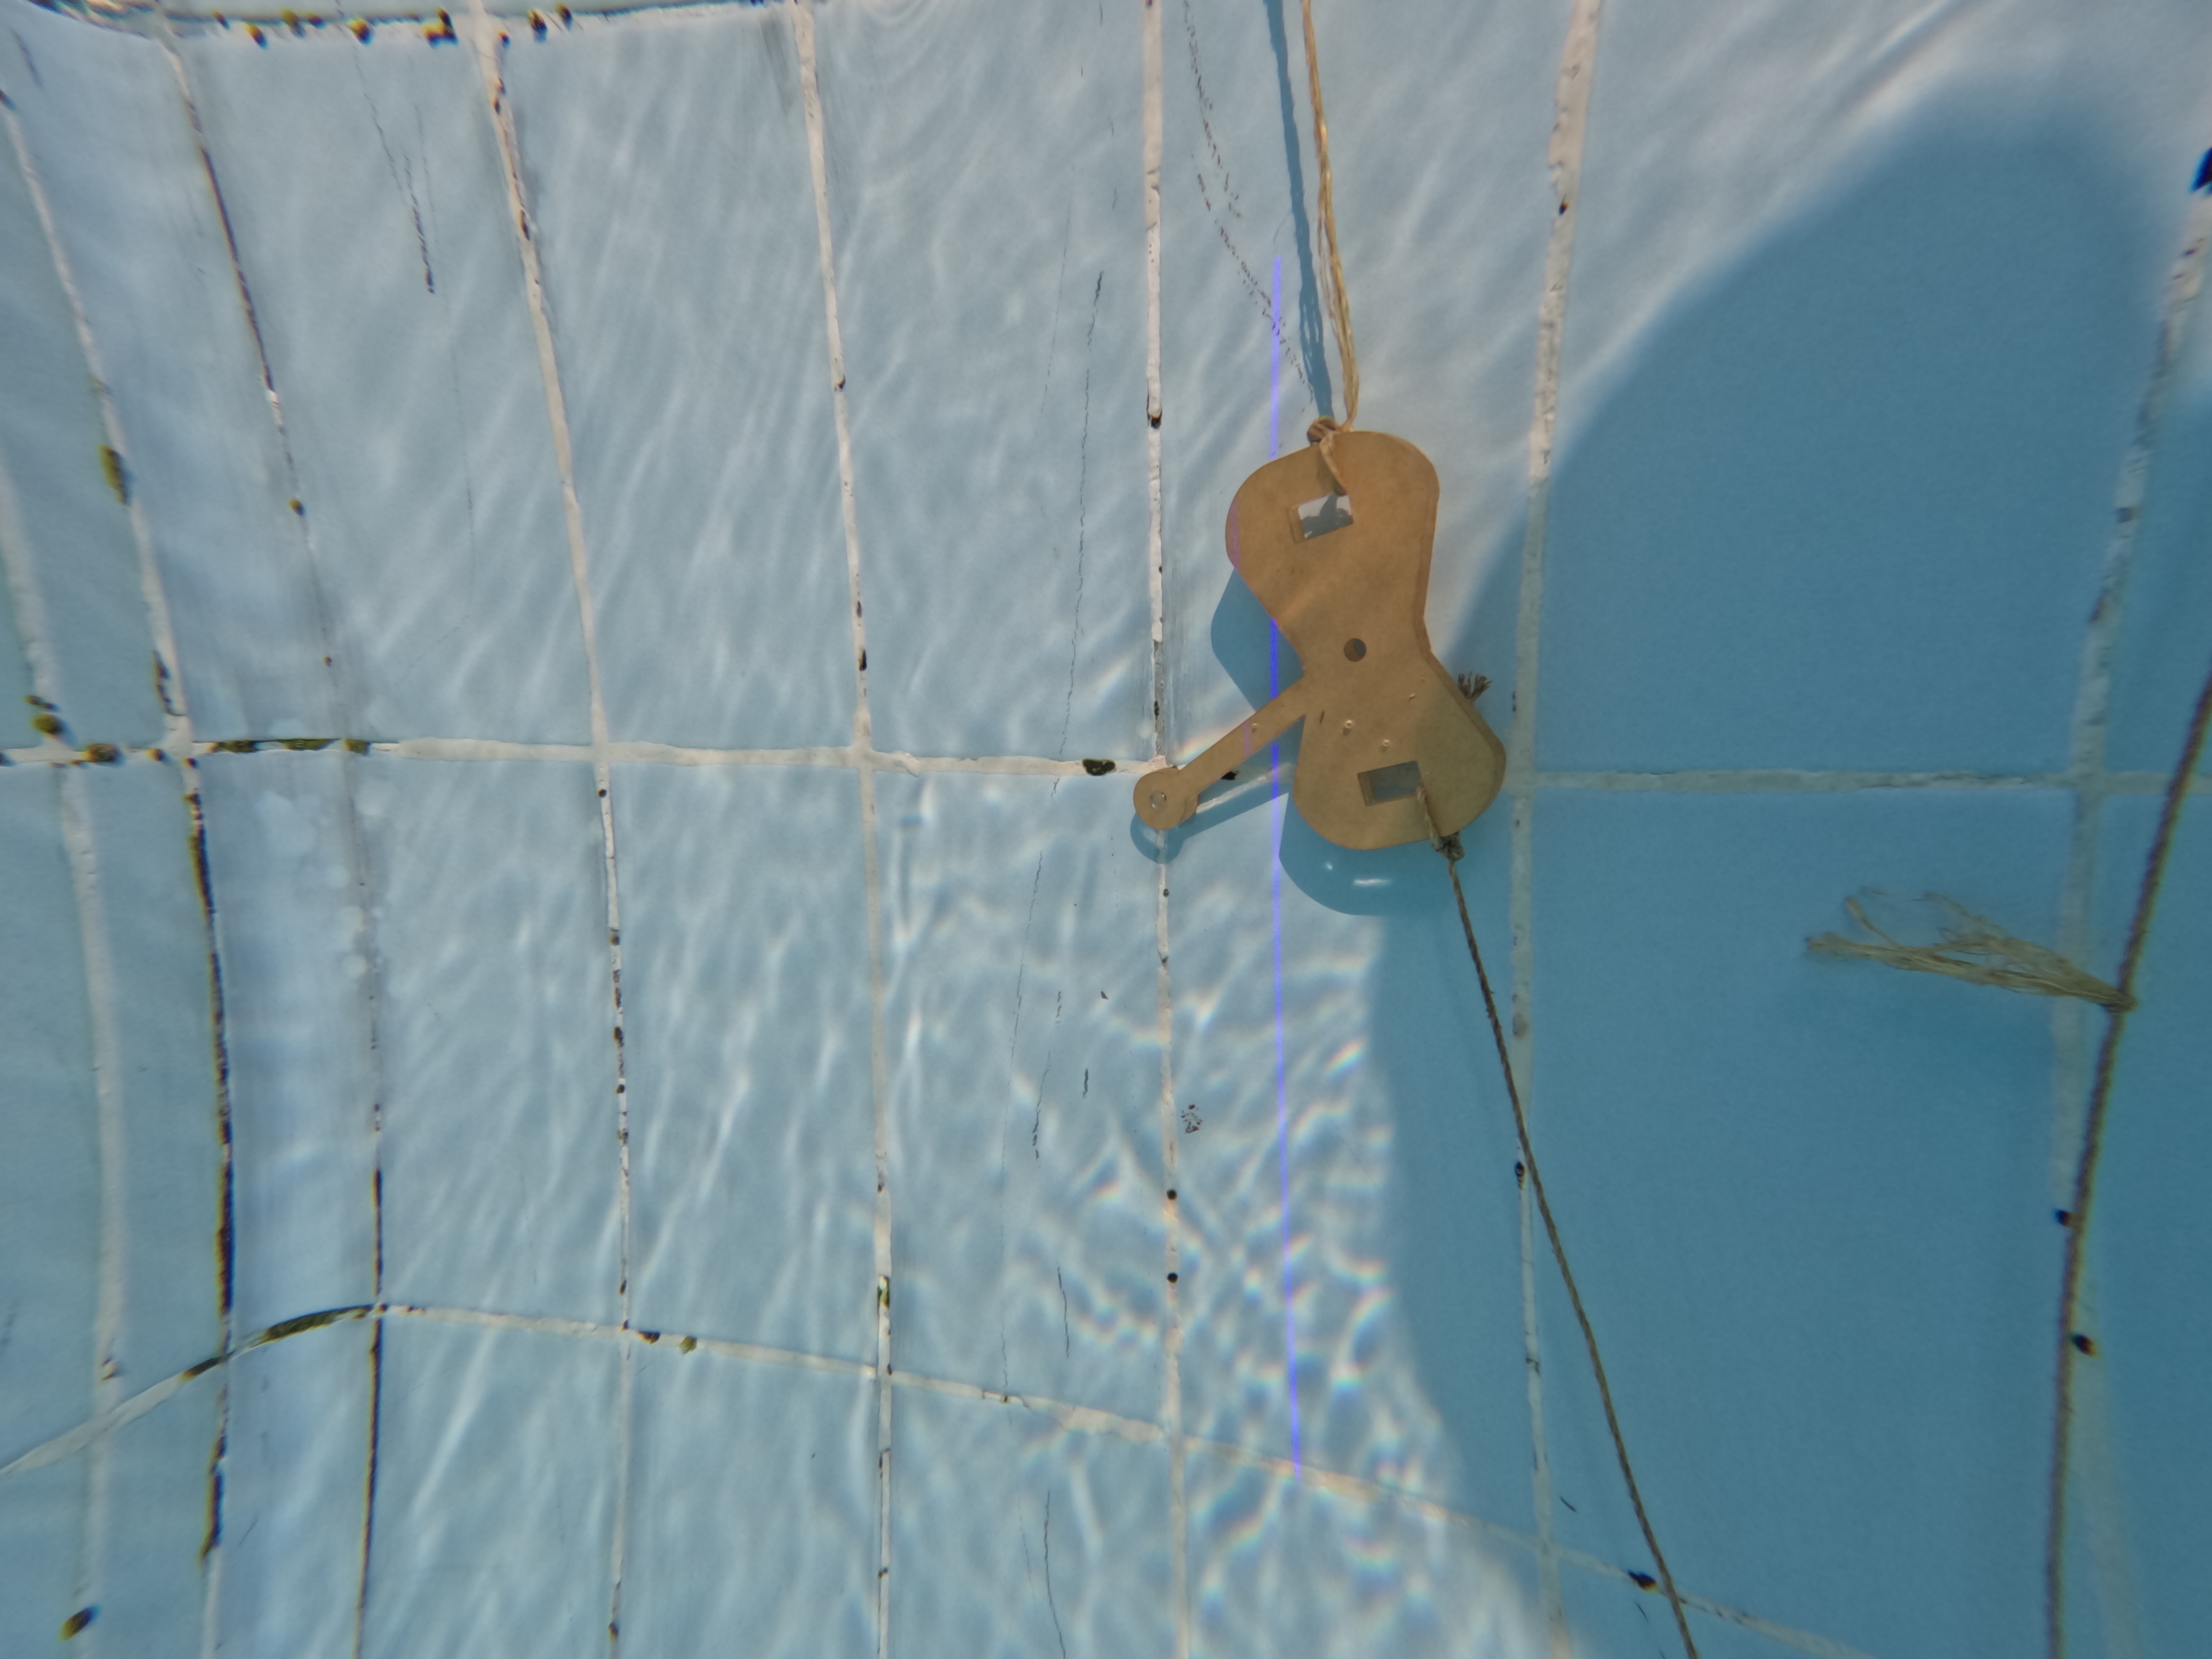

Supplement: Supplementary file 629 [file G0019643.pdf › Level_5_1/G0019643.pdf]

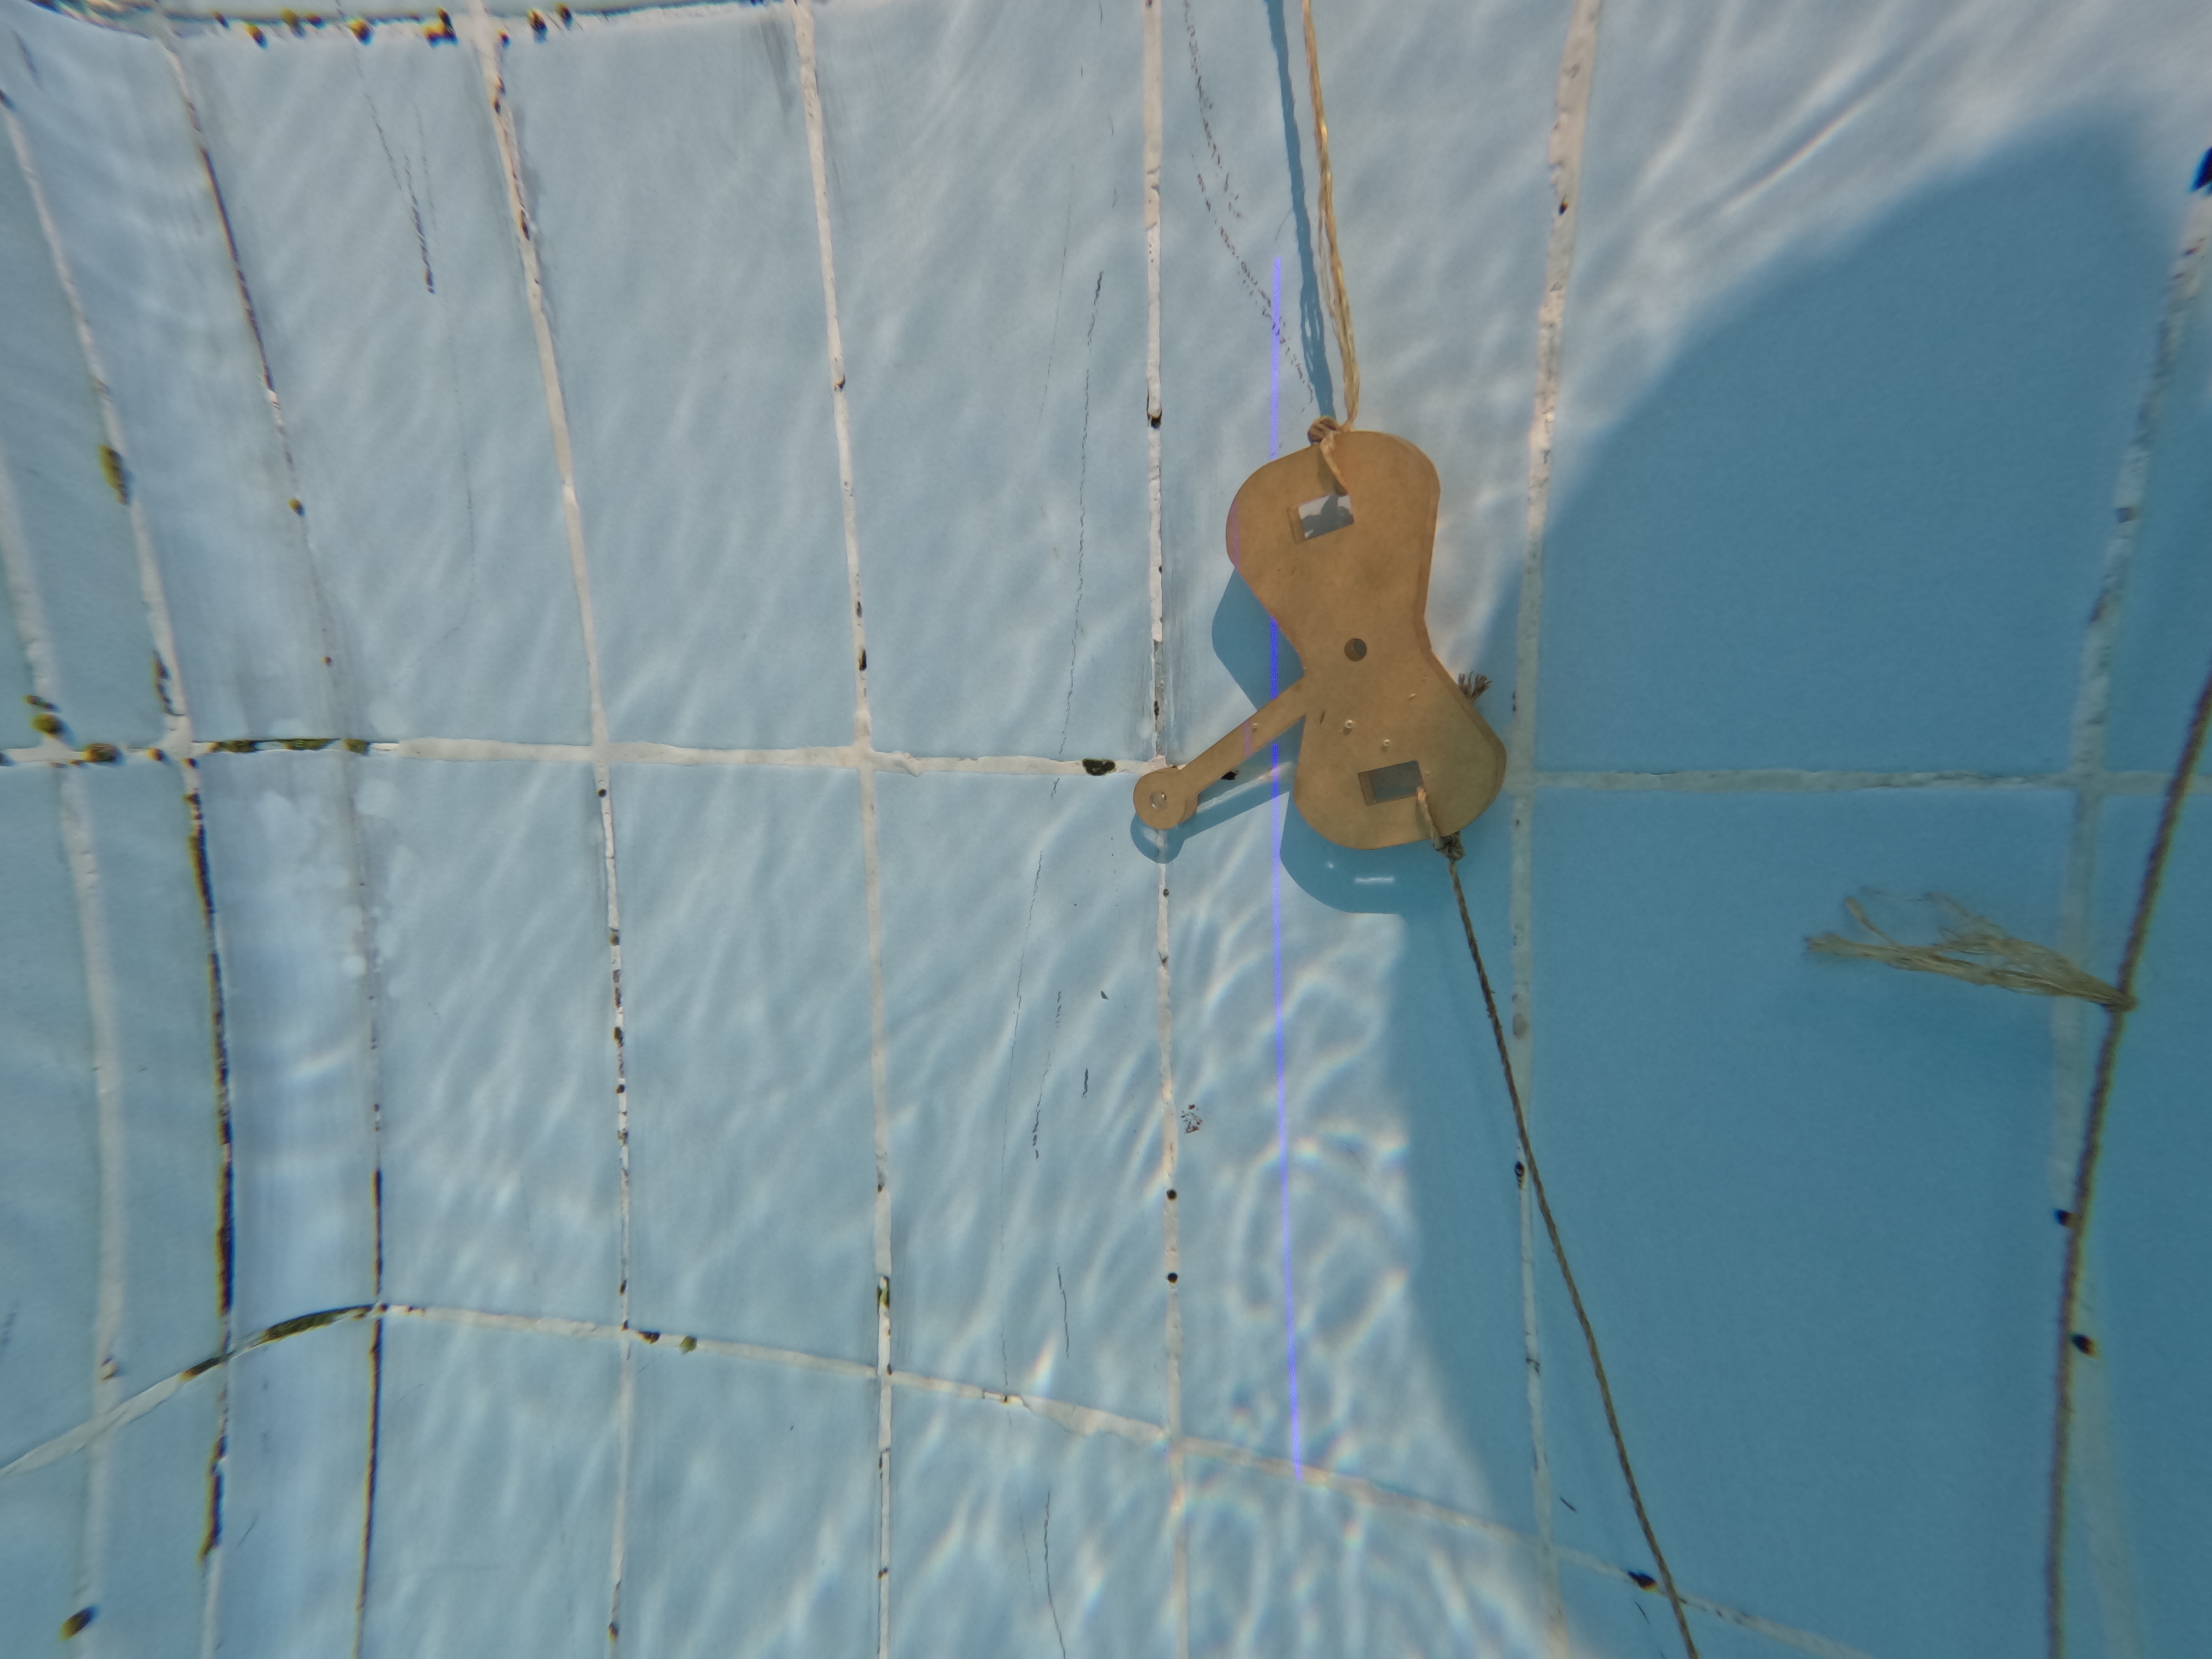

Supplement: Supplementary file 630 [file G0019644.pdf › Level_5_1/G0019644.pdf]

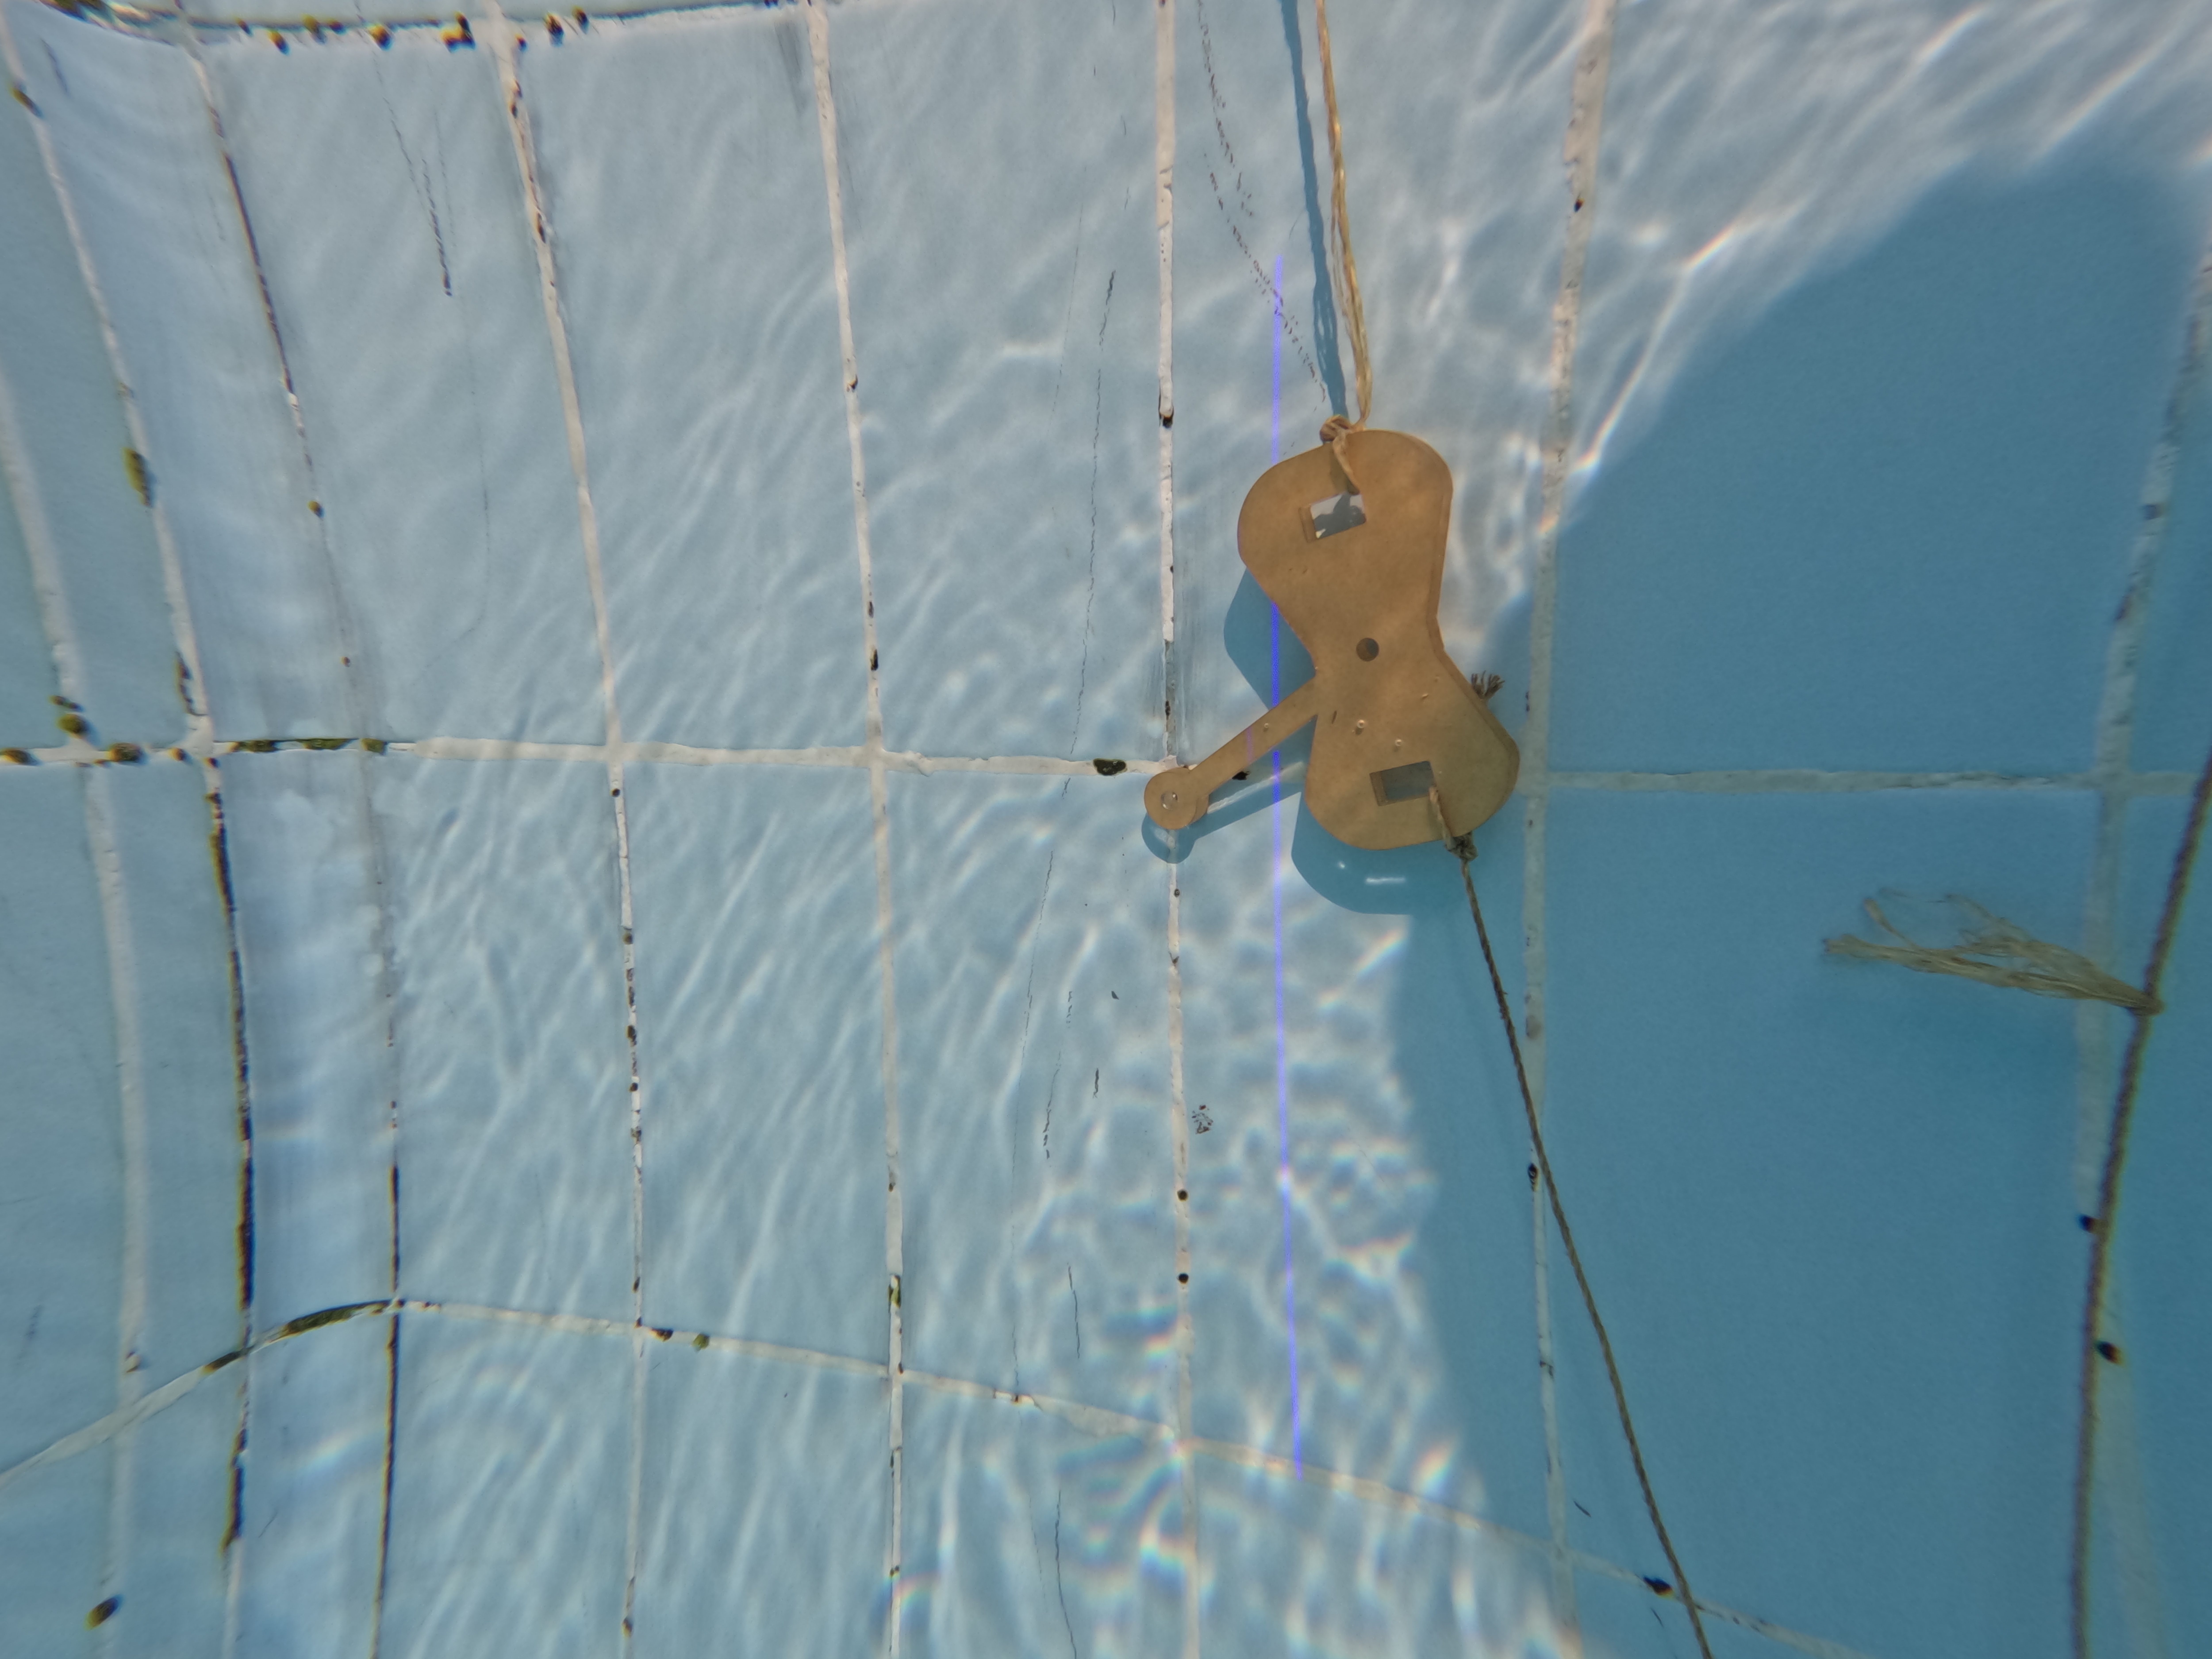

Supplement: Supplementary file 631 [file G0019645.pdf › Level_5_1/G0019645.pdf]

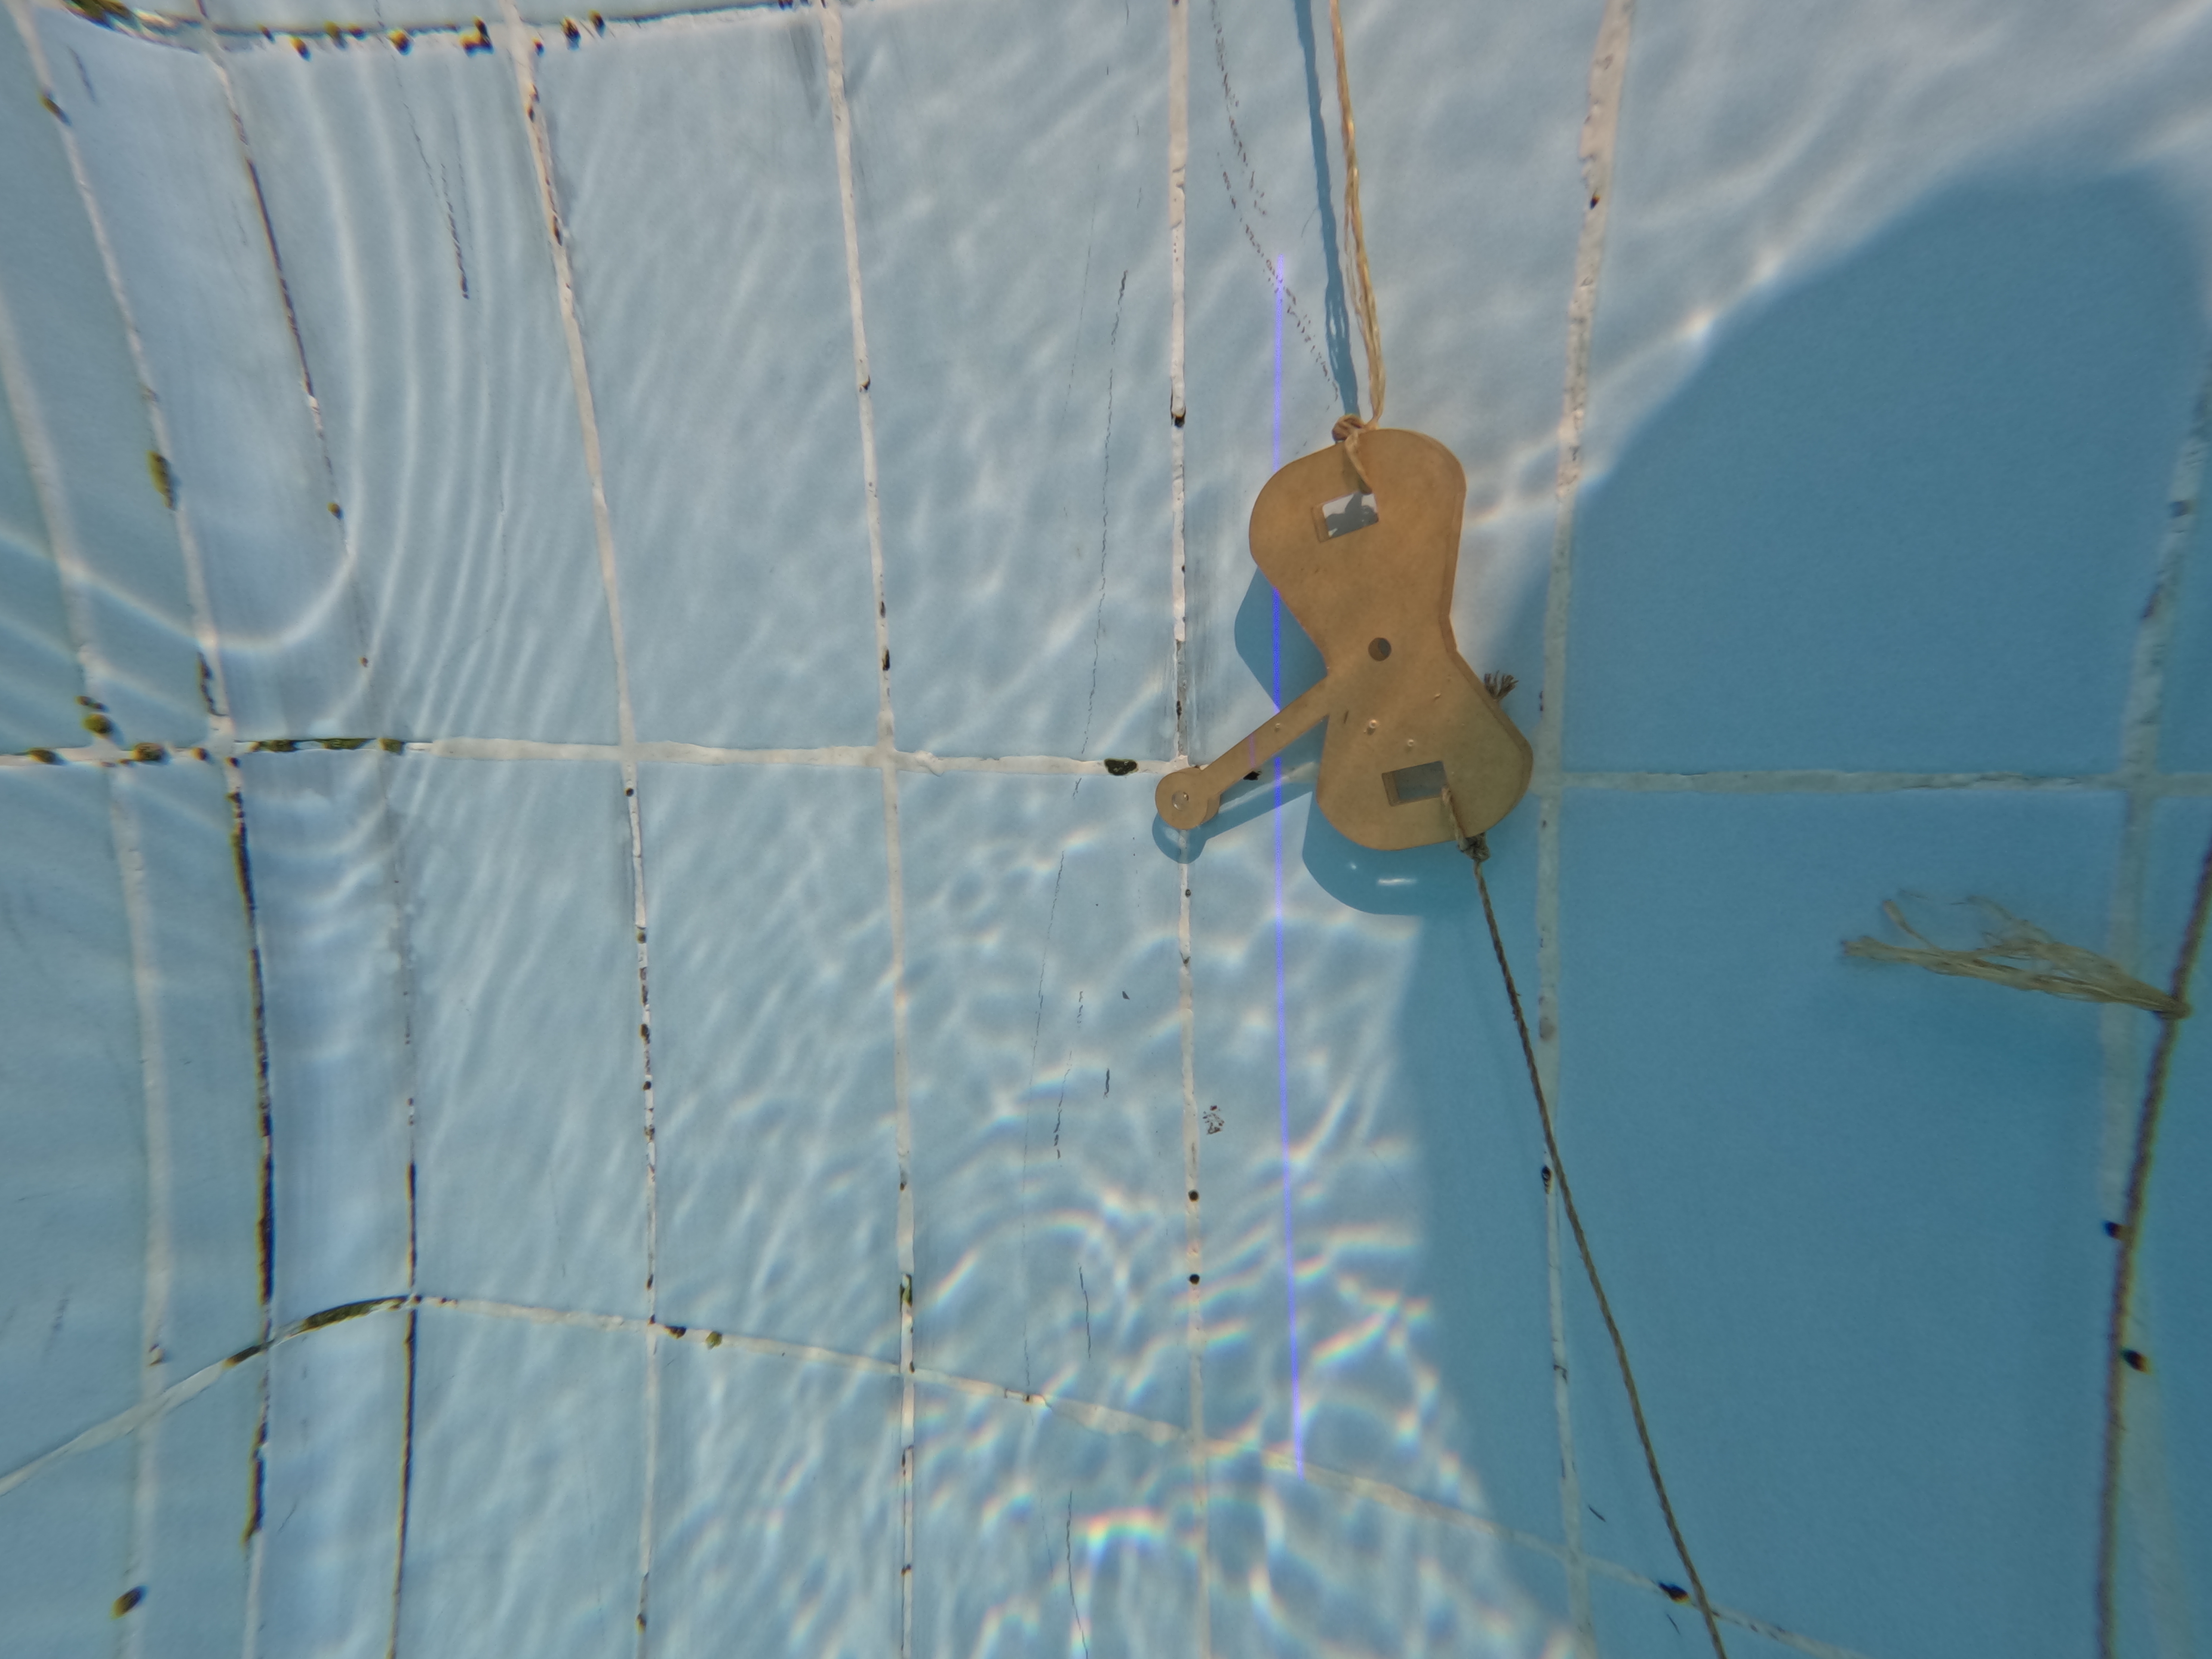

Supplement: Supplementary file 632 [file G0019646.pdf › Level_5_1/G0019646.pdf]

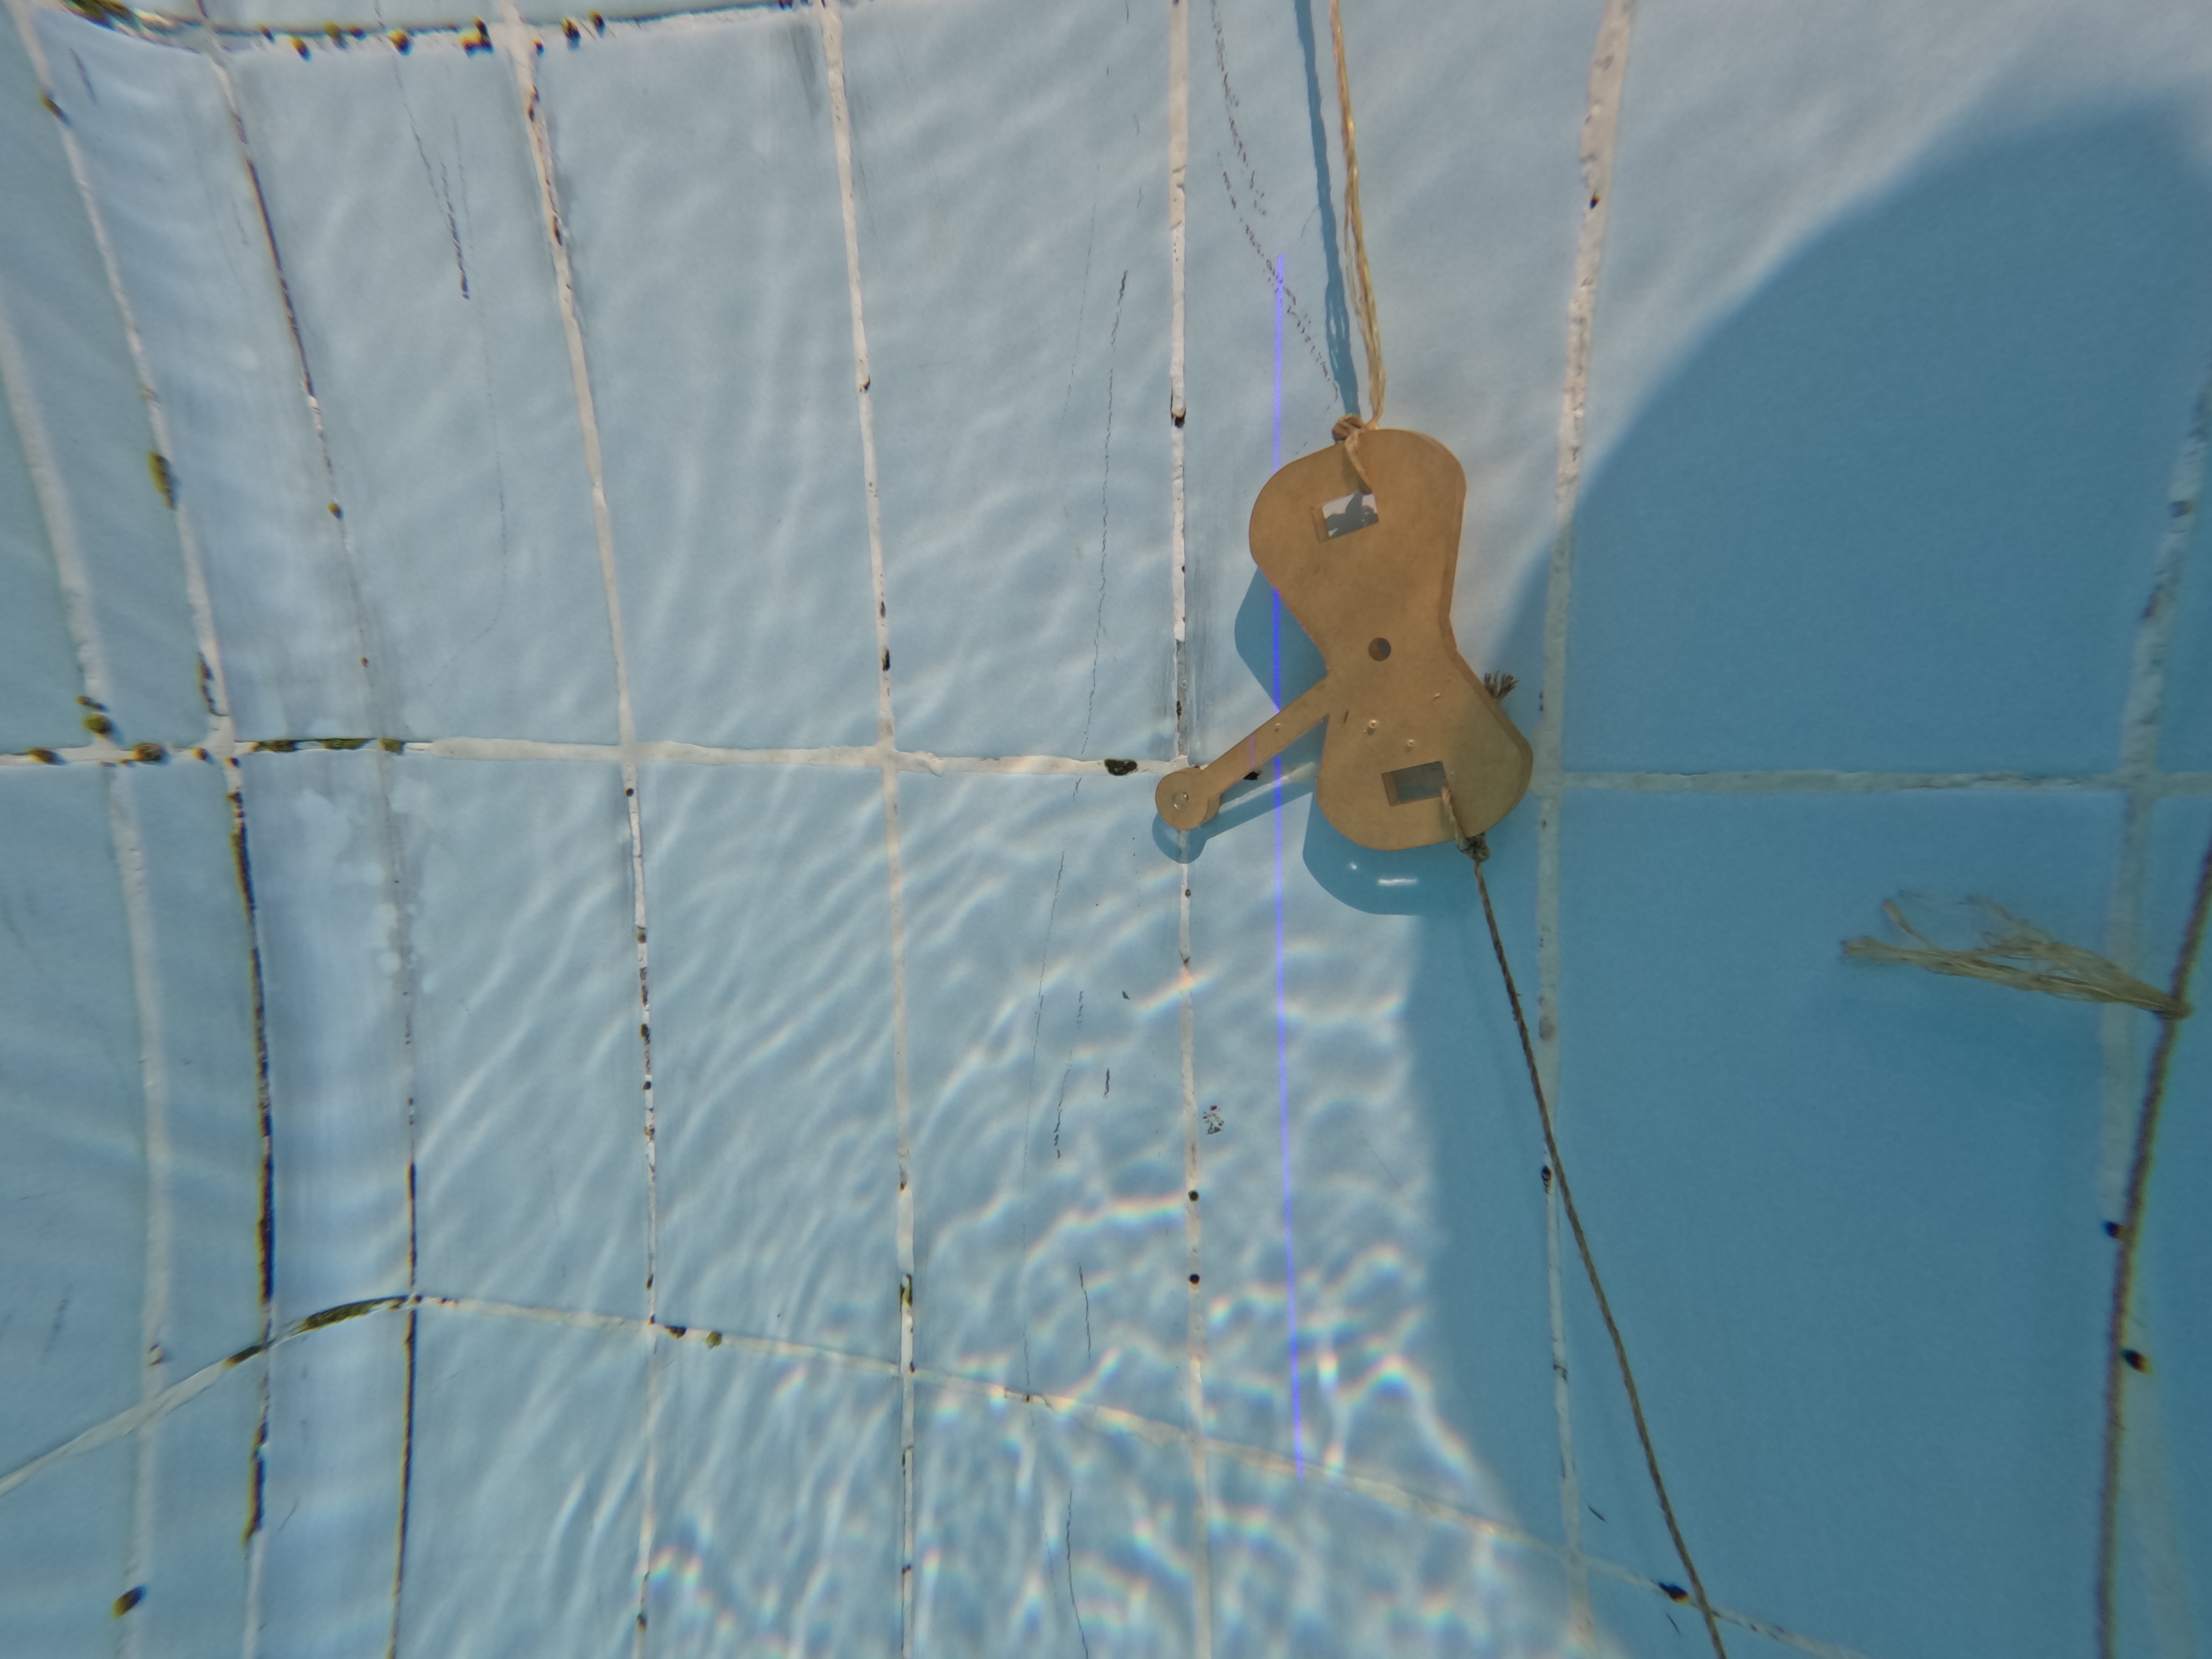

Supplement: Supplementary file 633 [file G0019647.pdf › Level_5_1/G0019647.pdf]

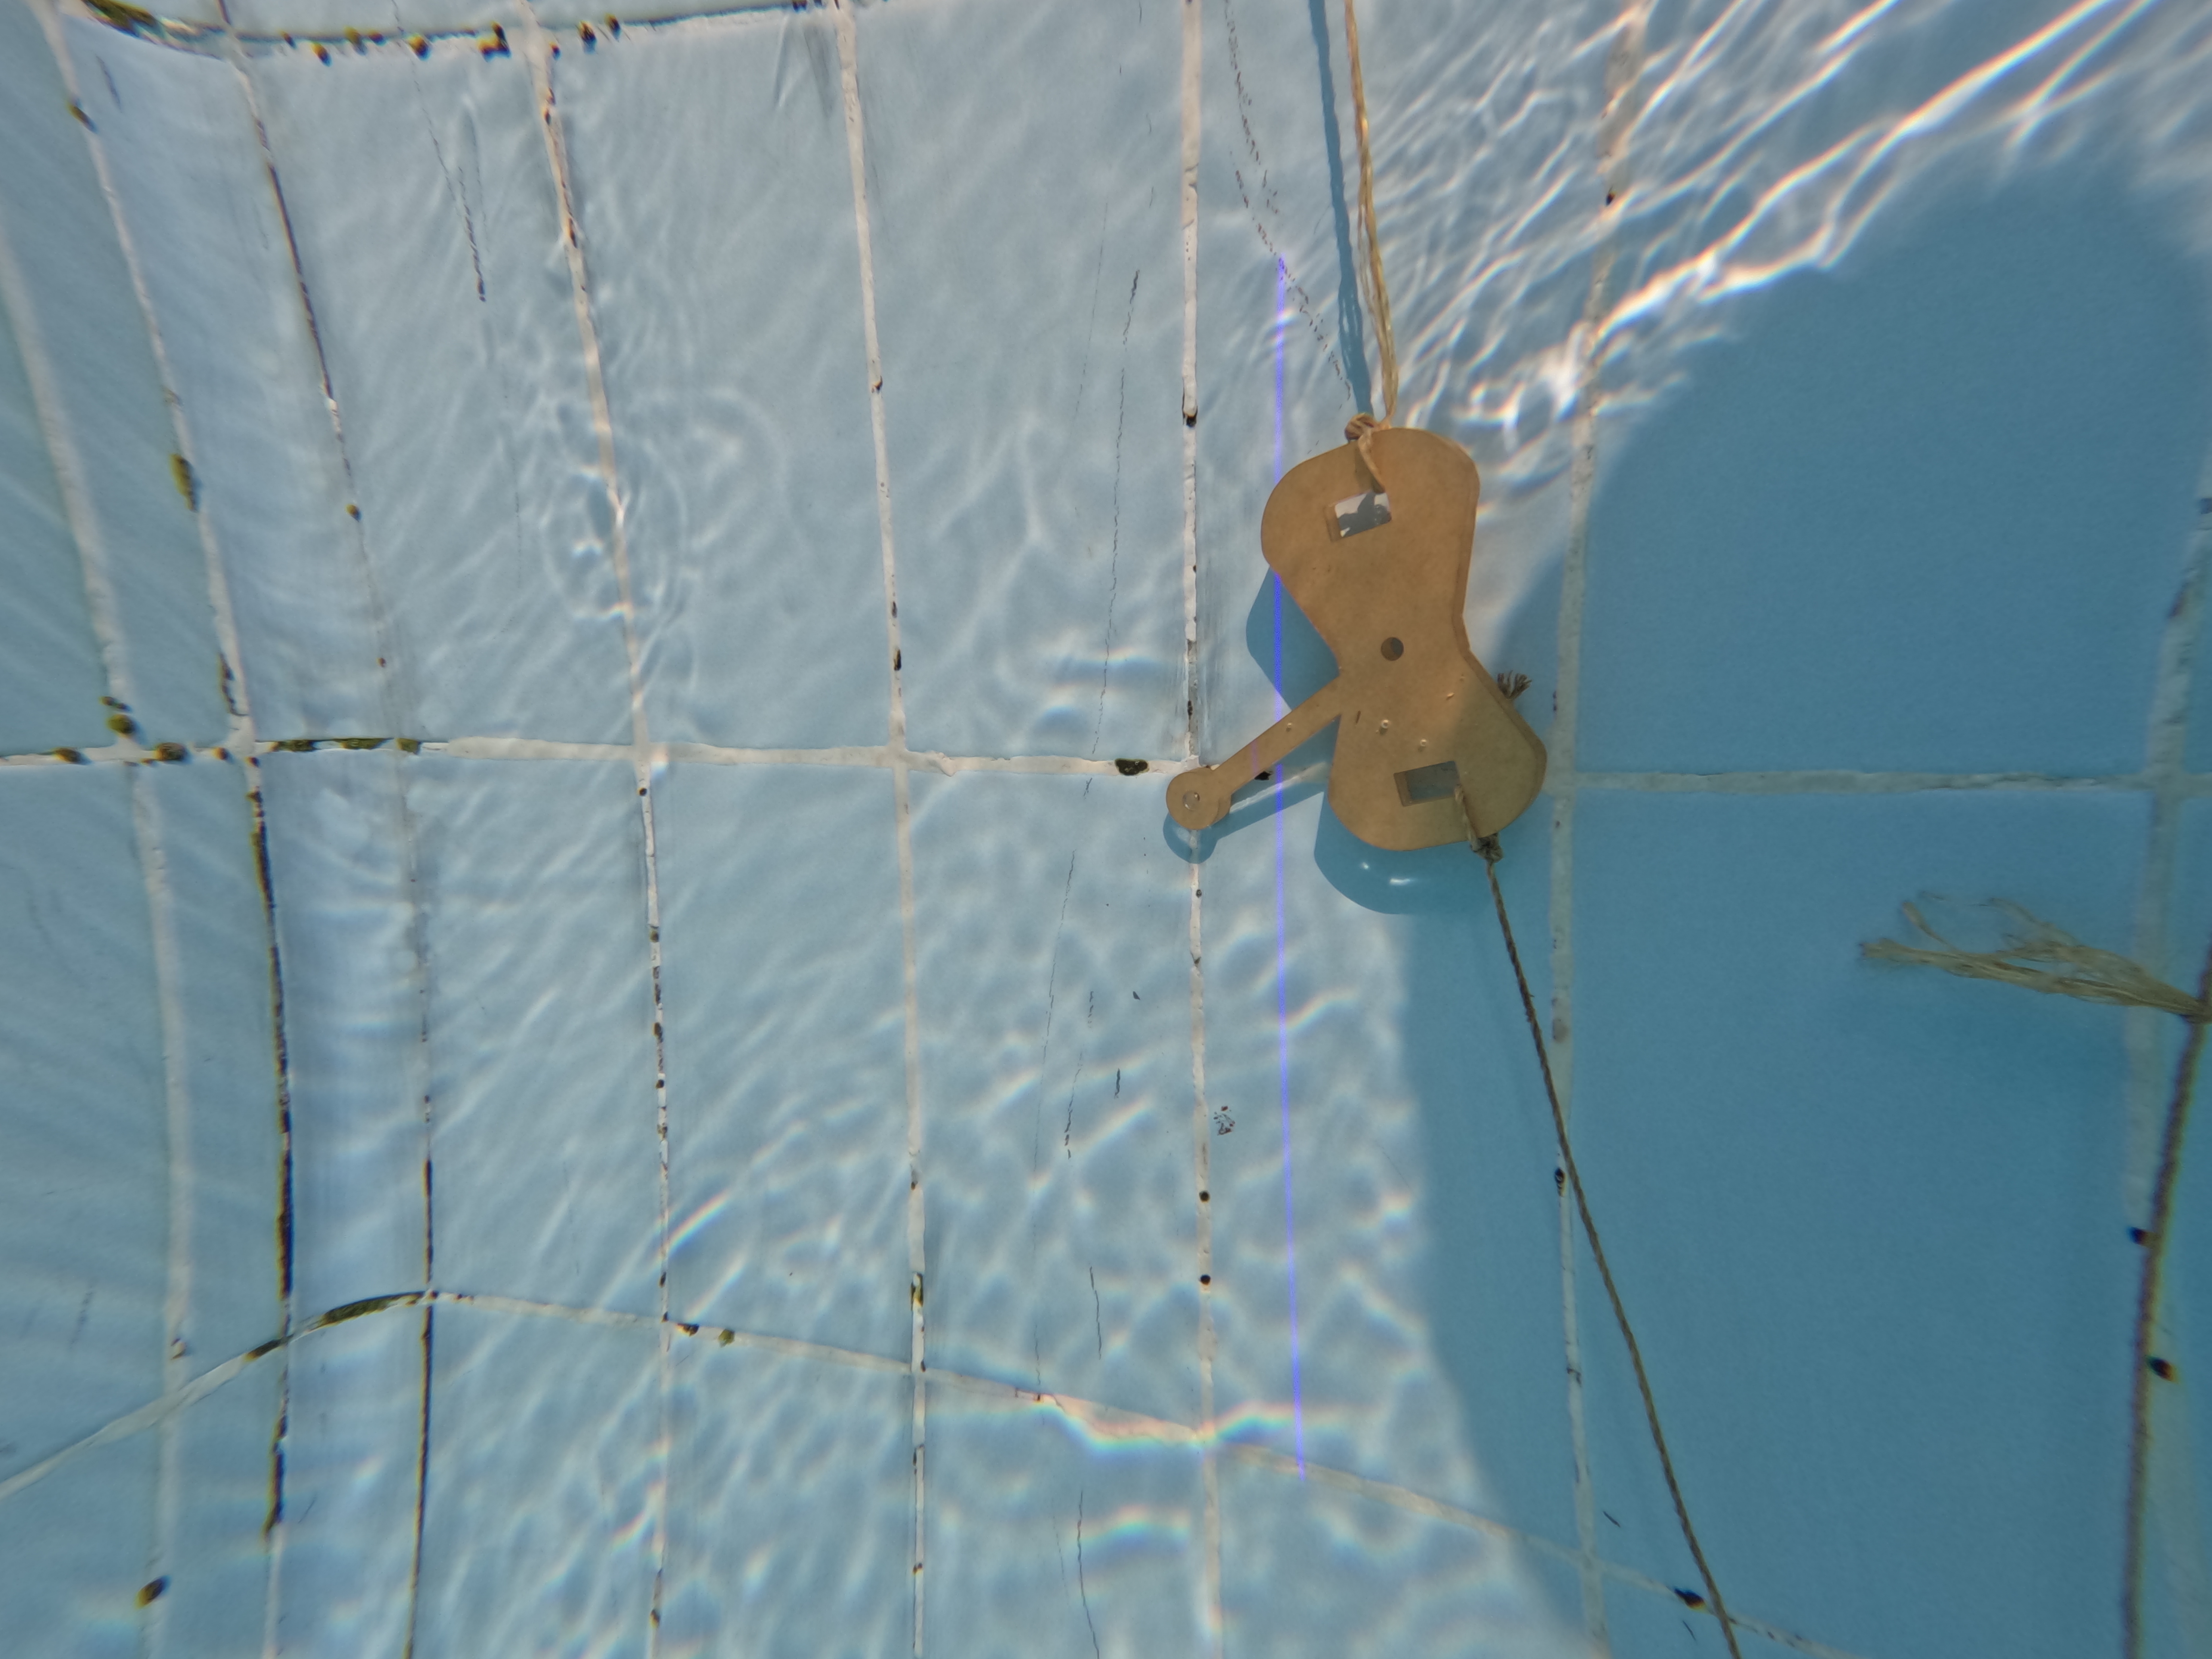

Supplement: Supplementary file 634 [file G0019648.pdf › Level_5_1/G0019648.pdf]

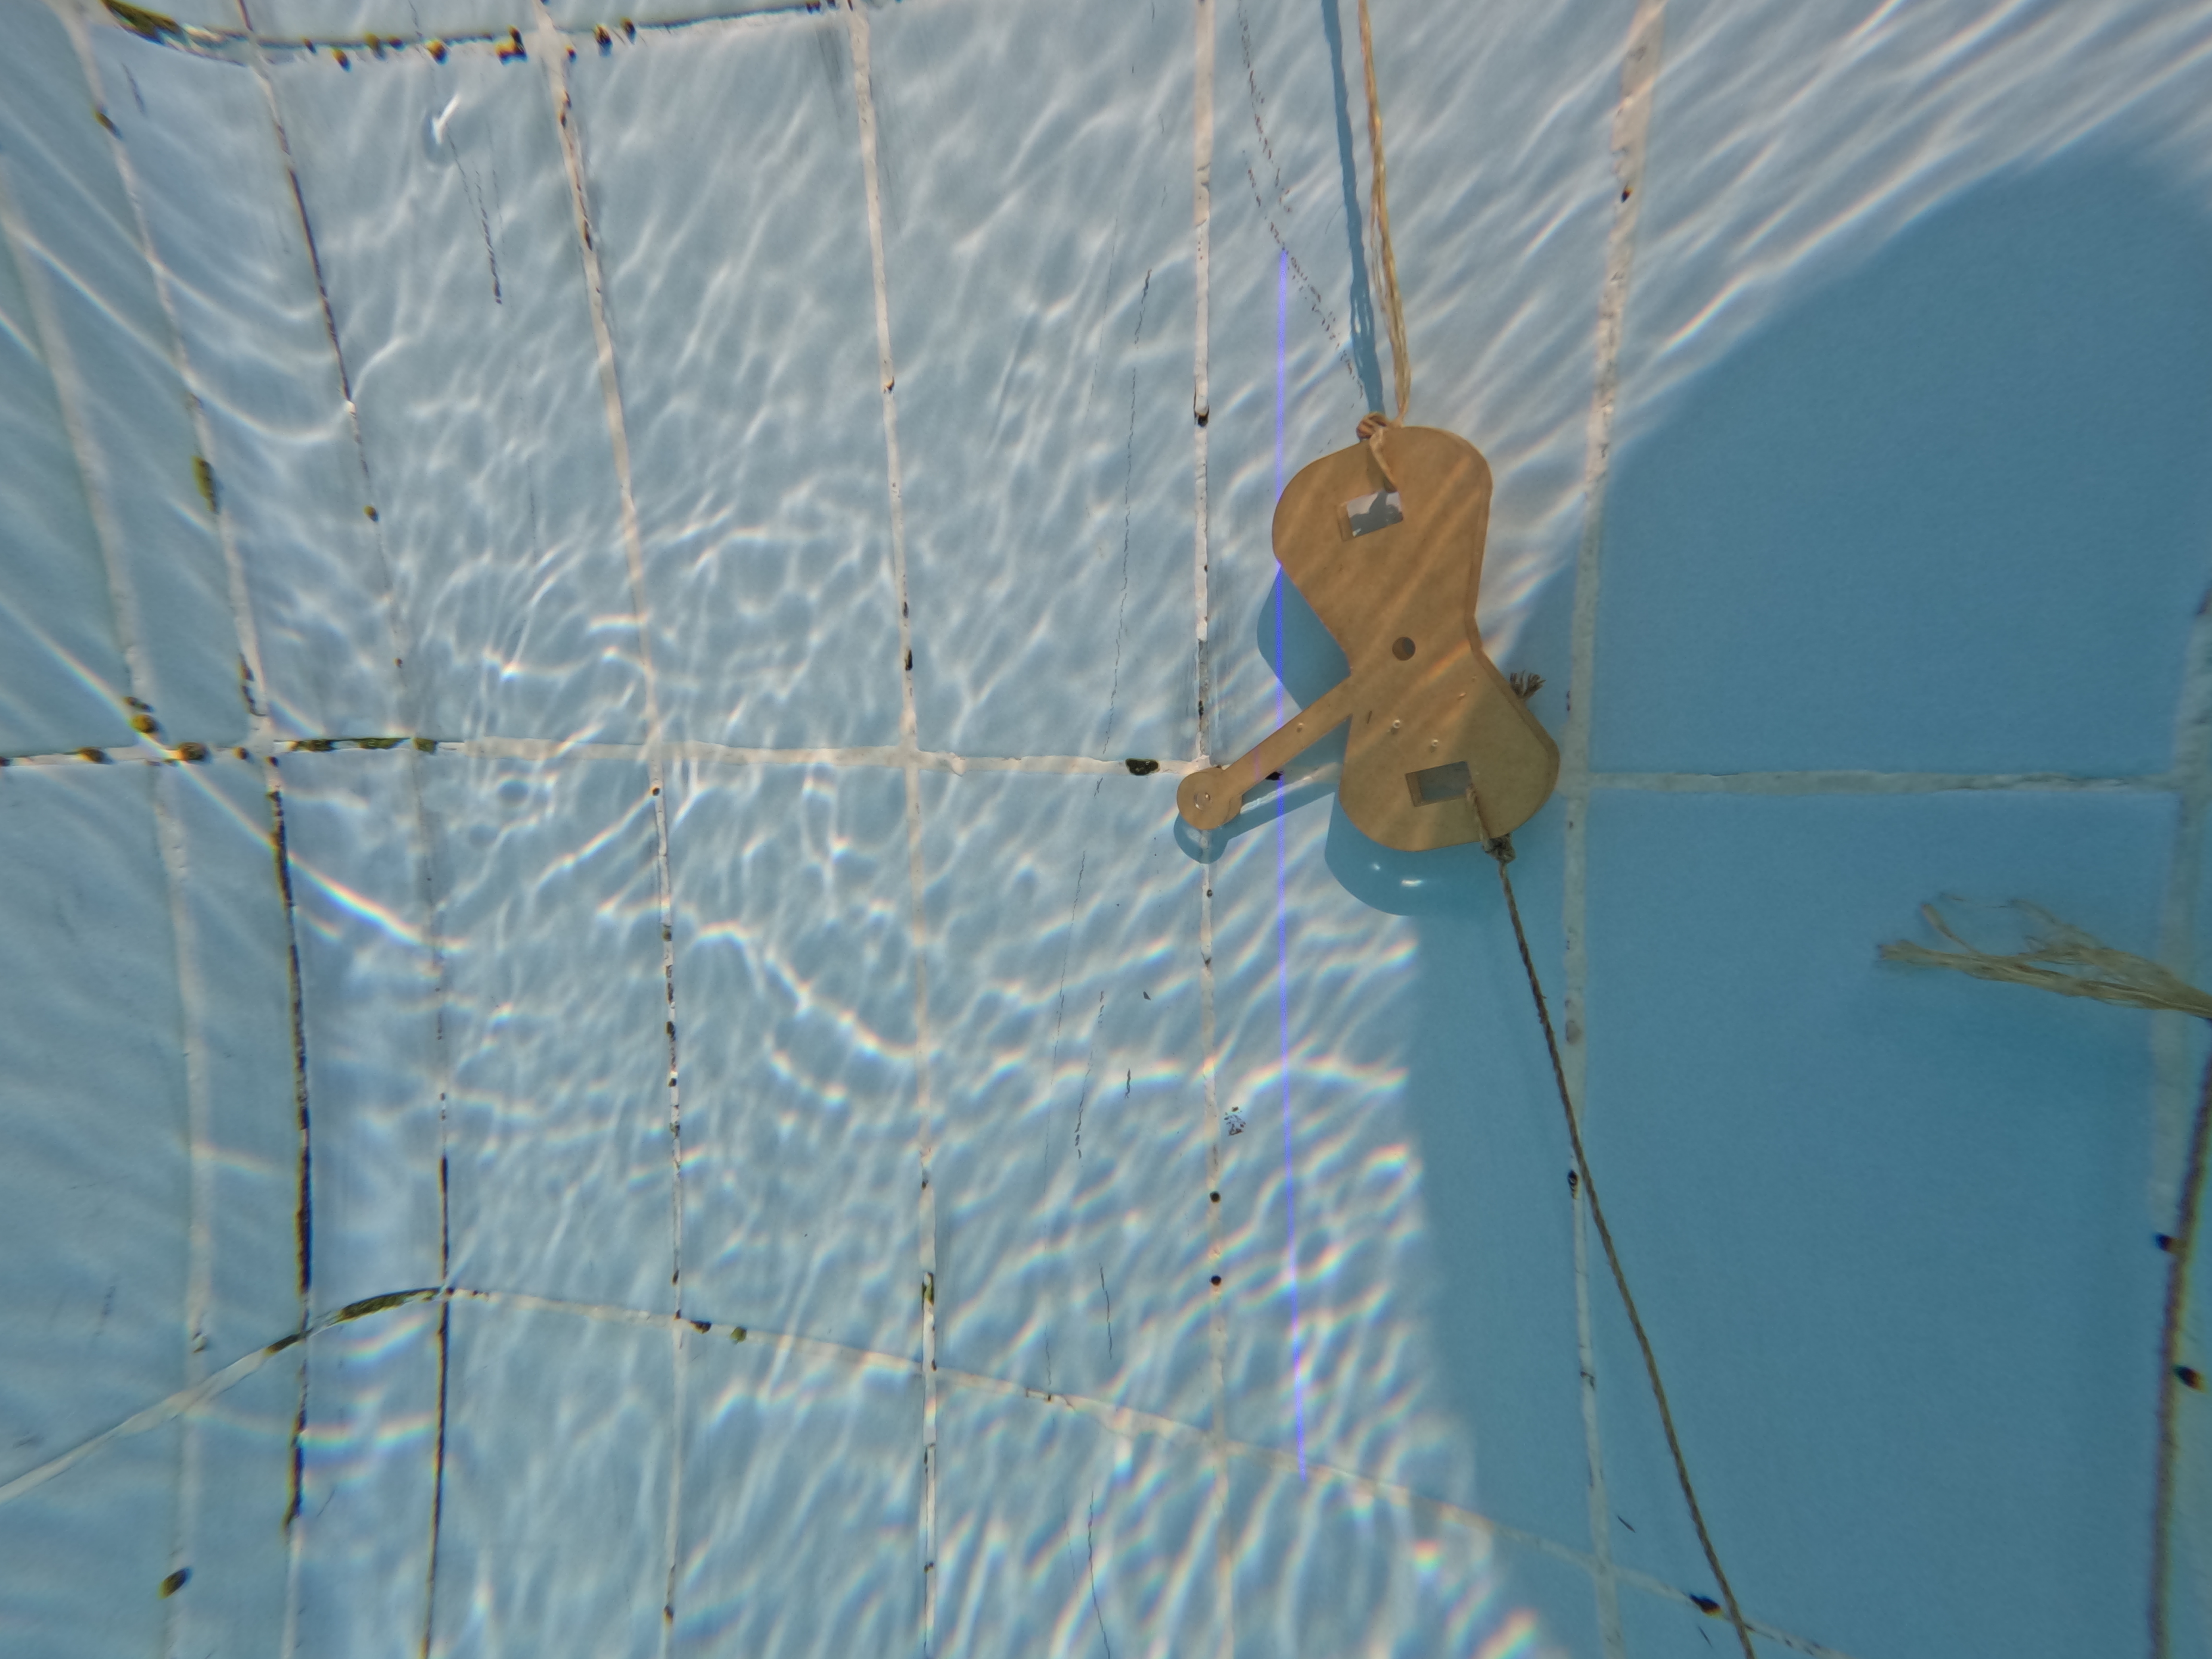

Supplement: Supplementary file 635 [file G0019649.pdf › Level_5_1/G0019649.pdf]

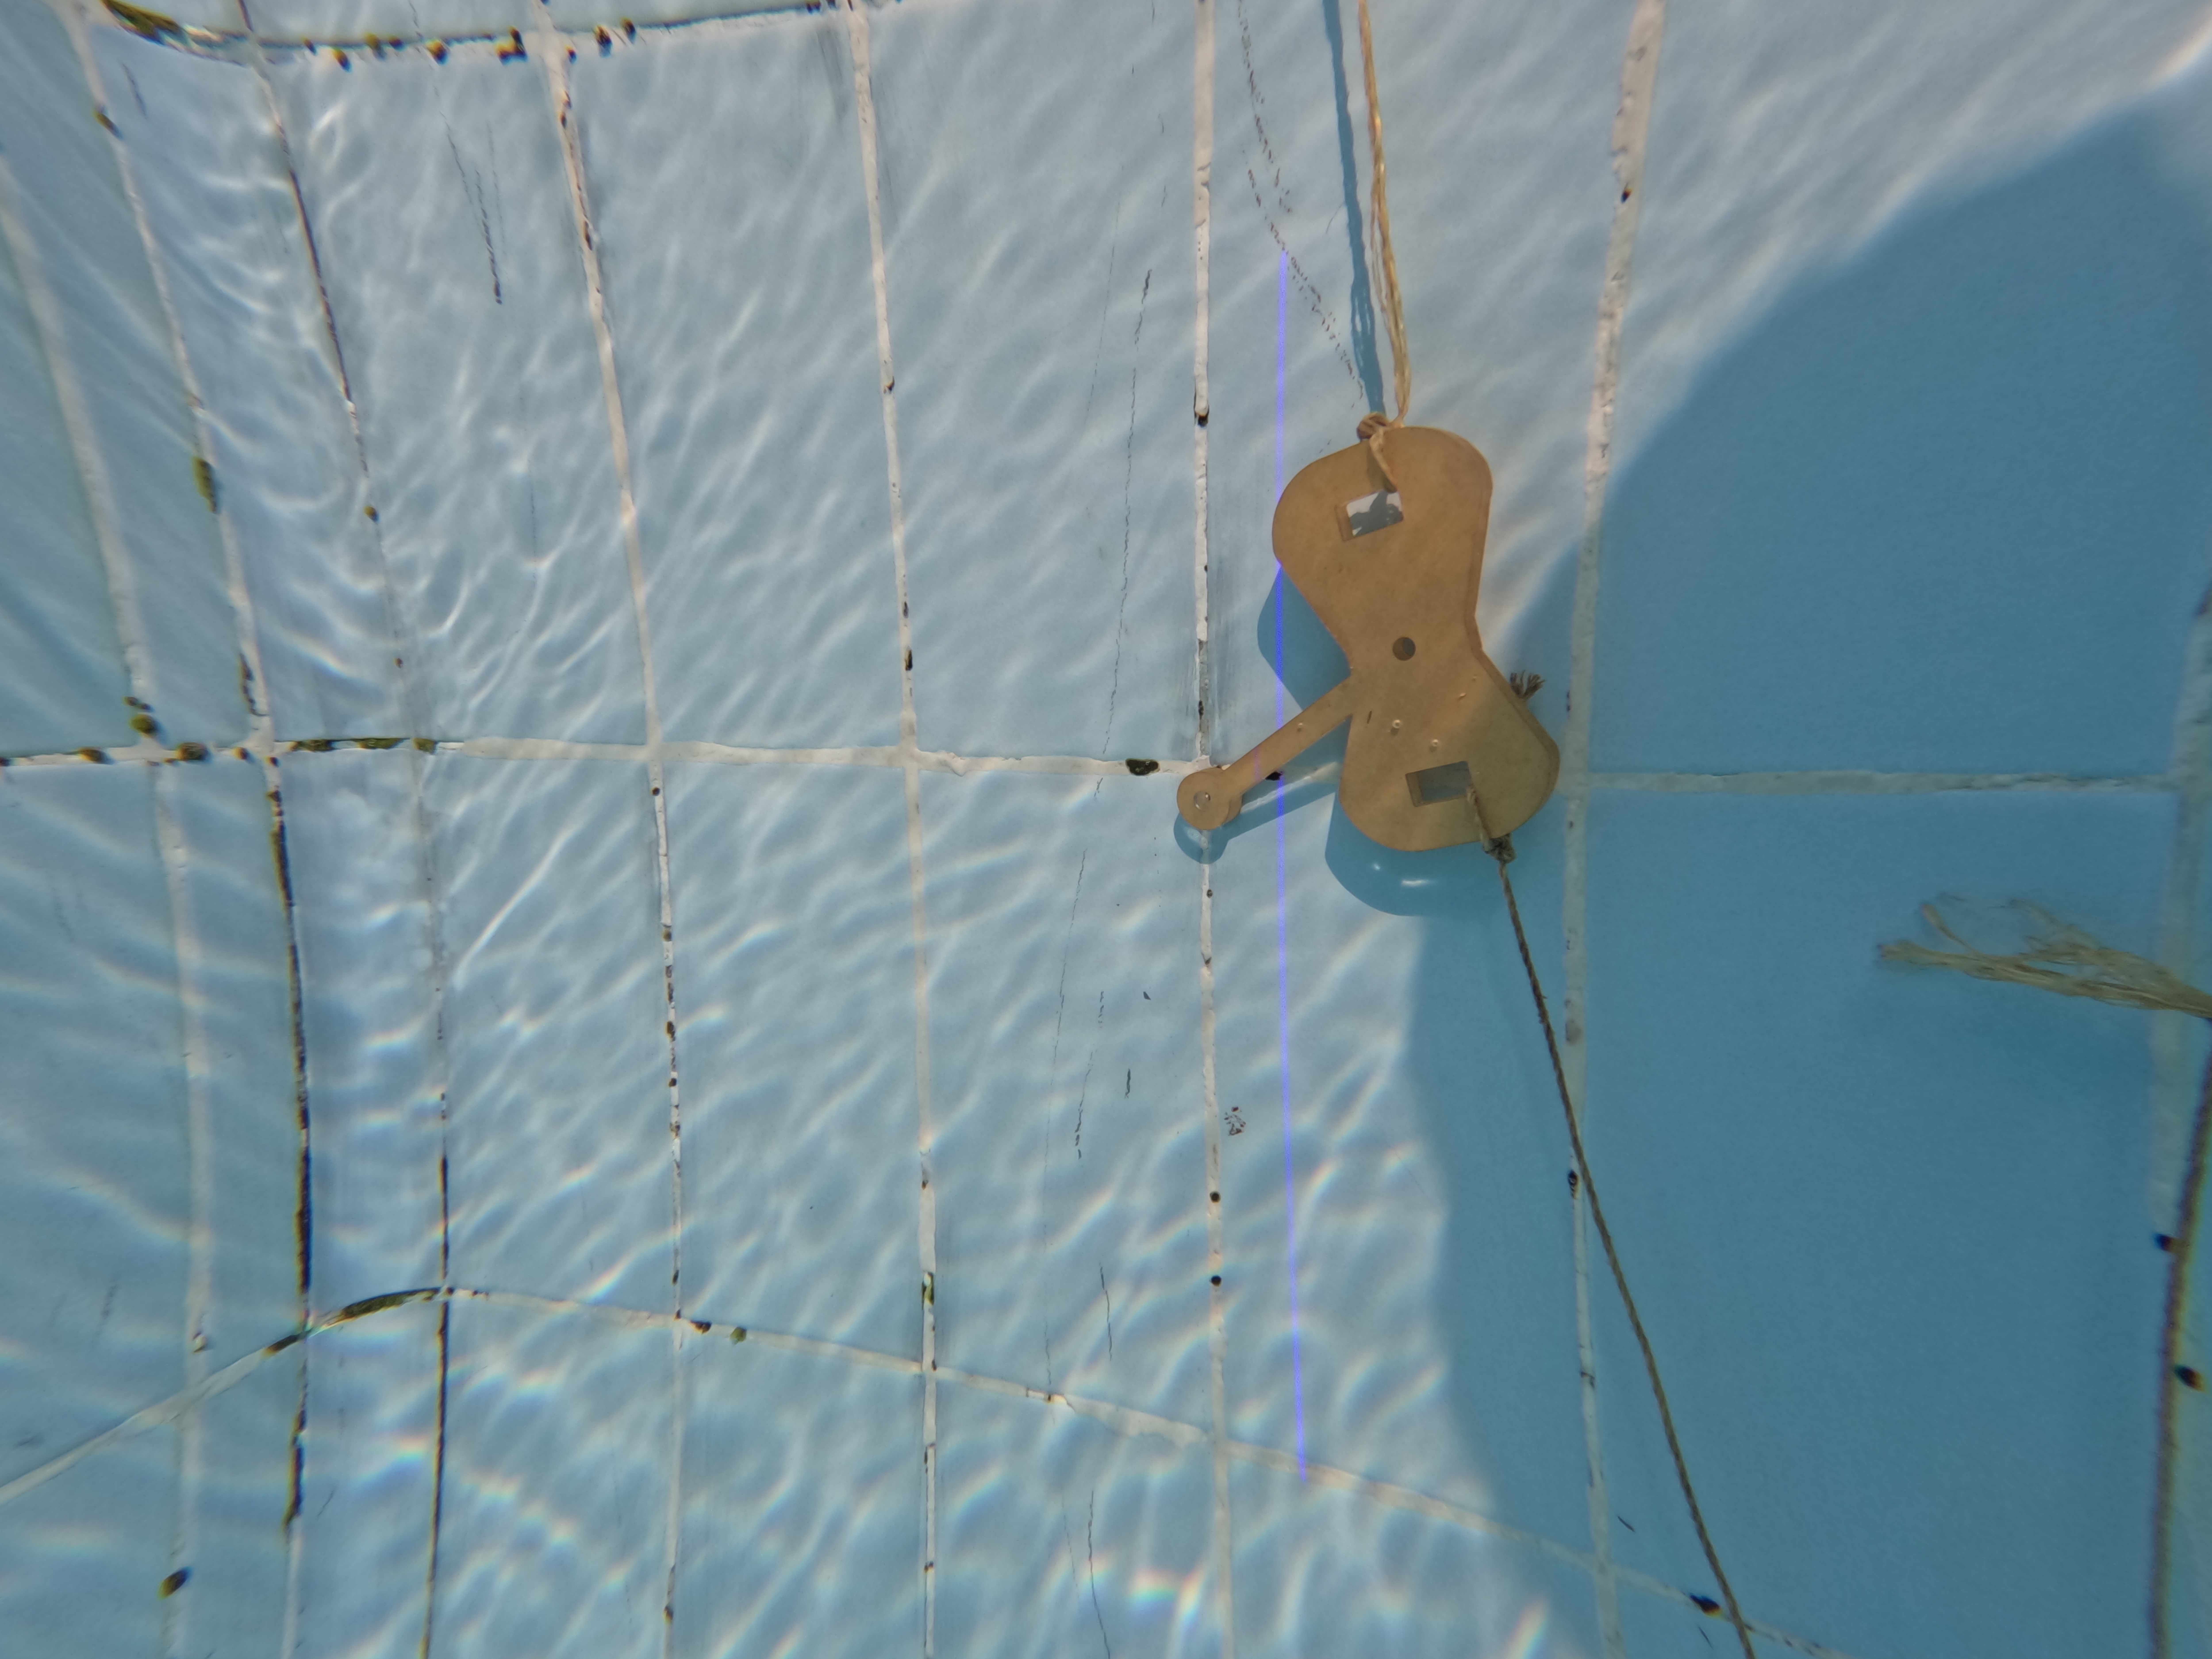

Supplement: Supplementary file 636 [file G0019650.pdf › Level_5_1/G0019650.pdf]

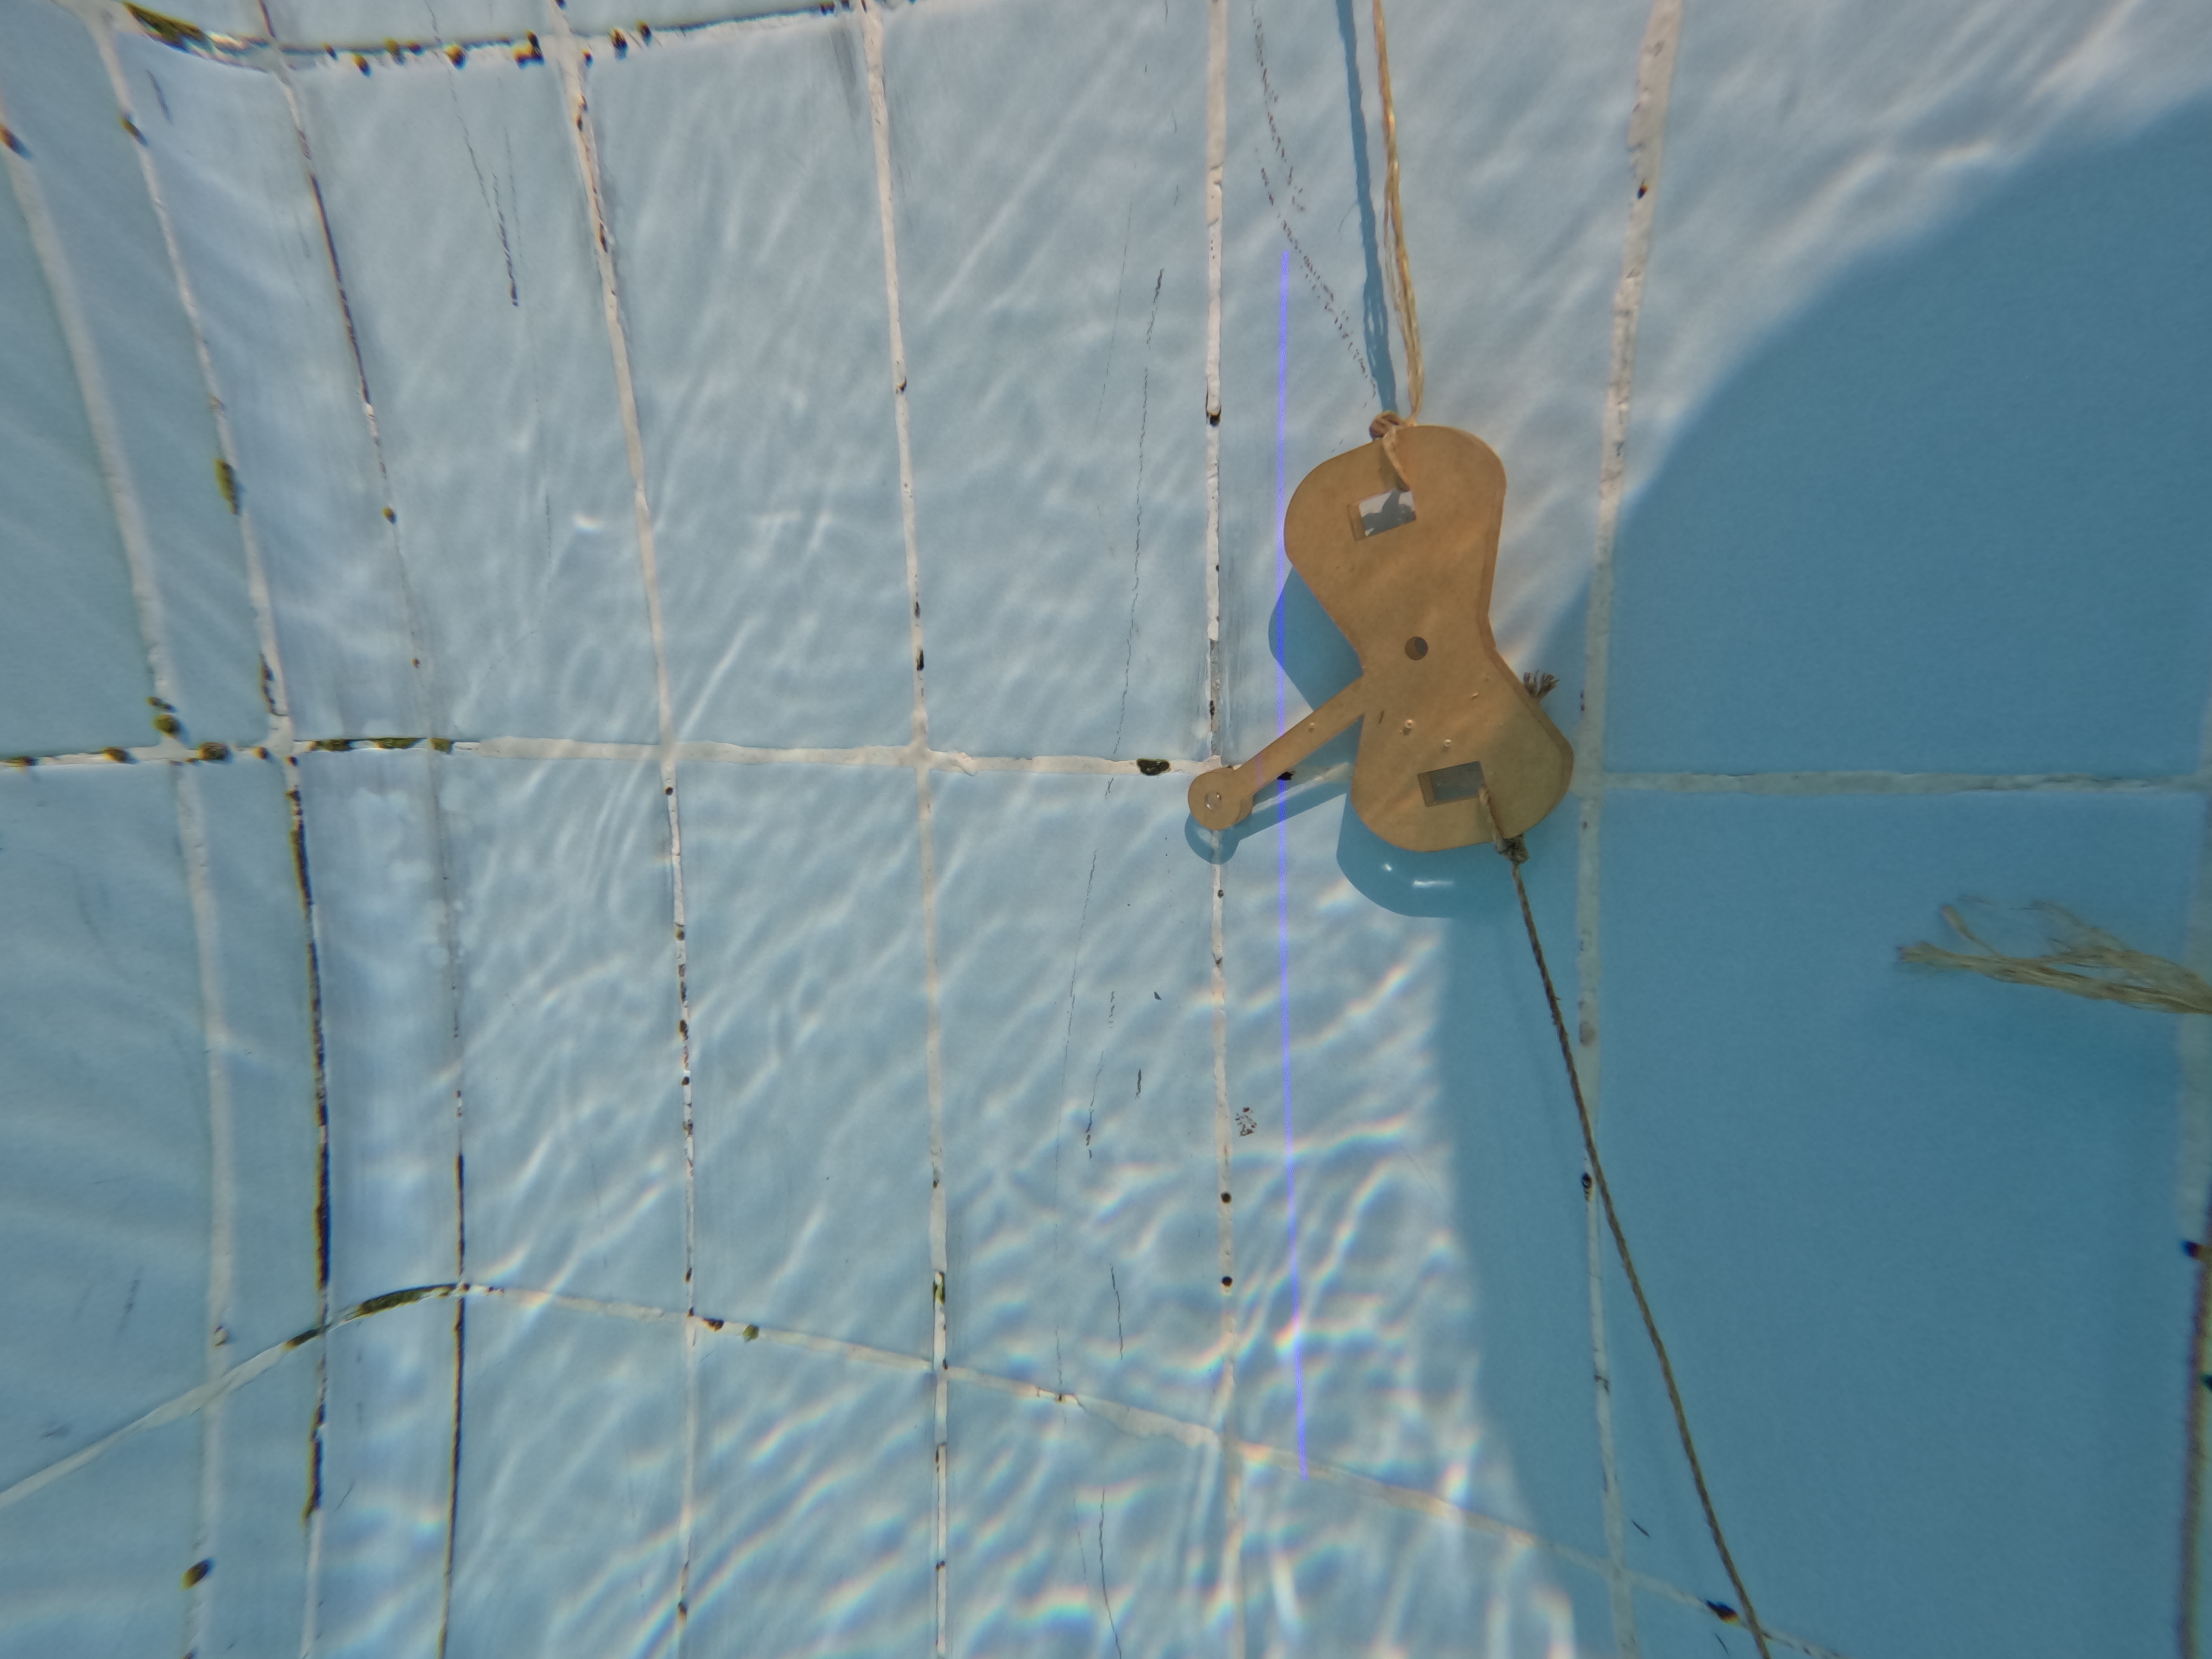

Supplement: Supplementary file 637 [file G0019651.pdf › Level_5_1/G0019651.pdf]

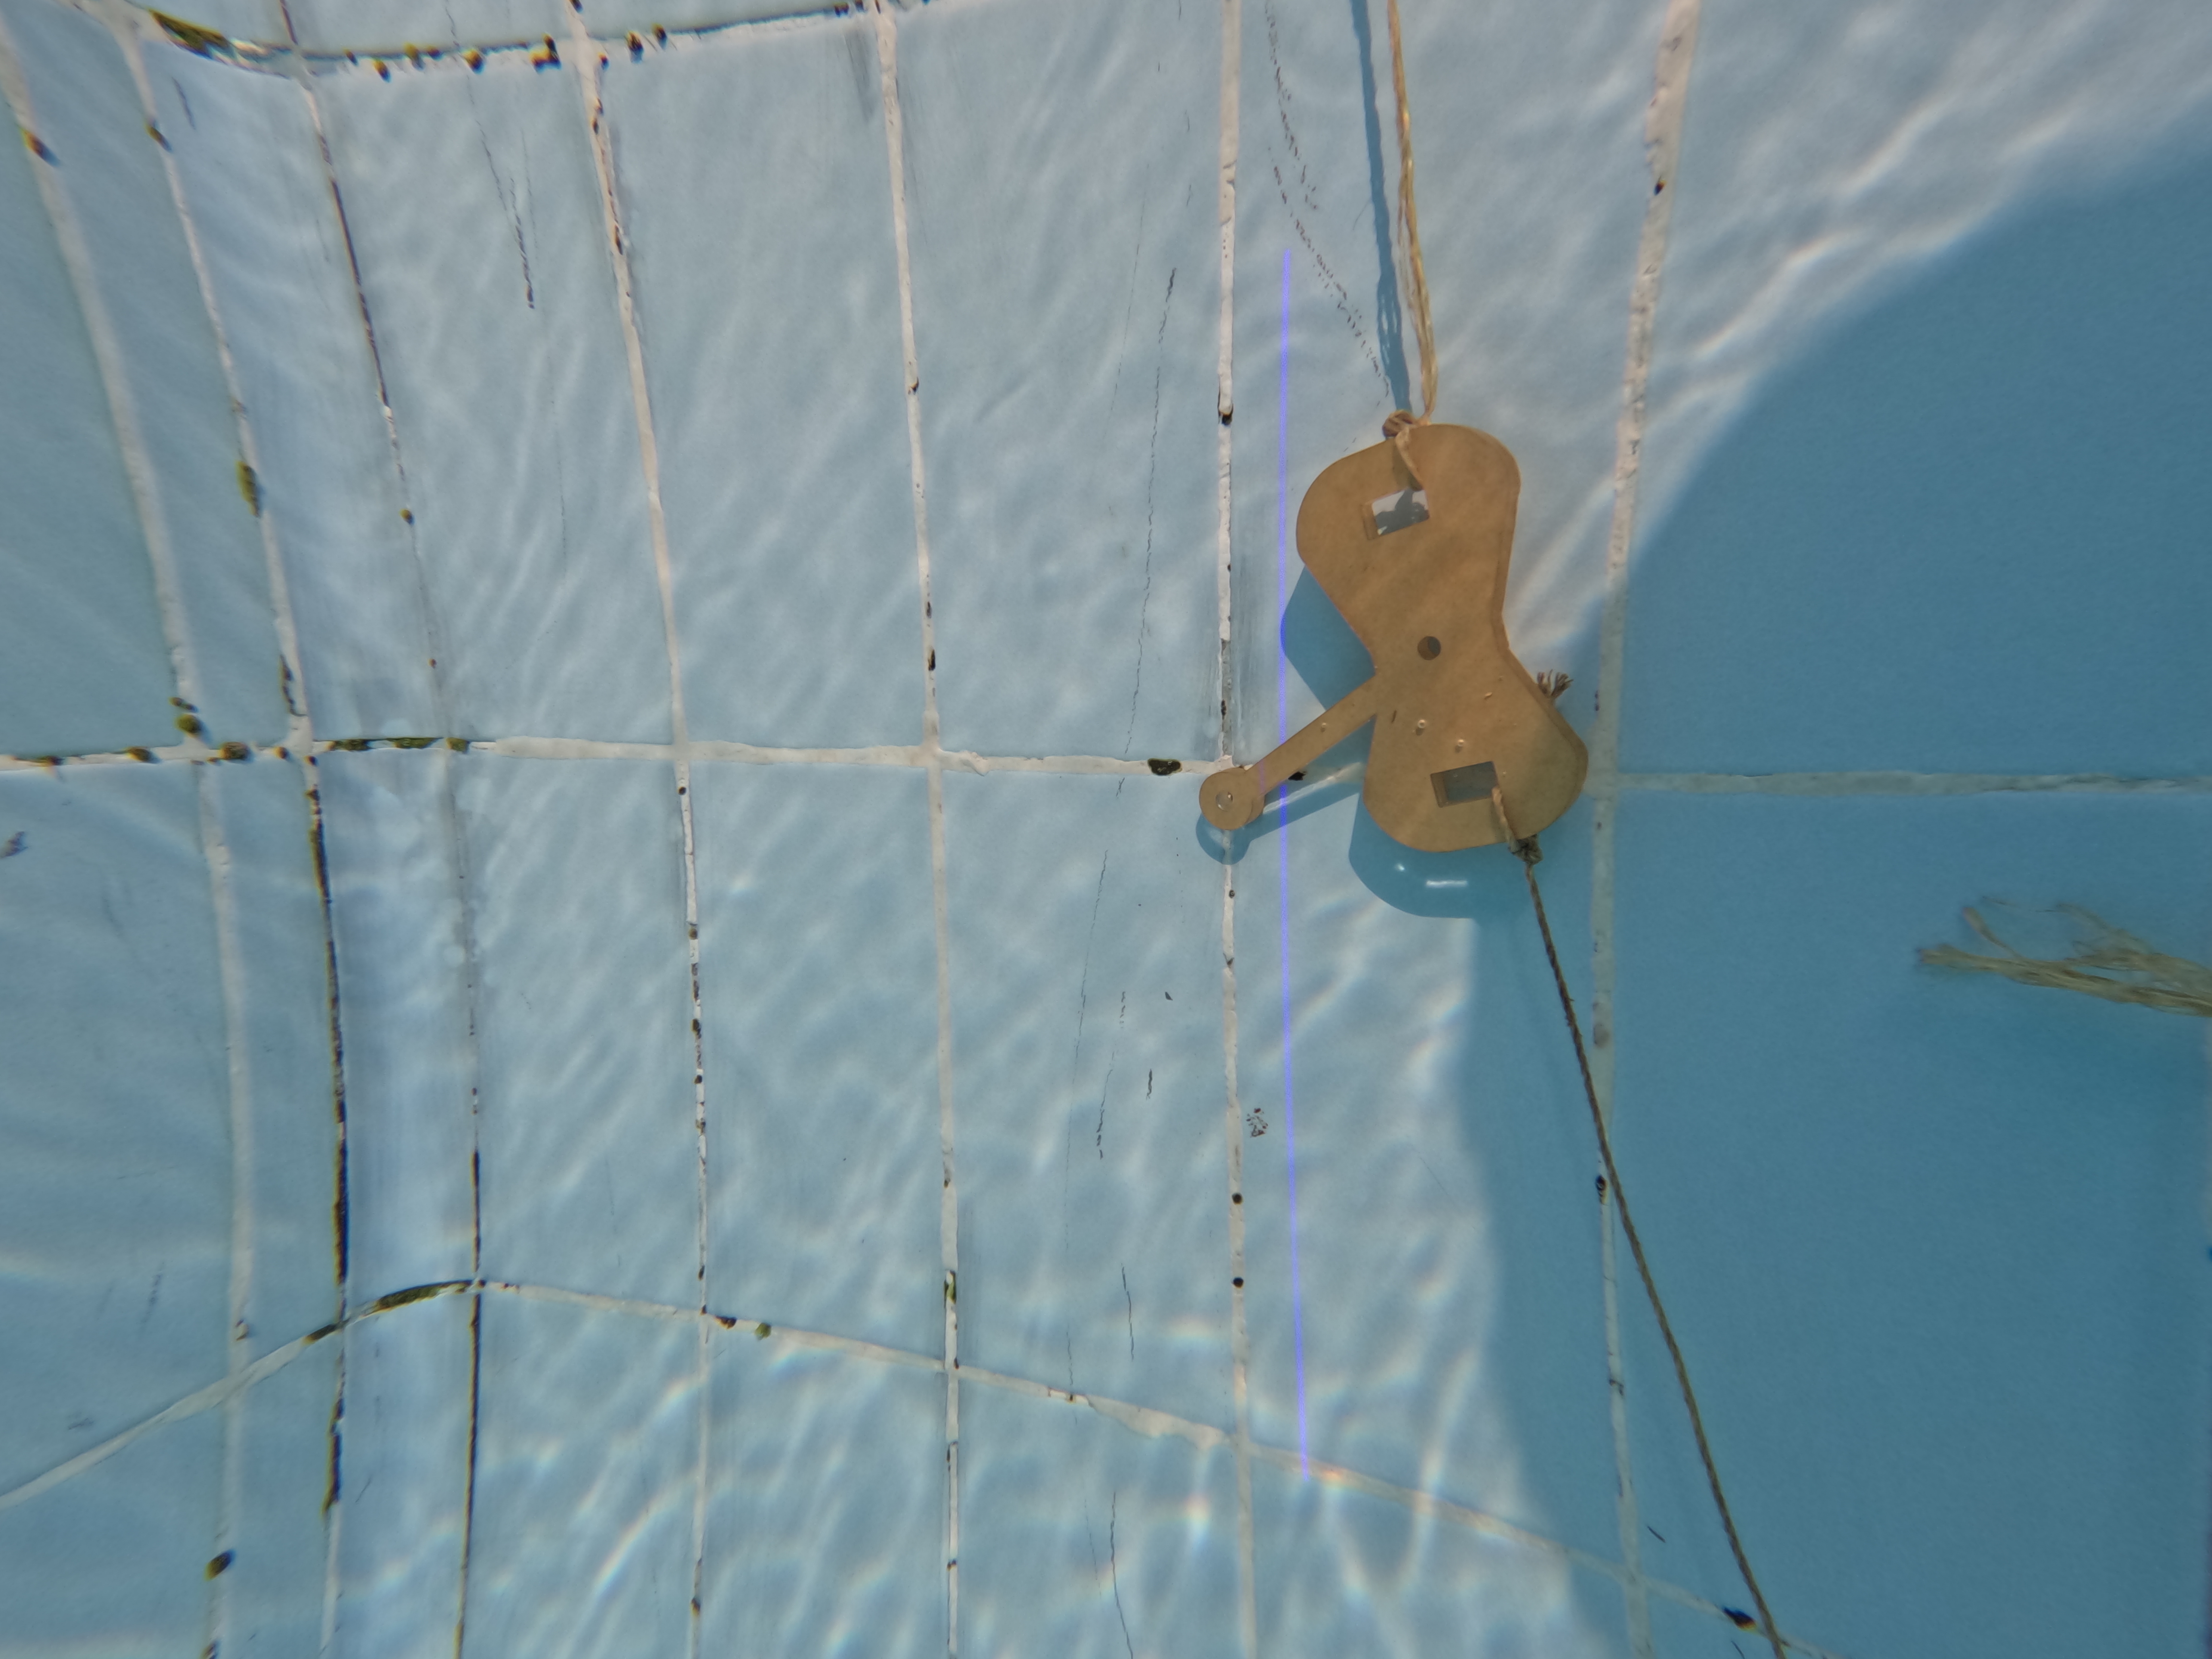

Supplement: Supplementary file 638 [file G0019652.pdf › Level_5_1/G0019652.pdf]

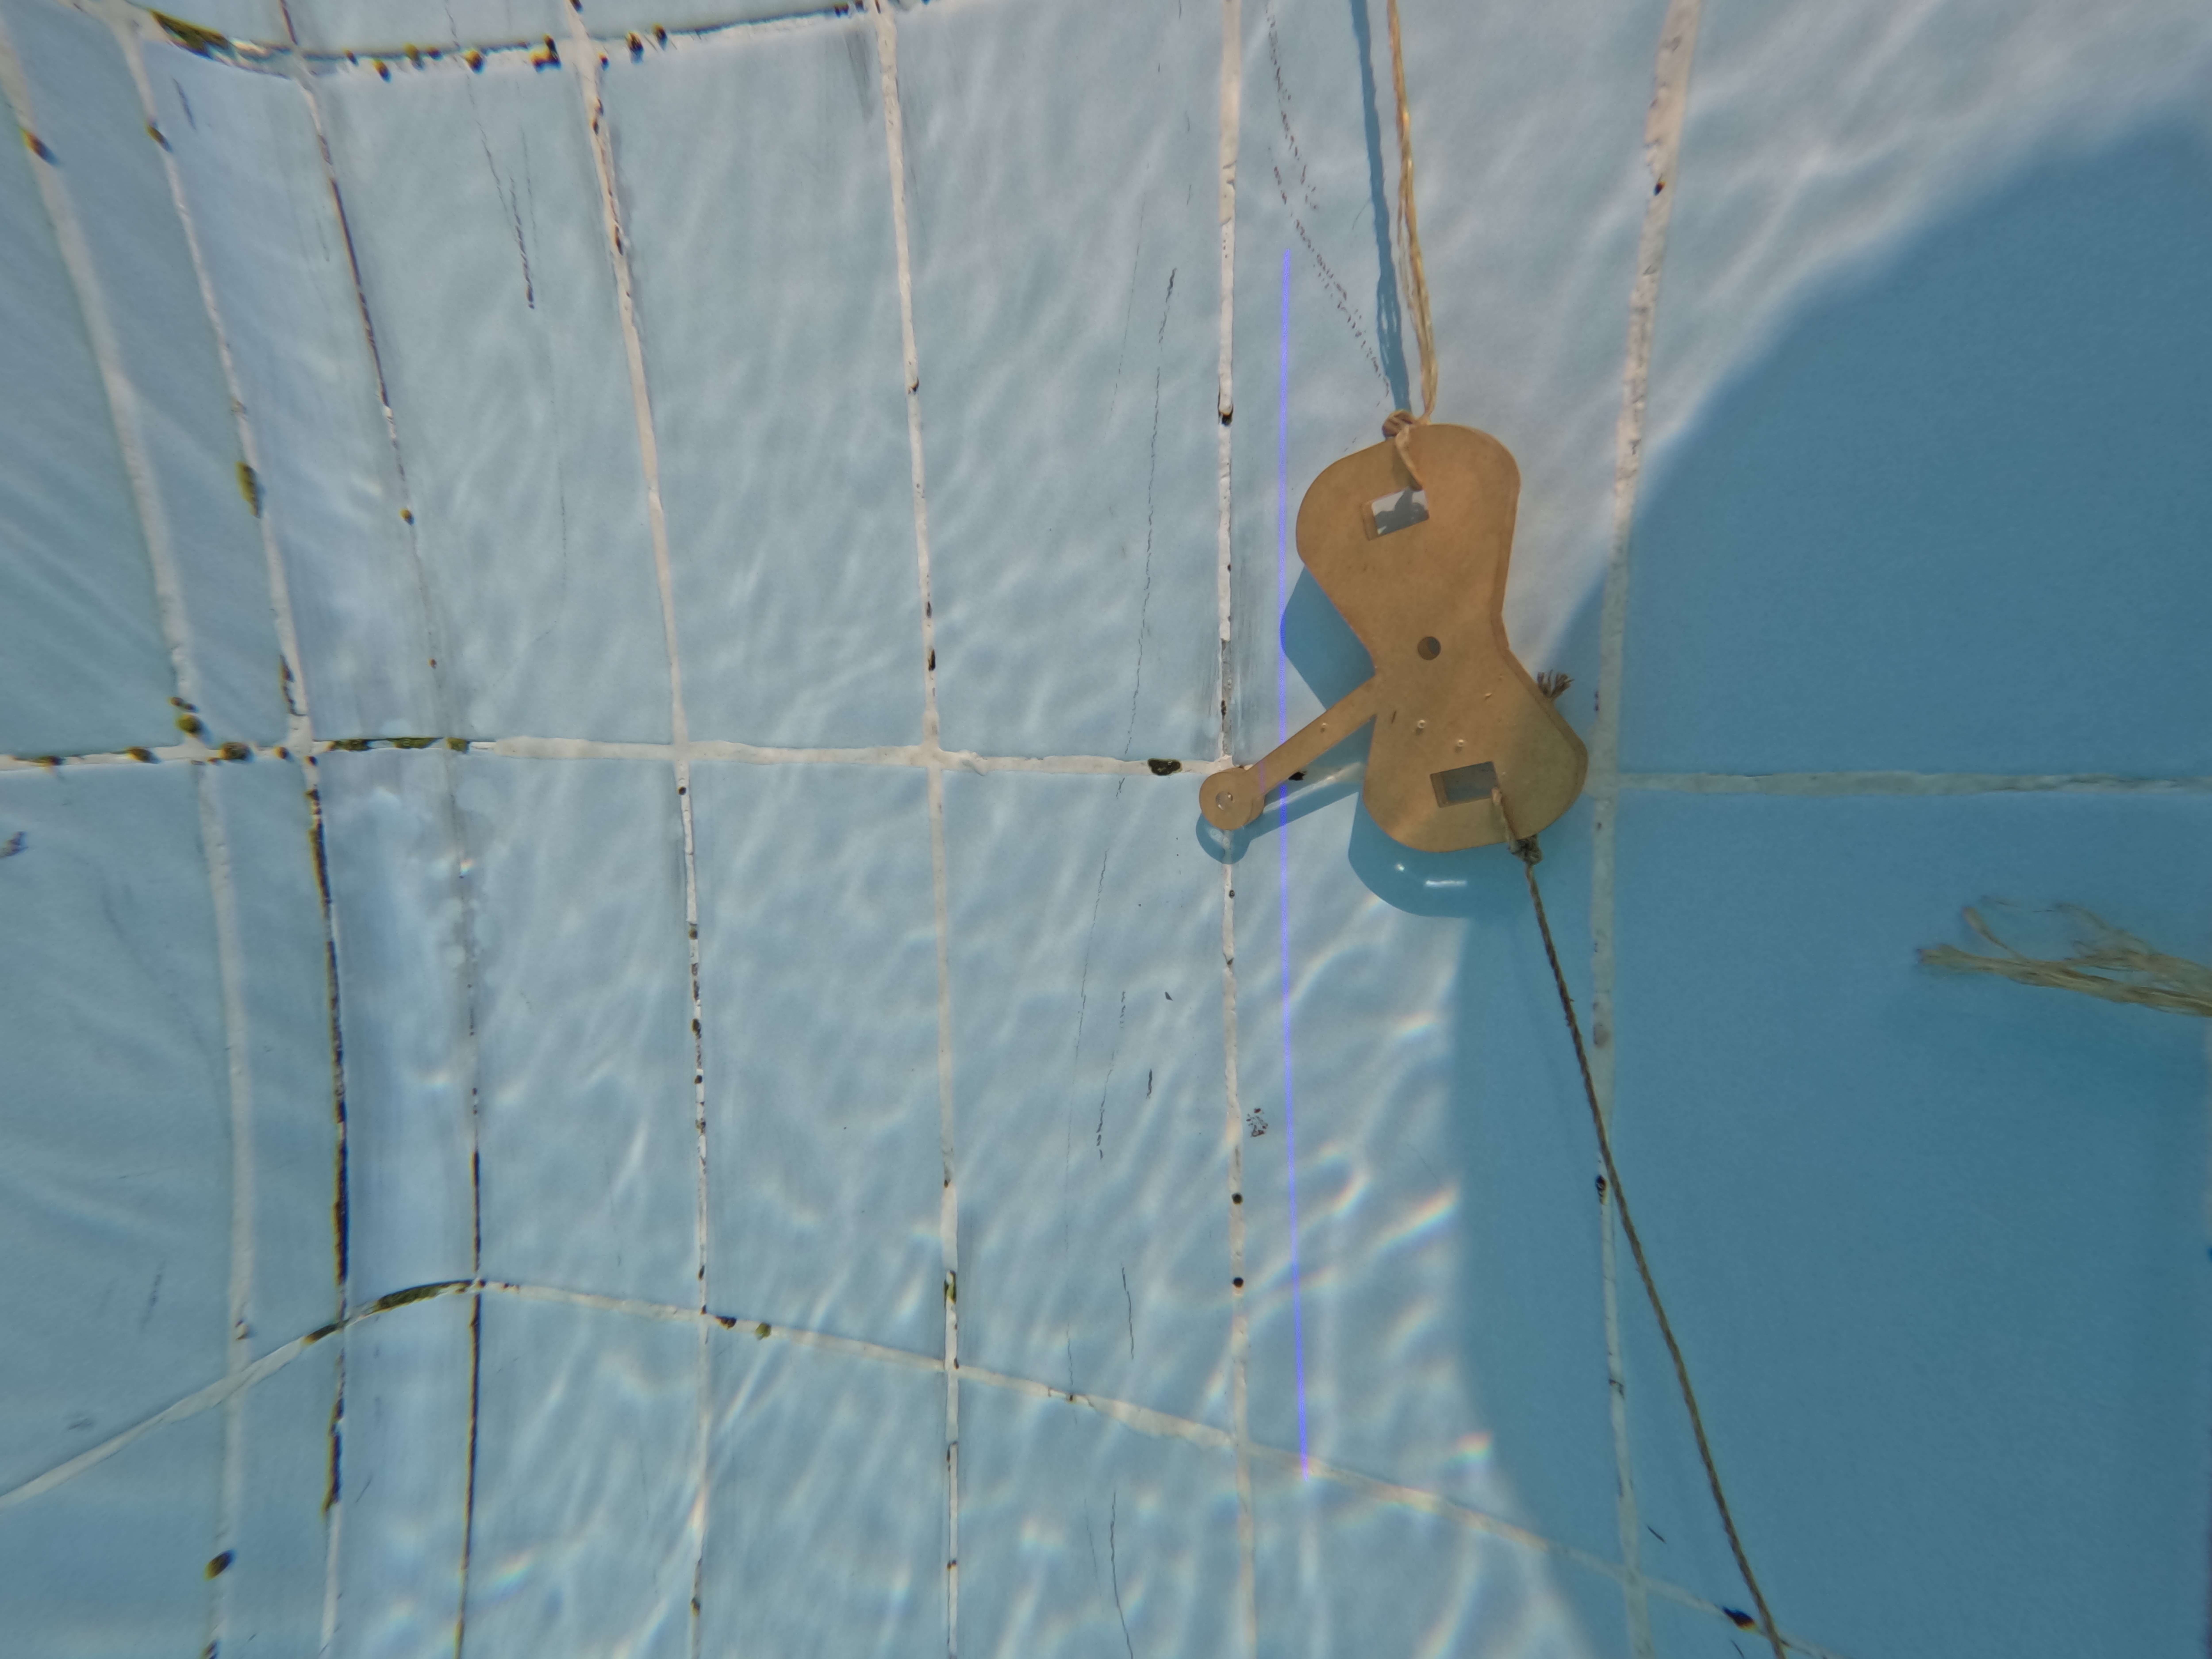

Supplement: Supplementary file 639 [file G0019653.pdf › Level_5_1/G0019653.pdf]

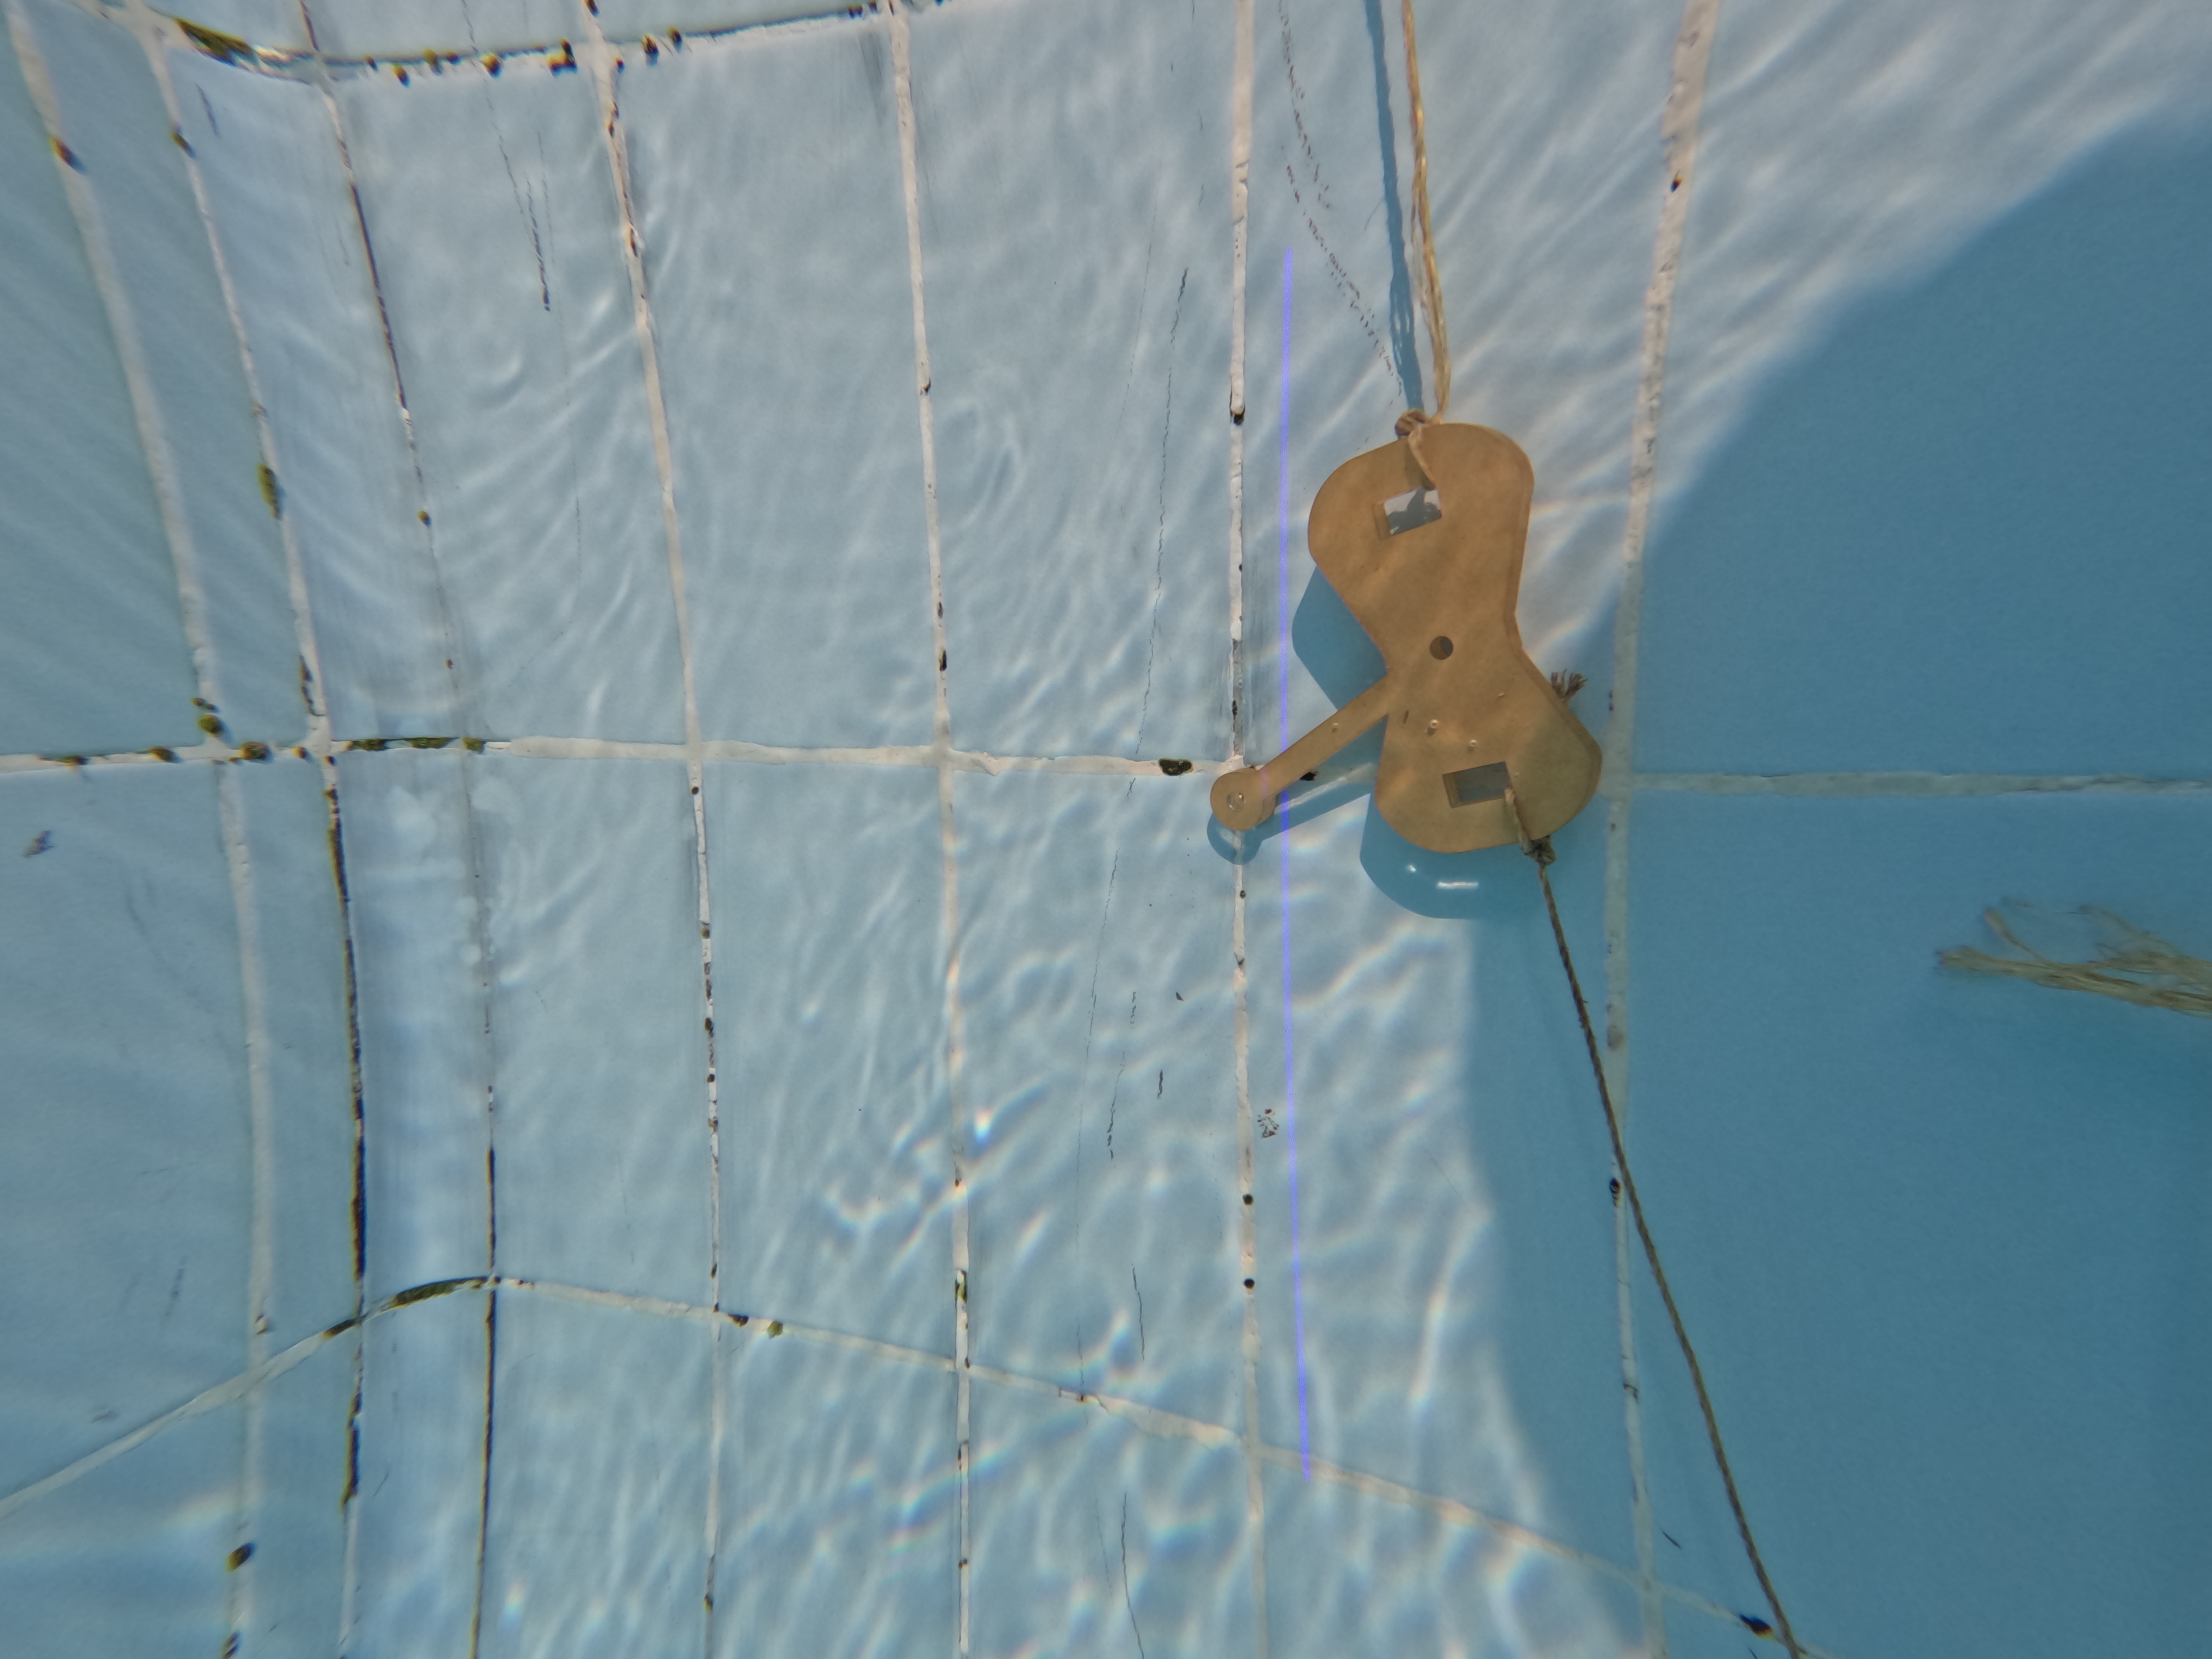

Supplement: Supplementary file 640 [file G0019654.pdf › Level_5_1/G0019654.pdf]

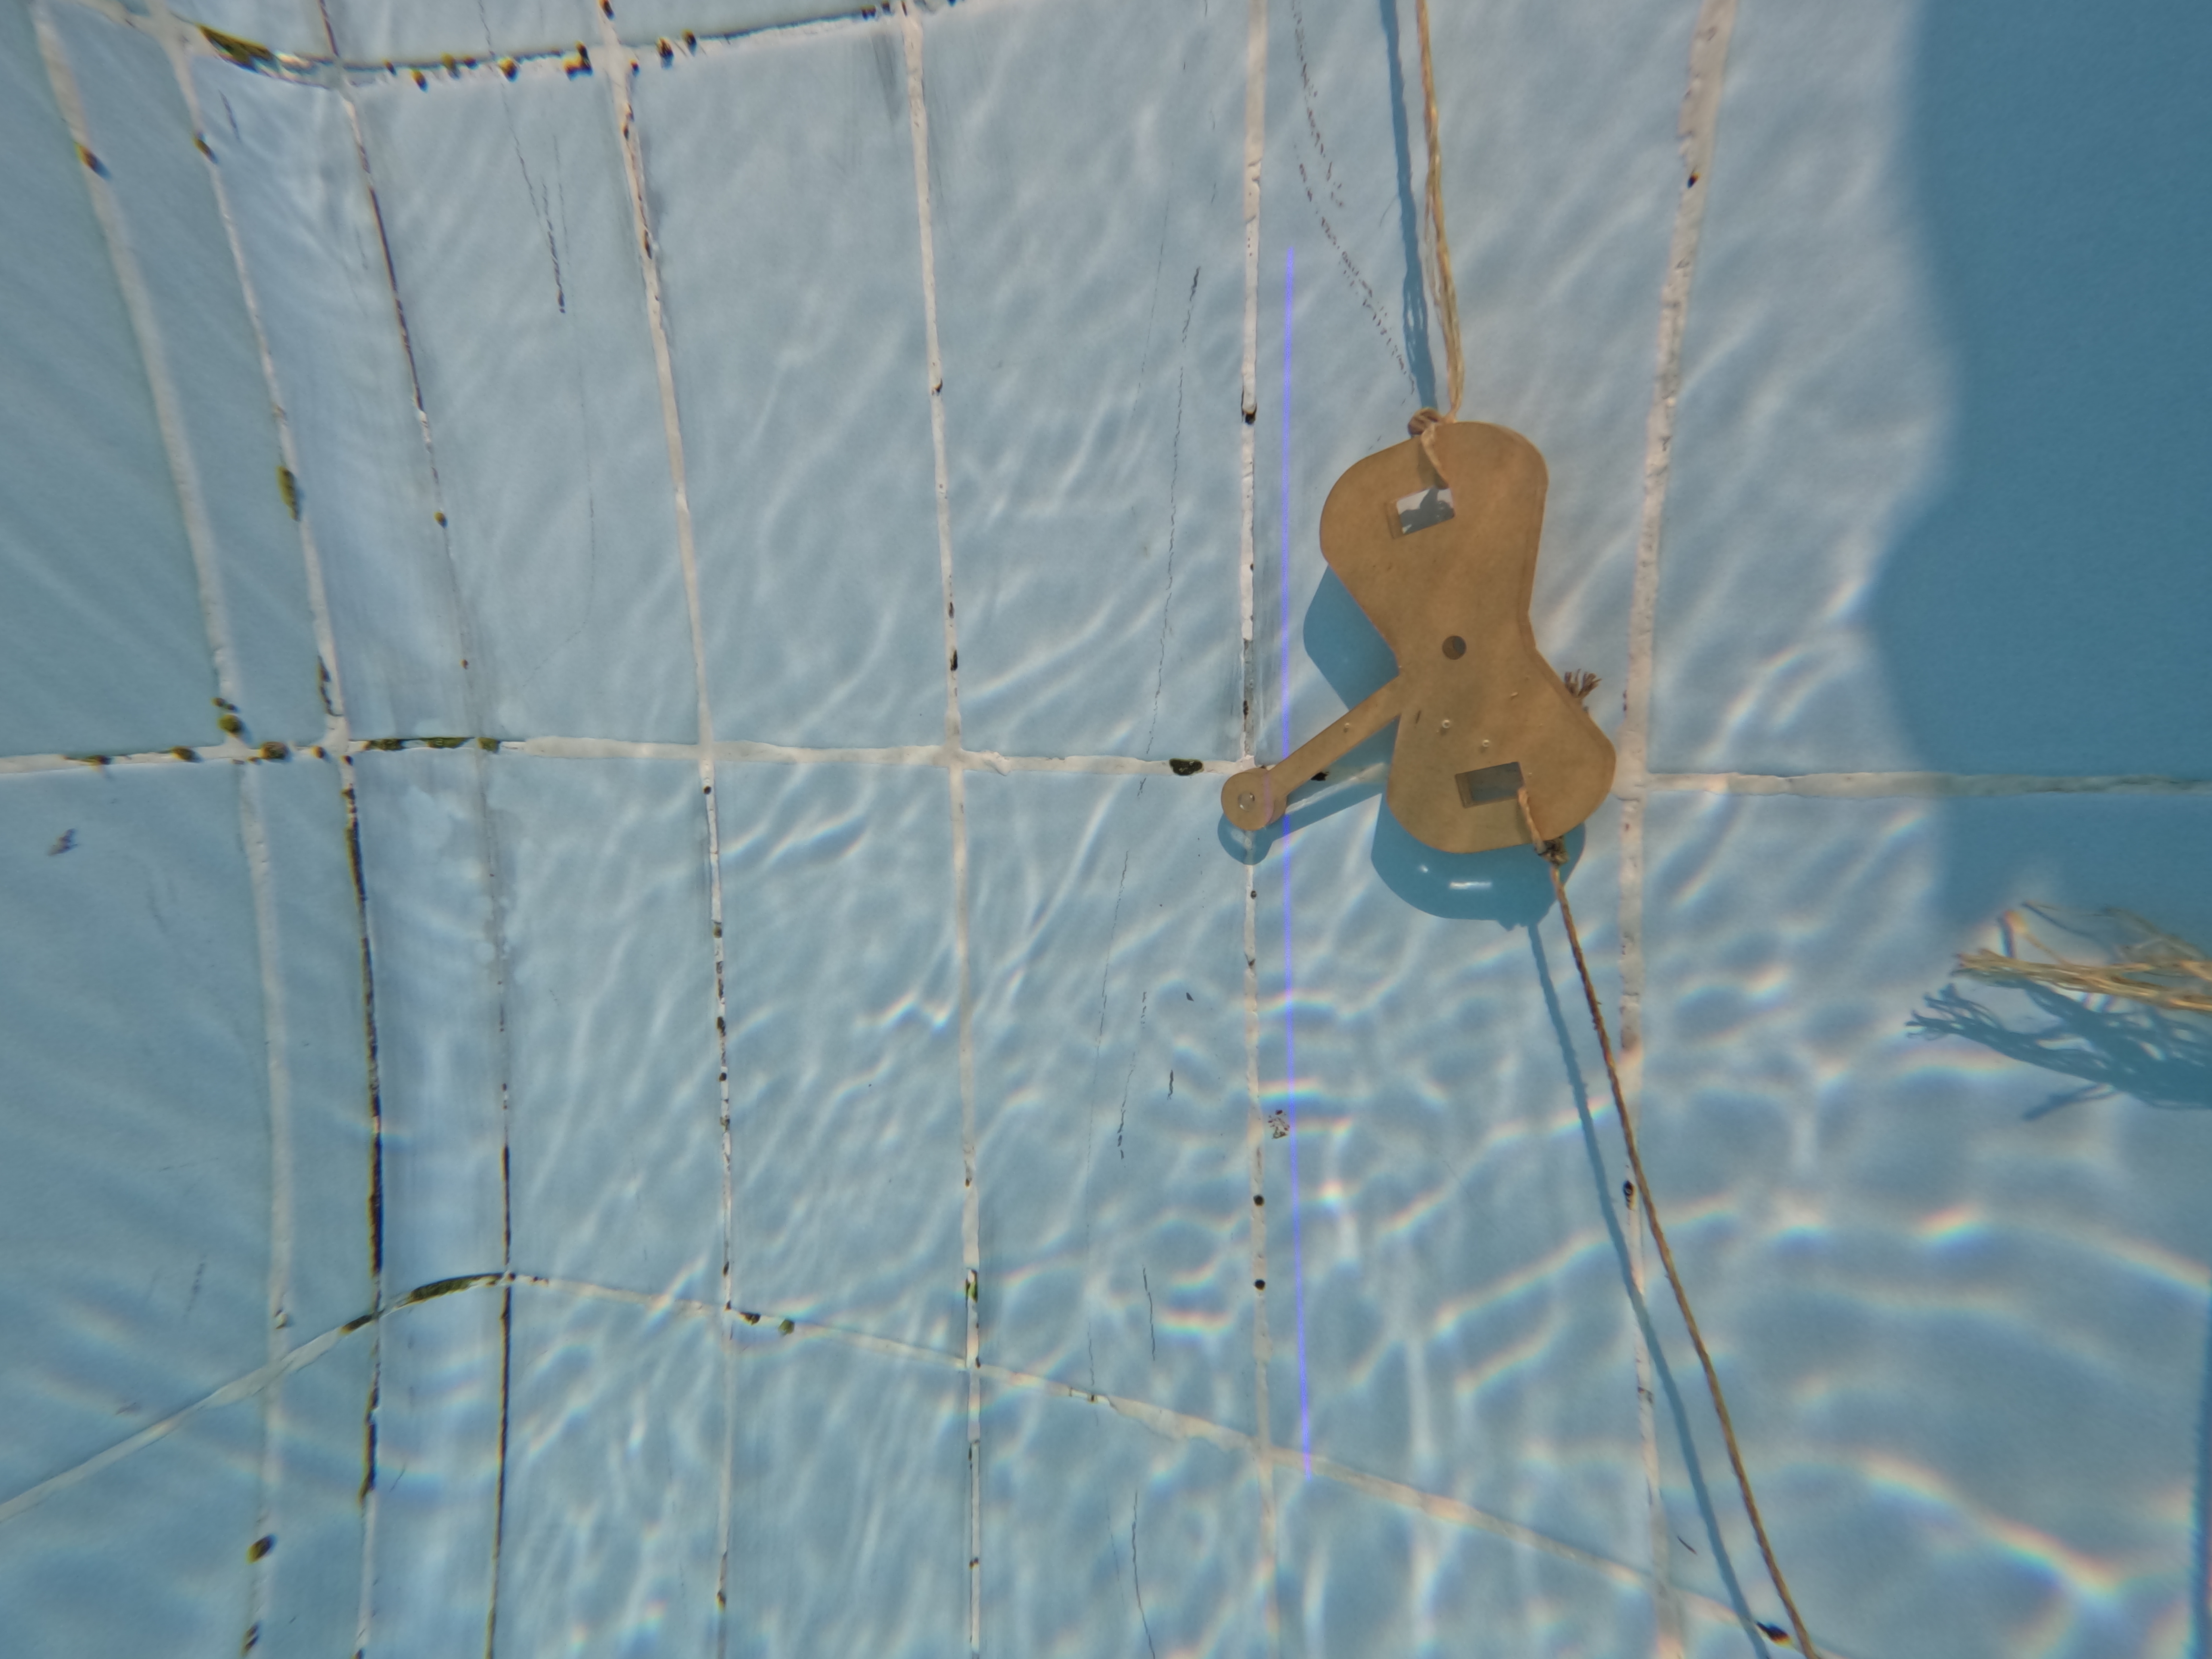

Supplement: Supplementary file 641 [file G0019655.pdf › Level_5_1/G0019655.pdf]

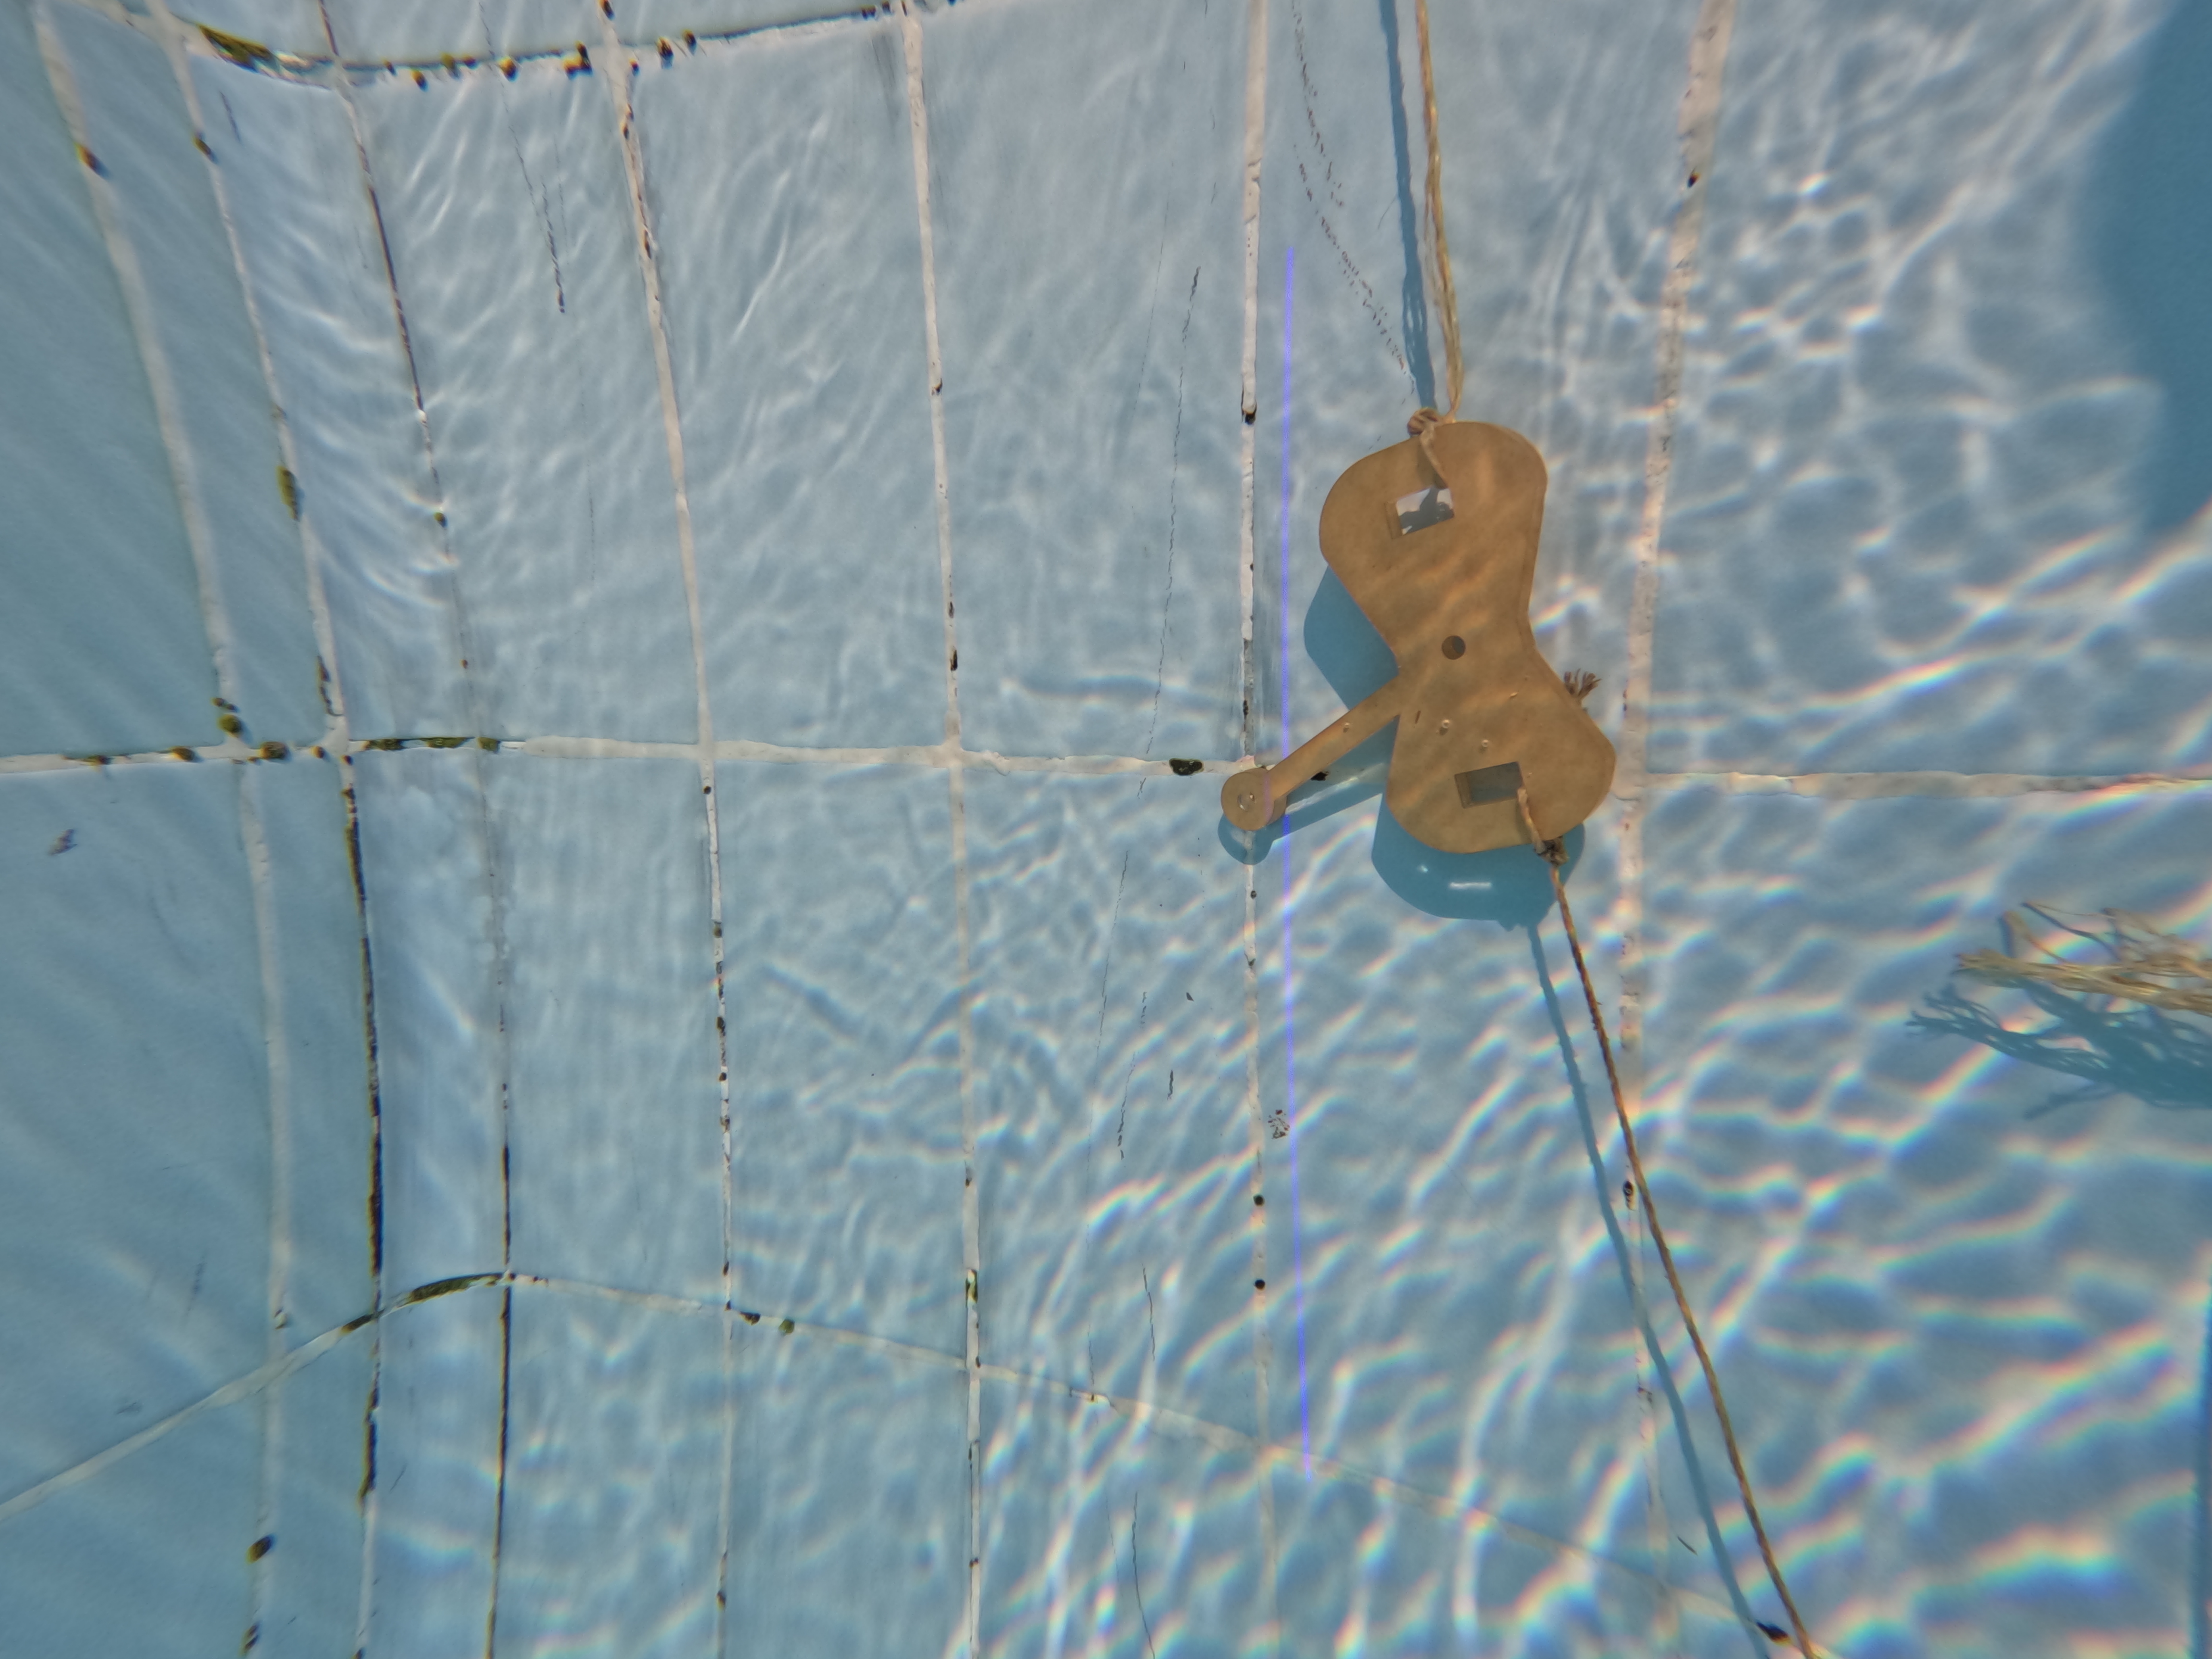

Supplement: Supplementary file 642 [file G0019656.pdf › Level_5_1/G0019656.pdf]

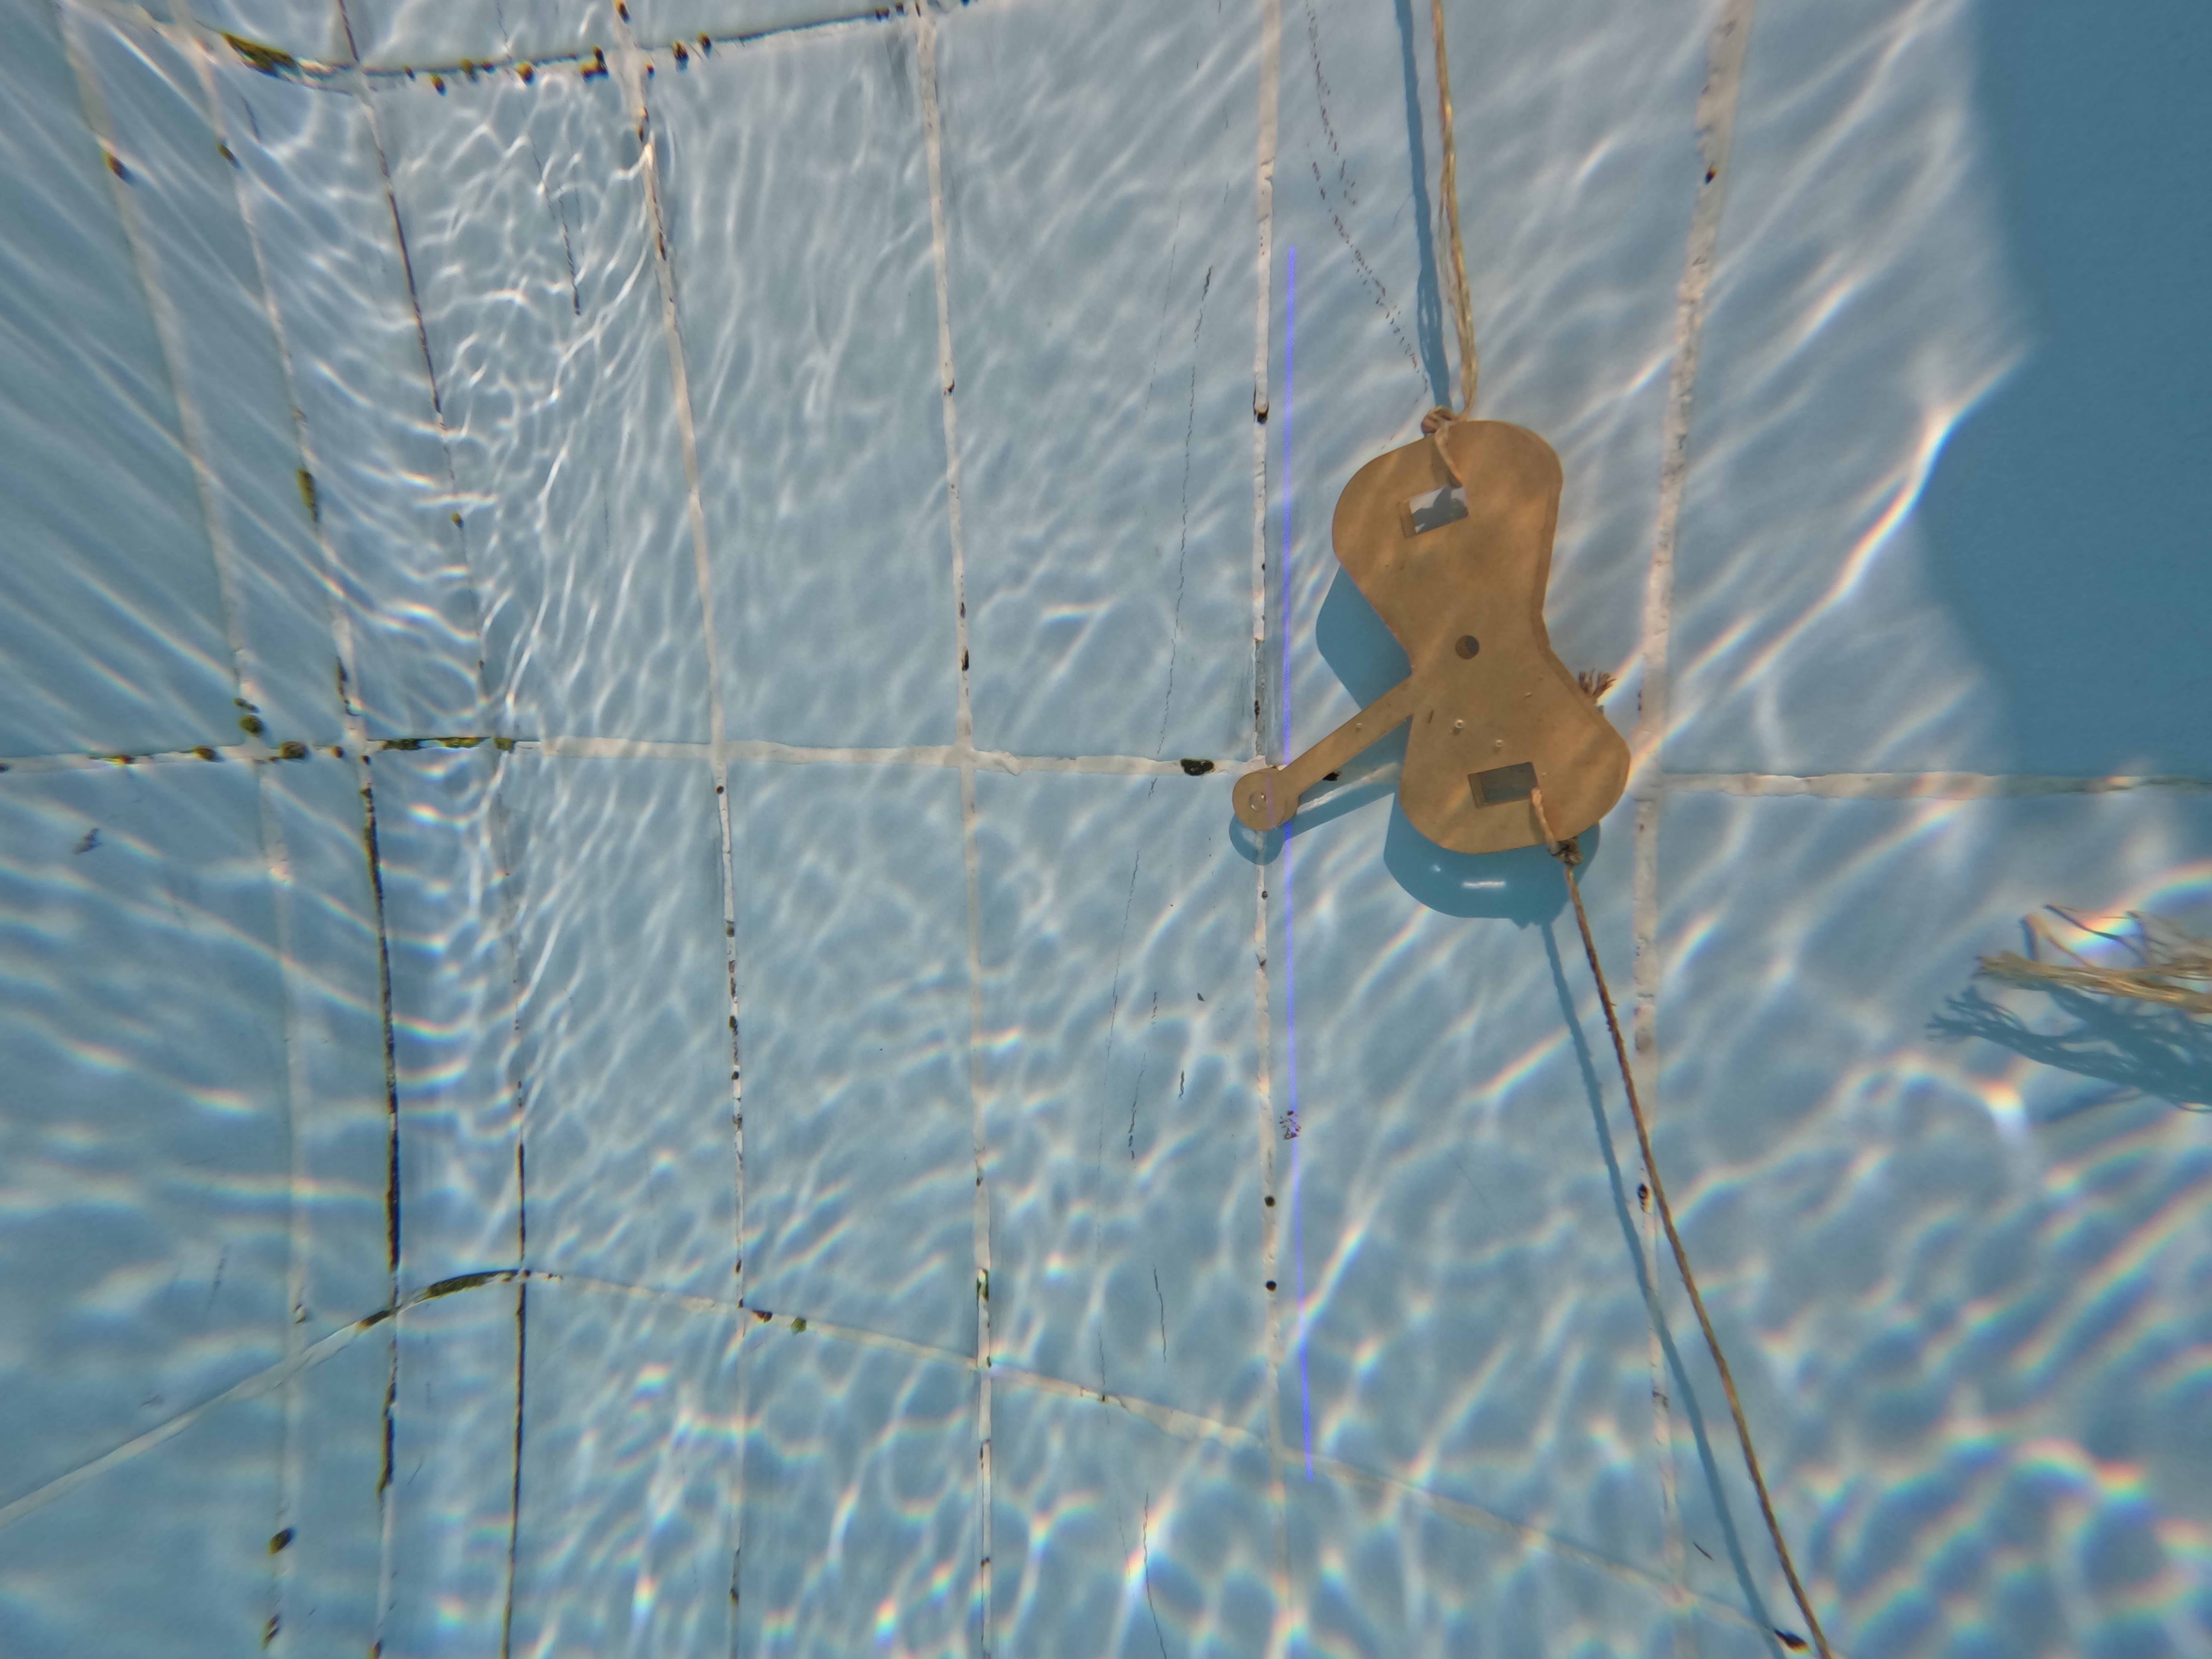

Supplement: Supplementary file 643 [file G0019657.pdf › Level_5_1/G0019657.pdf]

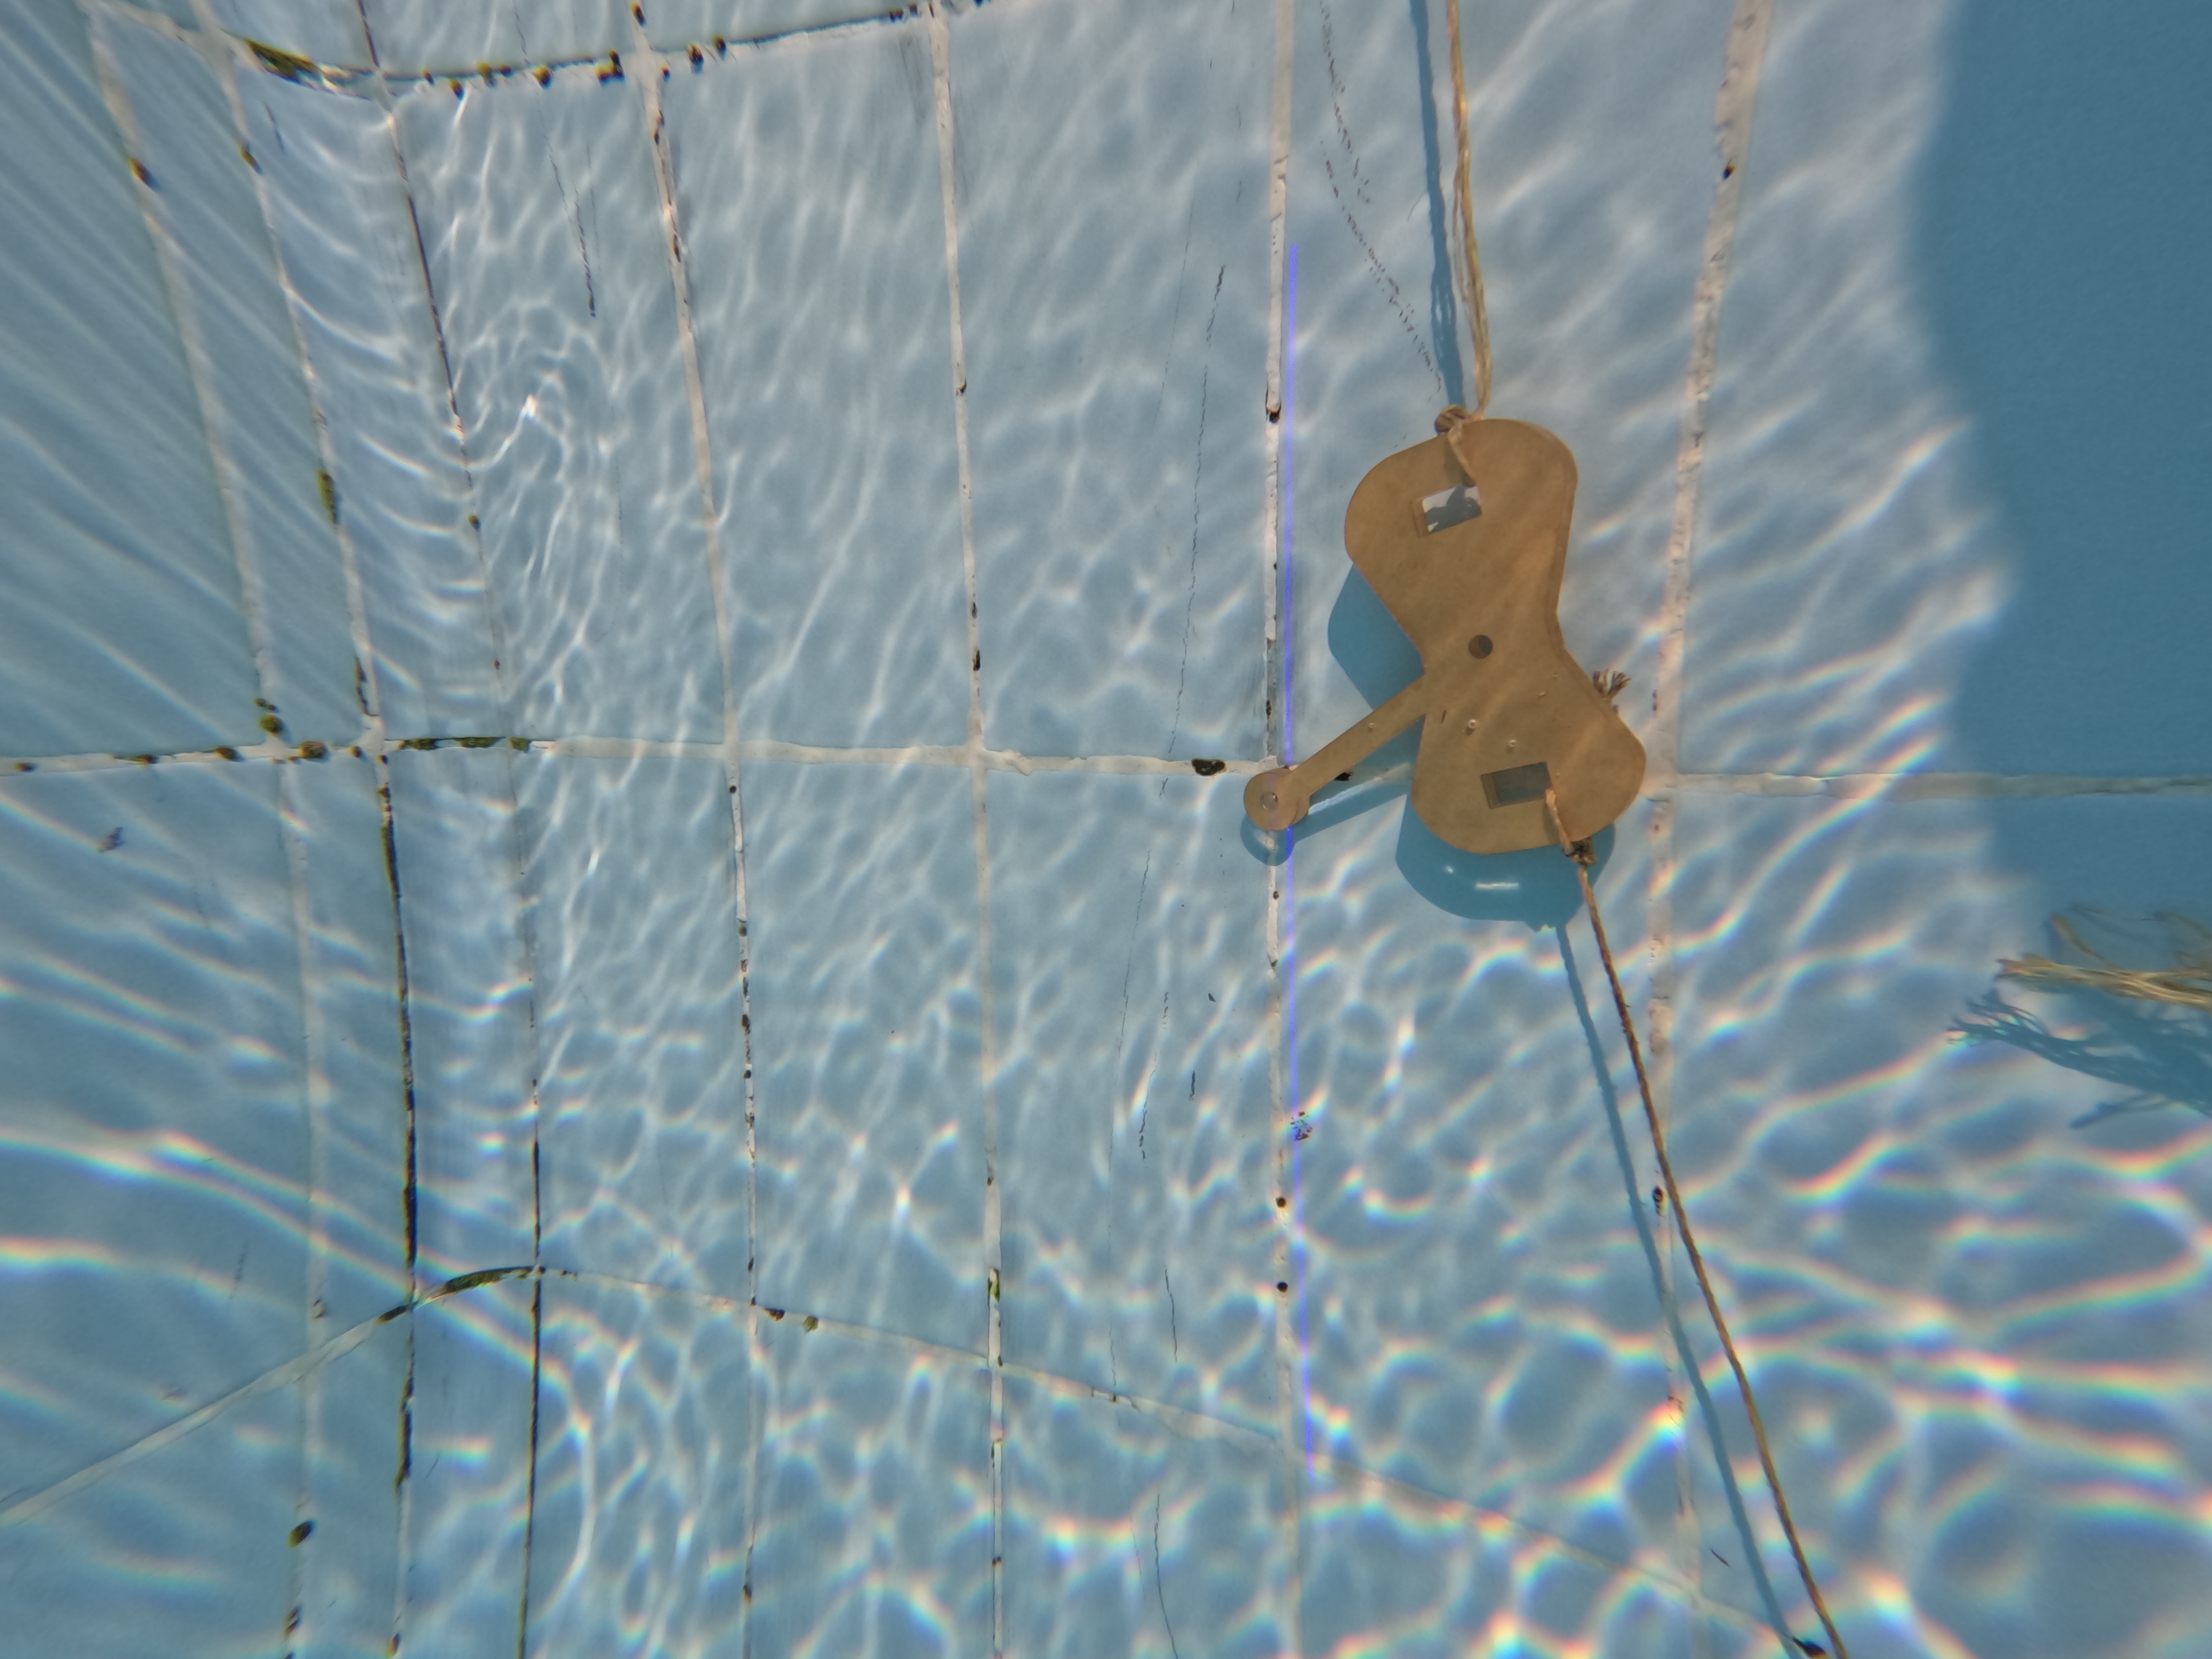

Supplement: Supplementary file 644 [file G0019658.pdf › Level_5_1/G0019658.pdf]

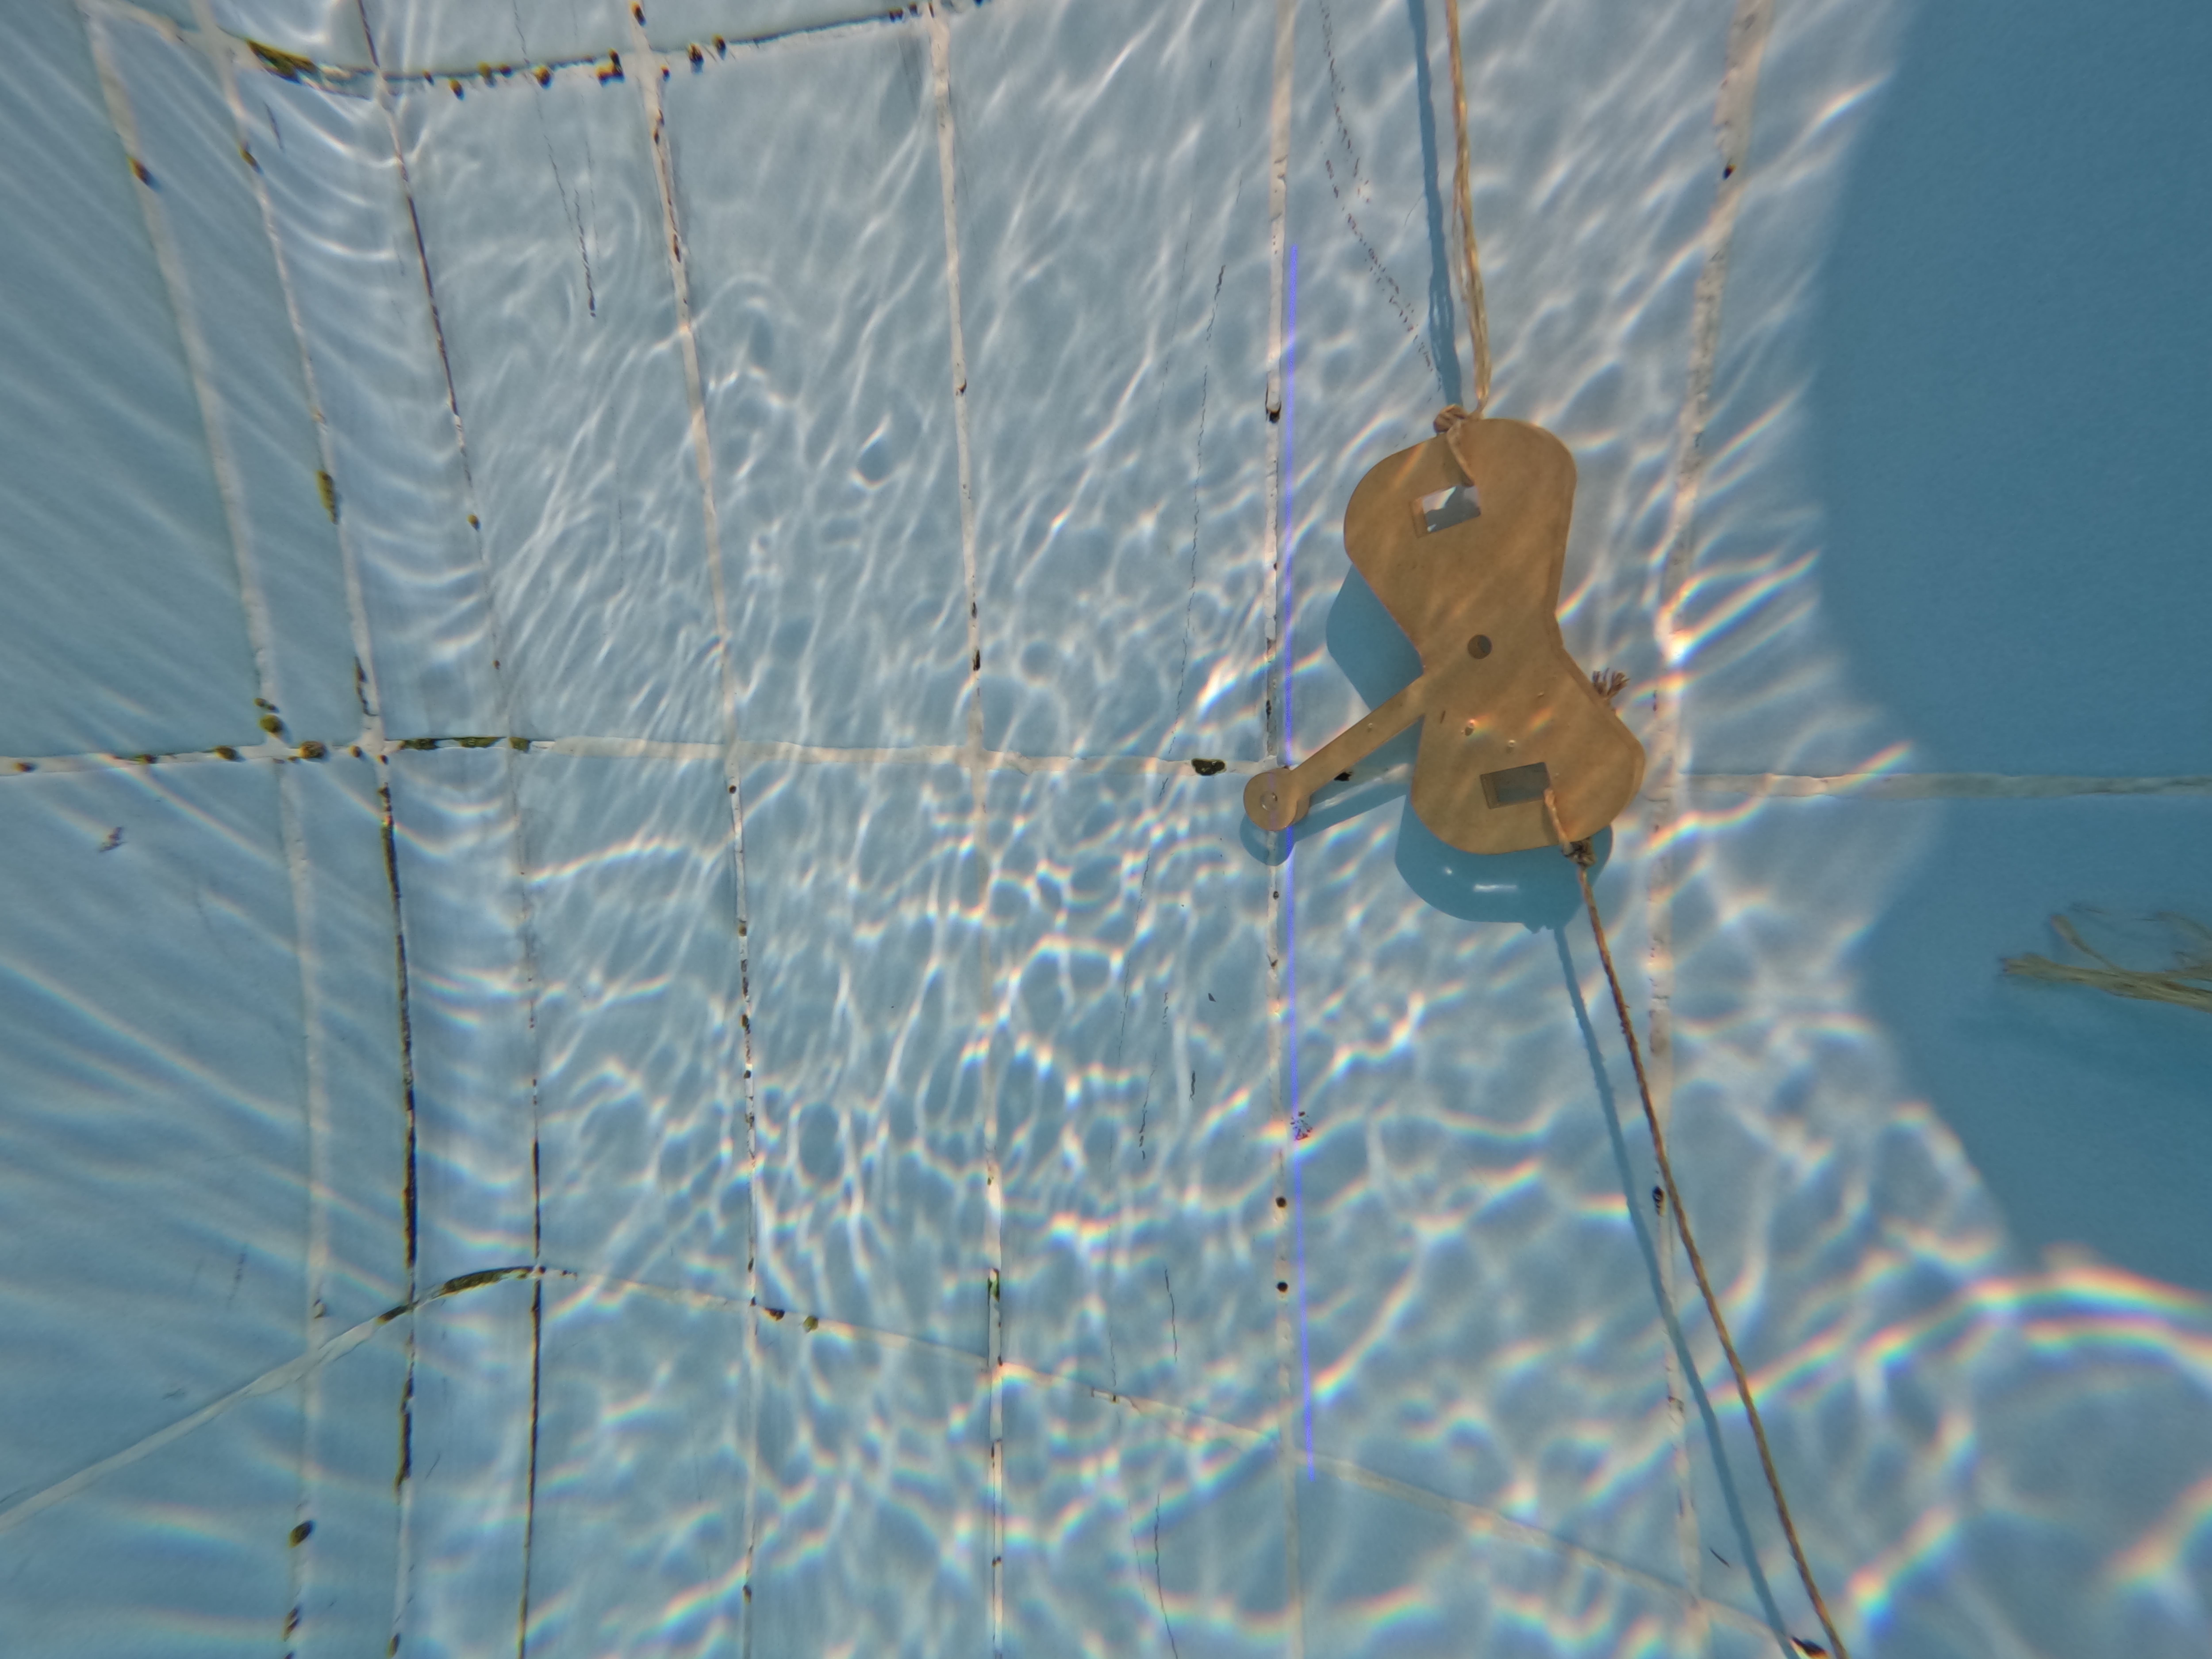

Supplement: Supplementary file 645 [file G0019659.pdf › Level_5_1/G0019659.pdf]

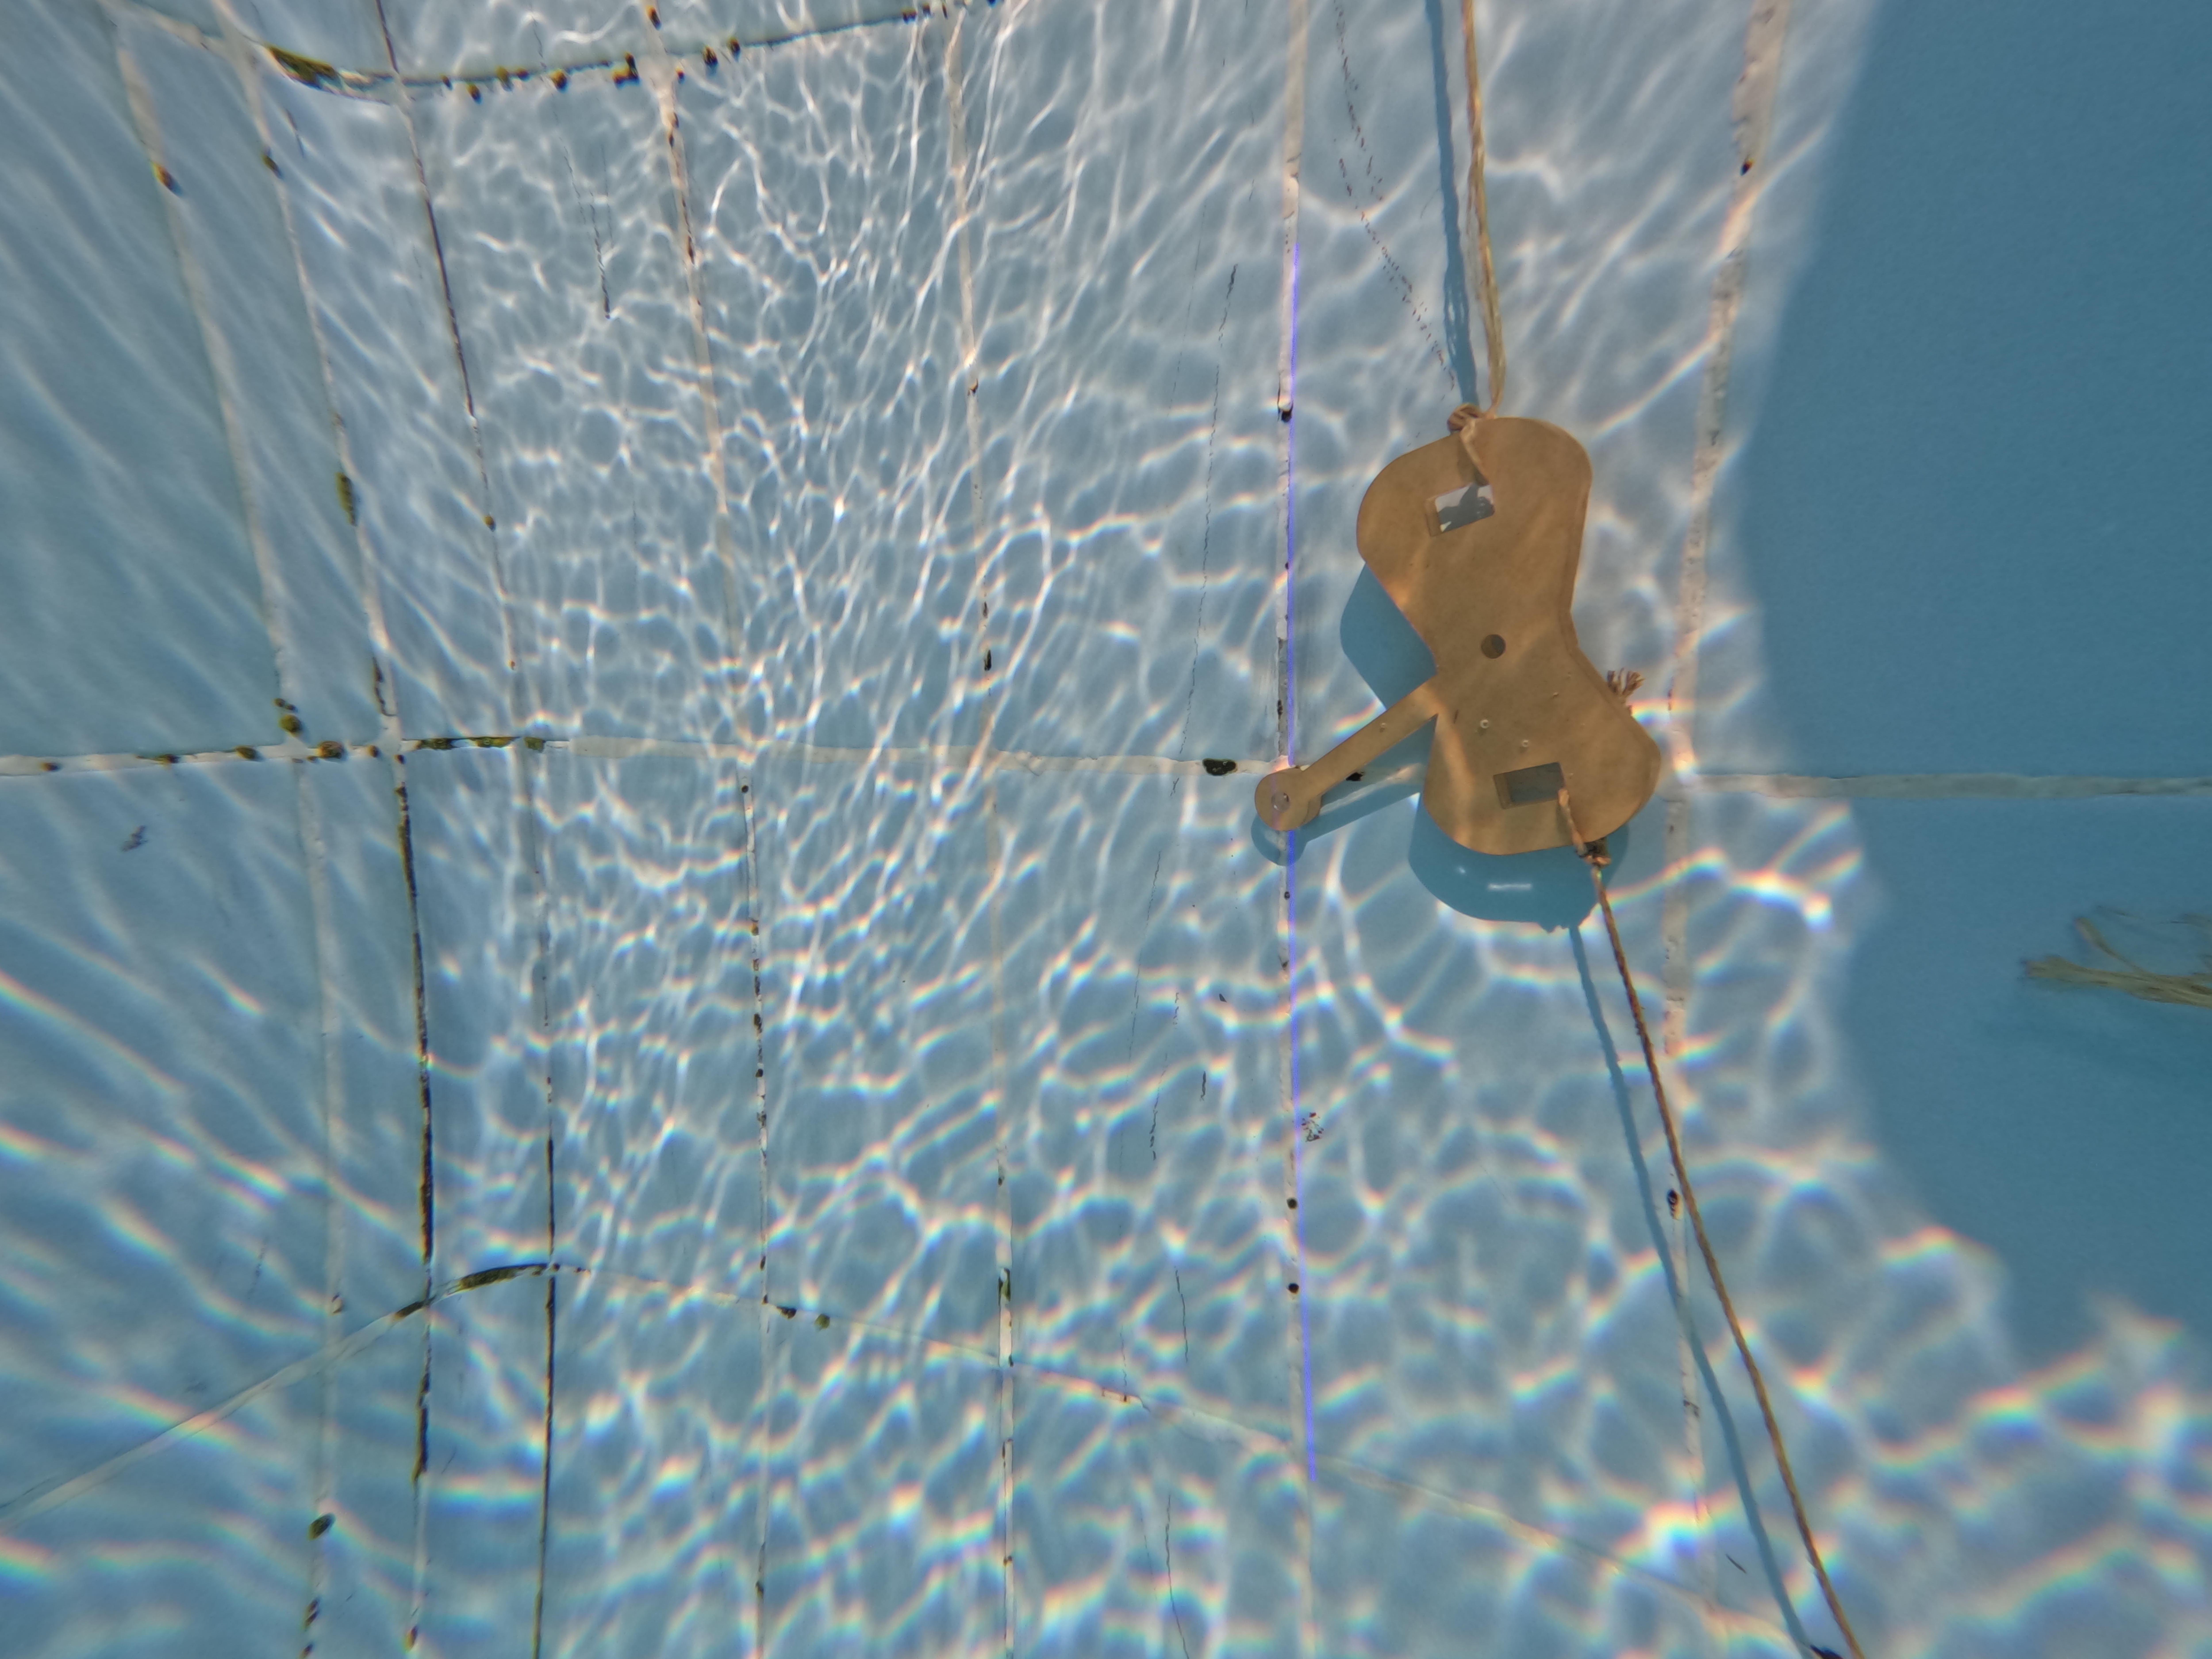

Supplement: Supplementary file 646 [file G0019660.pdf › Level_5_1/G0019660.pdf]

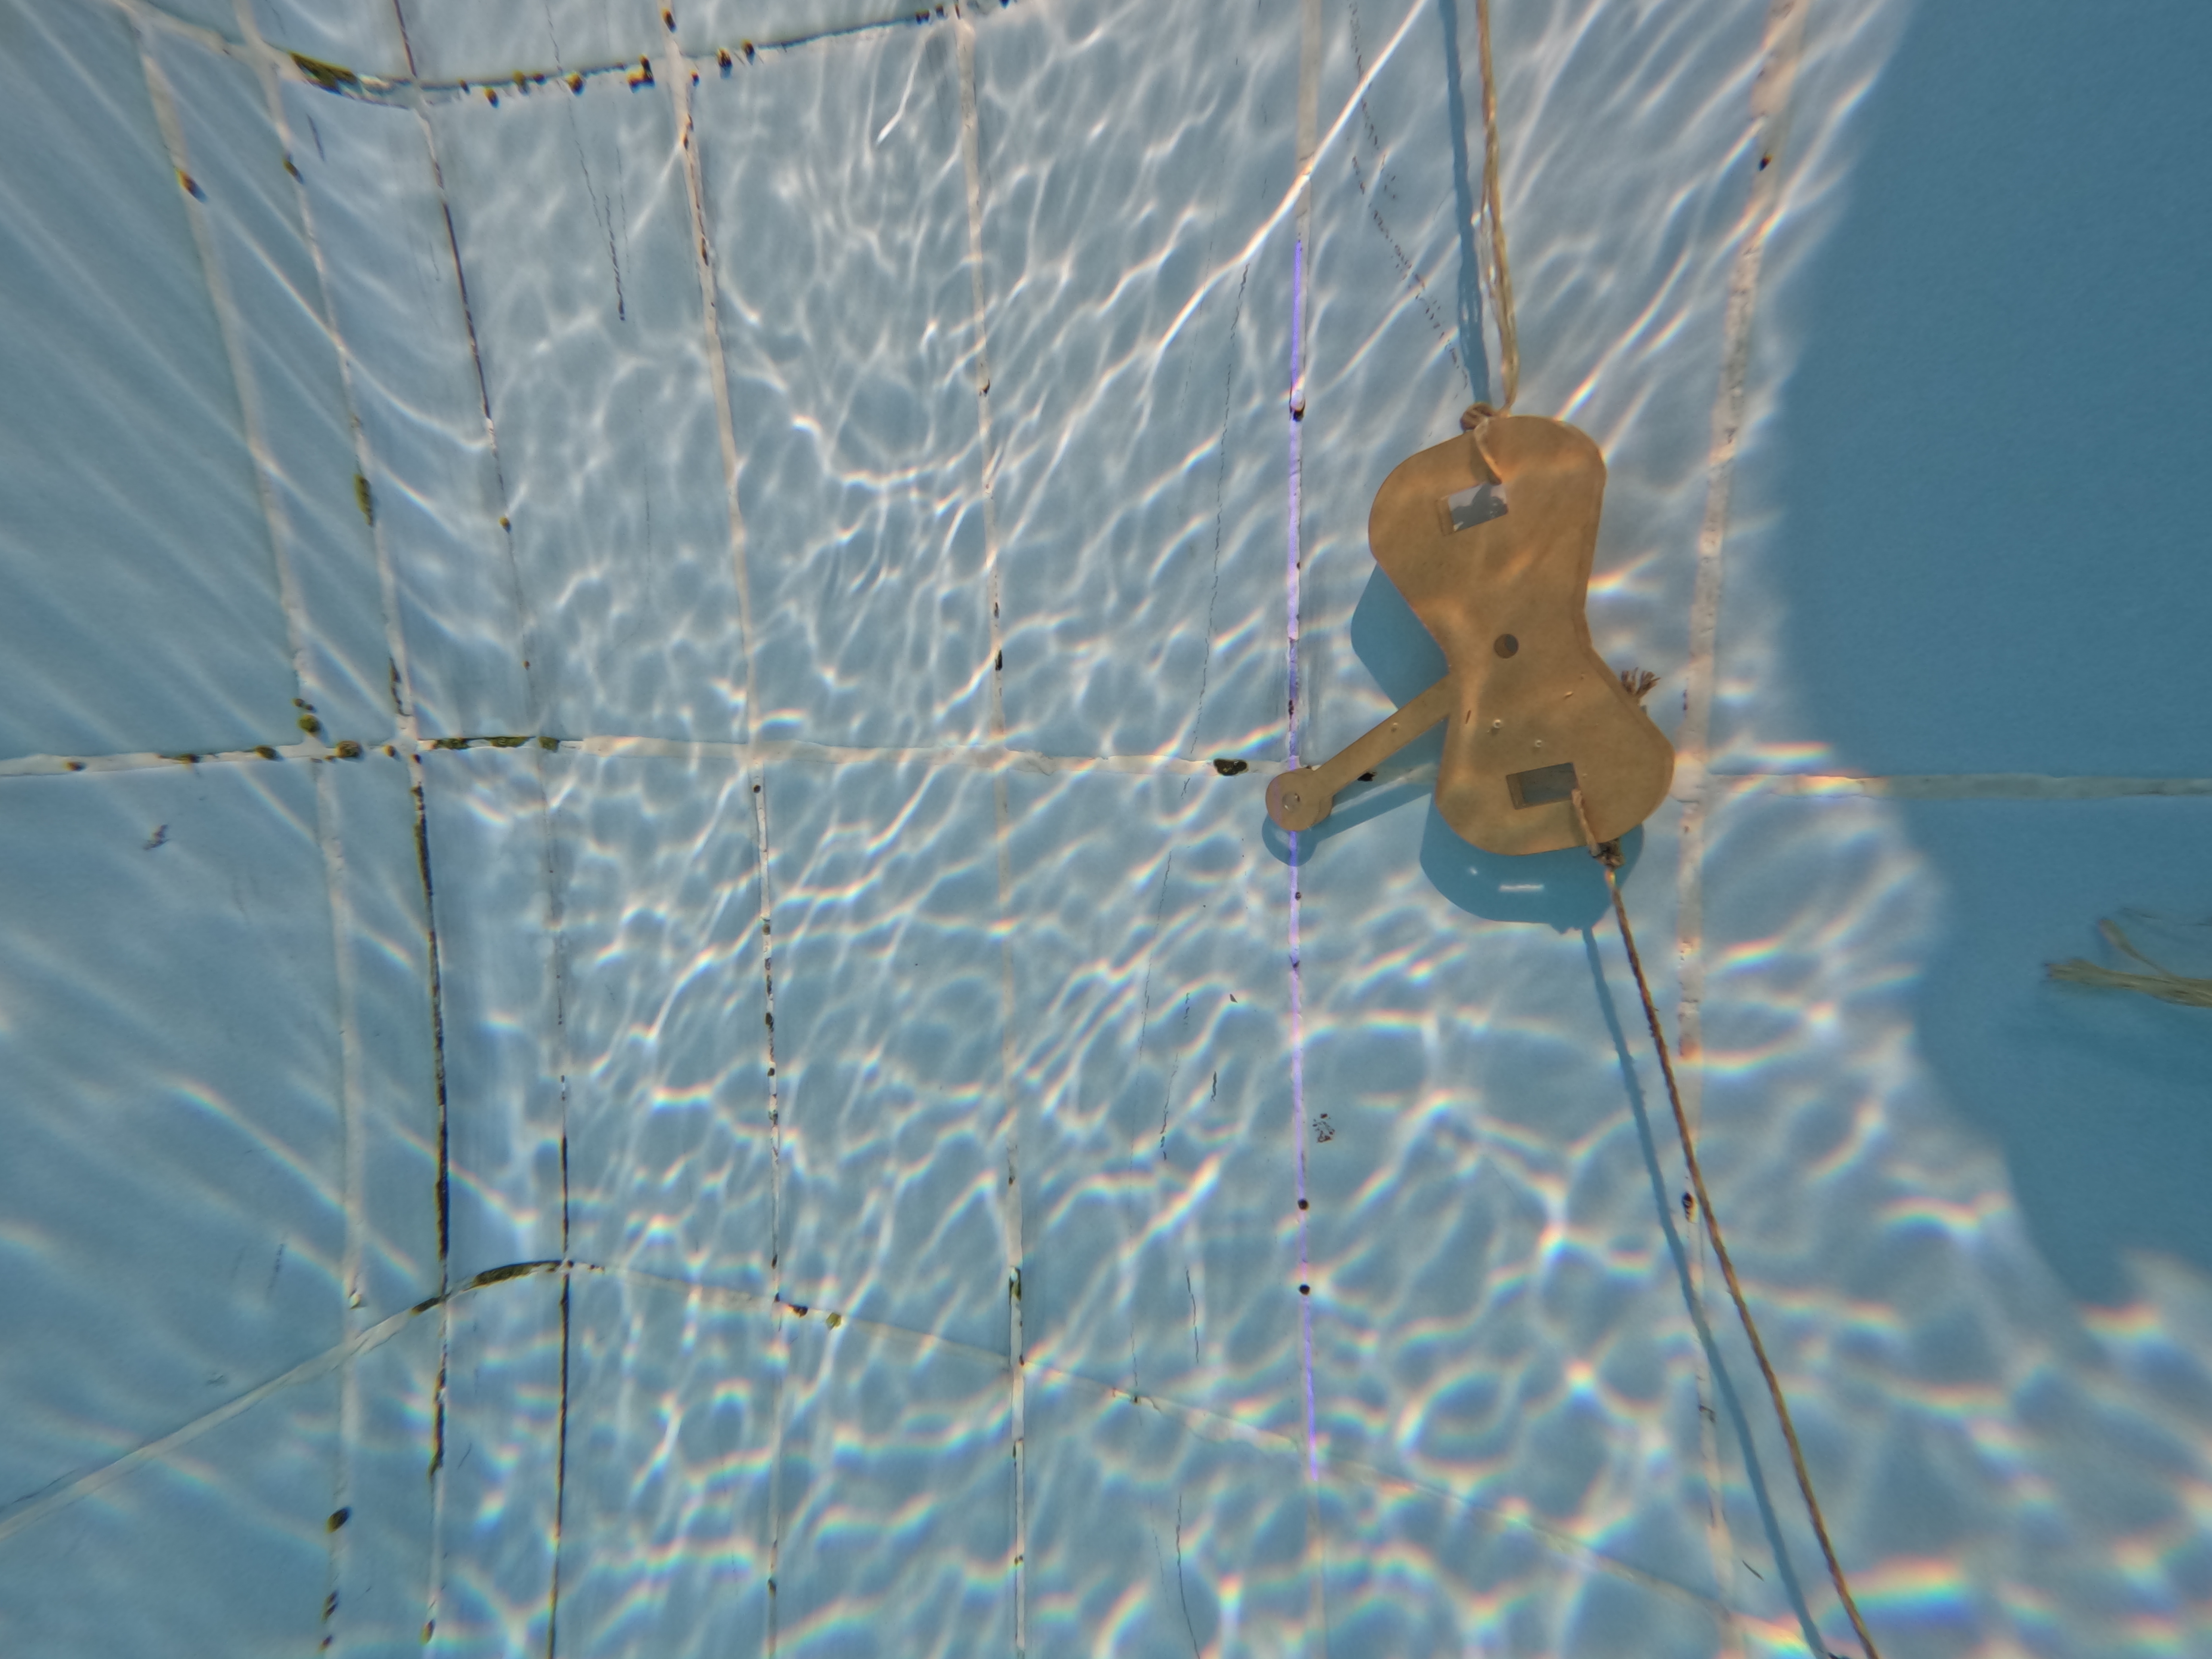

Supplement: Supplementary file 647 [file G0019661.pdf › Level_5_1/G0019661.pdf]

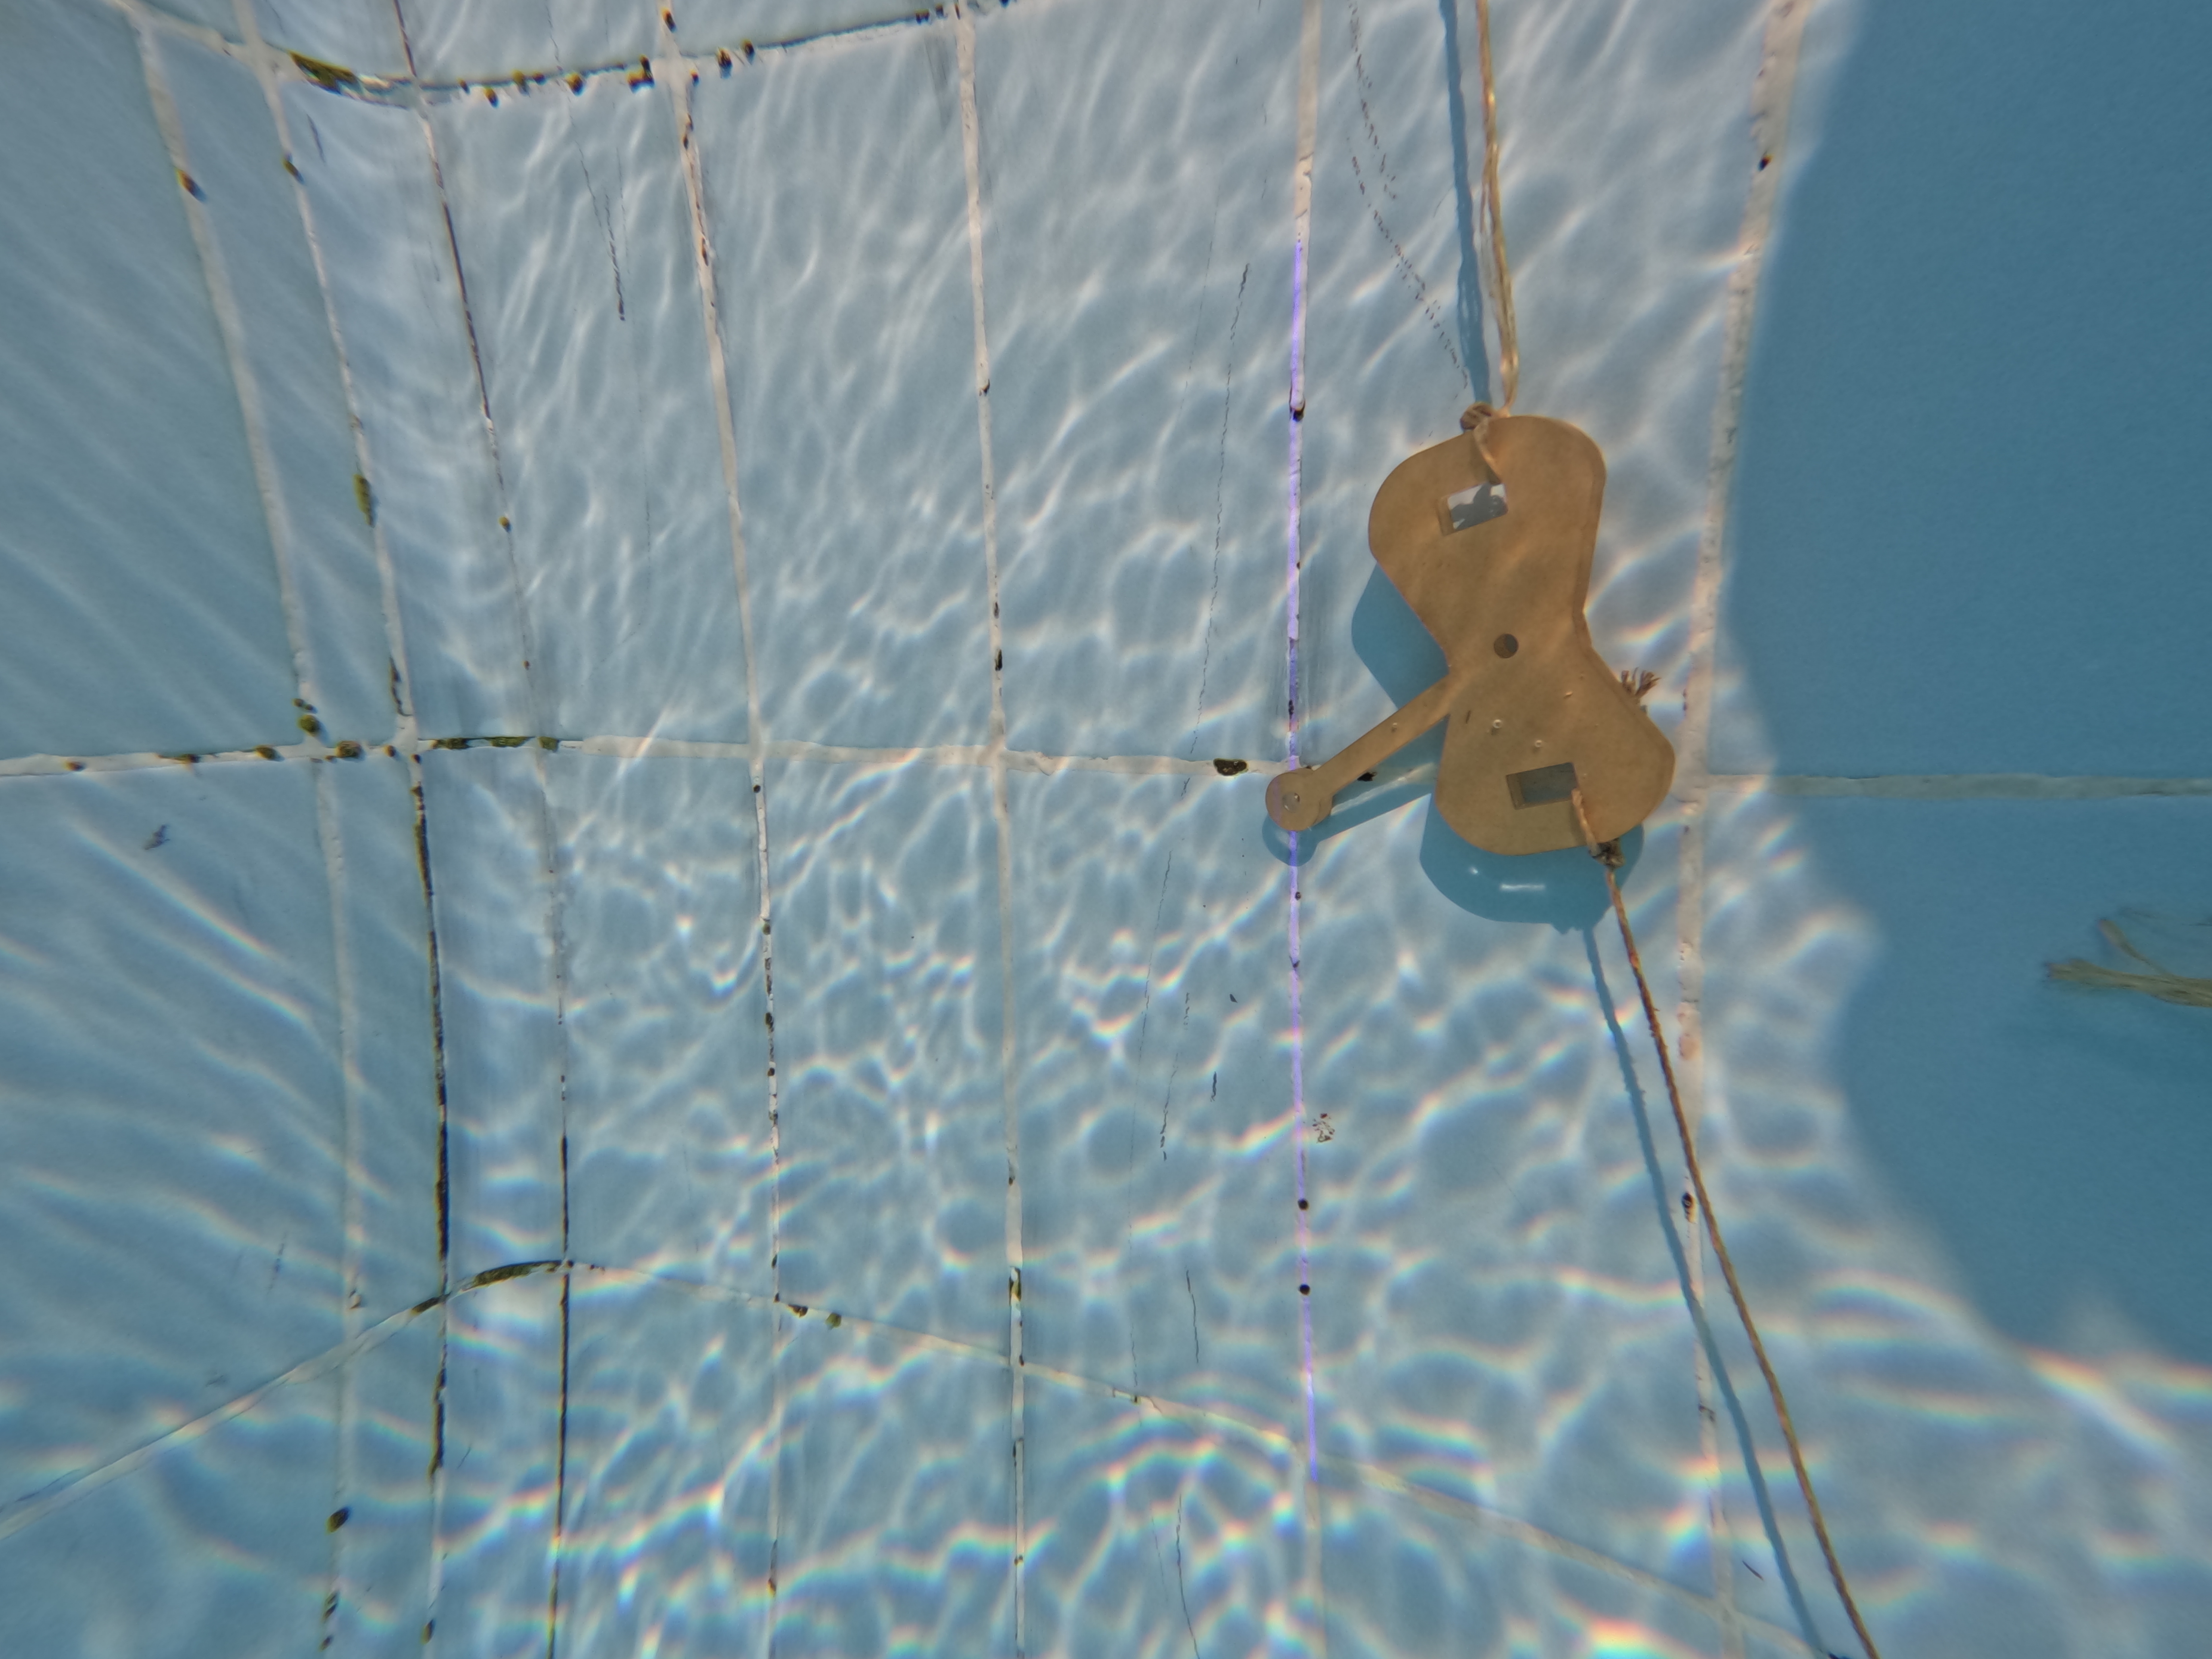

Supplement: Supplementary file 648 [file G0019662.pdf › Level_5_1/G0019662.pdf]

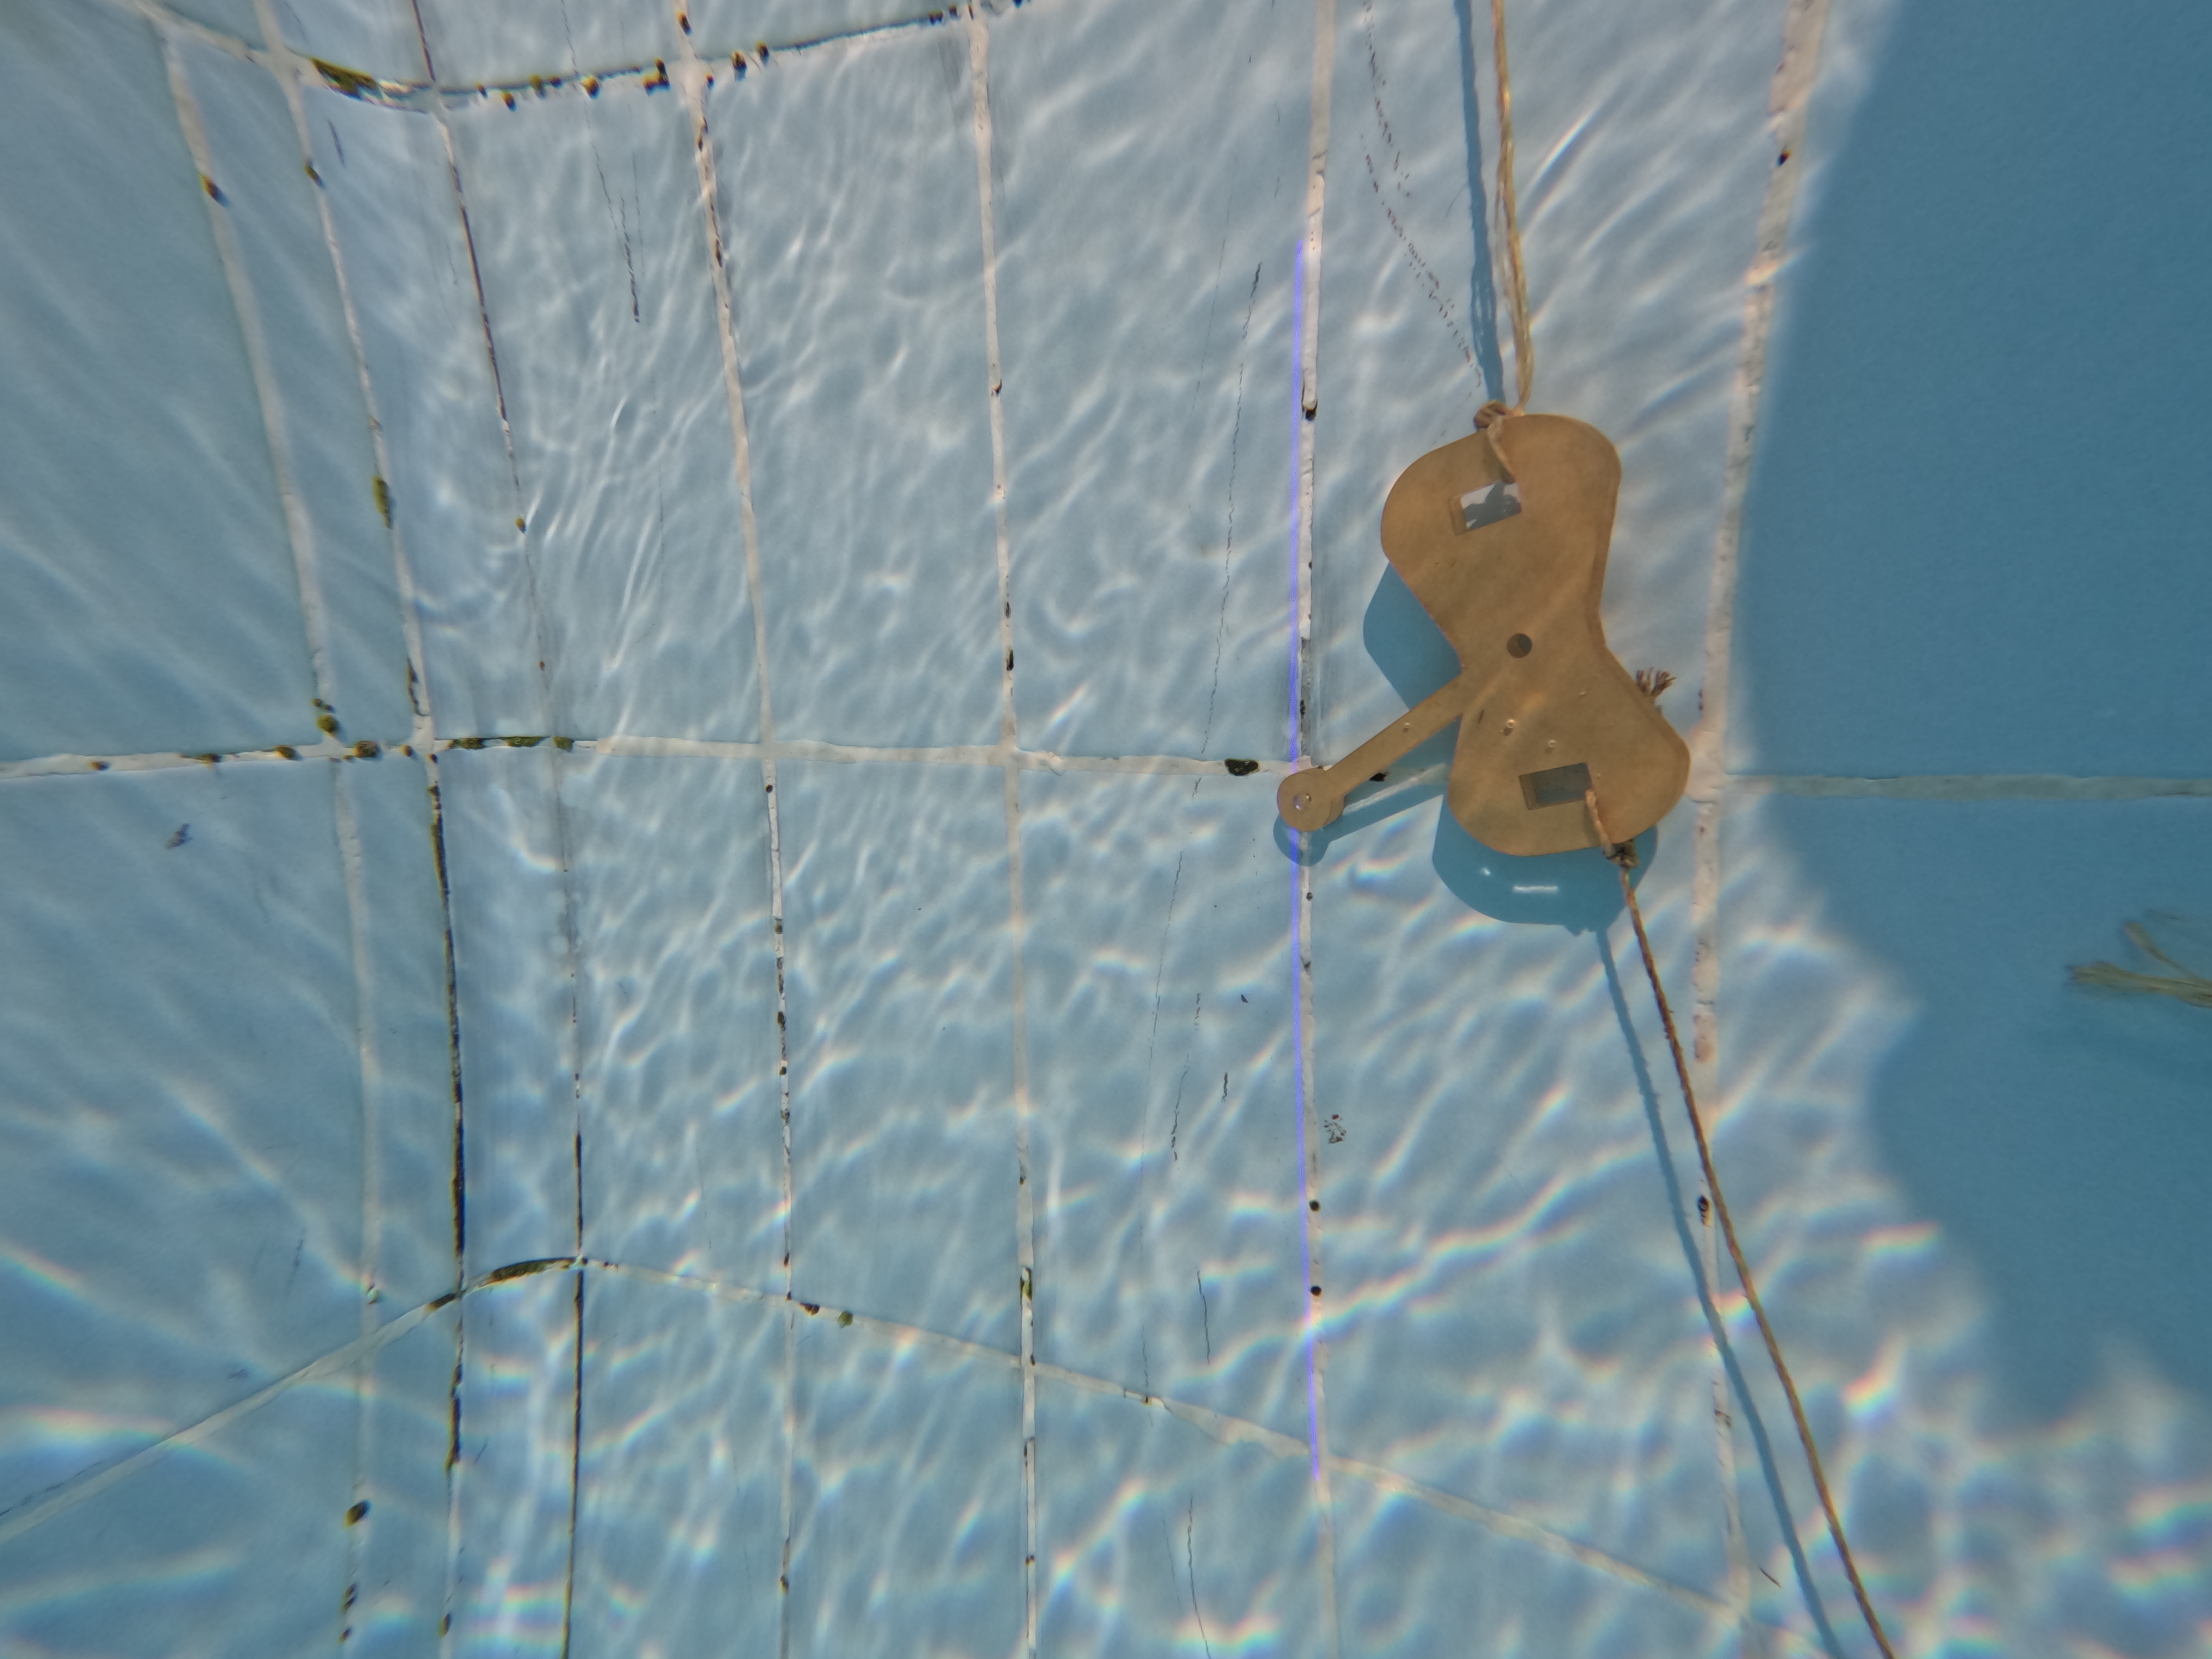

Supplement: Supplementary file 649 [file G0019663.pdf › Level_5_1/G0019663.pdf]

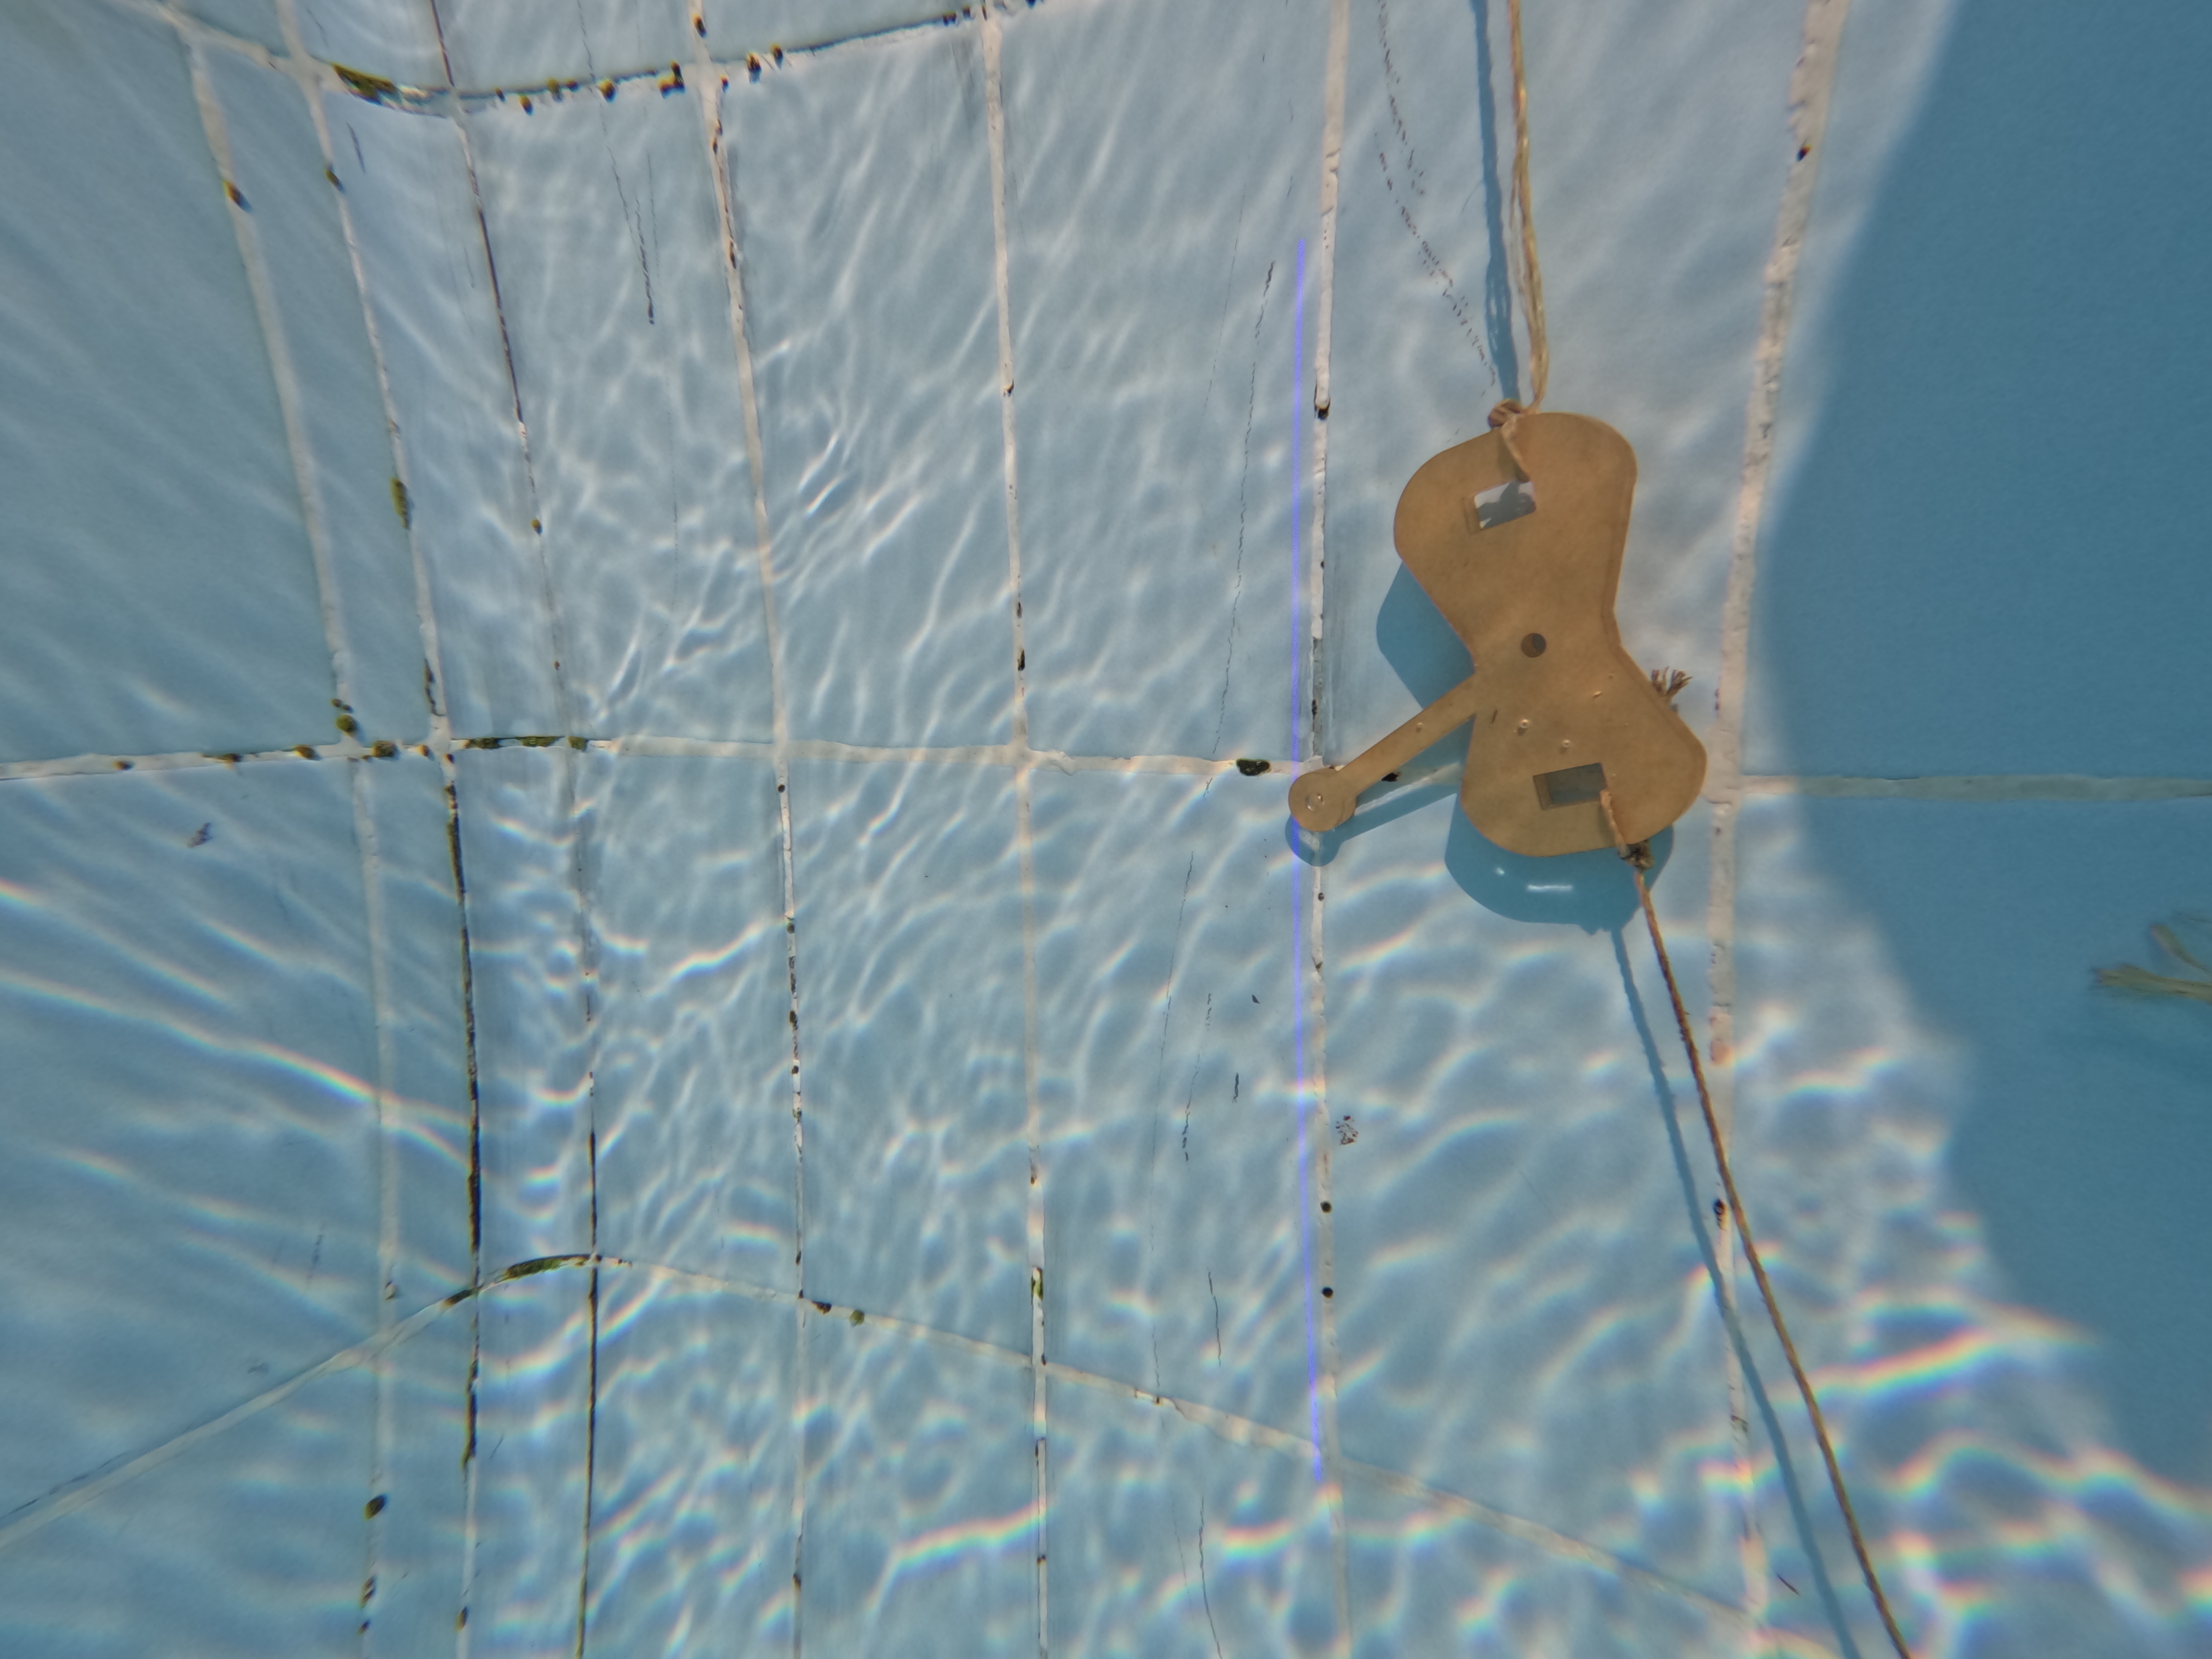

Supplement: Supplementary file 650 [file G0019664.pdf › Level_5_1/G0019664.pdf]

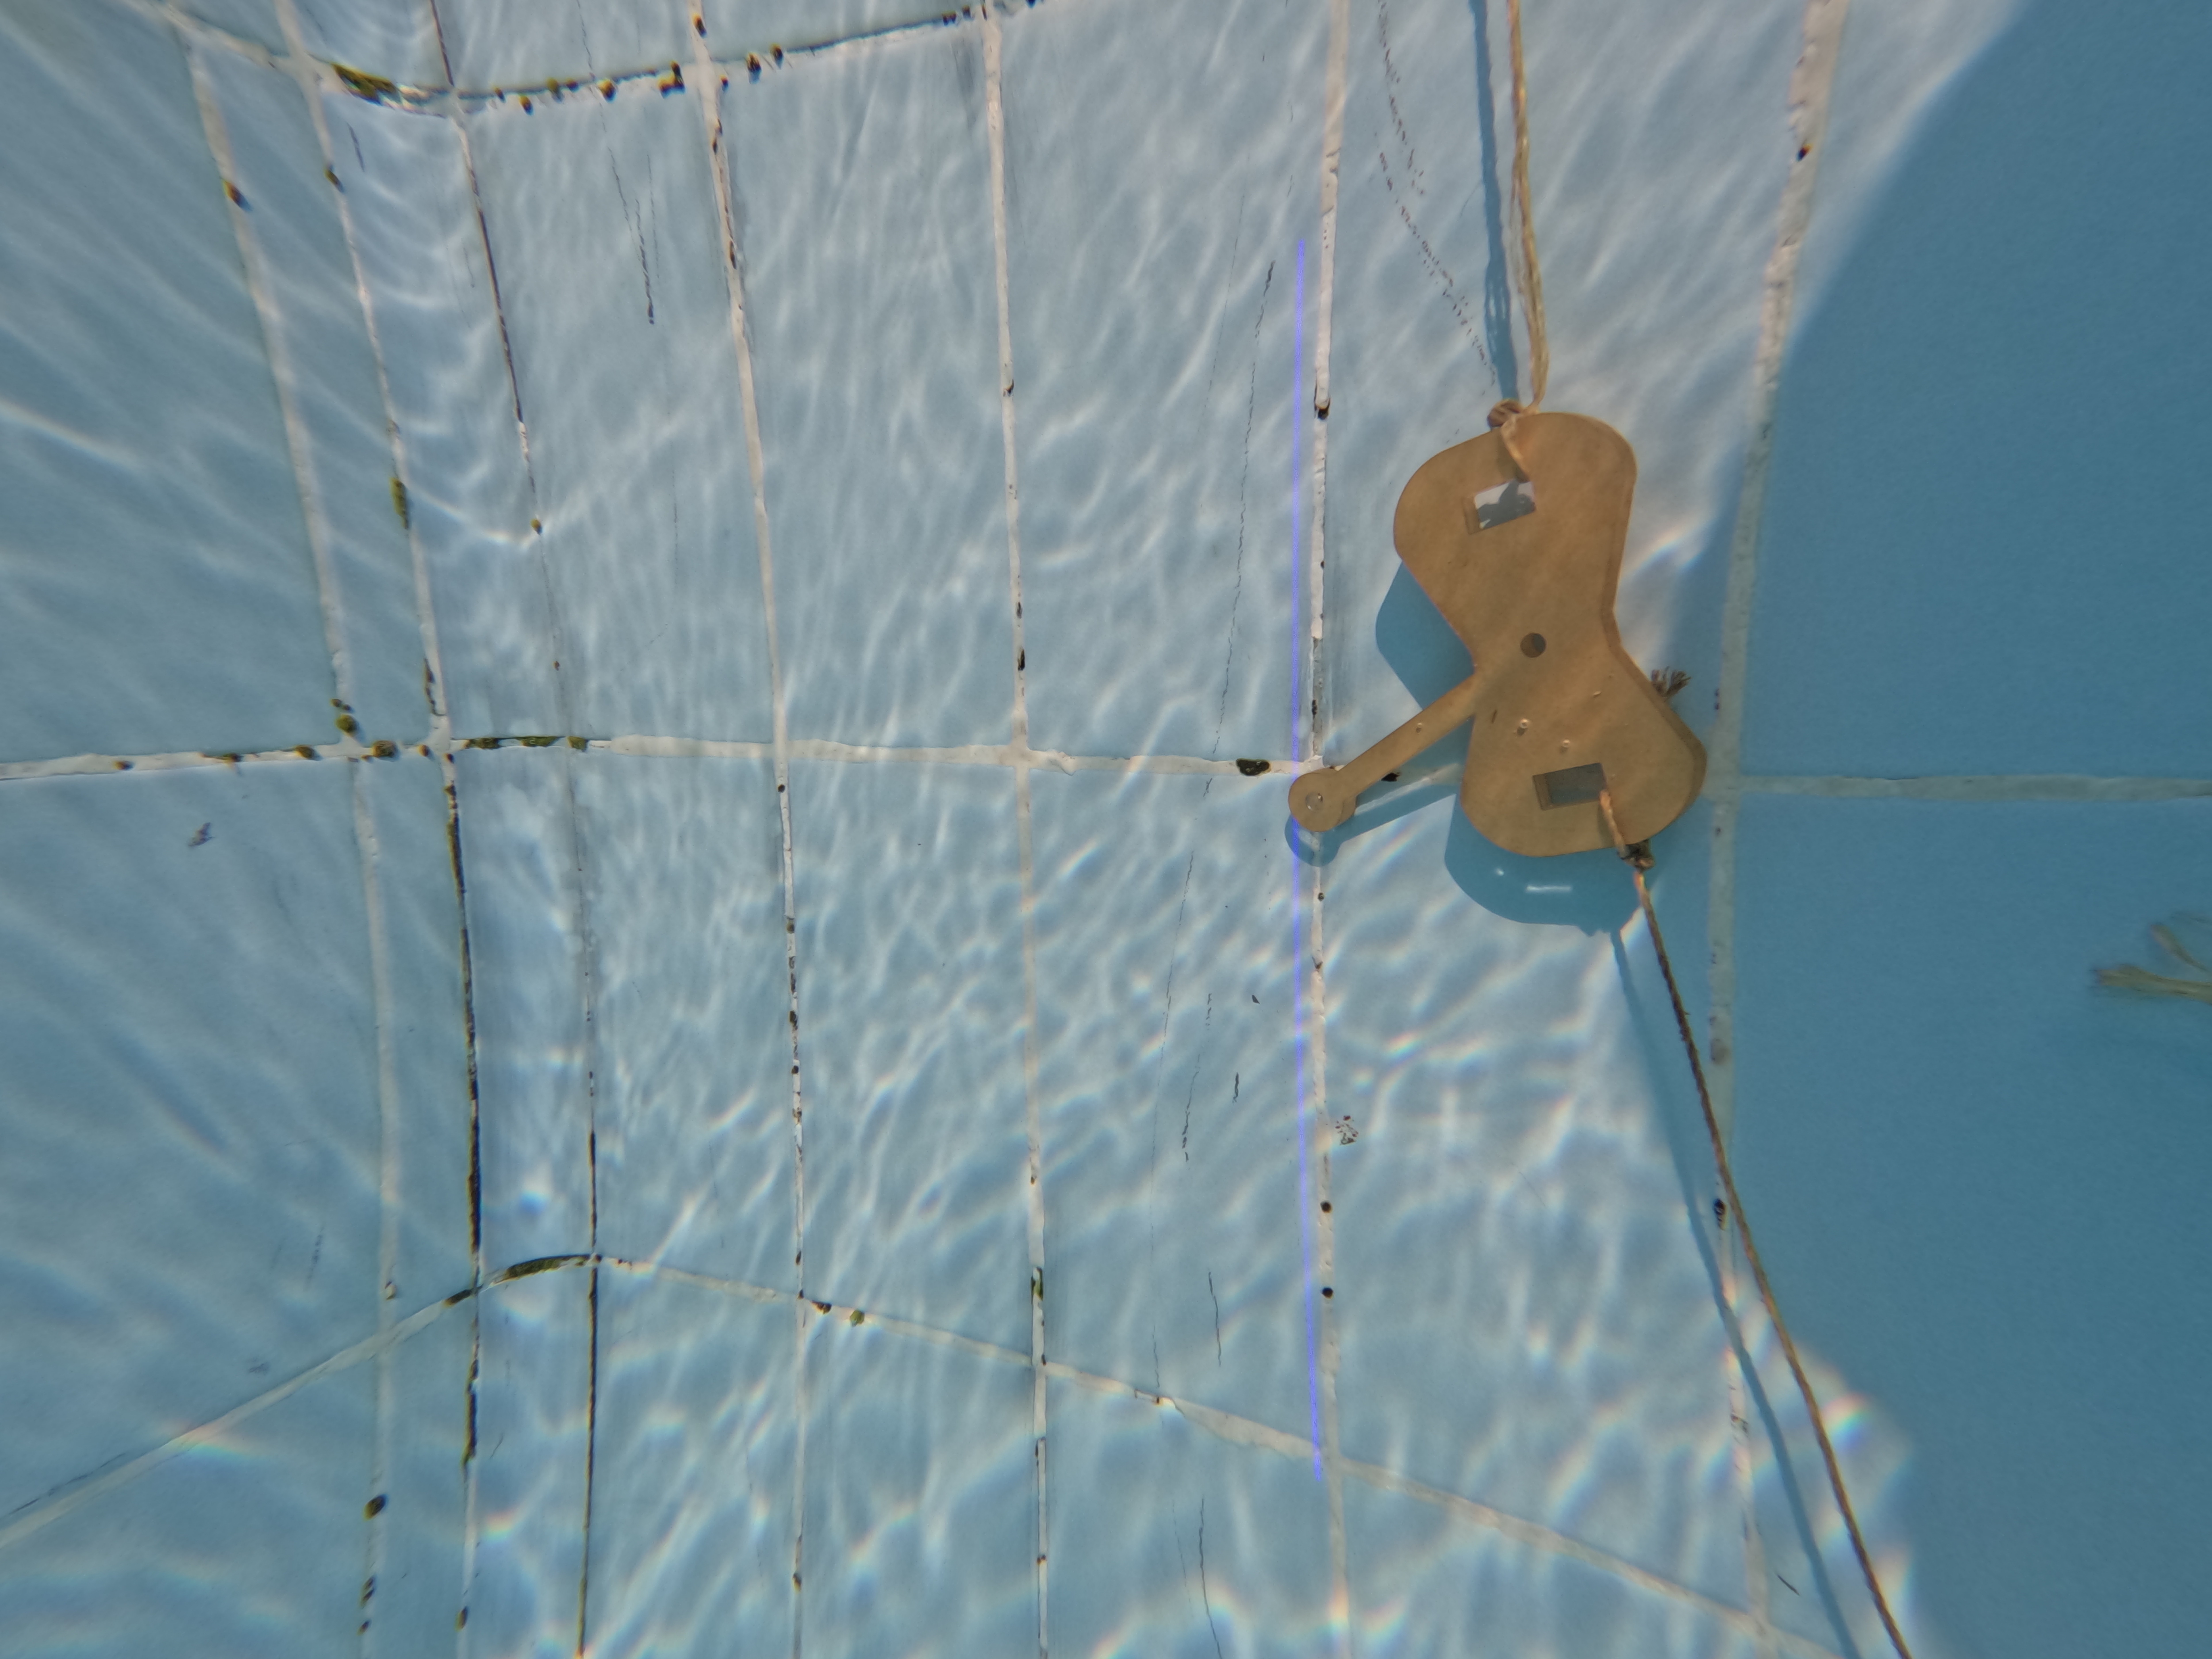

Supplement: Supplementary file 651 [file G0019665.pdf › Level_5_1/G0019665.pdf]

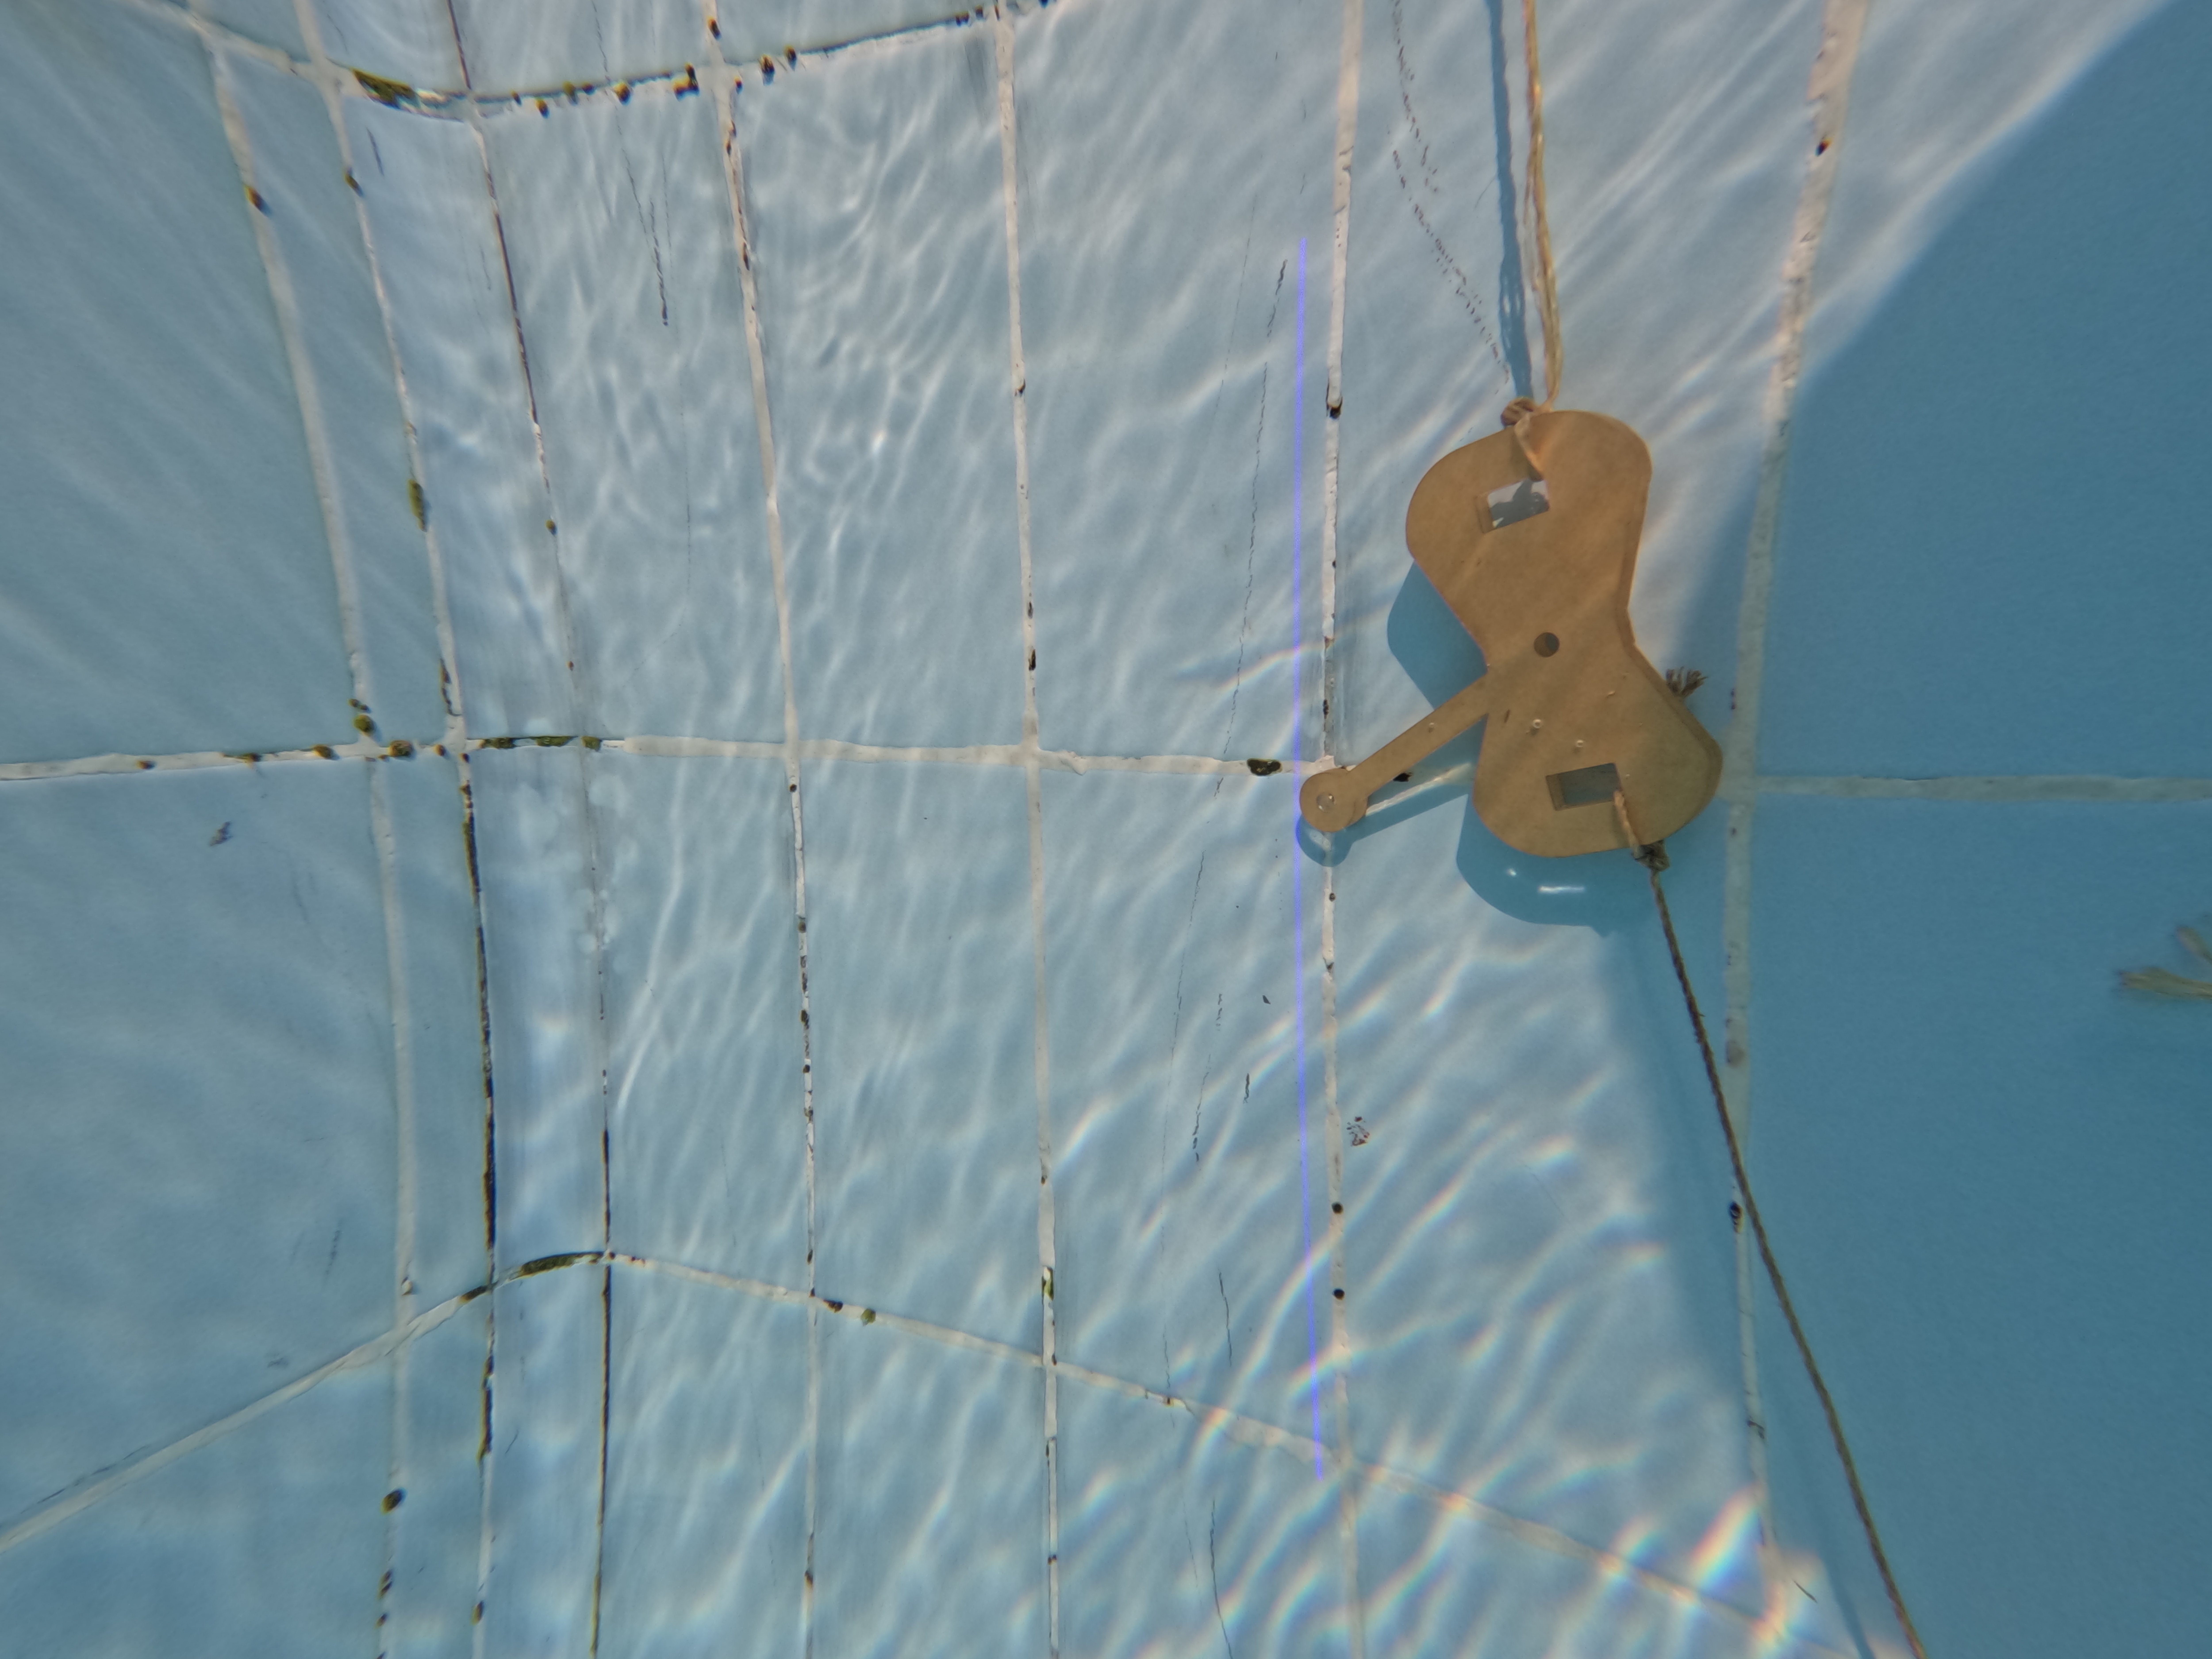

Supplement: Supplementary file 652 [file G0019666.pdf › Level_5_1/G0019666.pdf]

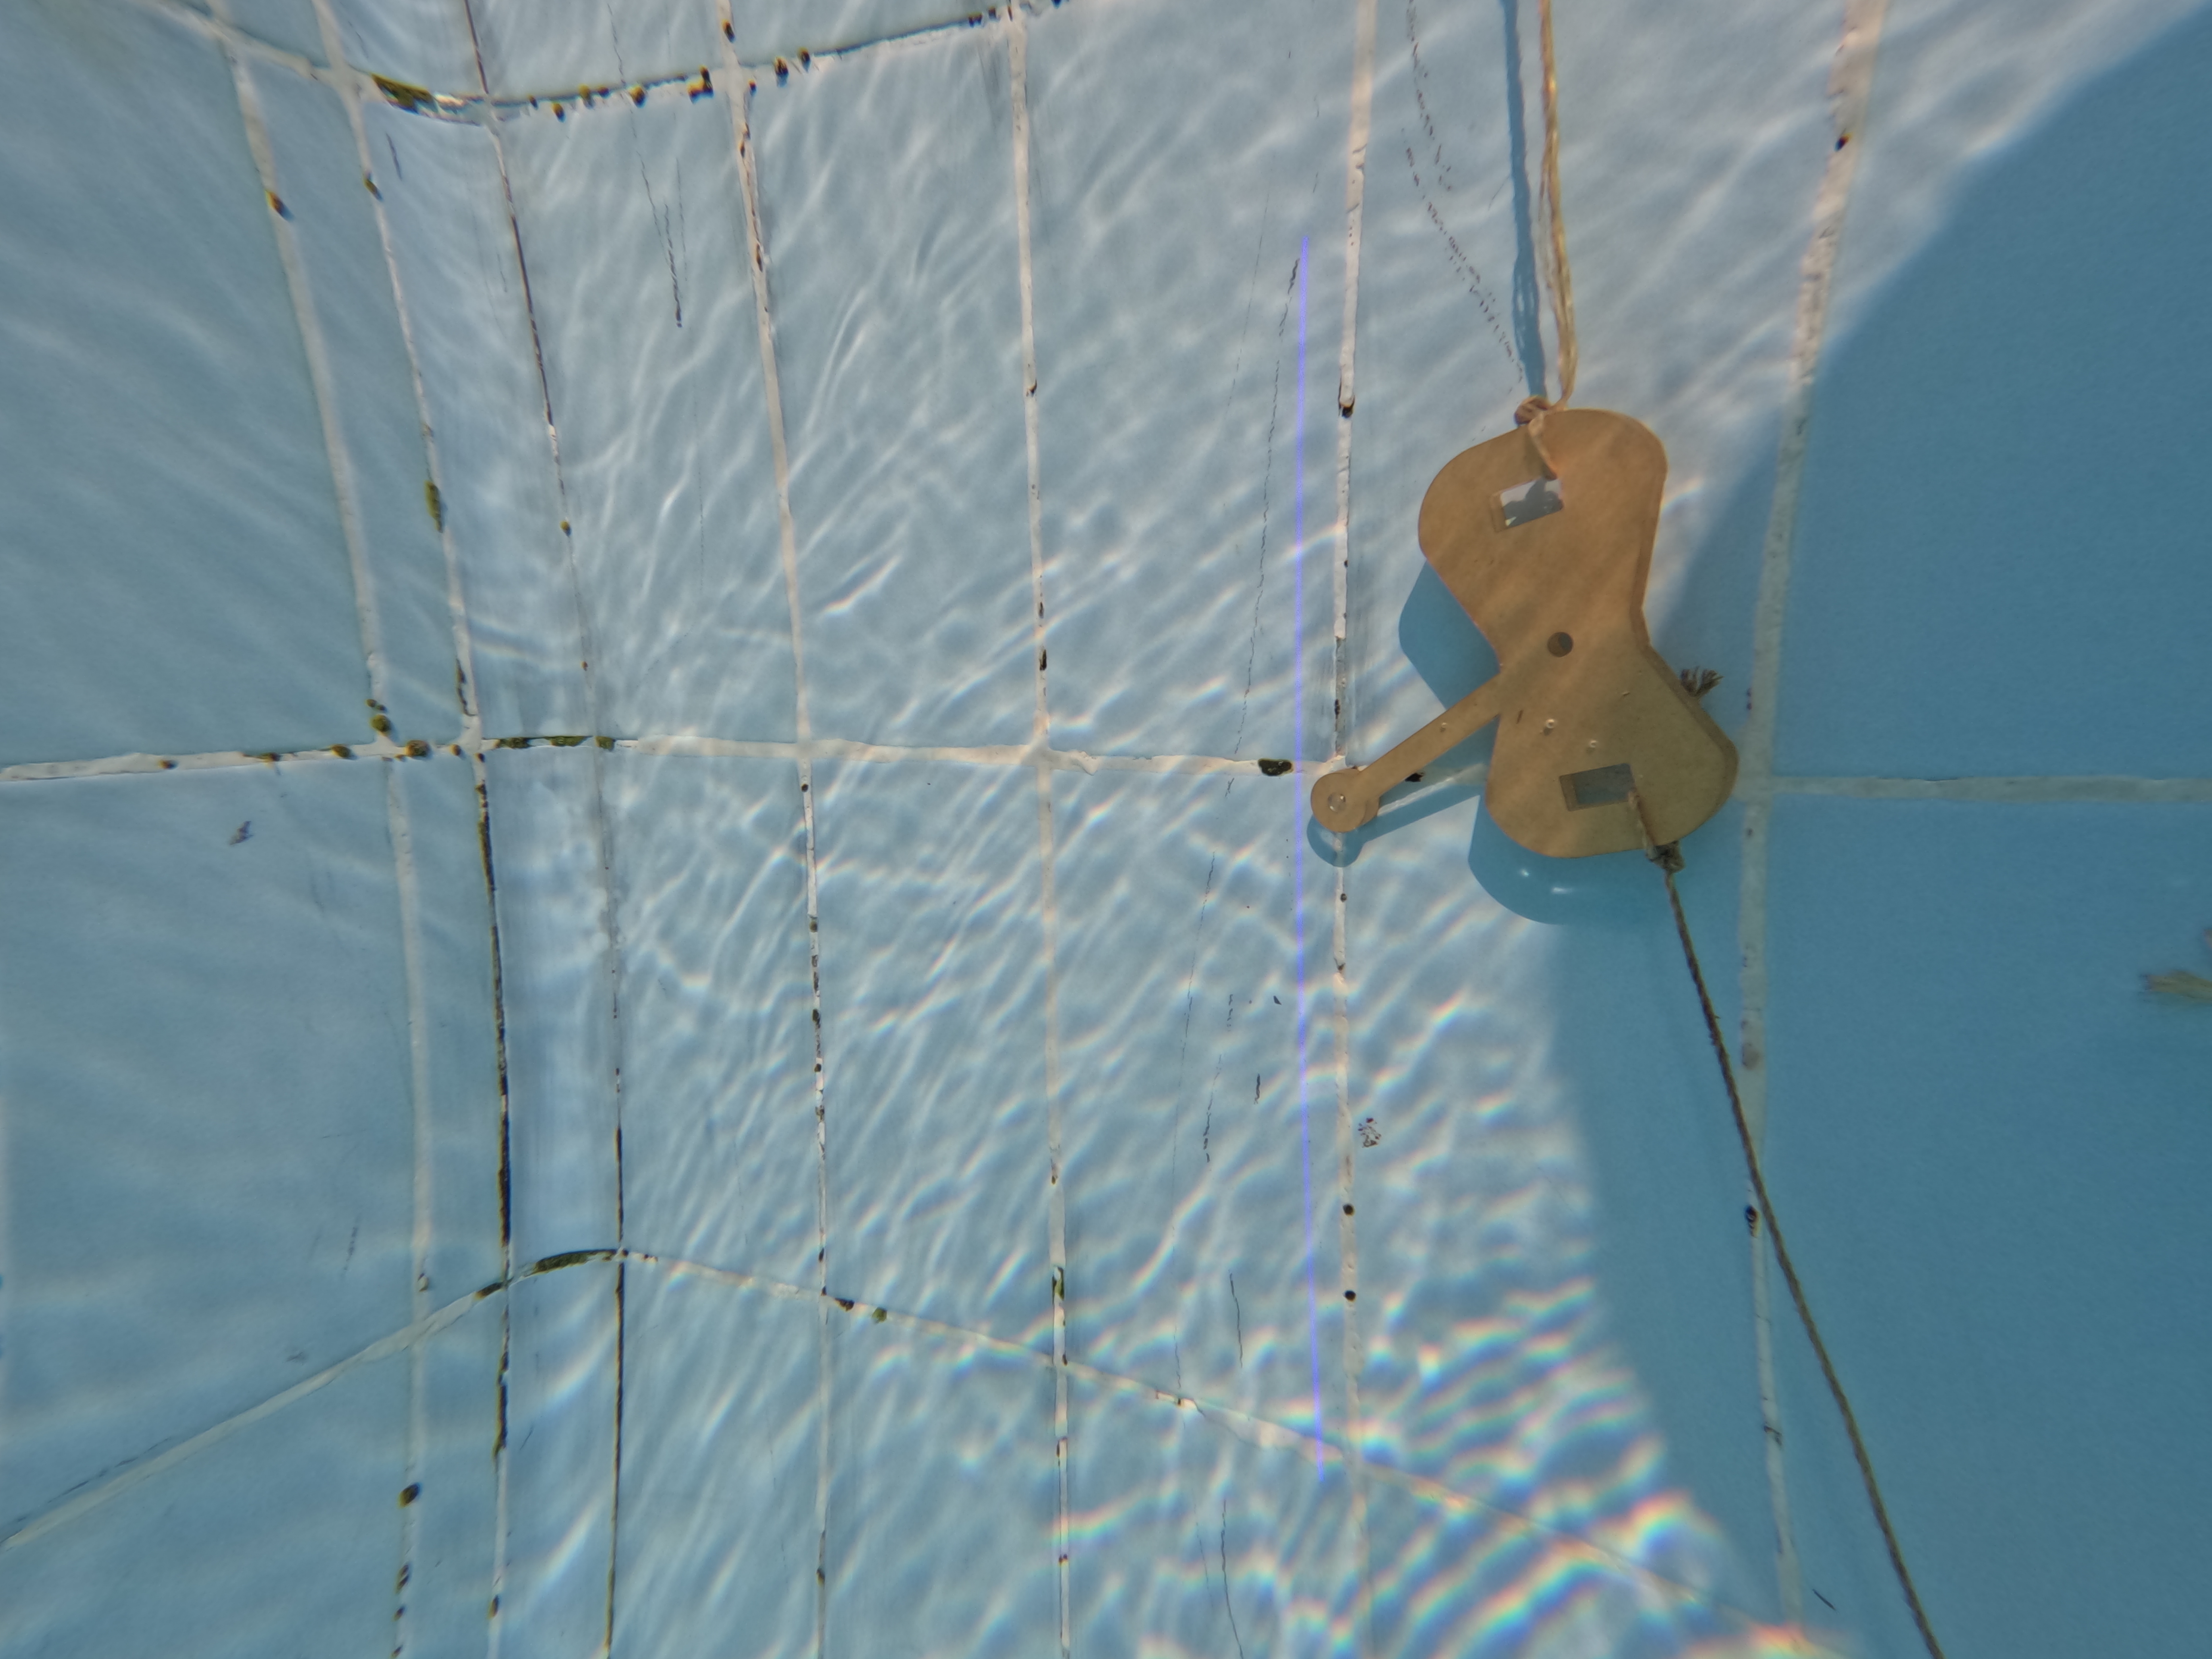

Supplement: Supplementary file 653 [file G0019667.pdf › Level_5_1/G0019667.pdf]

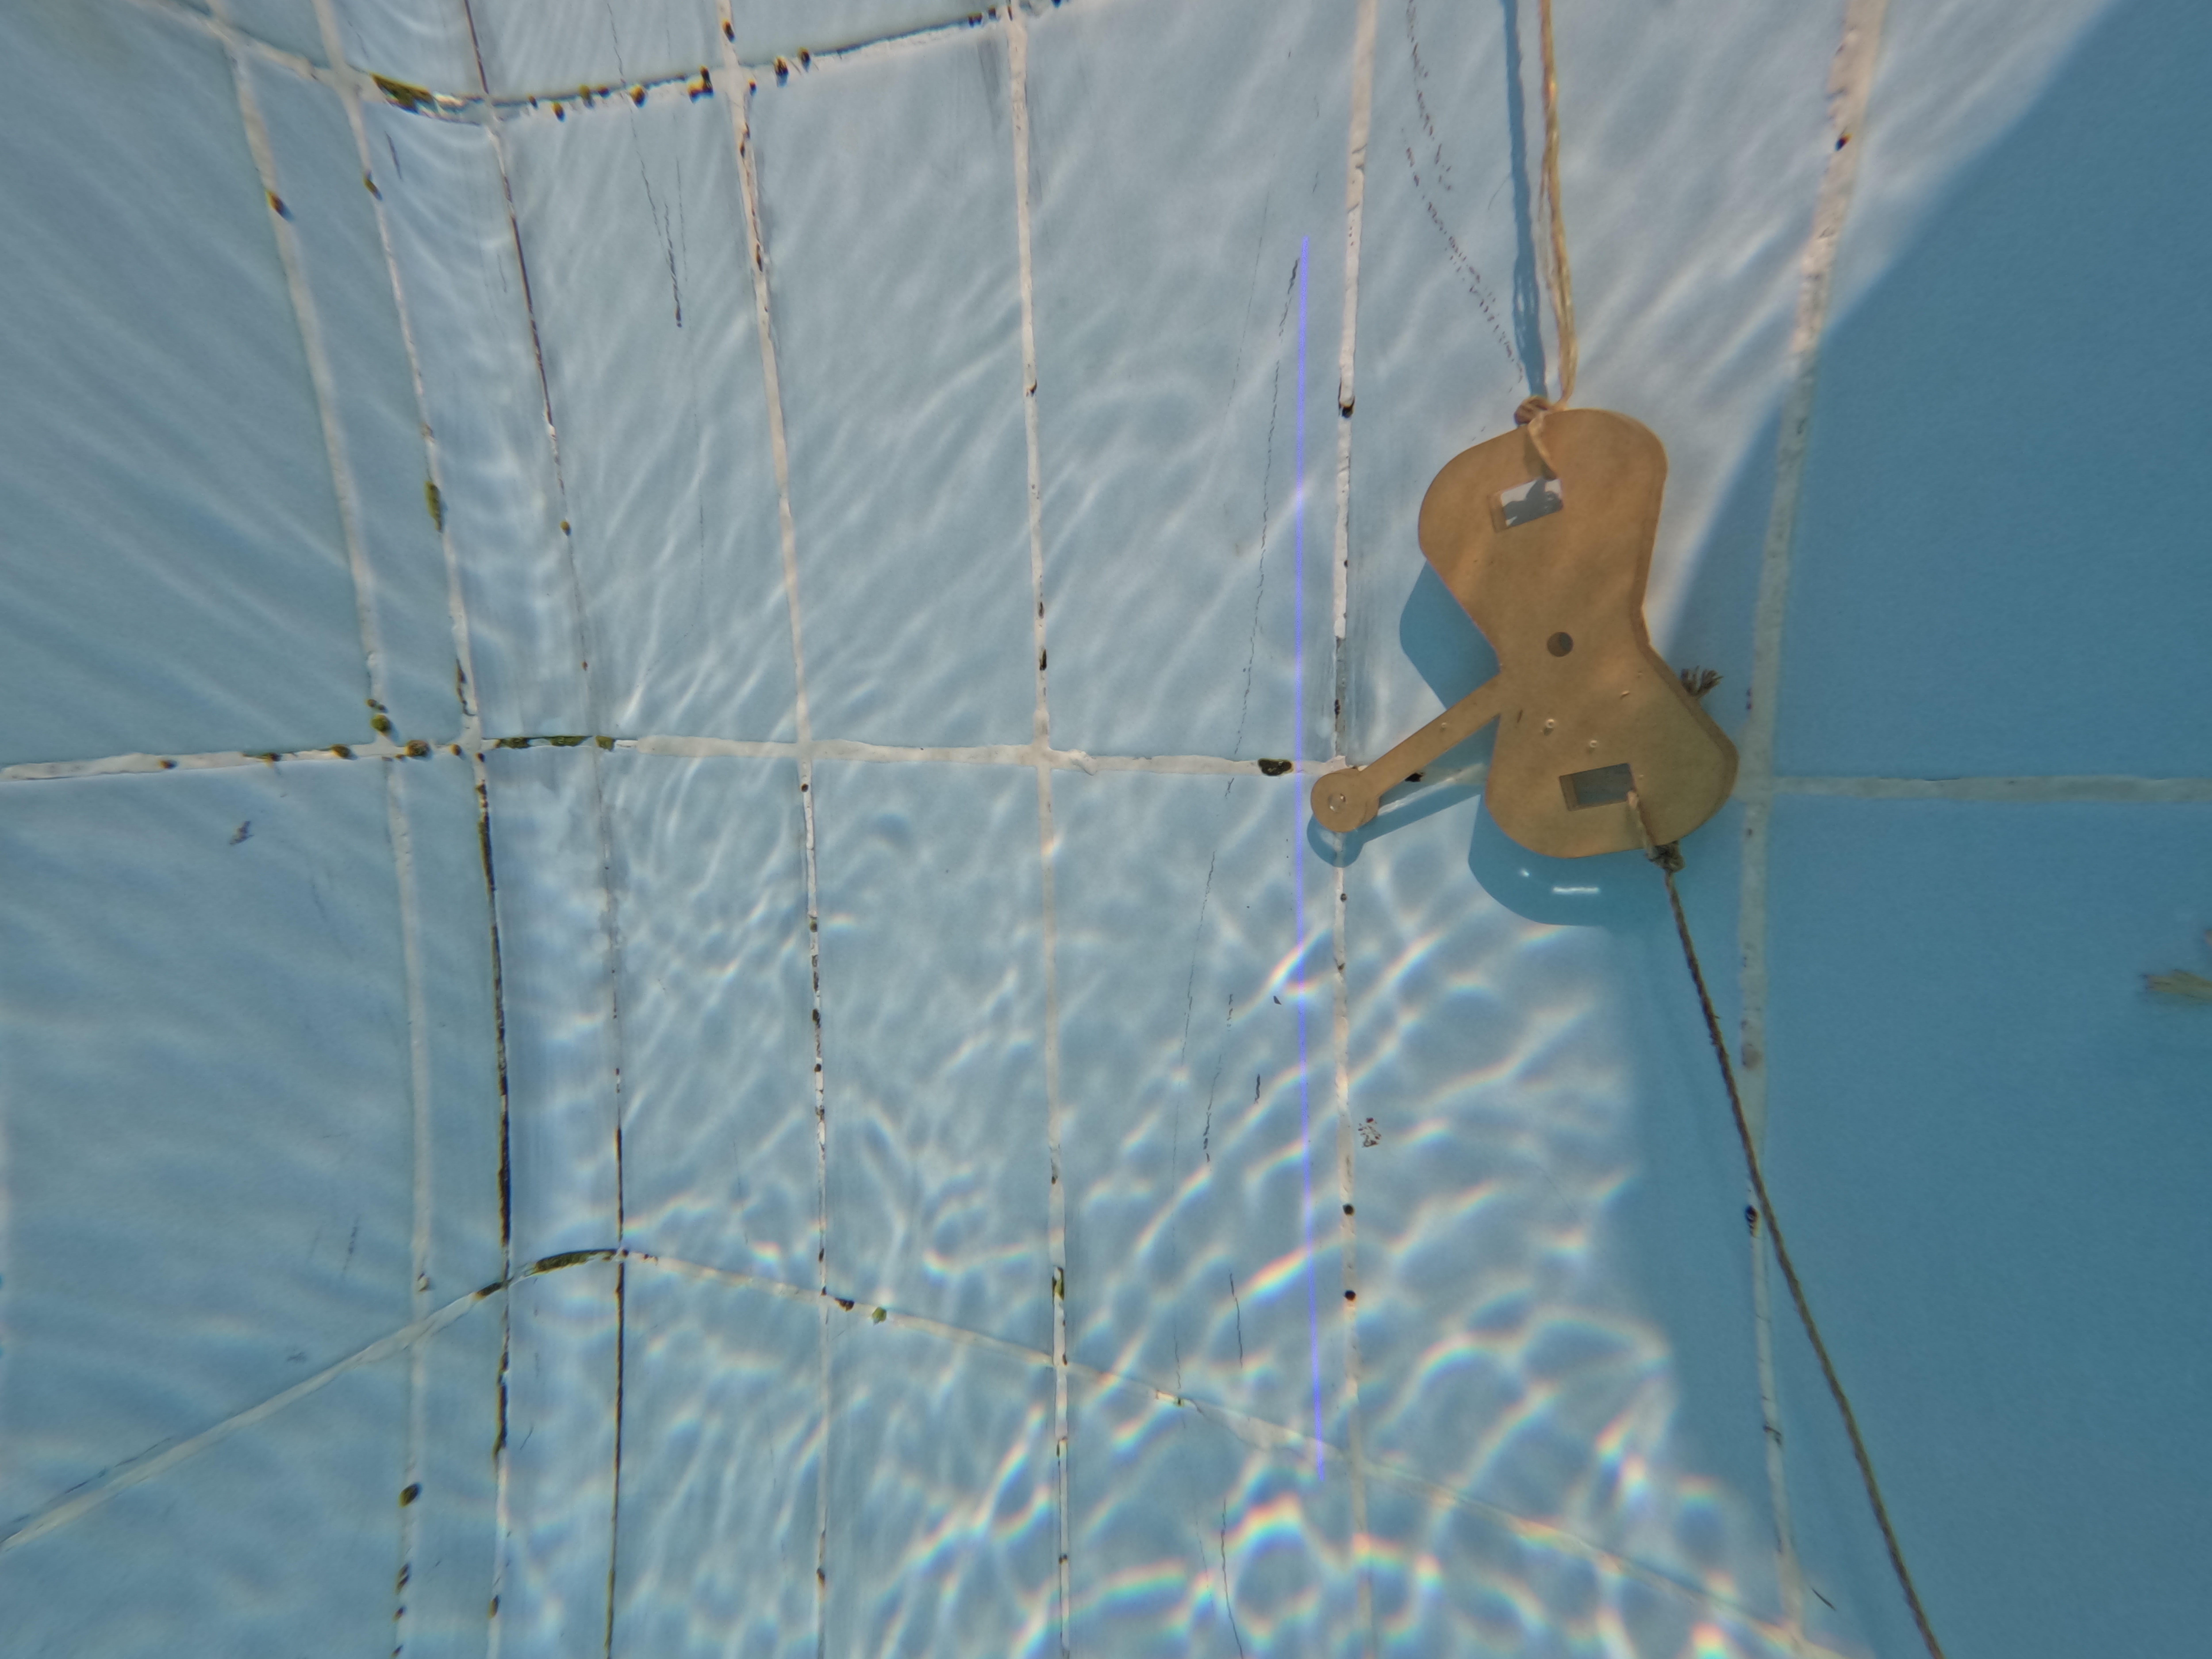

Supplement: Supplementary file 654 [file G0019668.pdf › Level_5_1/G0019668.pdf]

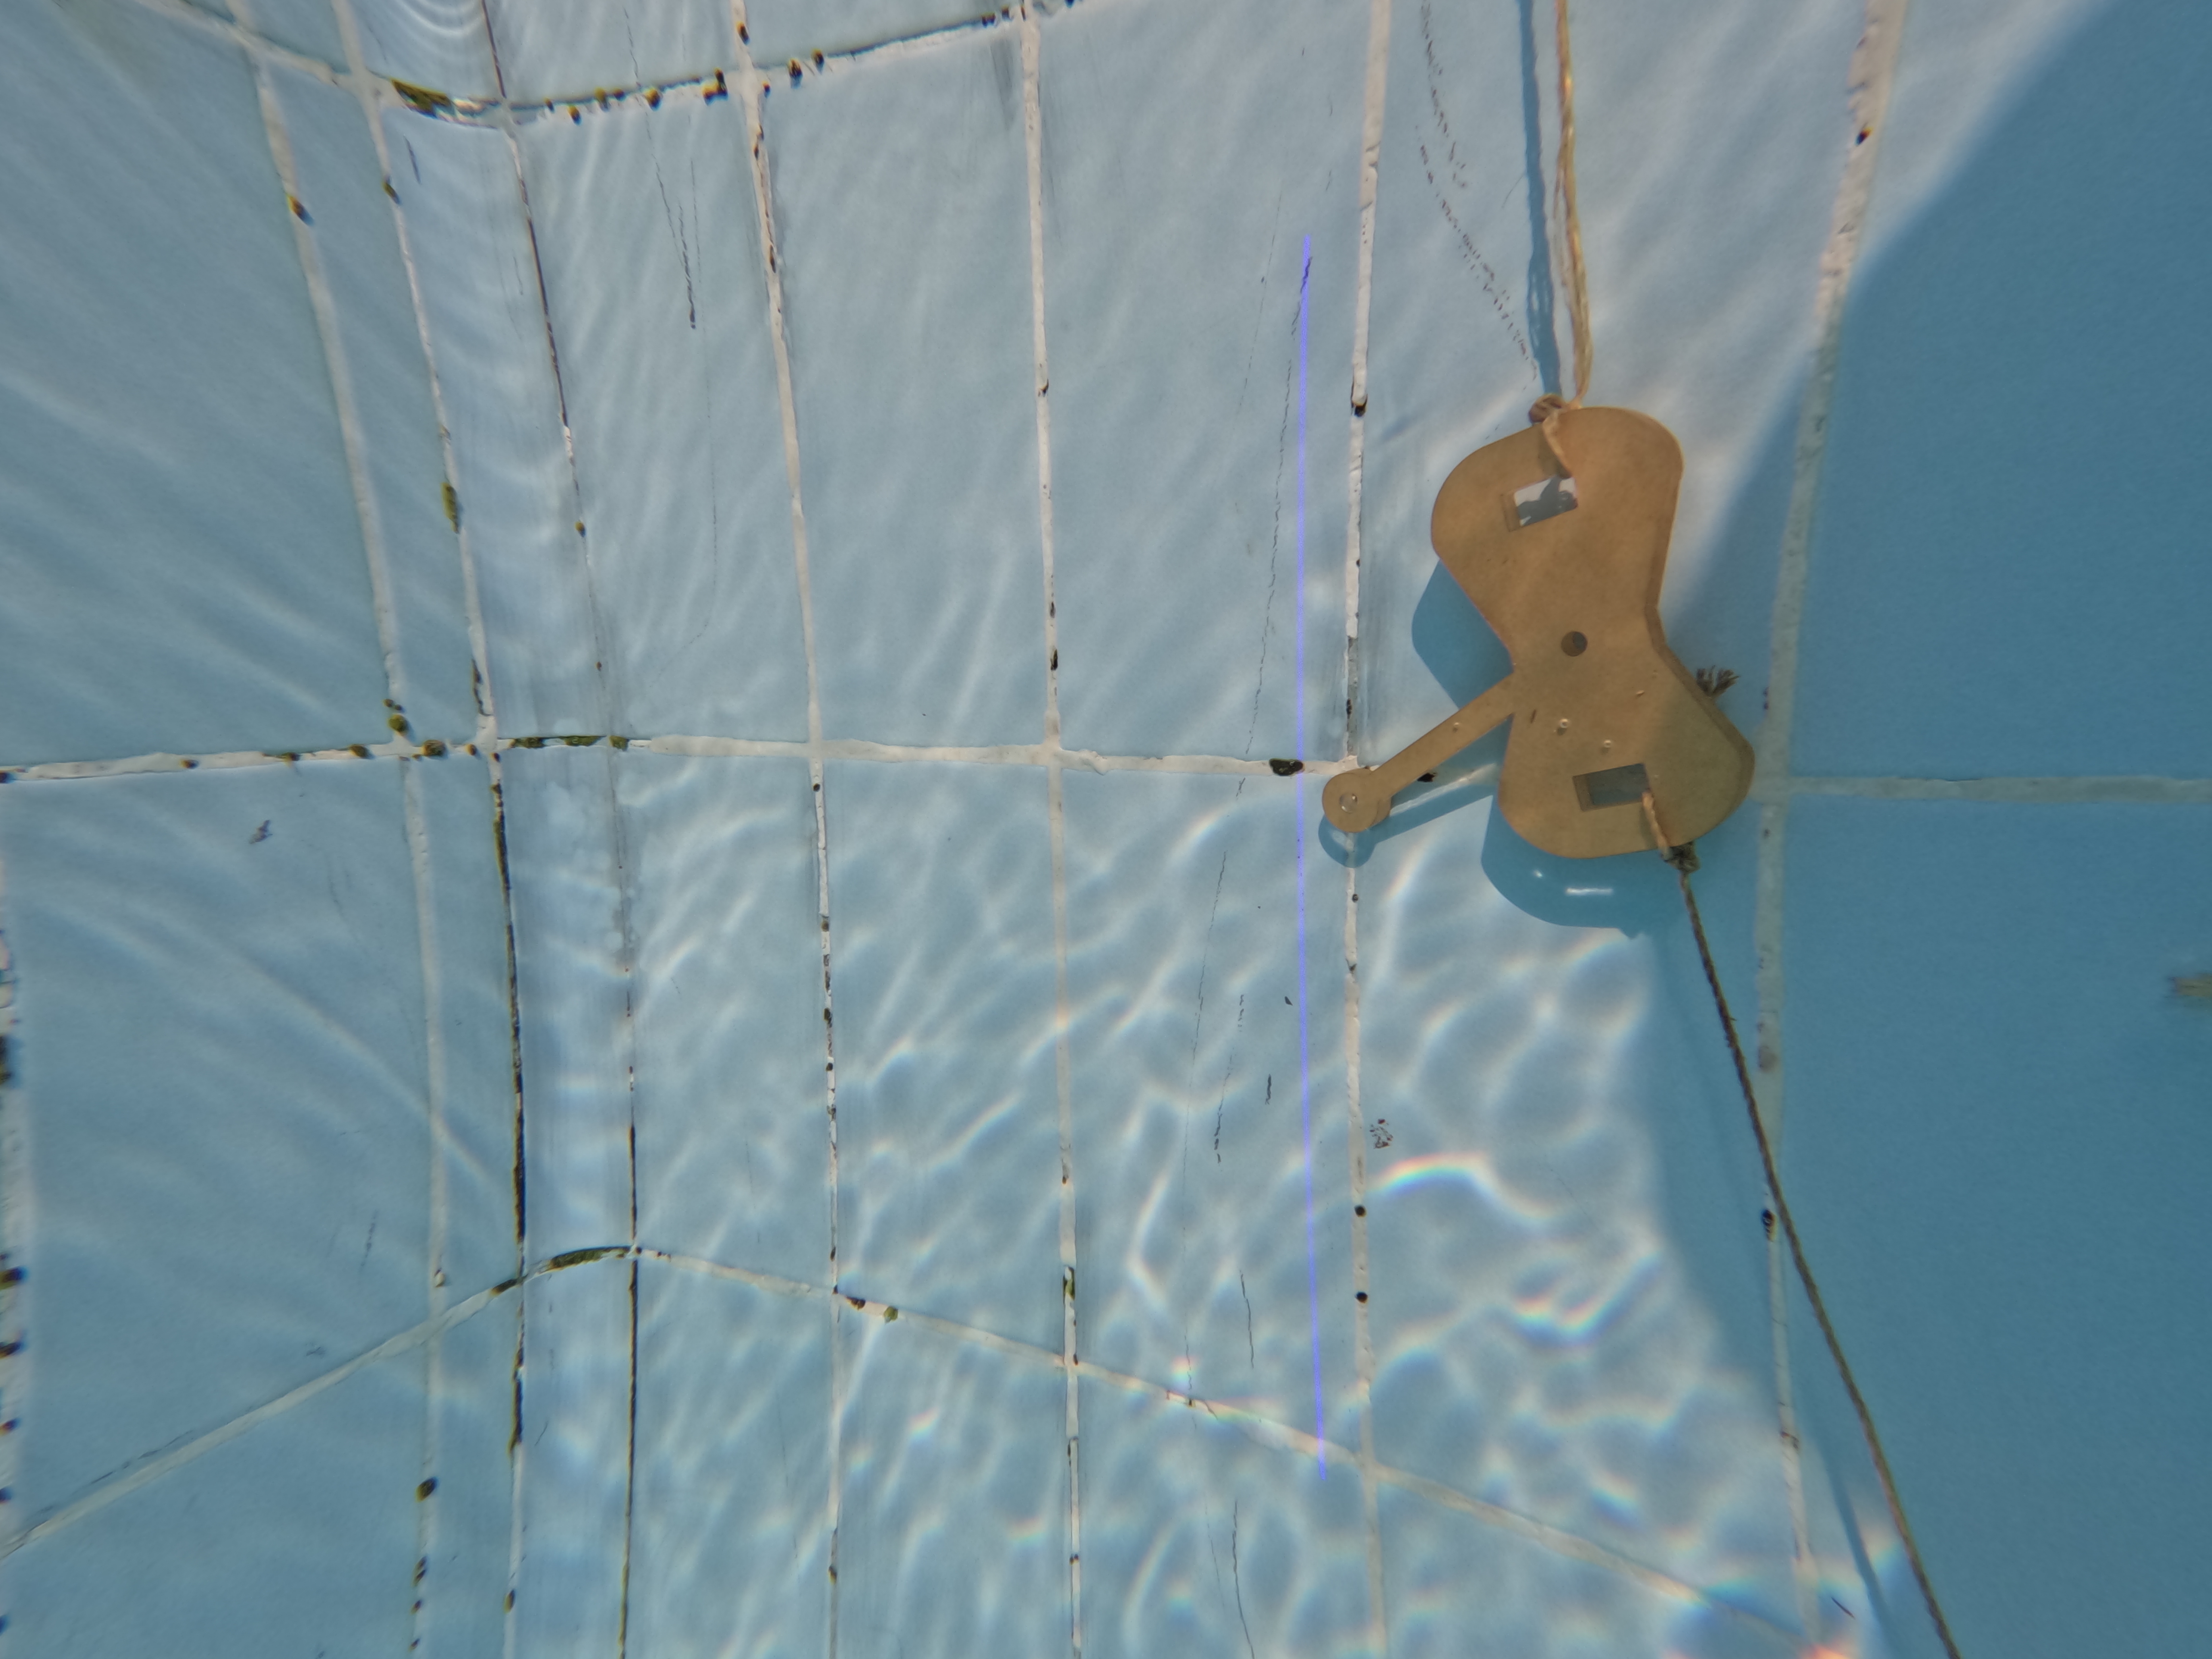

Supplement: Supplementary file 655 [file G0019669.pdf › Level_5_1/G0019669.pdf]

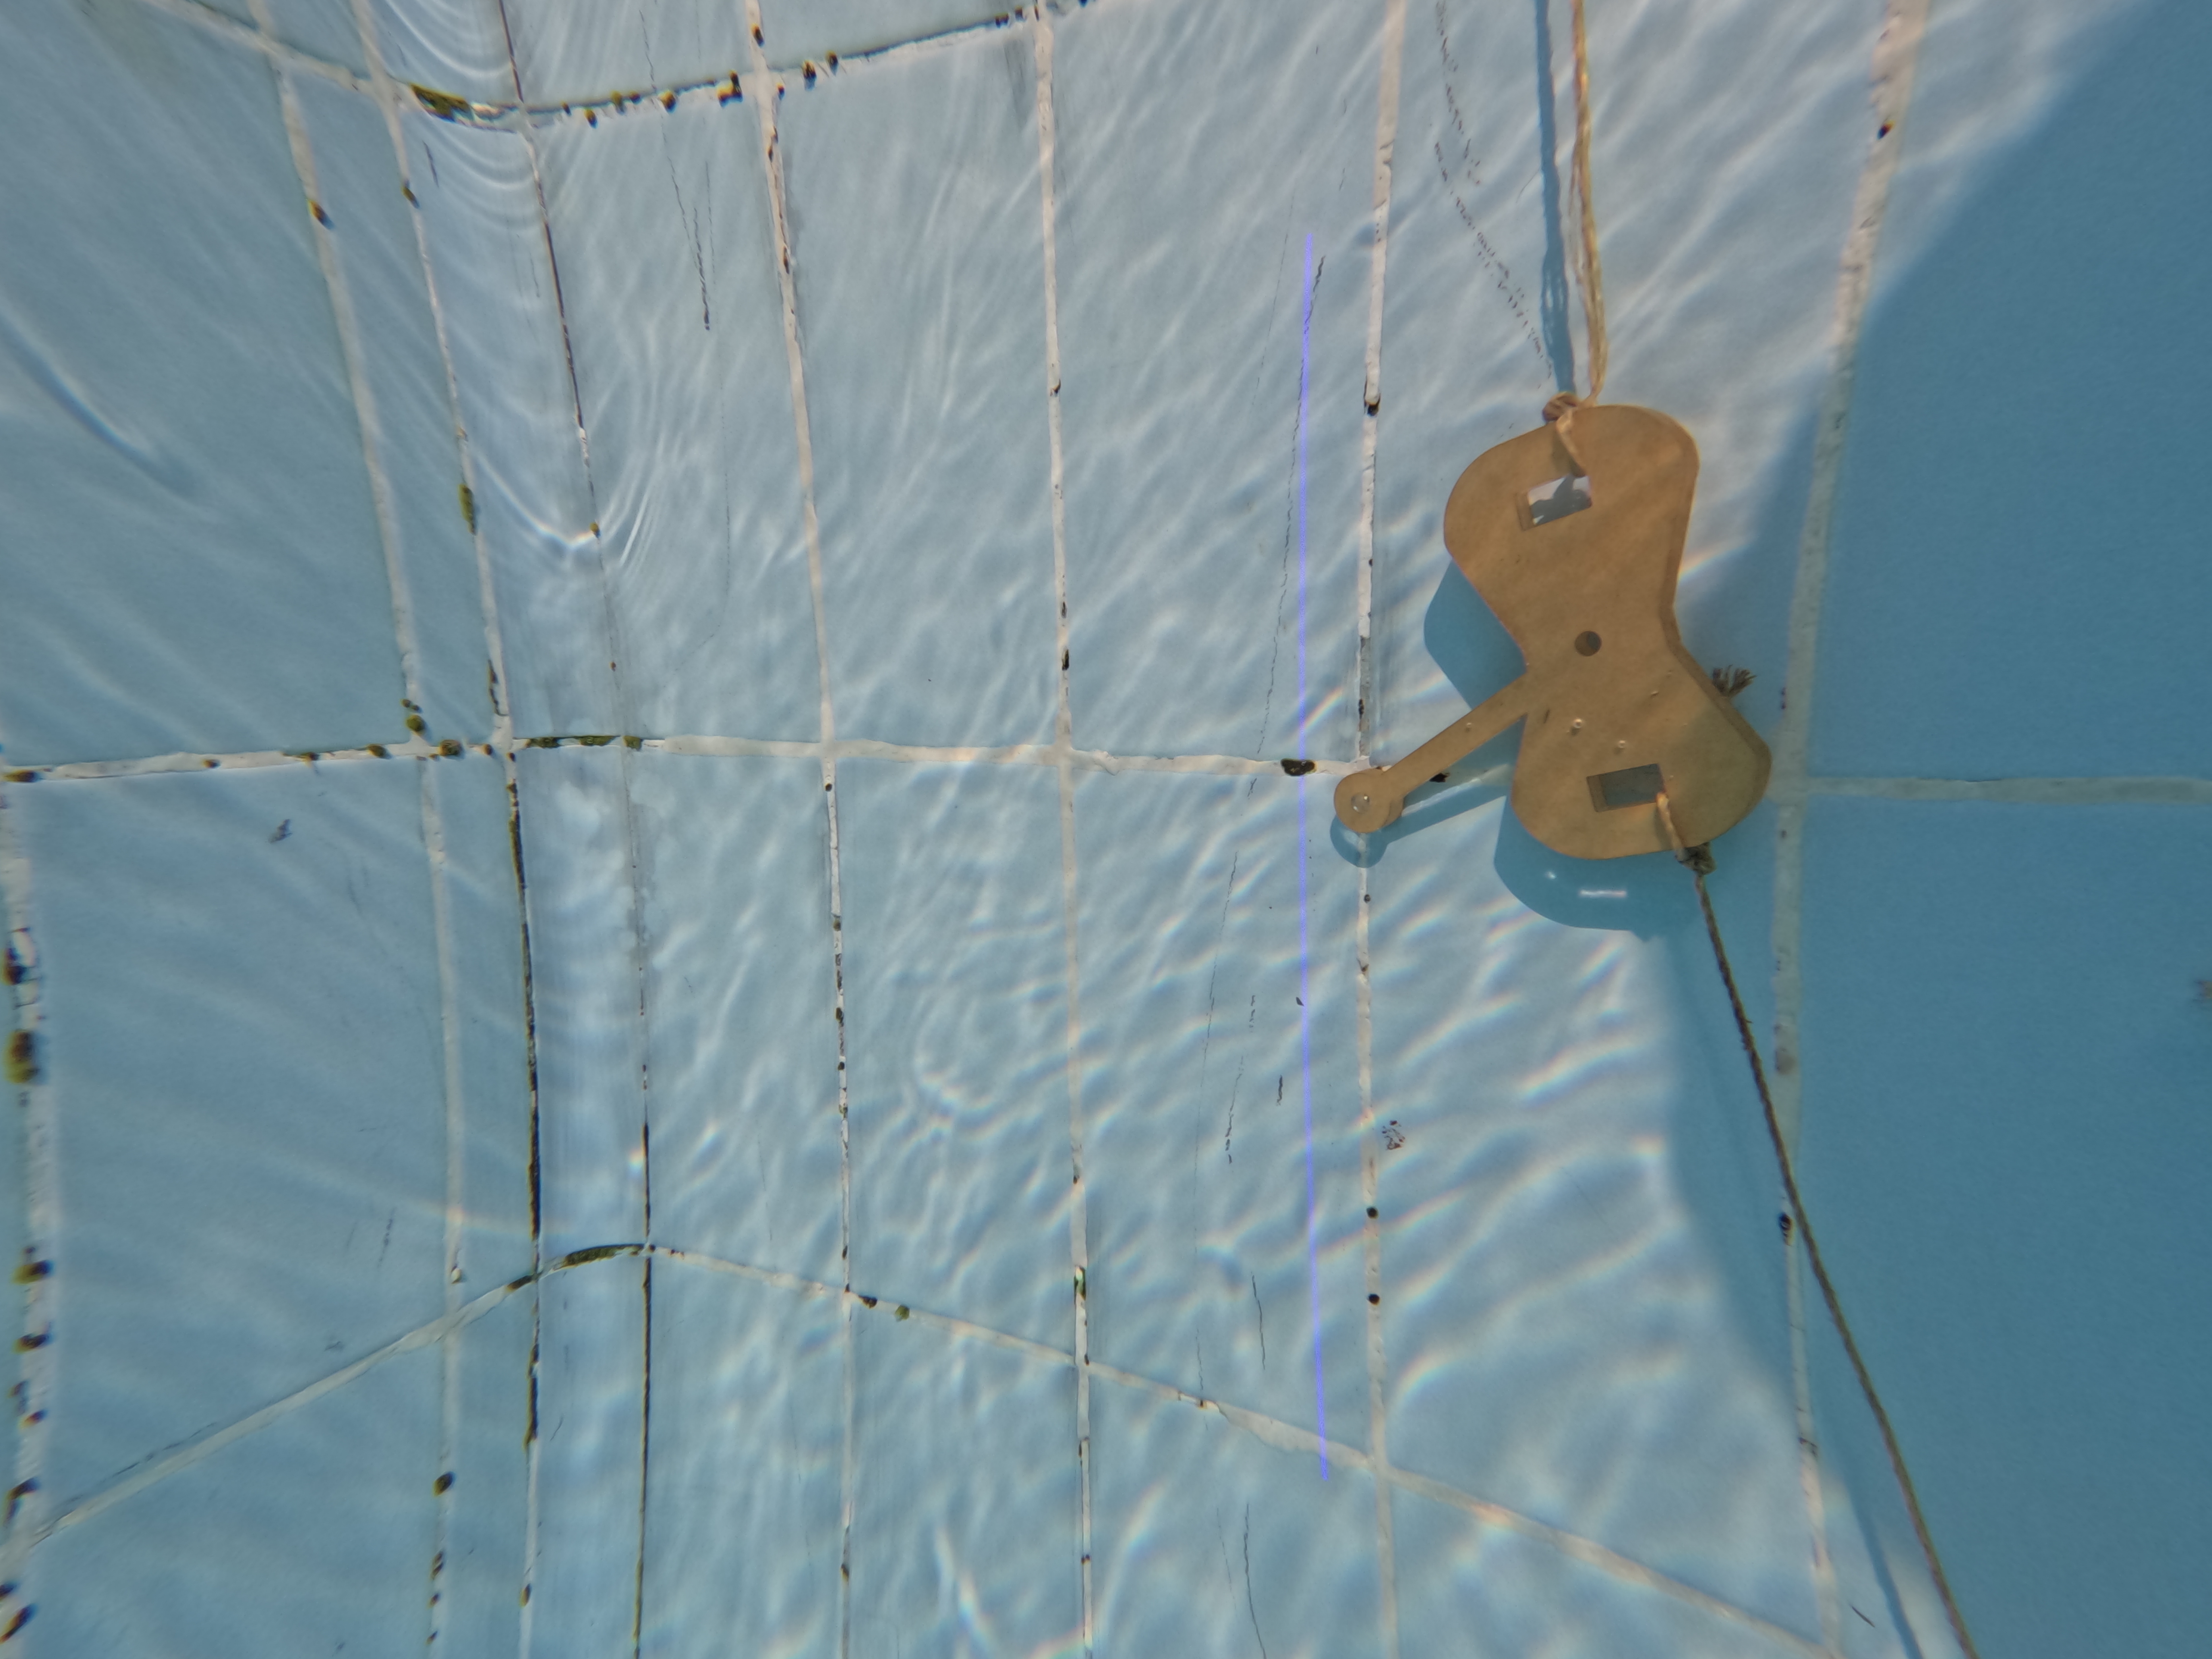

Supplement: Supplementary file 656 [file G0019670.pdf › Level_5_1/G0019670.pdf]

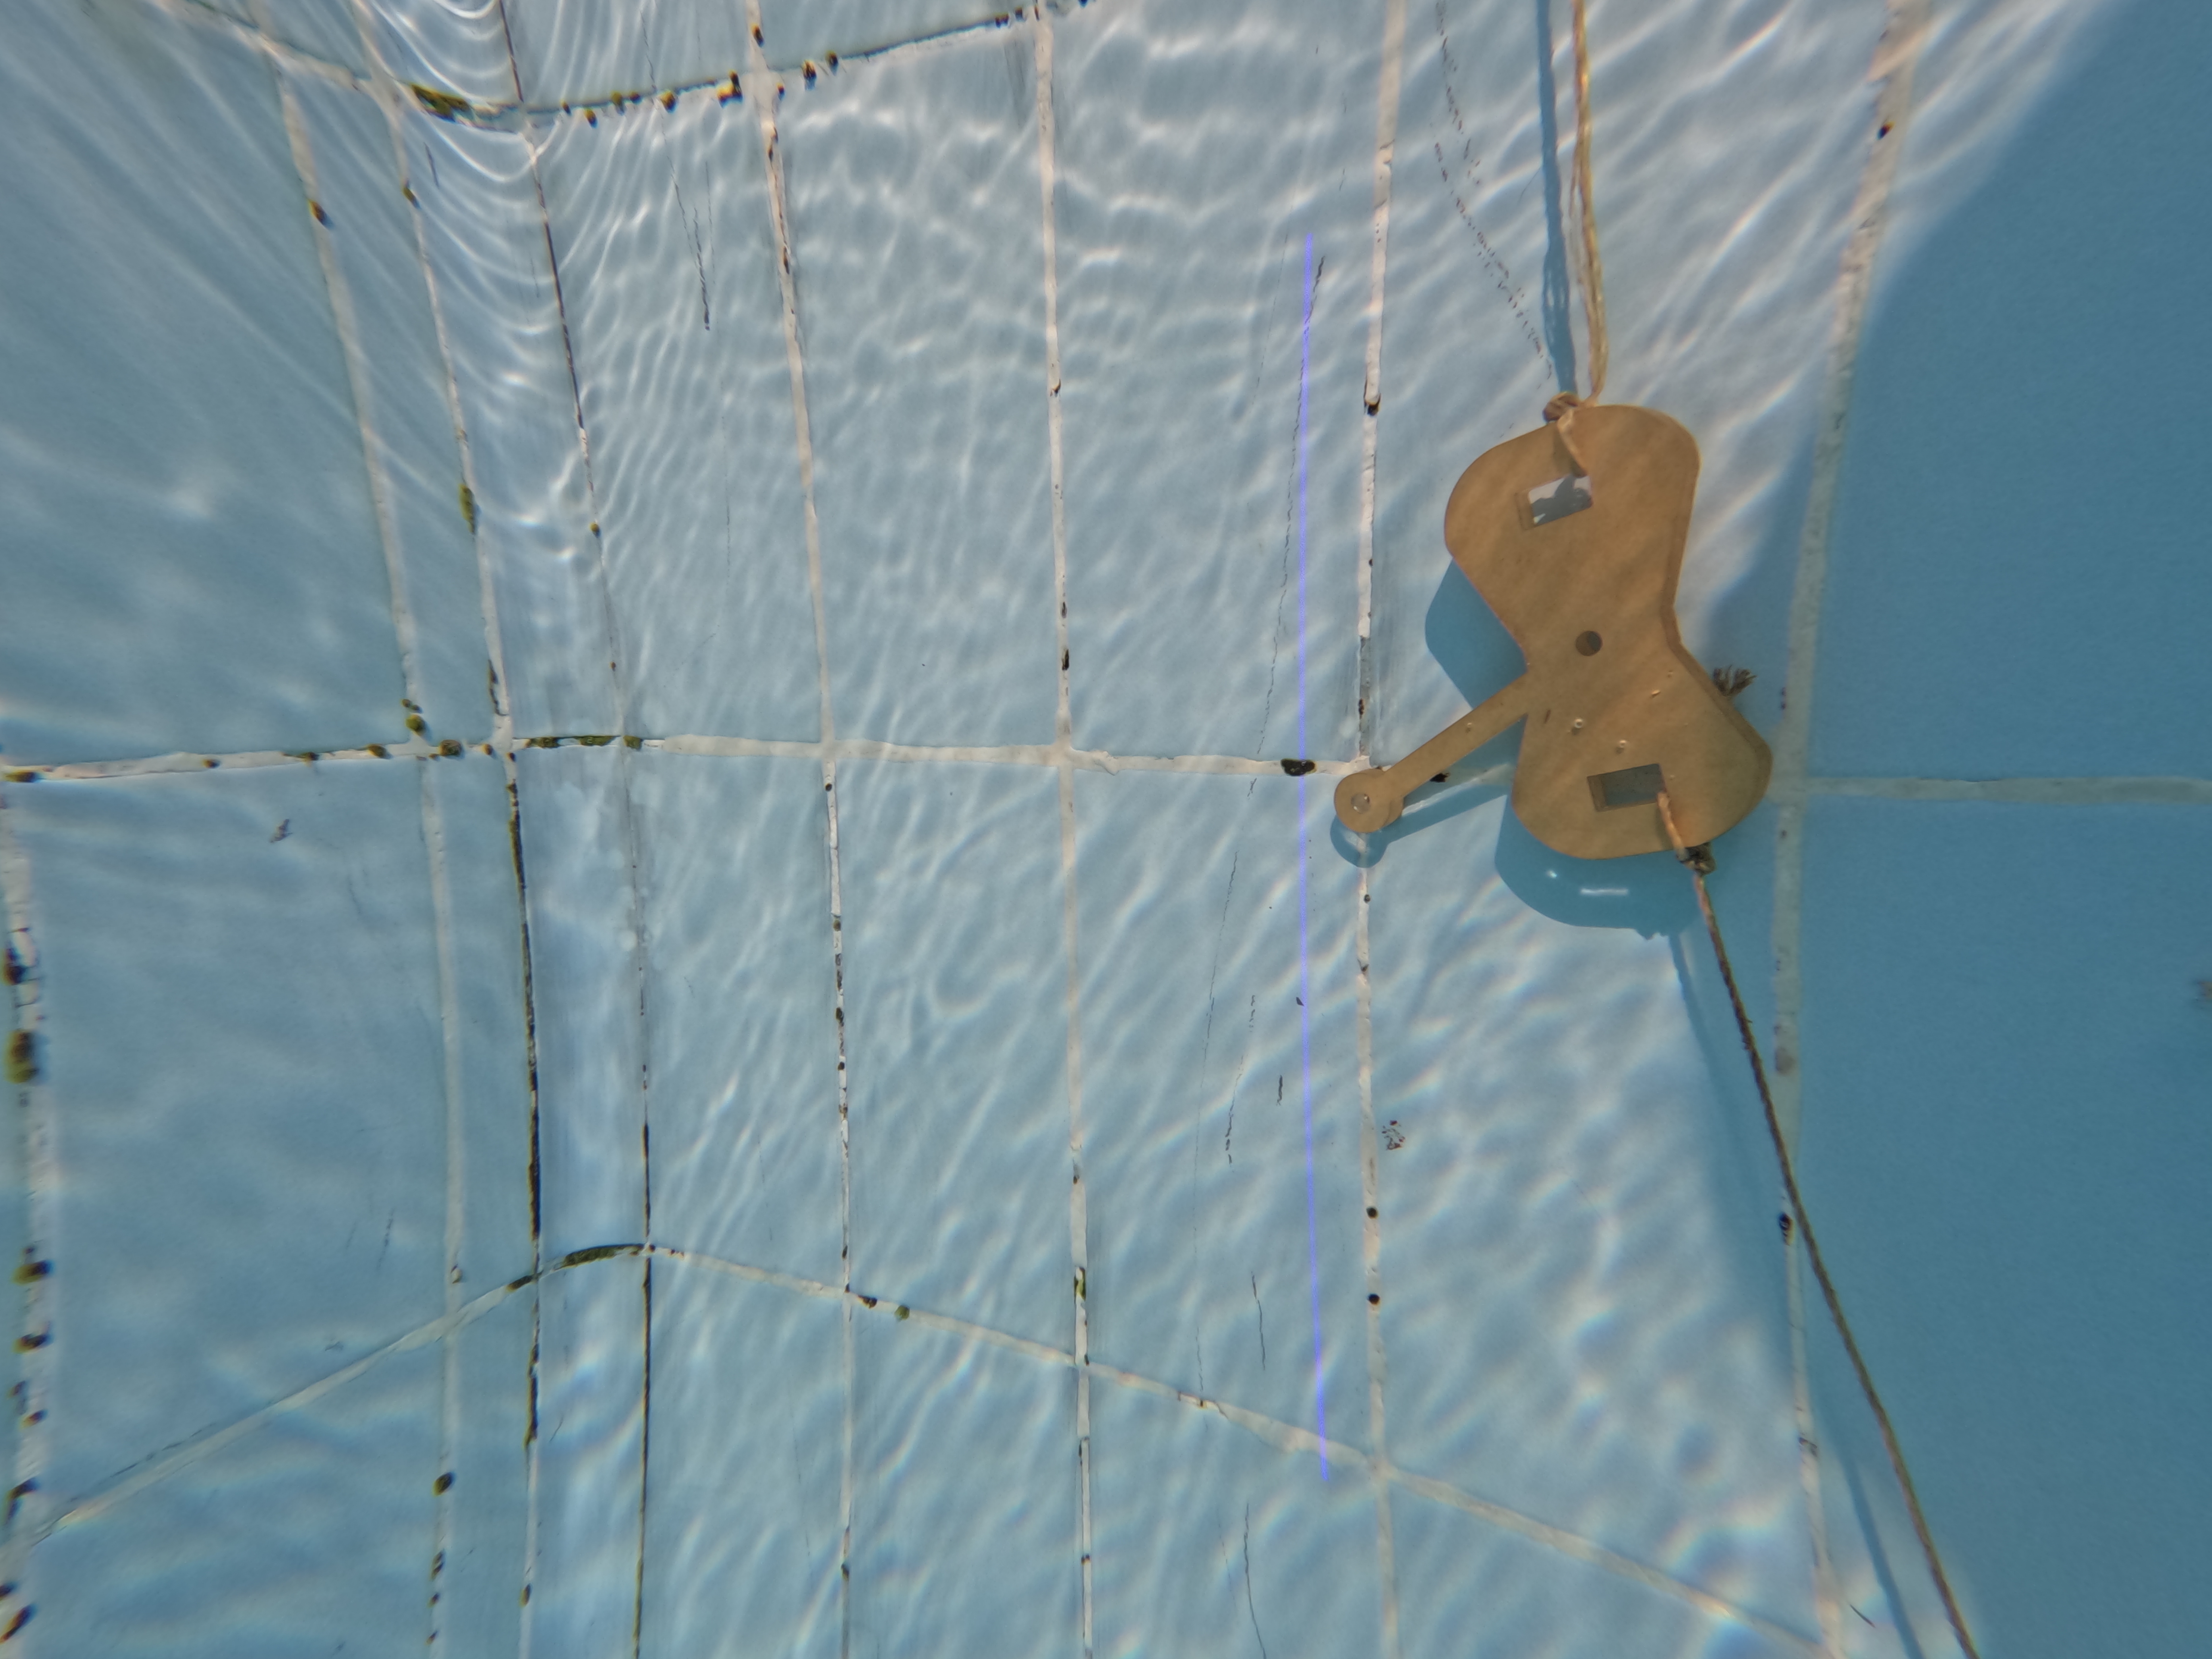

Supplement: Supplementary file 657 [file G0019671.pdf › Level_5_1/G0019671.pdf]

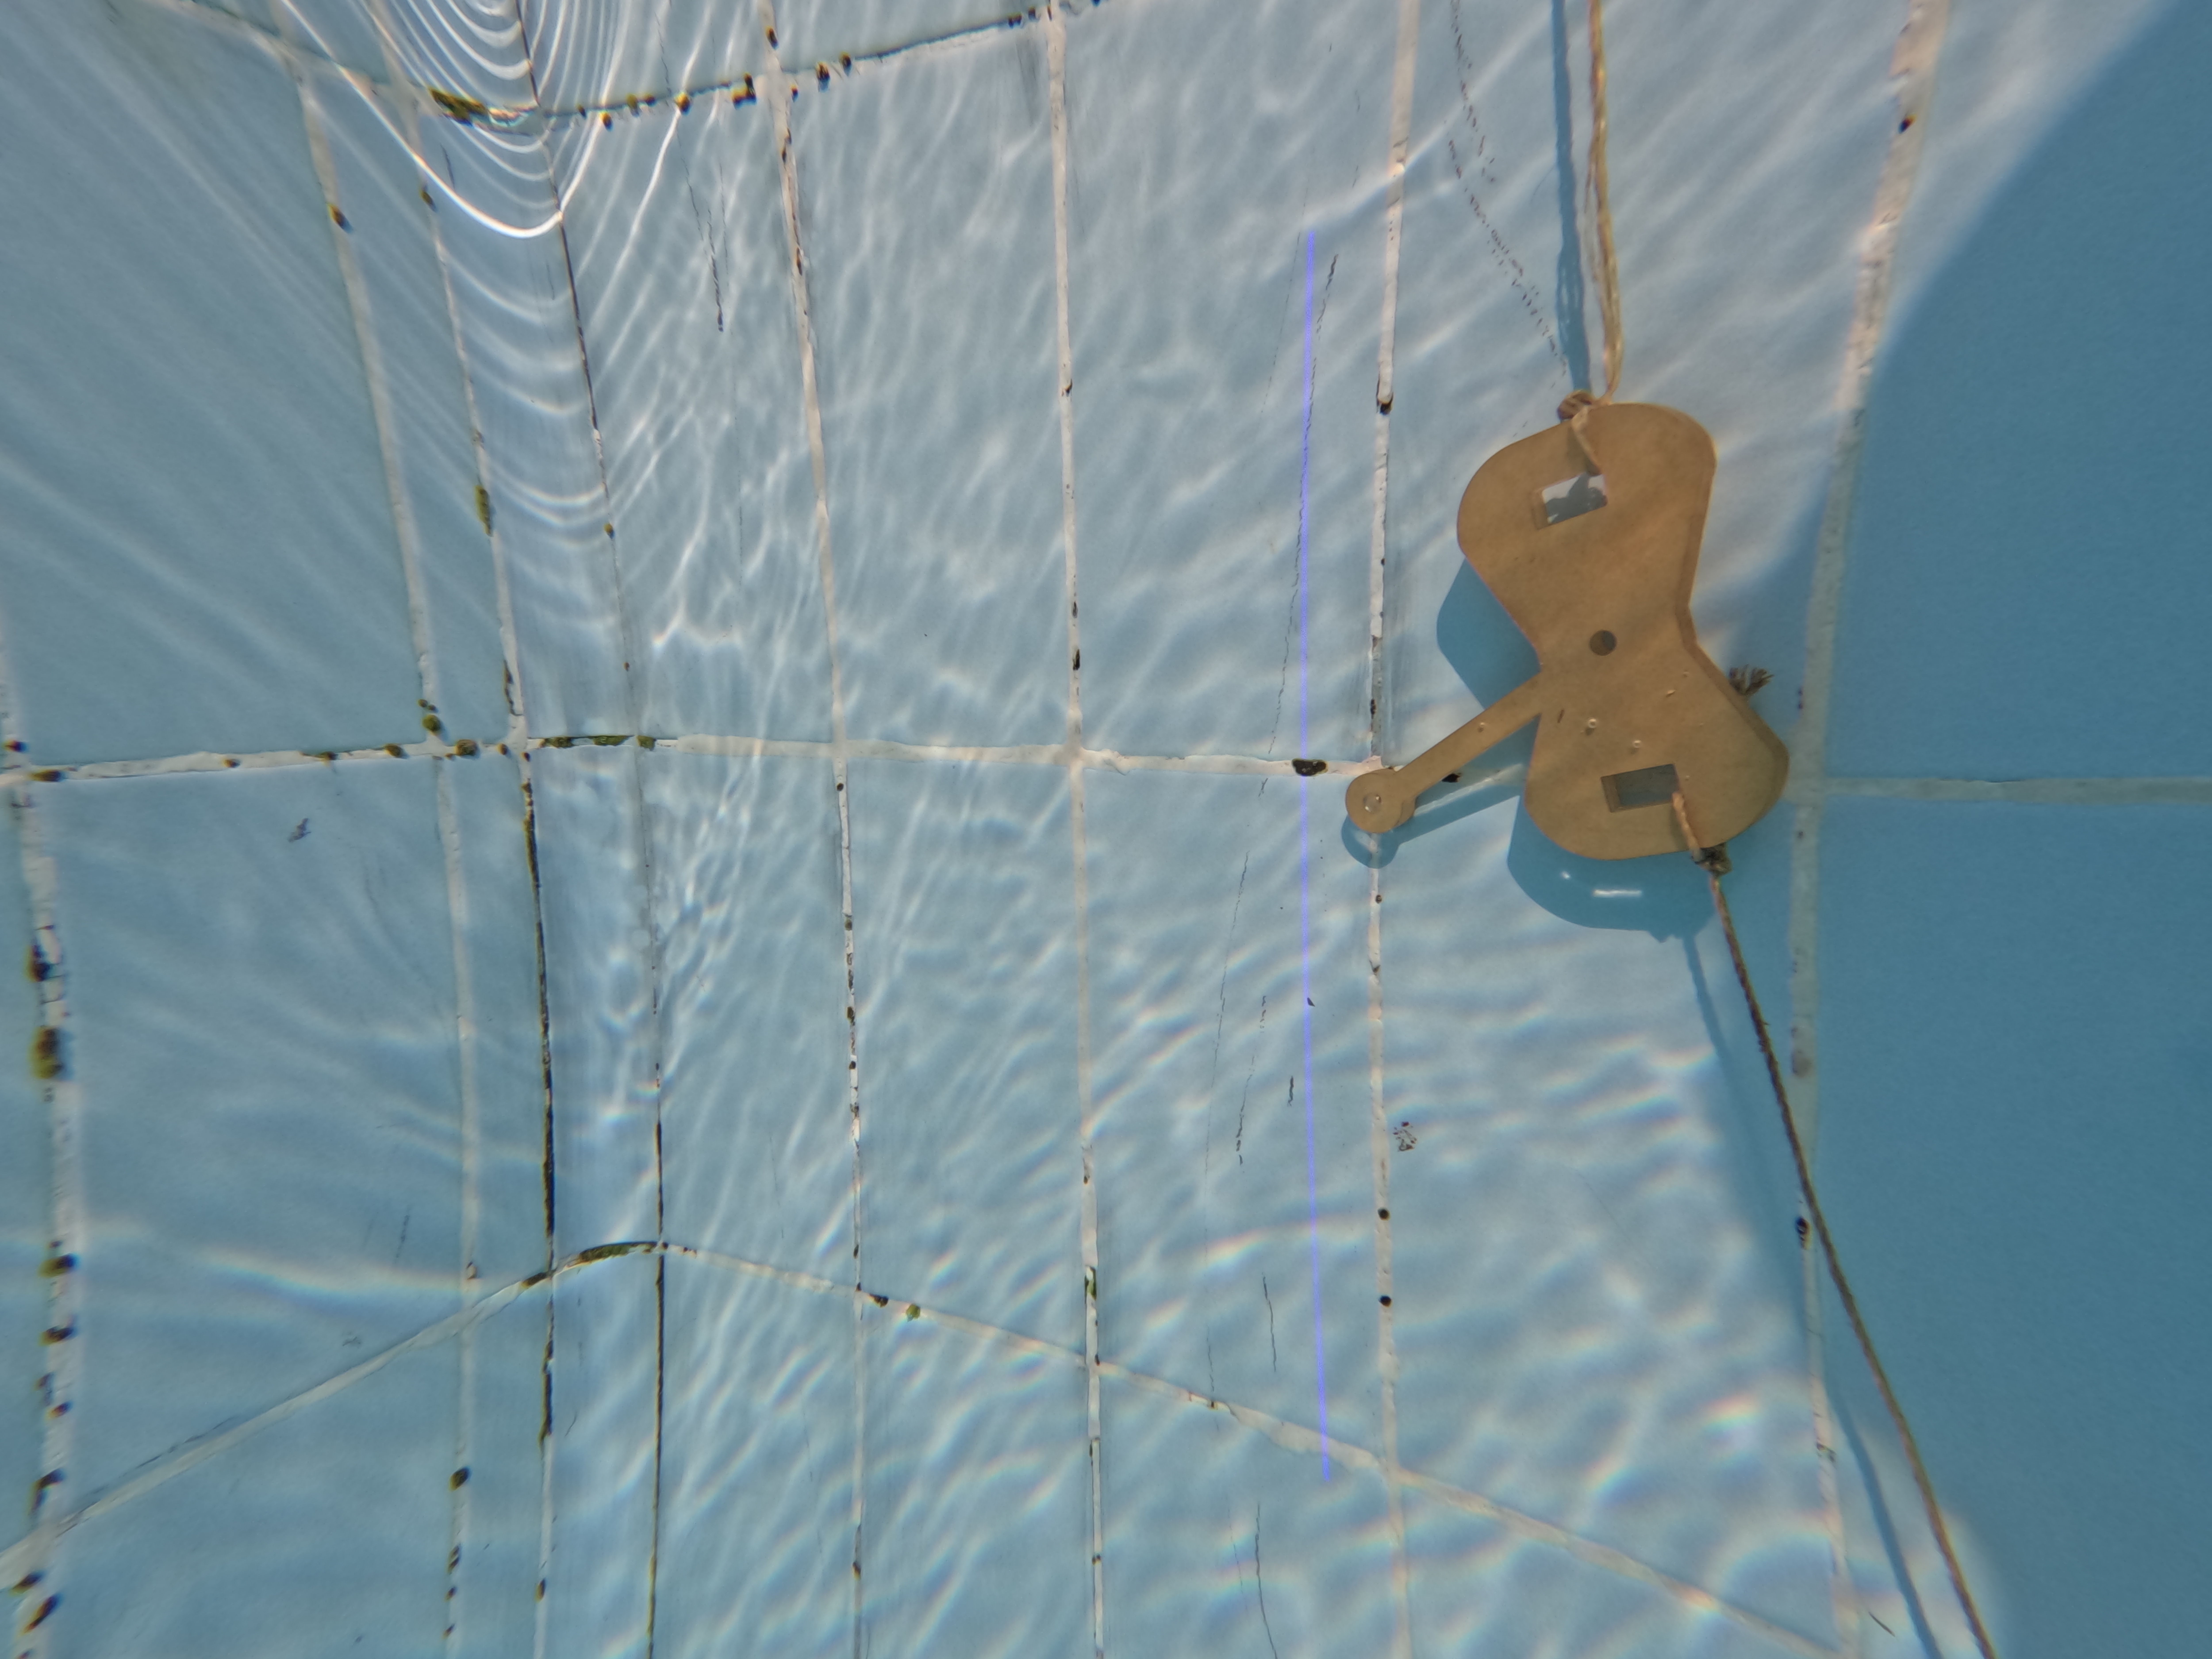

Supplement: Supplementary file 658 [file G0019672.pdf › Level_5_1/G0019672.pdf]

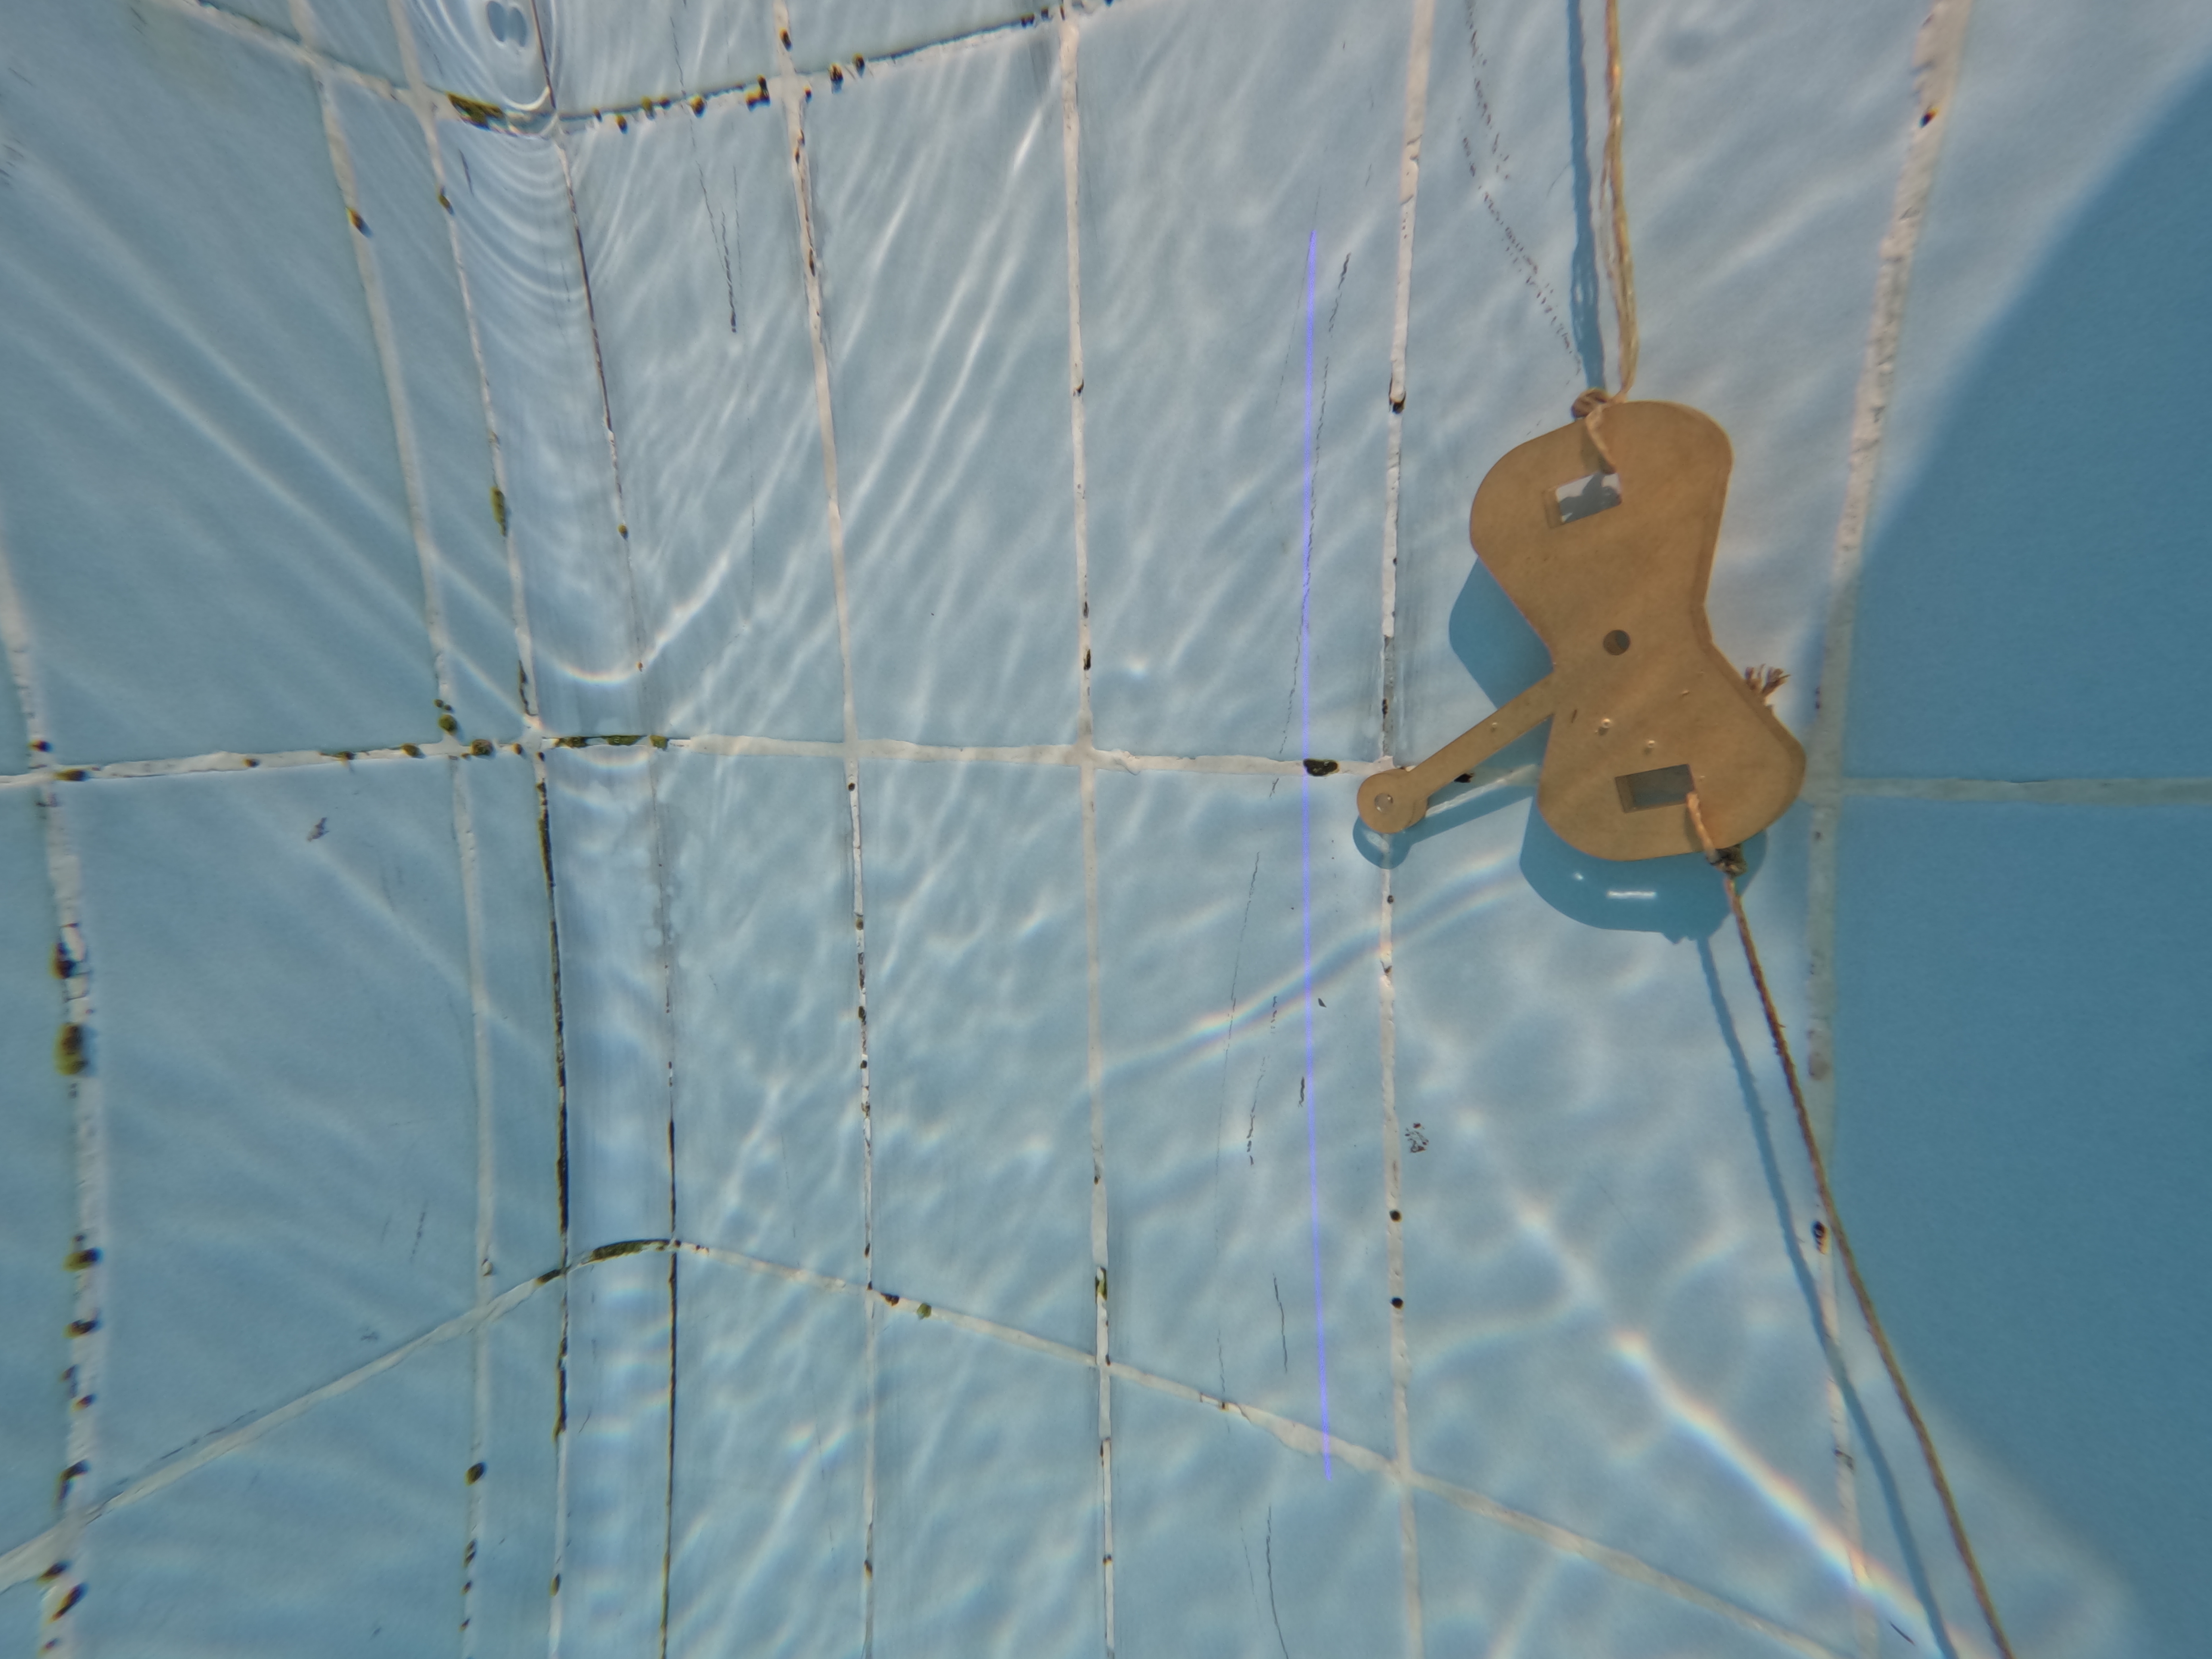

Supplement: Supplementary file 659 [file G0019673.pdf › Level_5_1/G0019673.pdf]

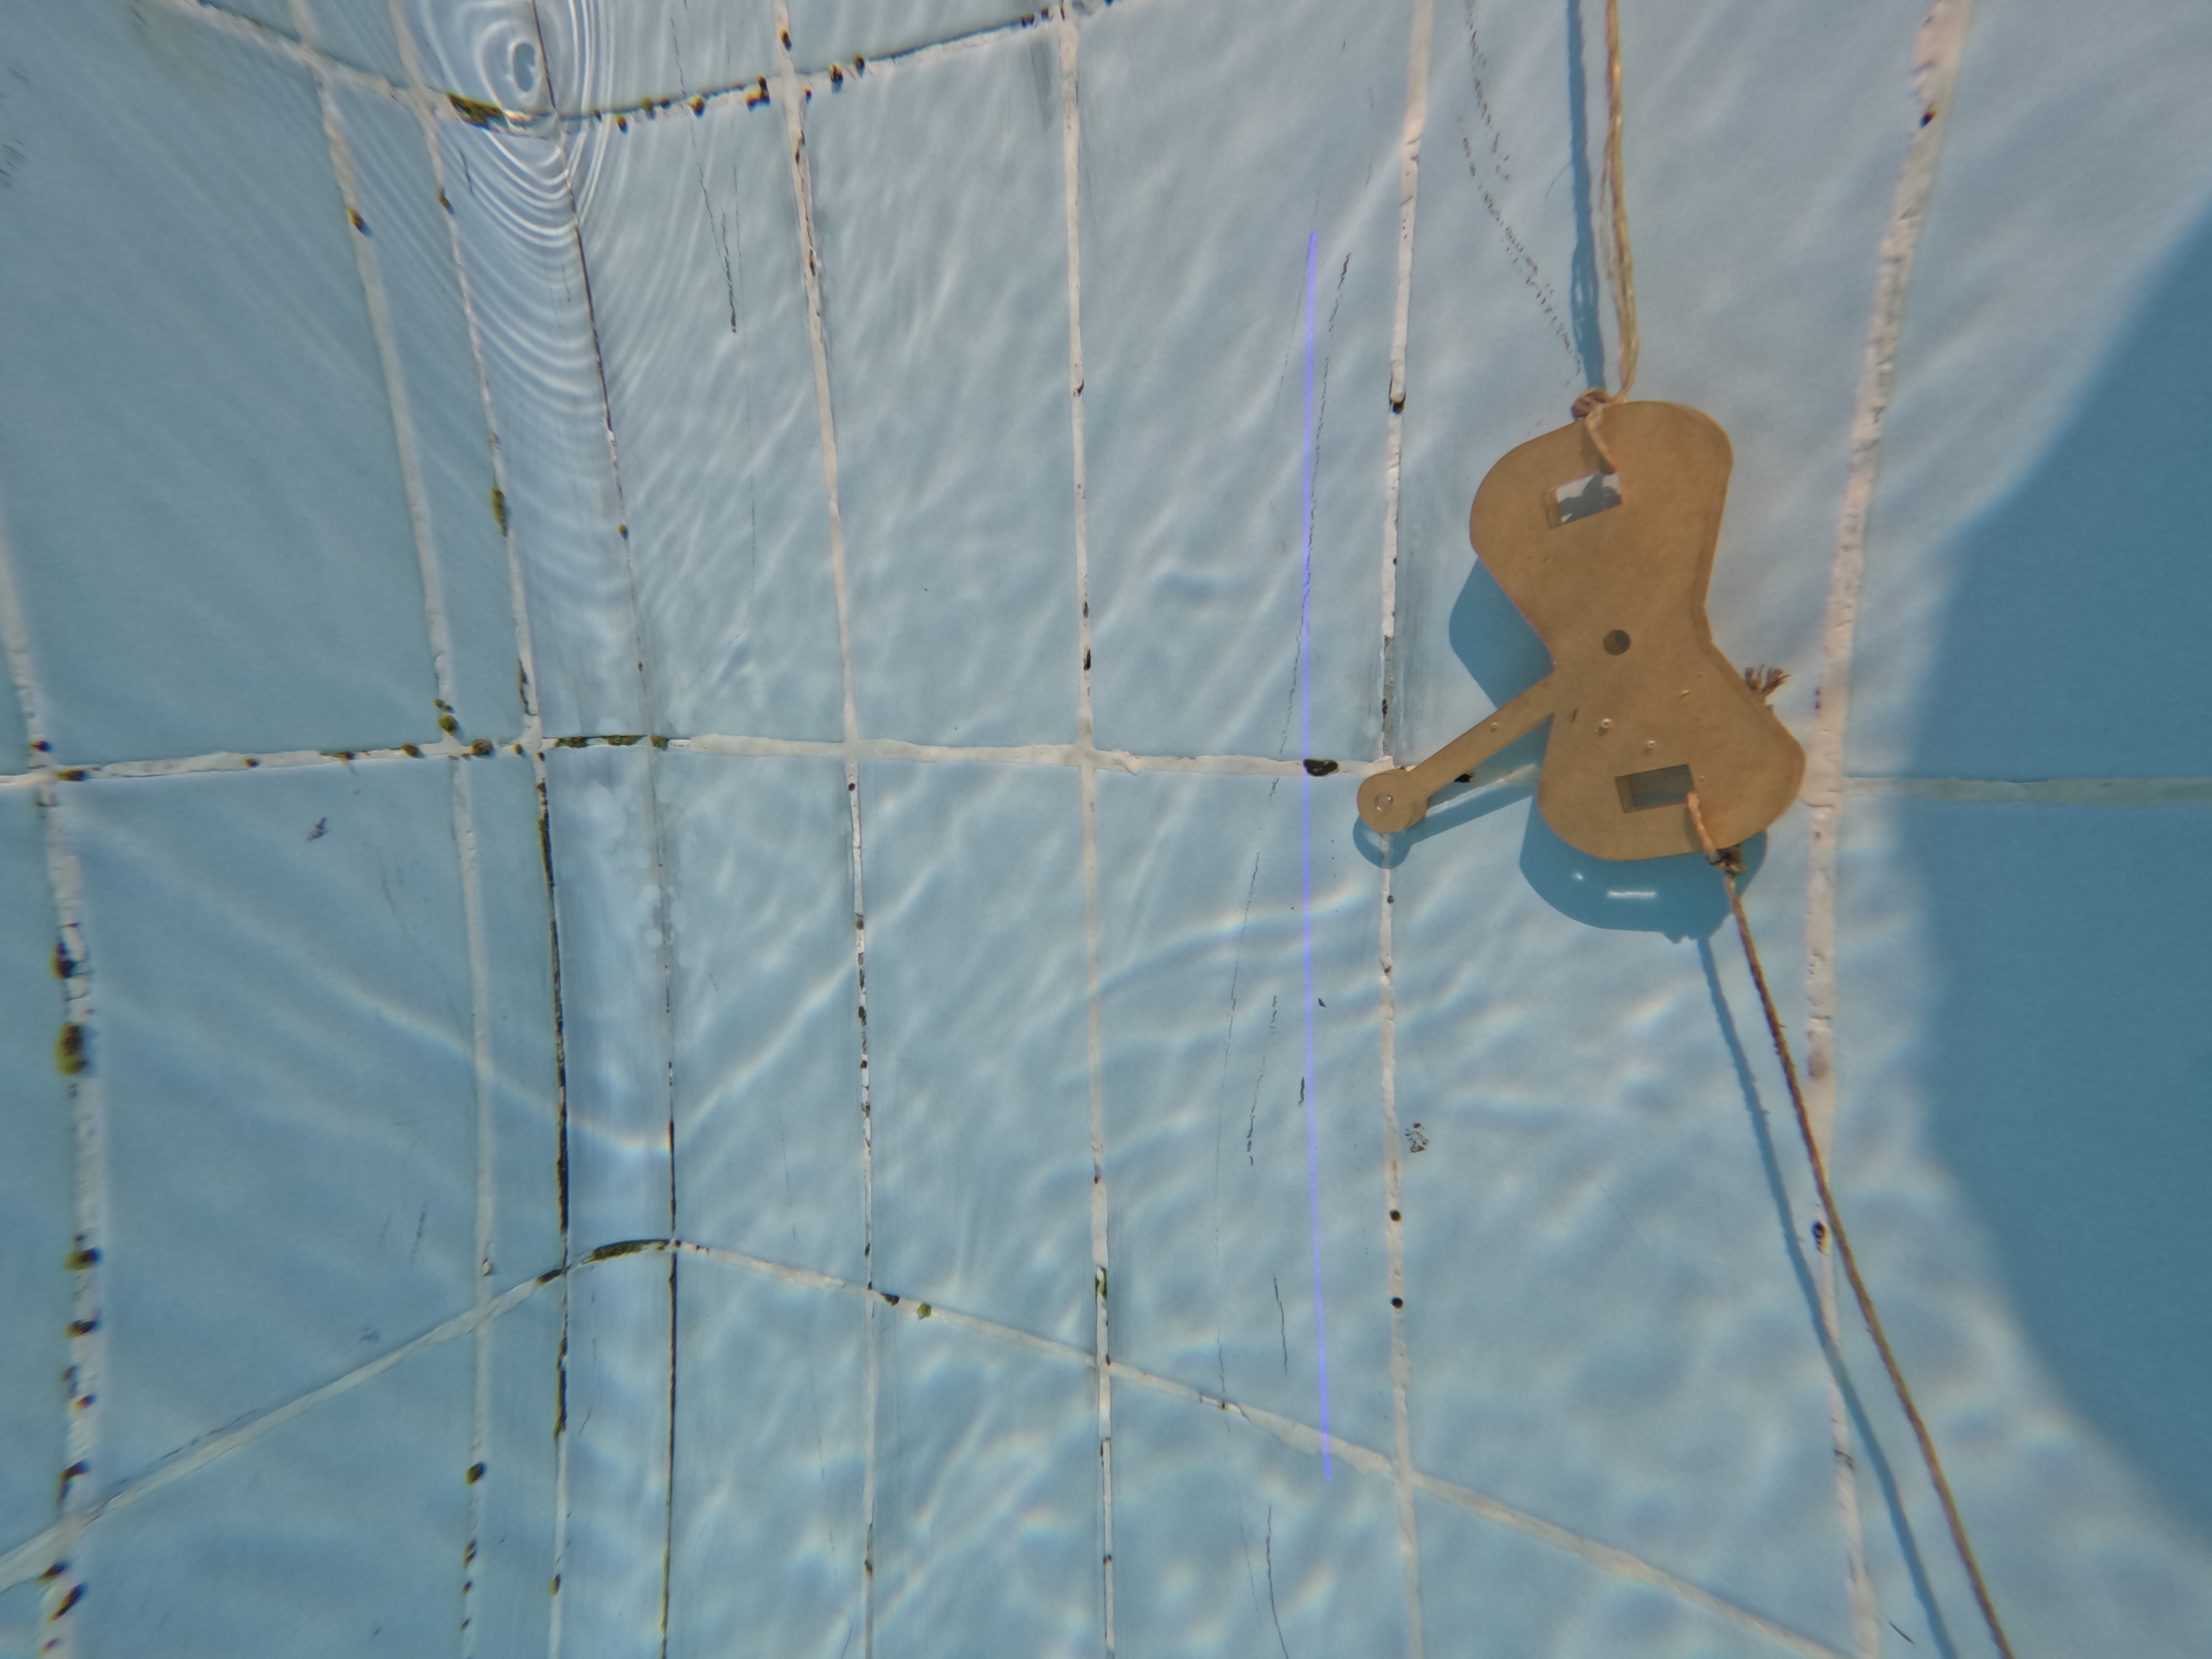

Supplement: Supplementary file 660 [file G0019674.pdf › Level_5_1/G0019674.pdf]

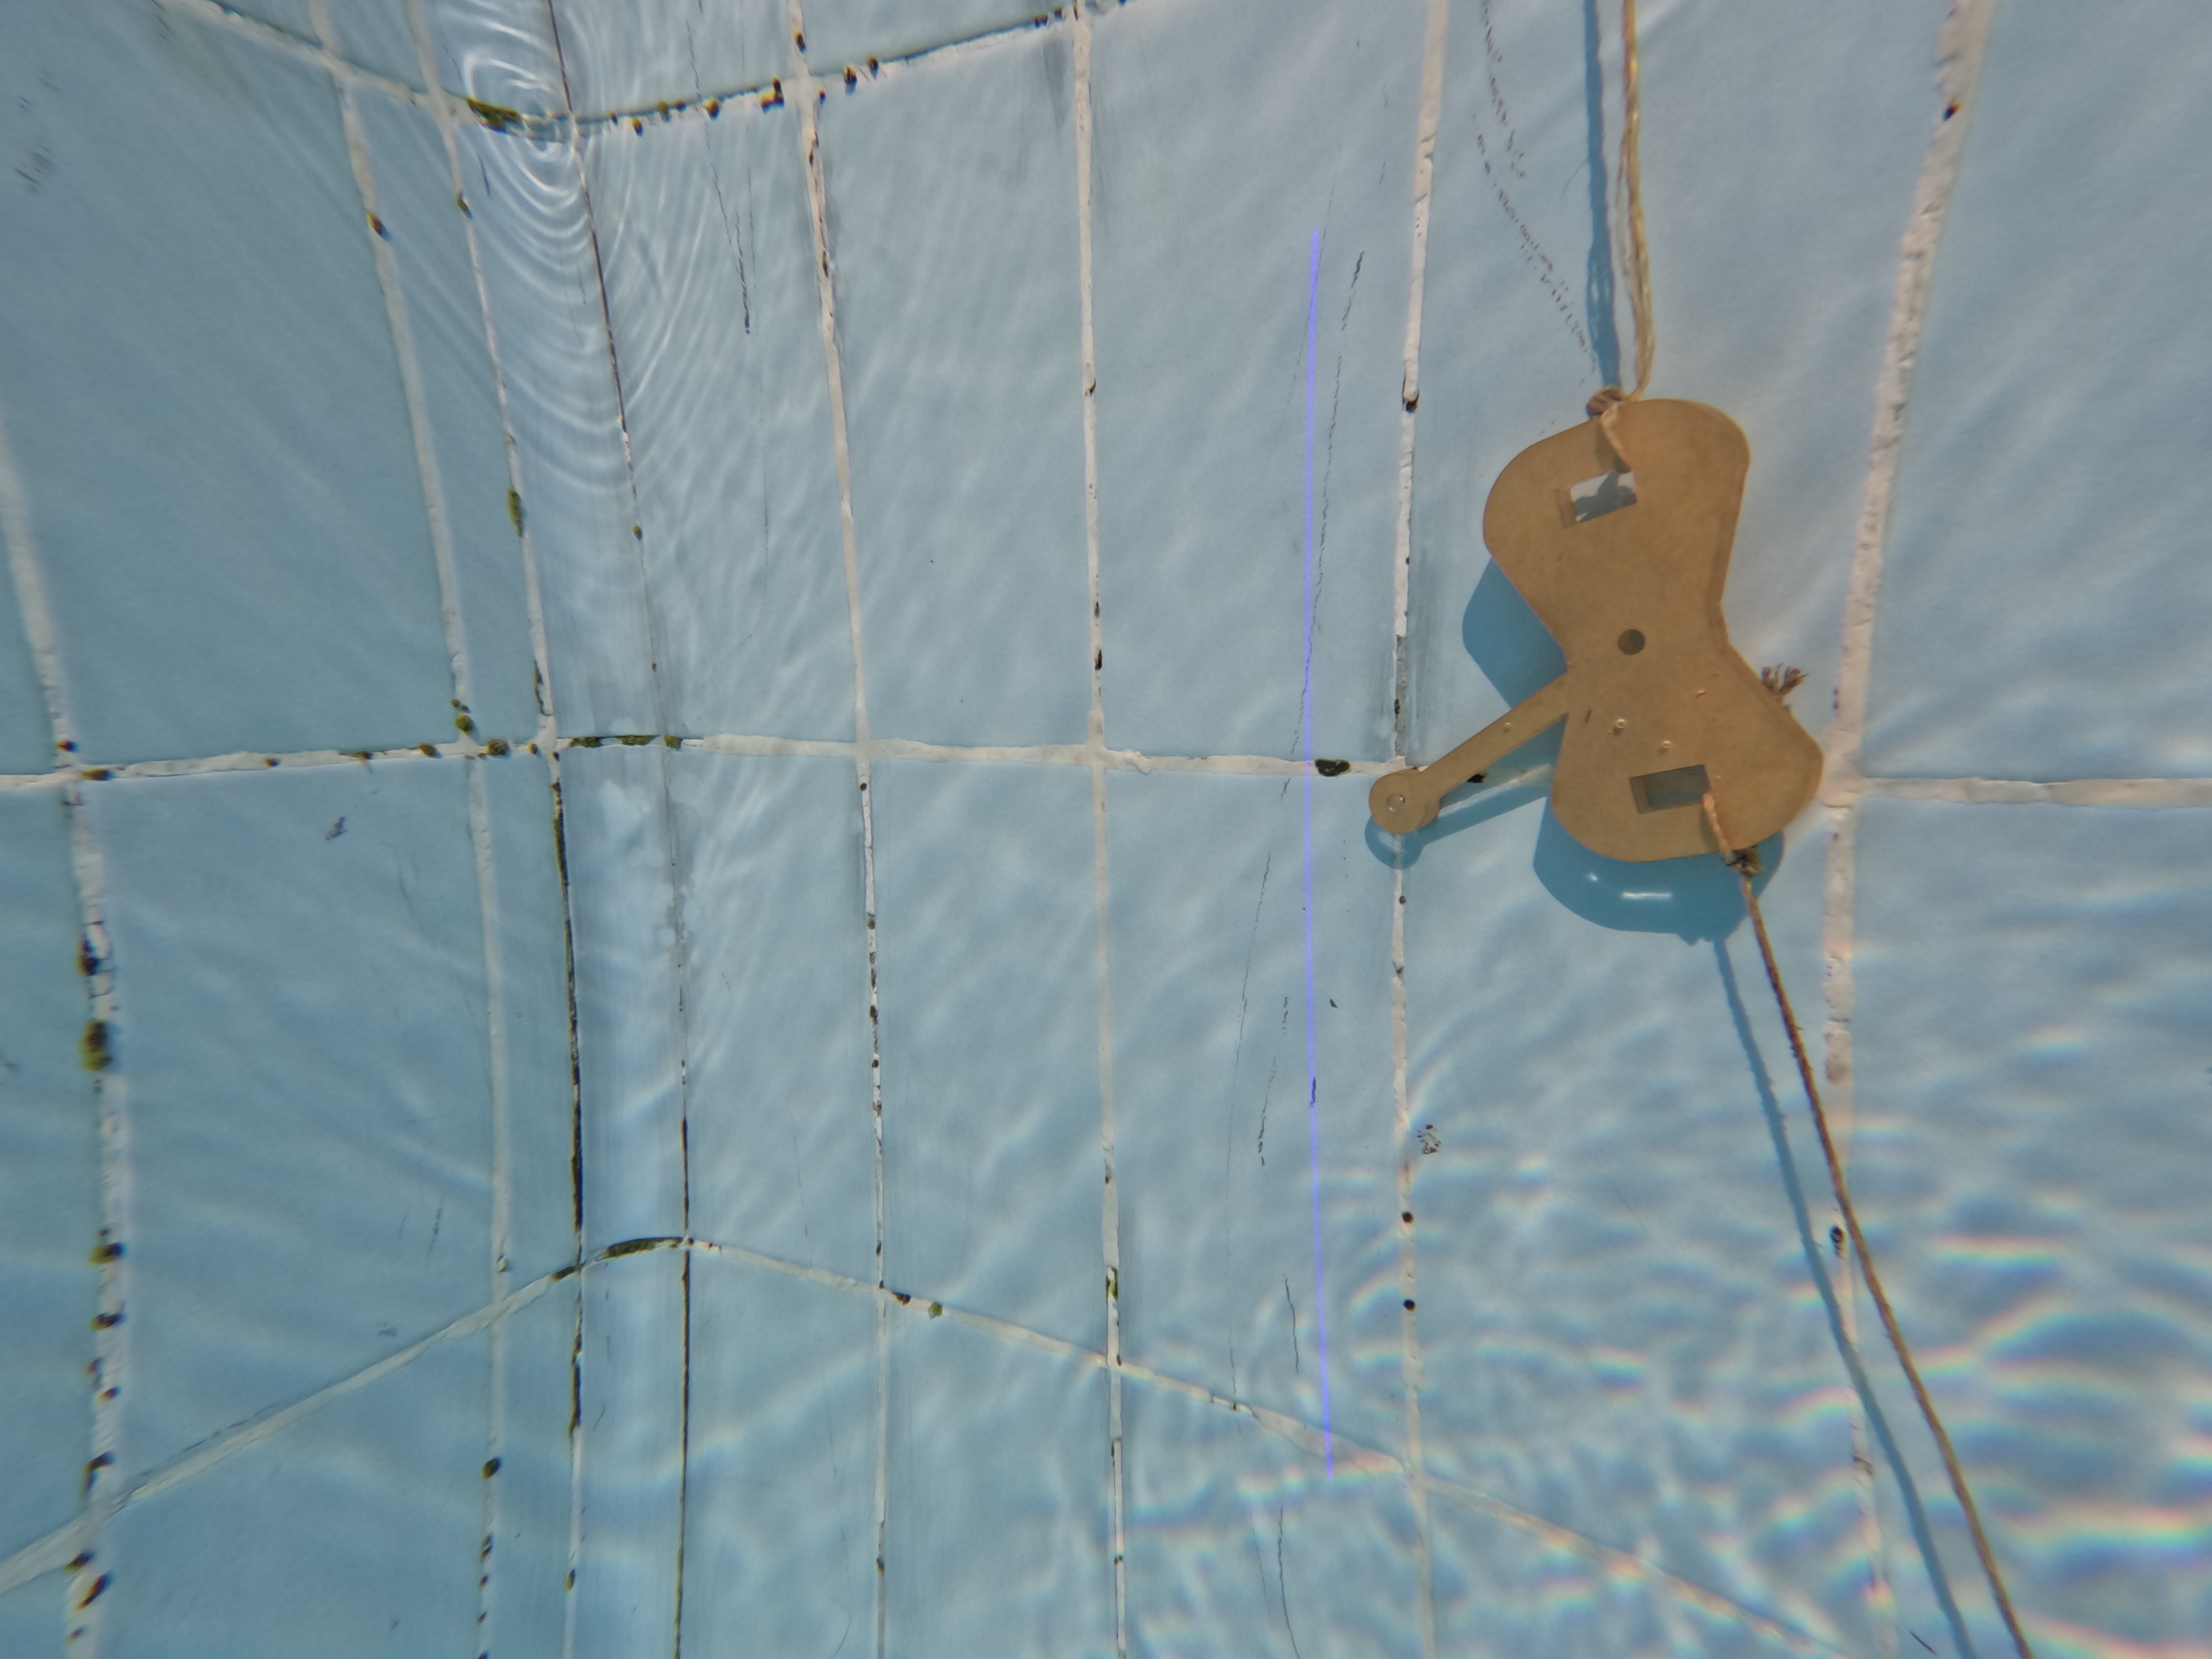

Supplement: Supplementary file 661 [file G0019675.pdf › Level_5_1/G0019675.pdf]

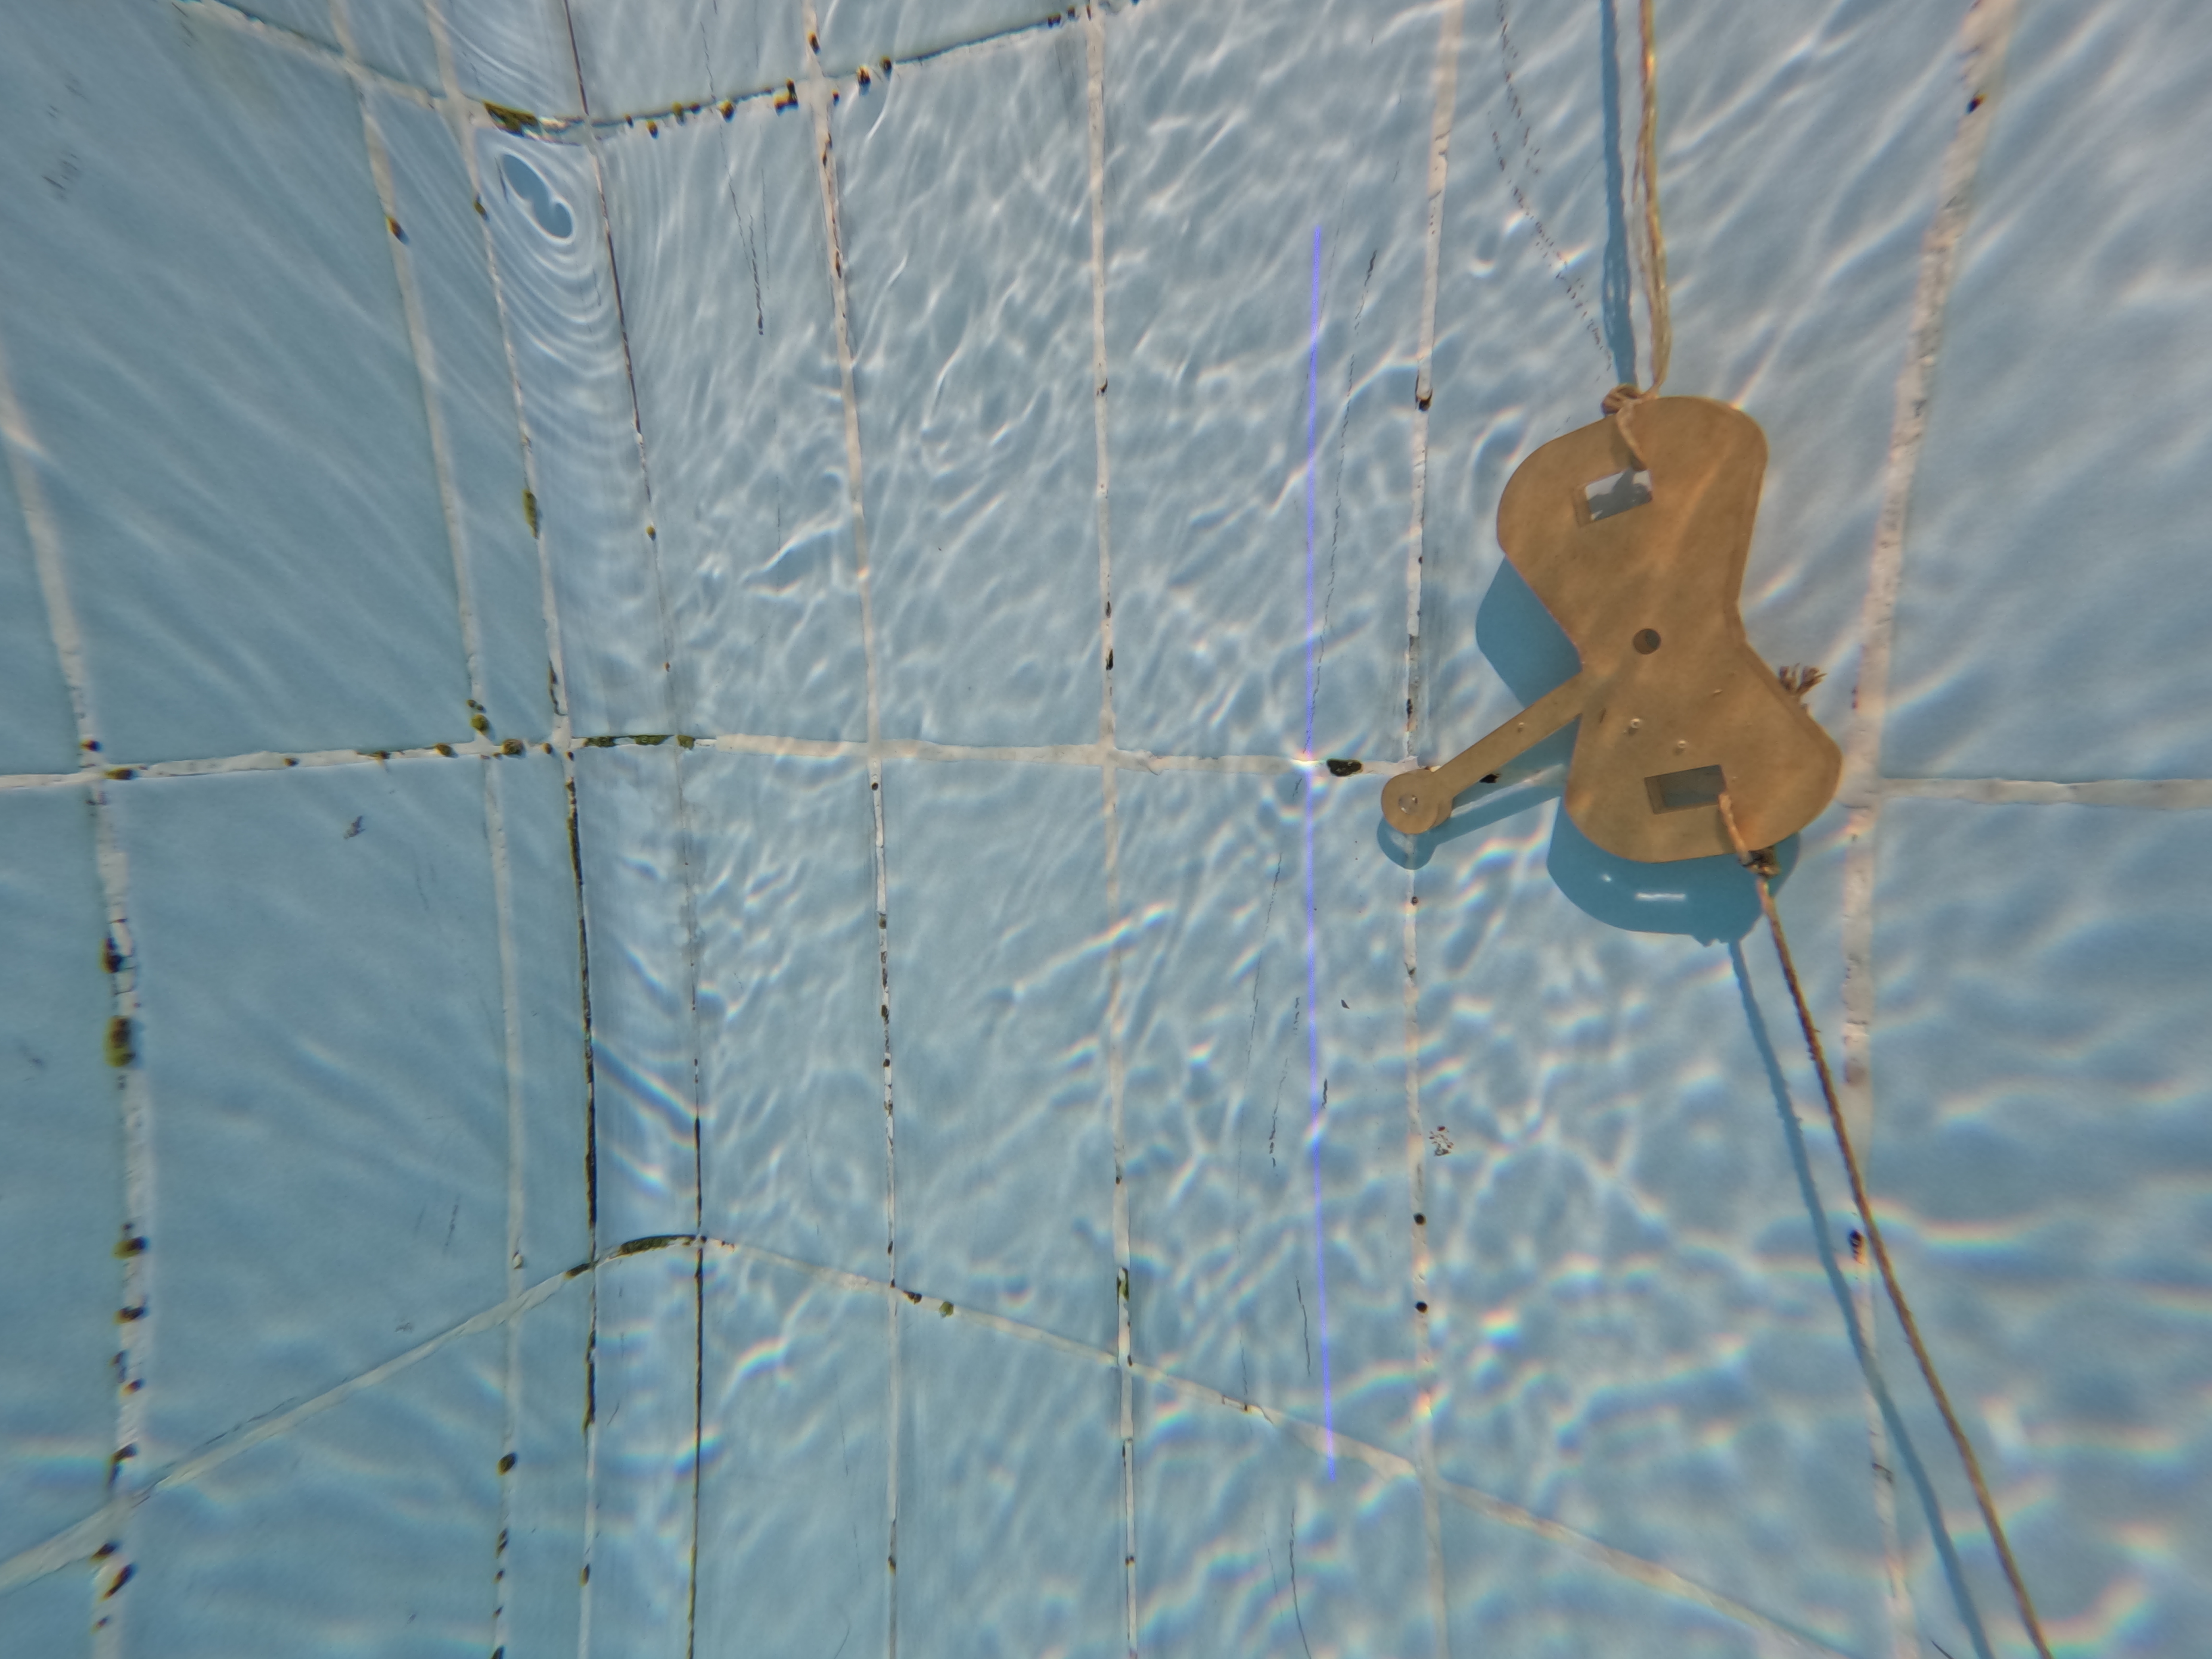

Supplement: Supplementary file 662 [file G0019676.pdf › Level_5_1/G0019676.pdf]

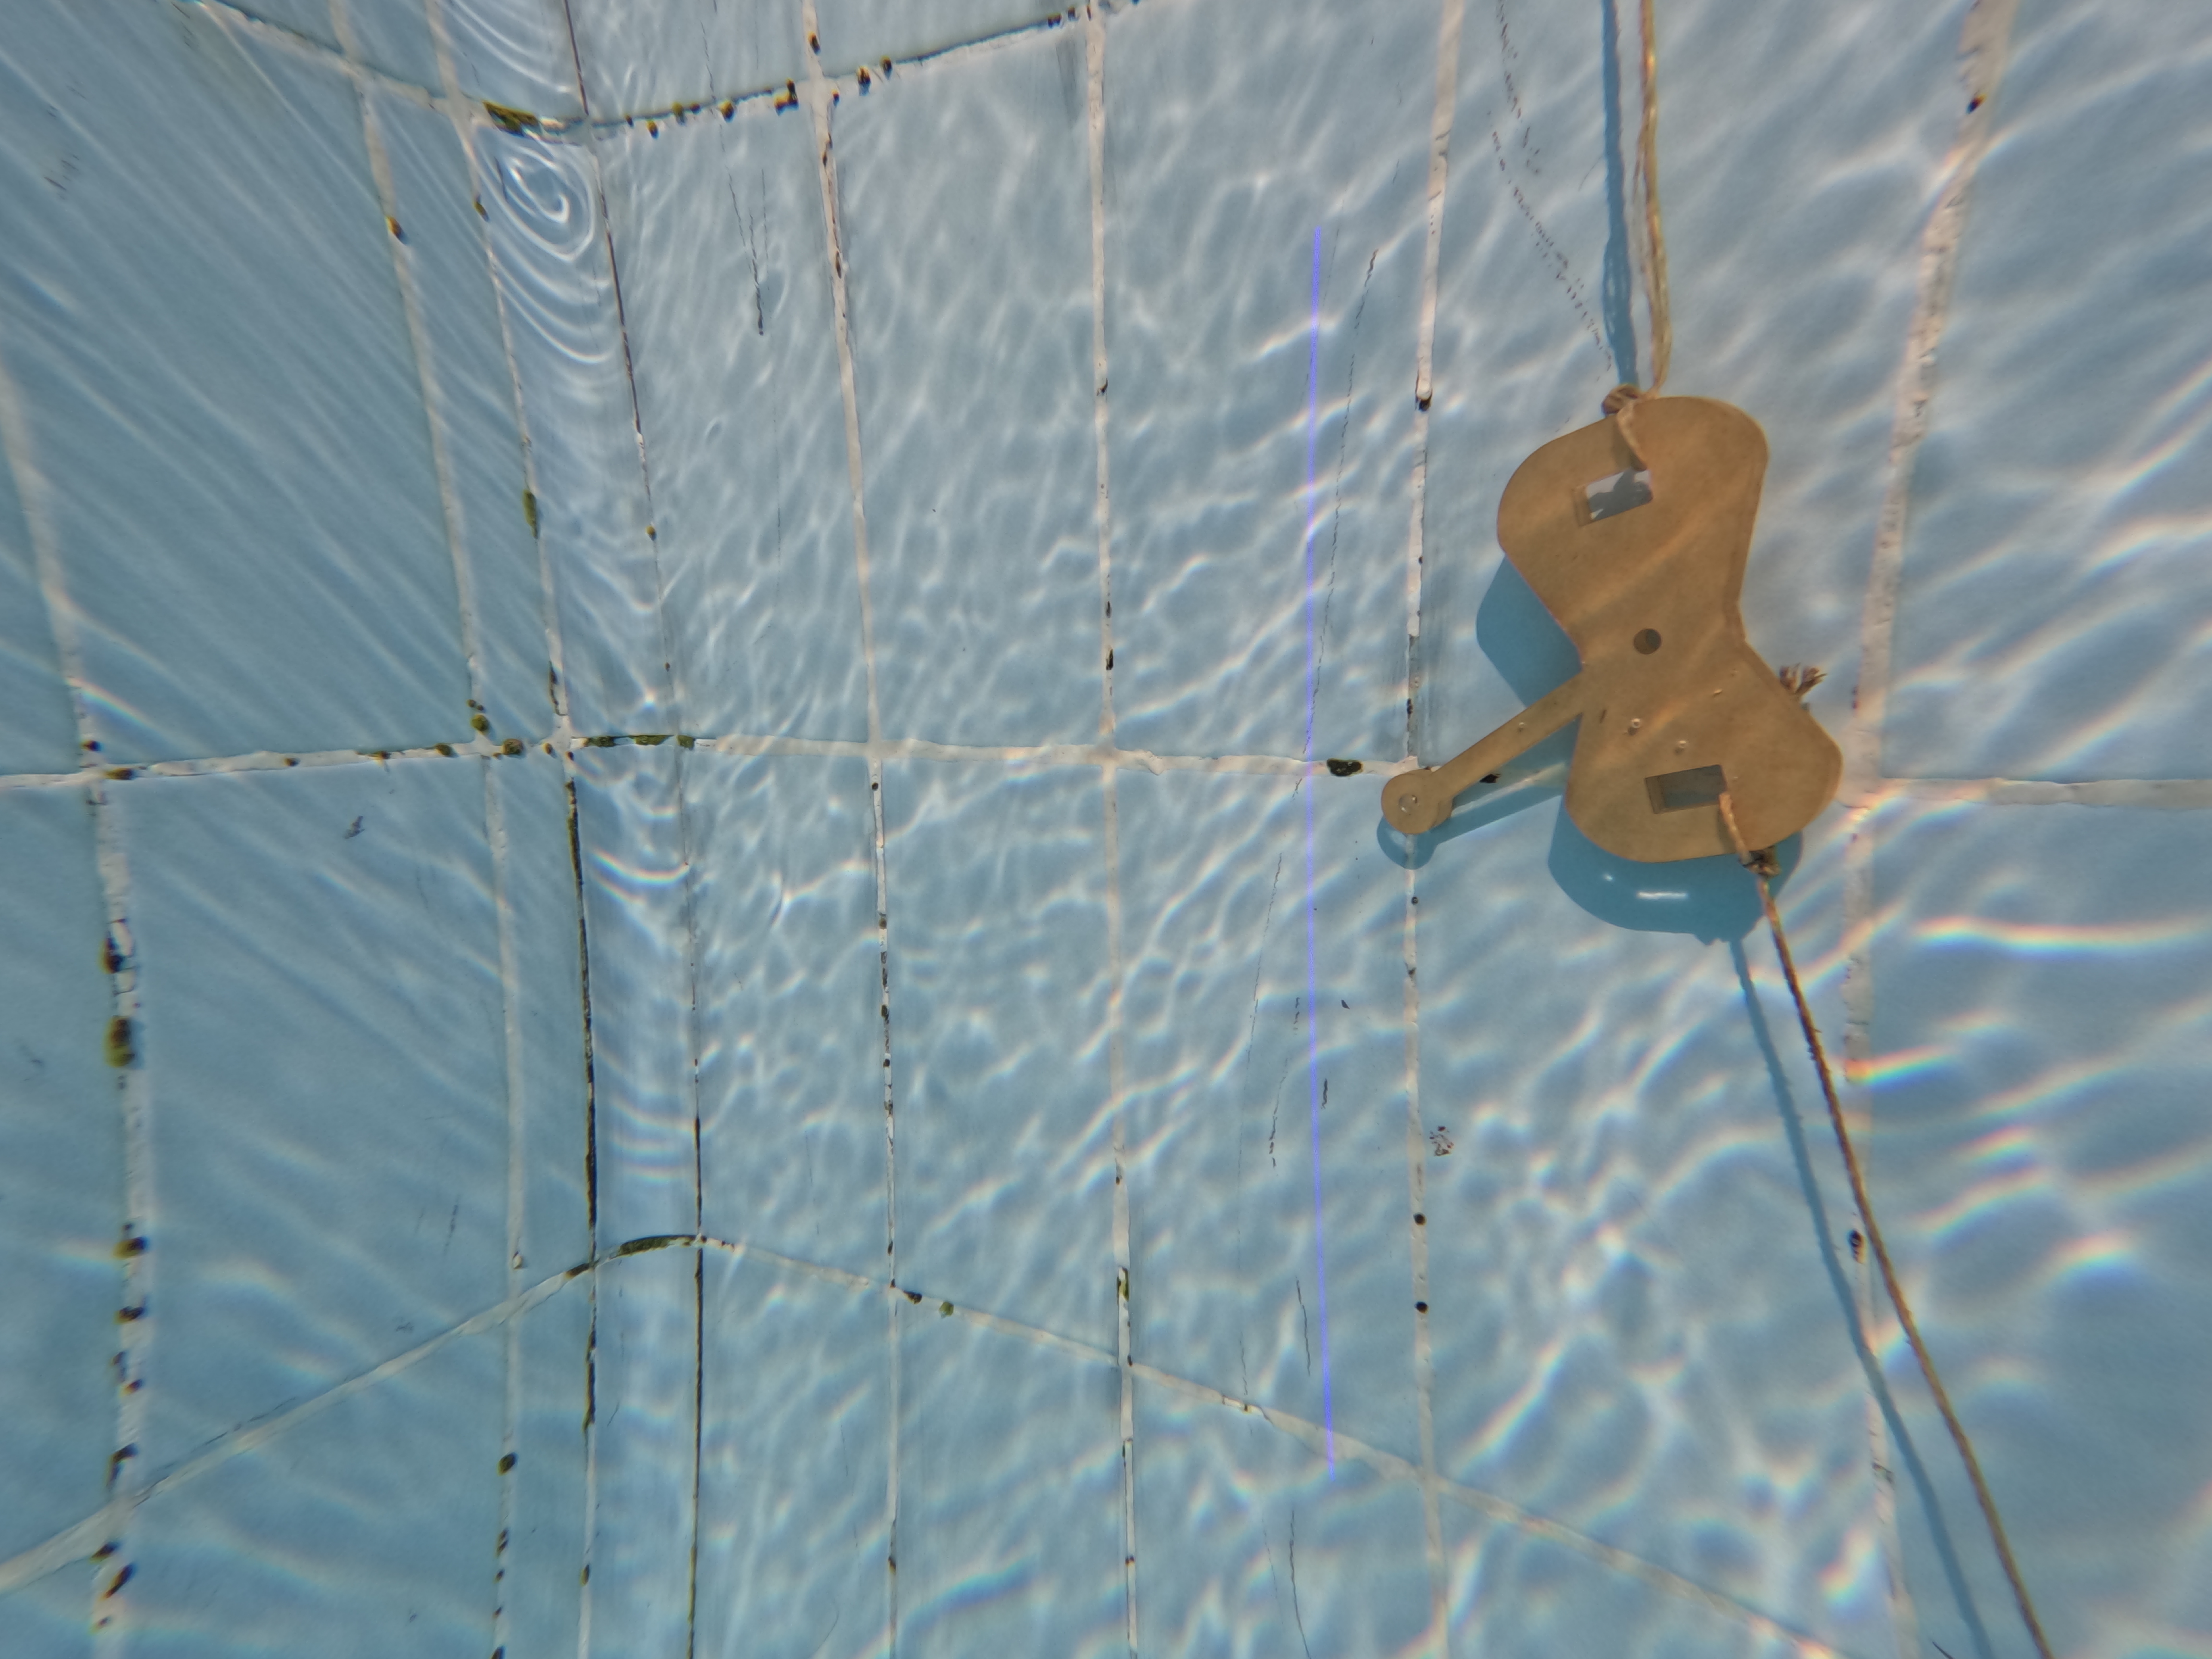

Supplement: Supplementary file 663 [file G0019677.pdf › Level_5_1/G0019677.pdf]

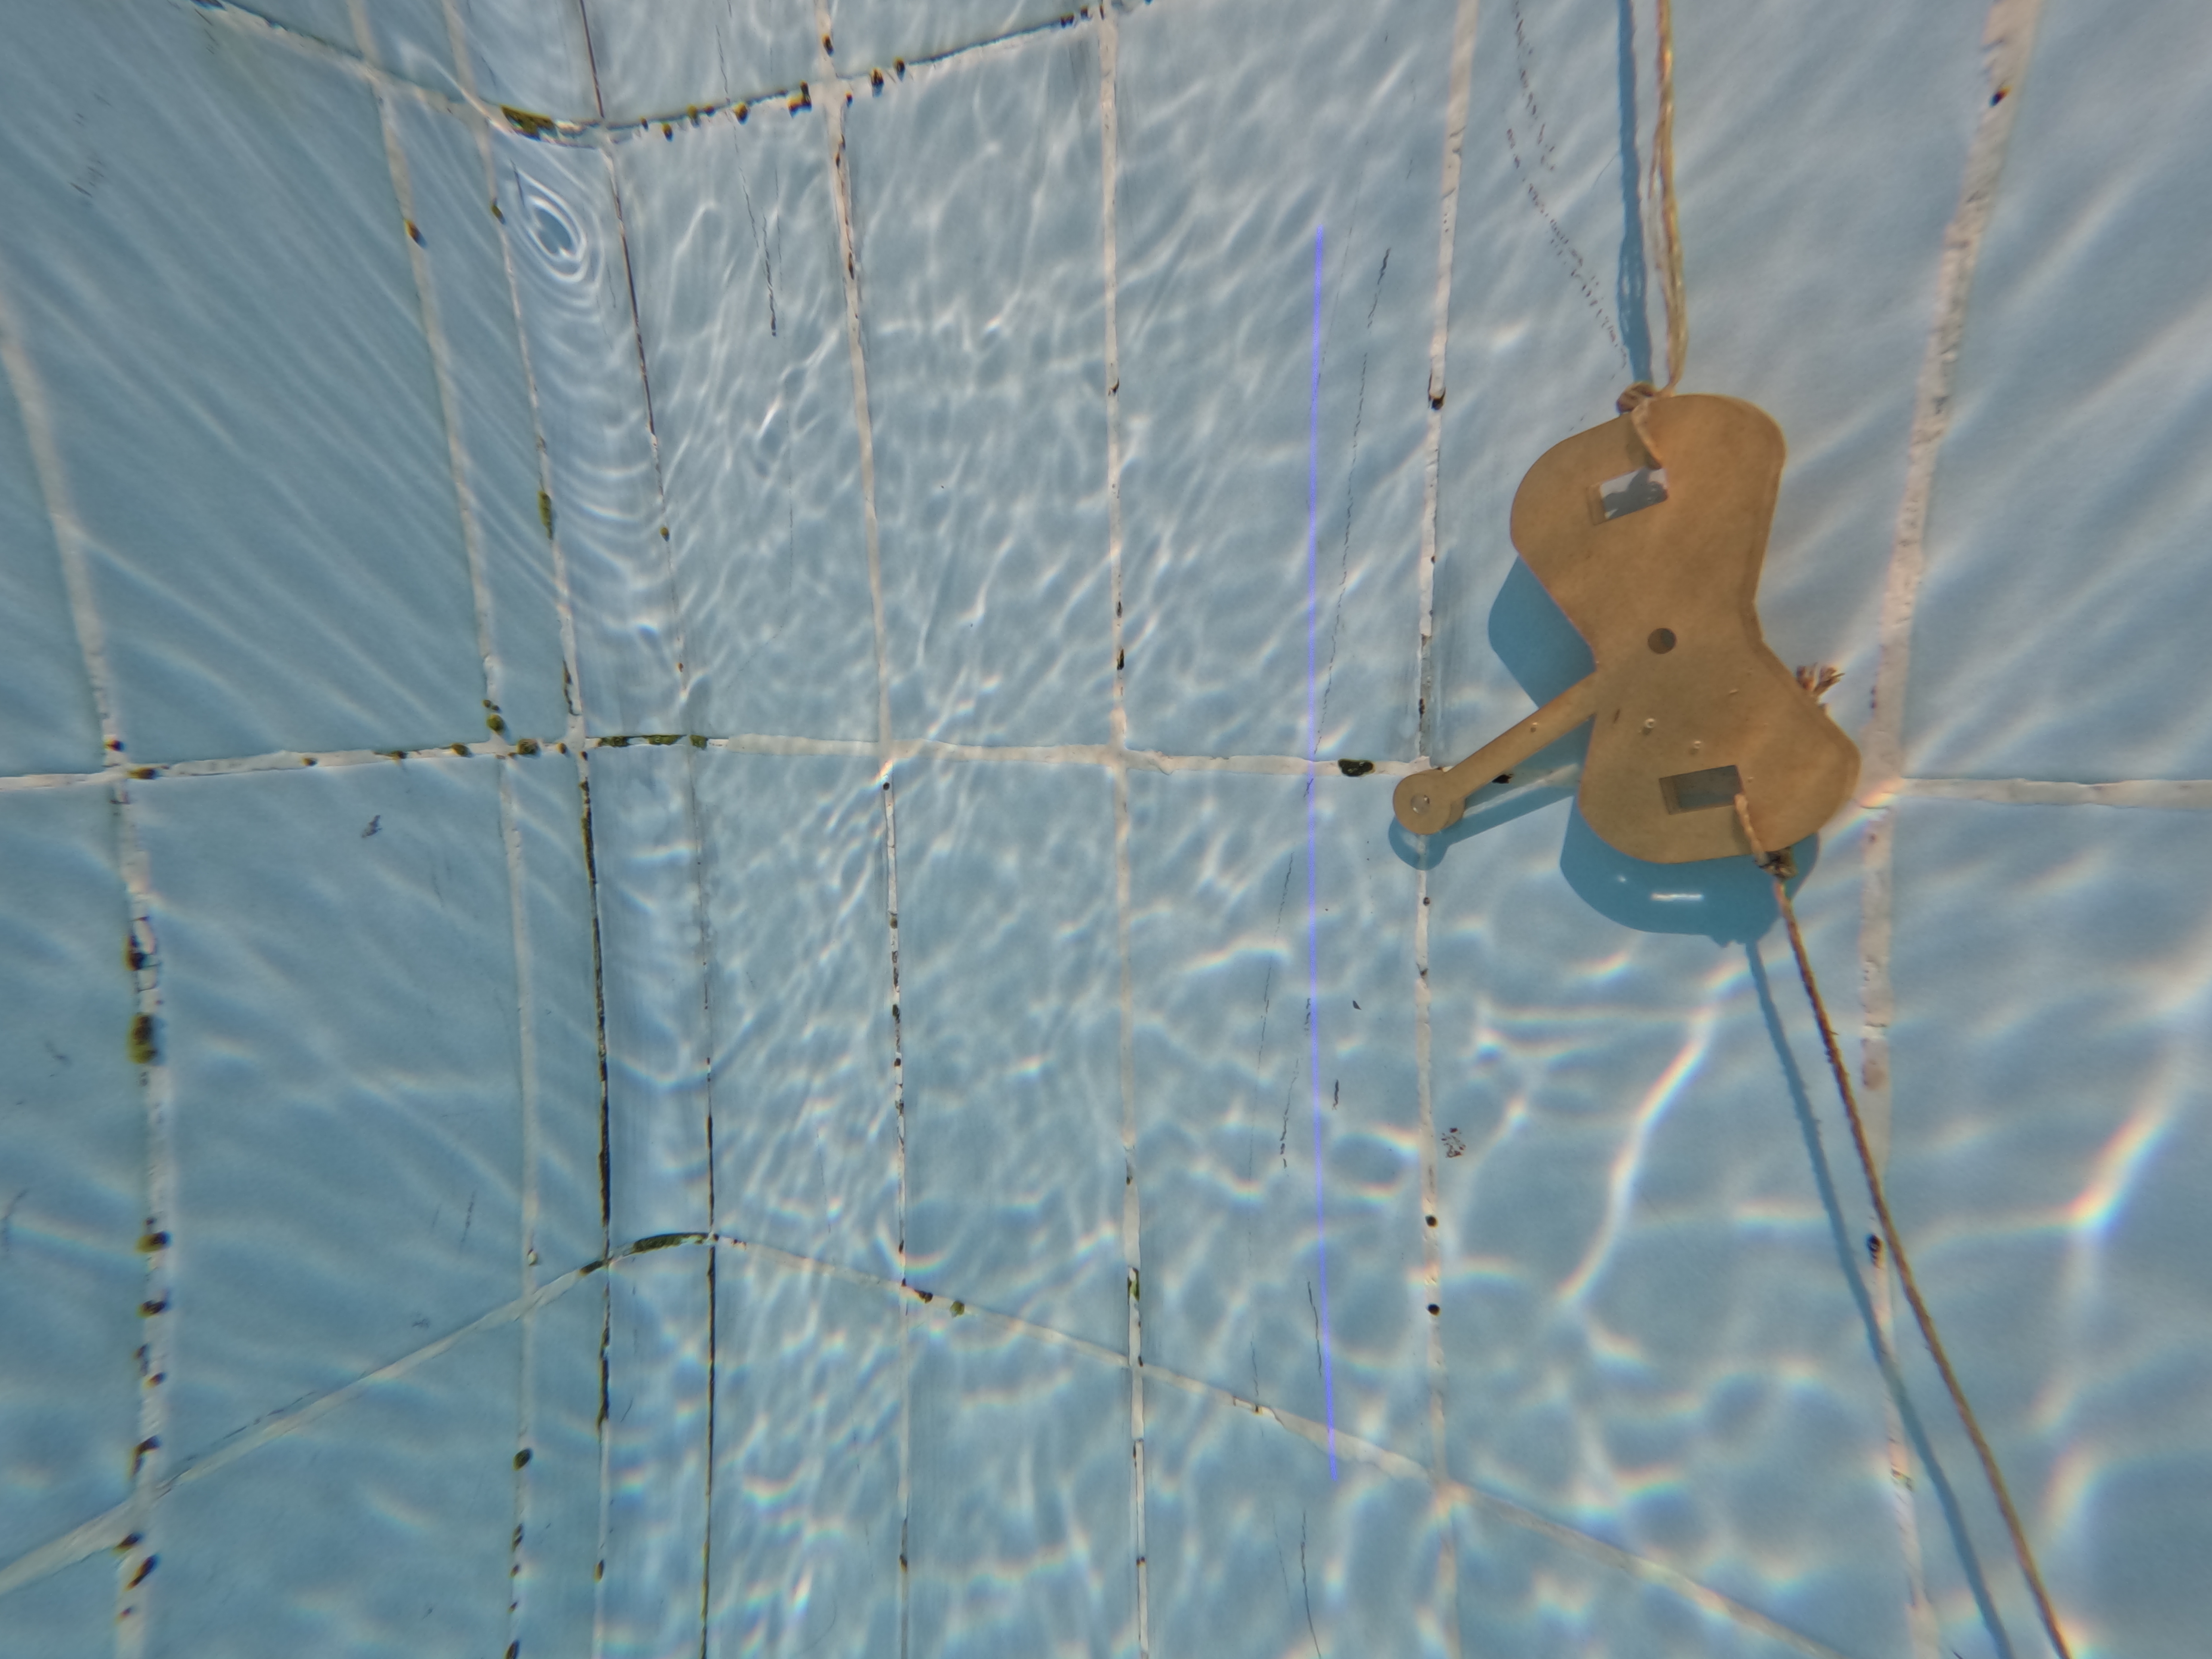

Supplement: Supplementary file 664 [file G0019678.pdf › Level_5_1/G0019678.pdf]

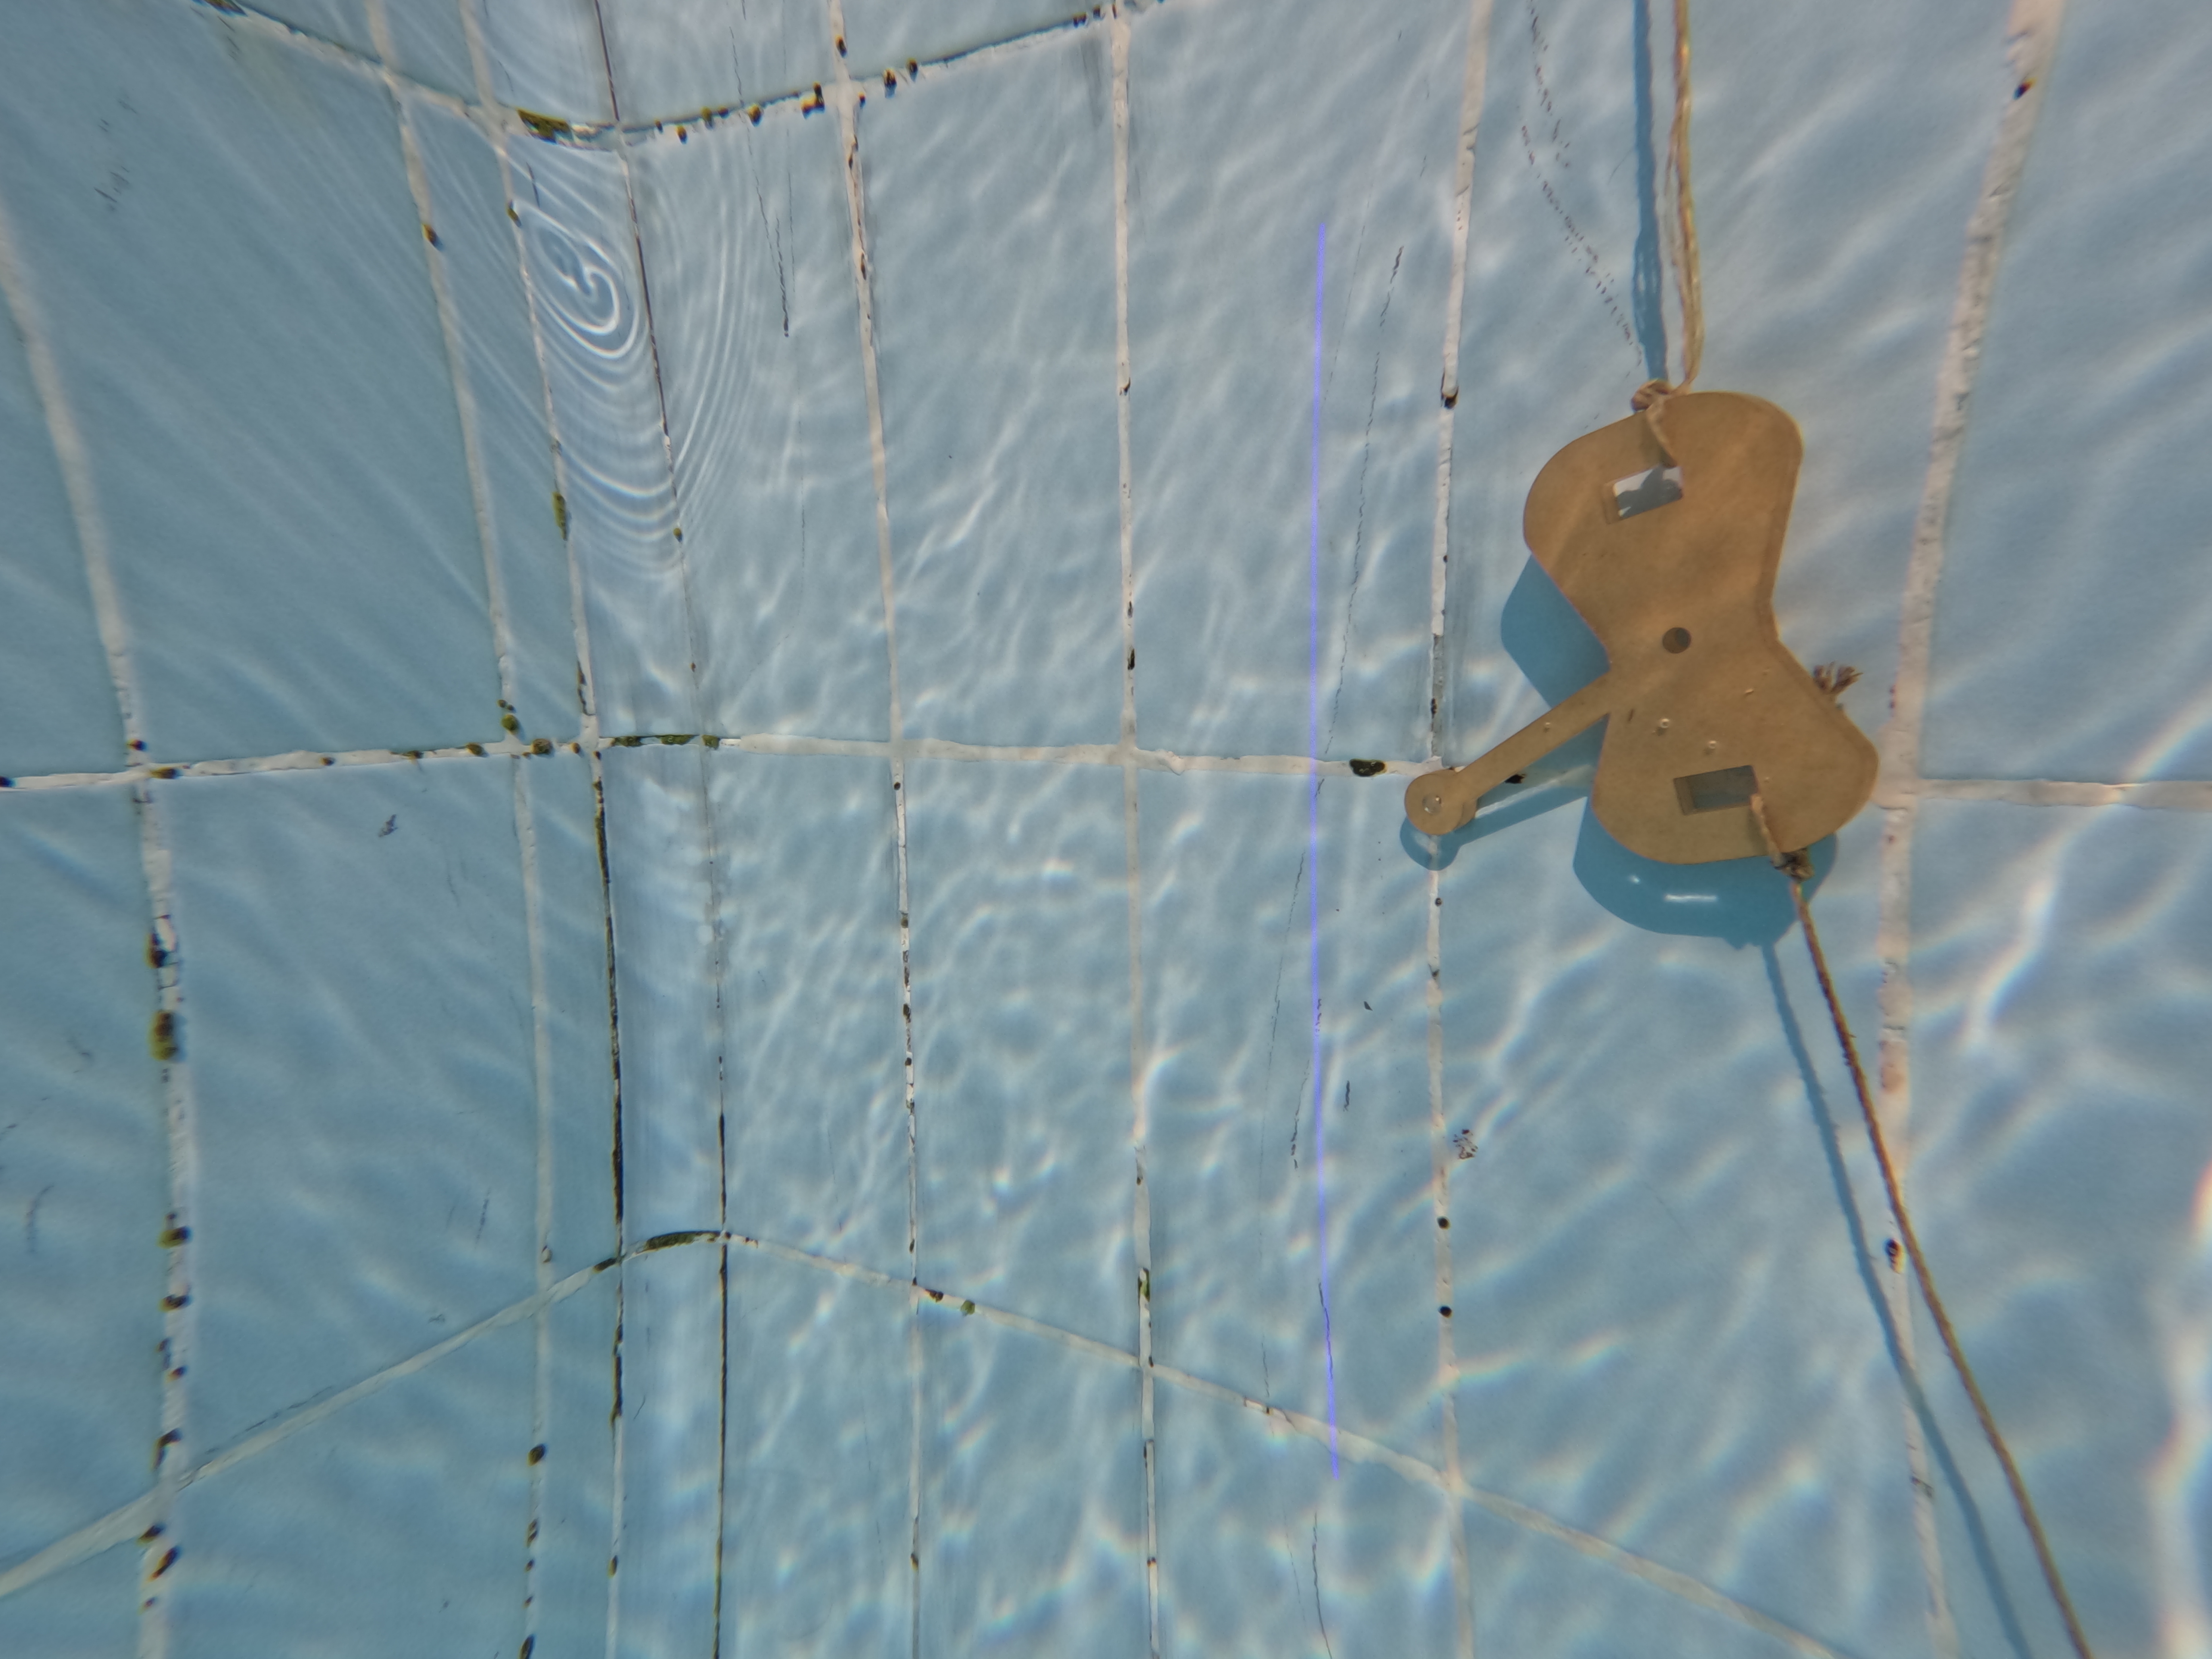

Supplement: Supplementary file 665 [file G0019679.pdf › Level_5_1/G0019679.pdf]

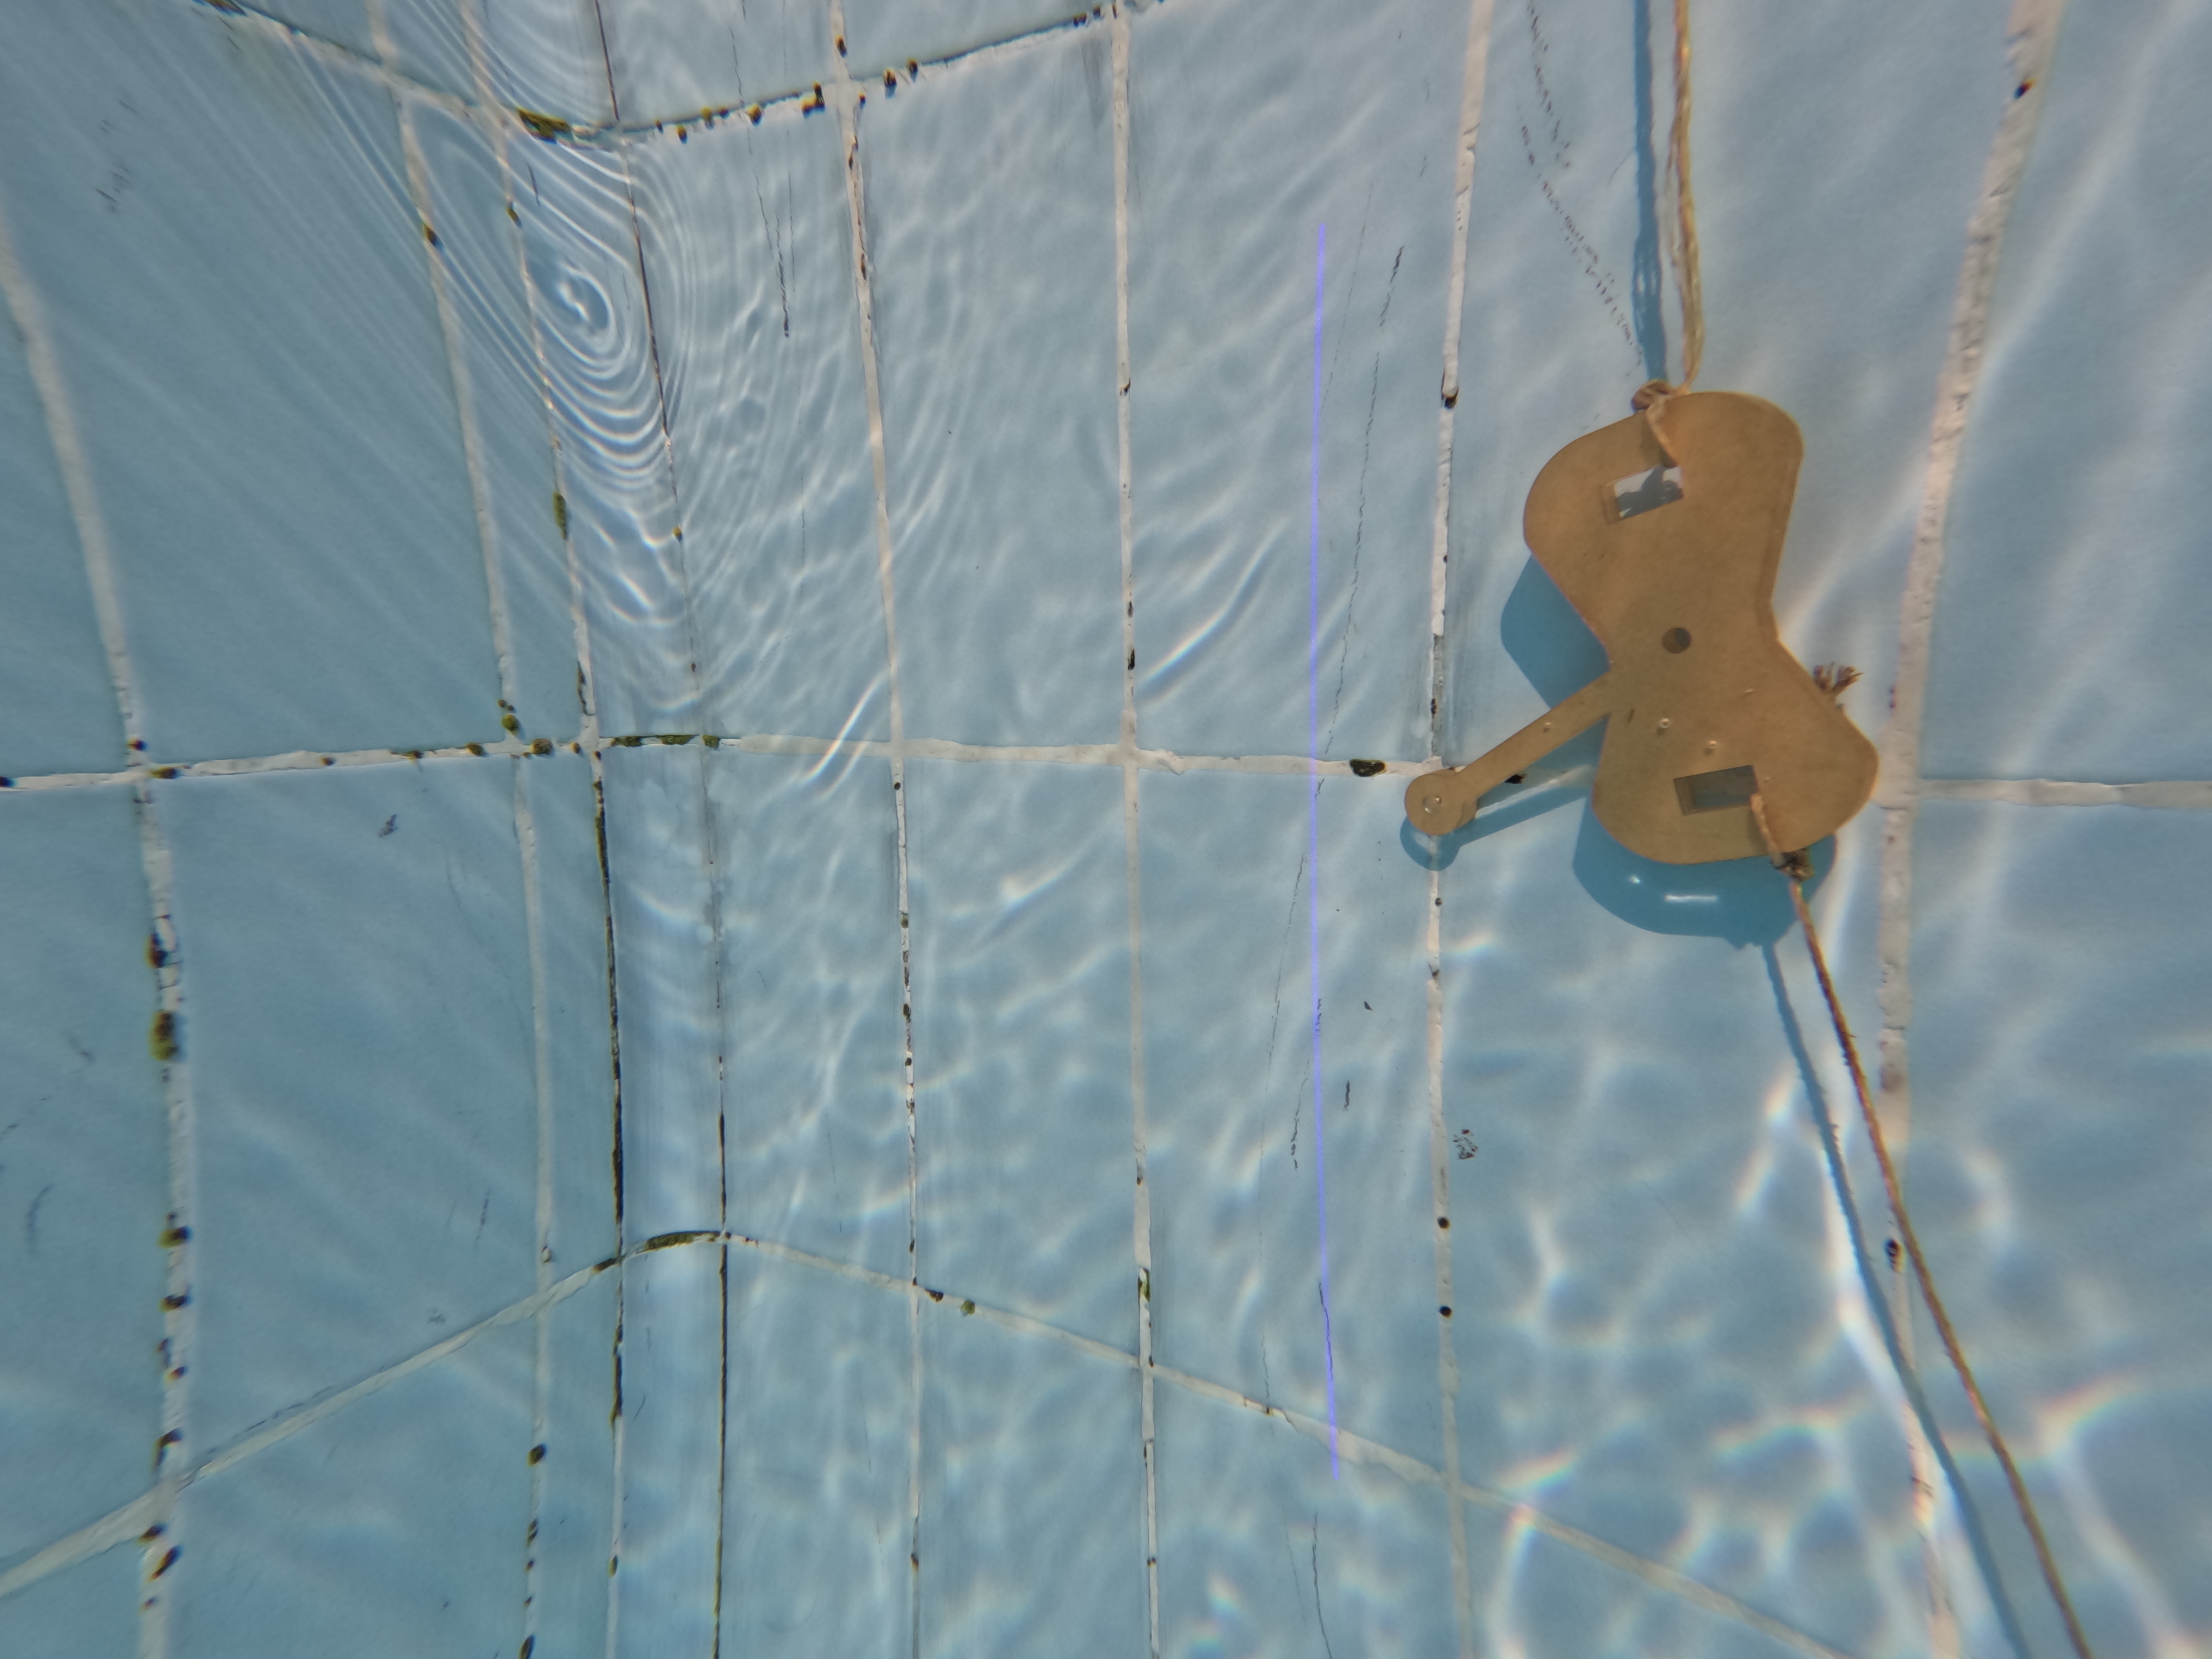

Supplement: Supplementary file 666 [file G0019680.pdf › Level_5_1/G0019680.pdf]

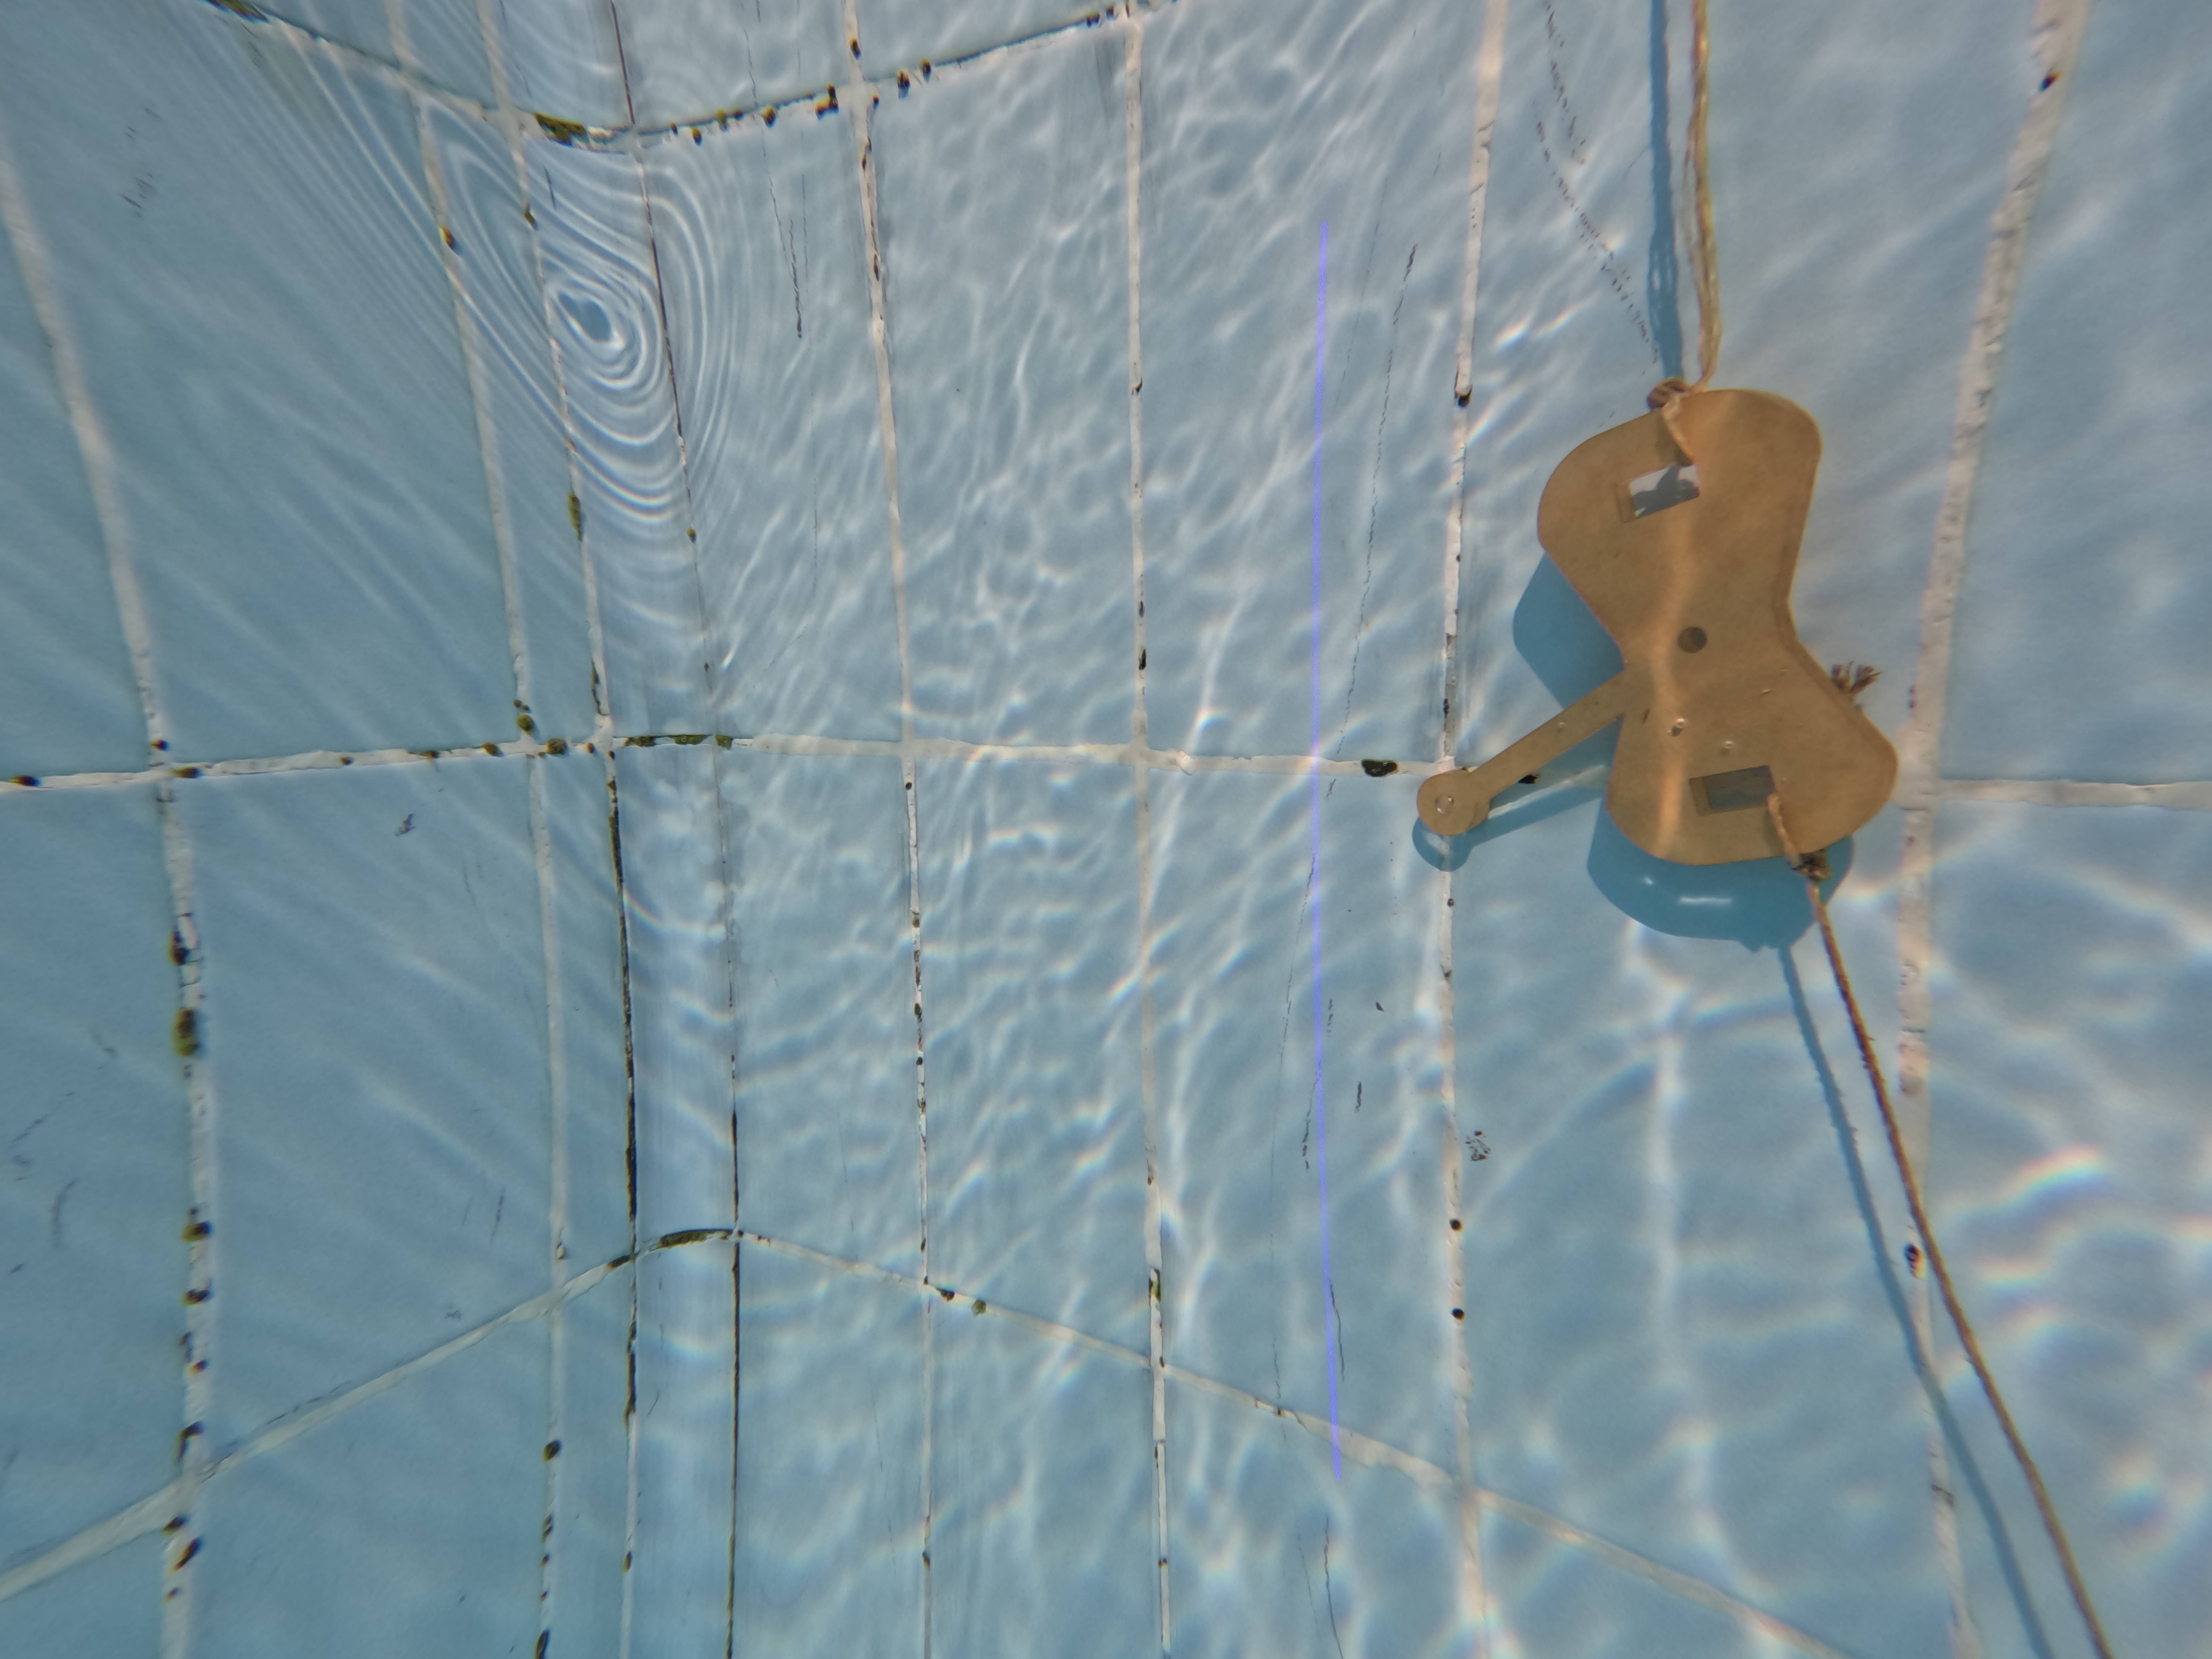

Supplement: Supplementary file 667 [file G0019681.pdf › Level_5_1/G0019681.pdf]

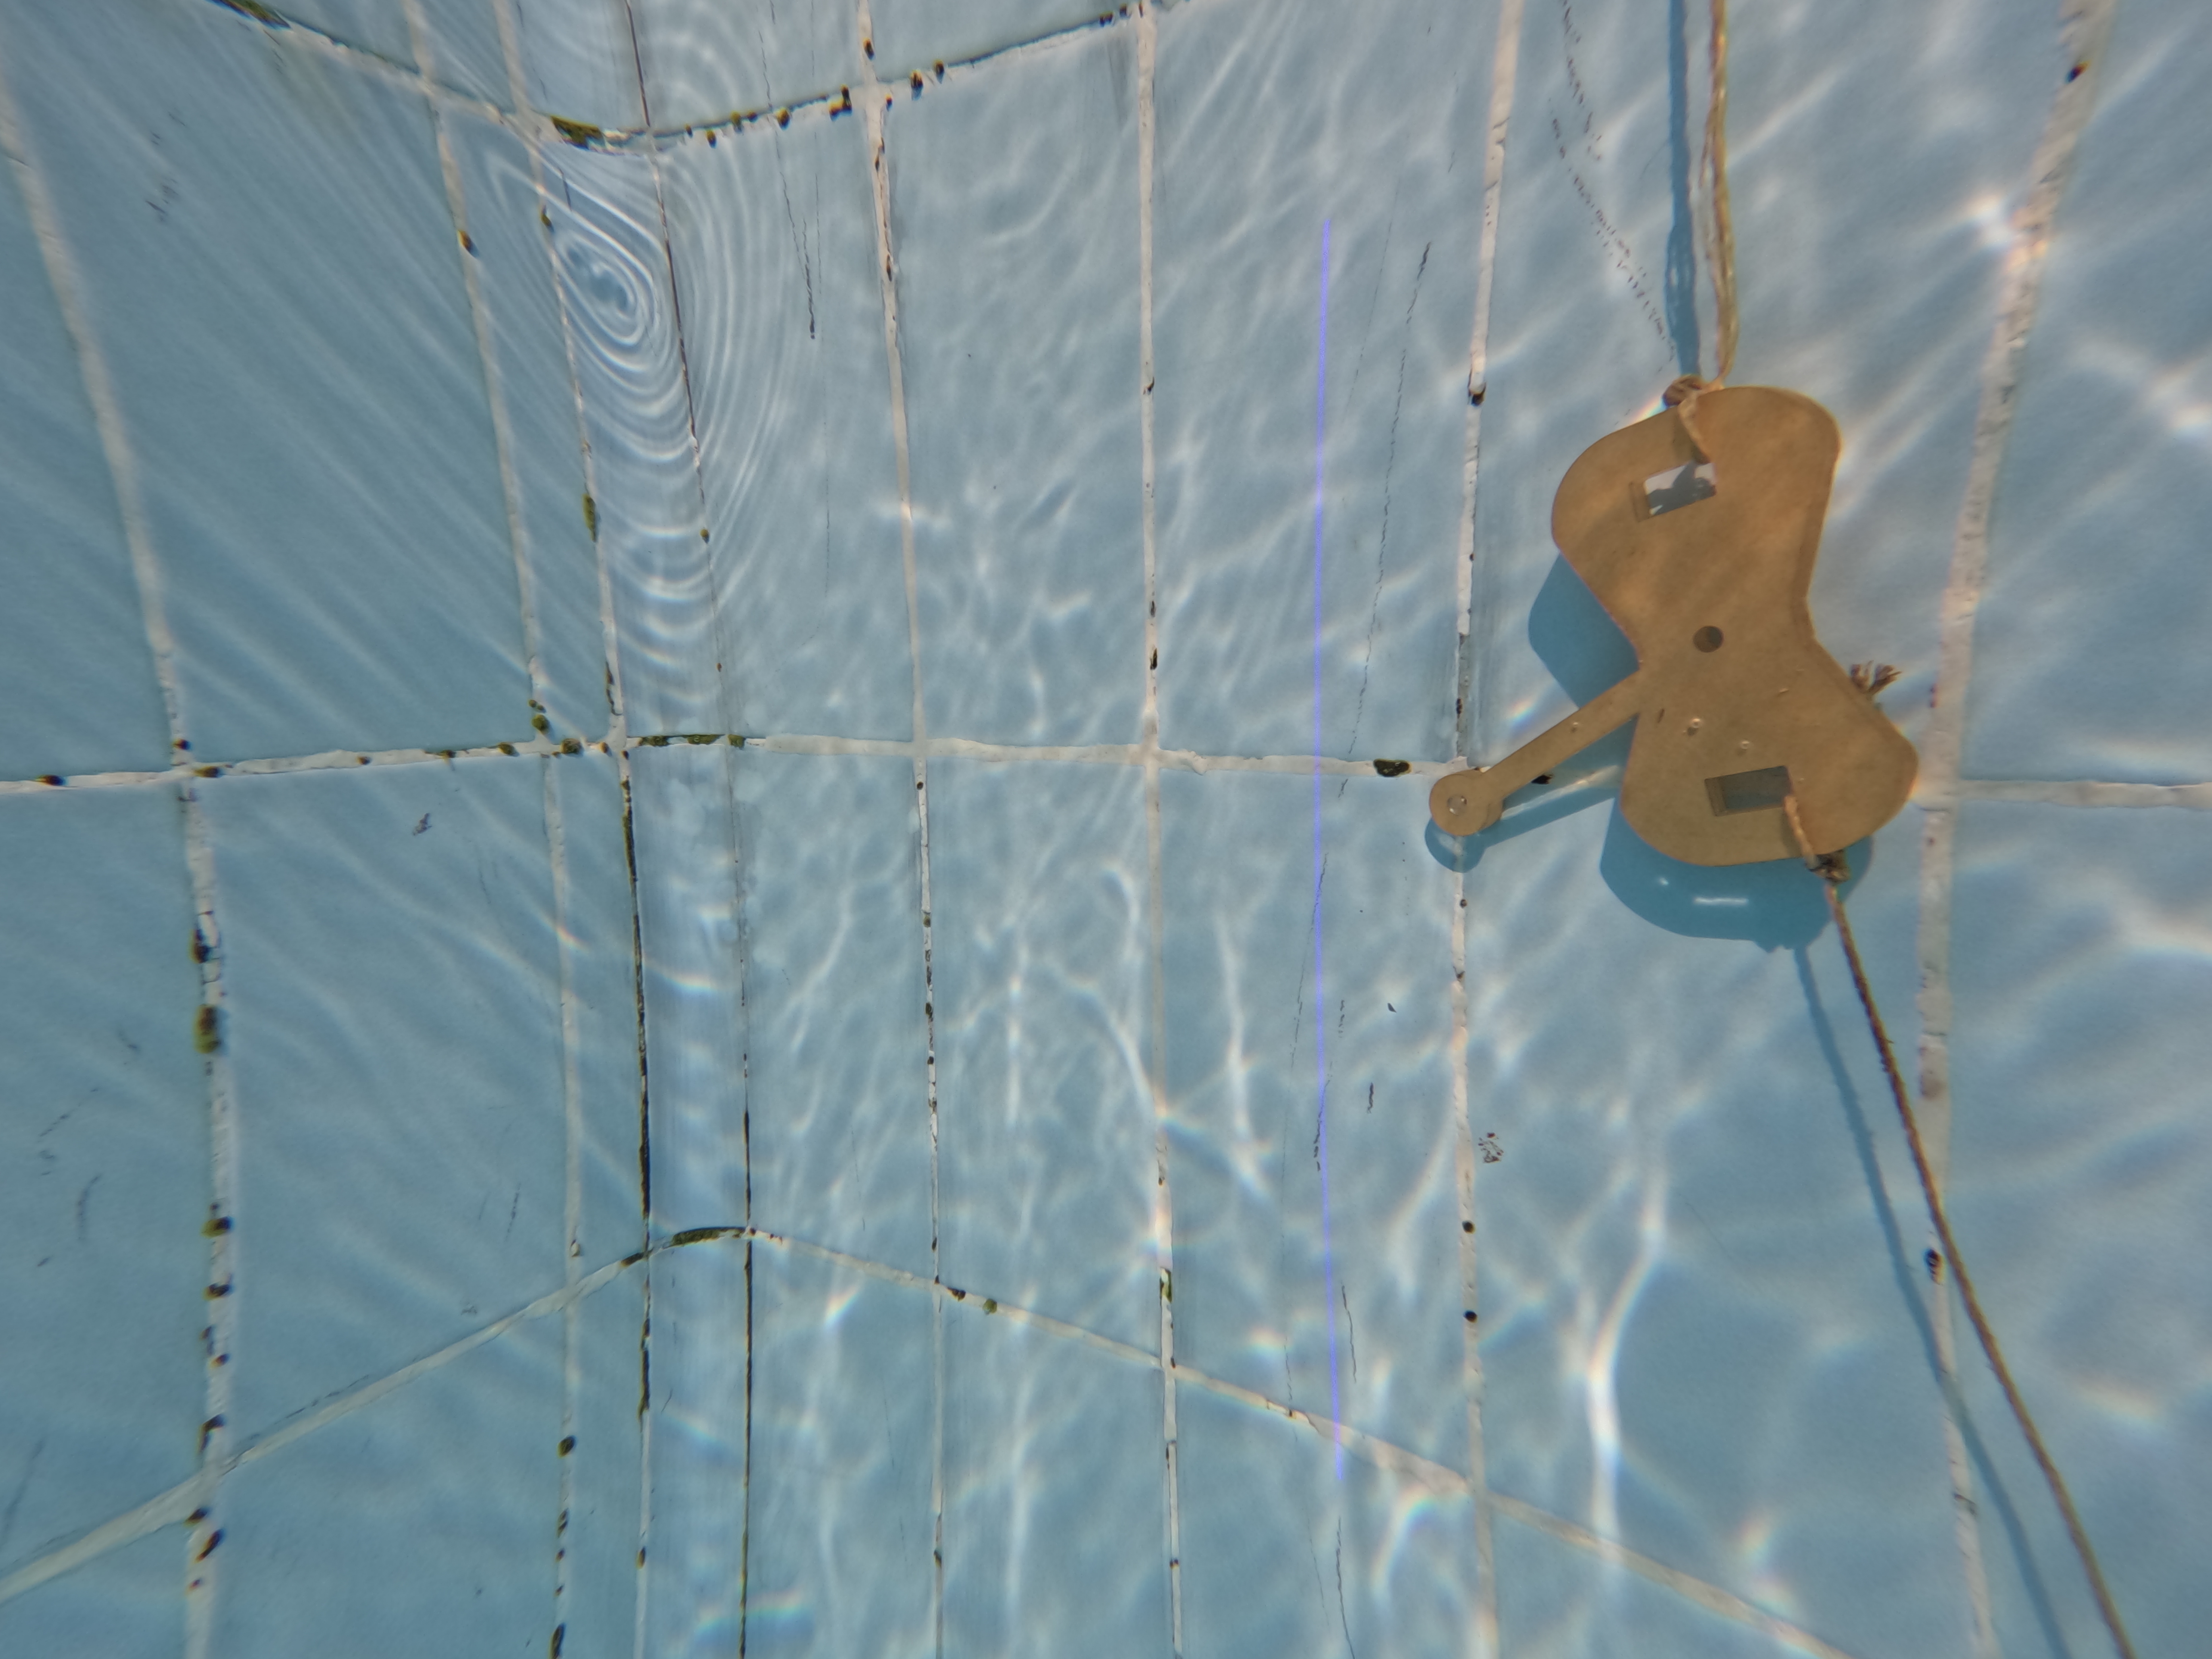

Supplement: Supplementary file 668 [file G0019682.pdf › Level_5_1/G0019682.pdf]

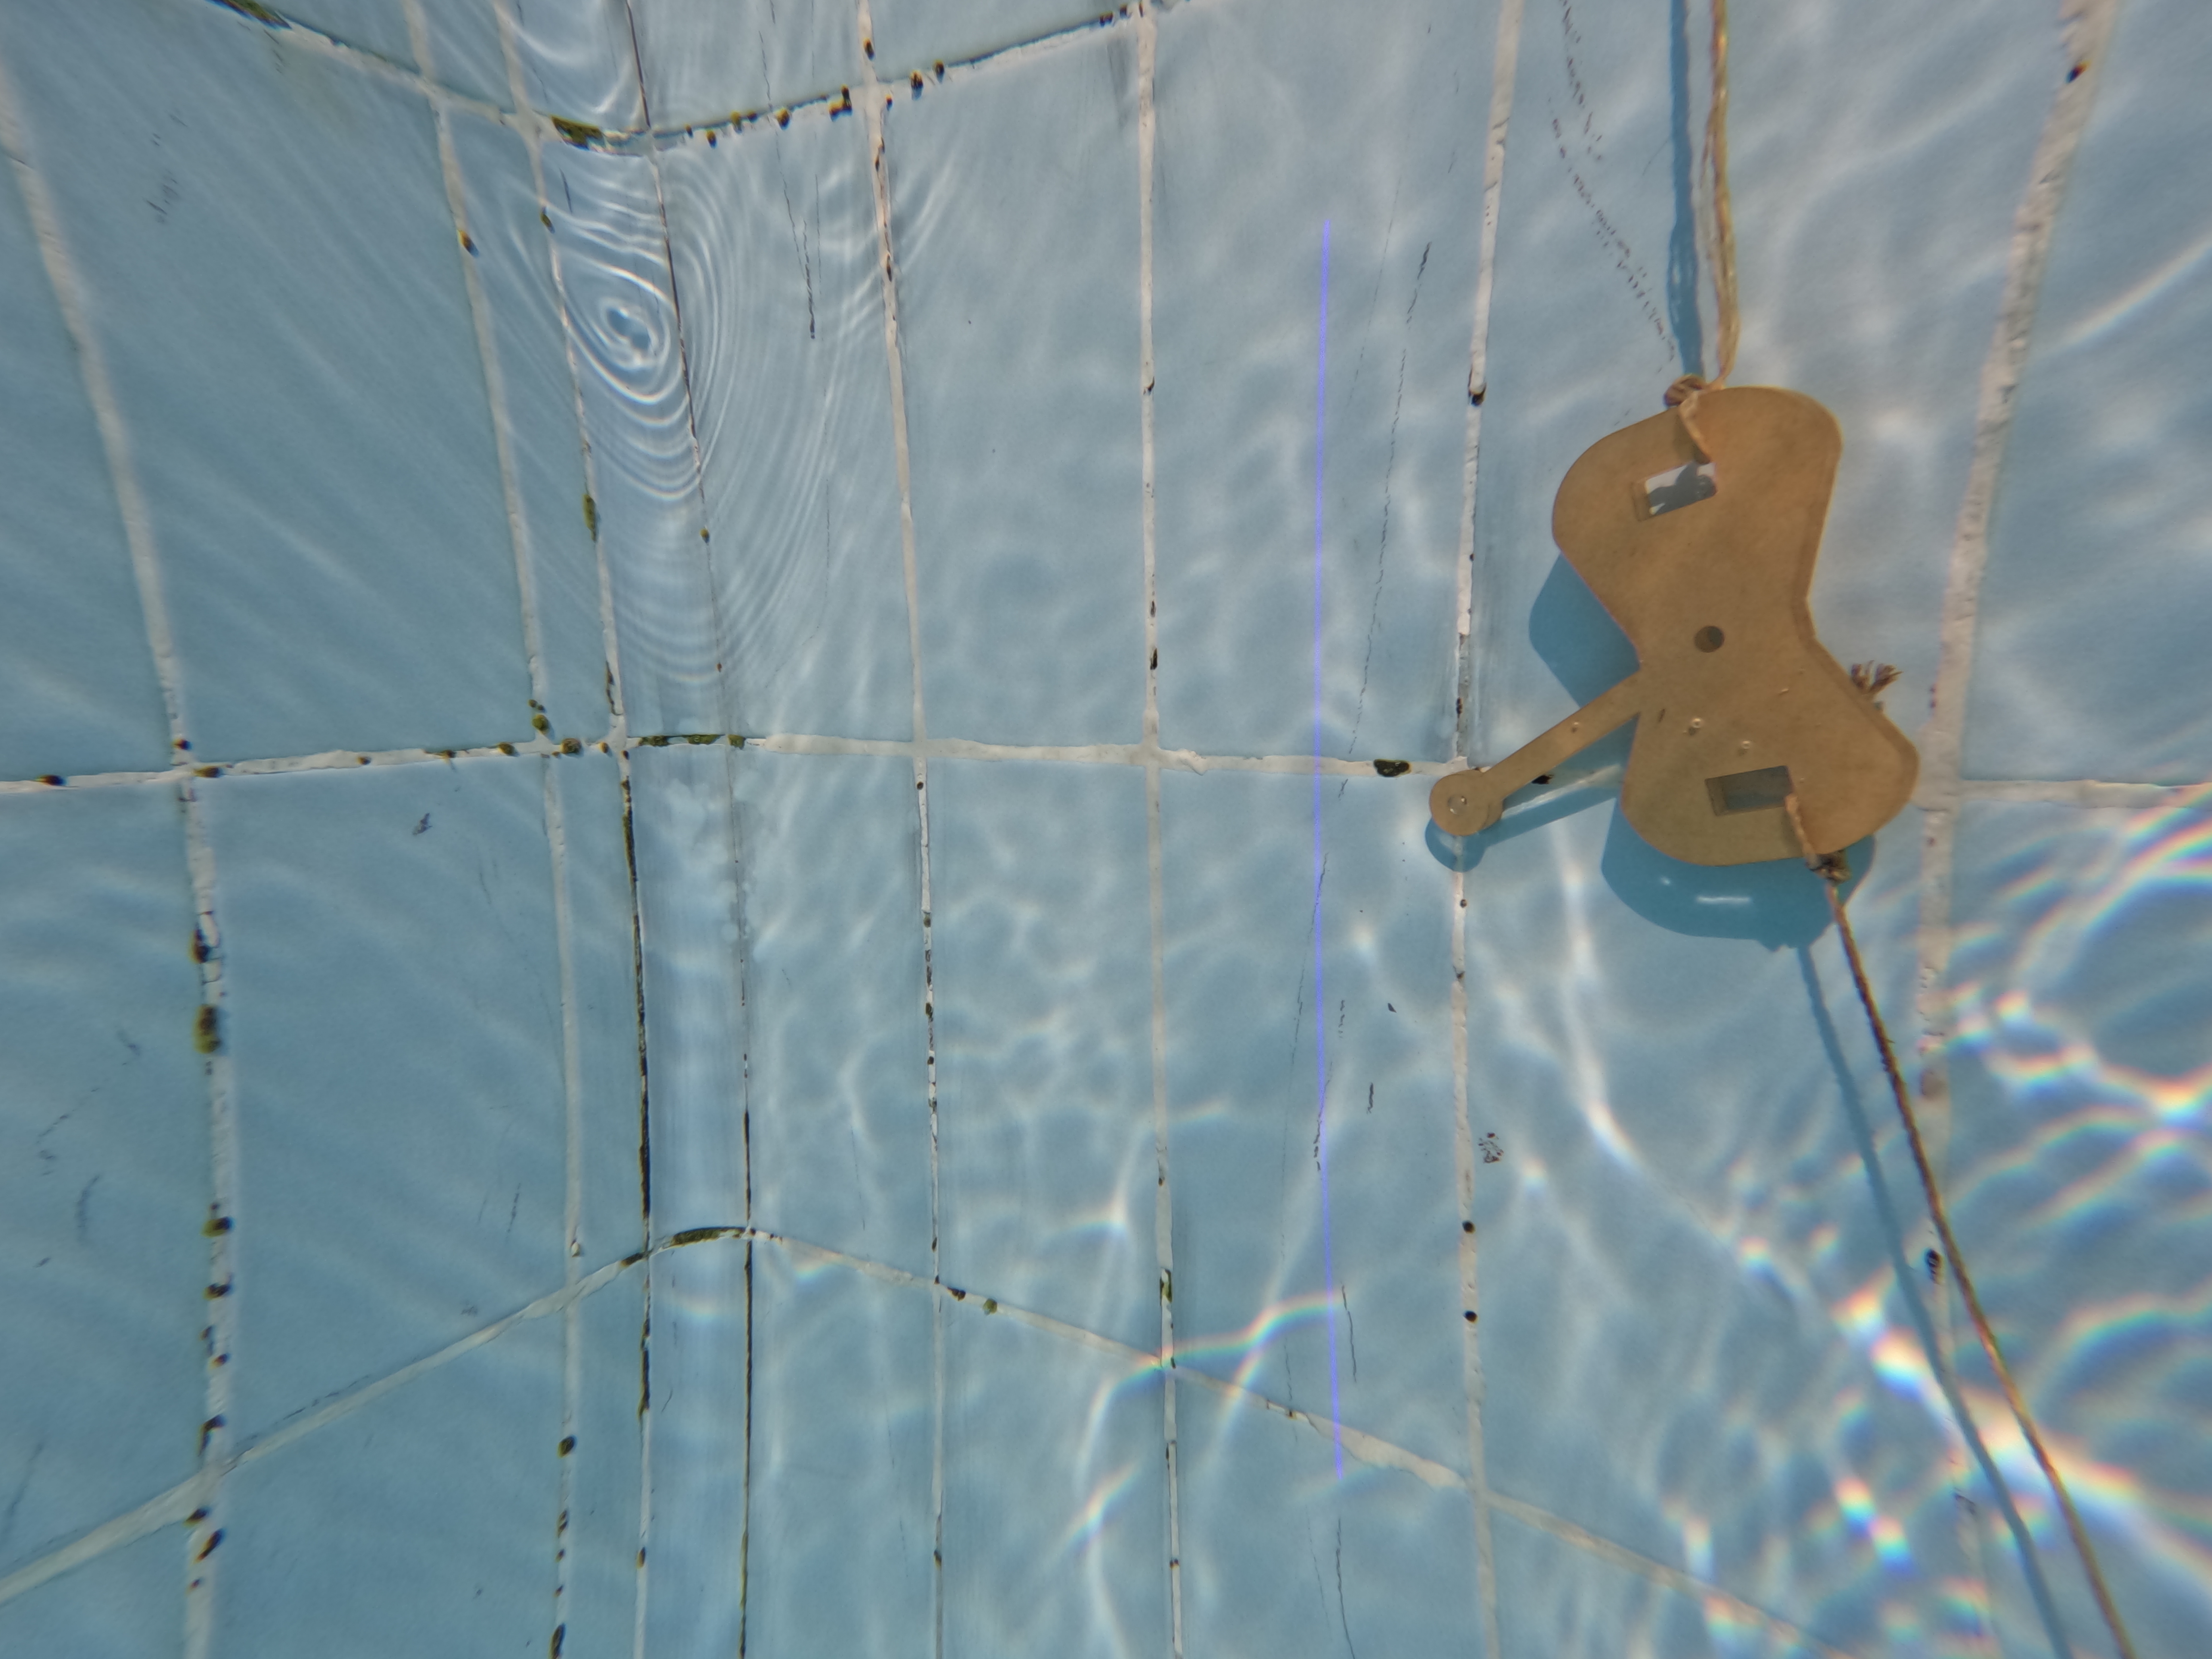

Supplement: Supplementary file 669 [file G0019683.pdf › Level_5_1/G0019683.pdf]

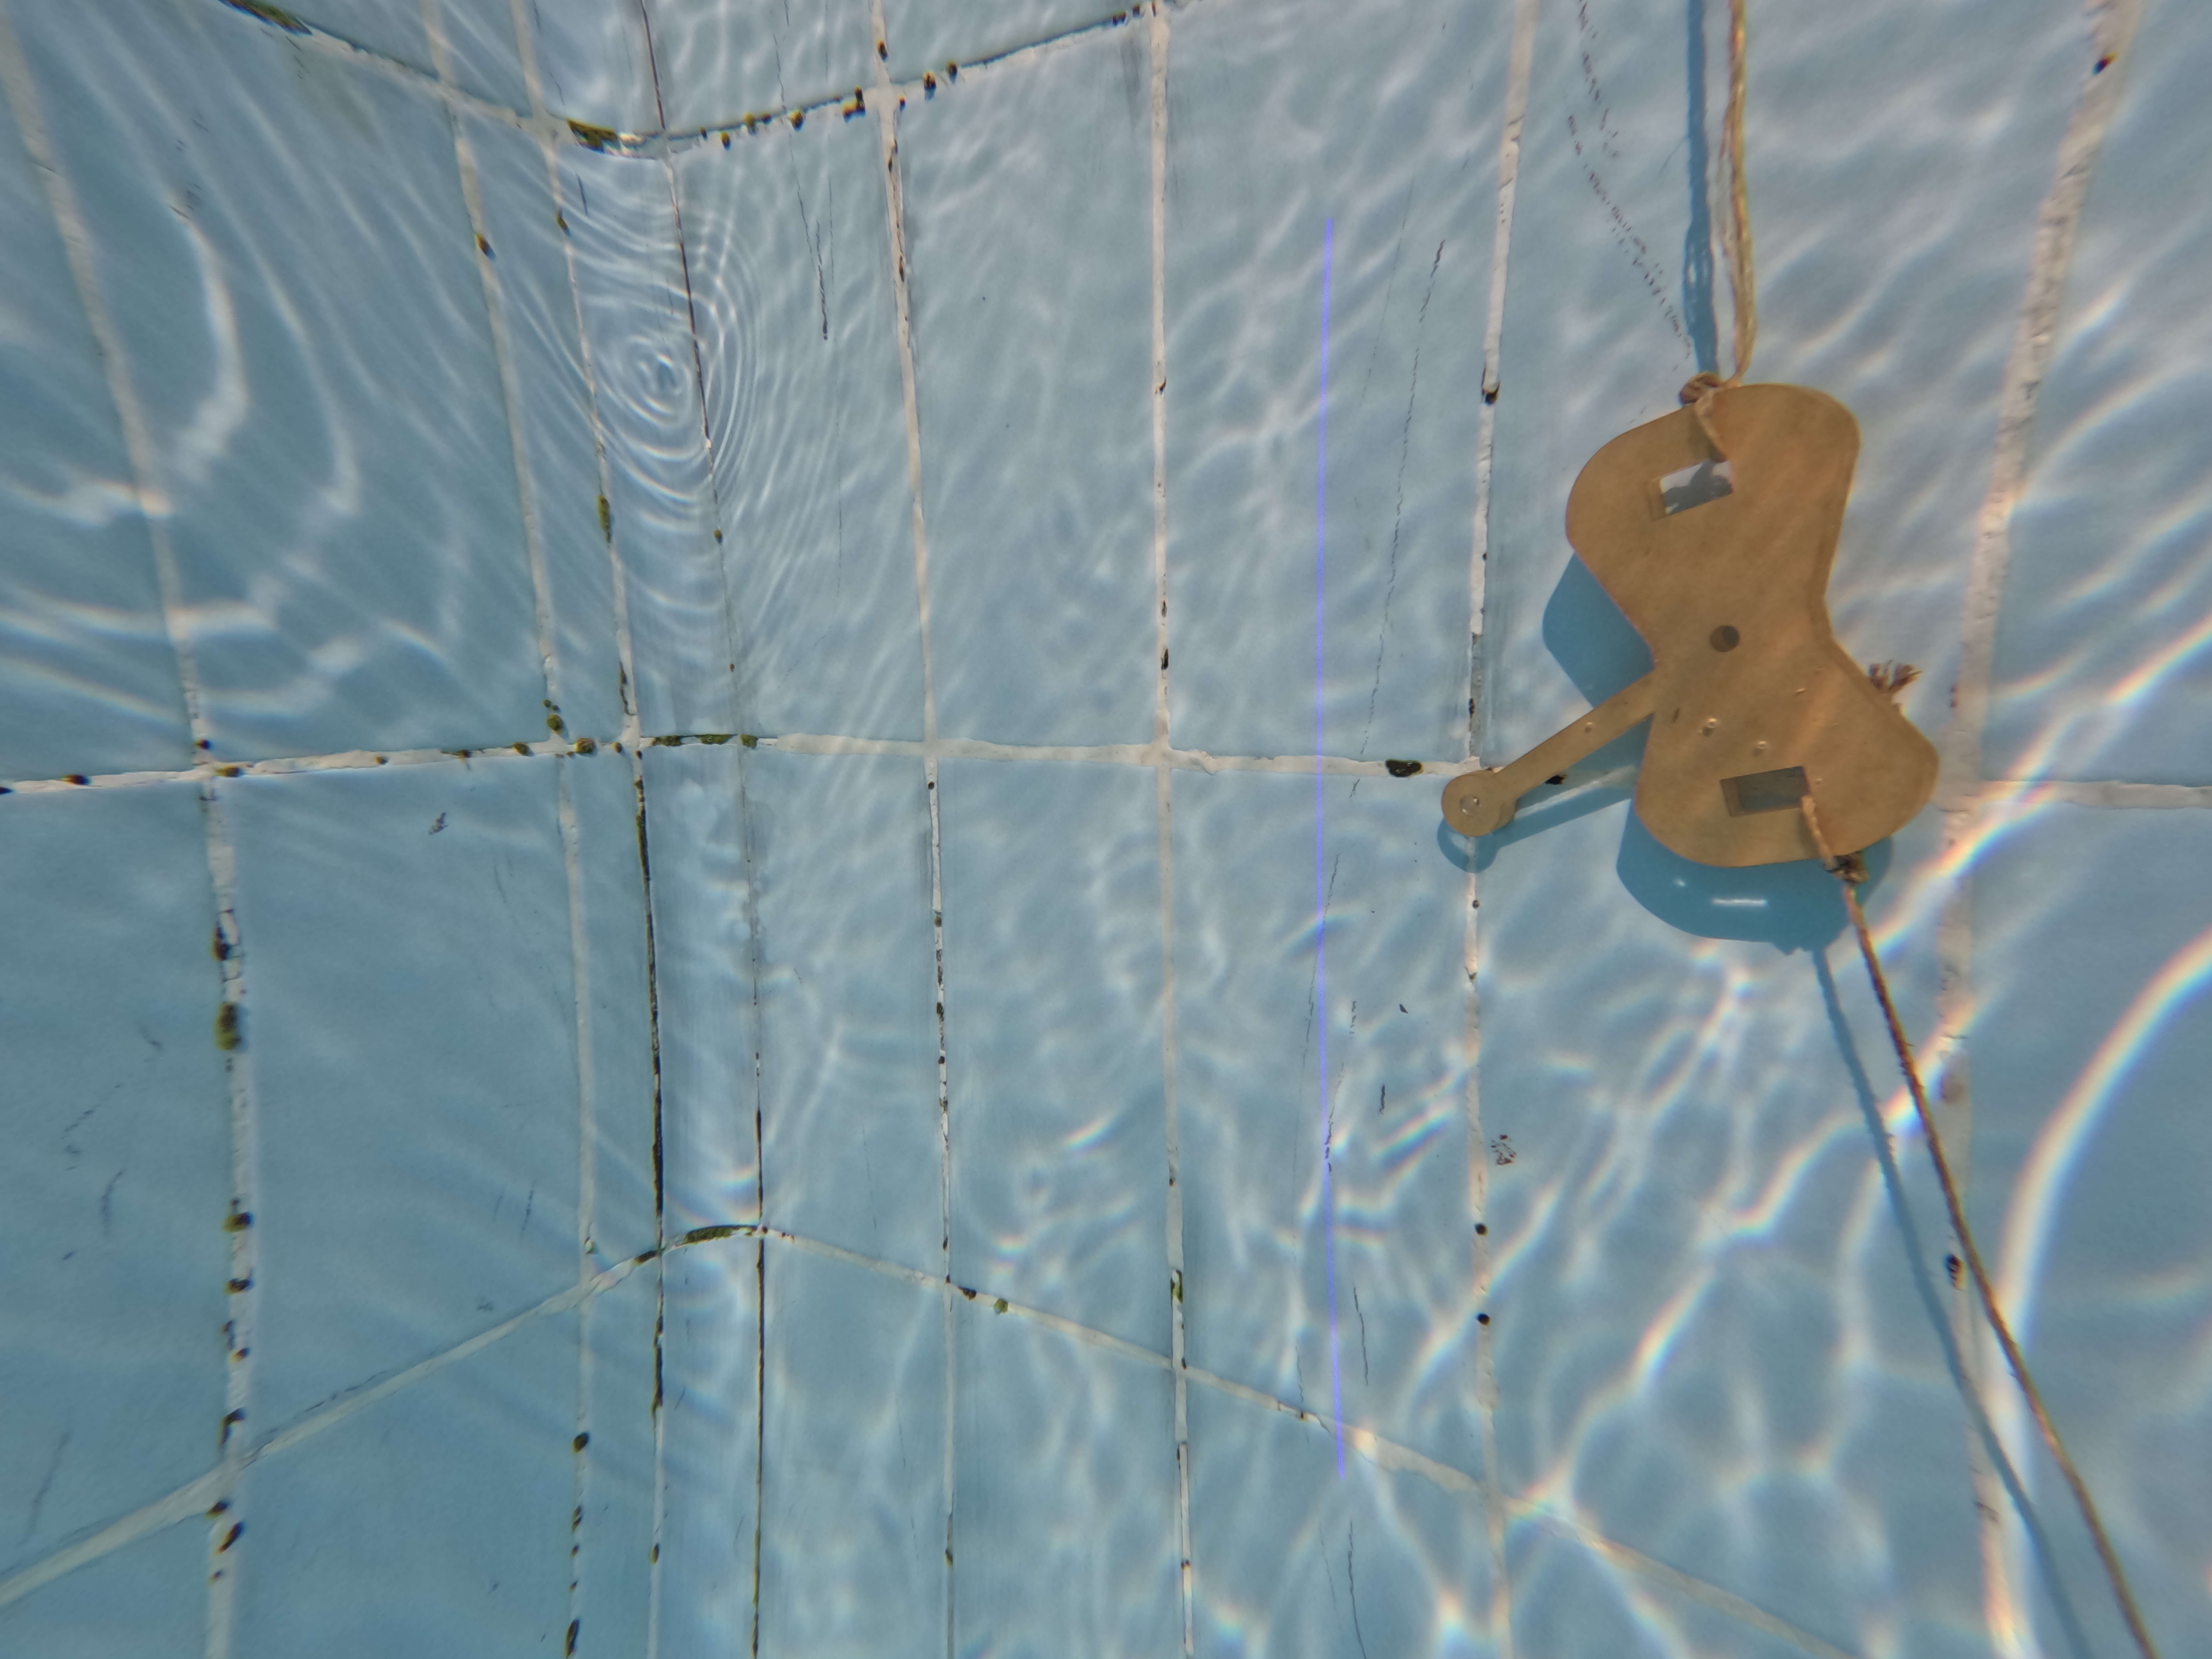

Supplement: Supplementary file 670 [file G0019684.pdf › Level_5_1/G0019684.pdf]

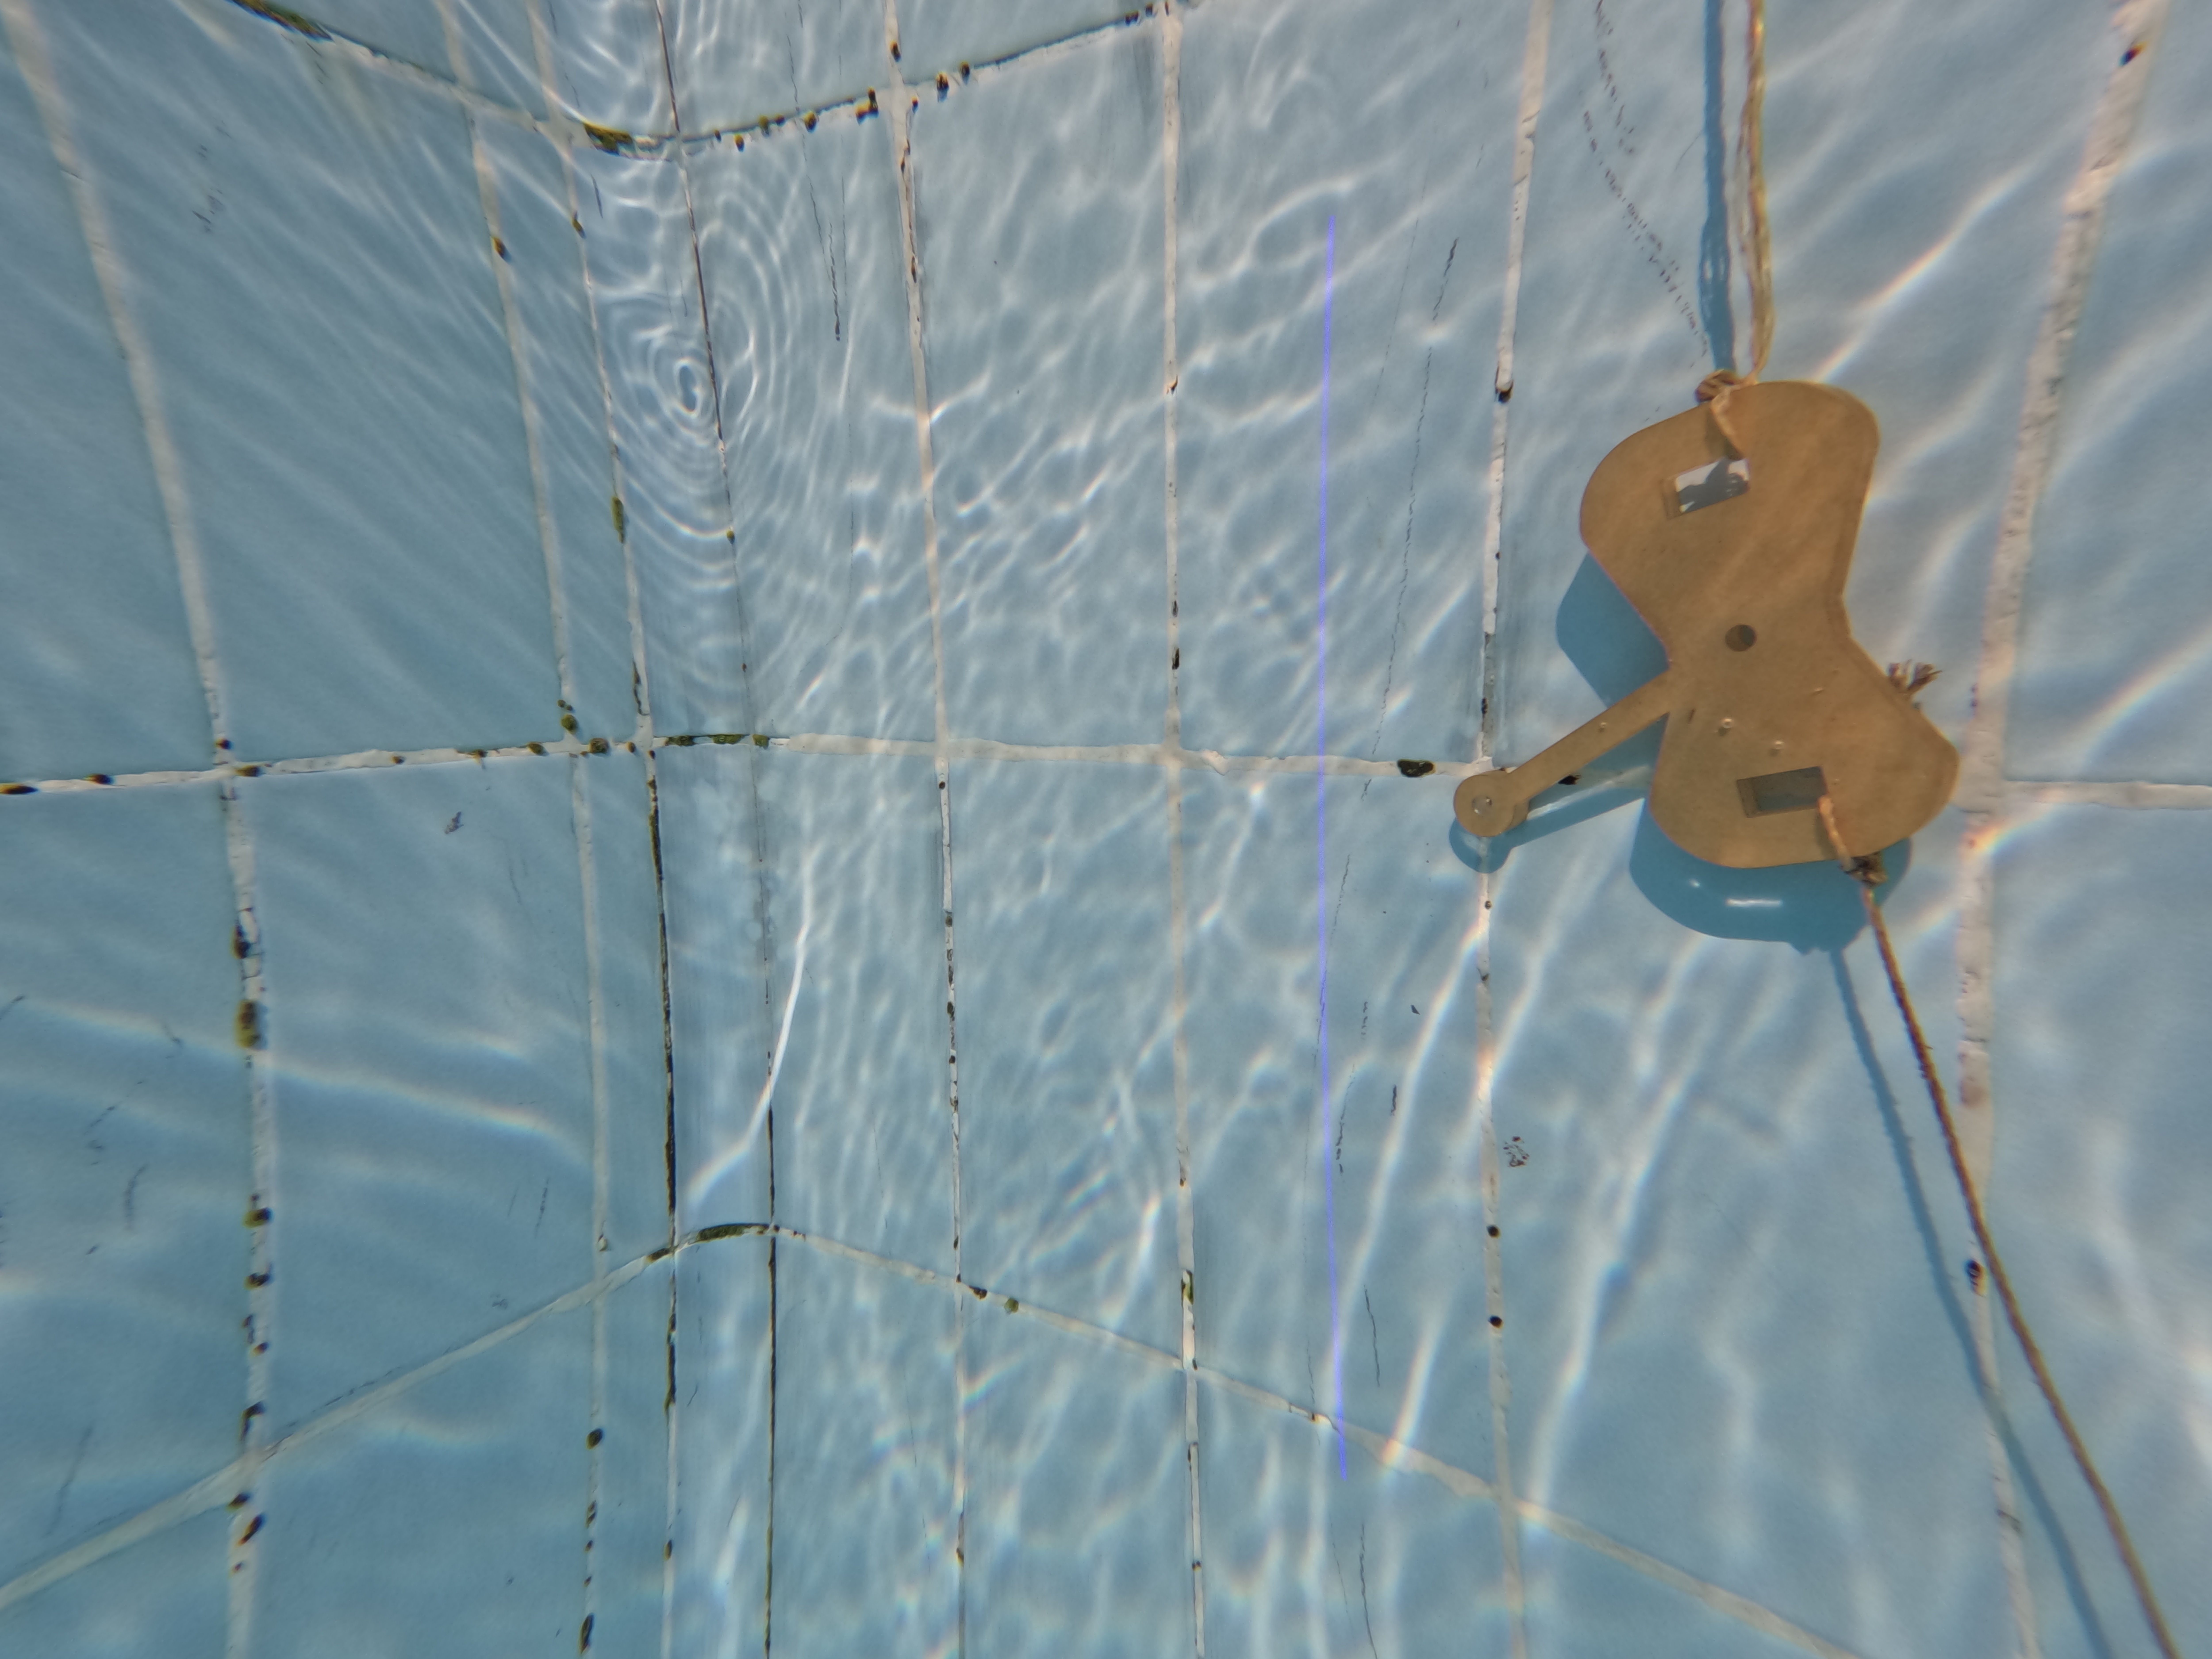

Supplement: Supplementary file 671 [file G0019685.pdf › Level_5_1/G0019685.pdf]

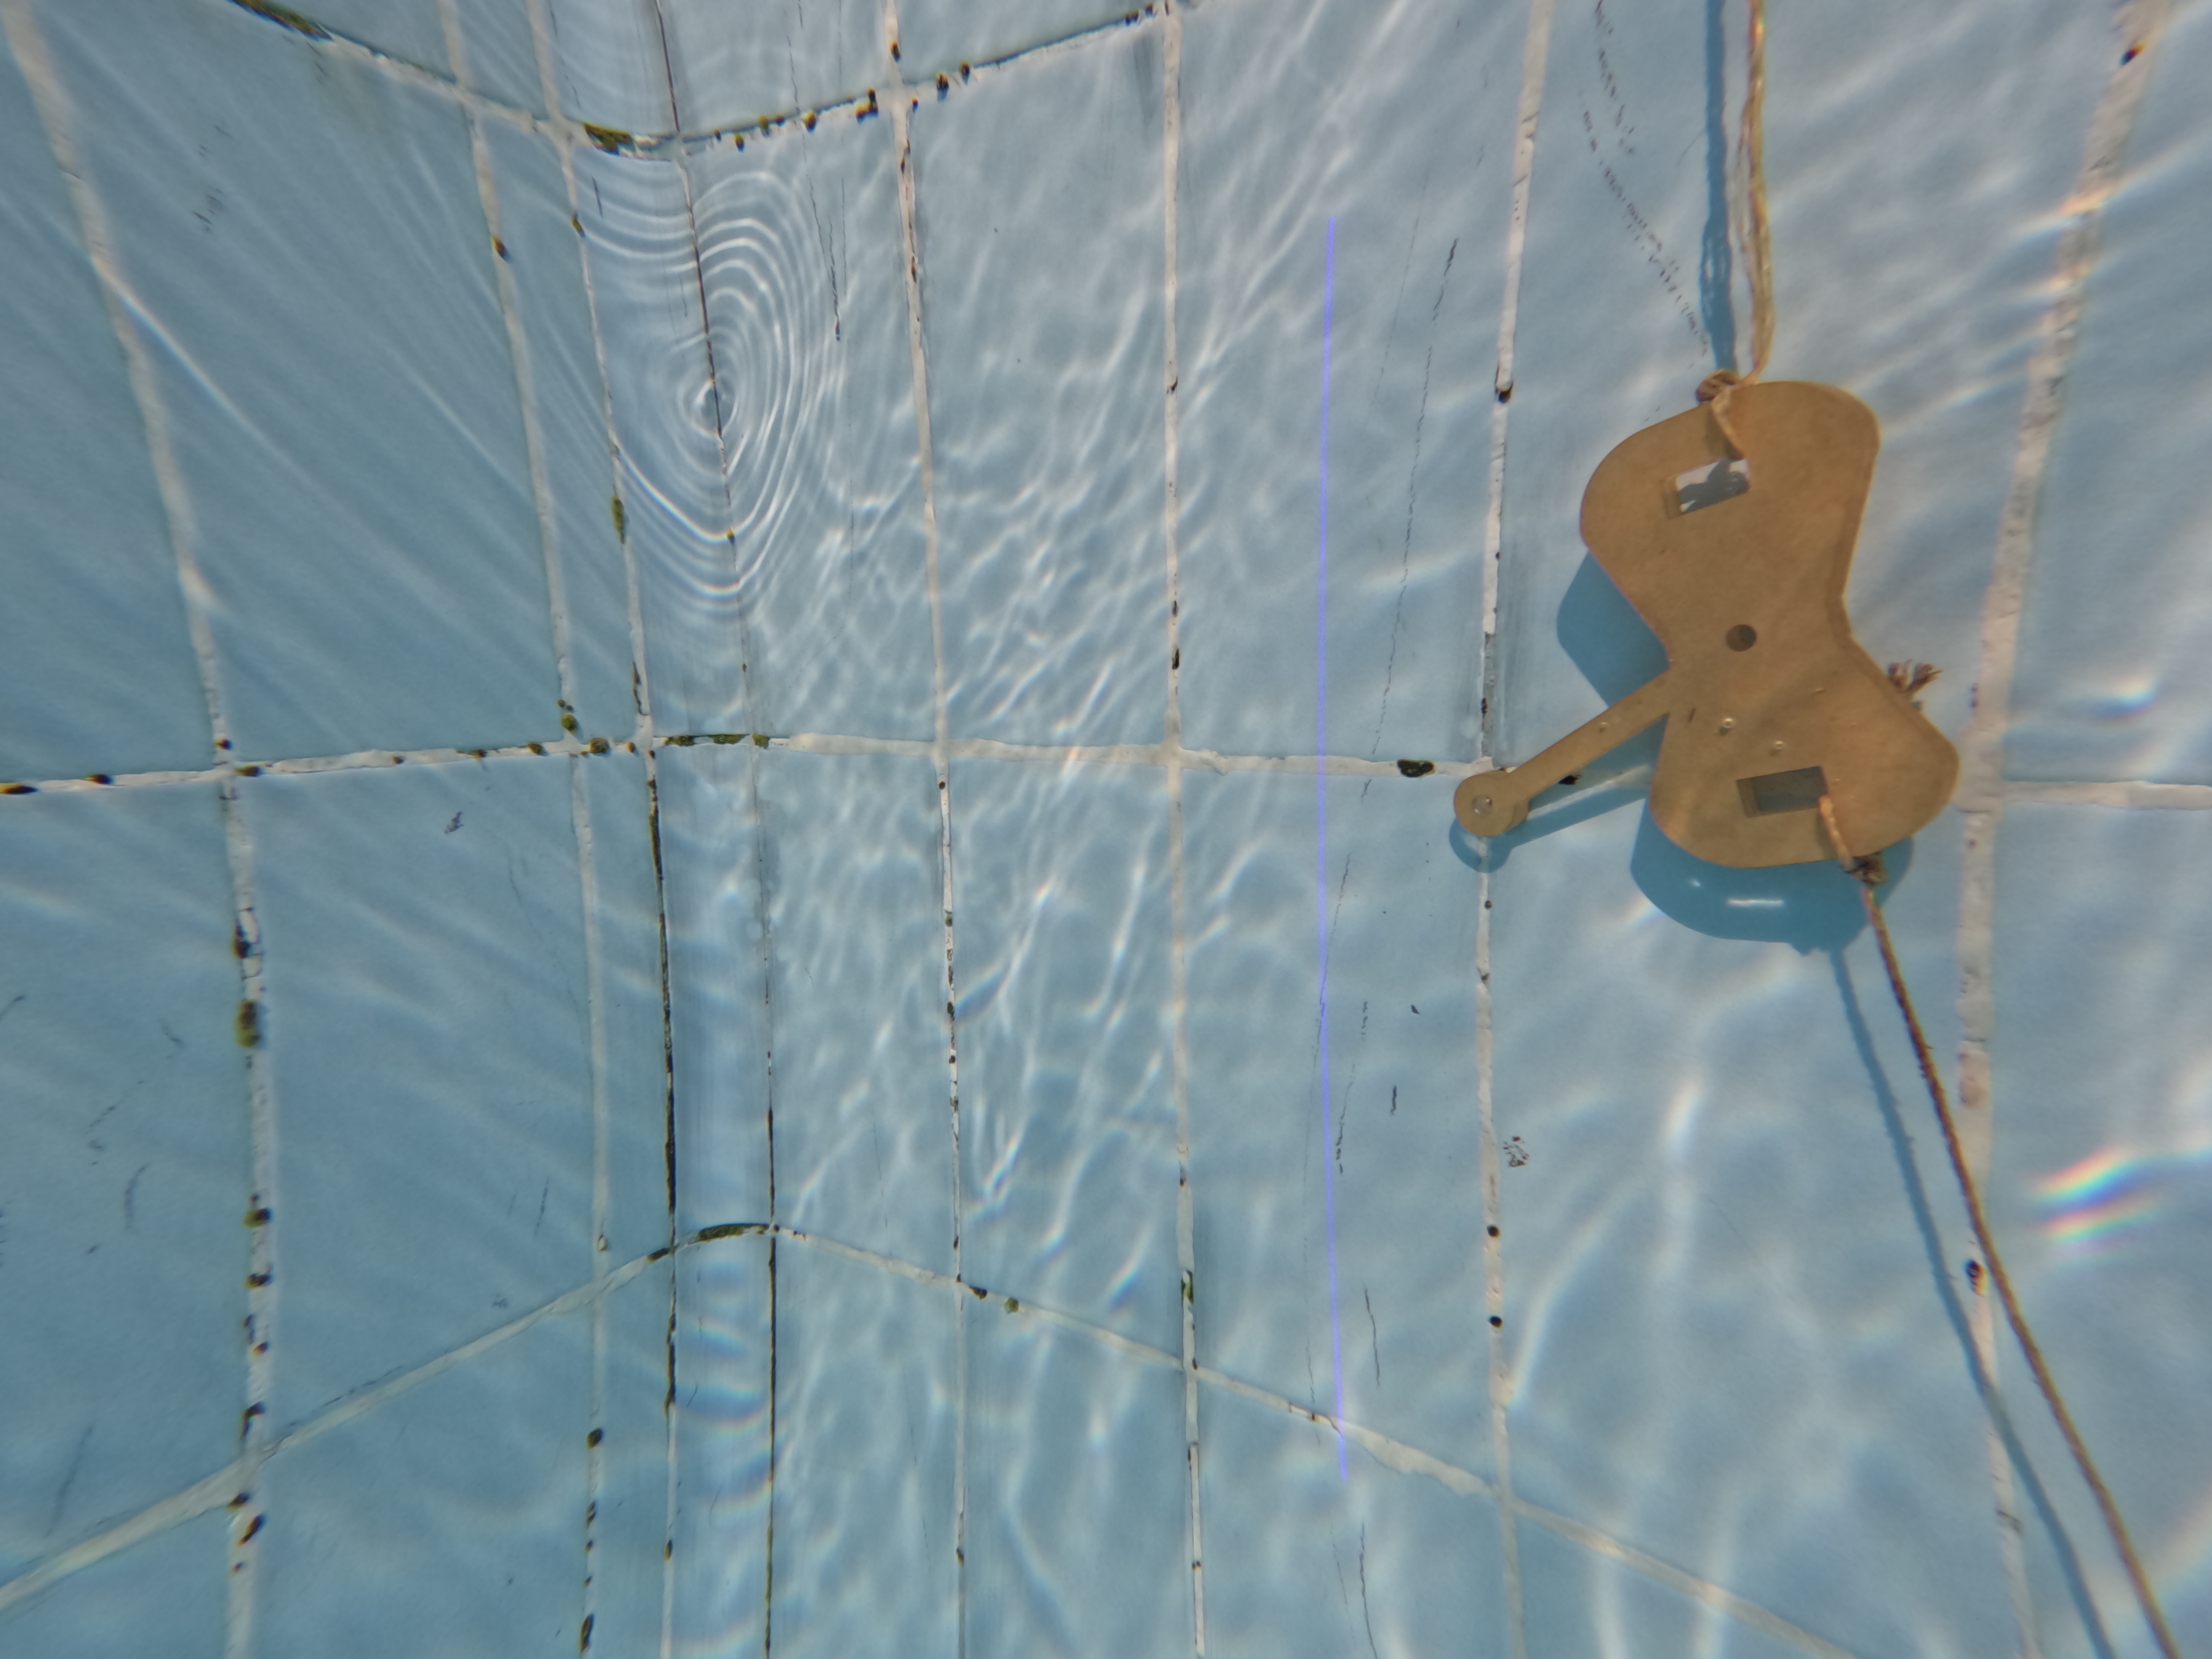

Supplement: Supplementary file 672 [file G0019686.pdf › Level_5_1/G0019686.pdf]

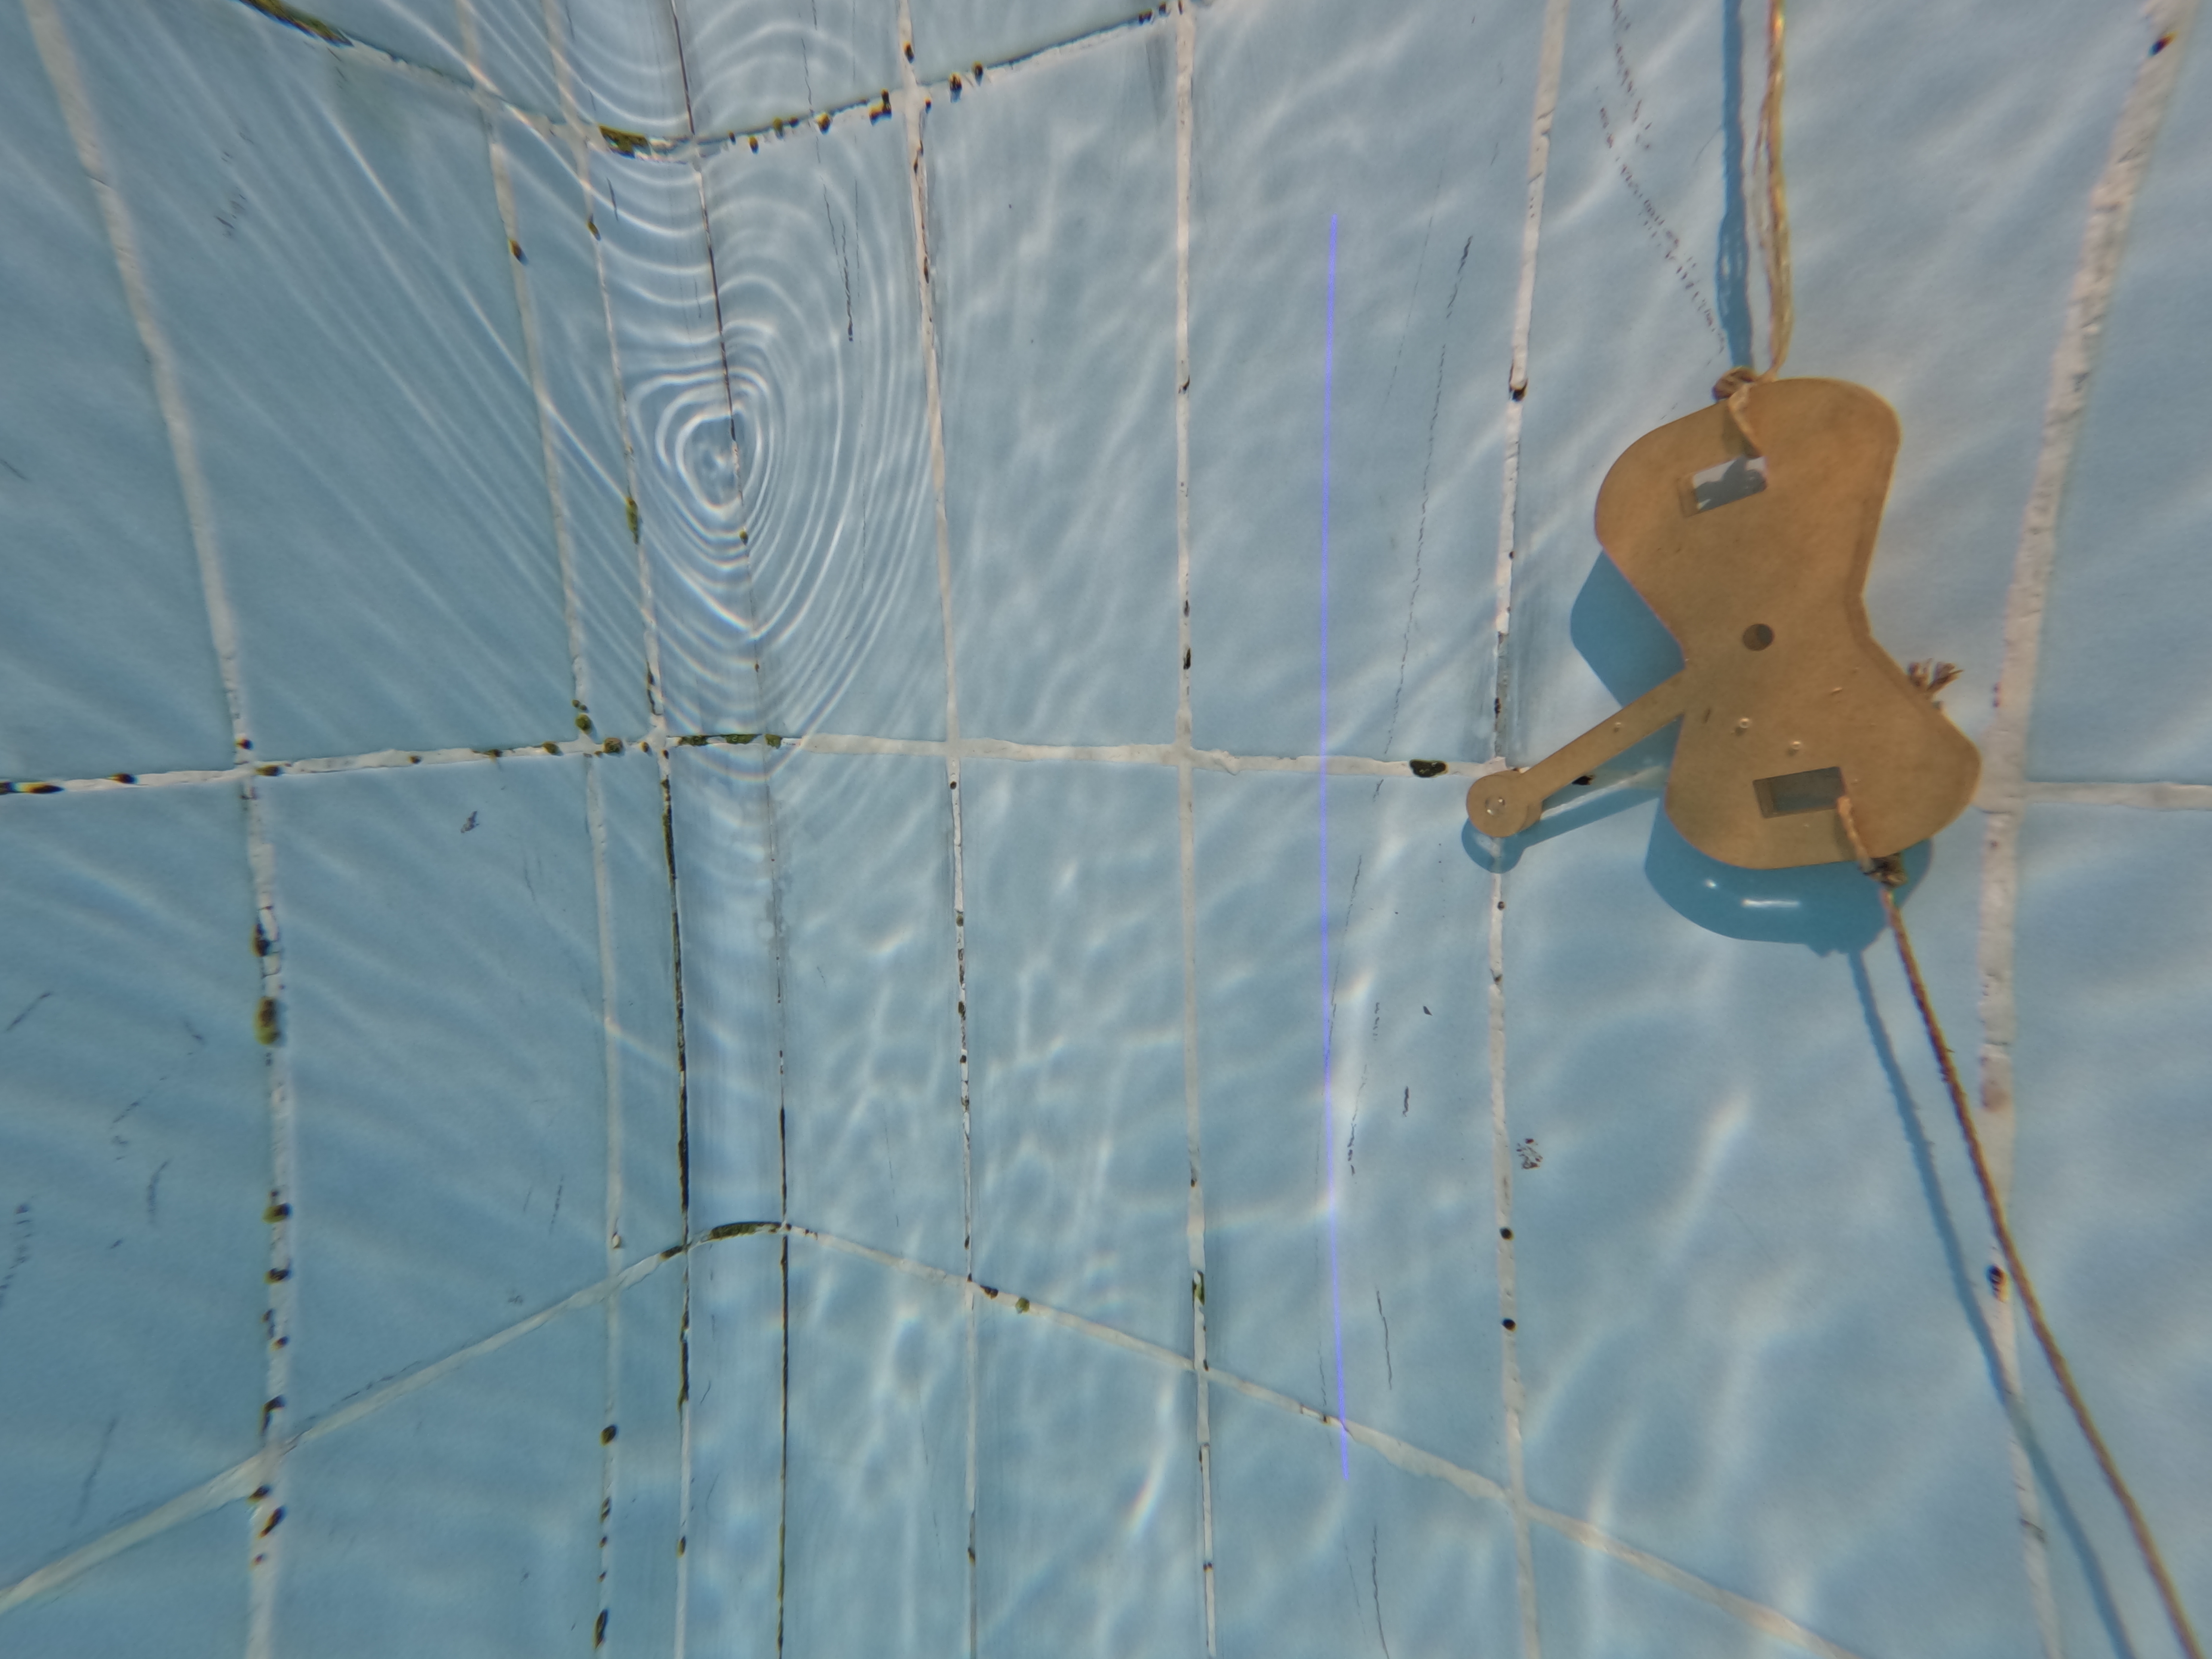

Supplement: Supplementary file 673 [file G0019687.pdf › Level_5_1/G0019687.pdf]

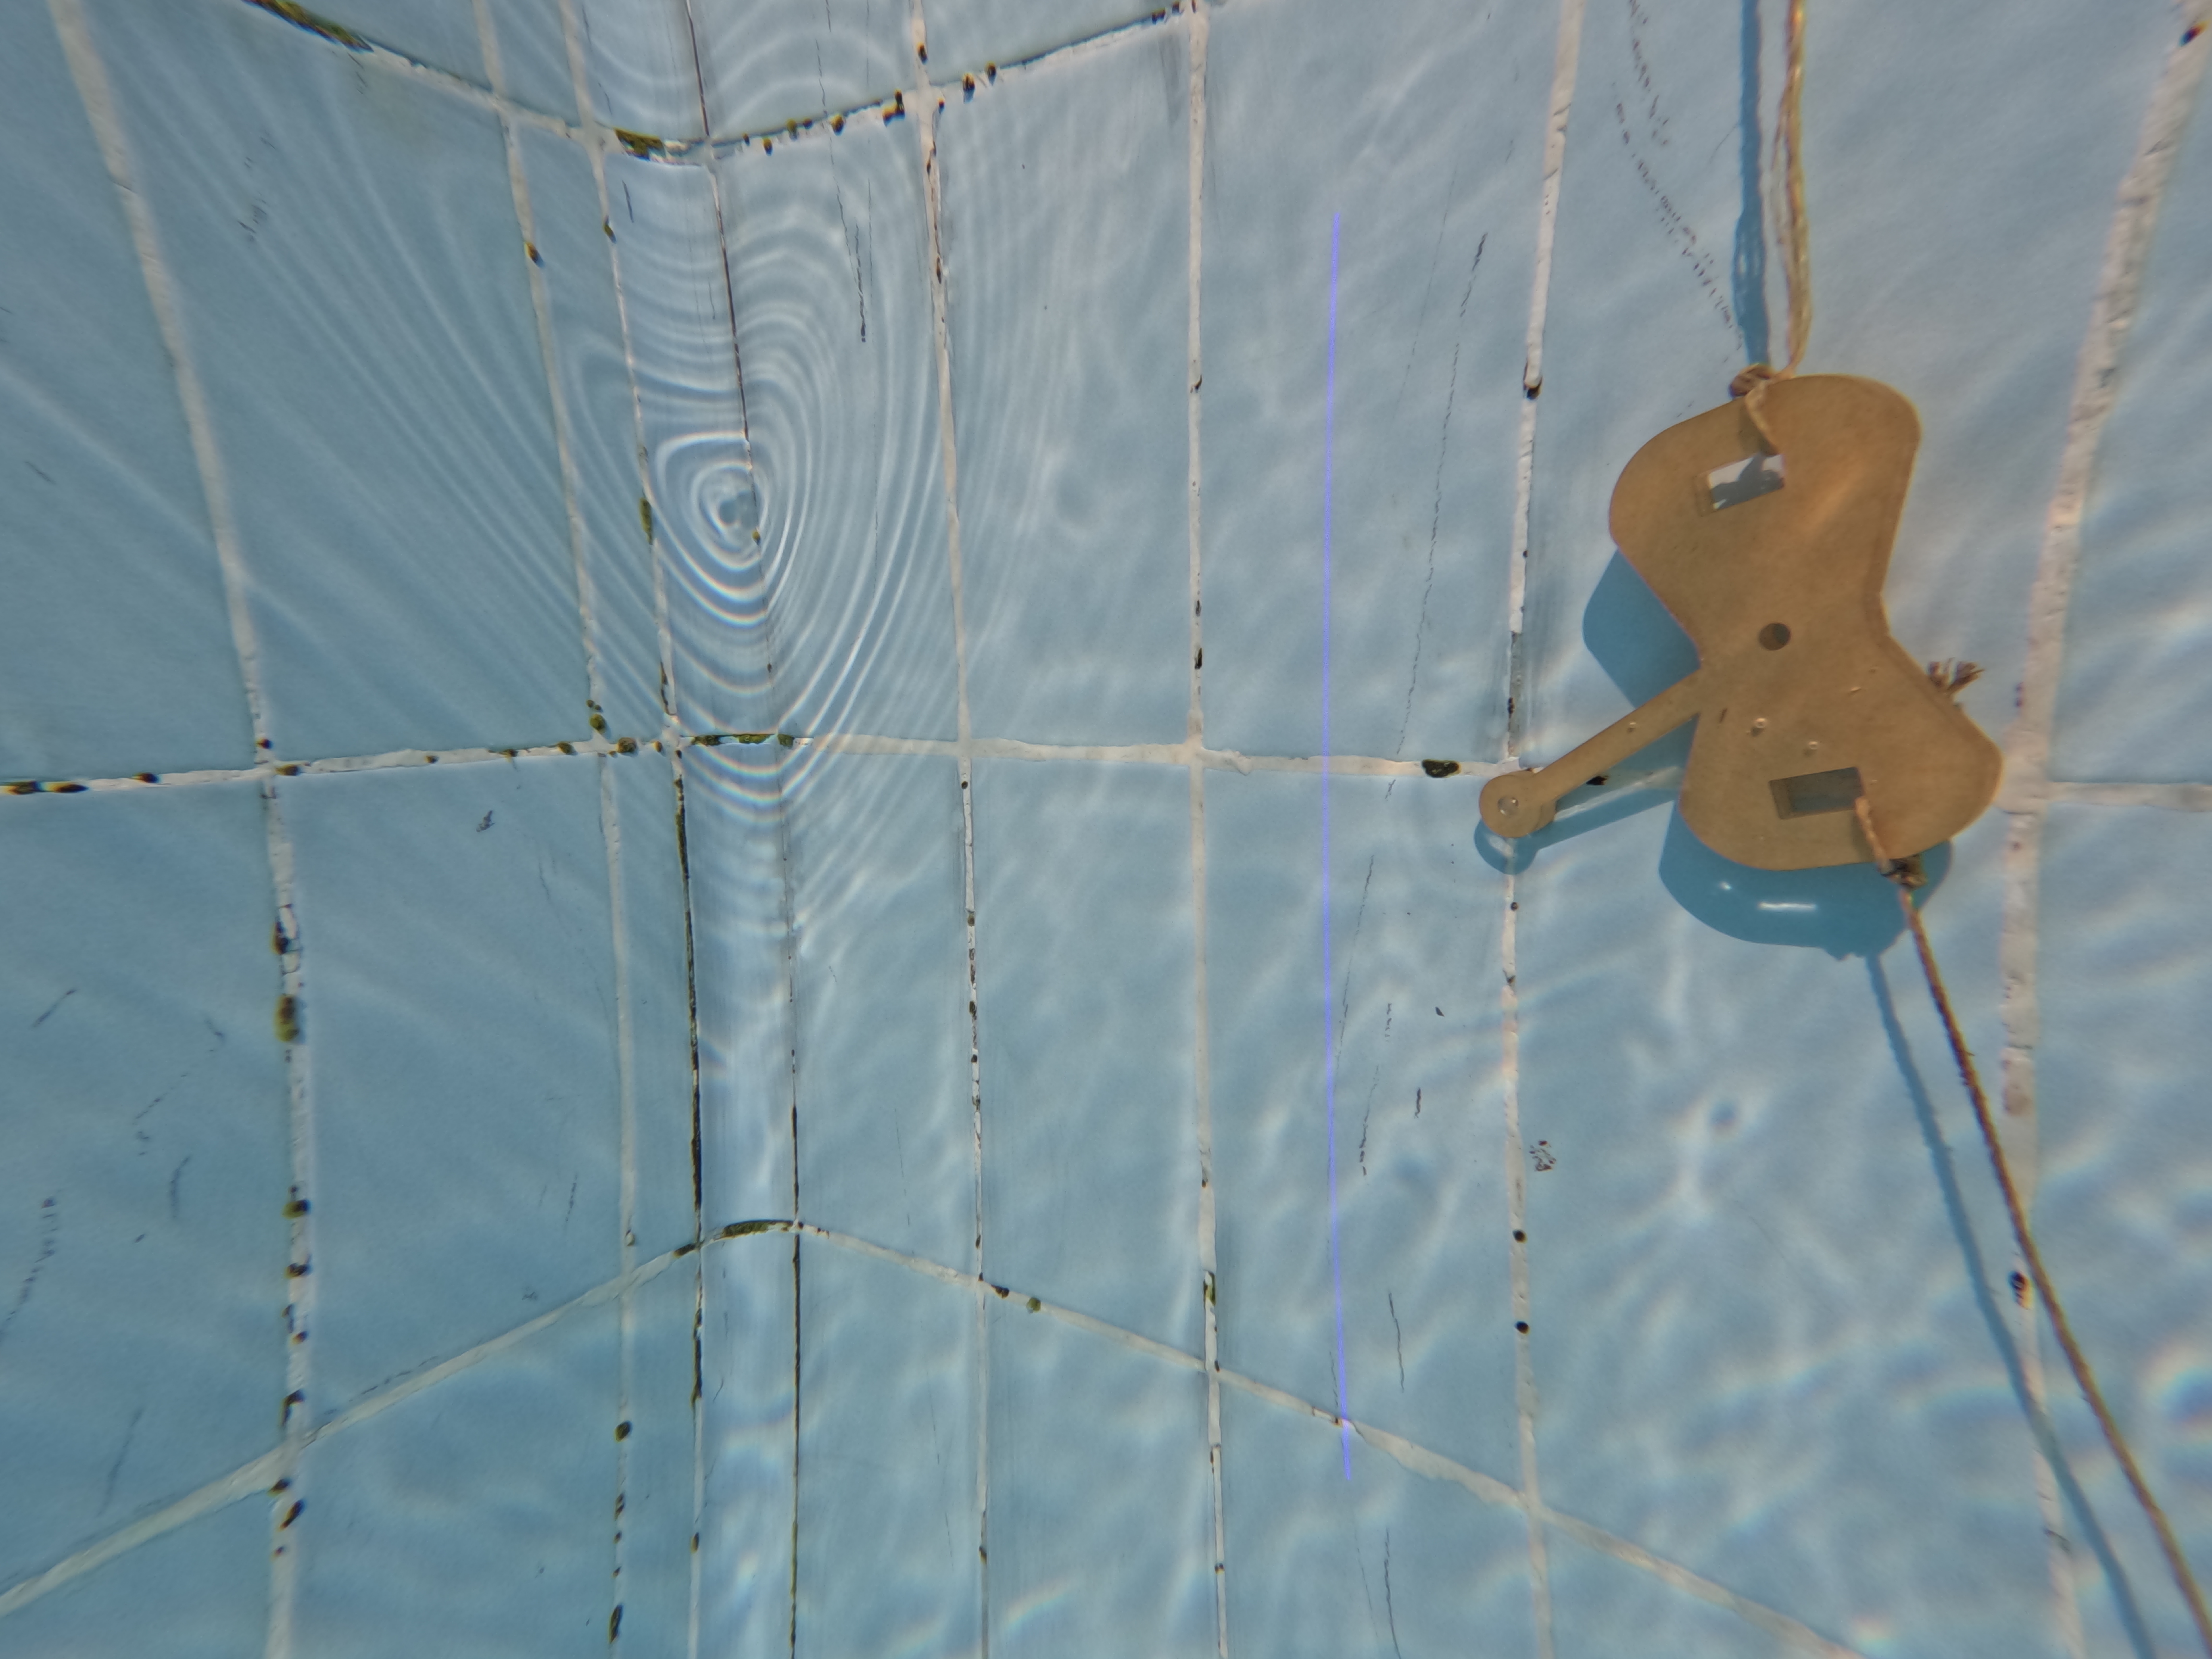

Supplement: Supplementary file 674 [file G0019688.pdf › Level_5_1/G0019688.pdf]

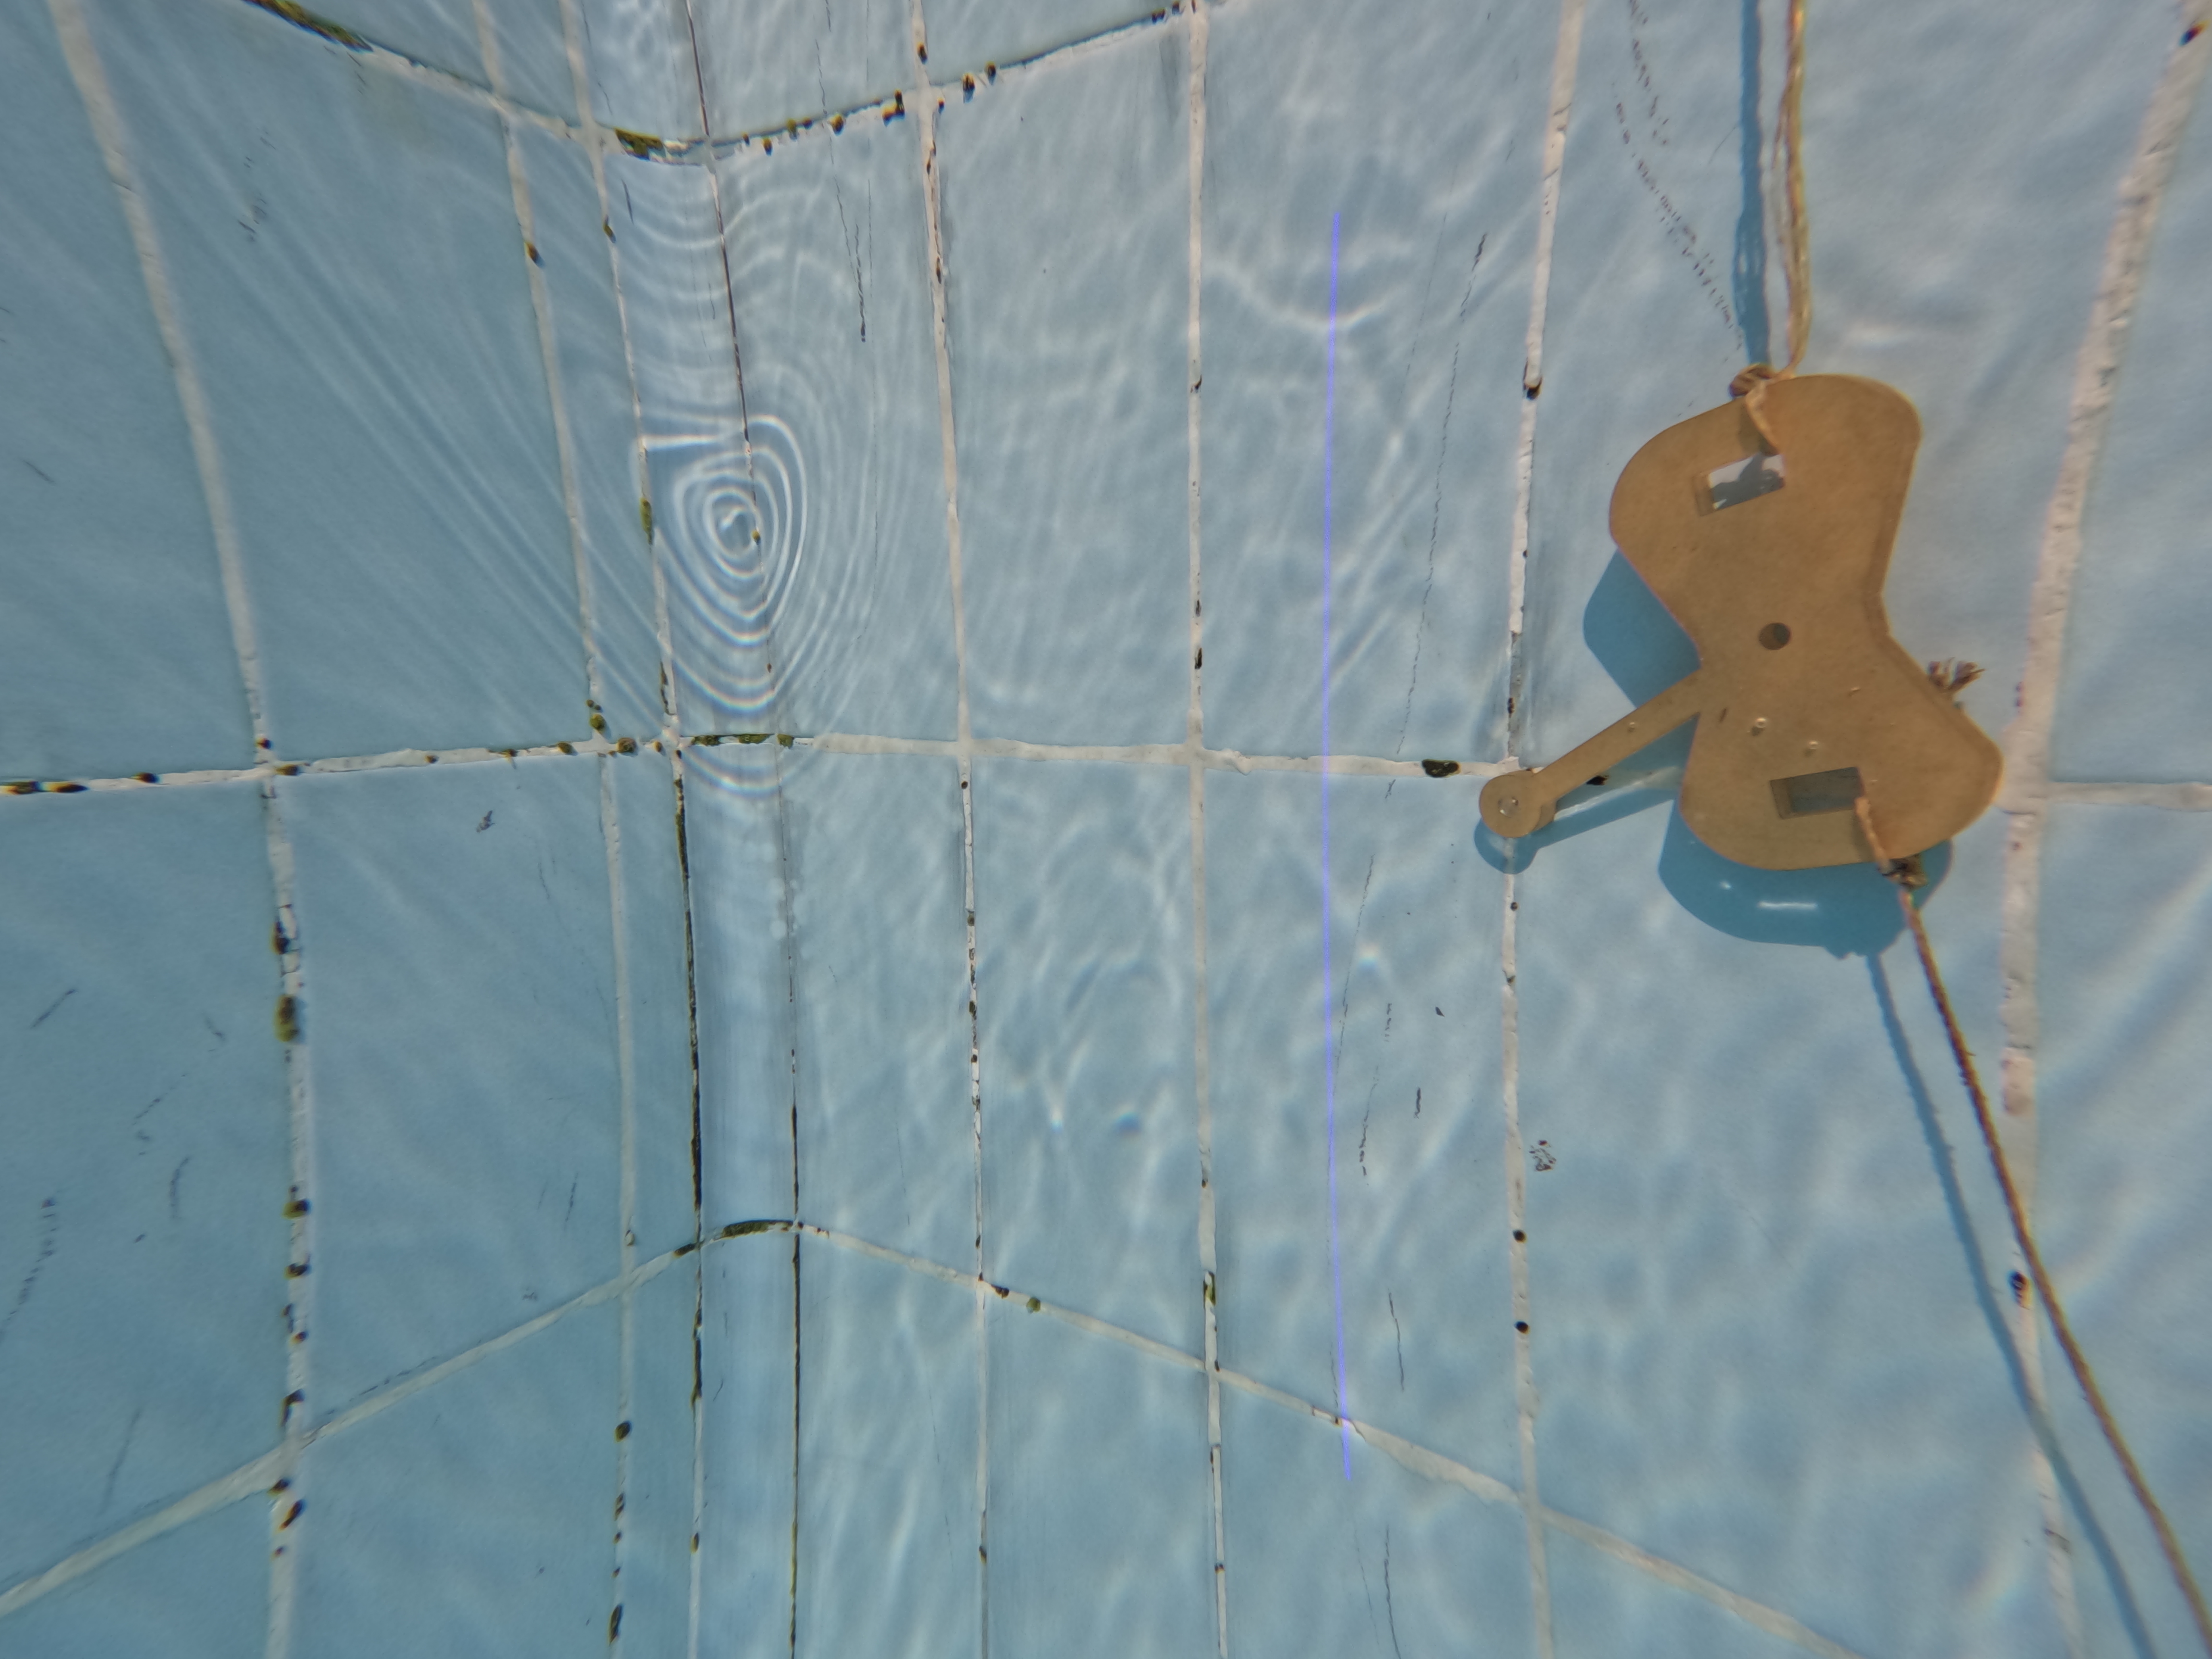

Supplement: Supplementary file 675 [file G0019689.pdf › Level_5_1/G0019689.pdf]

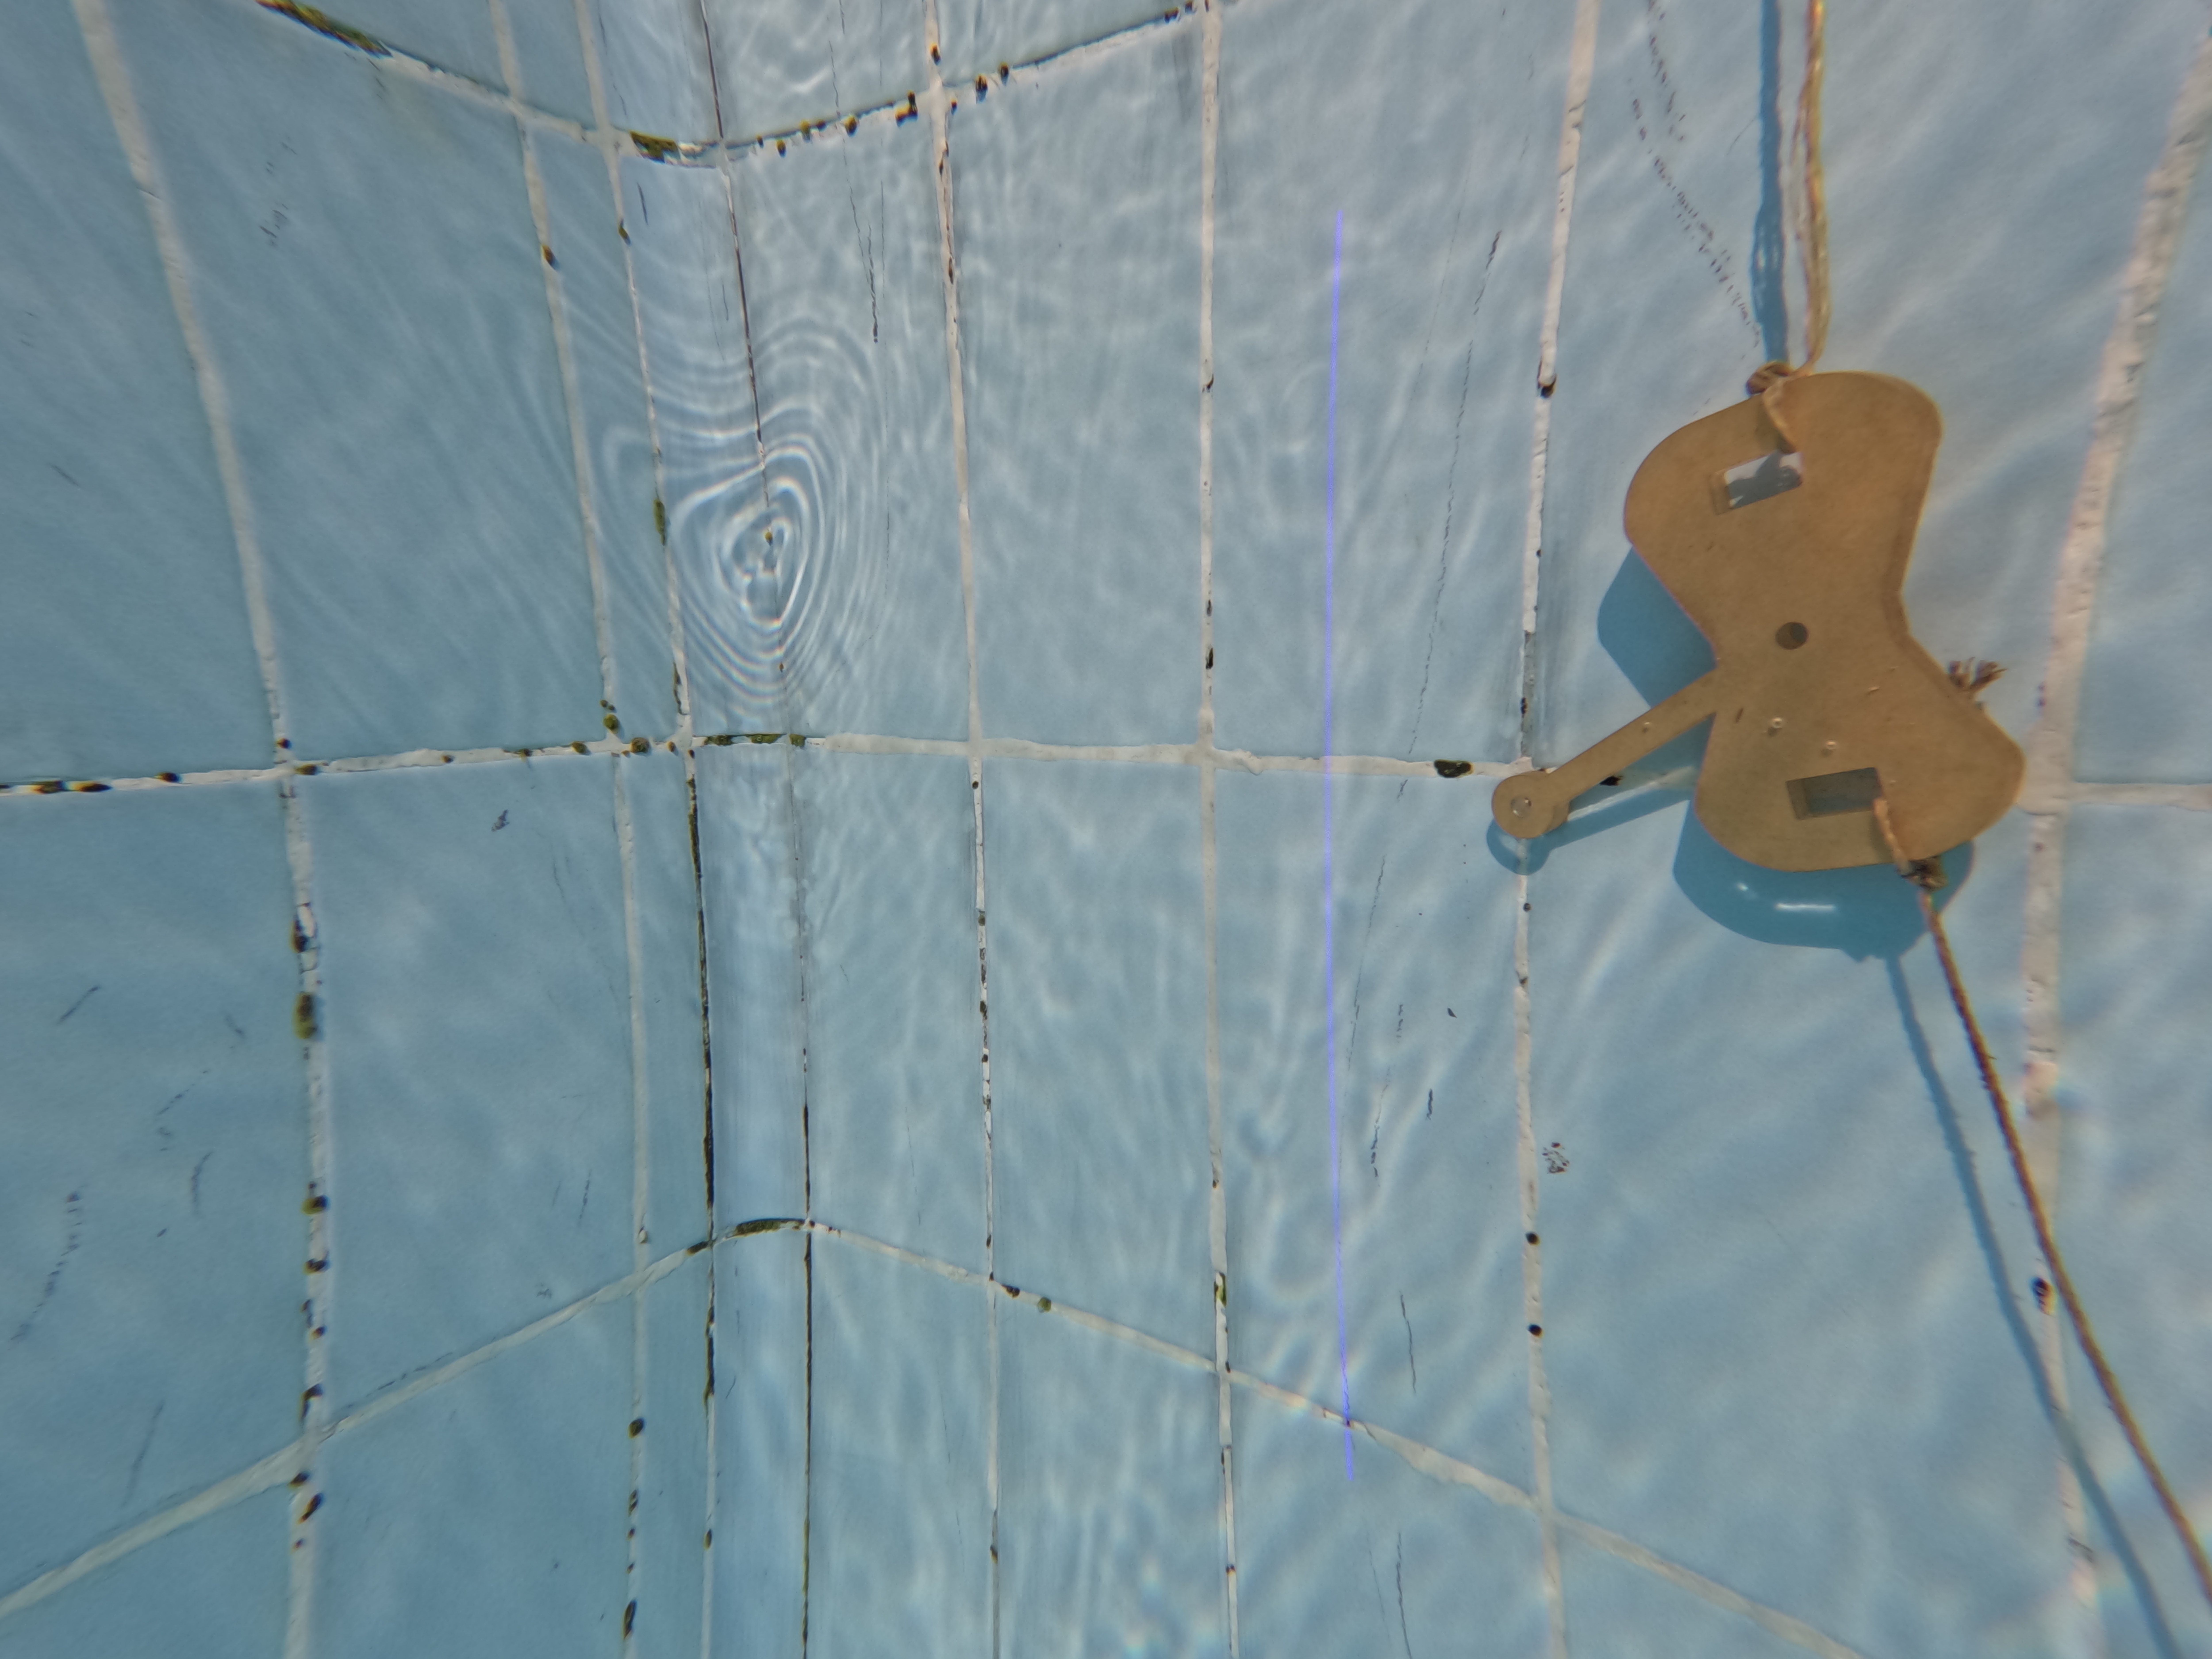

Supplement: Supplementary file 676 [file G0019690.pdf › Level_5_1/G0019690.pdf]

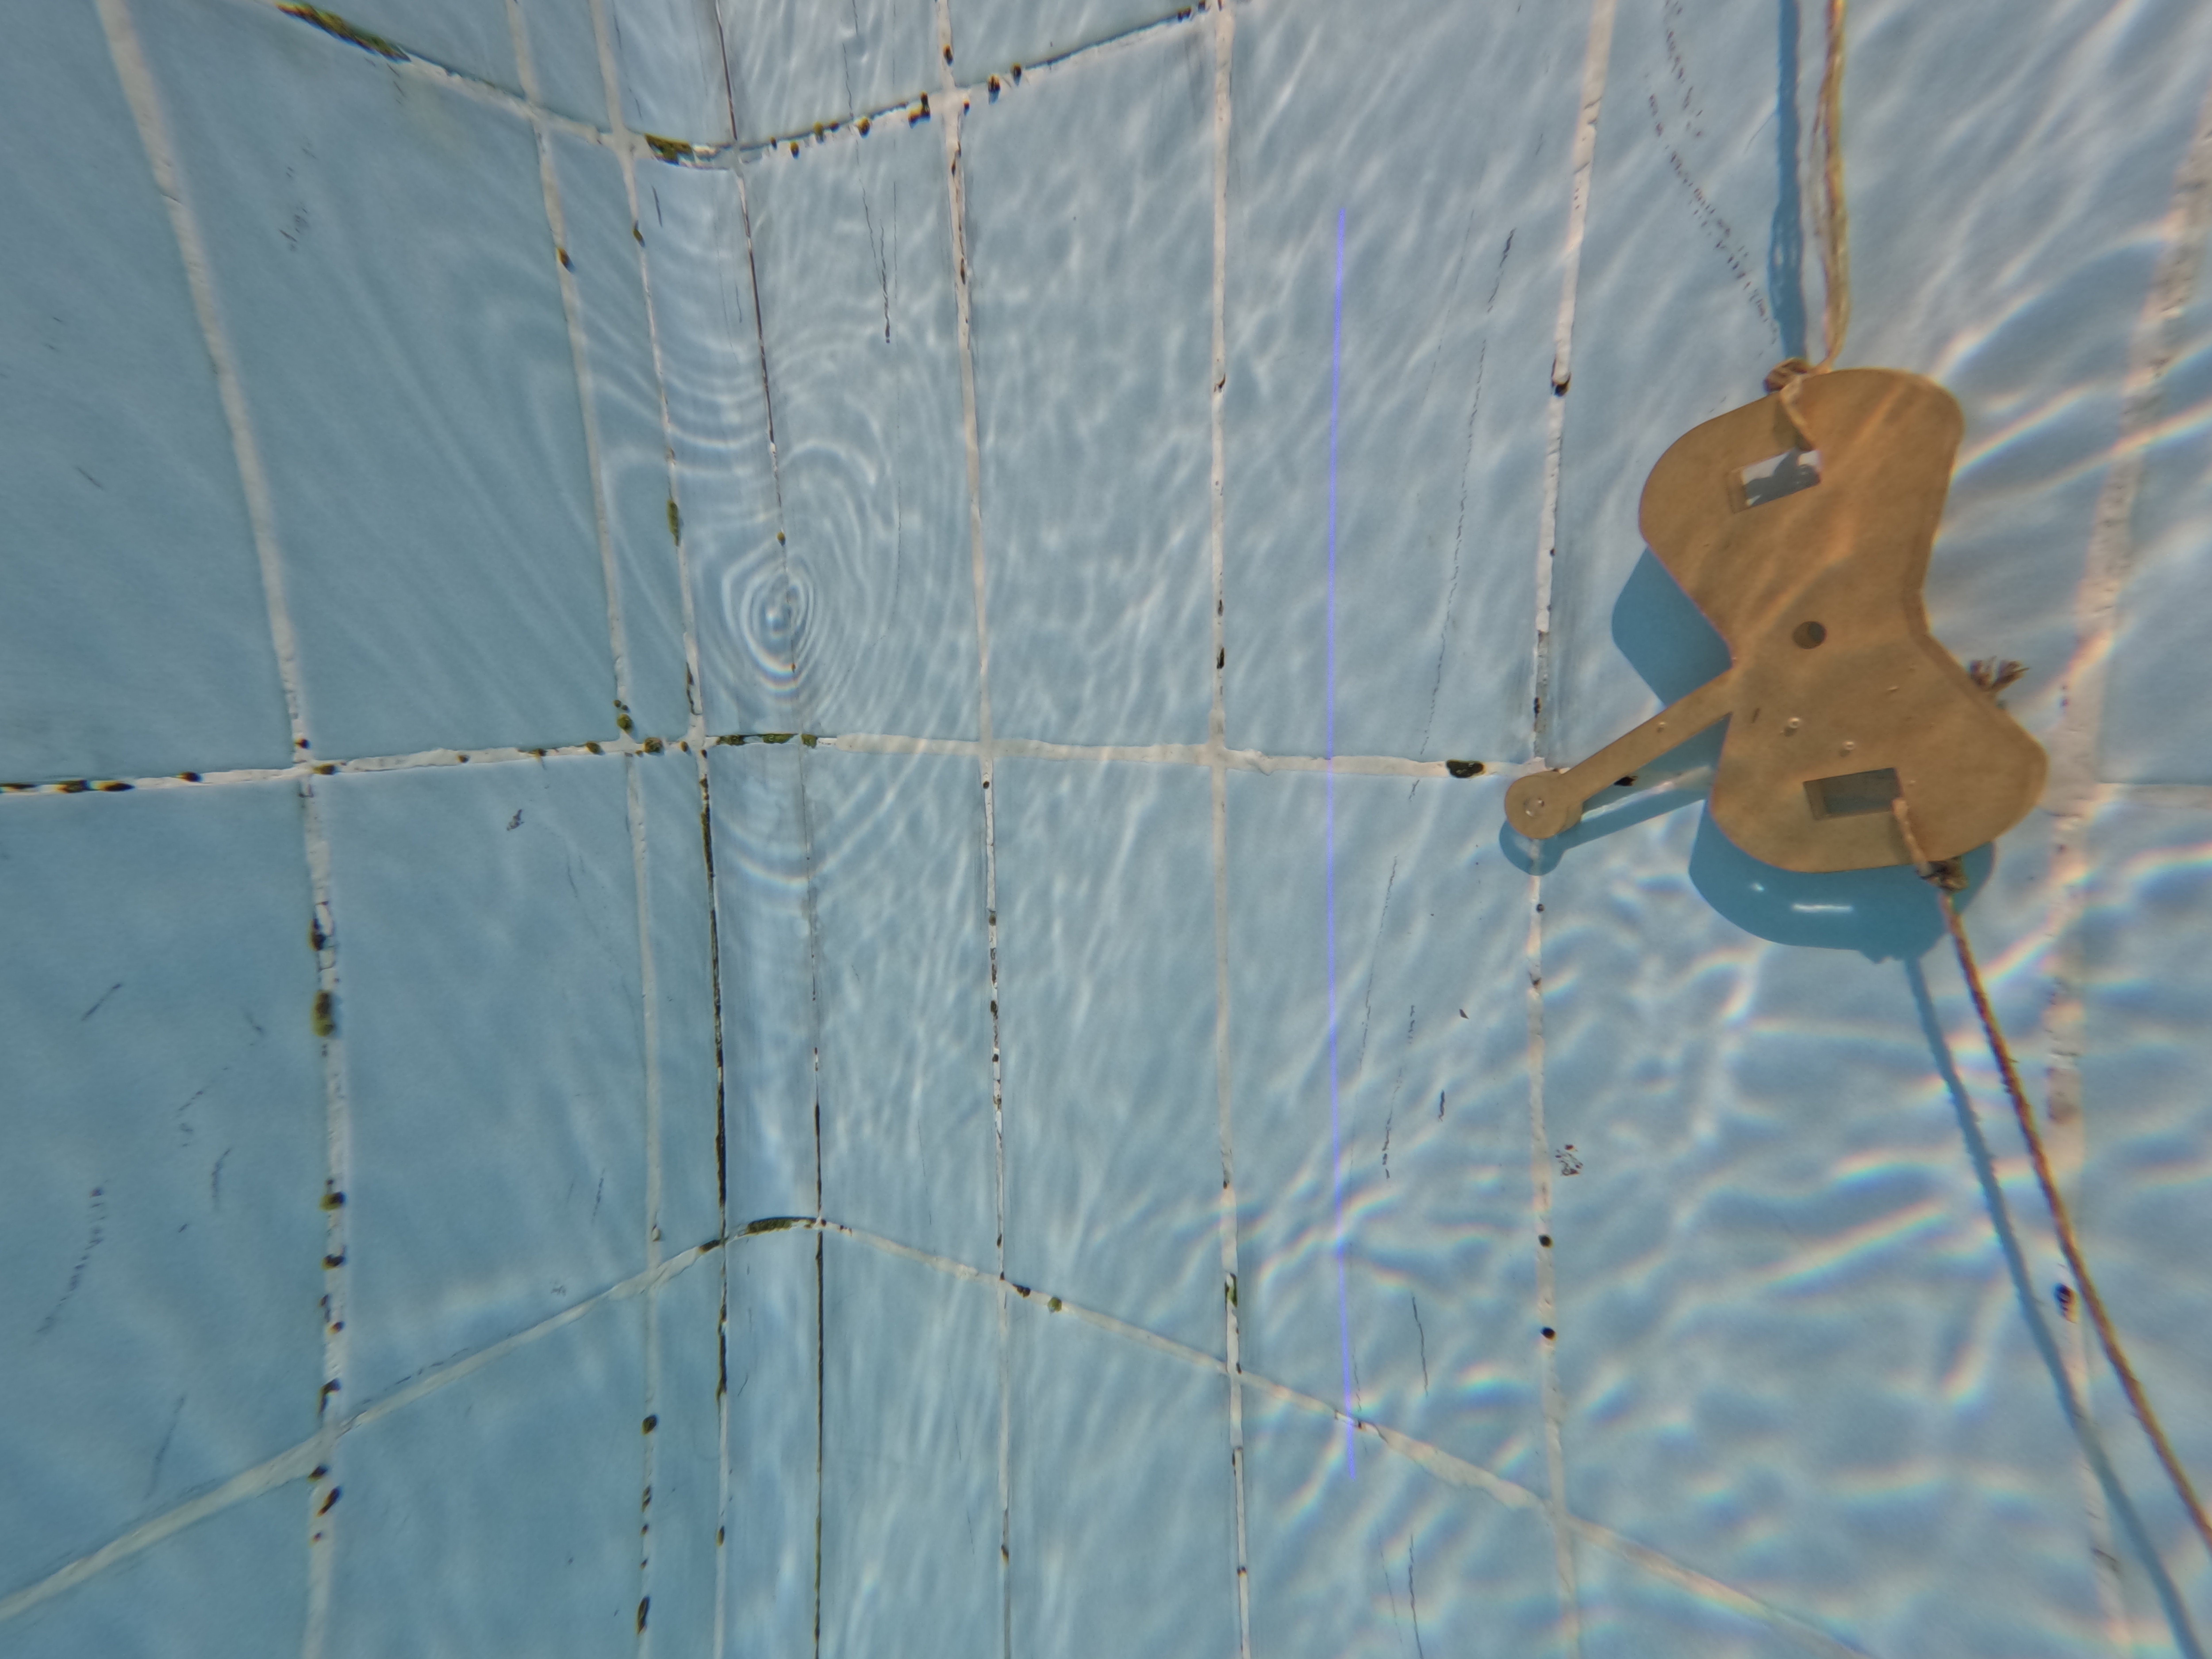

Supplement: Supplementary file 677 [file G0019691.pdf › Level_5_1/G0019691.pdf]

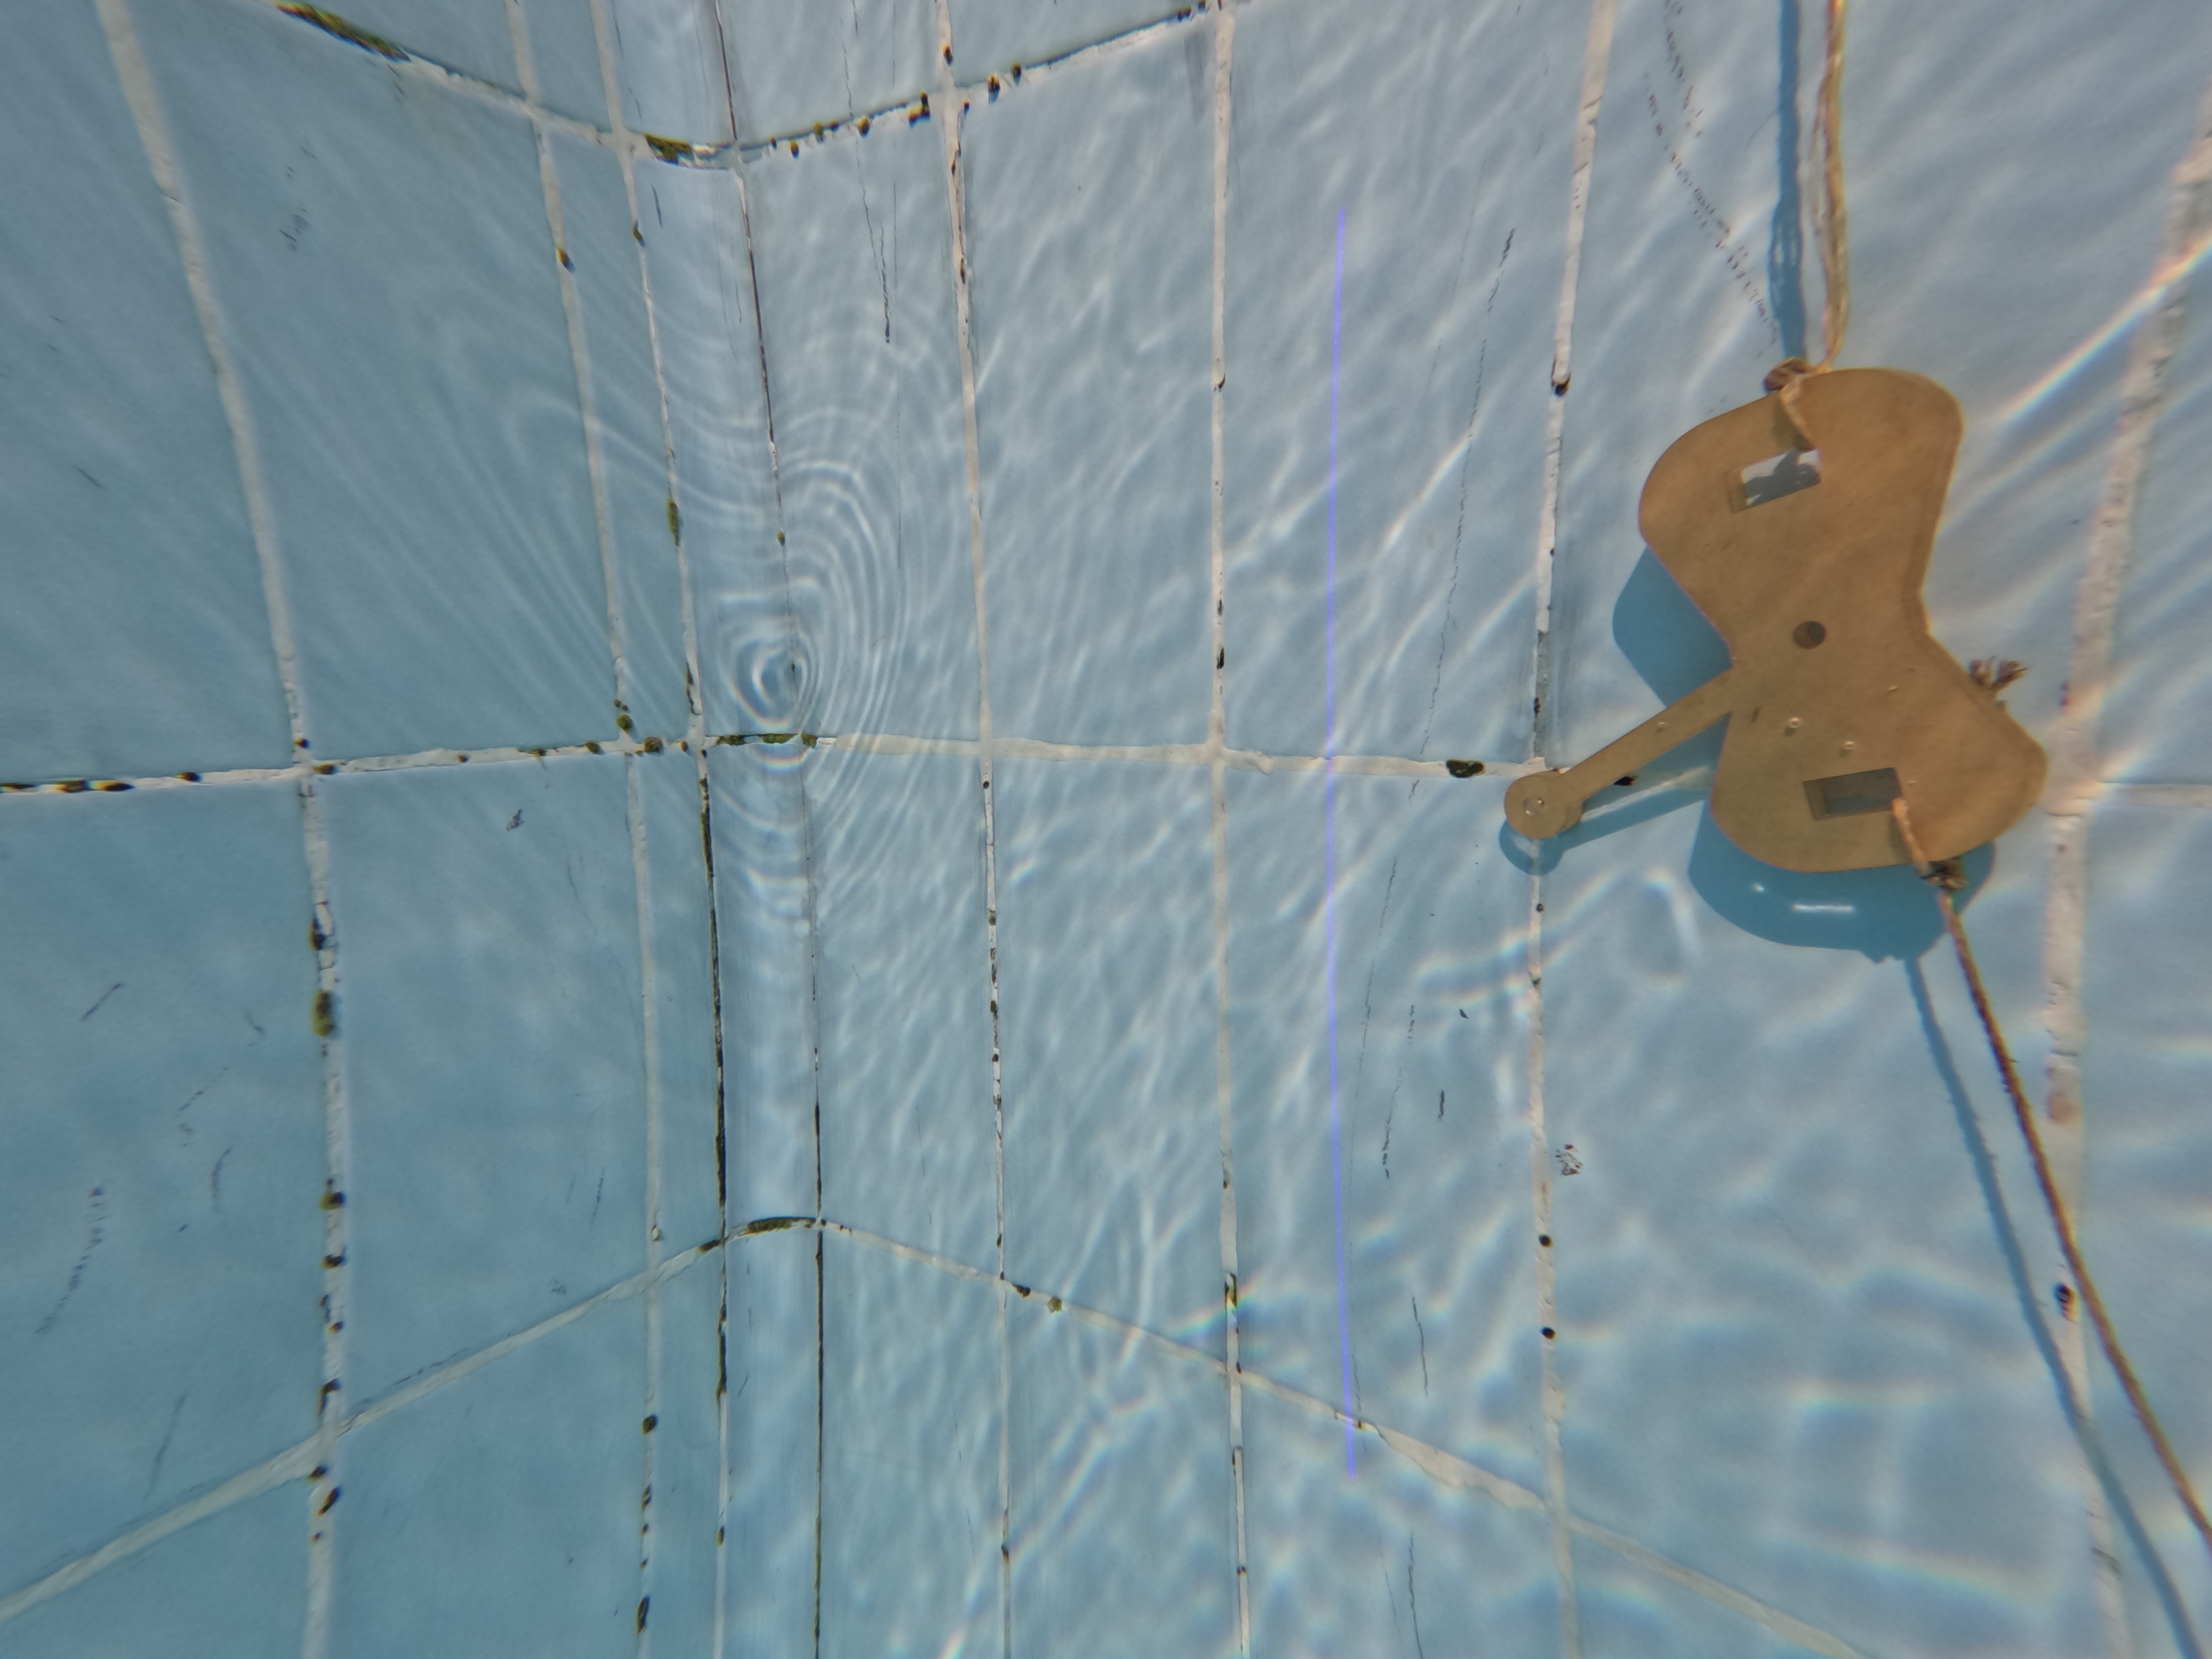

Supplement: Supplementary file 678 [file G0019692.pdf › Level_5_1/G0019692.pdf]

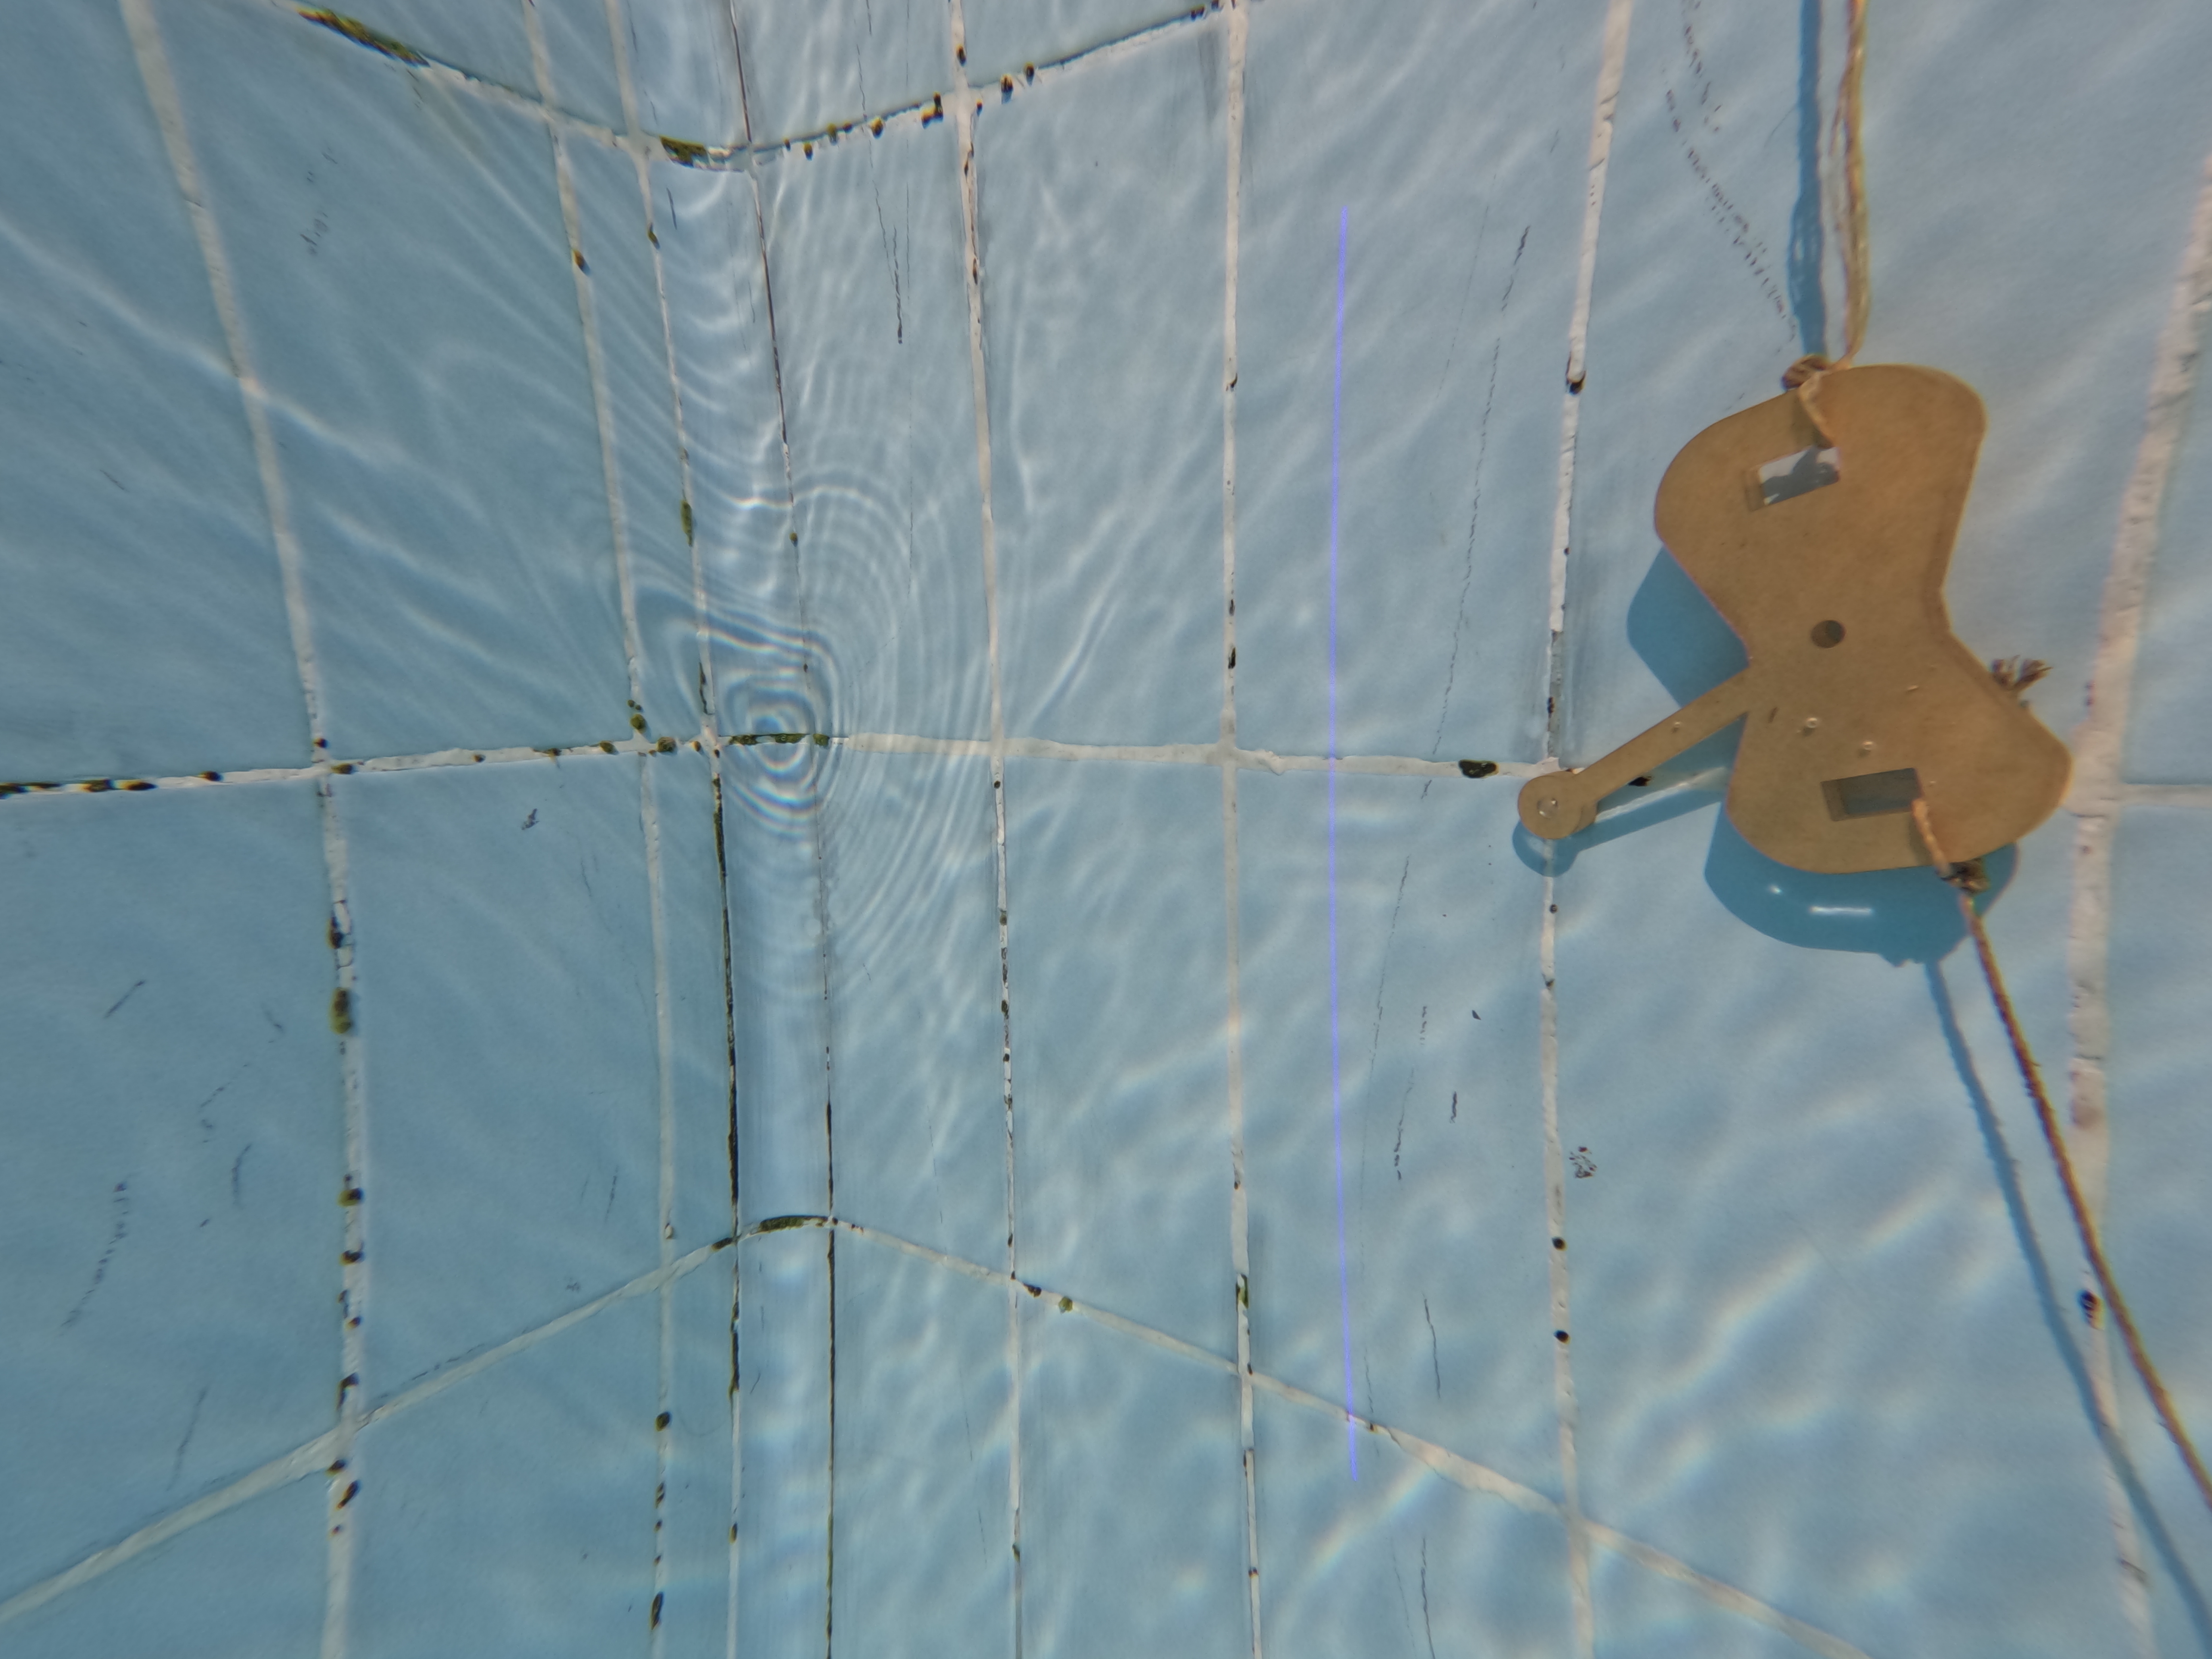

Supplement: Supplementary file 679 [file G0019693.pdf › Level_5_1/G0019693.pdf]

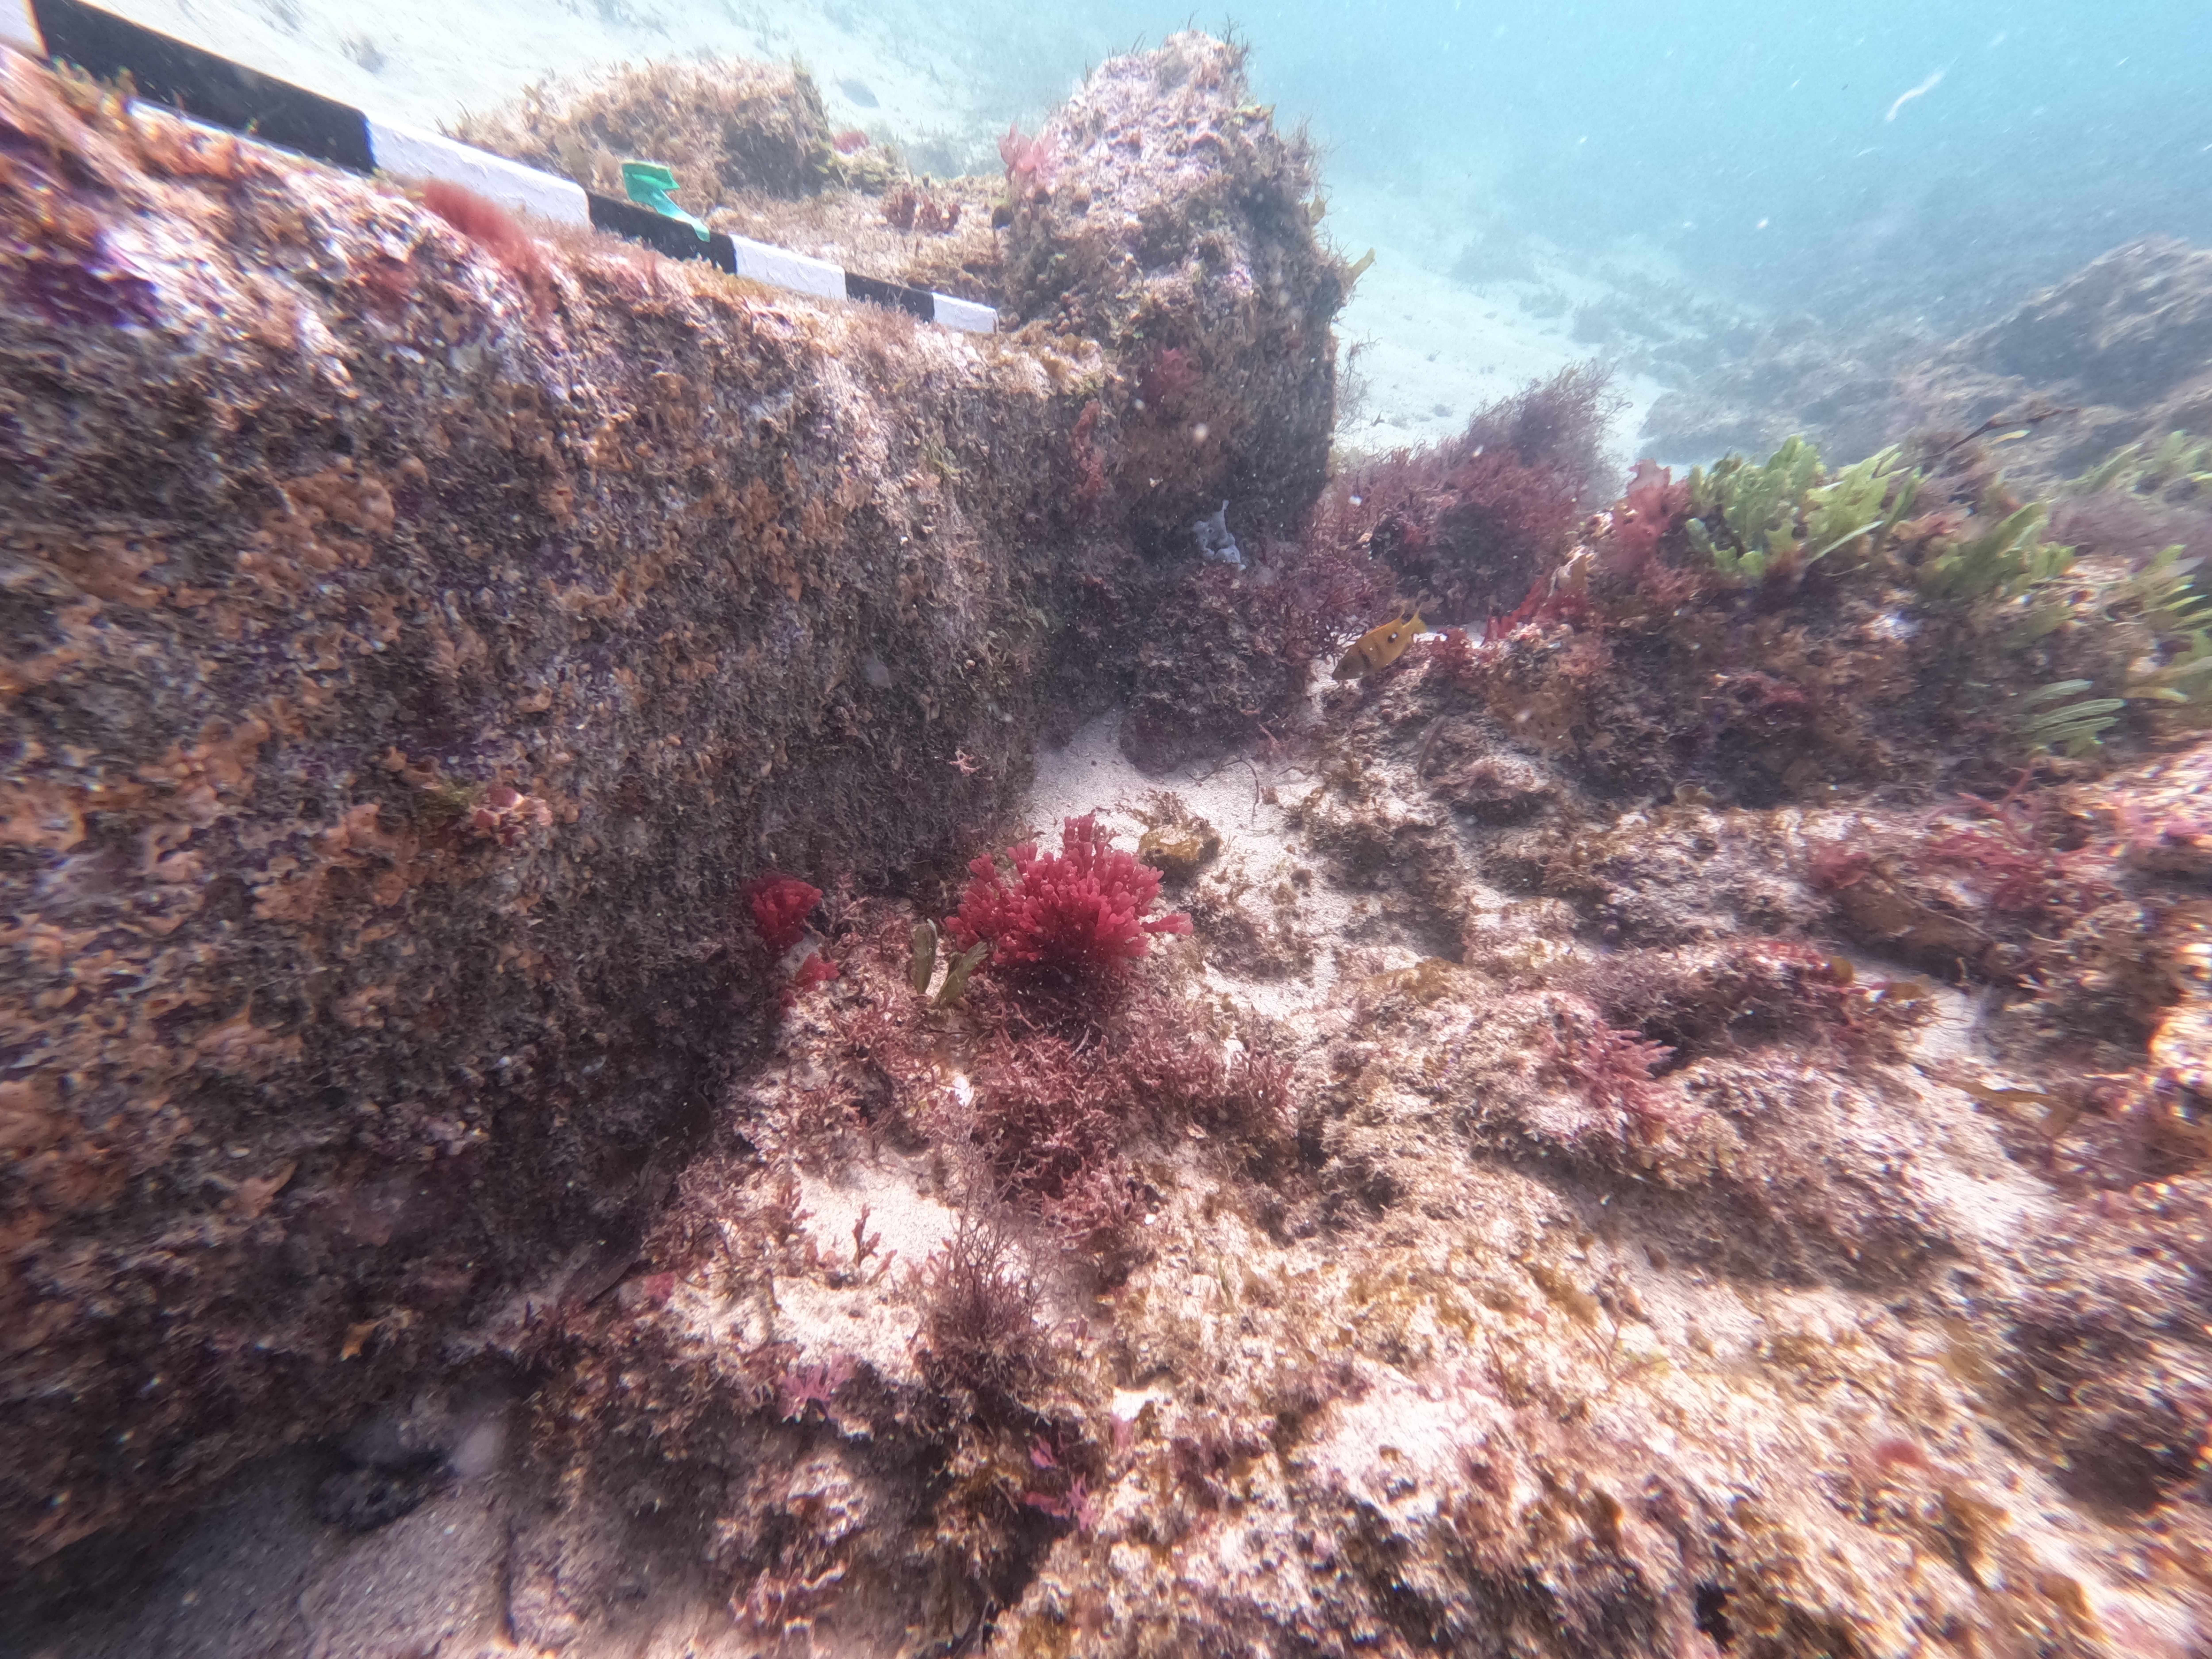

Supplement: Supplementary file 680 [file G0713747.pdf › Ocean2/G0713747.pdf]

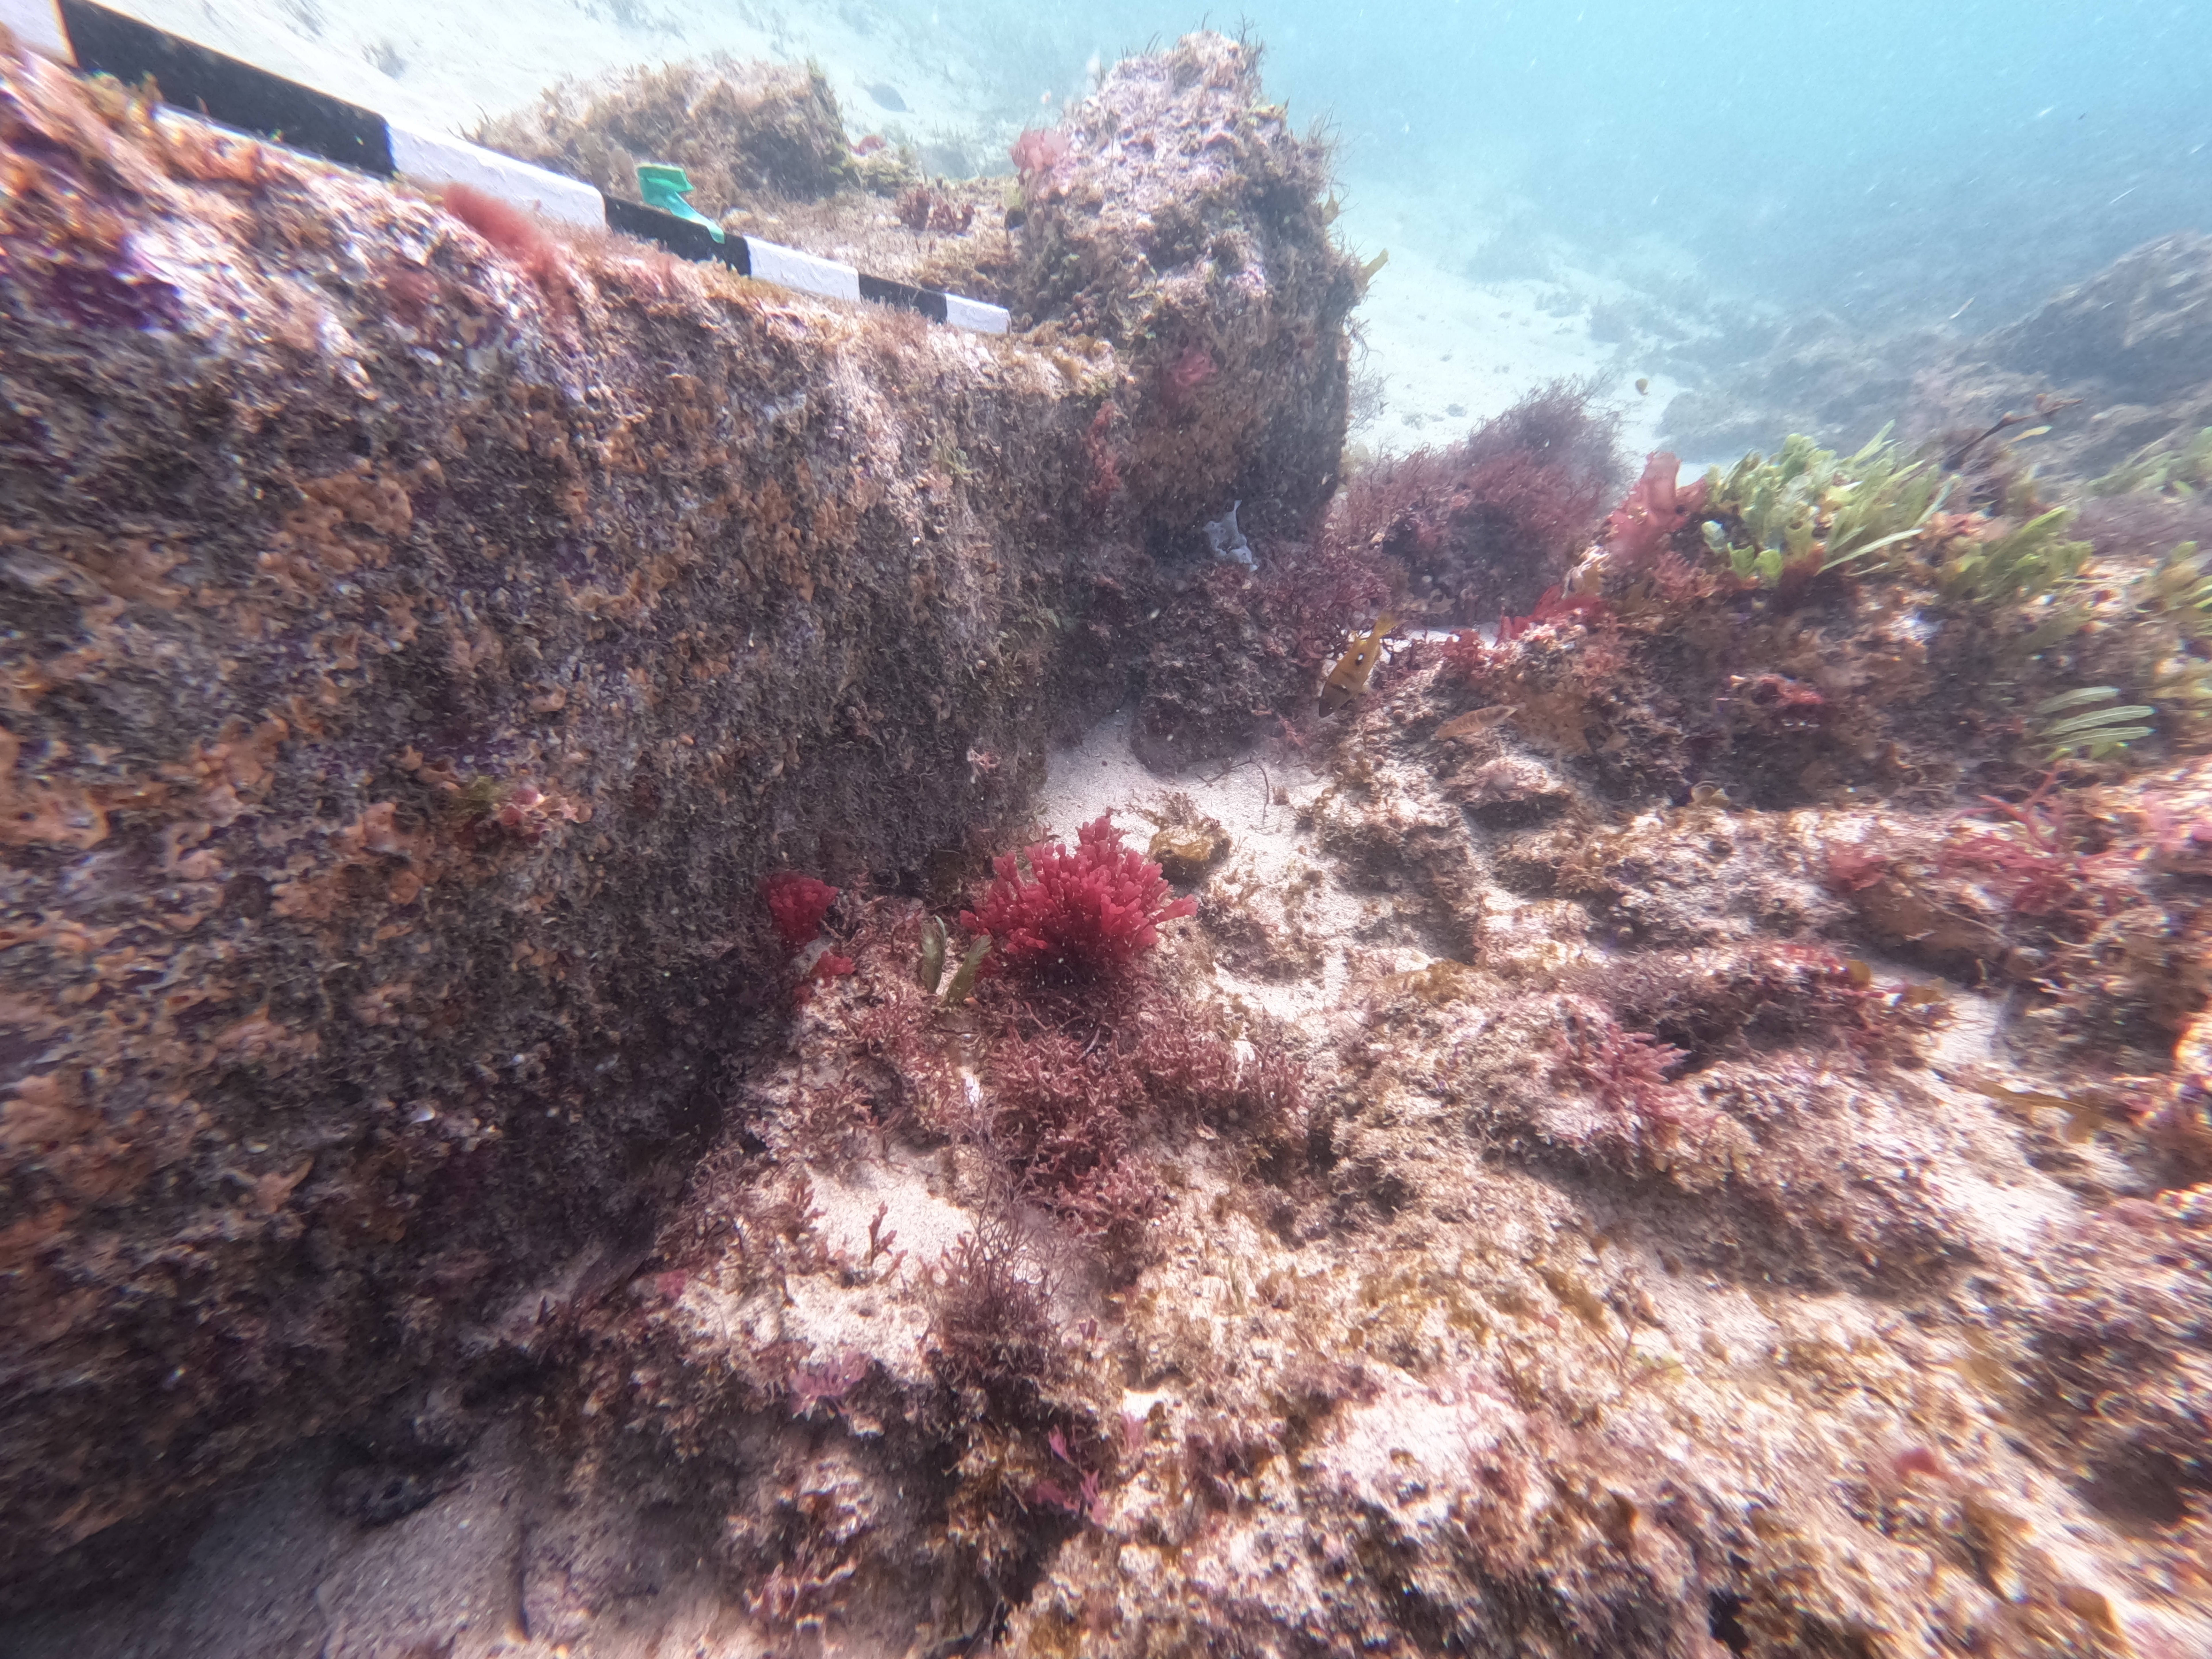

Supplement: Supplementary file 681 [file G0713748.pdf › Ocean2/G0713748.pdf]

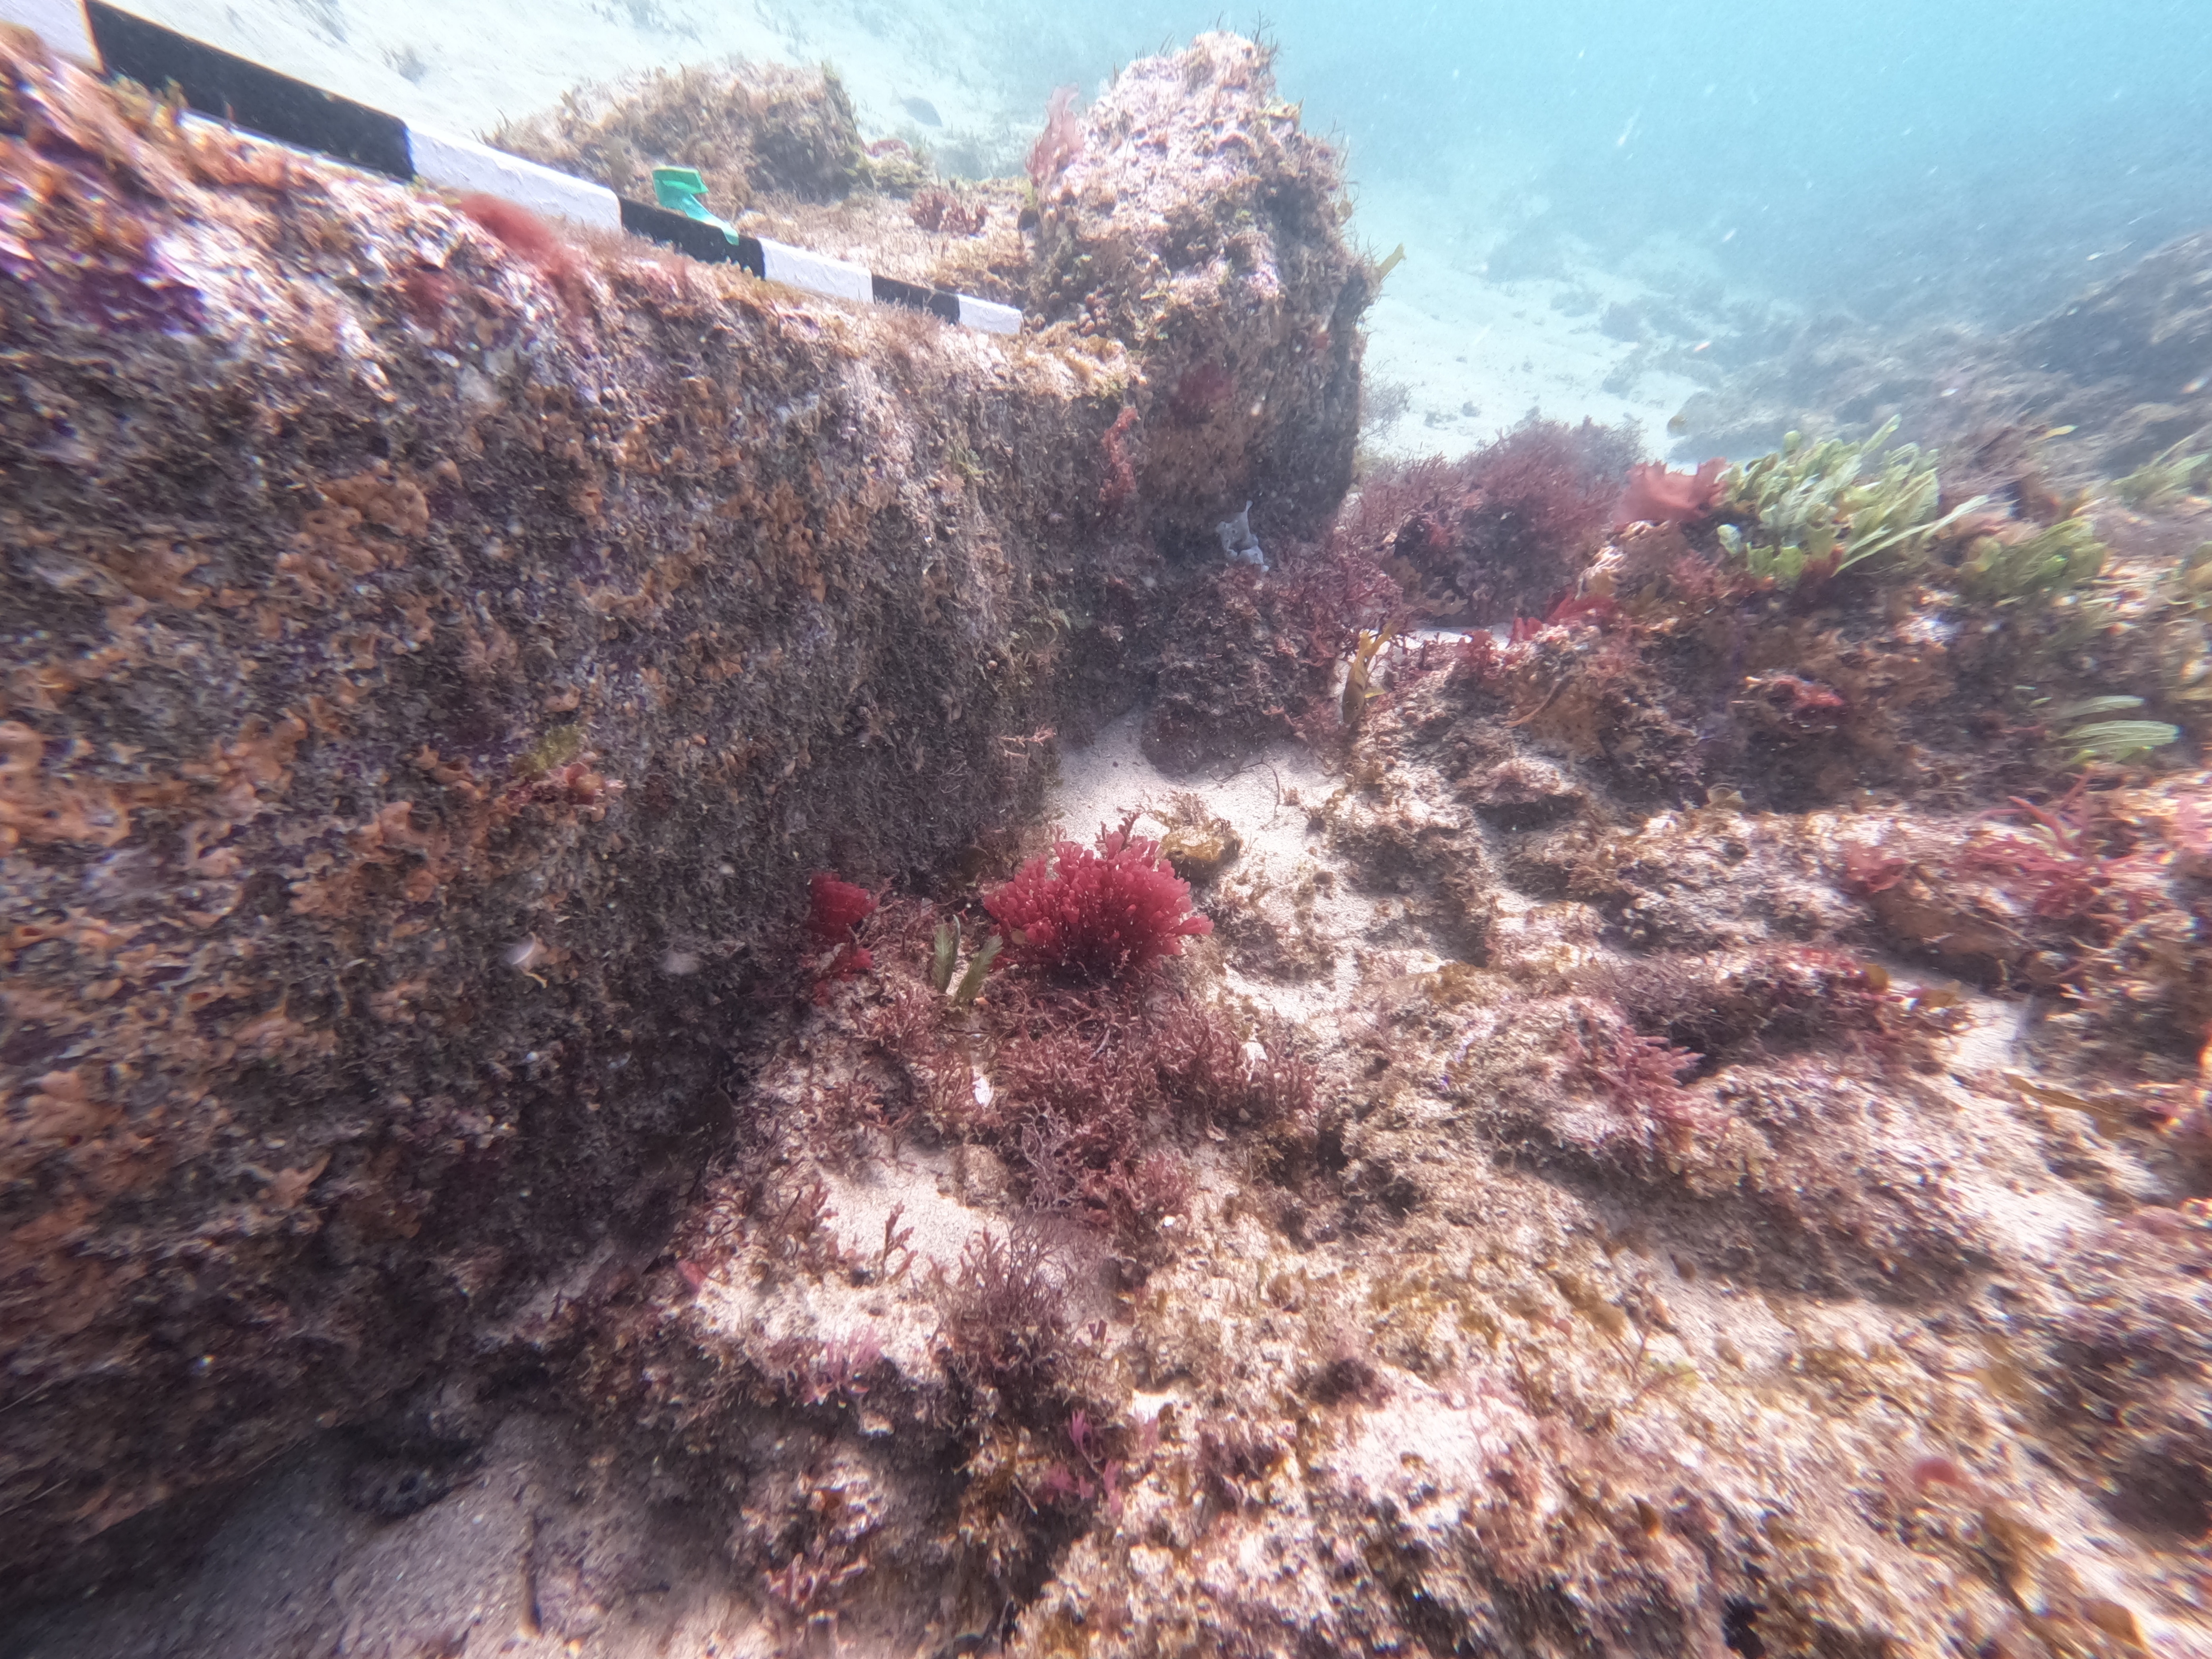

Supplement: Supplementary file 682 [file G0713749.pdf › Ocean2/G0713749.pdf]

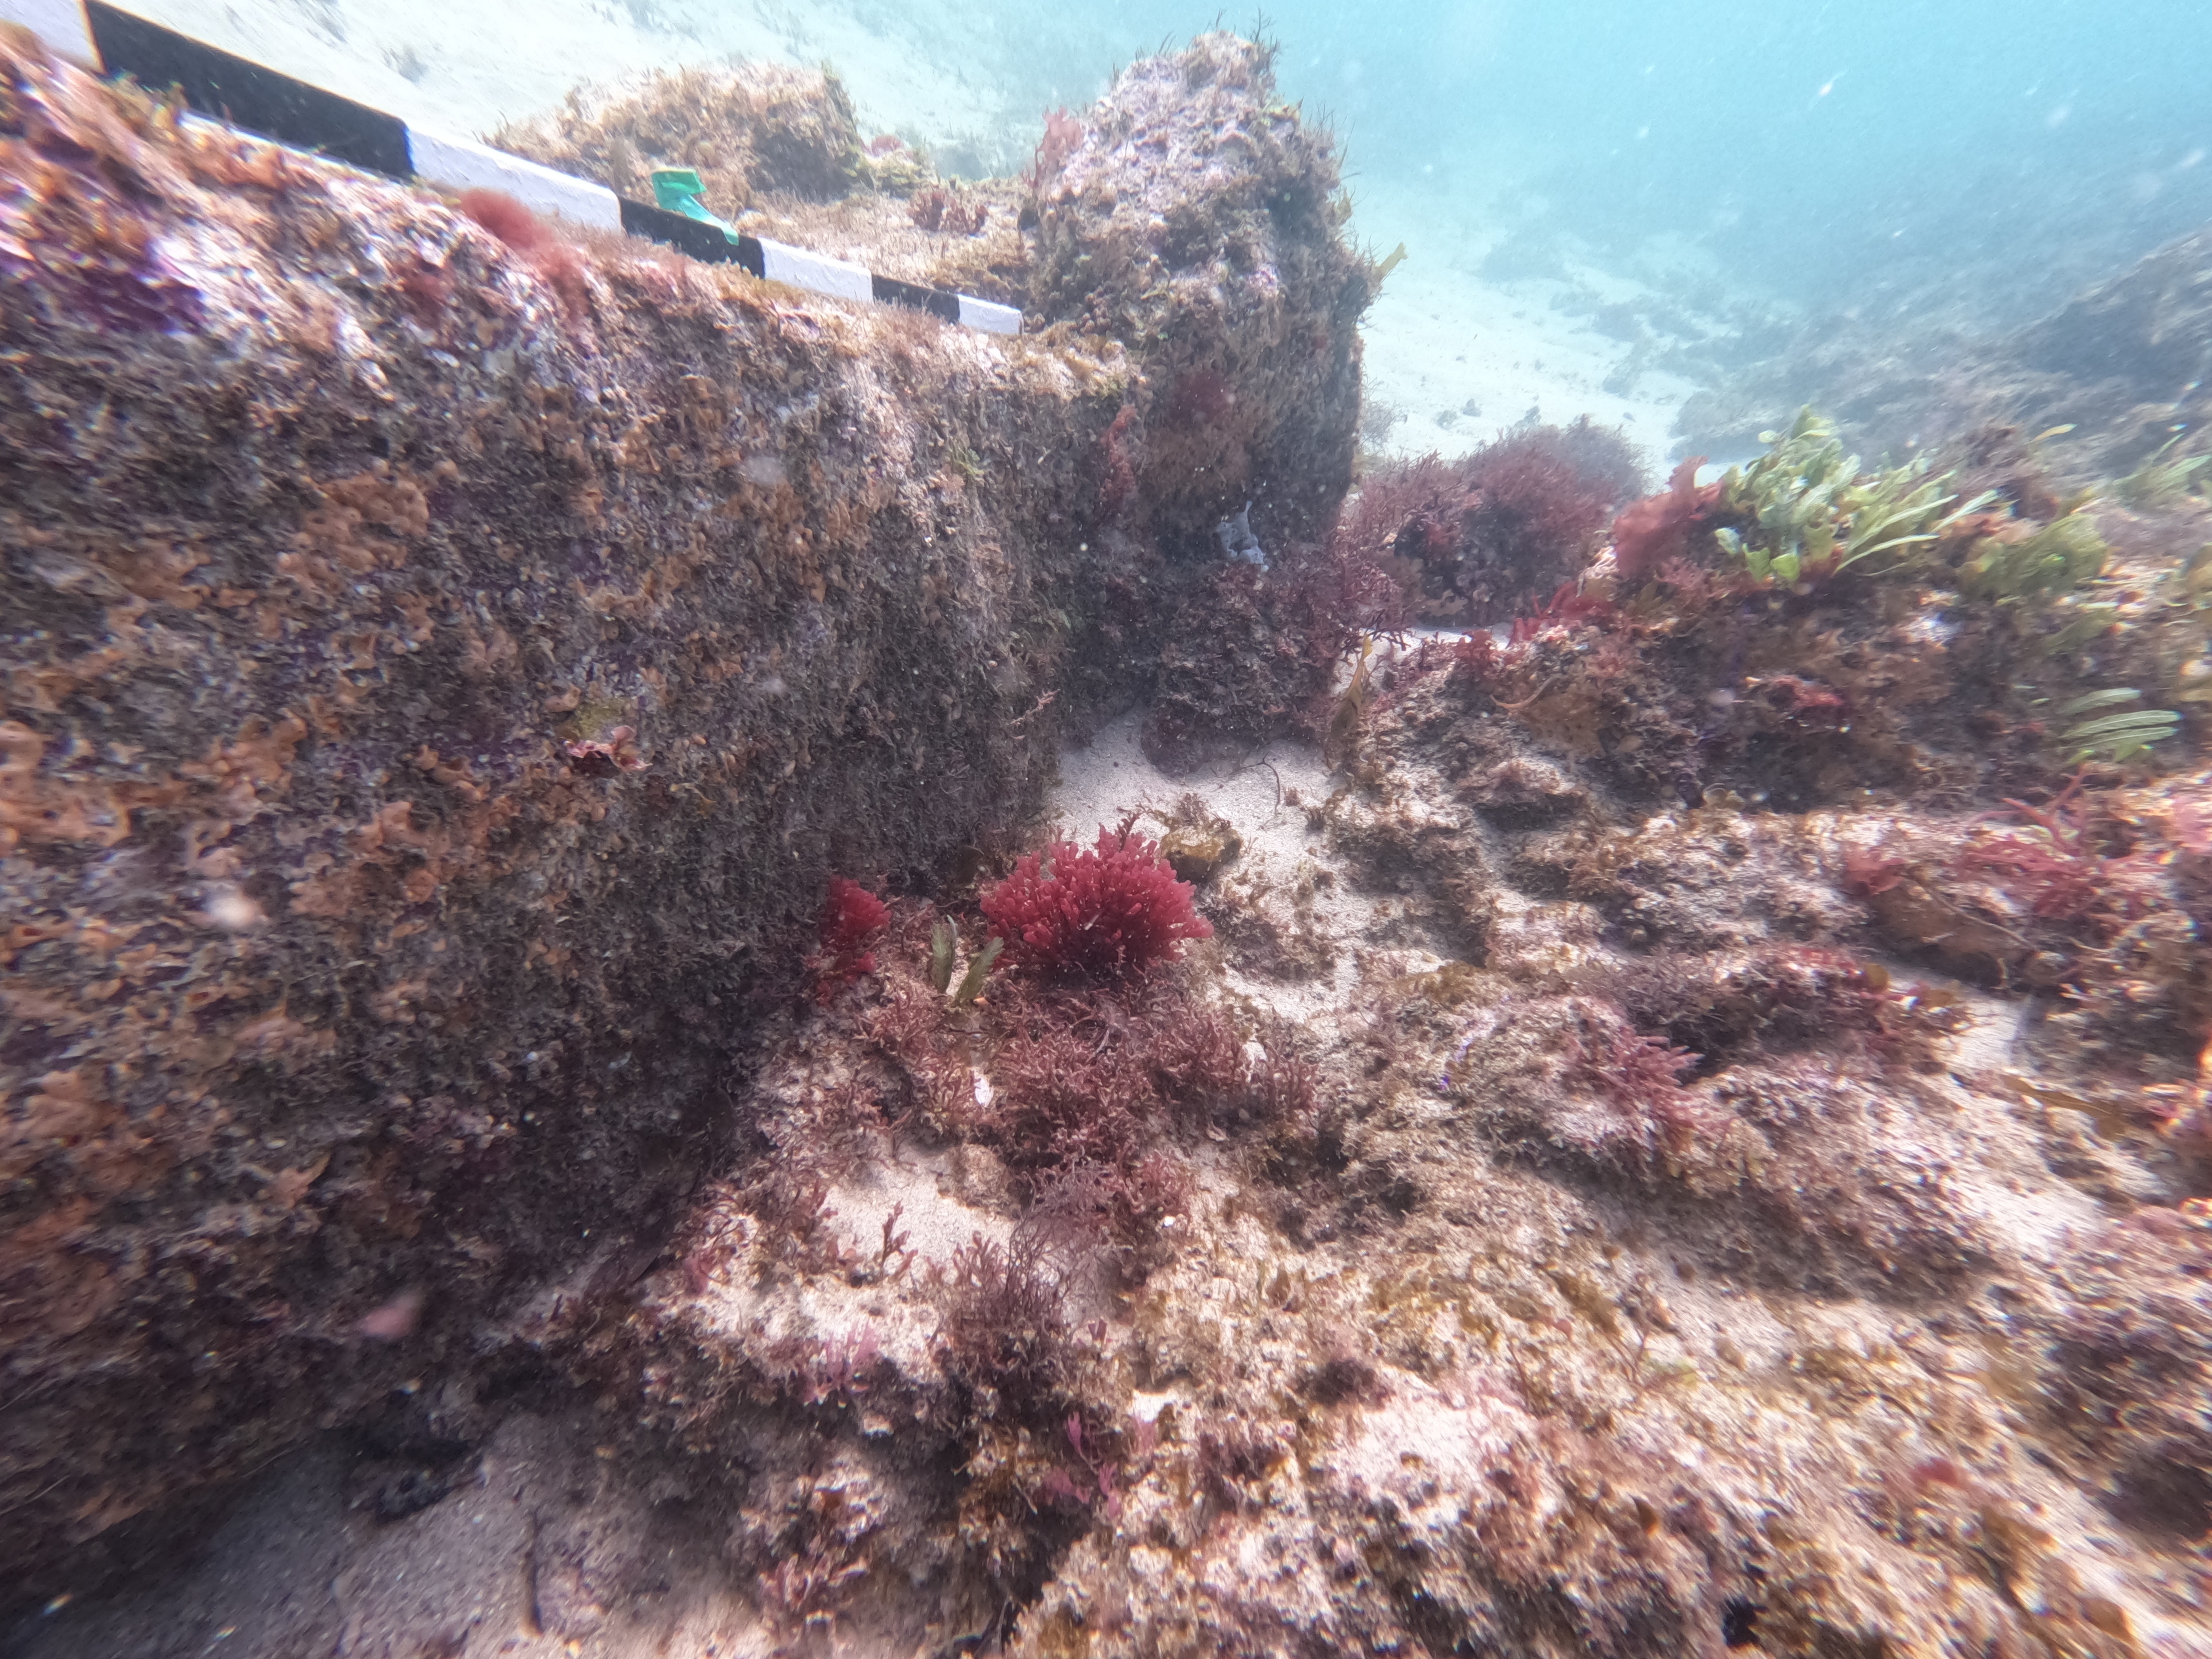

Supplement: Supplementary file 683 [file G0713750.pdf › Ocean2/G0713750.pdf]

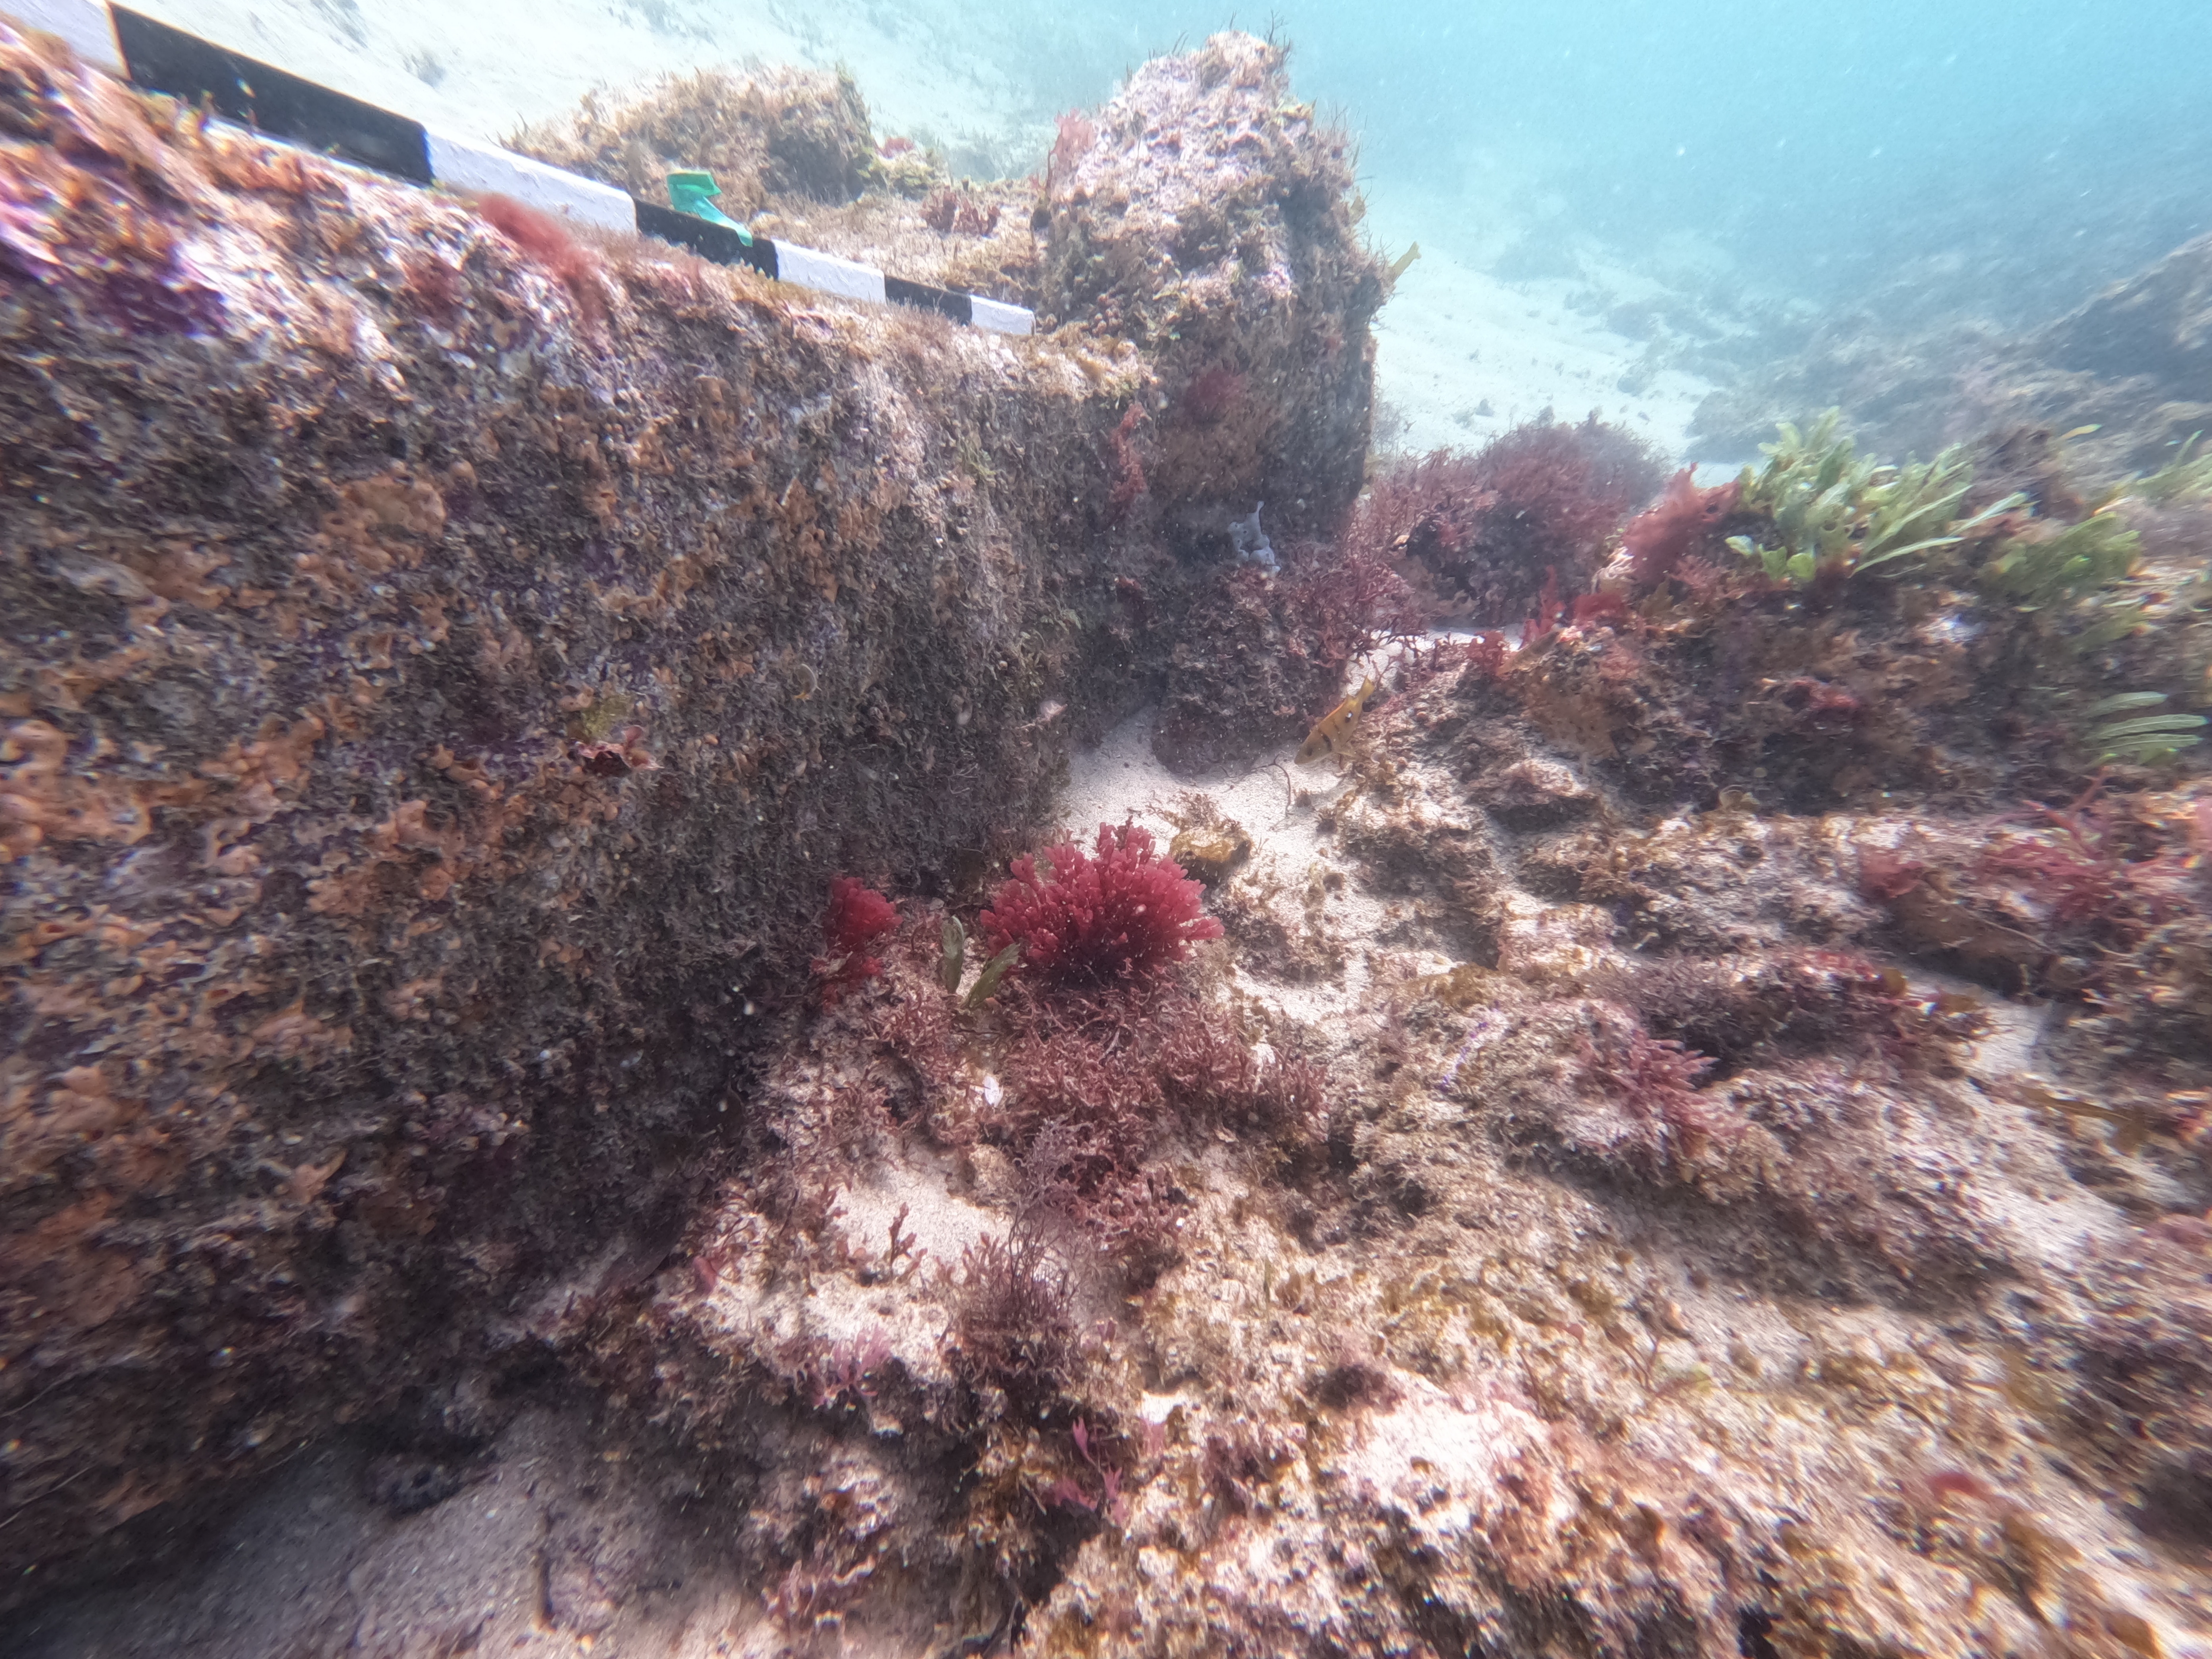

Supplement: Supplementary file 684 [file G0713751.pdf › Ocean2/G0713751.pdf]

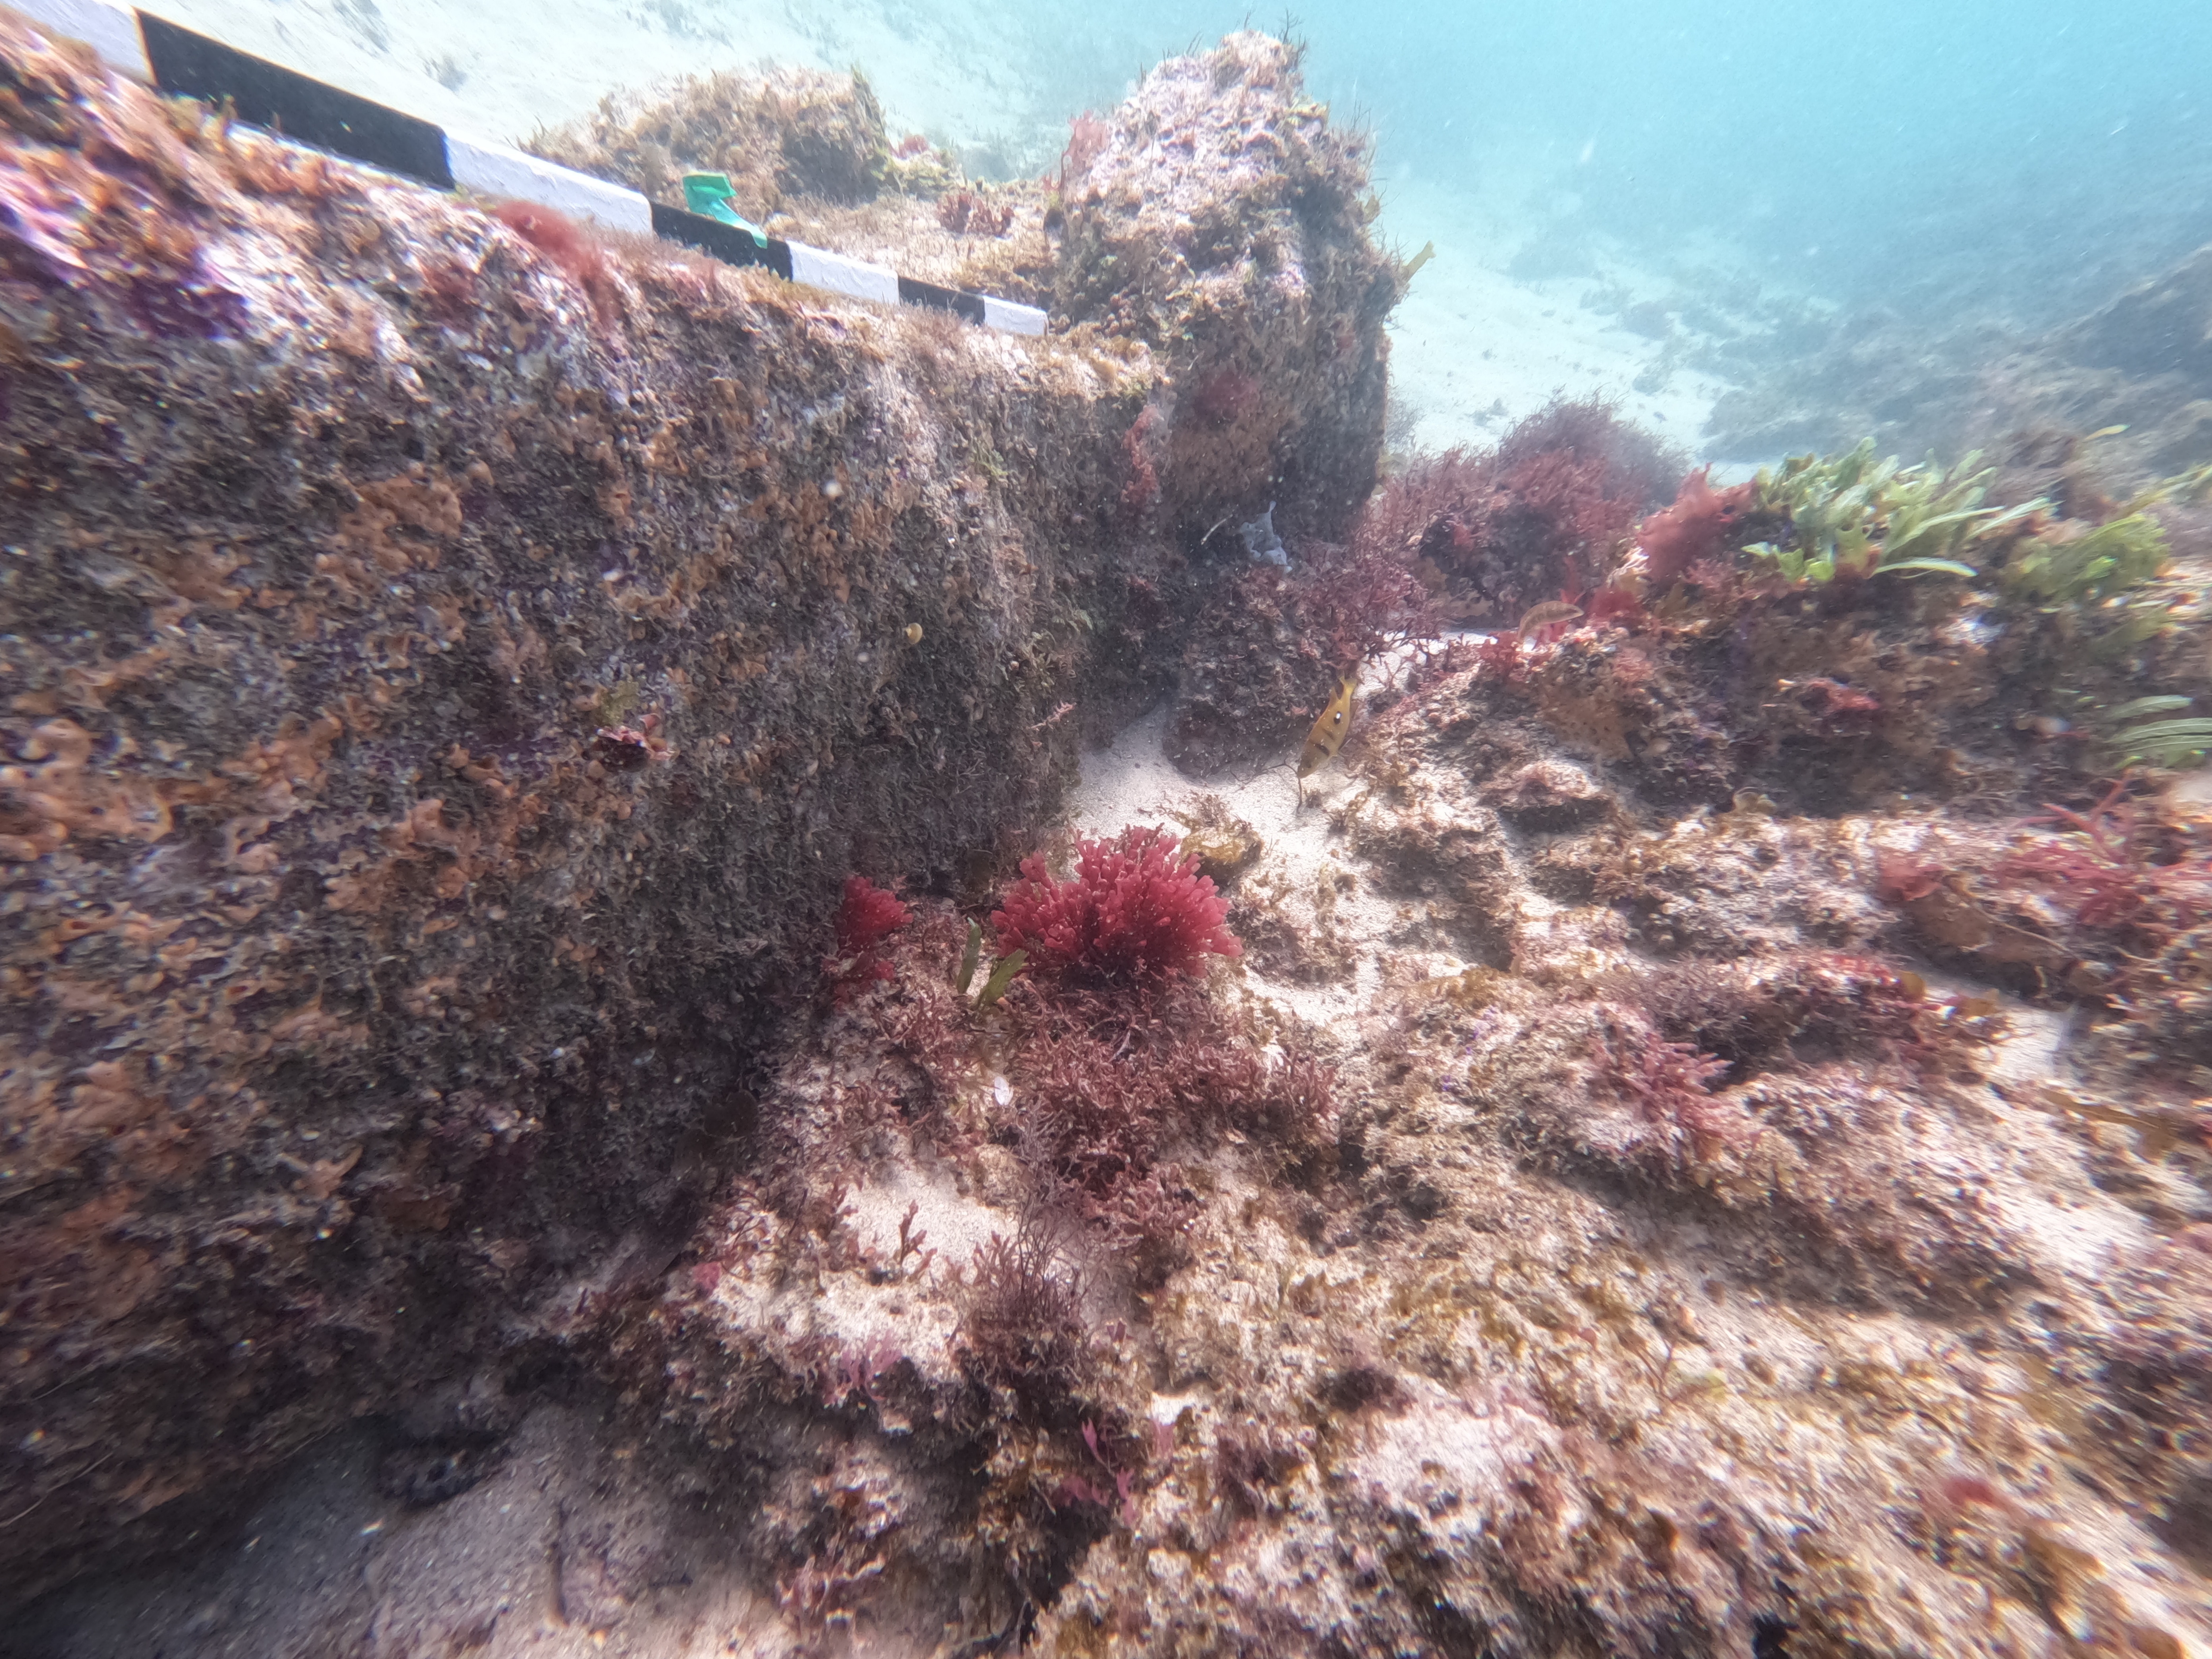

Supplement: Supplementary file 685 [file G0713752.pdf › Ocean2/G0713752.pdf]

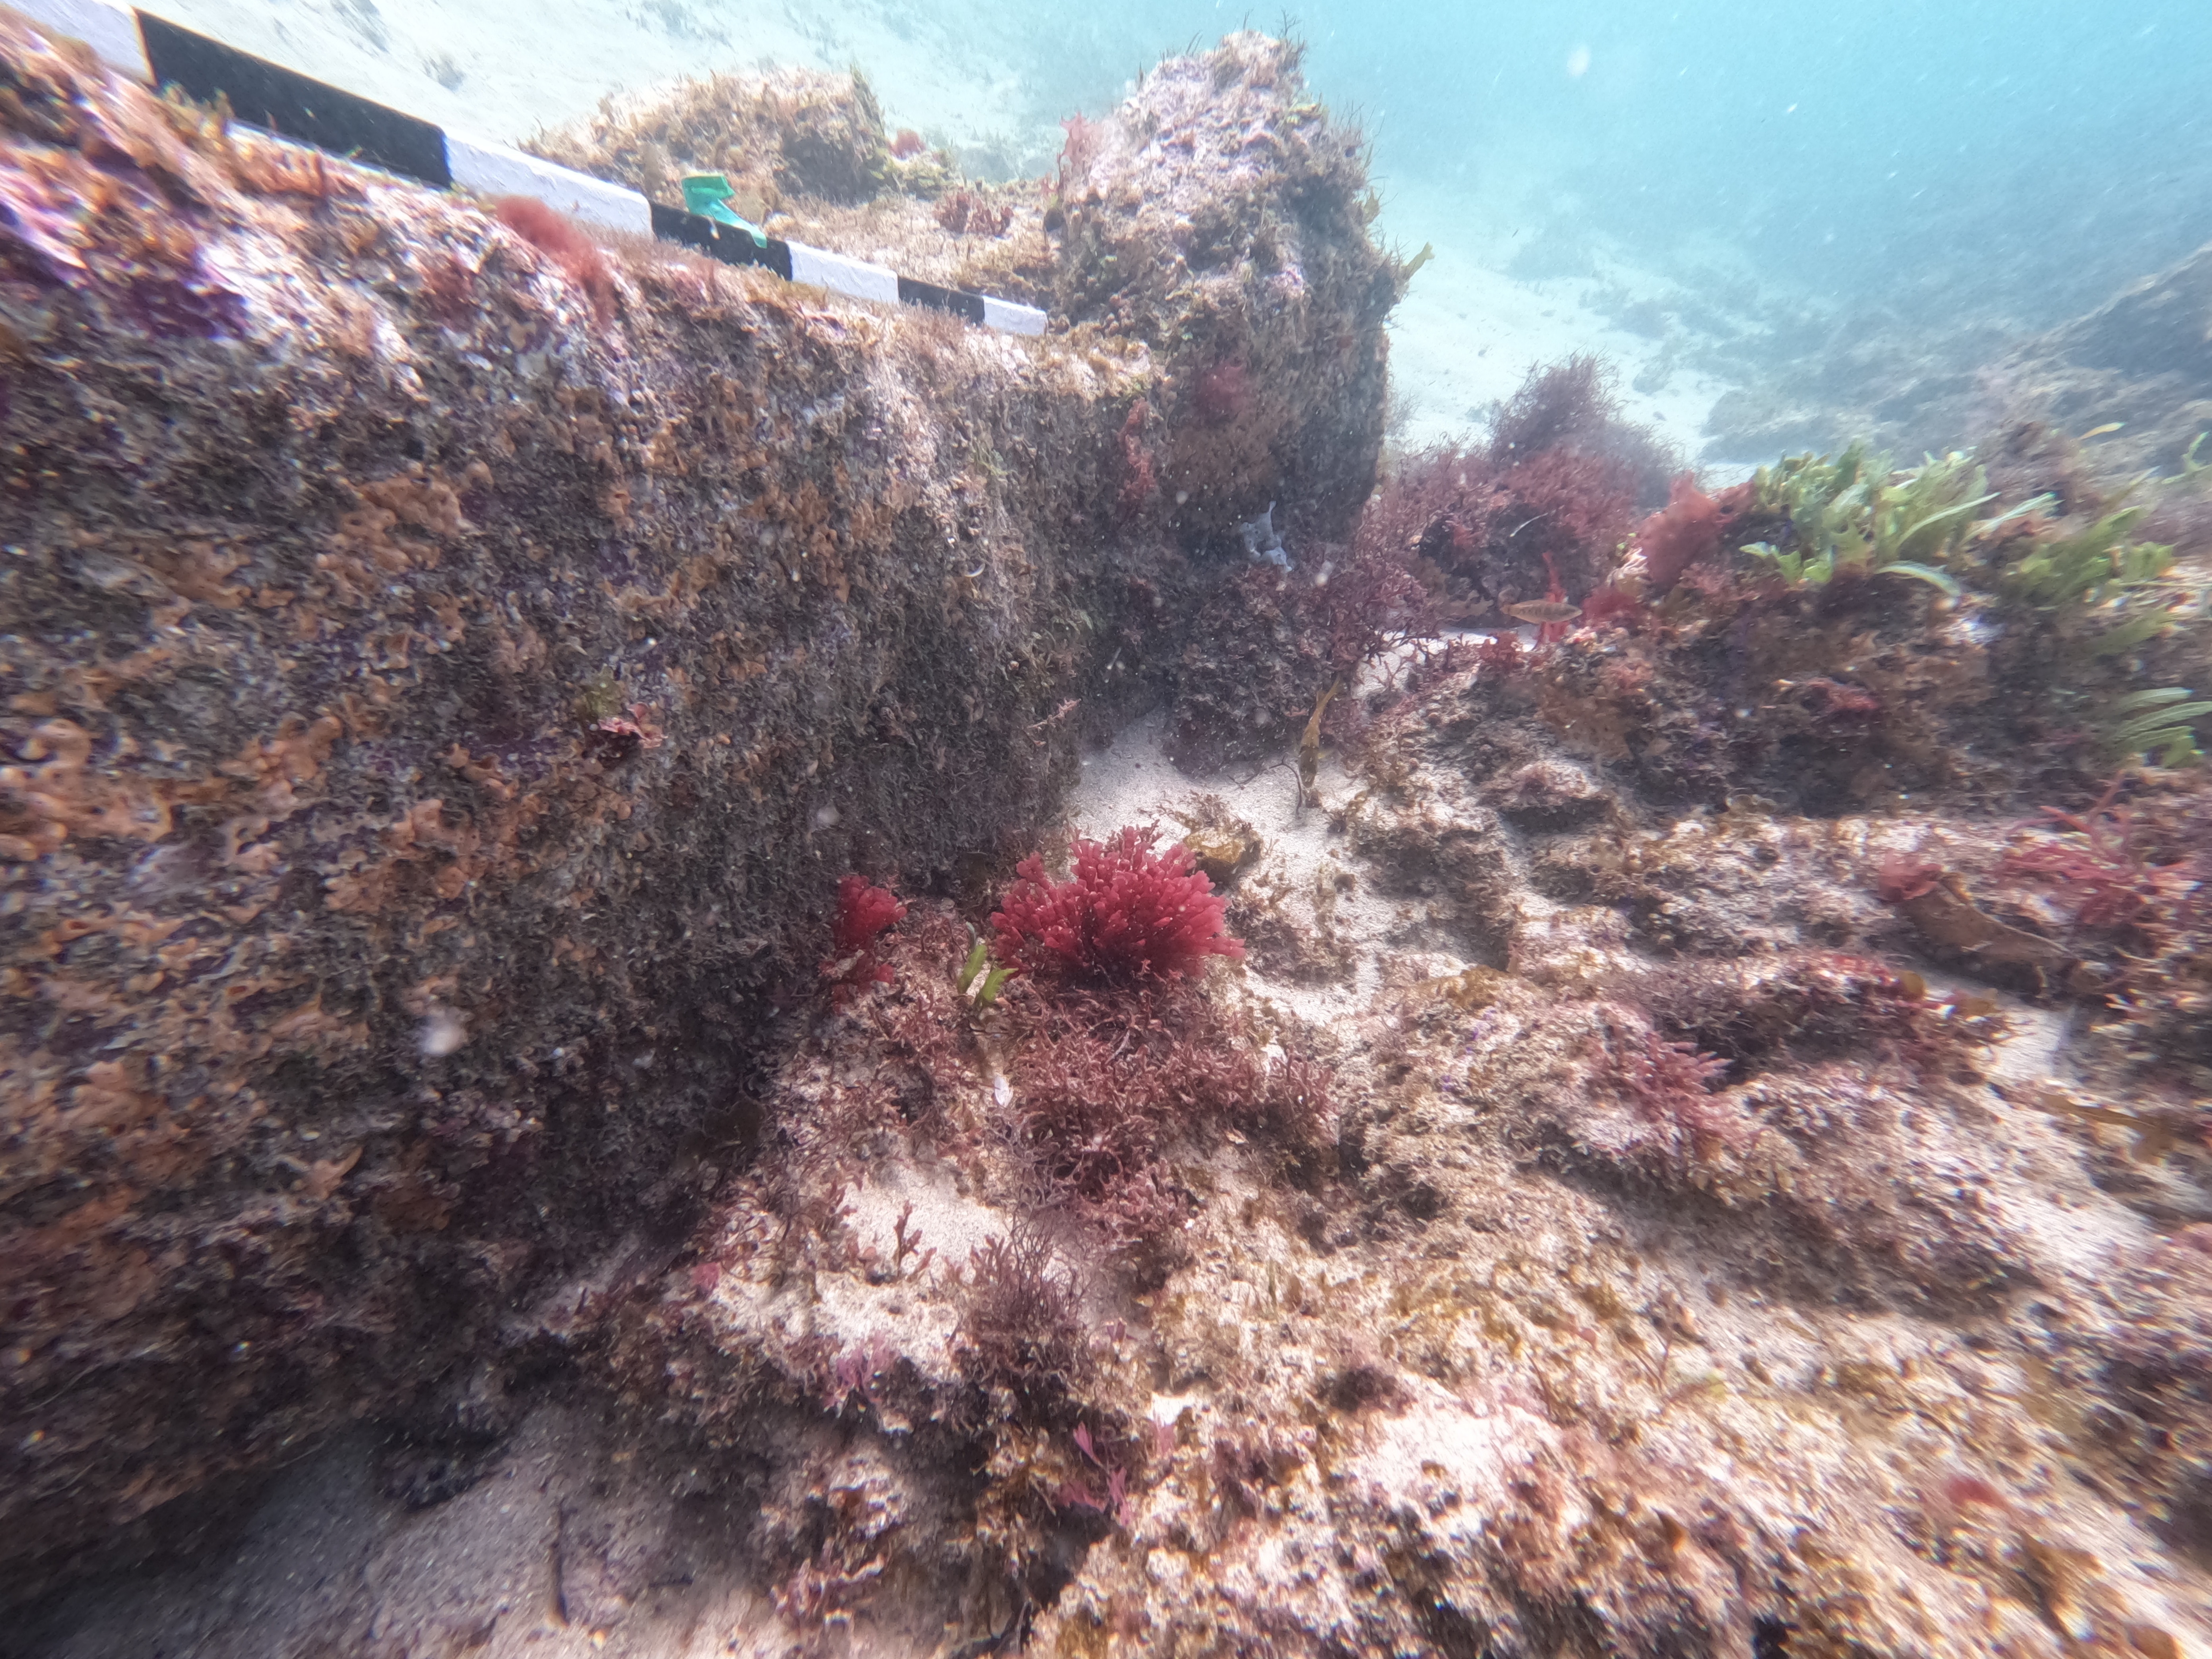

Supplement: Supplementary file 686 [file G0713753.pdf › Ocean2/G0713753.pdf]

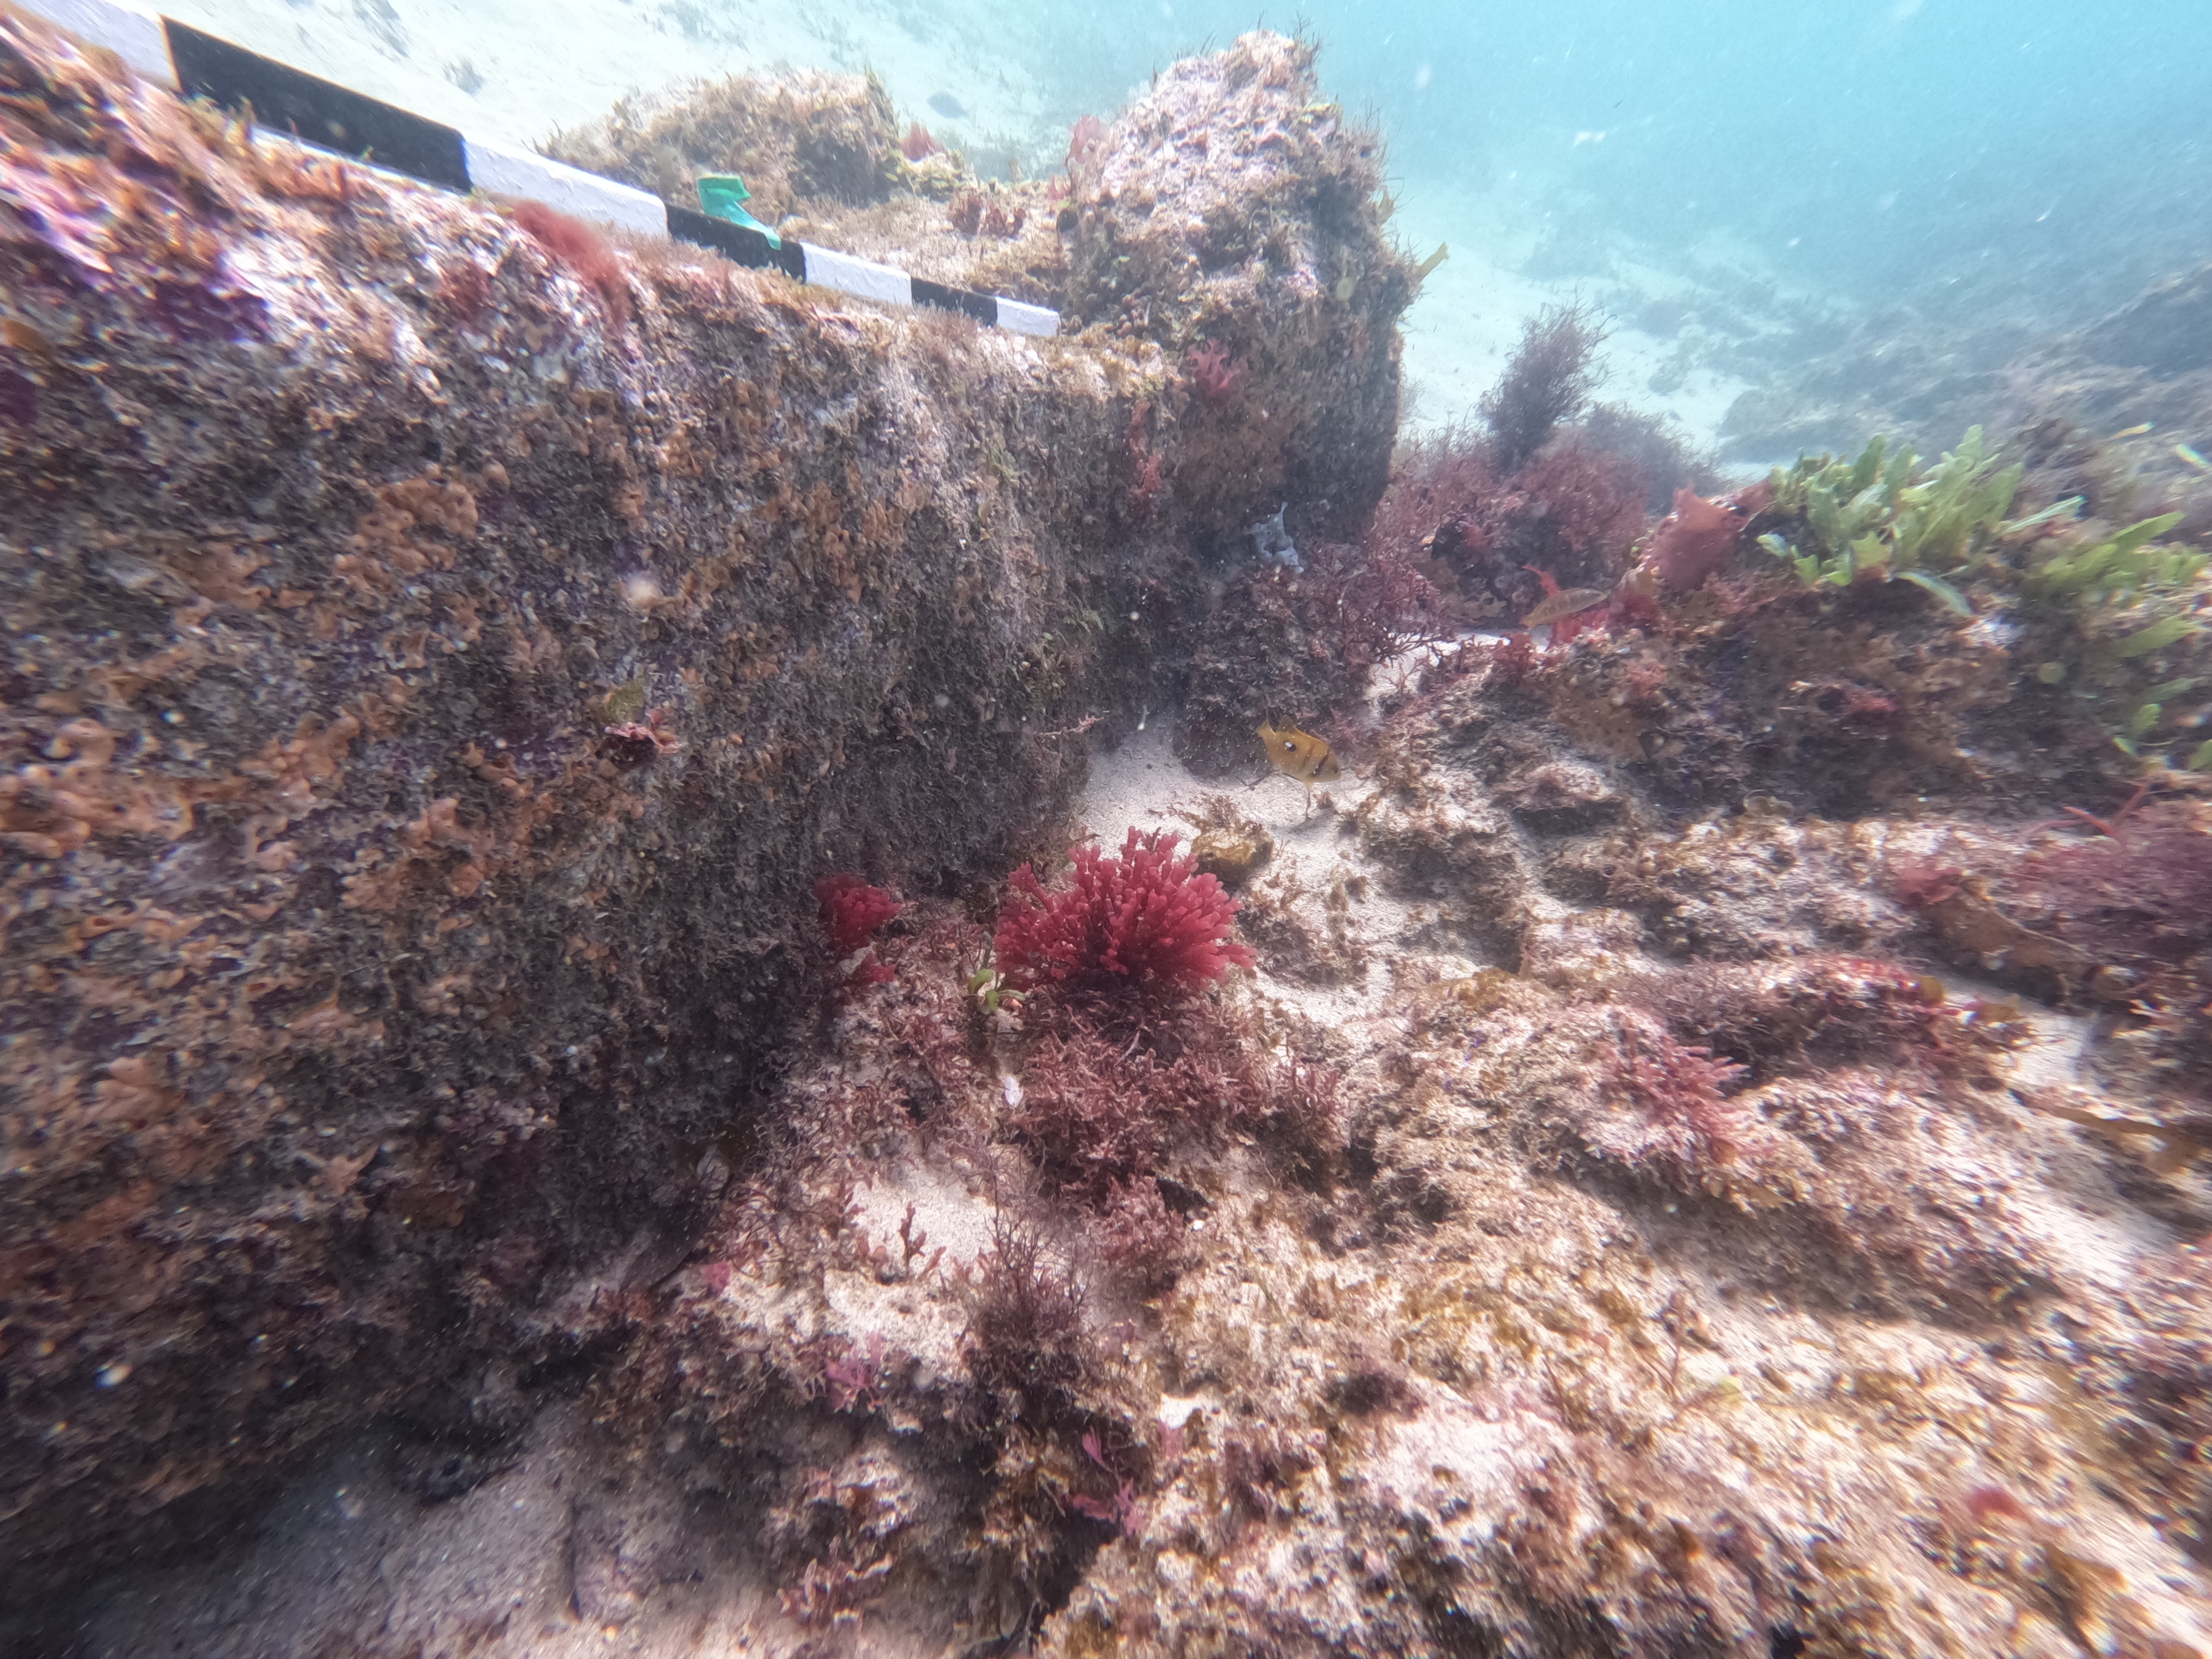

Supplement: Supplementary file 687 [file G0713754.pdf › Ocean2/G0713754.pdf]

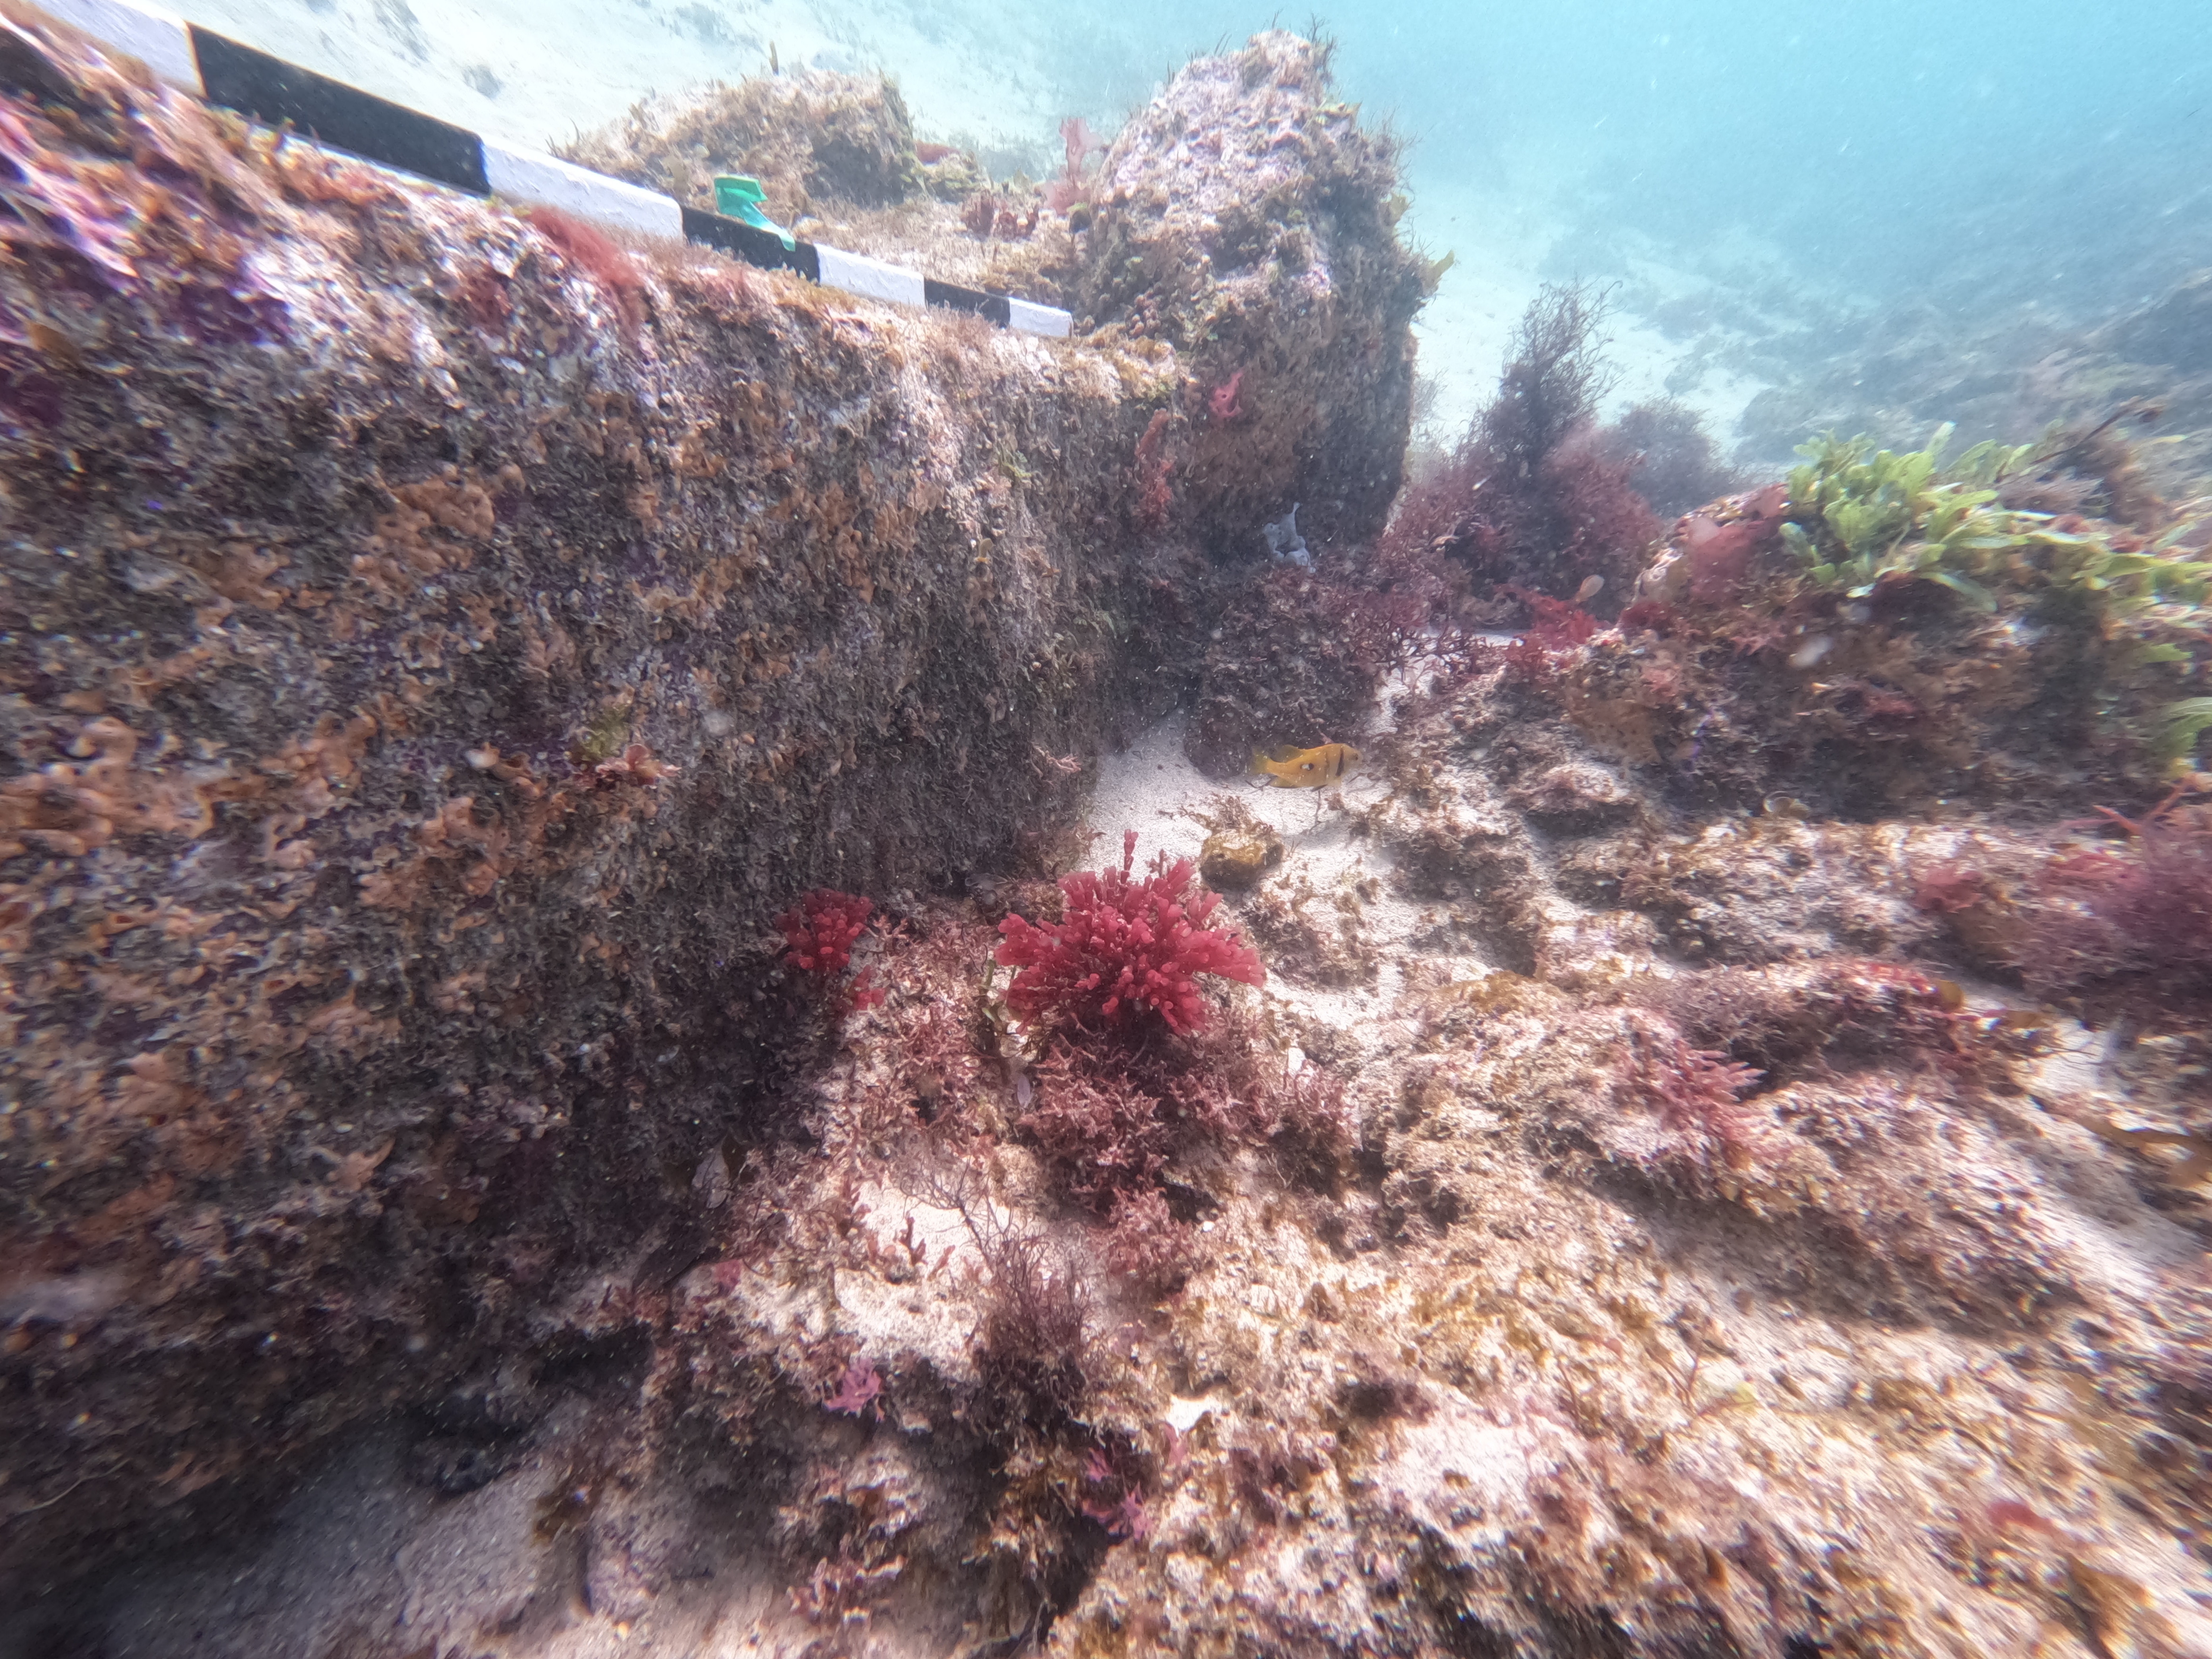

Supplement: Supplementary file 688 [file G0713755.pdf › Ocean2/G0713755.pdf]

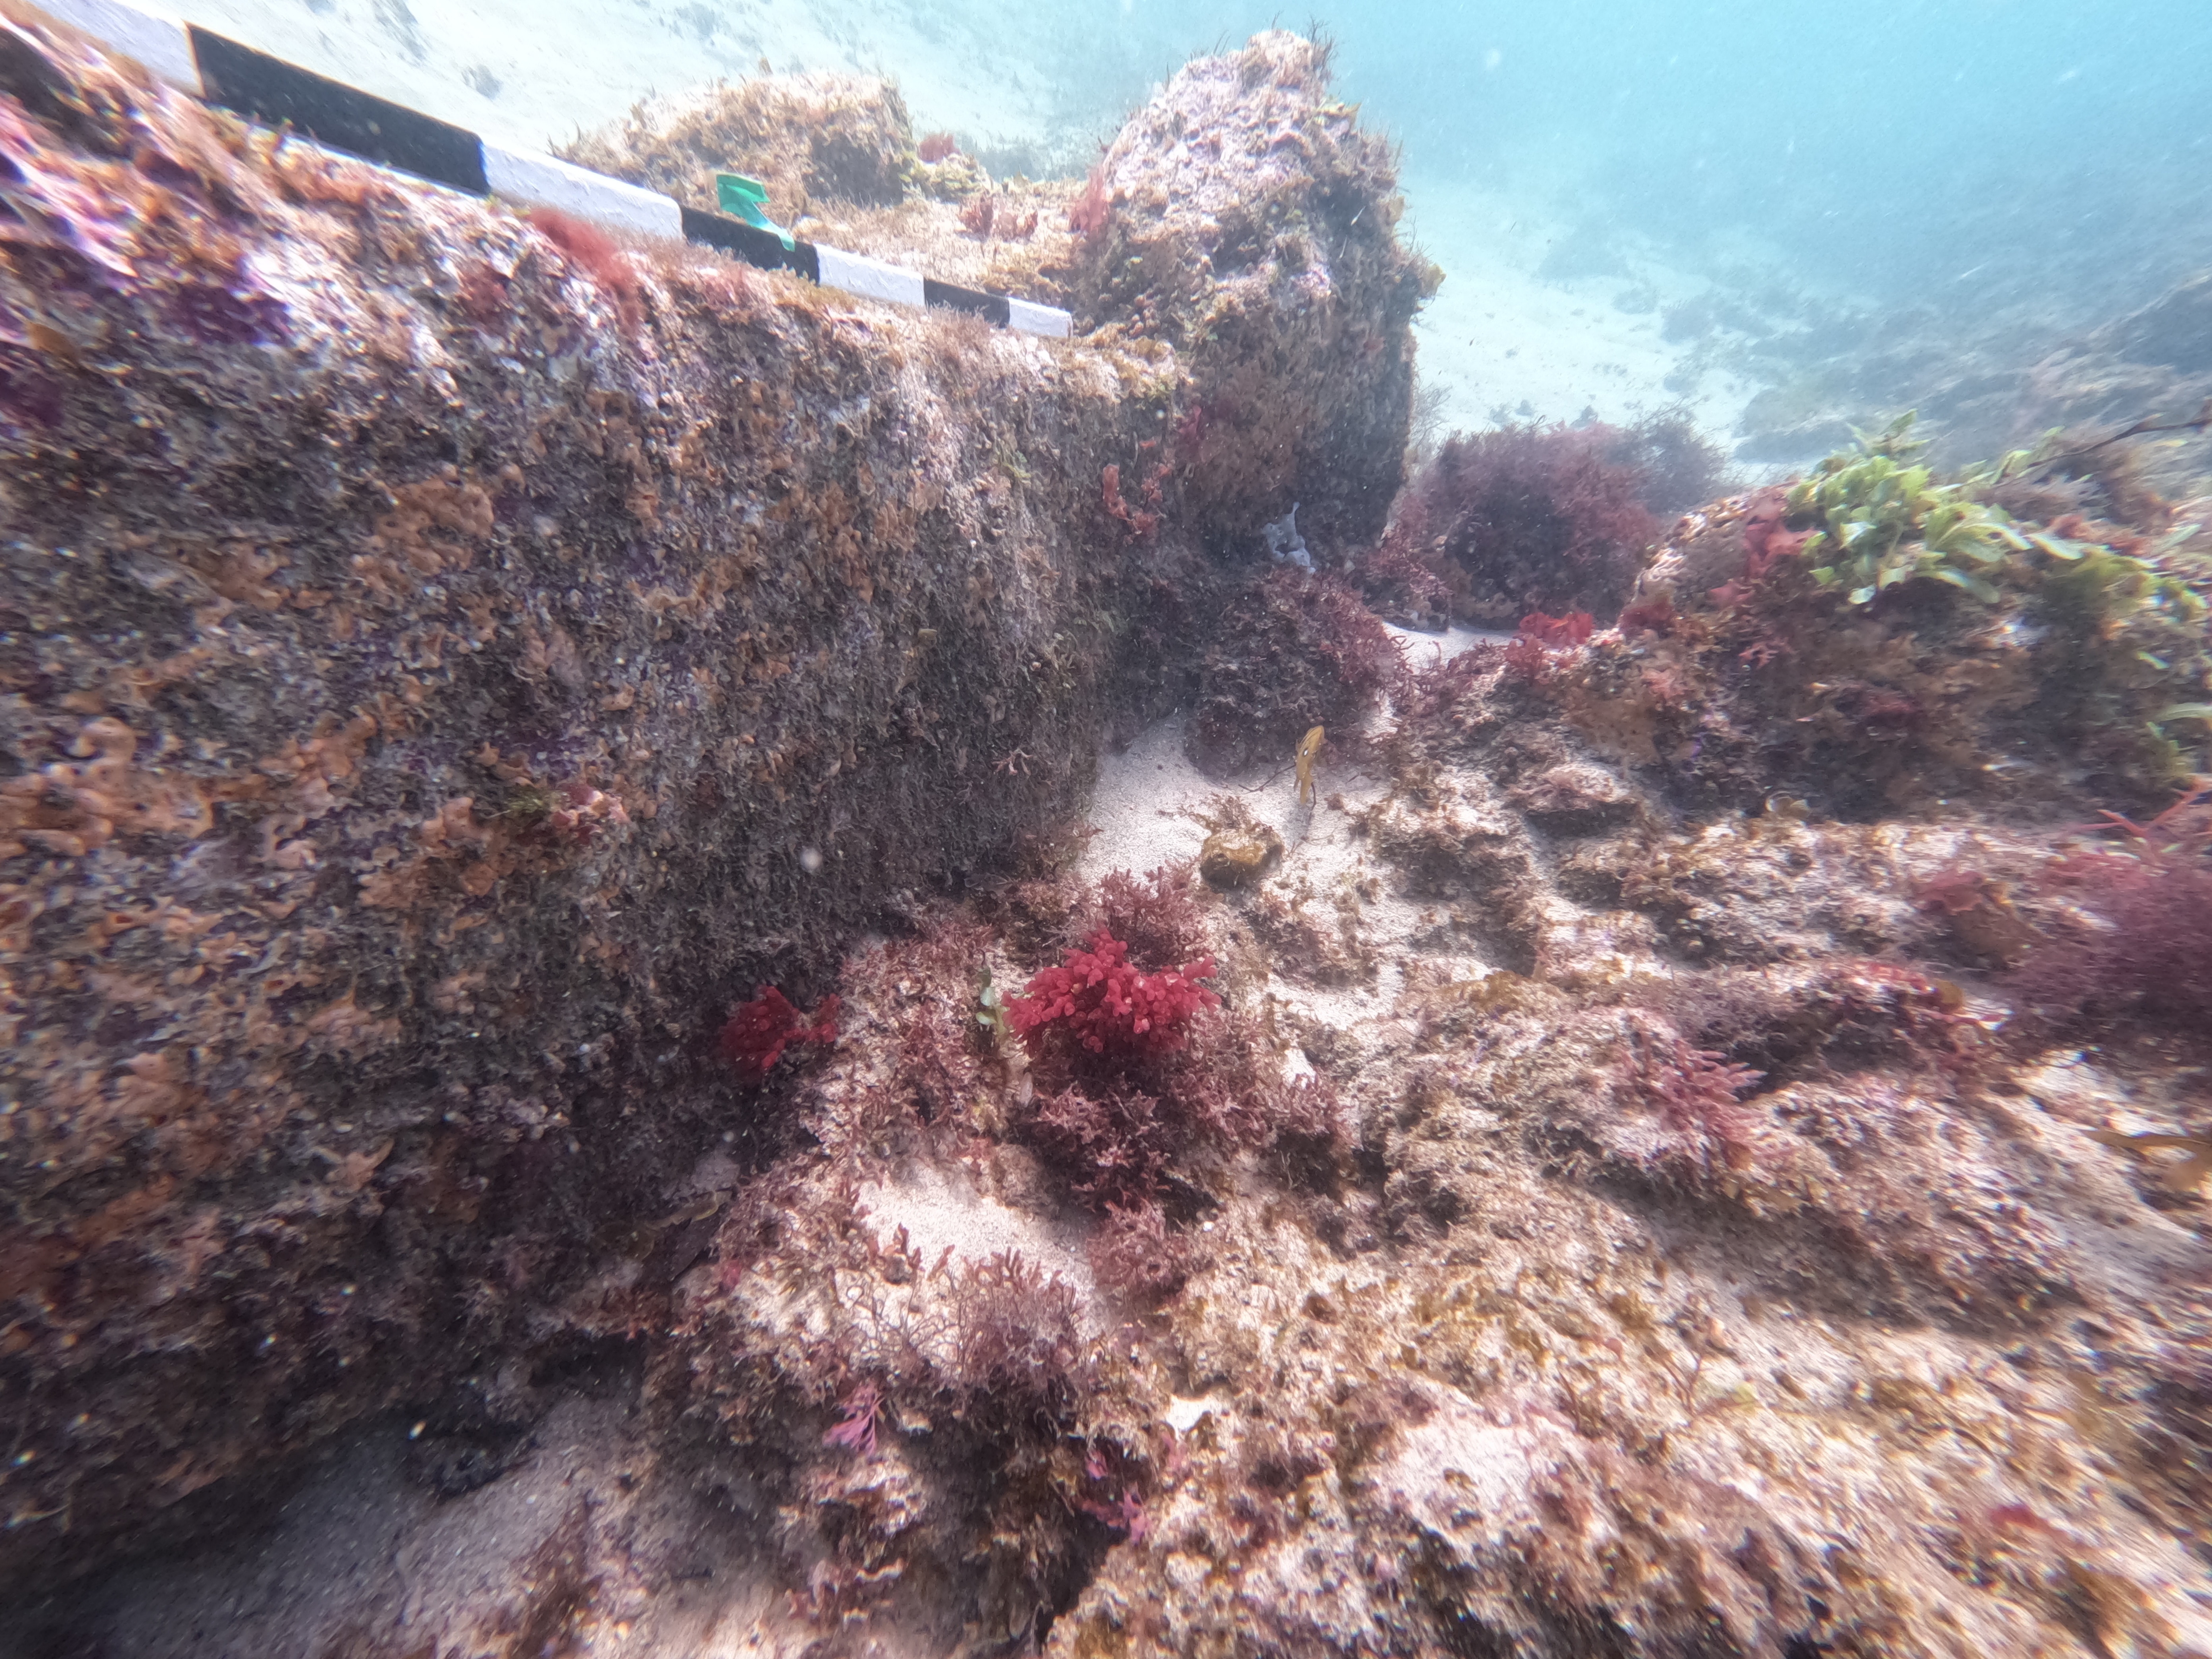

Supplement: Supplementary file 689 [file G0713756.pdf › Ocean2/G0713756.pdf]

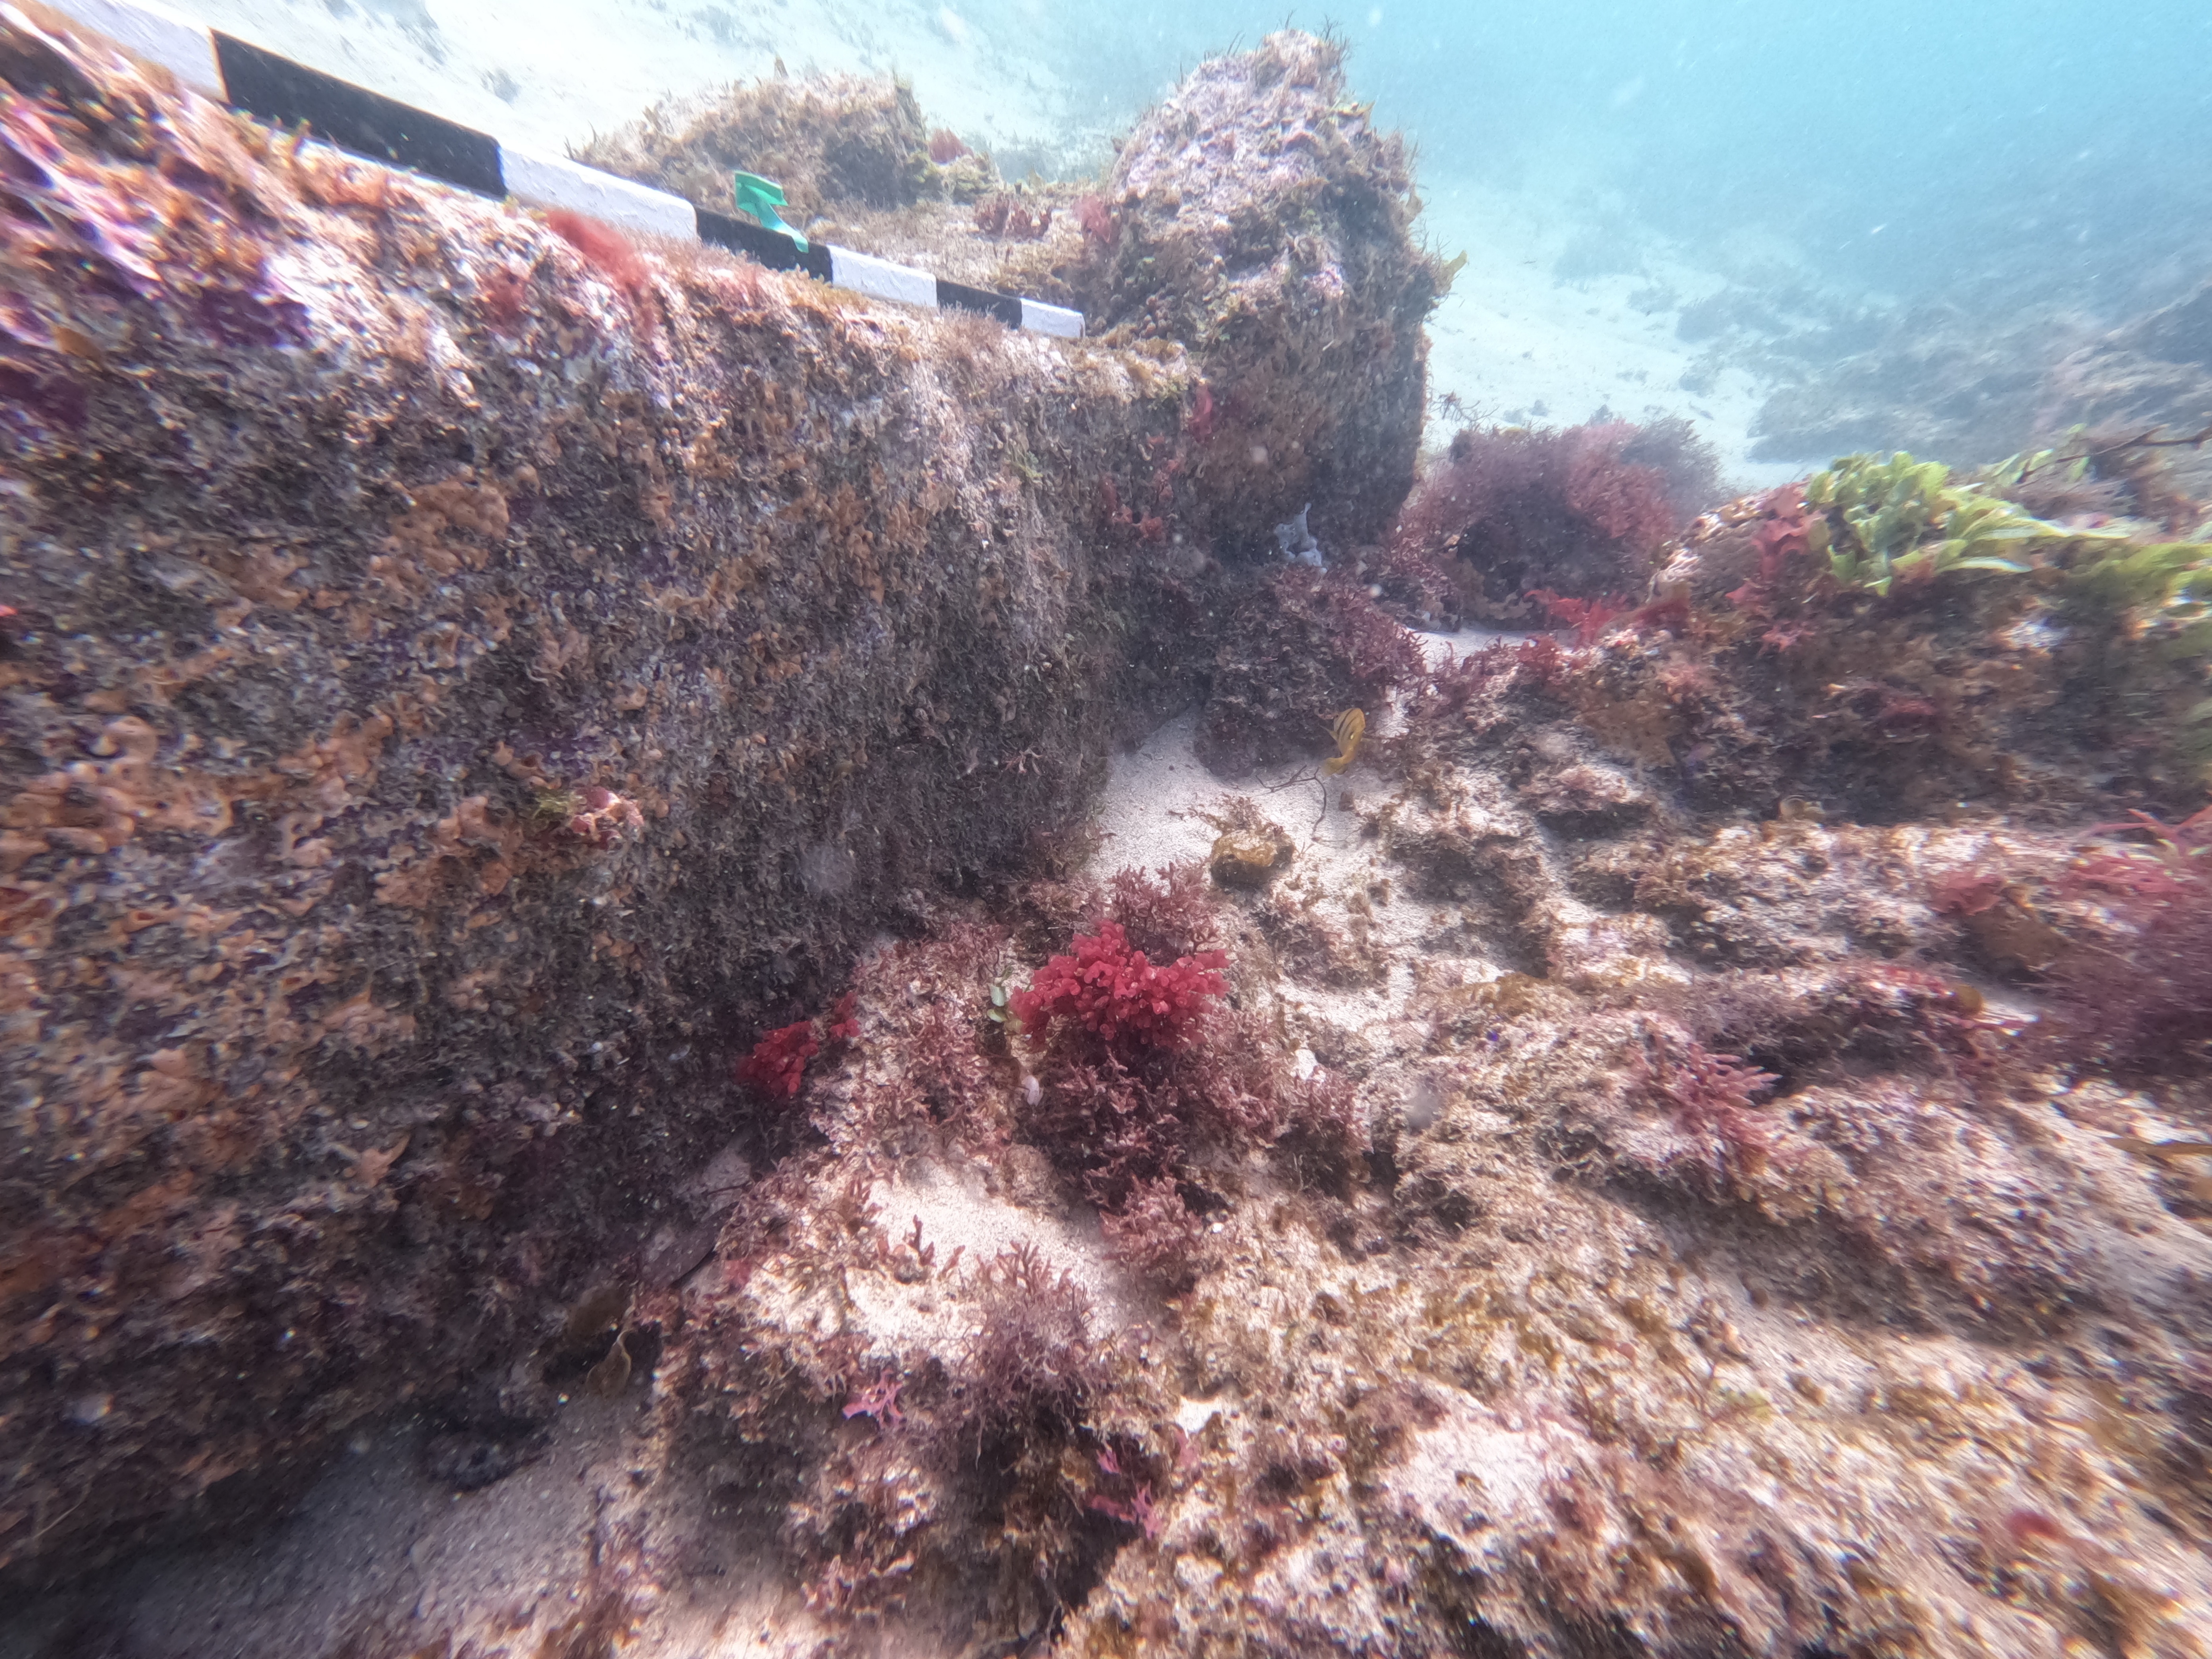

Supplement: Supplementary file 690 [file G0713757.pdf › Ocean2/G0713757.pdf]

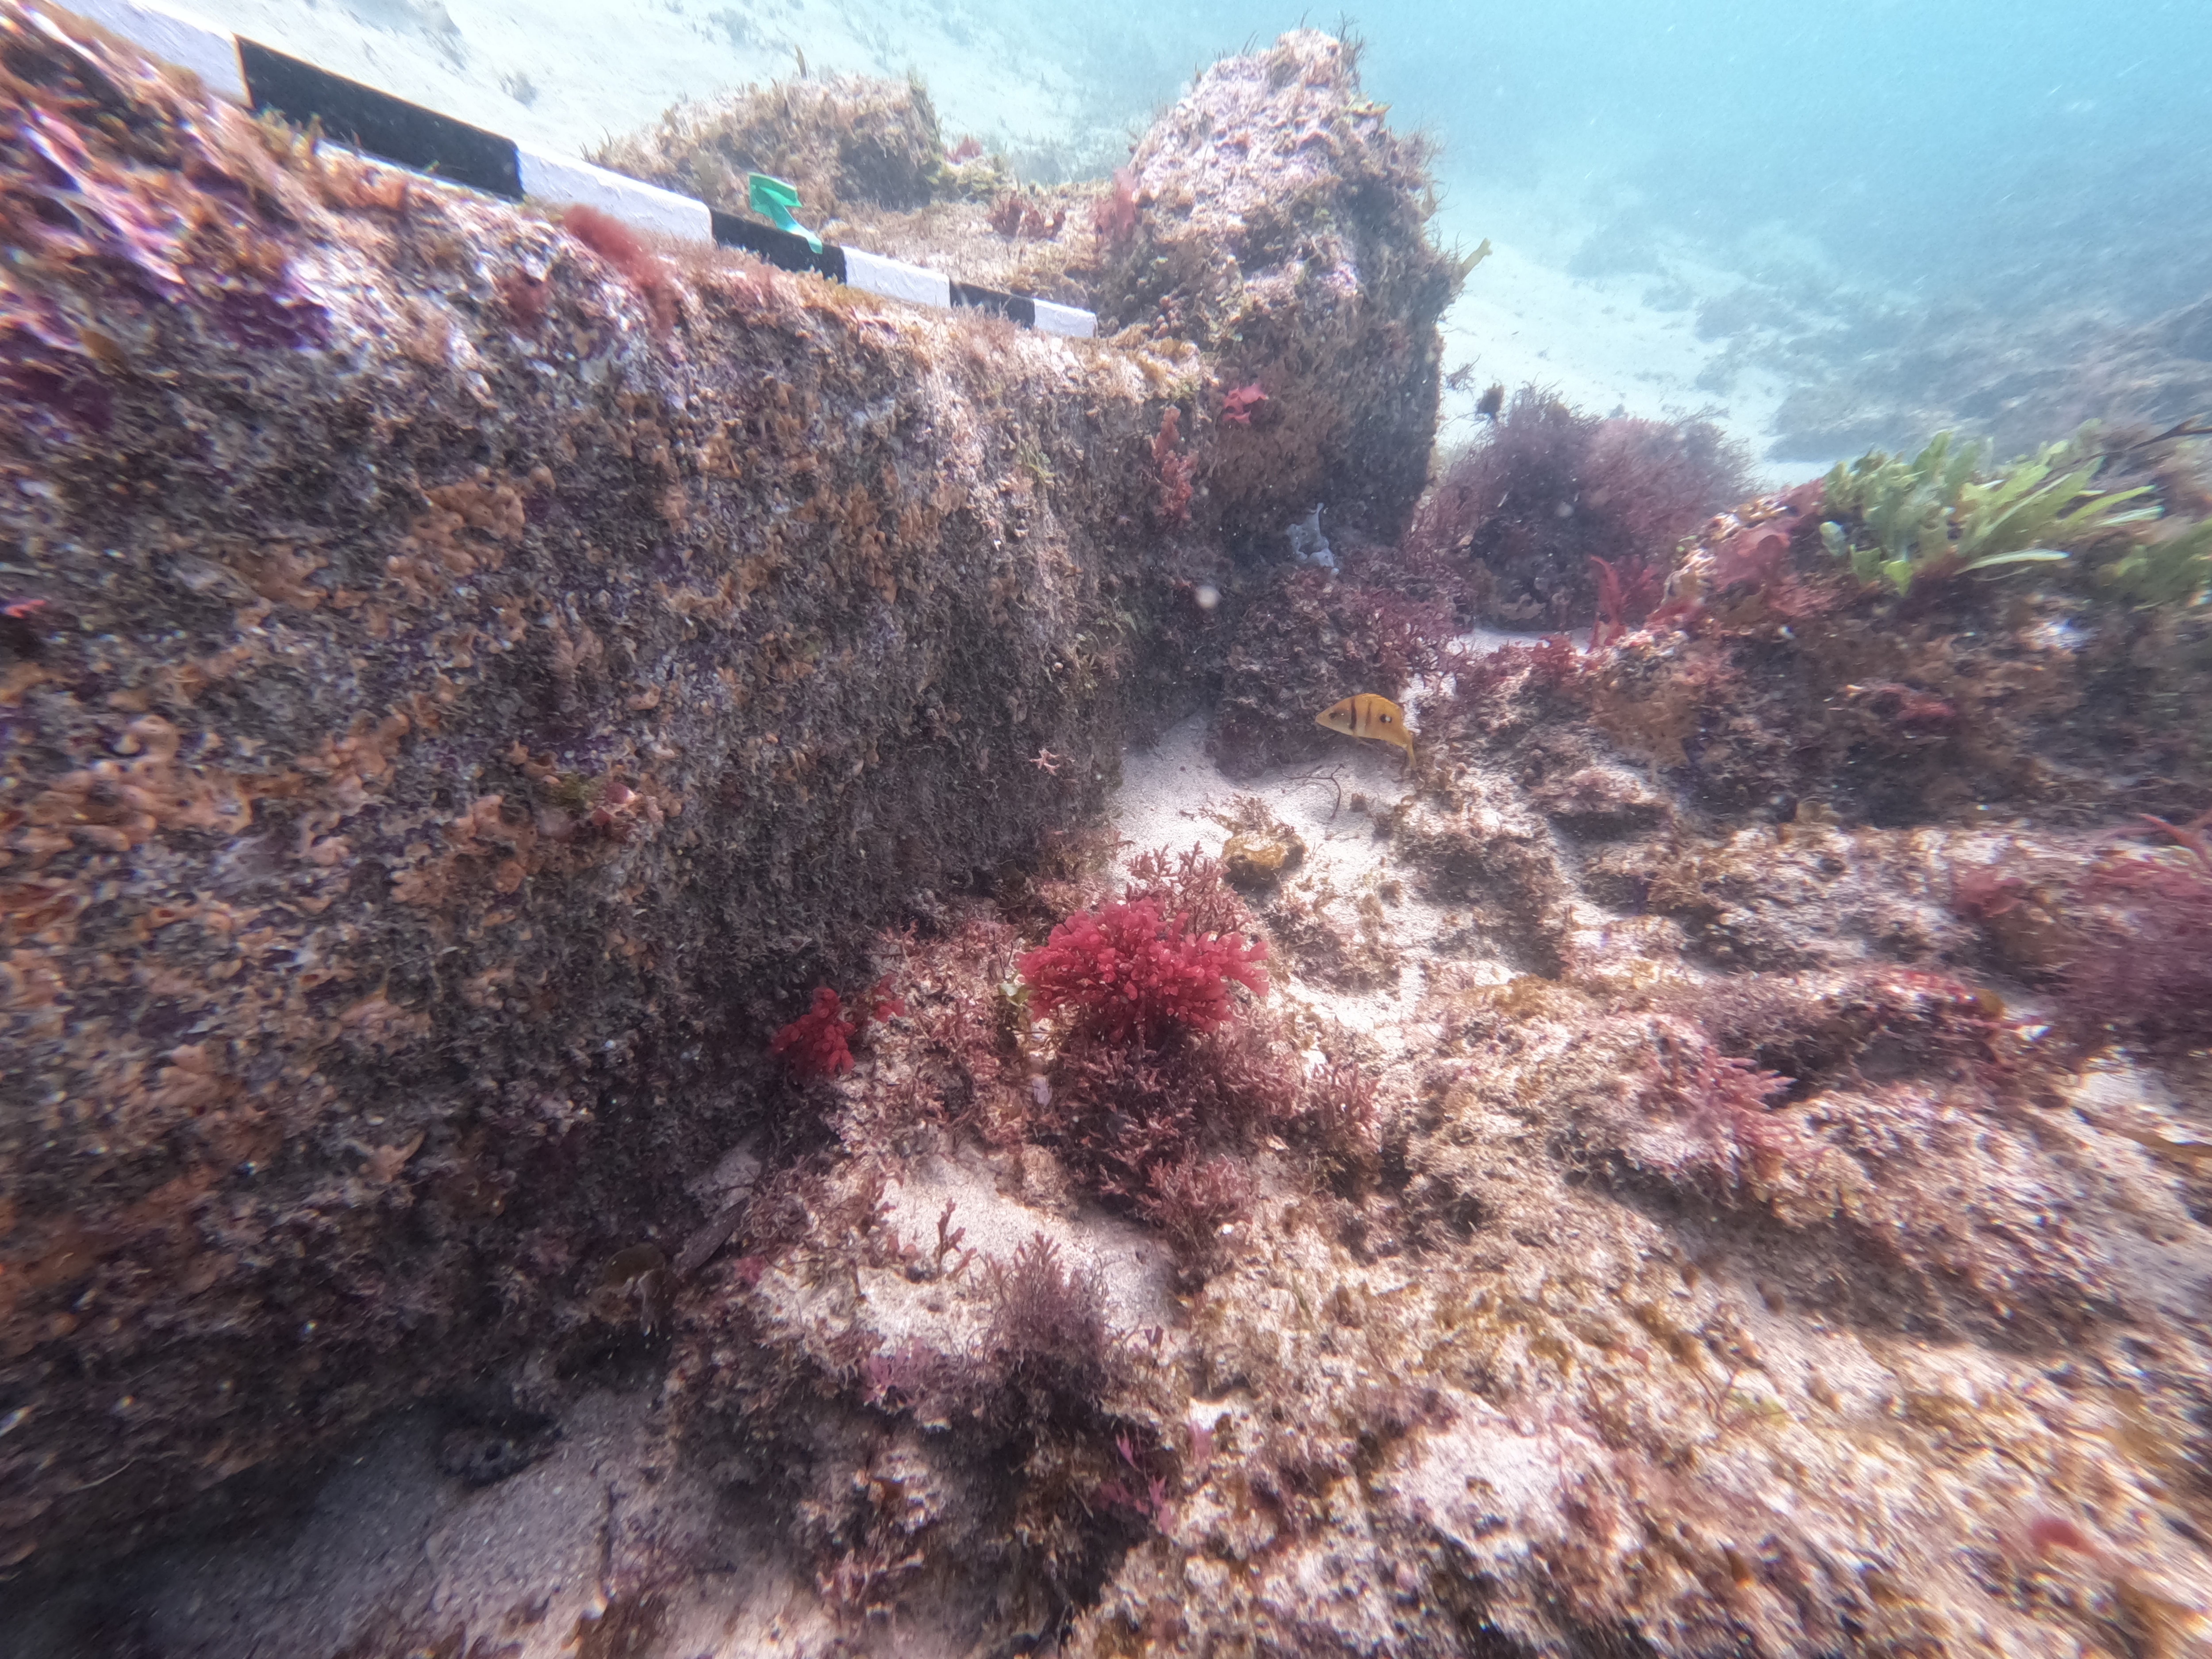

Supplement: Supplementary file 691 [file G0713758.pdf › Ocean2/G0713758.pdf]

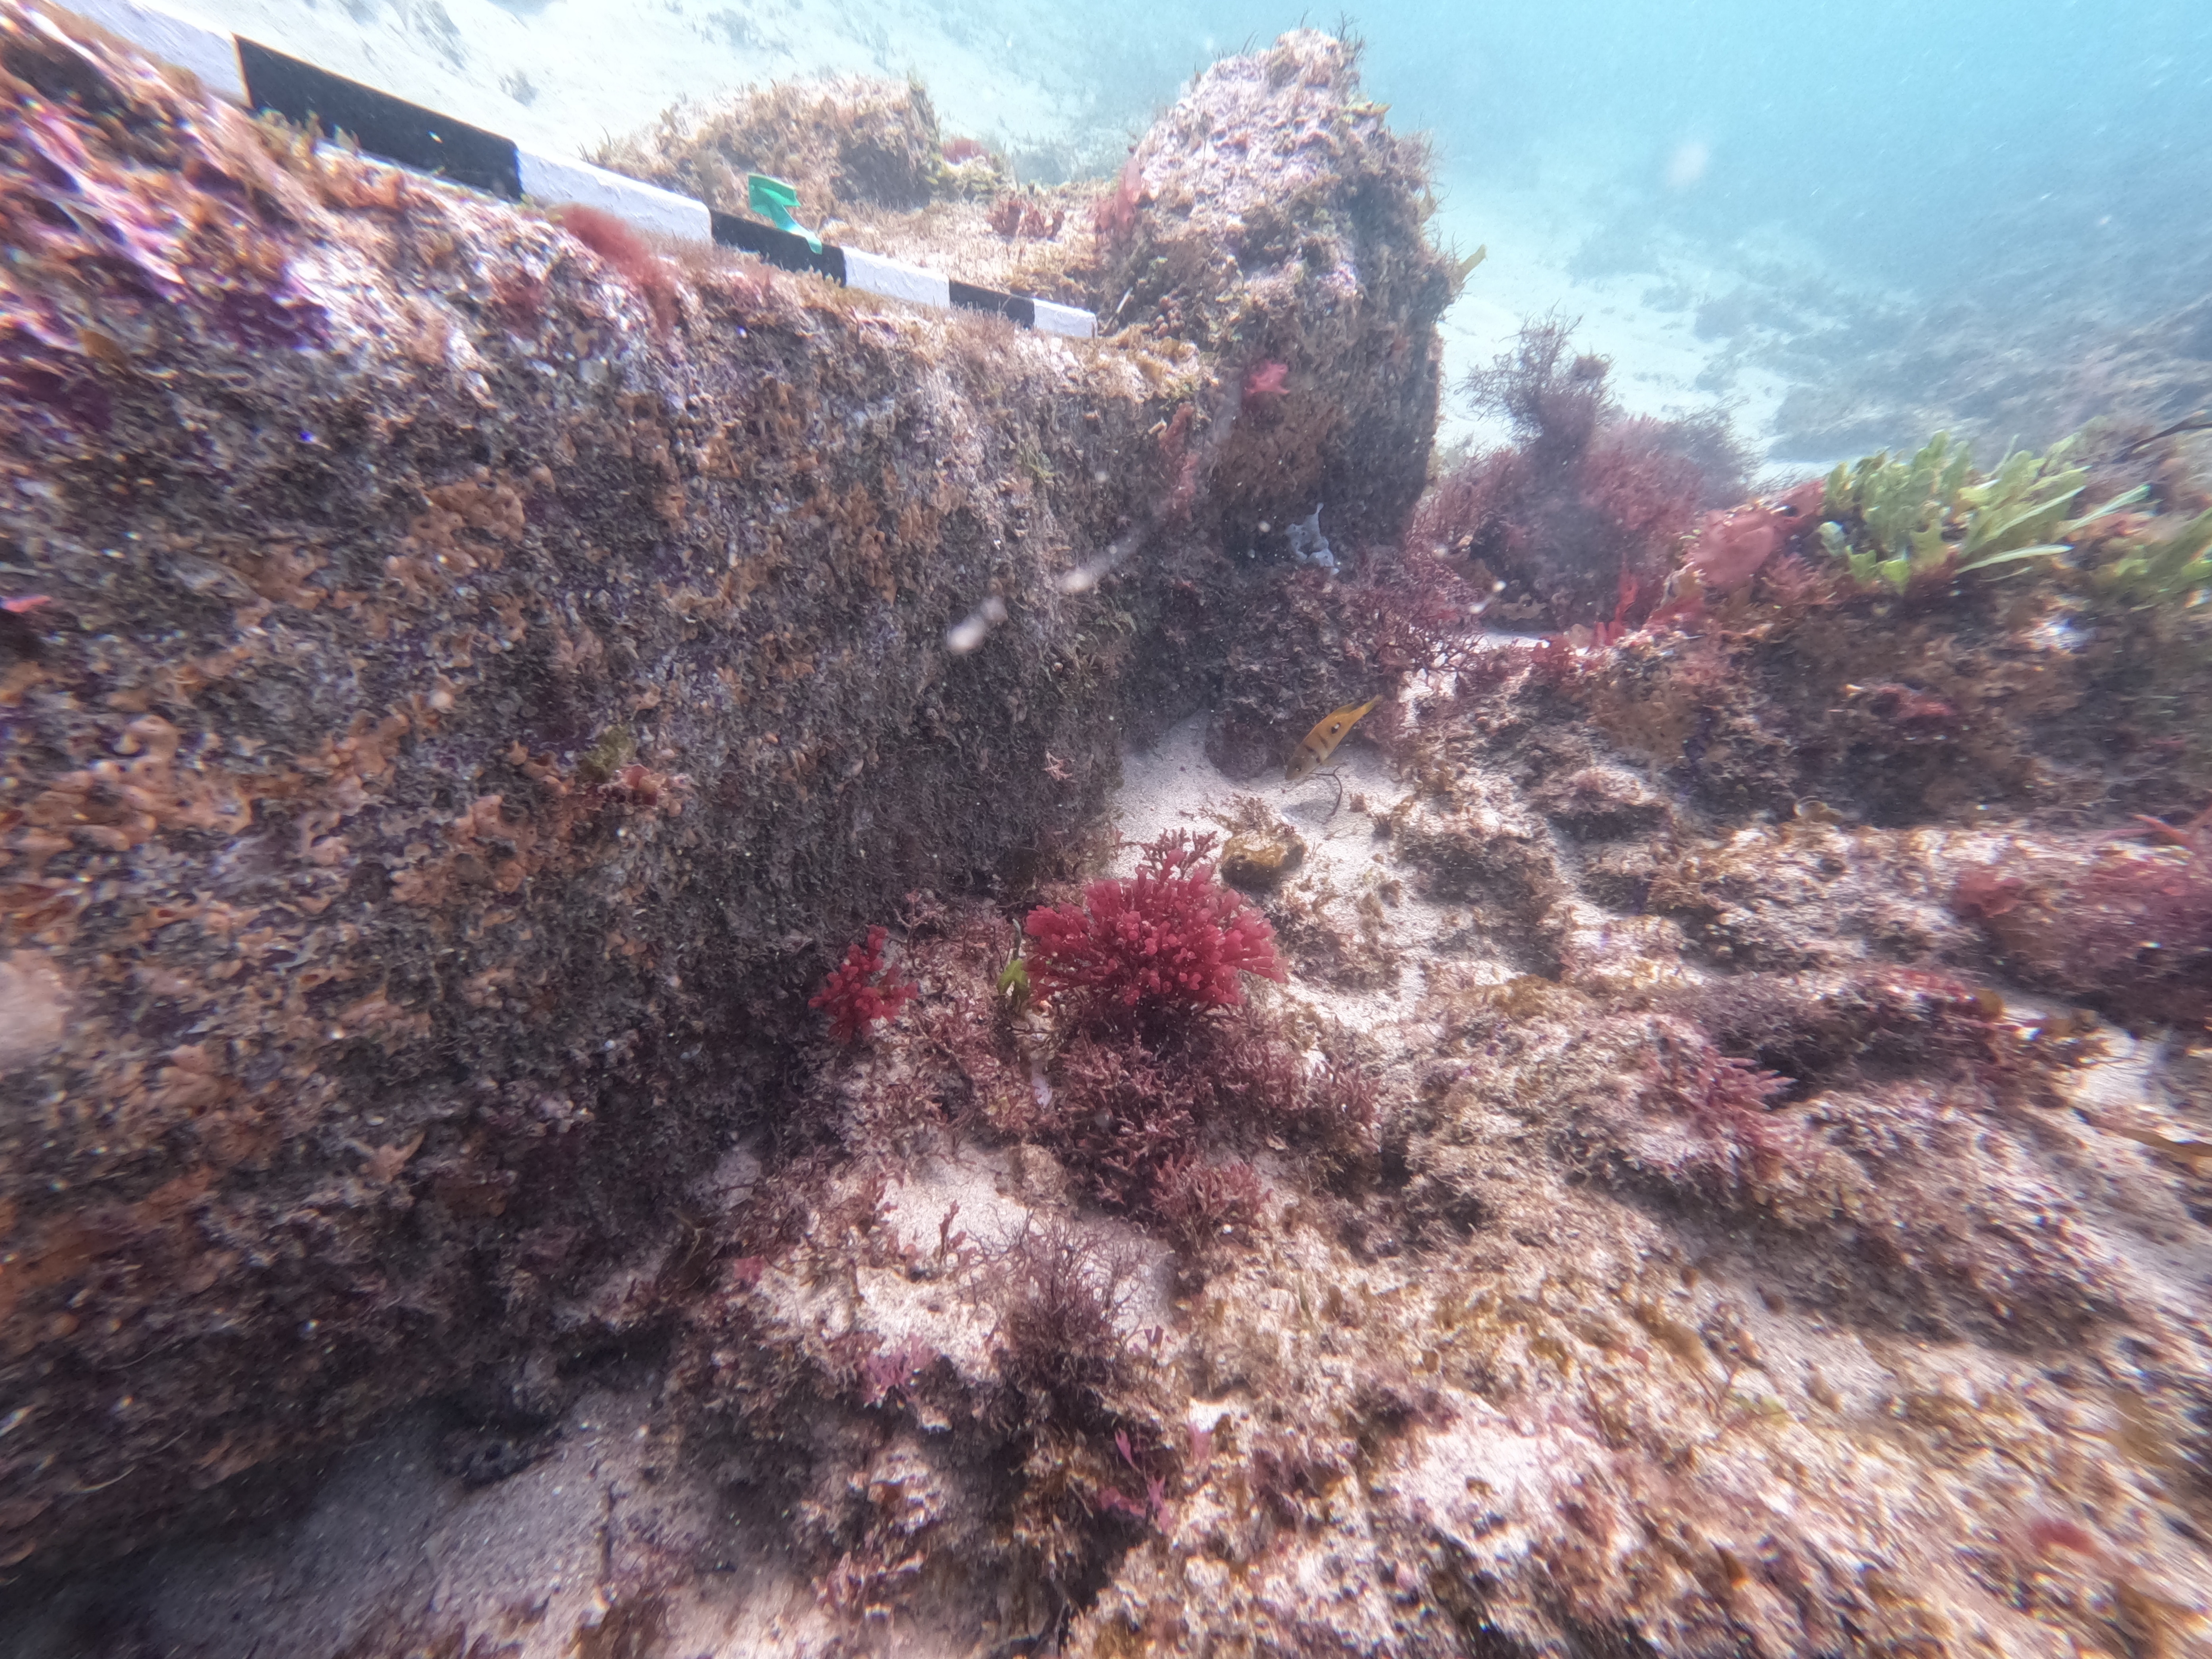

Supplement: Supplementary file 692 [file G0713759.pdf › Ocean2/G0713759.pdf]

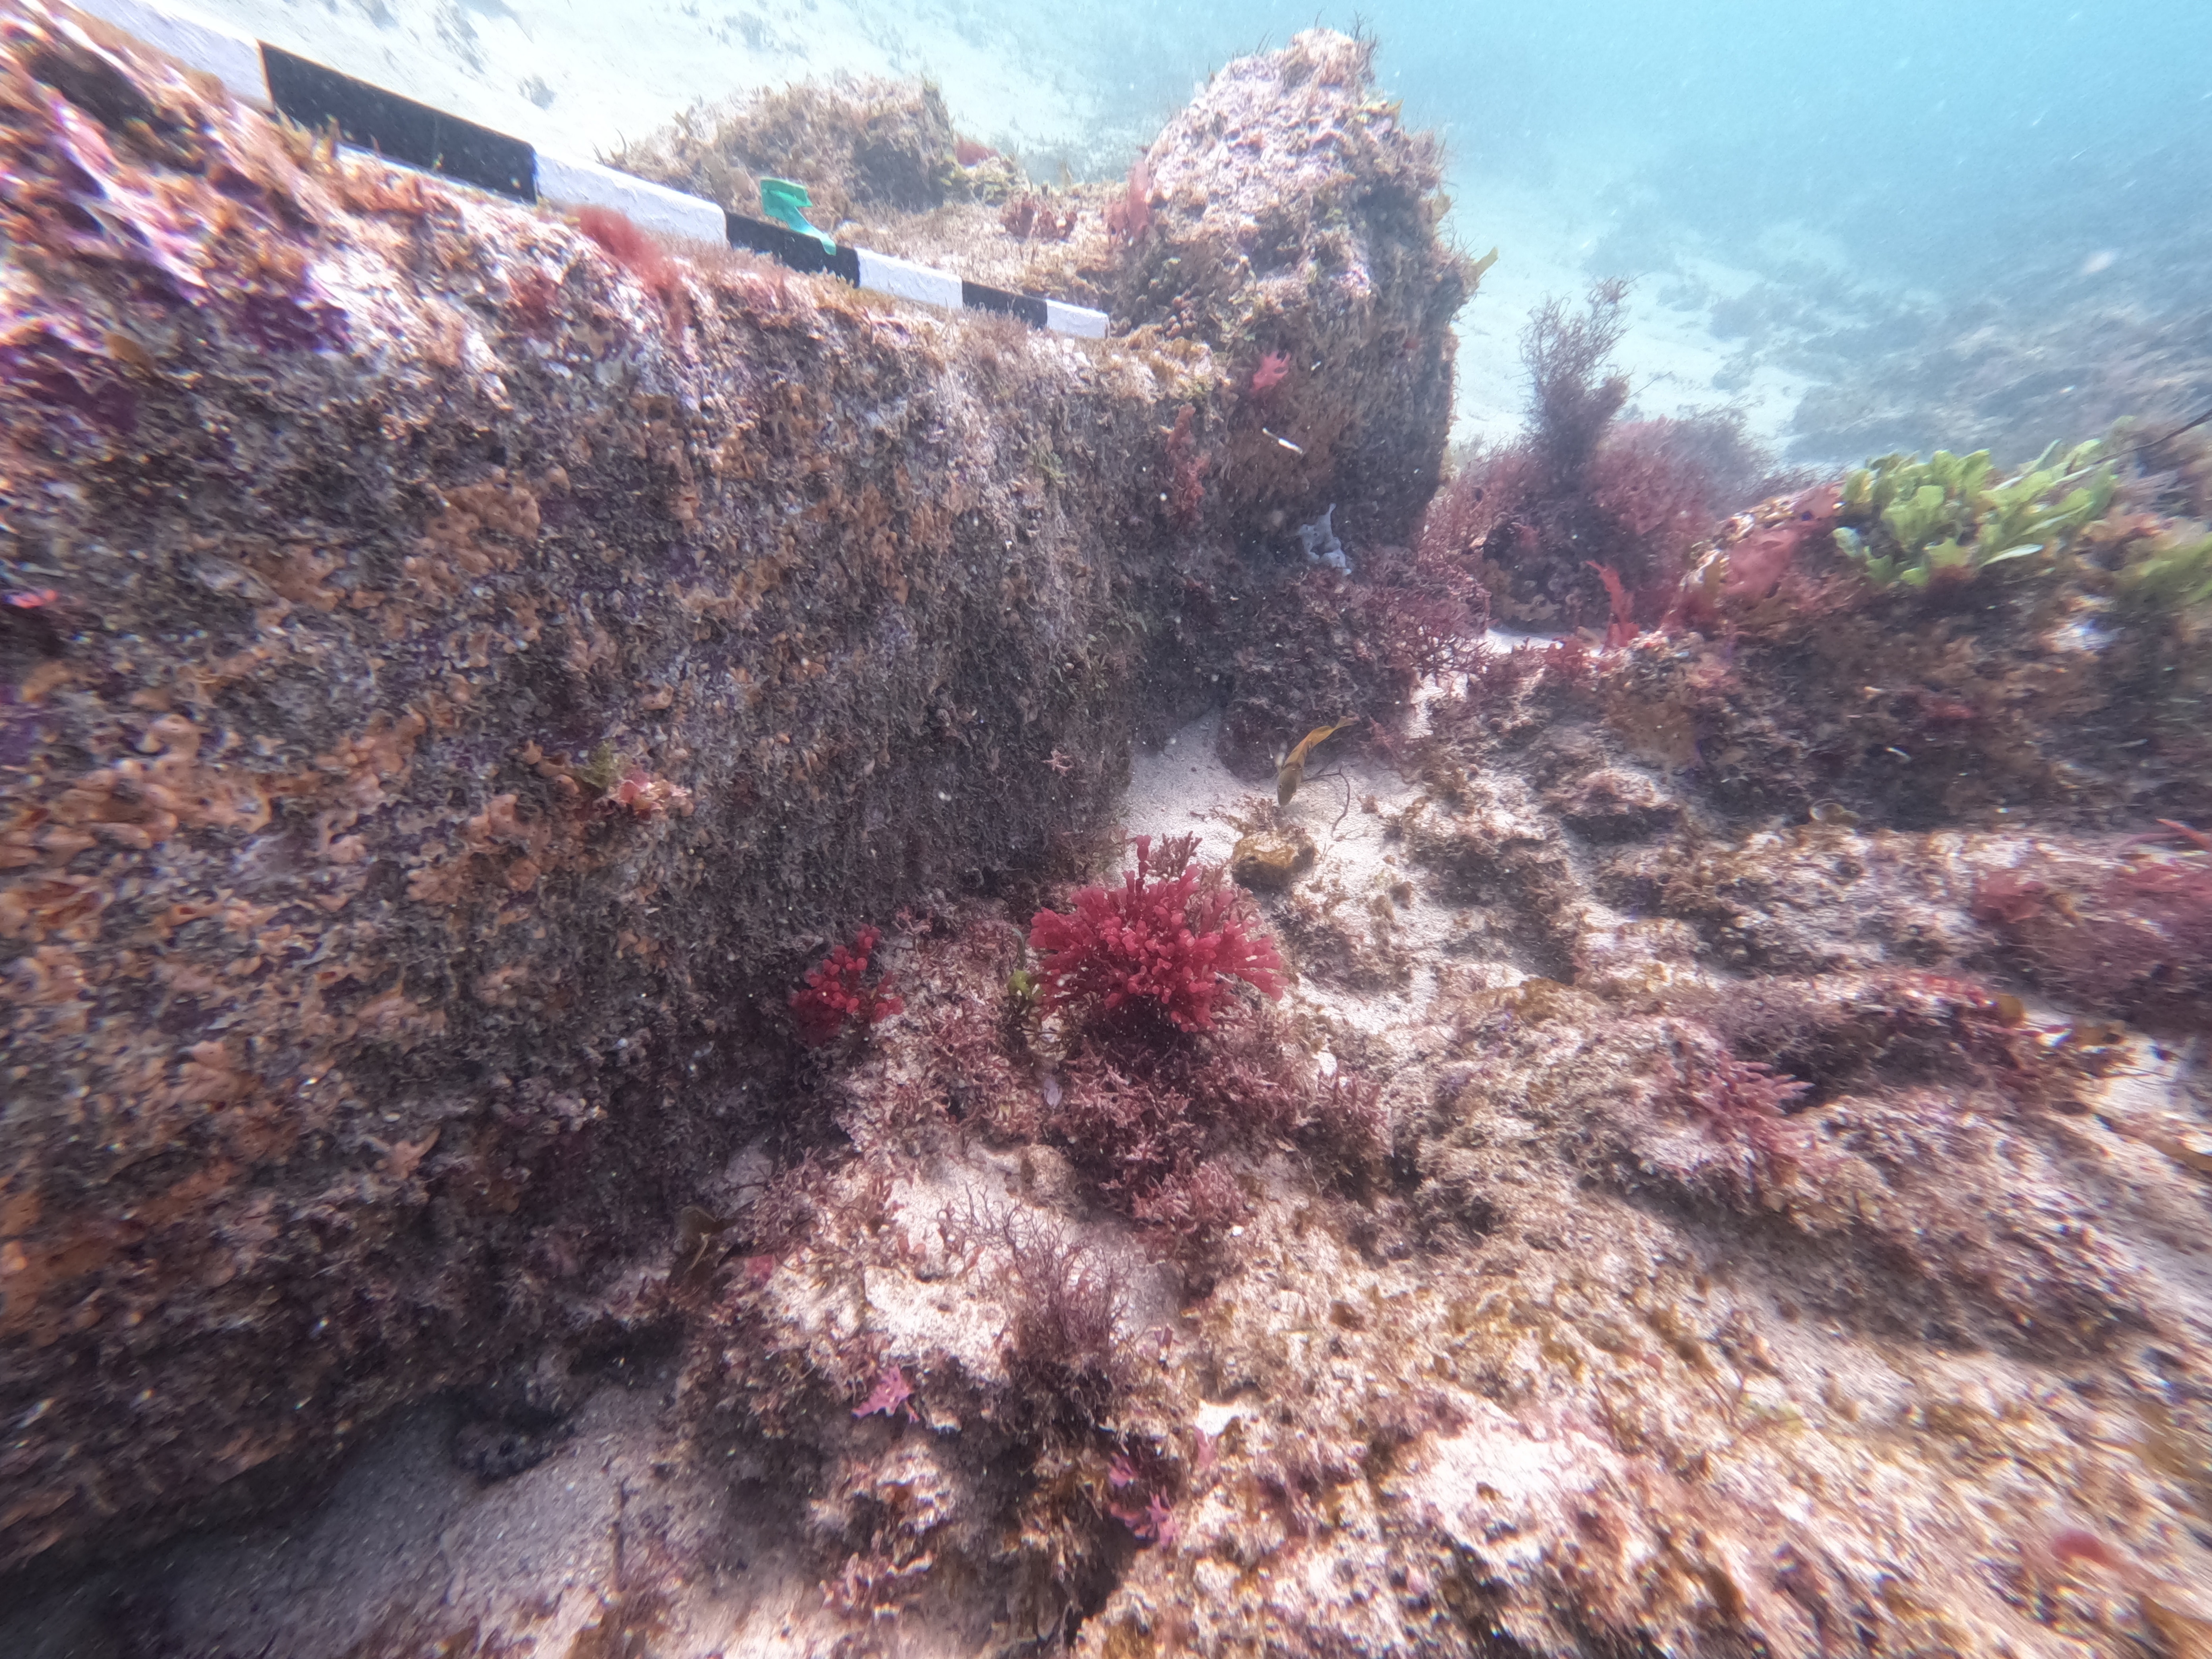

Supplement: Supplementary file 693 [file G0713760.pdf › Ocean2/G0713760.pdf]

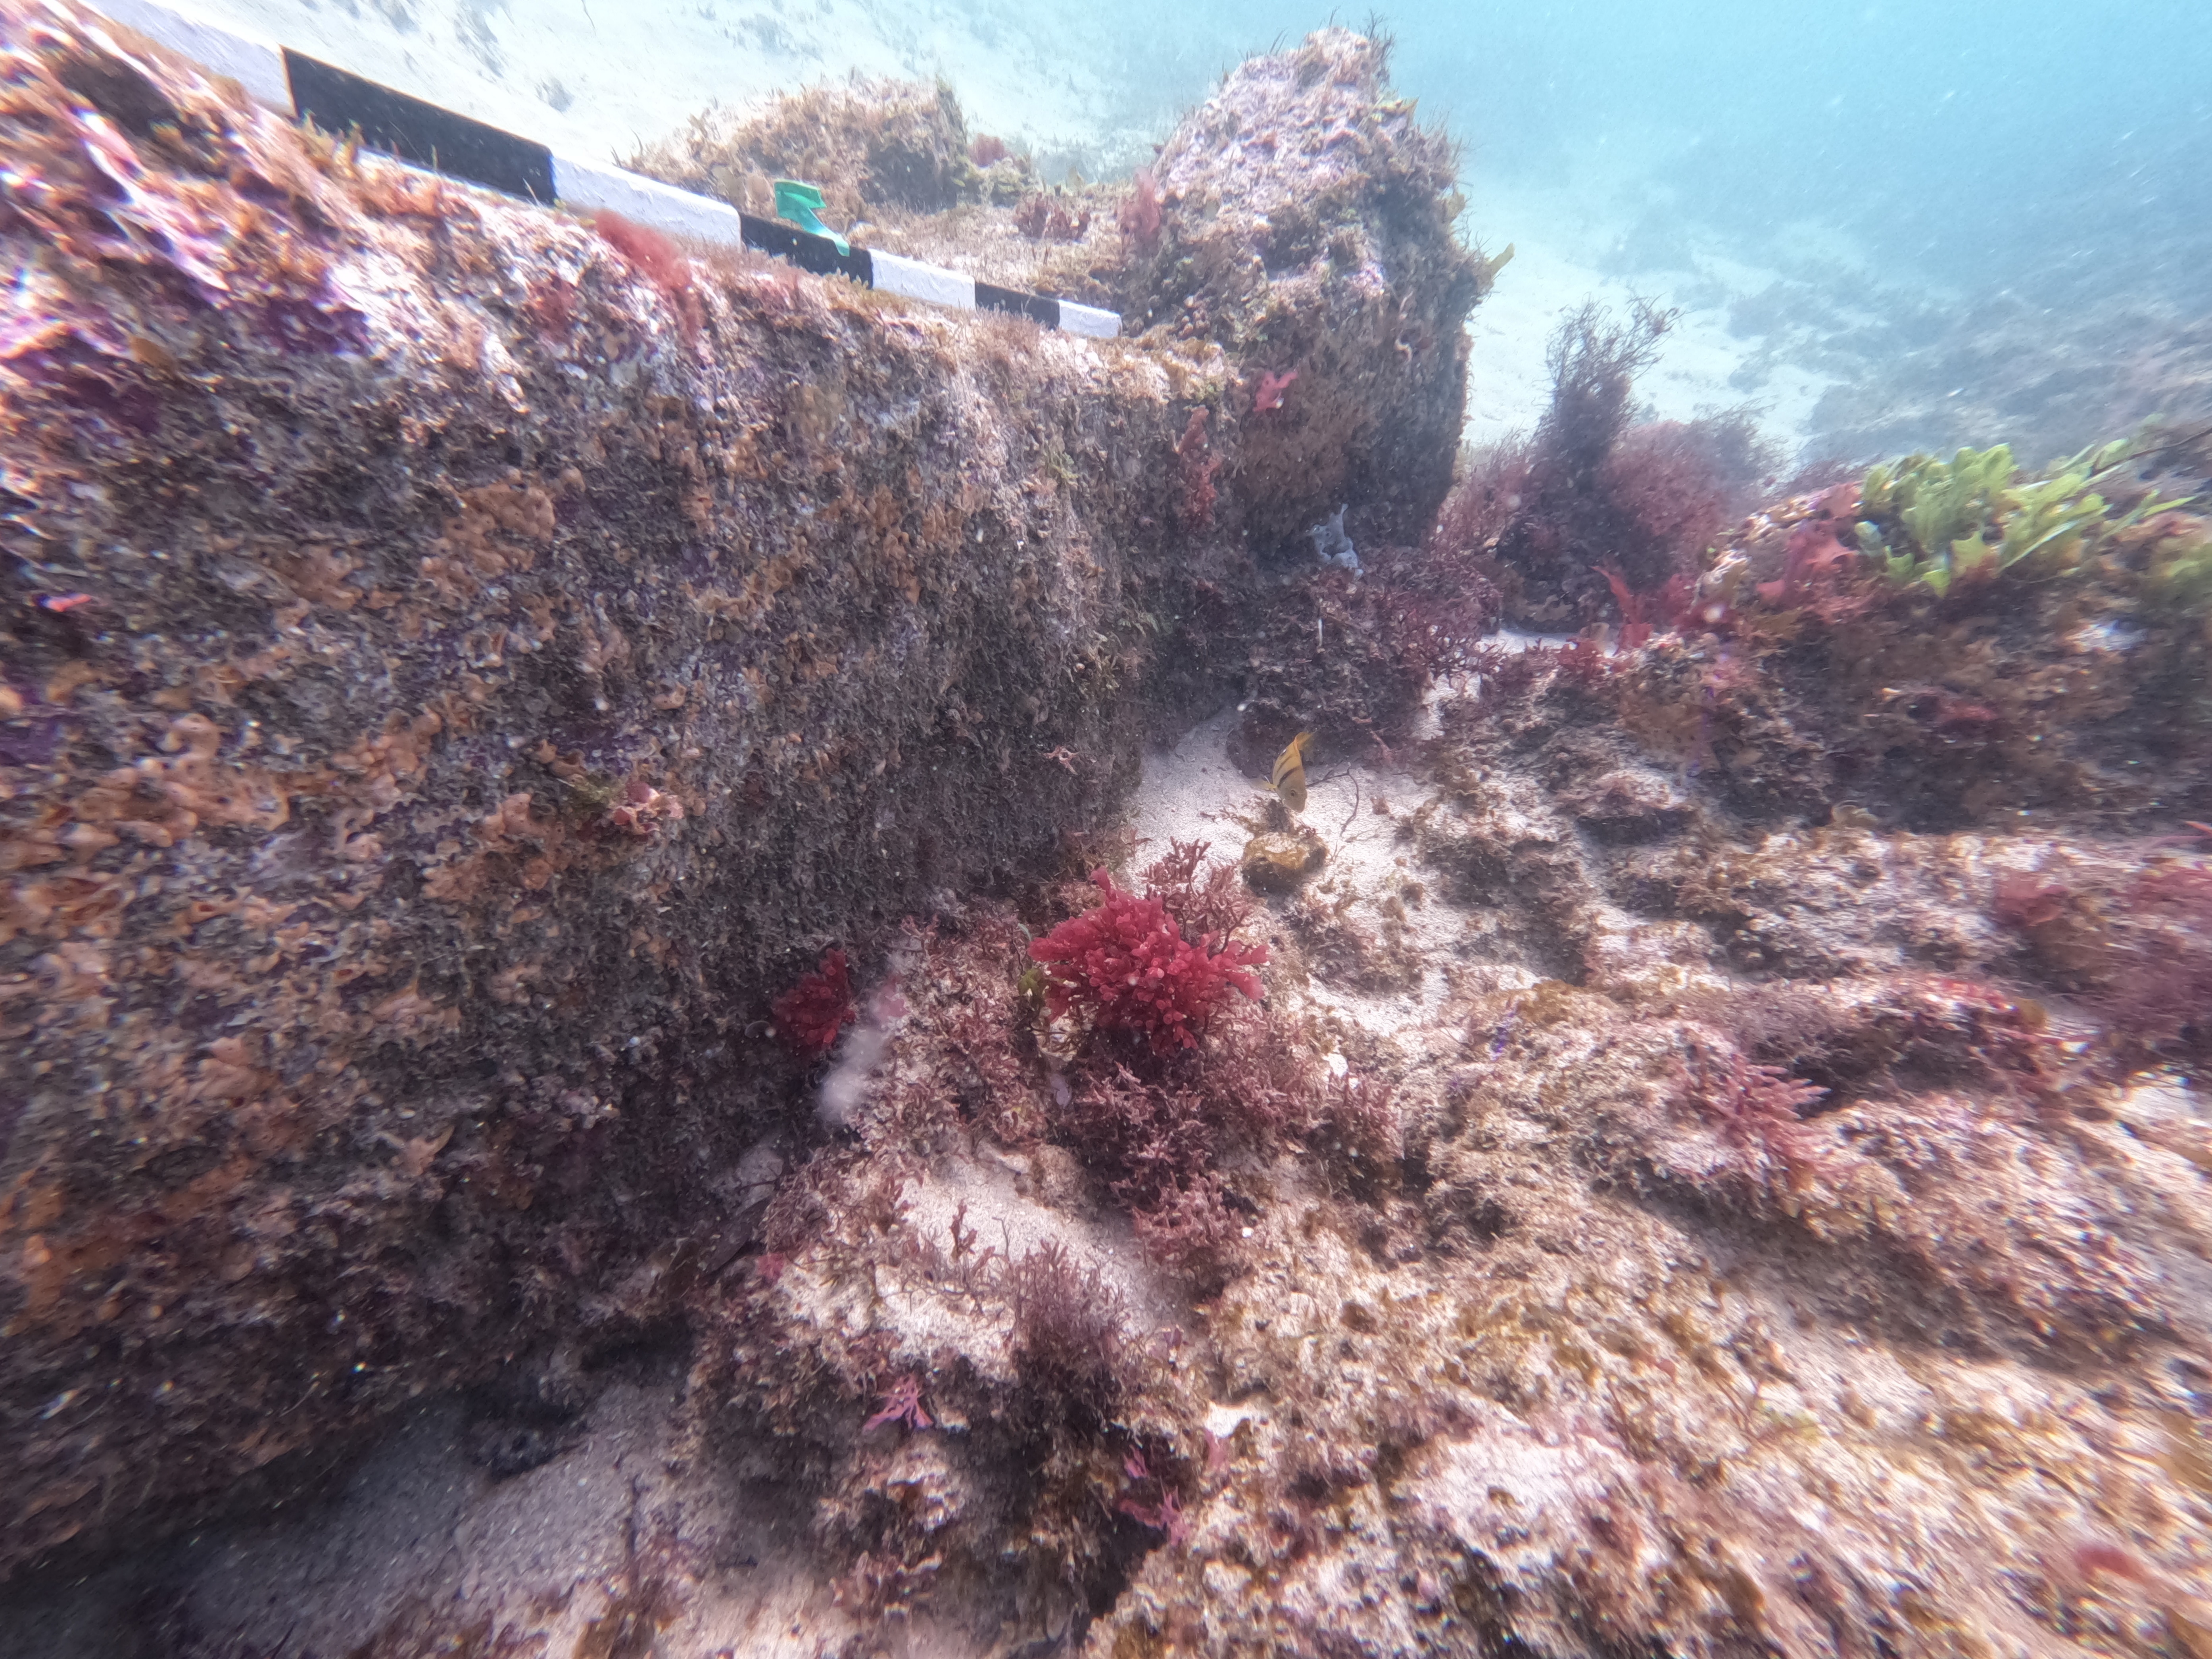

Supplement: Supplementary file 694 [file G0713761.pdf › Ocean2/G0713761.pdf]

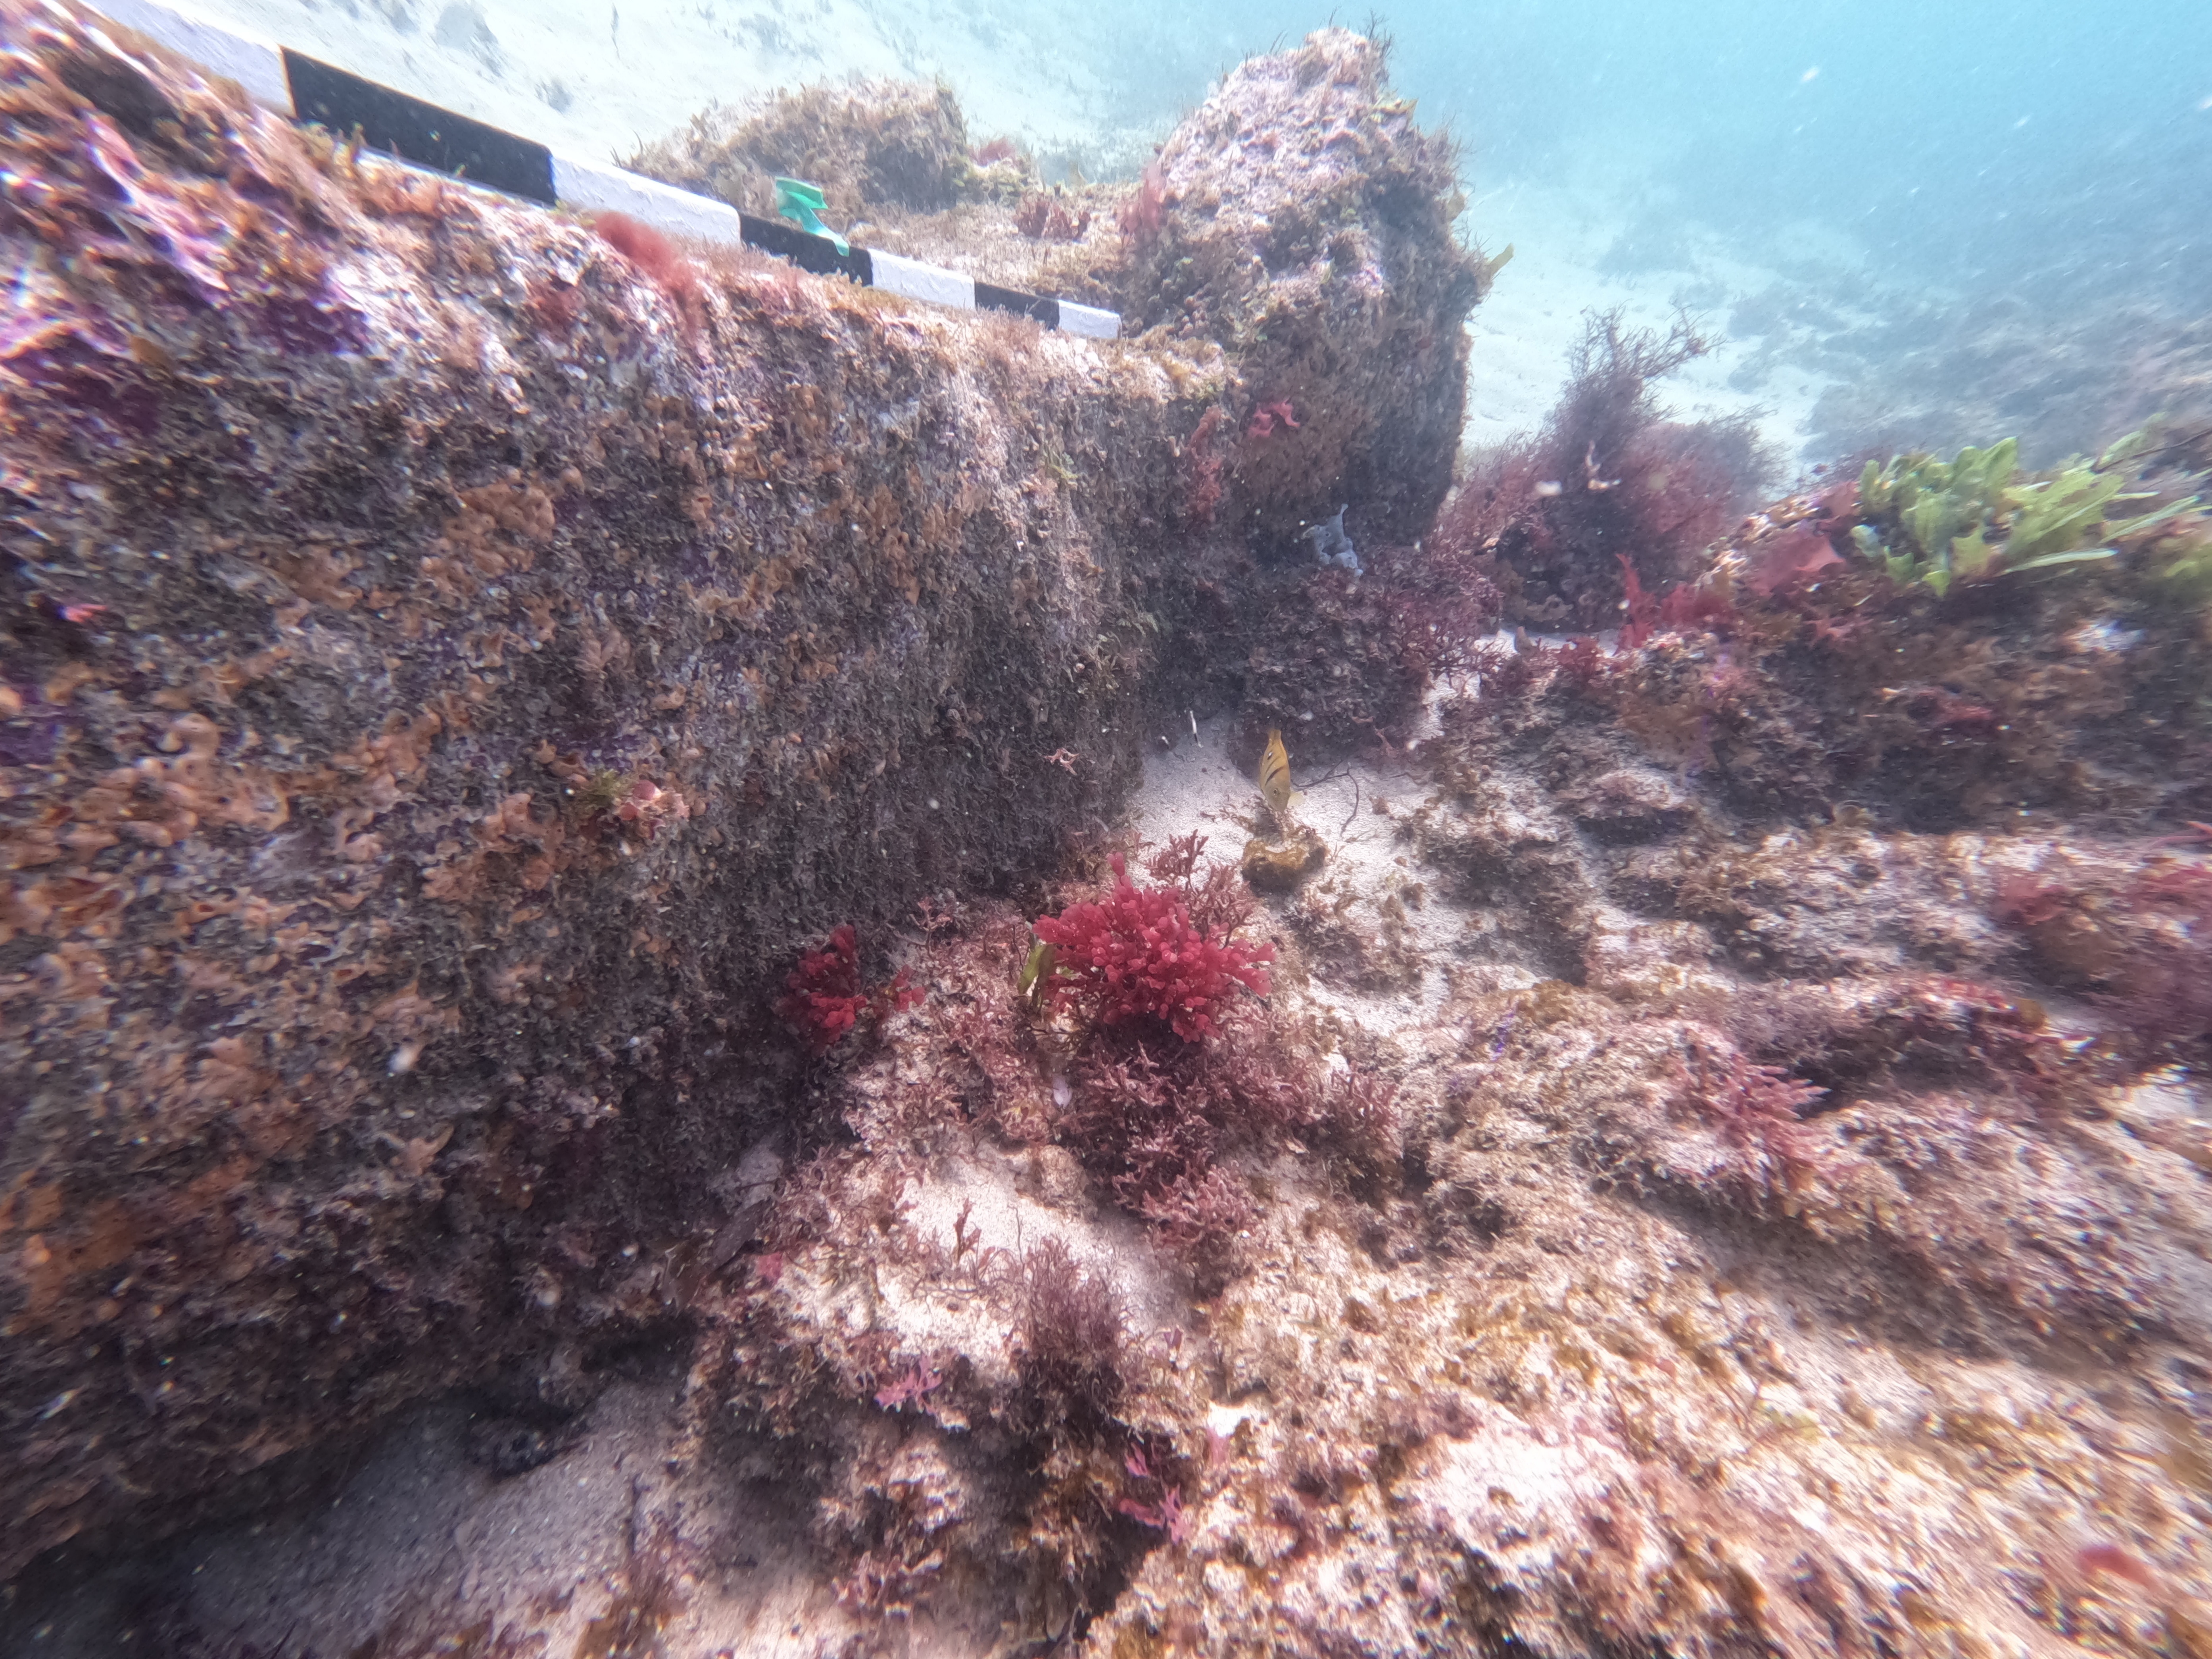

Supplement: Supplementary file 695 [file G0713762.pdf › Ocean2/G0713762.pdf]

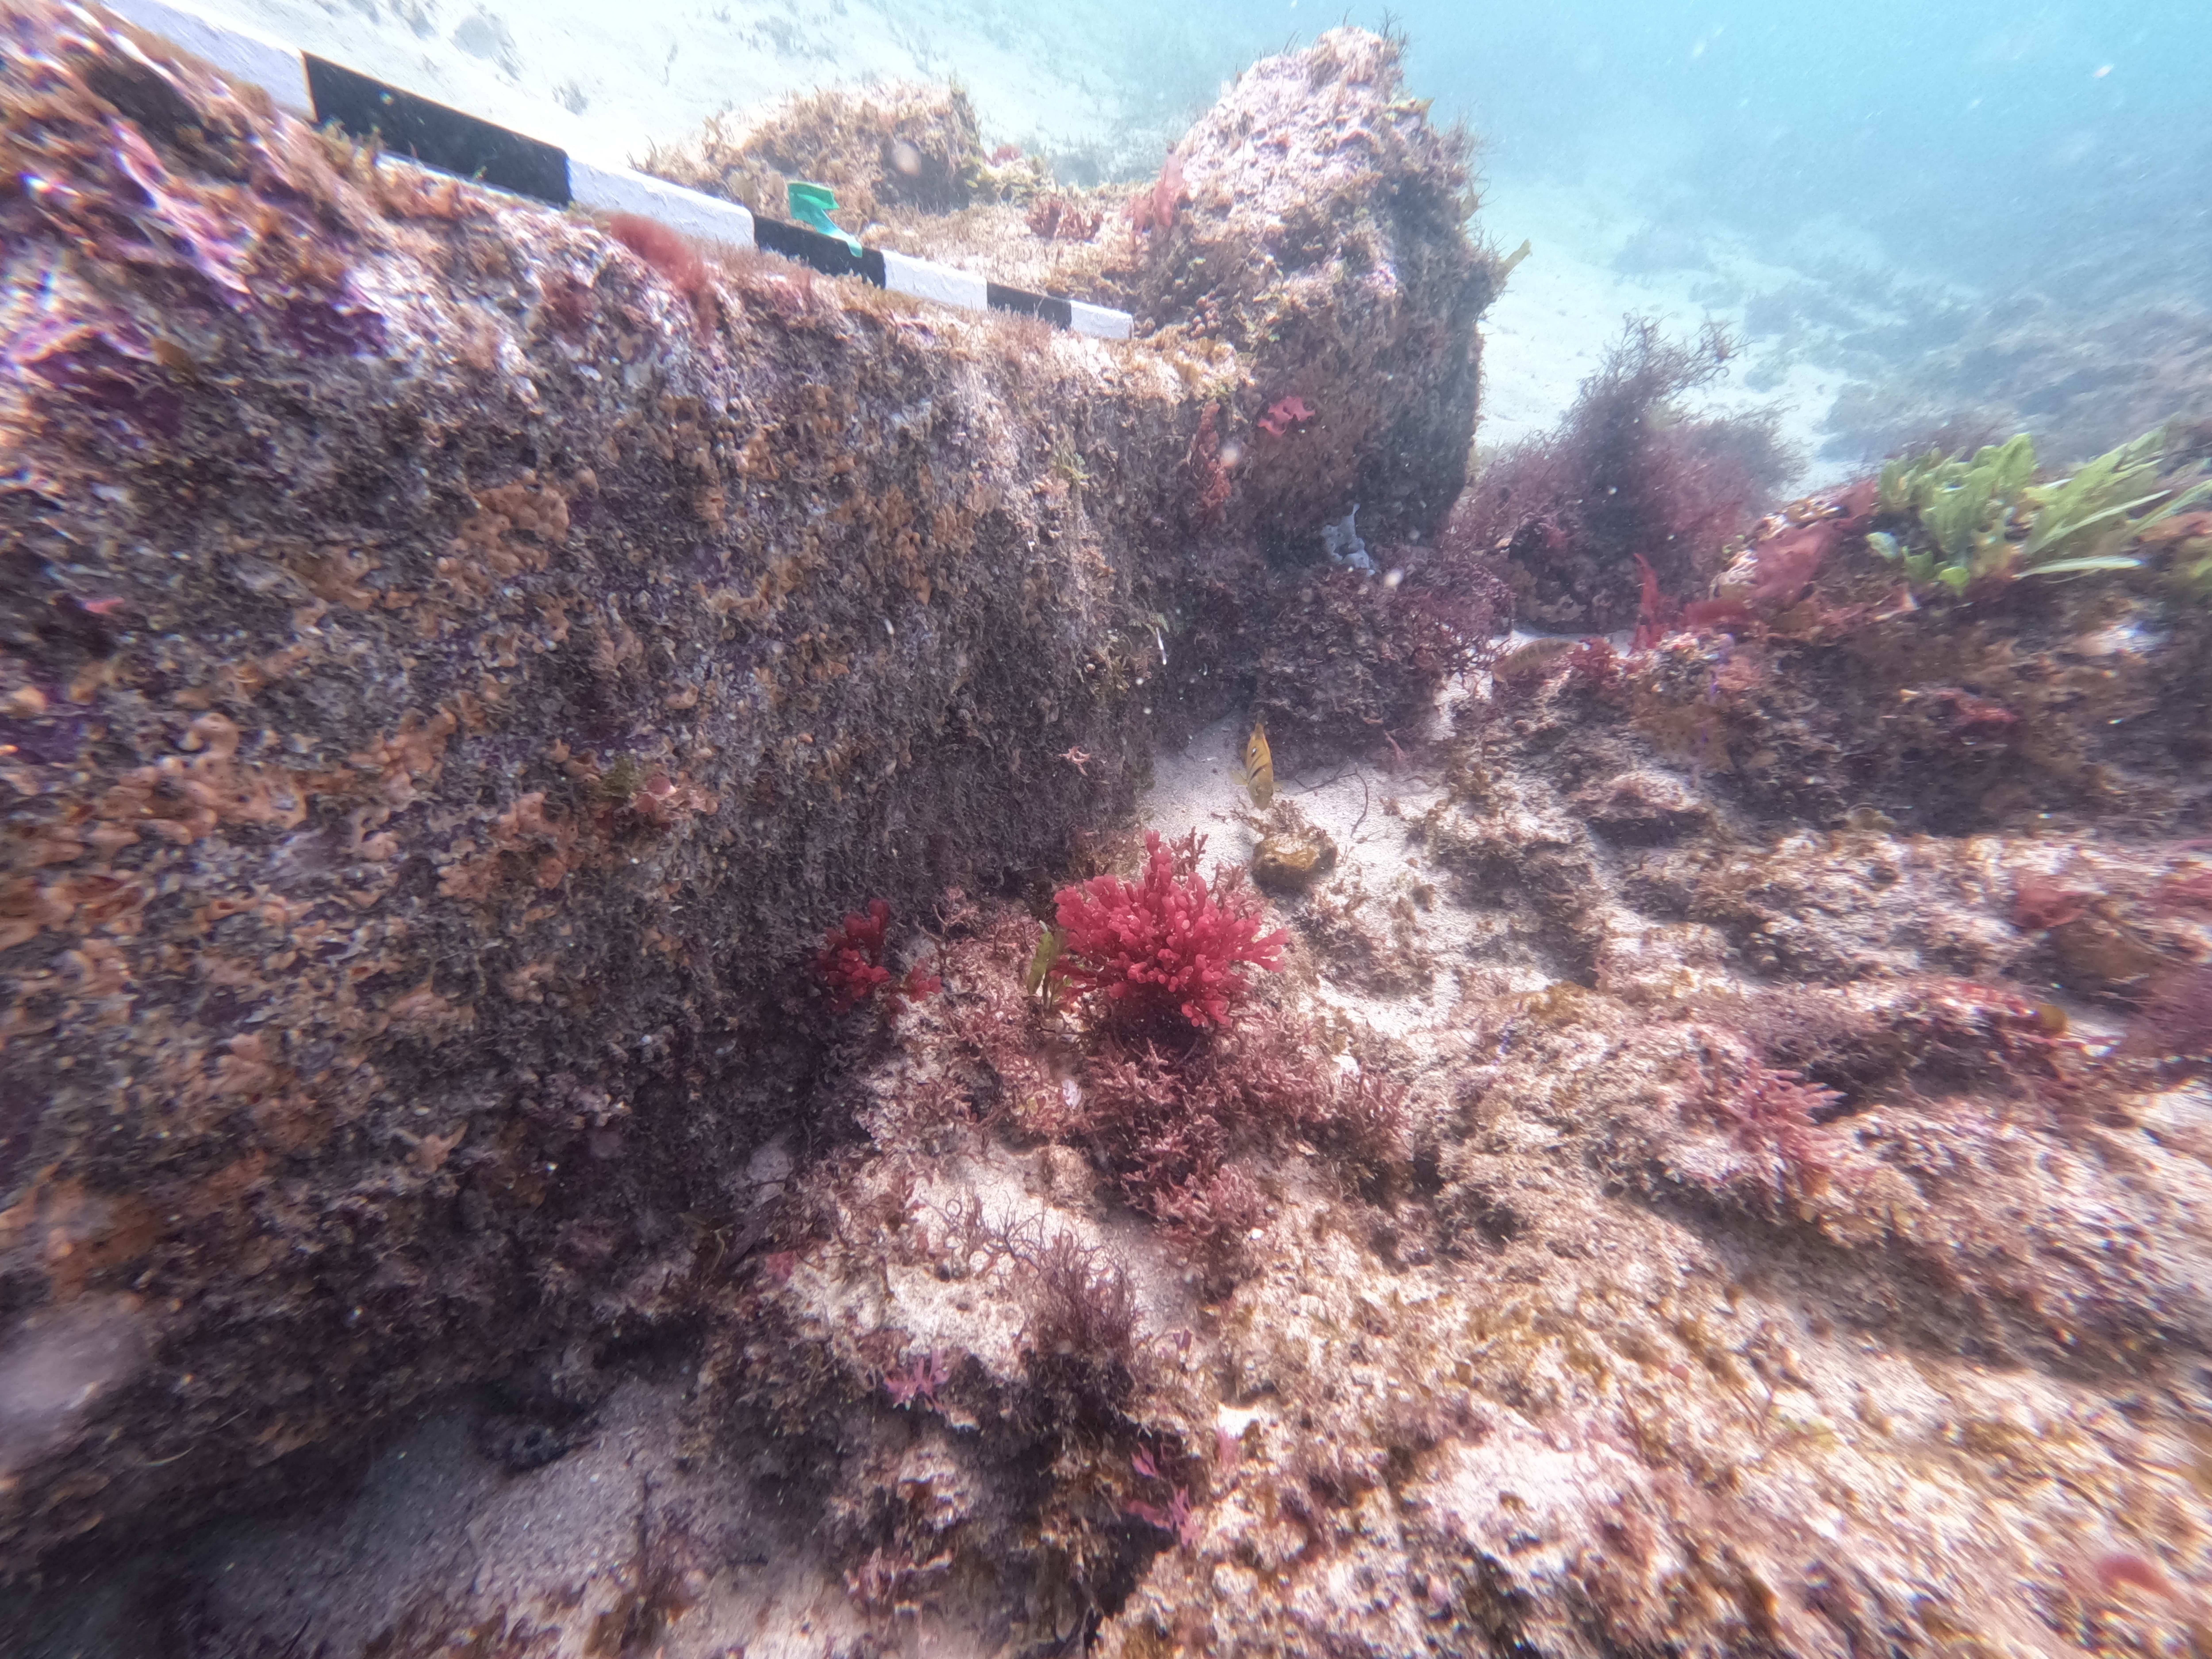

Supplement: Supplementary file 696 [file G0713763.pdf › Ocean2/G0713763.pdf]

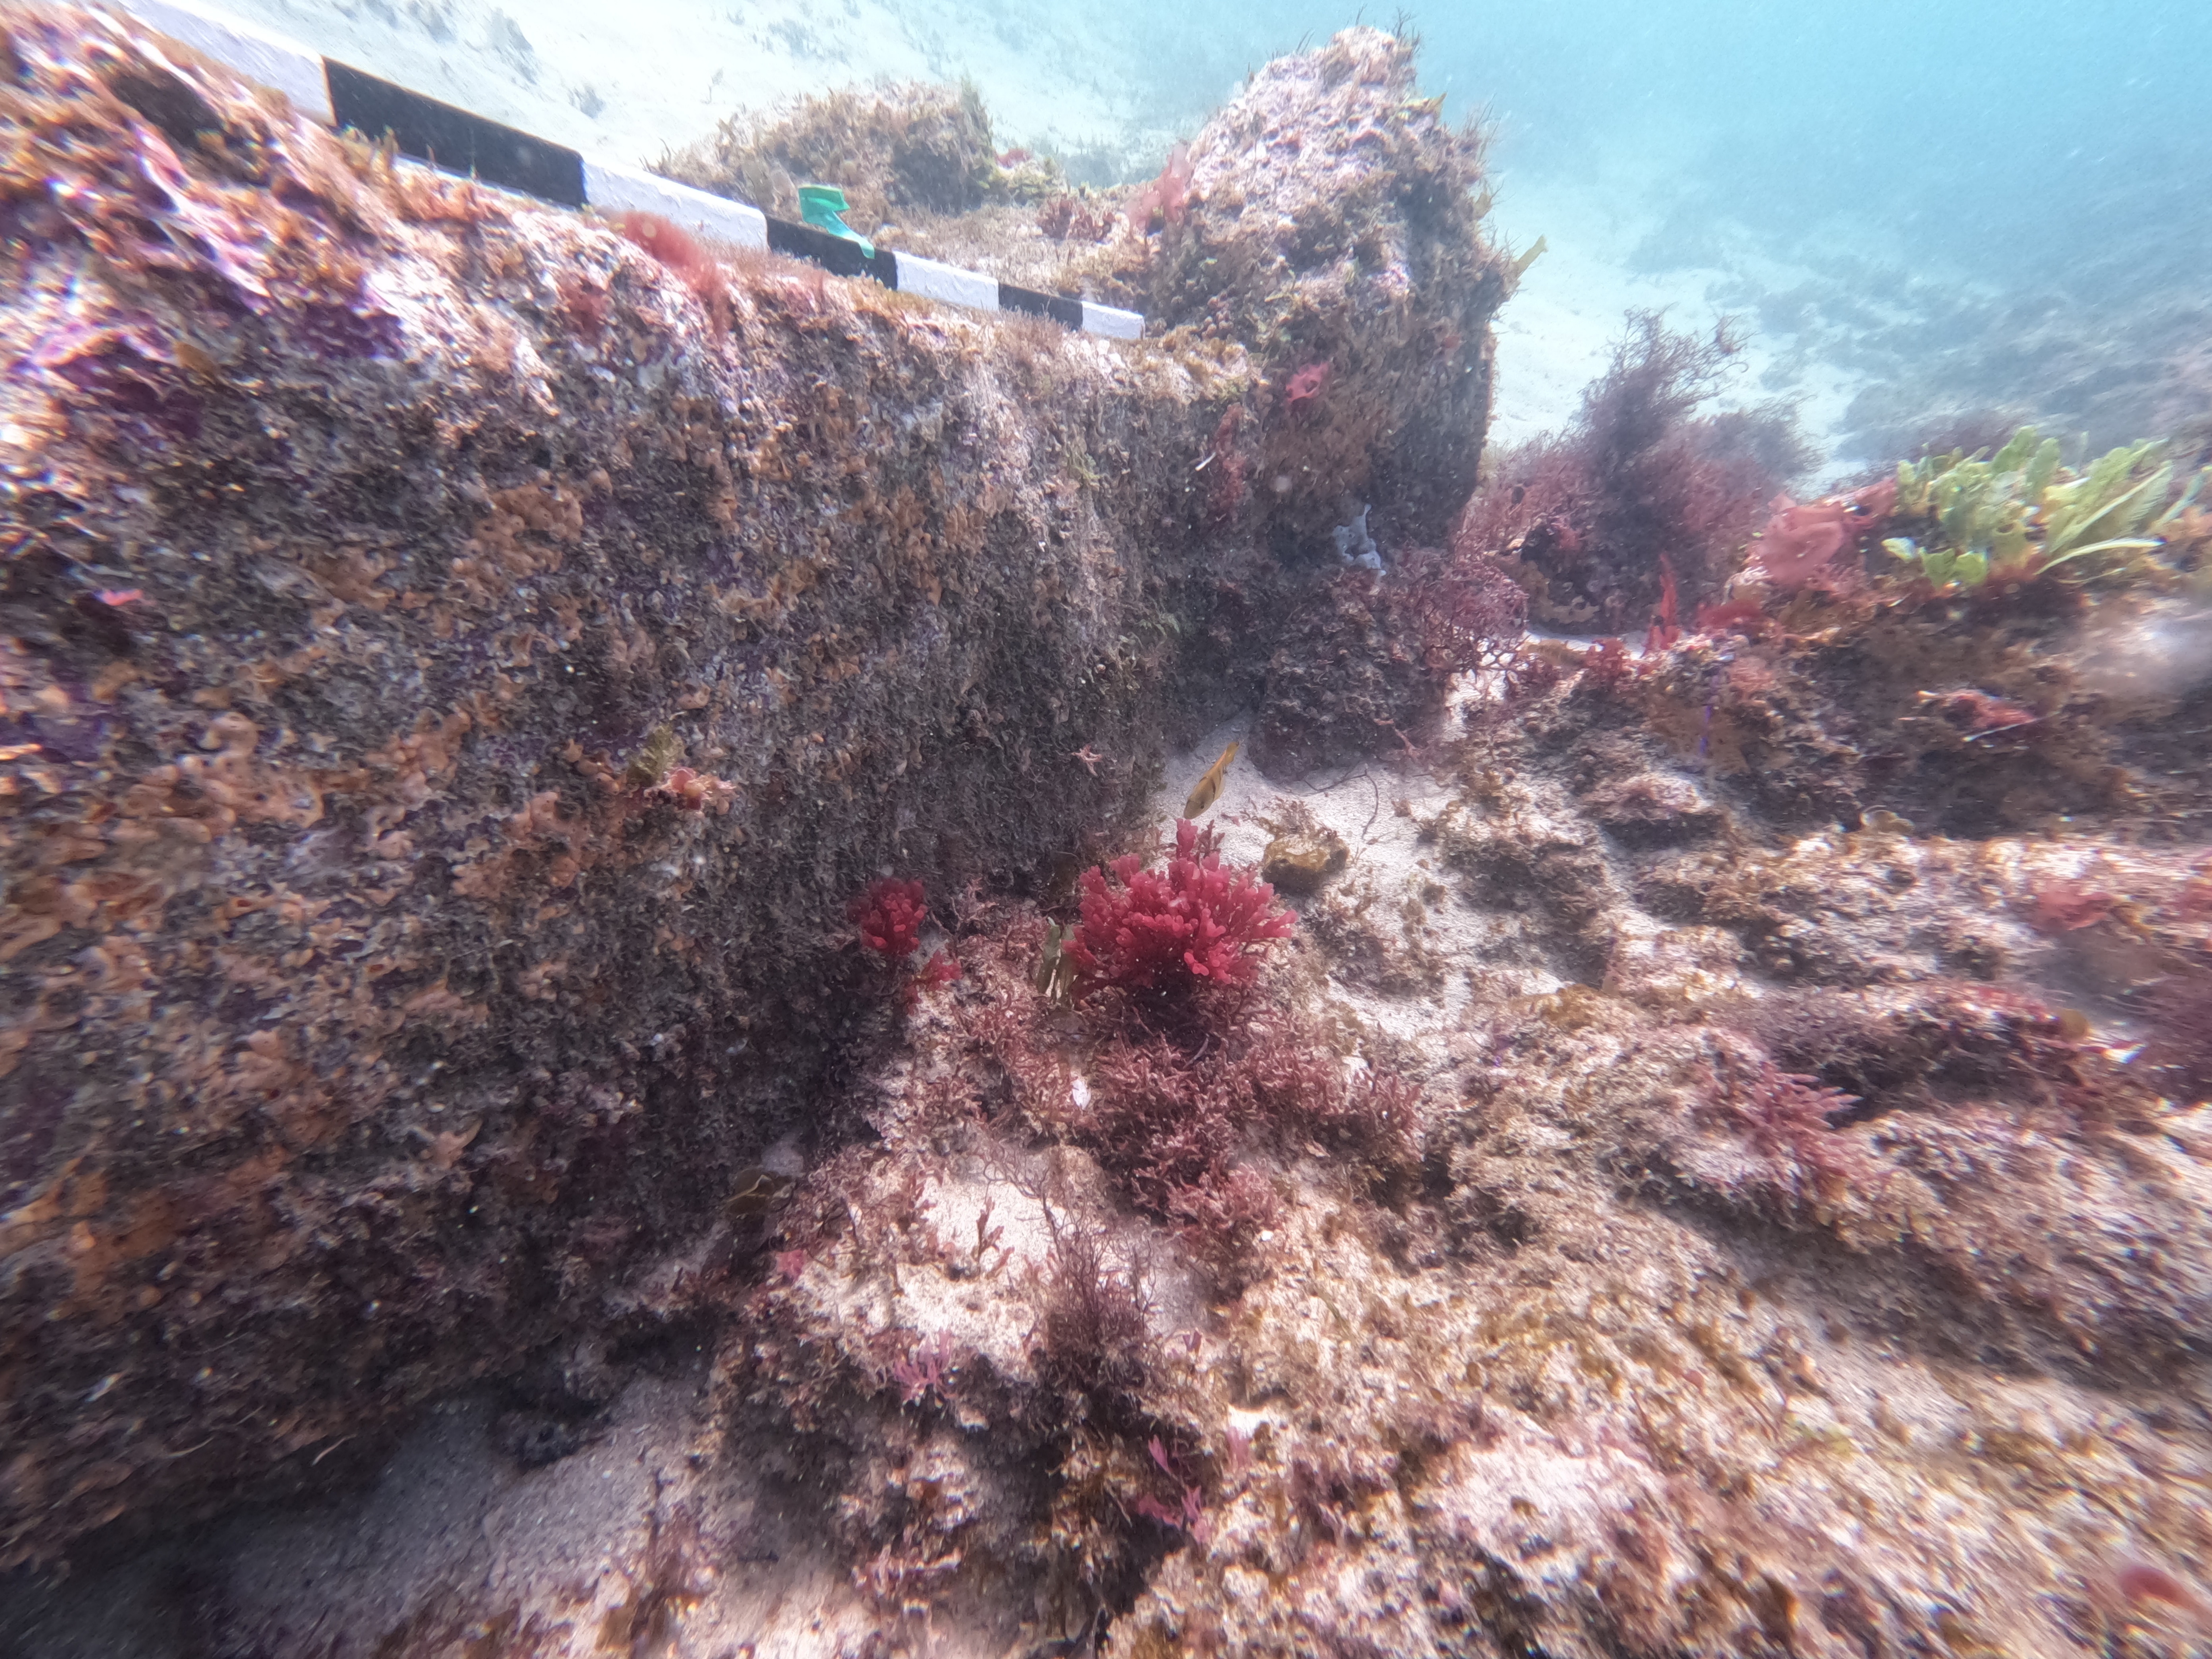

Supplement: Supplementary file 697 [file G0713764.pdf › Ocean2/G0713764.pdf]

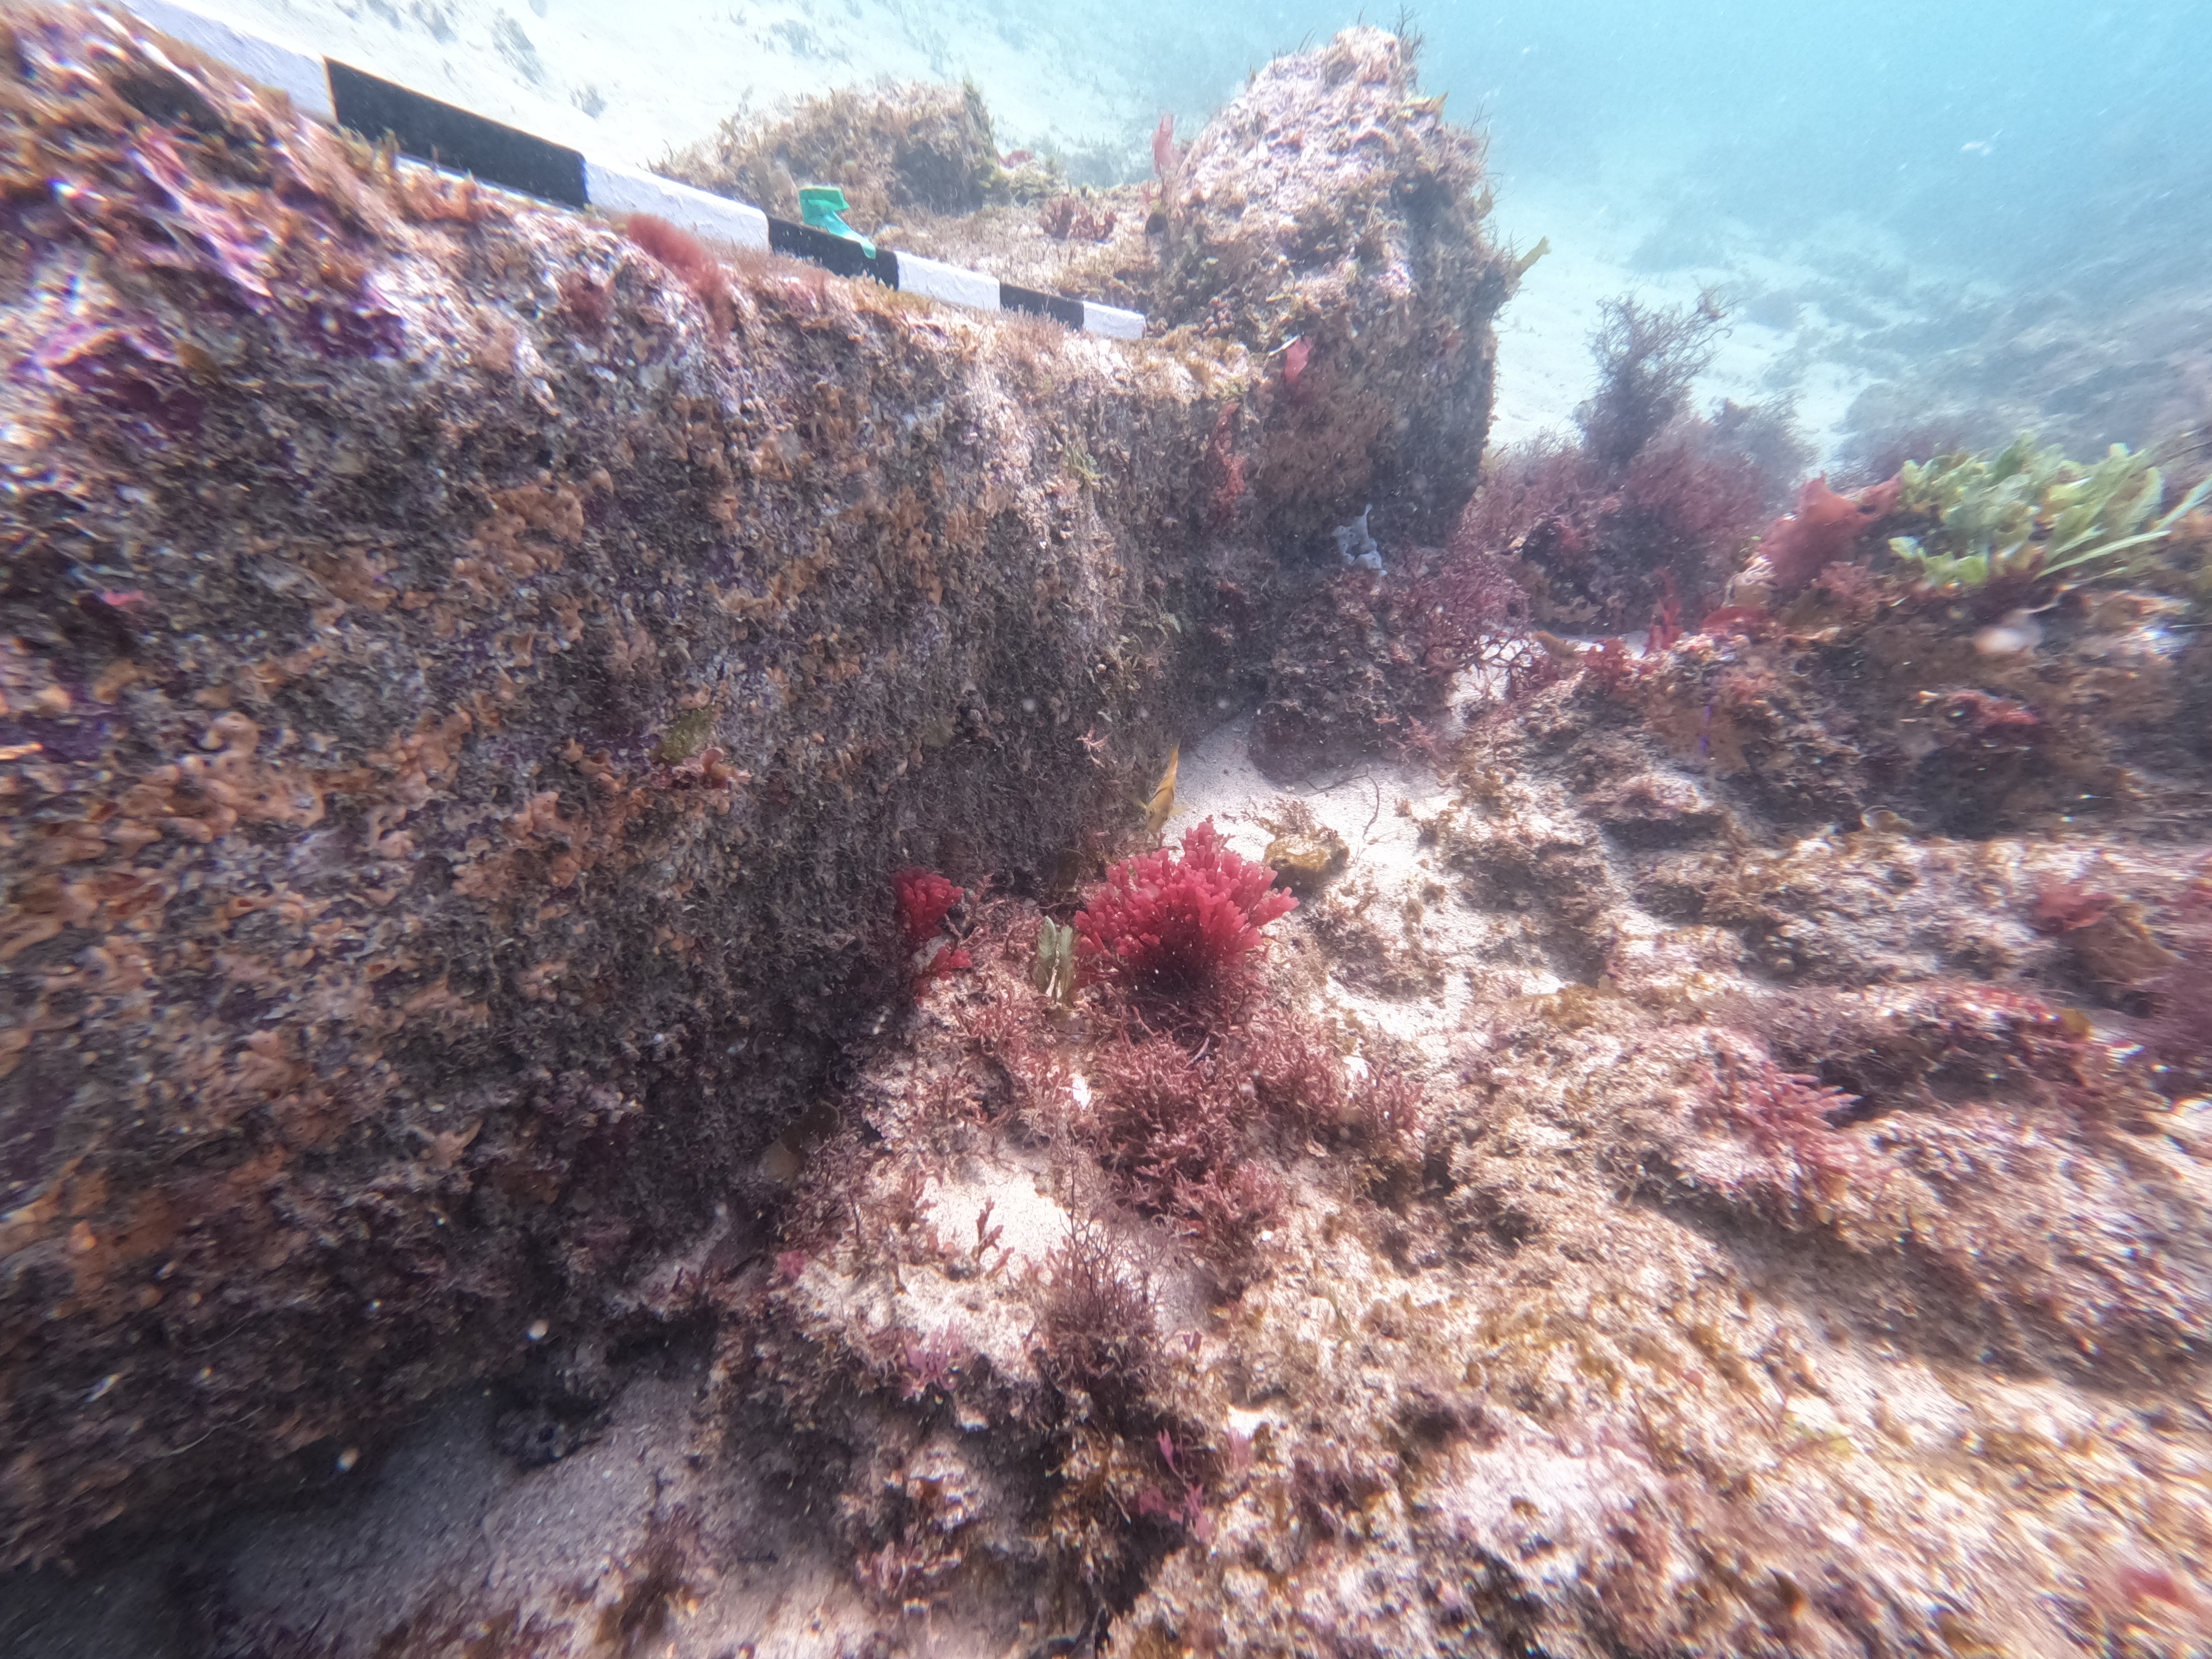

Supplement: Supplementary file 698 [file G0713765.pdf › Ocean2/G0713765.pdf]

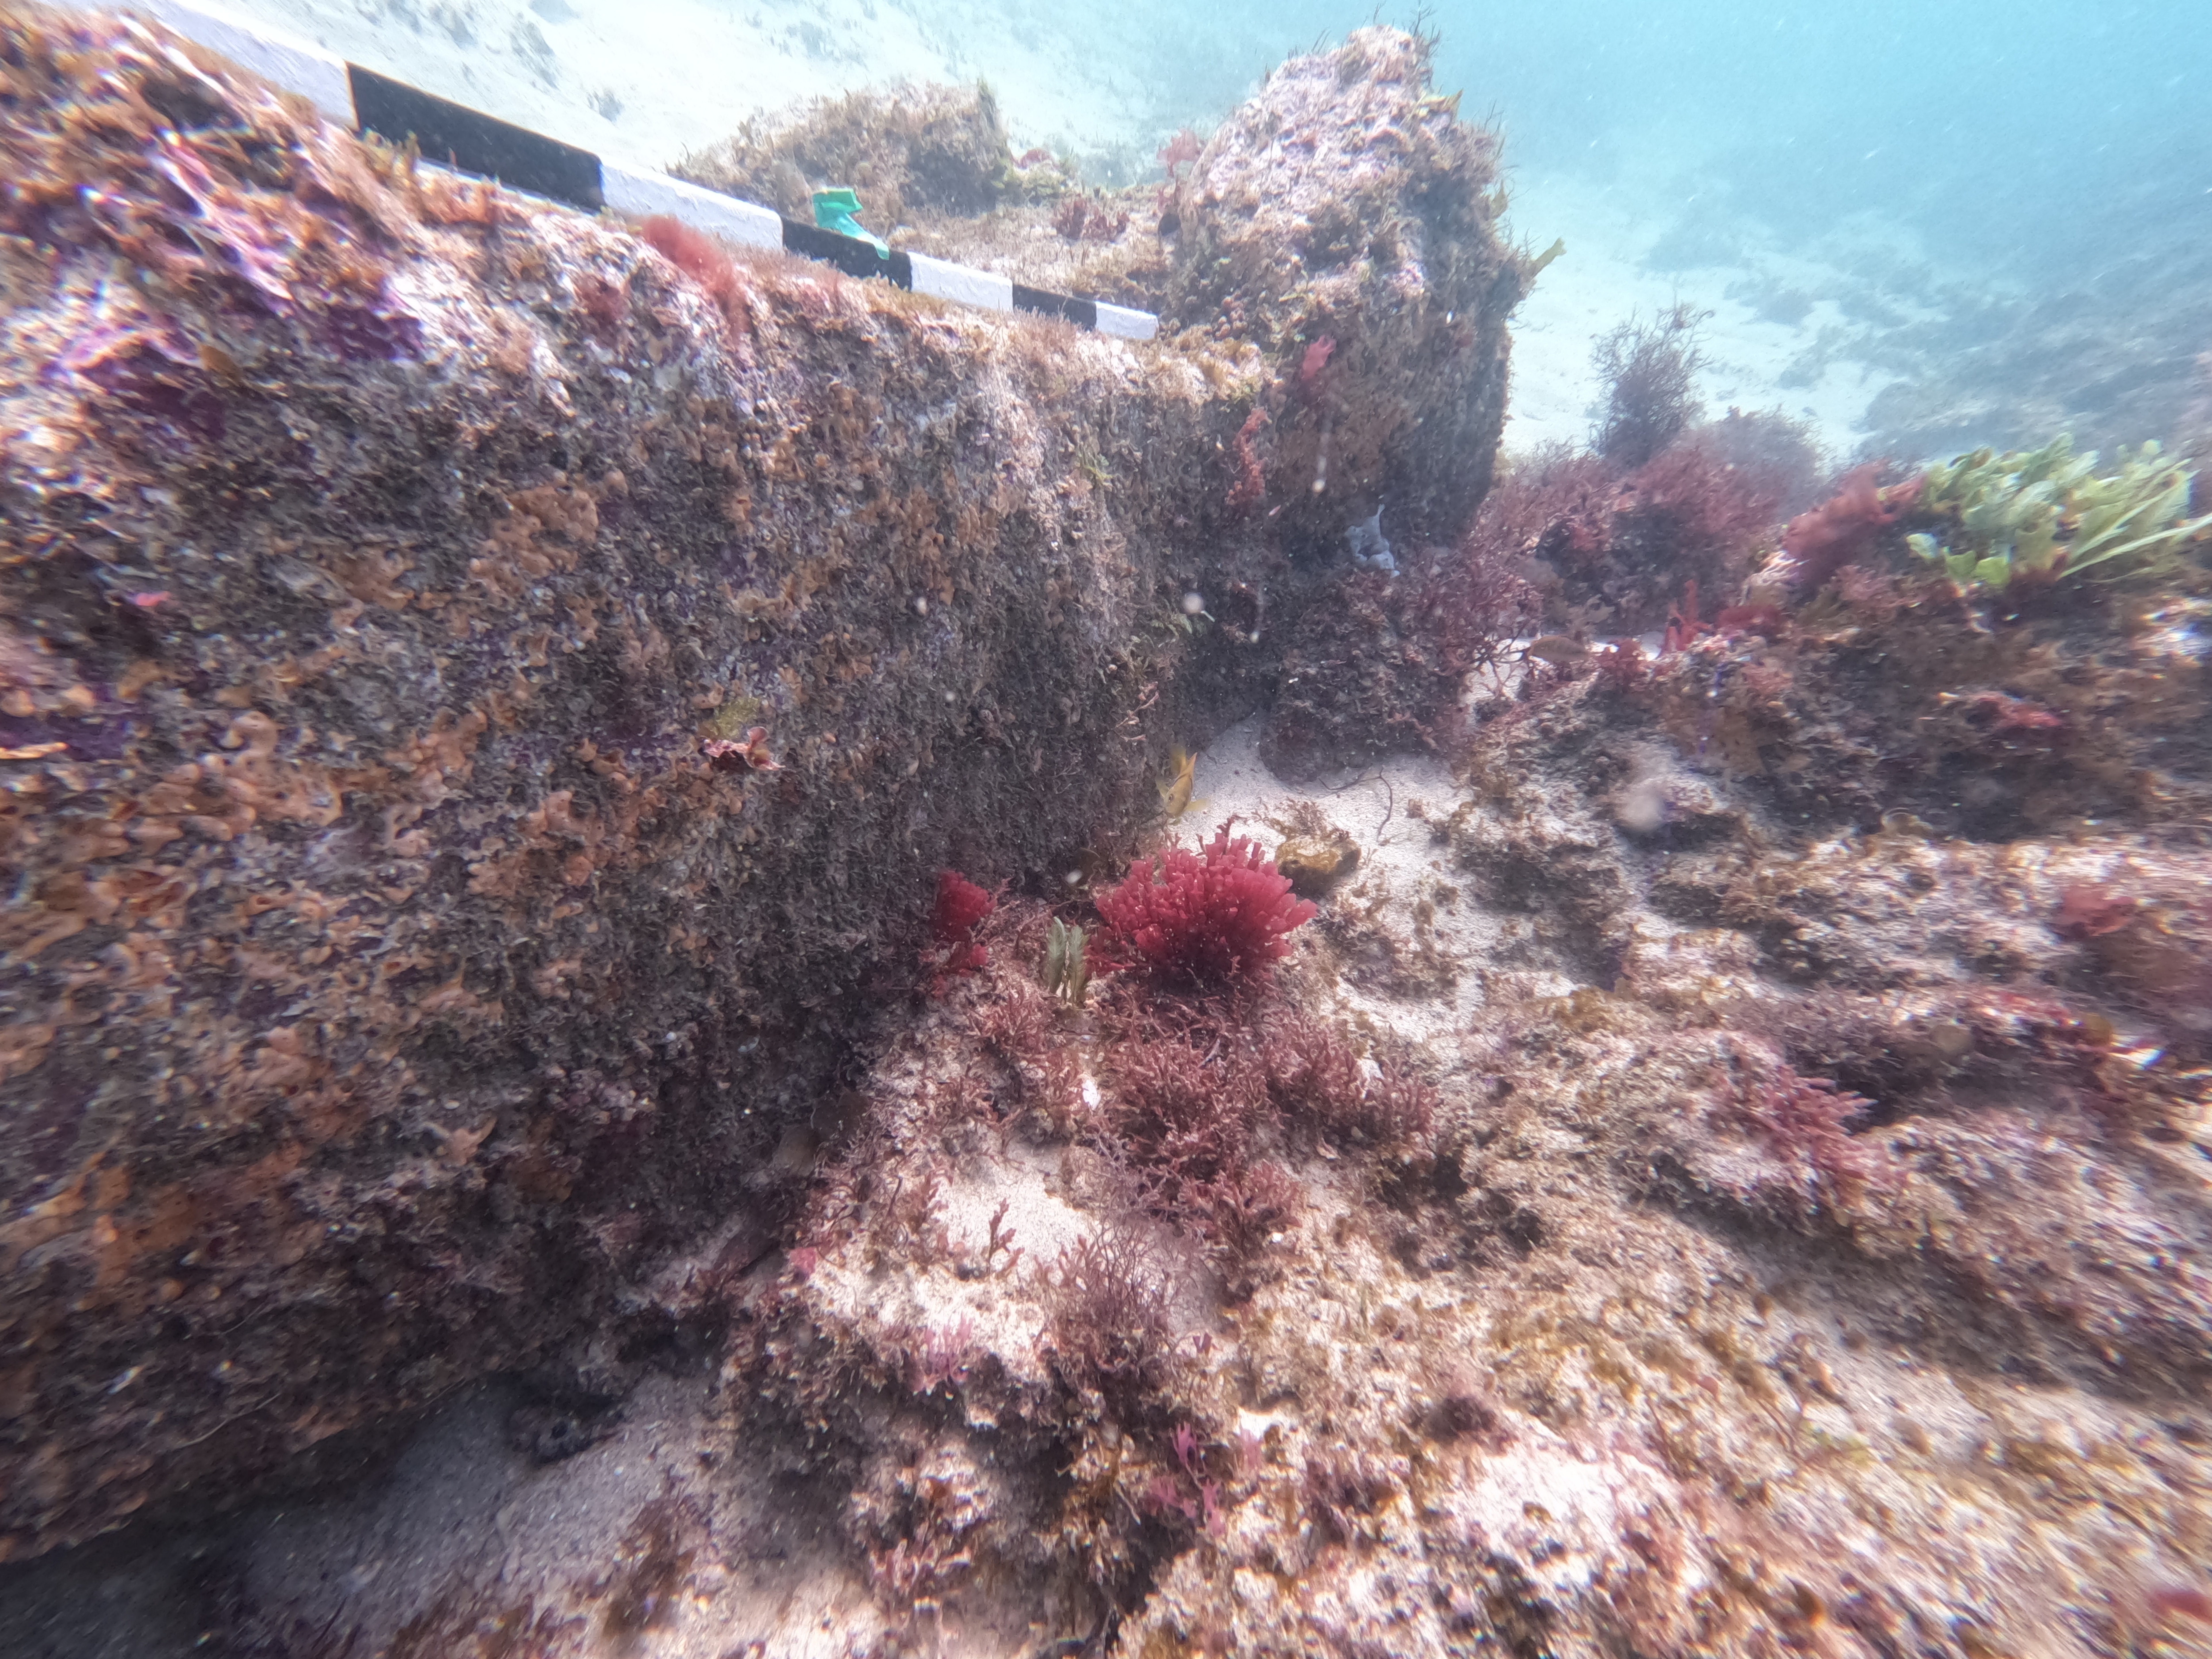

Supplement: Supplementary file 699 [file G0713766.pdf › Ocean2/G0713766.pdf]

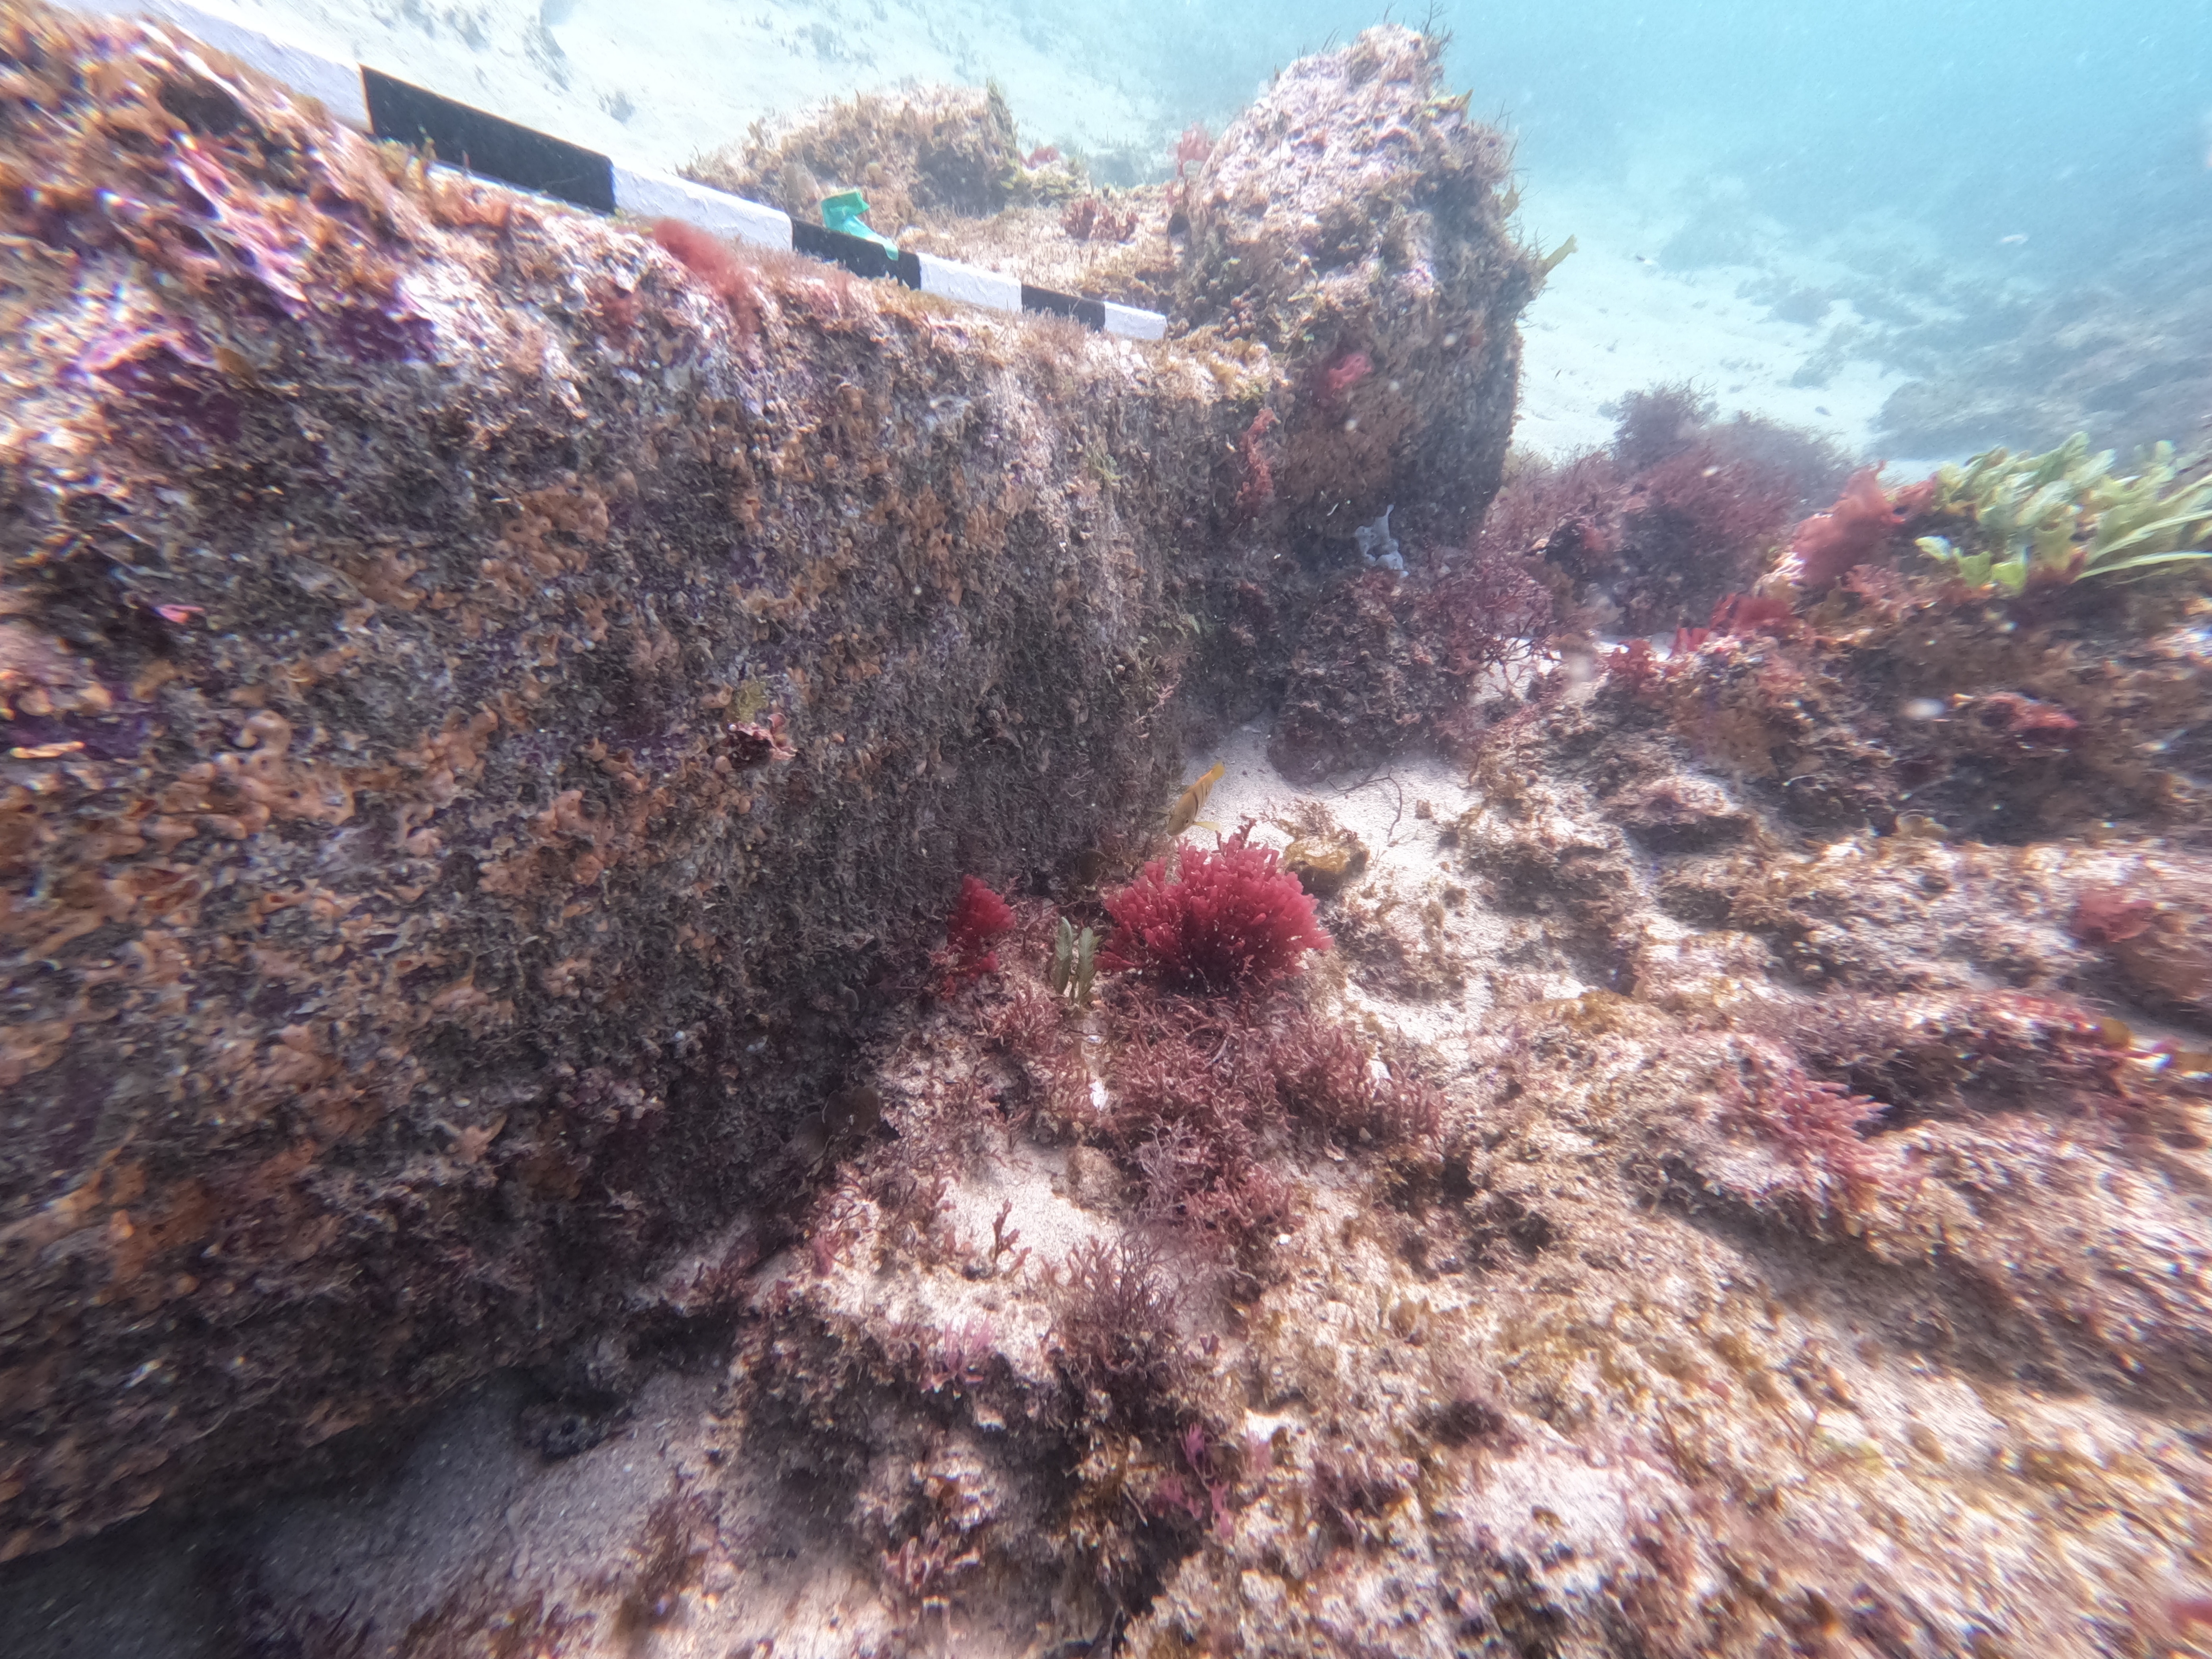

Supplement: Supplementary file 700 [file G0713767.pdf › Ocean2/G0713767.pdf]
