# Supplementary figures and images for: 3D reconstruction of shallow sea environment using direct system calibration and faint laser line extraction (part 8 of 35)
Source: Research Square preprint supplement (doi:10.21203/rs.3.rs-5262658/v1), 2024-12-02

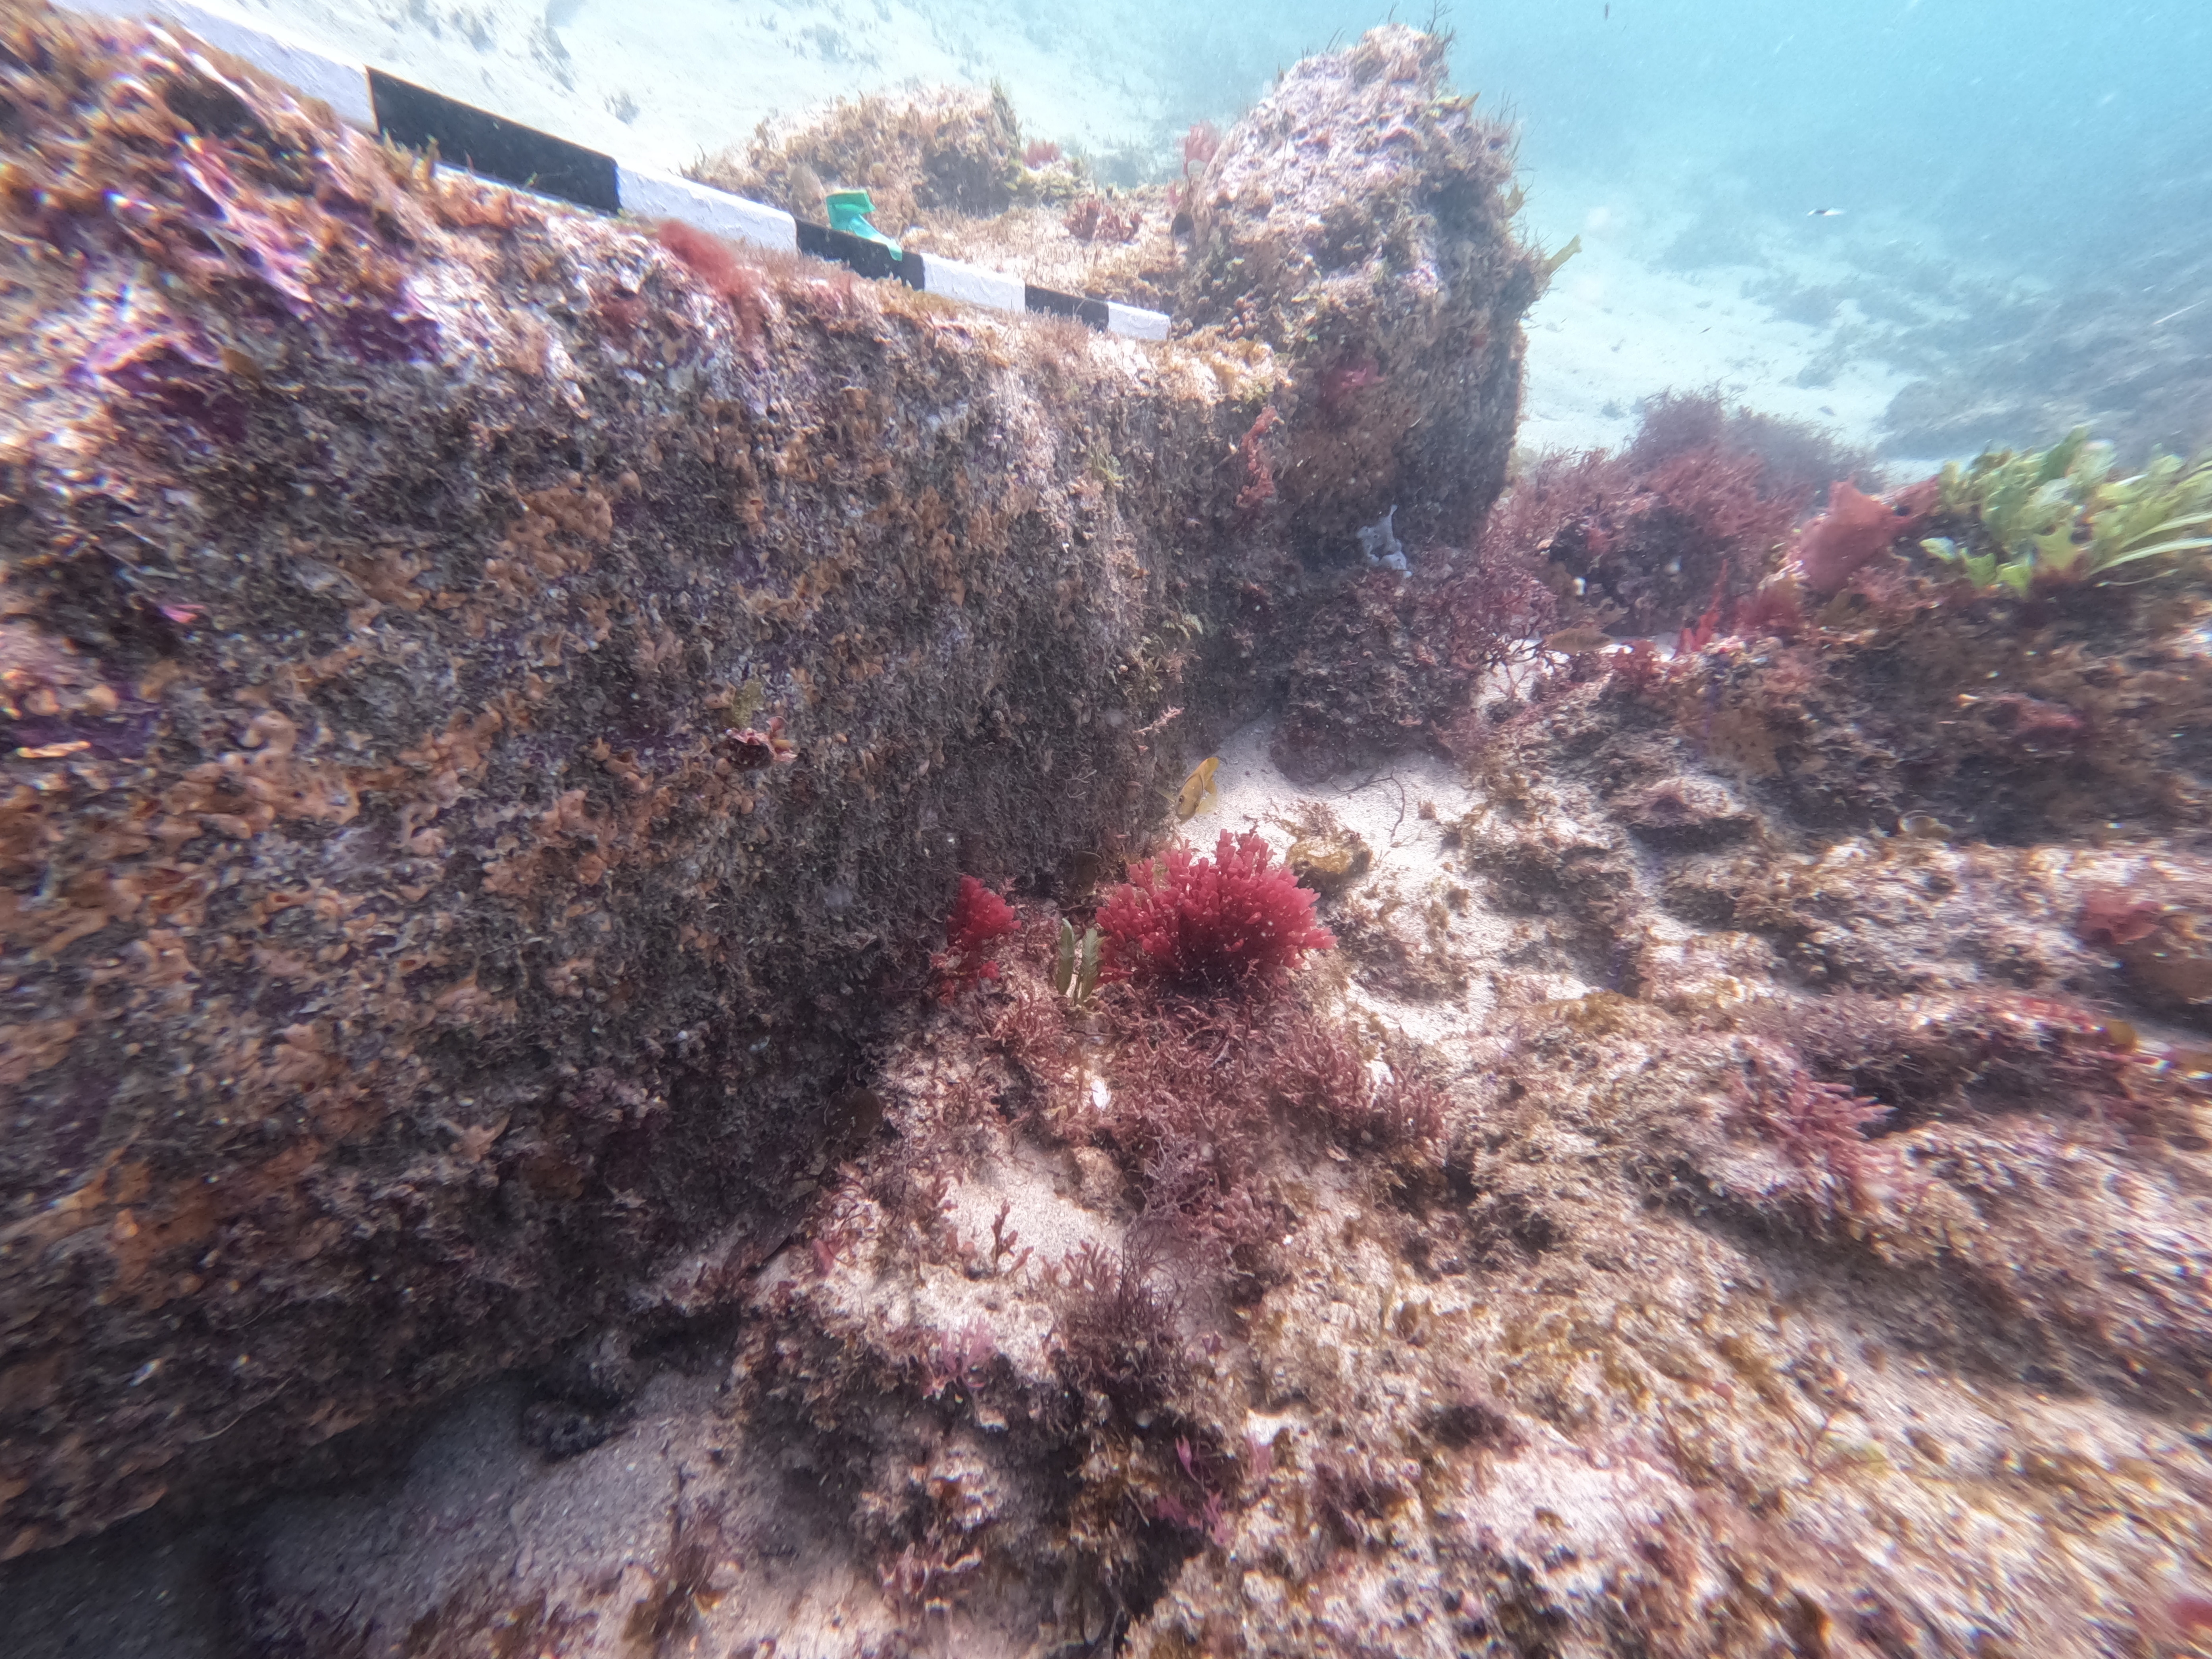

Supplement: Supplementary file 701 [file G0713768.pdf › Ocean2/G0713768.pdf]

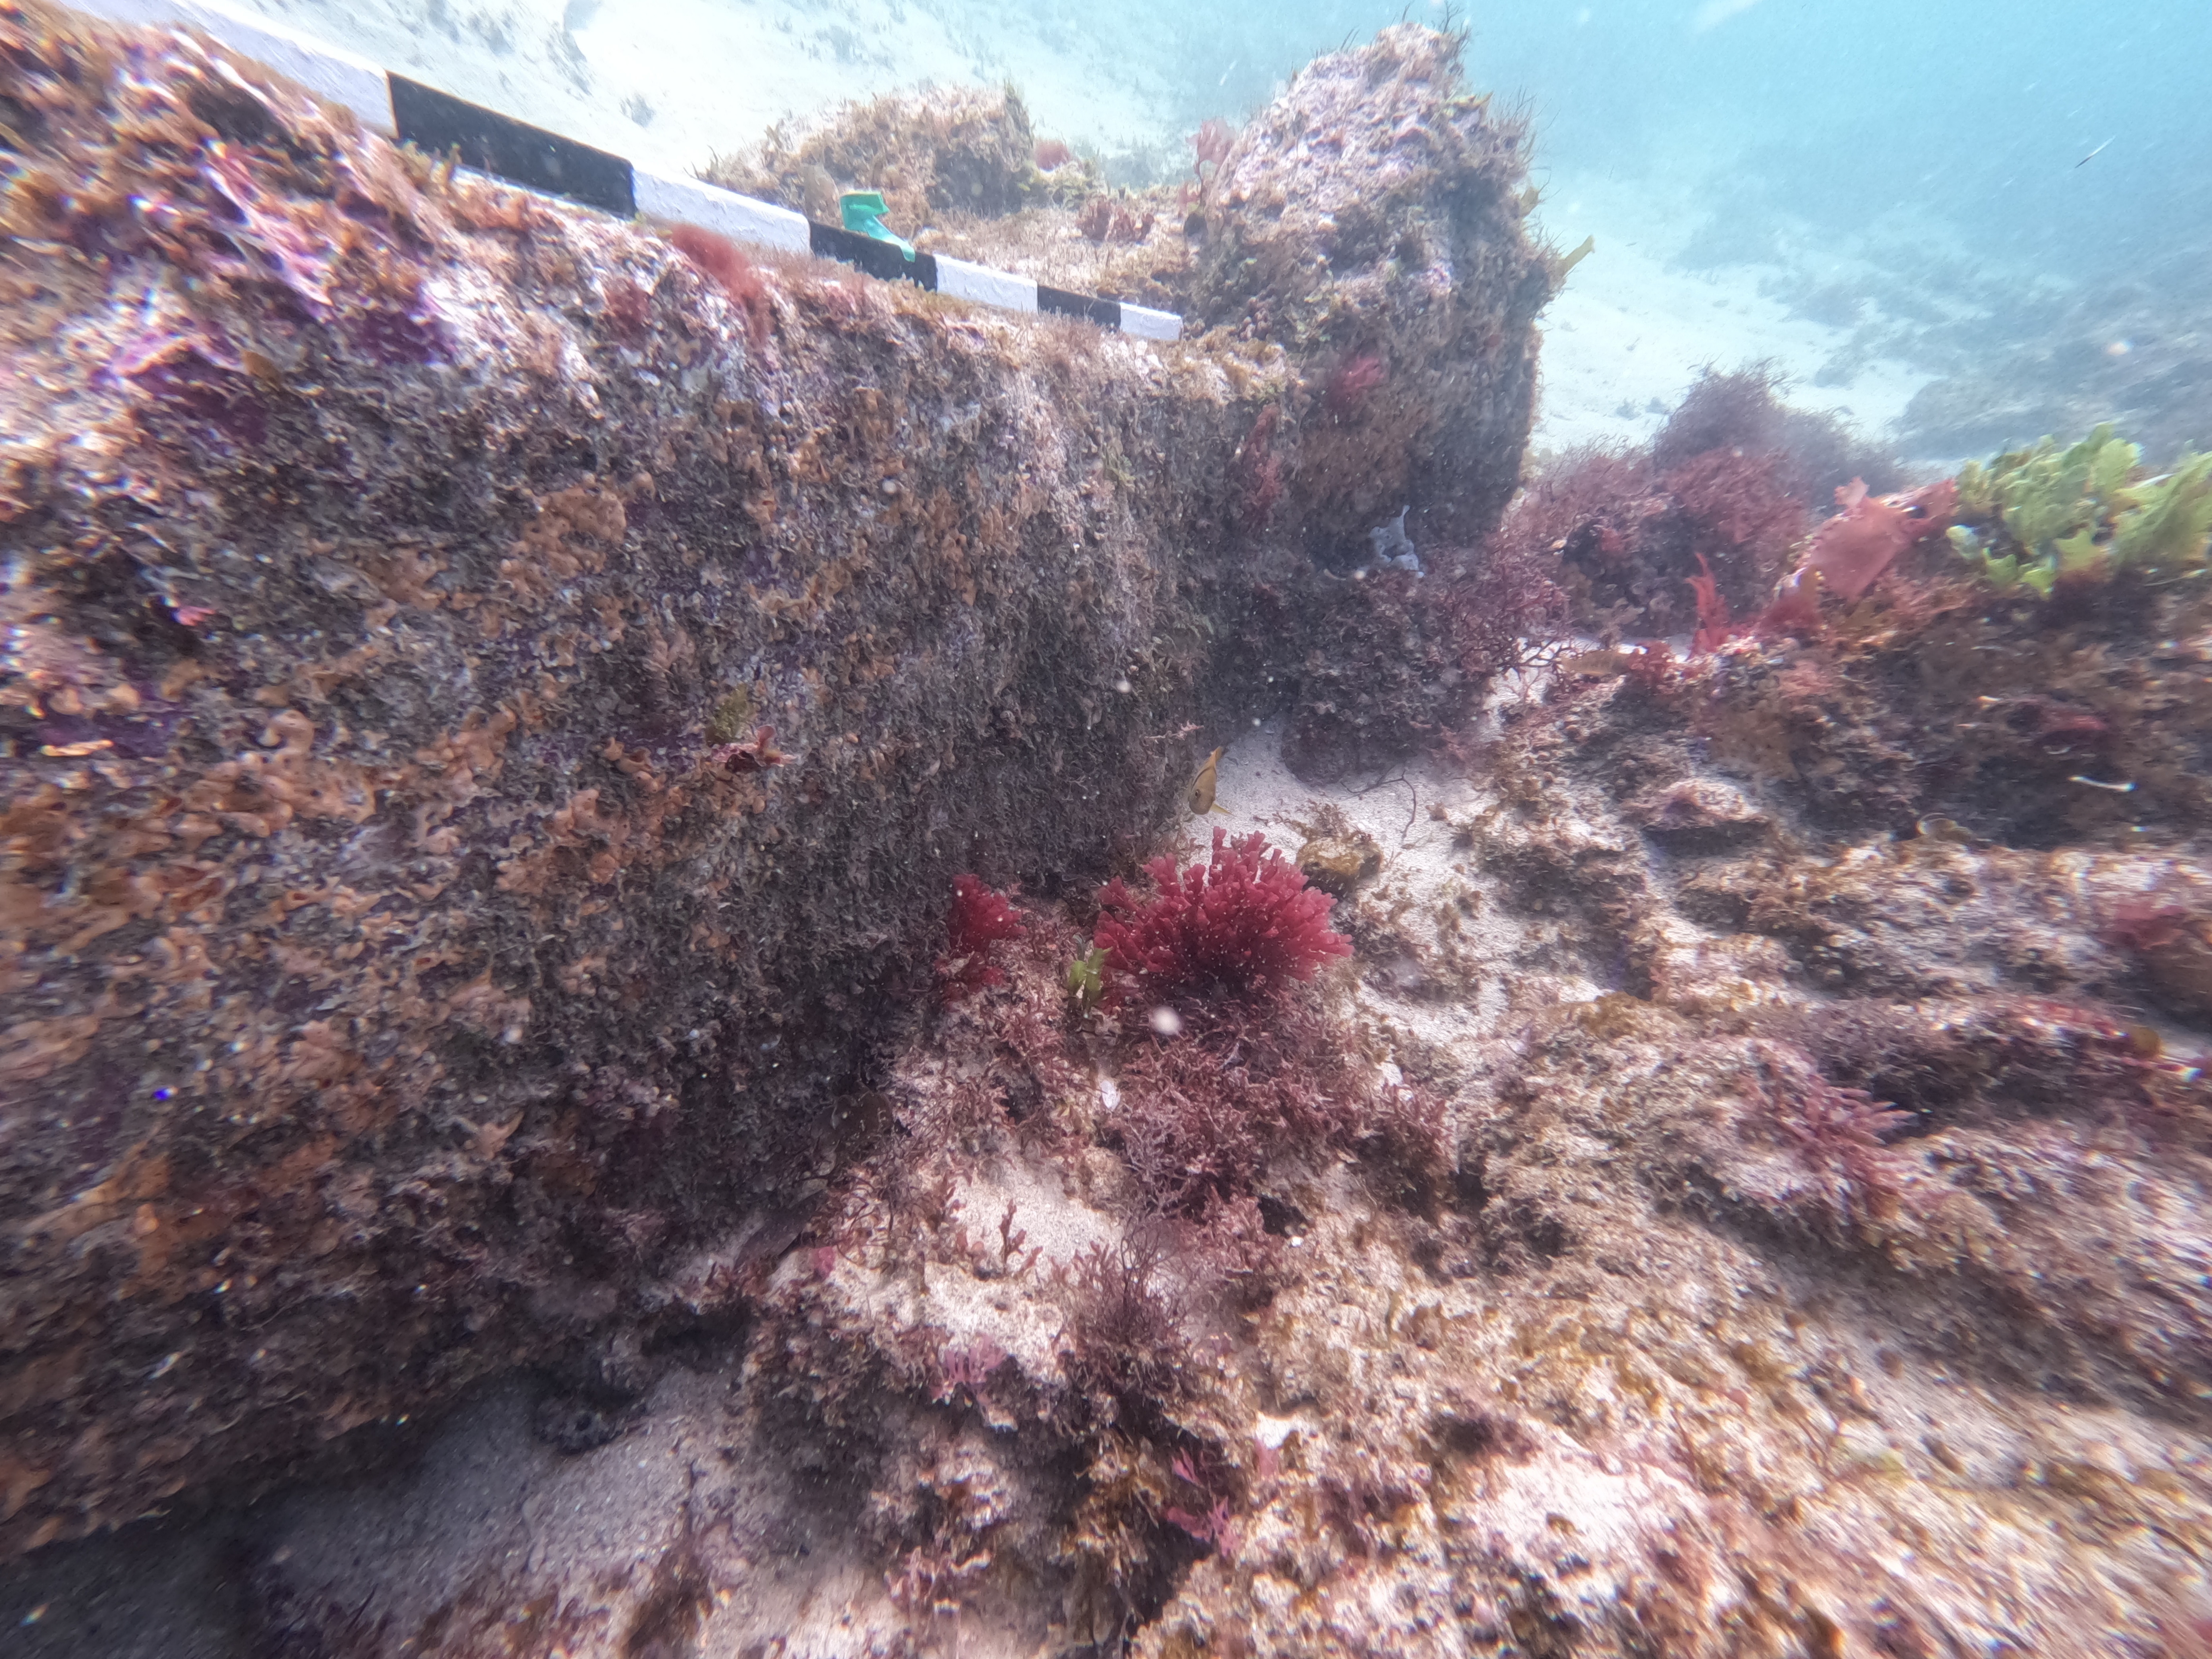

Supplement: Supplementary file 702 [file G0713769.pdf › Ocean2/G0713769.pdf]

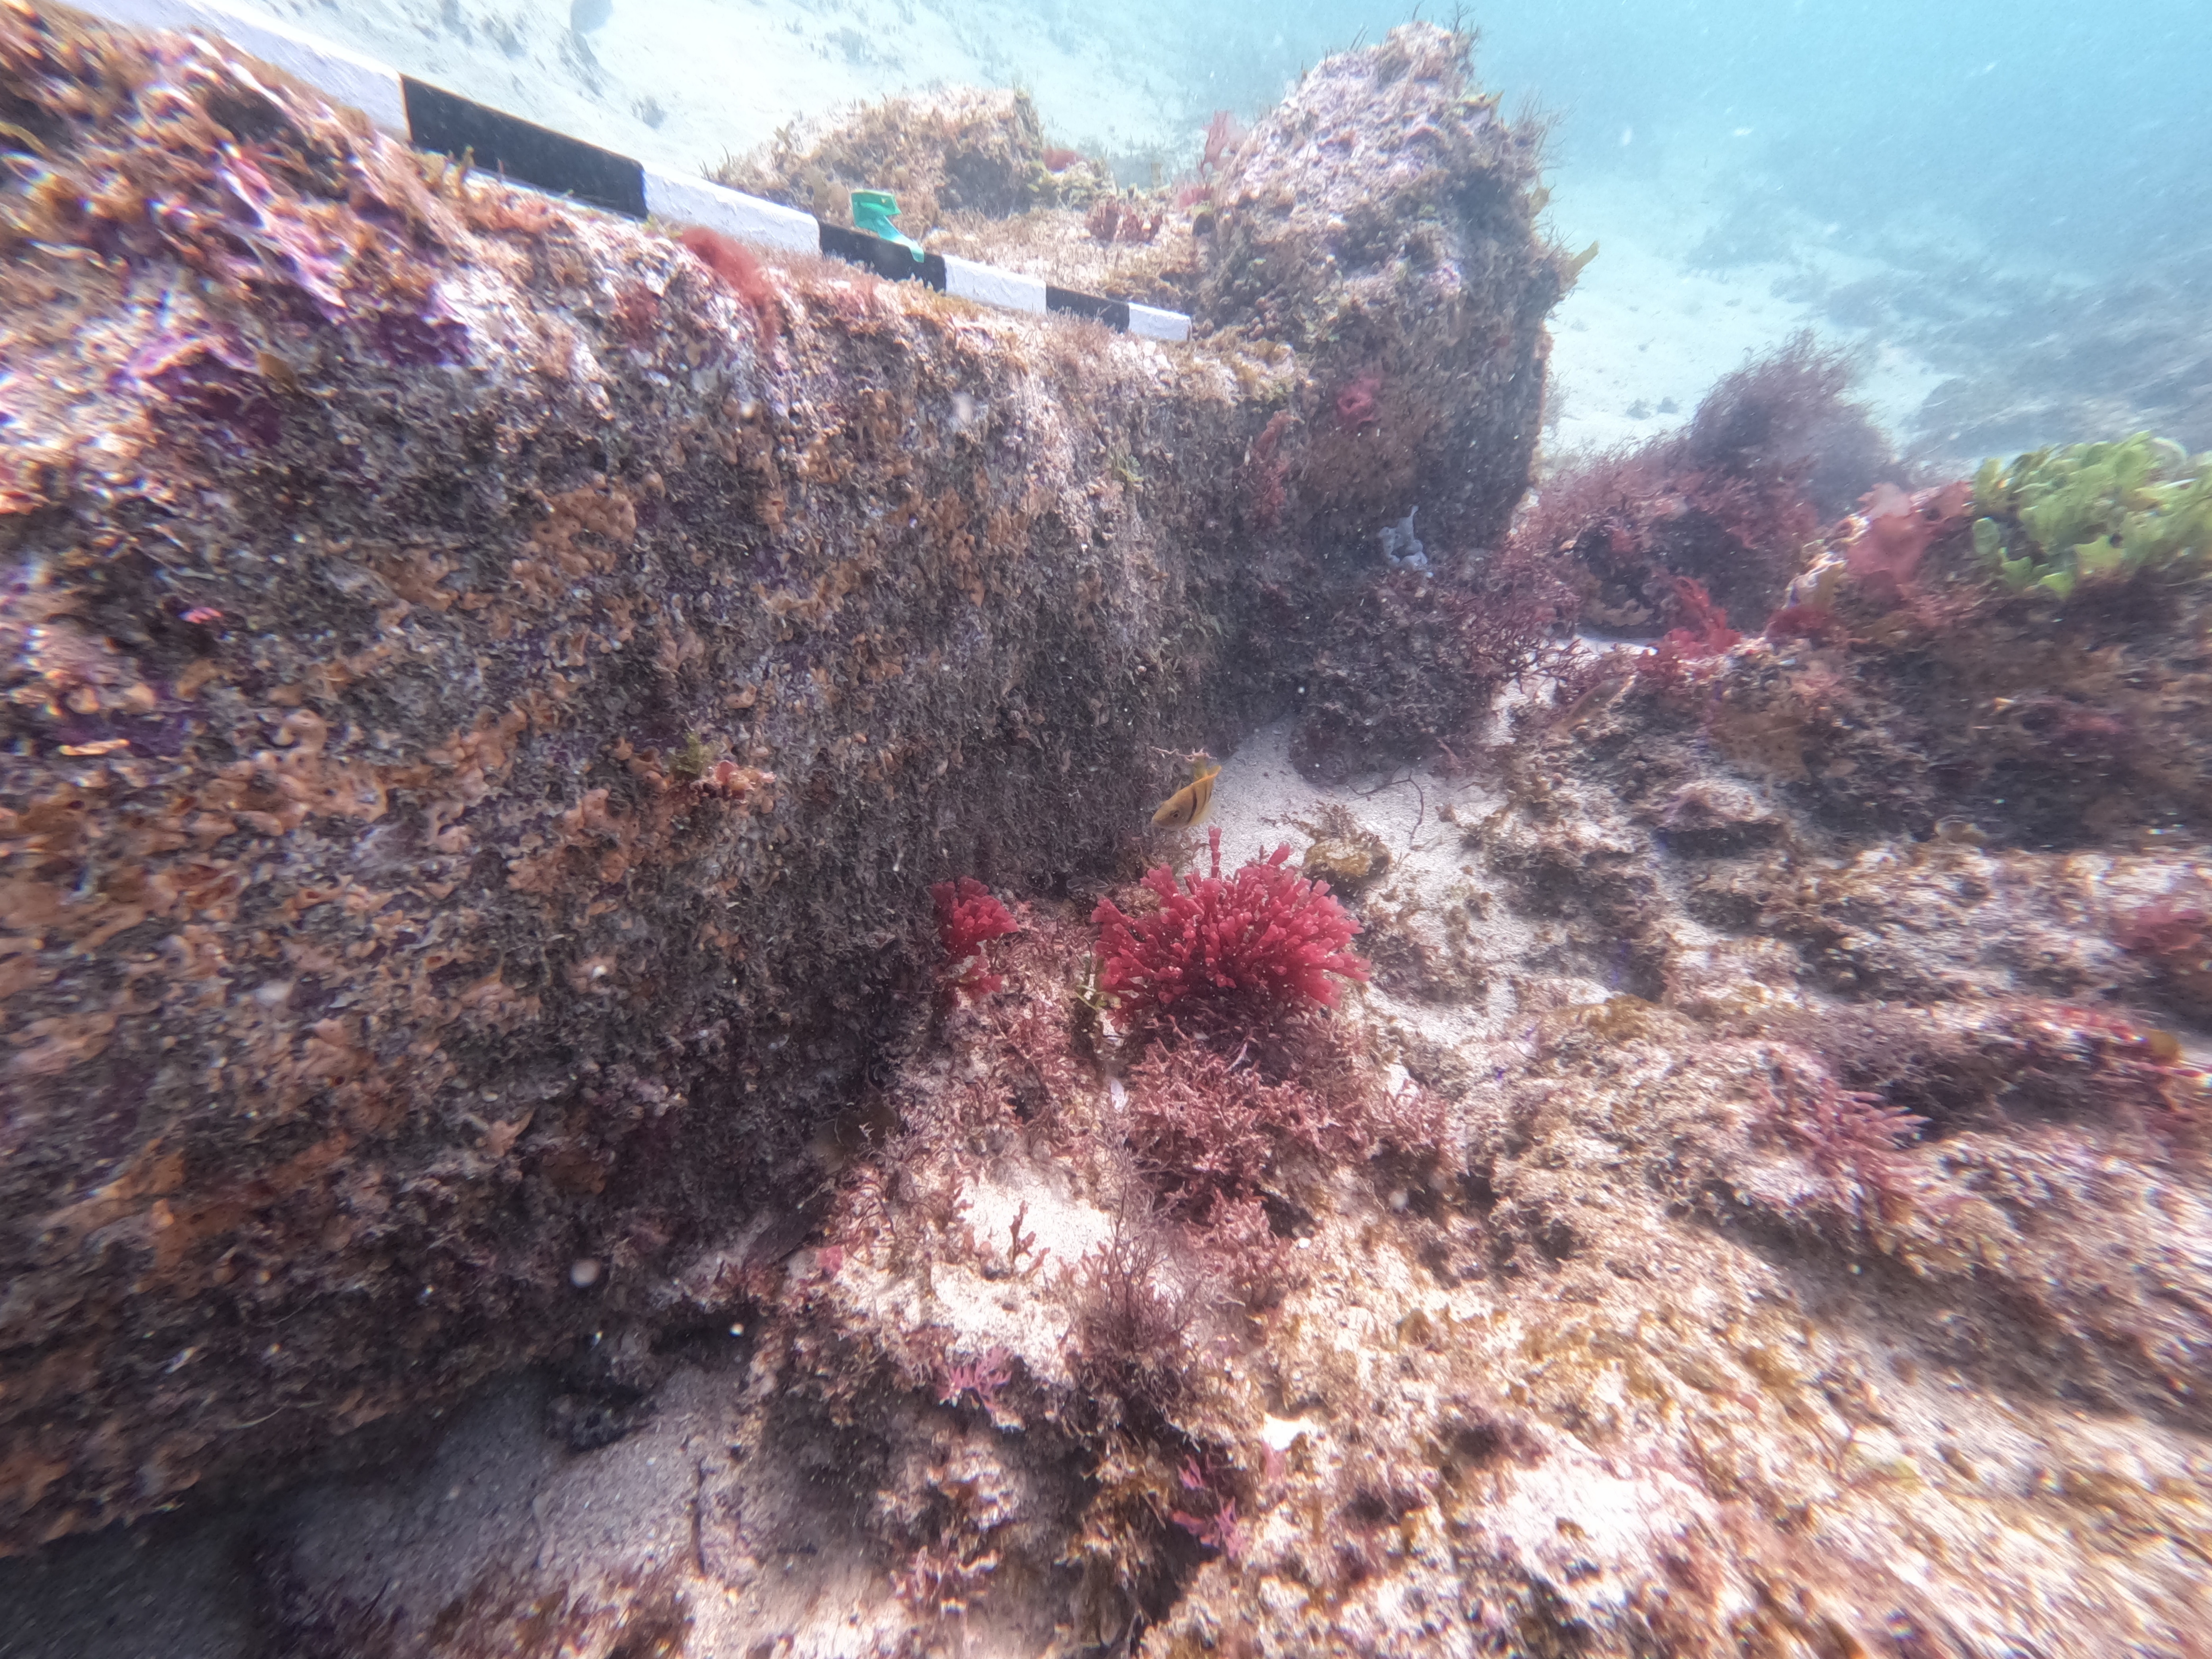

Supplement: Supplementary file 703 [file G0713770.pdf › Ocean2/G0713770.pdf]

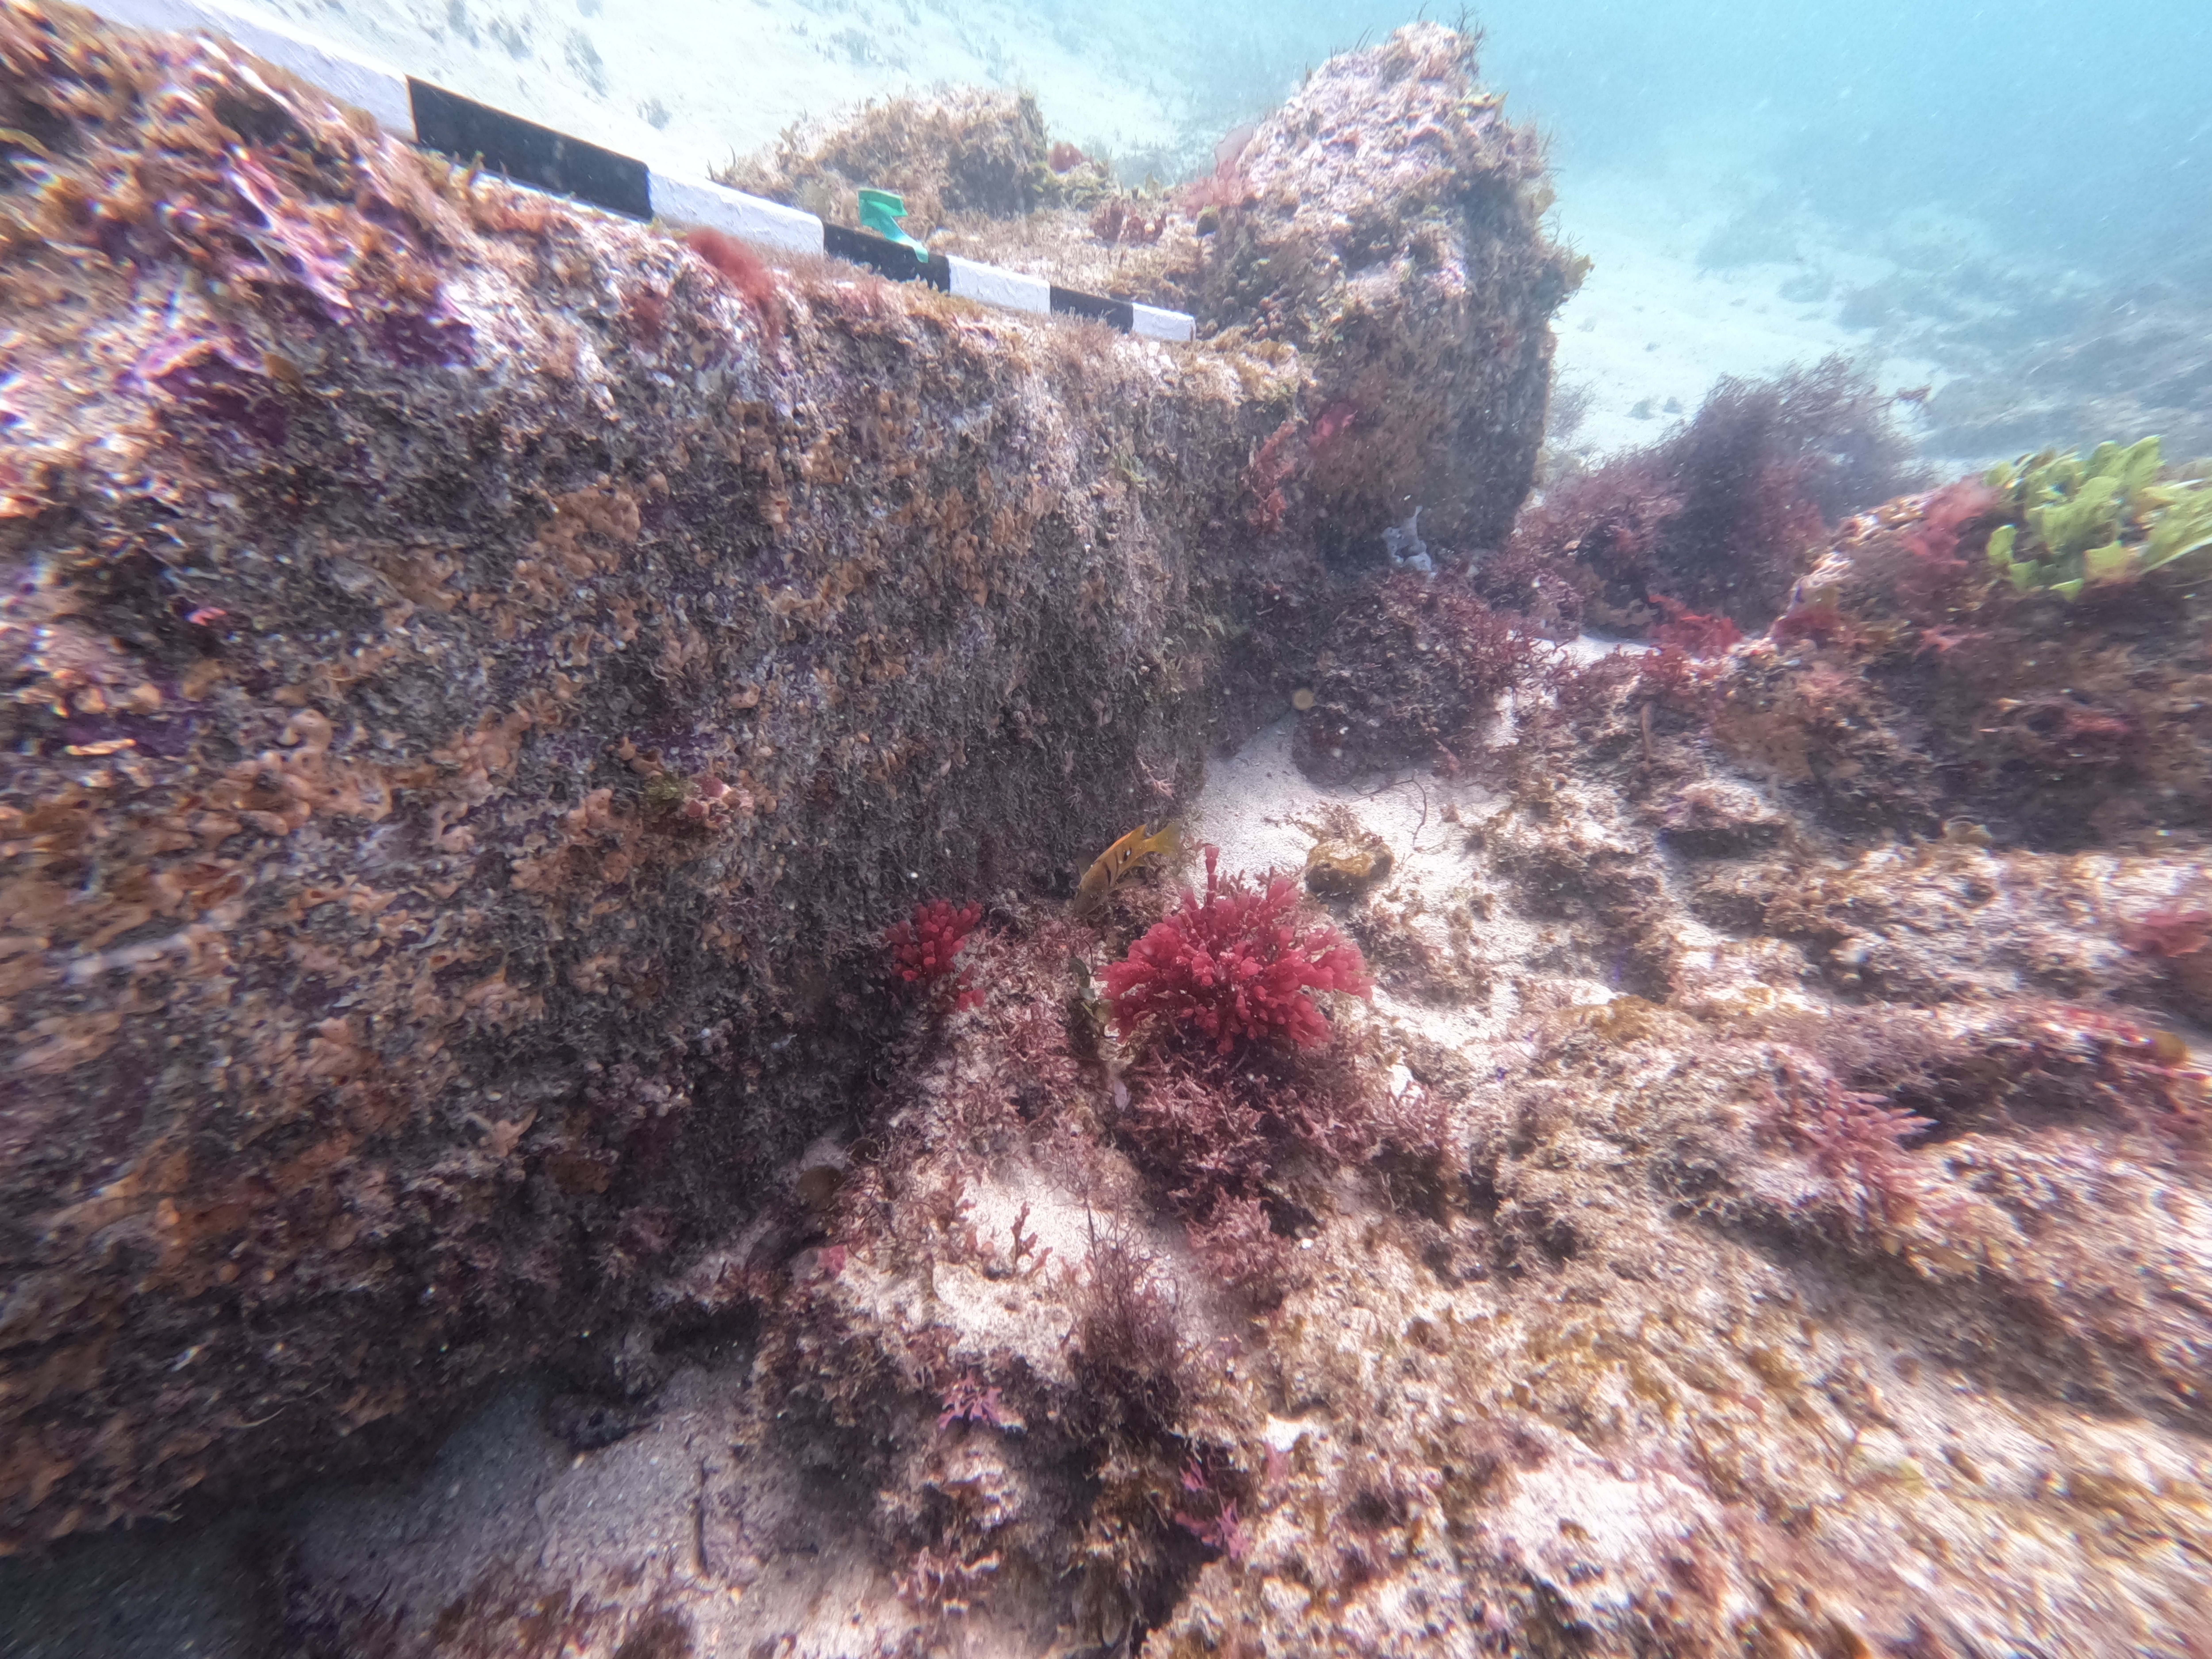

Supplement: Supplementary file 704 [file G0713771.pdf › Ocean2/G0713771.pdf]

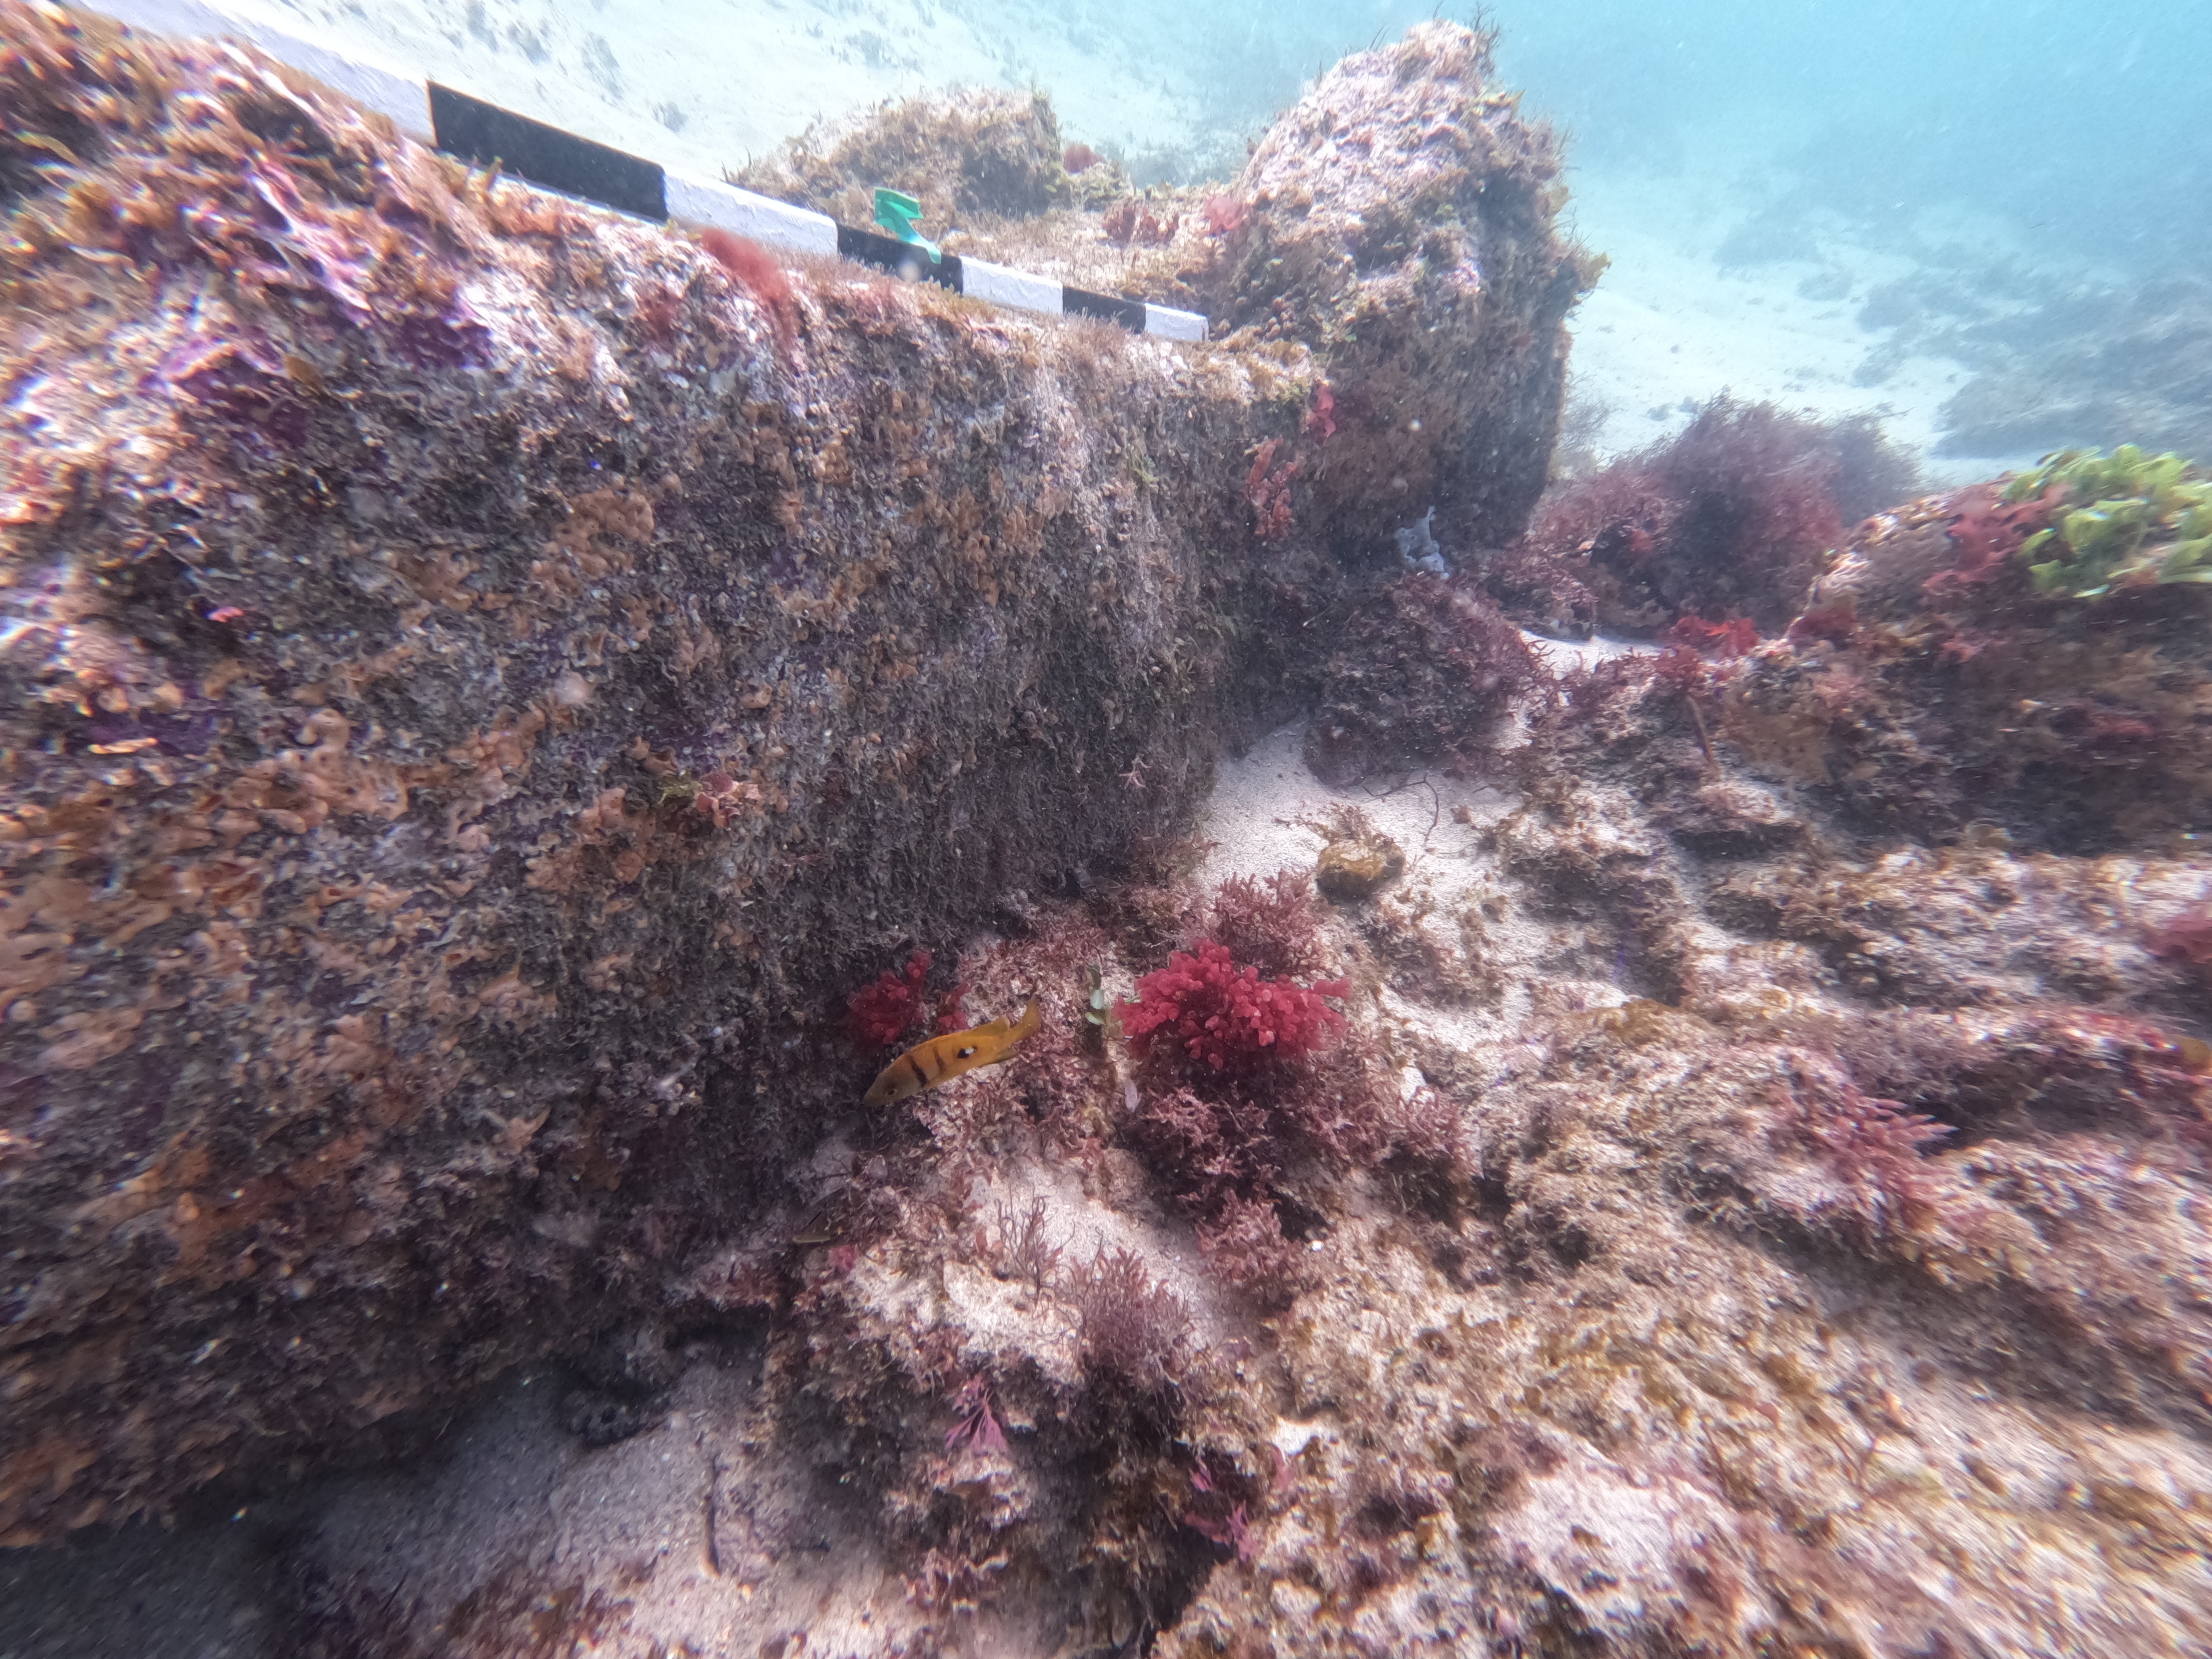

Supplement: Supplementary file 705 [file G0713772.pdf › Ocean2/G0713772.pdf]

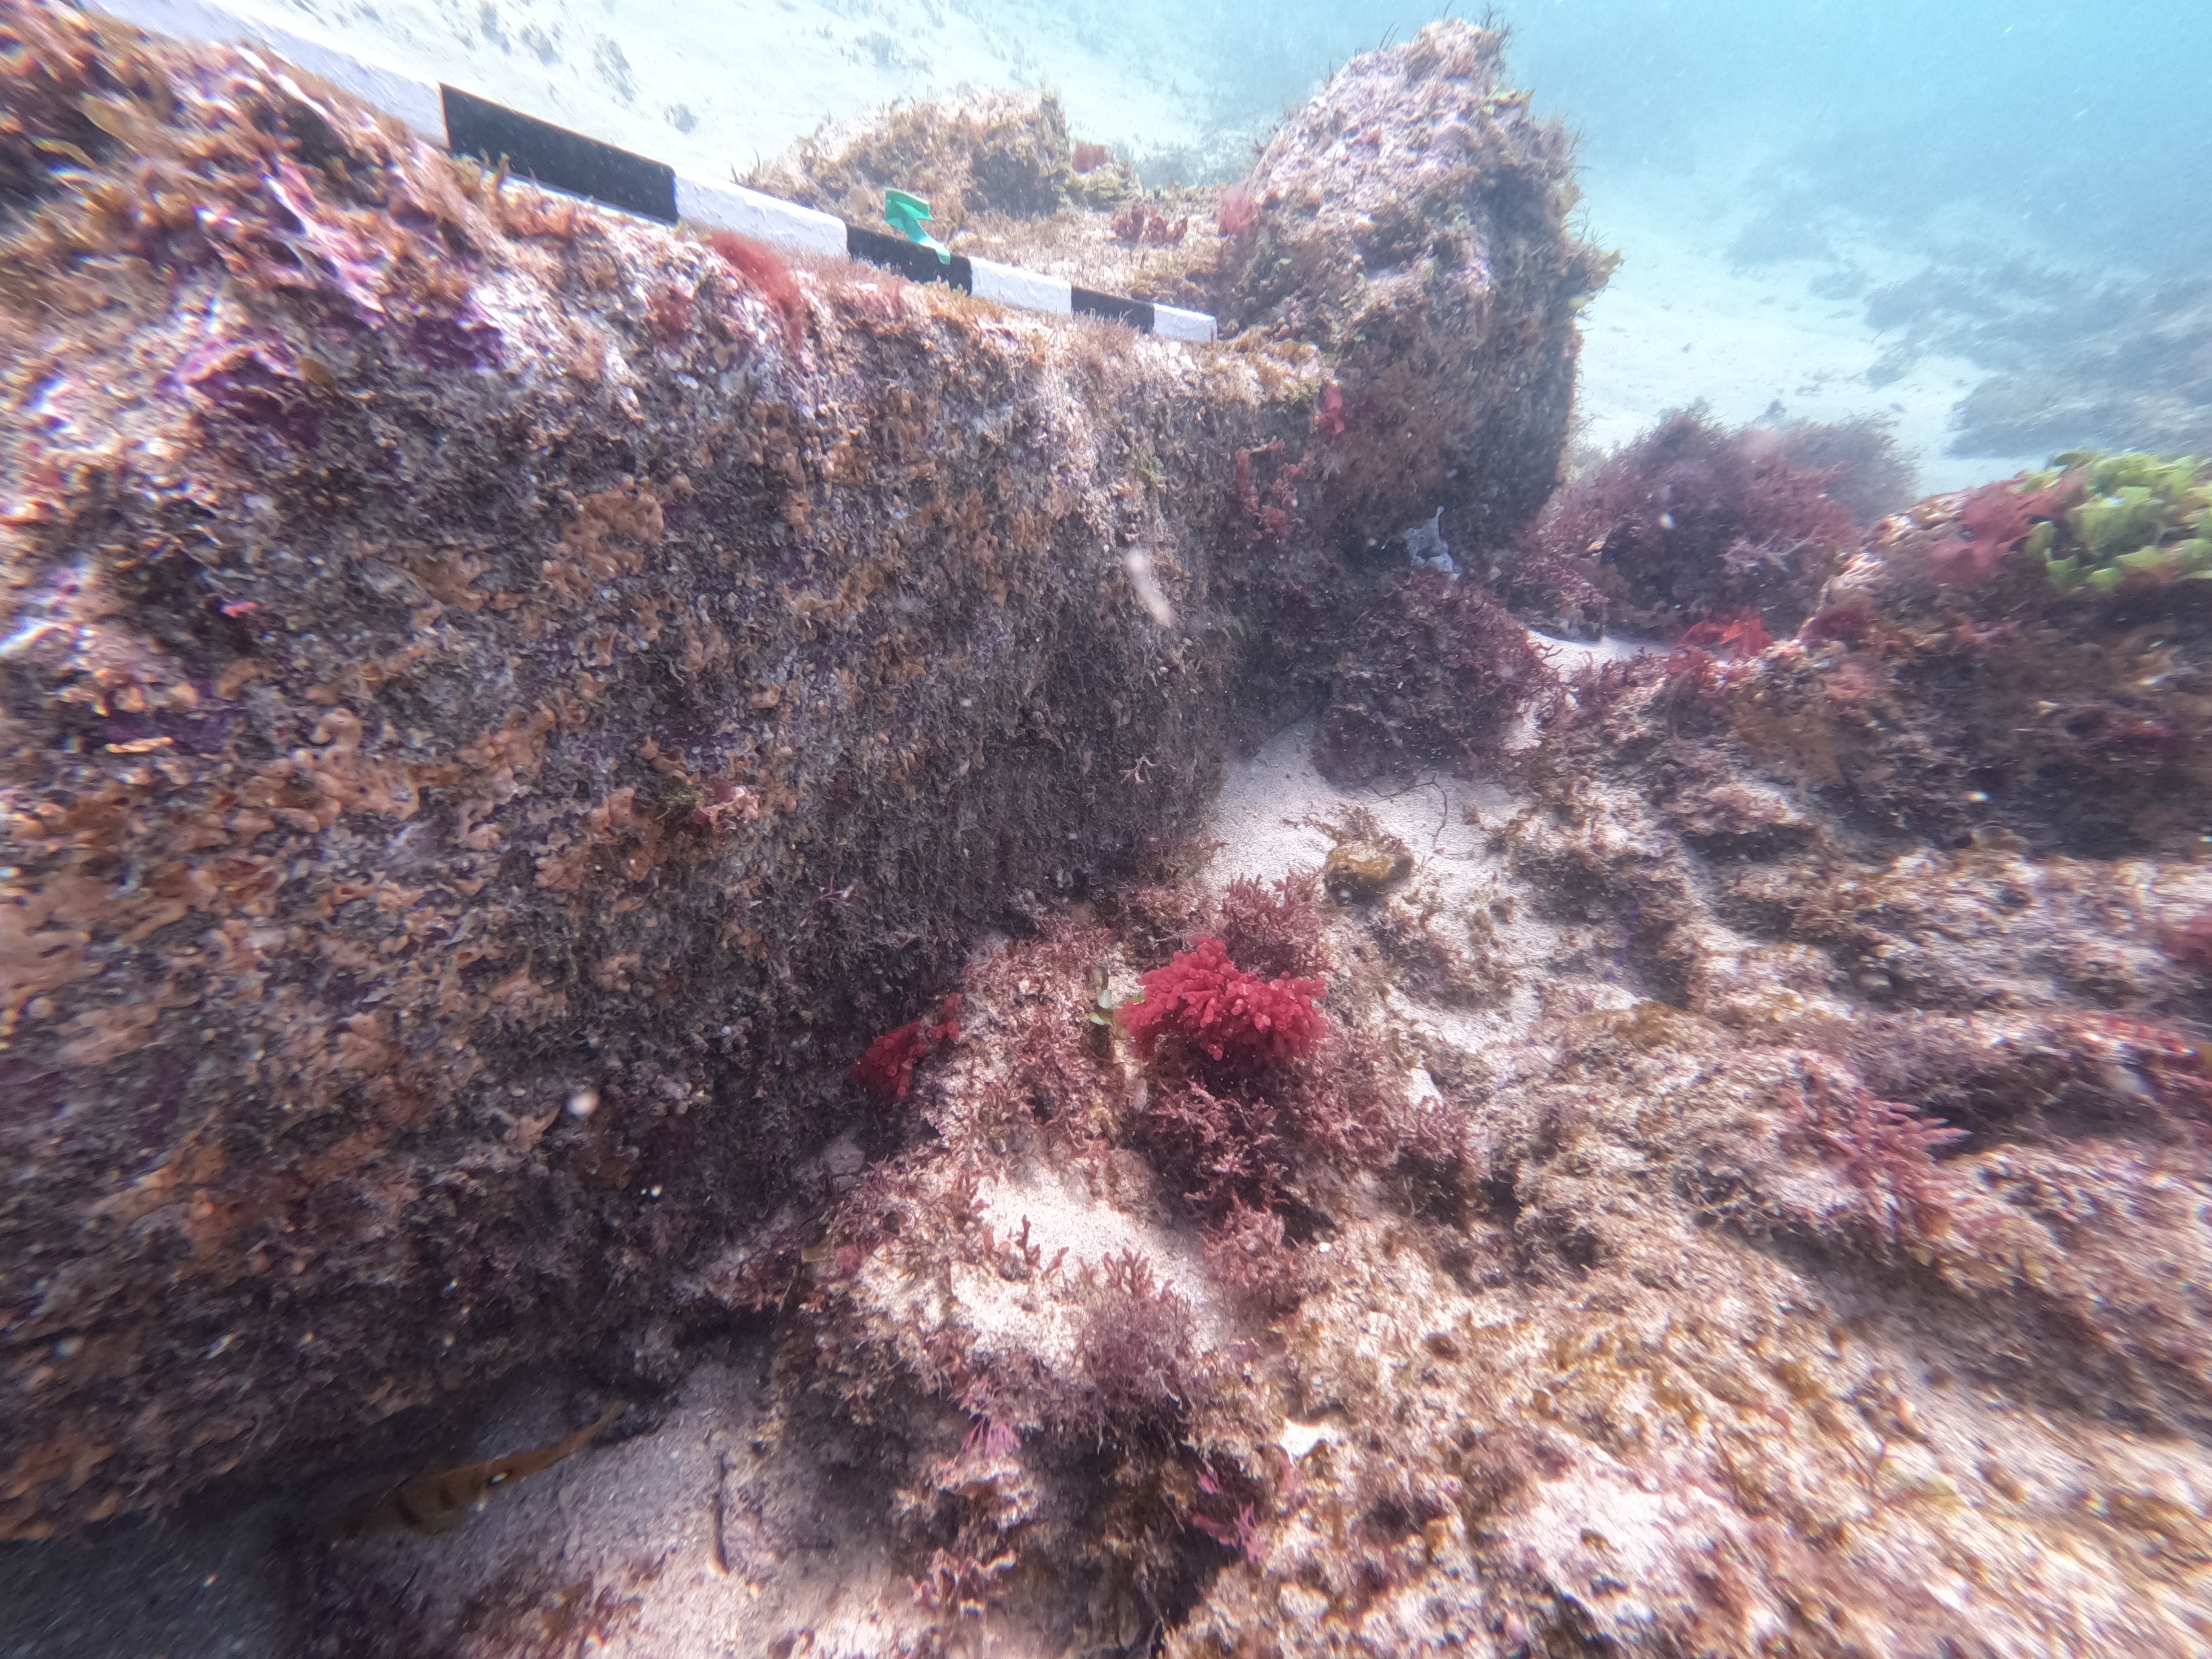

Supplement: Supplementary file 706 [file G0713773.pdf › Ocean2/G0713773.pdf]

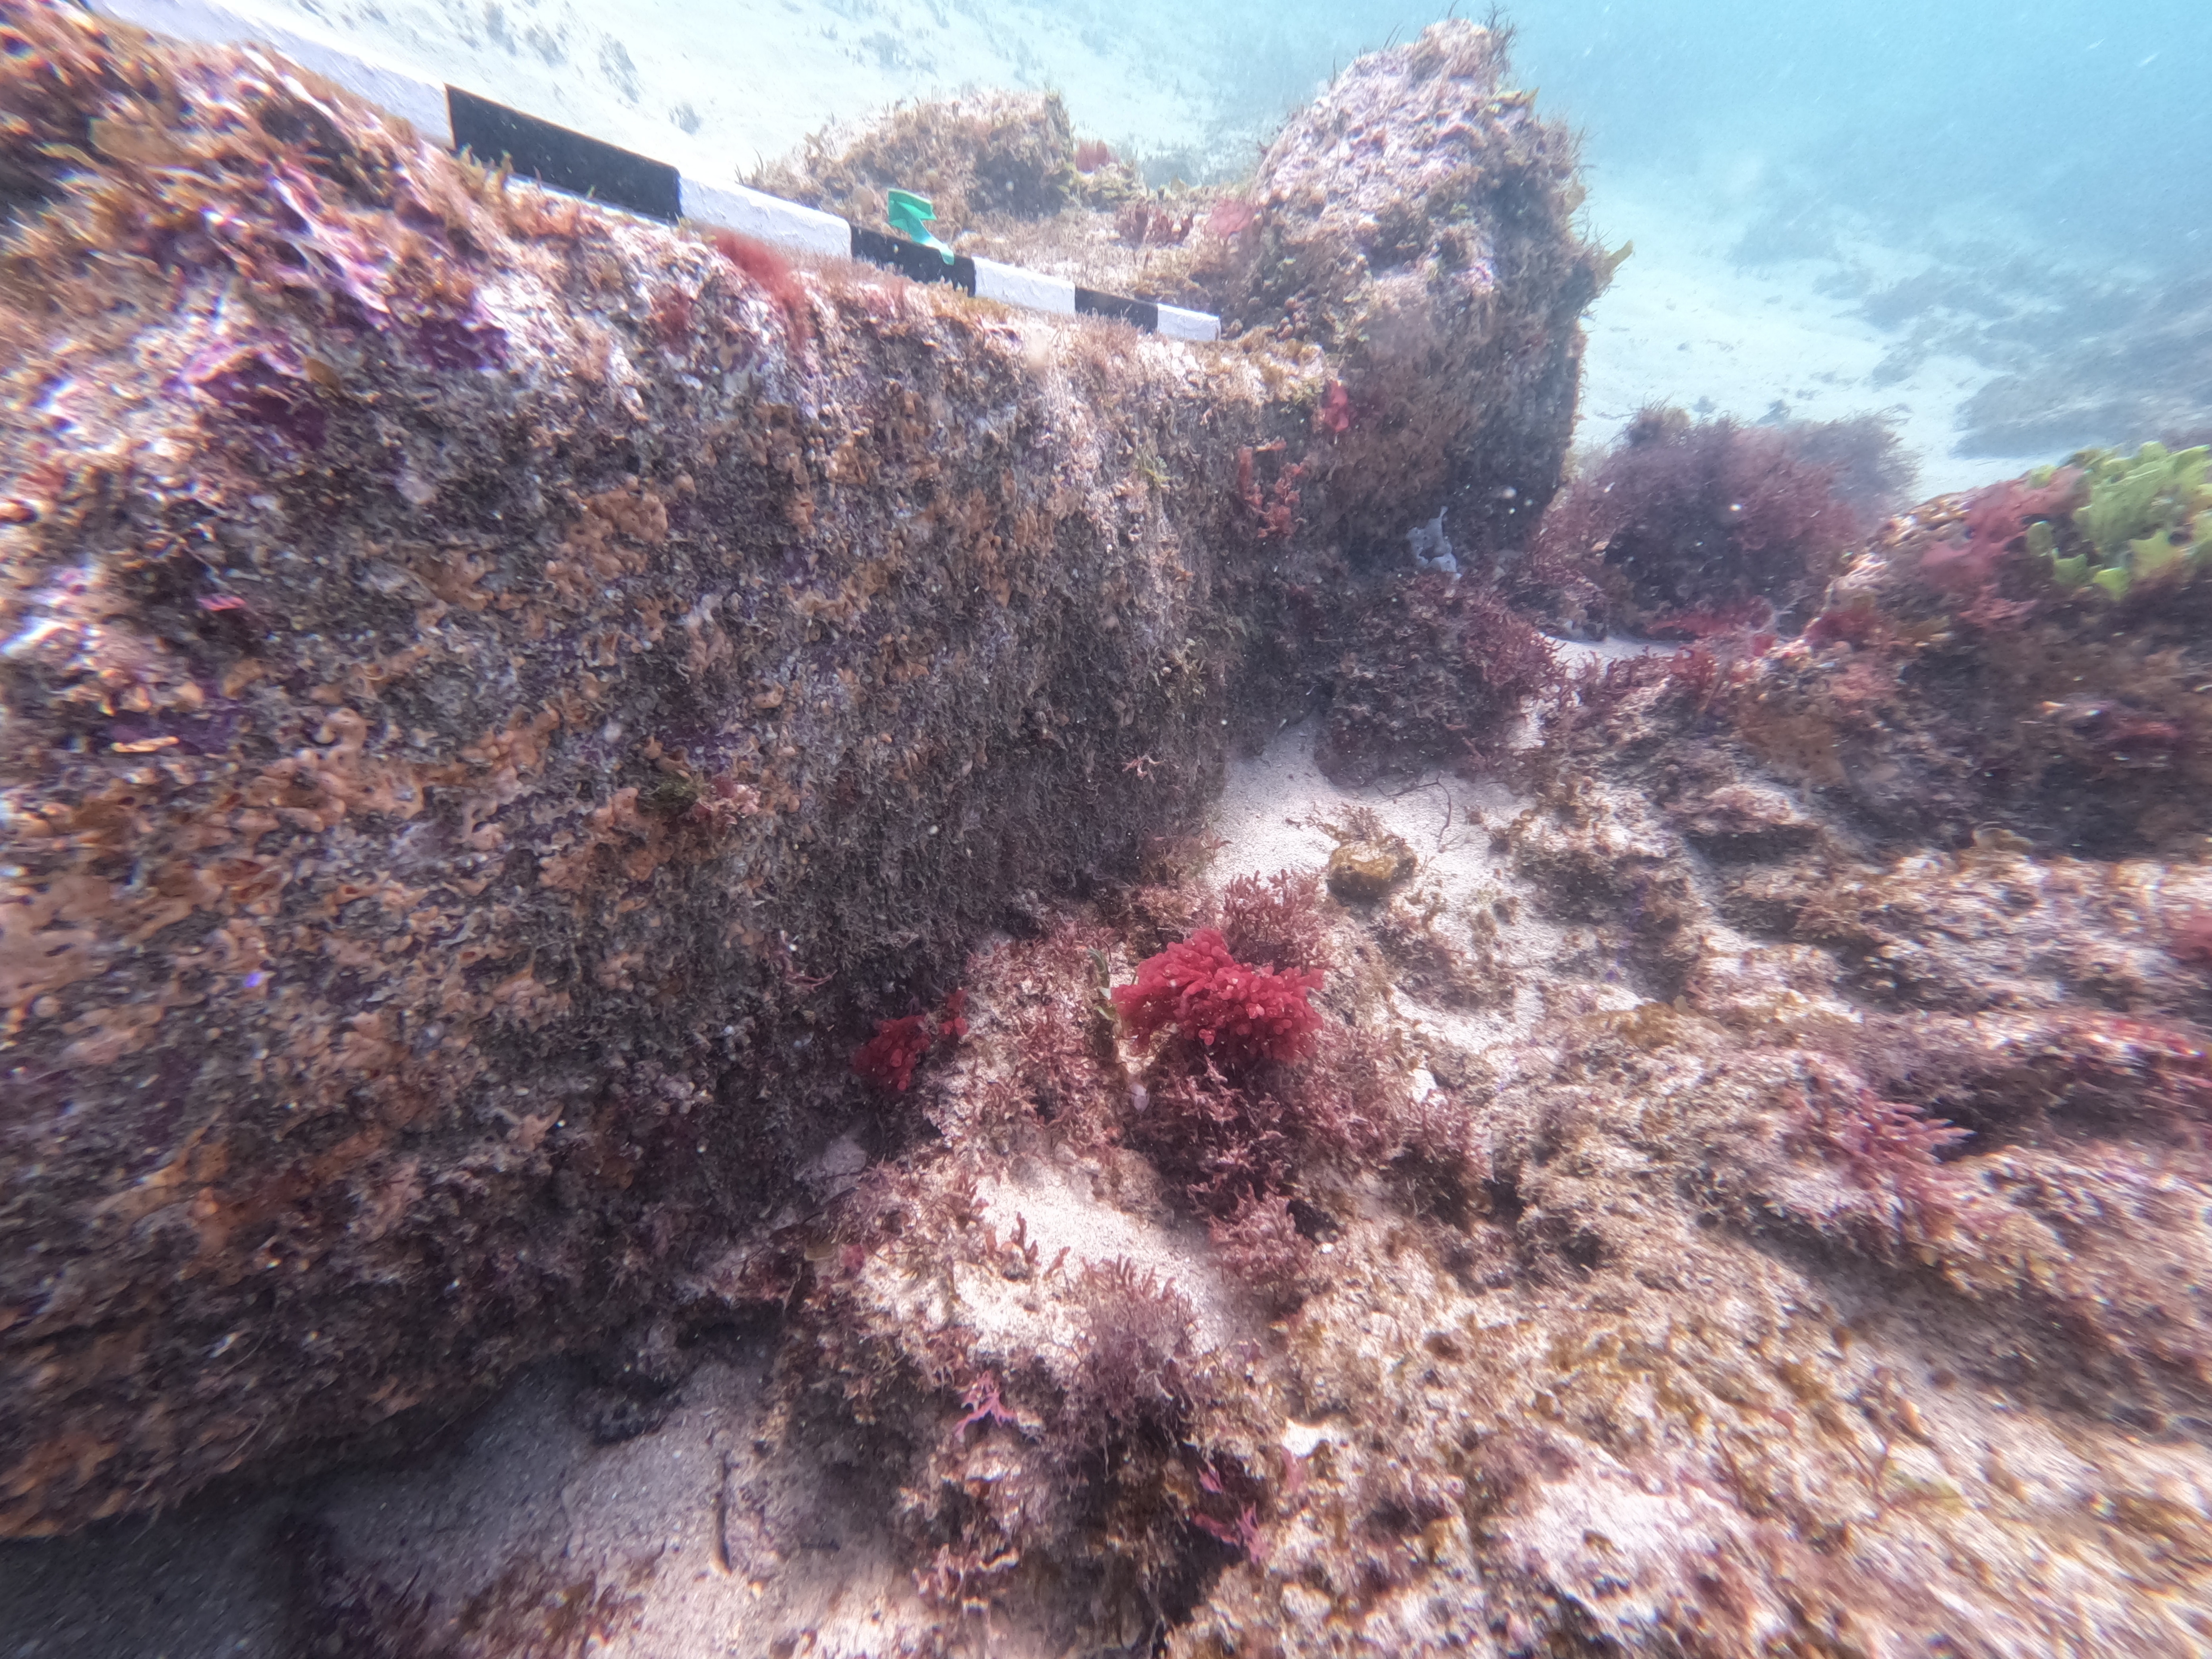

Supplement: Supplementary file 707 [file G0713774.pdf › Ocean2/G0713774.pdf]

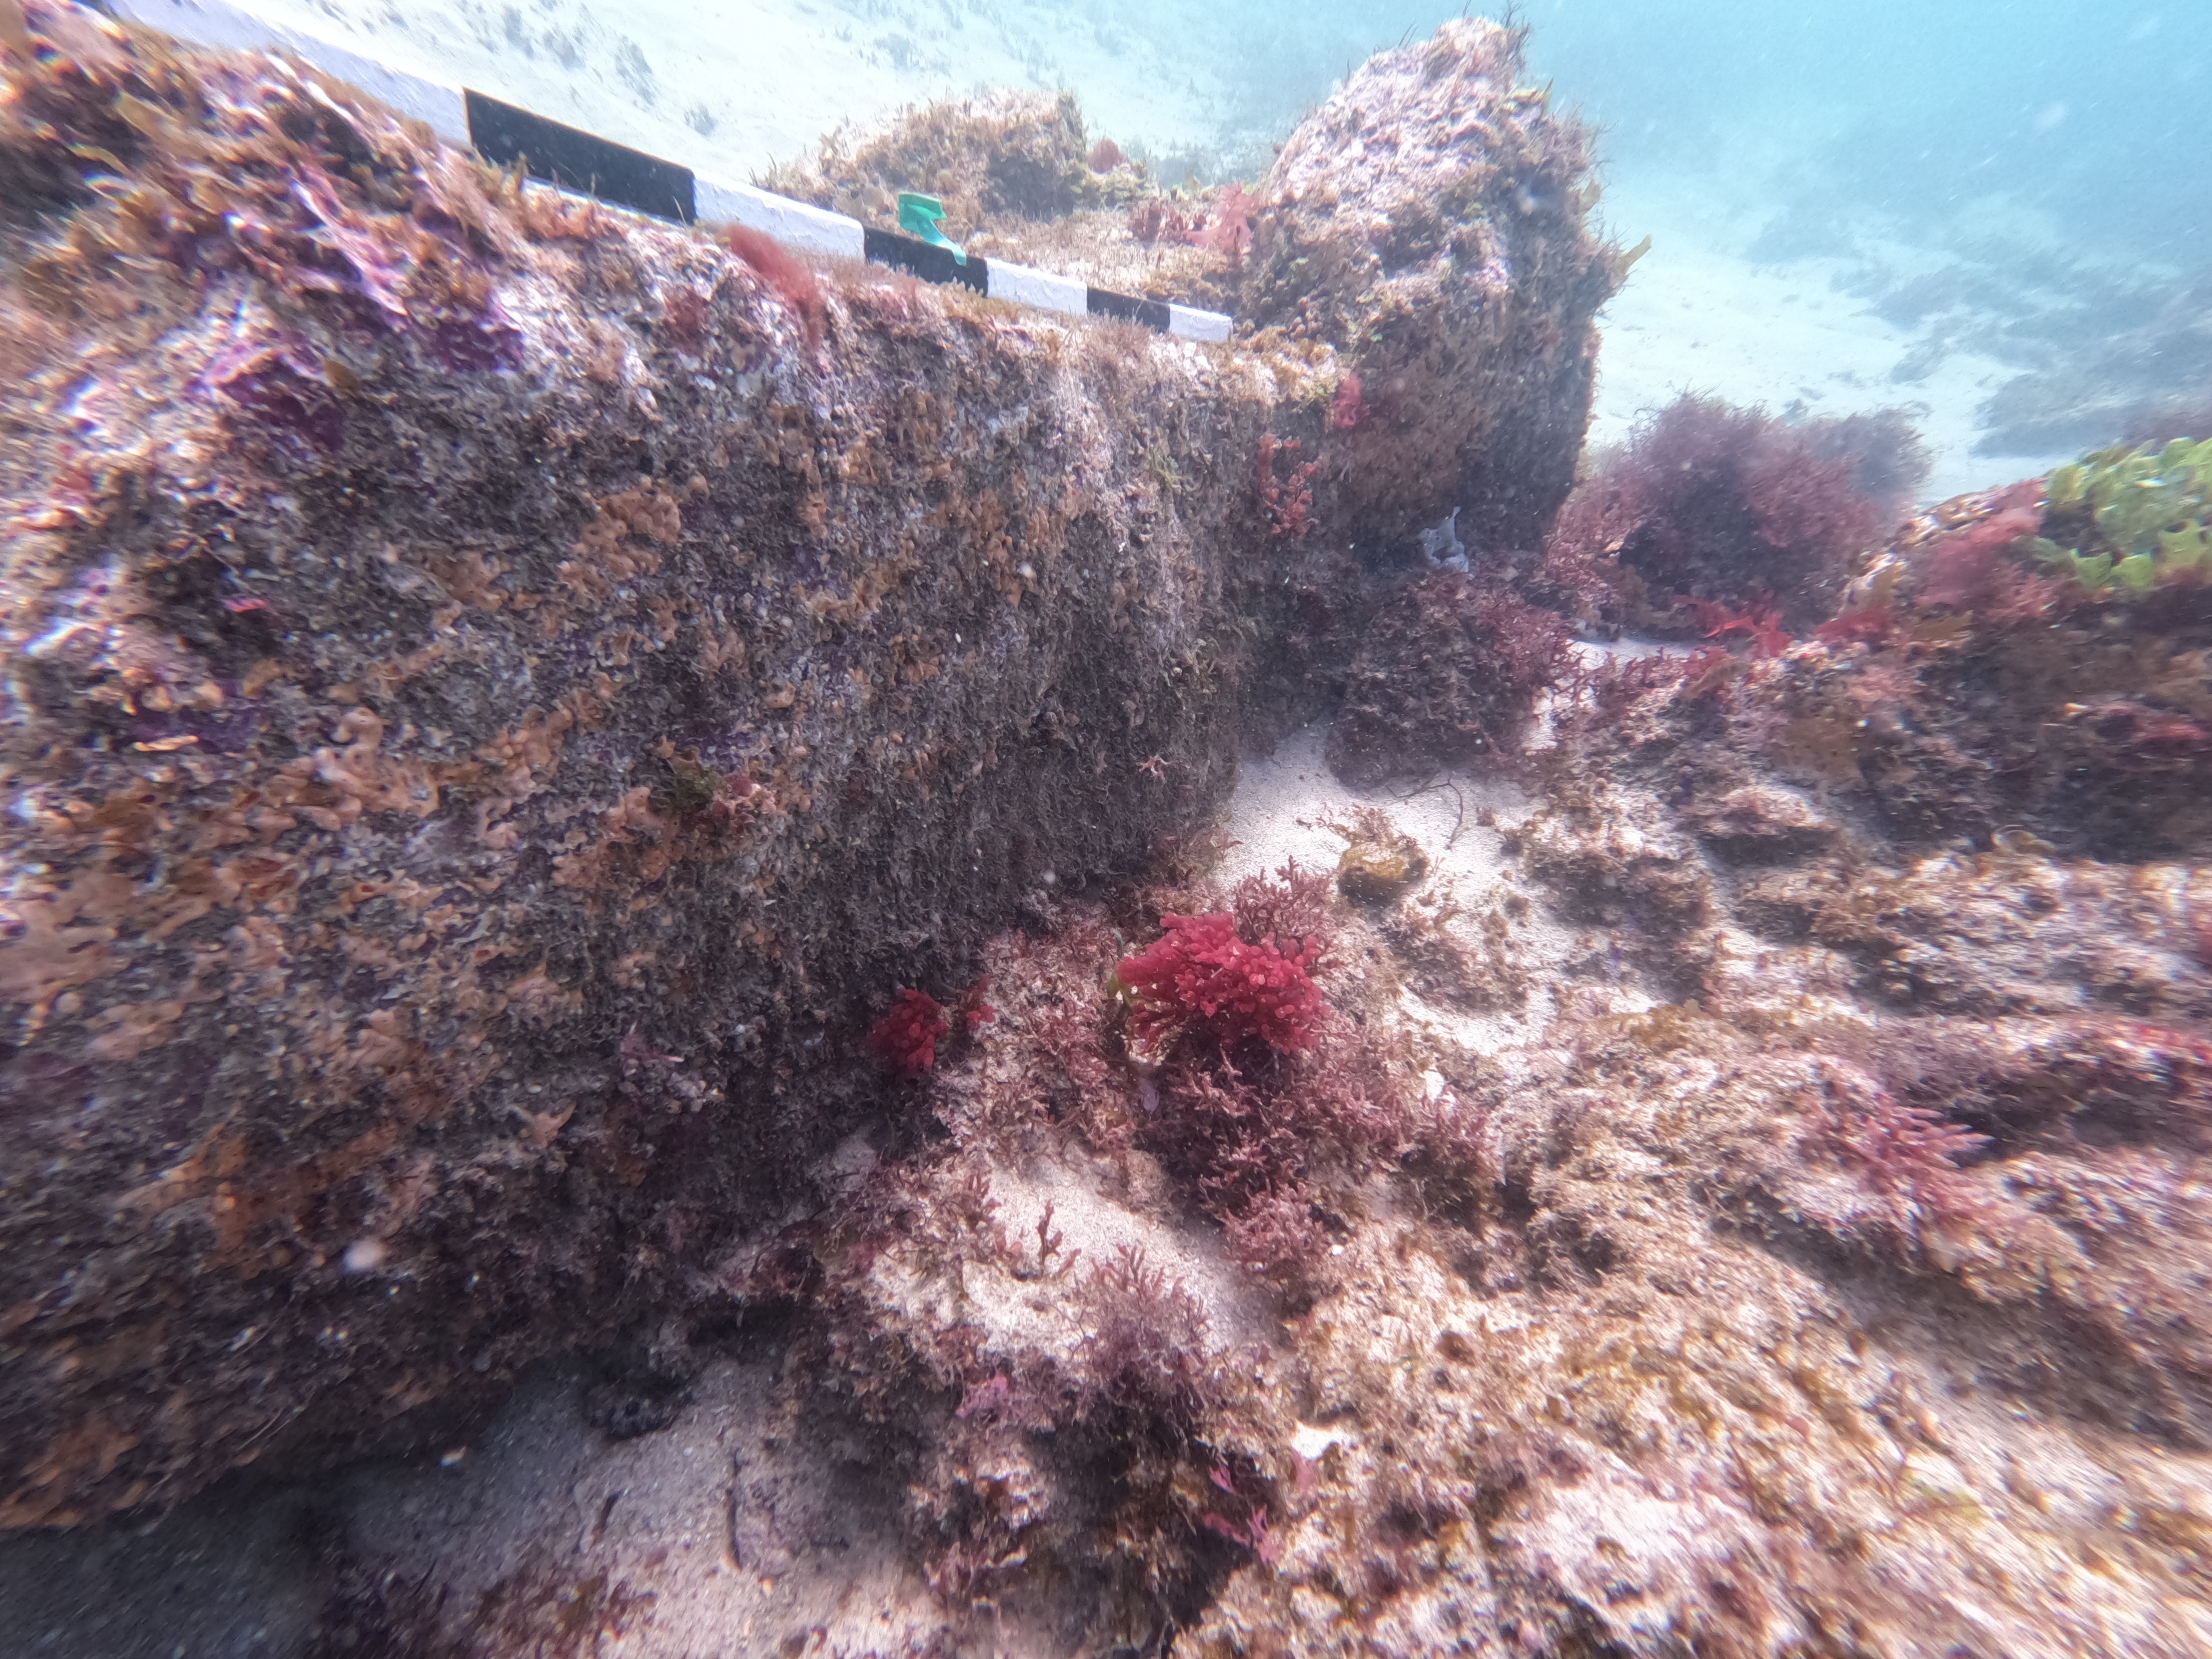

Supplement: Supplementary file 708 [file G0713775.pdf › Ocean2/G0713775.pdf]

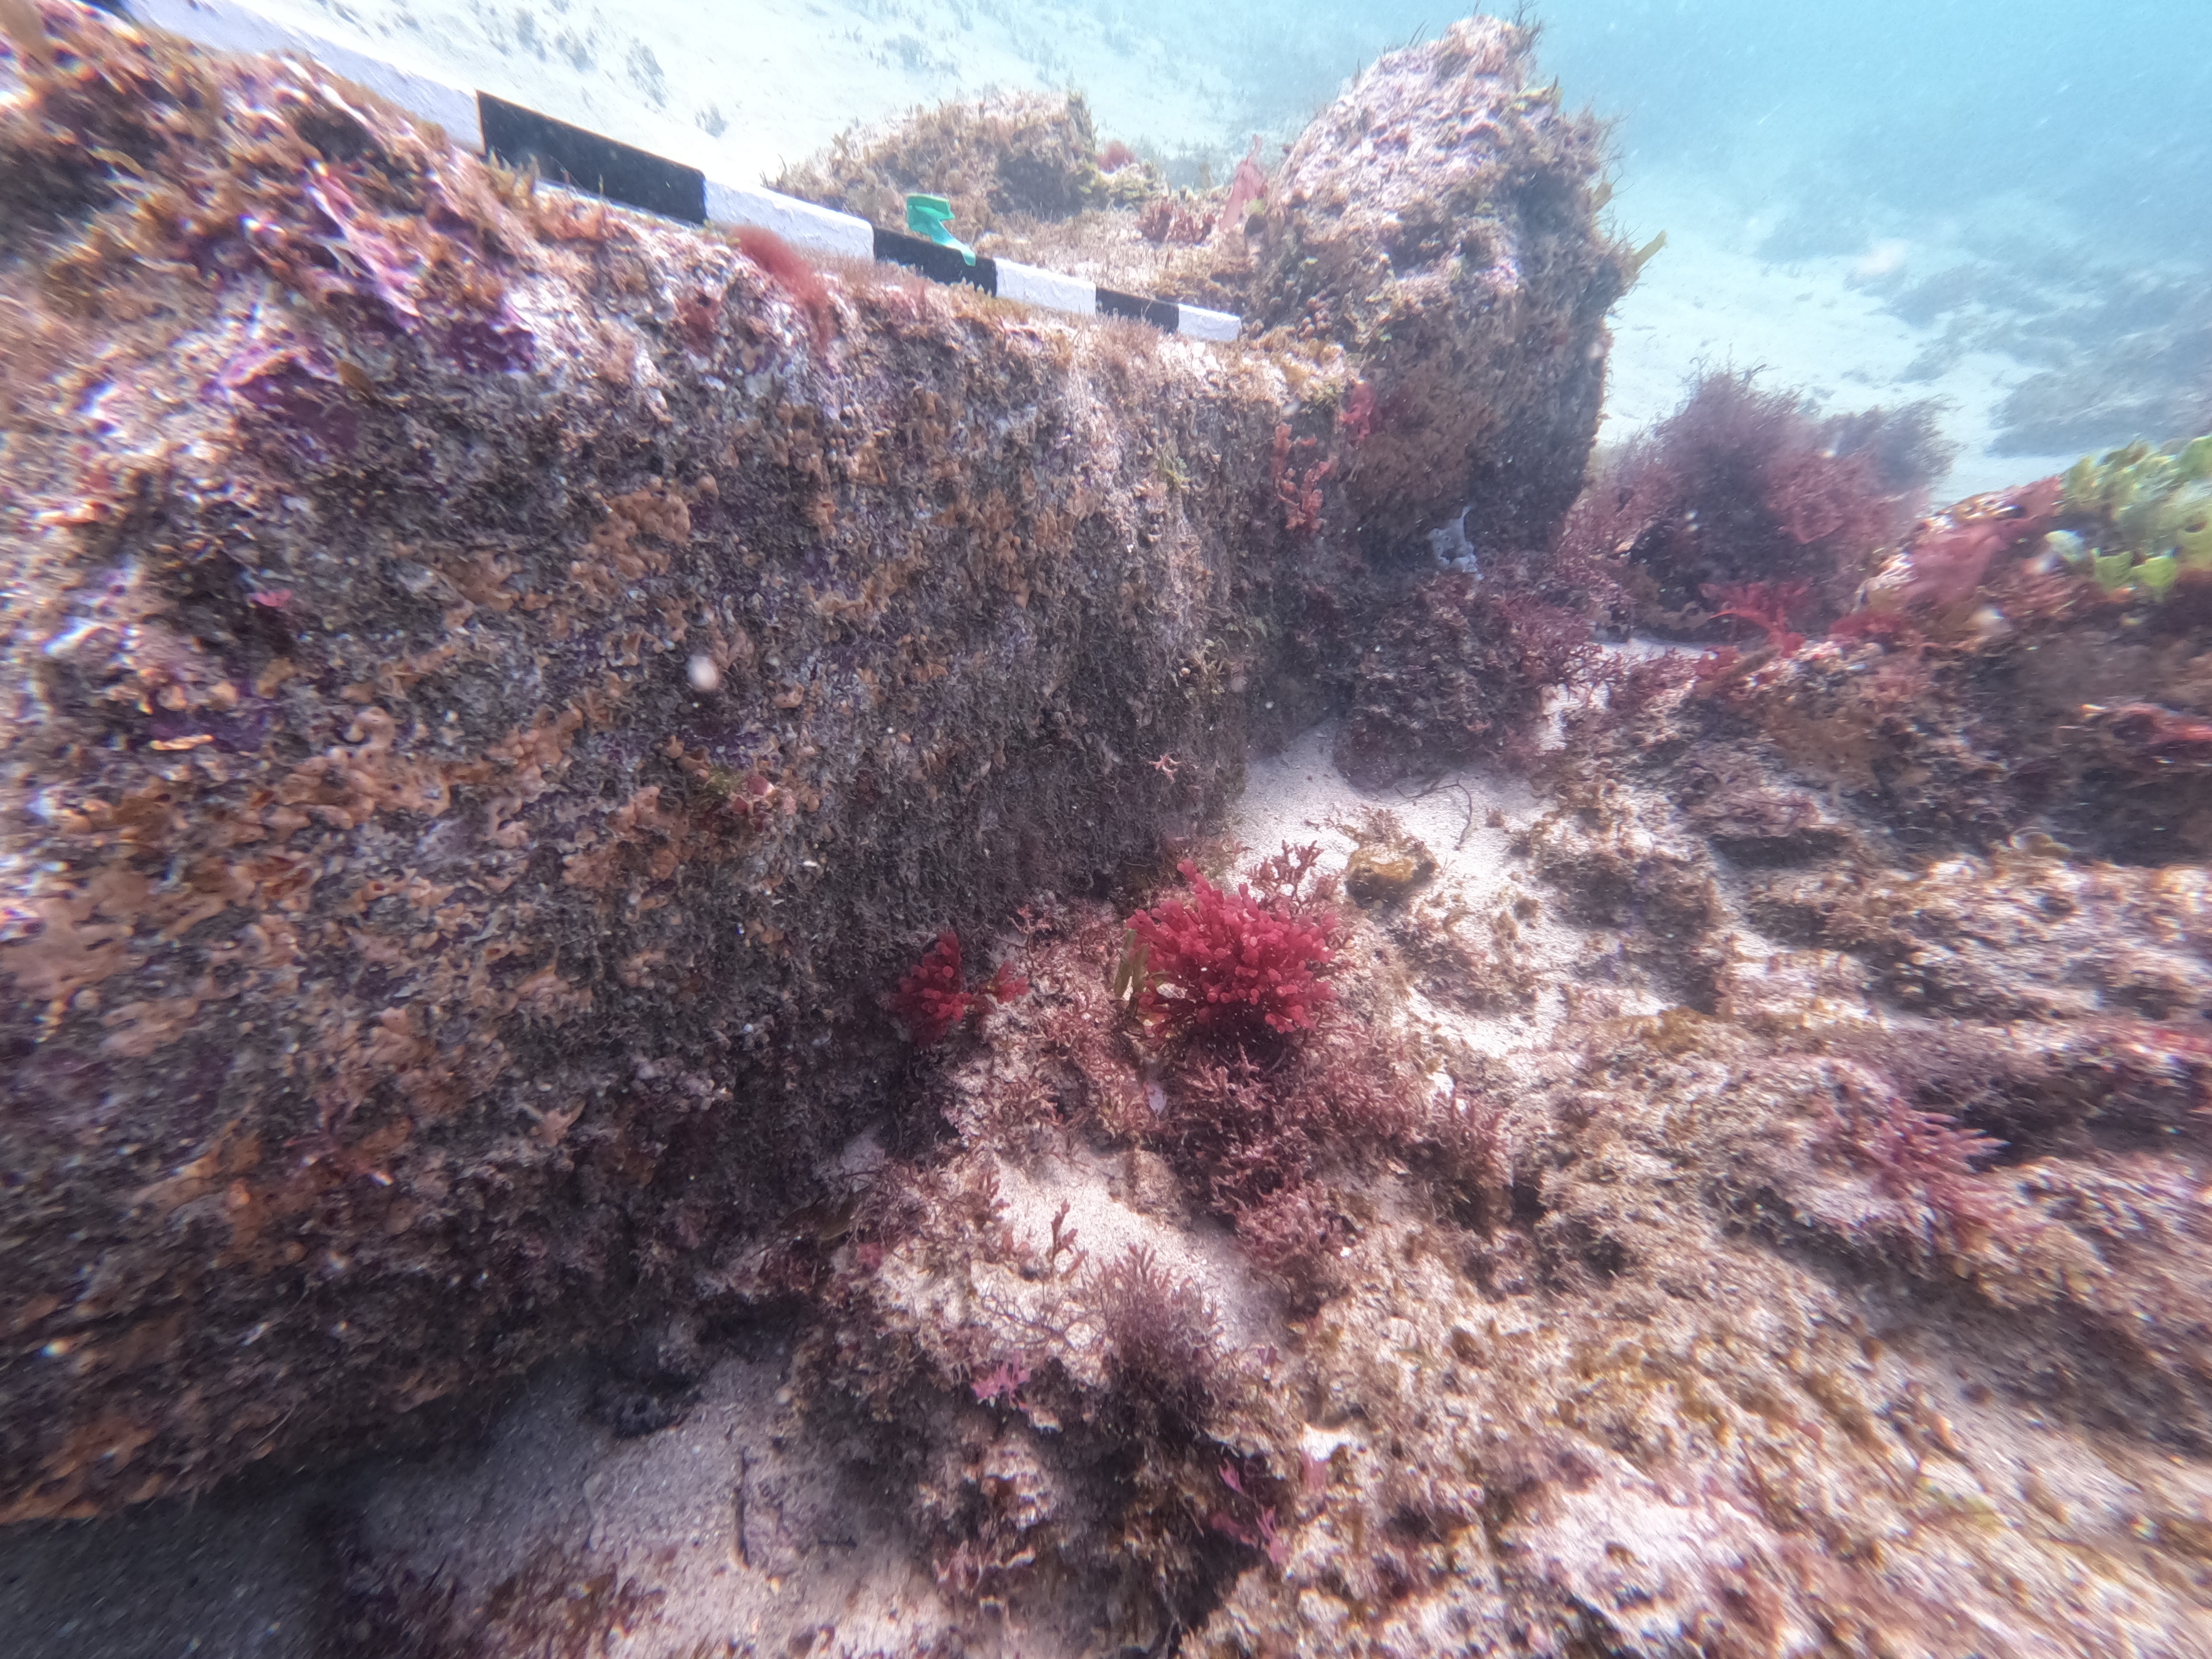

Supplement: Supplementary file 709 [file G0713776.pdf › Ocean2/G0713776.pdf]

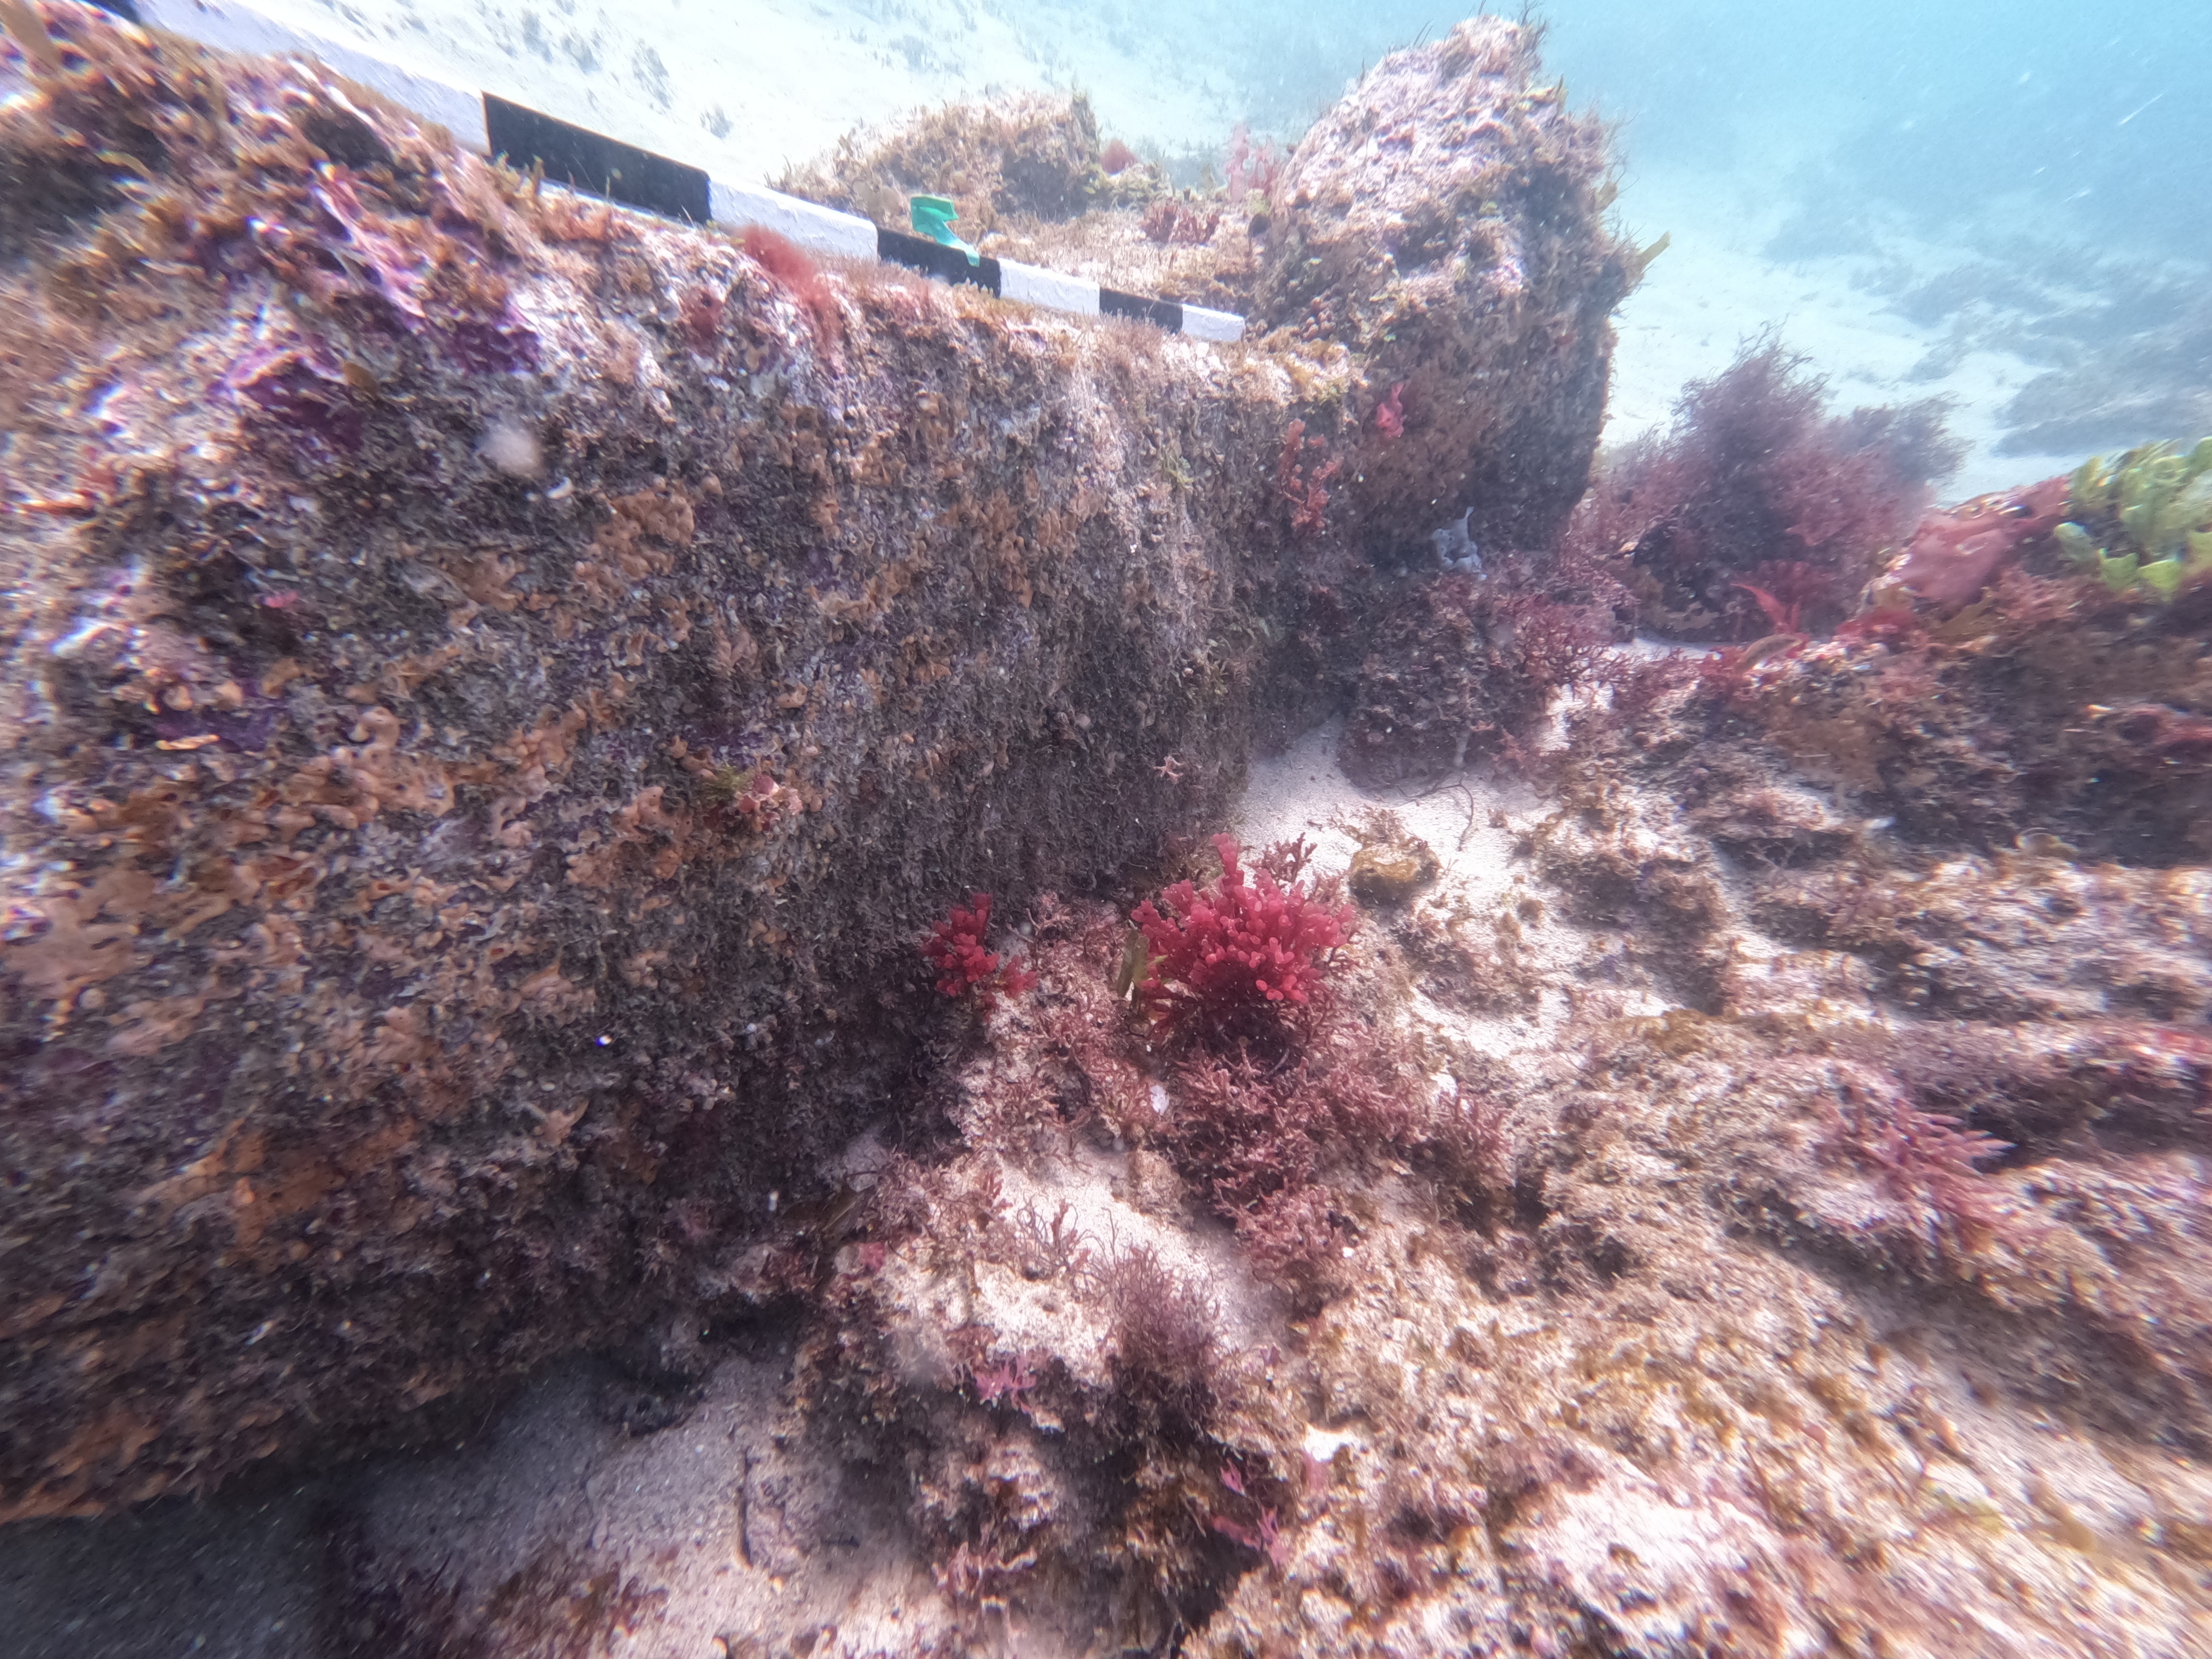

Supplement: Supplementary file 710 [file G0713777.pdf › Ocean2/G0713777.pdf]

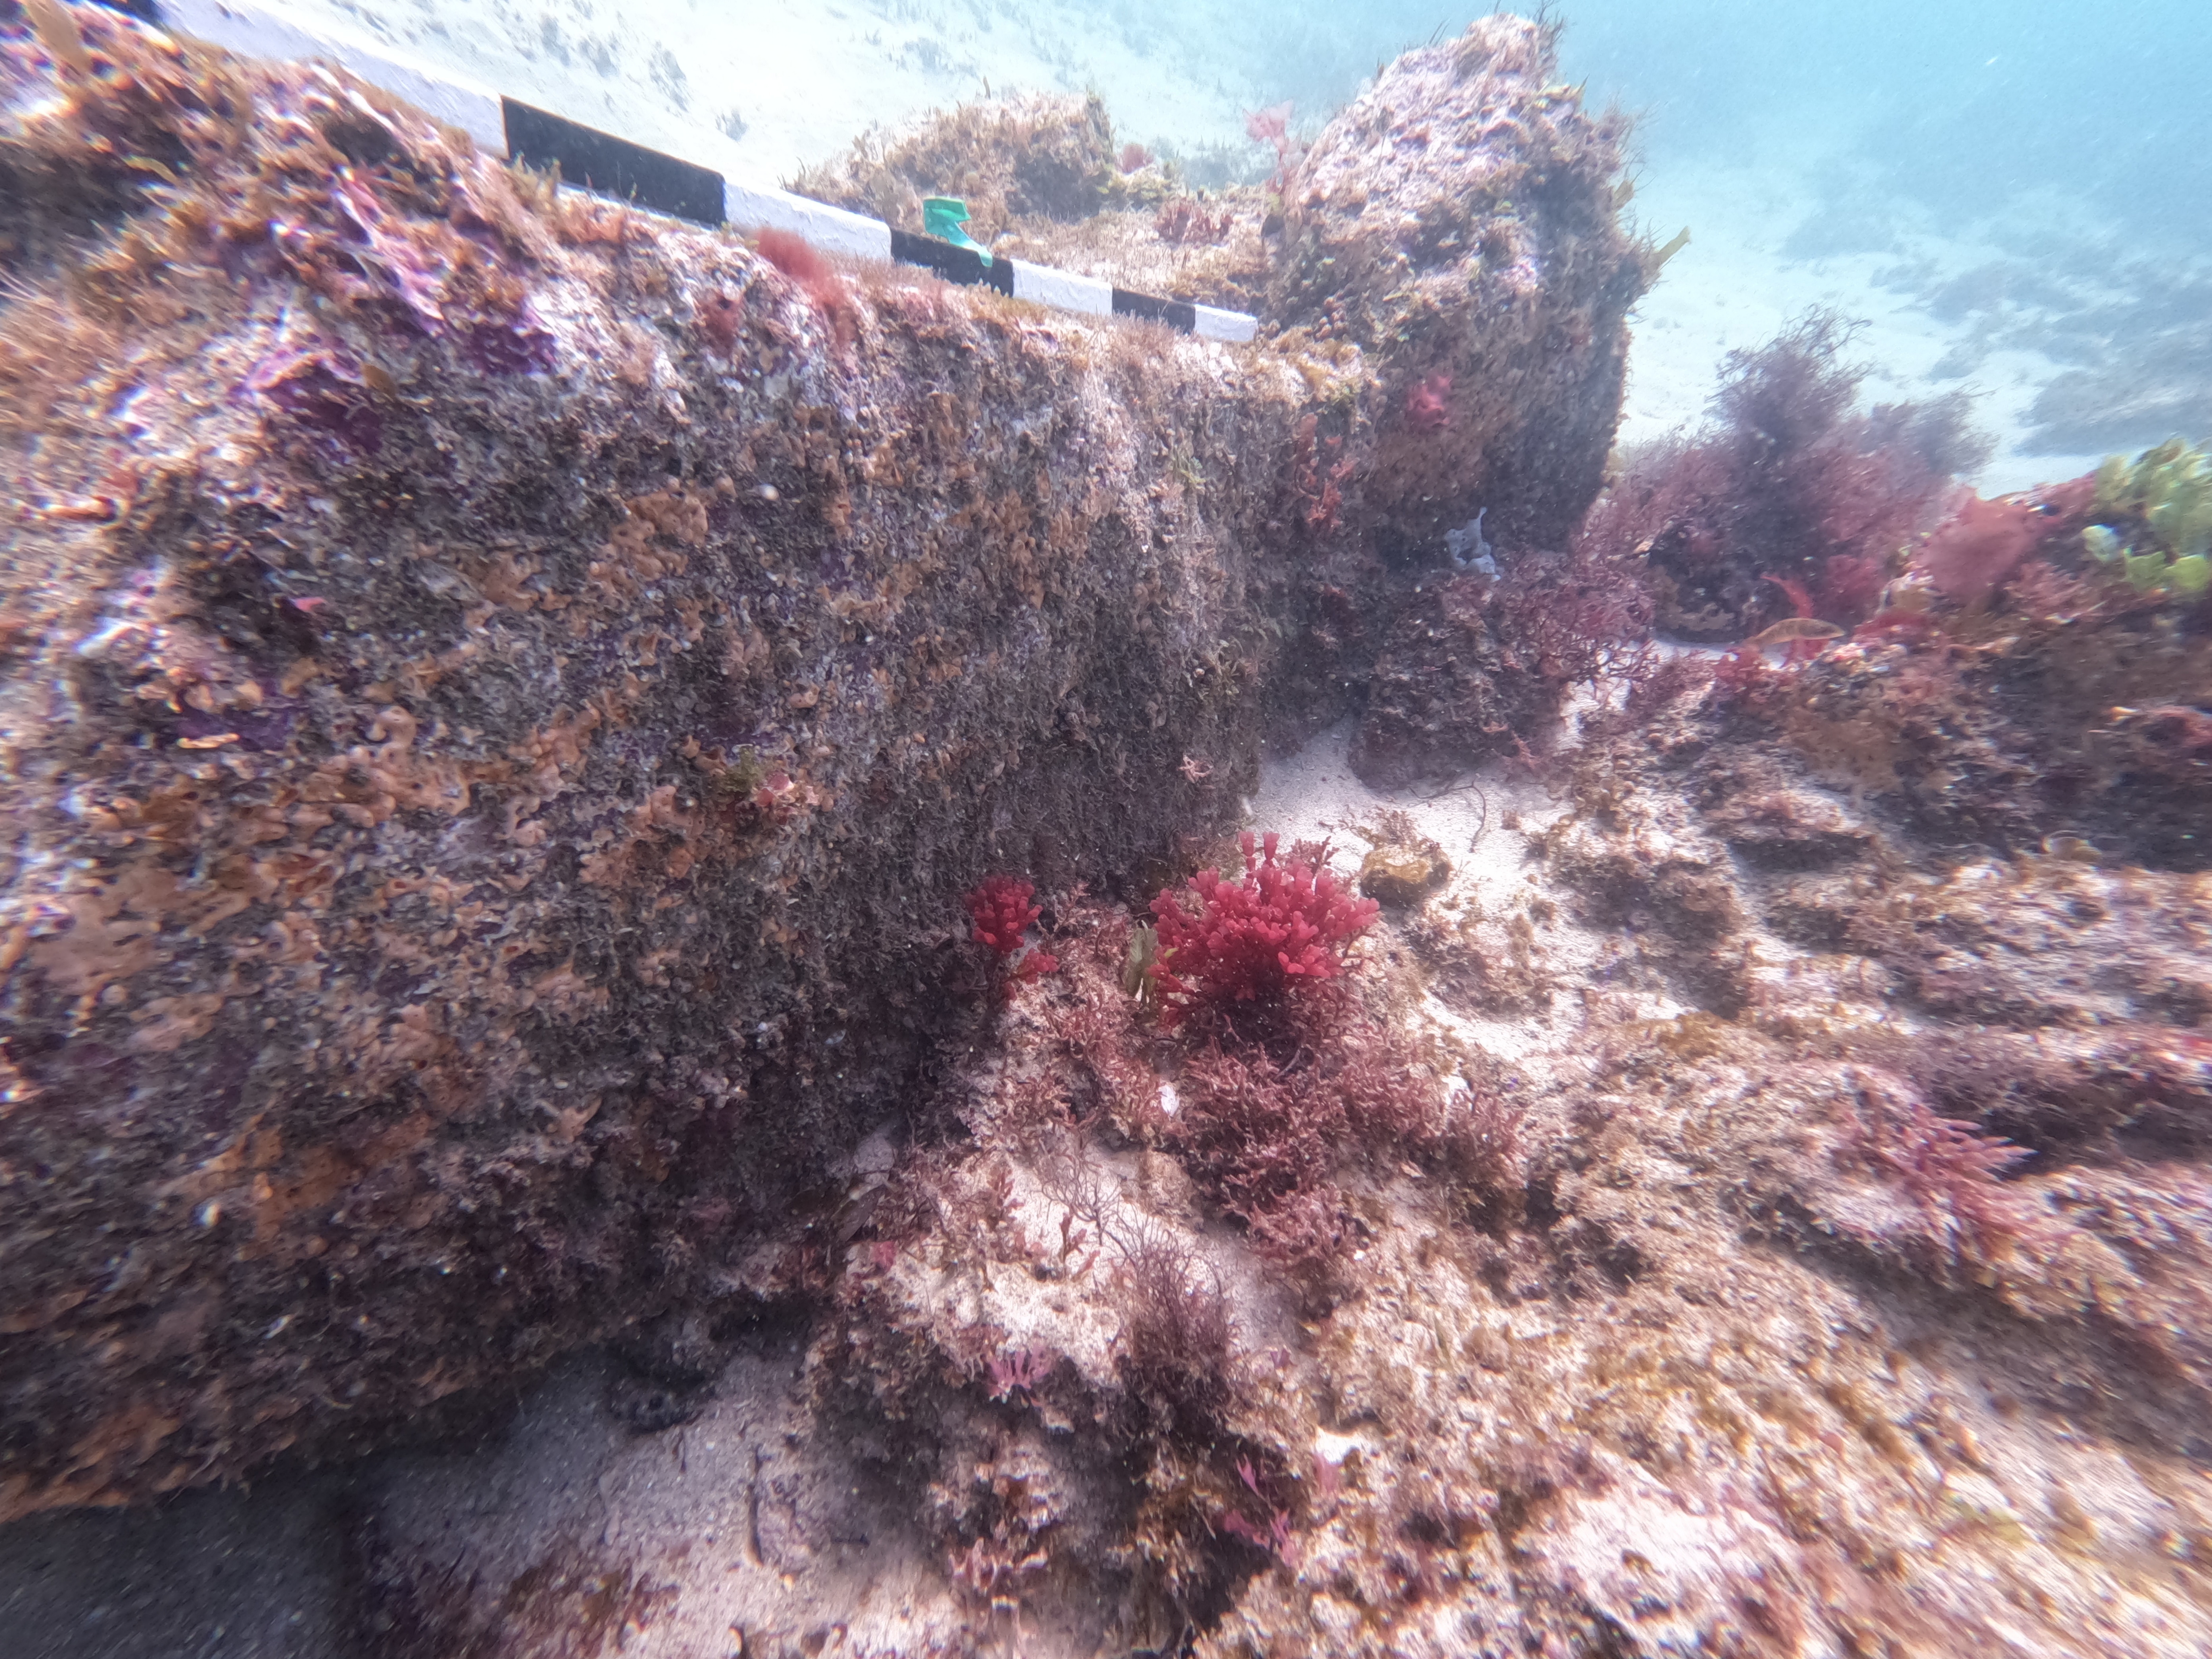

Supplement: Supplementary file 711 [file G0713778.pdf › Ocean2/G0713778.pdf]

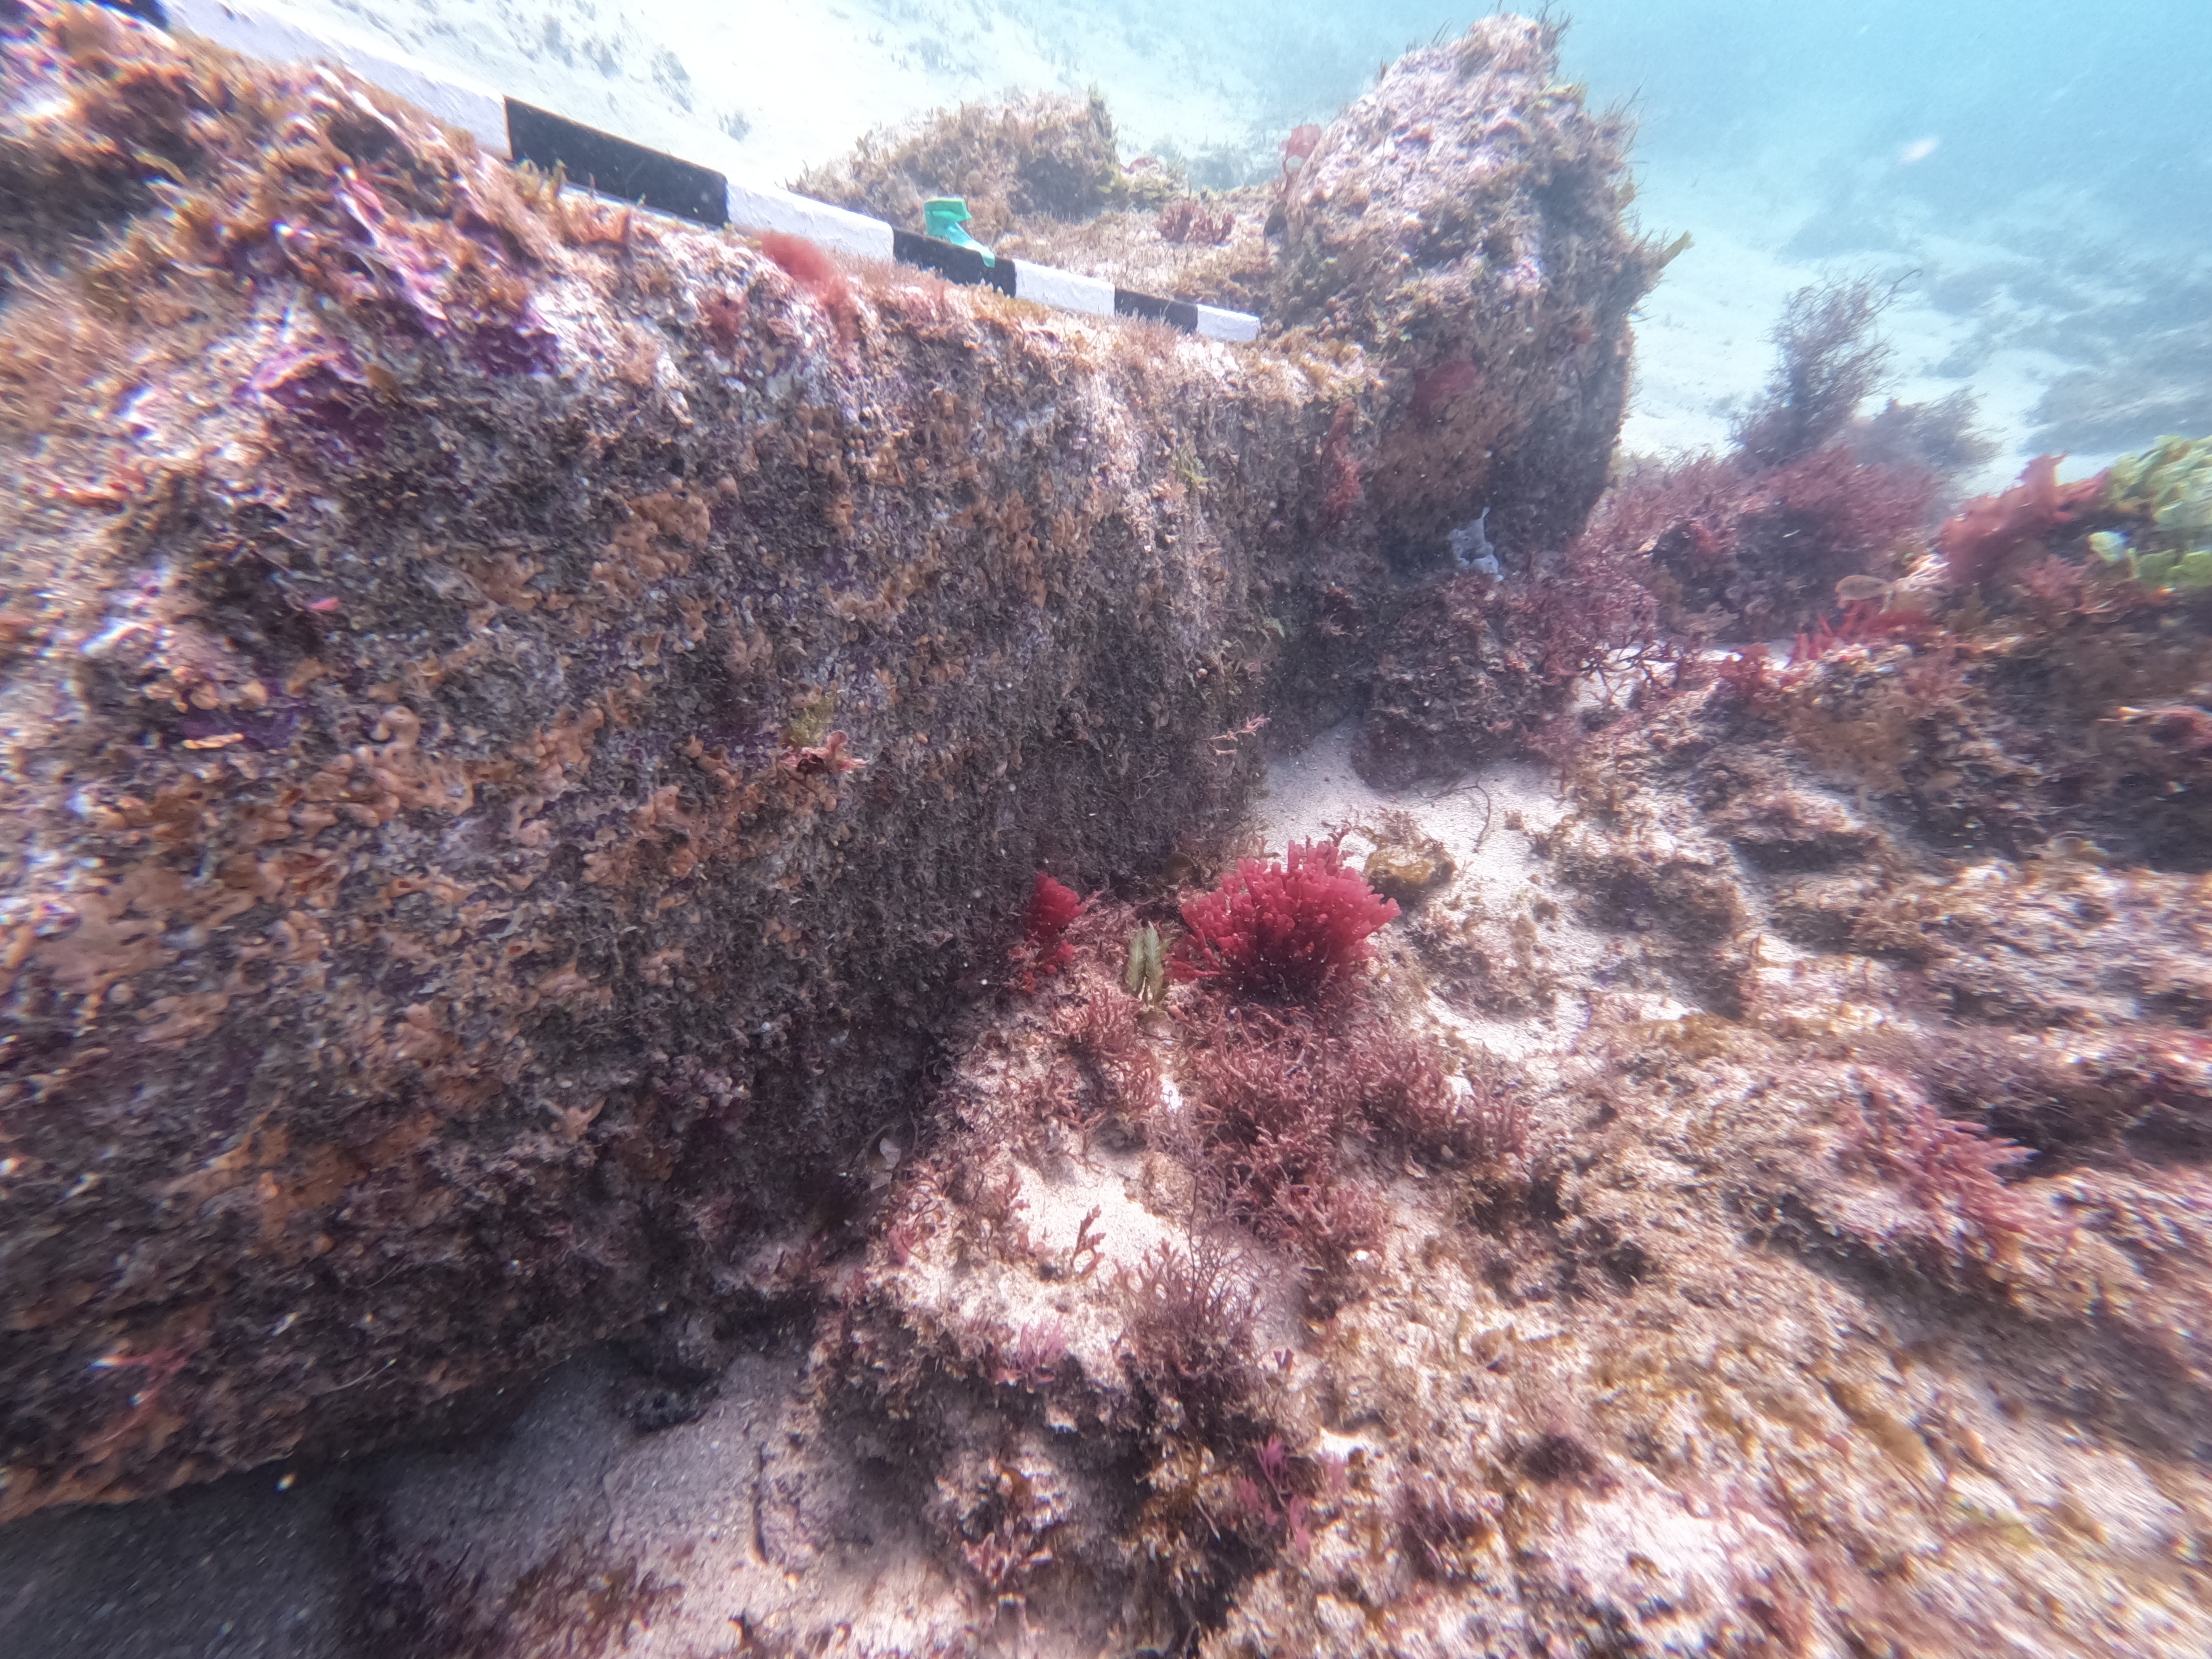

Supplement: Supplementary file 712 [file G0713779.pdf › Ocean2/G0713779.pdf]

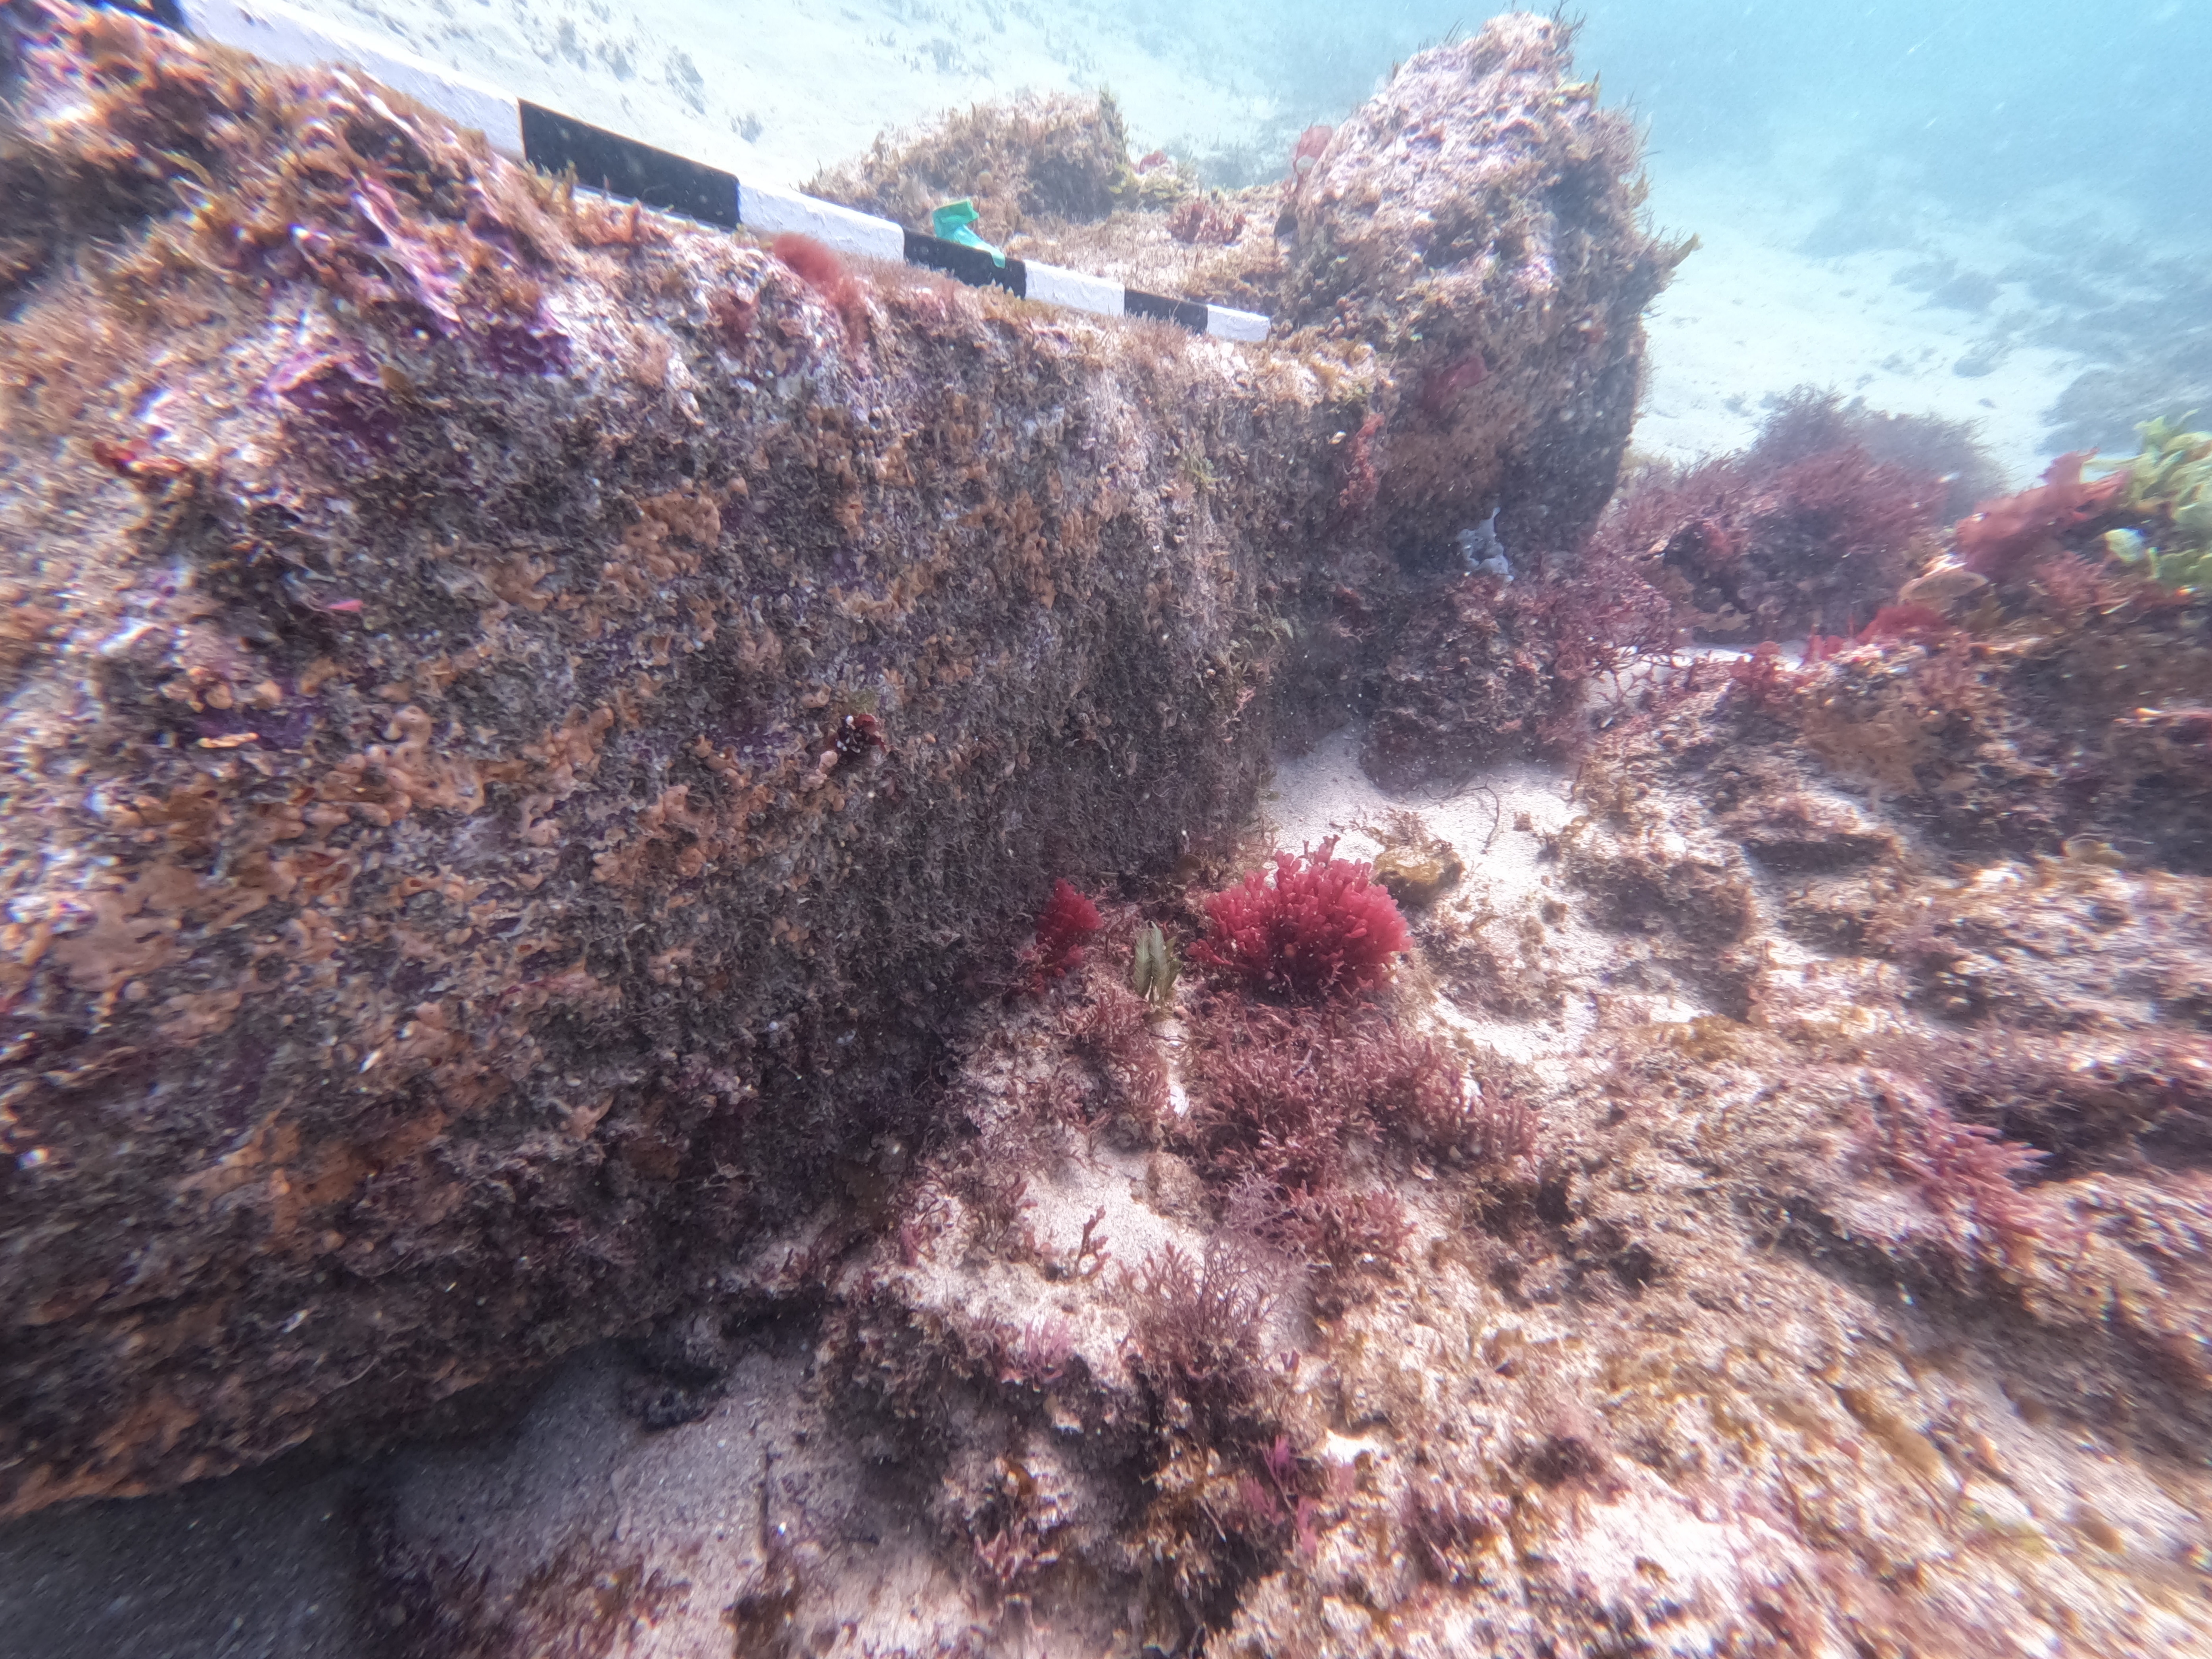

Supplement: Supplementary file 713 [file G0713780.pdf › Ocean2/G0713780.pdf]

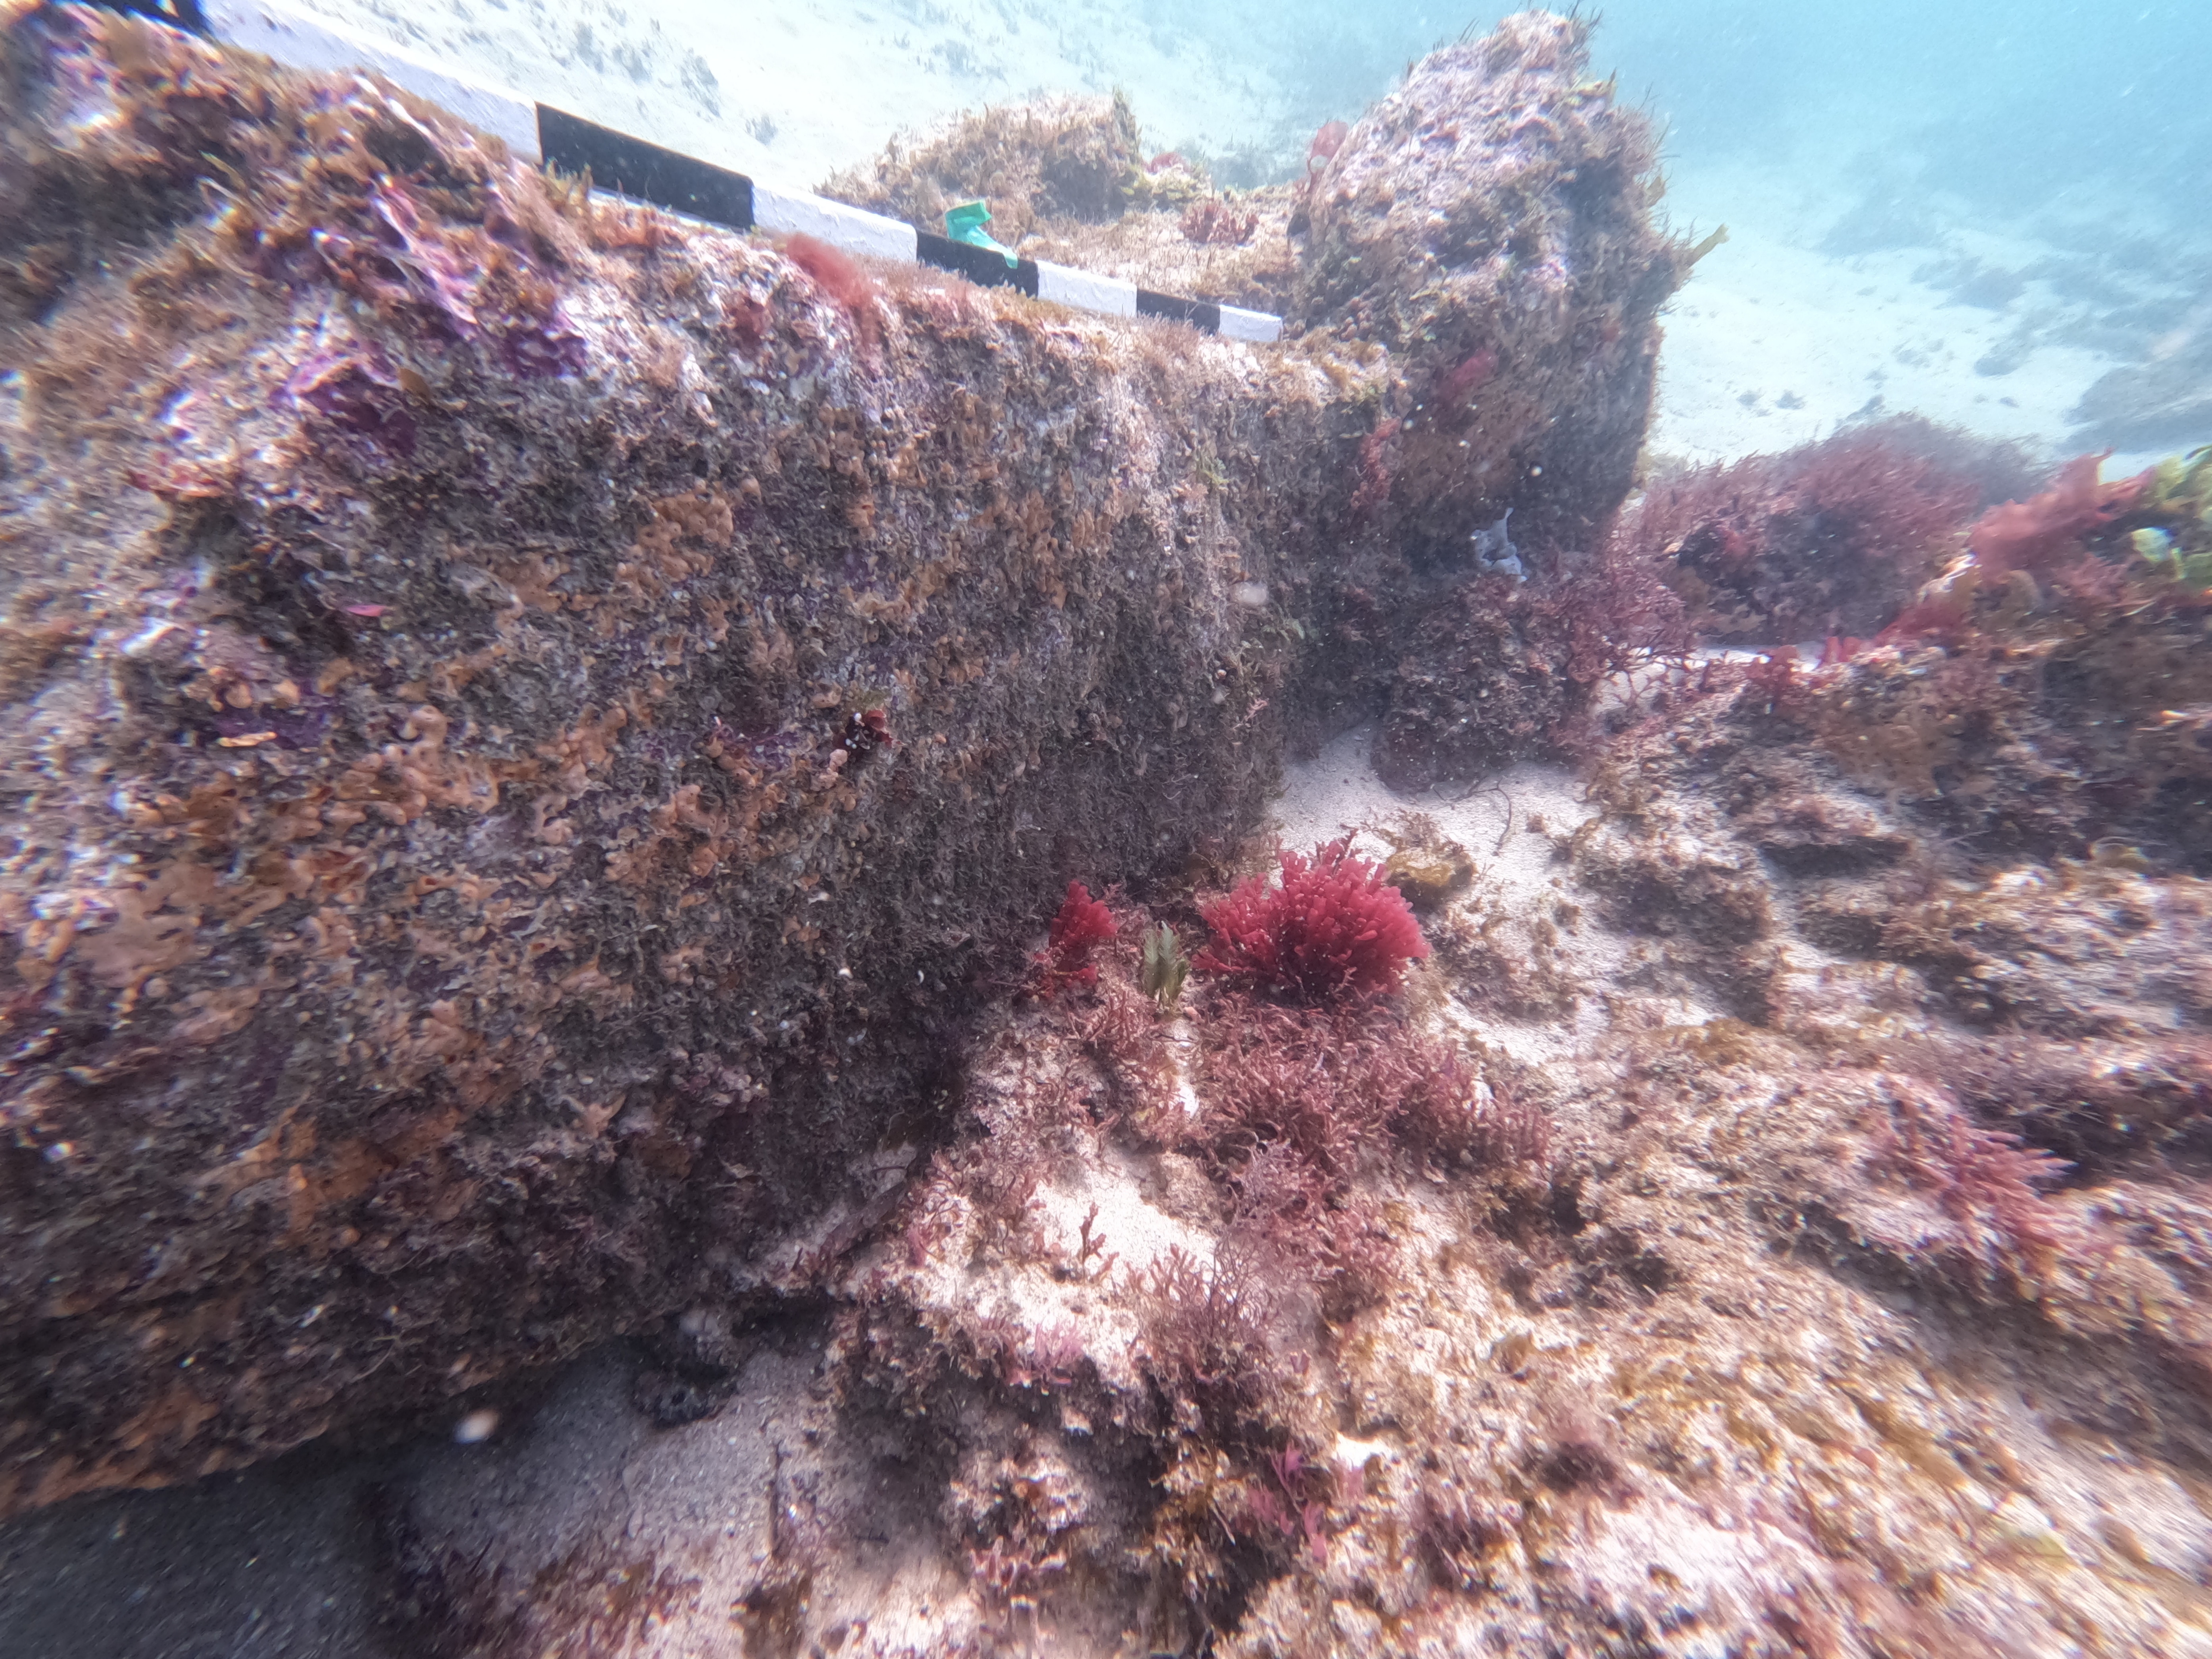

Supplement: Supplementary file 714 [file G0713781.pdf › Ocean2/G0713781.pdf]

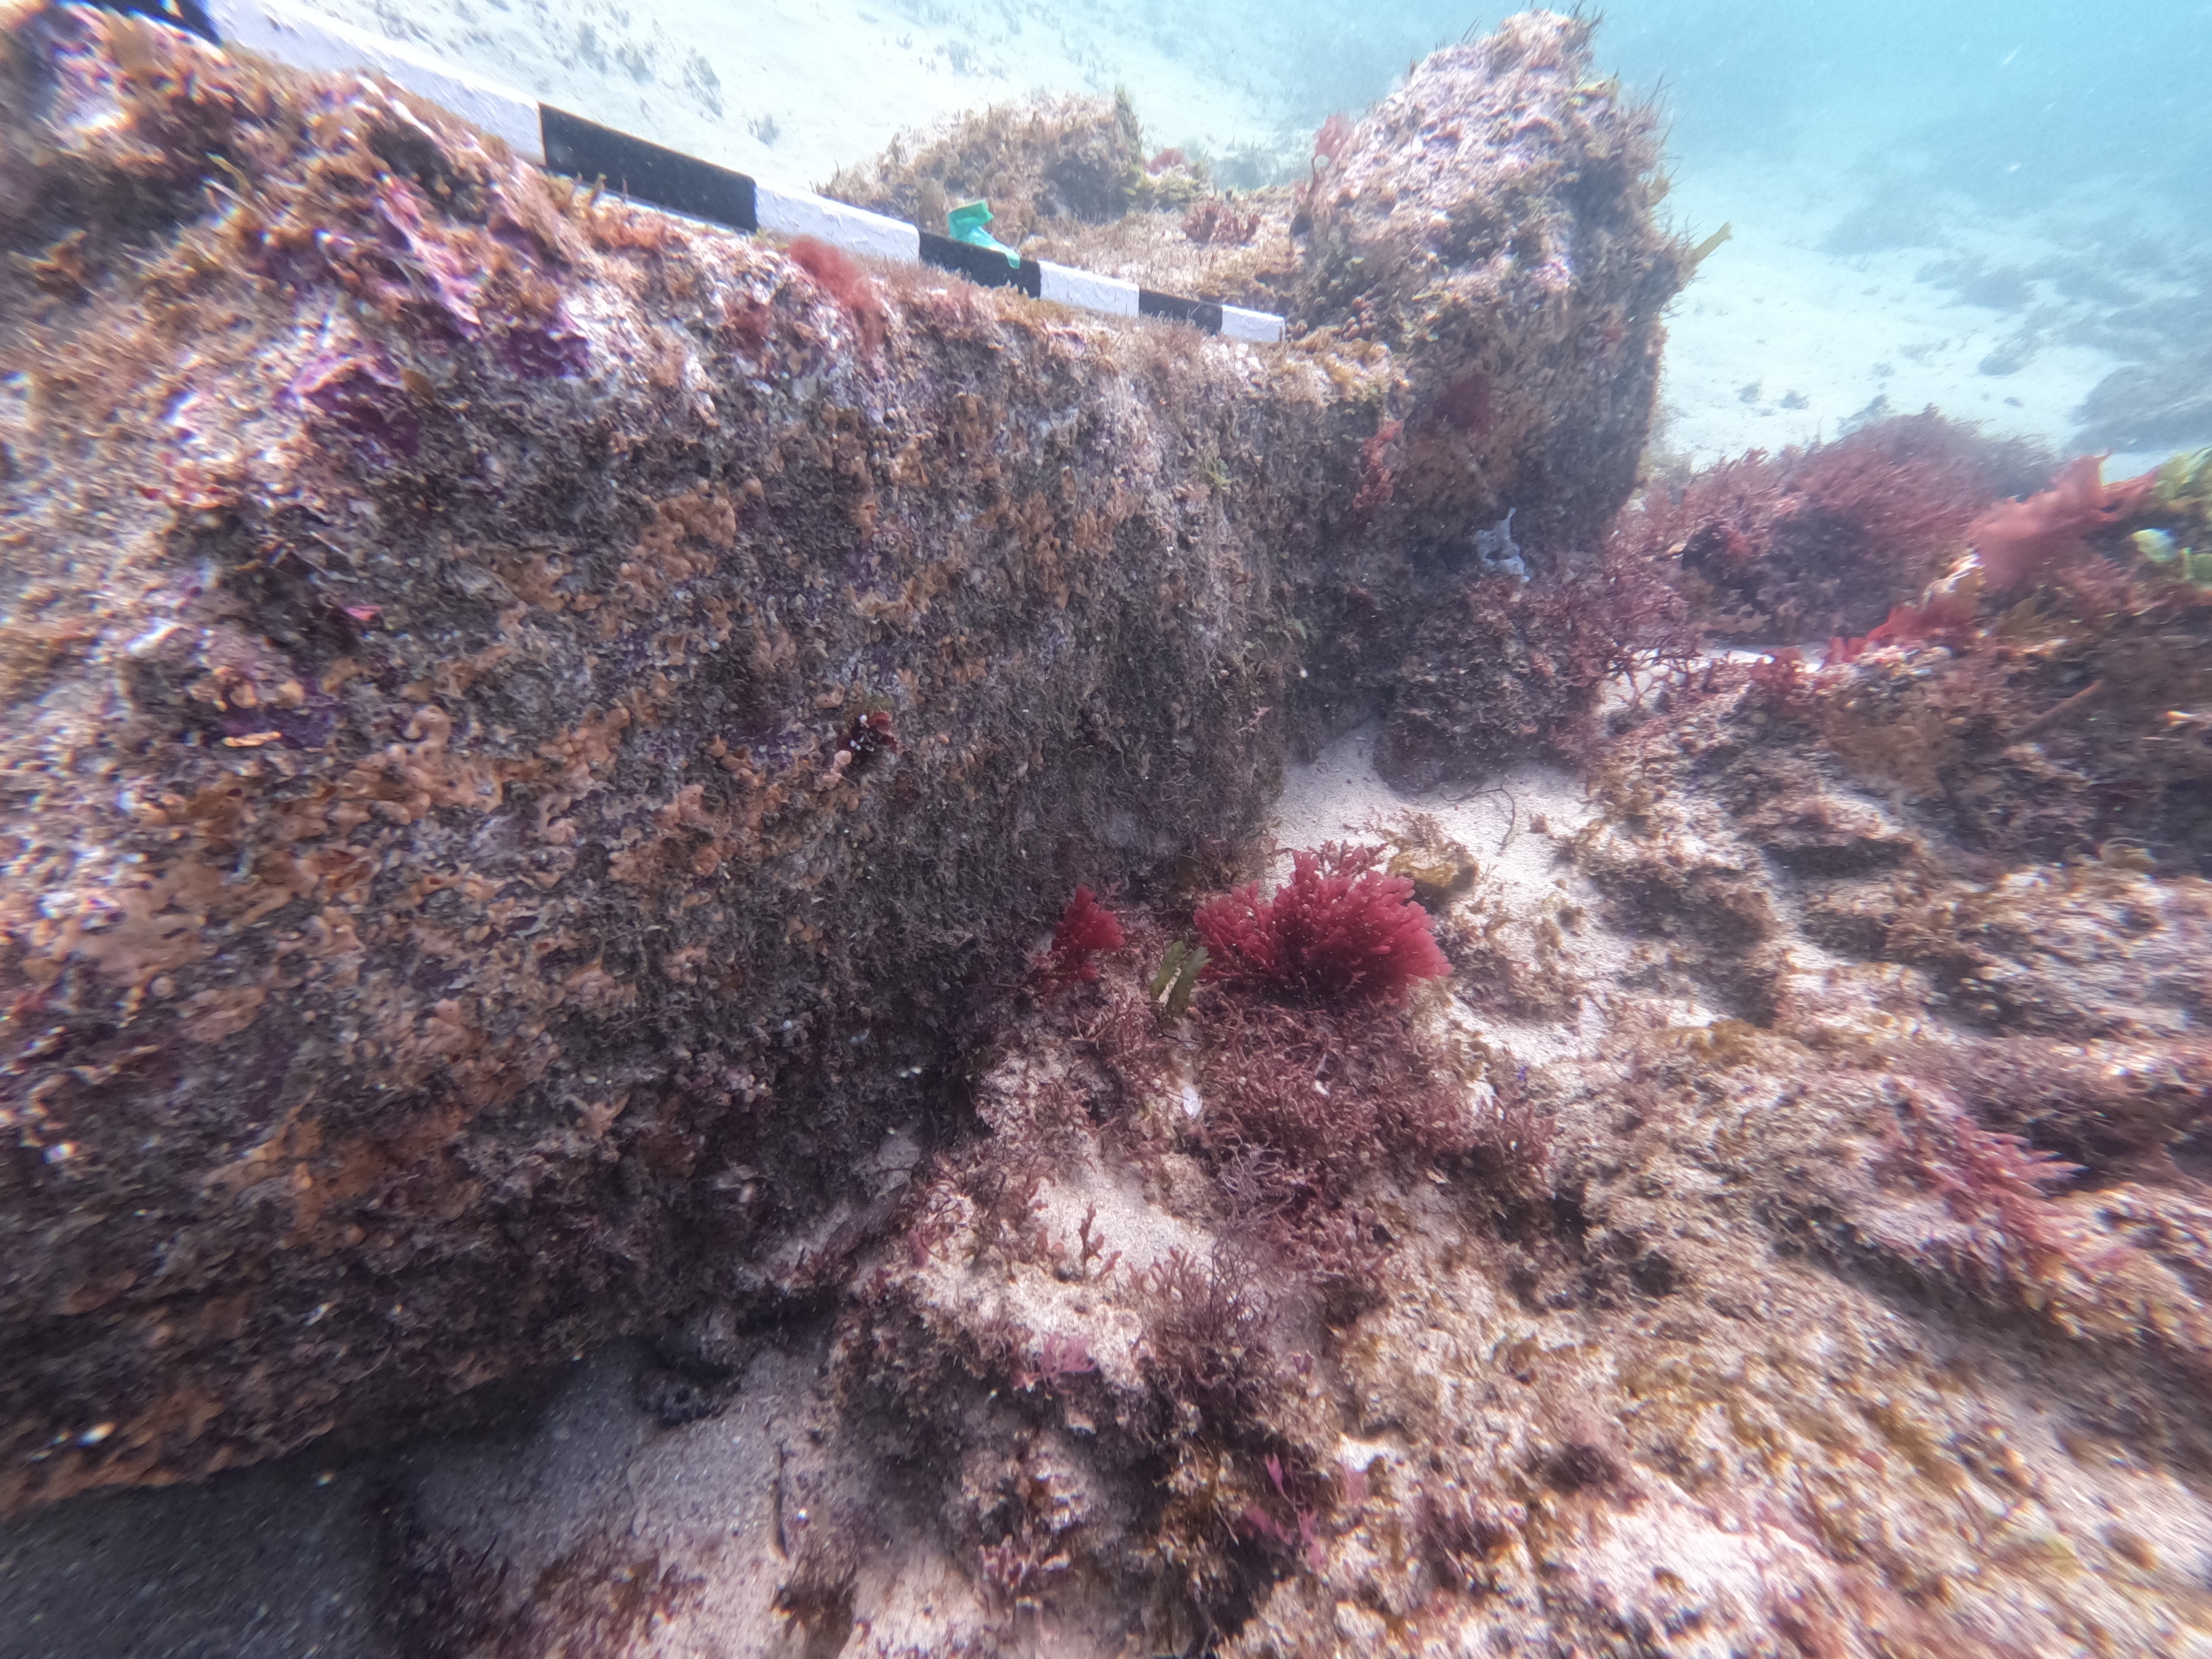

Supplement: Supplementary file 715 [file G0713782.pdf › Ocean2/G0713782.pdf]

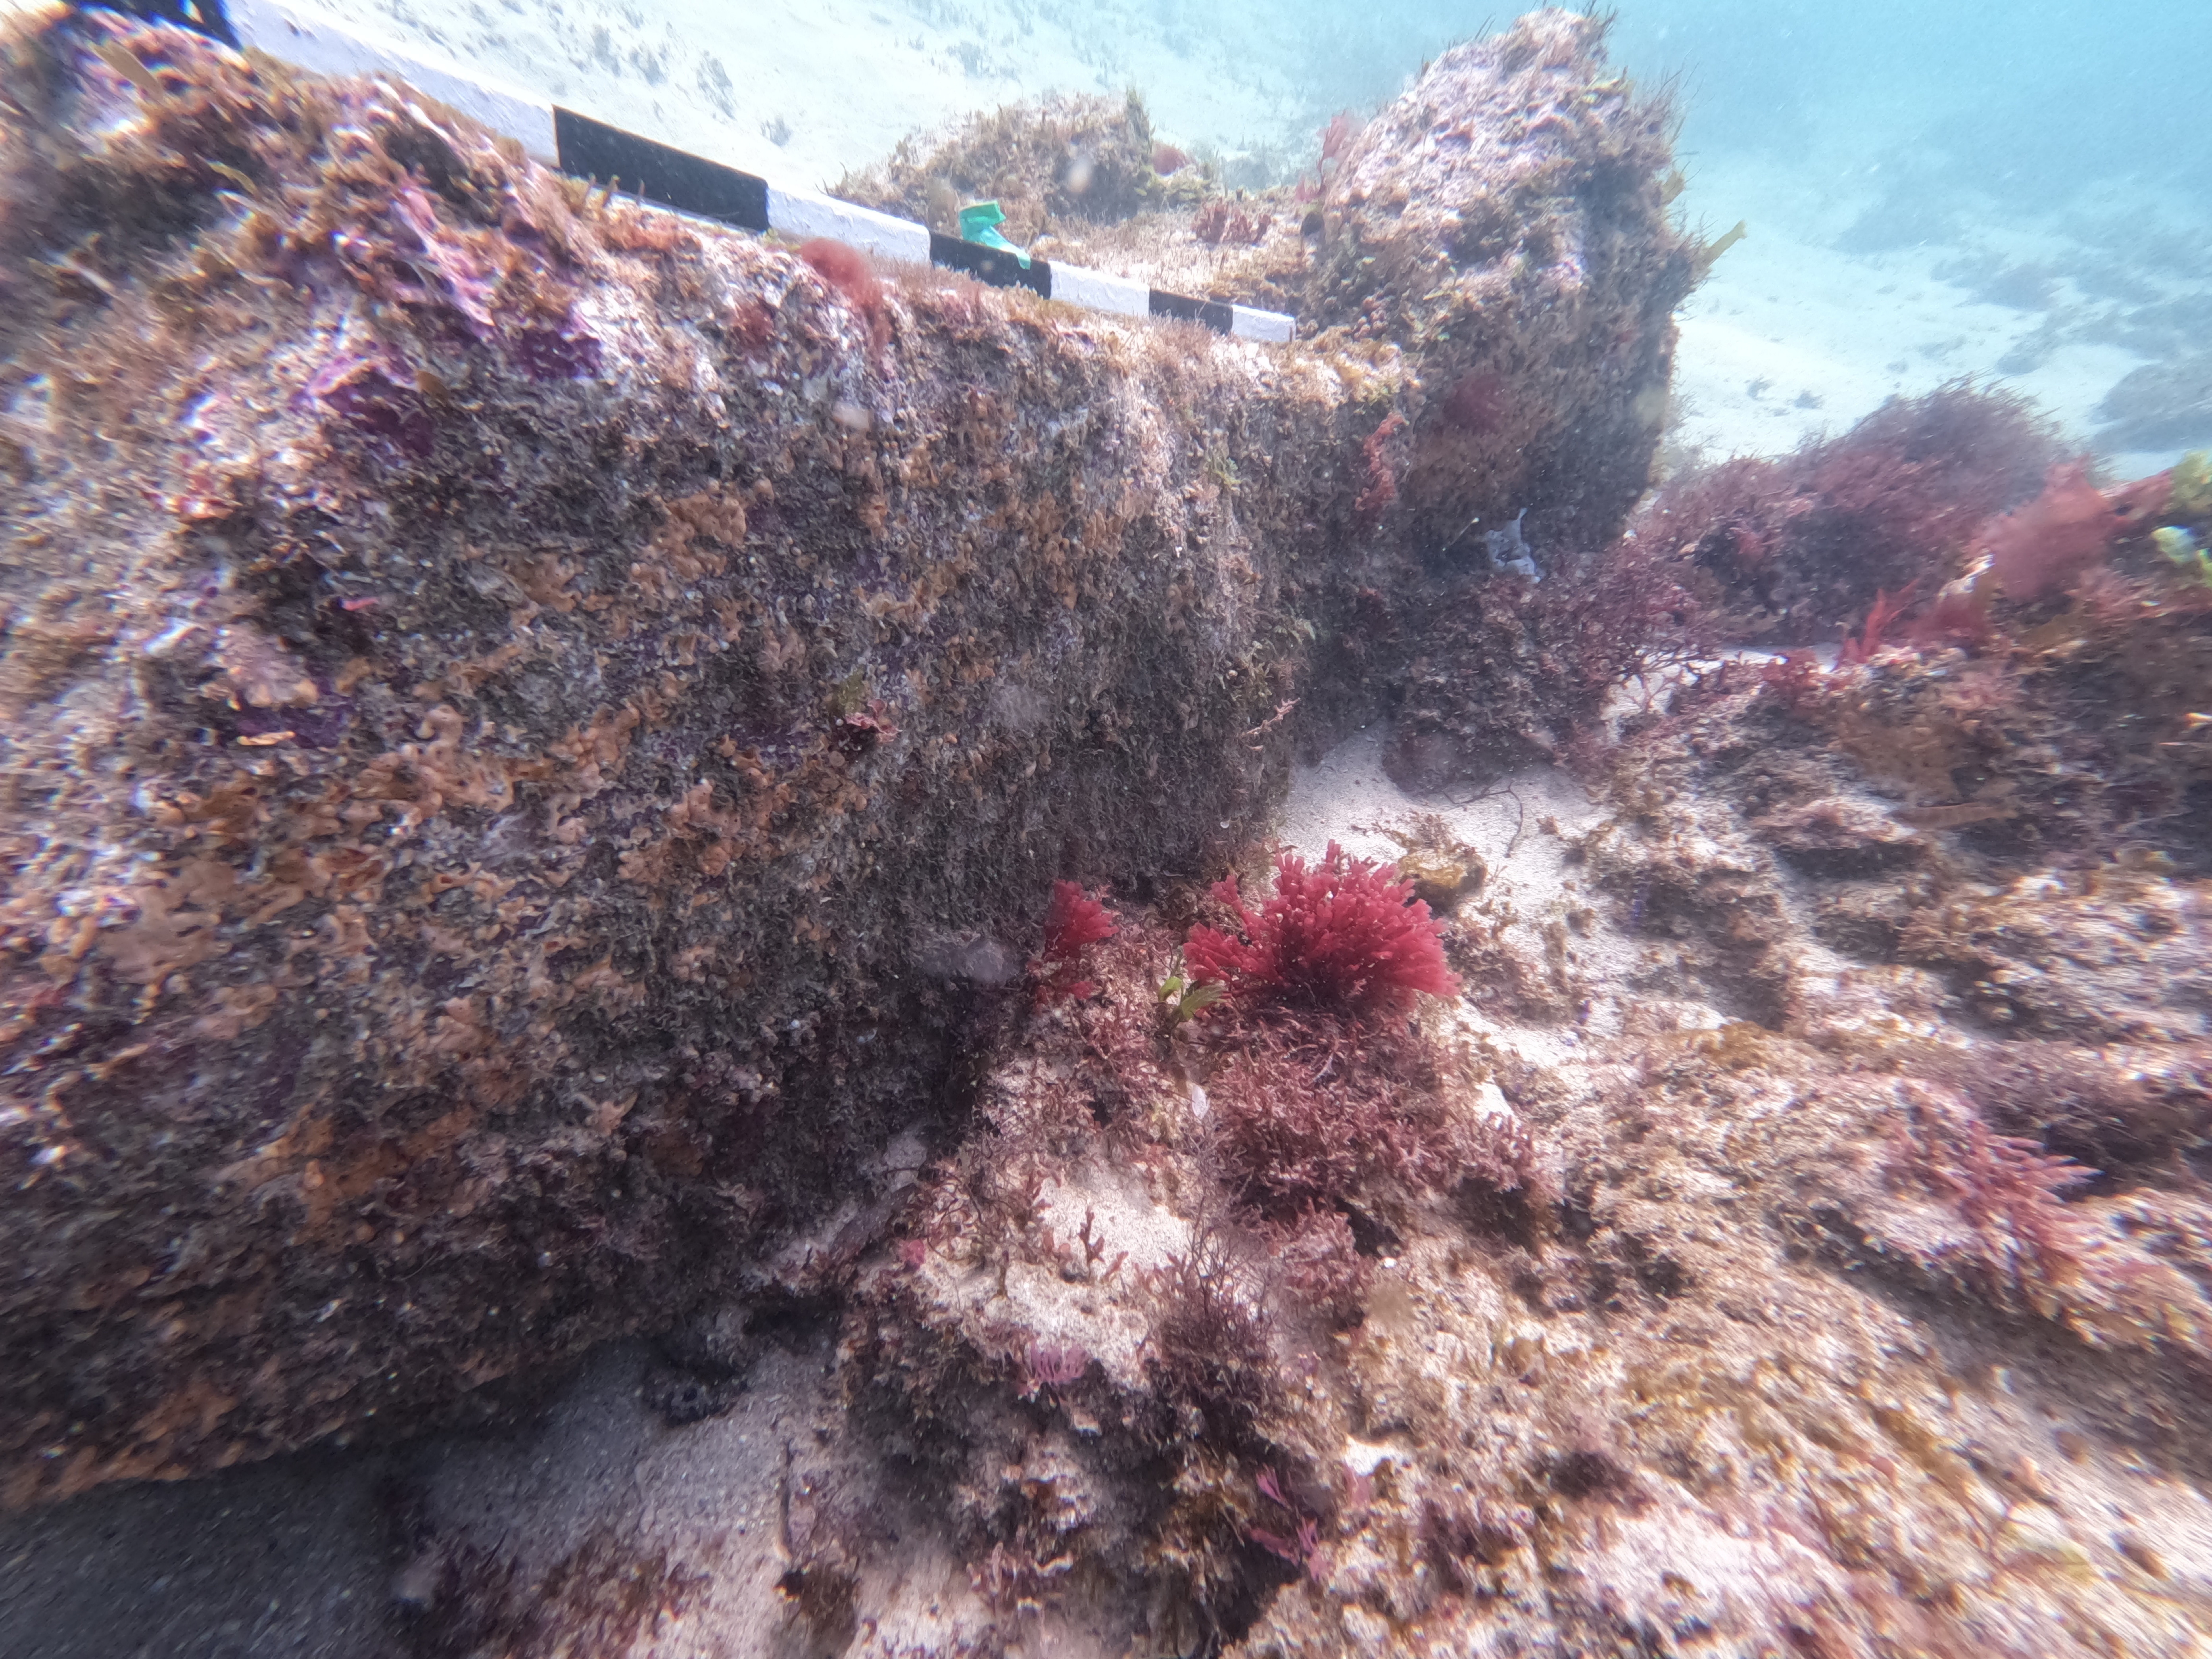

Supplement: Supplementary file 716 [file G0713783.pdf › Ocean2/G0713783.pdf]

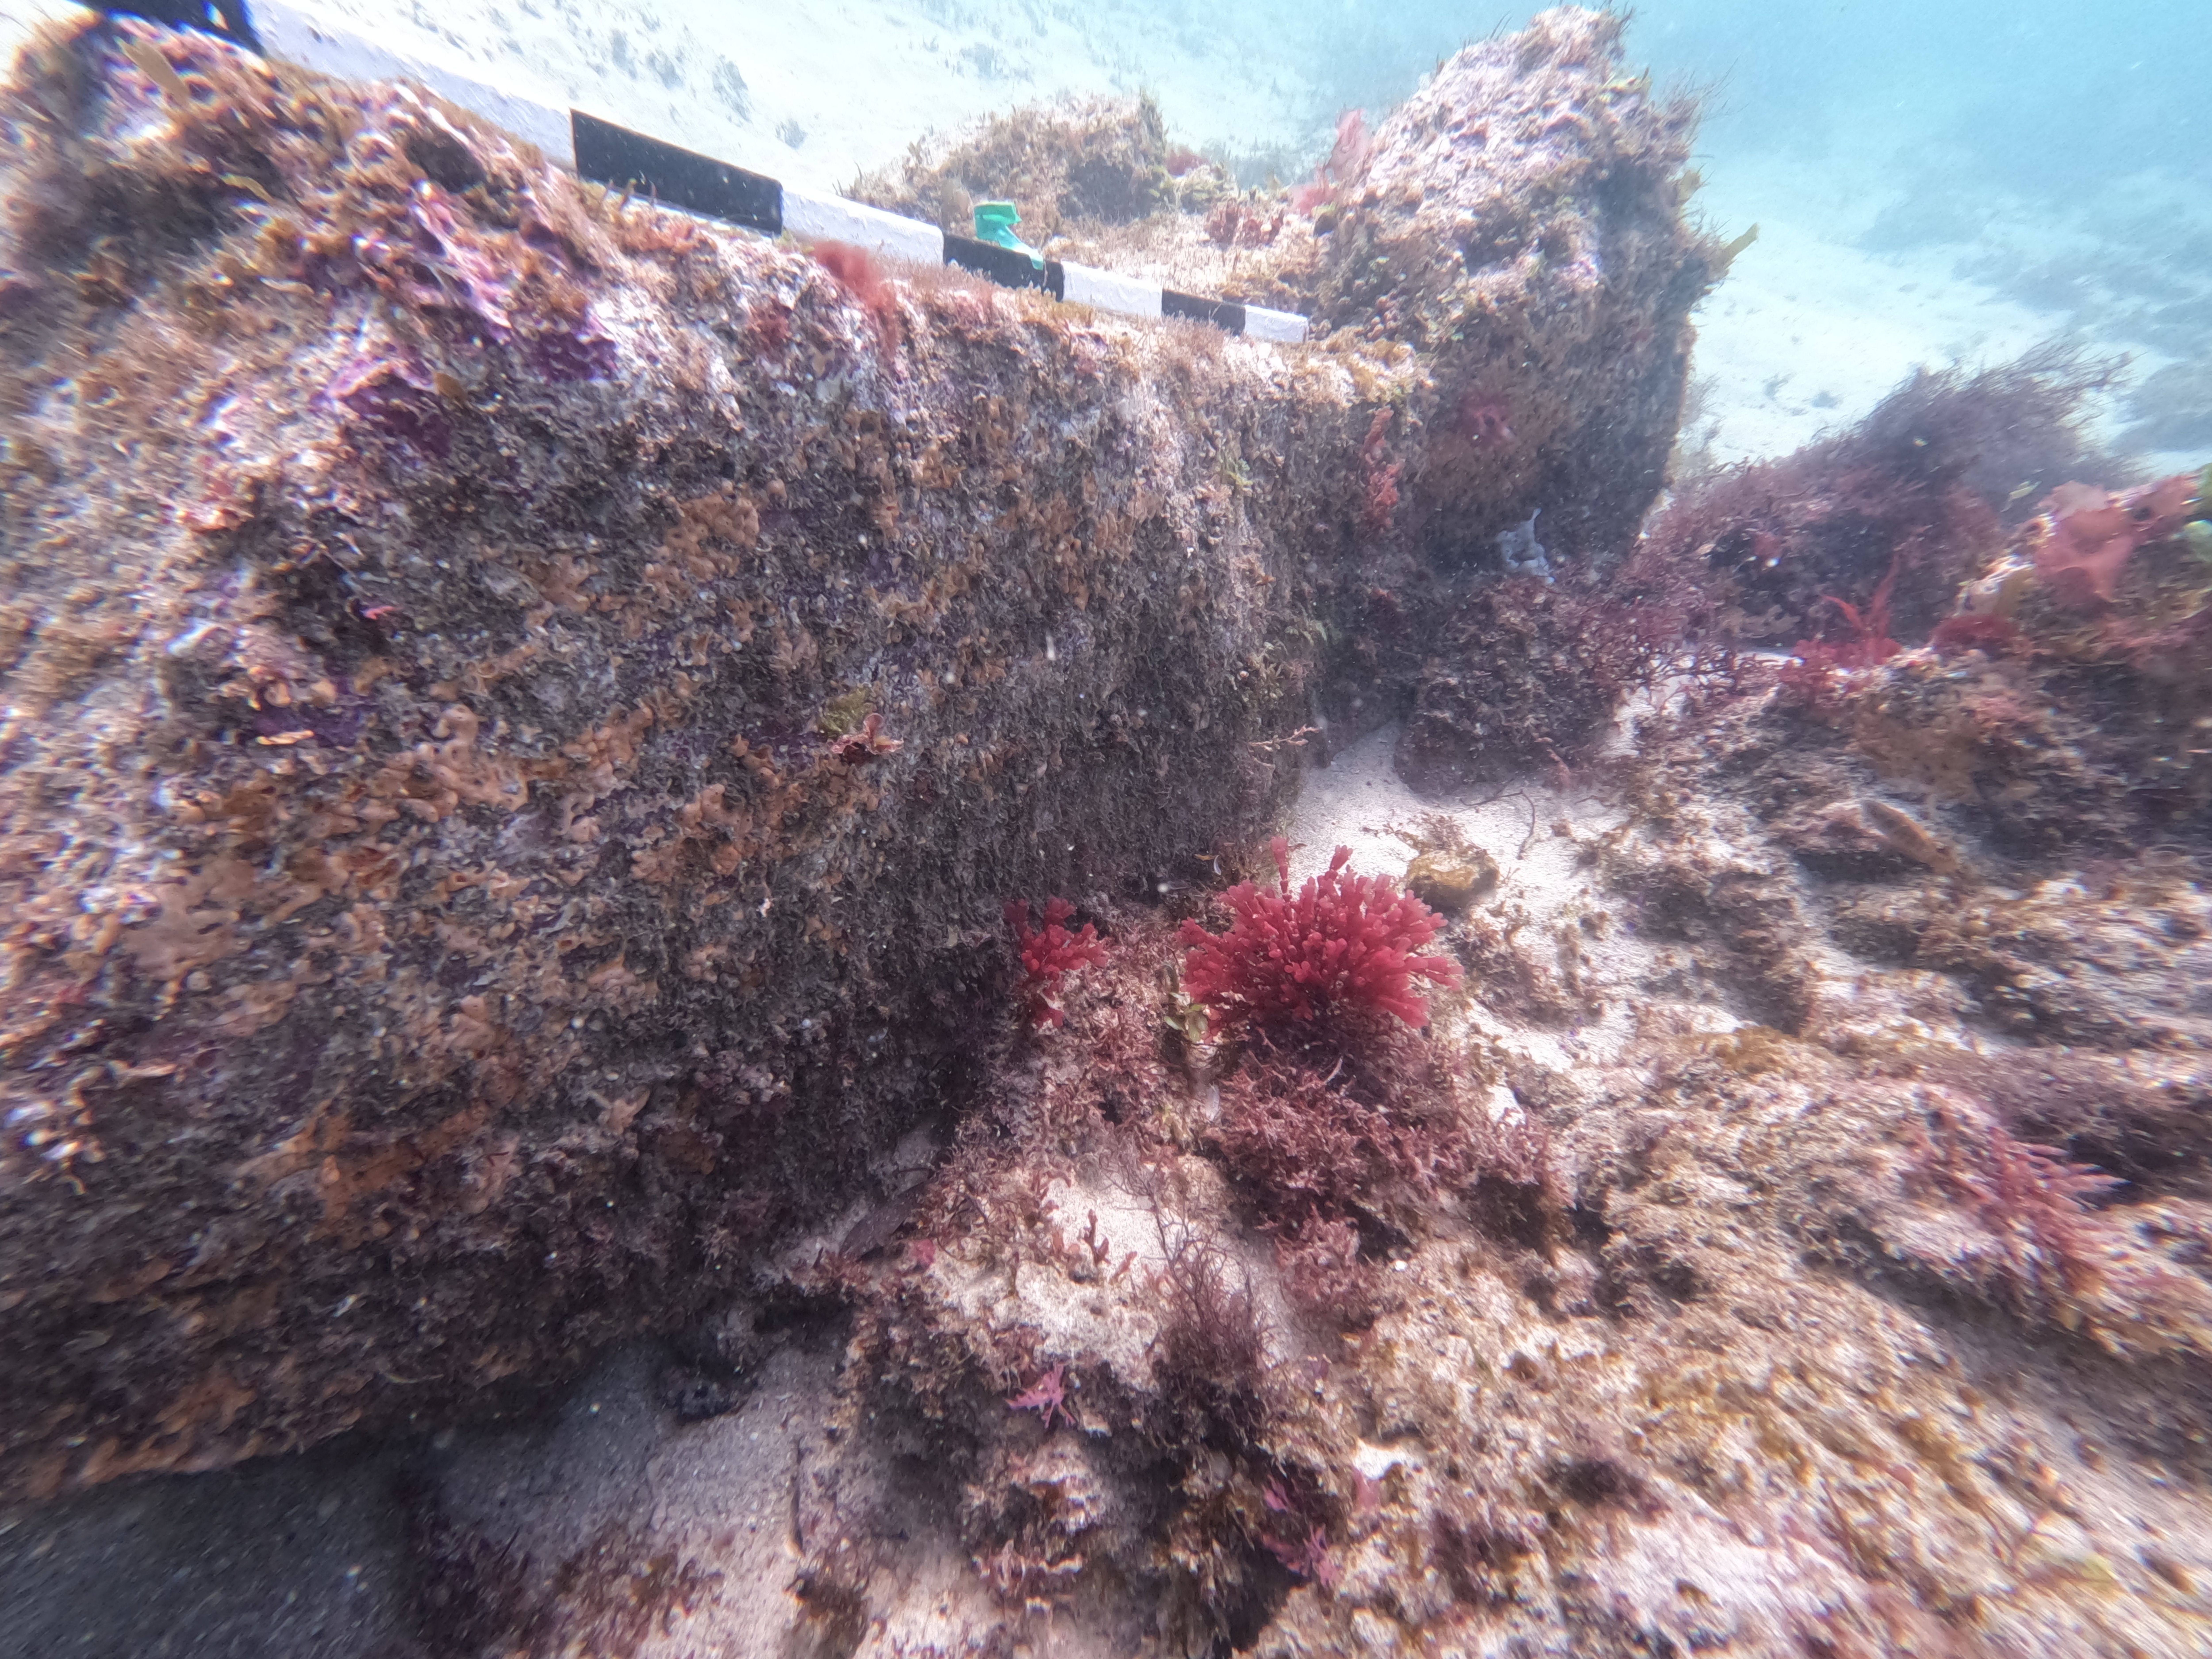

Supplement: Supplementary file 717 [file G0713784.pdf › Ocean2/G0713784.pdf]

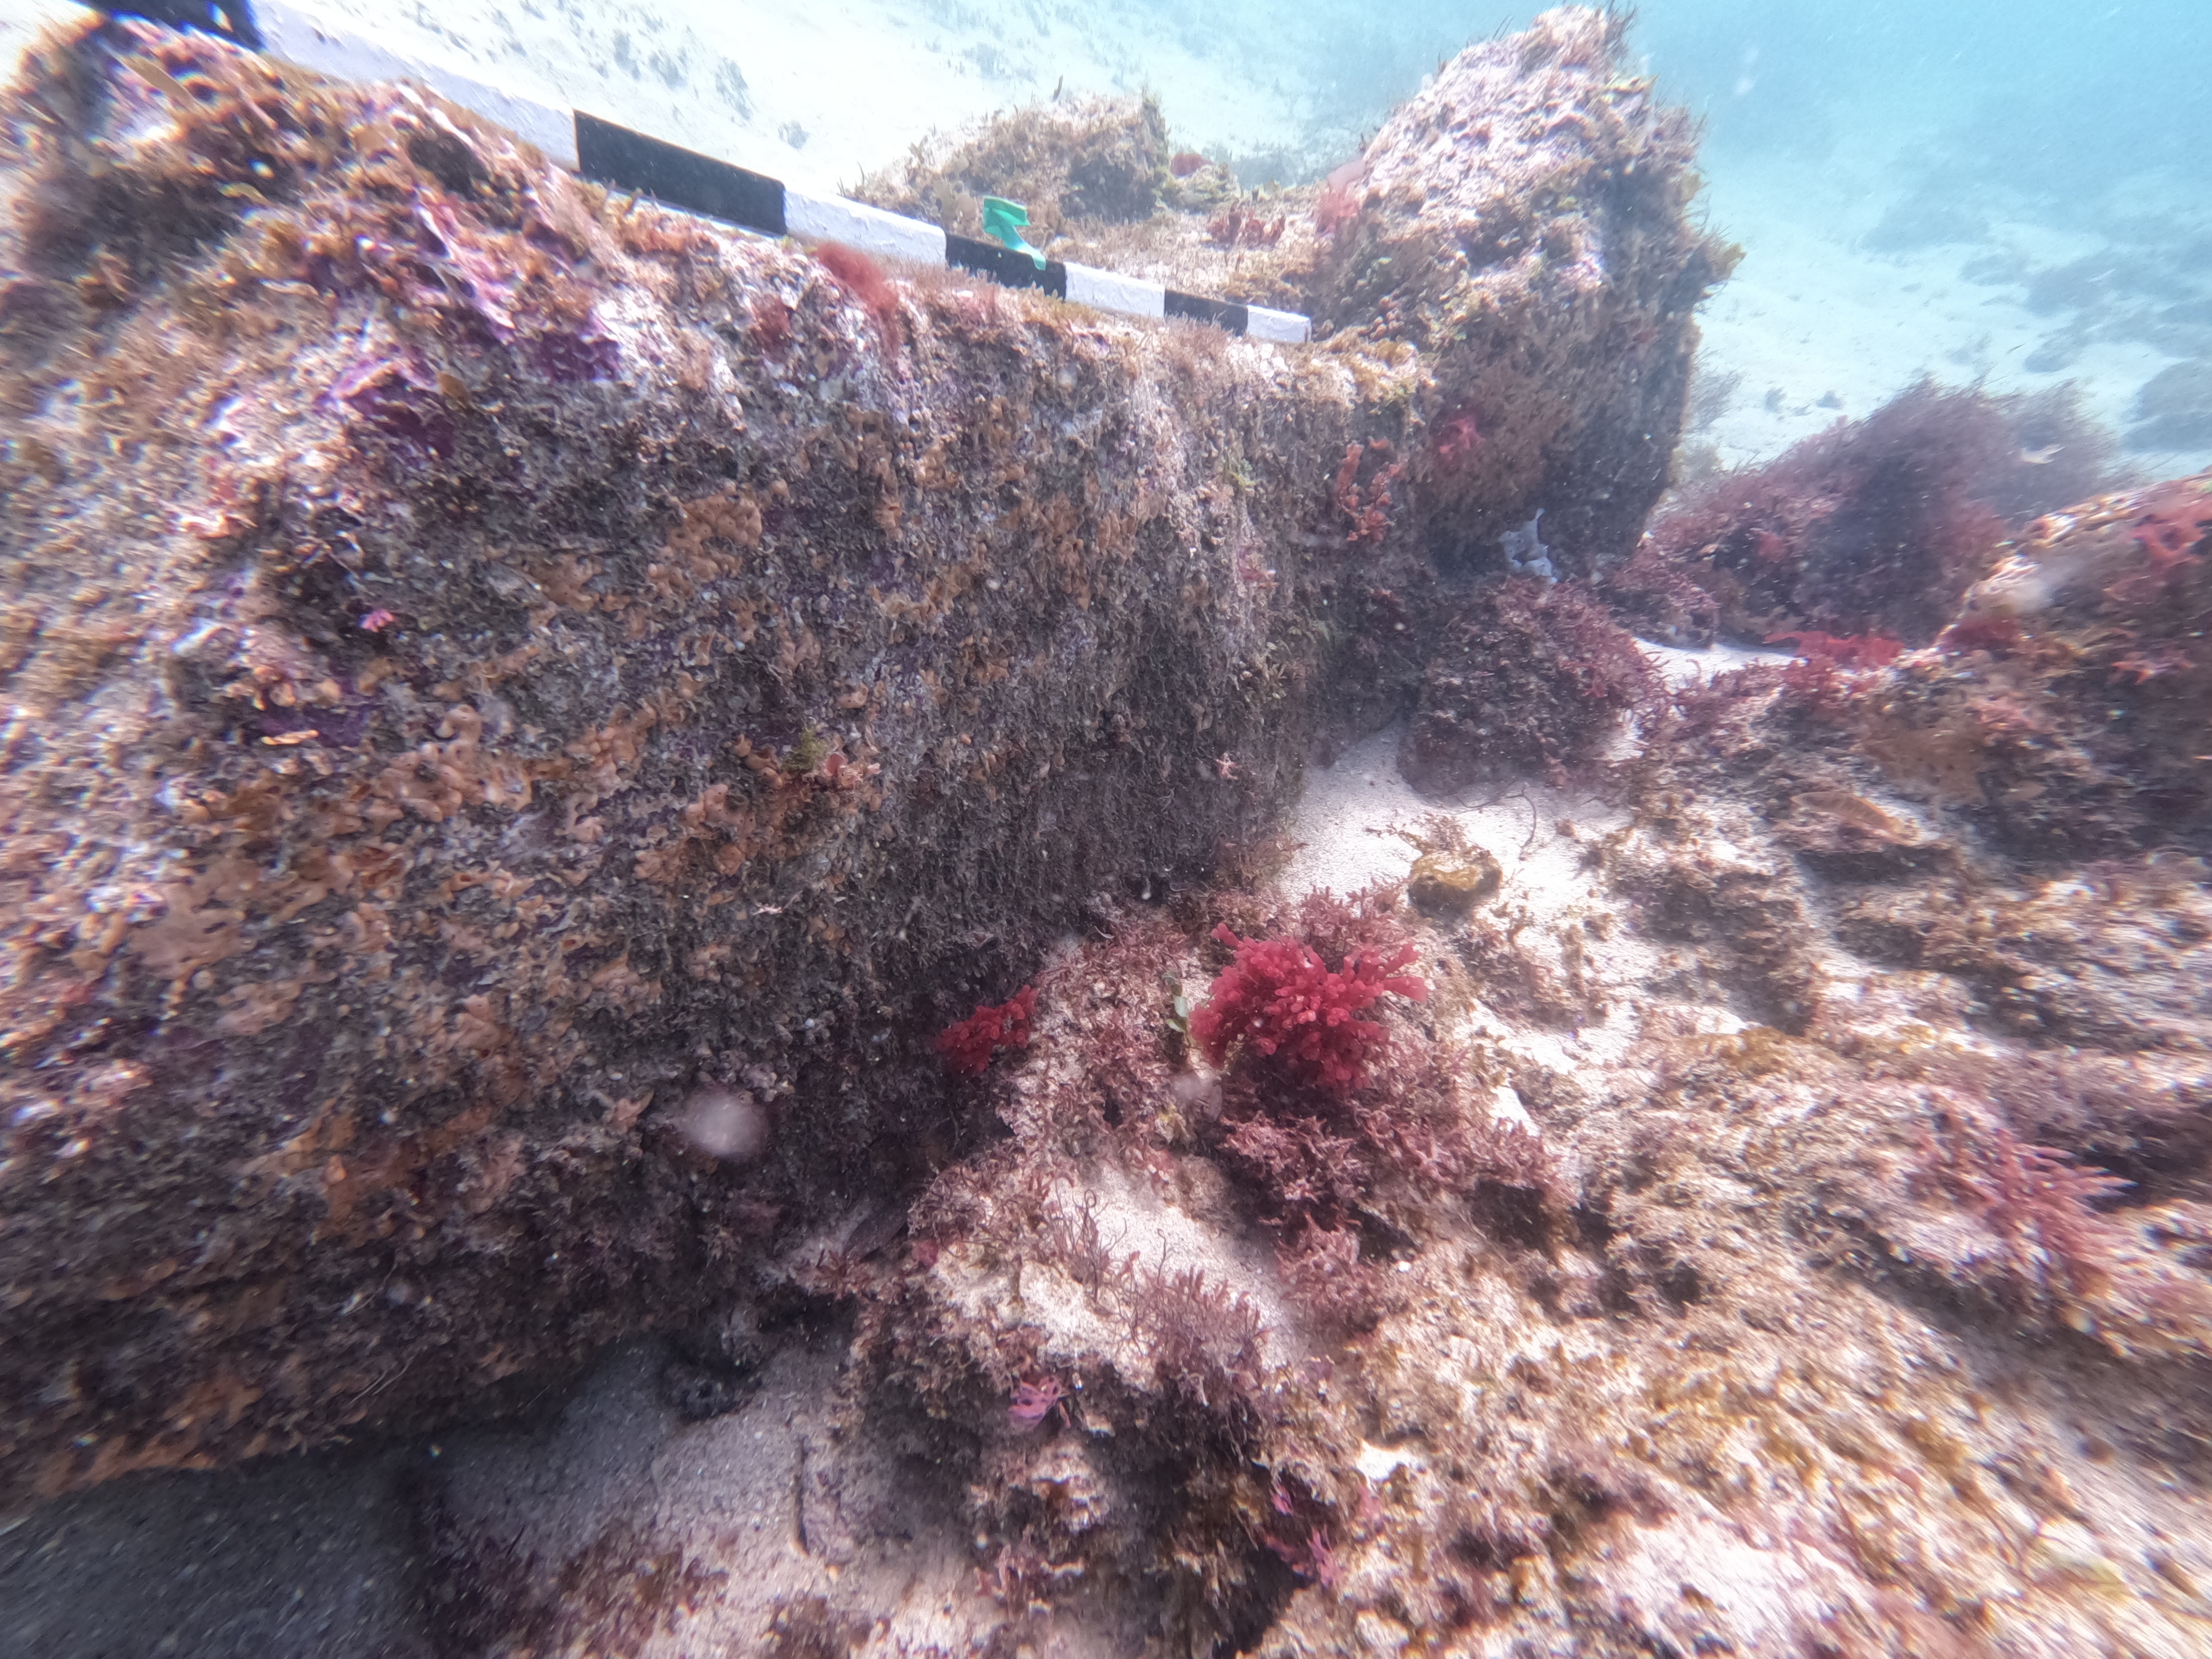

Supplement: Supplementary file 718 [file G0713785.pdf › Ocean2/G0713785.pdf]

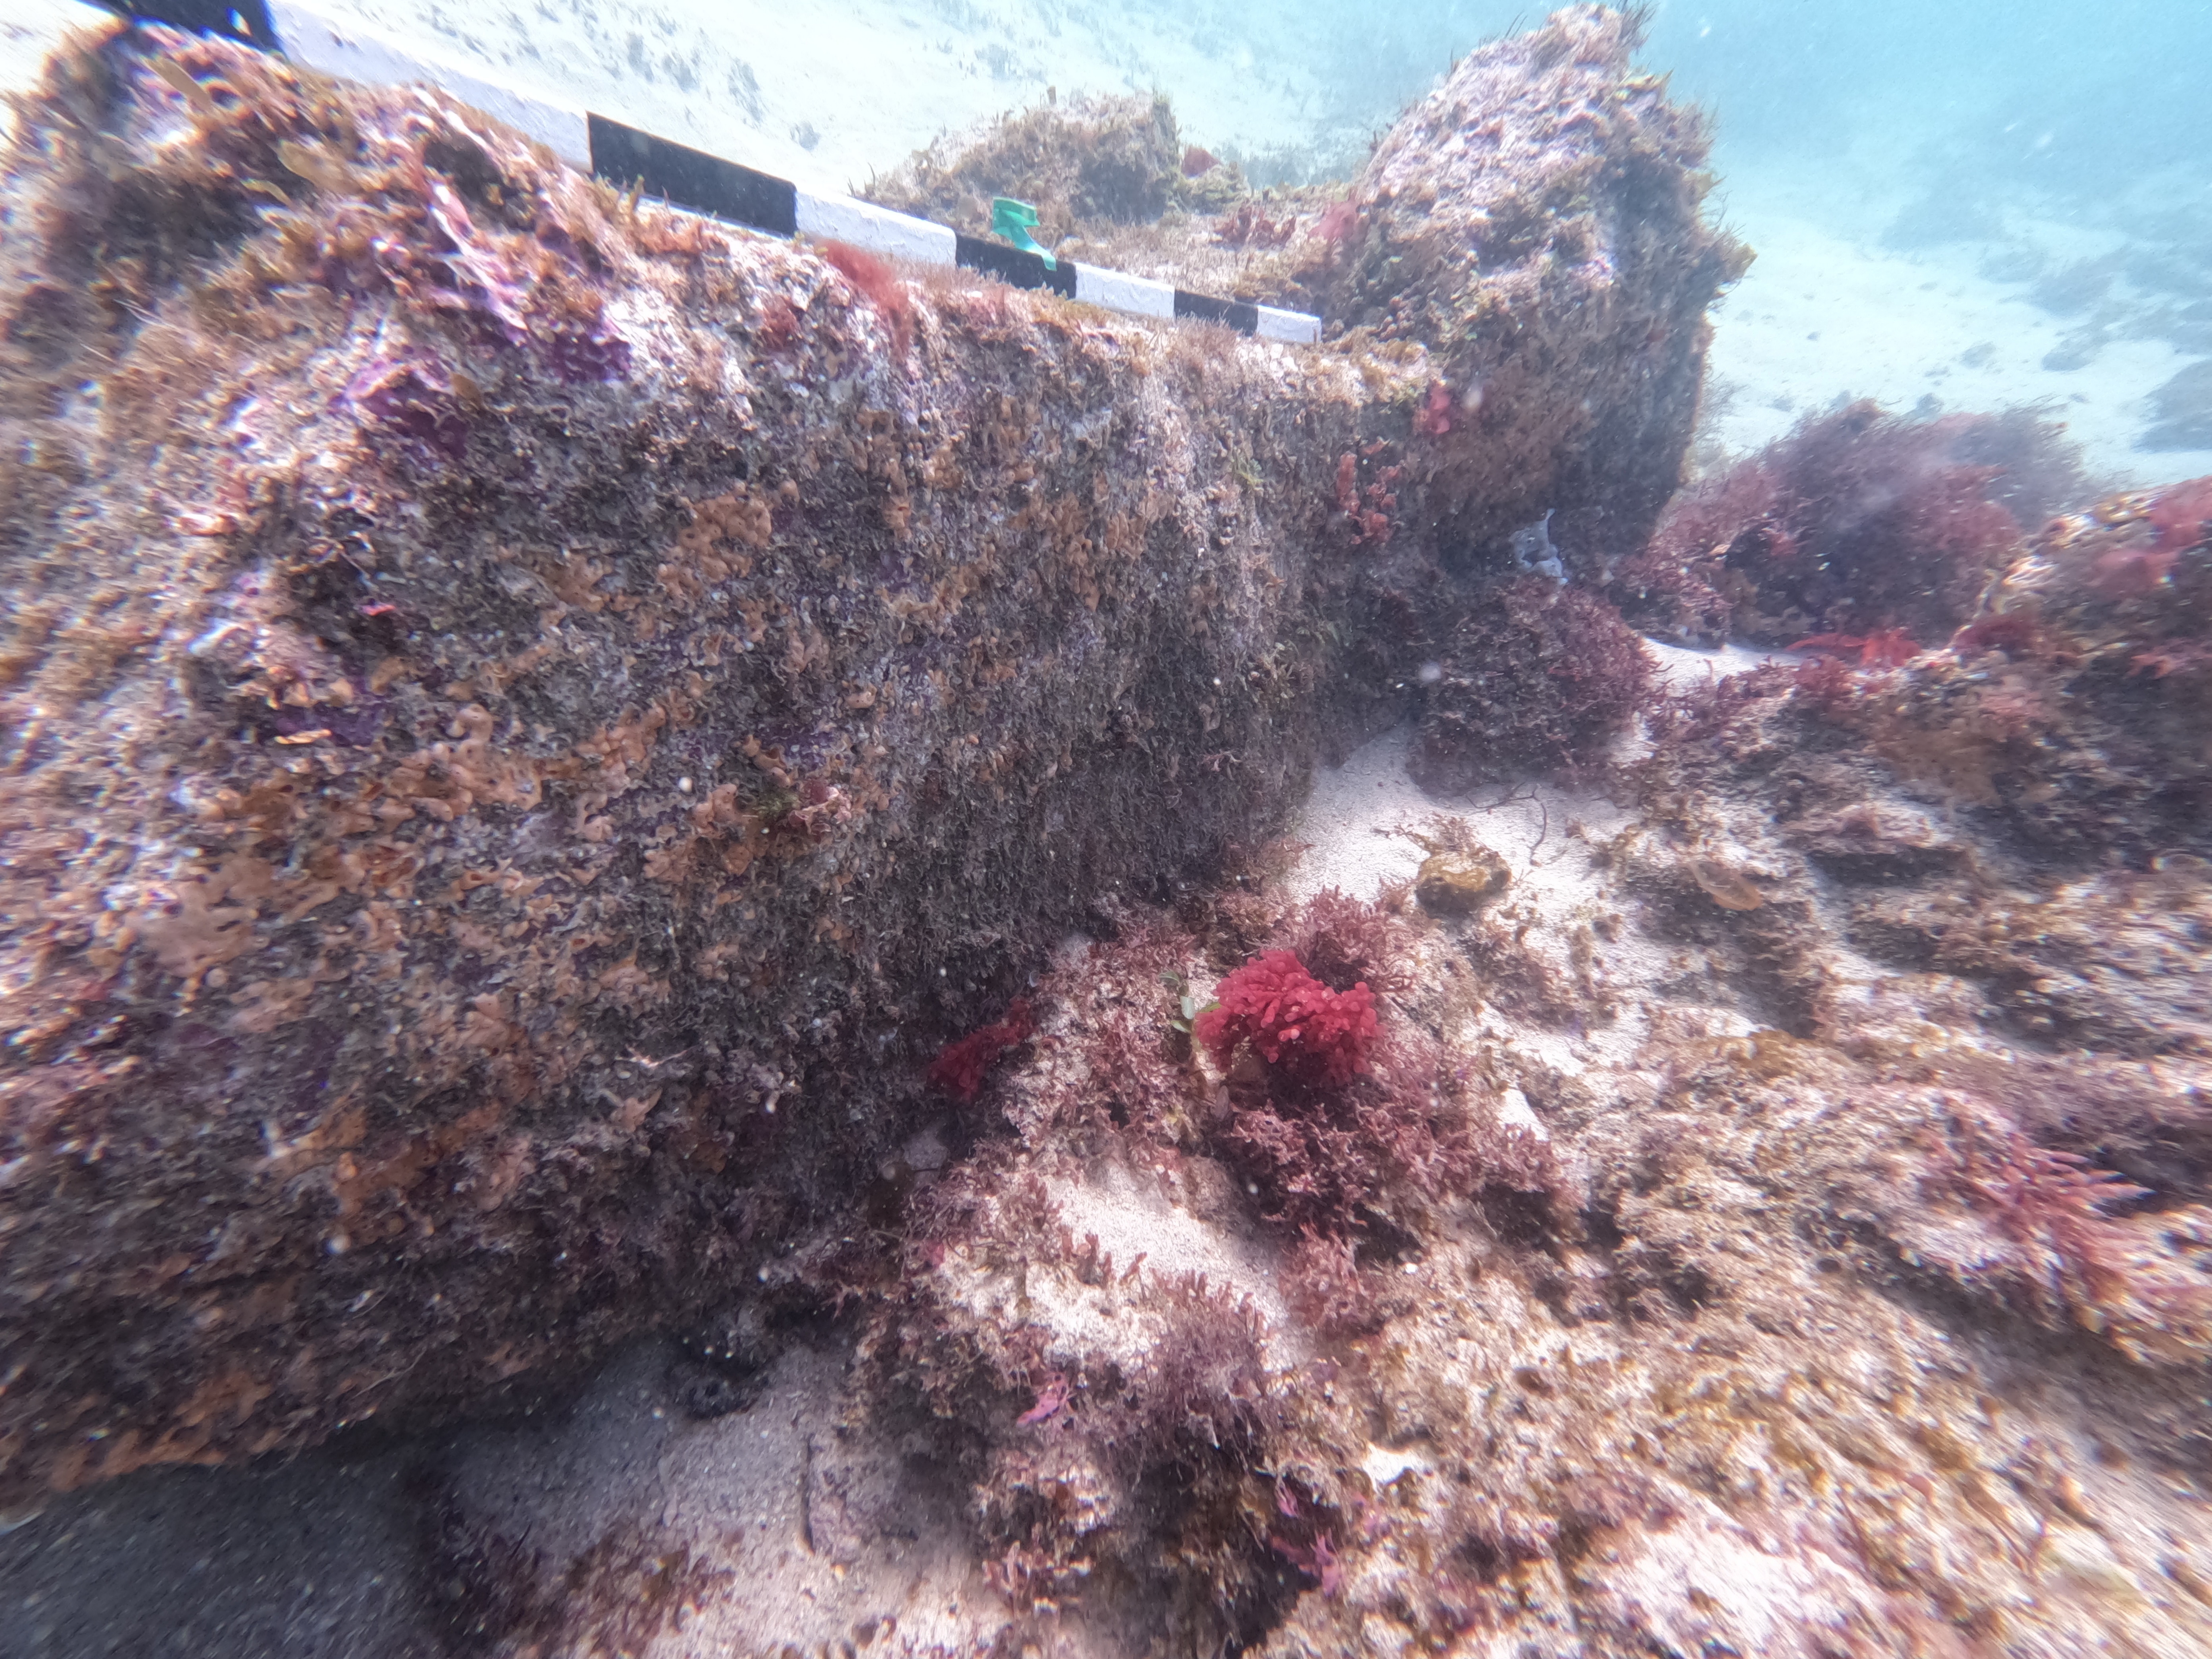

Supplement: Supplementary file 719 [file G0713786.pdf › Ocean2/G0713786.pdf]

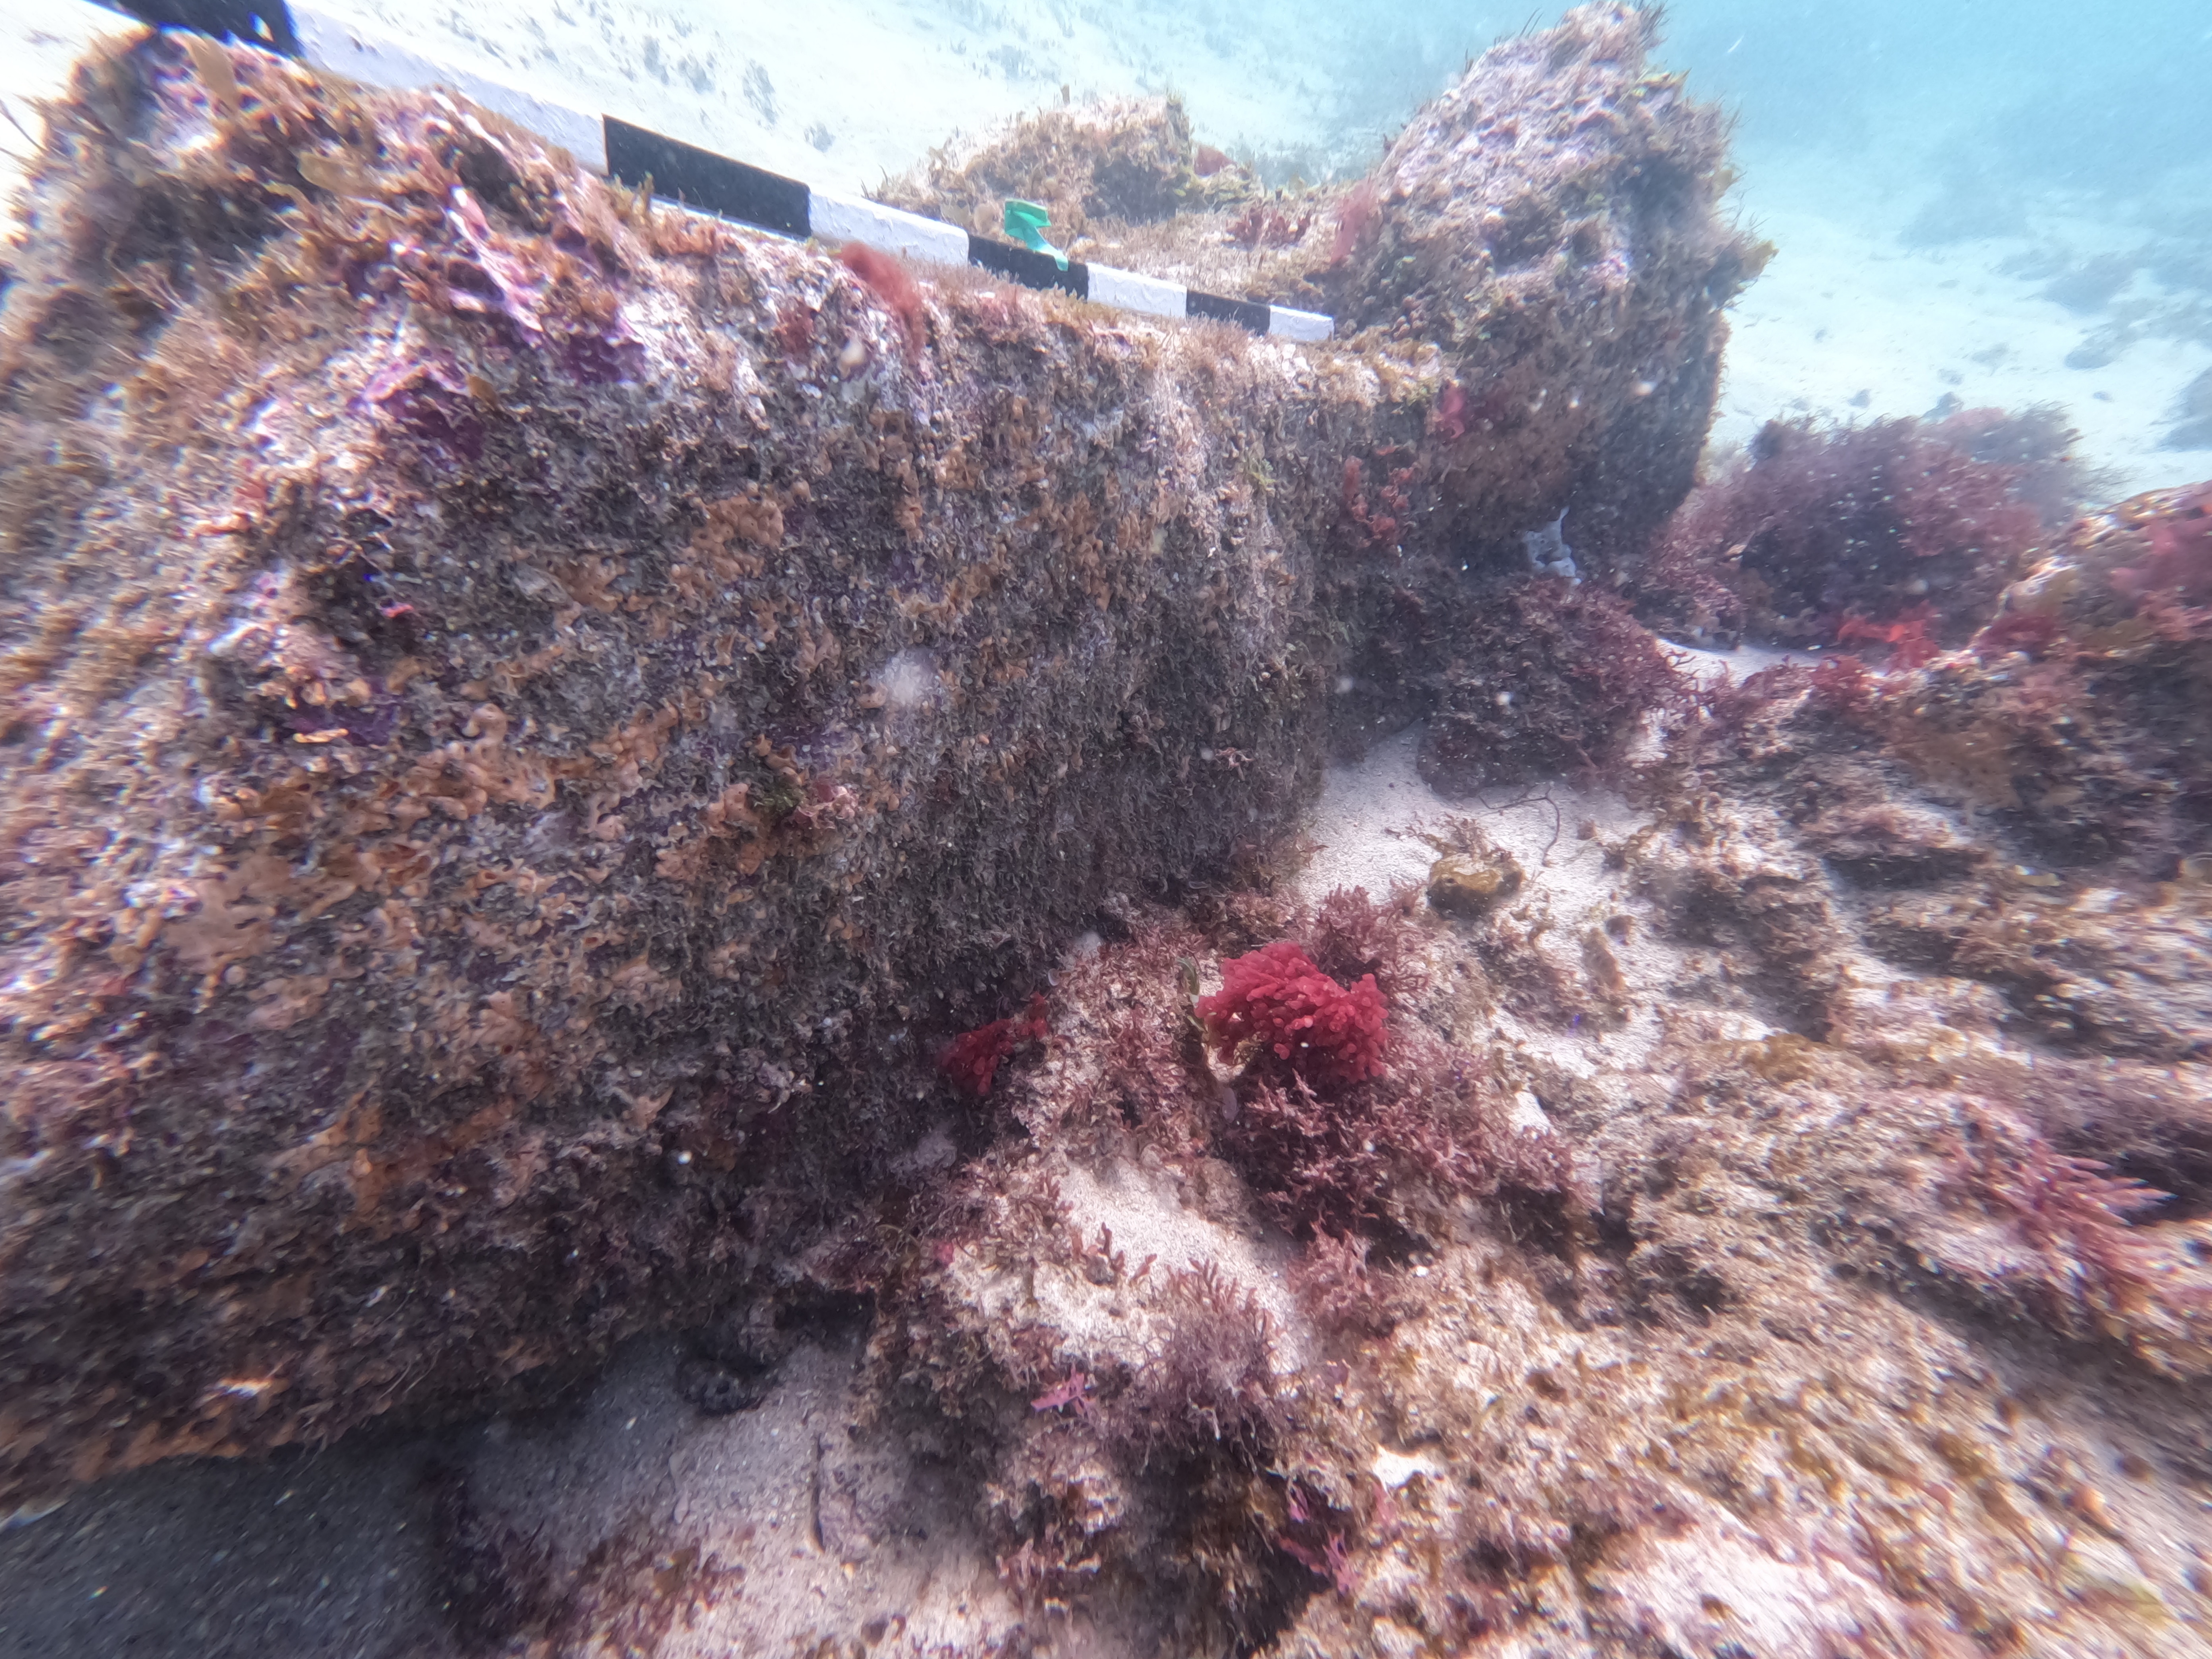

Supplement: Supplementary file 720 [file G0713787.pdf › Ocean2/G0713787.pdf]

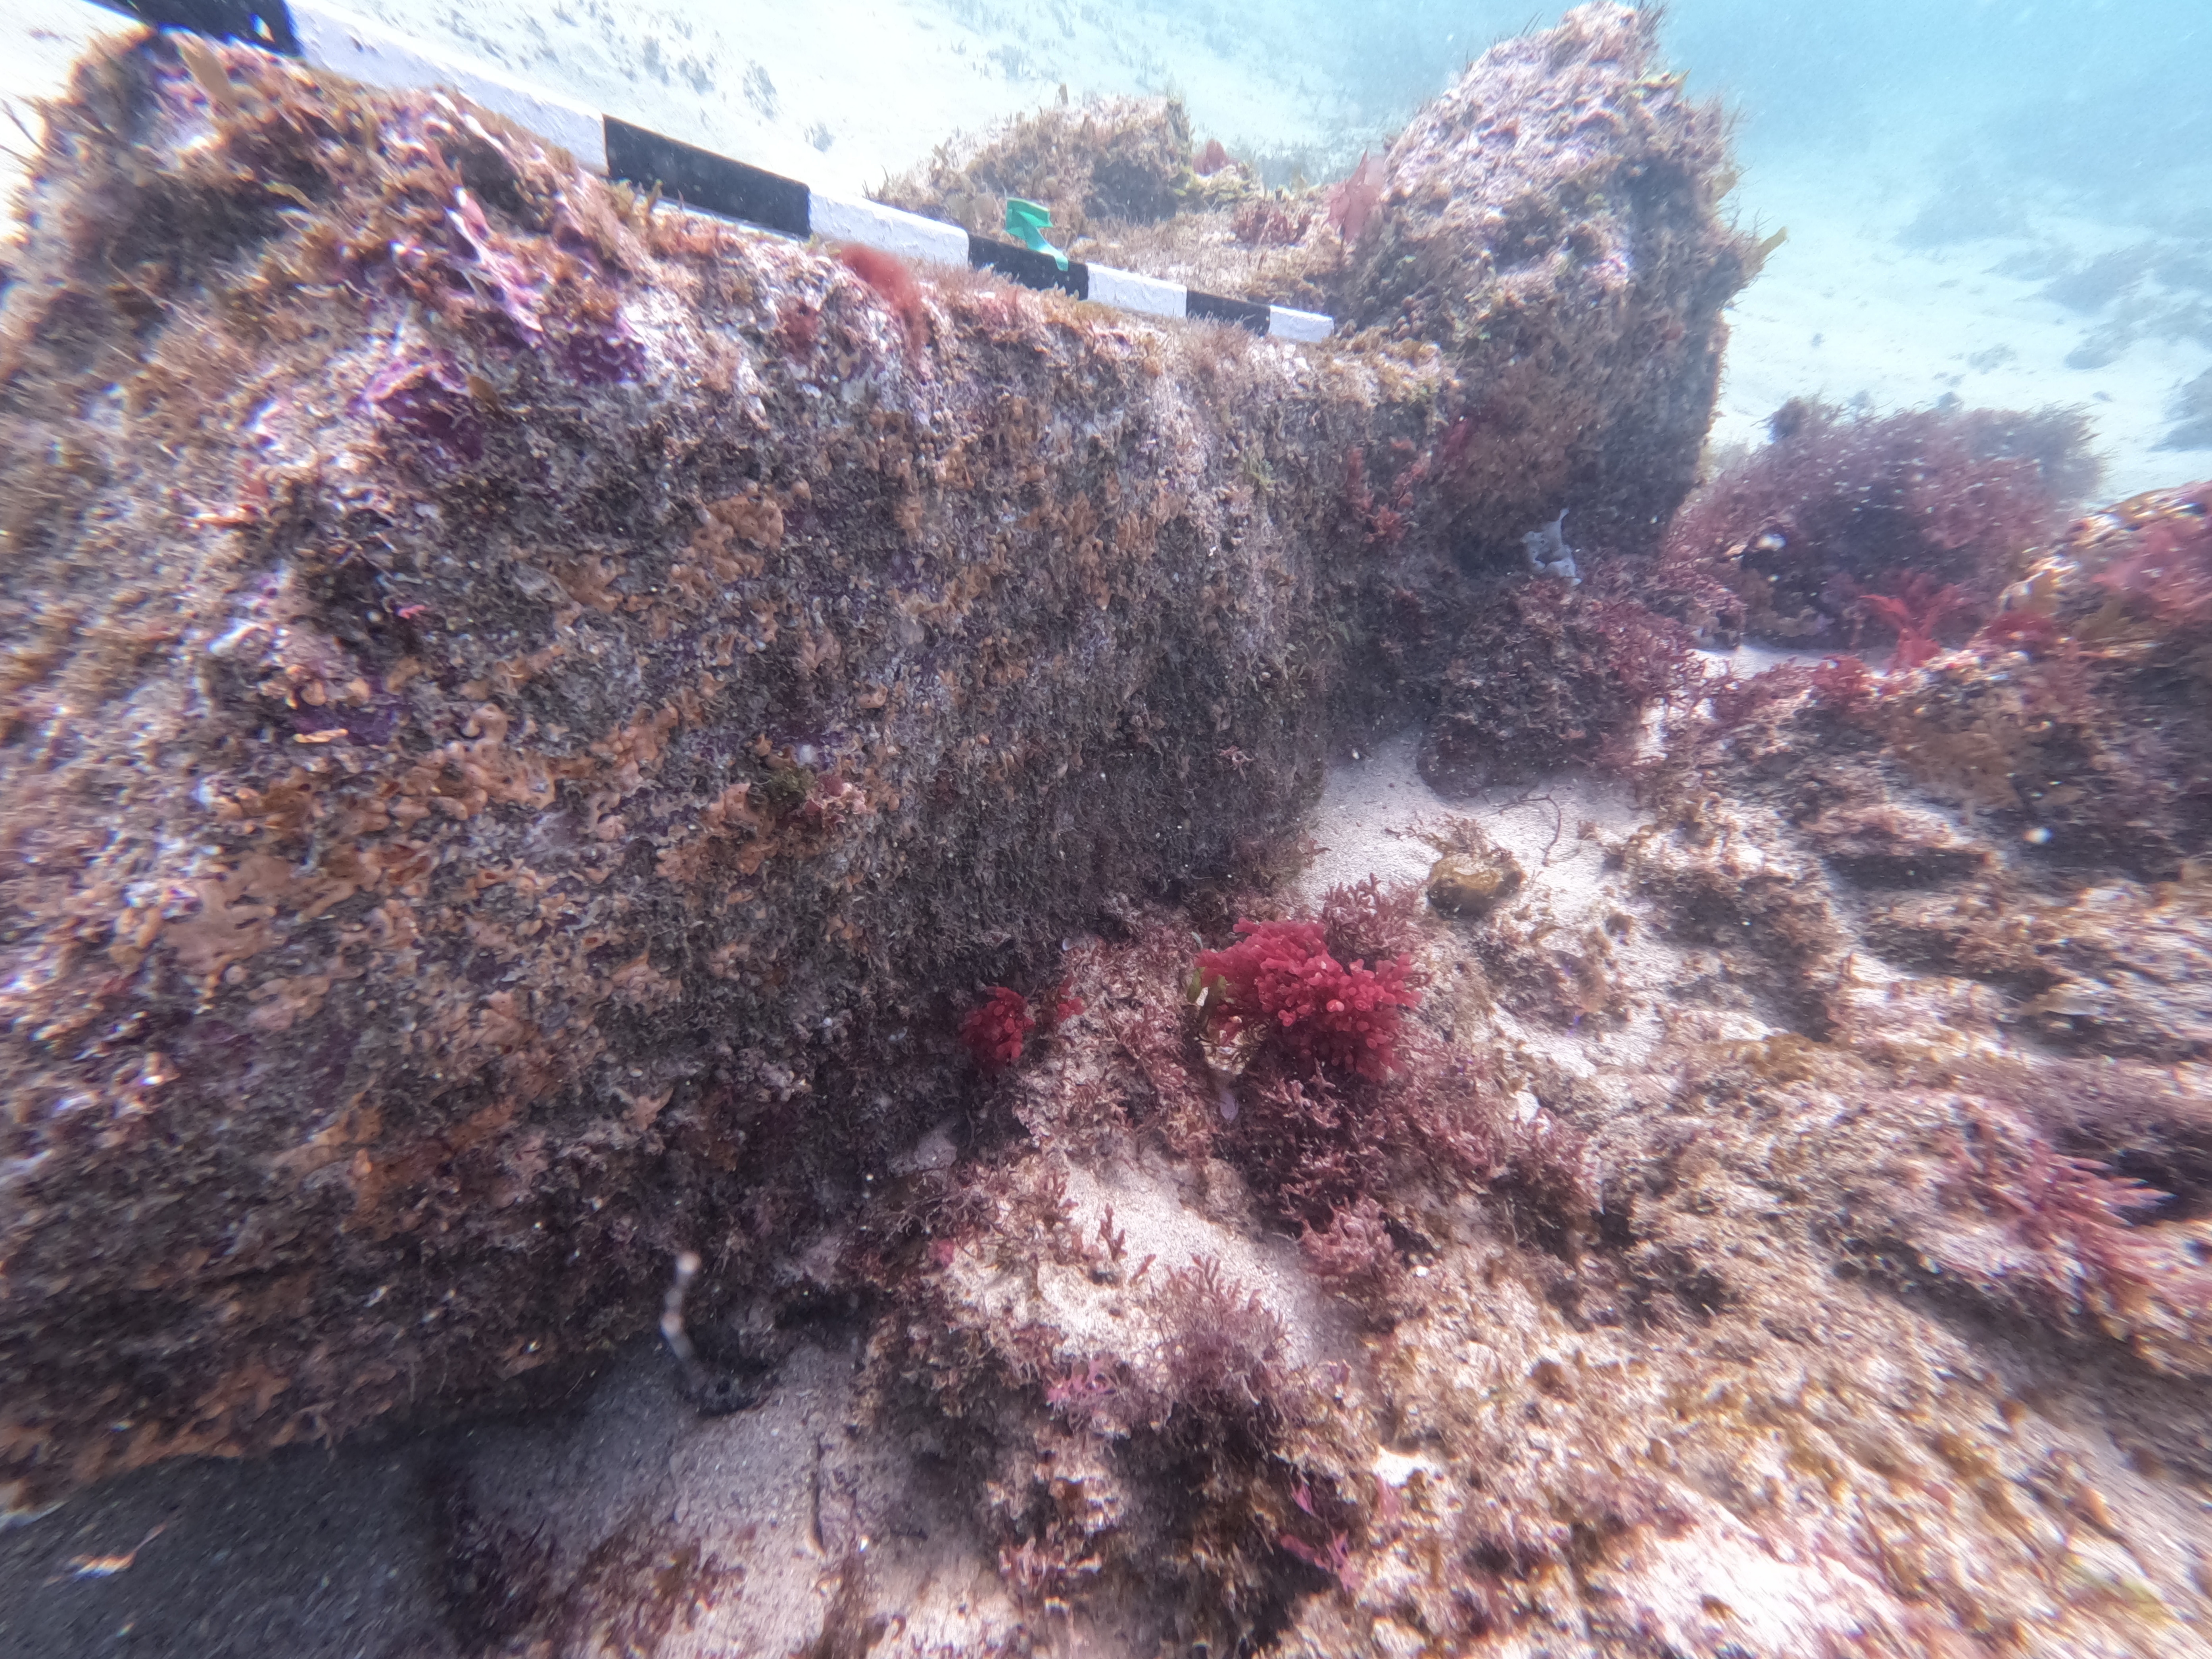

Supplement: Supplementary file 721 [file G0713788.pdf › Ocean2/G0713788.pdf]

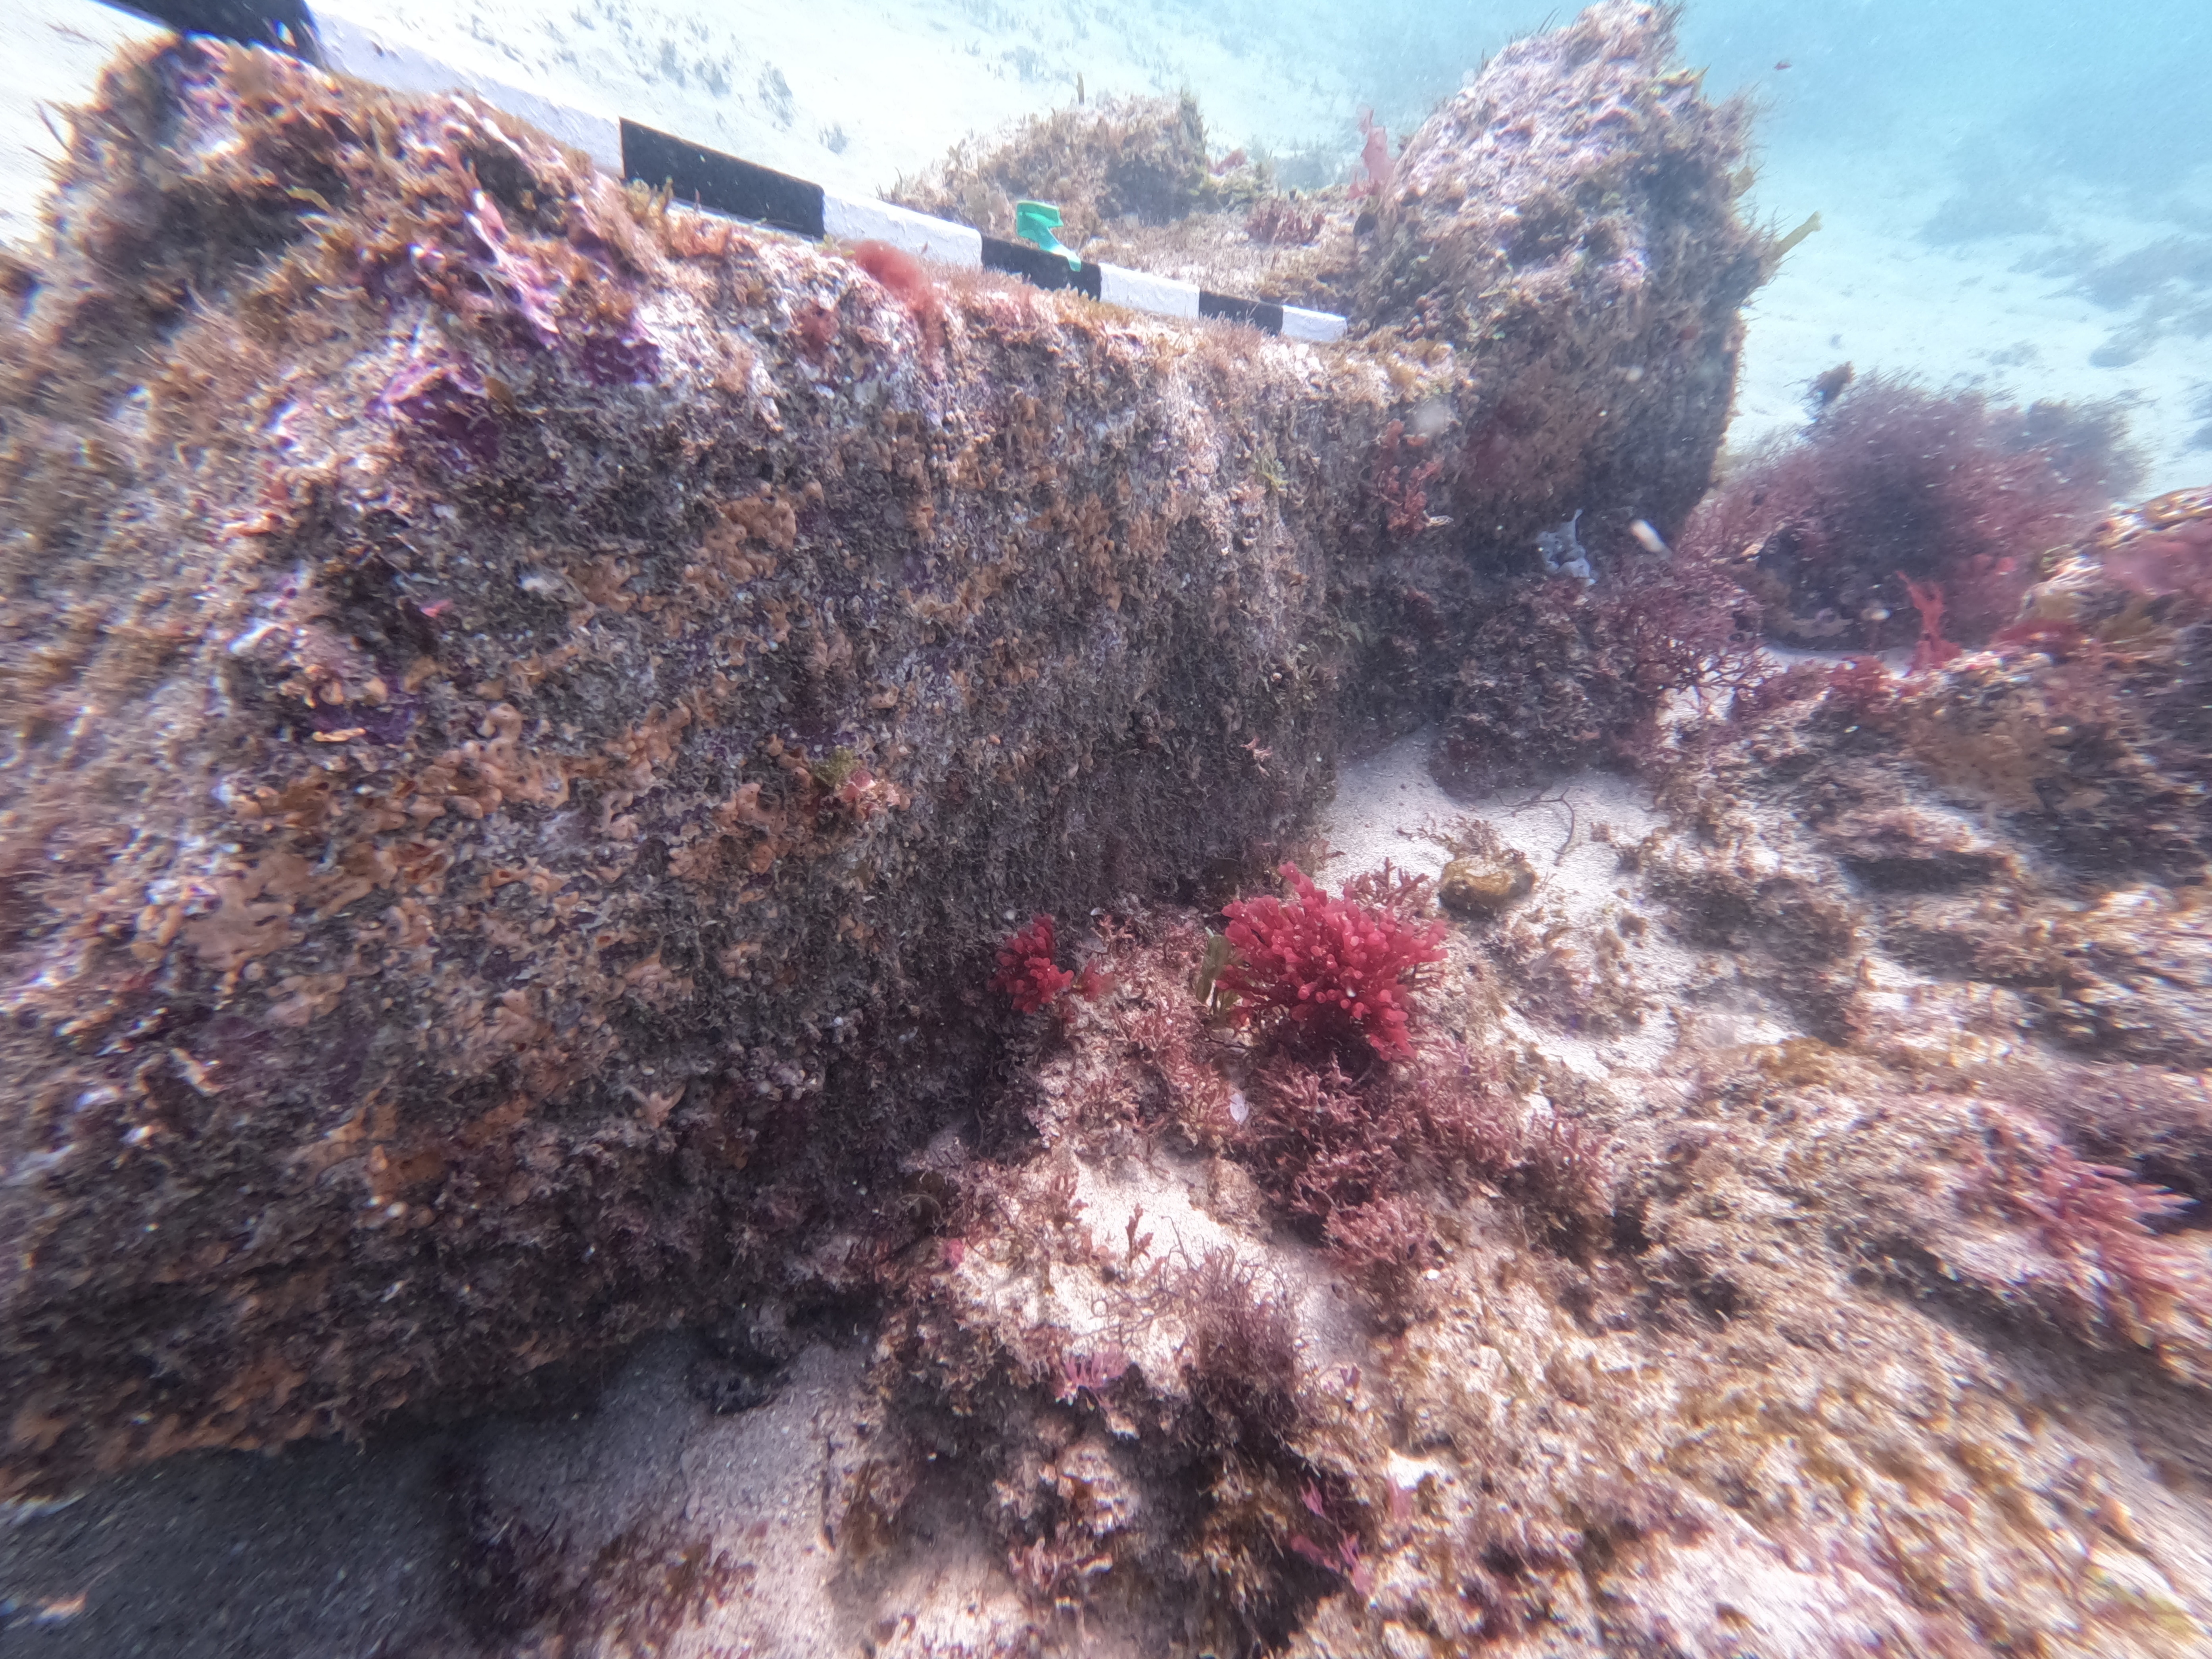

Supplement: Supplementary file 722 [file G0713789.pdf › Ocean2/G0713789.pdf]

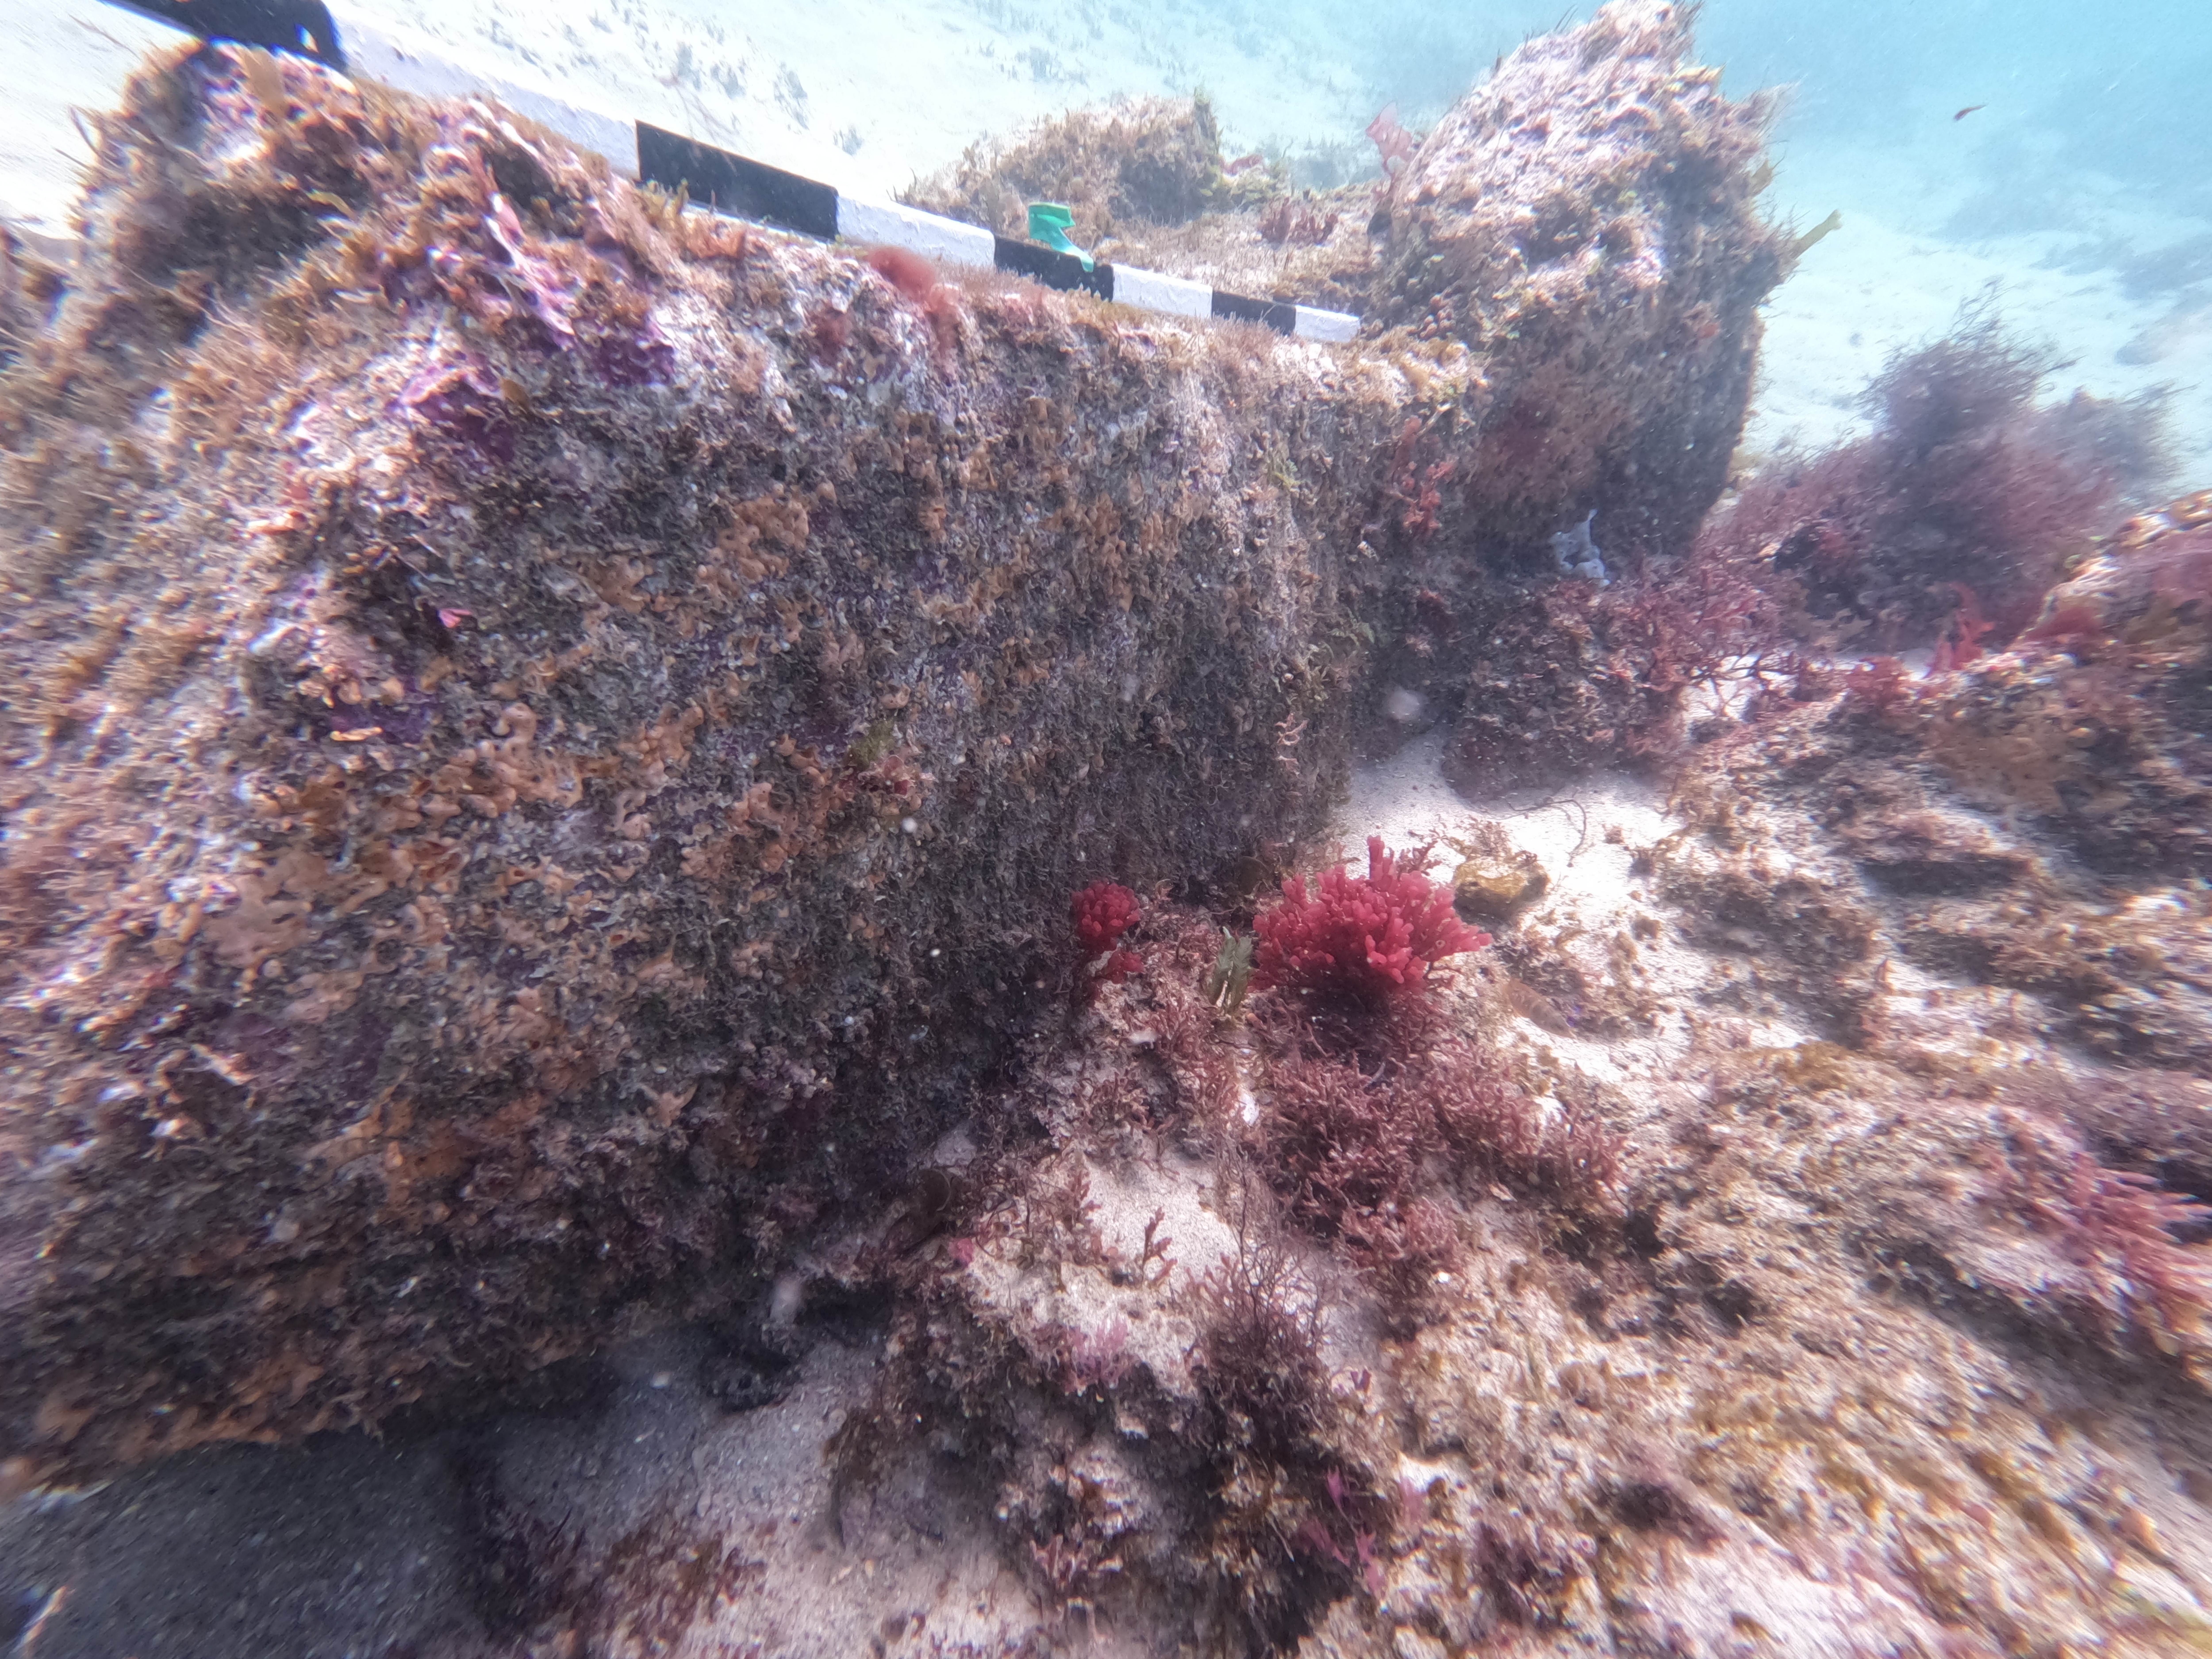

Supplement: Supplementary file 723 [file G0713790.pdf › Ocean2/G0713790.pdf]

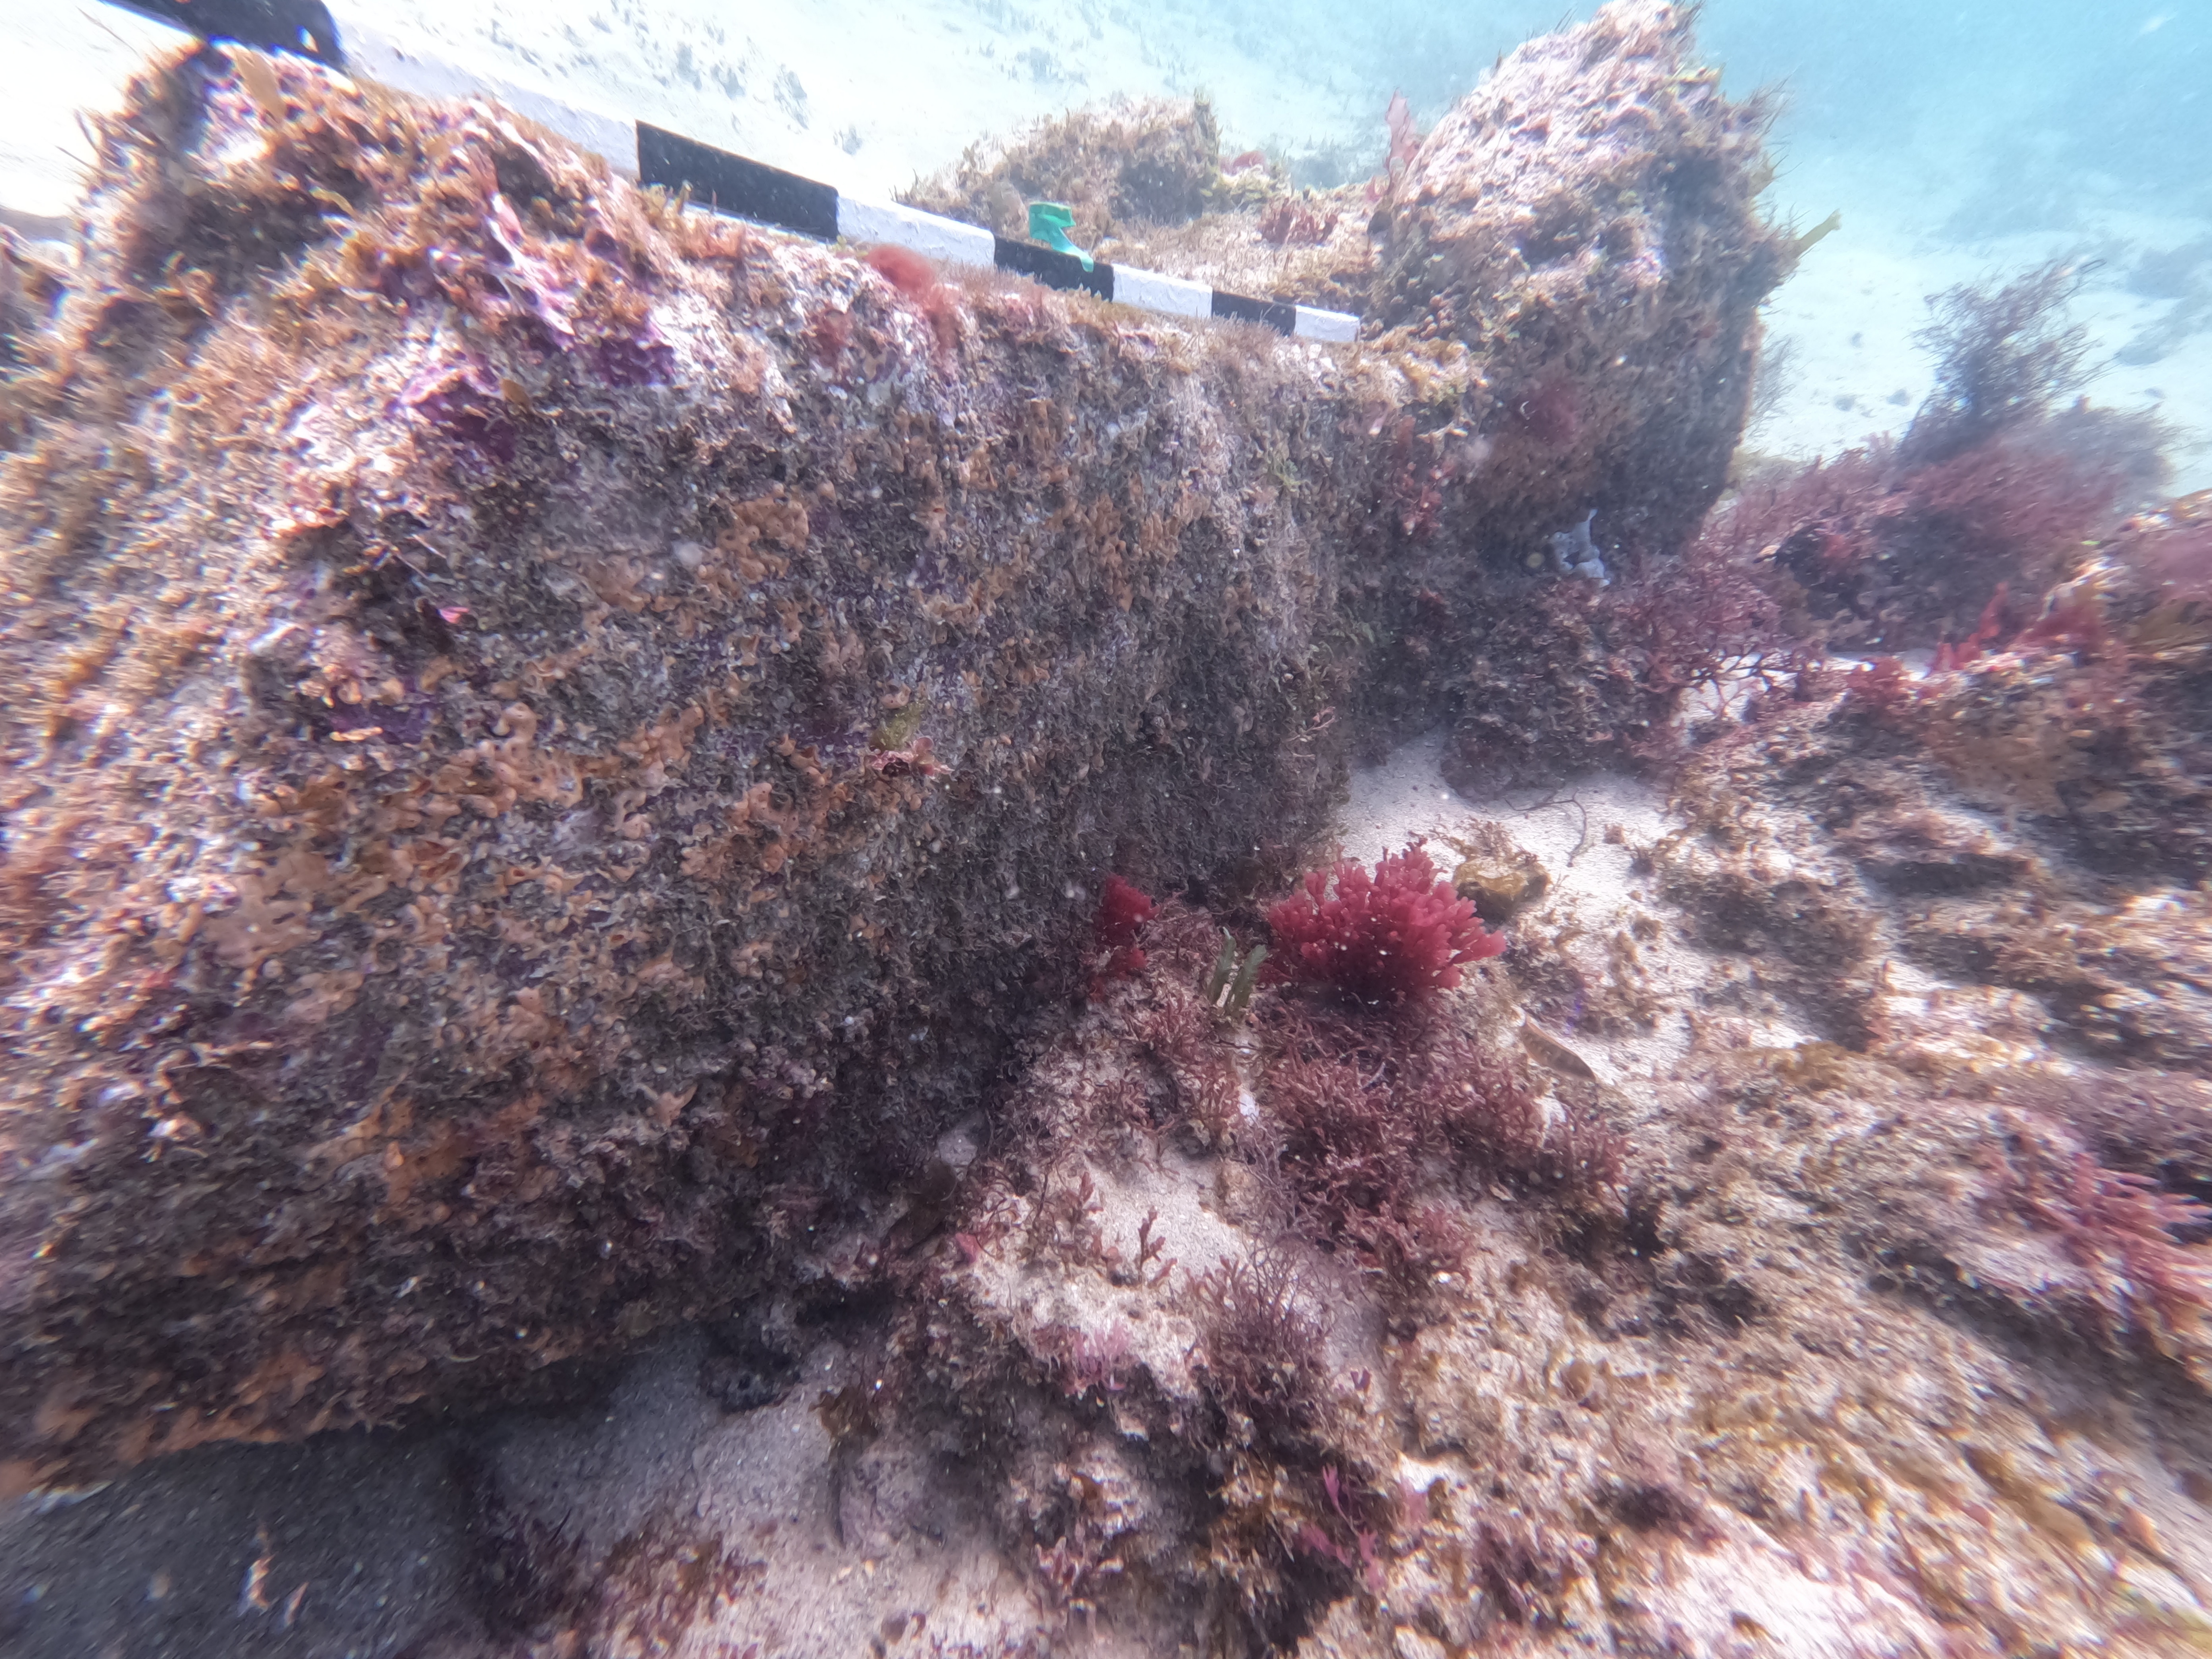

Supplement: Supplementary file 724 [file G0713791.pdf › Ocean2/G0713791.pdf]

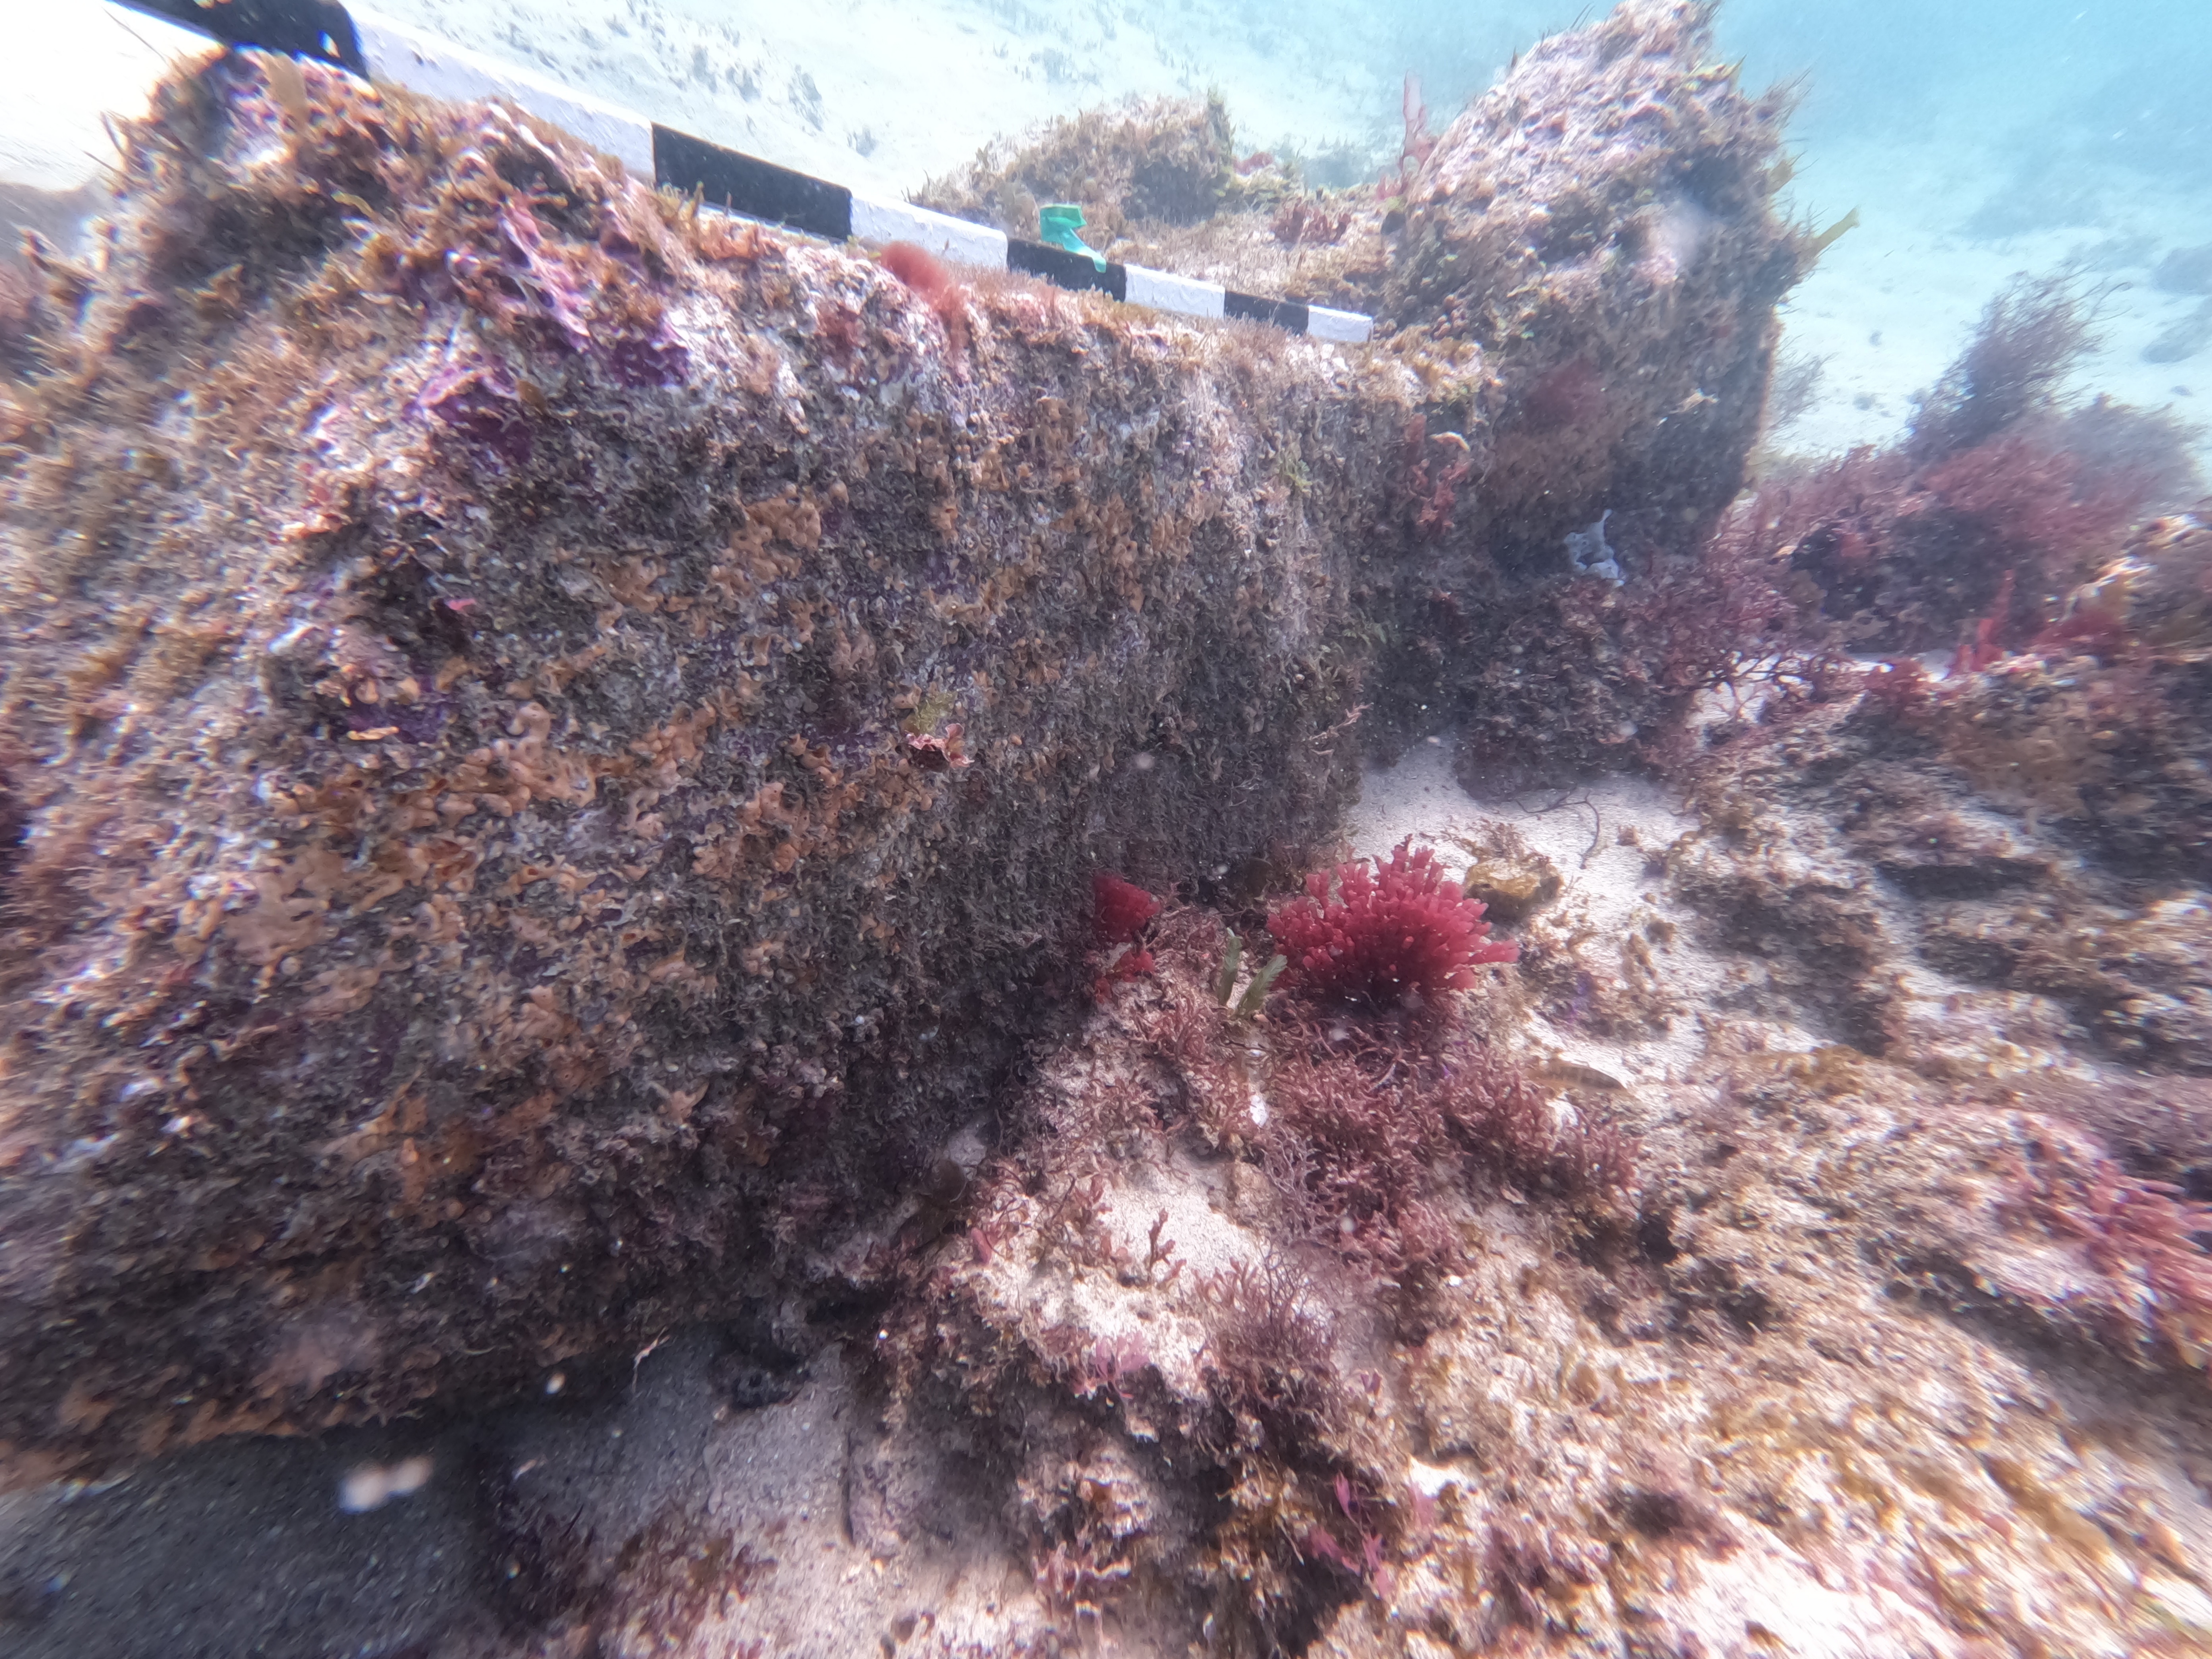

Supplement: Supplementary file 725 [file G0713792.pdf › Ocean2/G0713792.pdf]

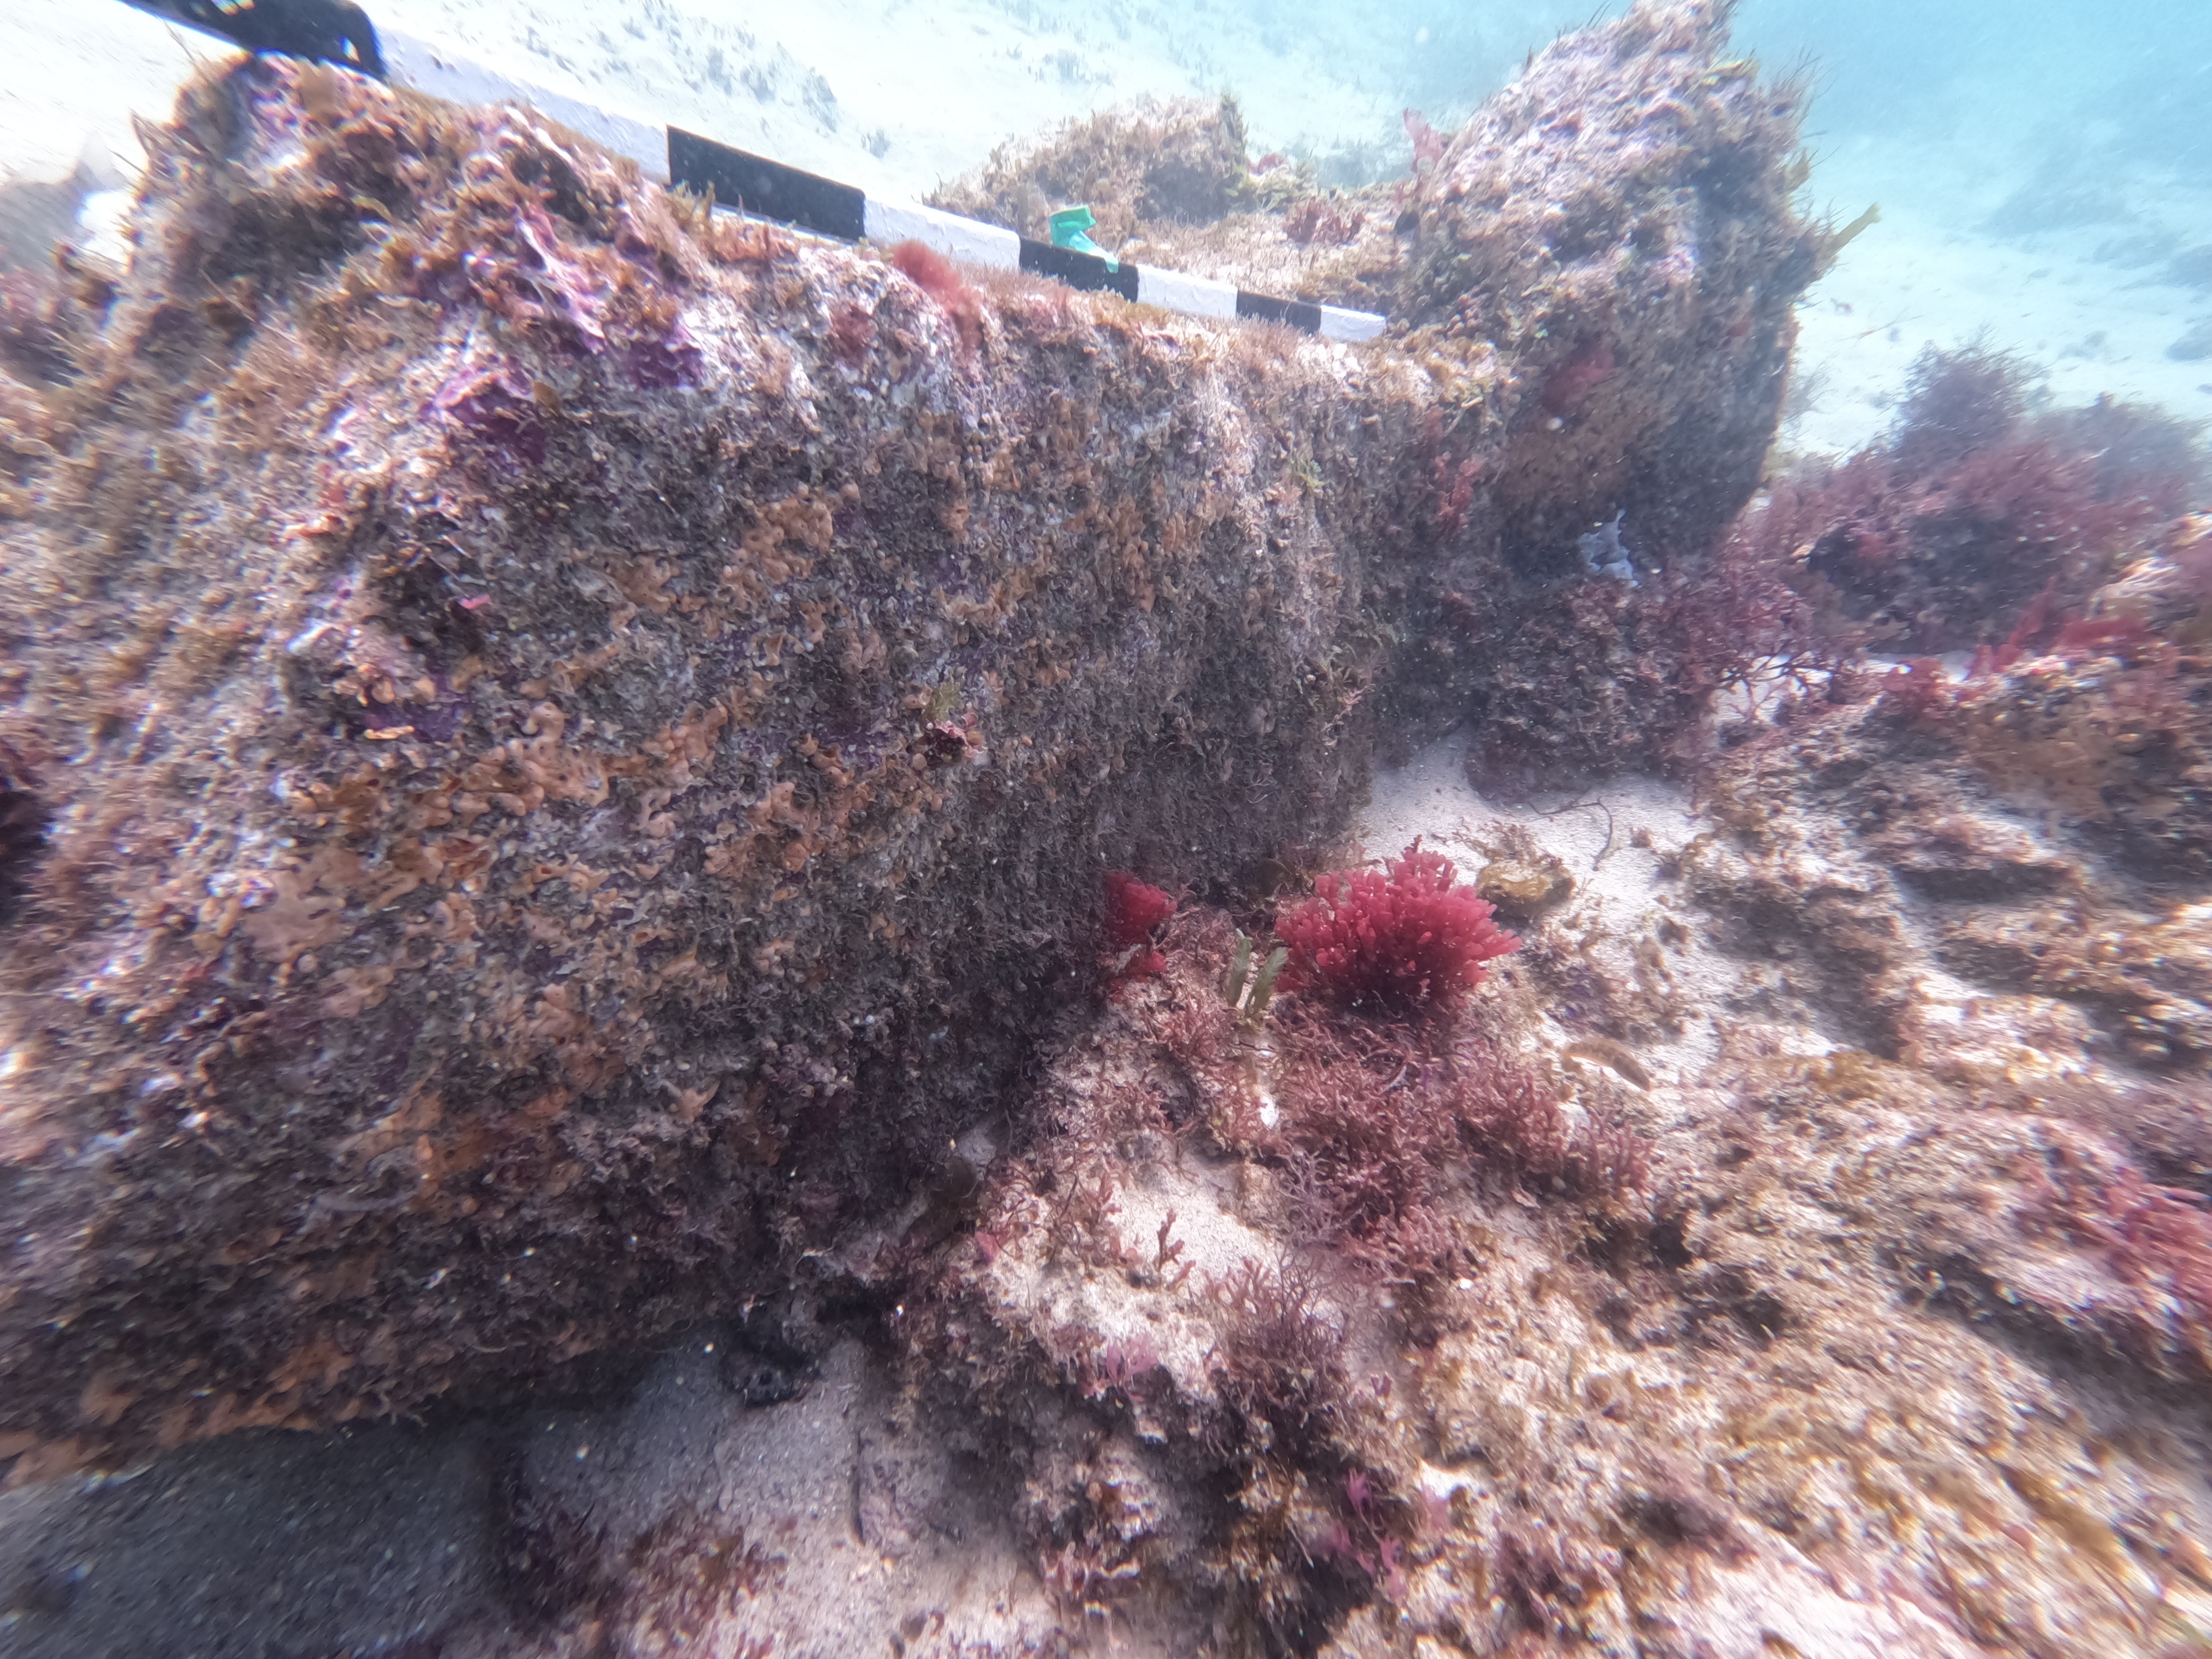

Supplement: Supplementary file 726 [file G0713793.pdf › Ocean2/G0713793.pdf]

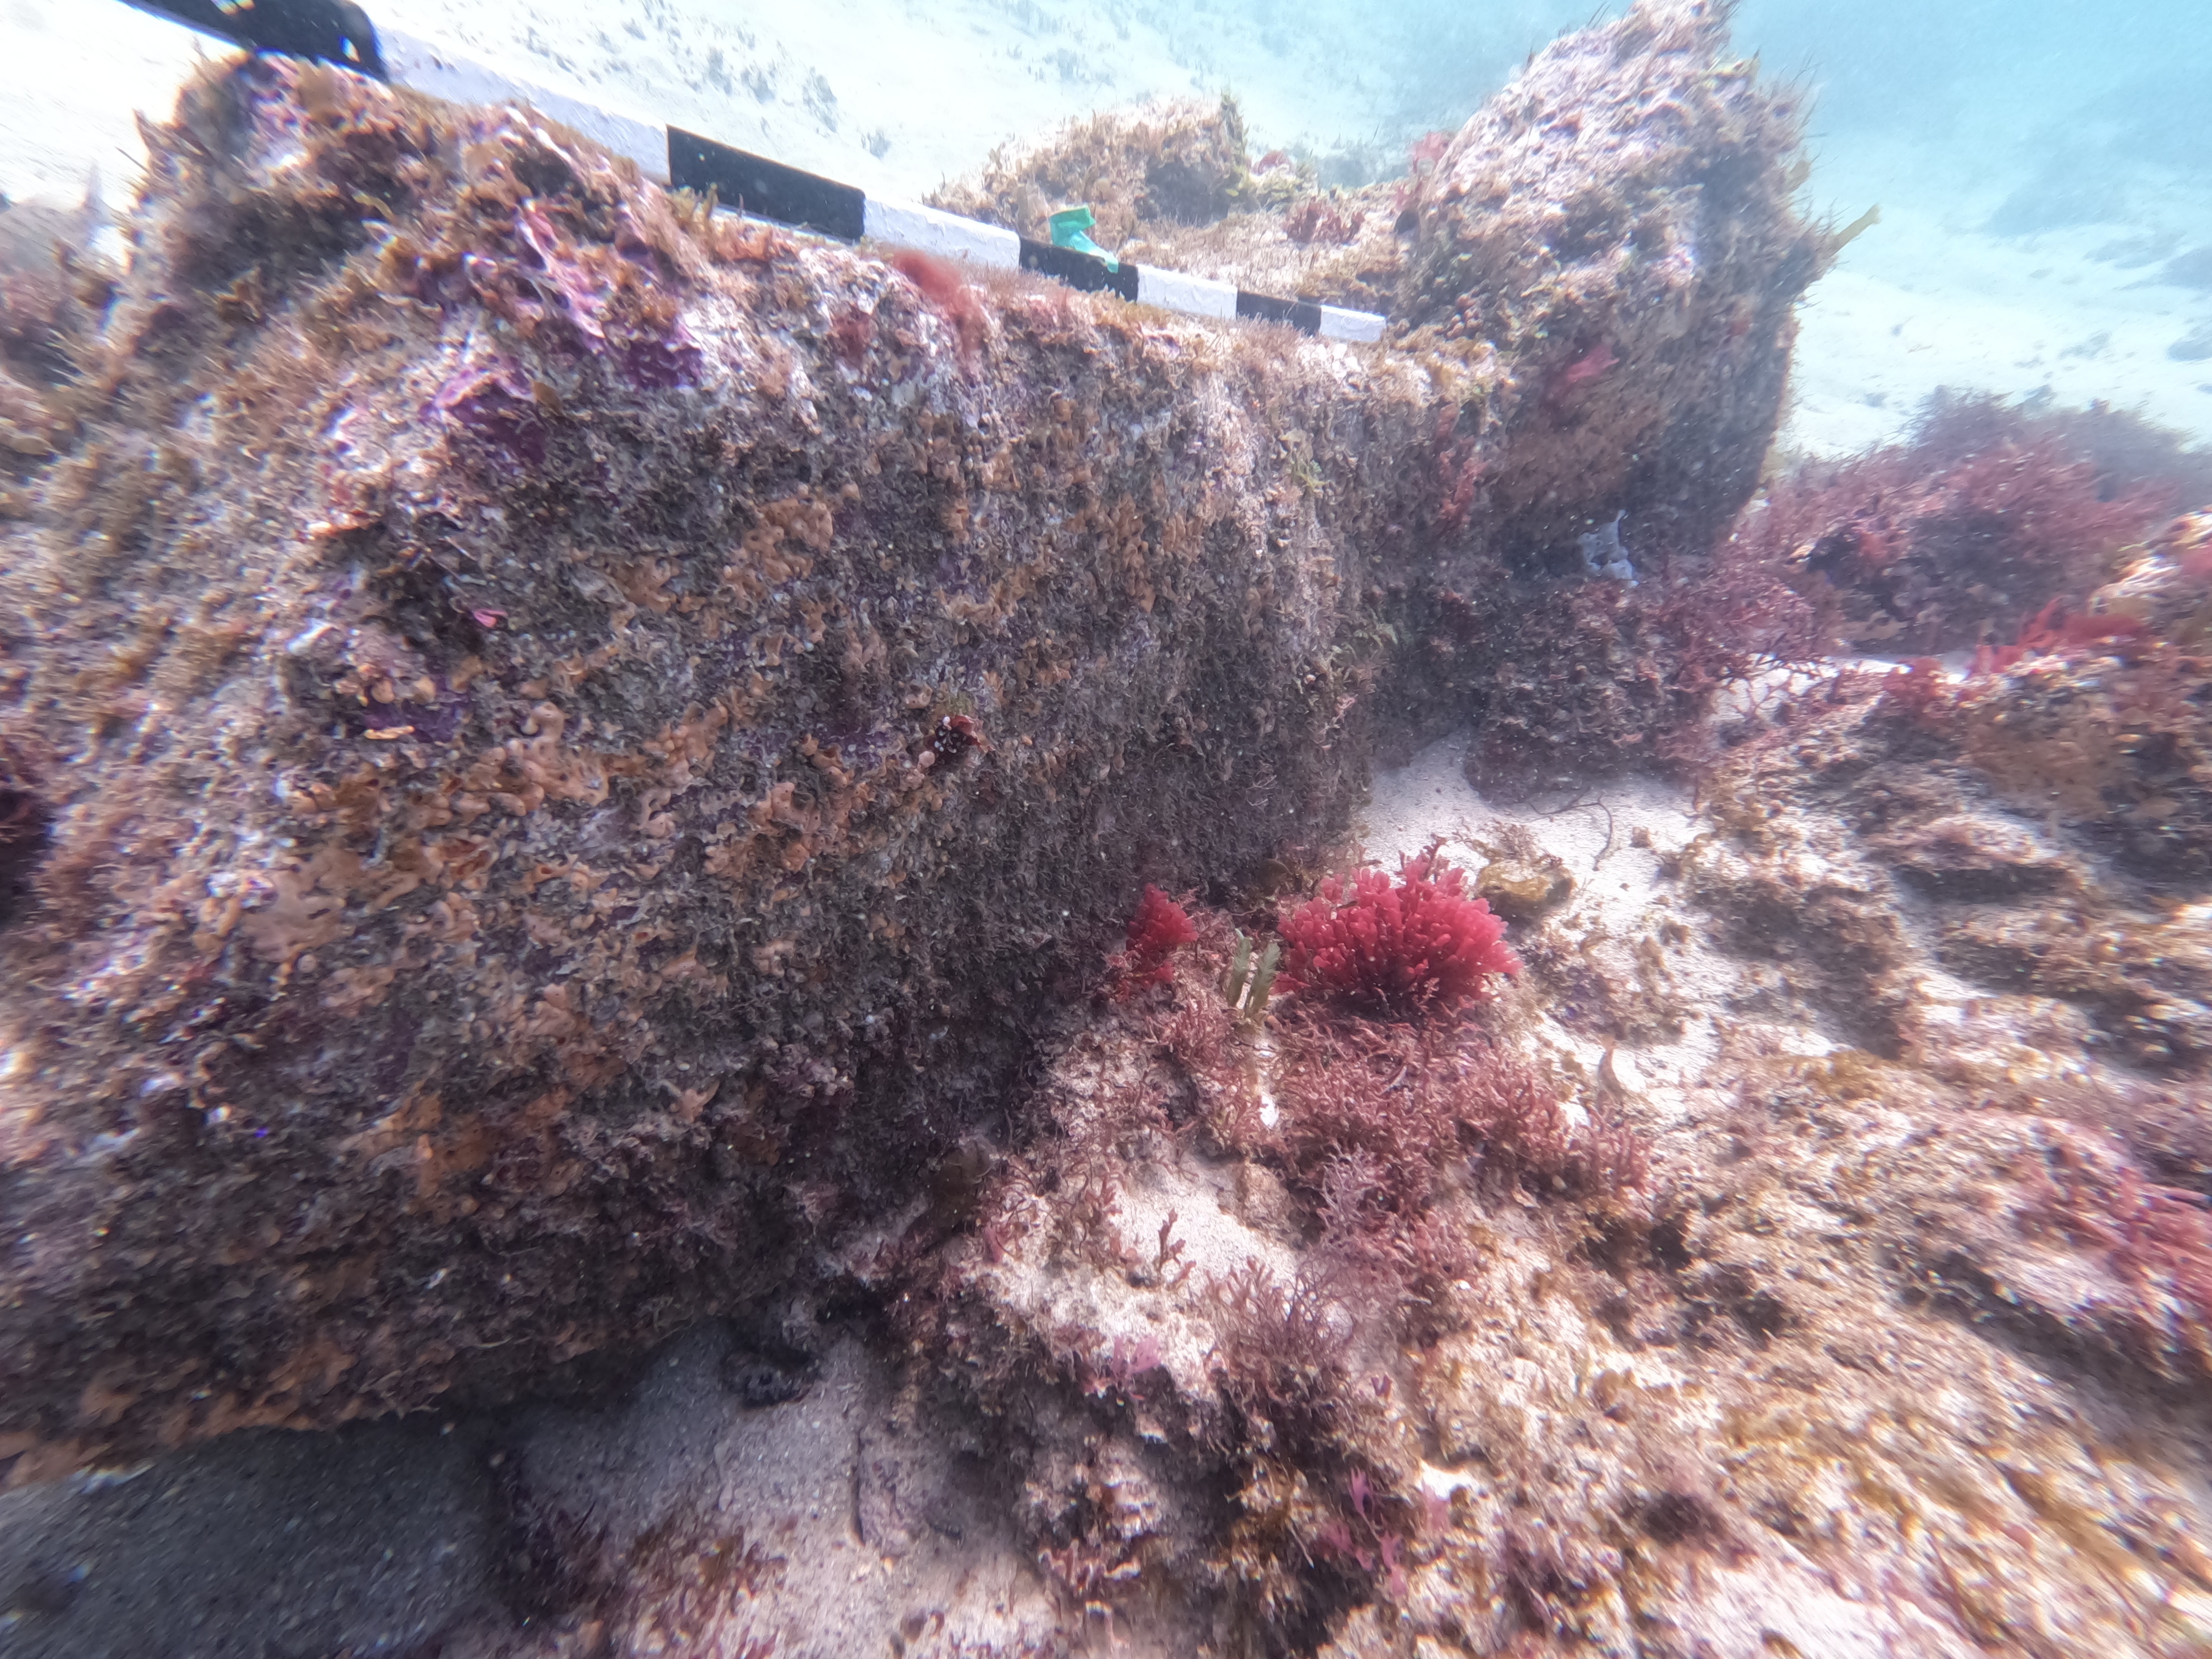

Supplement: Supplementary file 727 [file G0713794.pdf › Ocean2/G0713794.pdf]

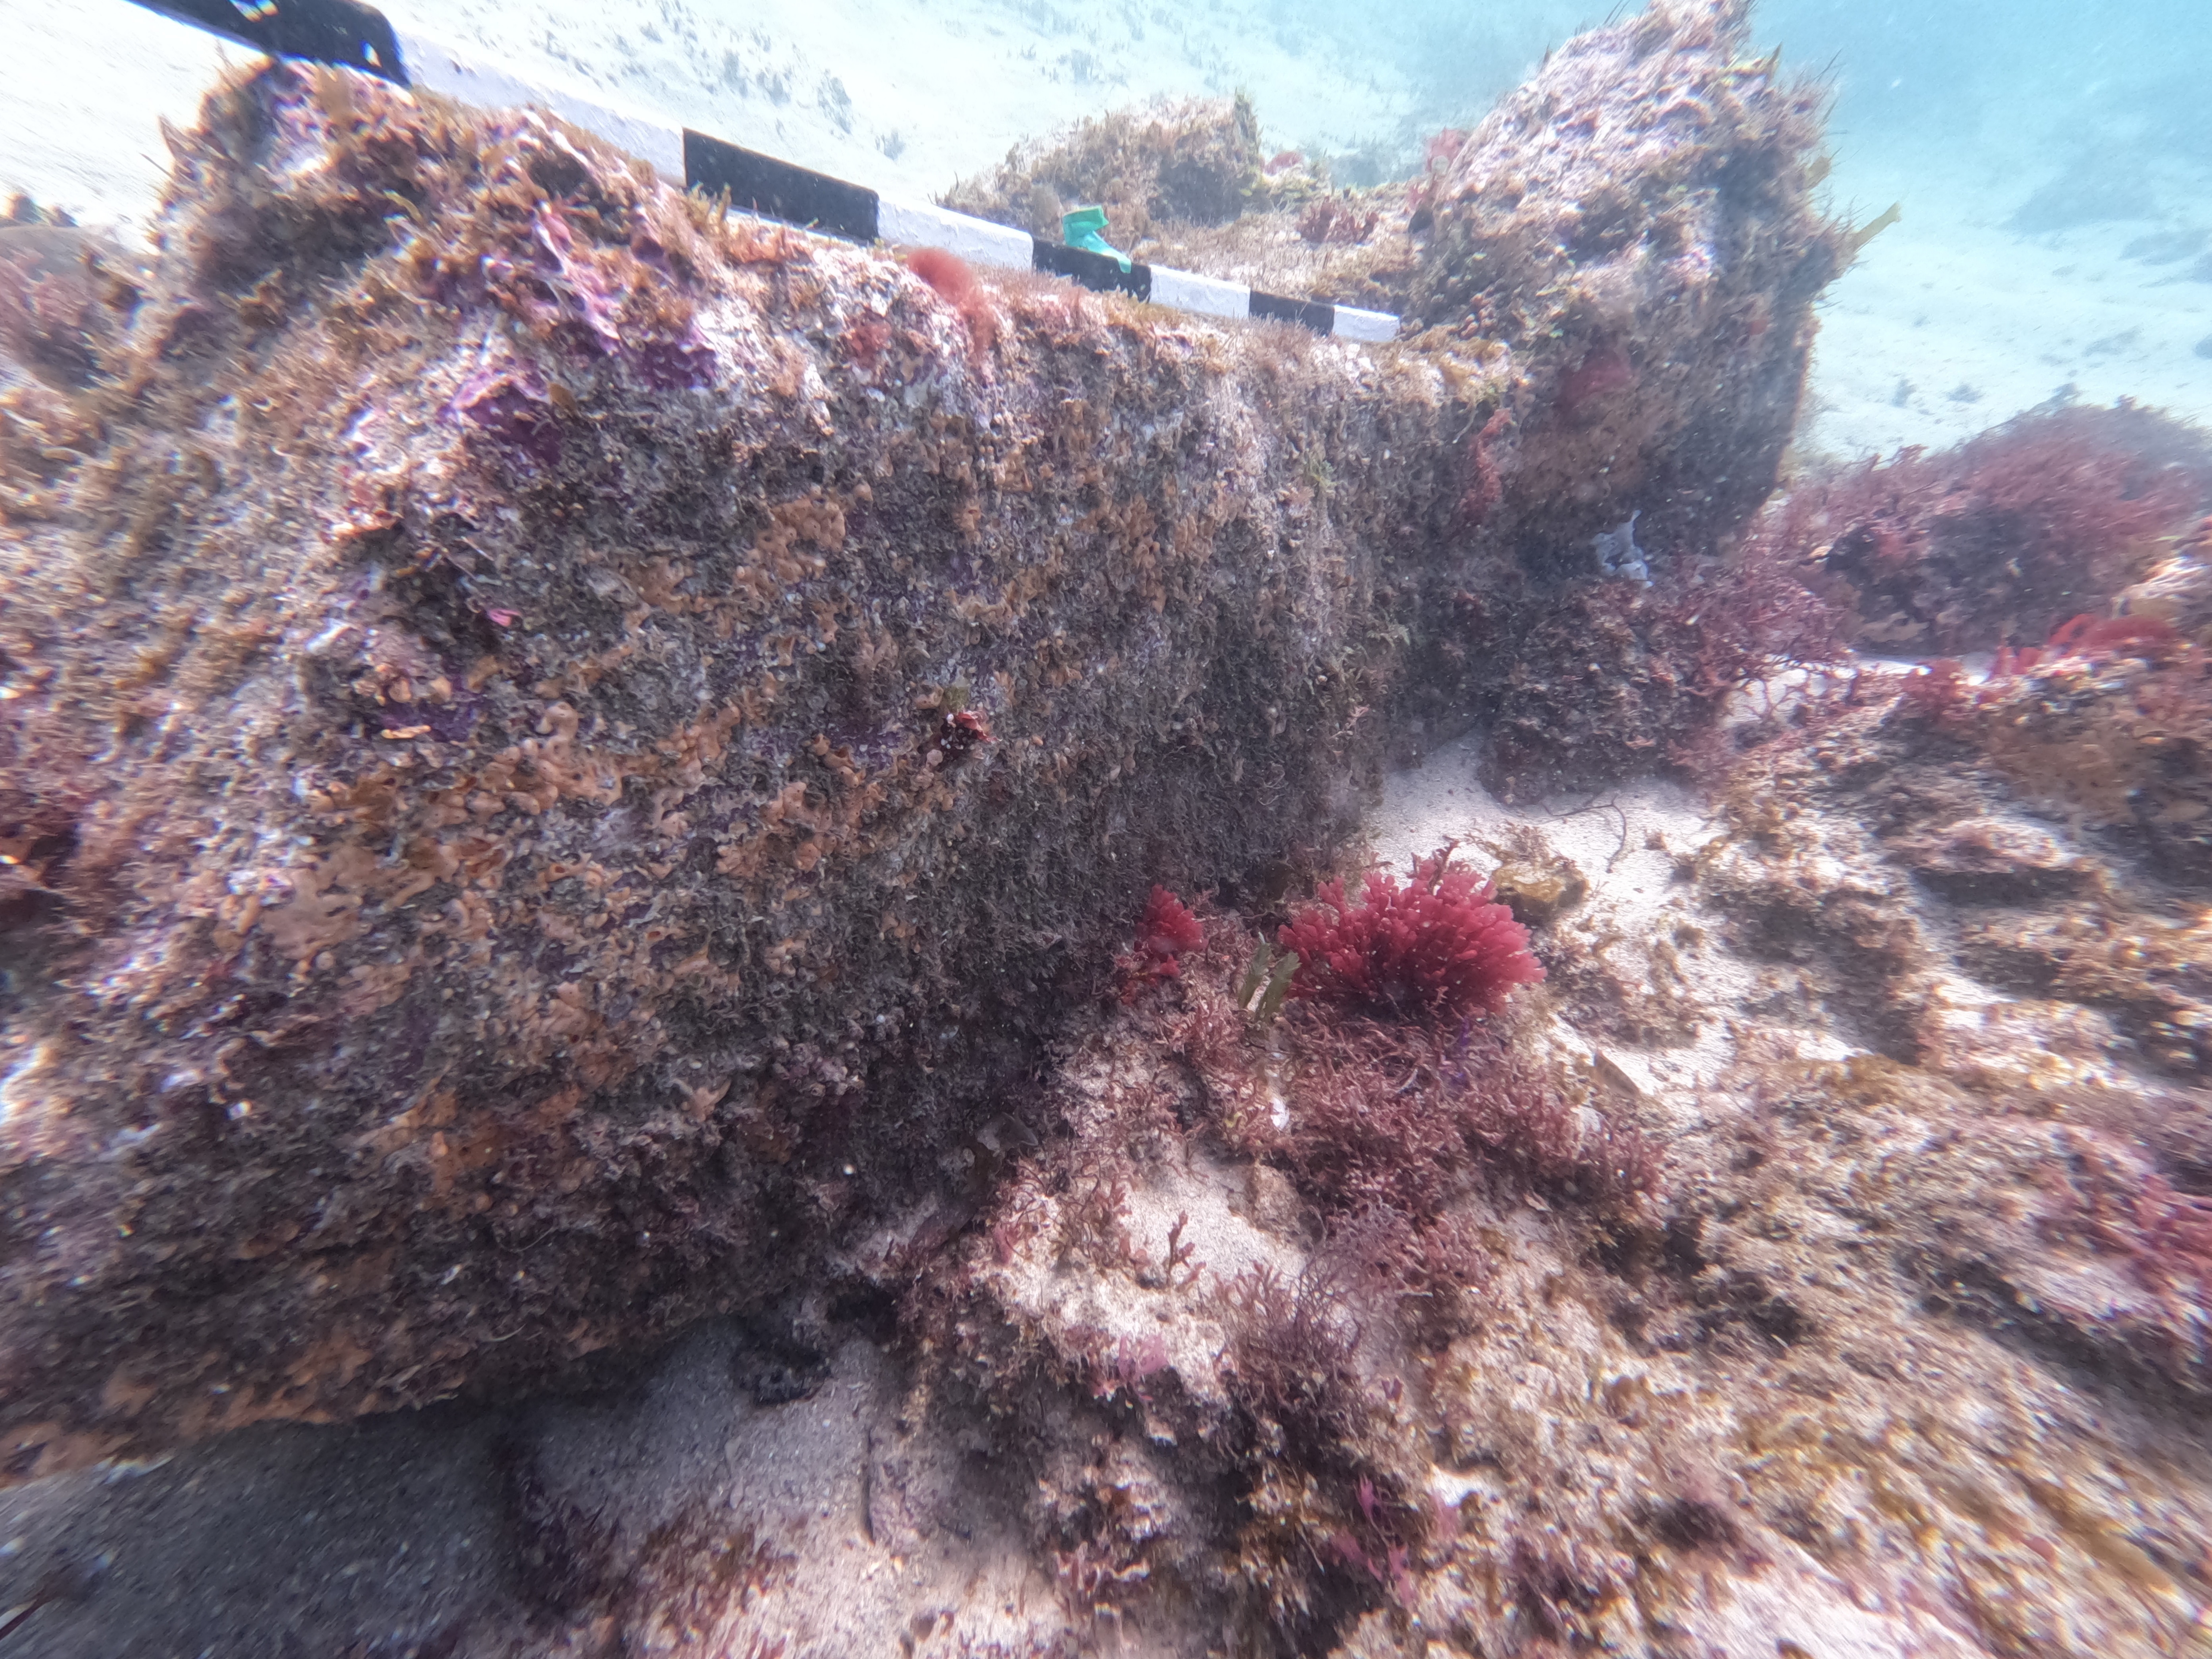

Supplement: Supplementary file 728 [file G0713795.pdf › Ocean2/G0713795.pdf]

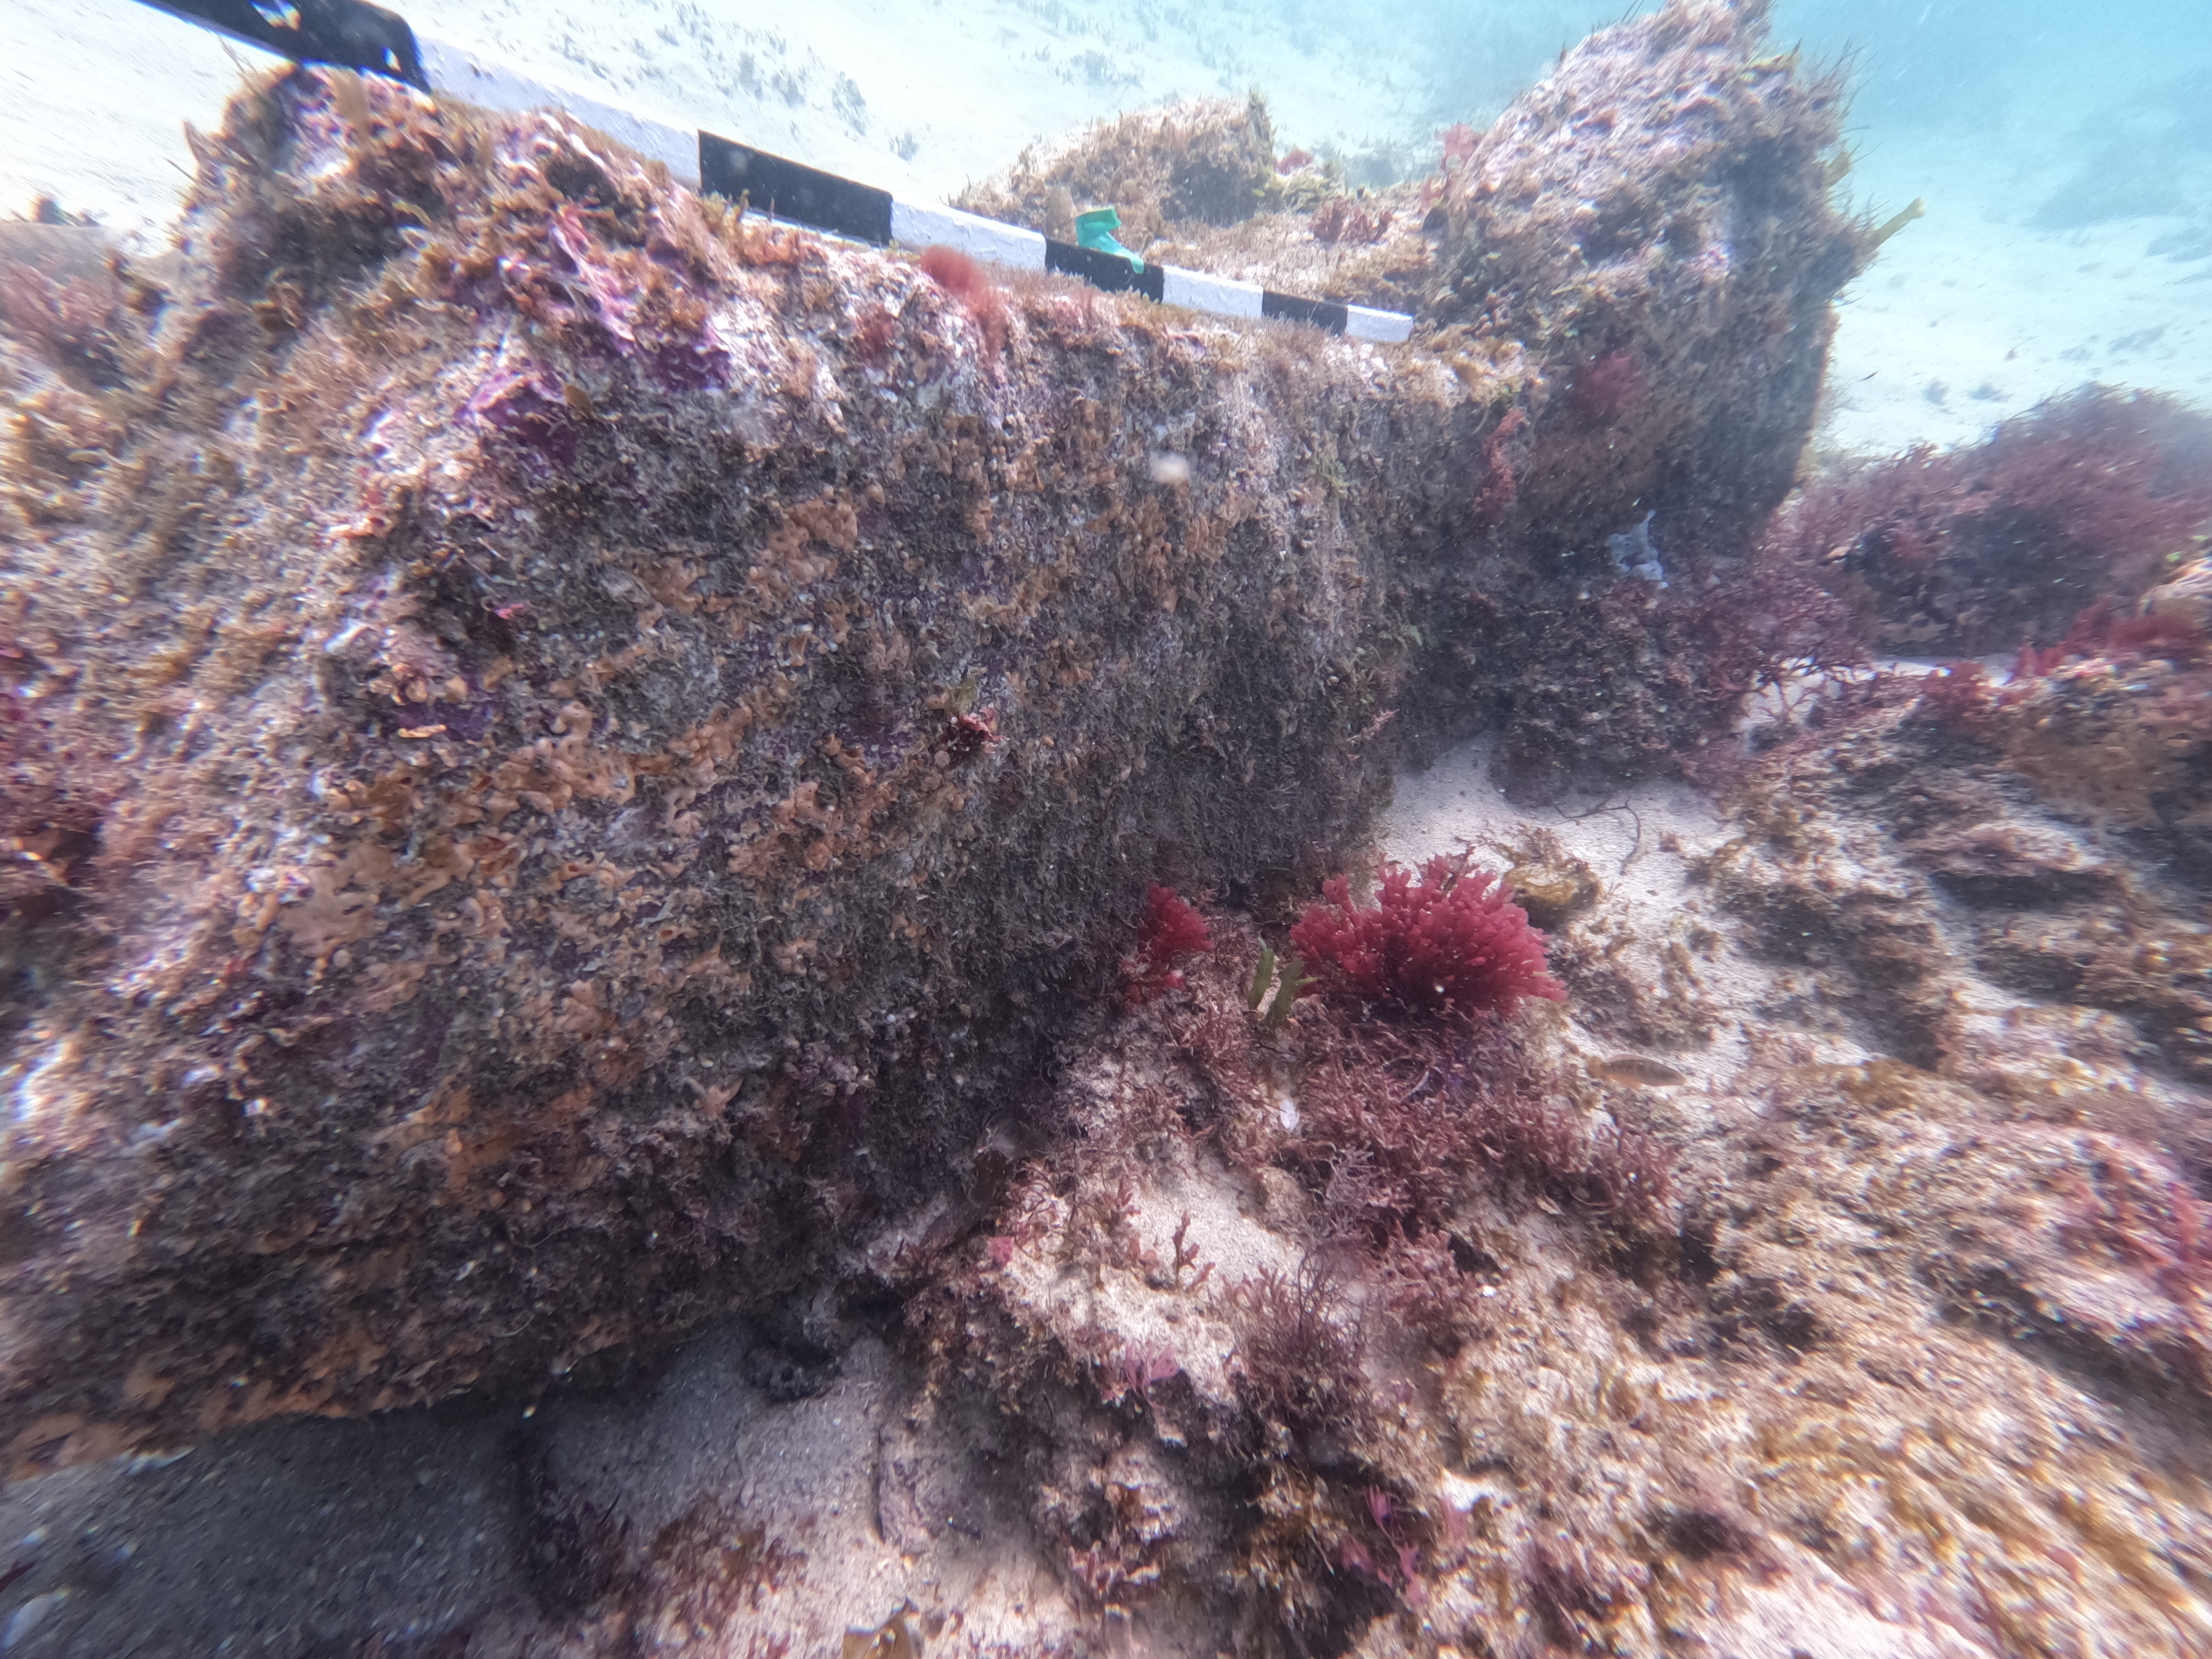

Supplement: Supplementary file 729 [file G0713796.pdf › Ocean2/G0713796.pdf]

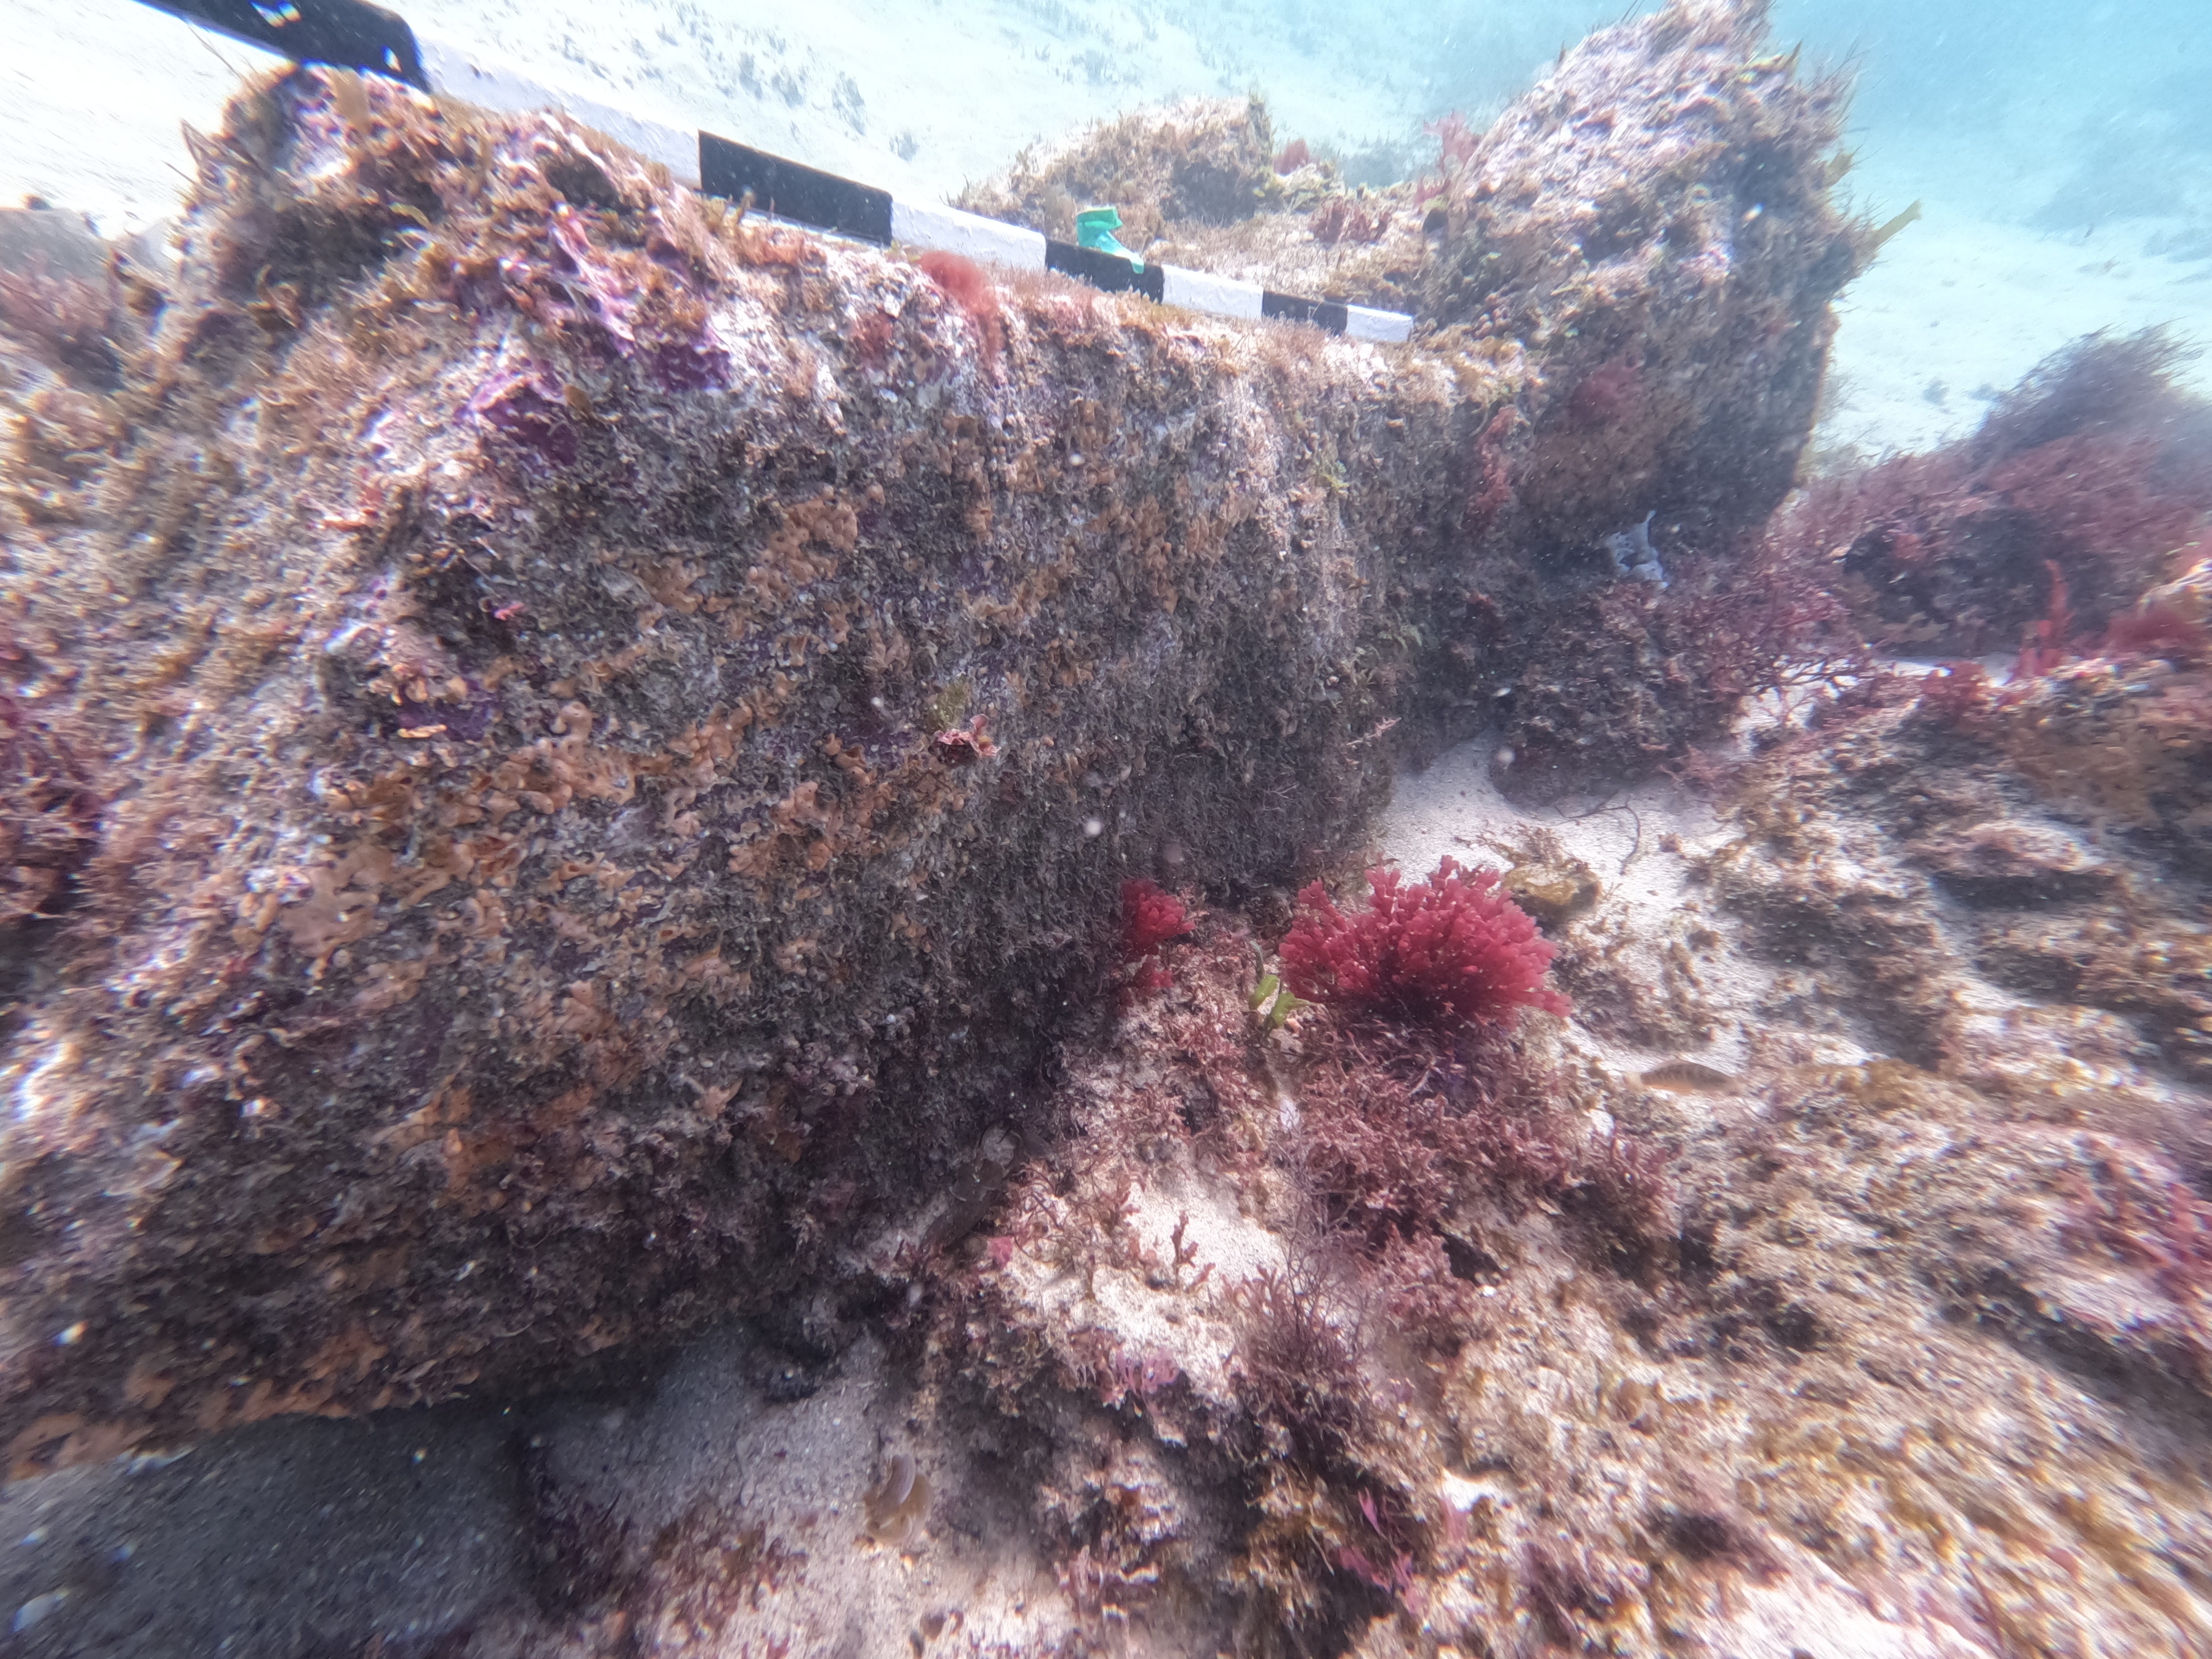

Supplement: Supplementary file 730 [file G0713797.pdf › Ocean2/G0713797.pdf]

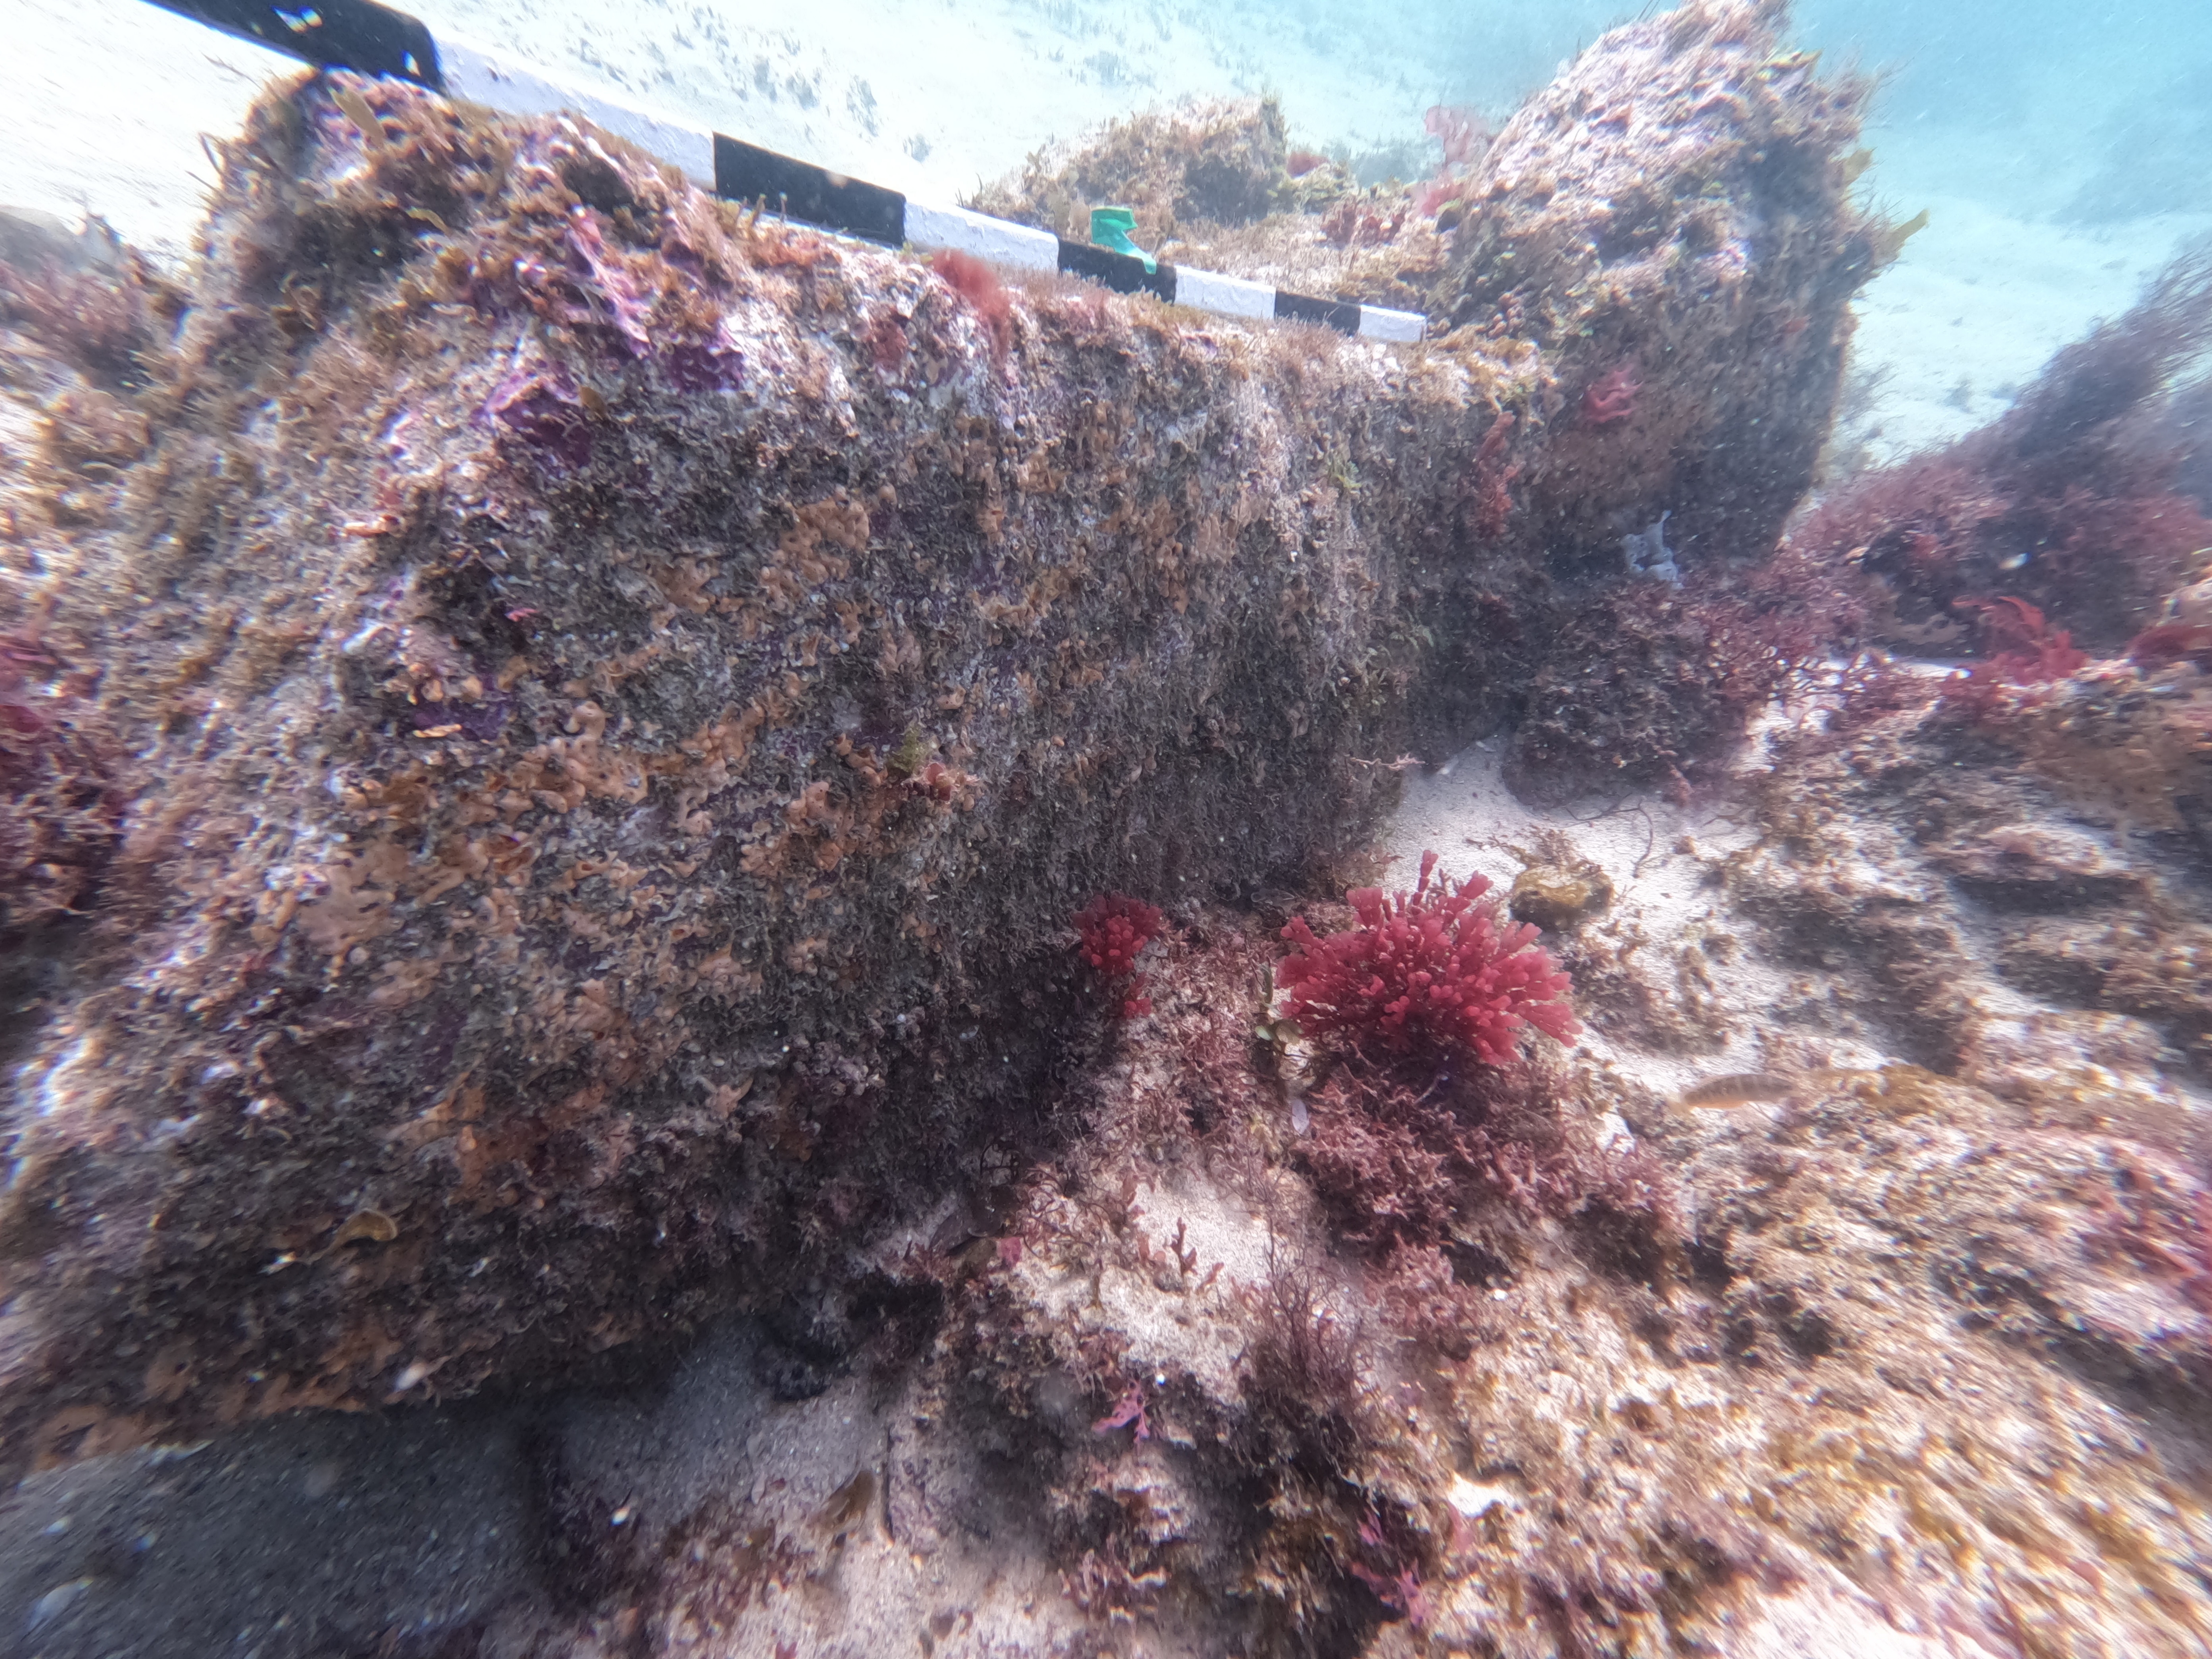

Supplement: Supplementary file 731 [file G0713798.pdf › Ocean2/G0713798.pdf]

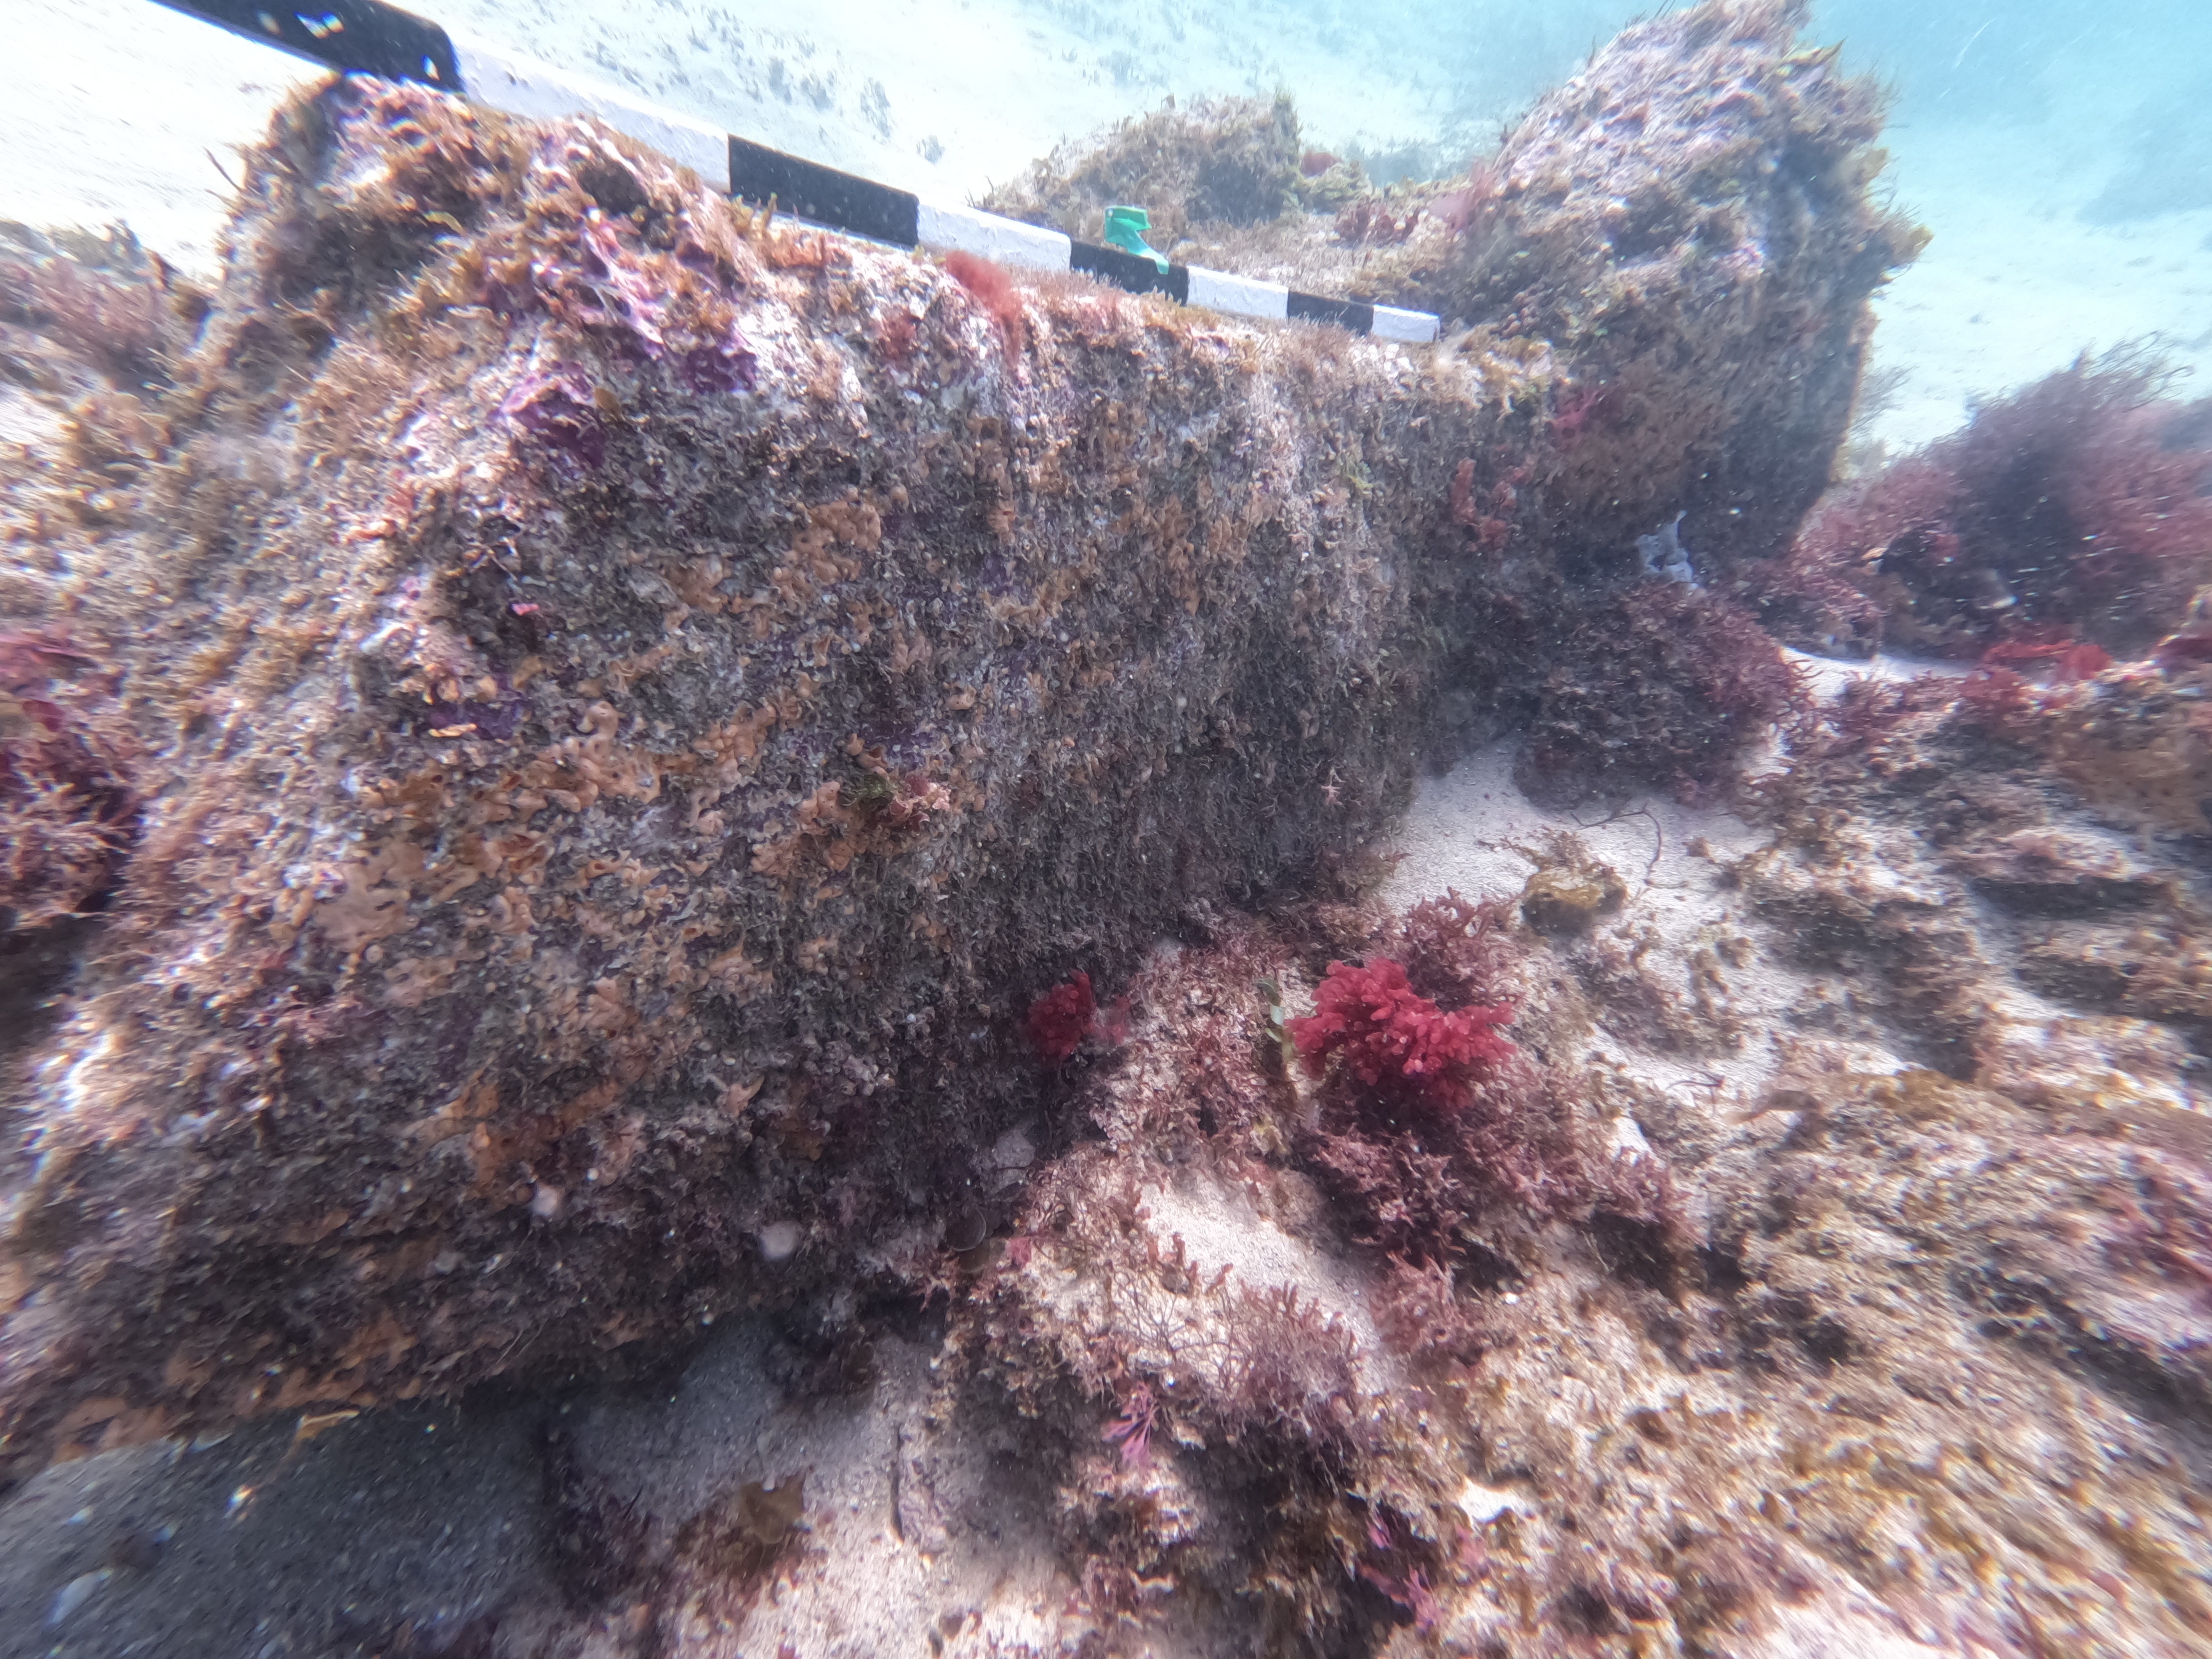

Supplement: Supplementary file 732 [file G0713799.pdf › Ocean2/G0713799.pdf]

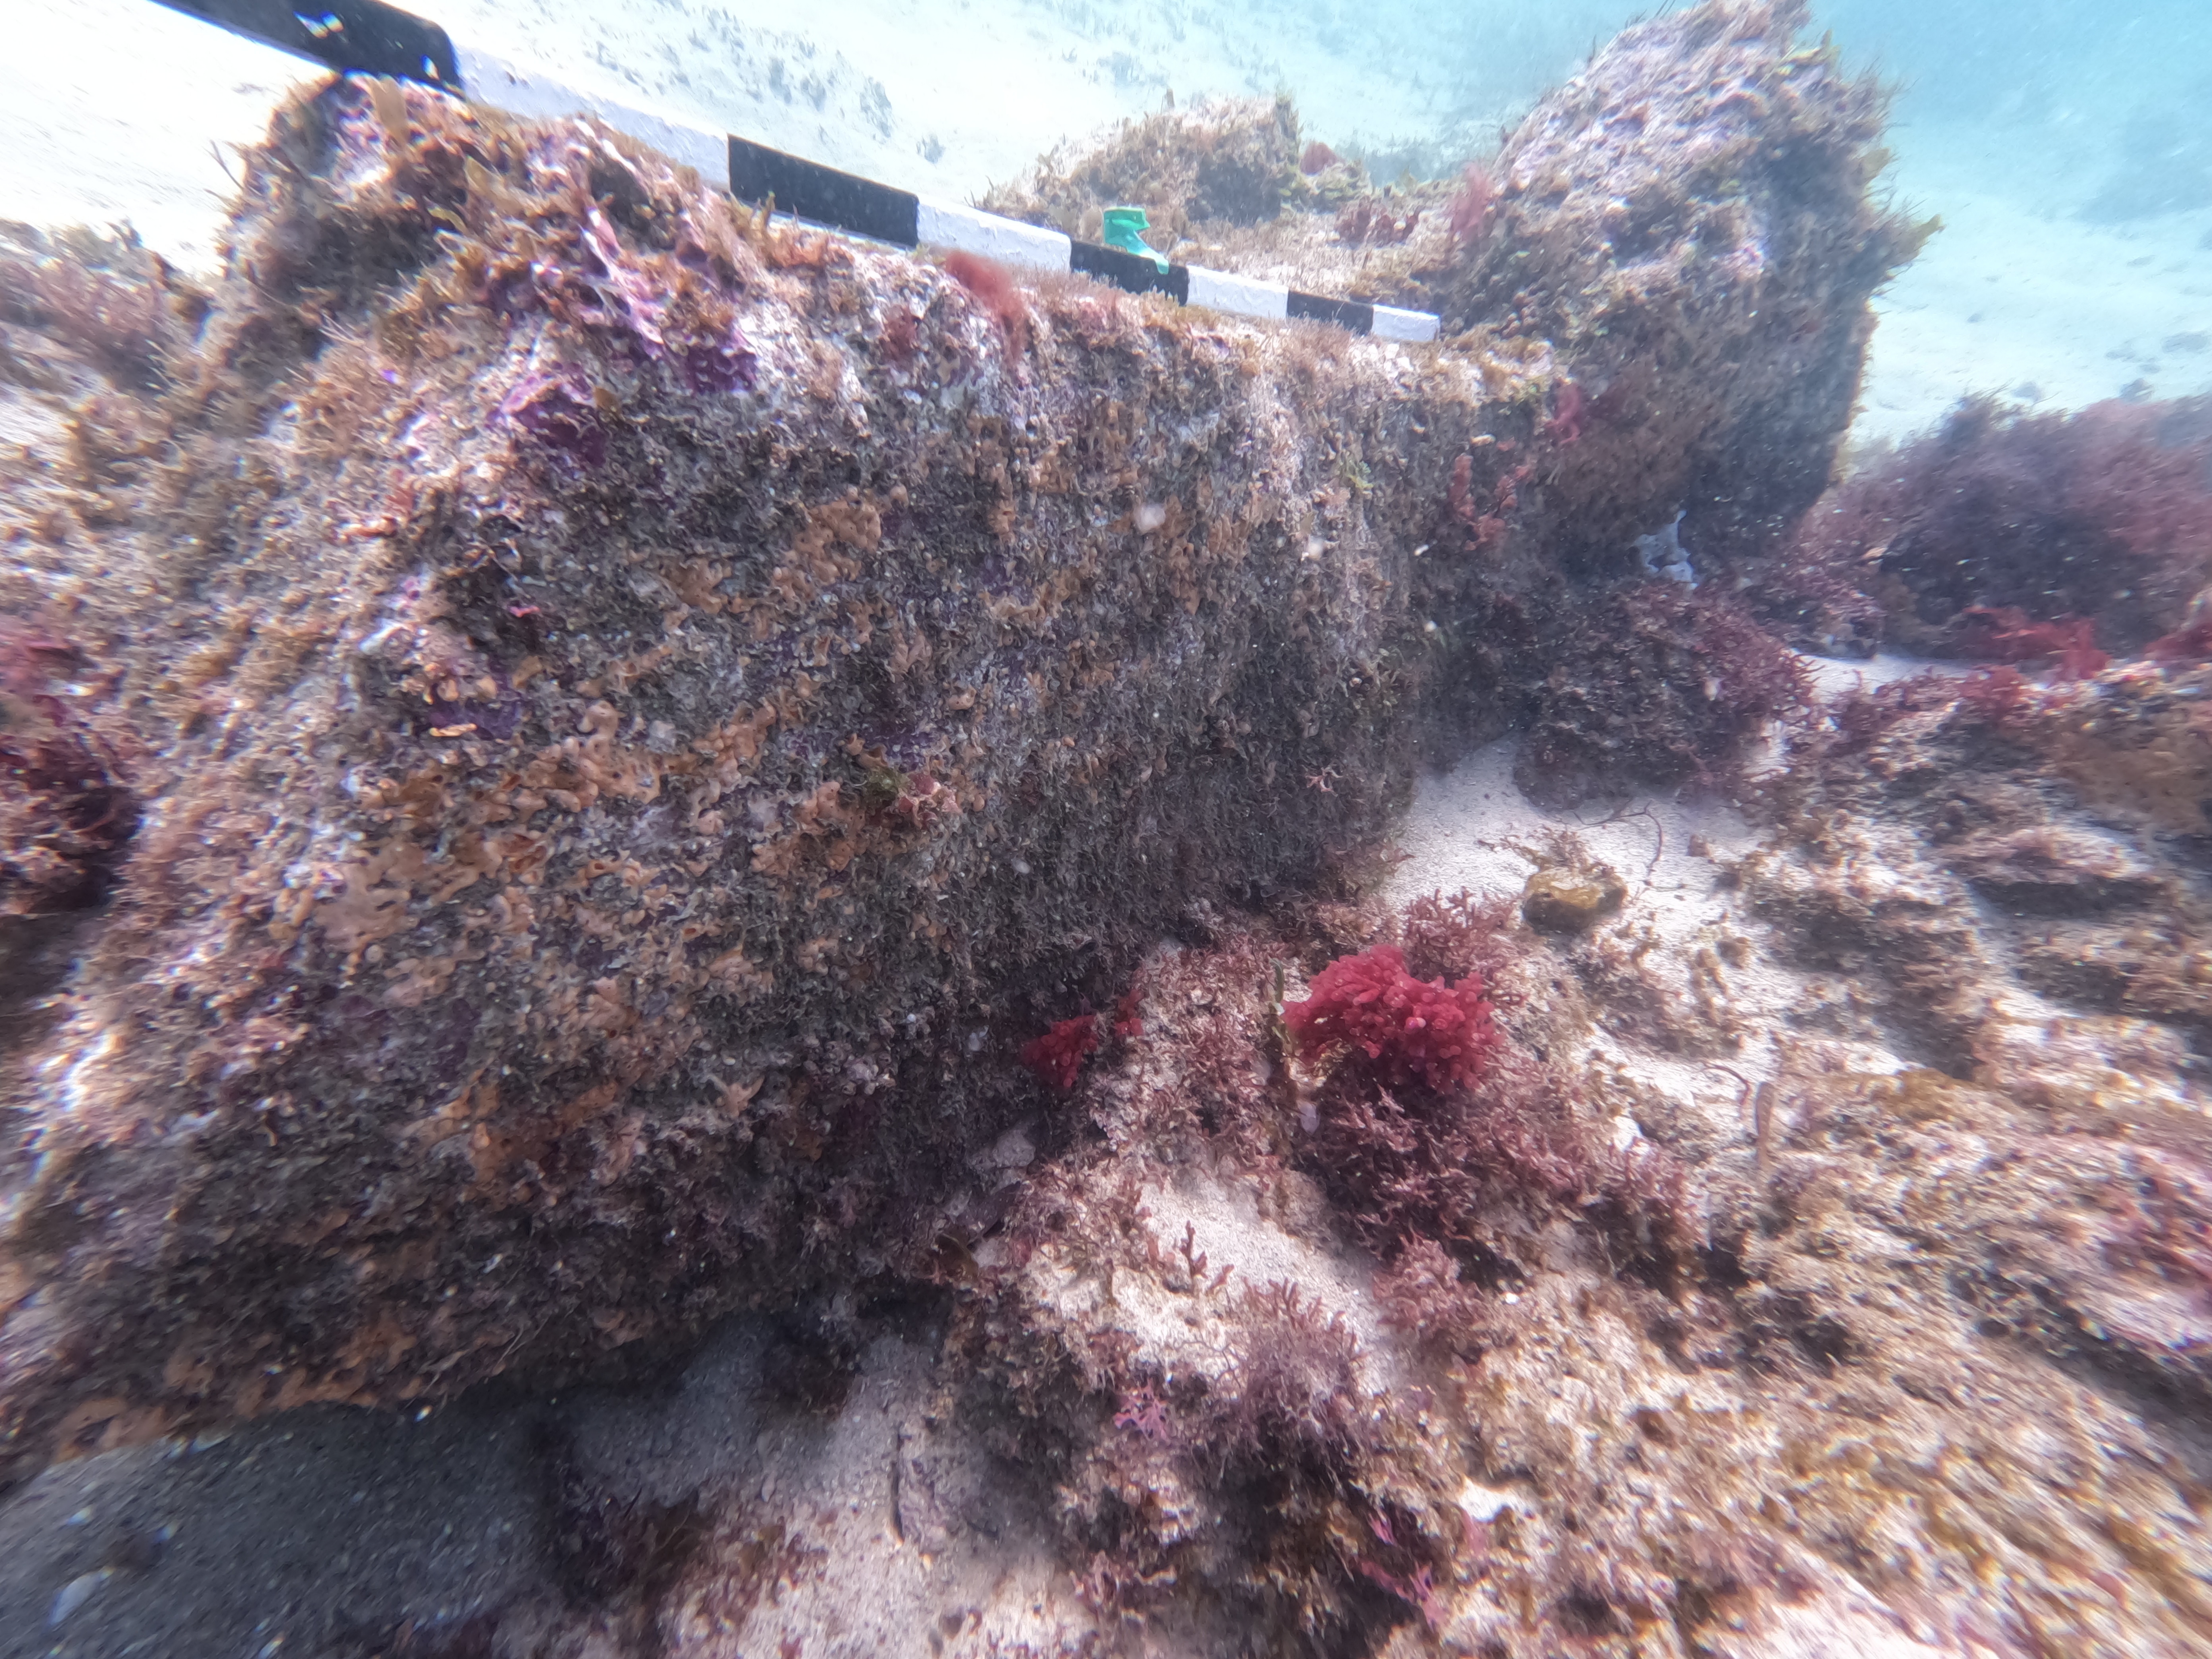

Supplement: Supplementary file 733 [file G0713800.pdf › Ocean2/G0713800.pdf]

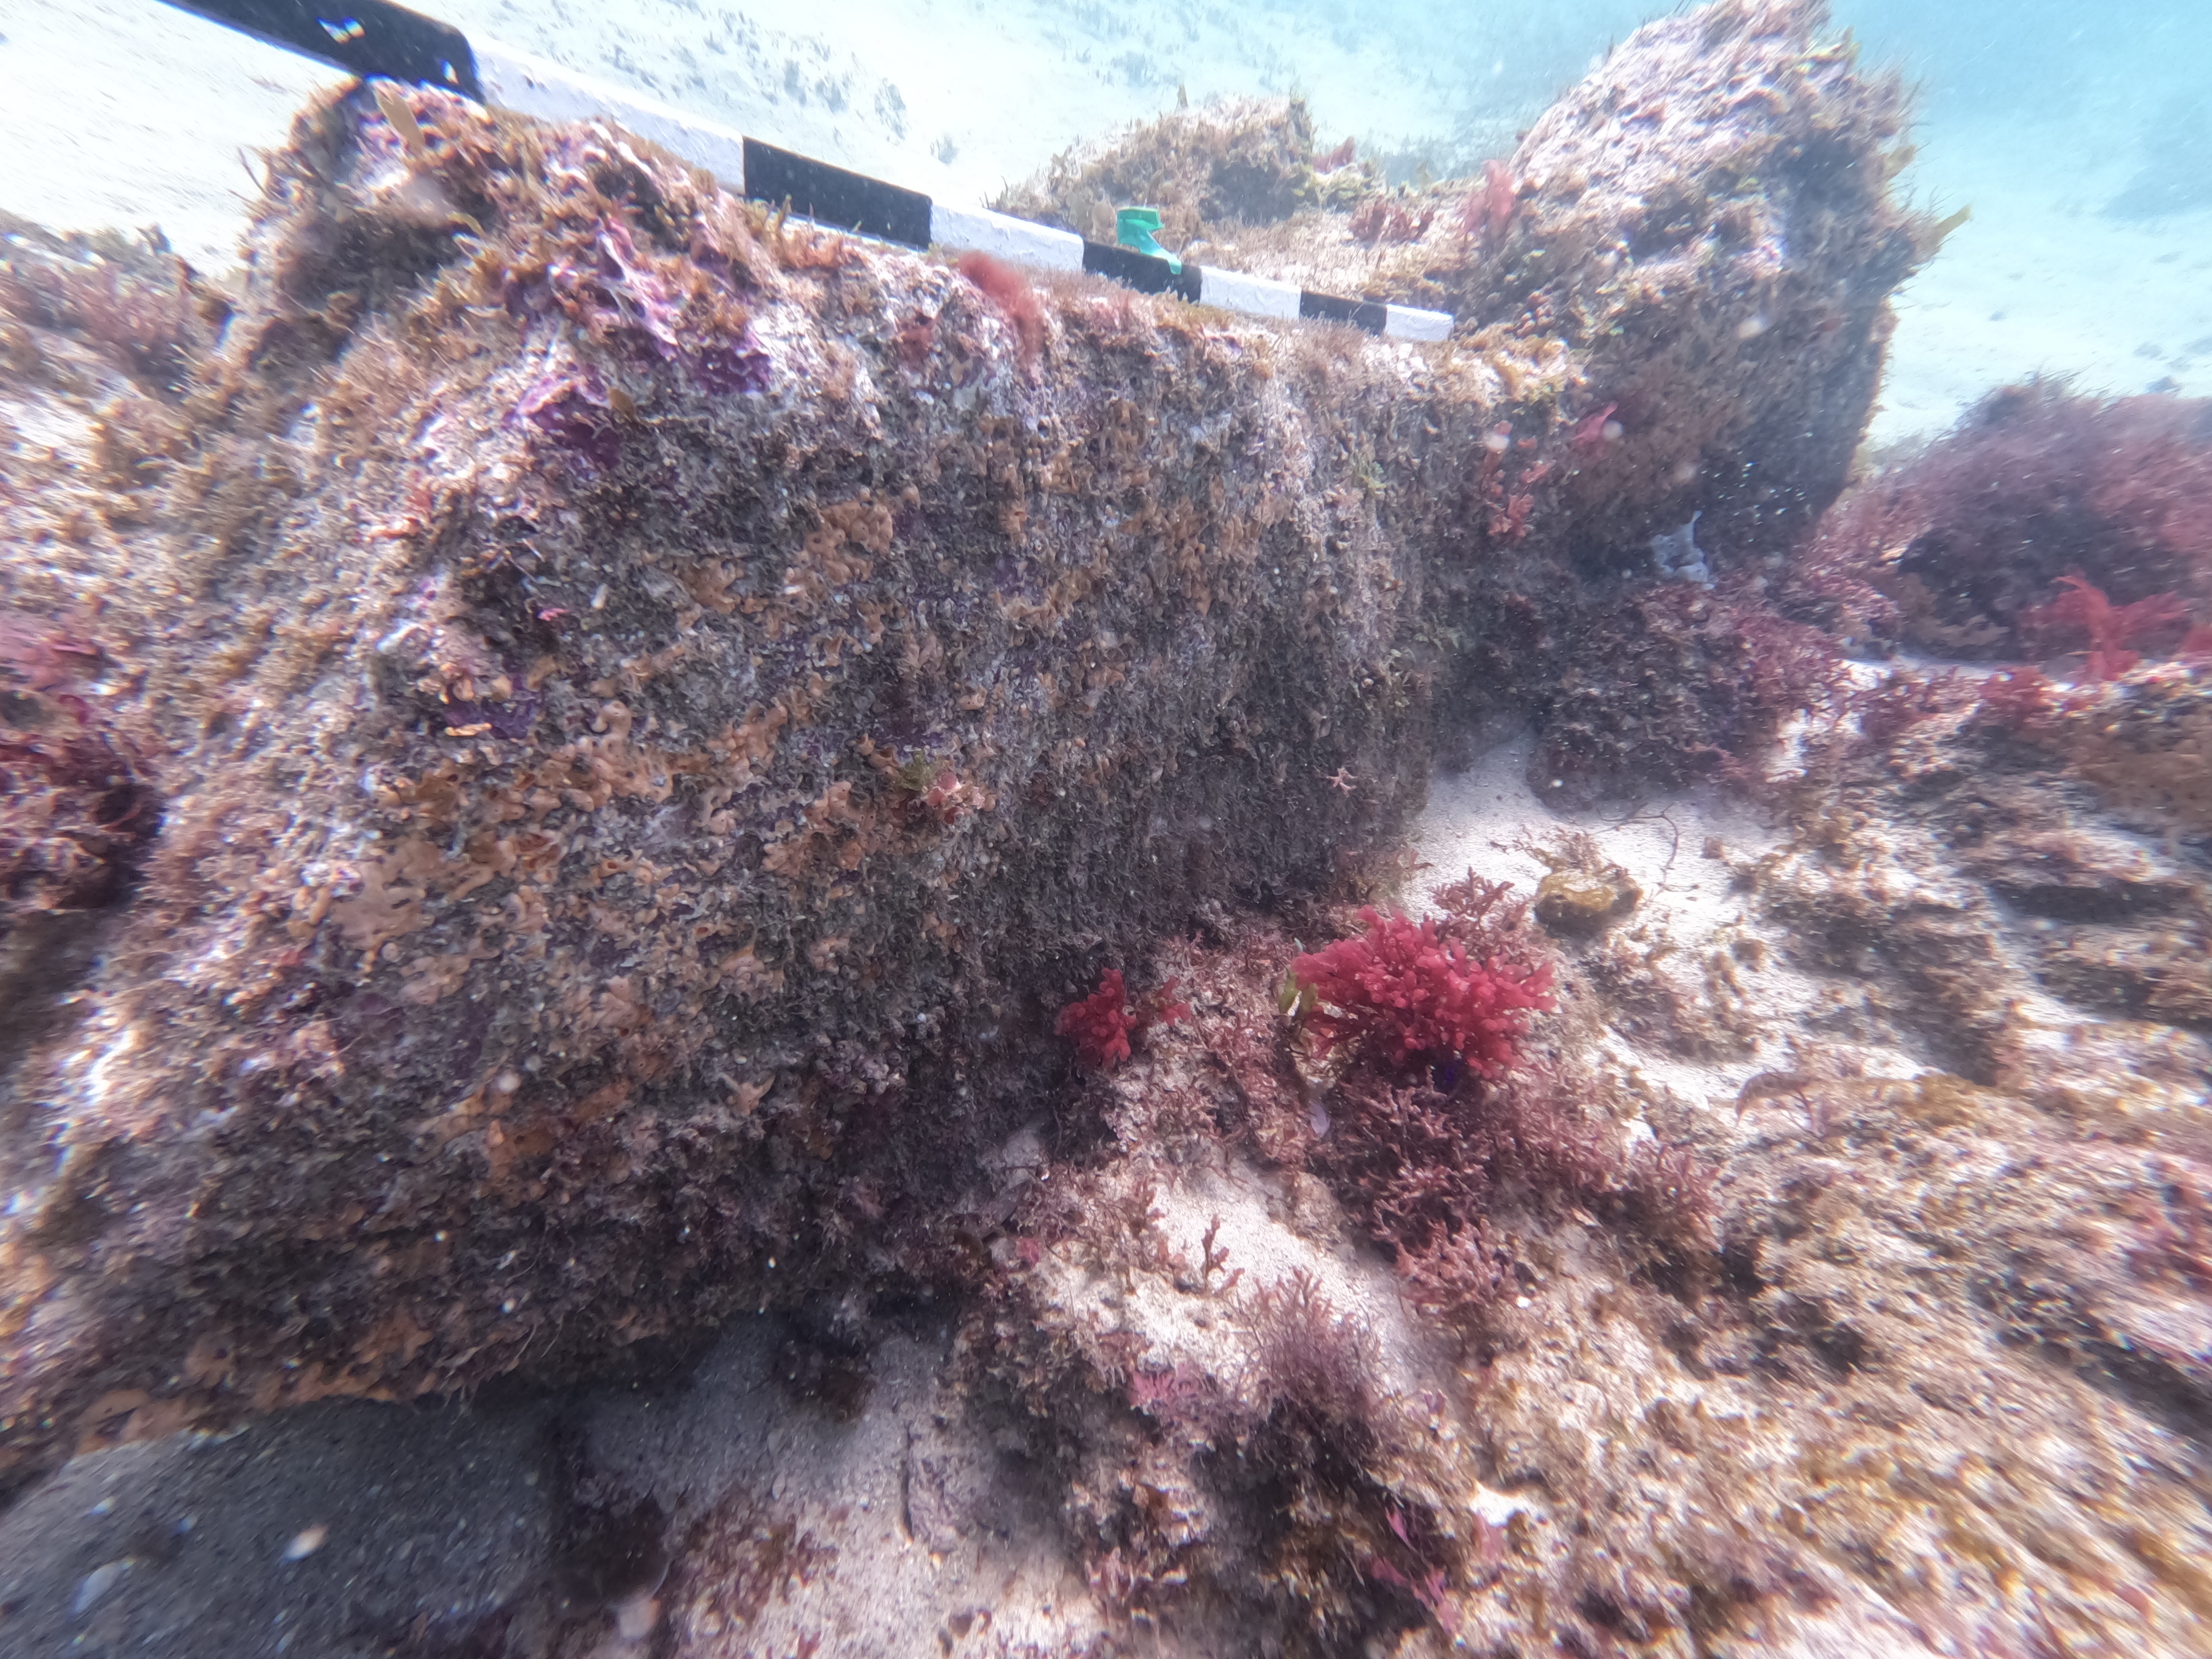

Supplement: Supplementary file 734 [file G0713801.pdf › Ocean2/G0713801.pdf]

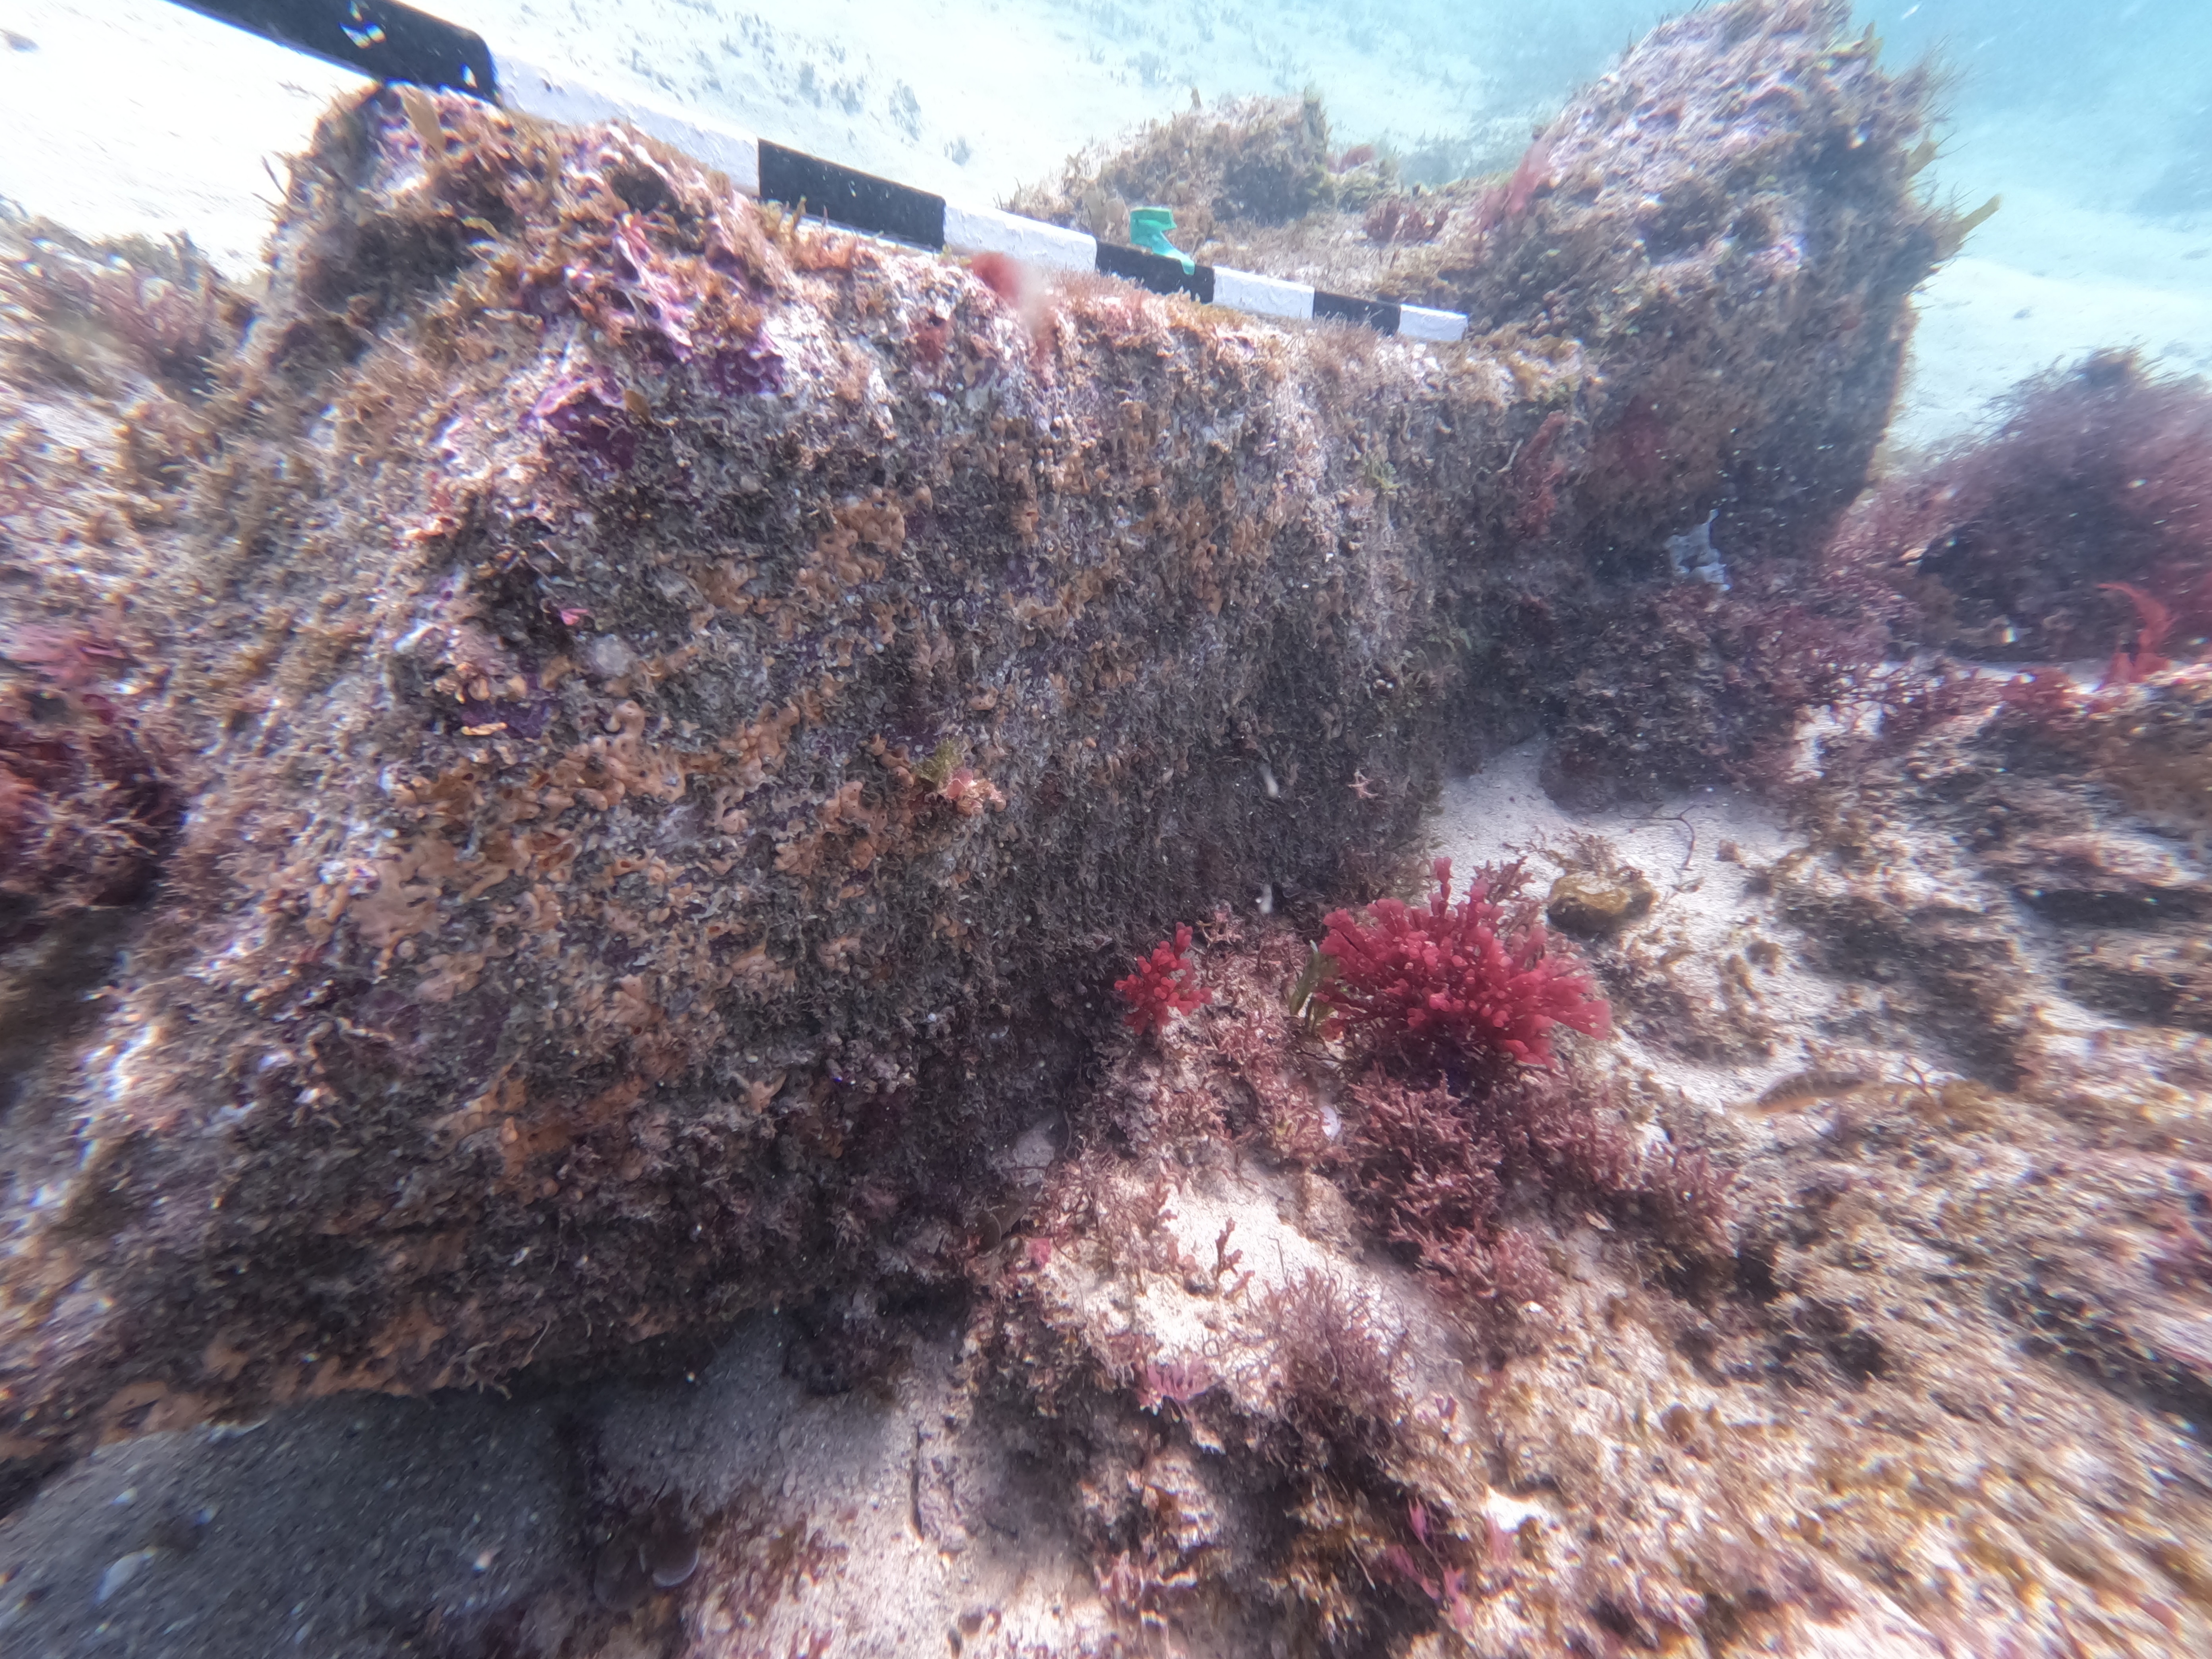

Supplement: Supplementary file 735 [file G0713802.pdf › Ocean2/G0713802.pdf]

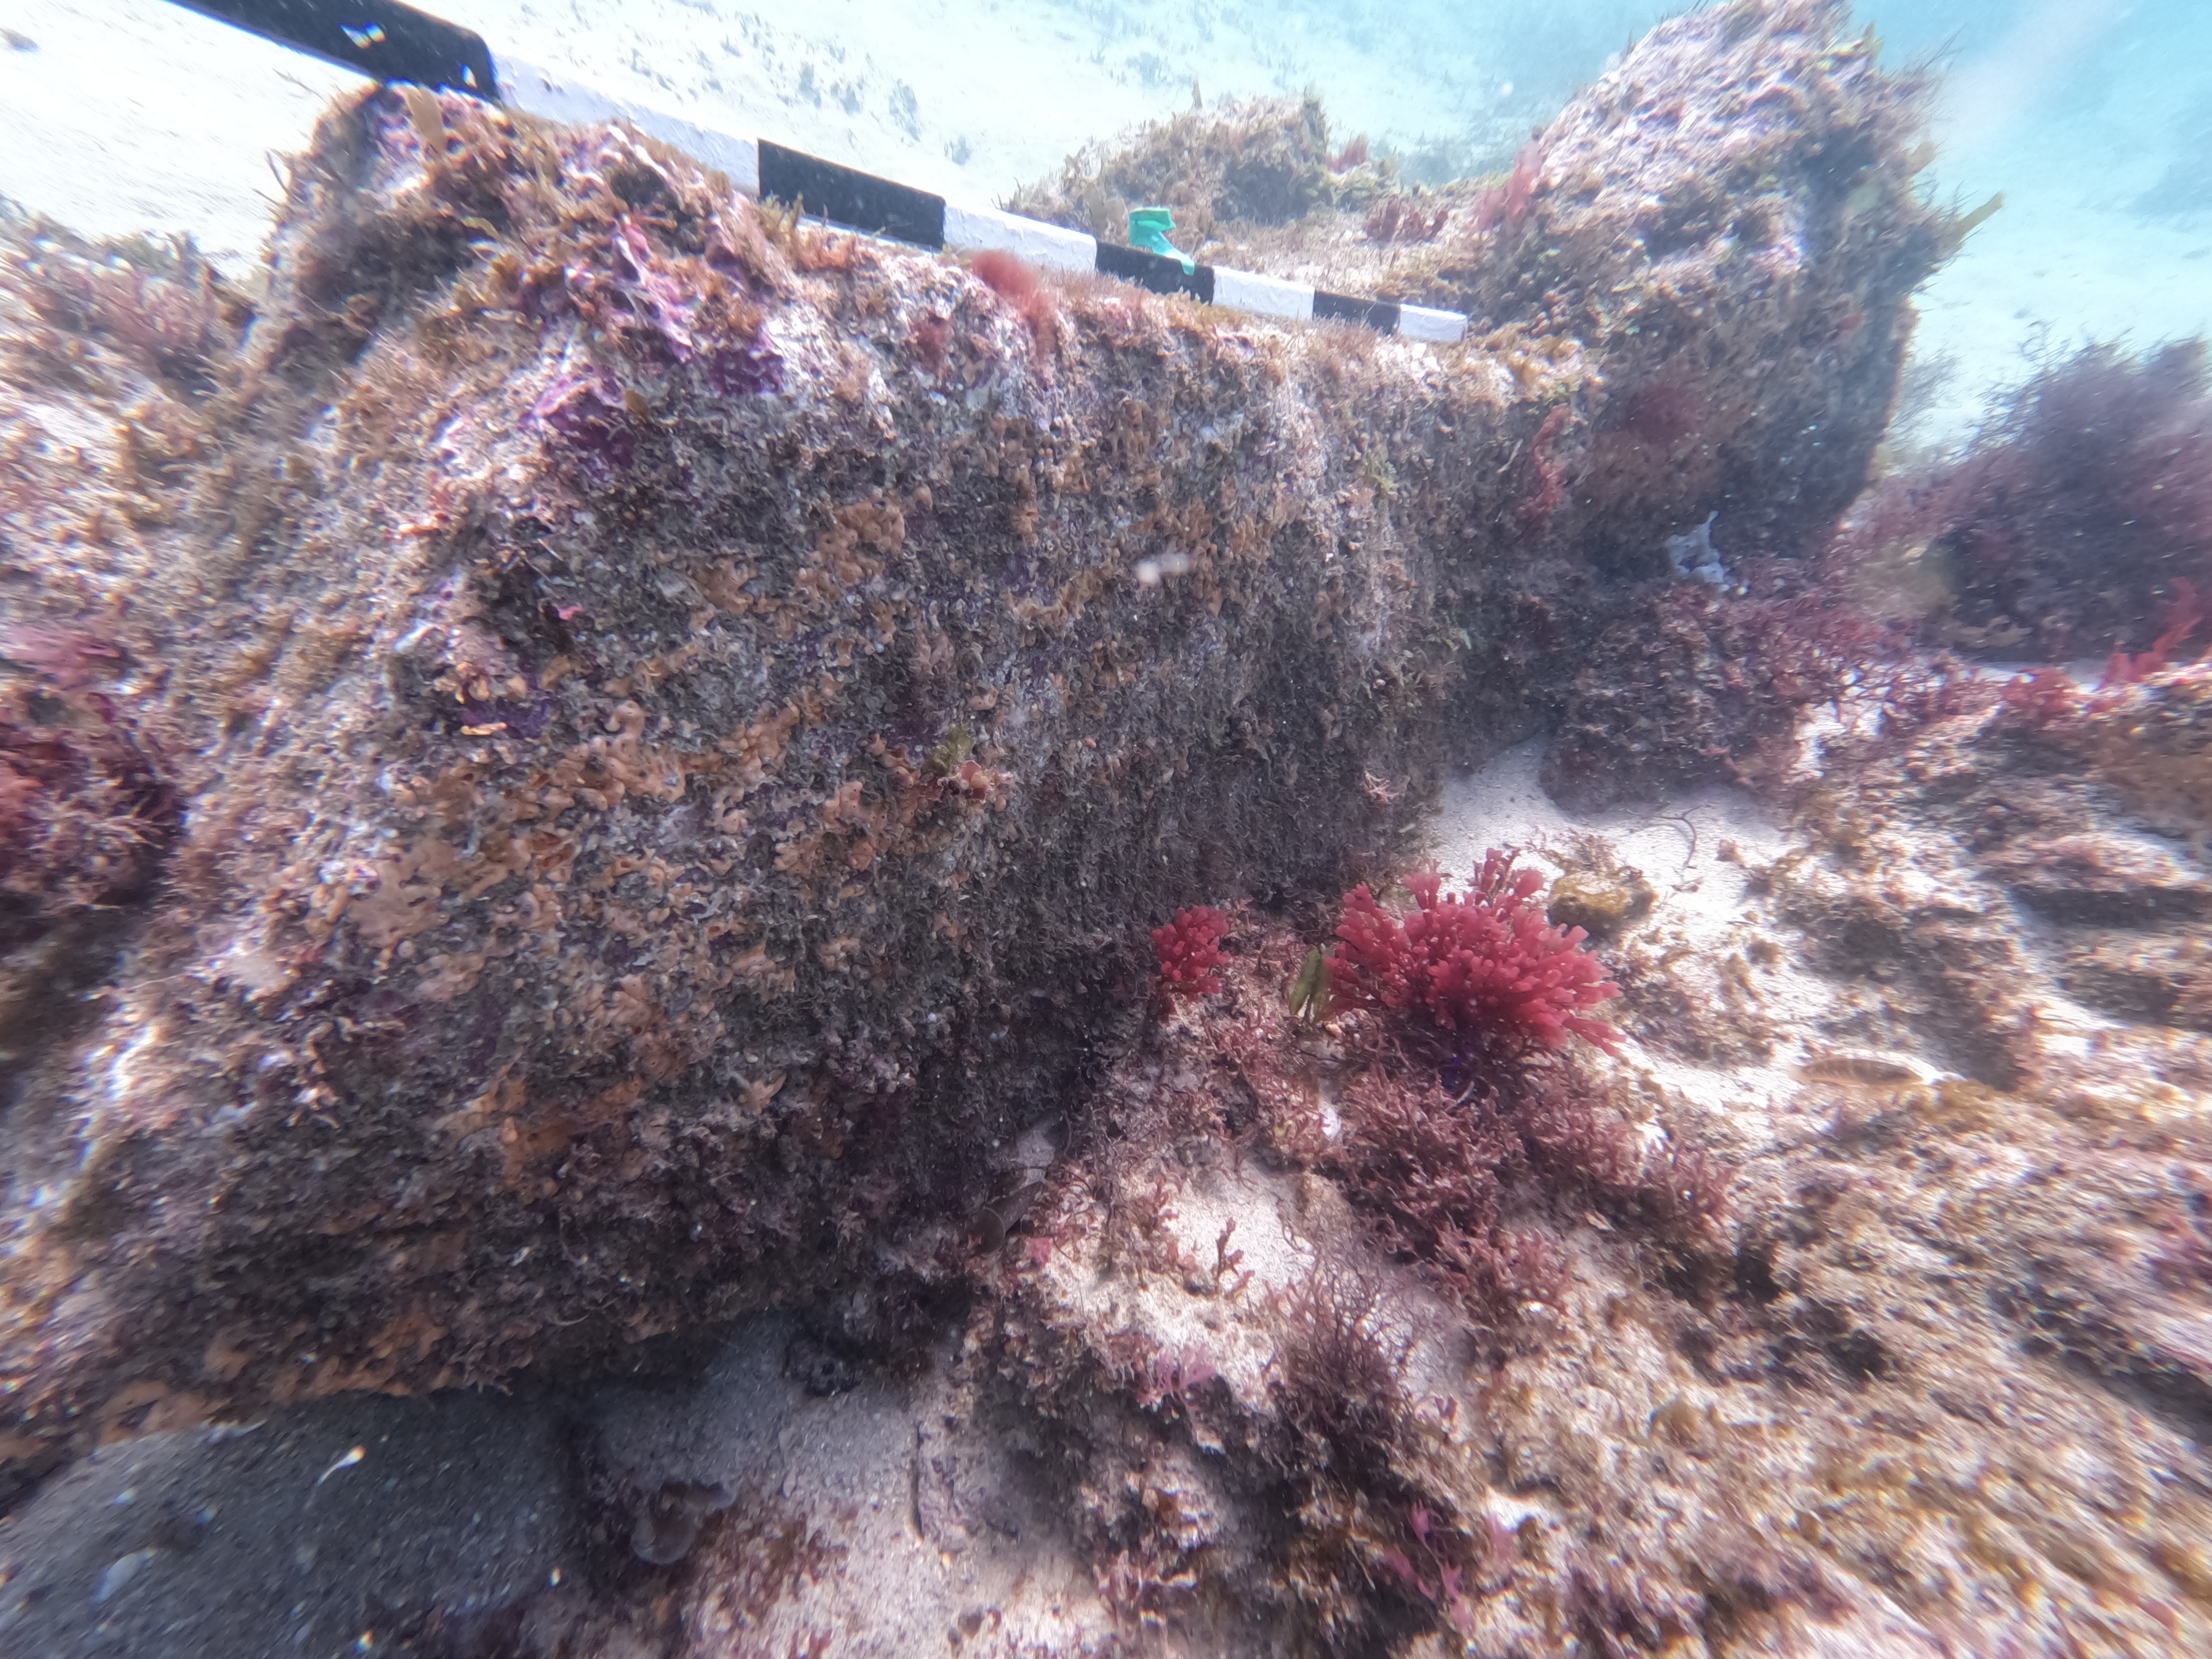

Supplement: Supplementary file 736 [file G0713803.pdf › Ocean2/G0713803.pdf]

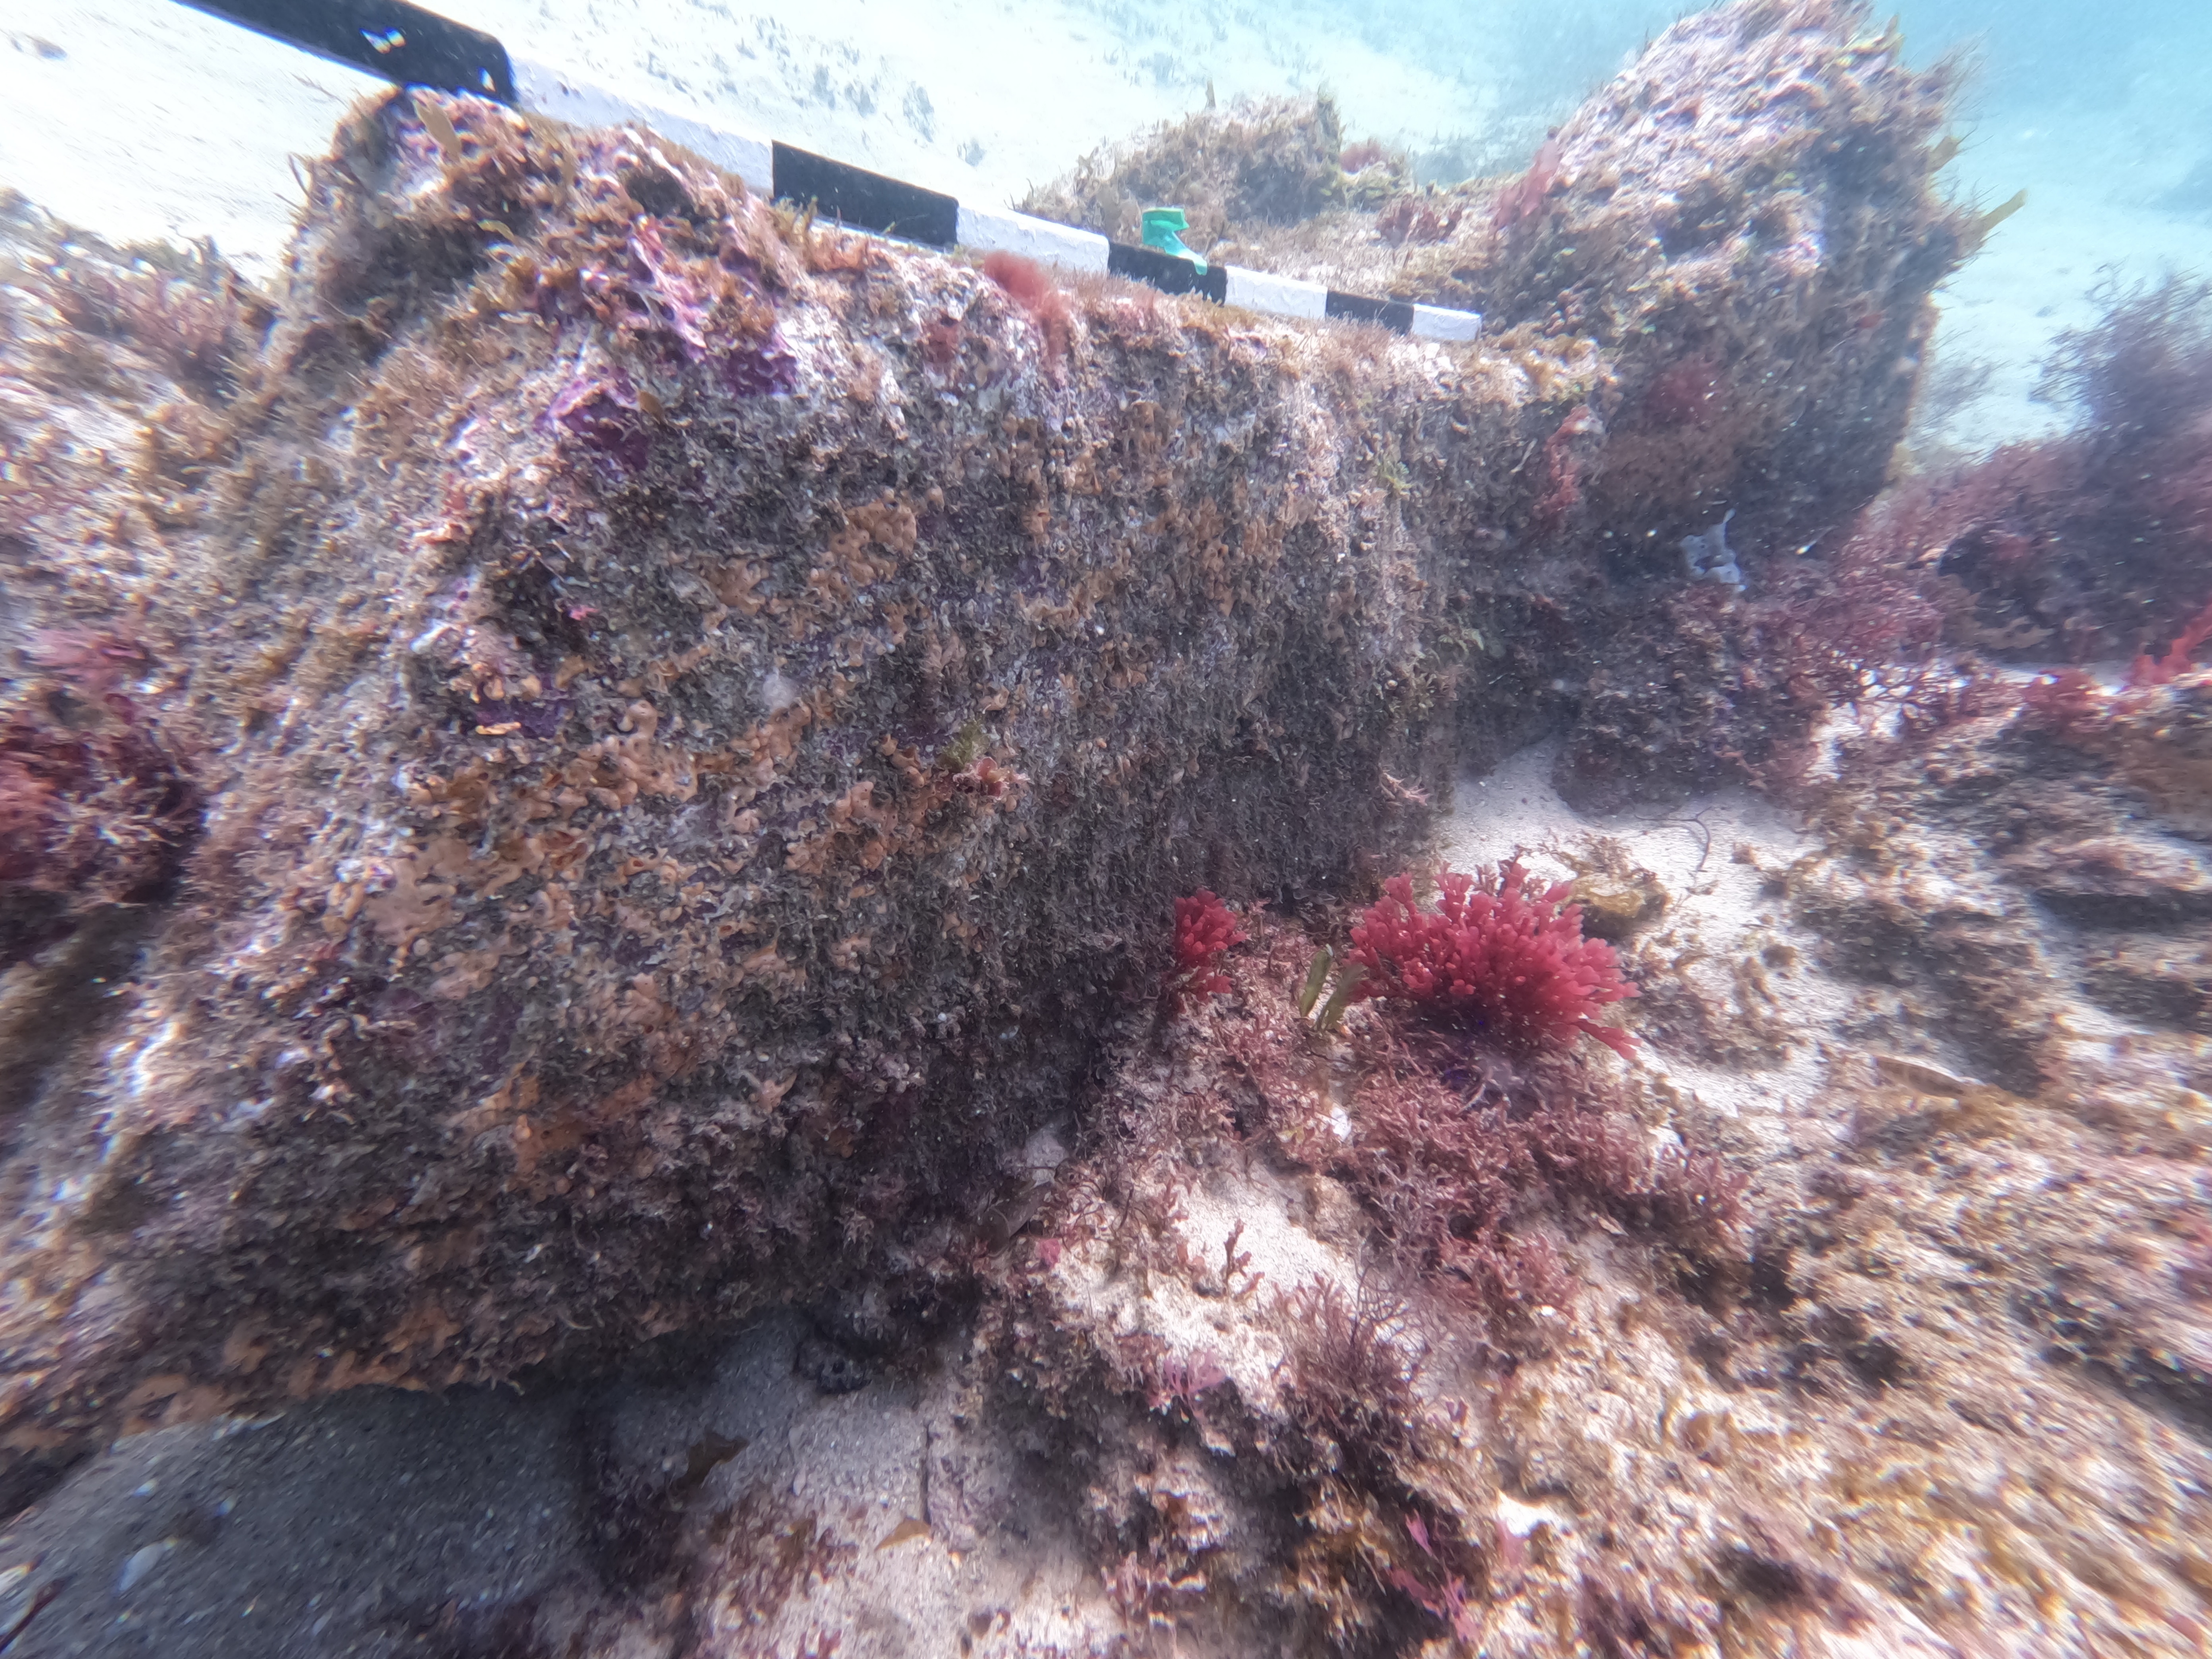

Supplement: Supplementary file 737 [file G0713804.pdf › Ocean2/G0713804.pdf]

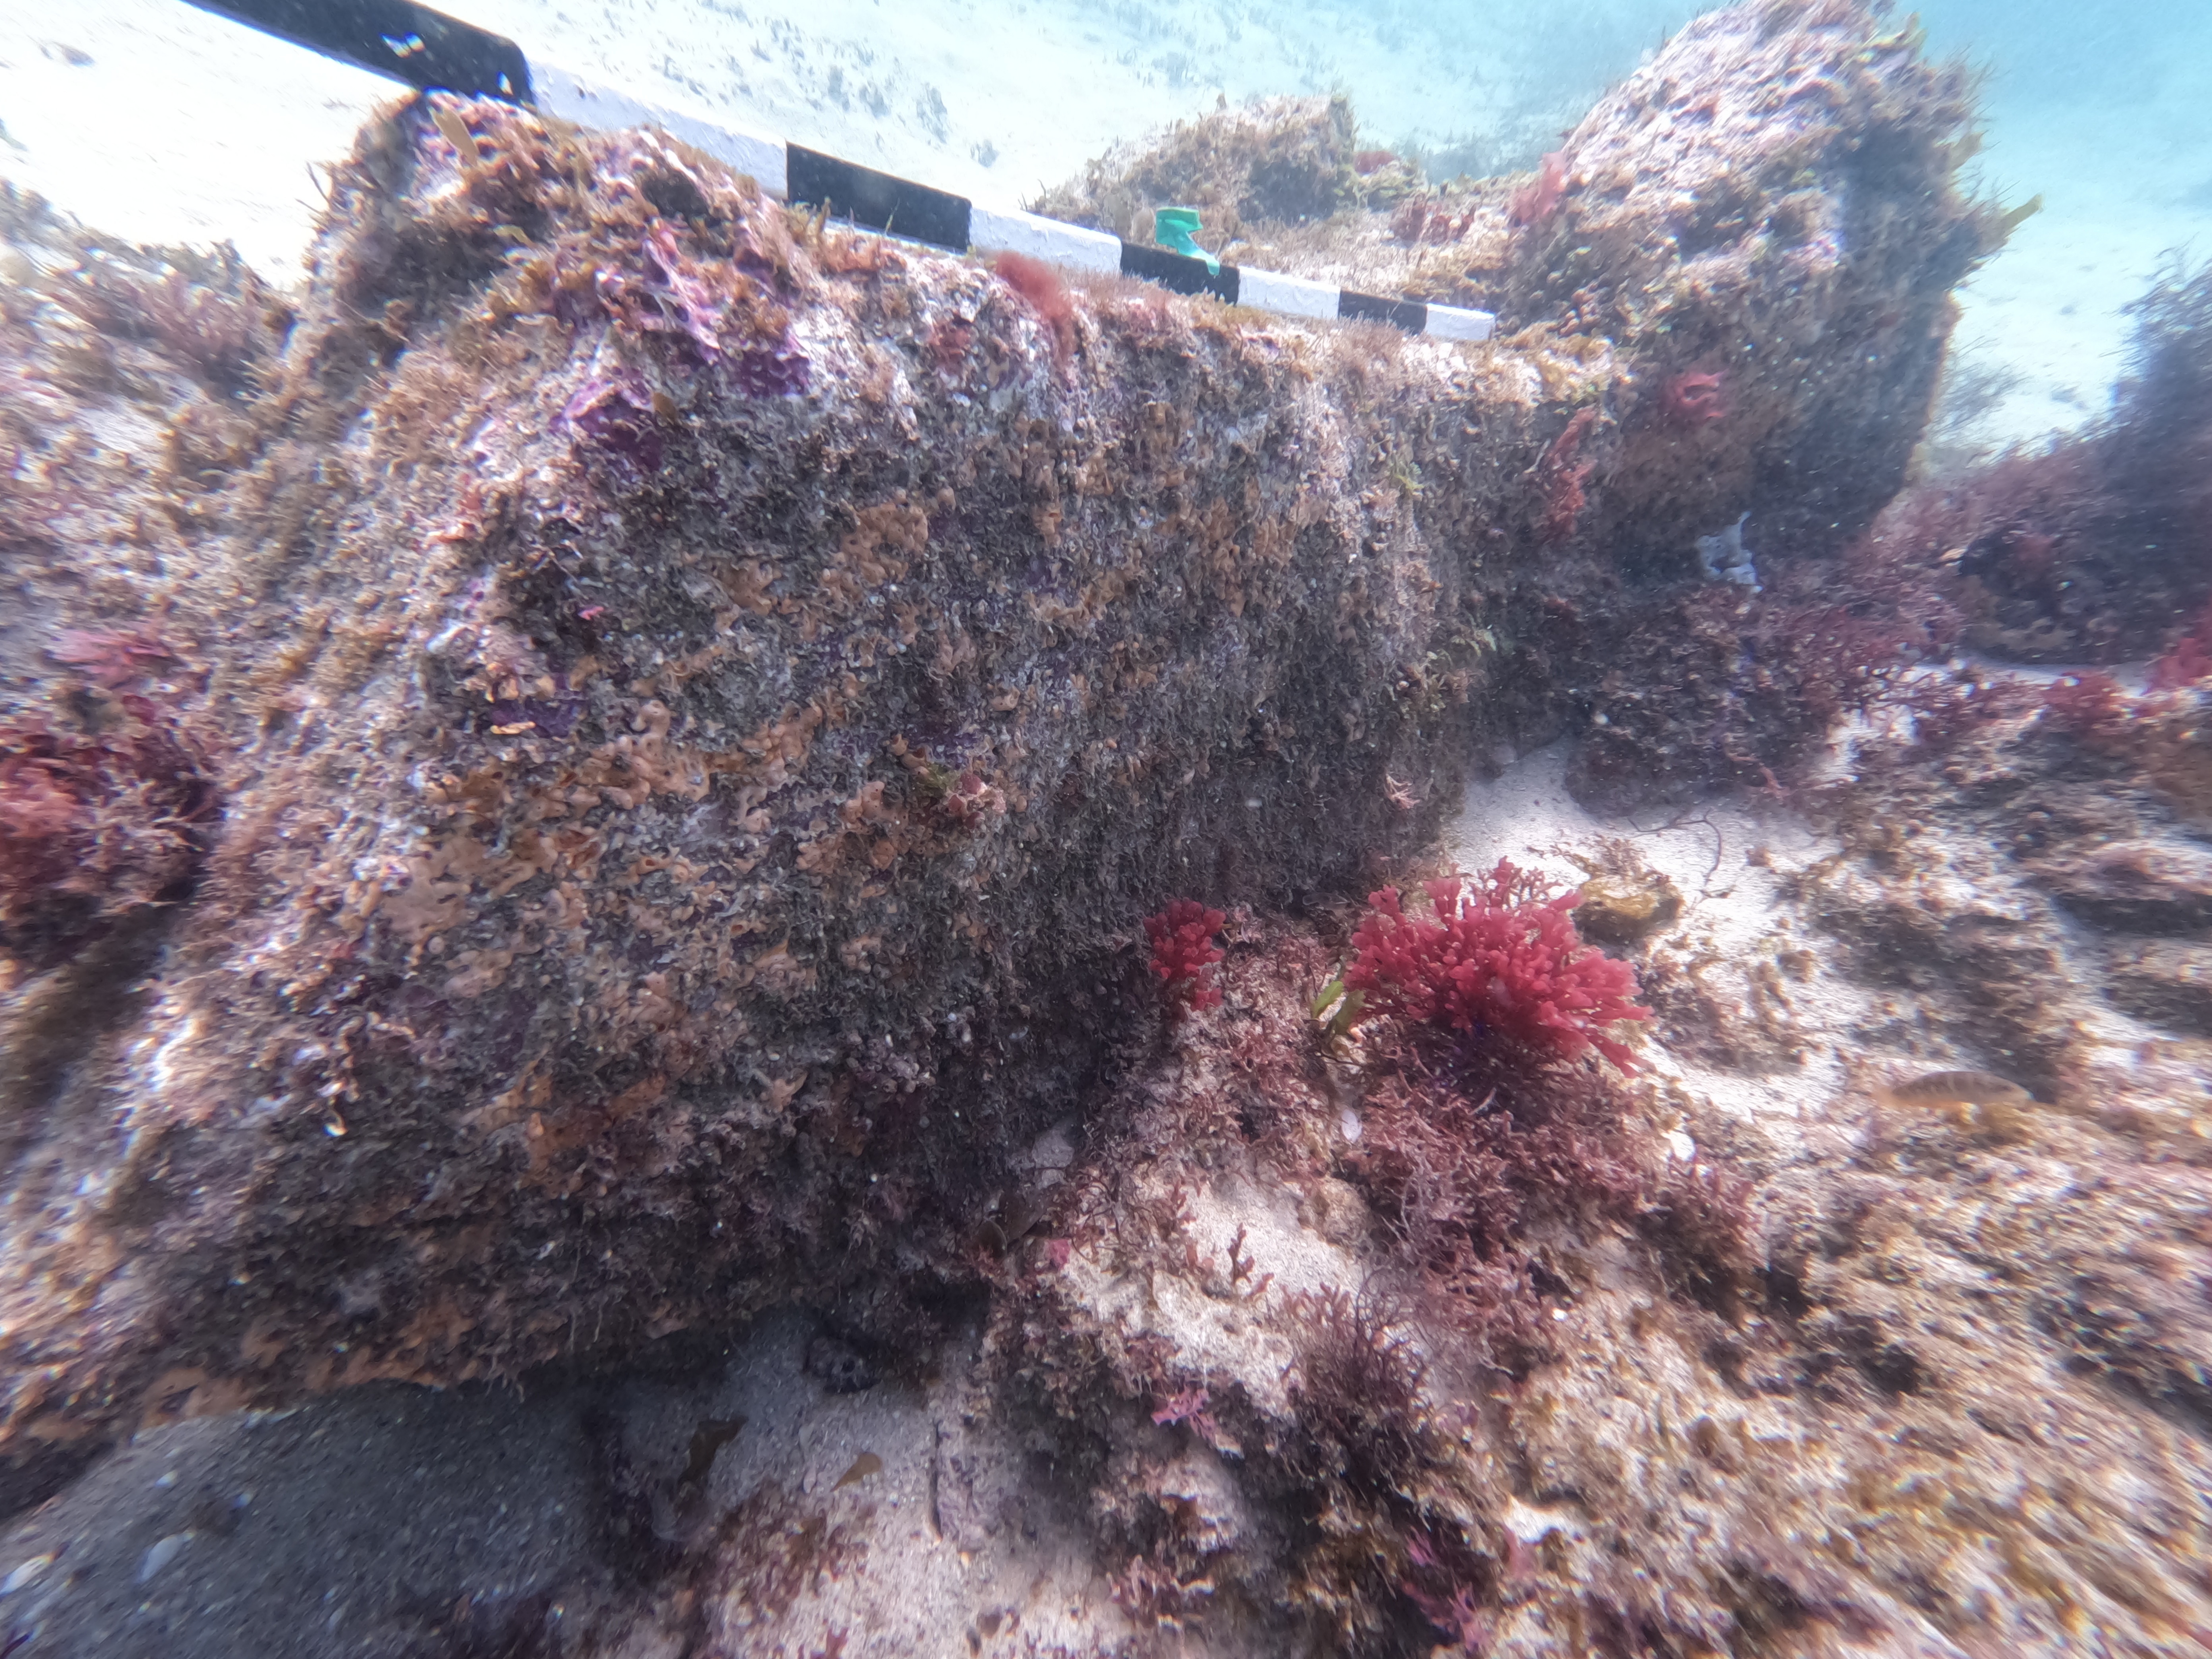

Supplement: Supplementary file 738 [file G0713805.pdf › Ocean2/G0713805.pdf]

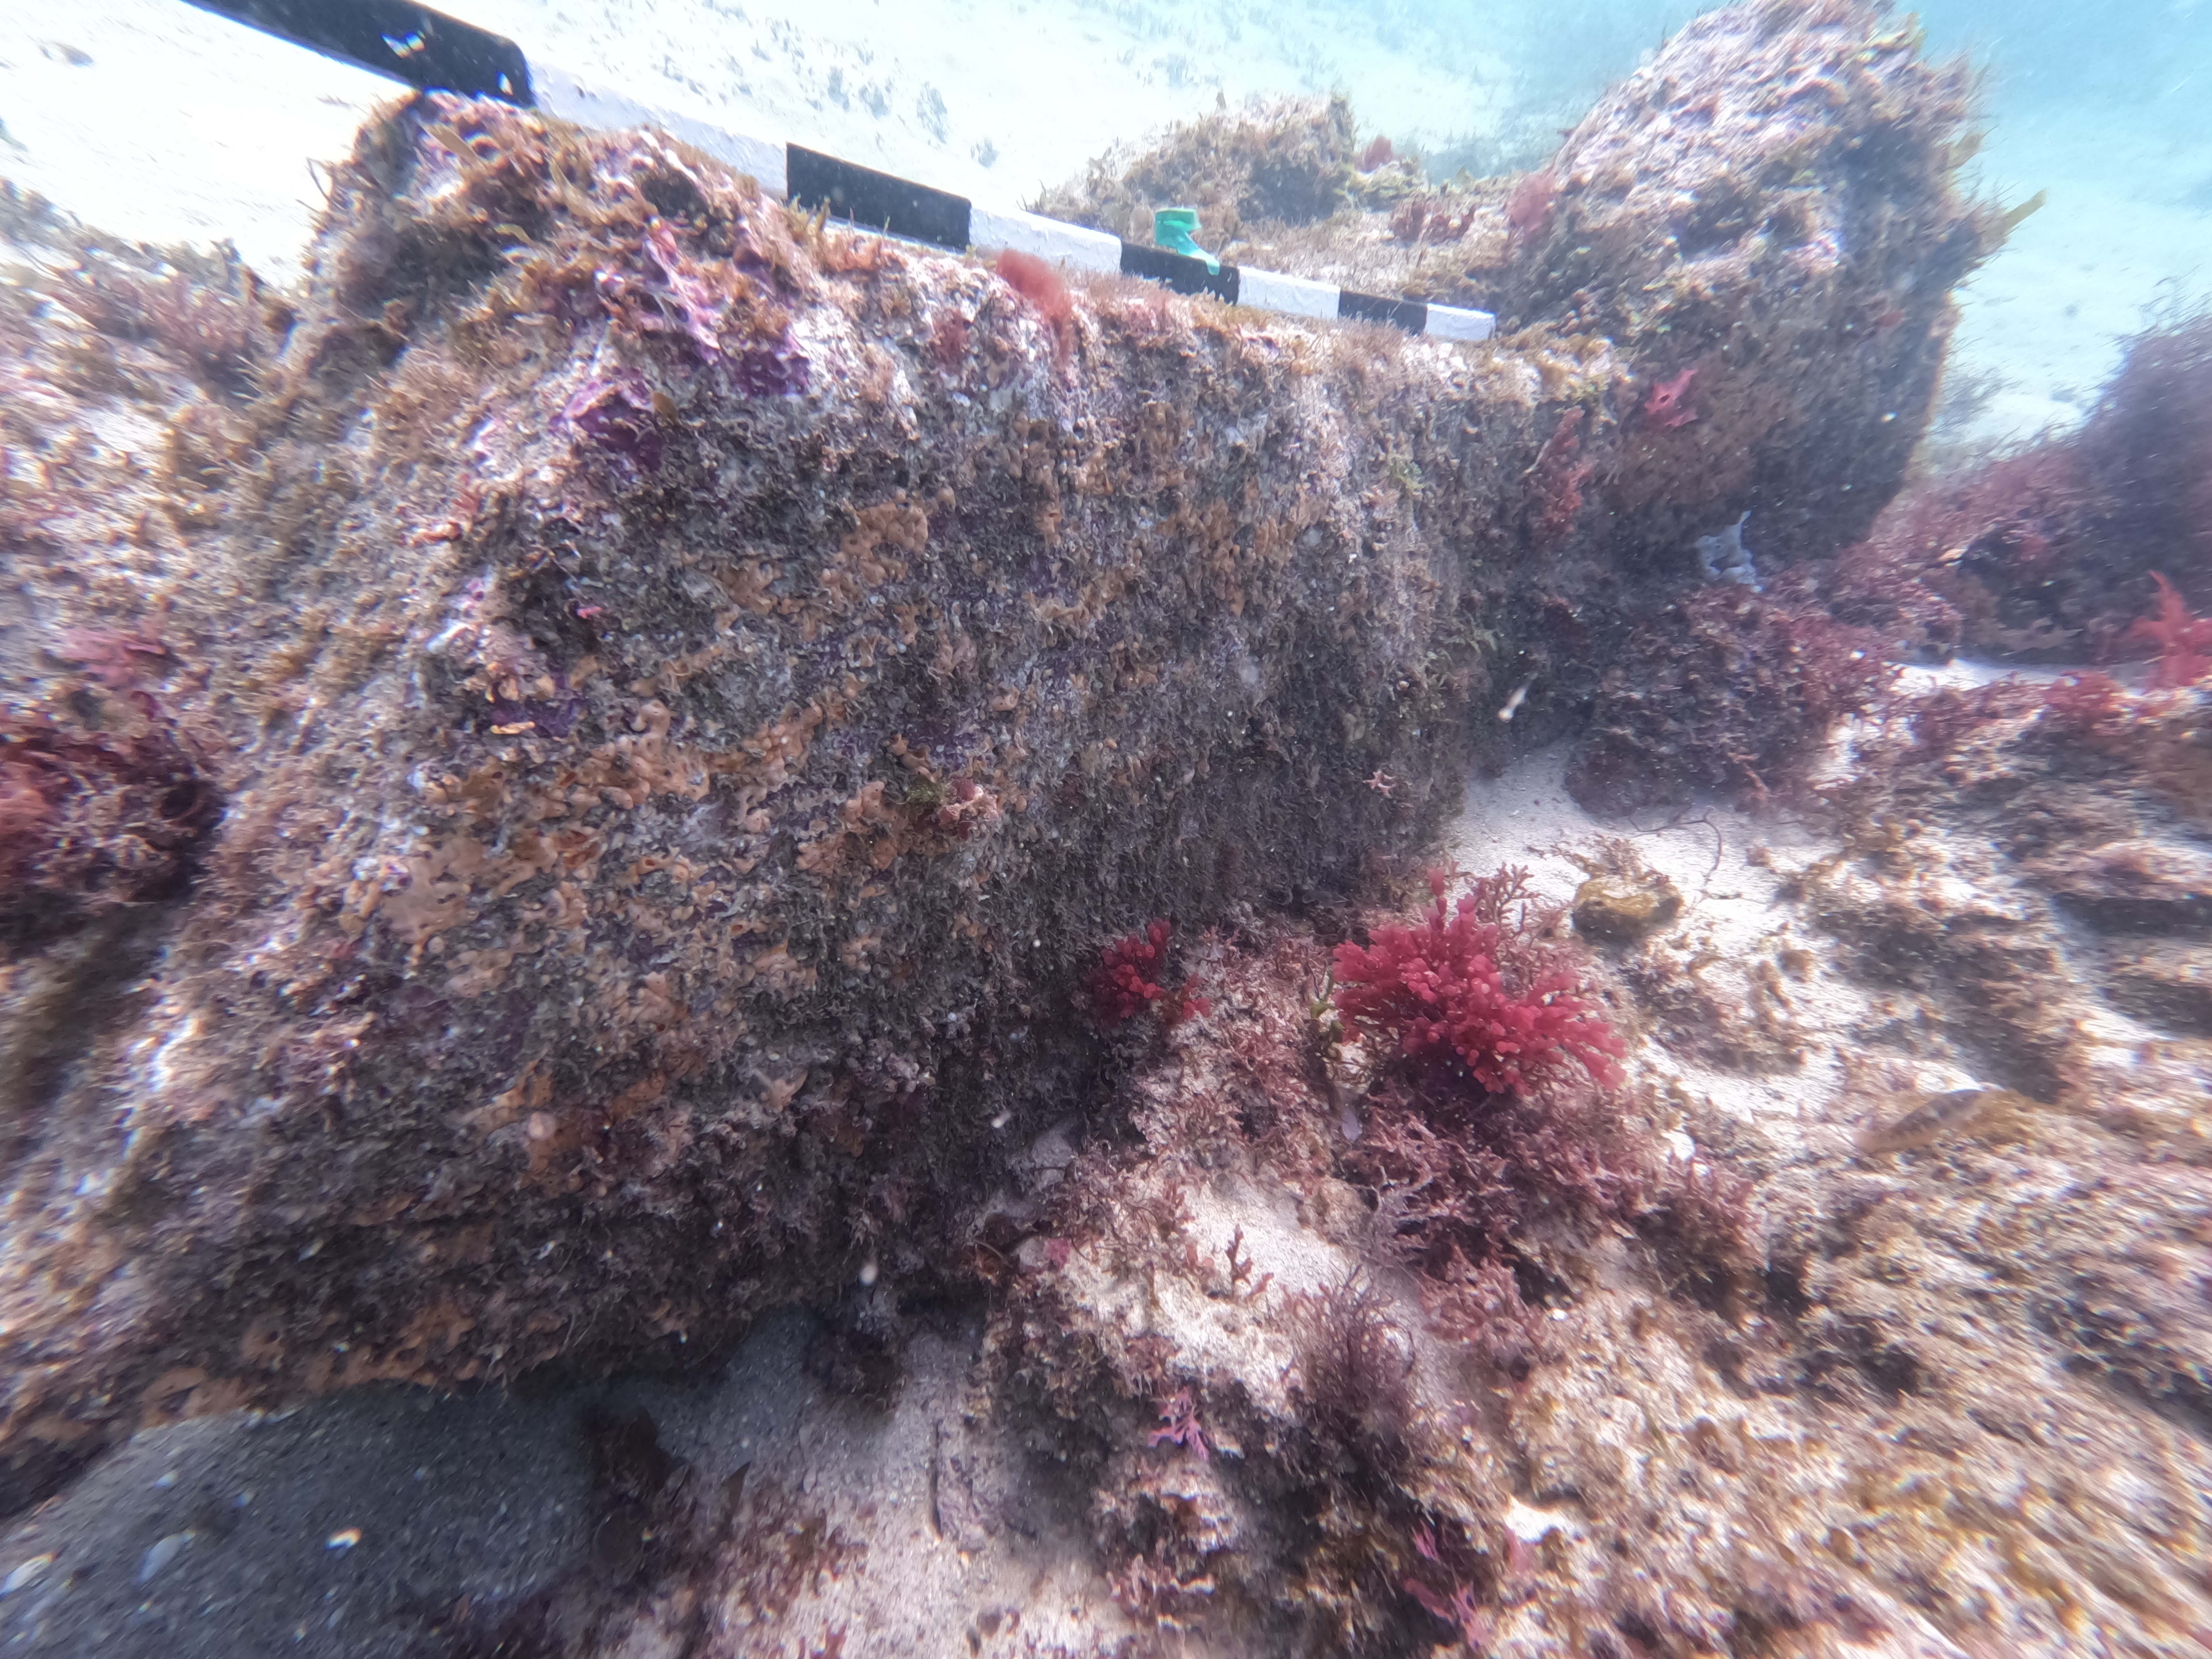

Supplement: Supplementary file 739 [file G0713806.pdf › Ocean2/G0713806.pdf]

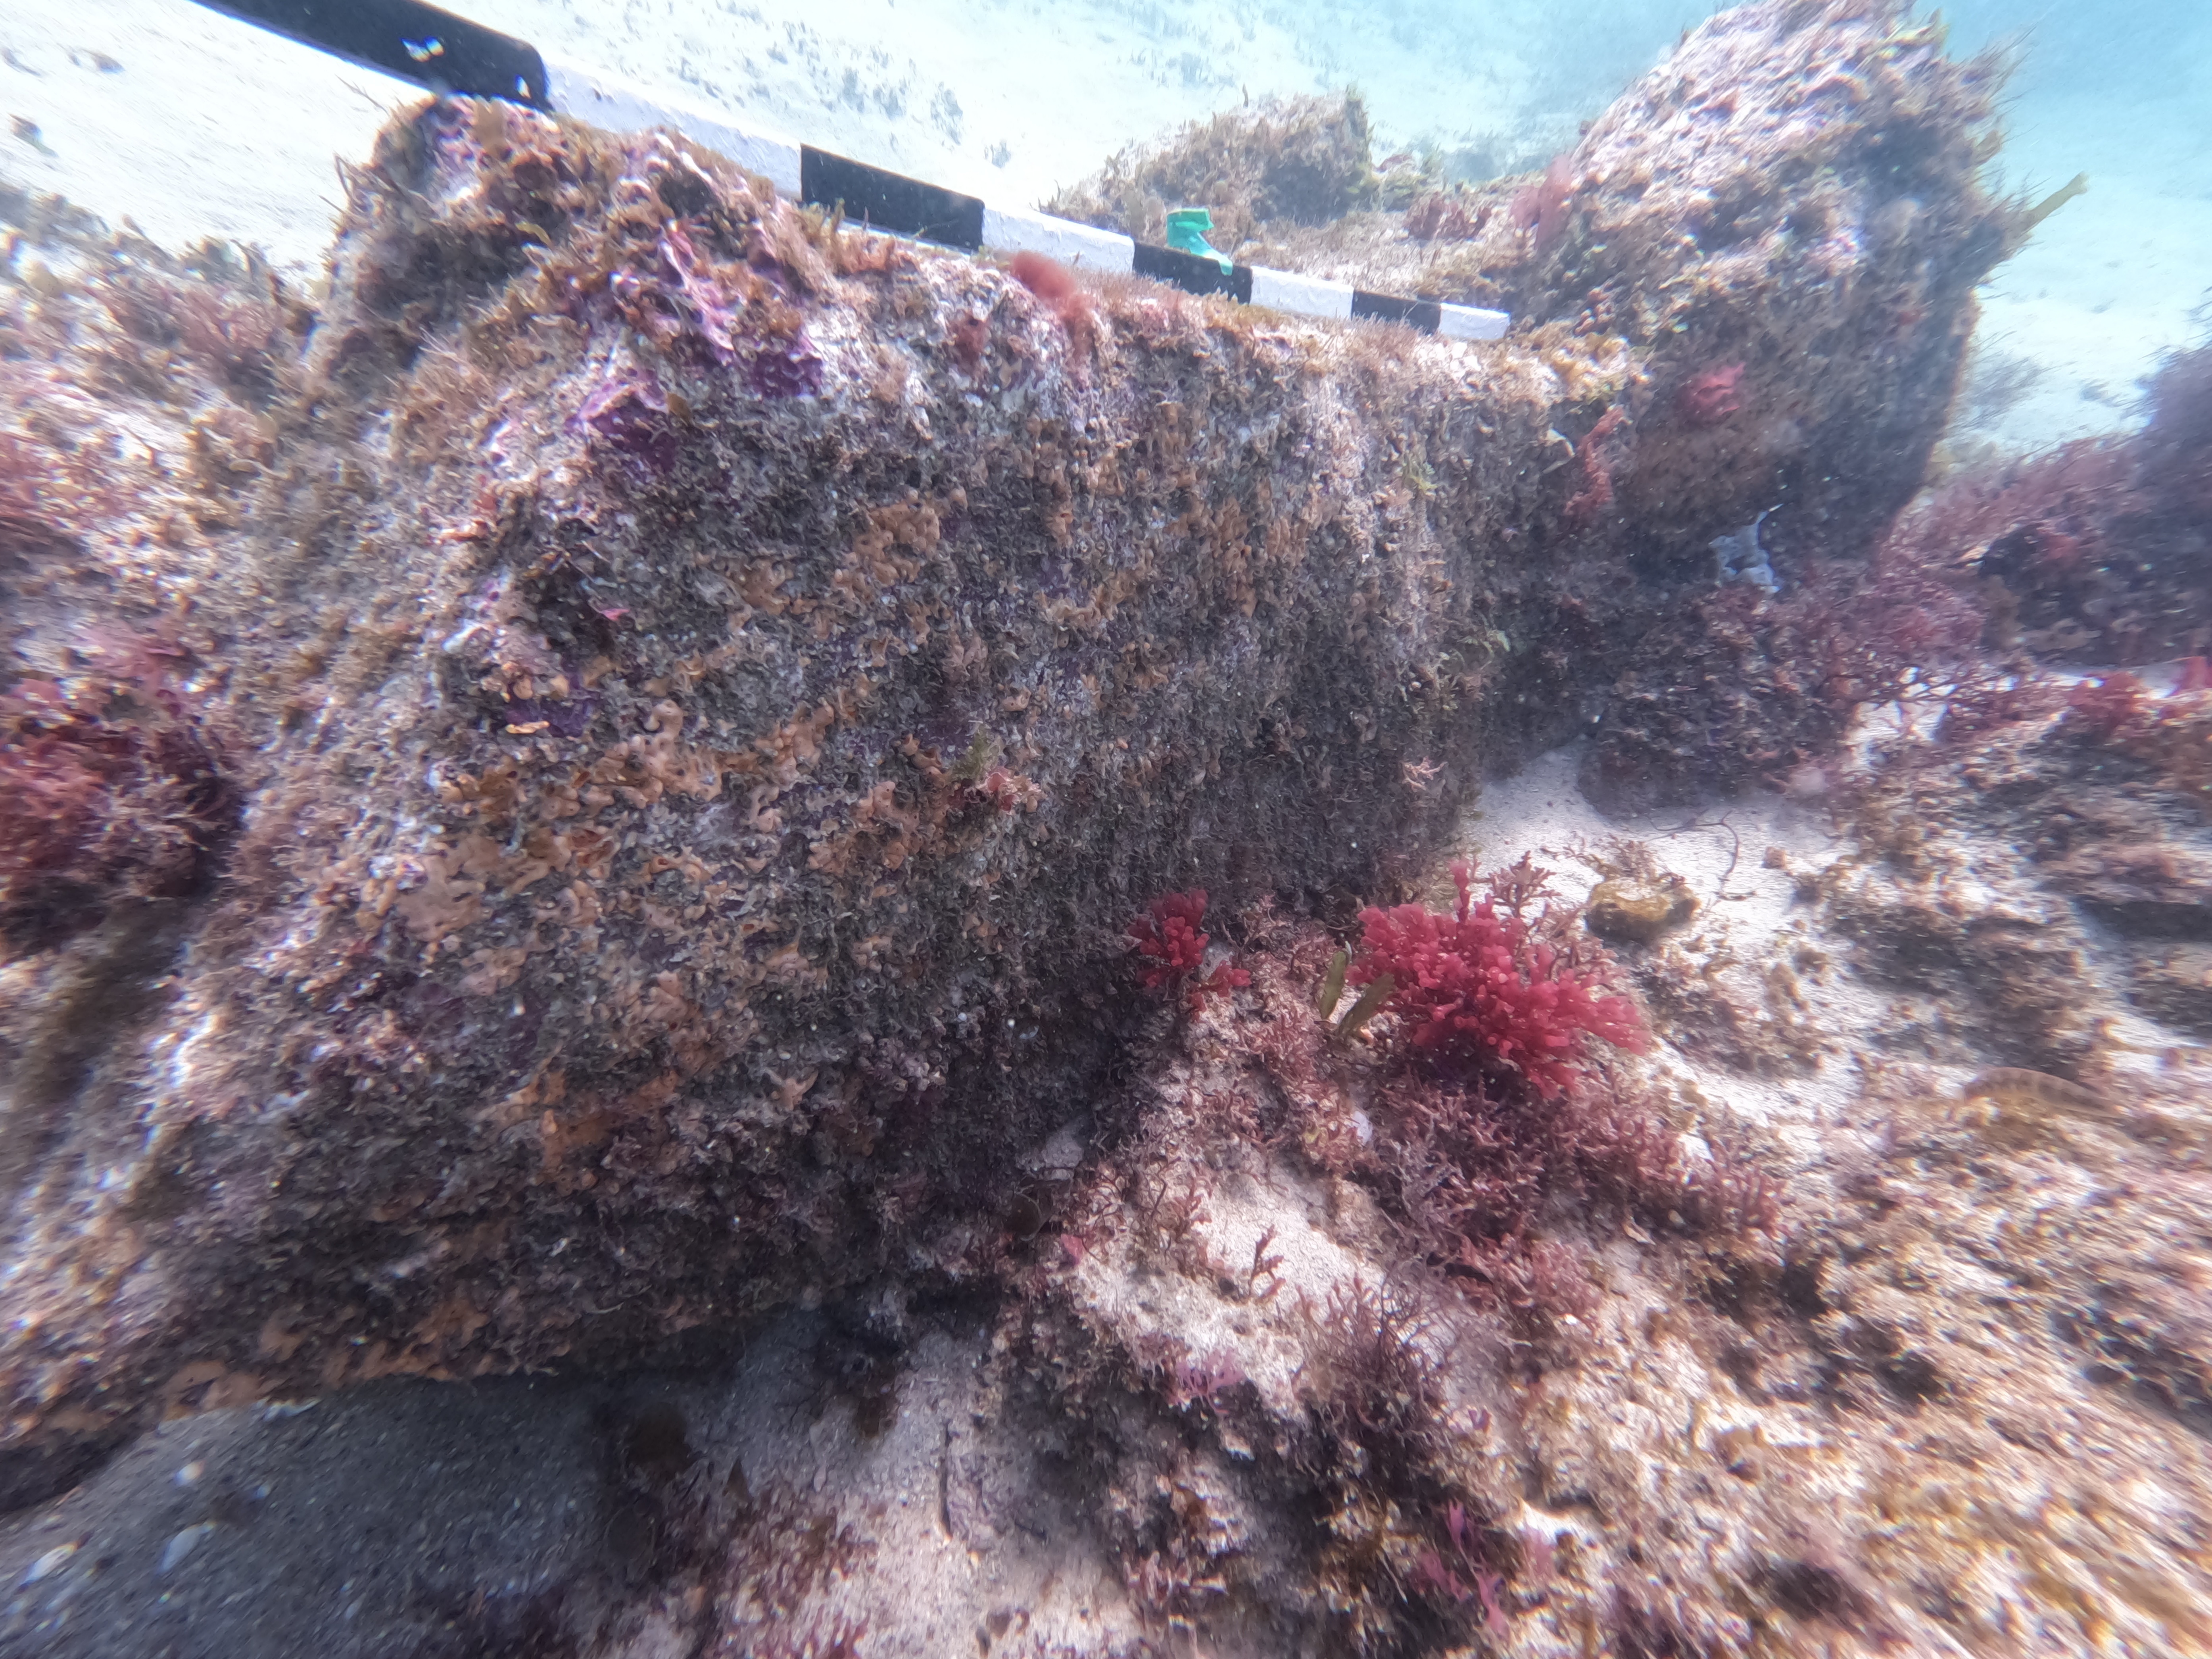

Supplement: Supplementary file 740 [file G0713807.pdf › Ocean2/G0713807.pdf]

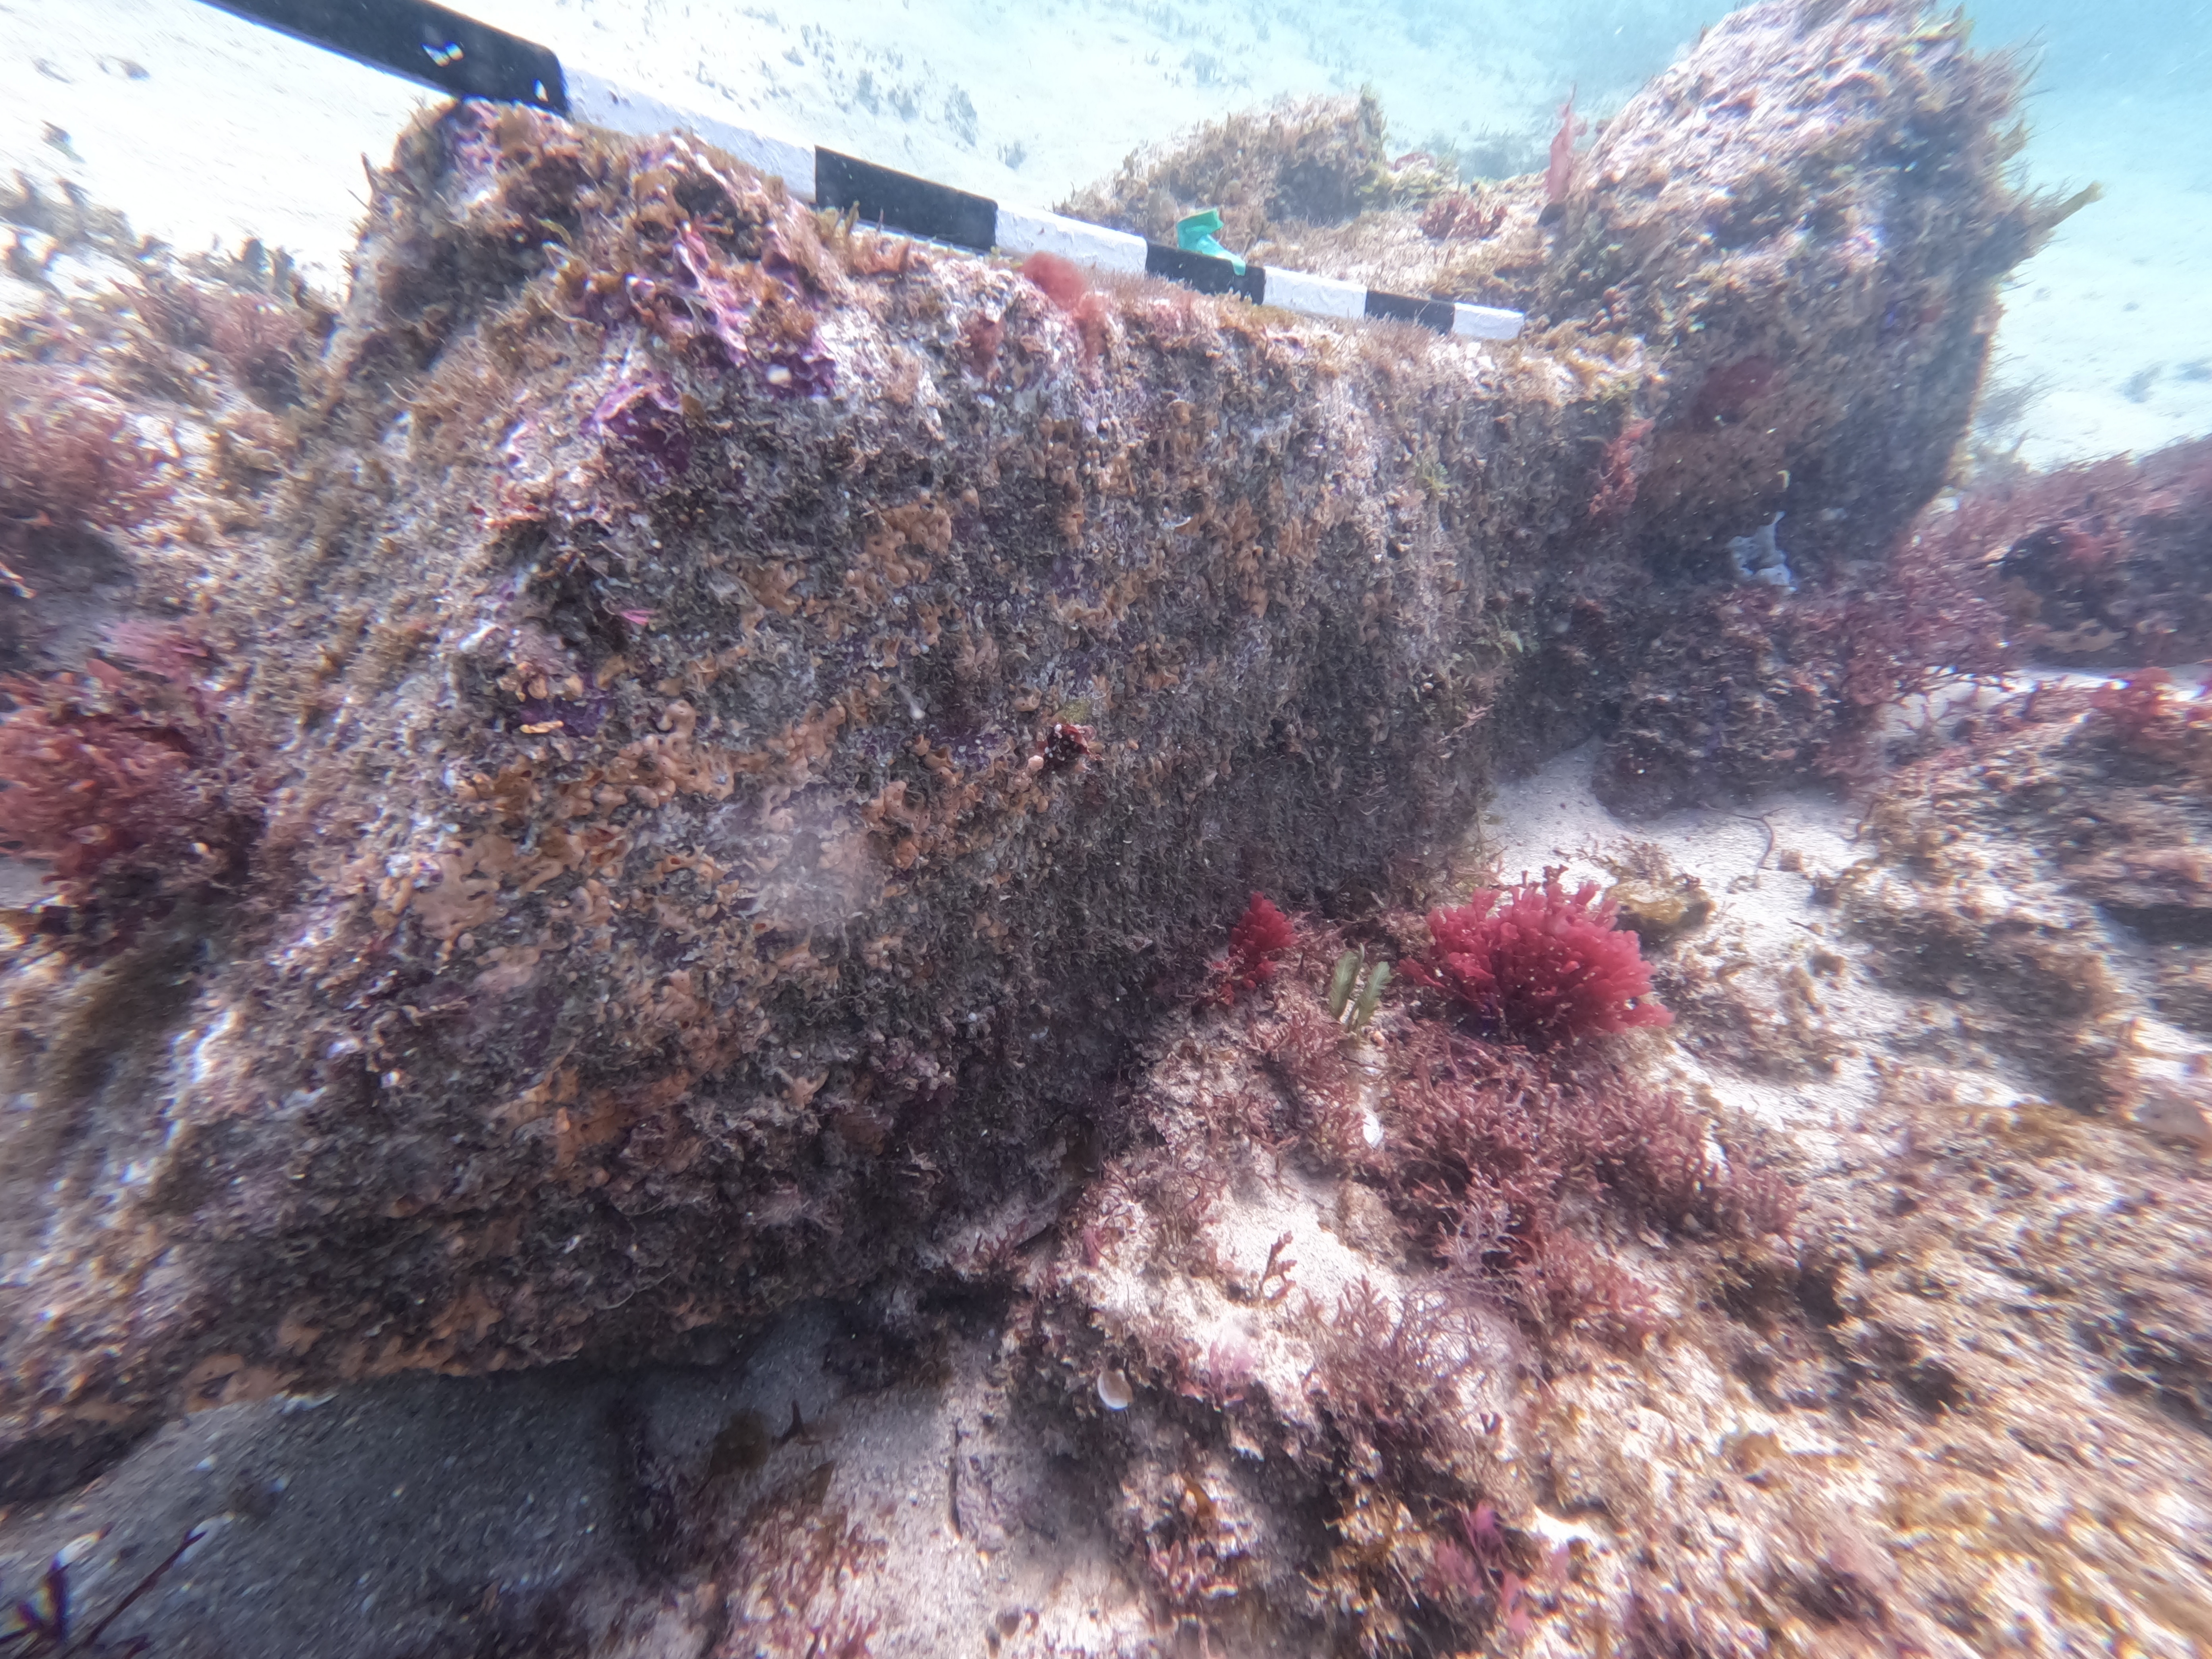

Supplement: Supplementary file 741 [file G0713808.pdf › Ocean2/G0713808.pdf]

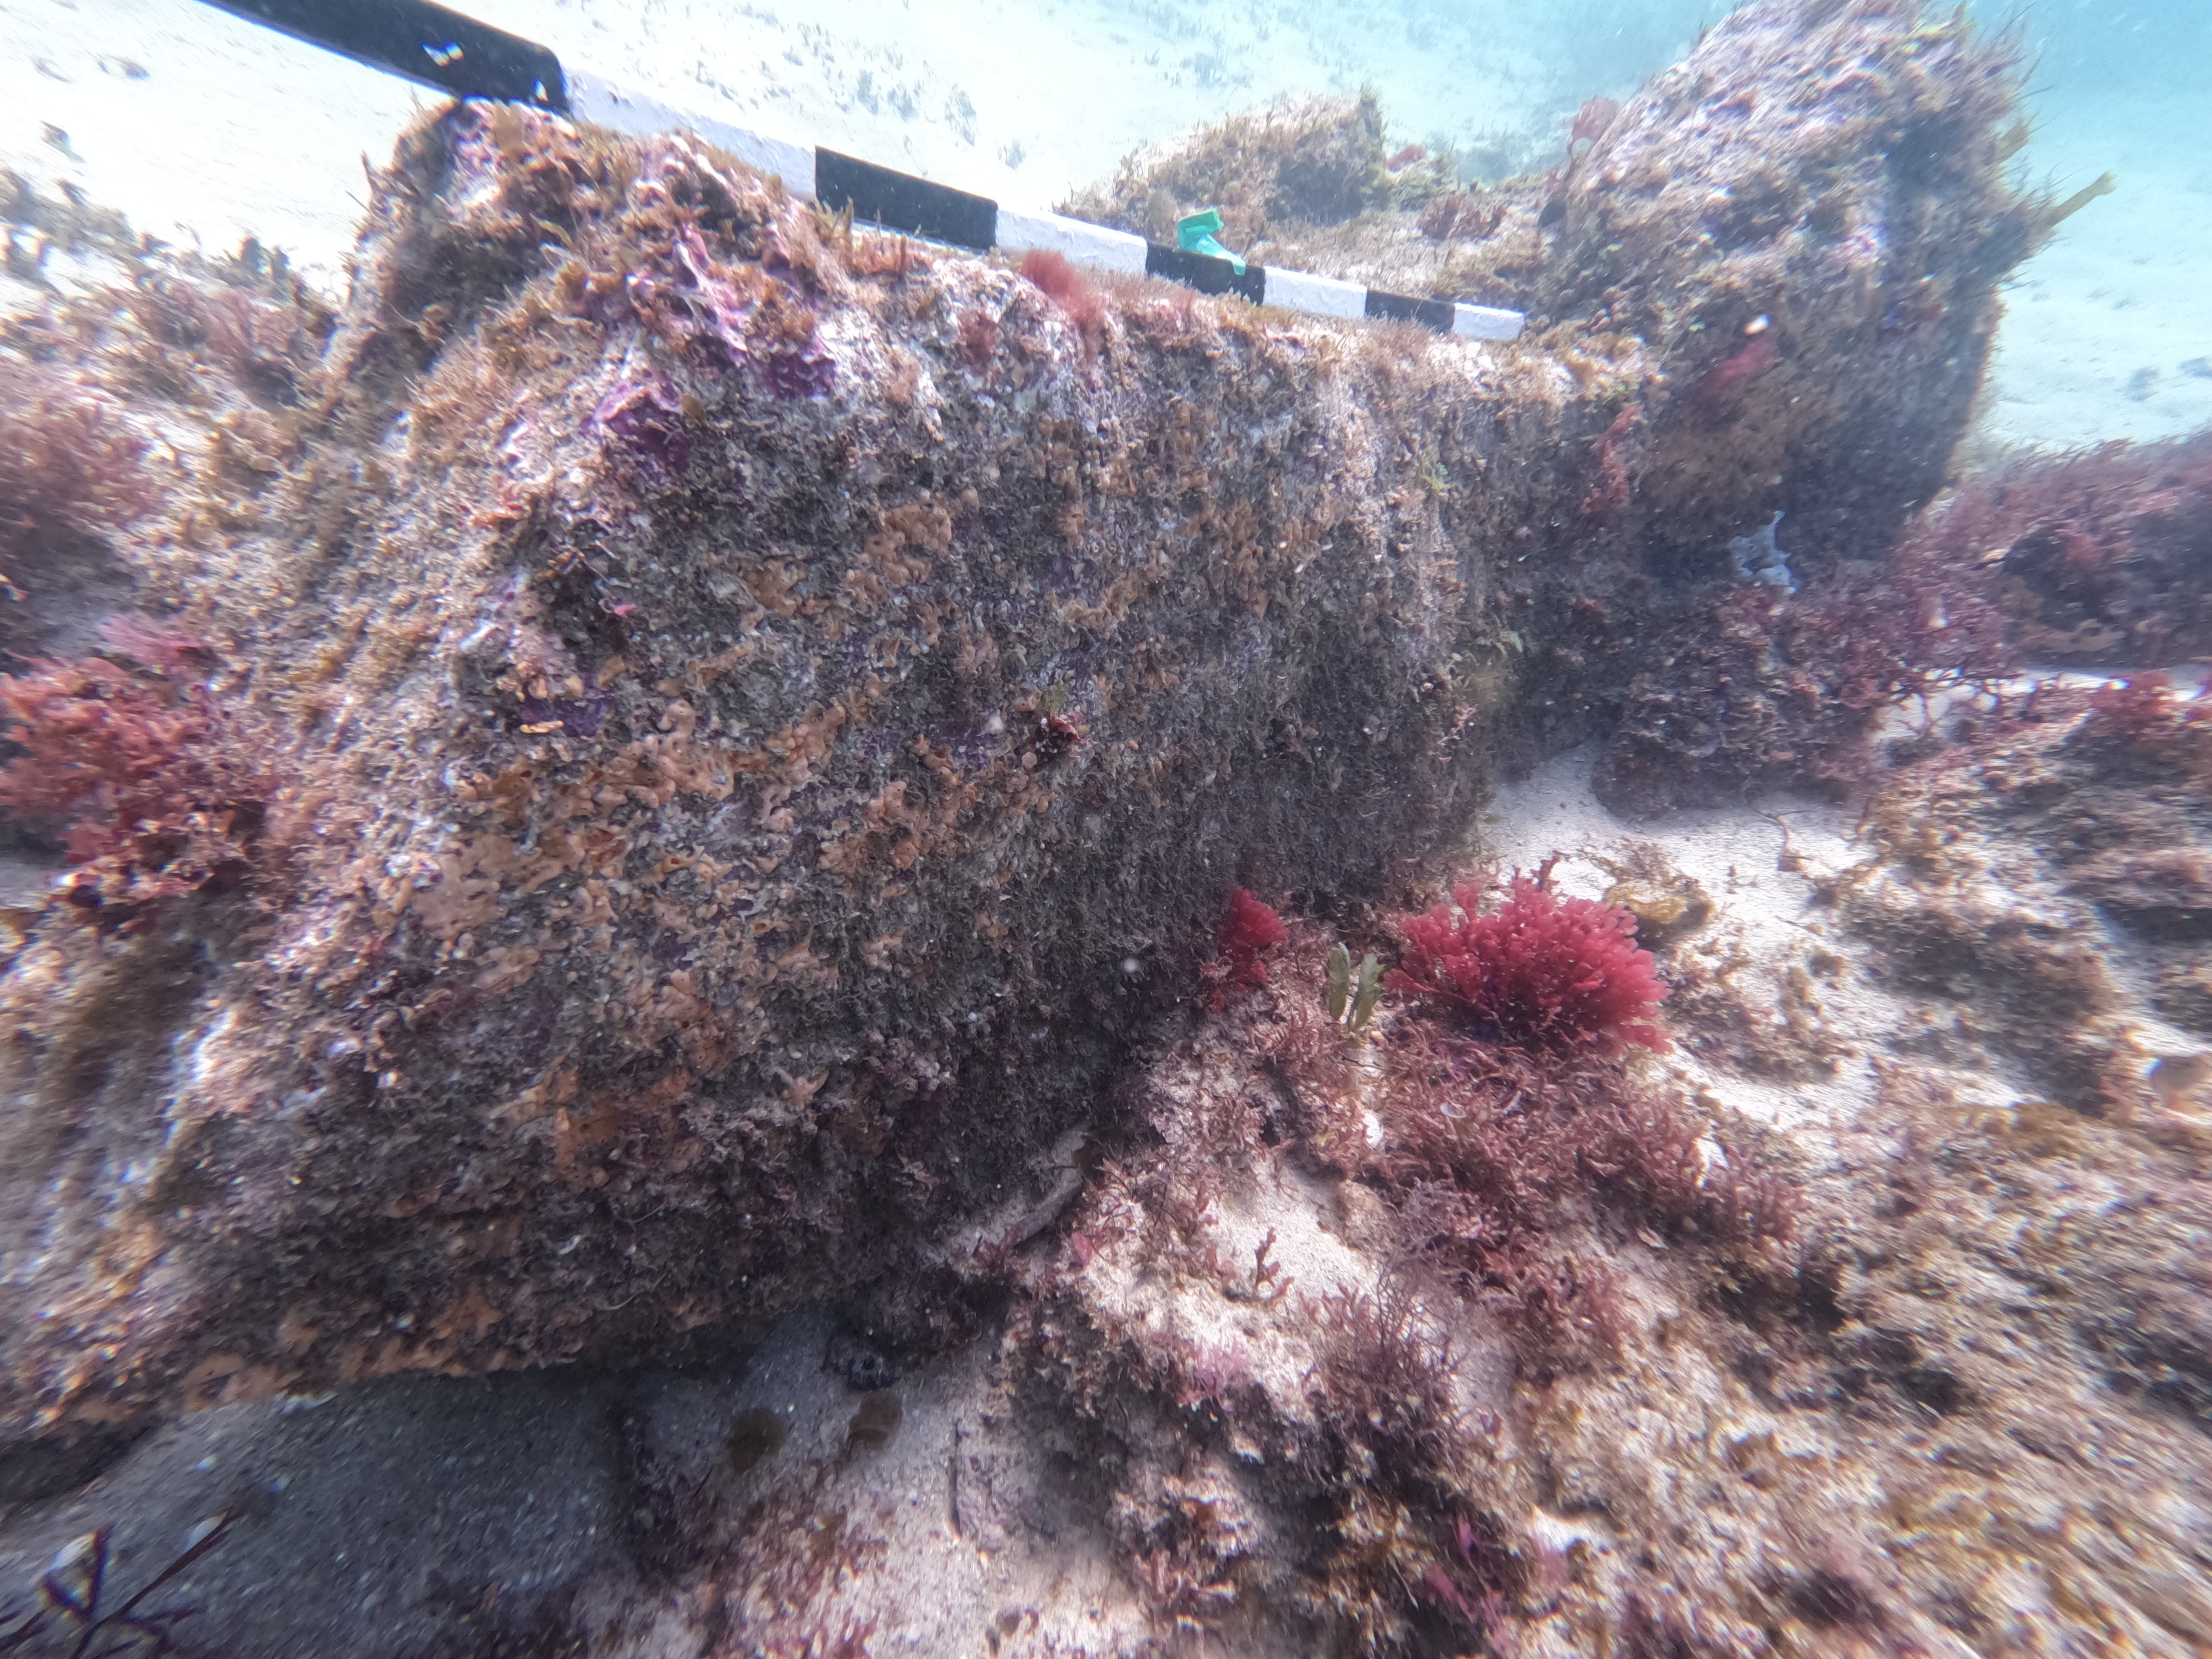

Supplement: Supplementary file 742 [file G0713809.pdf › Ocean2/G0713809.pdf]

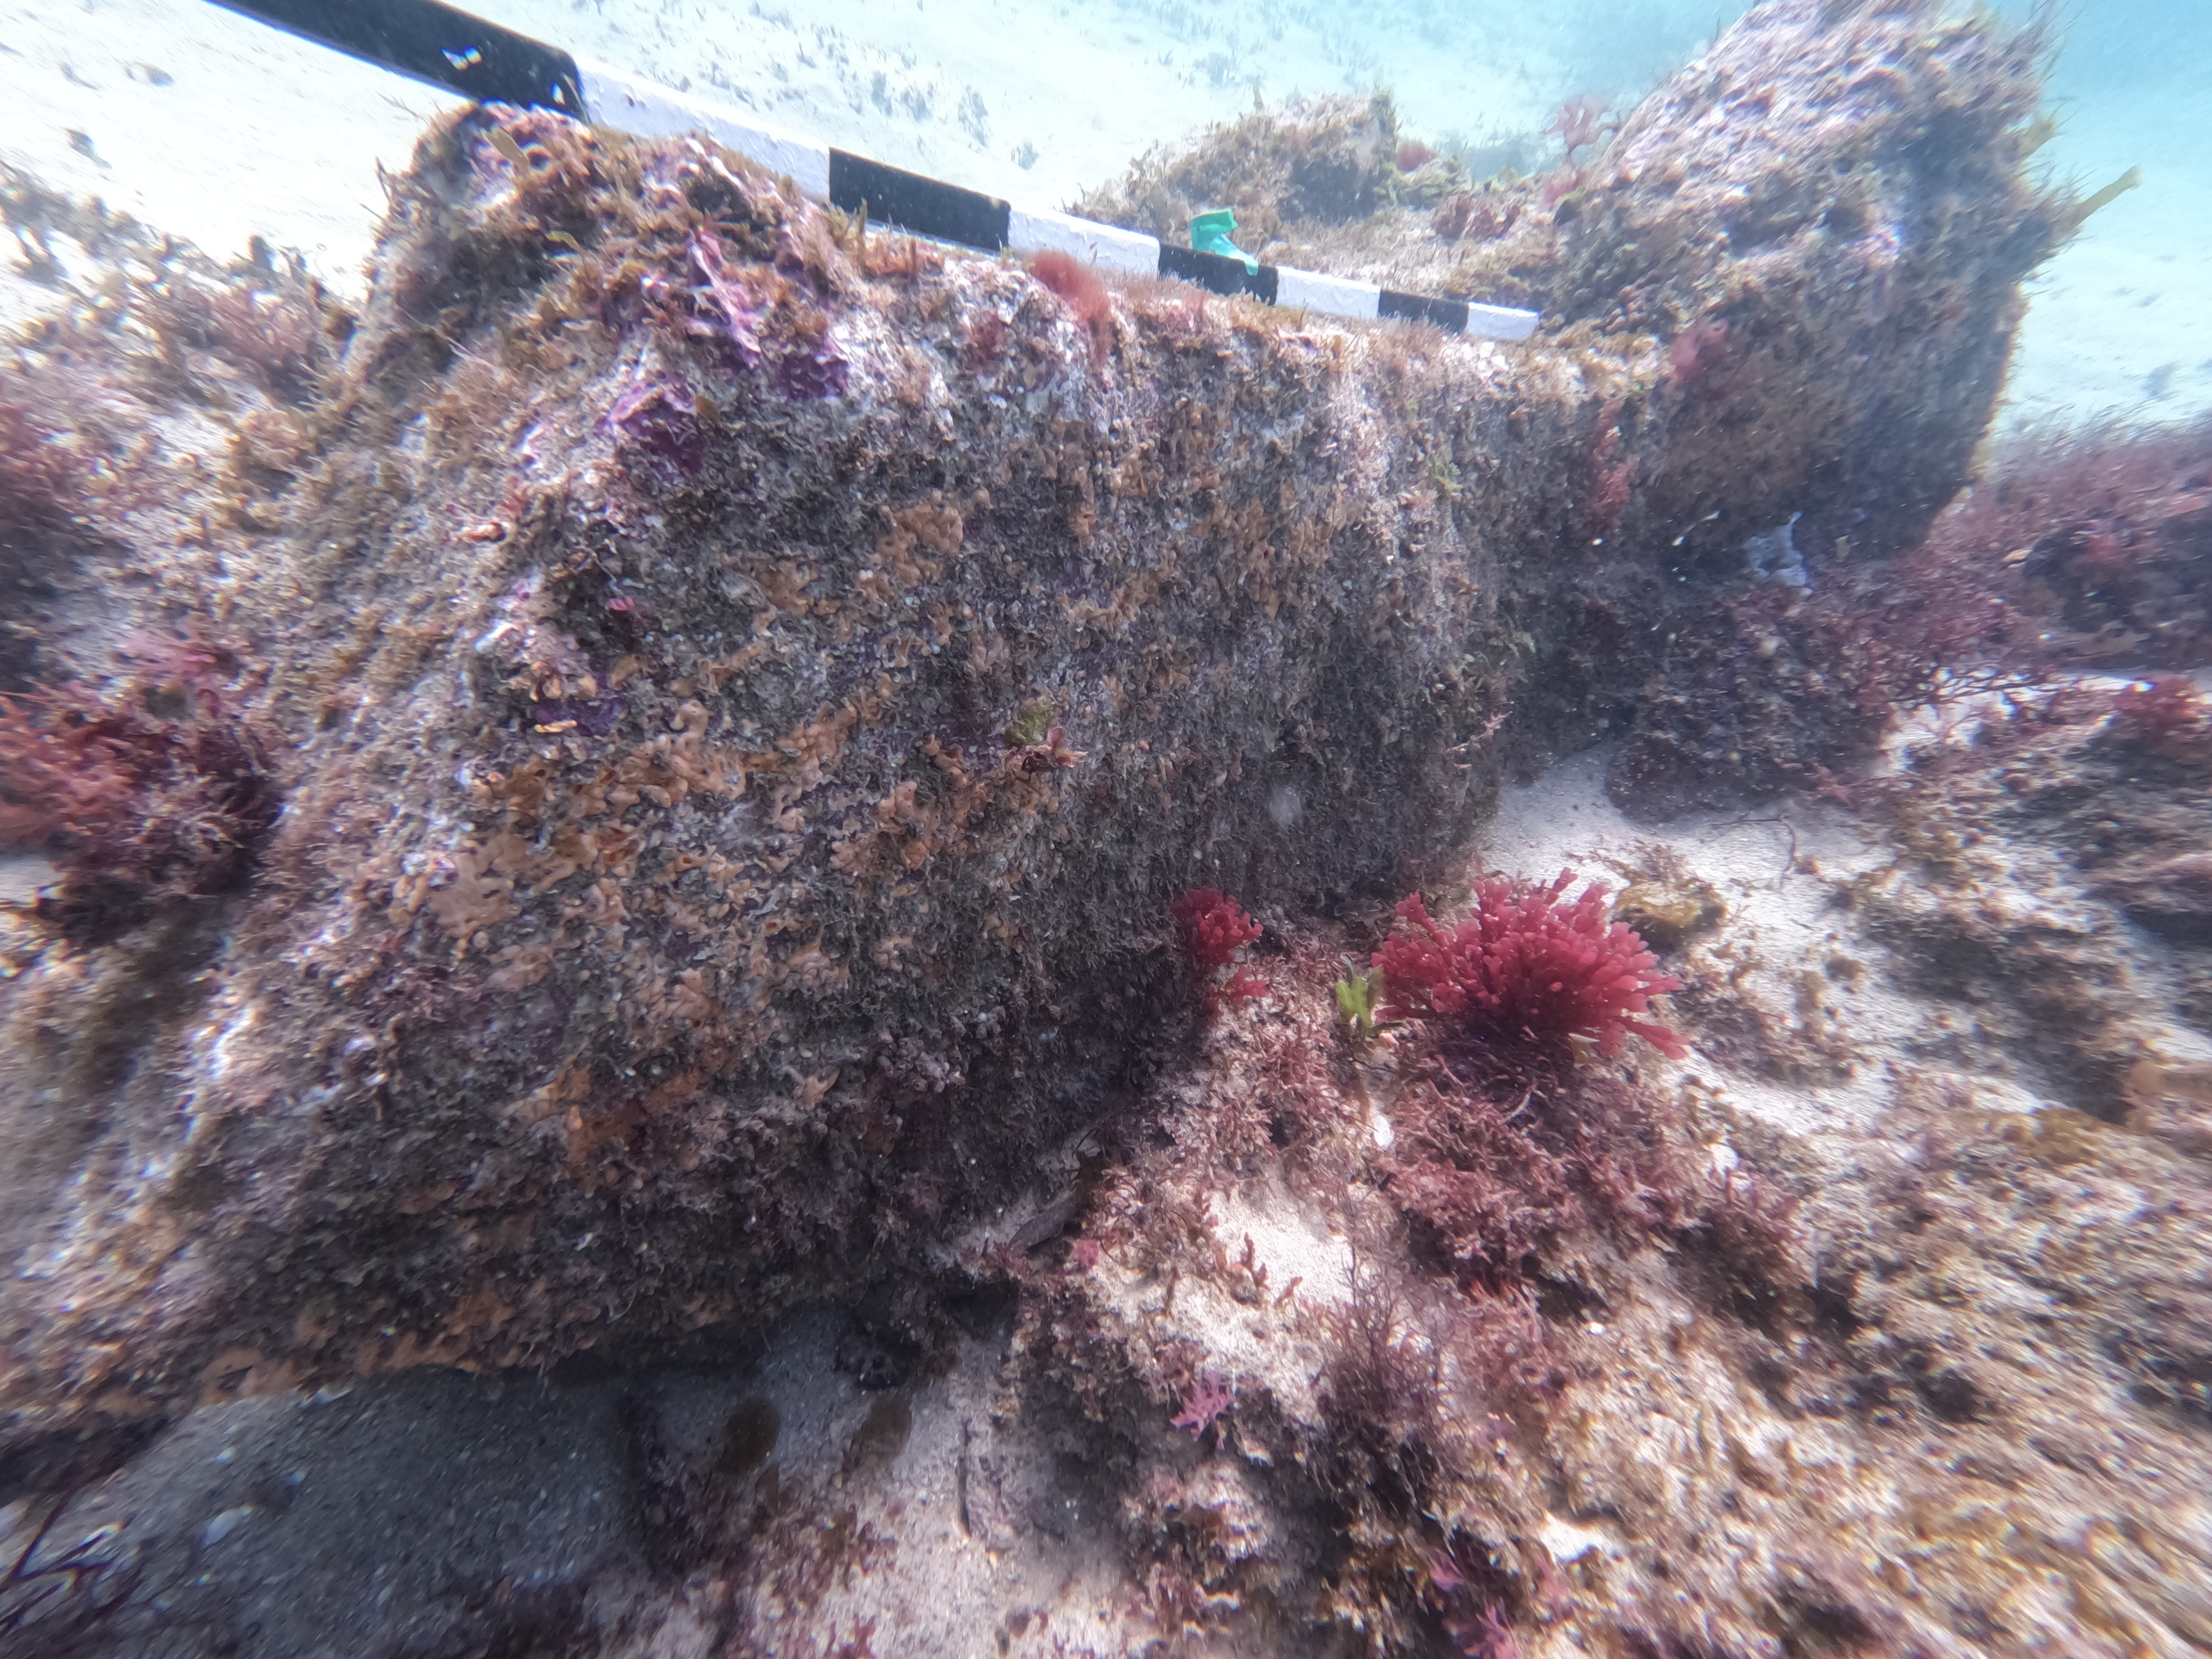

Supplement: Supplementary file 743 [file G0713810.pdf › Ocean2/G0713810.pdf]

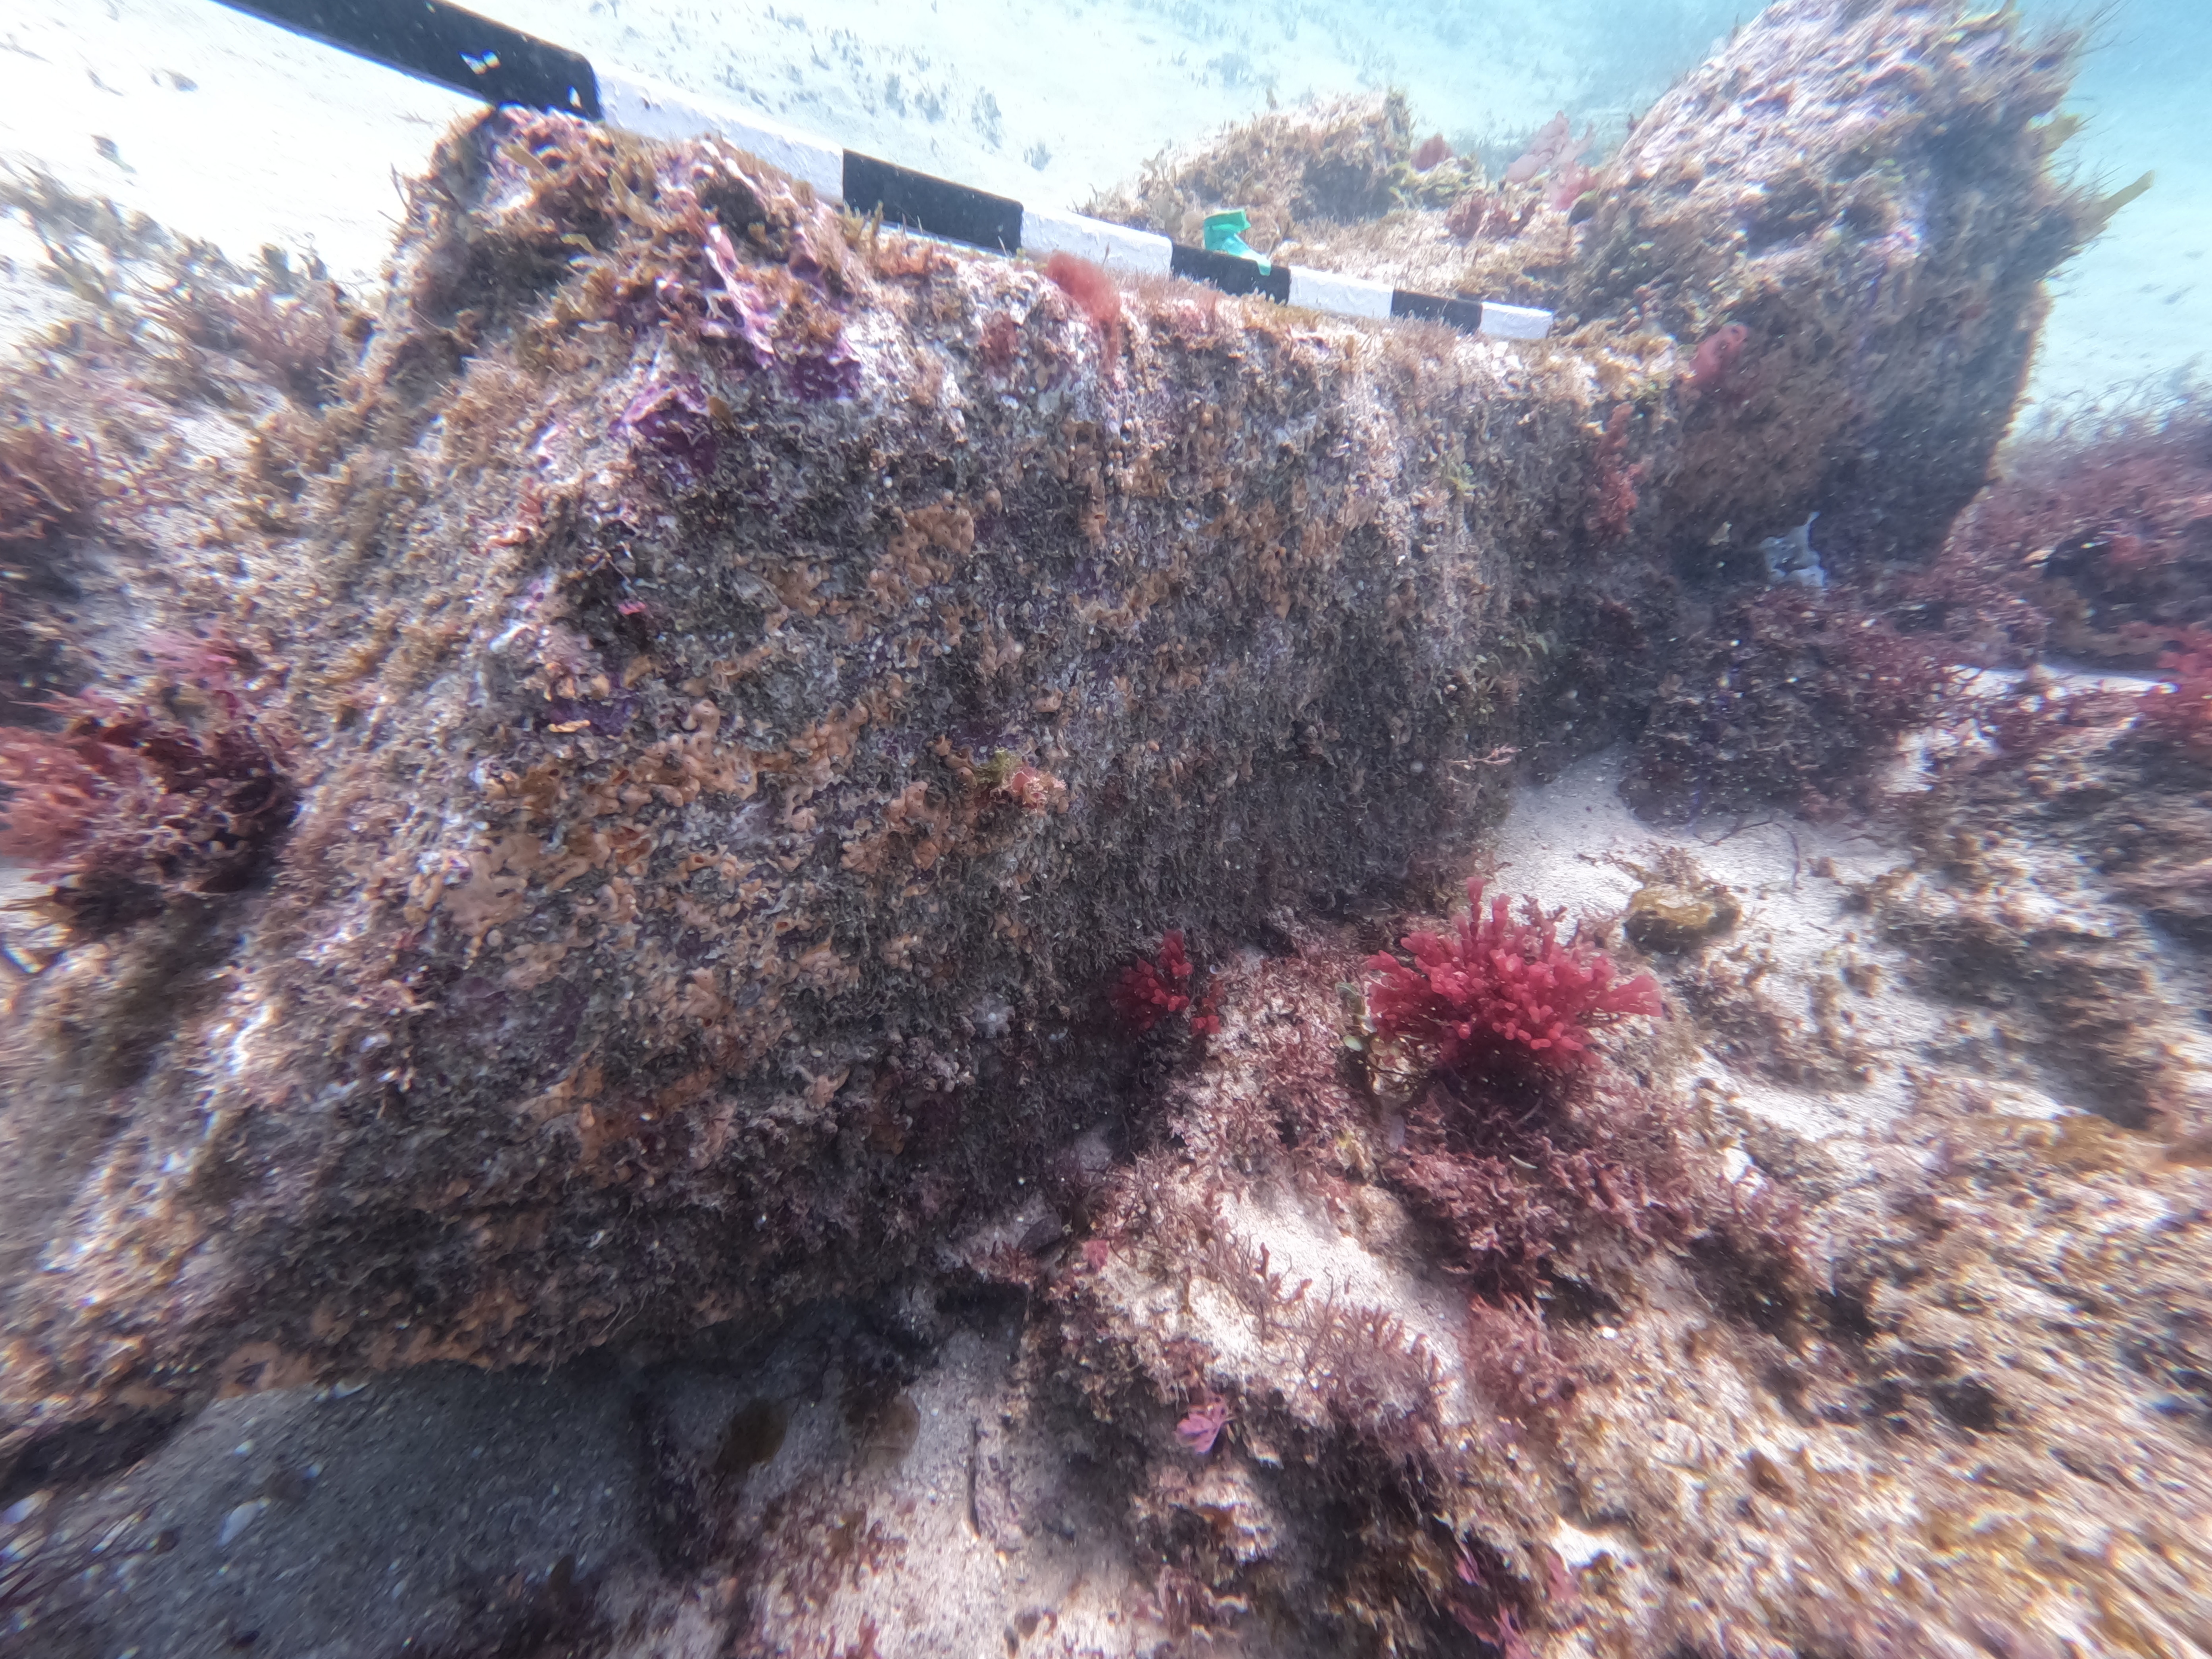

Supplement: Supplementary file 744 [file G0713811.pdf › Ocean2/G0713811.pdf]

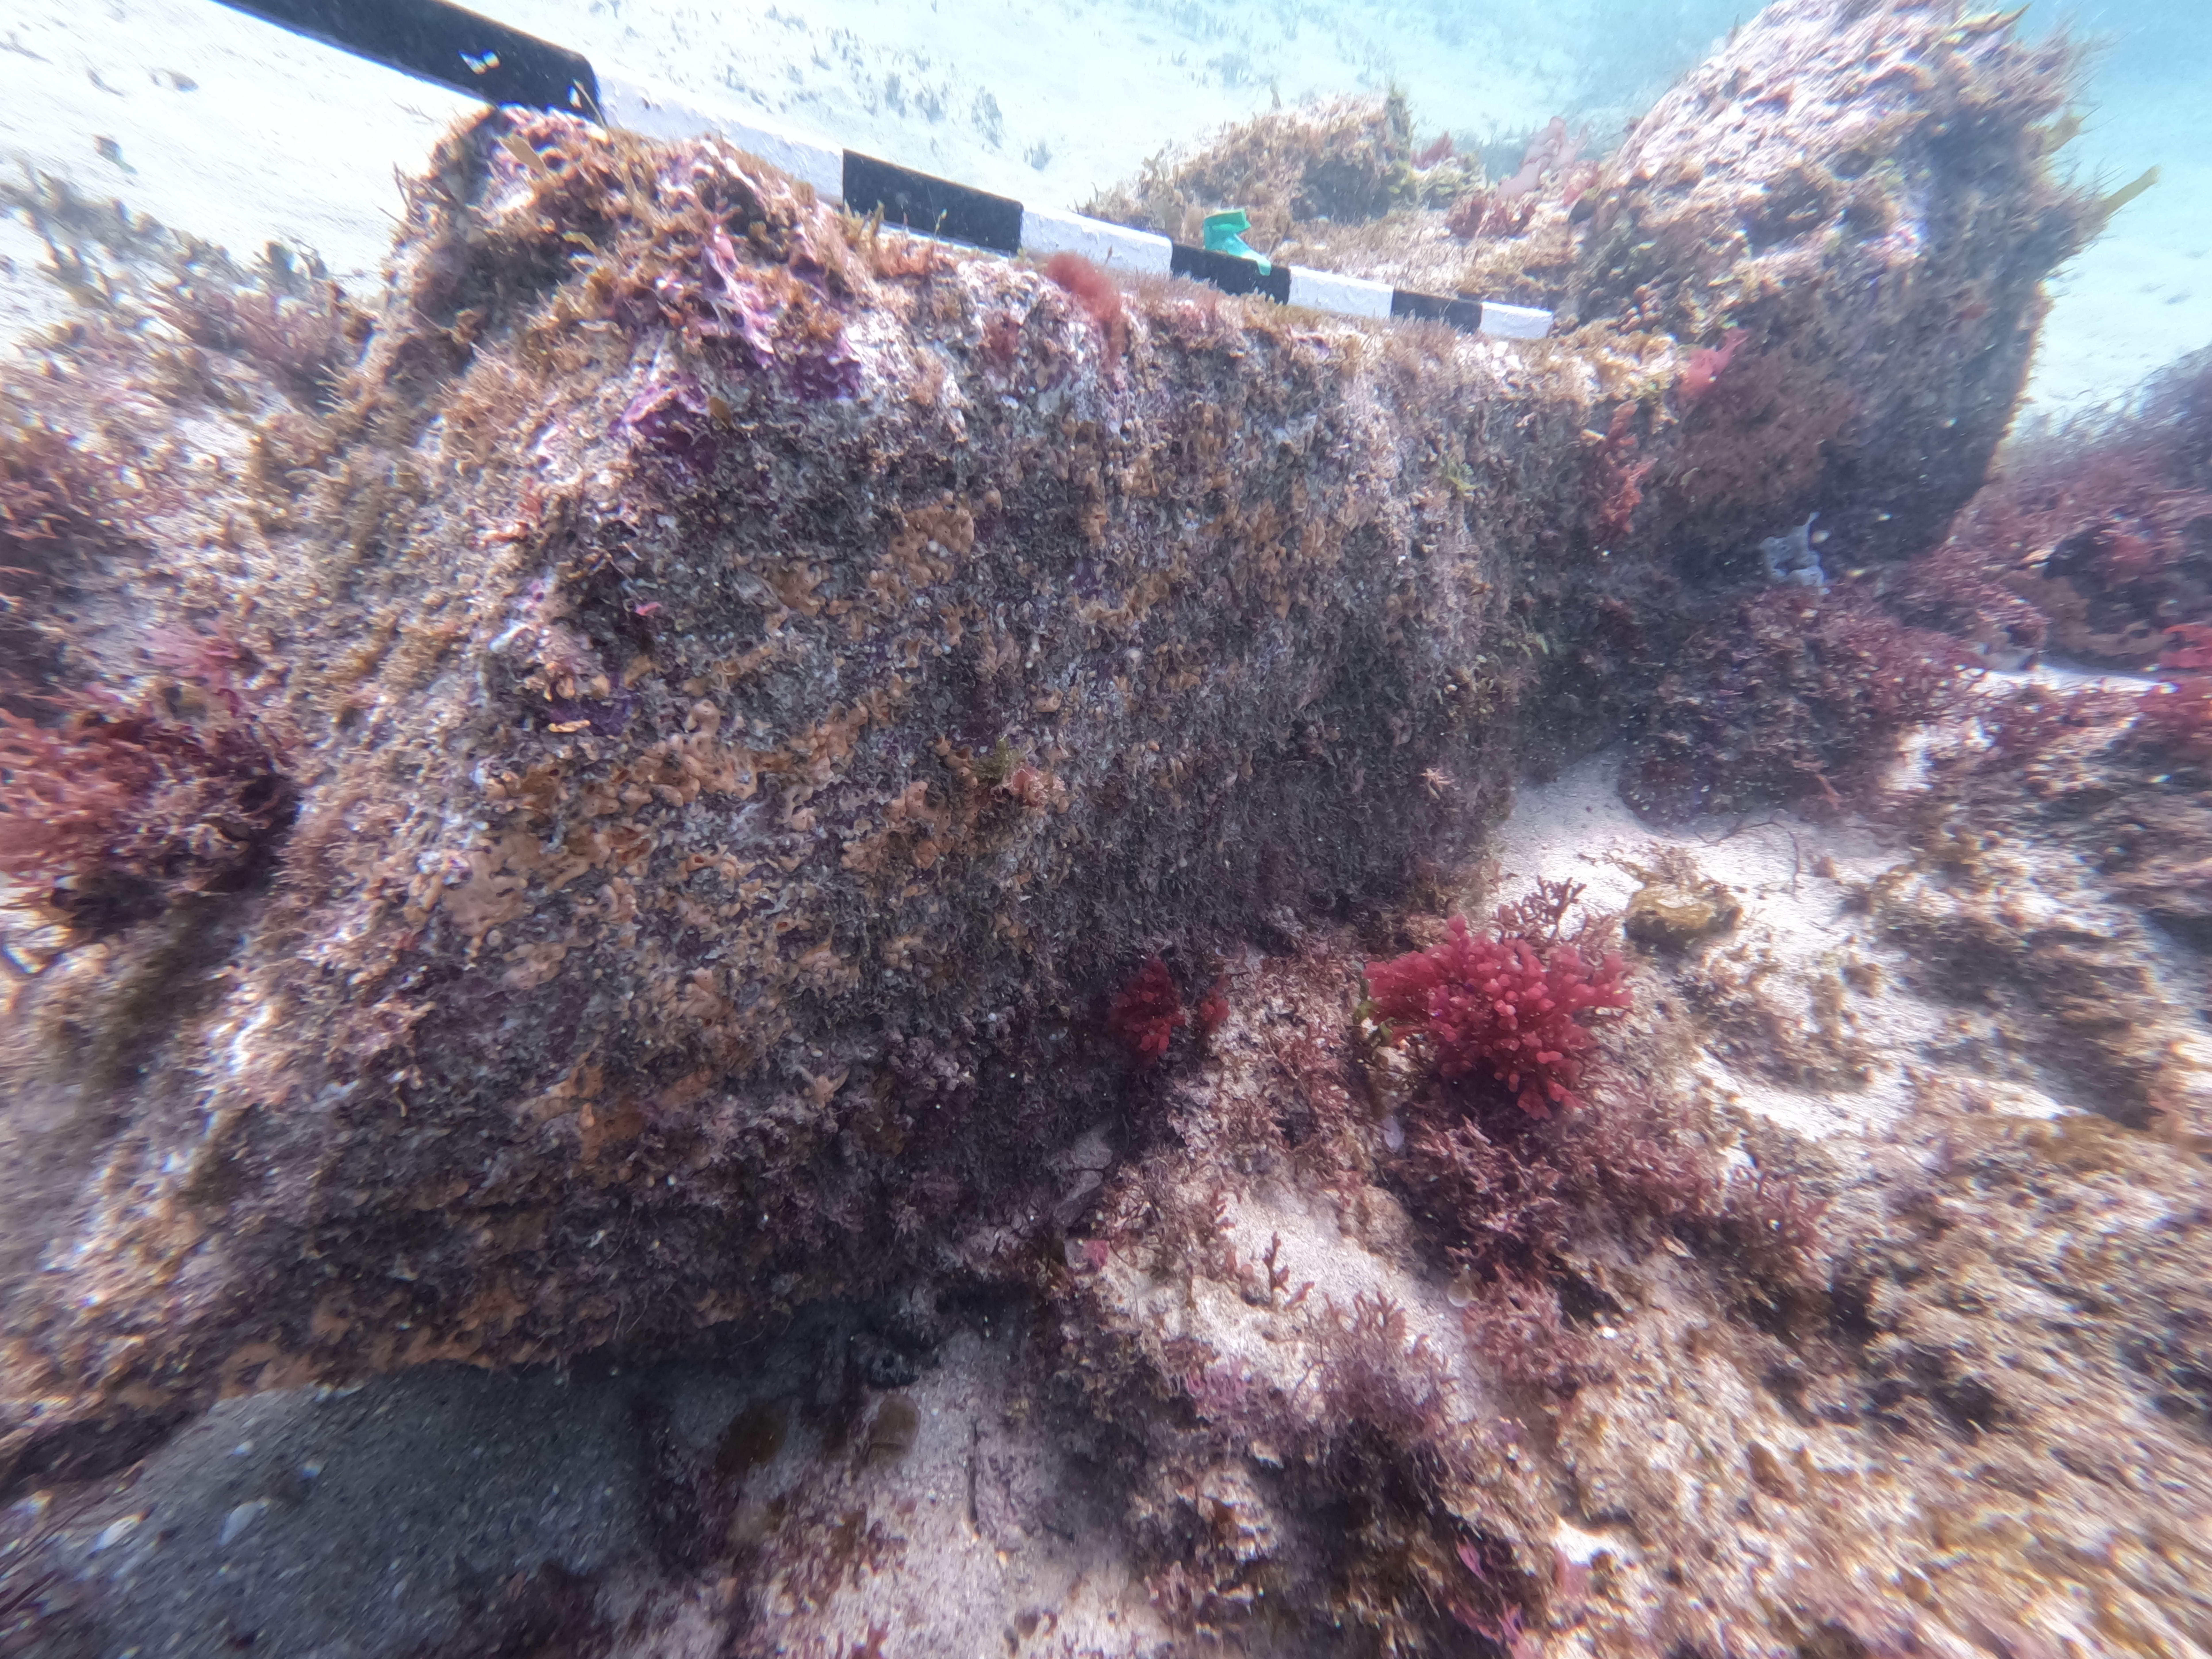

Supplement: Supplementary file 745 [file G0713812.pdf › Ocean2/G0713812.pdf]

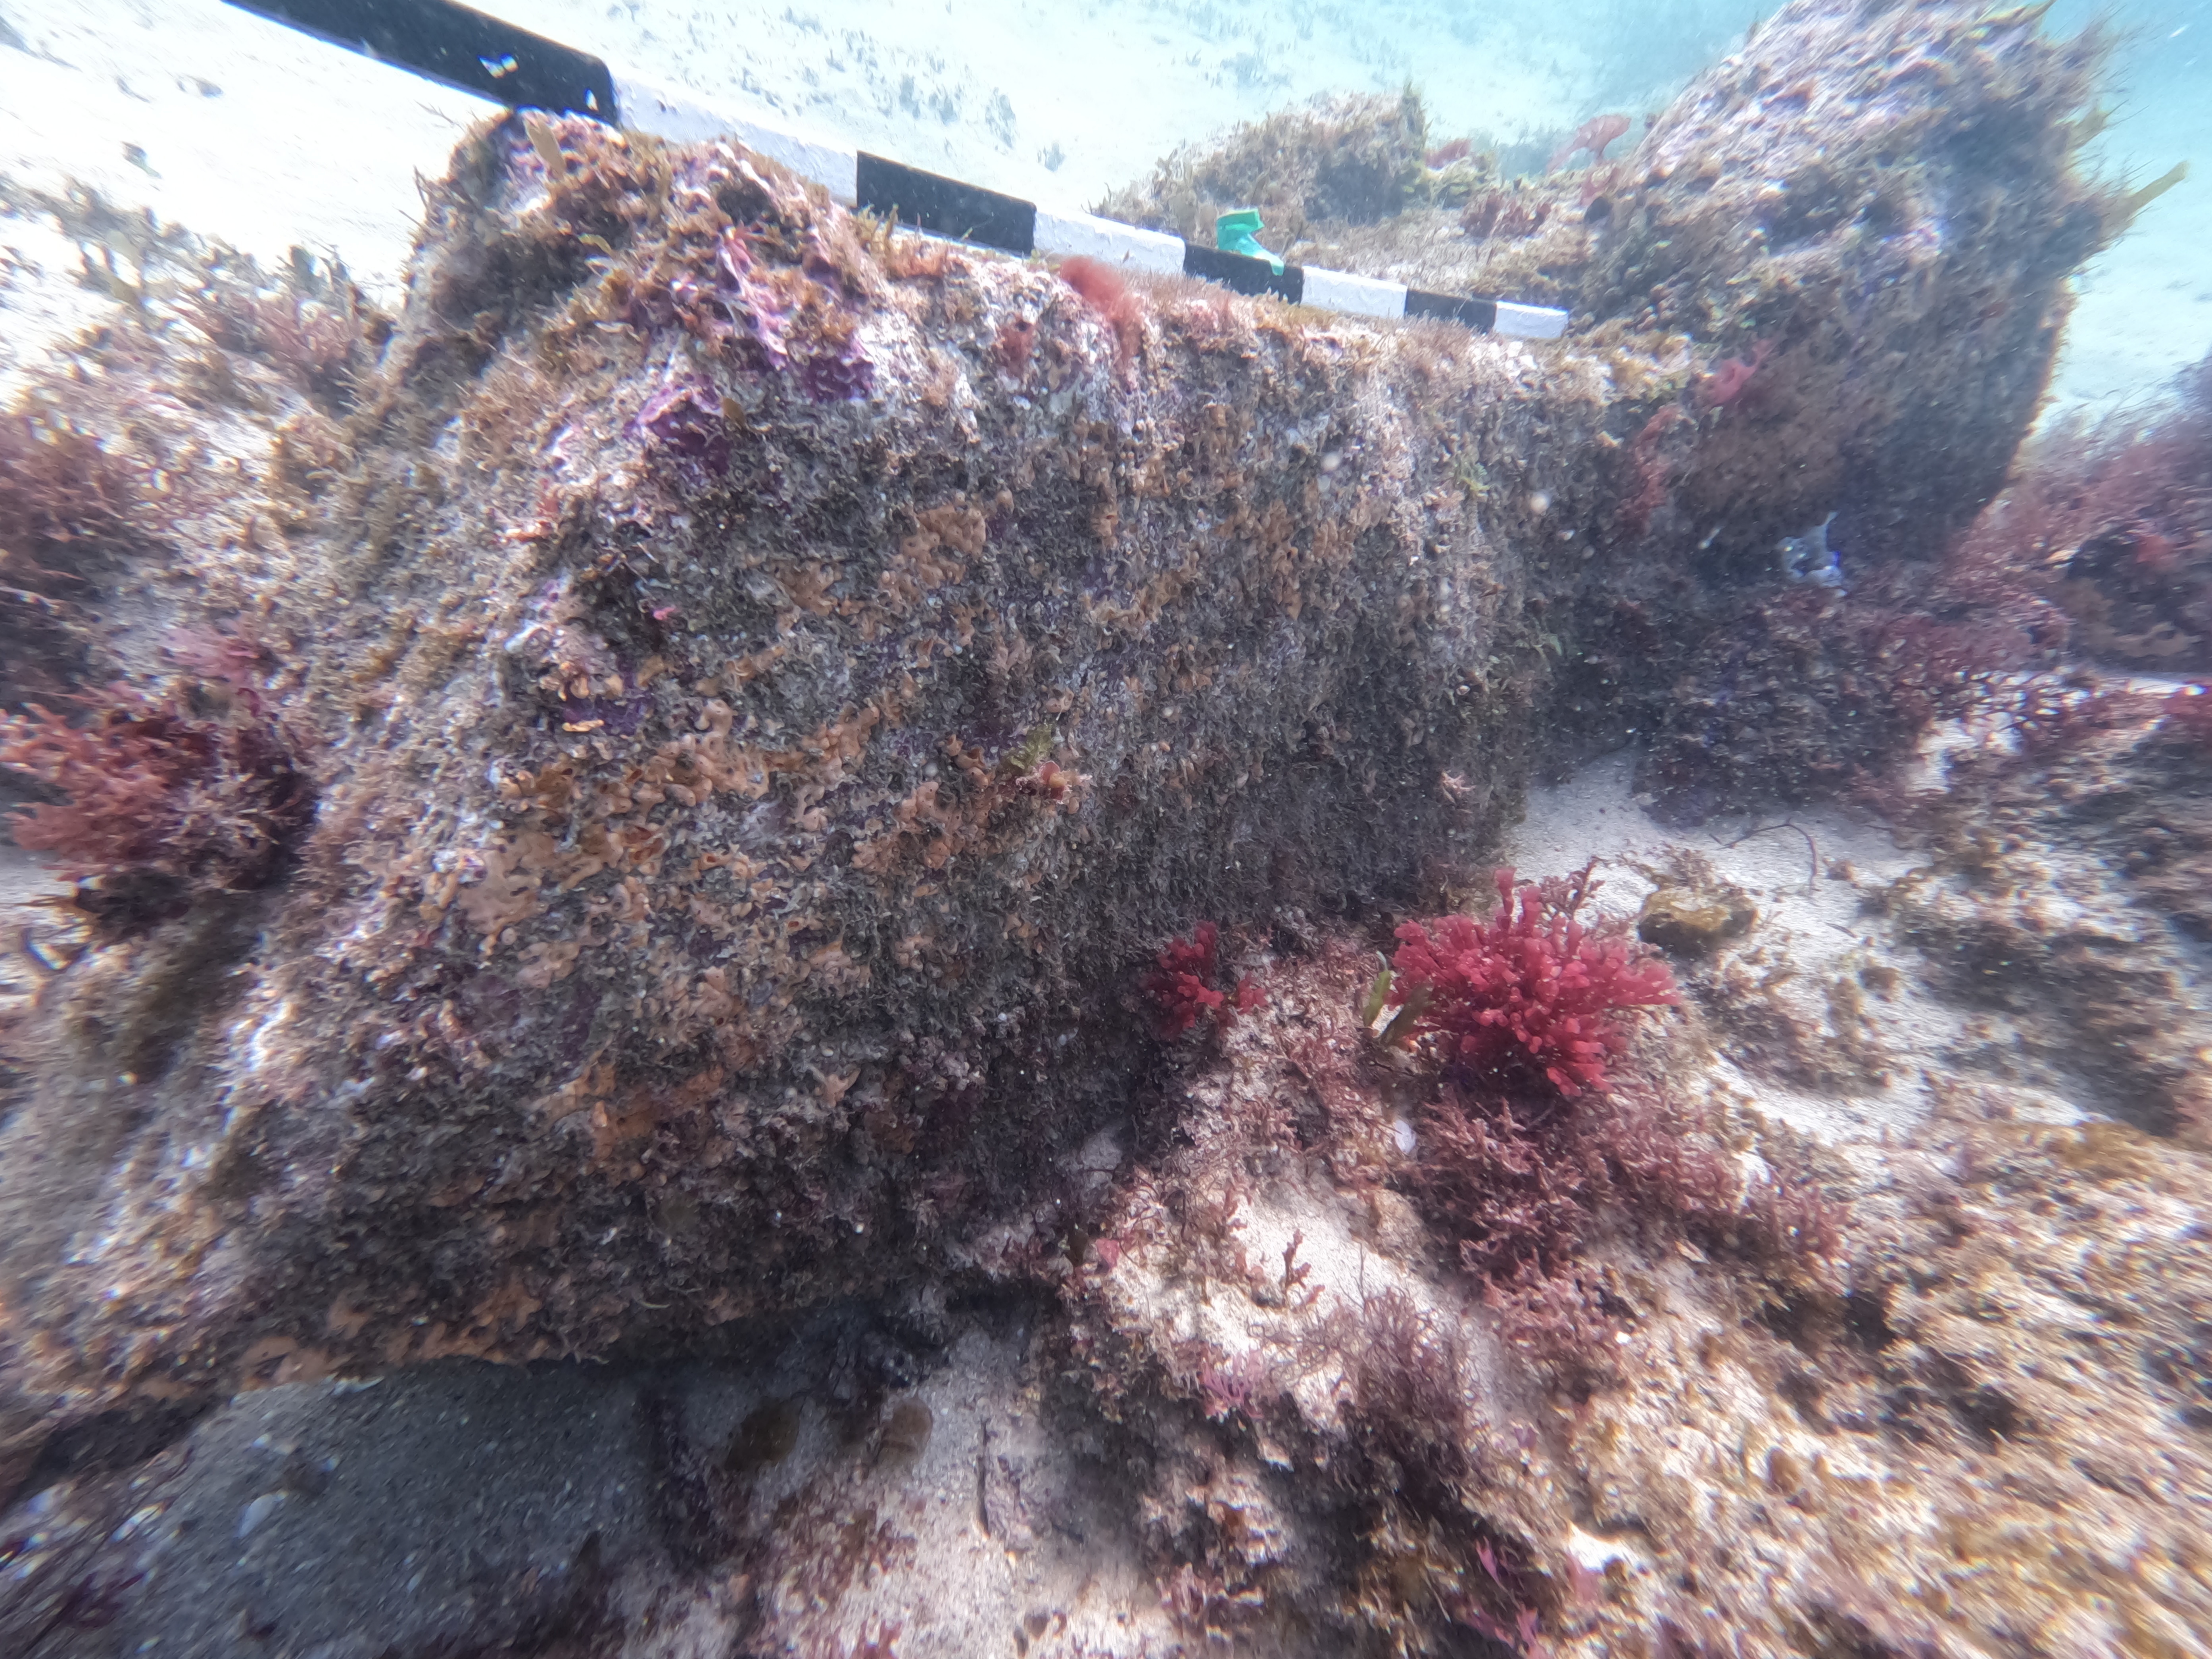

Supplement: Supplementary file 746 [file G0713813.pdf › Ocean2/G0713813.pdf]

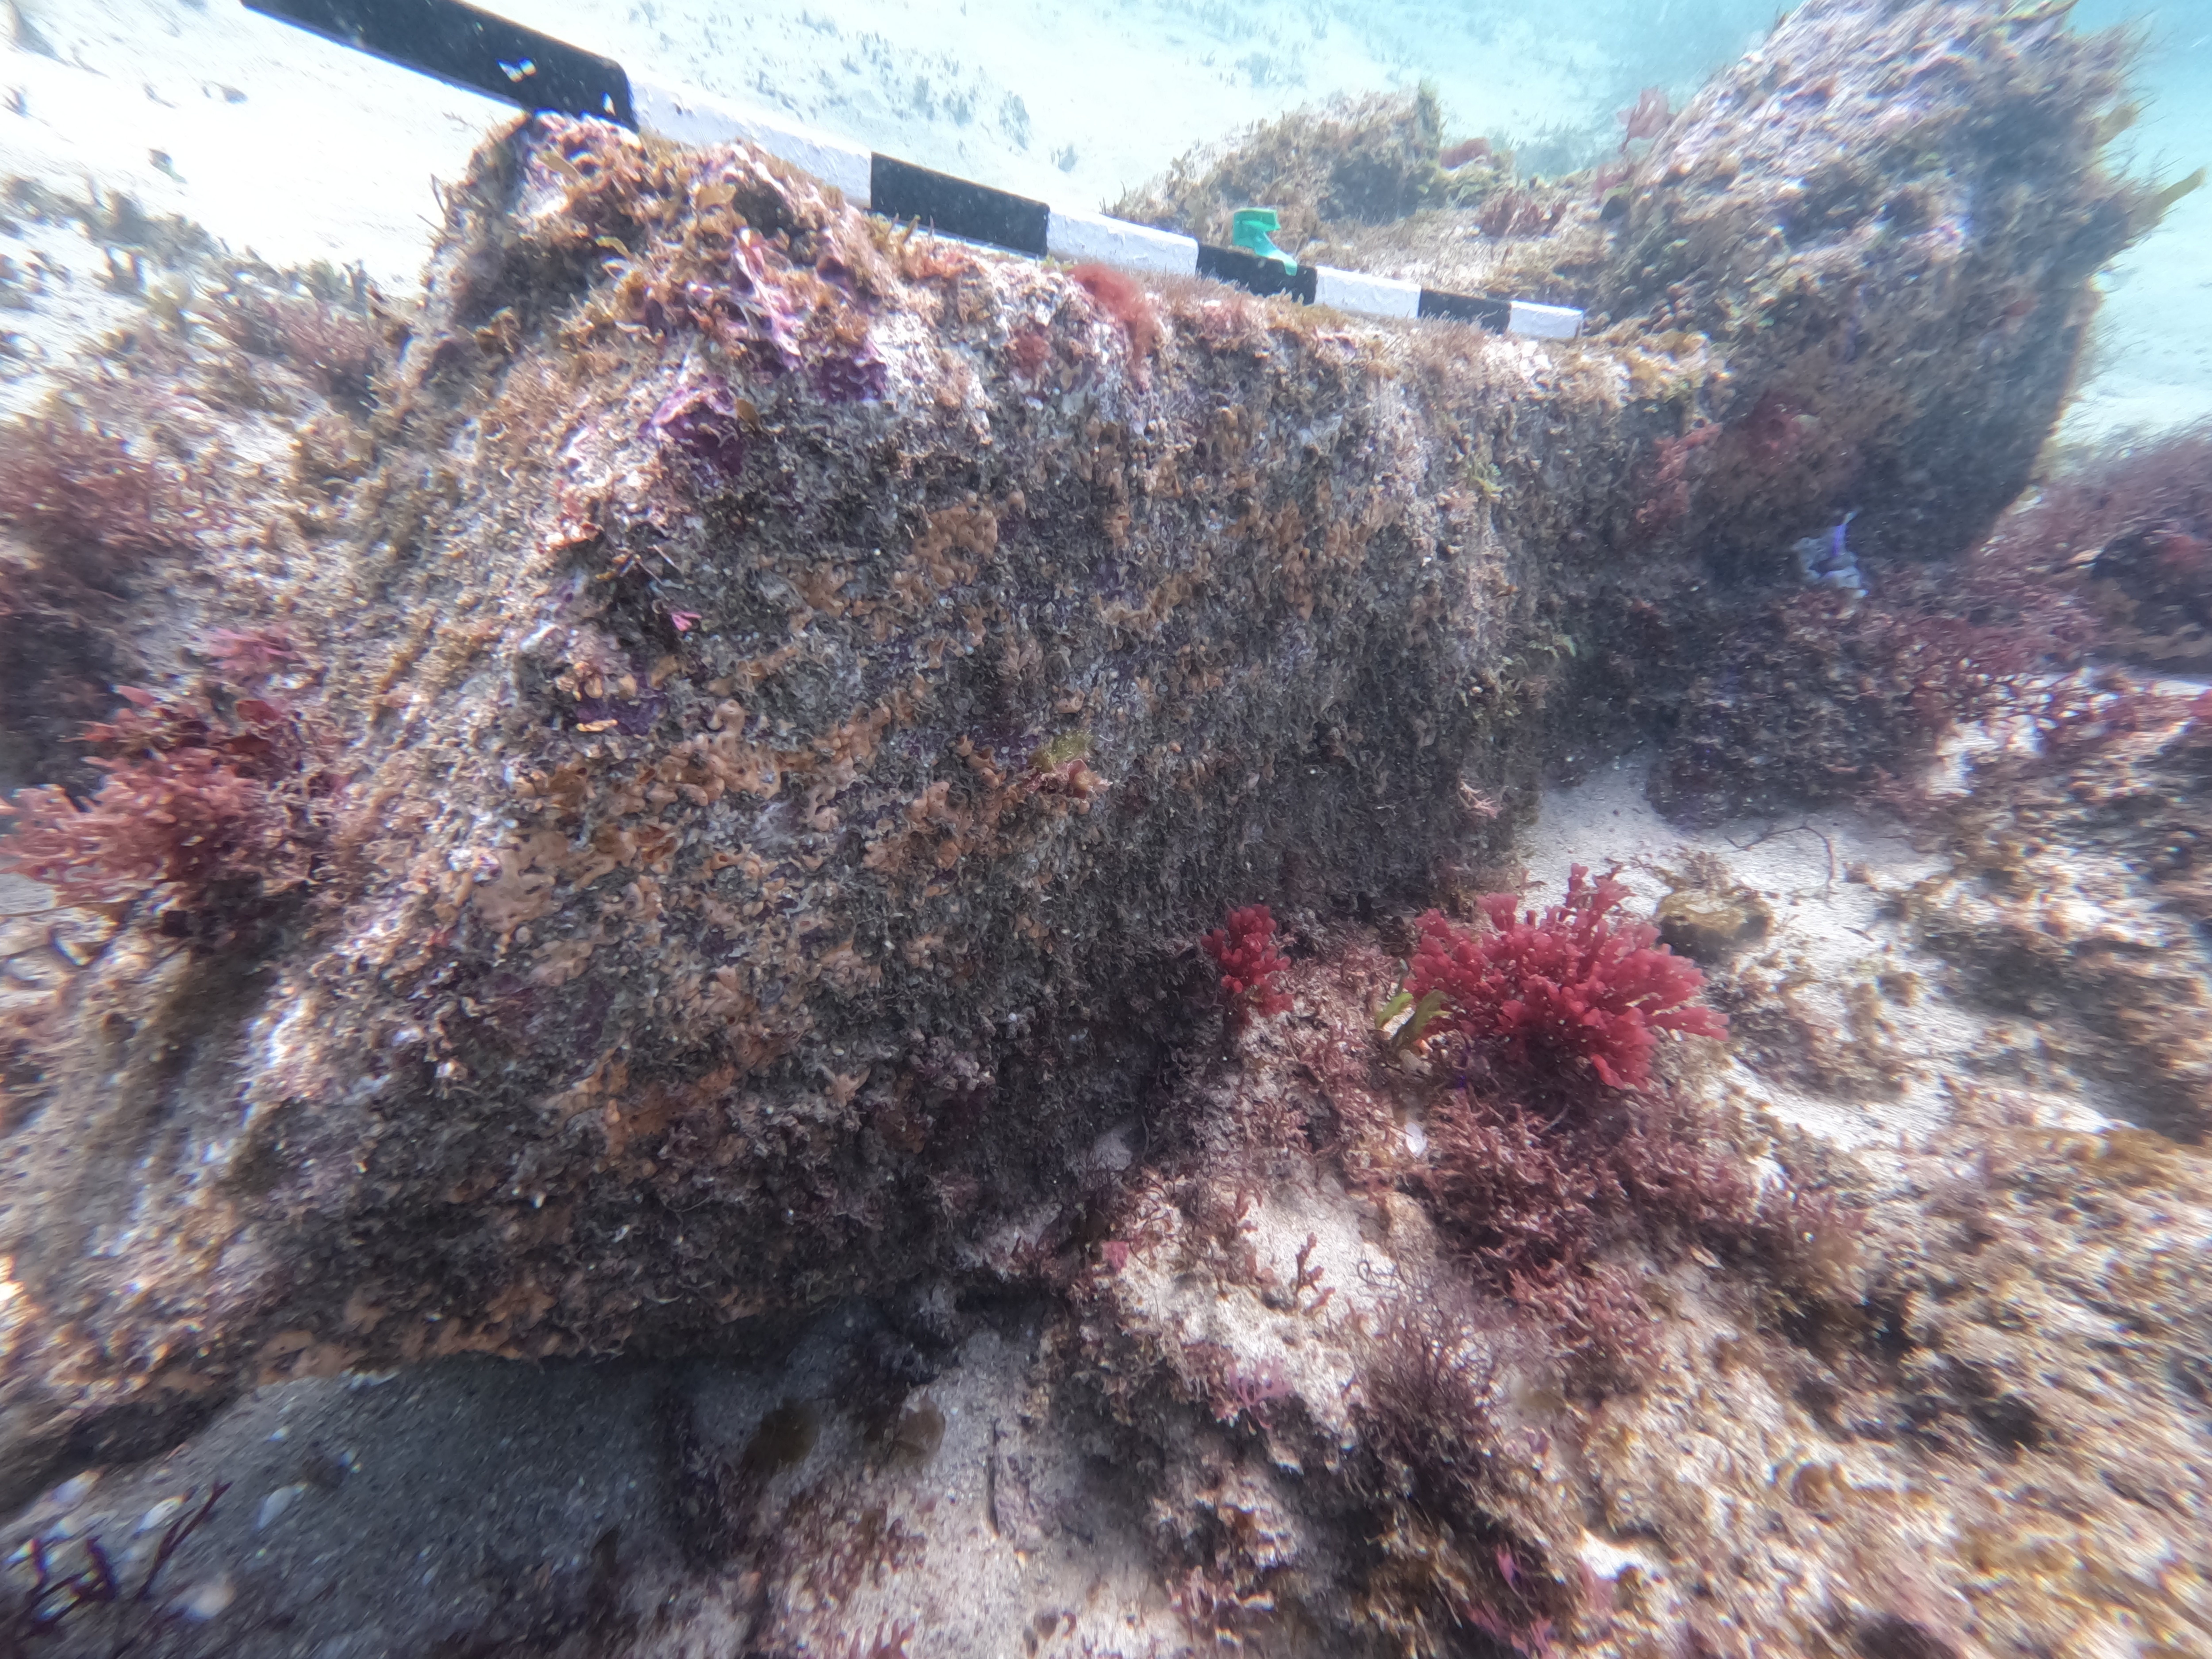

Supplement: Supplementary file 747 [file G0713814.pdf › Ocean2/G0713814.pdf]

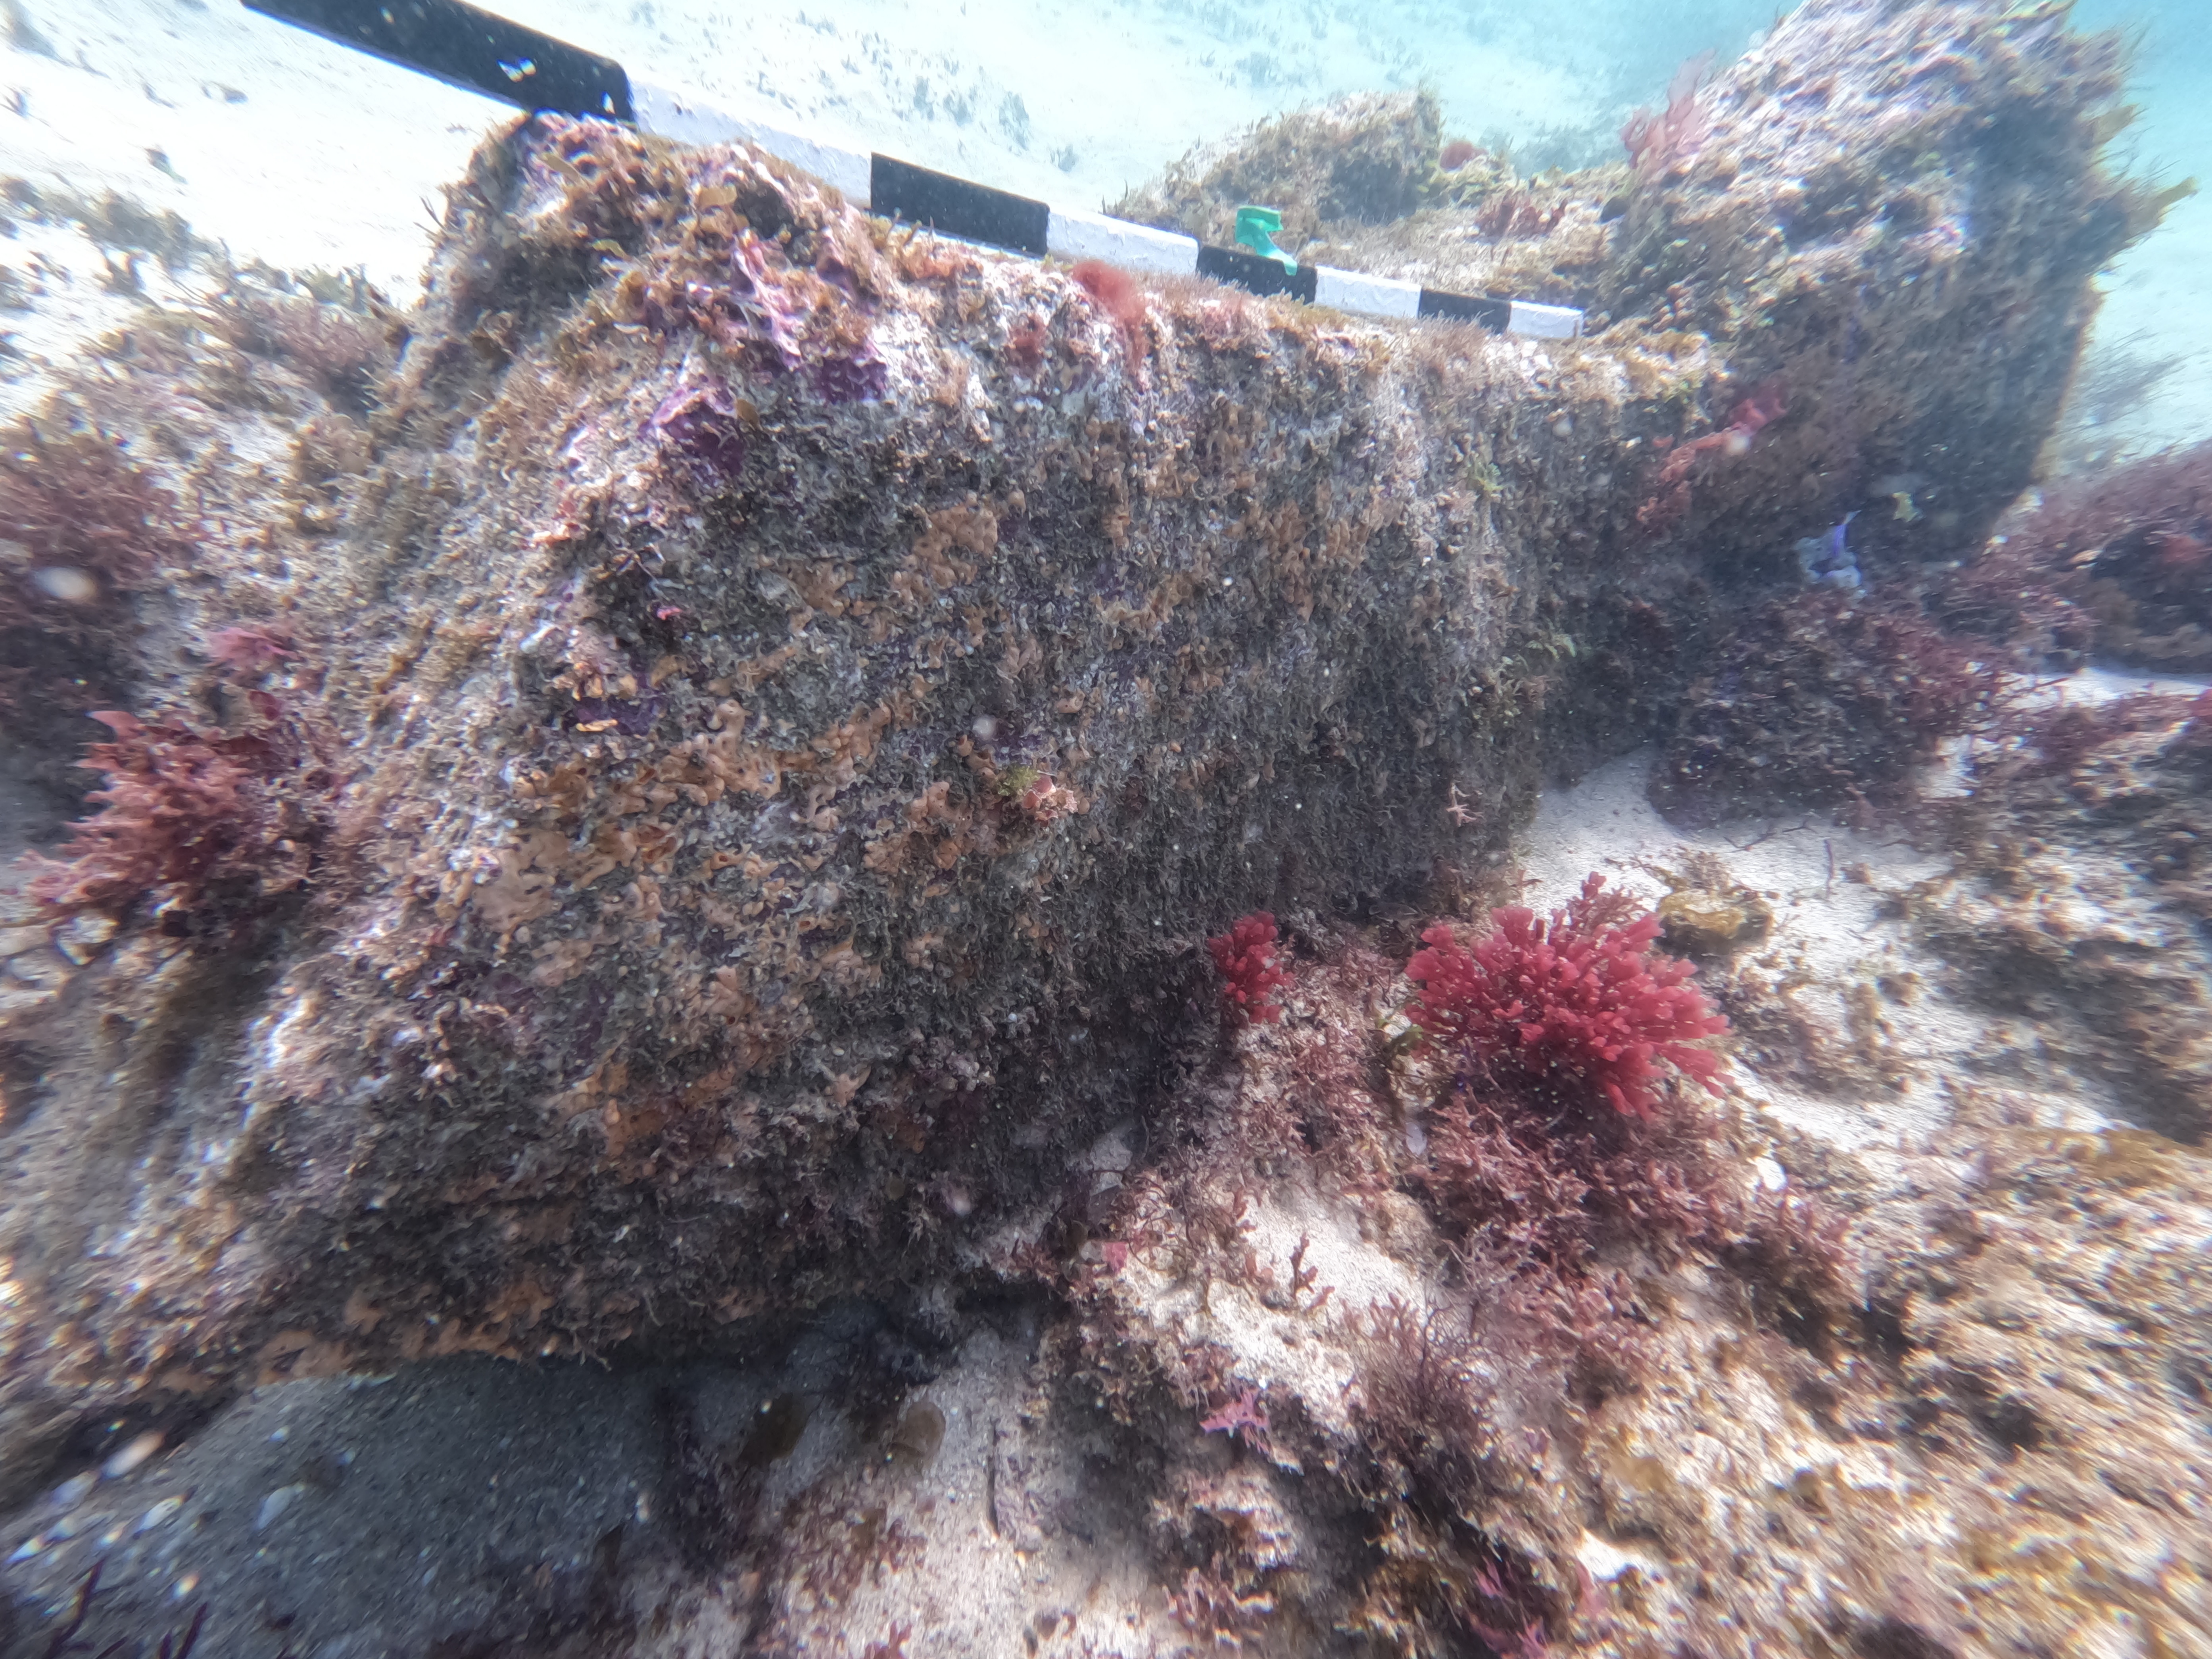

Supplement: Supplementary file 748 [file G0713815.pdf › Ocean2/G0713815.pdf]

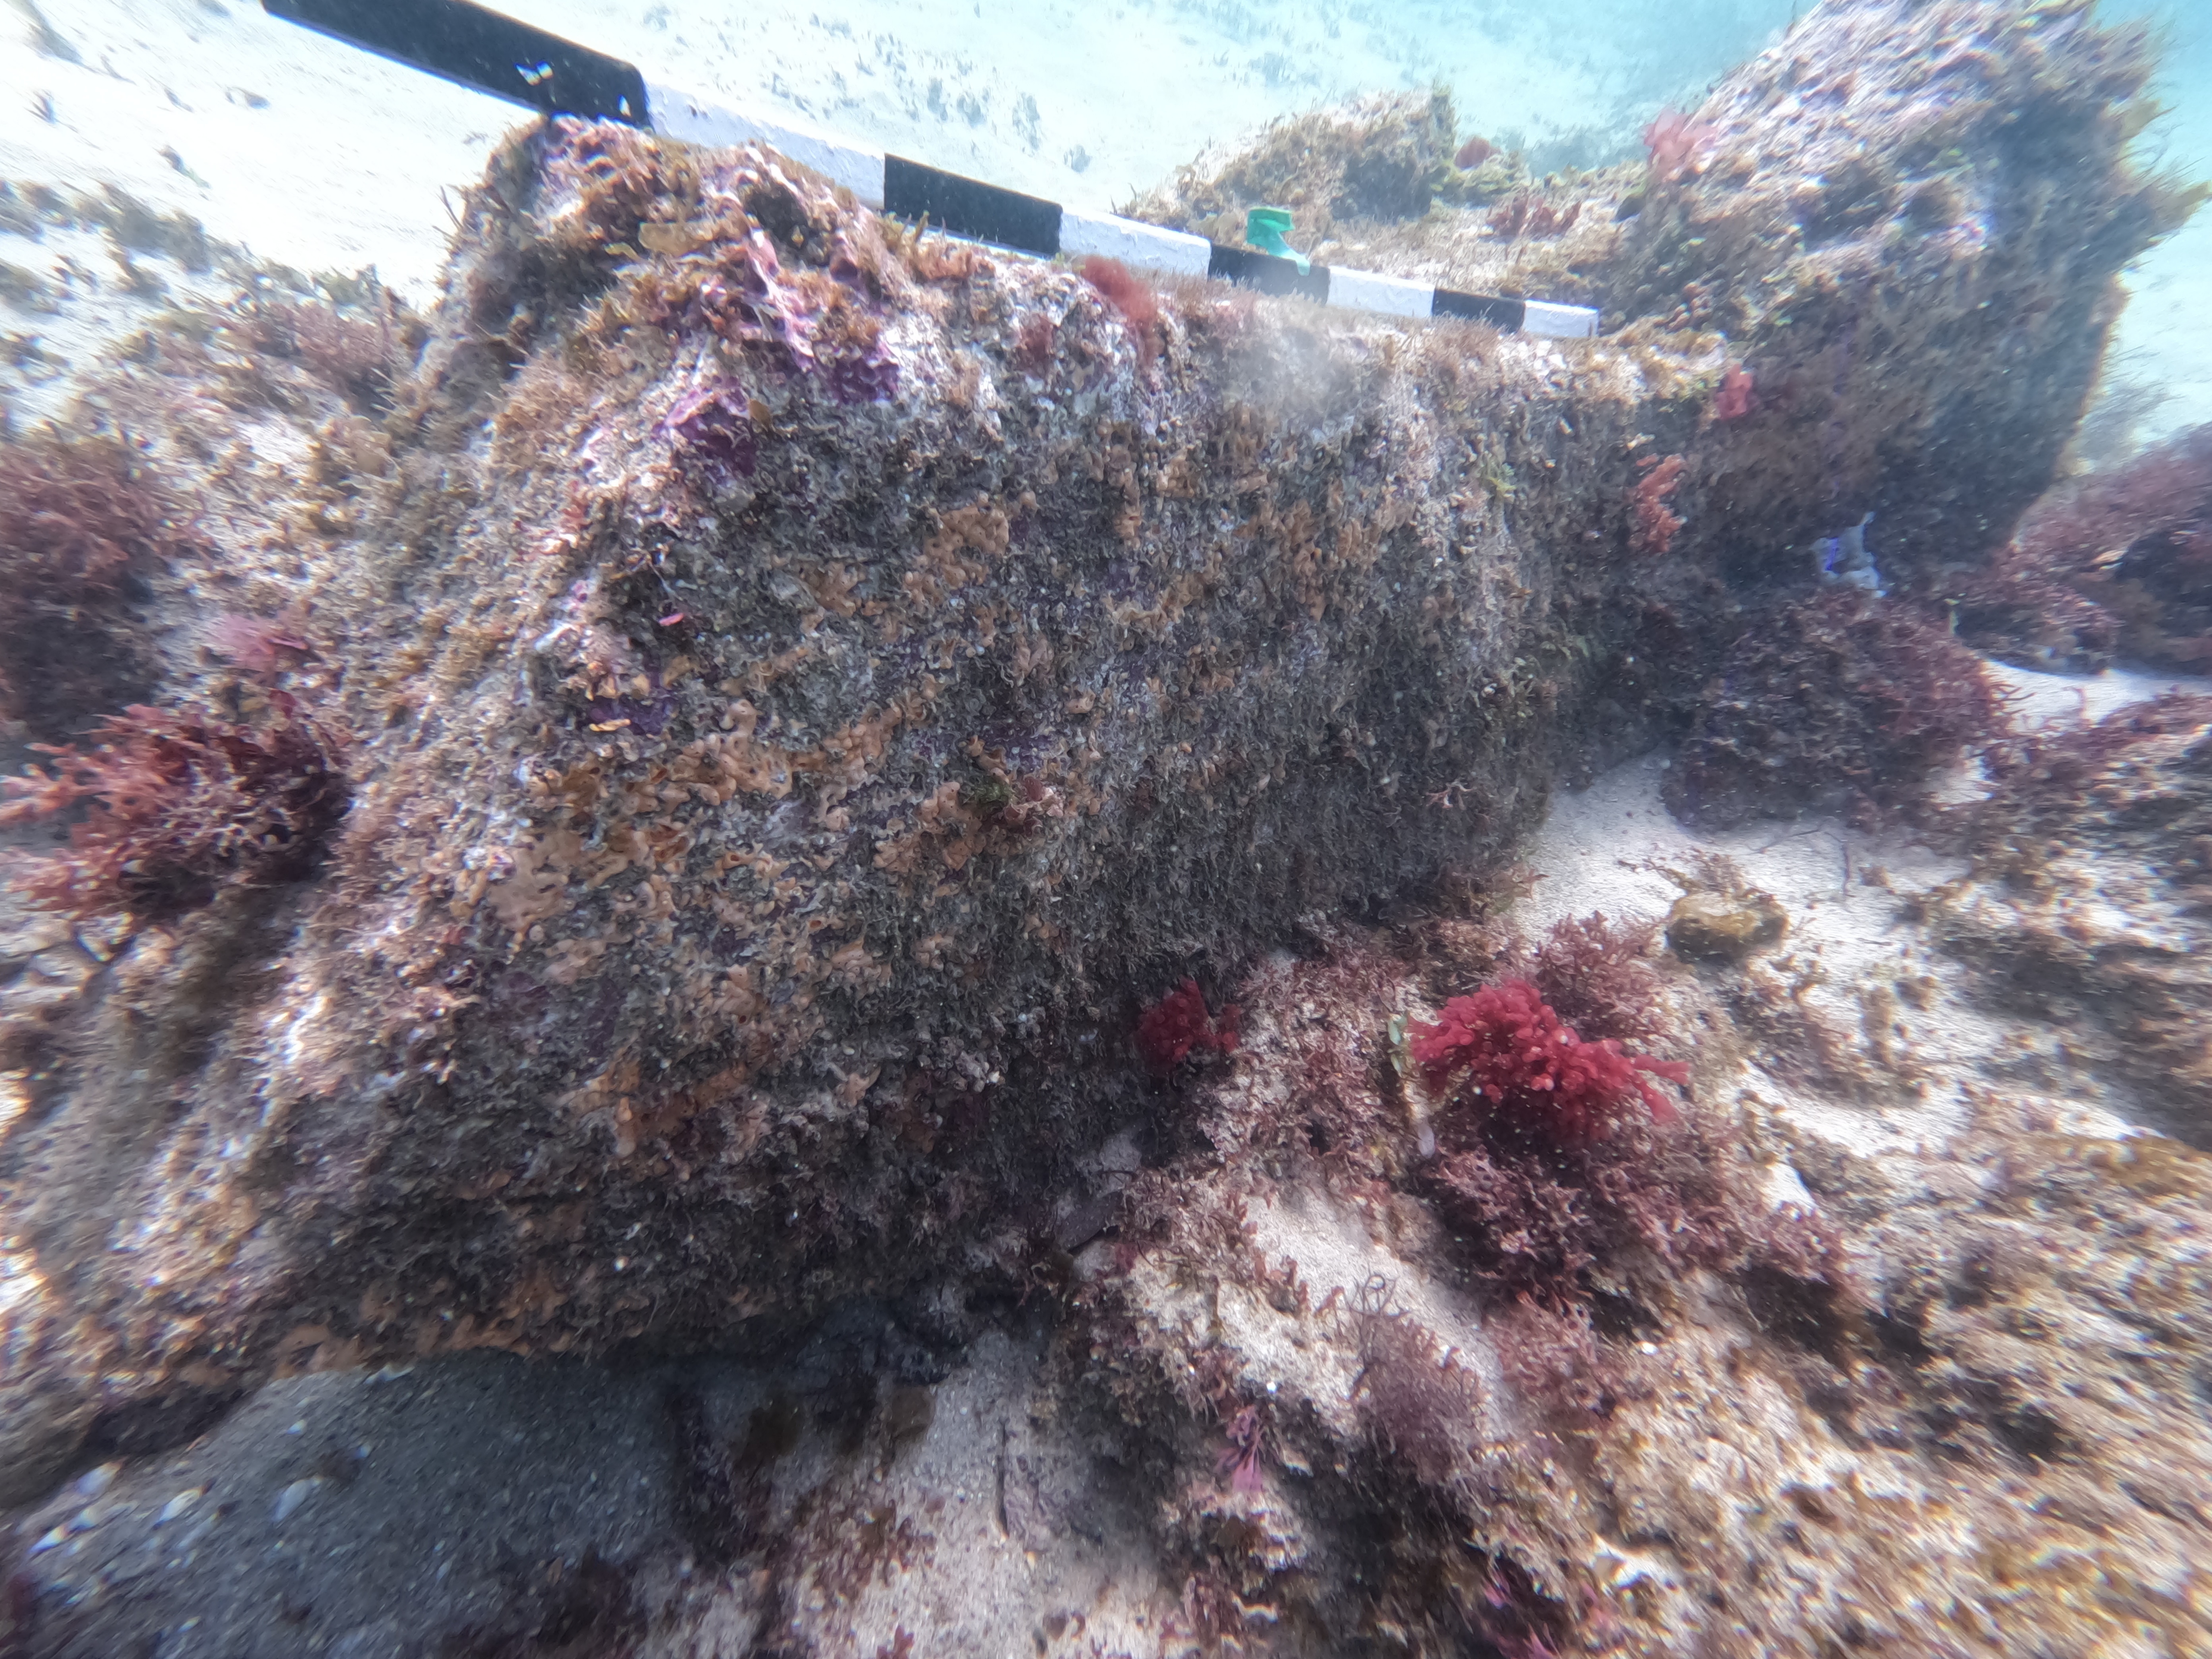

Supplement: Supplementary file 749 [file G0713816.pdf › Ocean2/G0713816.pdf]

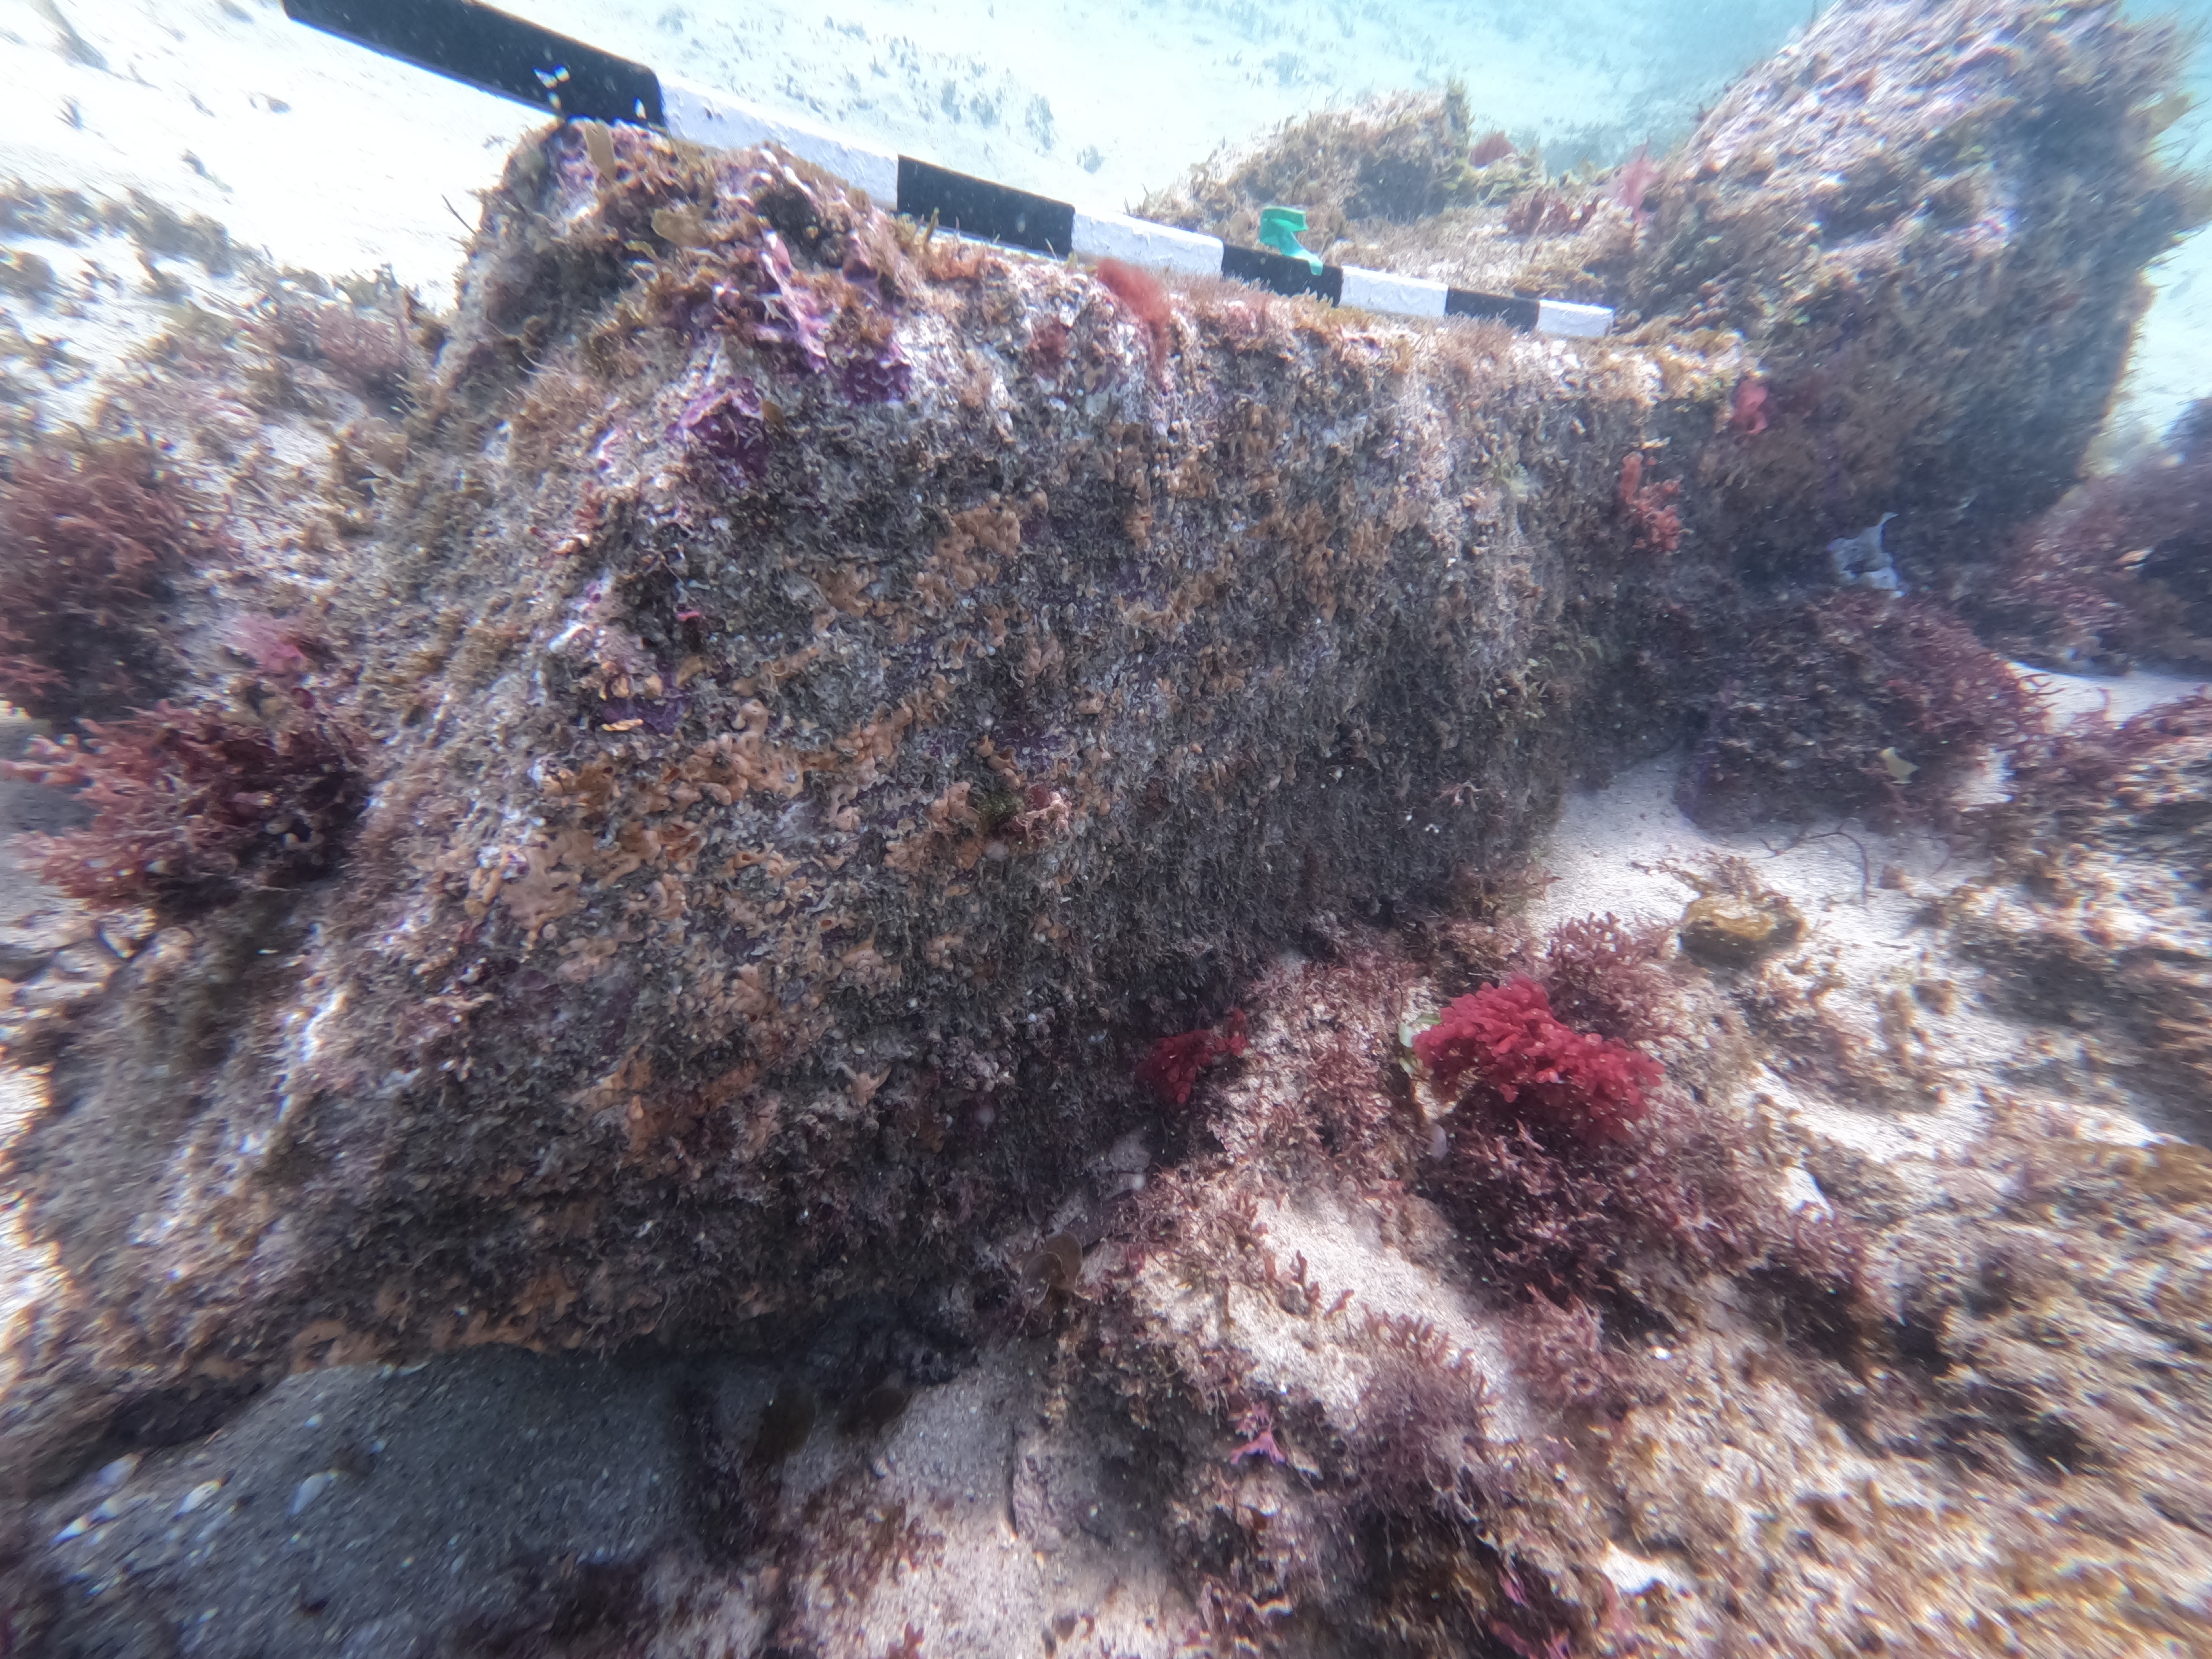

Supplement: Supplementary file 750 [file G0713817.pdf › Ocean2/G0713817.pdf]

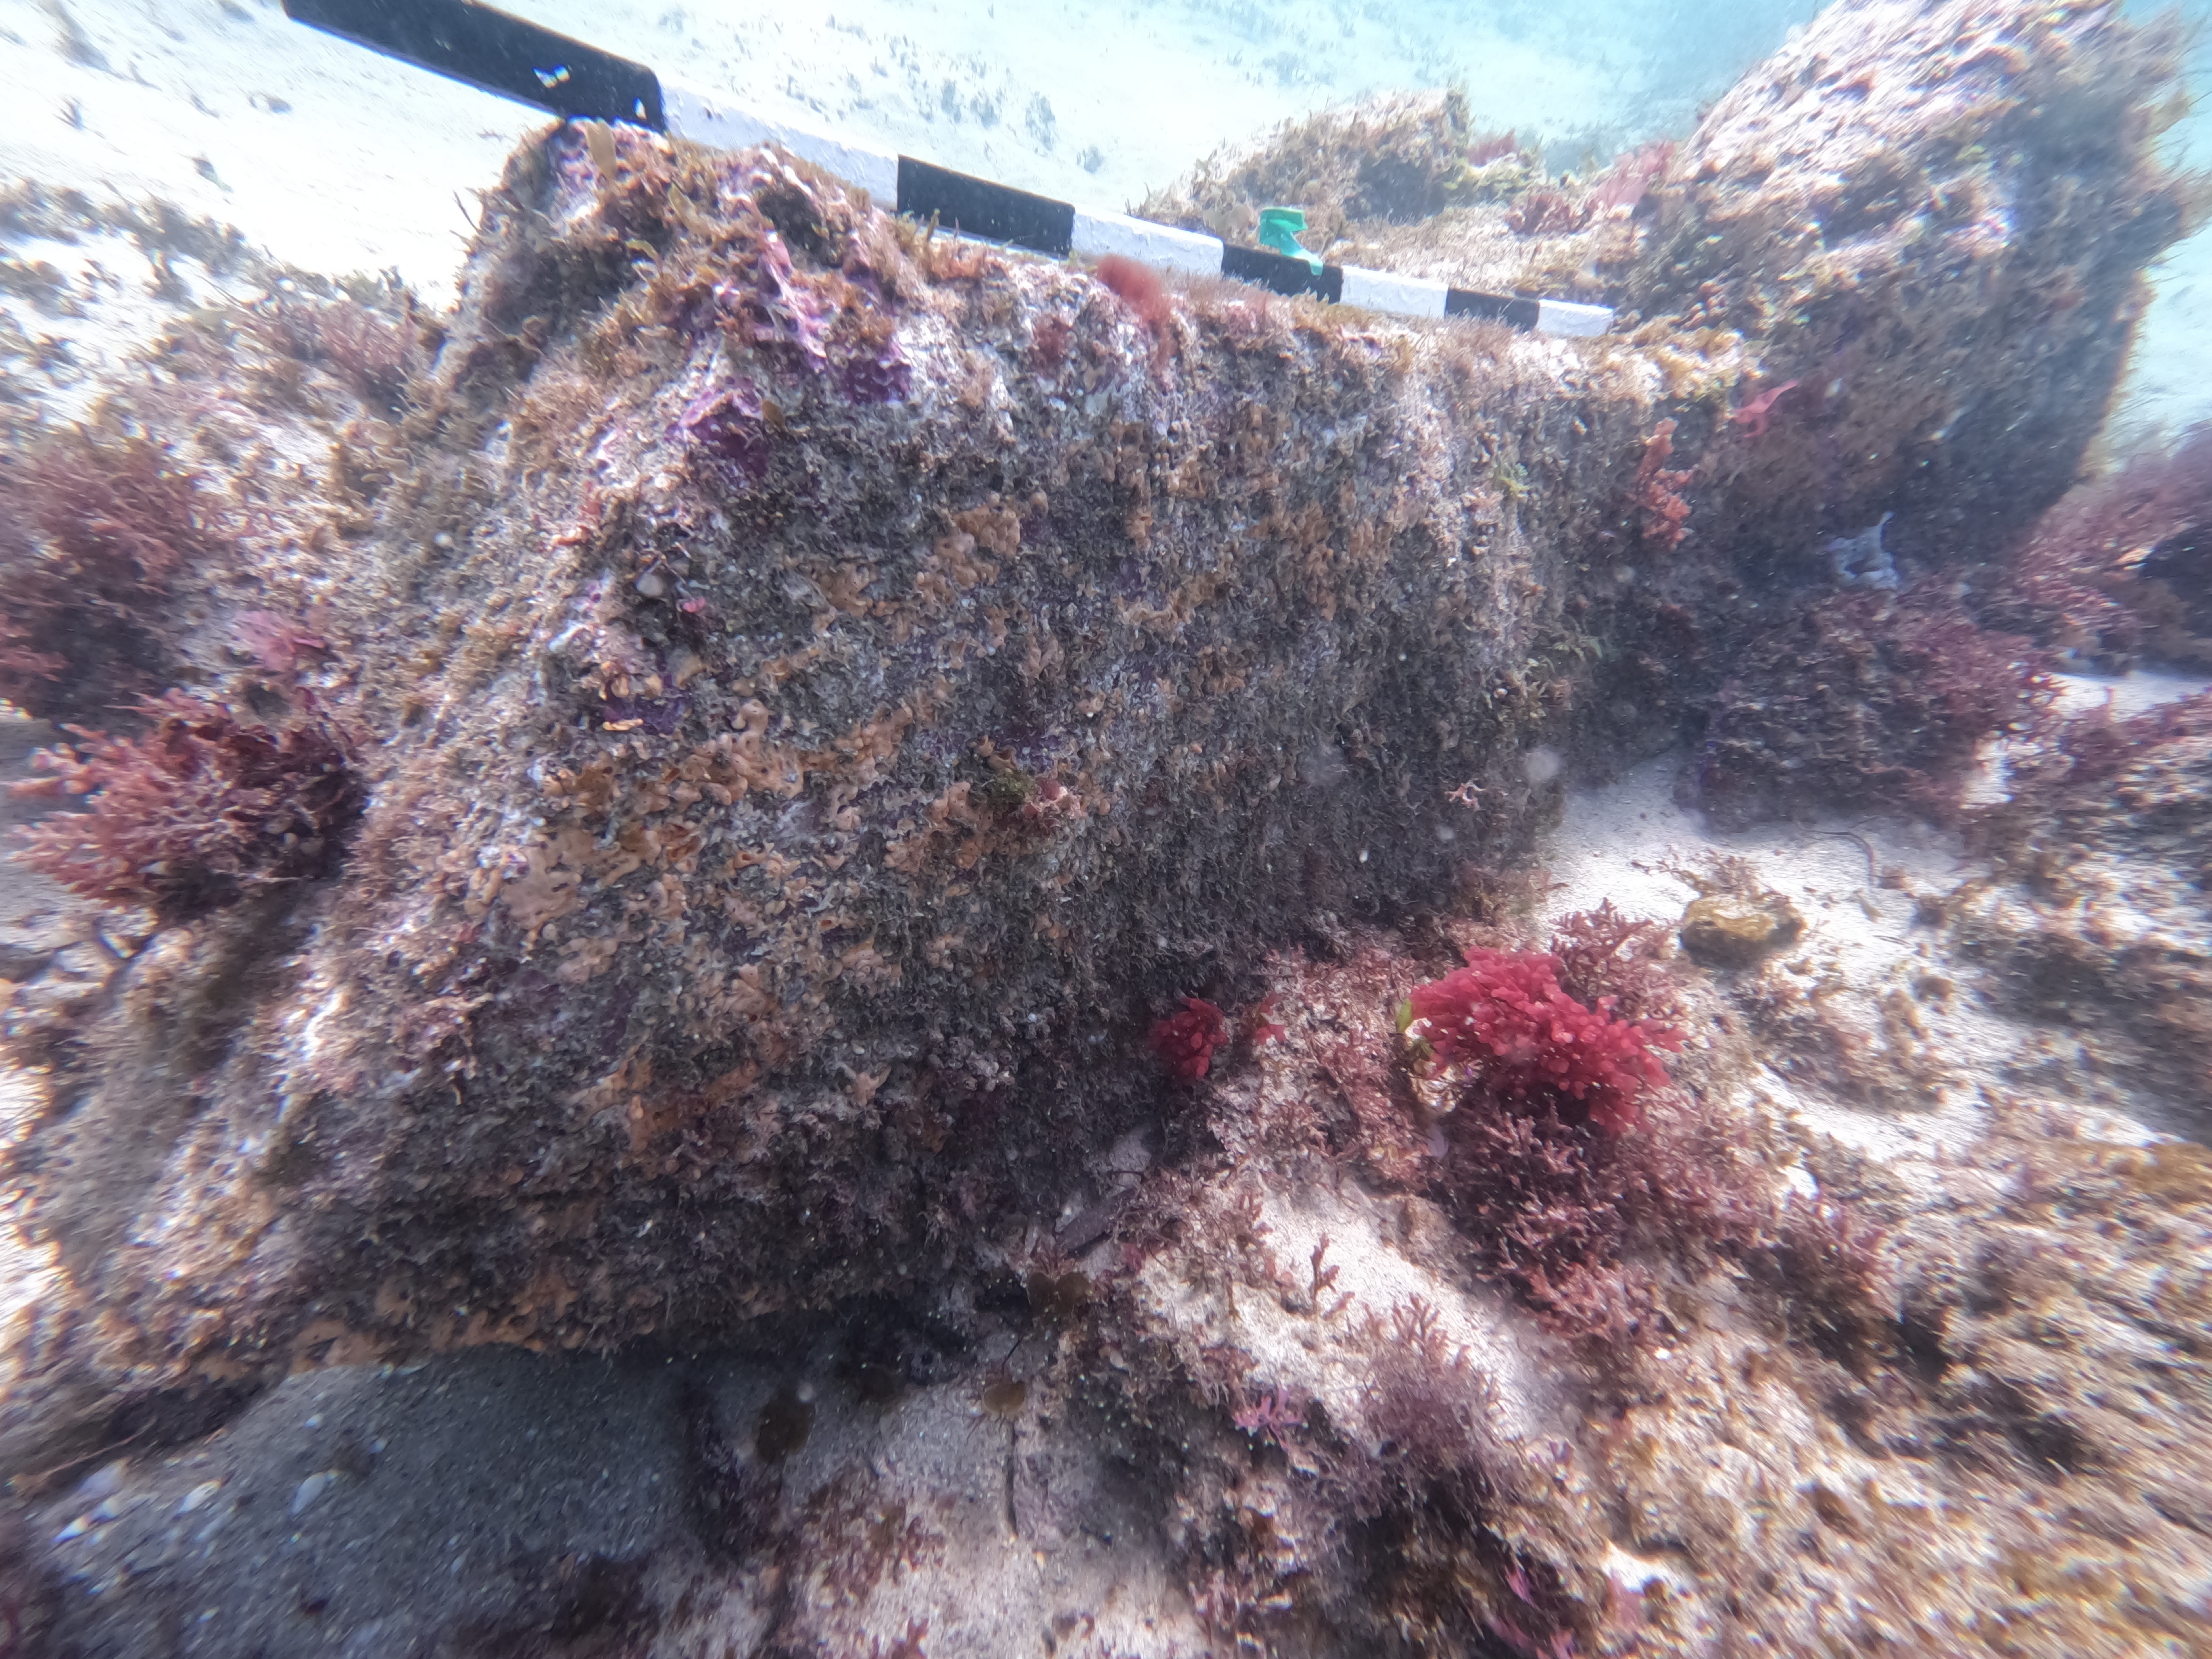

Supplement: Supplementary file 751 [file G0713818.pdf › Ocean2/G0713818.pdf]

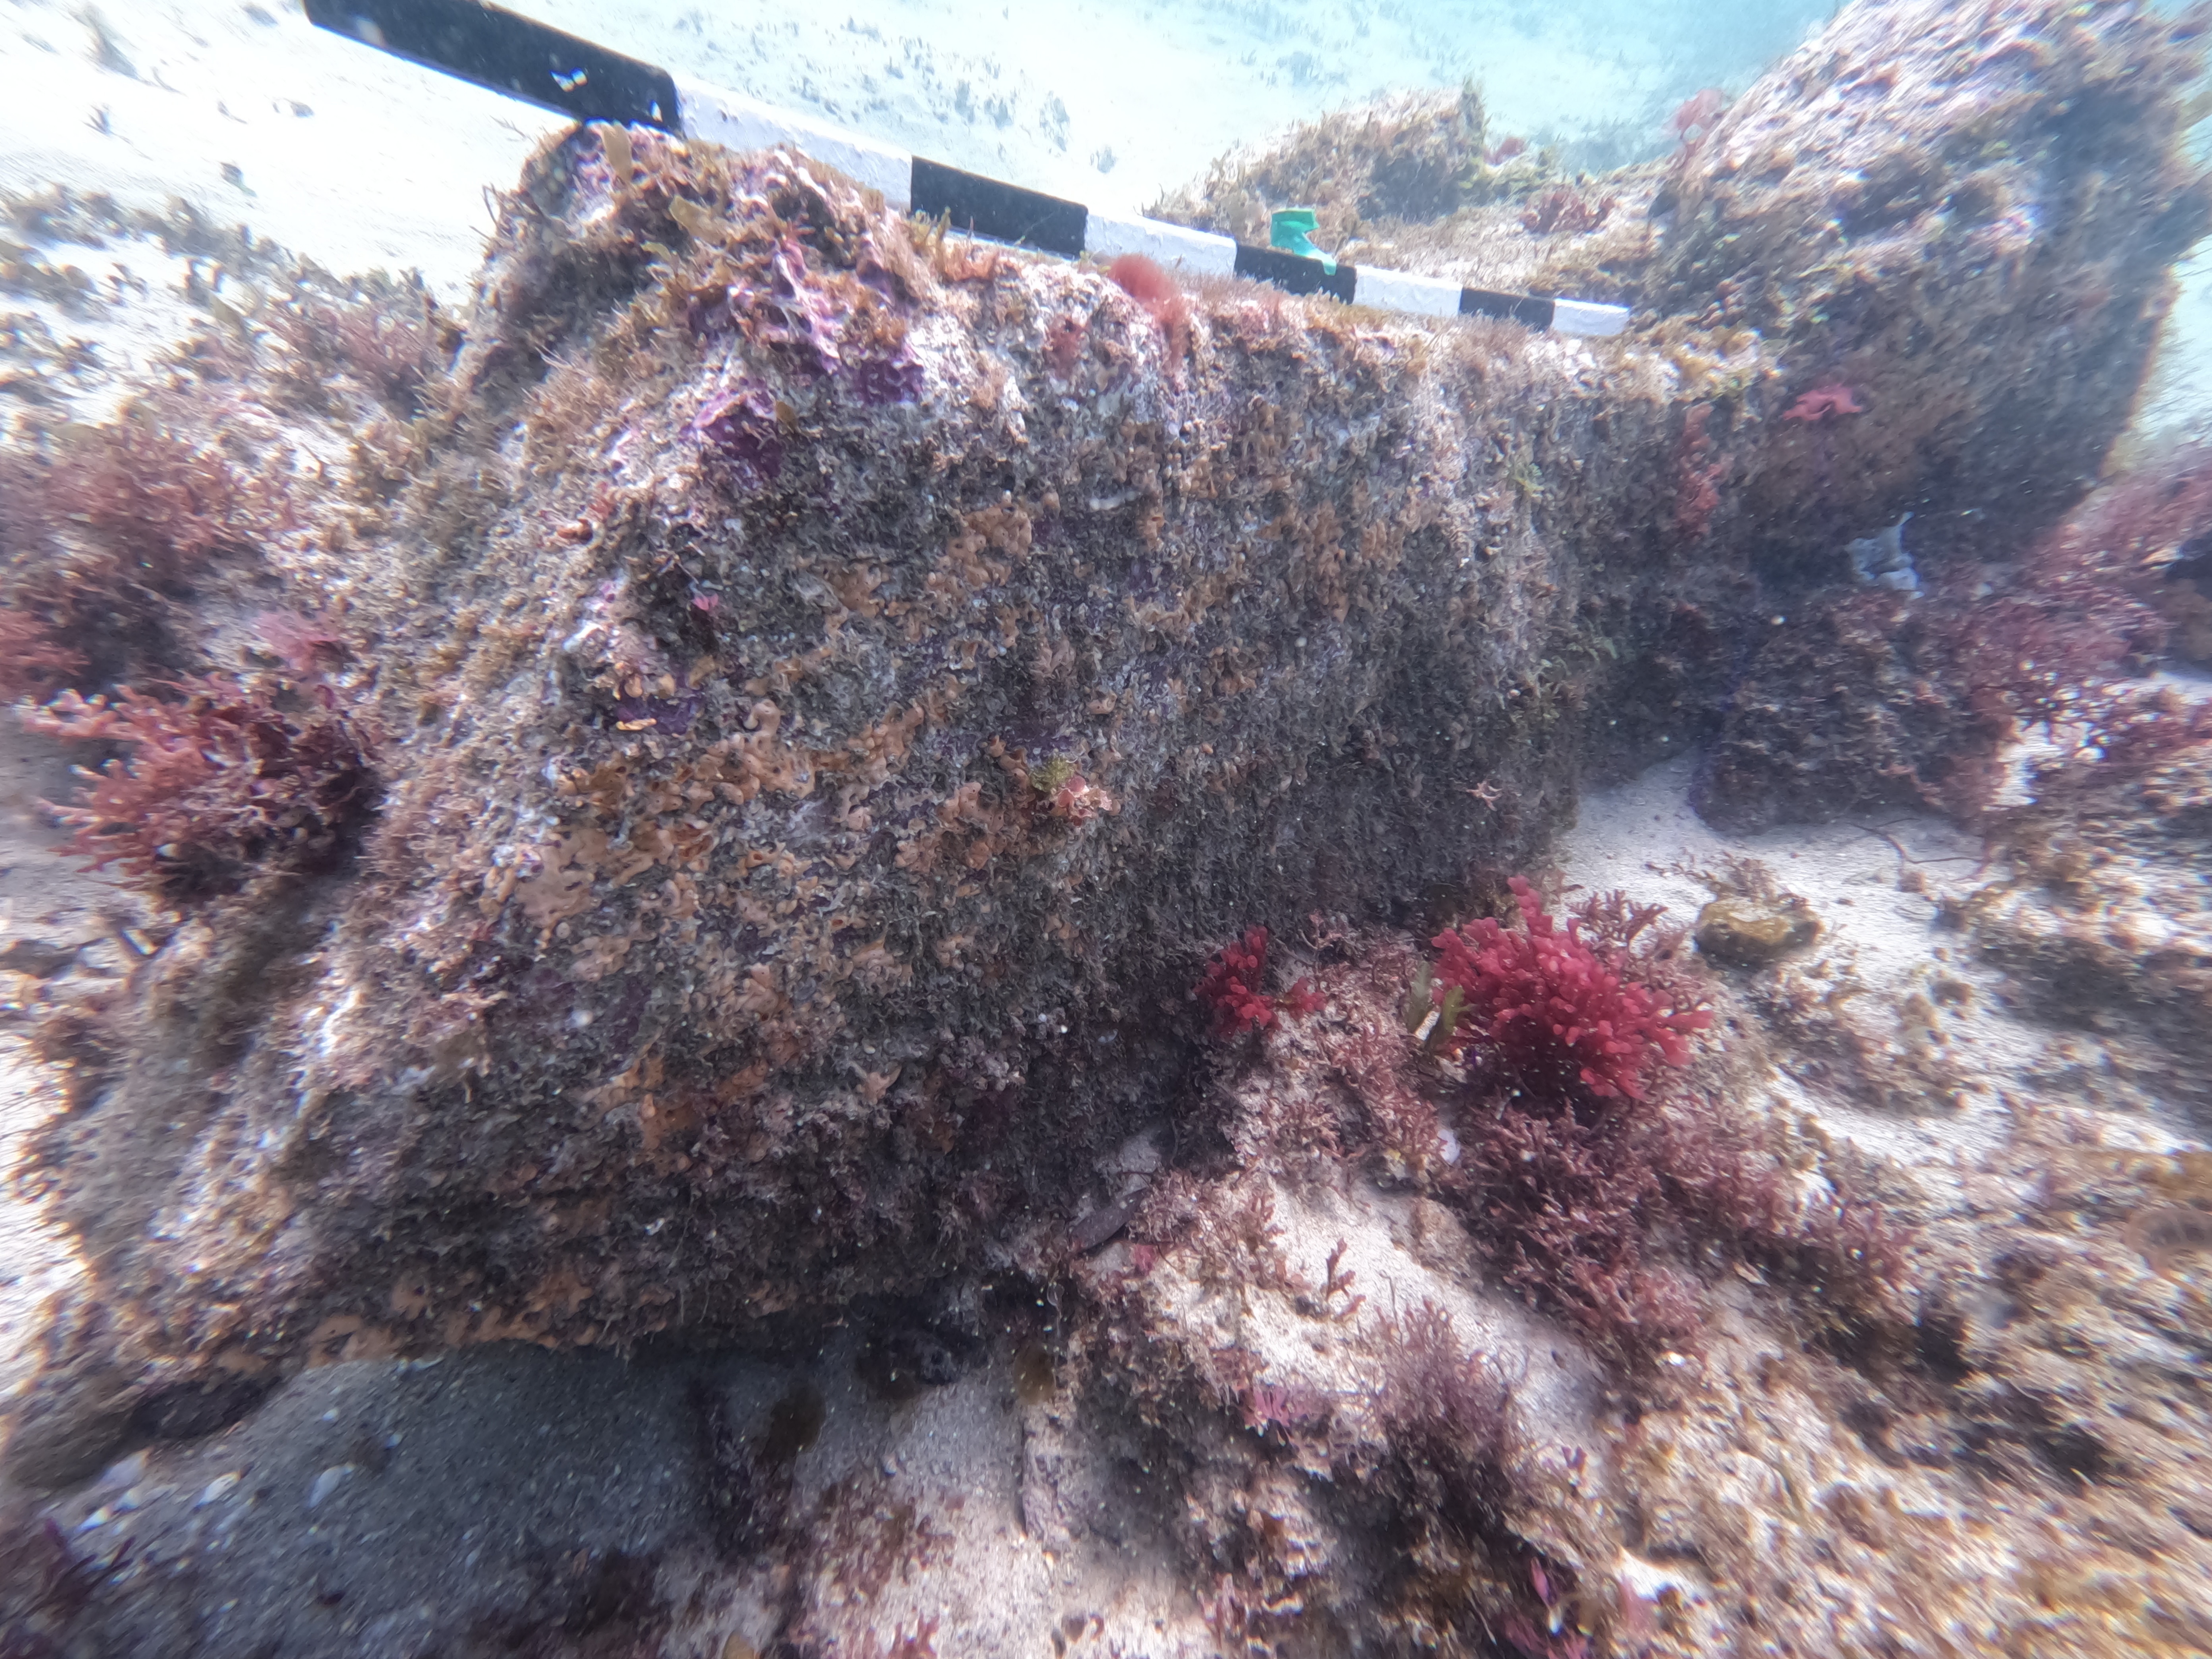

Supplement: Supplementary file 752 [file G0713819.pdf › Ocean2/G0713819.pdf]

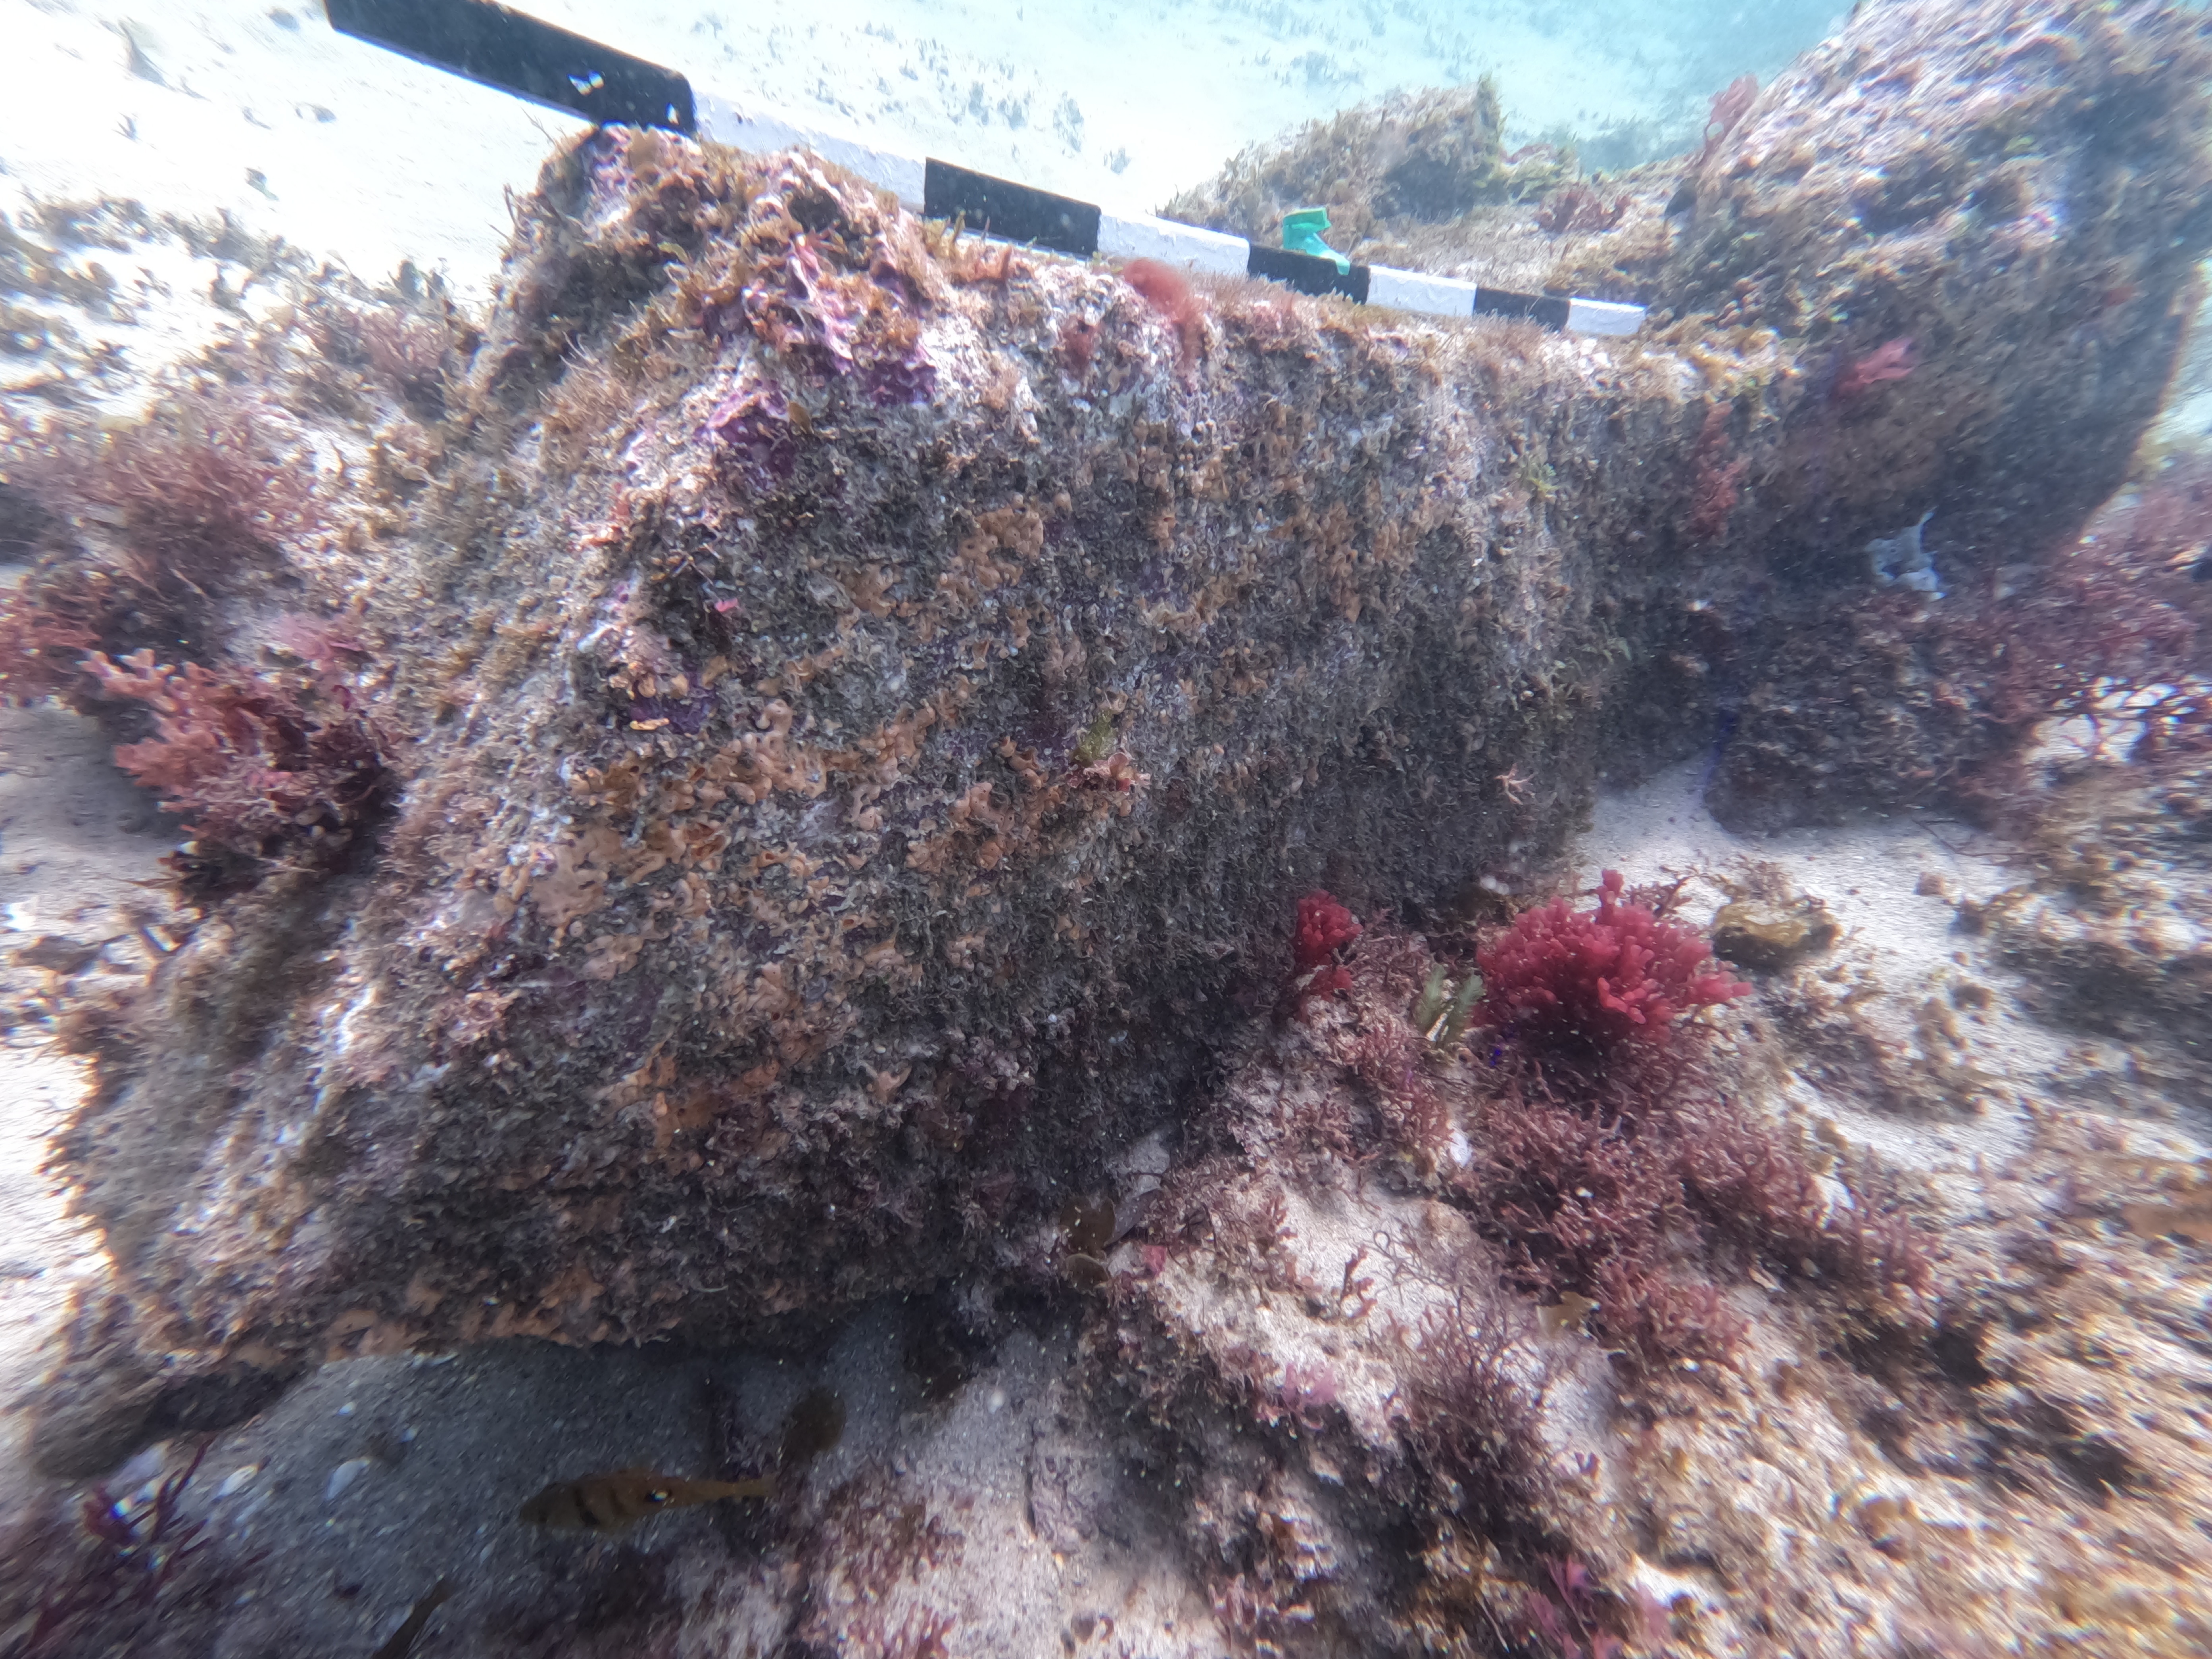

Supplement: Supplementary file 753 [file G0713820.pdf › Ocean2/G0713820.pdf]

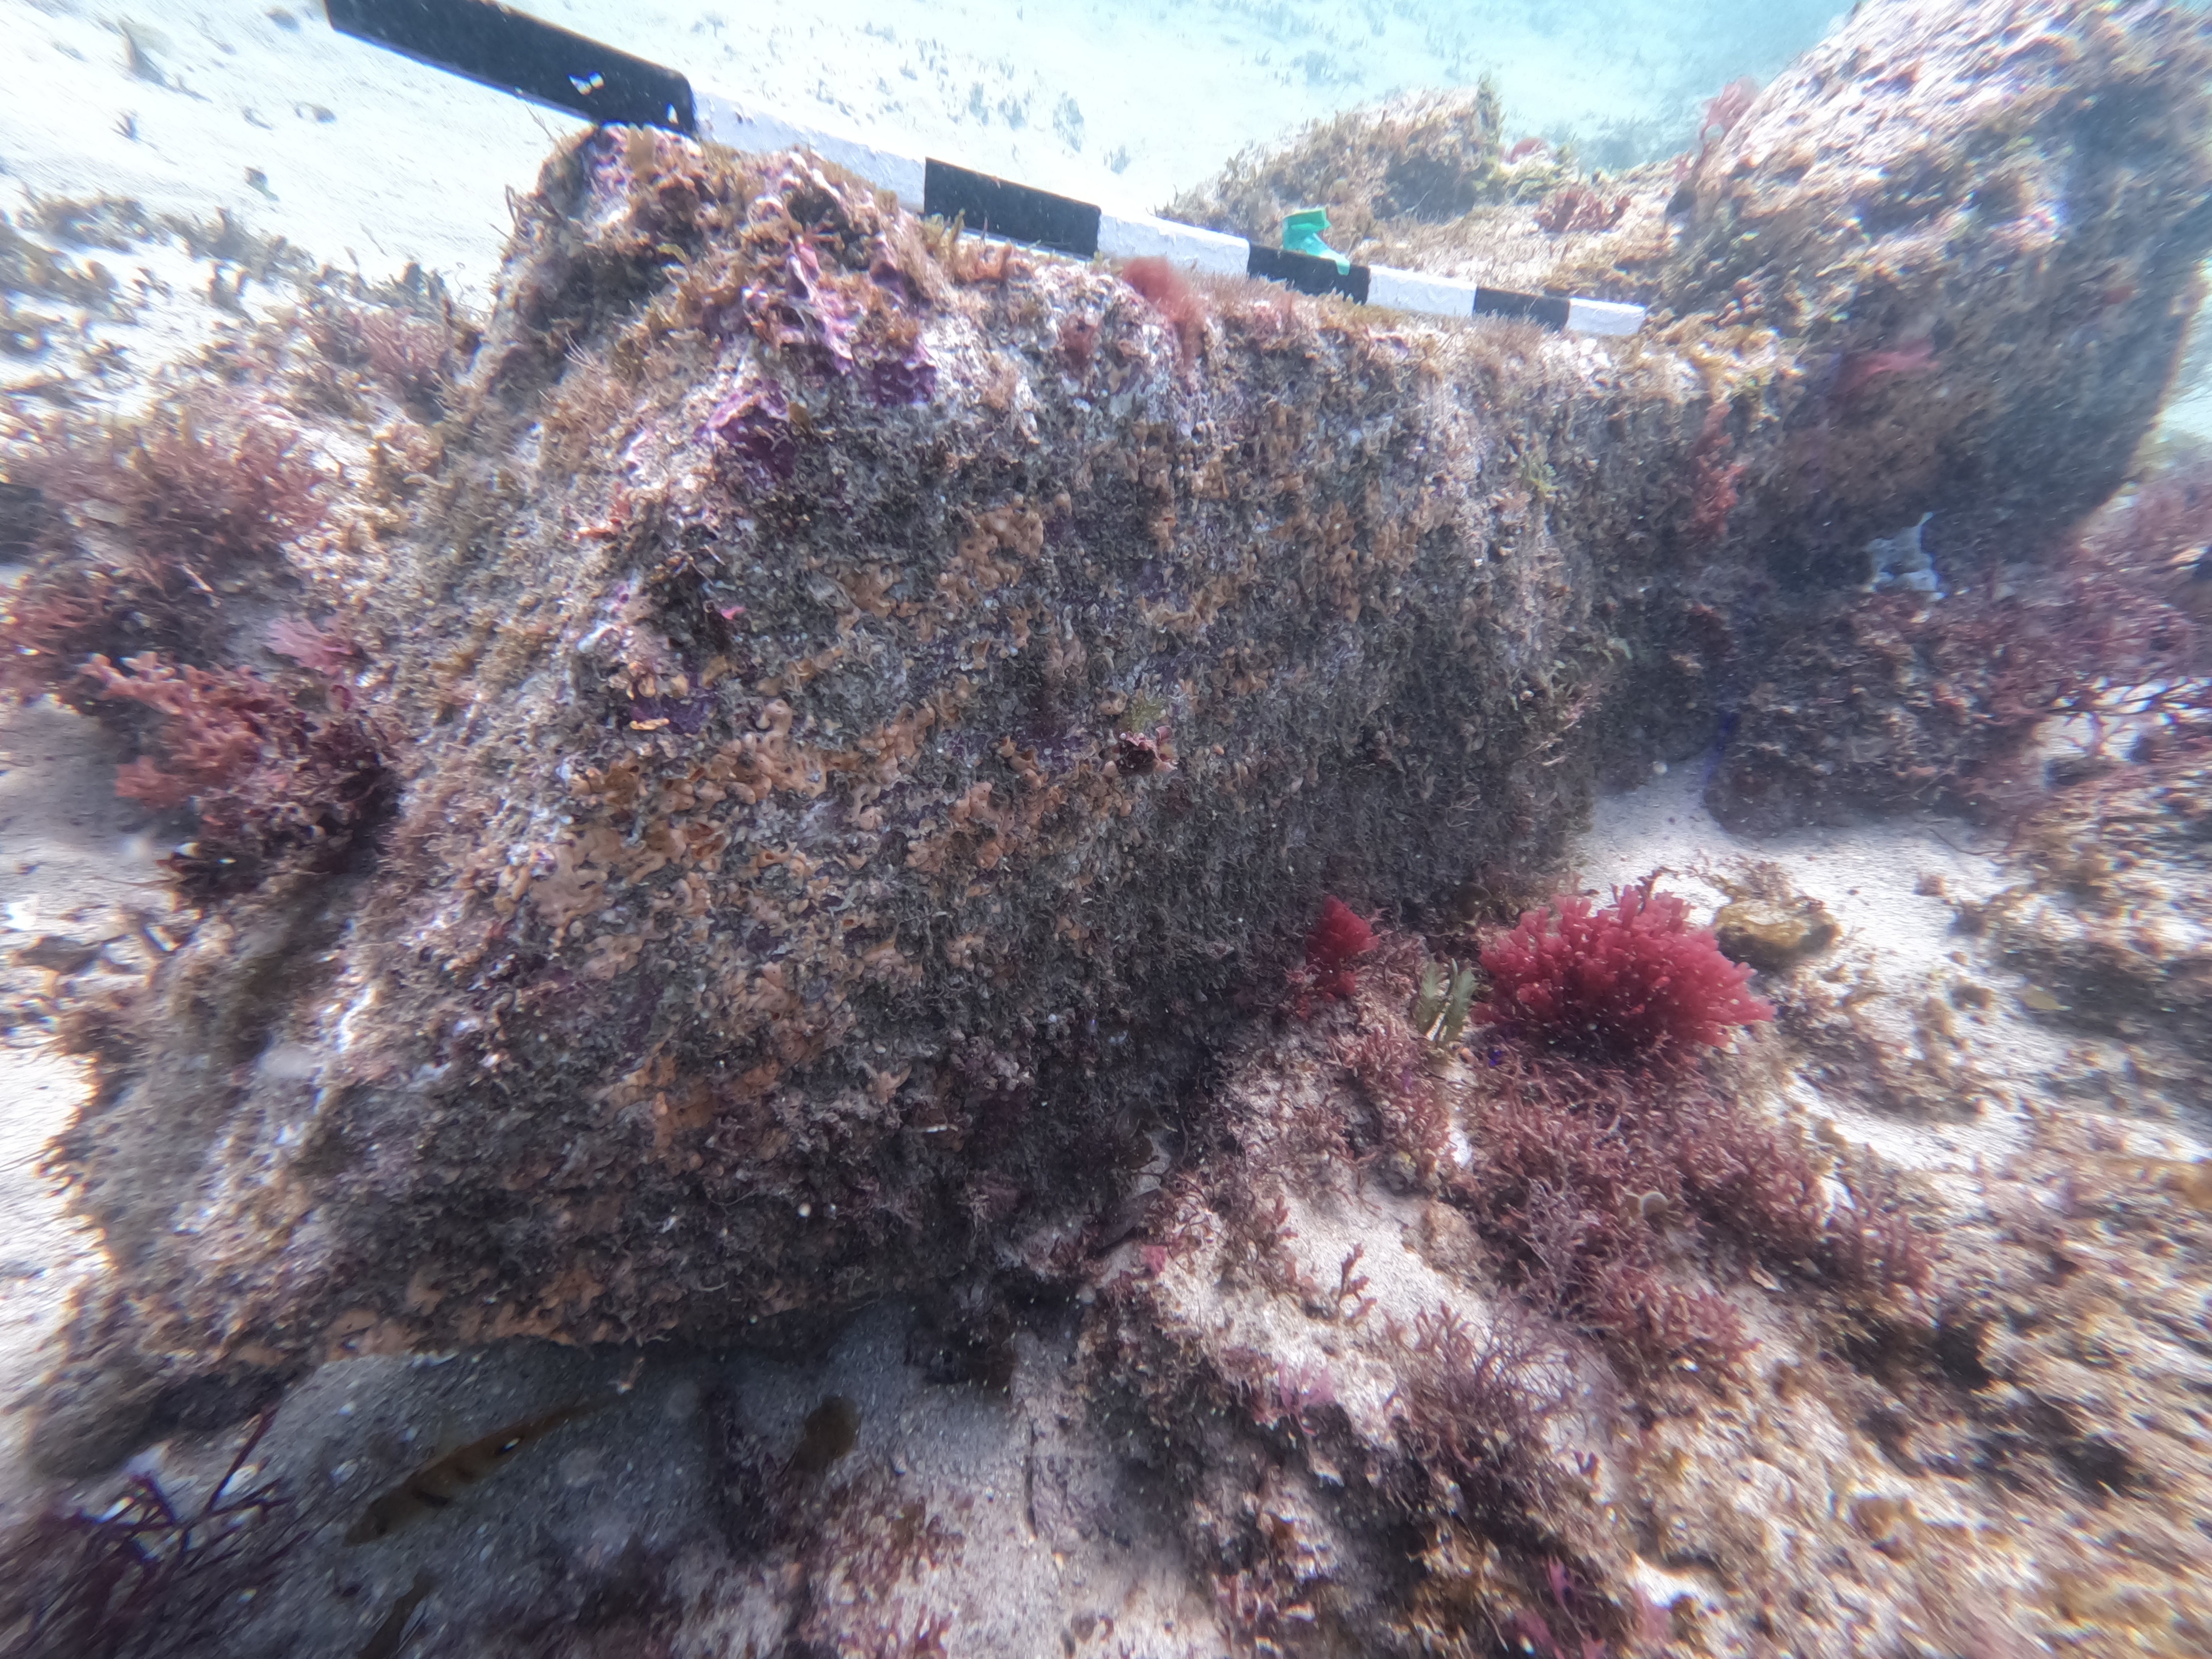

Supplement: Supplementary file 754 [file G0713821.pdf › Ocean2/G0713821.pdf]

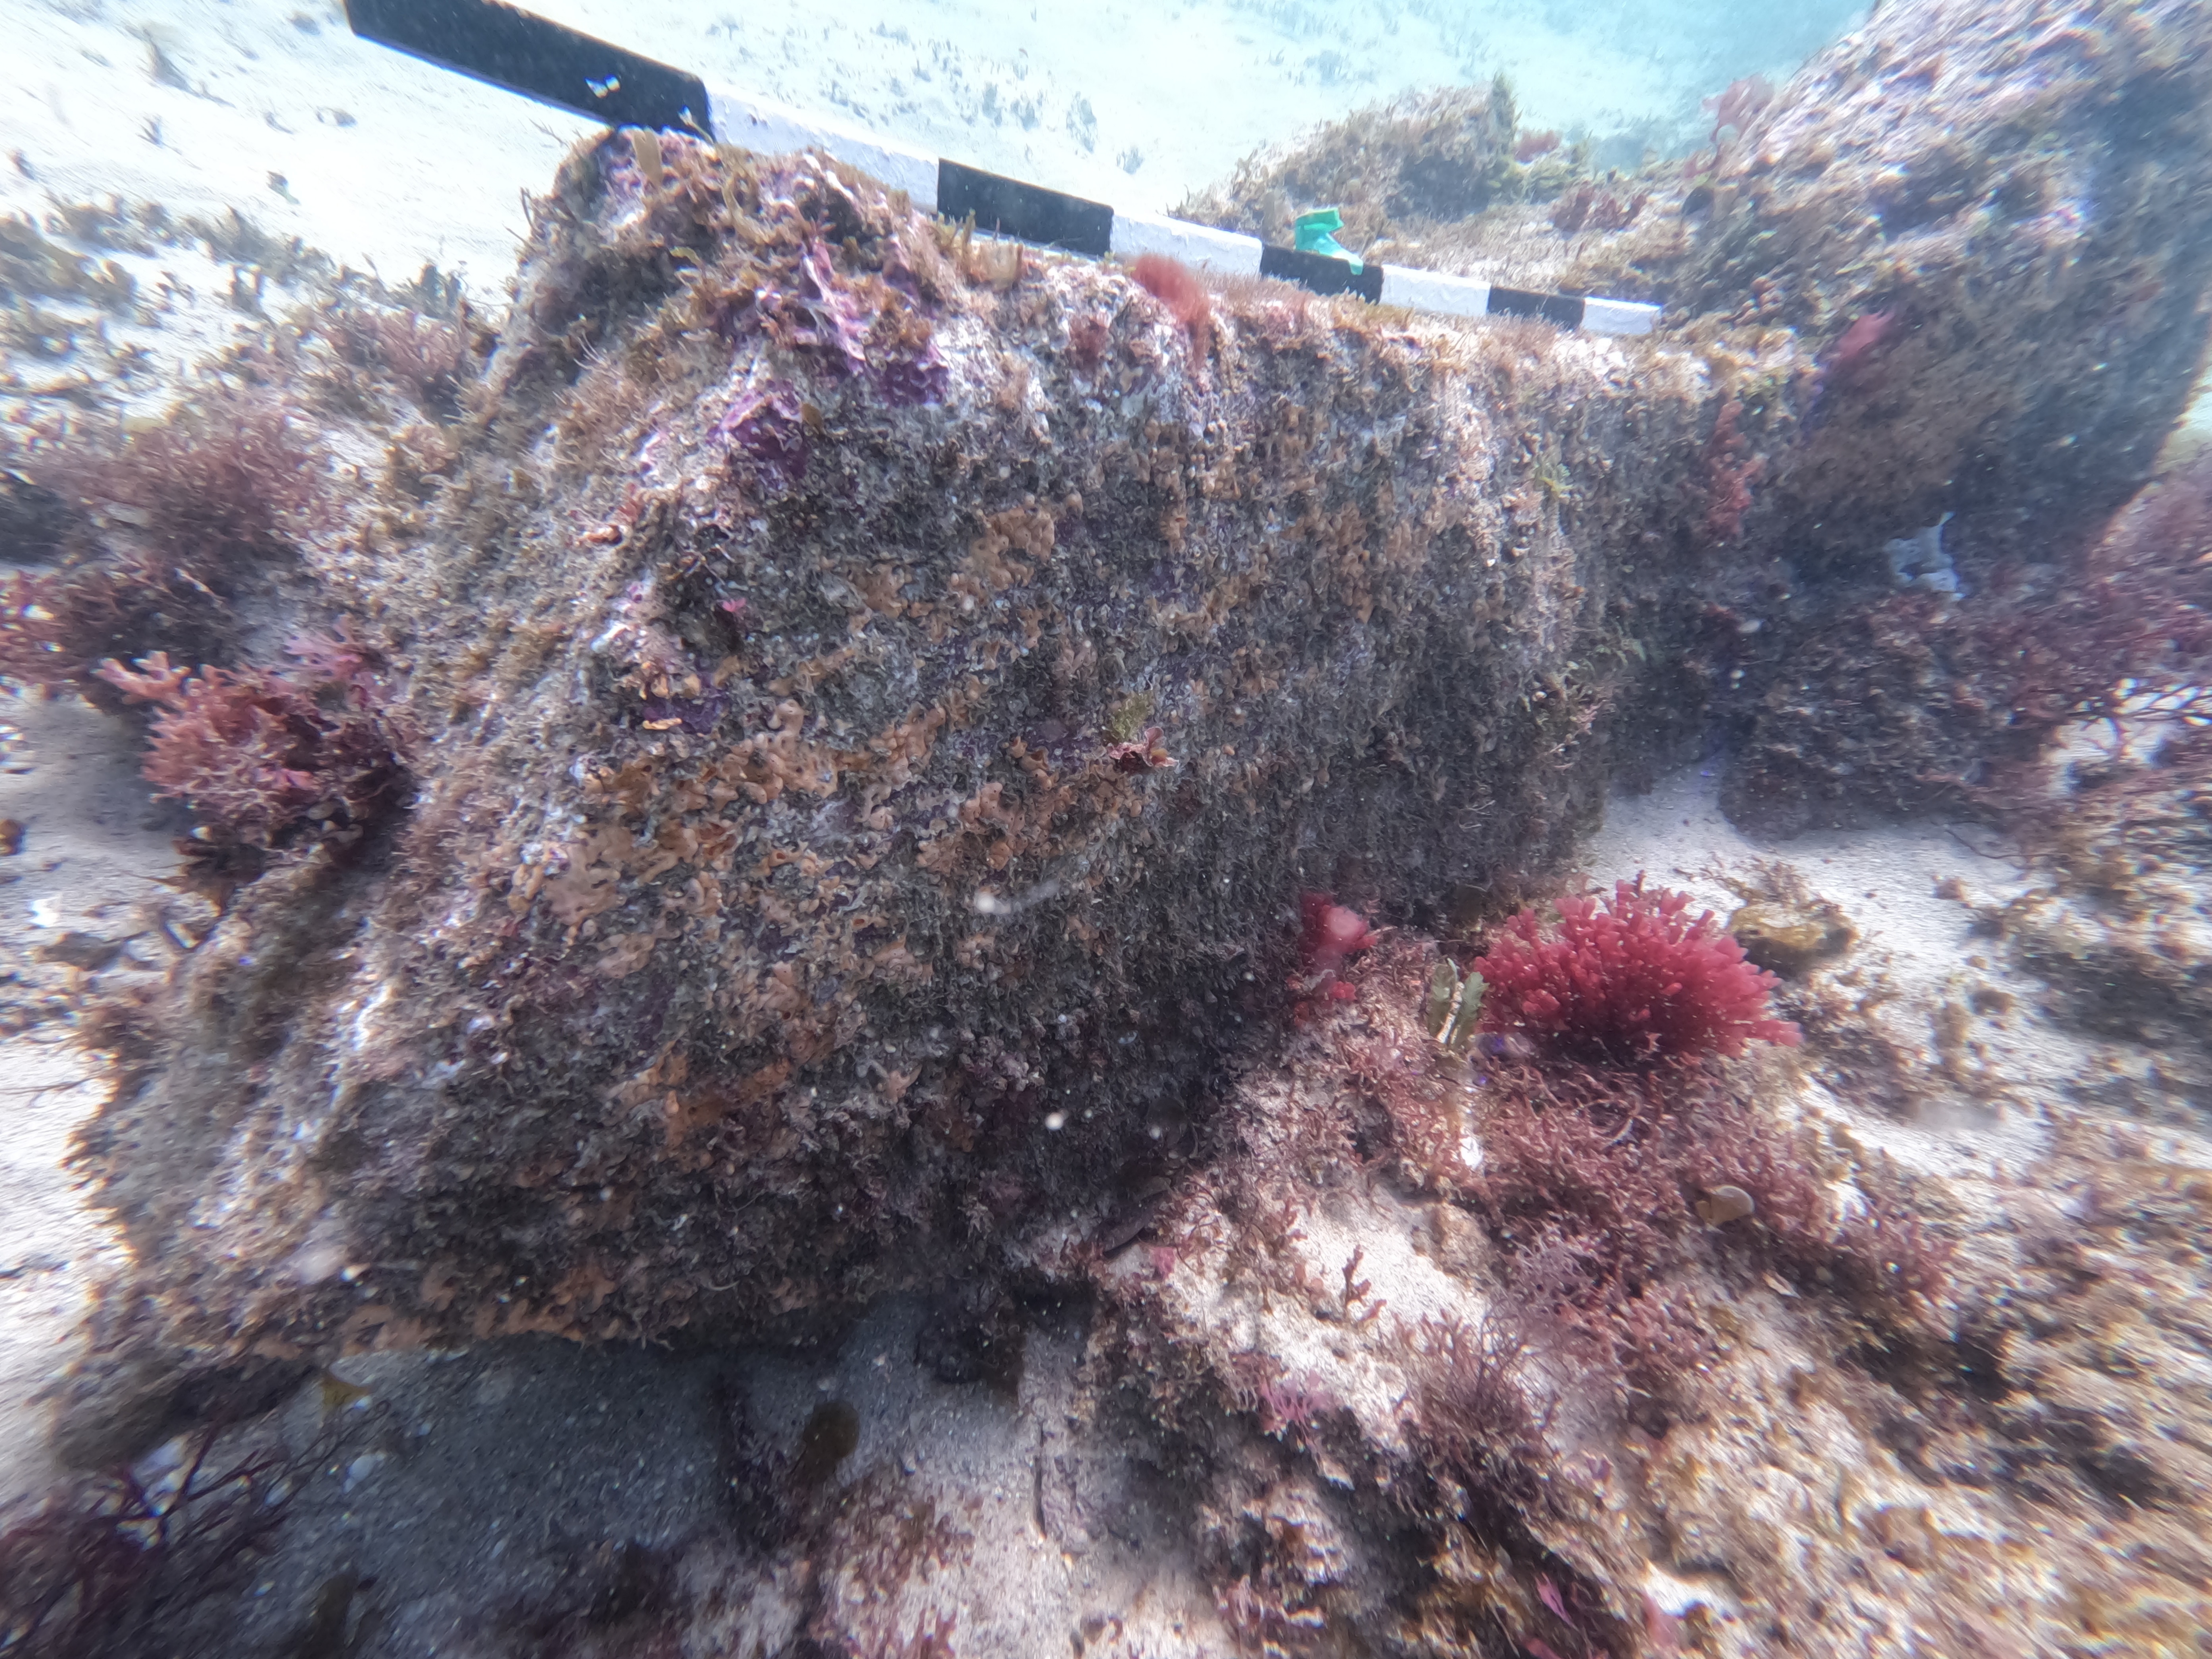

Supplement: Supplementary file 755 [file G0713822.pdf › Ocean2/G0713822.pdf]

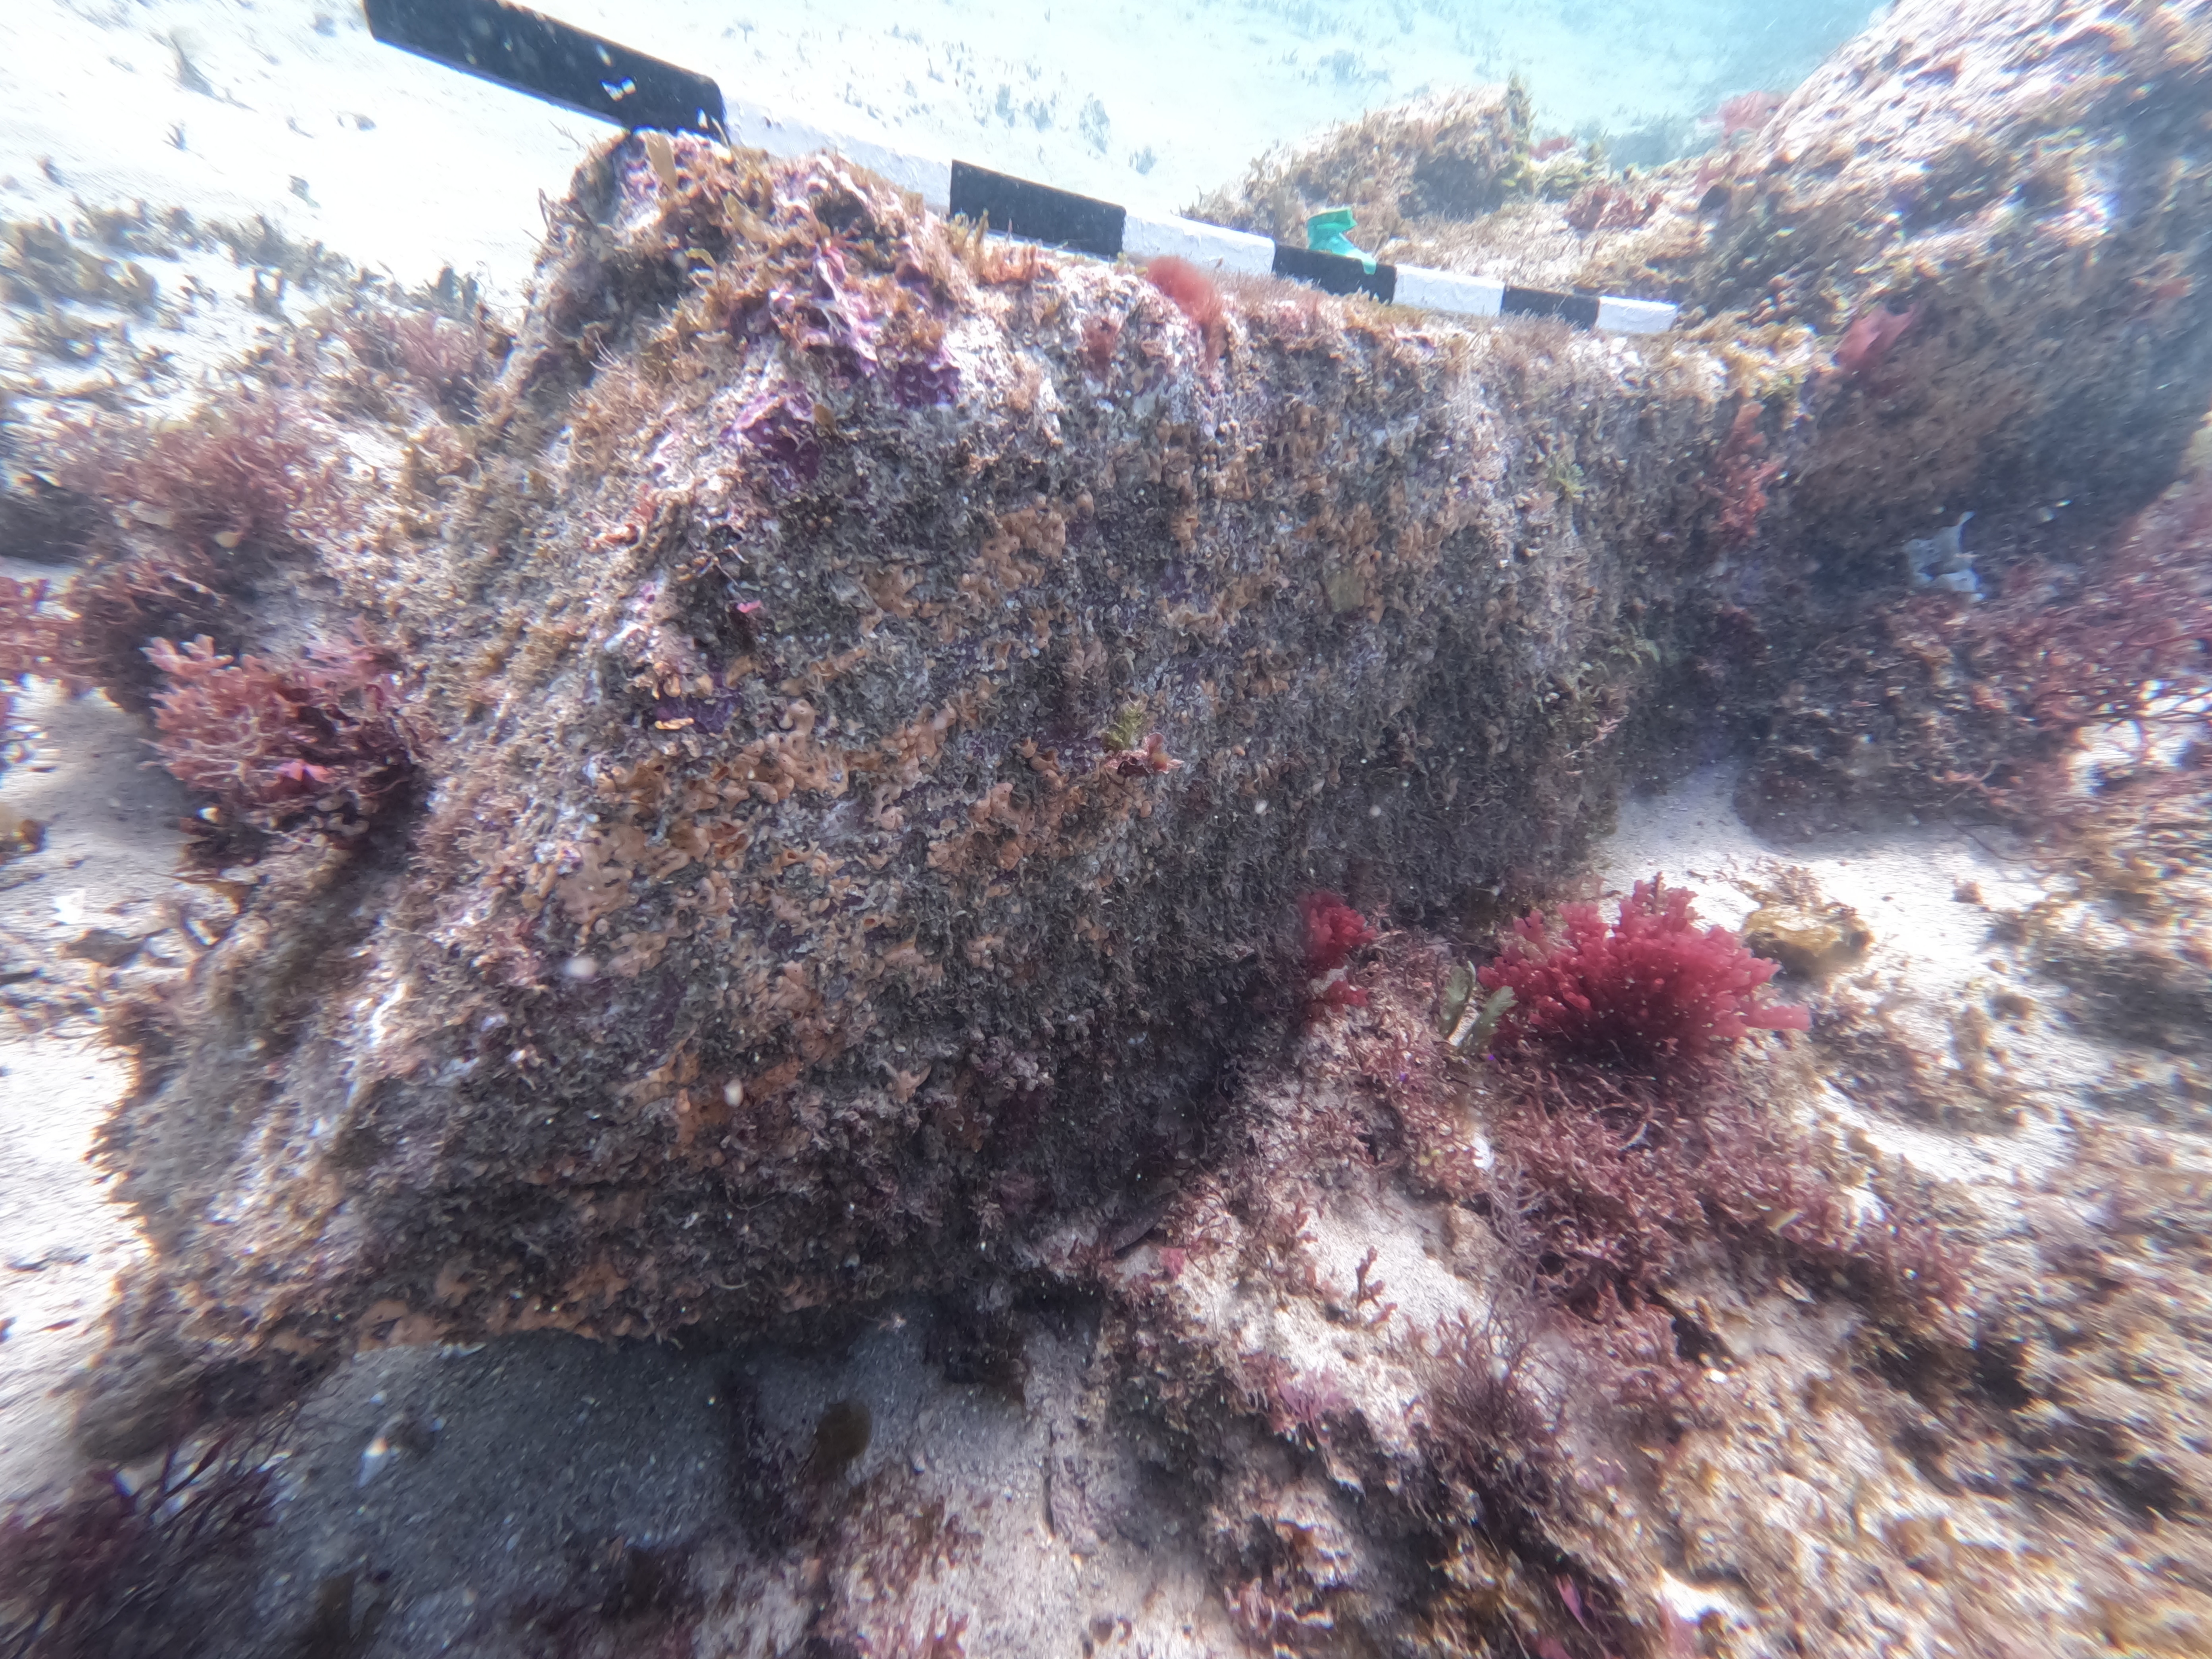

Supplement: Supplementary file 756 [file G0713823.pdf › Ocean2/G0713823.pdf]

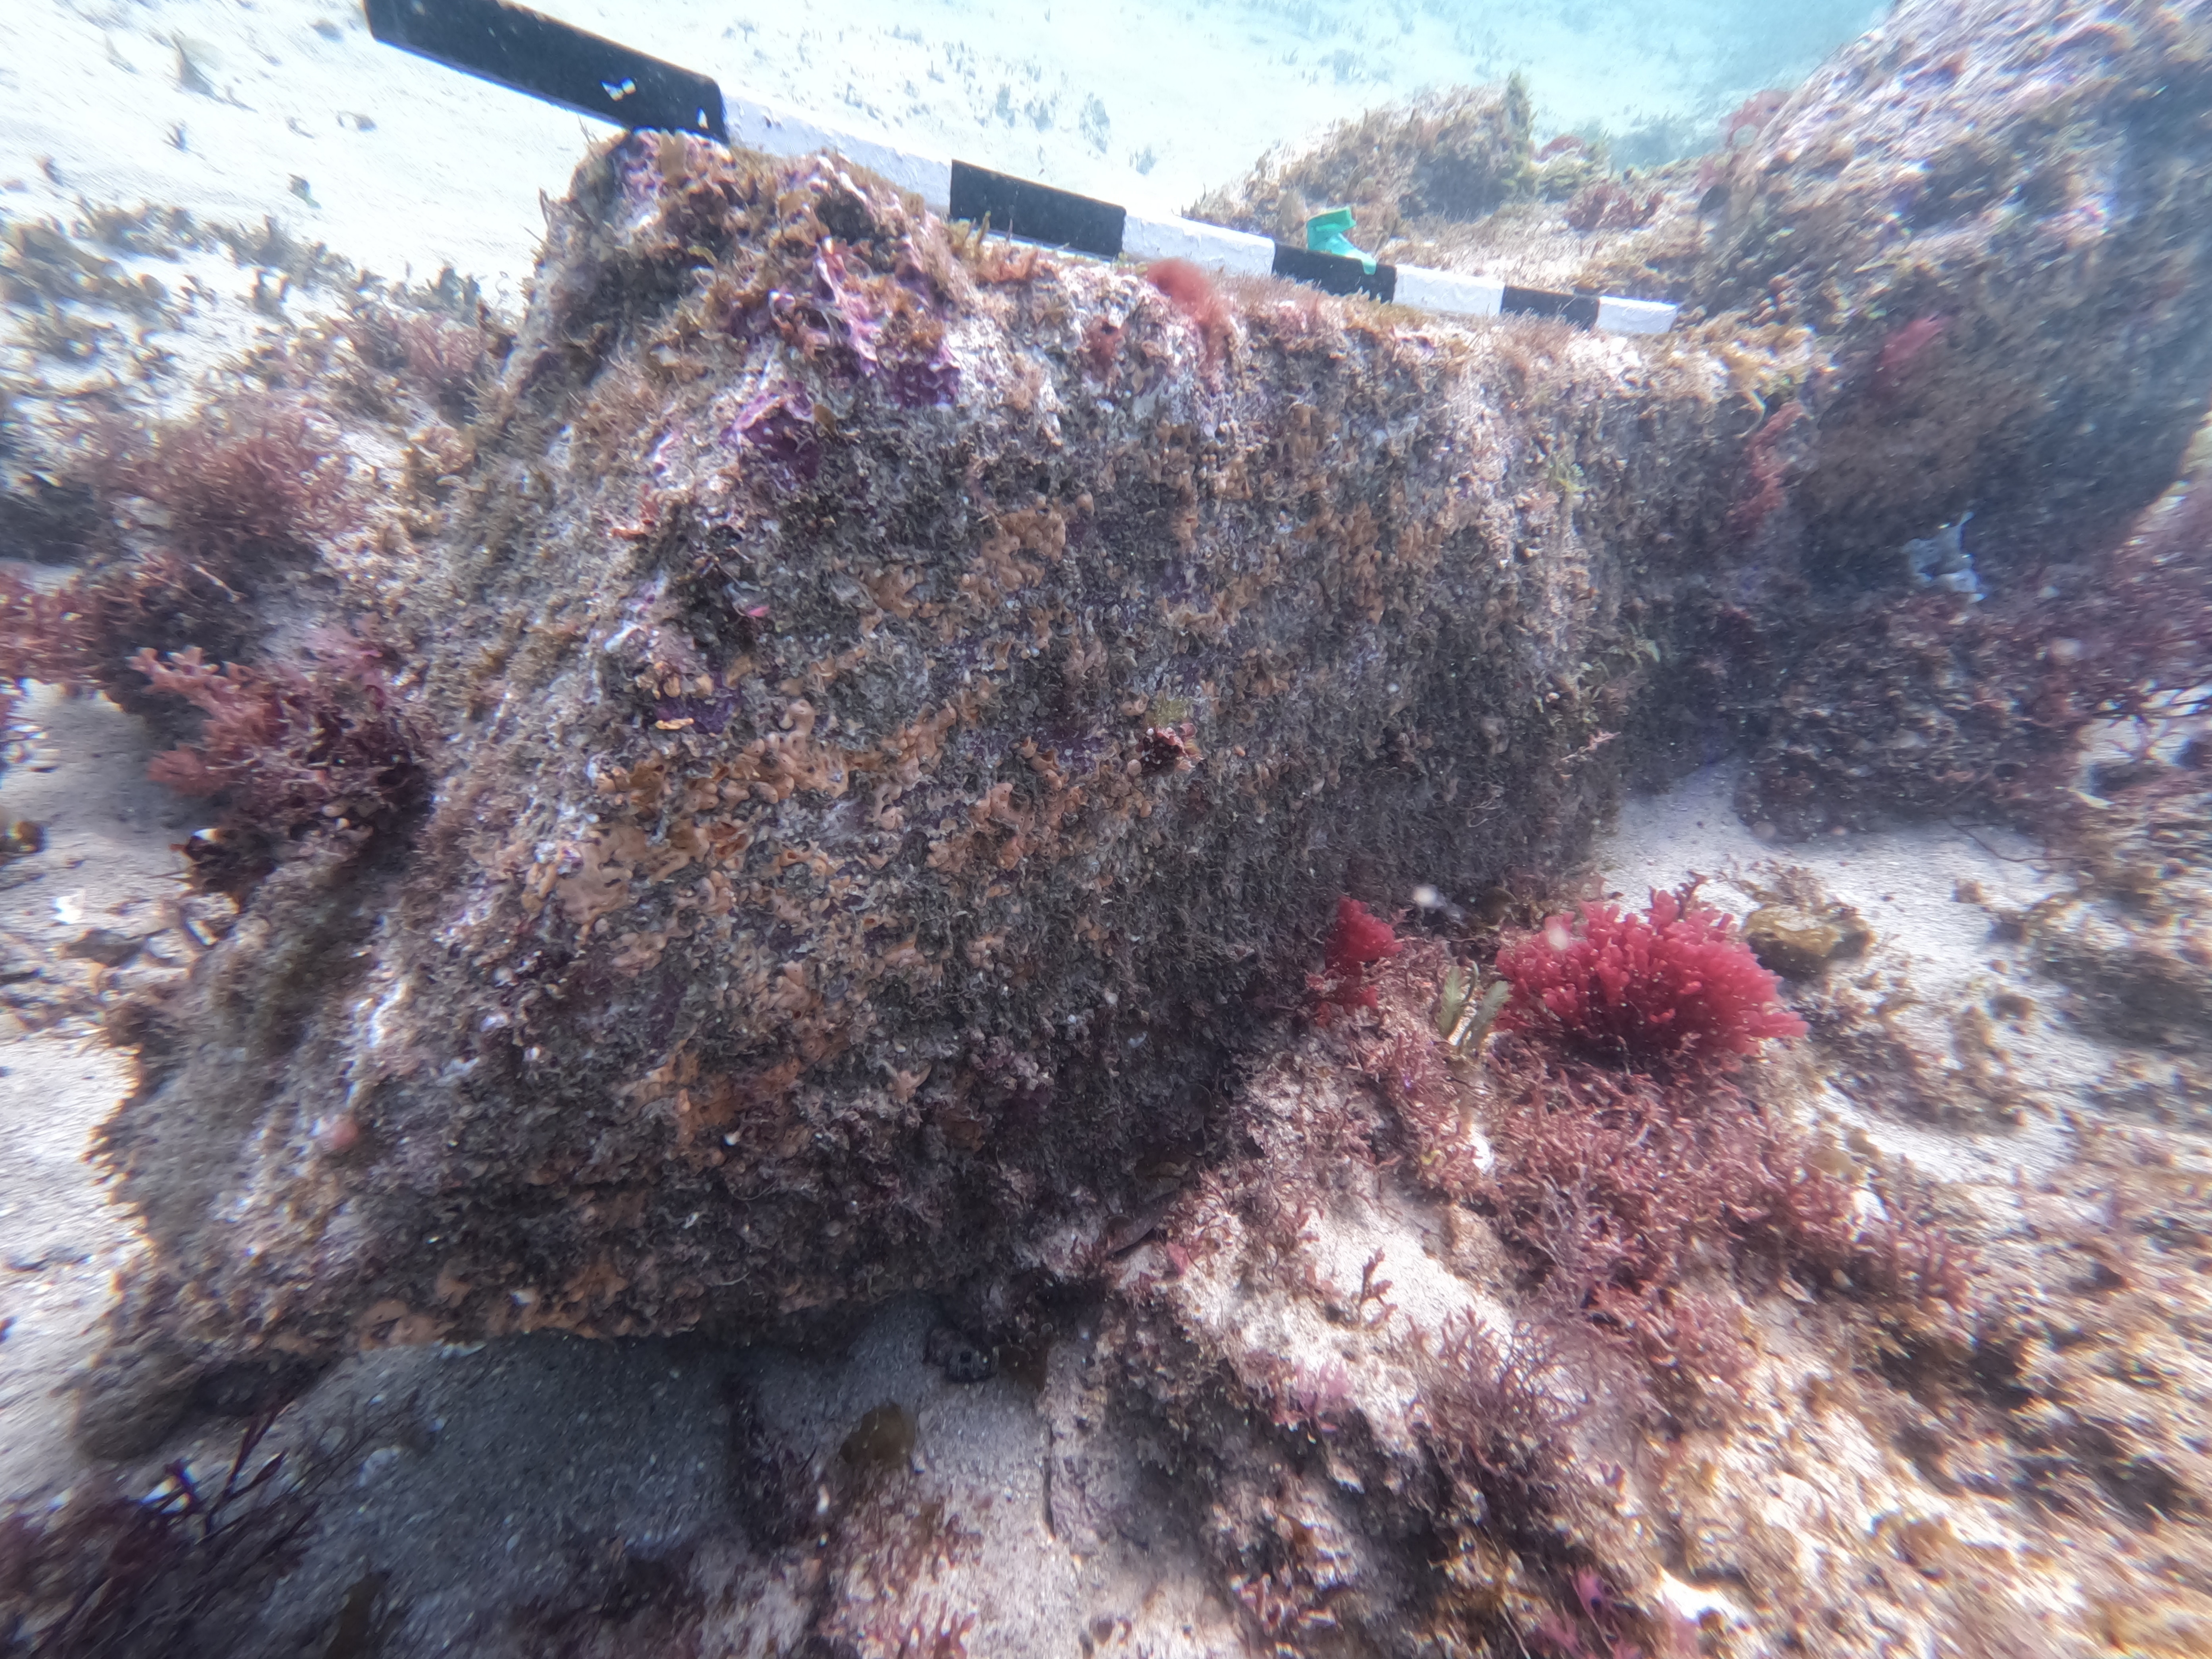

Supplement: Supplementary file 757 [file G0713824.pdf › Ocean2/G0713824.pdf]

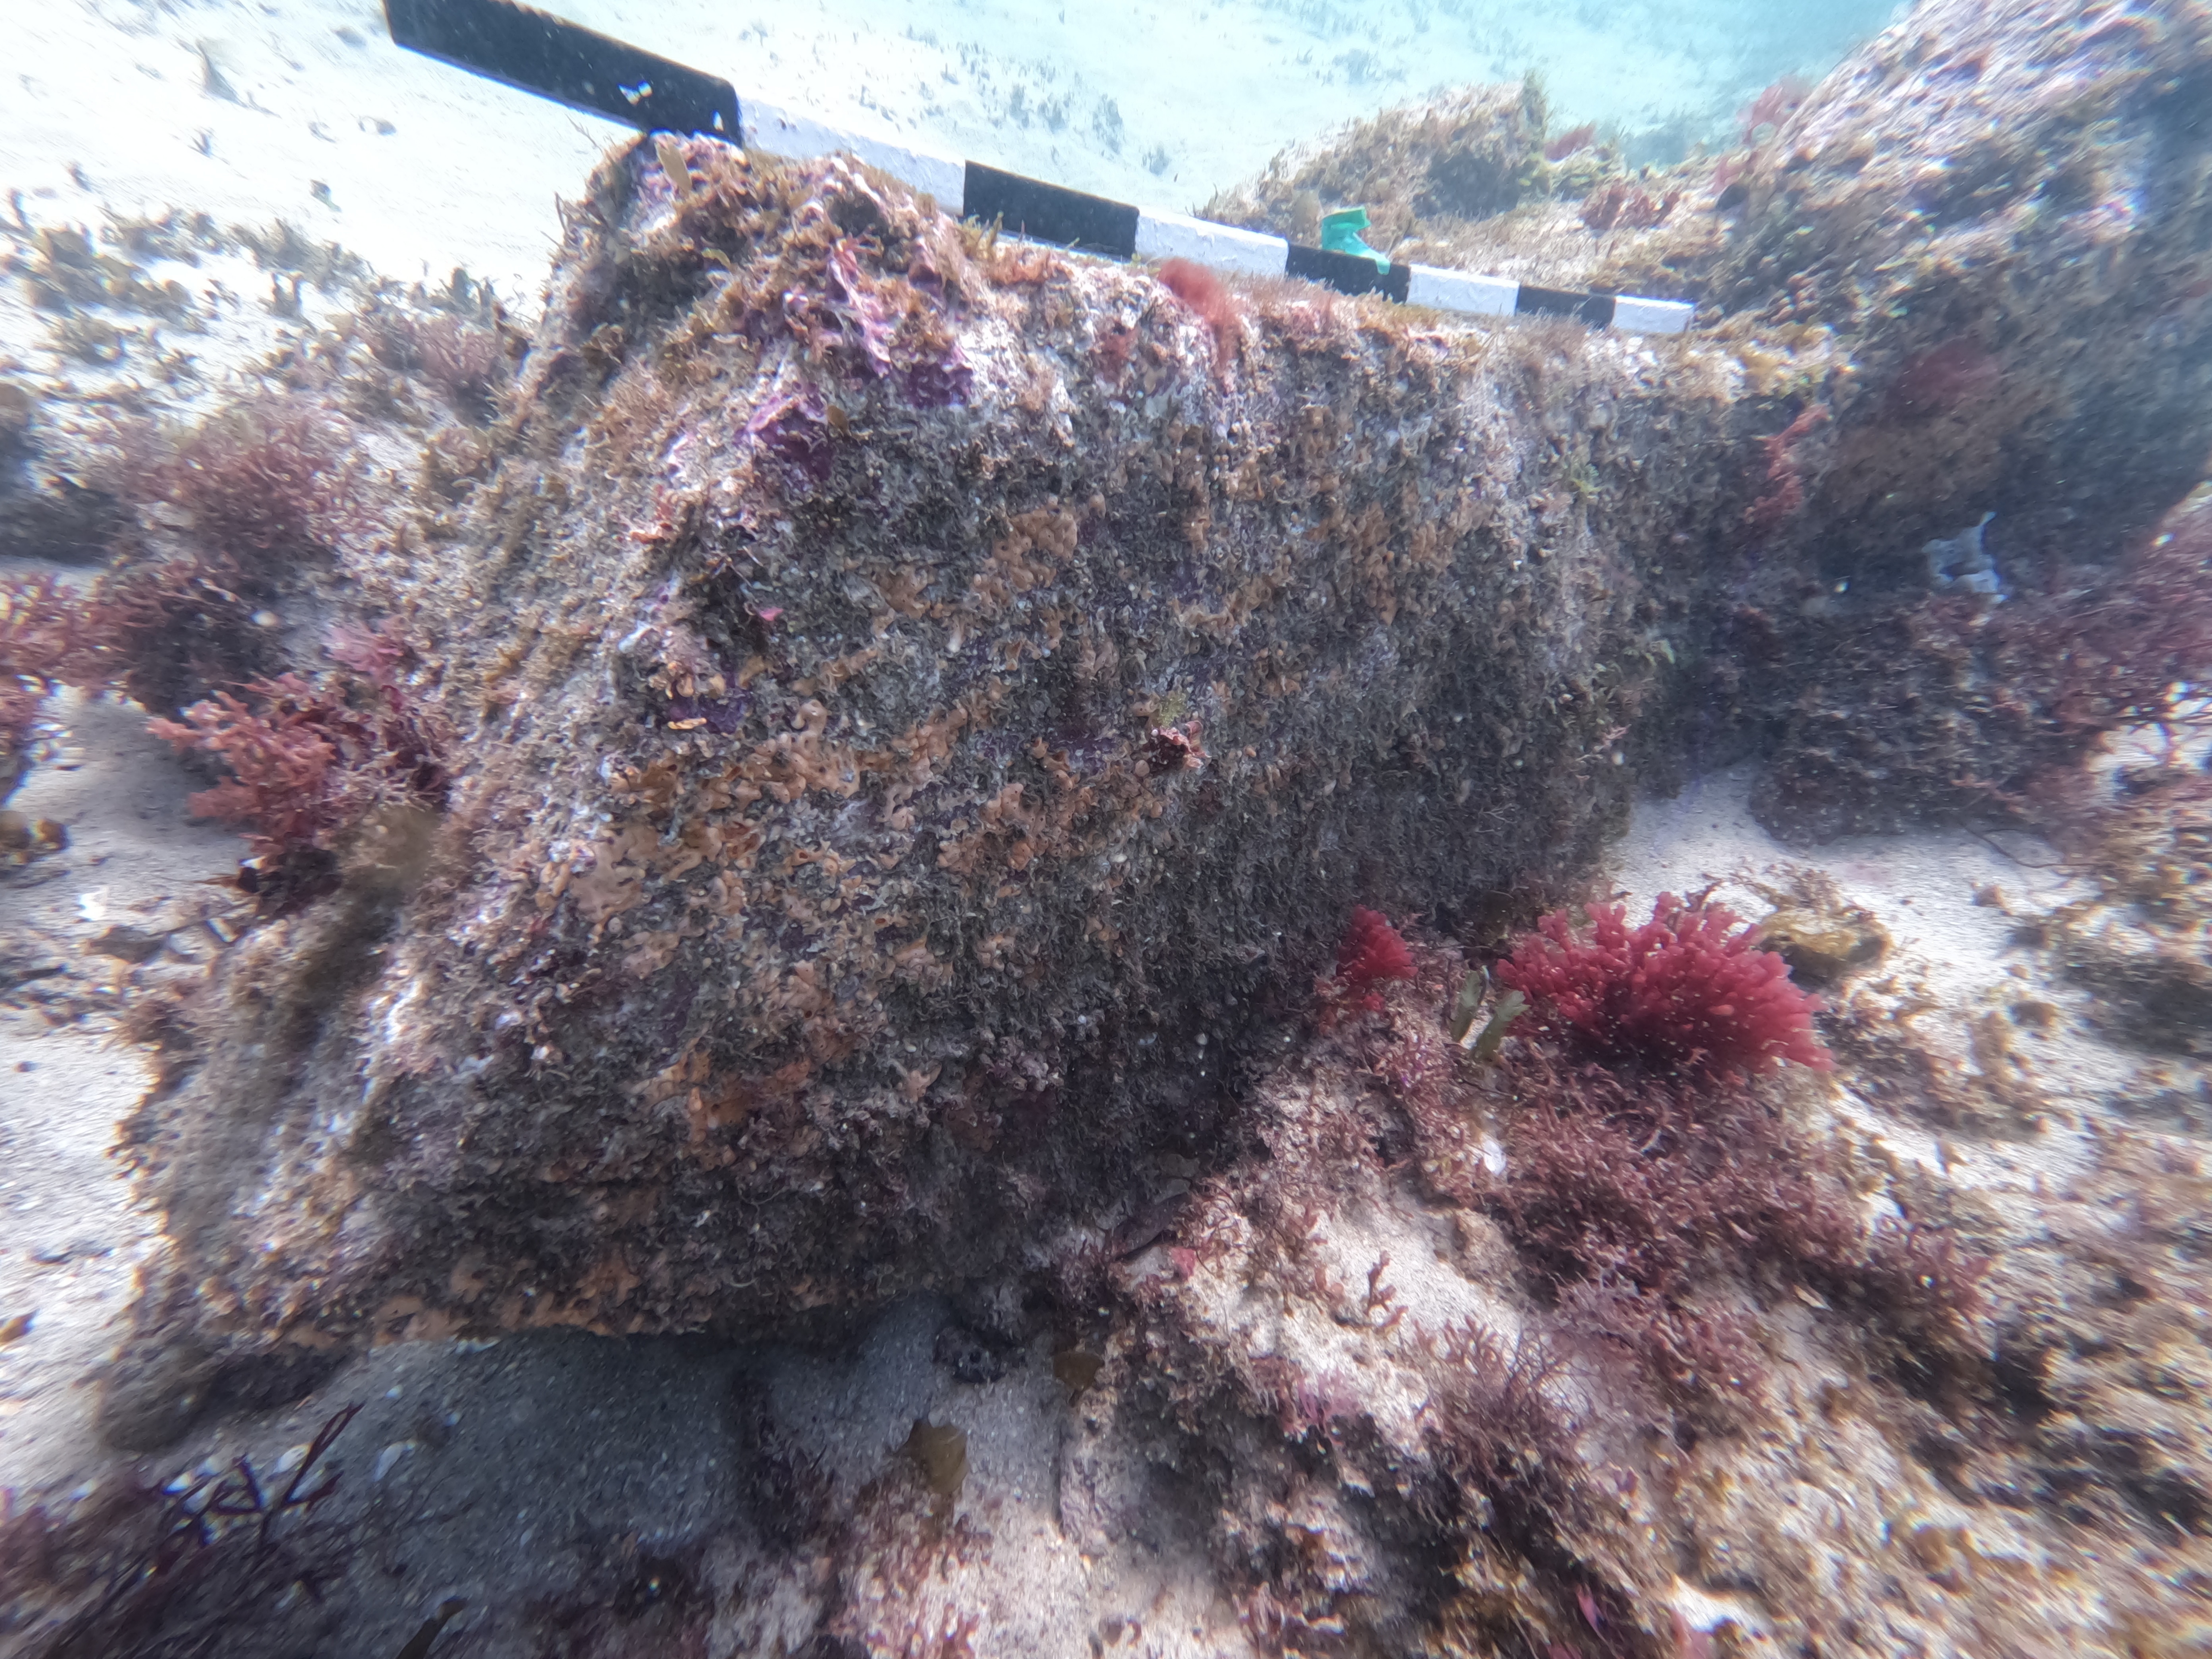

Supplement: Supplementary file 758 [file G0713825.pdf › Ocean2/G0713825.pdf]

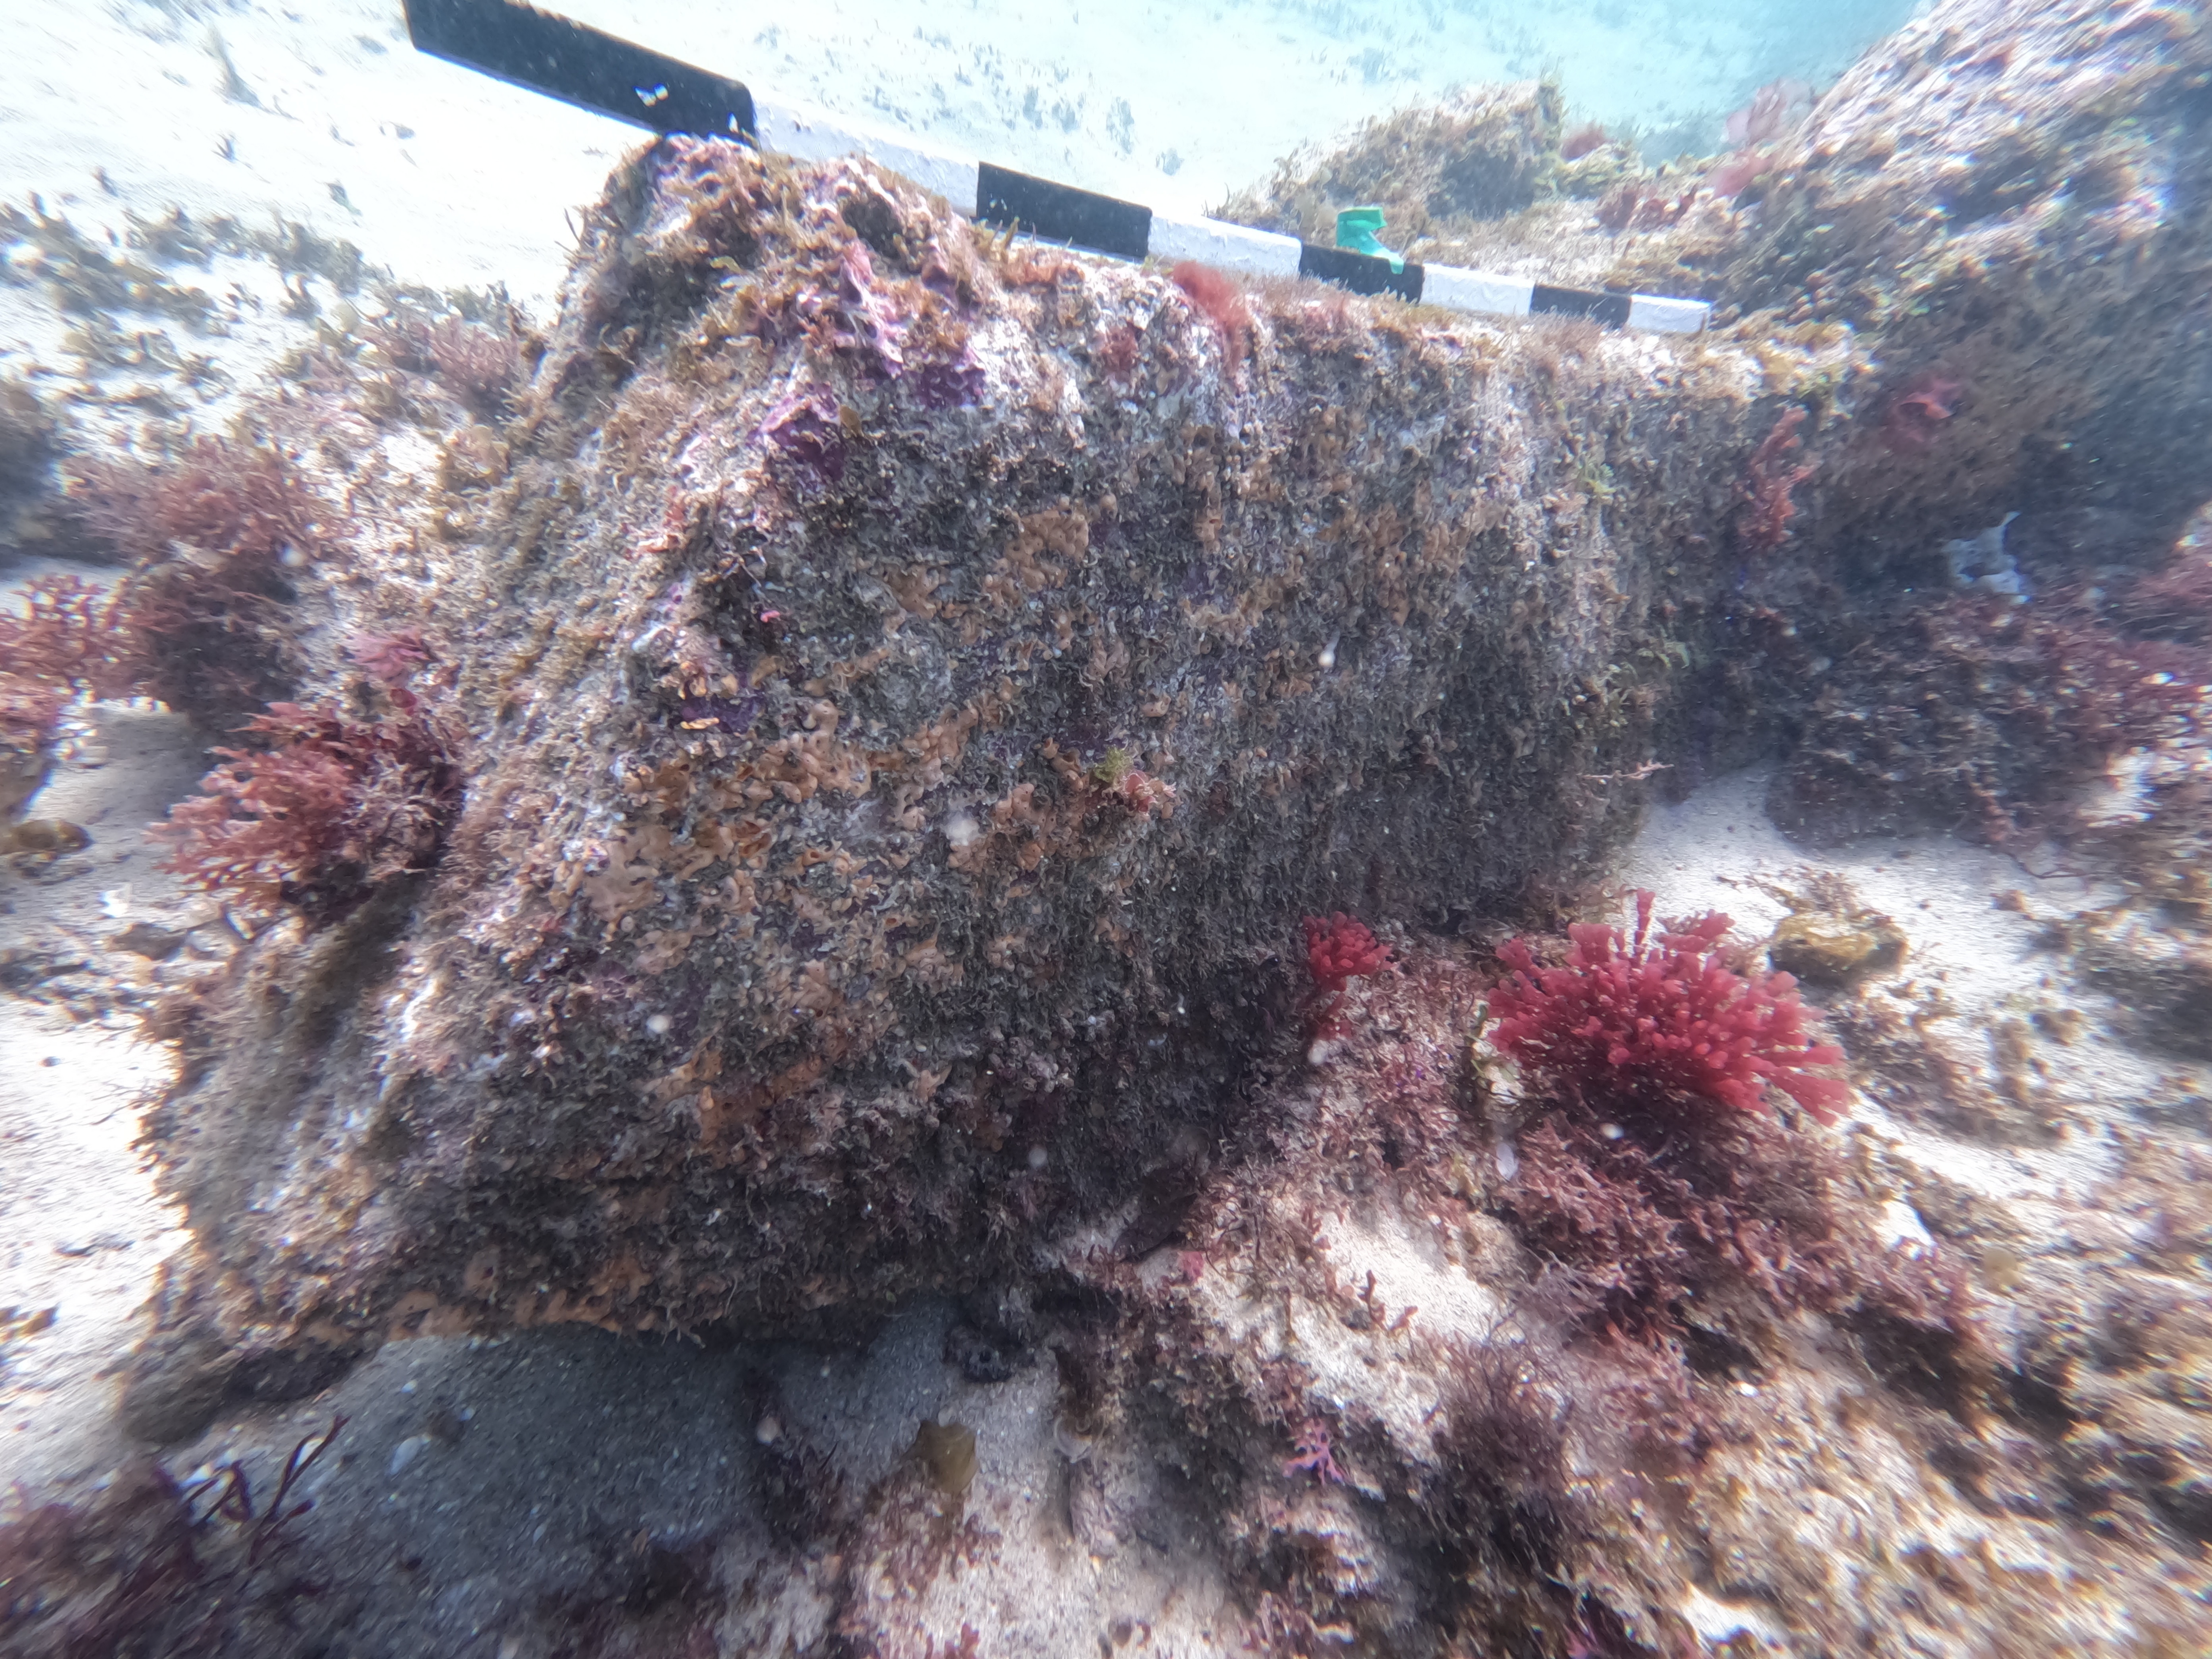

Supplement: Supplementary file 759 [file G0713826.pdf › Ocean2/G0713826.pdf]

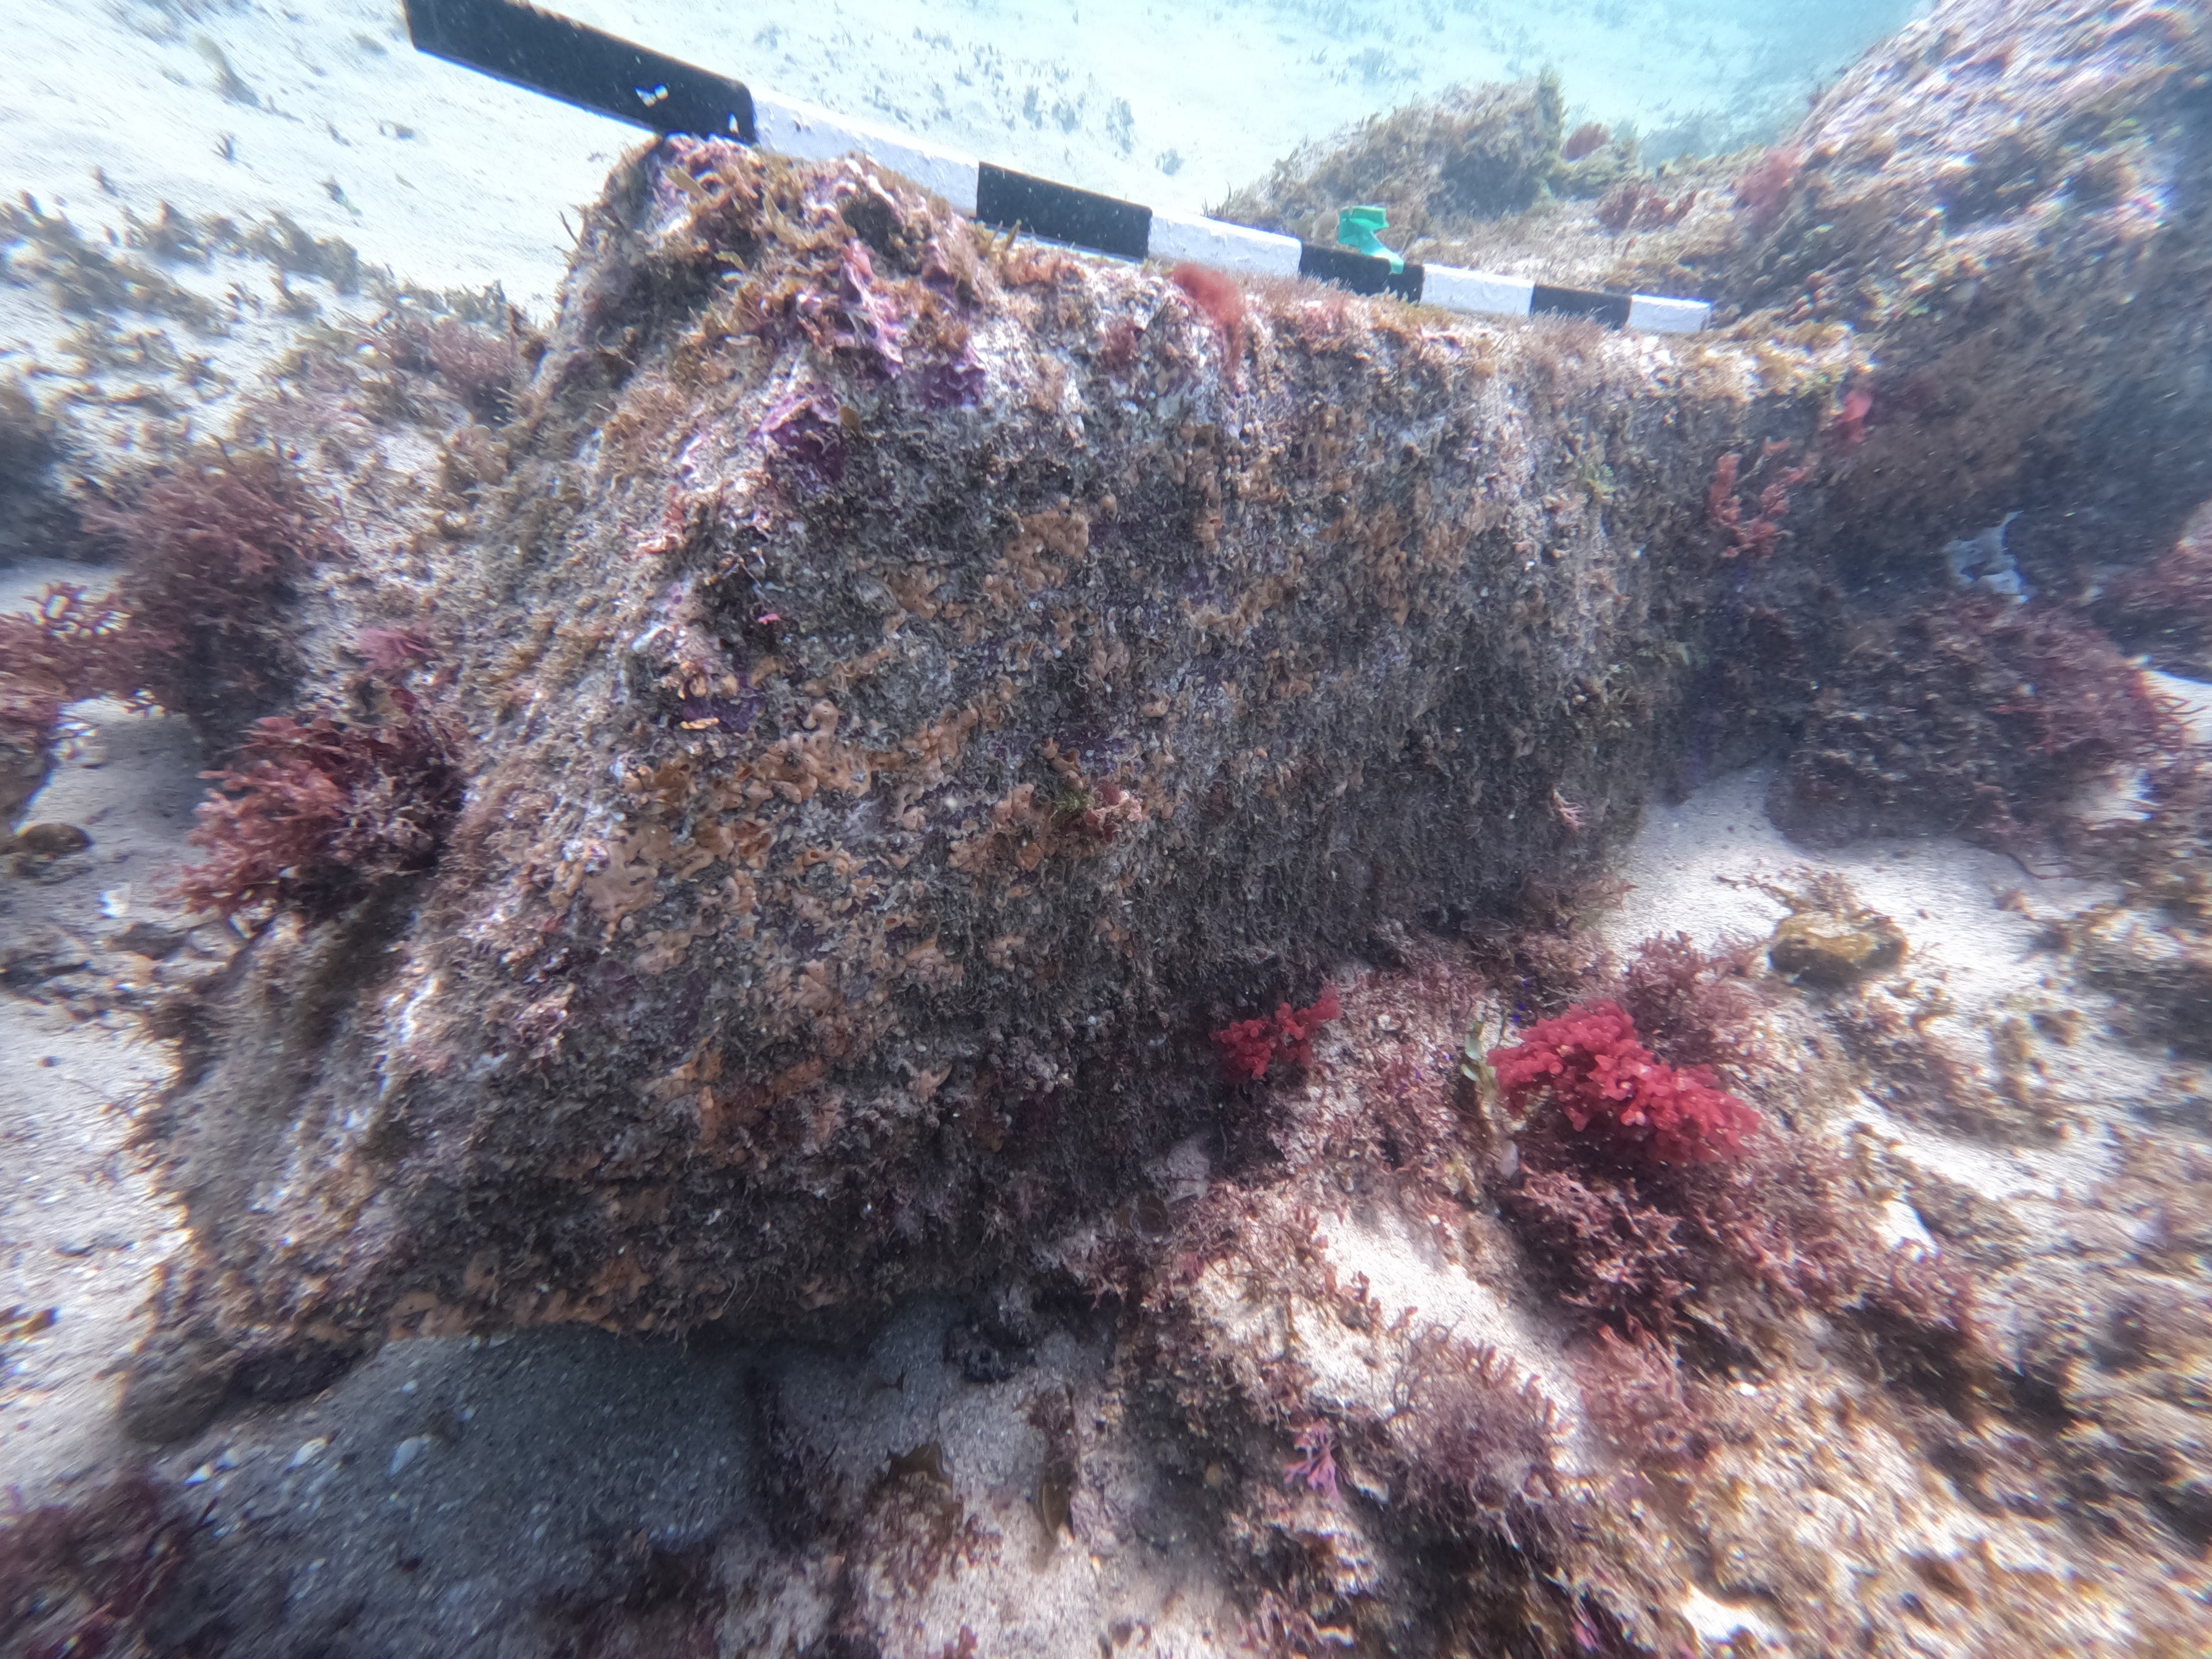

Supplement: Supplementary file 760 [file G0713827.pdf › Ocean2/G0713827.pdf]

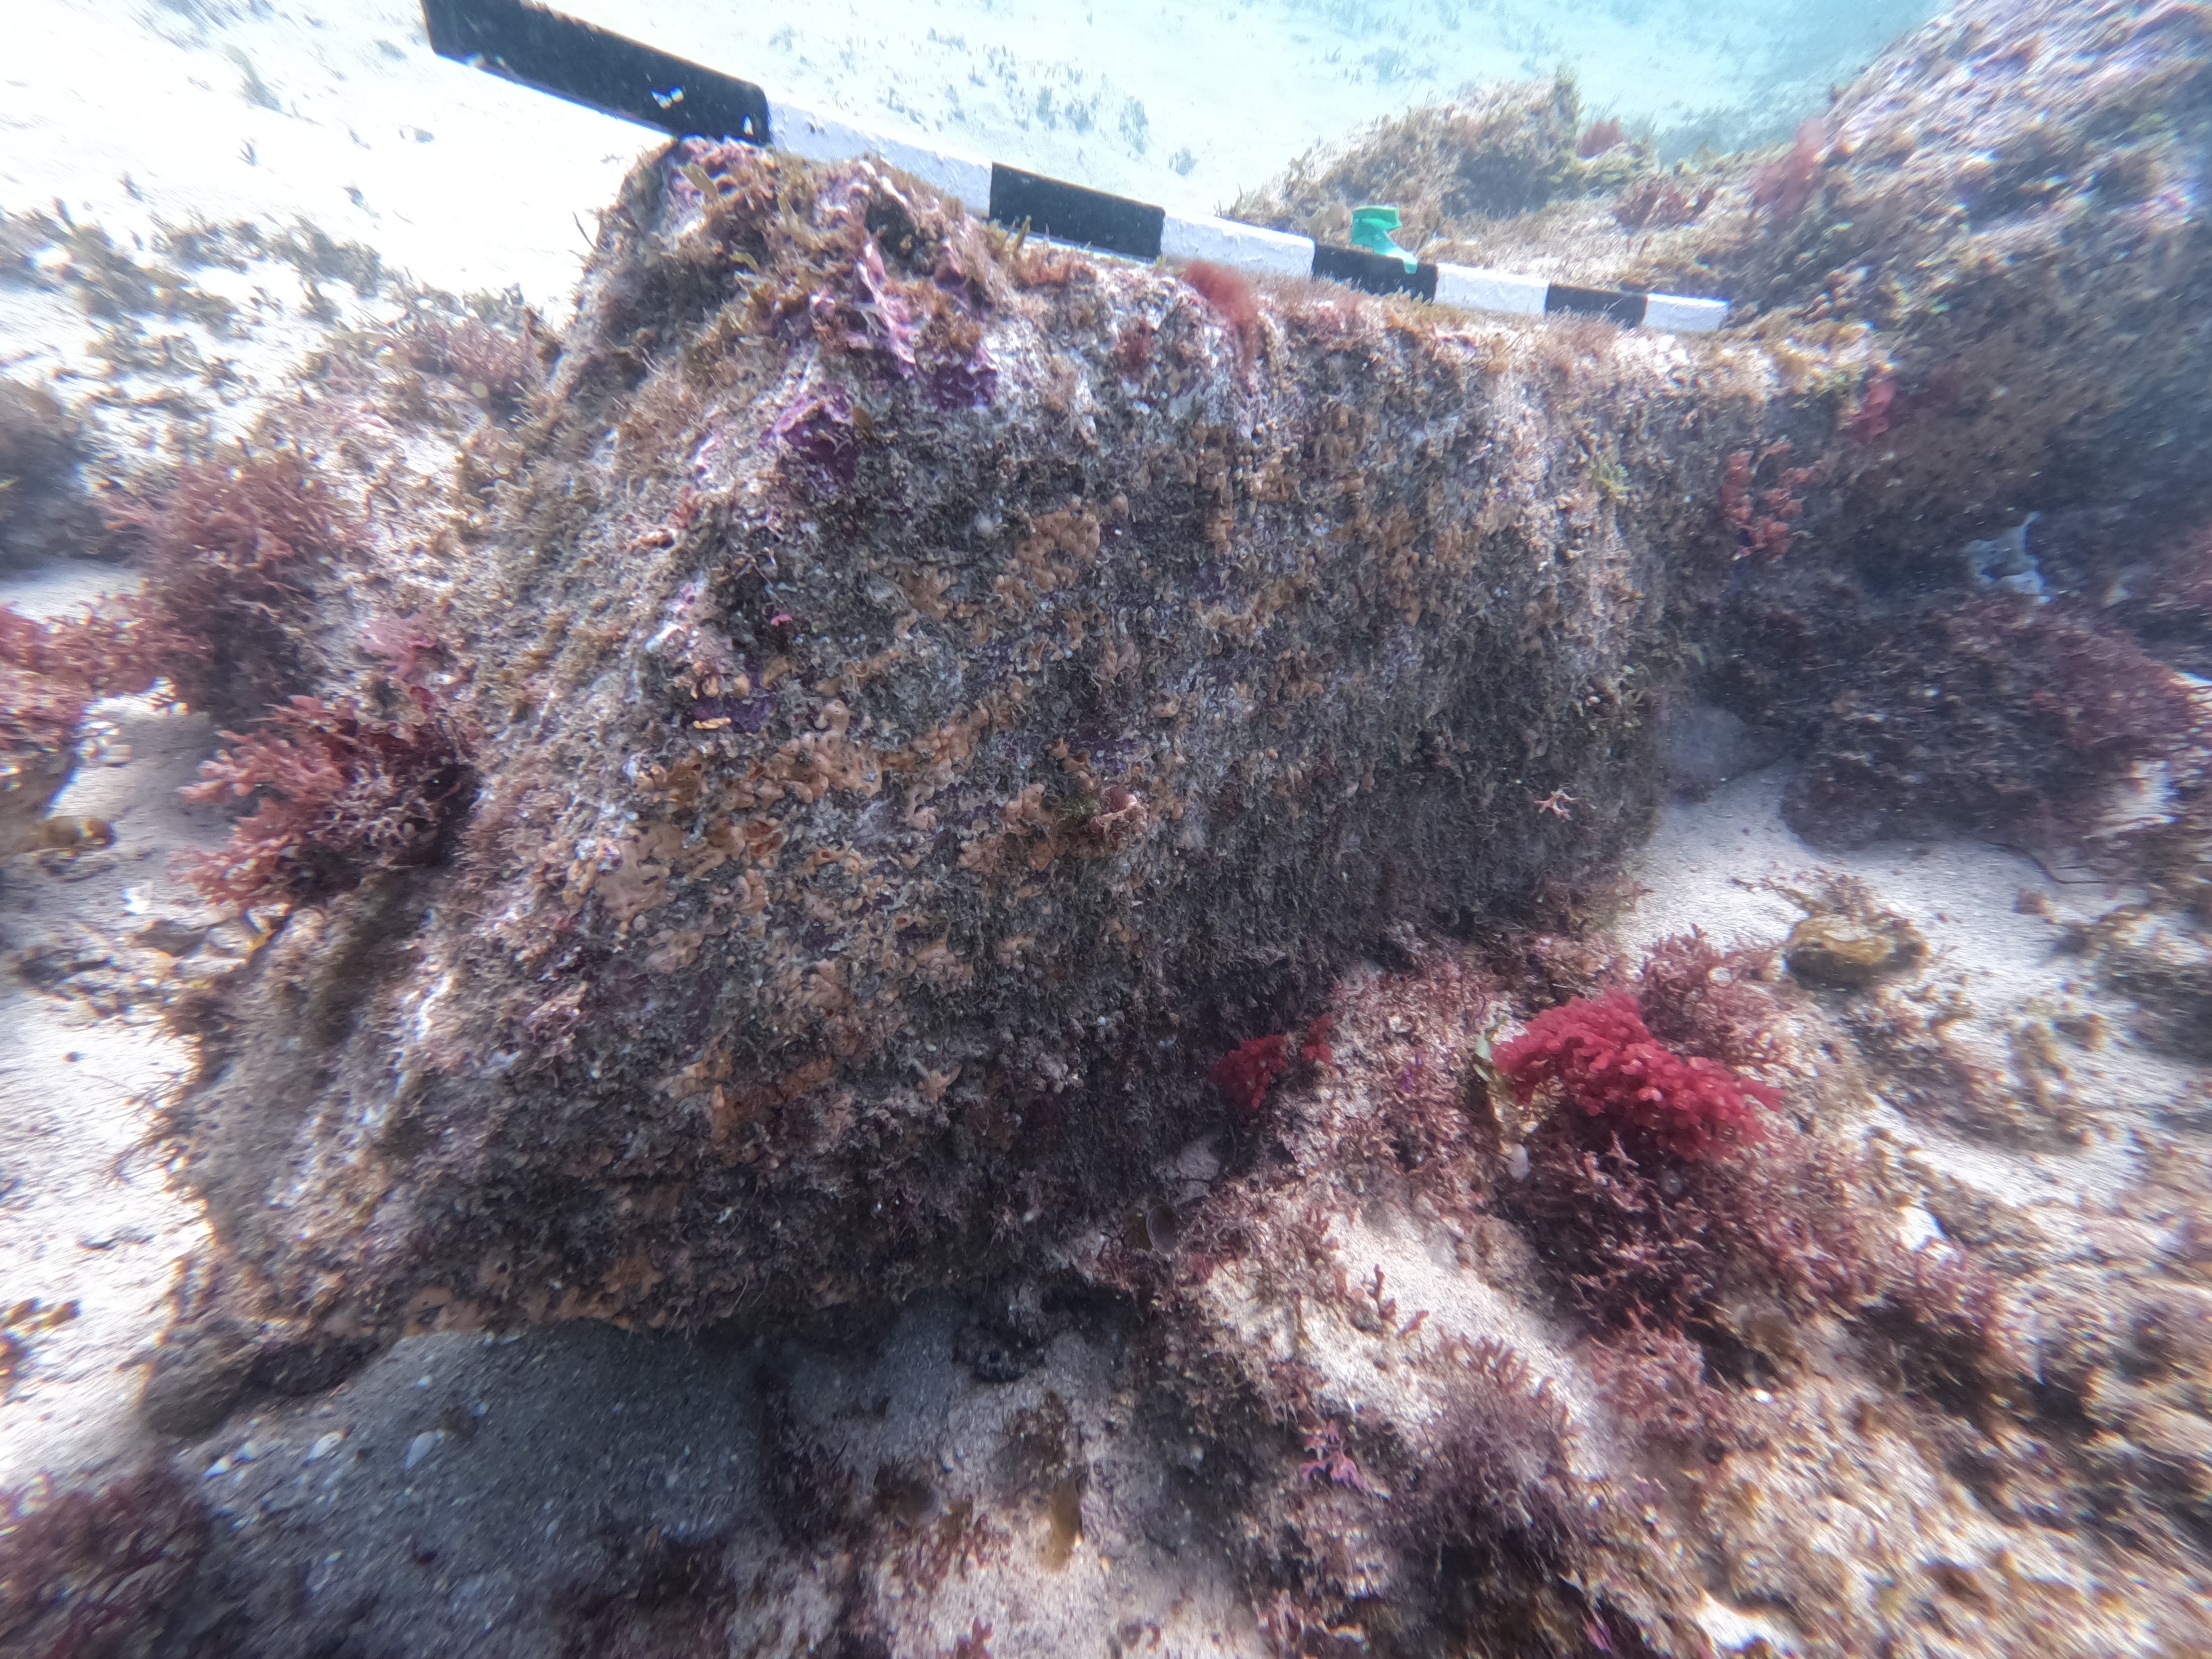

Supplement: Supplementary file 761 [file G0713828.pdf › Ocean2/G0713828.pdf]

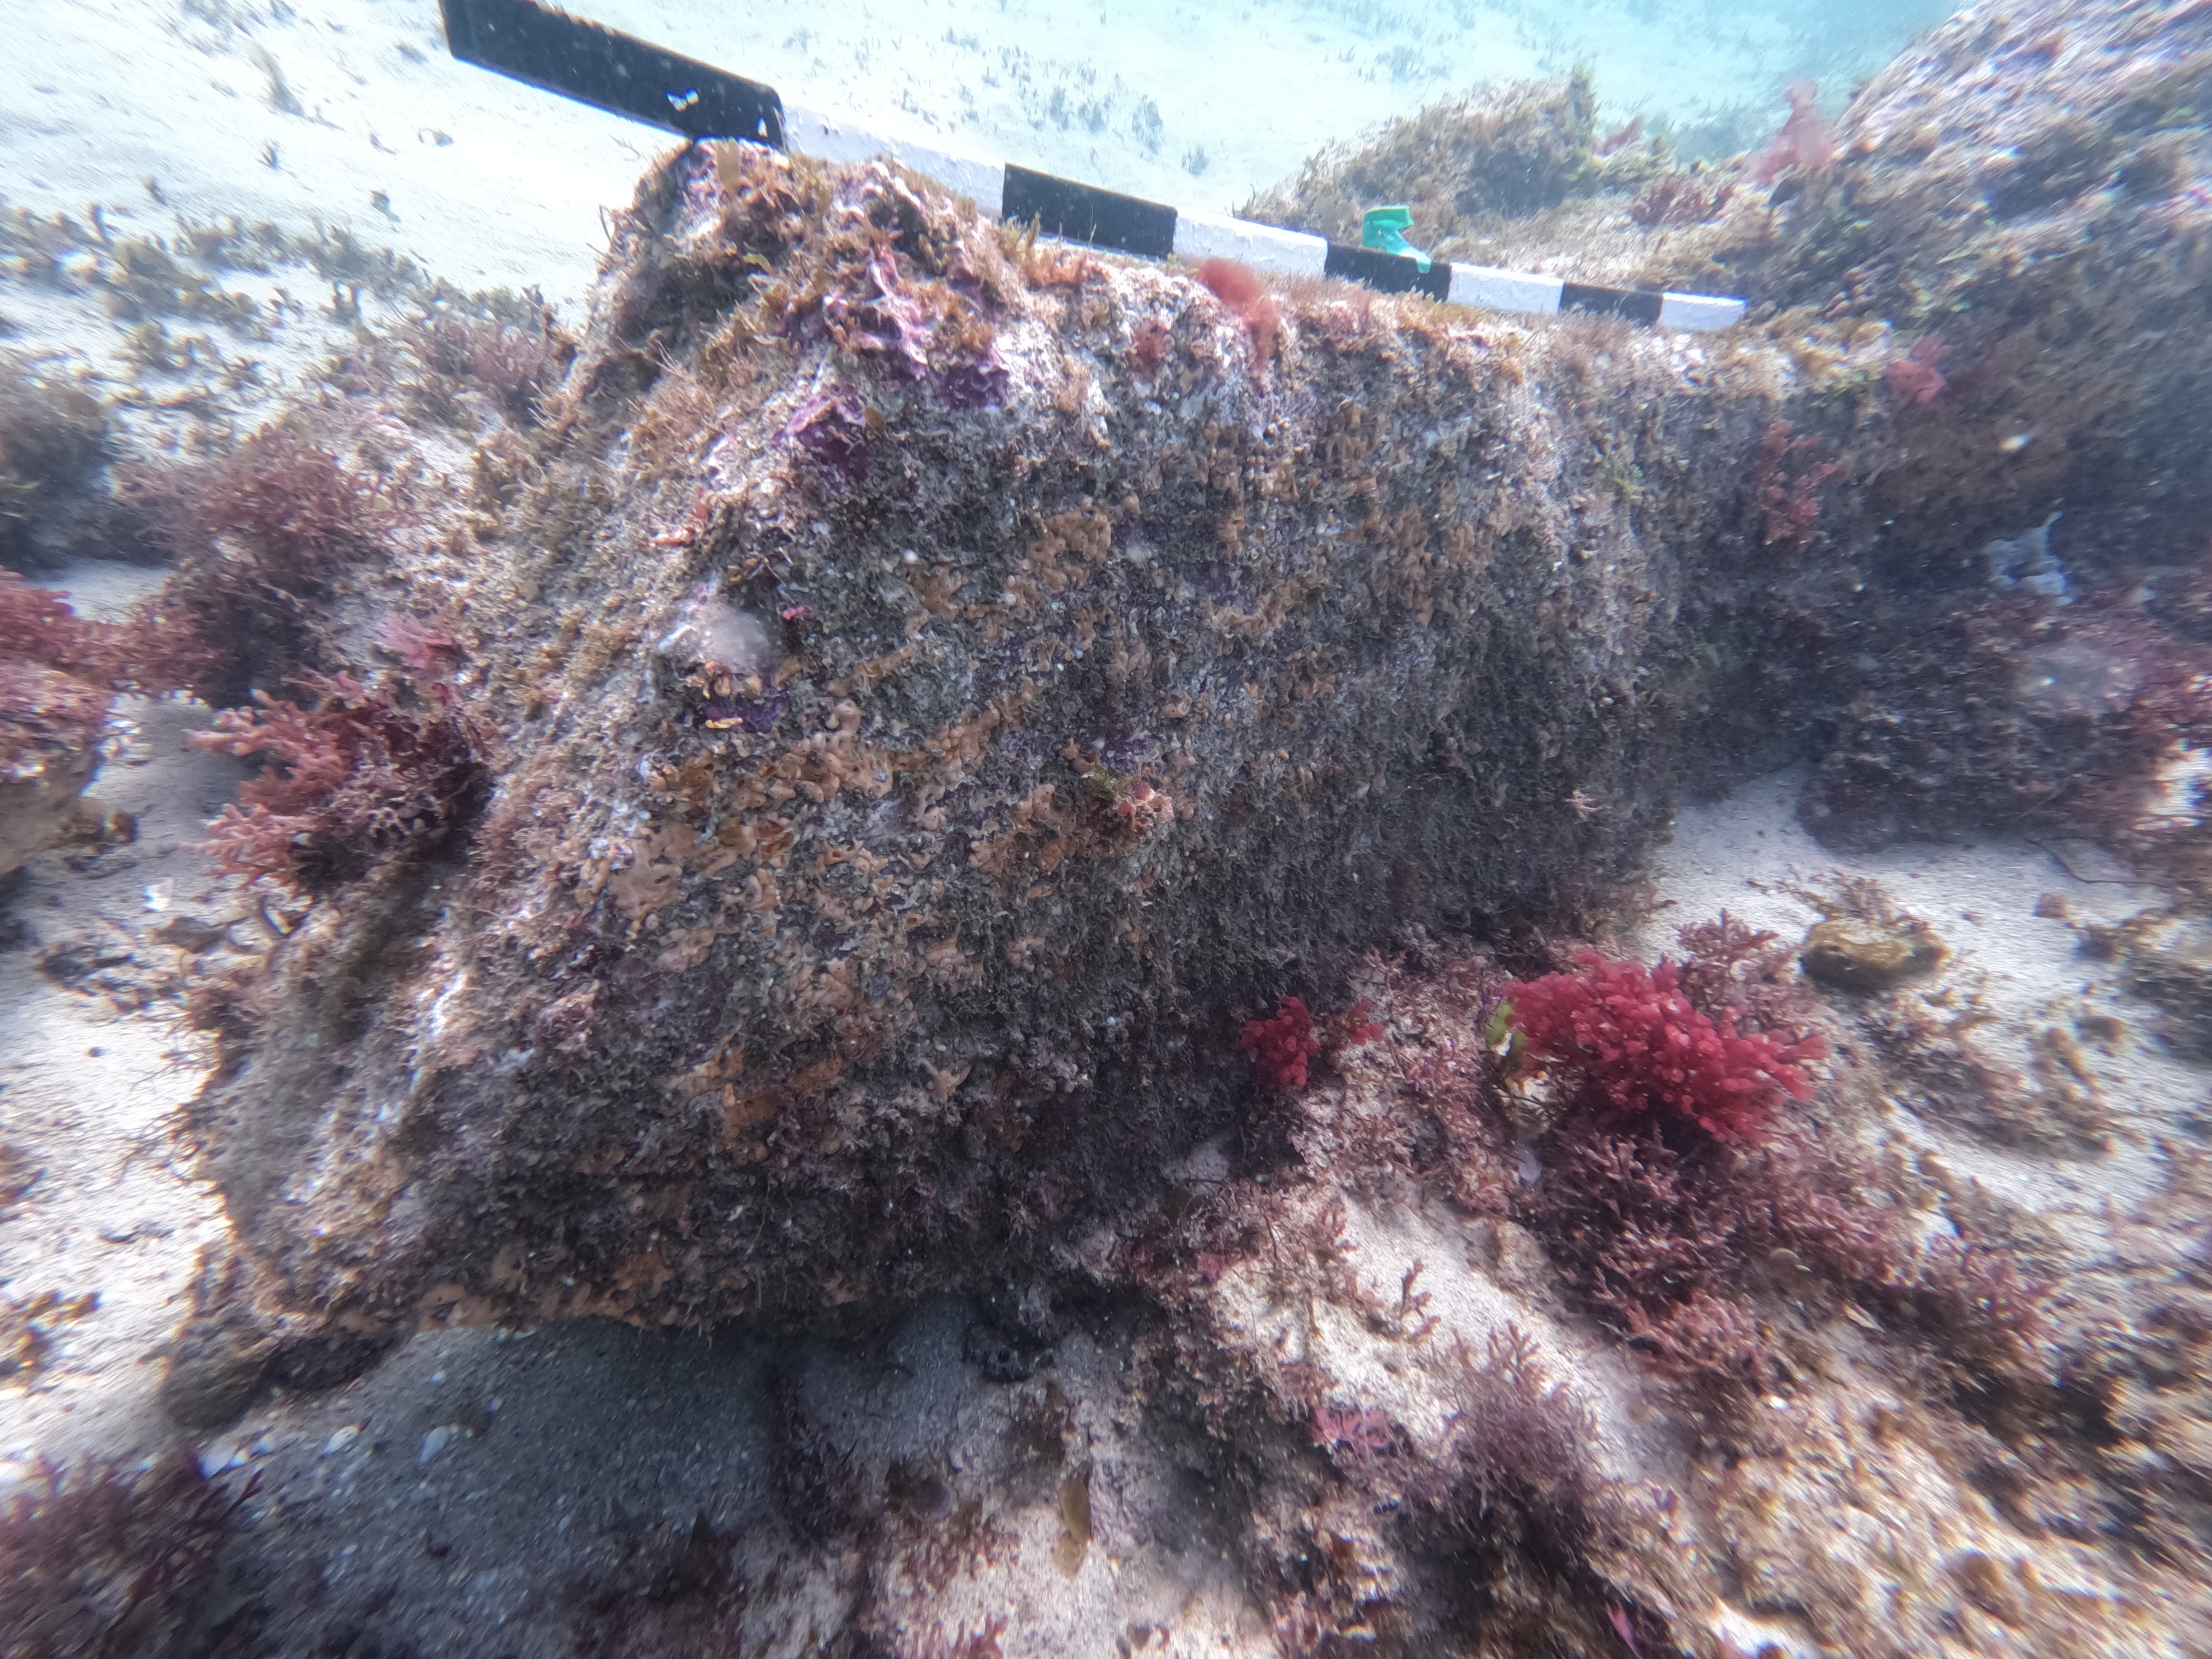

Supplement: Supplementary file 762 [file G0713829.pdf › Ocean2/G0713829.pdf]

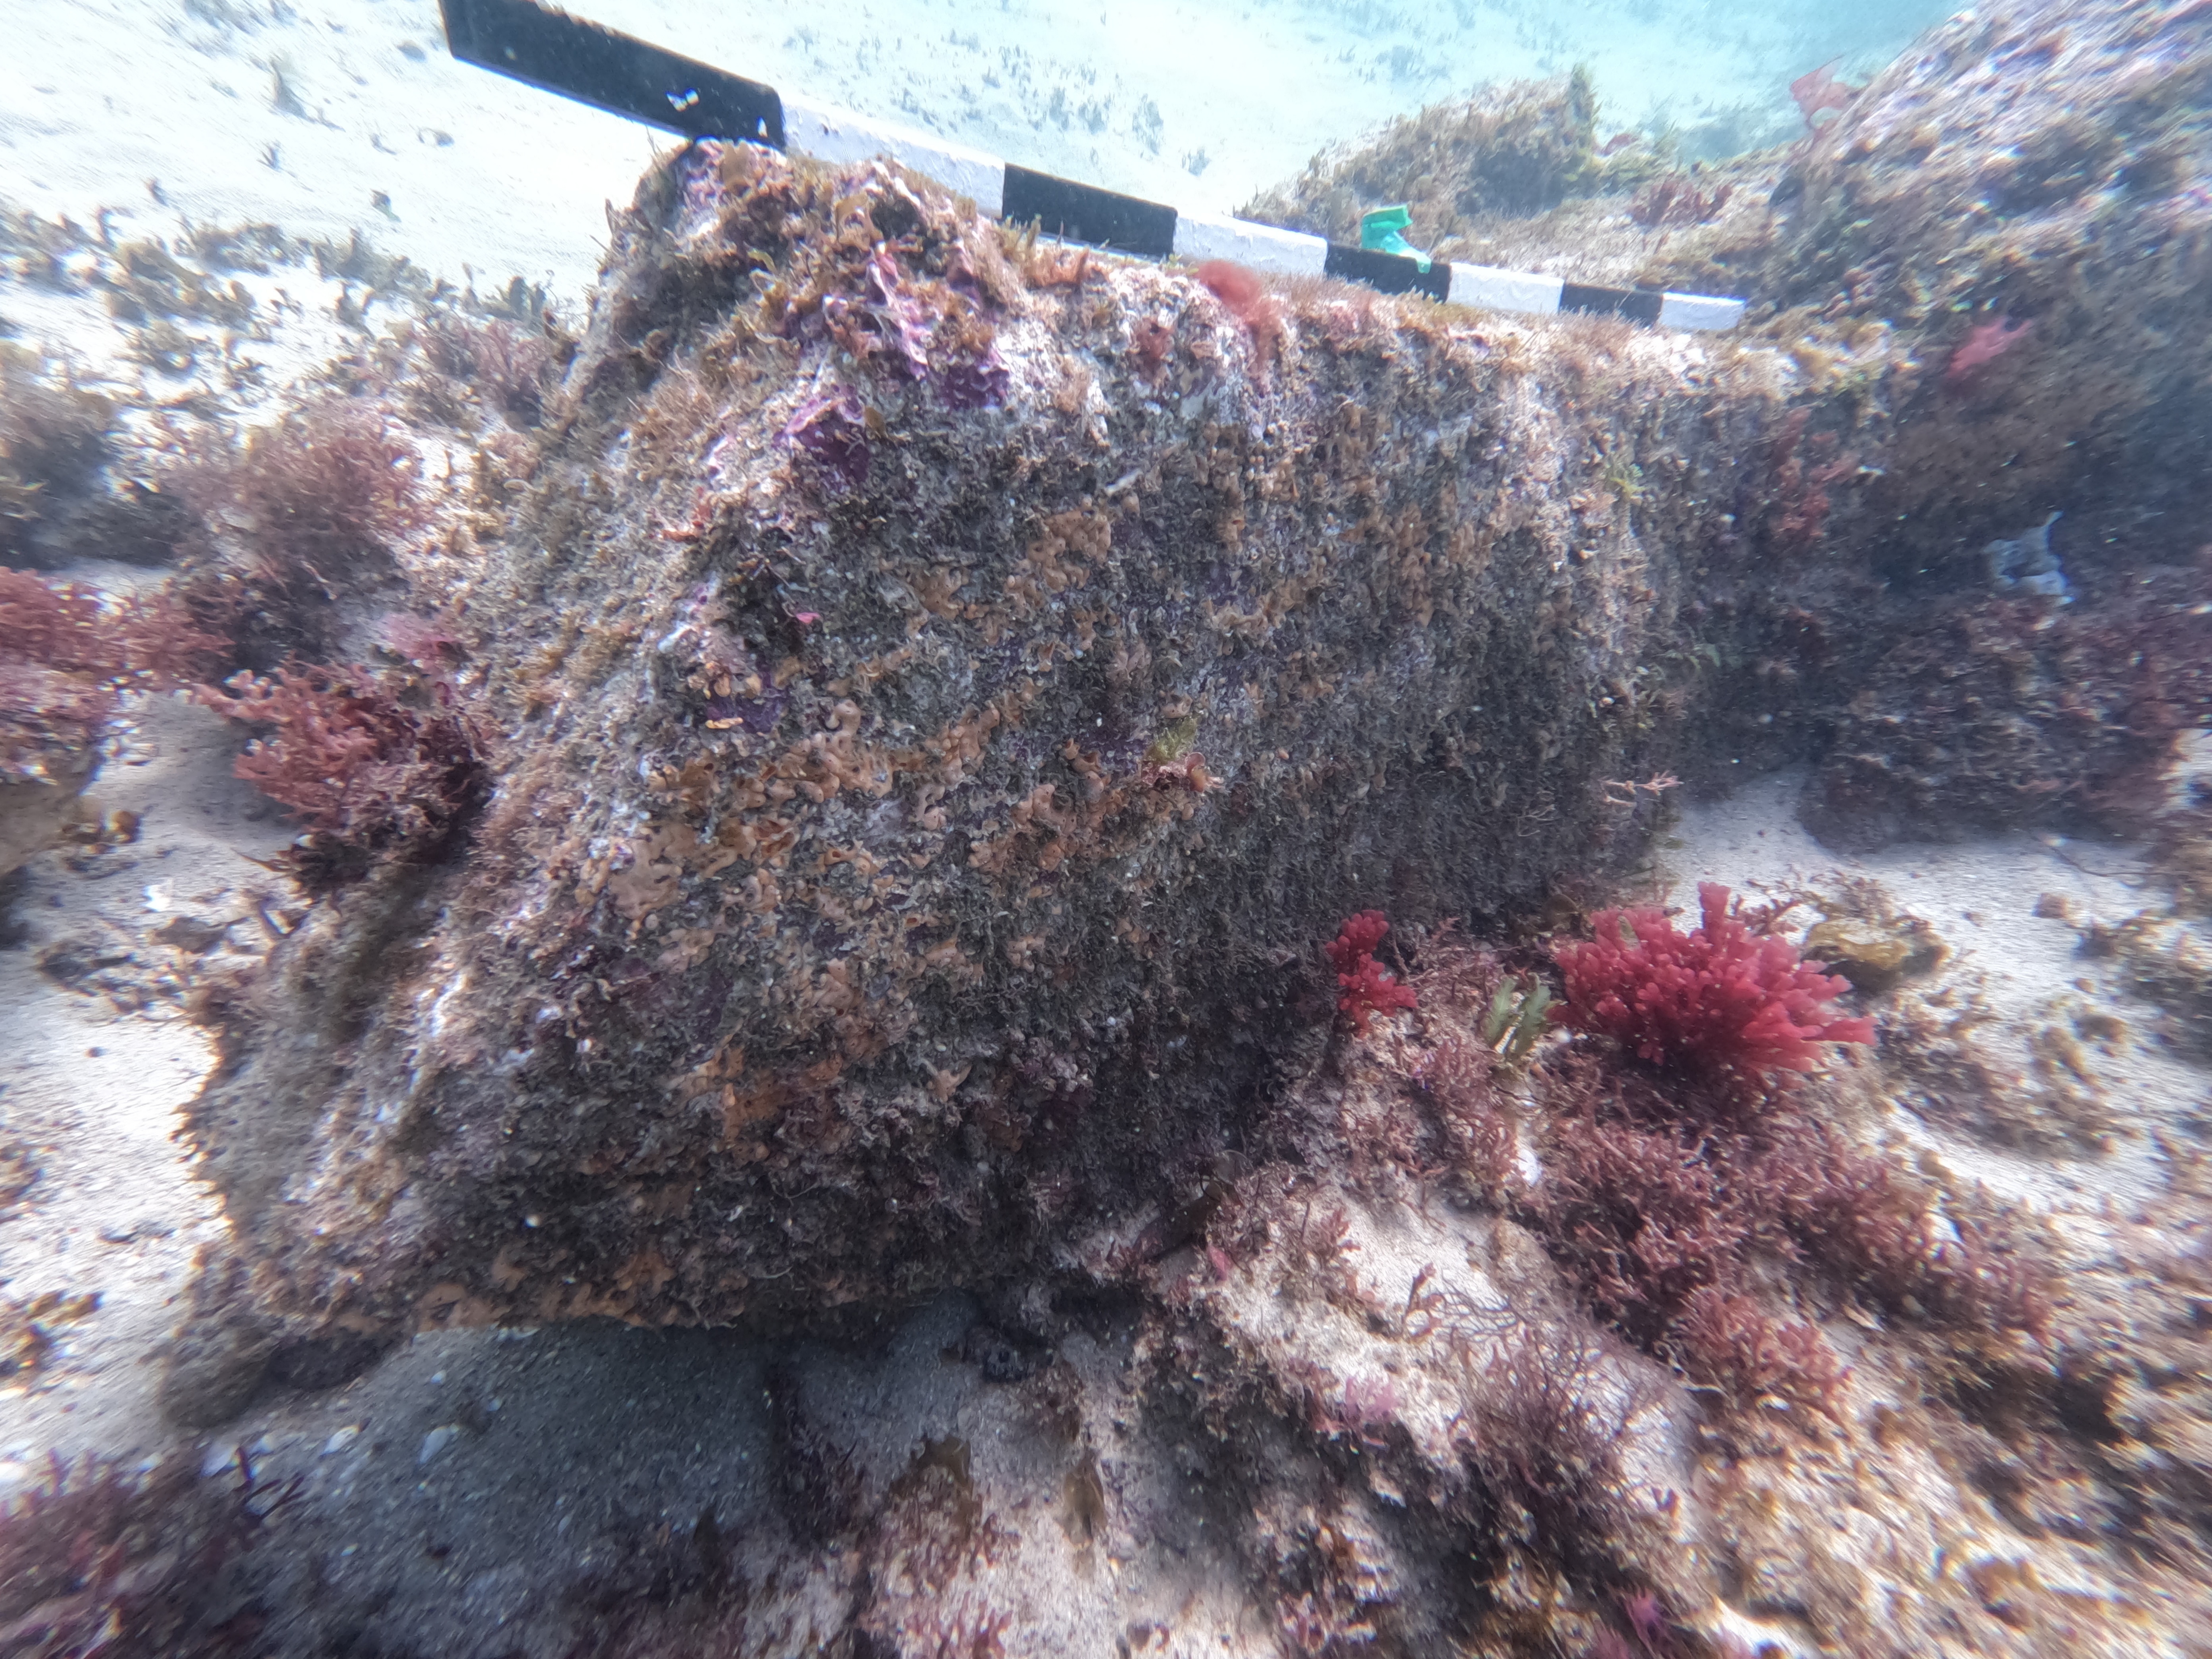

Supplement: Supplementary file 763 [file G0713830.pdf › Ocean2/G0713830.pdf]

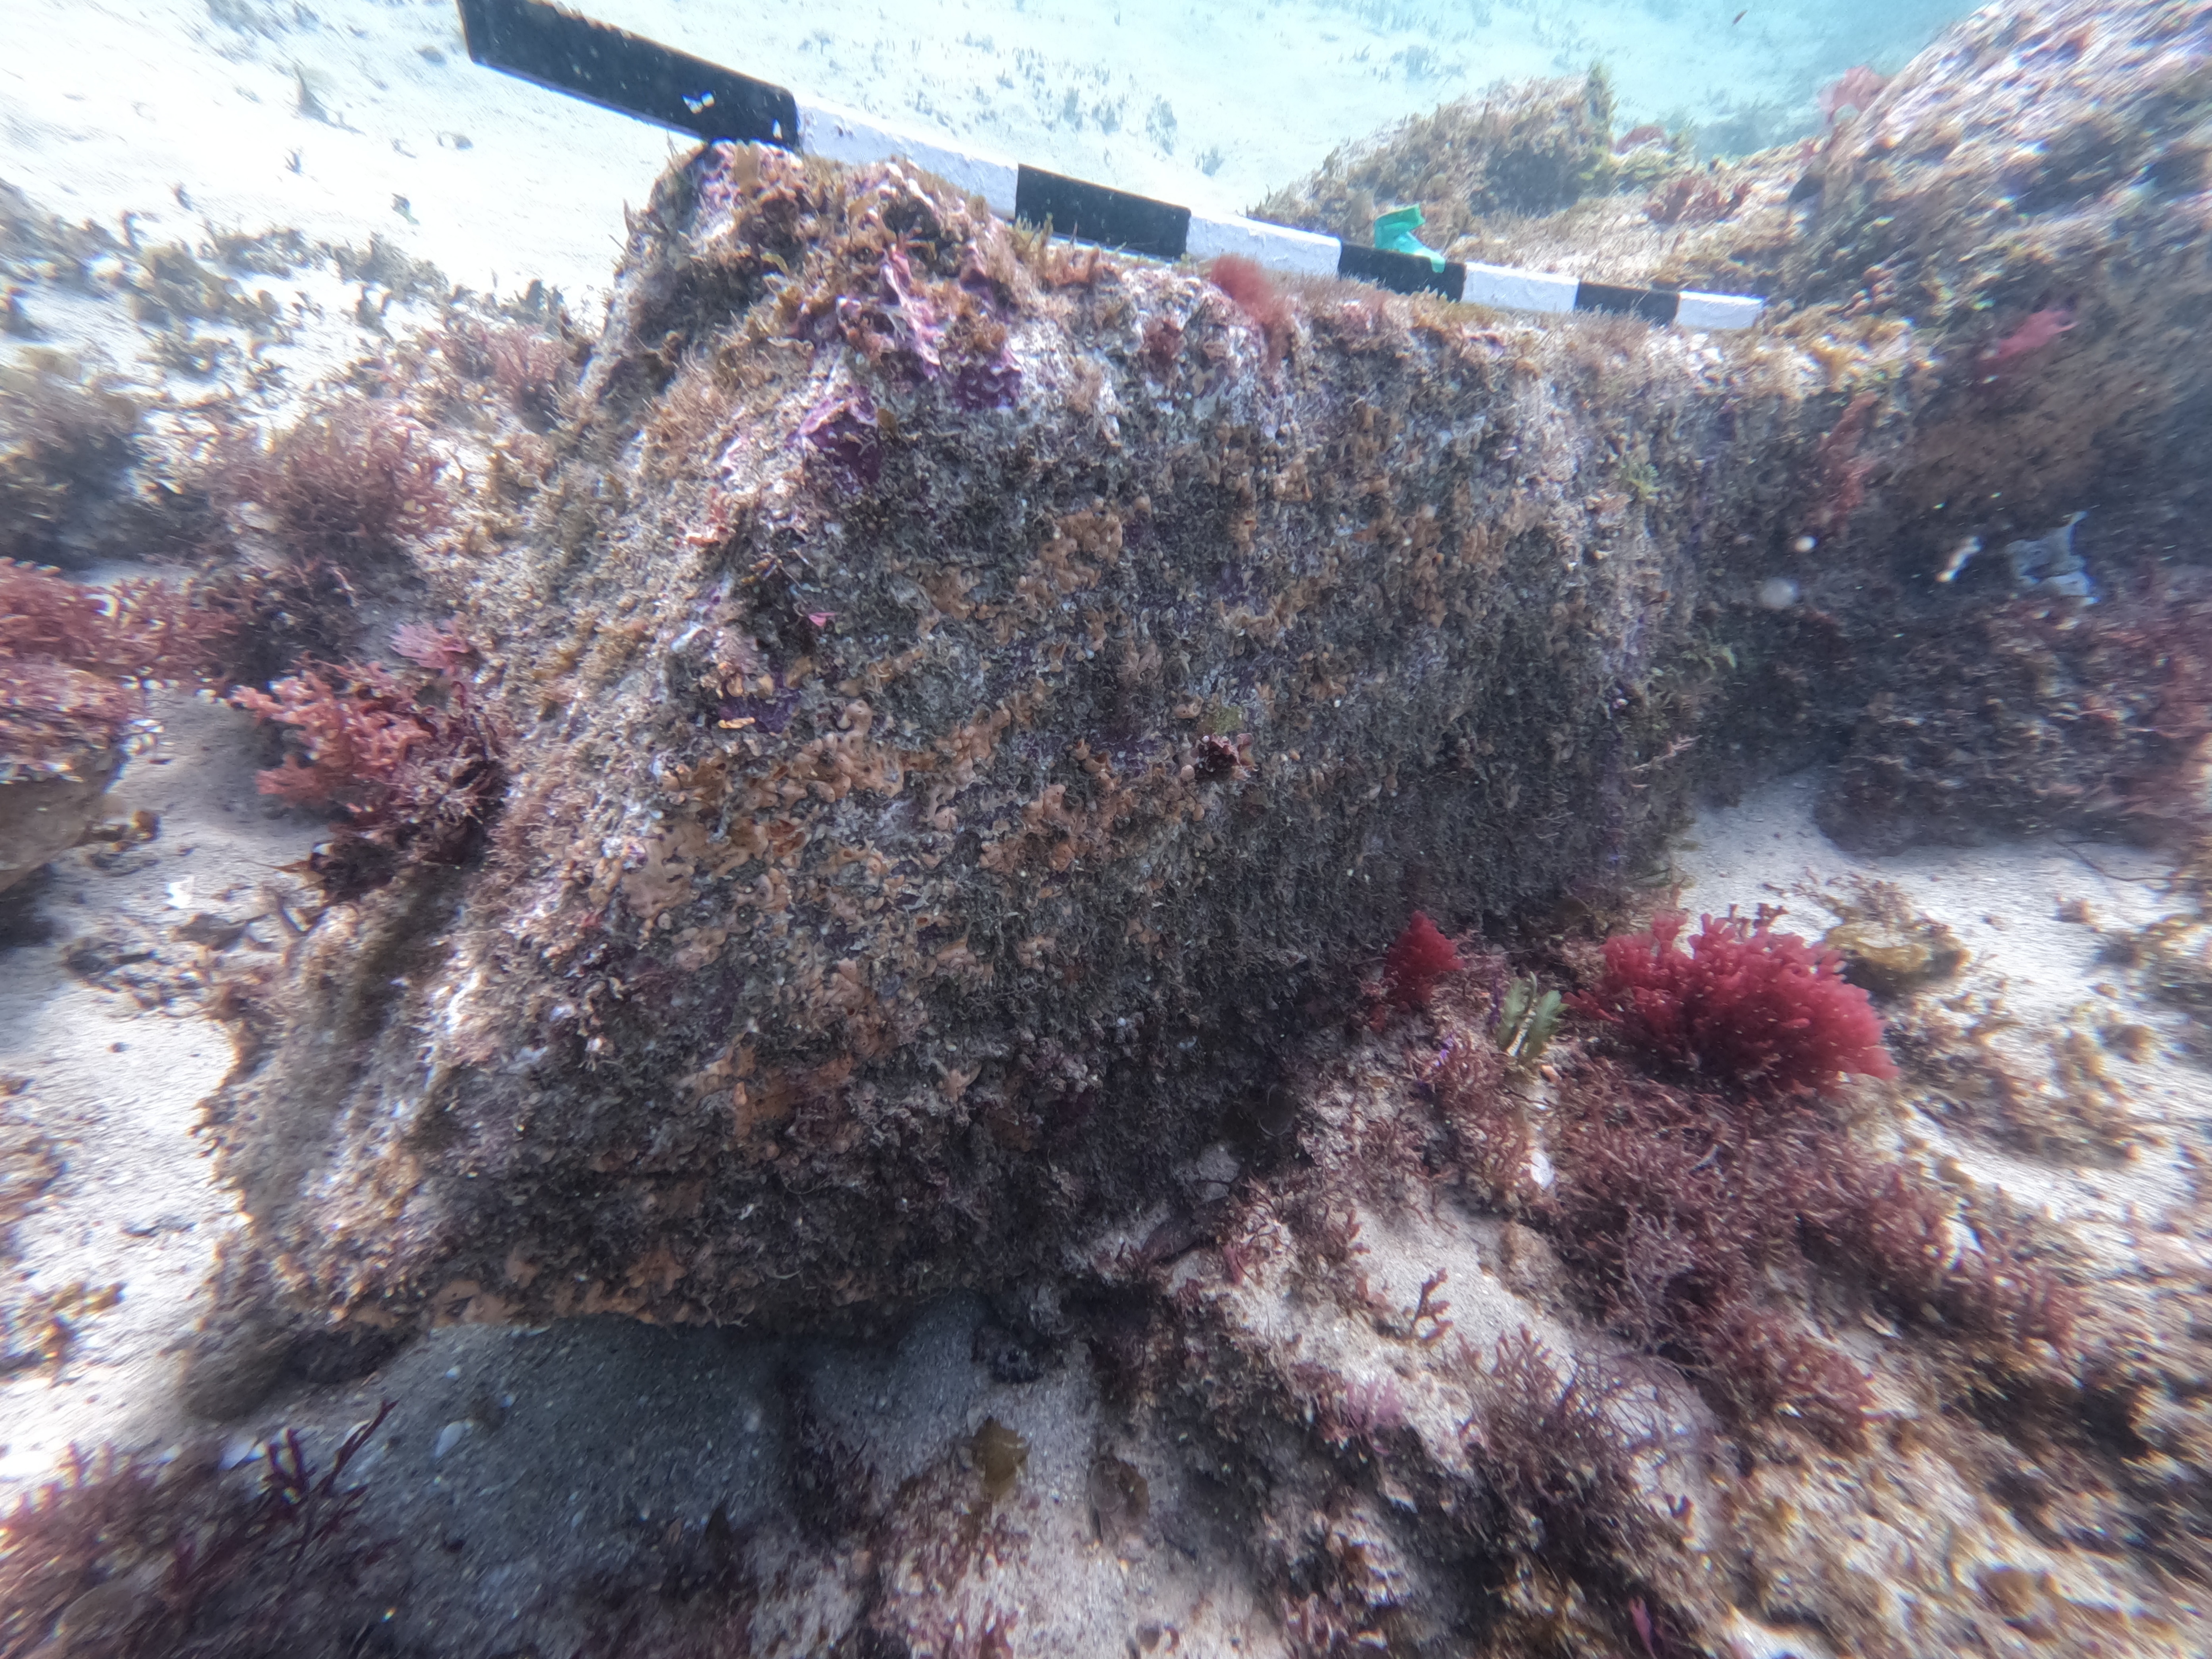

Supplement: Supplementary file 764 [file G0713831.pdf › Ocean2/G0713831.pdf]

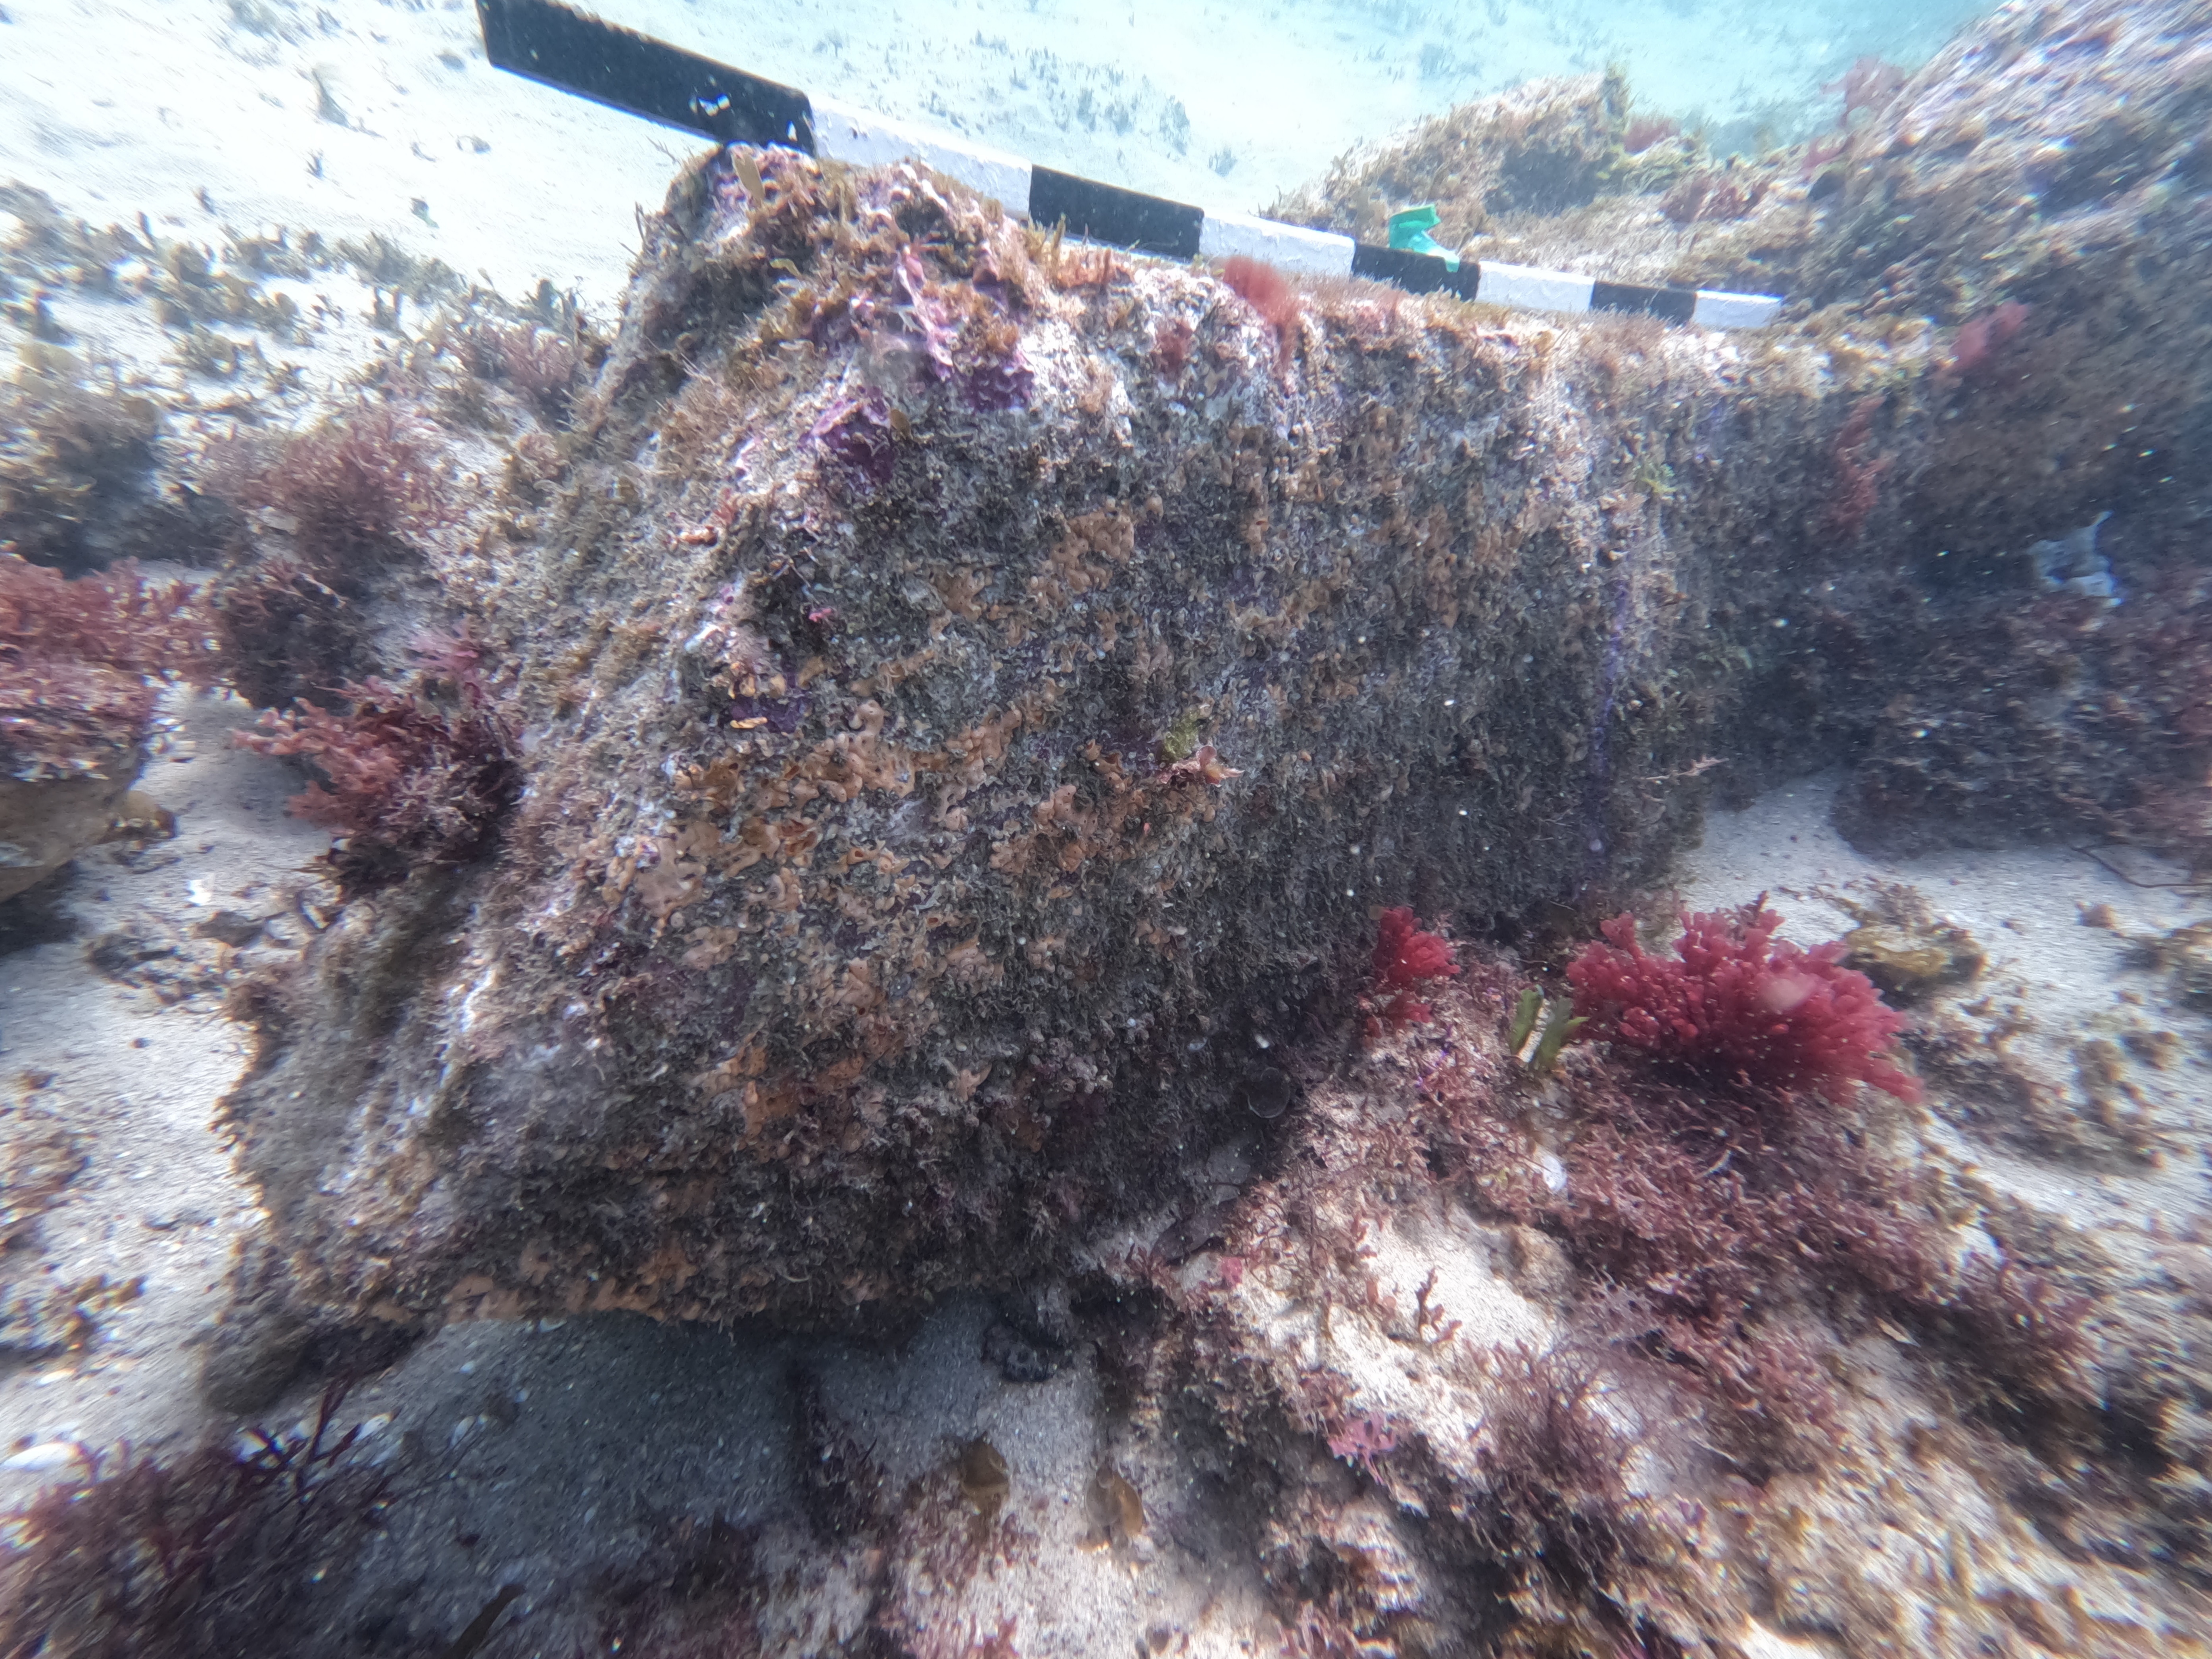

Supplement: Supplementary file 765 [file G0713832.pdf › Ocean2/G0713832.pdf]

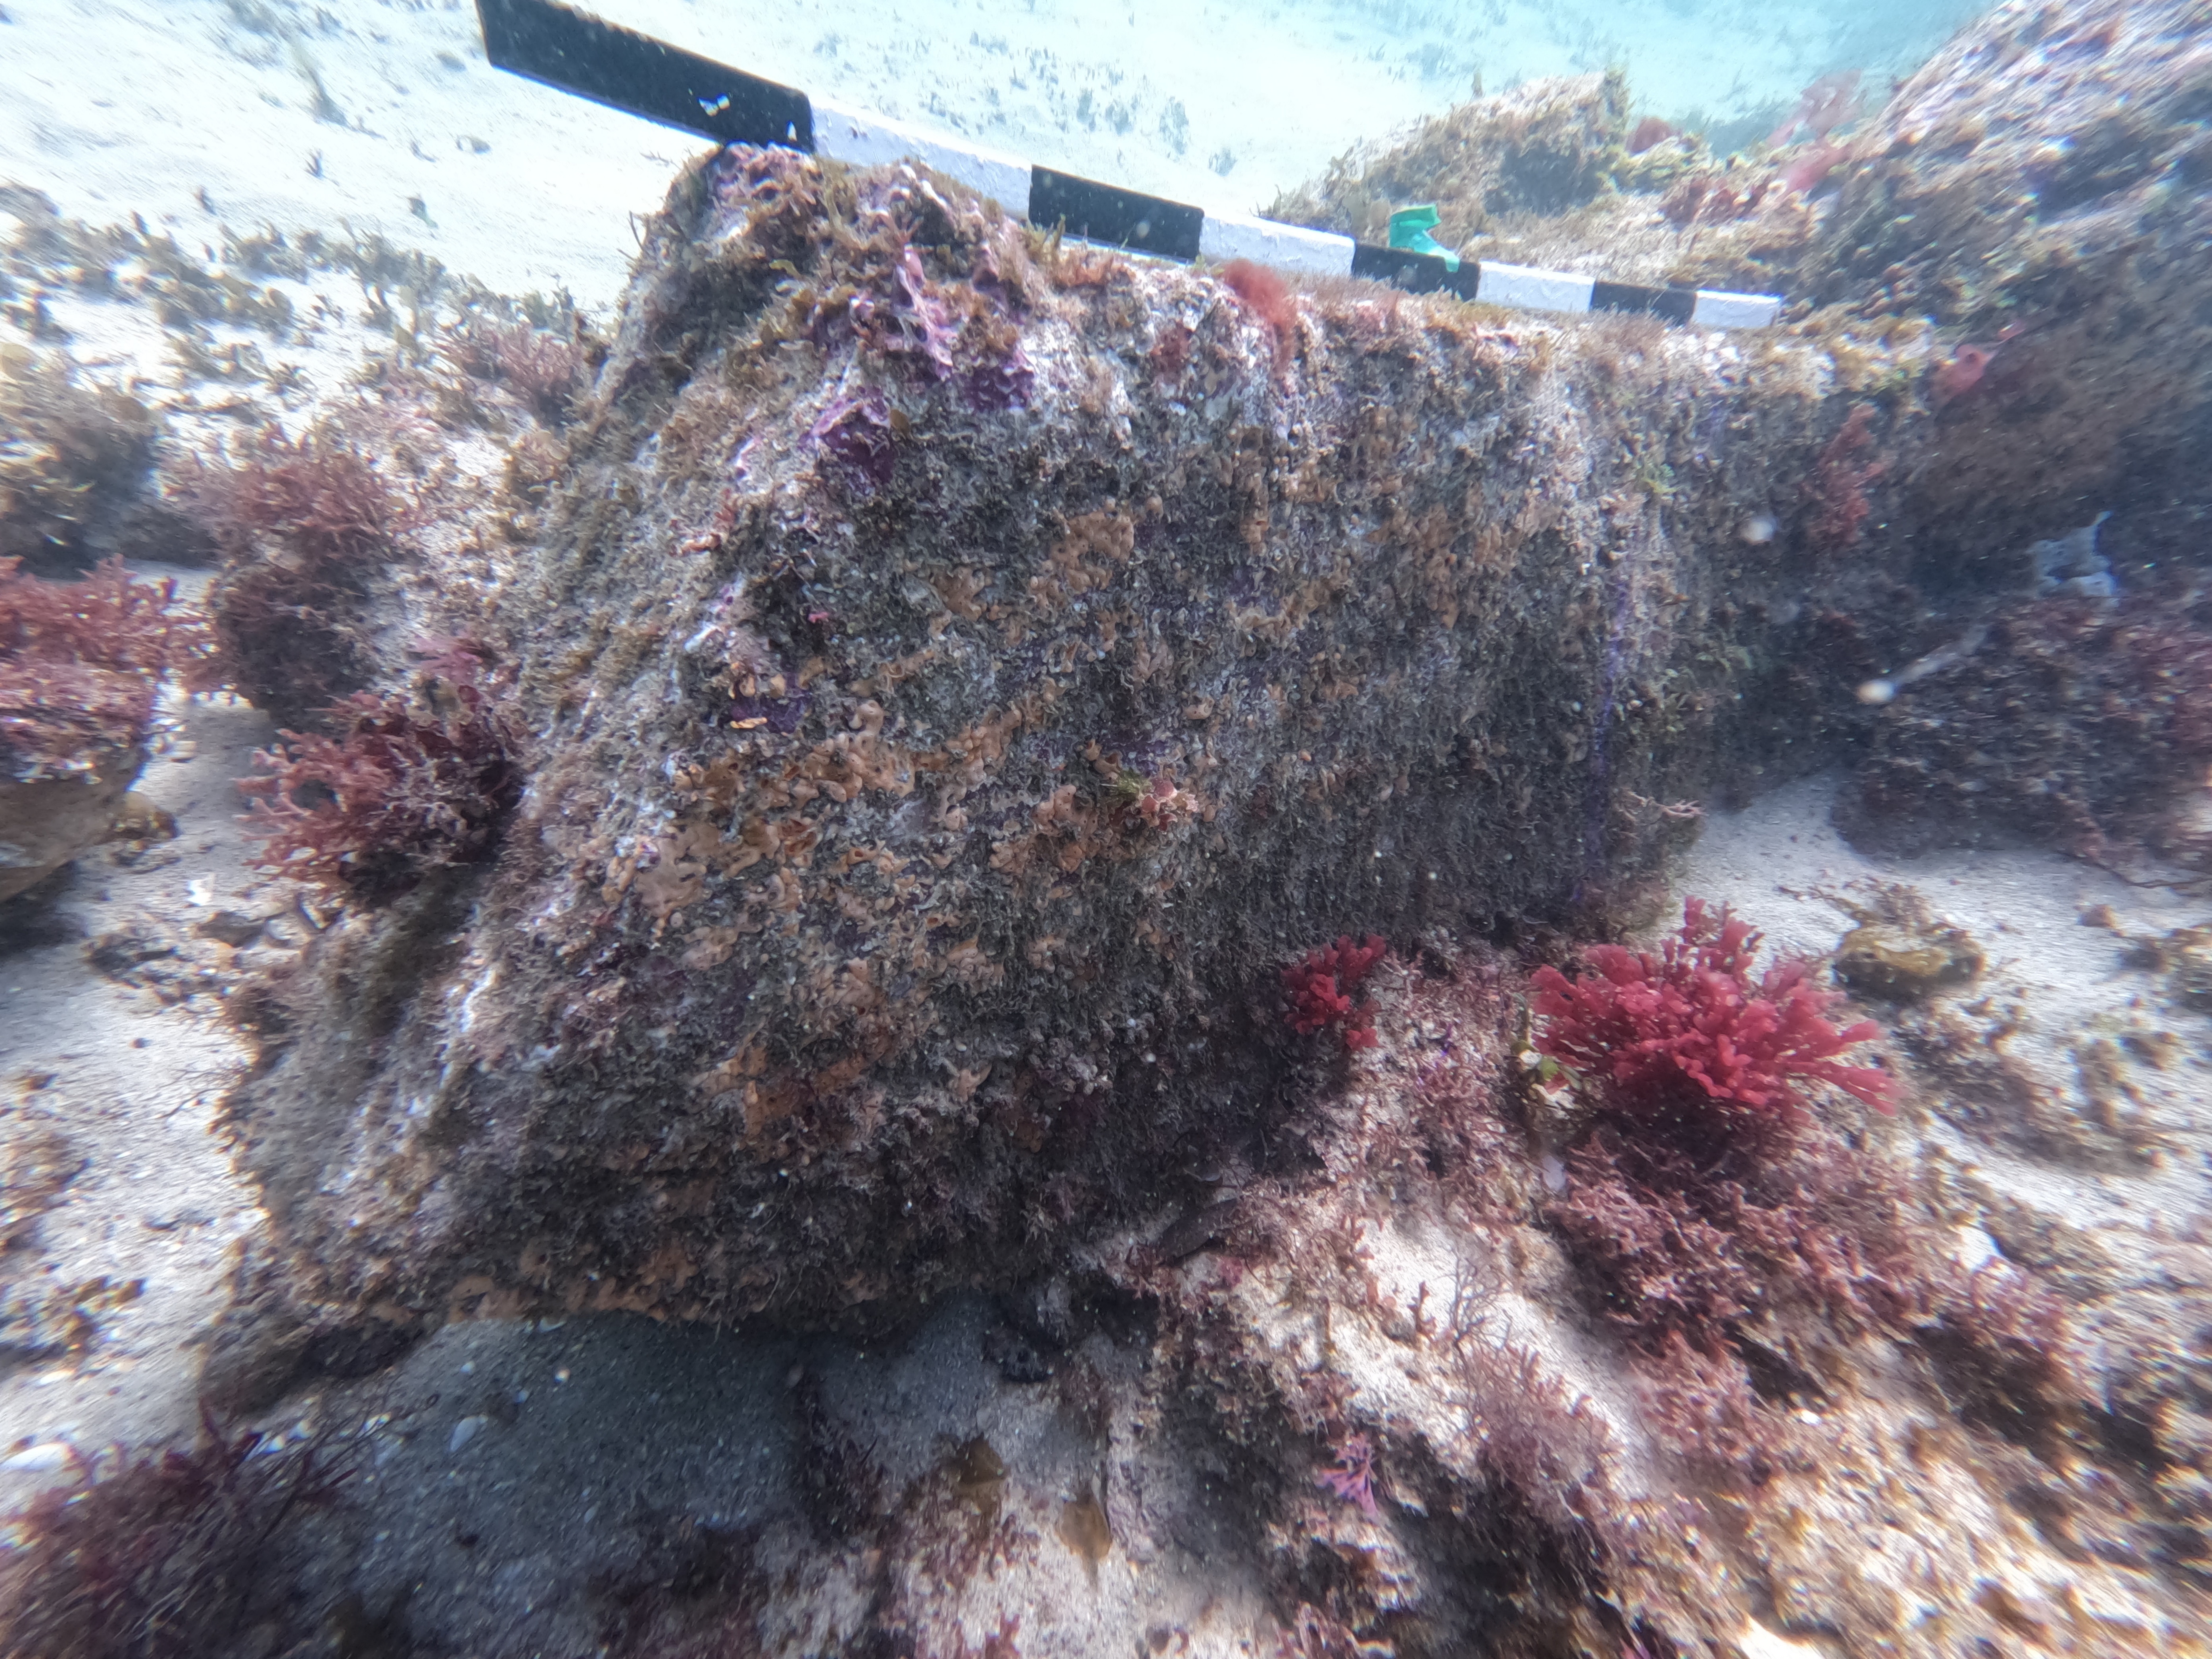

Supplement: Supplementary file 766 [file G0713833.pdf › Ocean2/G0713833.pdf]

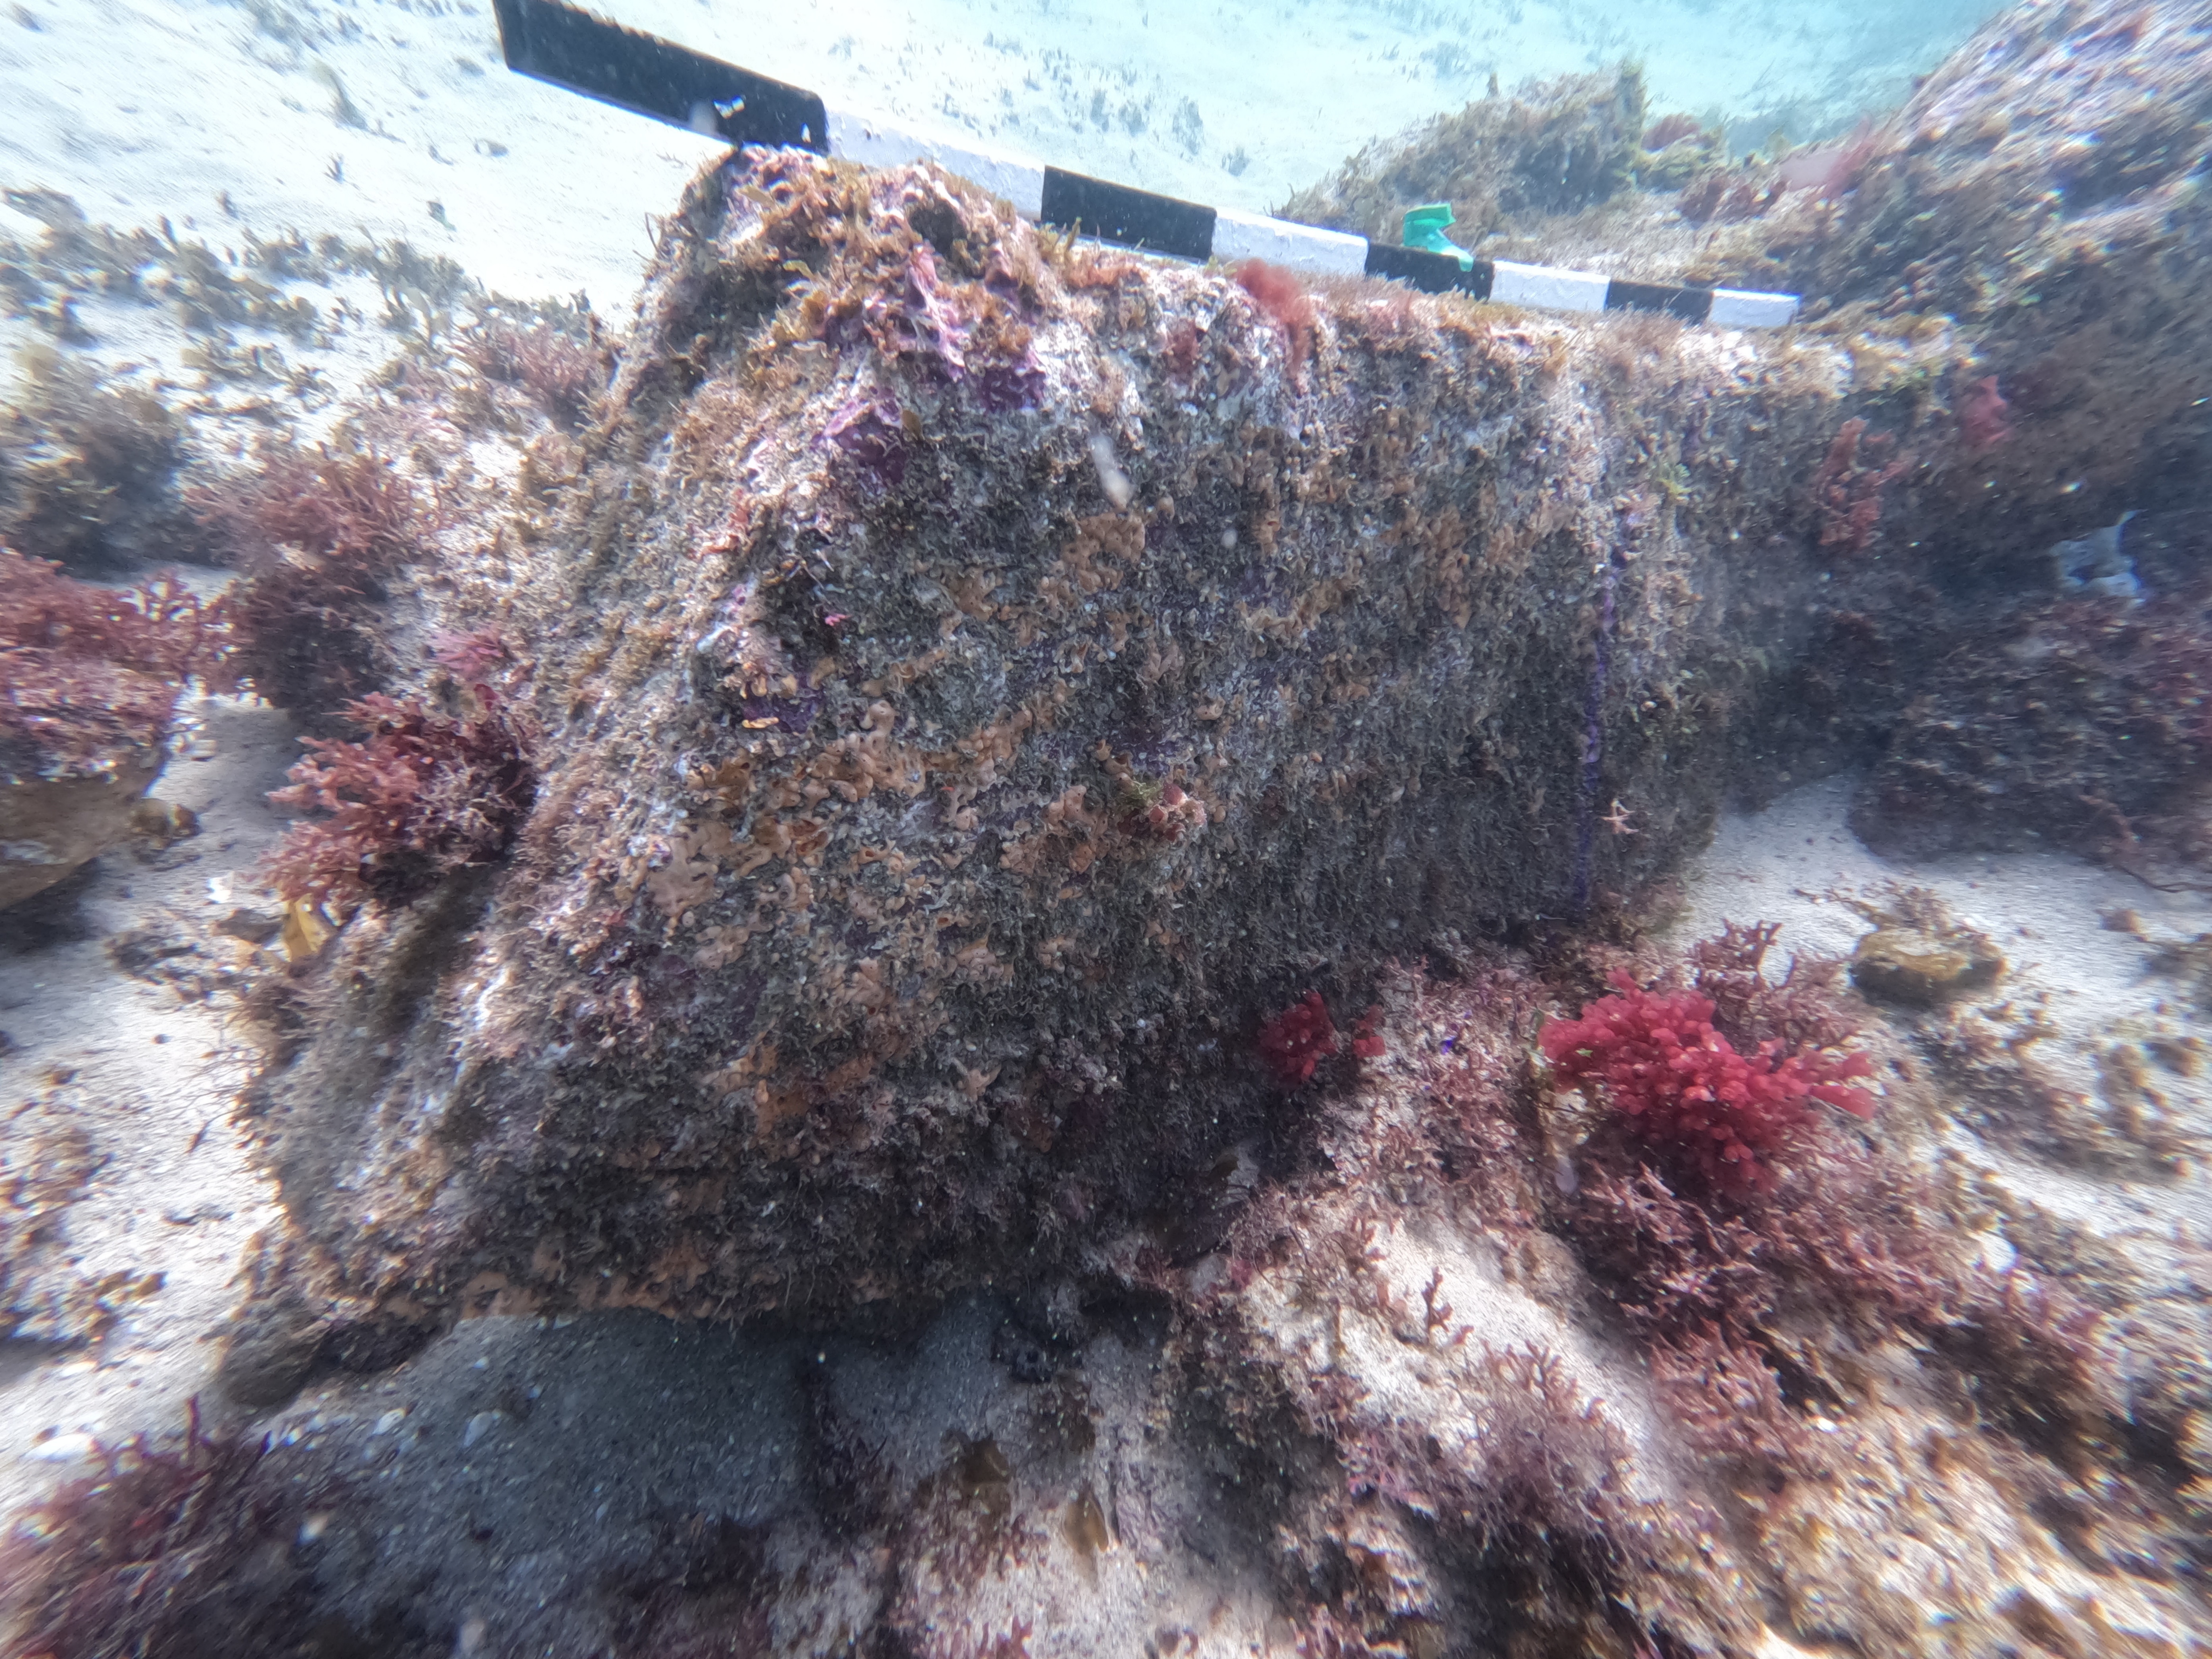

Supplement: Supplementary file 767 [file G0713834.pdf › Ocean2/G0713834.pdf]

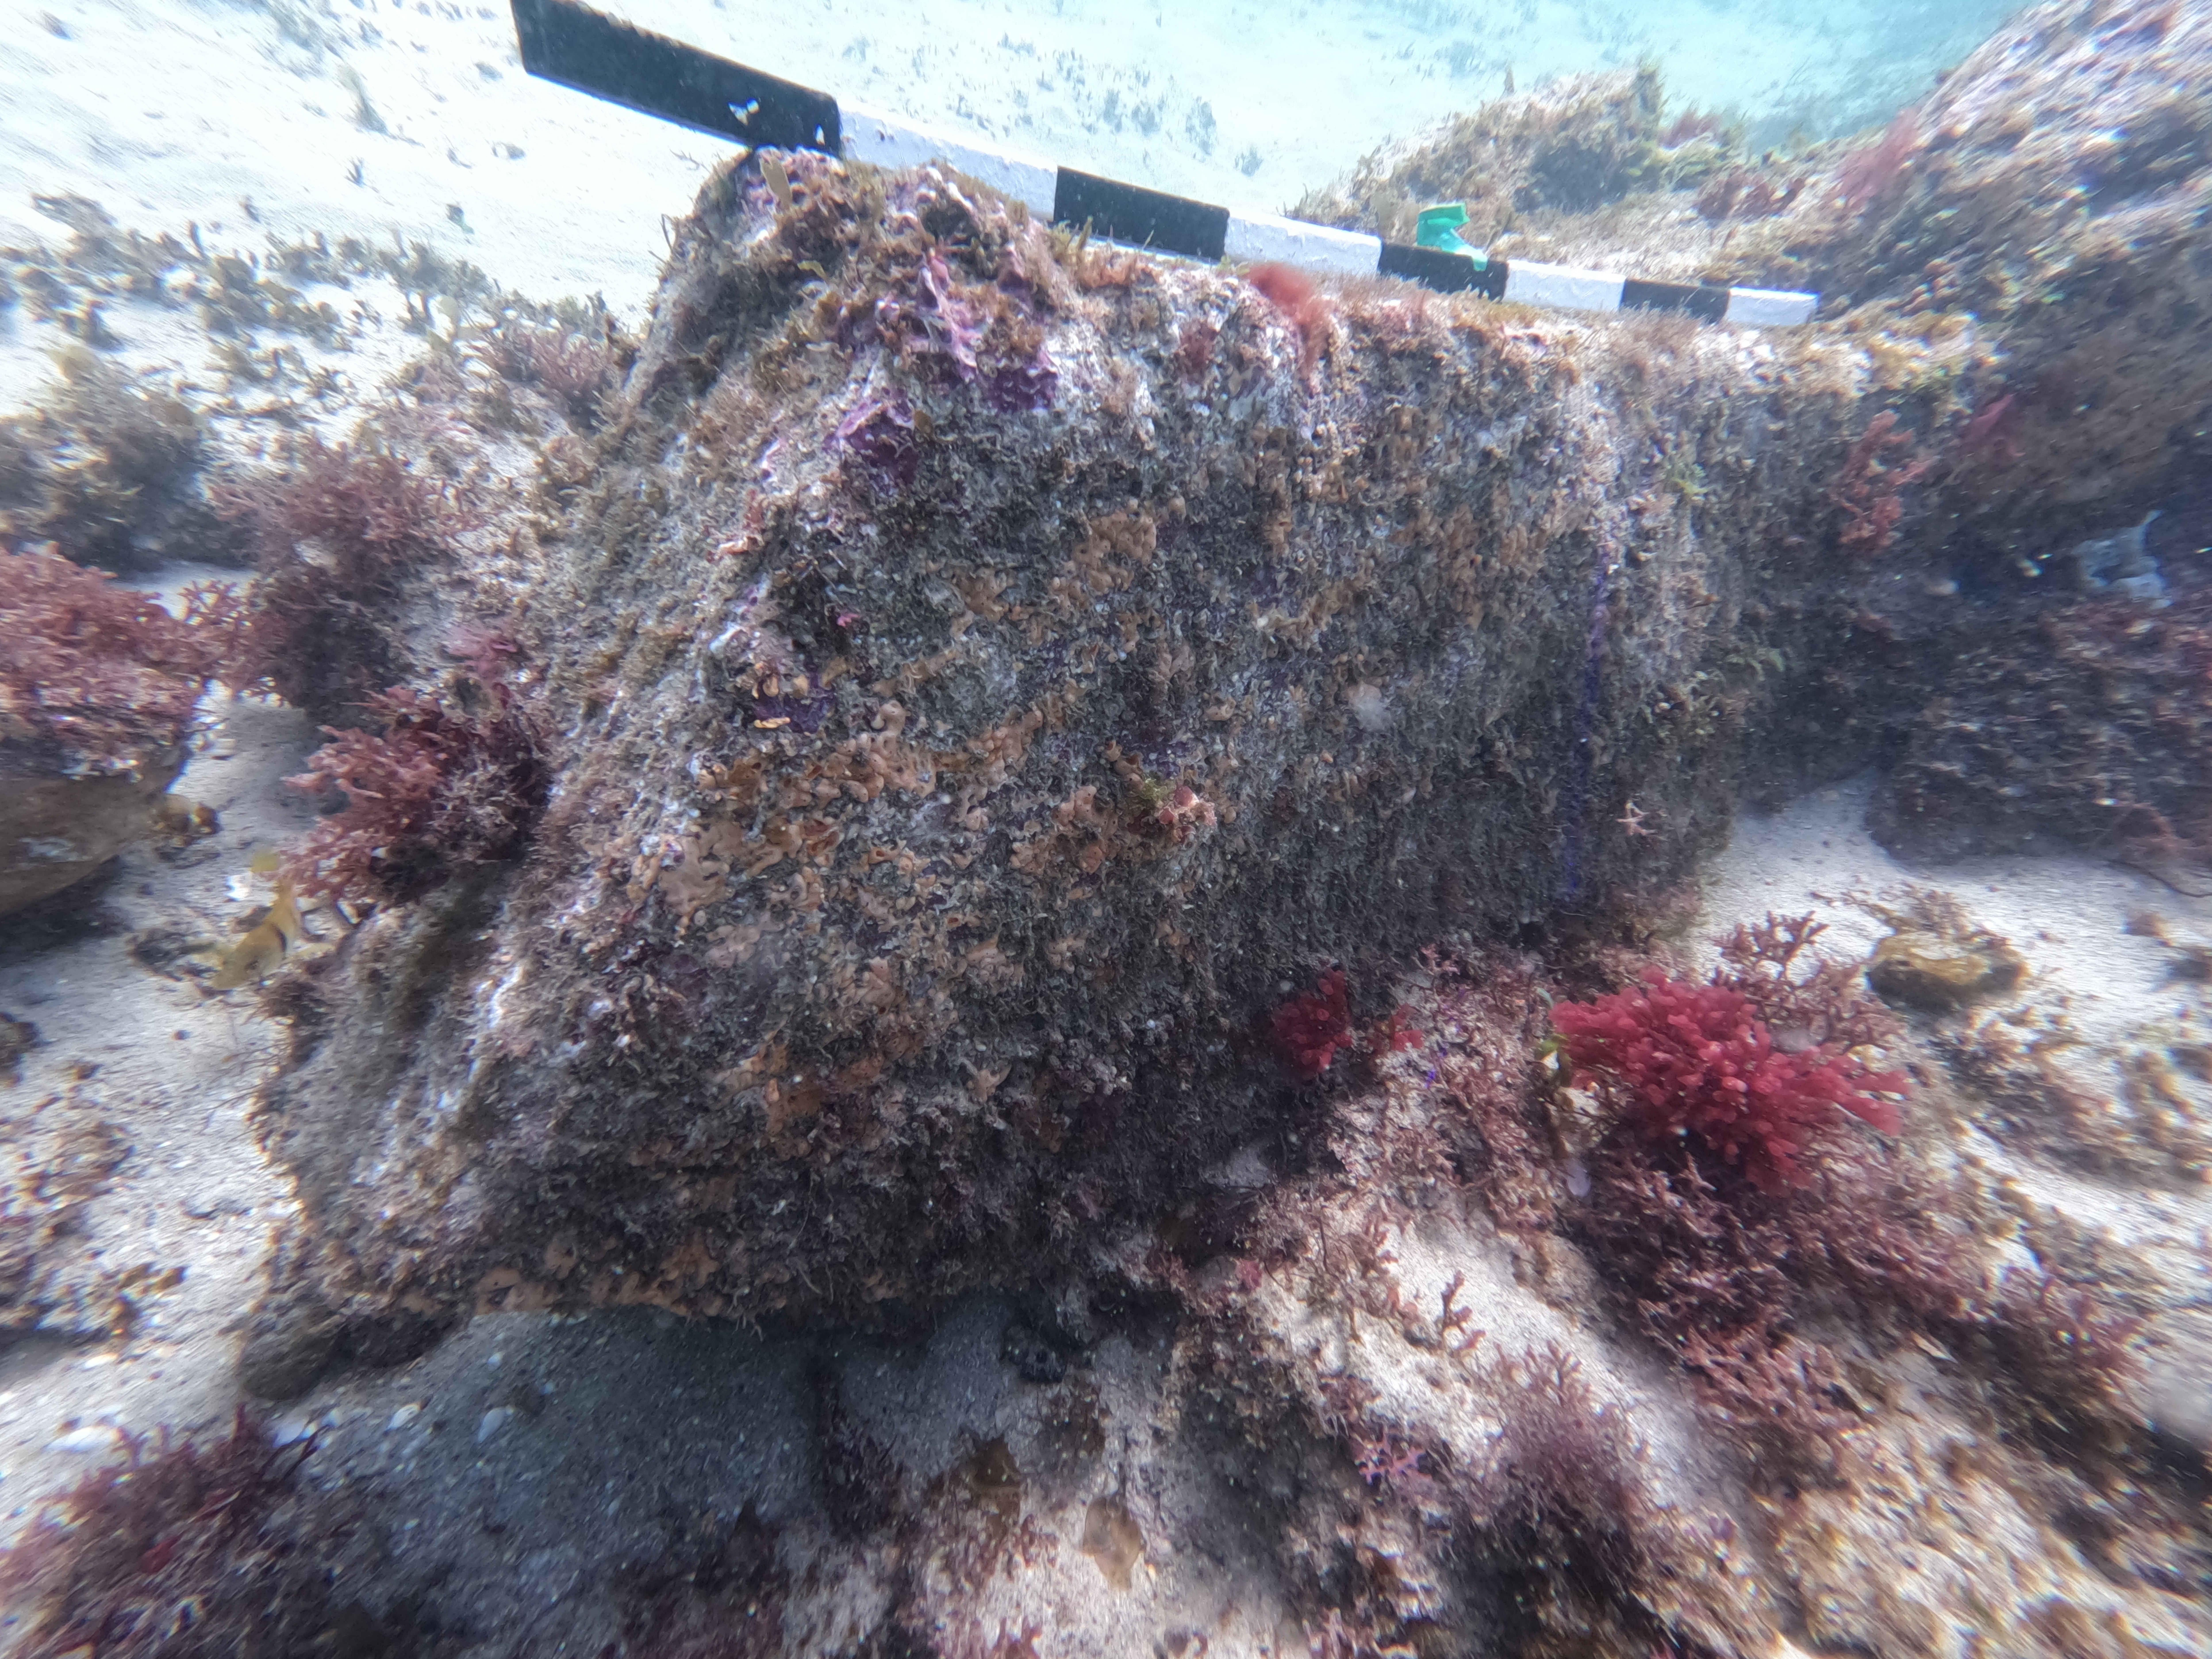

Supplement: Supplementary file 768 [file G0713835.pdf › Ocean2/G0713835.pdf]

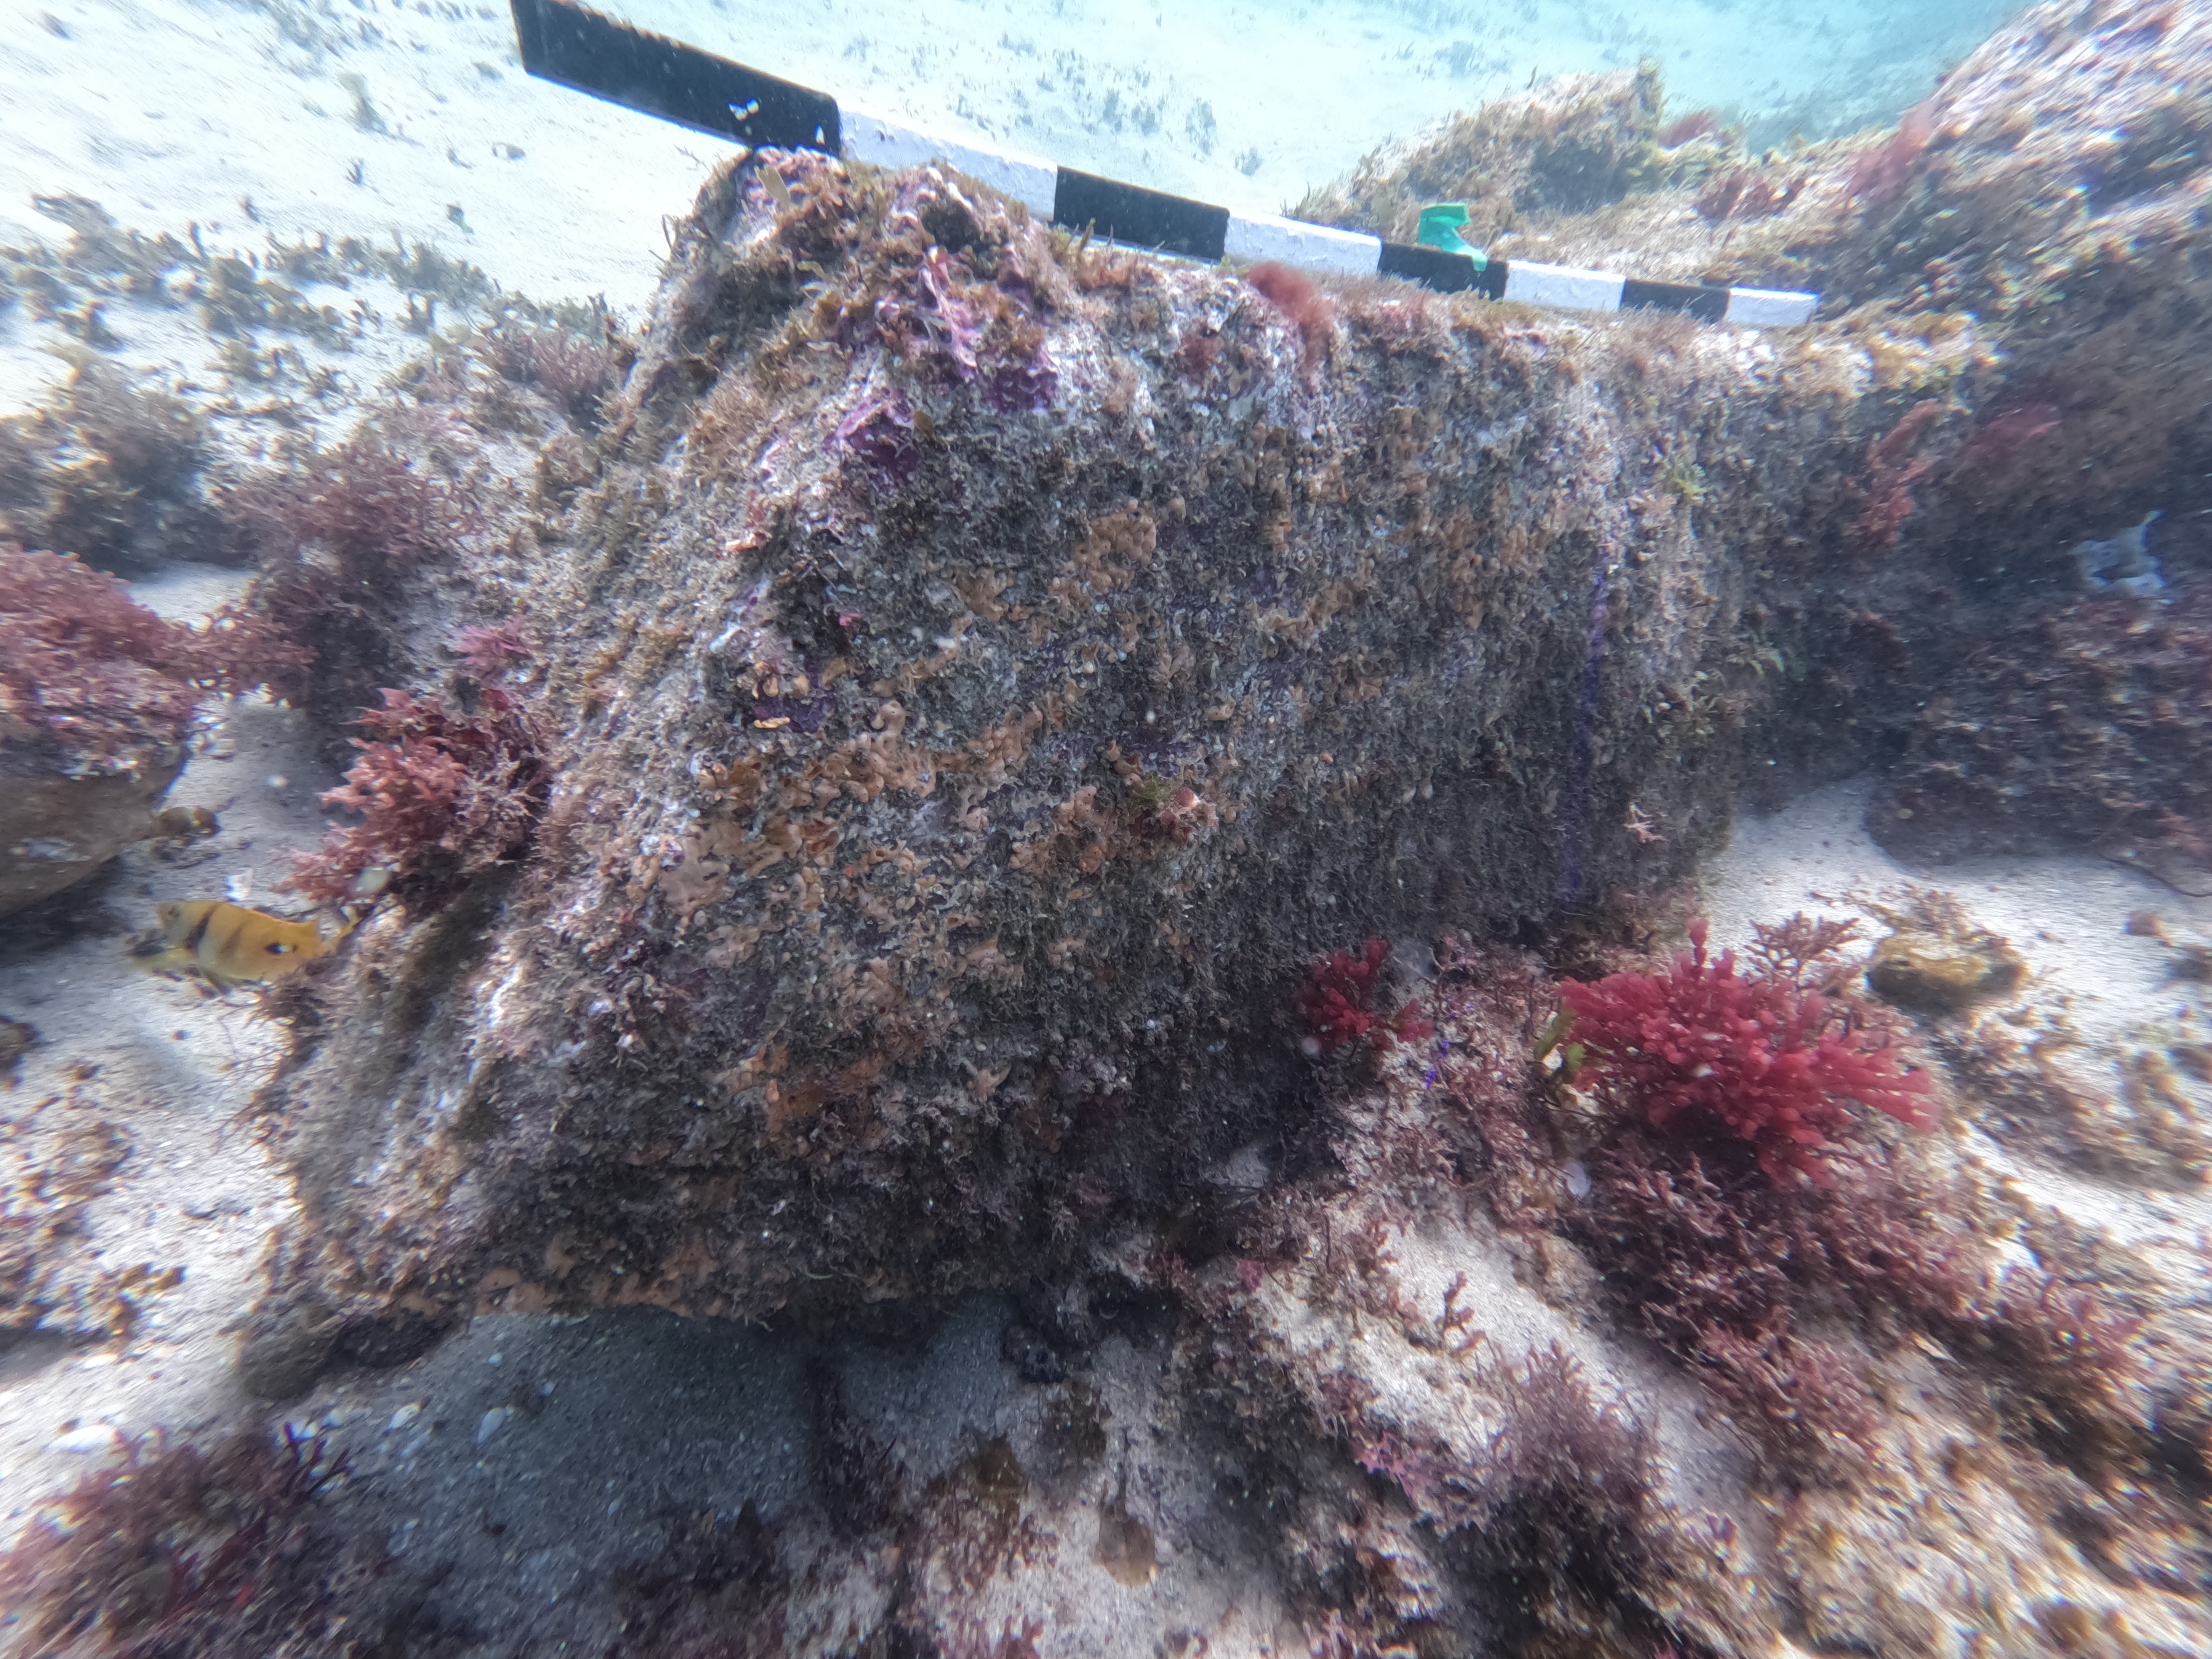

Supplement: Supplementary file 769 [file G0713836.pdf › Ocean2/G0713836.pdf]

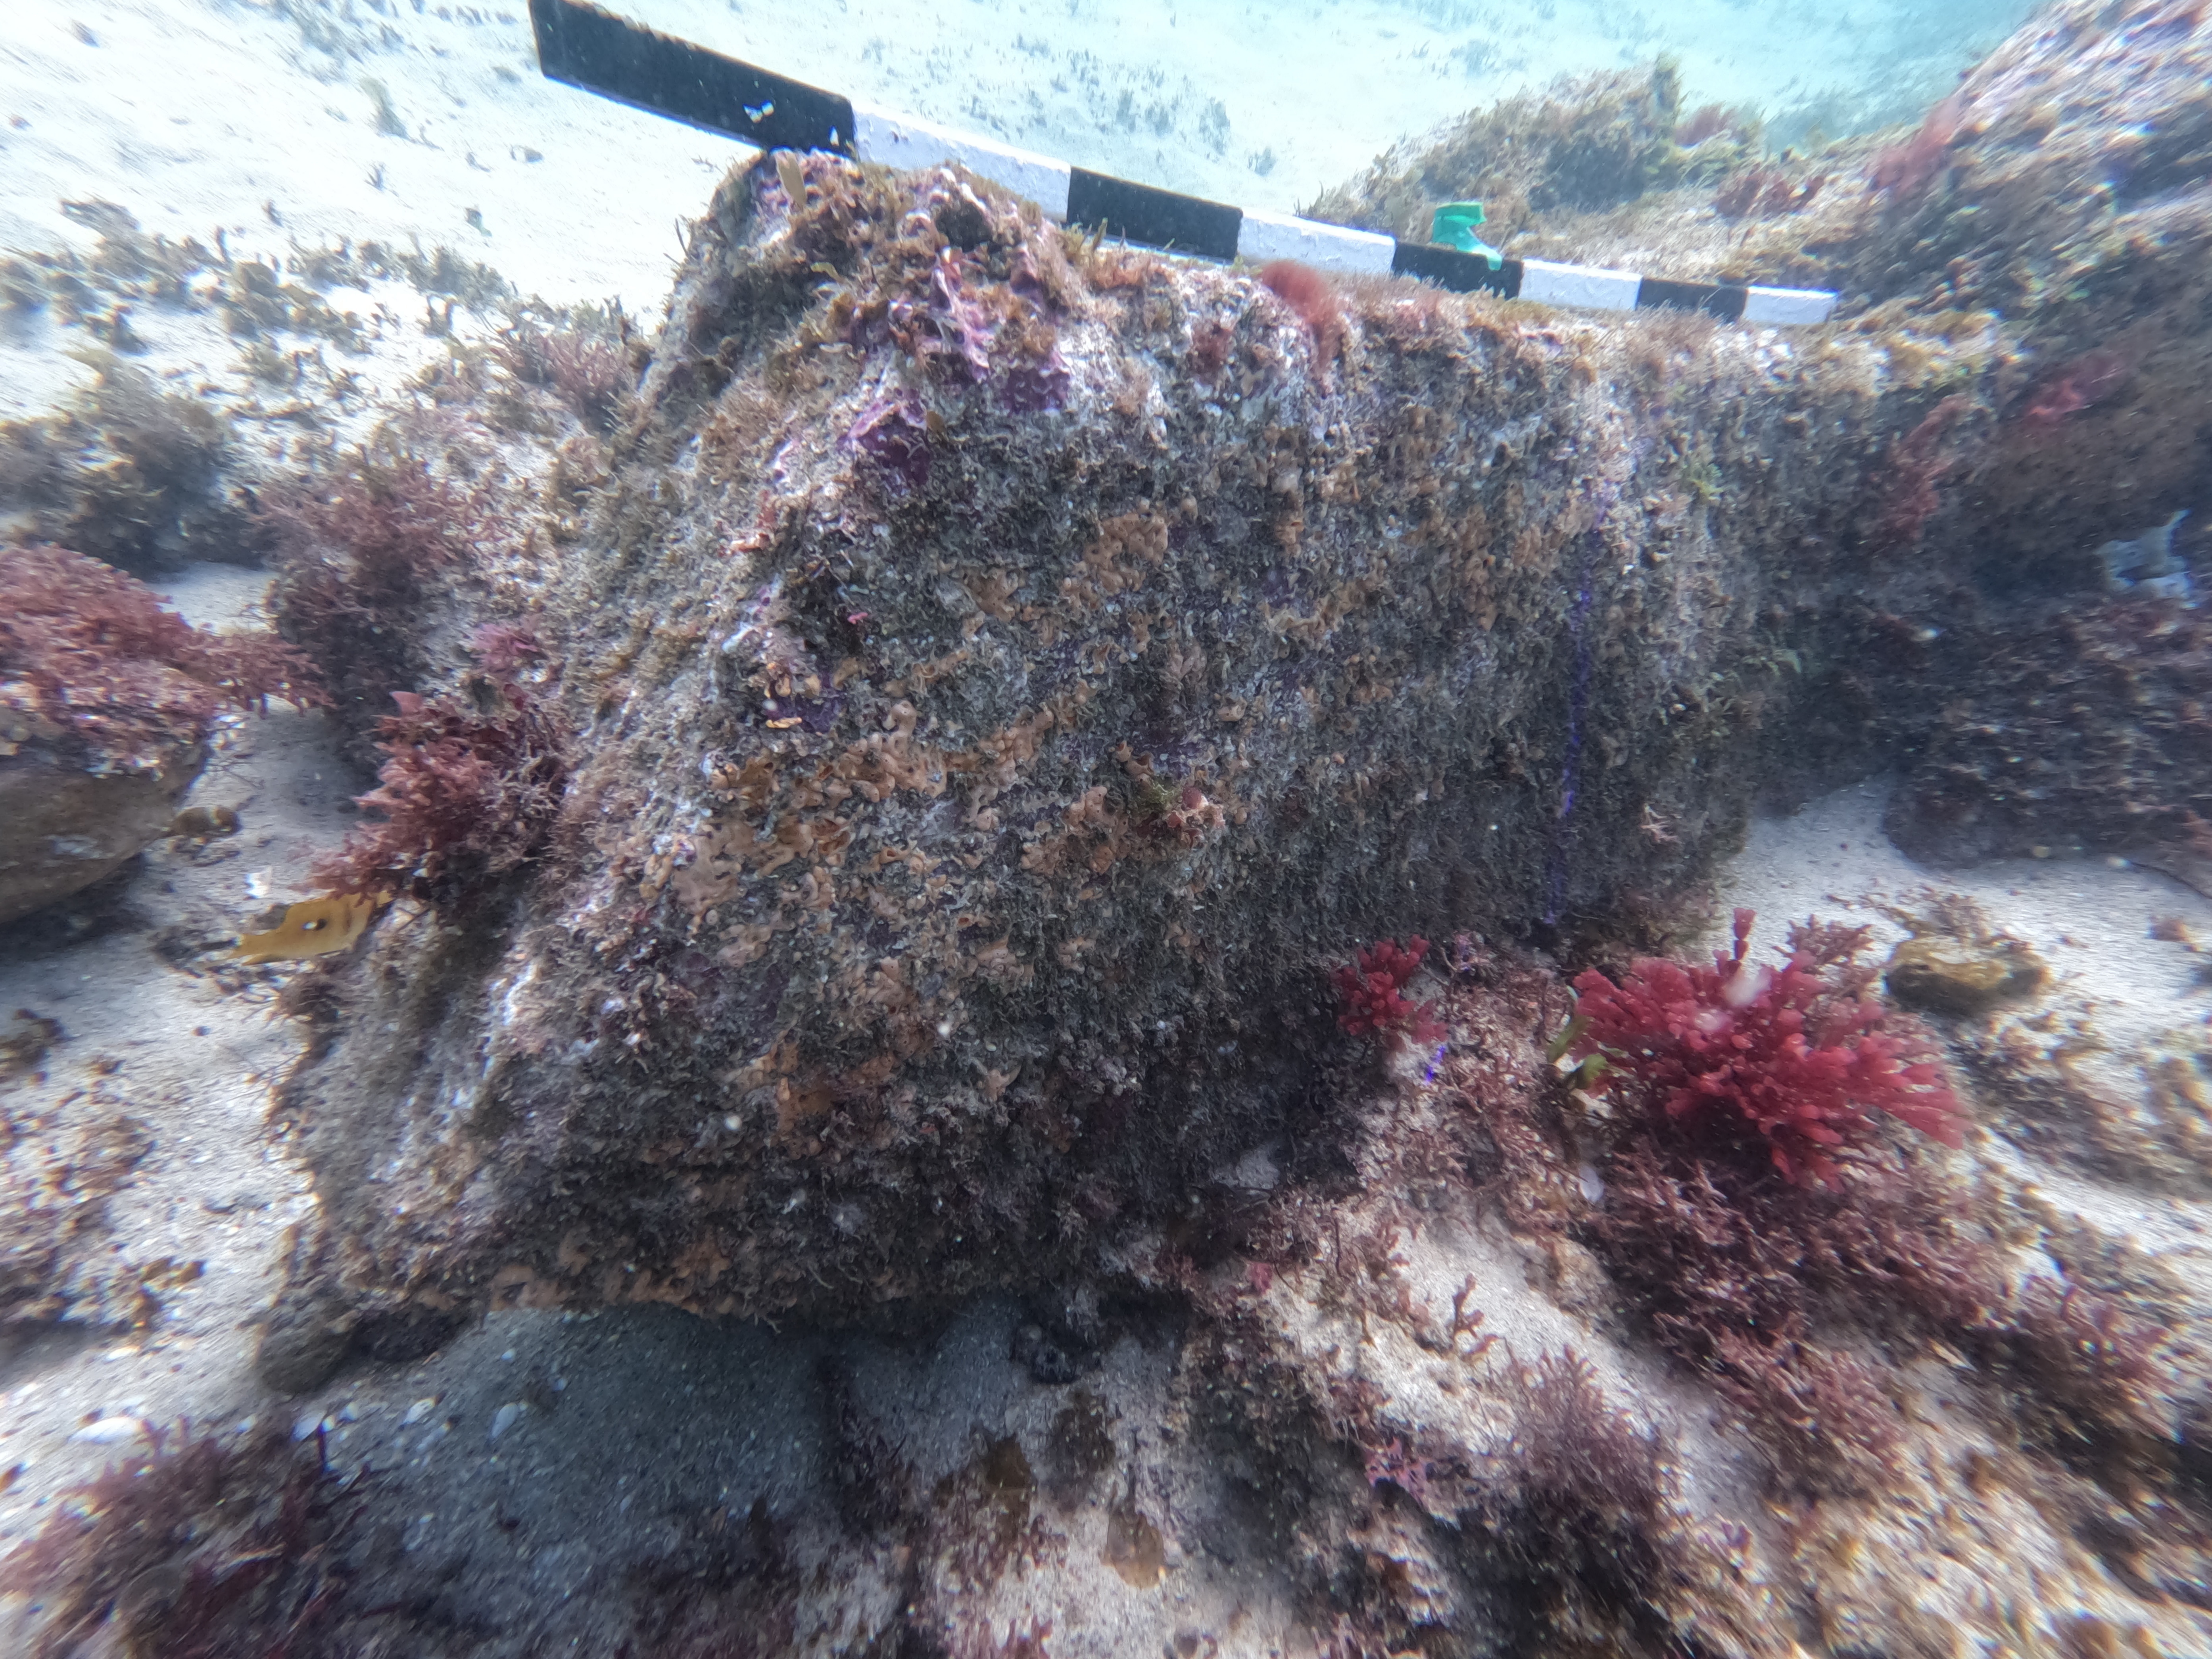

Supplement: Supplementary file 770 [file G0713837.pdf › Ocean2/G0713837.pdf]

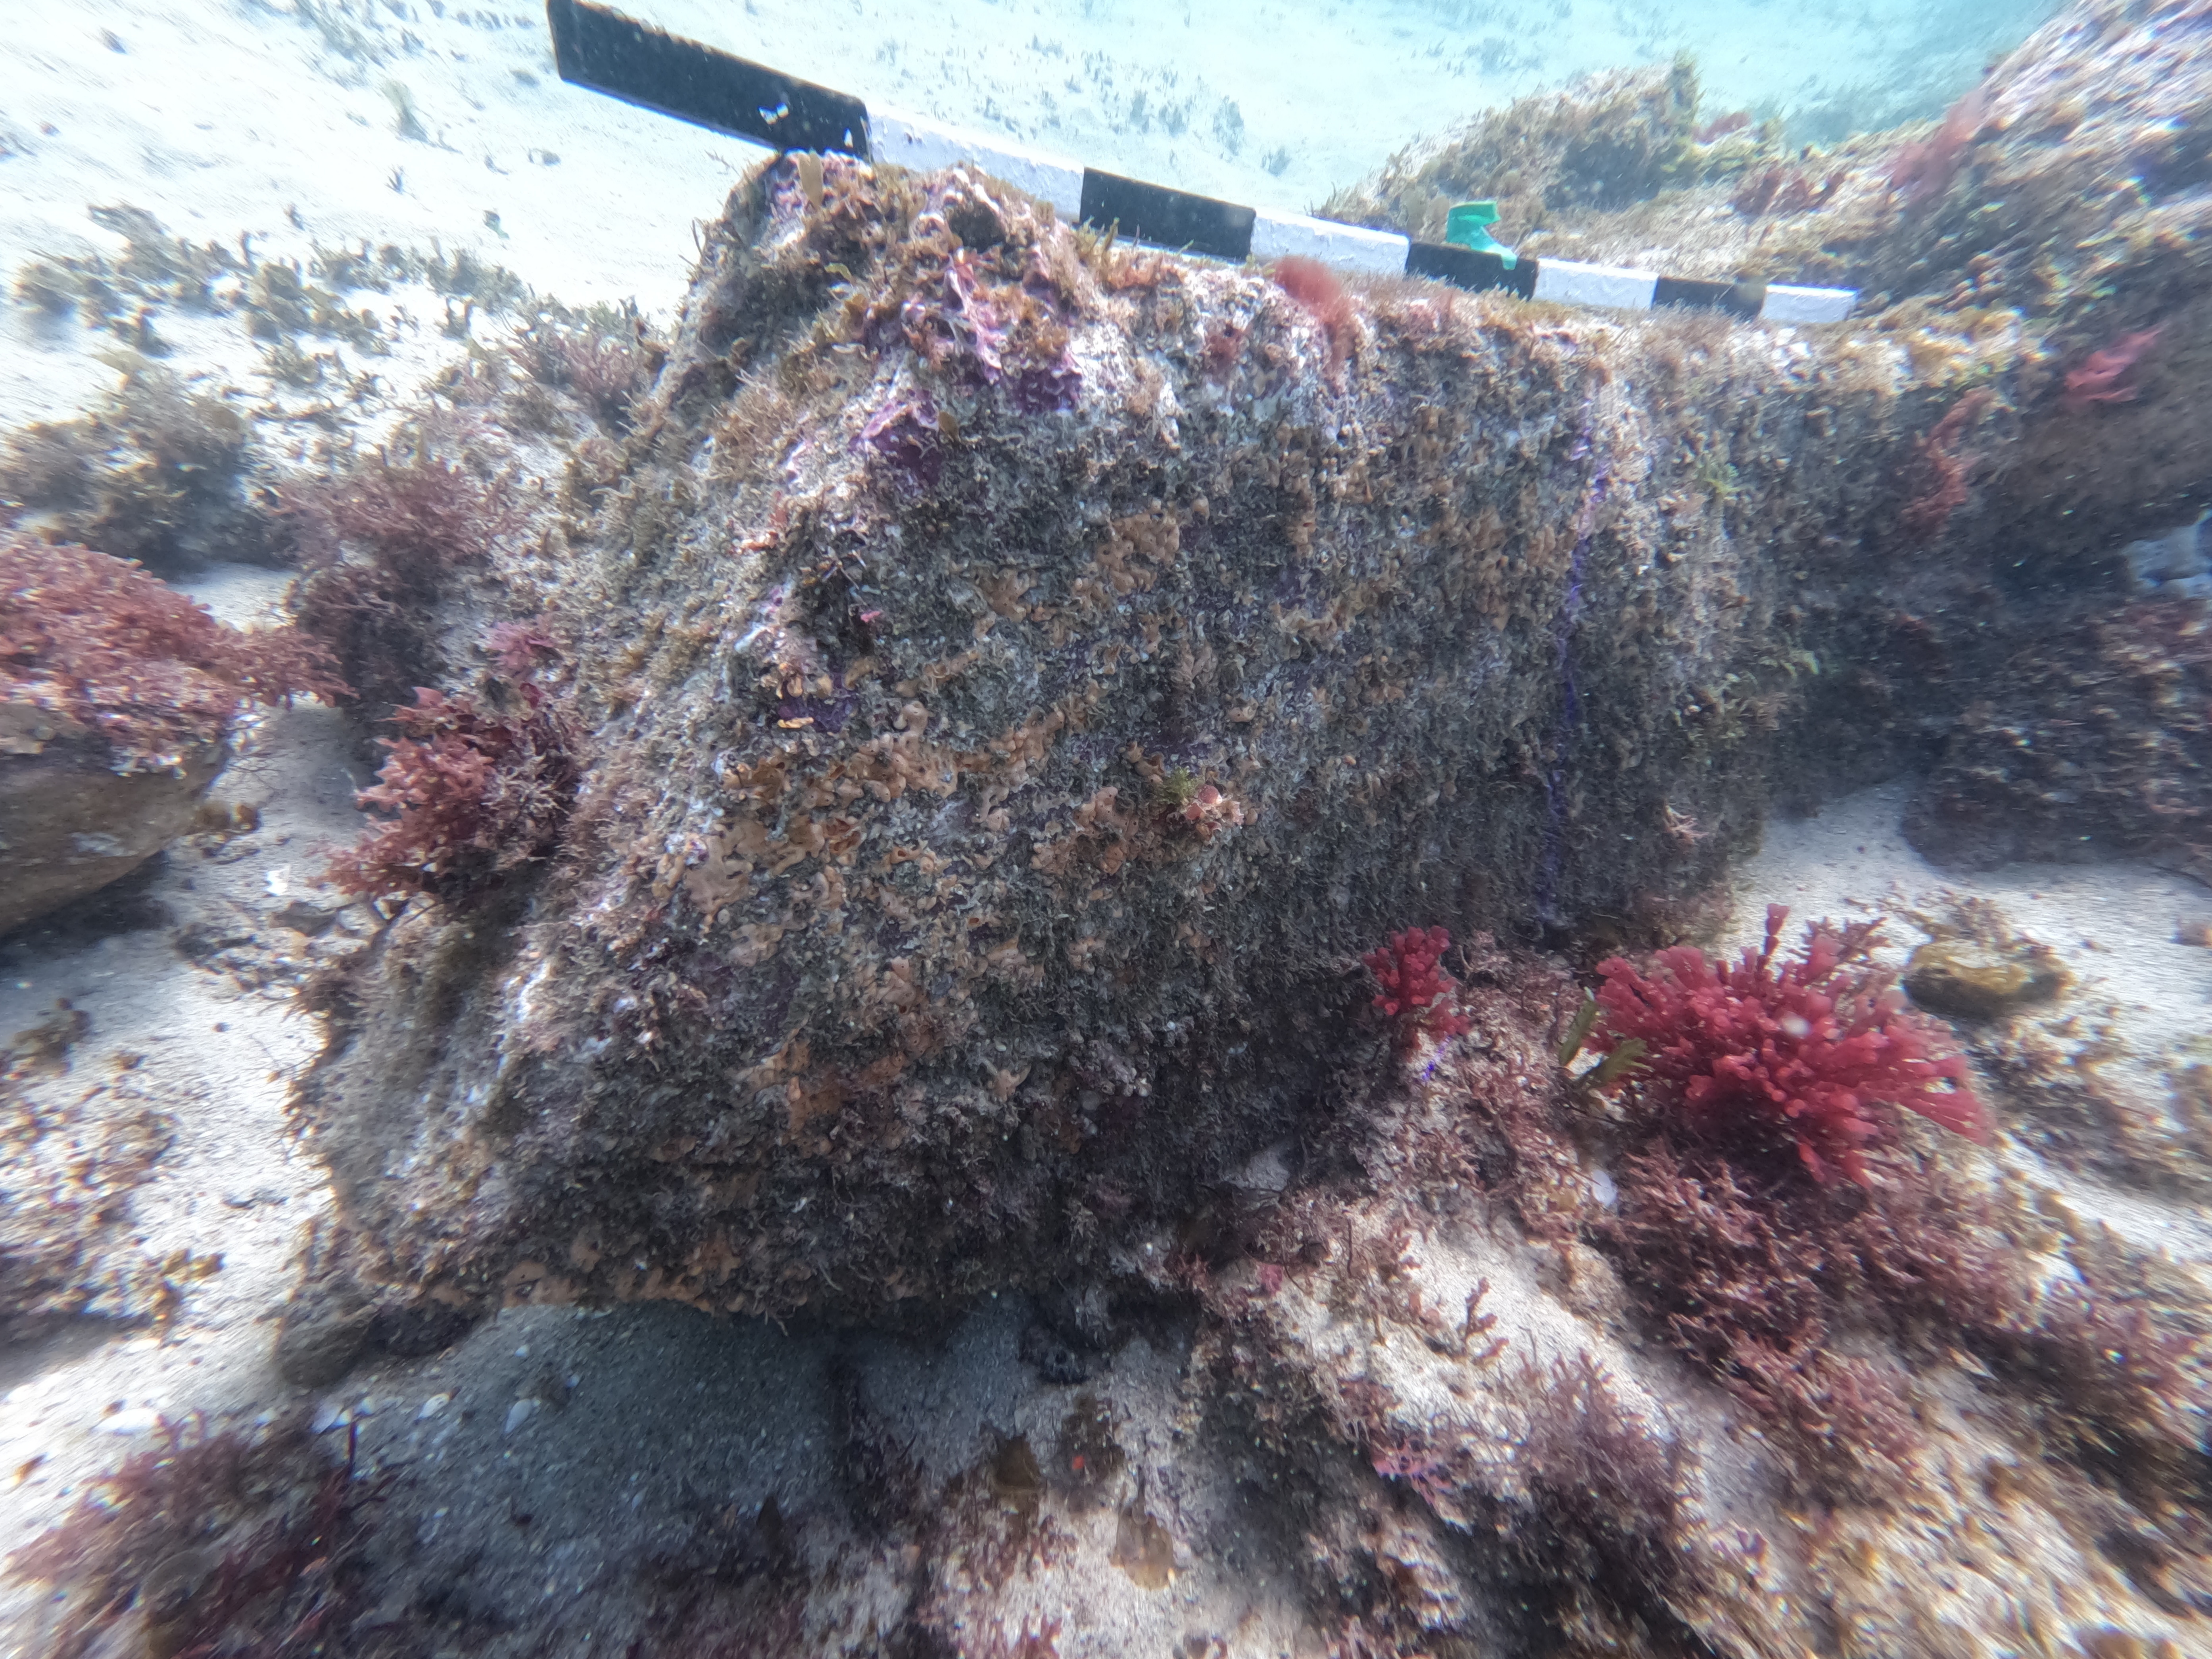

Supplement: Supplementary file 771 [file G0713838.pdf › Ocean2/G0713838.pdf]

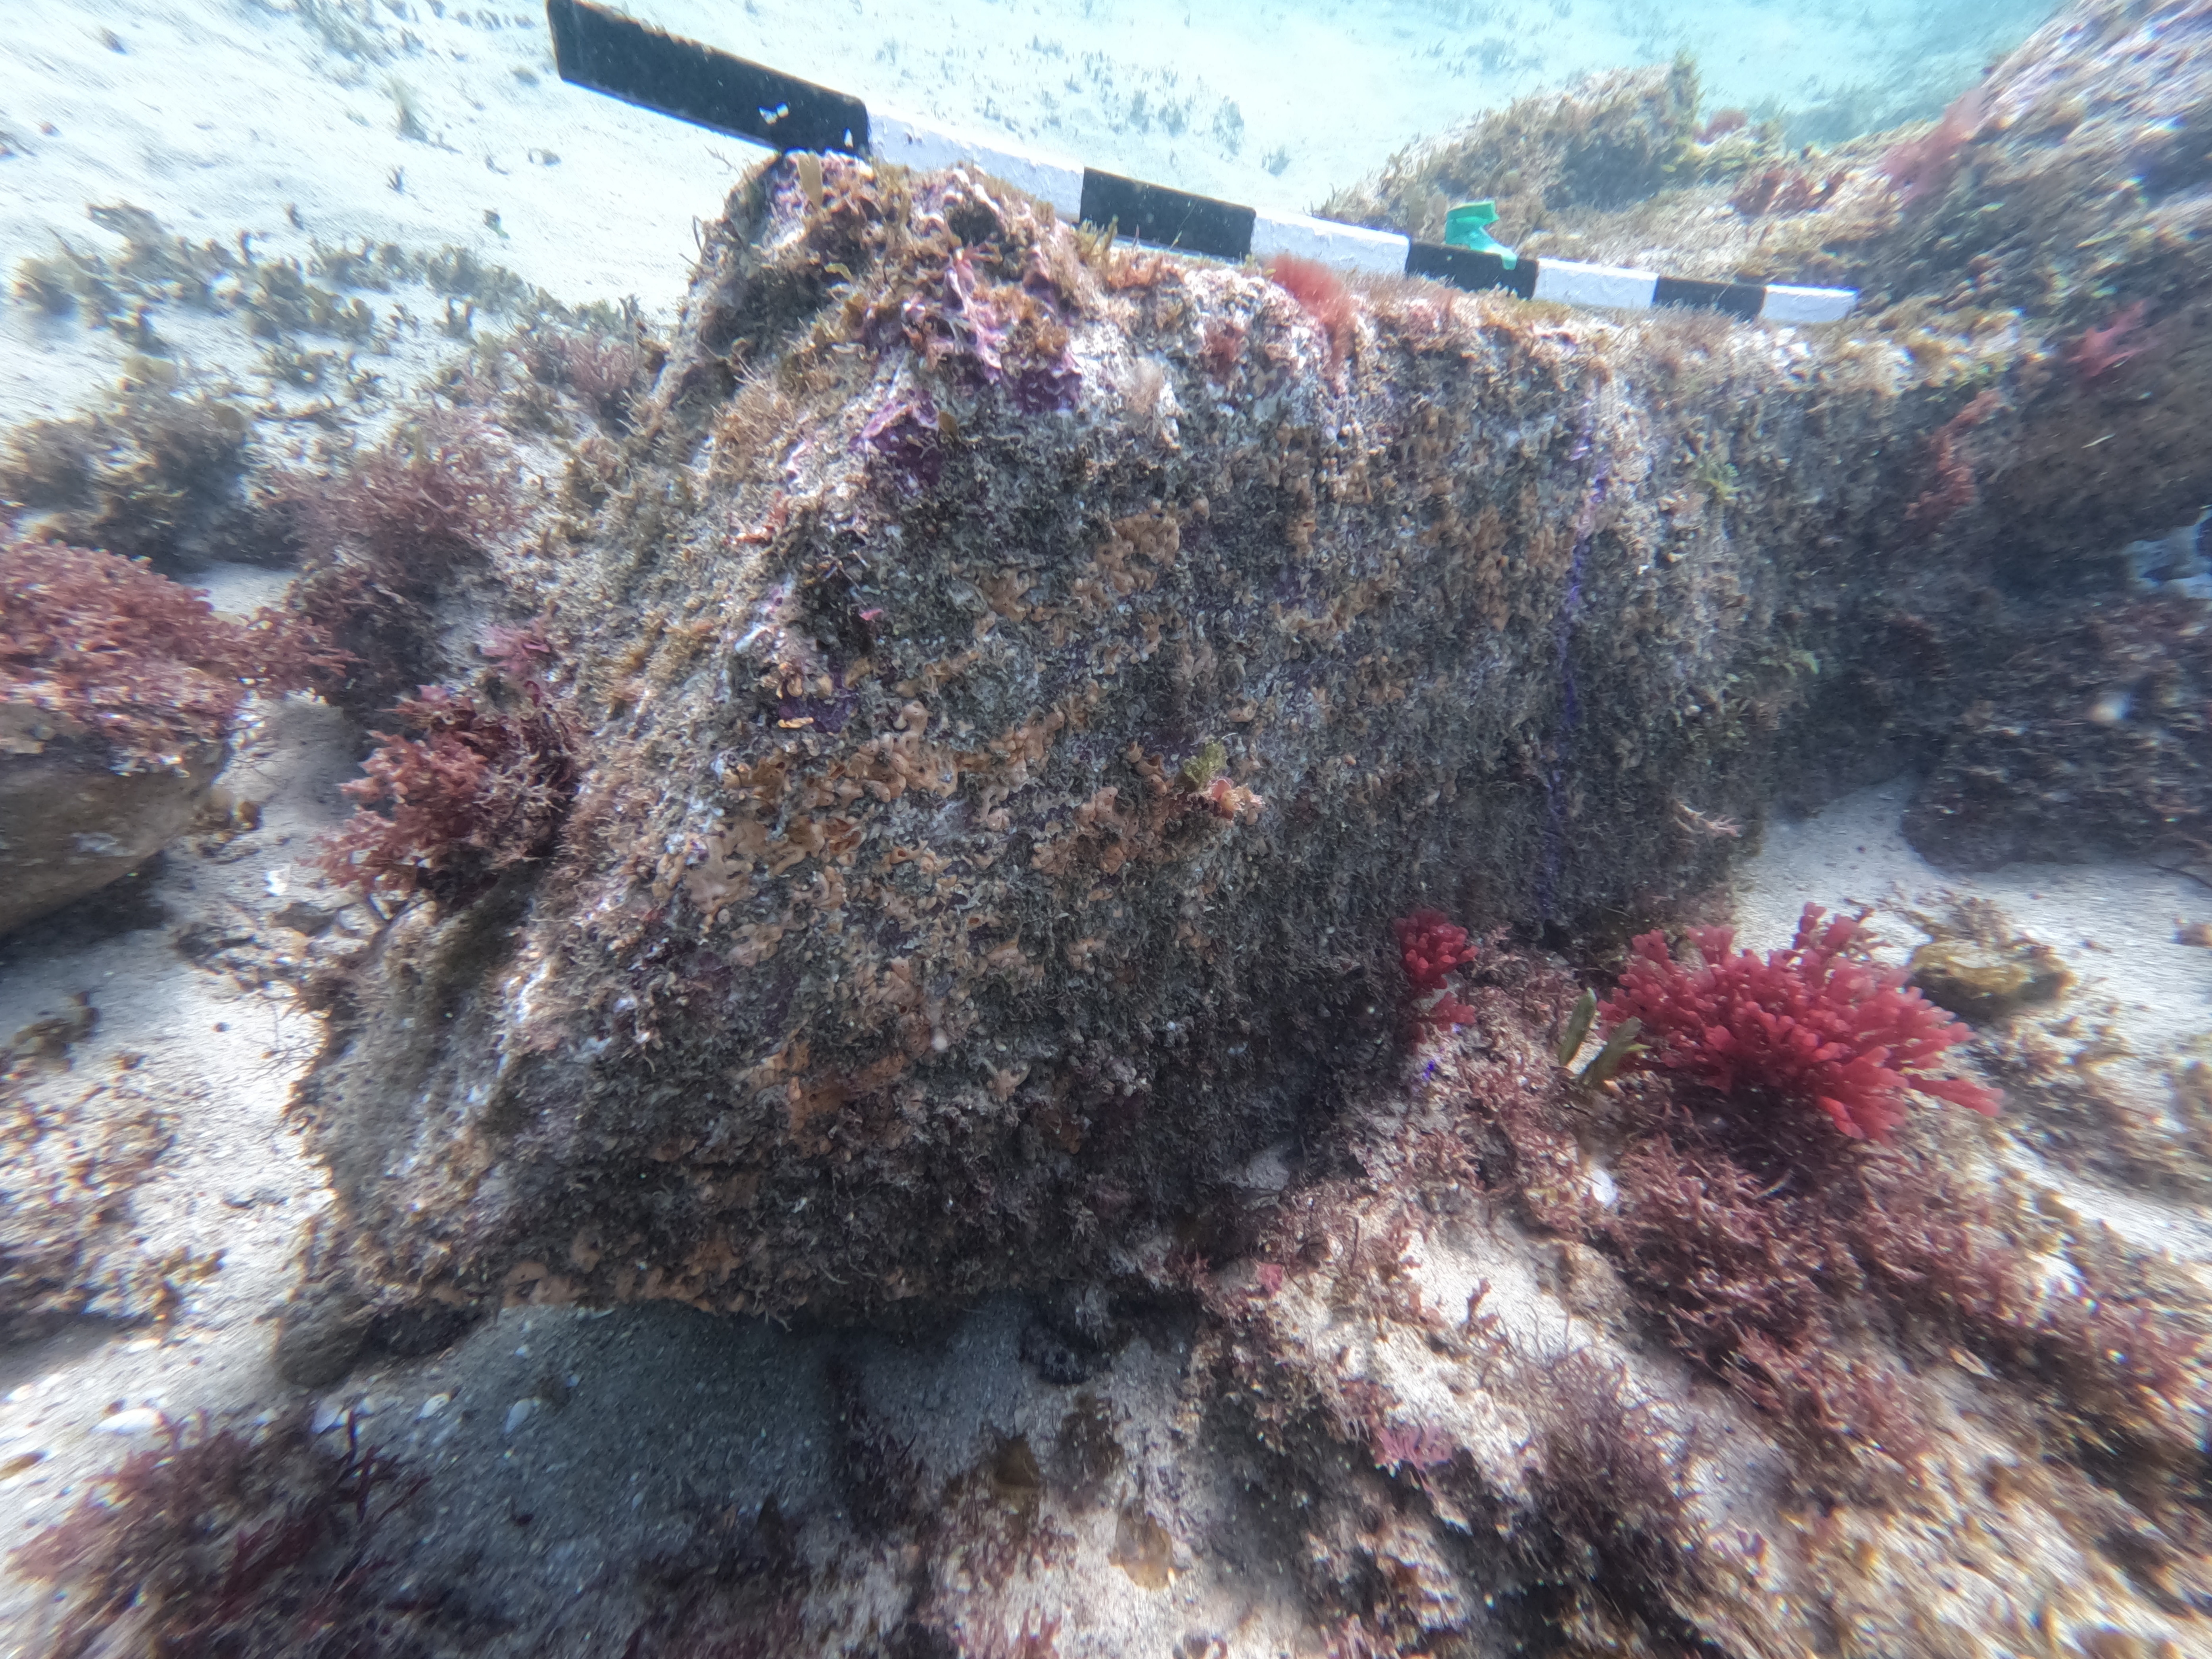

Supplement: Supplementary file 772 [file G0713839.pdf › Ocean2/G0713839.pdf]

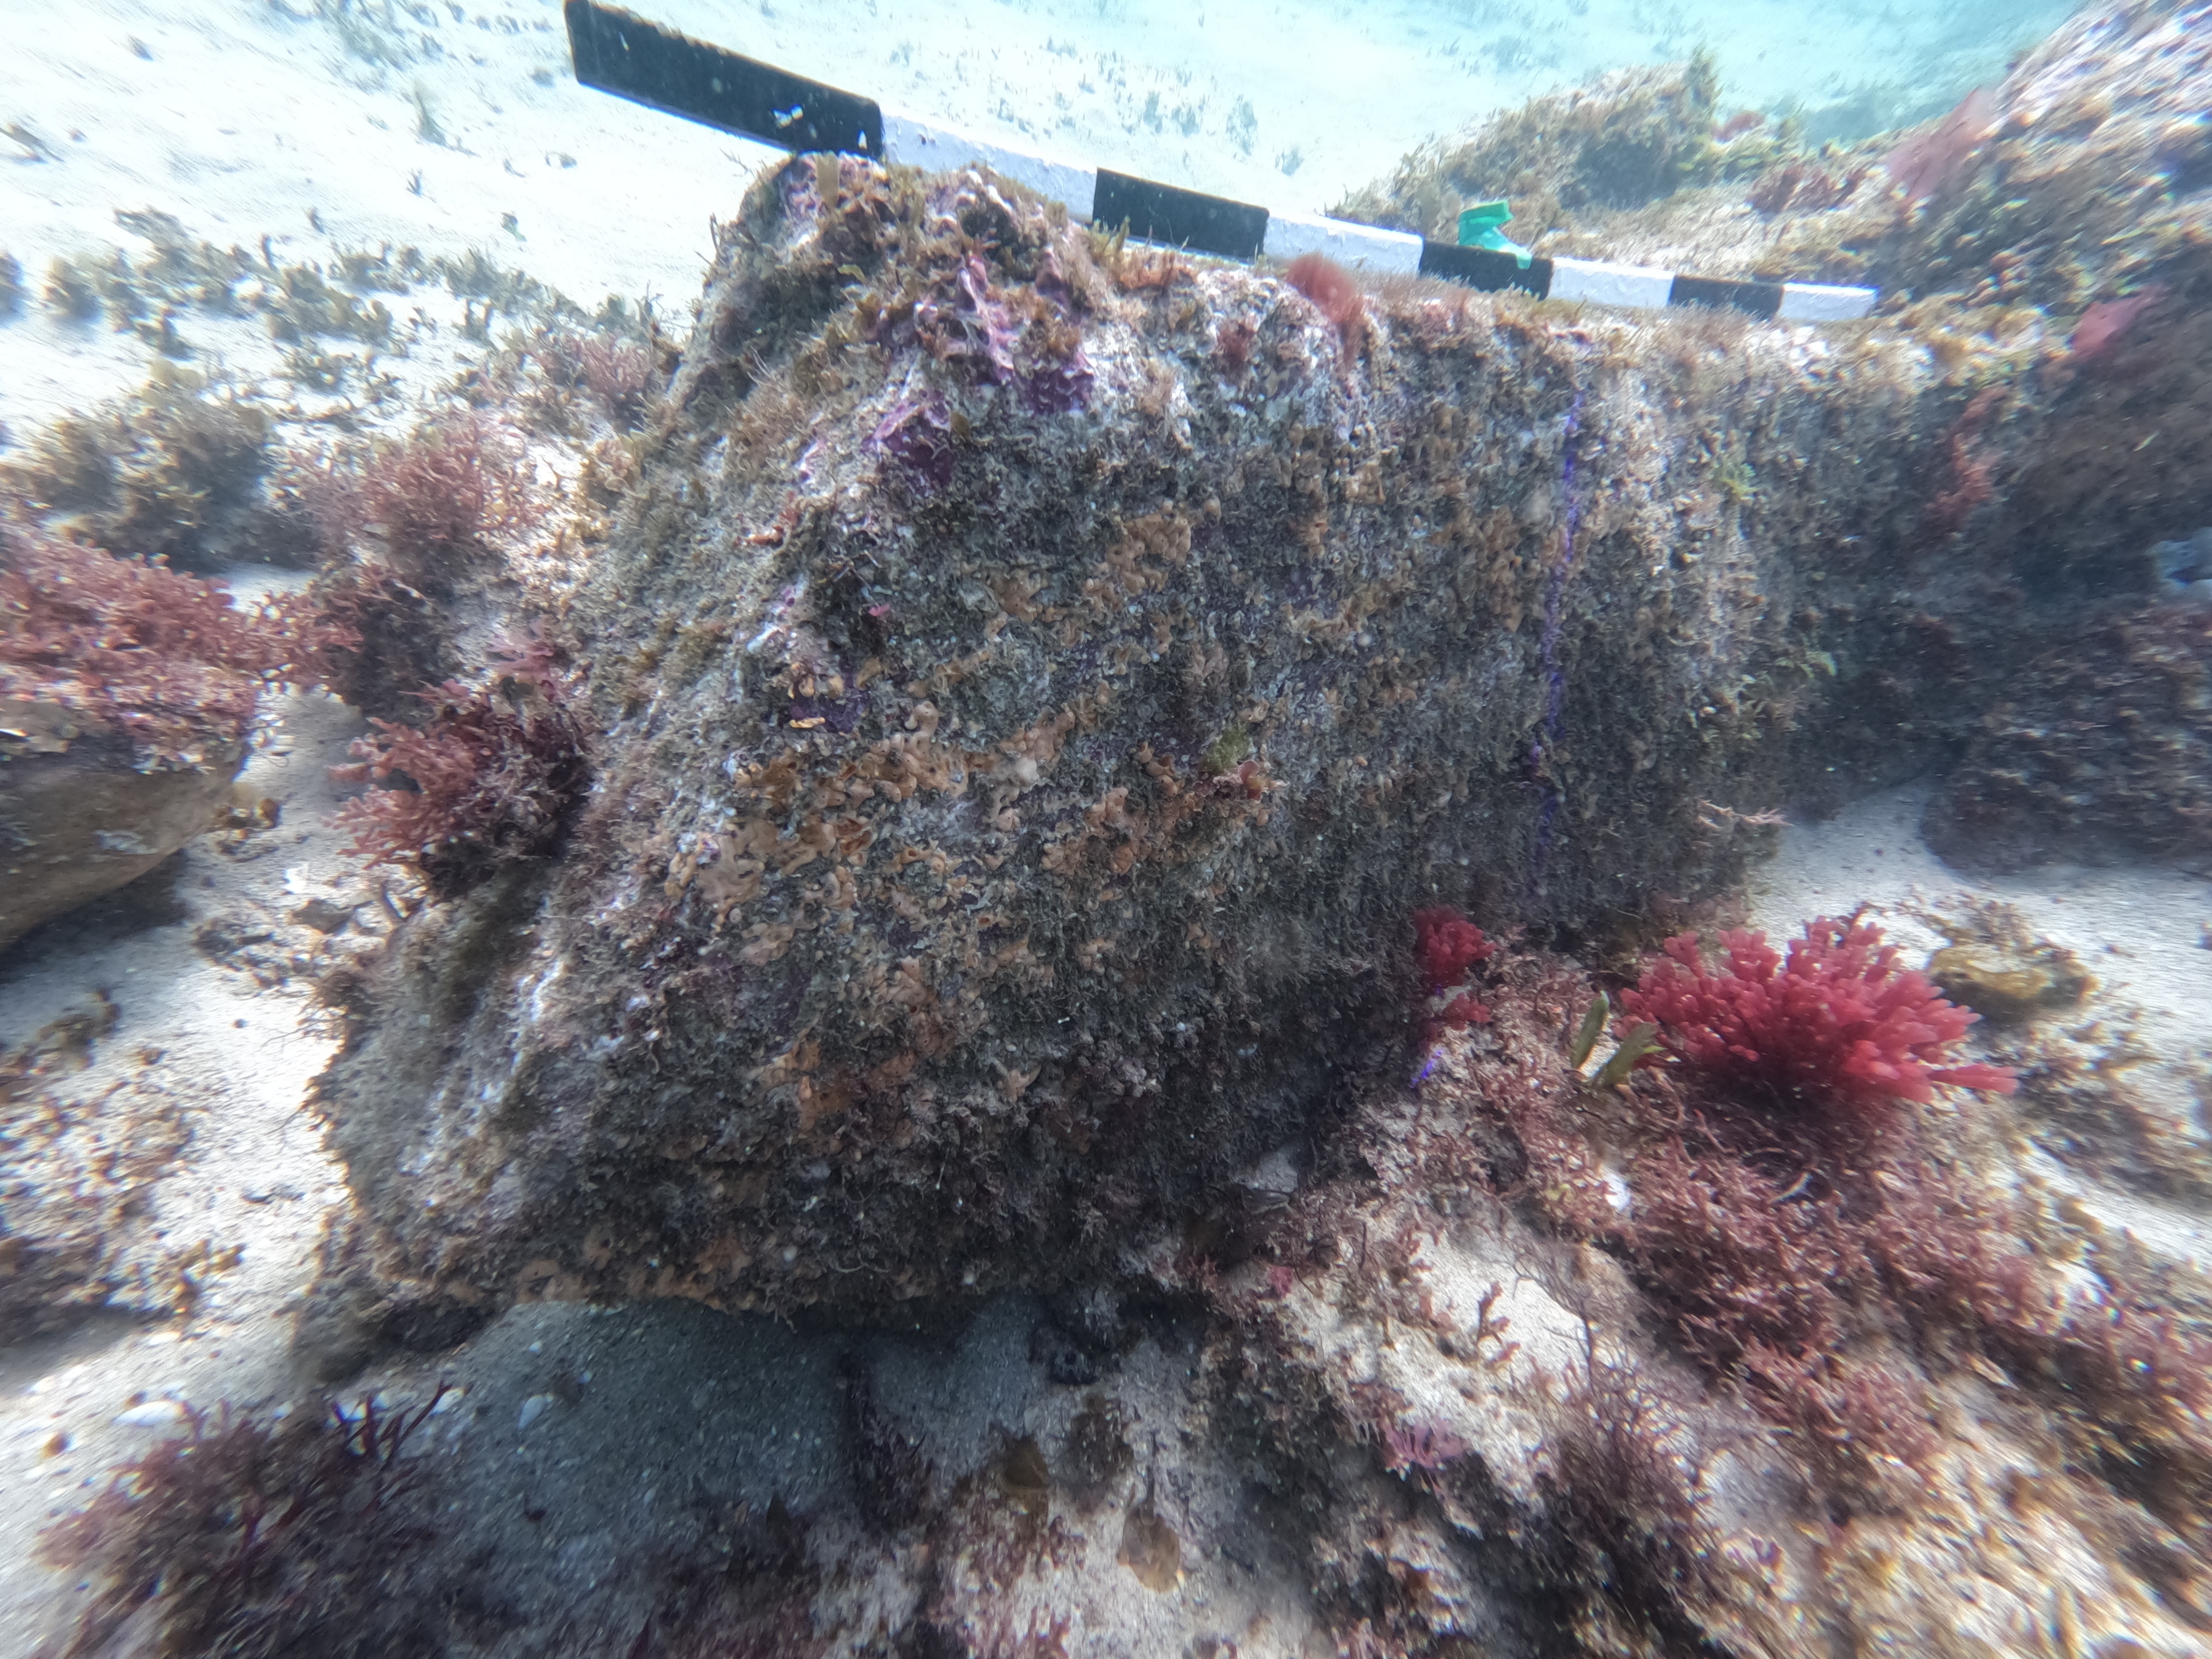

Supplement: Supplementary file 773 [file G0713840.pdf › Ocean2/G0713840.pdf]

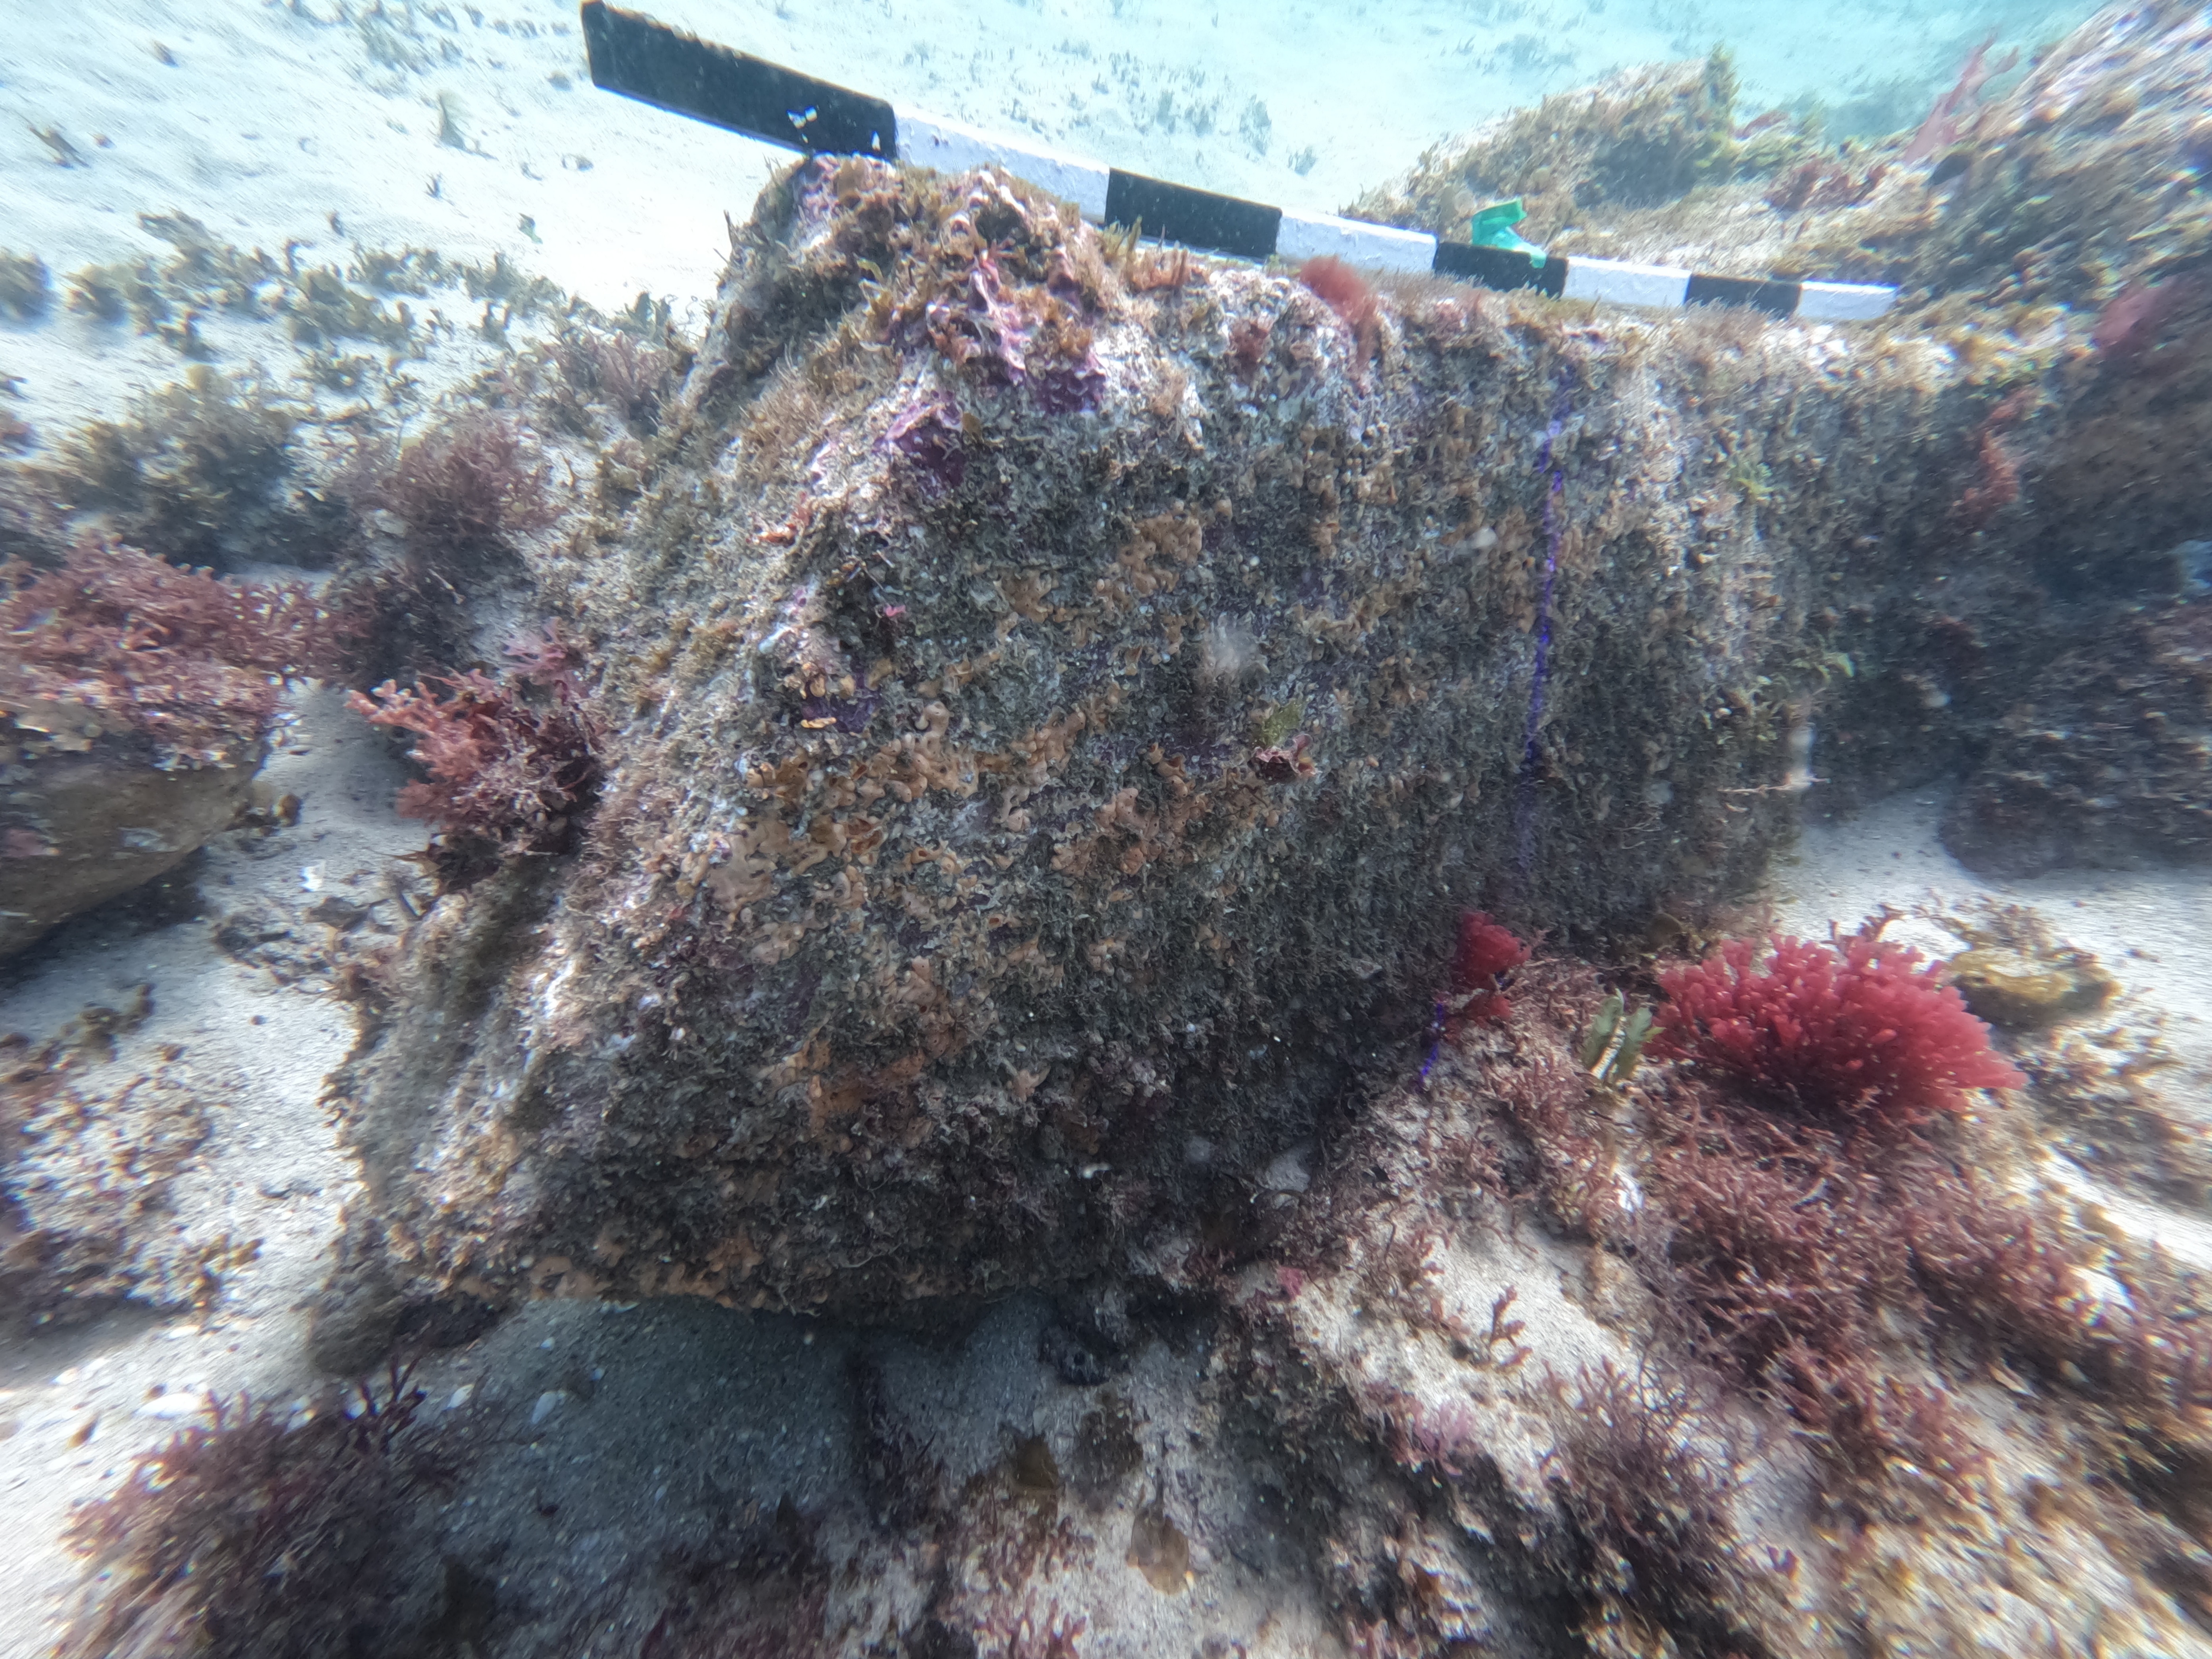

Supplement: Supplementary file 774 [file G0713841.pdf › Ocean2/G0713841.pdf]

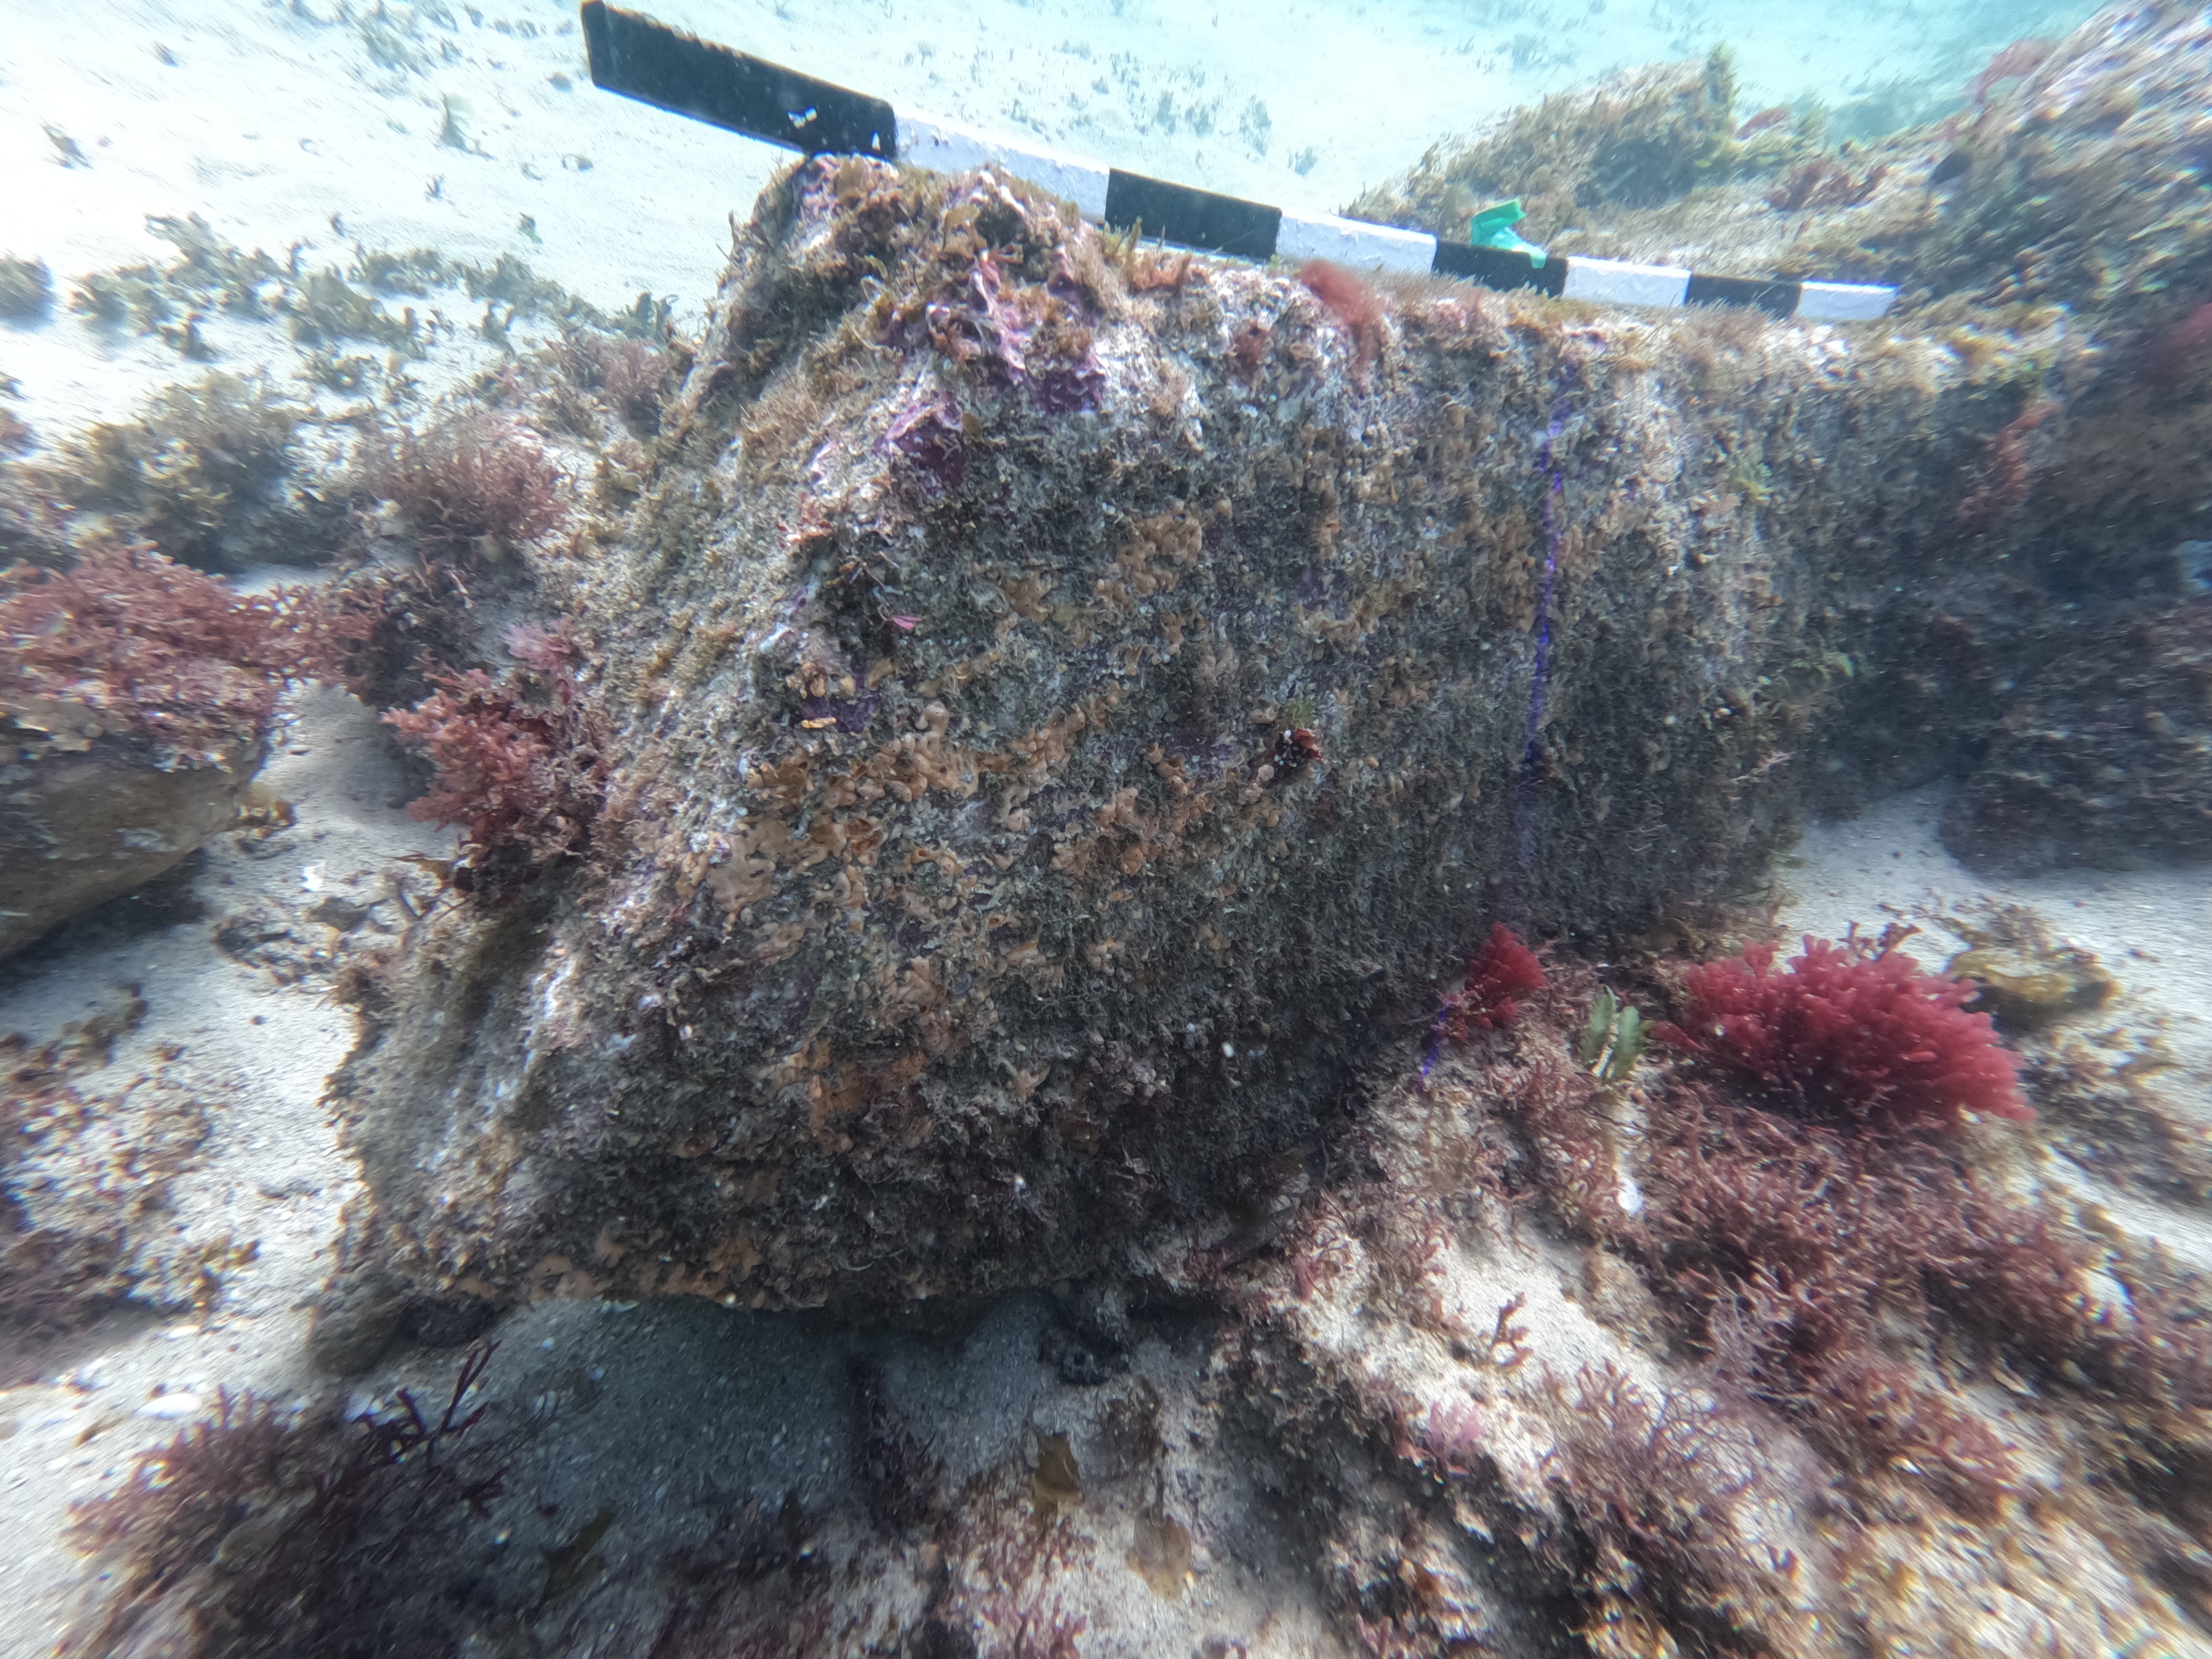

Supplement: Supplementary file 775 [file G0713842.pdf › Ocean2/G0713842.pdf]

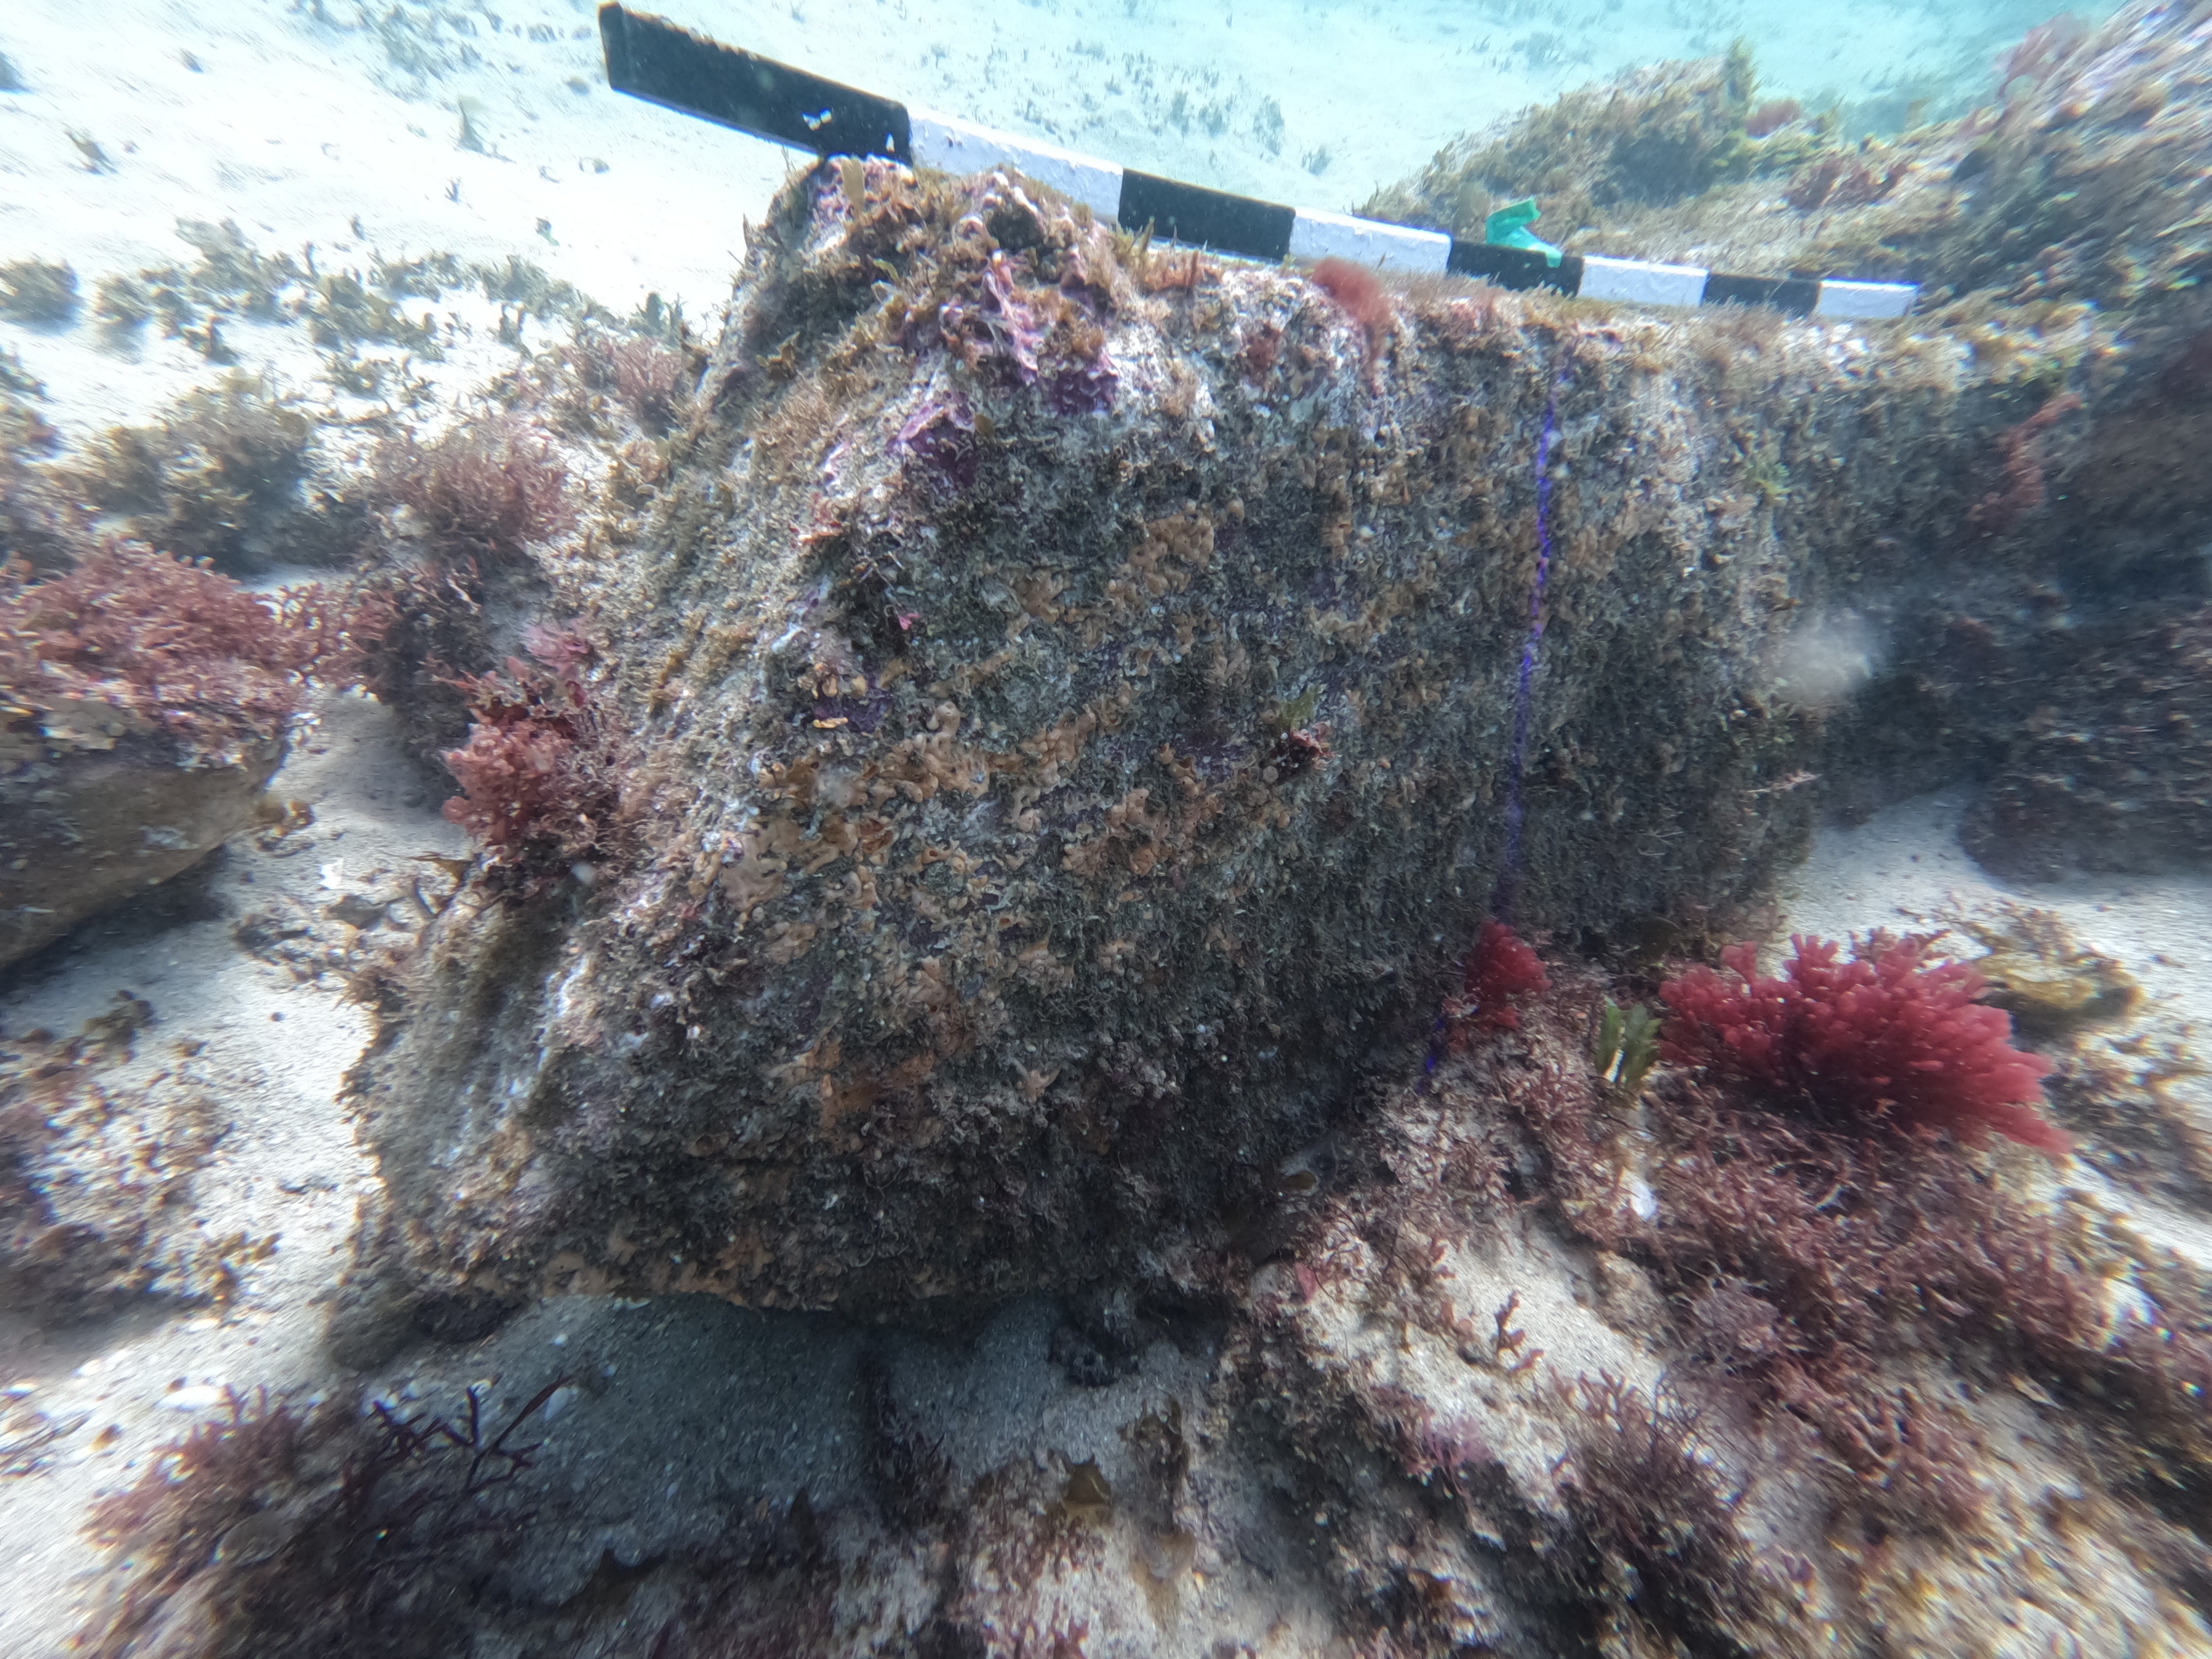

Supplement: Supplementary file 776 [file G0713843.pdf › Ocean2/G0713843.pdf]

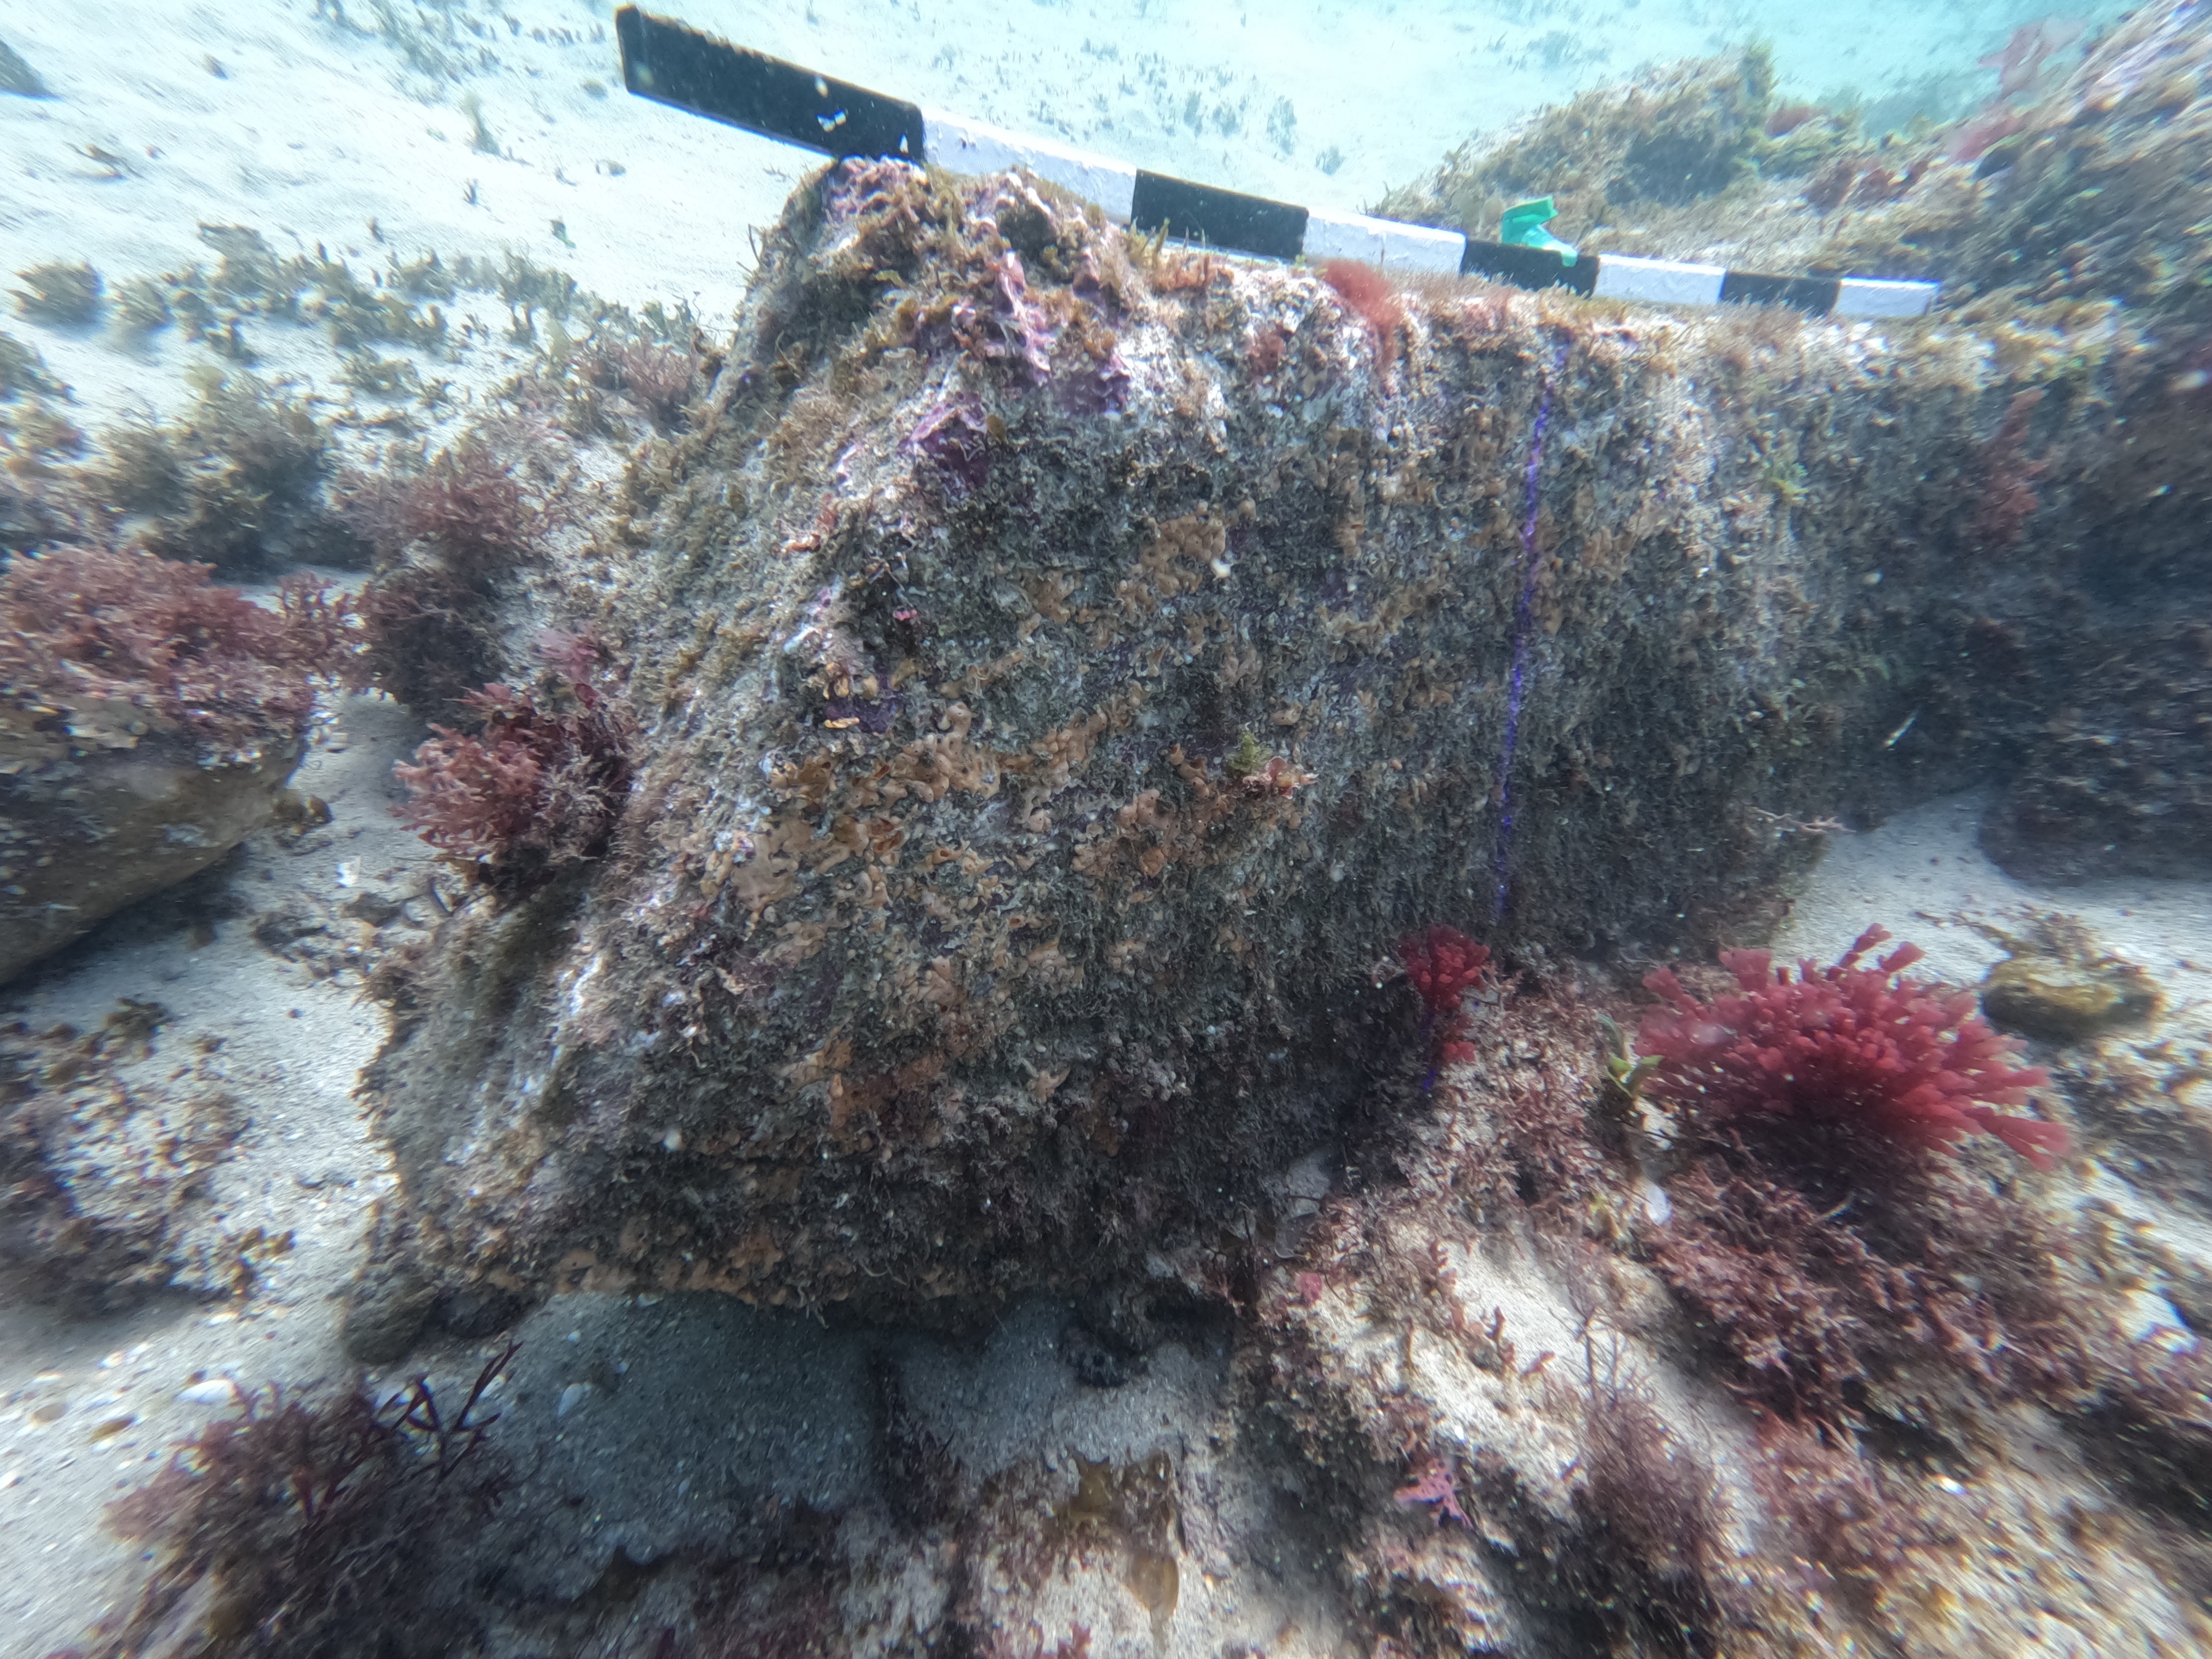

Supplement: Supplementary file 777 [file G0713844.pdf › Ocean2/G0713844.pdf]

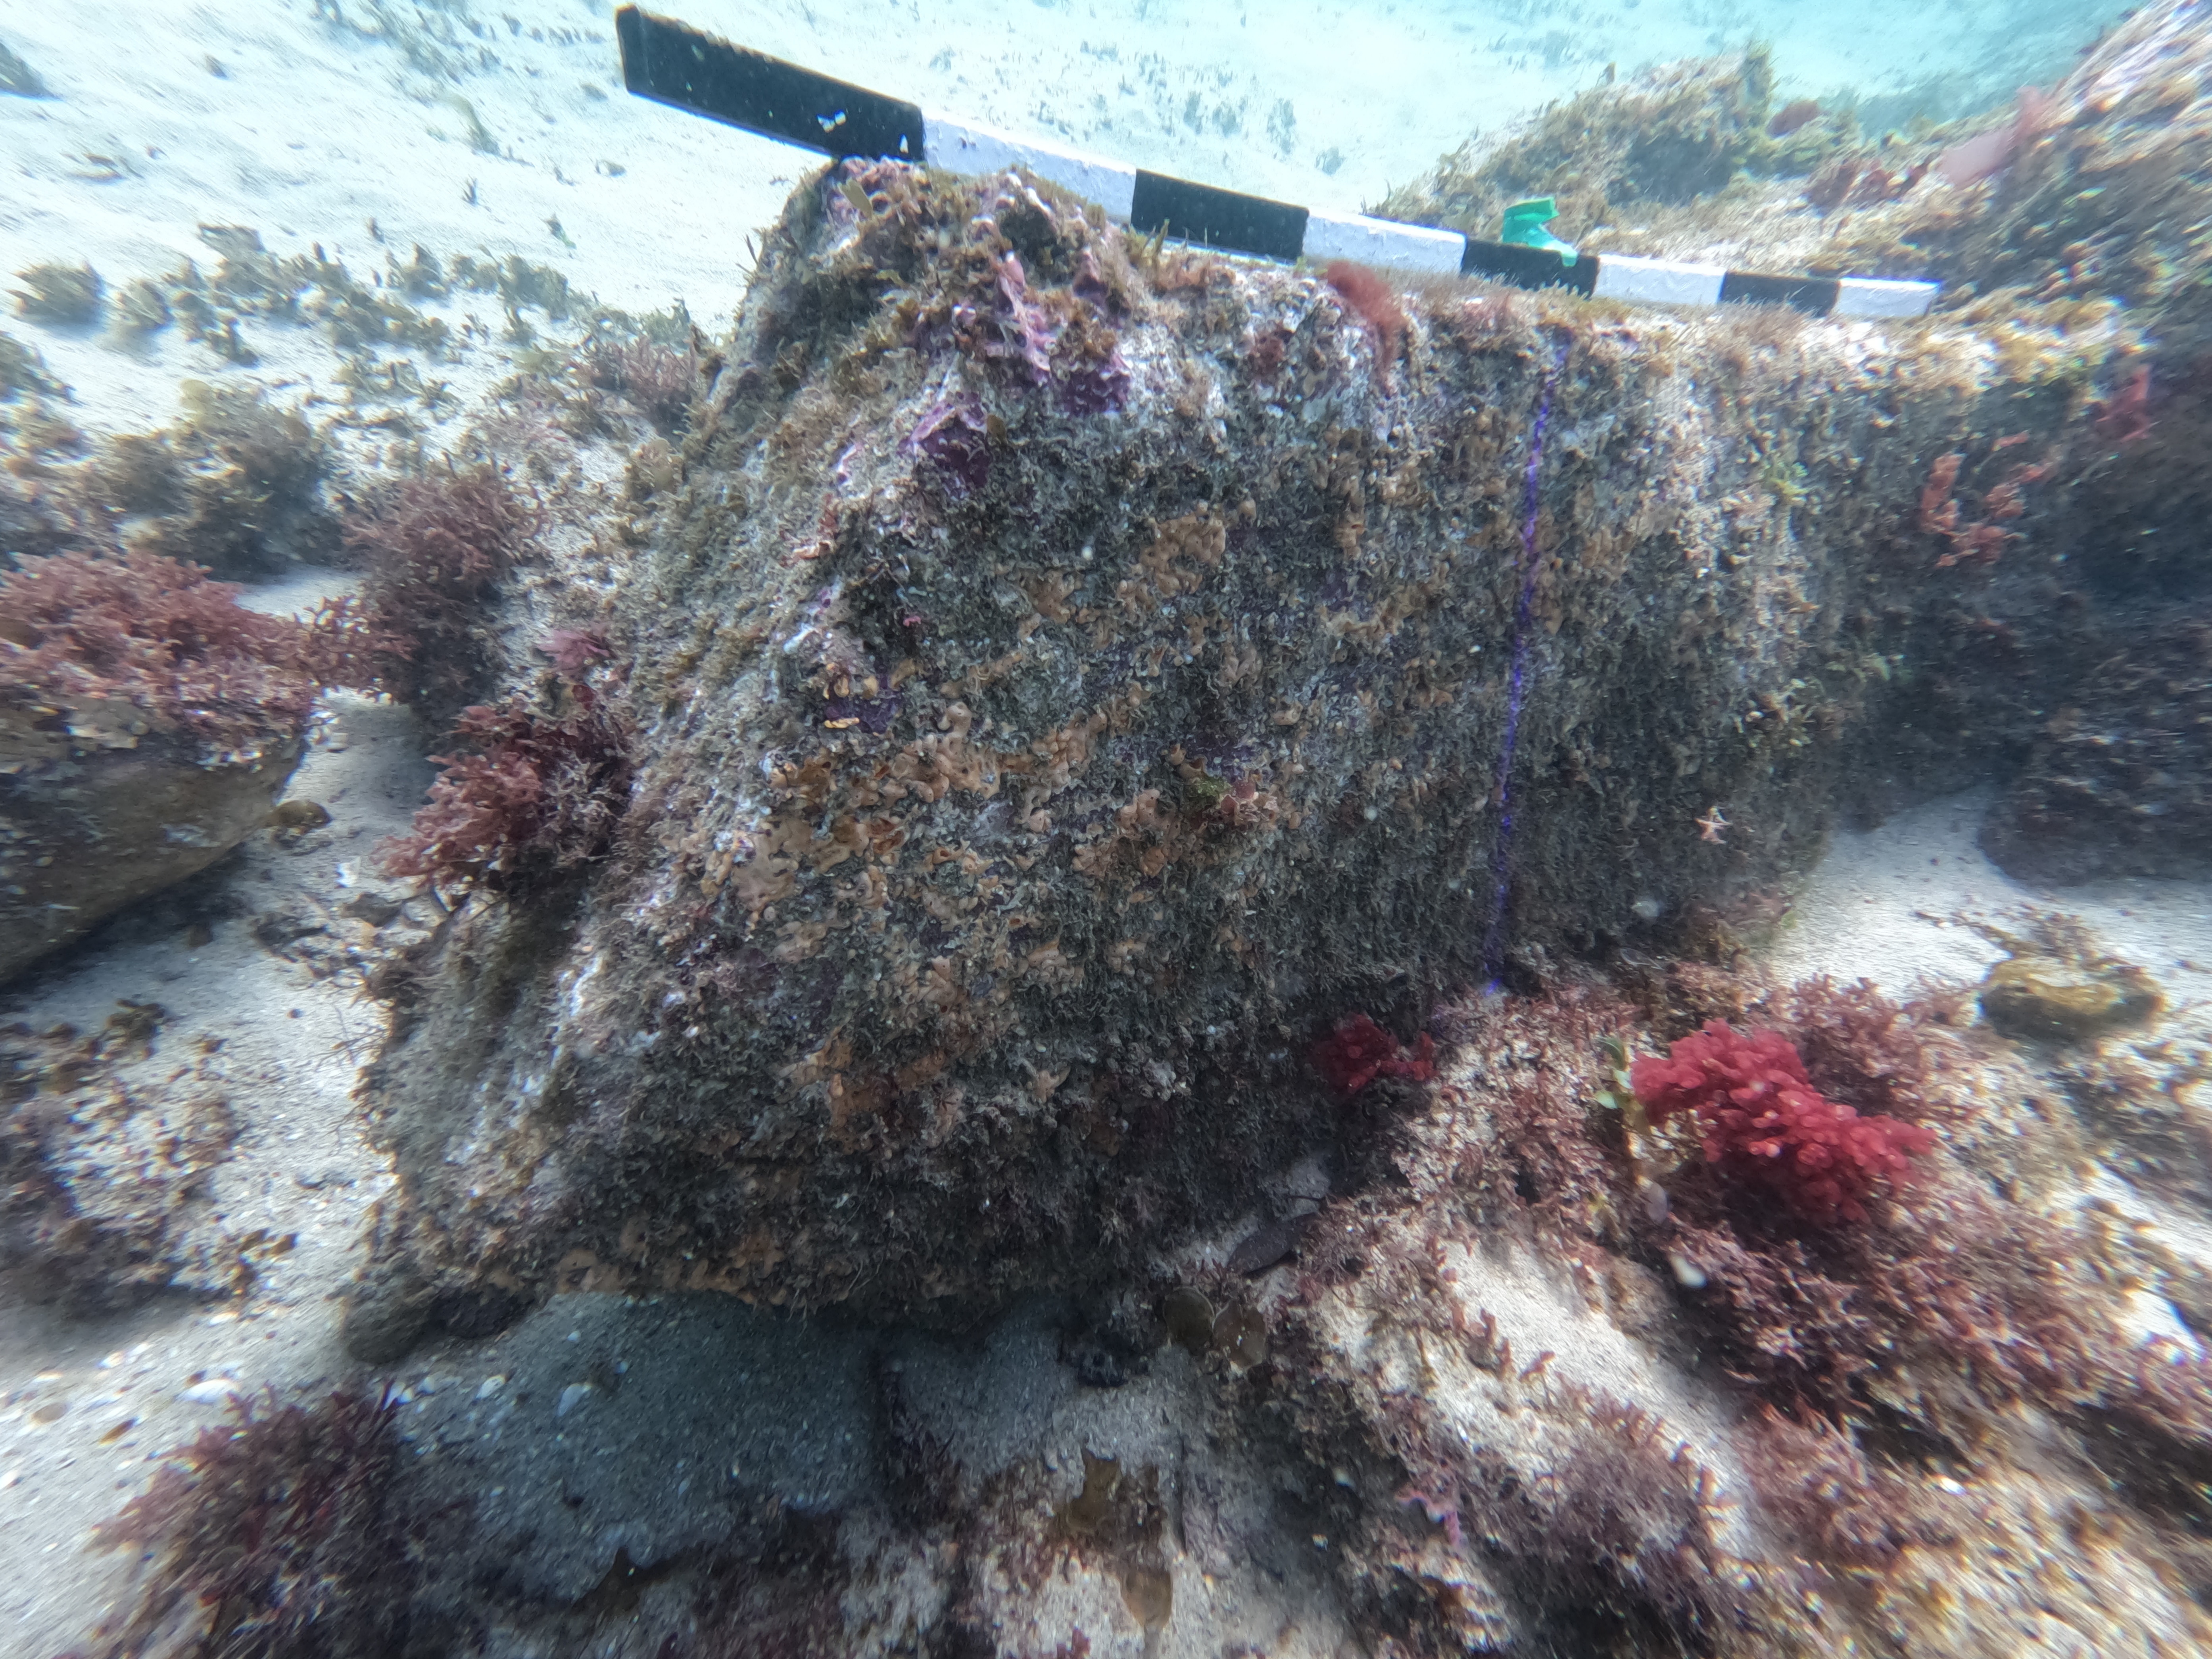

Supplement: Supplementary file 778 [file G0713845.pdf › Ocean2/G0713845.pdf]

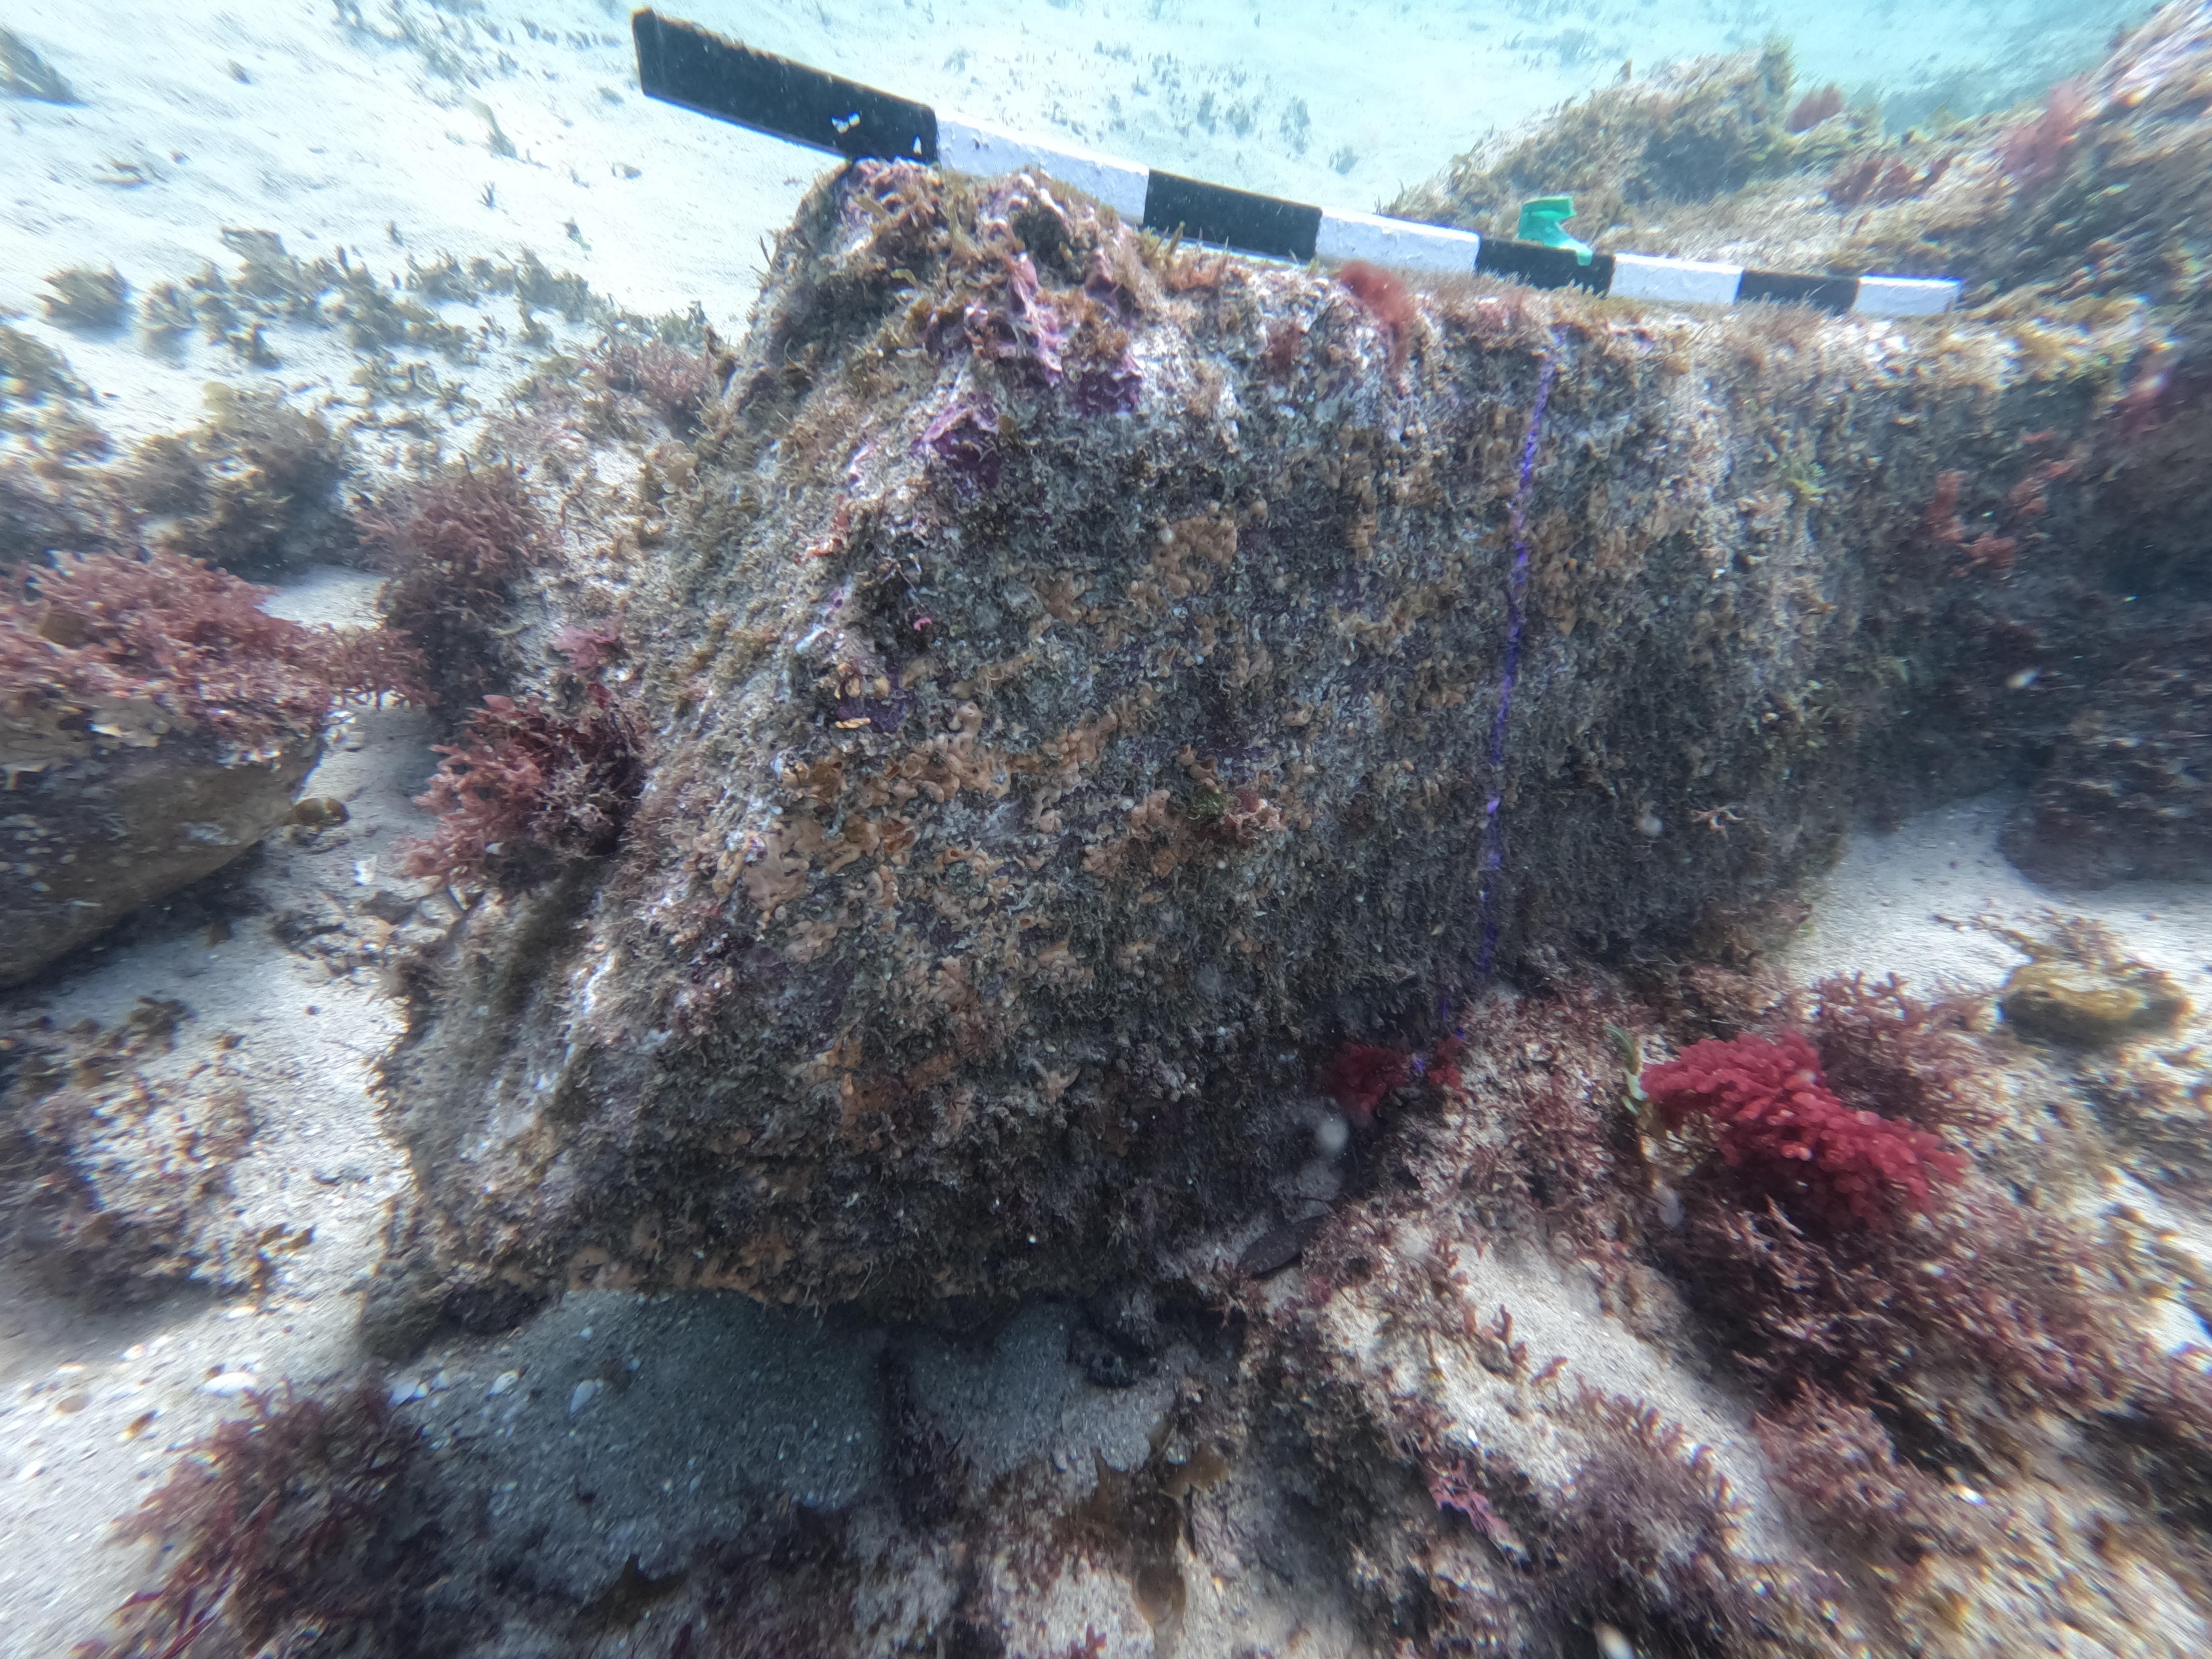

Supplement: Supplementary file 779 [file G0713846.pdf › Ocean2/G0713846.pdf]

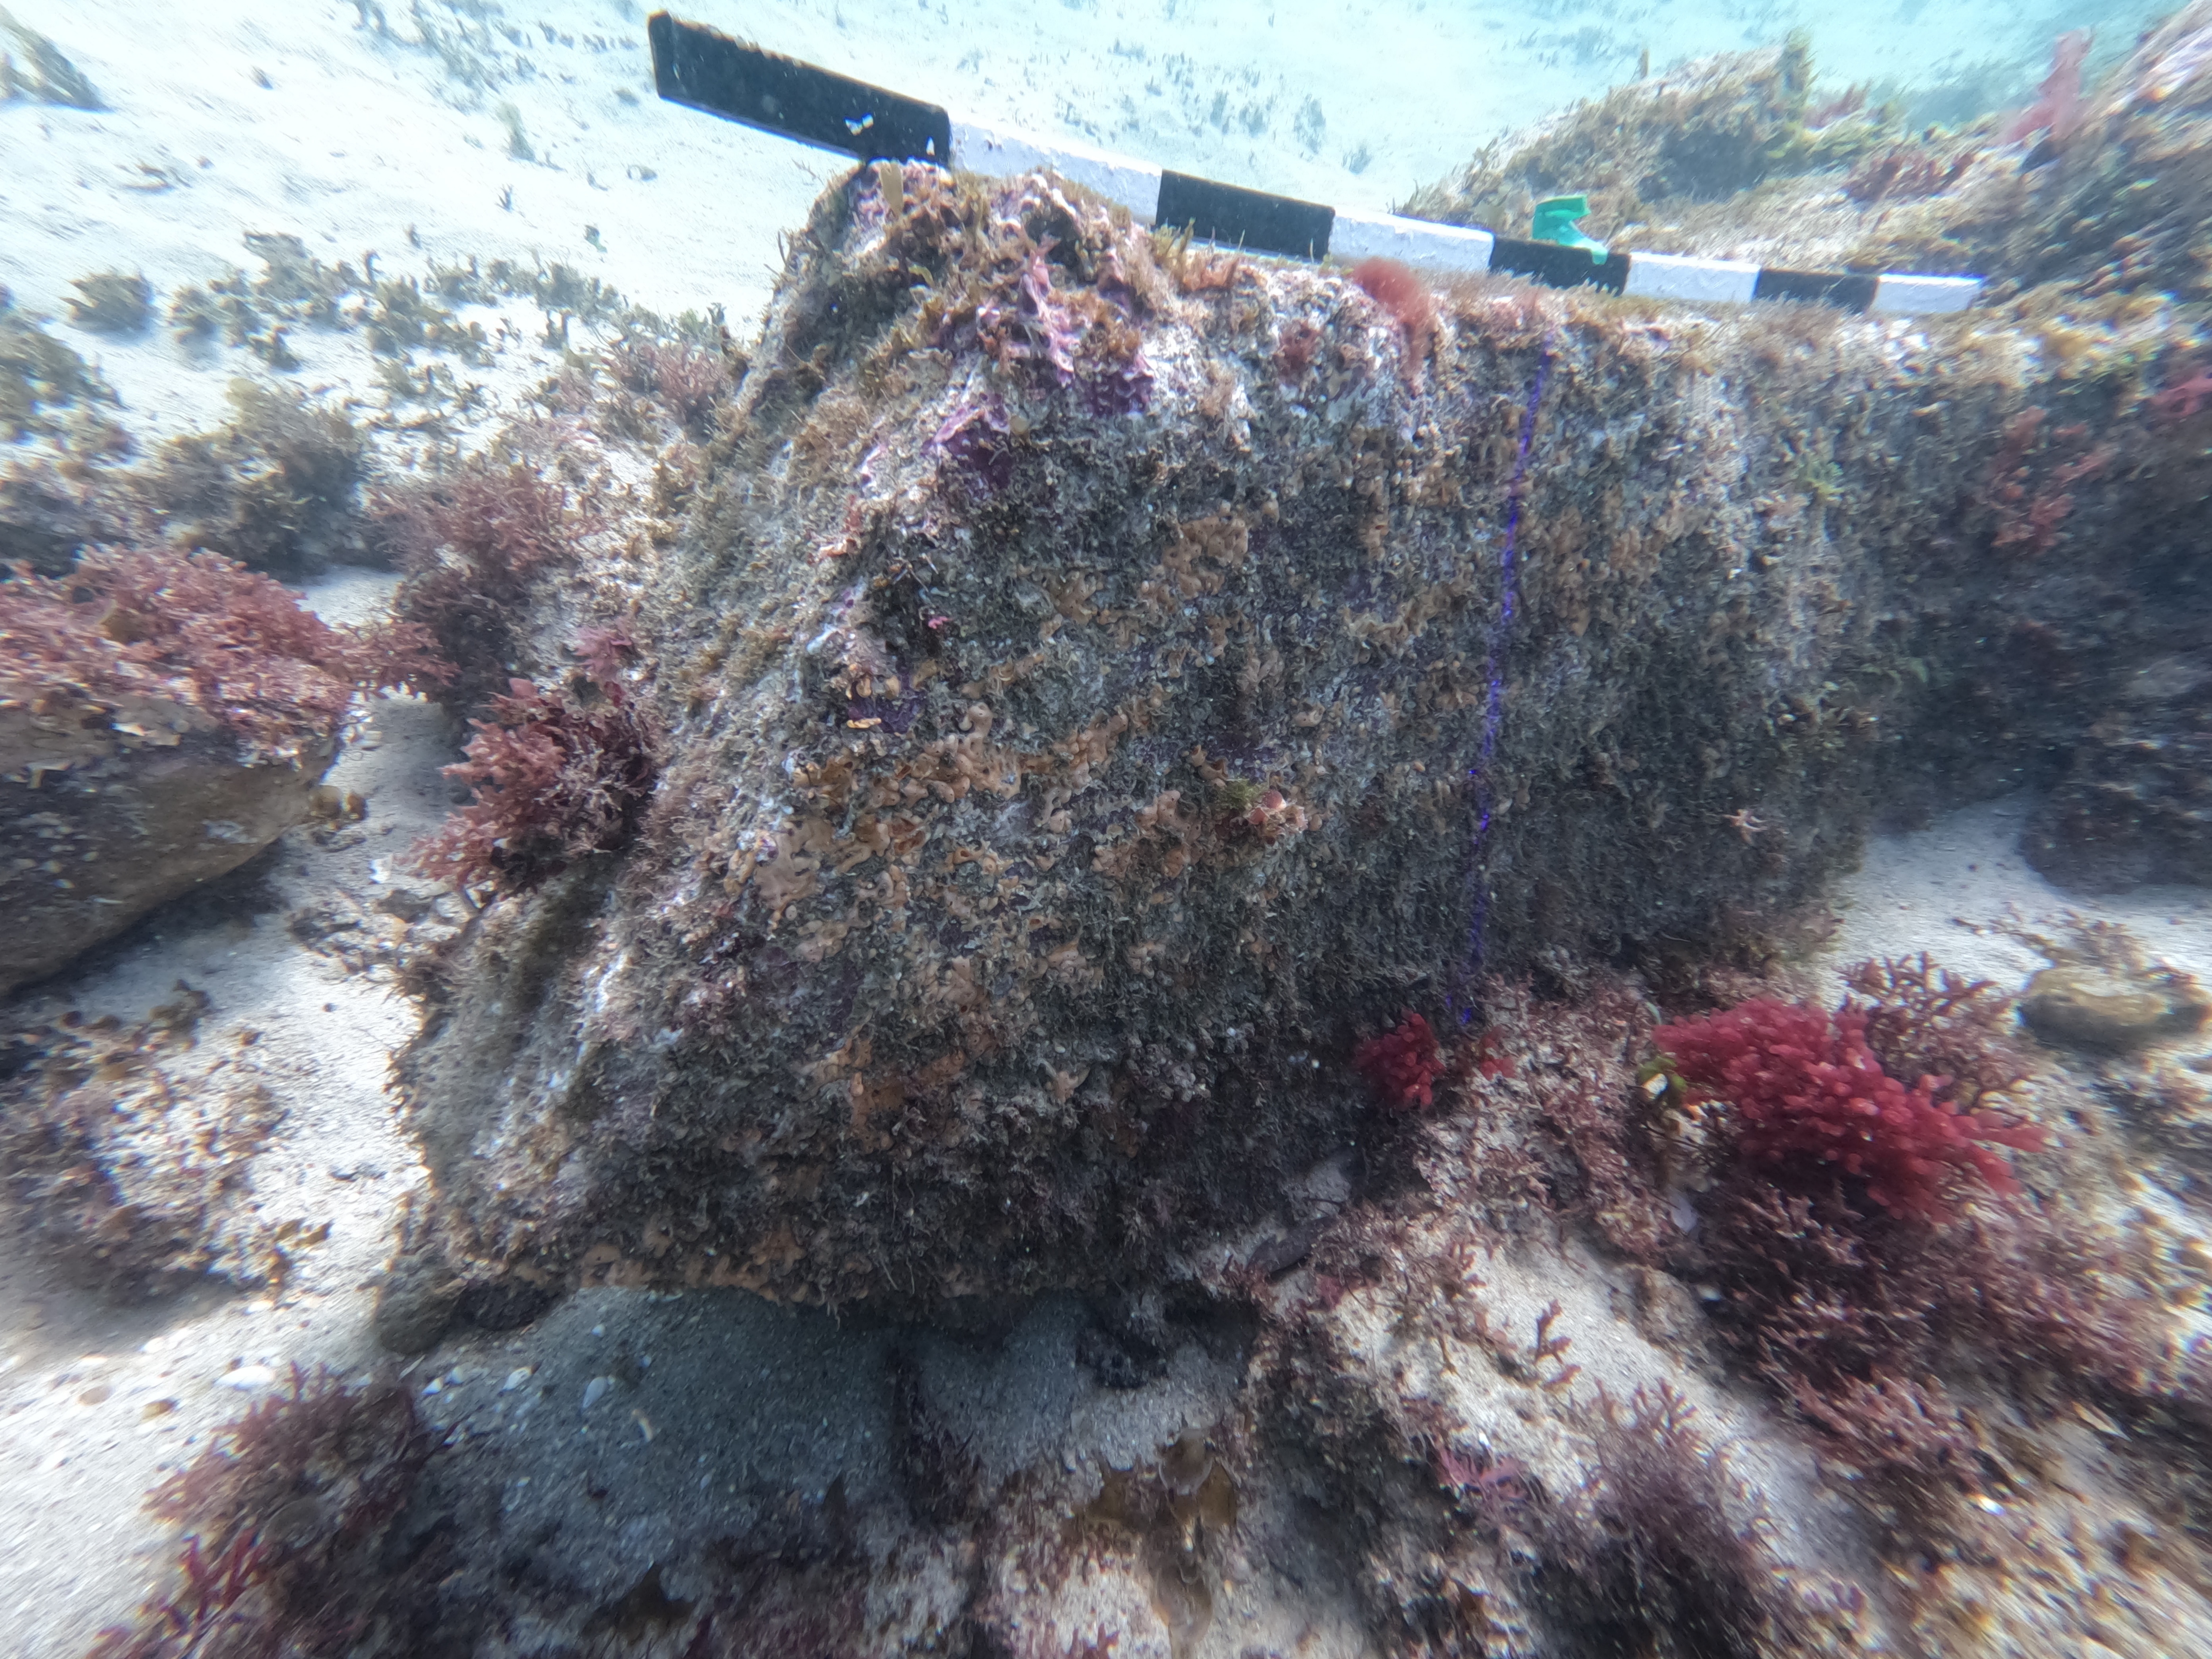

Supplement: Supplementary file 780 [file G0713847.pdf › Ocean2/G0713847.pdf]

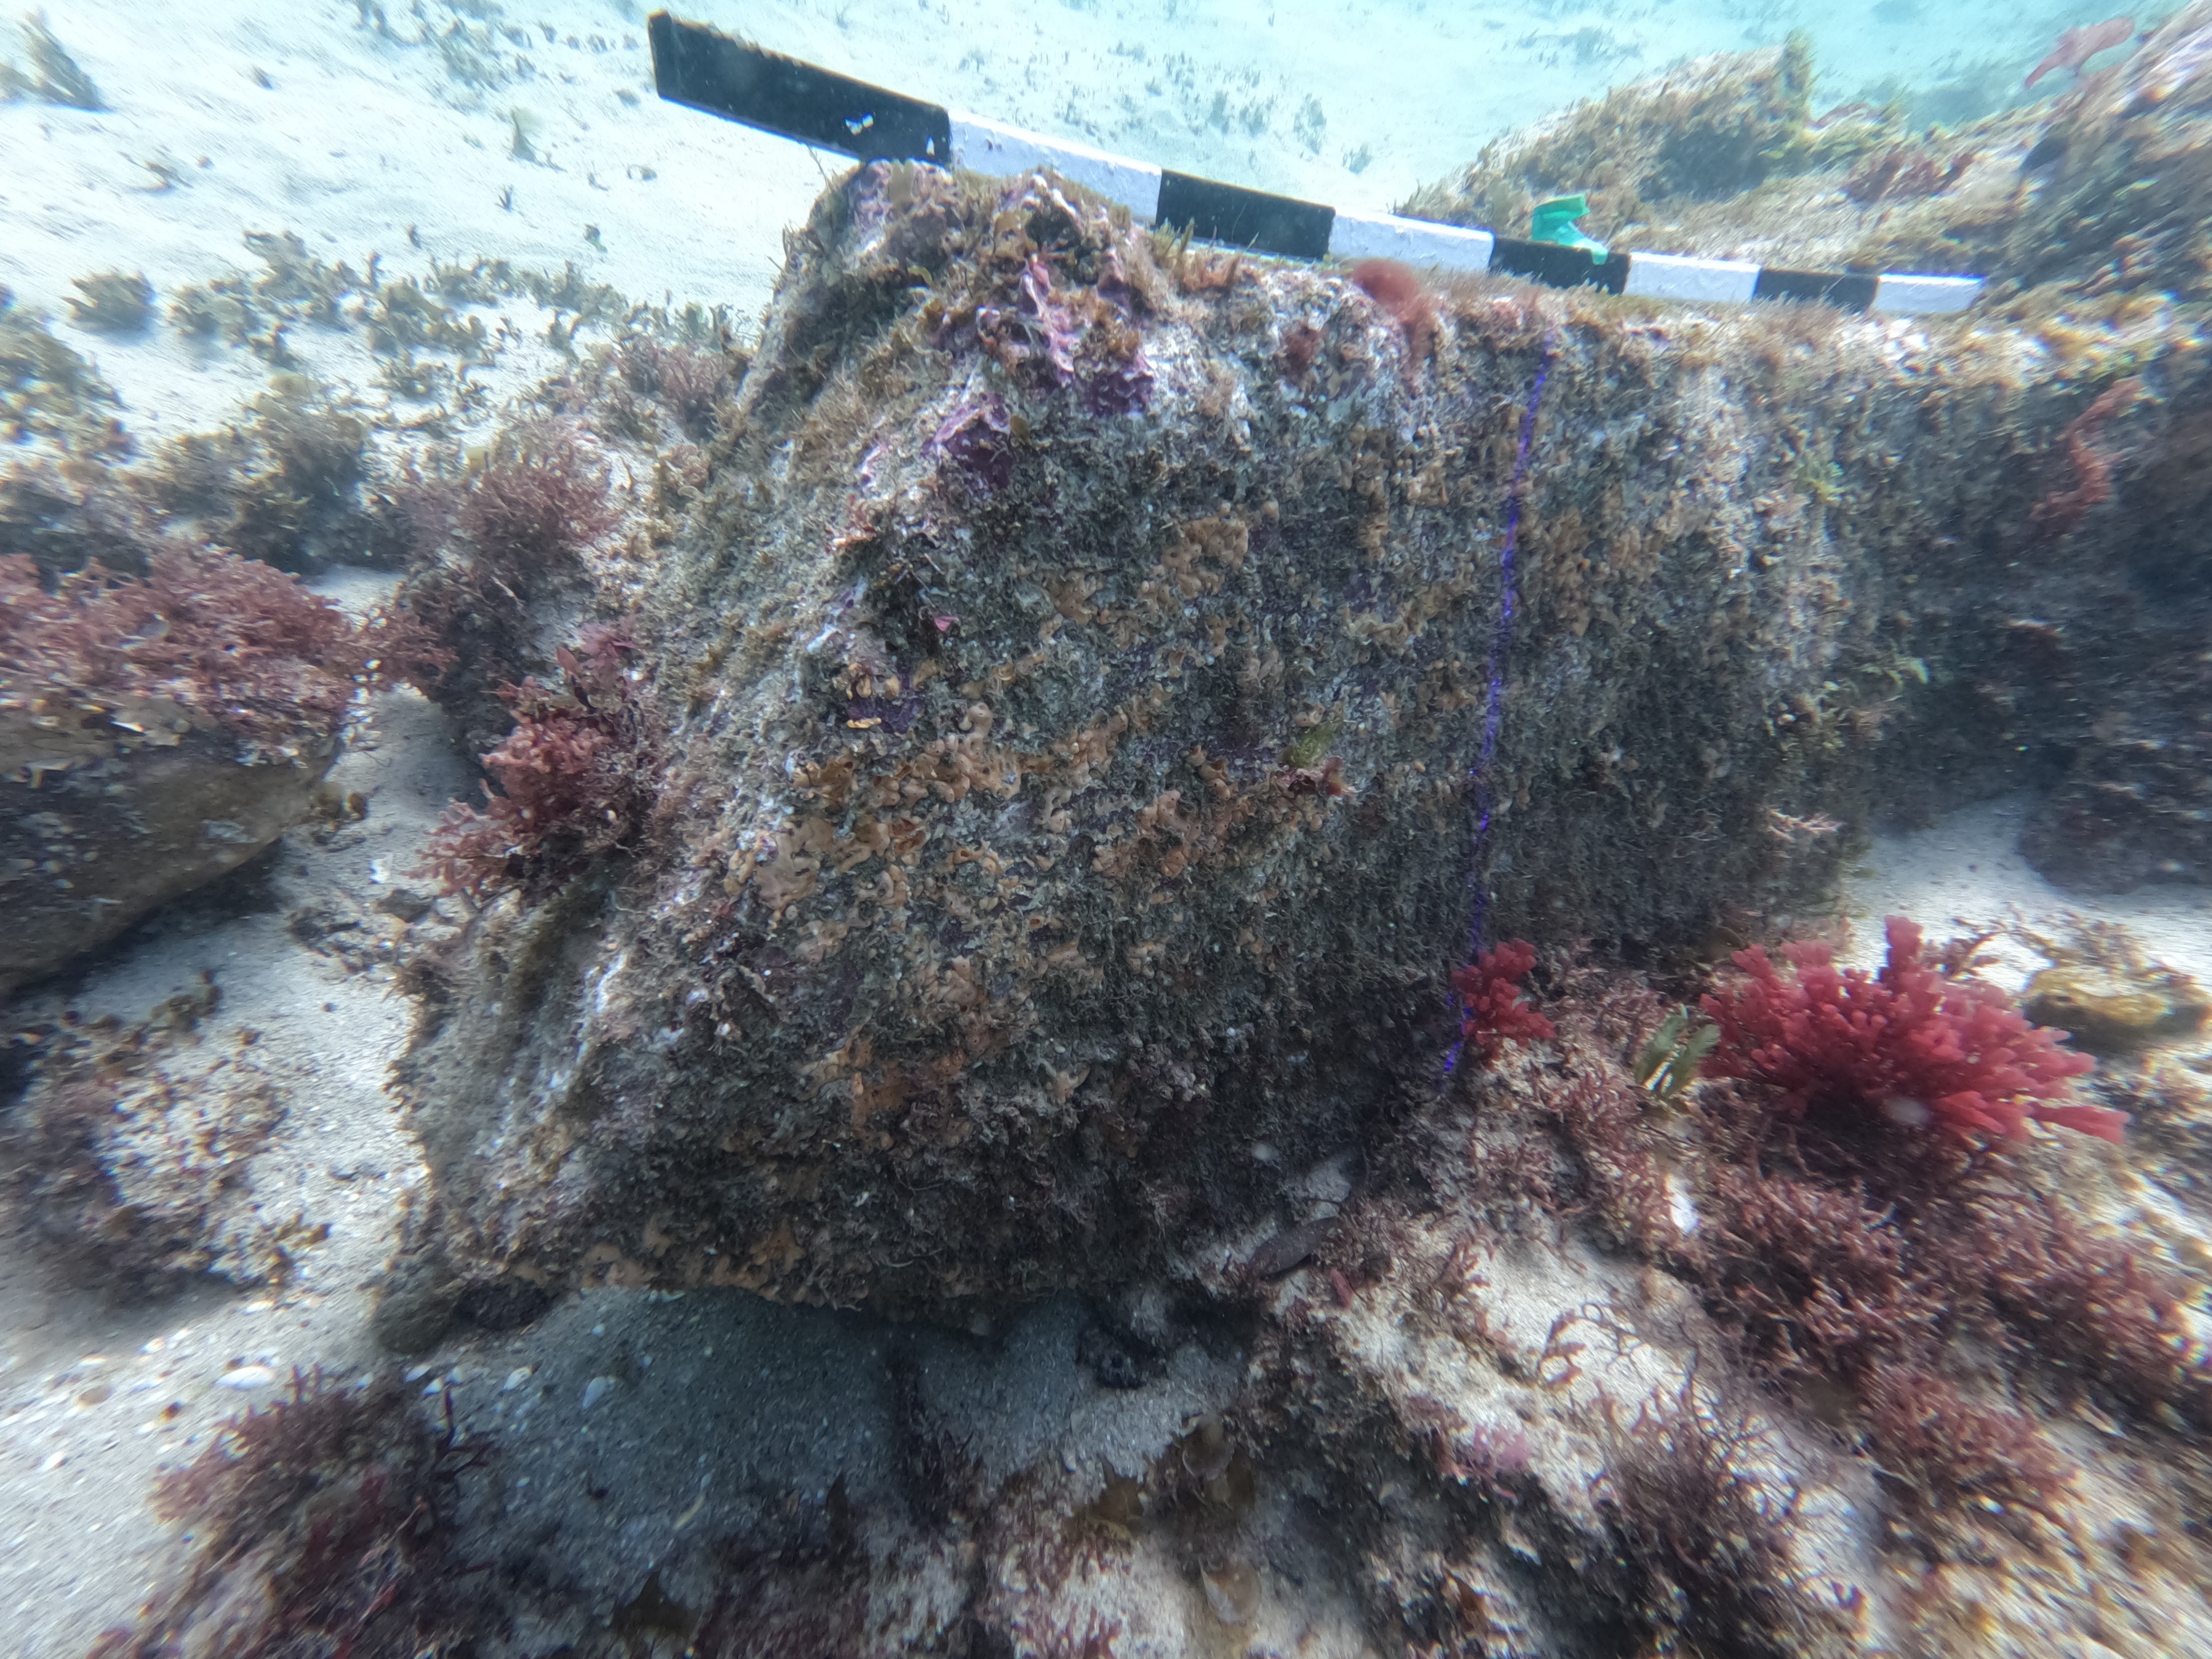

Supplement: Supplementary file 781 [file G0713848.pdf › Ocean2/G0713848.pdf]

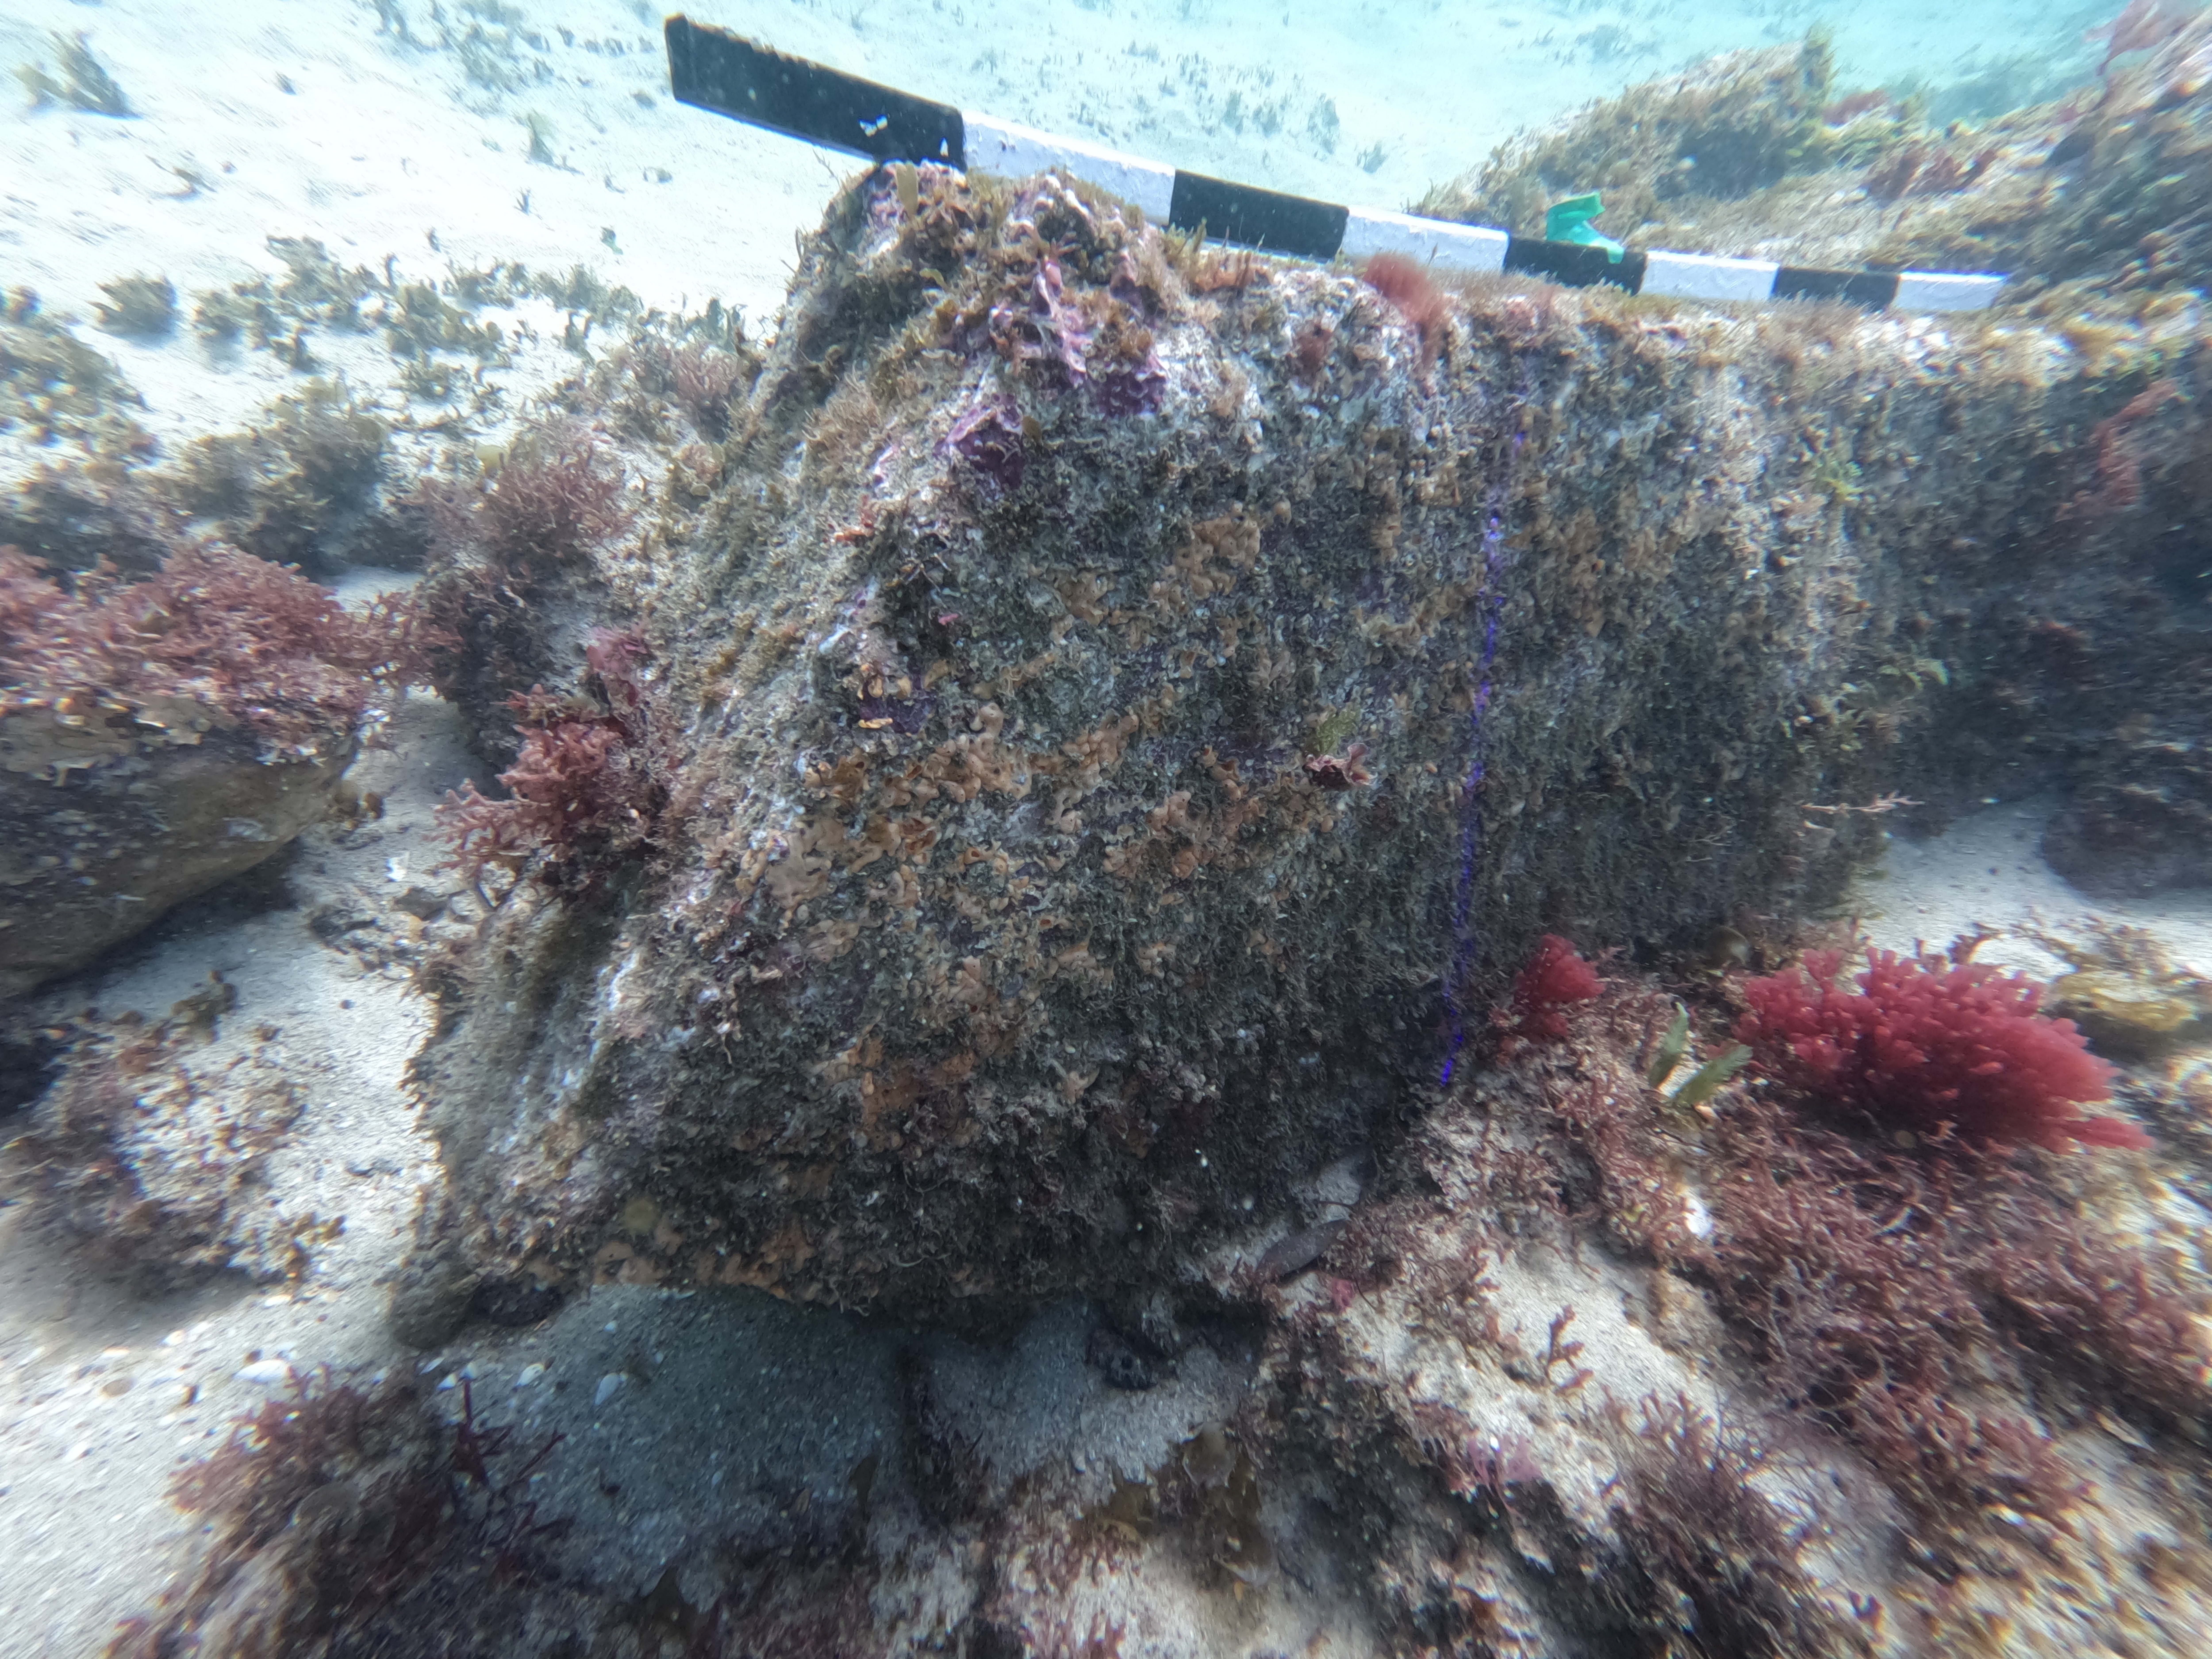

Supplement: Supplementary file 782 [file G0713849.pdf › Ocean2/G0713849.pdf]

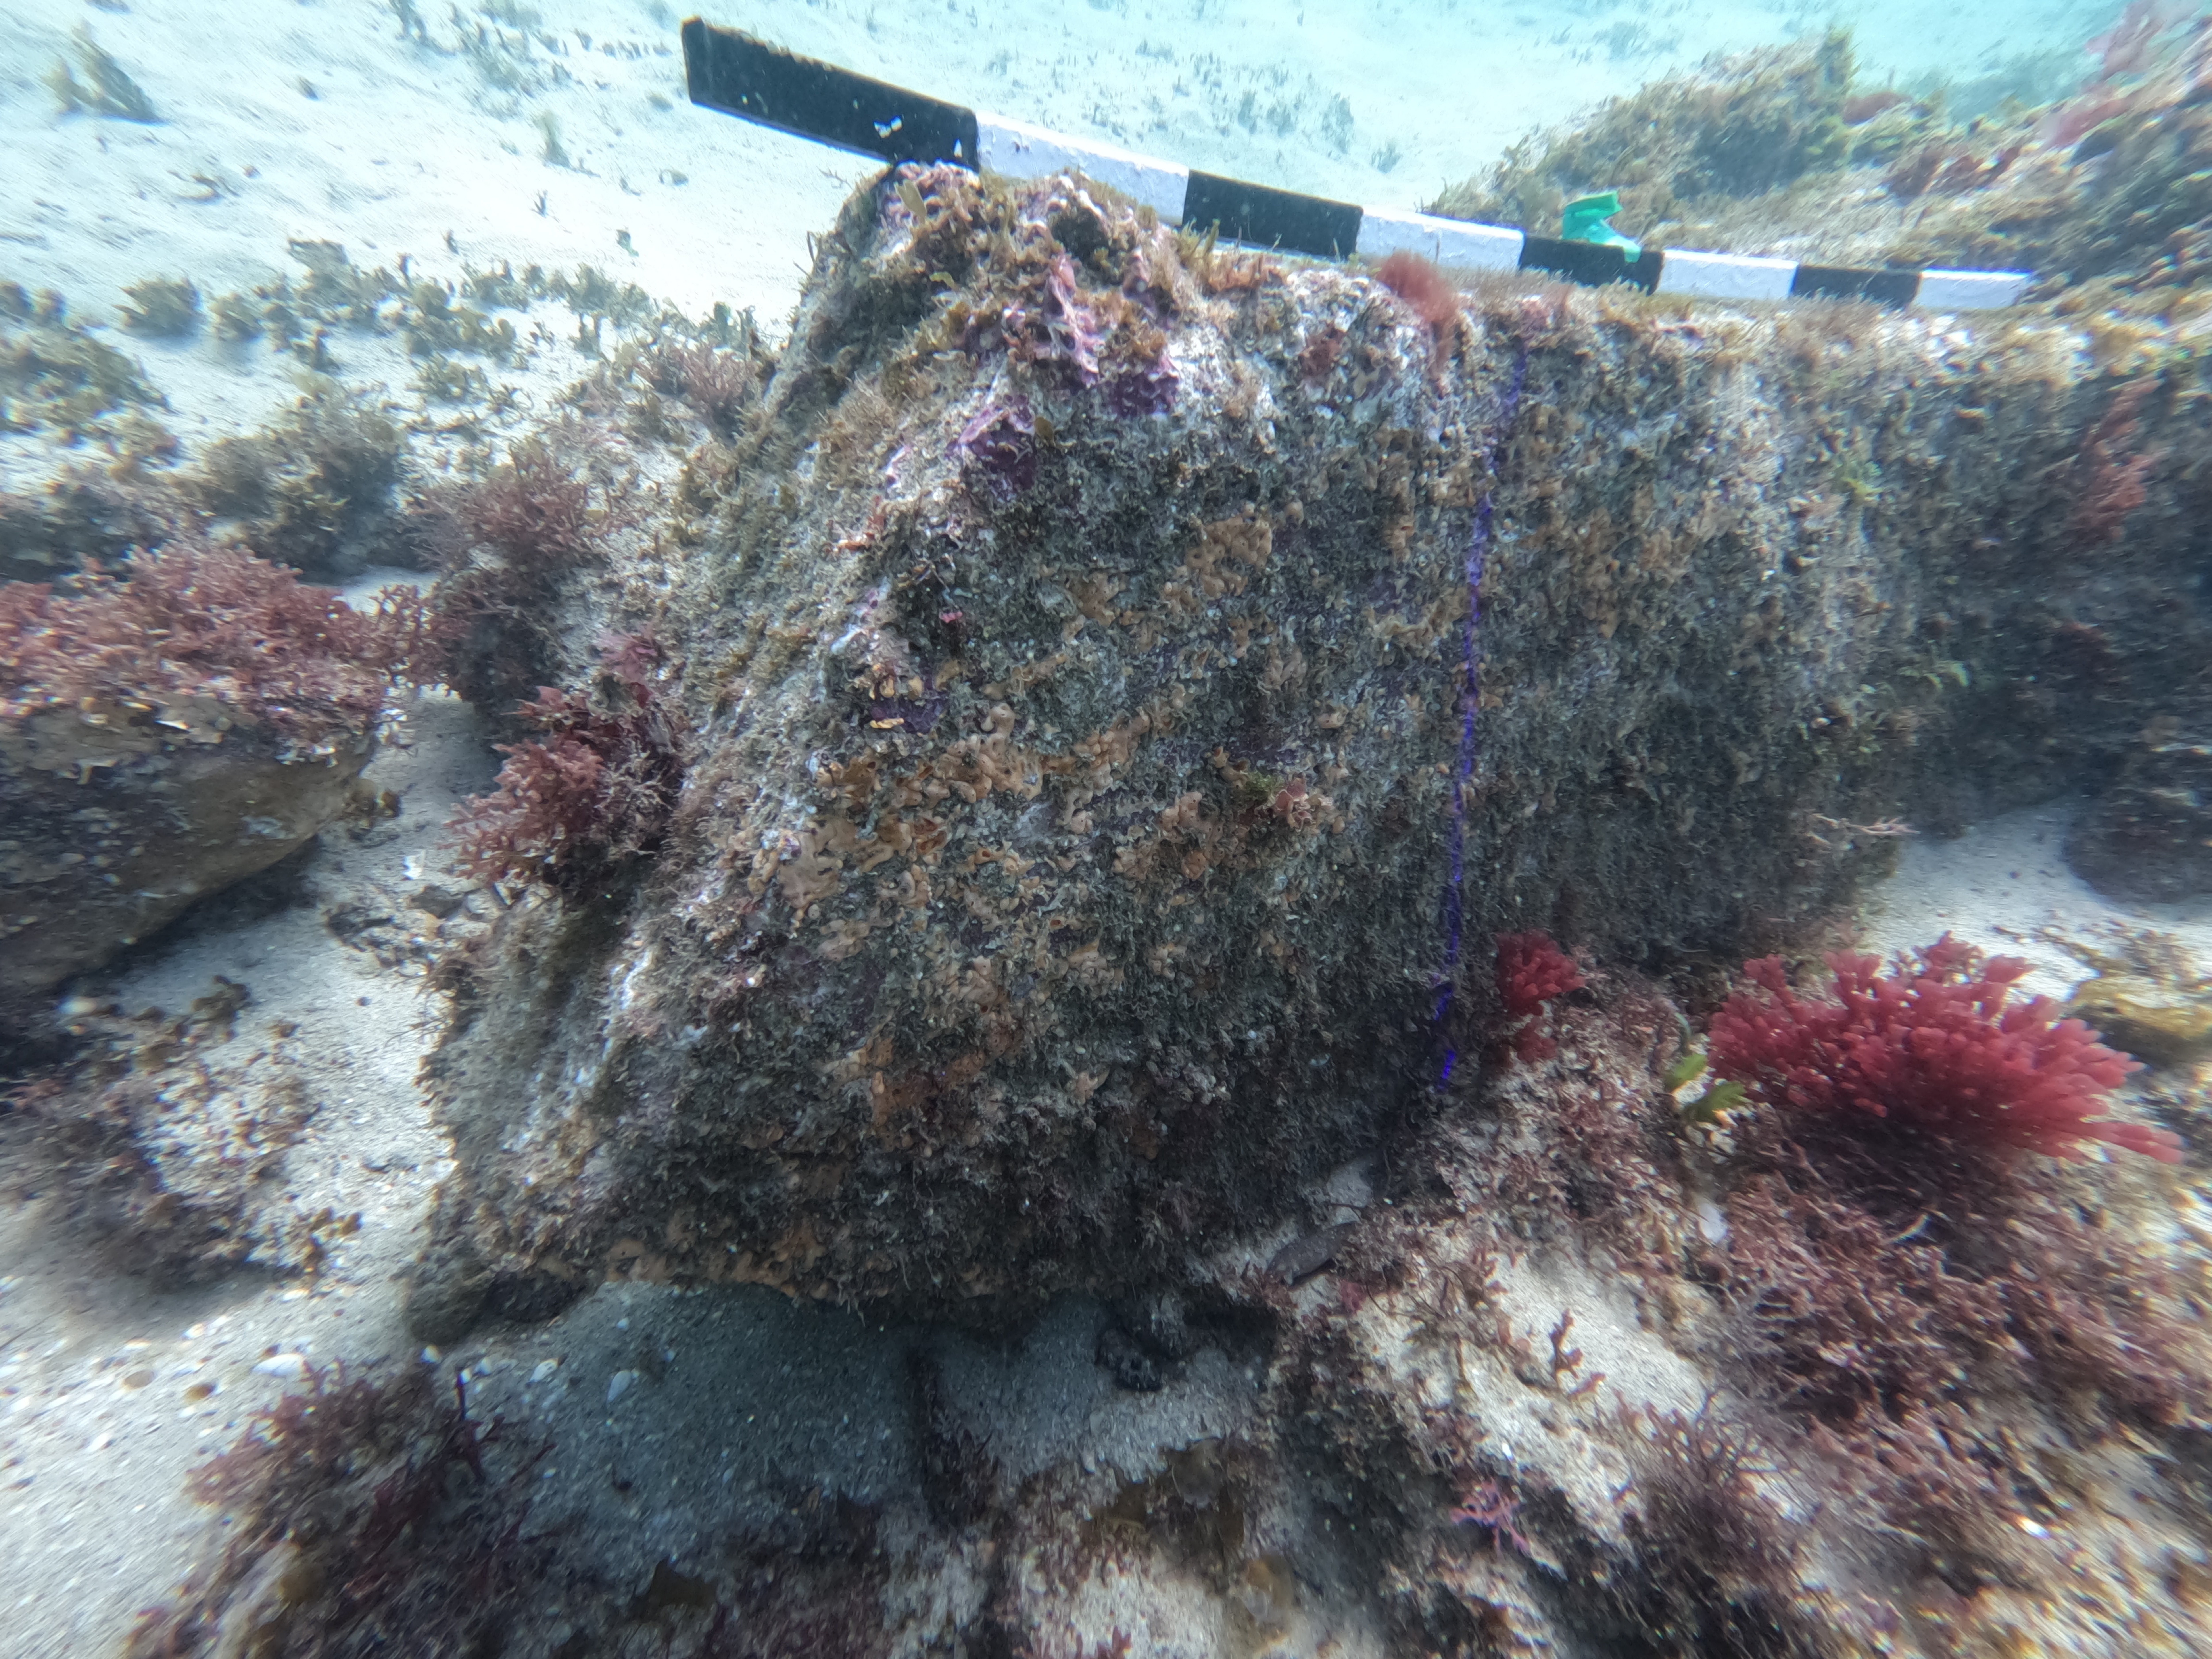

Supplement: Supplementary file 783 [file G0713850.pdf › Ocean2/G0713850.pdf]

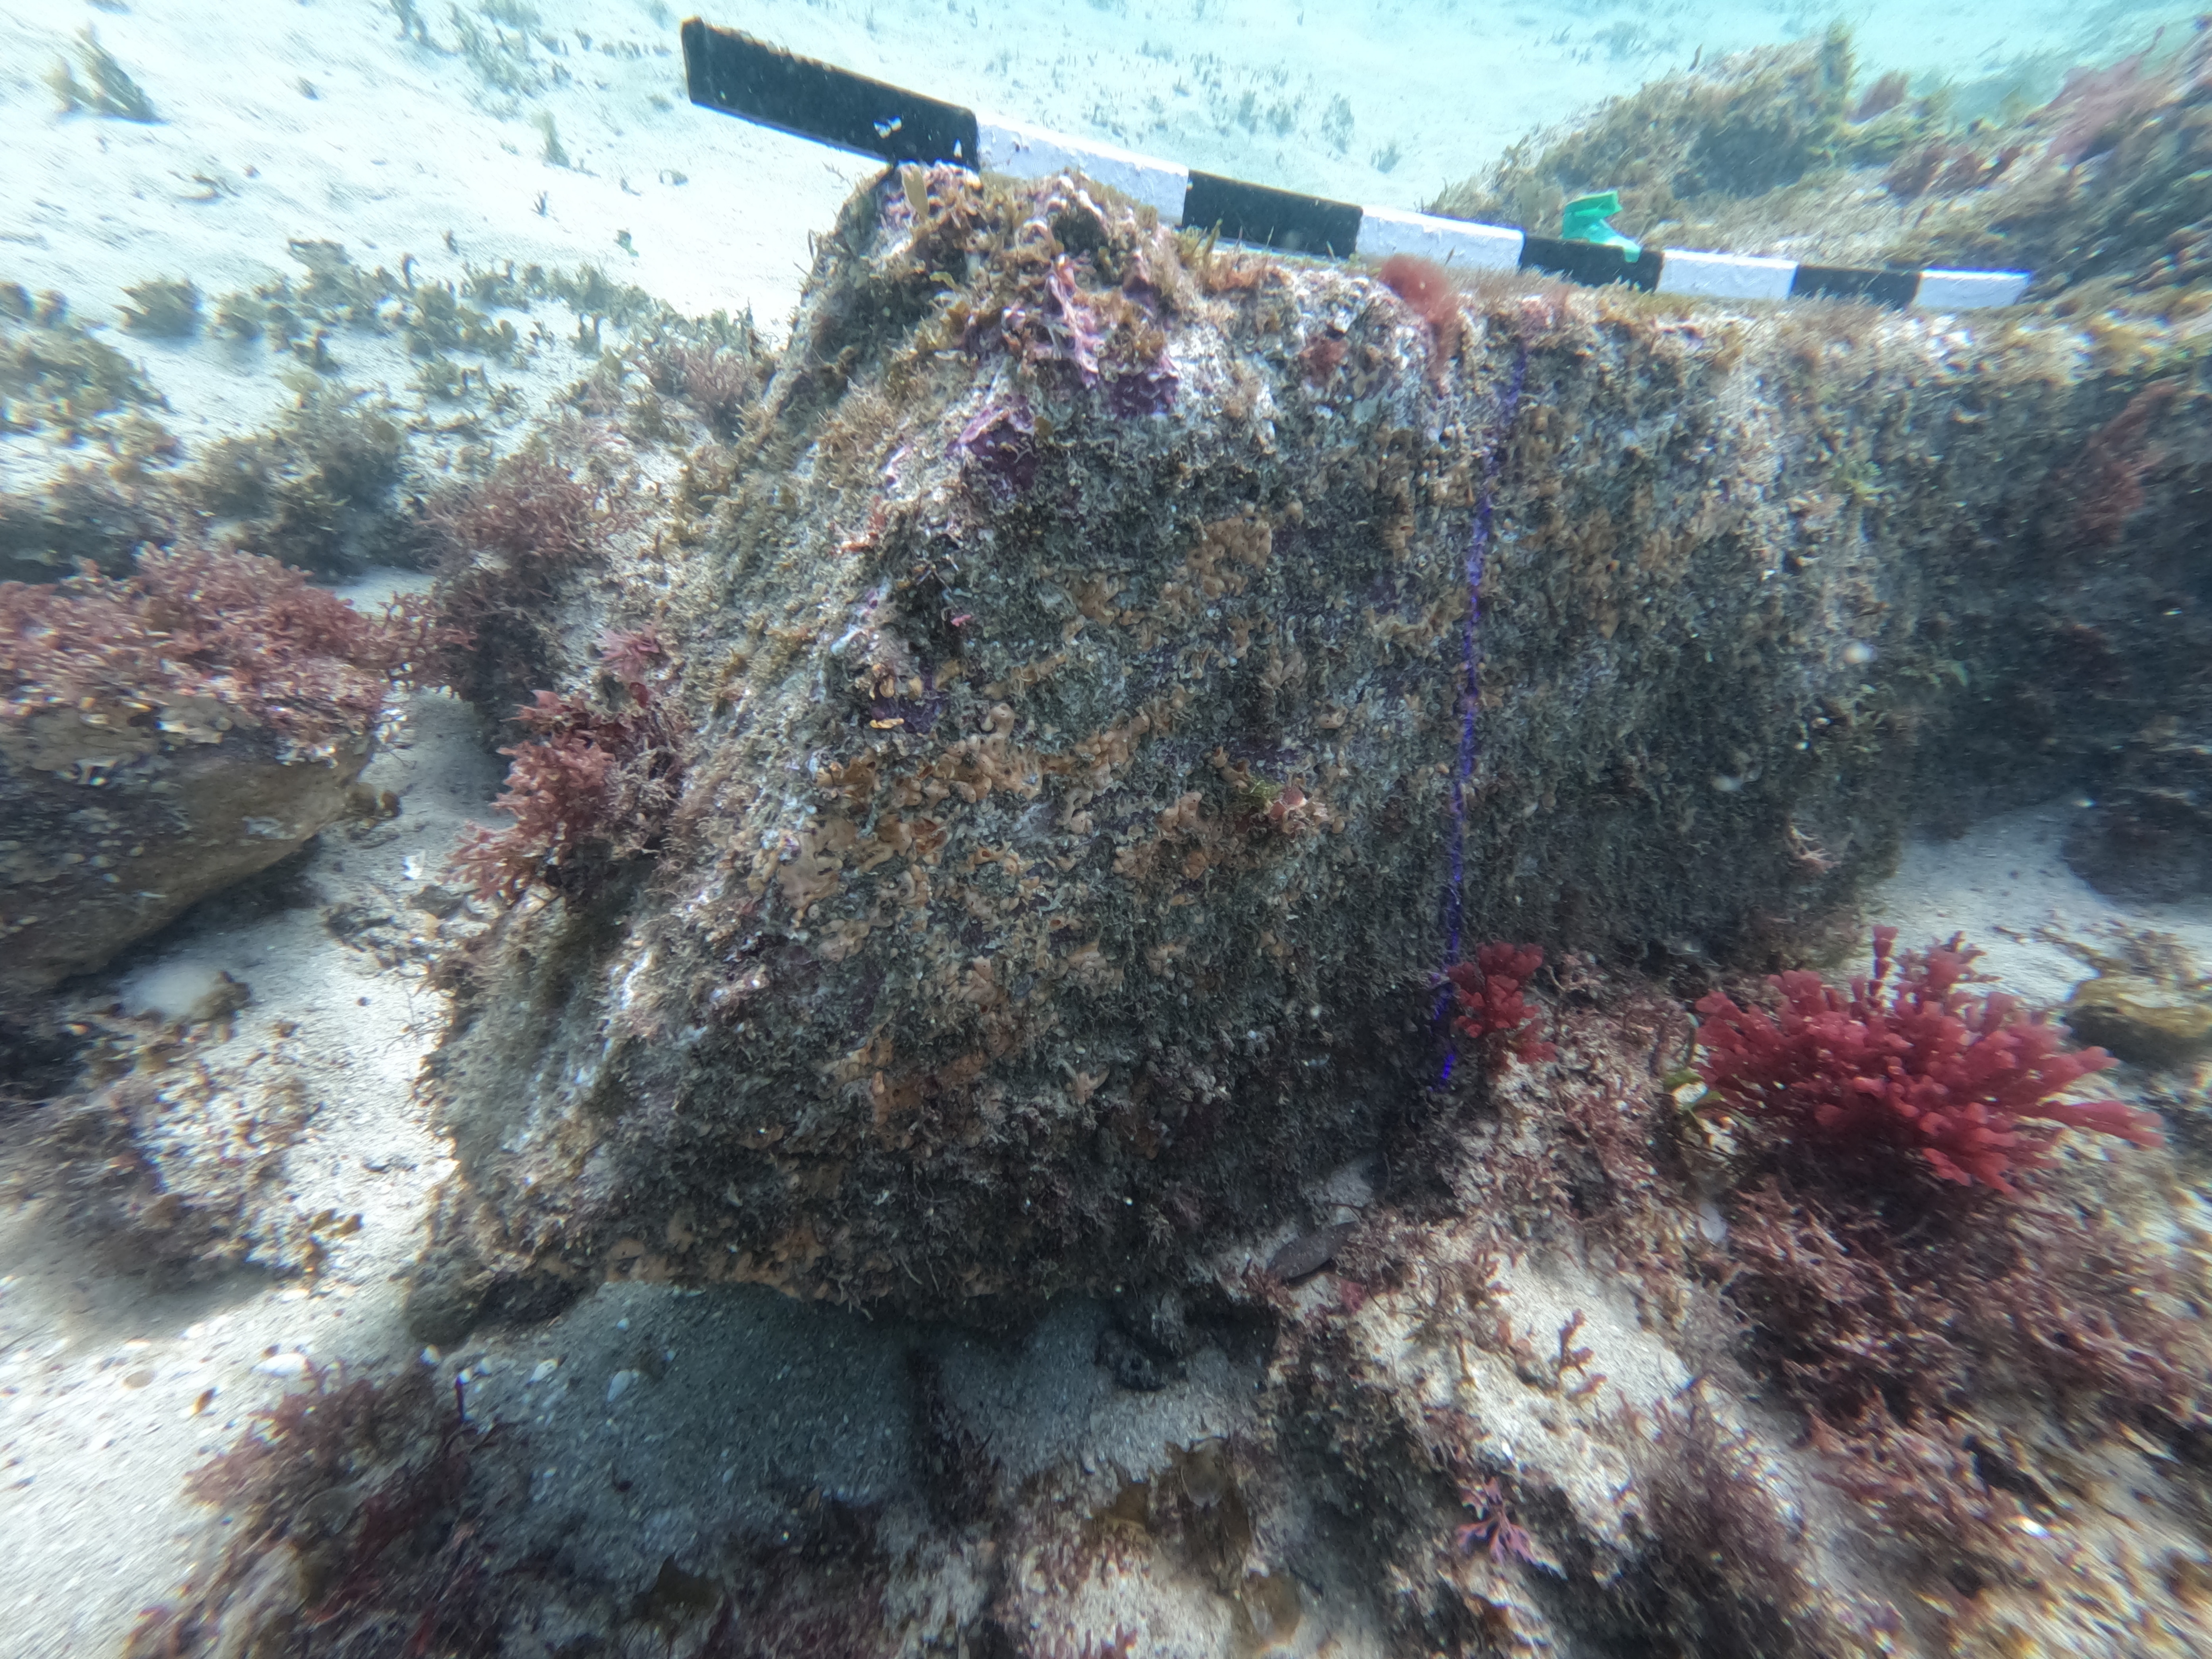

Supplement: Supplementary file 784 [file G0713851.pdf › Ocean2/G0713851.pdf]

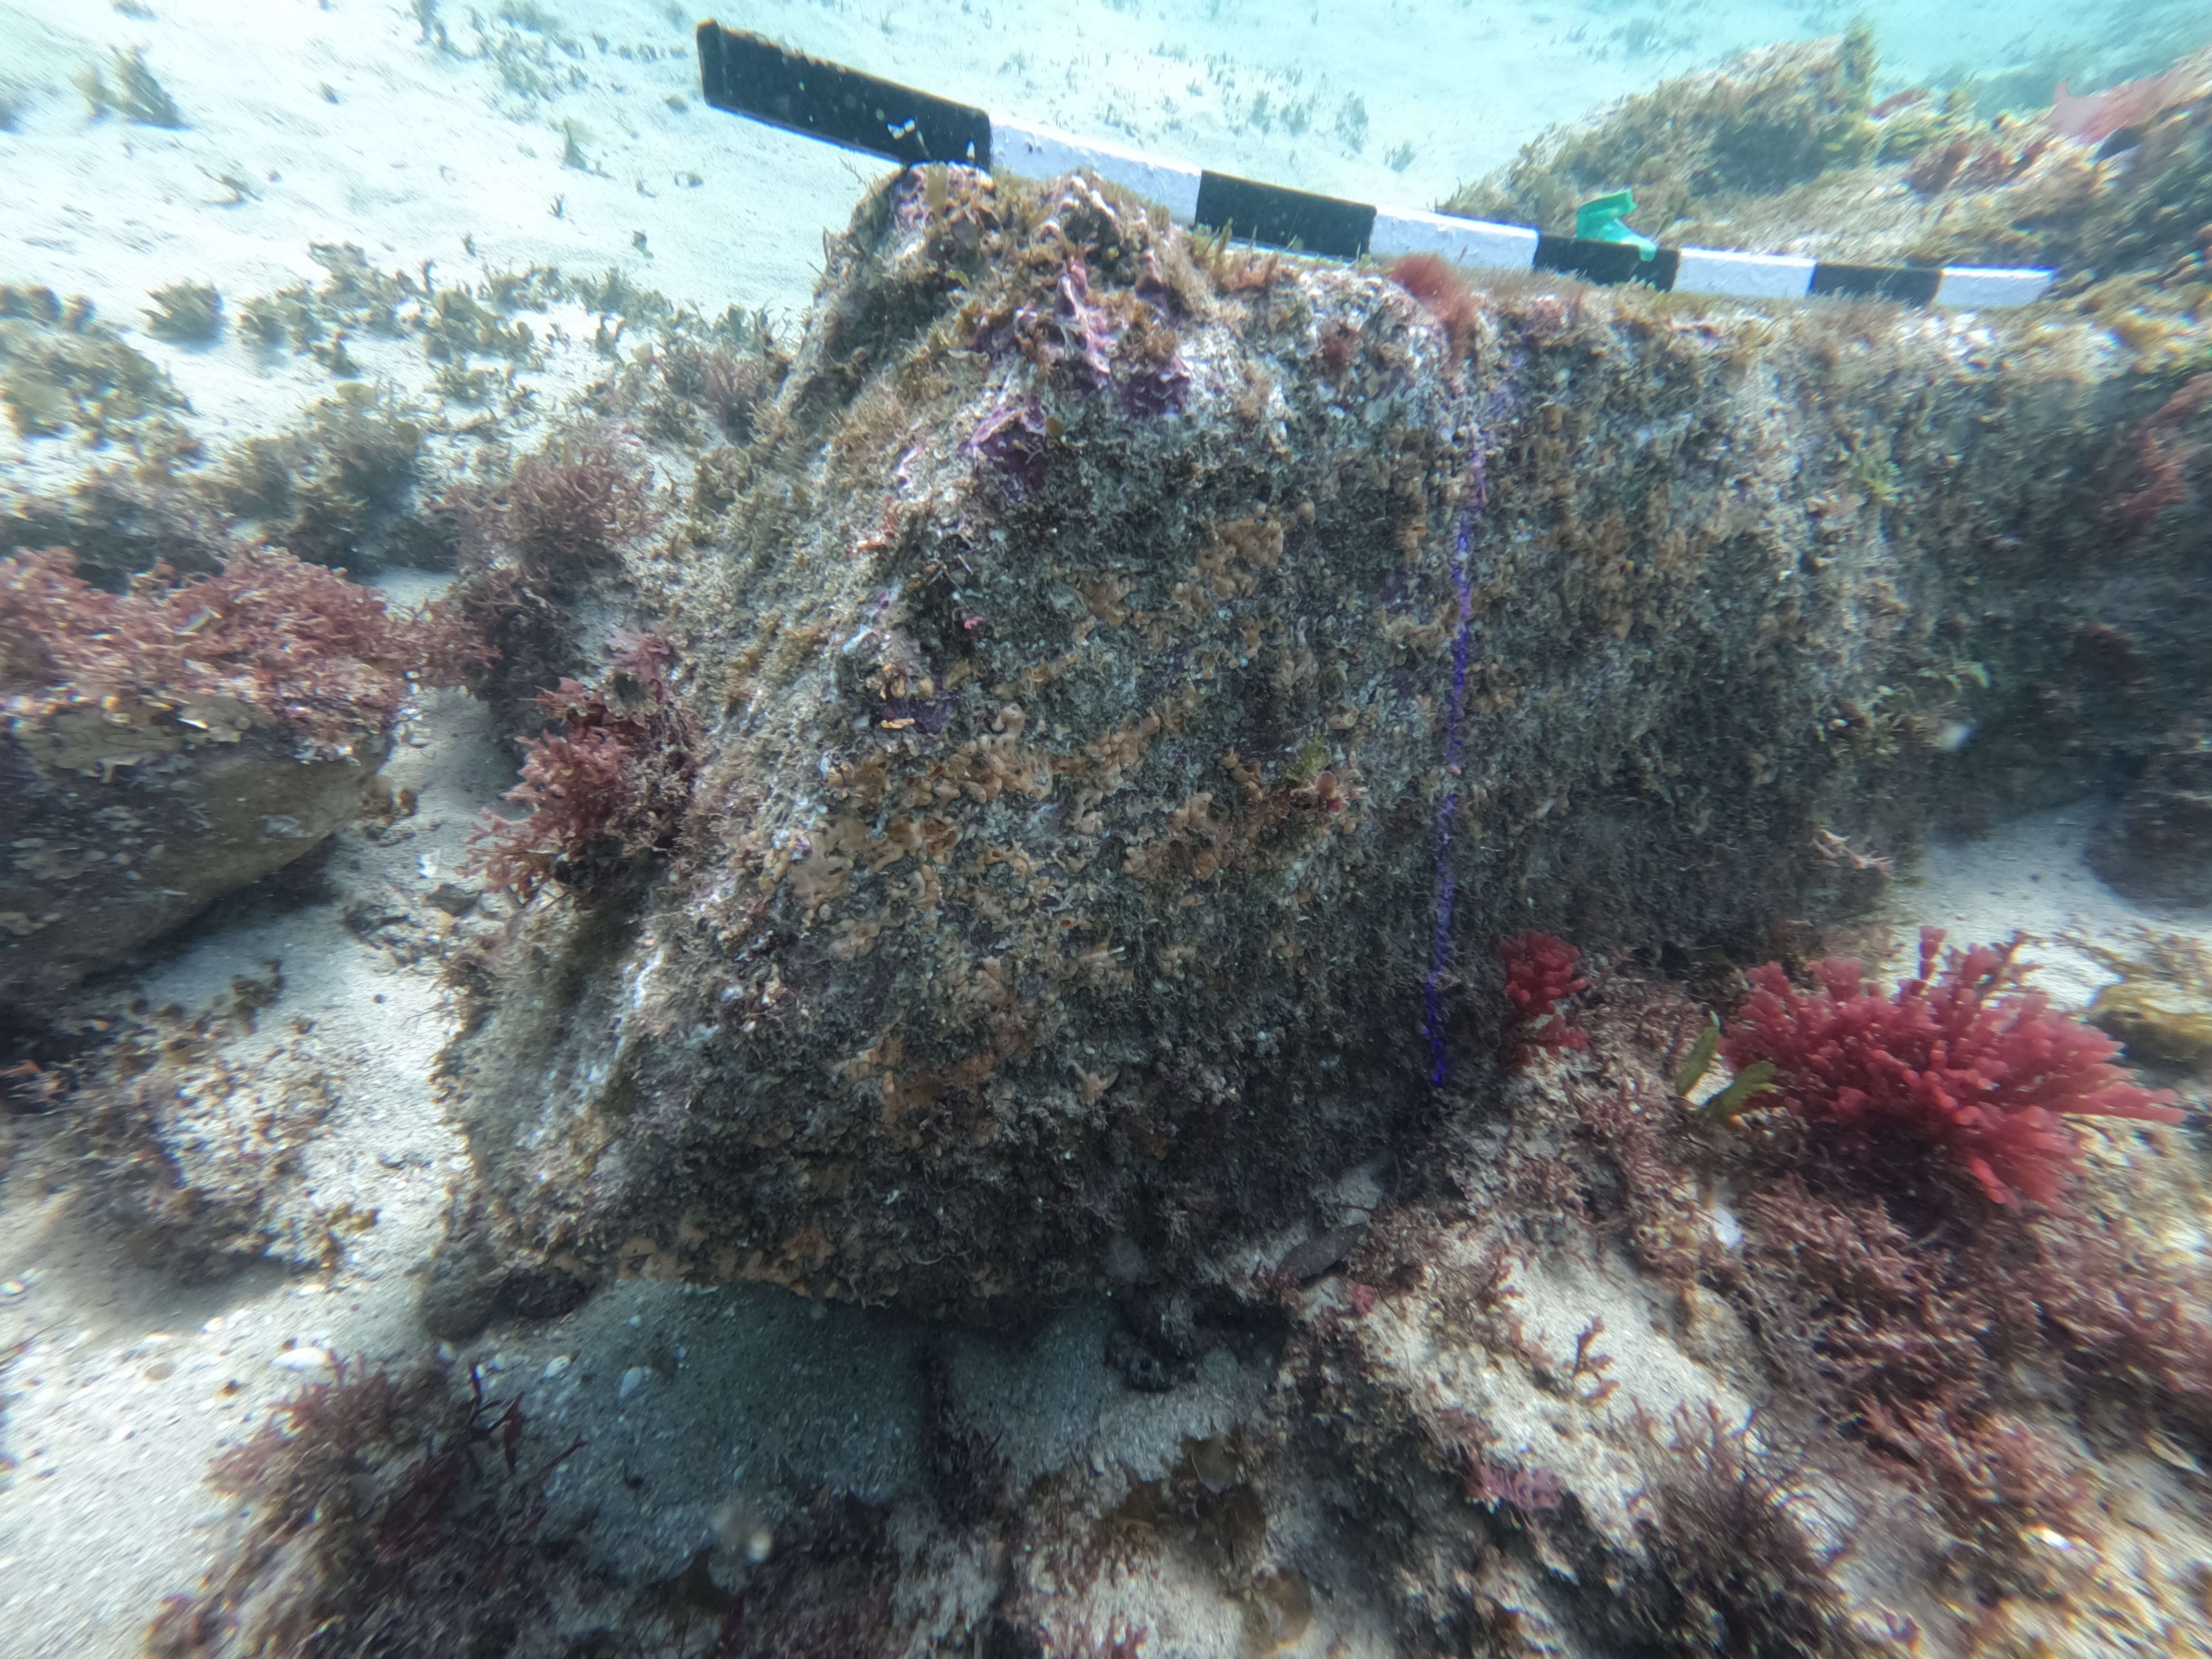

Supplement: Supplementary file 785 [file G0713852.pdf › Ocean2/G0713852.pdf]

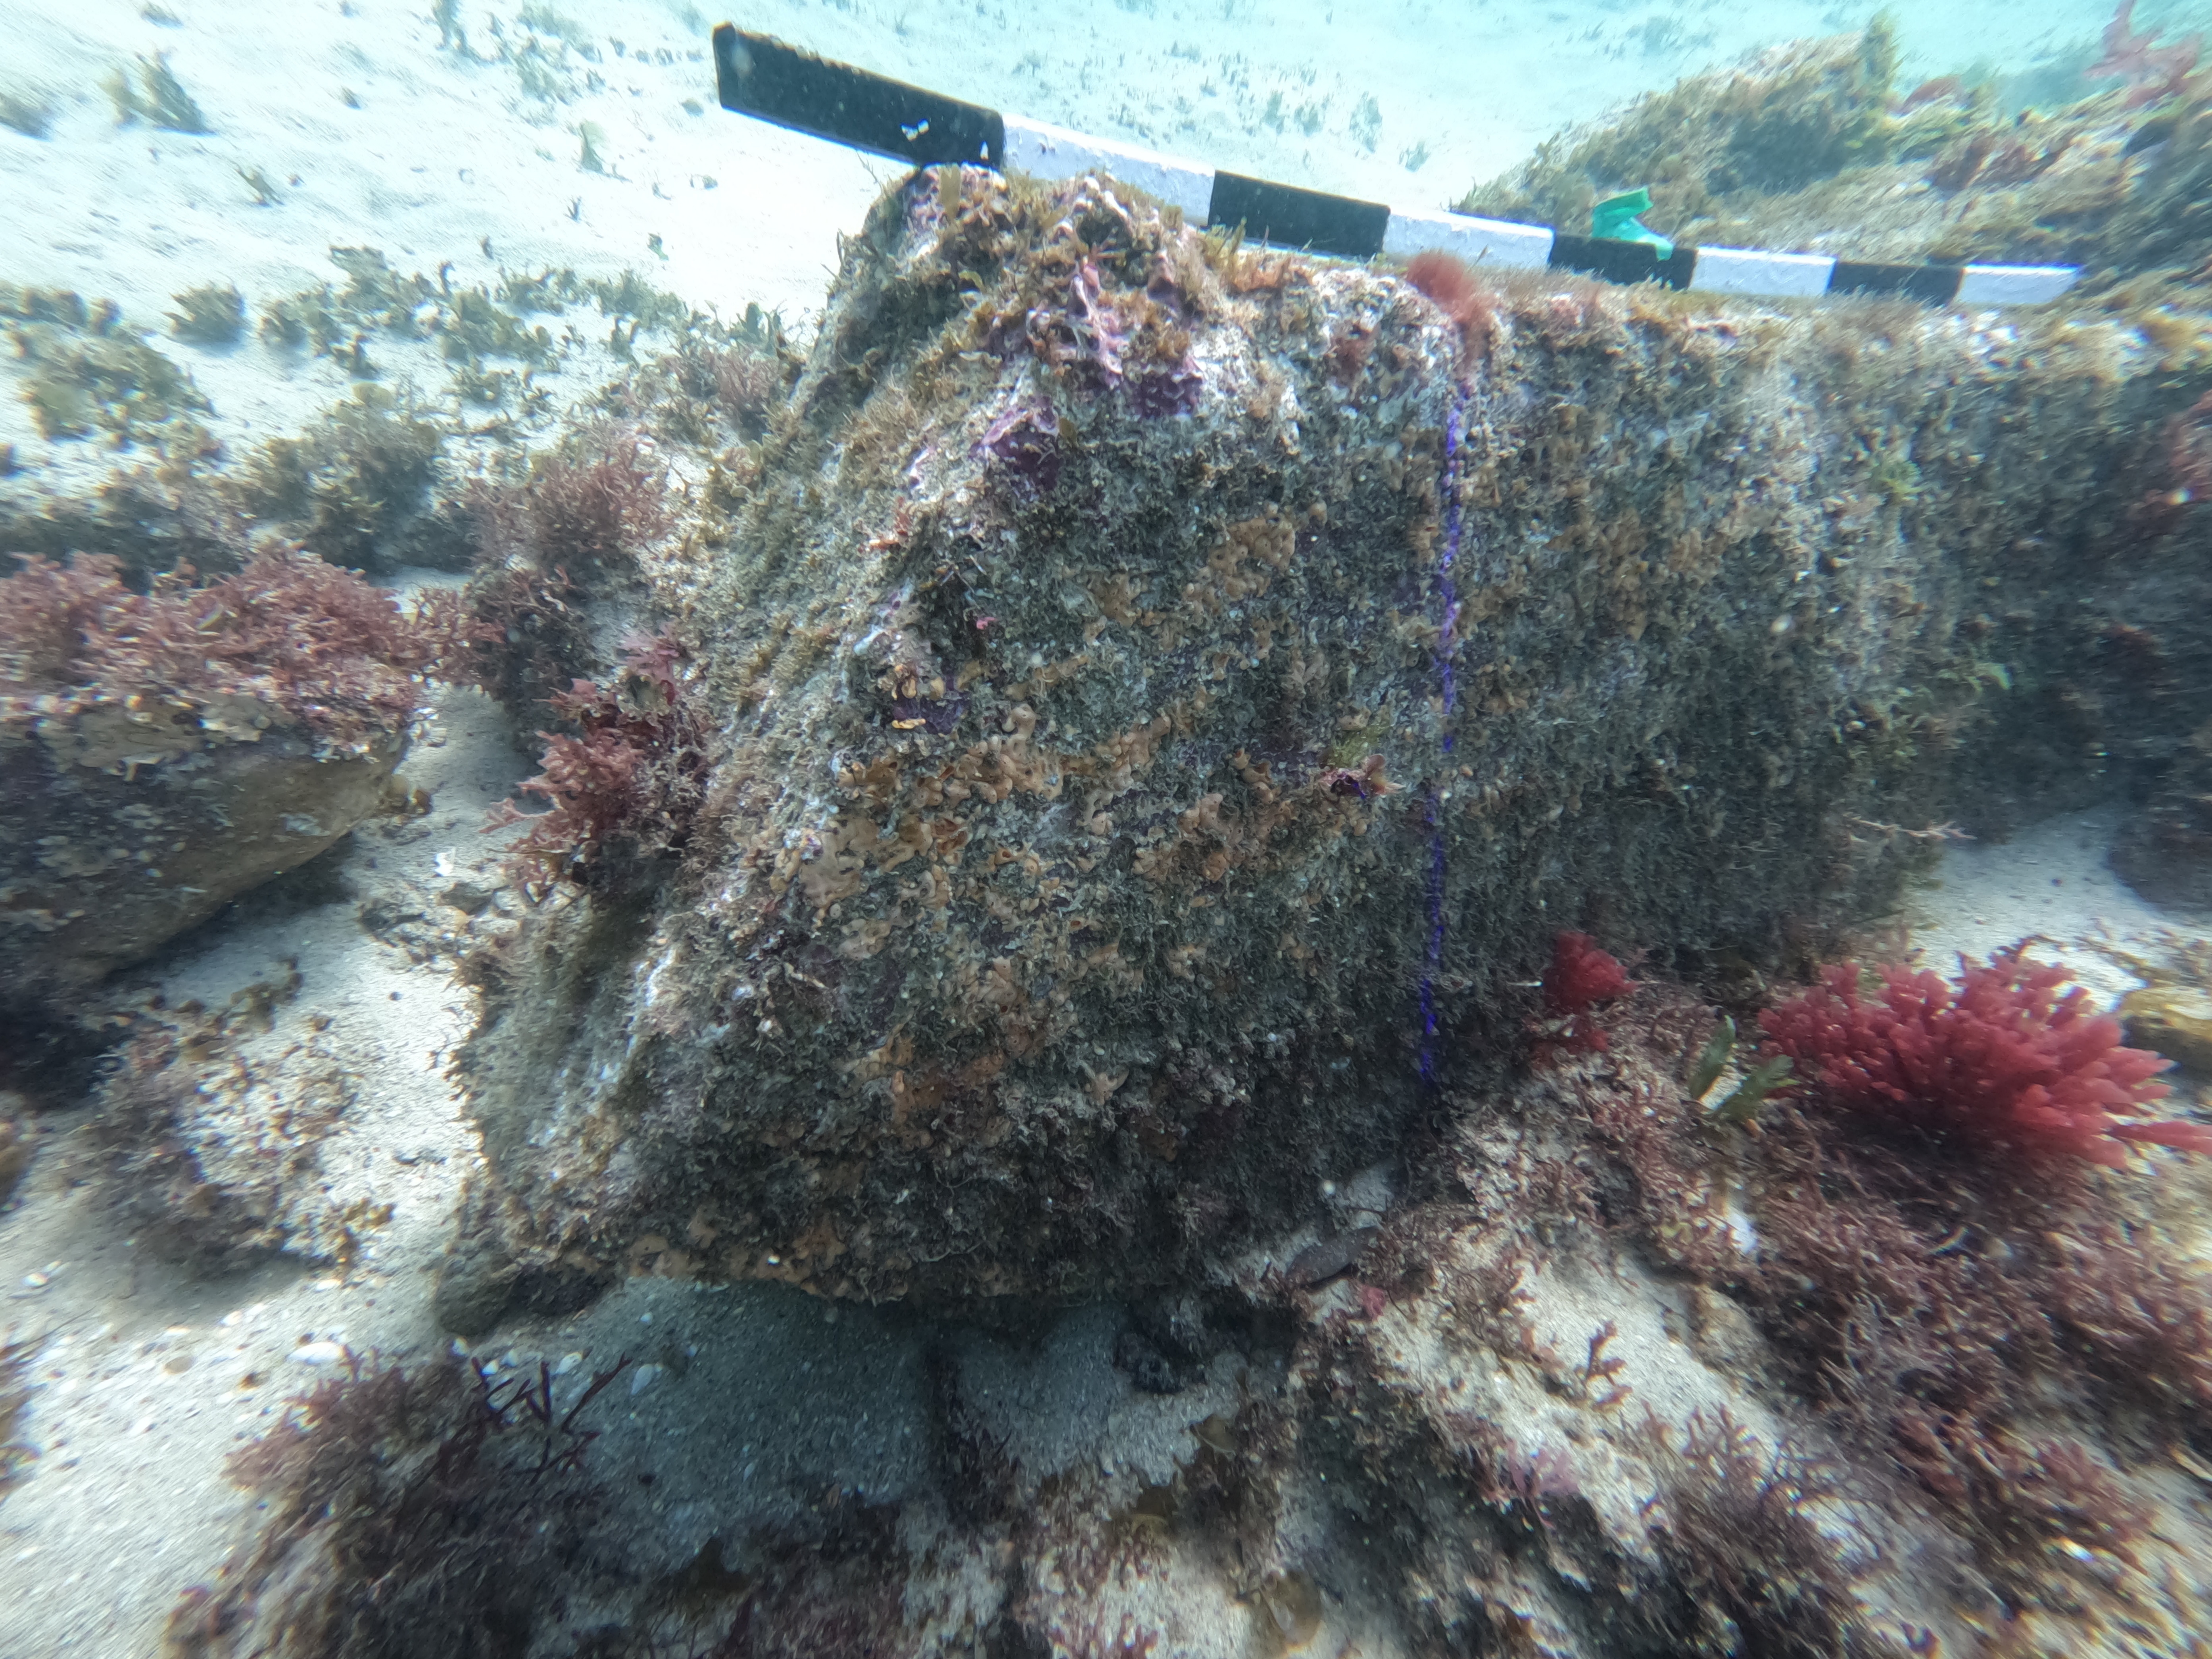

Supplement: Supplementary file 786 [file G0713853.pdf › Ocean2/G0713853.pdf]

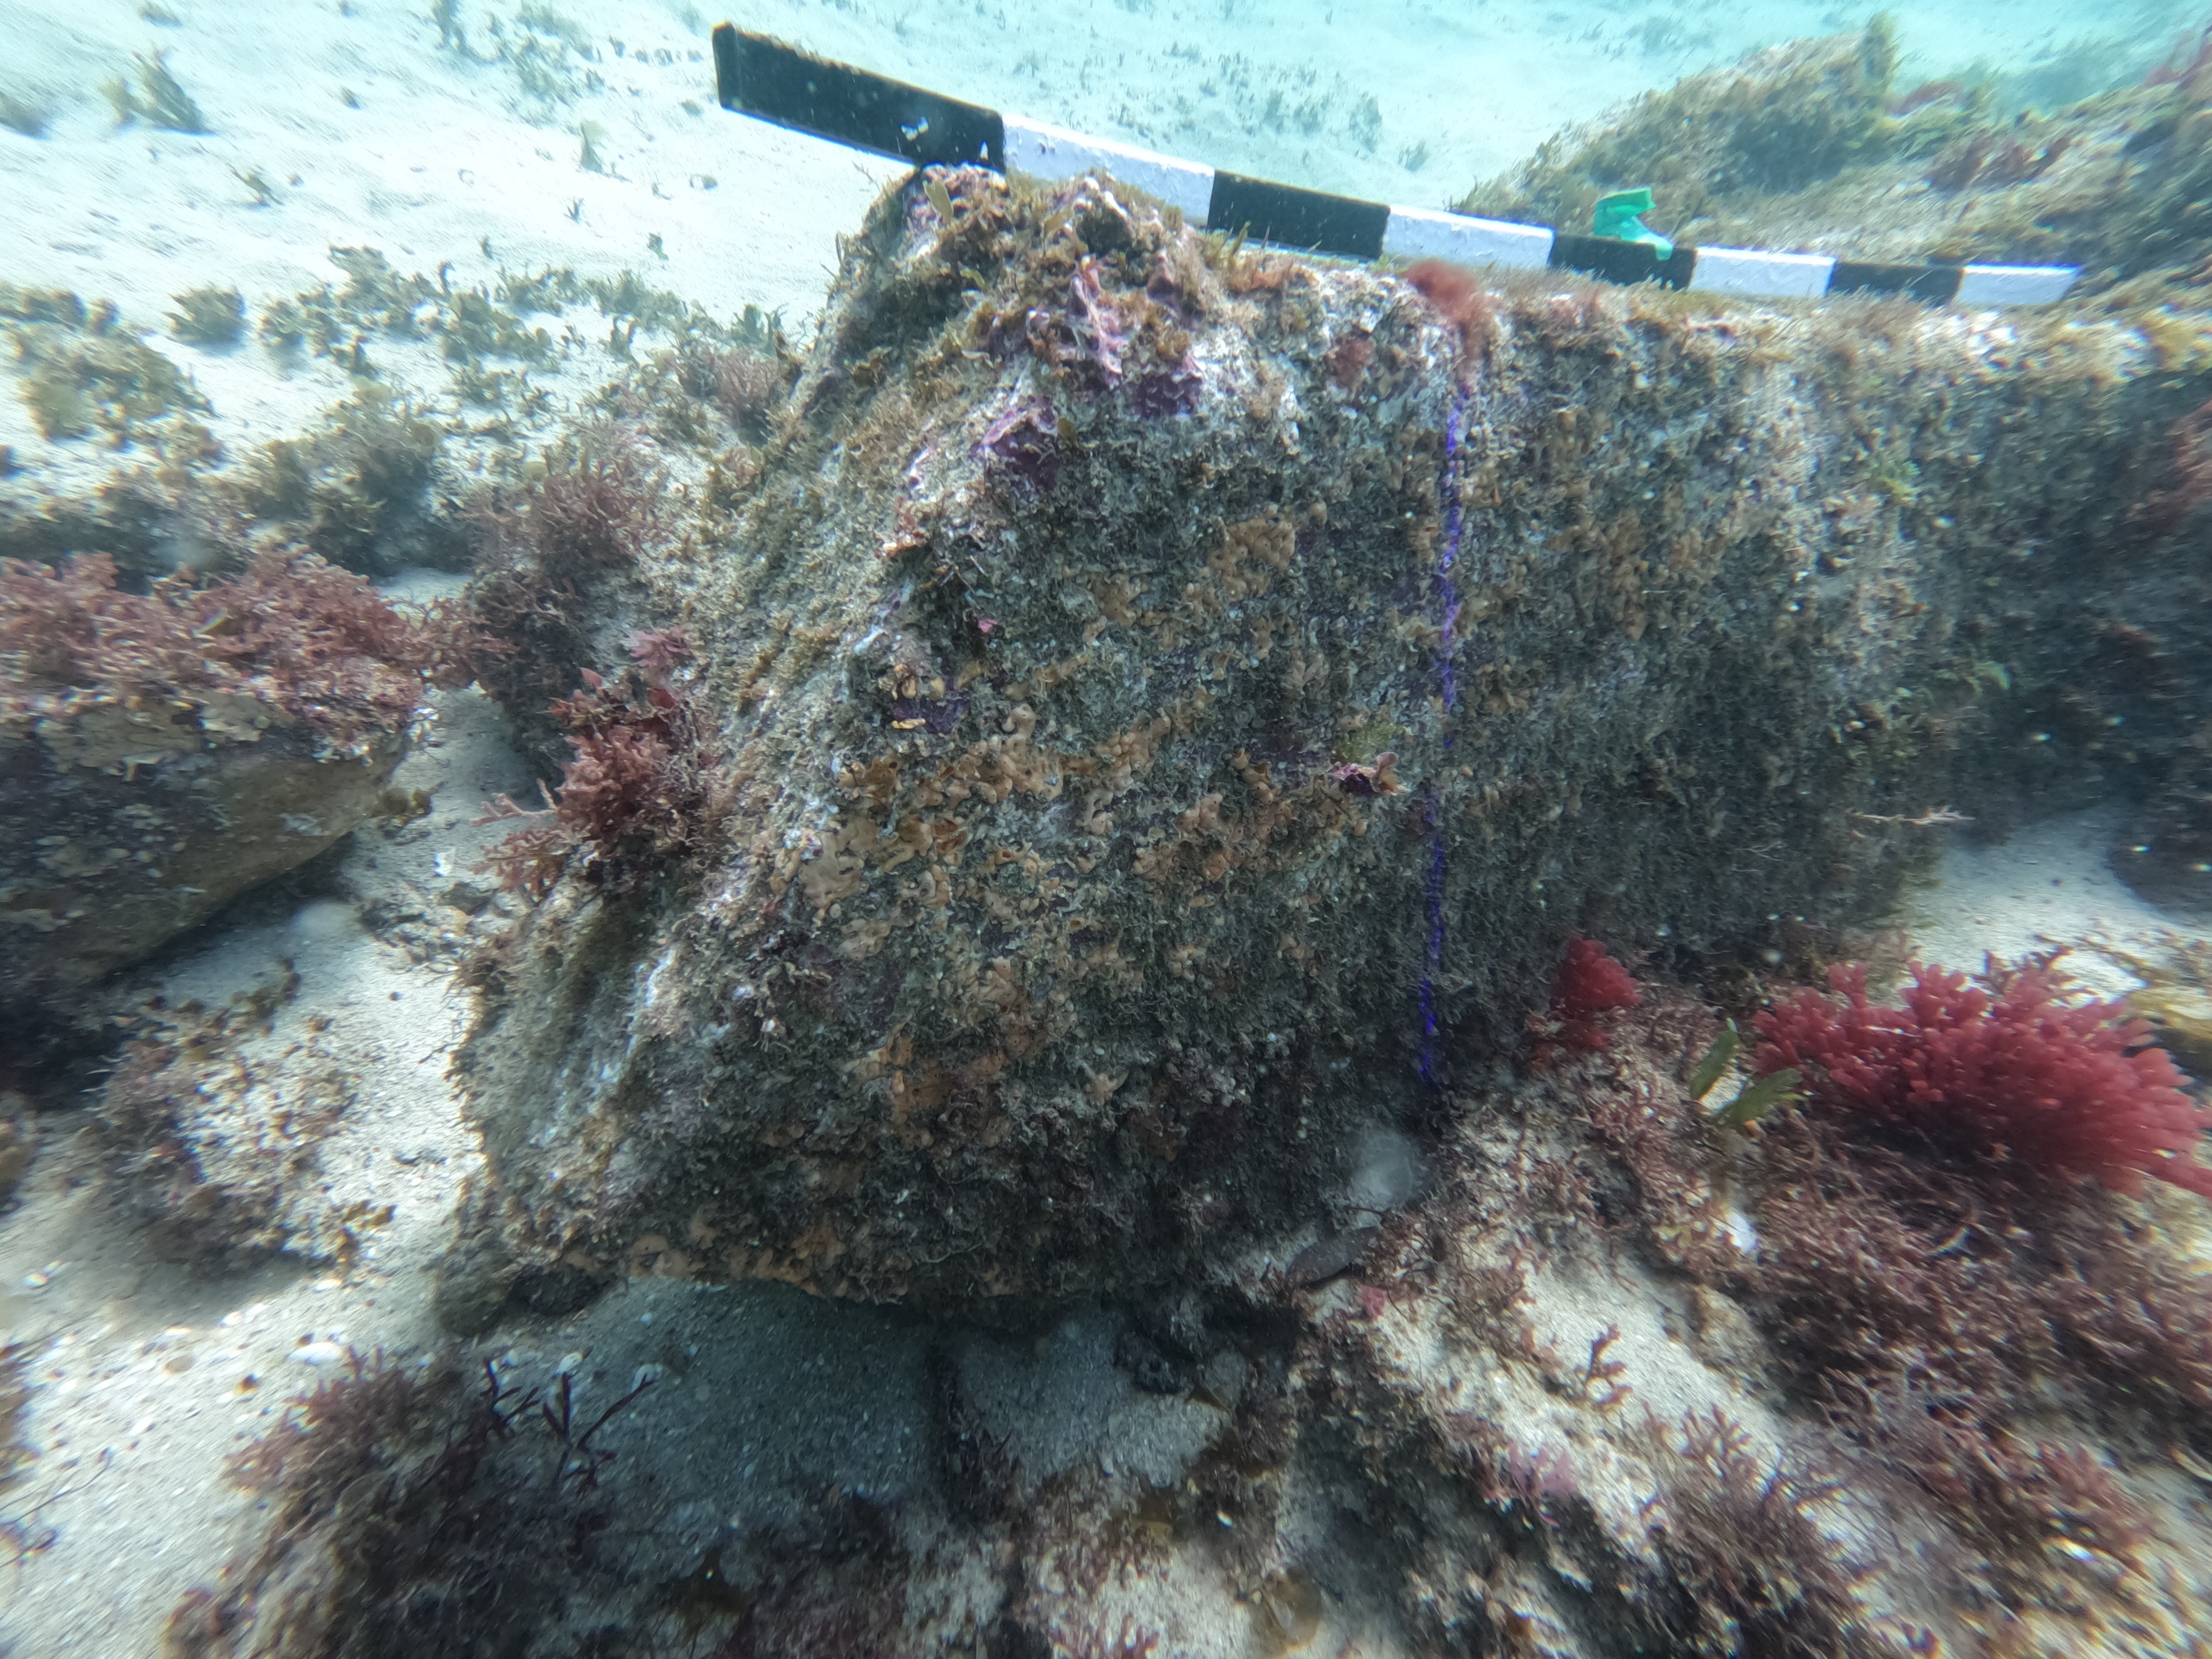

Supplement: Supplementary file 787 [file G0713854.pdf › Ocean2/G0713854.pdf]

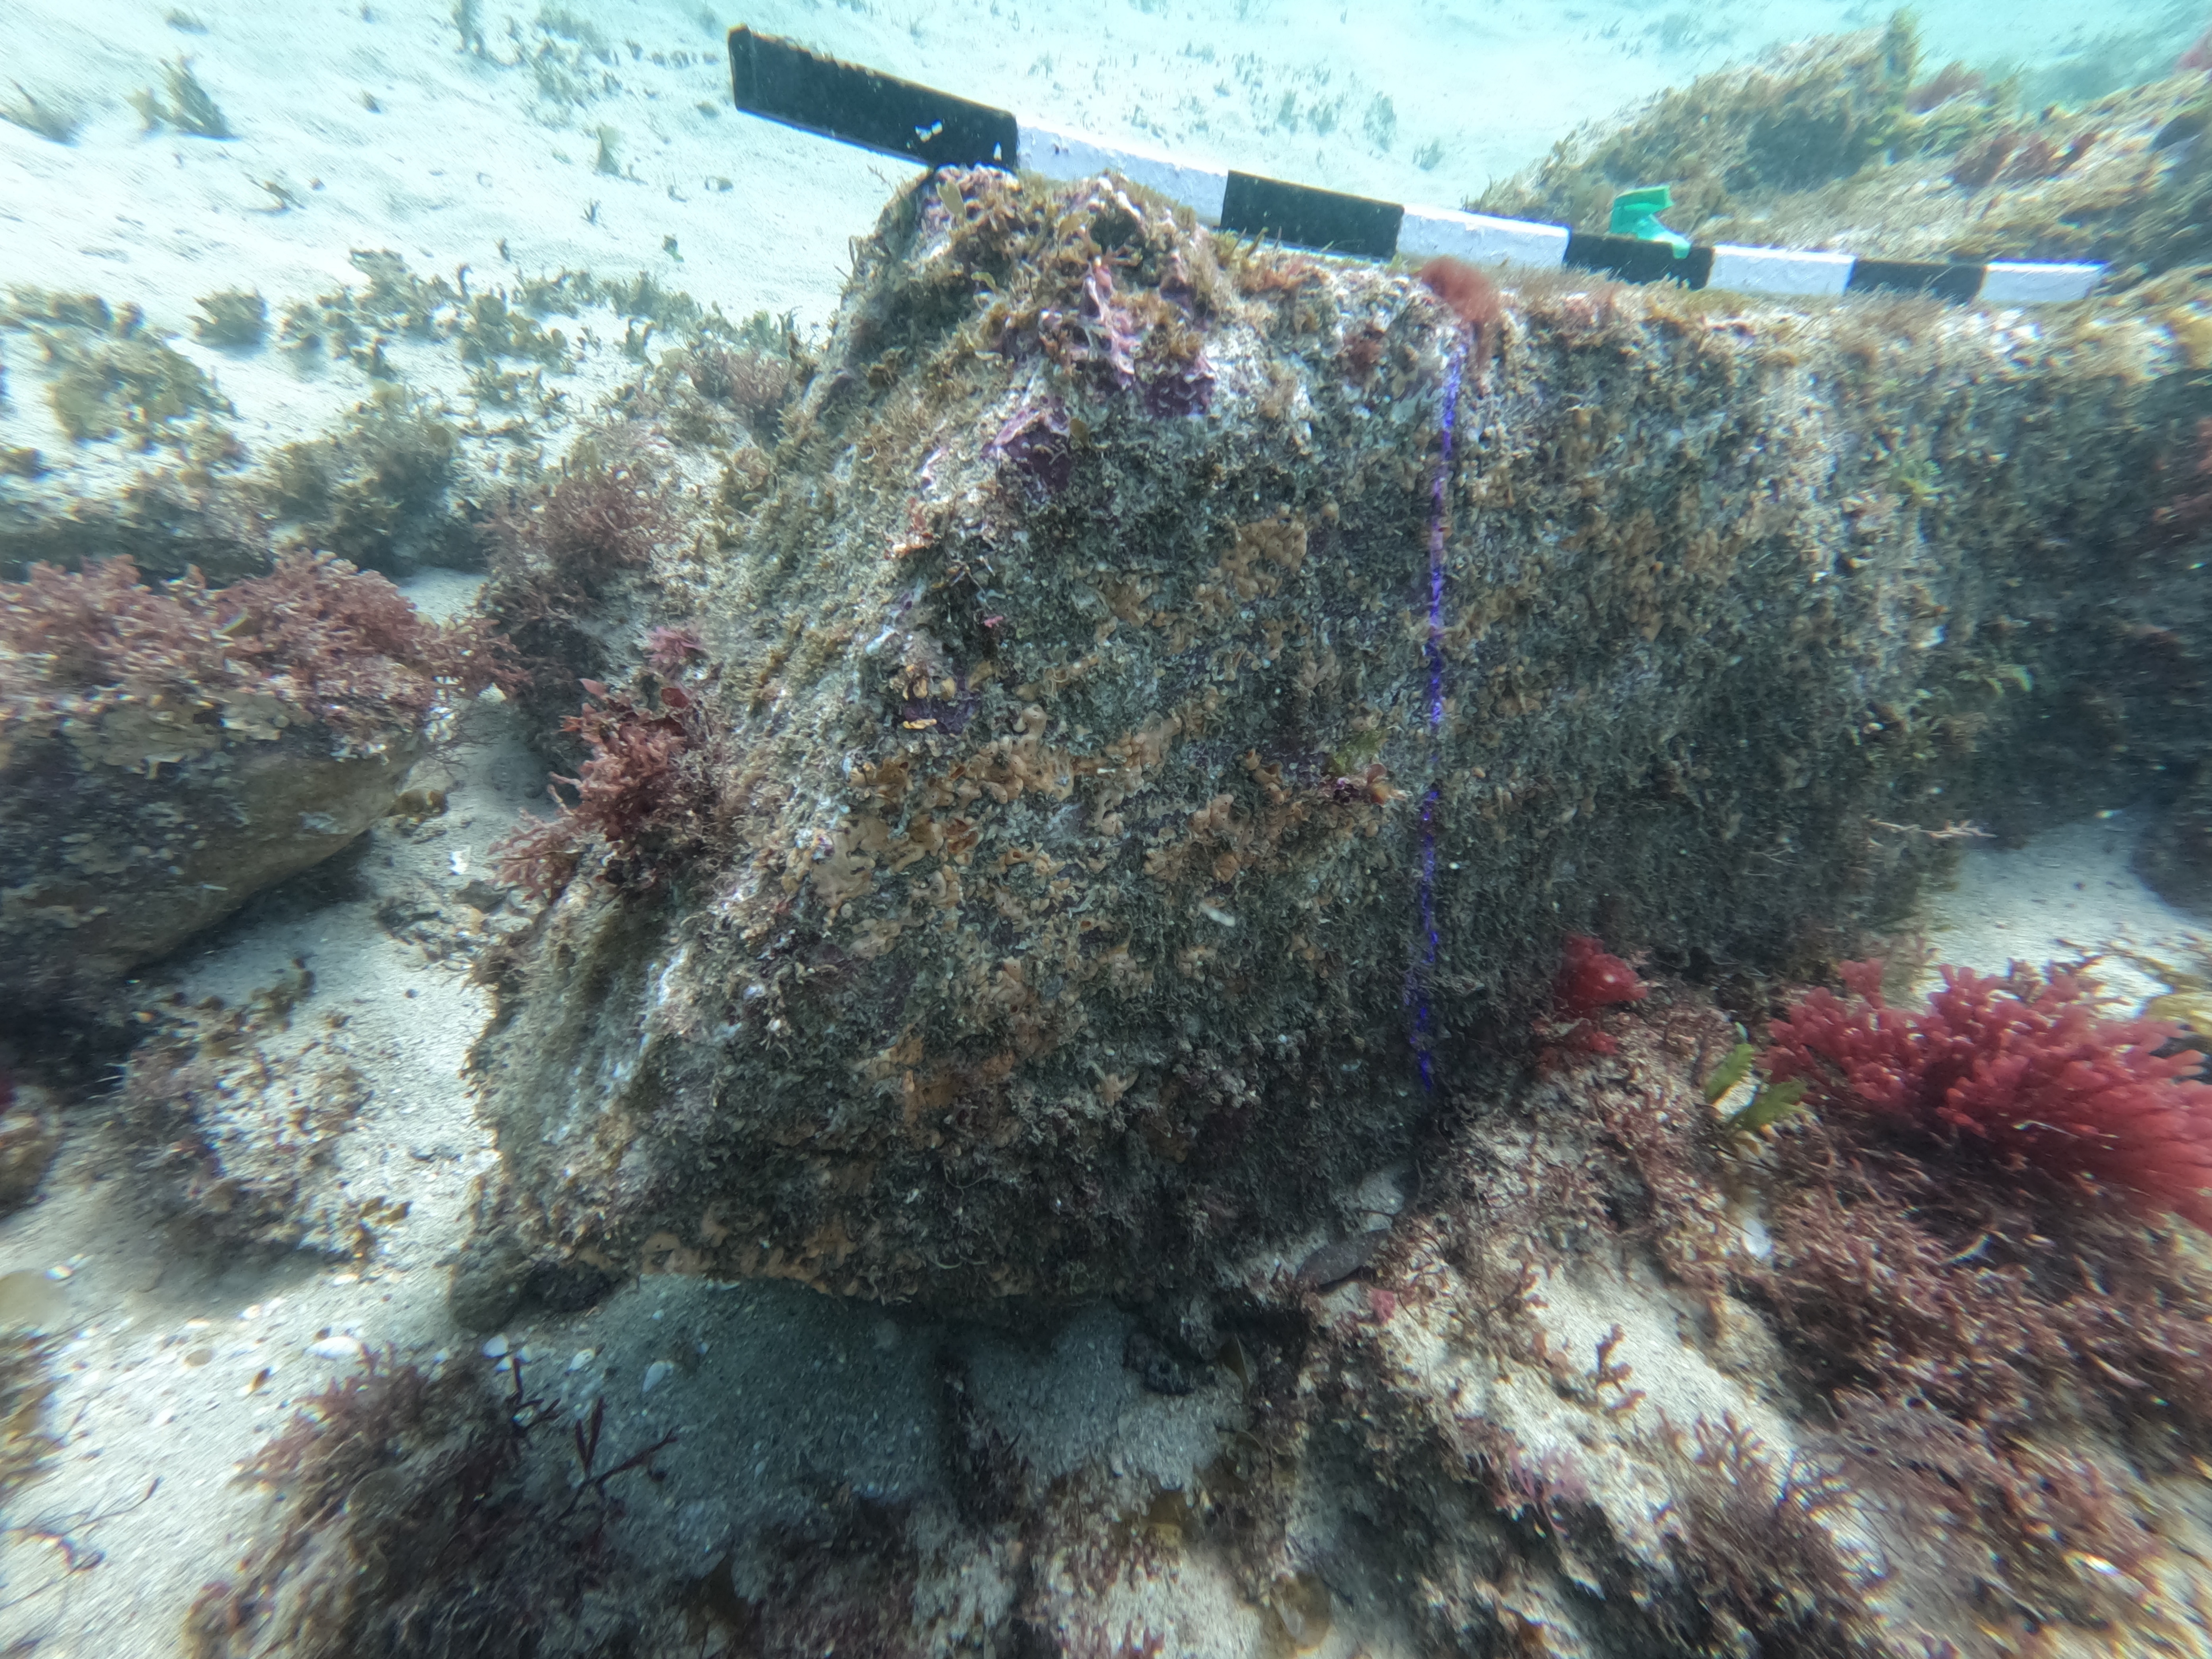

Supplement: Supplementary file 788 [file G0713855.pdf › Ocean2/G0713855.pdf]

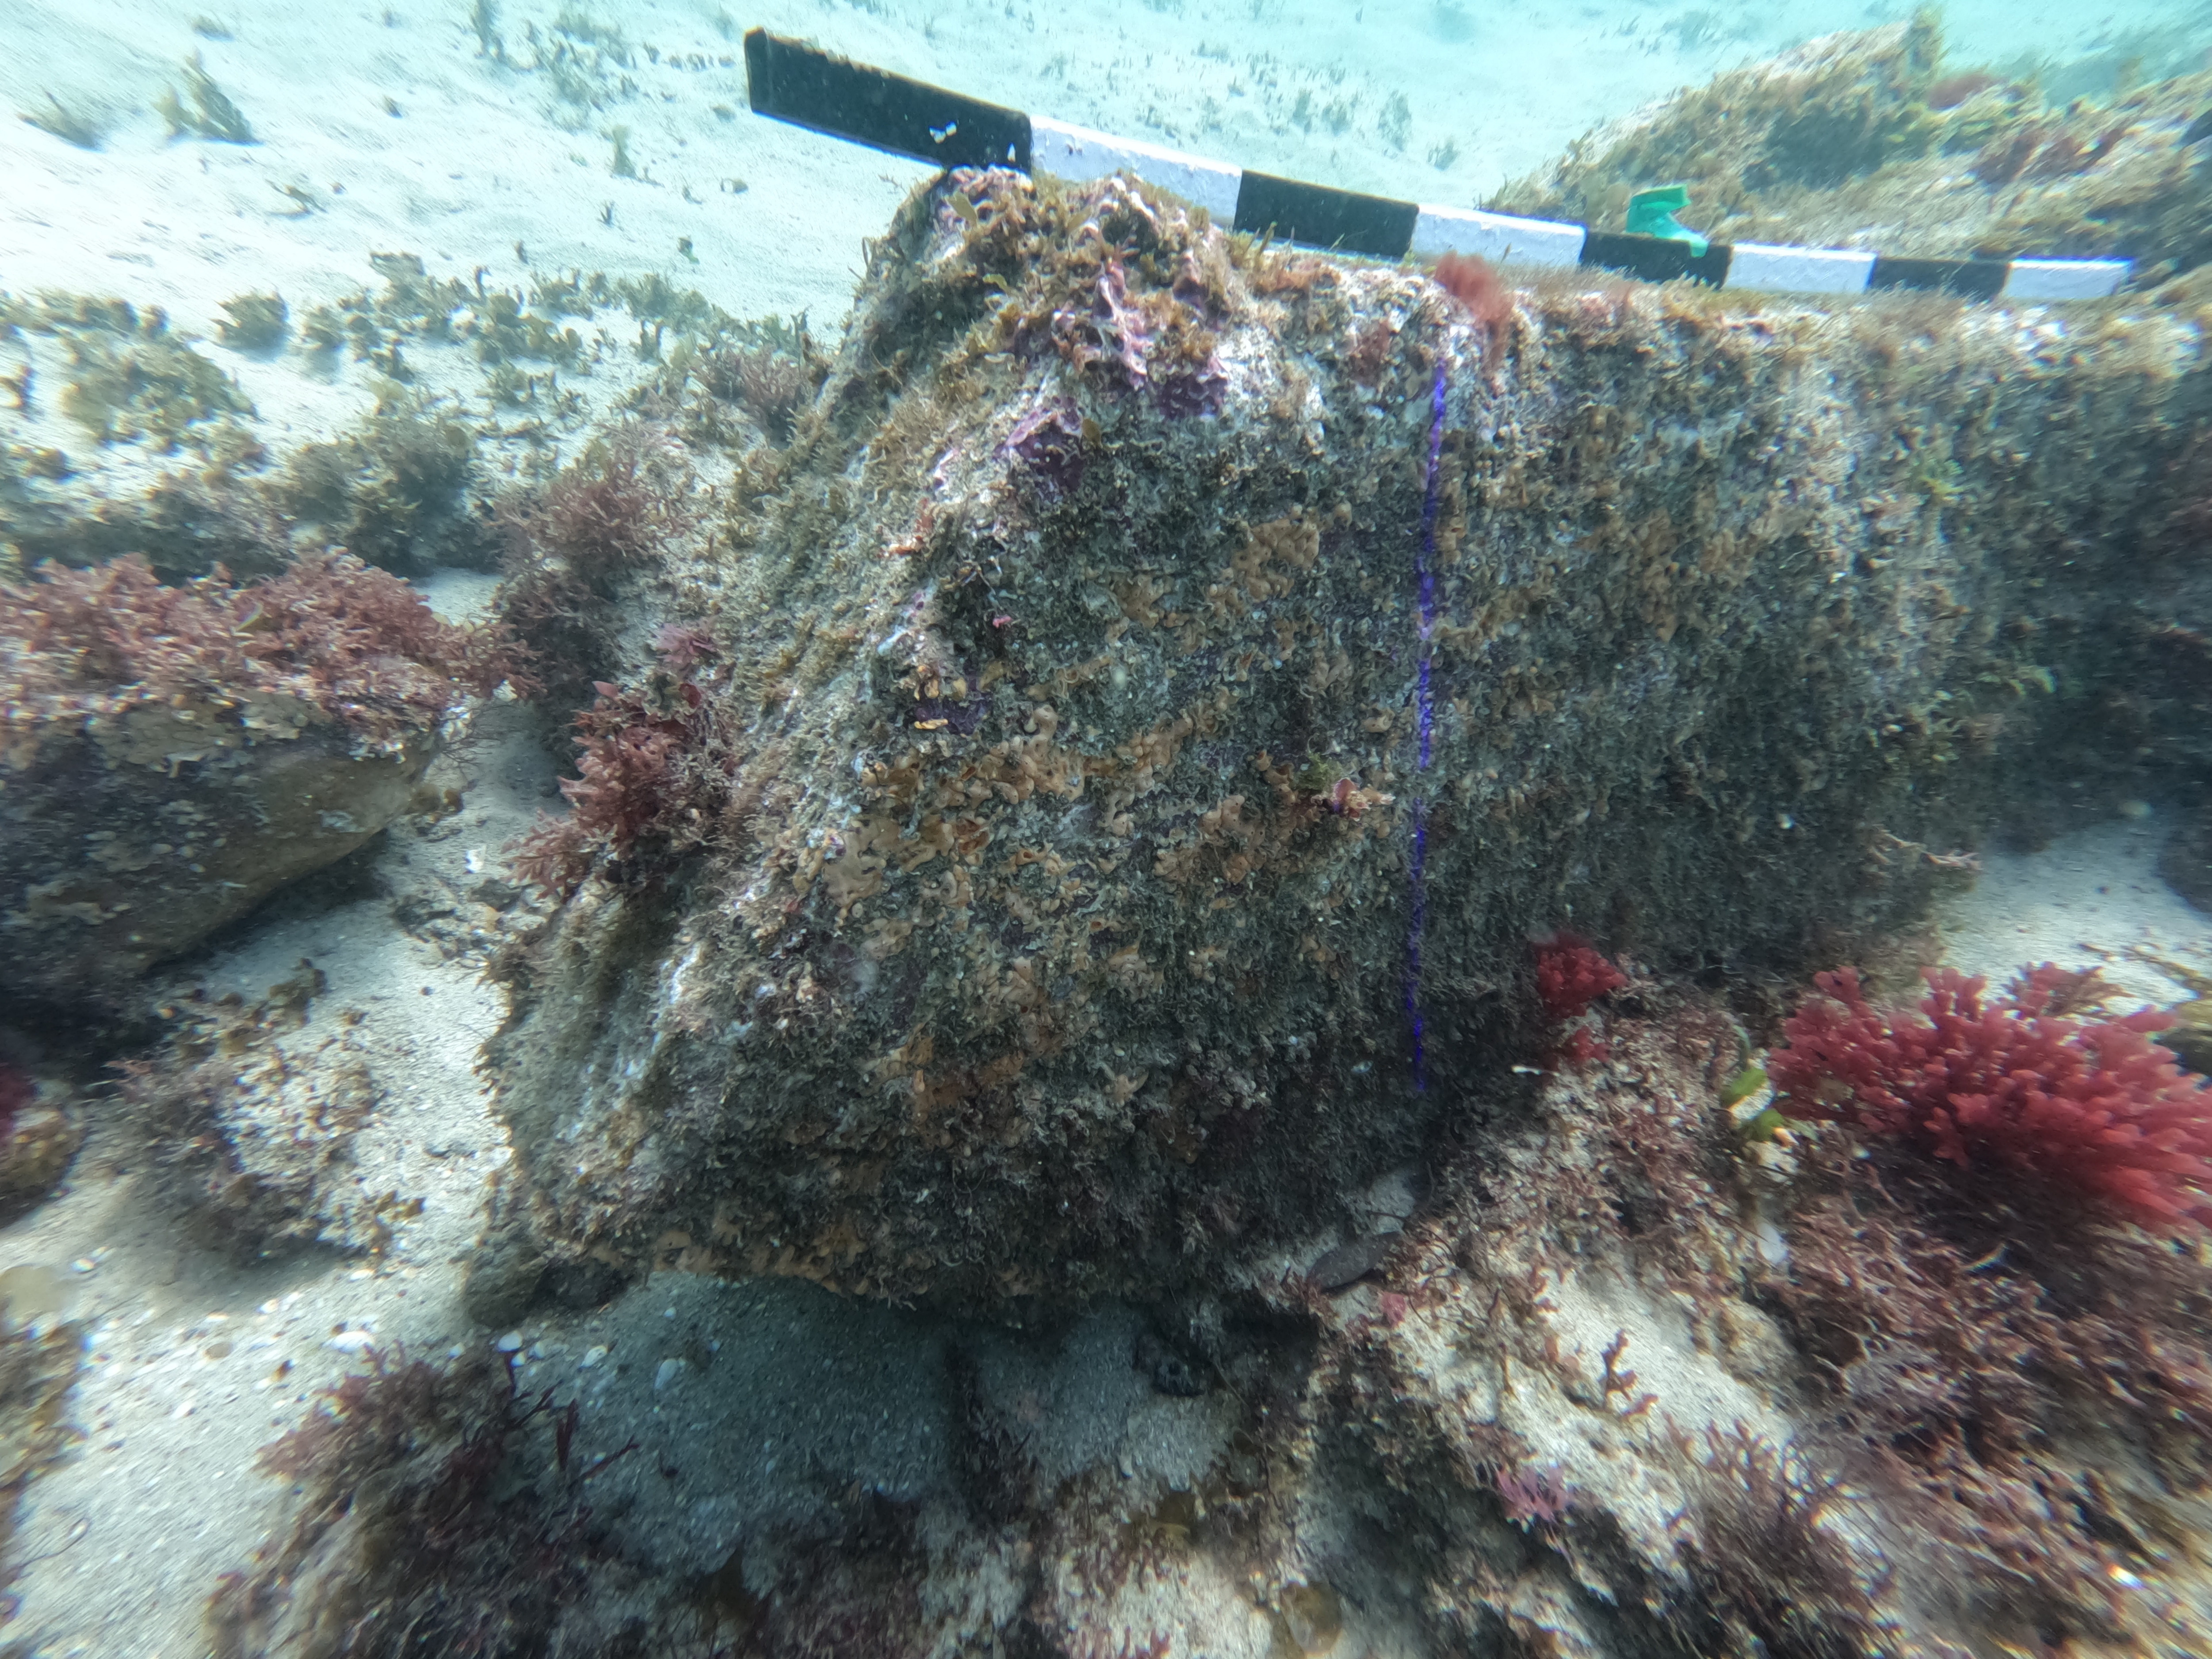

Supplement: Supplementary file 789 [file G0713856.pdf › Ocean2/G0713856.pdf]

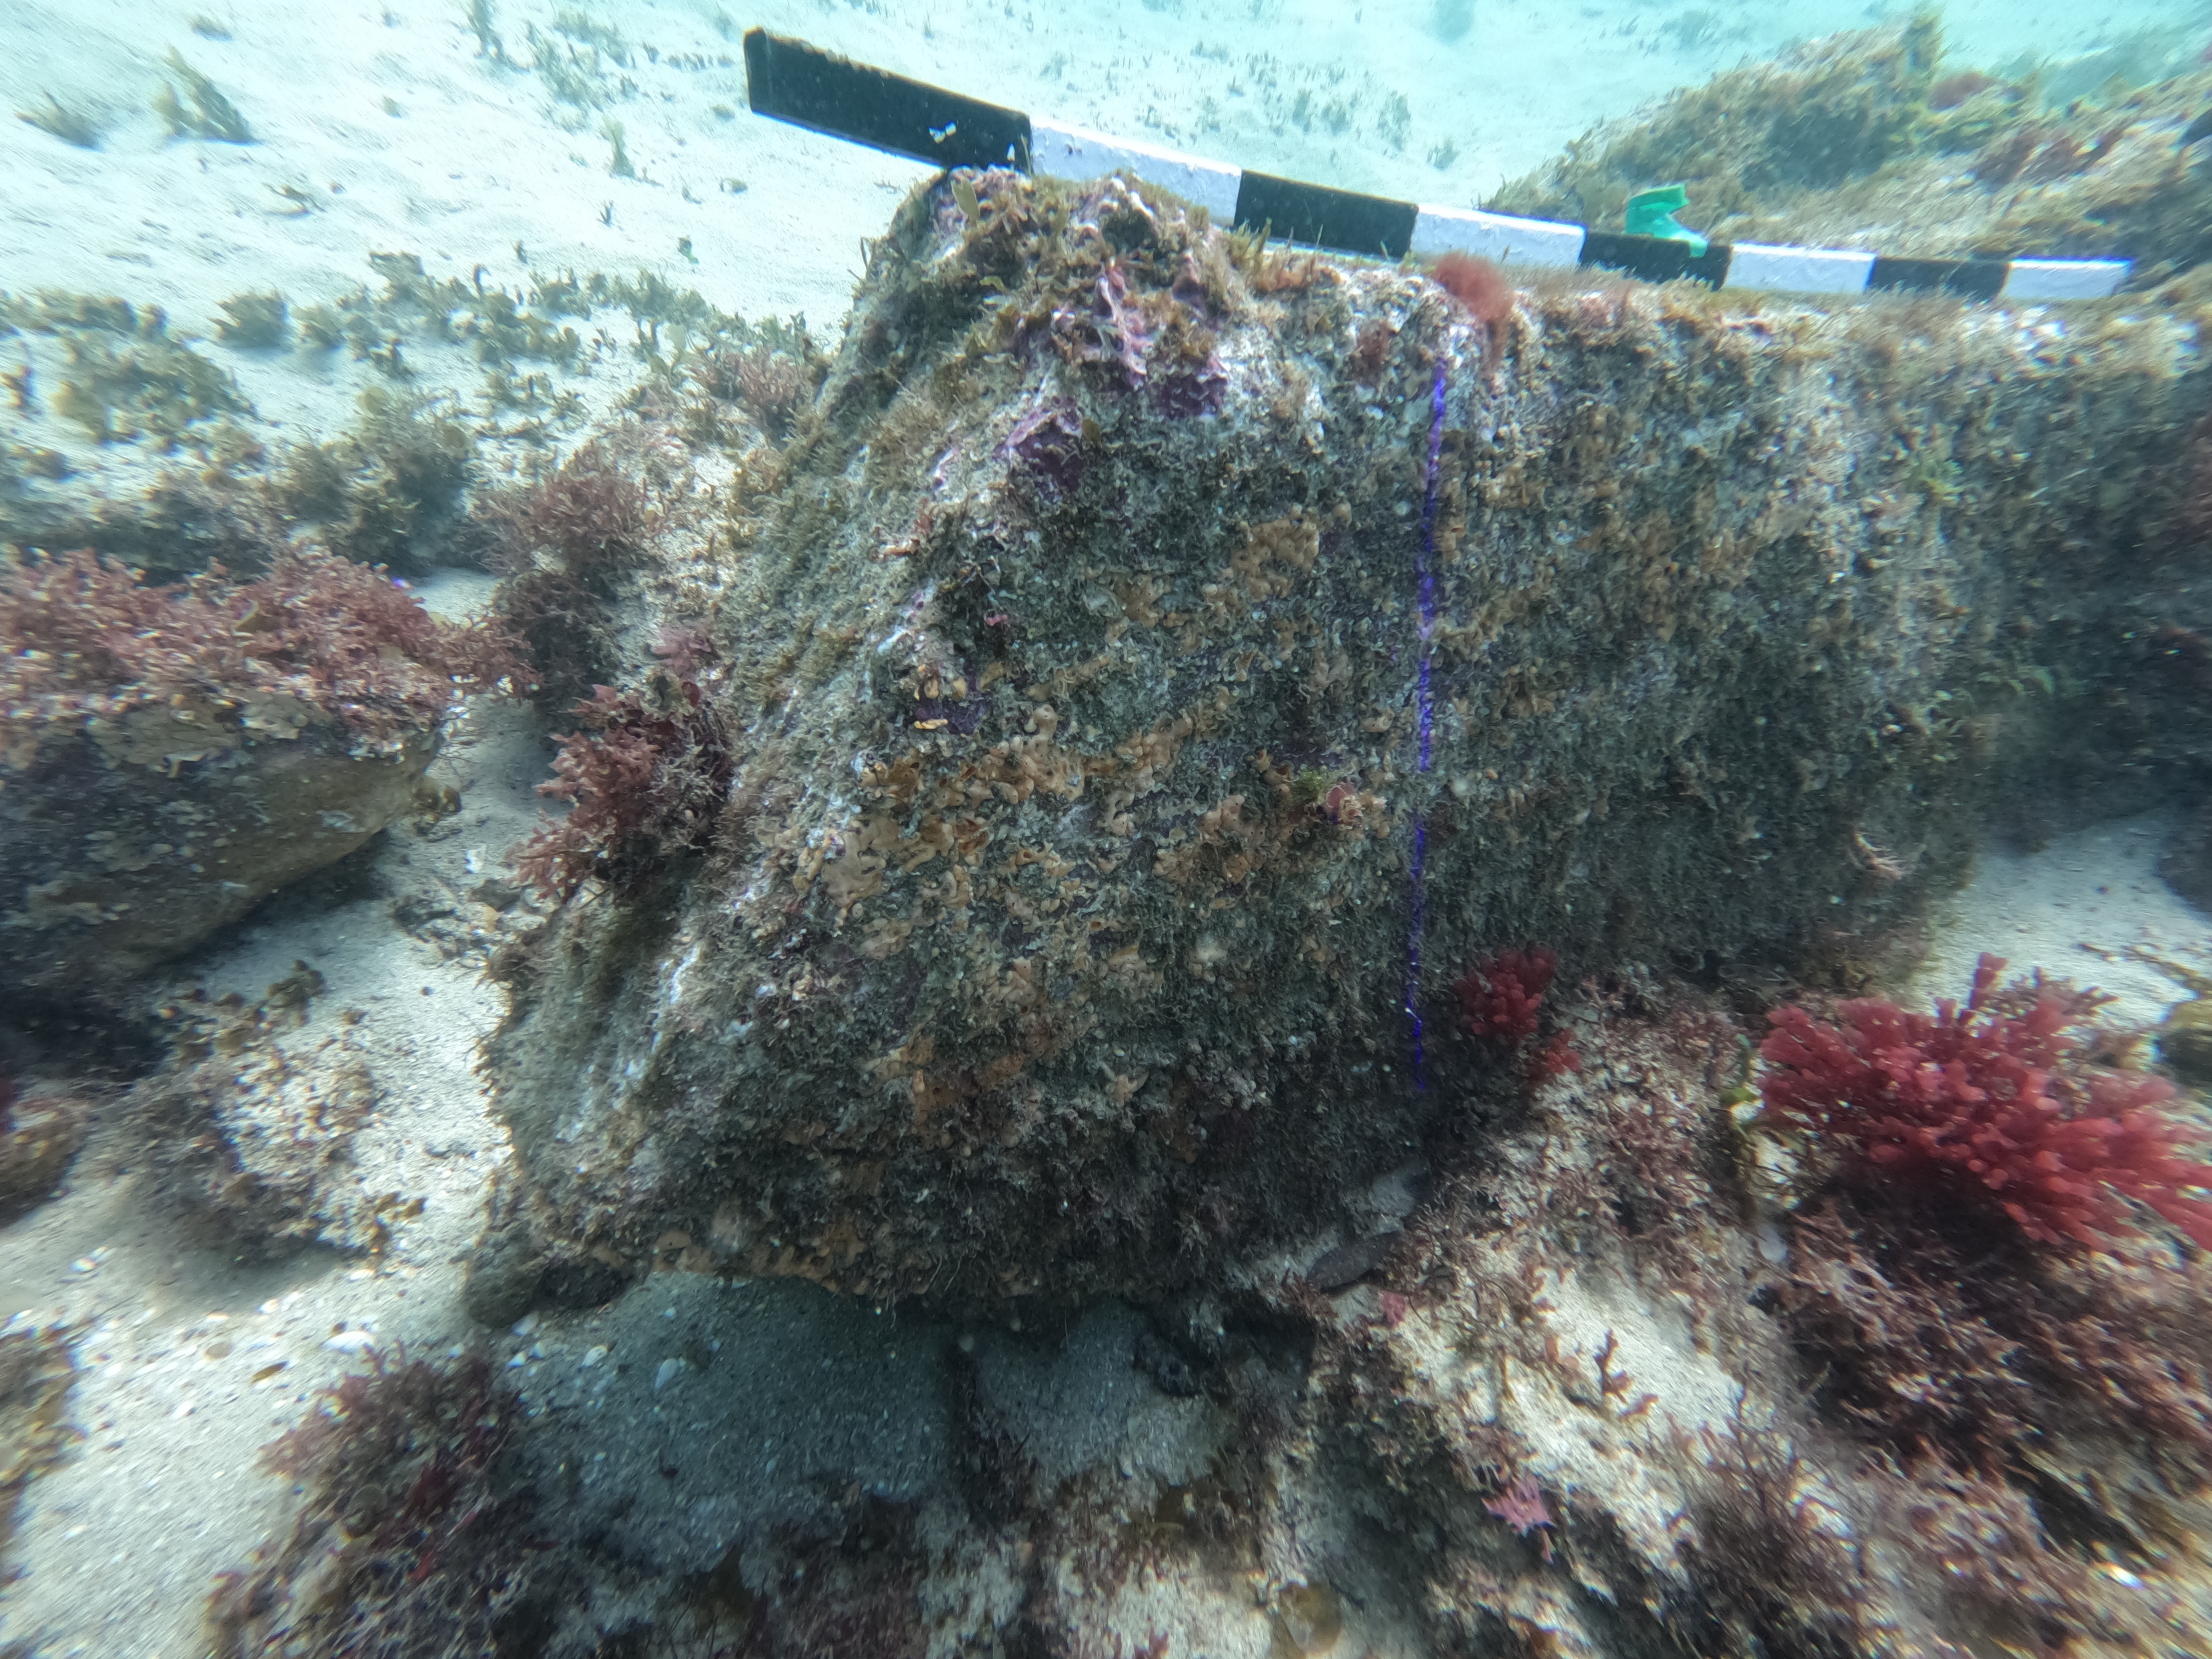

Supplement: Supplementary file 790 [file G0713857.pdf › Ocean2/G0713857.pdf]

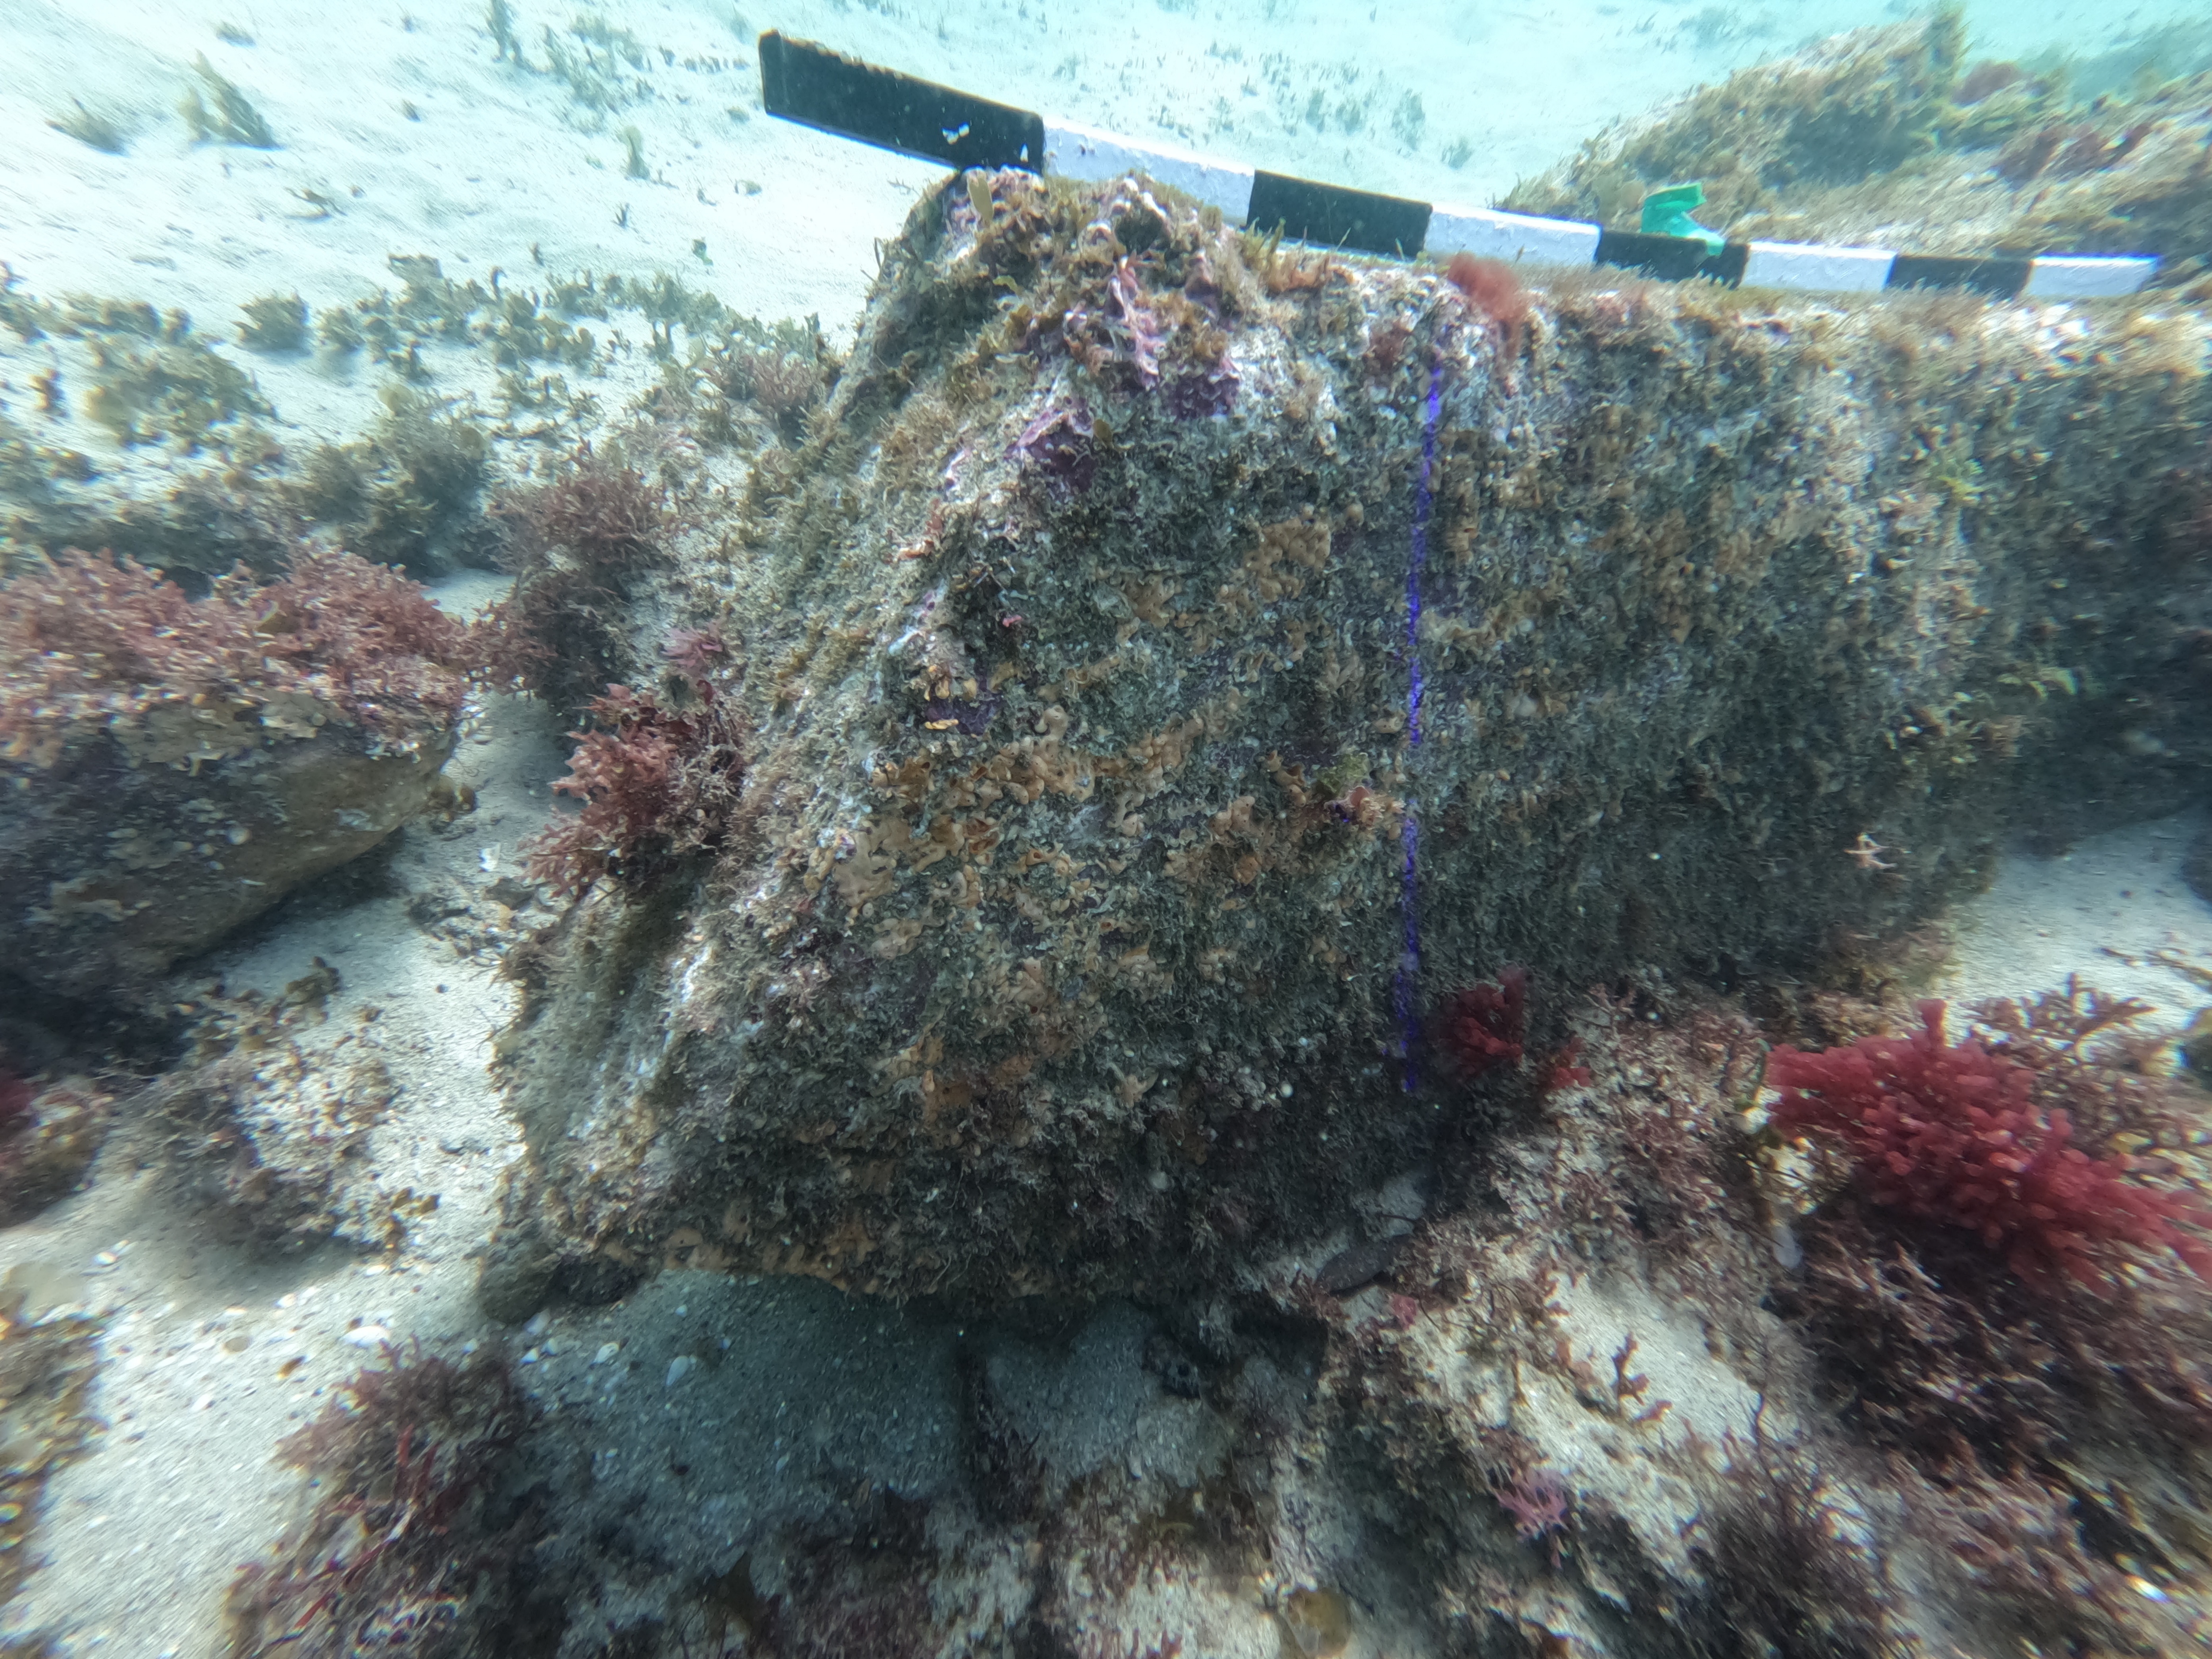

Supplement: Supplementary file 791 [file G0713858.pdf › Ocean2/G0713858.pdf]

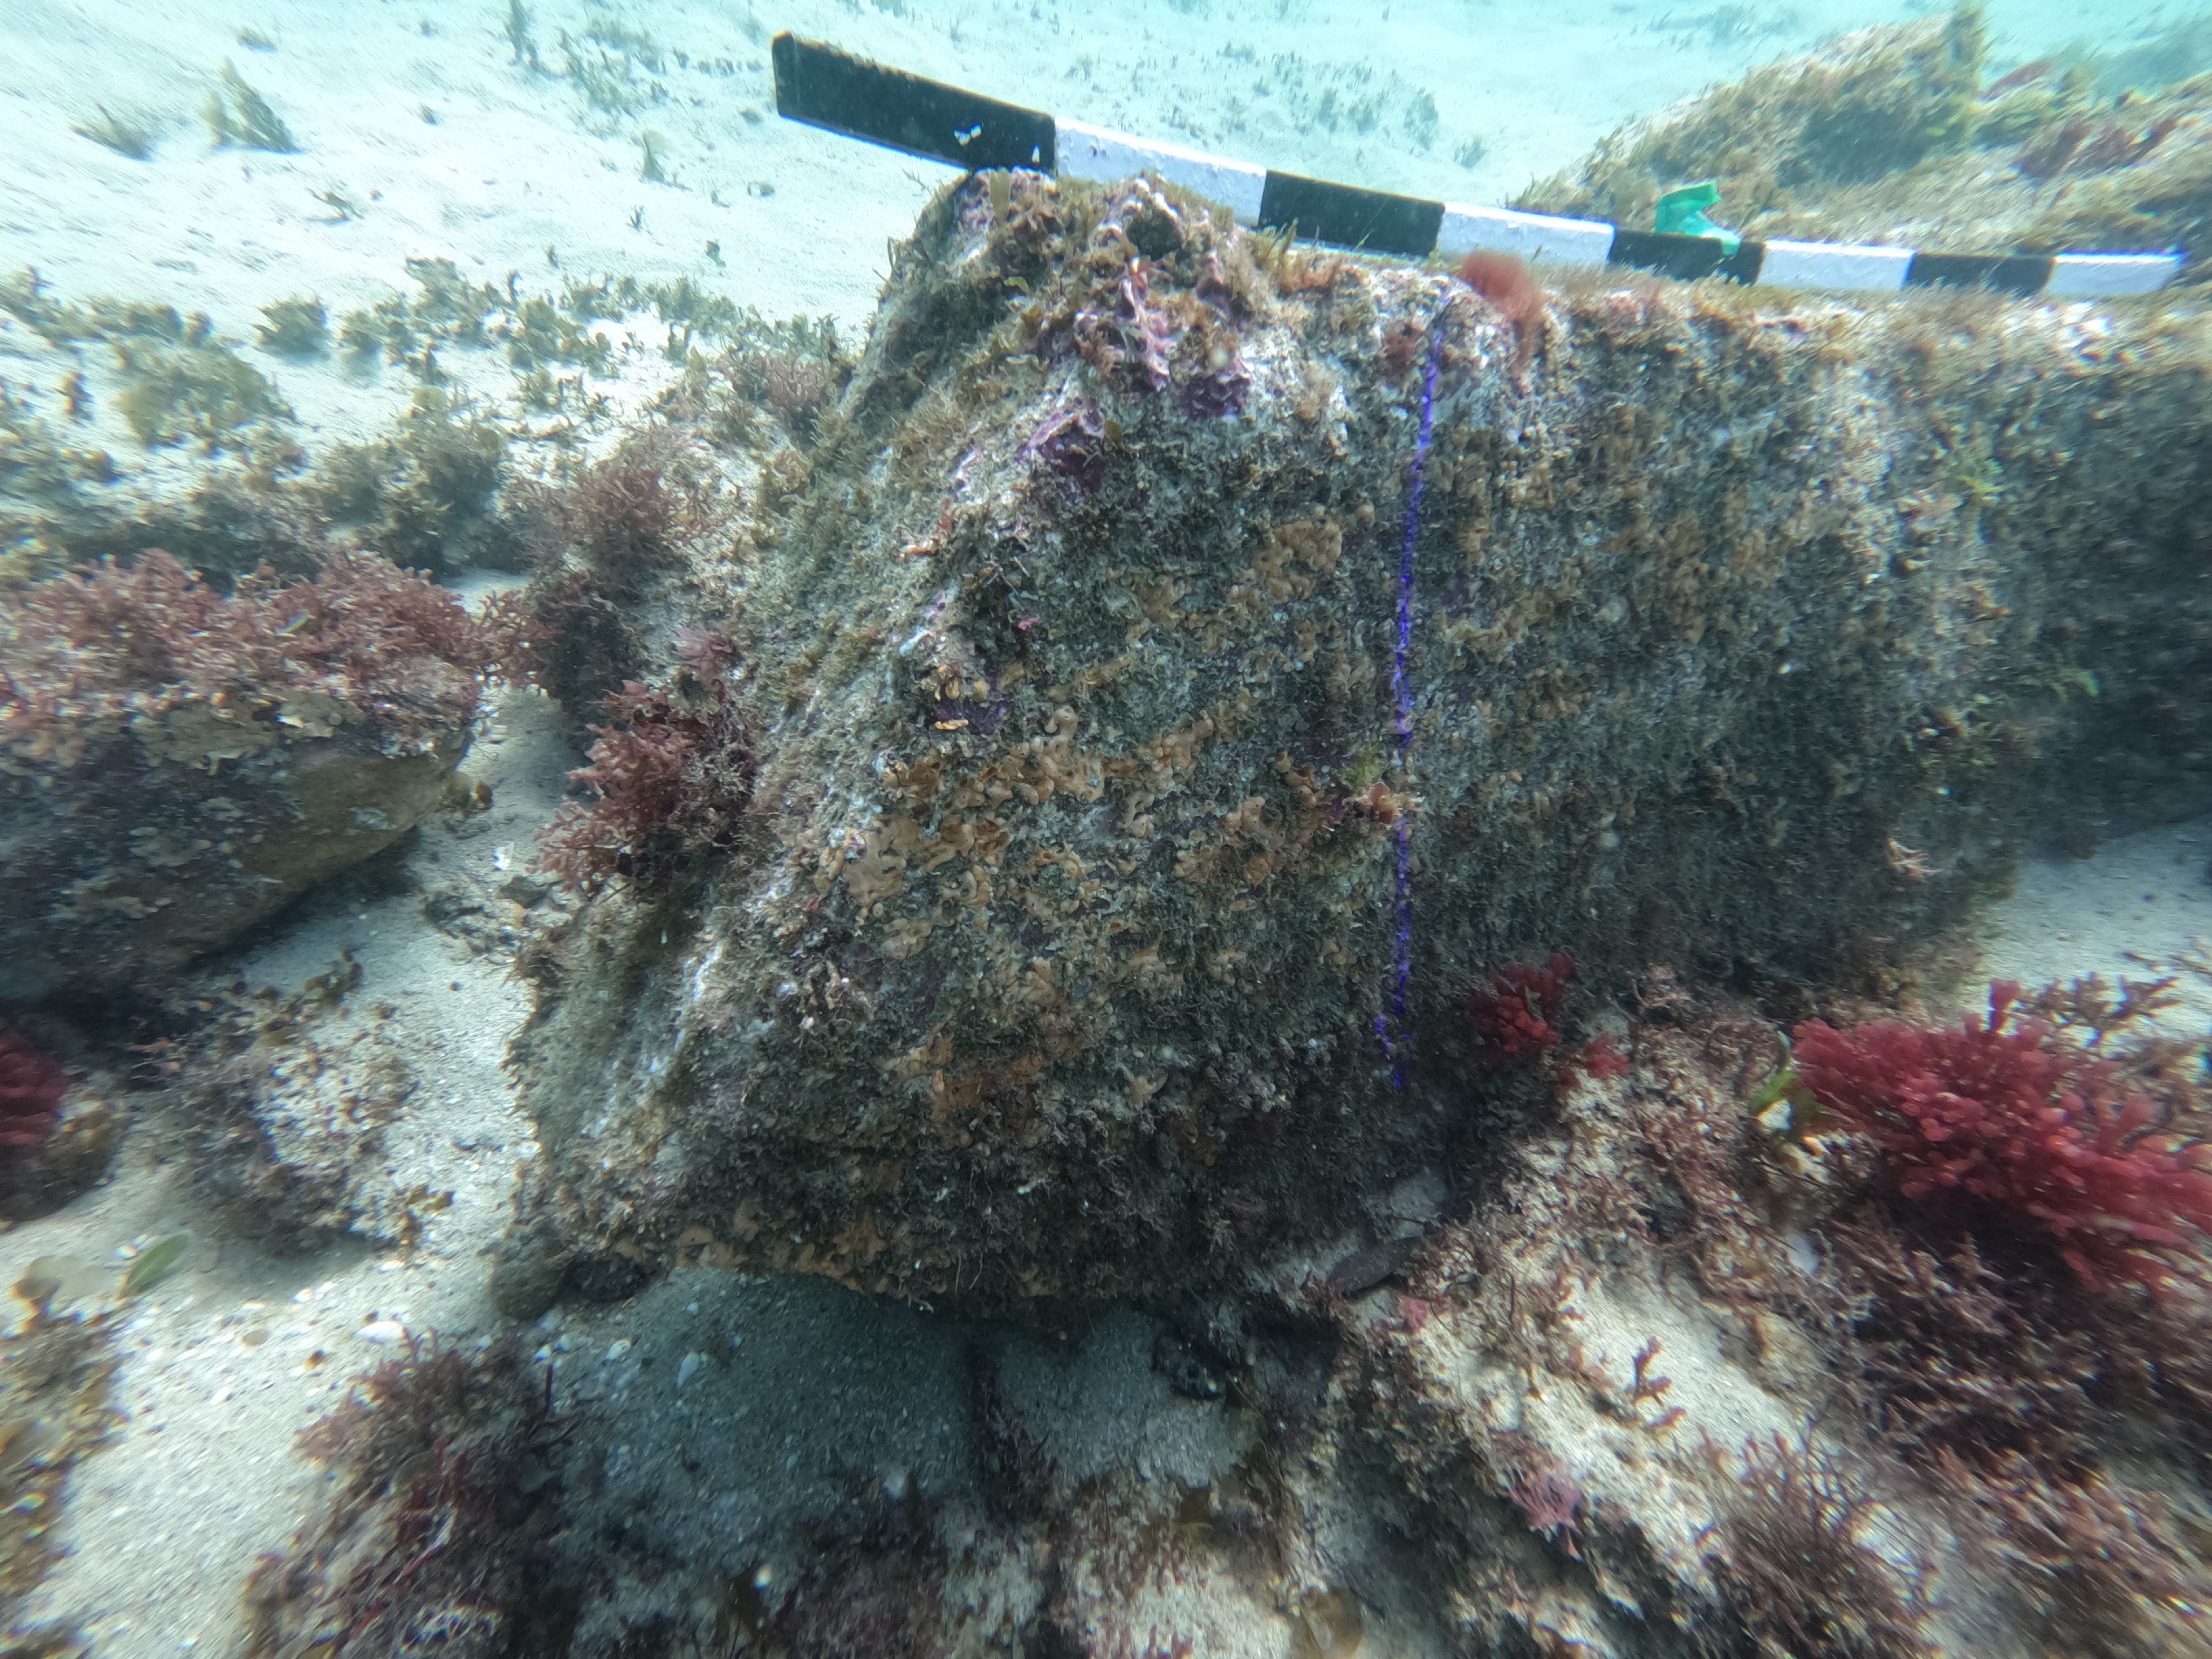

Supplement: Supplementary file 792 [file G0713859.pdf › Ocean2/G0713859.pdf]

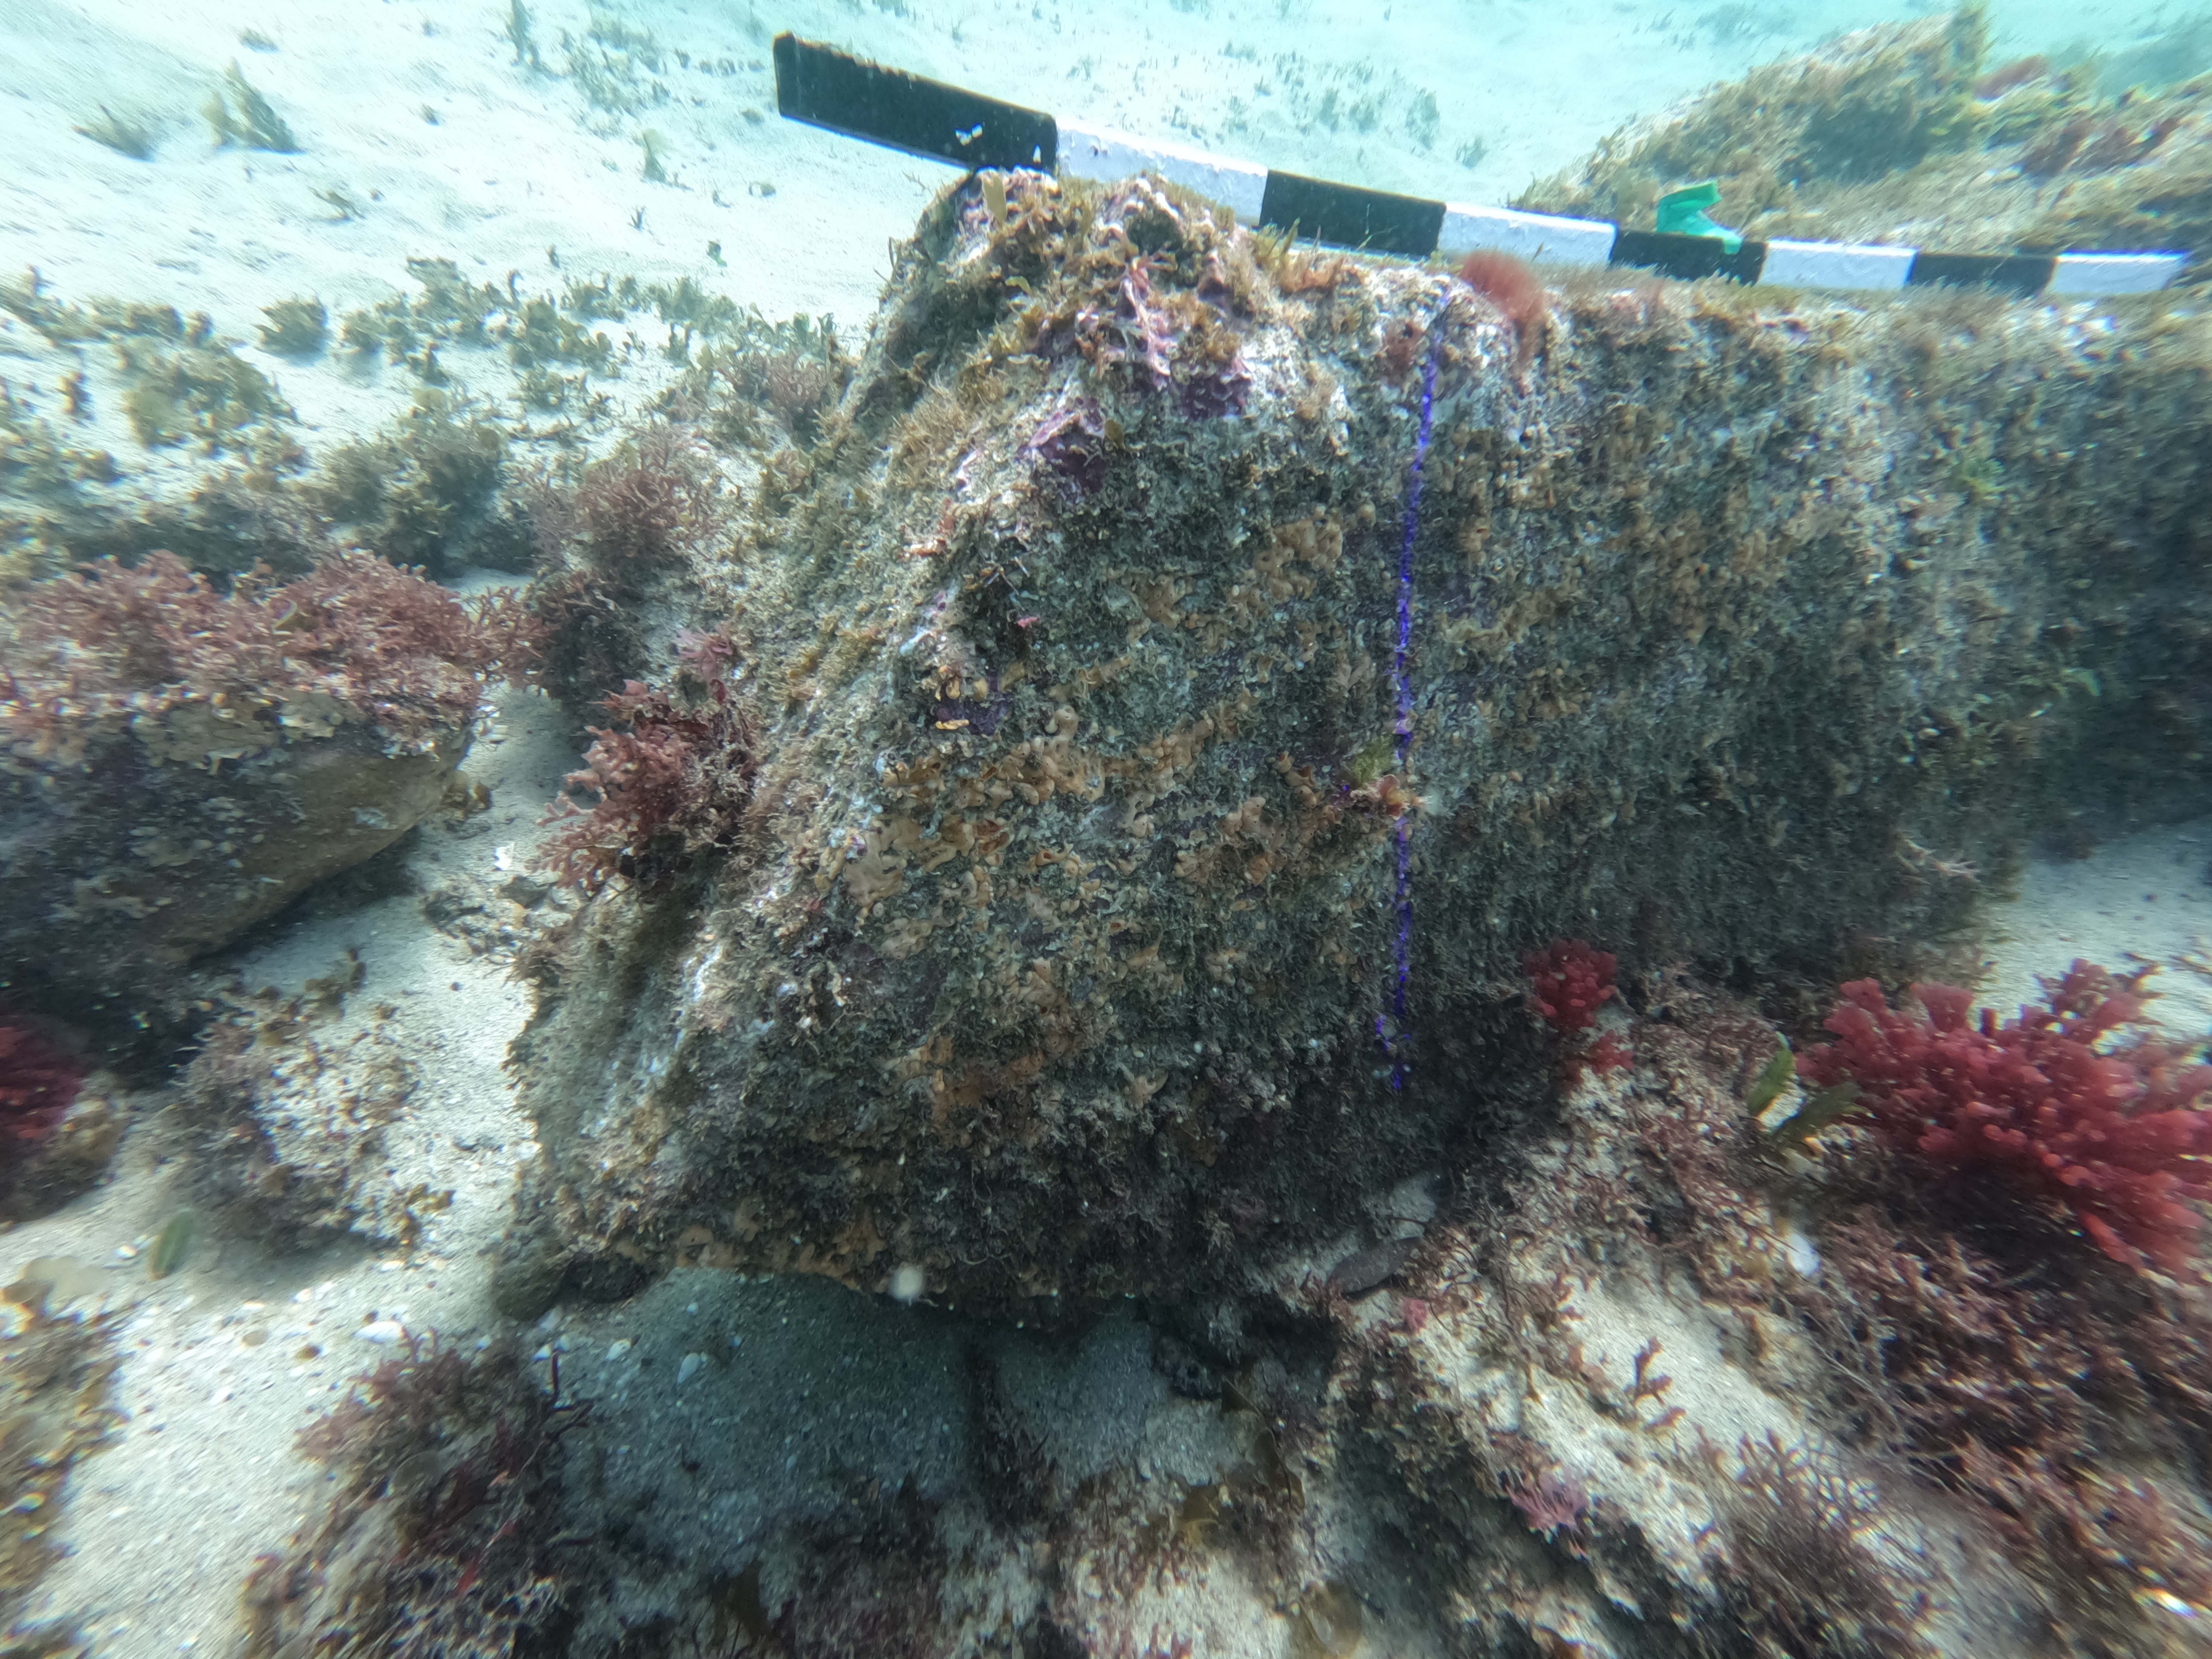

Supplement: Supplementary file 793 [file G0713860.pdf › Ocean2/G0713860.pdf]

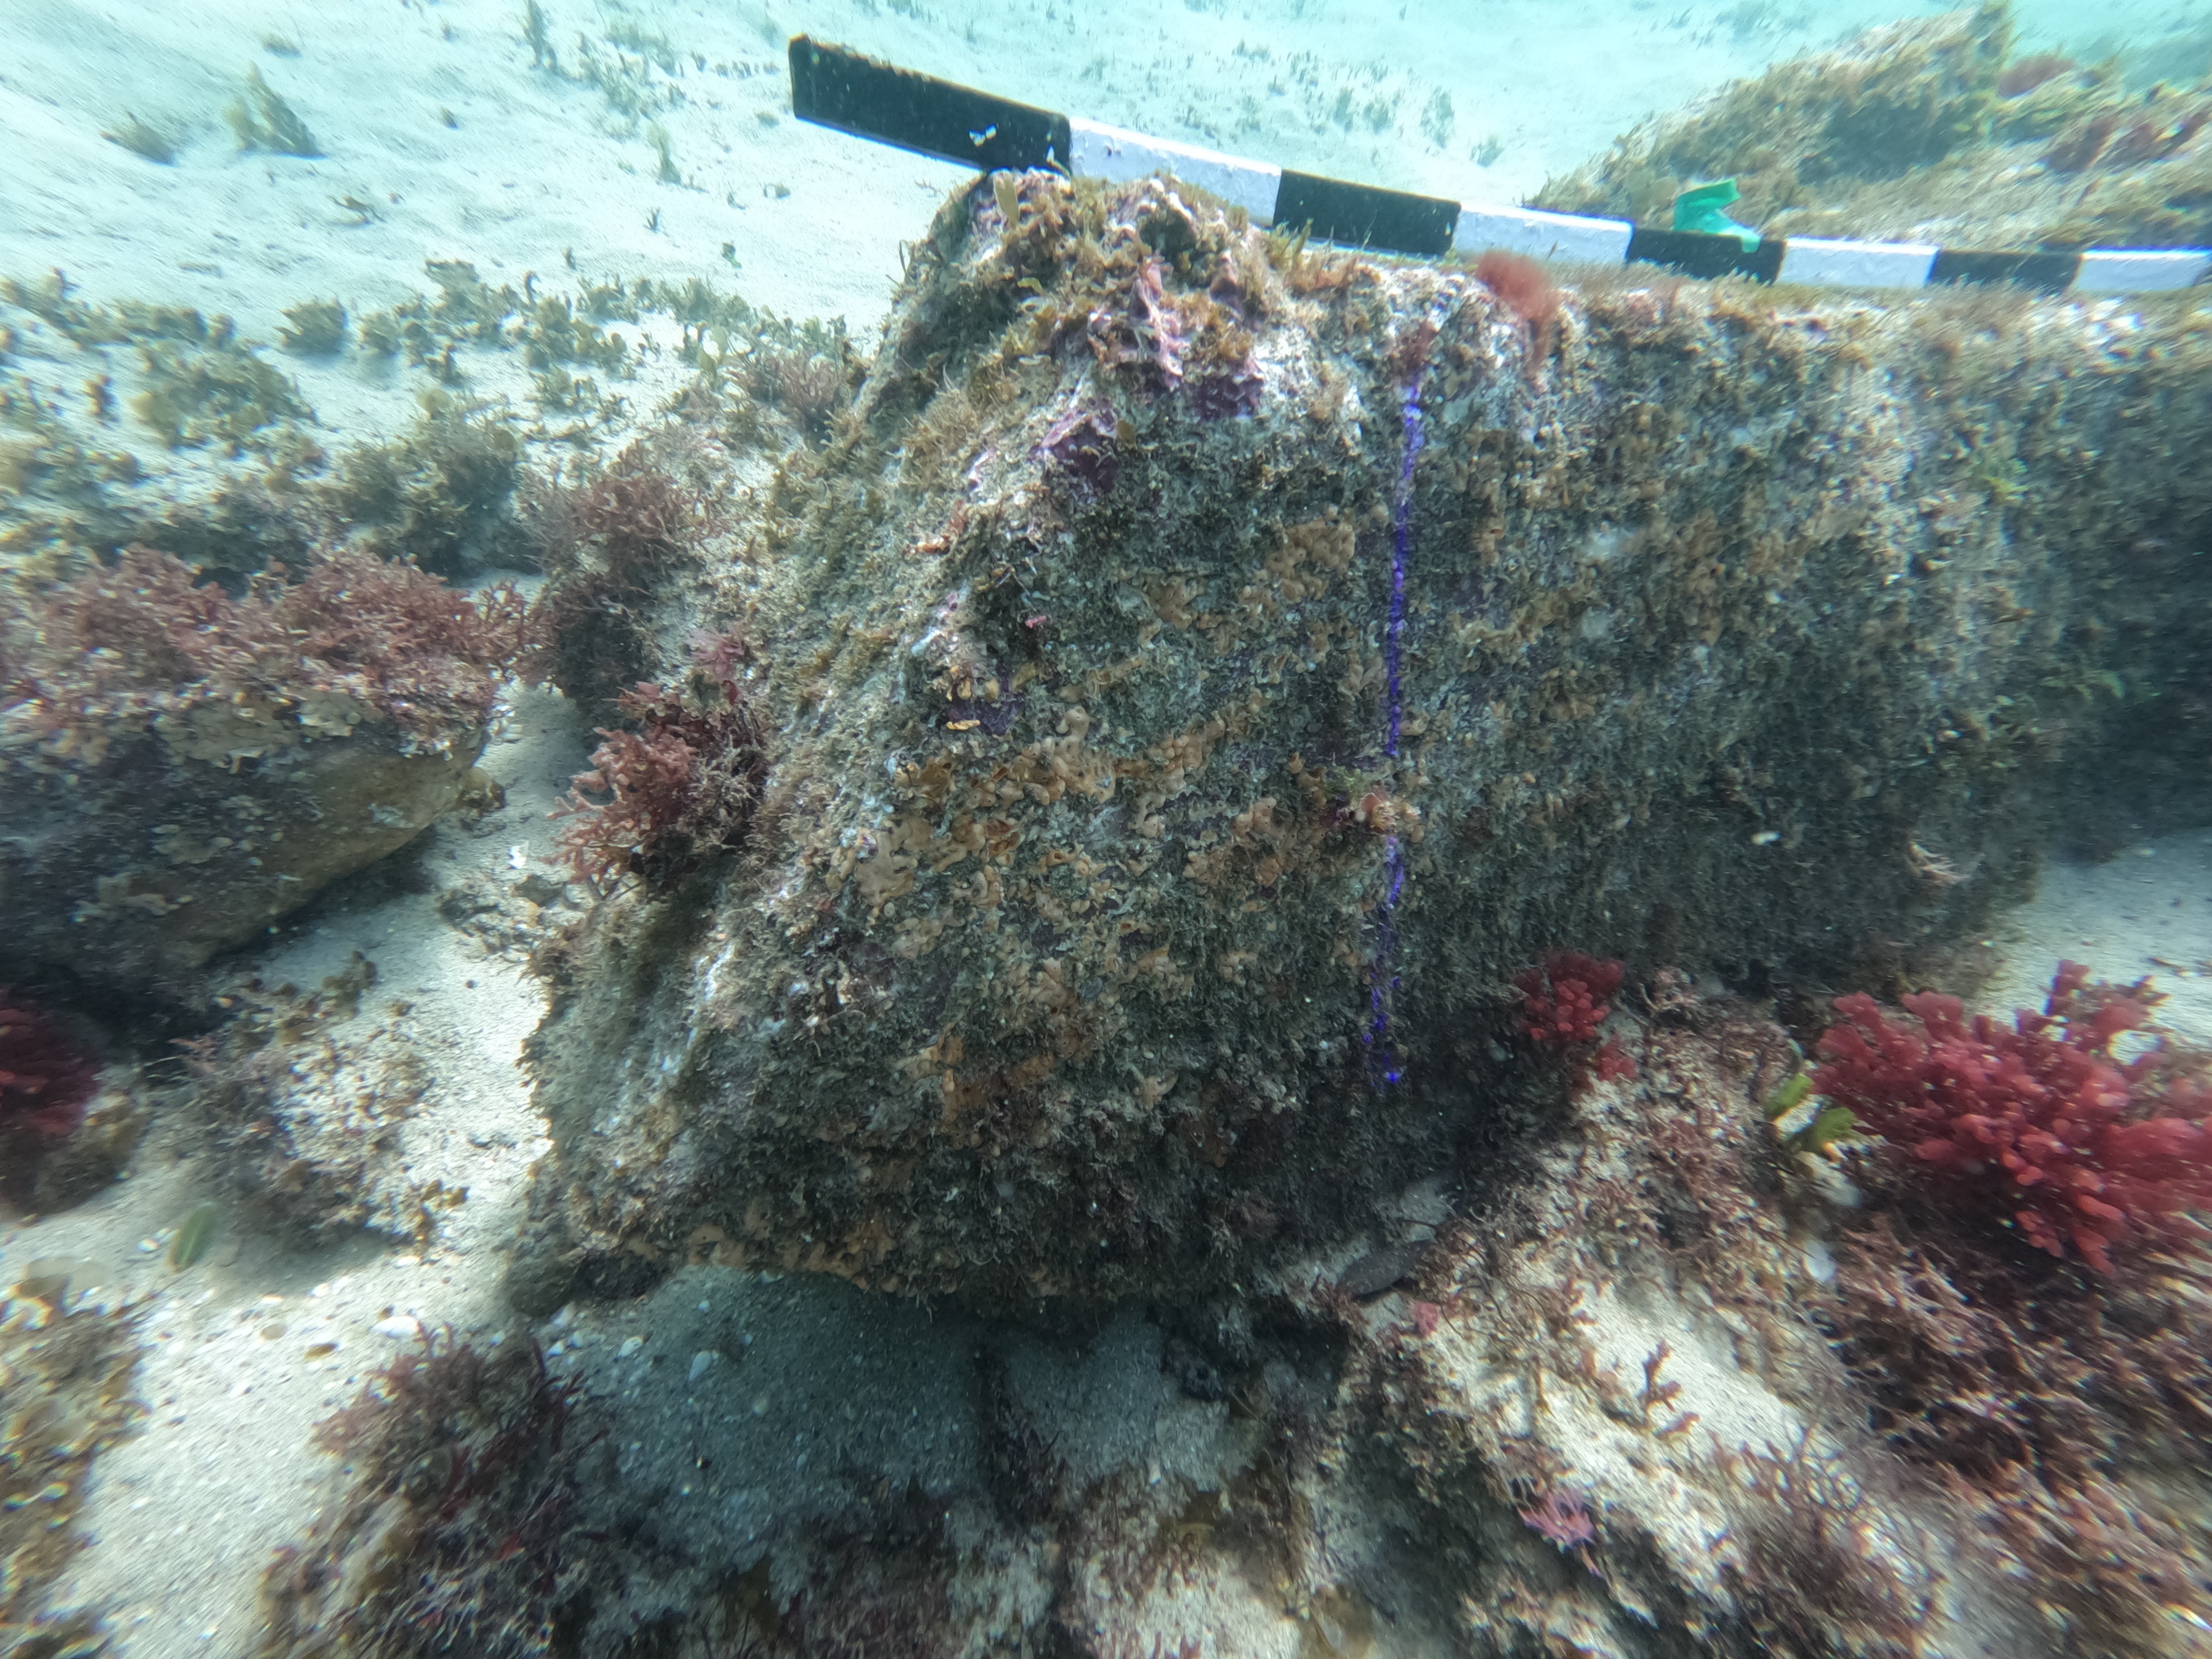

Supplement: Supplementary file 794 [file G0713861.pdf › Ocean2/G0713861.pdf]

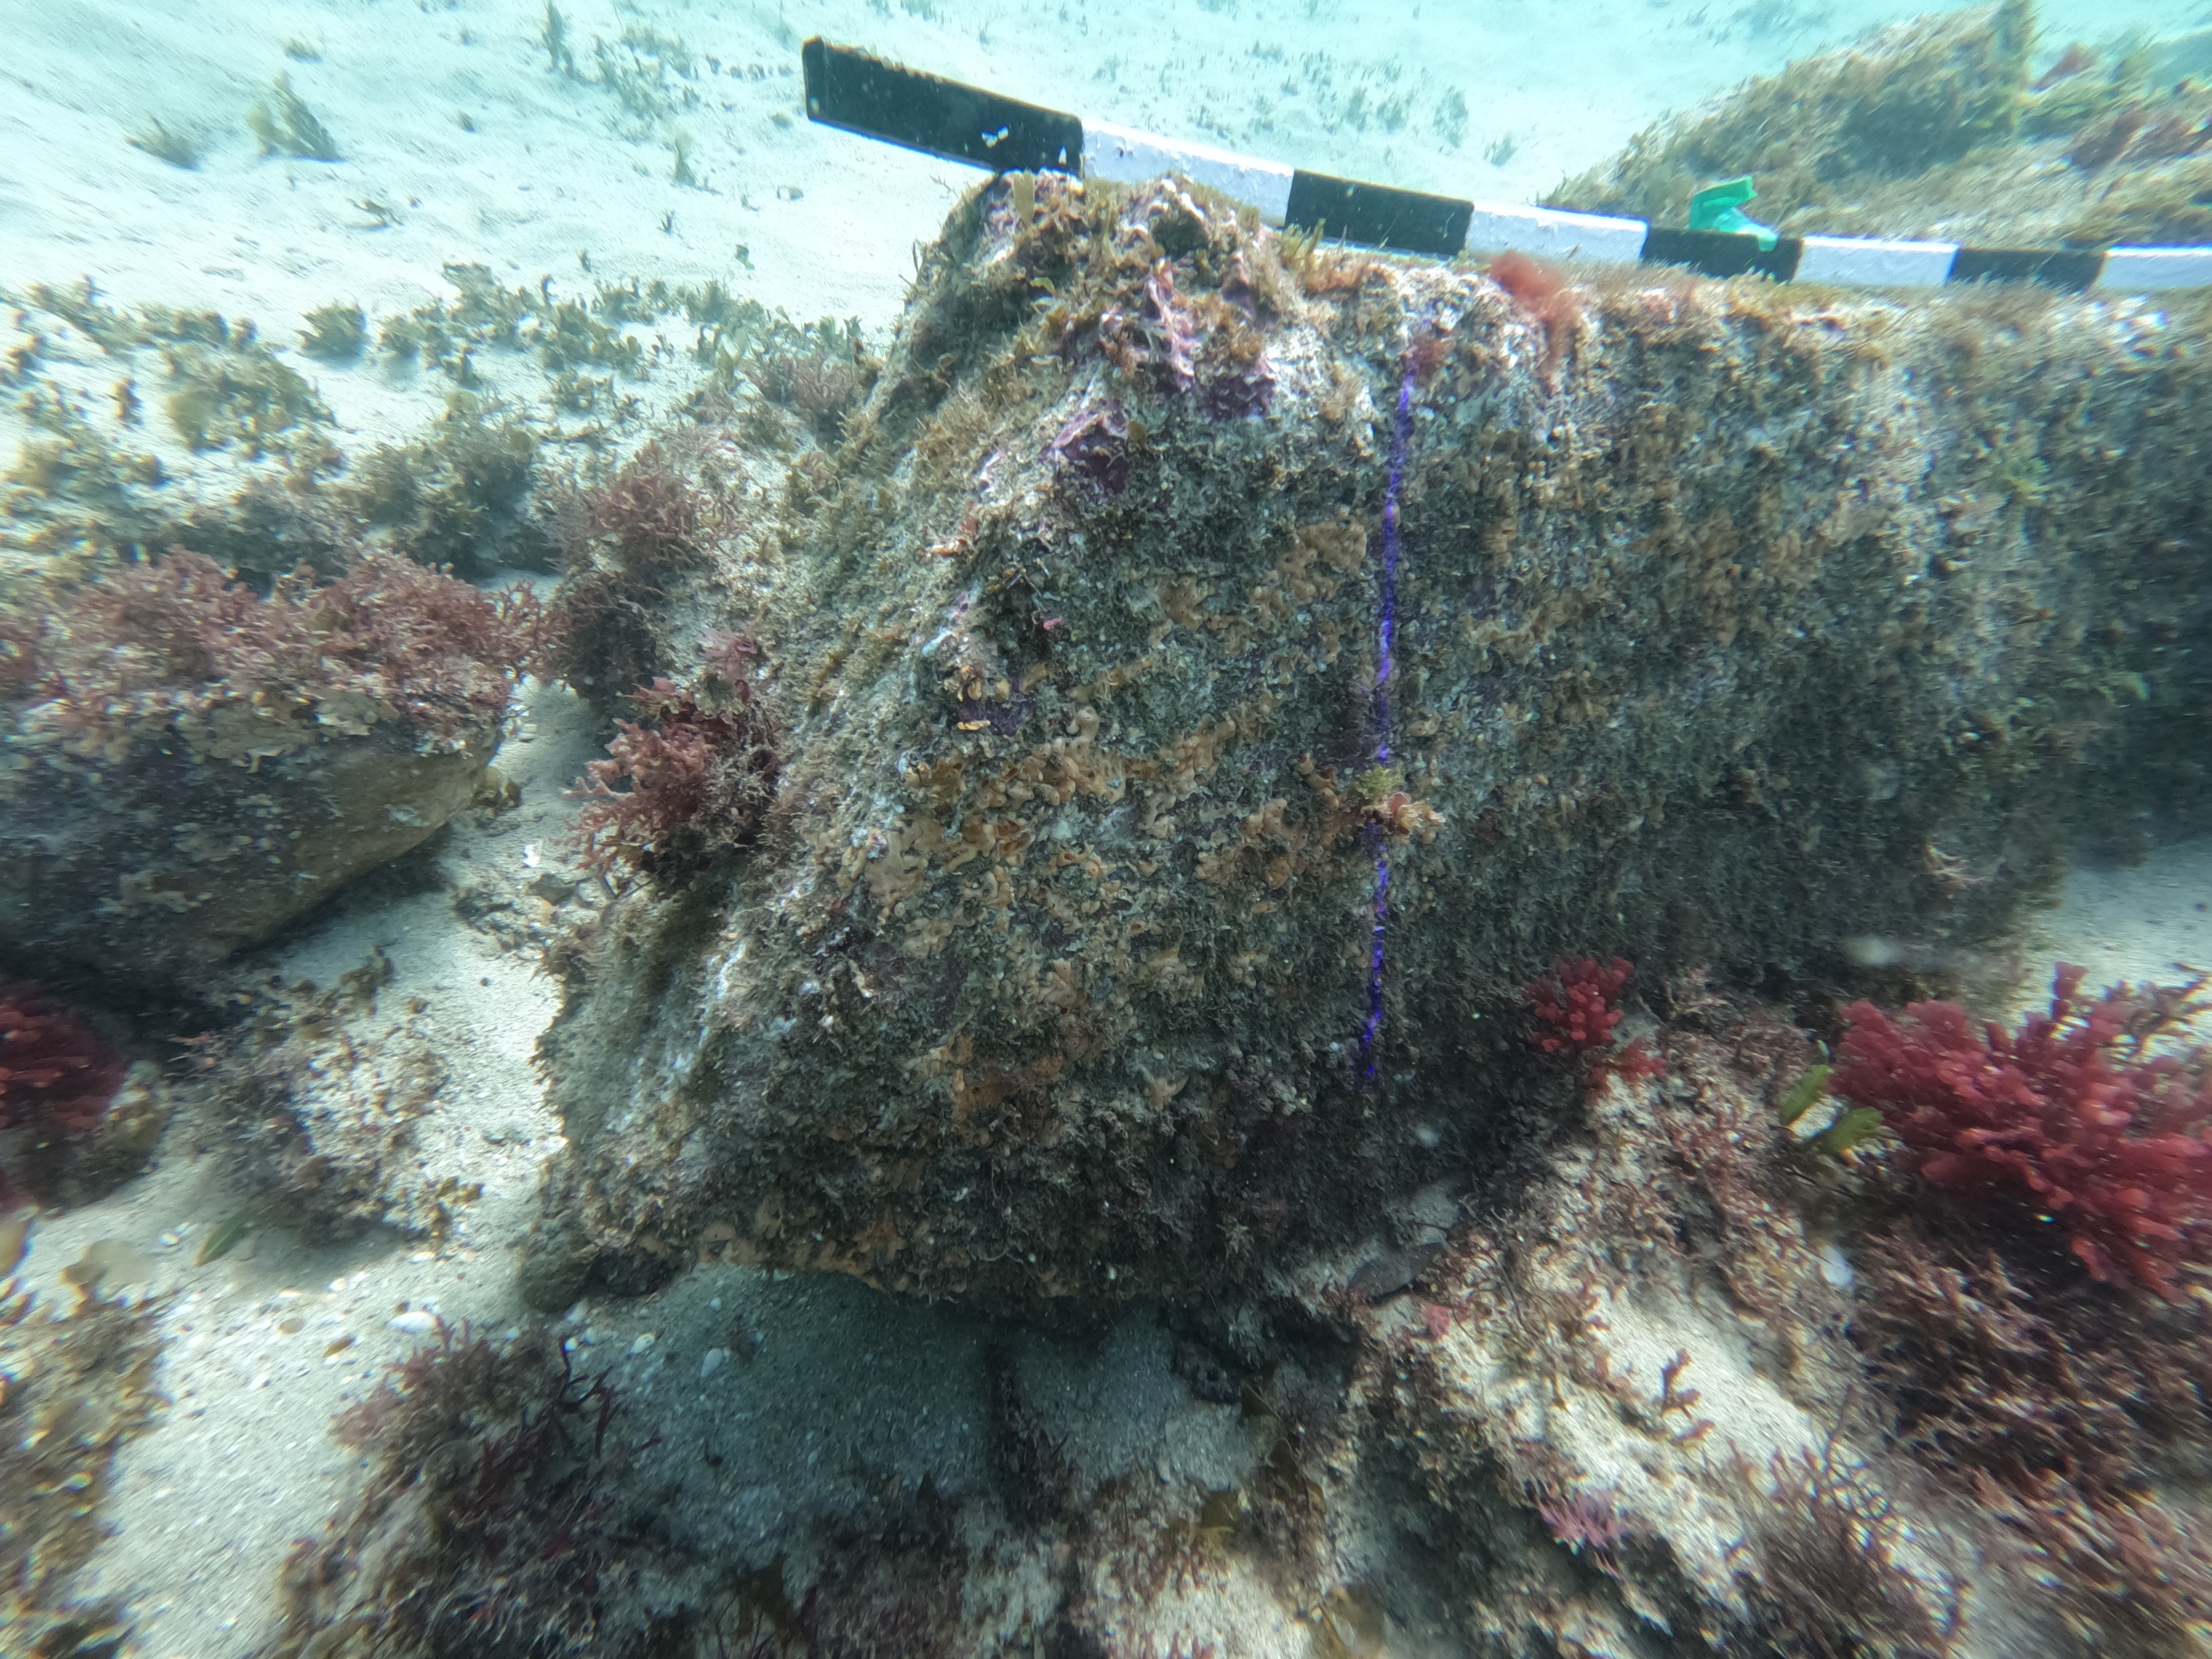

Supplement: Supplementary file 795 [file G0713862.pdf › Ocean2/G0713862.pdf]

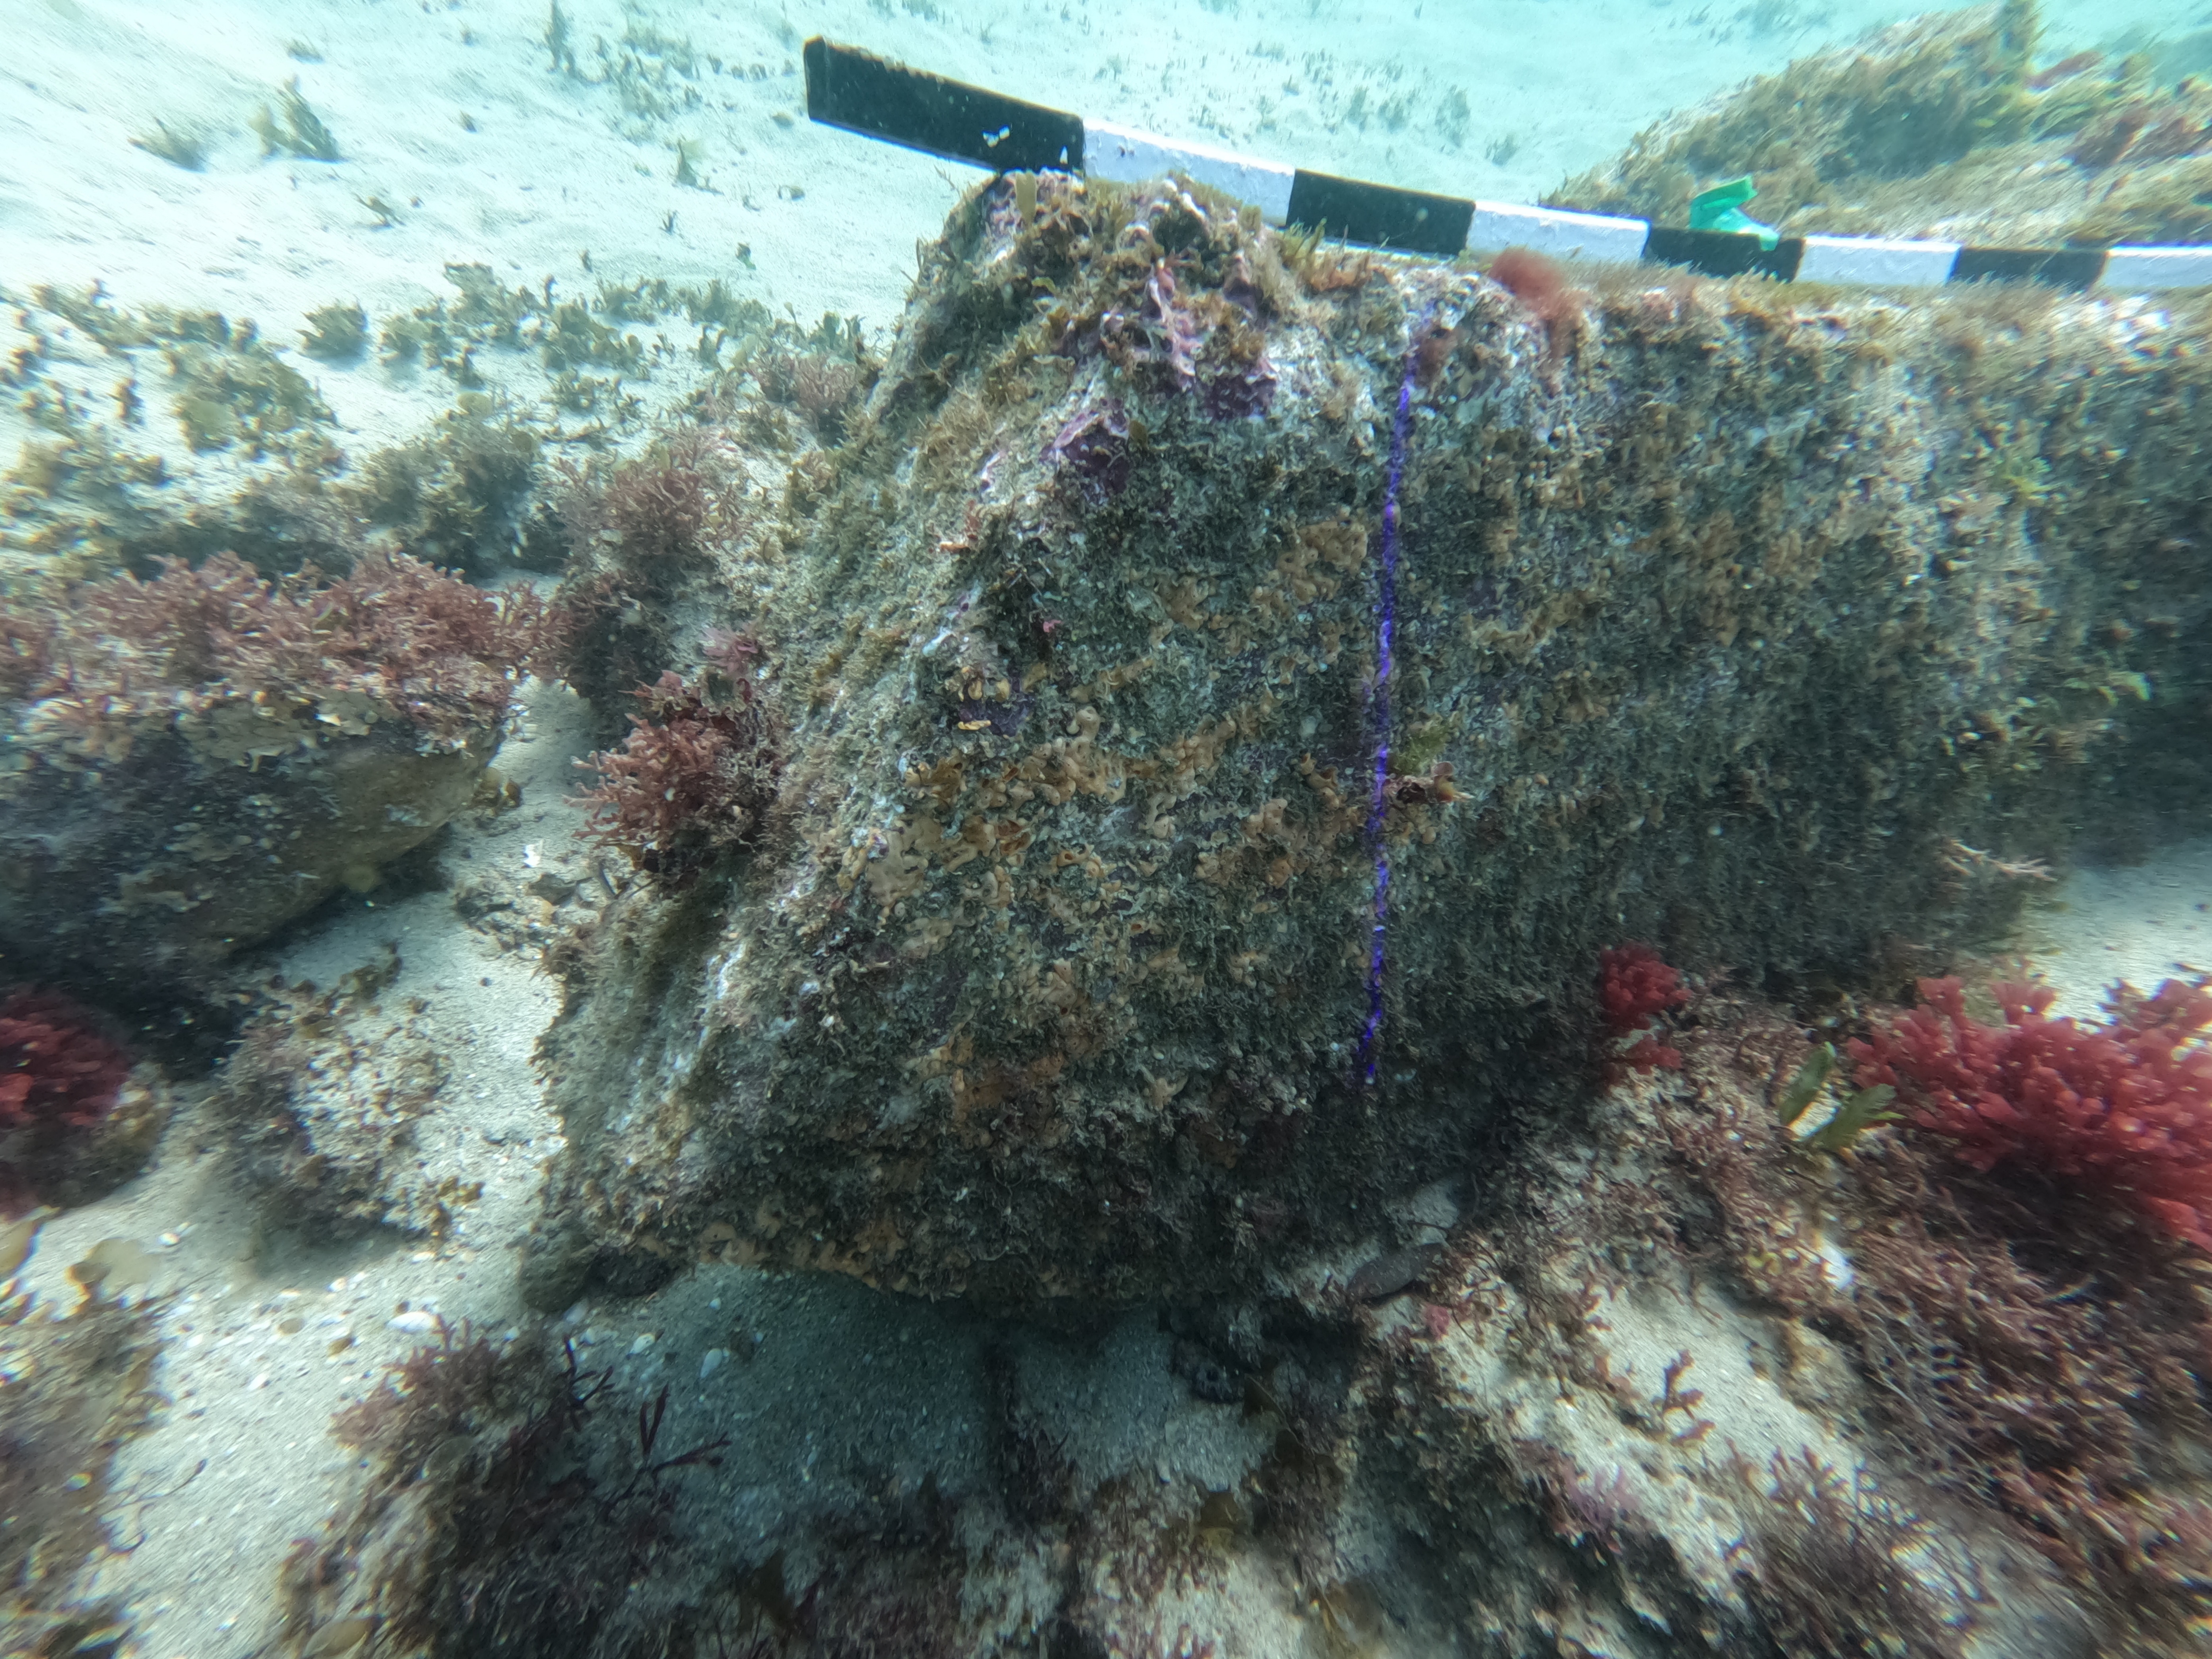

Supplement: Supplementary file 796 [file G0713863.pdf › Ocean2/G0713863.pdf]

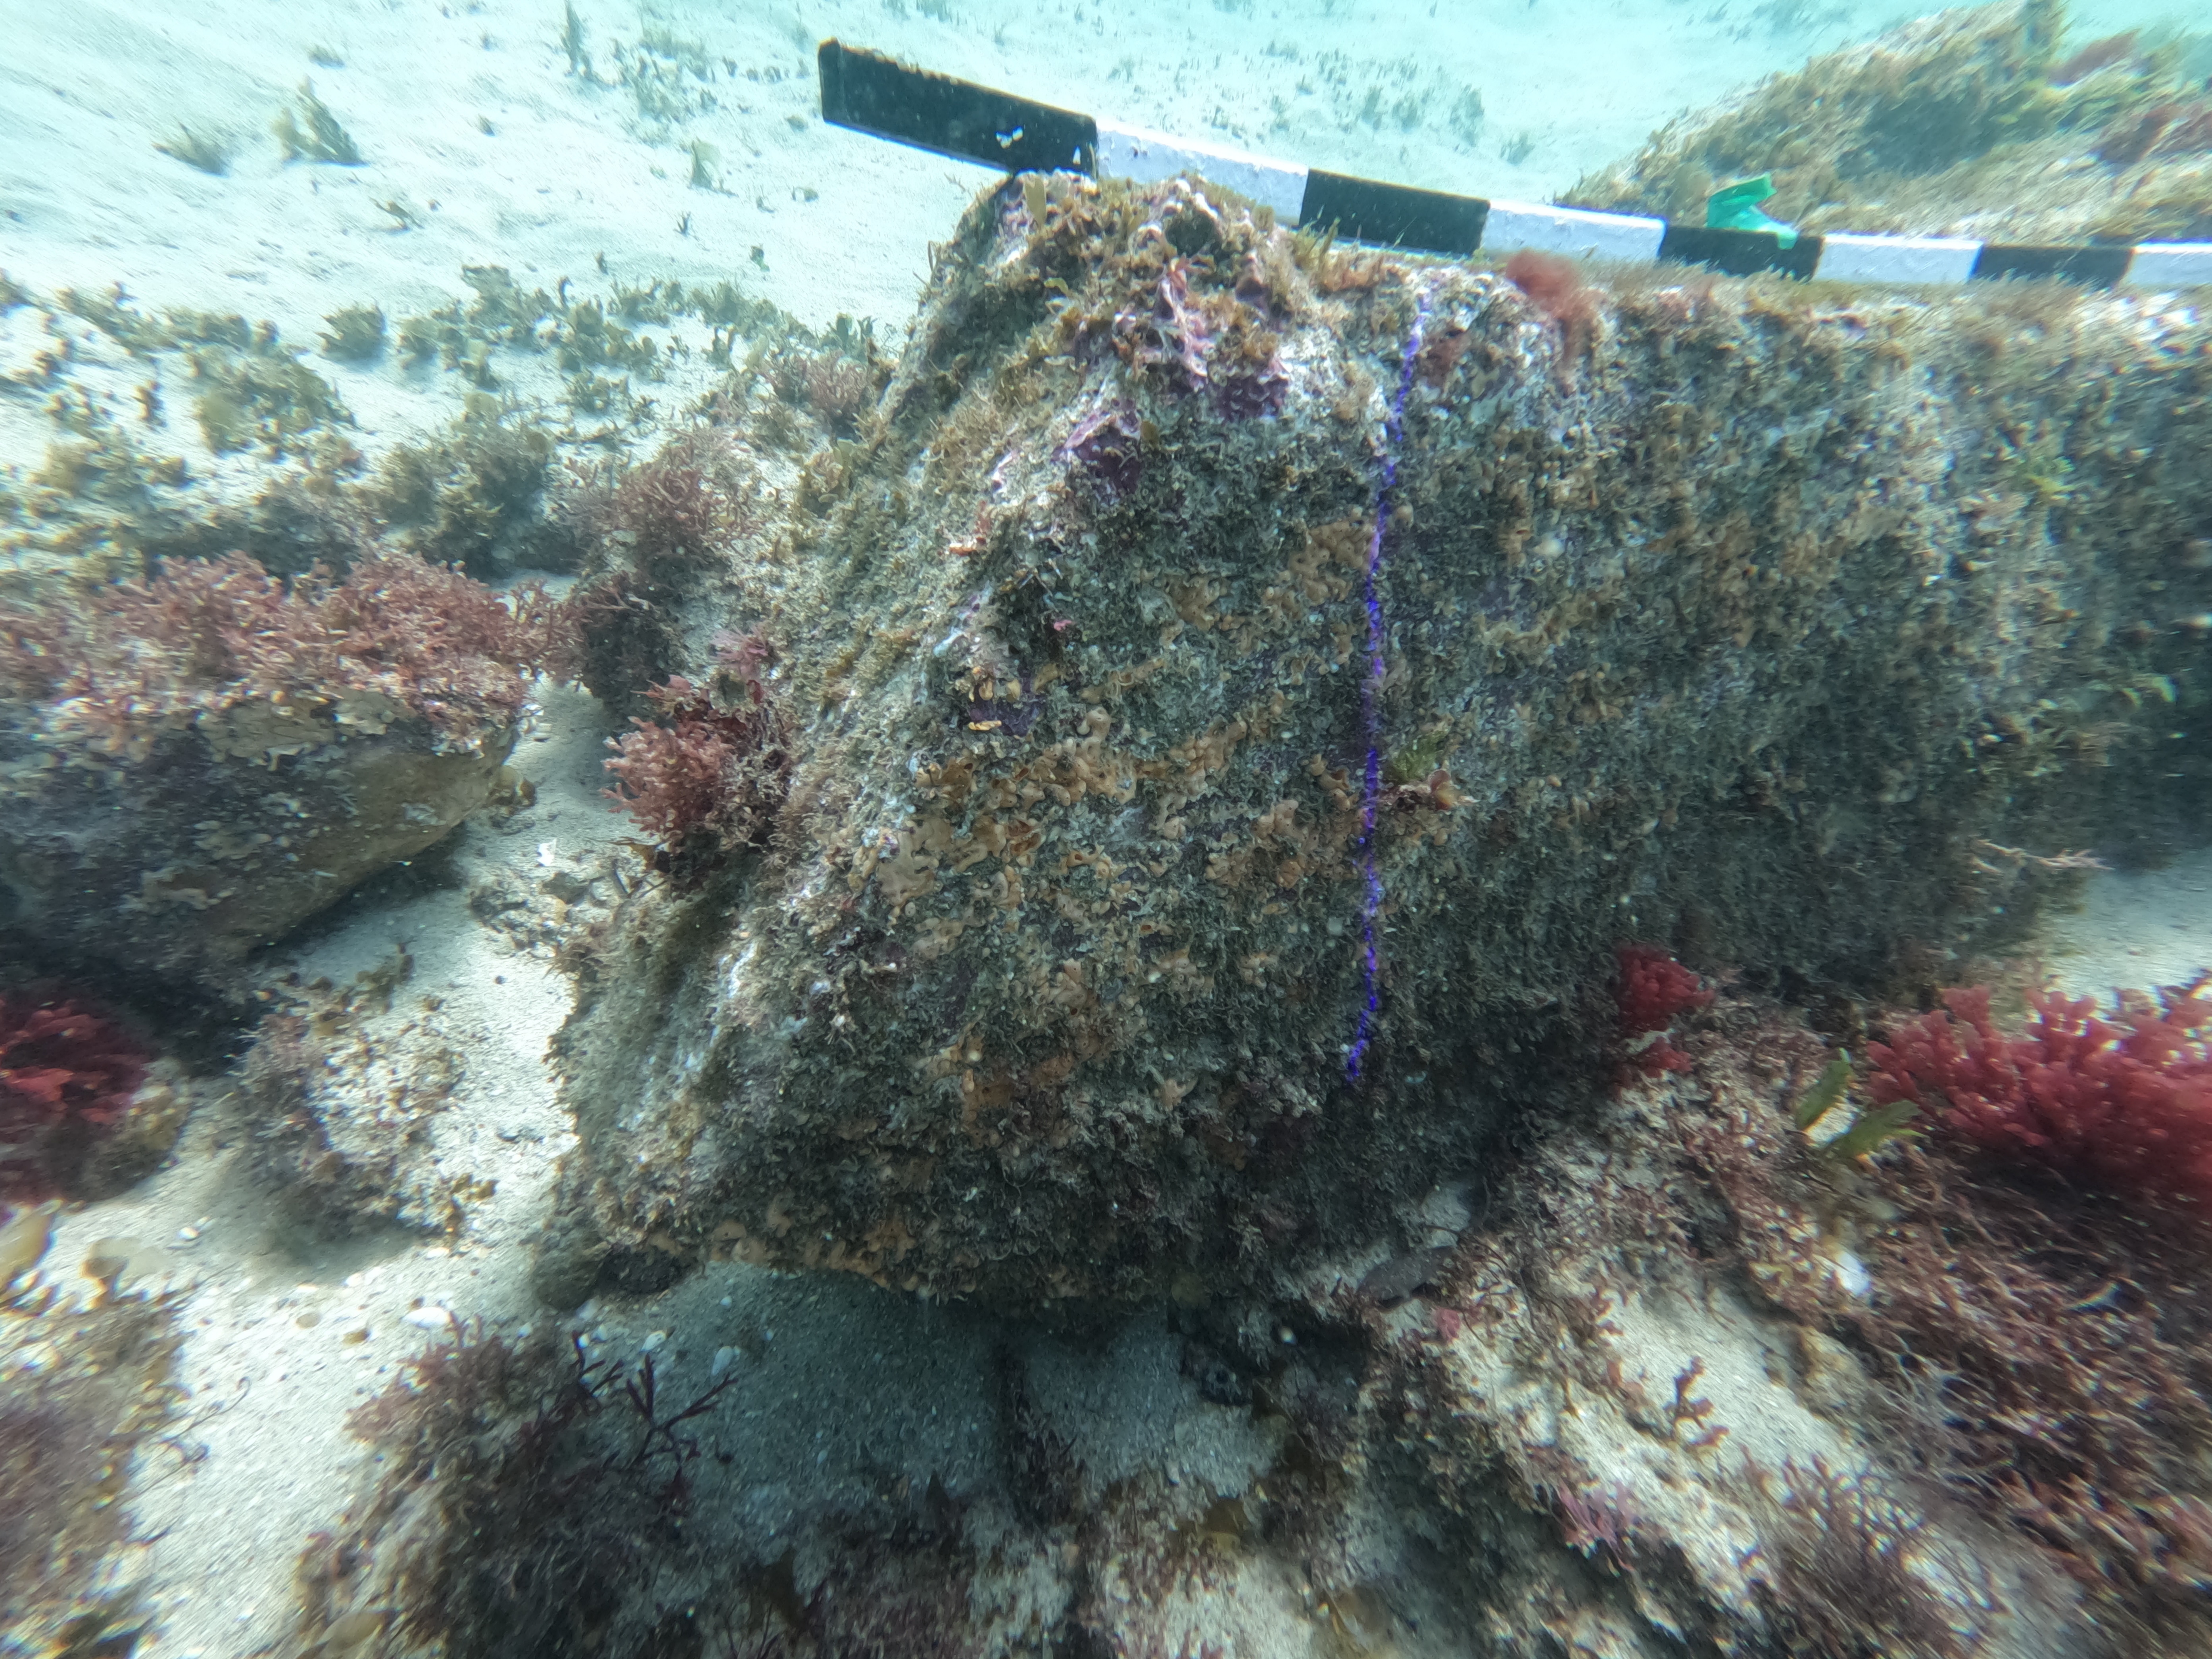

Supplement: Supplementary file 797 [file G0713864.pdf › Ocean2/G0713864.pdf]

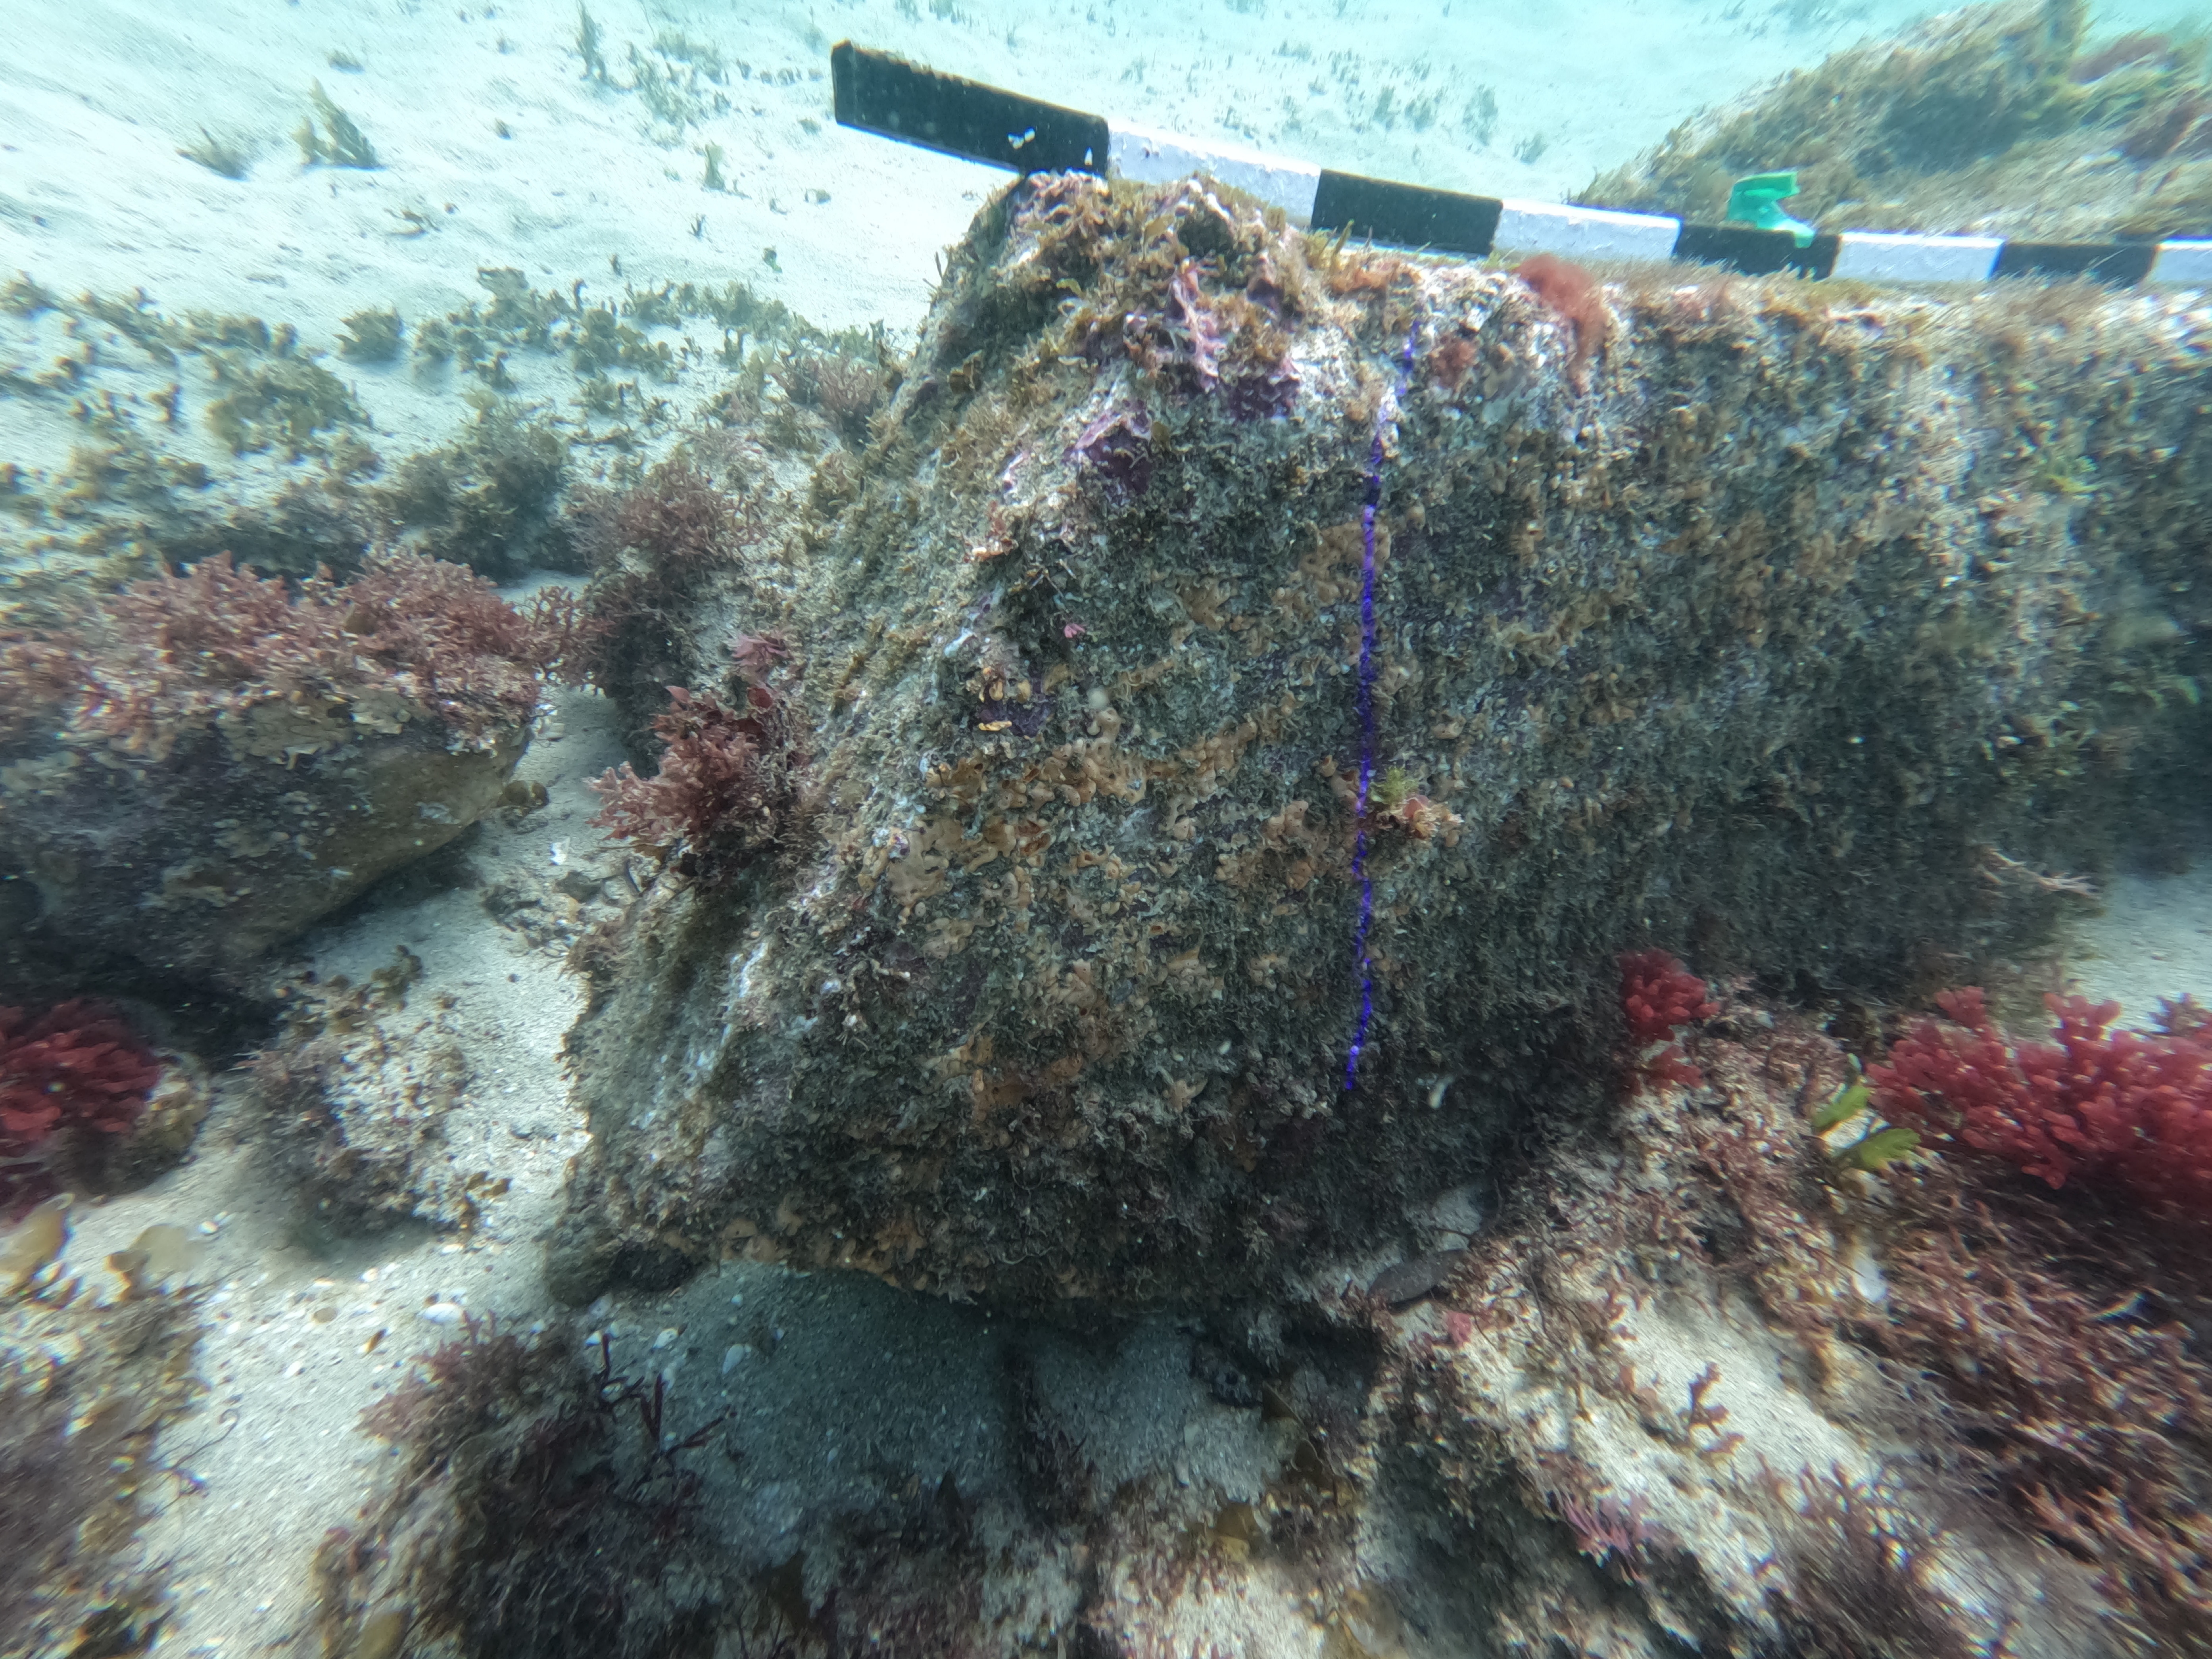

Supplement: Supplementary file 798 [file G0713865.pdf › Ocean2/G0713865.pdf]

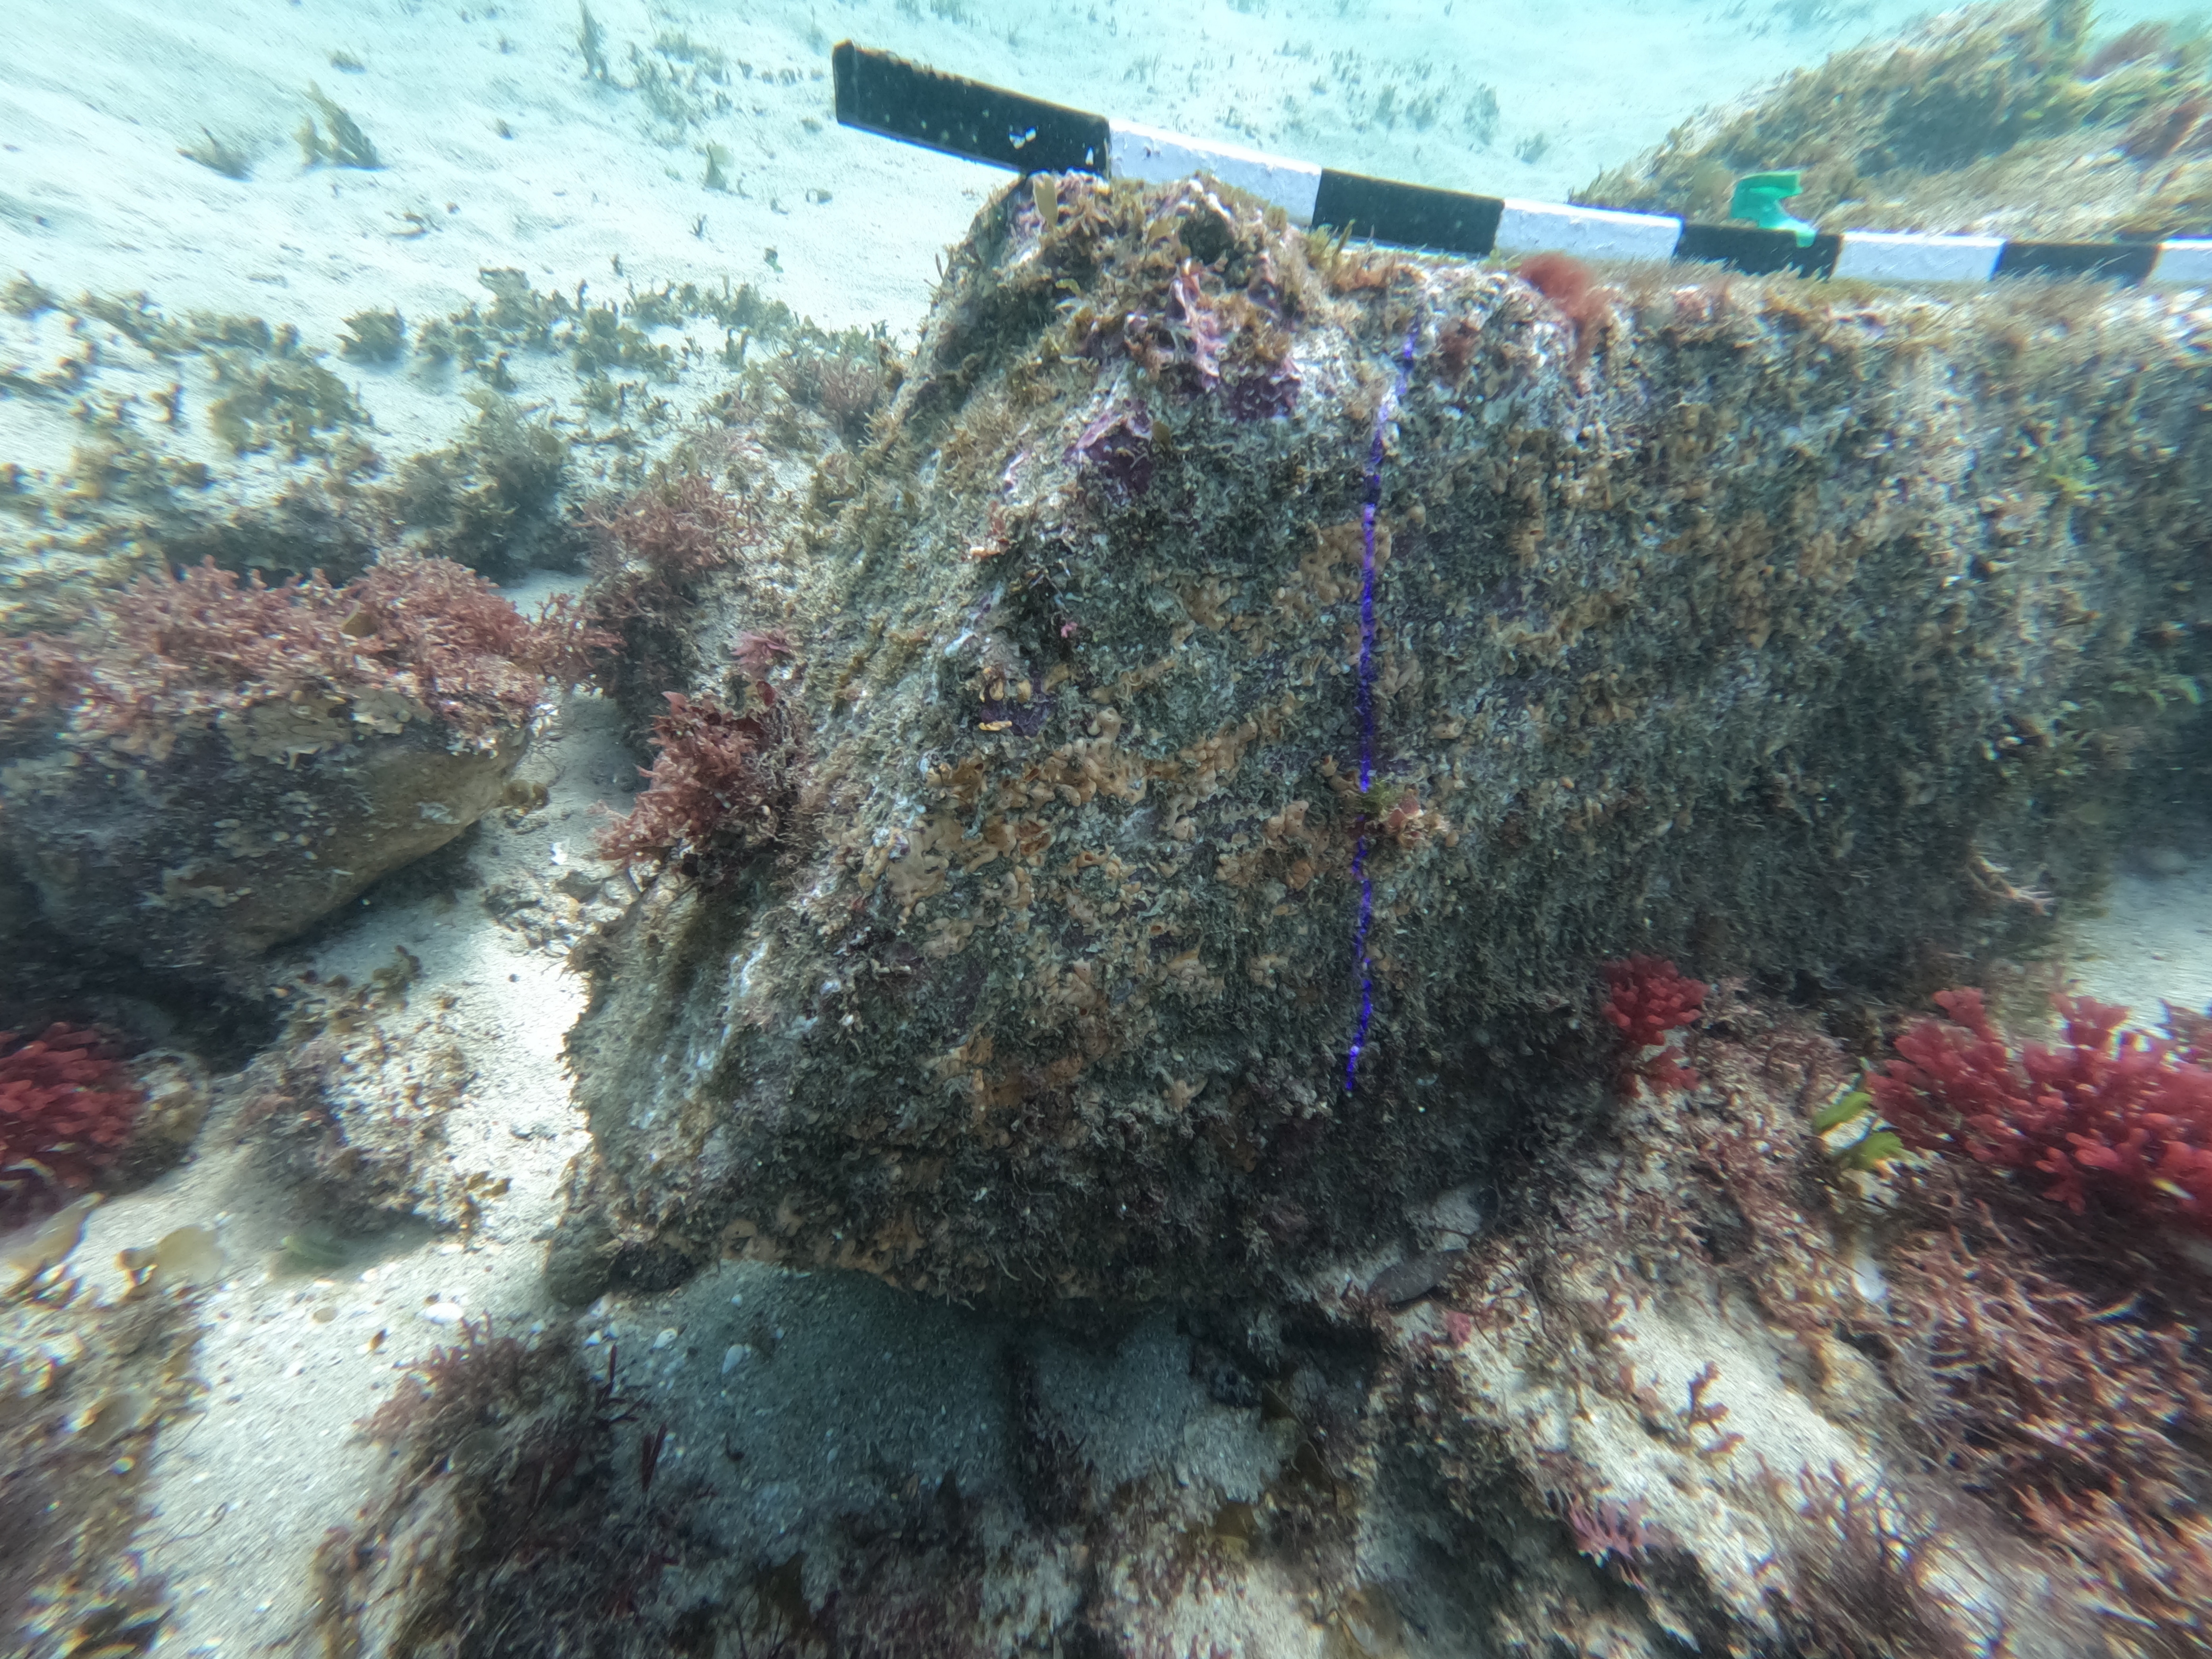

Supplement: Supplementary file 799 [file G0713866.pdf › Ocean2/G0713866.pdf]

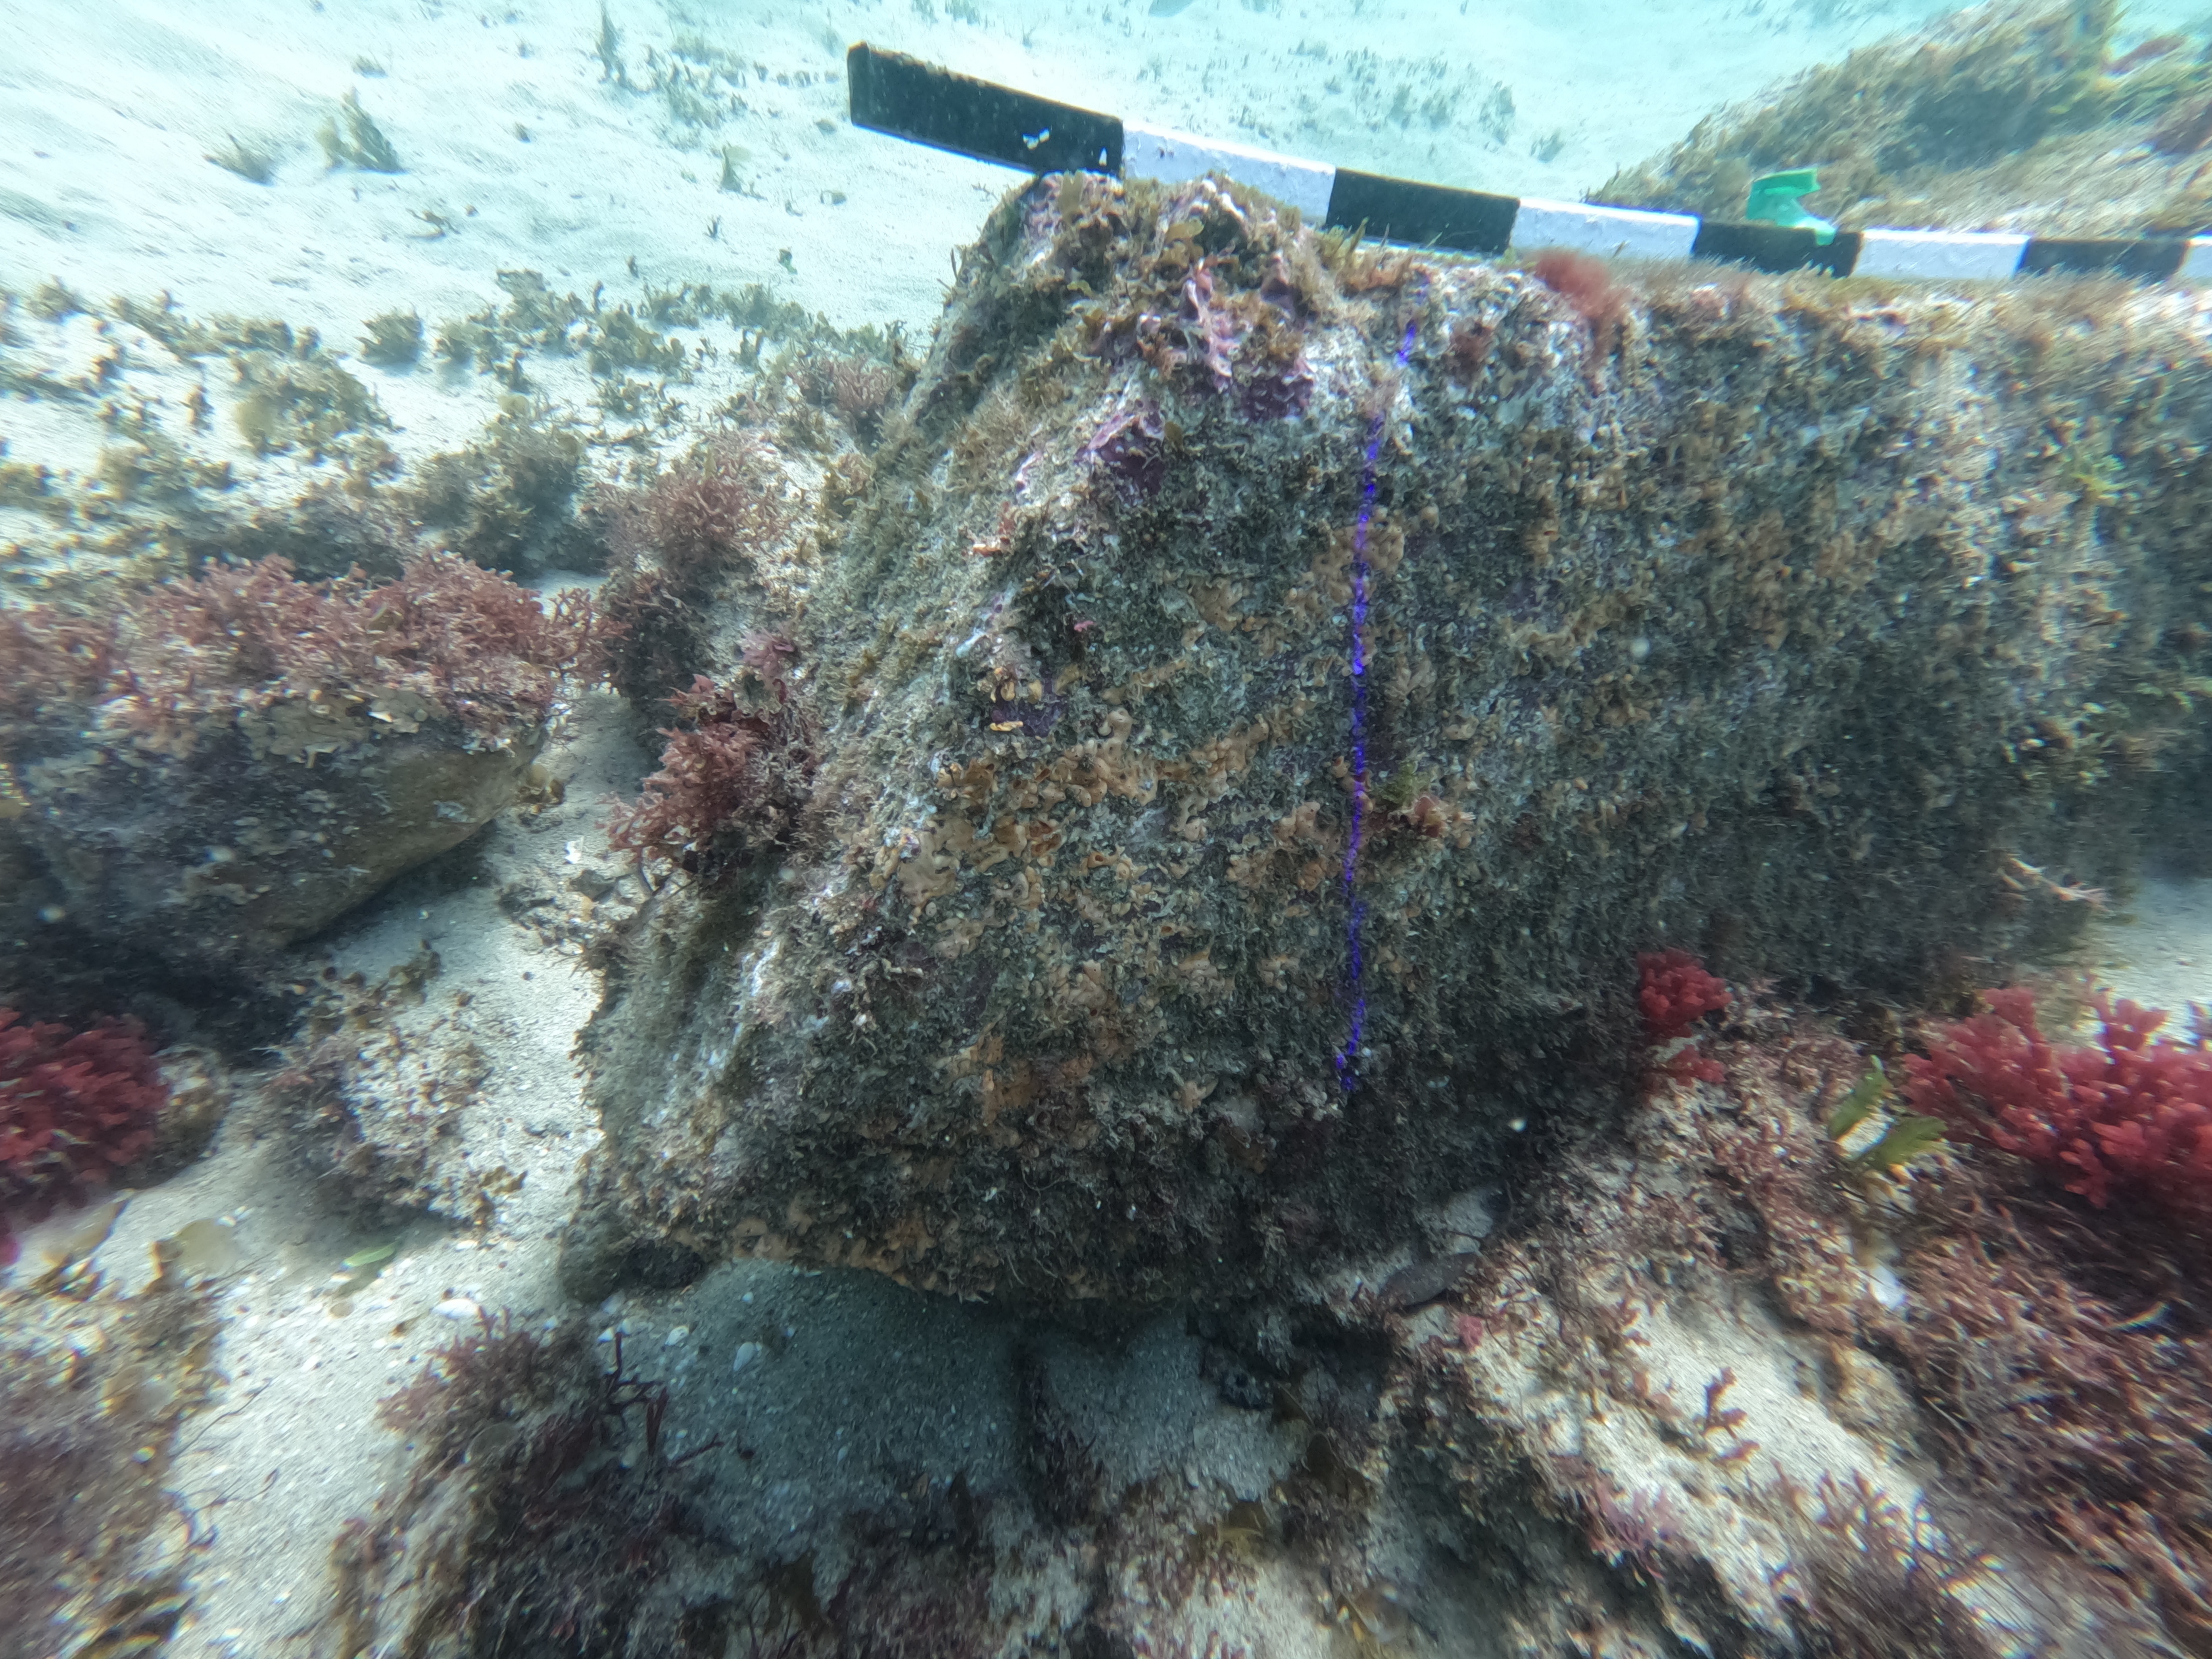

Supplement: Supplementary file 800 [file G0713867.pdf › Ocean2/G0713867.pdf]
