# Supplementary figures and images for: 3D reconstruction of shallow sea environment using direct system calibration and faint laser line extraction (part 9 of 35)
Source: Research Square preprint supplement (doi:10.21203/rs.3.rs-5262658/v1), 2024-12-02

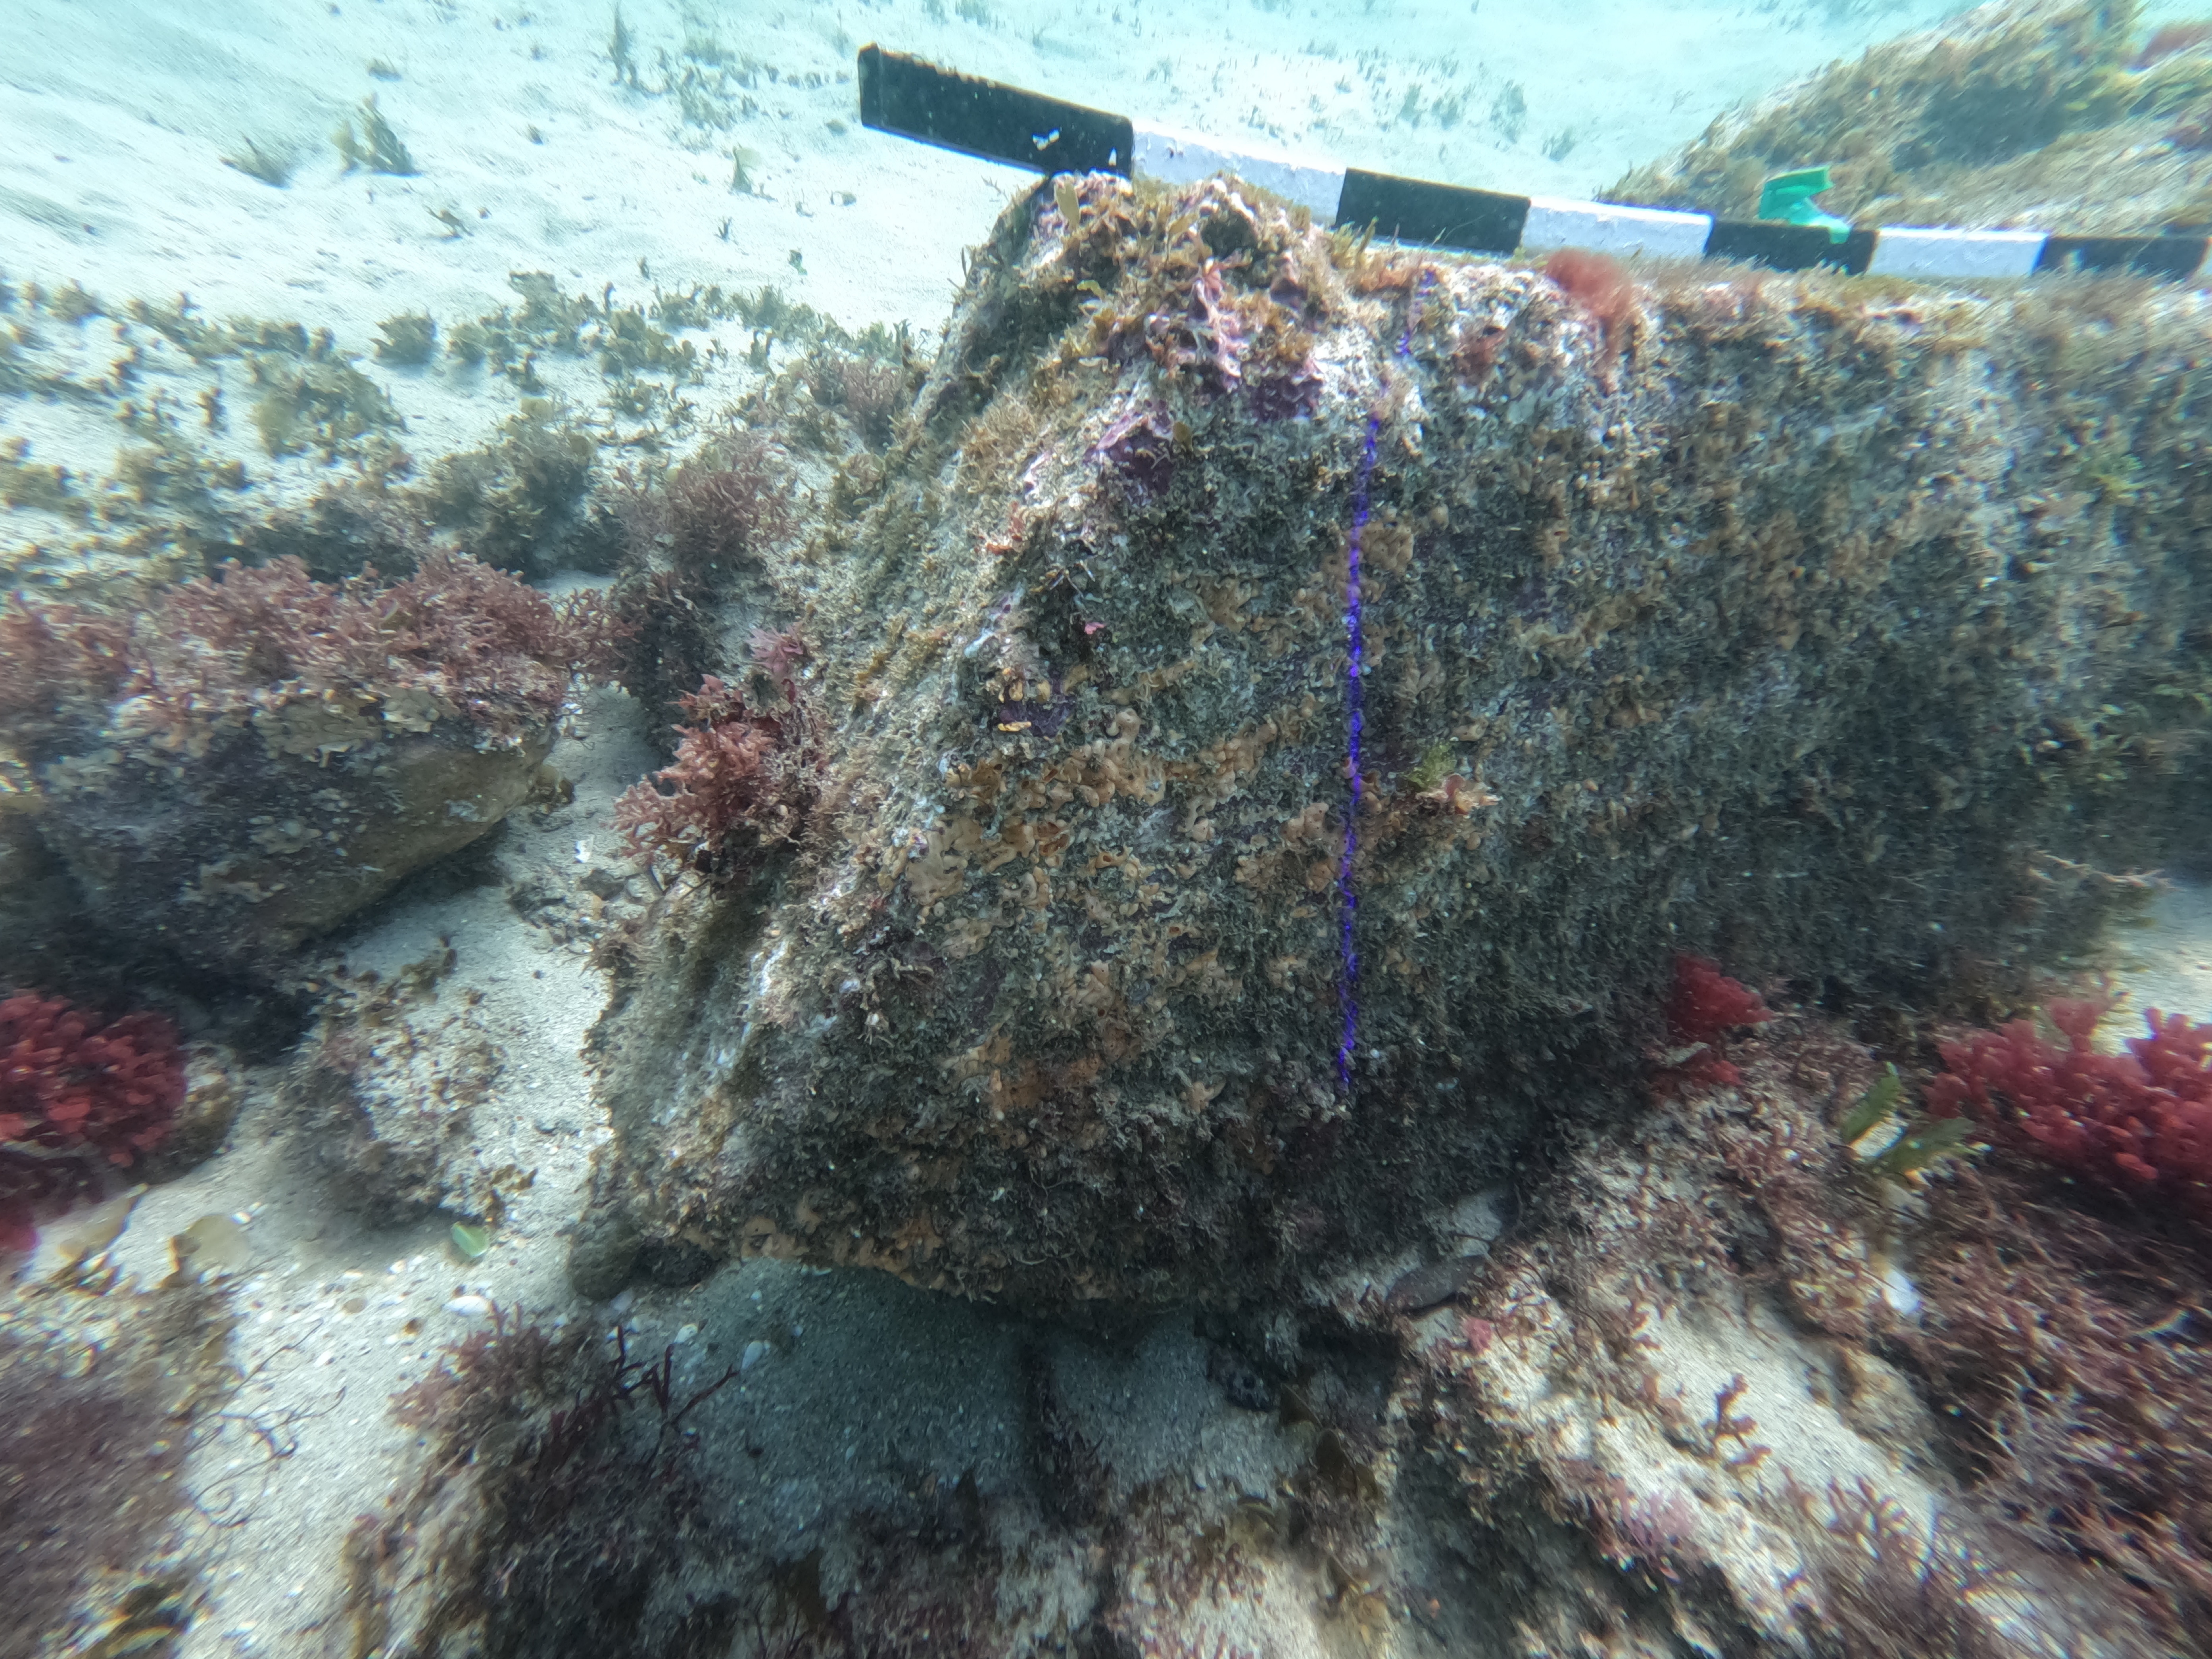

Supplement: Supplementary file 801 [file G0713868.pdf › Ocean2/G0713868.pdf]

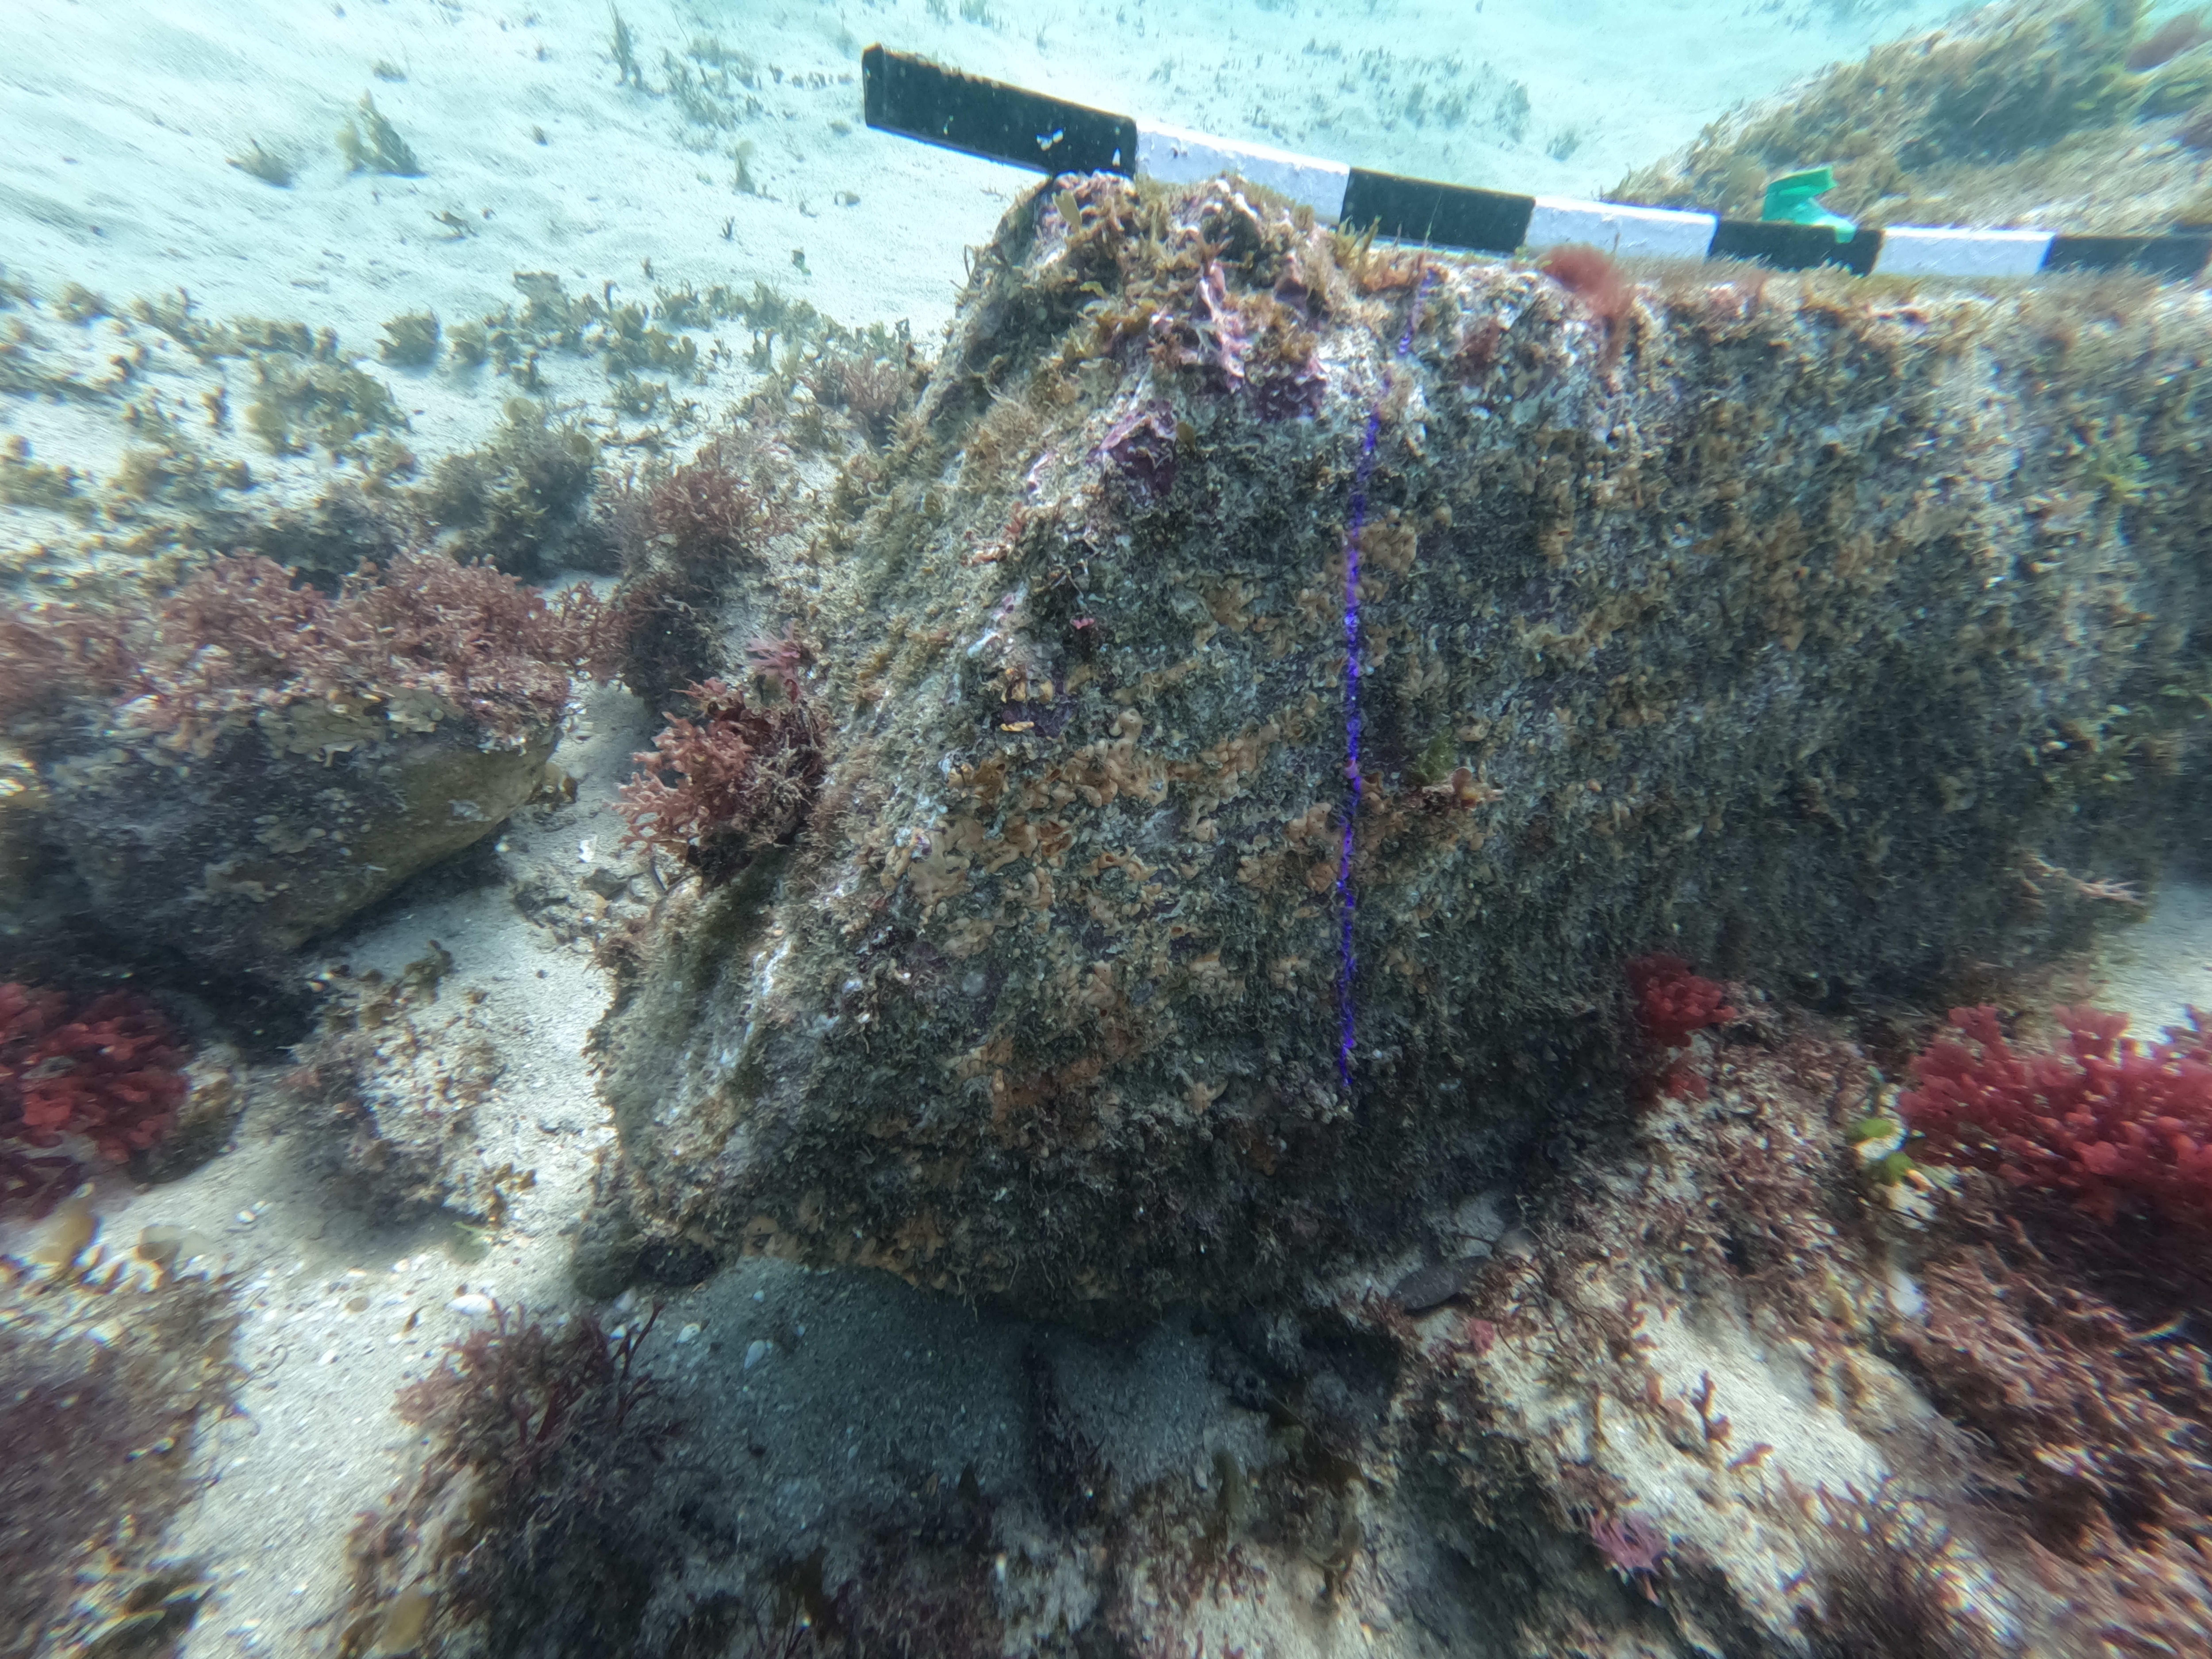

Supplement: Supplementary file 802 [file G0713869.pdf › Ocean2/G0713869.pdf]

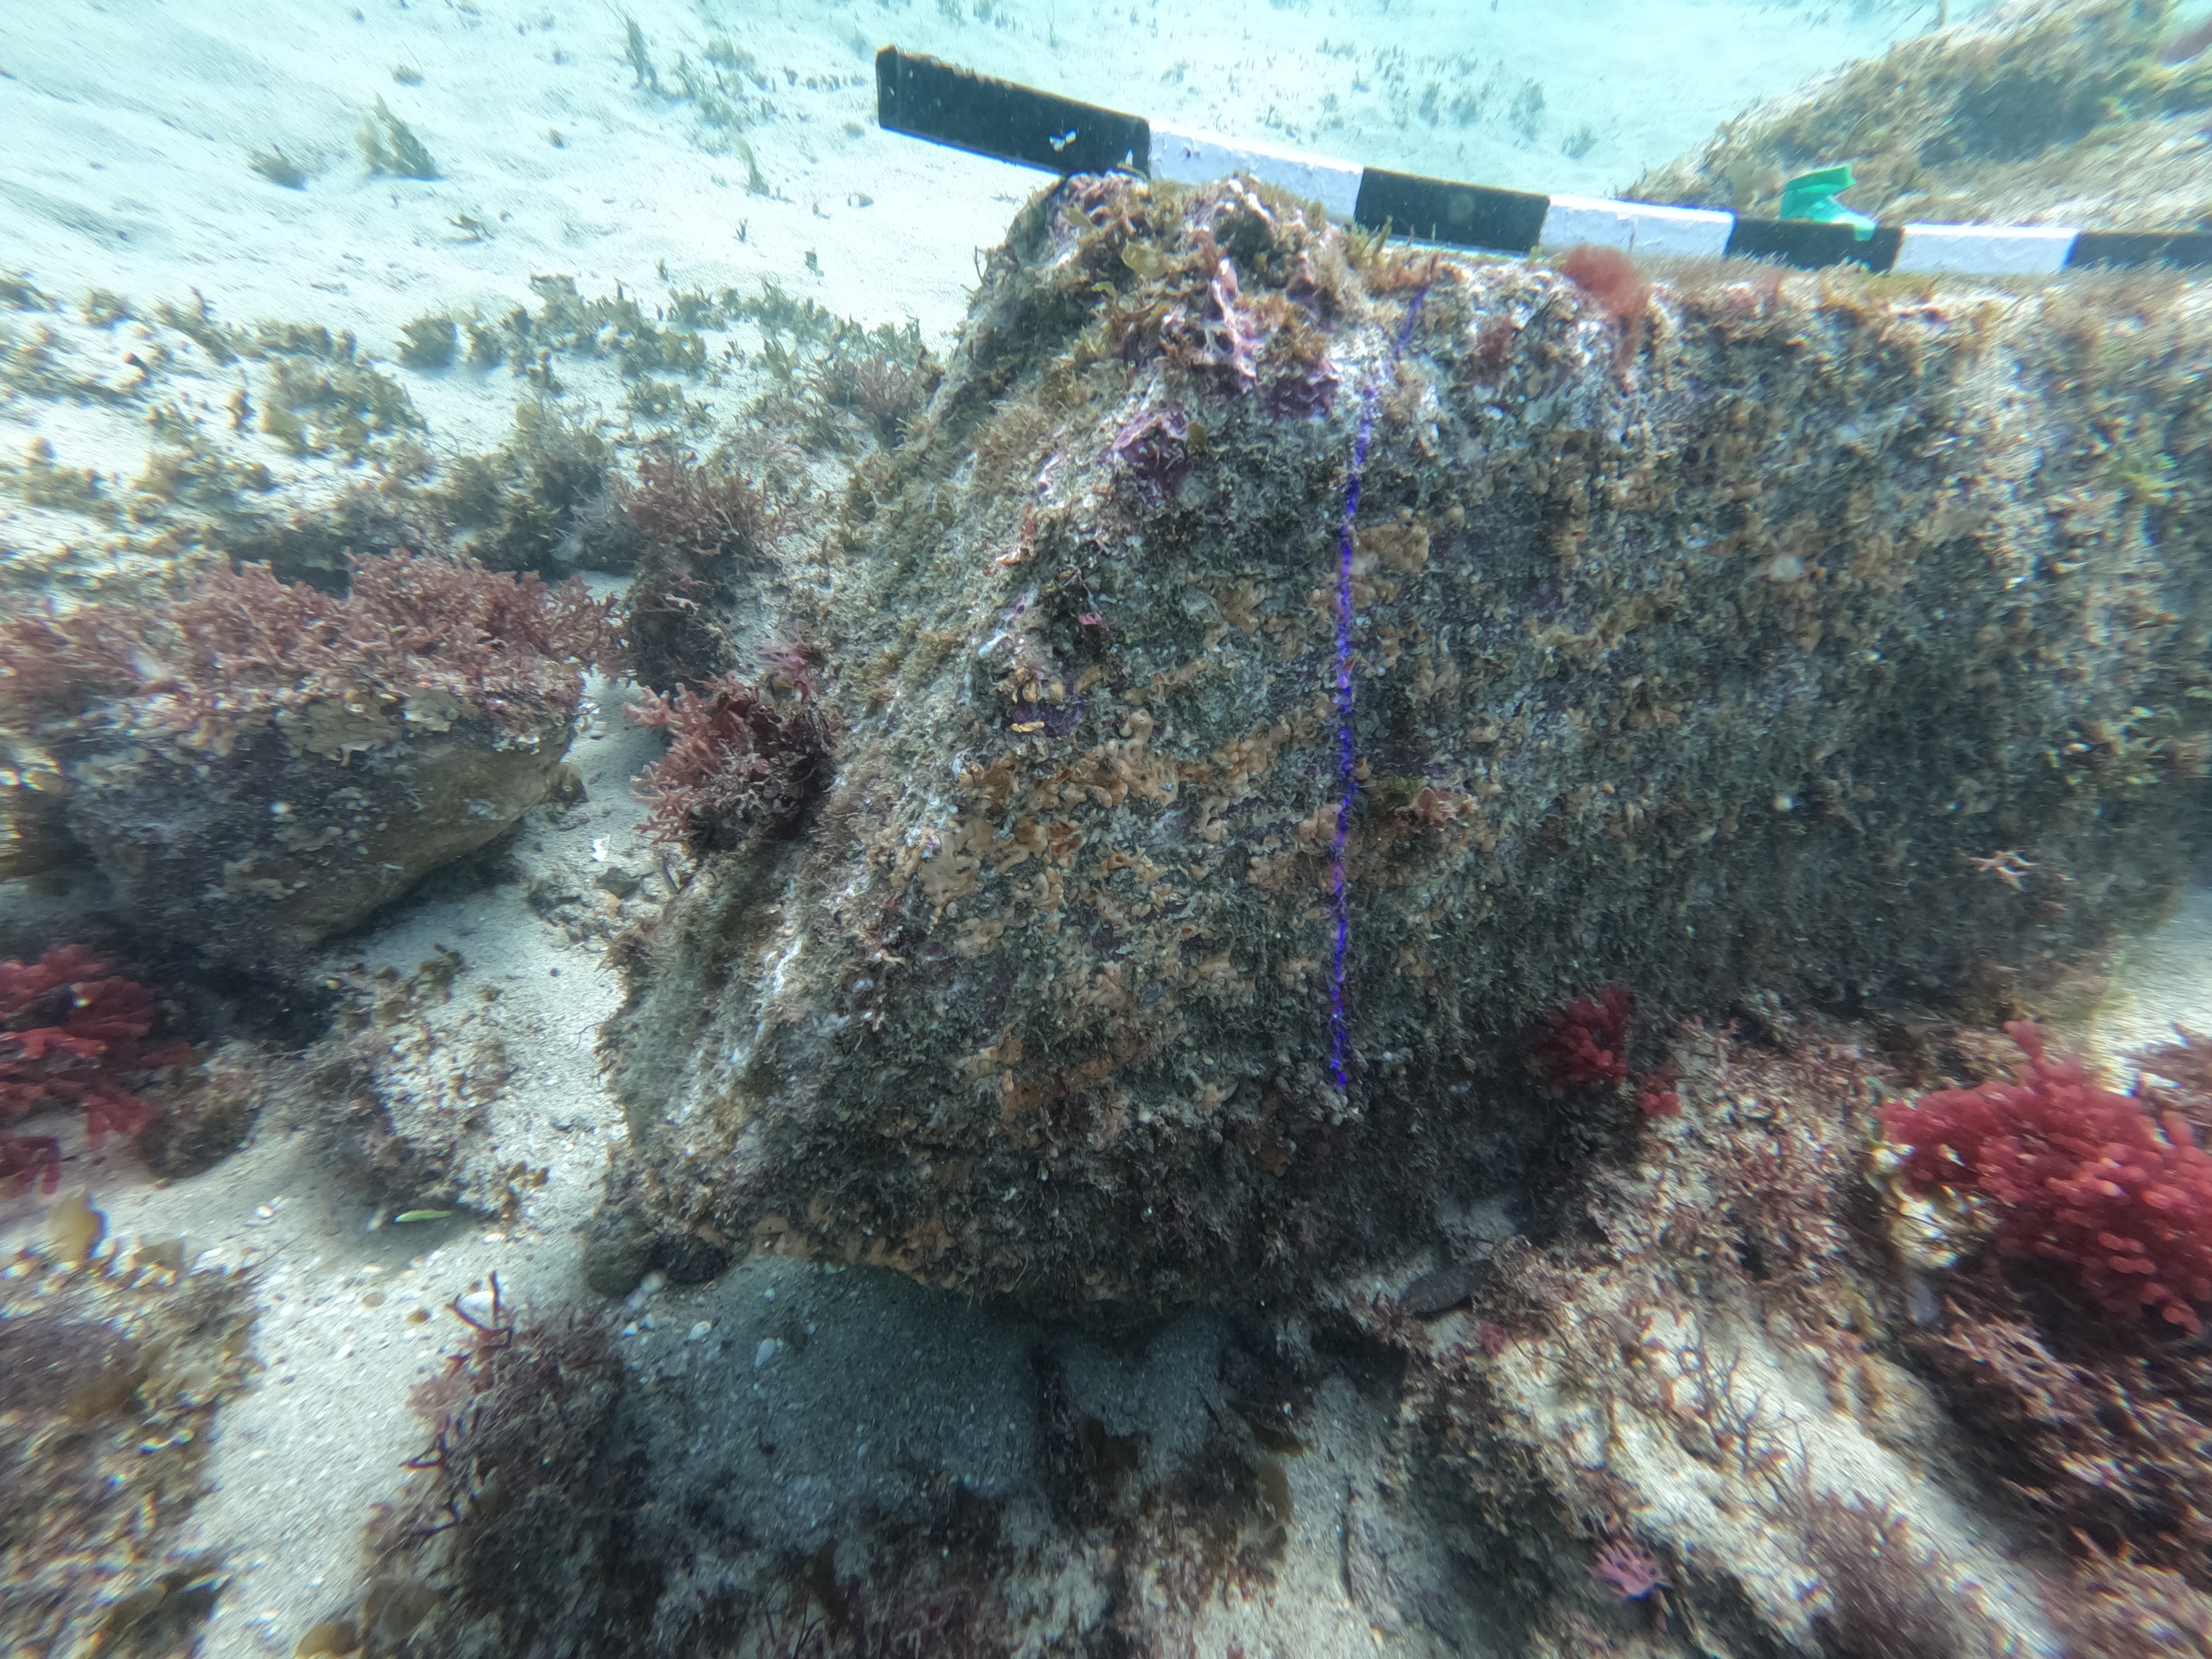

Supplement: Supplementary file 803 [file G0713870.pdf › Ocean2/G0713870.pdf]

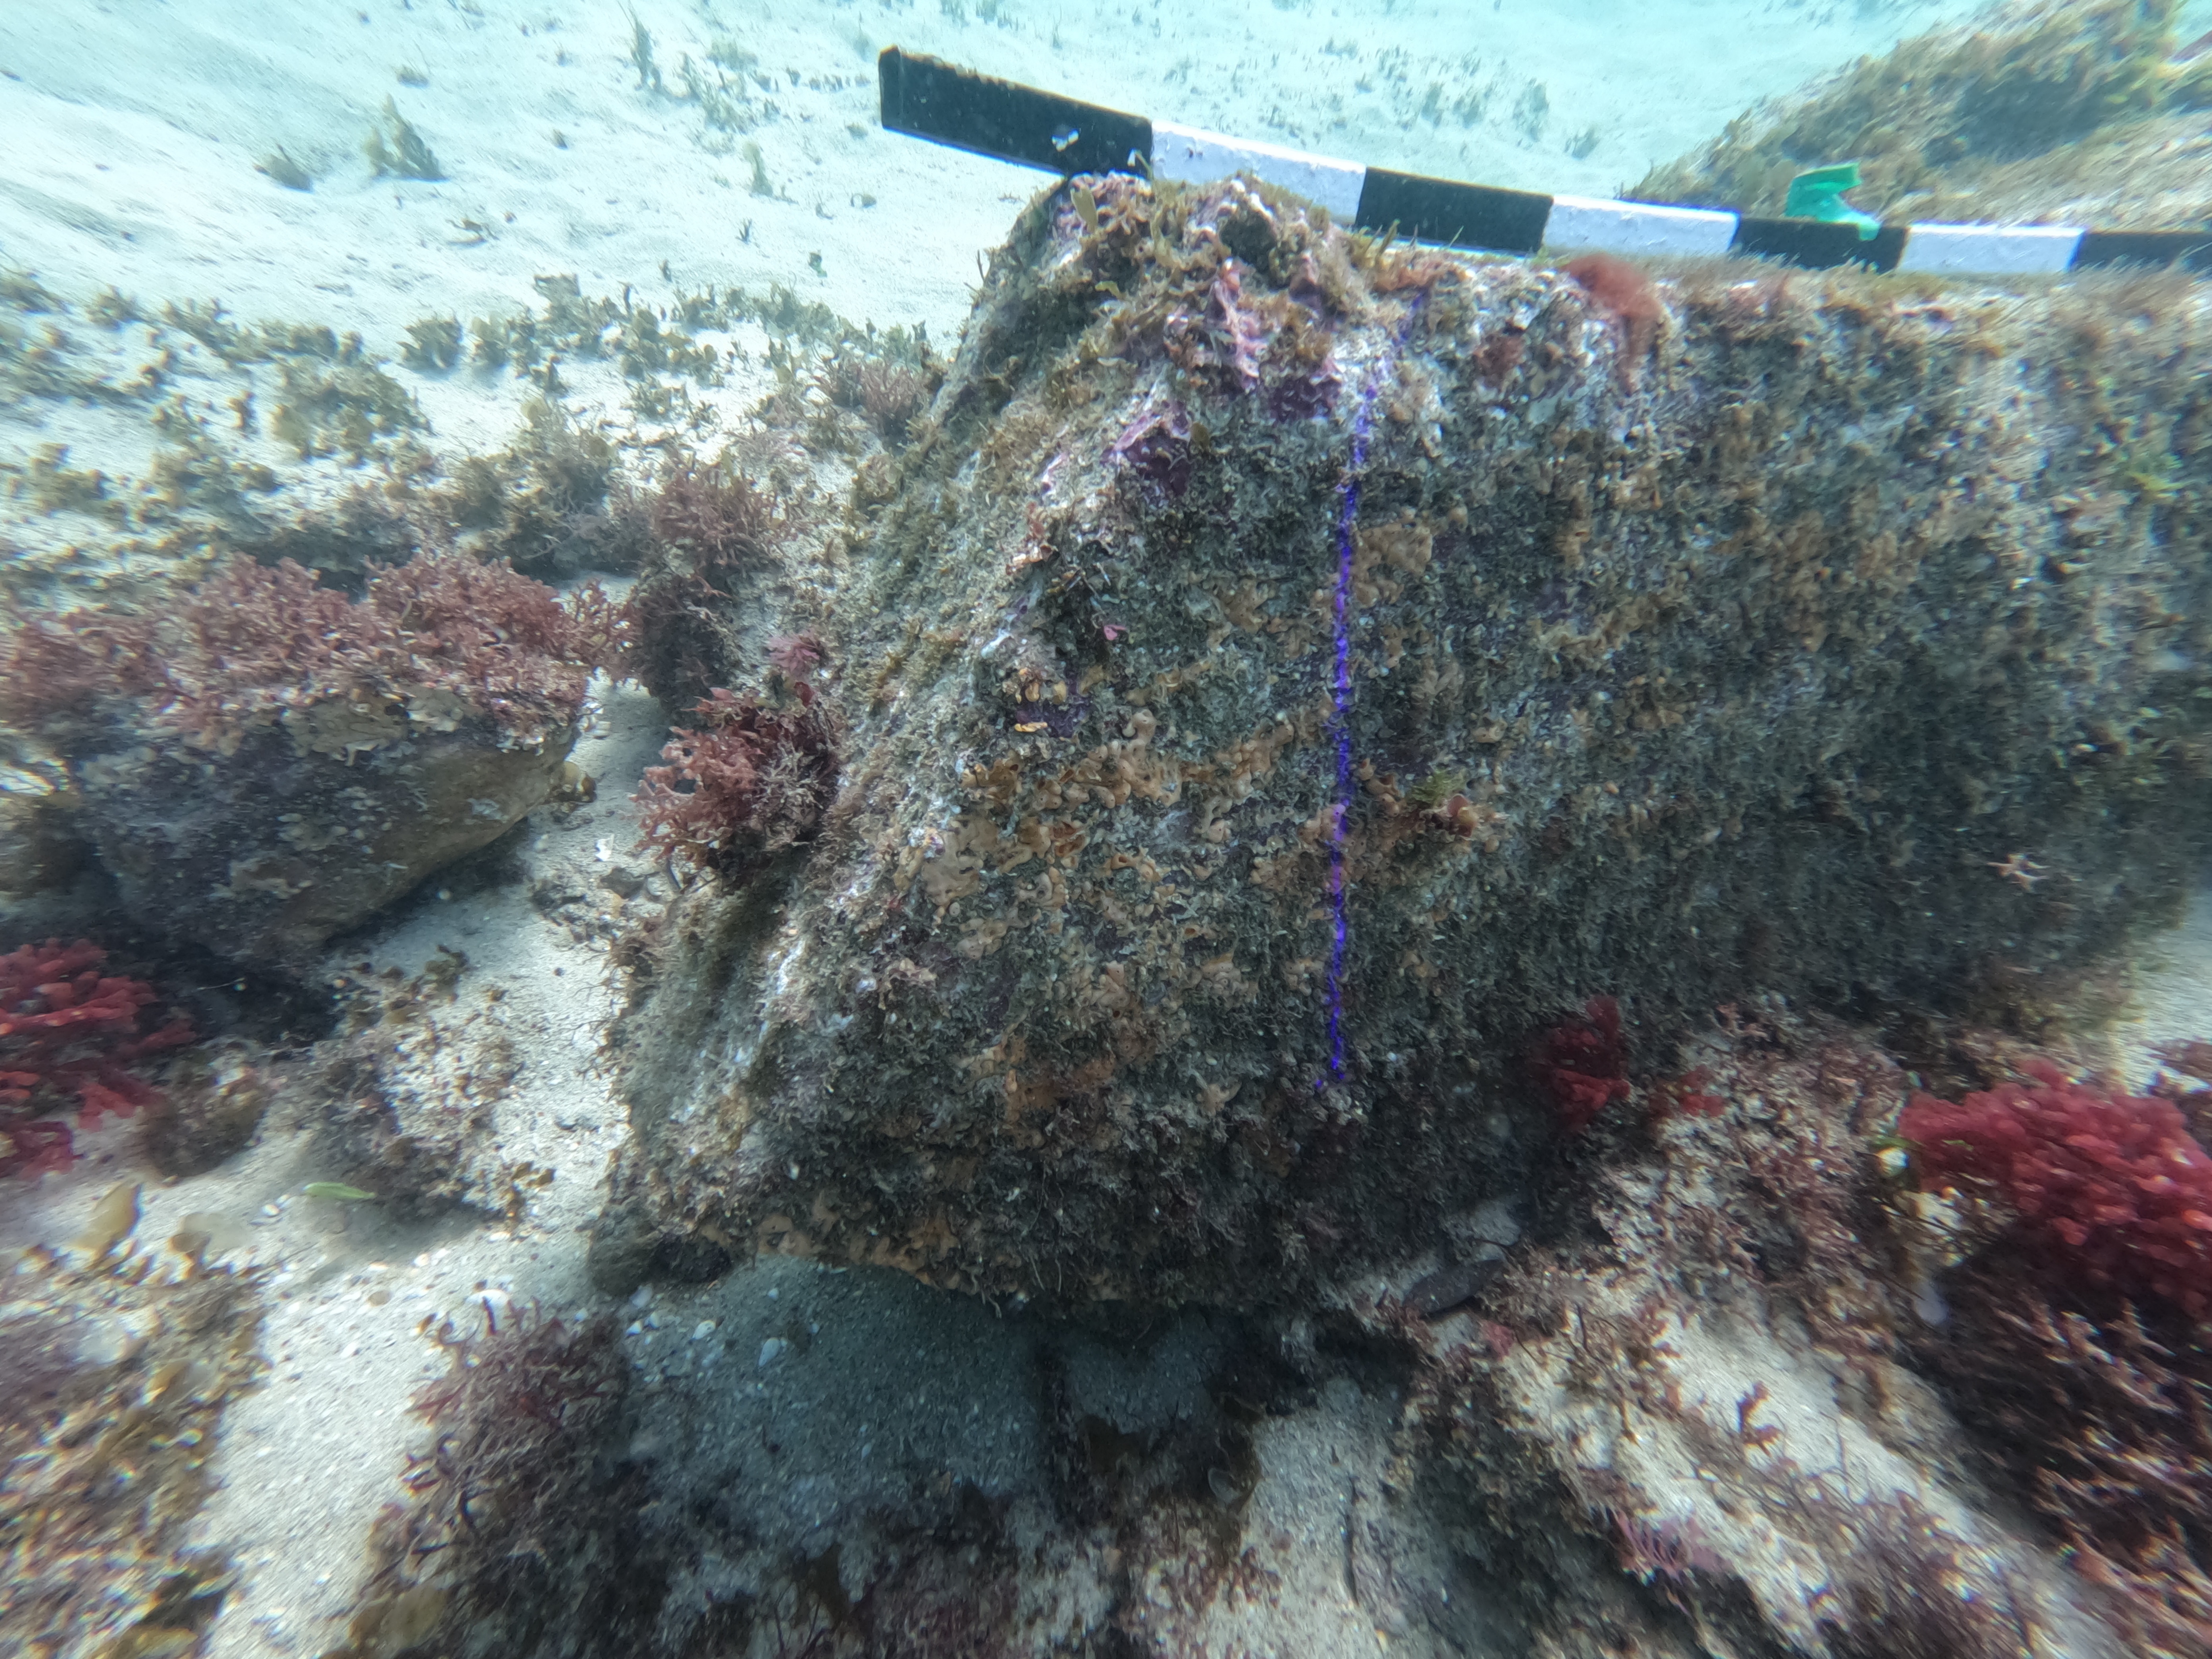

Supplement: Supplementary file 804 [file G0713871.pdf › Ocean2/G0713871.pdf]

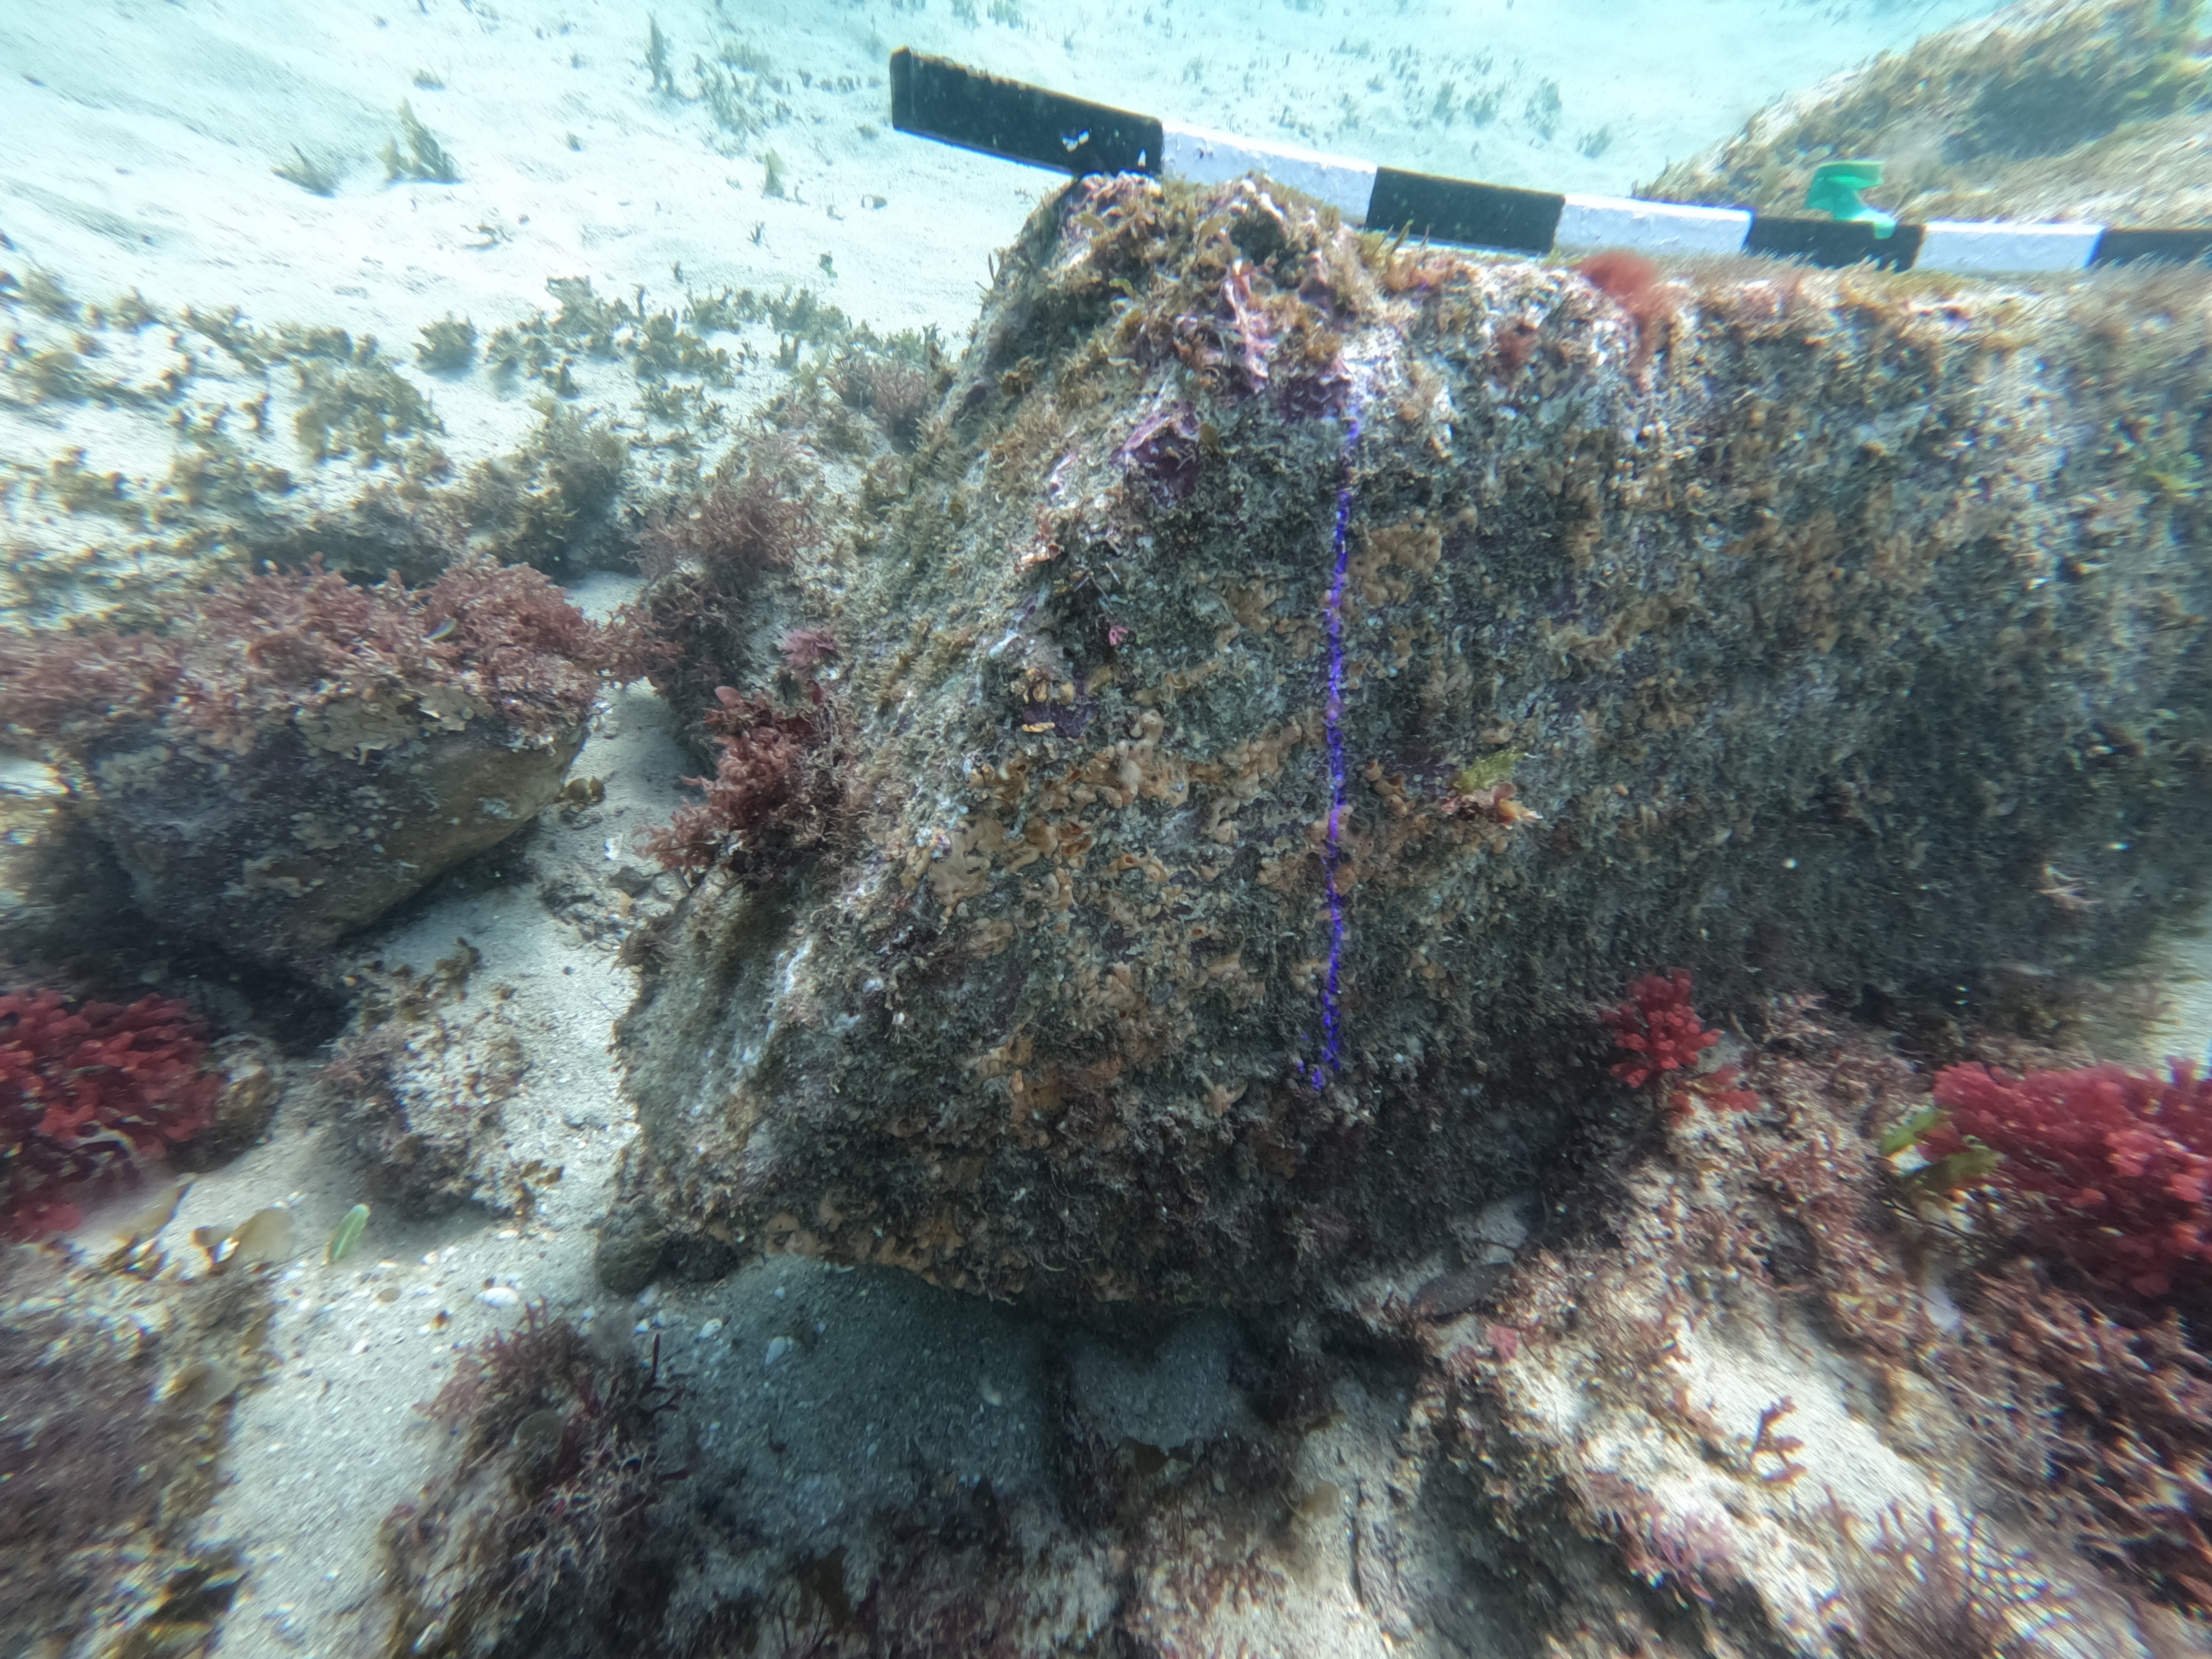

Supplement: Supplementary file 805 [file G0713872.pdf › Ocean2/G0713872.pdf]

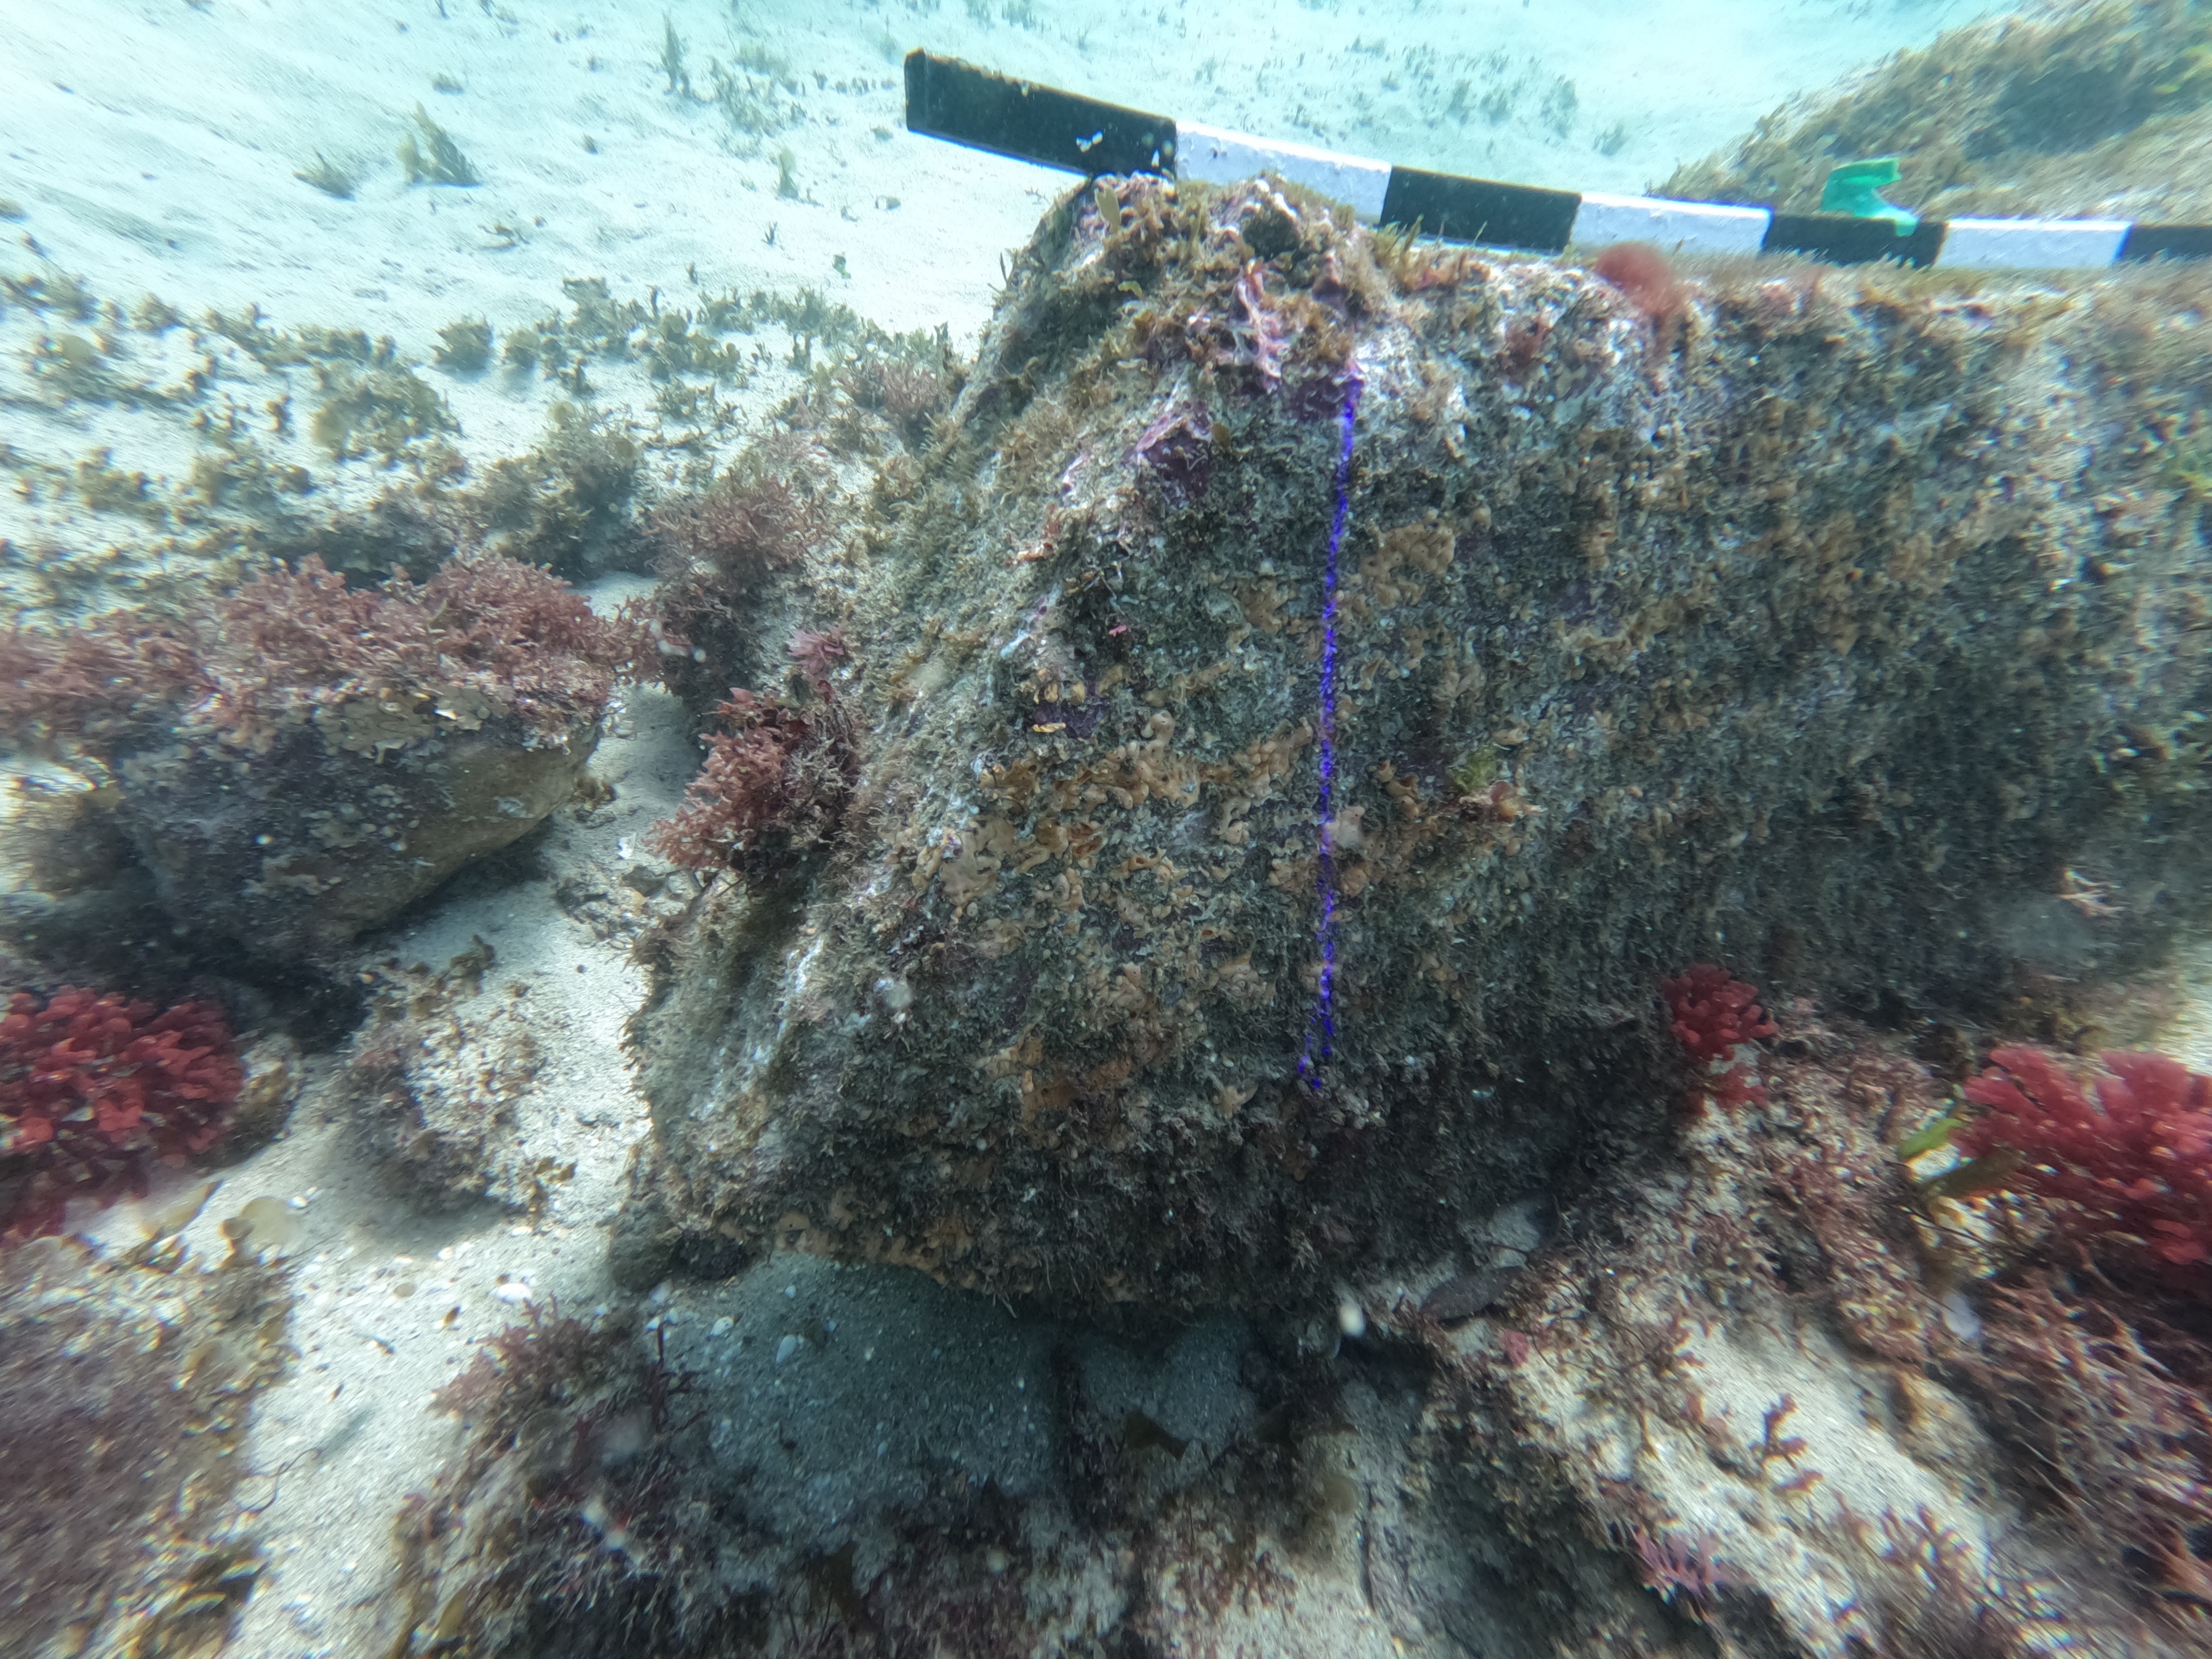

Supplement: Supplementary file 806 [file G0713873.pdf › Ocean2/G0713873.pdf]

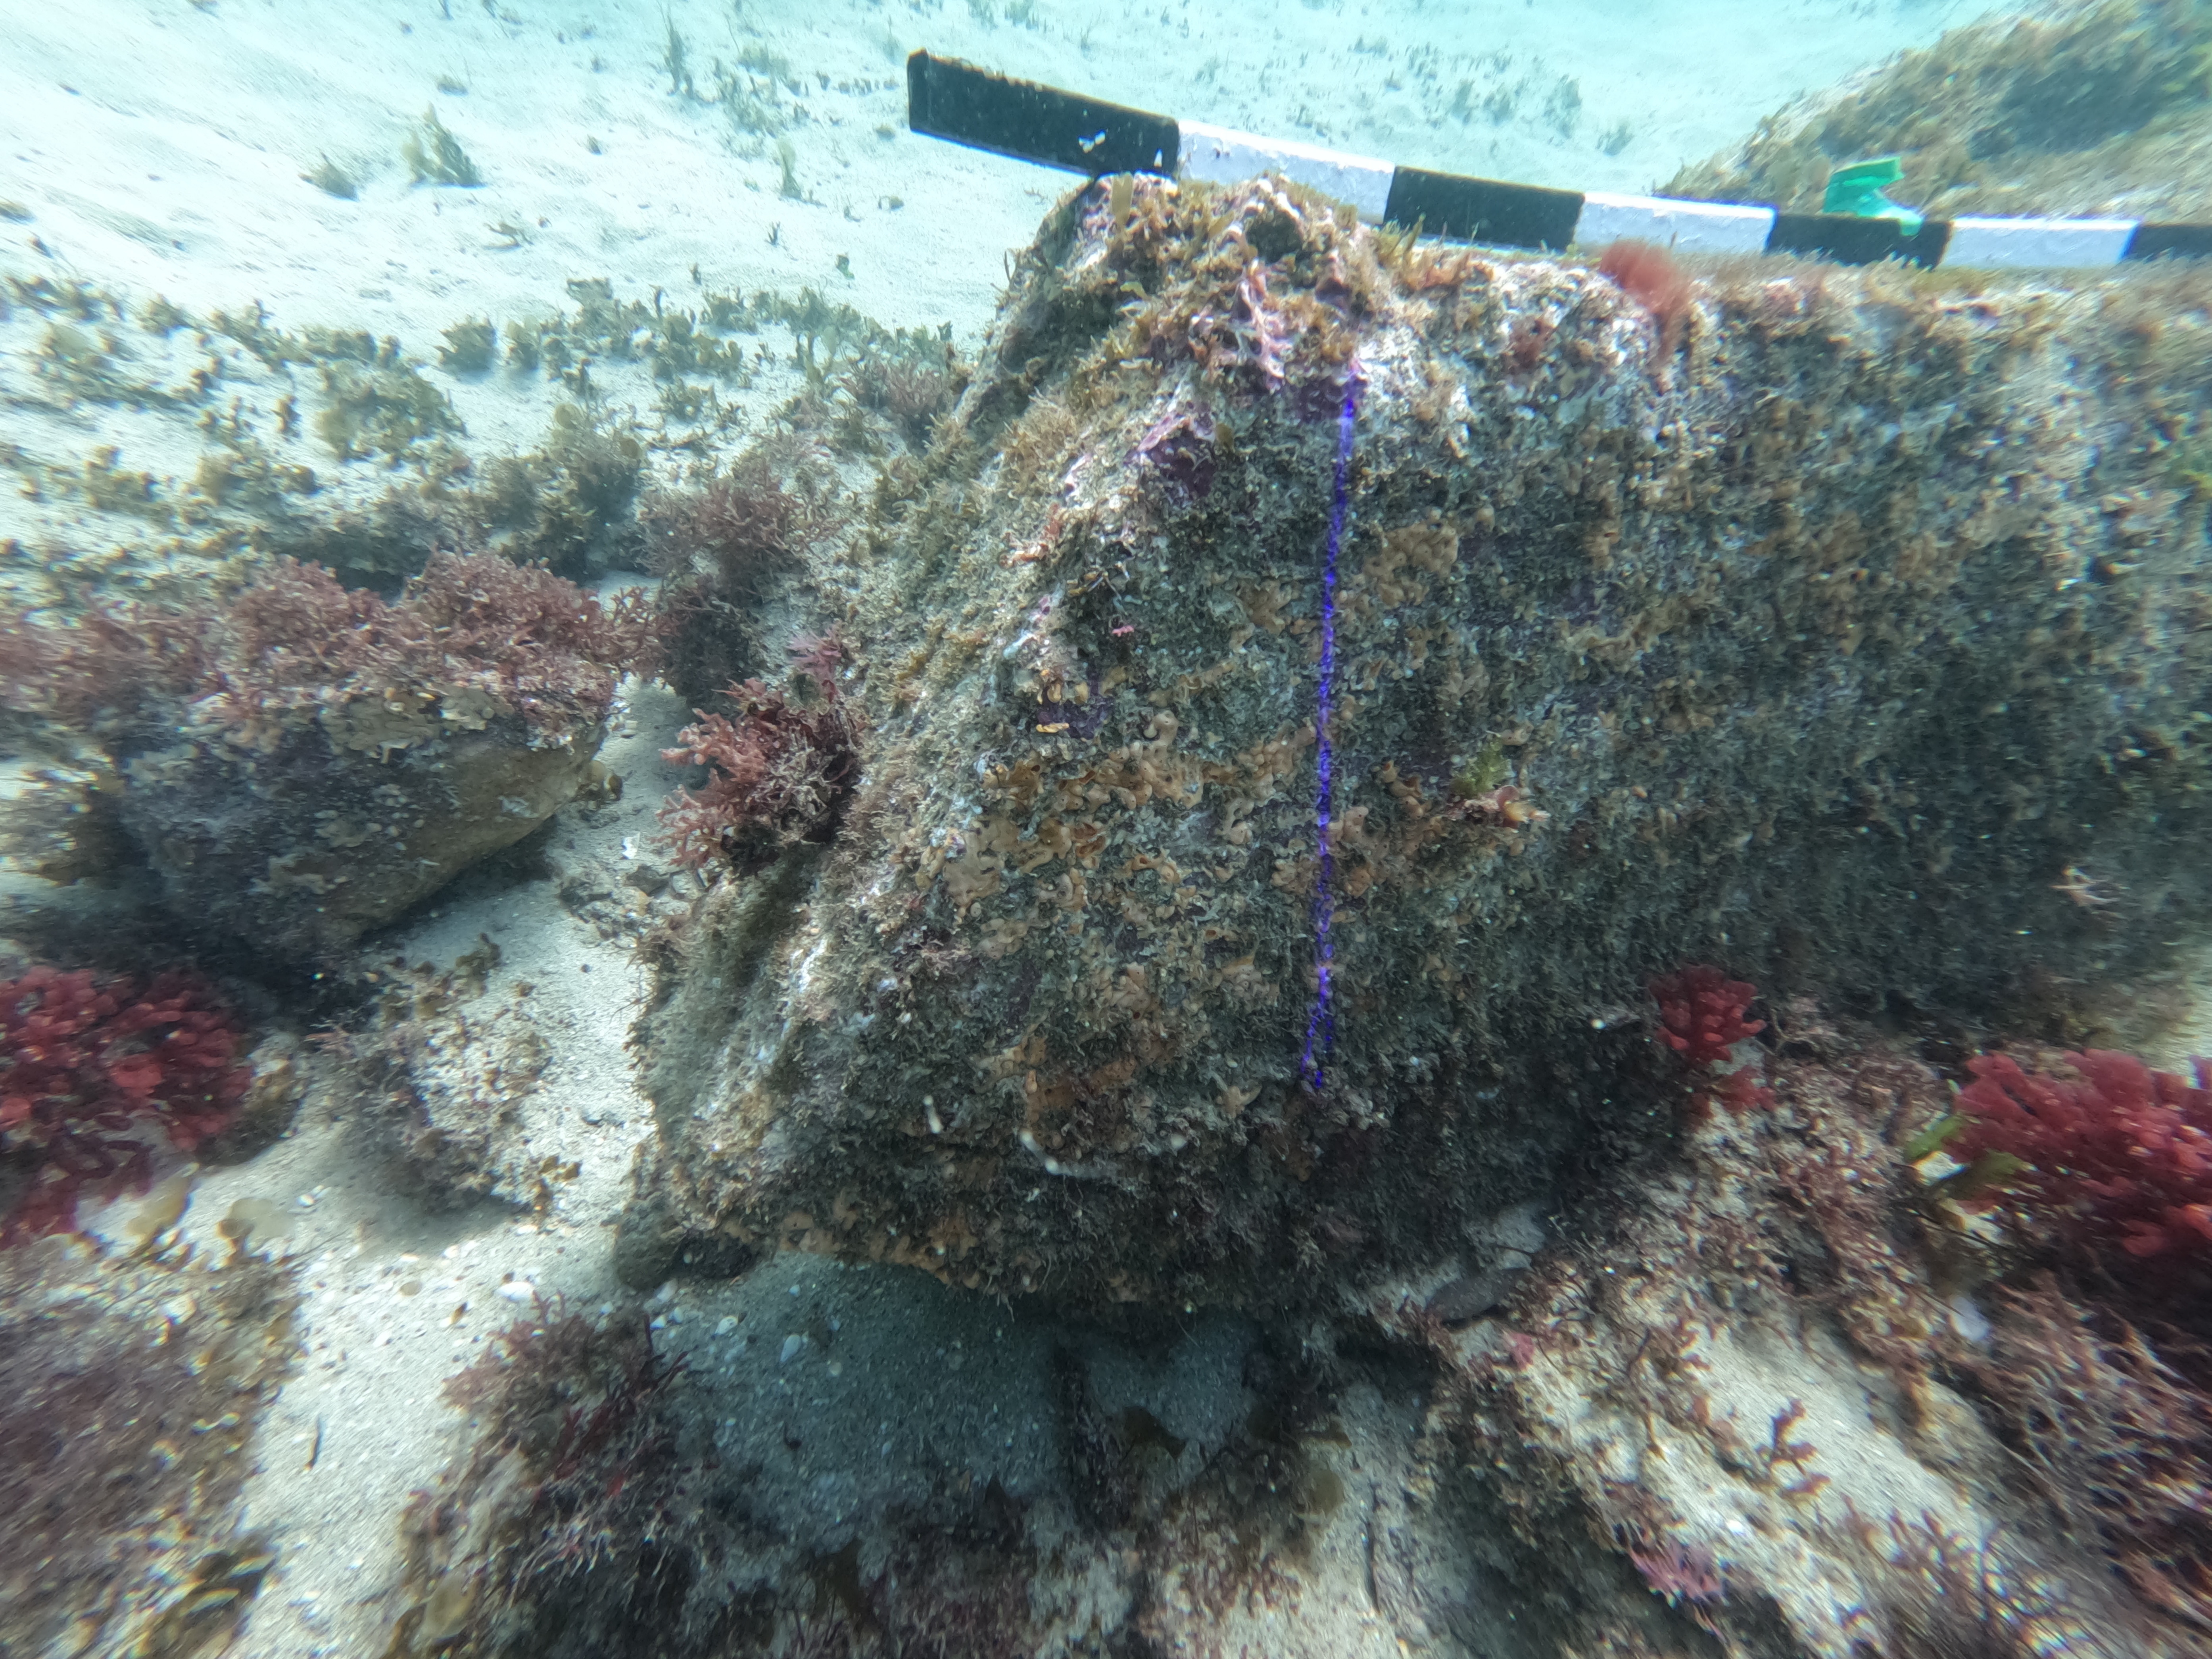

Supplement: Supplementary file 807 [file G0713874.pdf › Ocean2/G0713874.pdf]

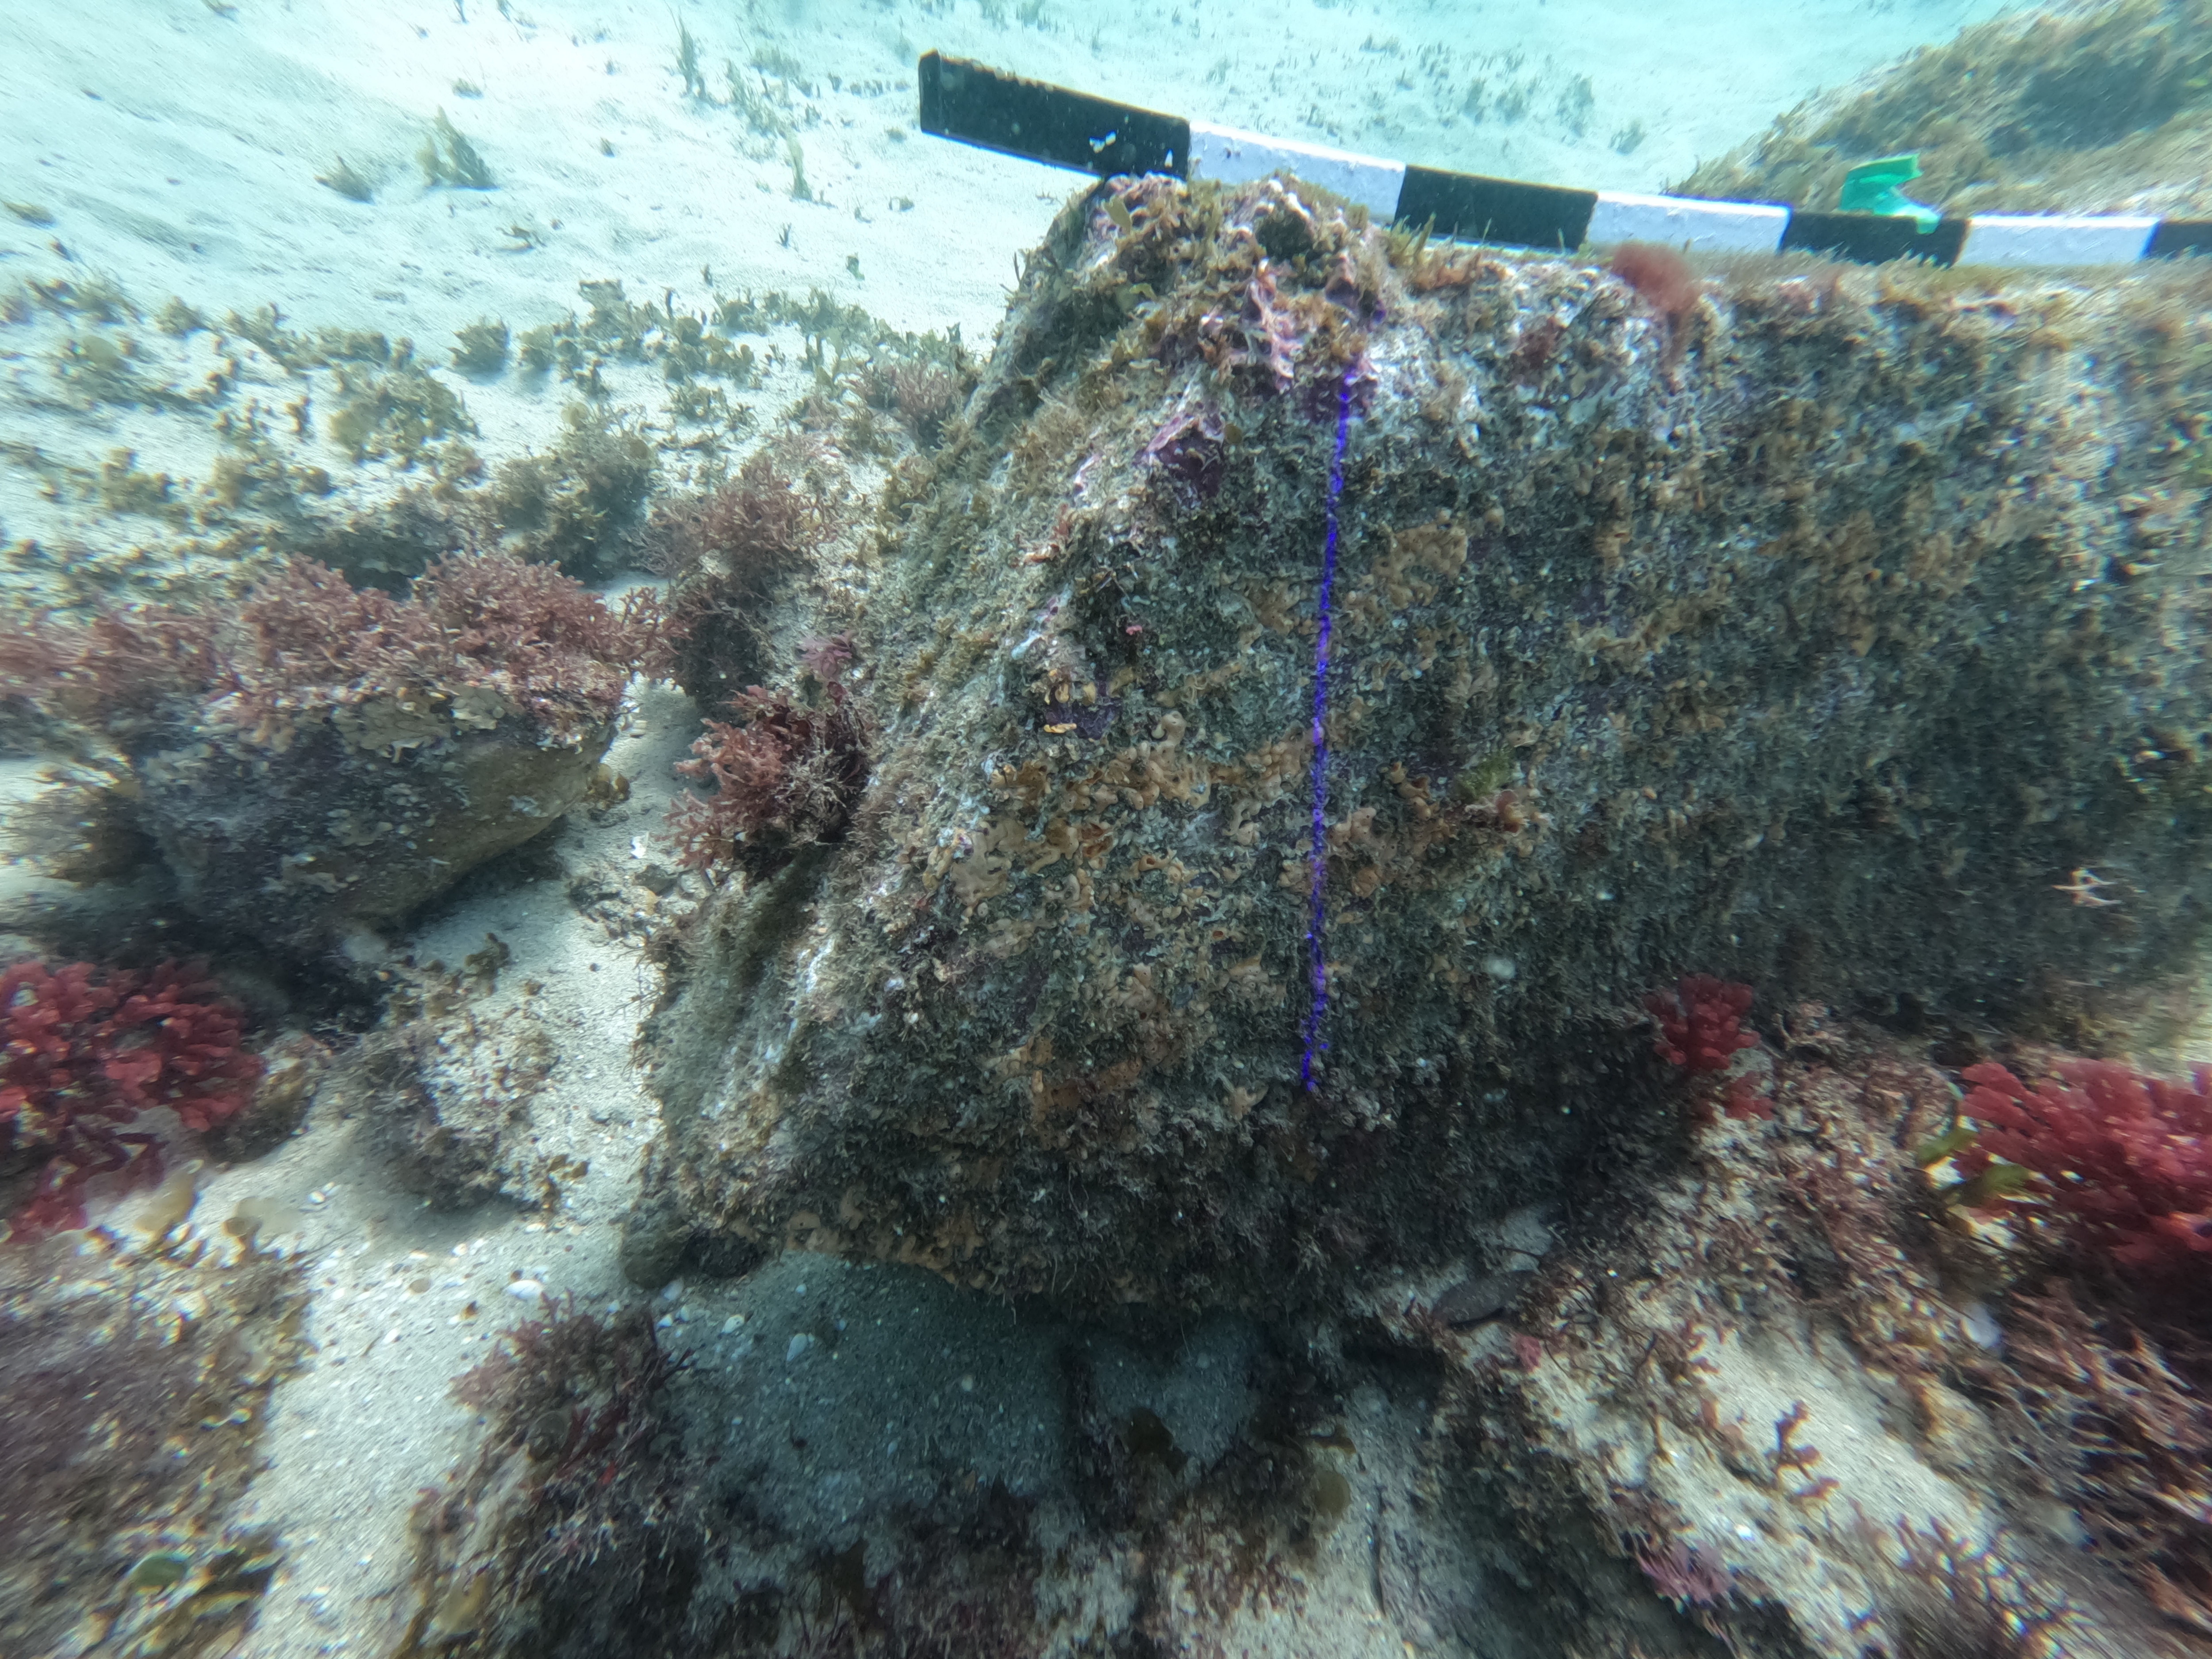

Supplement: Supplementary file 808 [file G0713875.pdf › Ocean2/G0713875.pdf]

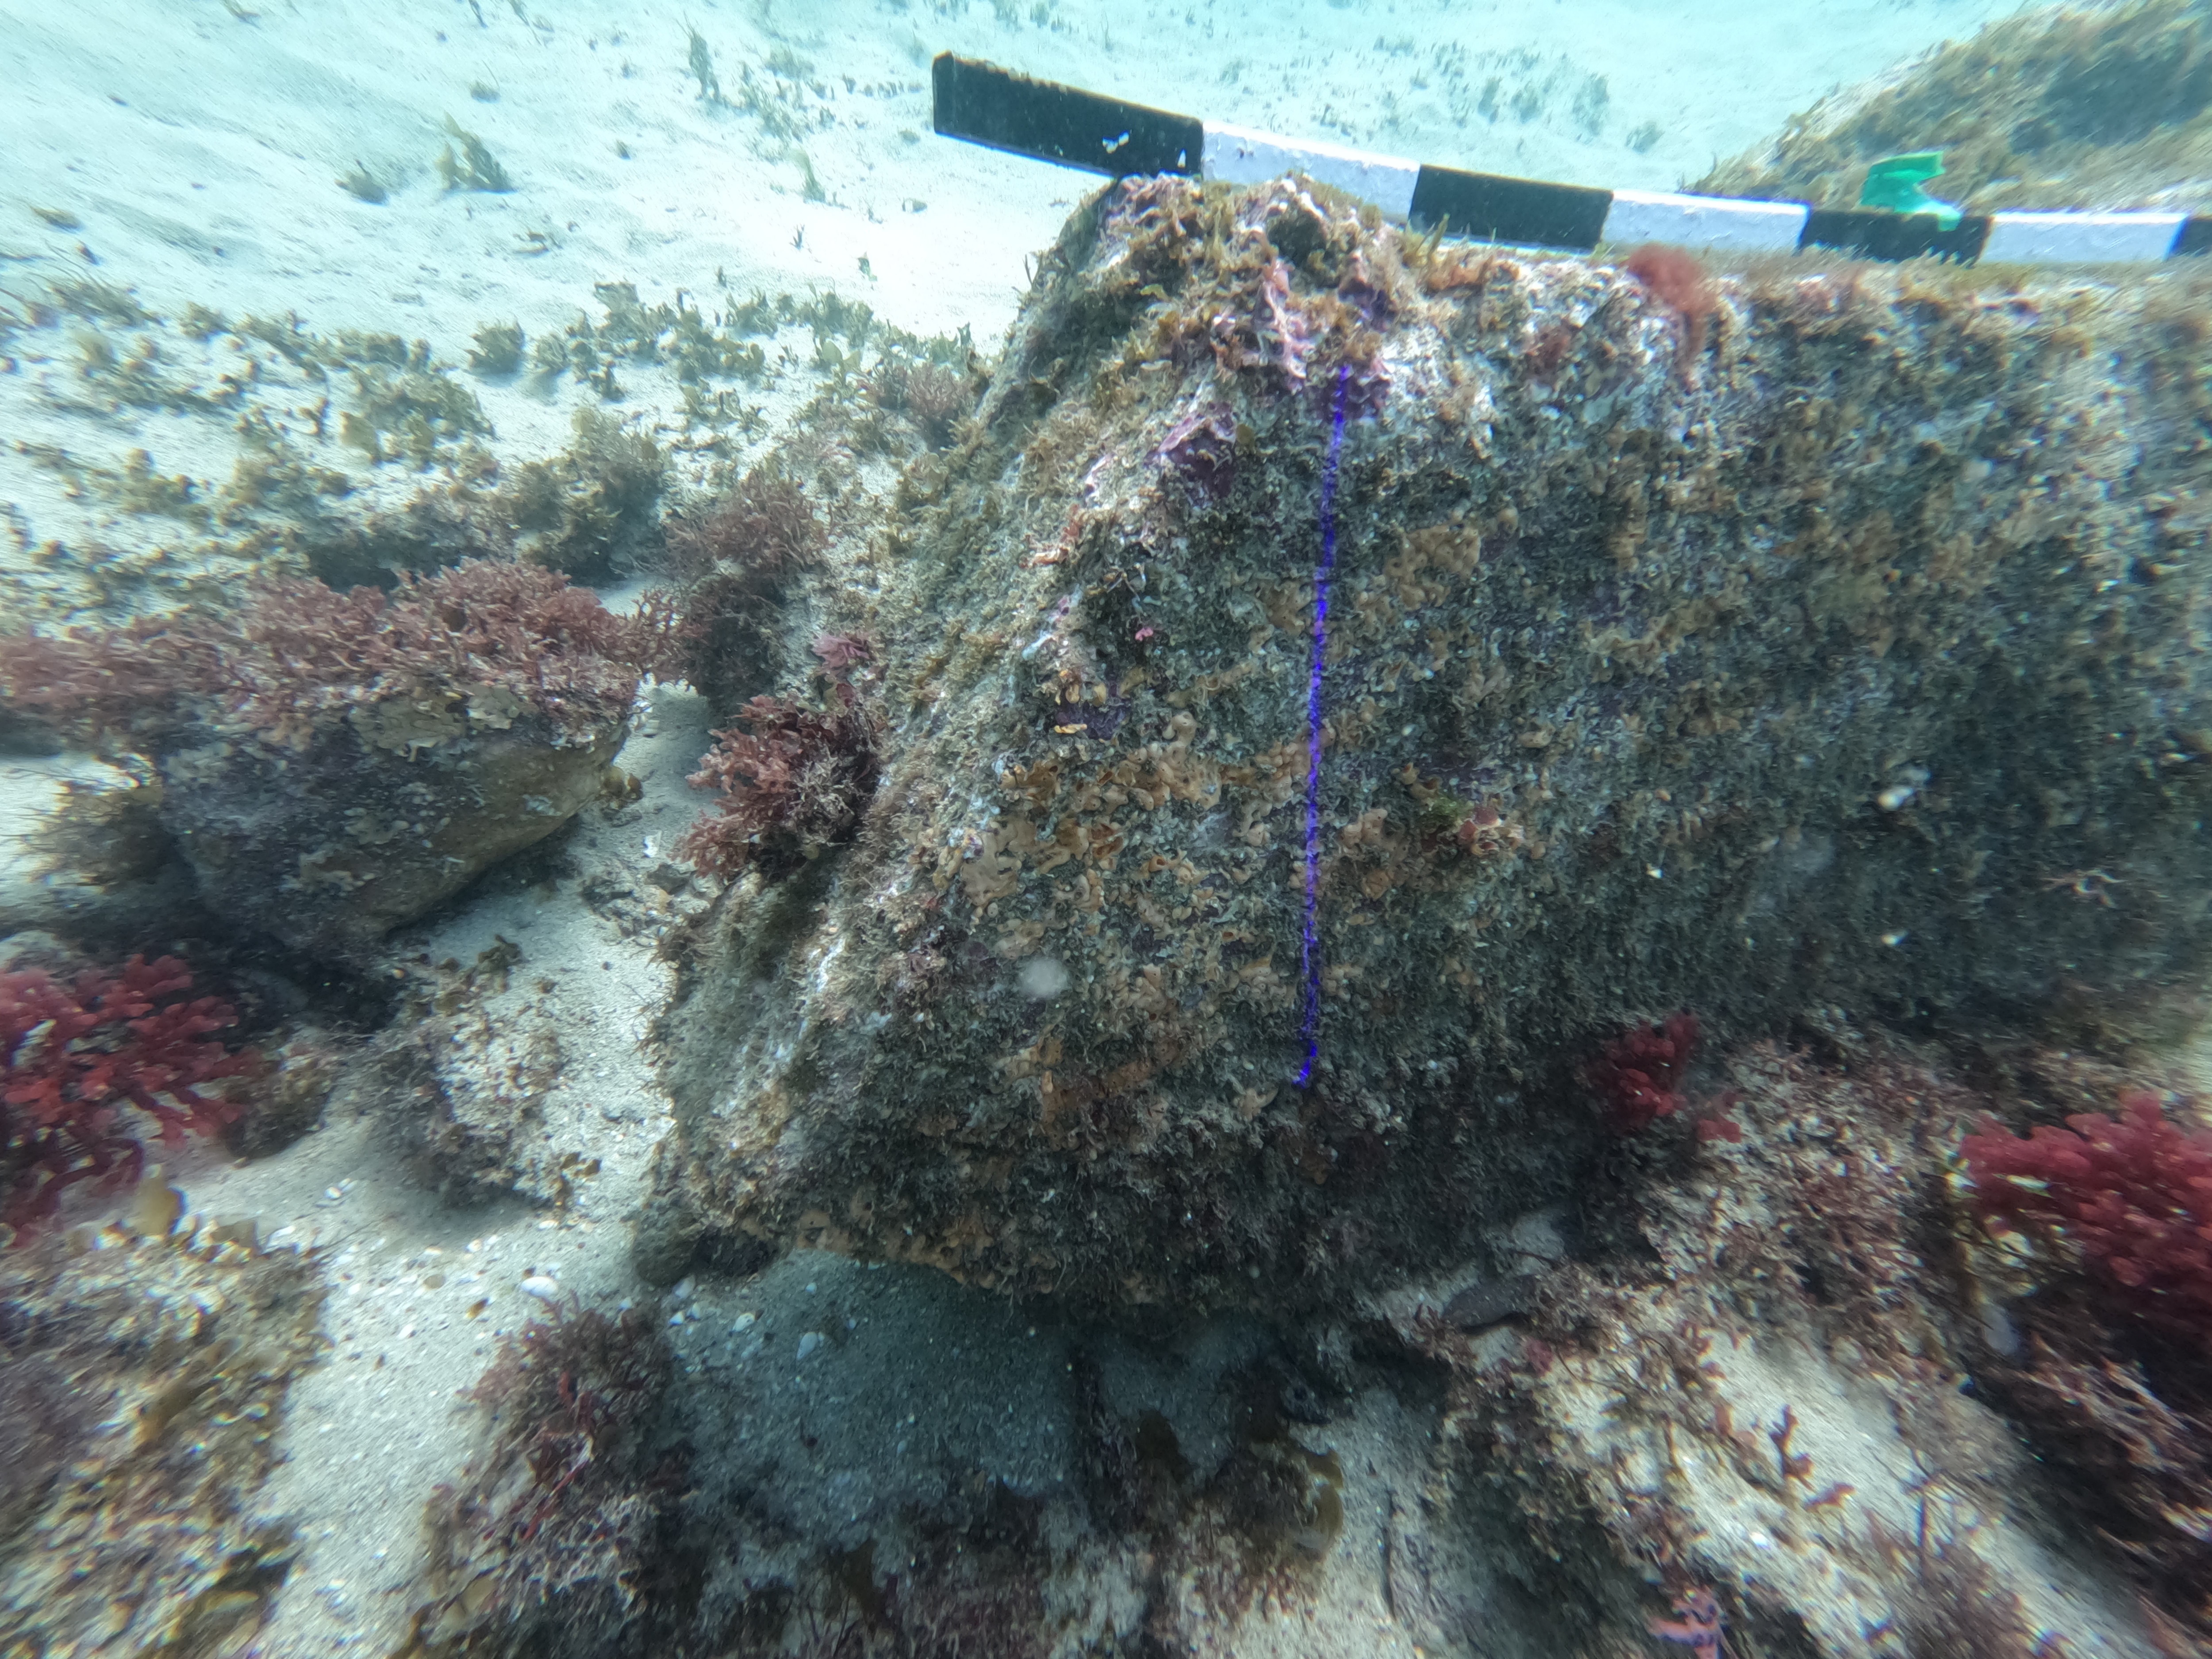

Supplement: Supplementary file 809 [file G0713876.pdf › Ocean2/G0713876.pdf]

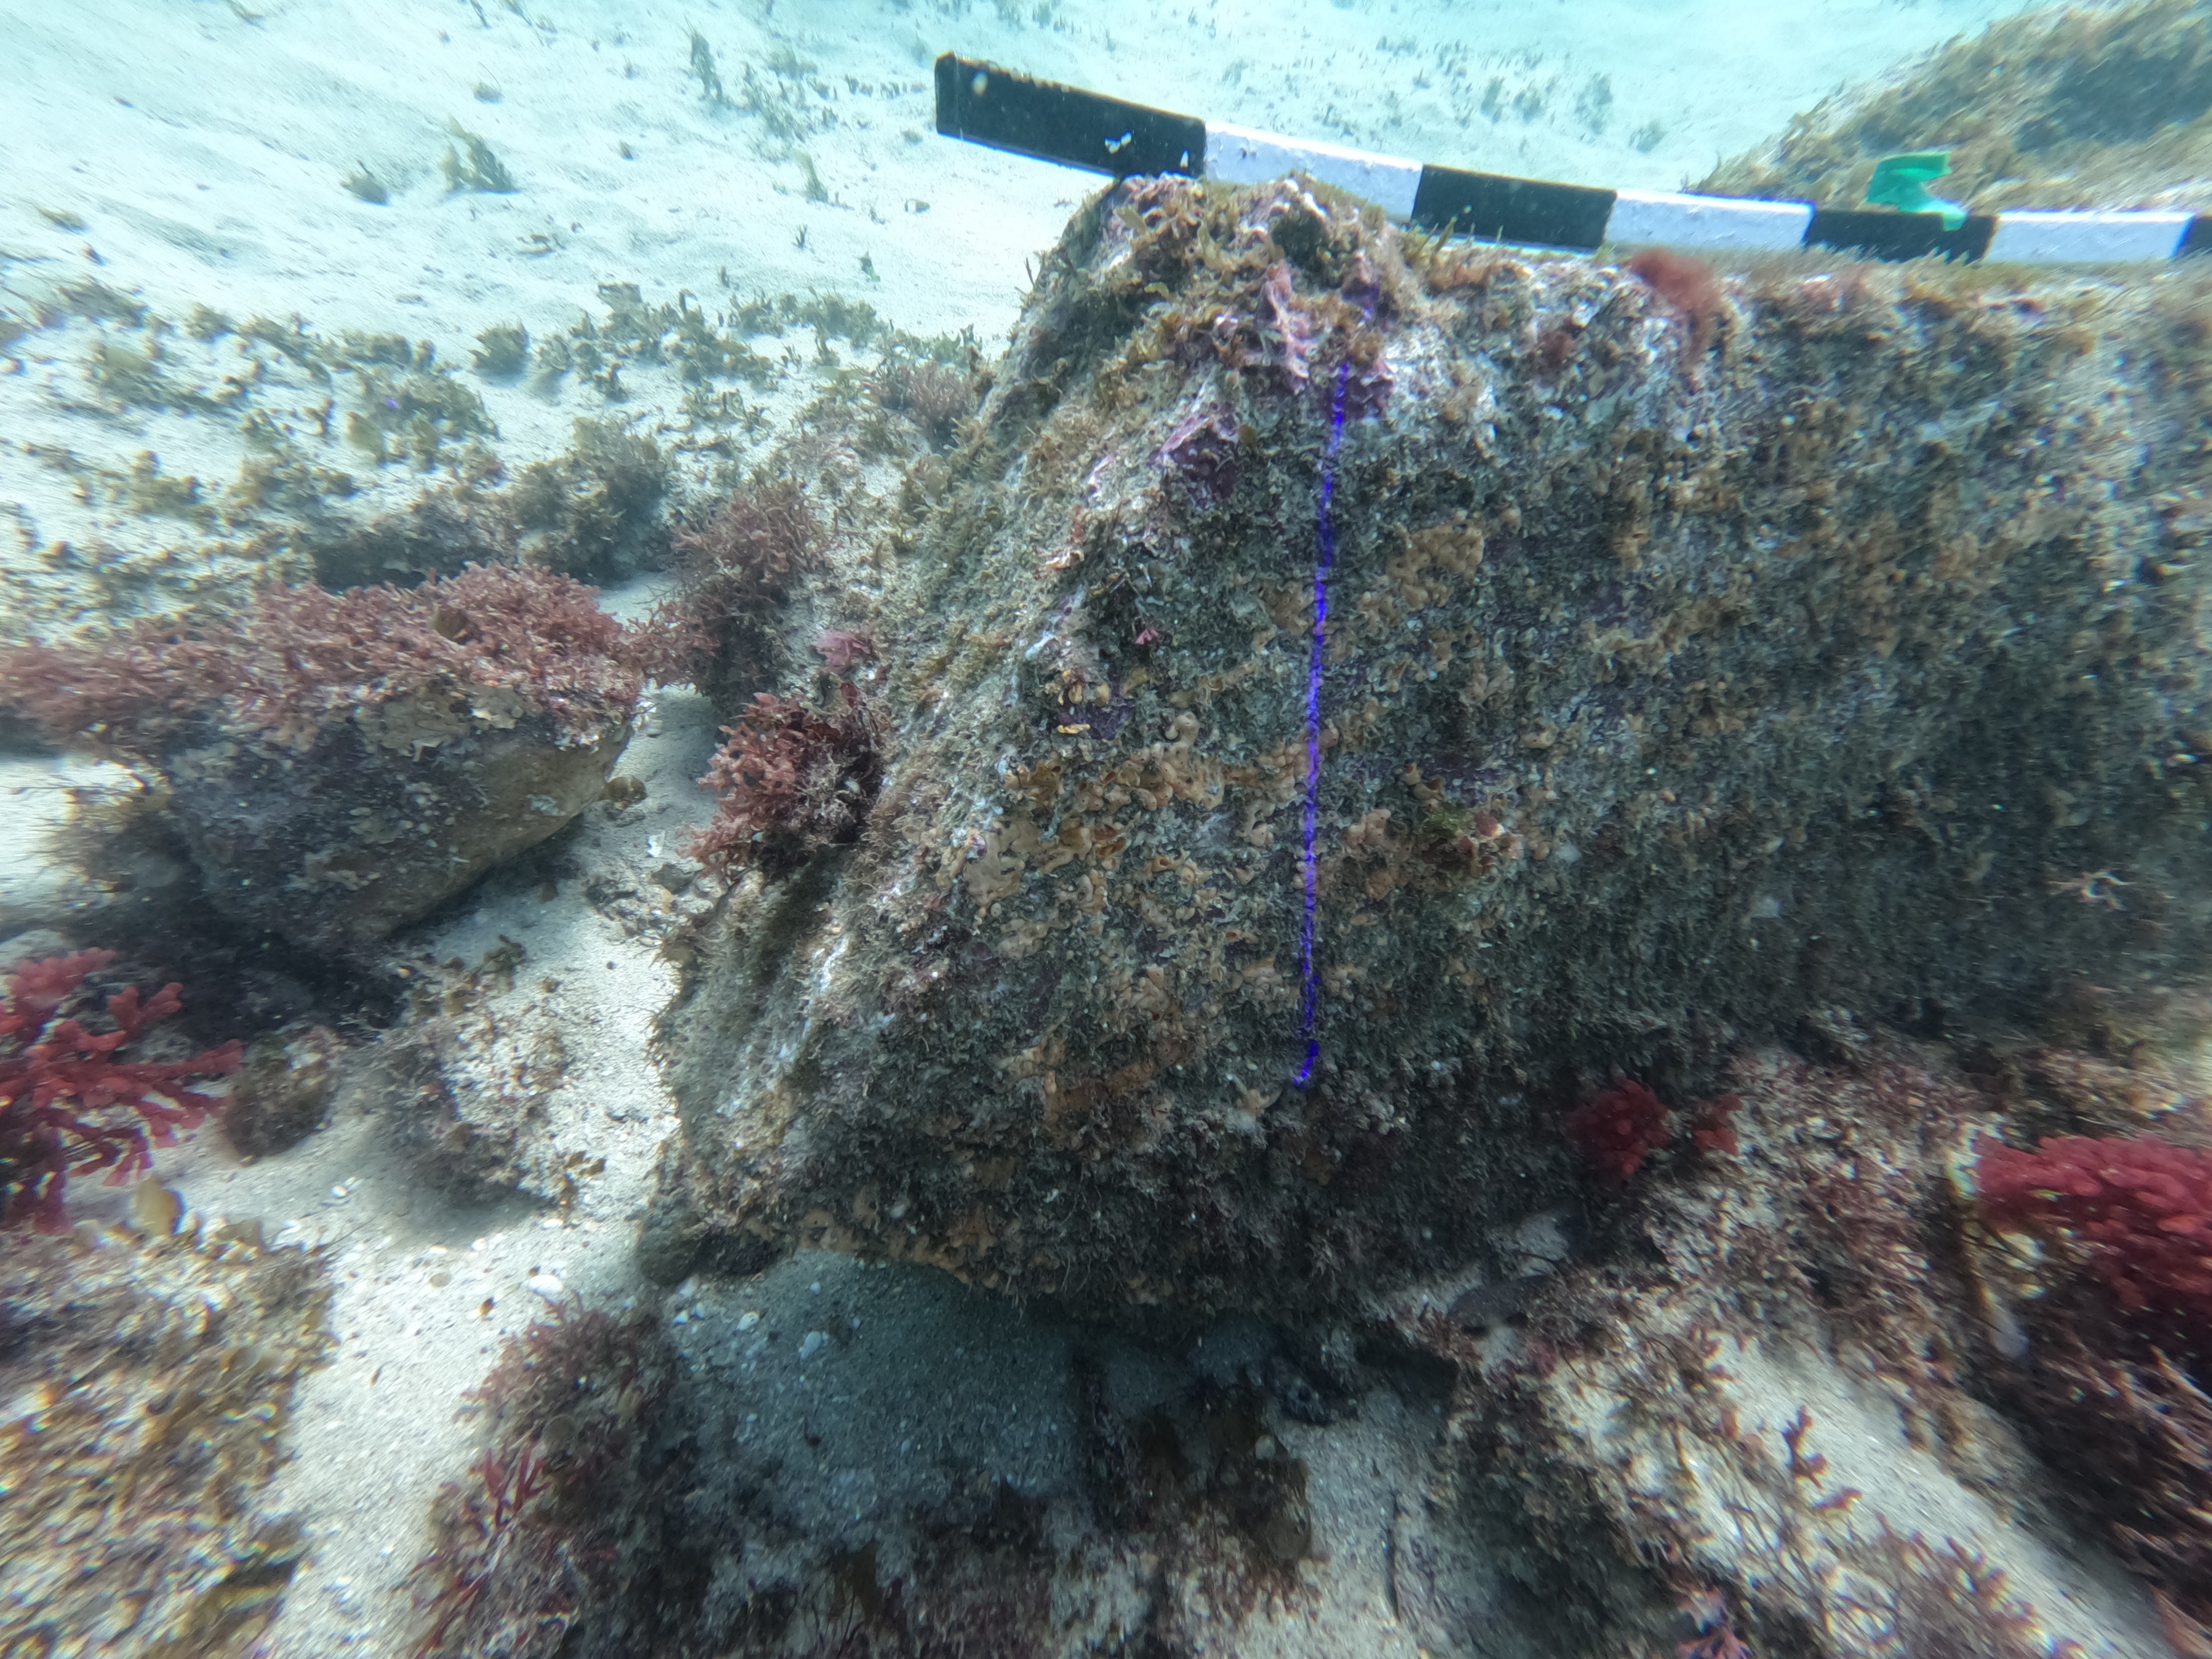

Supplement: Supplementary file 810 [file G0713877.pdf › Ocean2/G0713877.pdf]

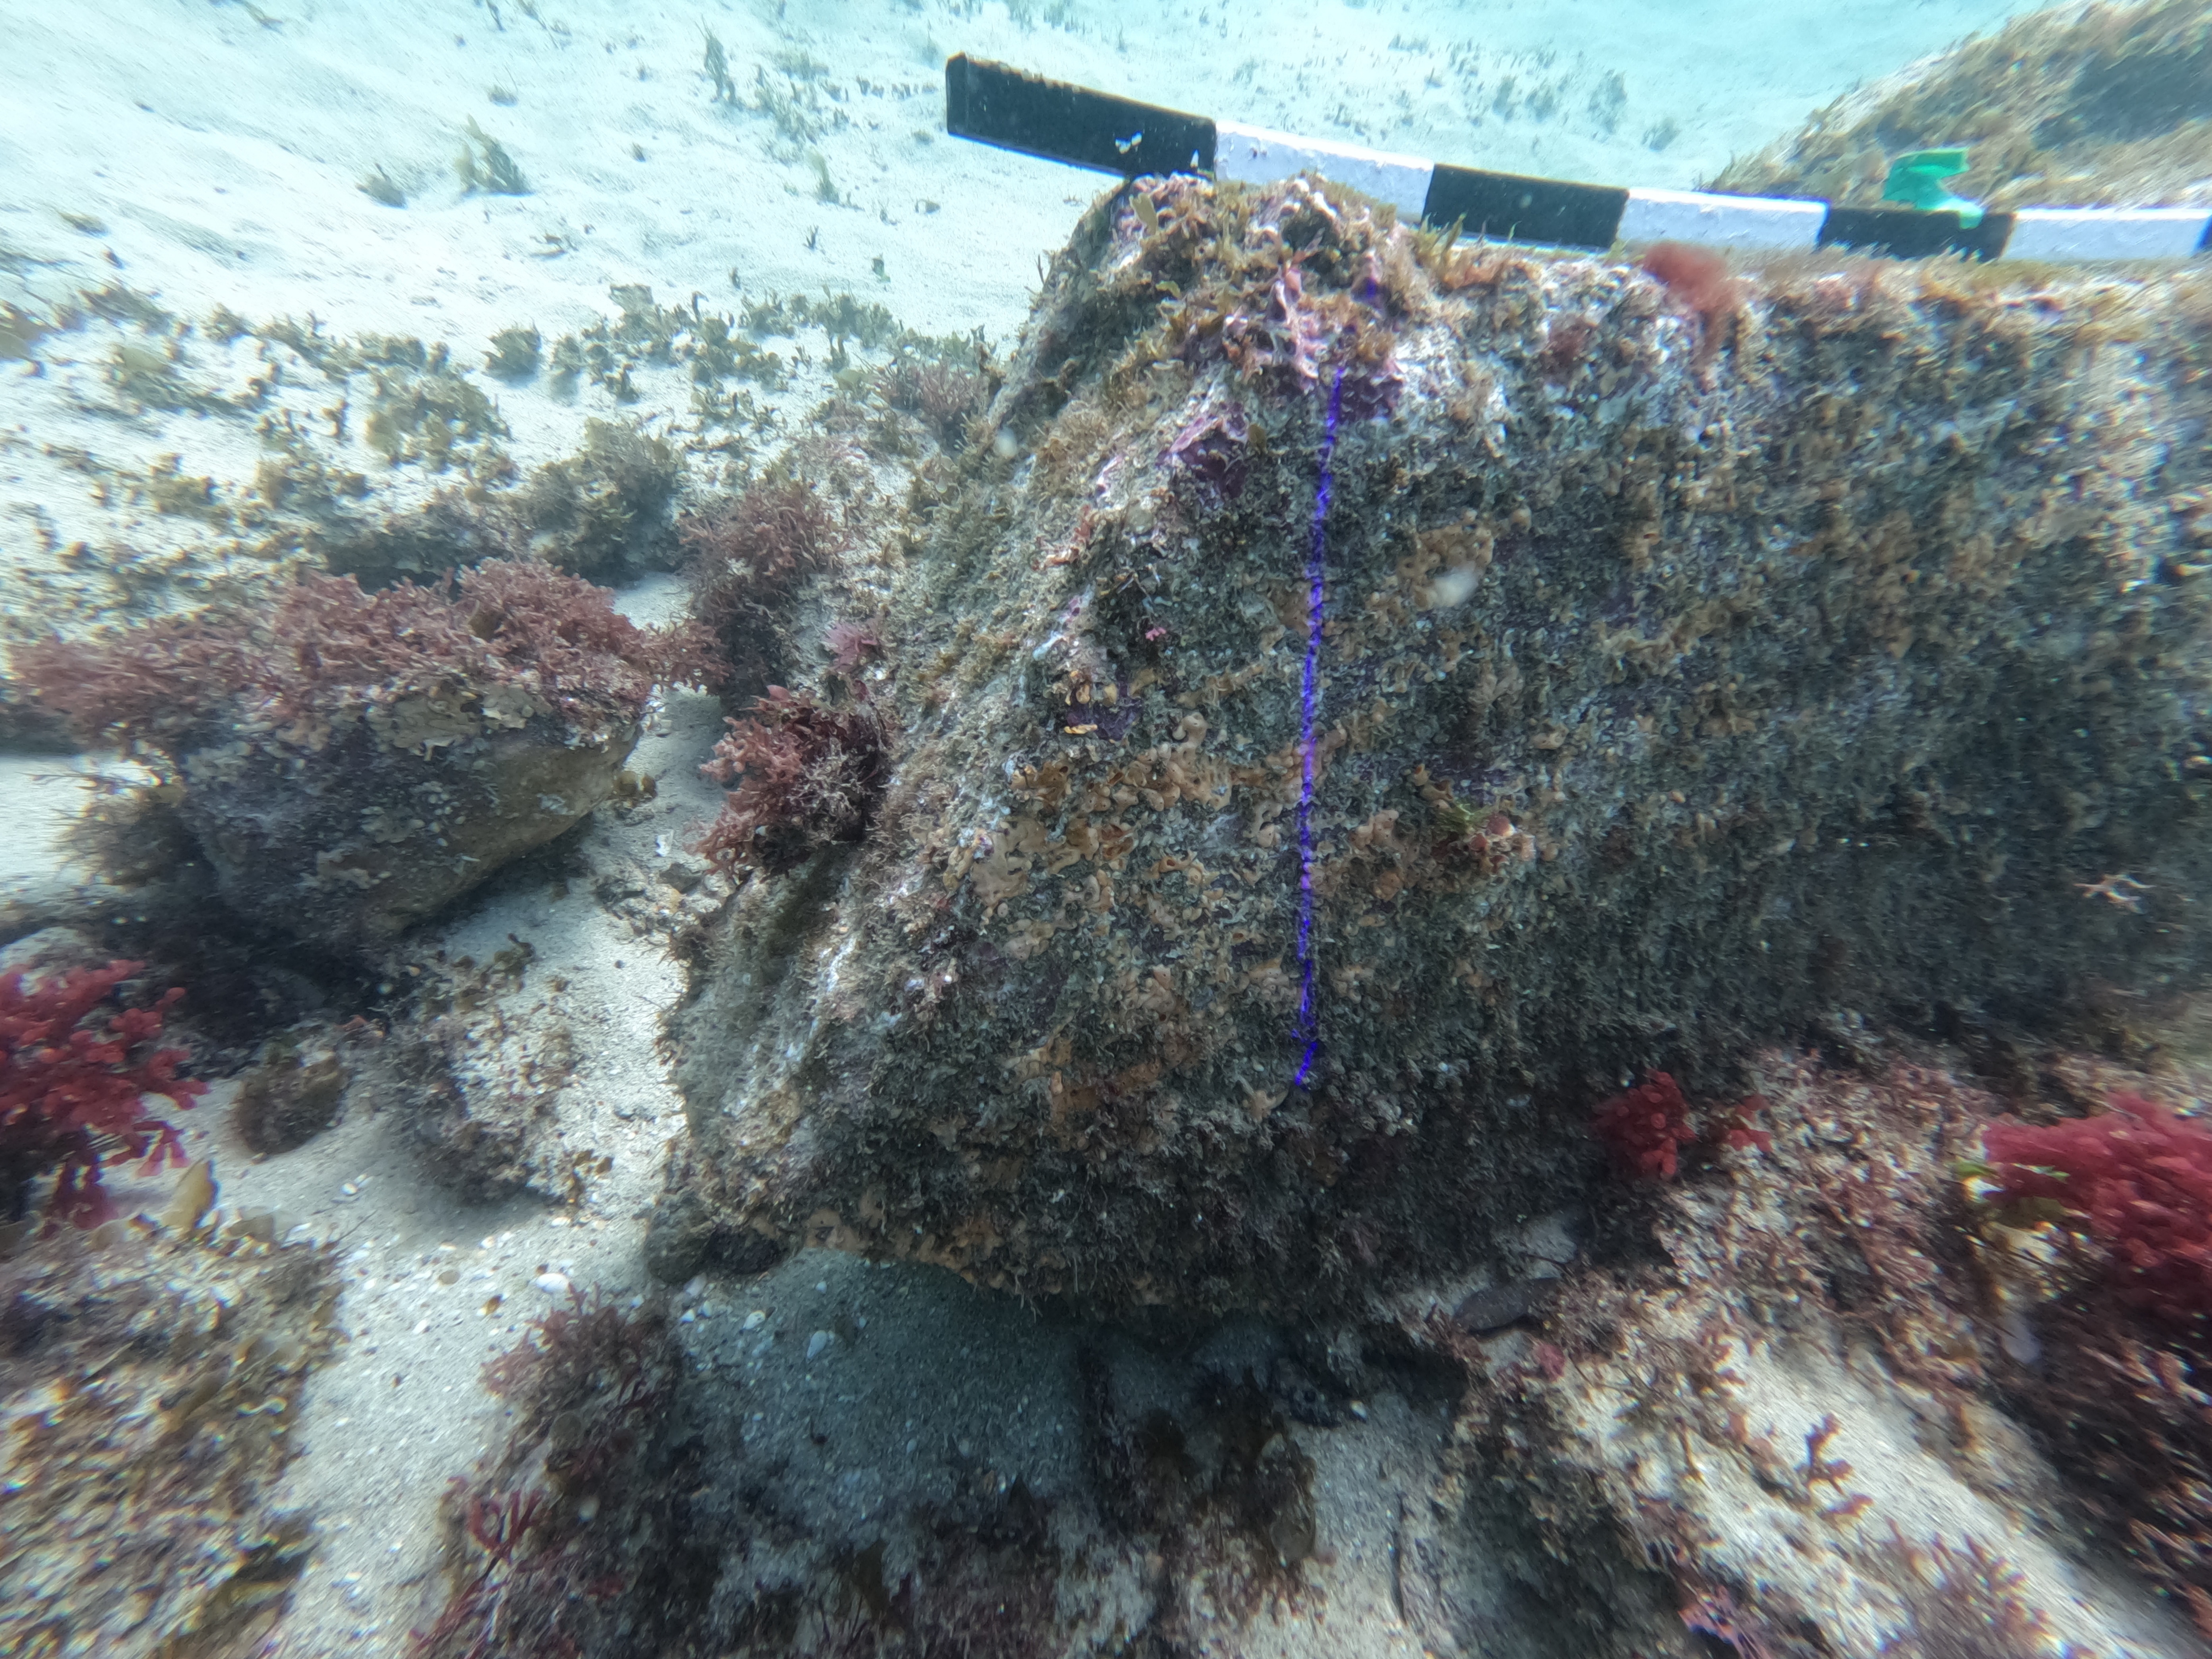

Supplement: Supplementary file 811 [file G0713878.pdf › Ocean2/G0713878.pdf]

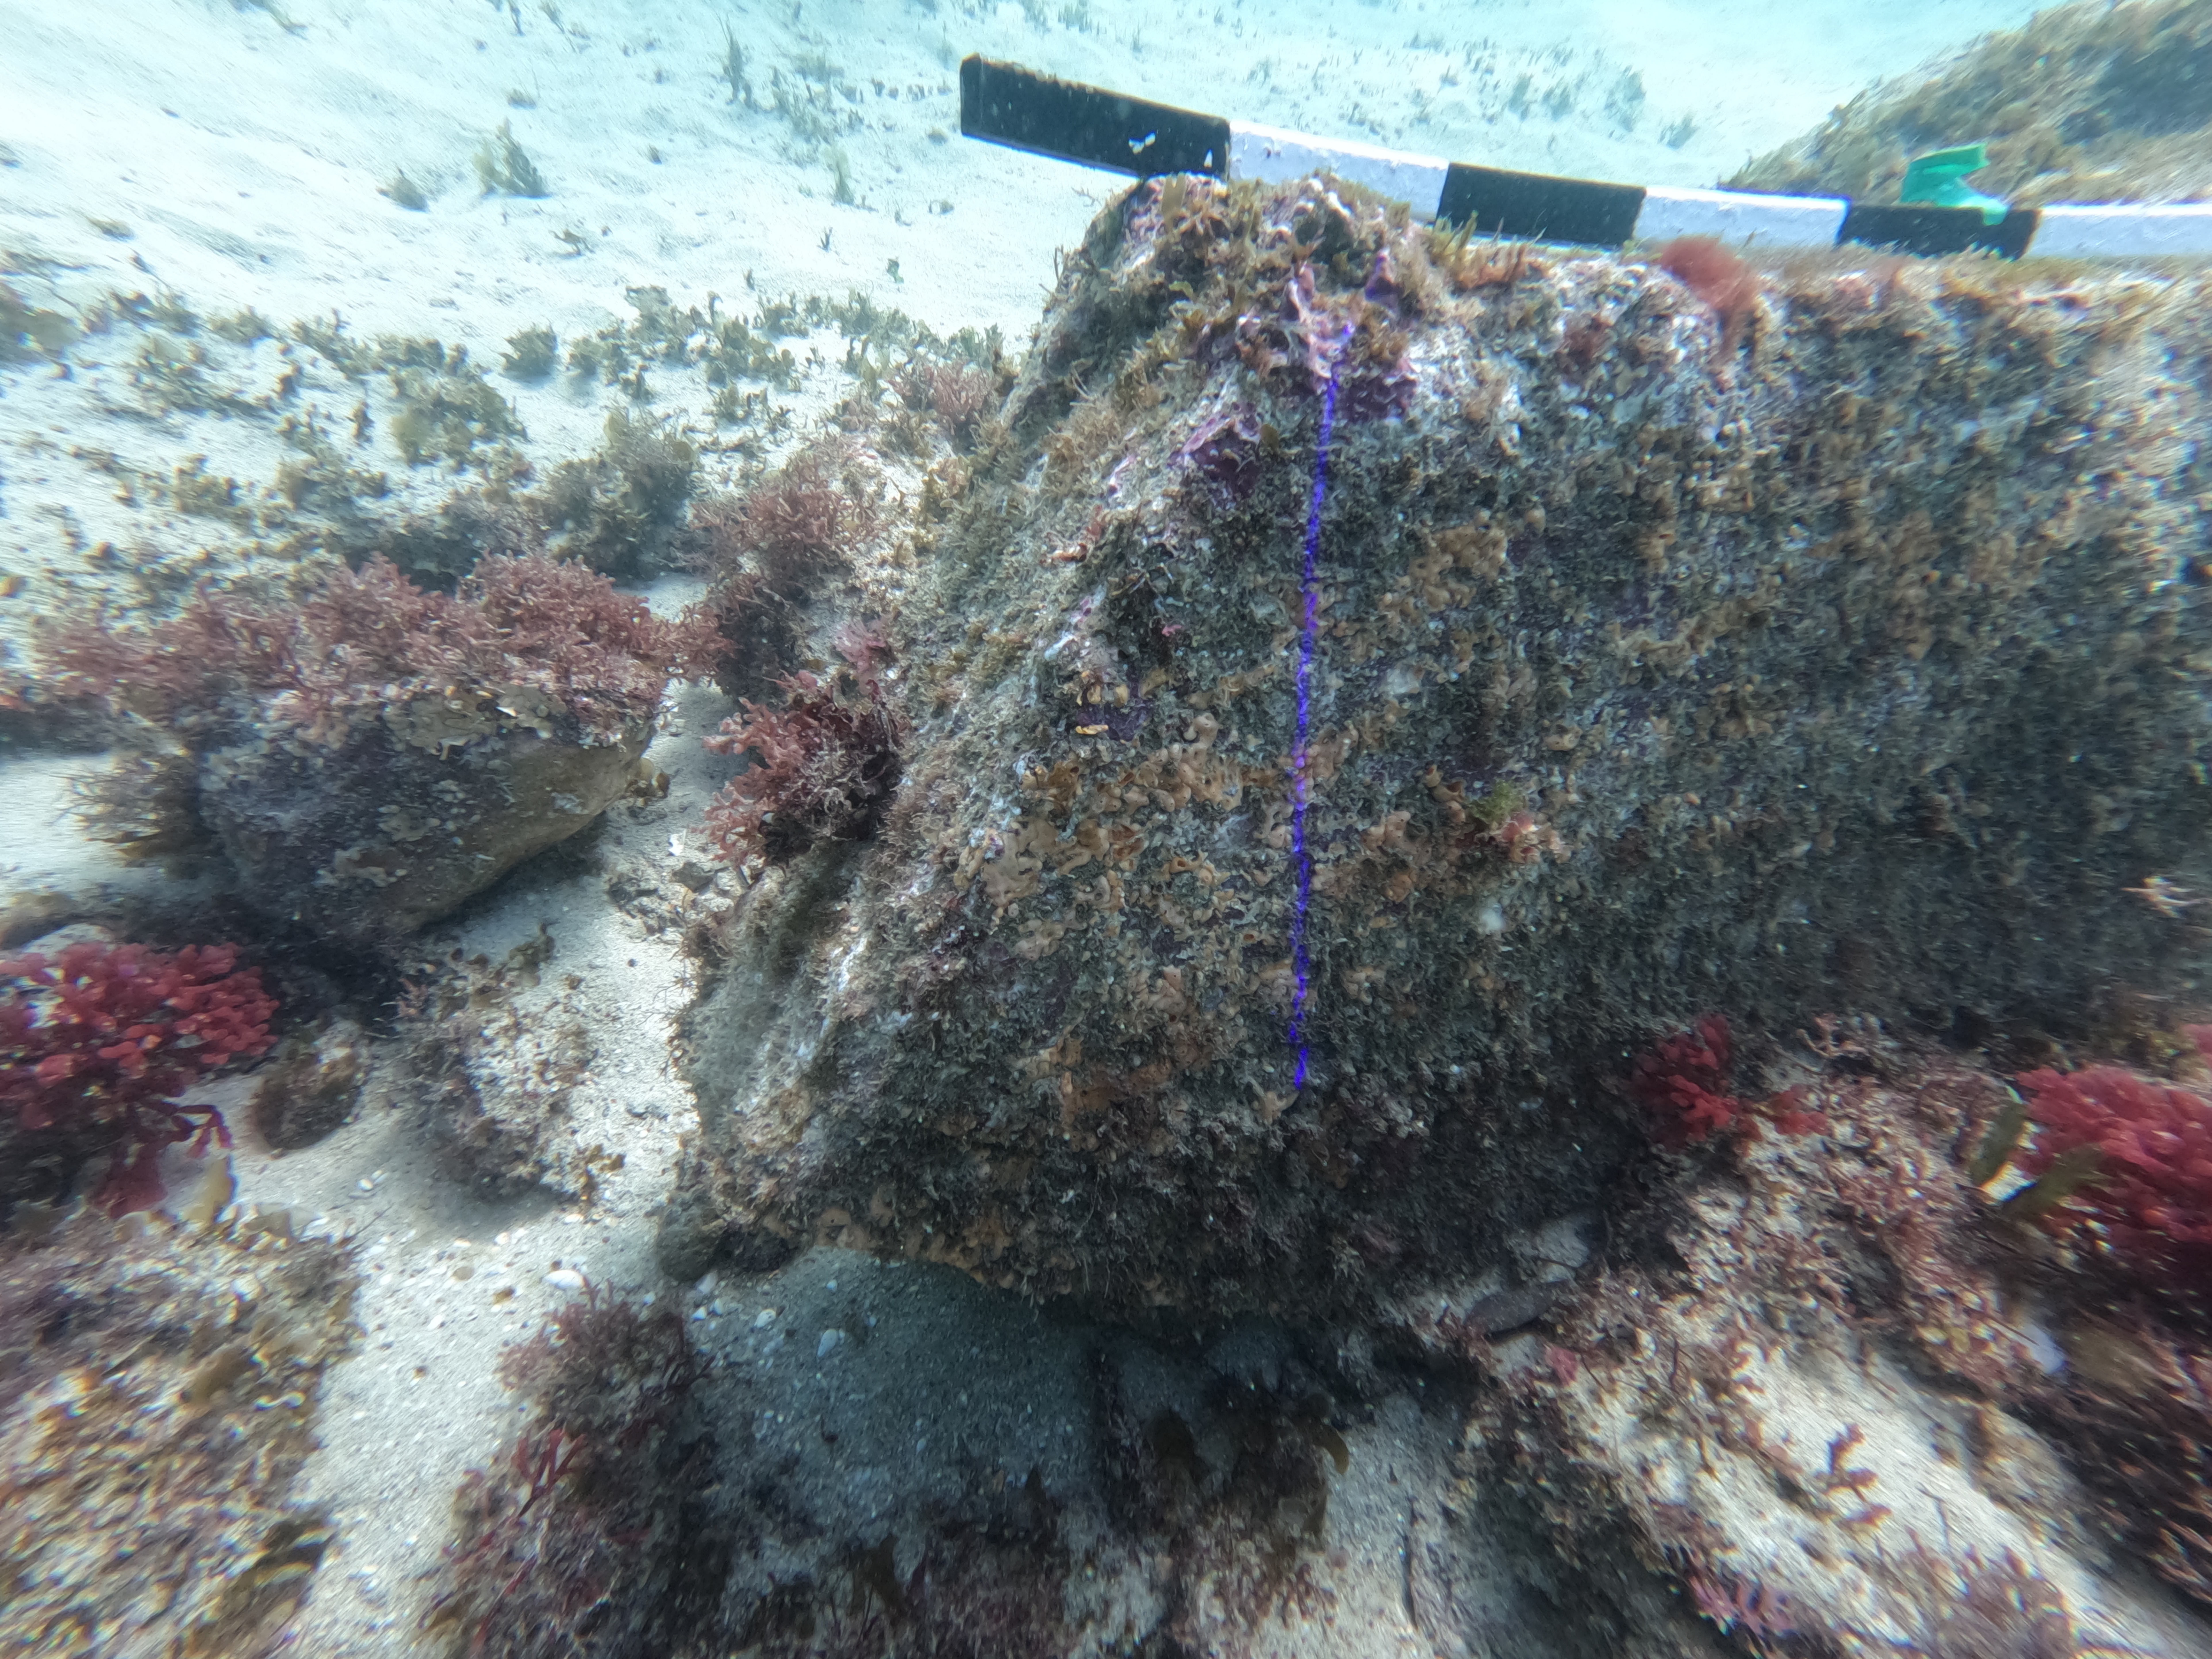

Supplement: Supplementary file 812 [file G0713879.pdf › Ocean2/G0713879.pdf]

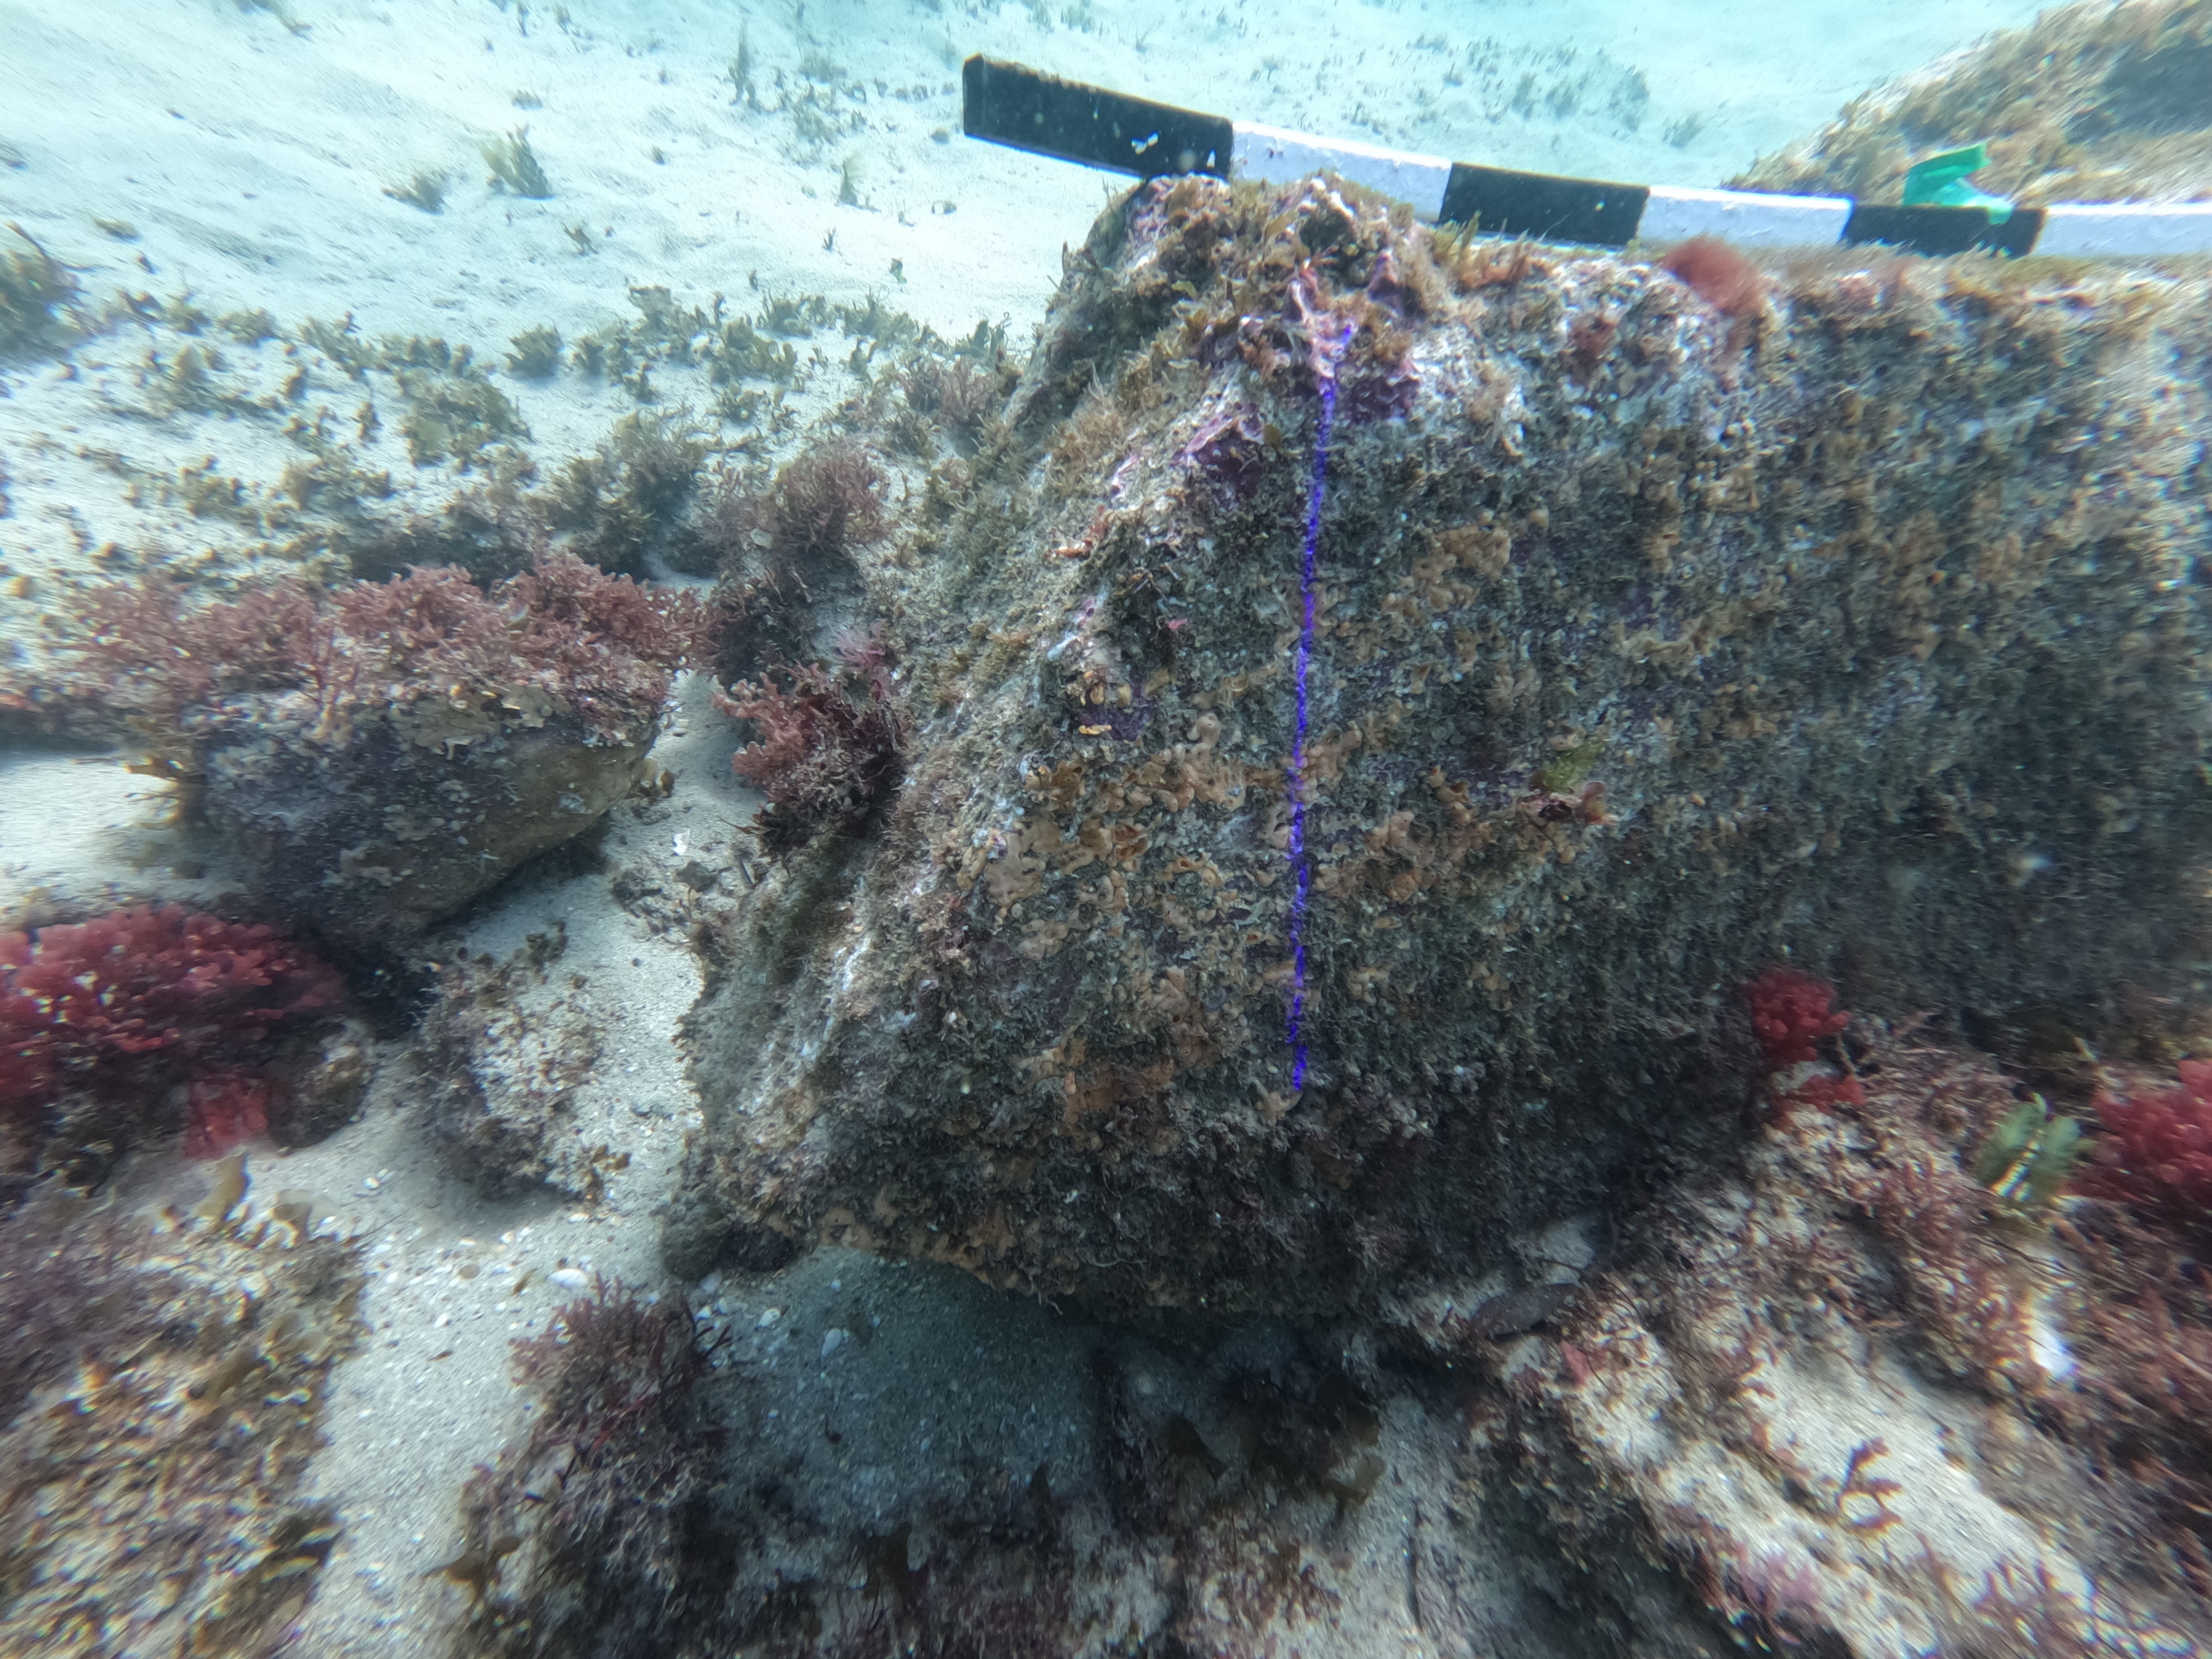

Supplement: Supplementary file 813 [file G0713880.pdf › Ocean2/G0713880.pdf]

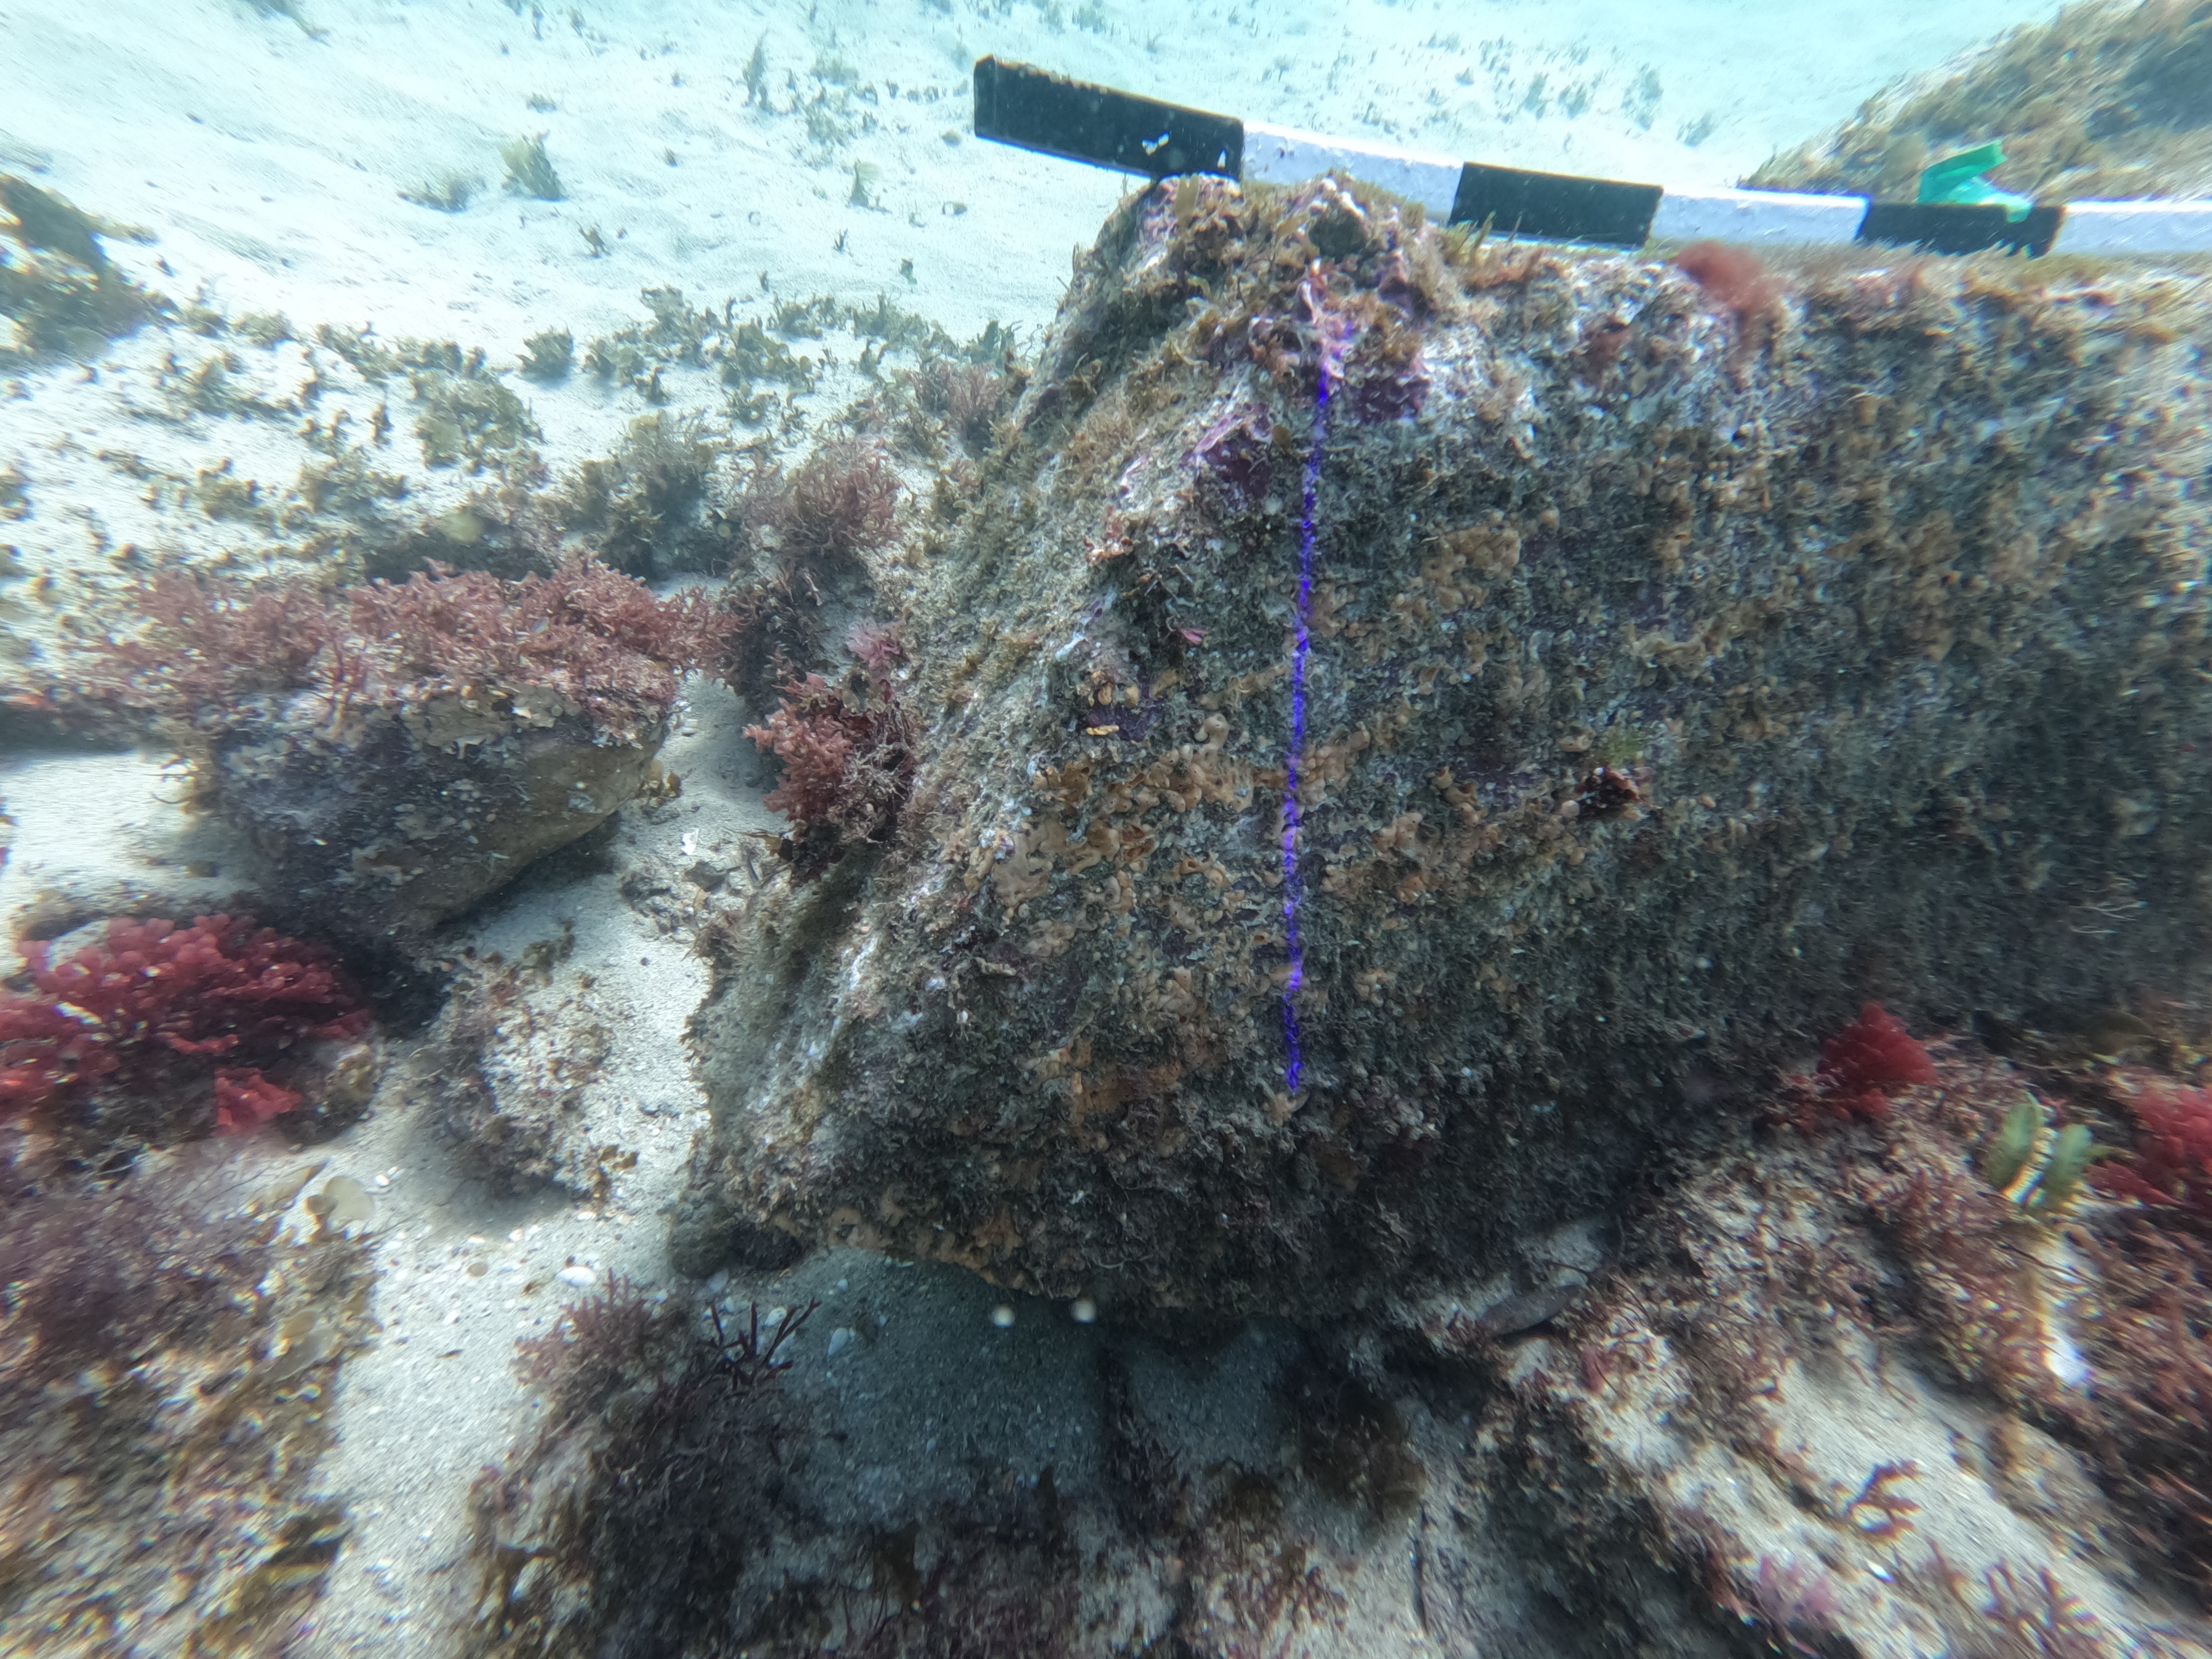

Supplement: Supplementary file 814 [file G0713881.pdf › Ocean2/G0713881.pdf]

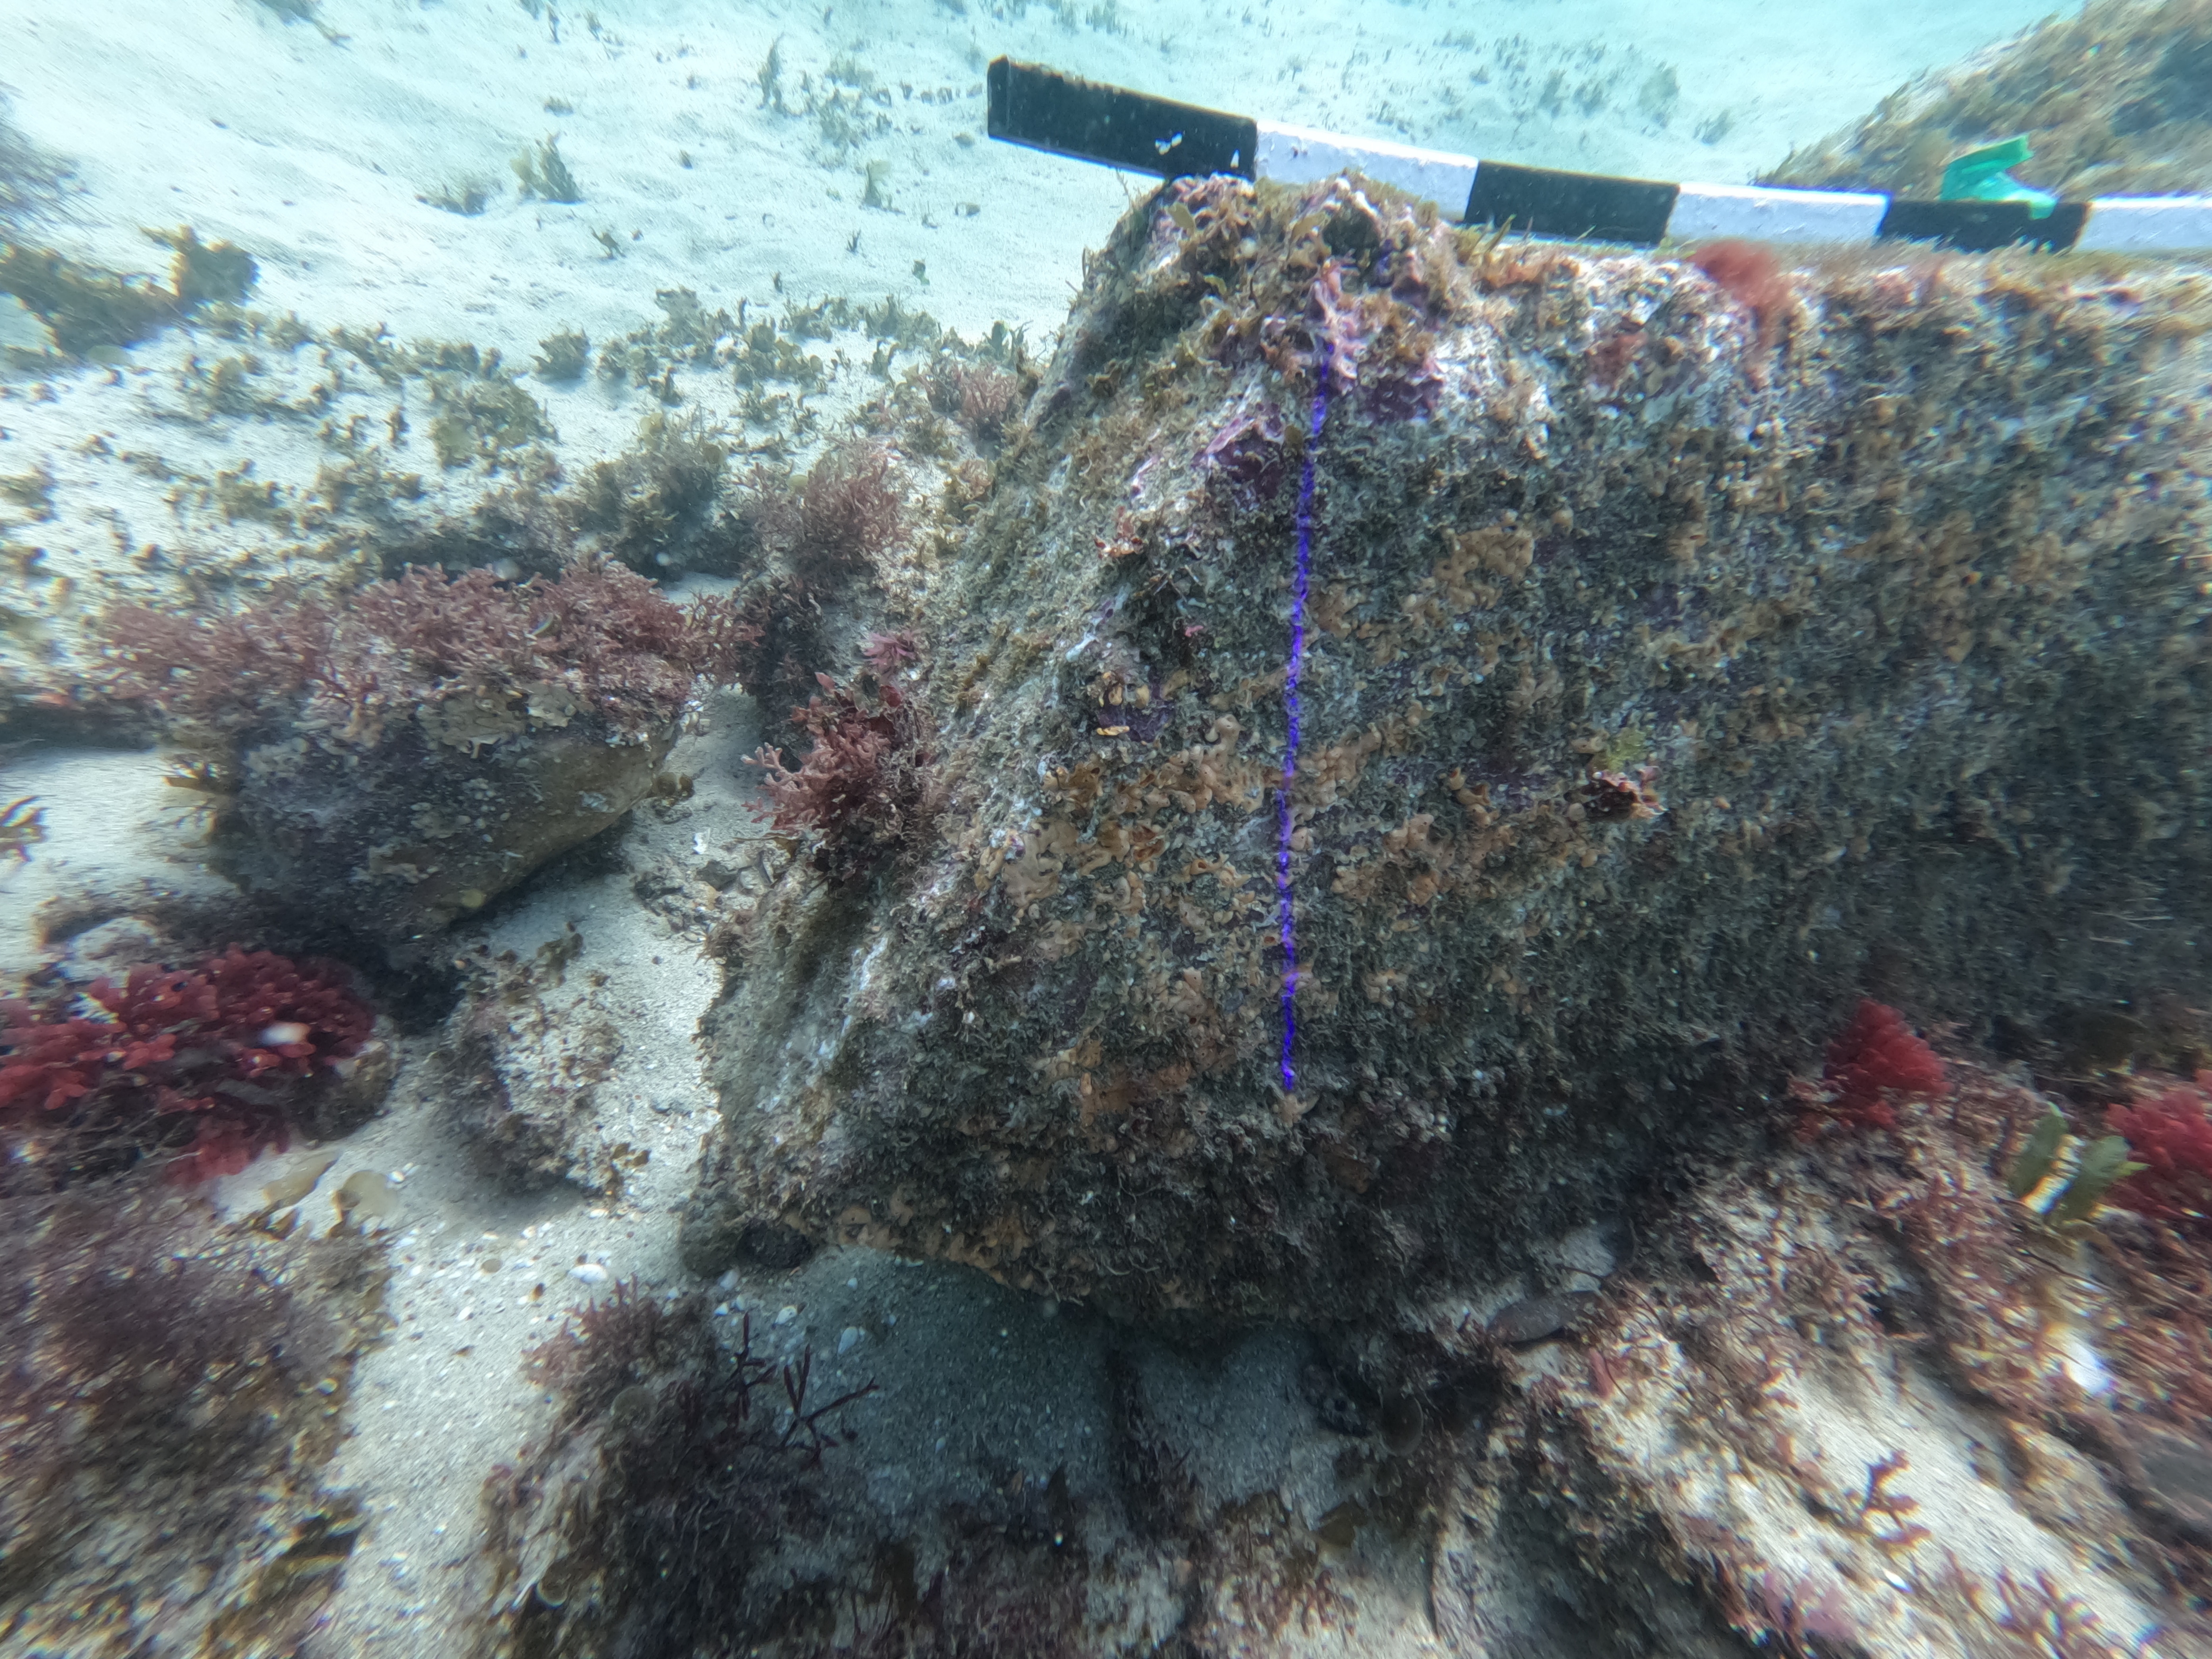

Supplement: Supplementary file 815 [file G0713882.pdf › Ocean2/G0713882.pdf]

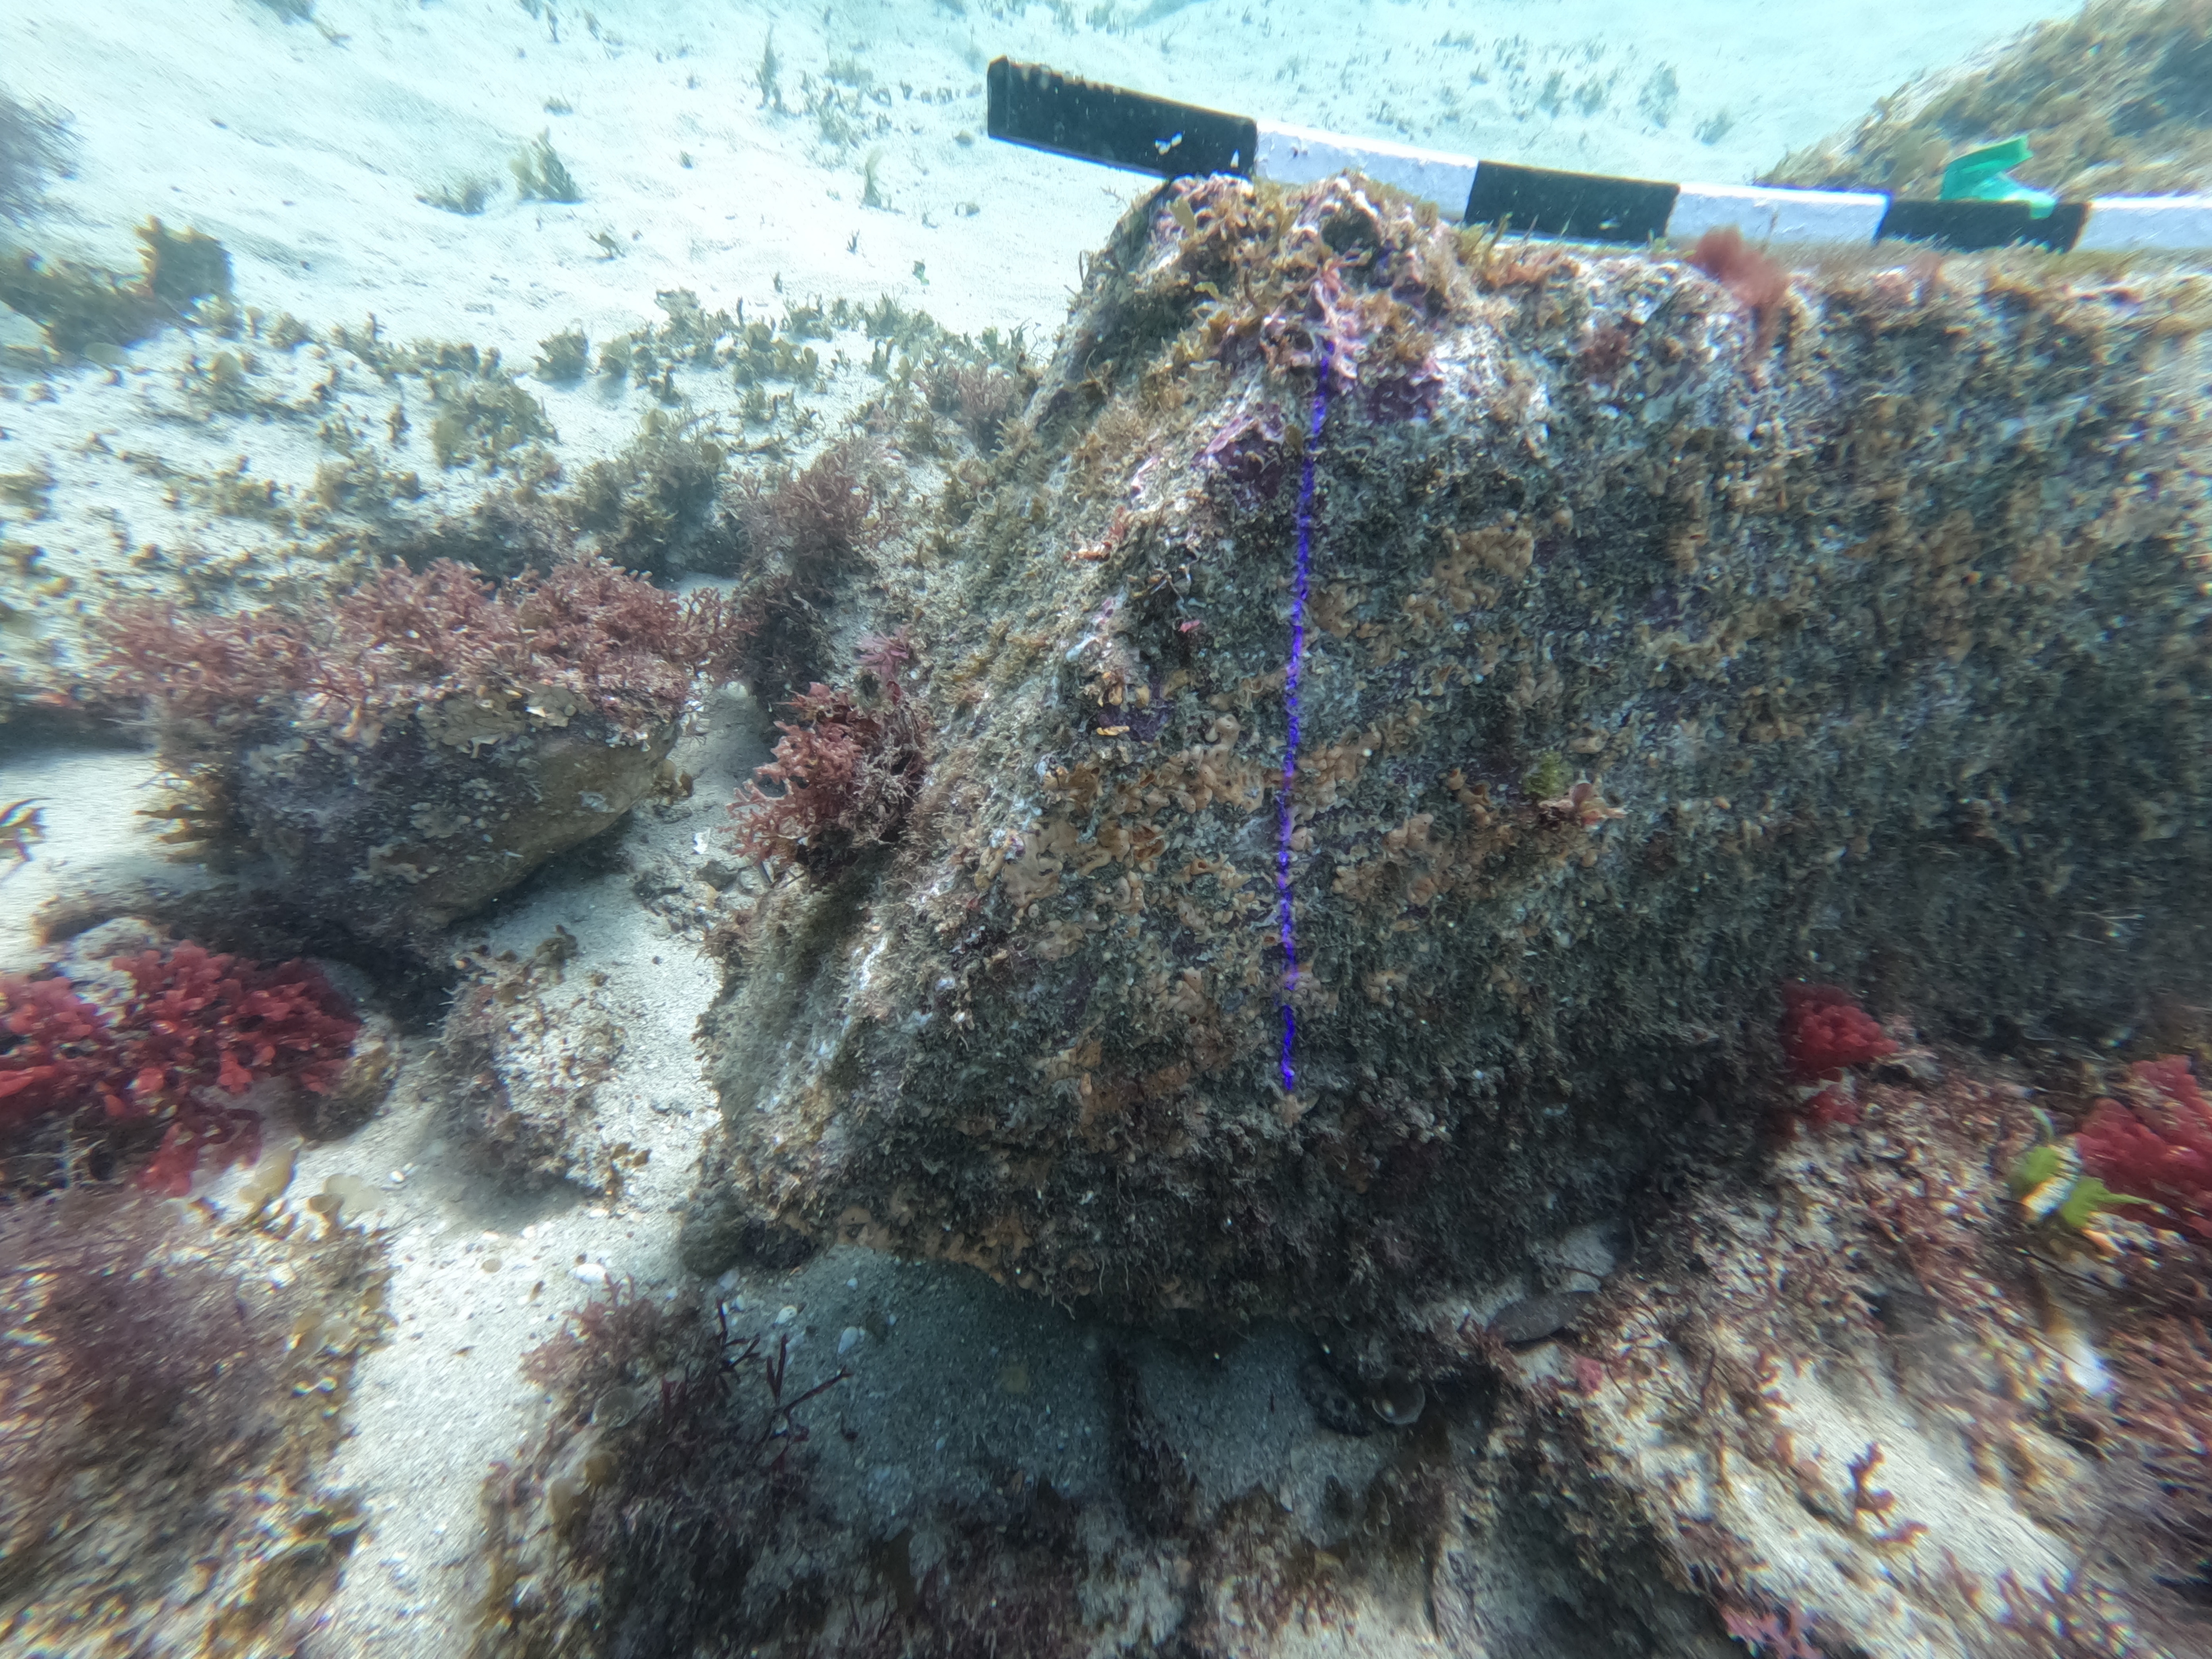

Supplement: Supplementary file 816 [file G0713883.pdf › Ocean2/G0713883.pdf]

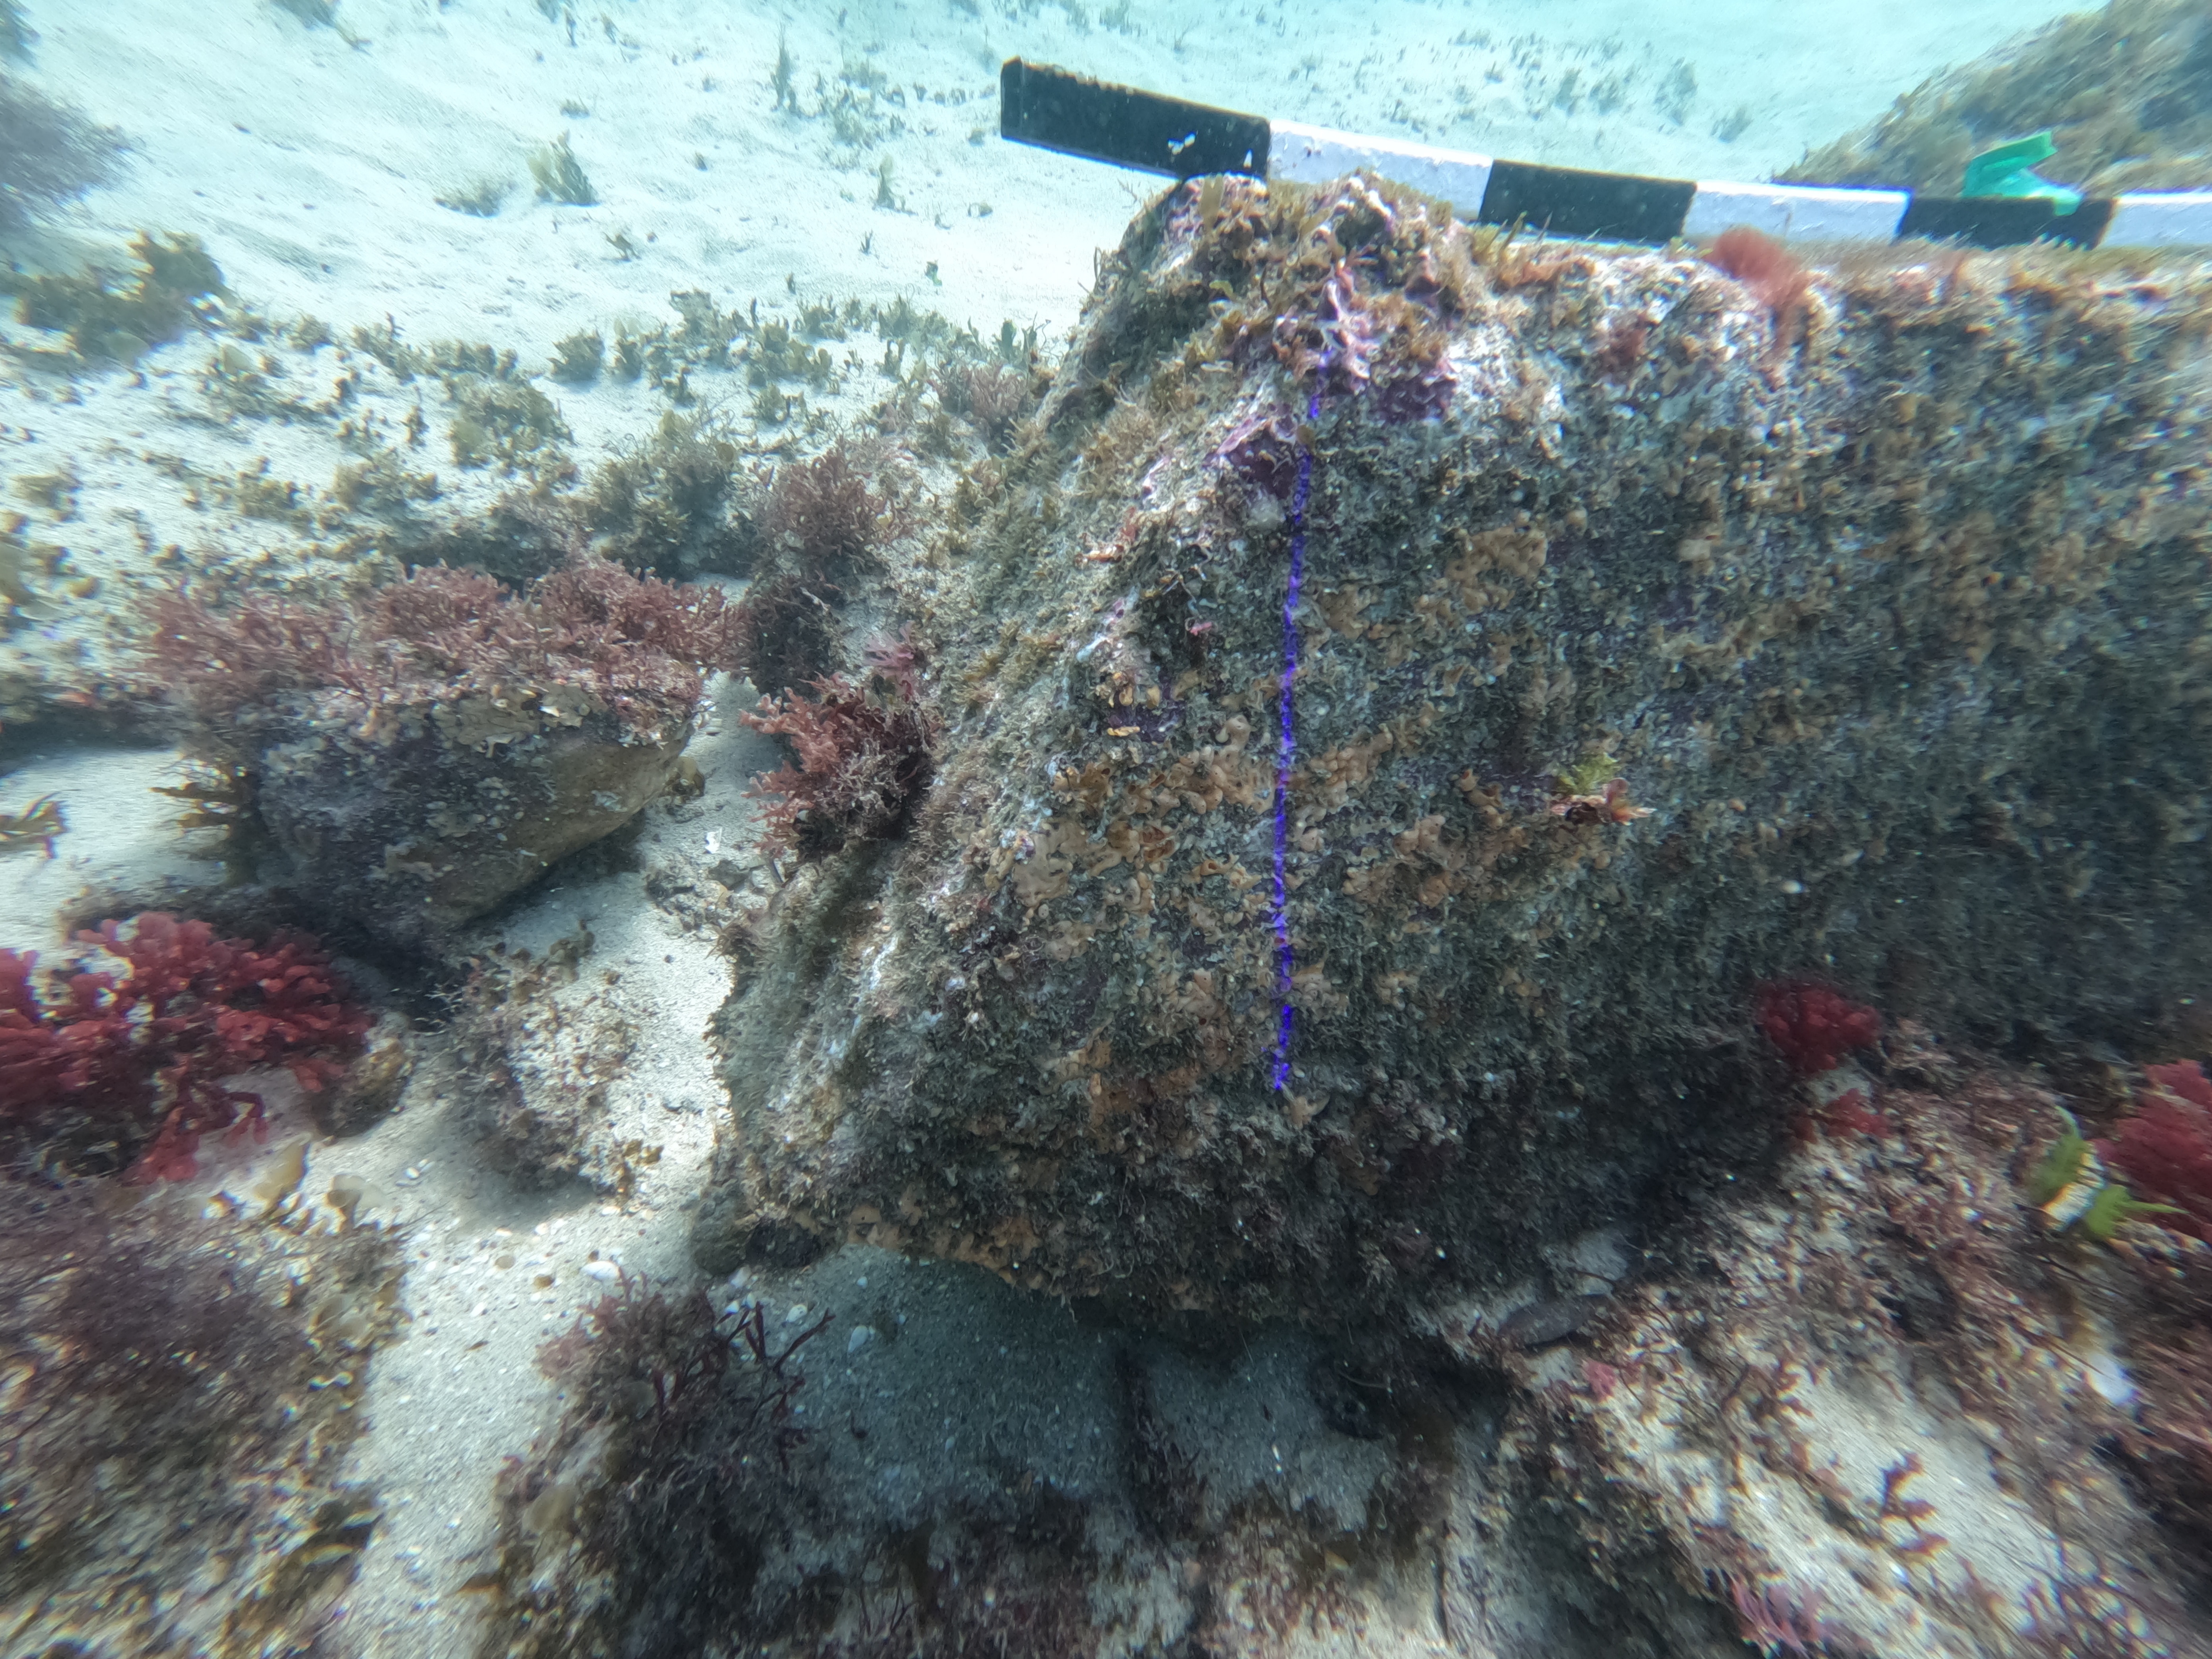

Supplement: Supplementary file 817 [file G0713884.pdf › Ocean2/G0713884.pdf]

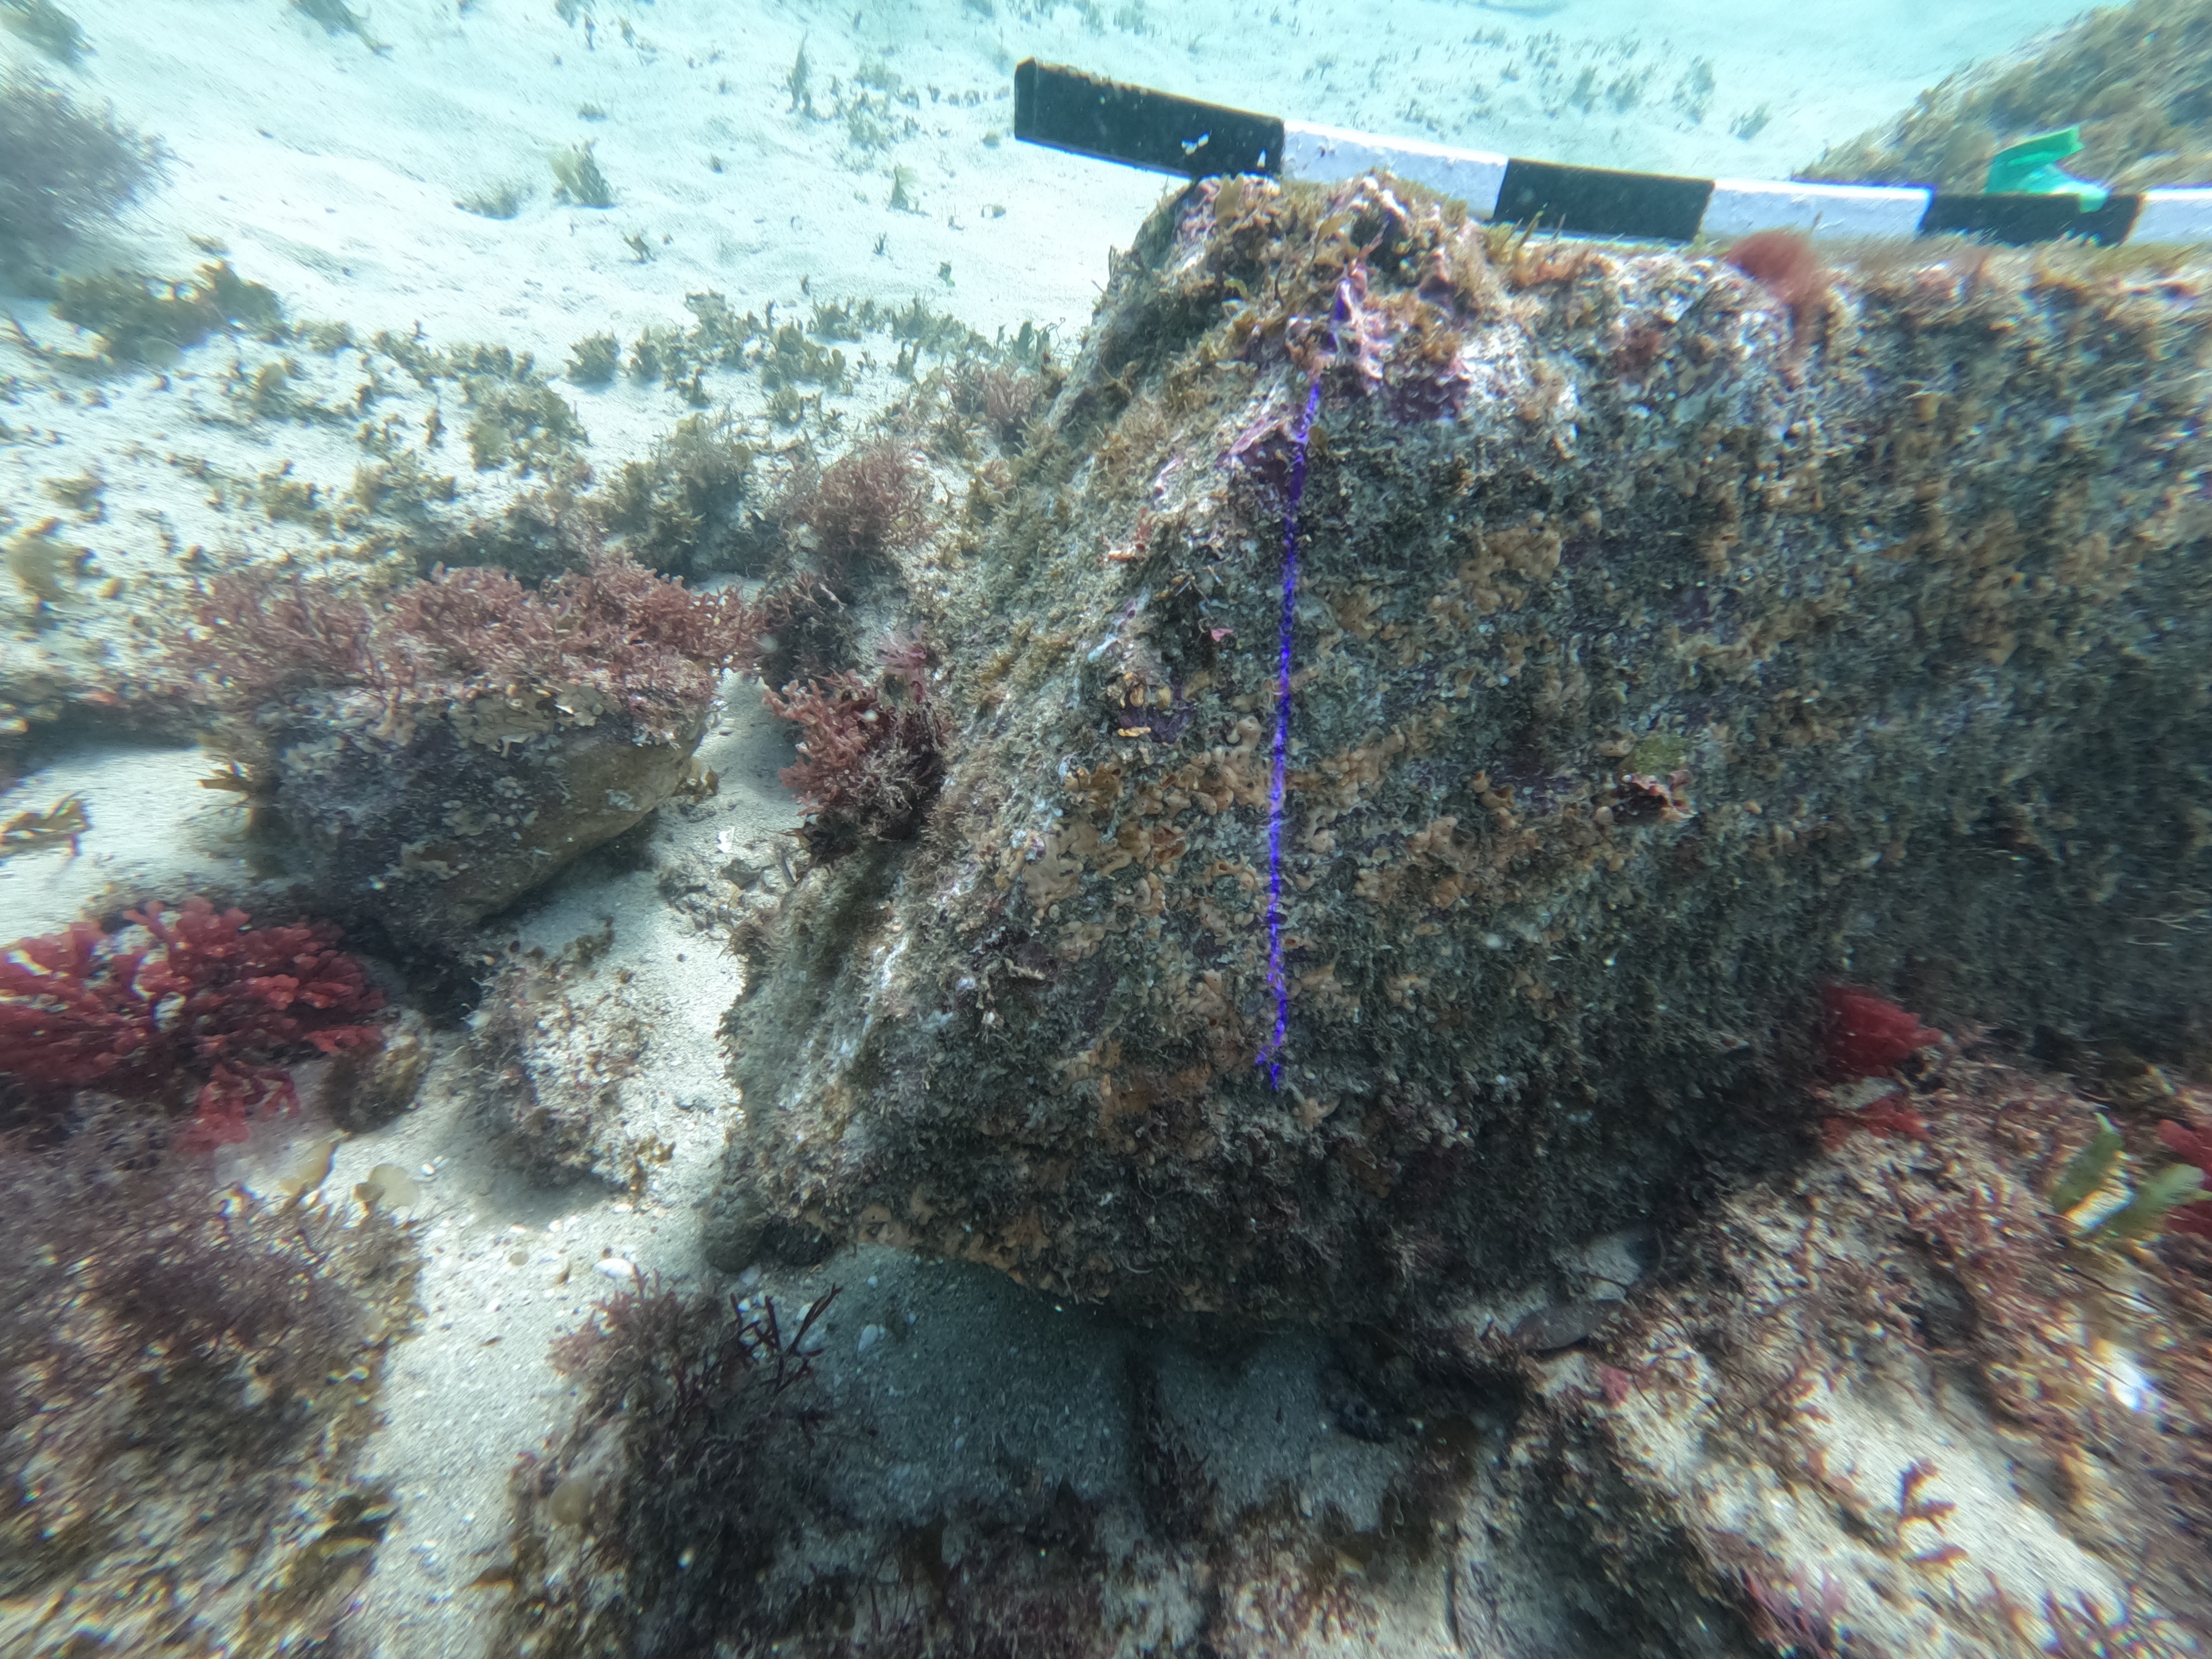

Supplement: Supplementary file 818 [file G0713885.pdf › Ocean2/G0713885.pdf]

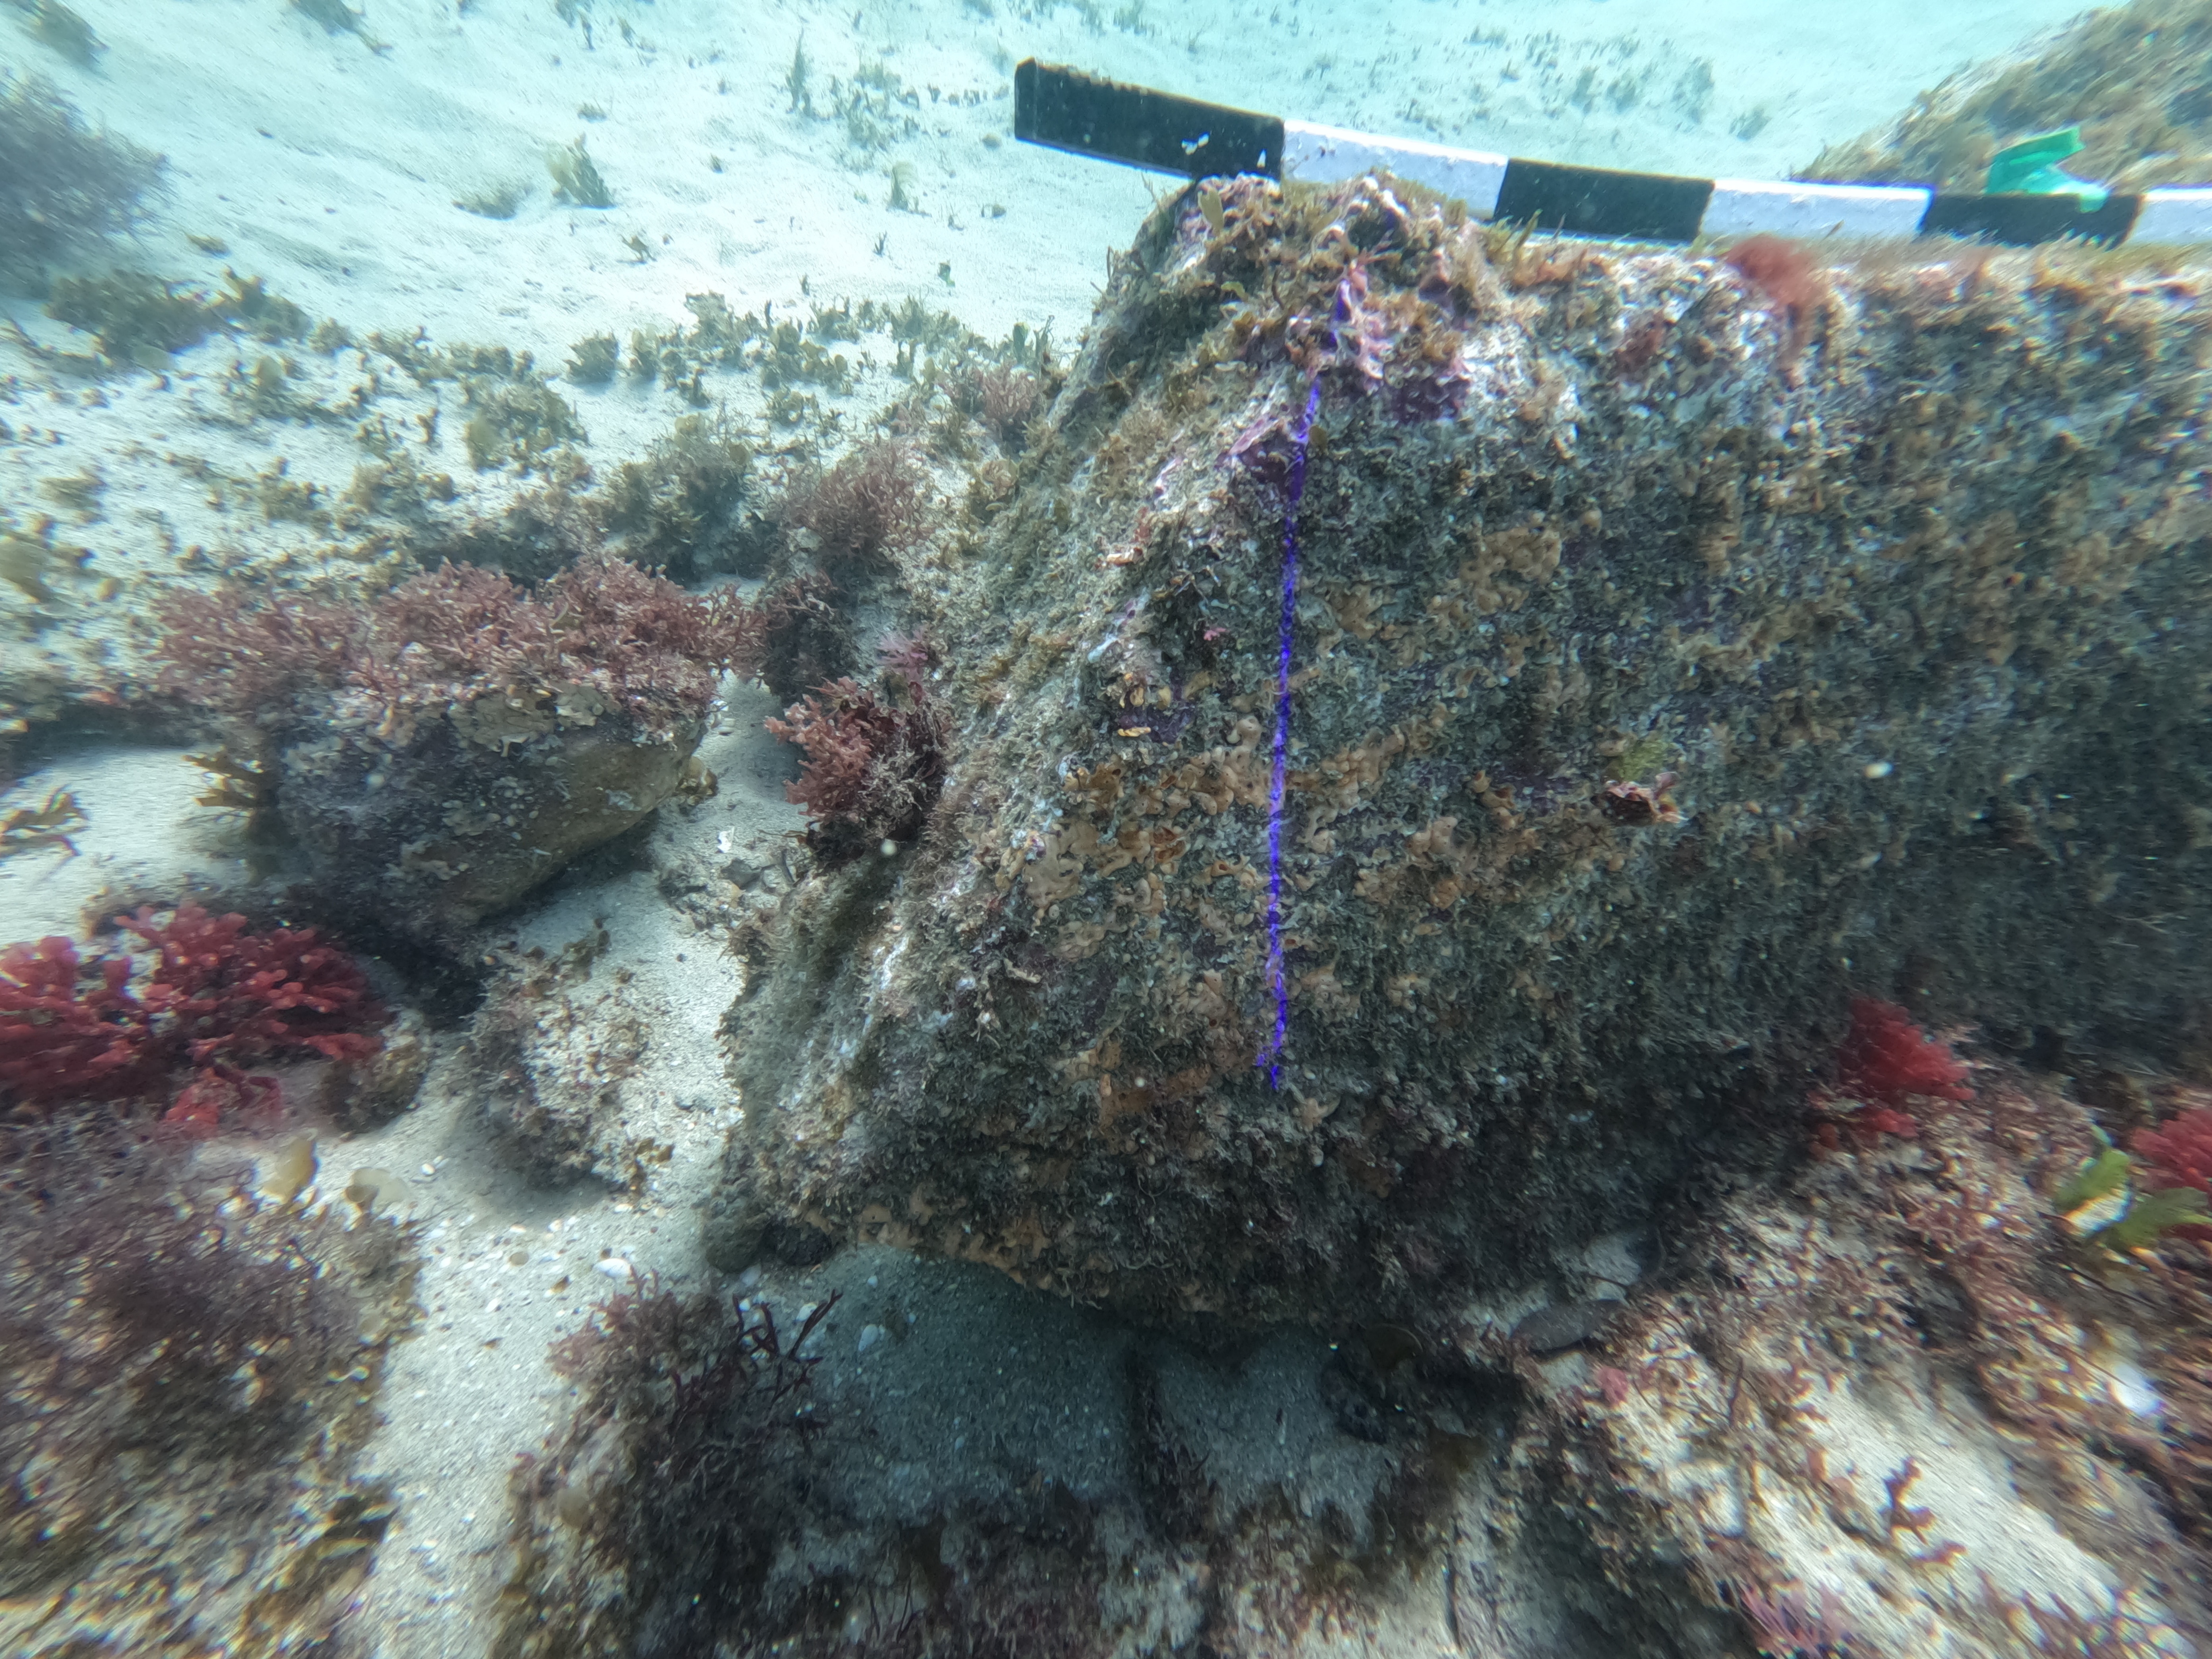

Supplement: Supplementary file 819 [file G0713886.pdf › Ocean2/G0713886.pdf]

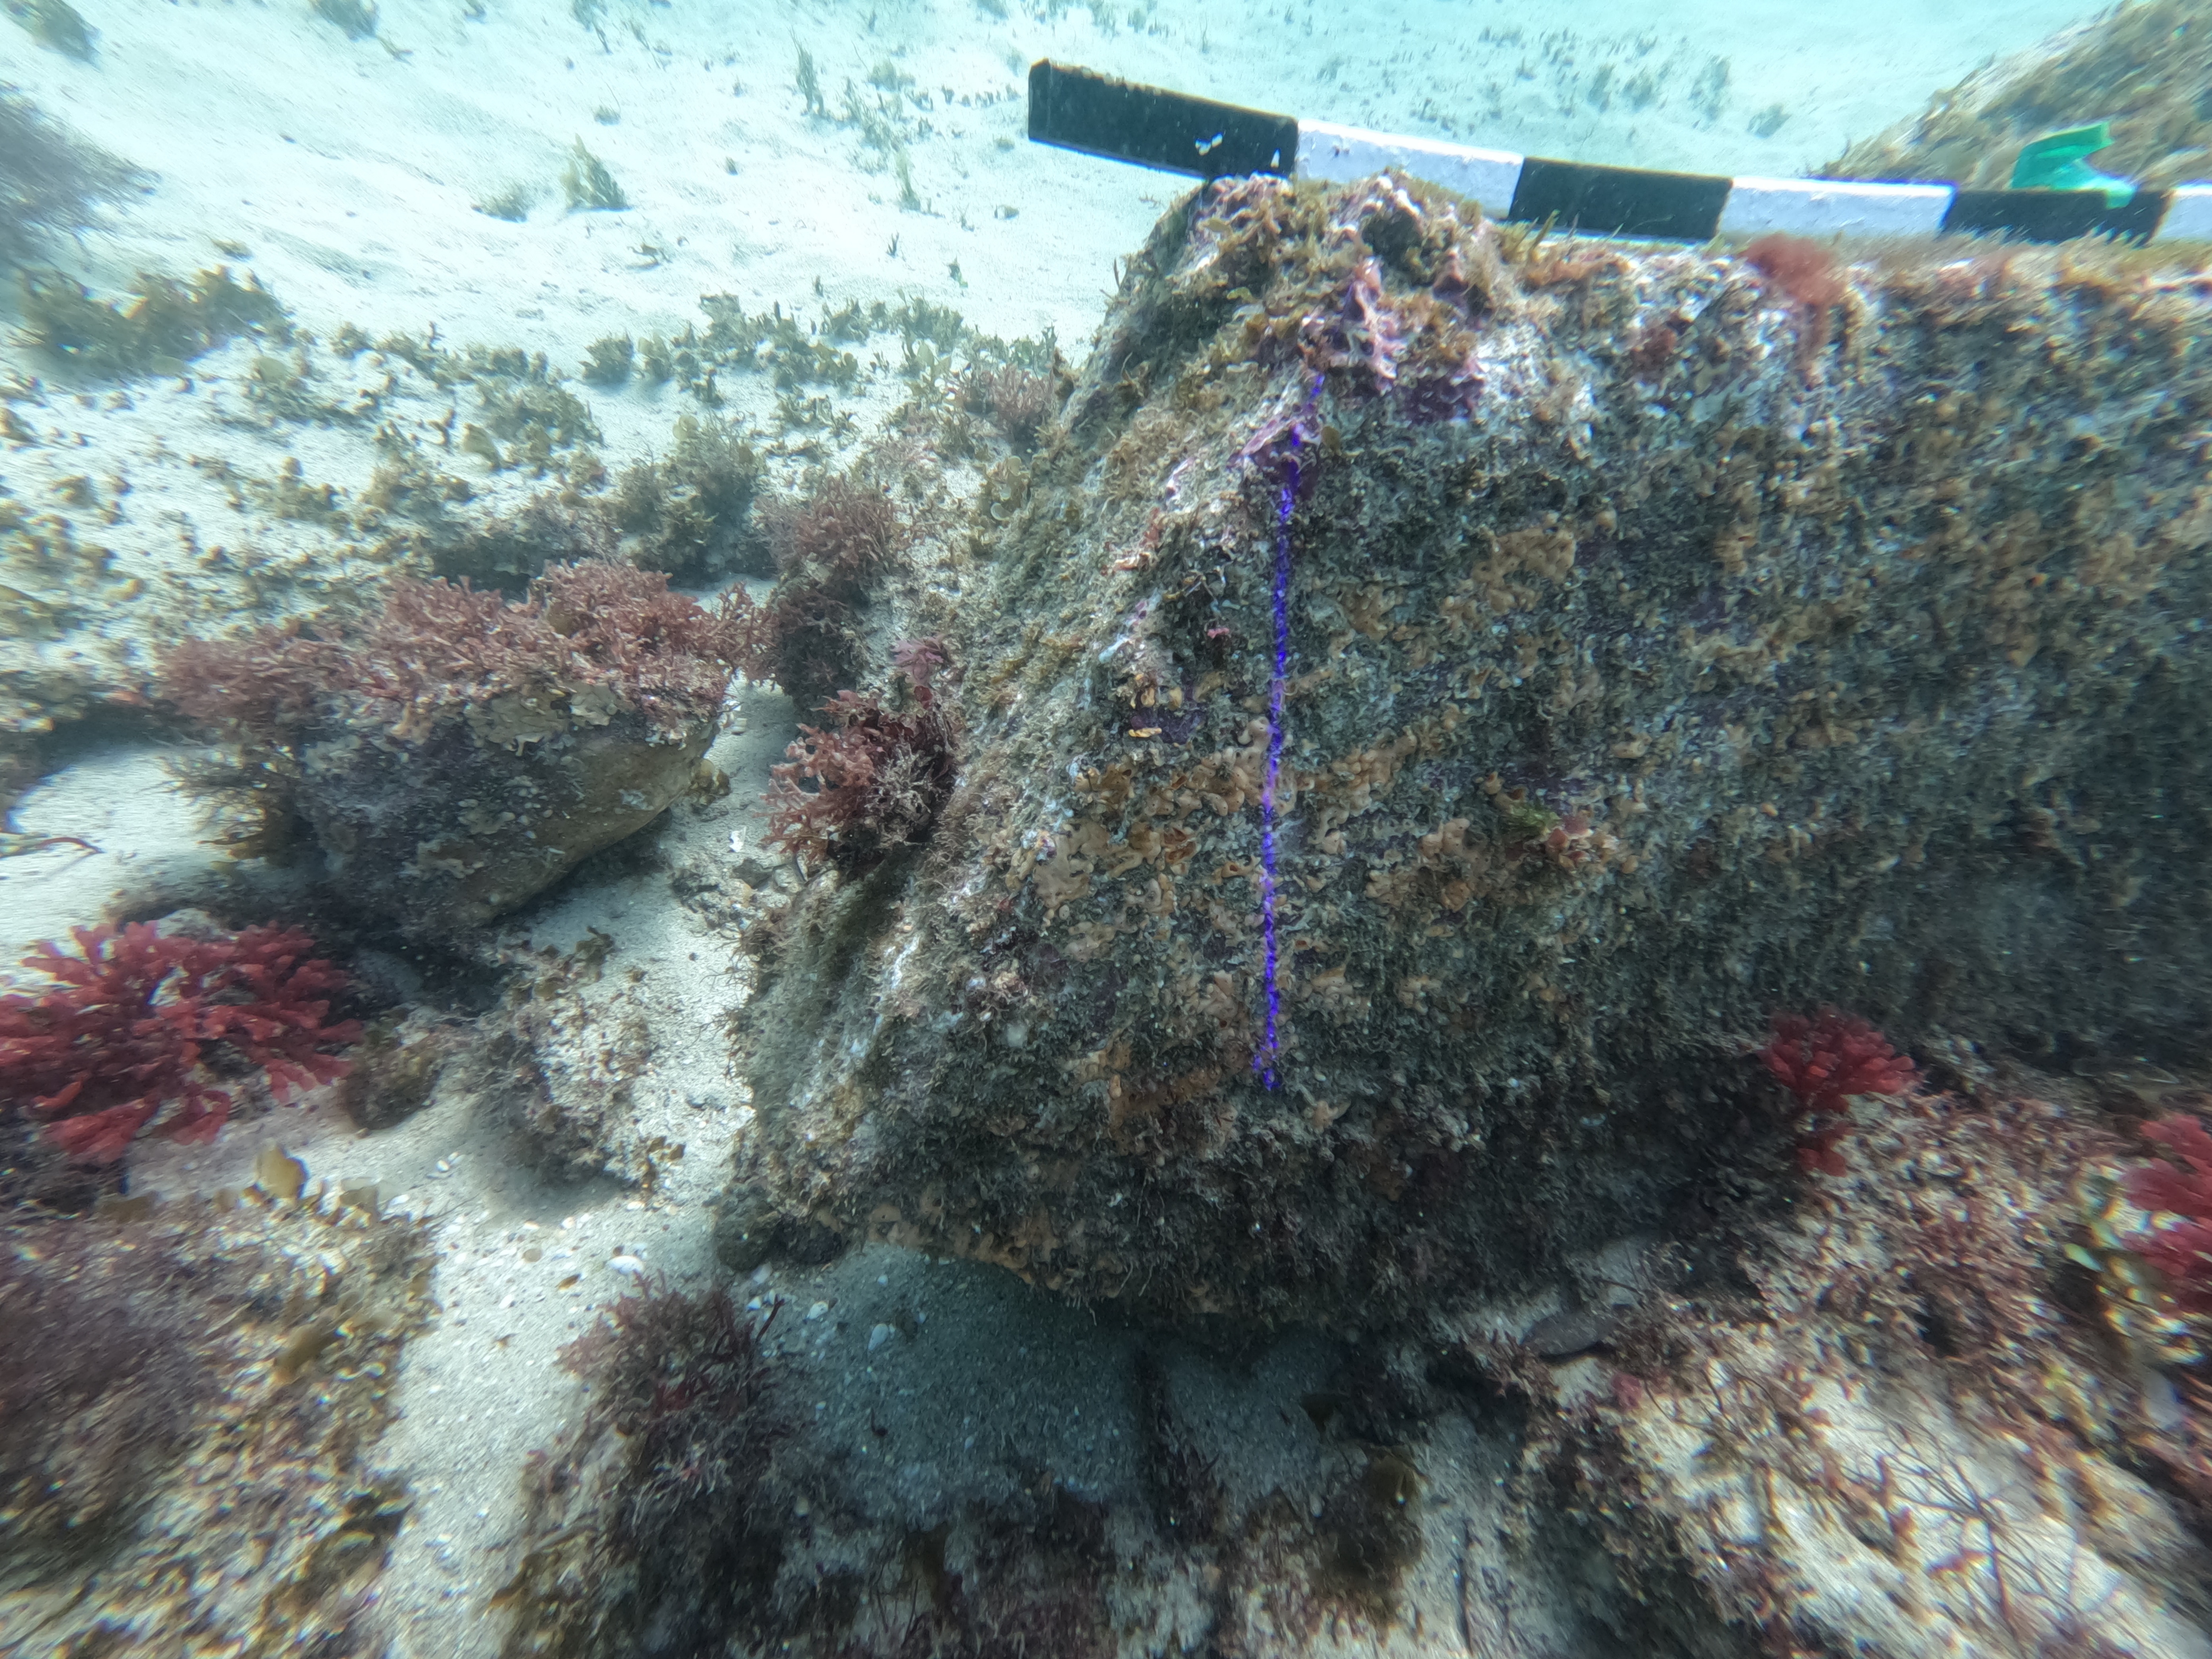

Supplement: Supplementary file 820 [file G0713887.pdf › Ocean2/G0713887.pdf]

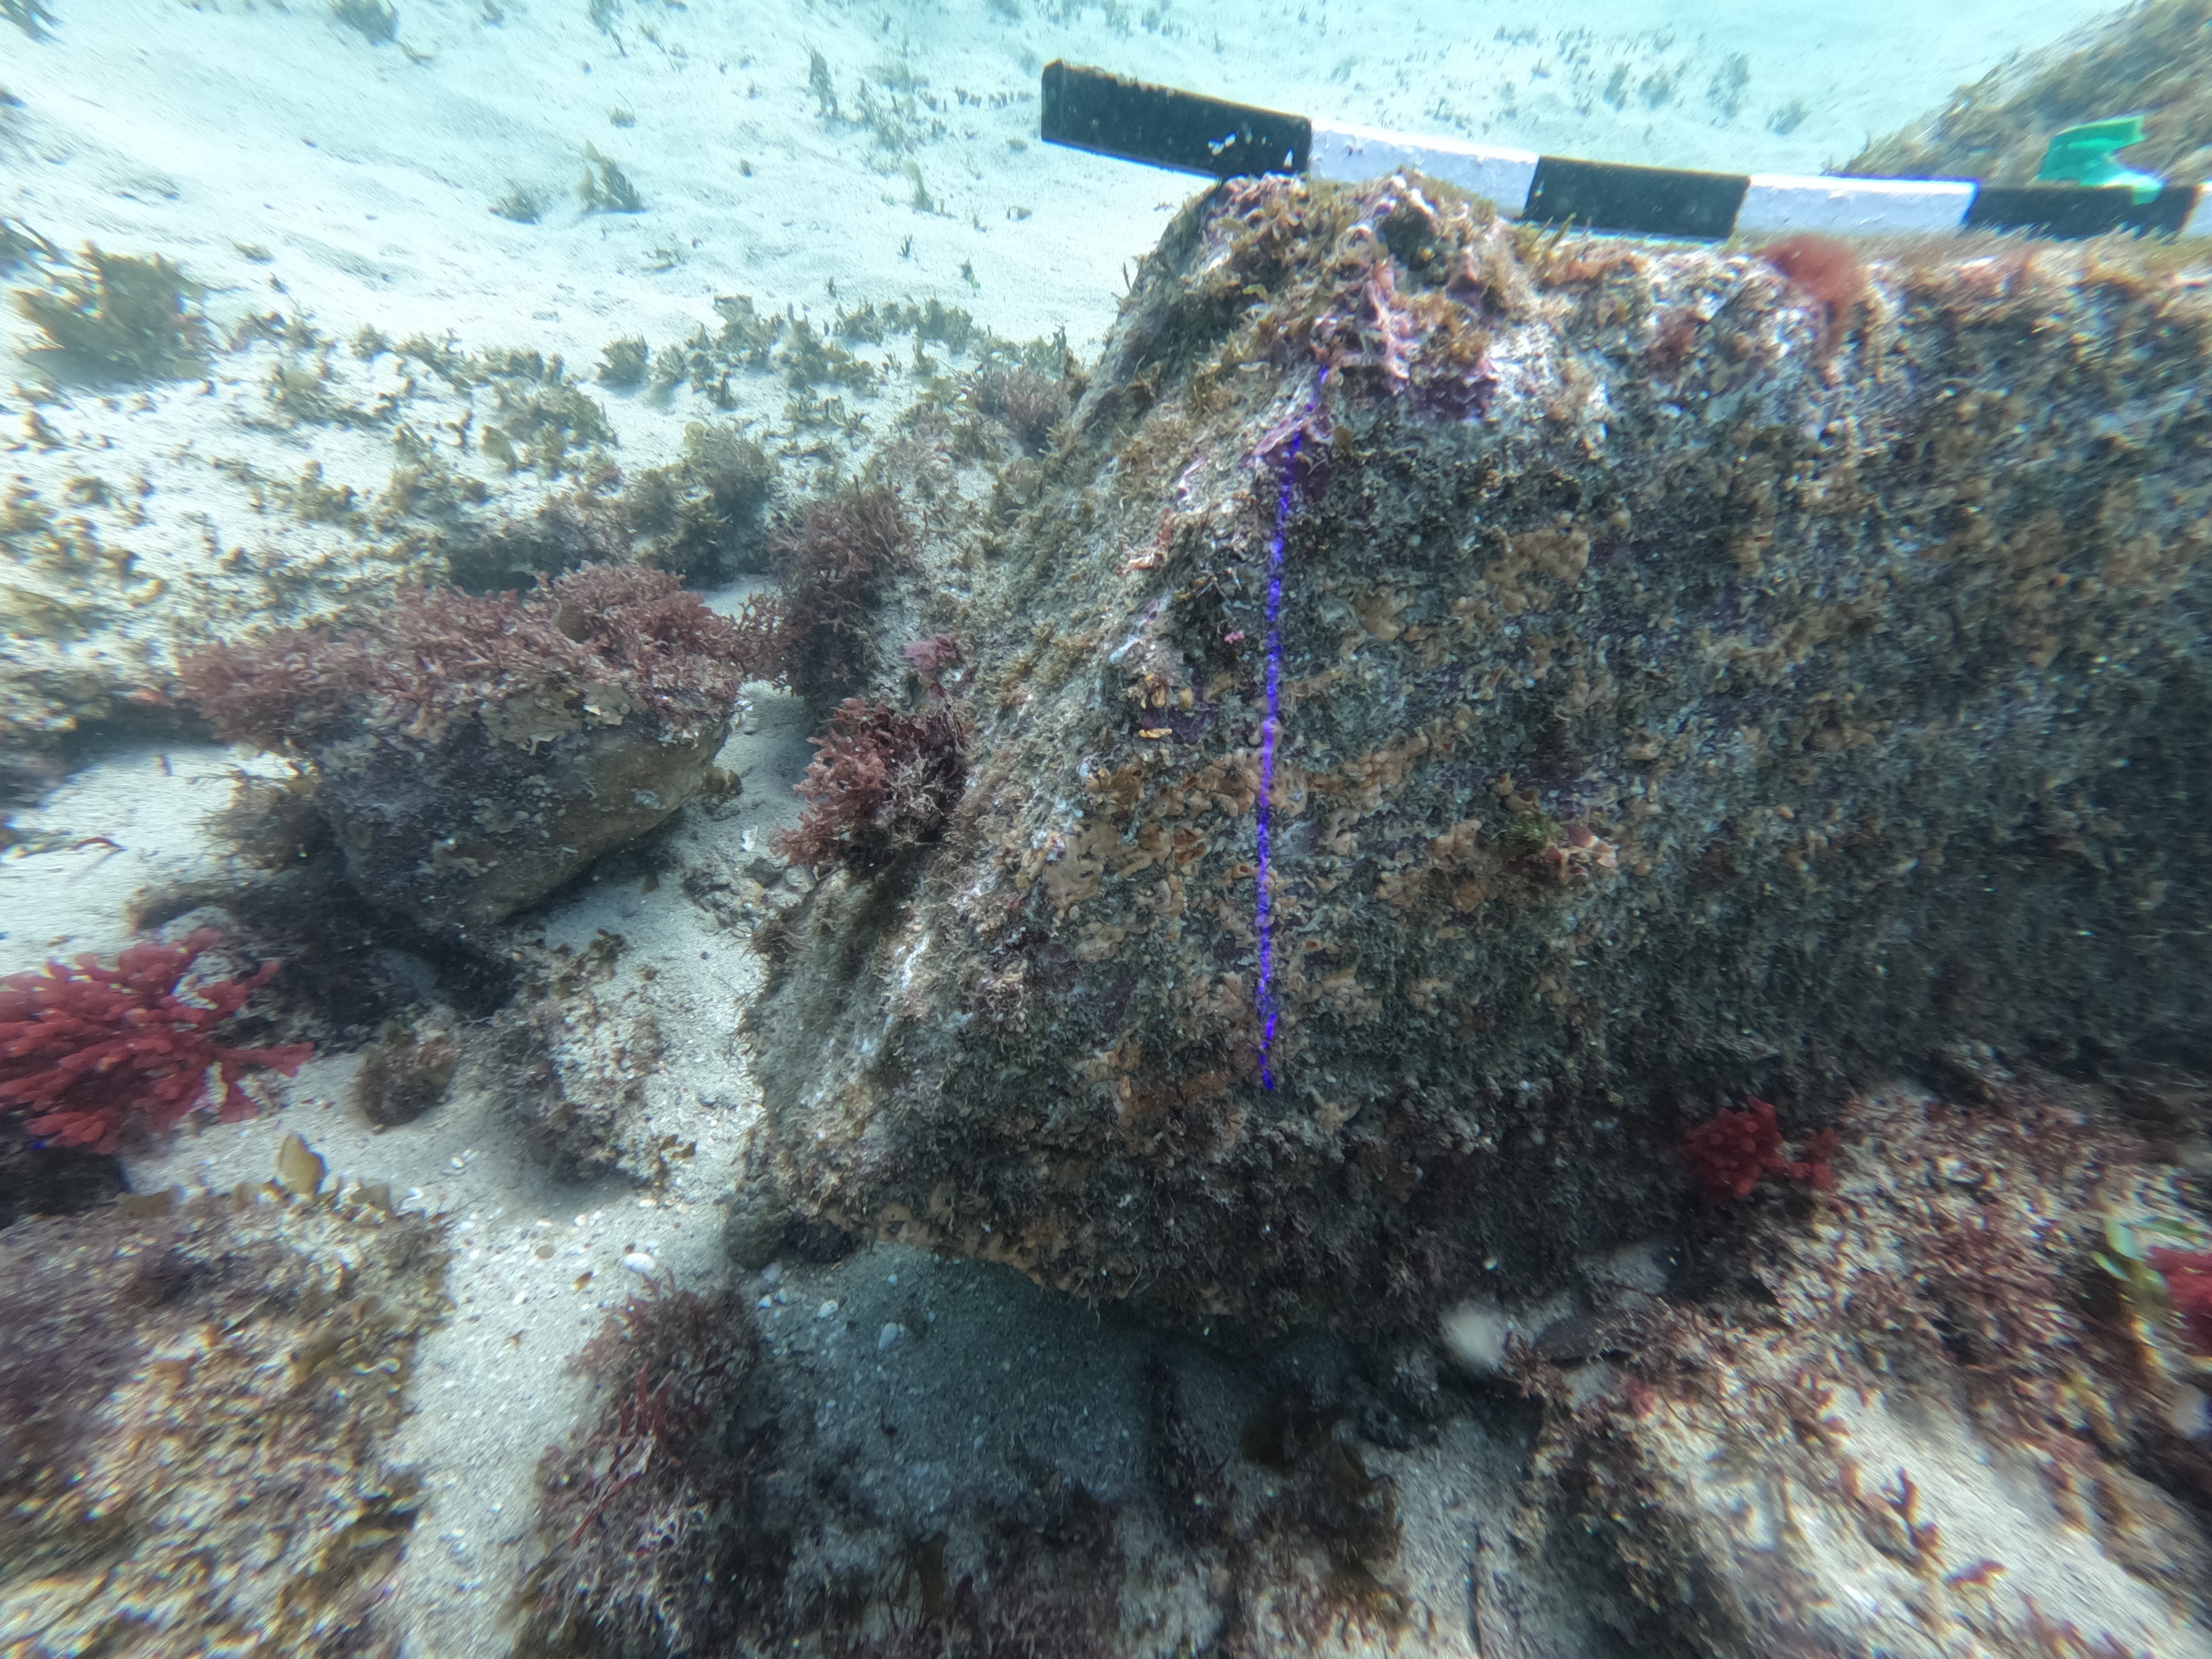

Supplement: Supplementary file 821 [file G0713888.pdf › Ocean2/G0713888.pdf]

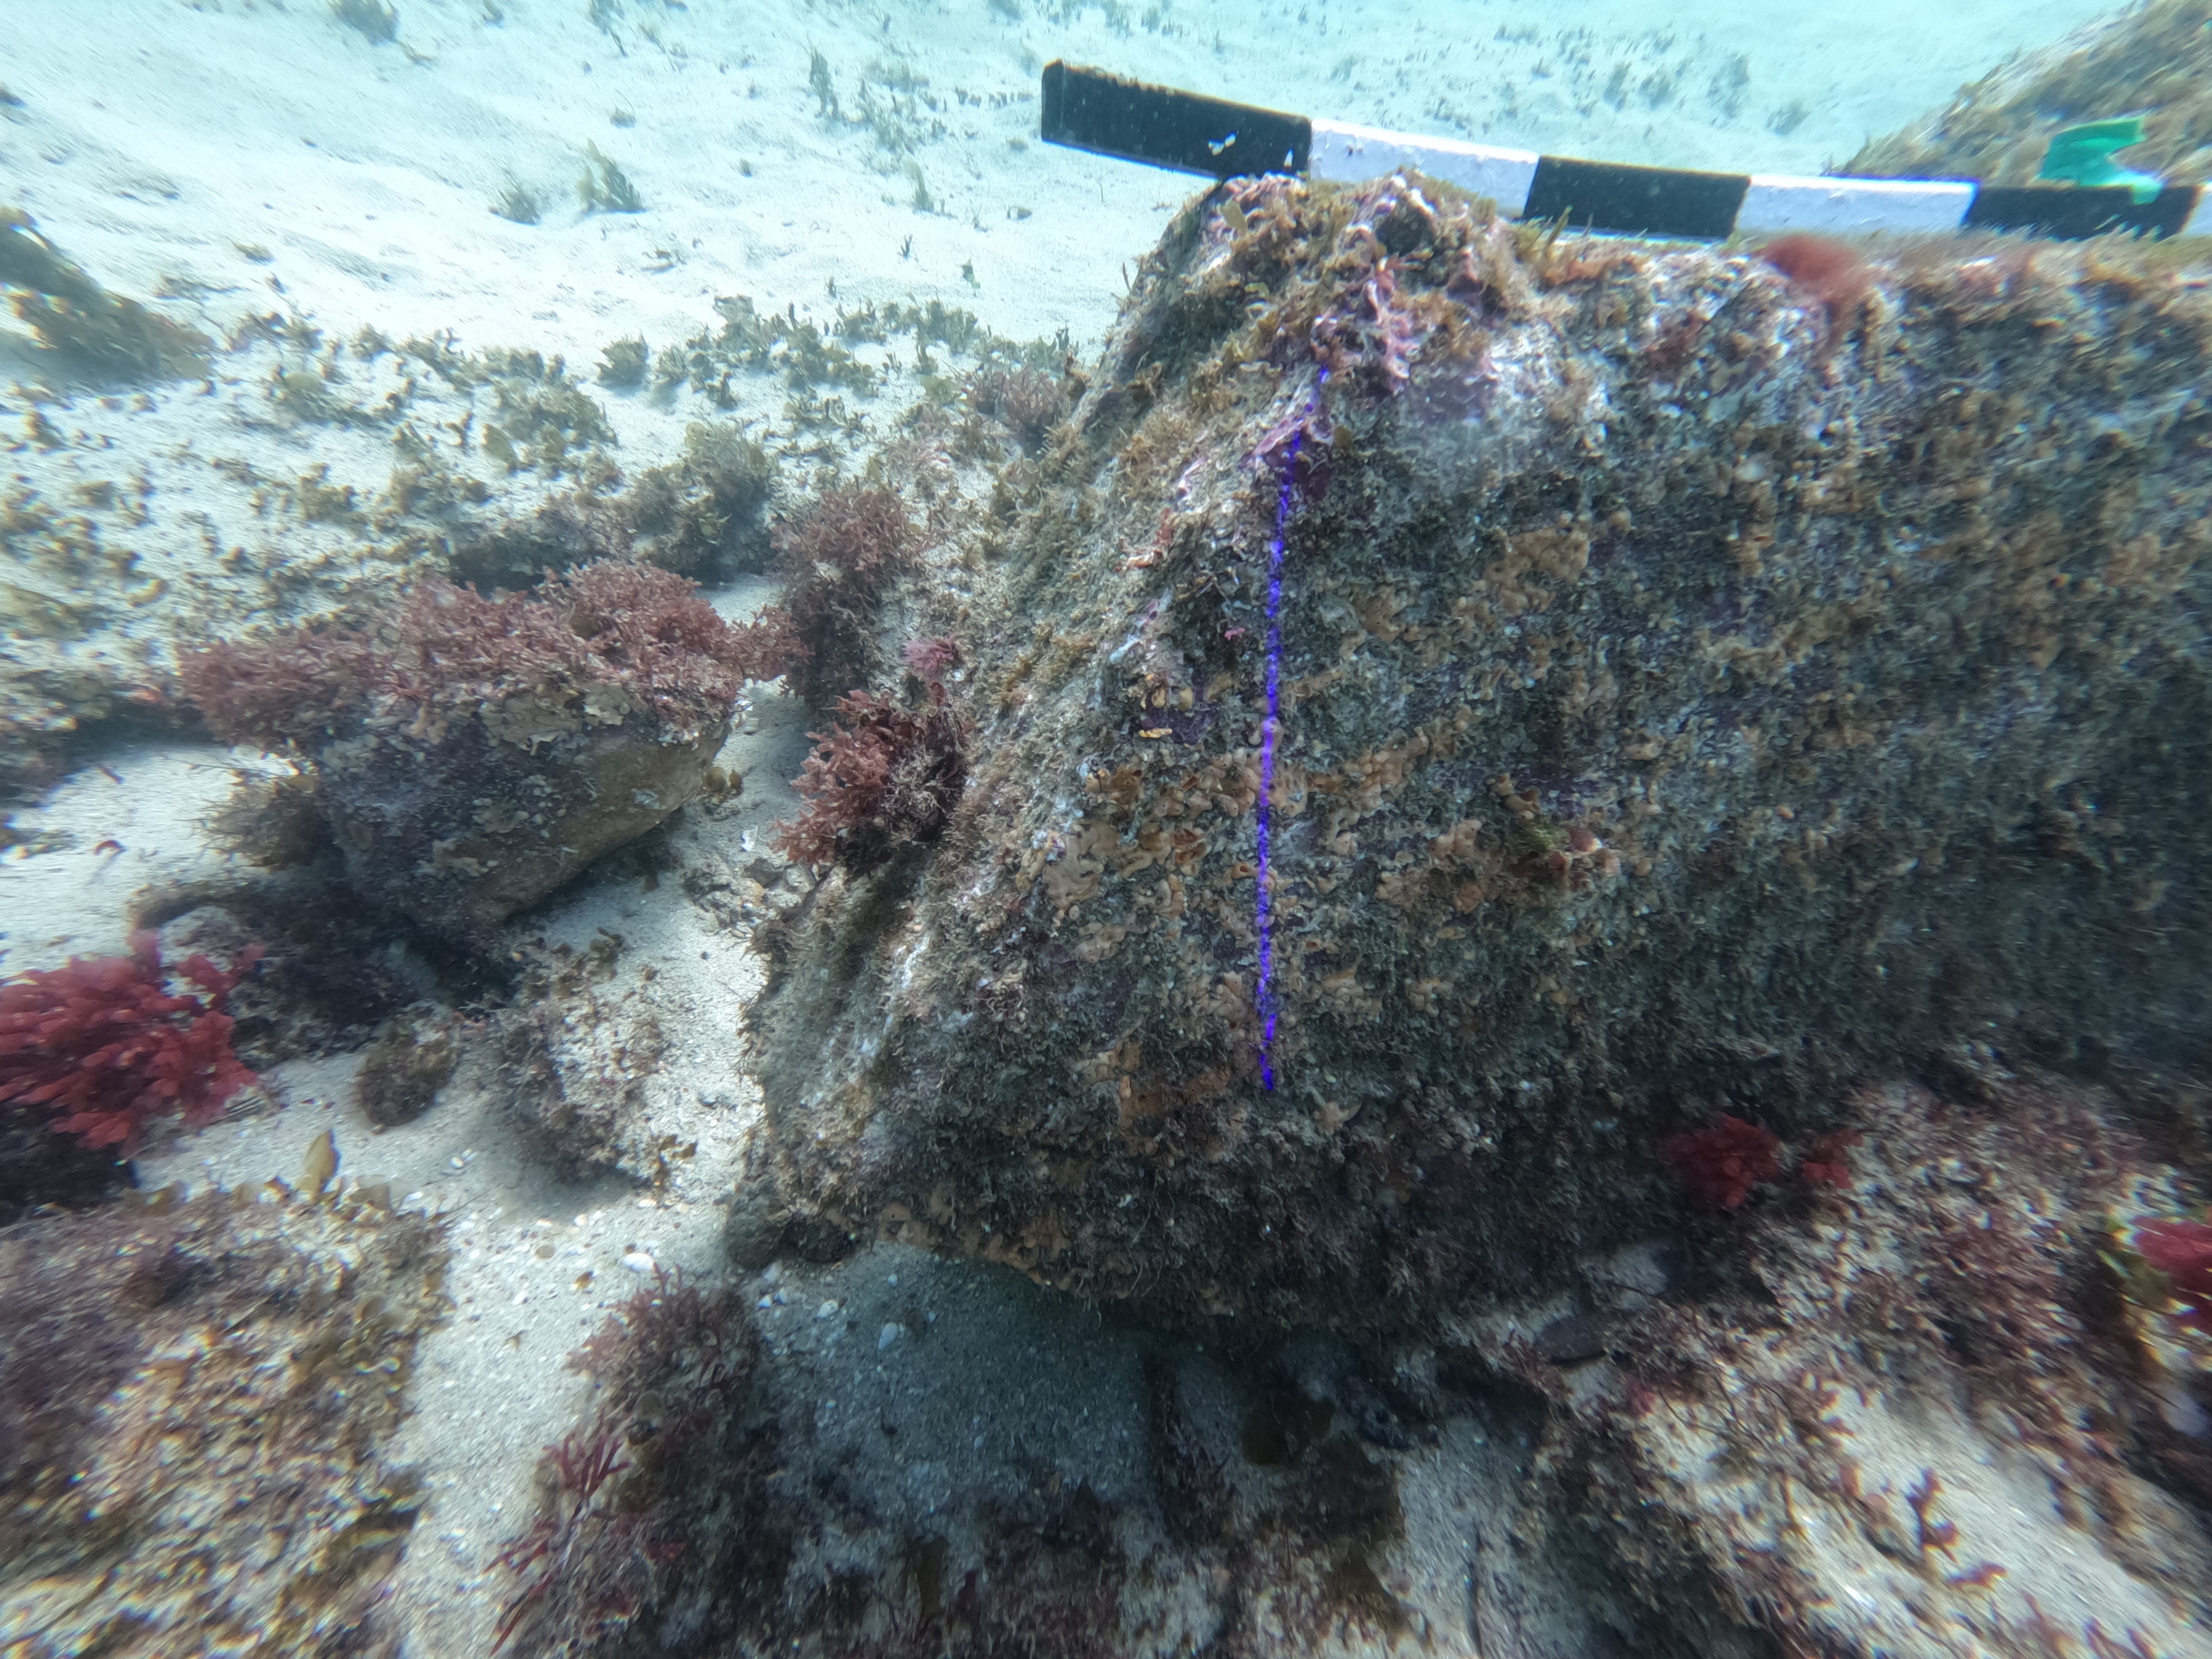

Supplement: Supplementary file 822 [file G0713889.pdf › Ocean2/G0713889.pdf]

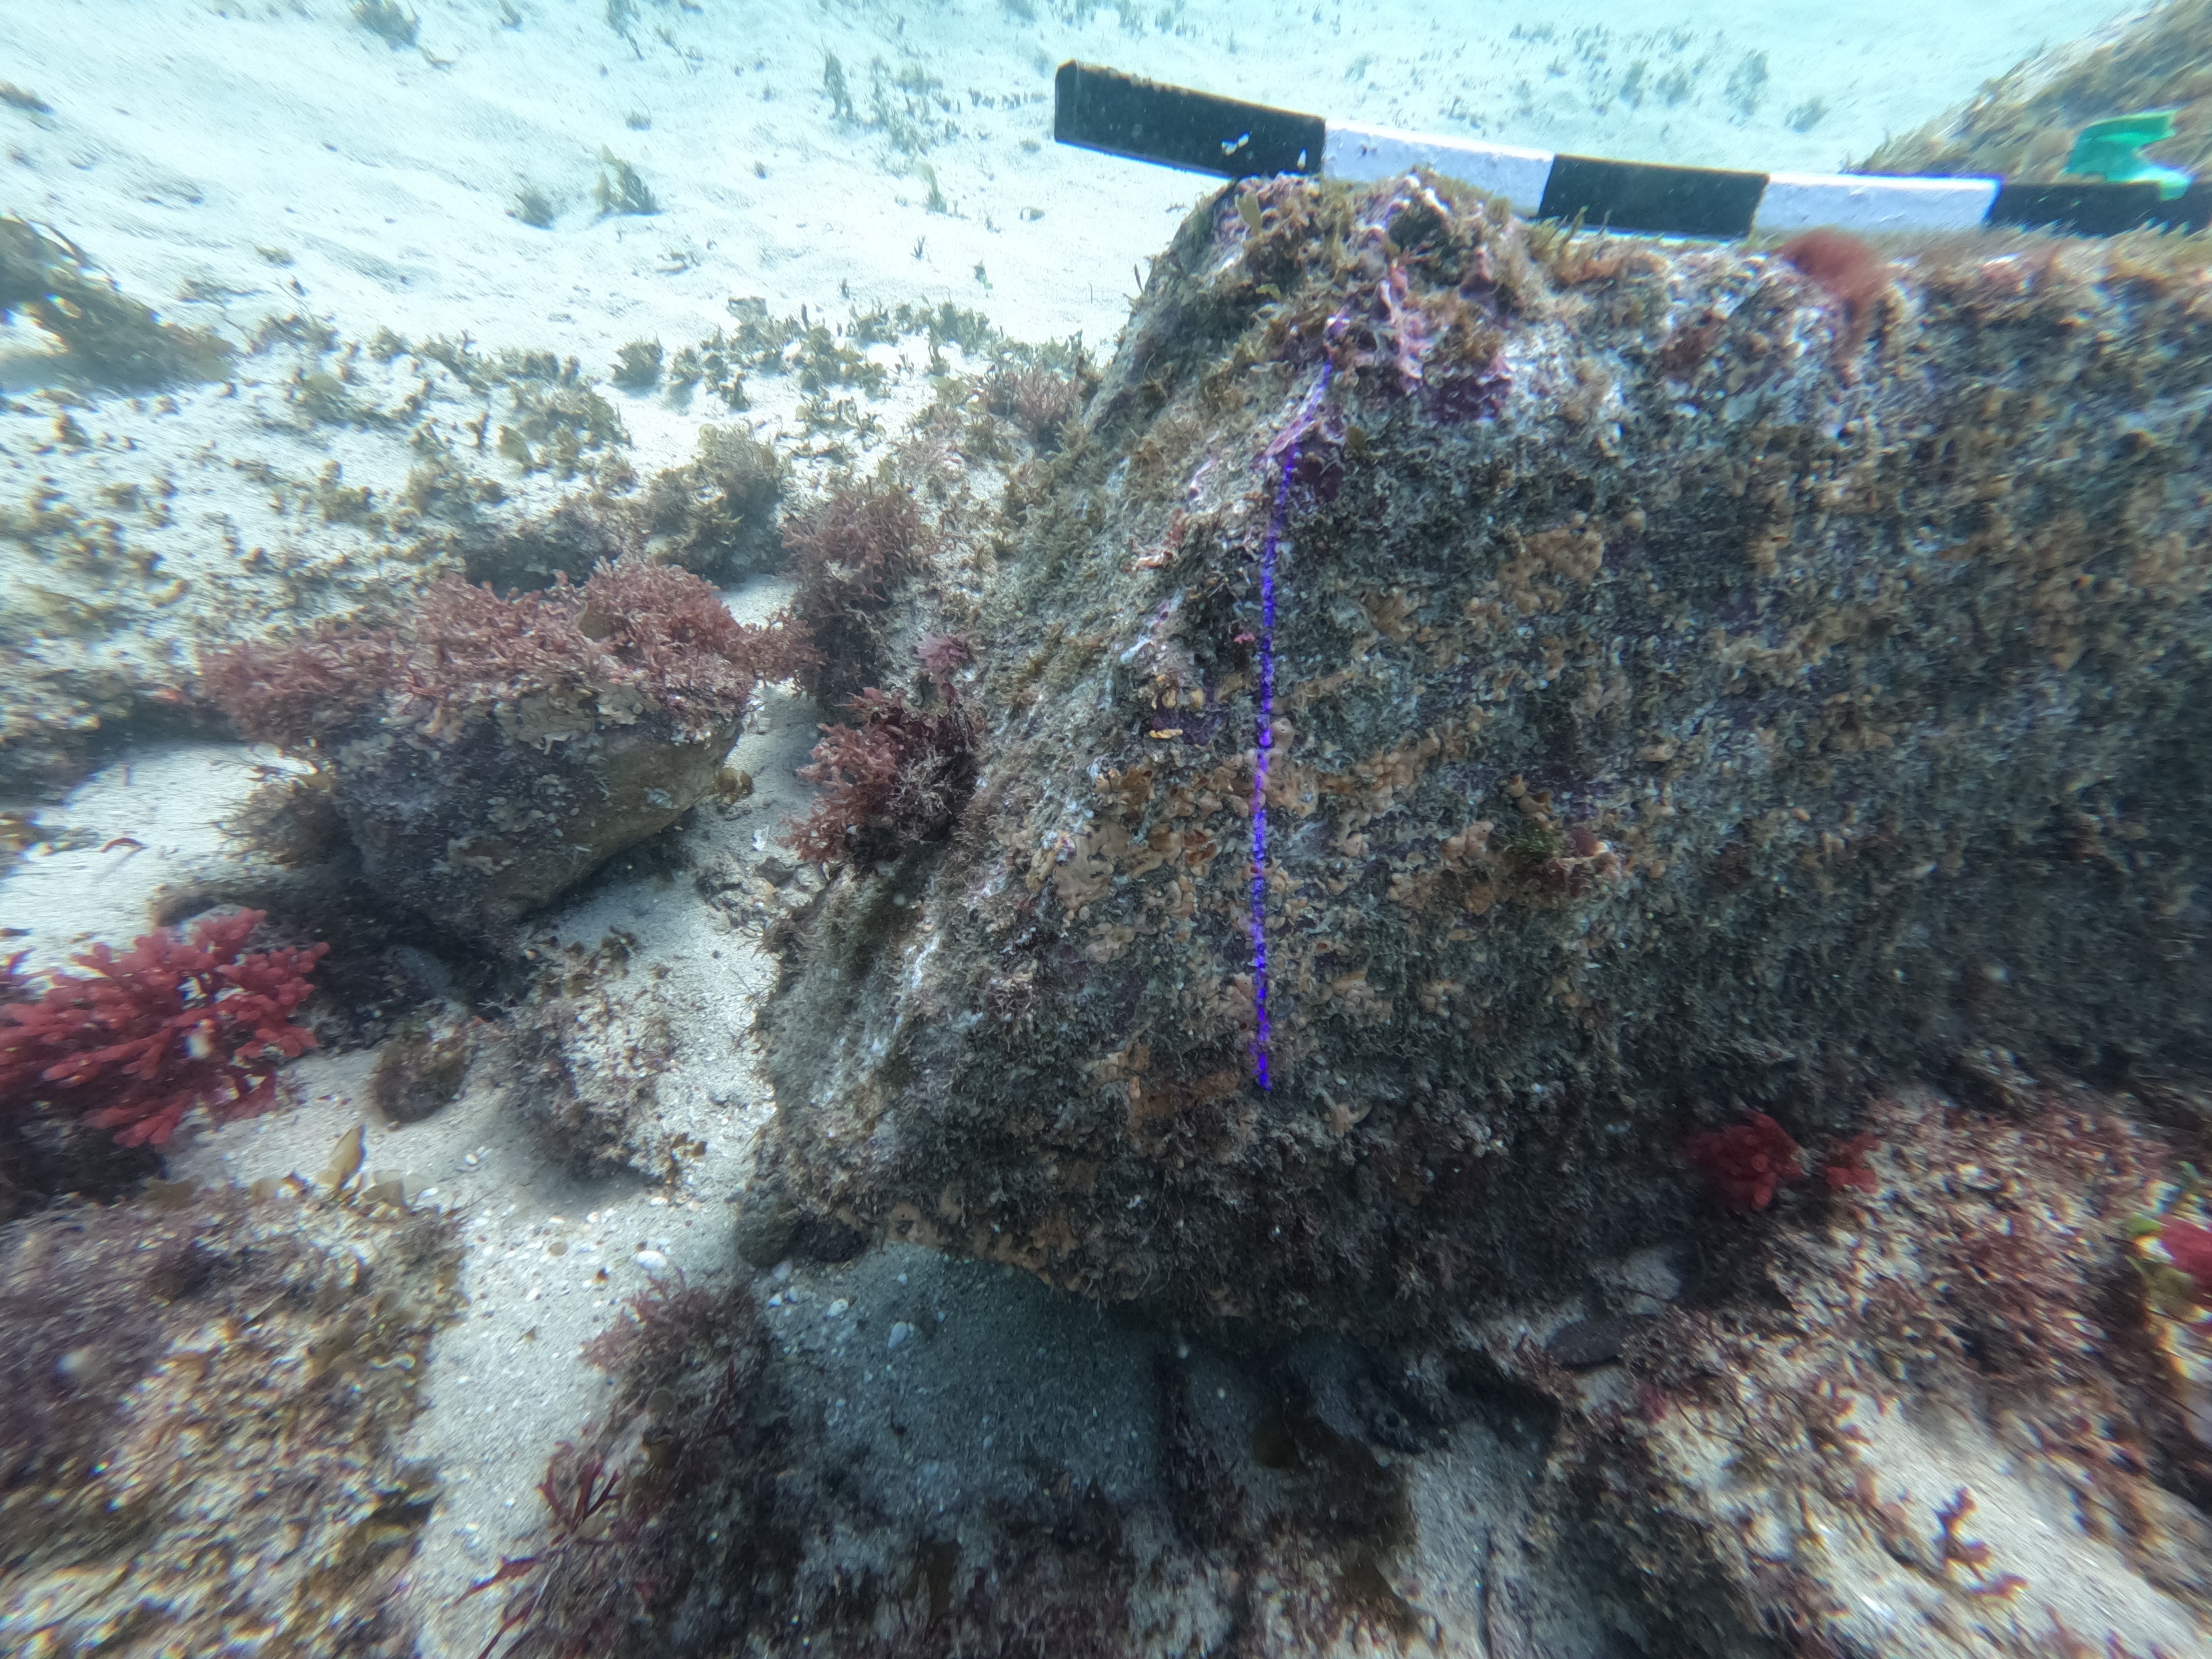

Supplement: Supplementary file 823 [file G0713890.pdf › Ocean2/G0713890.pdf]

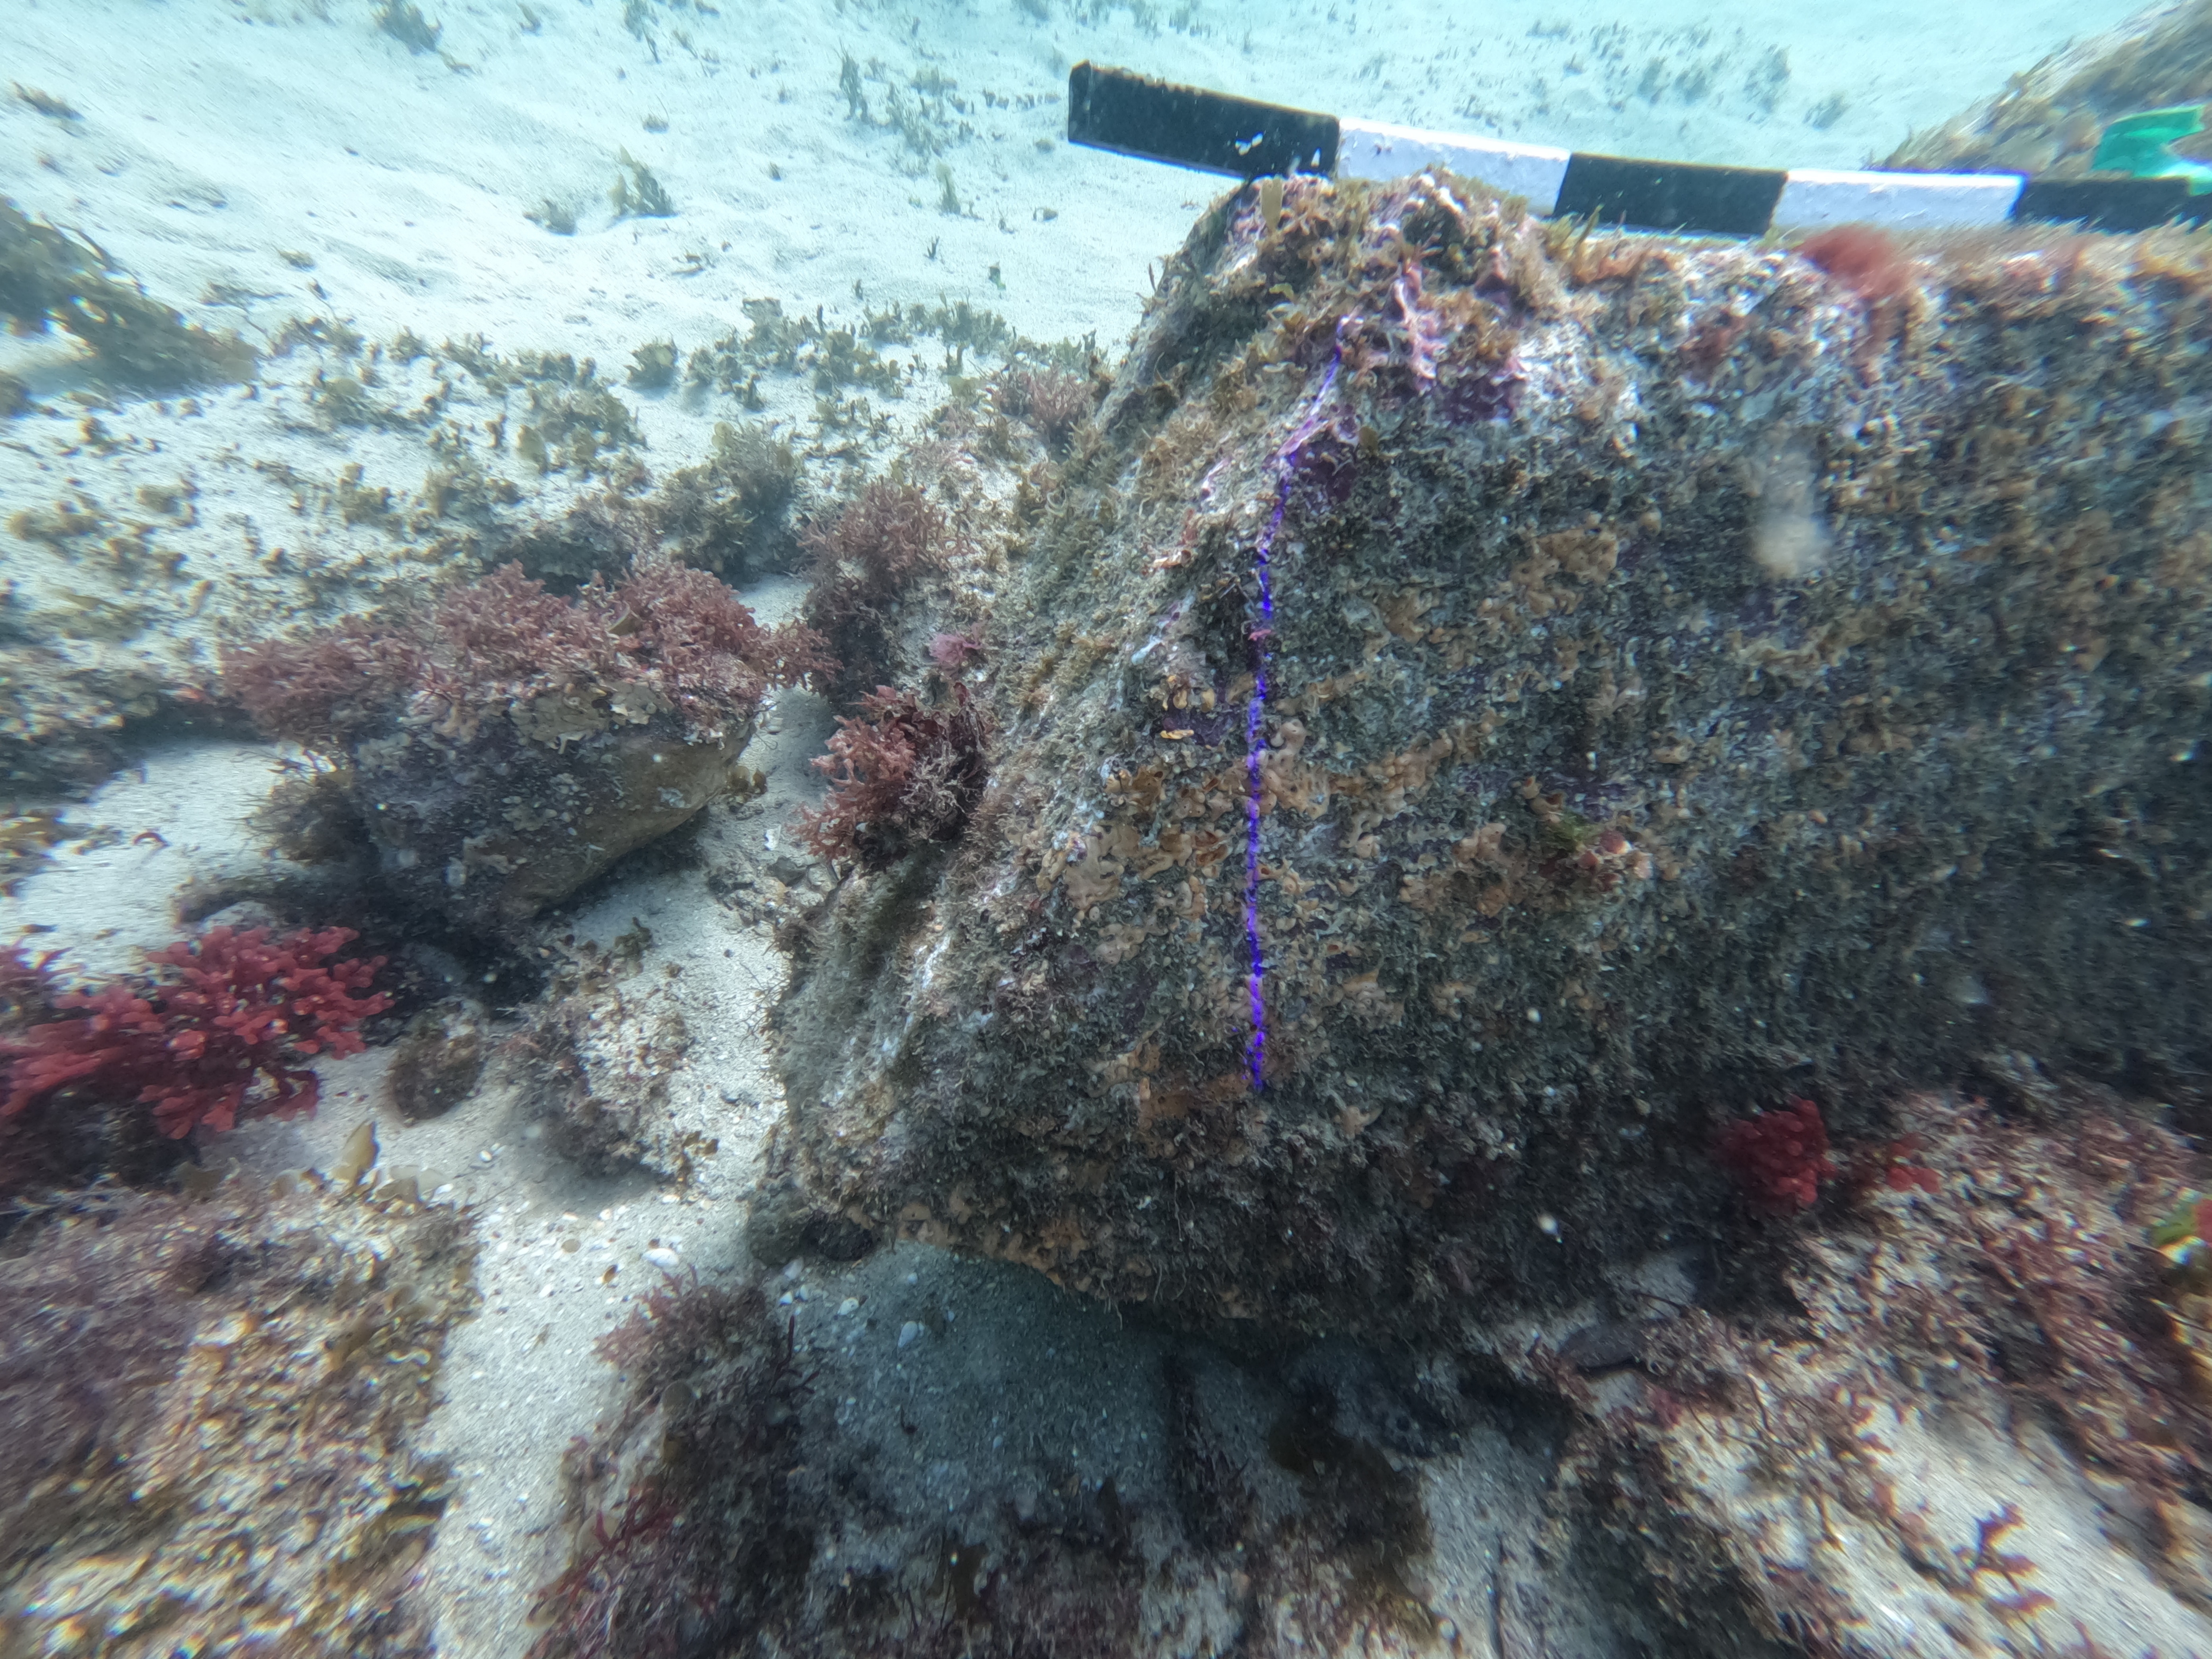

Supplement: Supplementary file 824 [file G0713891.pdf › Ocean2/G0713891.pdf]

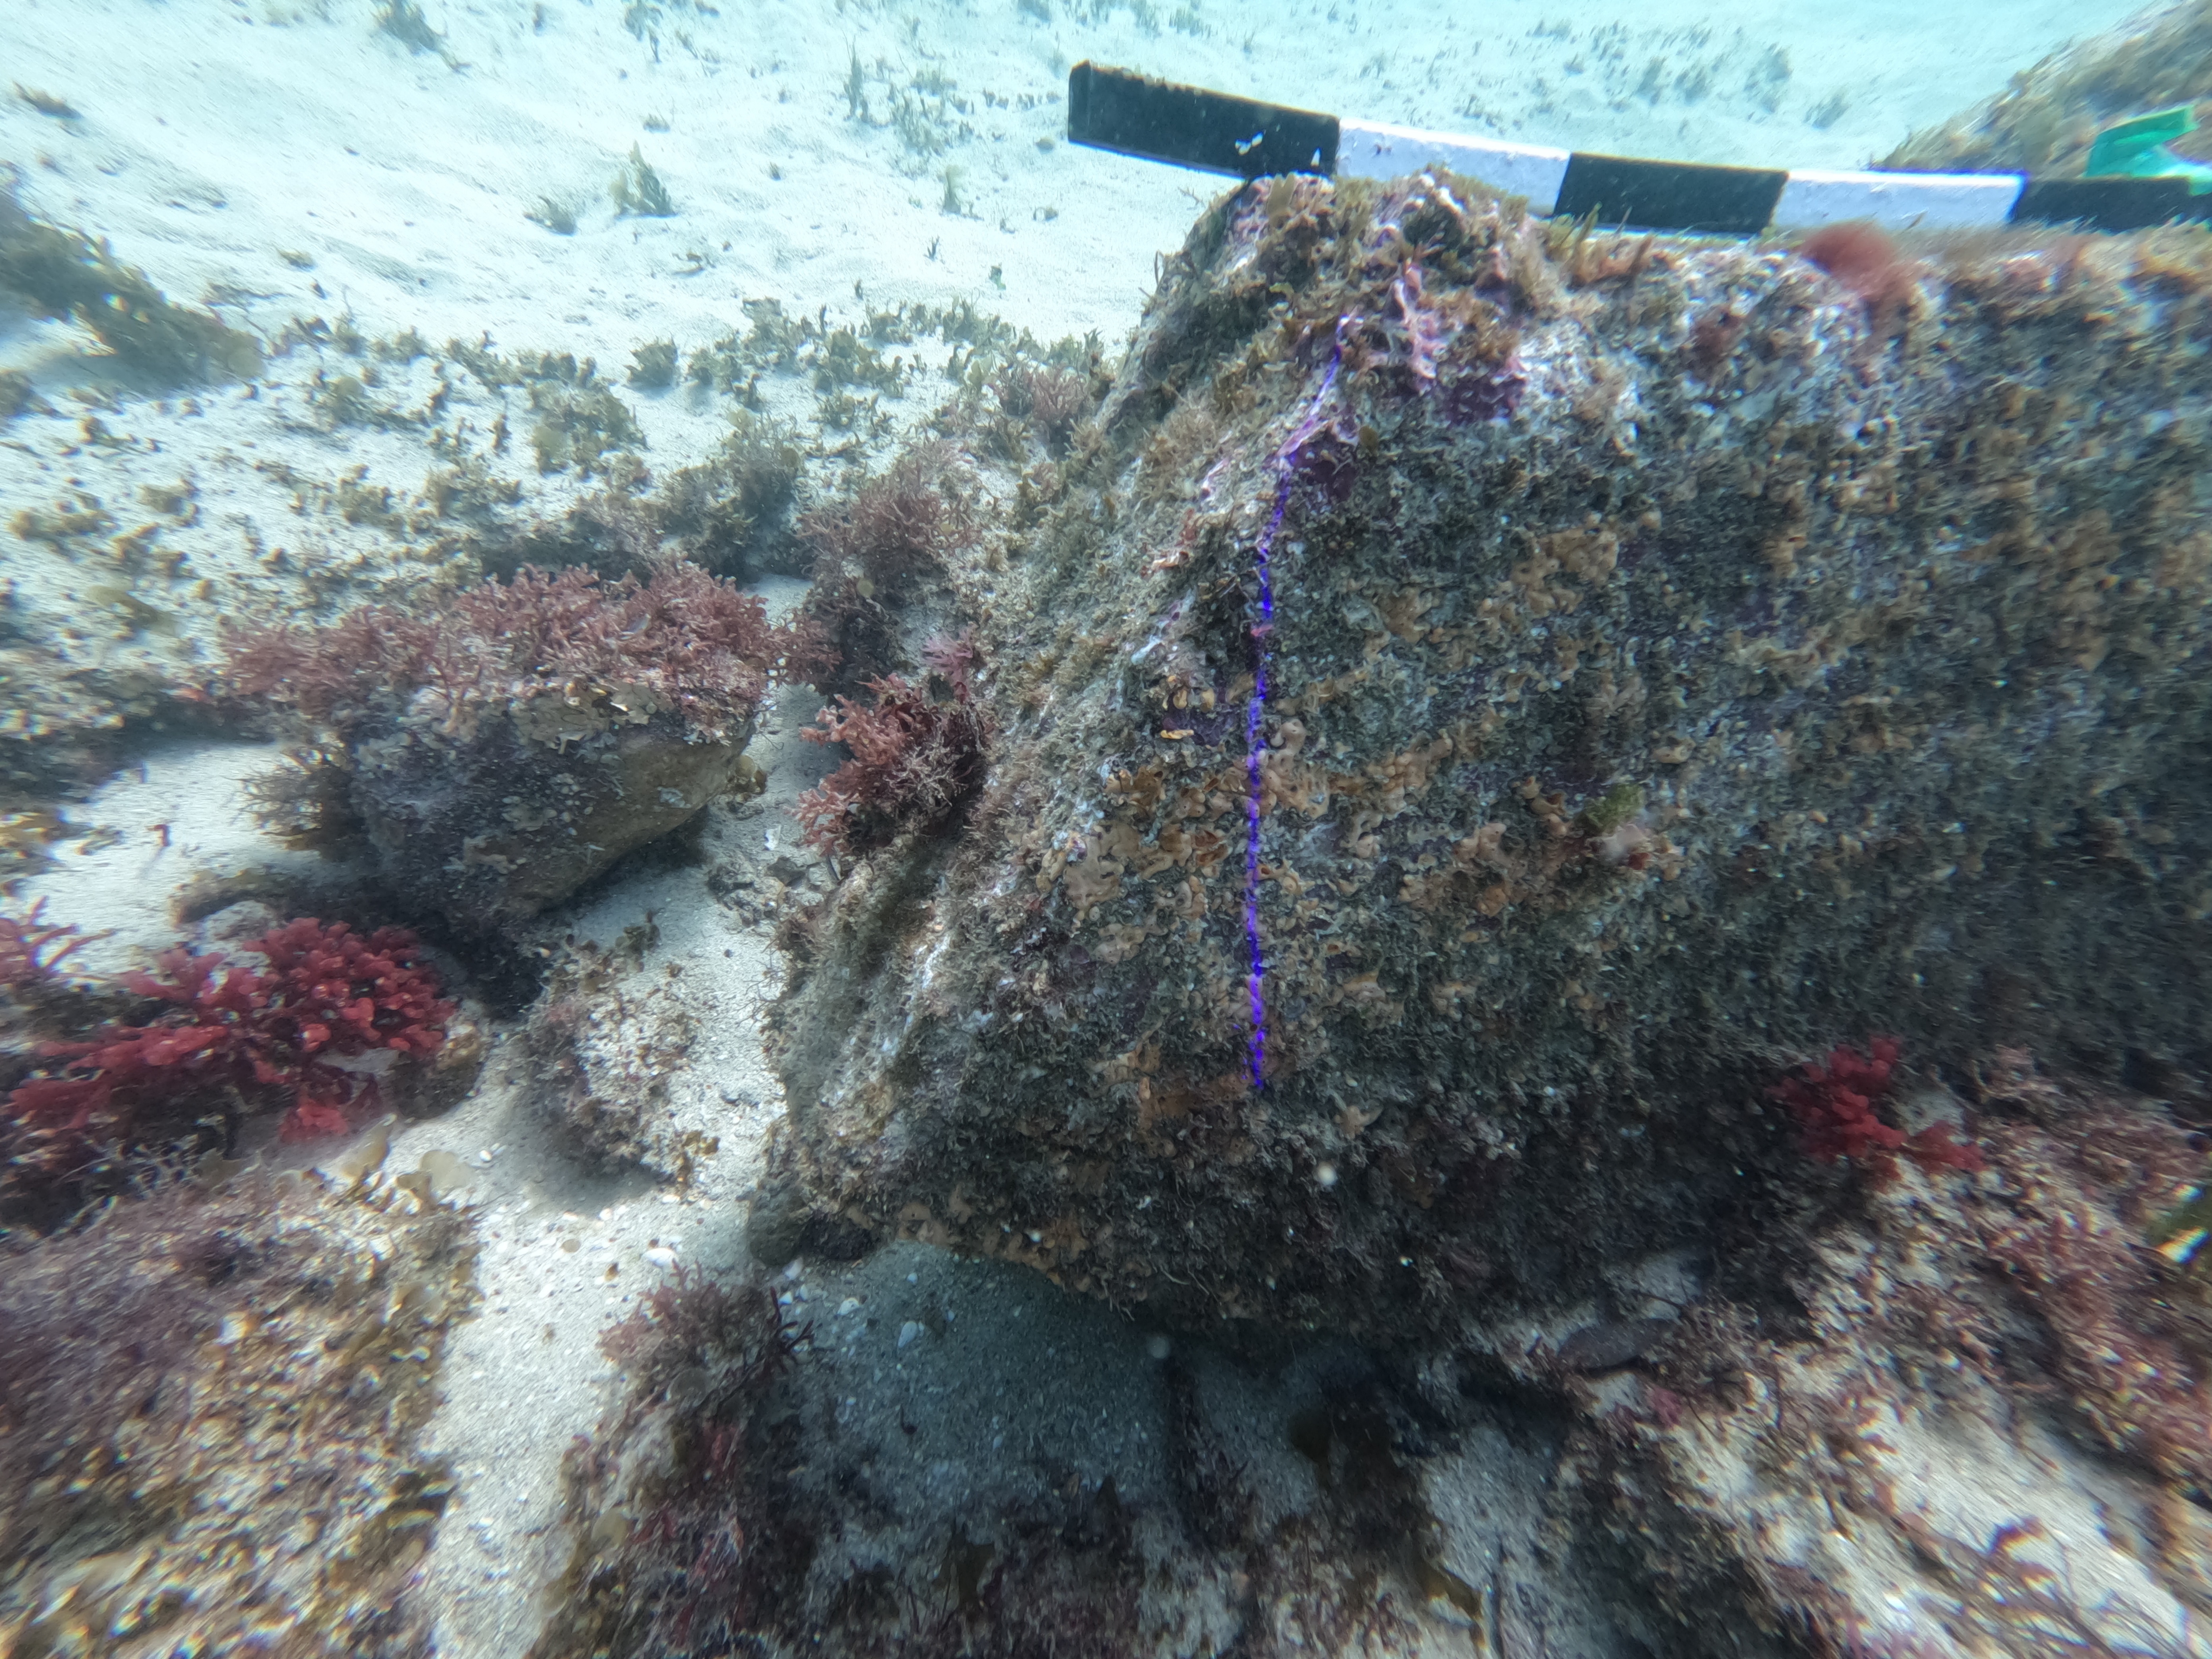

Supplement: Supplementary file 825 [file G0713892.pdf › Ocean2/G0713892.pdf]

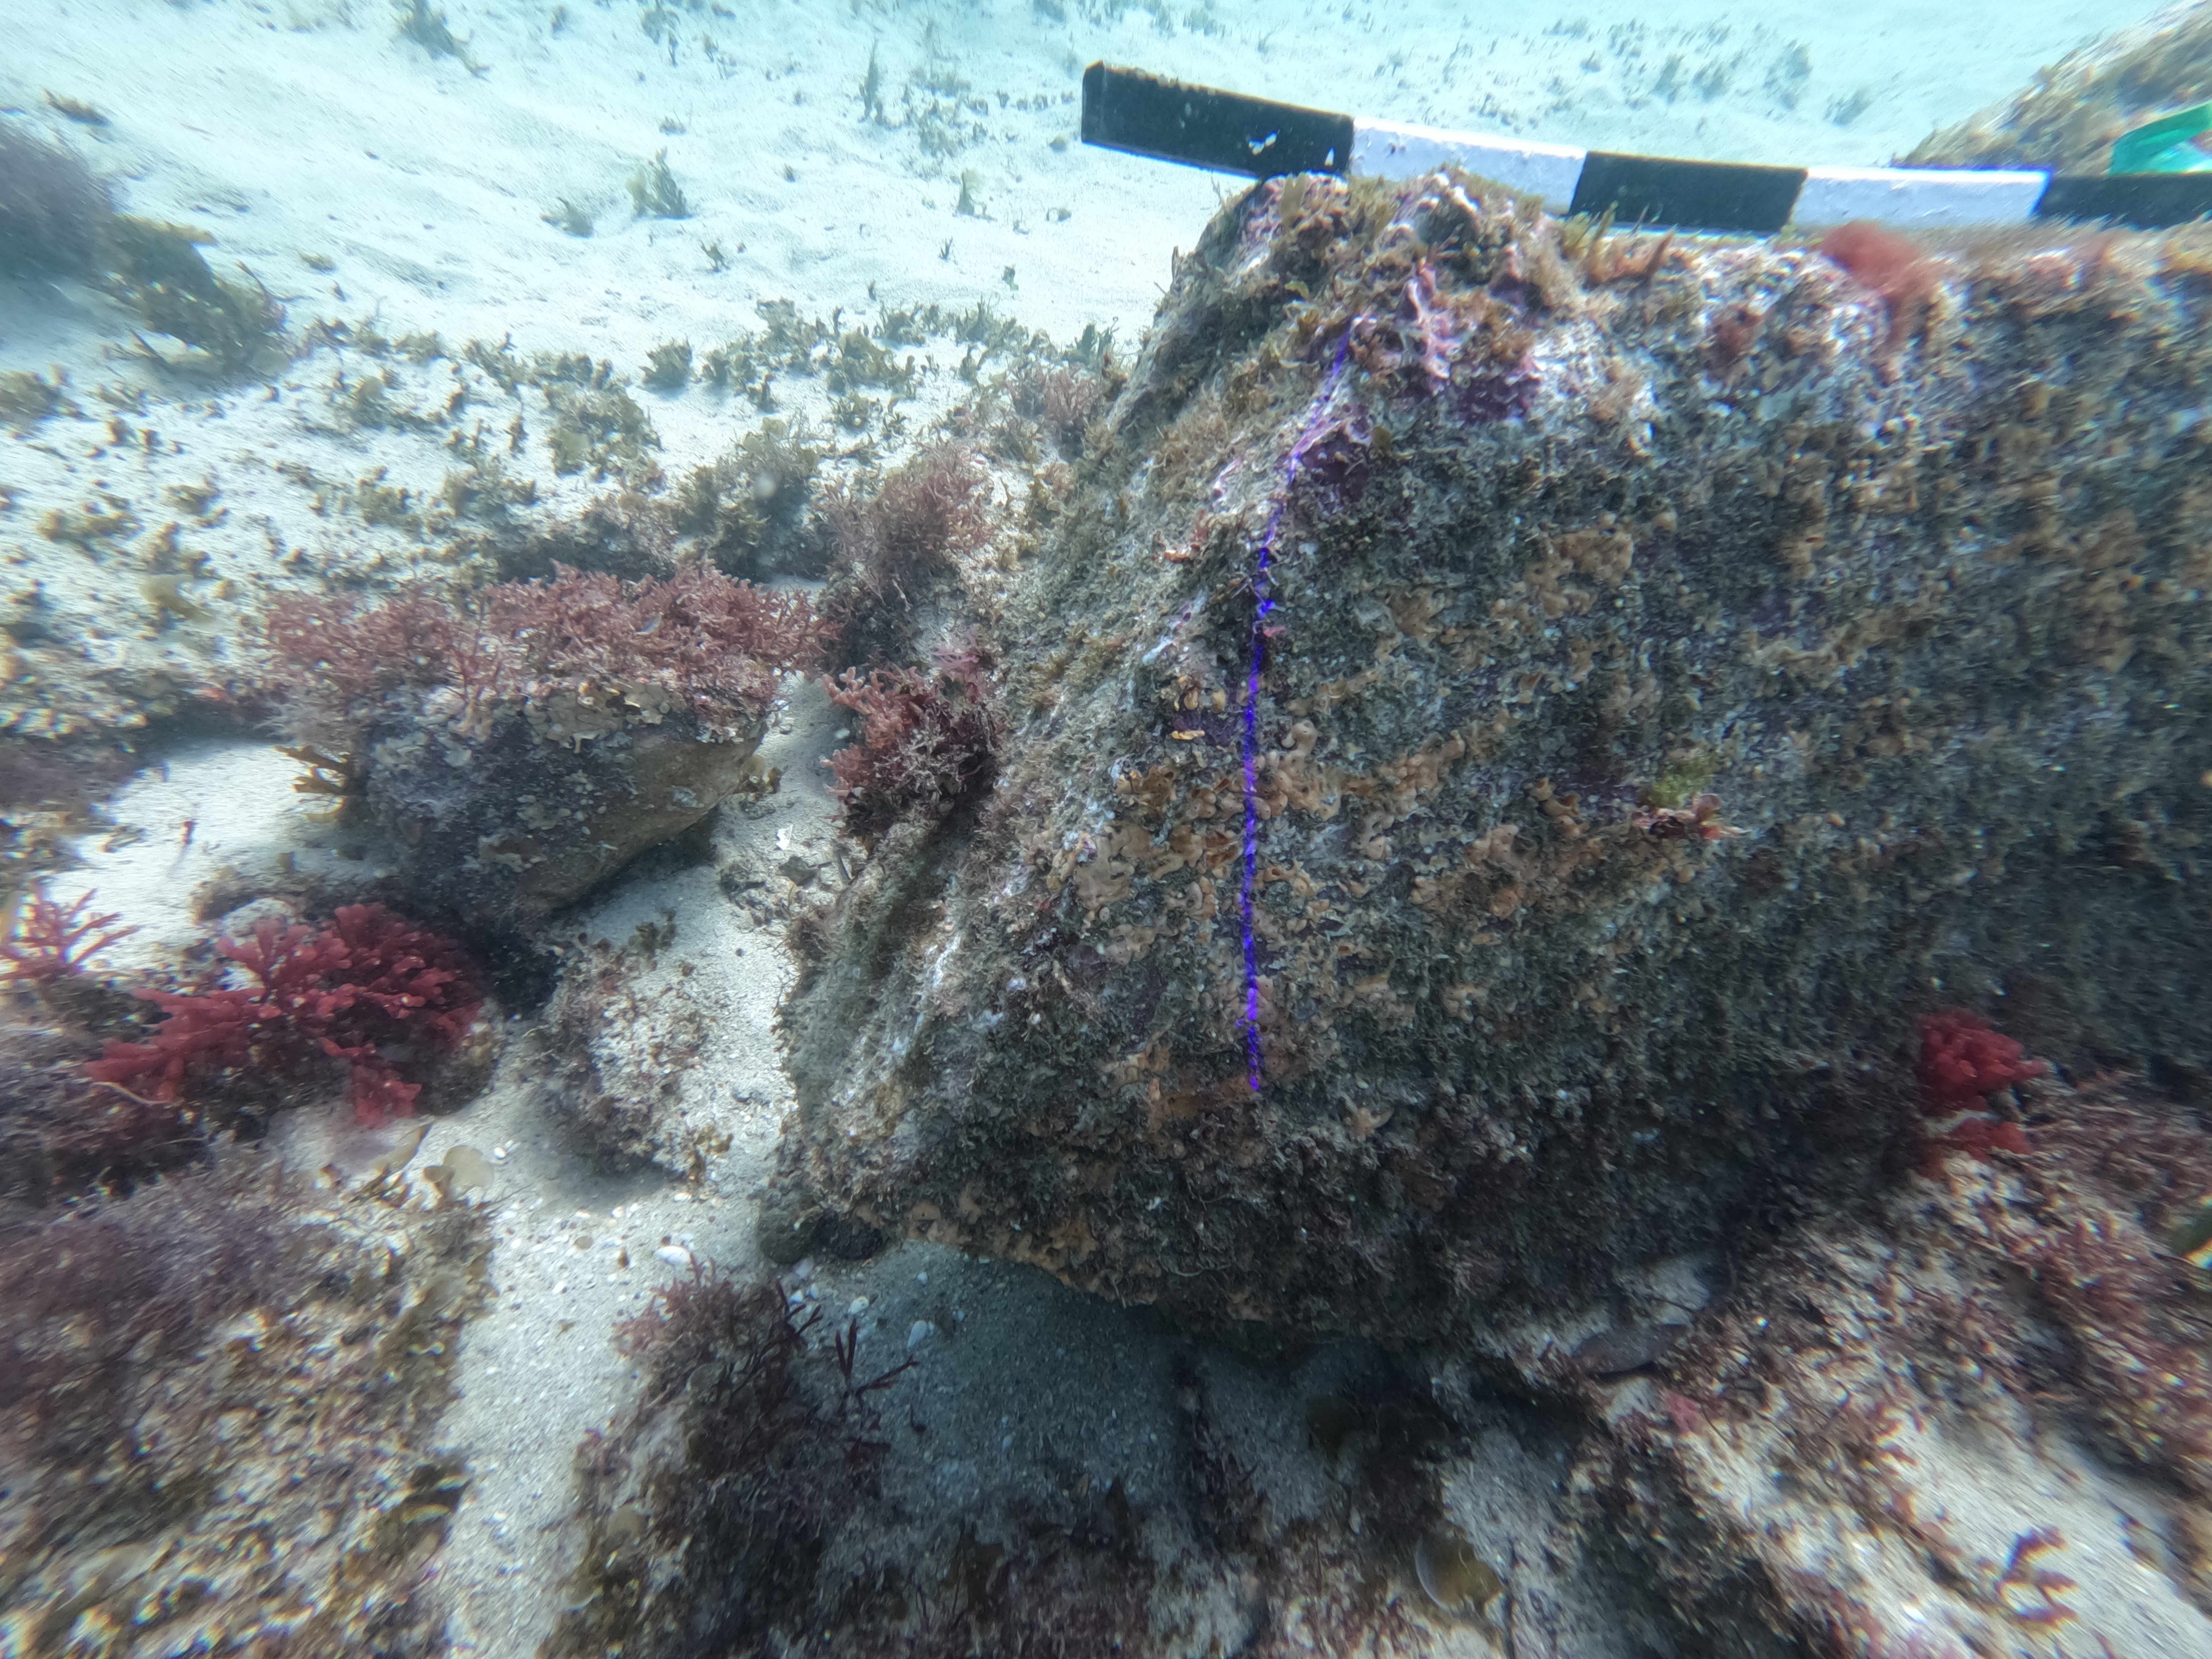

Supplement: Supplementary file 826 [file G0713893.pdf › Ocean2/G0713893.pdf]

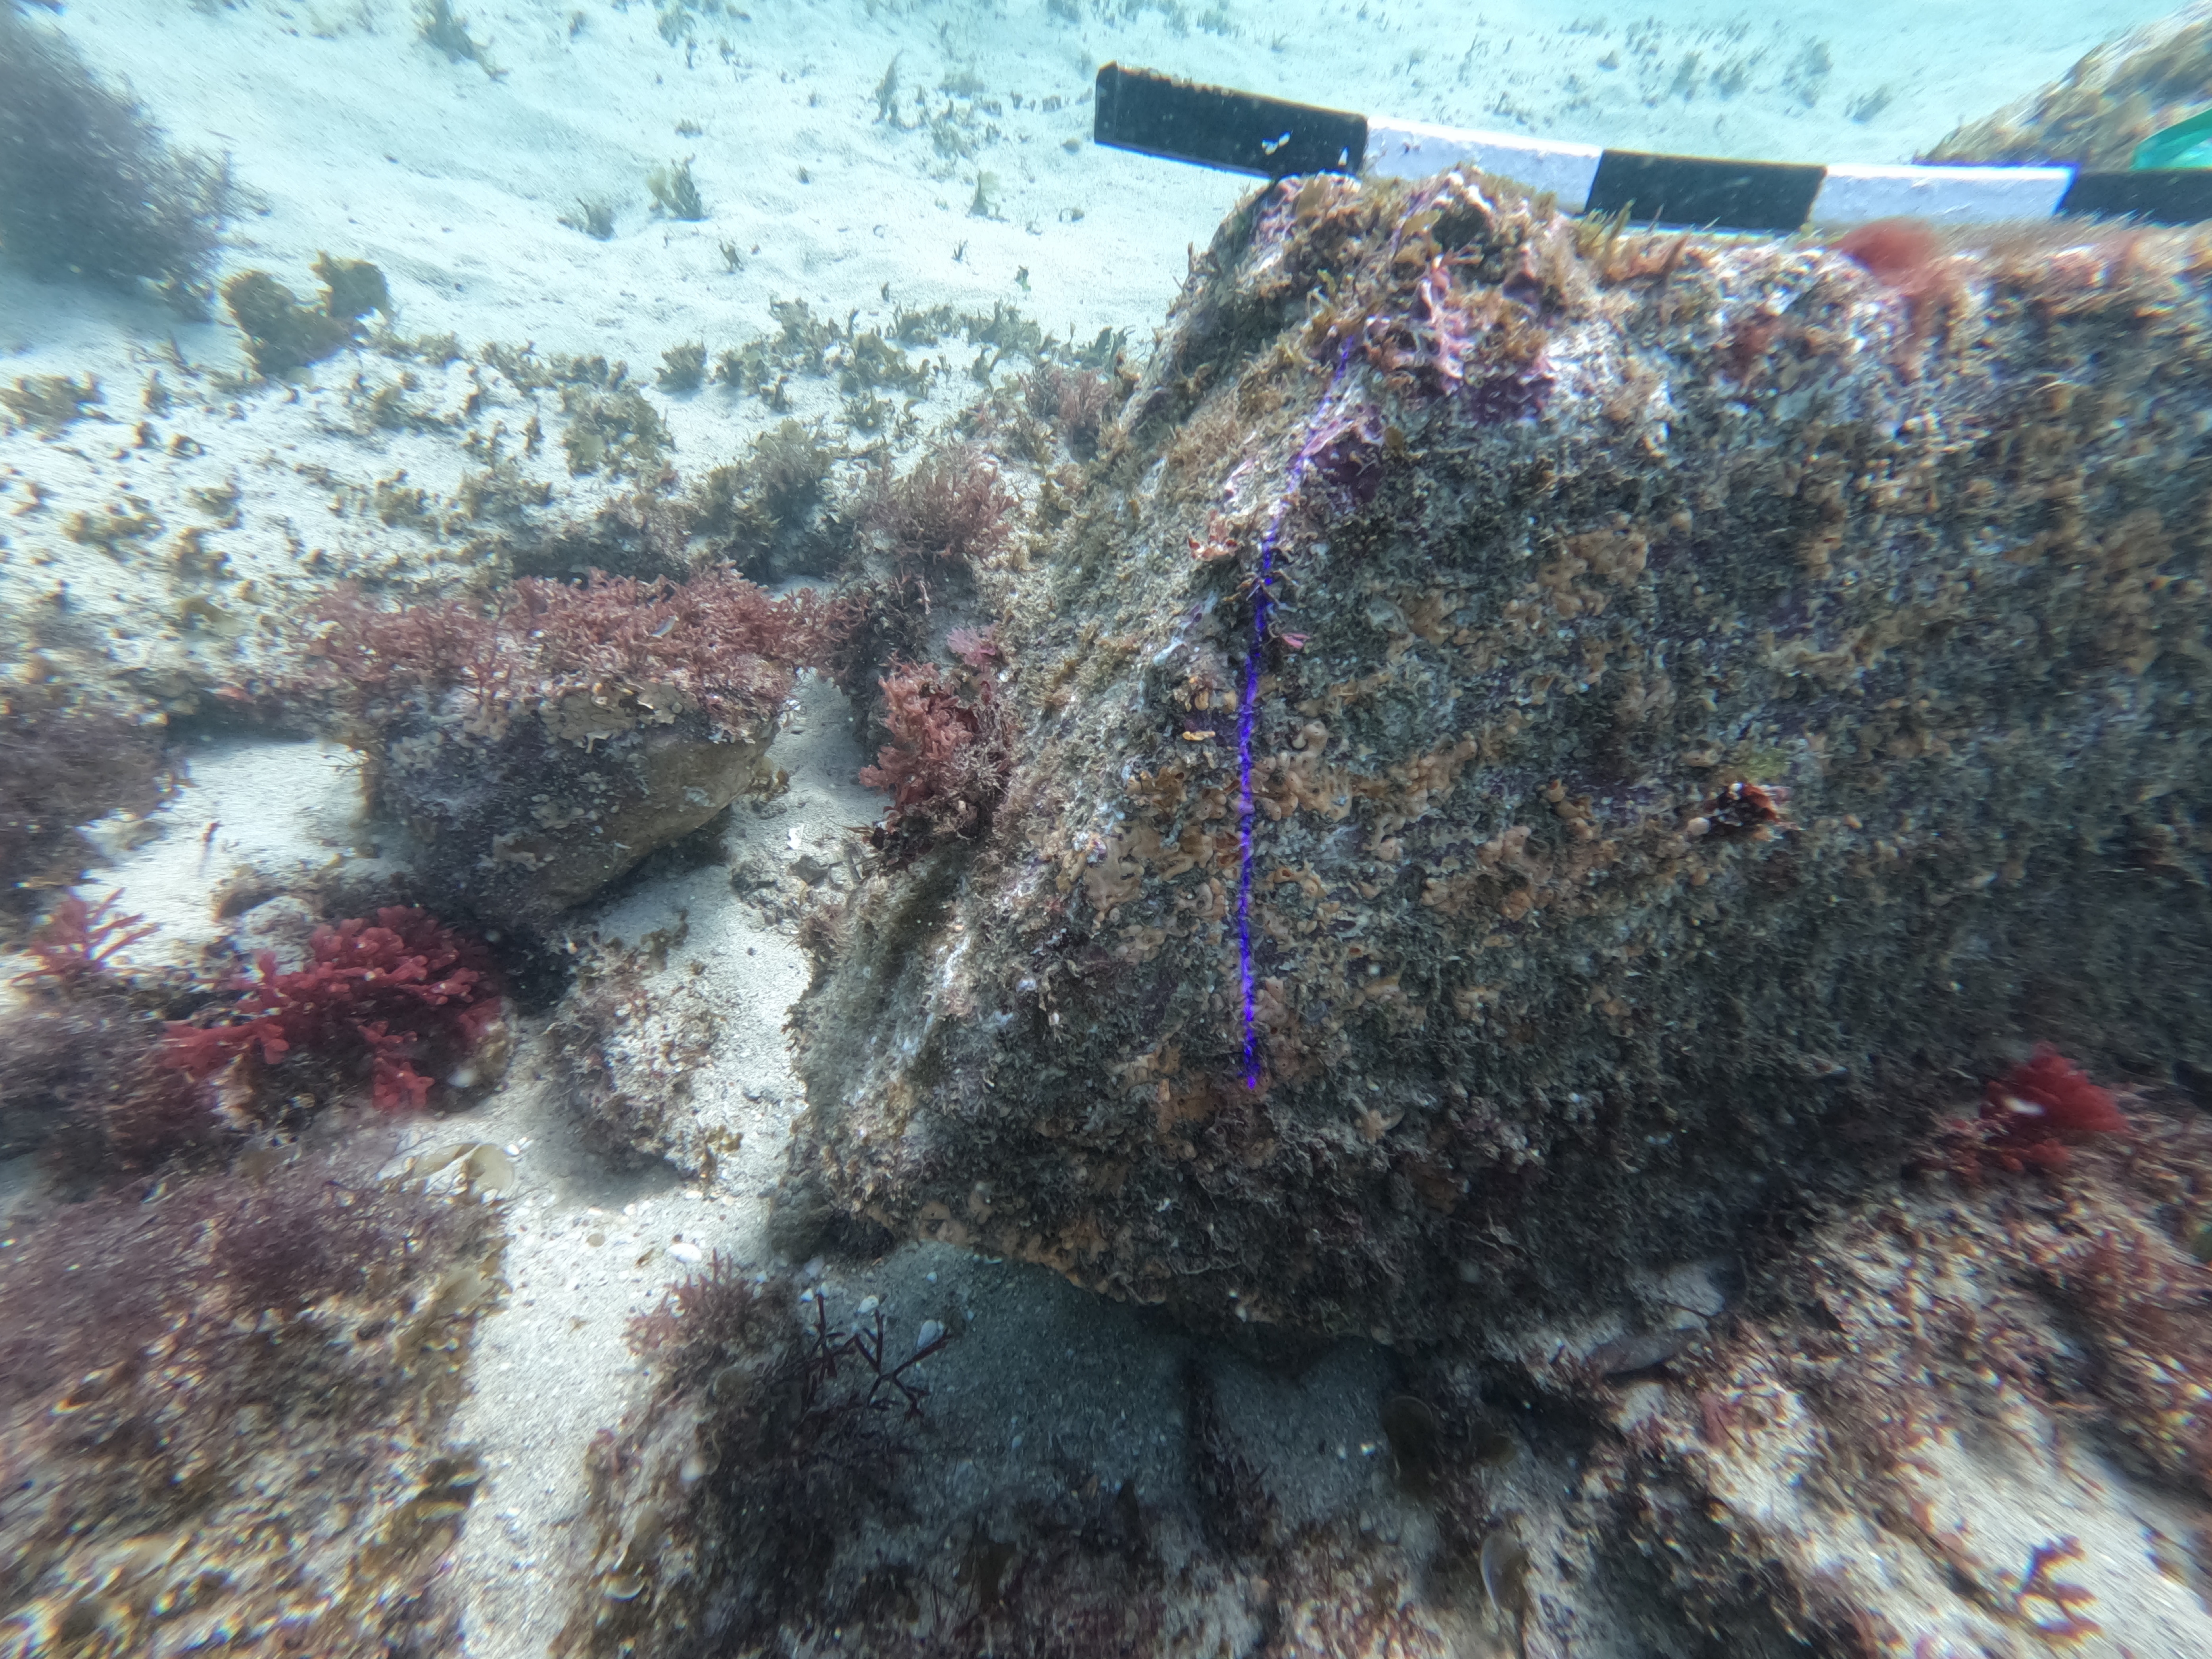

Supplement: Supplementary file 827 [file G0713894.pdf › Ocean2/G0713894.pdf]

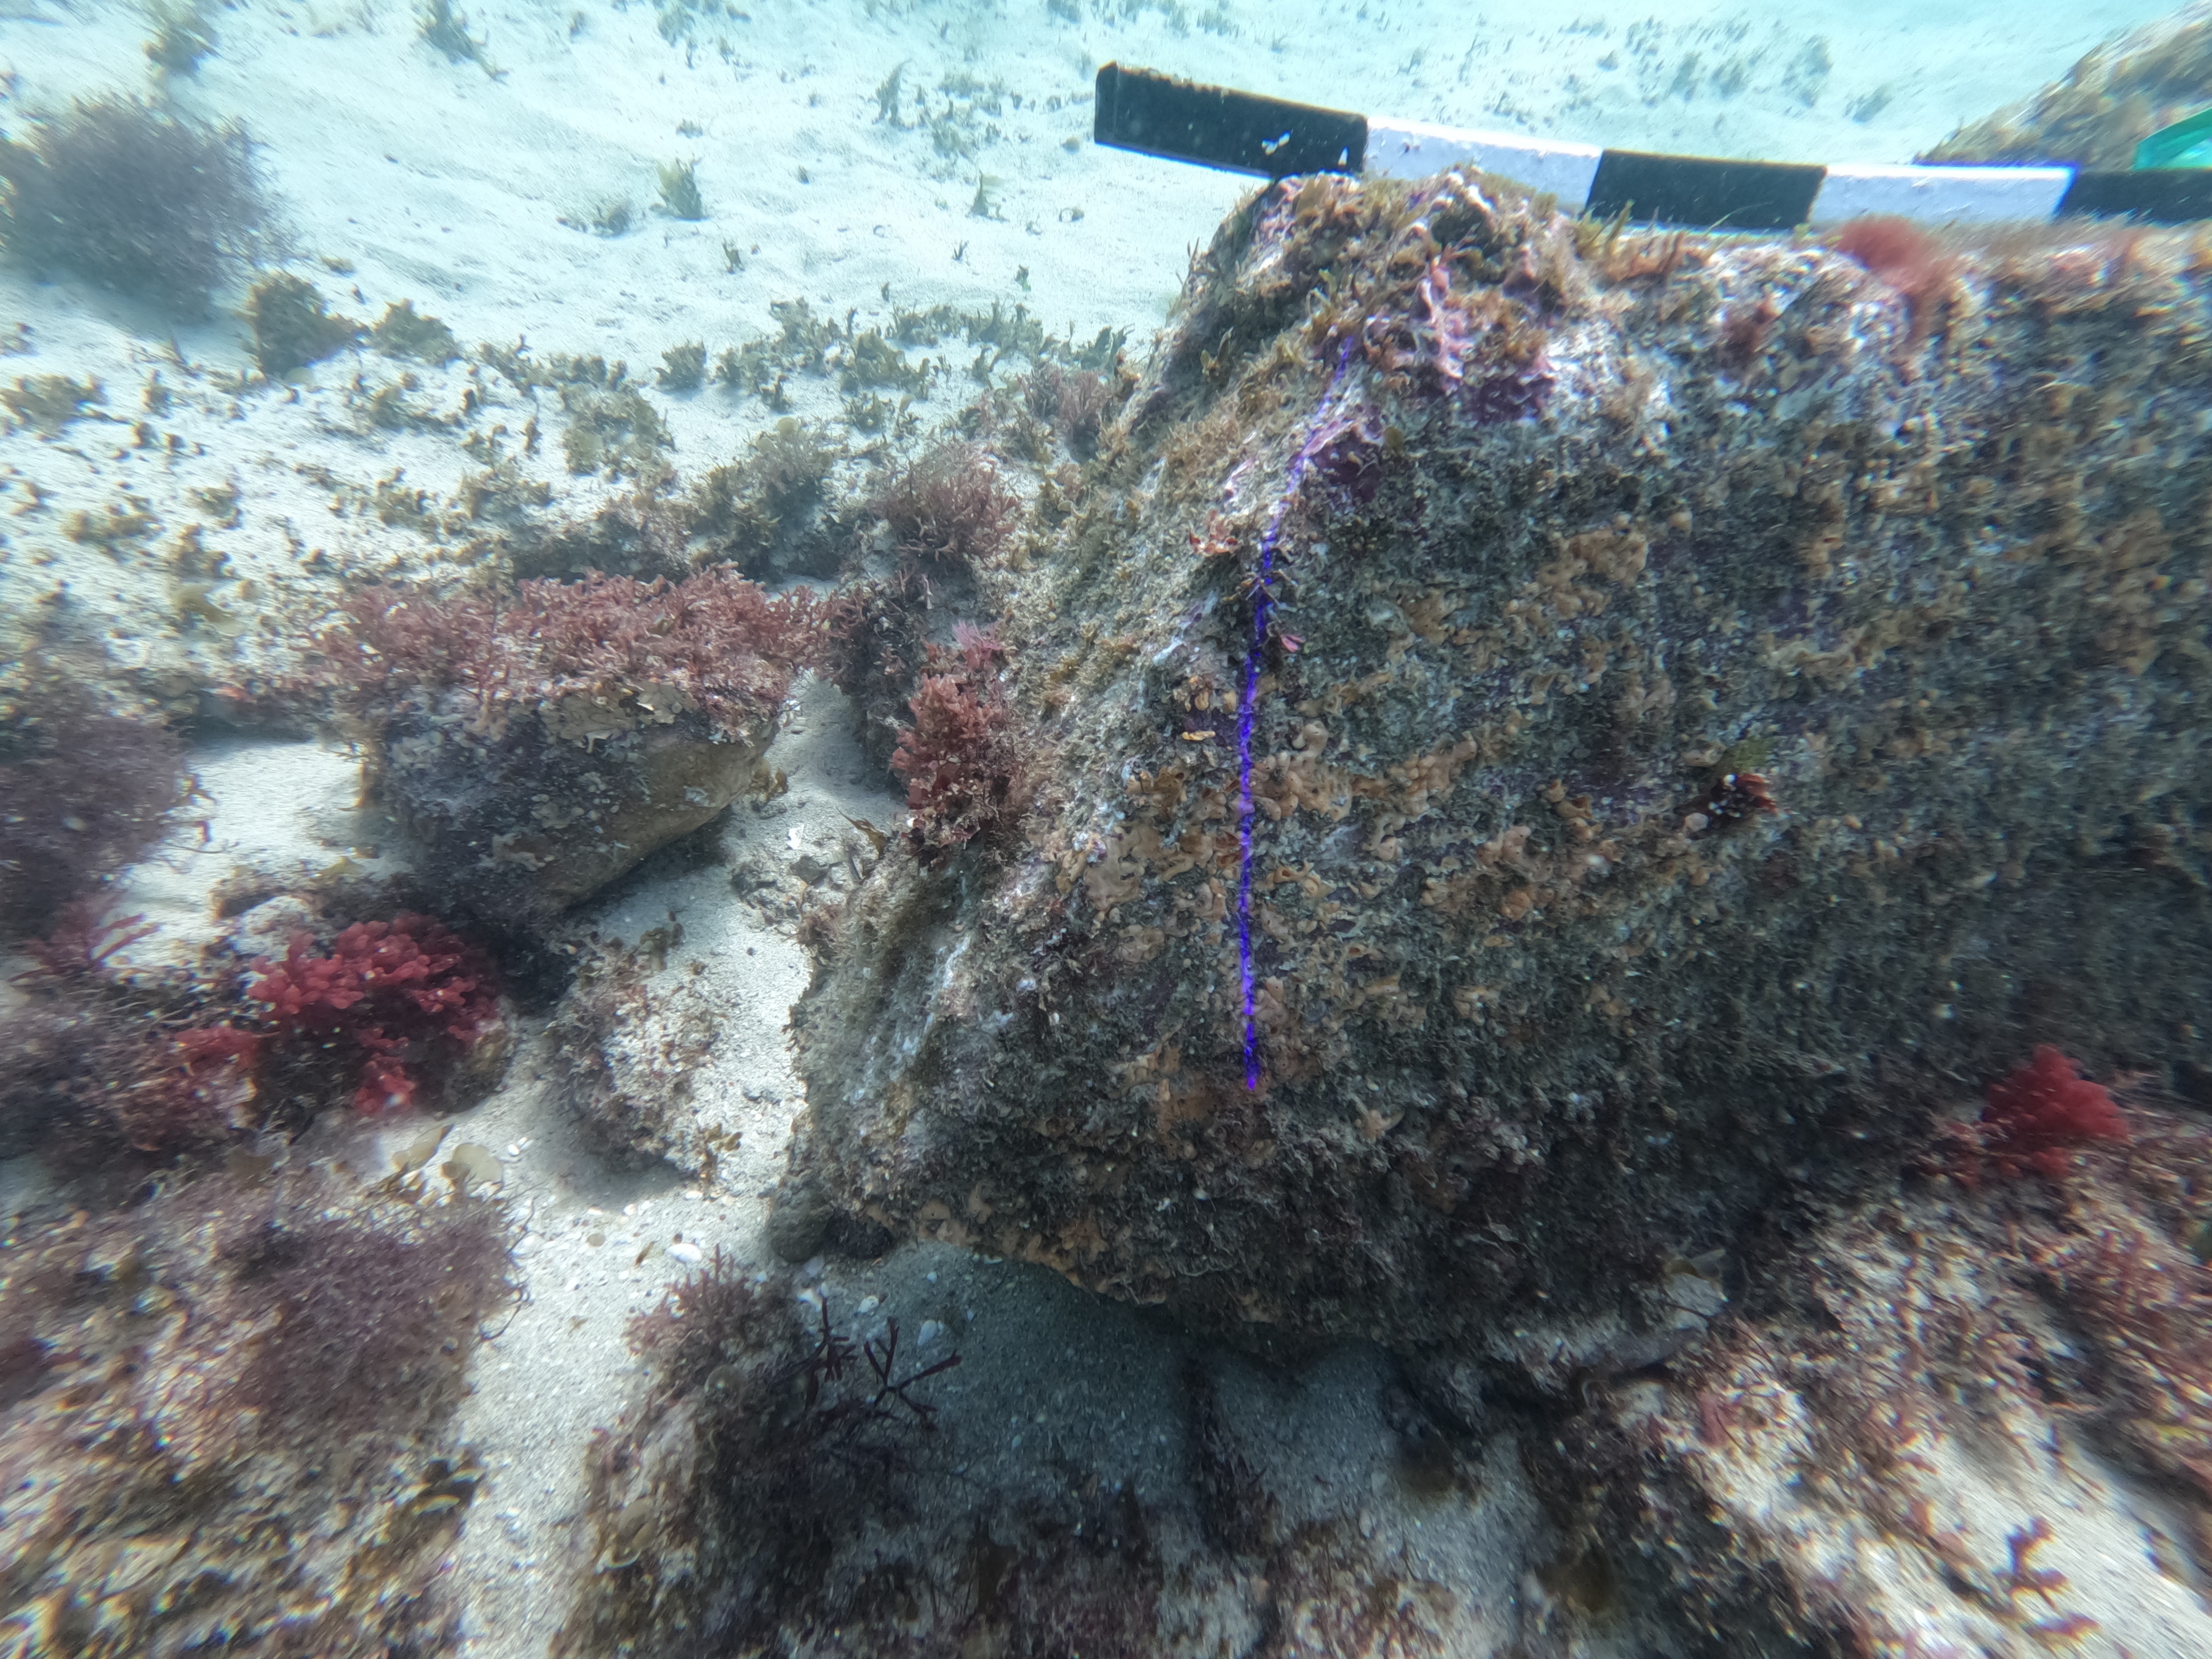

Supplement: Supplementary file 828 [file G0713895.pdf › Ocean2/G0713895.pdf]

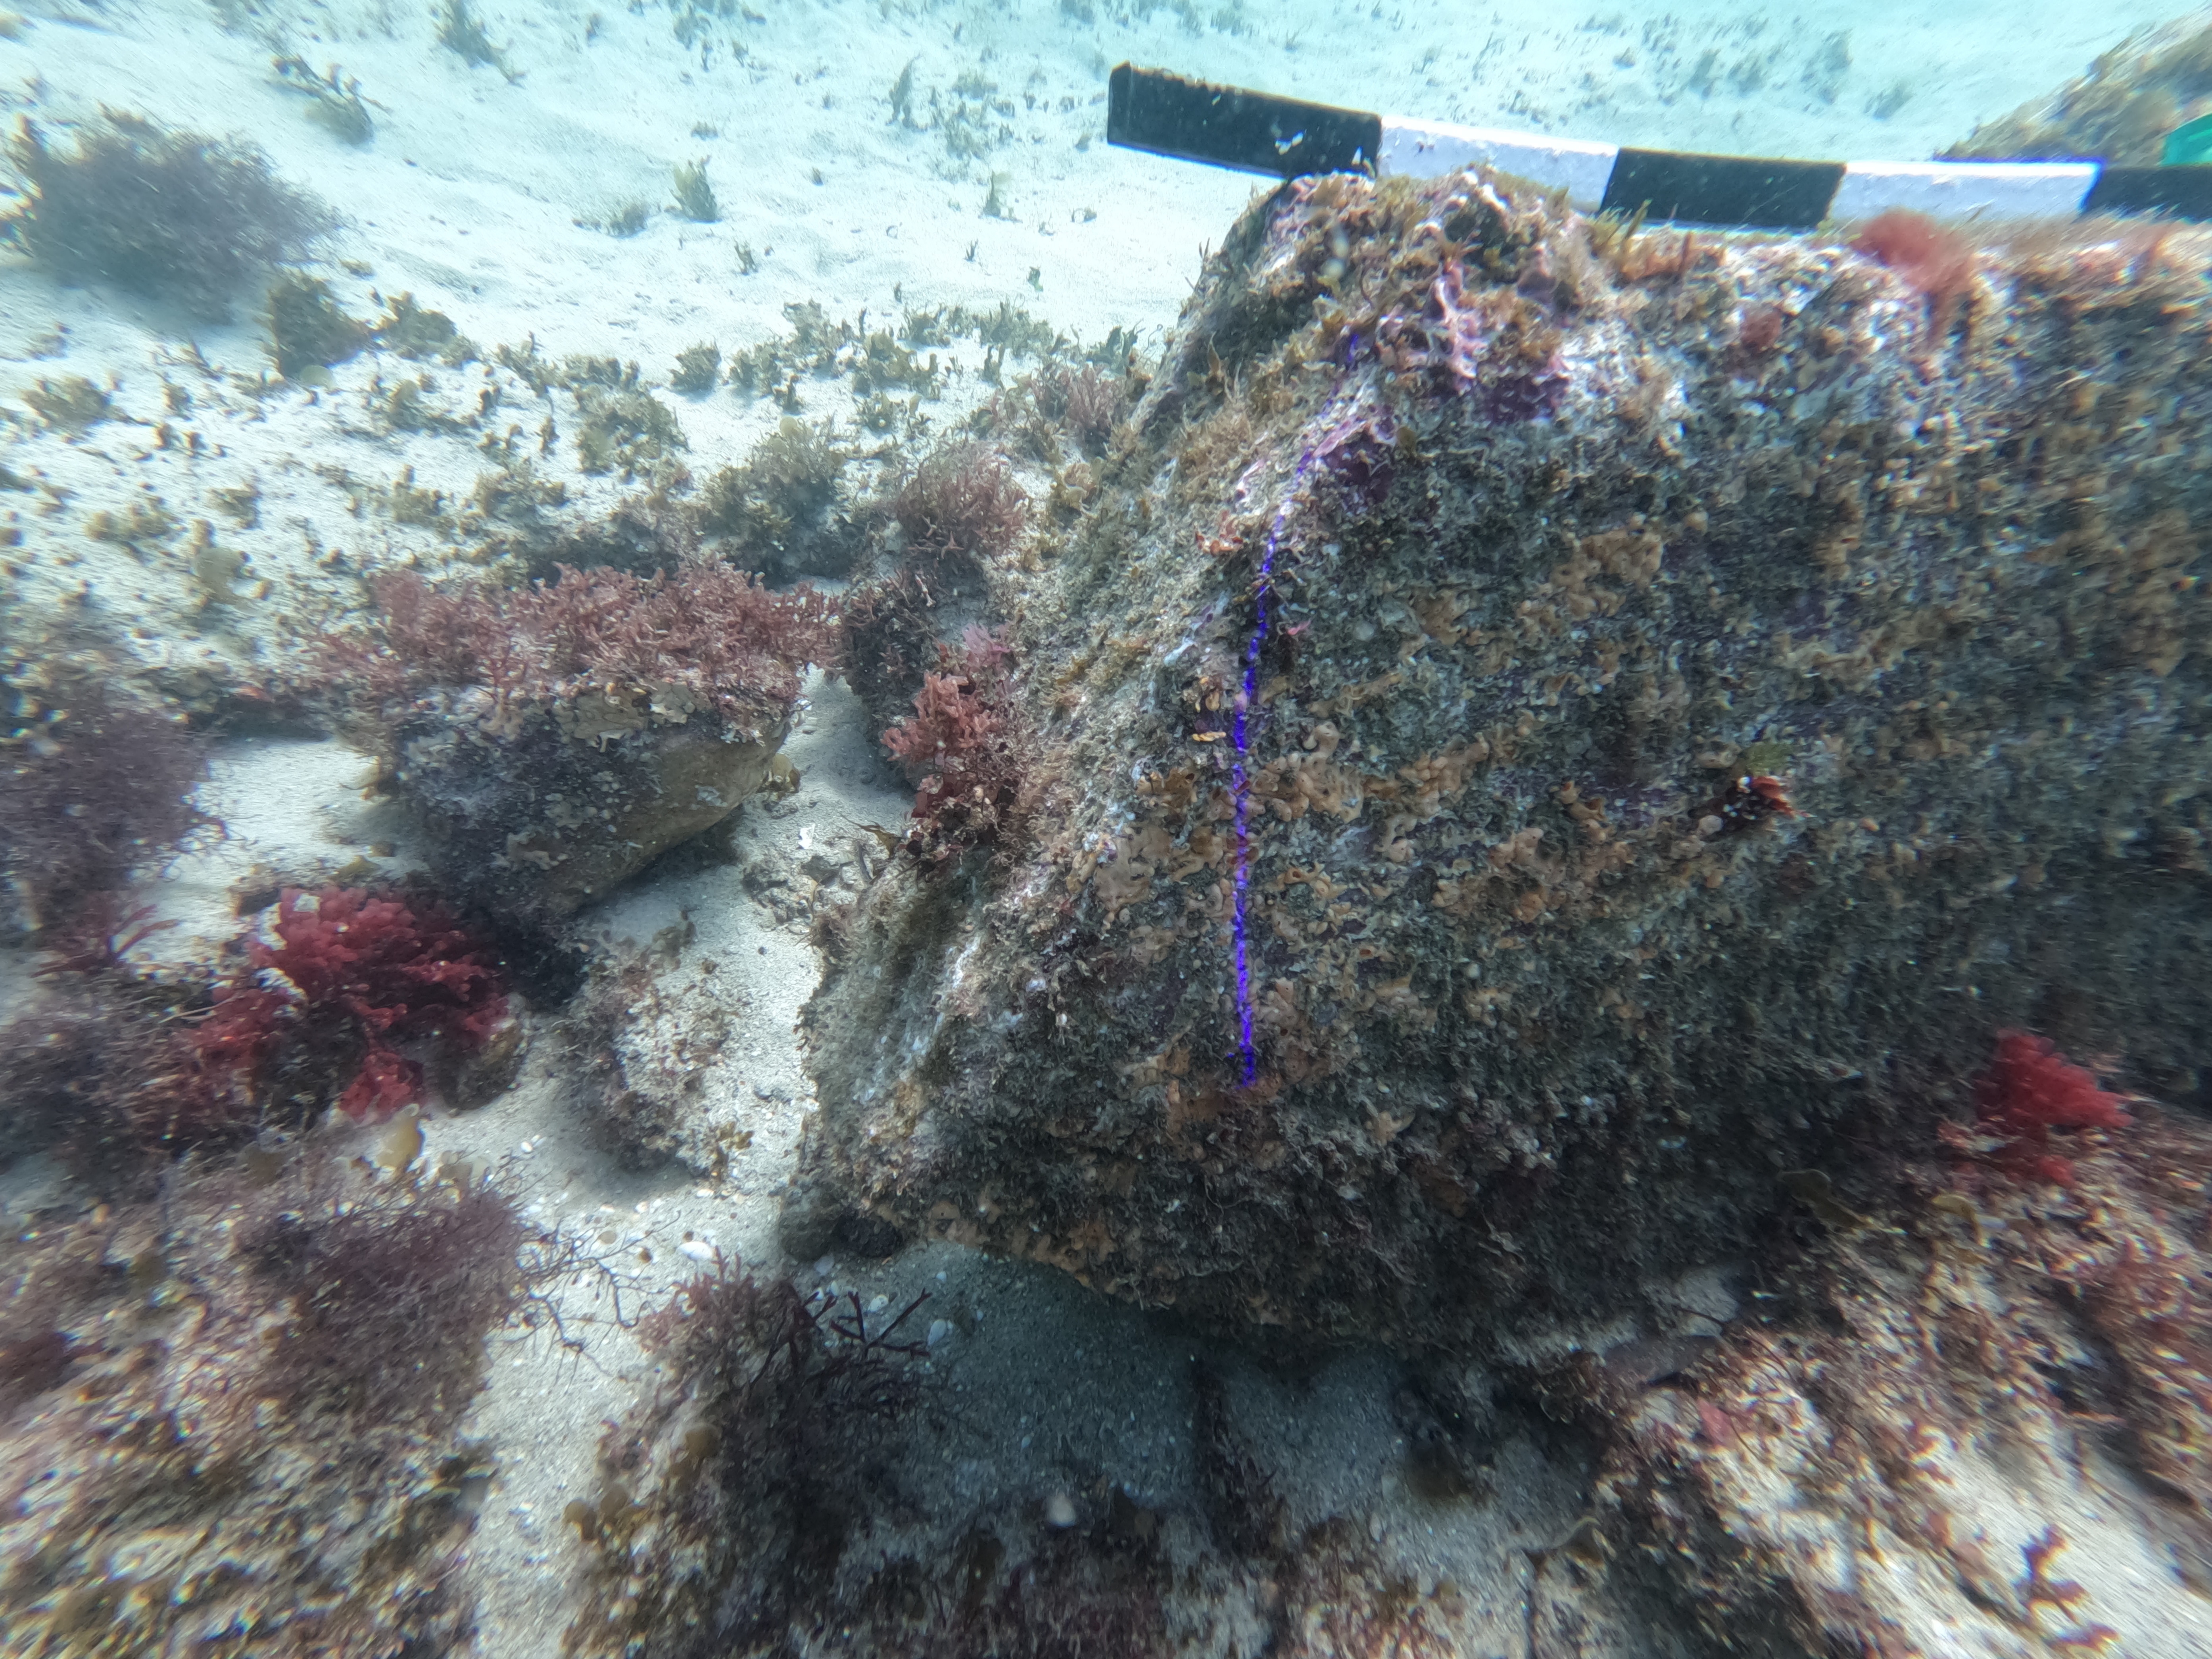

Supplement: Supplementary file 829 [file G0713896.pdf › Ocean2/G0713896.pdf]

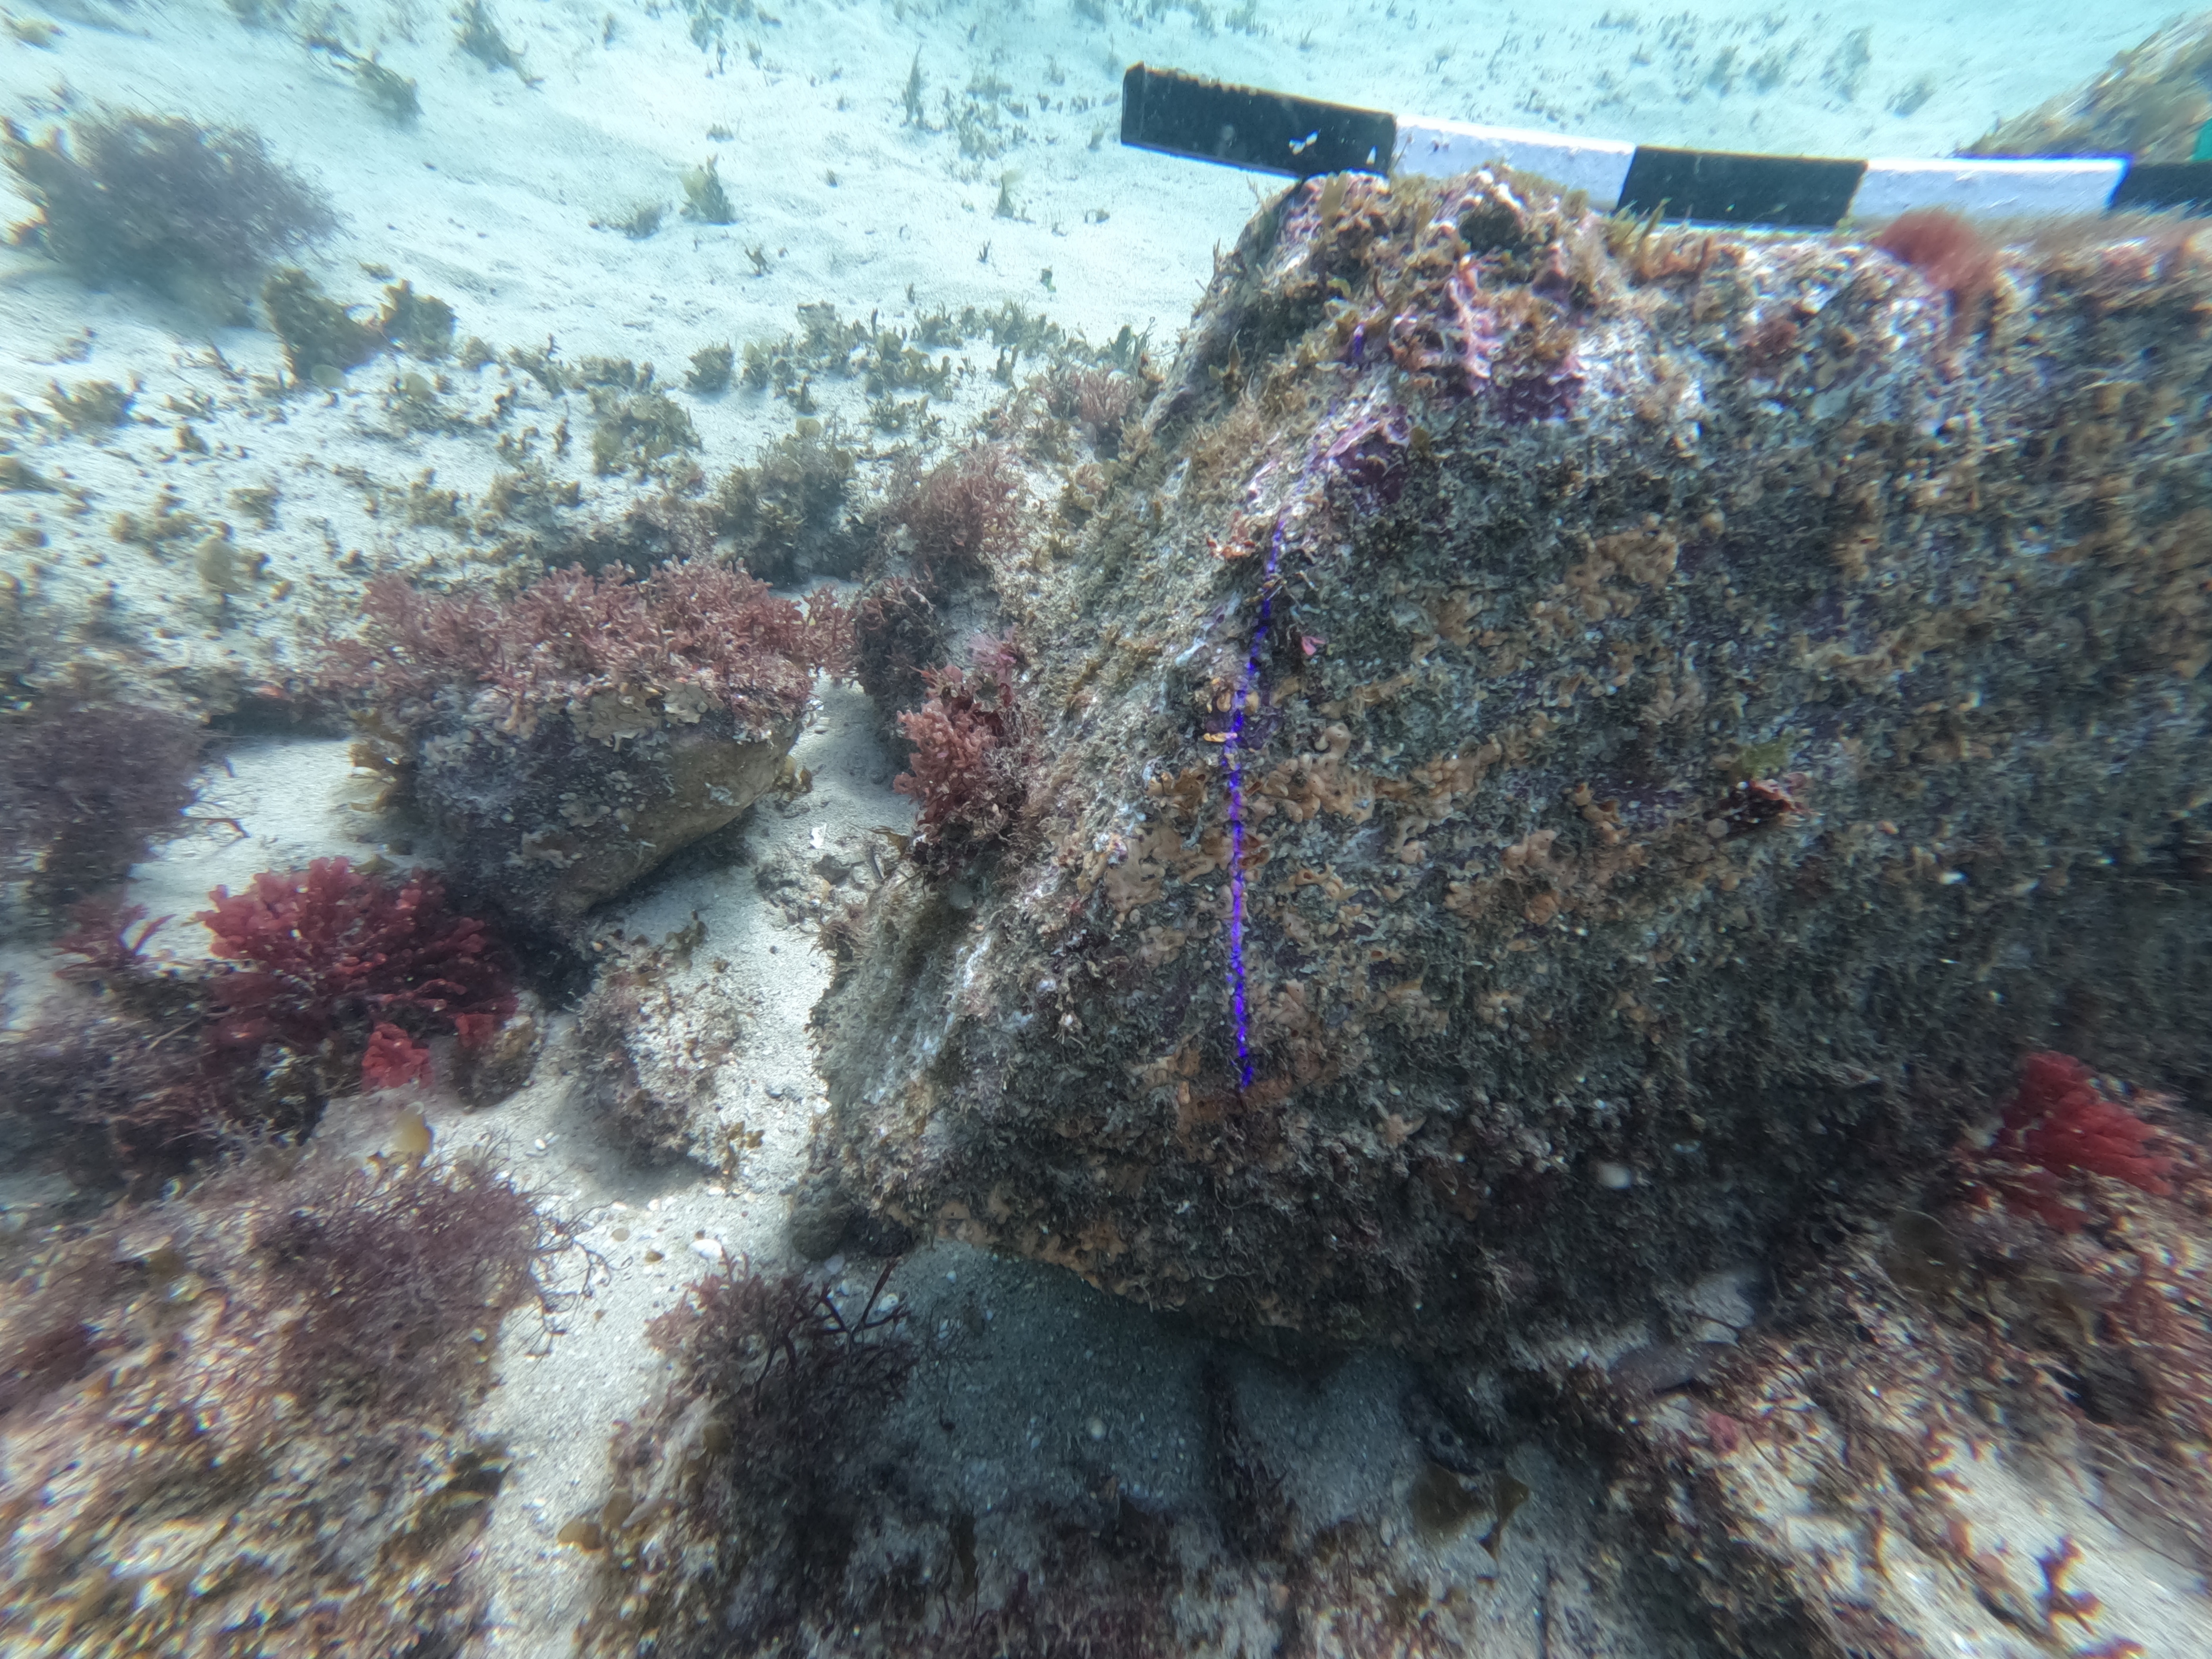

Supplement: Supplementary file 830 [file G0713897.pdf › Ocean2/G0713897.pdf]

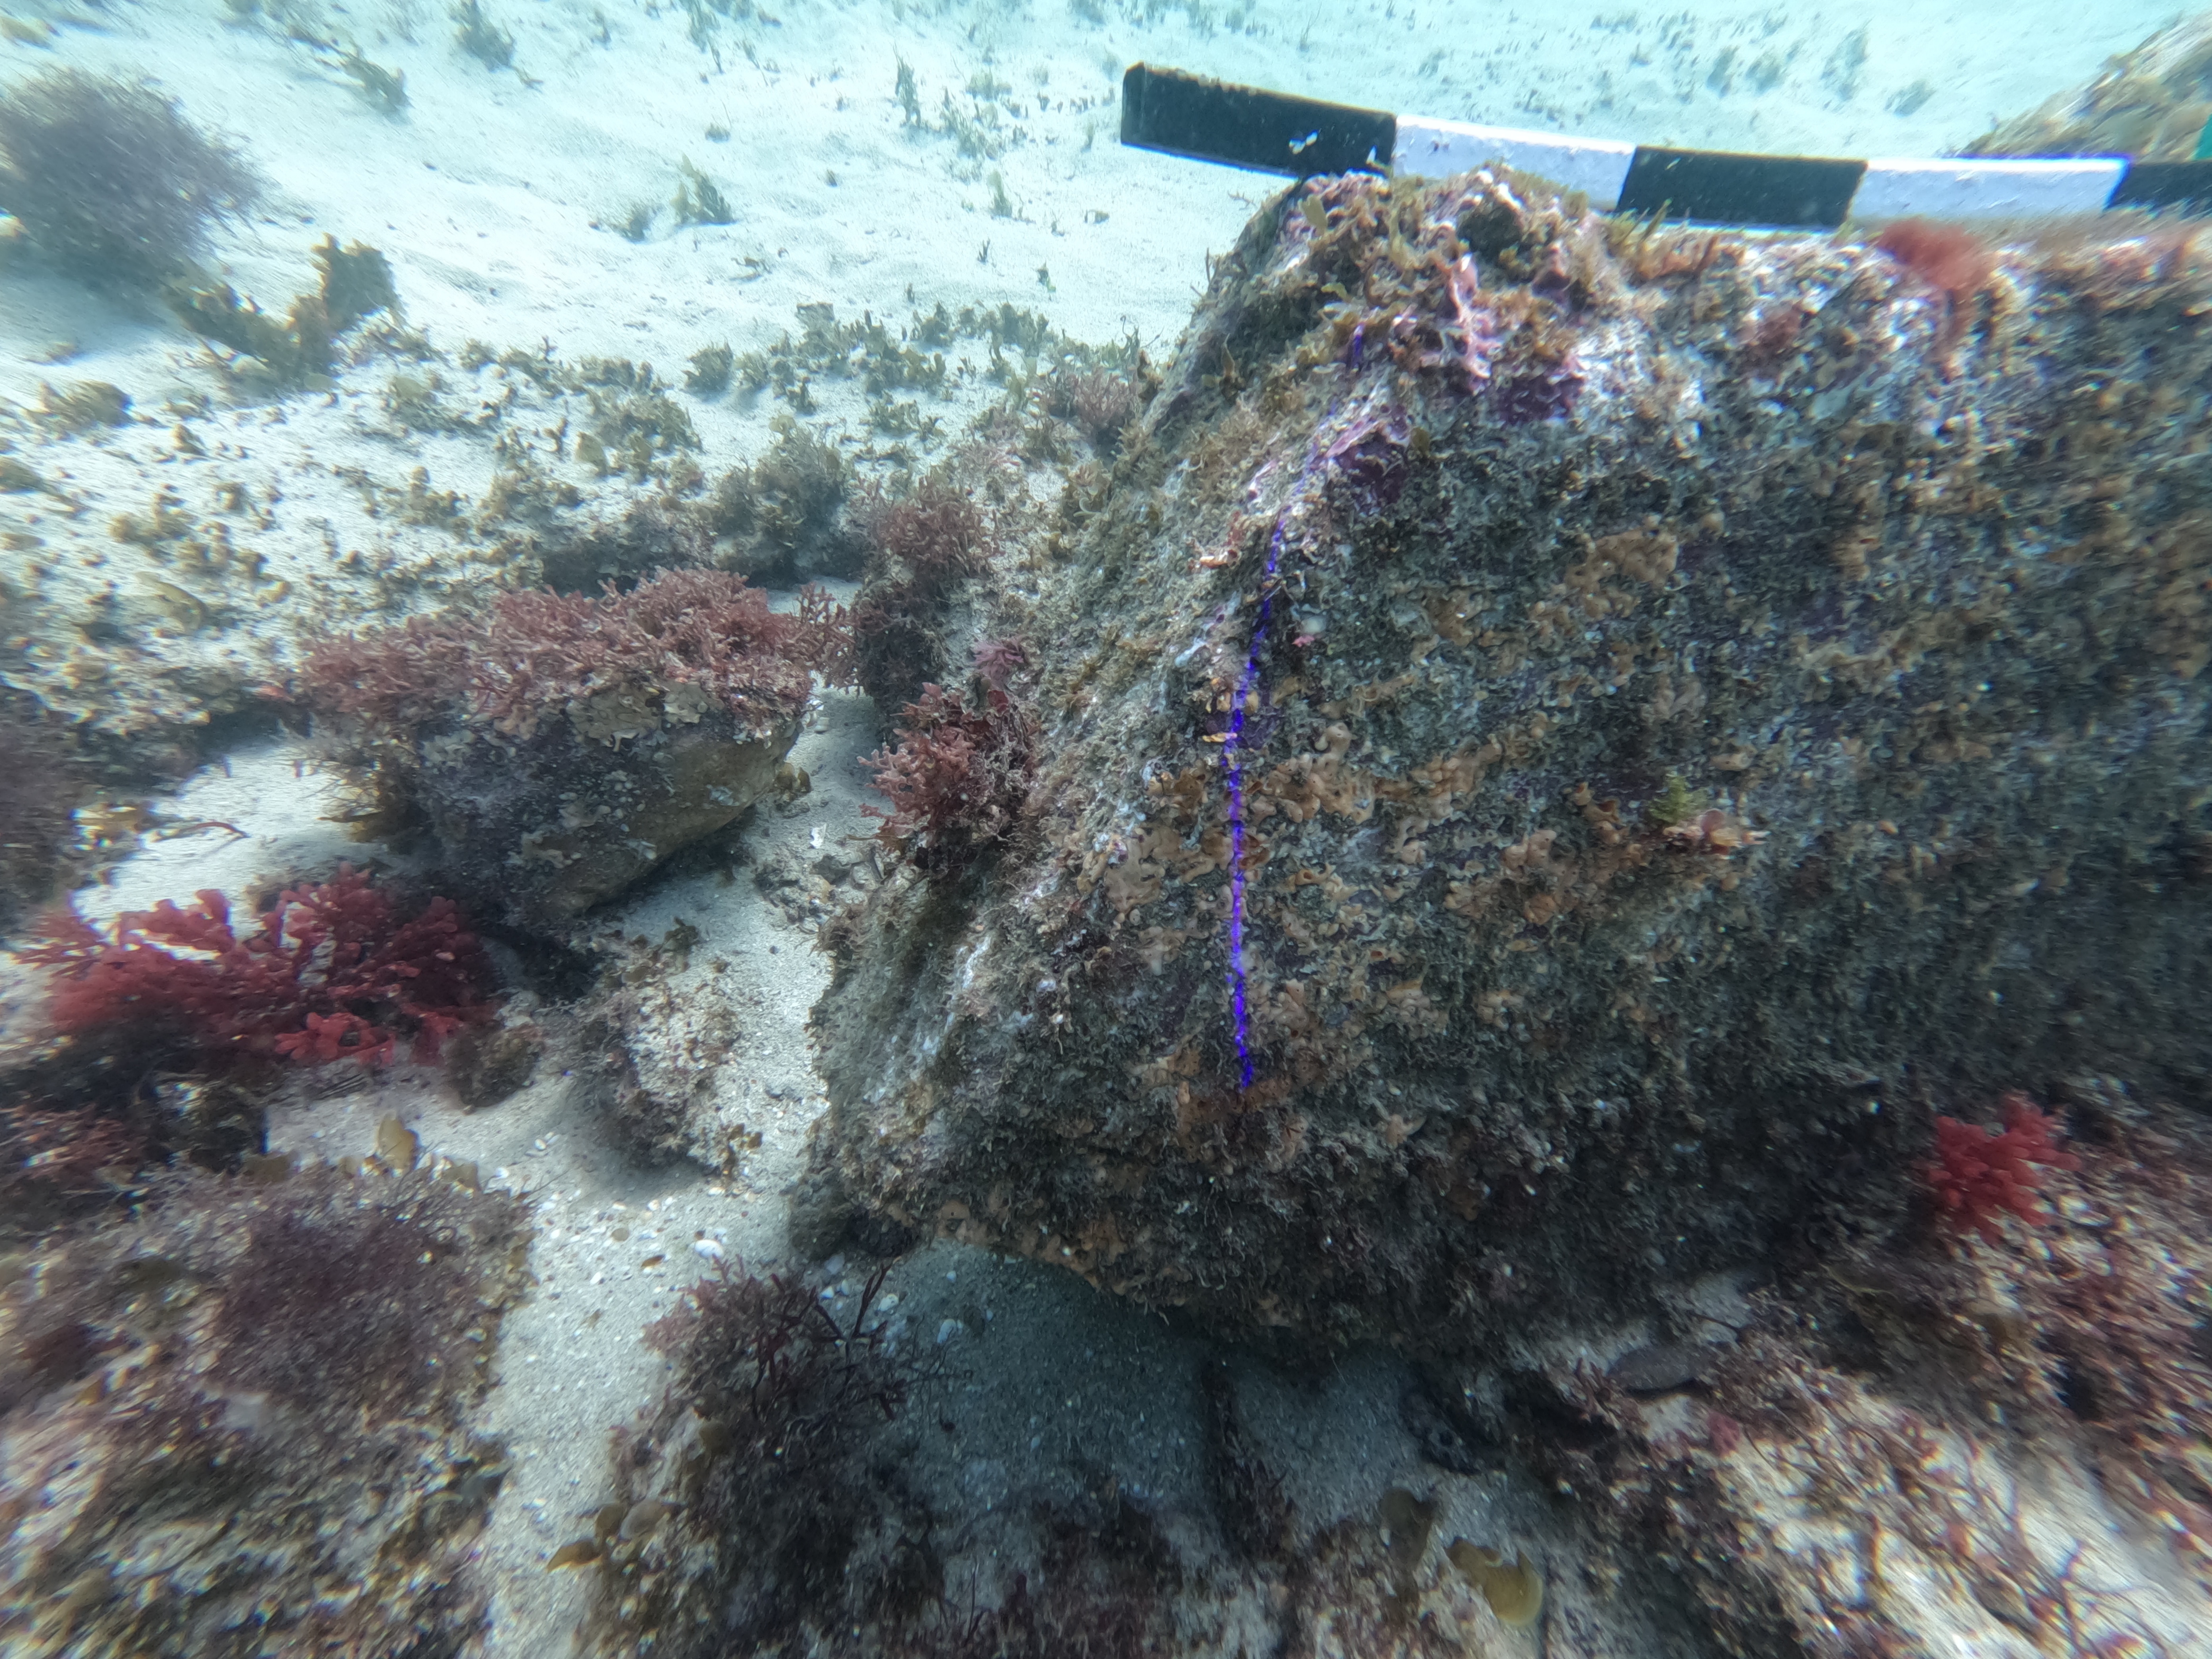

Supplement: Supplementary file 831 [file G0713898.pdf › Ocean2/G0713898.pdf]

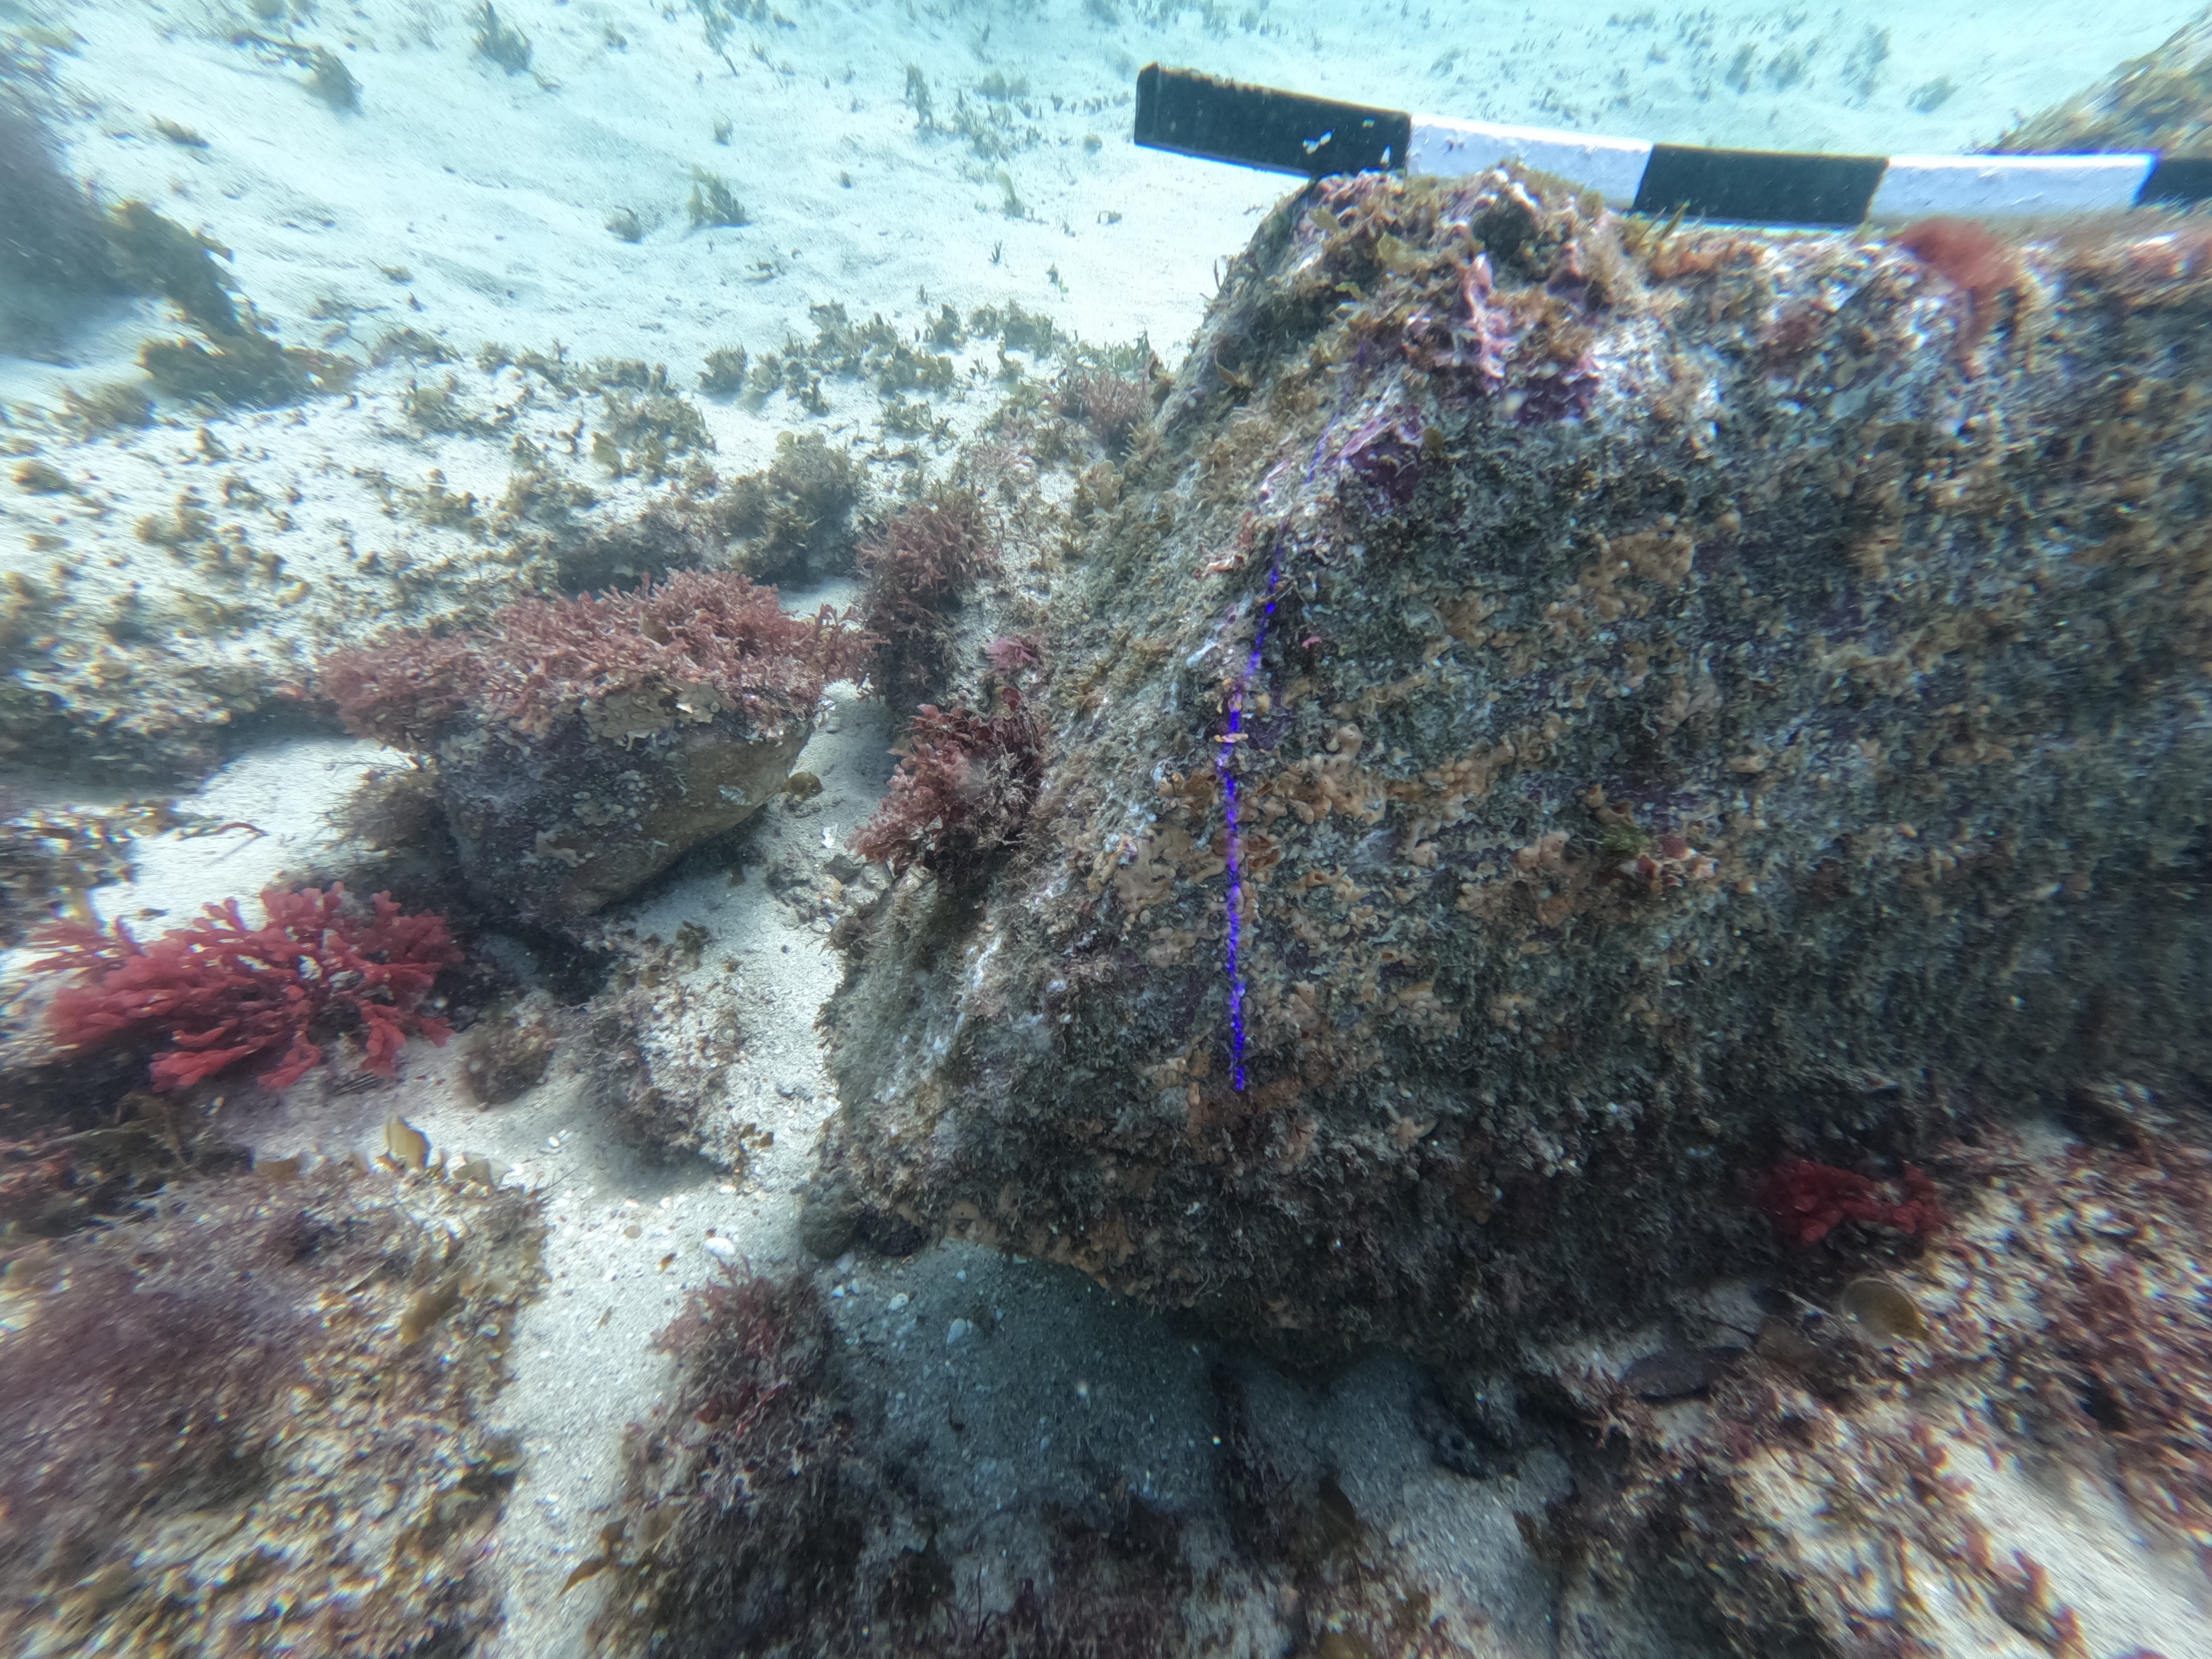

Supplement: Supplementary file 832 [file G0713899.pdf › Ocean2/G0713899.pdf]

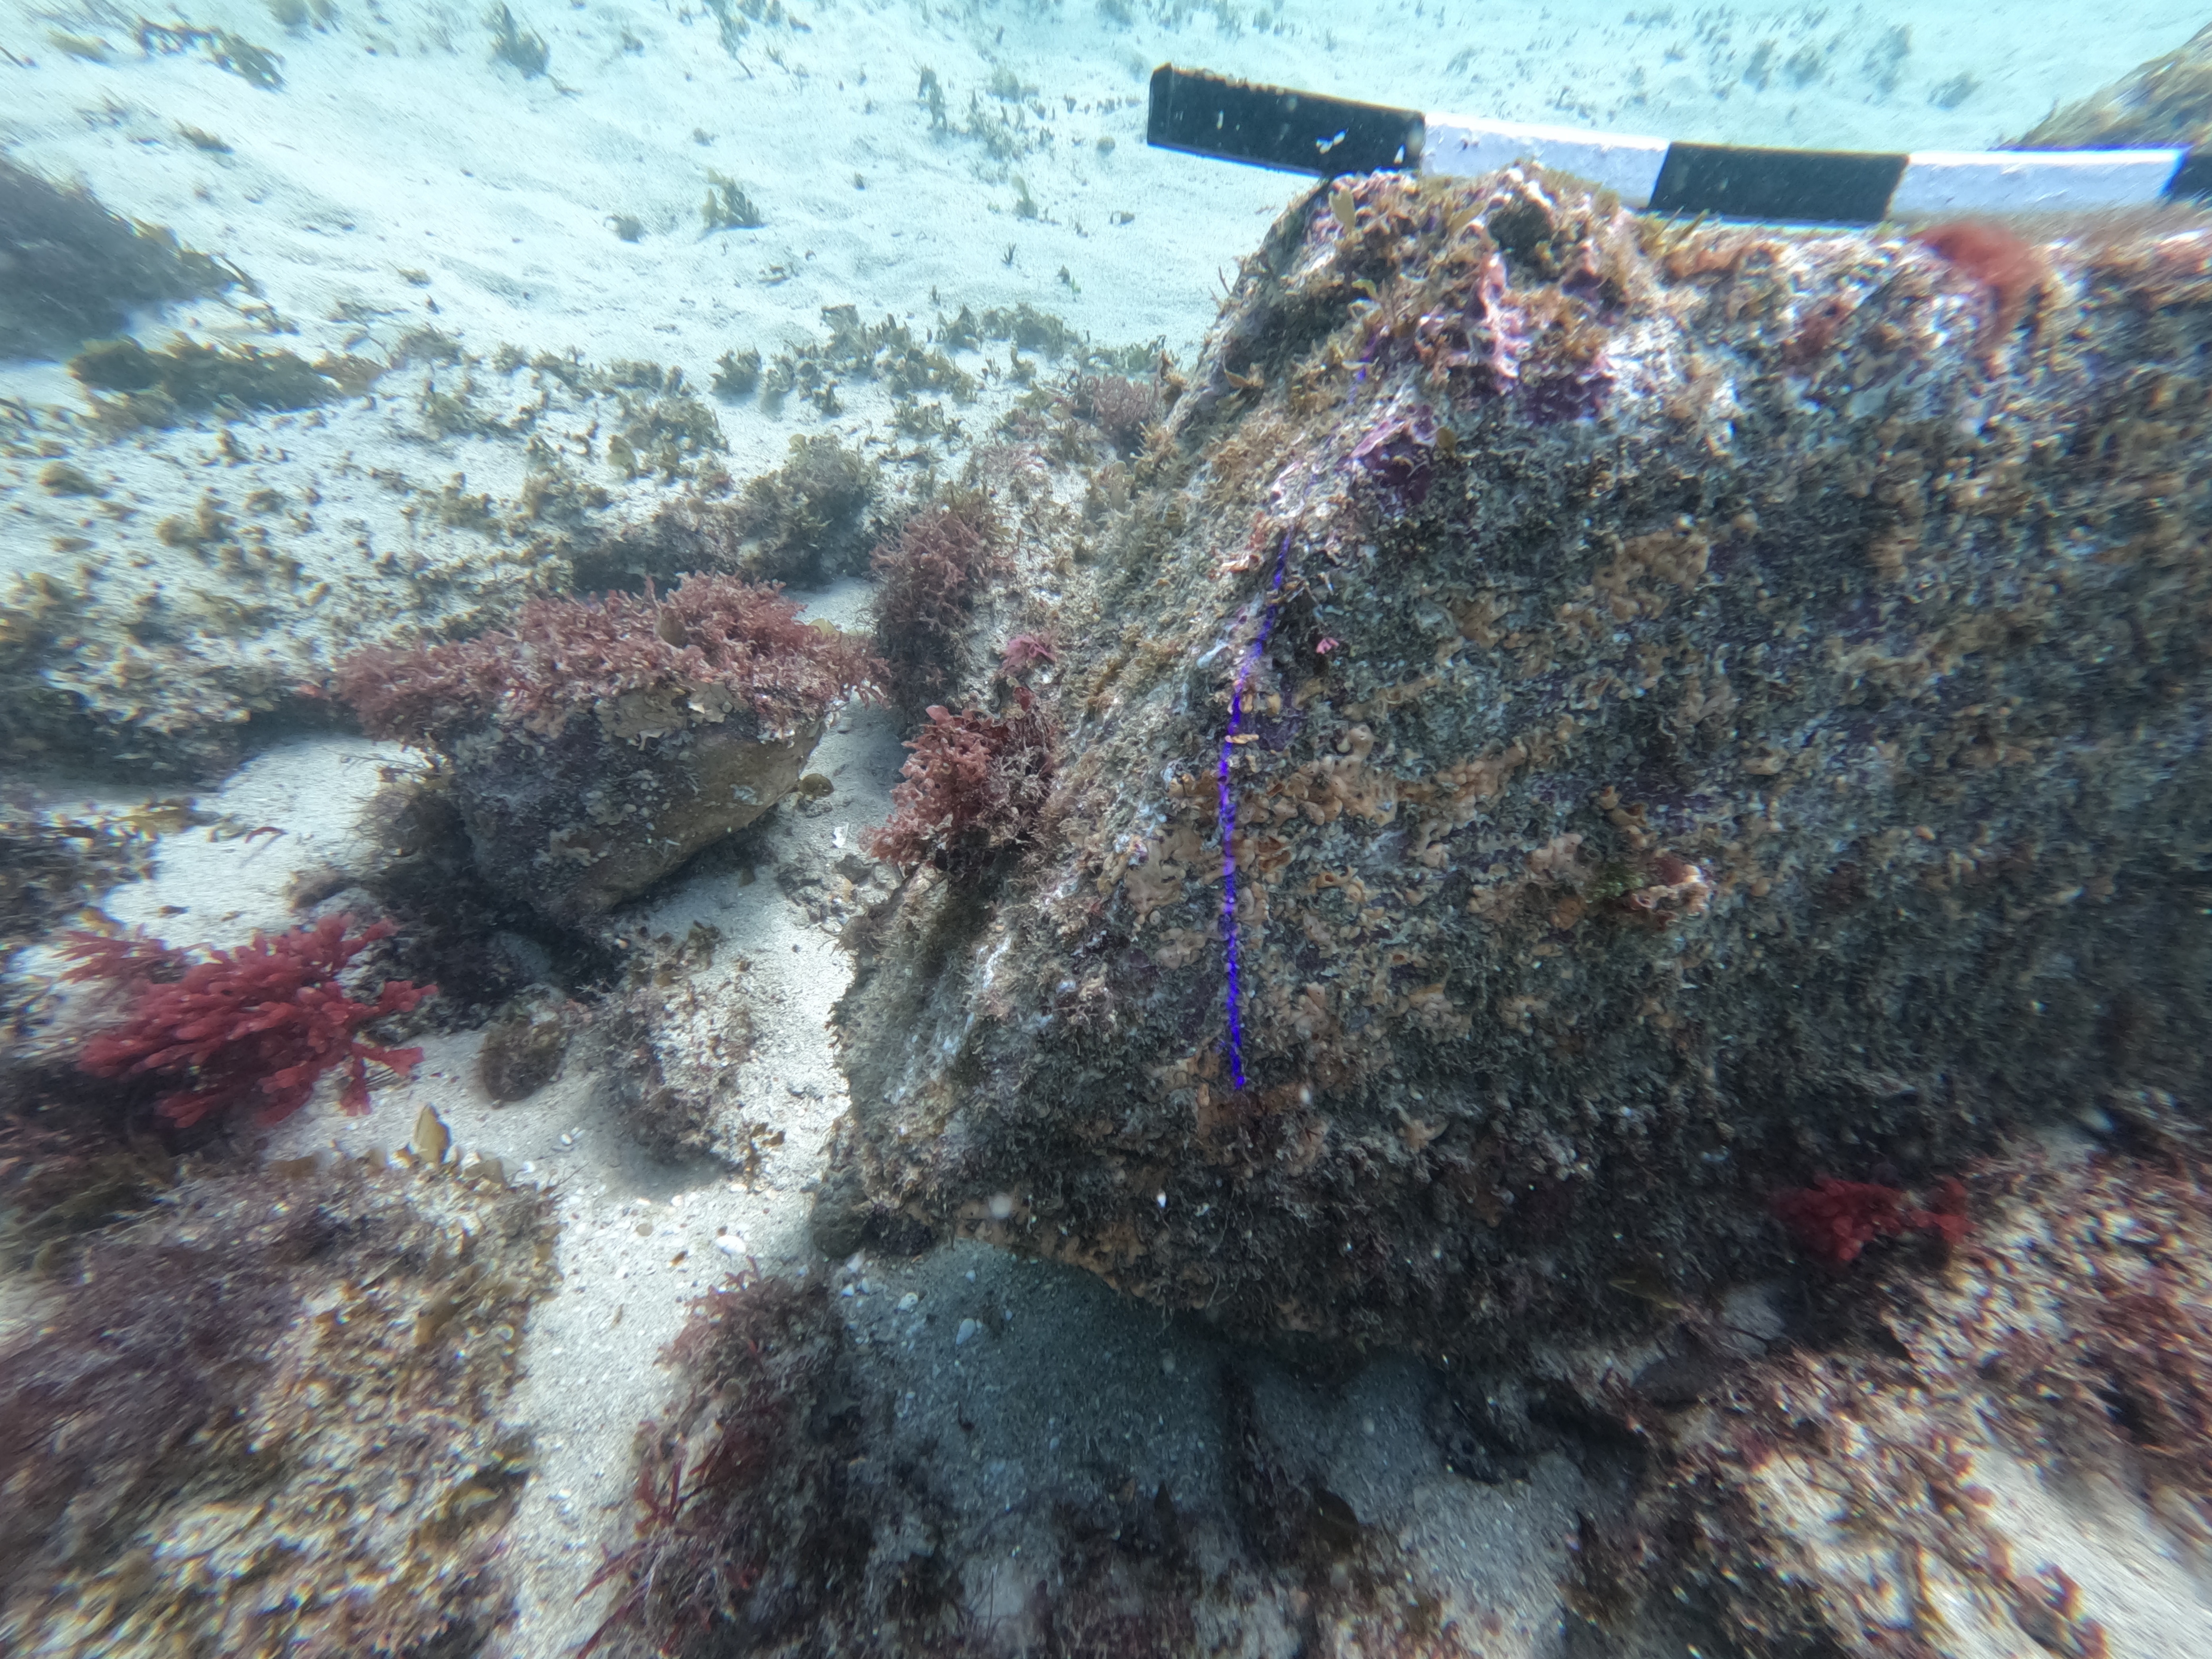

Supplement: Supplementary file 833 [file G0713900.pdf › Ocean2/G0713900.pdf]

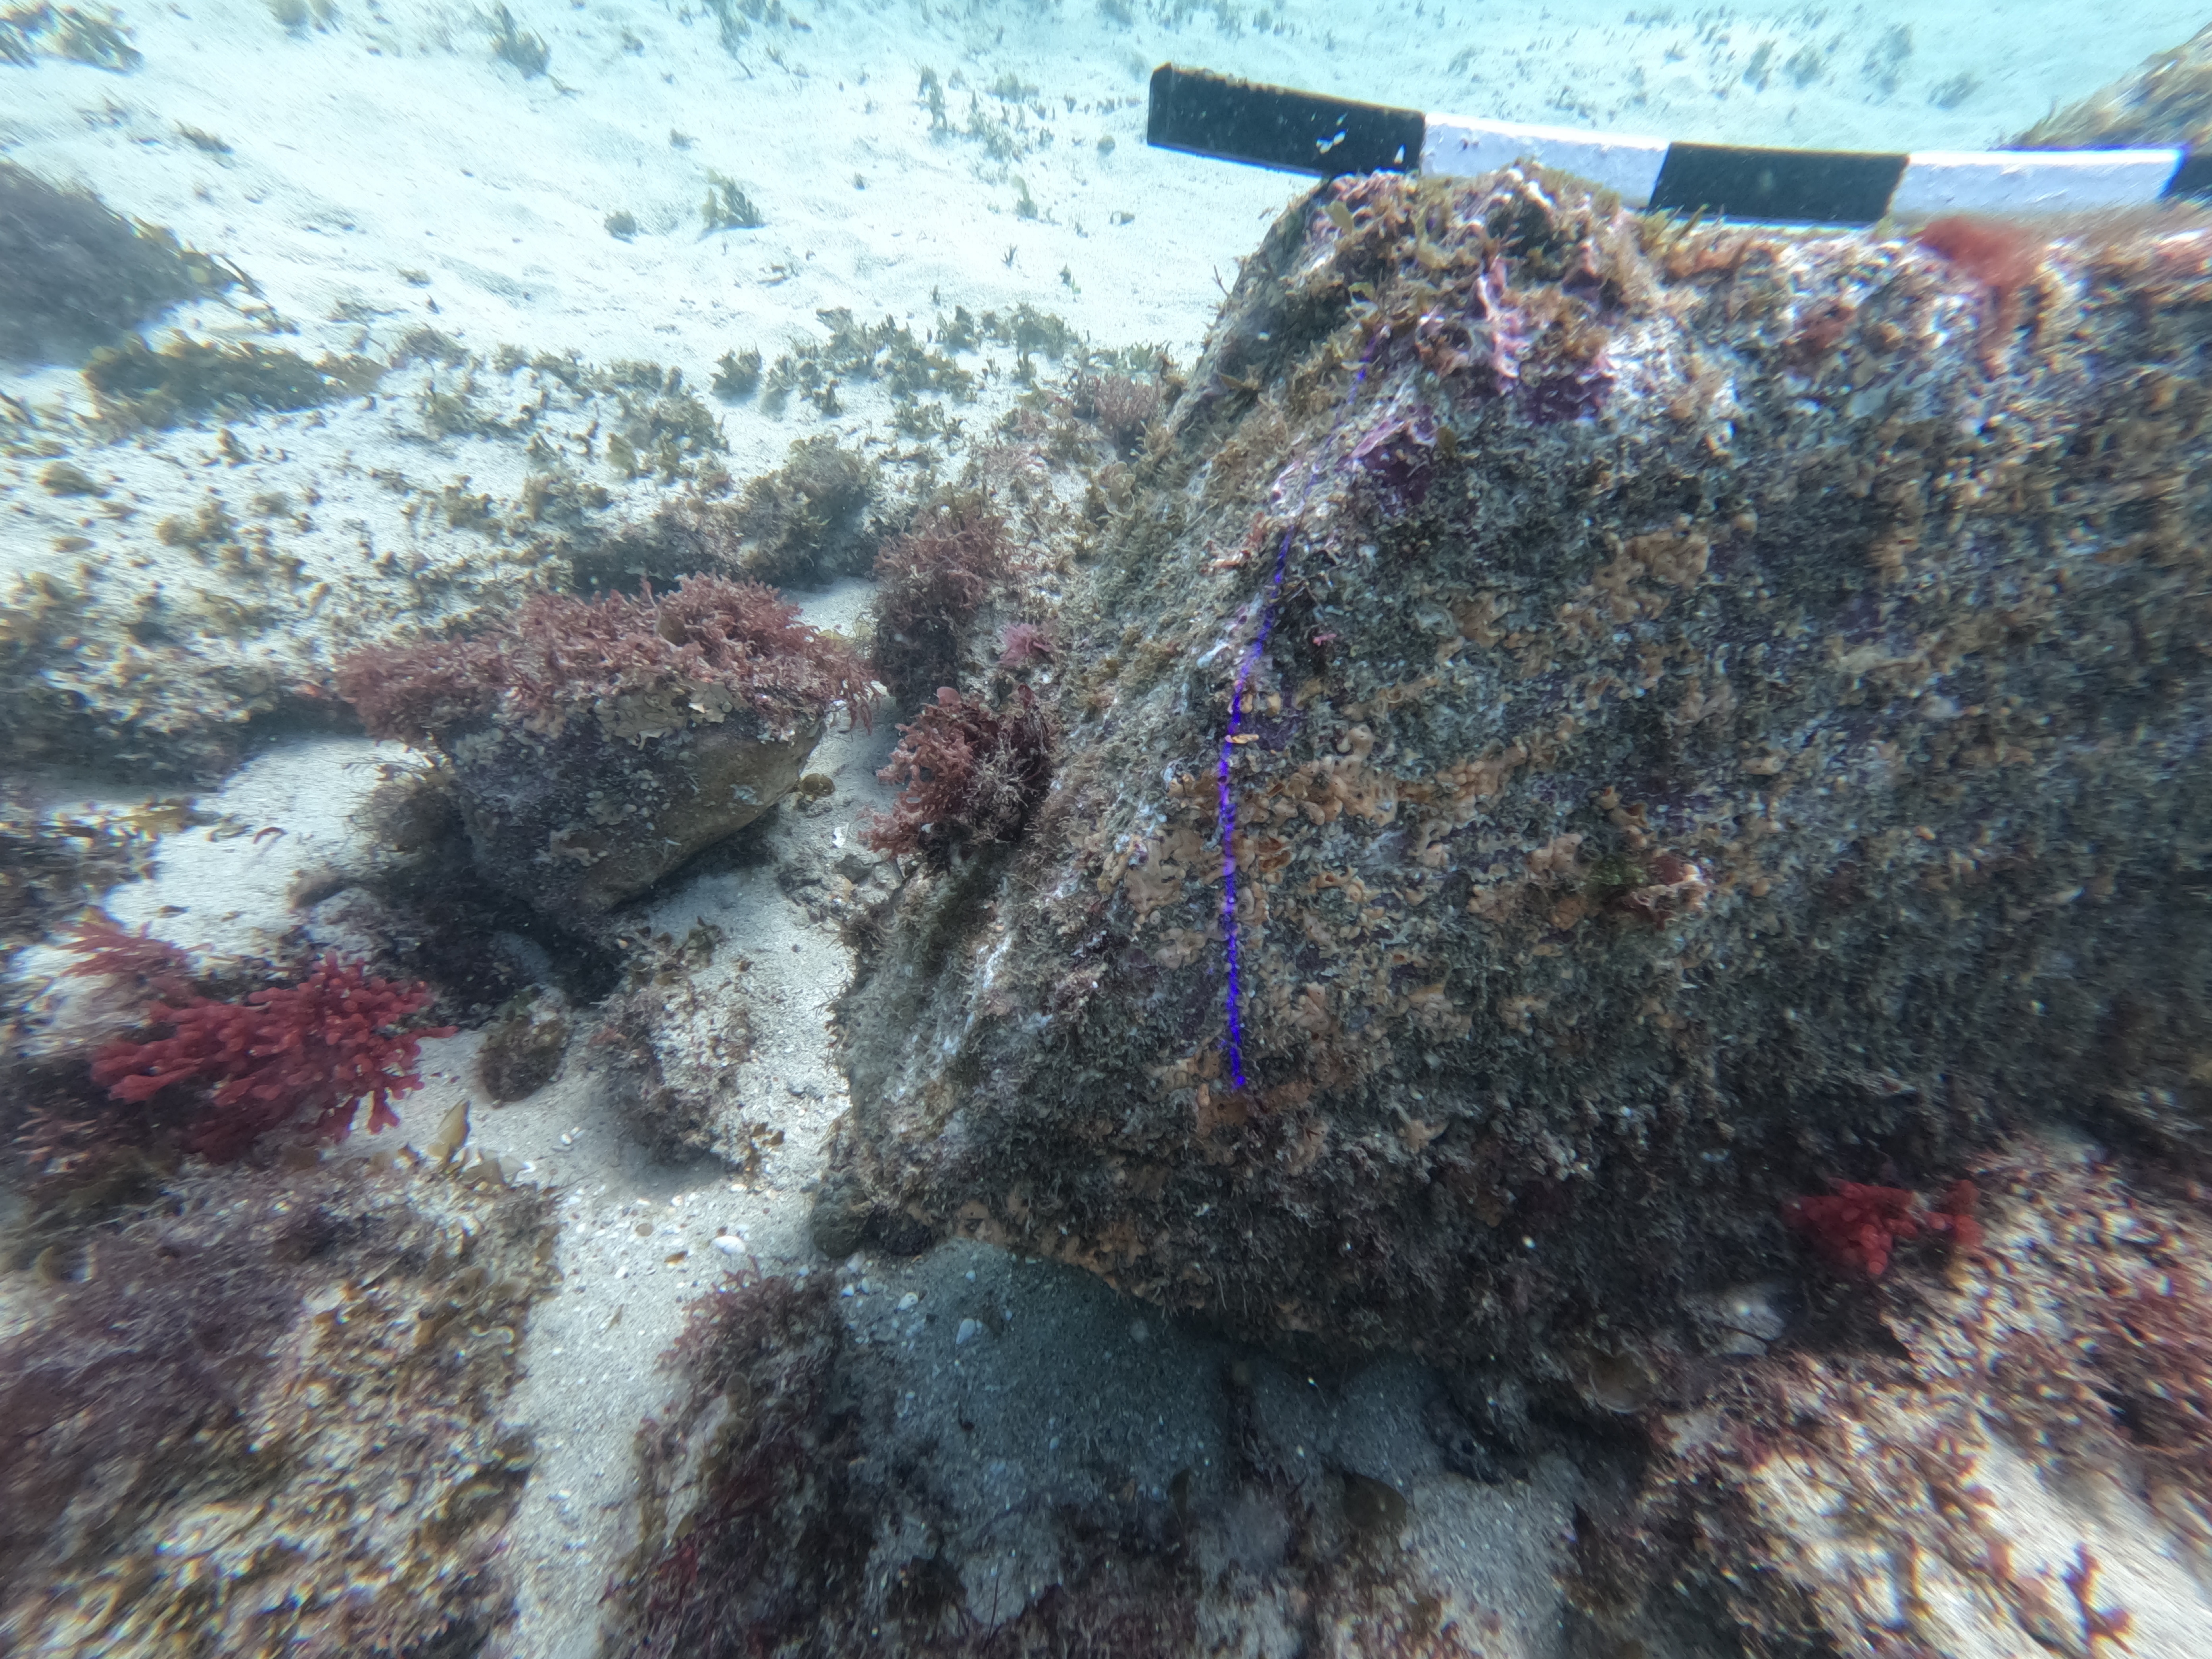

Supplement: Supplementary file 834 [file G0713901.pdf › Ocean2/G0713901.pdf]

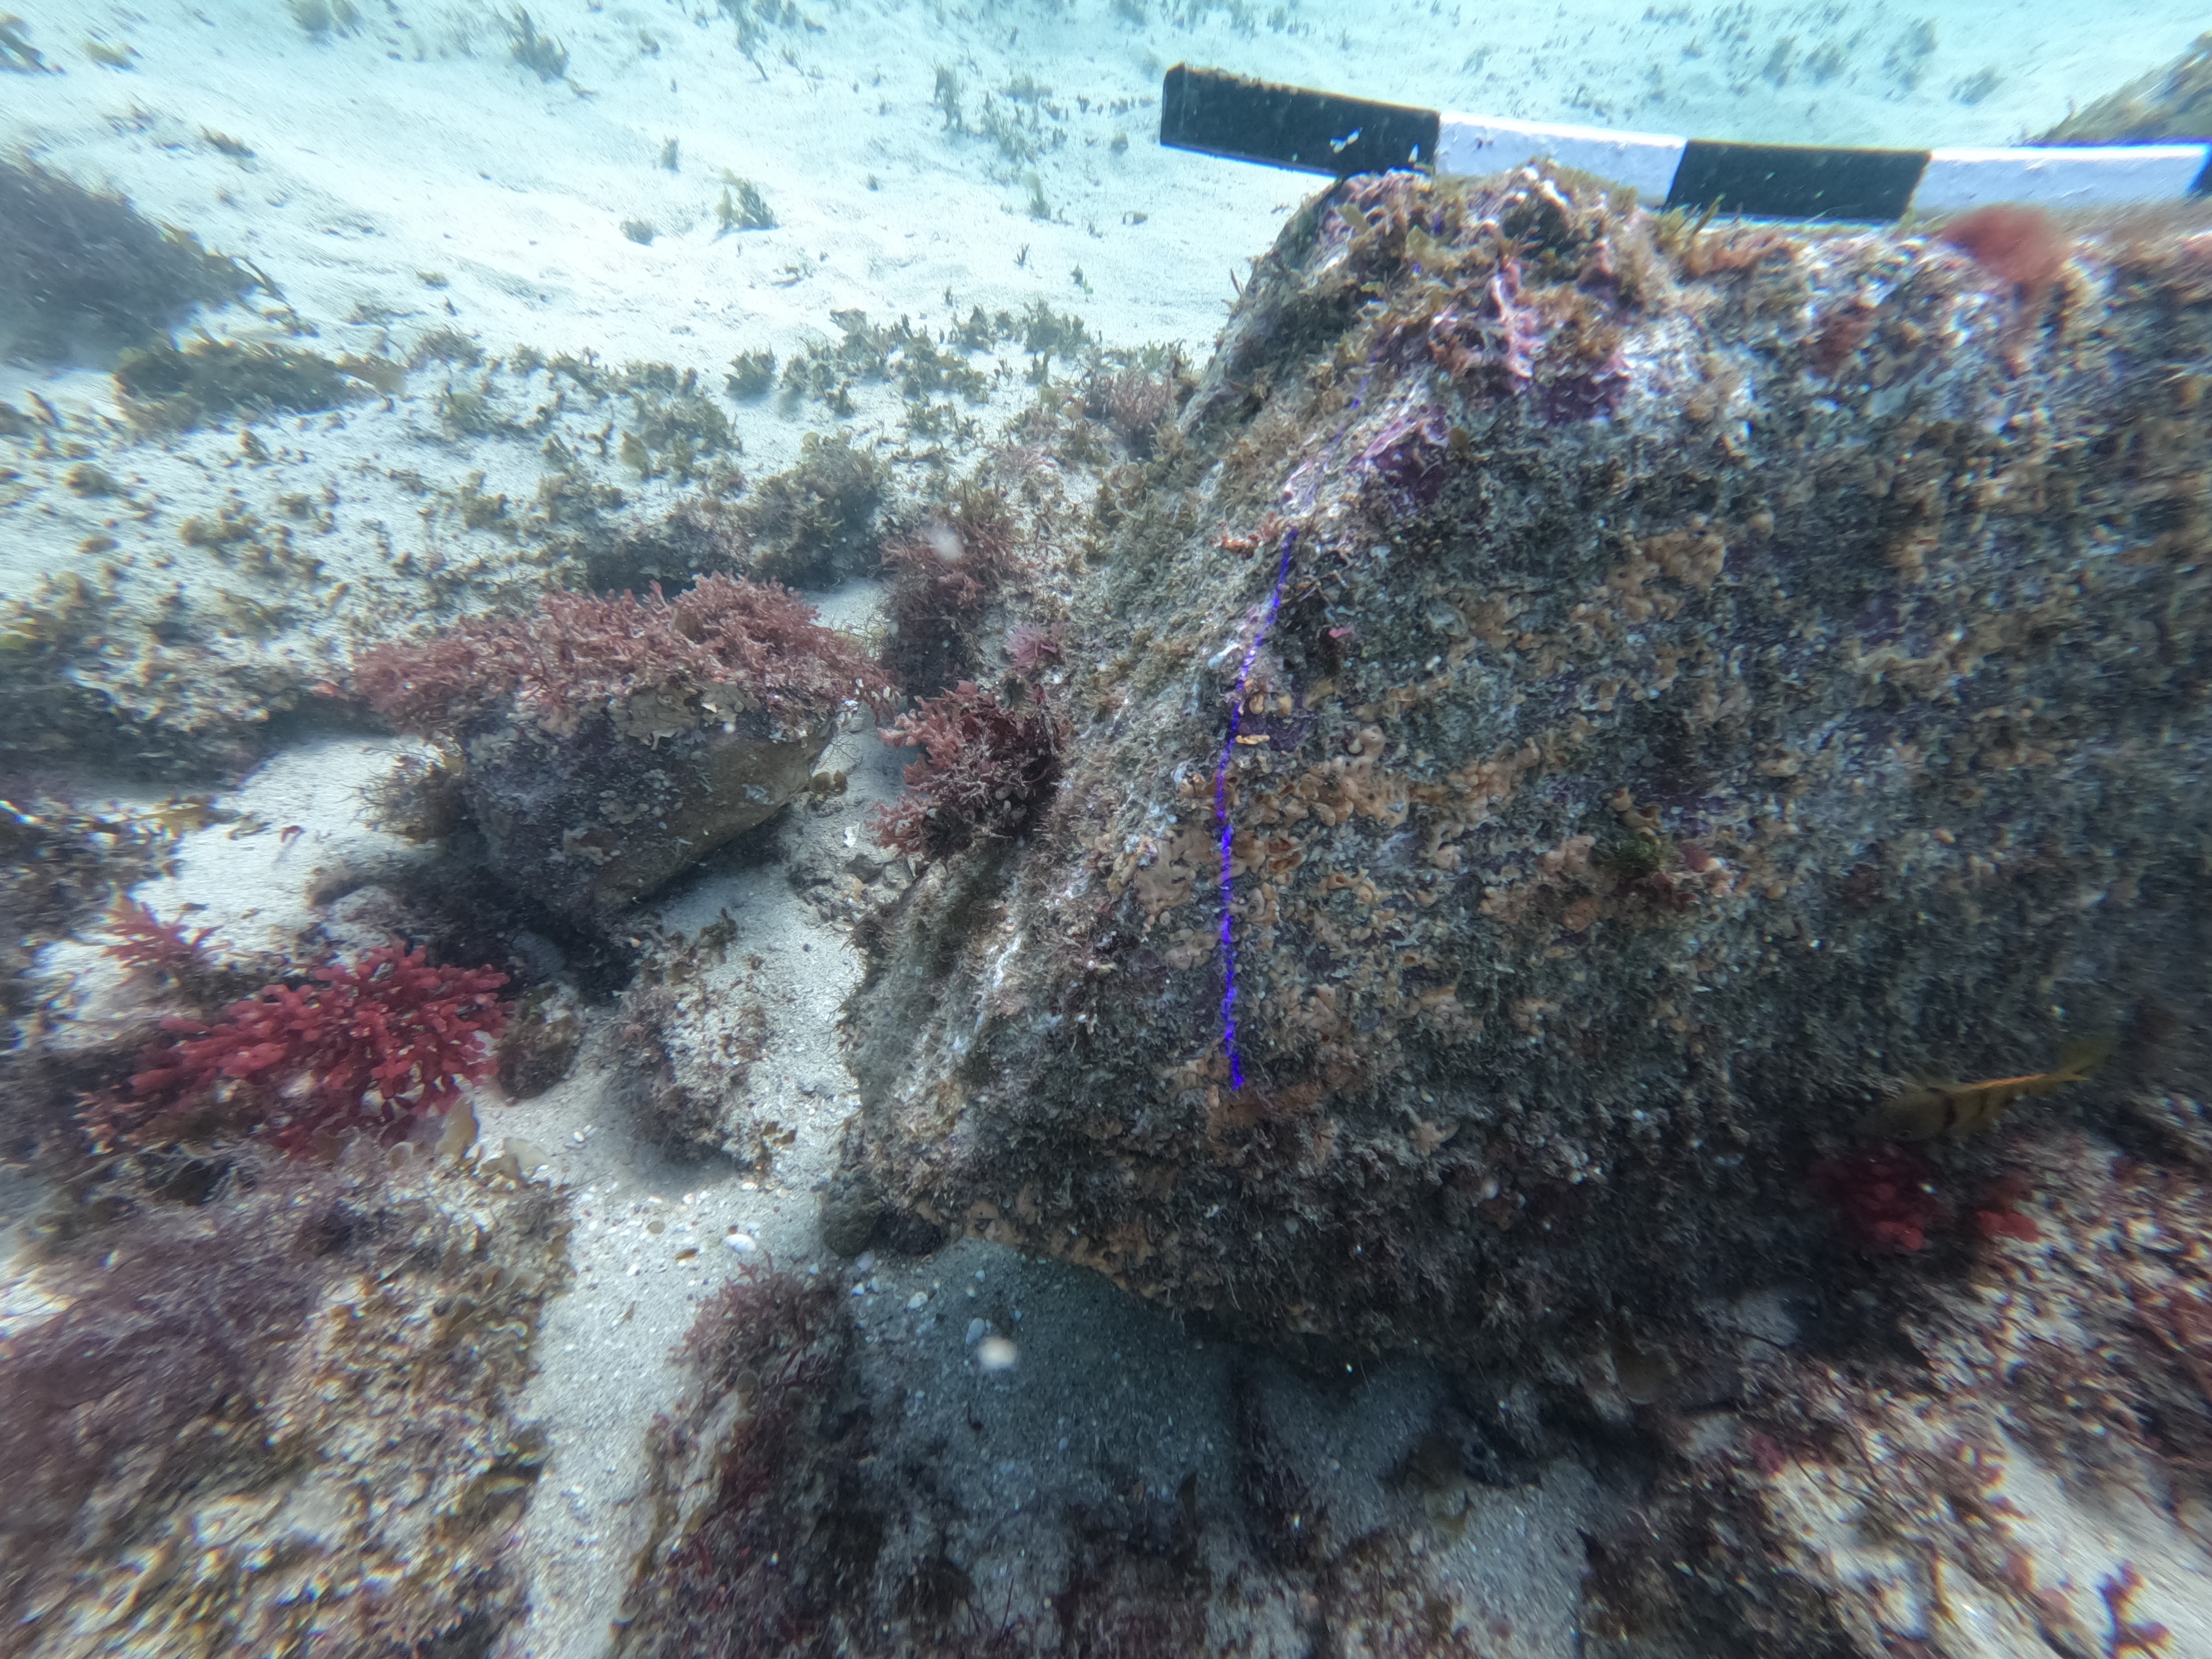

Supplement: Supplementary file 835 [file G0713902.pdf › Ocean2/G0713902.pdf]

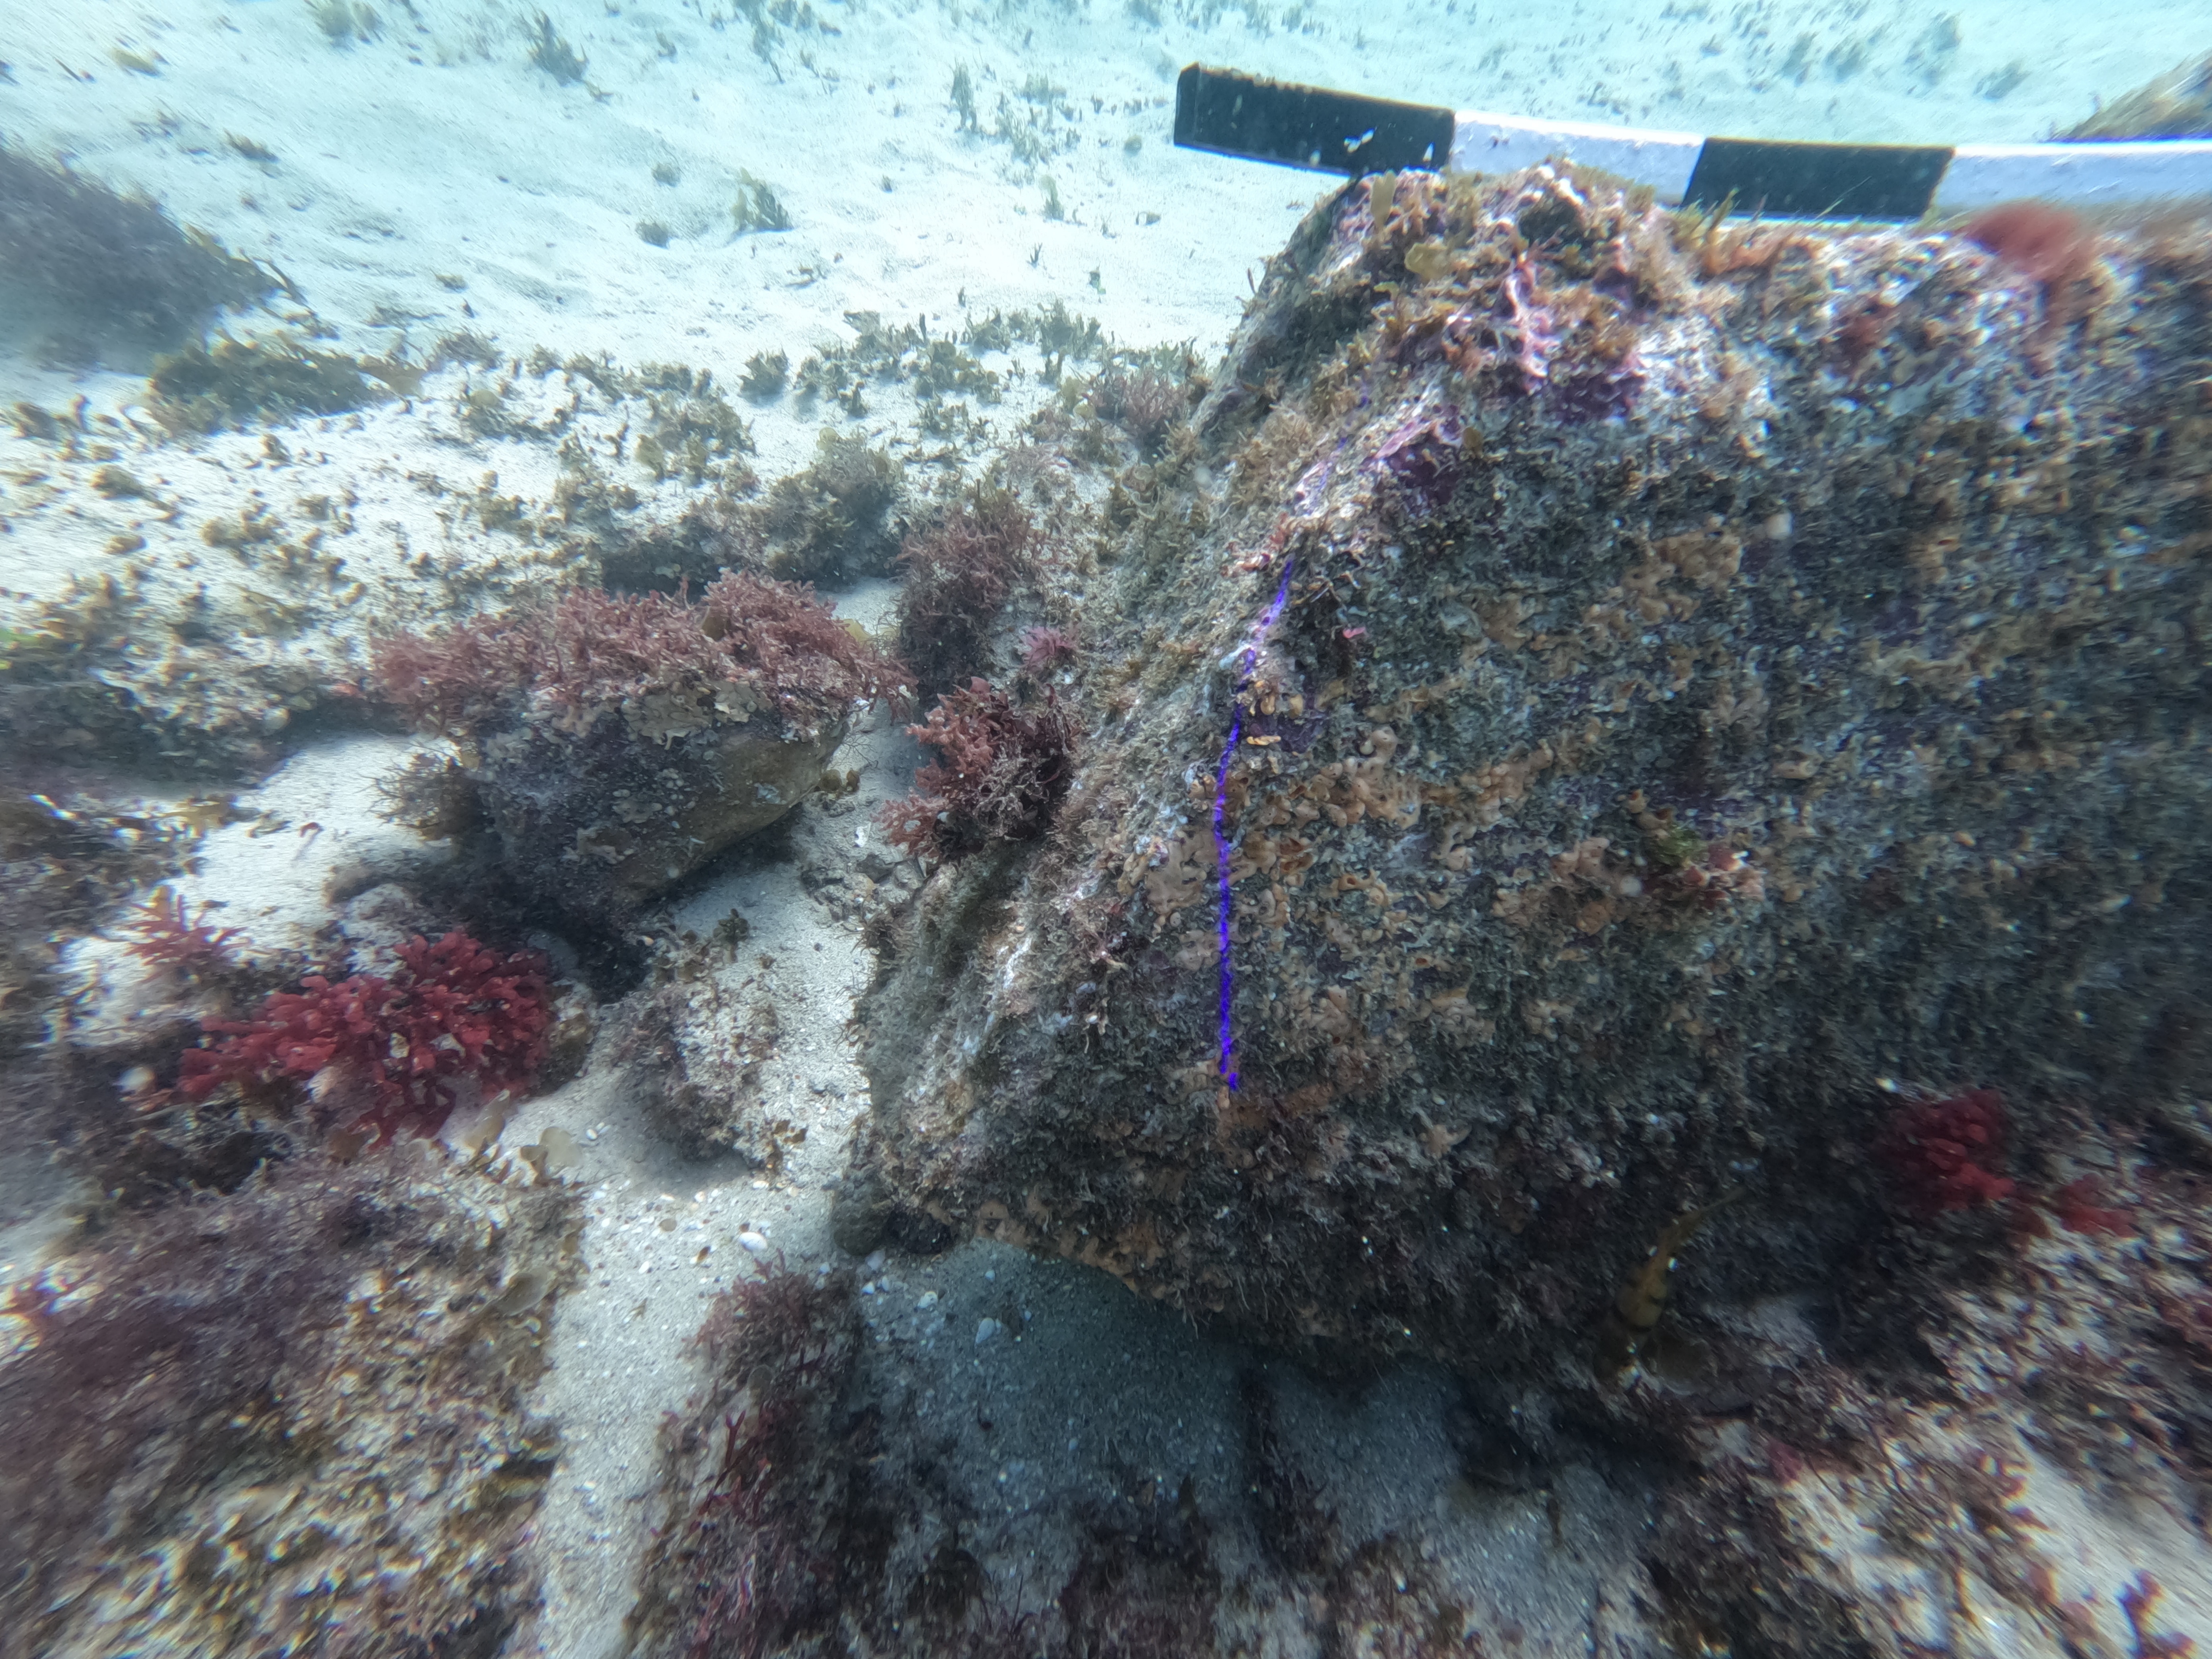

Supplement: Supplementary file 836 [file G0713903.pdf › Ocean2/G0713903.pdf]

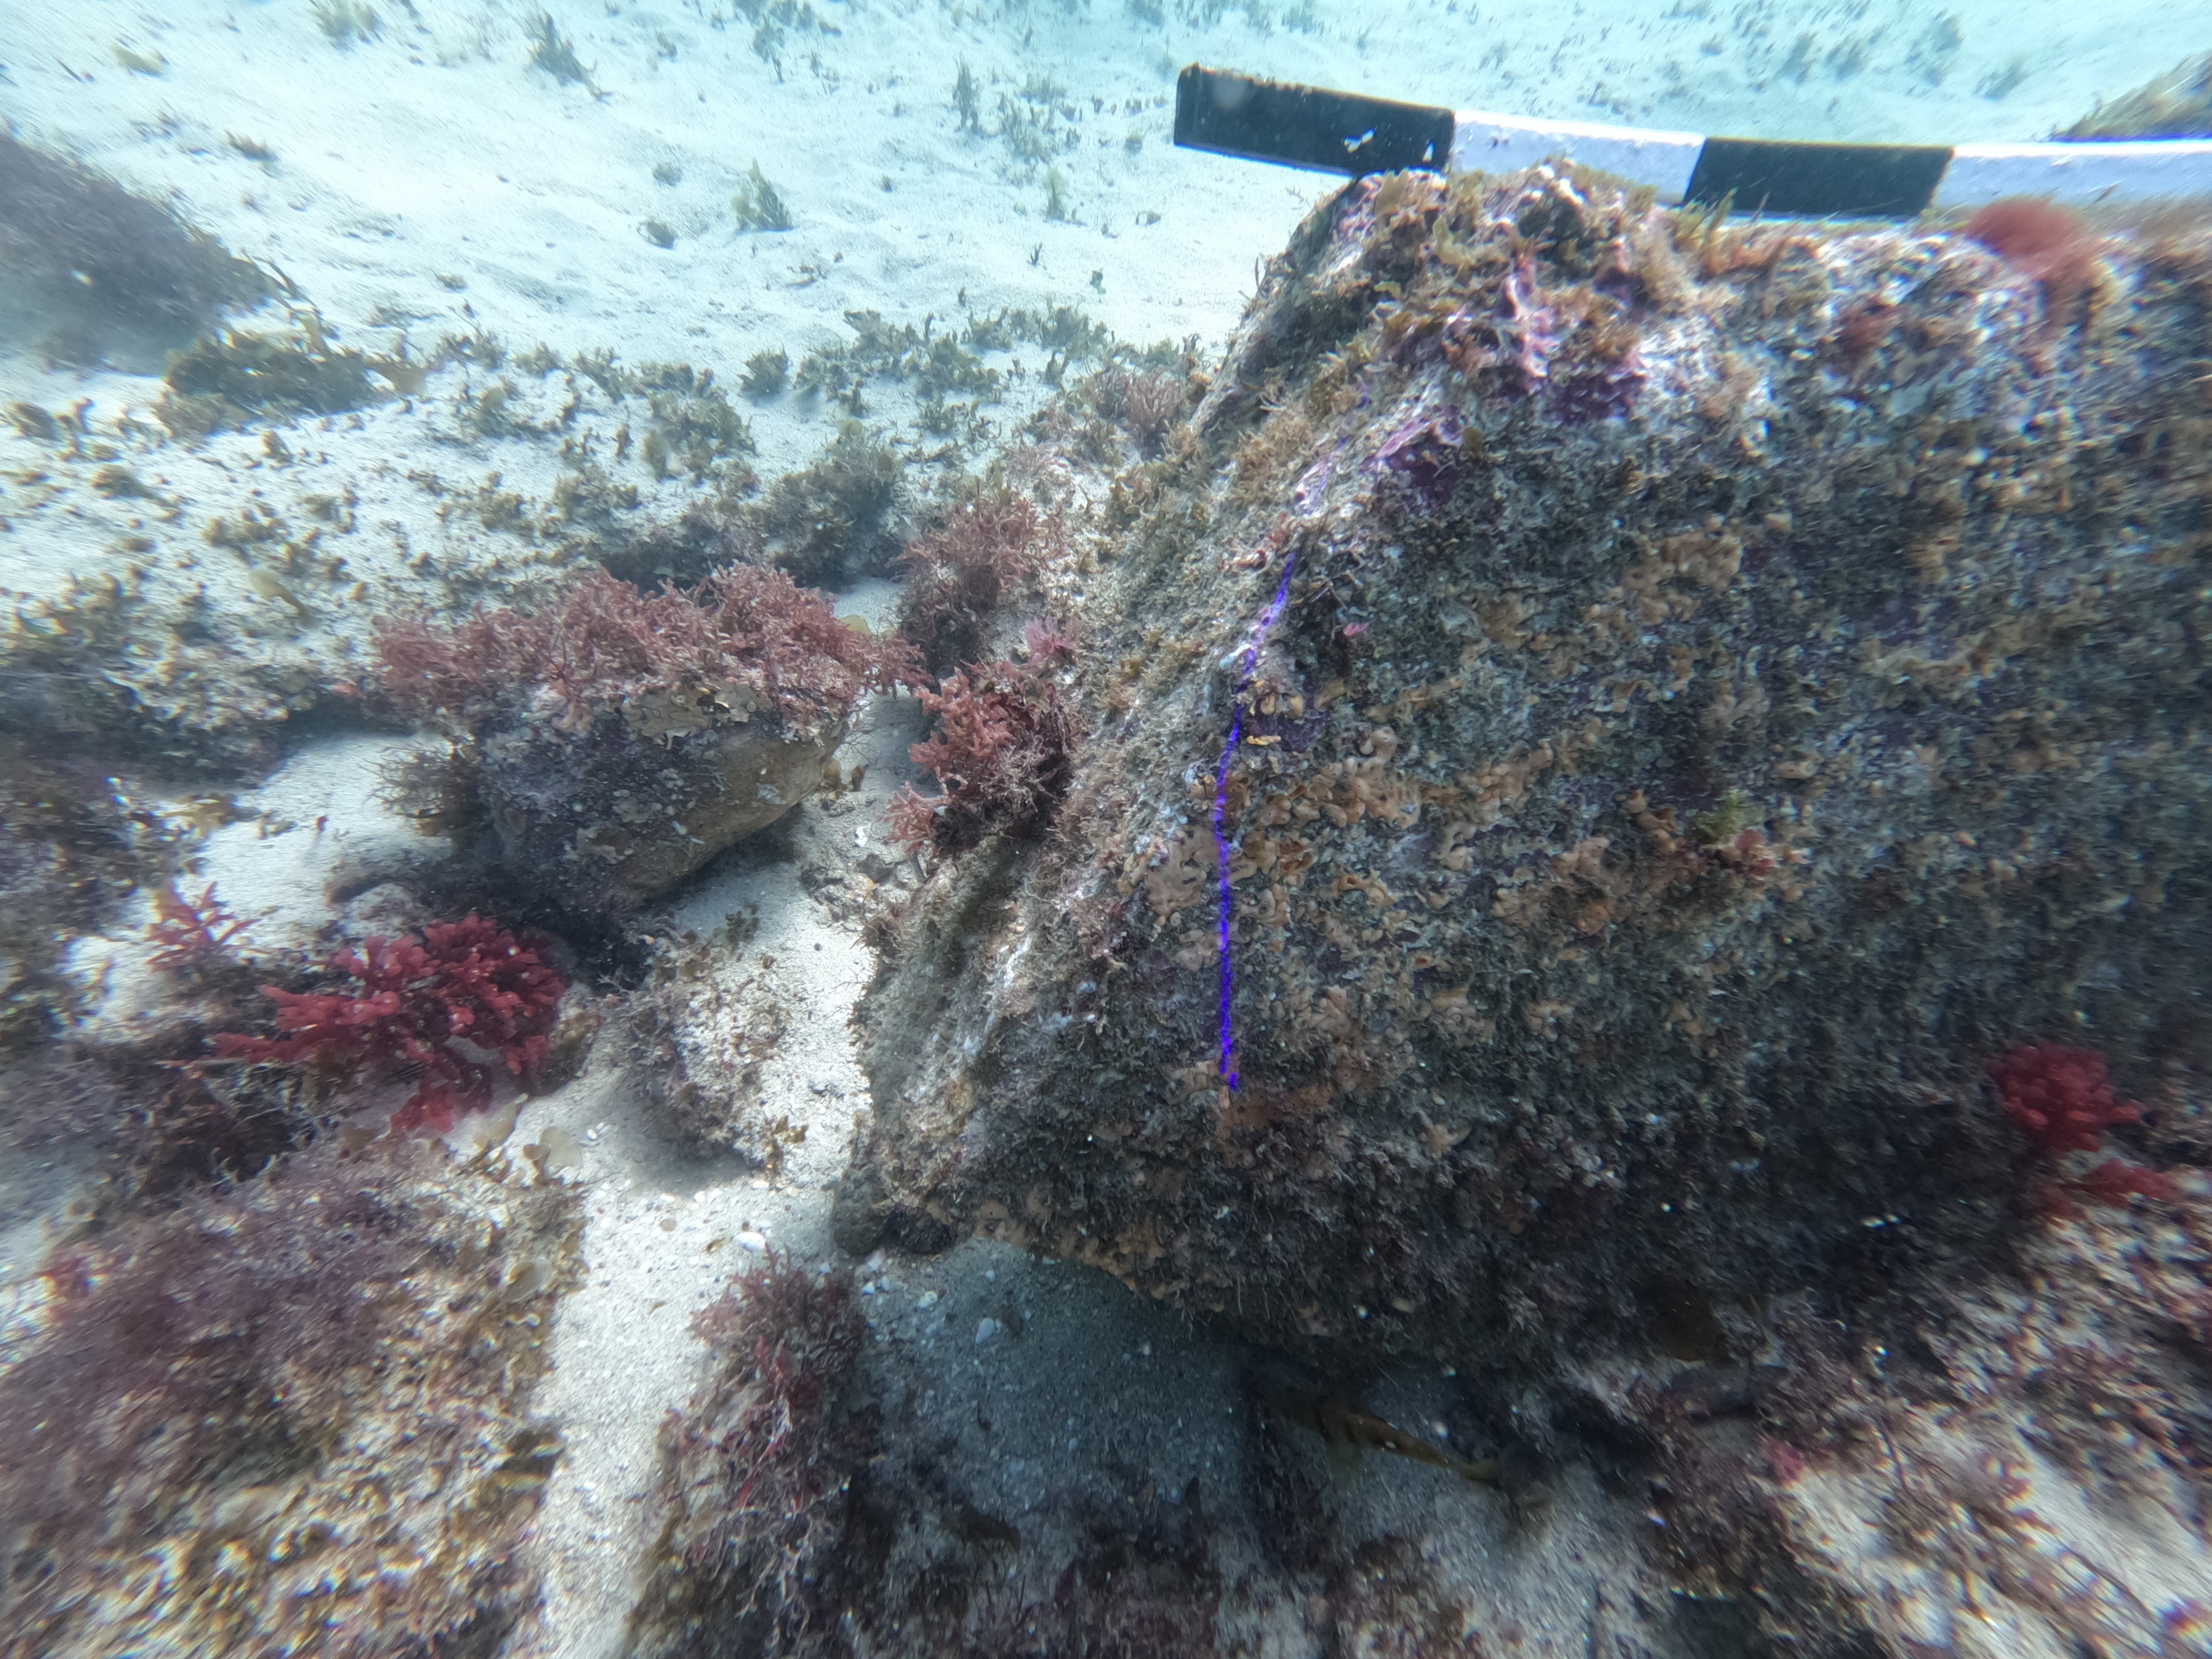

Supplement: Supplementary file 837 [file G0713904.pdf › Ocean2/G0713904.pdf]

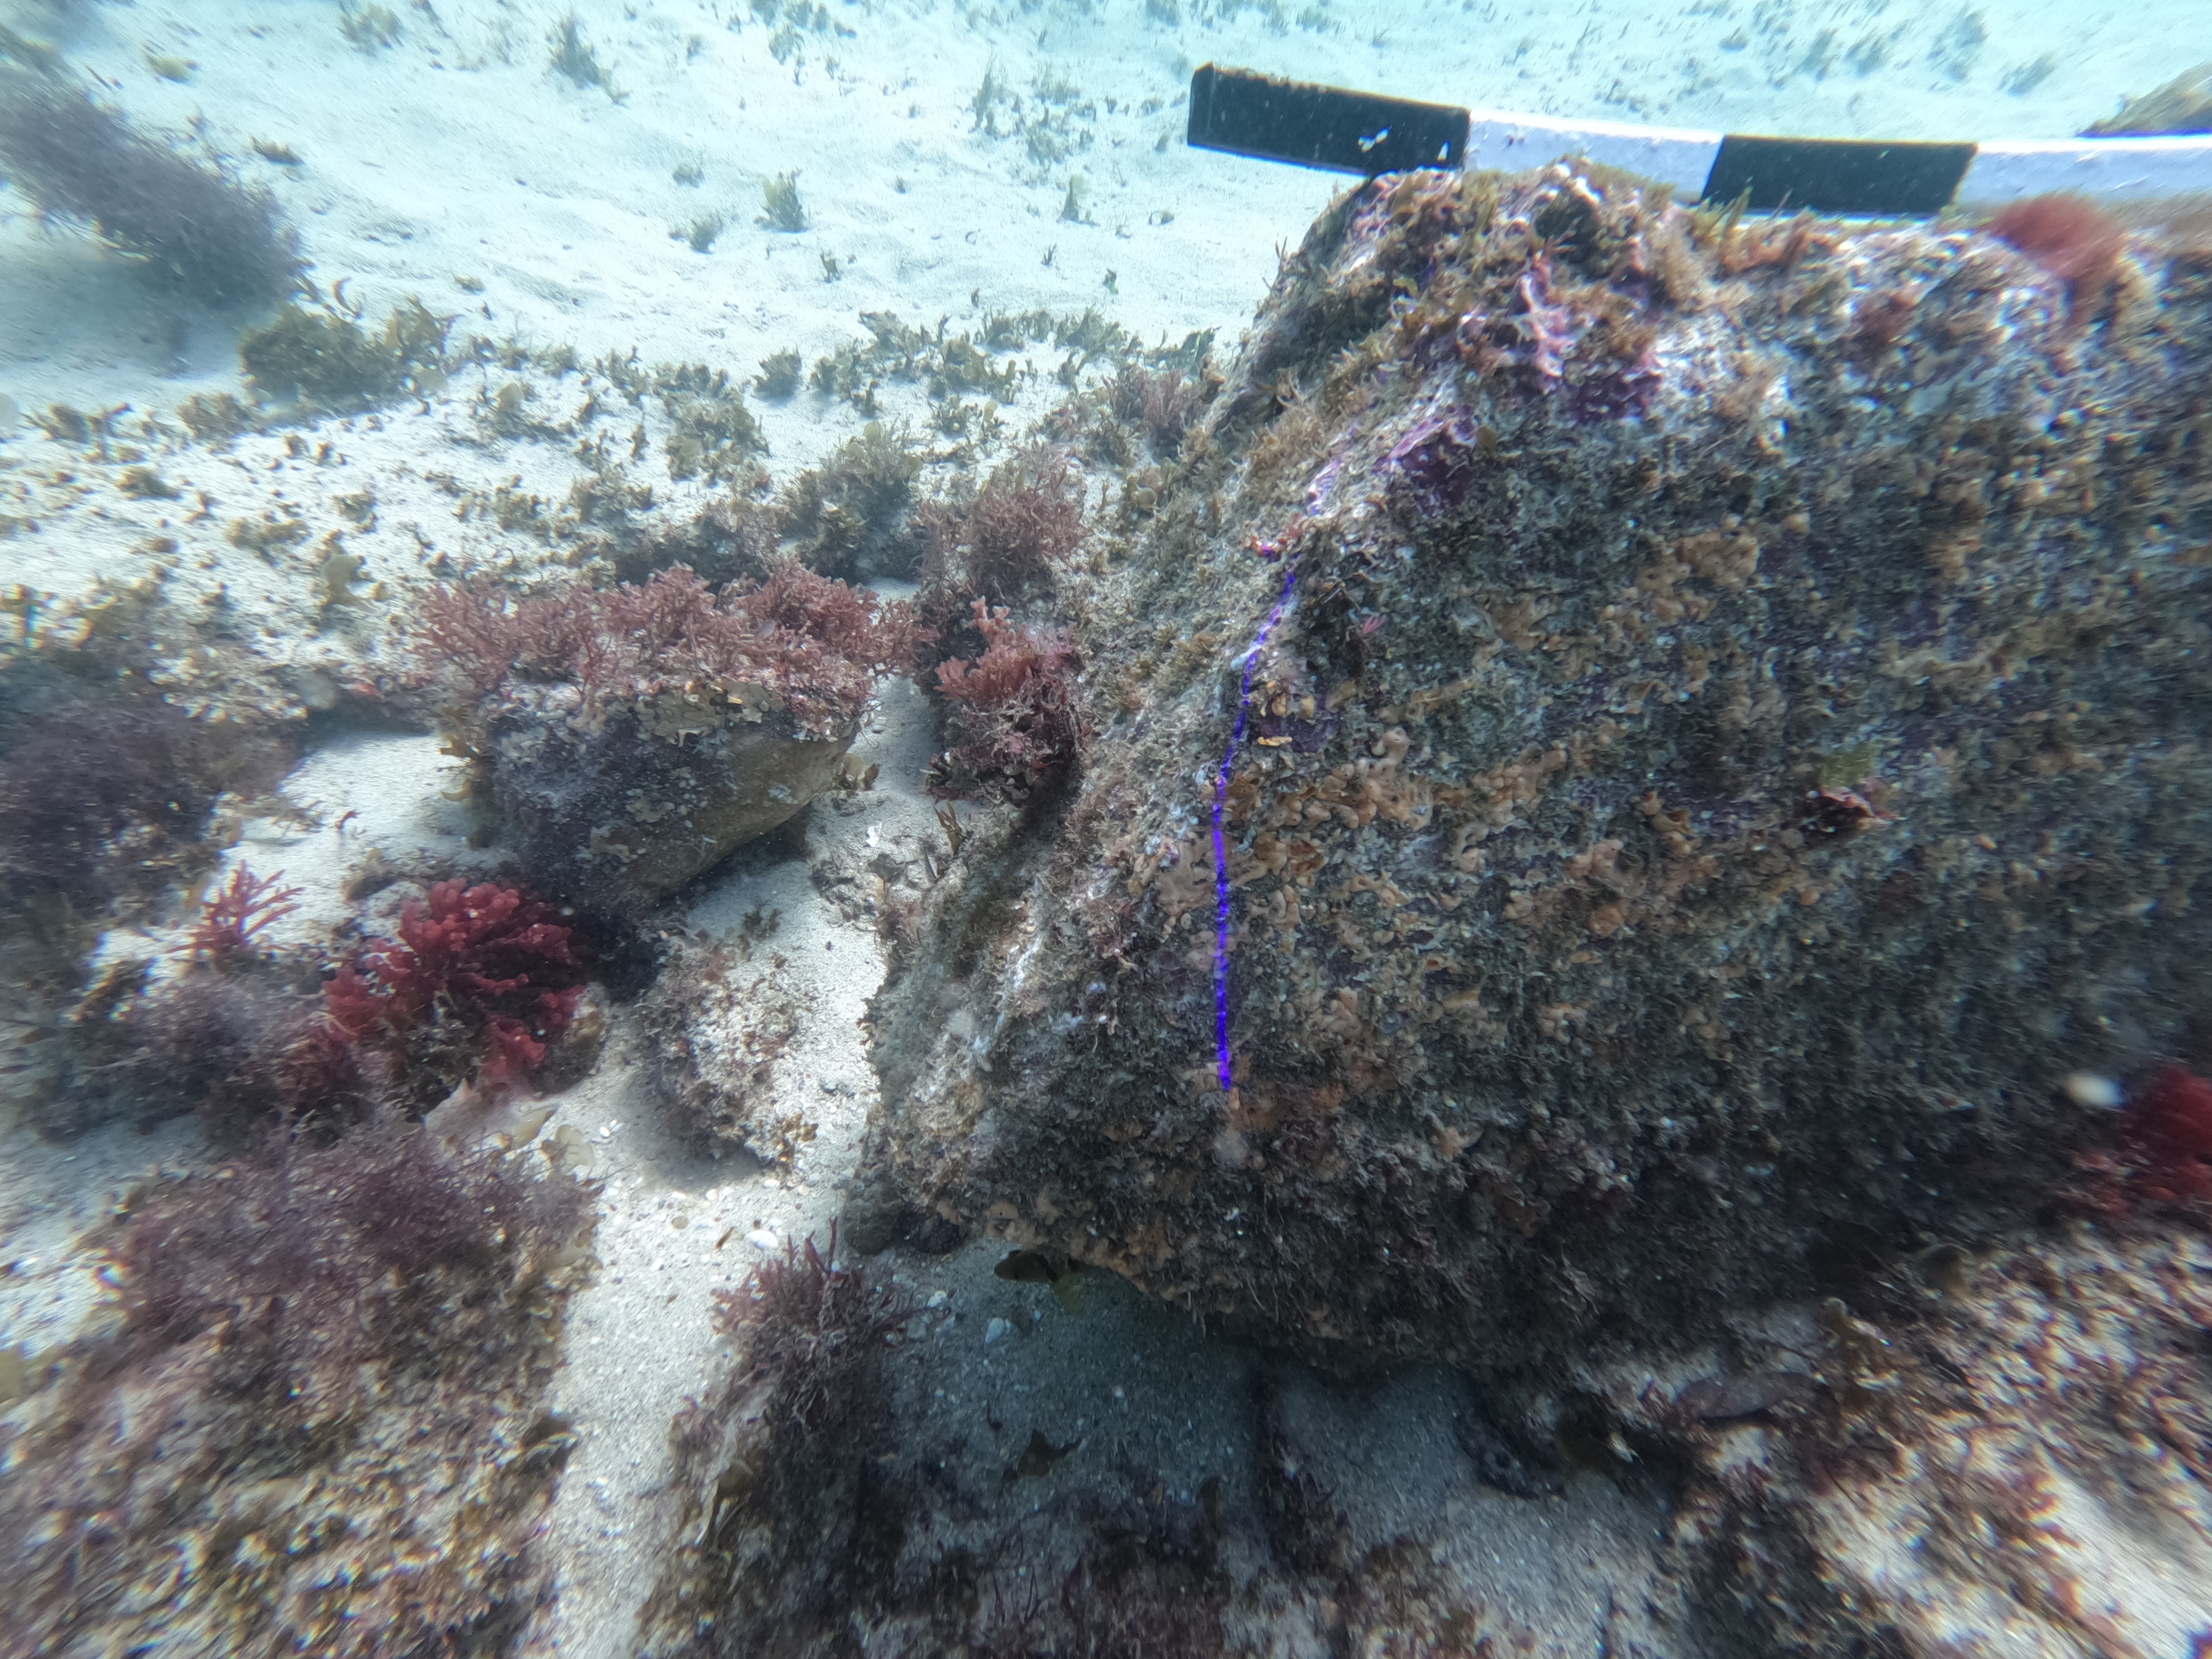

Supplement: Supplementary file 838 [file G0713905.pdf › Ocean2/G0713905.pdf]

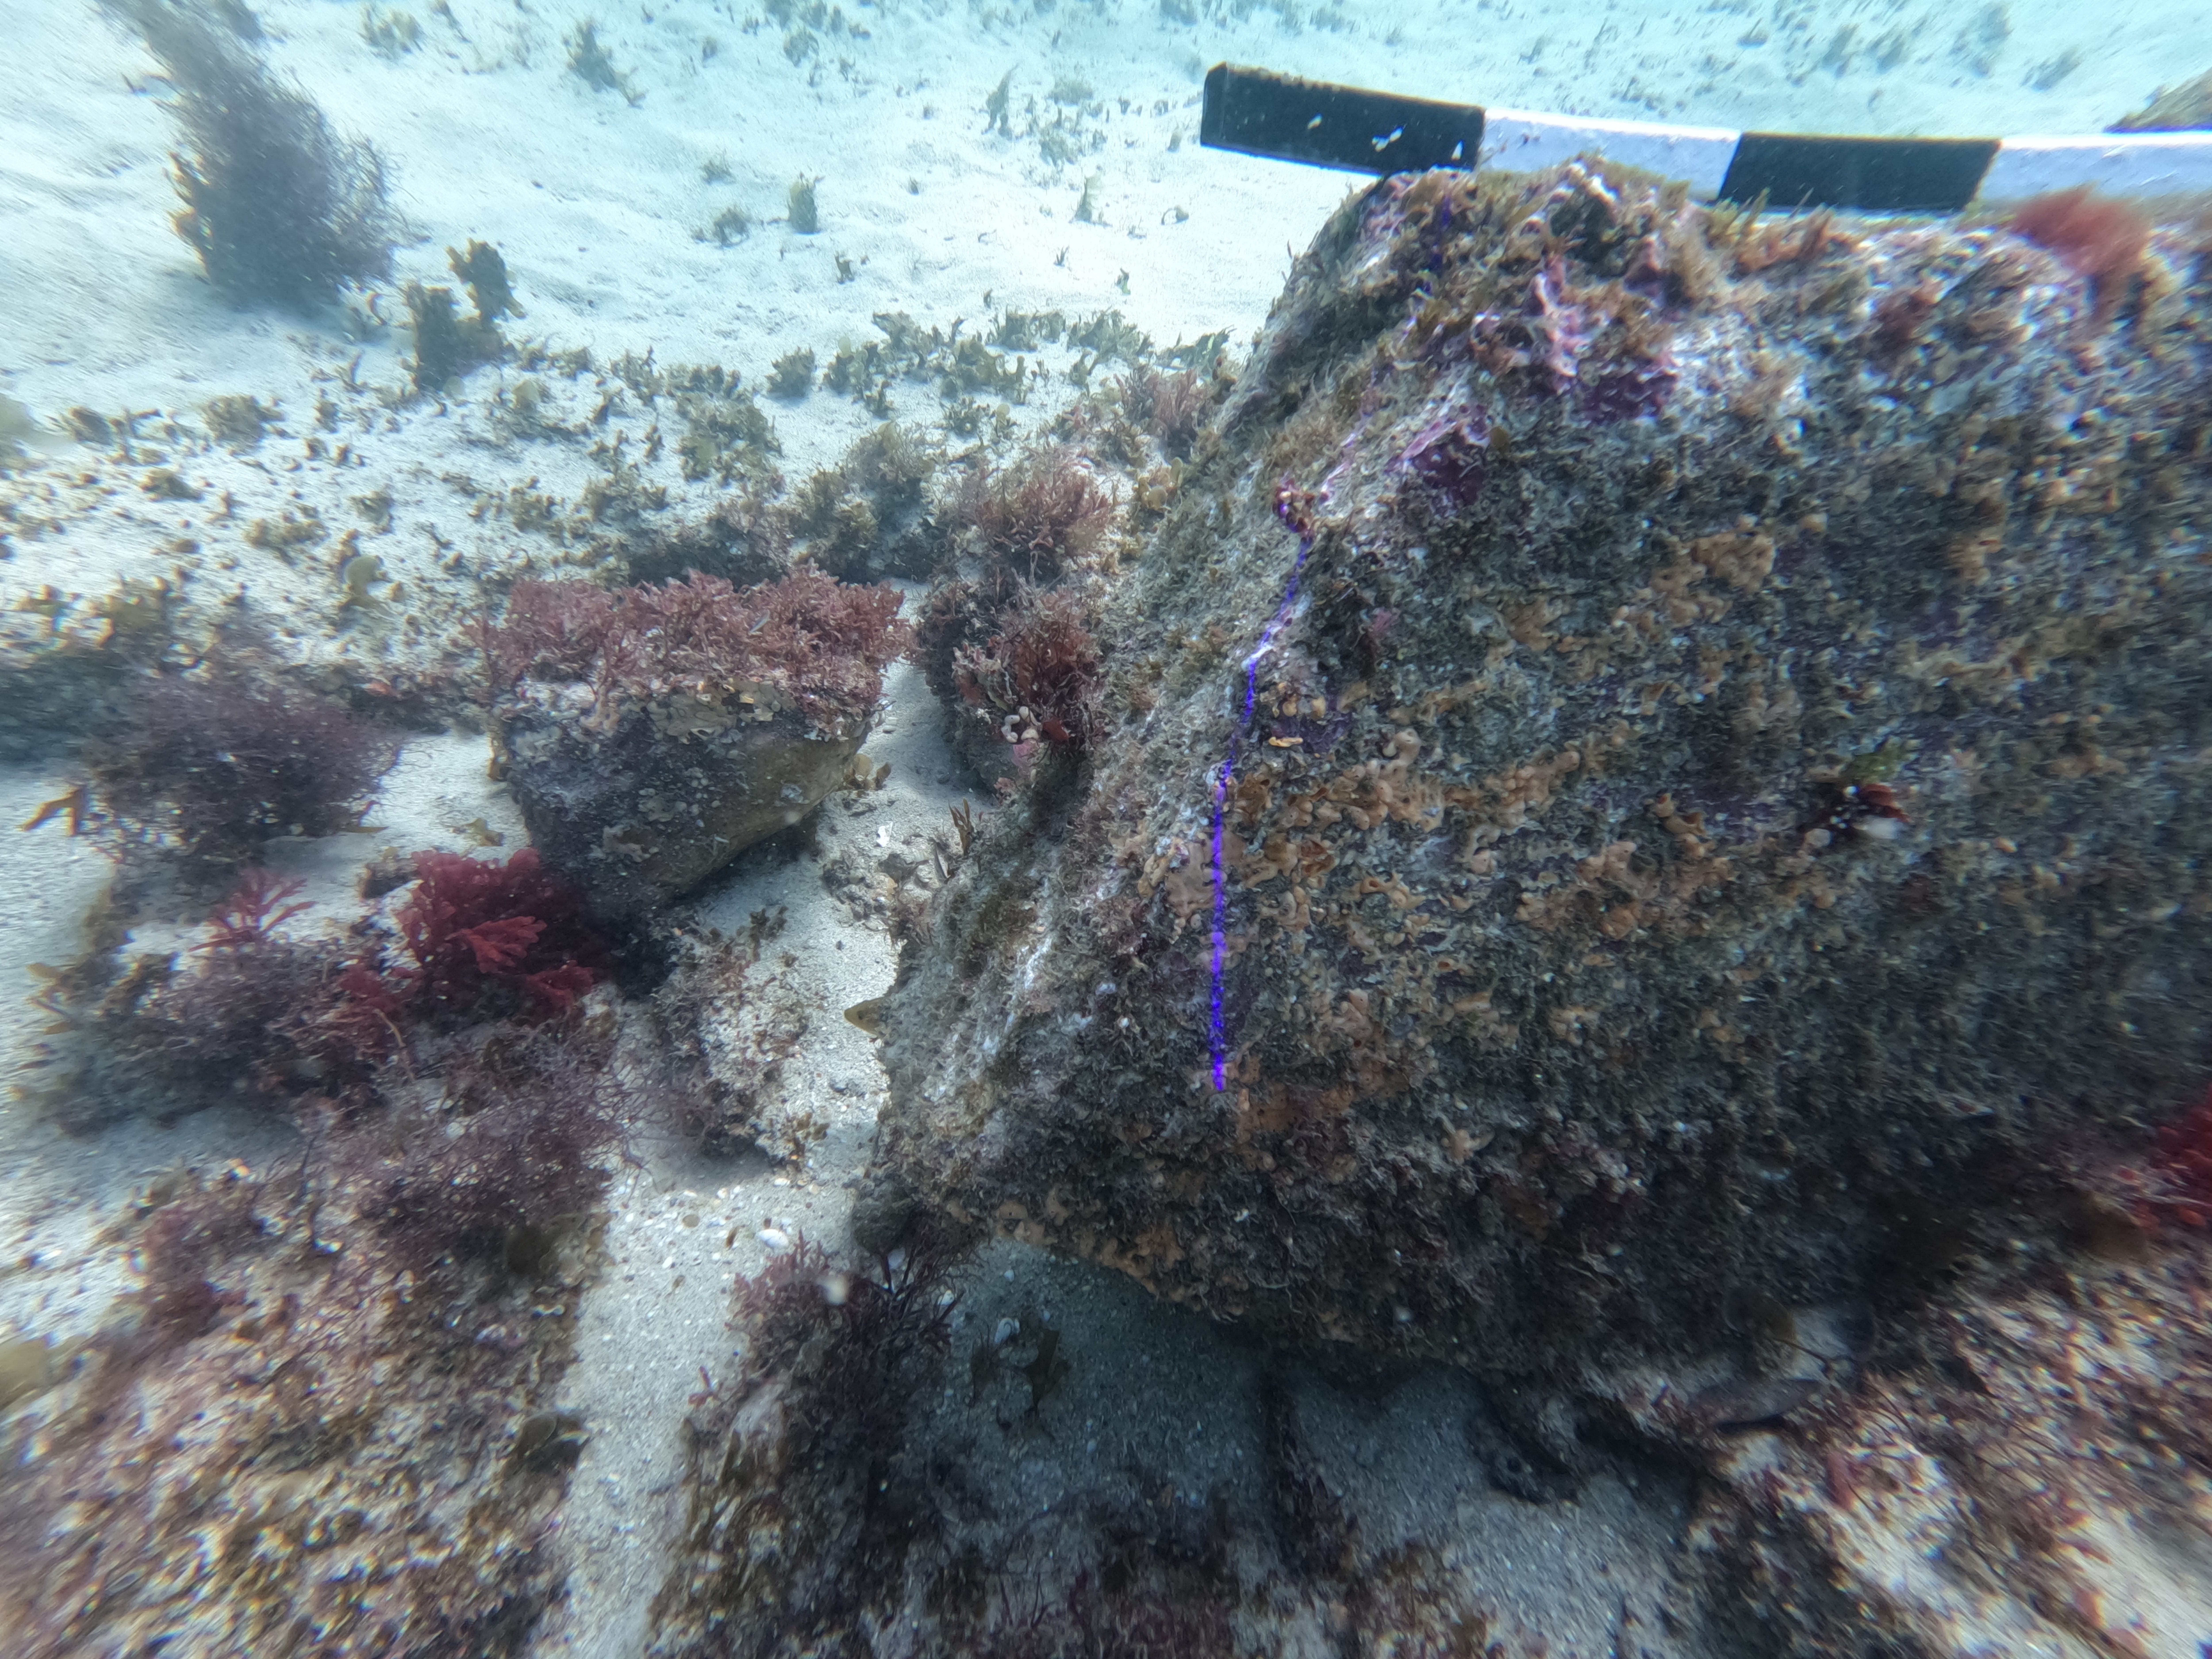

Supplement: Supplementary file 839 [file G0713906.pdf › Ocean2/G0713906.pdf]

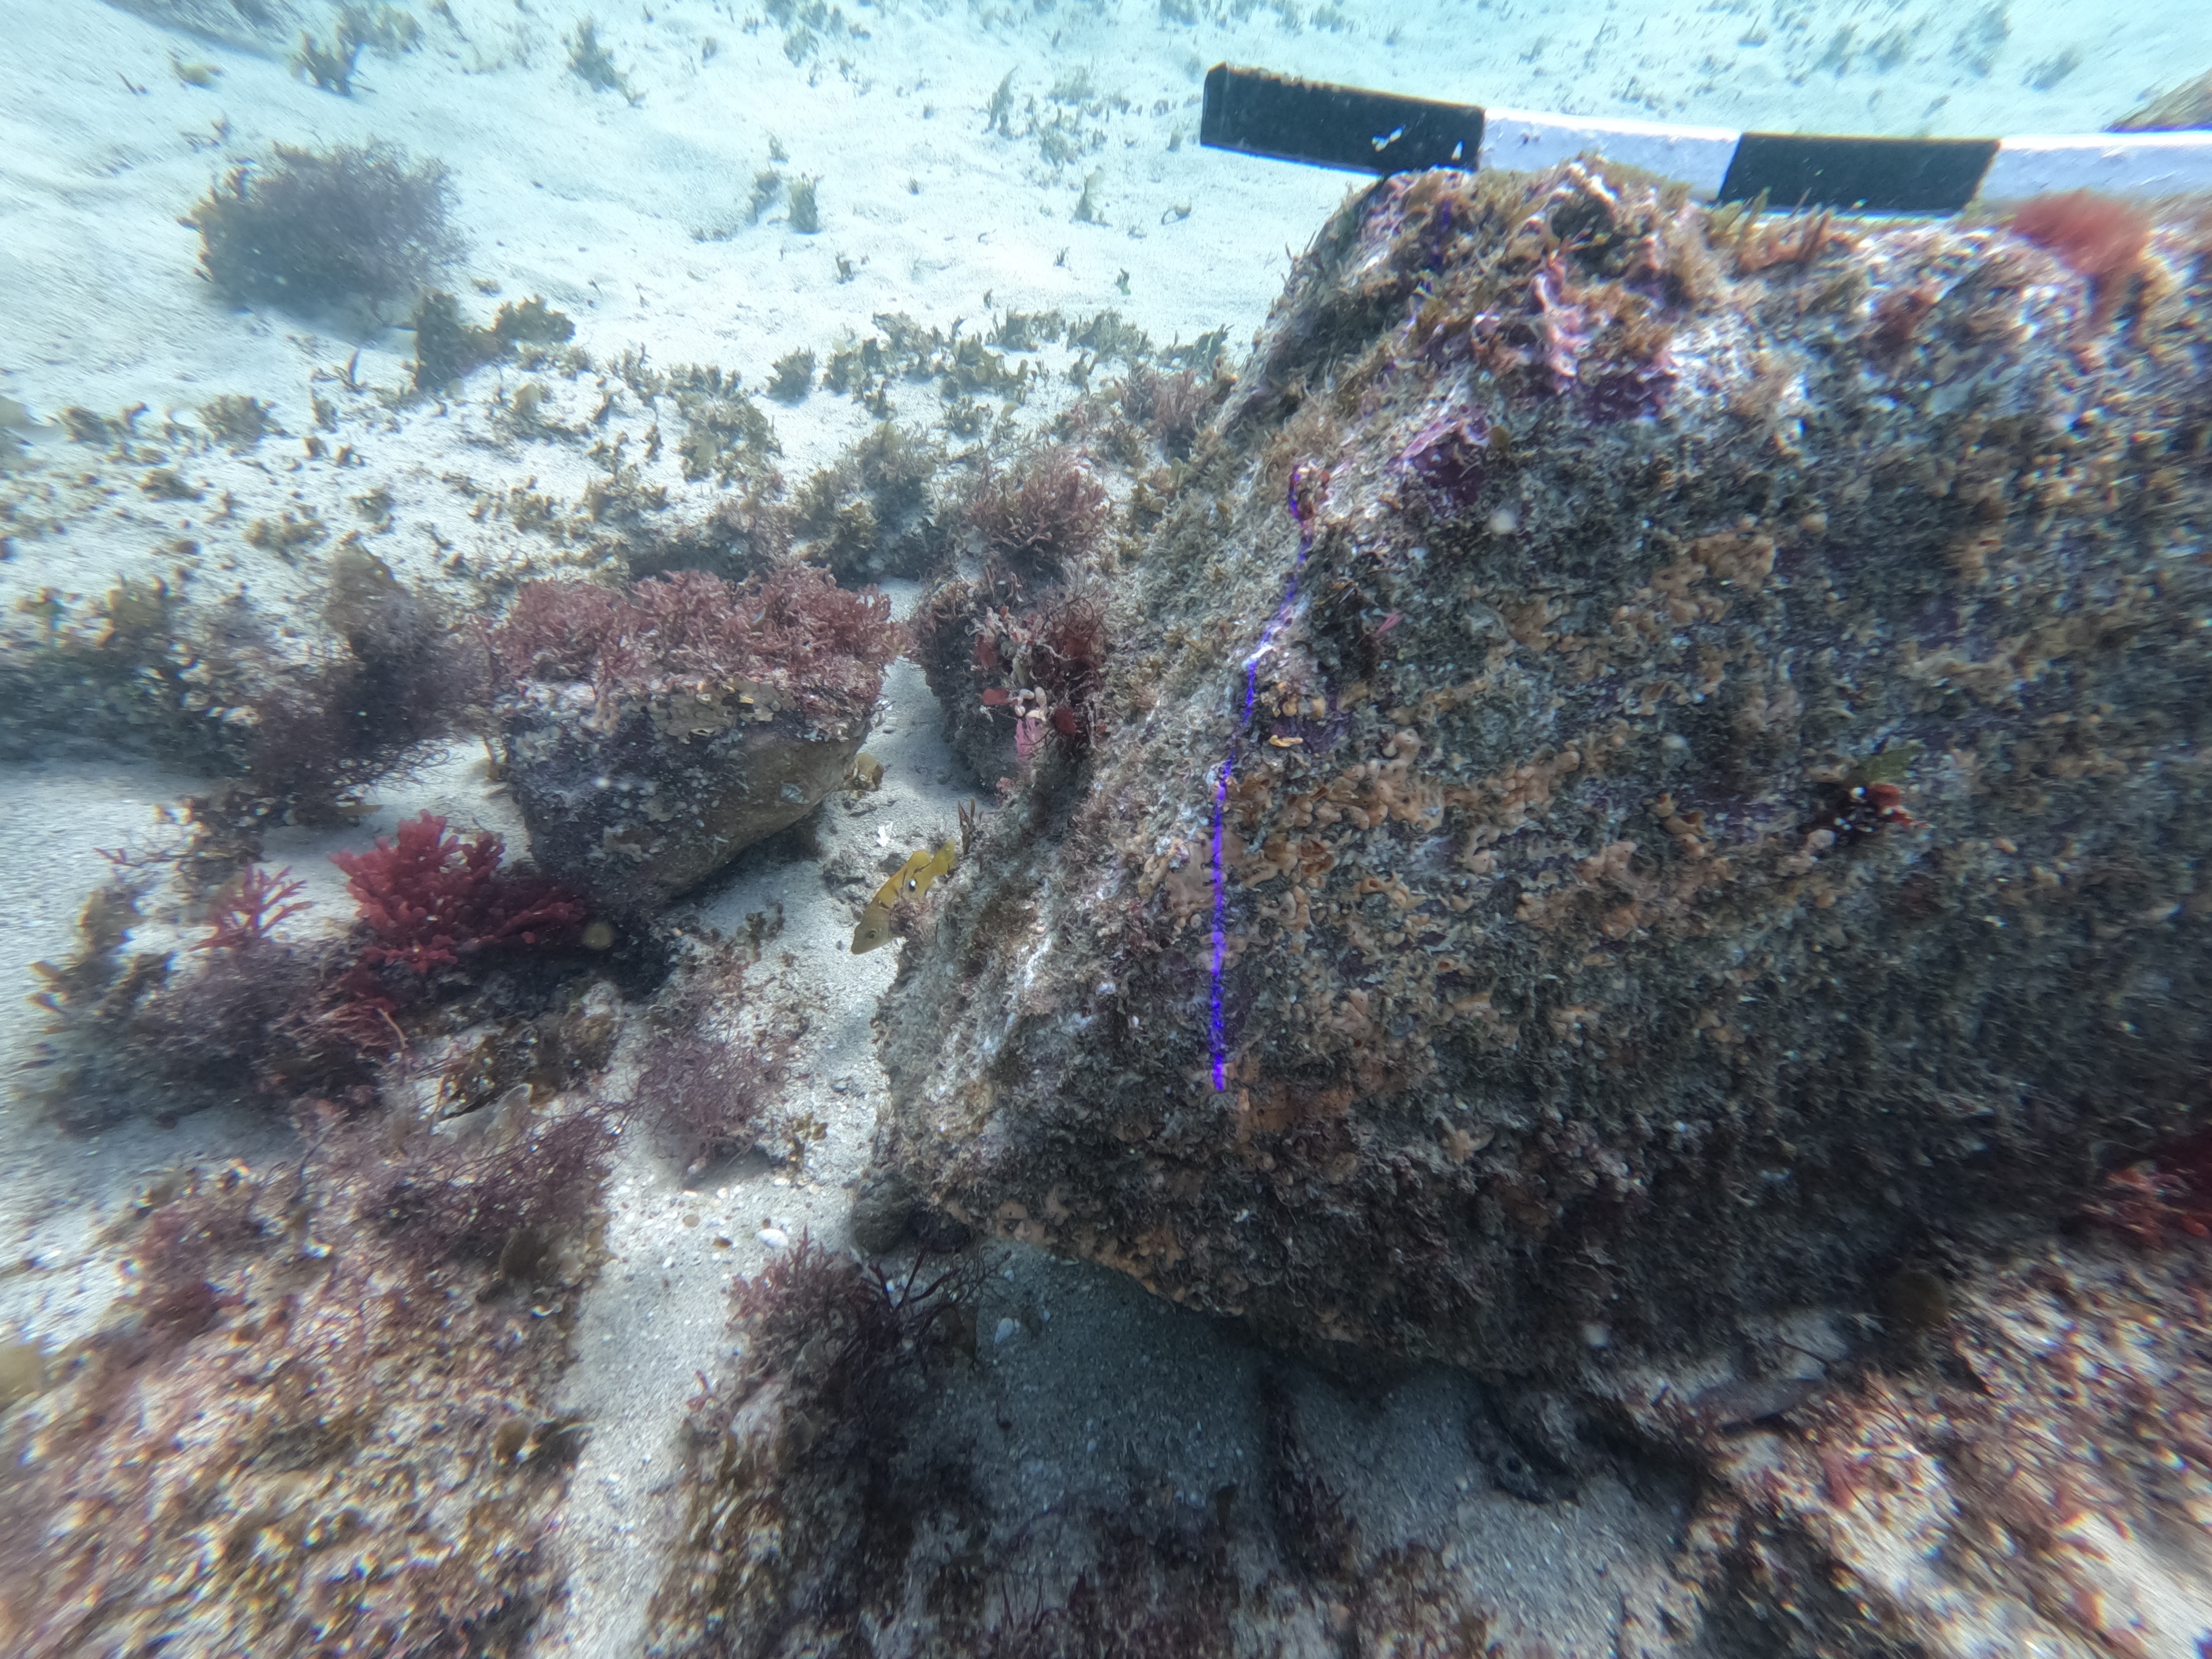

Supplement: Supplementary file 840 [file G0713907.pdf › Ocean2/G0713907.pdf]

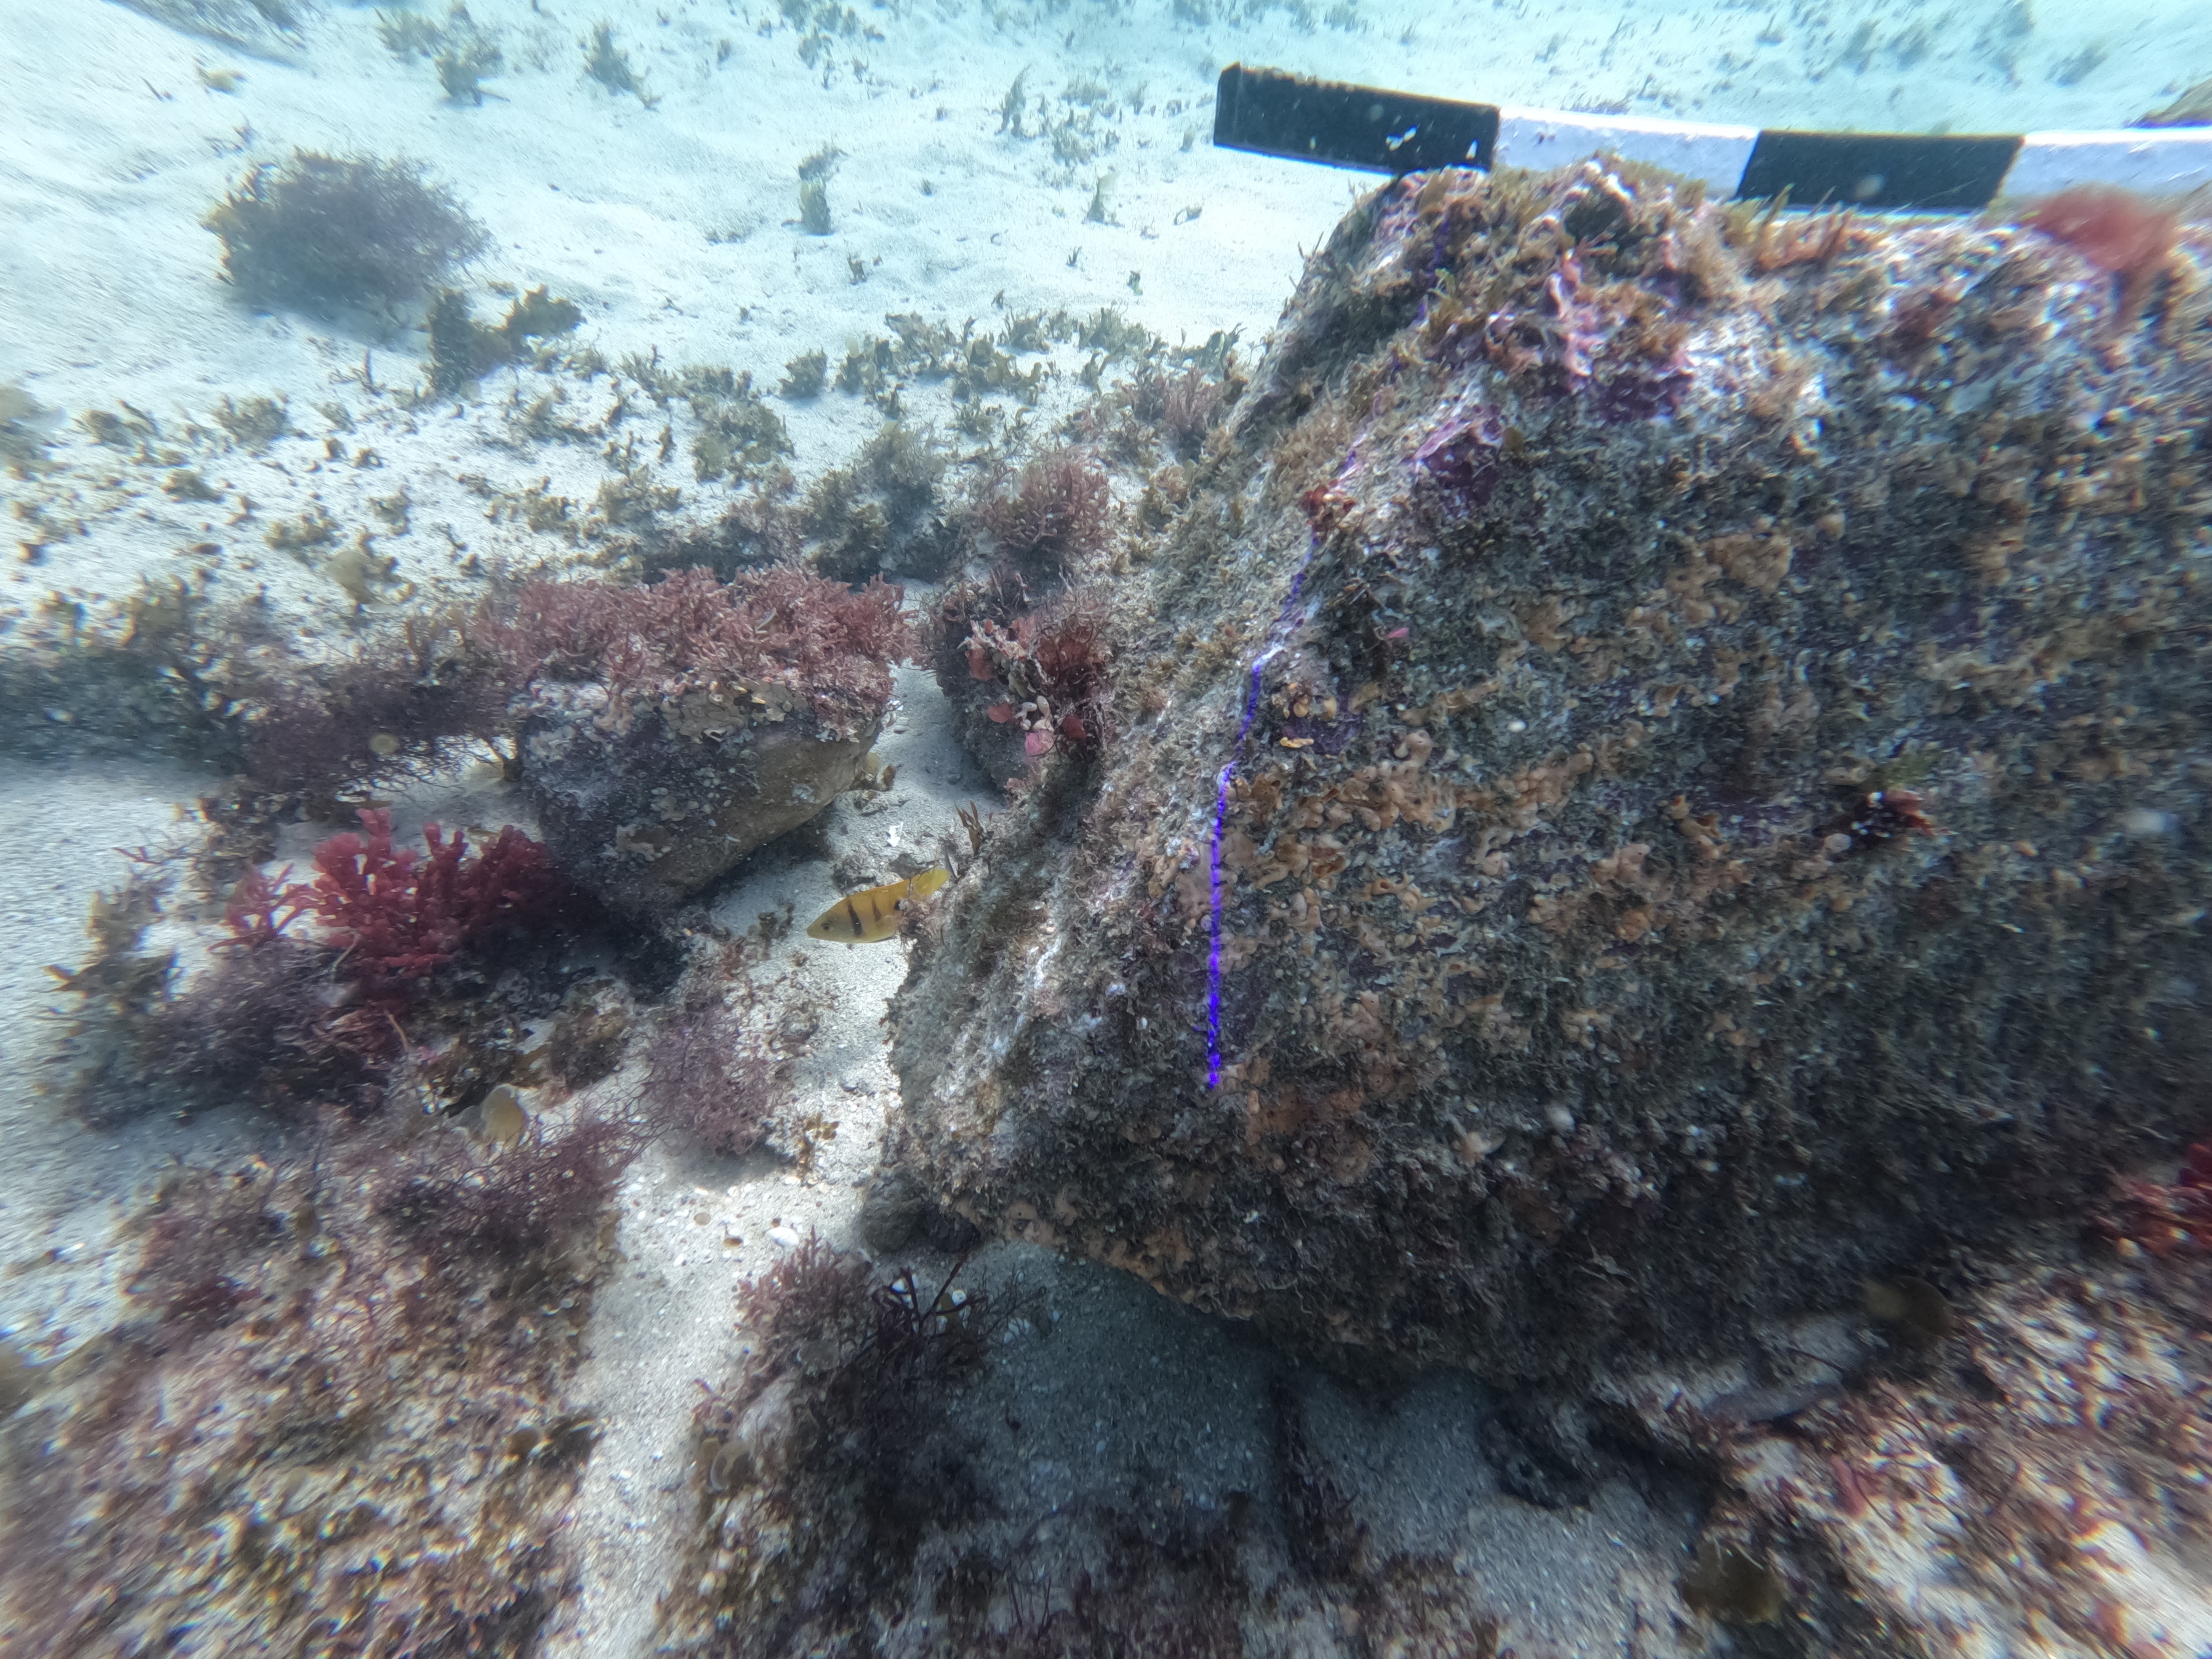

Supplement: Supplementary file 841 [file G0713908.pdf › Ocean2/G0713908.pdf]

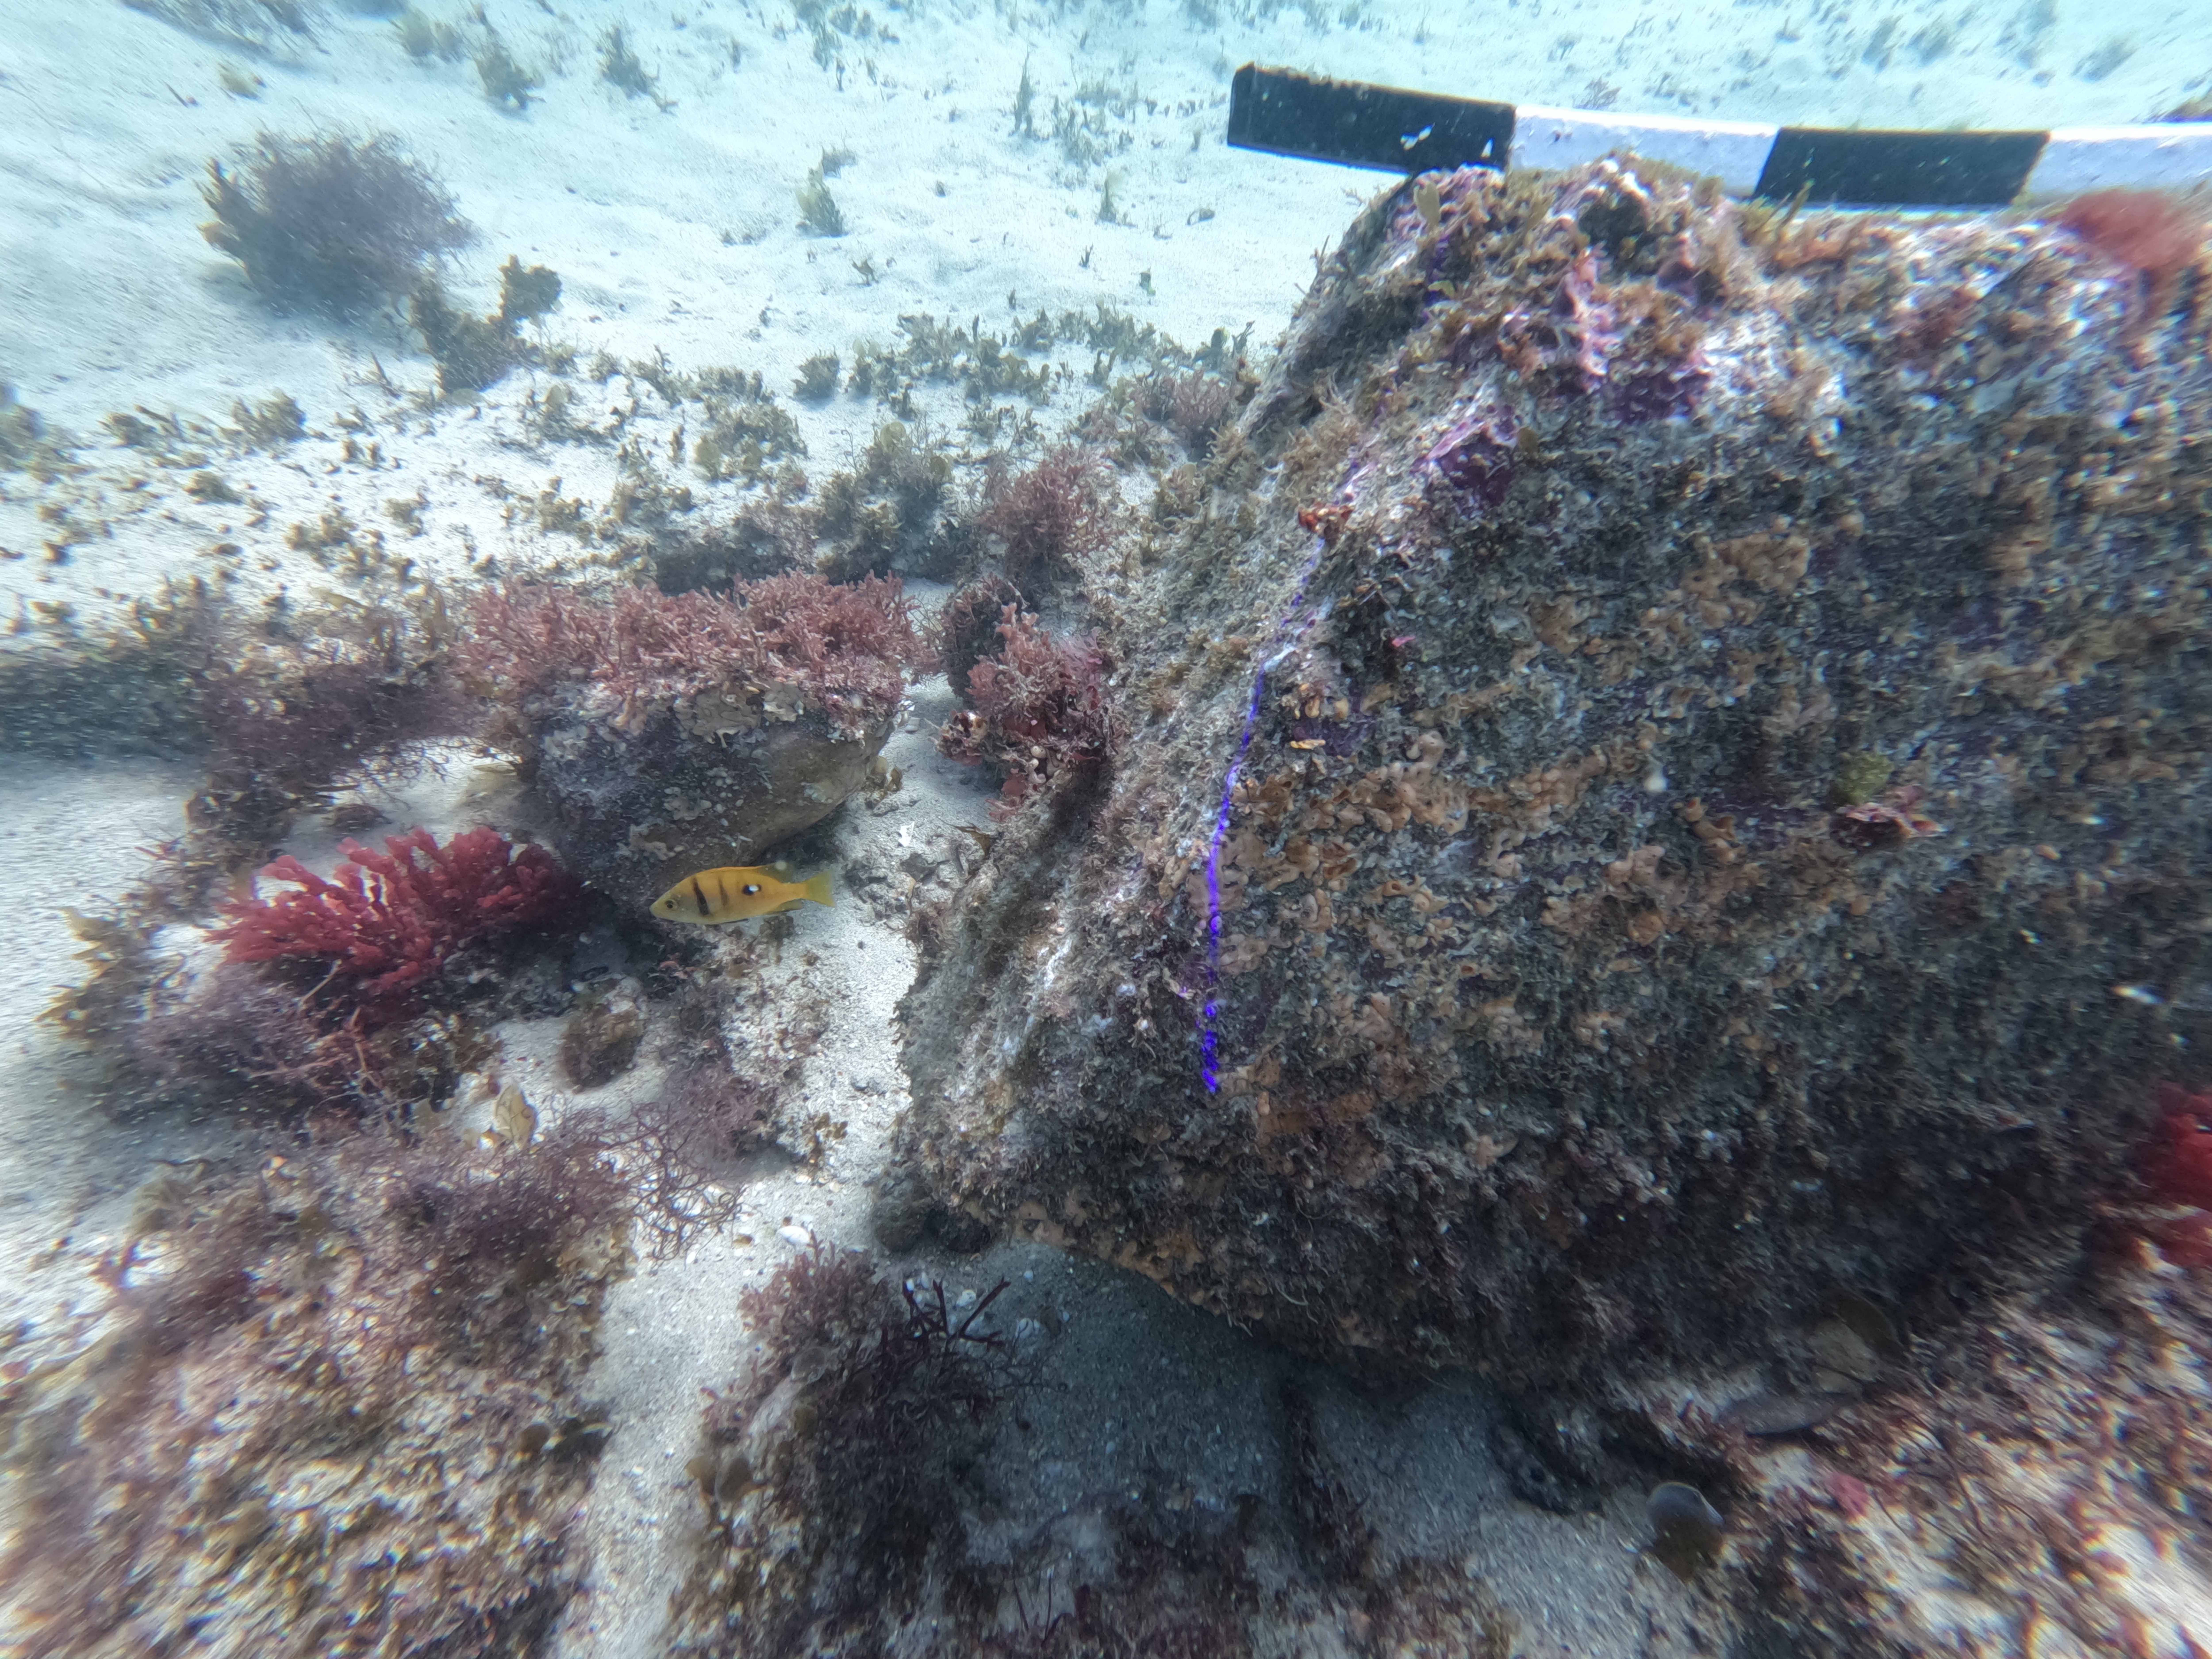

Supplement: Supplementary file 842 [file G0713909.pdf › Ocean2/G0713909.pdf]

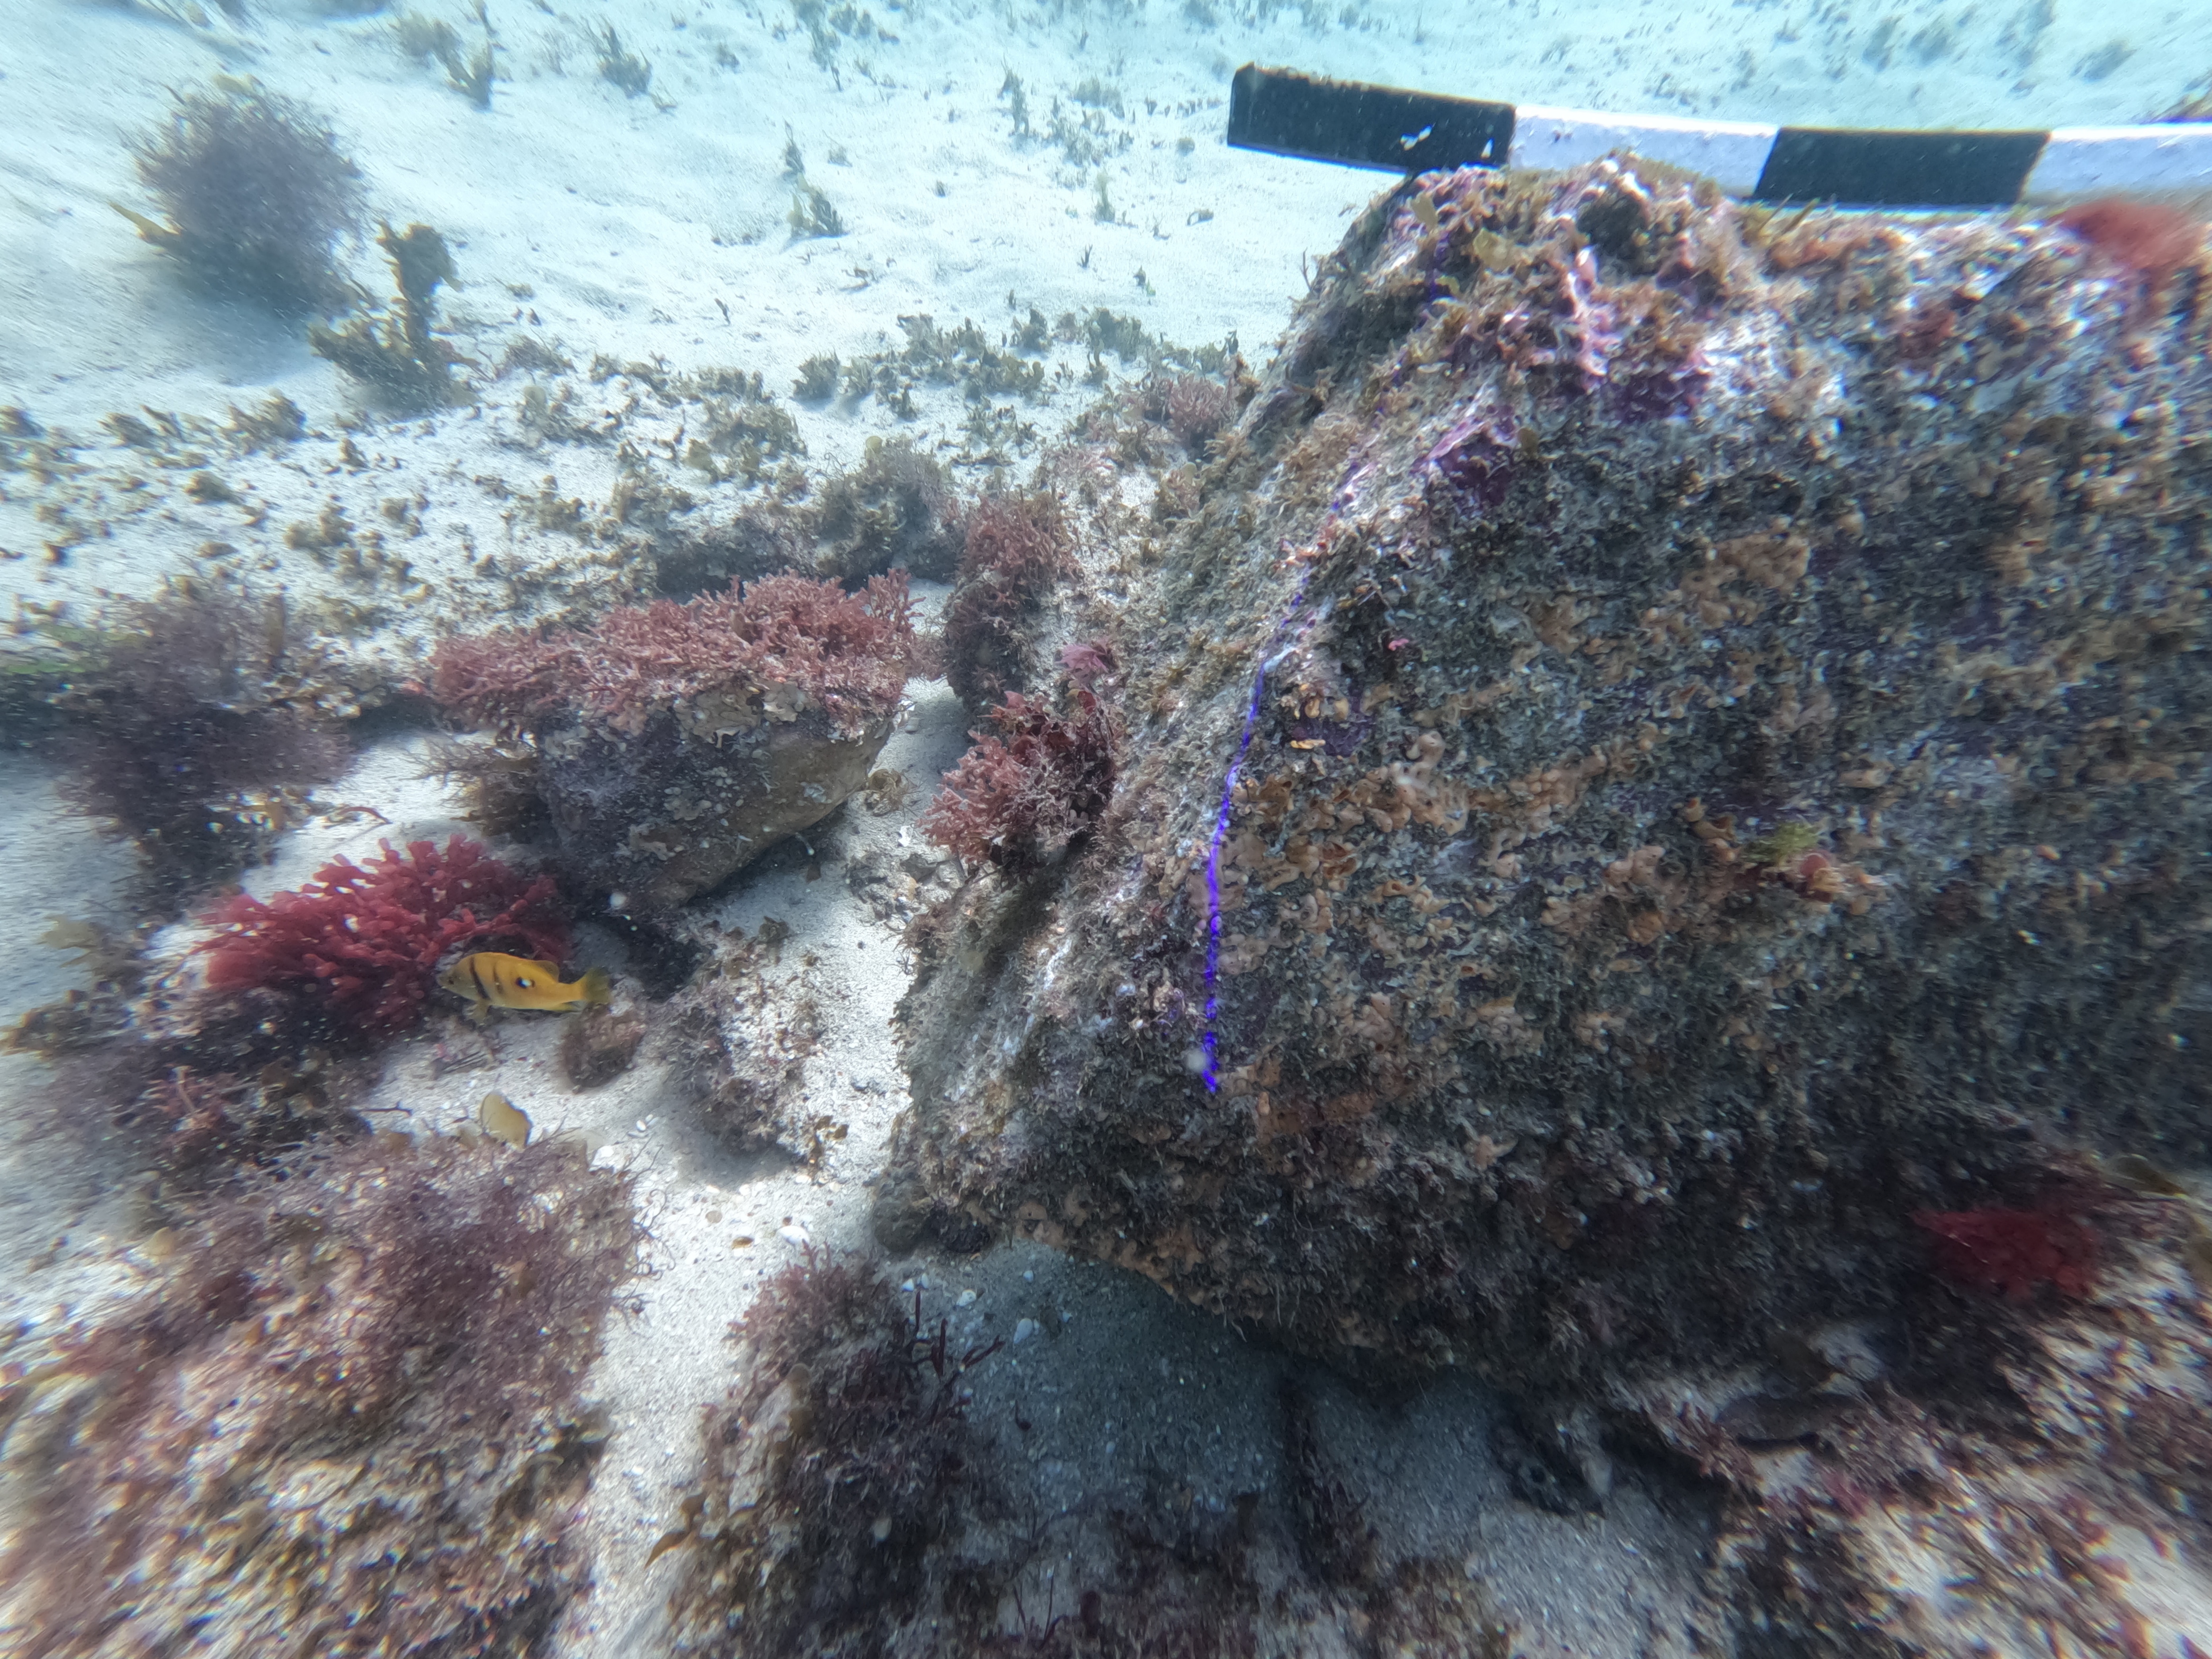

Supplement: Supplementary file 843 [file G0713910.pdf › Ocean2/G0713910.pdf]

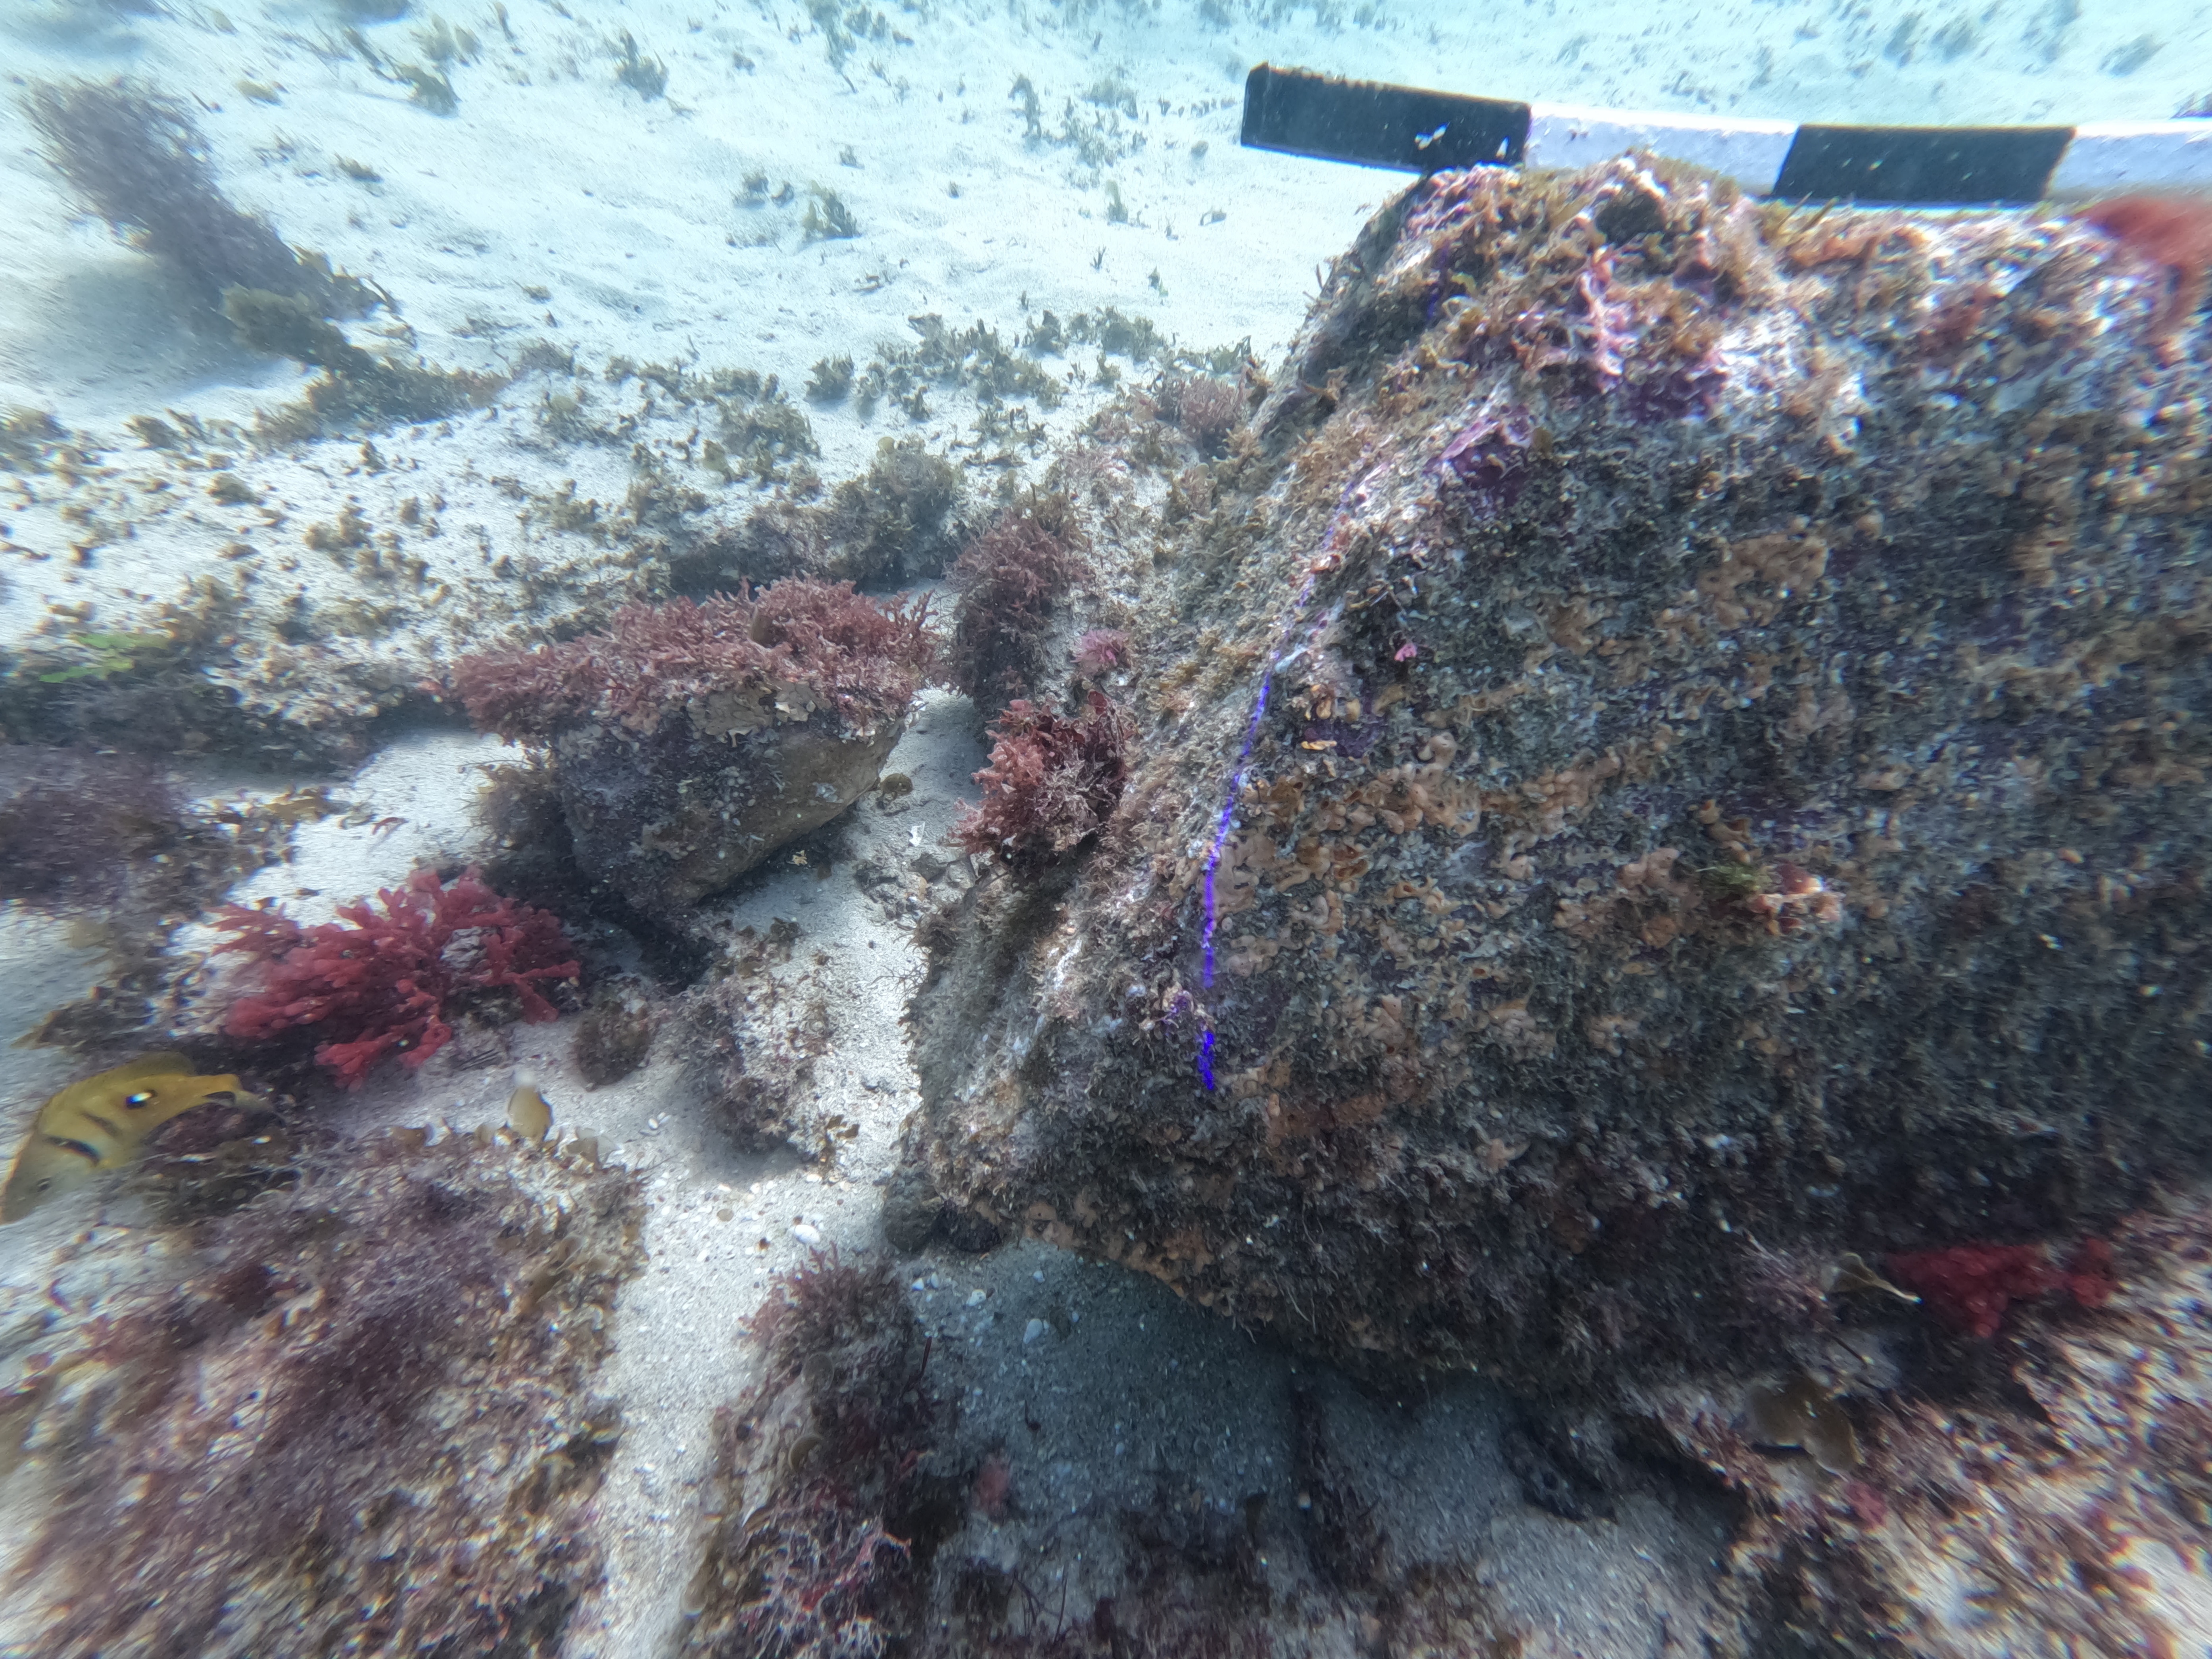

Supplement: Supplementary file 844 [file G0713911.pdf › Ocean2/G0713911.pdf]

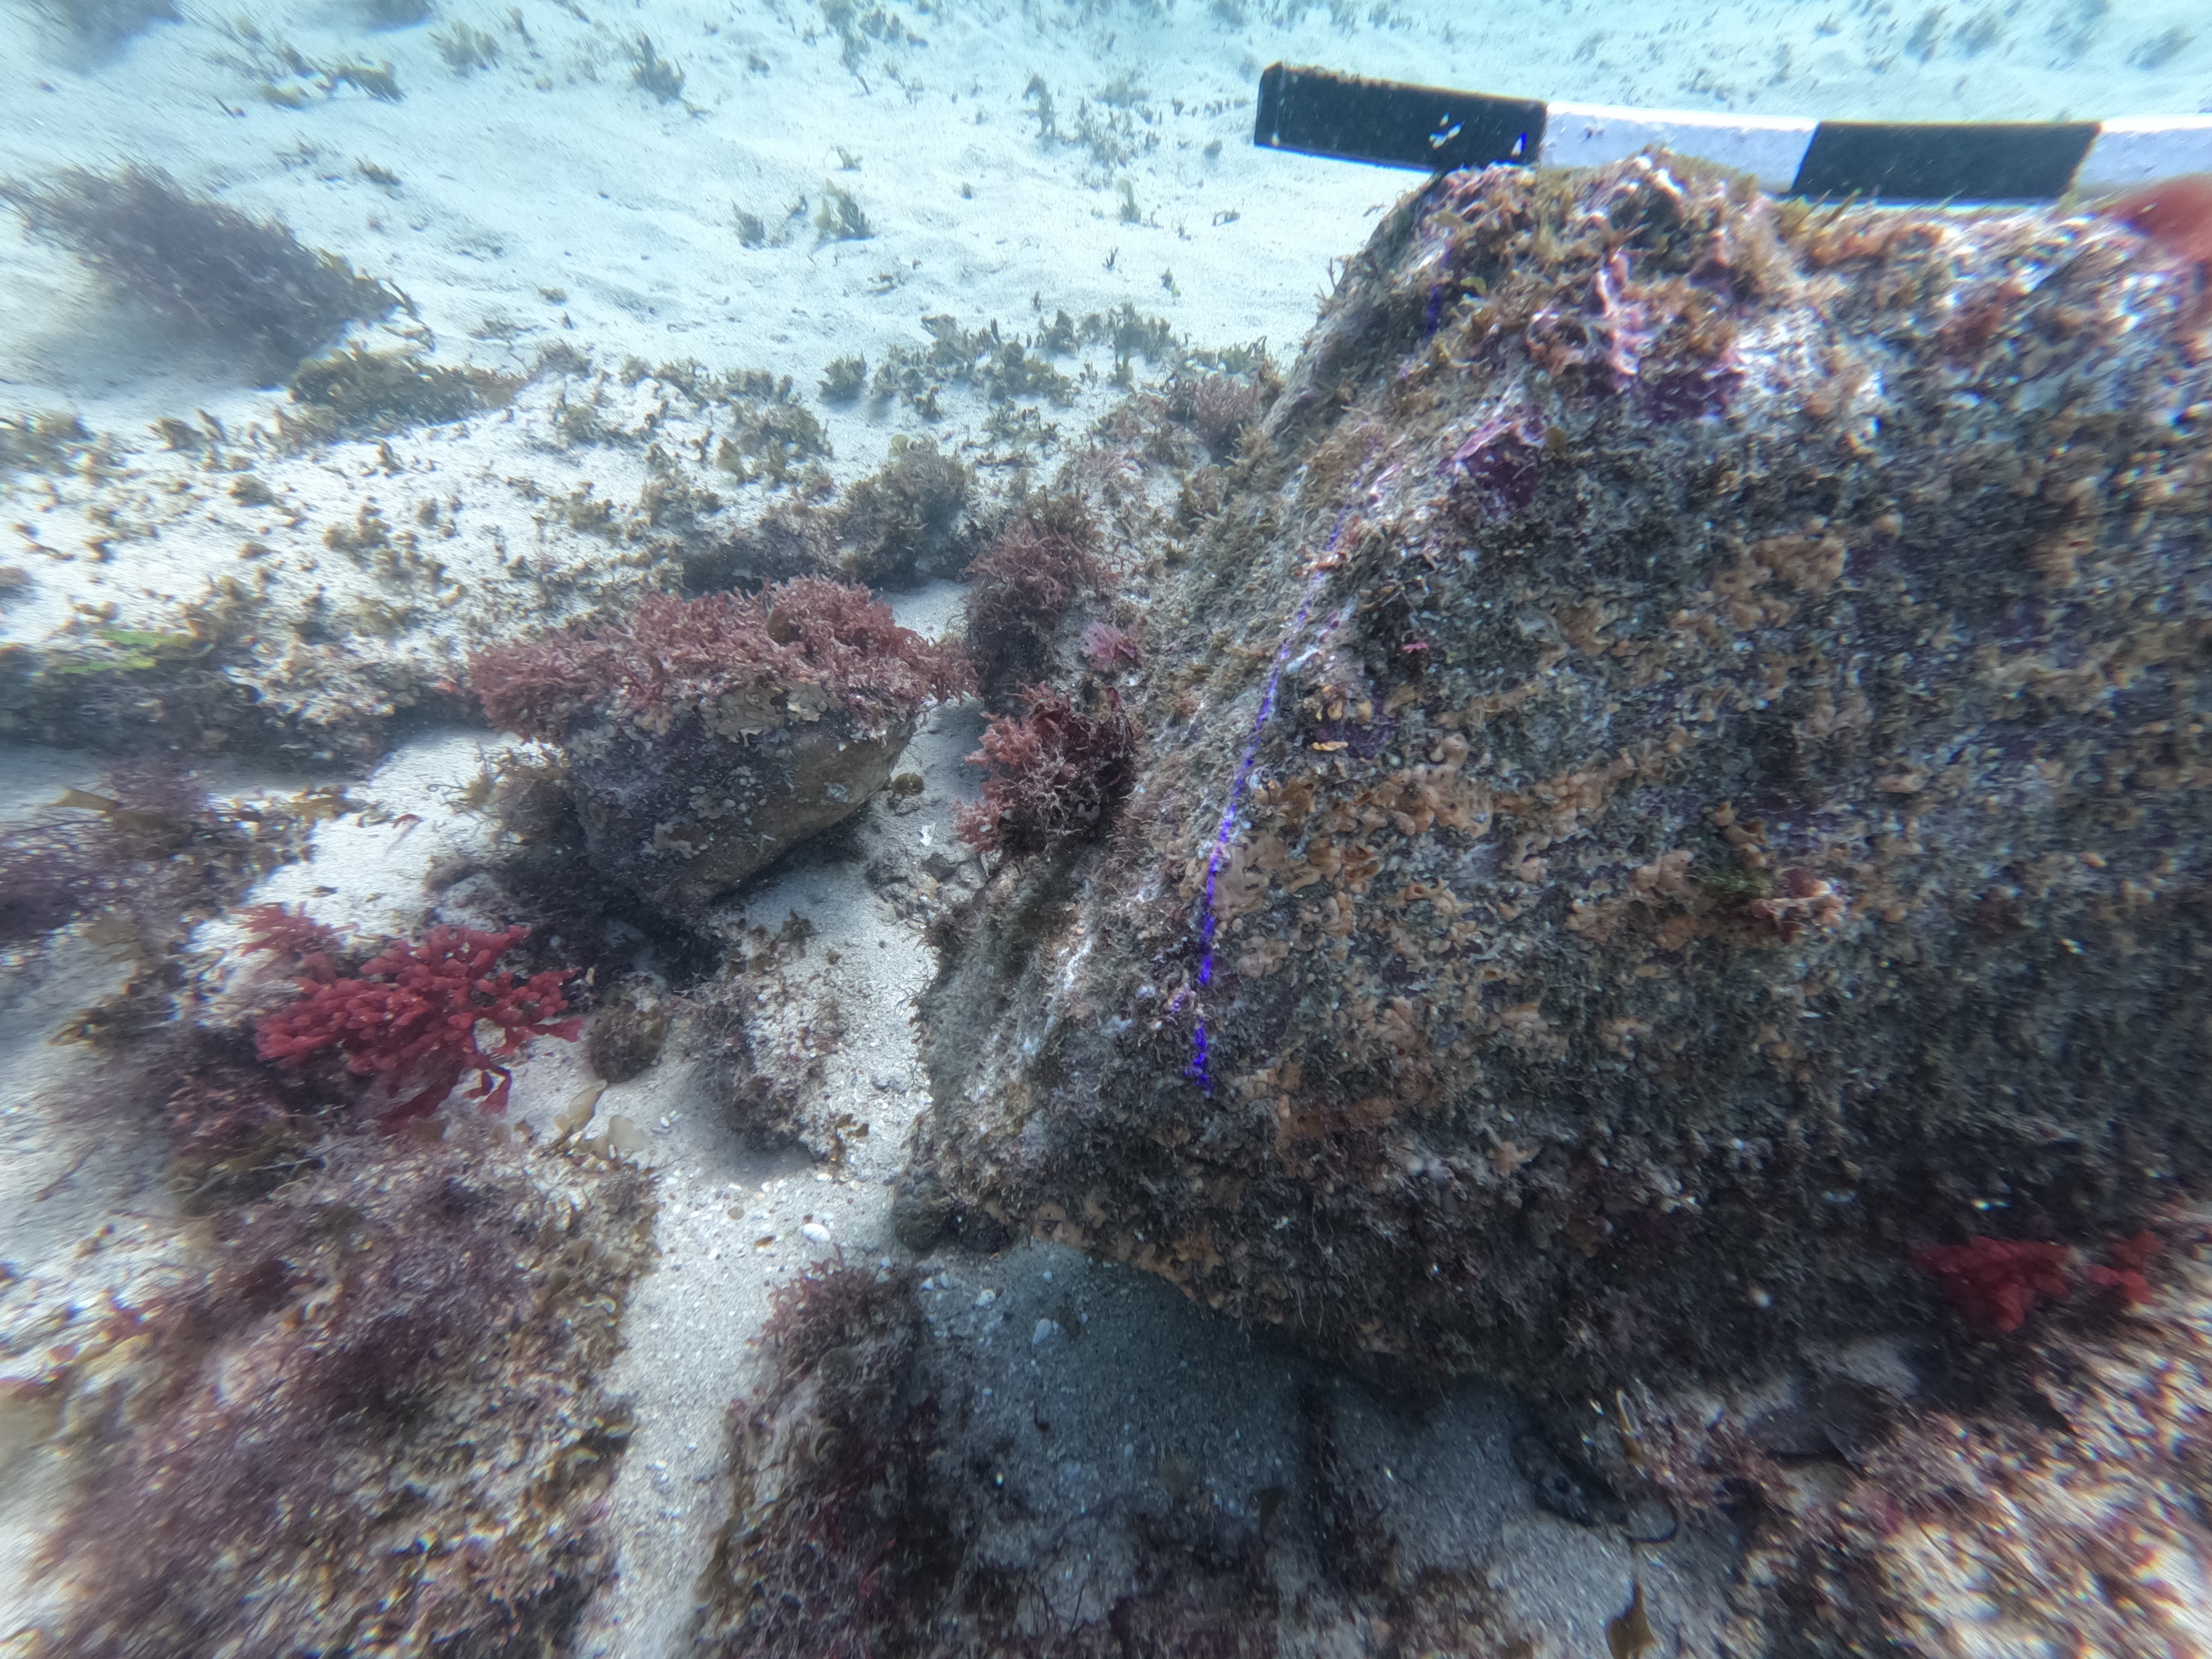

Supplement: Supplementary file 845 [file G0713912.pdf › Ocean2/G0713912.pdf]

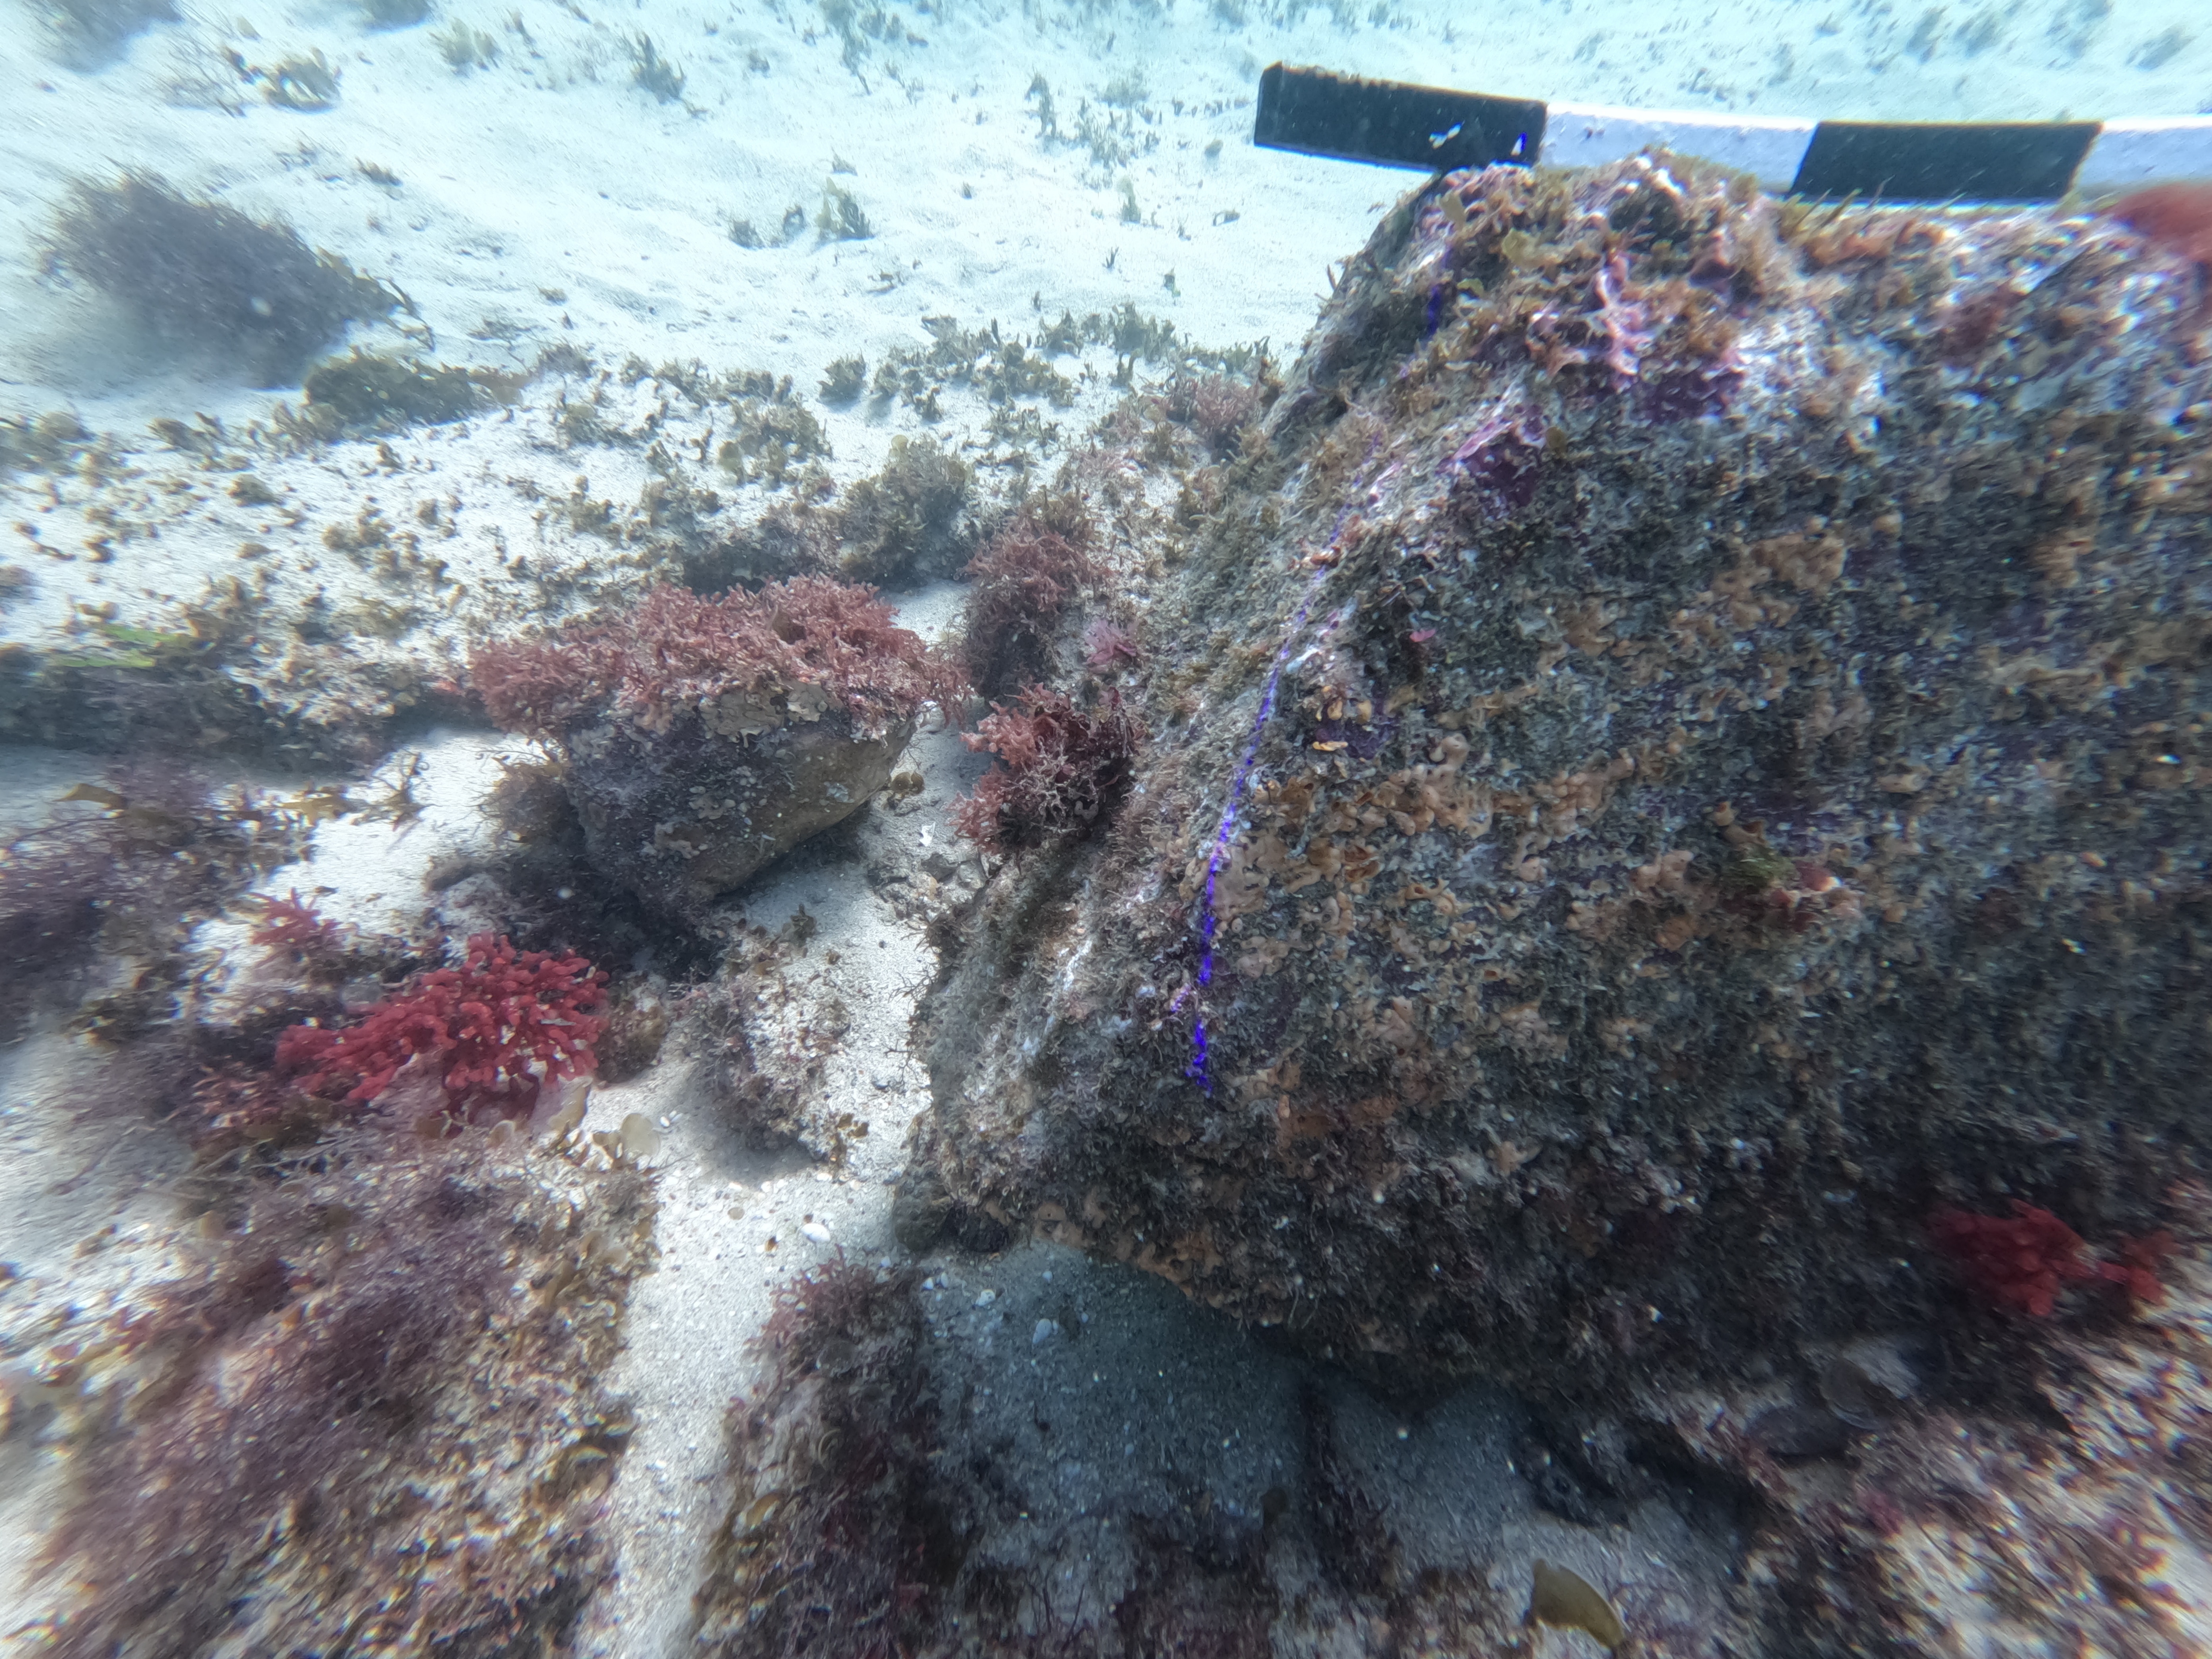

Supplement: Supplementary file 846 [file G0713913.pdf › Ocean2/G0713913.pdf]

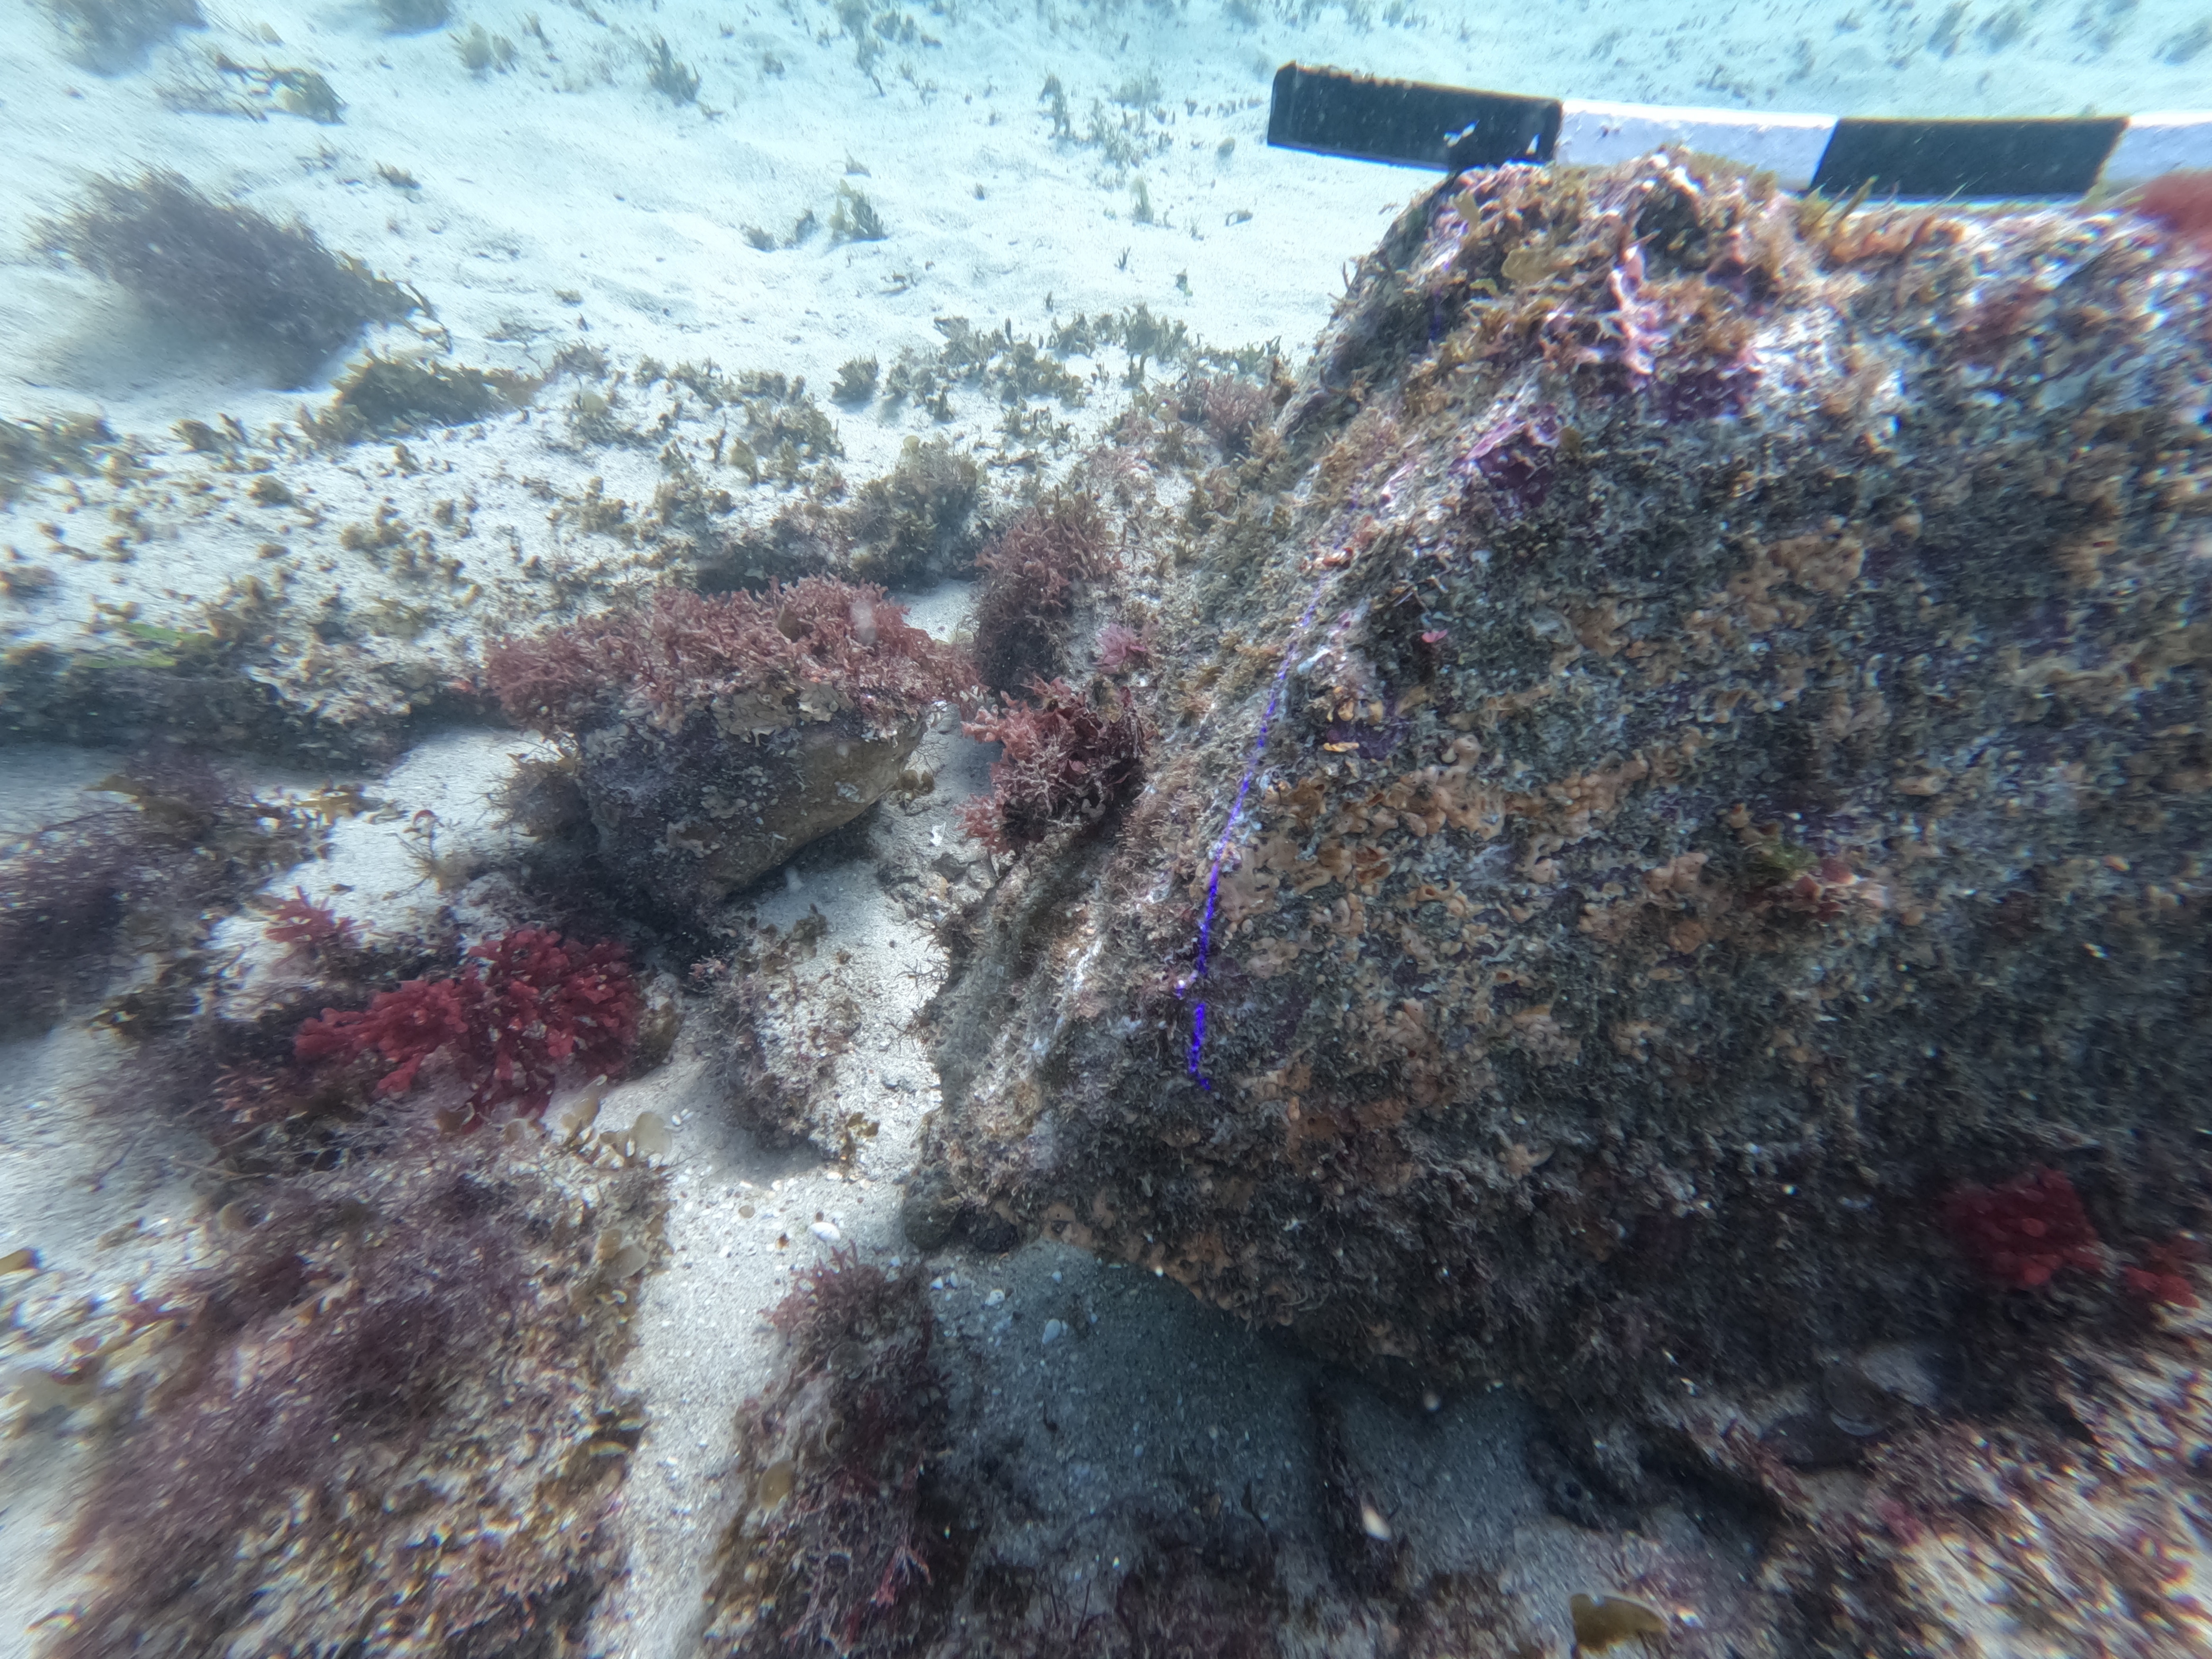

Supplement: Supplementary file 847 [file G0713914.pdf › Ocean2/G0713914.pdf]

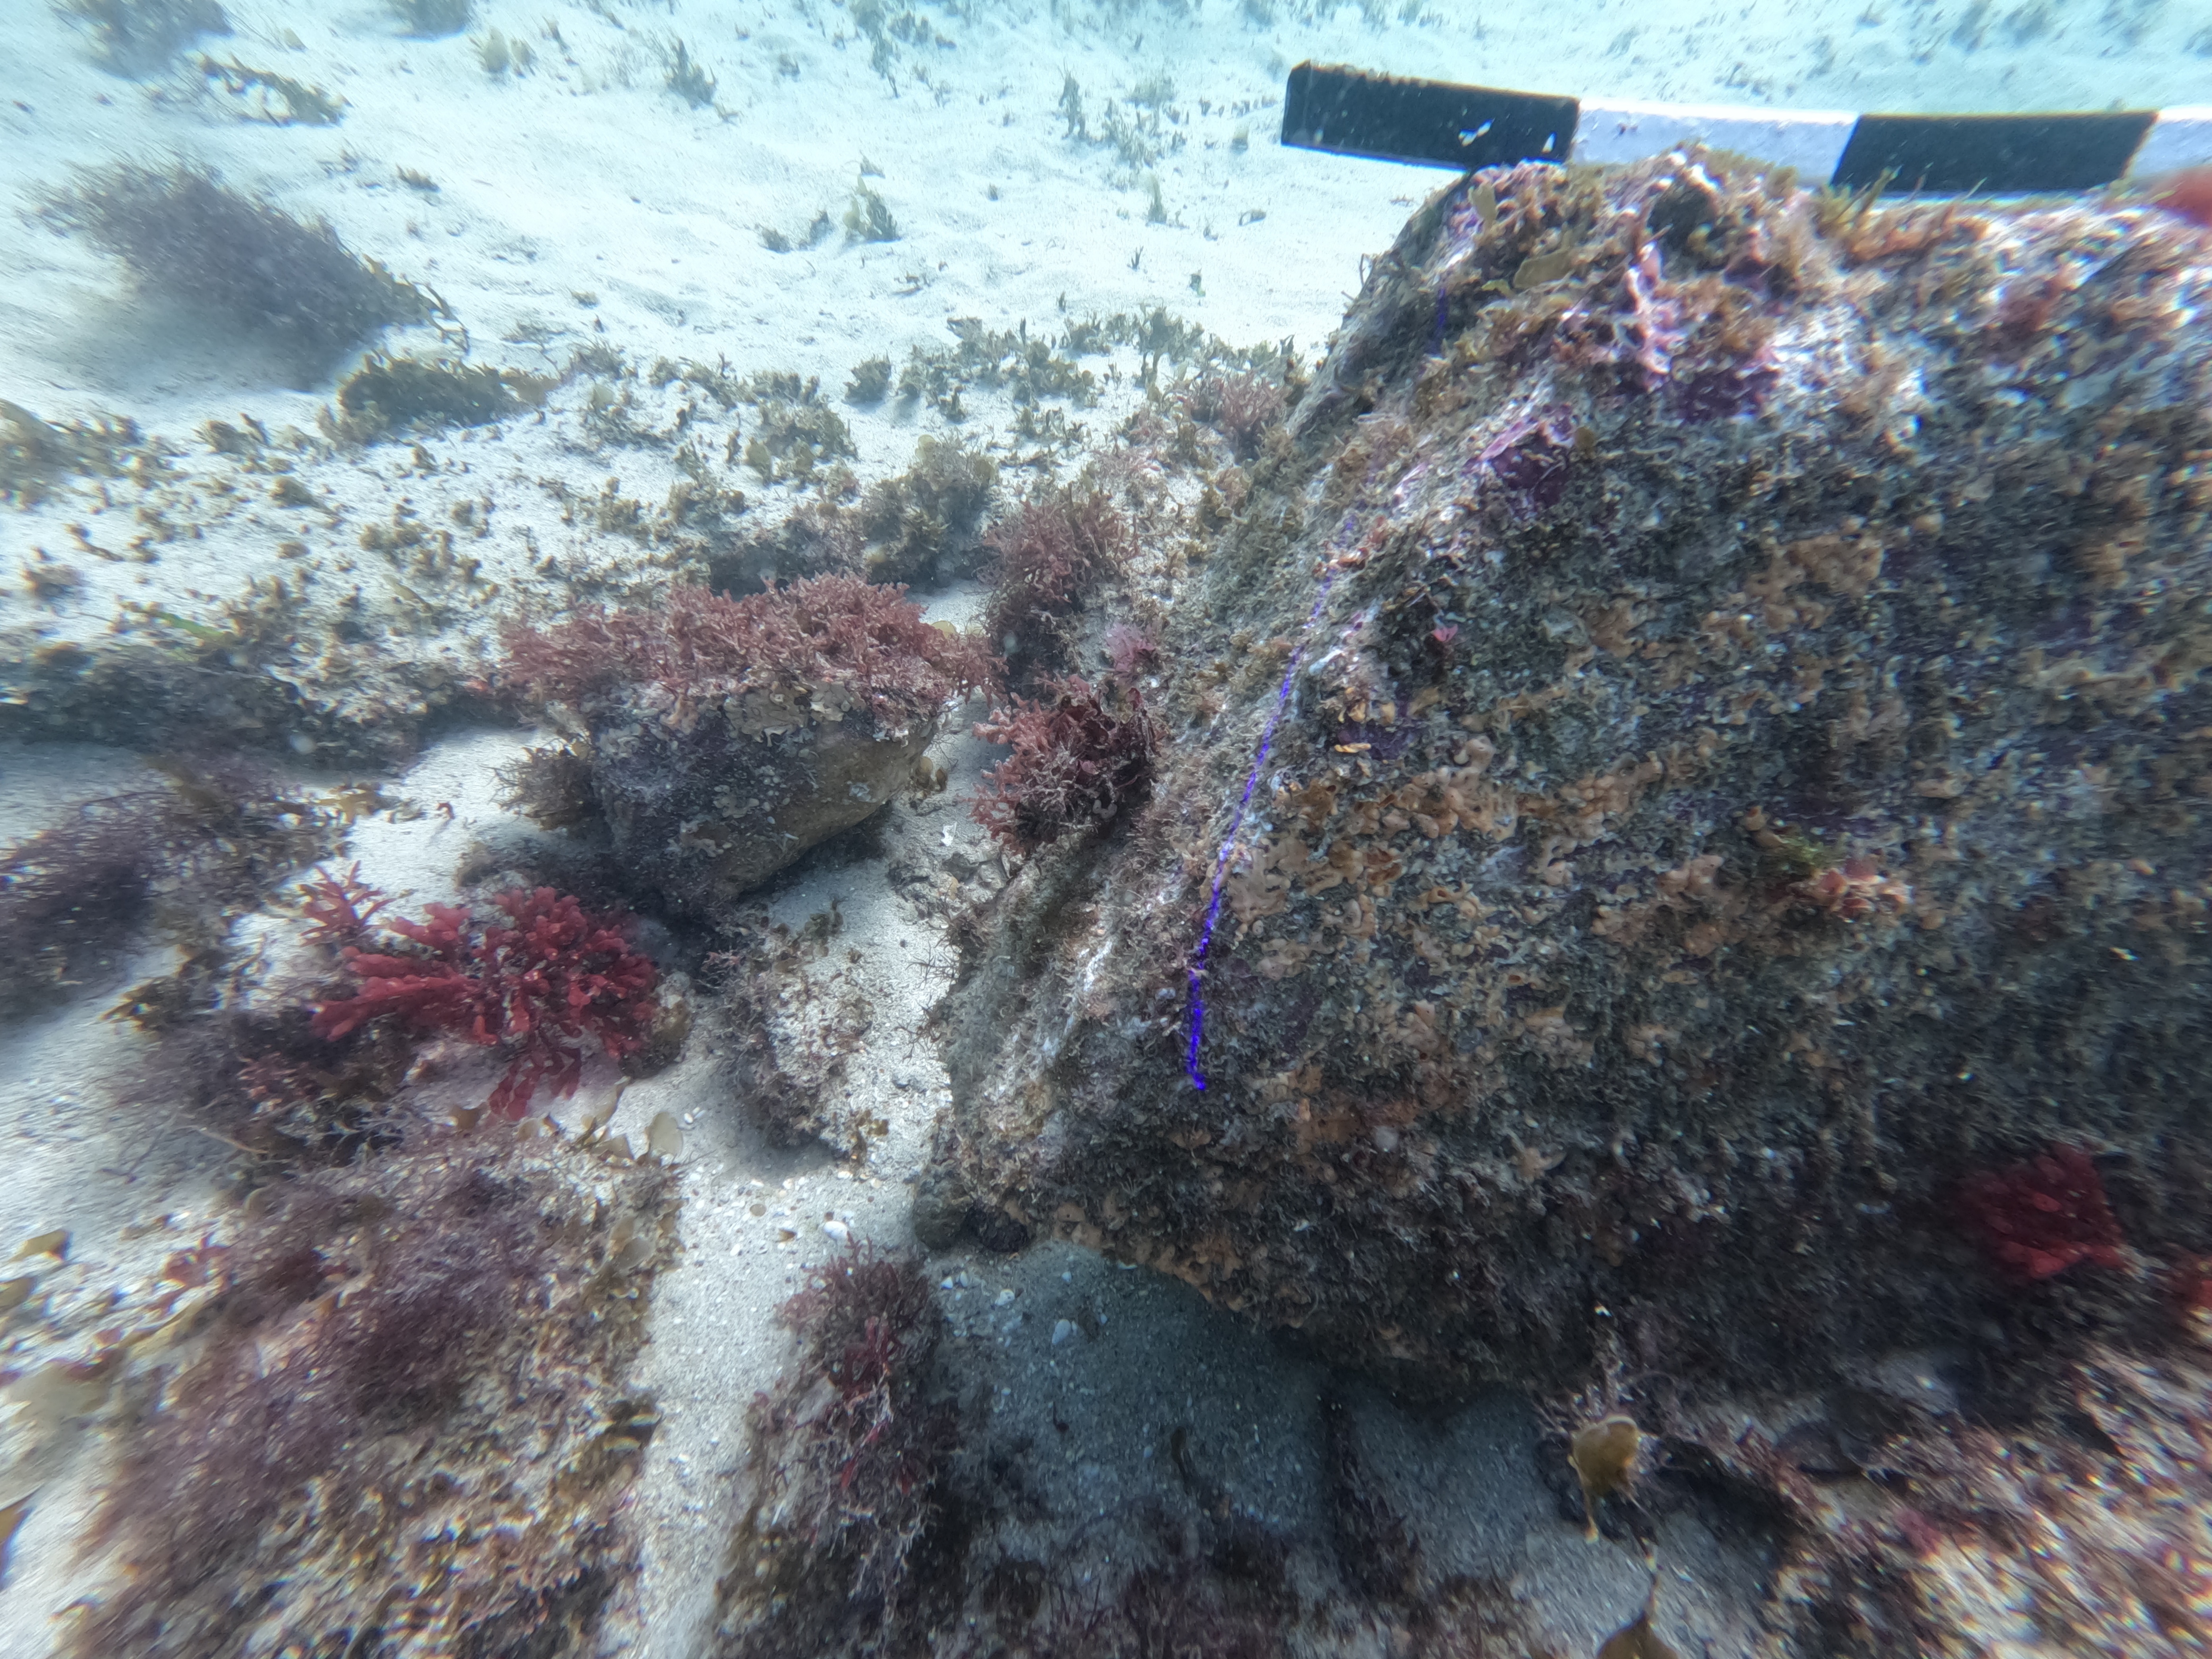

Supplement: Supplementary file 848 [file G0713915.pdf › Ocean2/G0713915.pdf]

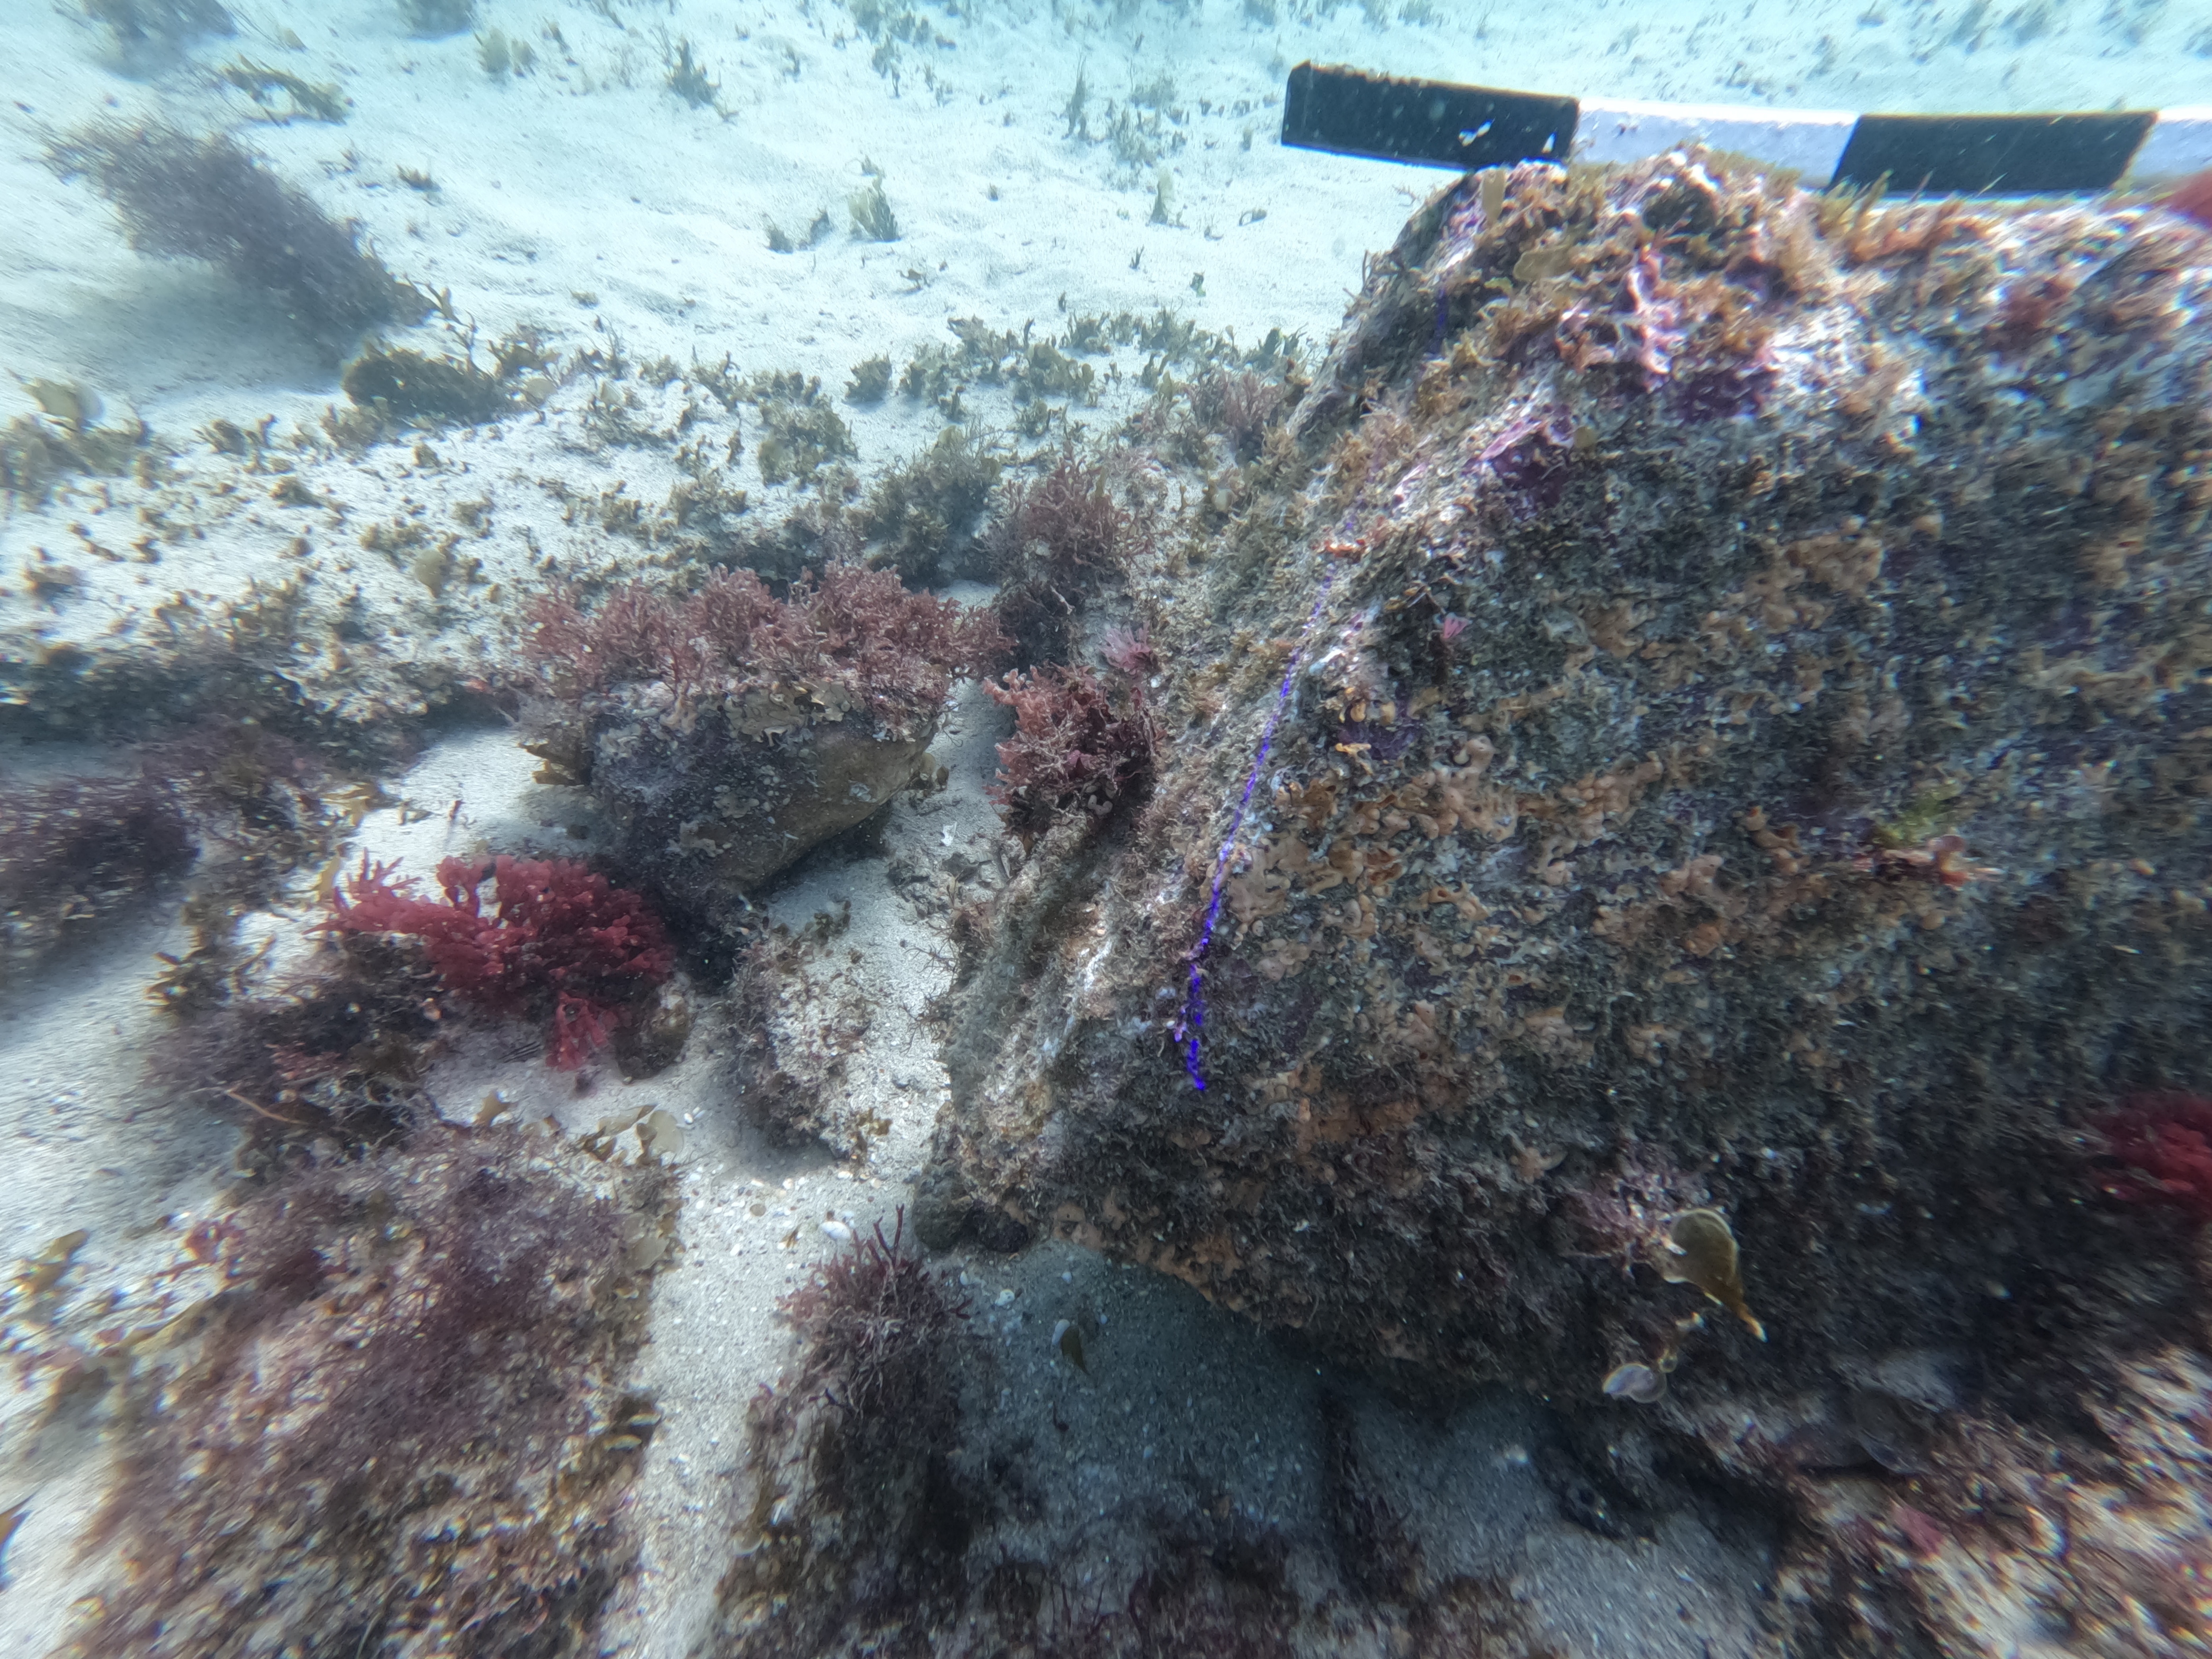

Supplement: Supplementary file 849 [file G0713916.pdf › Ocean2/G0713916.pdf]

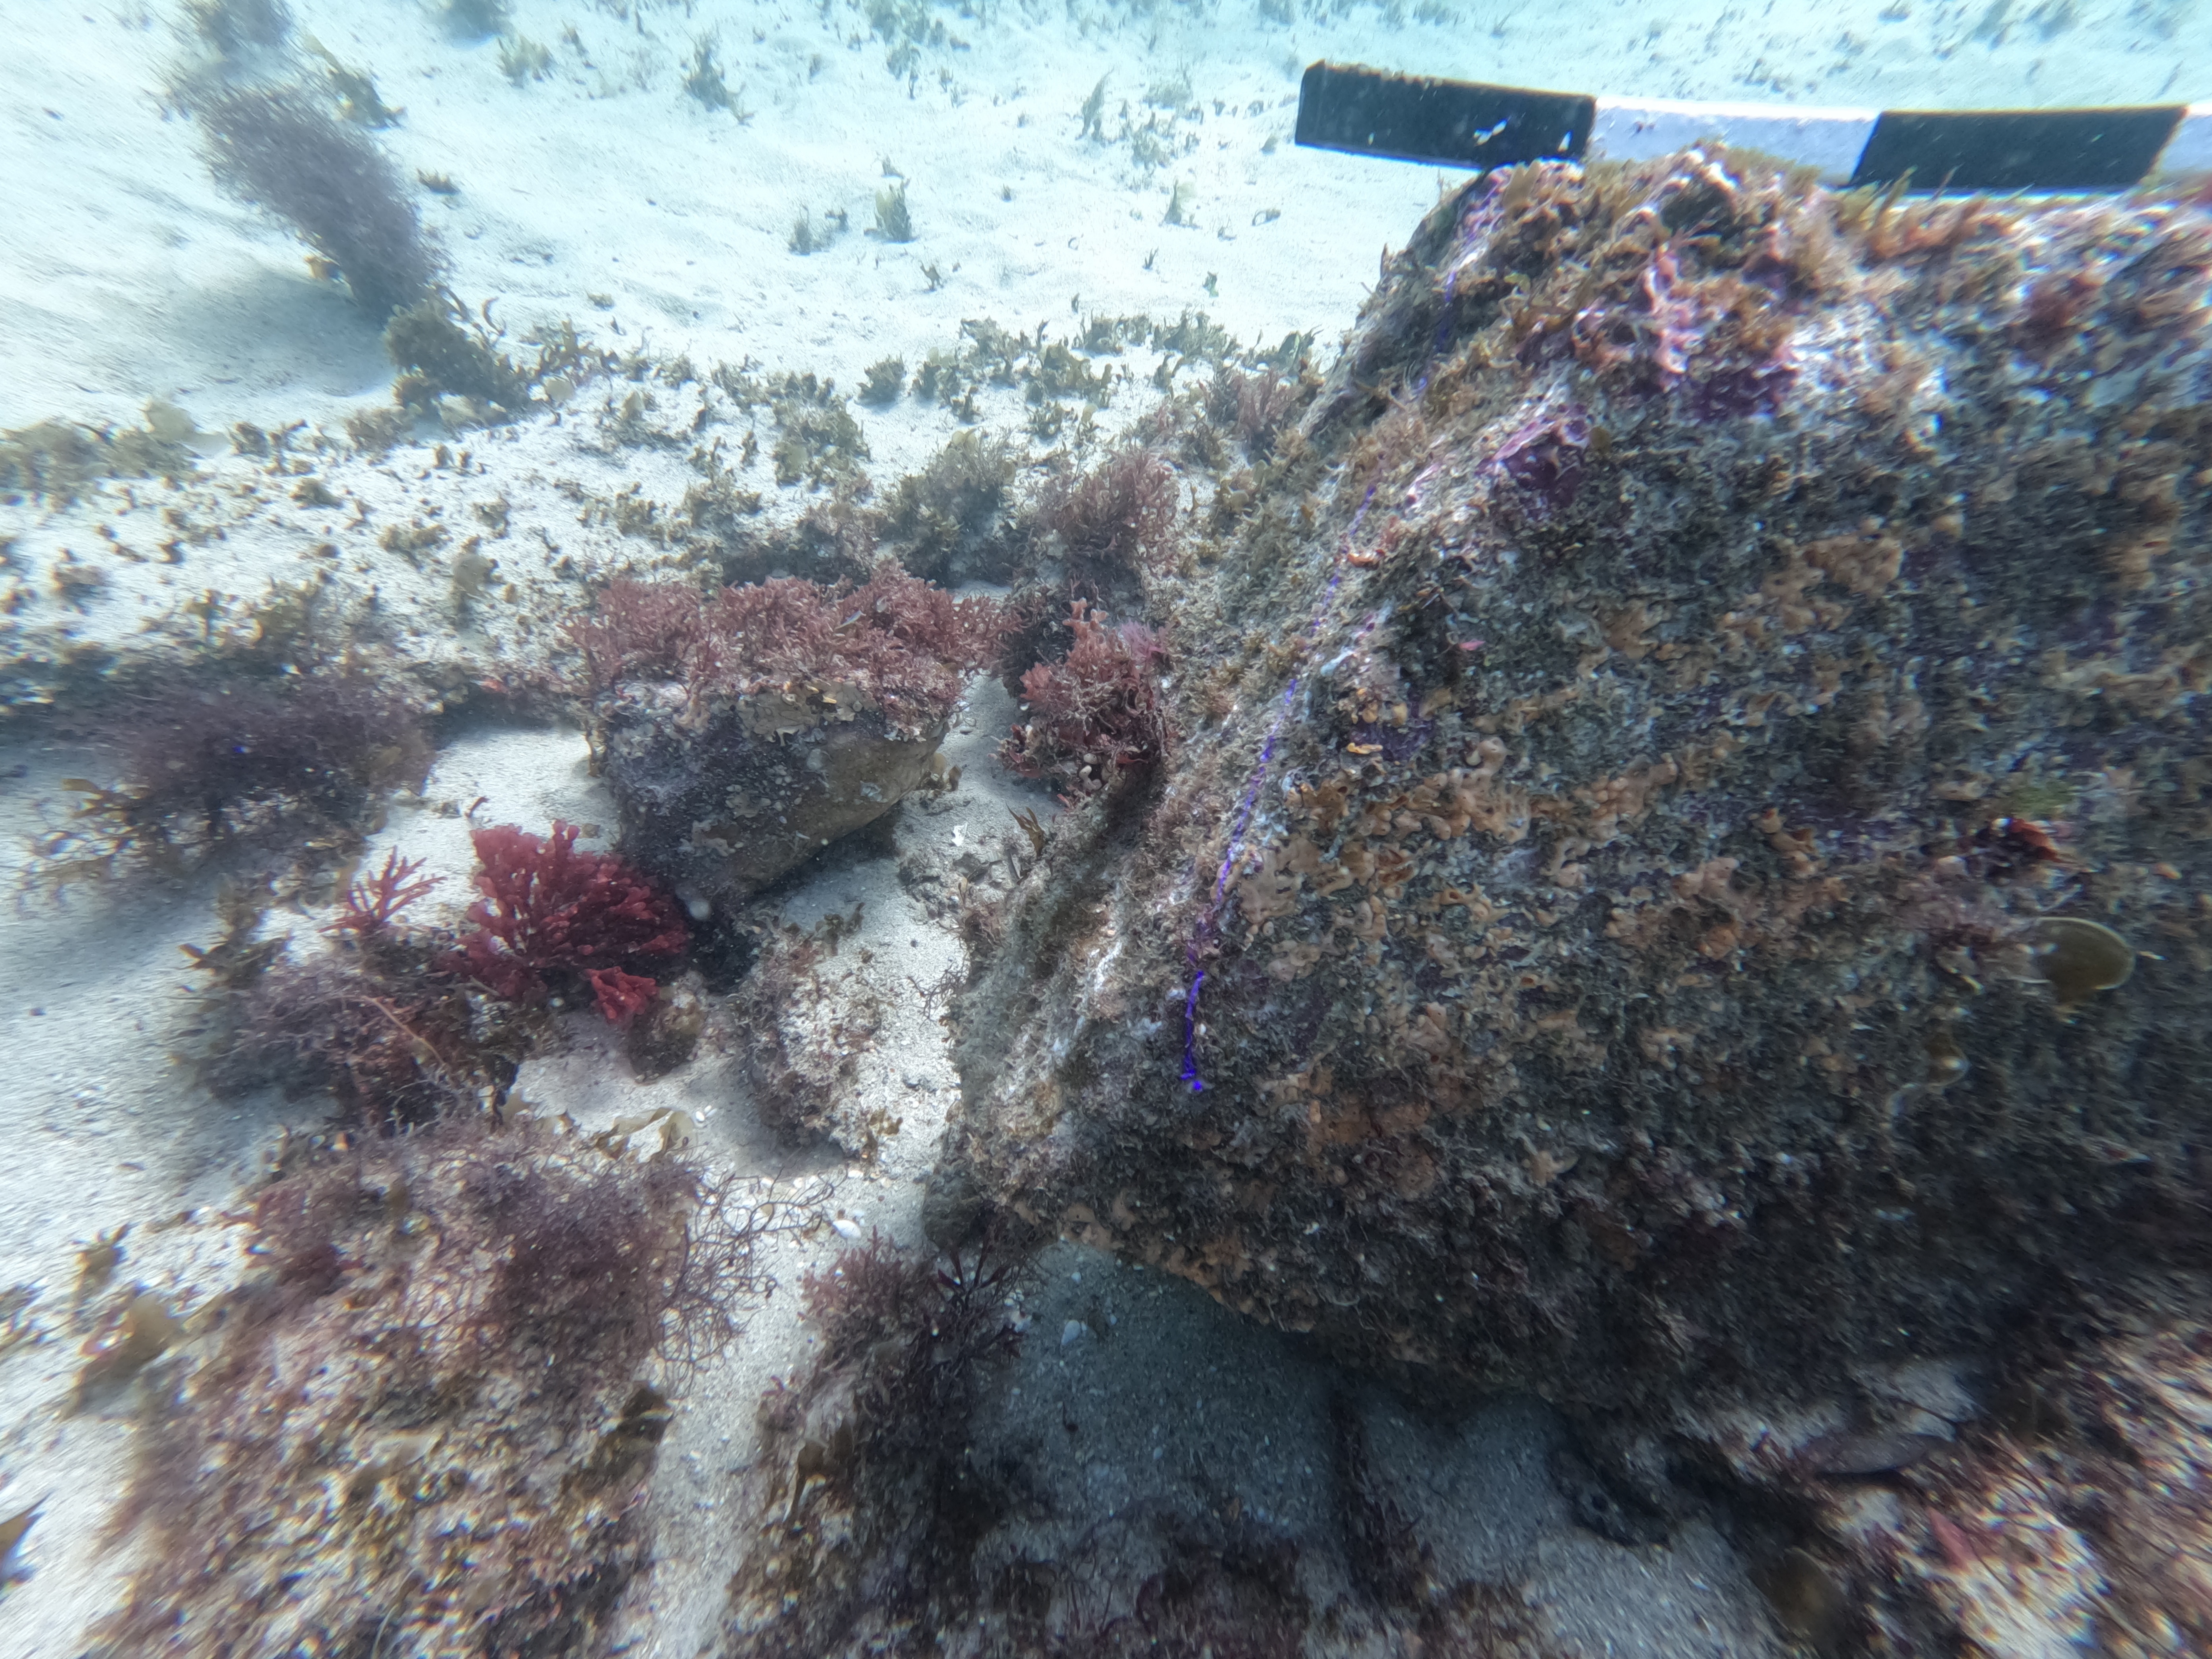

Supplement: Supplementary file 850 [file G0713917.pdf › Ocean2/G0713917.pdf]

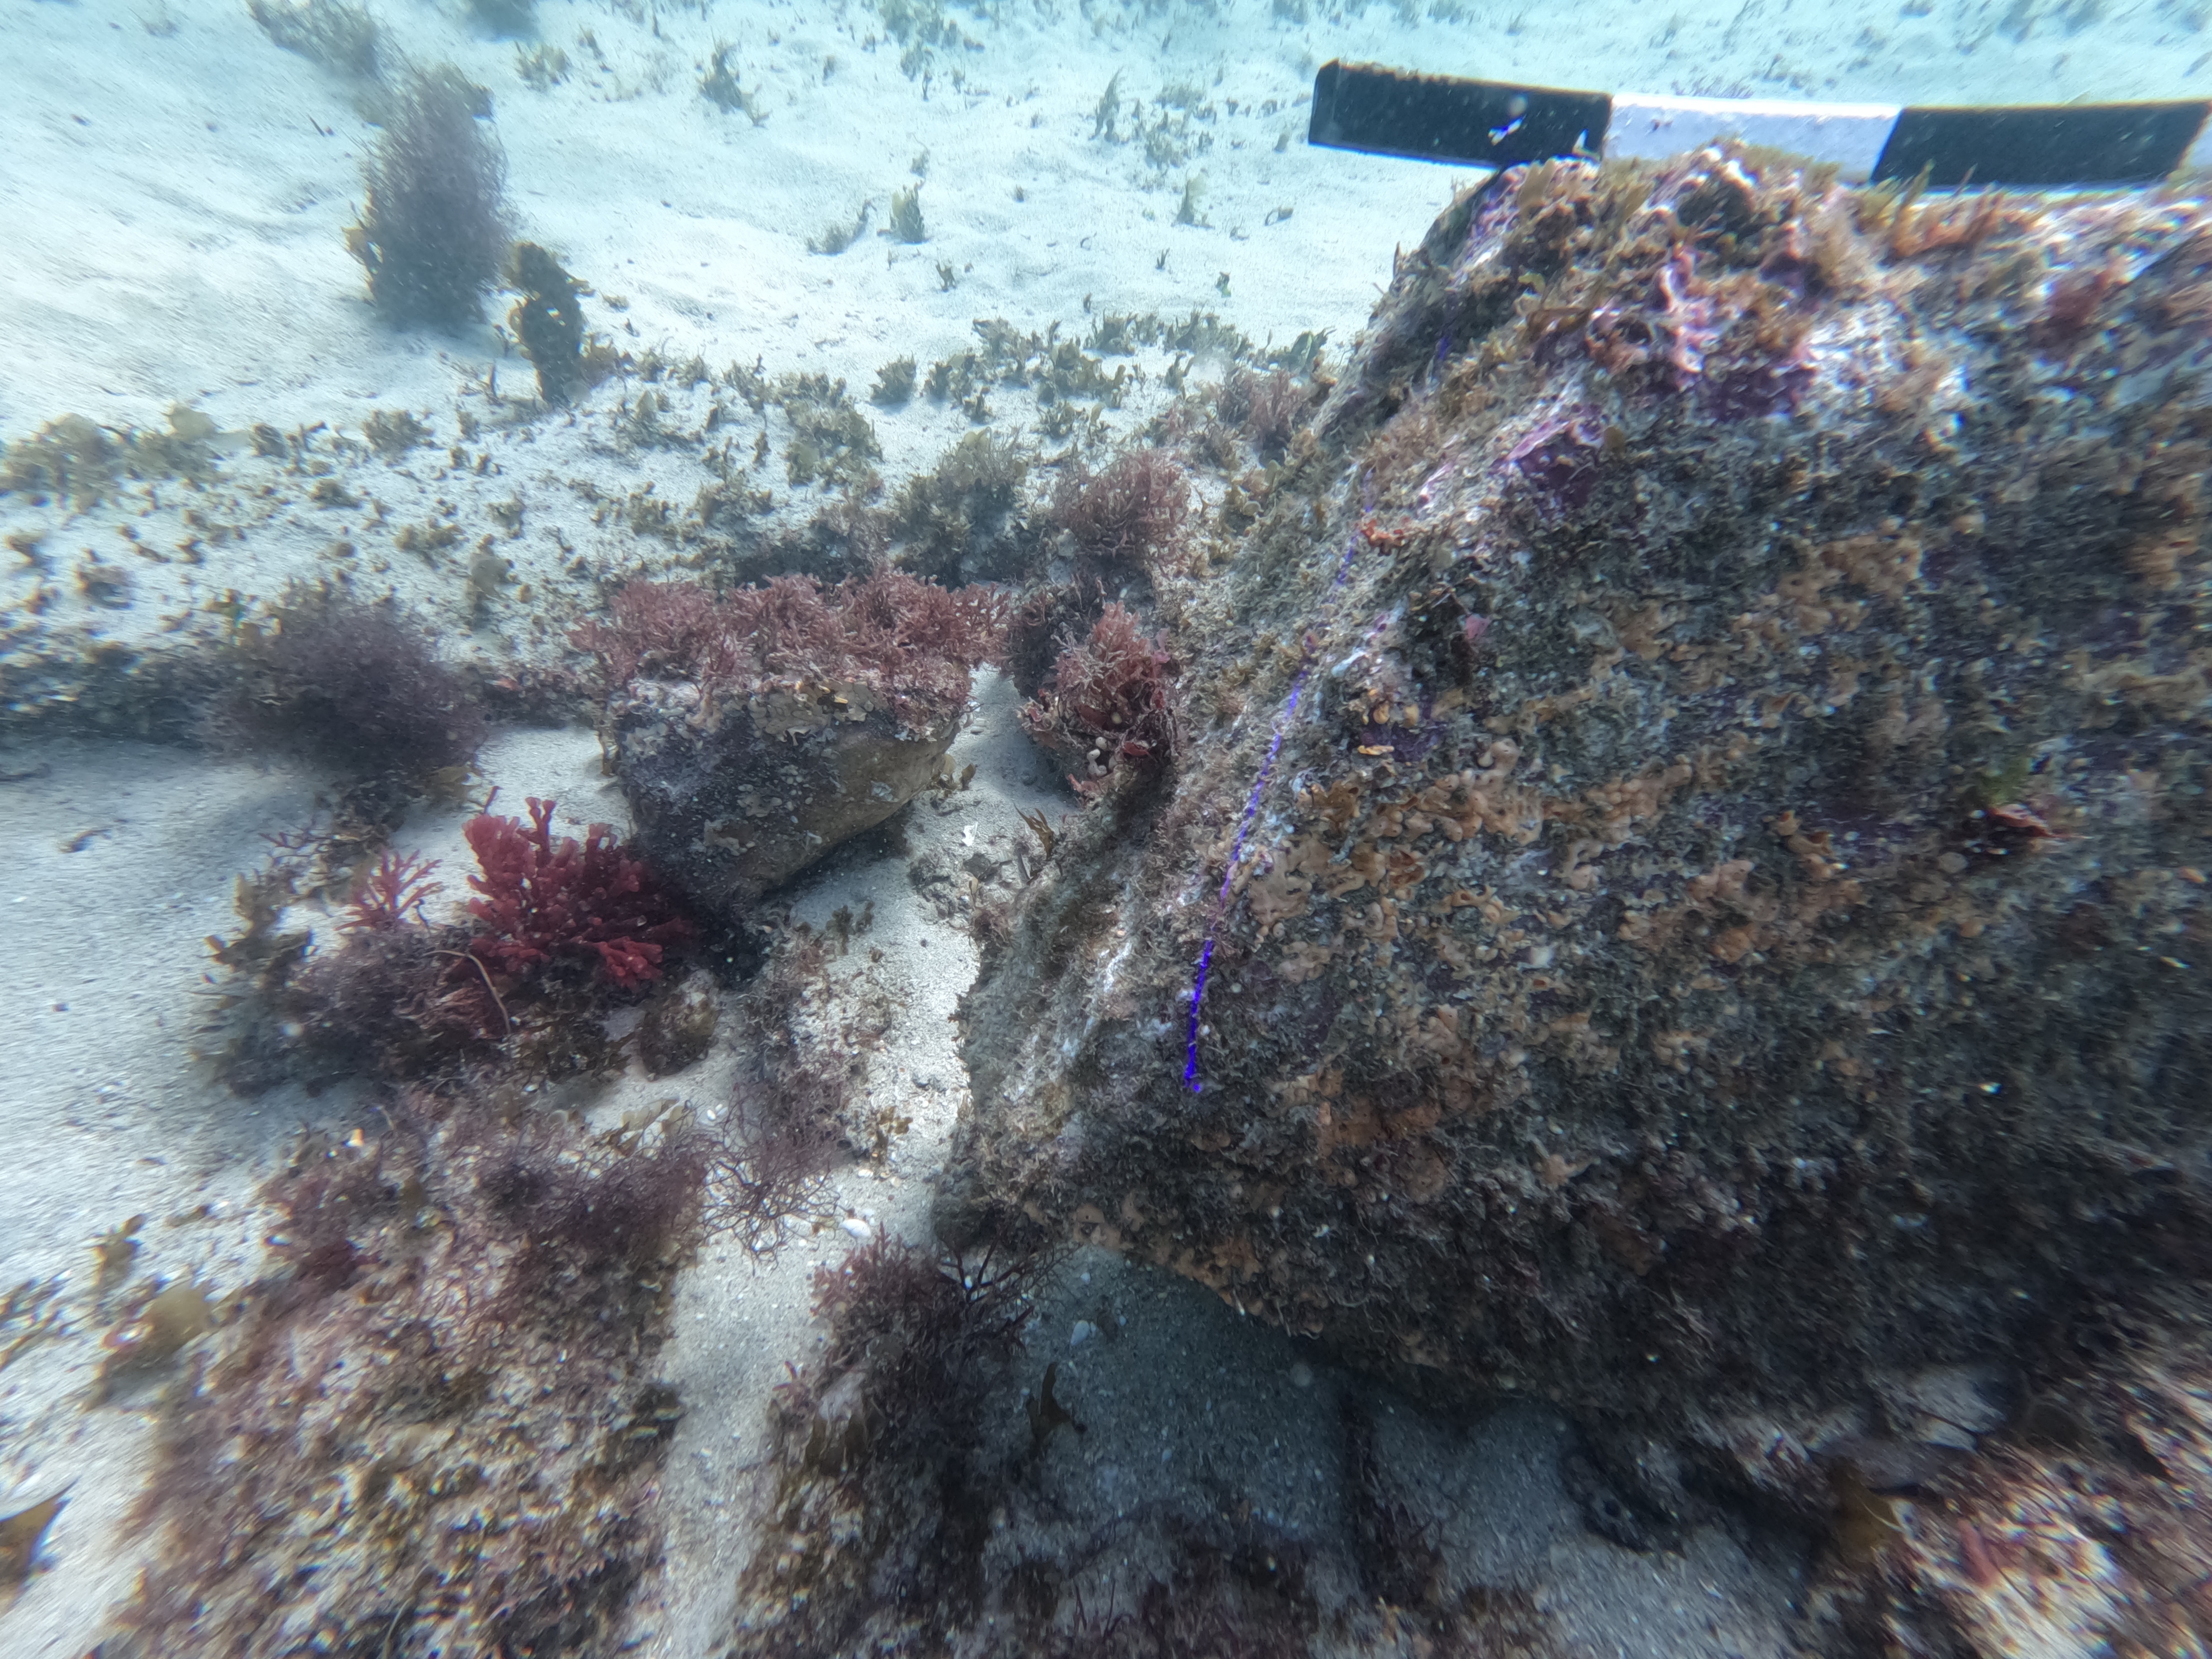

Supplement: Supplementary file 851 [file G0713918.pdf › Ocean2/G0713918.pdf]

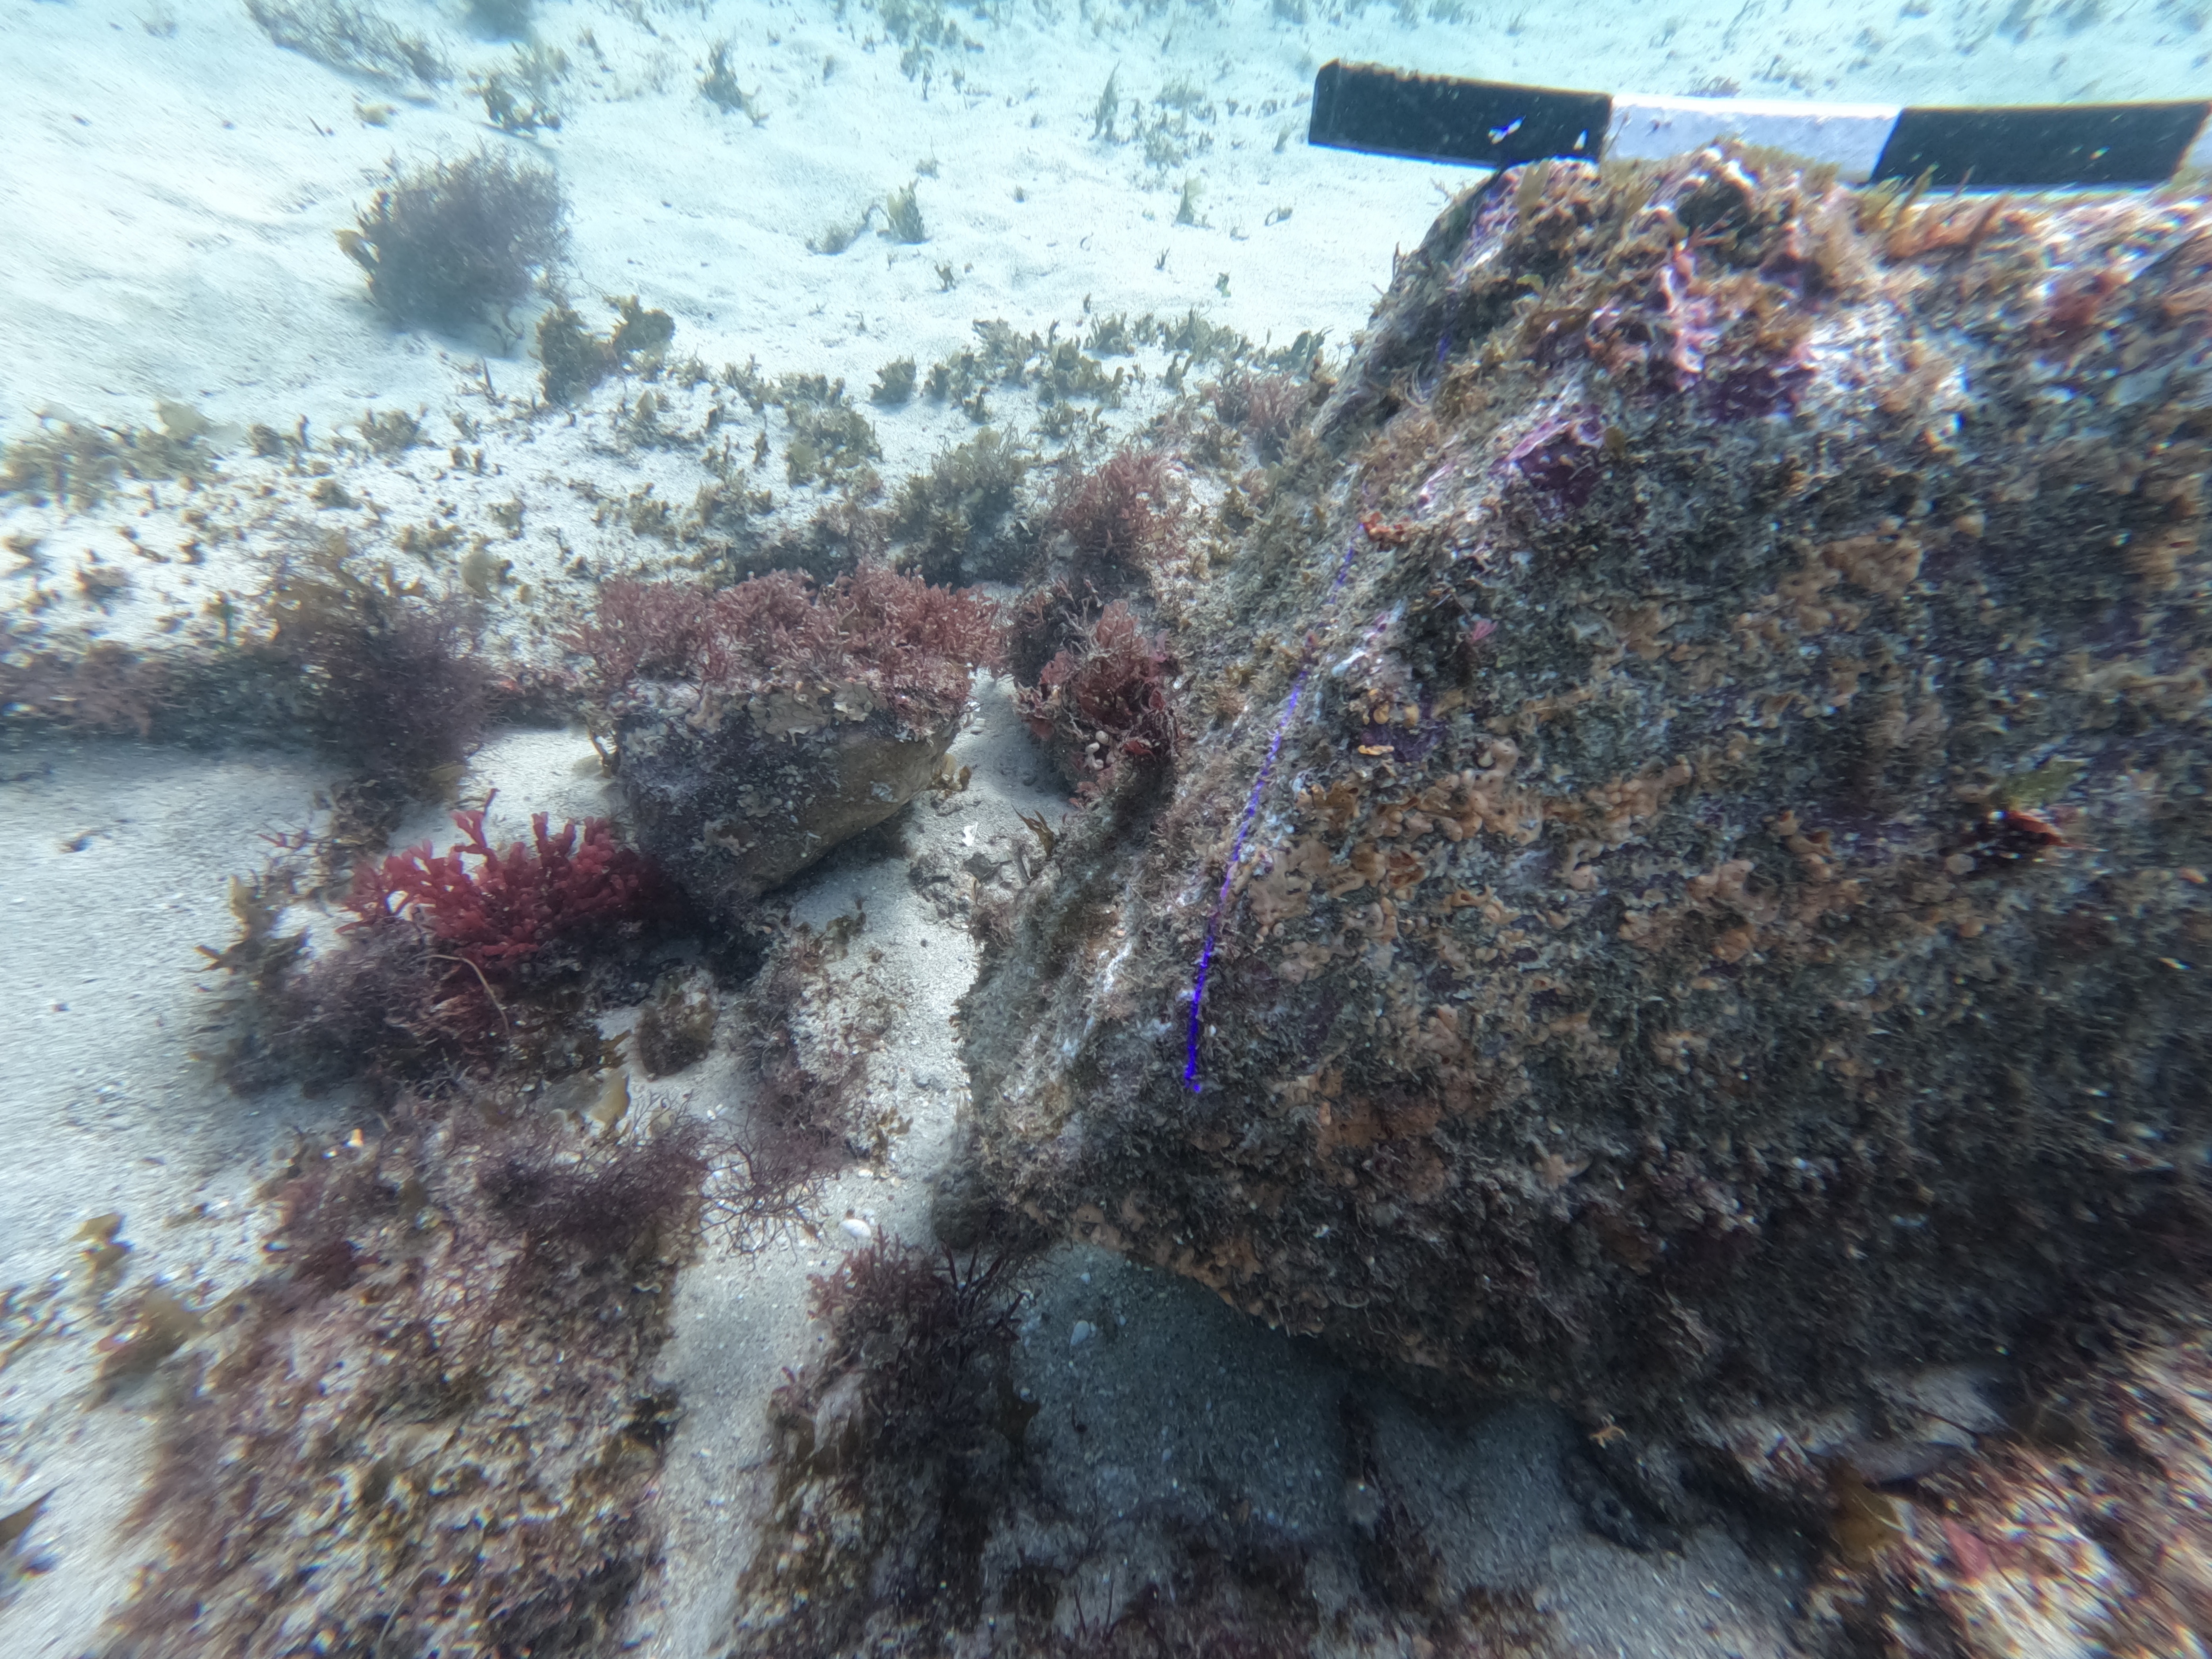

Supplement: Supplementary file 852 [file G0713919.pdf › Ocean2/G0713919.pdf]

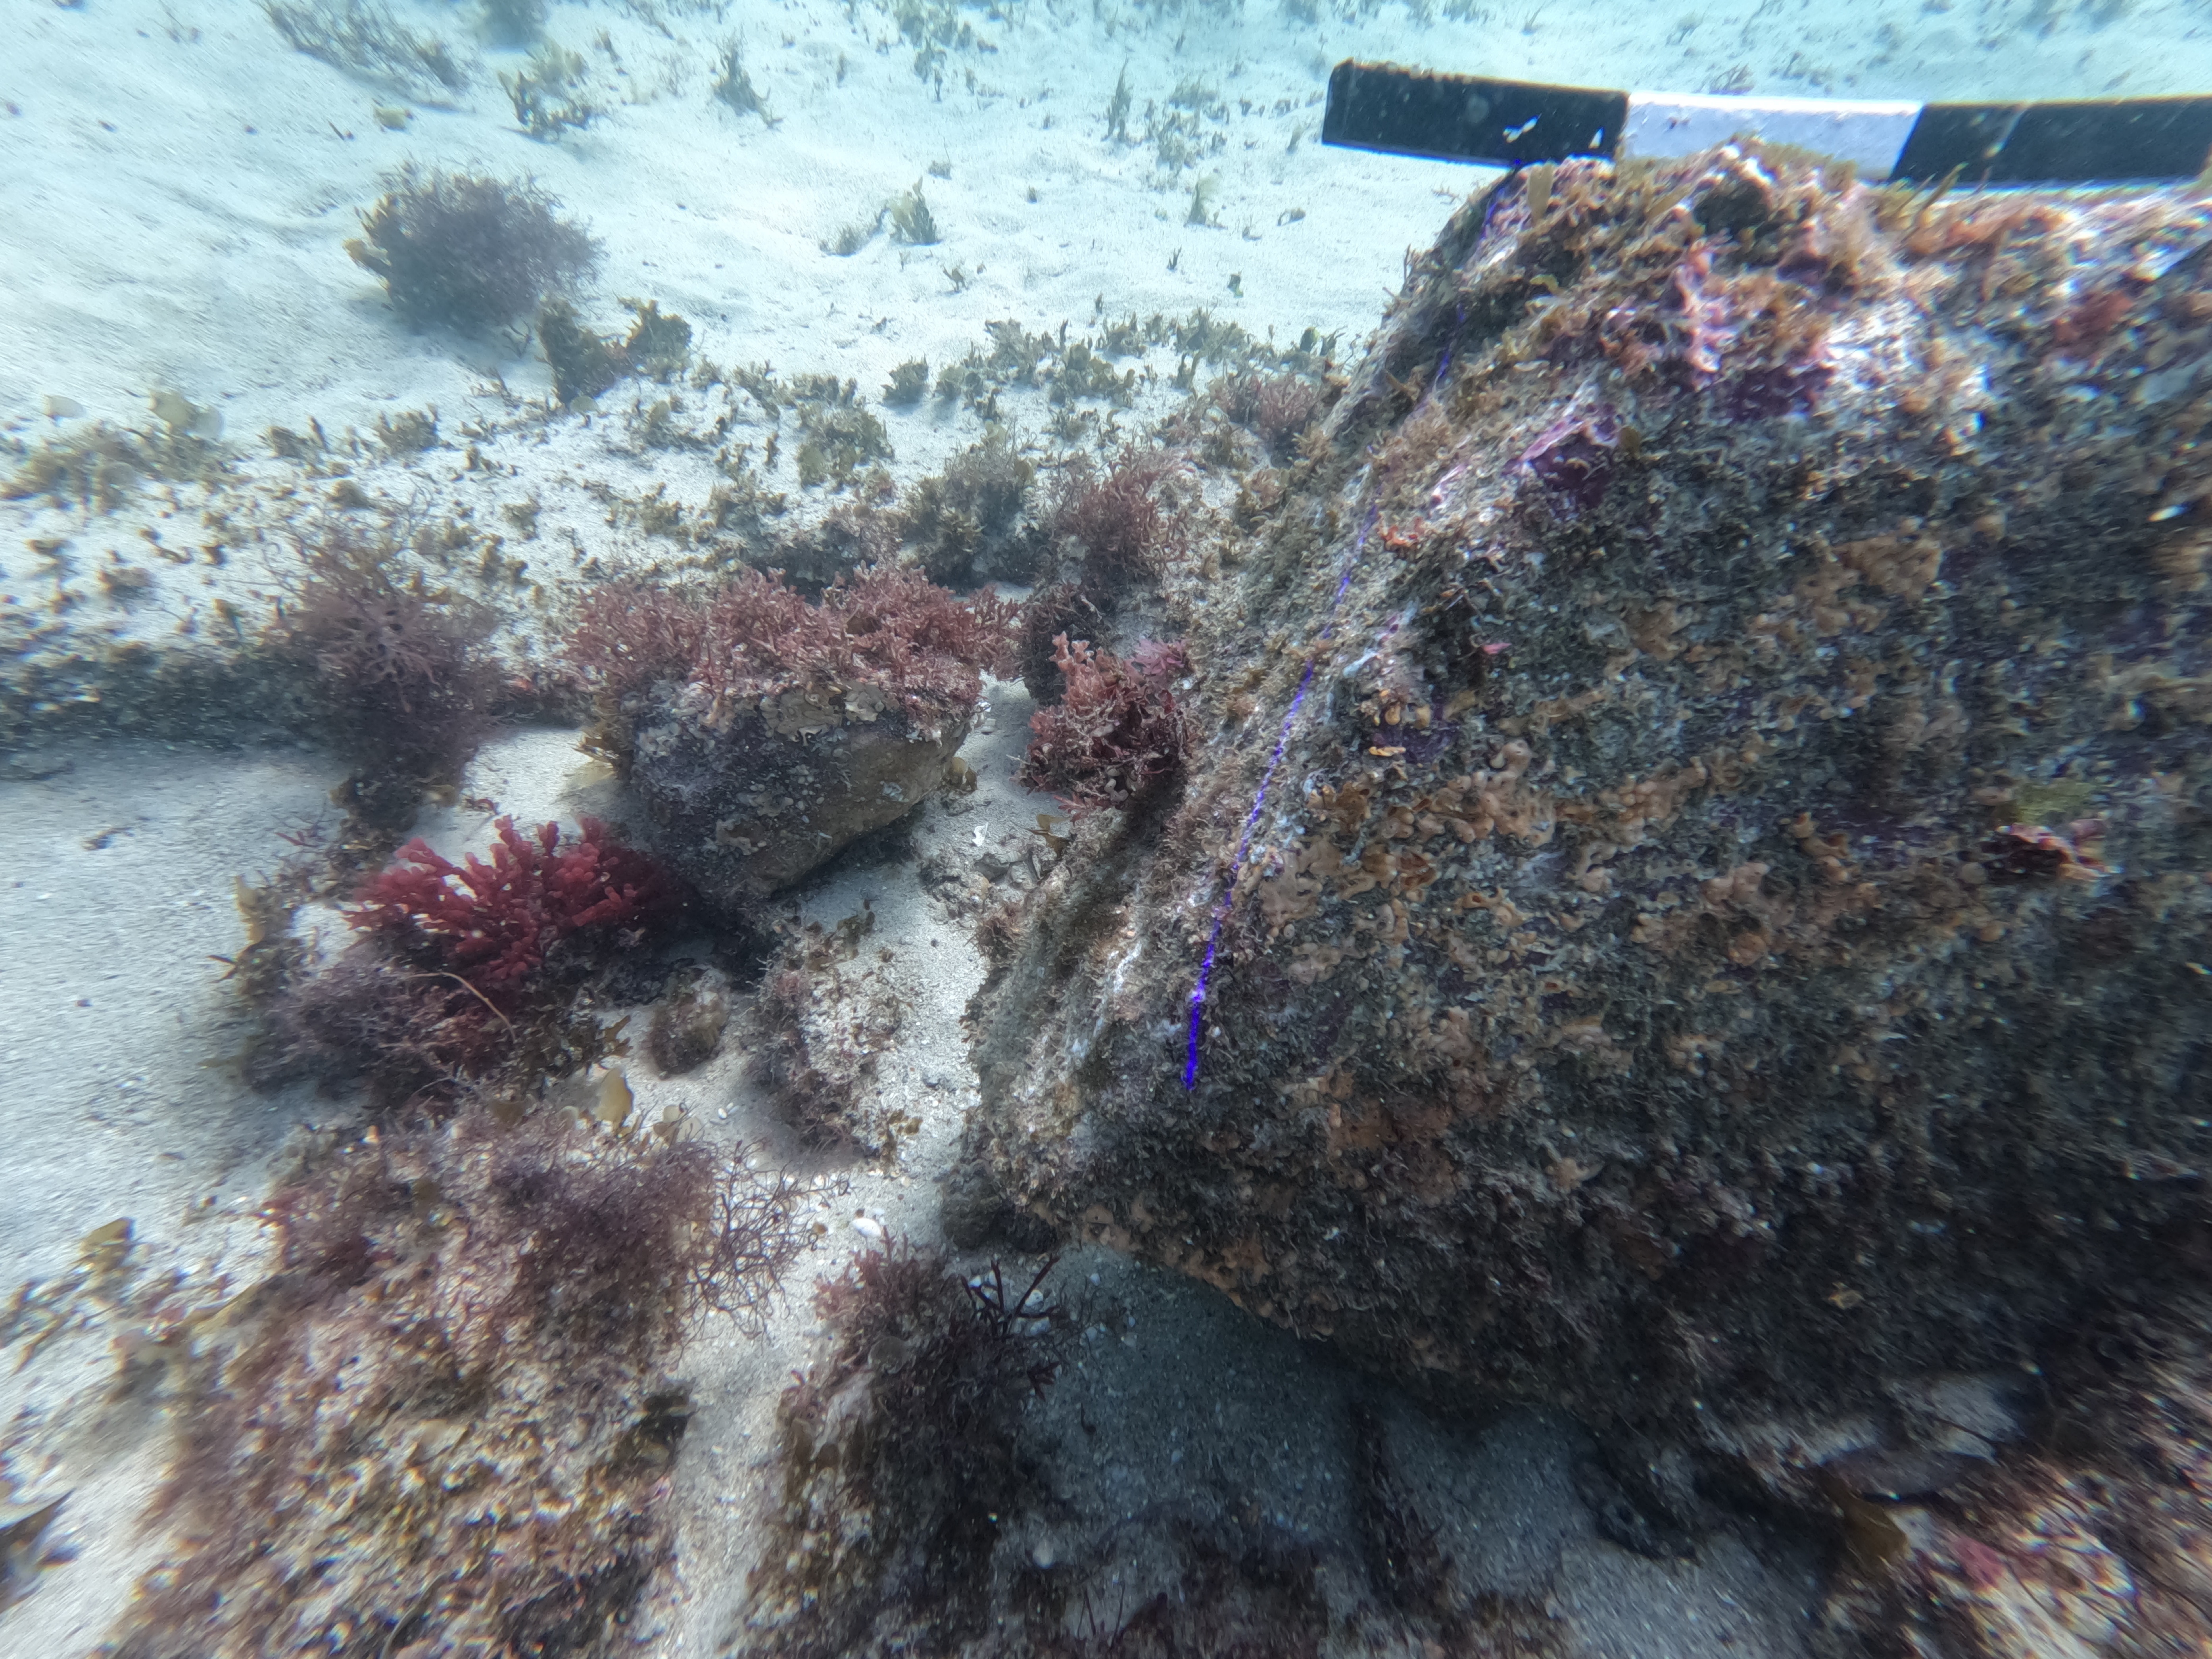

Supplement: Supplementary file 853 [file G0713920.pdf › Ocean2/G0713920.pdf]

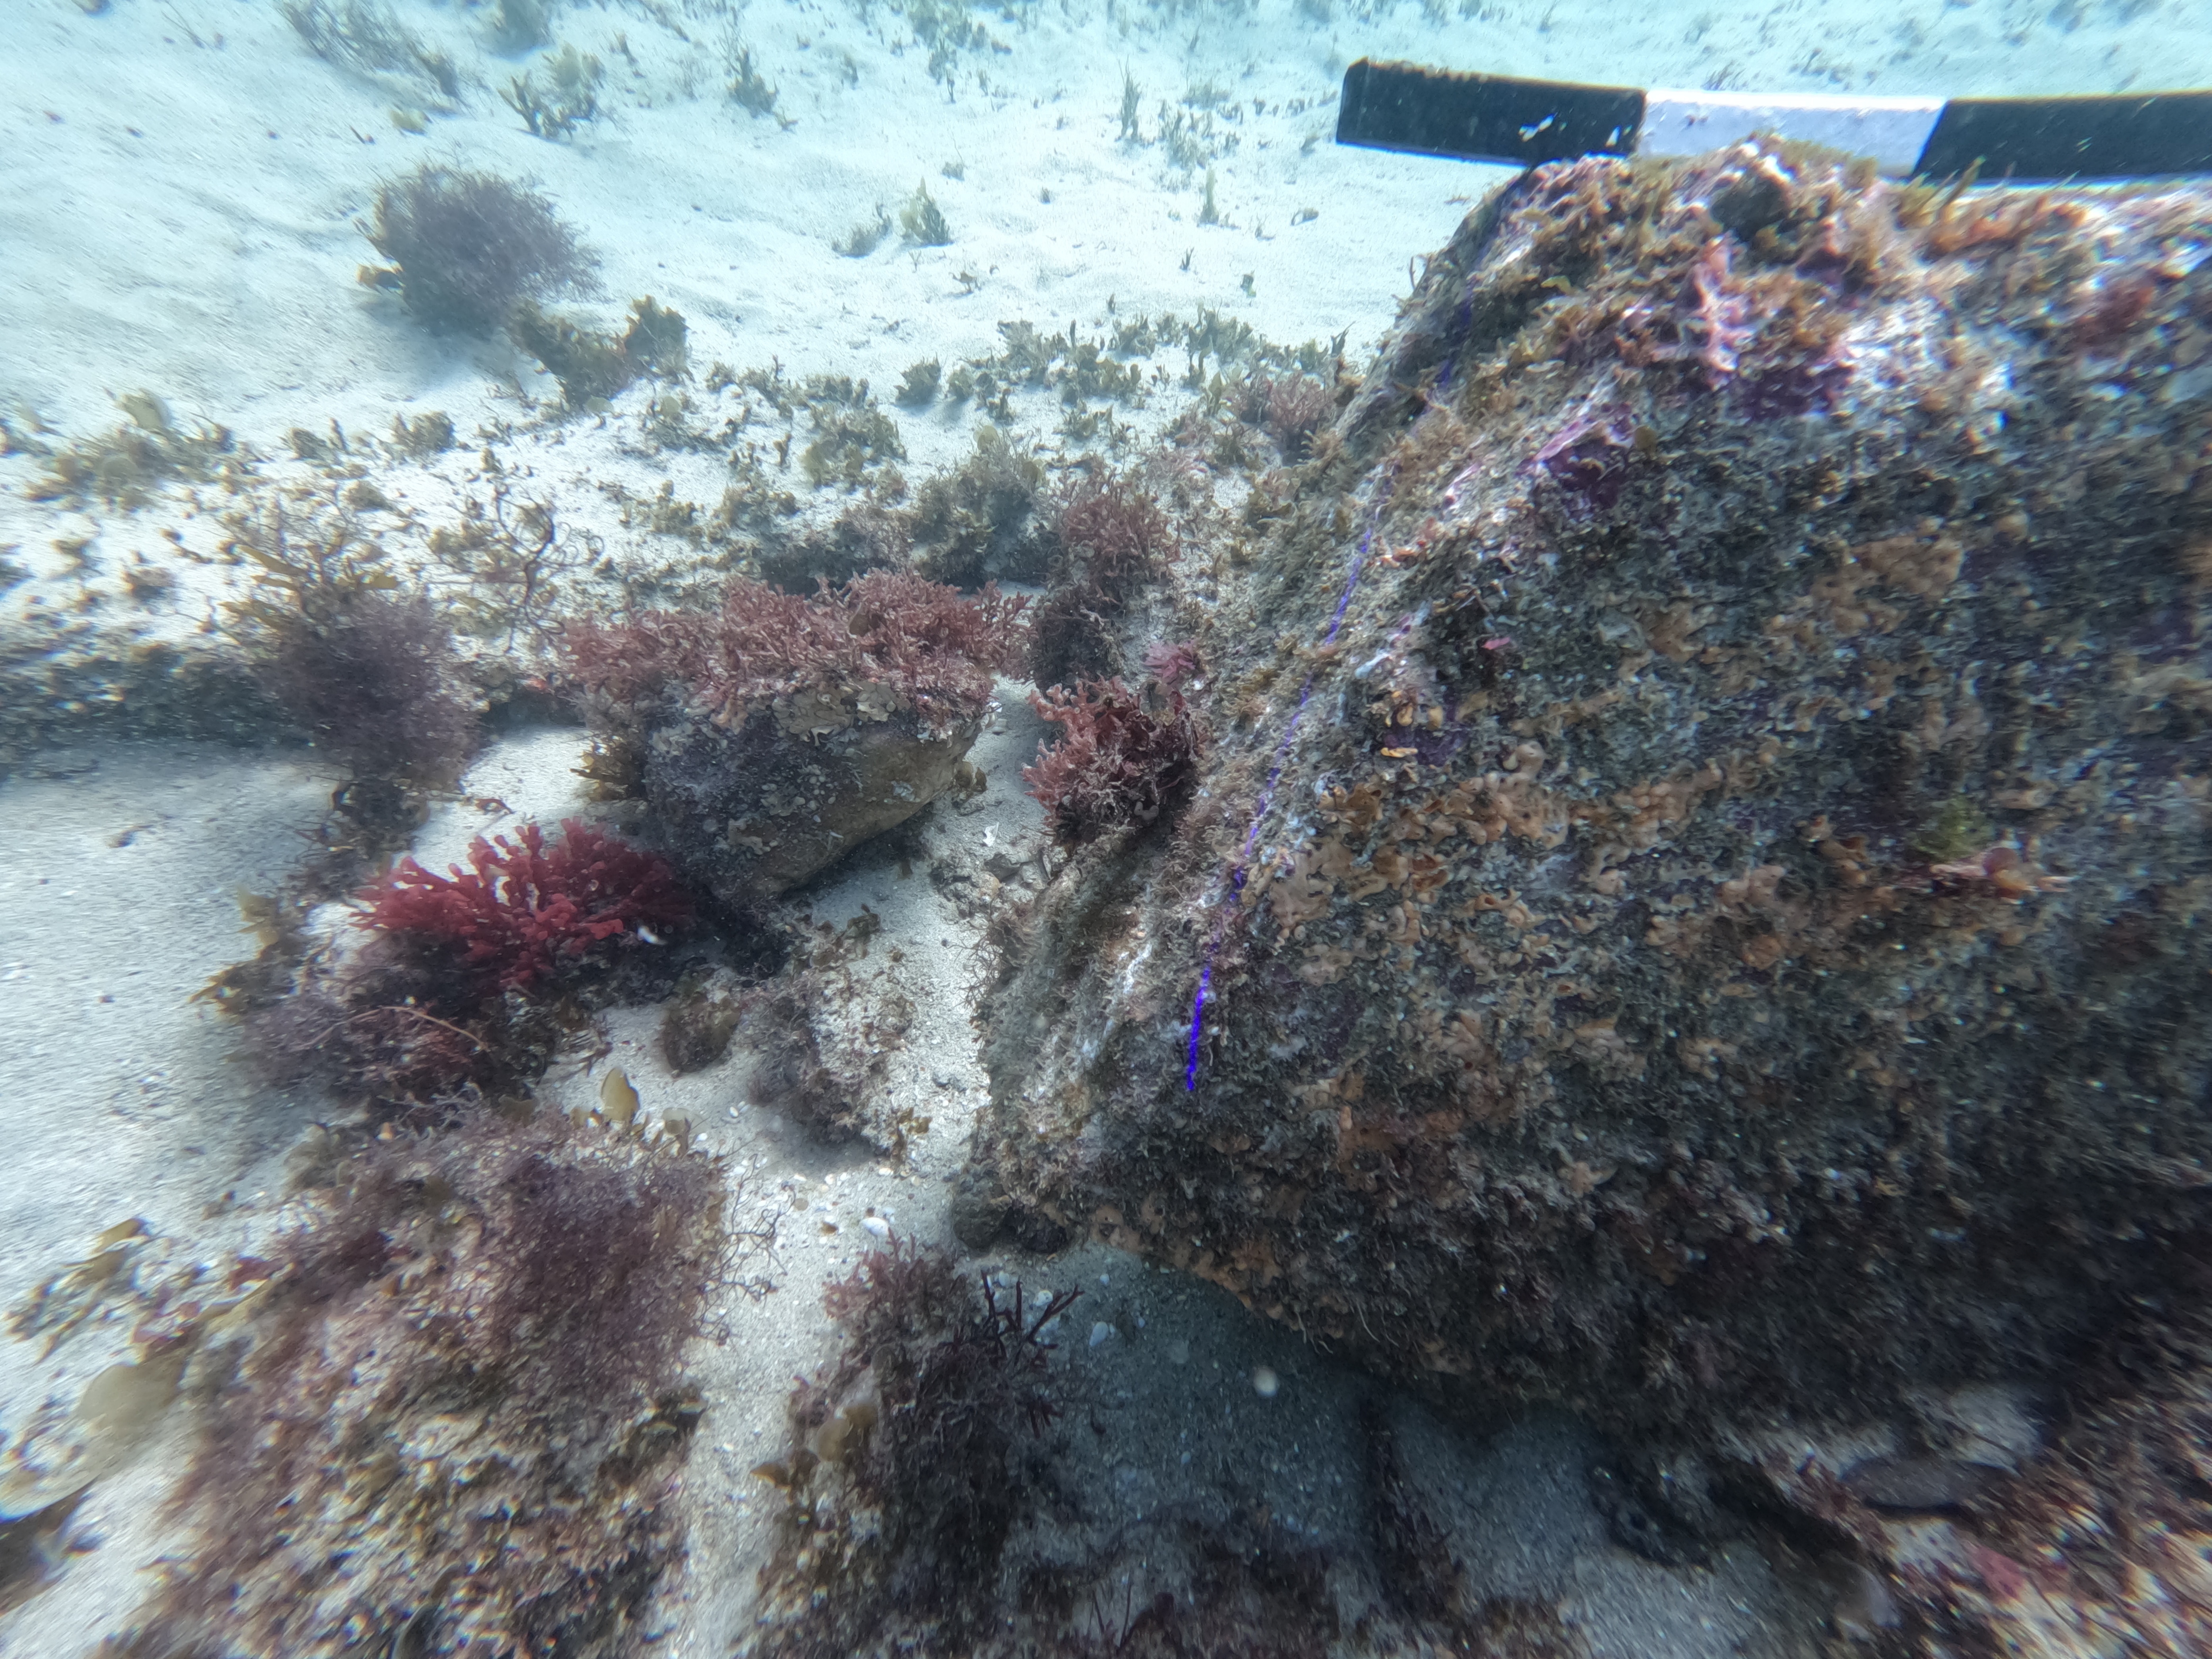

Supplement: Supplementary file 854 [file G0713921.pdf › Ocean2/G0713921.pdf]

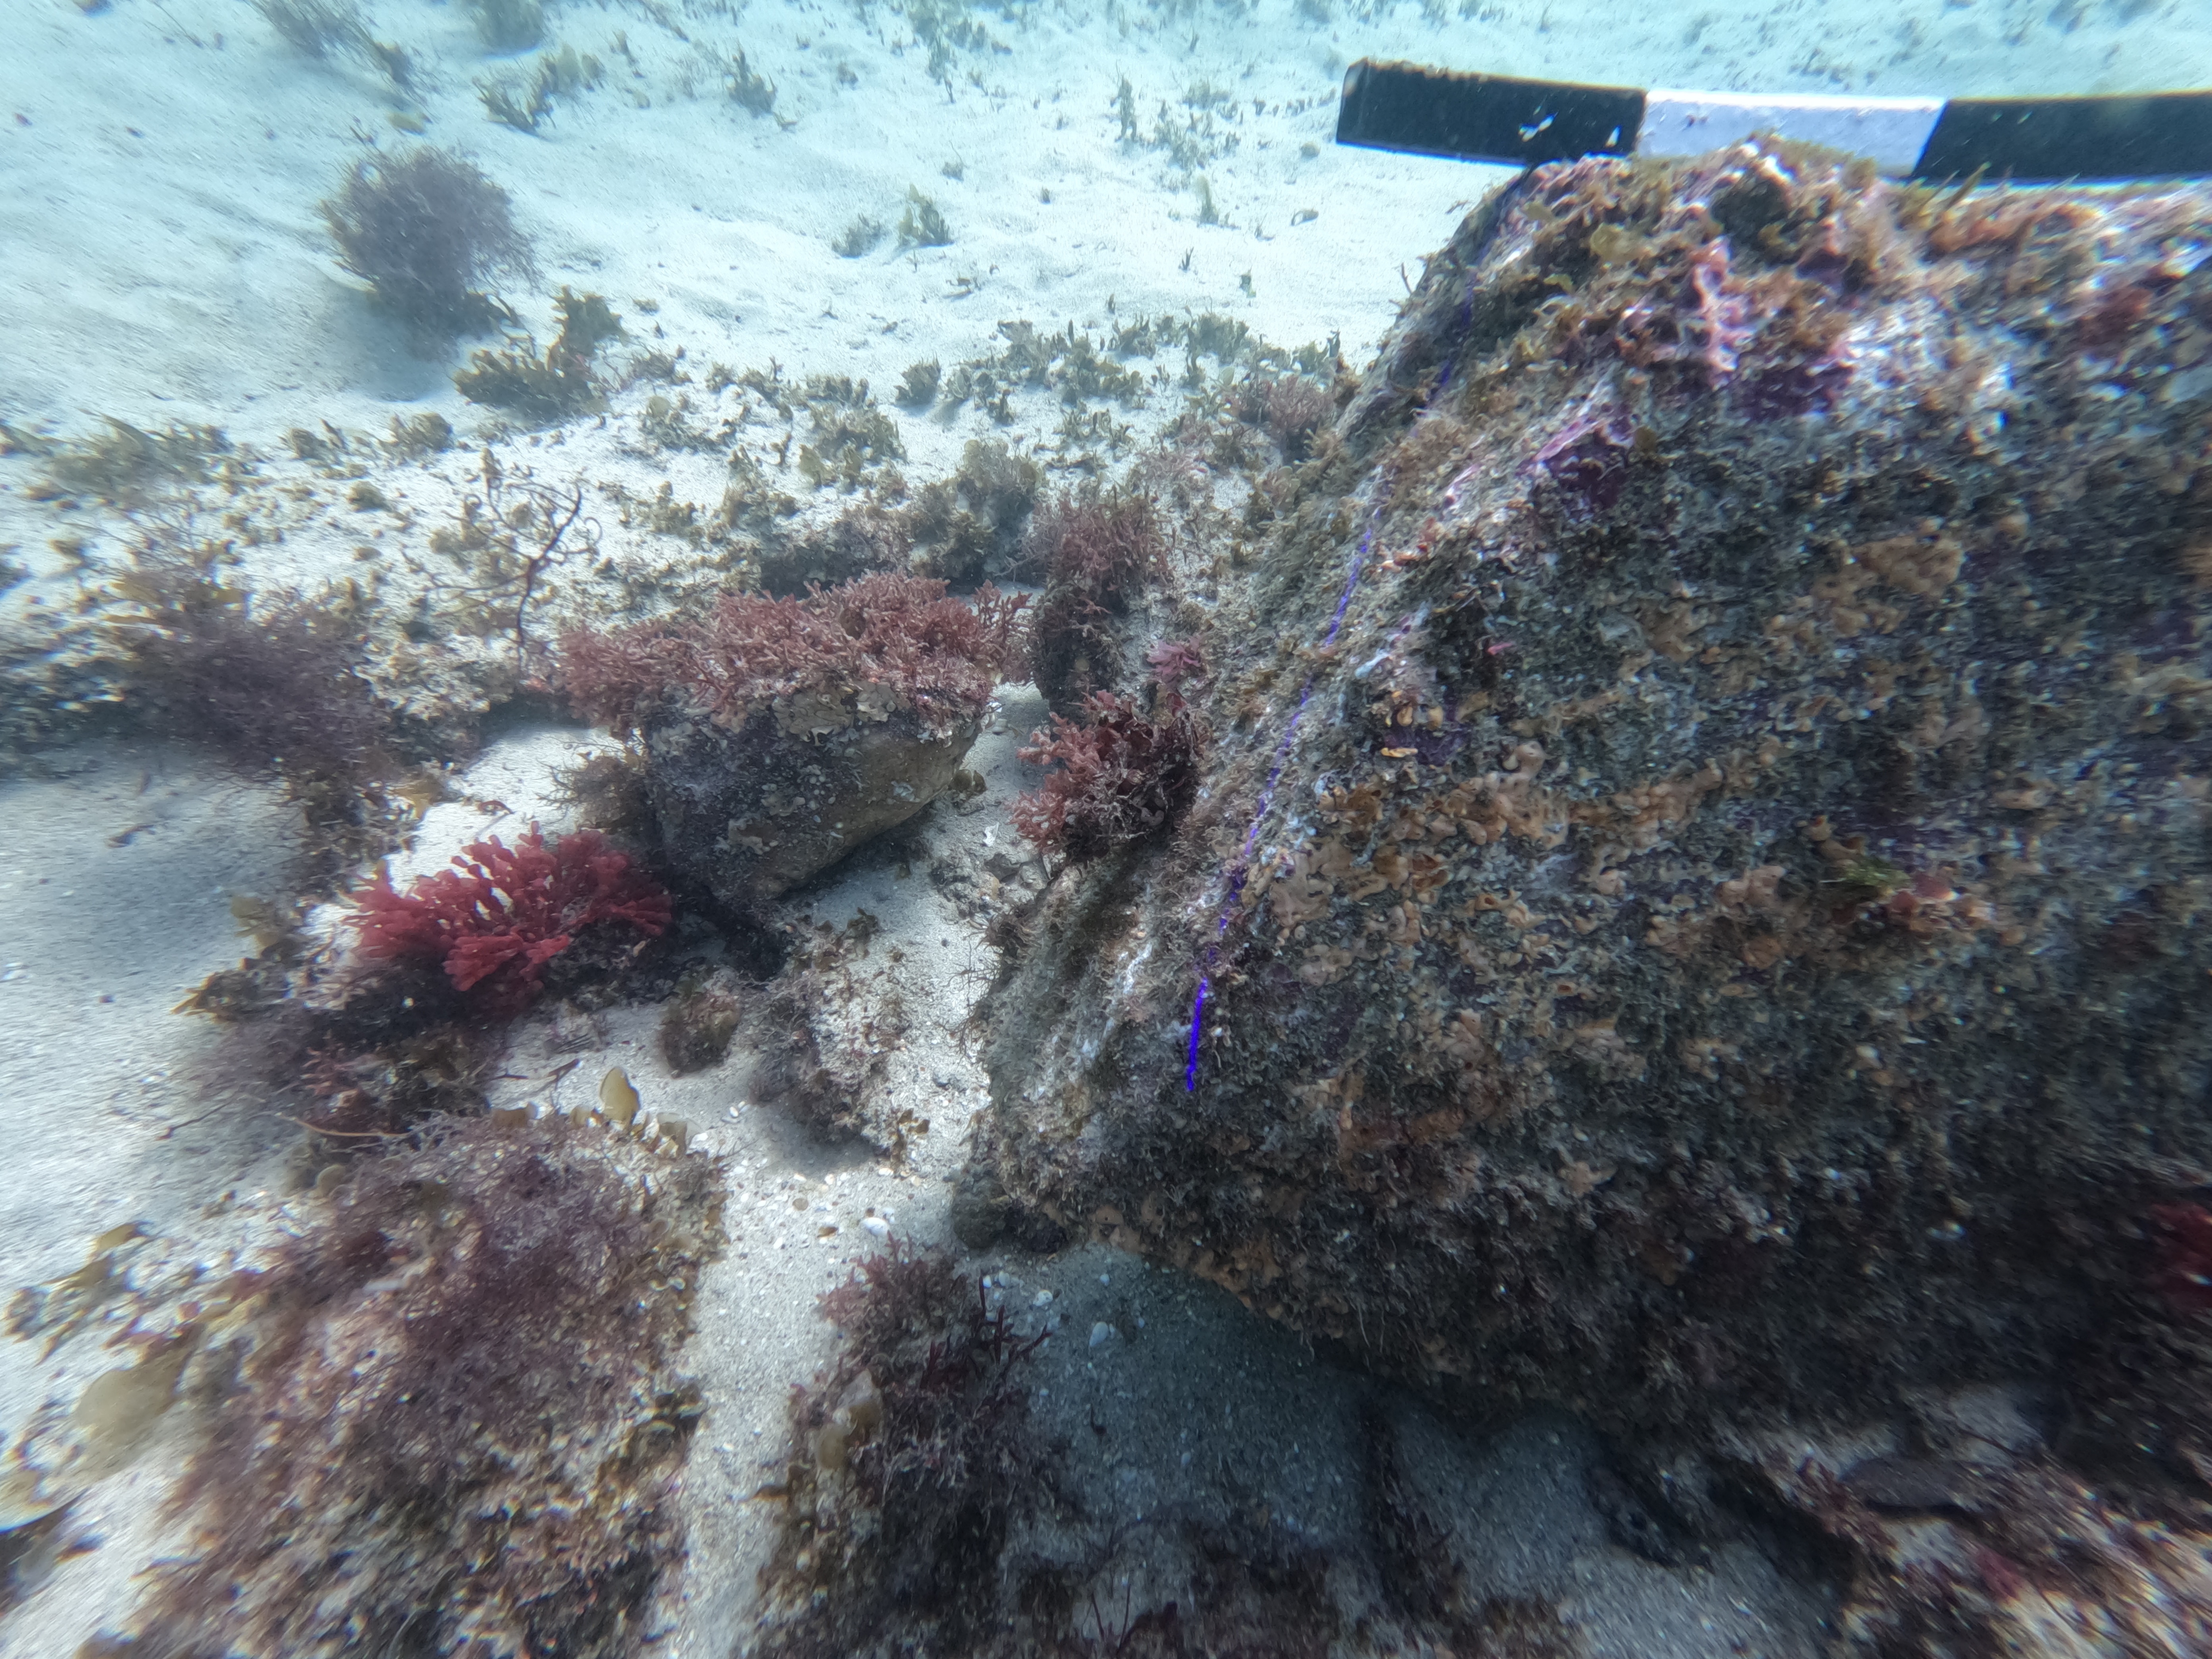

Supplement: Supplementary file 855 [file G0713922.pdf › Ocean2/G0713922.pdf]

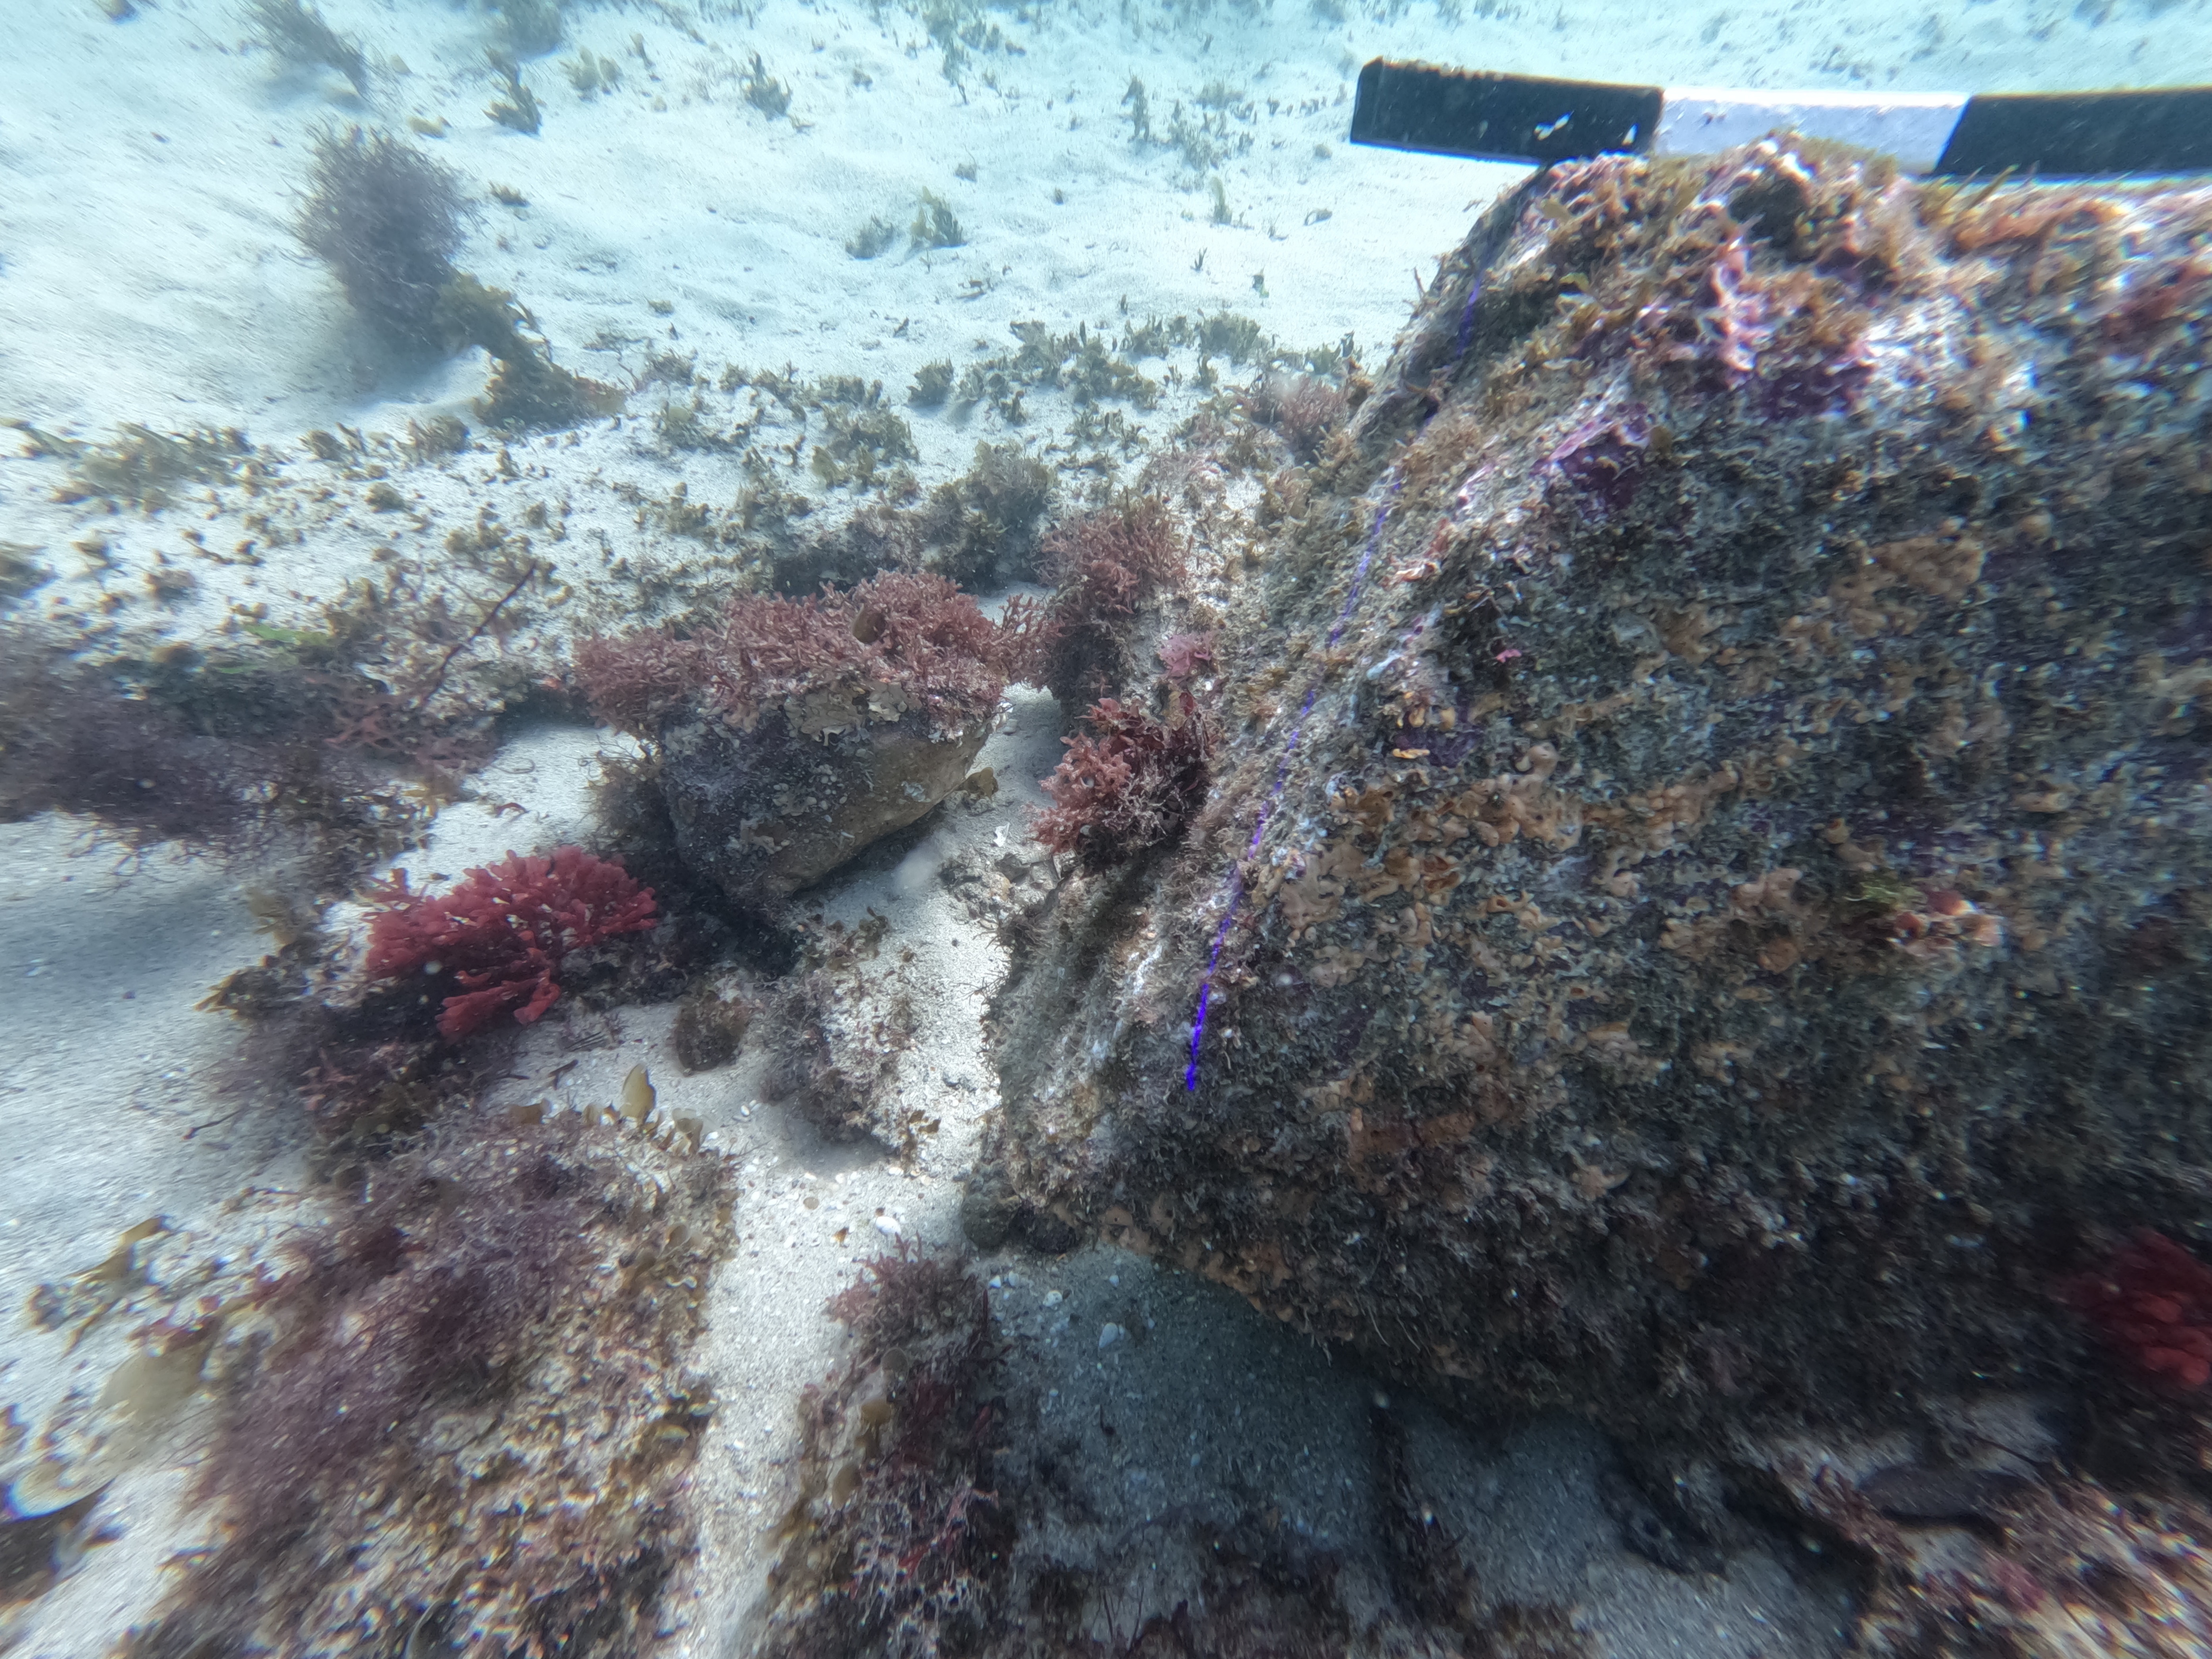

Supplement: Supplementary file 856 [file G0713923.pdf › Ocean2/G0713923.pdf]

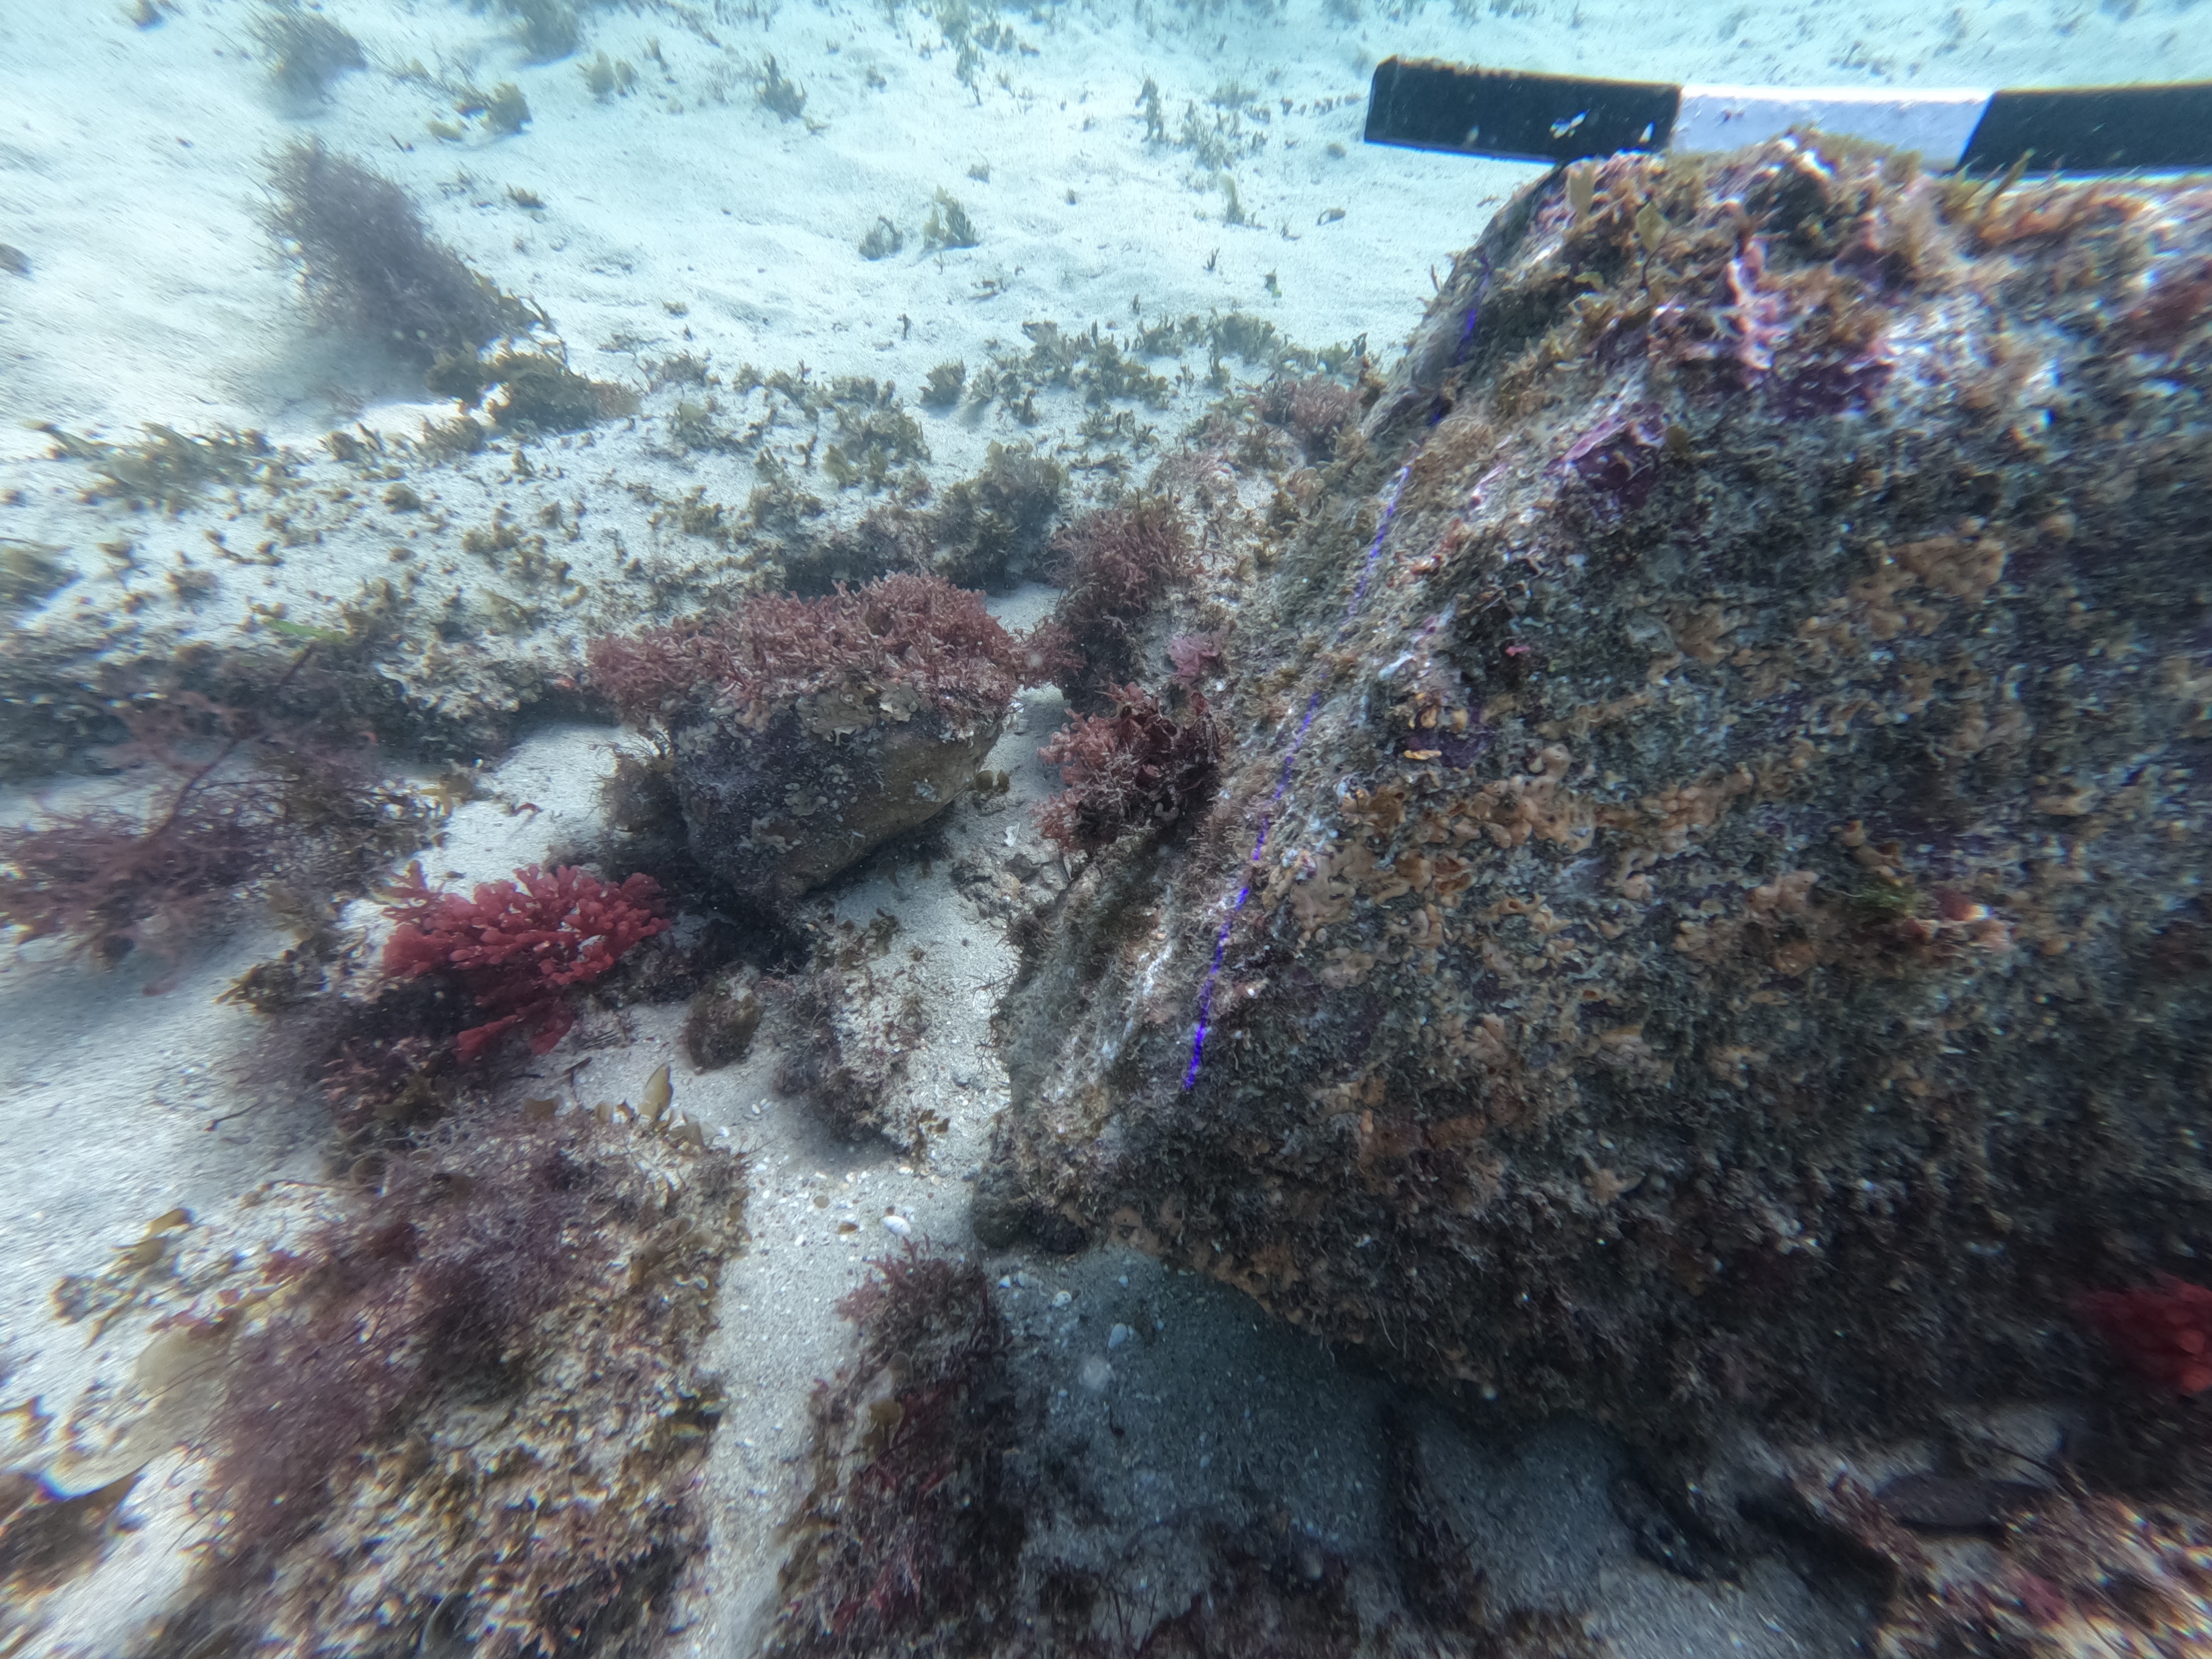

Supplement: Supplementary file 857 [file G0713924.pdf › Ocean2/G0713924.pdf]

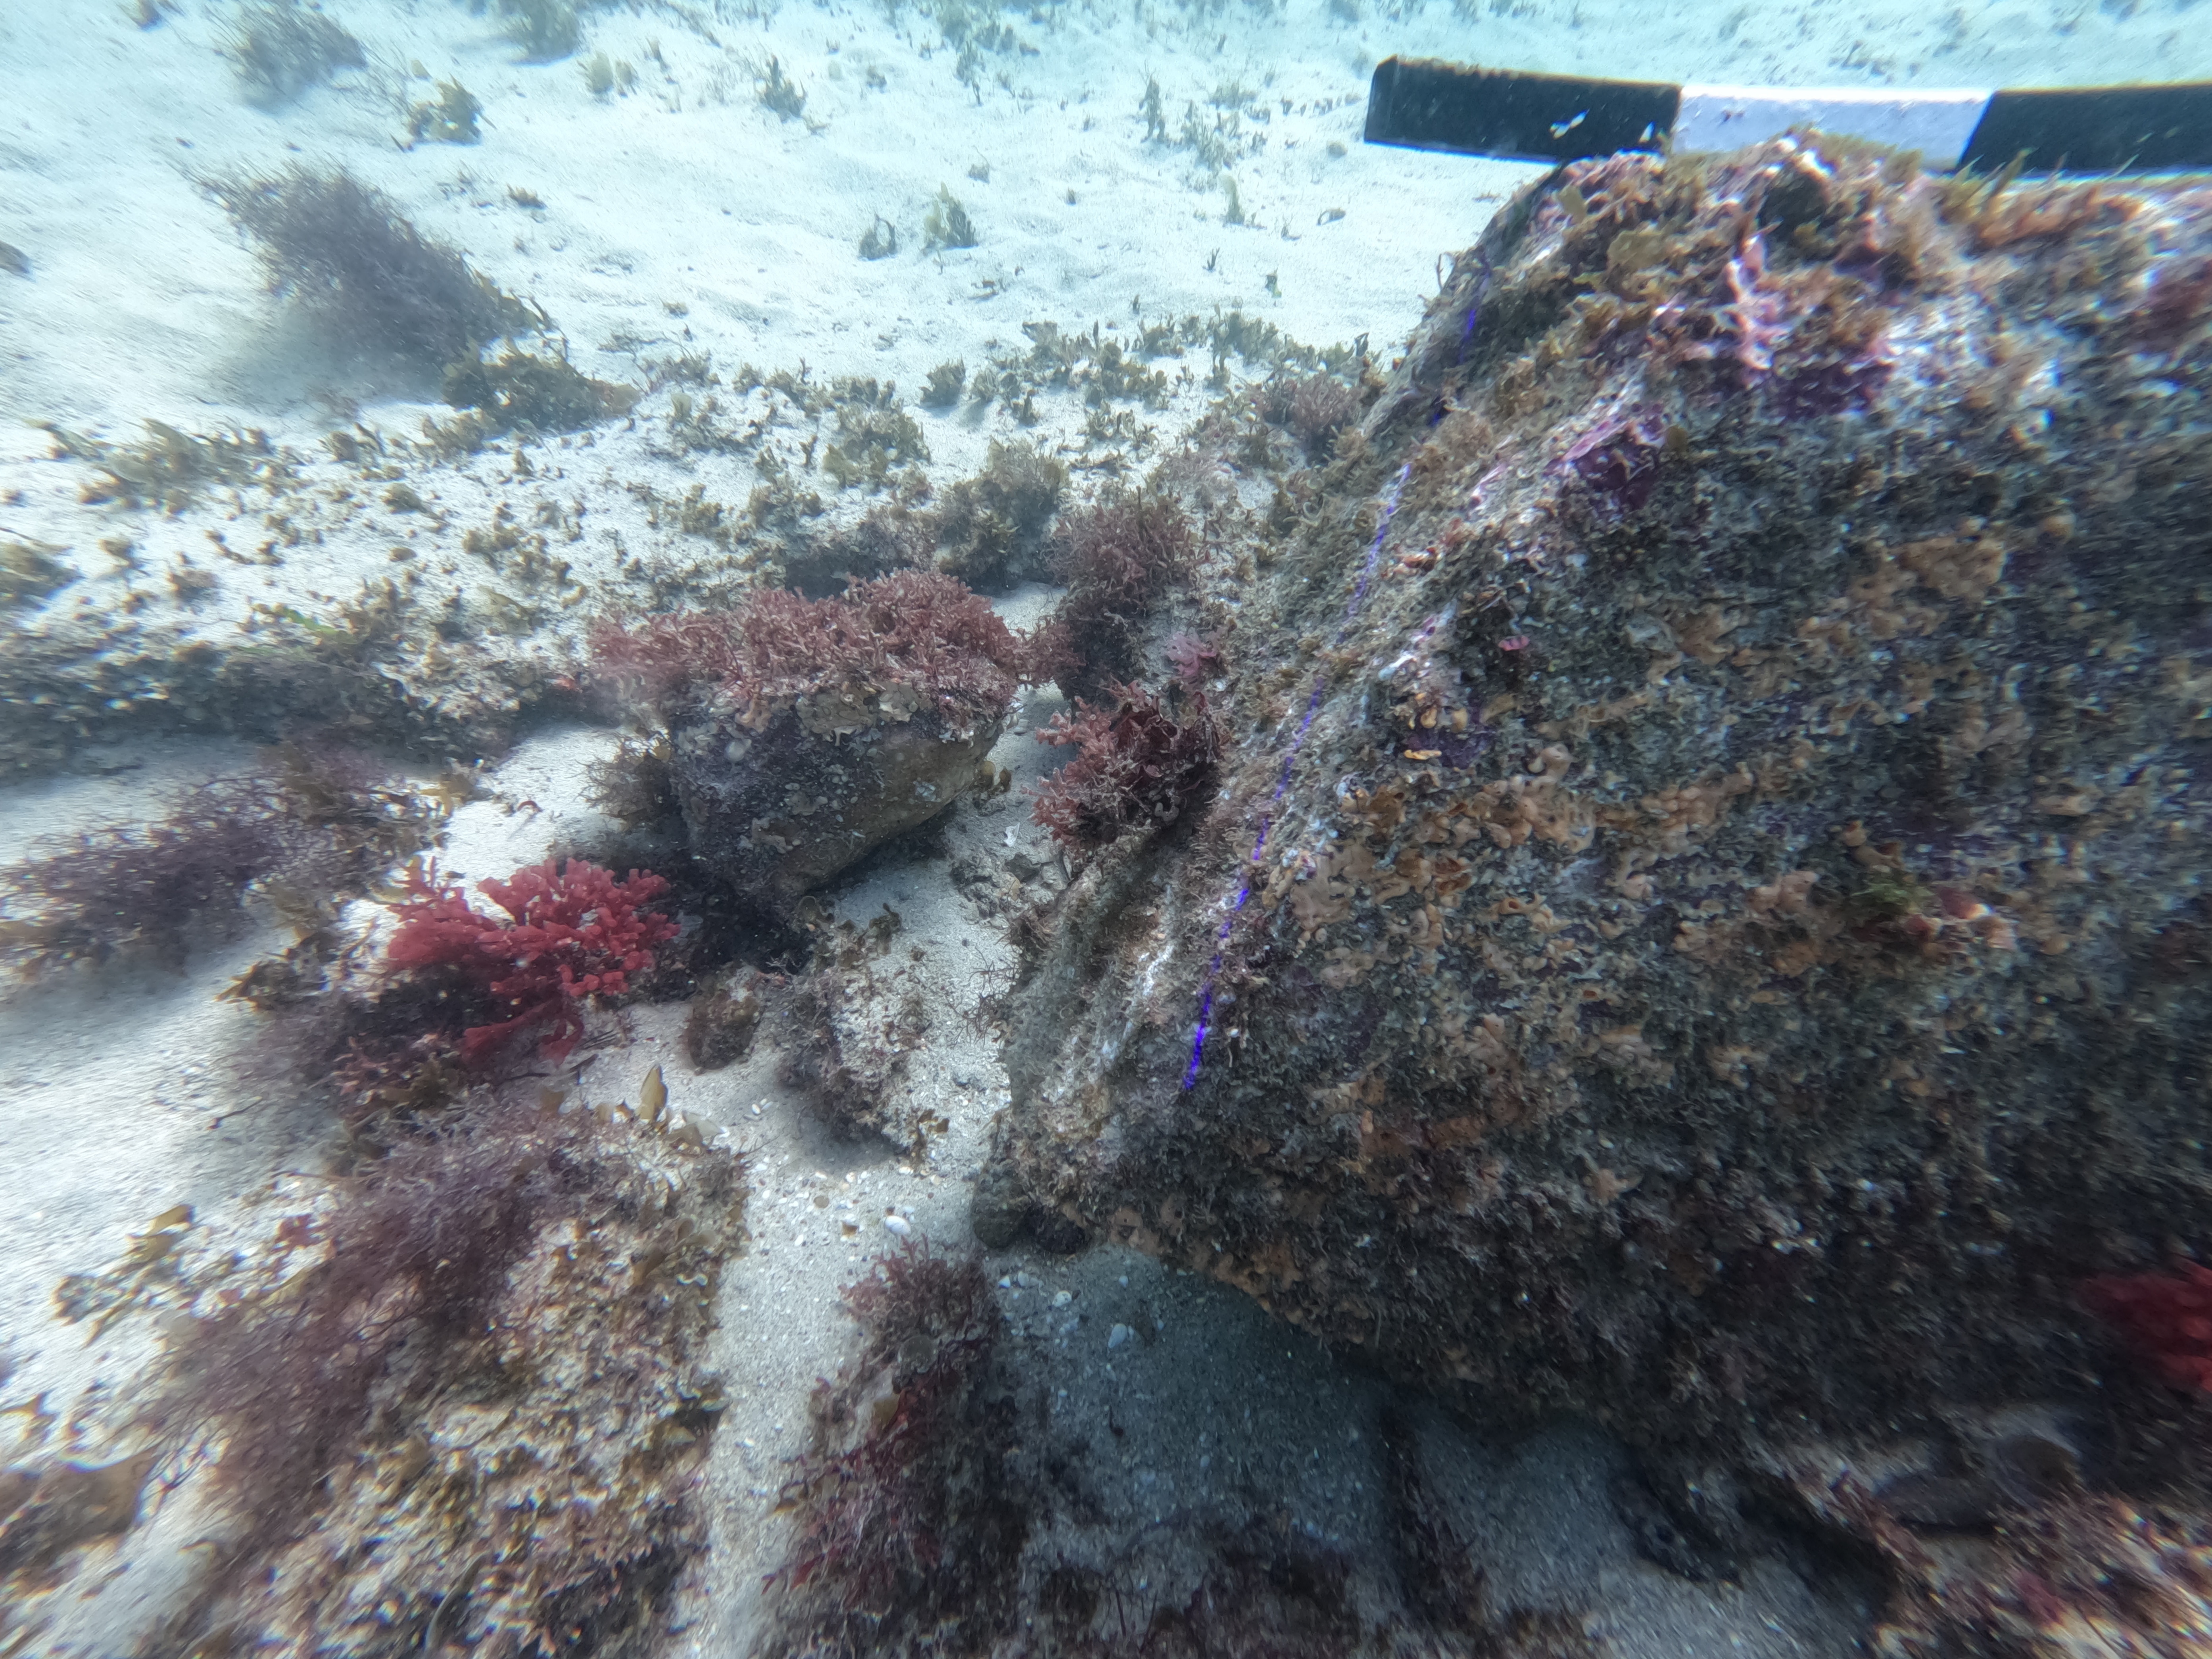

Supplement: Supplementary file 858 [file G0713925.pdf › Ocean2/G0713925.pdf]

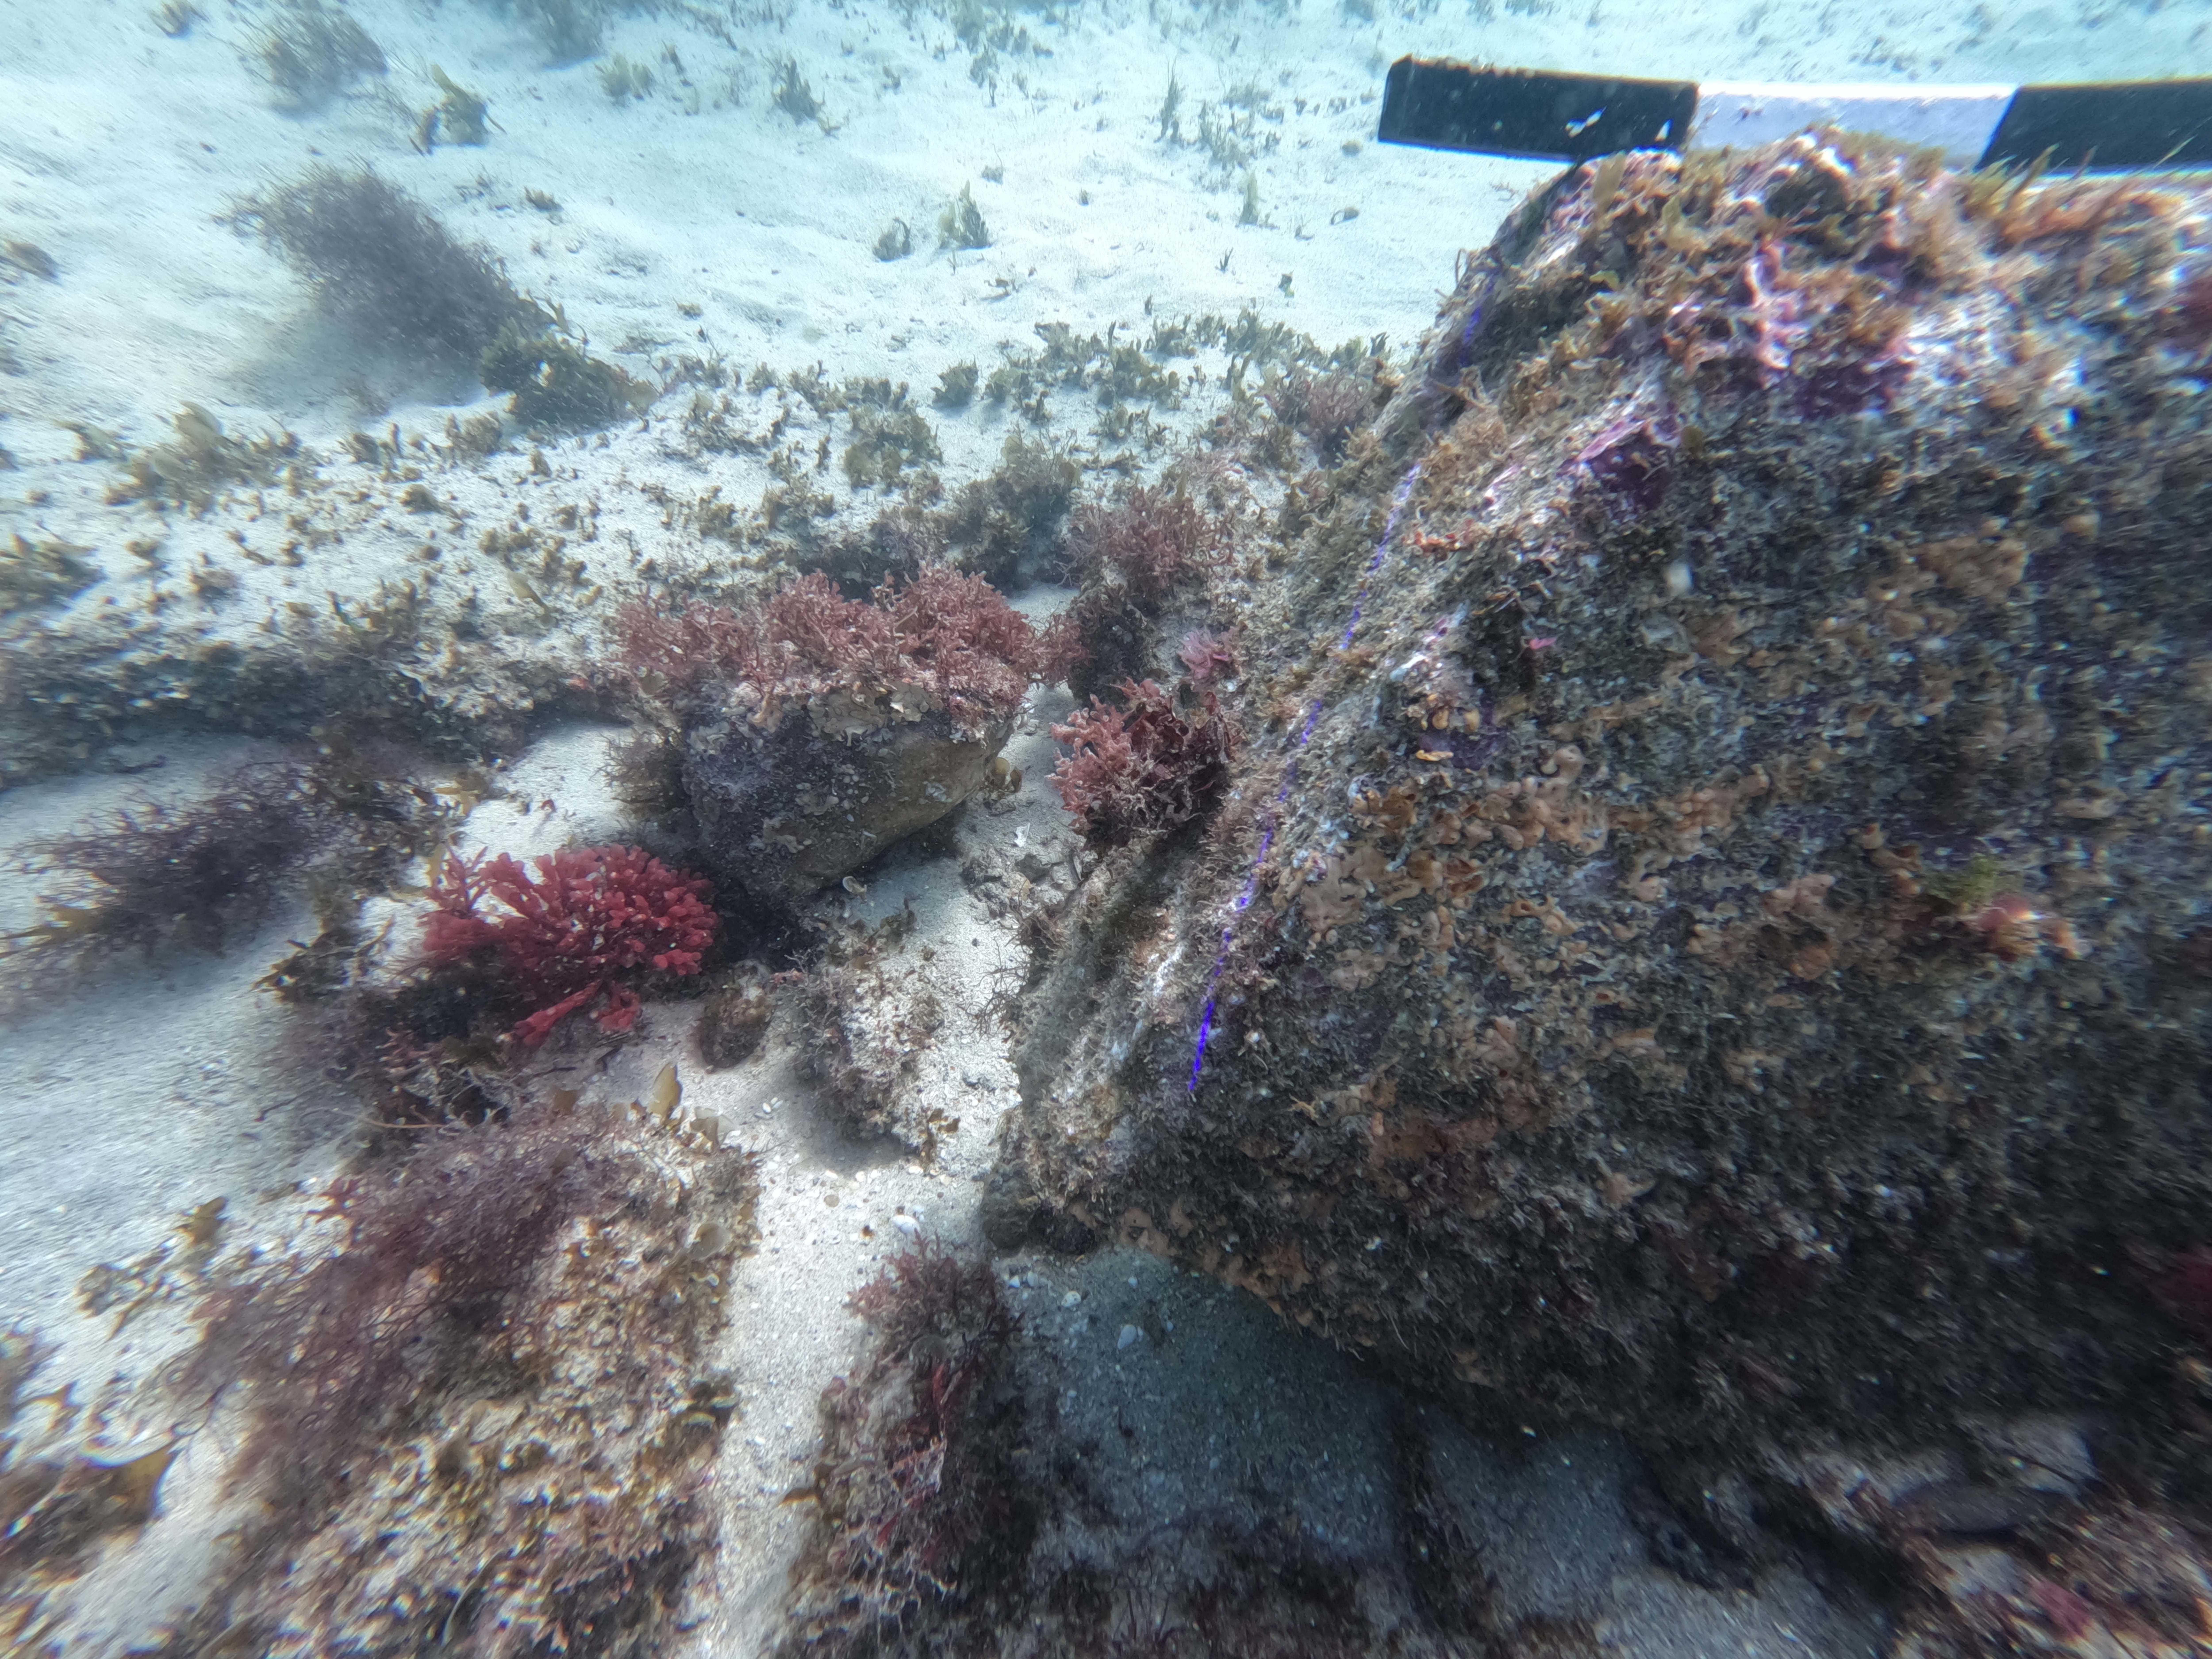

Supplement: Supplementary file 859 [file G0713926.pdf › Ocean2/G0713926.pdf]

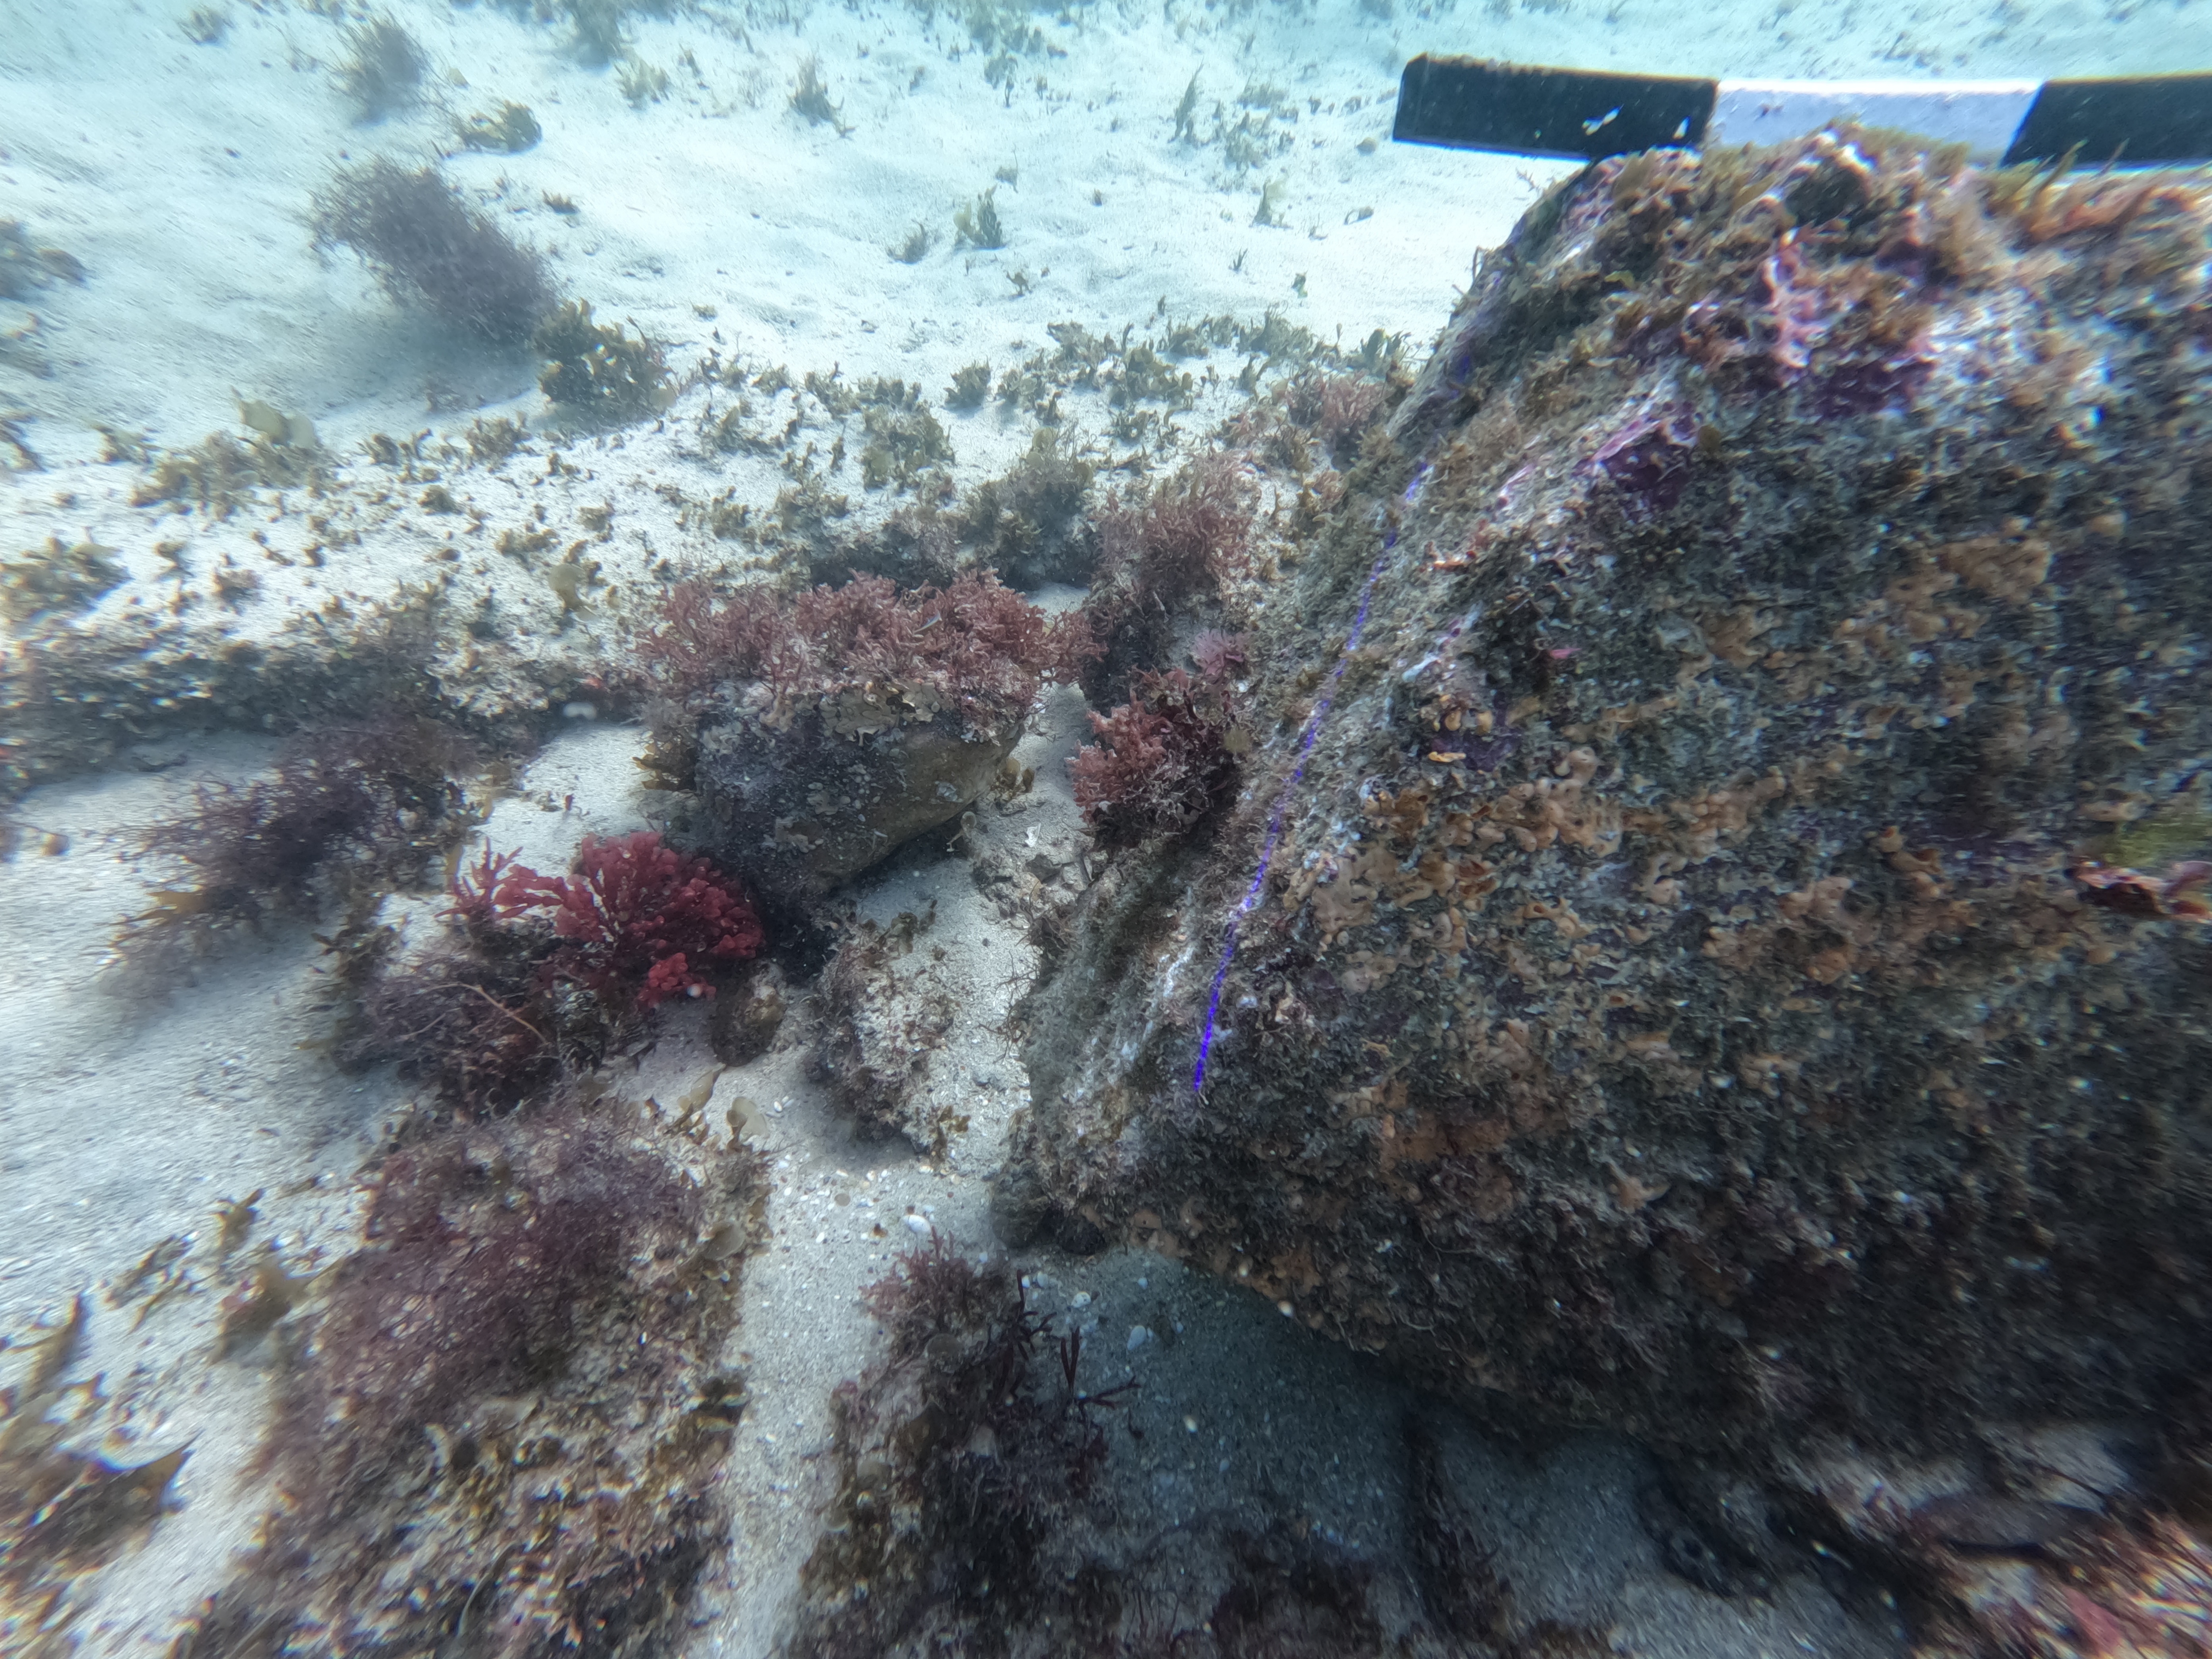

Supplement: Supplementary file 860 [file G0713927.pdf › Ocean2/G0713927.pdf]

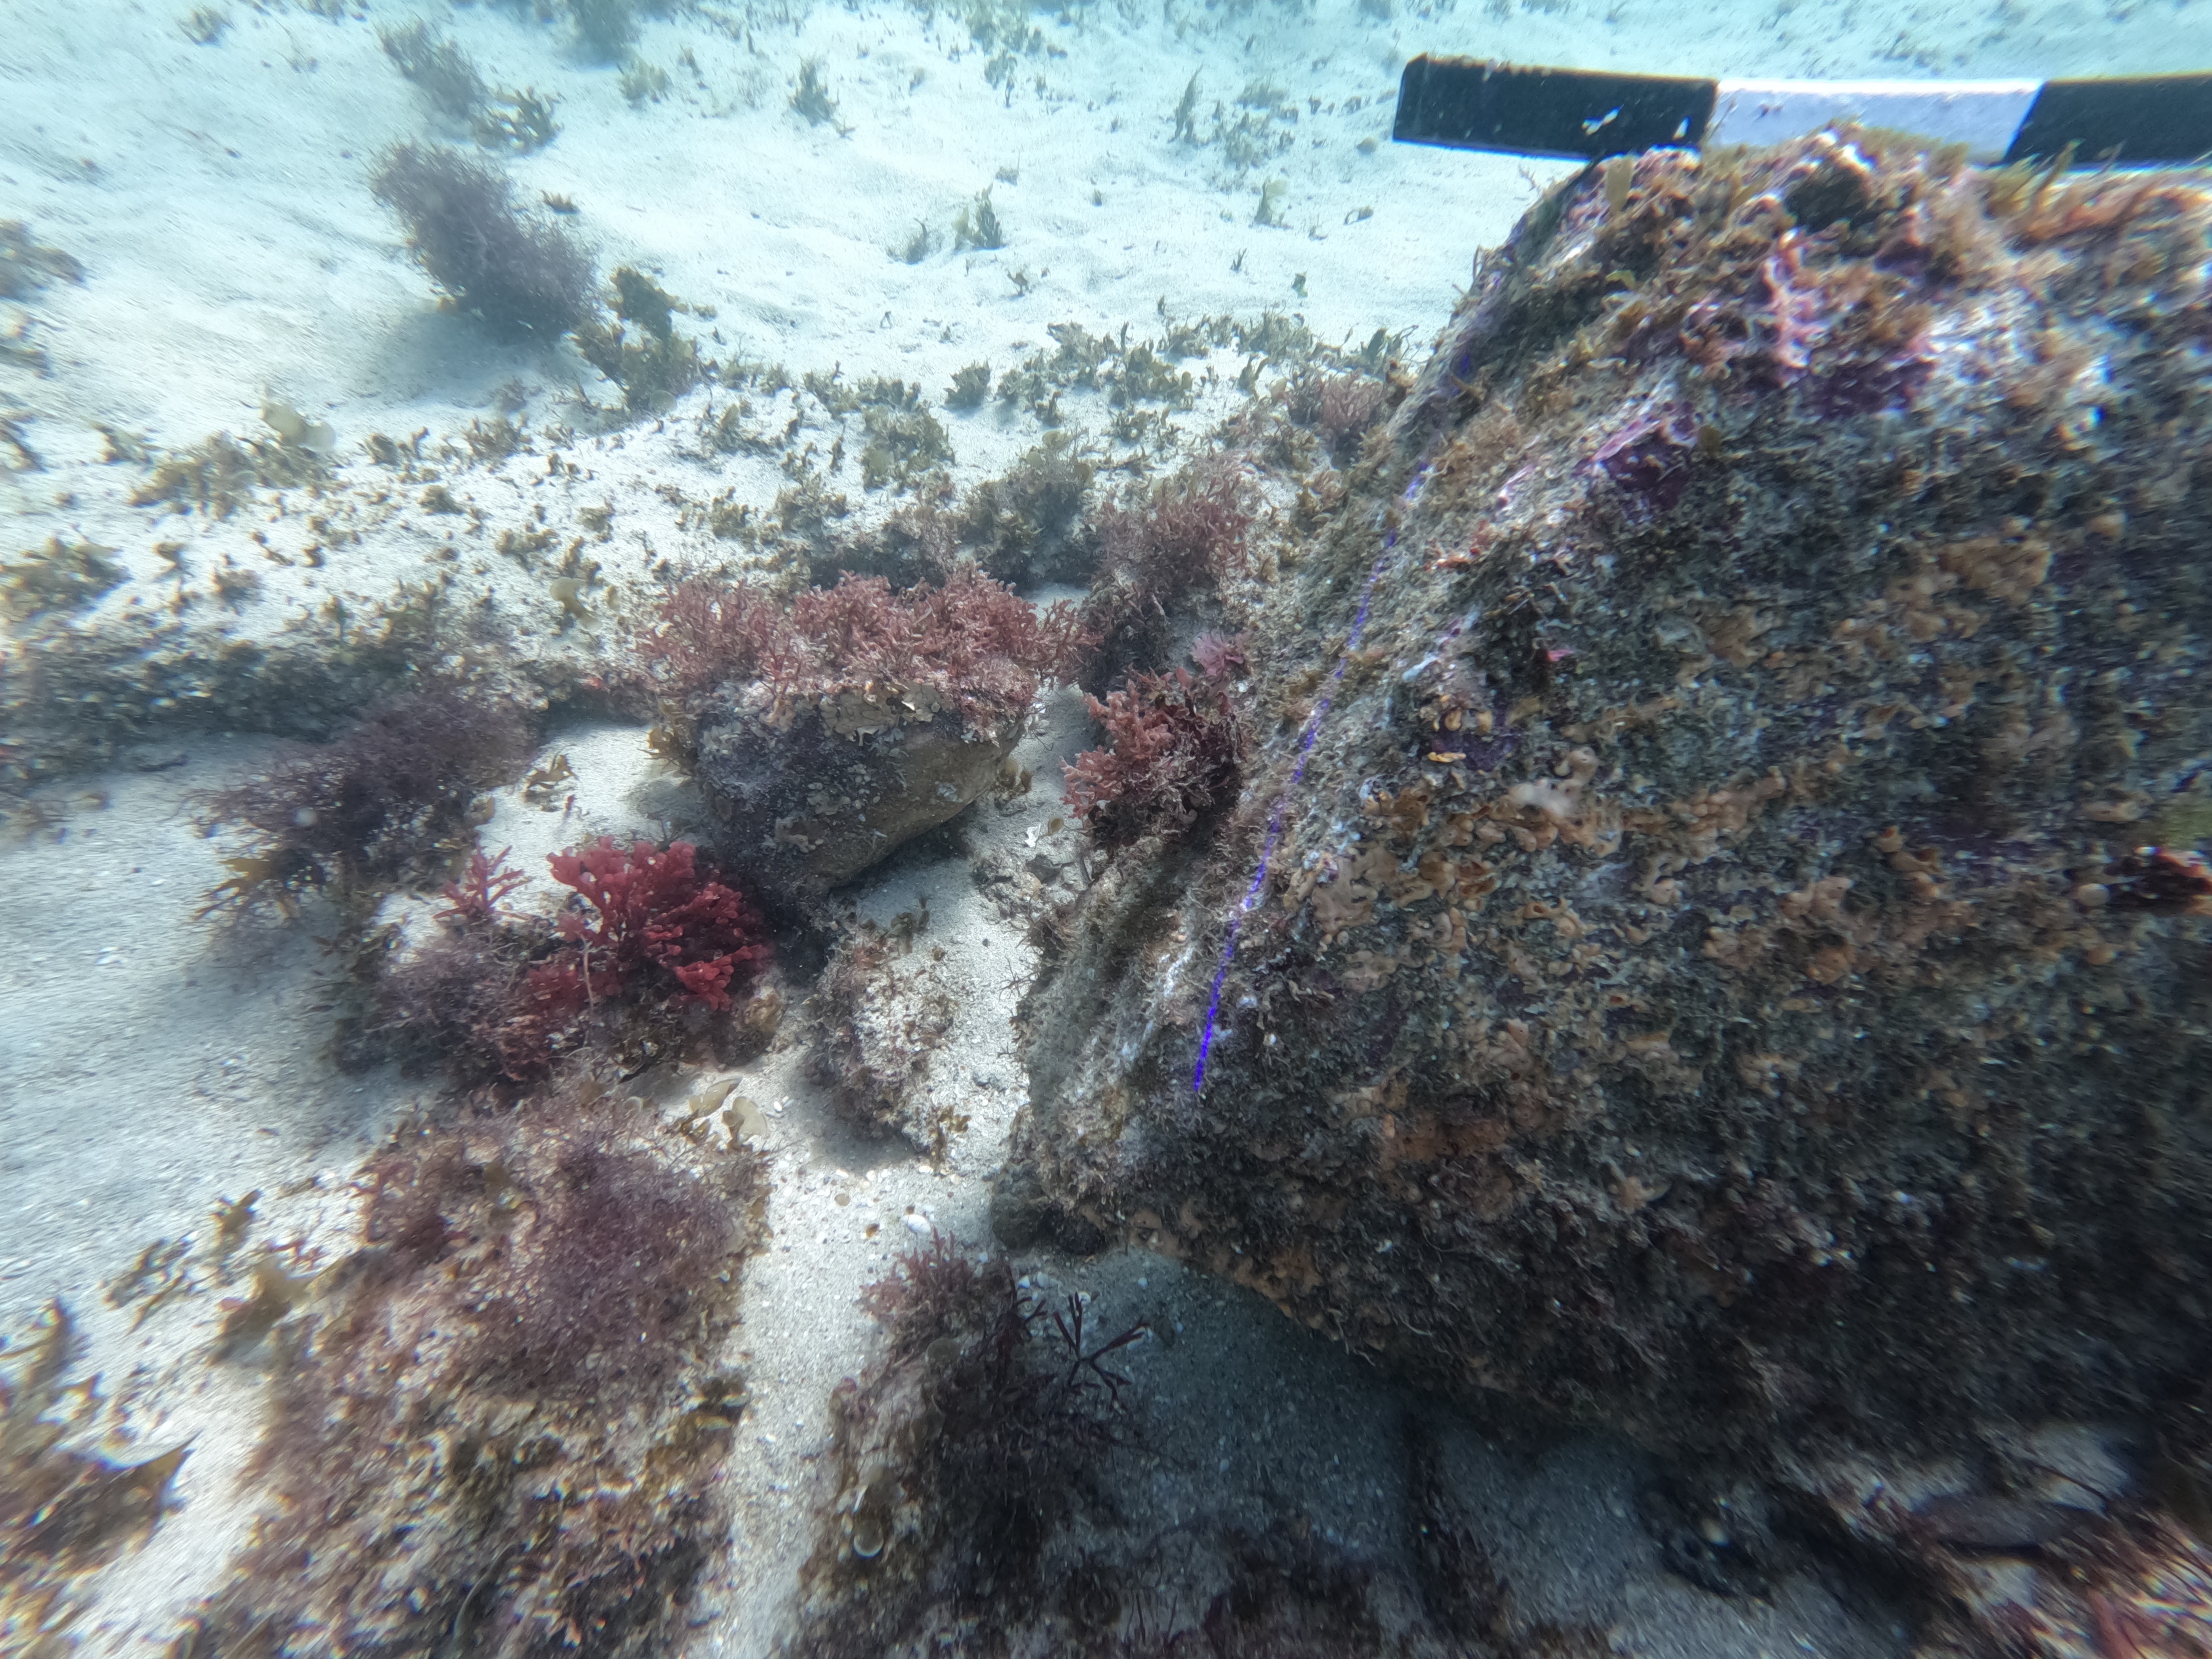

Supplement: Supplementary file 861 [file G0713928.pdf › Ocean2/G0713928.pdf]

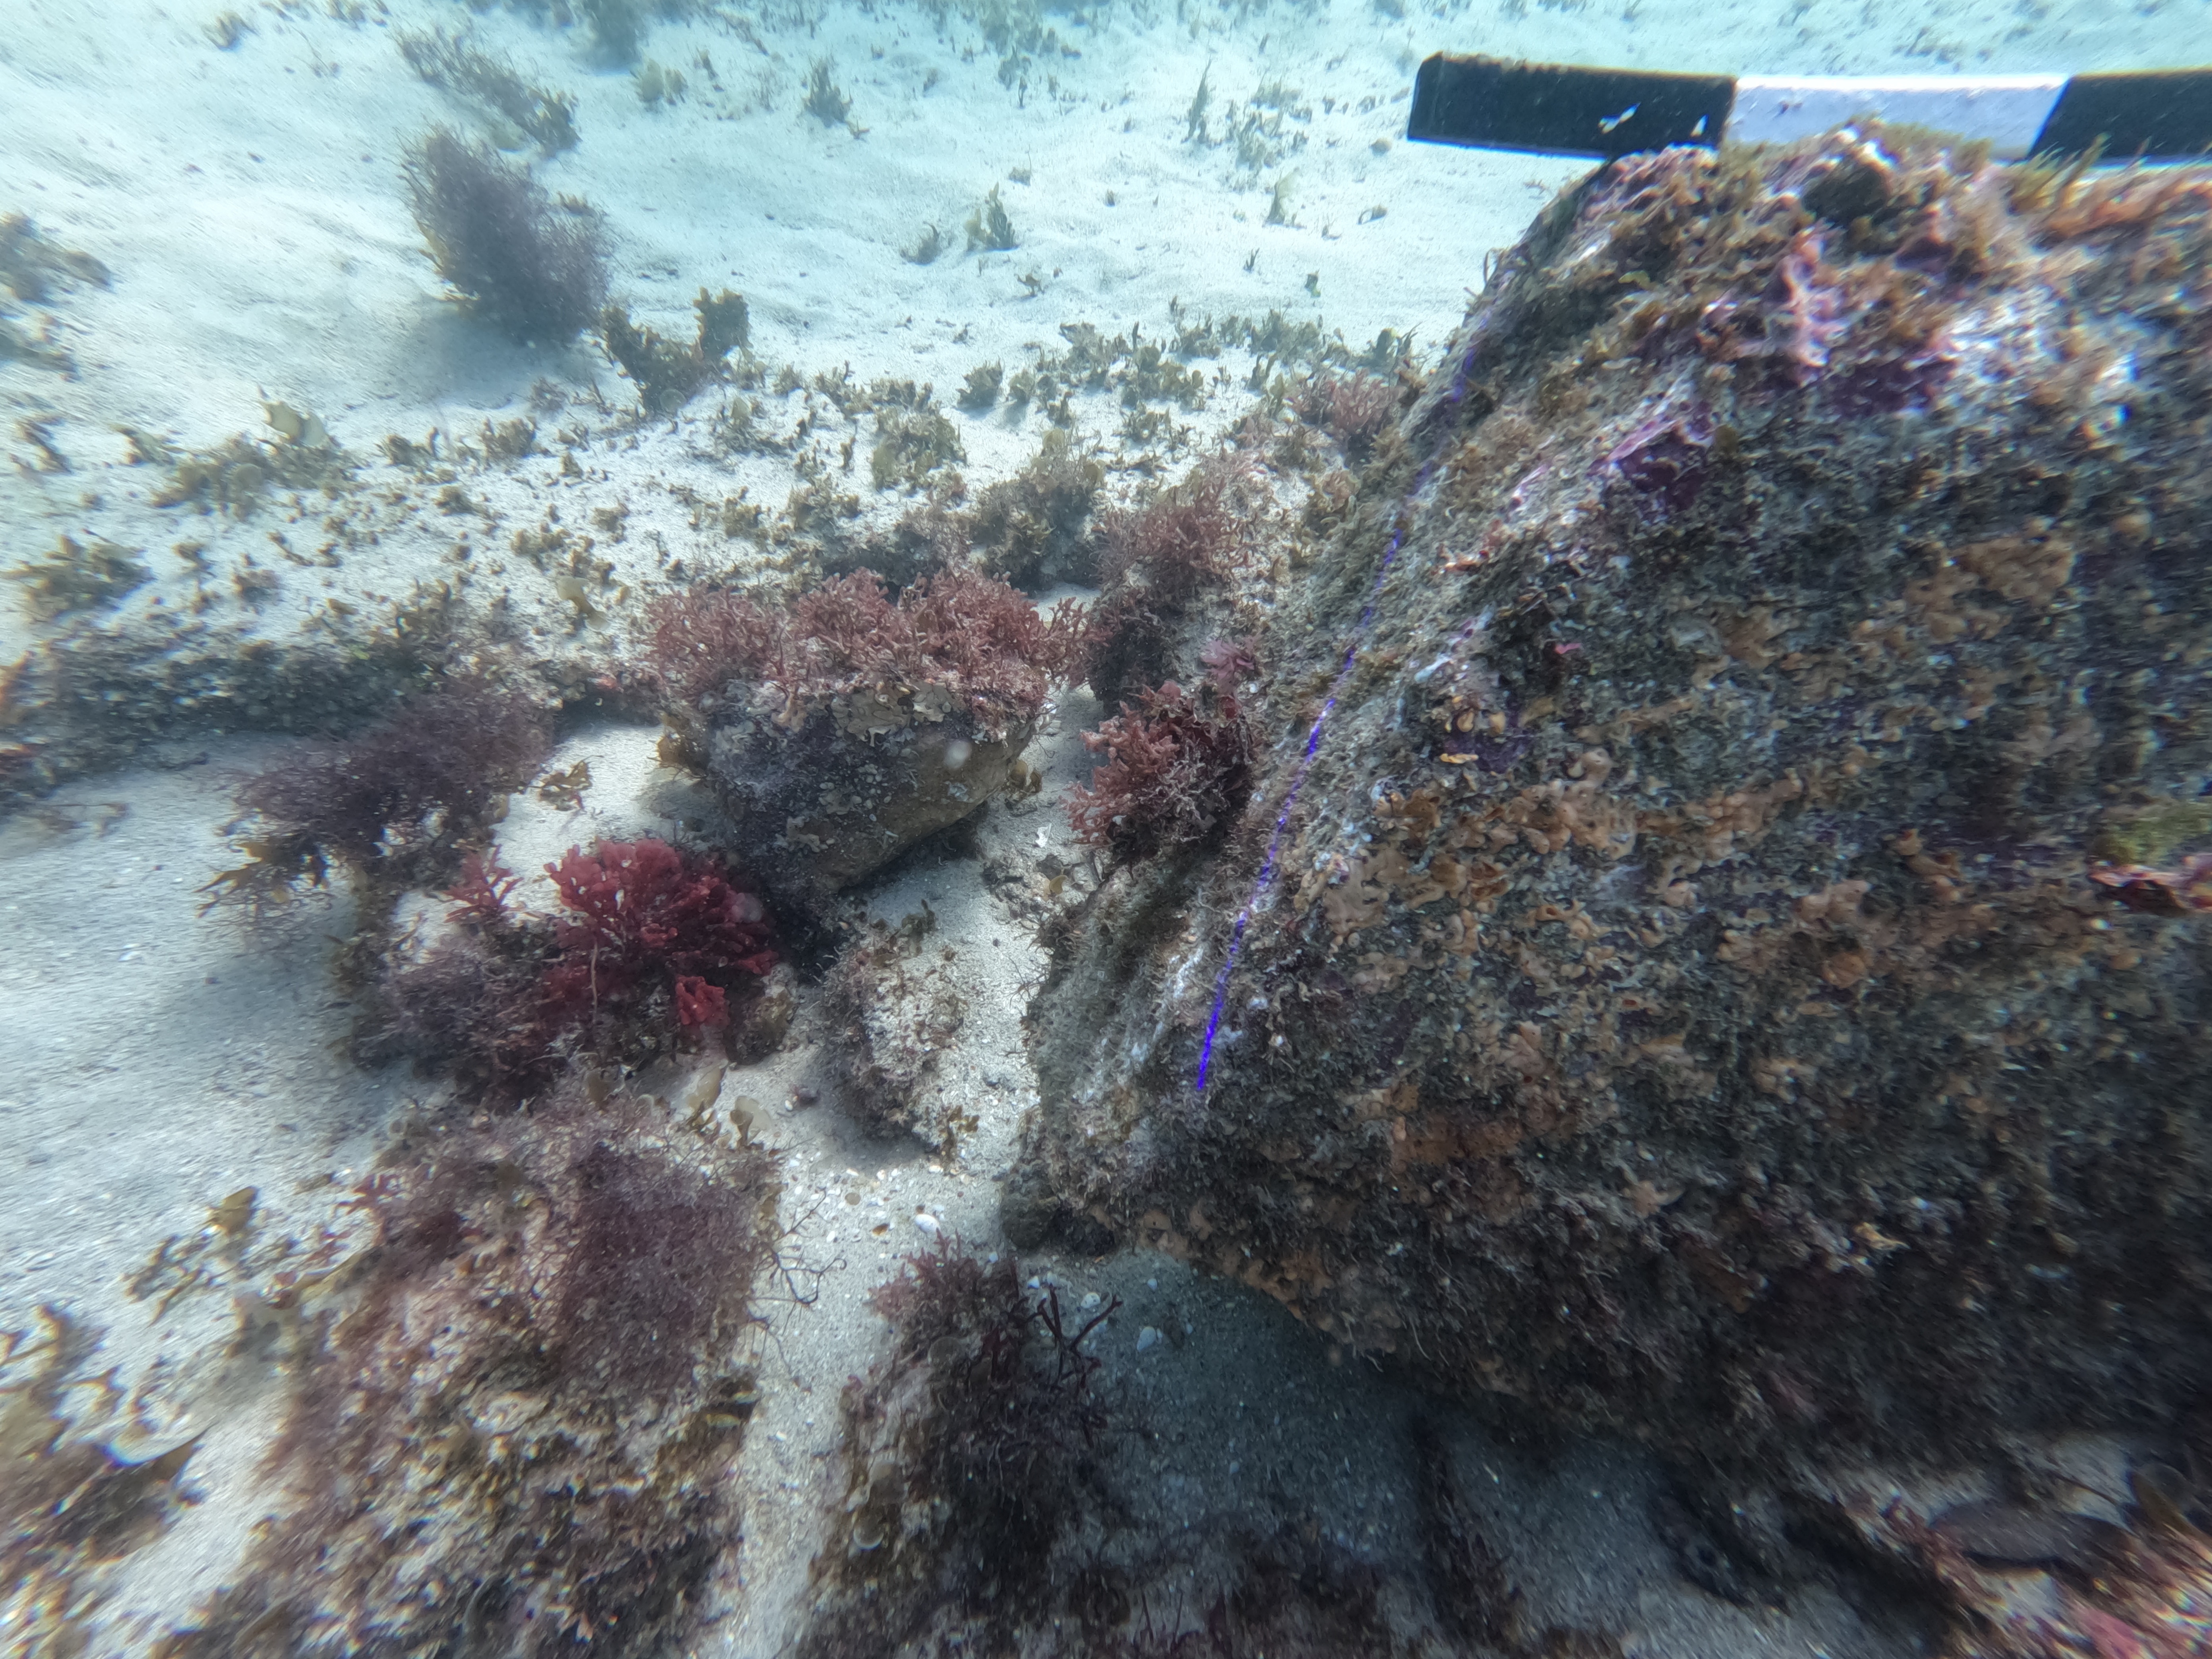

Supplement: Supplementary file 862 [file G0713929.pdf › Ocean2/G0713929.pdf]

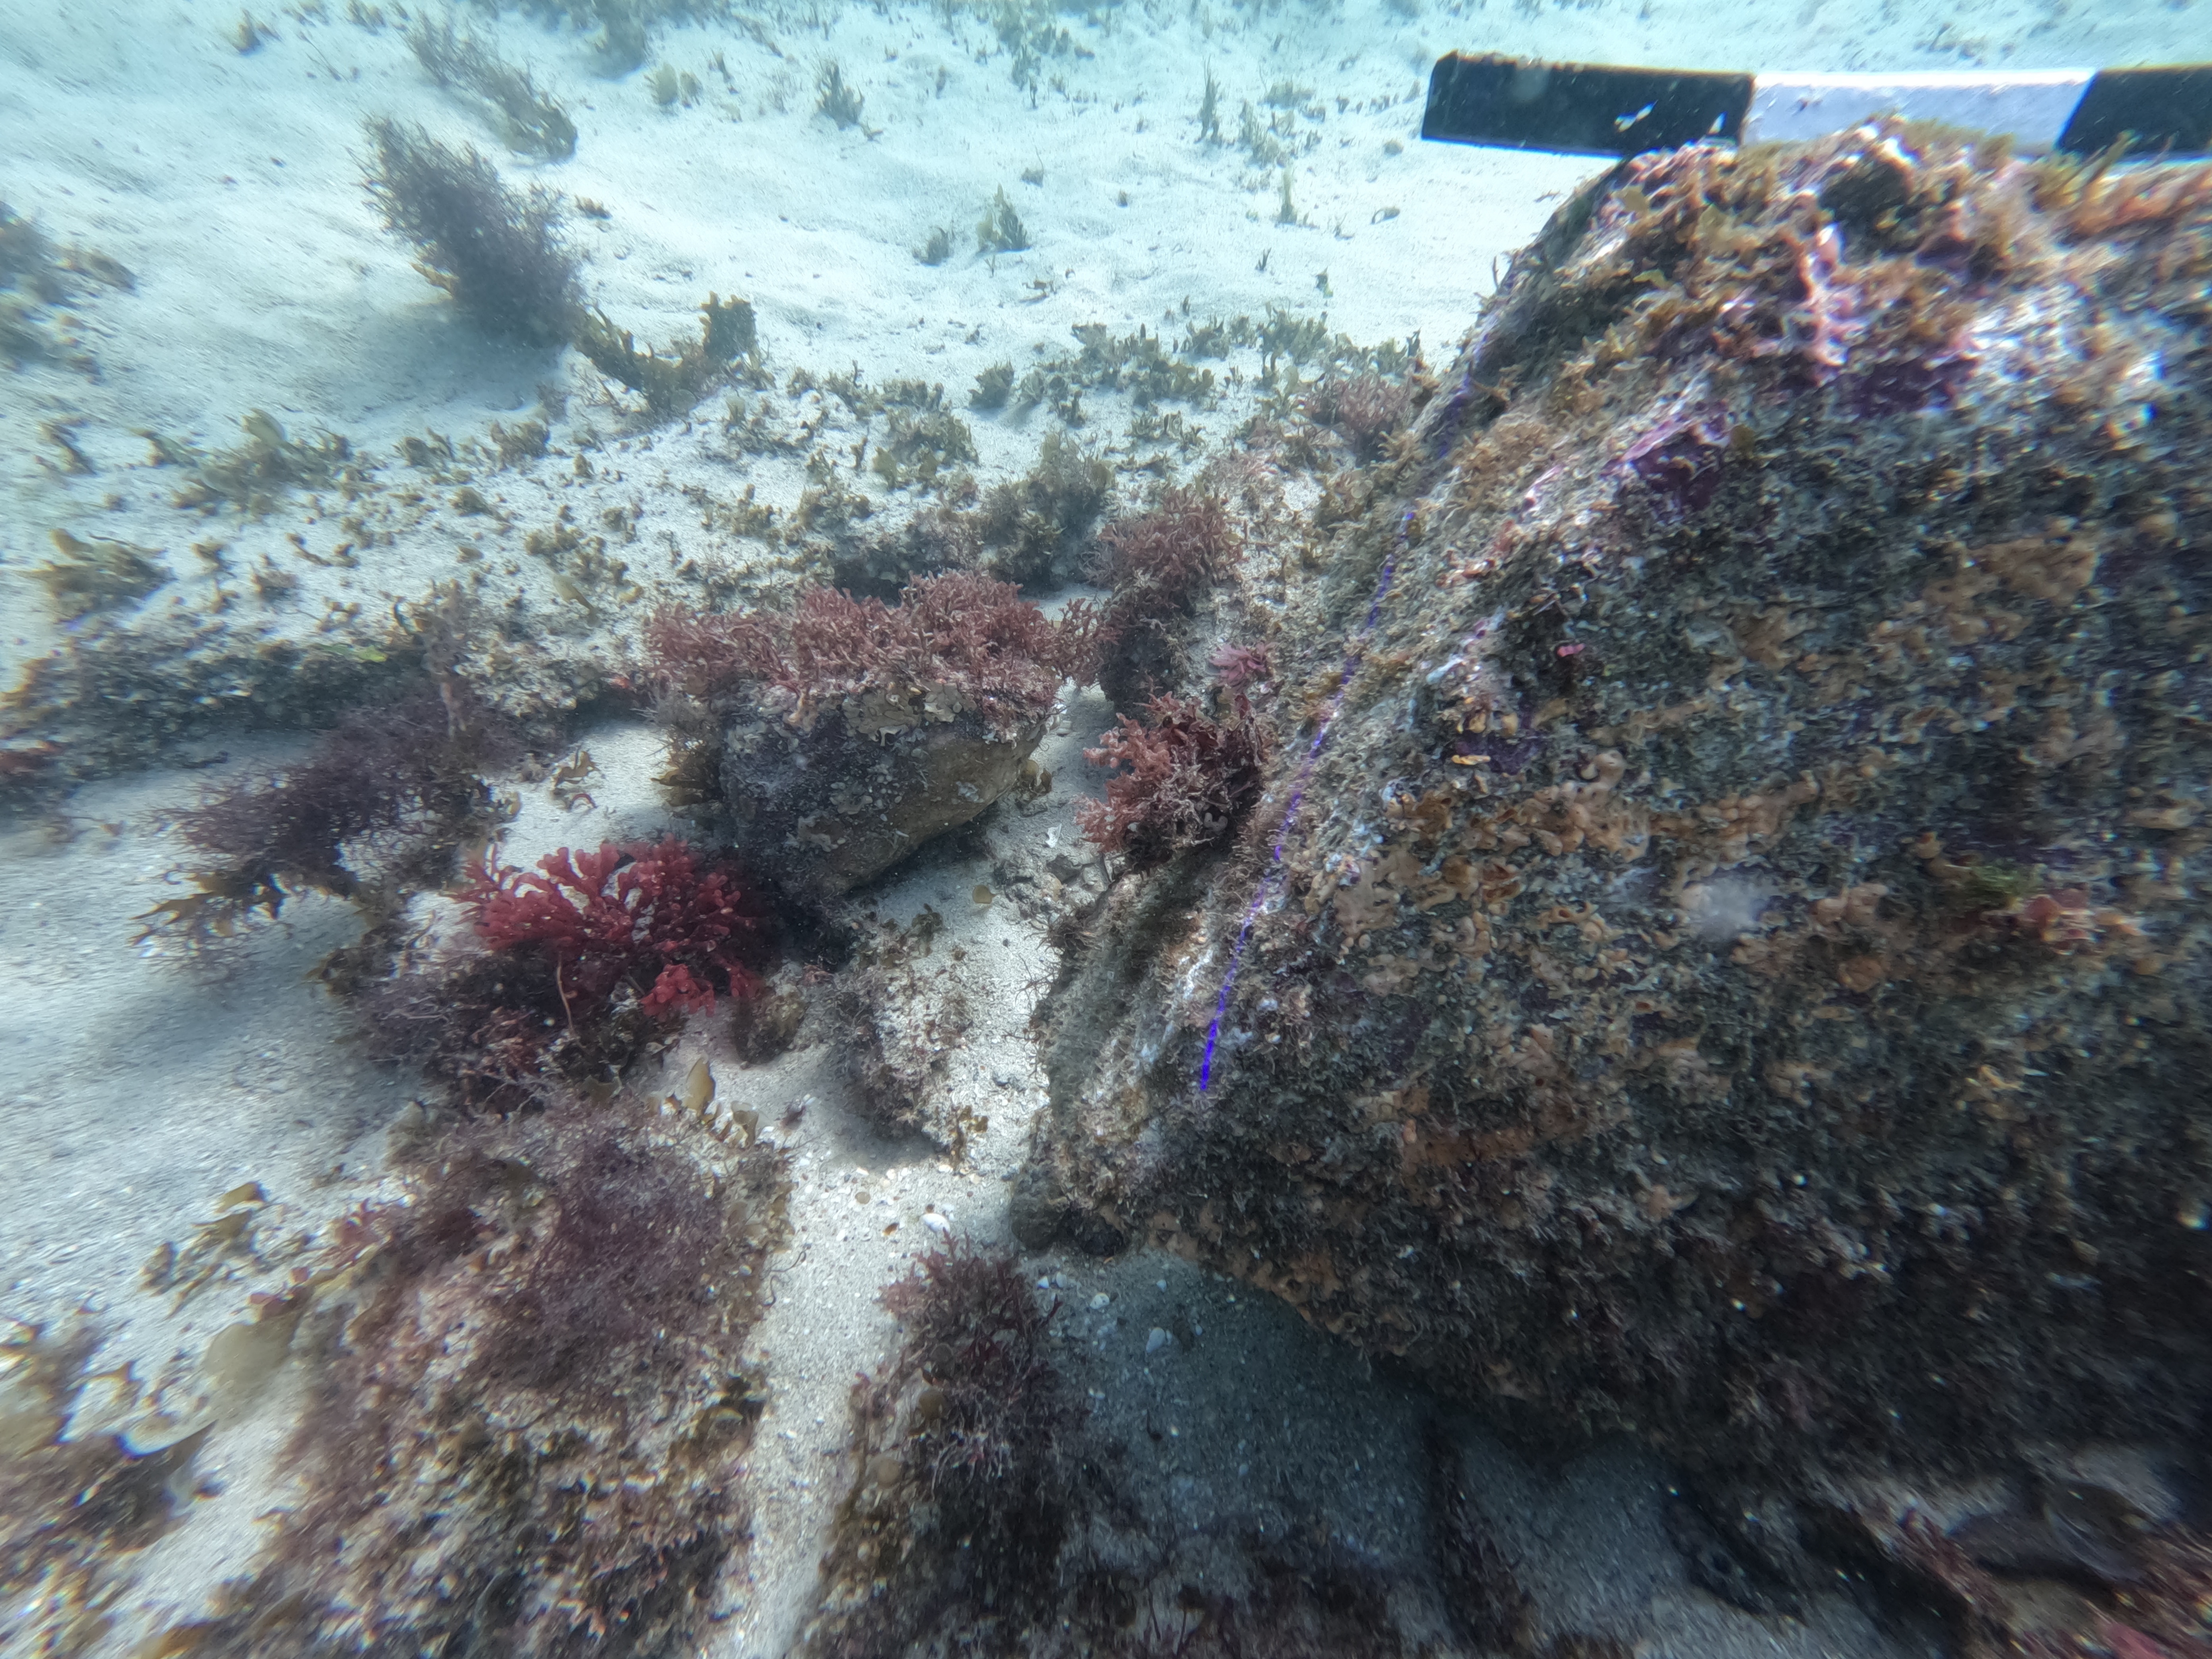

Supplement: Supplementary file 863 [file G0713930.pdf › Ocean2/G0713930.pdf]

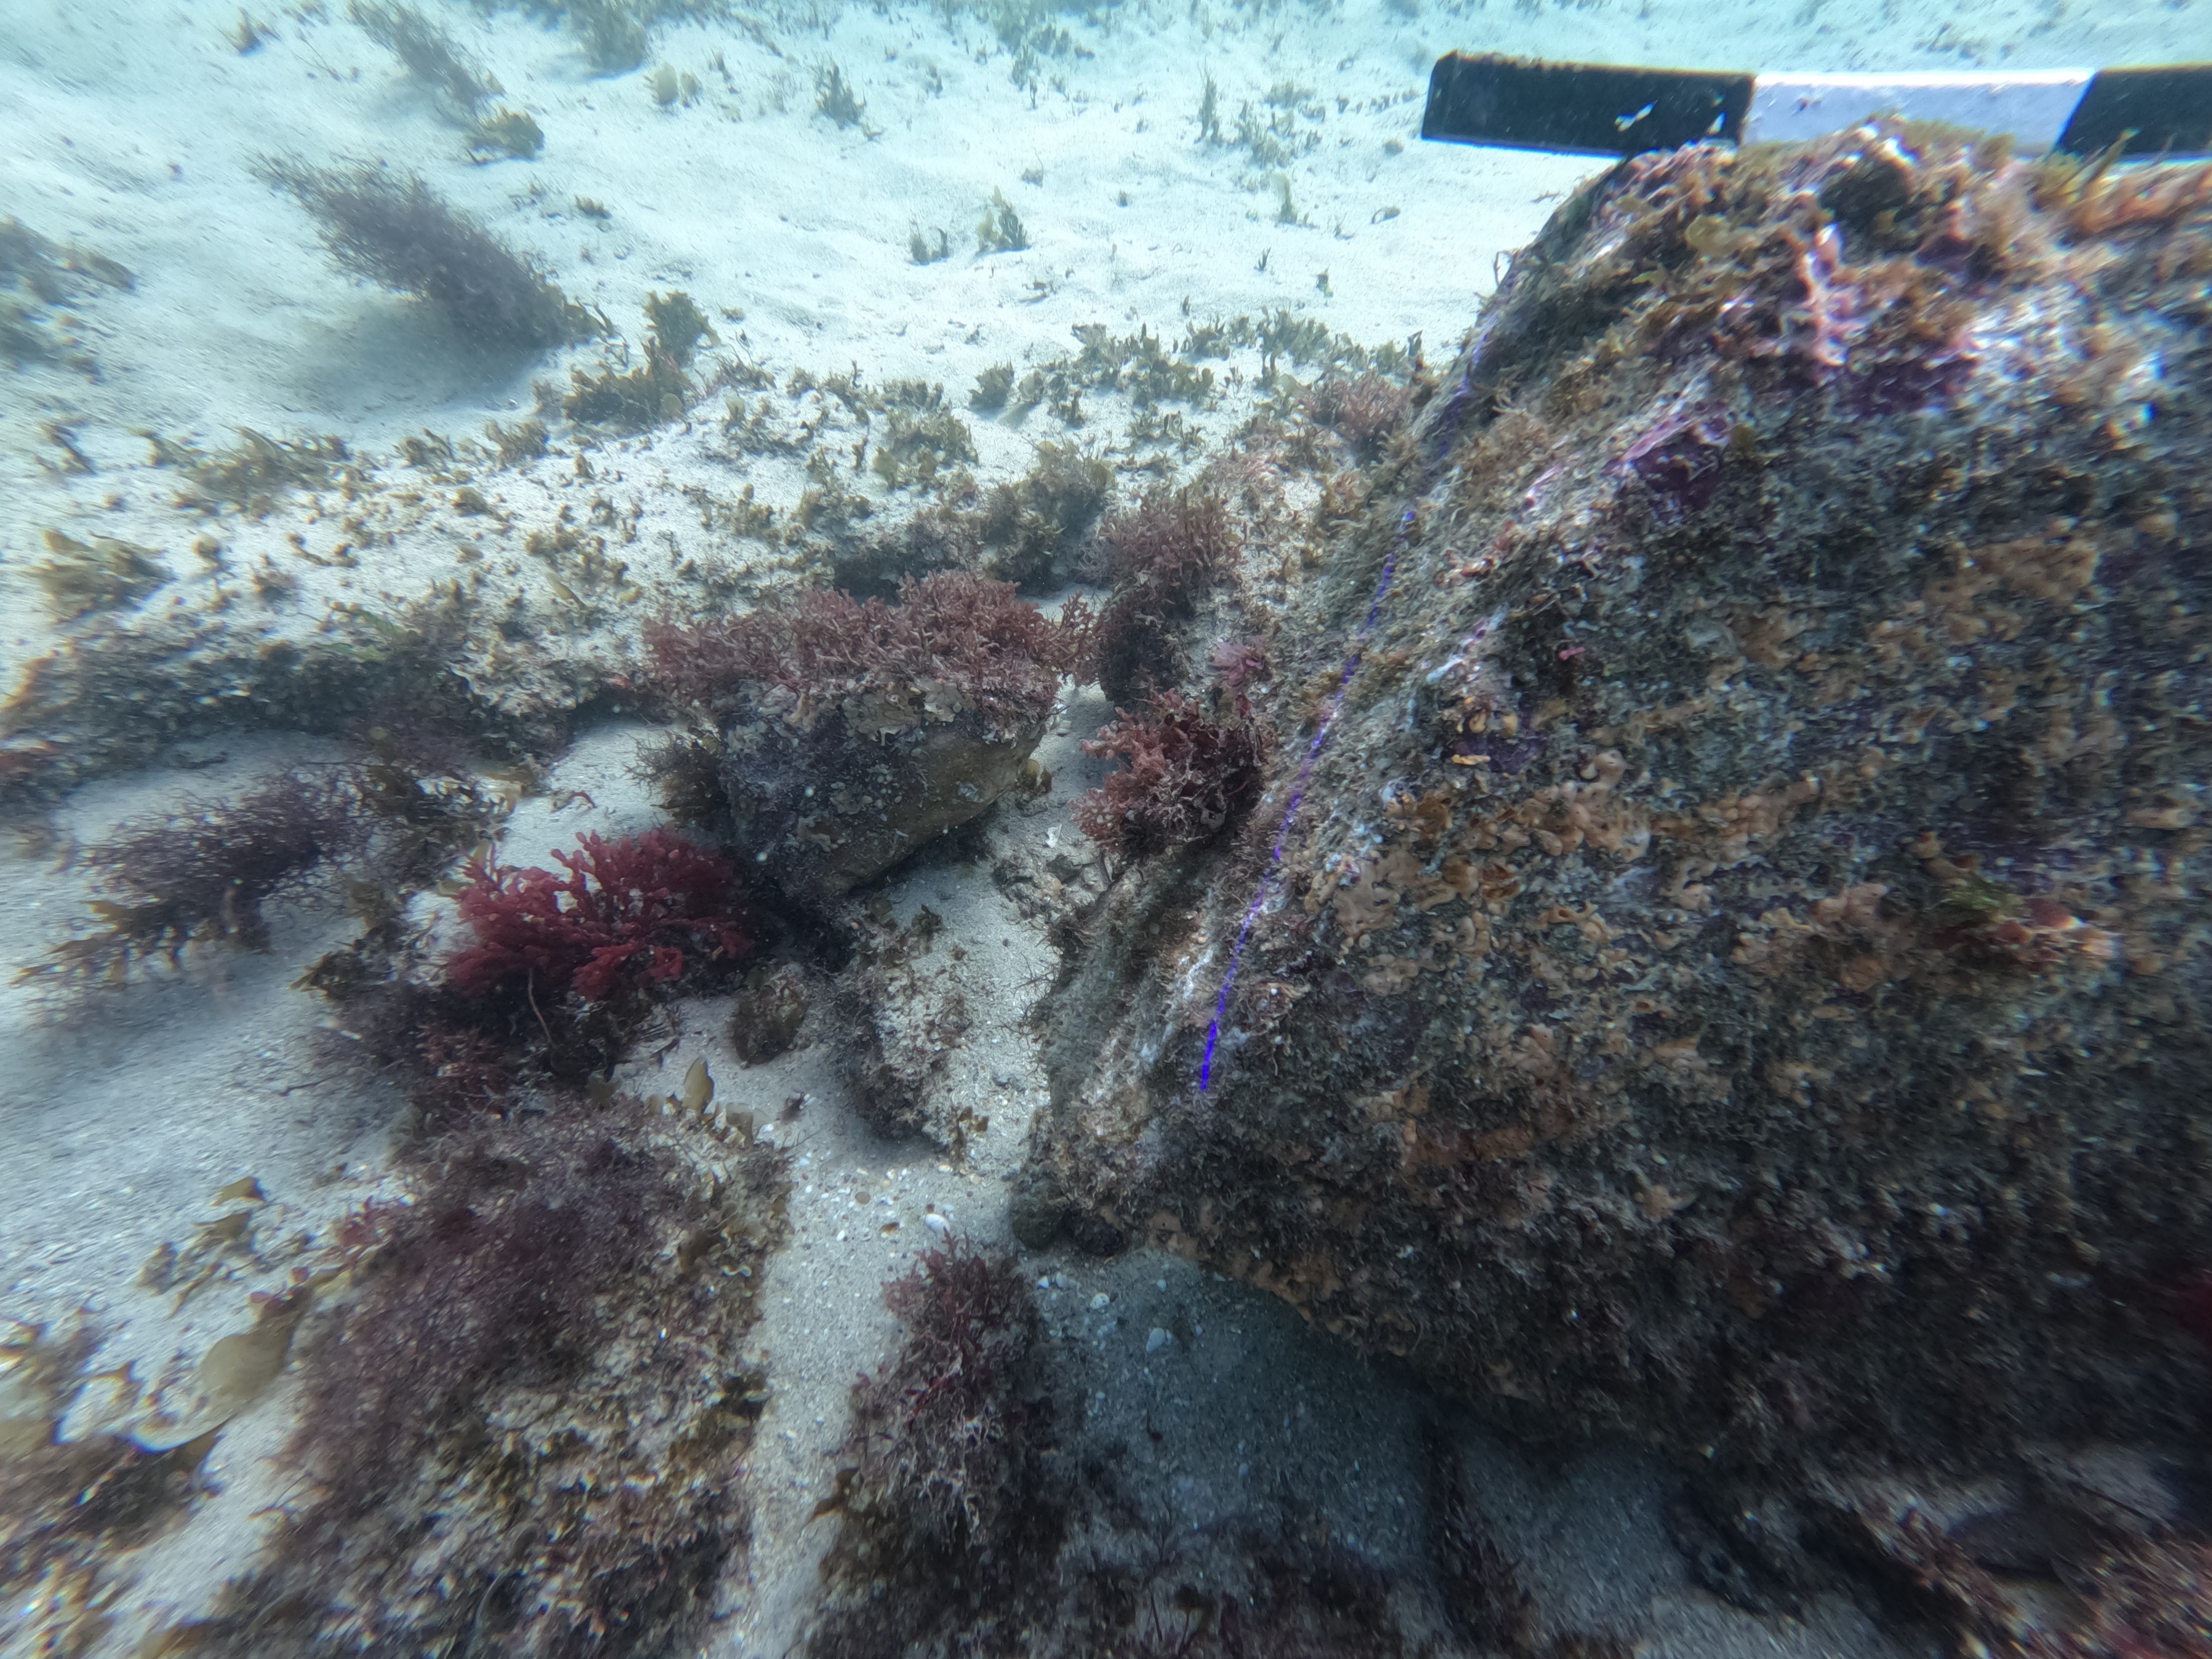

Supplement: Supplementary file 864 [file G0713931.pdf › Ocean2/G0713931.pdf]

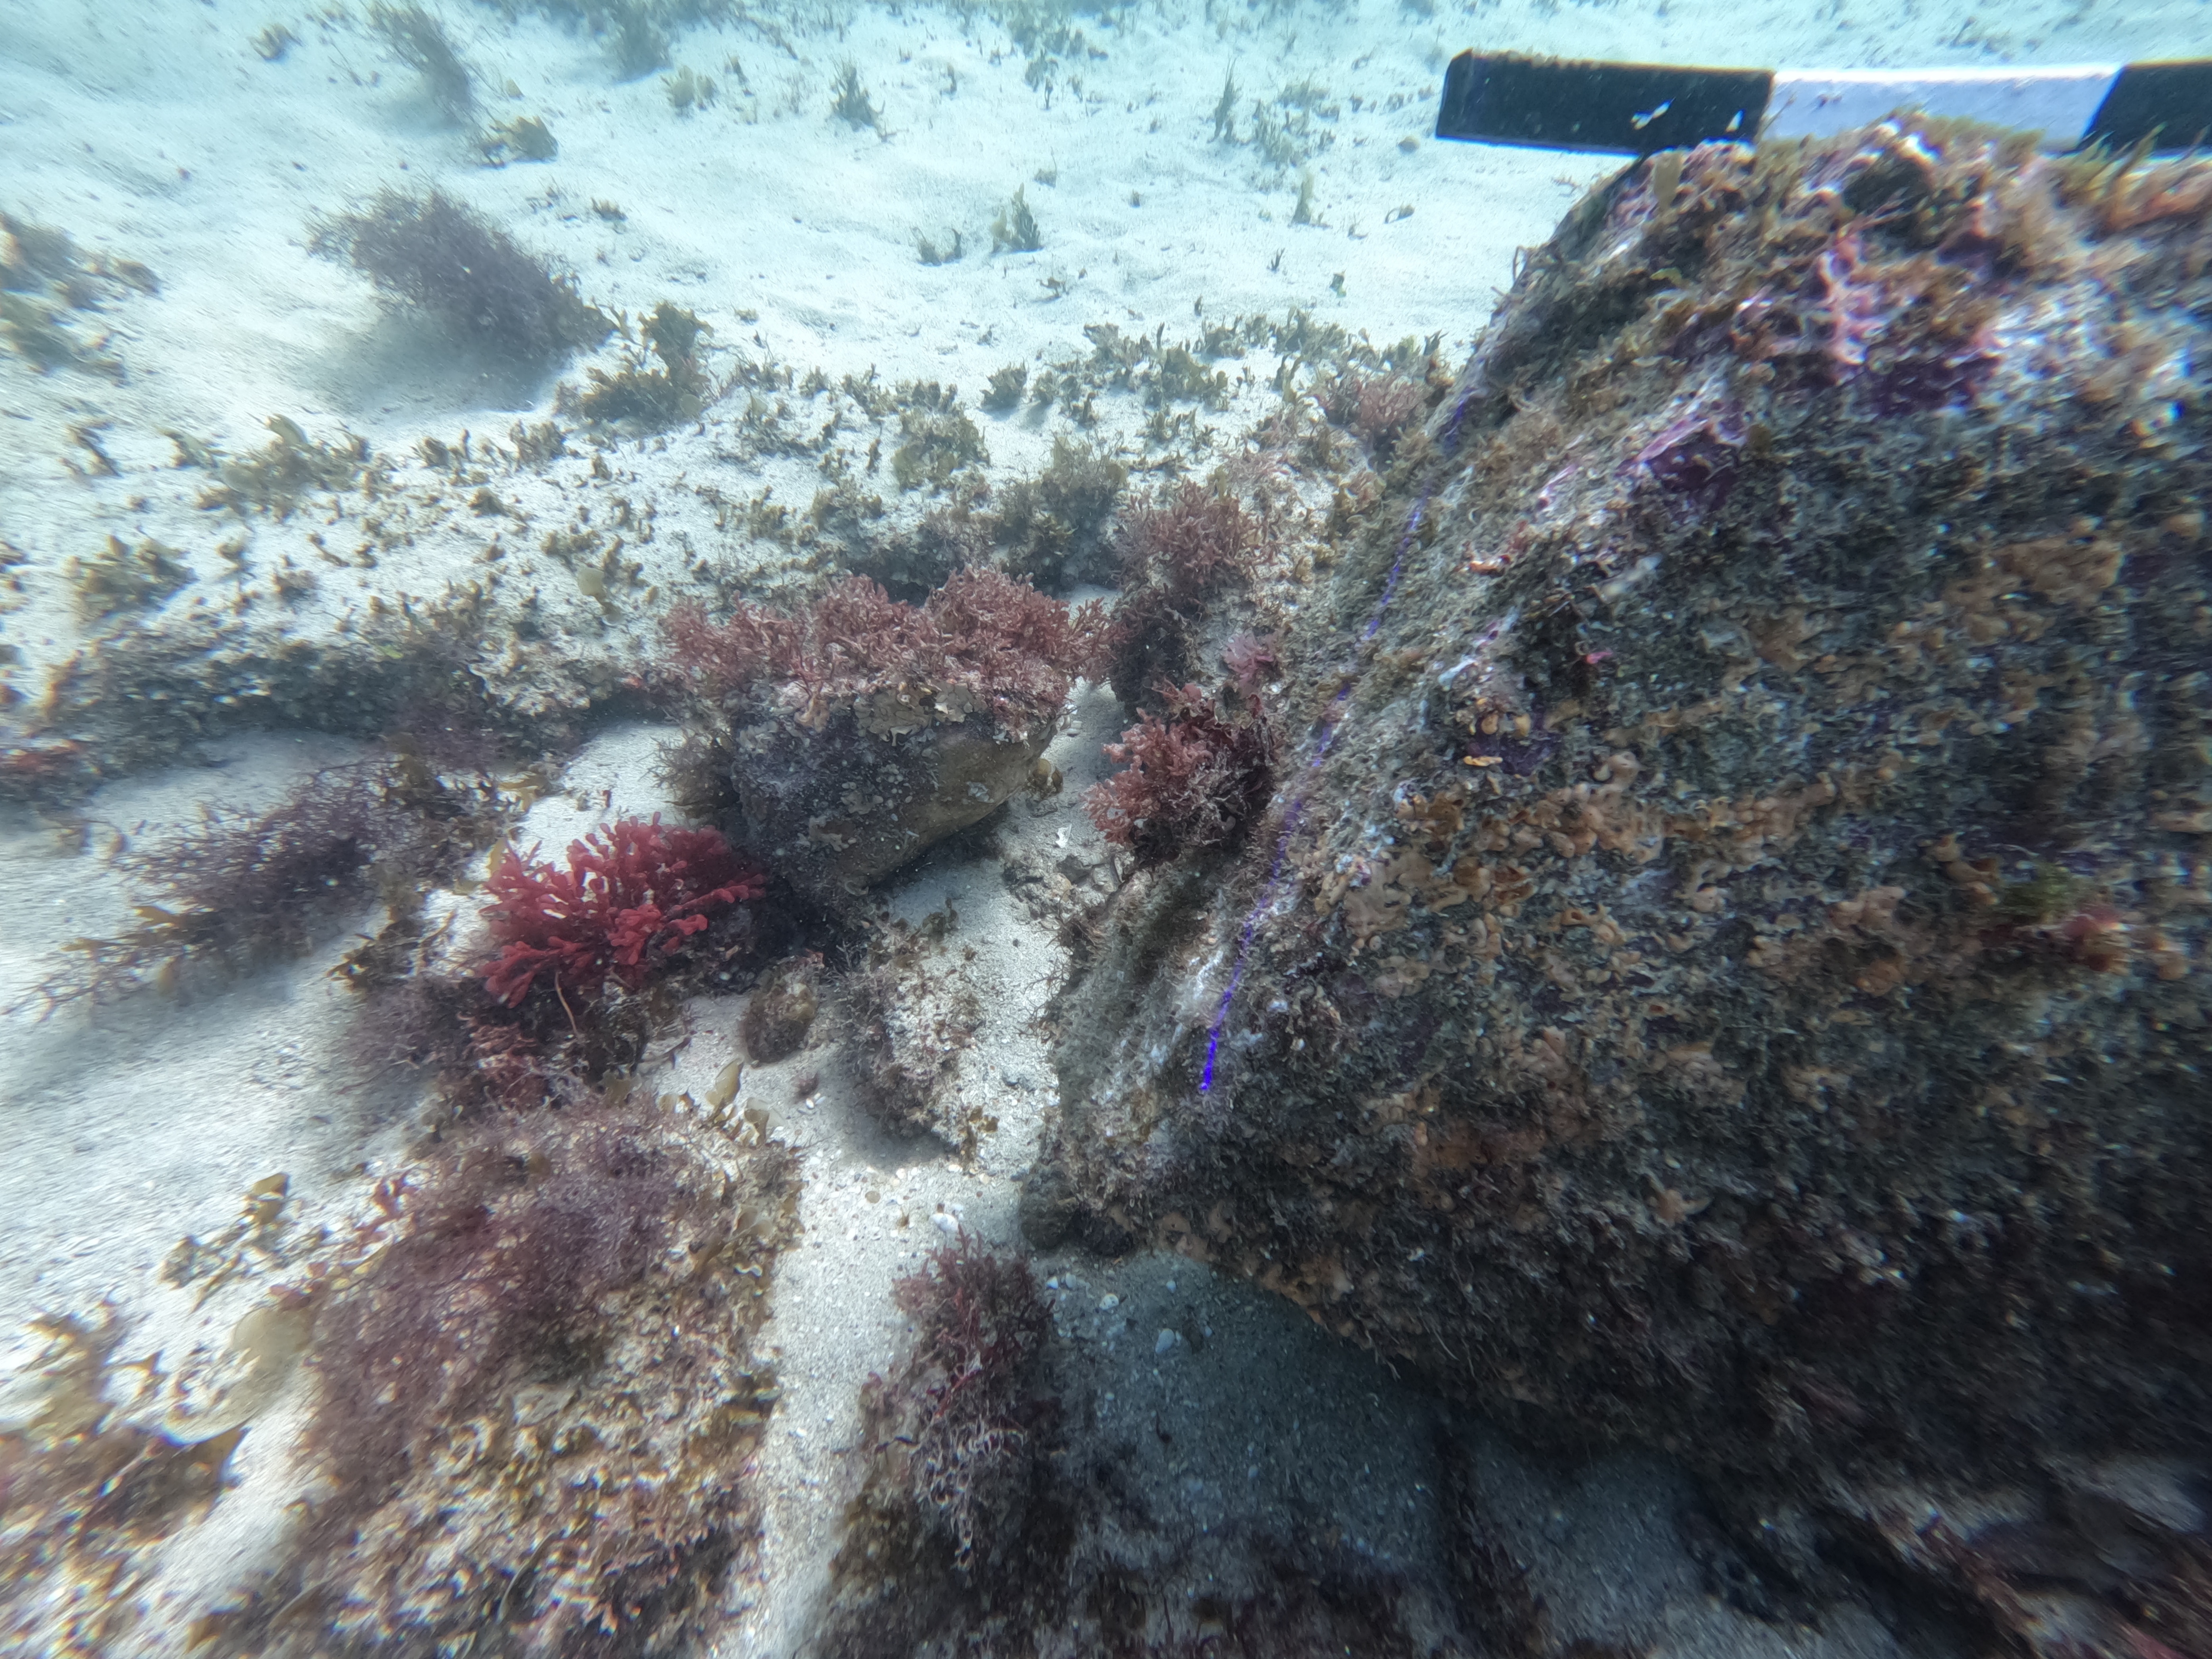

Supplement: Supplementary file 865 [file G0713932.pdf › Ocean2/G0713932.pdf]

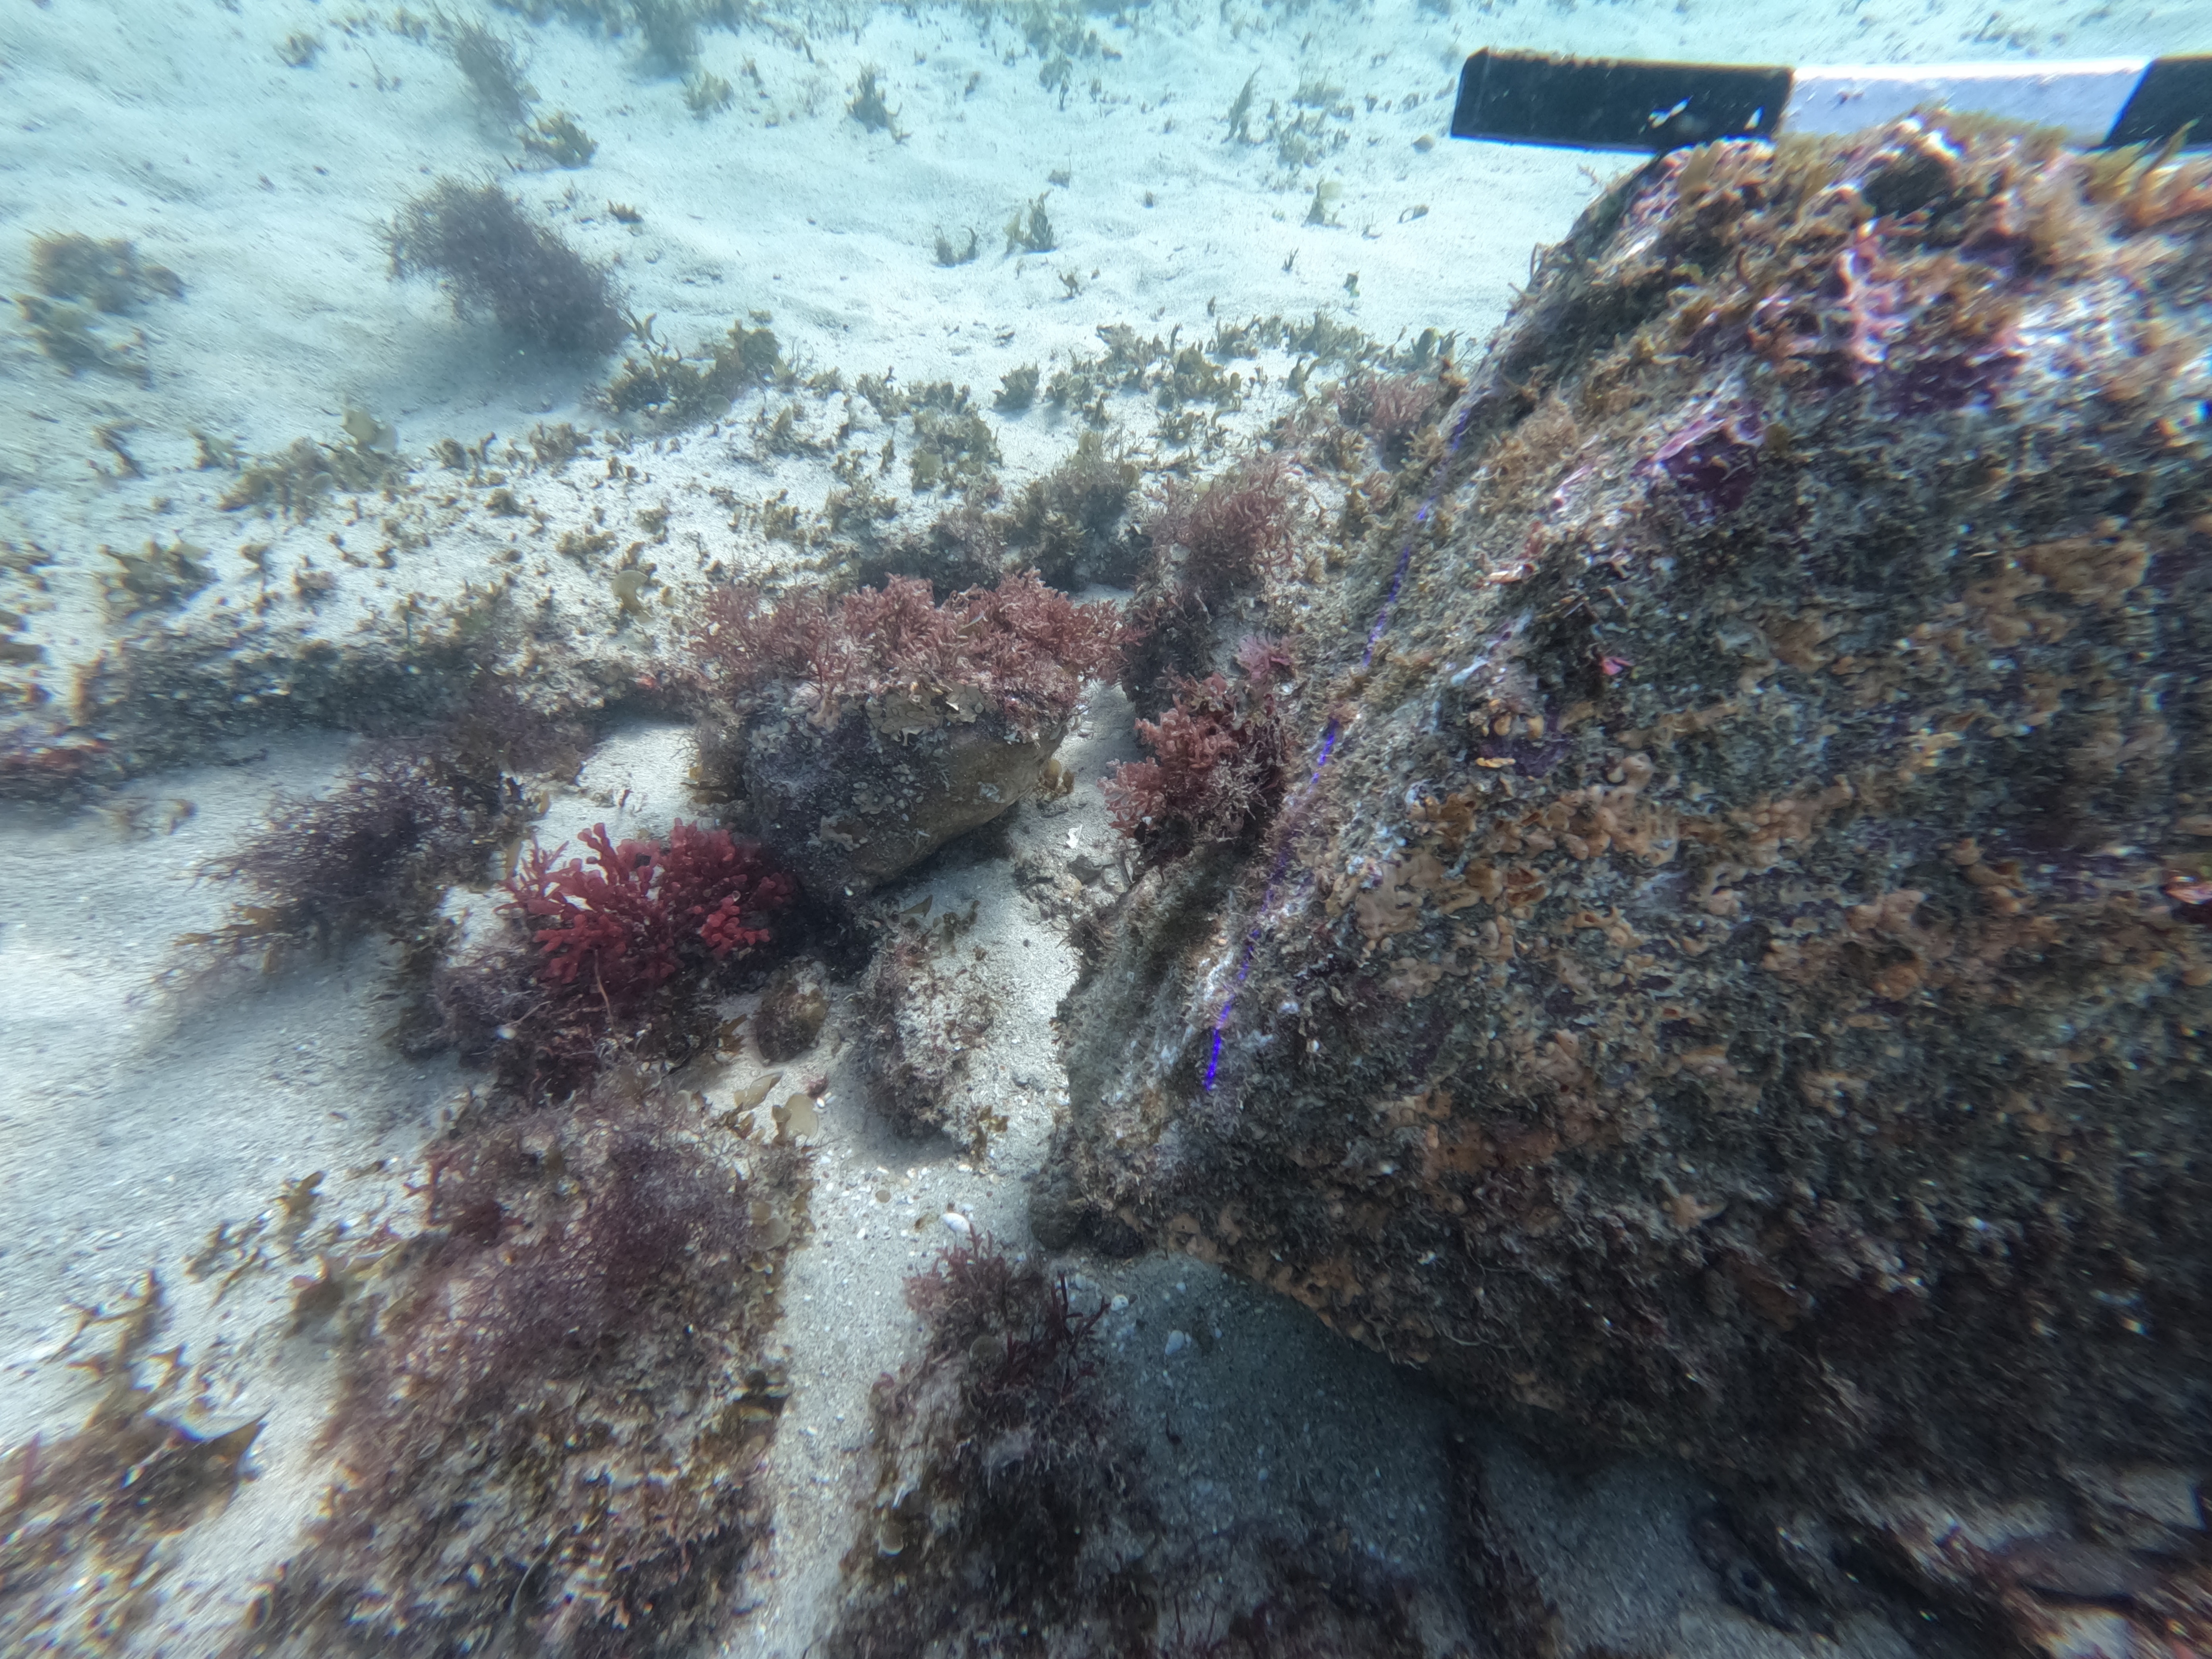

Supplement: Supplementary file 866 [file G0713933.pdf › Ocean2/G0713933.pdf]

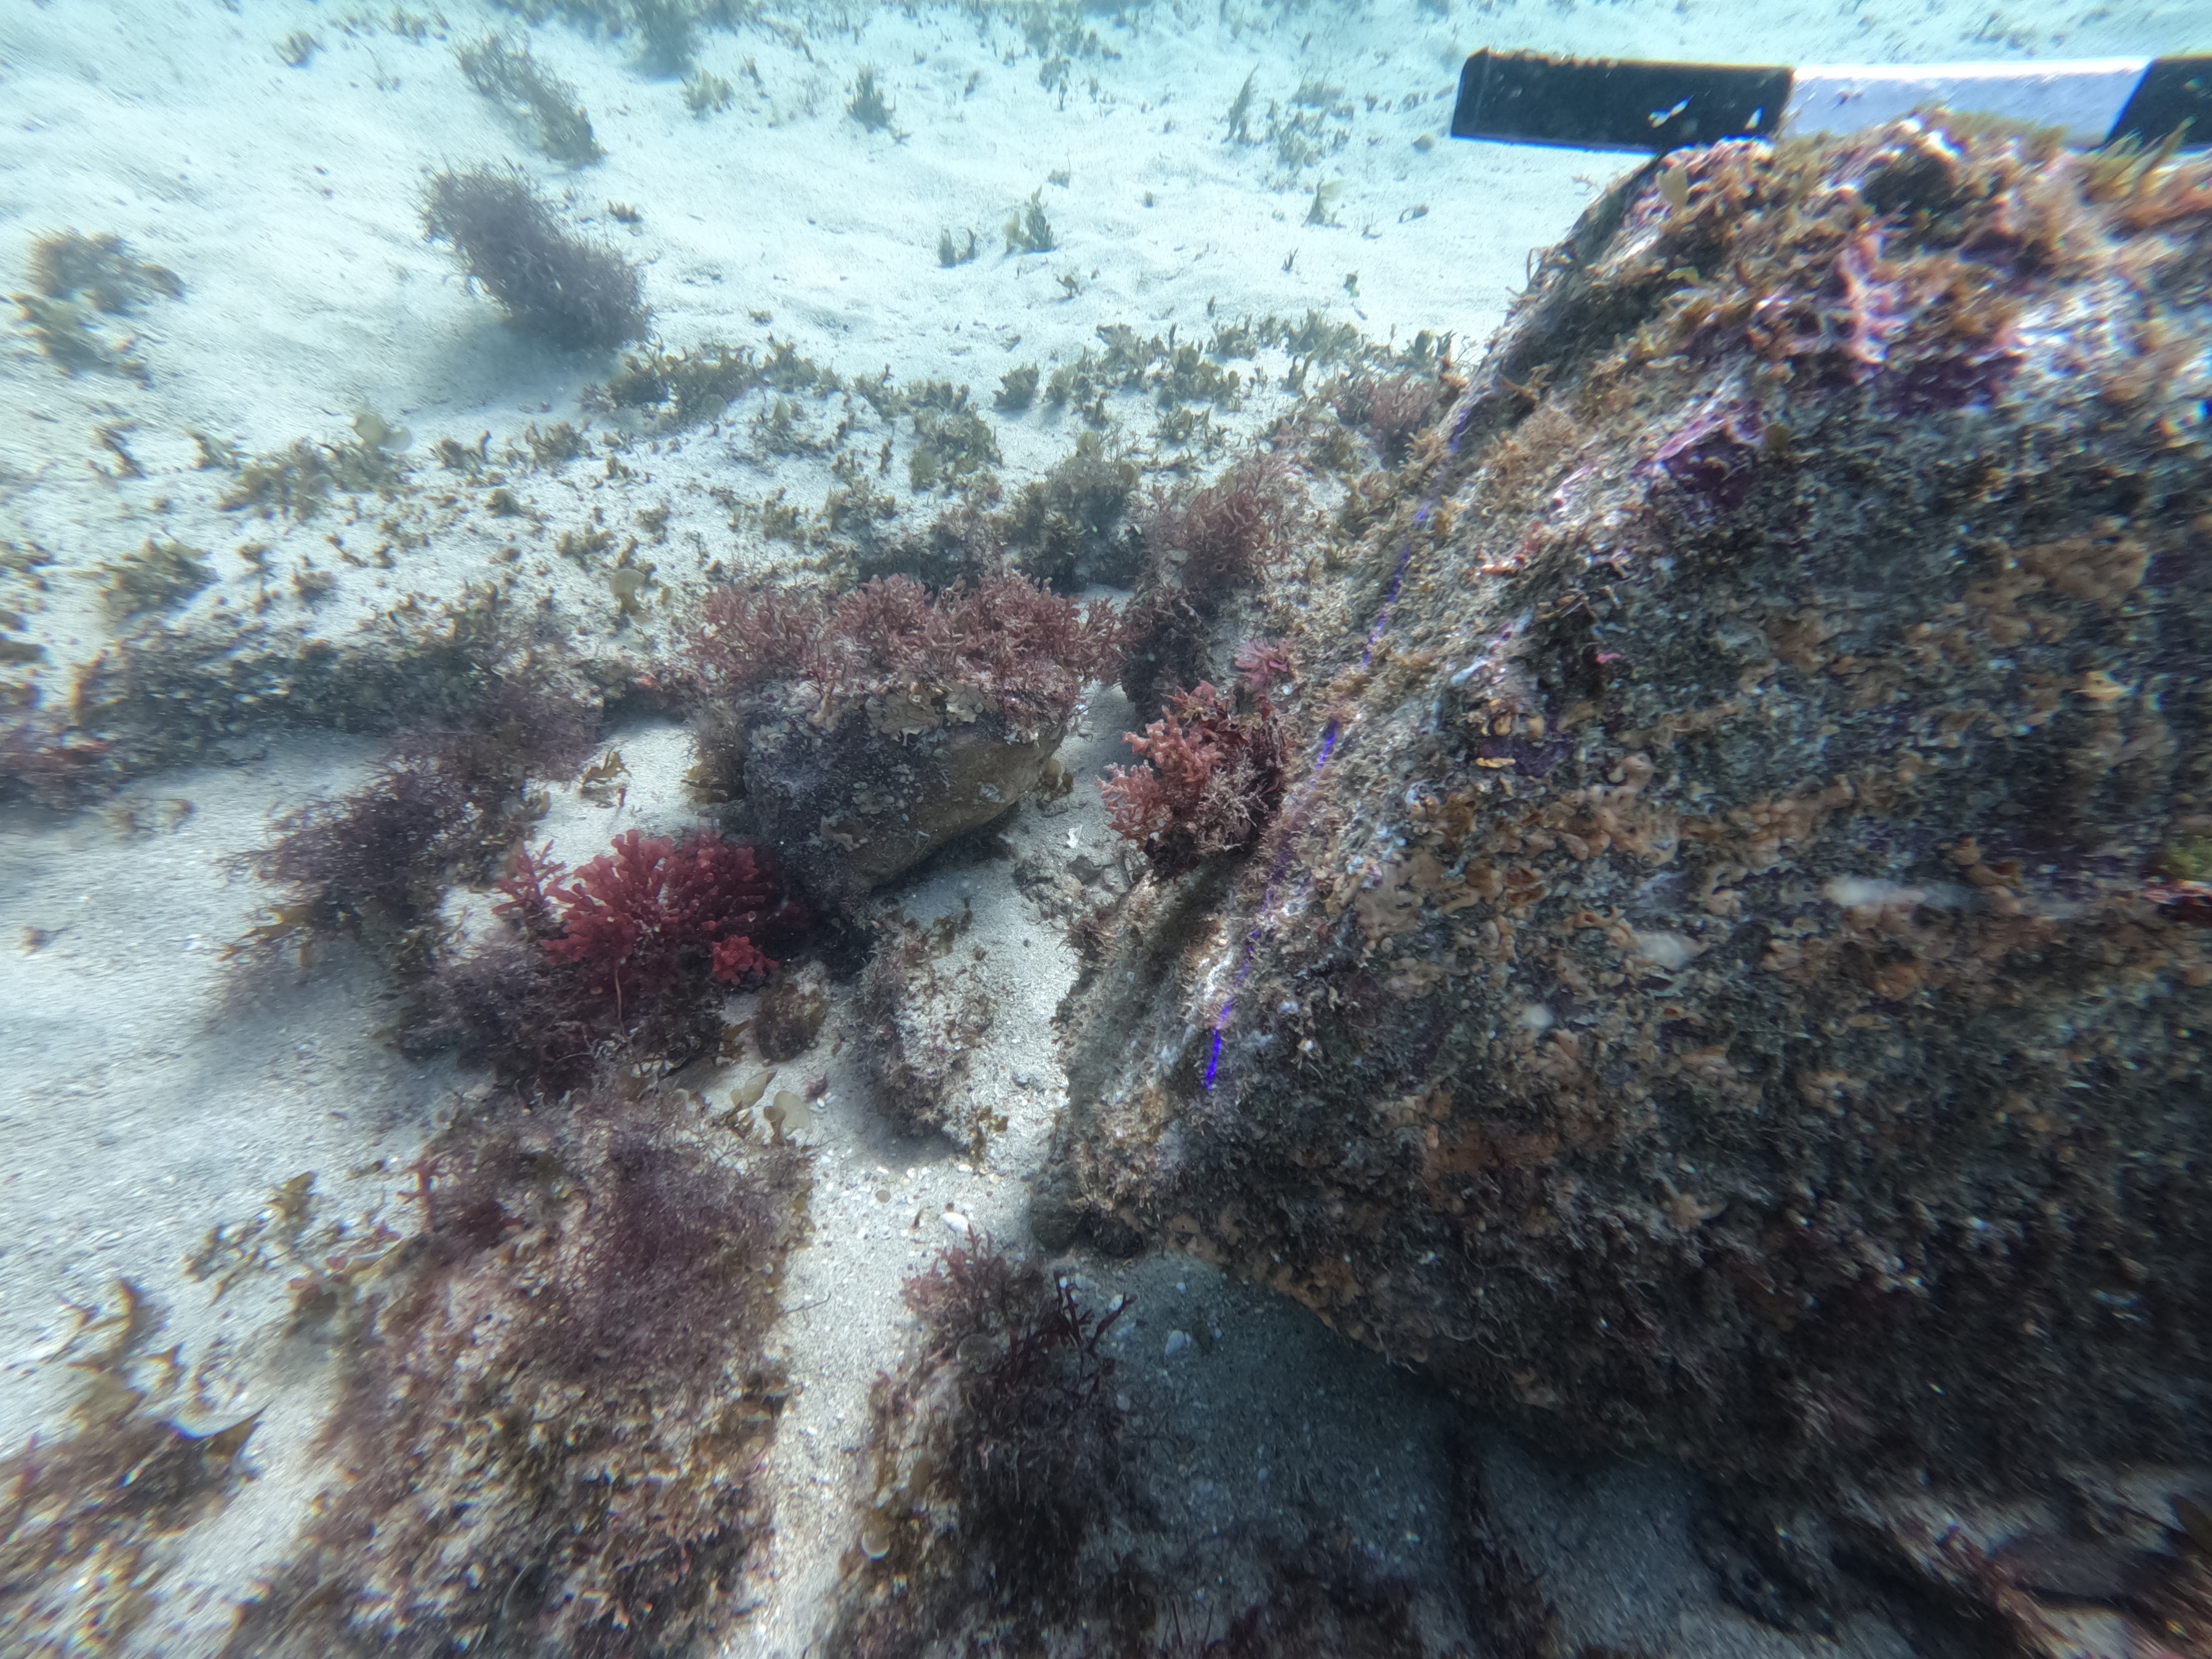

Supplement: Supplementary file 867 [file G0713934.pdf › Ocean2/G0713934.pdf]

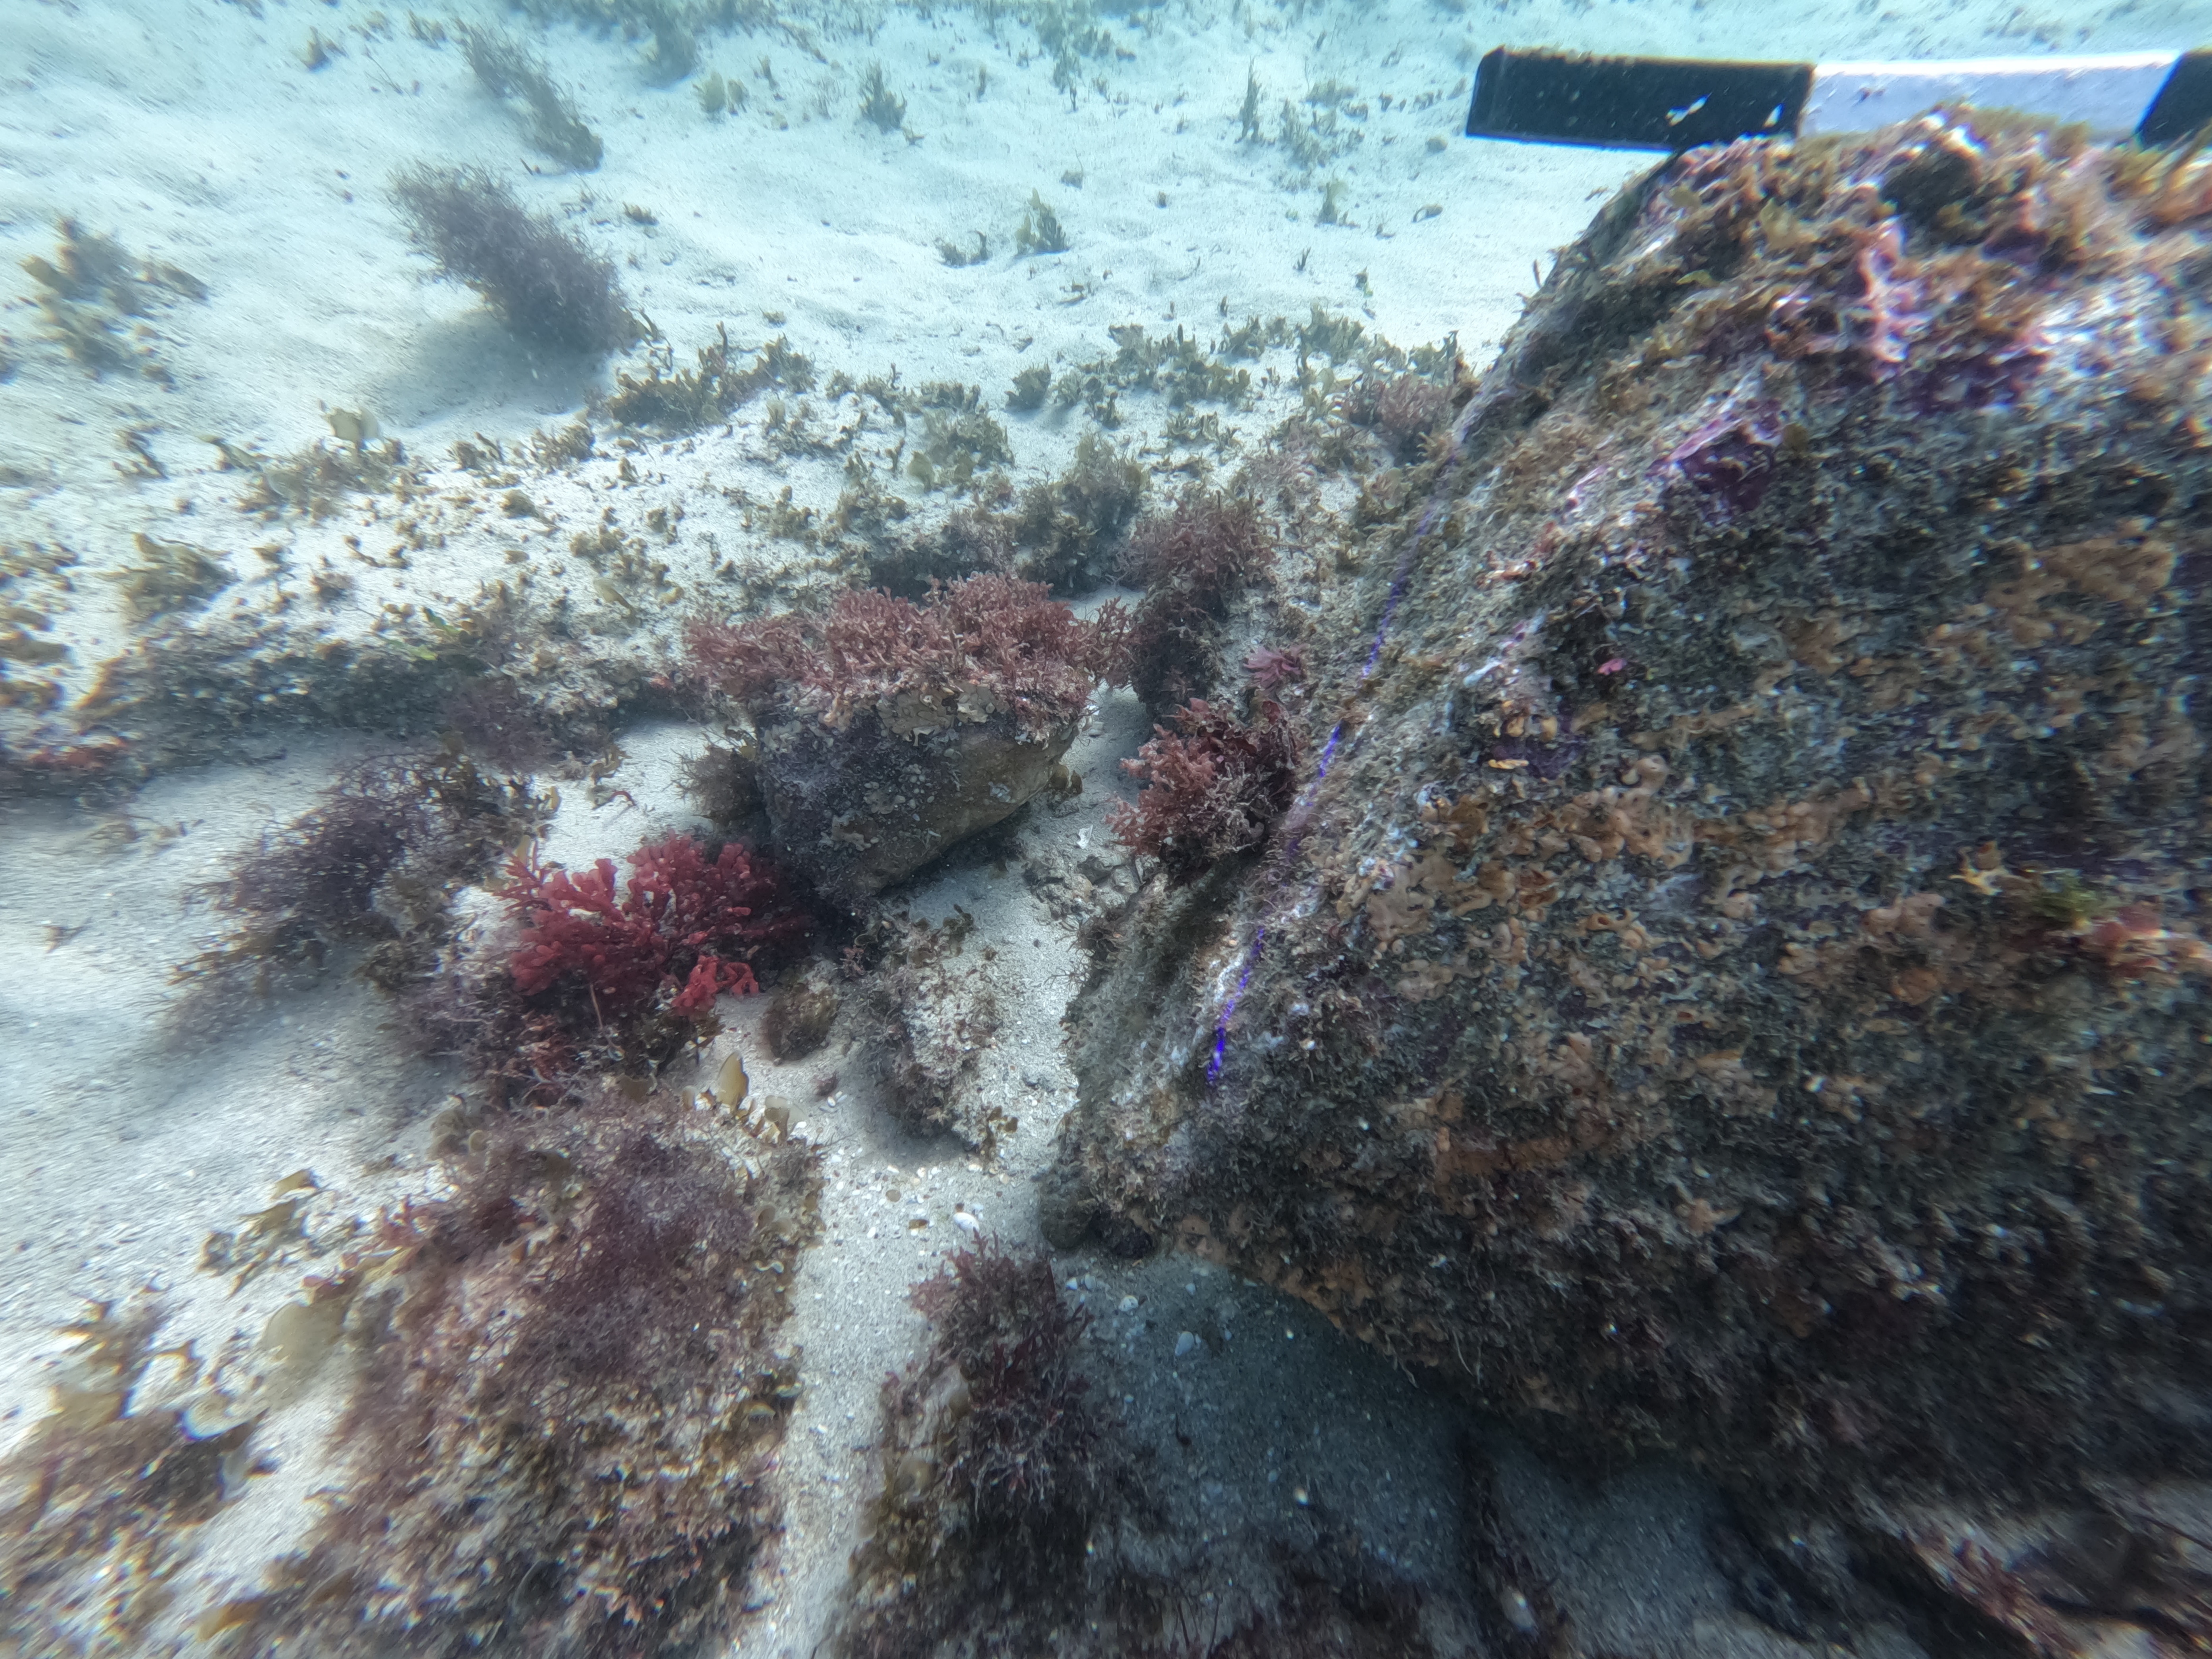

Supplement: Supplementary file 868 [file G0713935.pdf › Ocean2/G0713935.pdf]

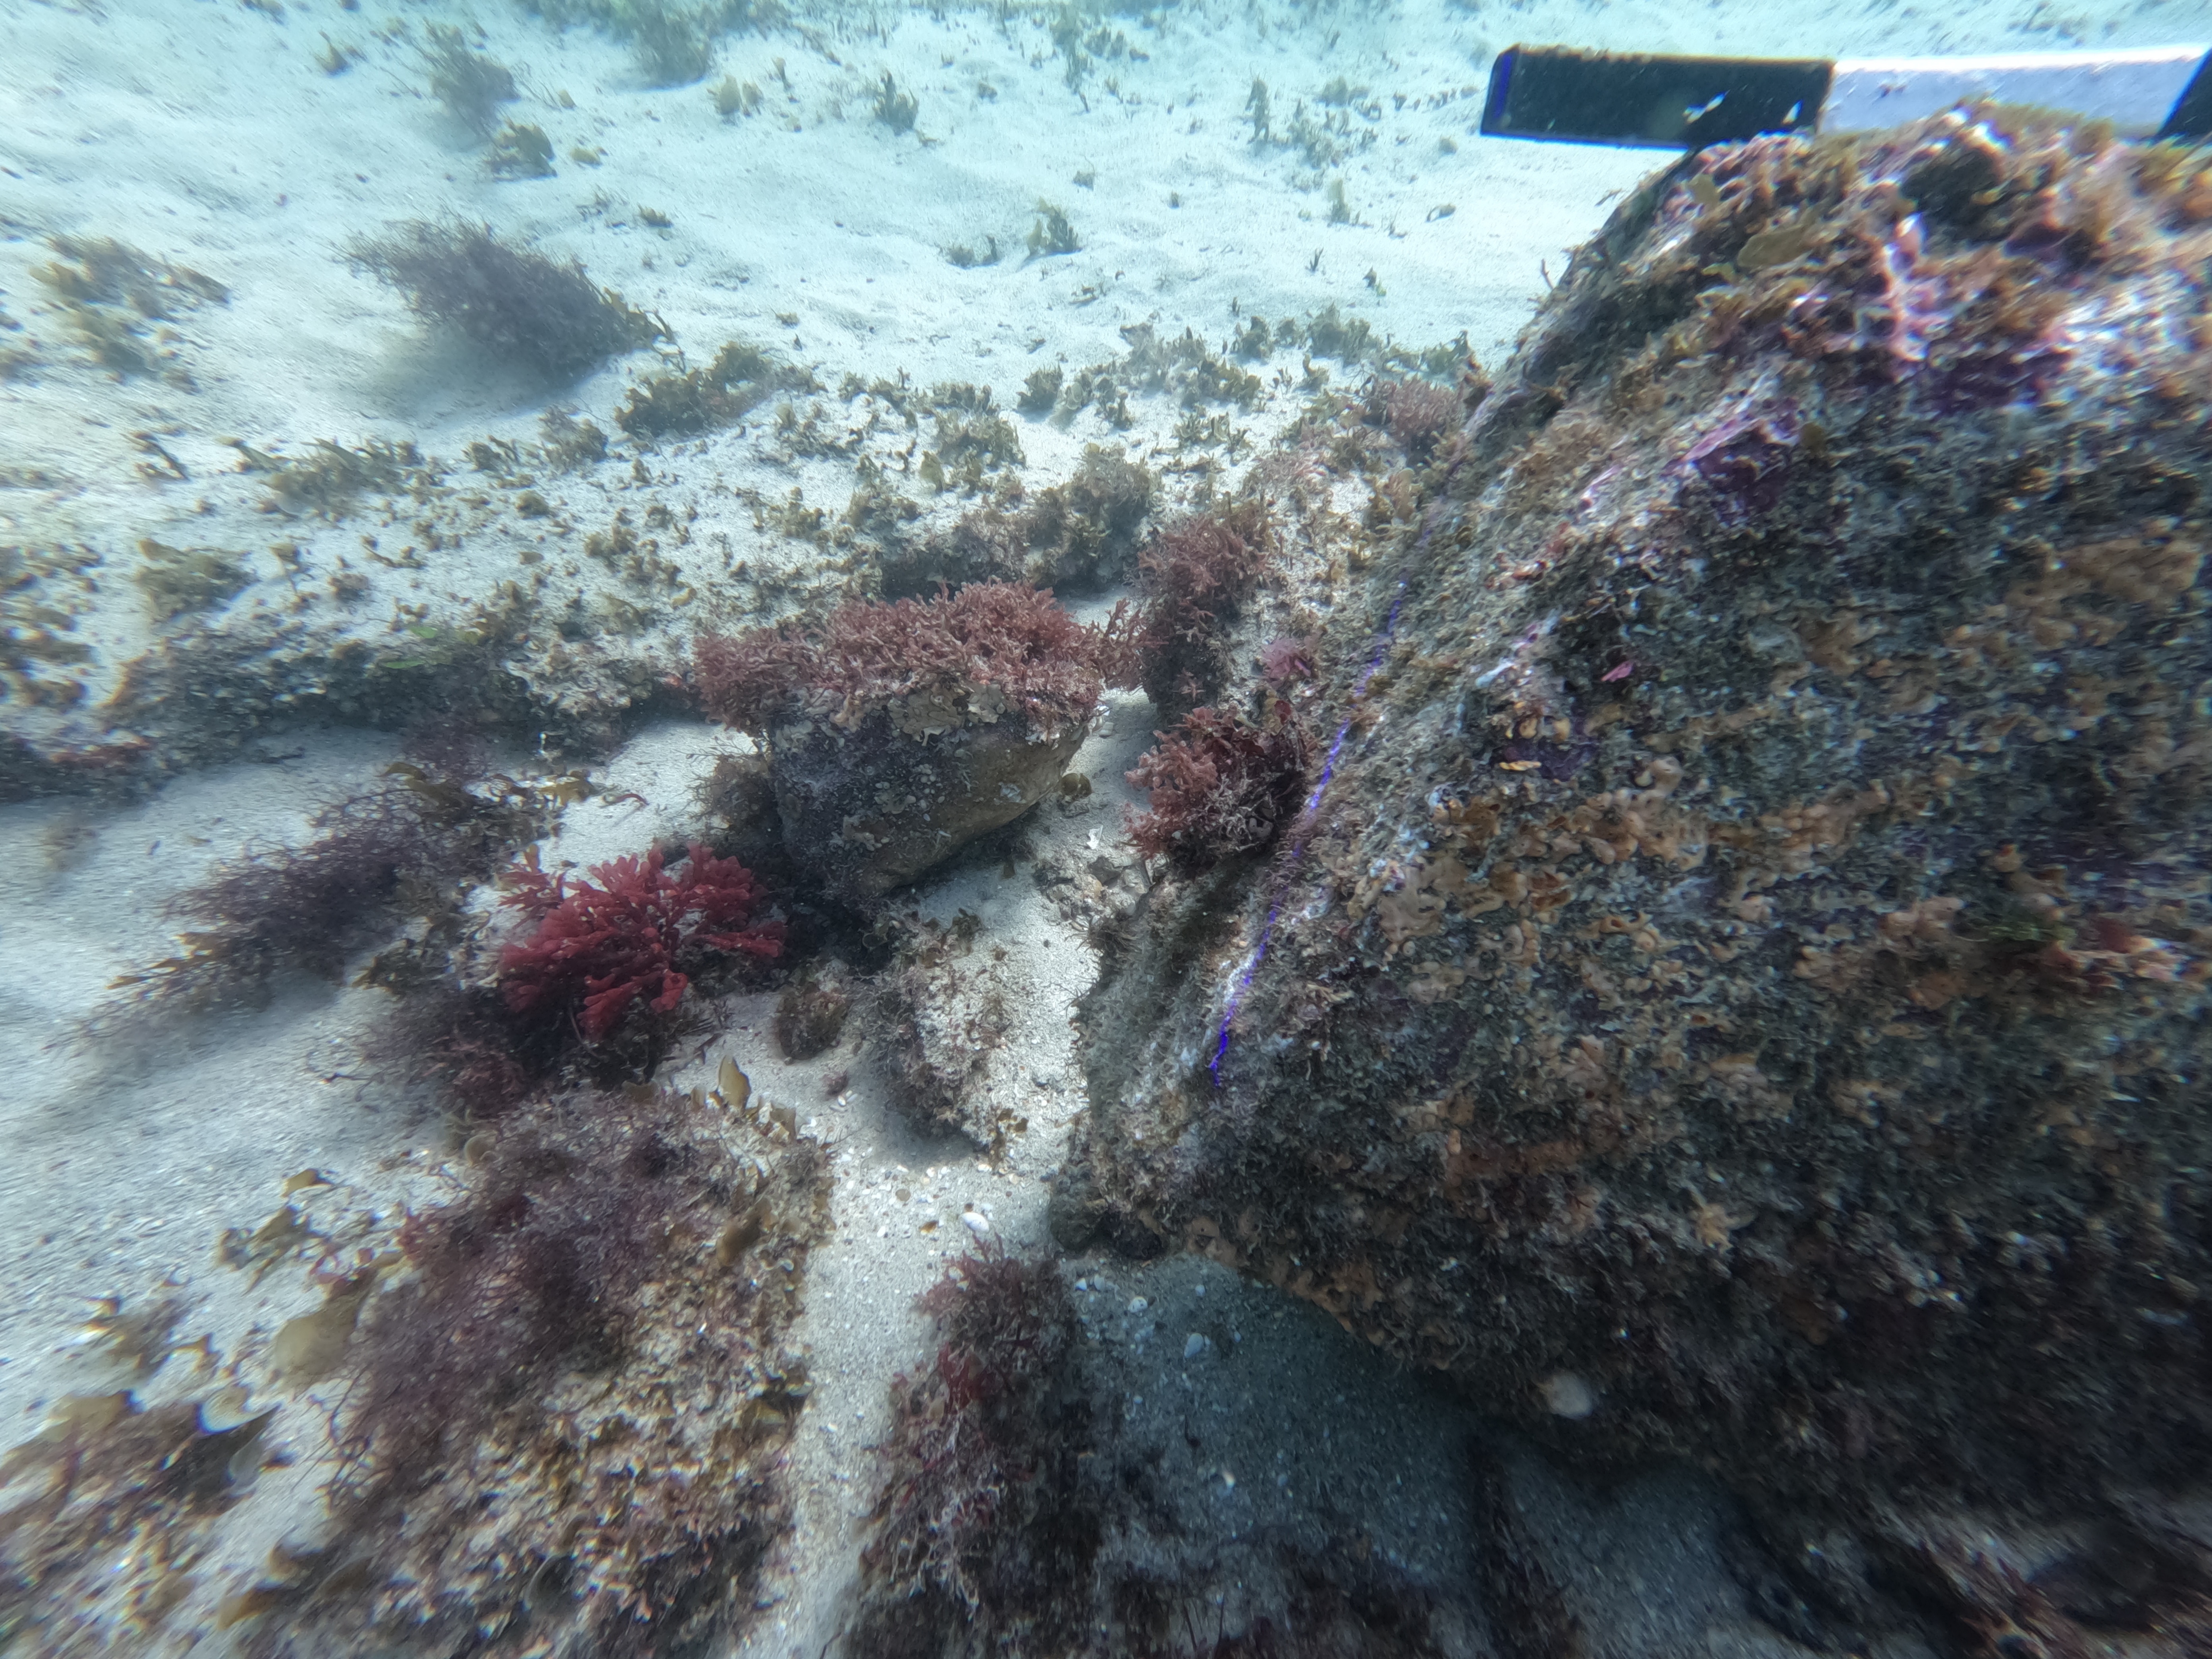

Supplement: Supplementary file 869 [file G0713936.pdf › Ocean2/G0713936.pdf]

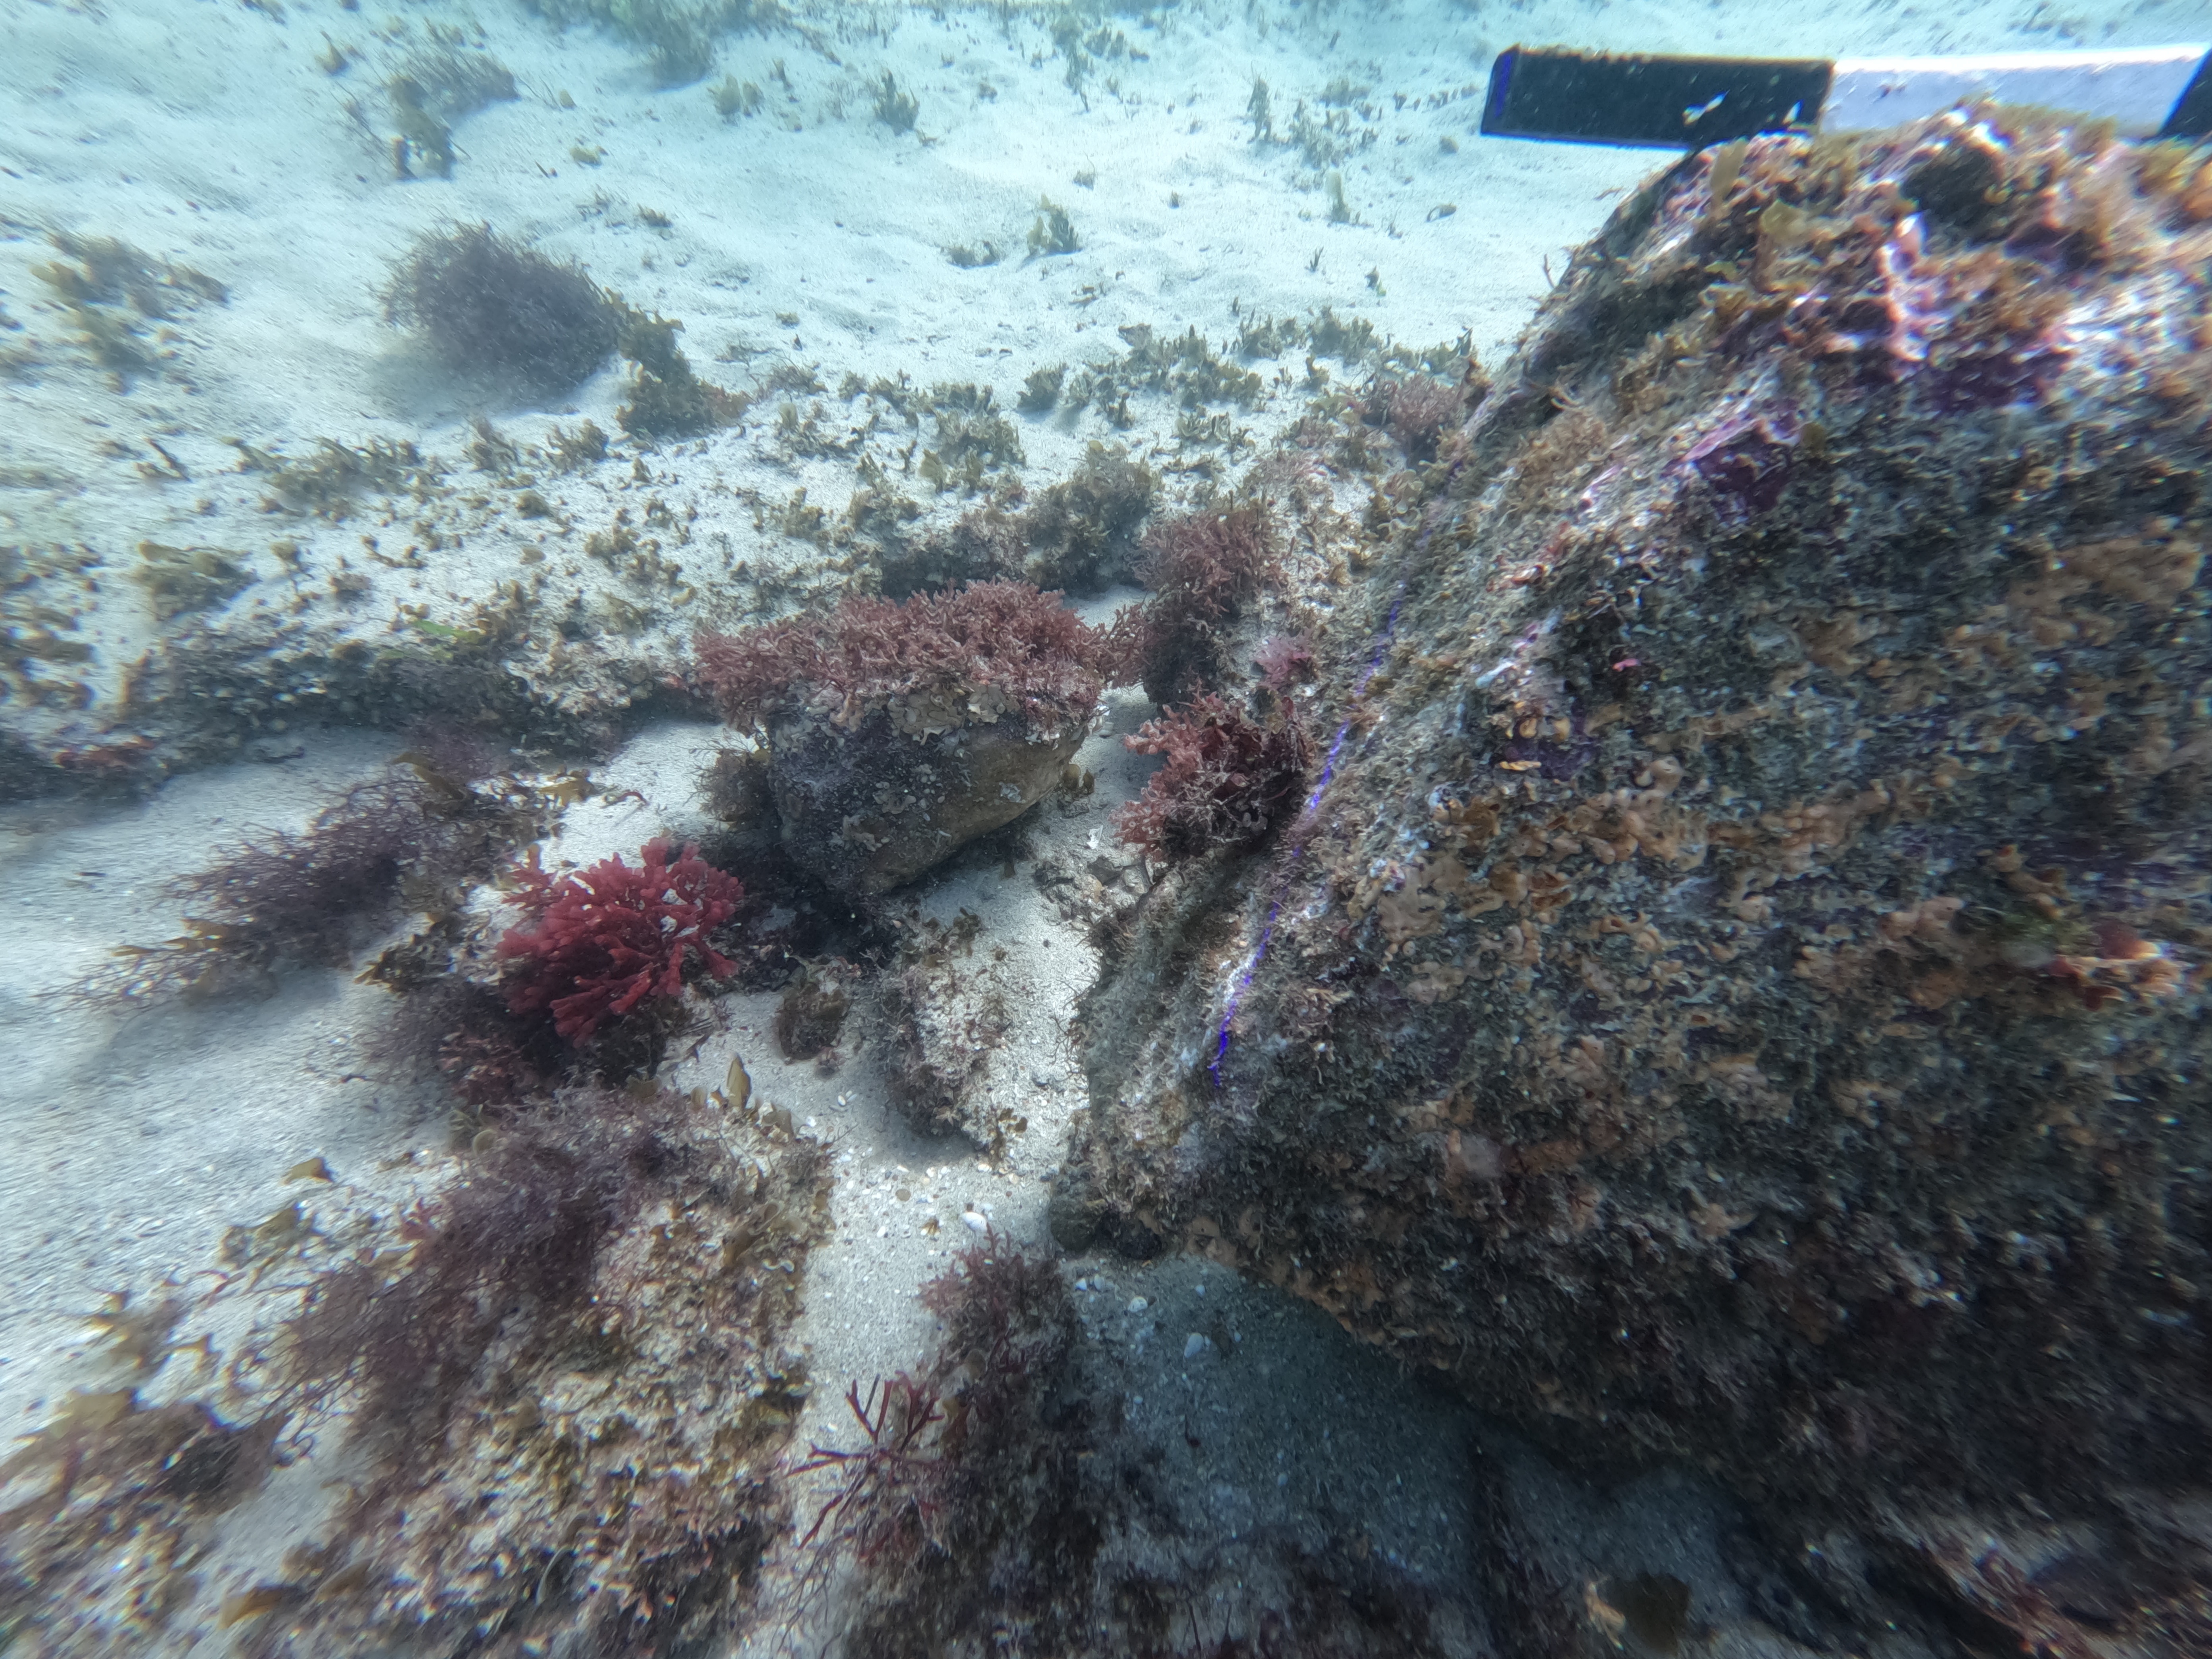

Supplement: Supplementary file 870 [file G0713937.pdf › Ocean2/G0713937.pdf]

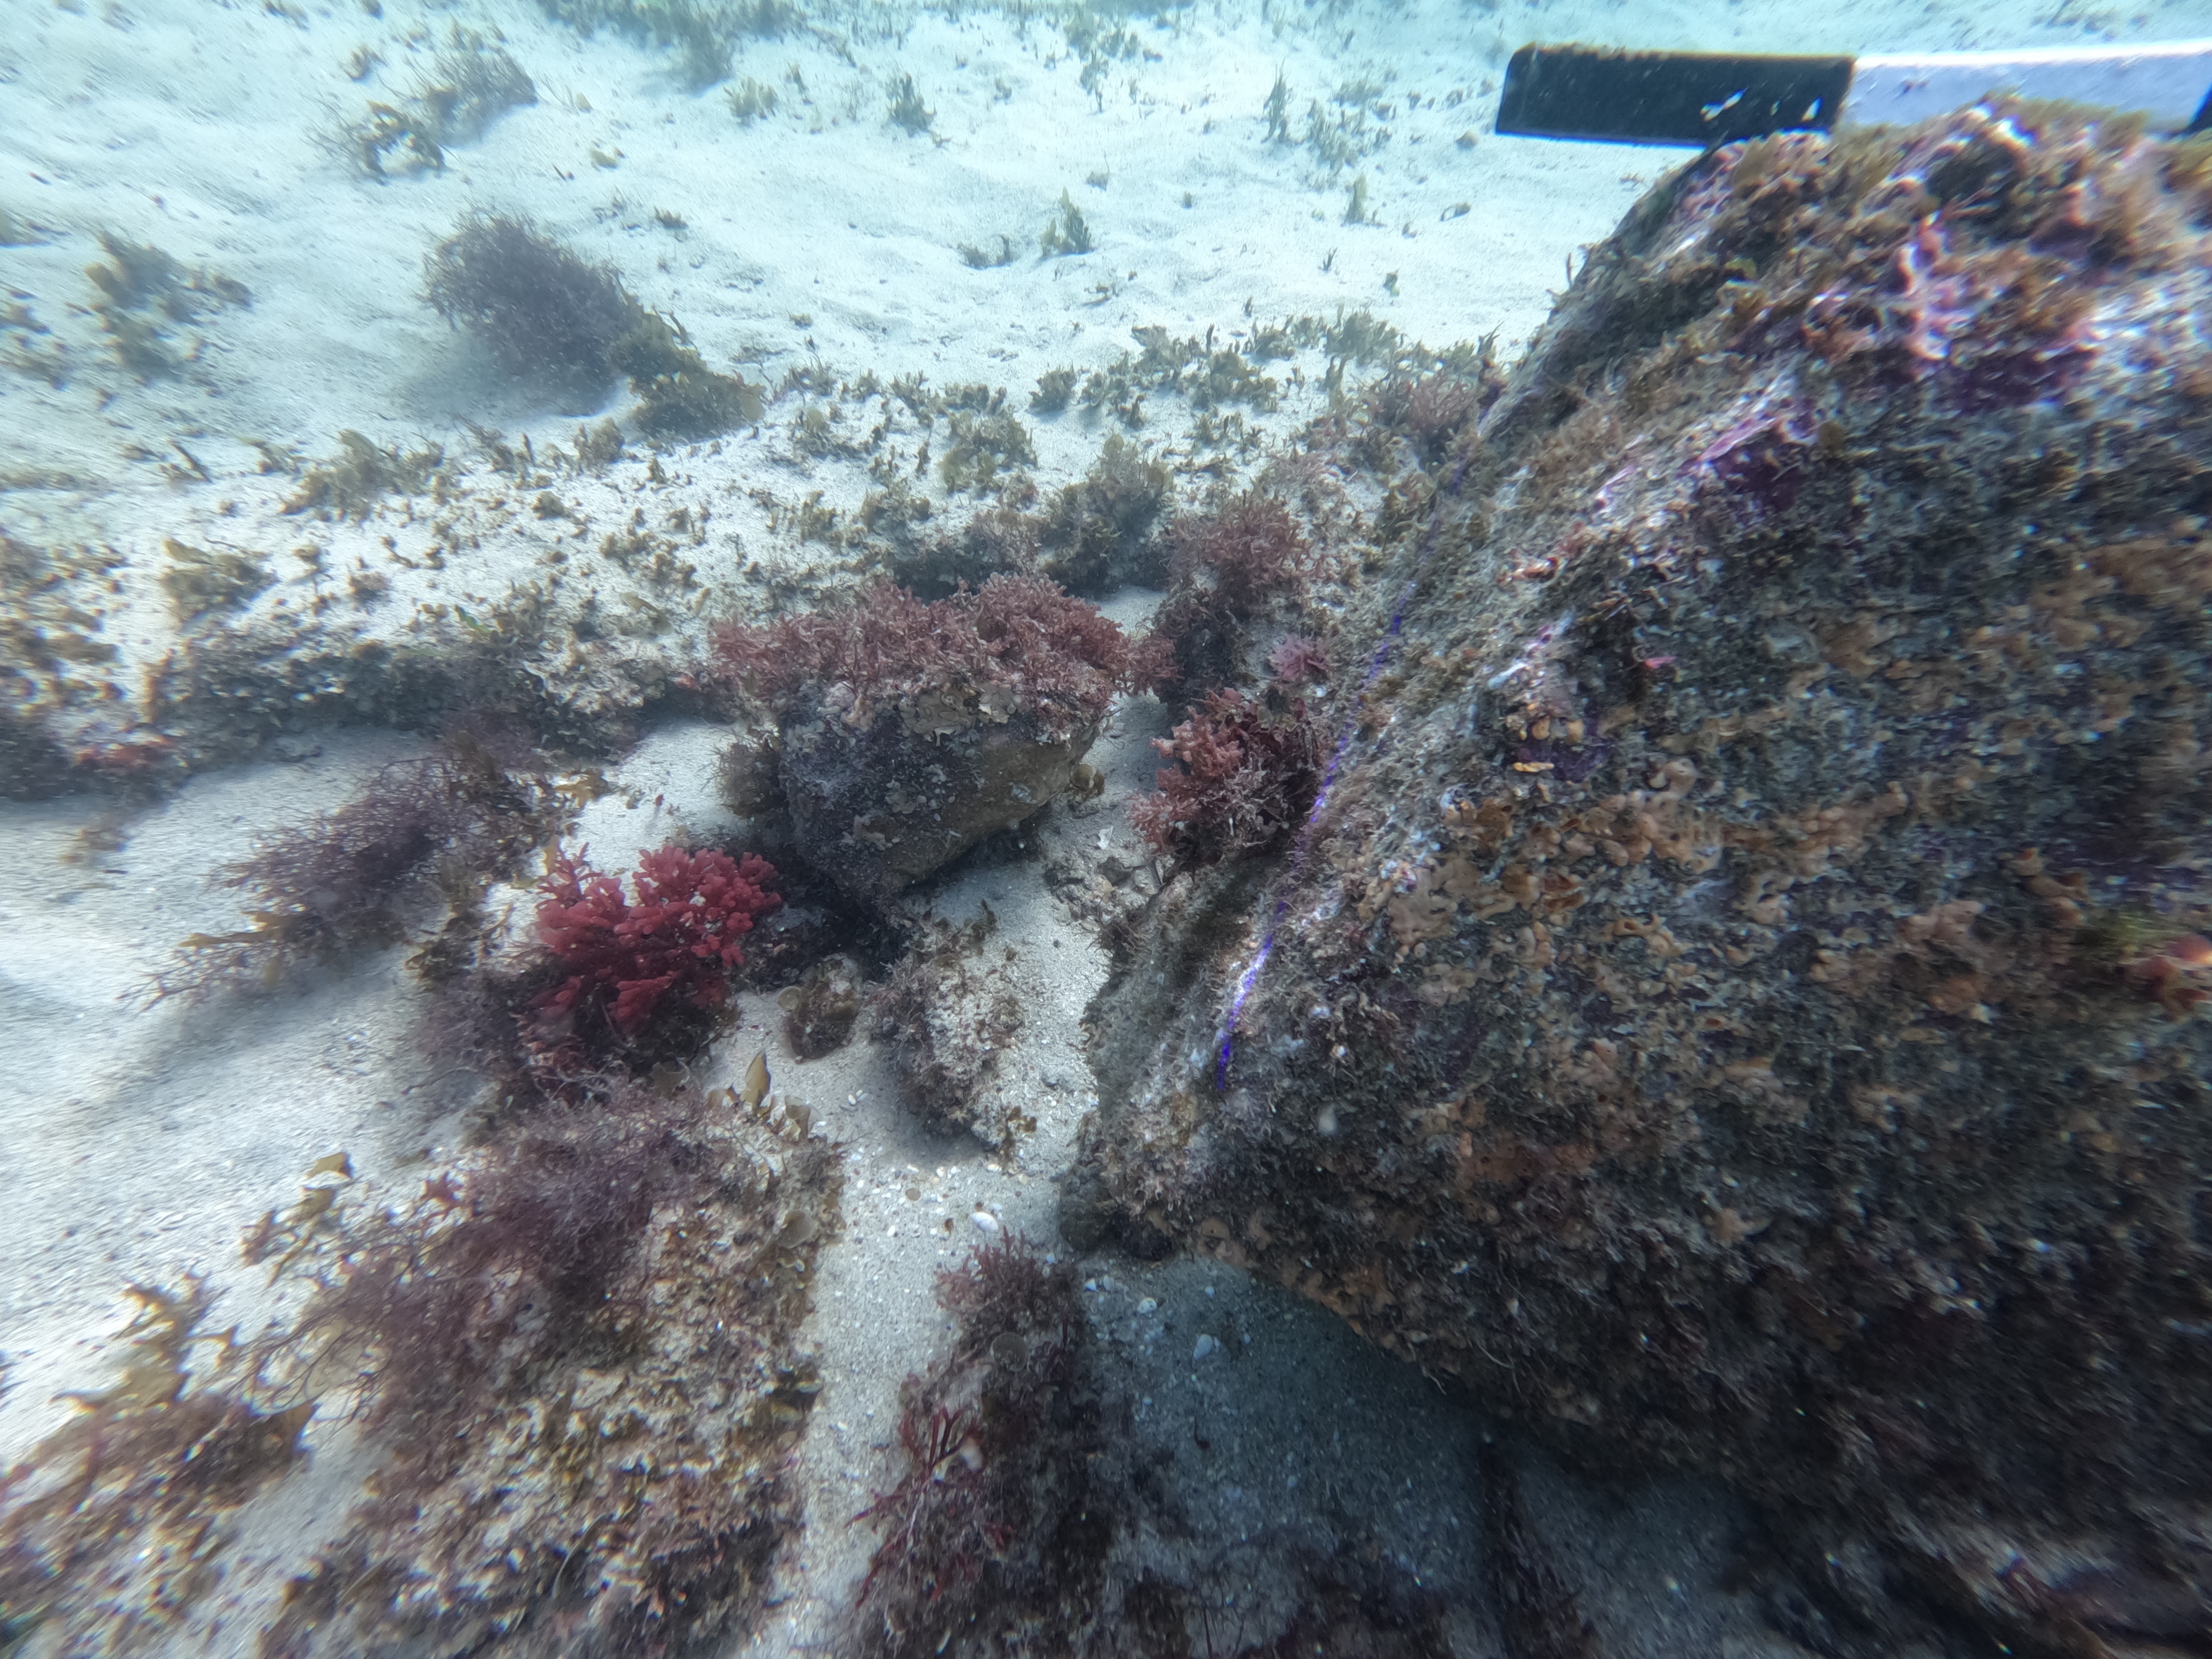

Supplement: Supplementary file 871 [file G0713938.pdf › Ocean2/G0713938.pdf]

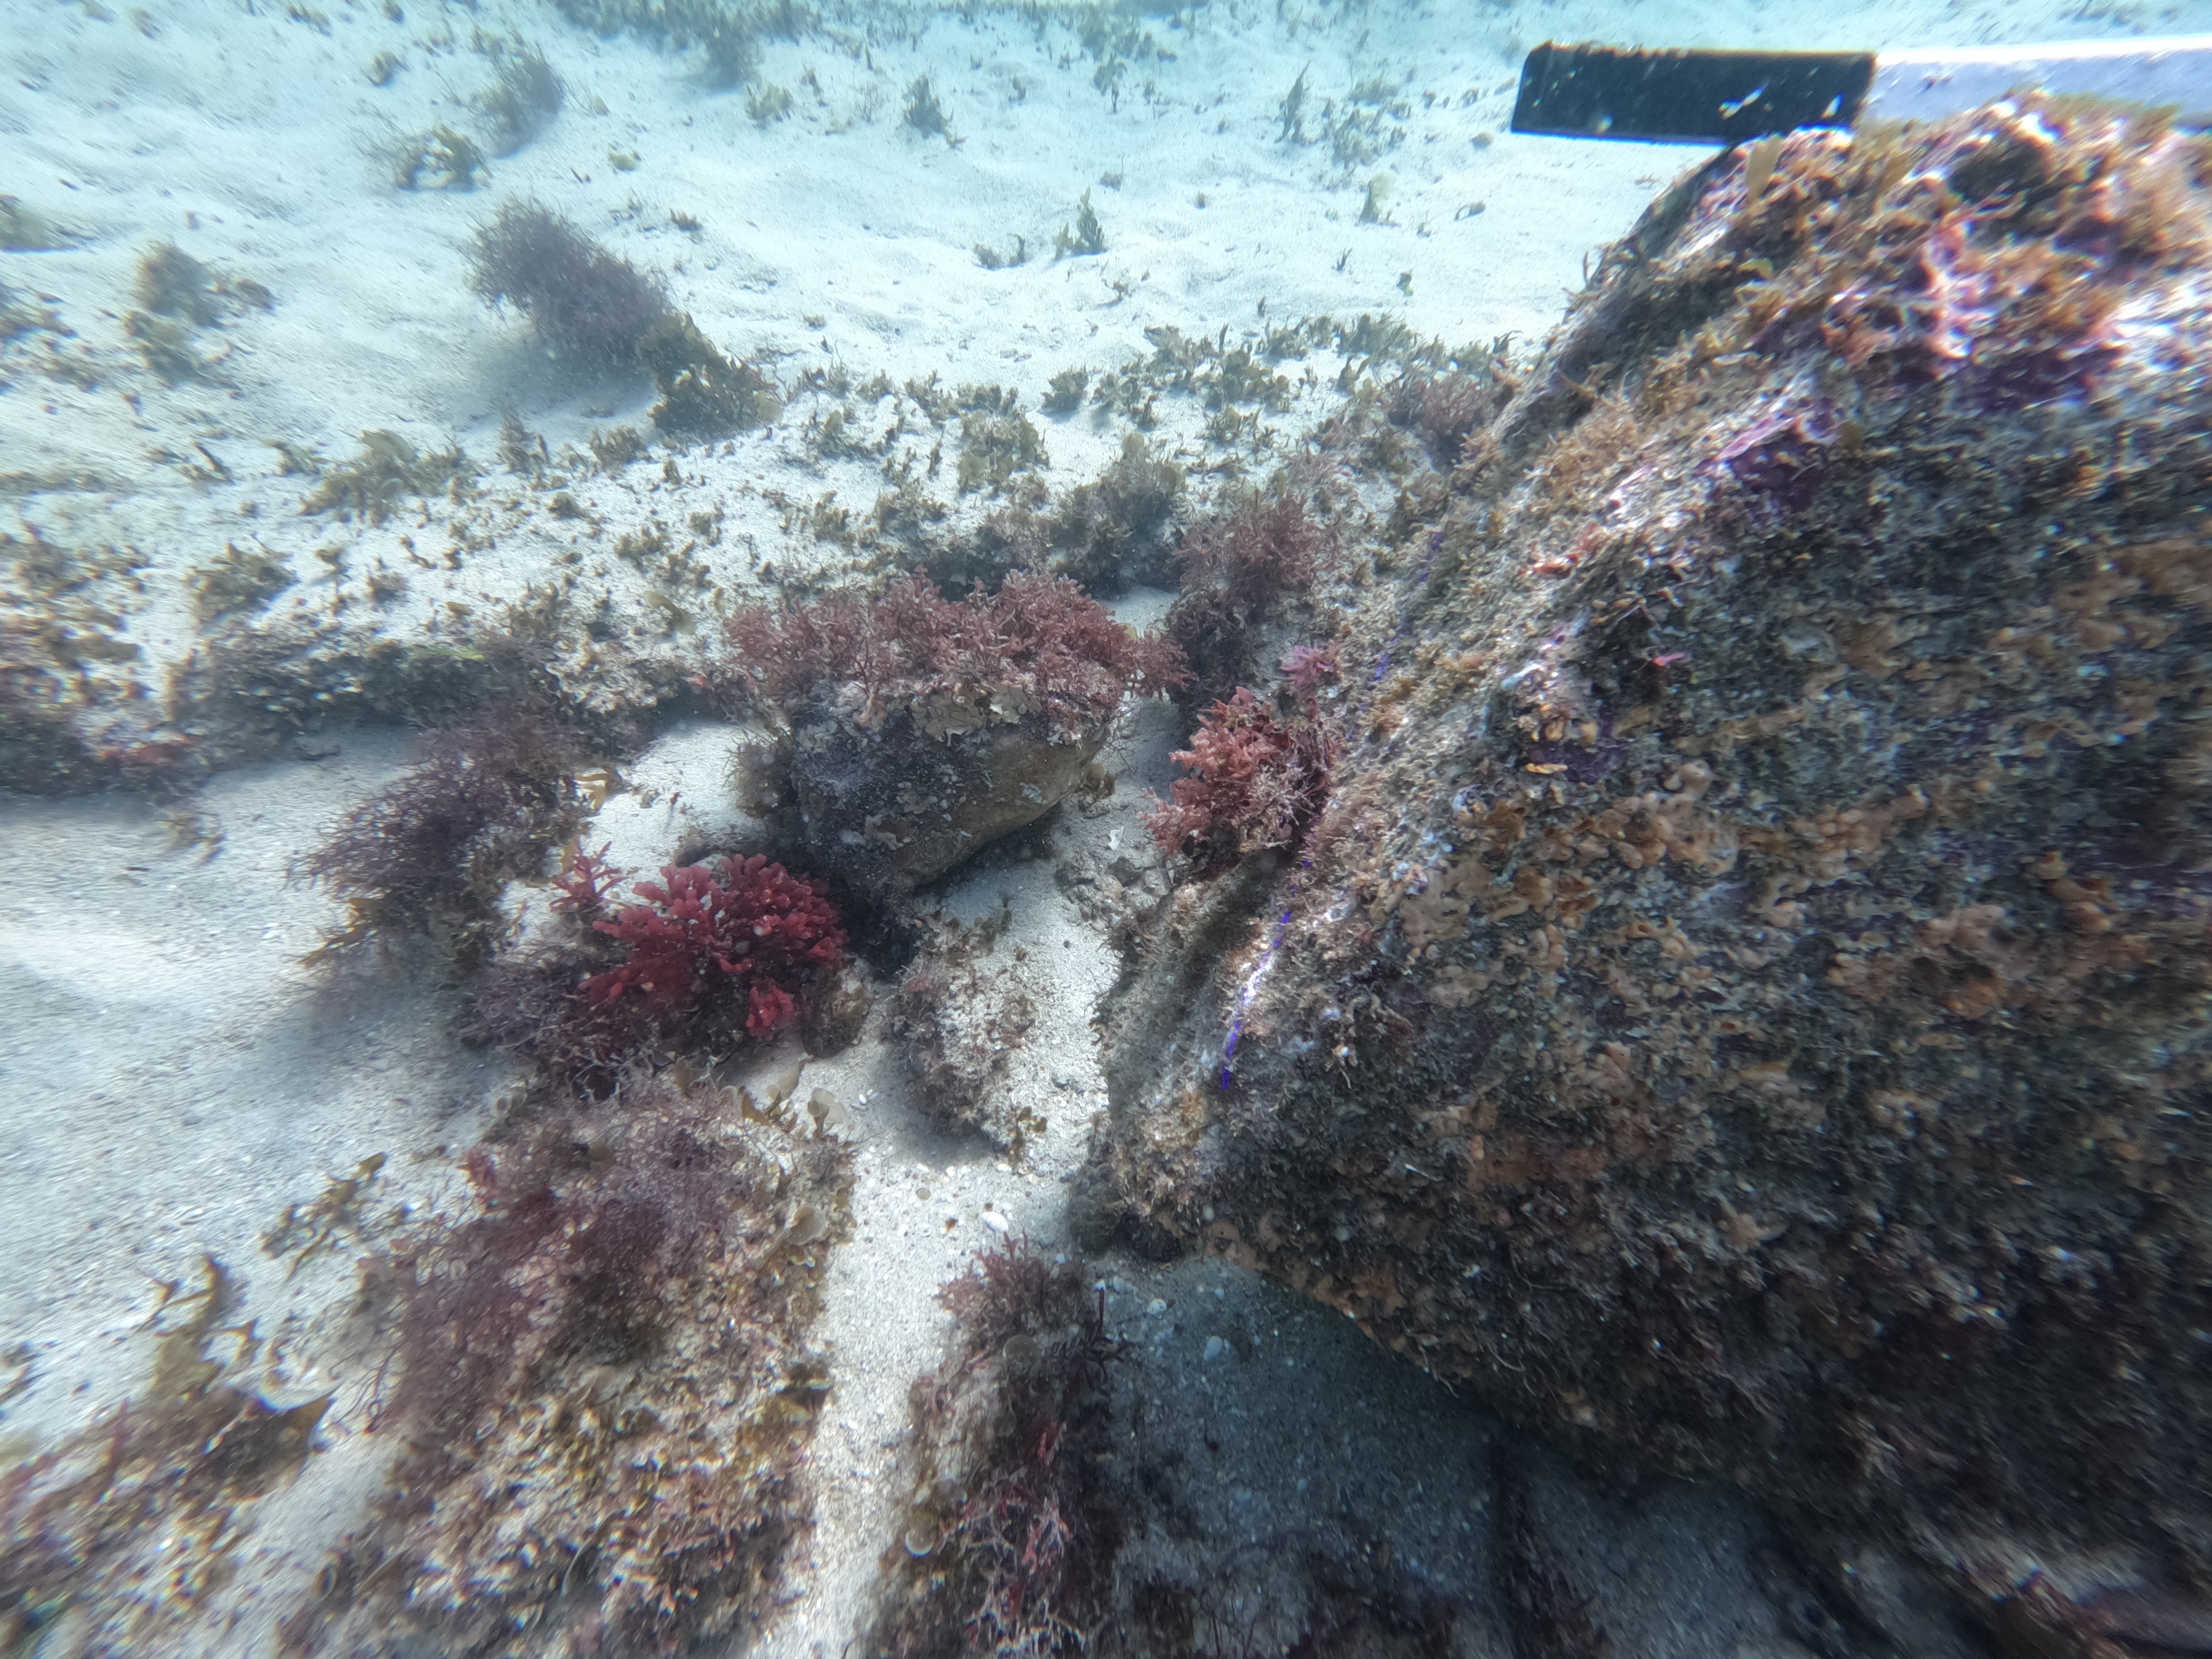

Supplement: Supplementary file 872 [file G0713939.pdf › Ocean2/G0713939.pdf]

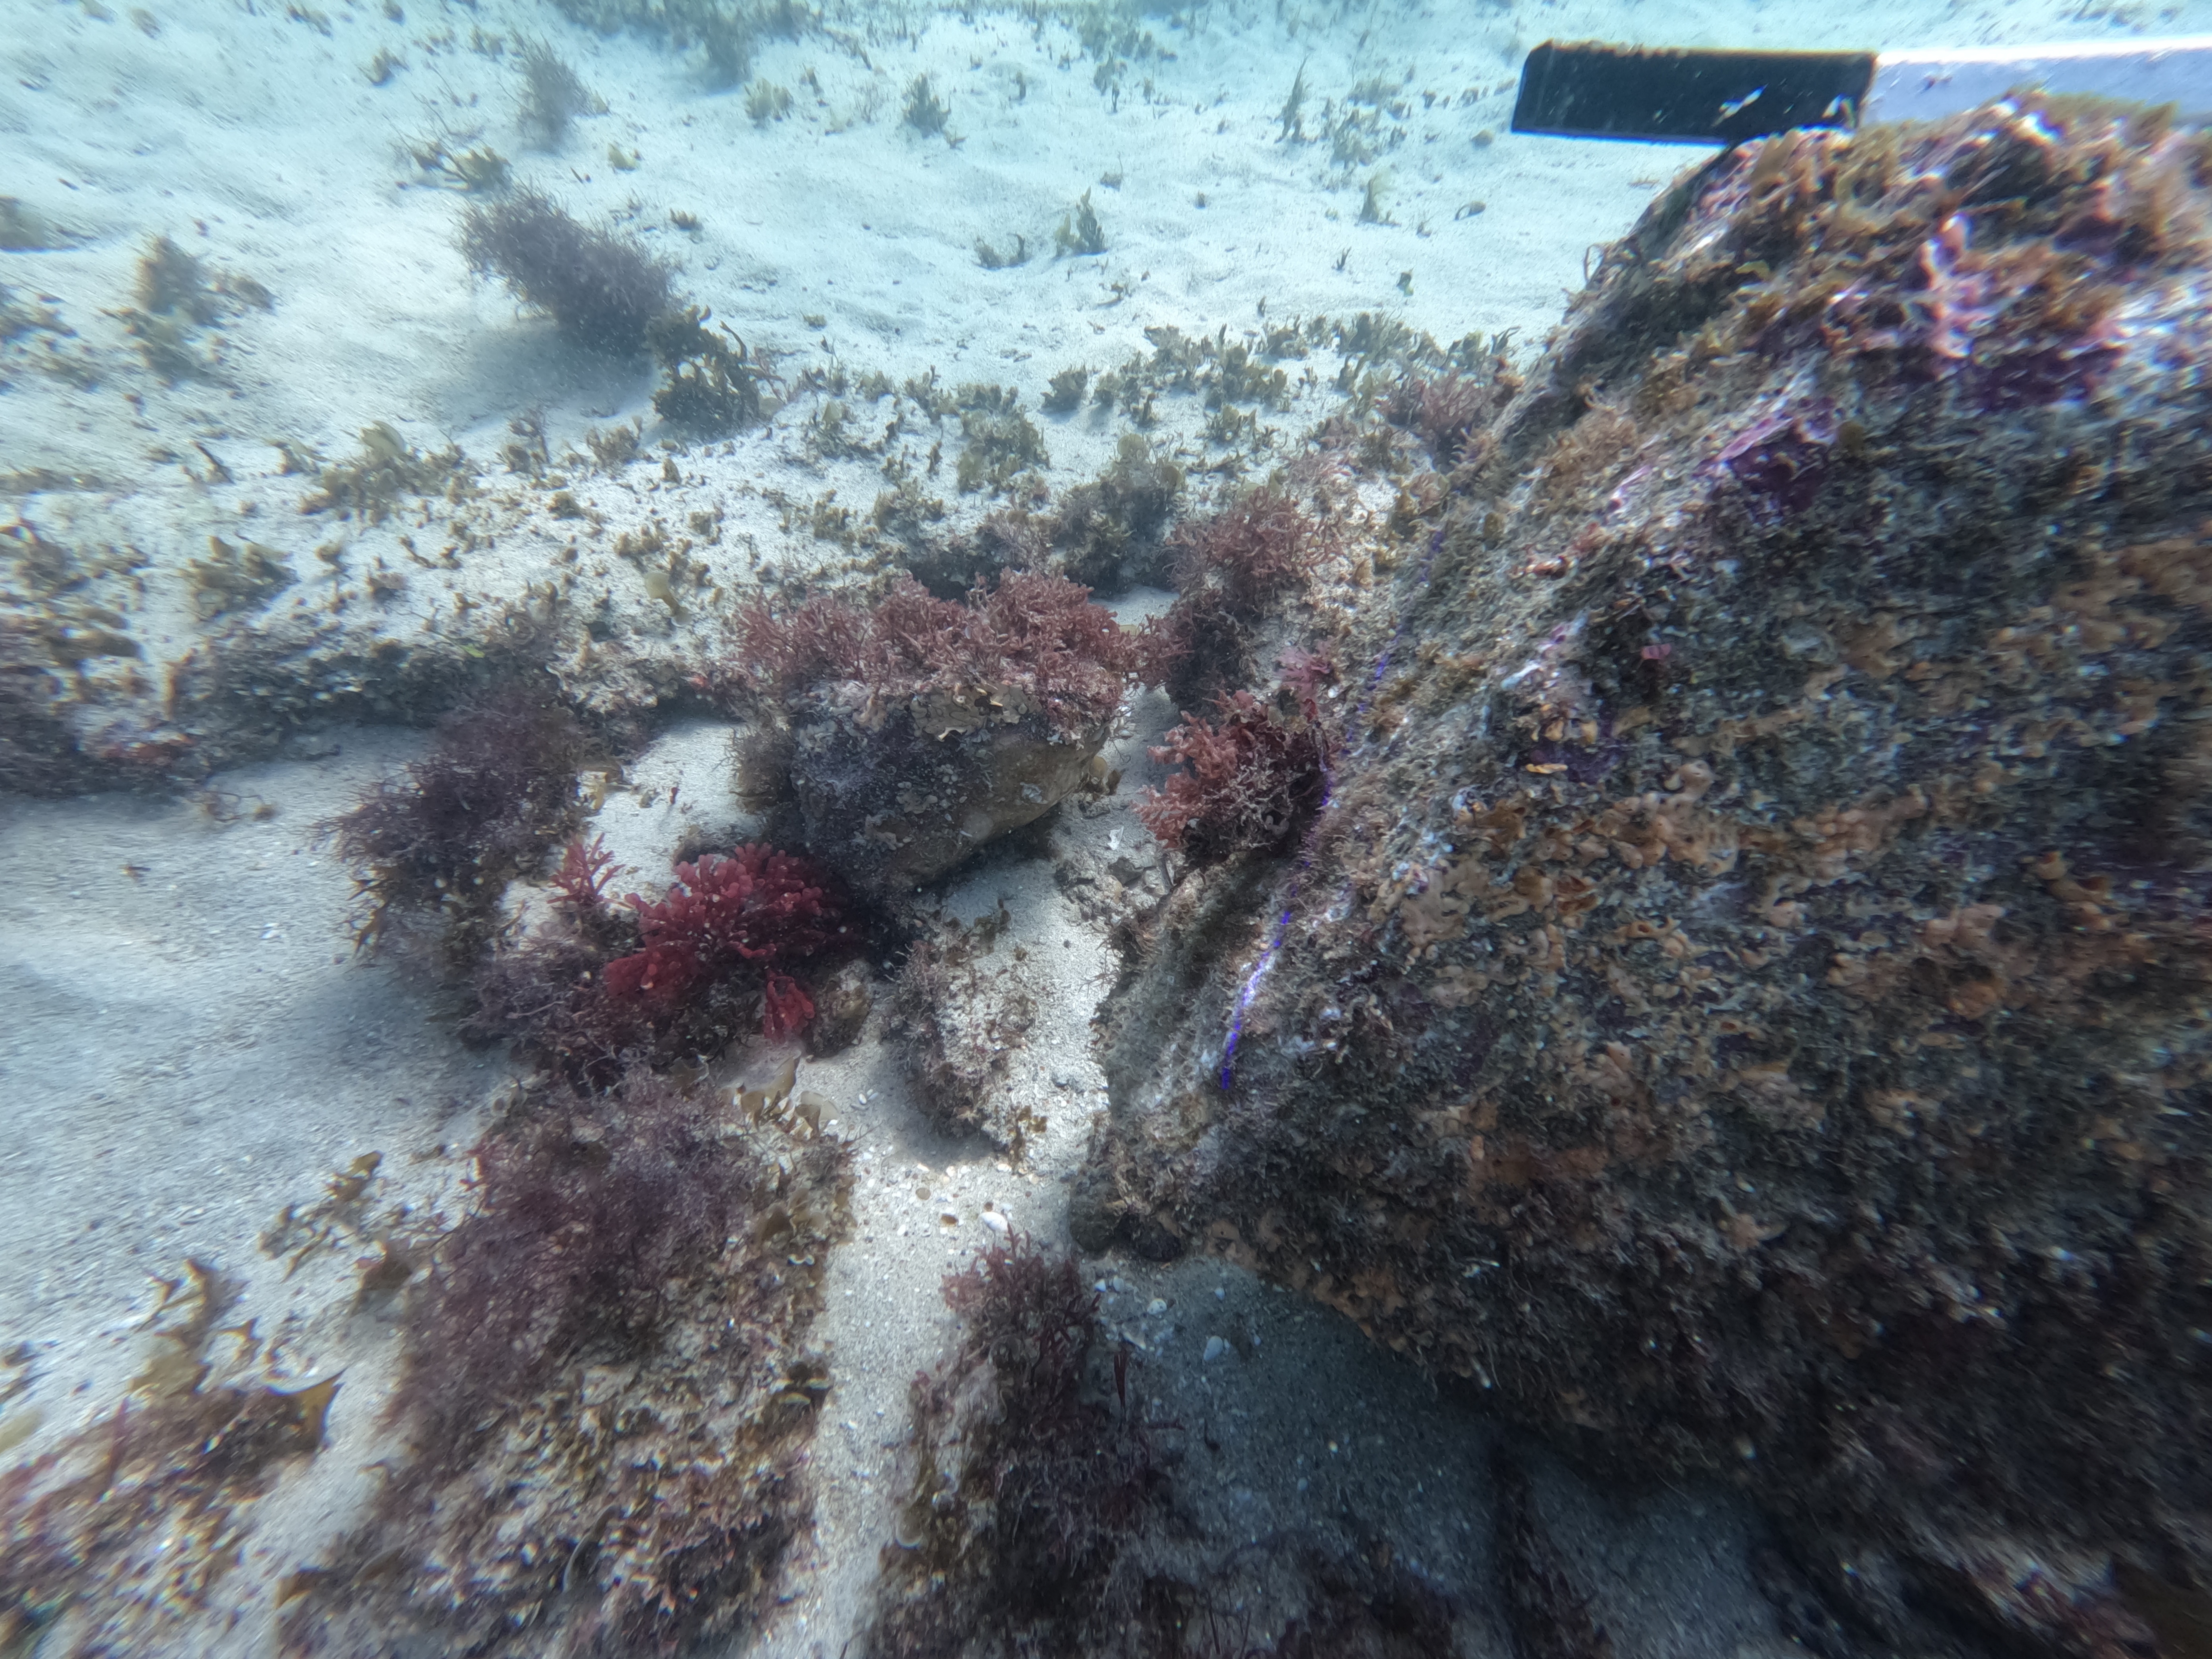

Supplement: Supplementary file 873 [file G0713940.pdf › Ocean2/G0713940.pdf]

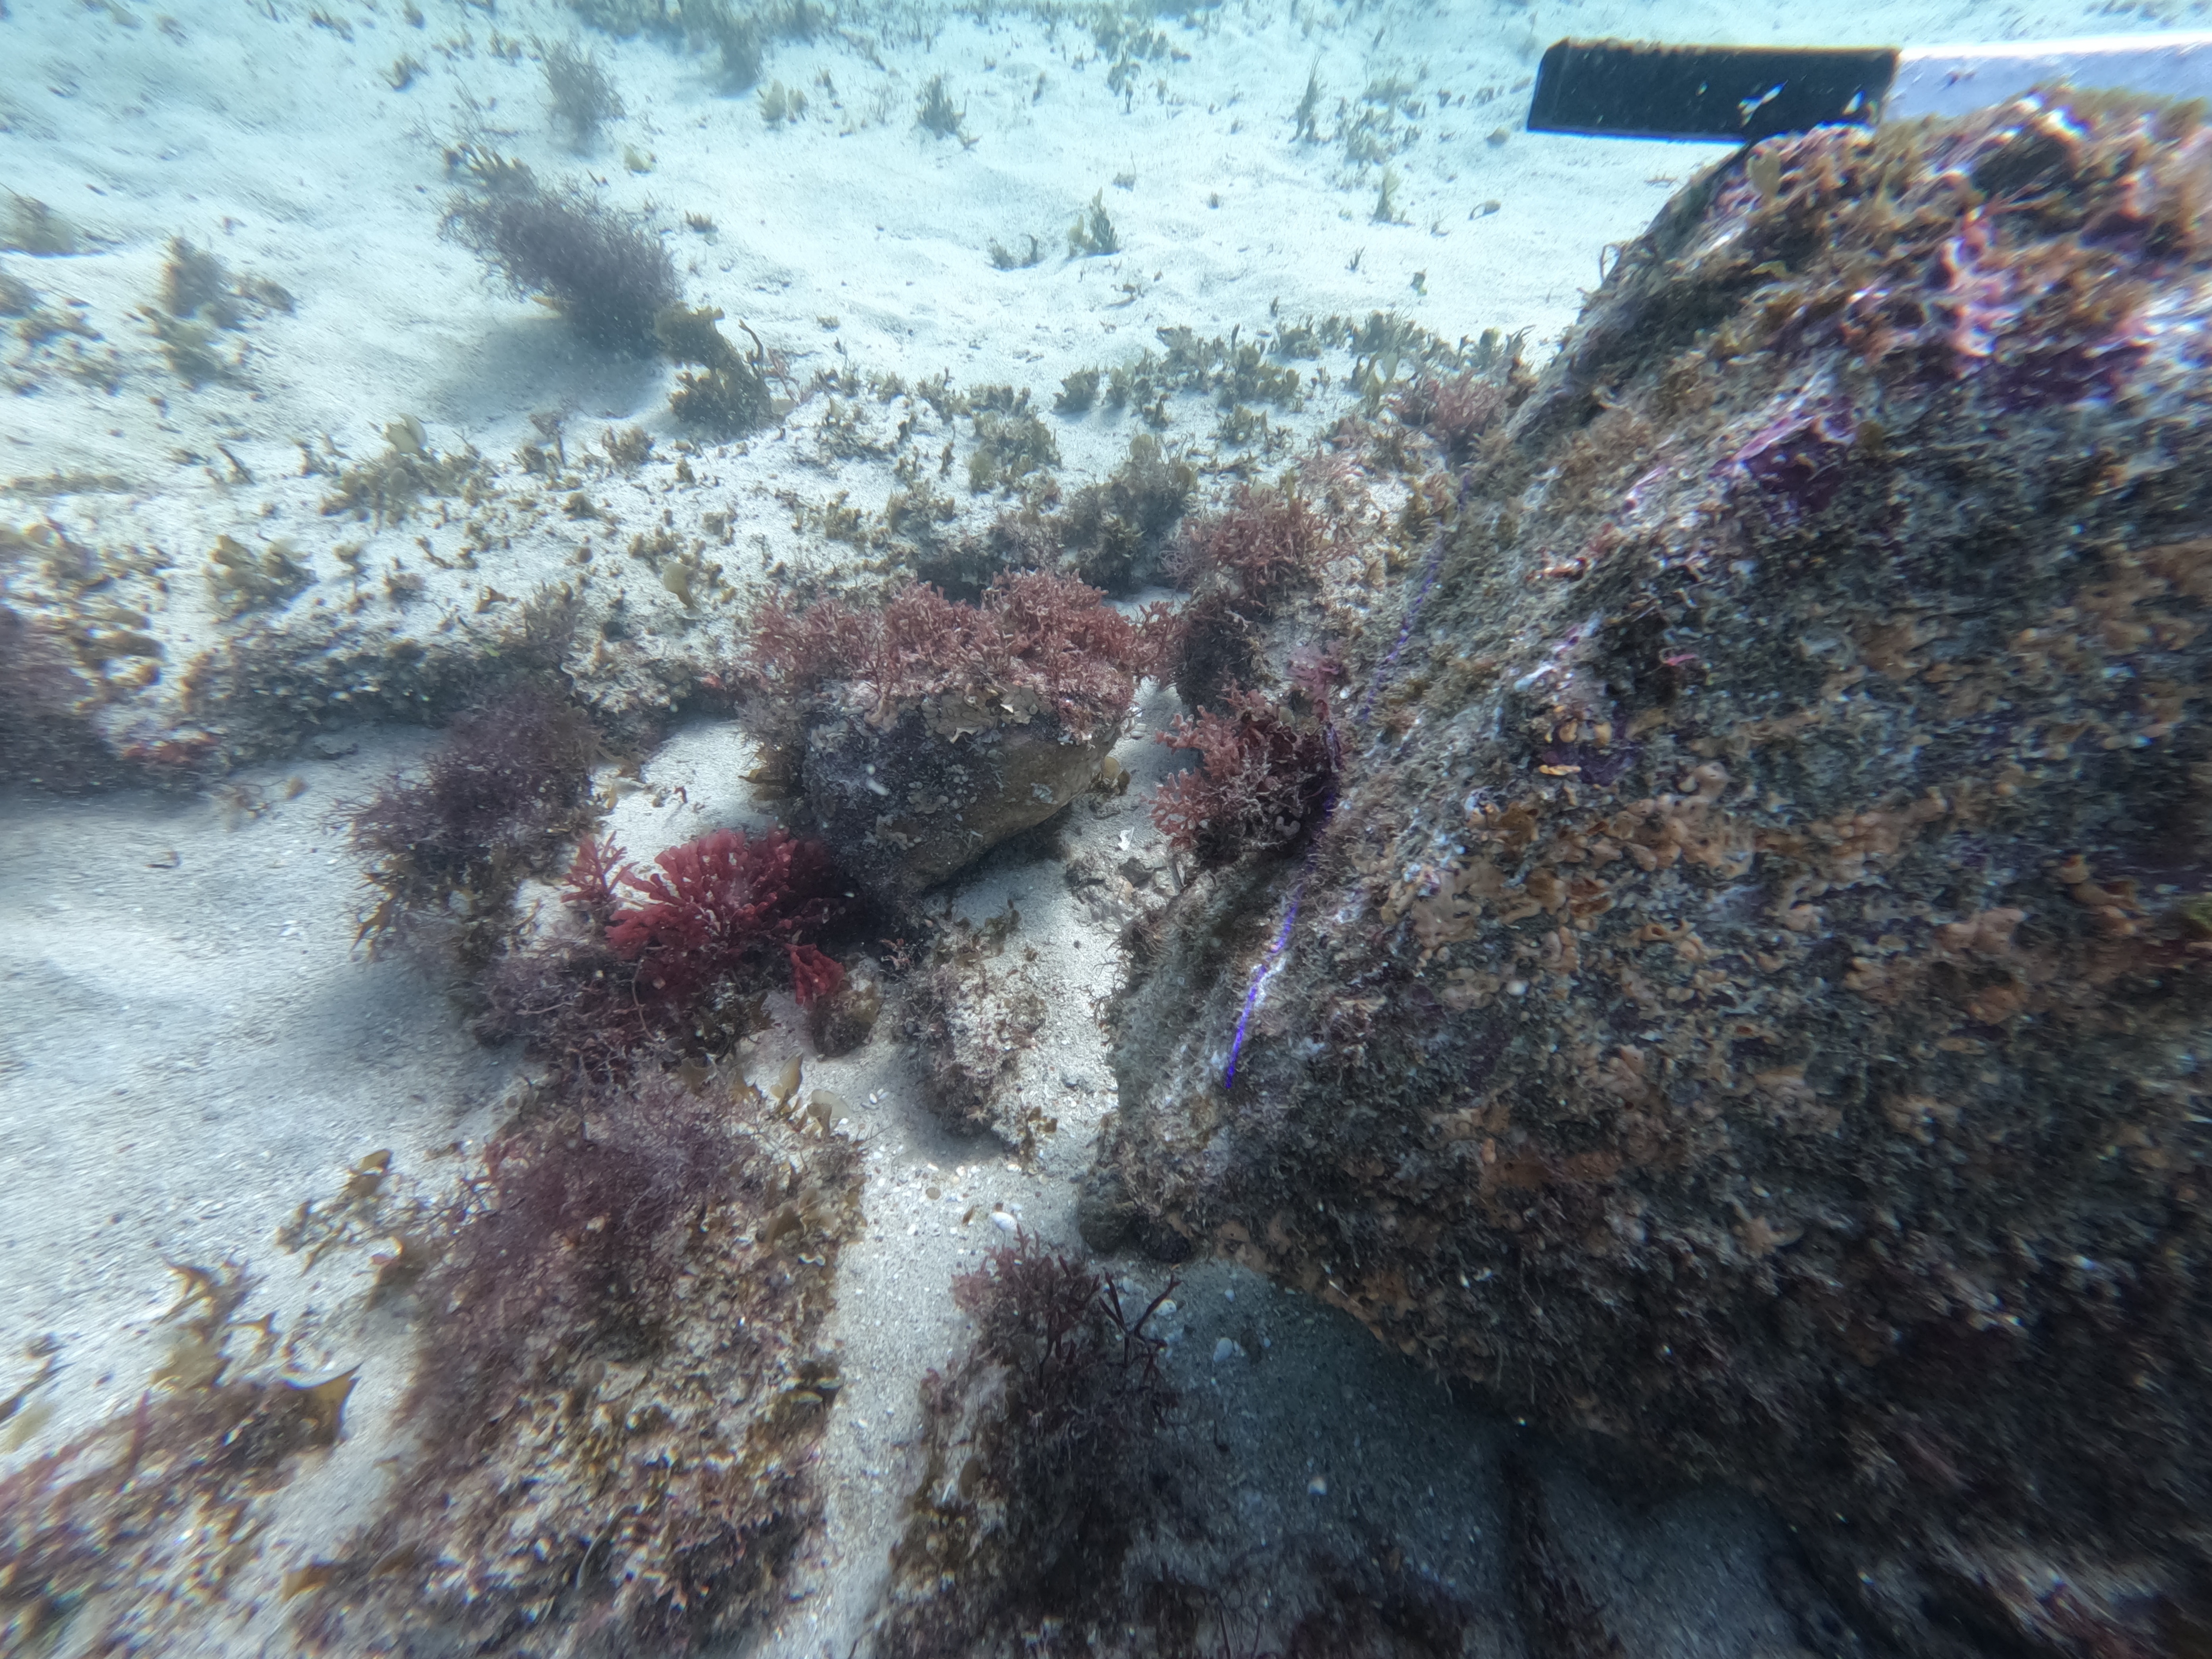

Supplement: Supplementary file 874 [file G0713941.pdf › Ocean2/G0713941.pdf]

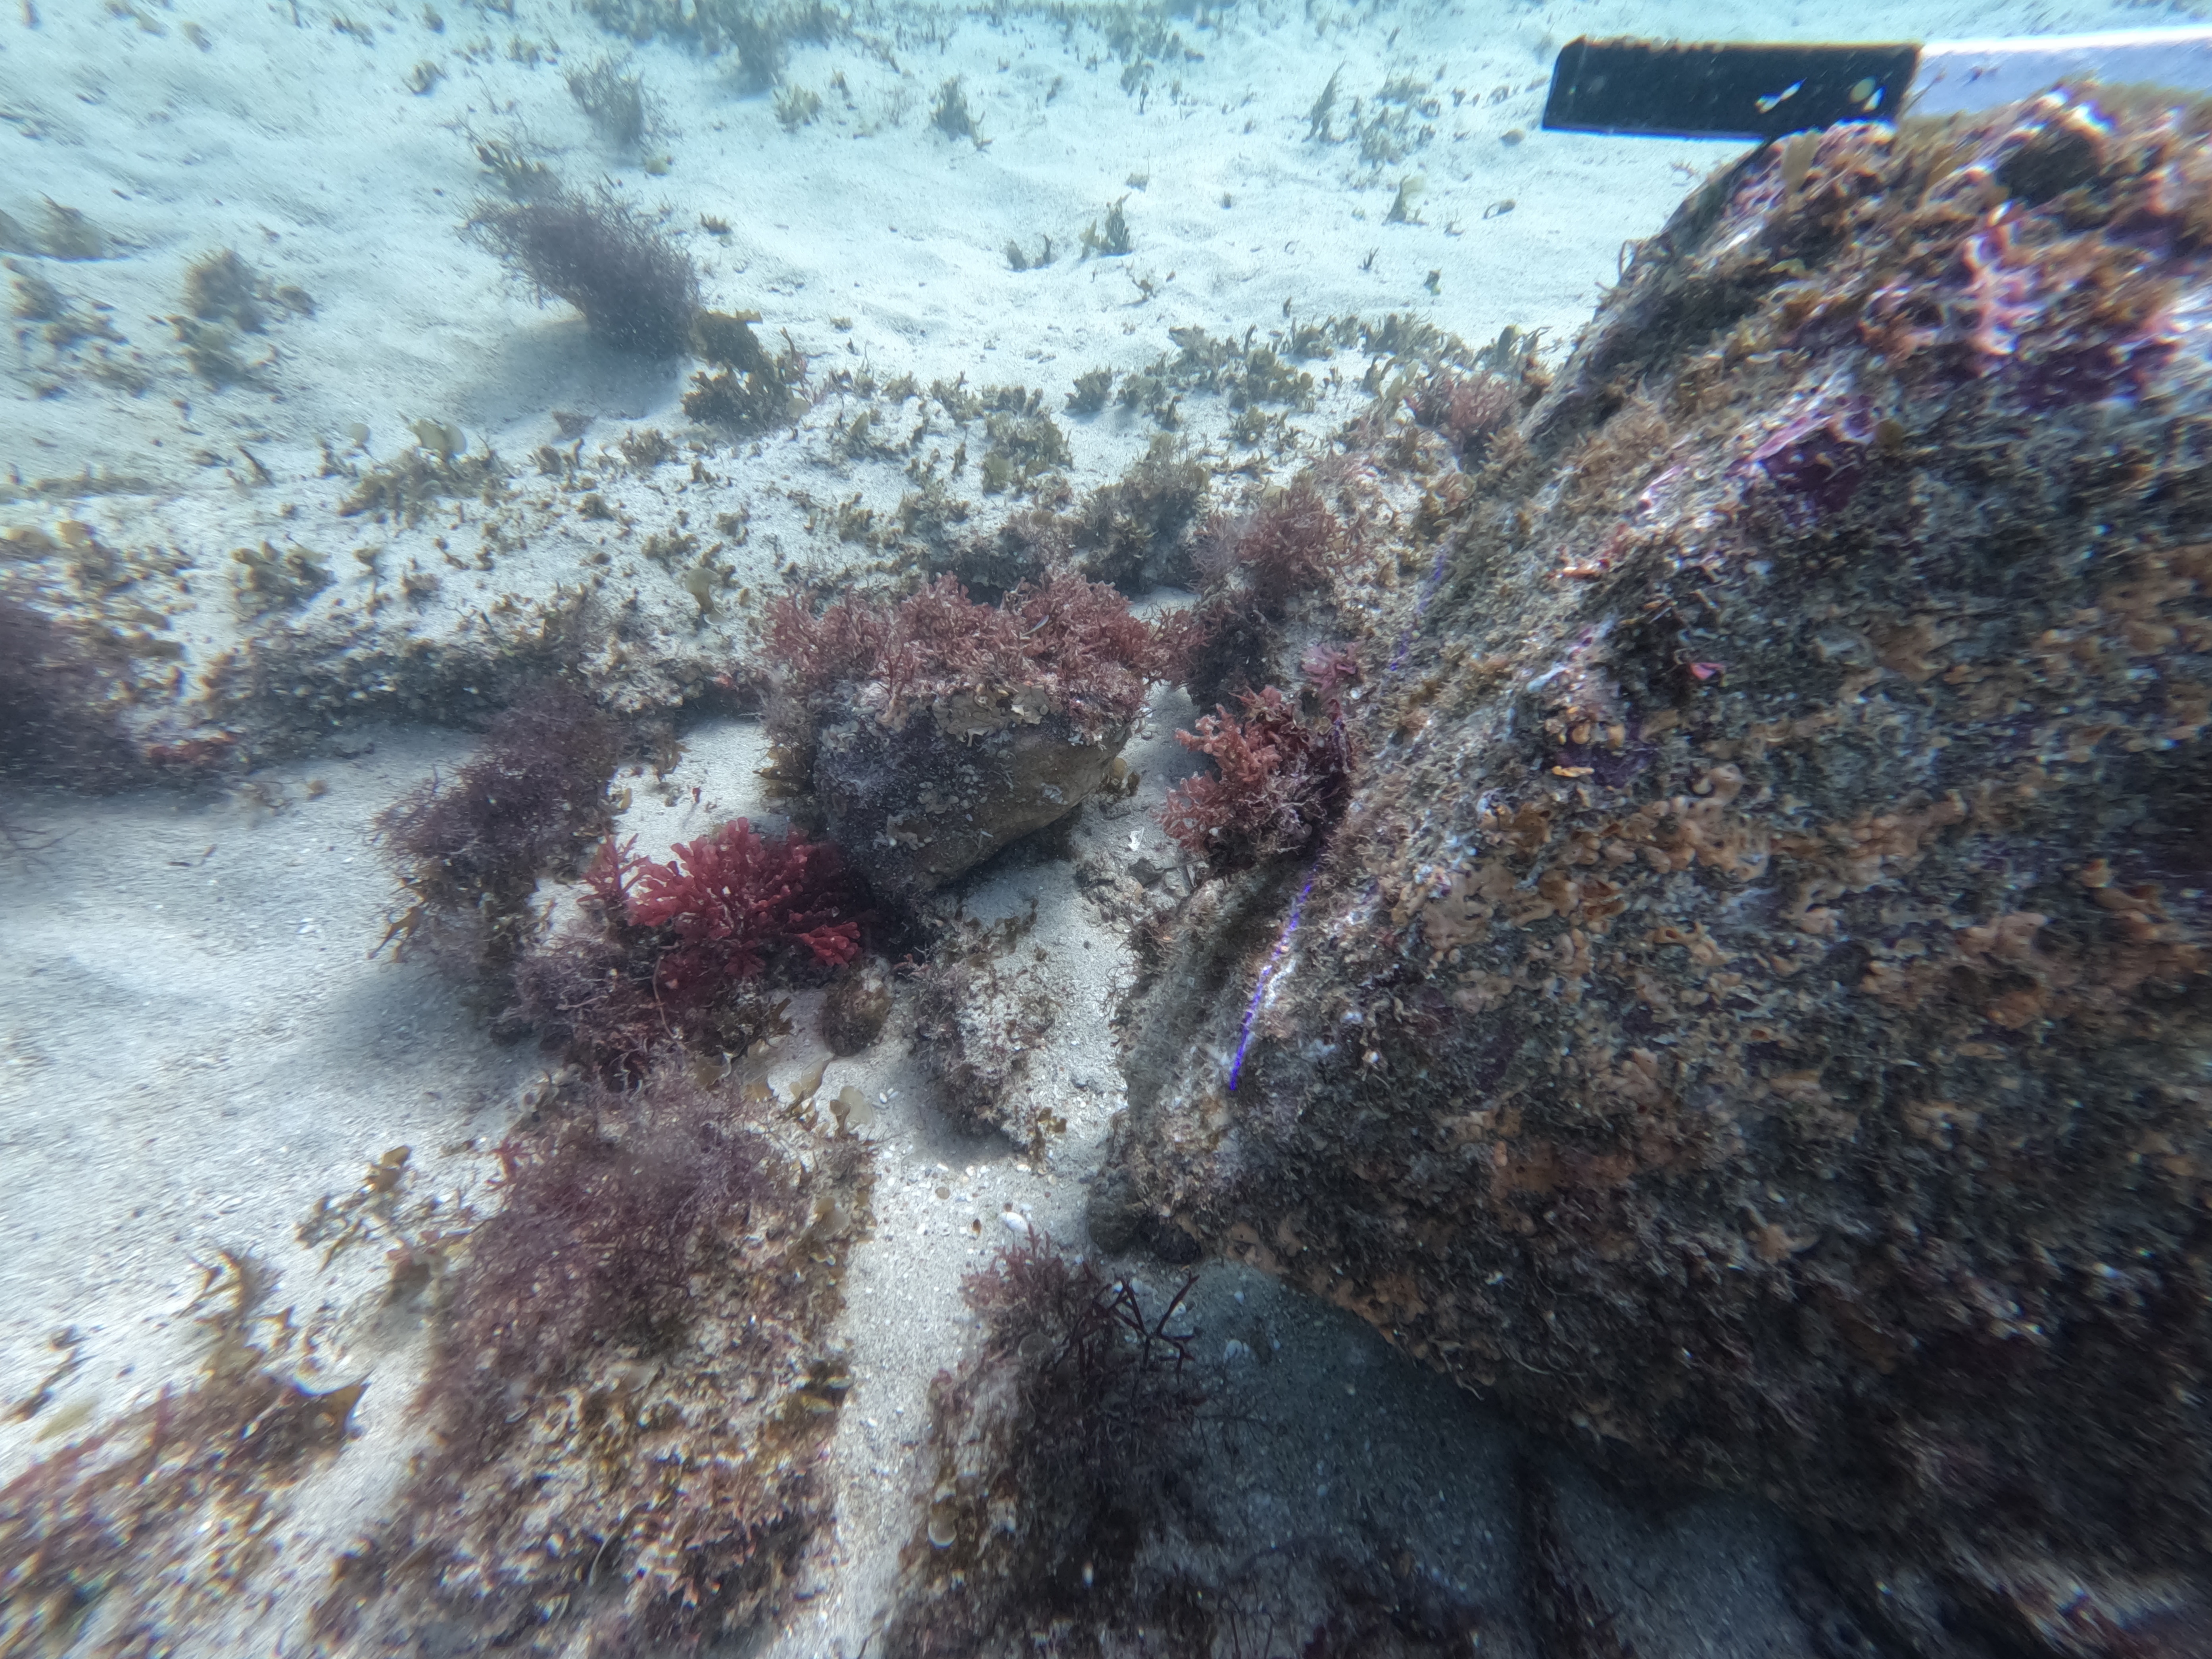

Supplement: Supplementary file 875 [file G0713942.pdf › Ocean2/G0713942.pdf]

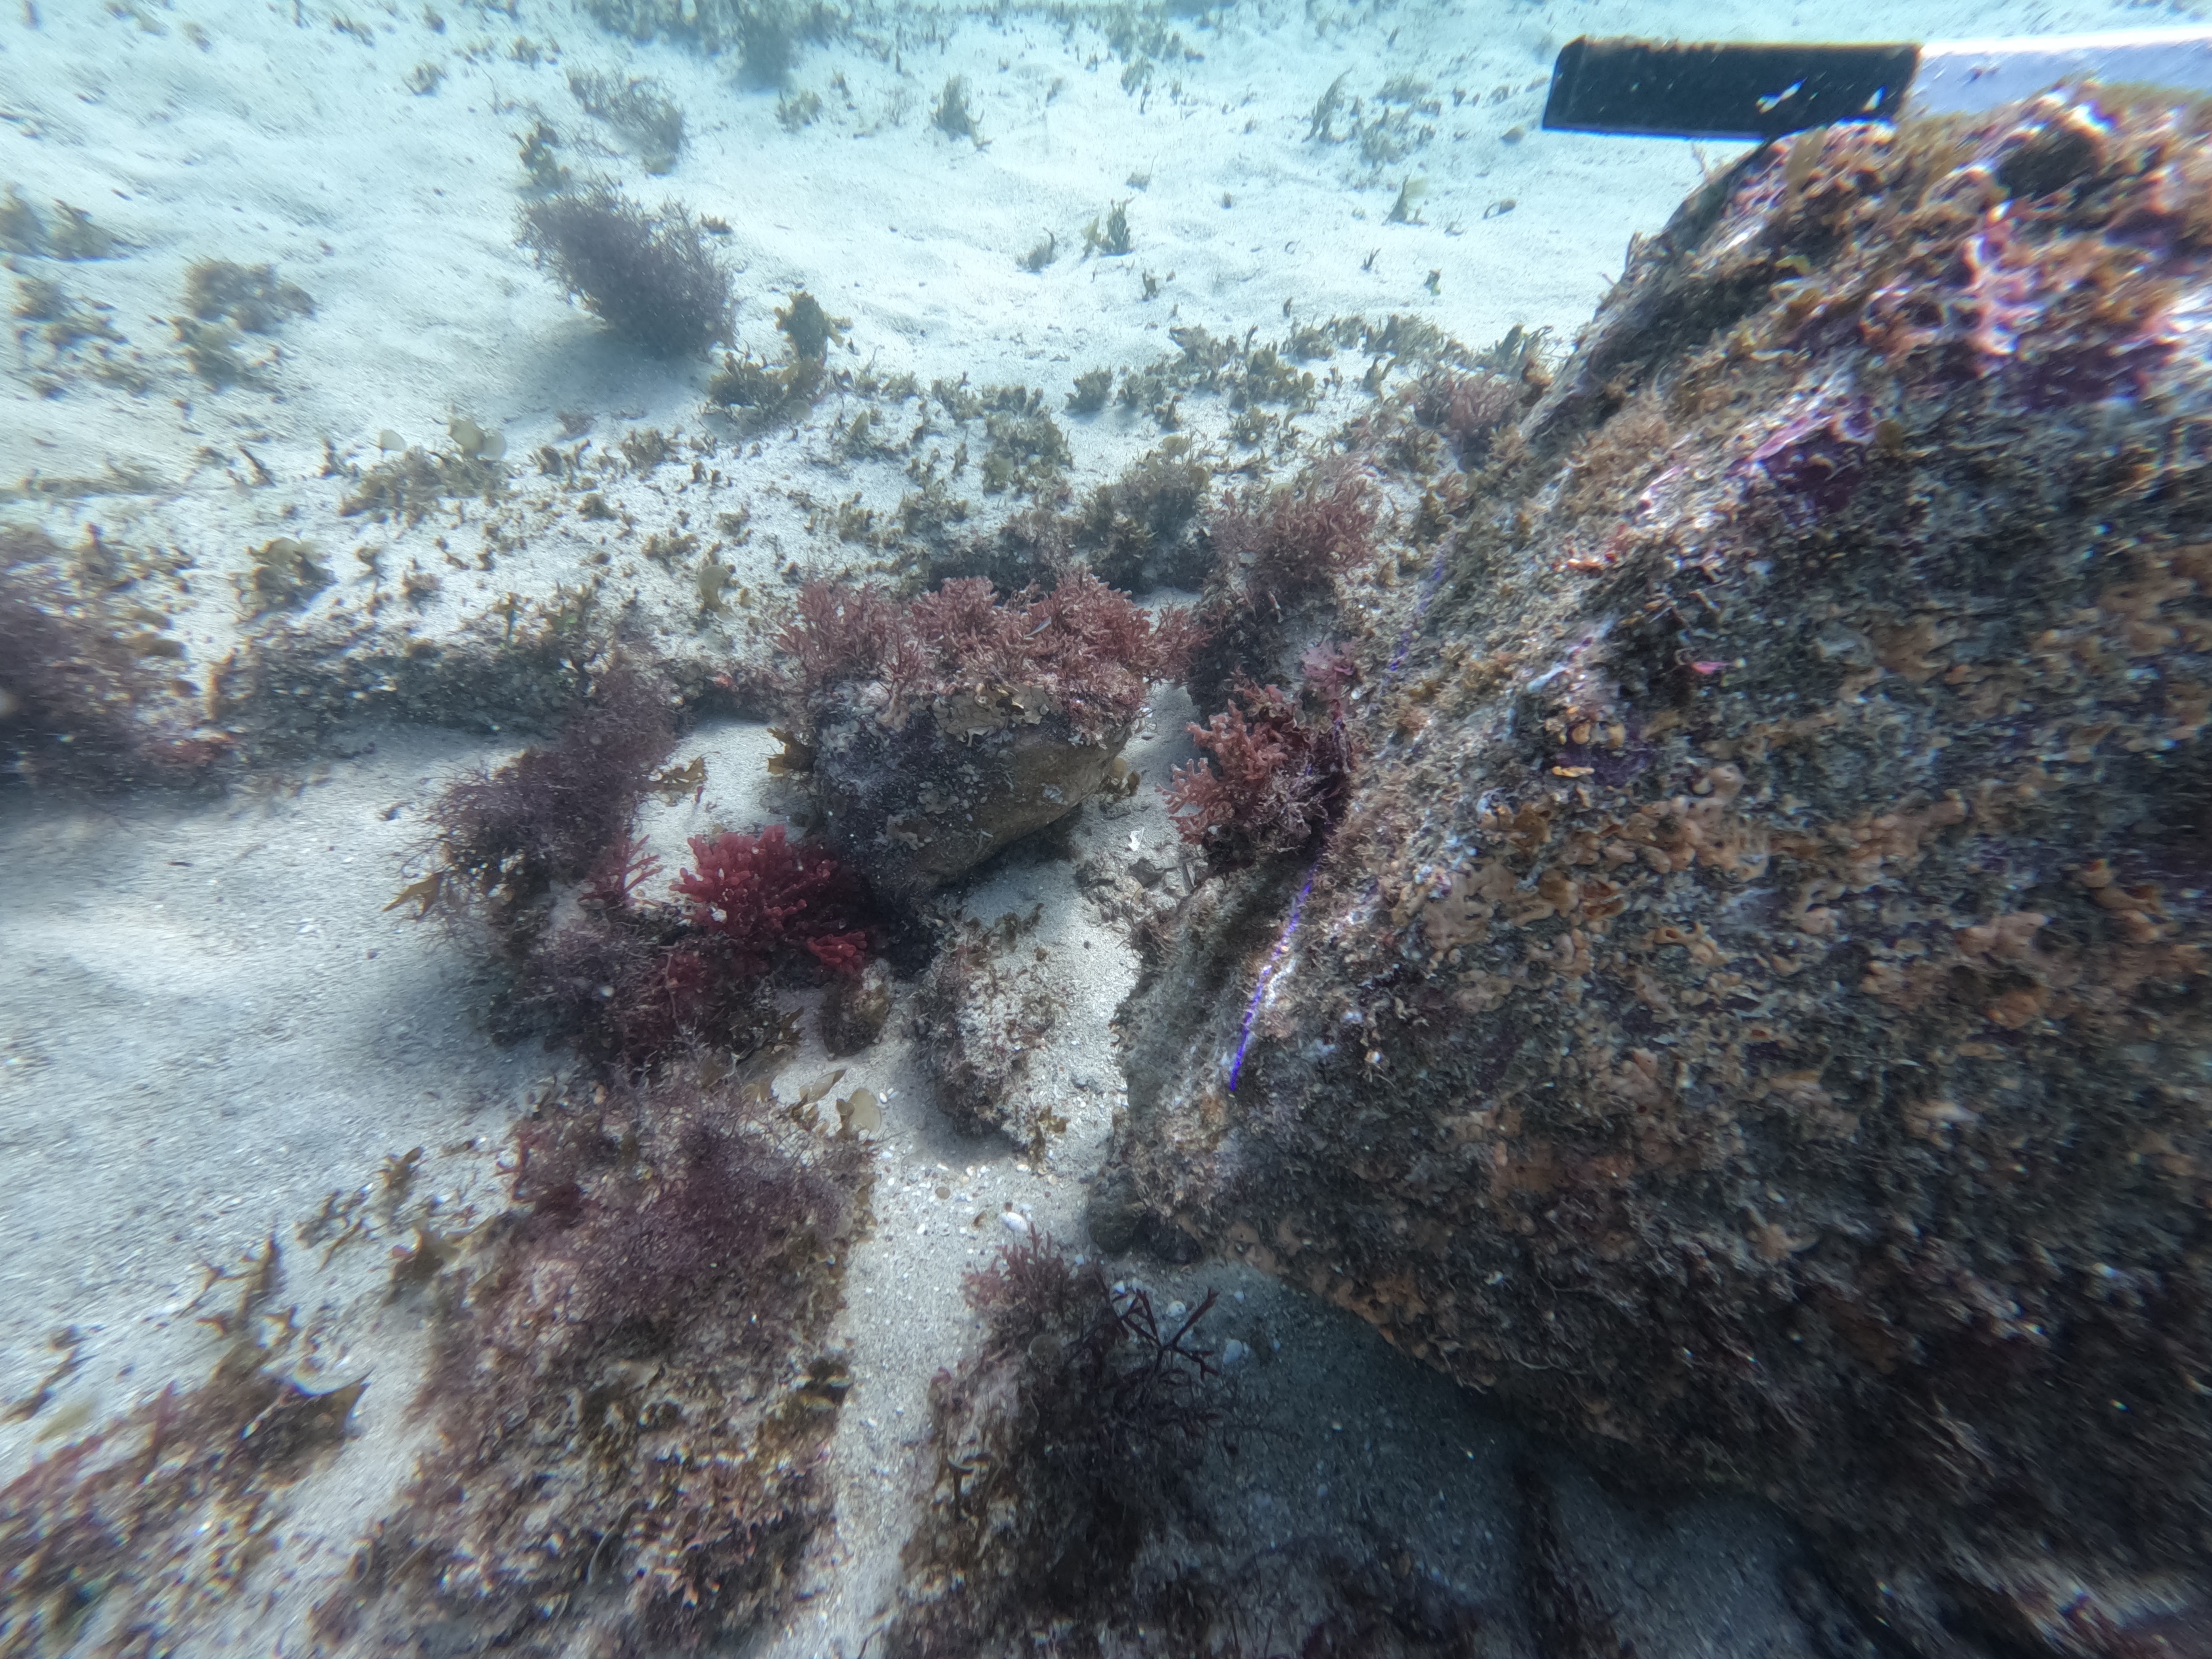

Supplement: Supplementary file 876 [file G0713943.pdf › Ocean2/G0713943.pdf]

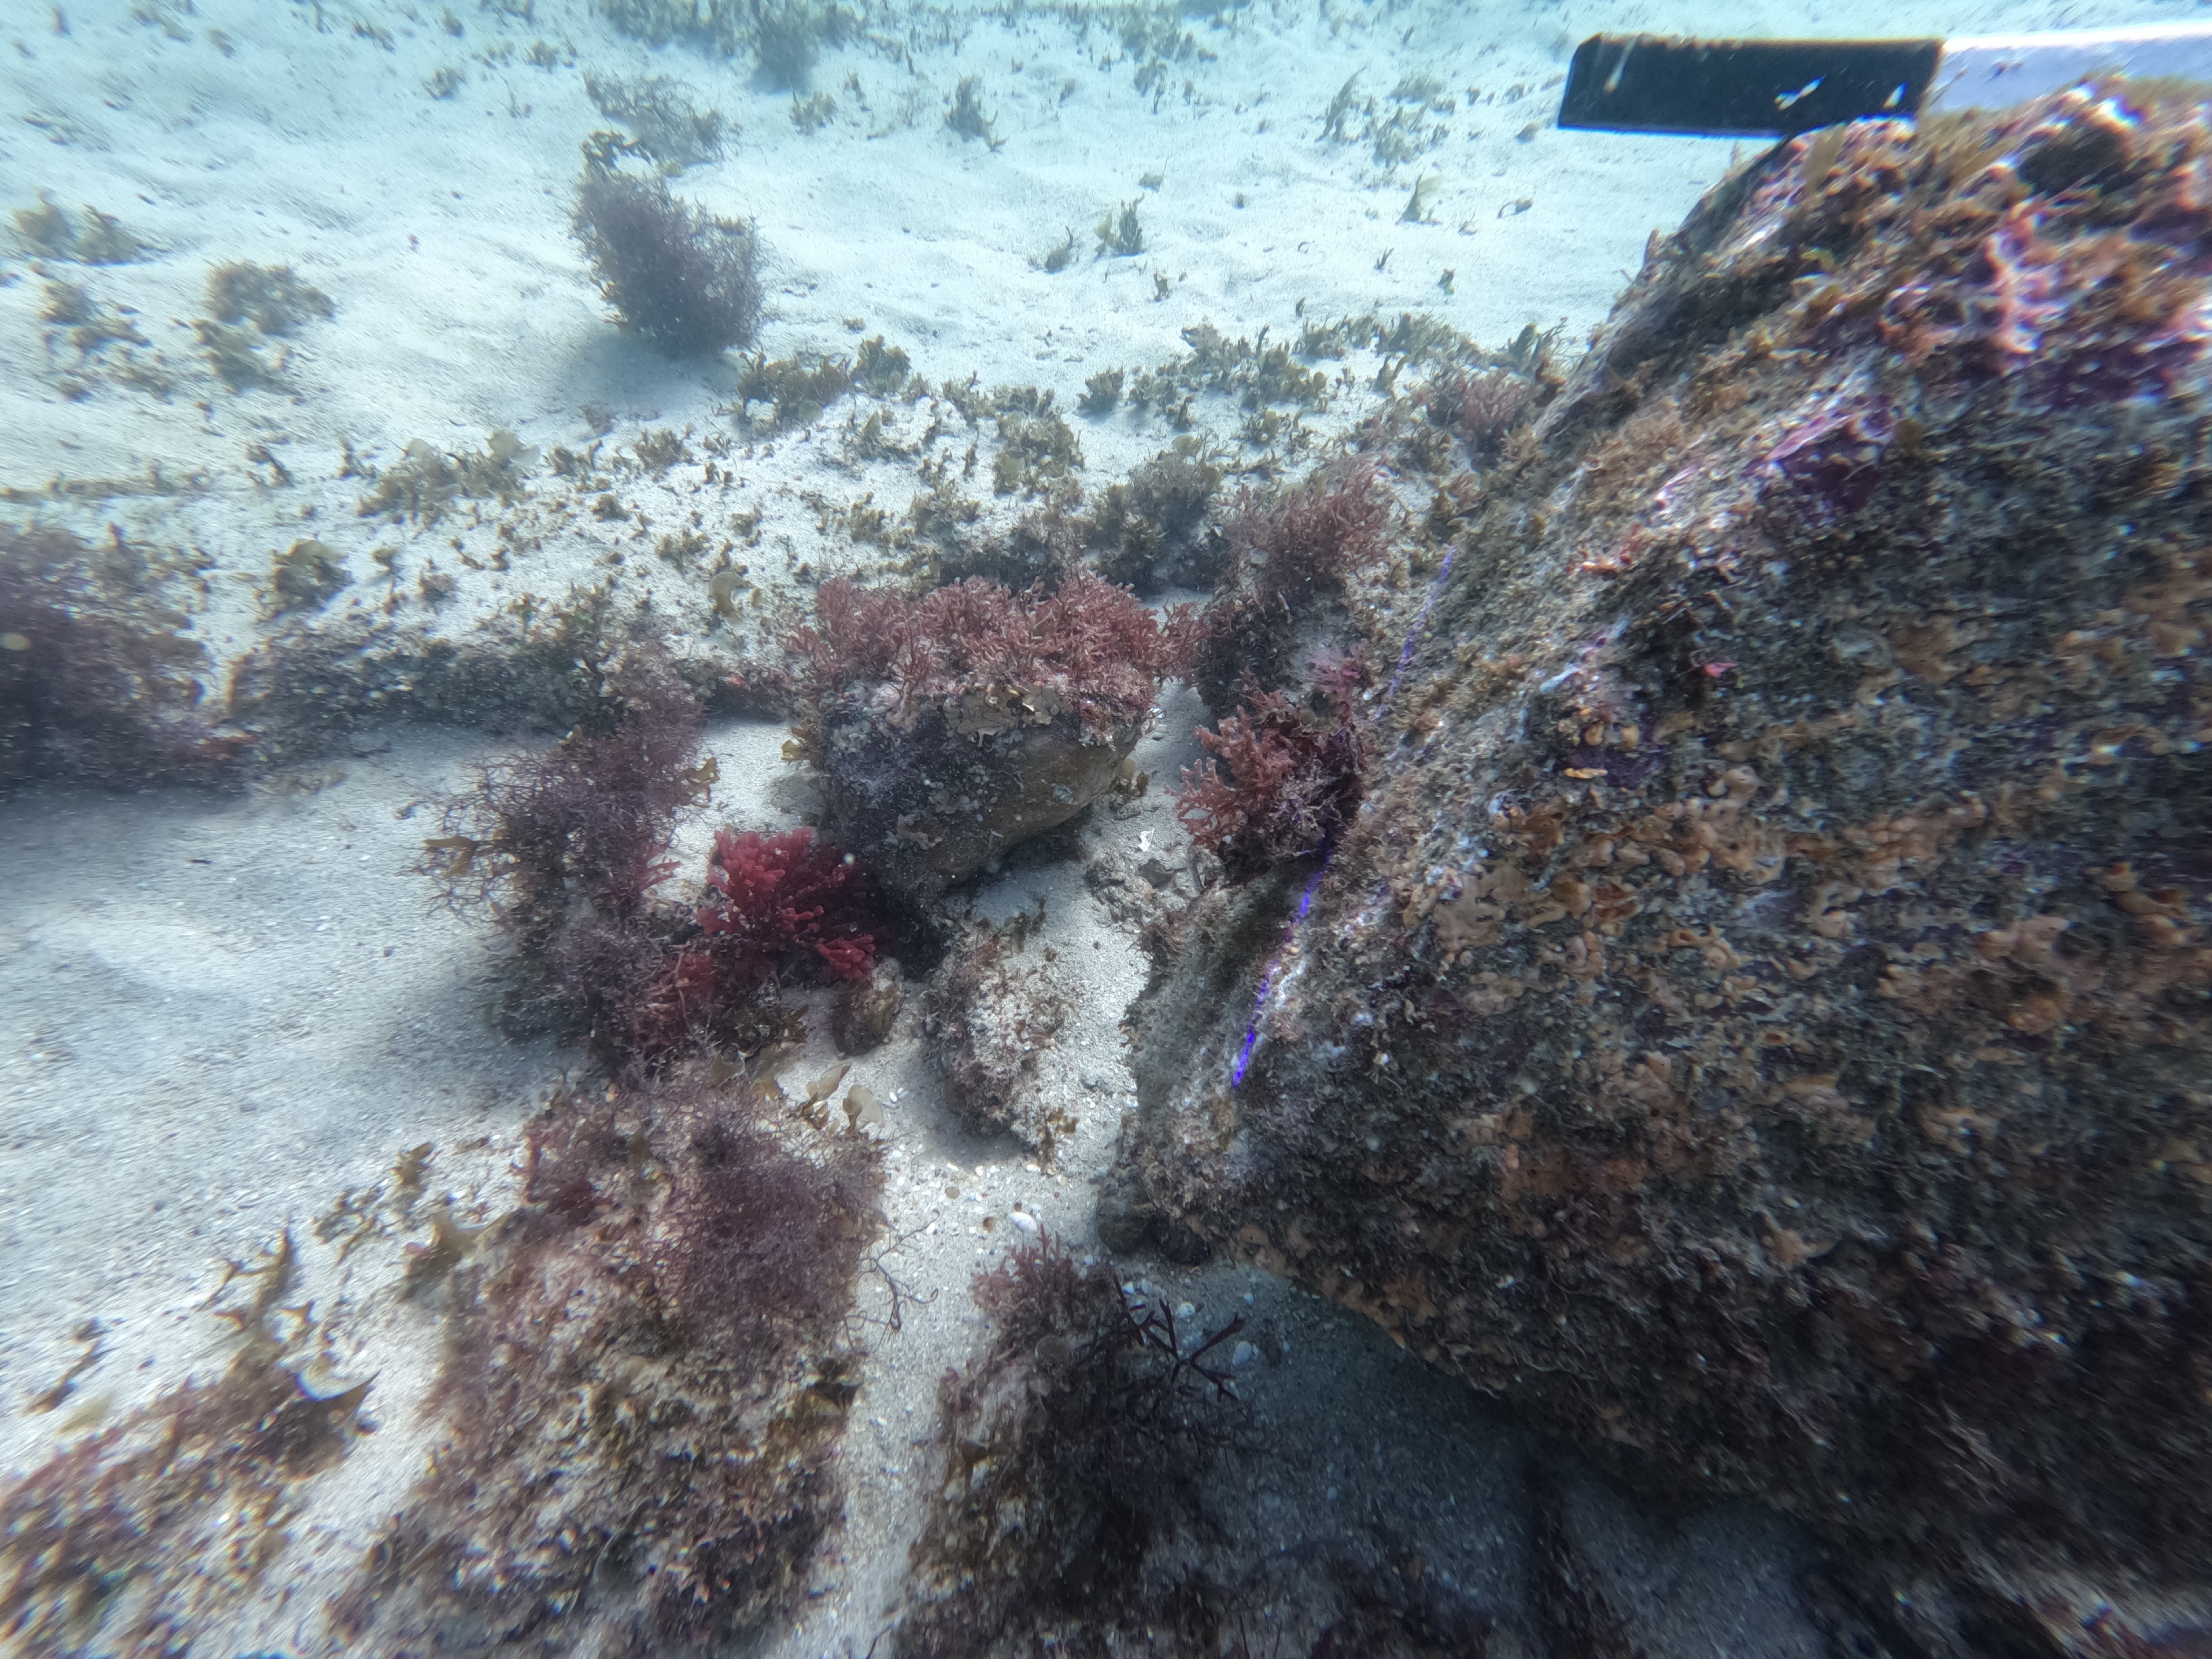

Supplement: Supplementary file 877 [file G0713944.pdf › Ocean2/G0713944.pdf]

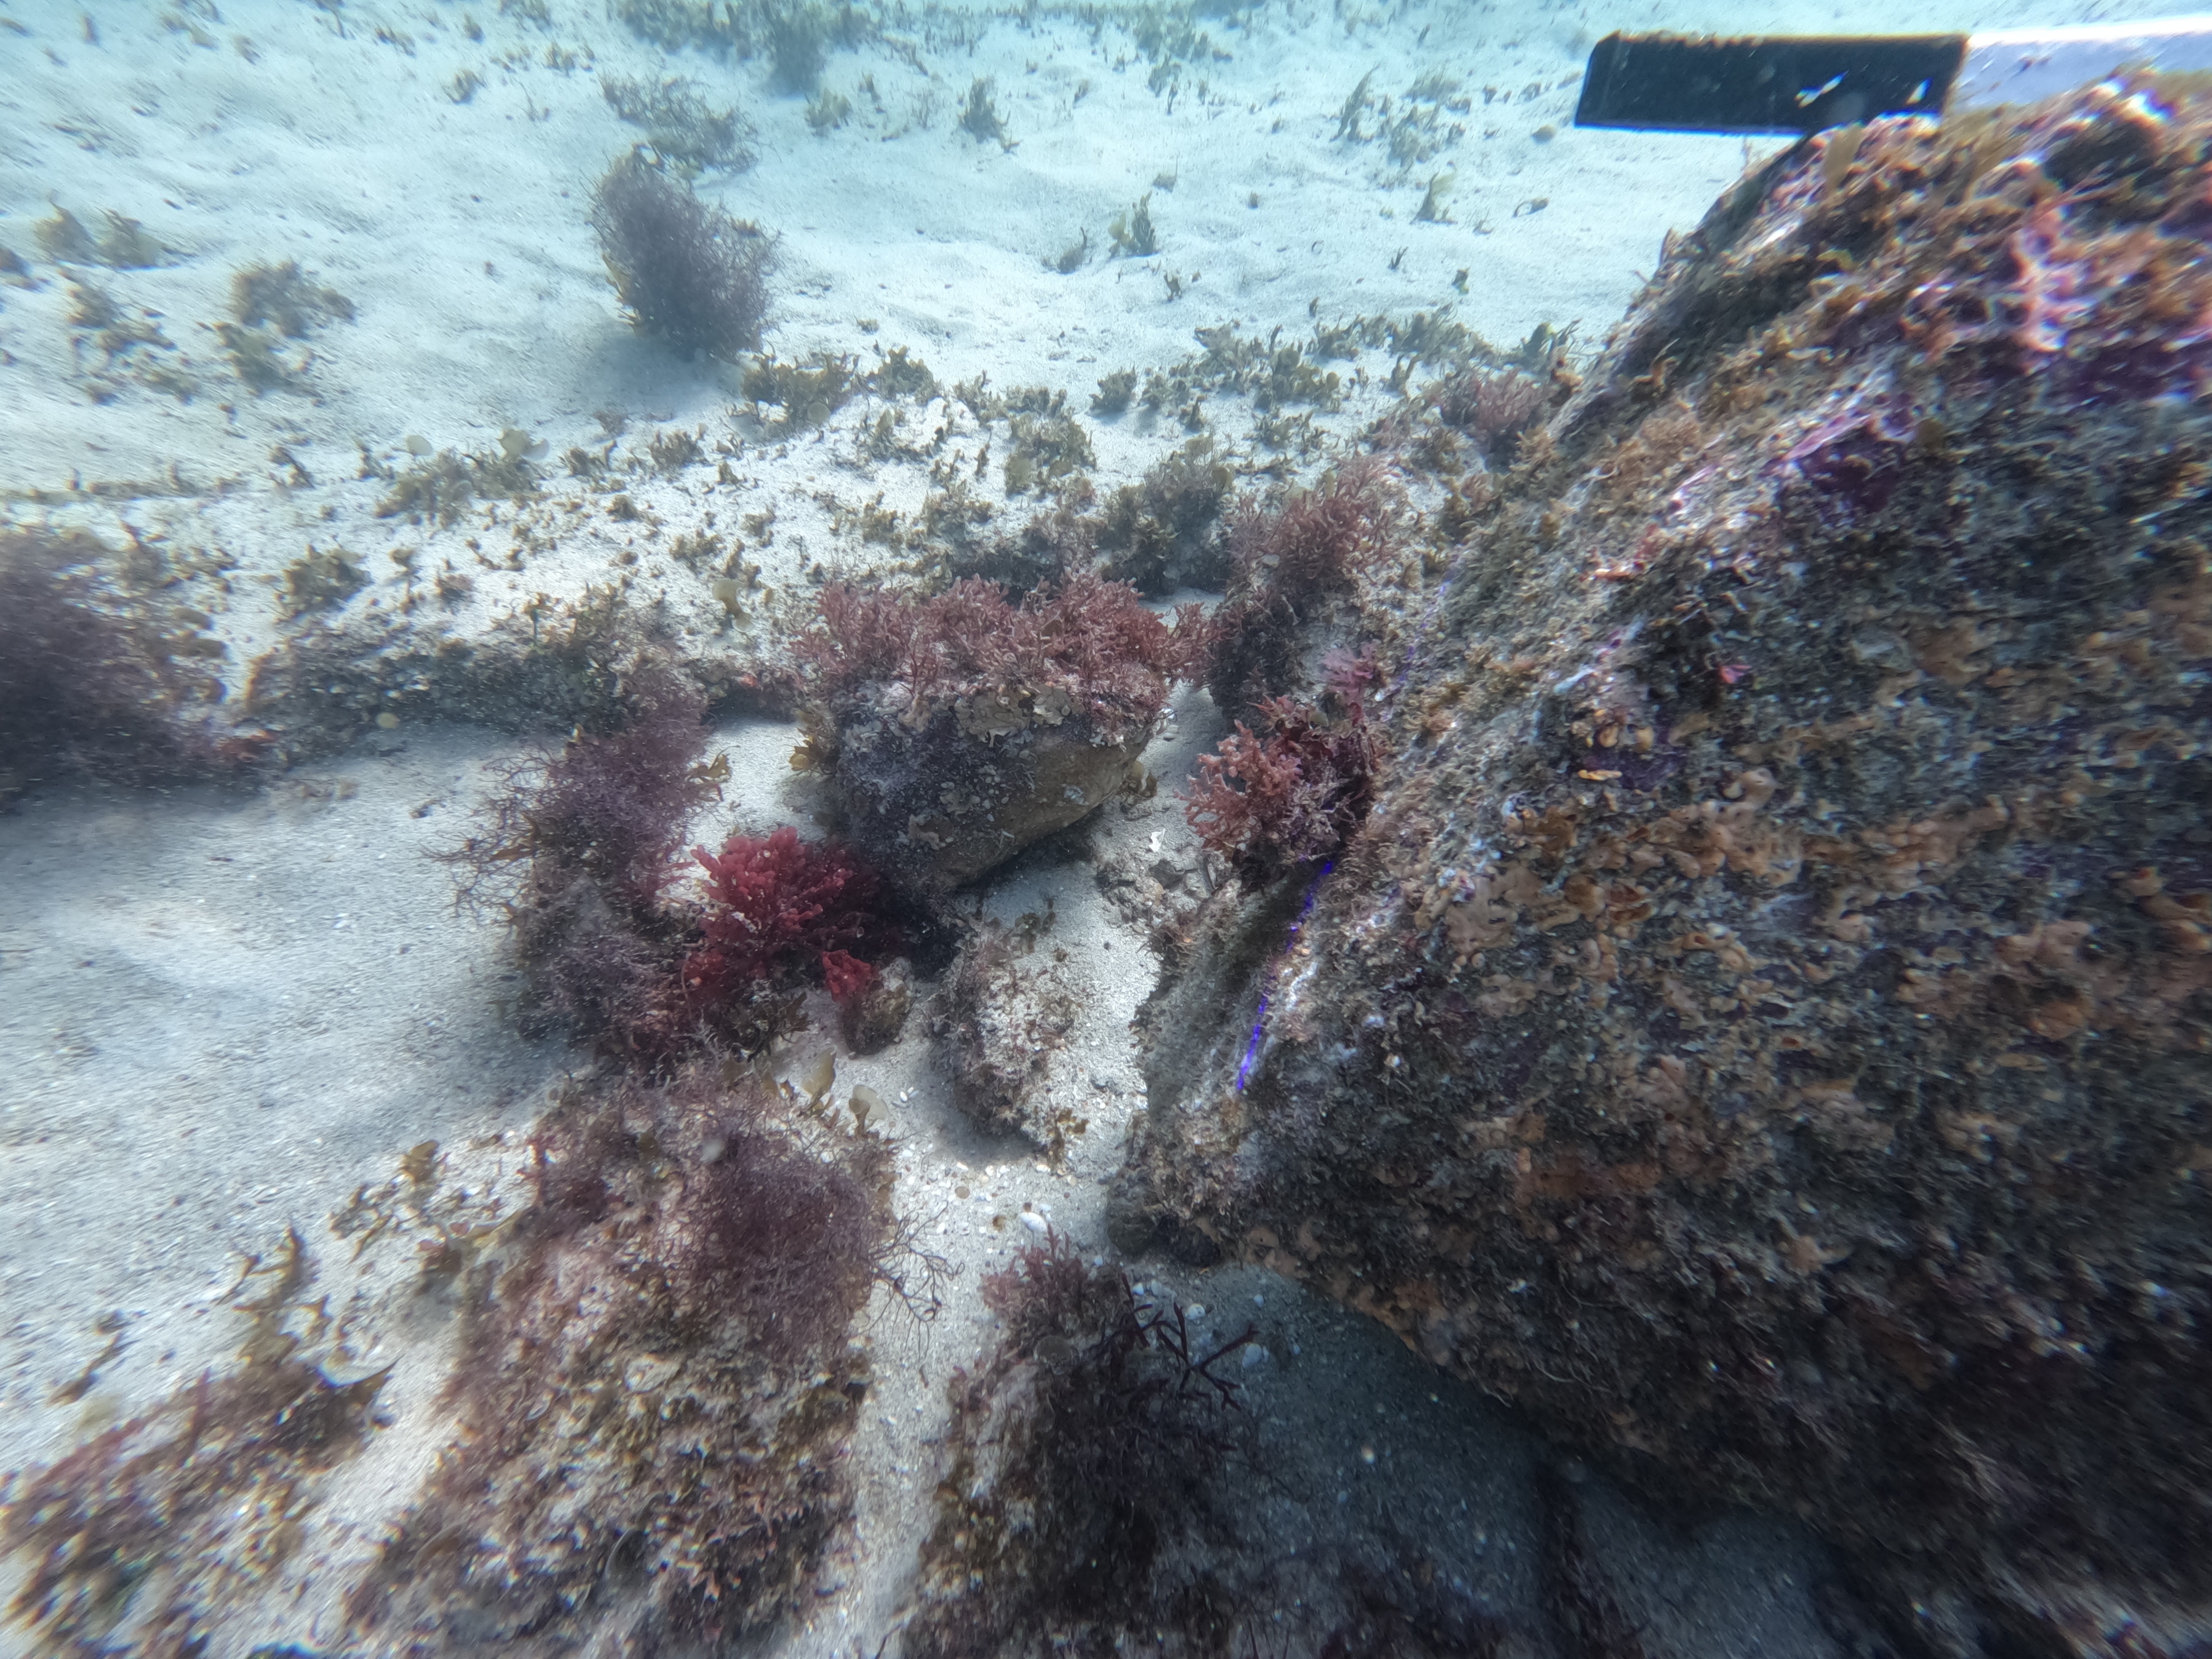

Supplement: Supplementary file 878 [file G0713945.pdf › Ocean2/G0713945.pdf]

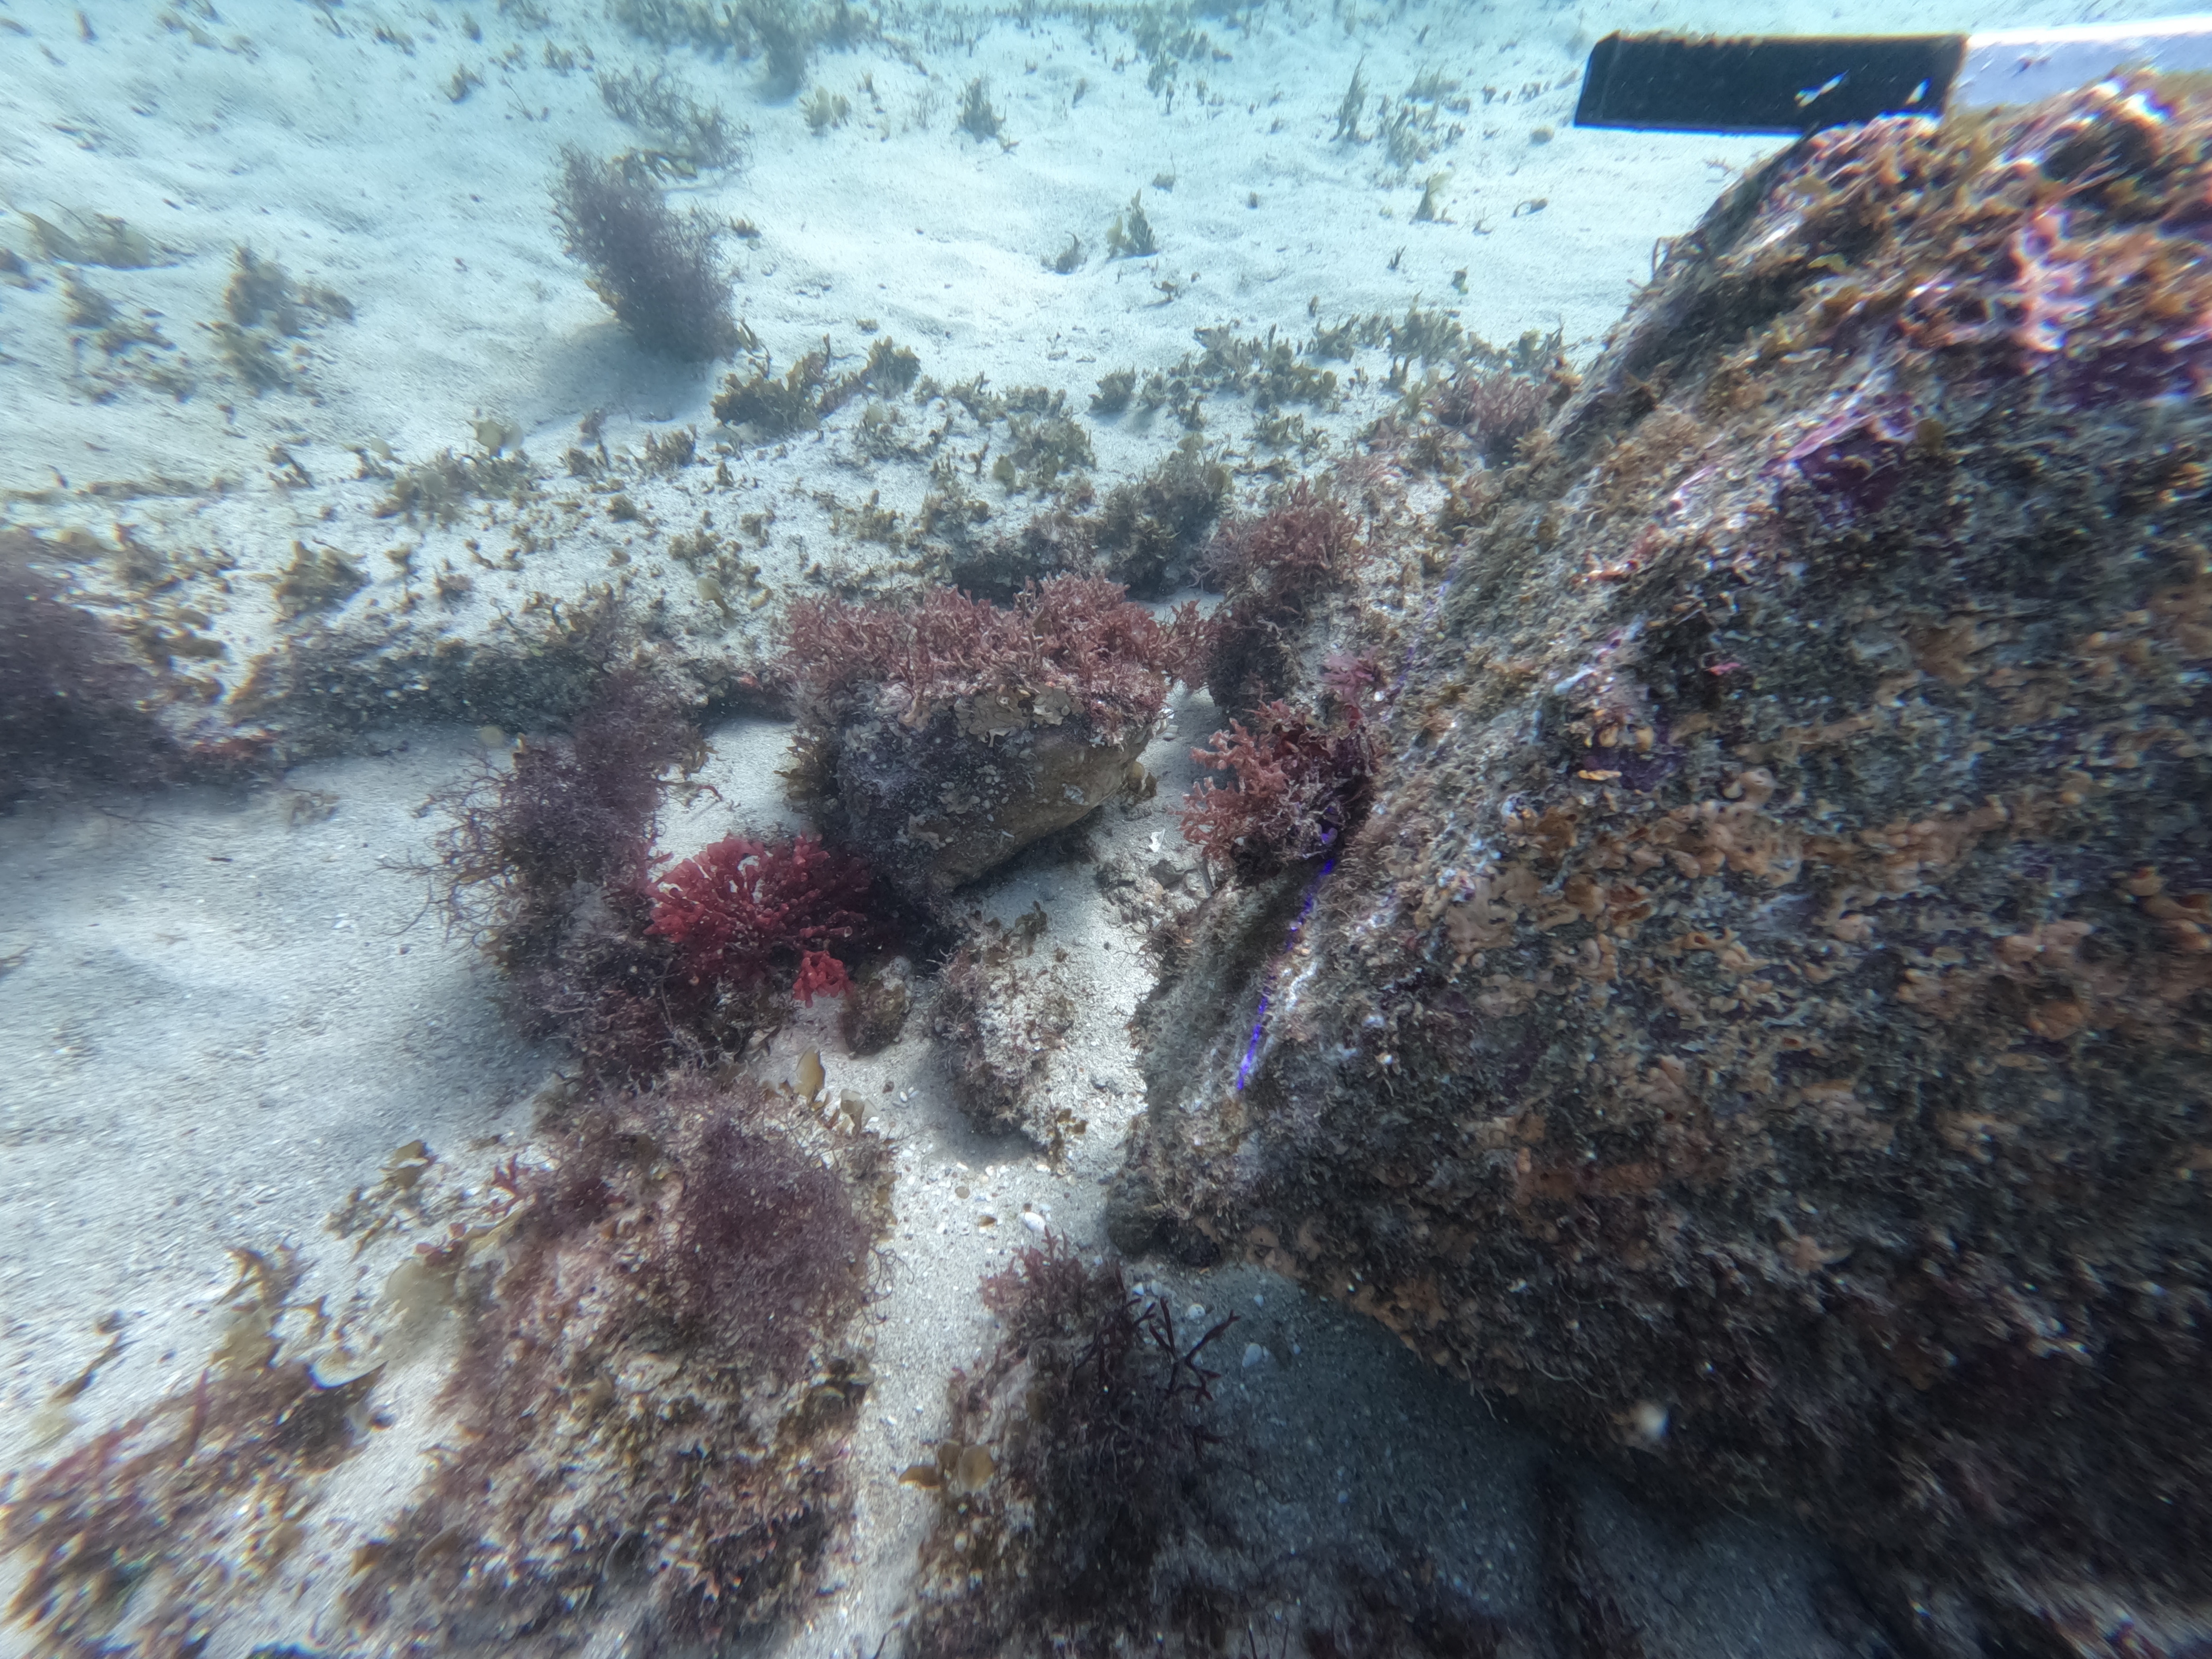

Supplement: Supplementary file 879 [file G0713946.pdf › Ocean2/G0713946.pdf]

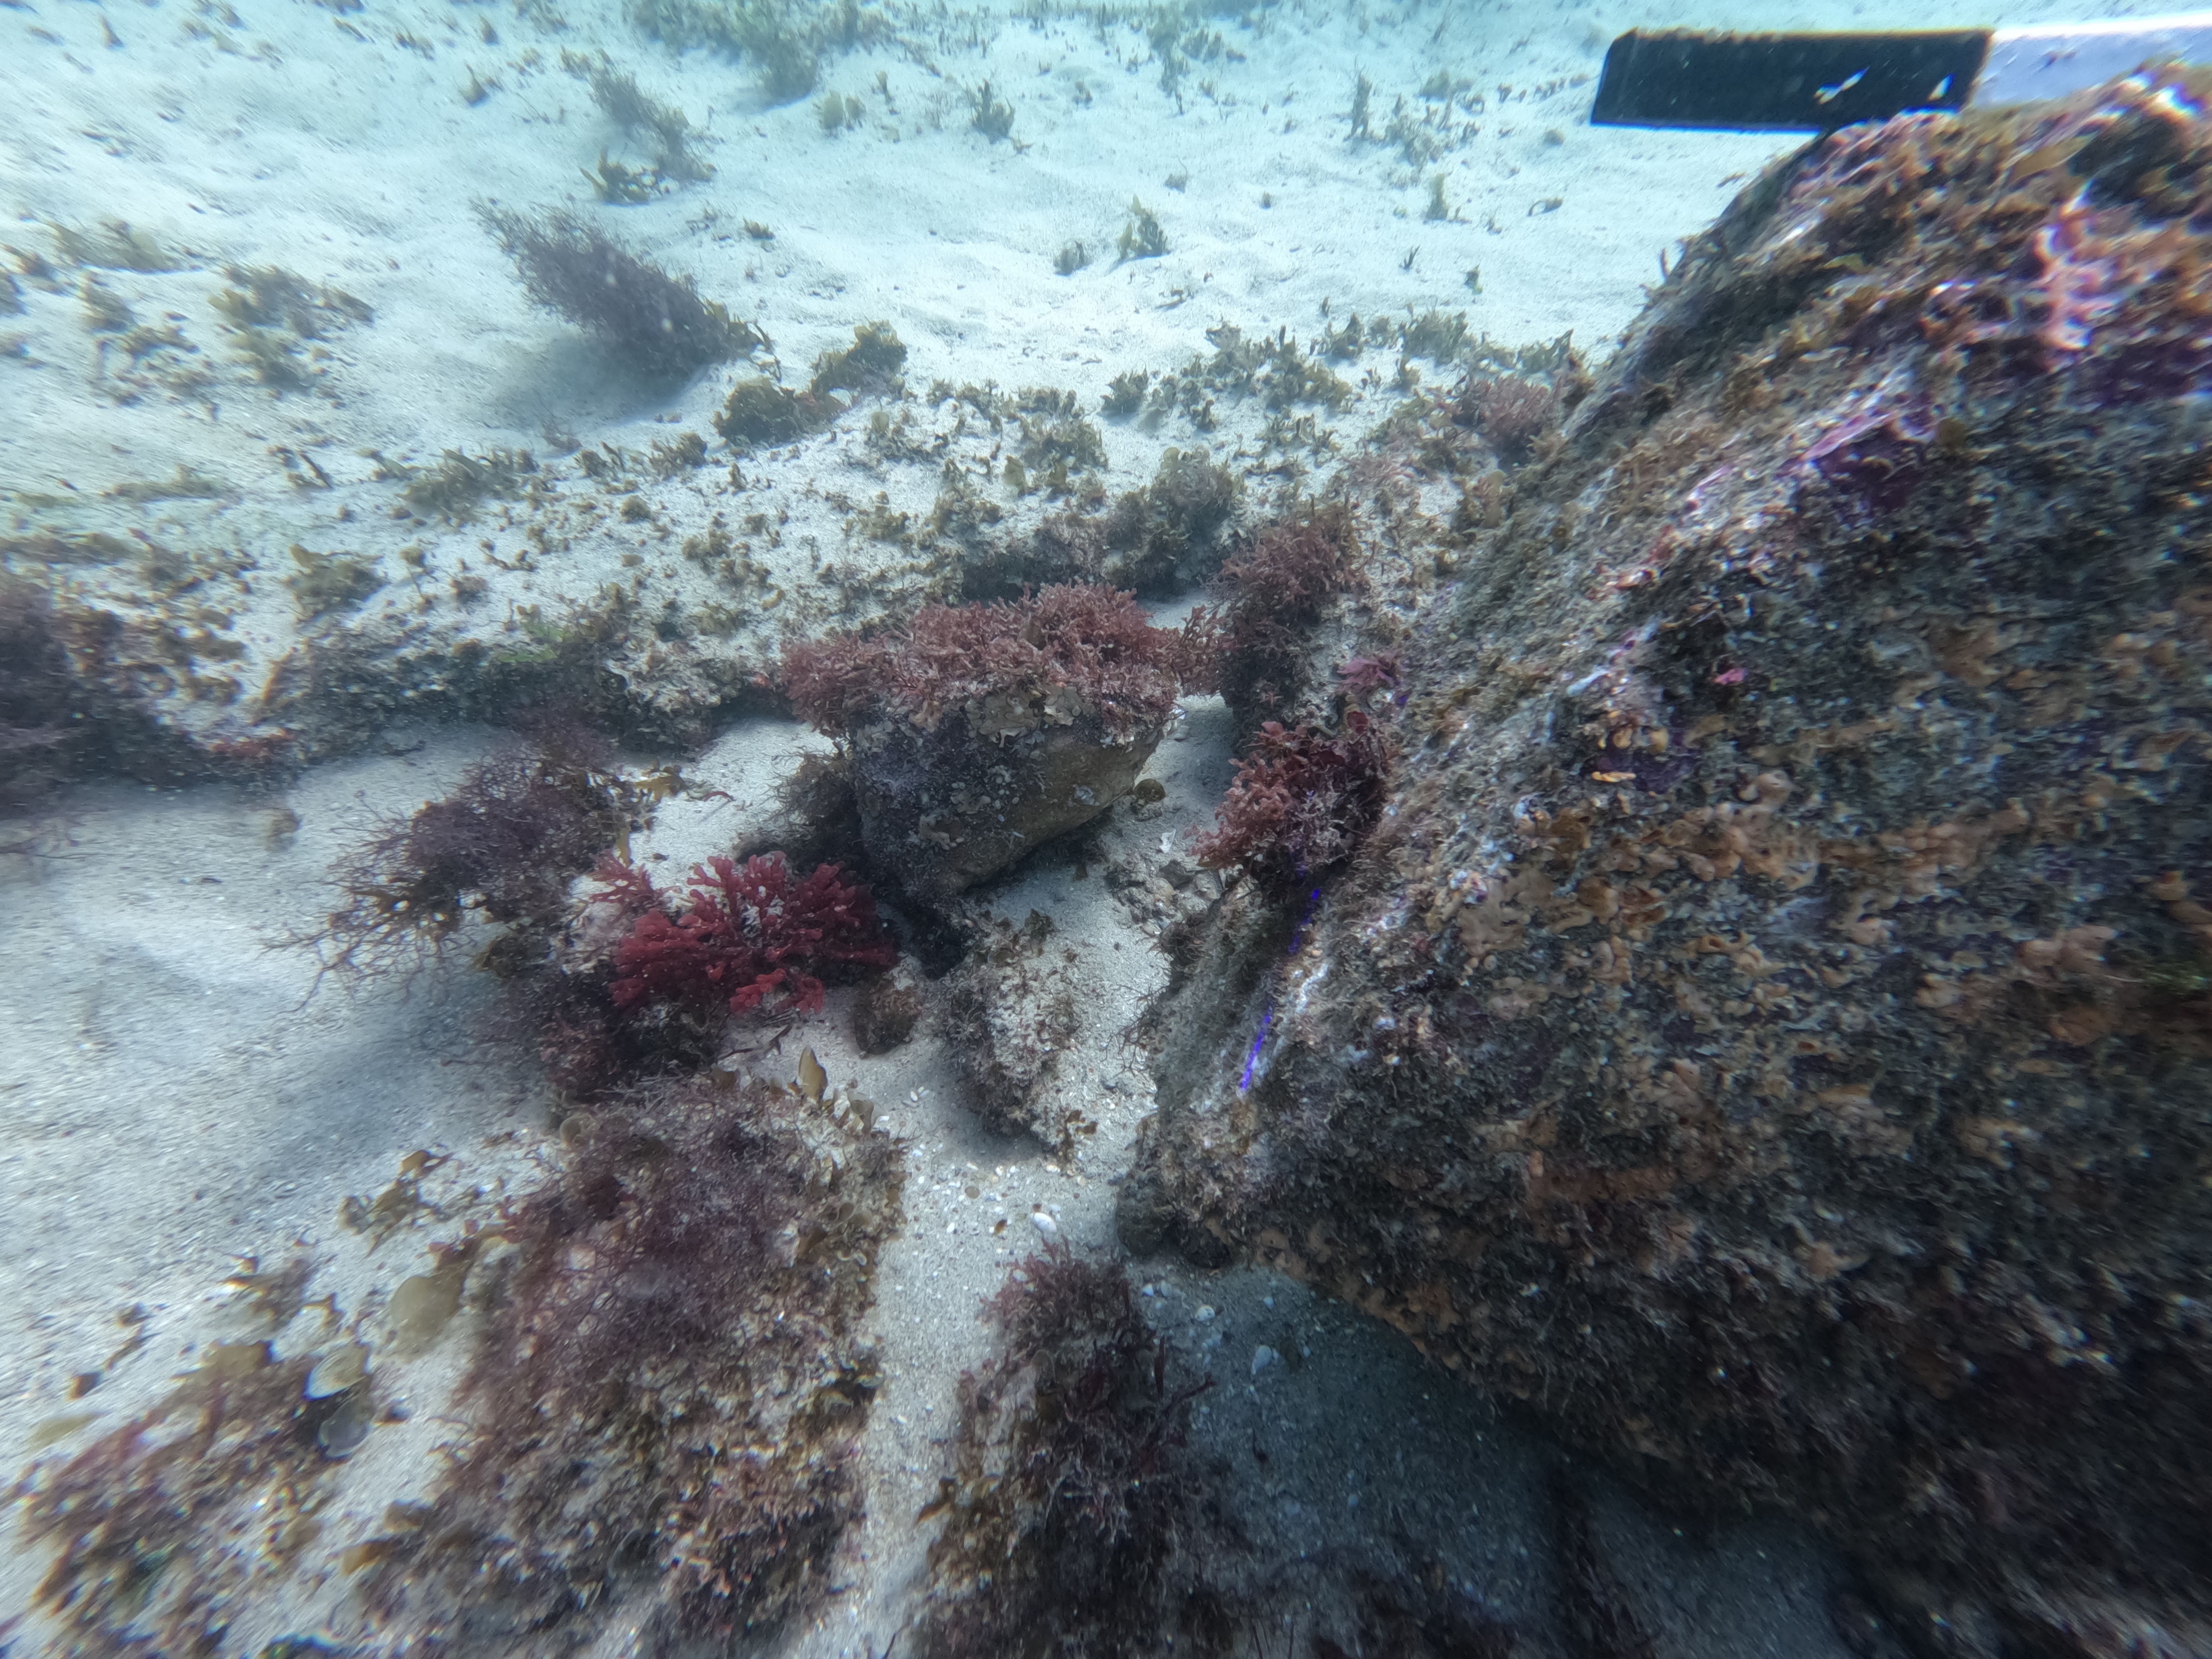

Supplement: Supplementary file 880 [file G0713947.pdf › Ocean2/G0713947.pdf]

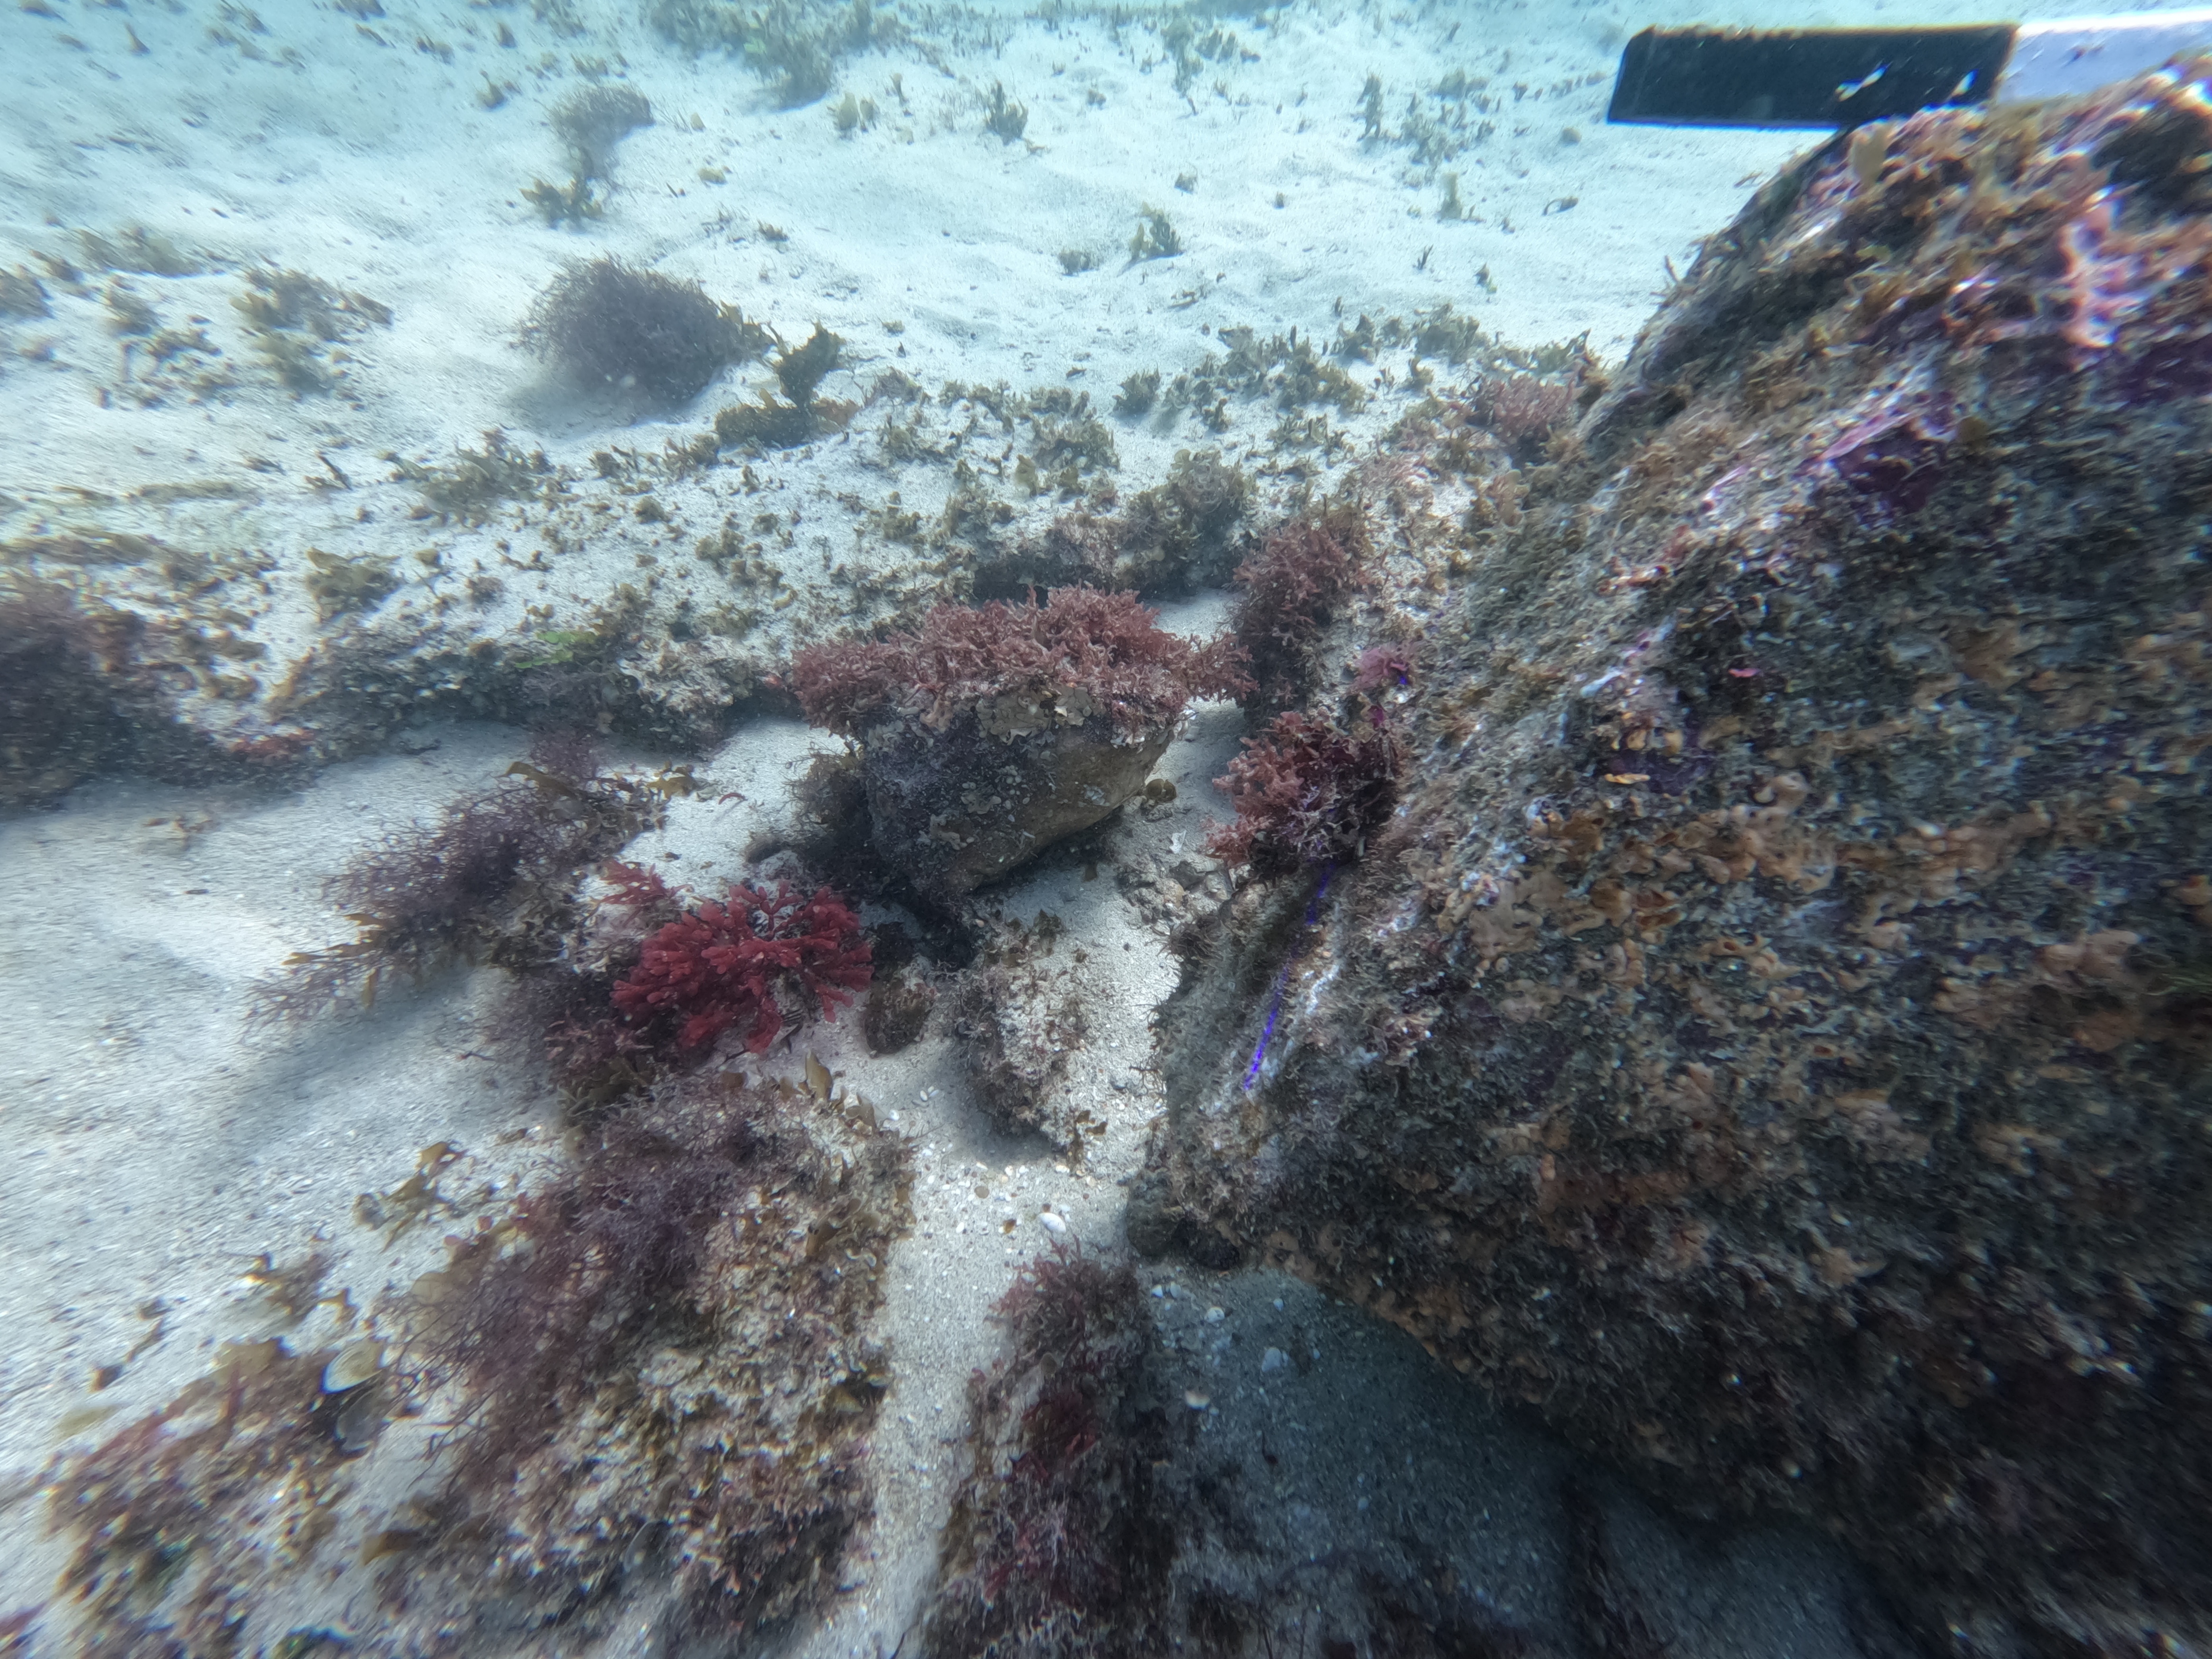

Supplement: Supplementary file 881 [file G0713948.pdf › Ocean2/G0713948.pdf]

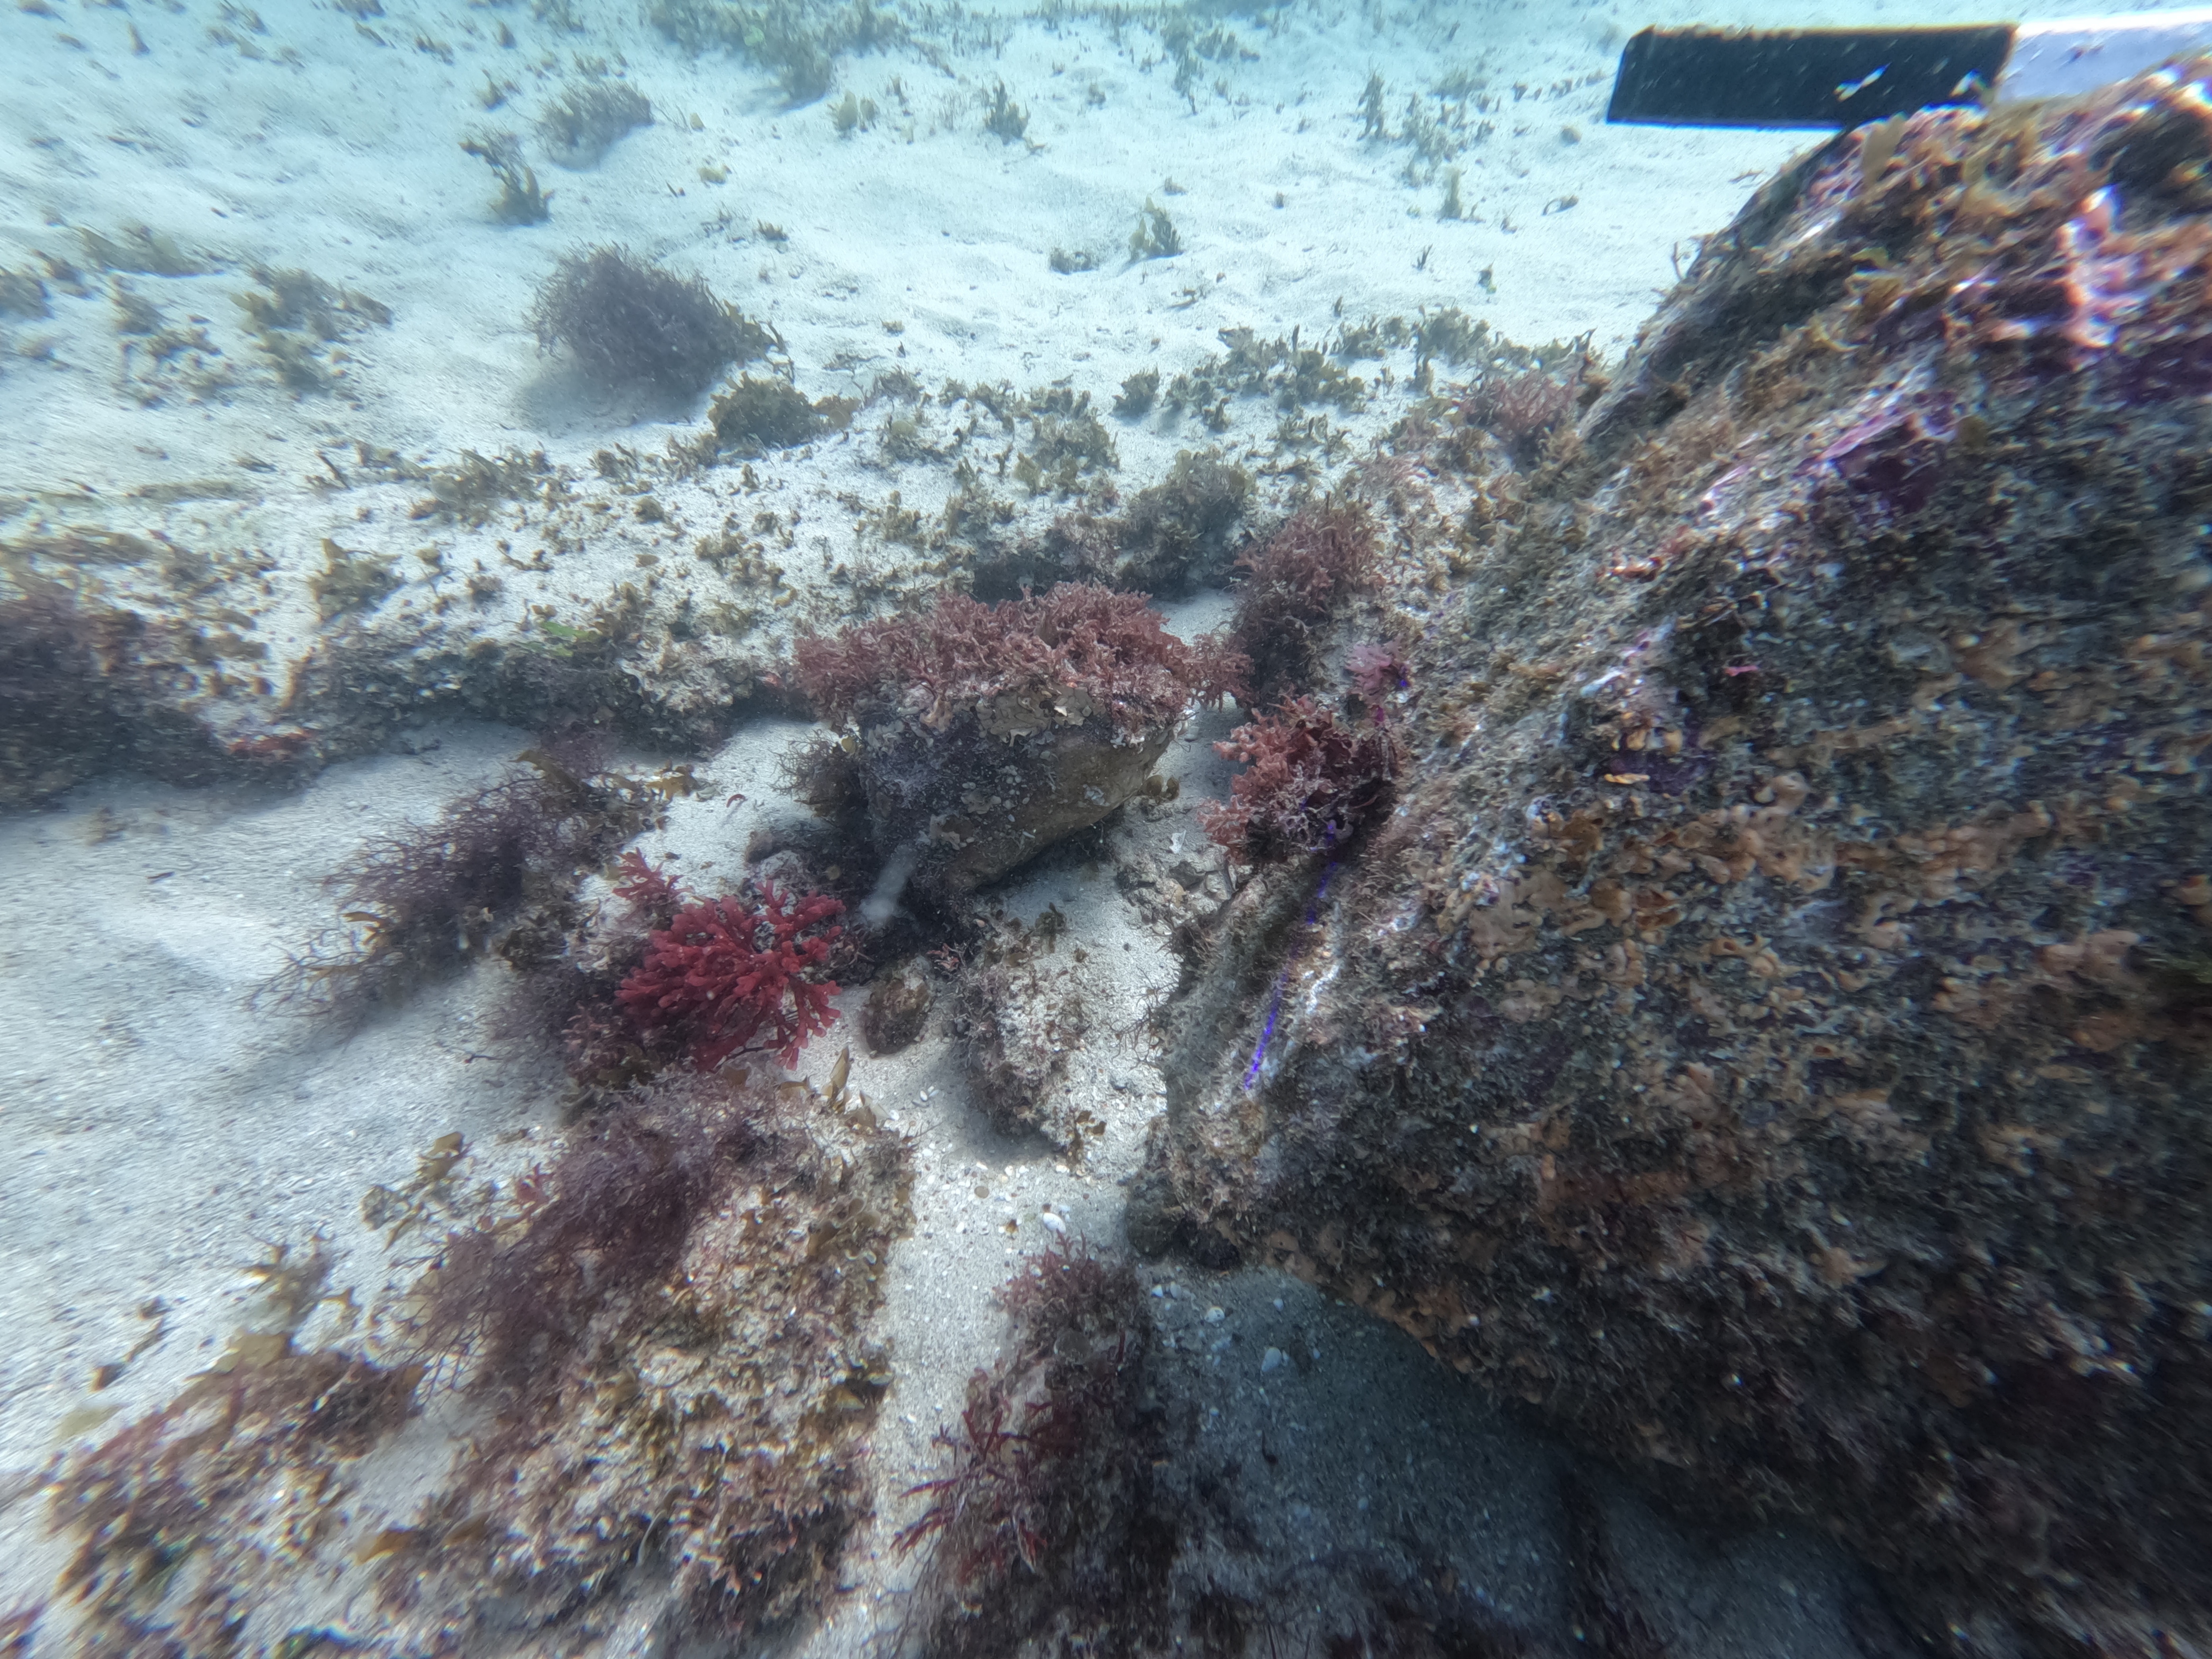

Supplement: Supplementary file 882 [file G0713949.pdf › Ocean2/G0713949.pdf]

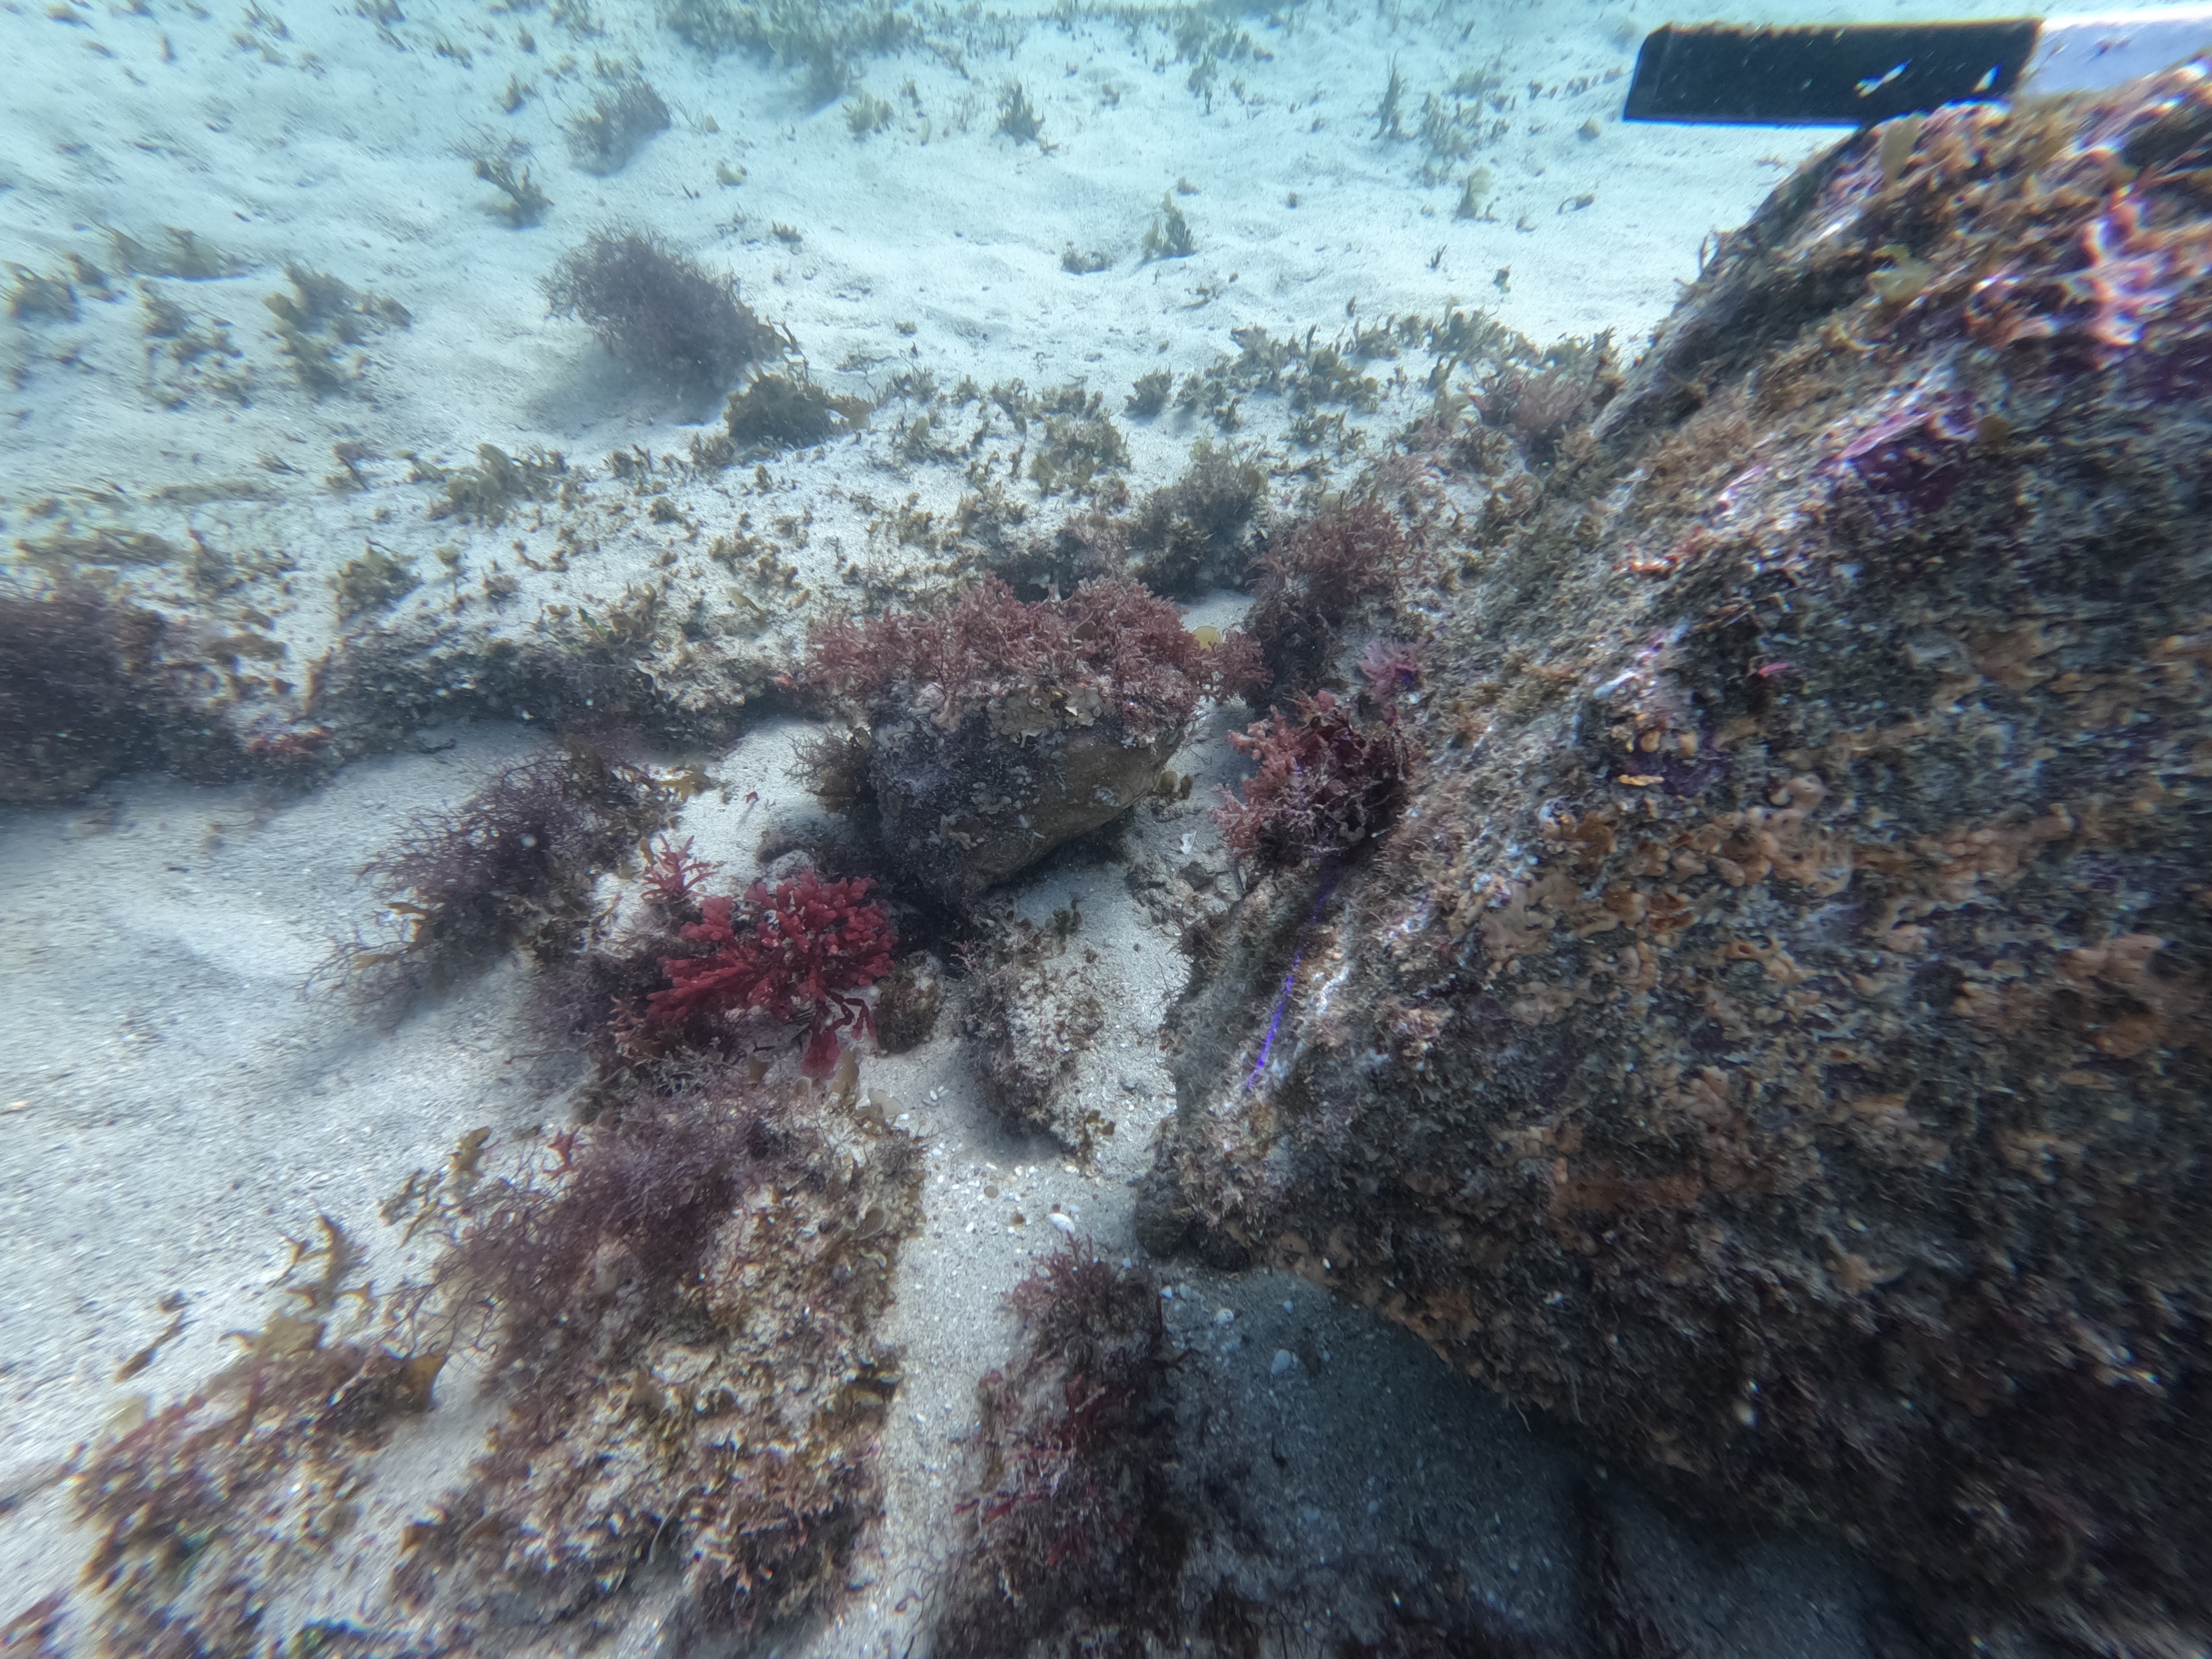

Supplement: Supplementary file 883 [file G0713950.pdf › Ocean2/G0713950.pdf]

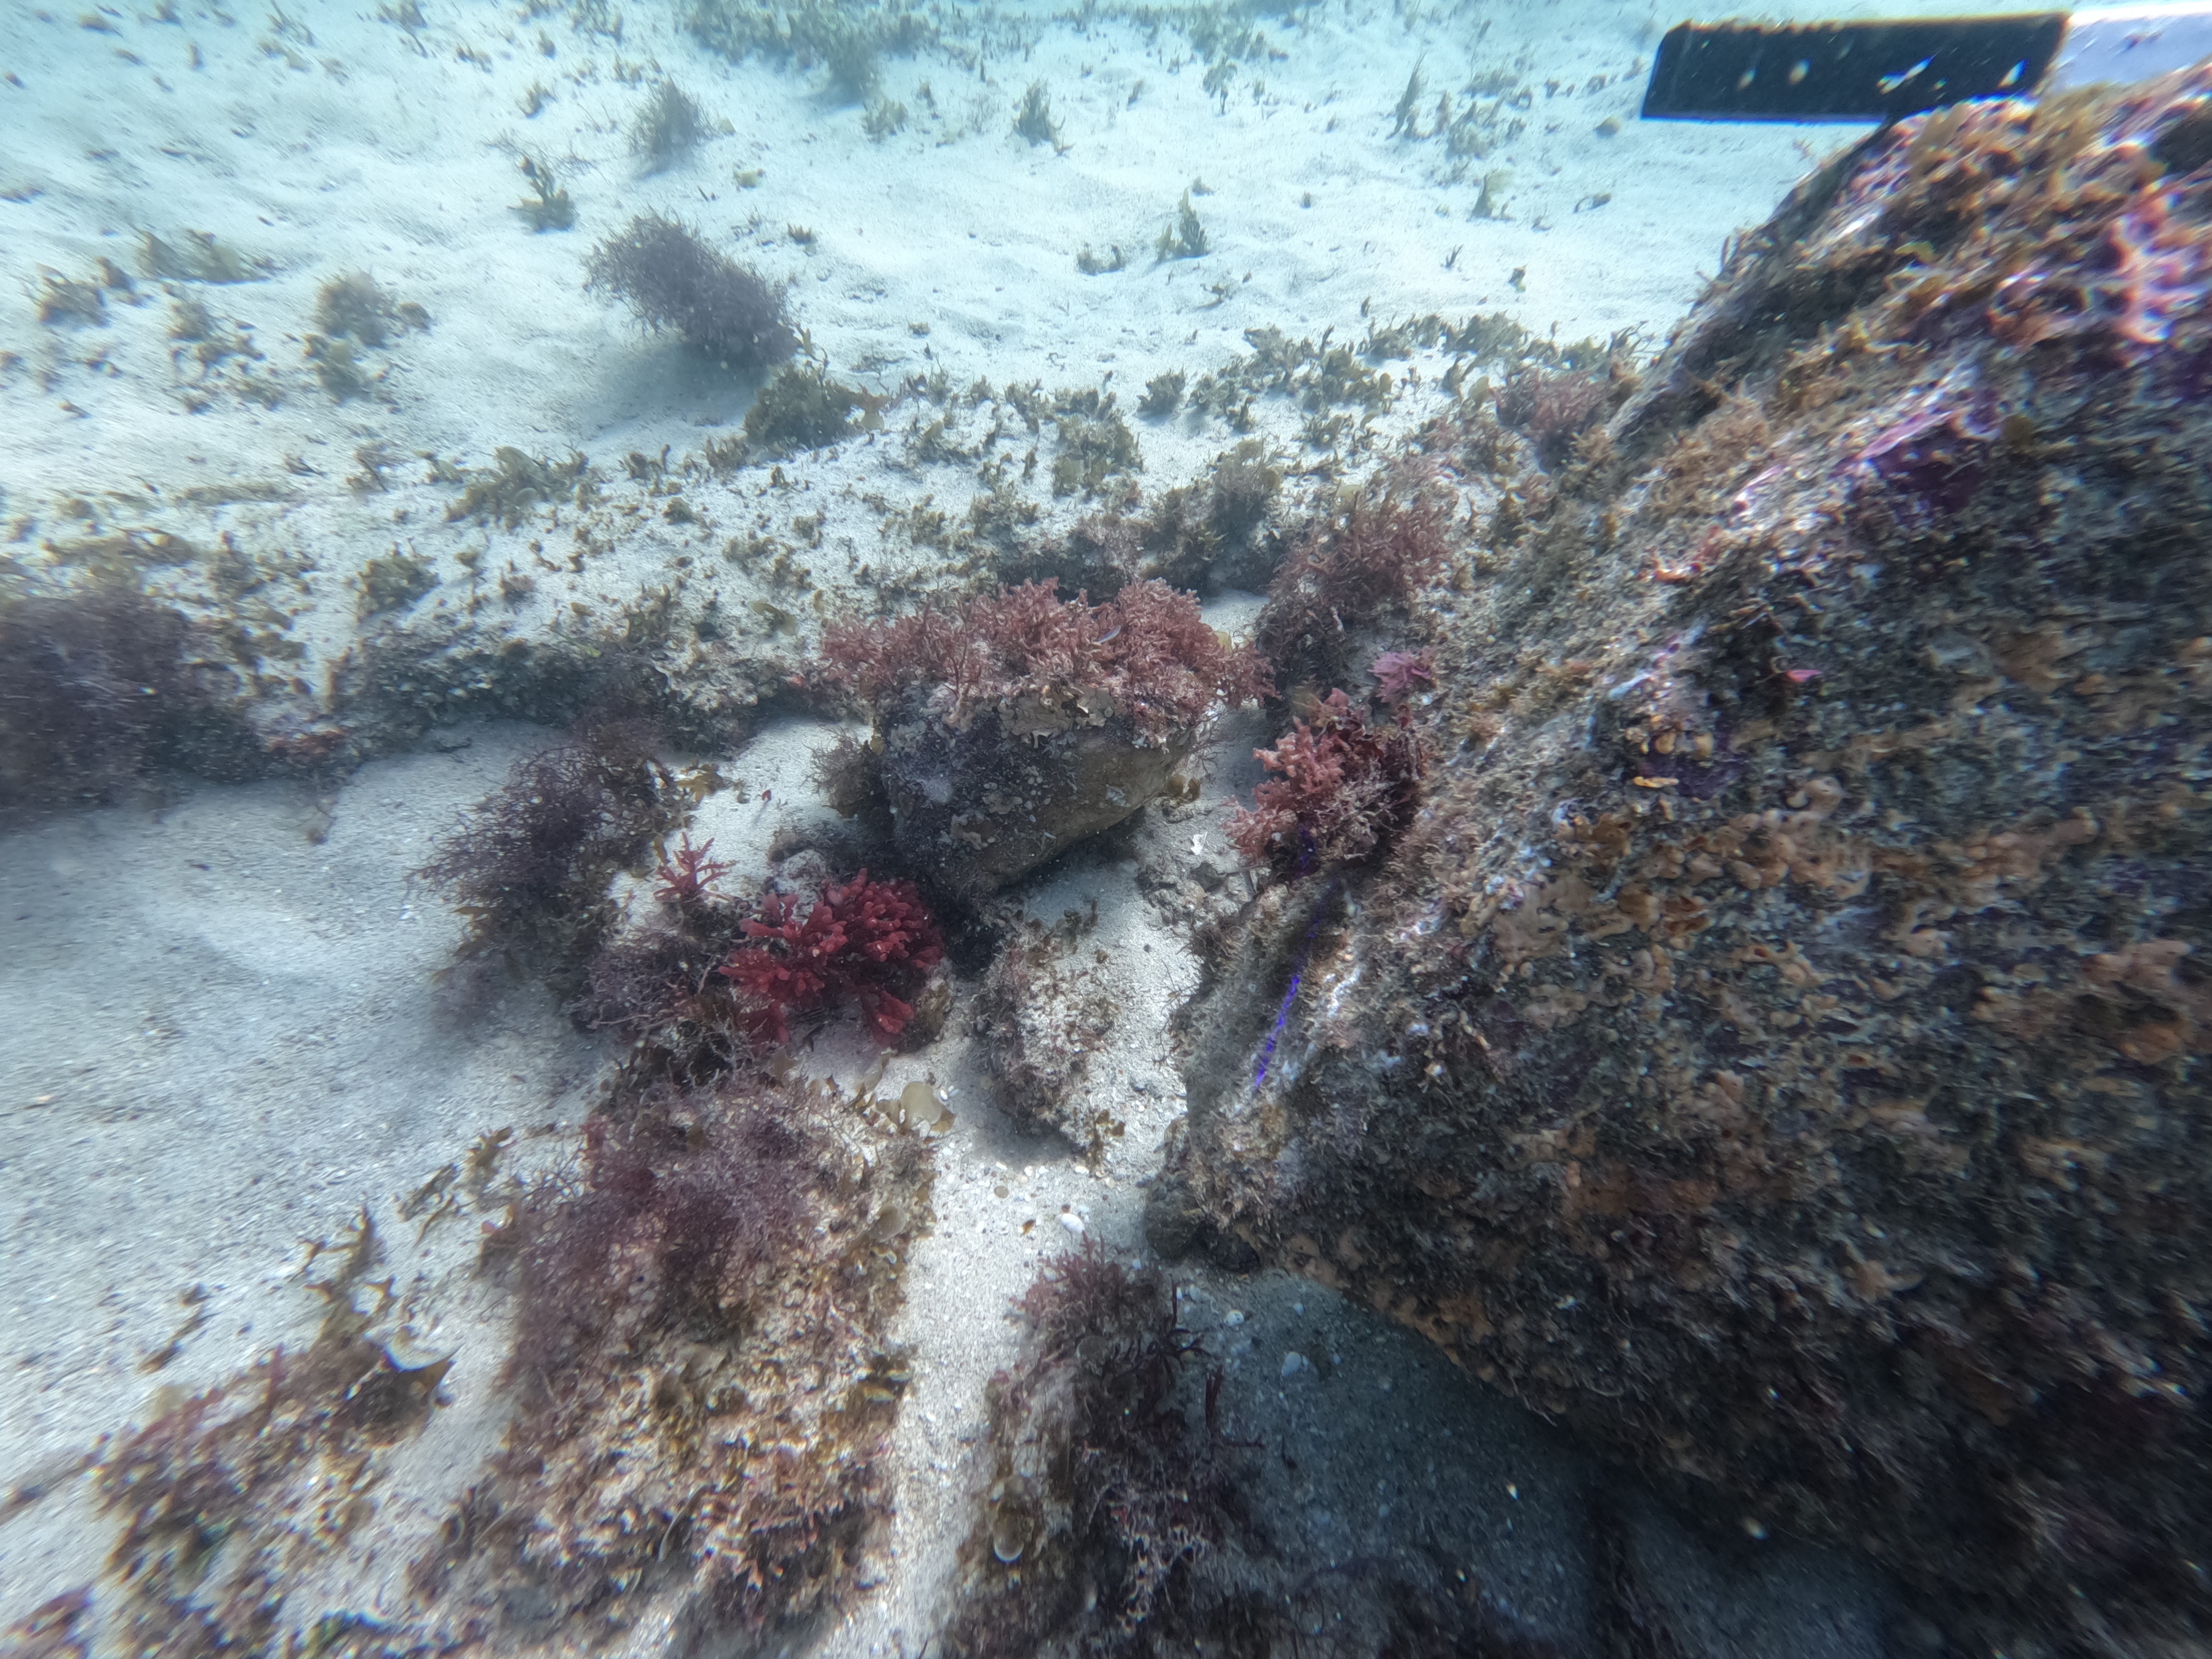

Supplement: Supplementary file 884 [file G0713951.pdf › Ocean2/G0713951.pdf]

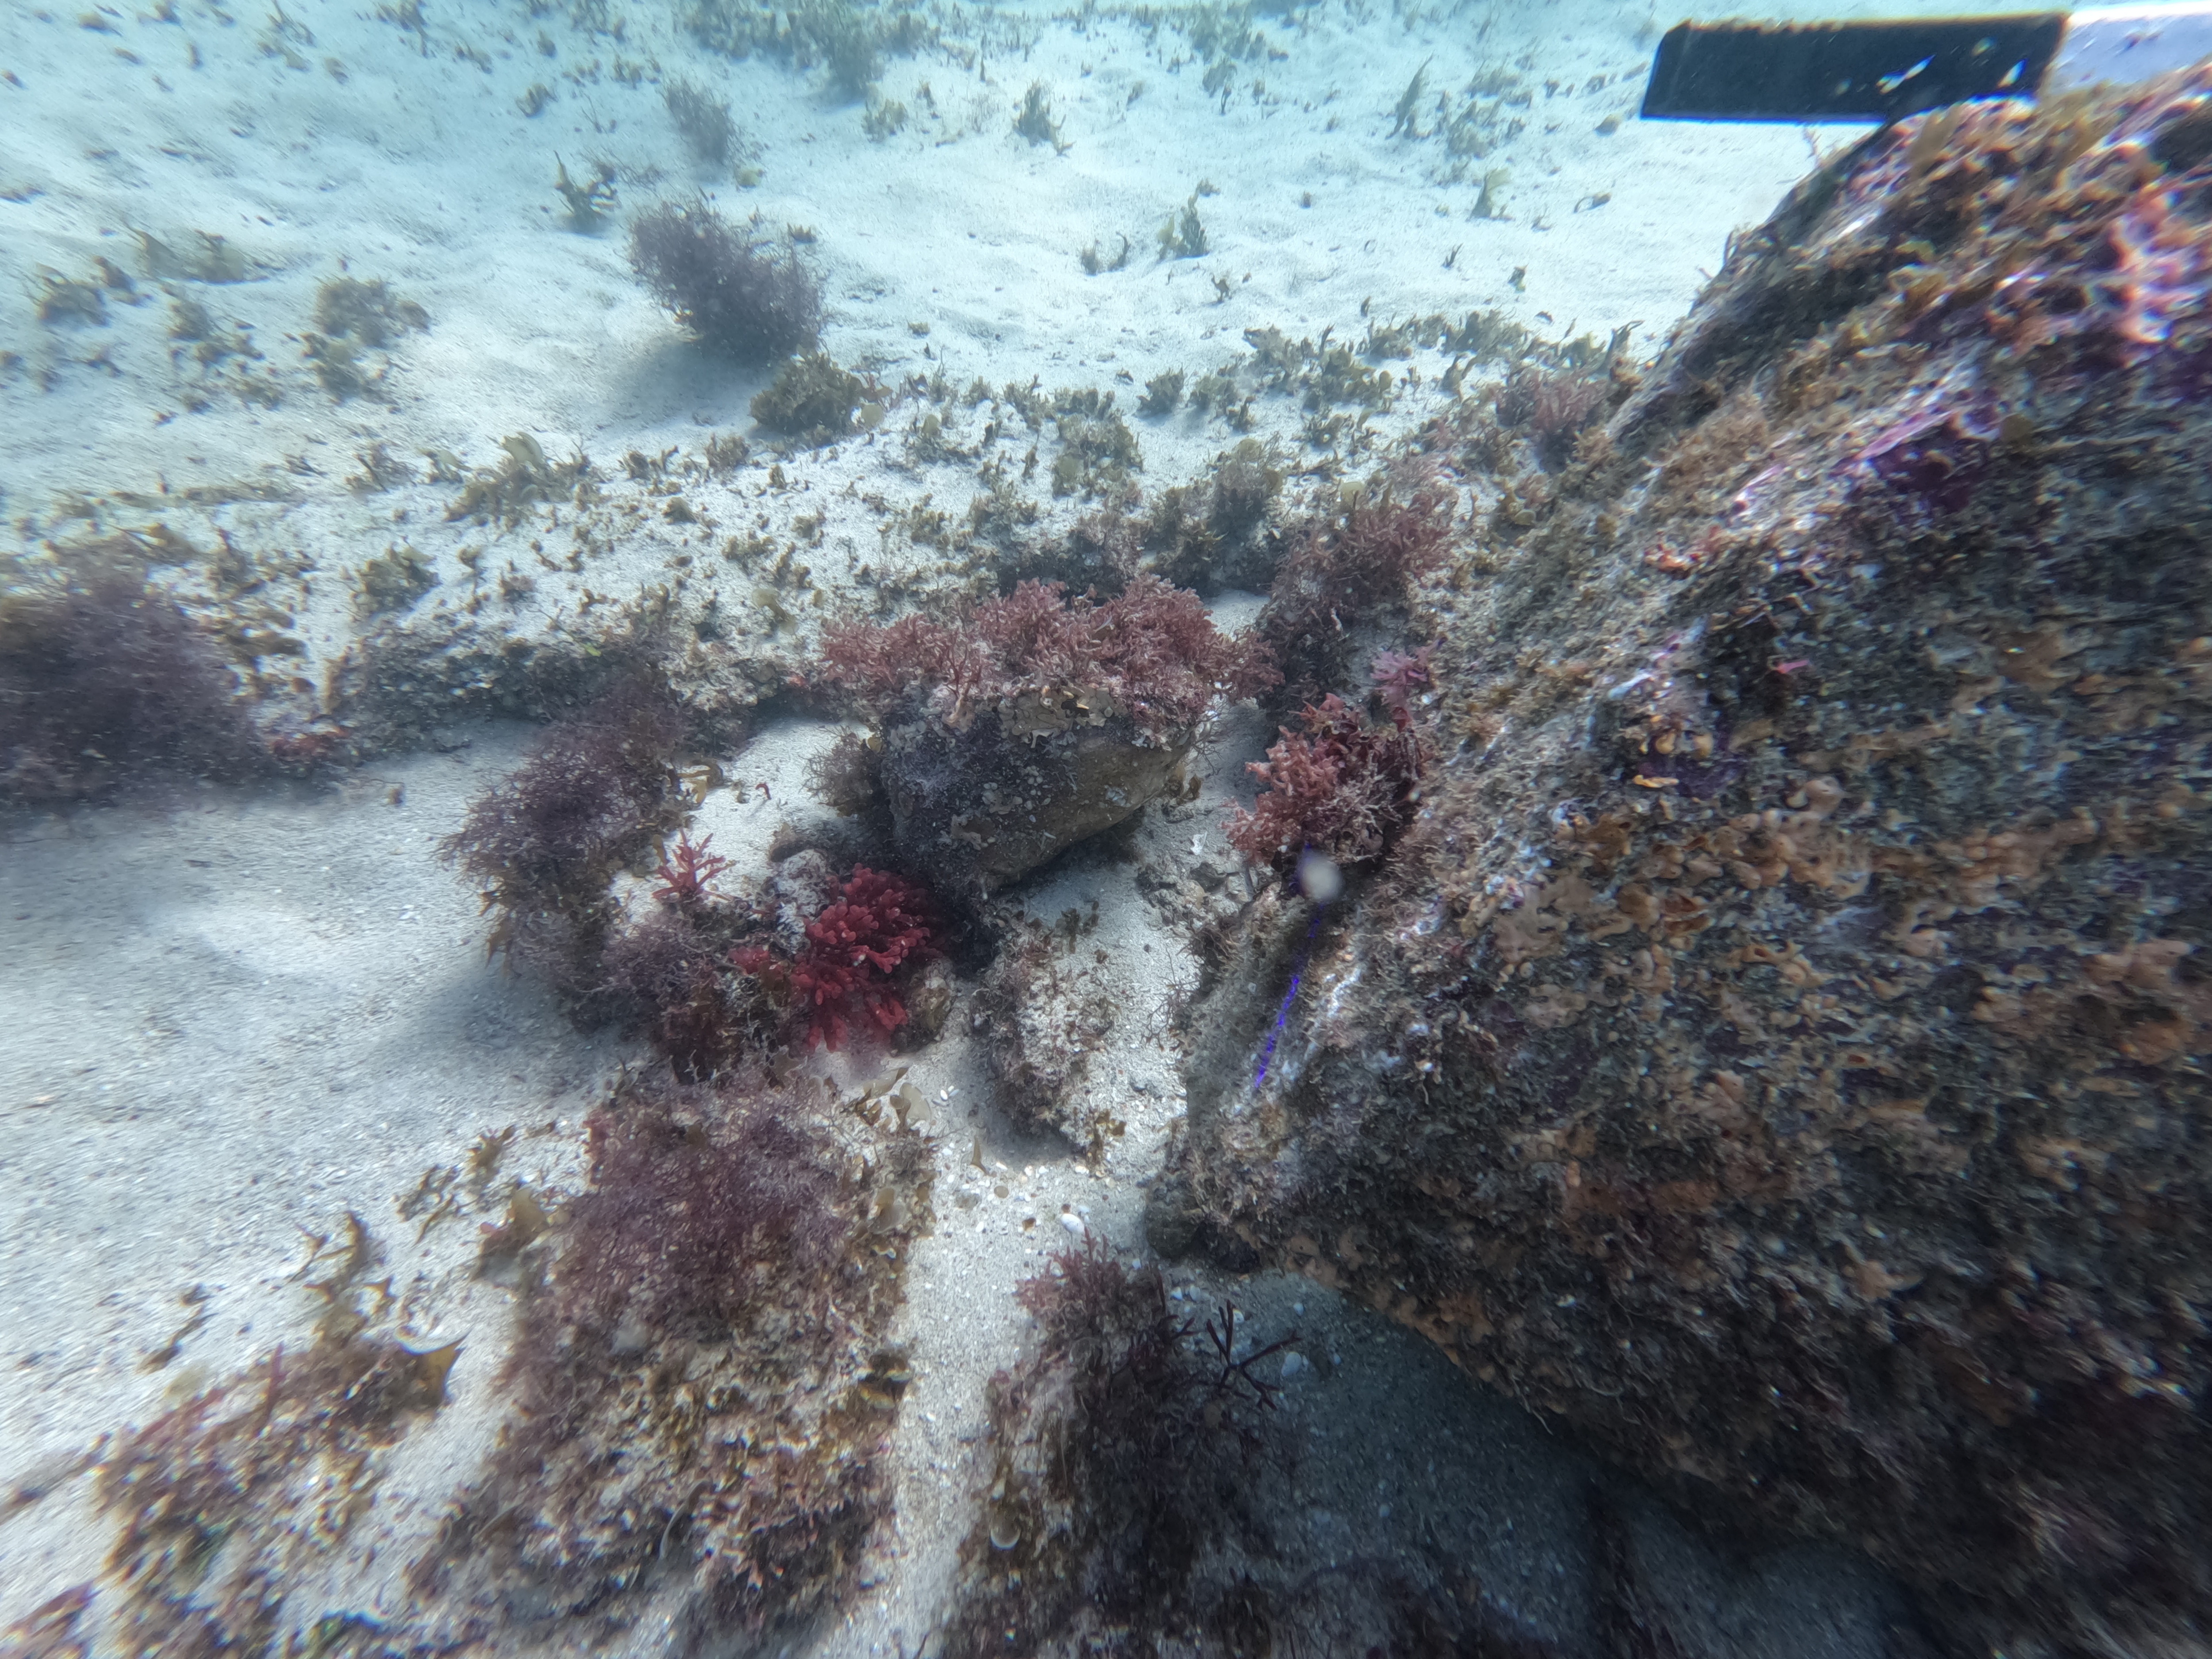

Supplement: Supplementary file 885 [file G0713952.pdf › Ocean2/G0713952.pdf]

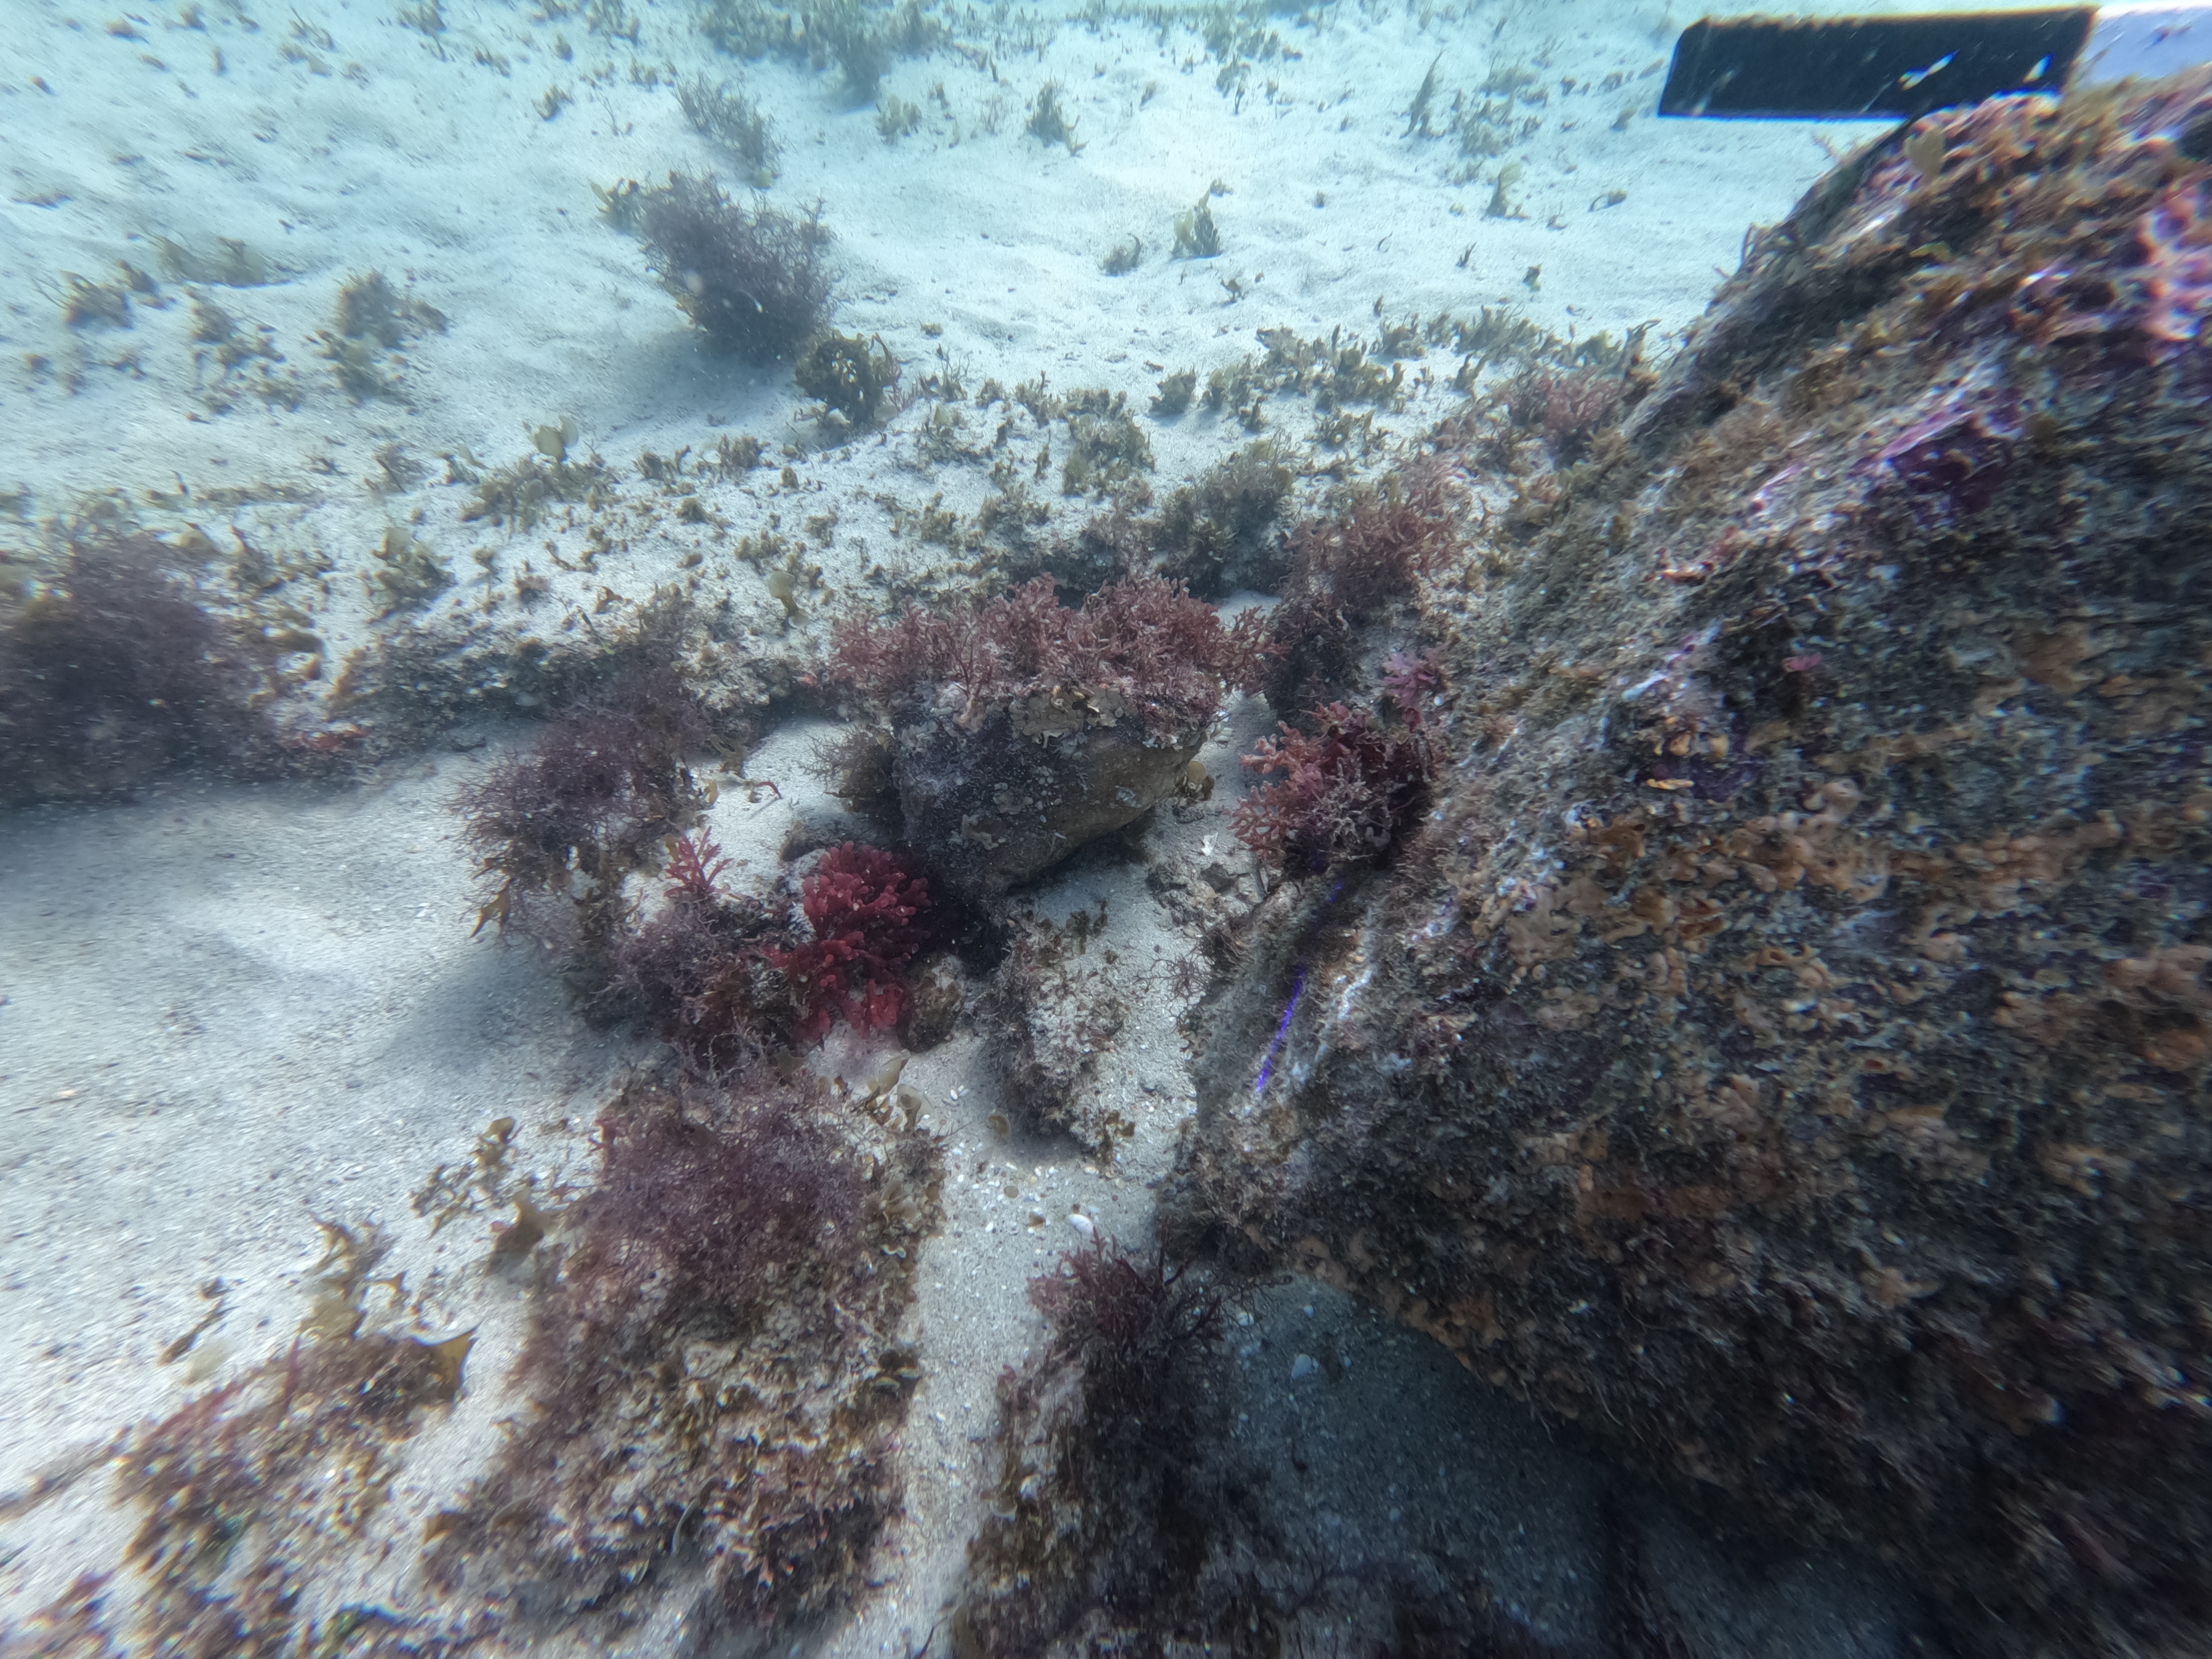

Supplement: Supplementary file 886 [file G0713953.pdf › Ocean2/G0713953.pdf]

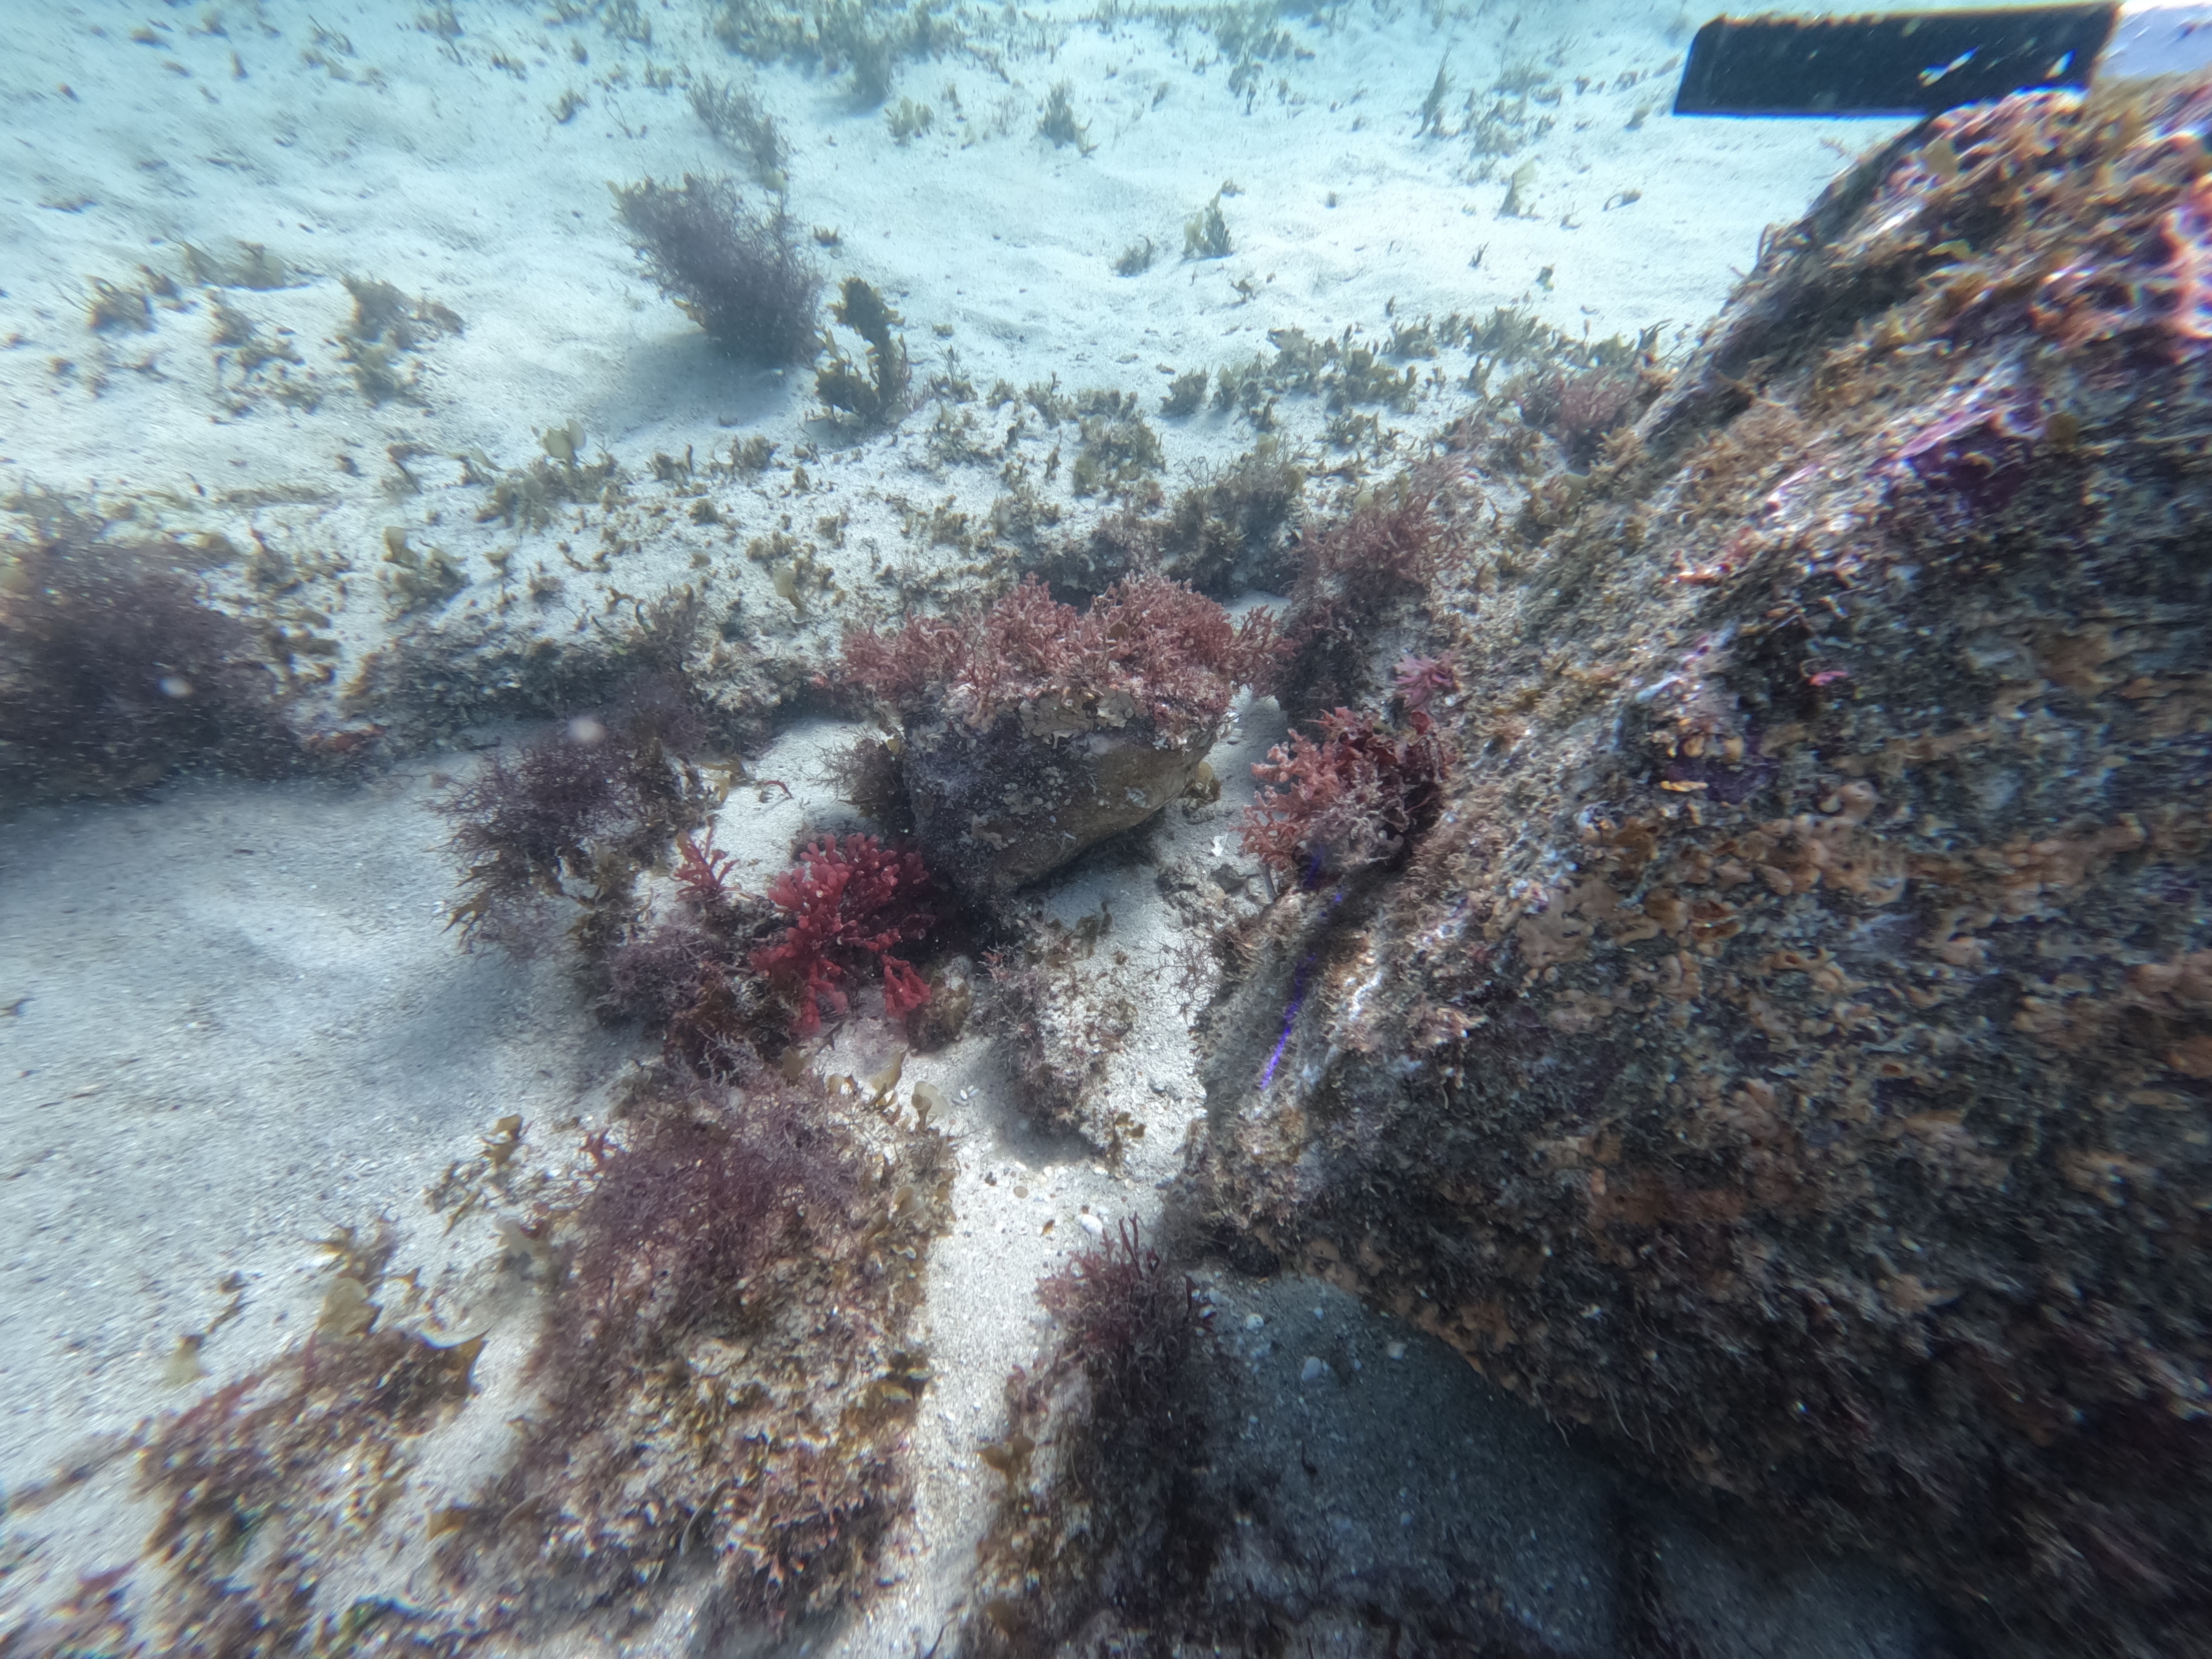

Supplement: Supplementary file 887 [file G0713954.pdf › Ocean2/G0713954.pdf]

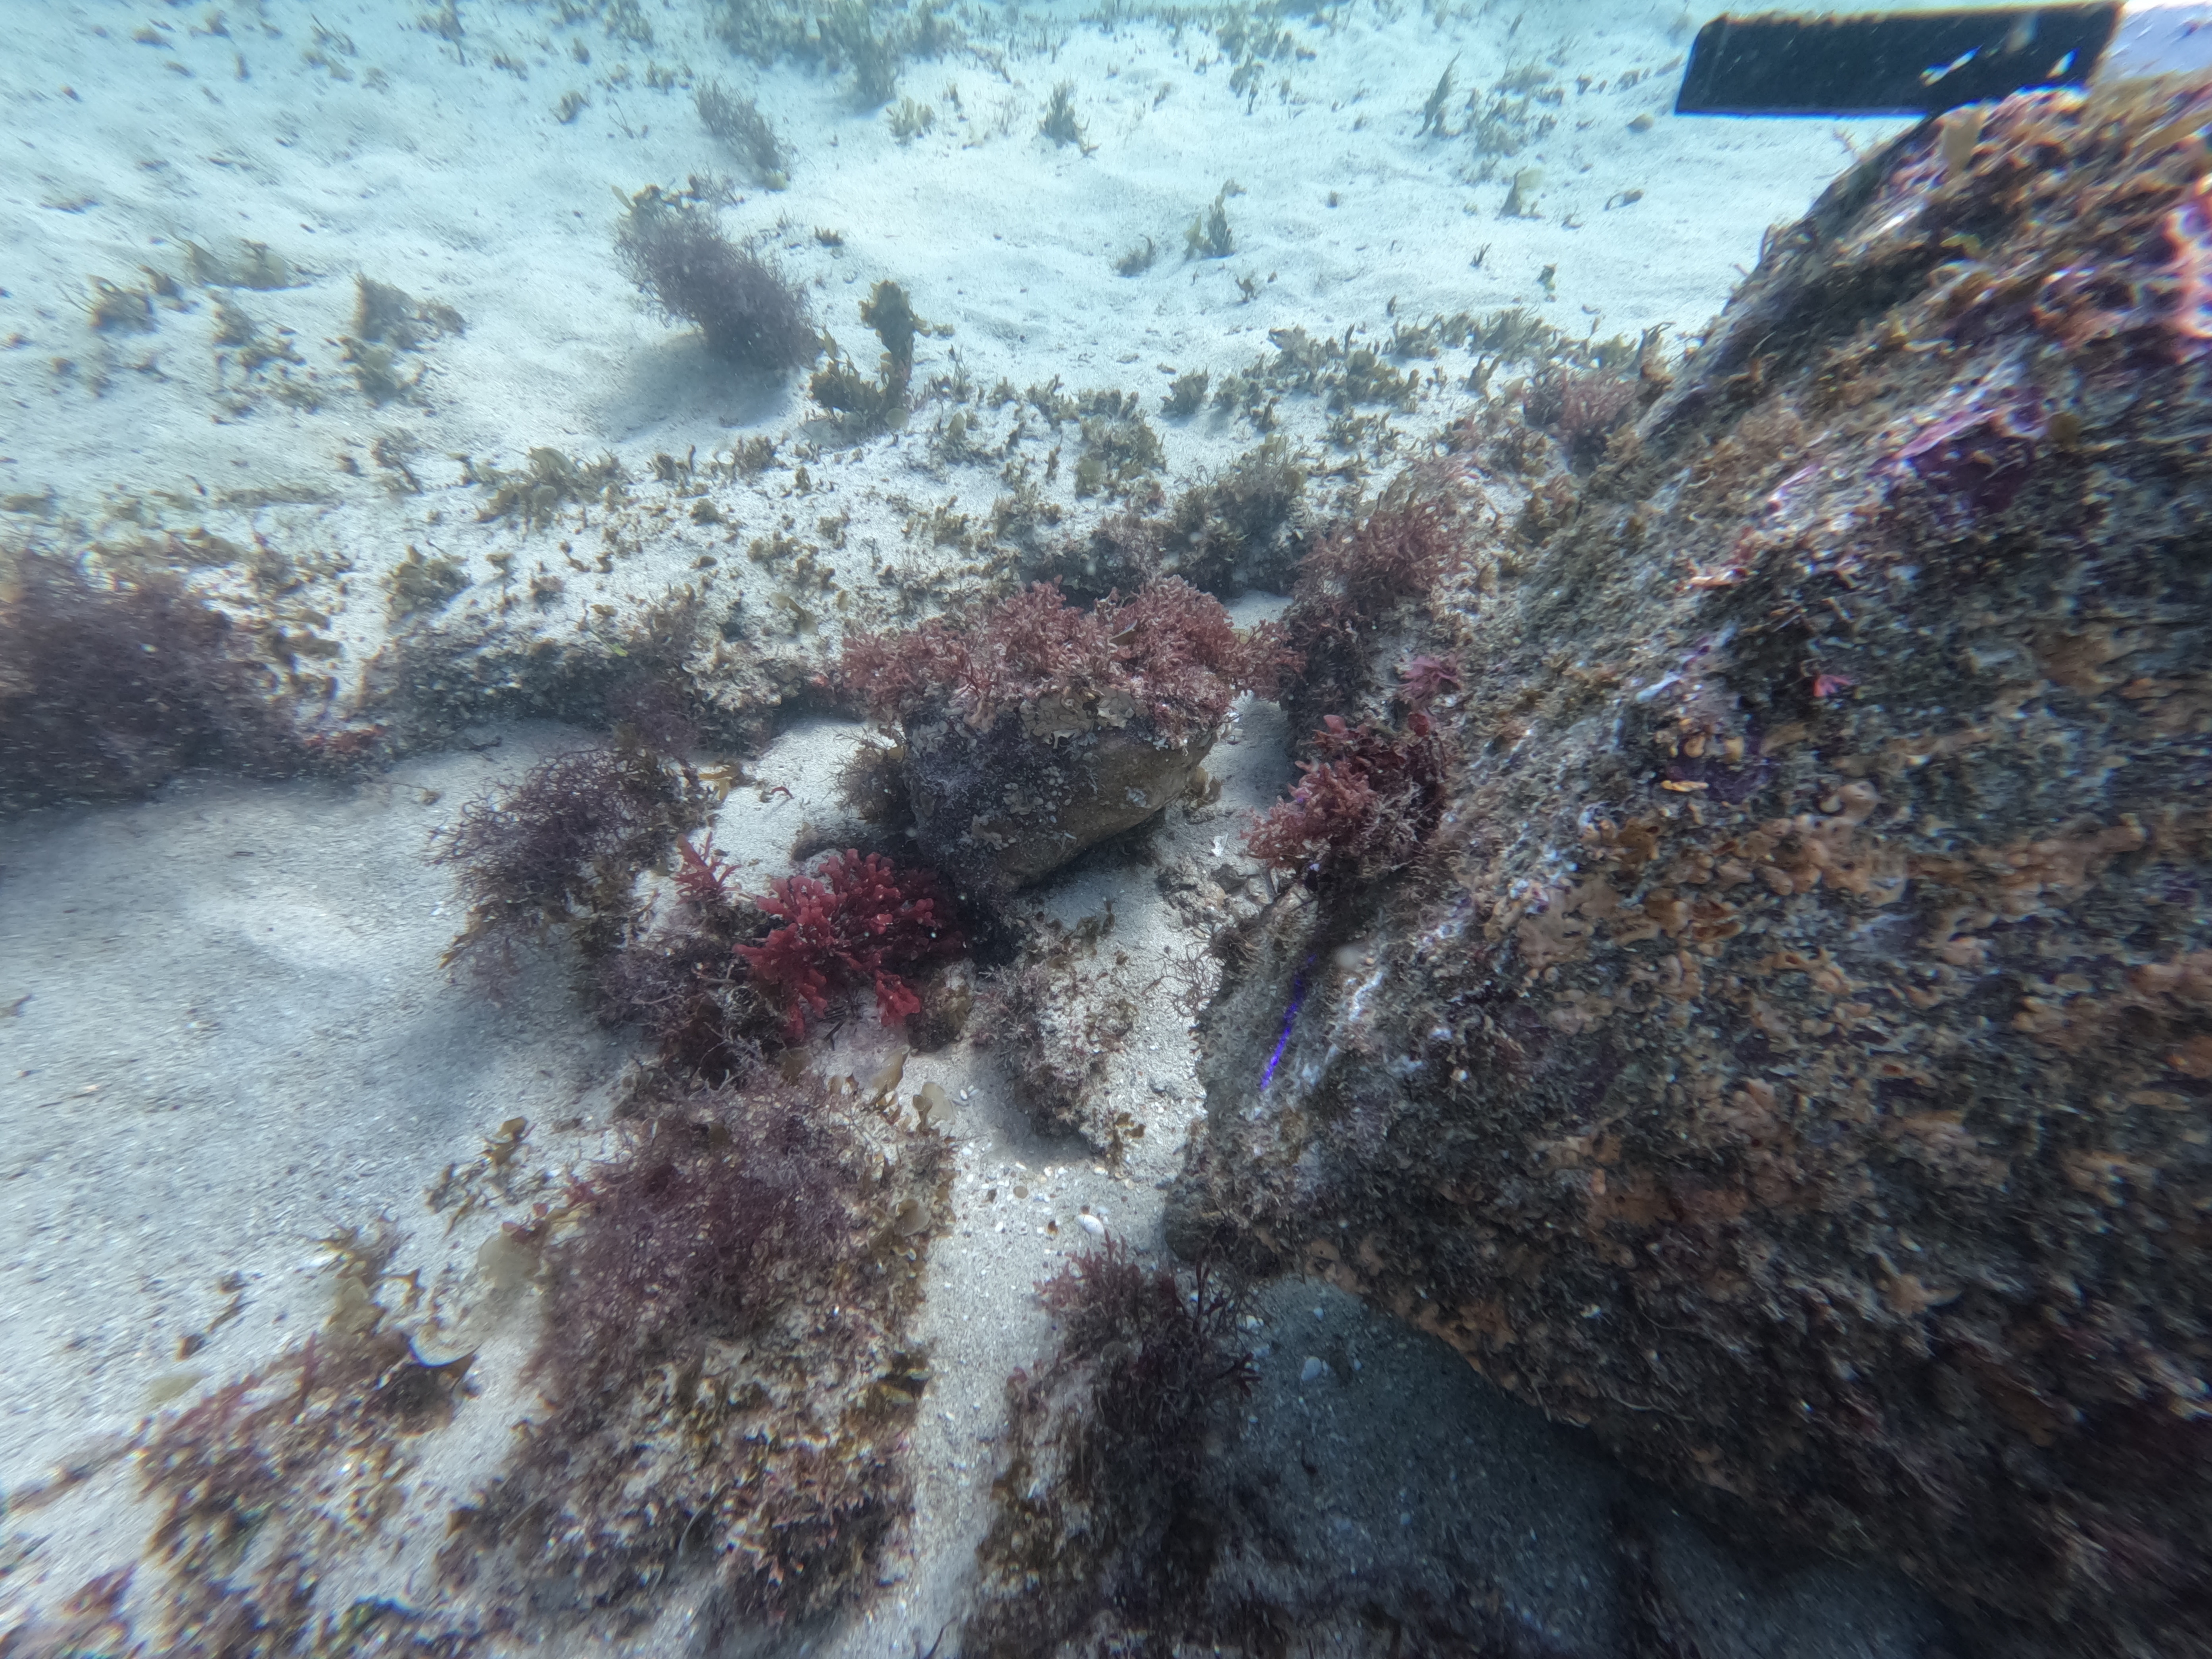

Supplement: Supplementary file 888 [file G0713955.pdf › Ocean2/G0713955.pdf]

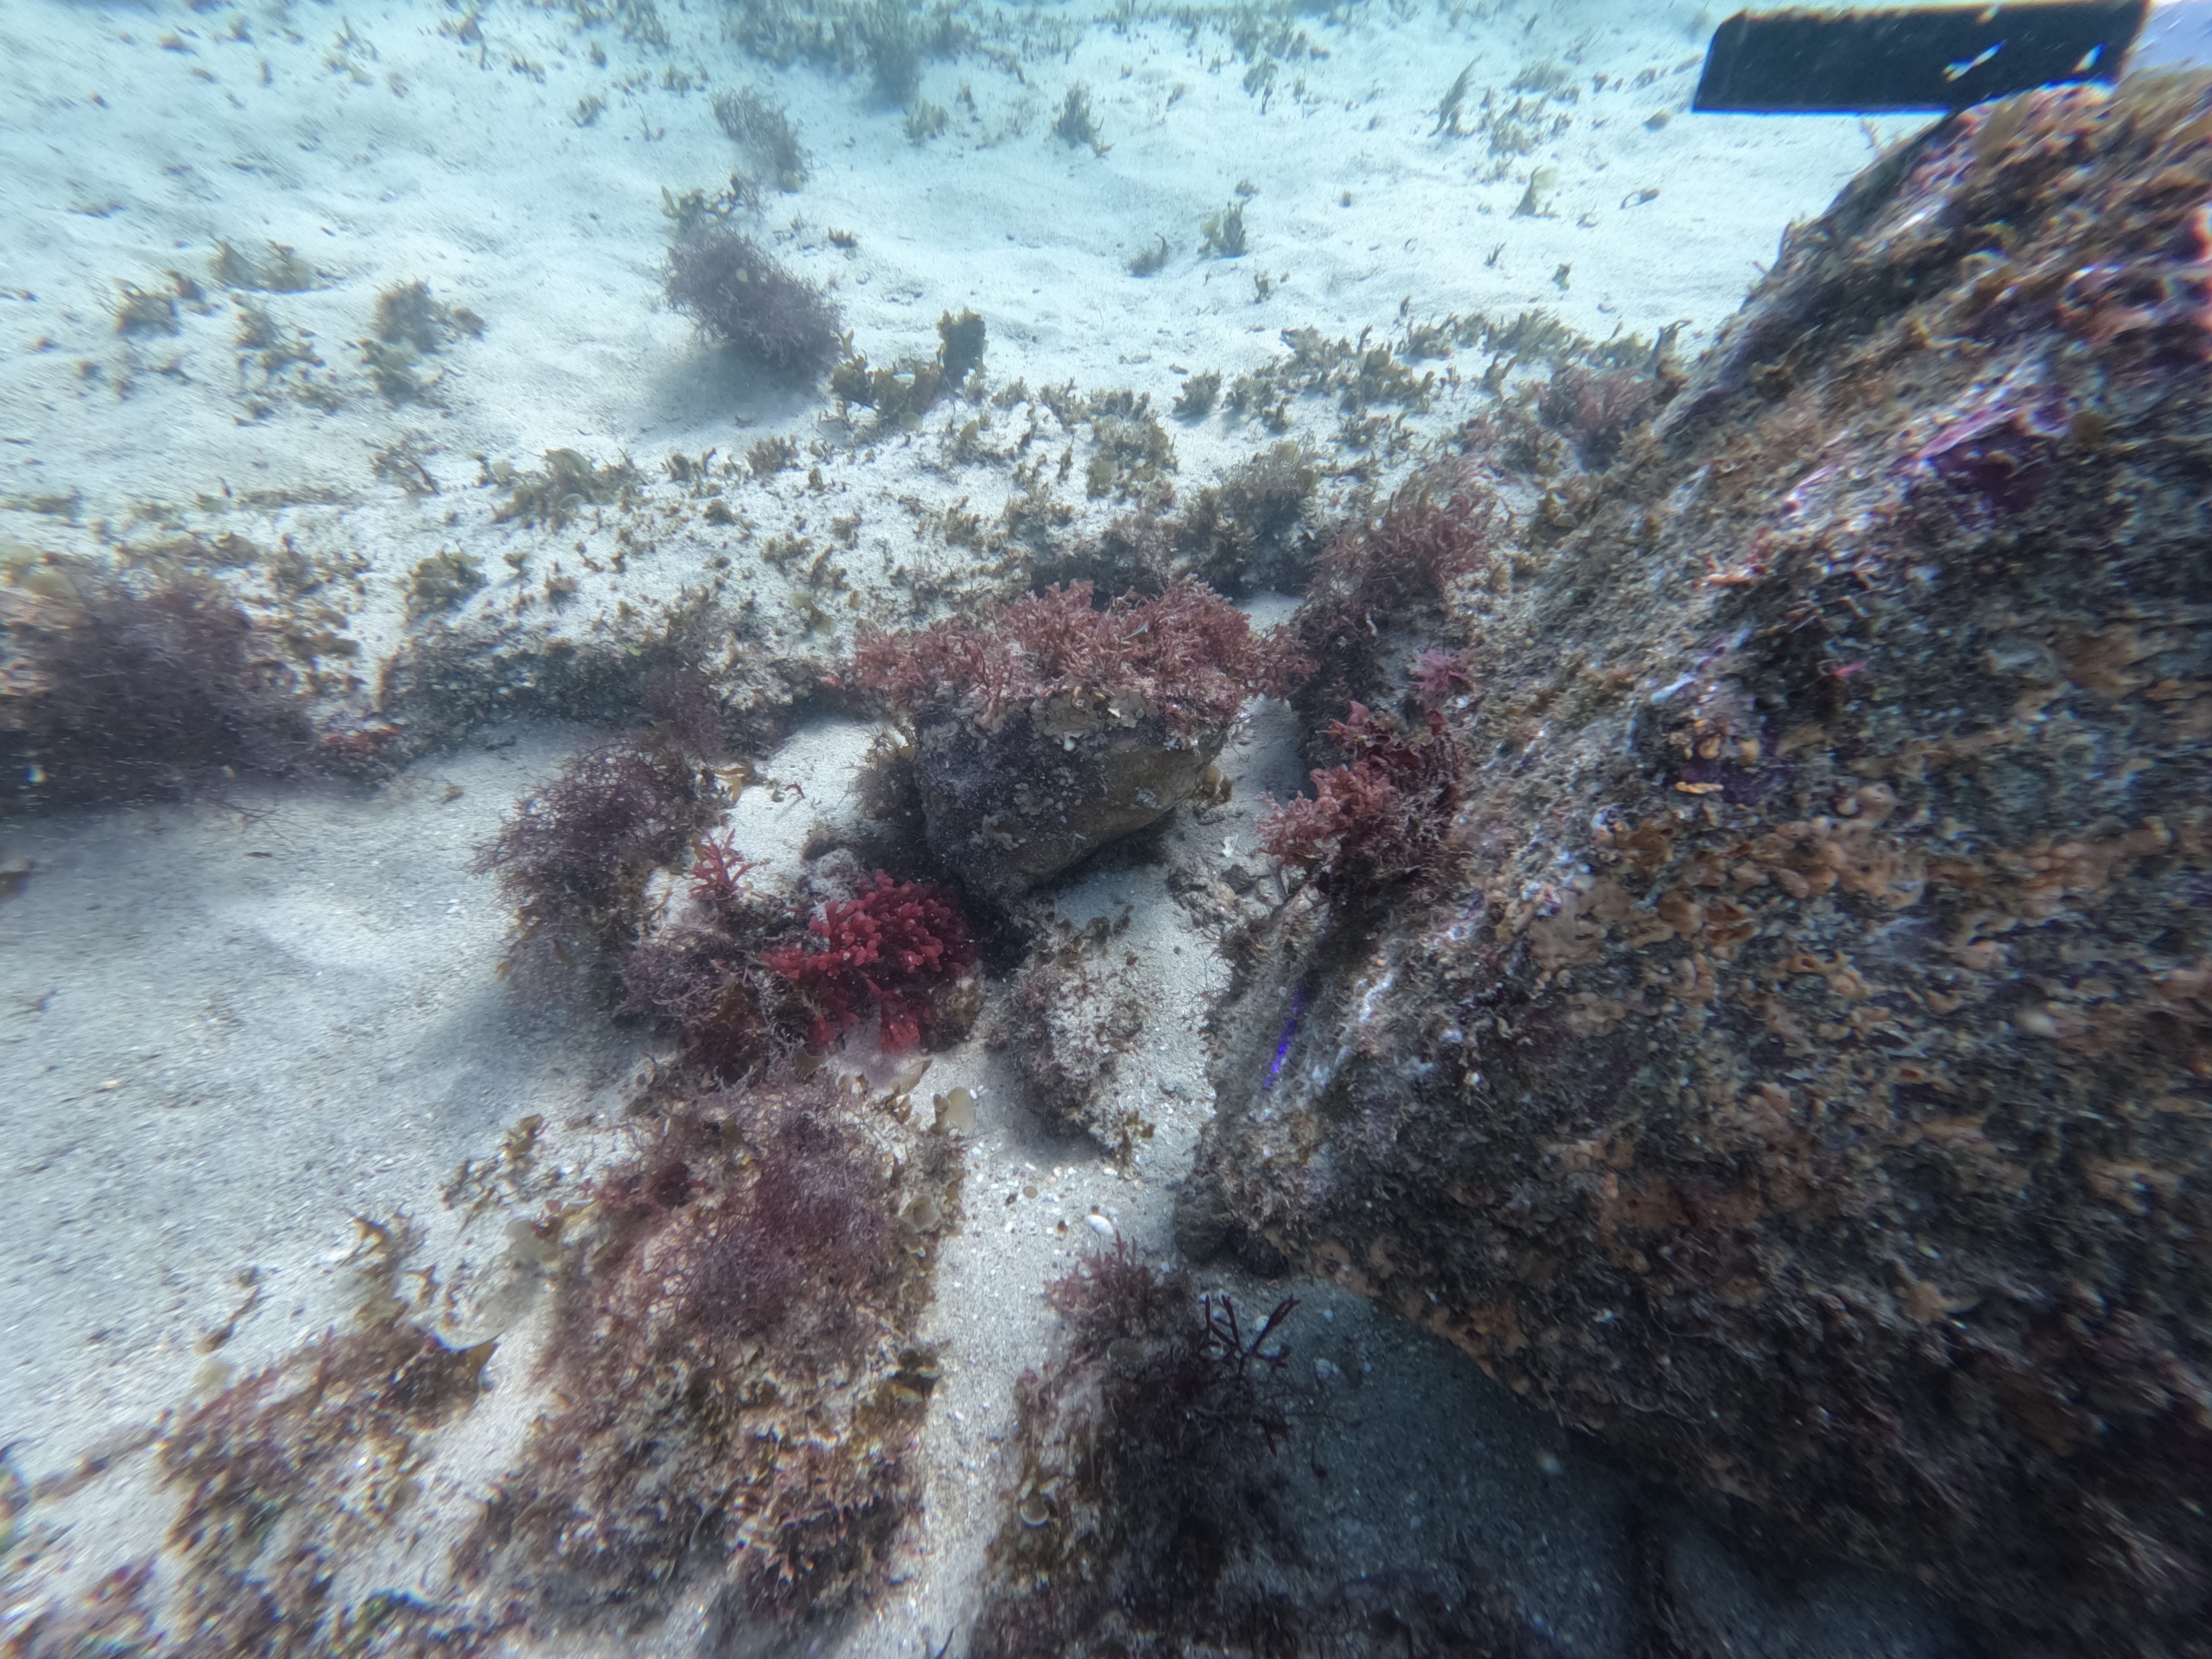

Supplement: Supplementary file 889 [file G0713956.pdf › Ocean2/G0713956.pdf]

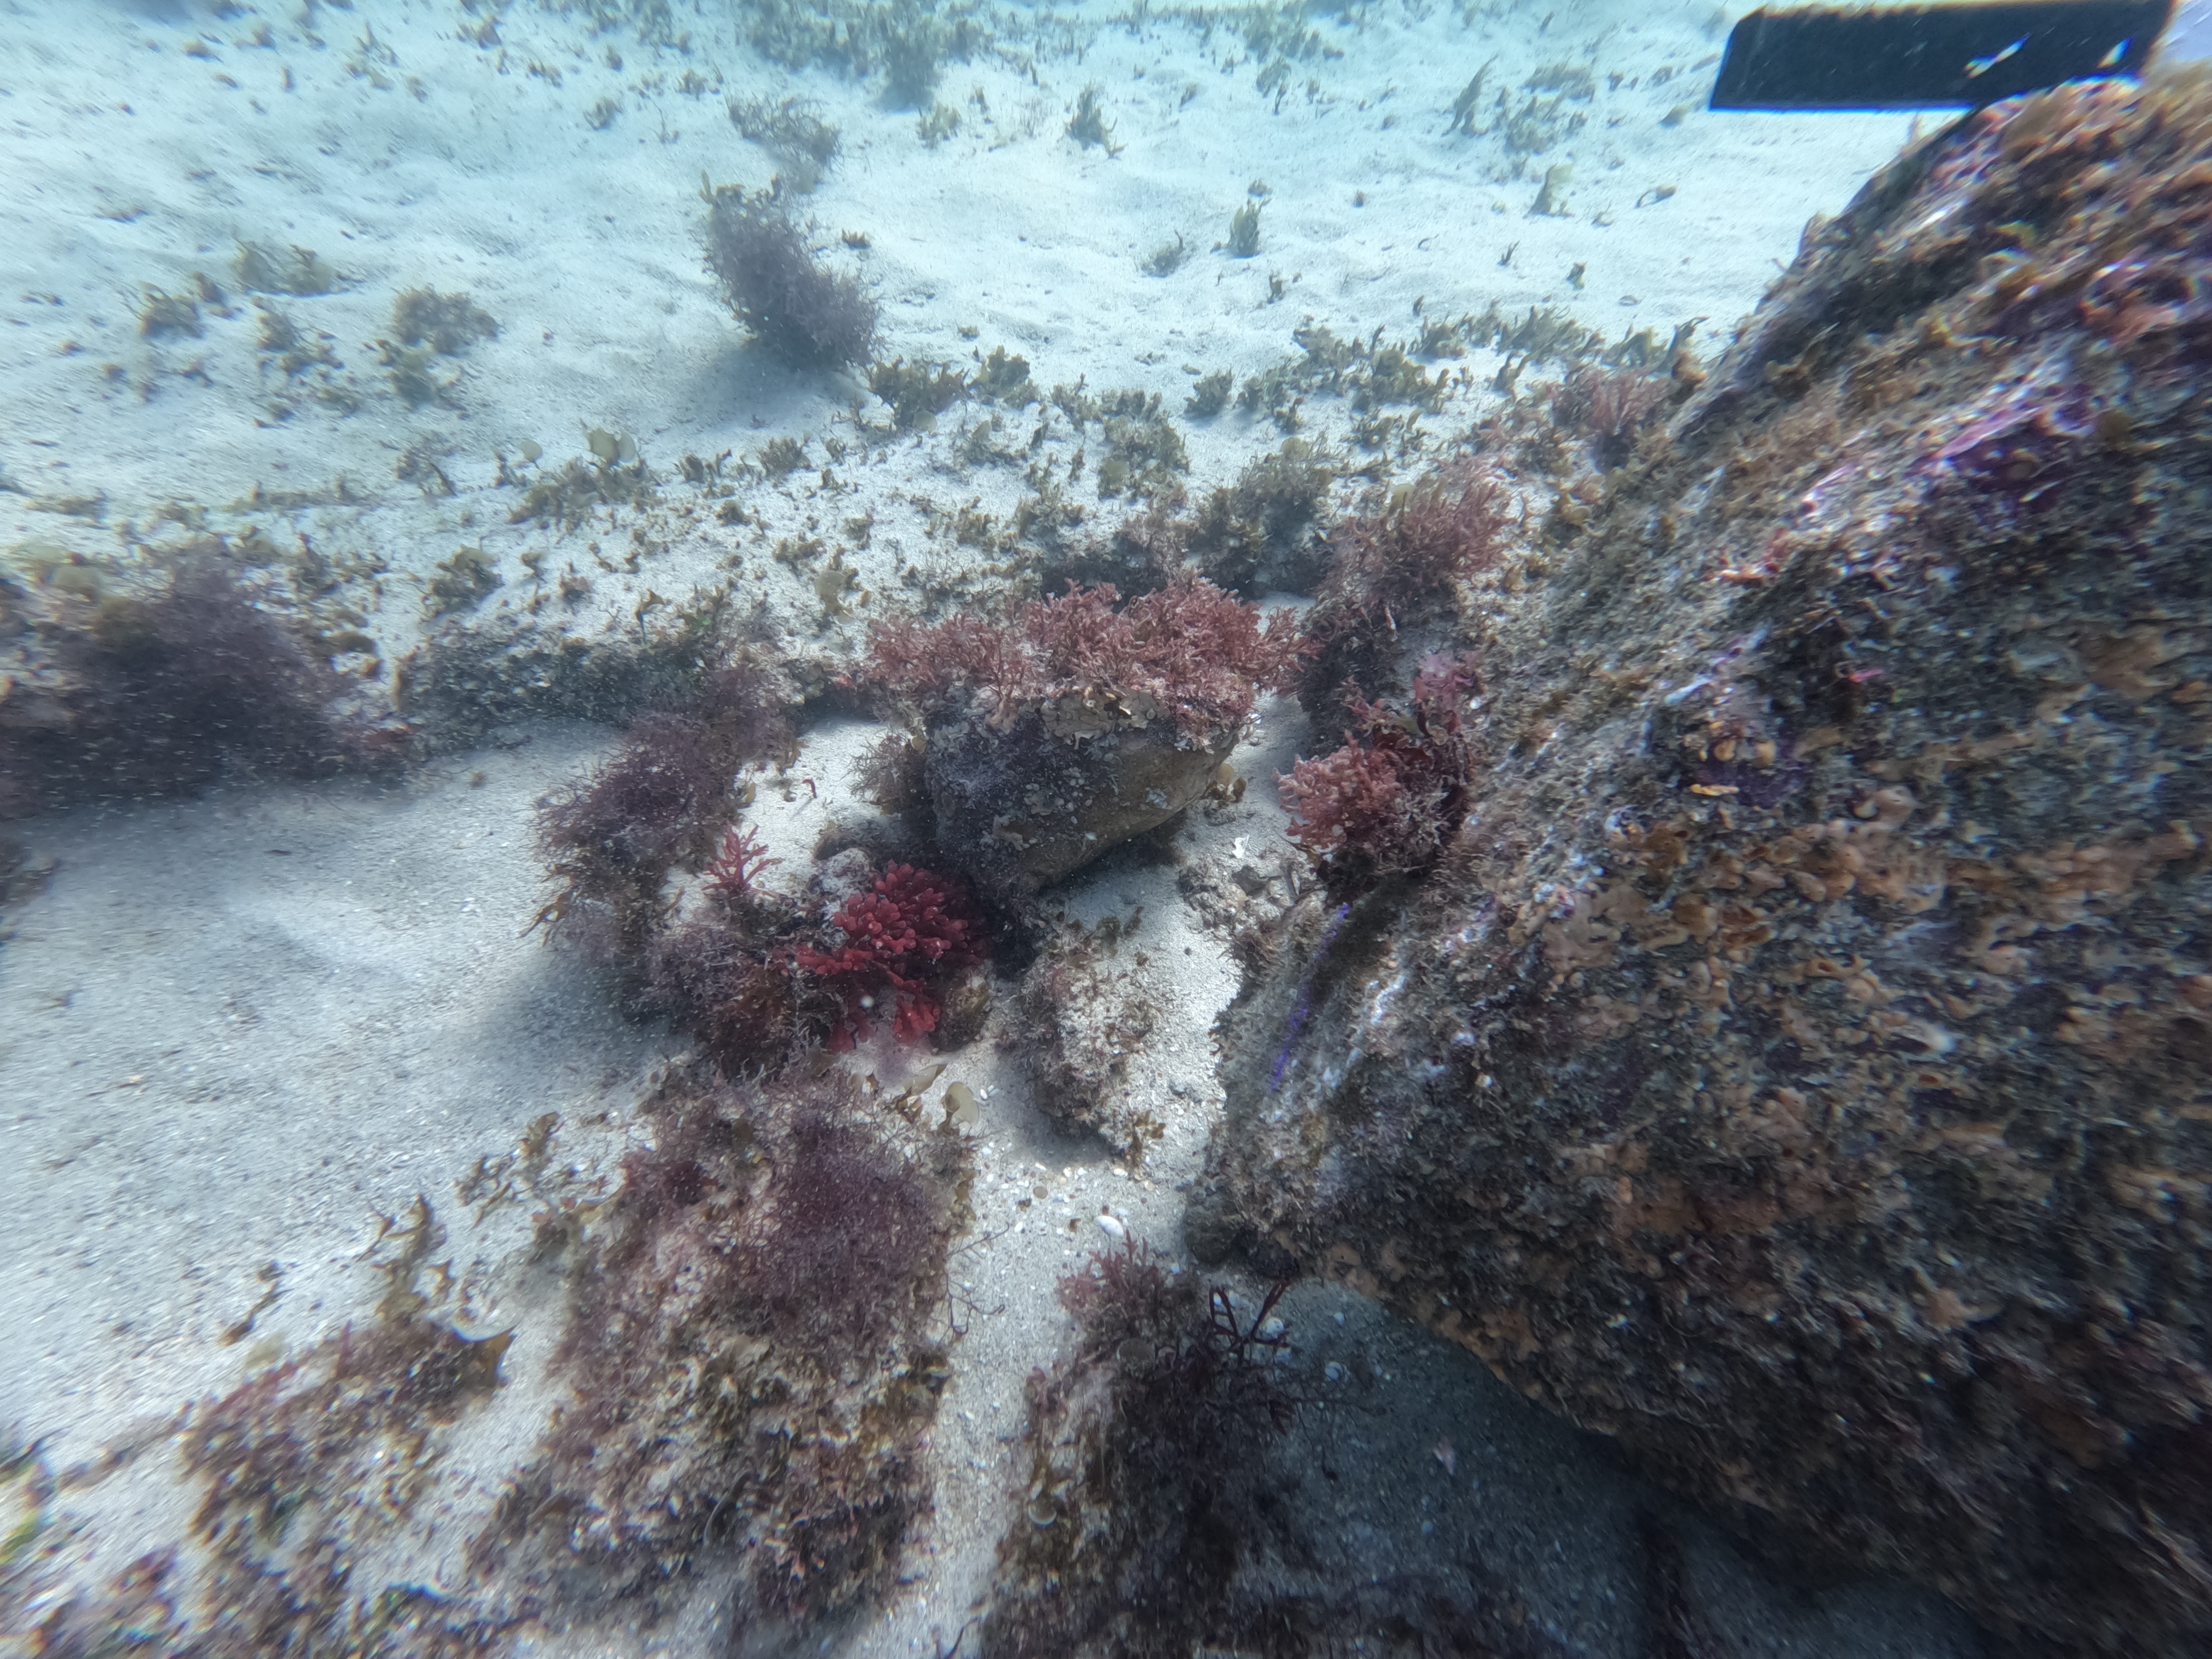

Supplement: Supplementary file 890 [file G0713957.pdf › Ocean2/G0713957.pdf]

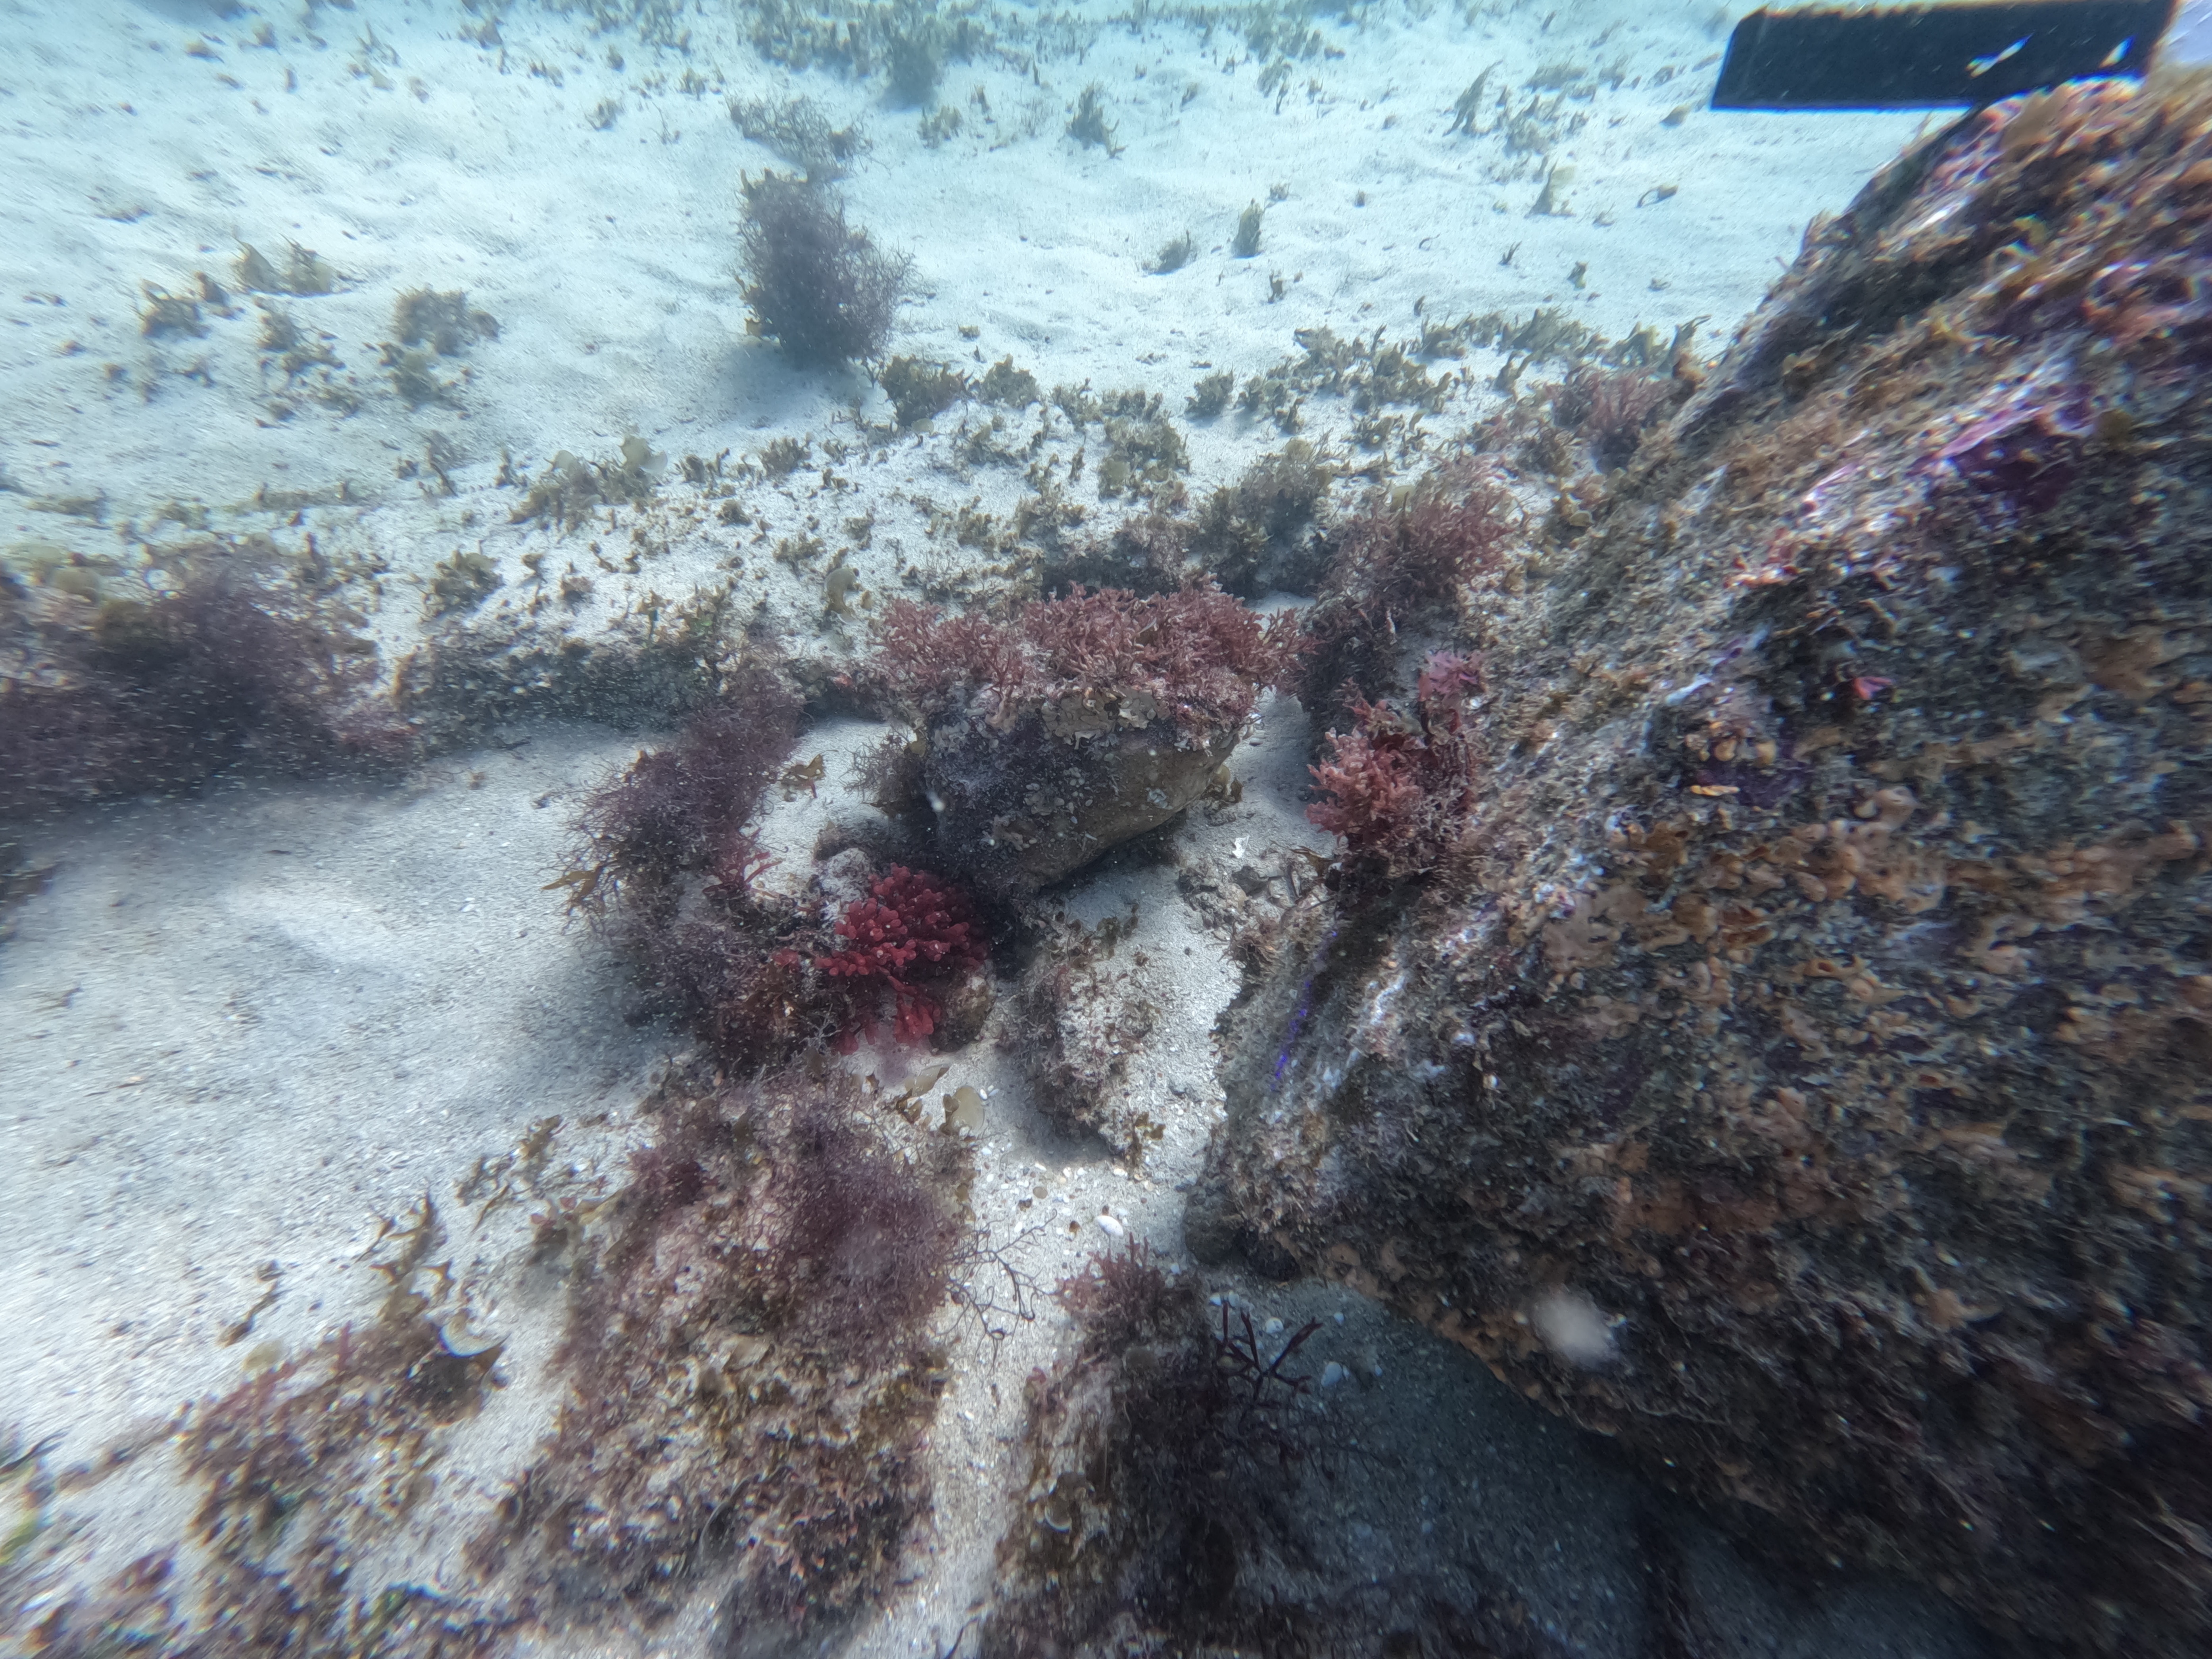

Supplement: Supplementary file 891 [file G0713958.pdf › Ocean2/G0713958.pdf]

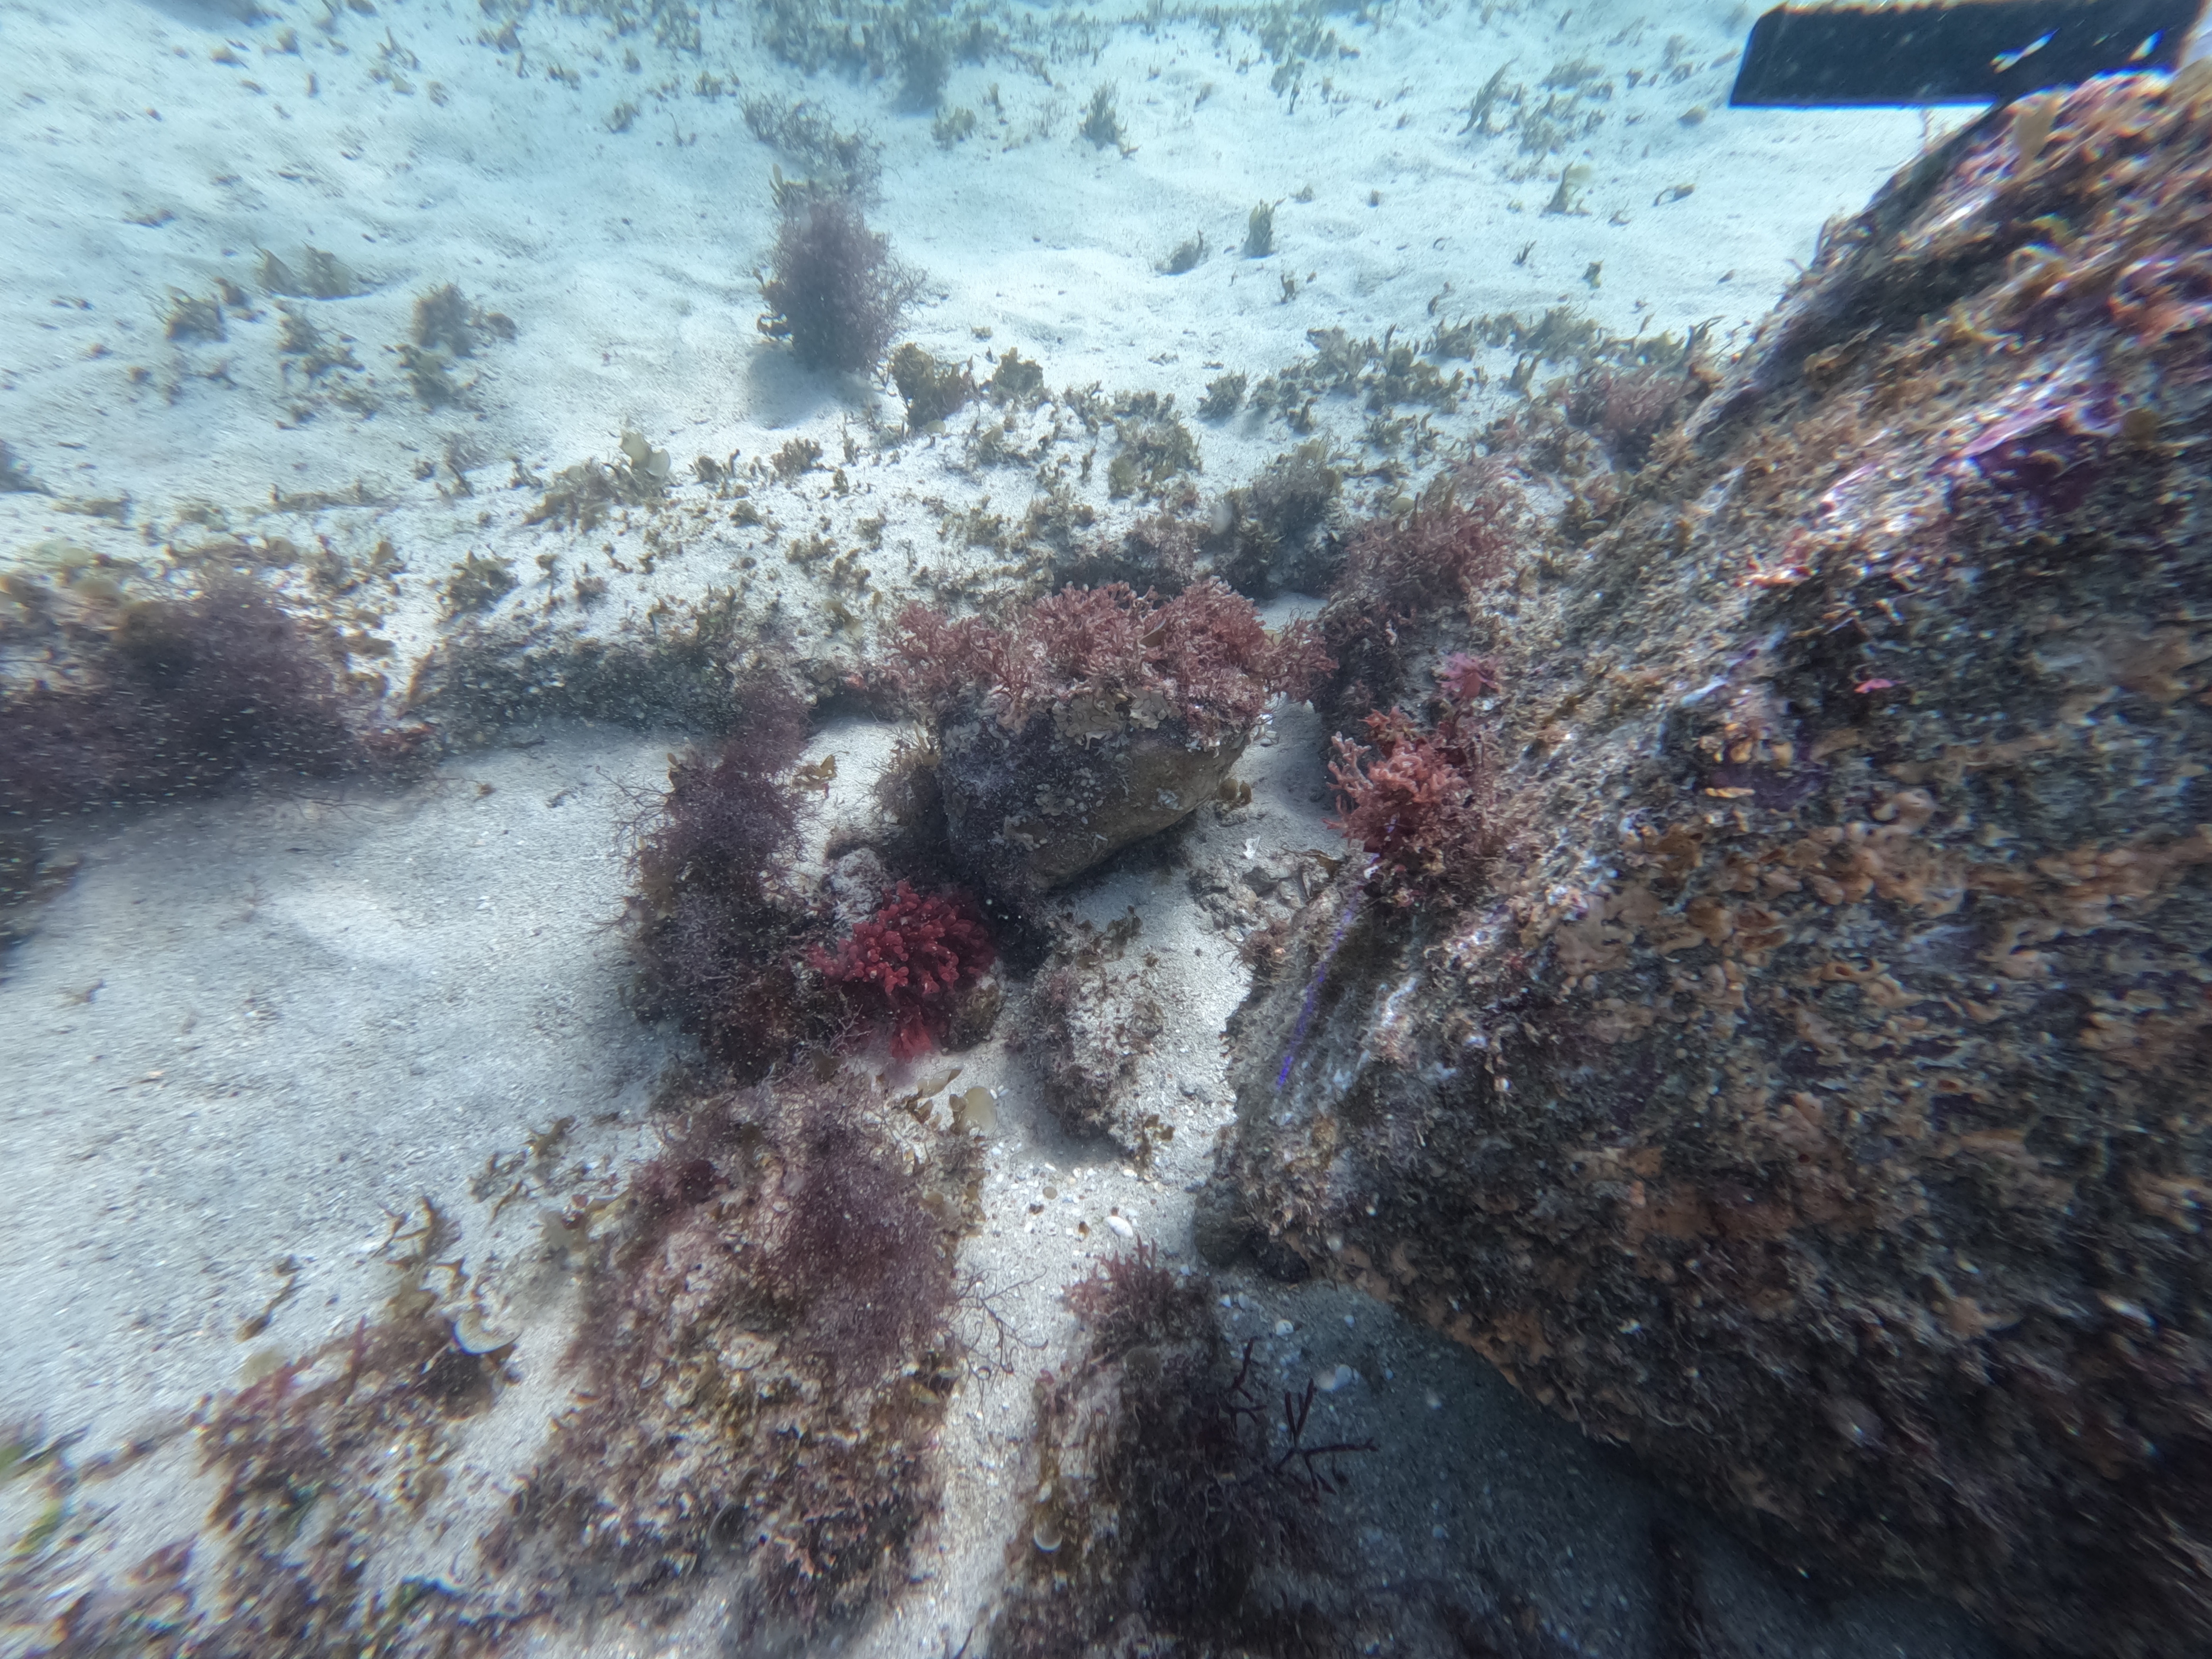

Supplement: Supplementary file 892 [file G0713959.pdf › Ocean2/G0713959.pdf]

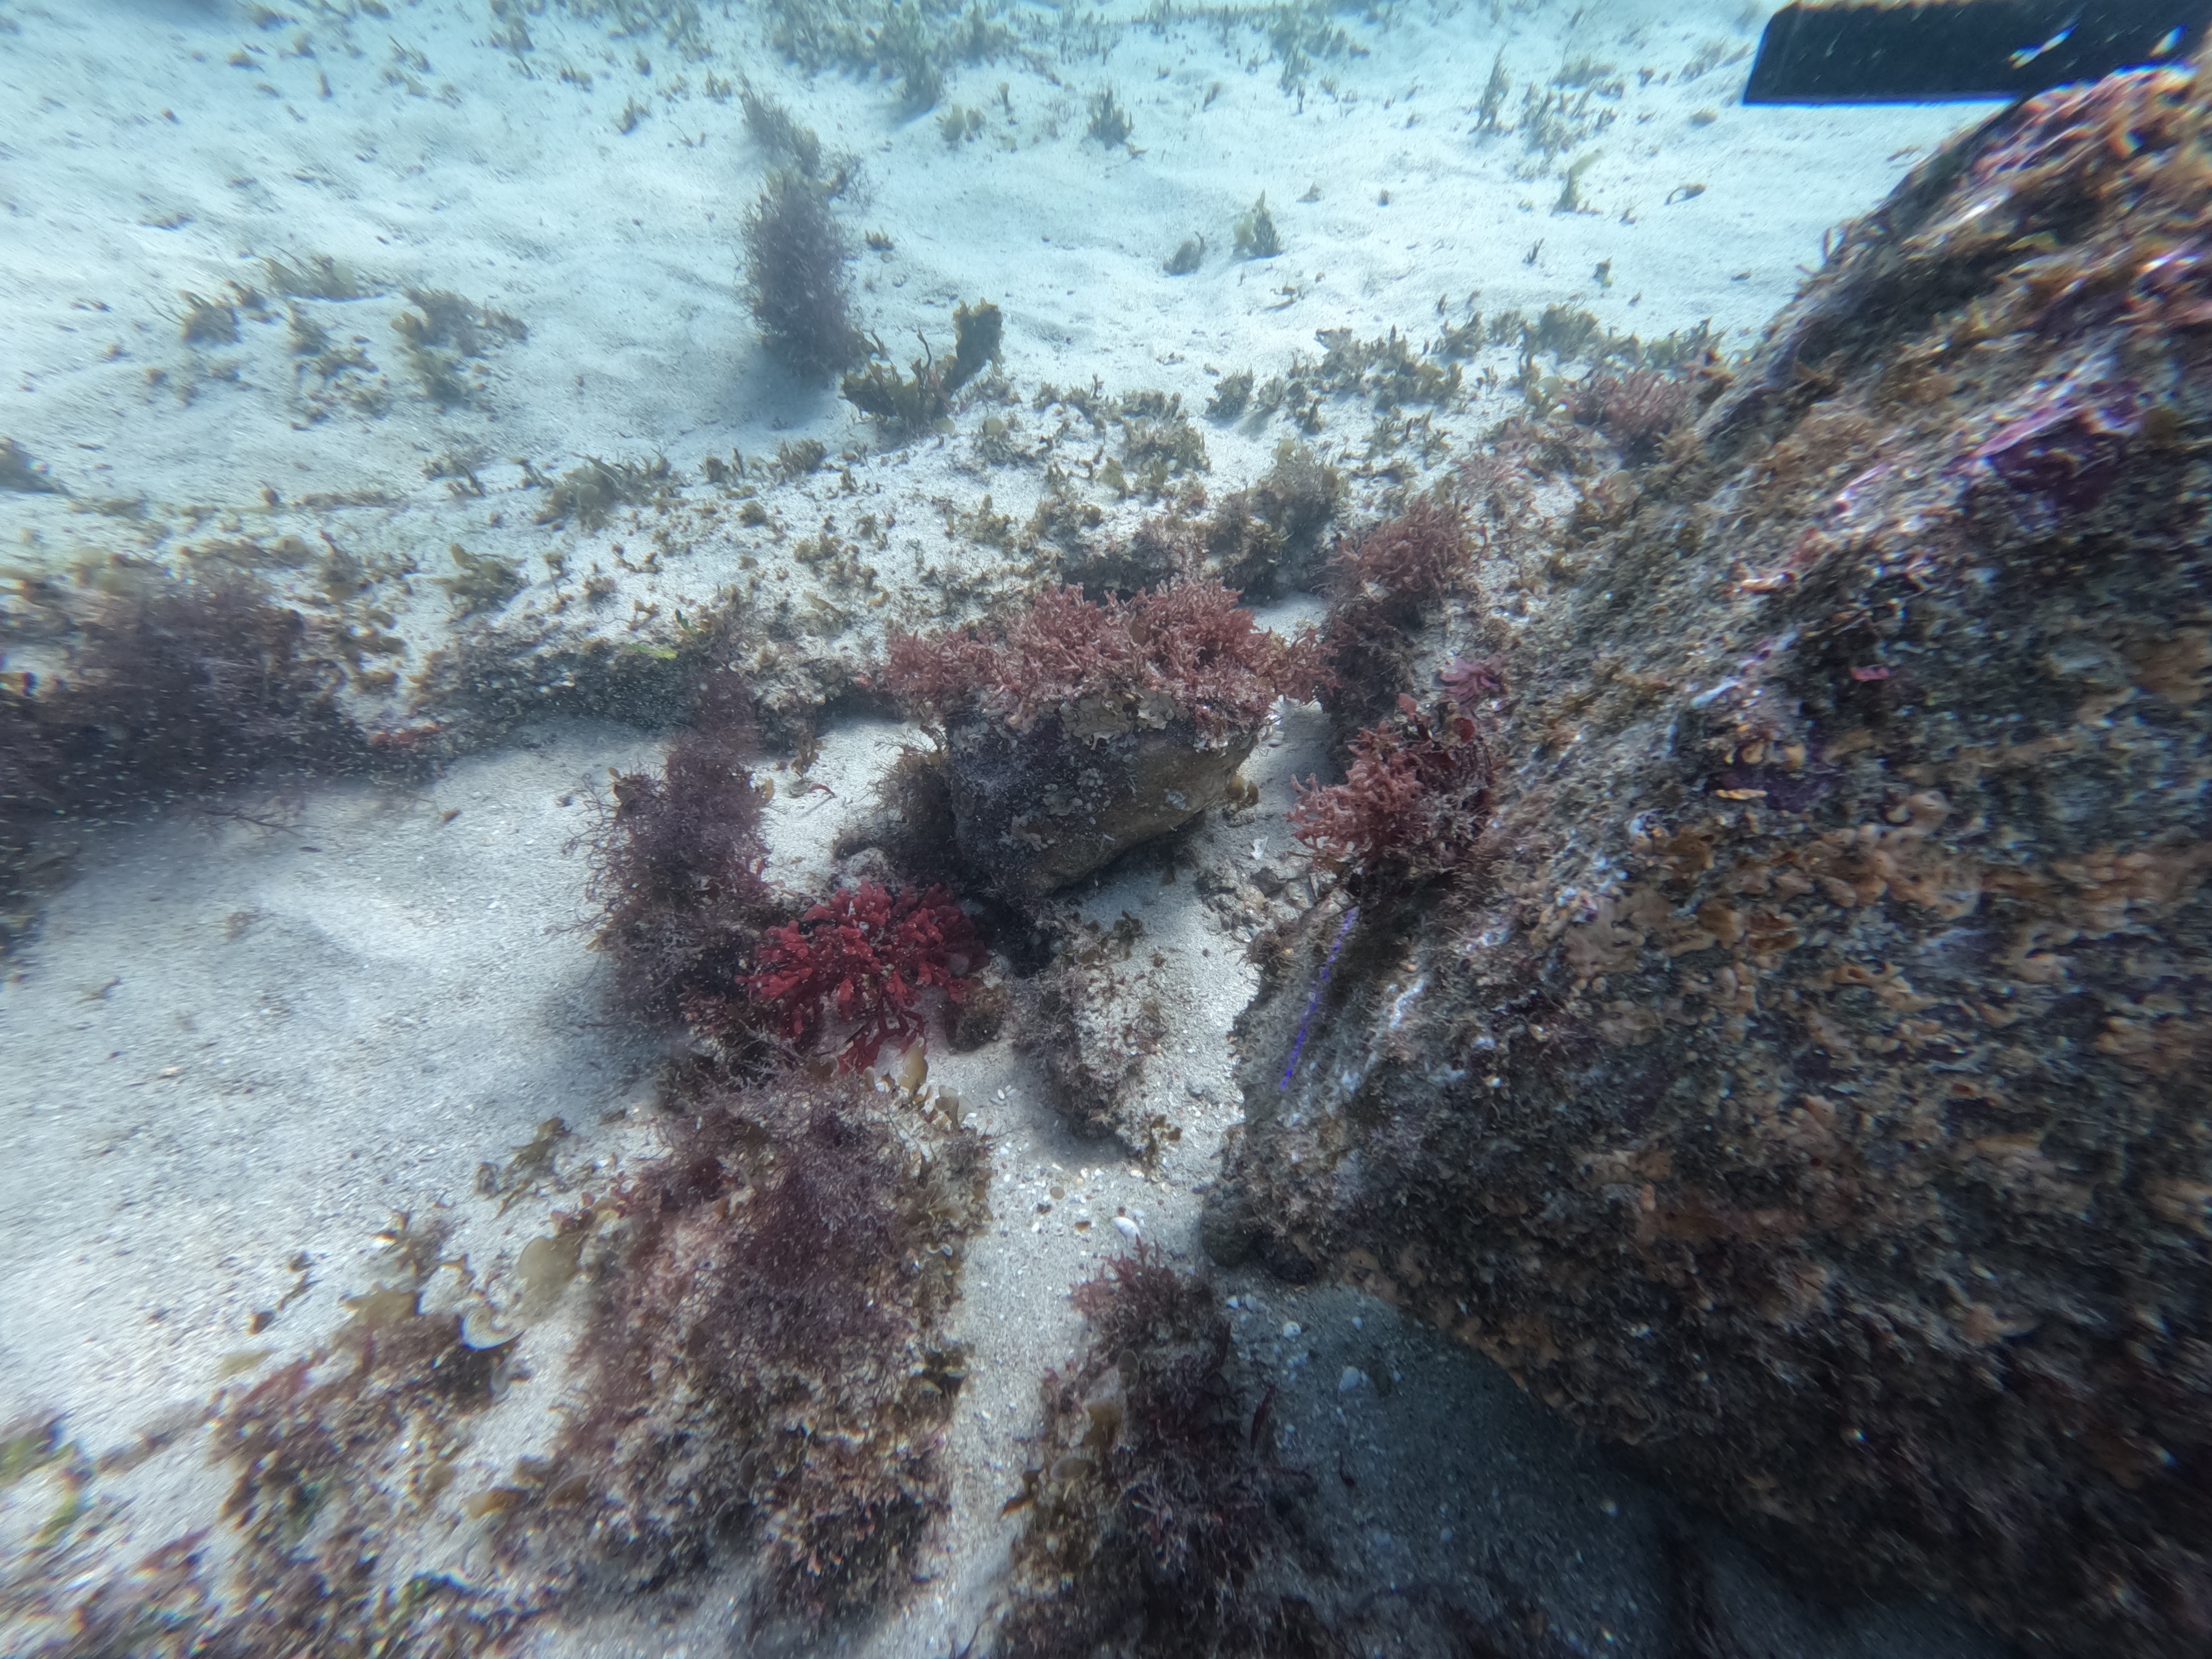

Supplement: Supplementary file 893 [file G0713960.pdf › Ocean2/G0713960.pdf]

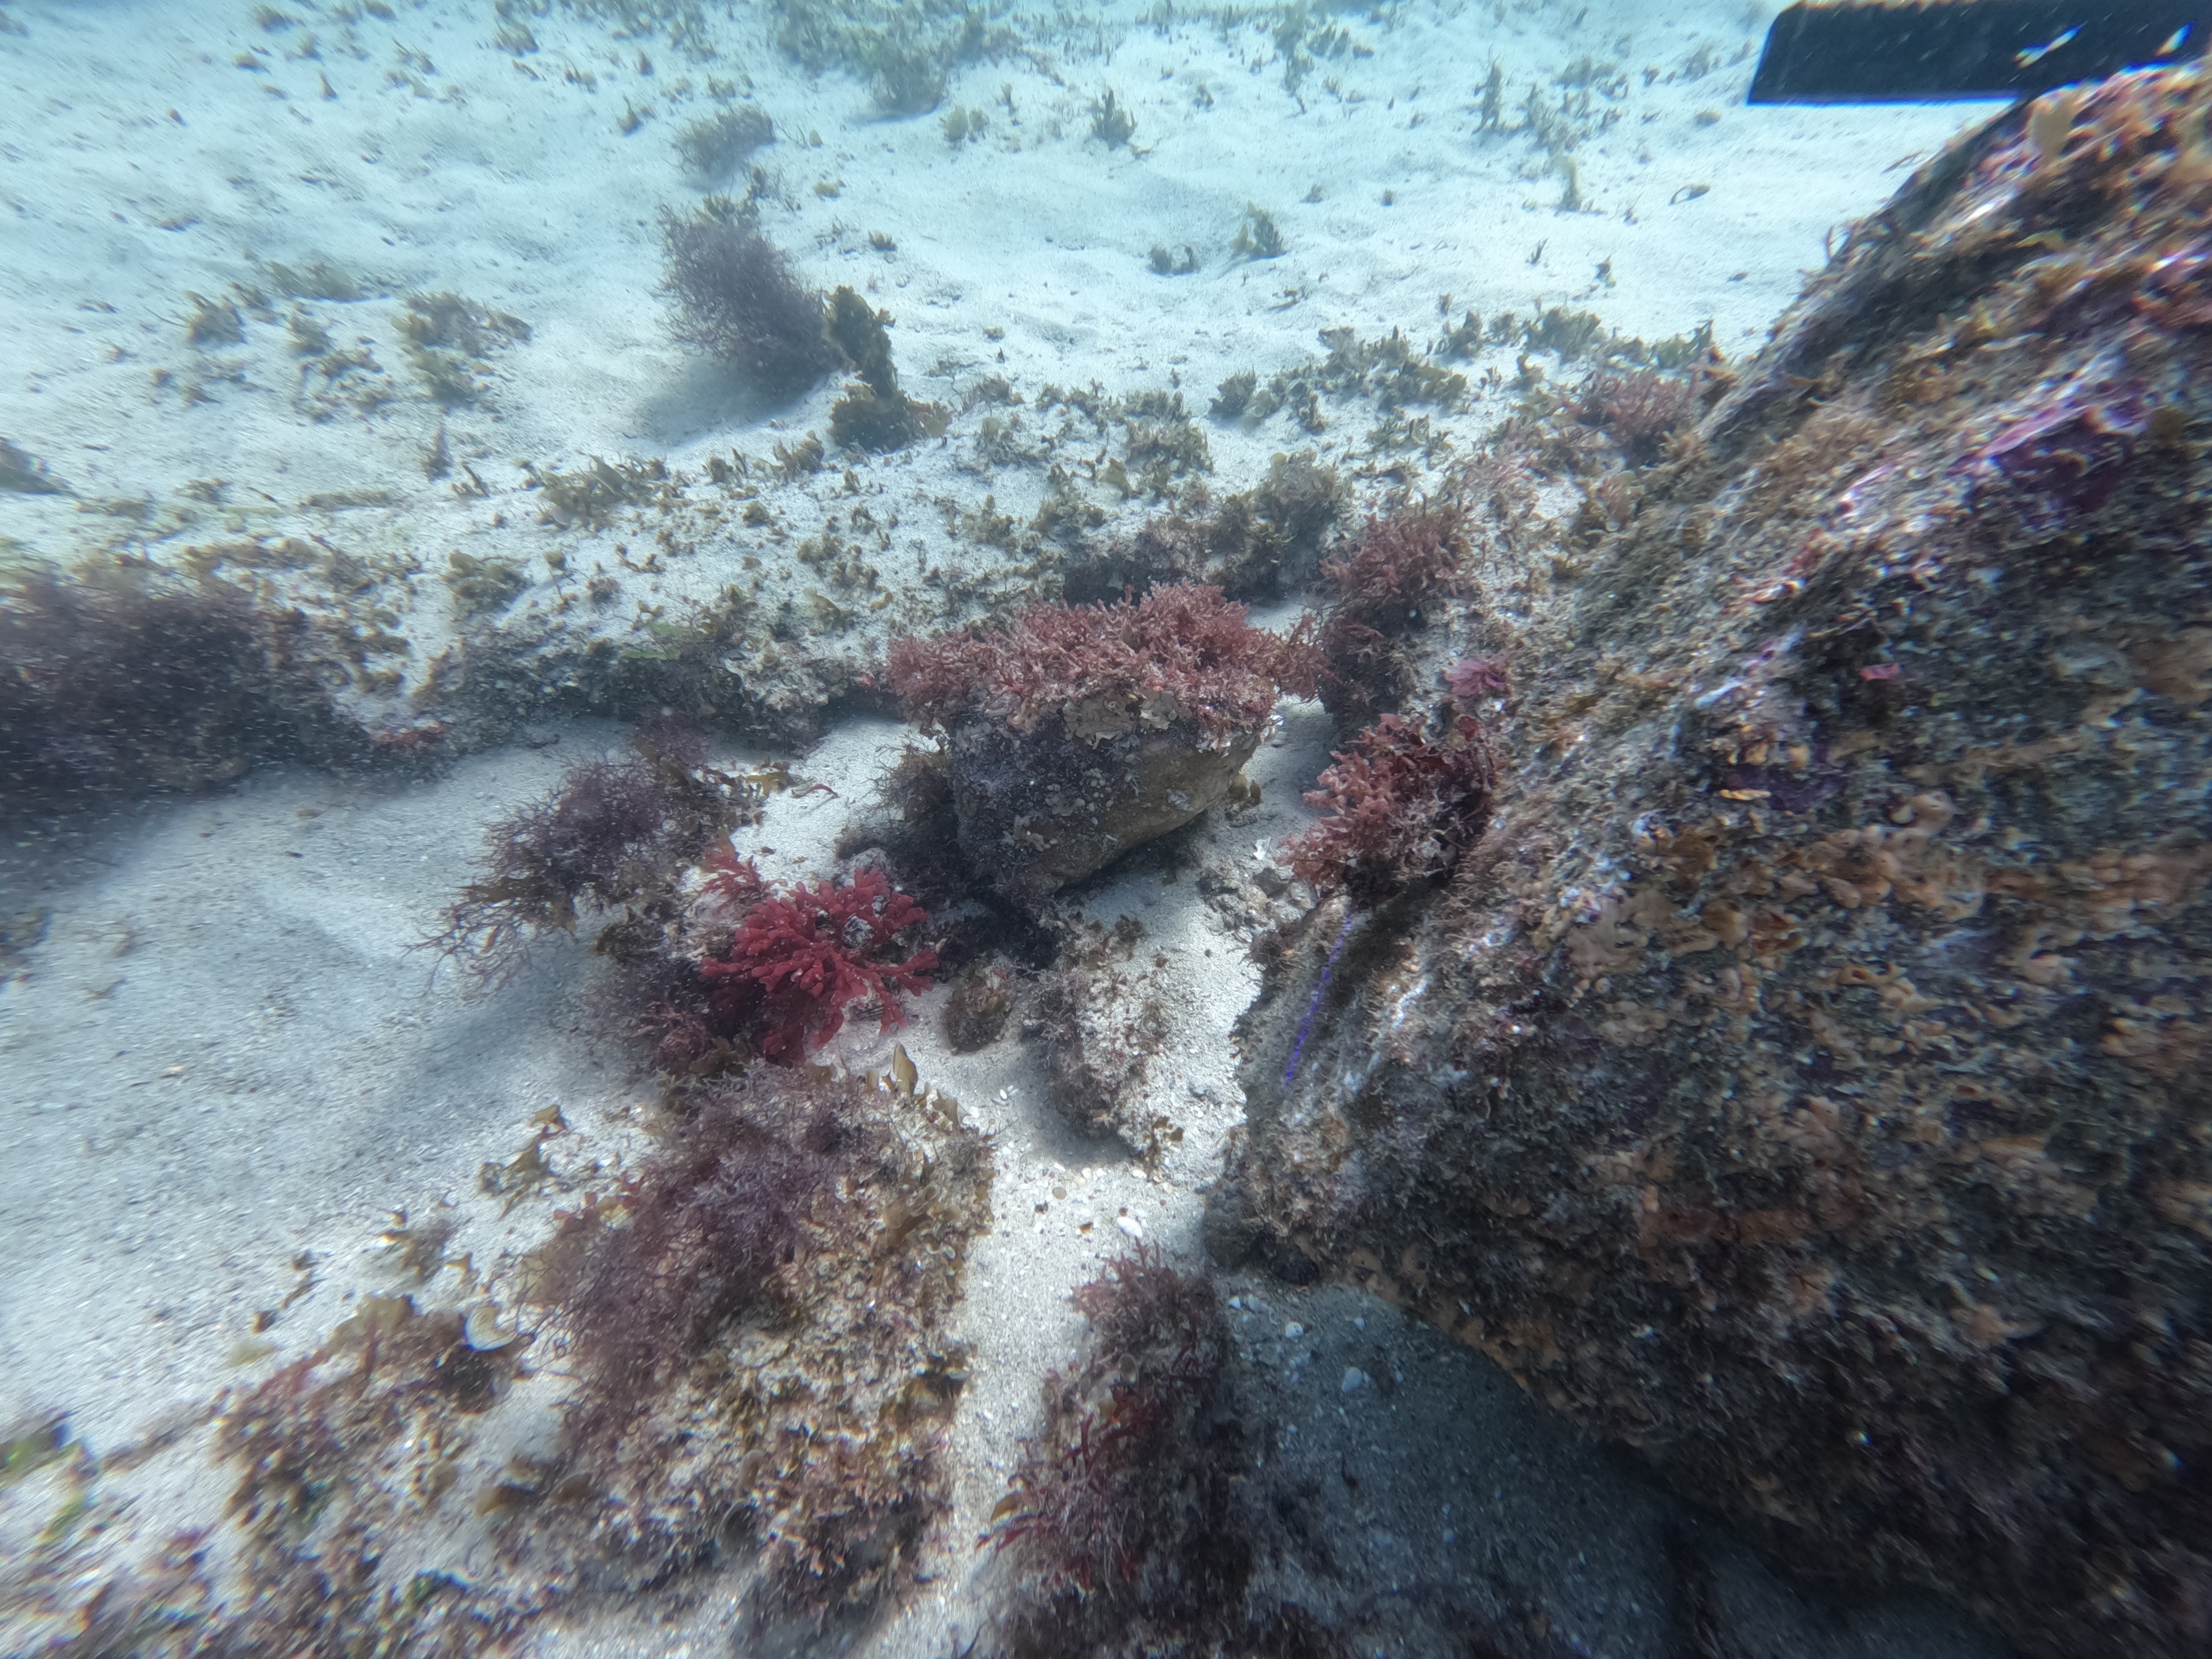

Supplement: Supplementary file 894 [file G0713961.pdf › Ocean2/G0713961.pdf]

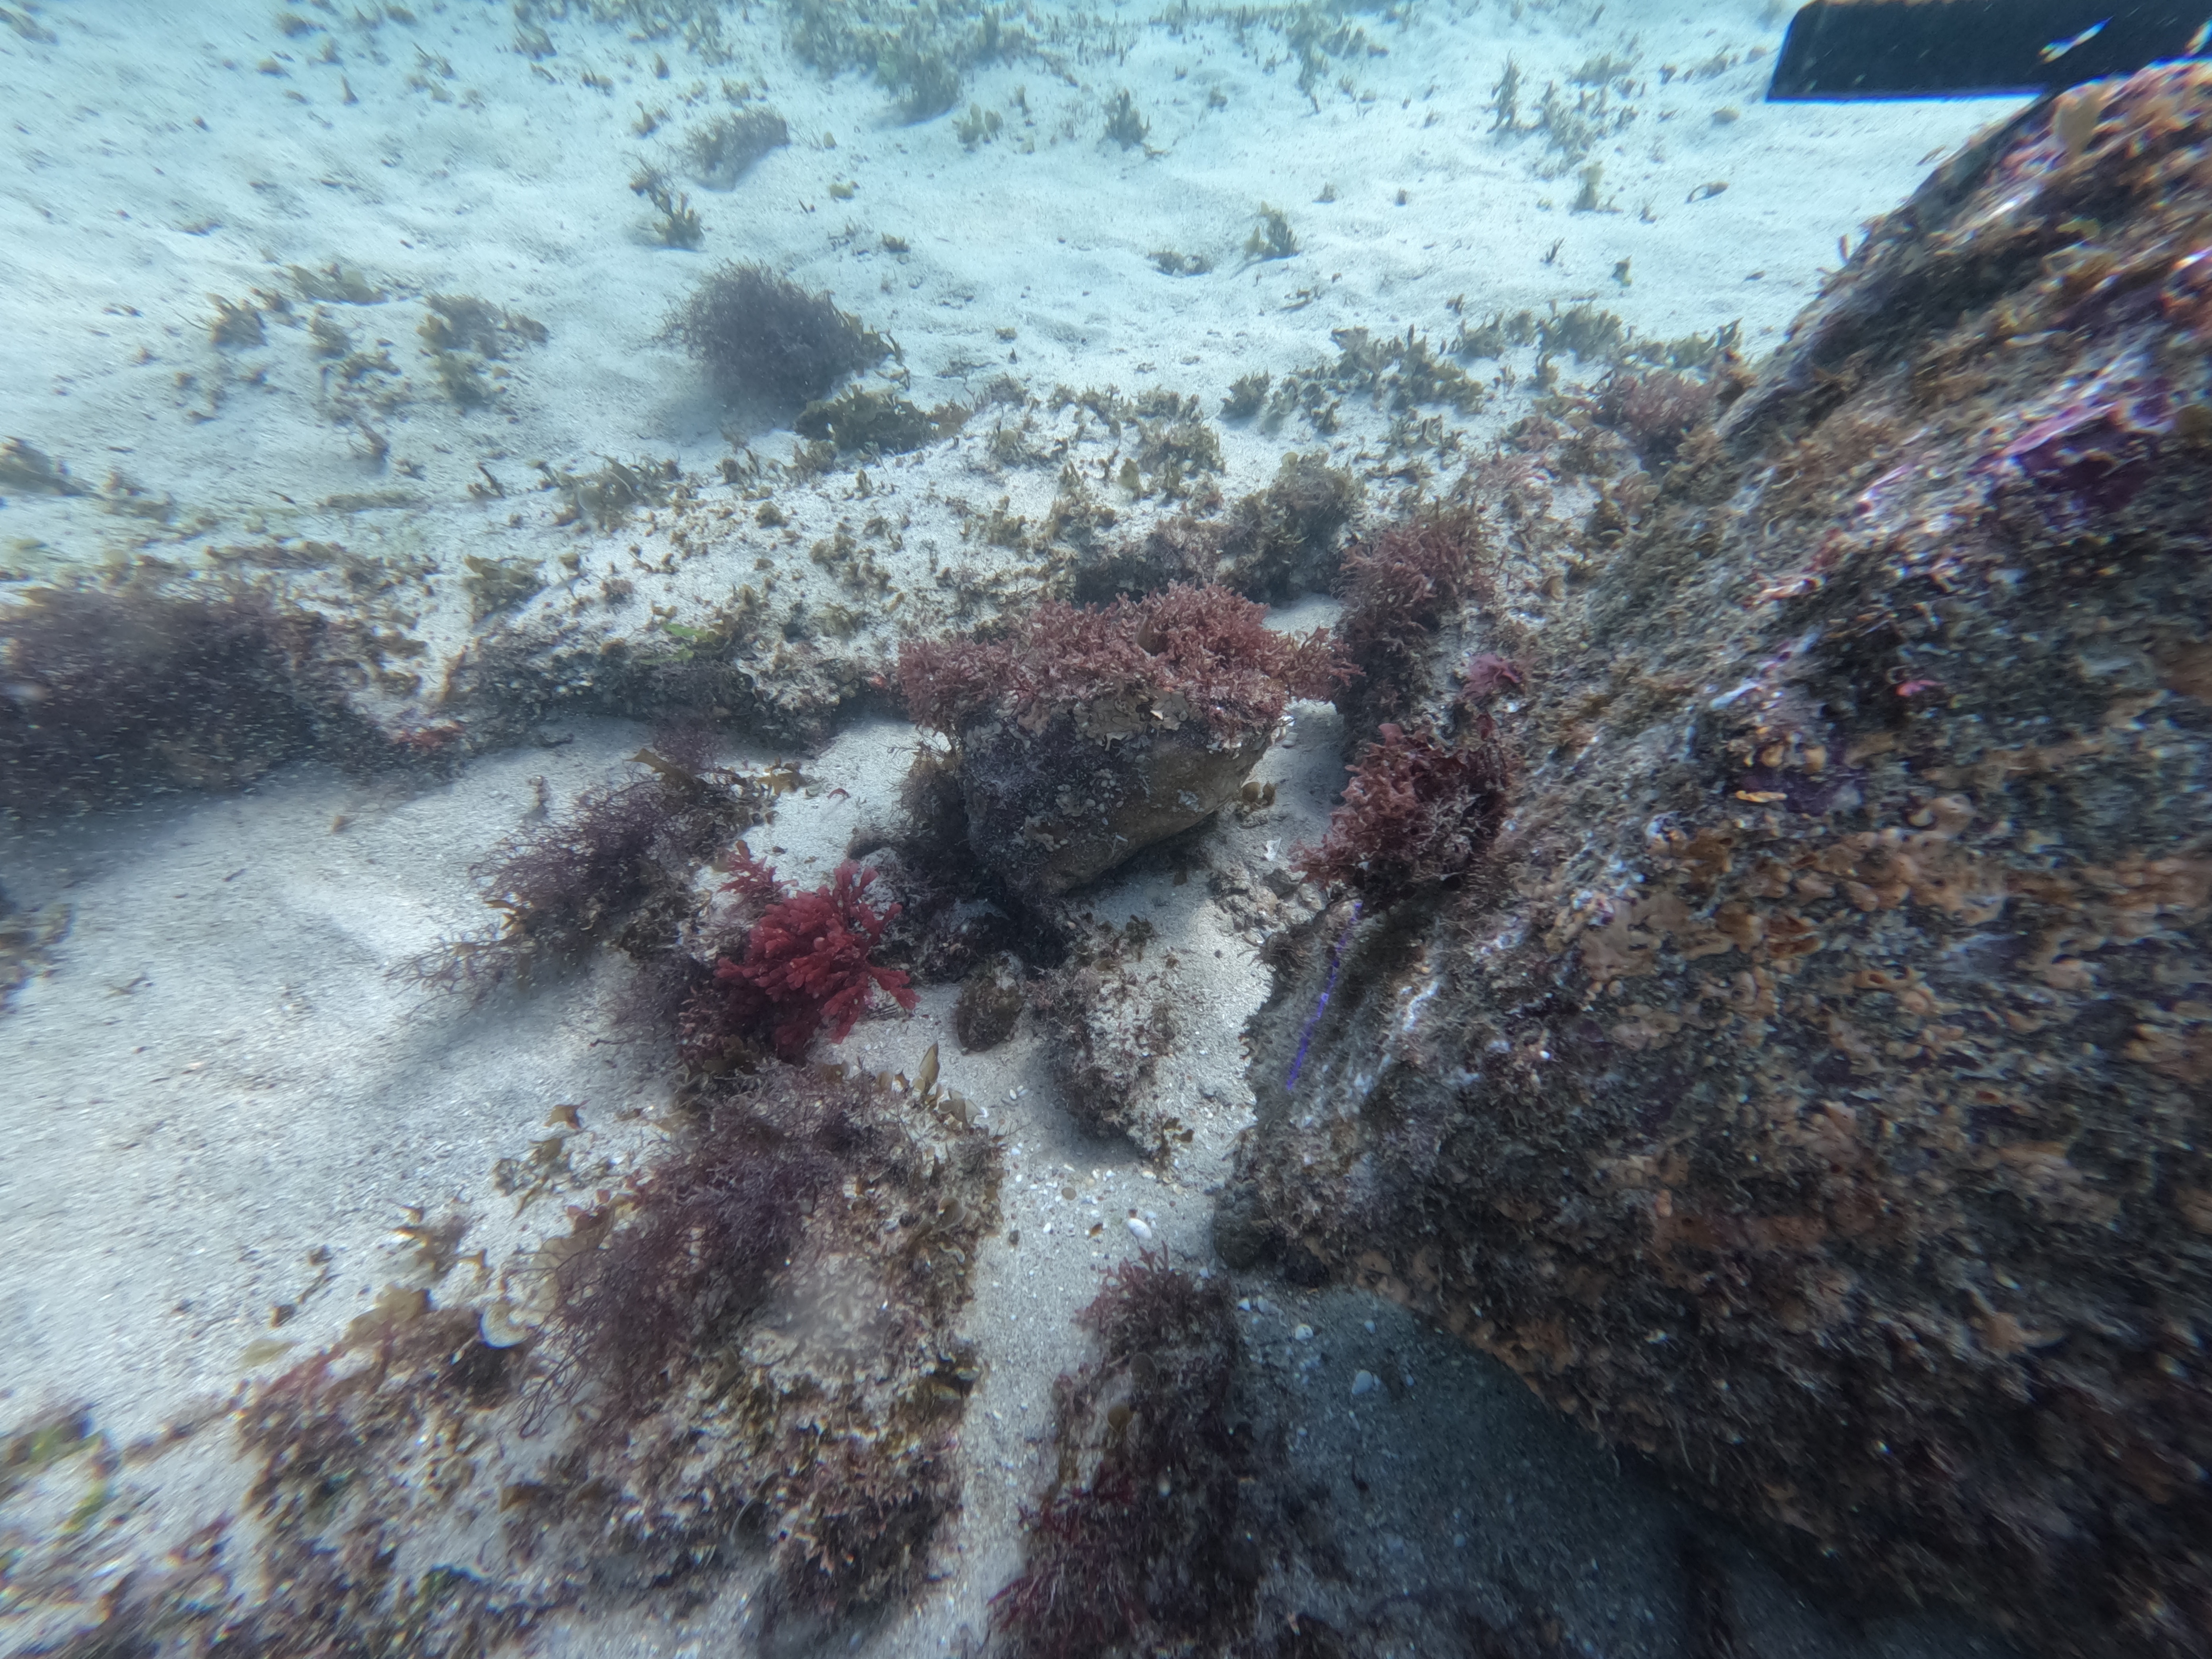

Supplement: Supplementary file 895 [file G0713962.pdf › Ocean2/G0713962.pdf]

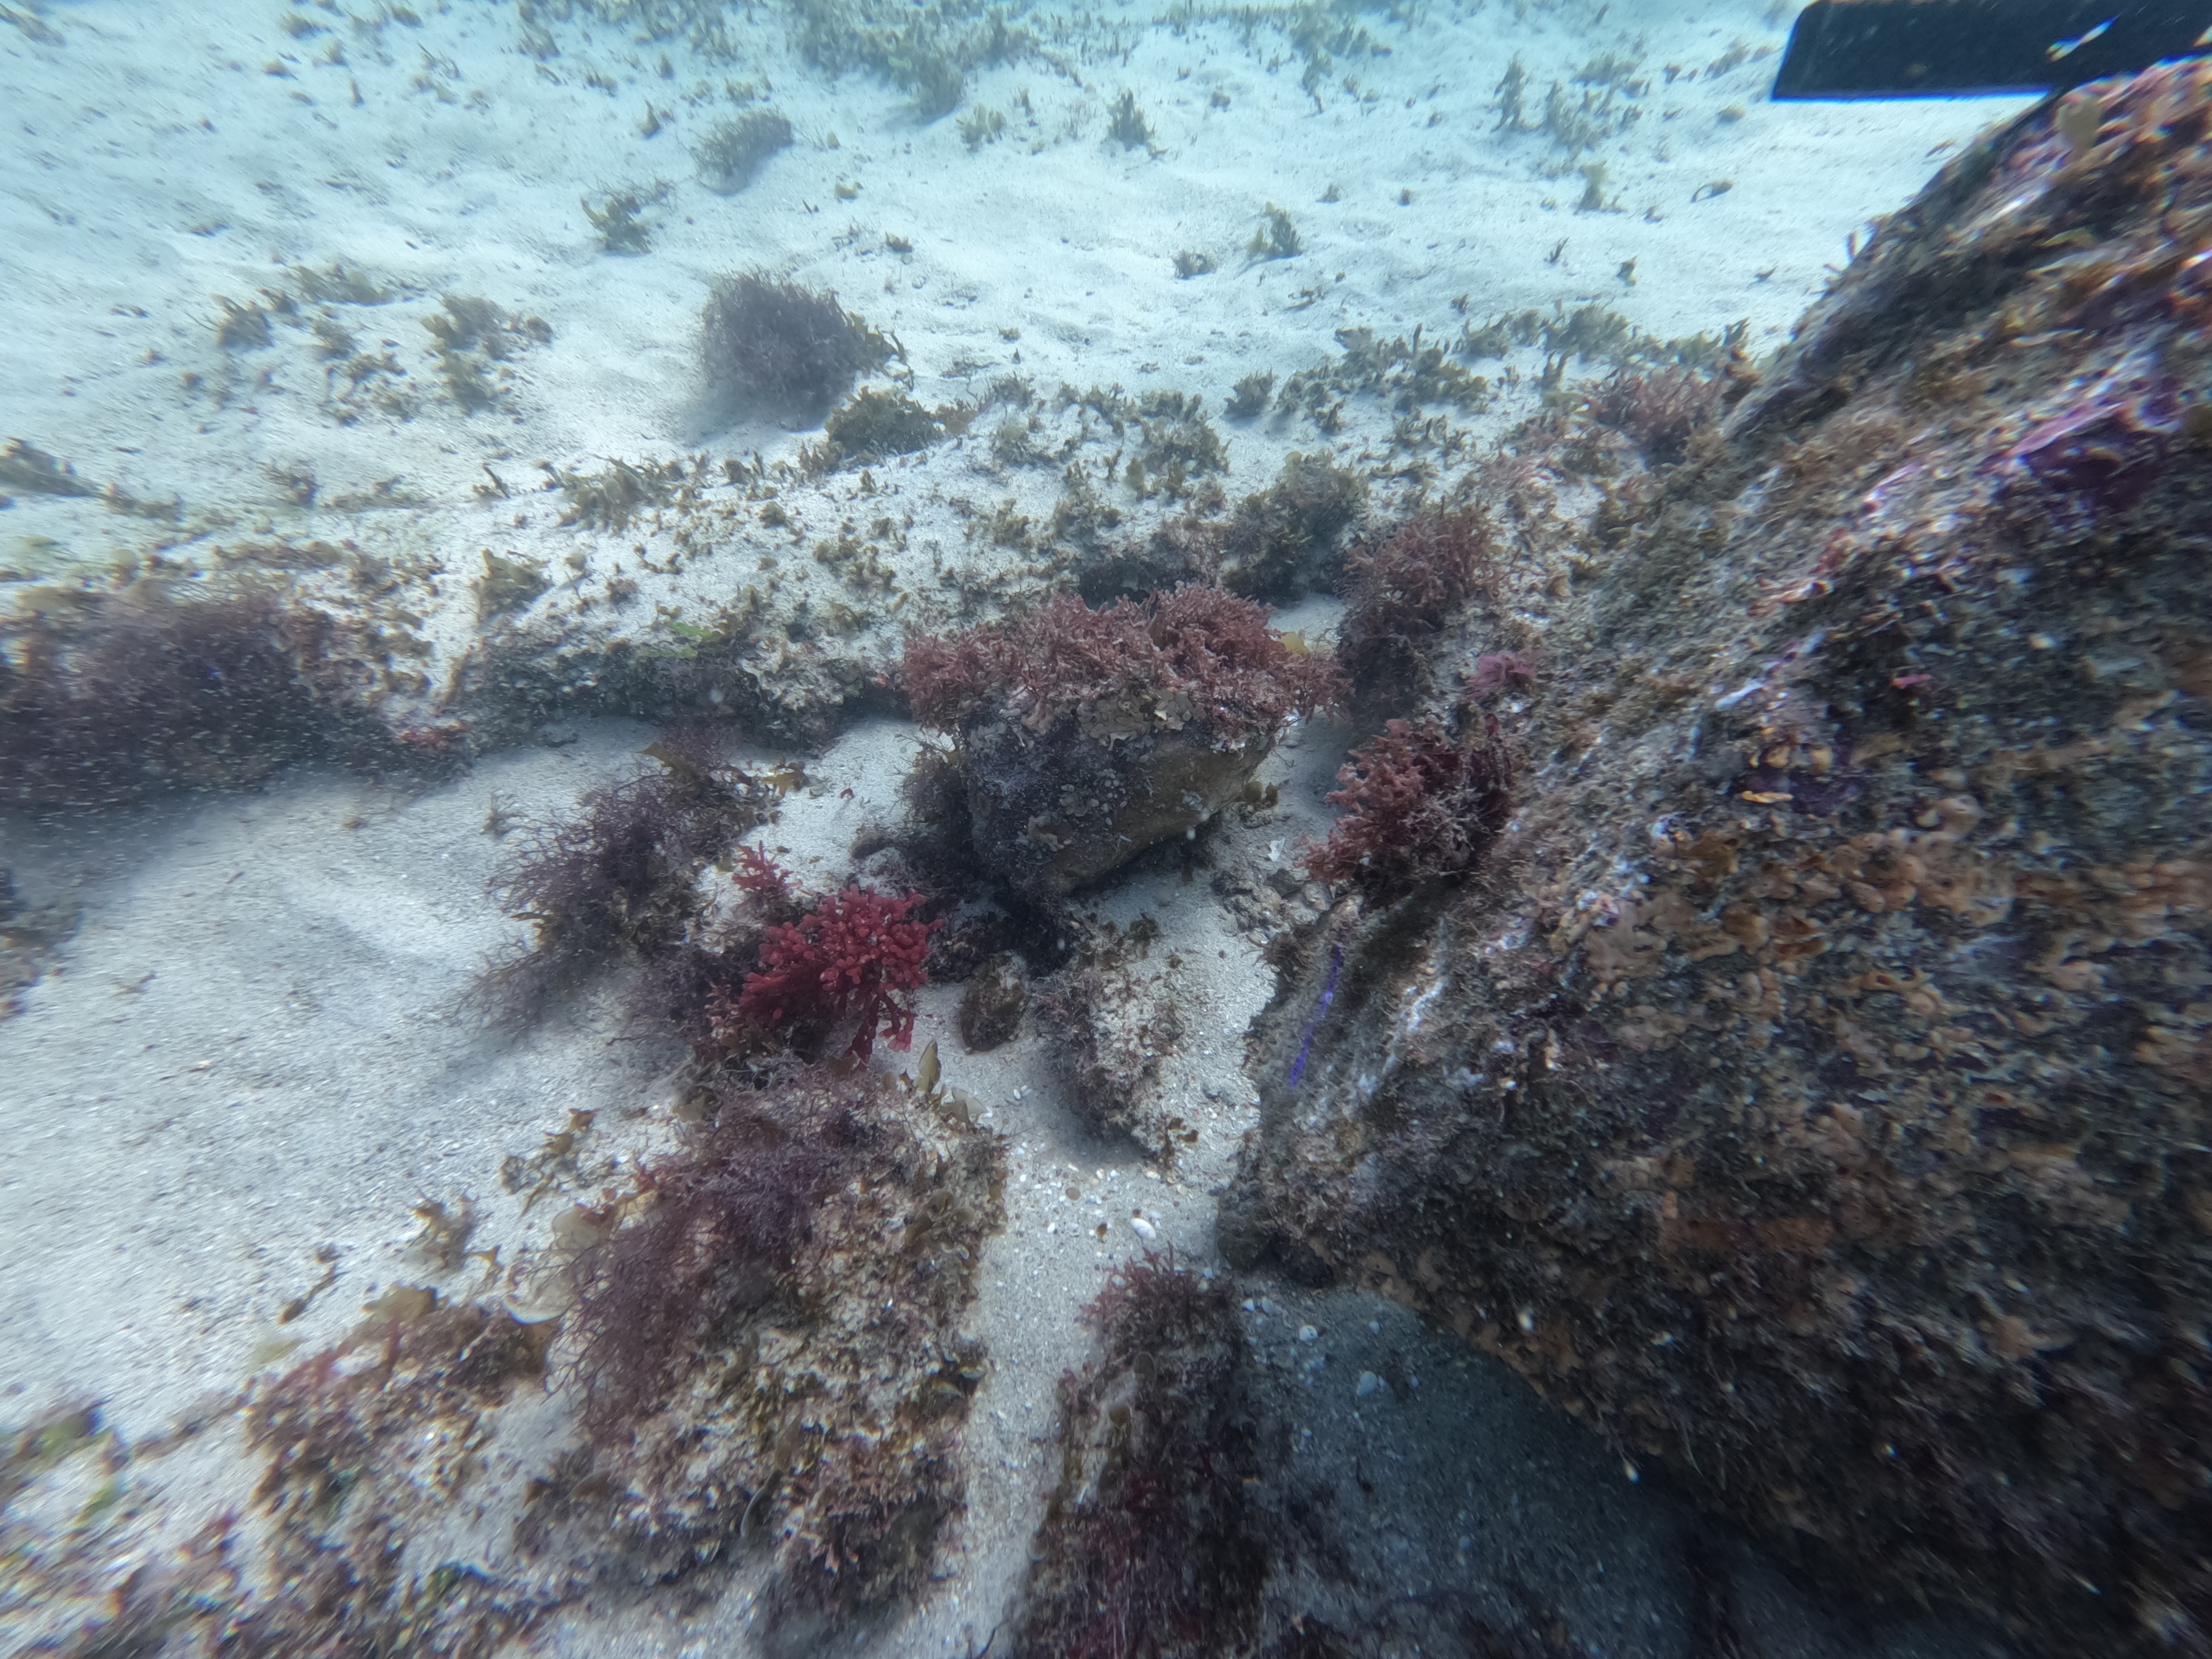

Supplement: Supplementary file 896 [file G0713963.pdf › Ocean2/G0713963.pdf]

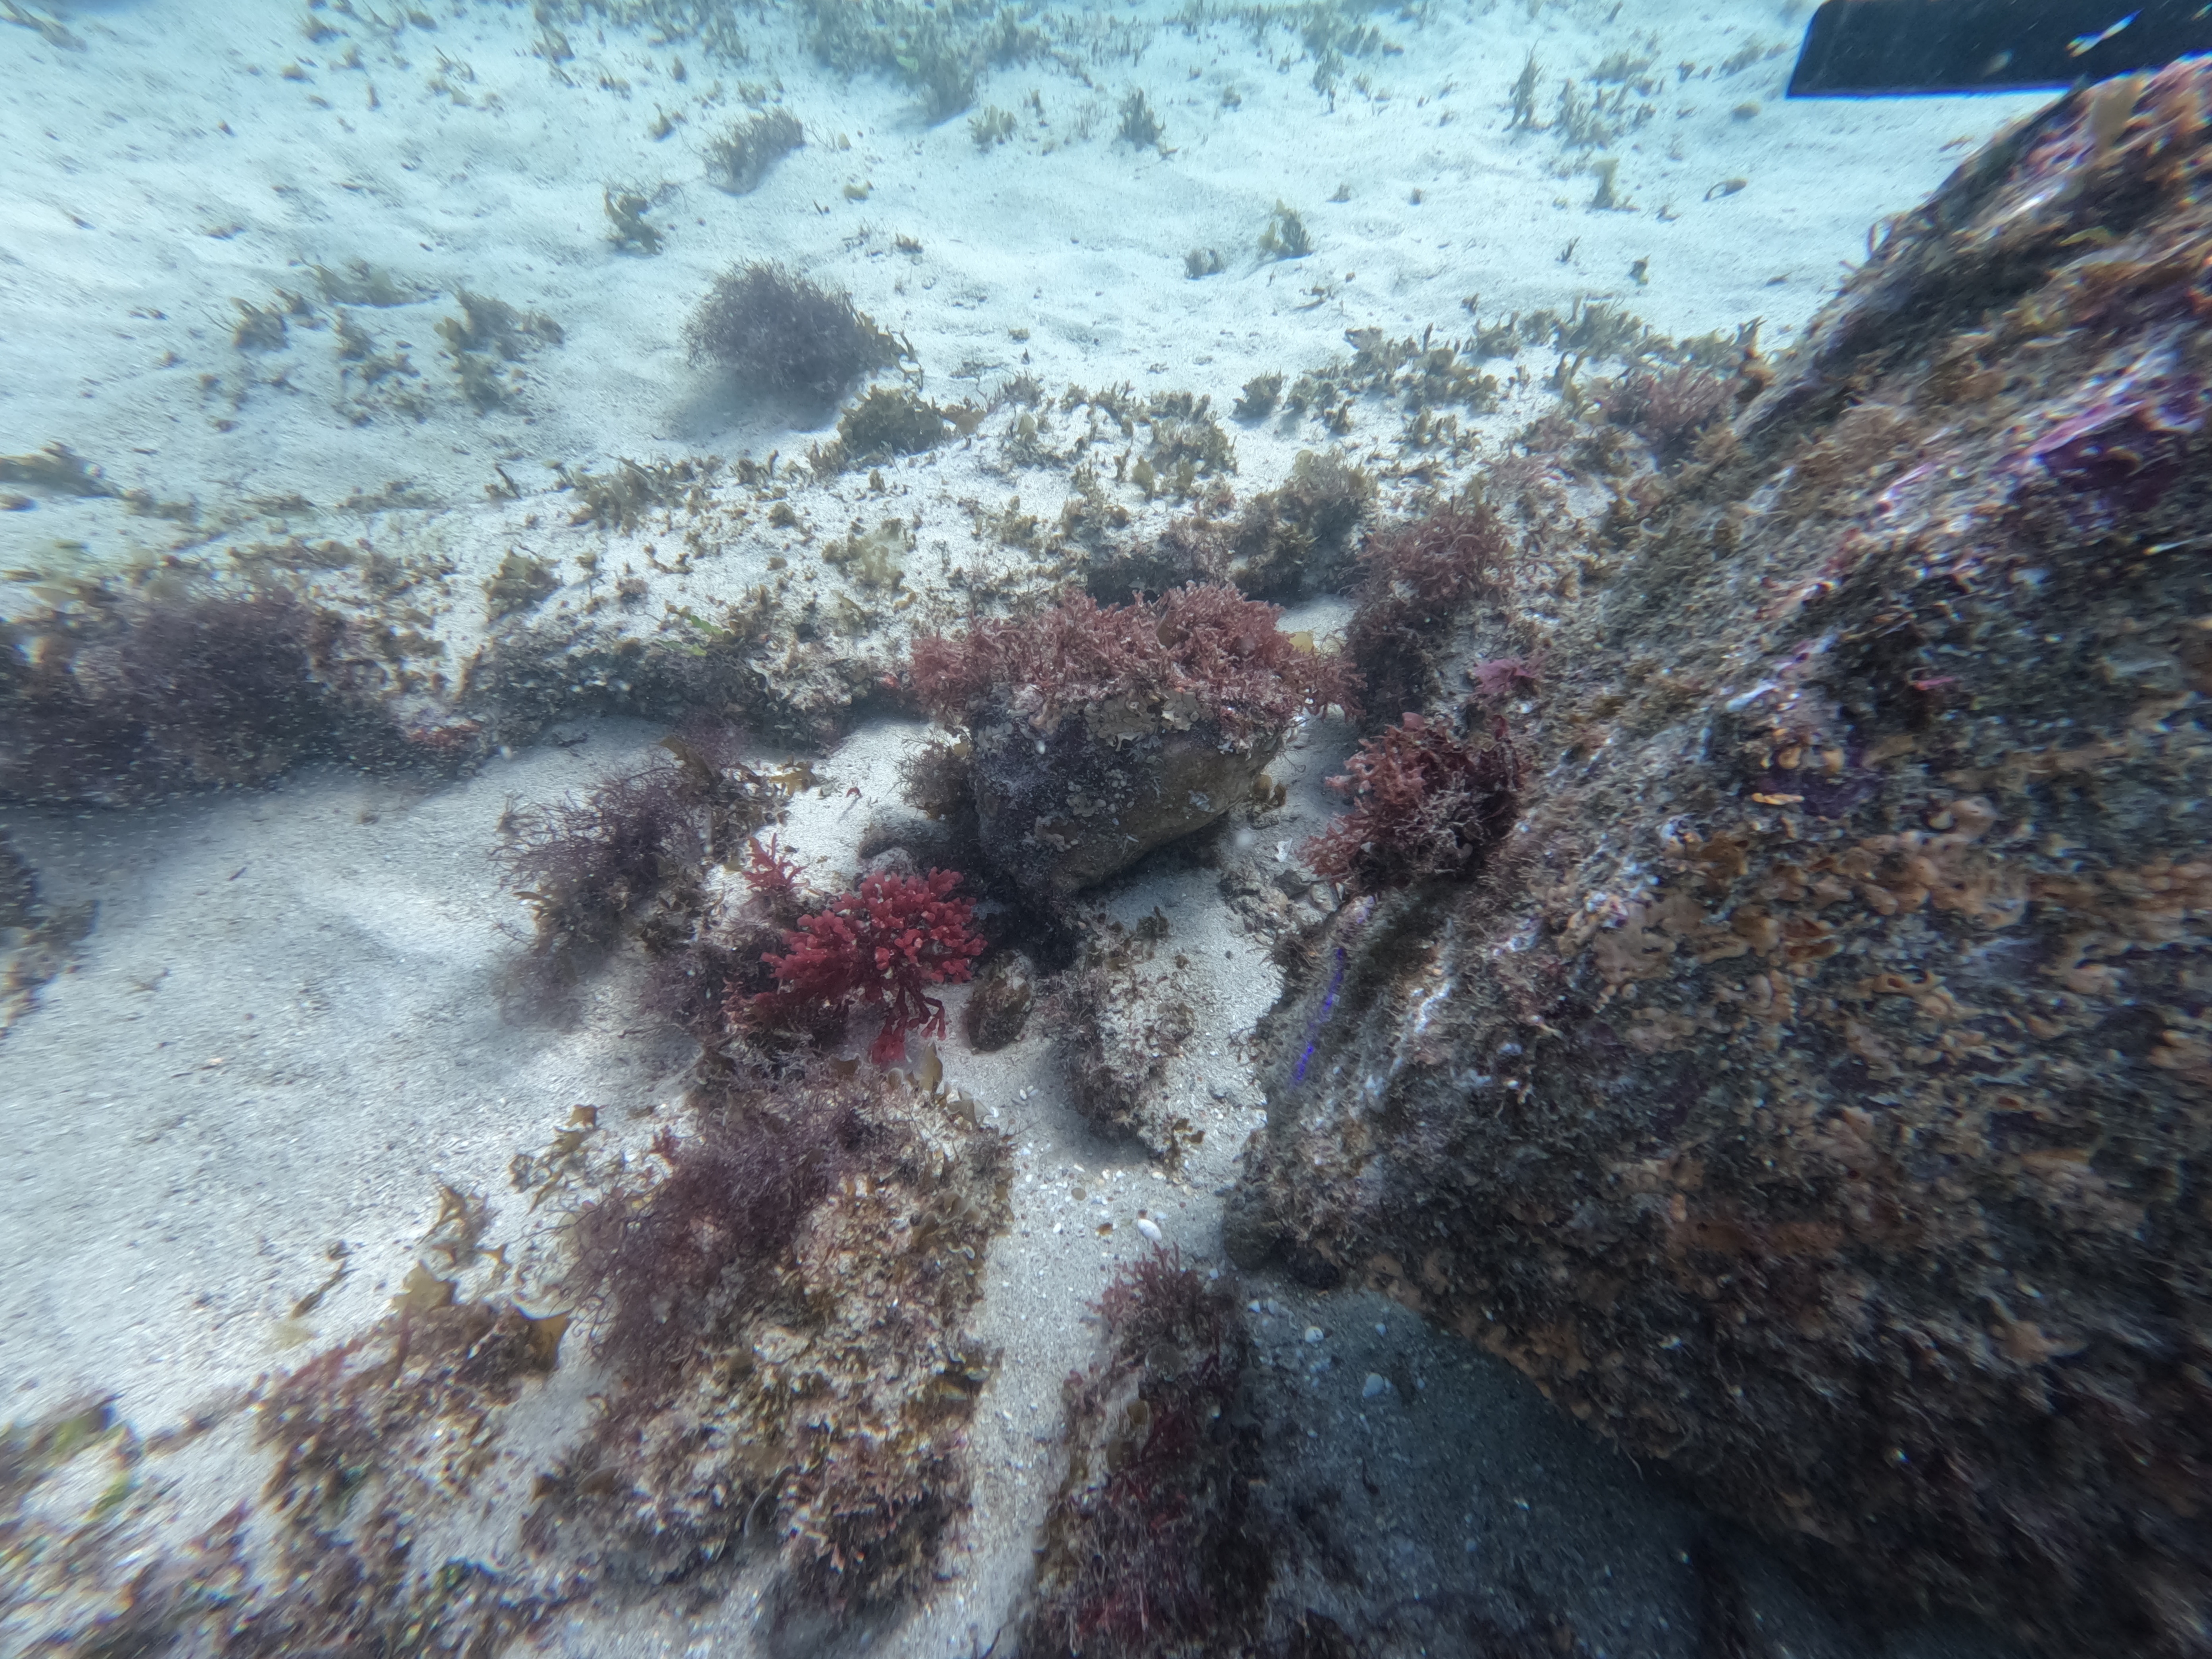

Supplement: Supplementary file 897 [file G0713964.pdf › Ocean2/G0713964.pdf]

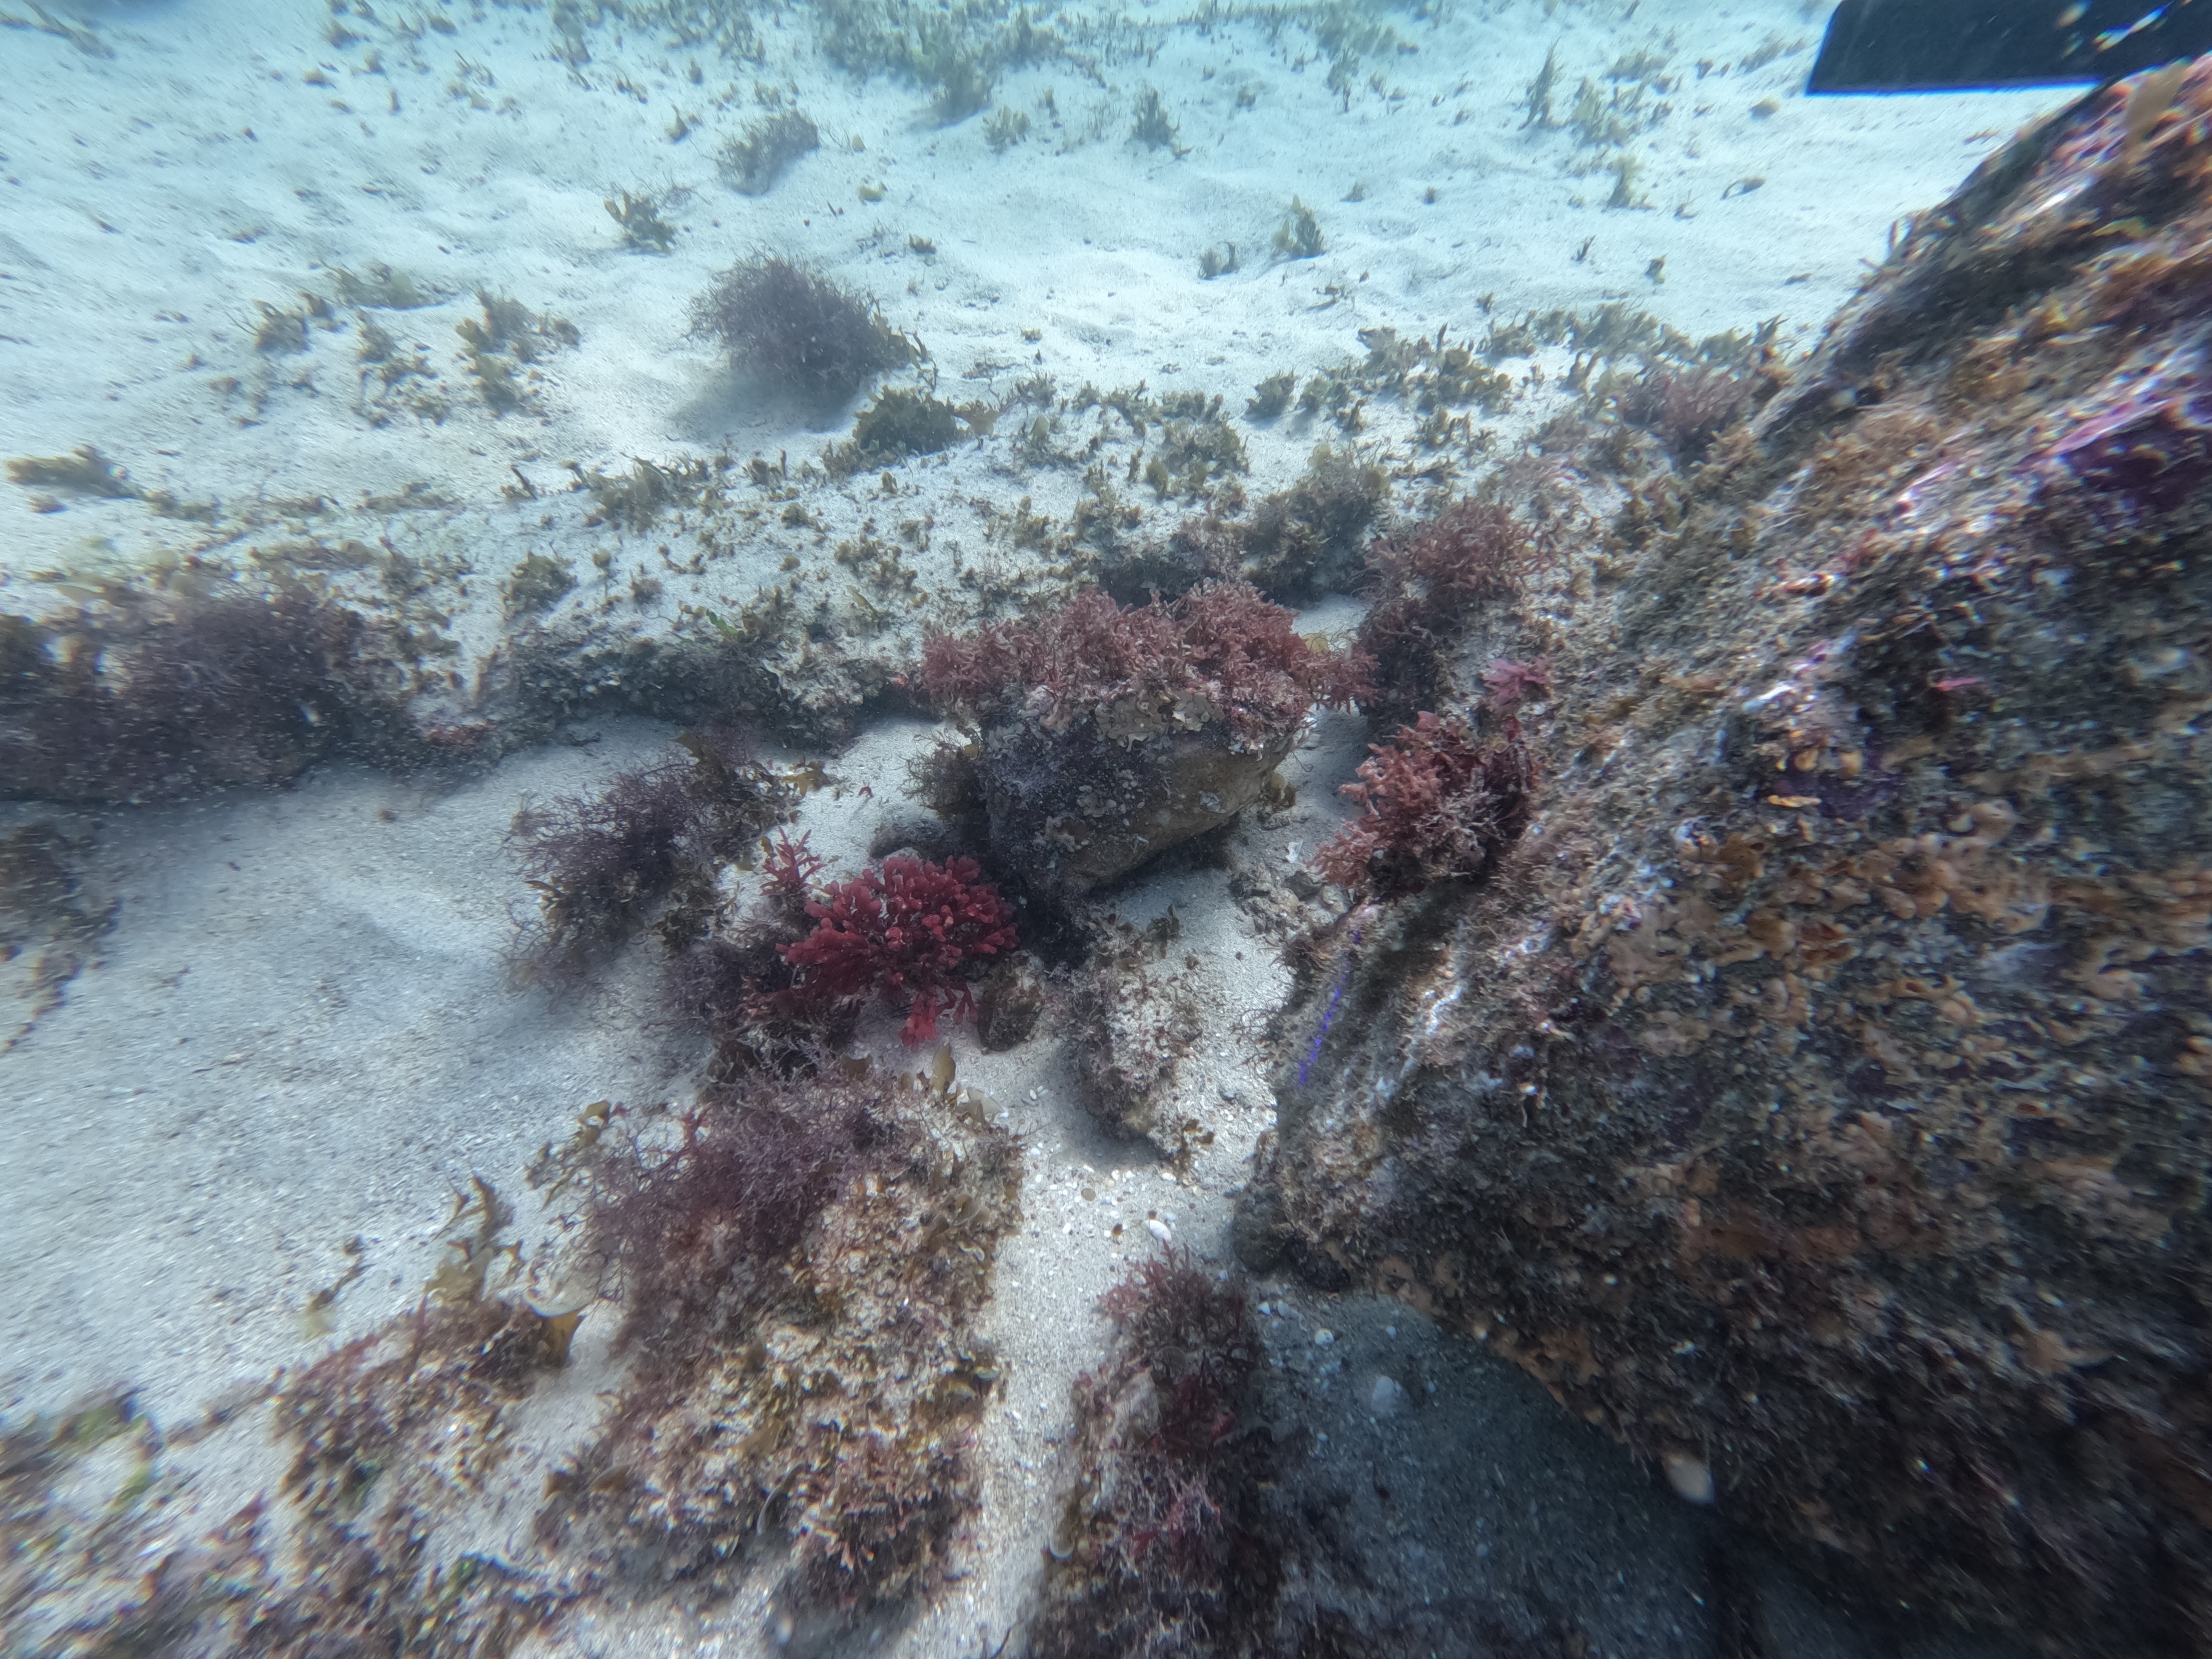

Supplement: Supplementary file 898 [file G0713965.pdf › Ocean2/G0713965.pdf]

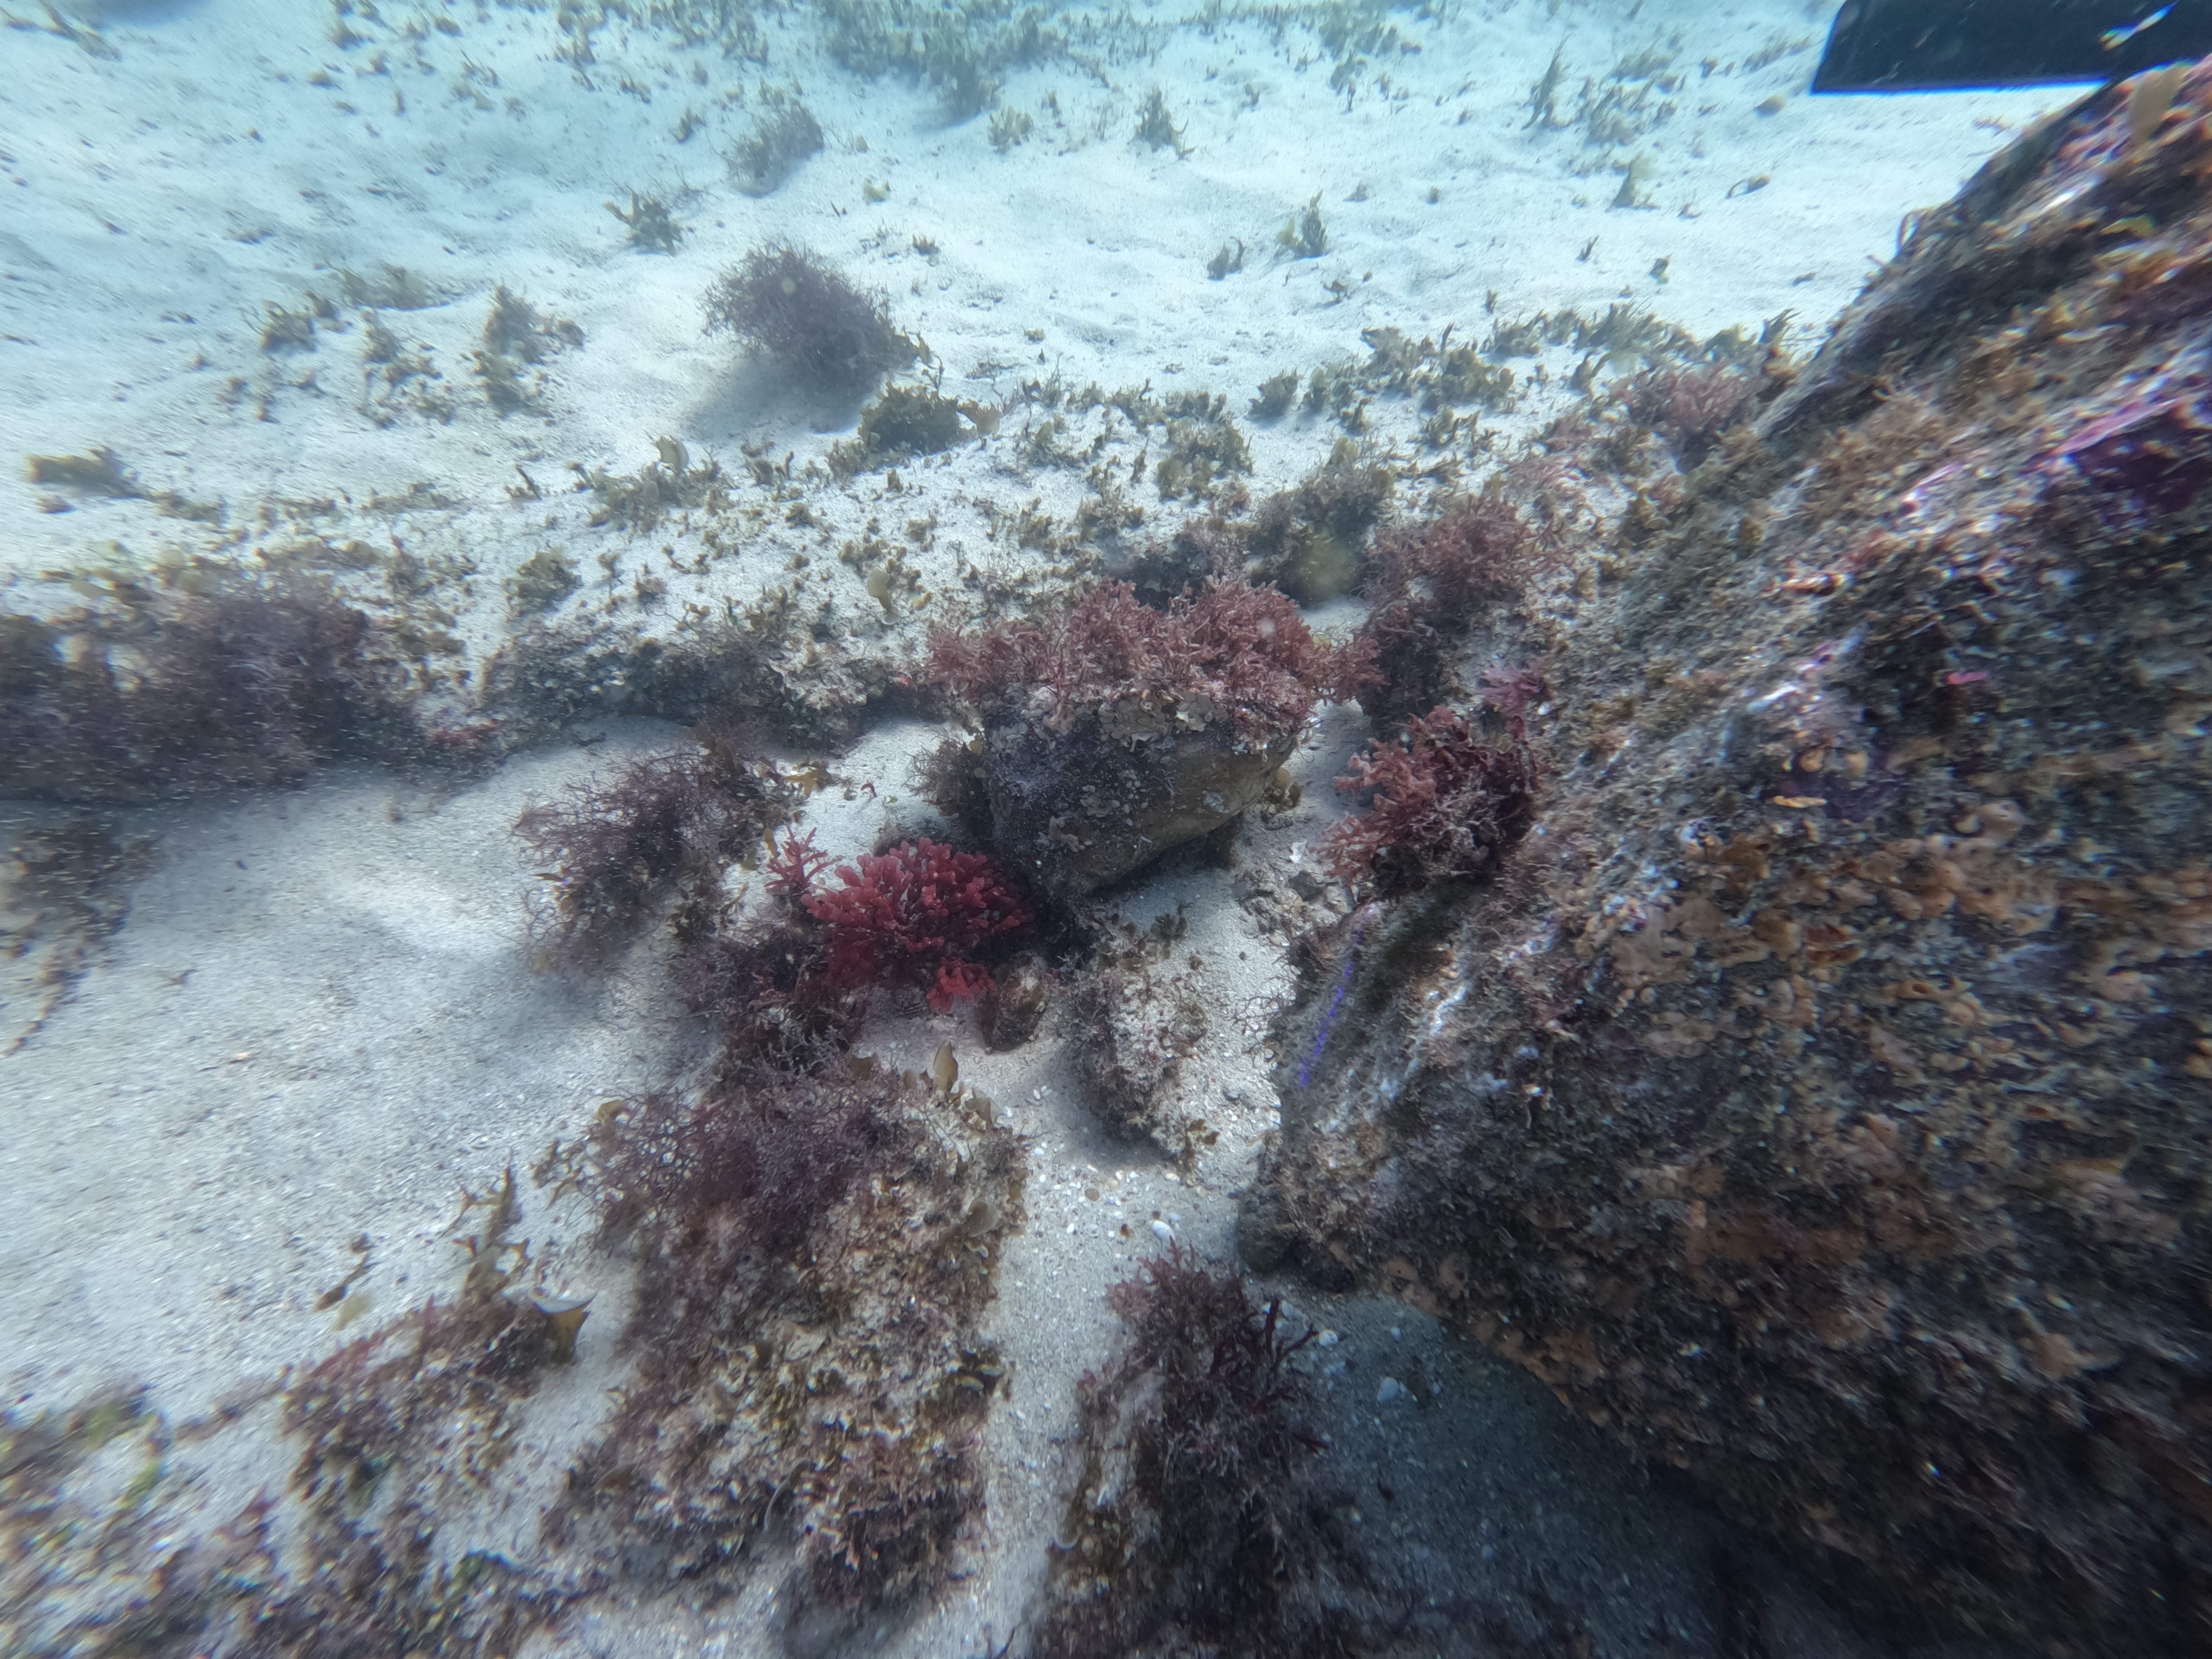

Supplement: Supplementary file 899 [file G0713966.pdf › Ocean2/G0713966.pdf]

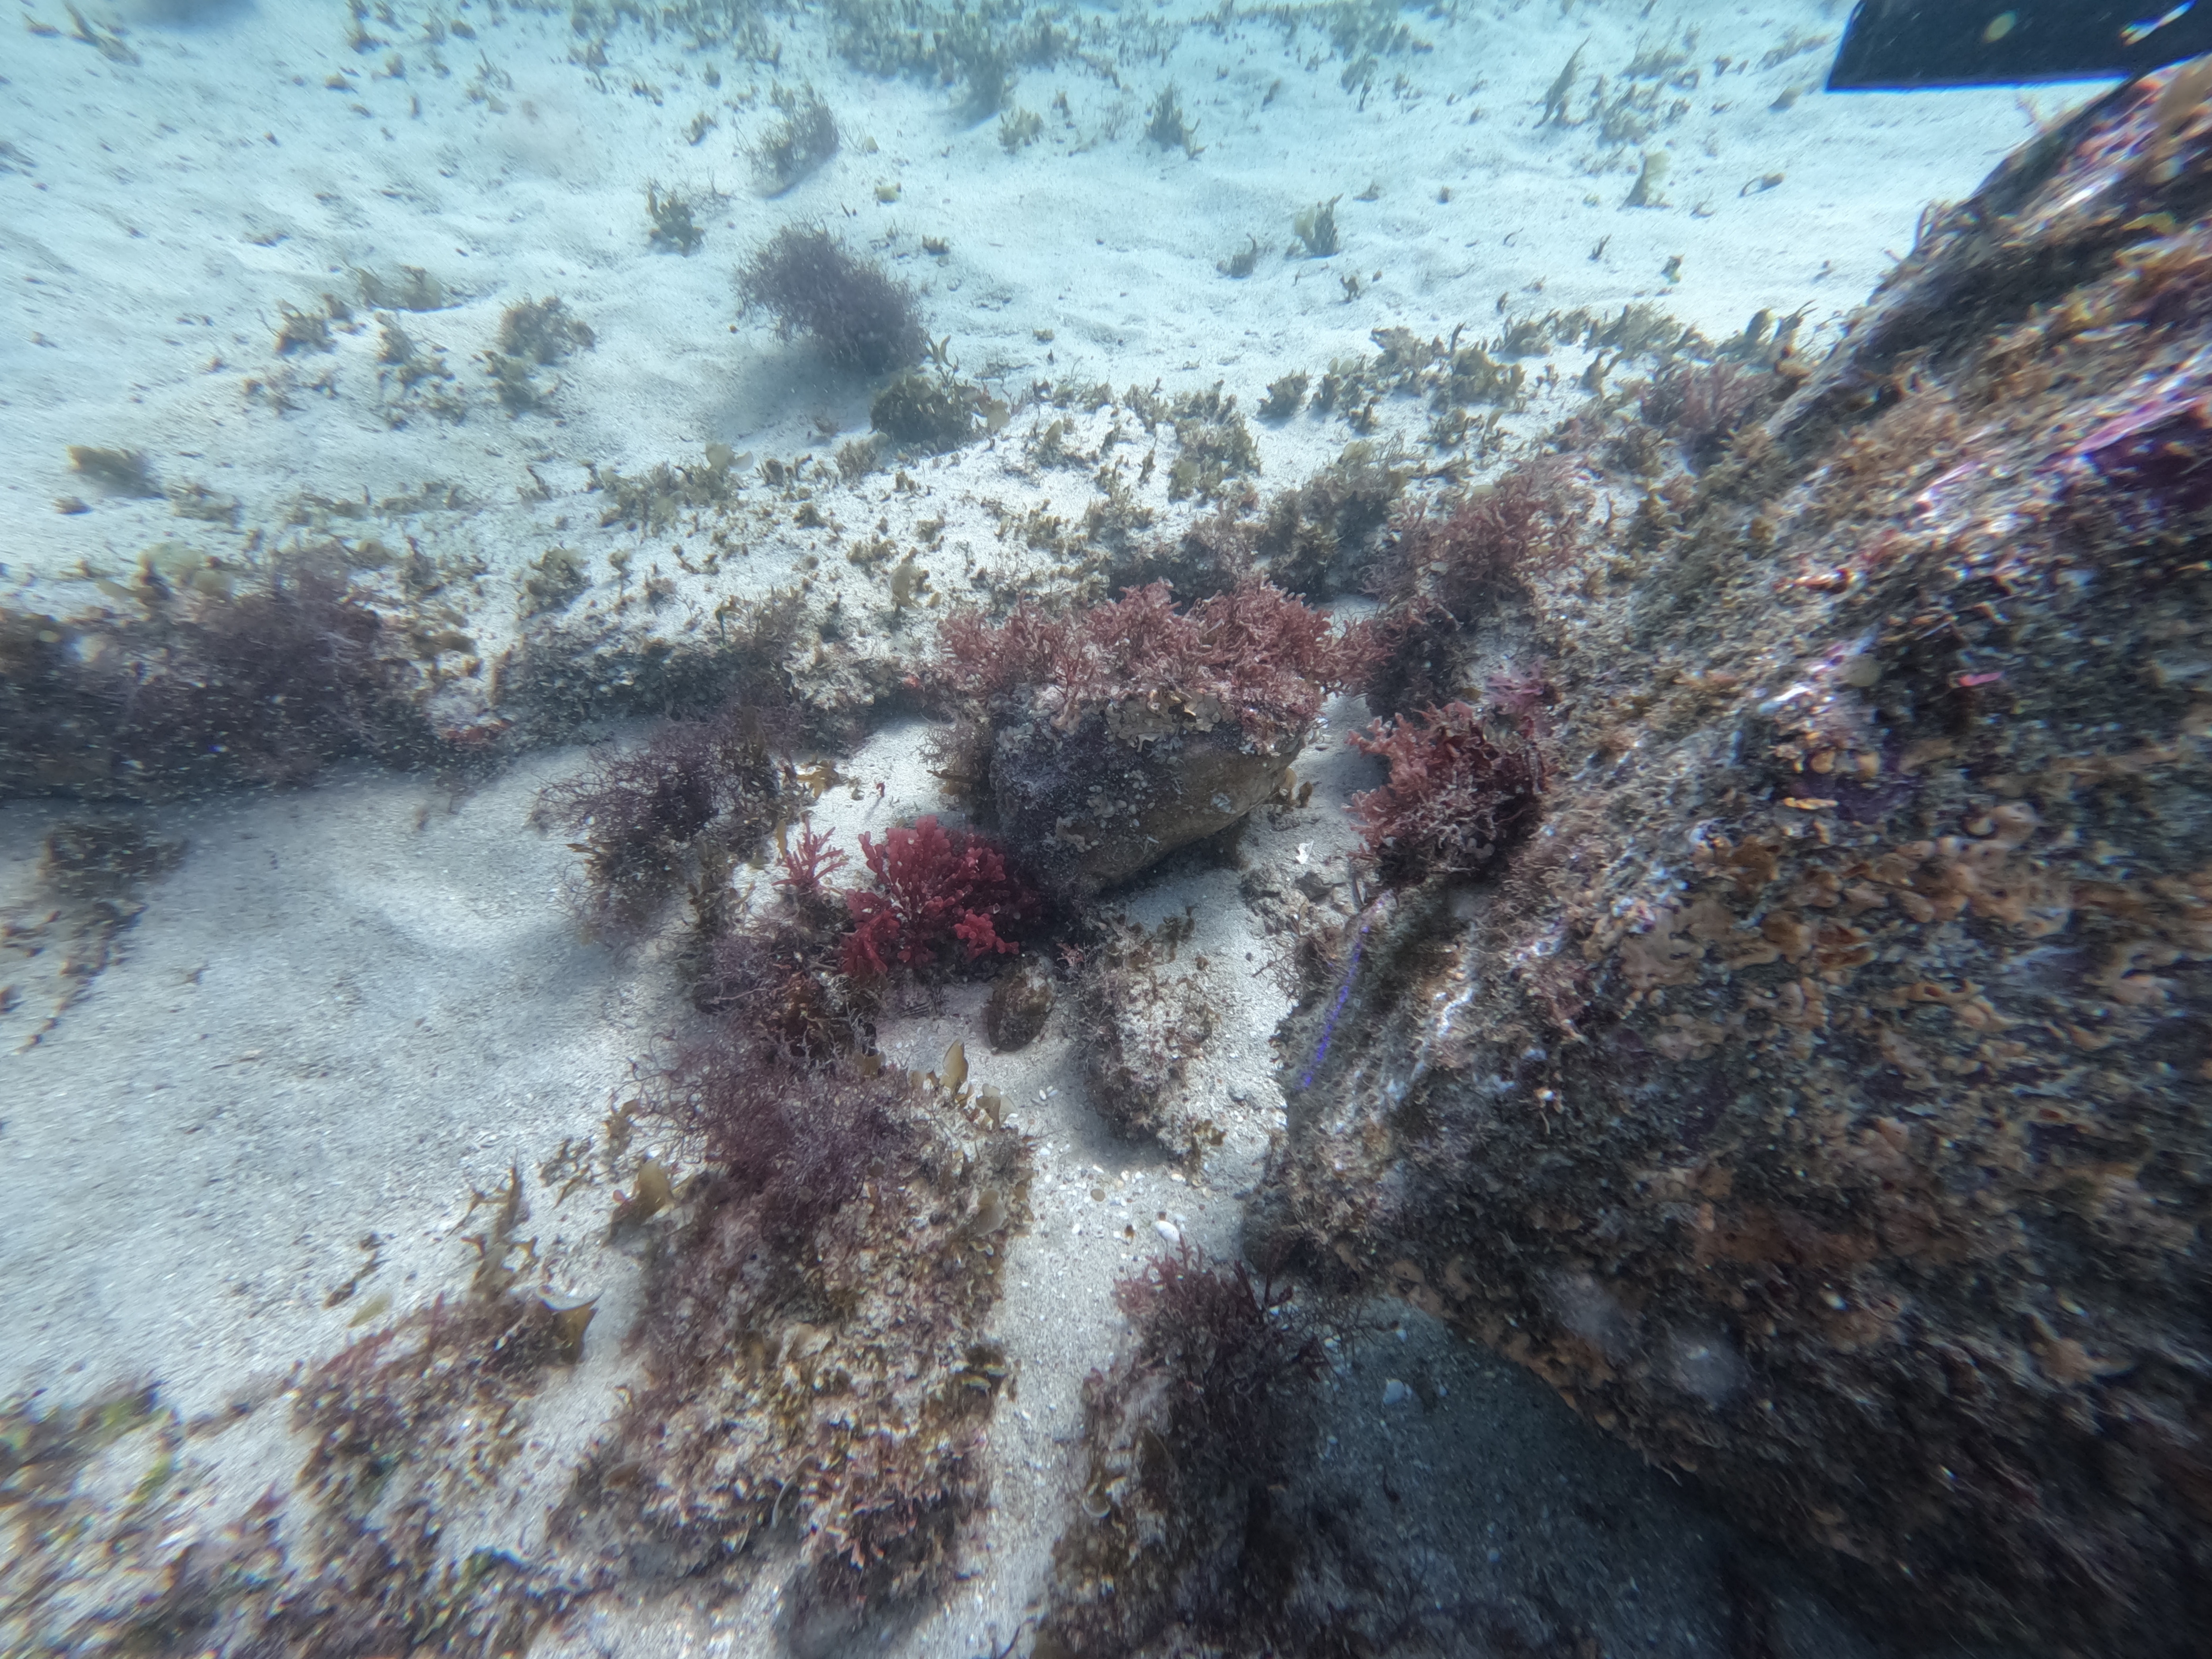

Supplement: Supplementary file 900 [file G0713967.pdf › Ocean2/G0713967.pdf]
