# Supplementary figures and images for: 3D reconstruction of shallow sea environment using direct system calibration and faint laser line extraction (part 10 of 35)
Source: Research Square preprint supplement (doi:10.21203/rs.3.rs-5262658/v1), 2024-12-02

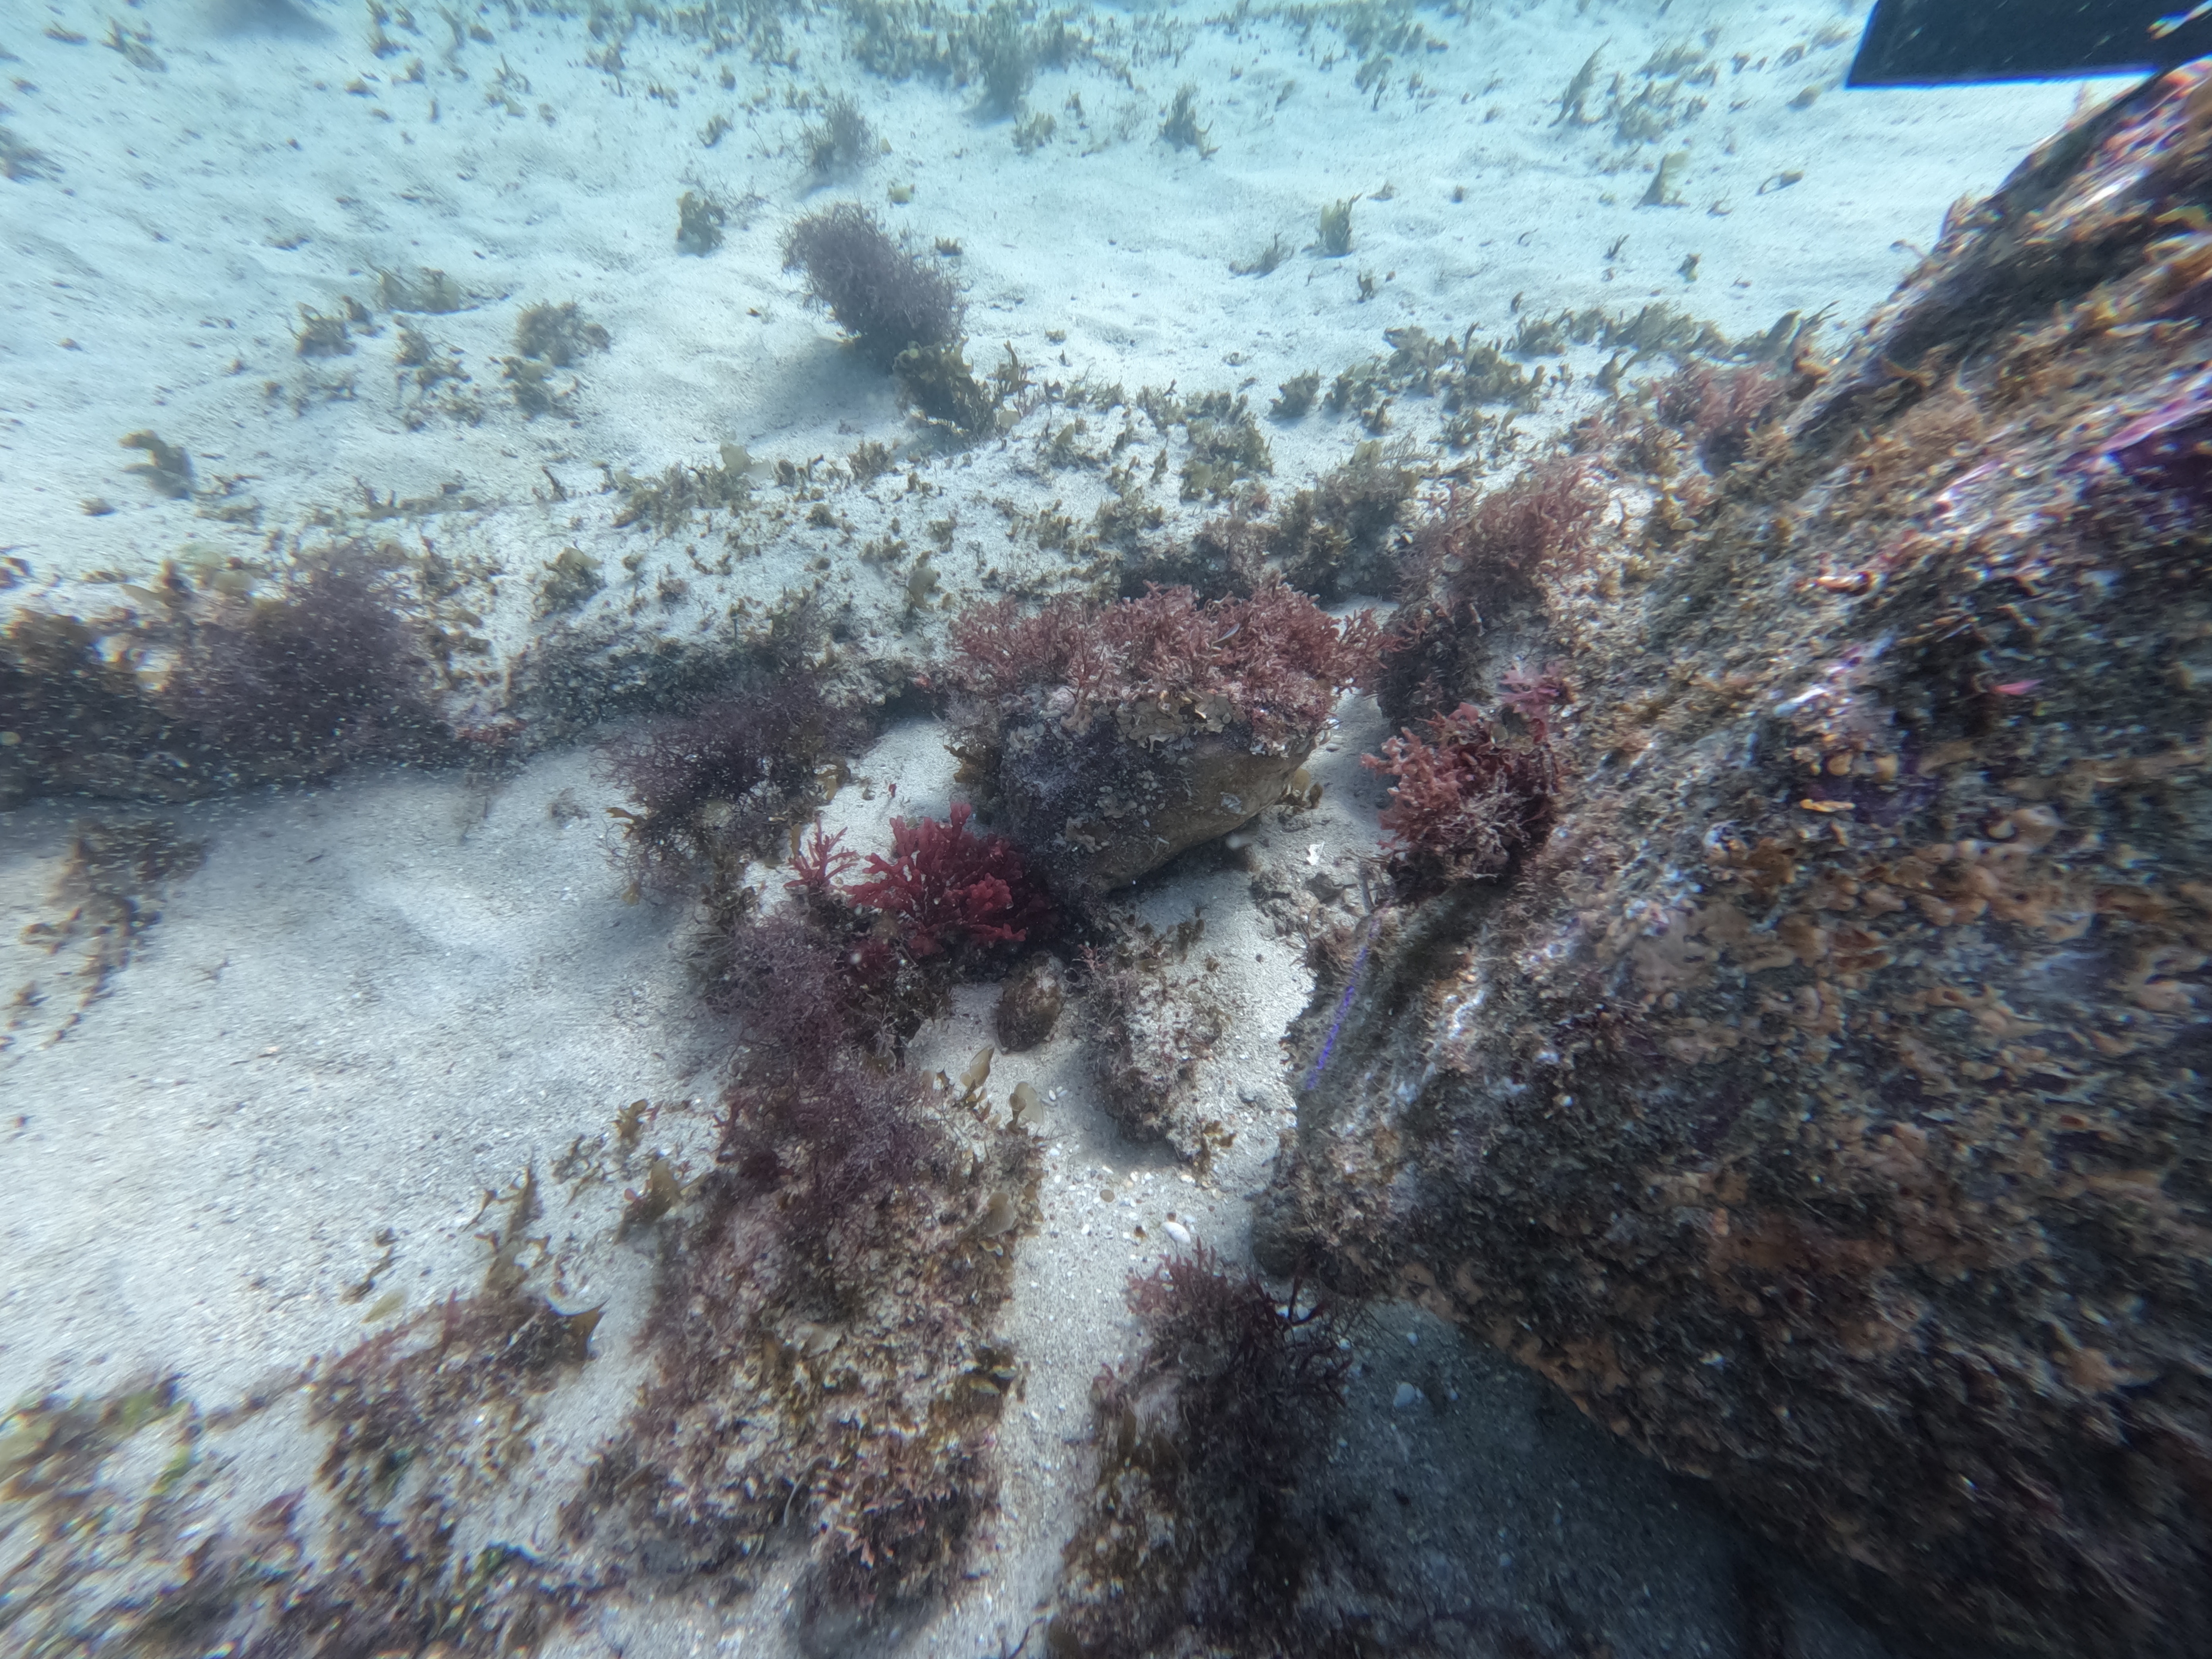

Supplement: Supplementary file 901 [file G0713968.pdf › Ocean2/G0713968.pdf]

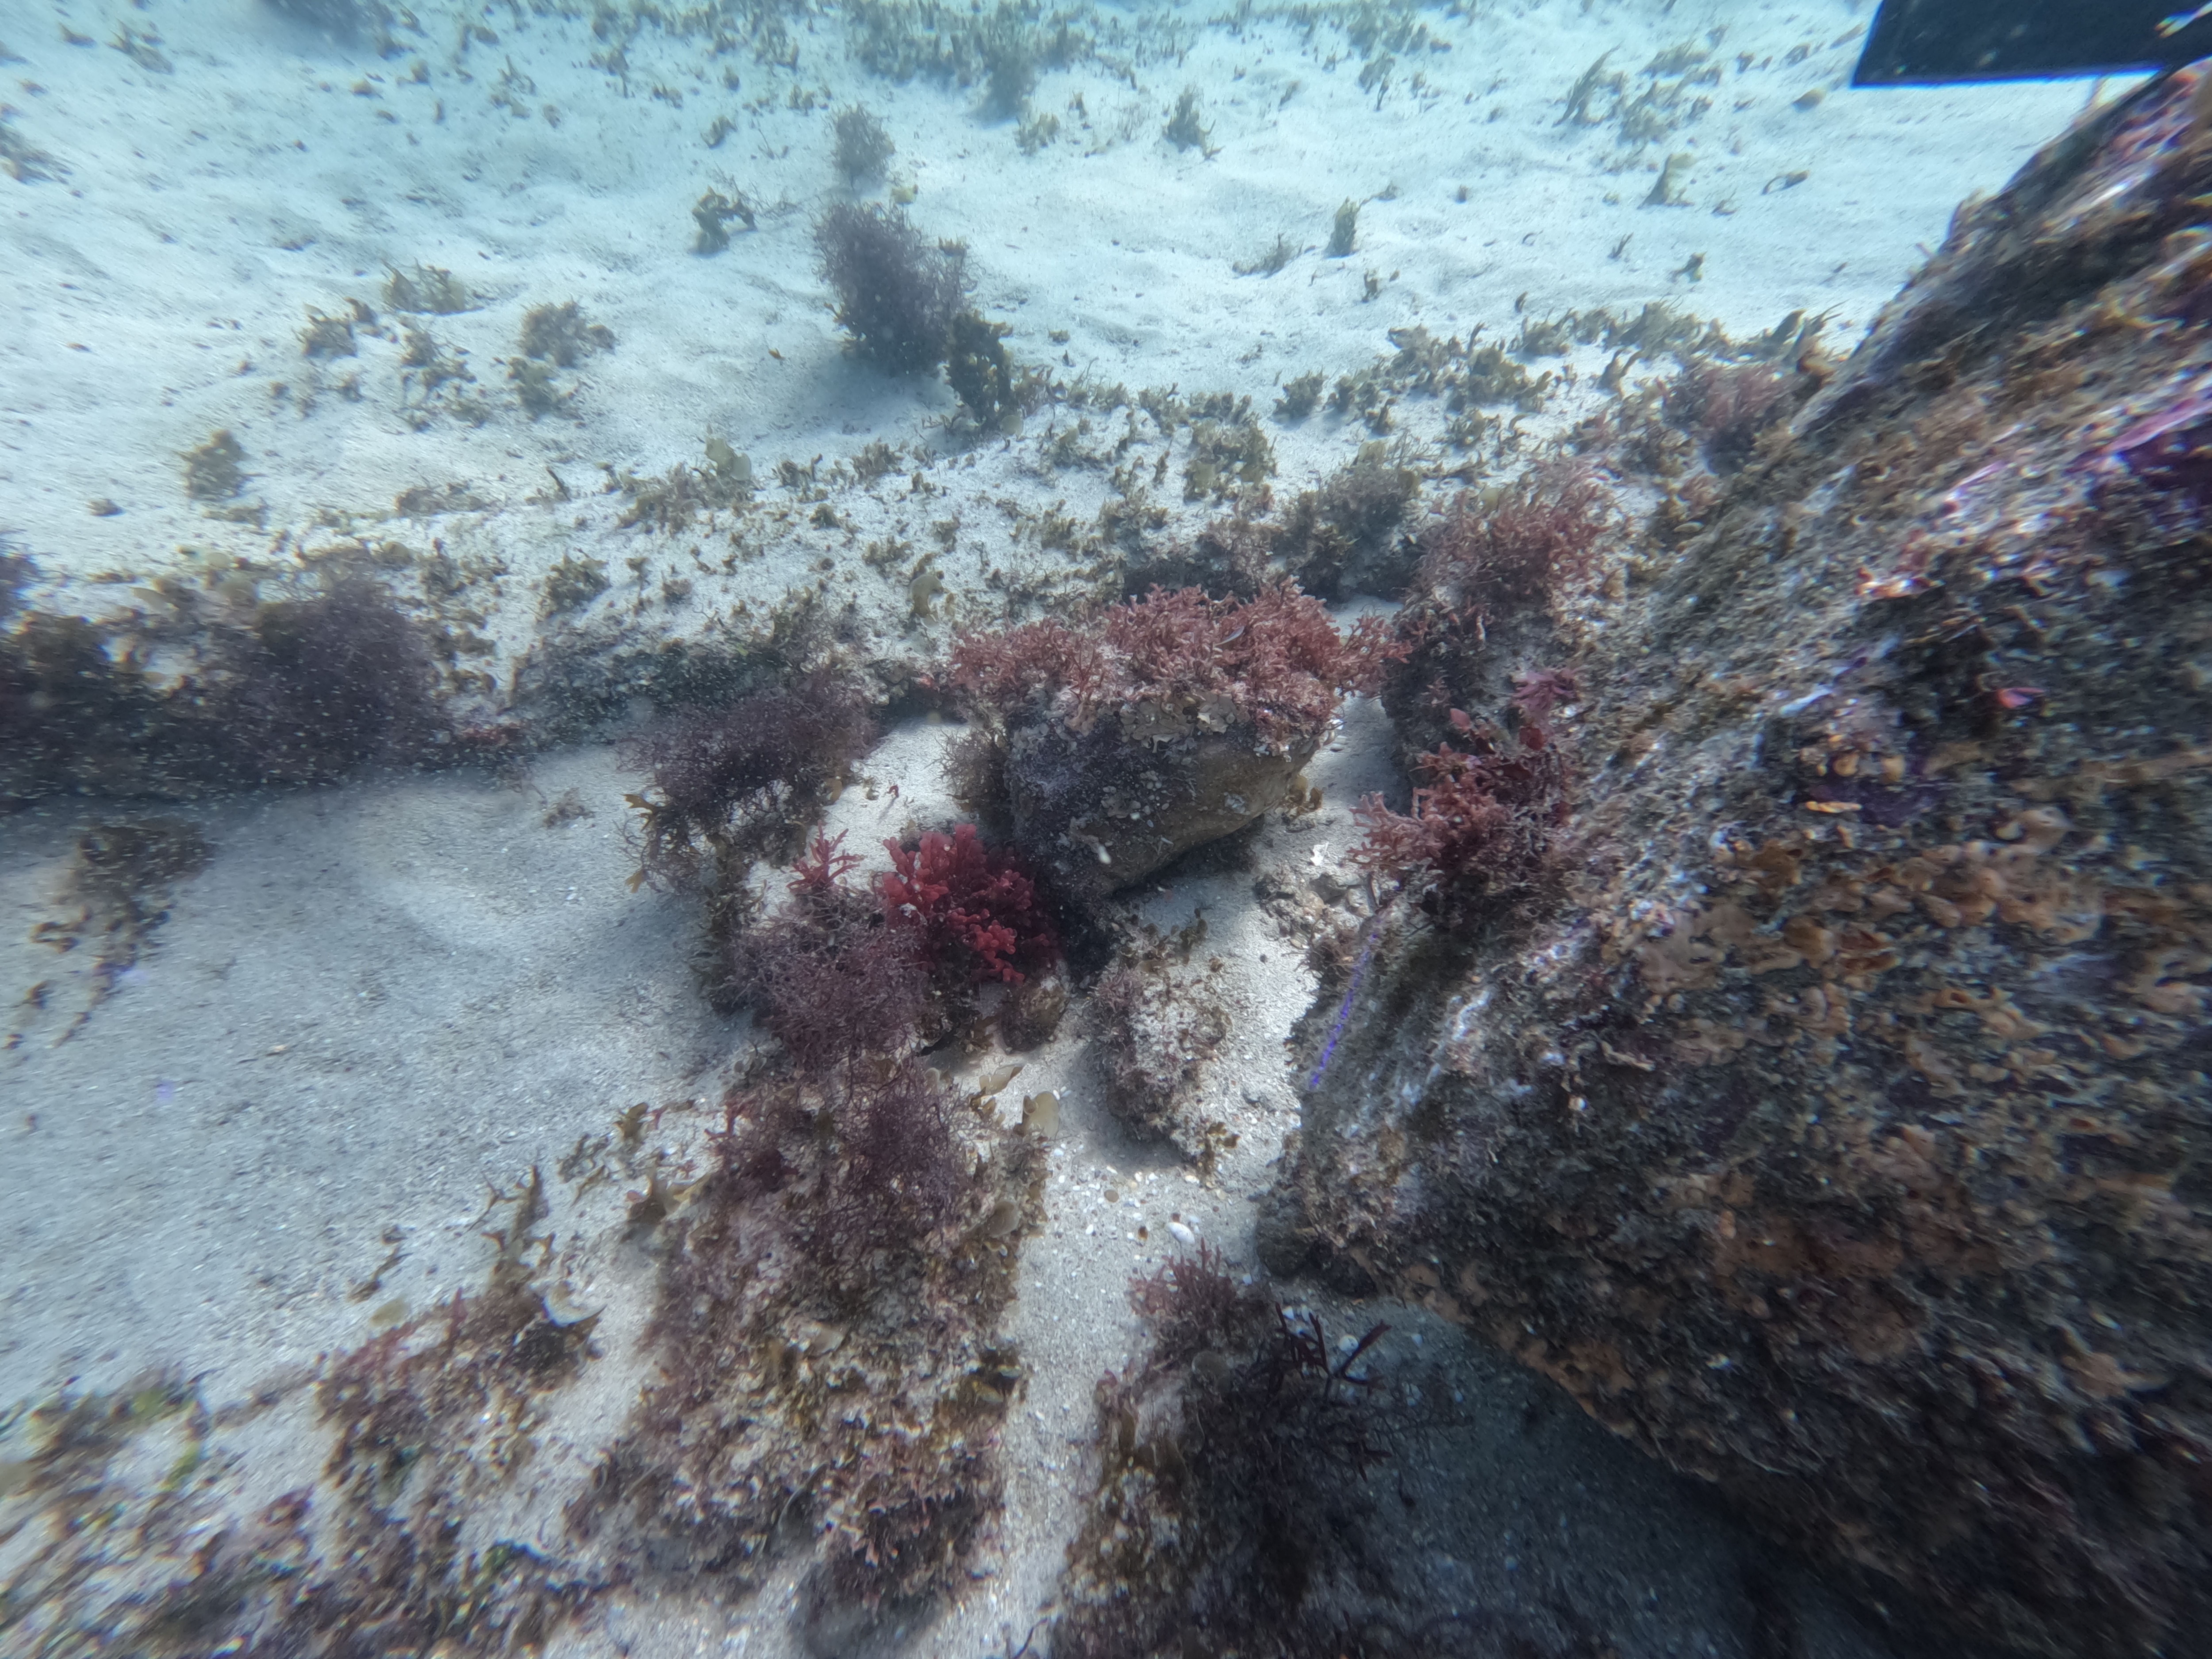

Supplement: Supplementary file 902 [file G0713969.pdf › Ocean2/G0713969.pdf]

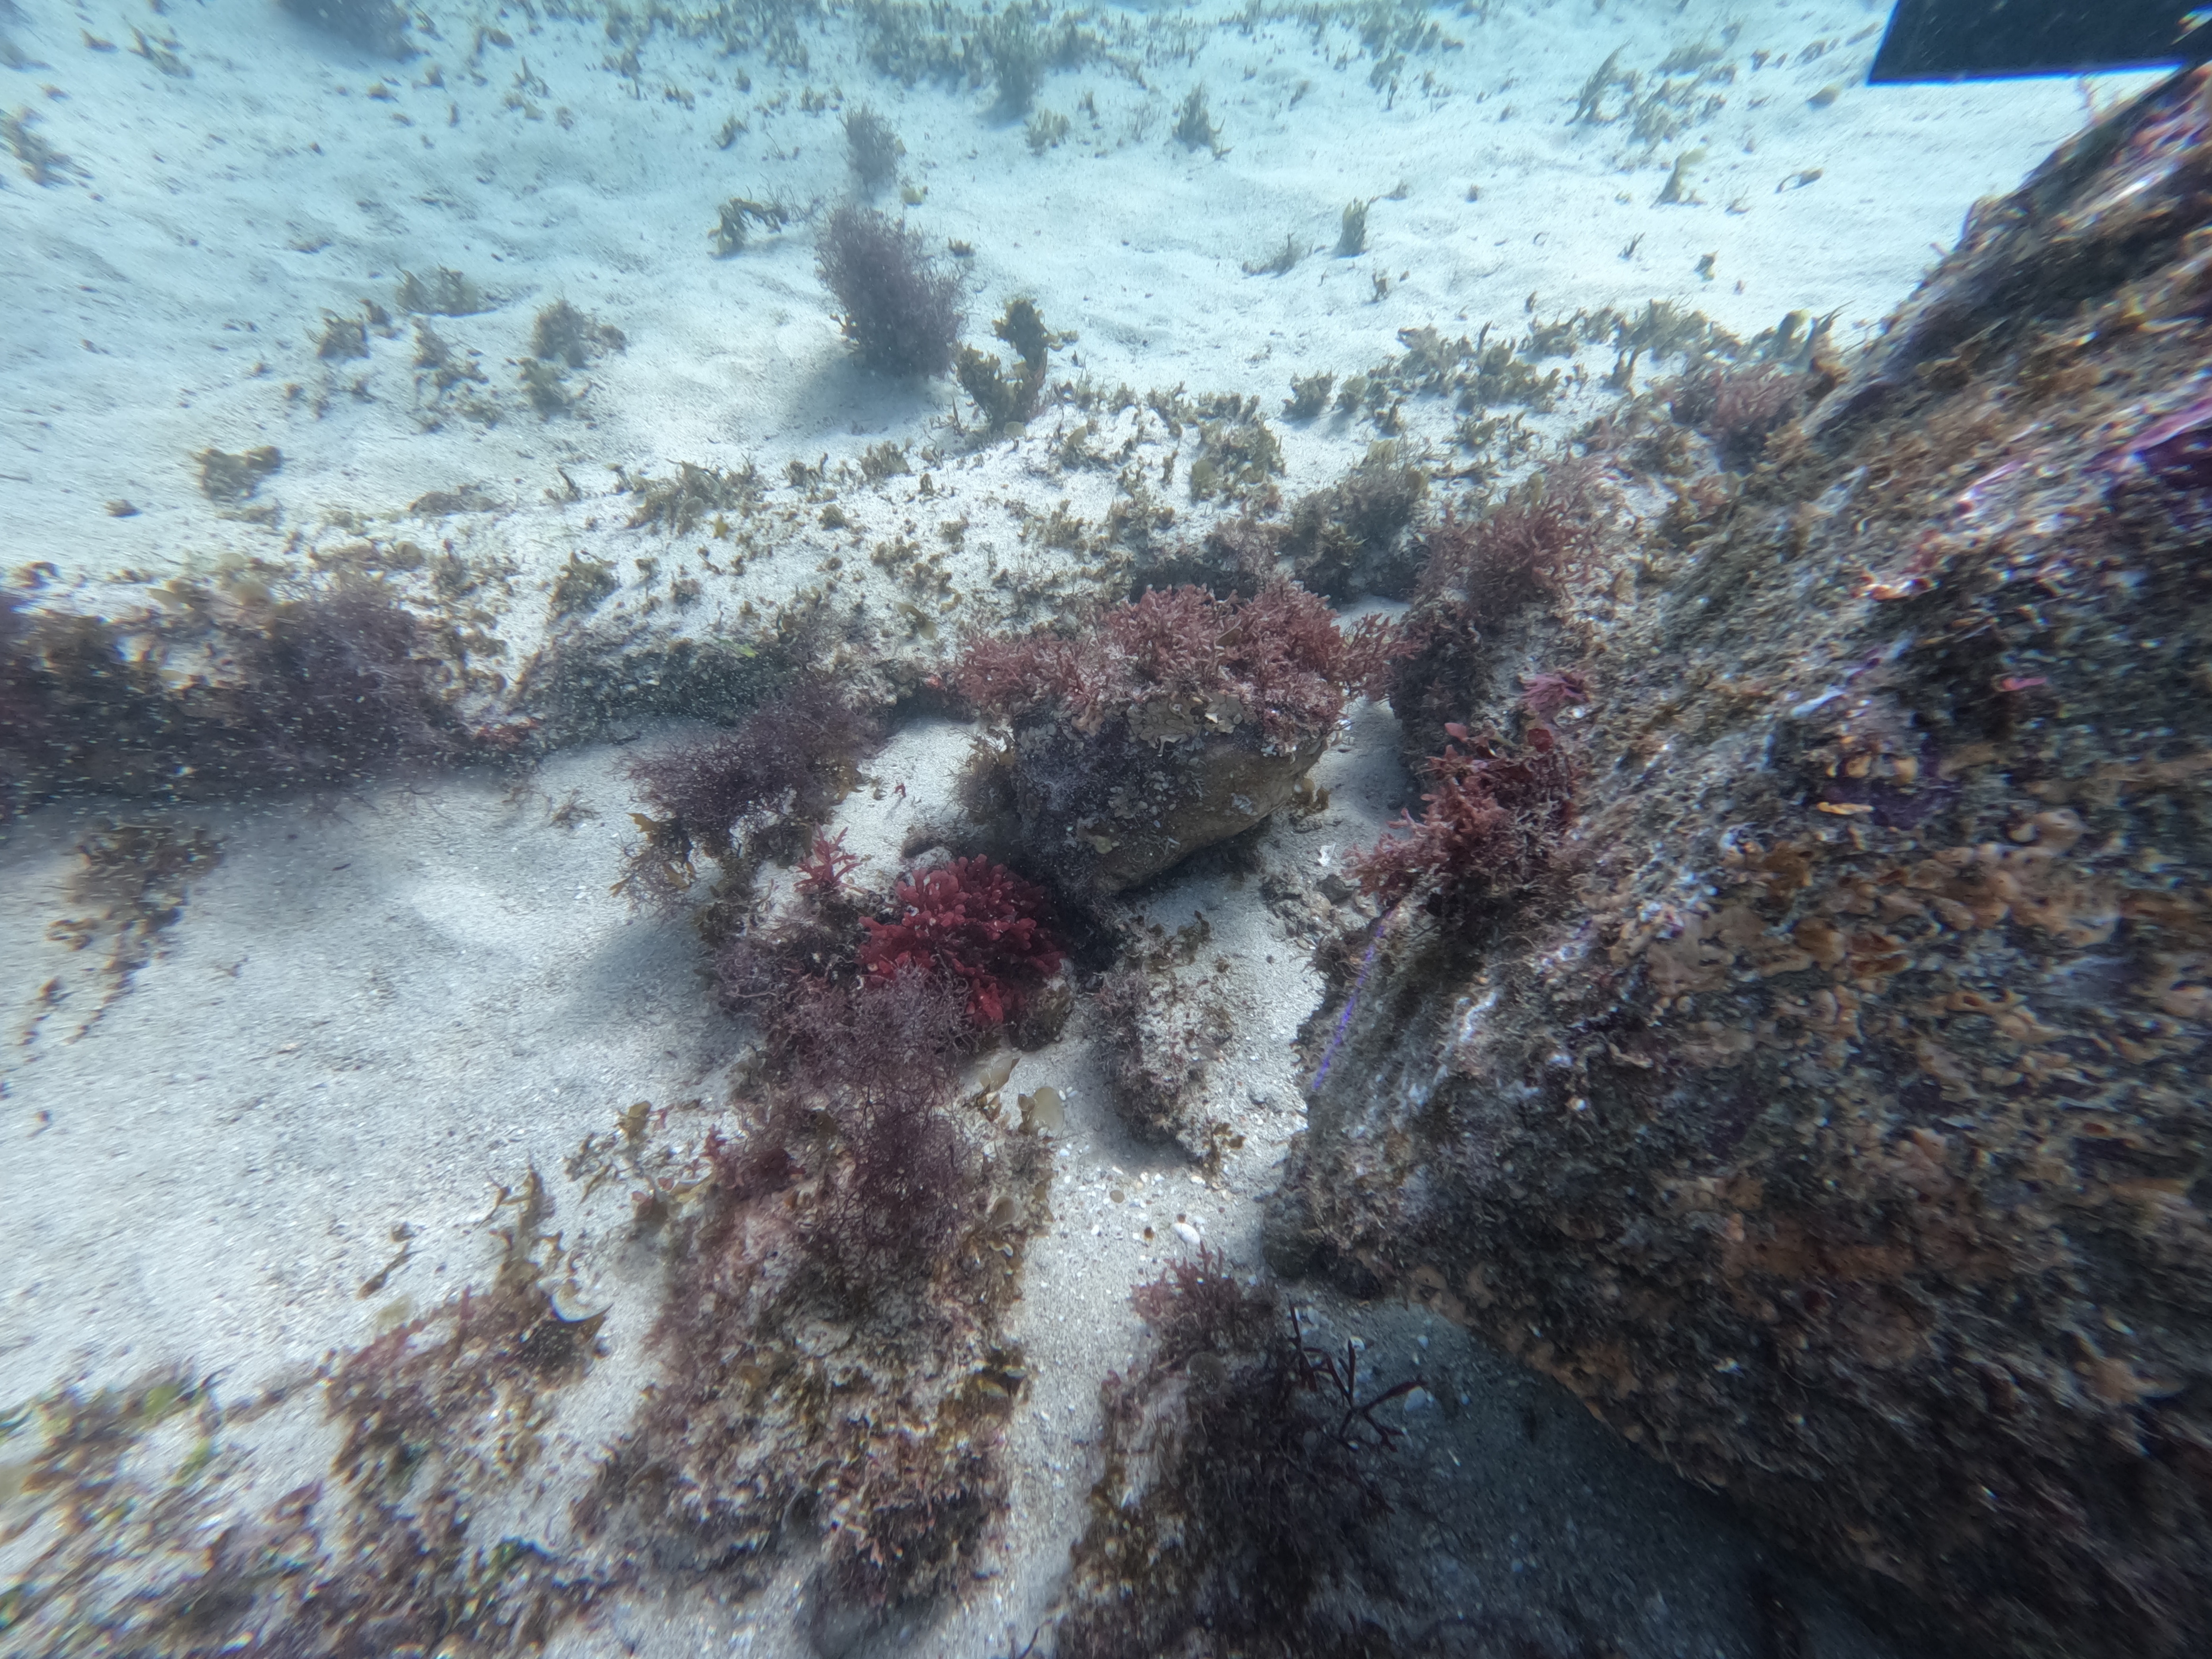

Supplement: Supplementary file 903 [file G0713970.pdf › Ocean2/G0713970.pdf]

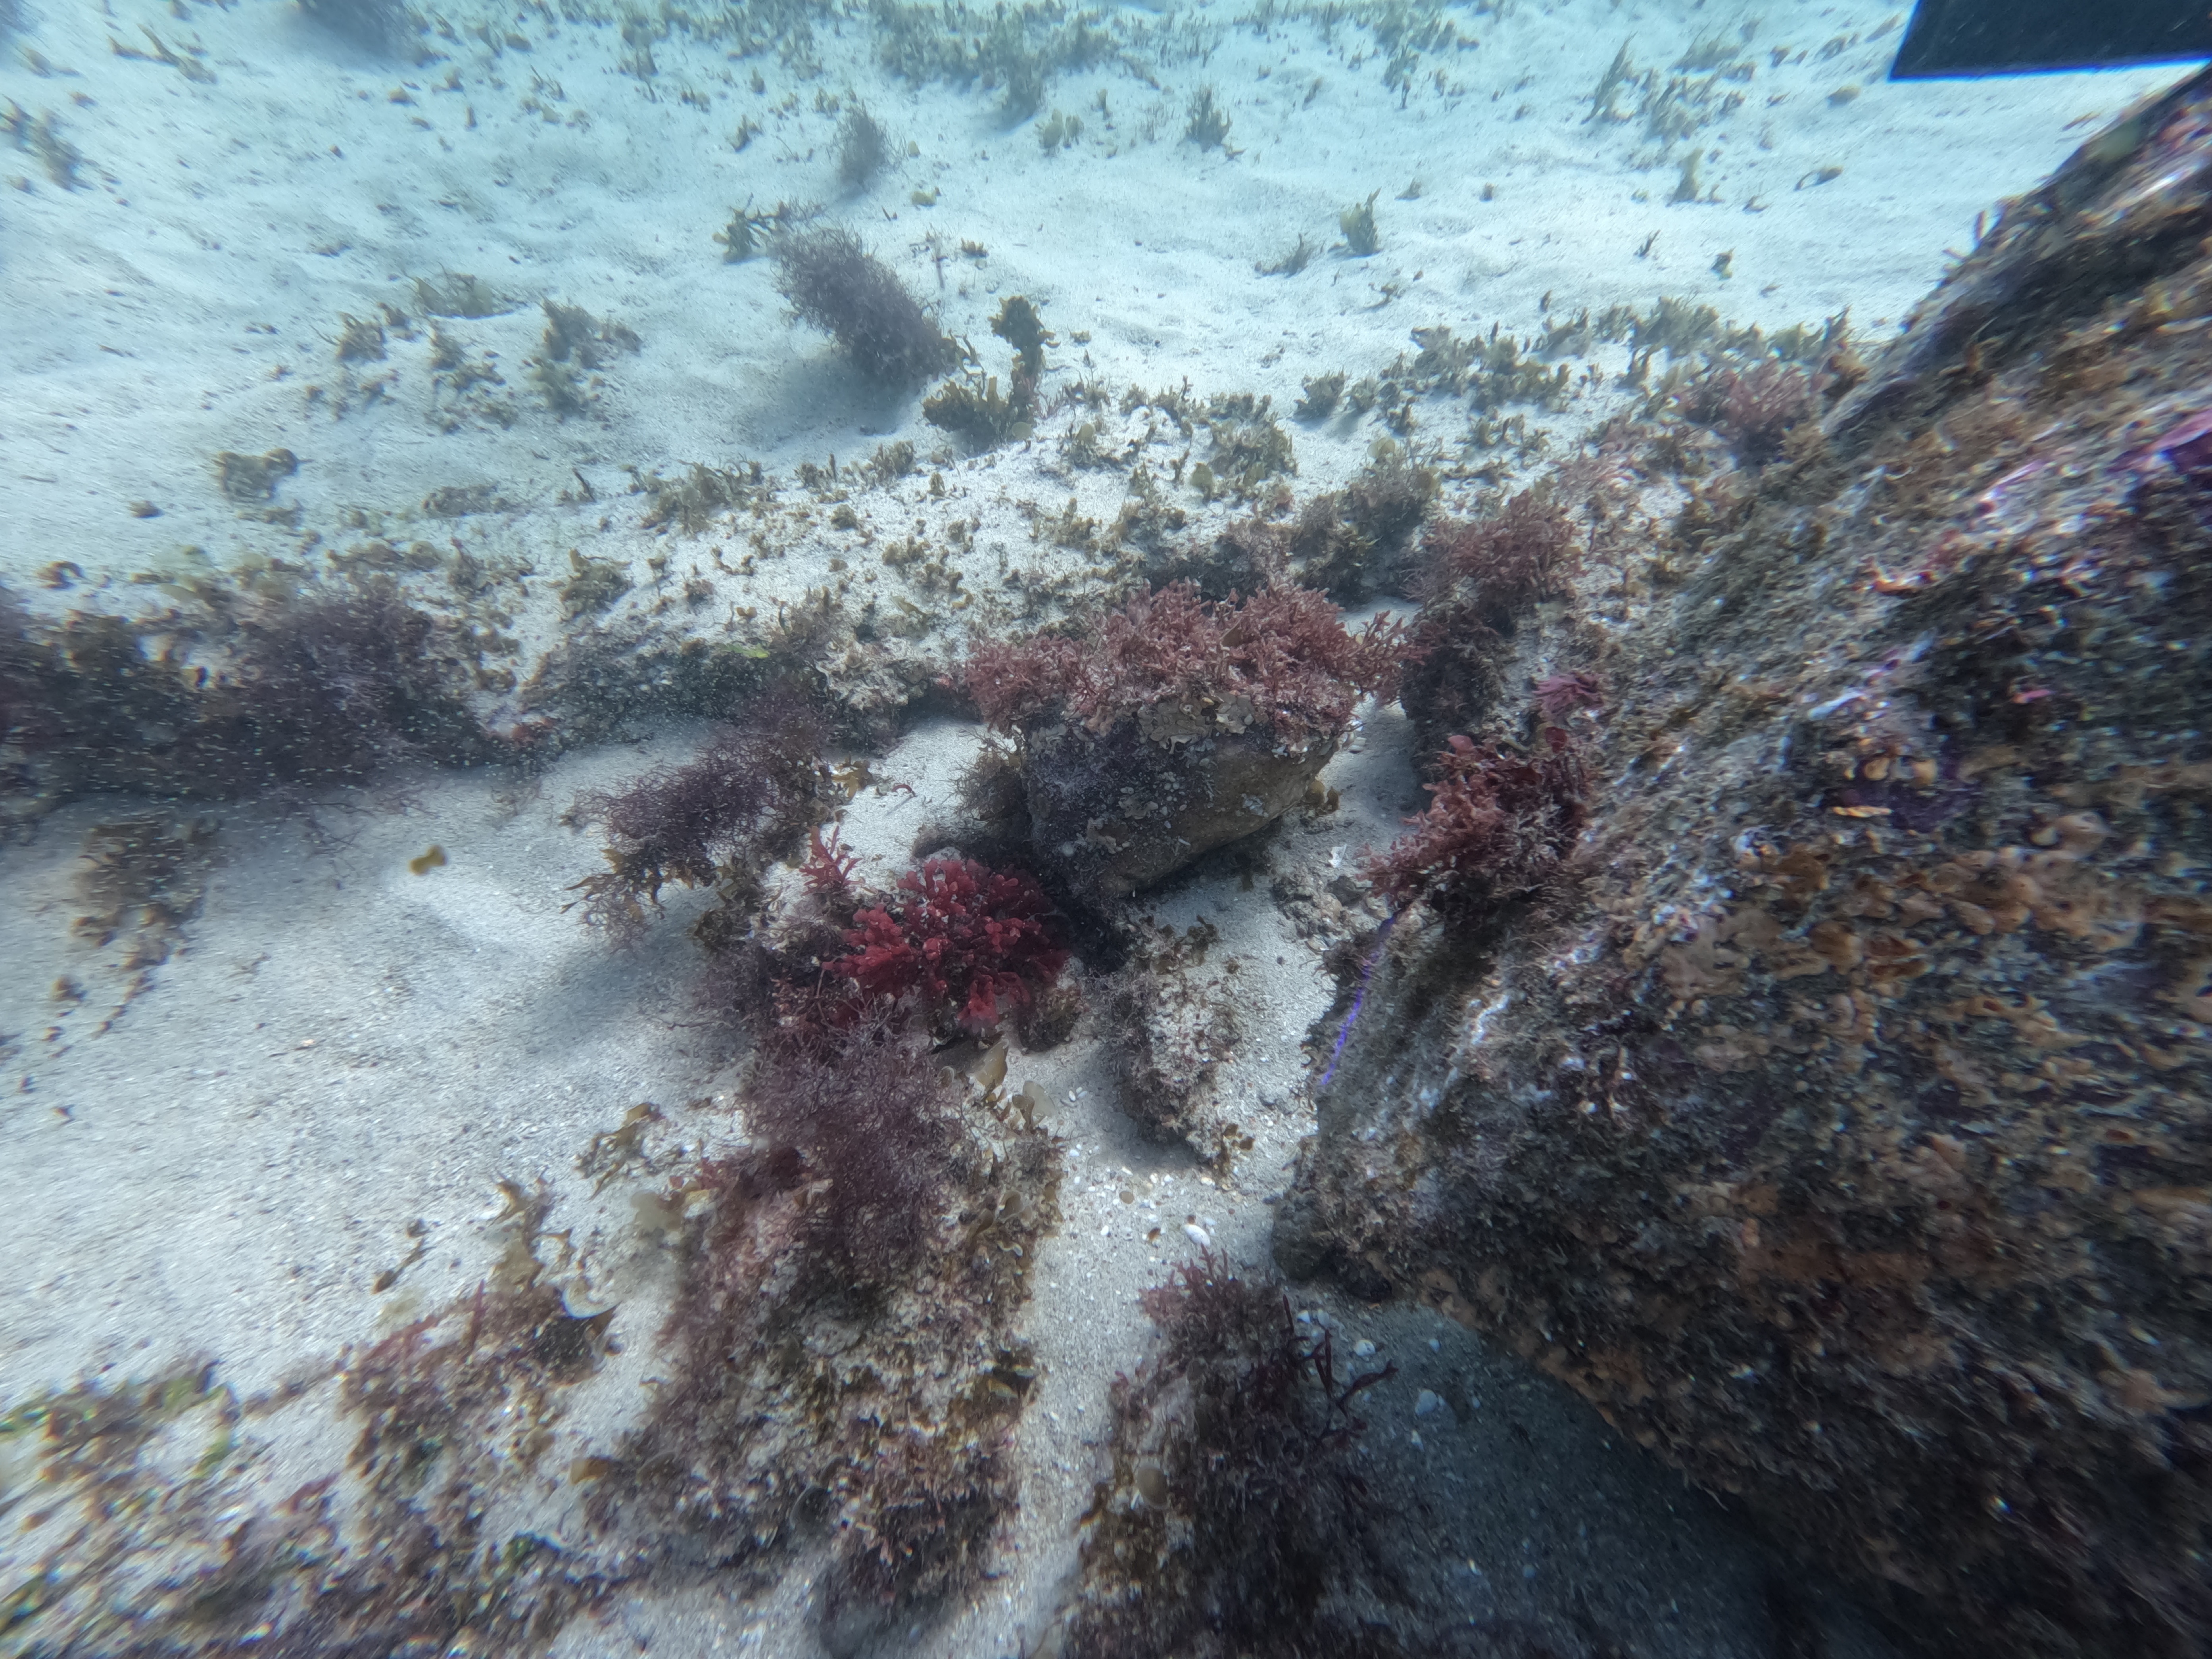

Supplement: Supplementary file 904 [file G0713971.pdf › Ocean2/G0713971.pdf]

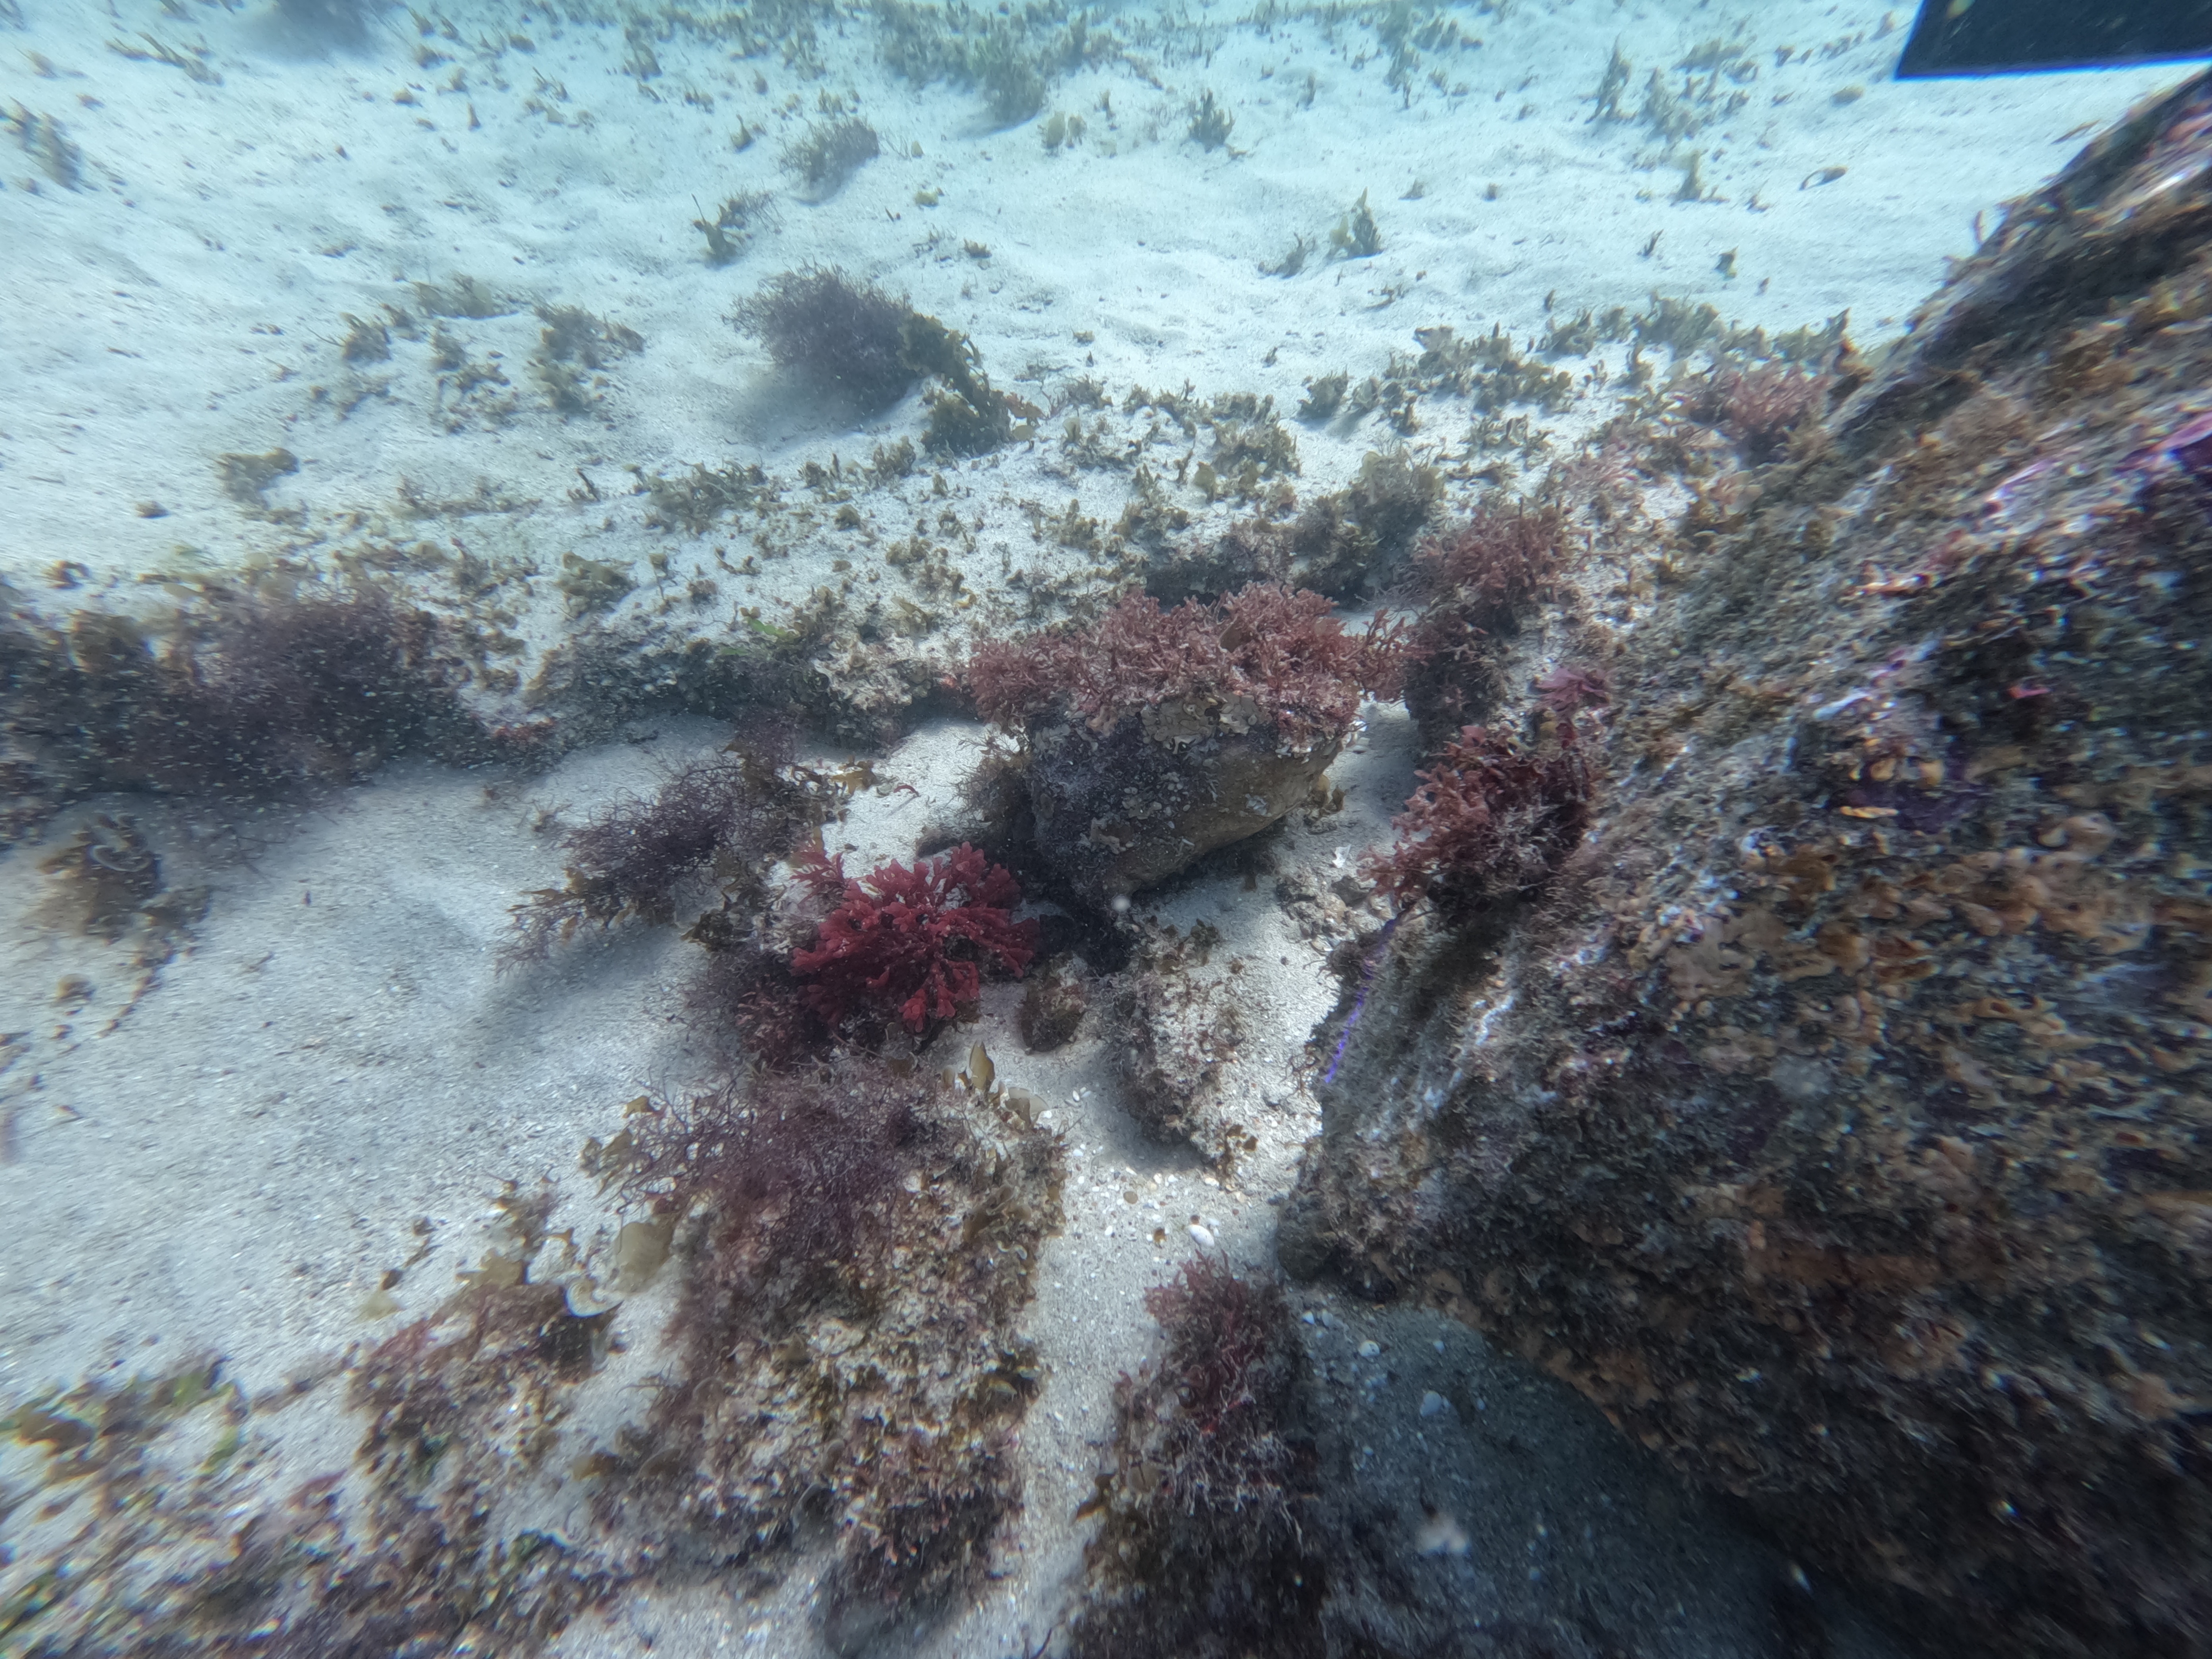

Supplement: Supplementary file 905 [file G0713972.pdf › Ocean2/G0713972.pdf]

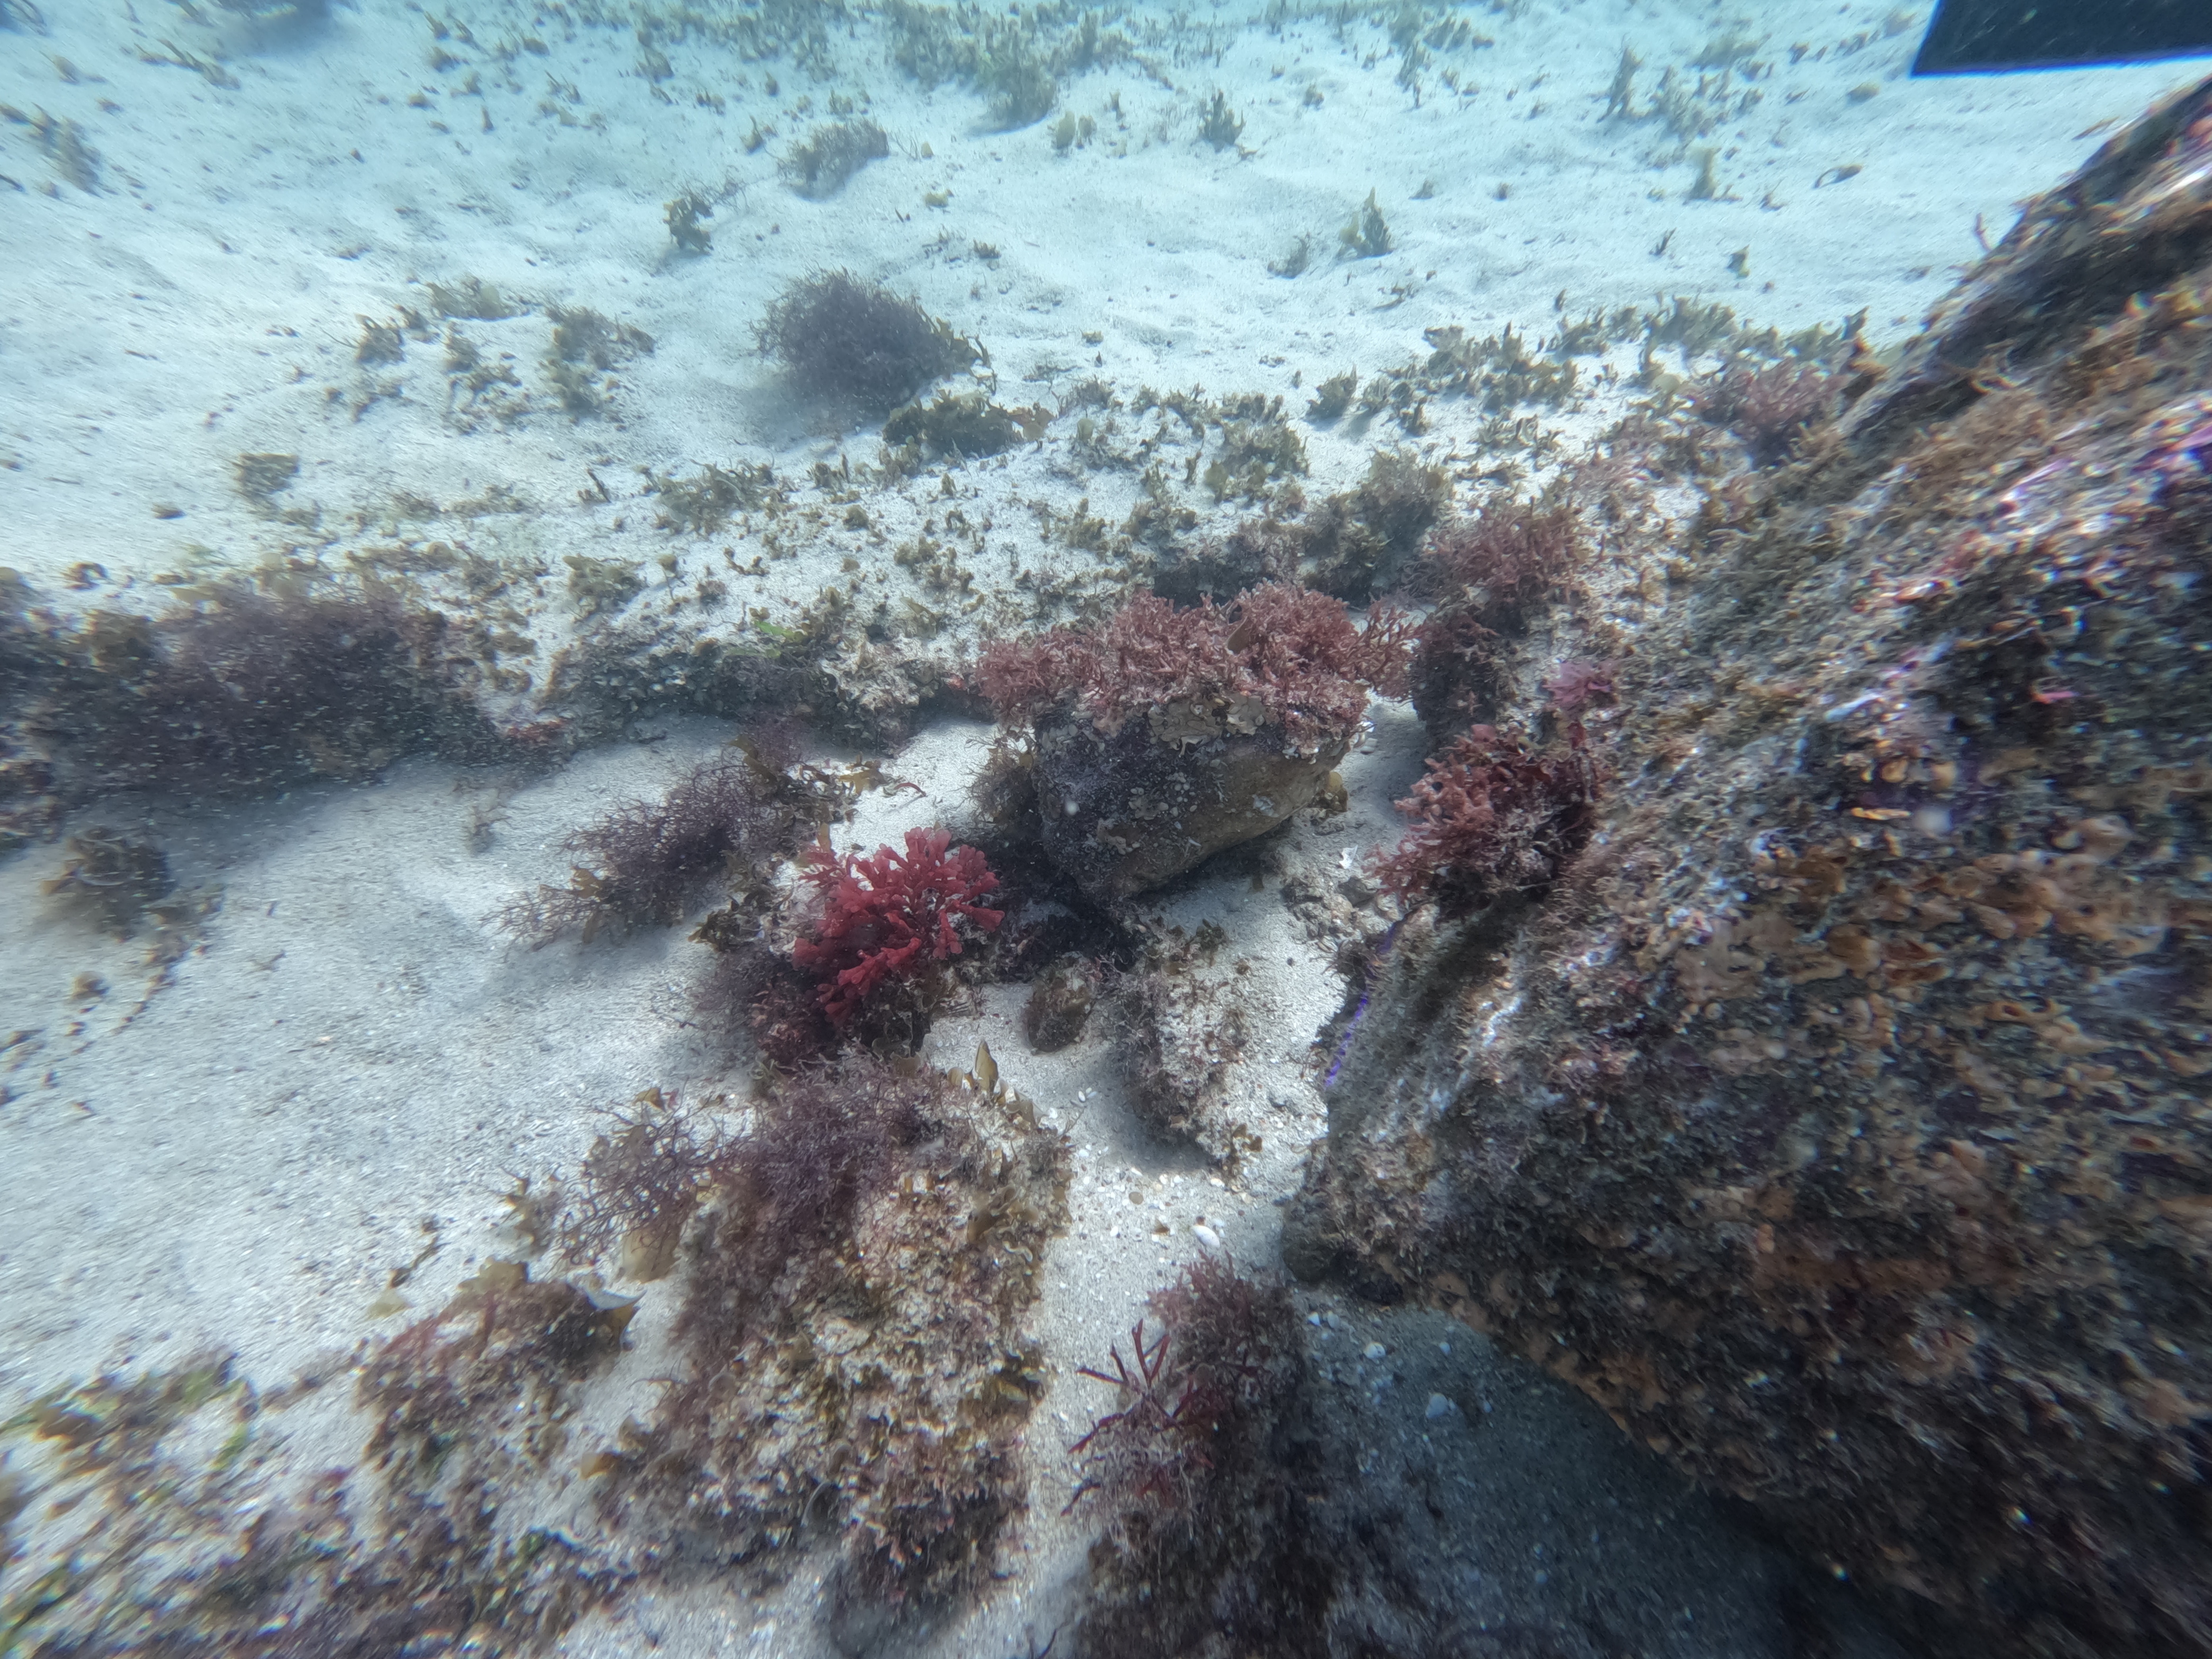

Supplement: Supplementary file 906 [file G0713973.pdf › Ocean2/G0713973.pdf]

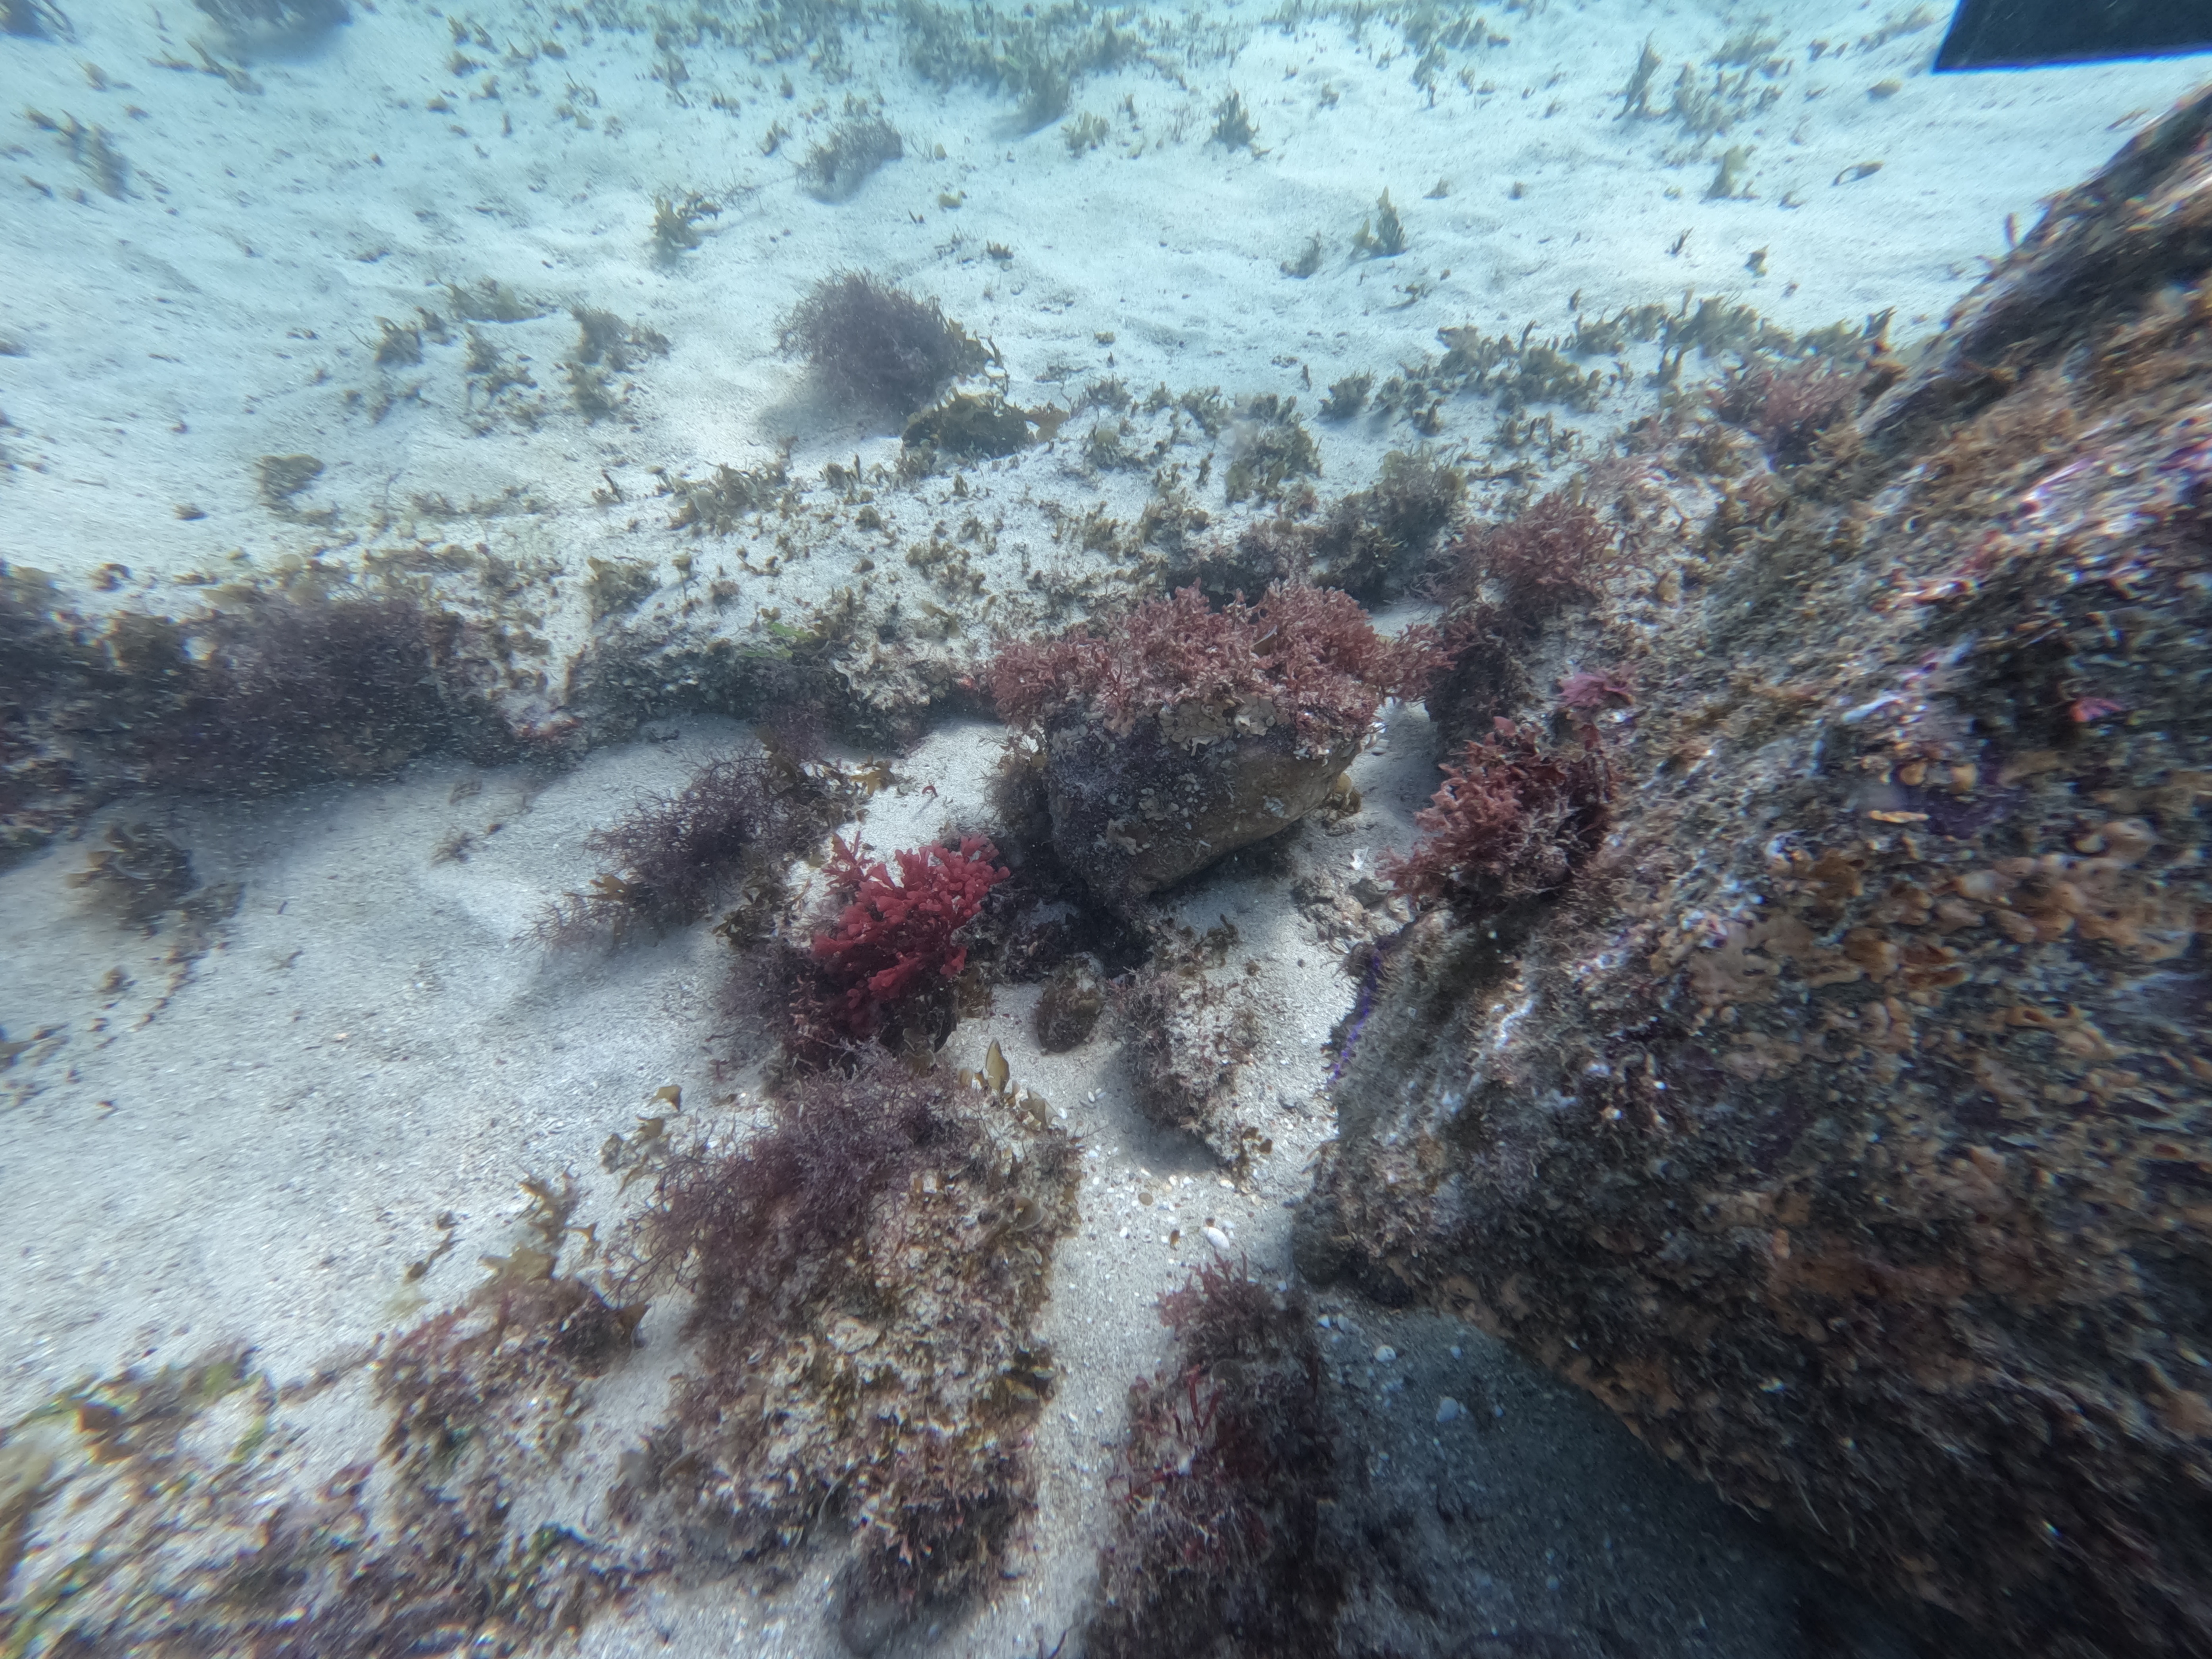

Supplement: Supplementary file 907 [file G0713974.pdf › Ocean2/G0713974.pdf]

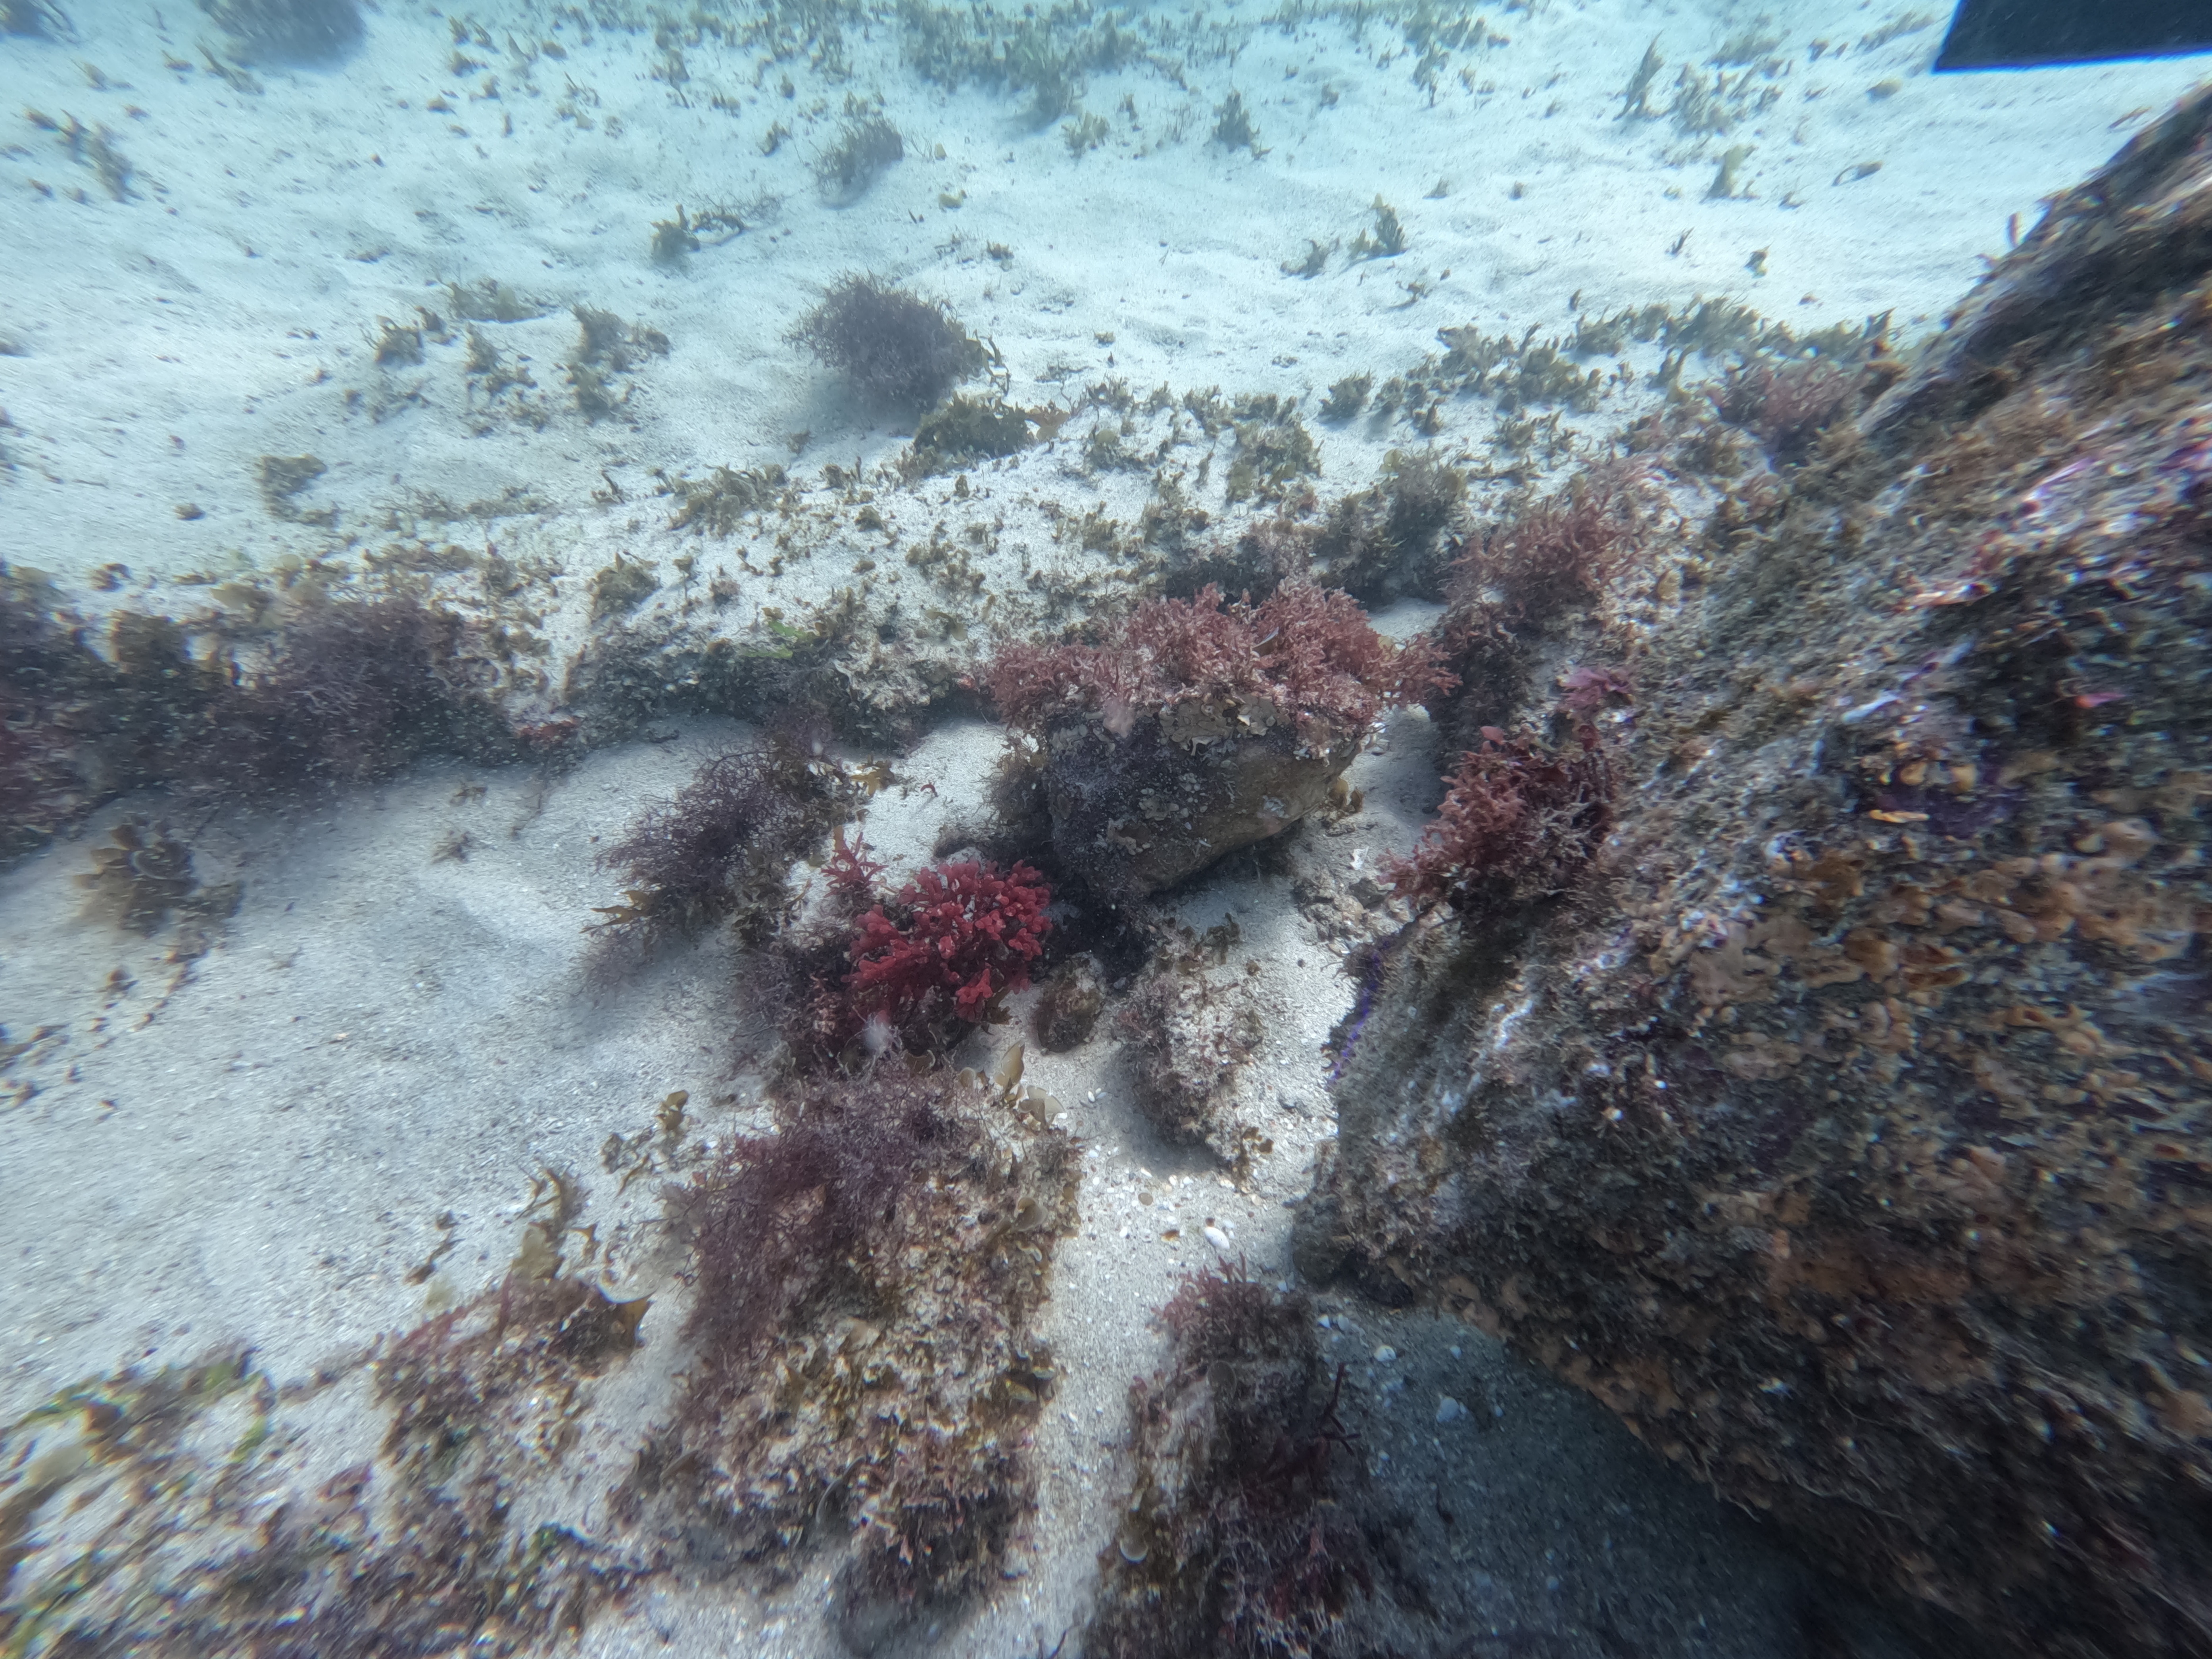

Supplement: Supplementary file 908 [file G0713975.pdf › Ocean2/G0713975.pdf]

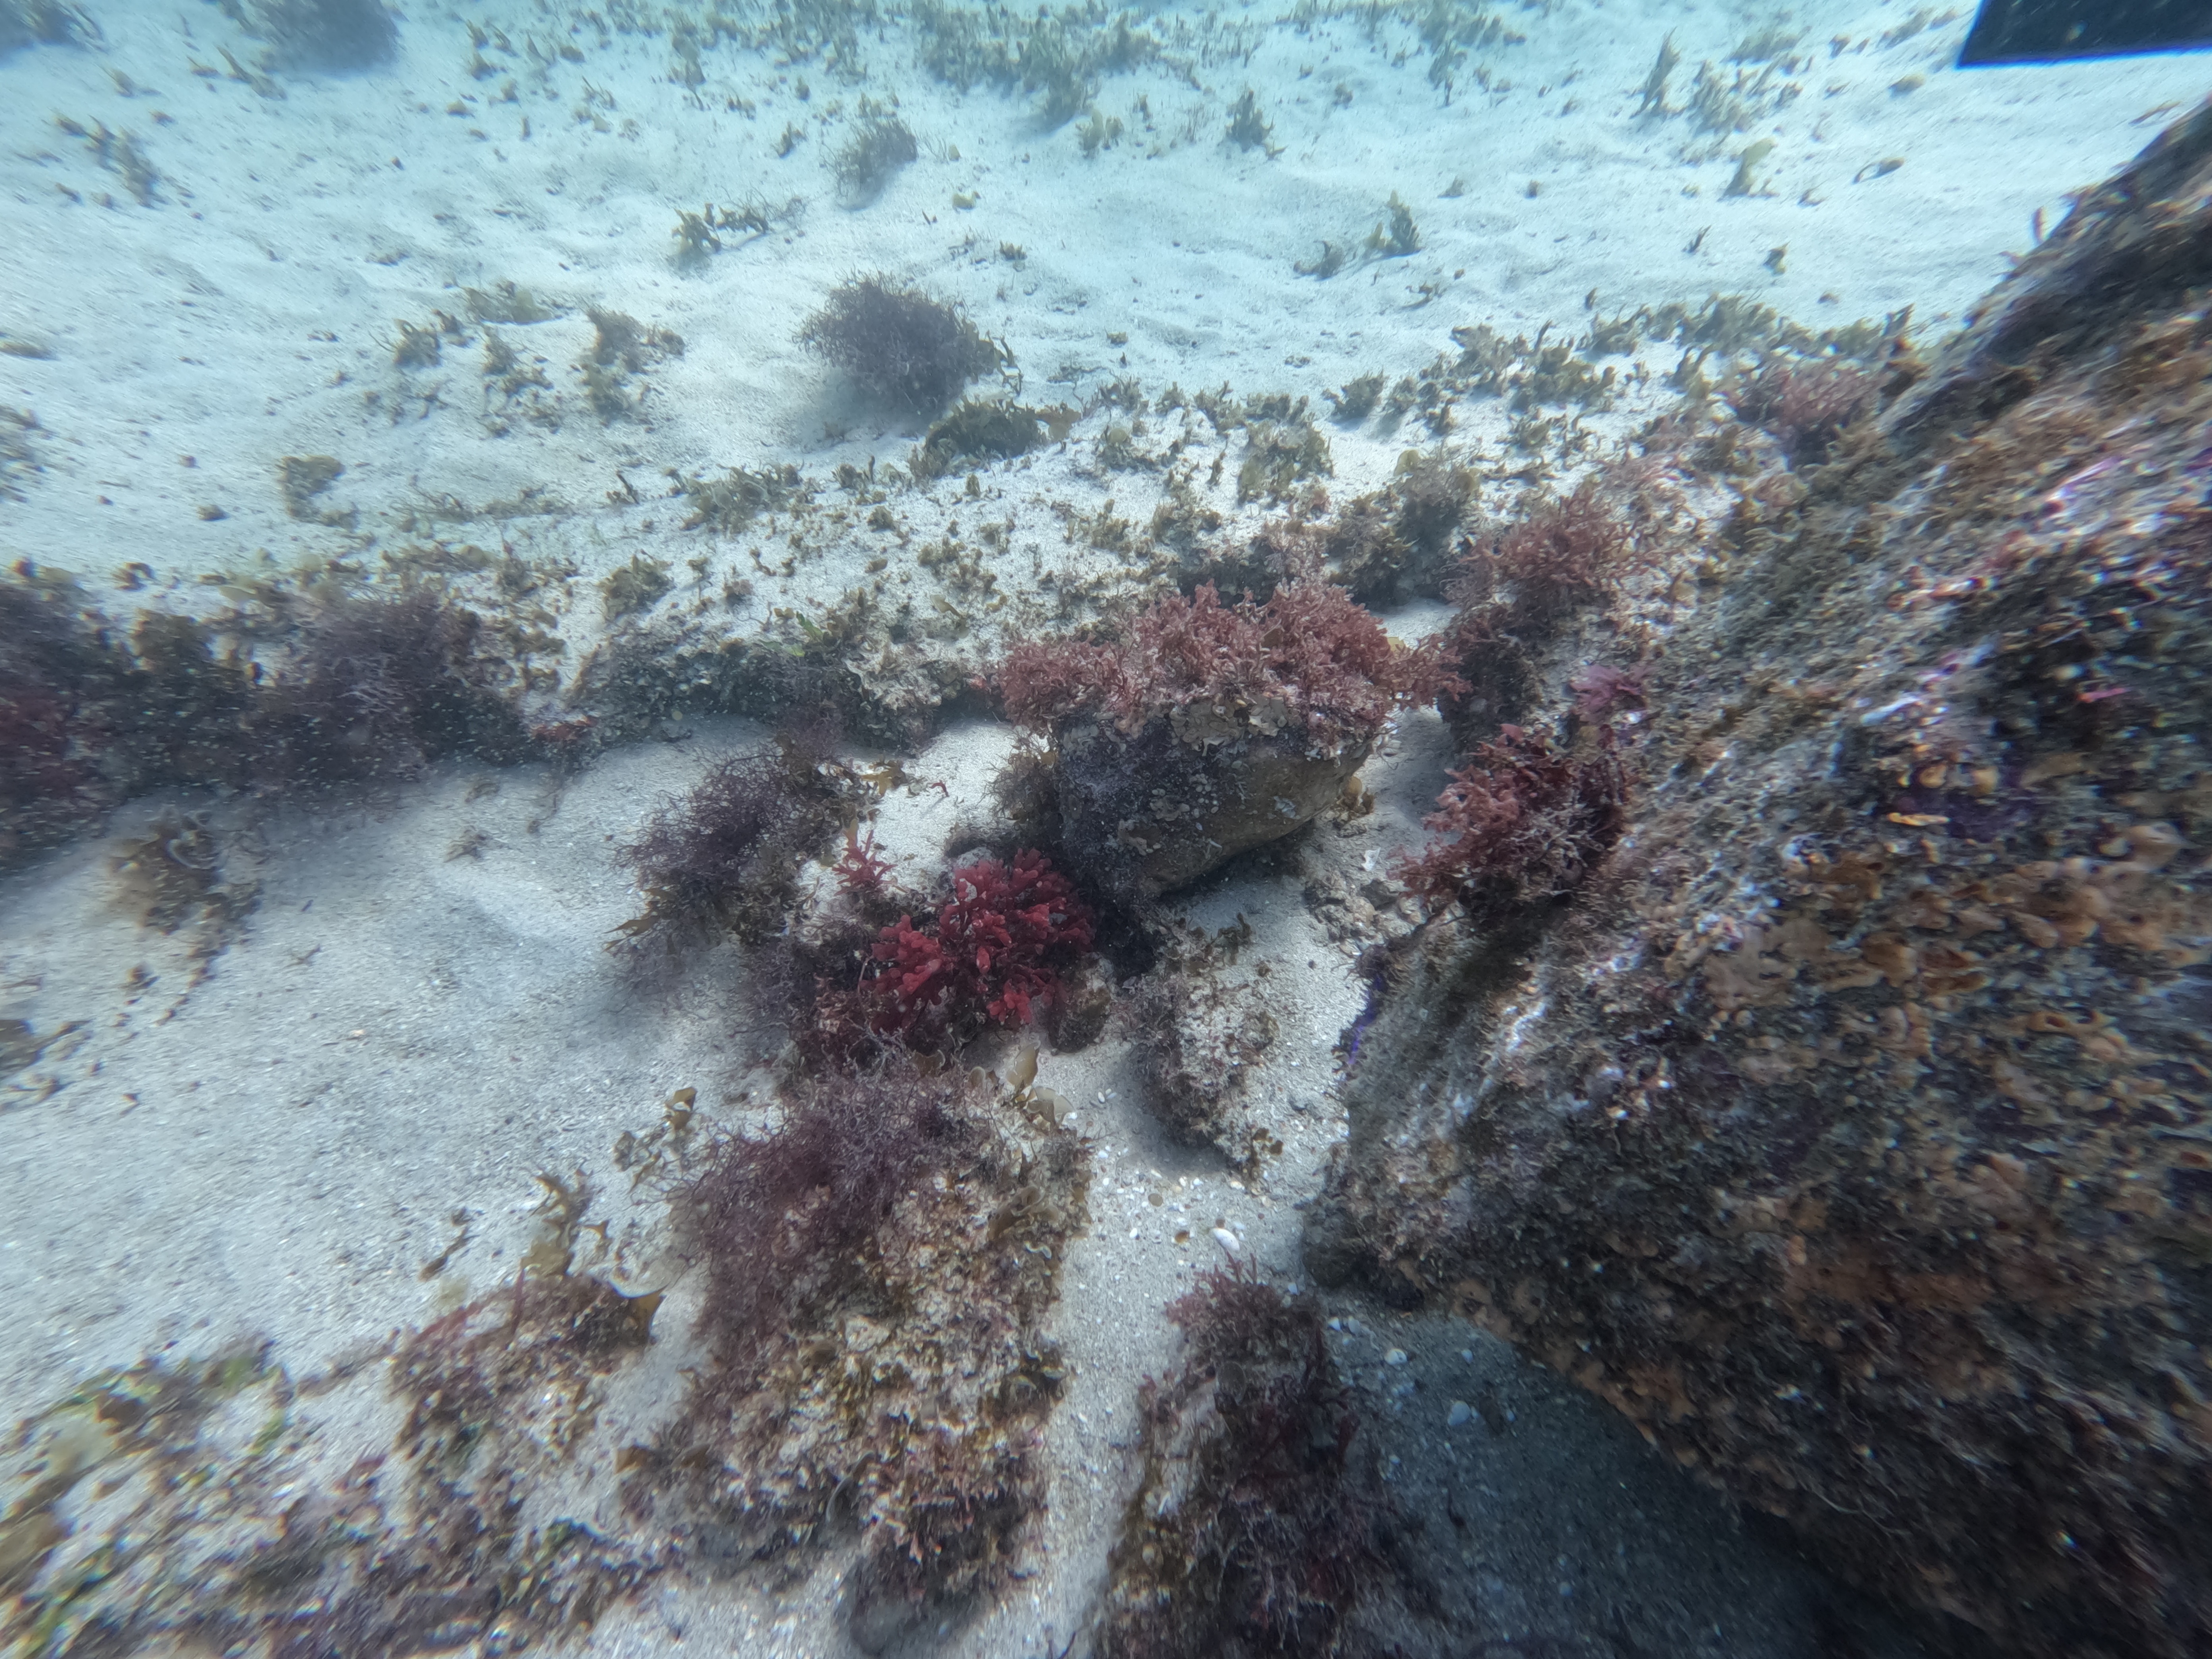

Supplement: Supplementary file 909 [file G0713976.pdf › Ocean2/G0713976.pdf]

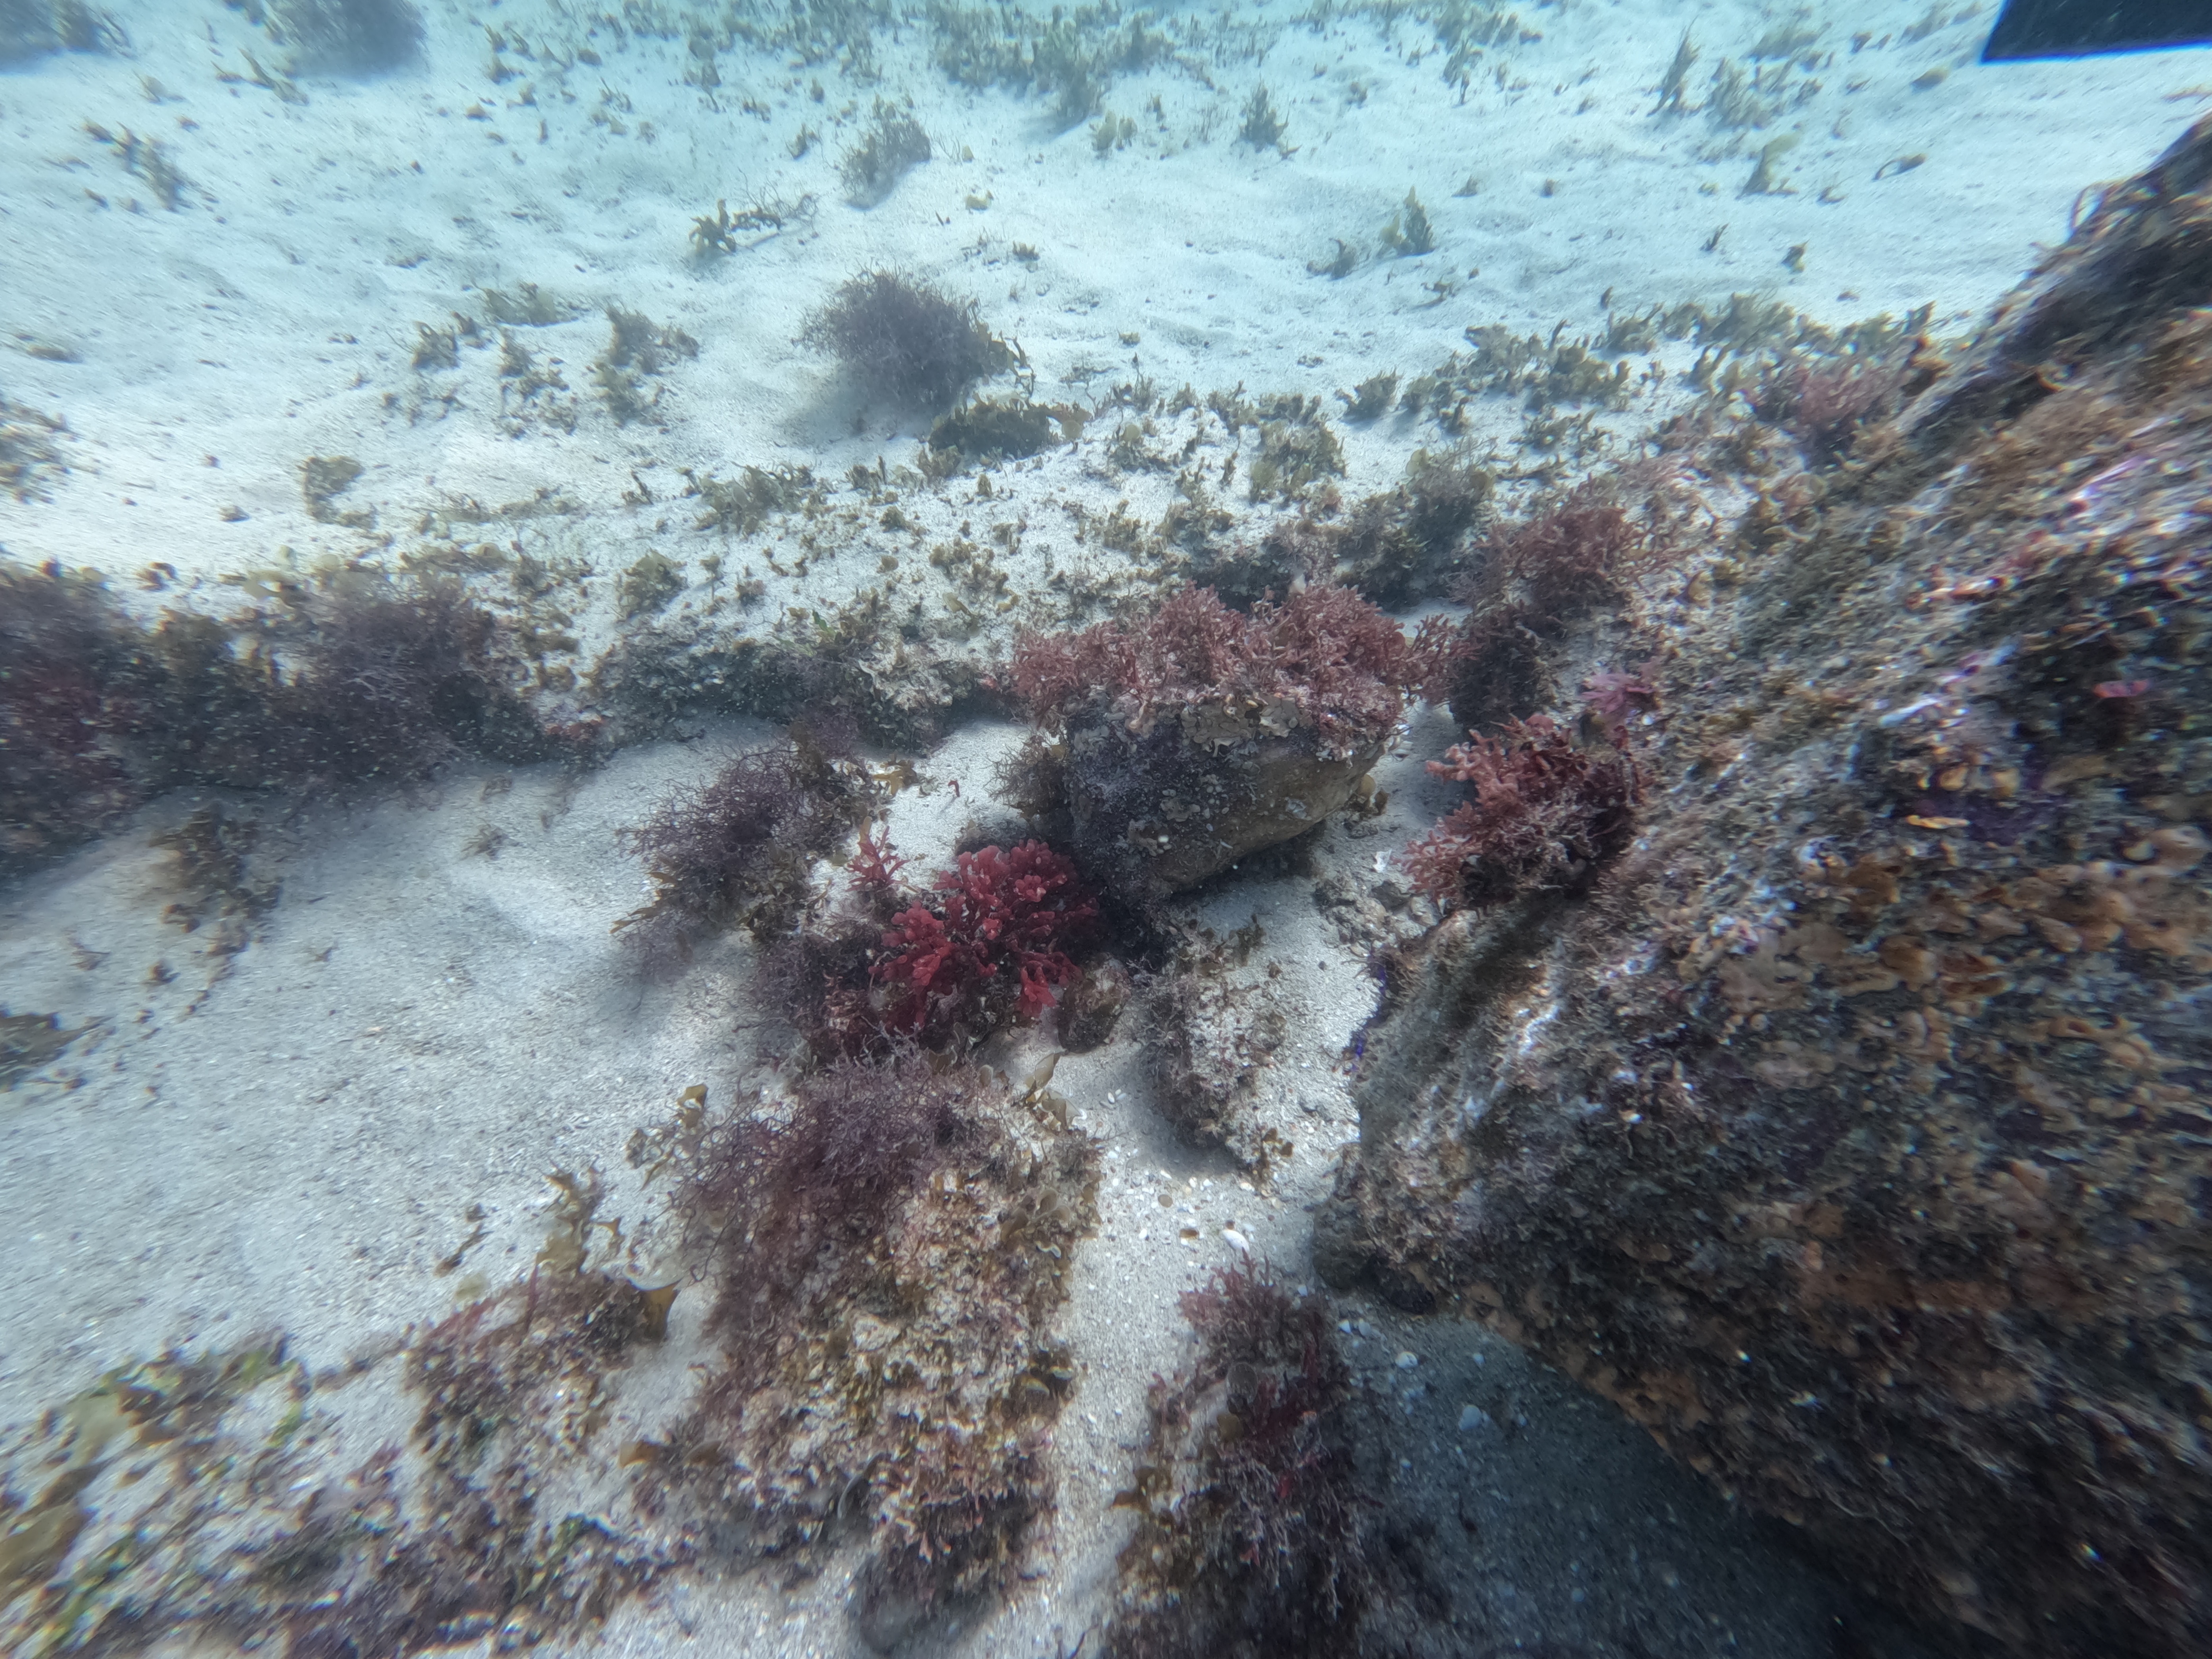

Supplement: Supplementary file 910 [file G0713977.pdf › Ocean2/G0713977.pdf]

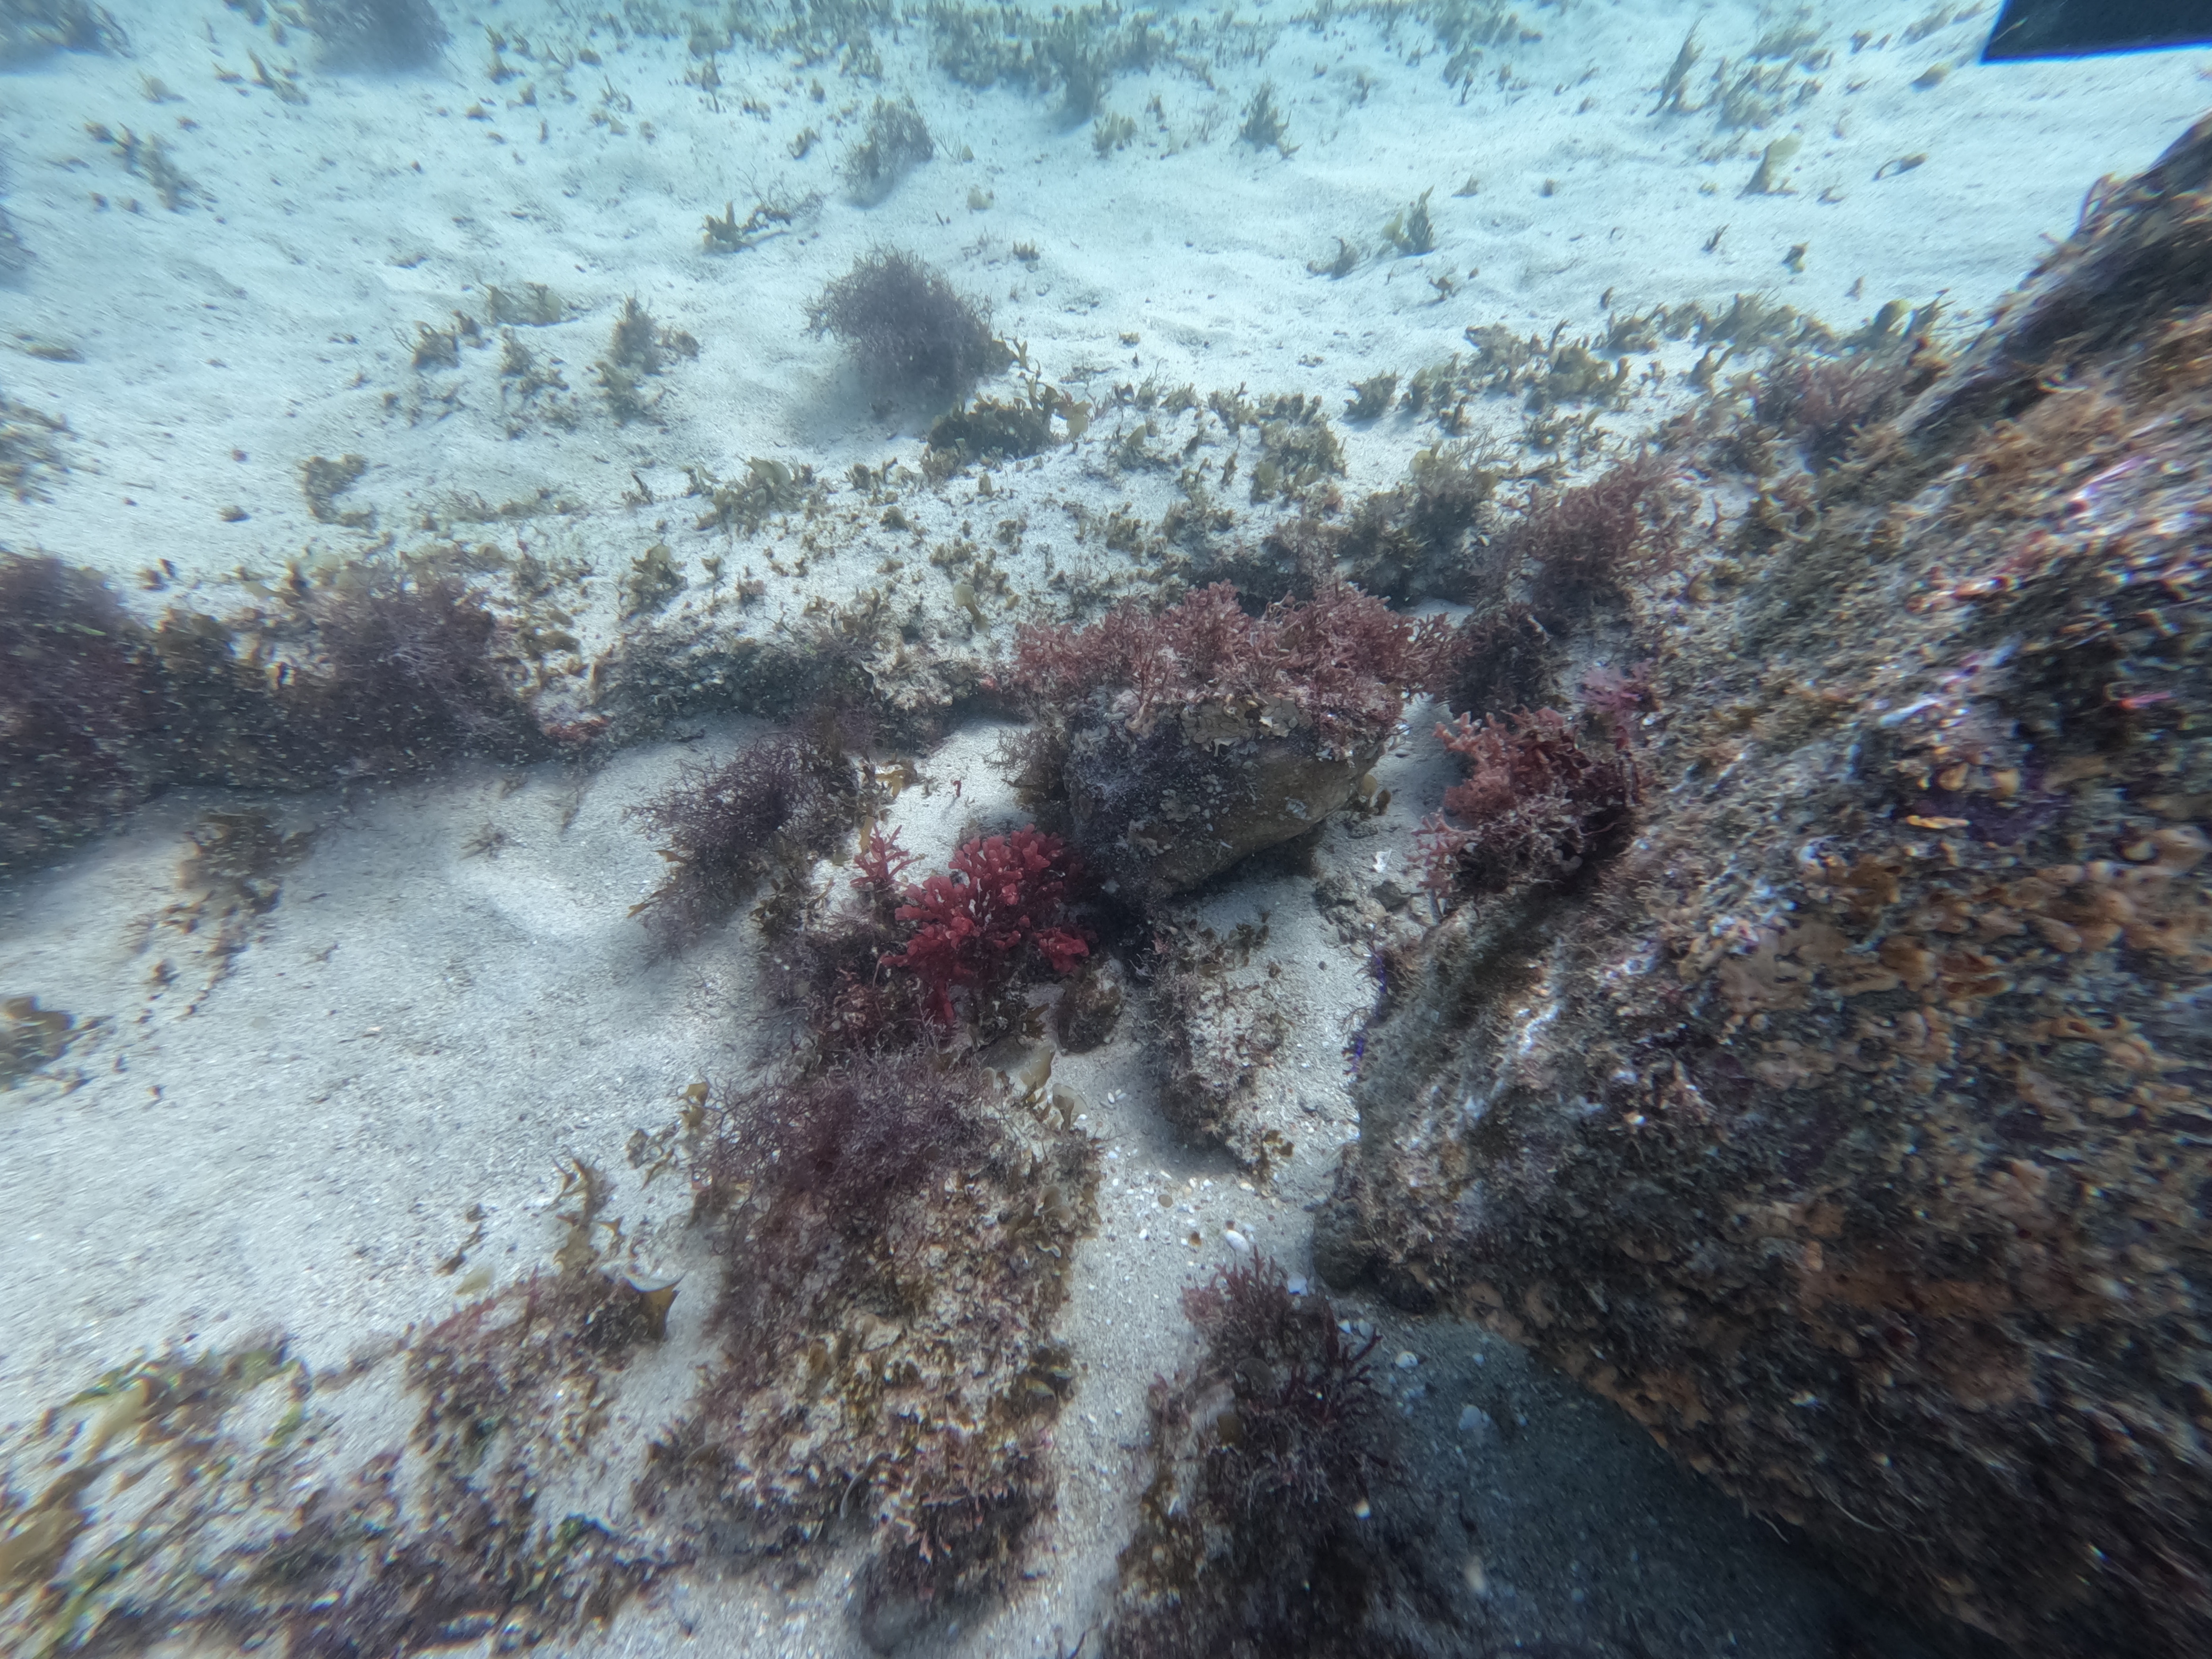

Supplement: Supplementary file 911 [file G0713978.pdf › Ocean2/G0713978.pdf]

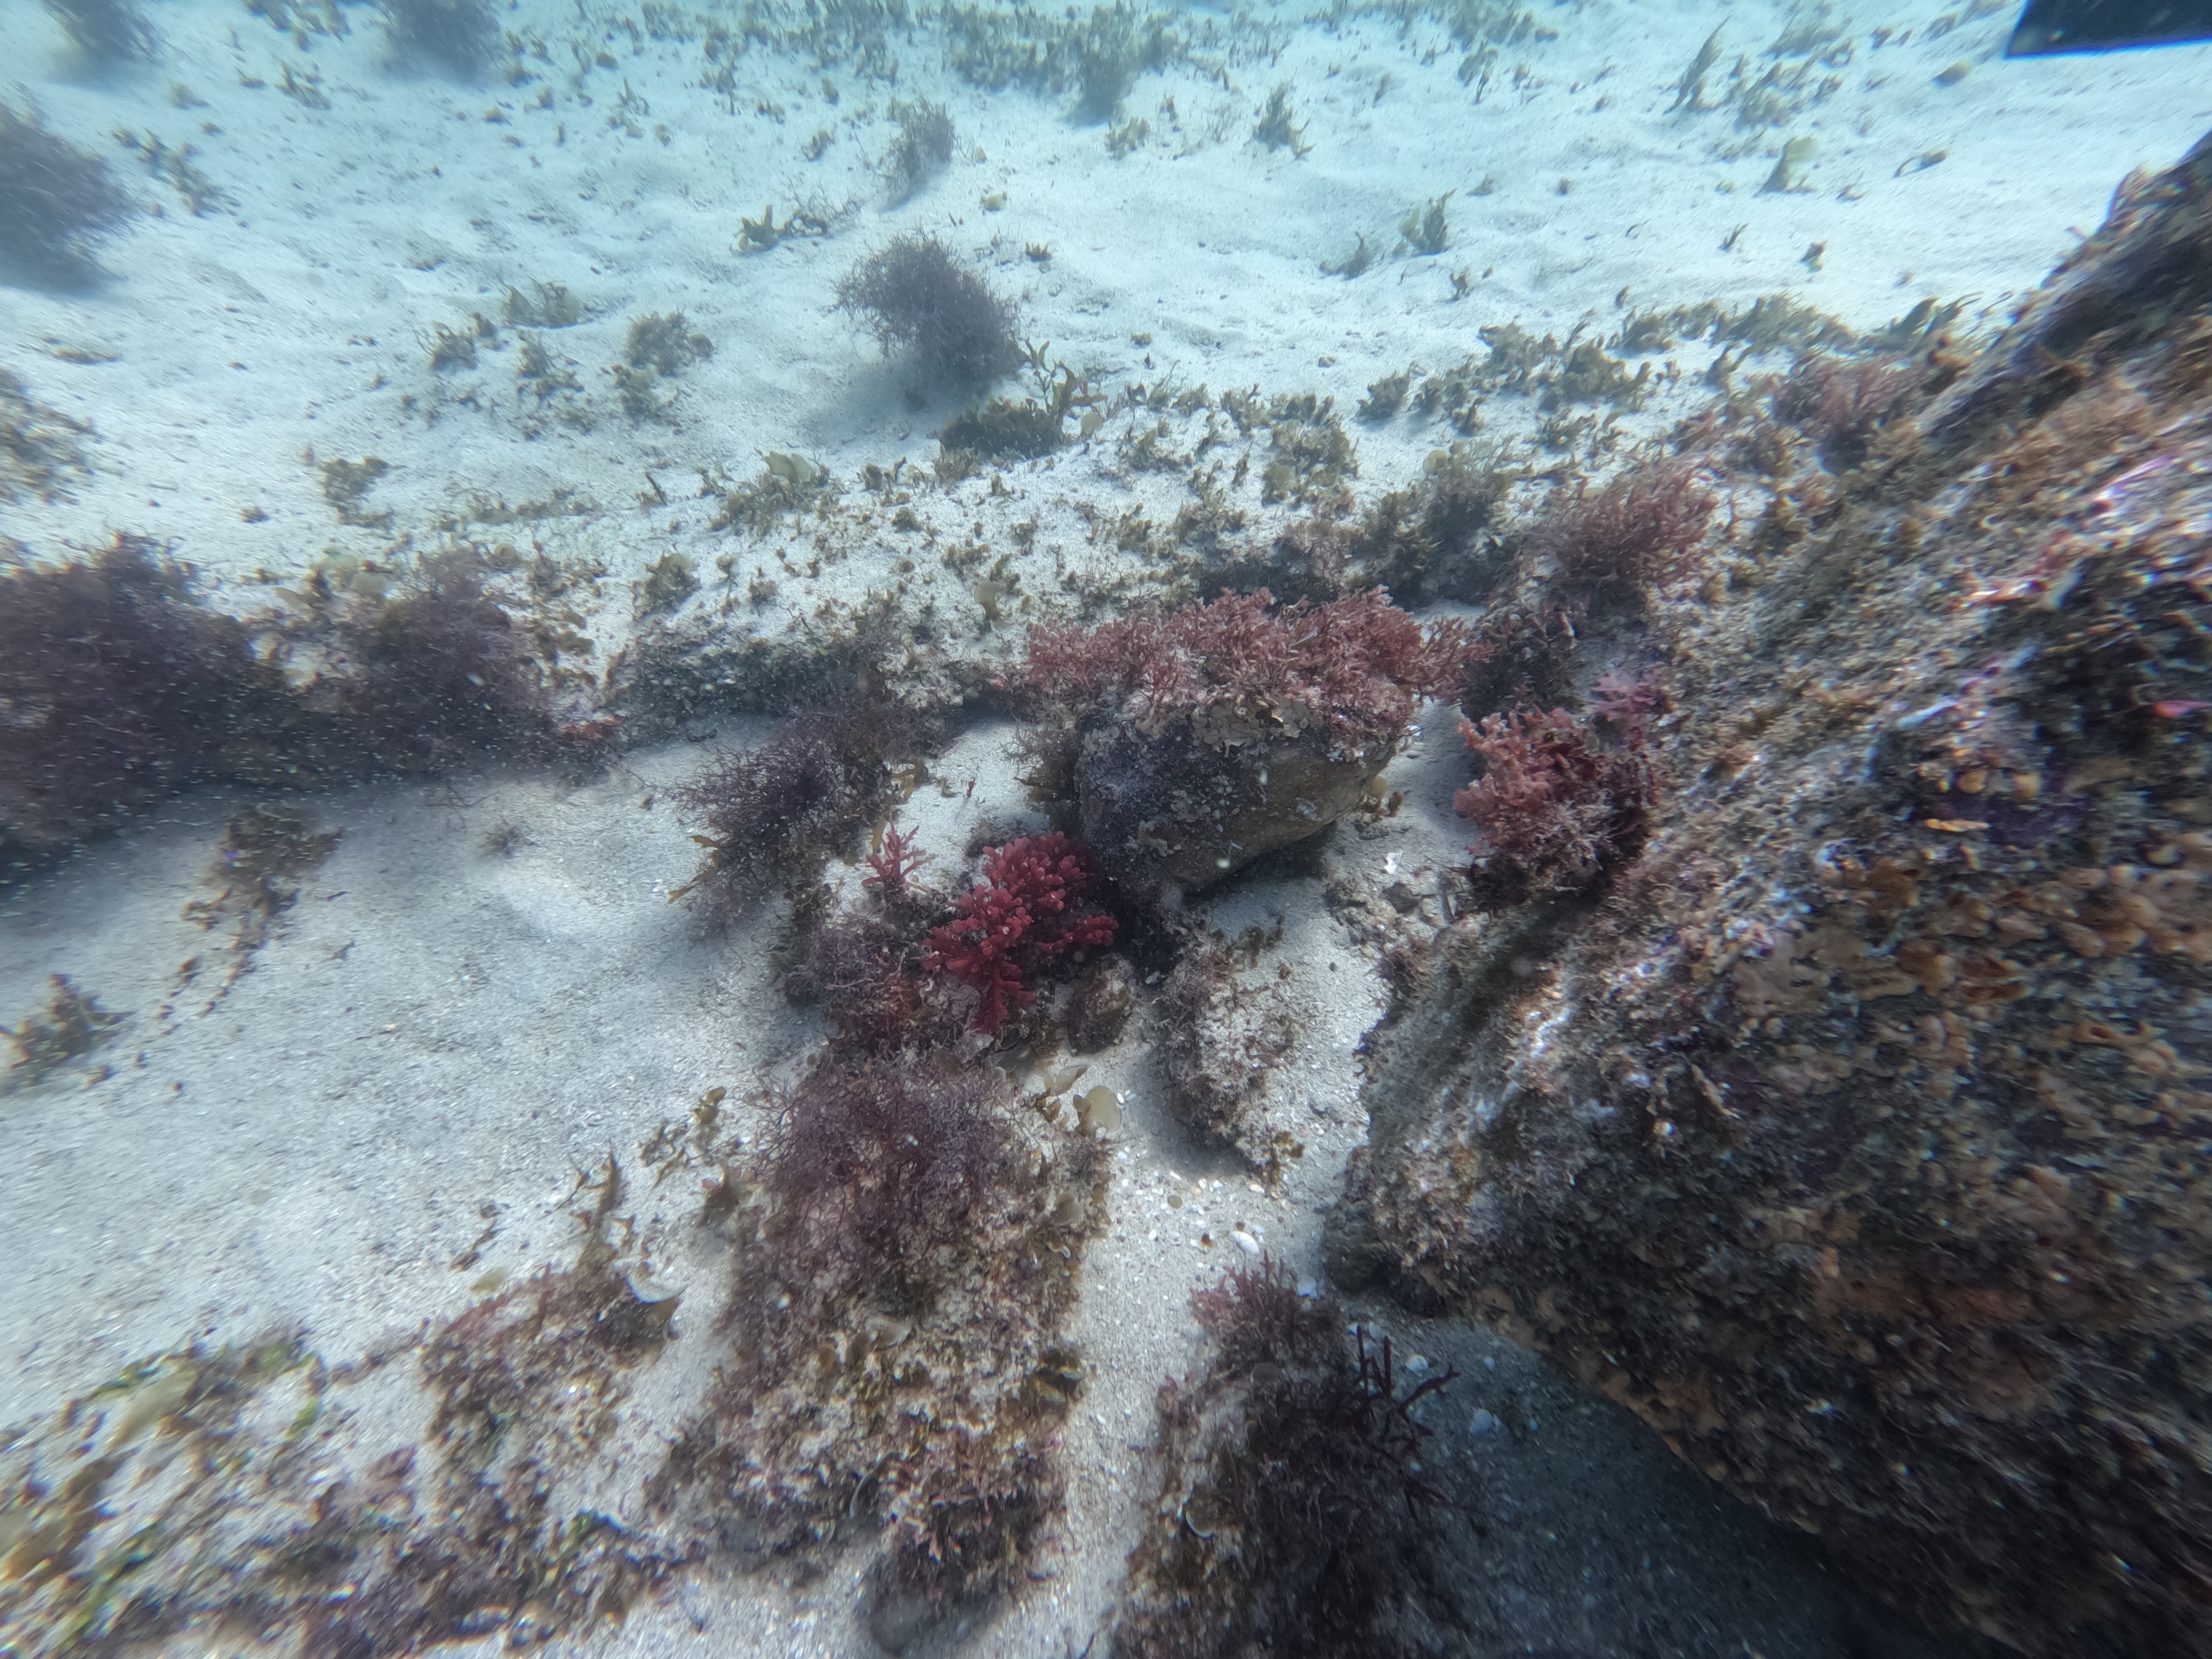

Supplement: Supplementary file 912 [file G0713979.pdf › Ocean2/G0713979.pdf]

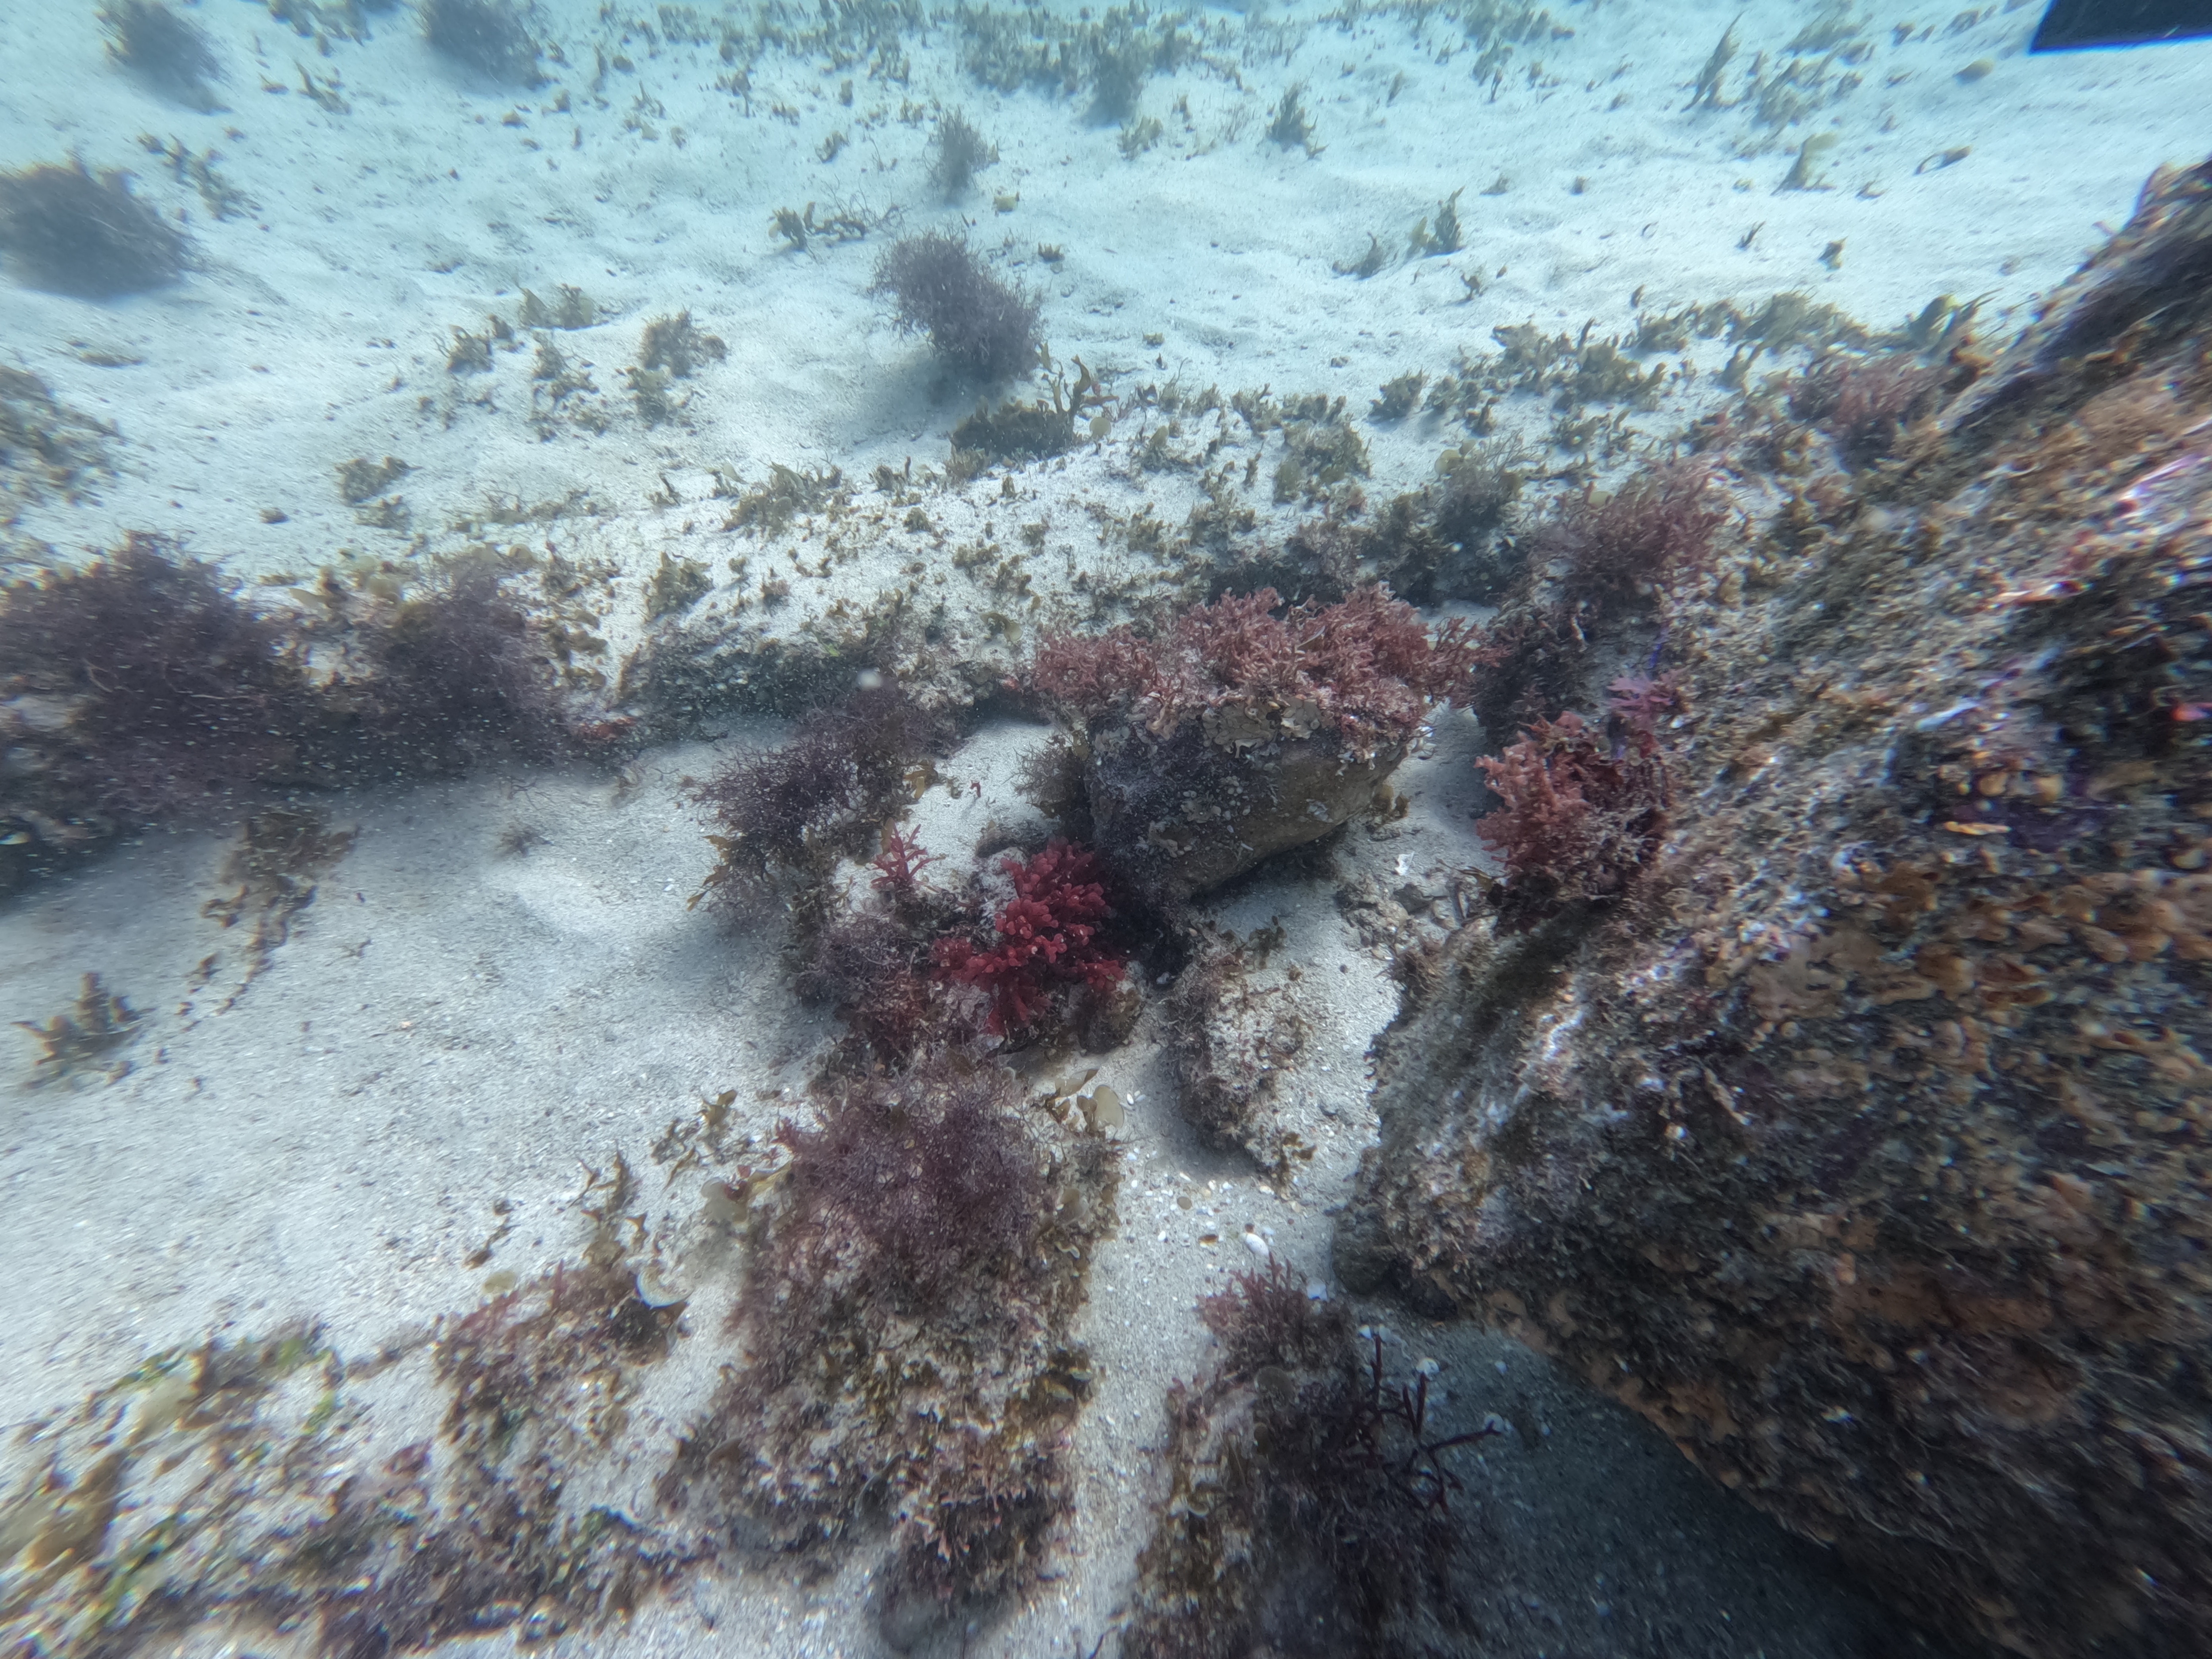

Supplement: Supplementary file 913 [file G0713980.pdf › Ocean2/G0713980.pdf]

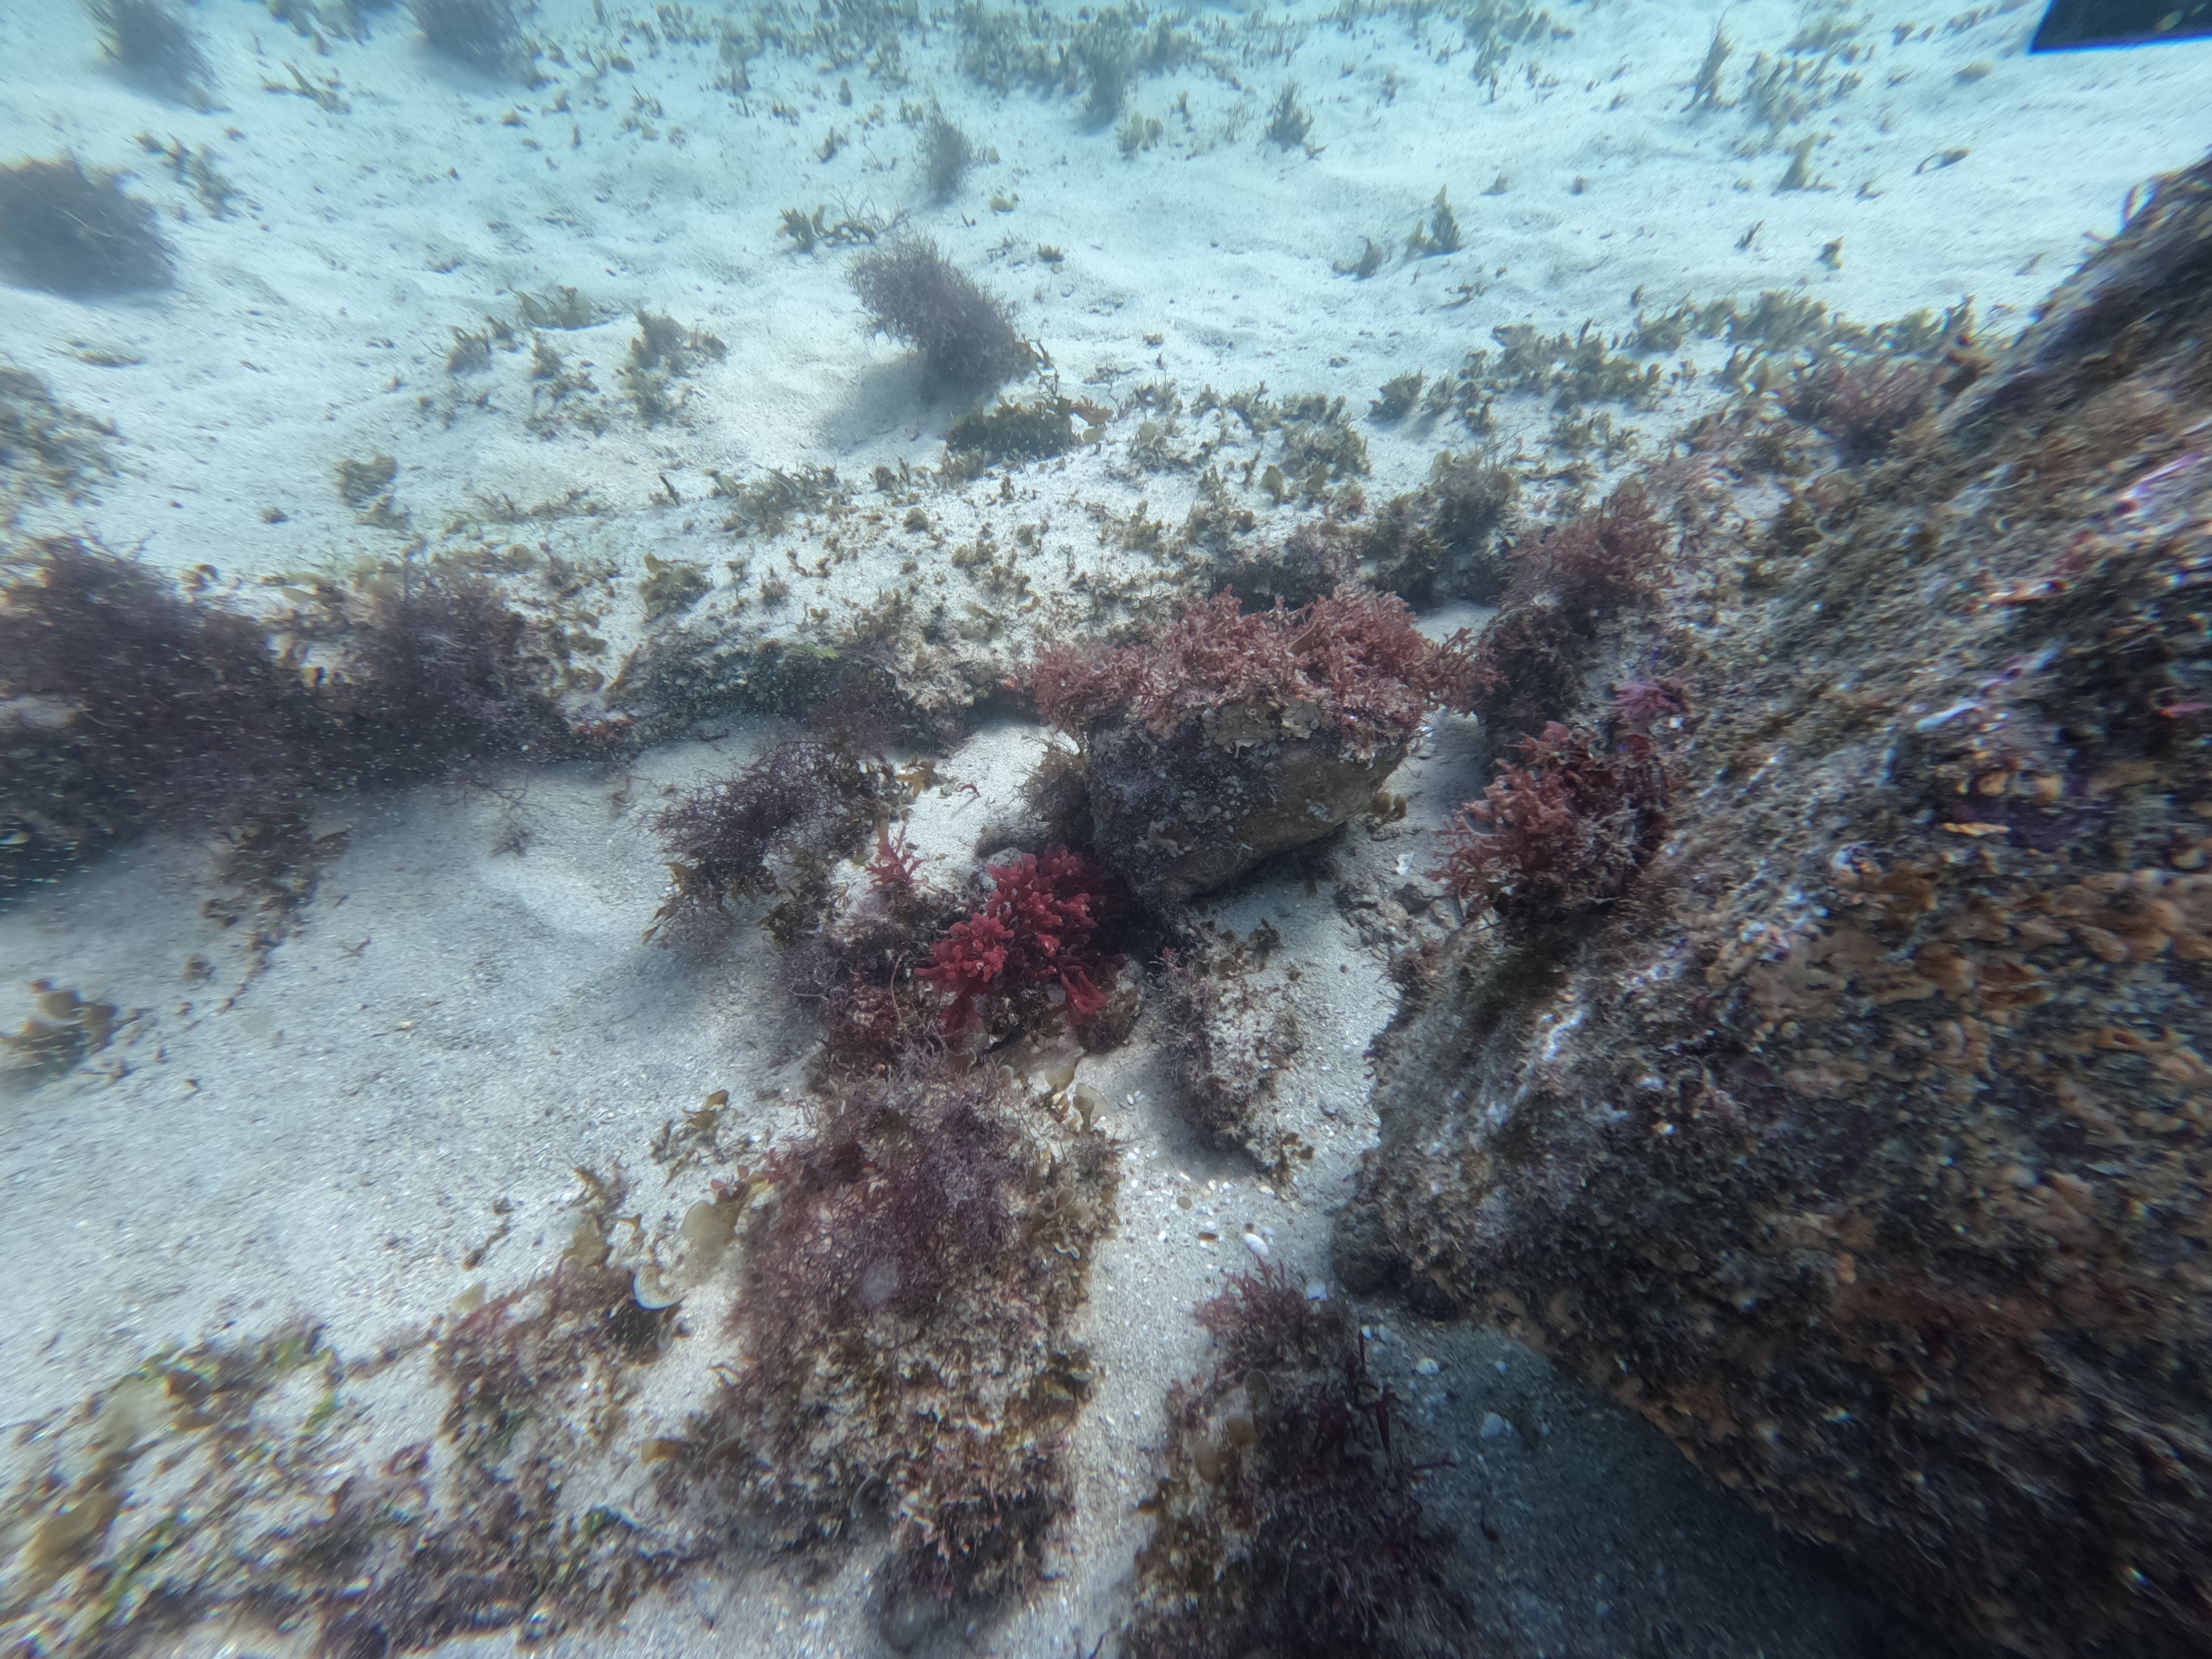

Supplement: Supplementary file 914 [file G0713981.pdf › Ocean2/G0713981.pdf]

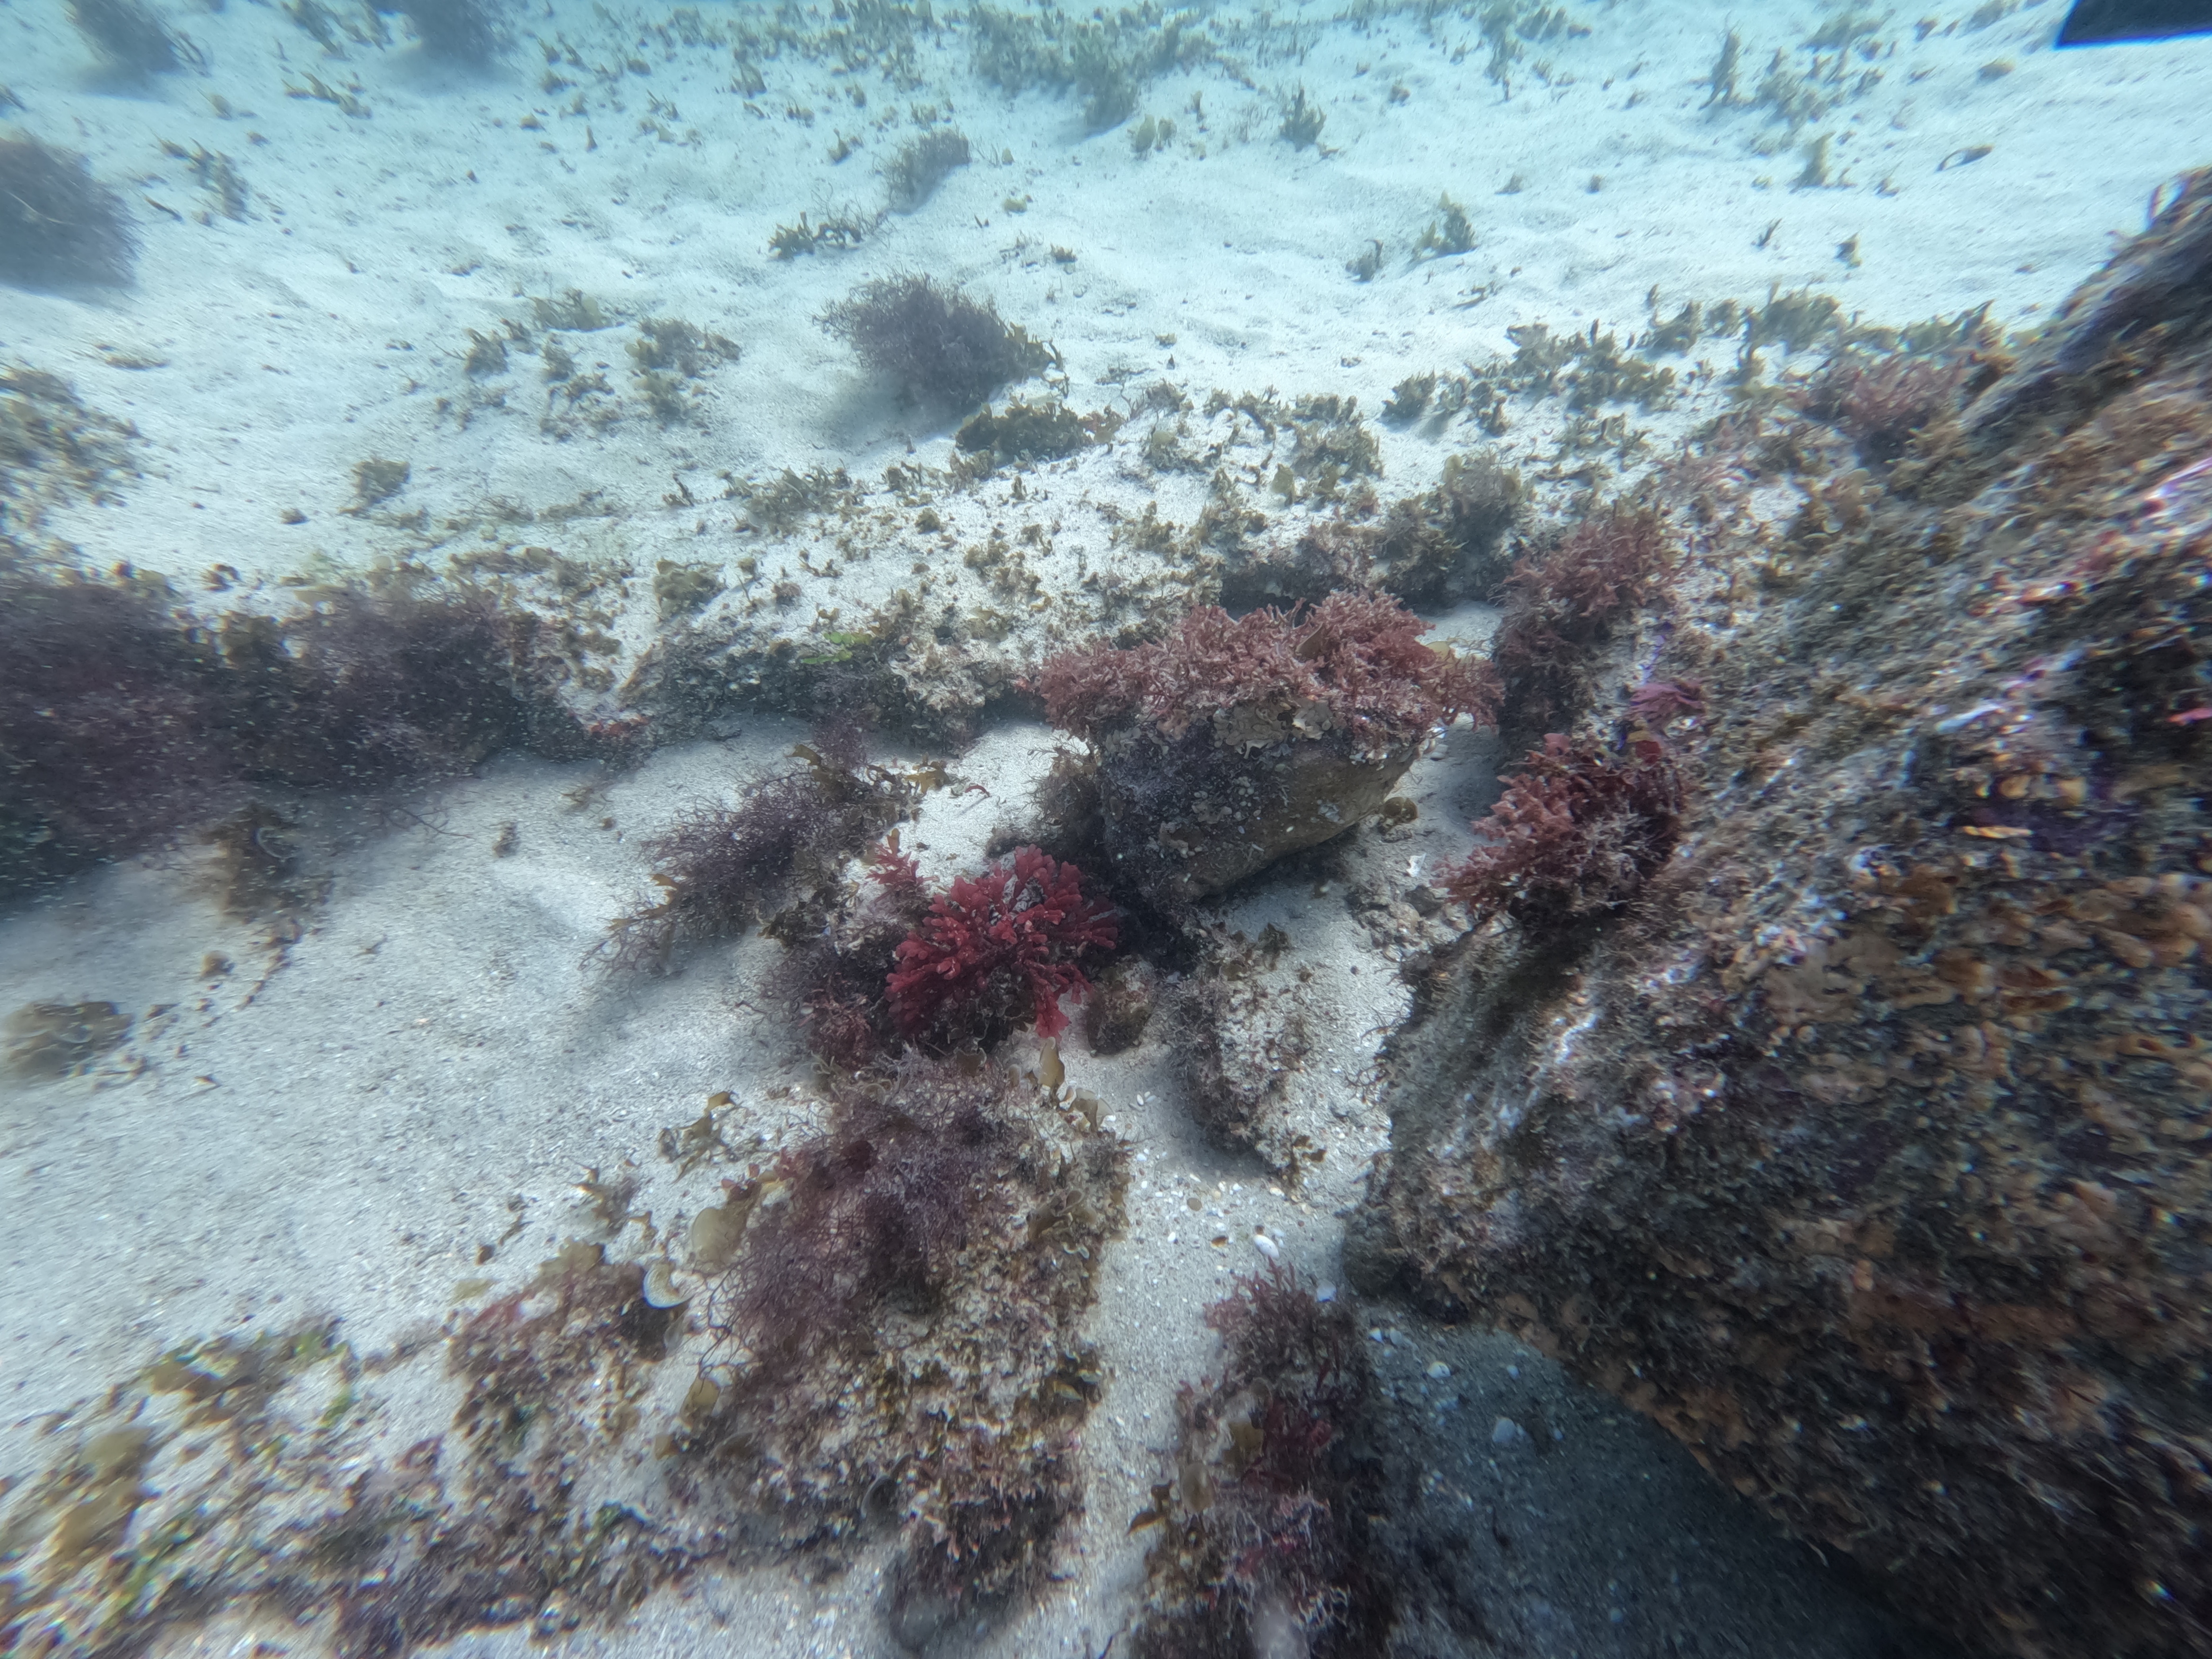

Supplement: Supplementary file 915 [file G0713982.pdf › Ocean2/G0713982.pdf]

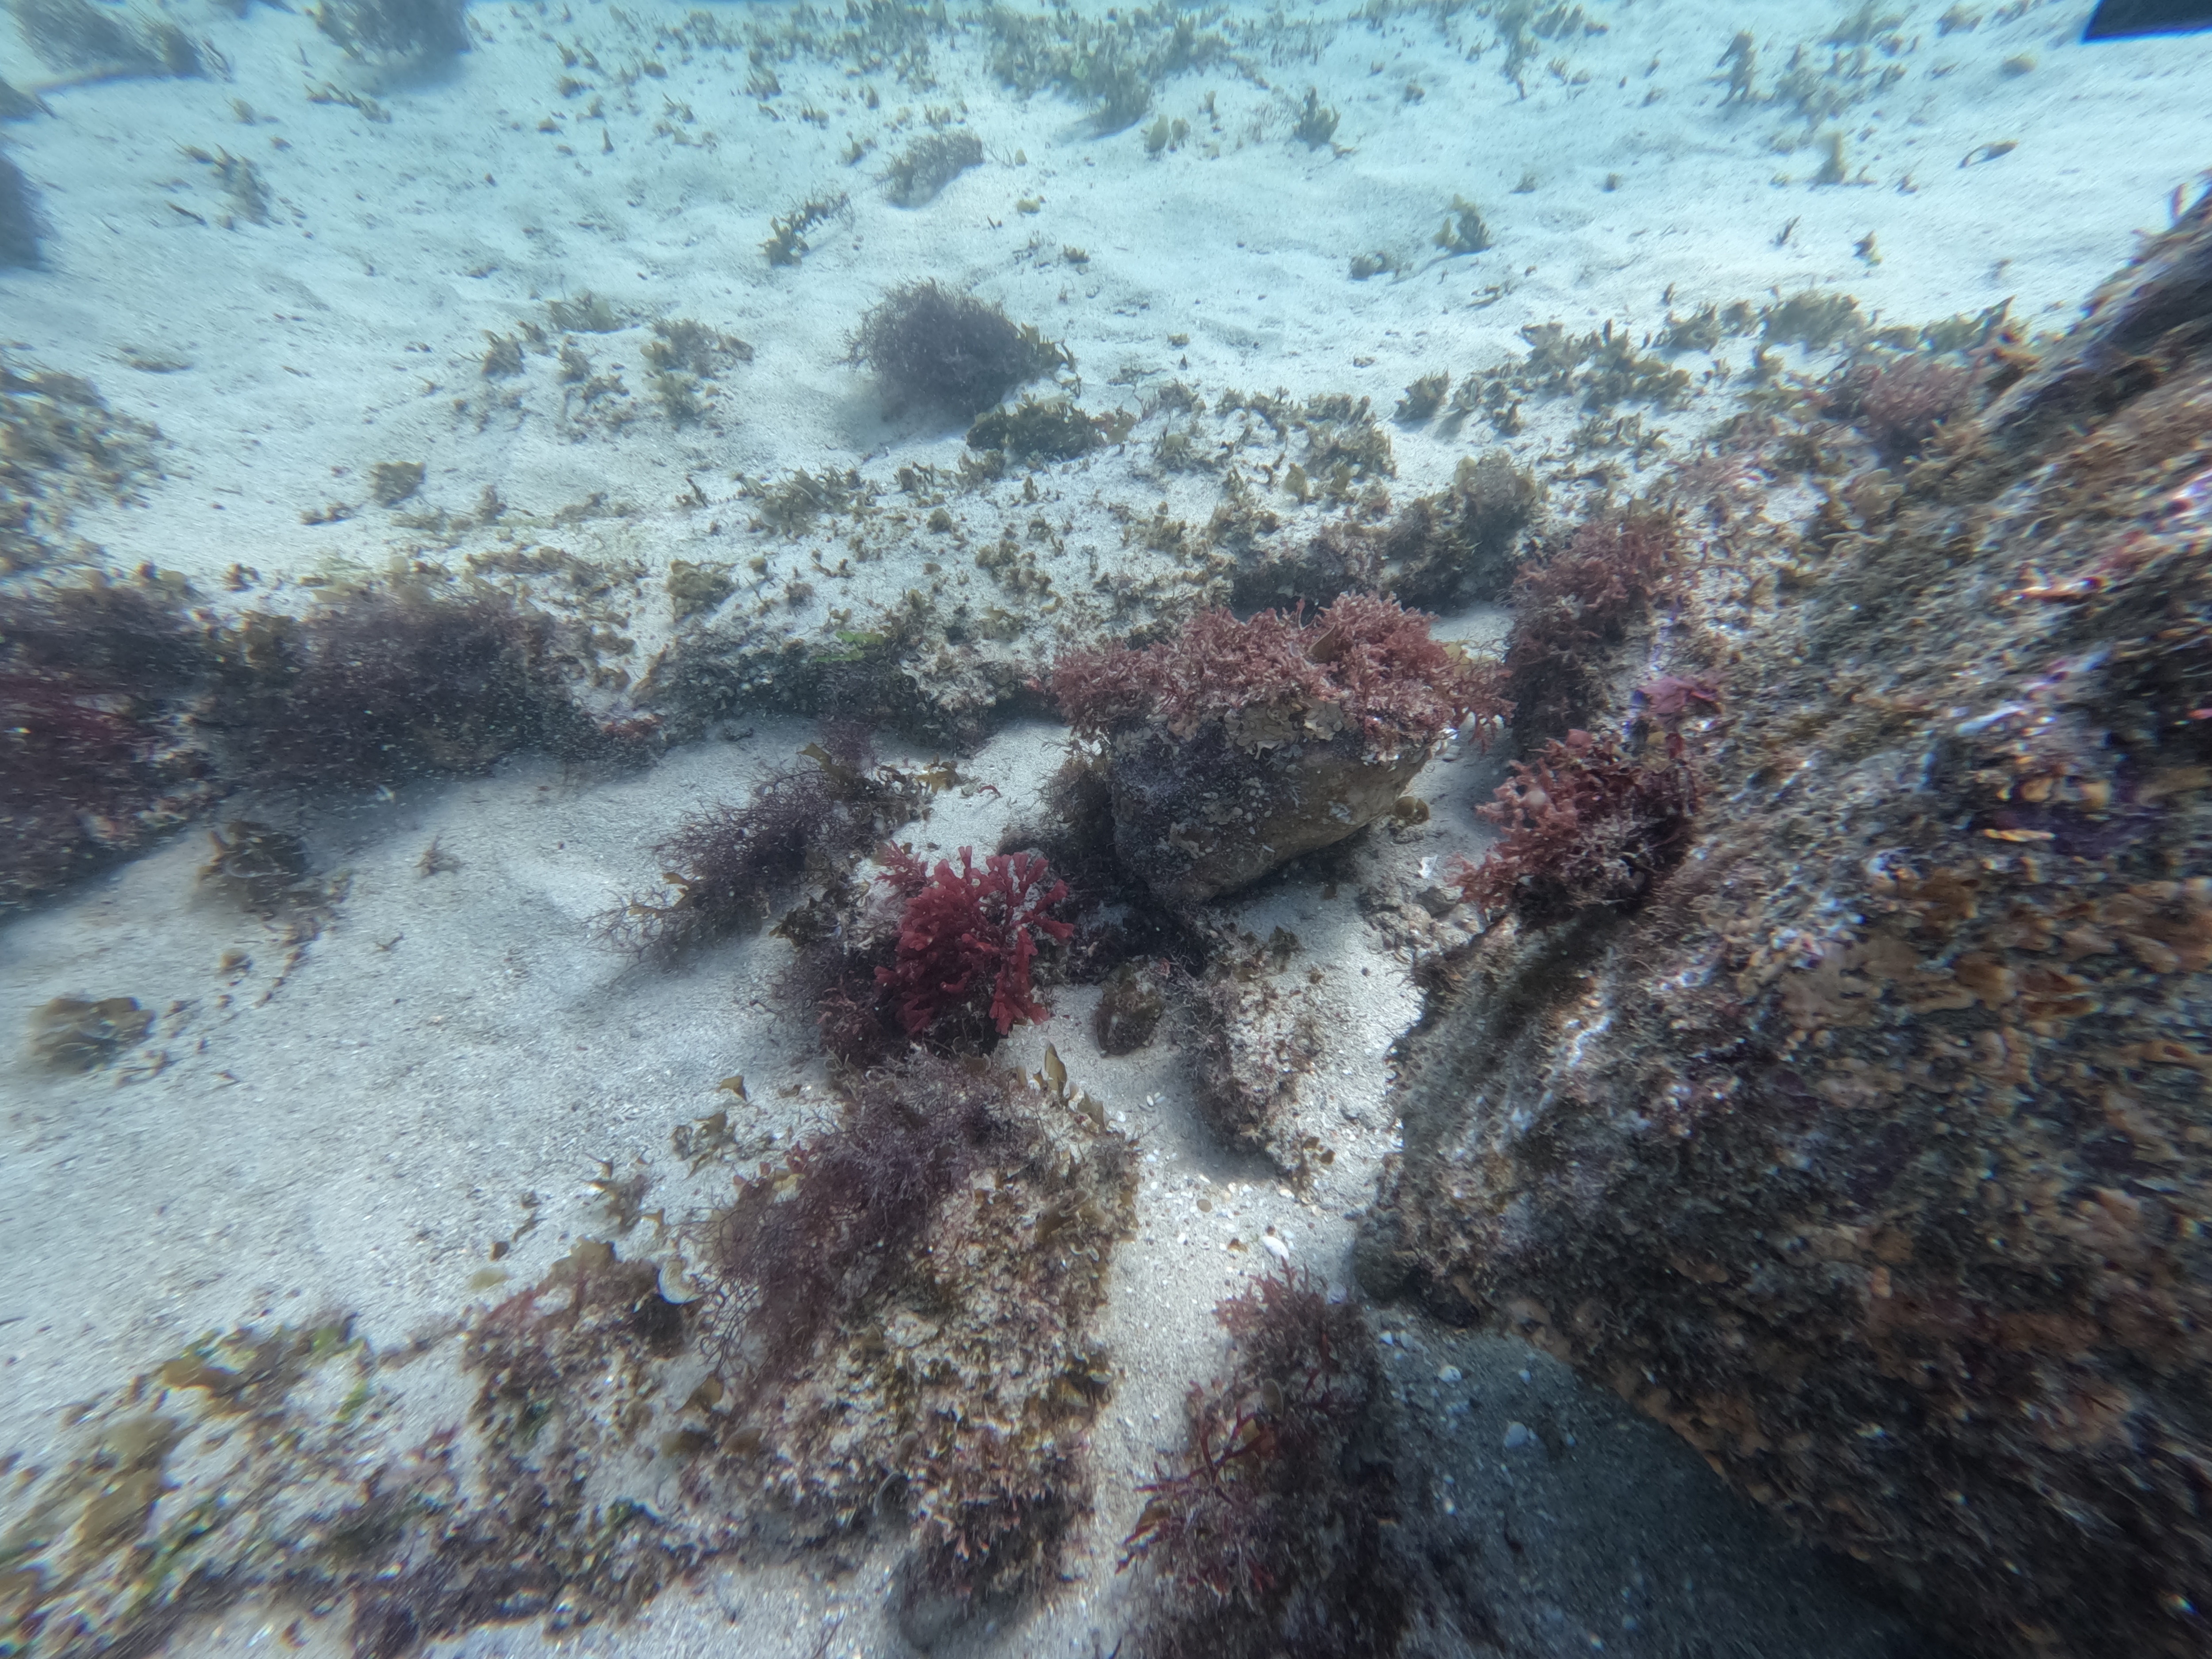

Supplement: Supplementary file 916 [file G0713983.pdf › Ocean2/G0713983.pdf]

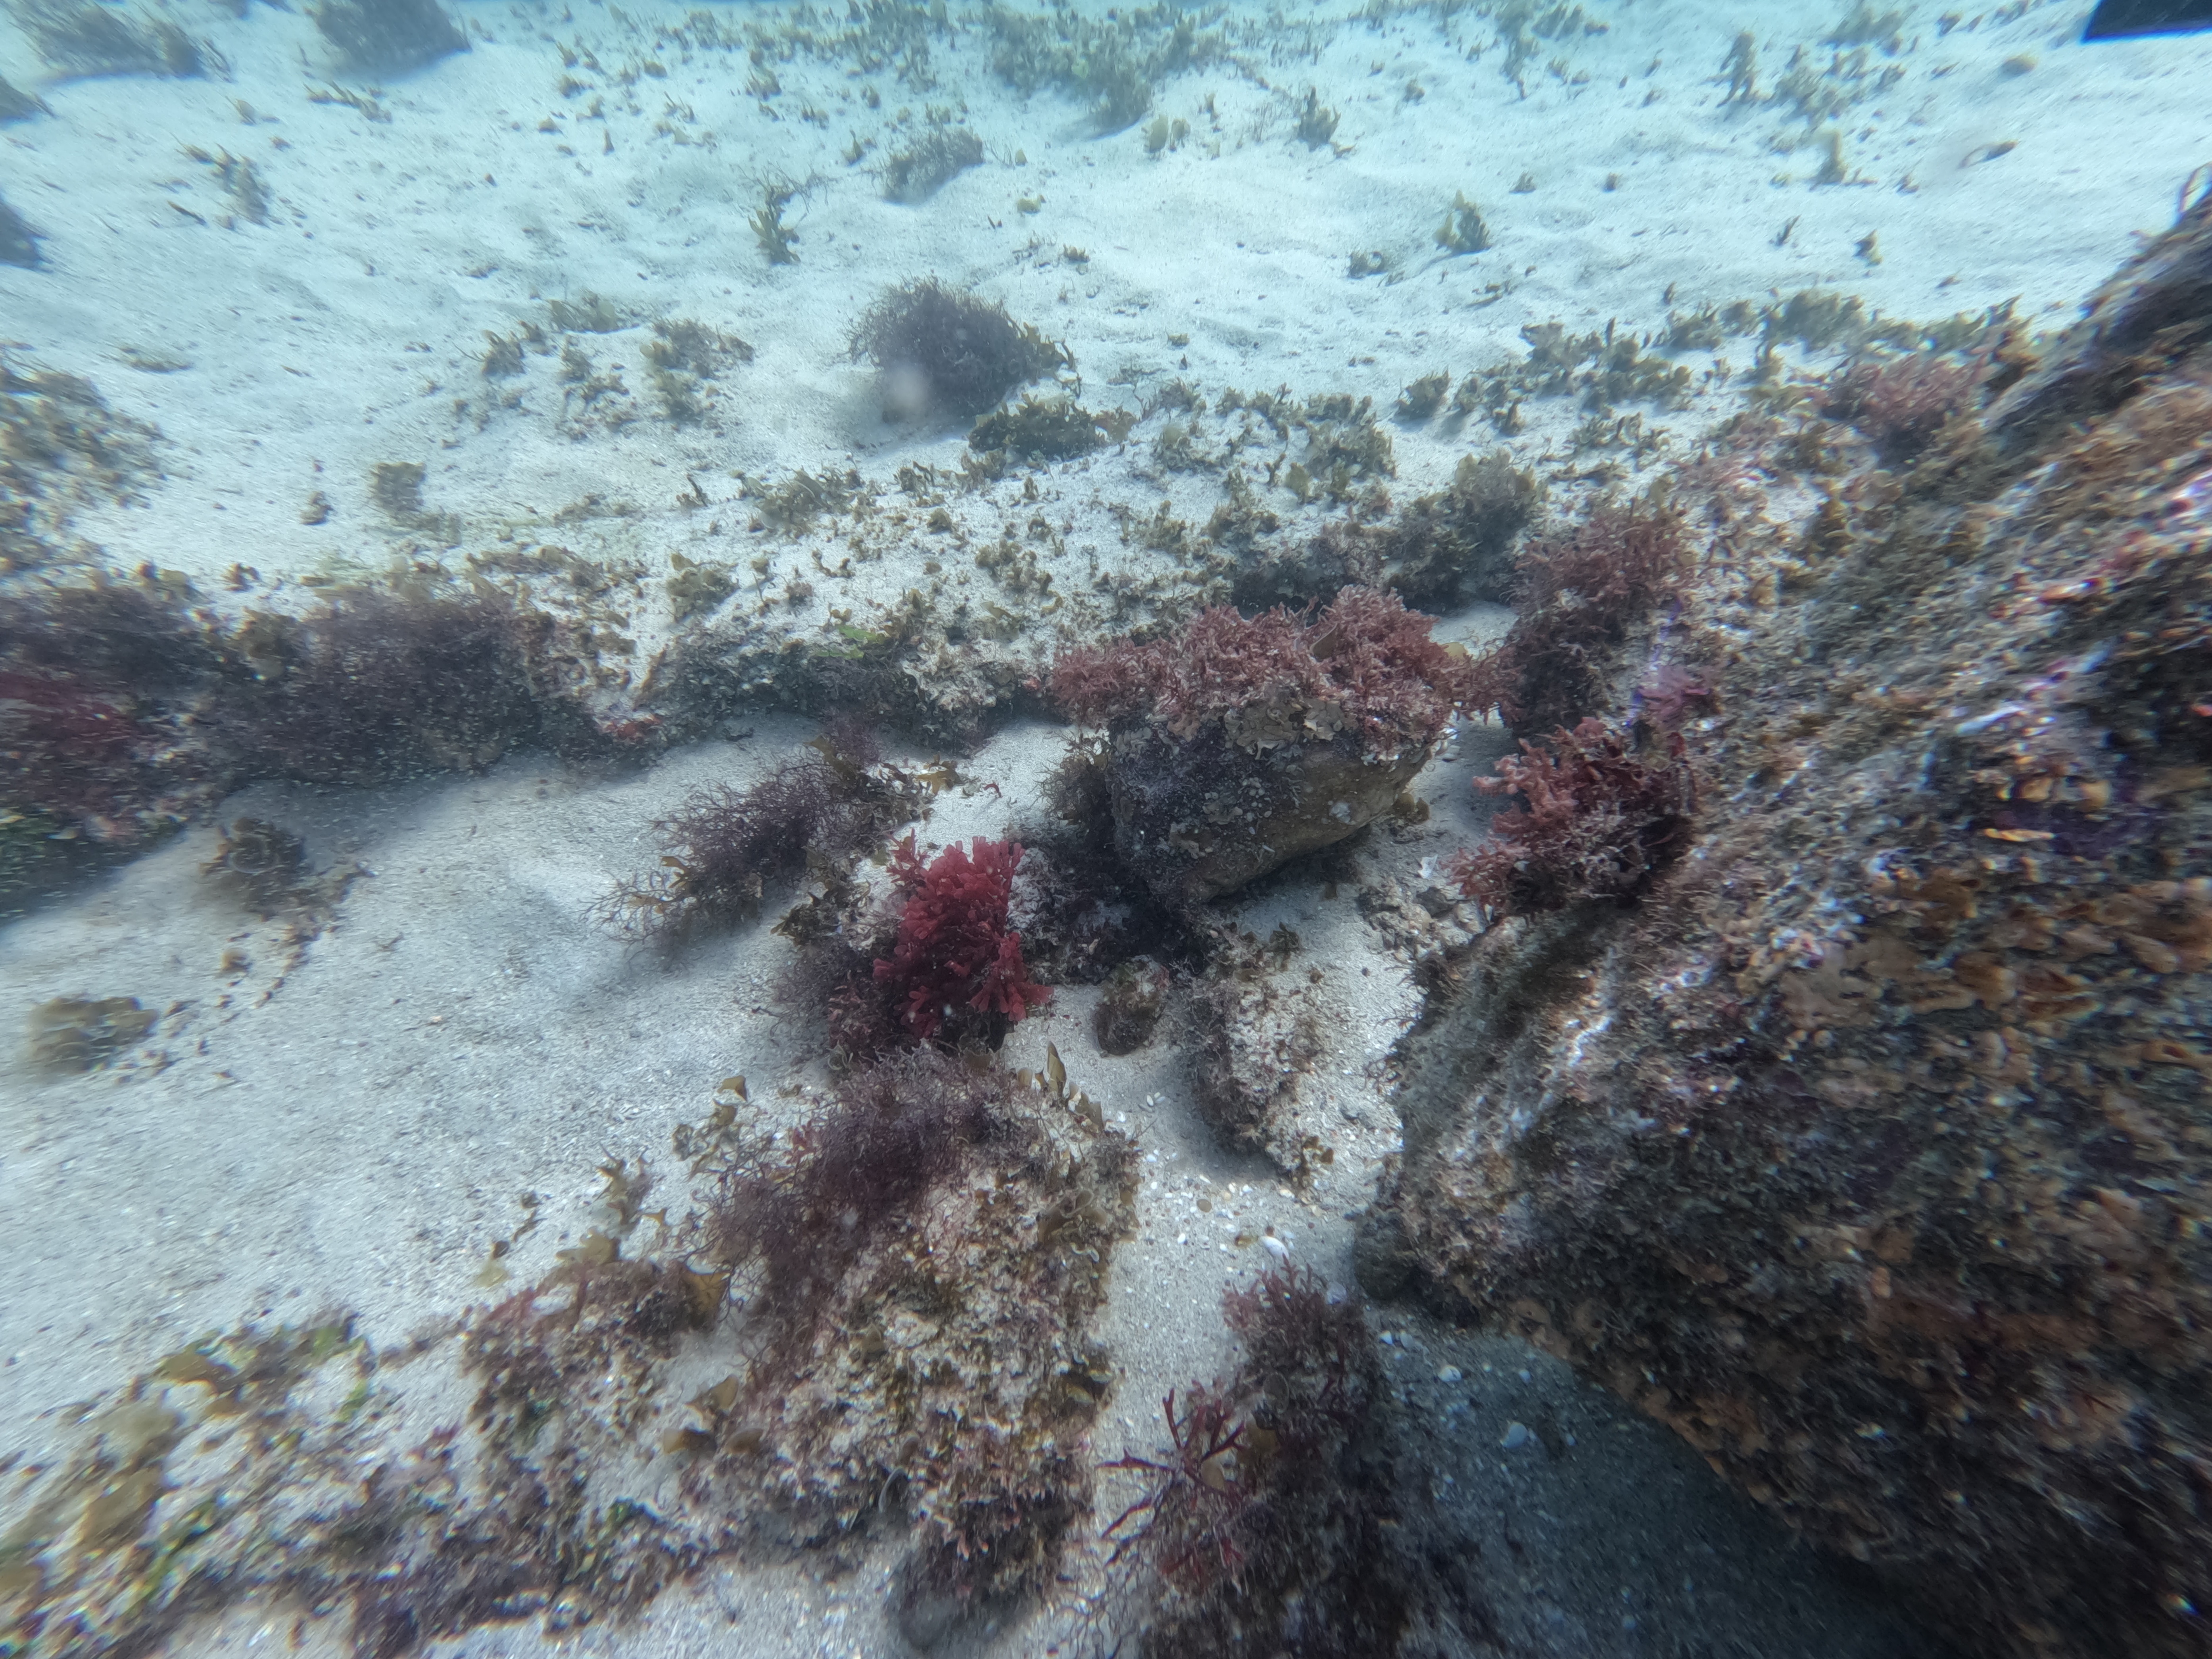

Supplement: Supplementary file 917 [file G0713984.pdf › Ocean2/G0713984.pdf]

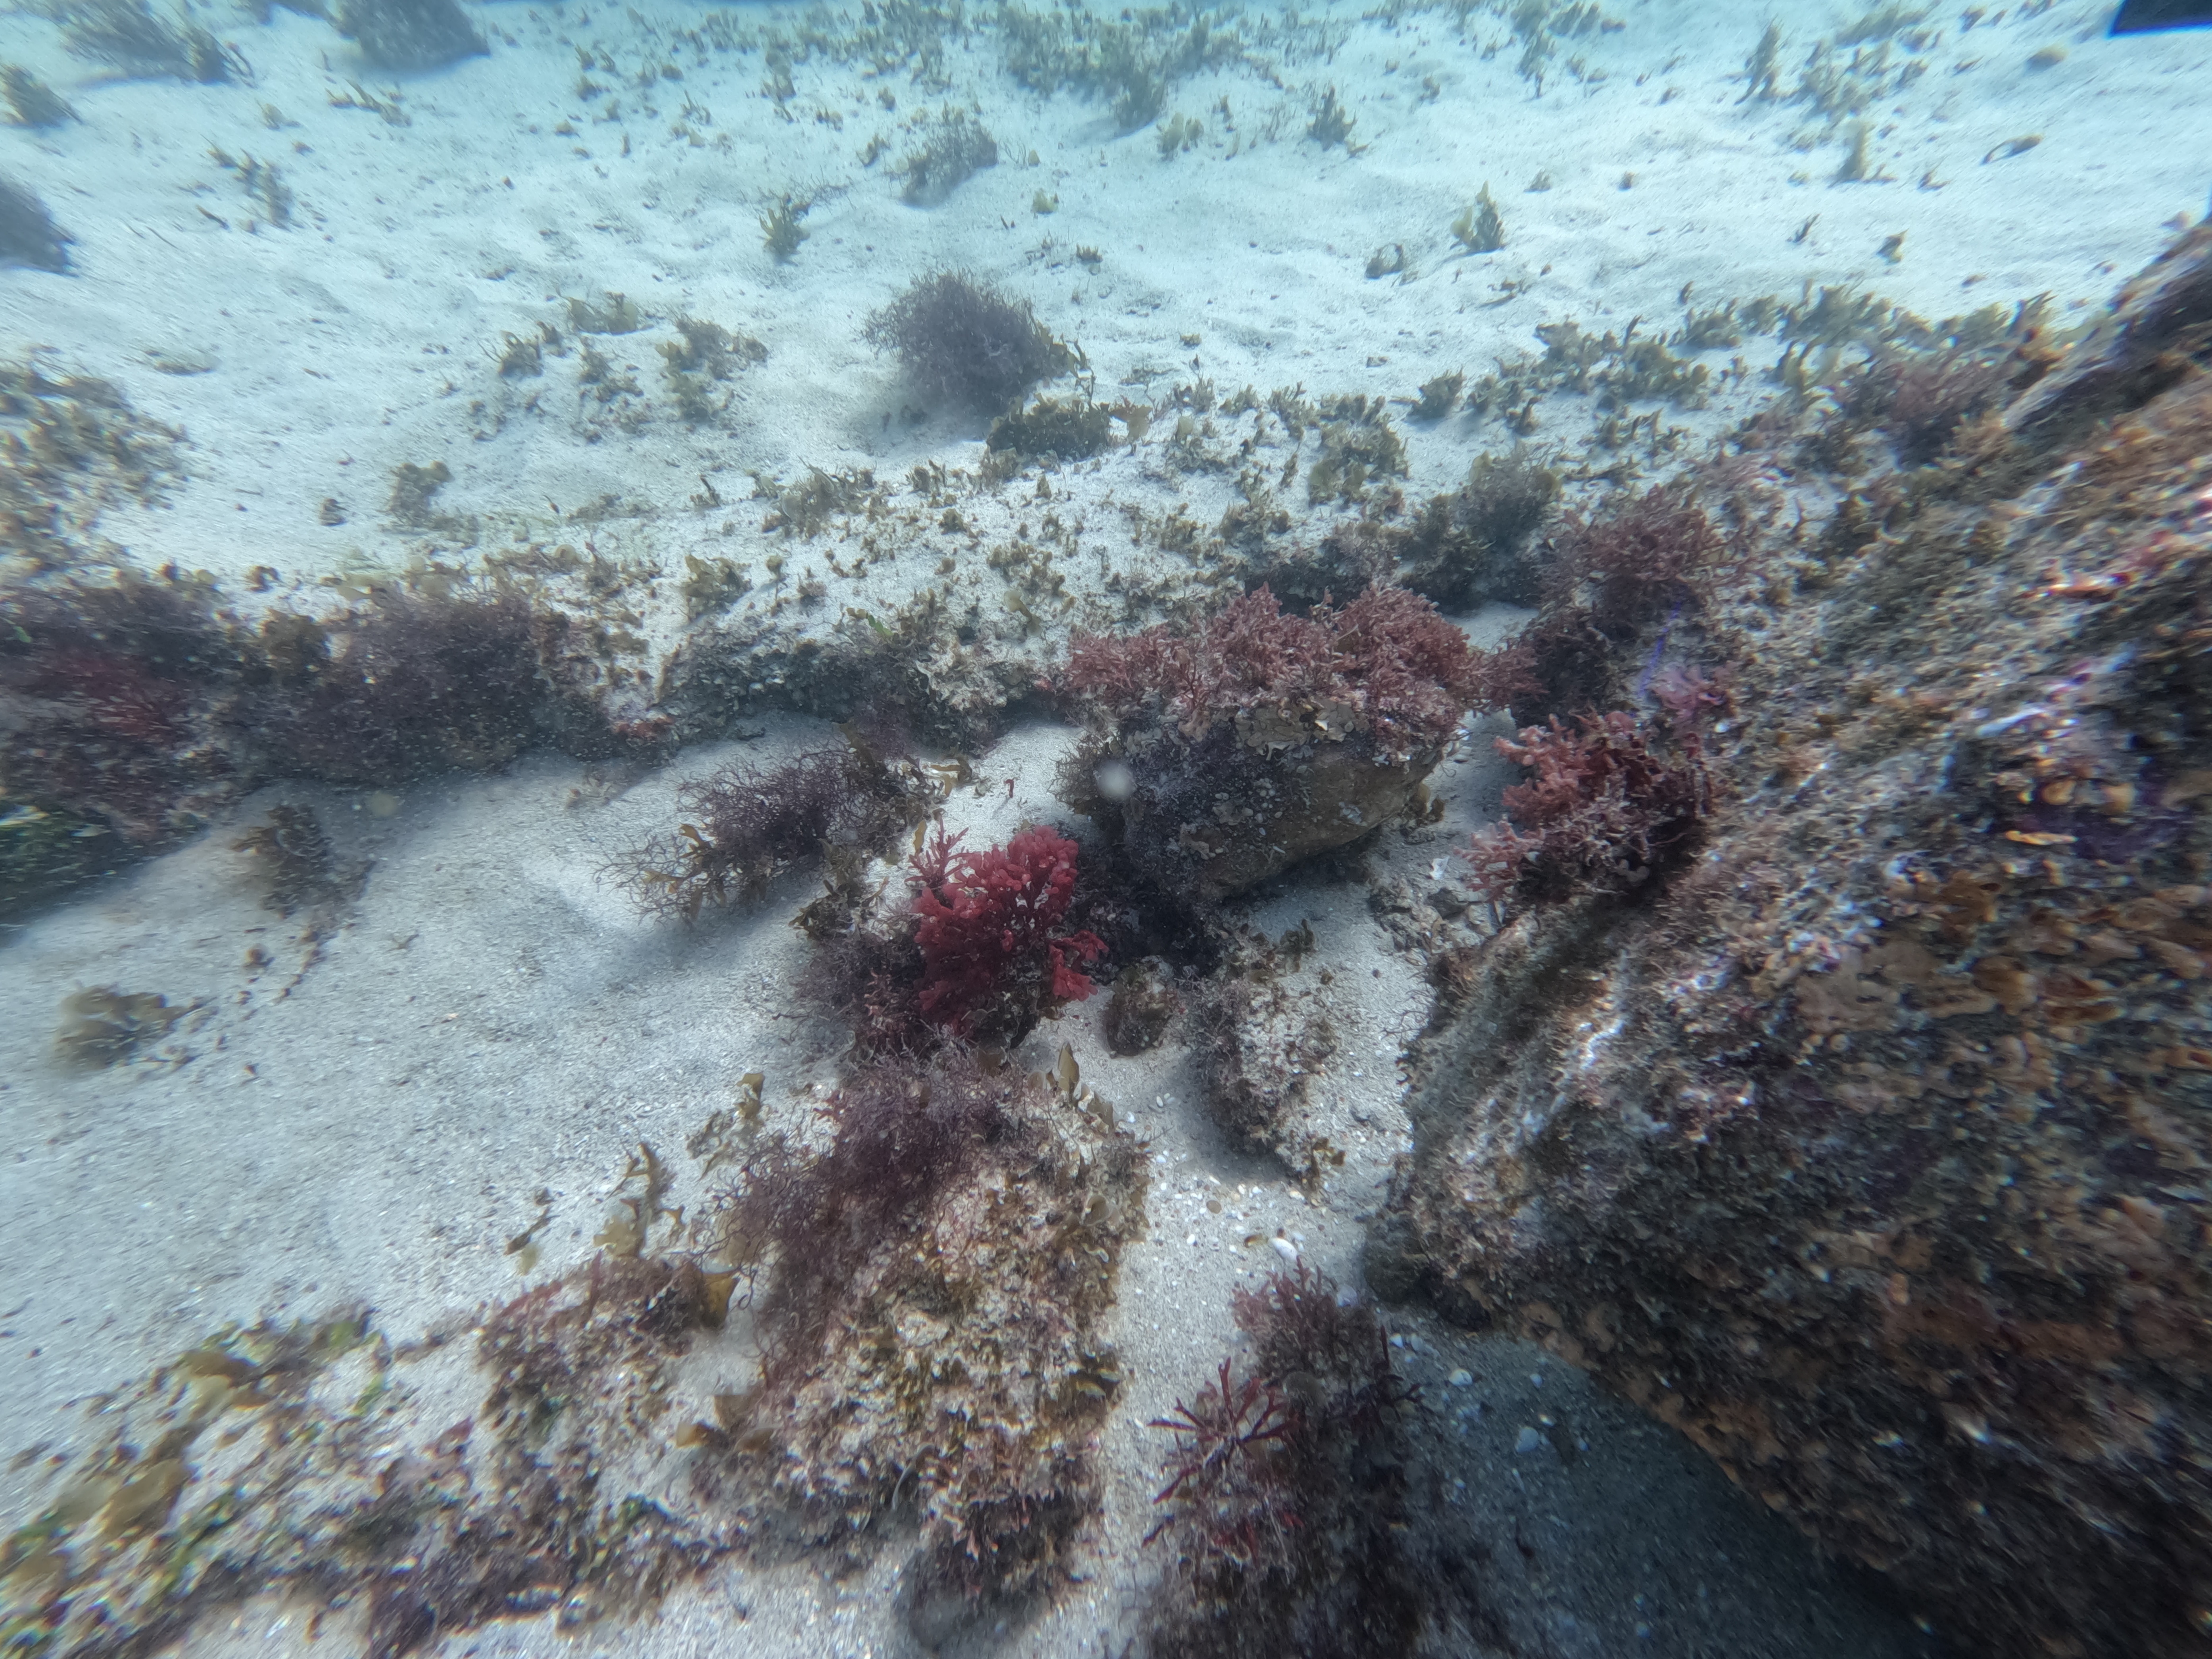

Supplement: Supplementary file 918 [file G0713985.pdf › Ocean2/G0713985.pdf]

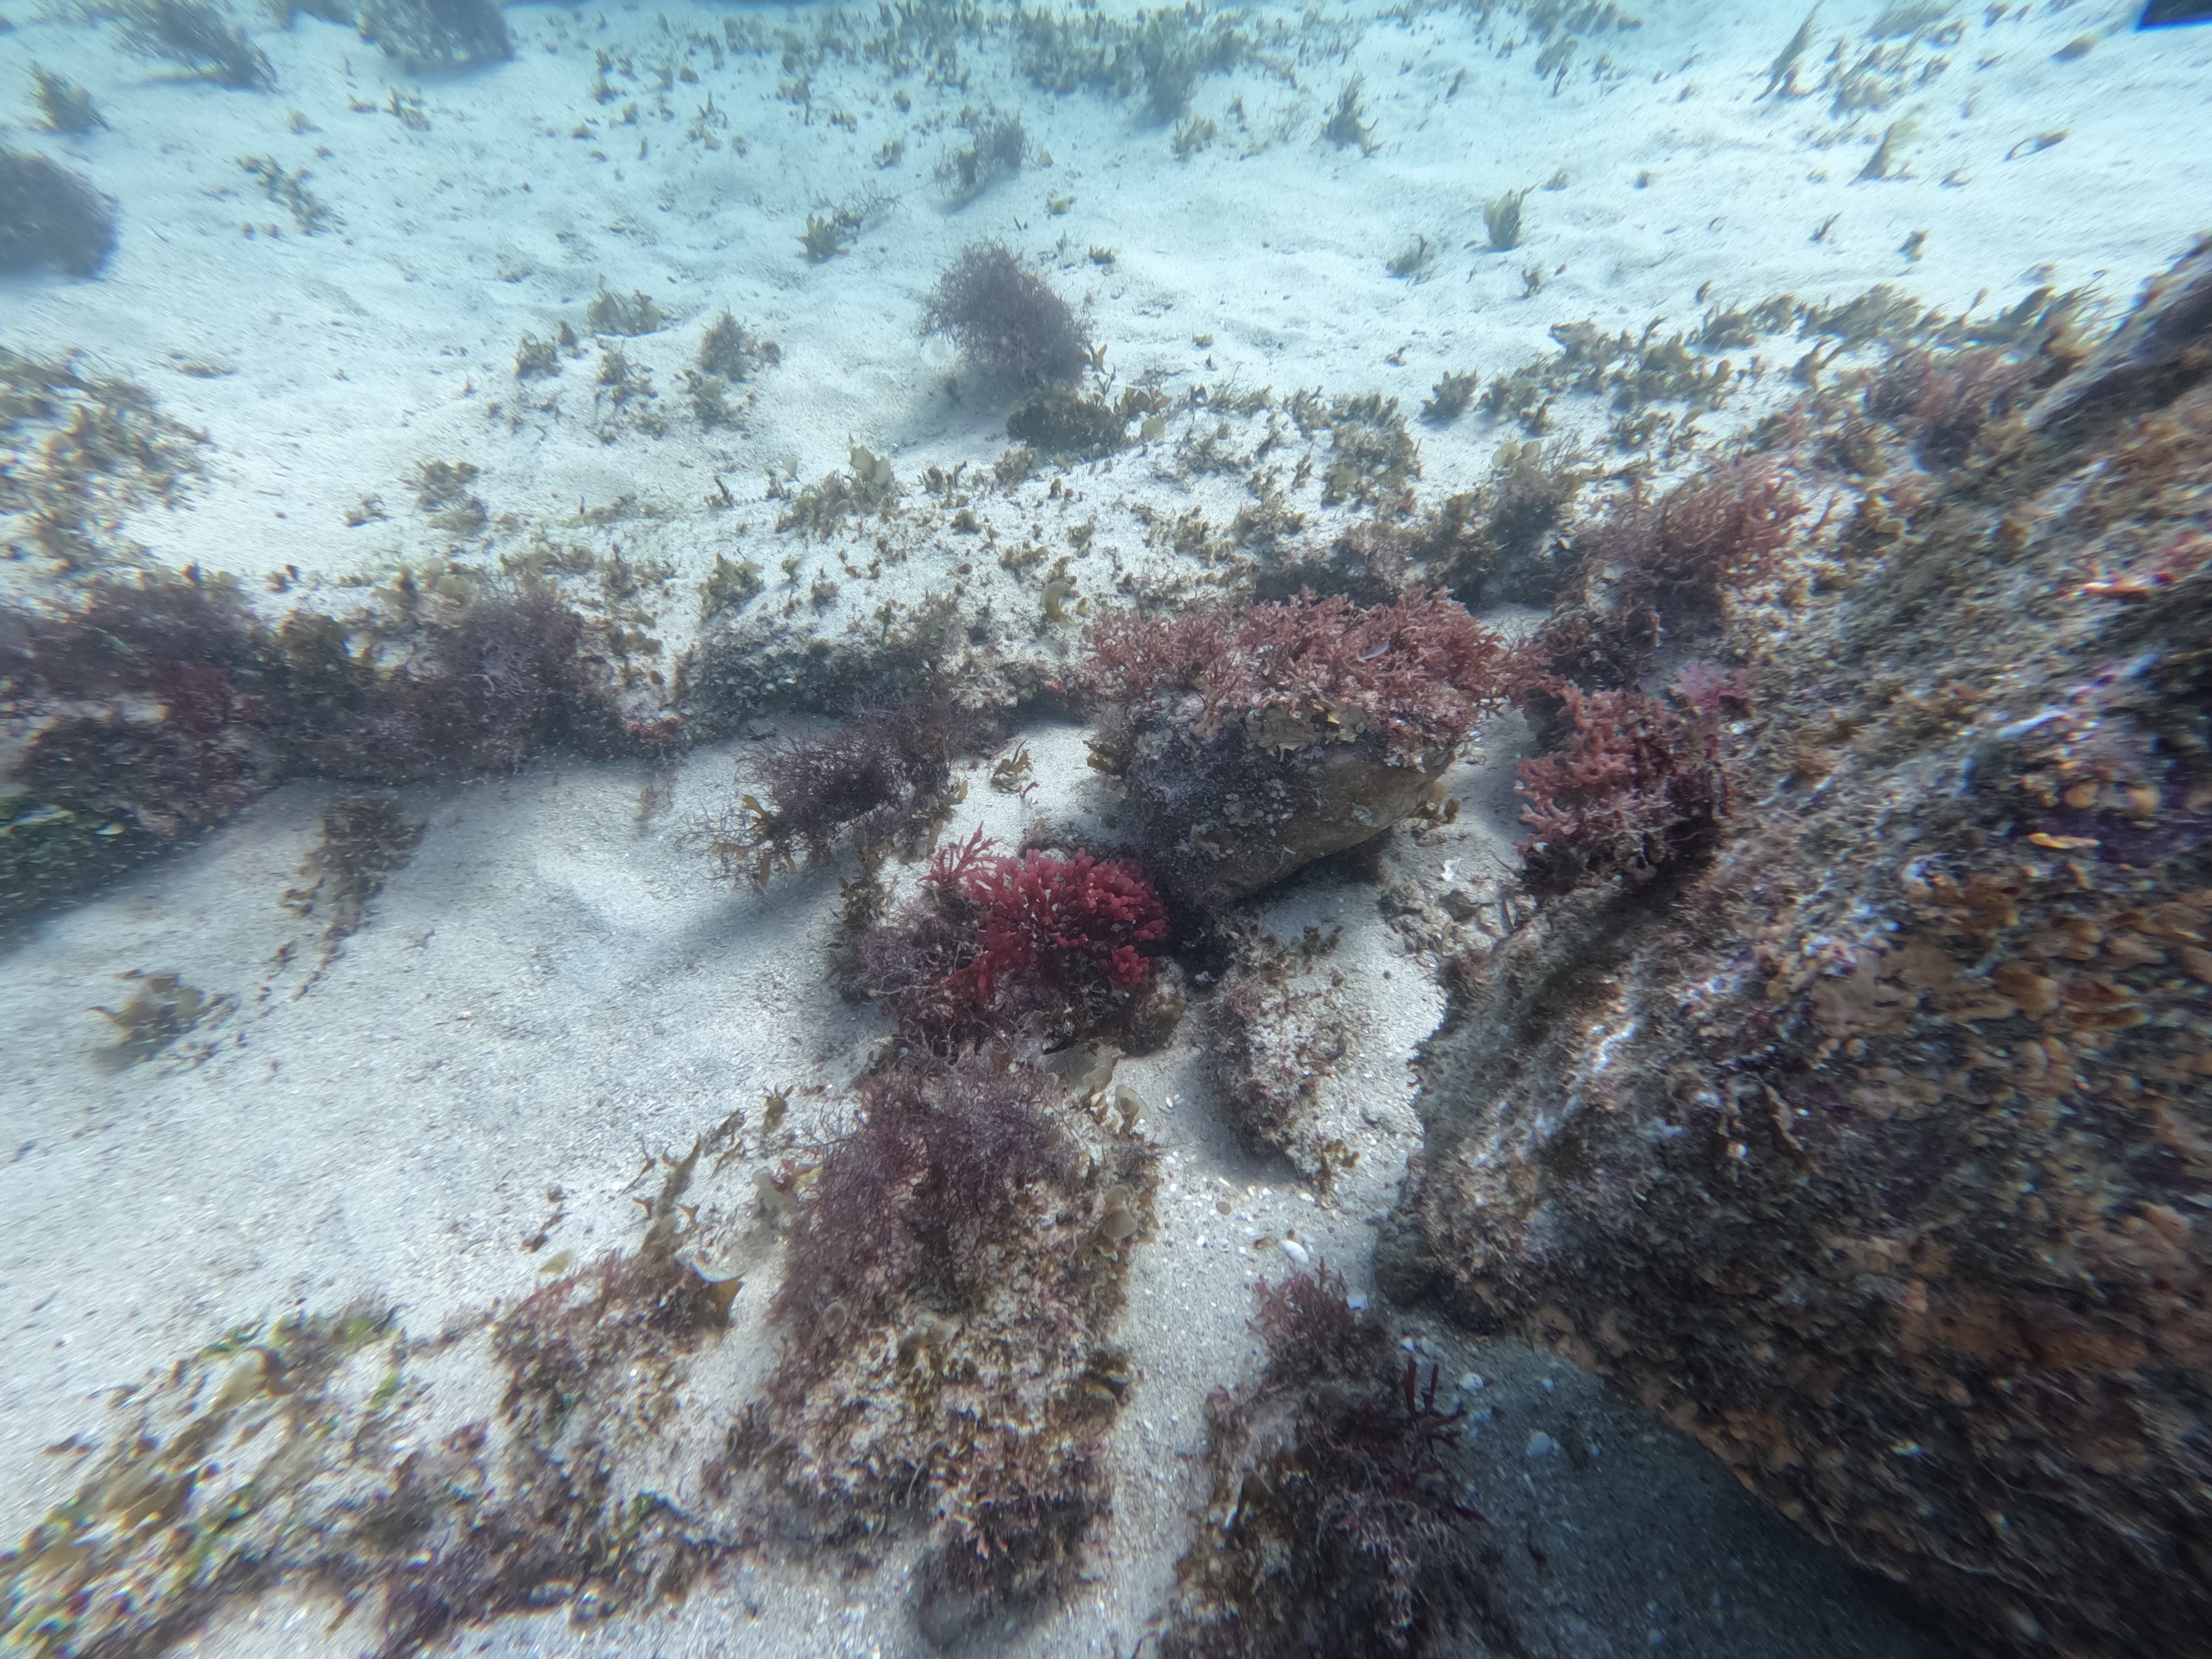

Supplement: Supplementary file 919 [file G0713986.pdf › Ocean2/G0713986.pdf]

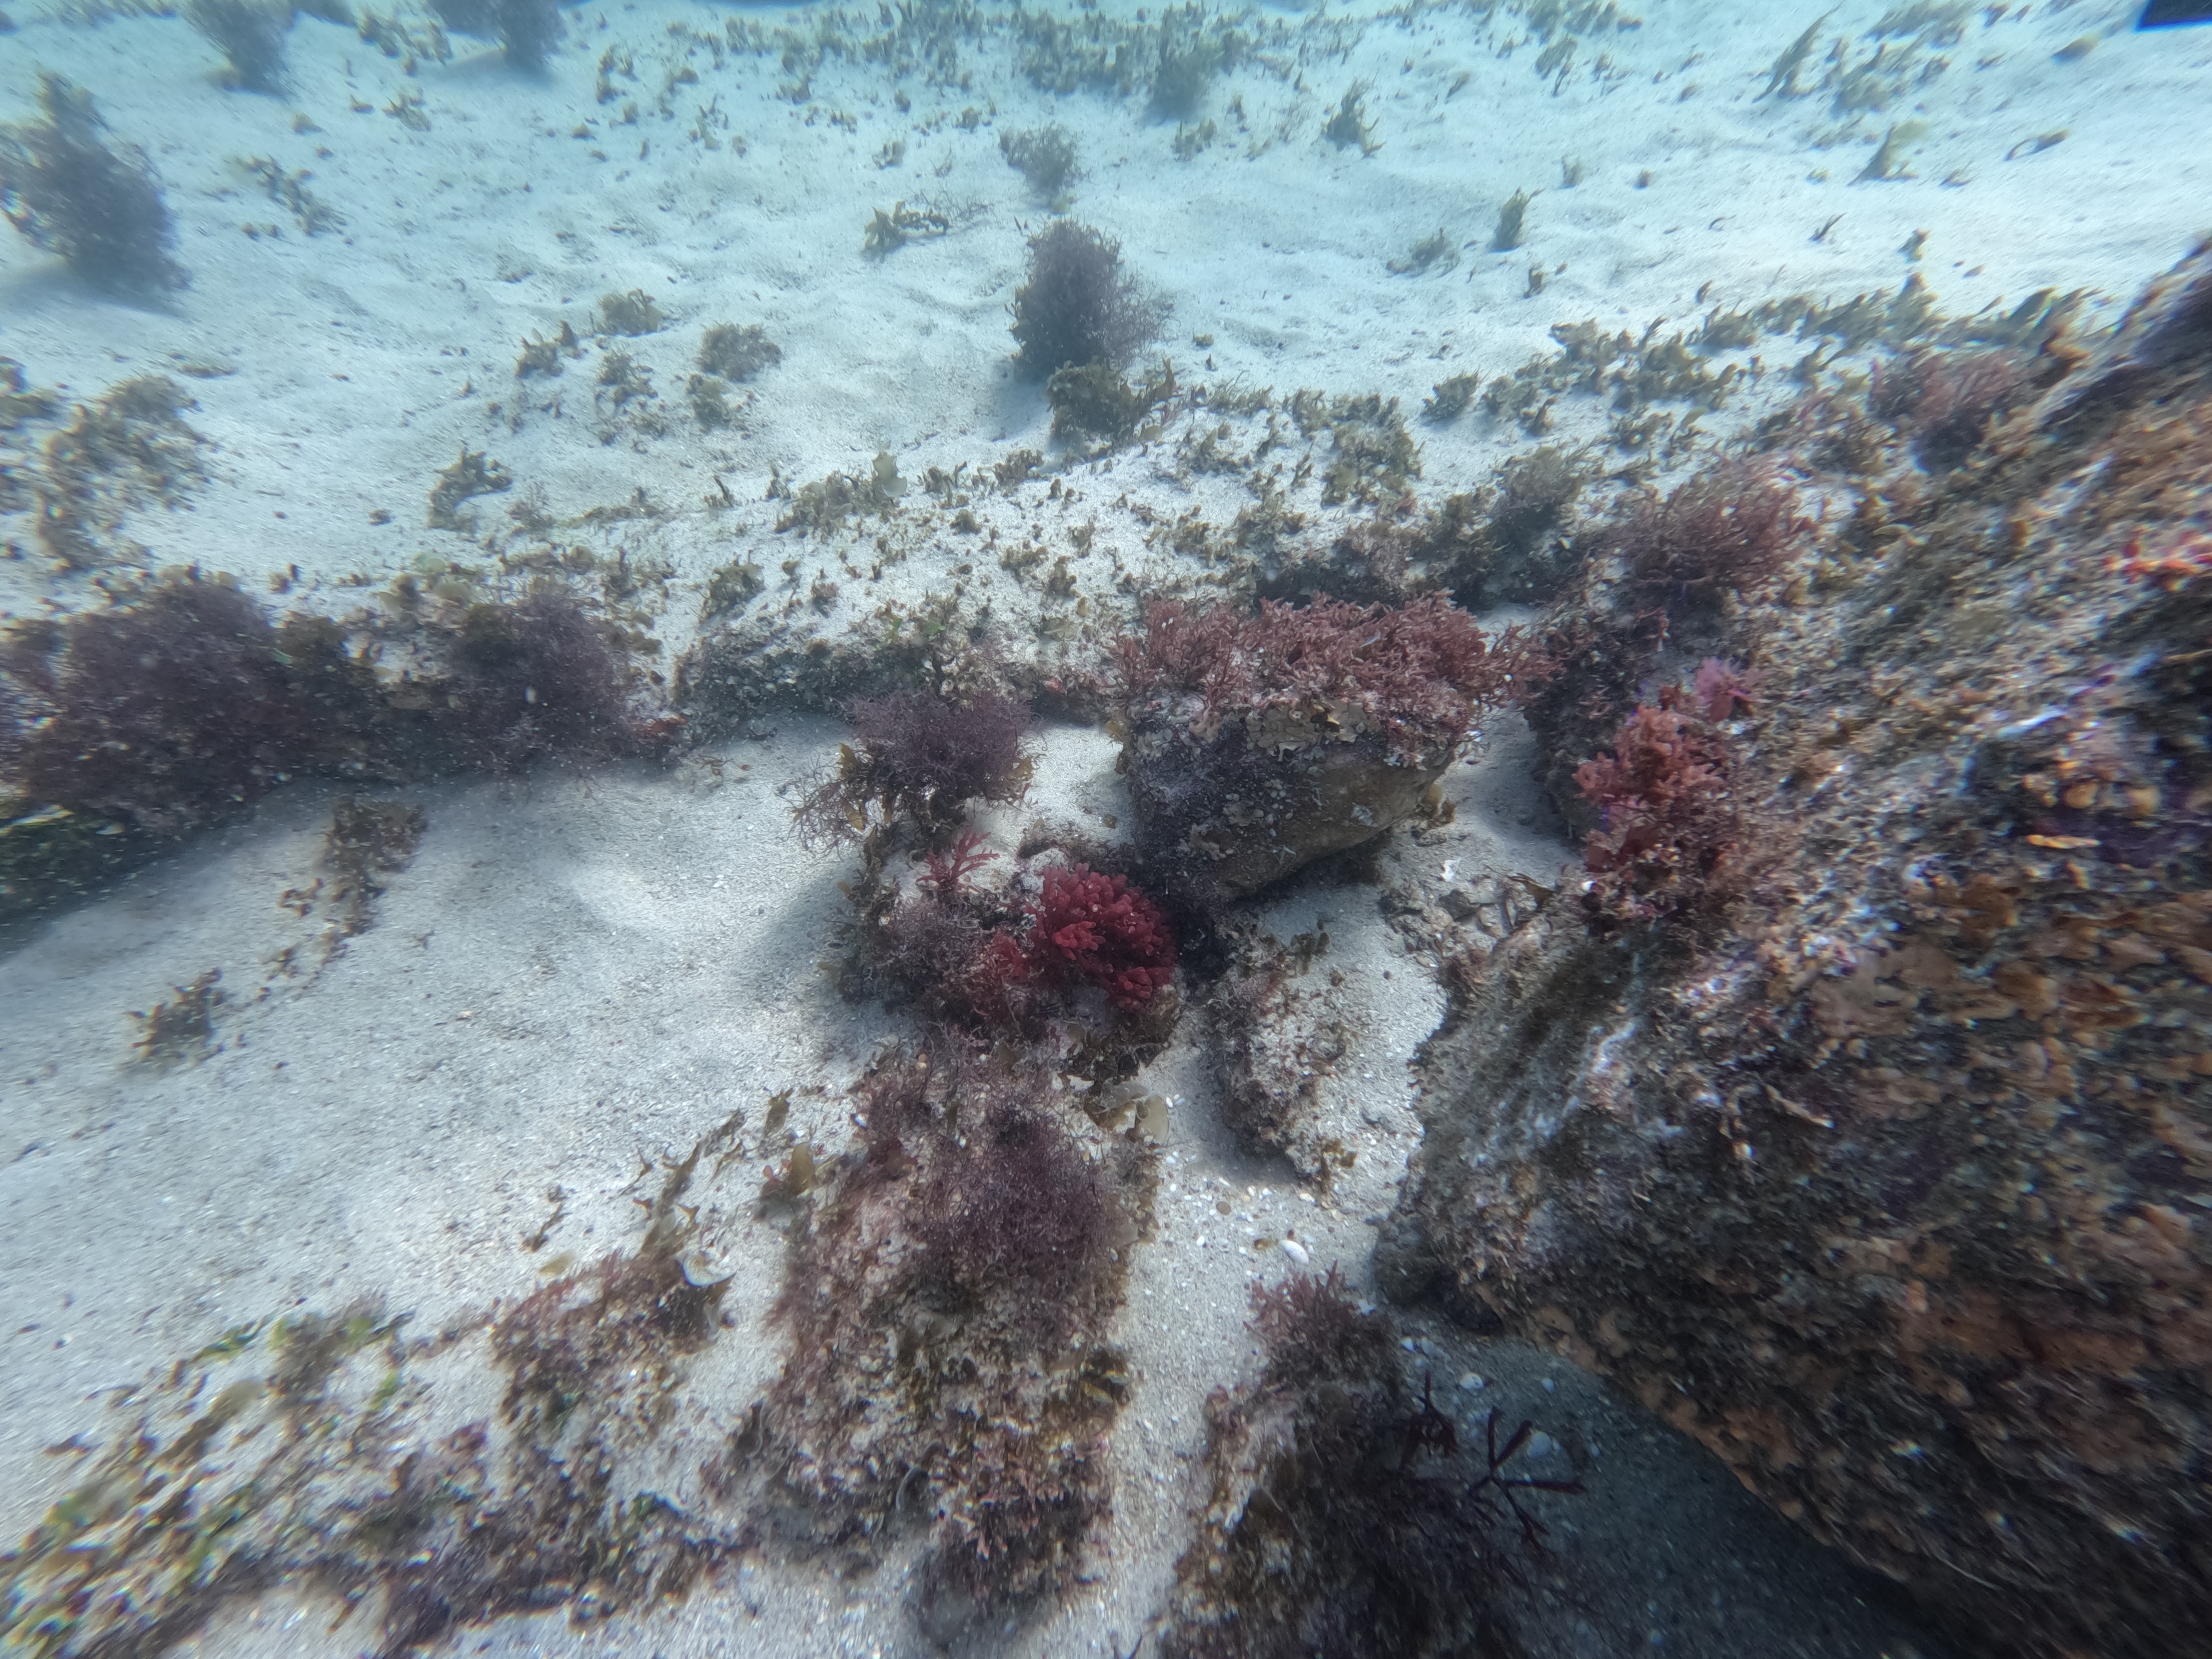

Supplement: Supplementary file 920 [file G0713987.pdf › Ocean2/G0713987.pdf]

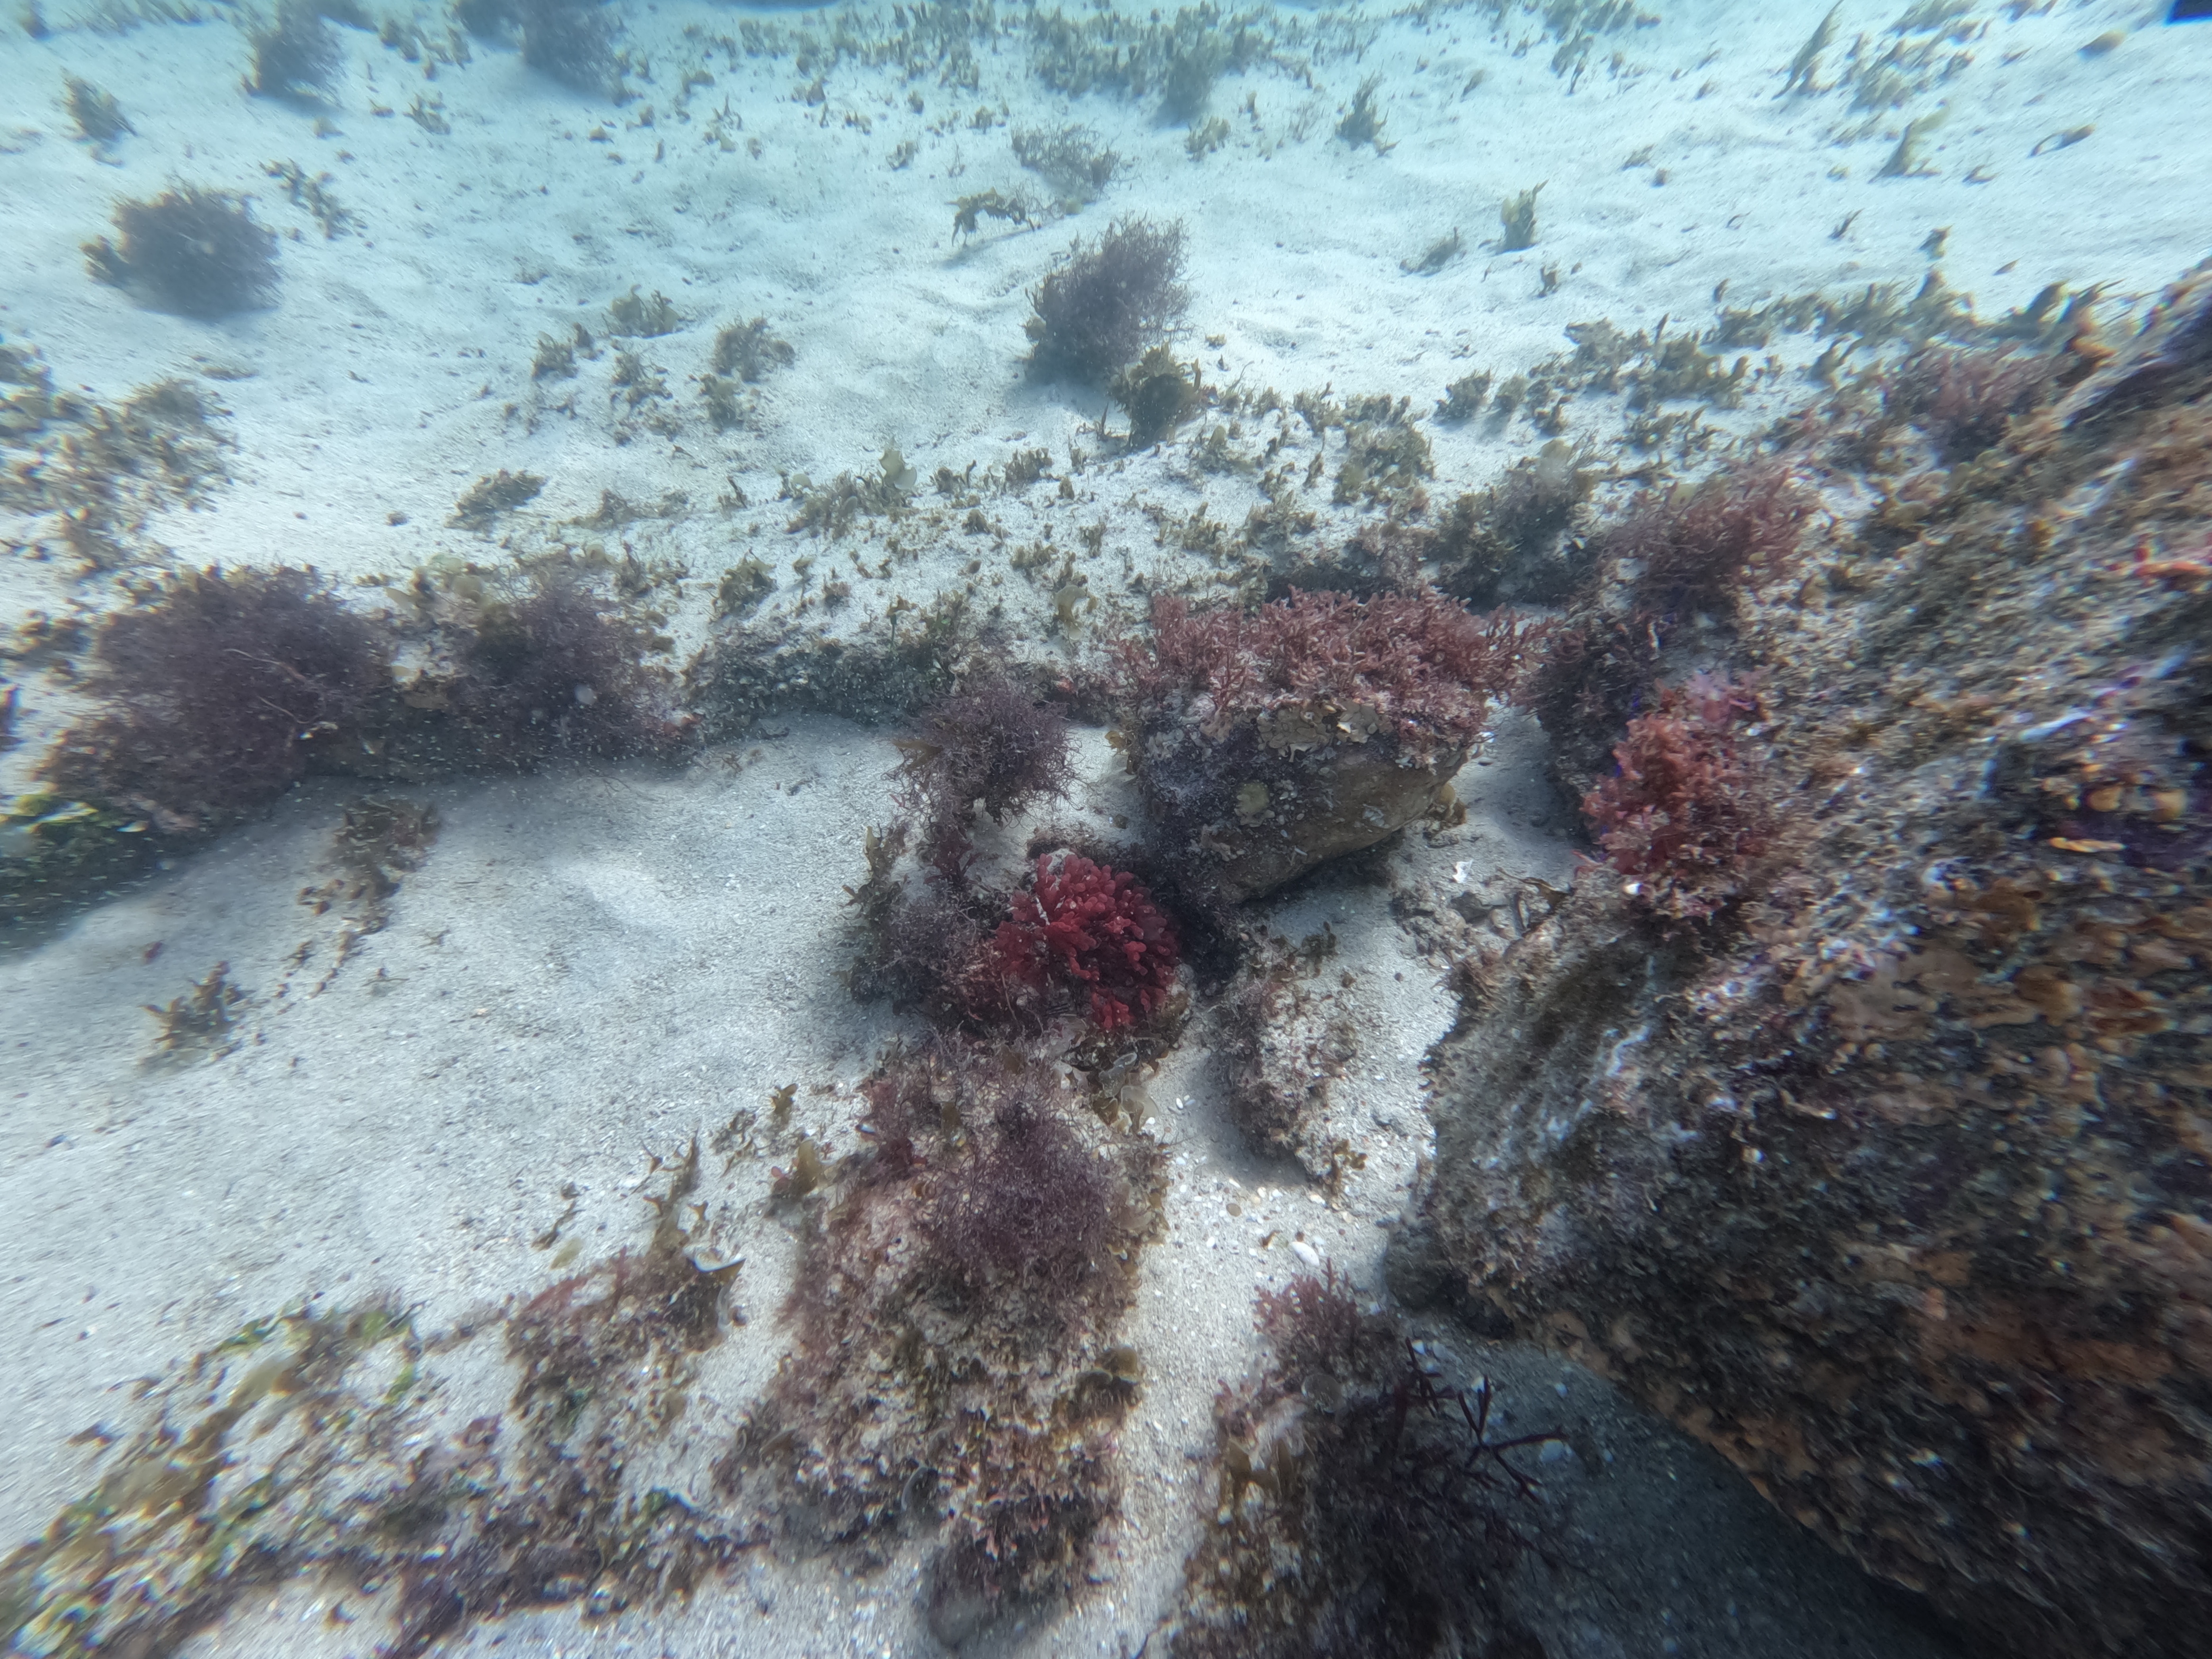

Supplement: Supplementary file 921 [file G0713988.pdf › Ocean2/G0713988.pdf]

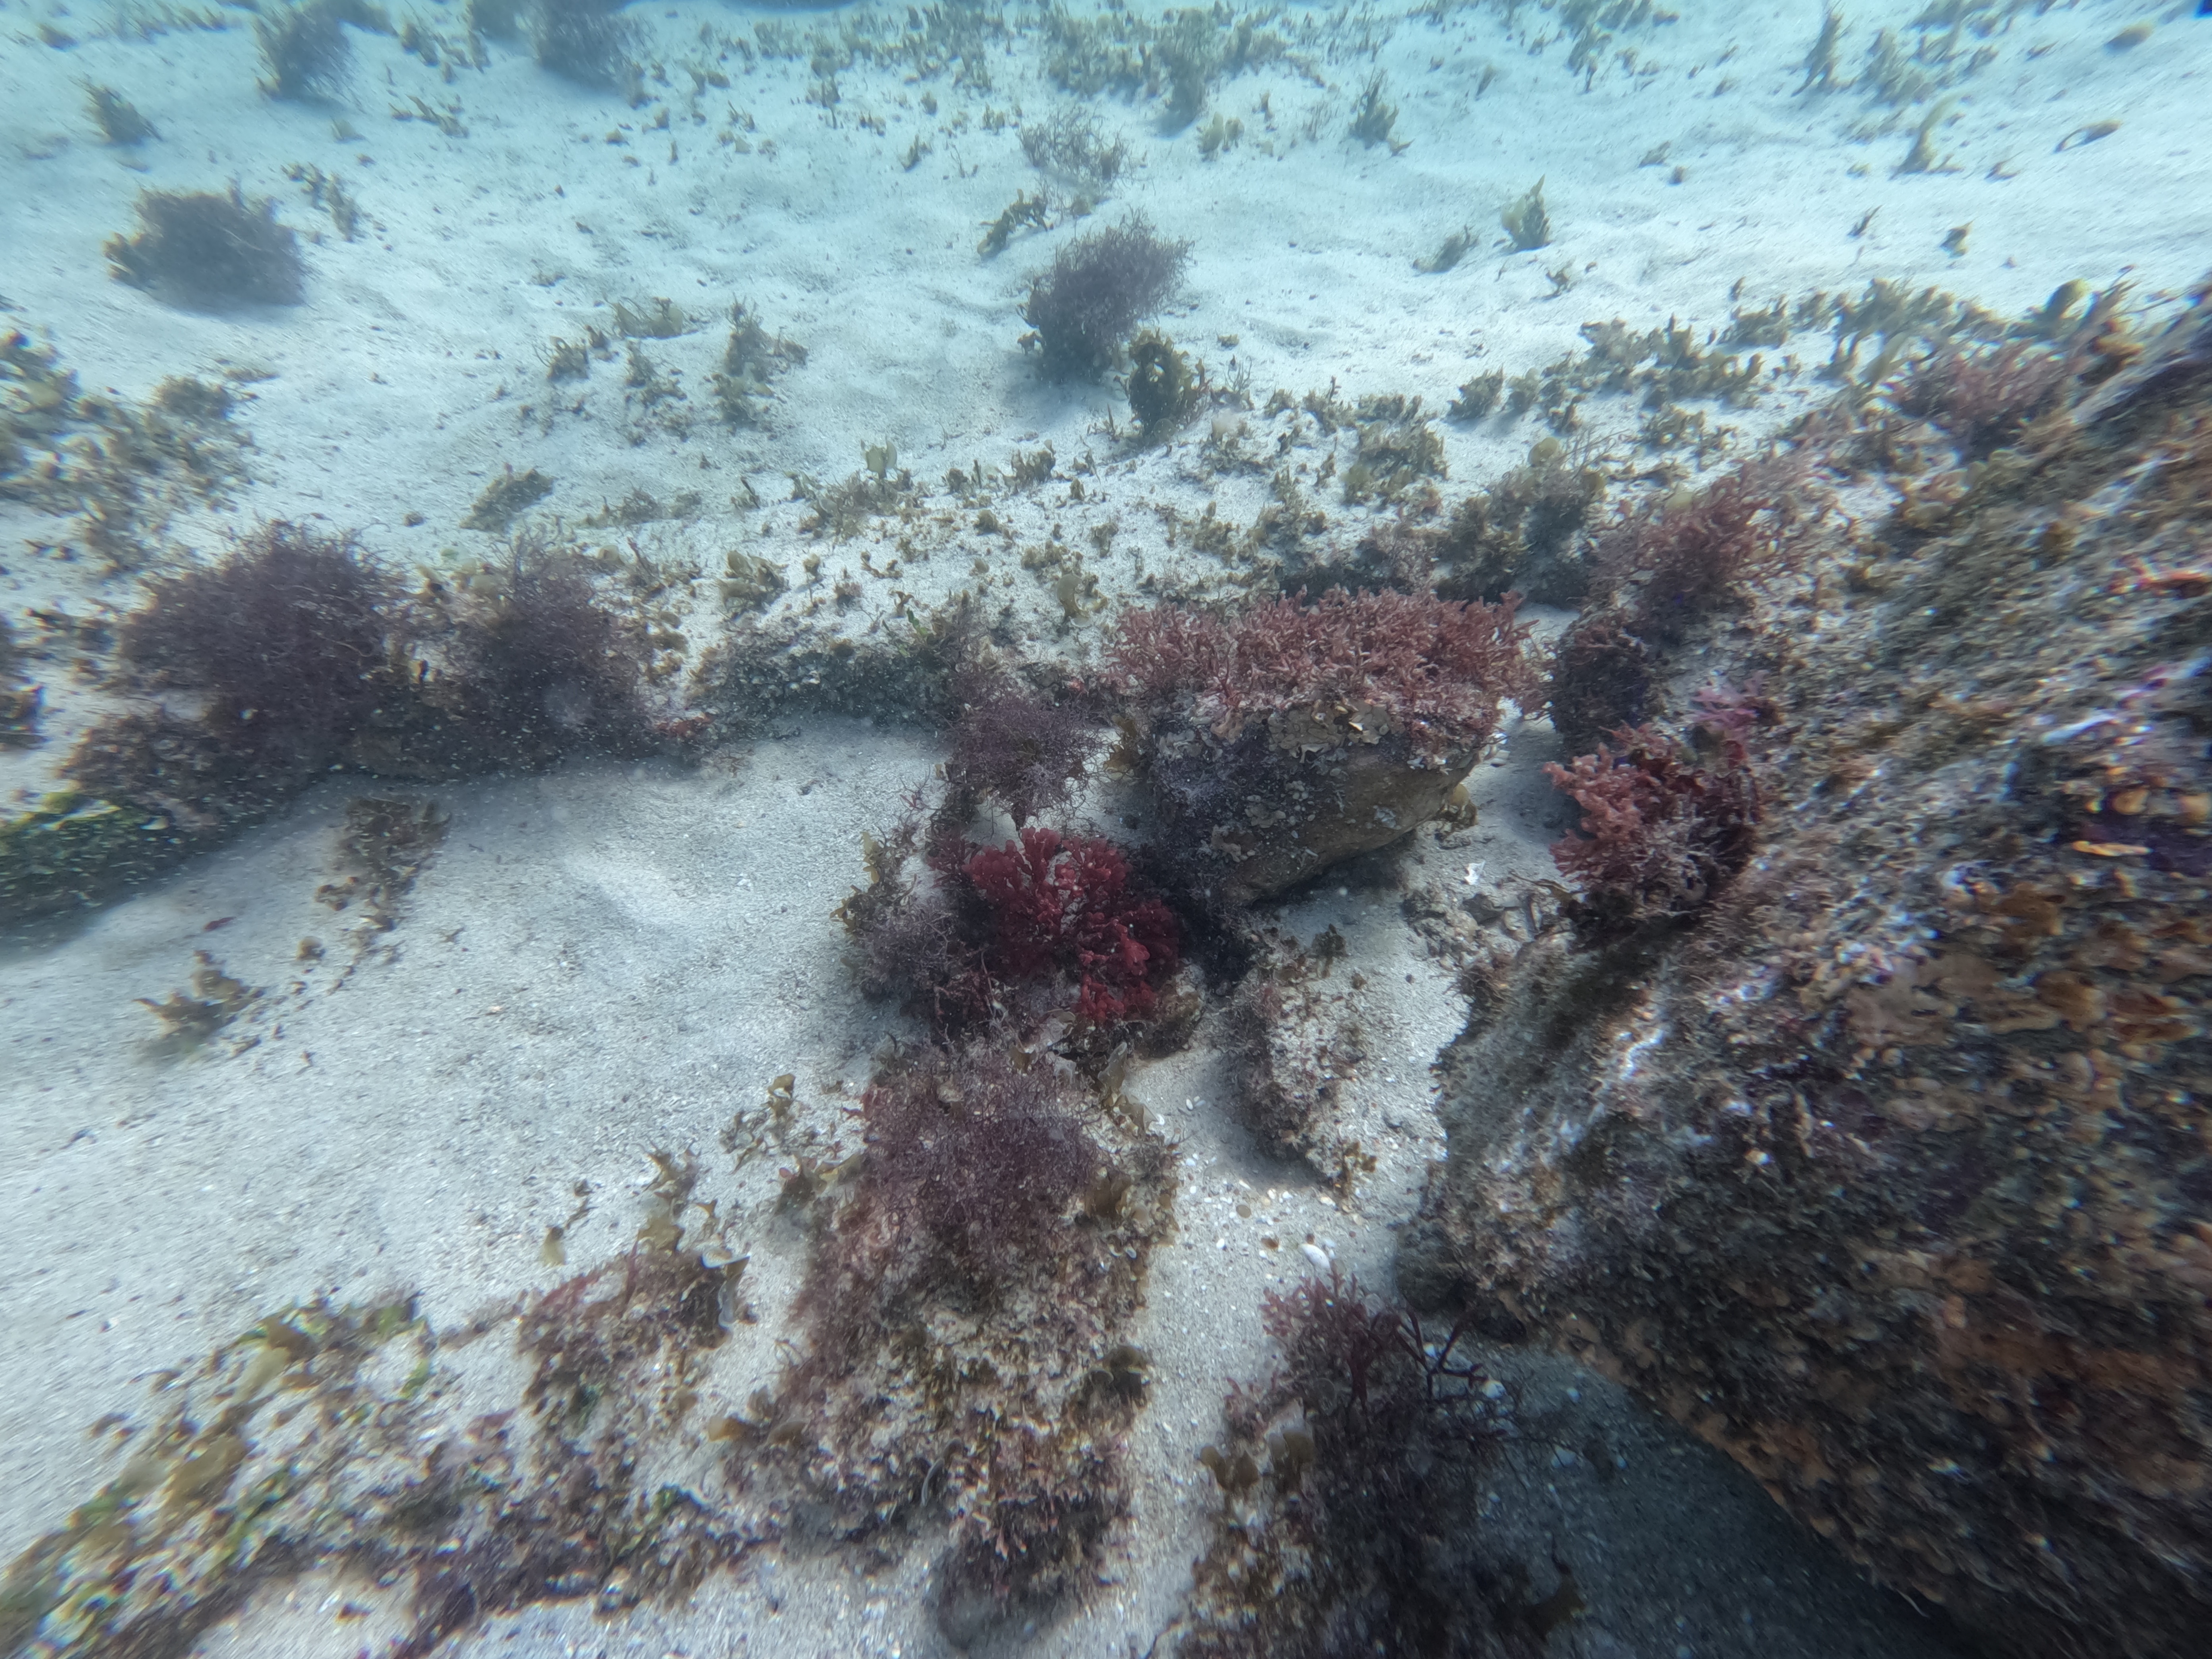

Supplement: Supplementary file 922 [file G0713989.pdf › Ocean2/G0713989.pdf]

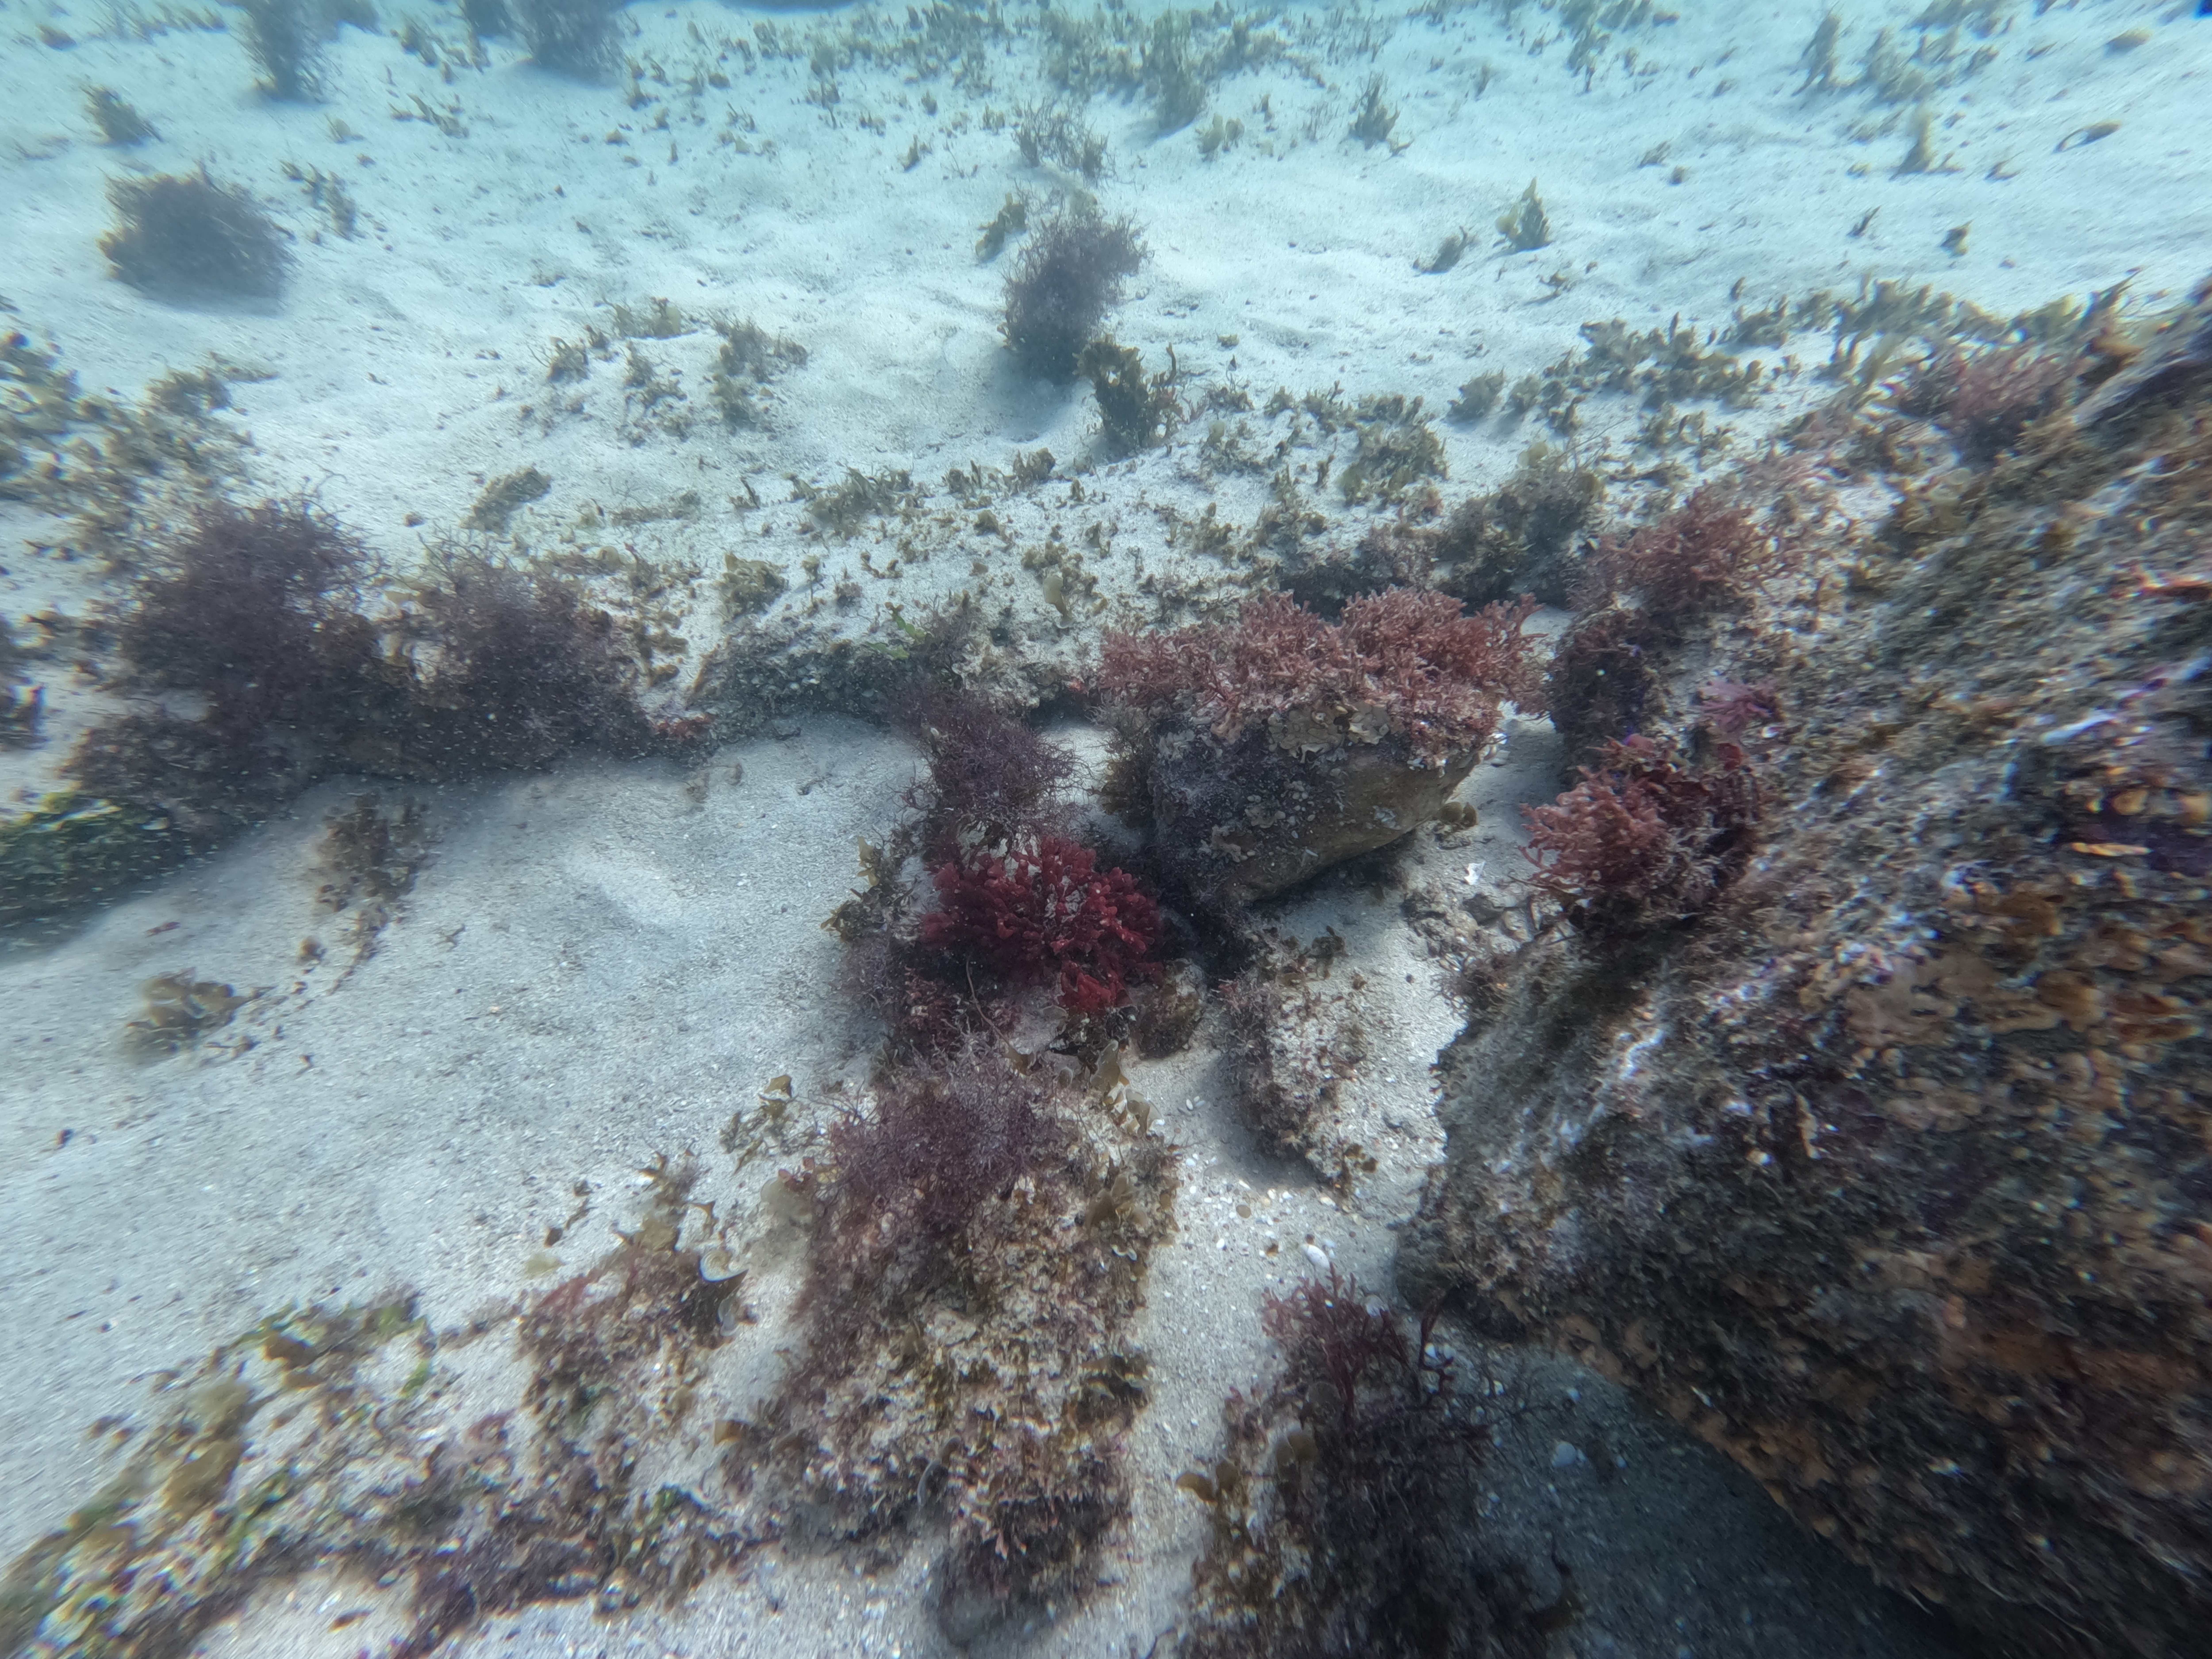

Supplement: Supplementary file 923 [file G0713990.pdf › Ocean2/G0713990.pdf]

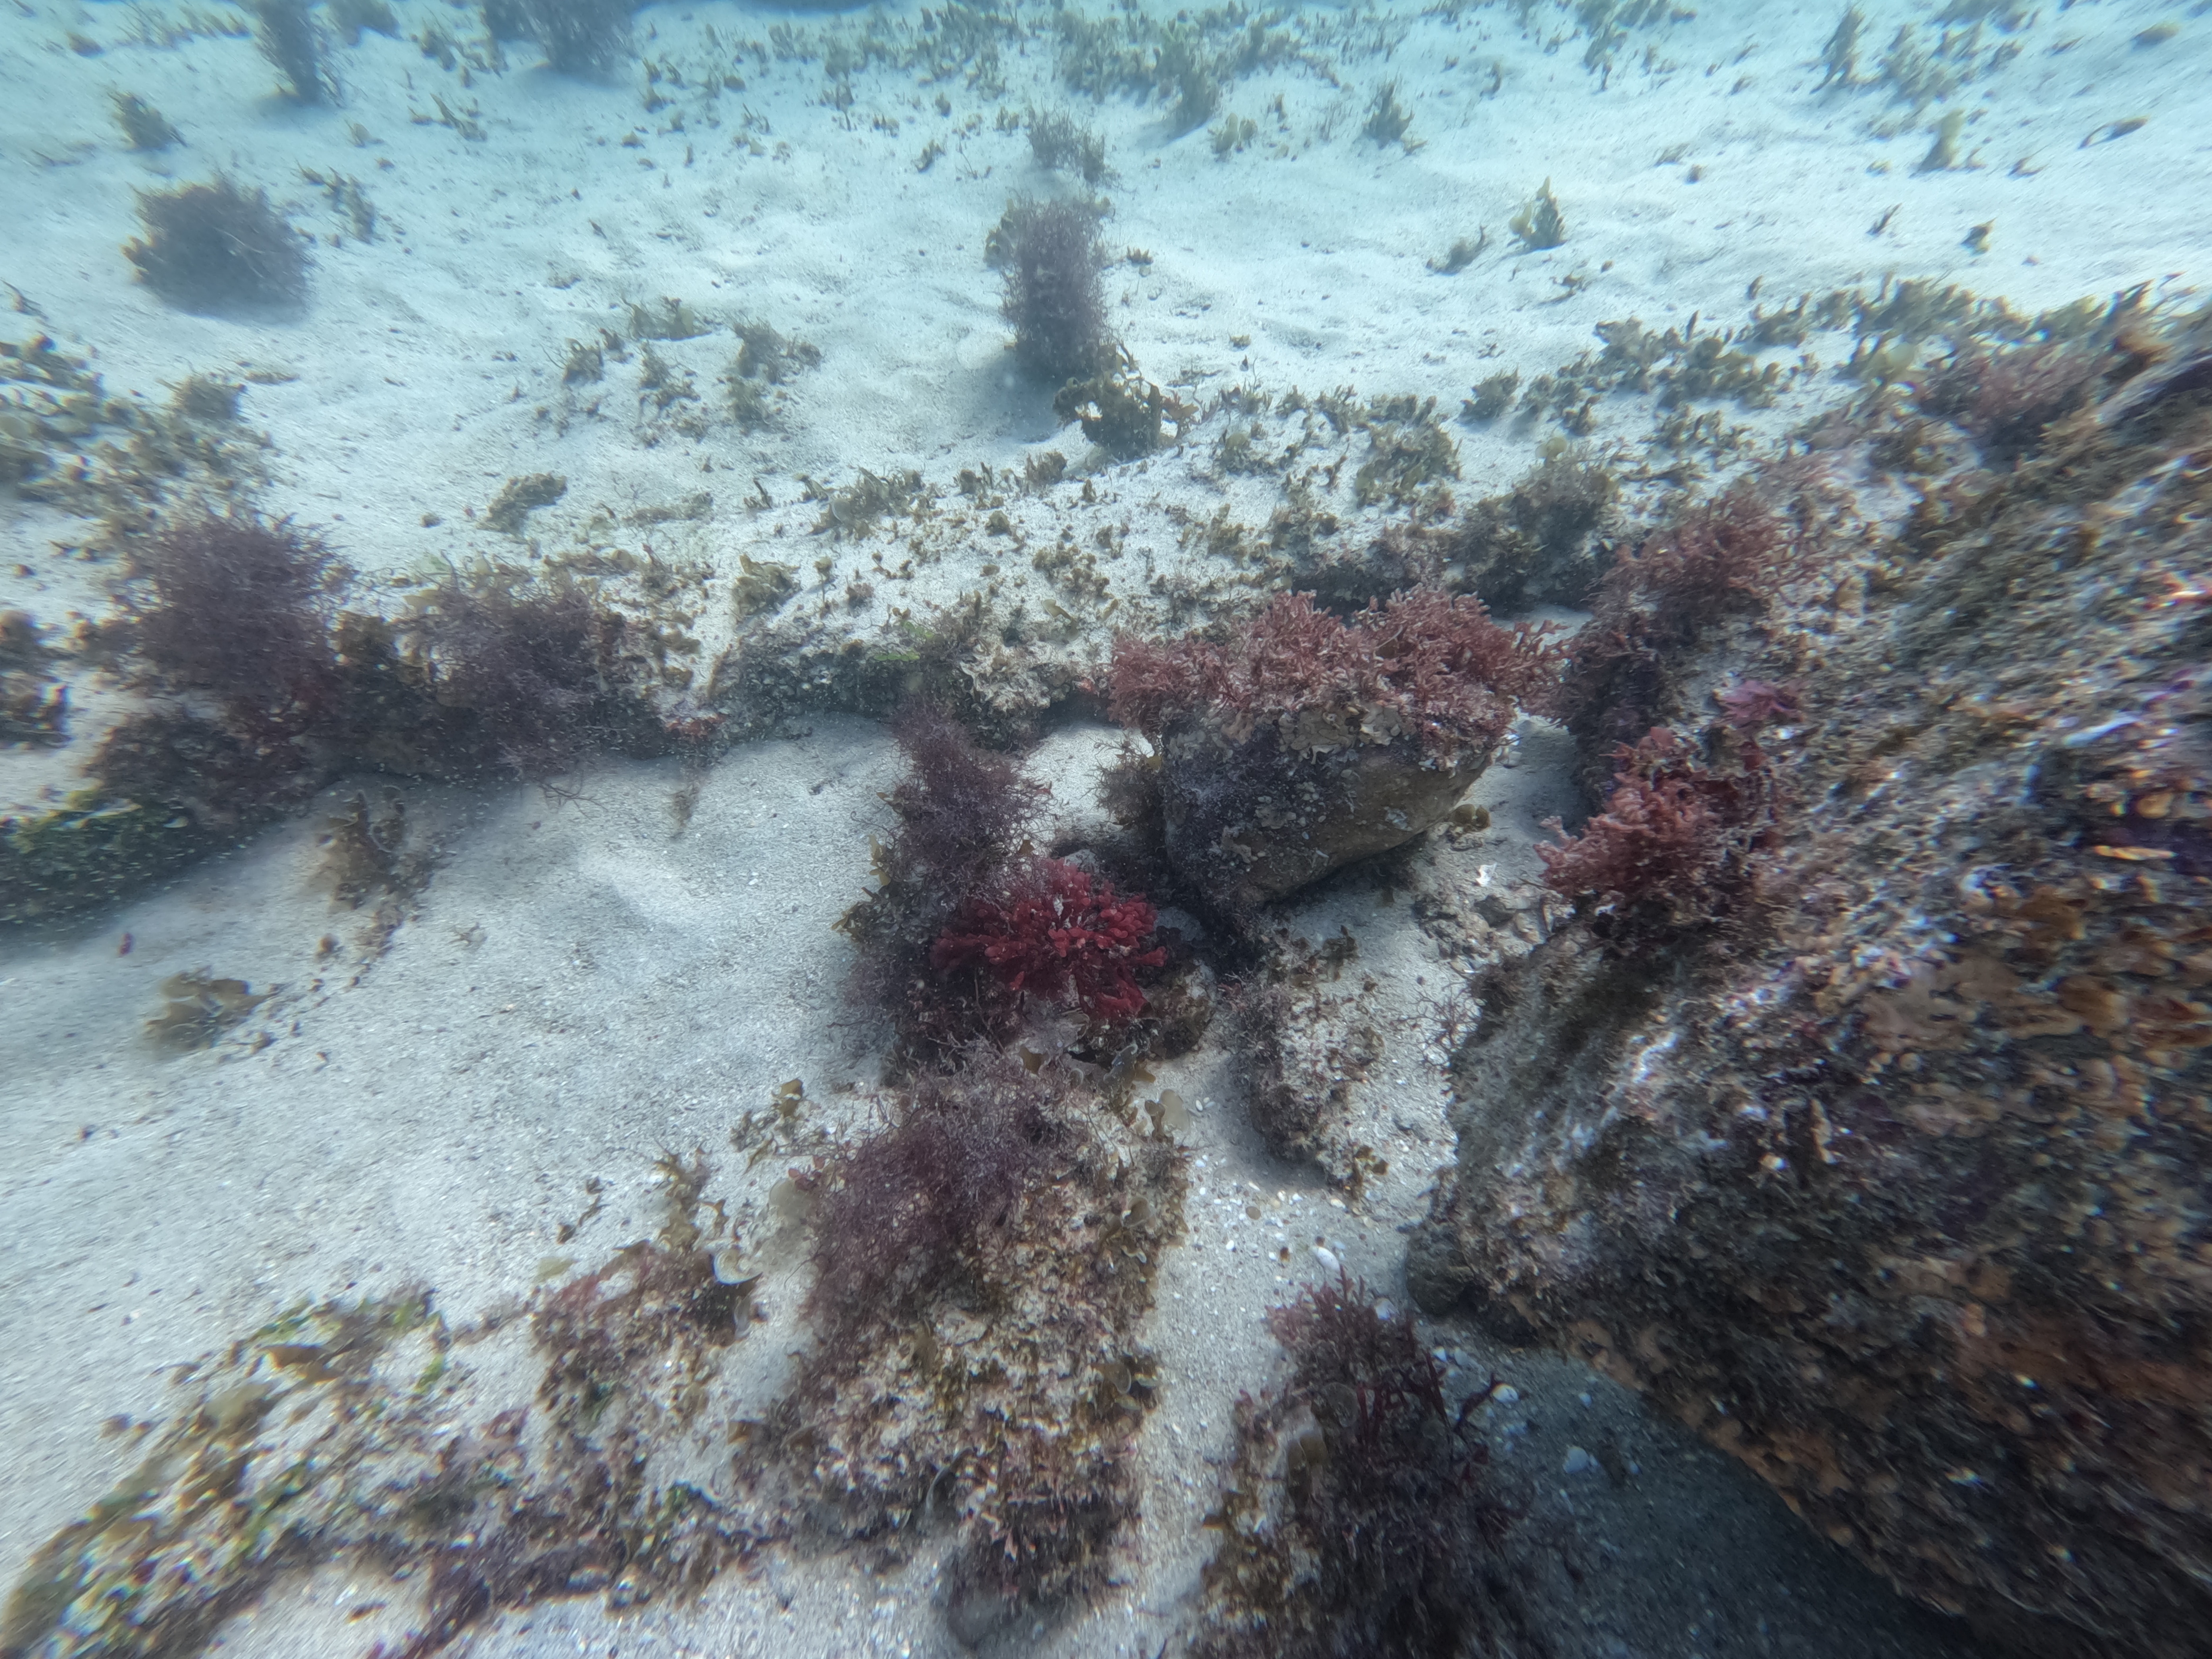

Supplement: Supplementary file 924 [file G0713991.pdf › Ocean2/G0713991.pdf]

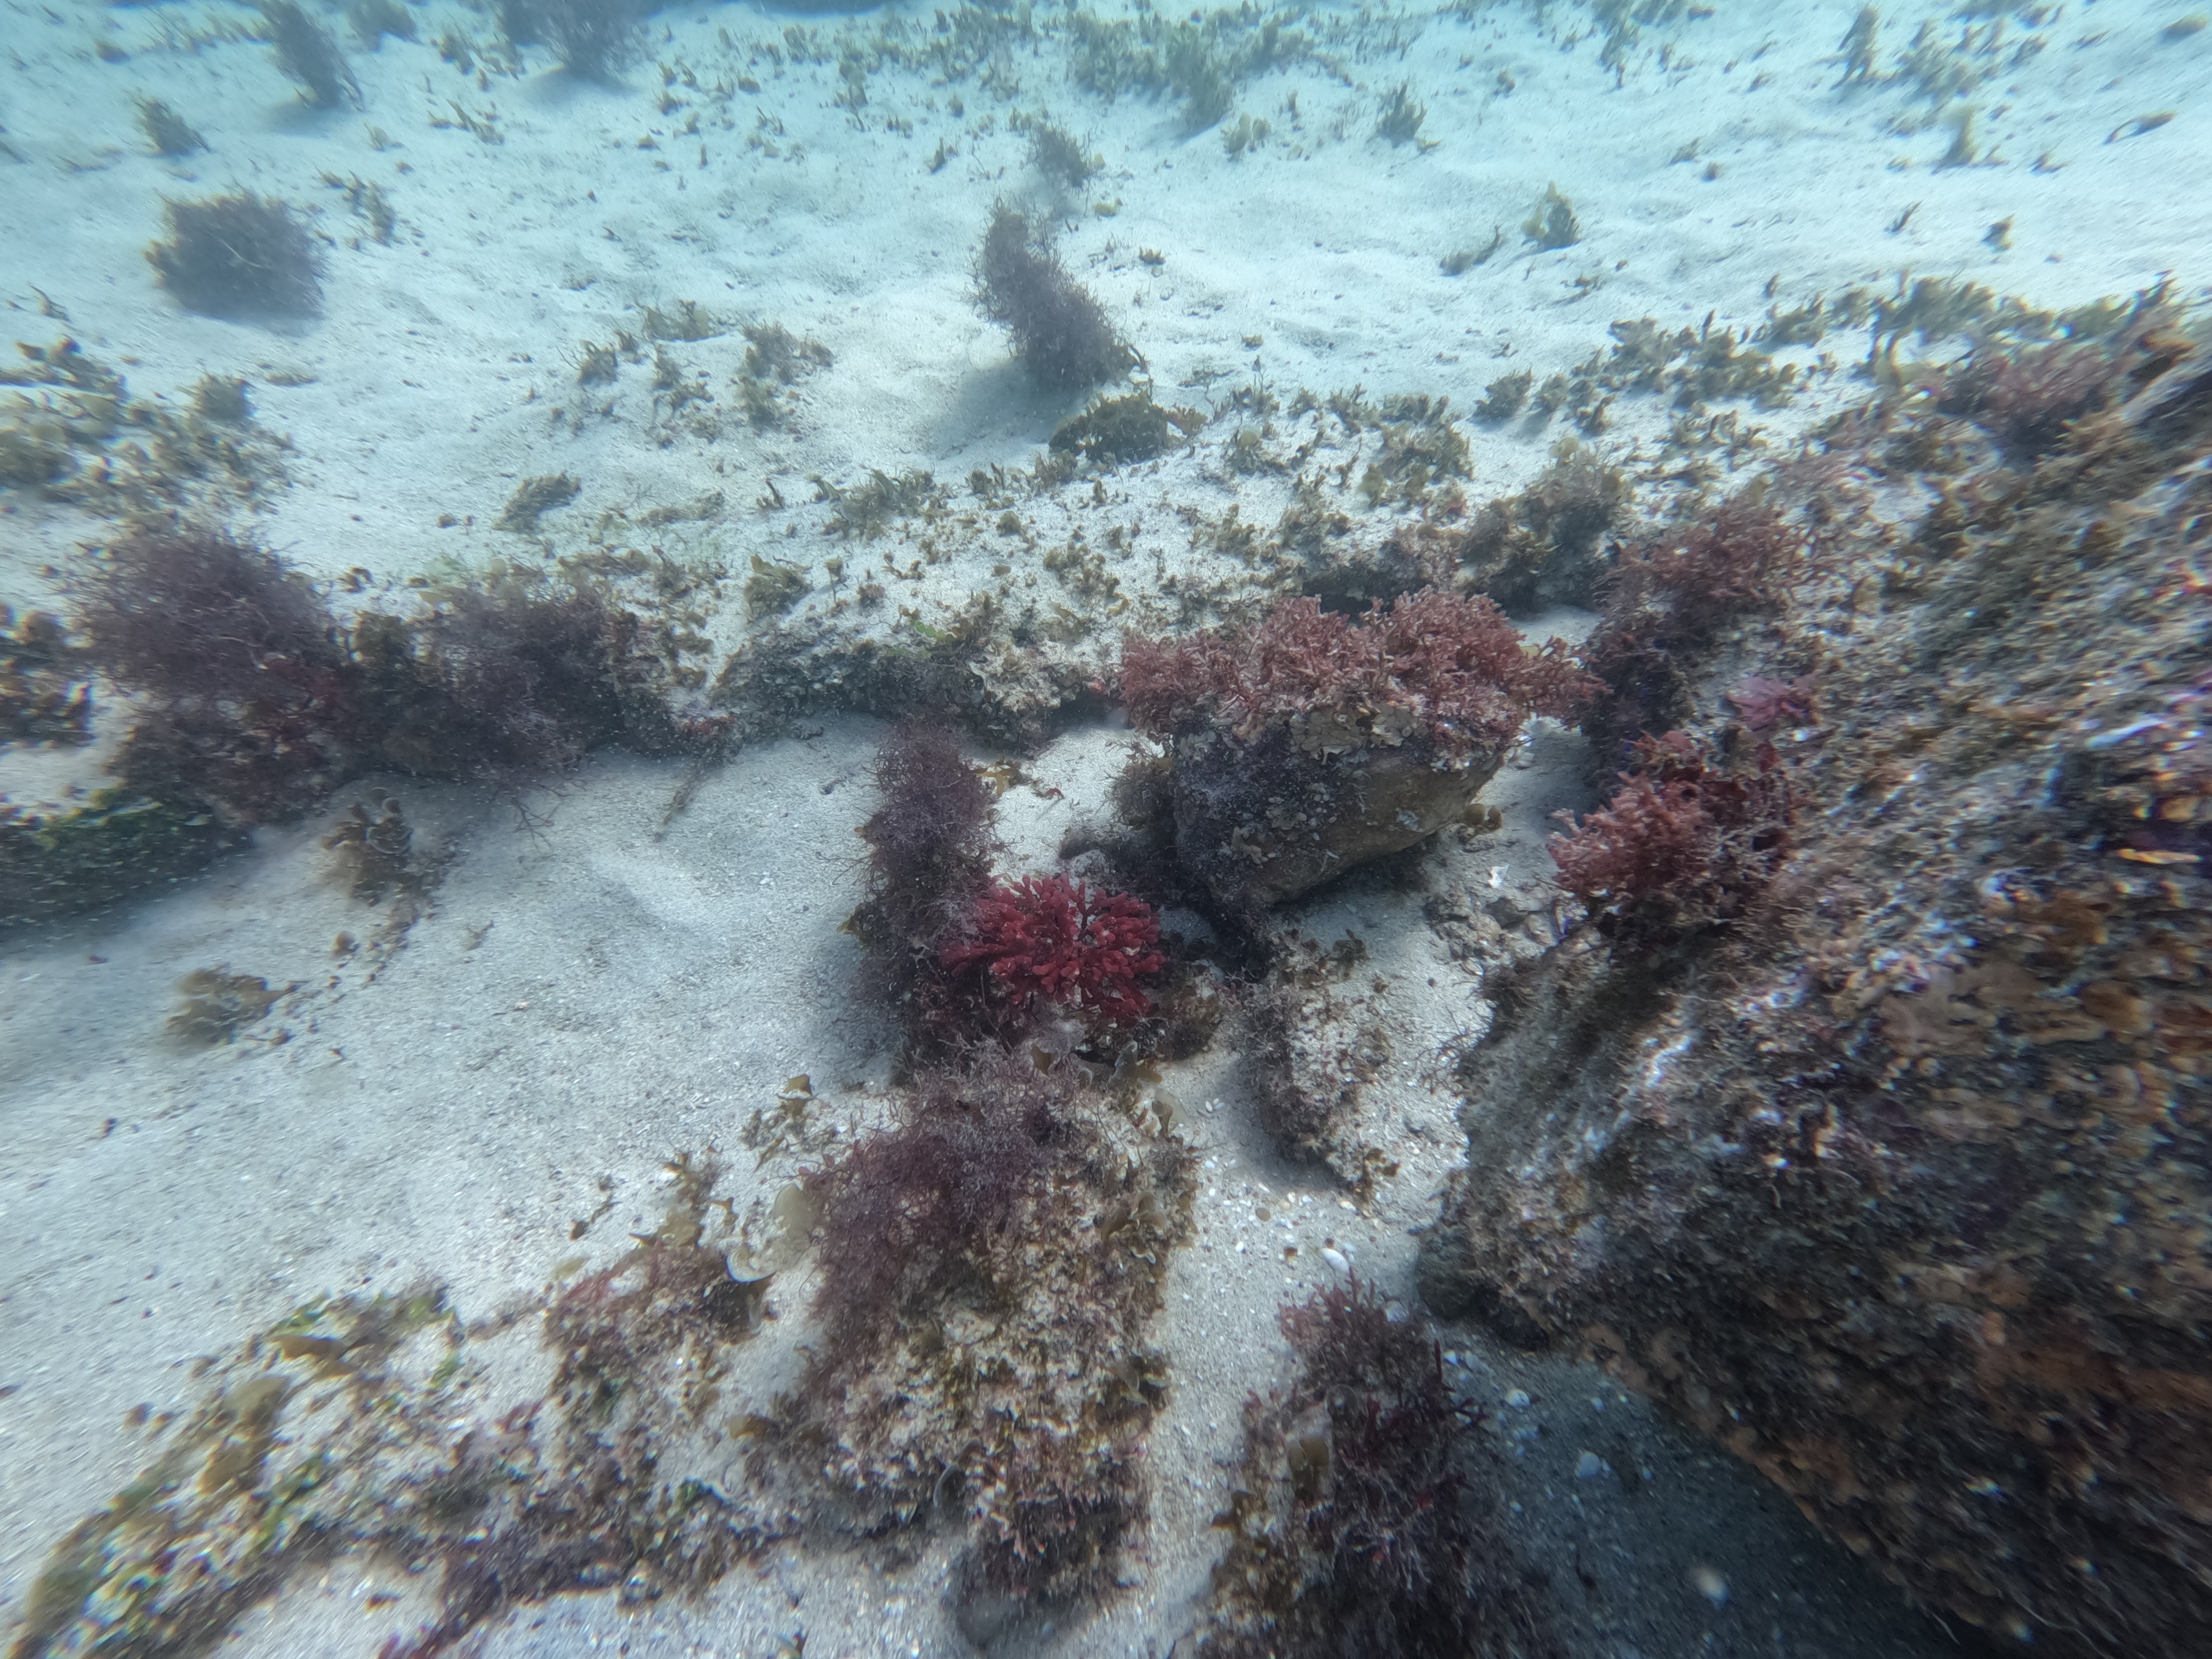

Supplement: Supplementary file 925 [file G0713992.pdf › Ocean2/G0713992.pdf]

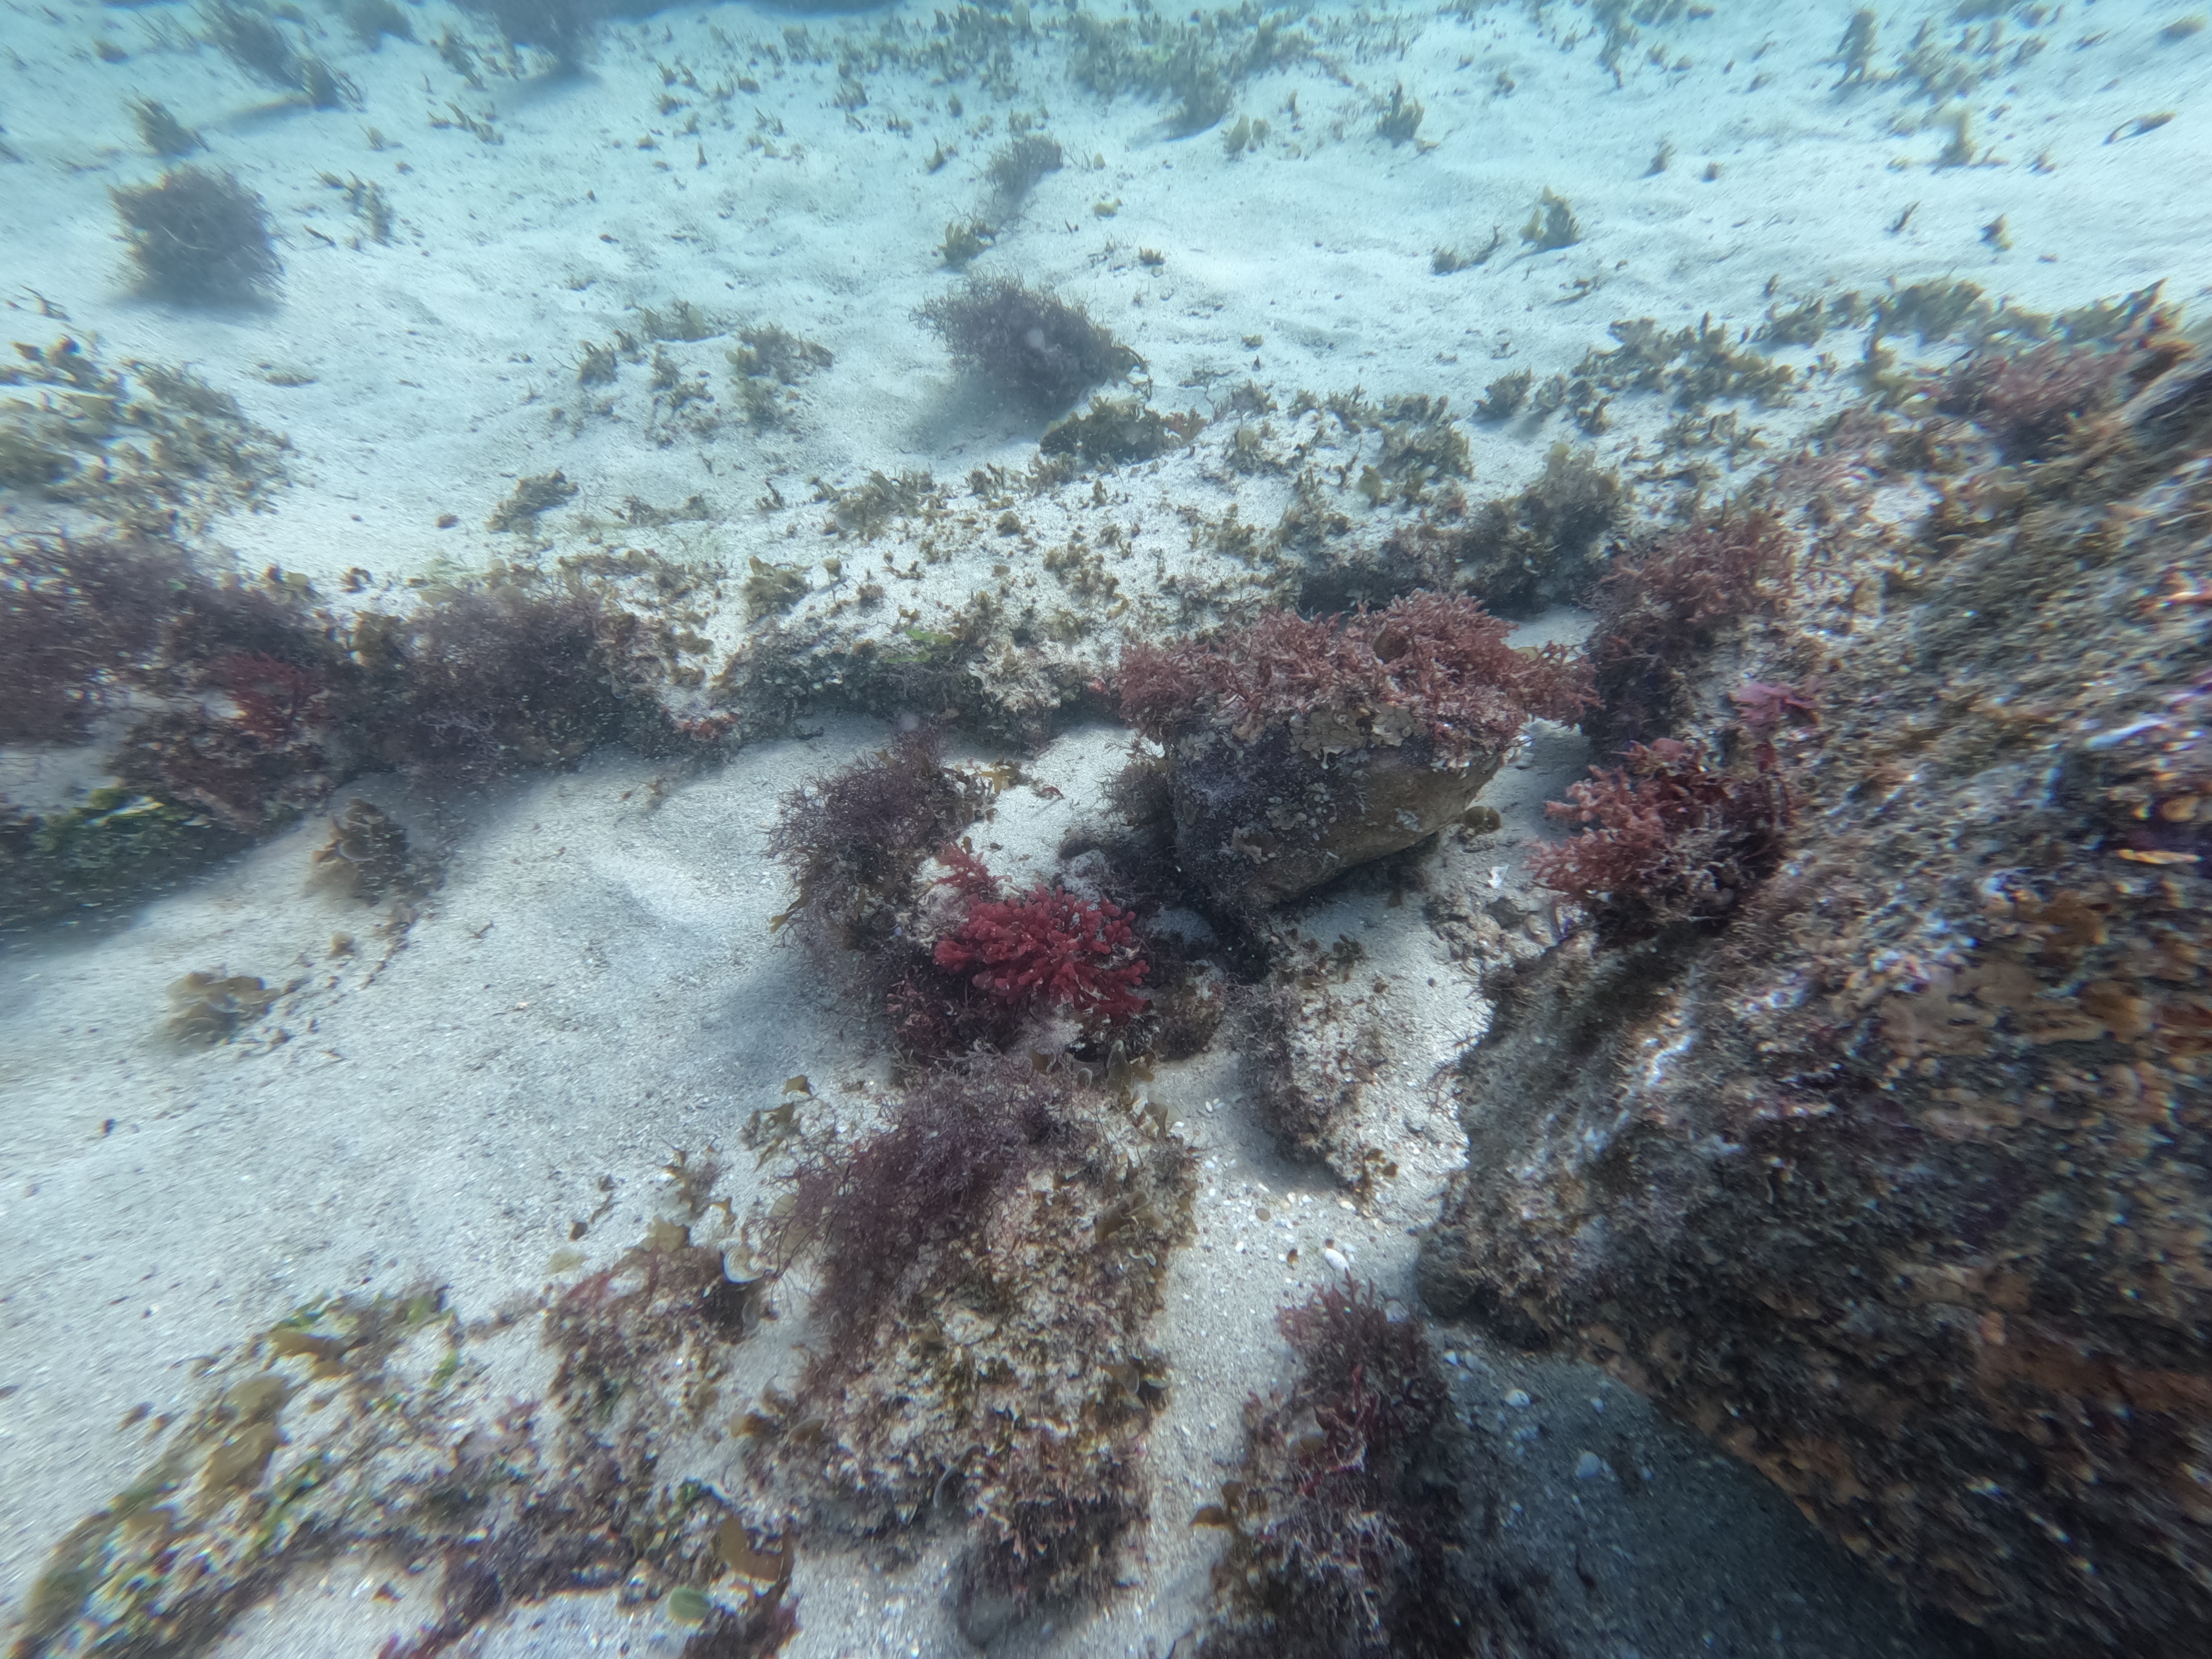

Supplement: Supplementary file 926 [file G0713993.pdf › Ocean2/G0713993.pdf]

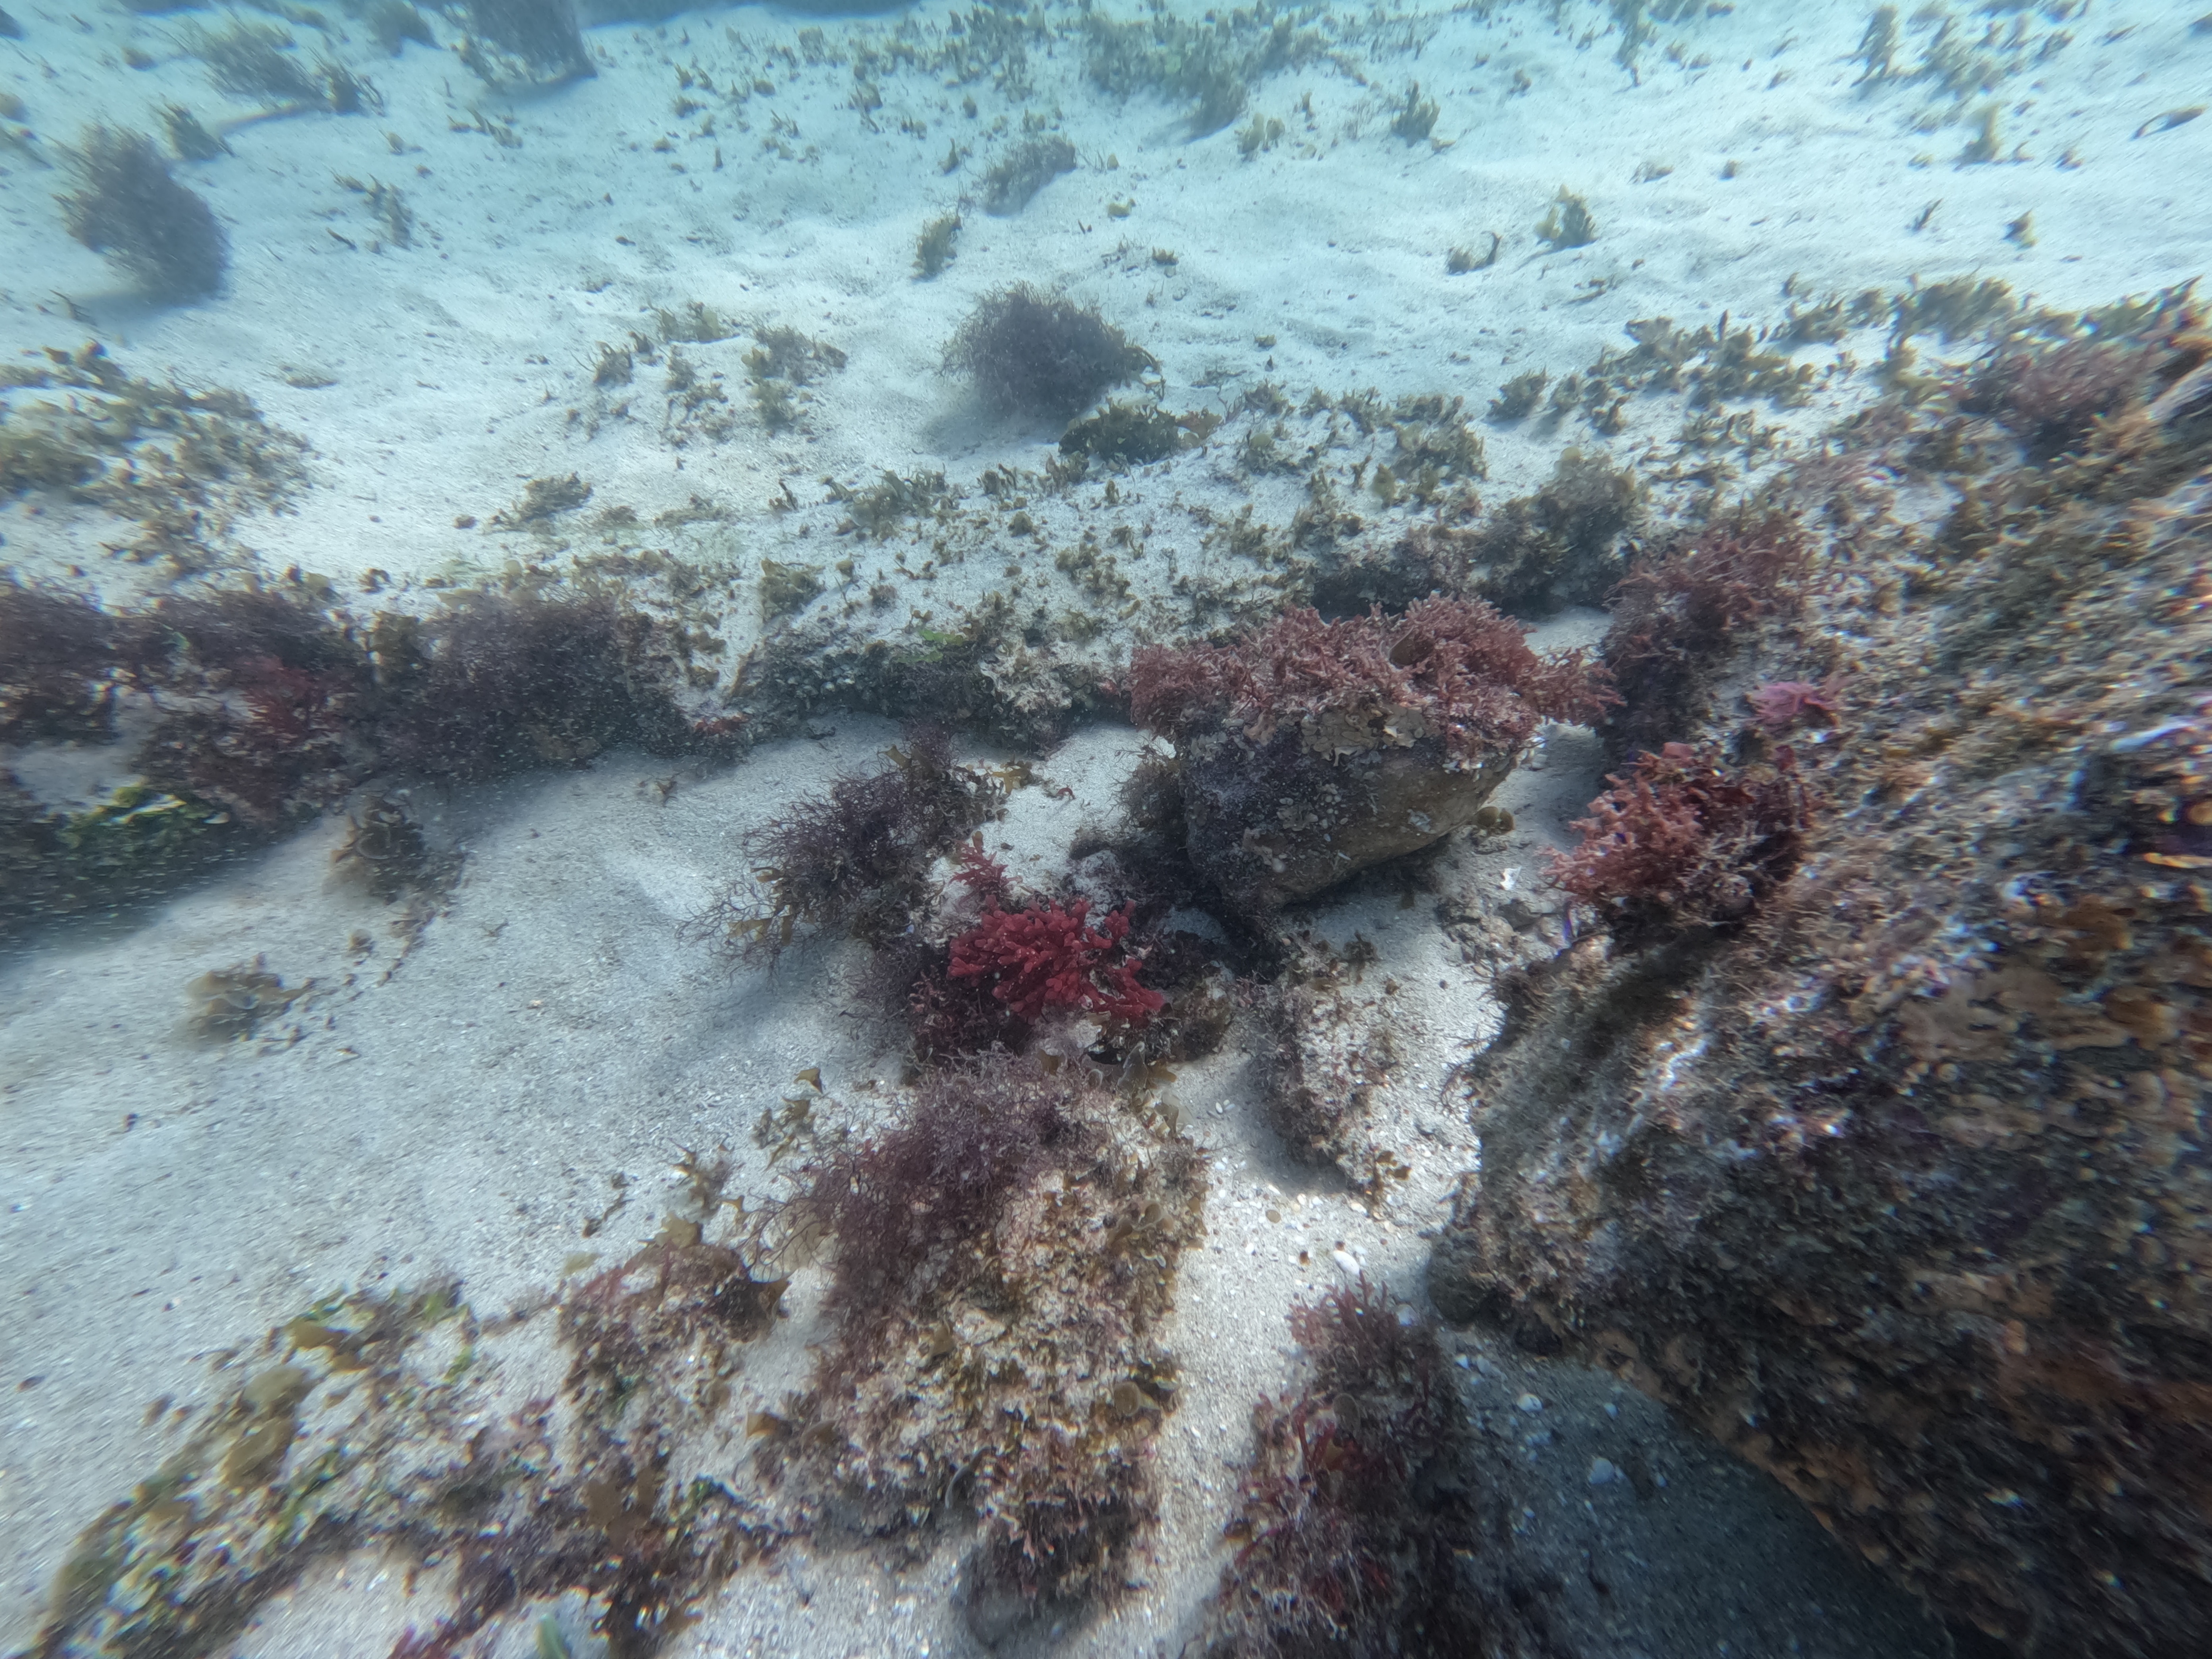

Supplement: Supplementary file 927 [file G0713994.pdf › Ocean2/G0713994.pdf]

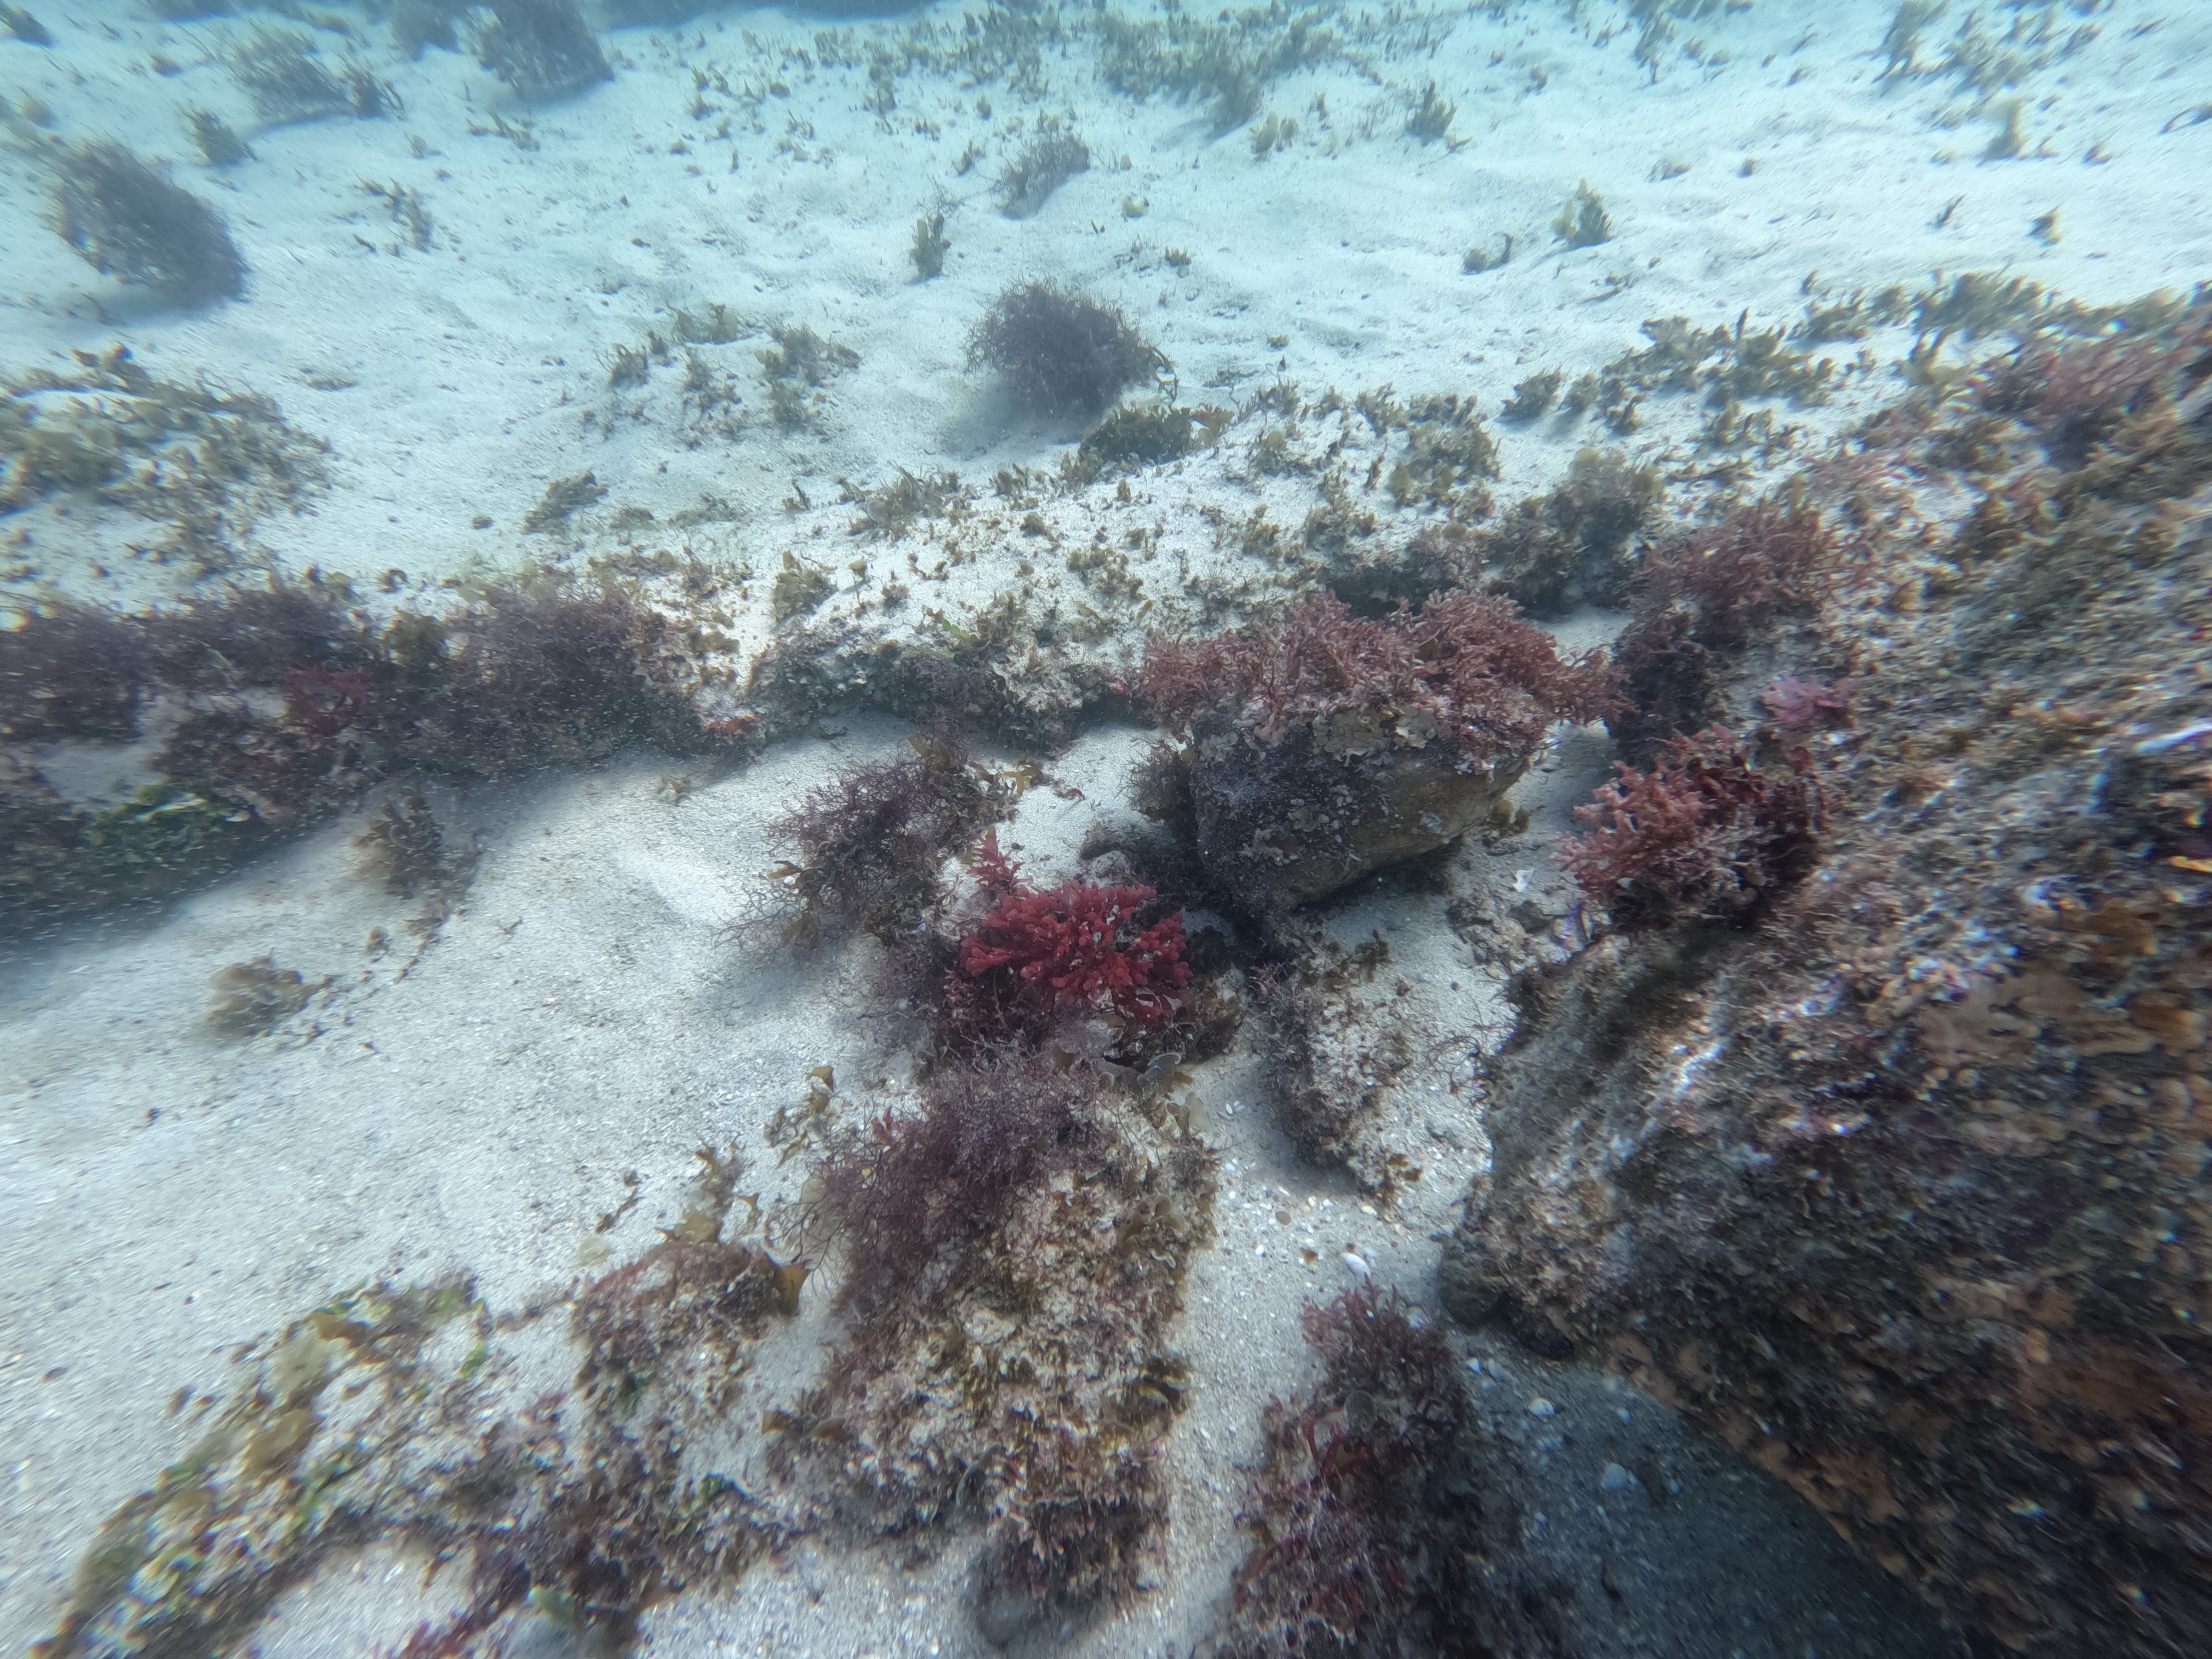

Supplement: Supplementary file 928 [file G0713995.pdf › Ocean2/G0713995.pdf]

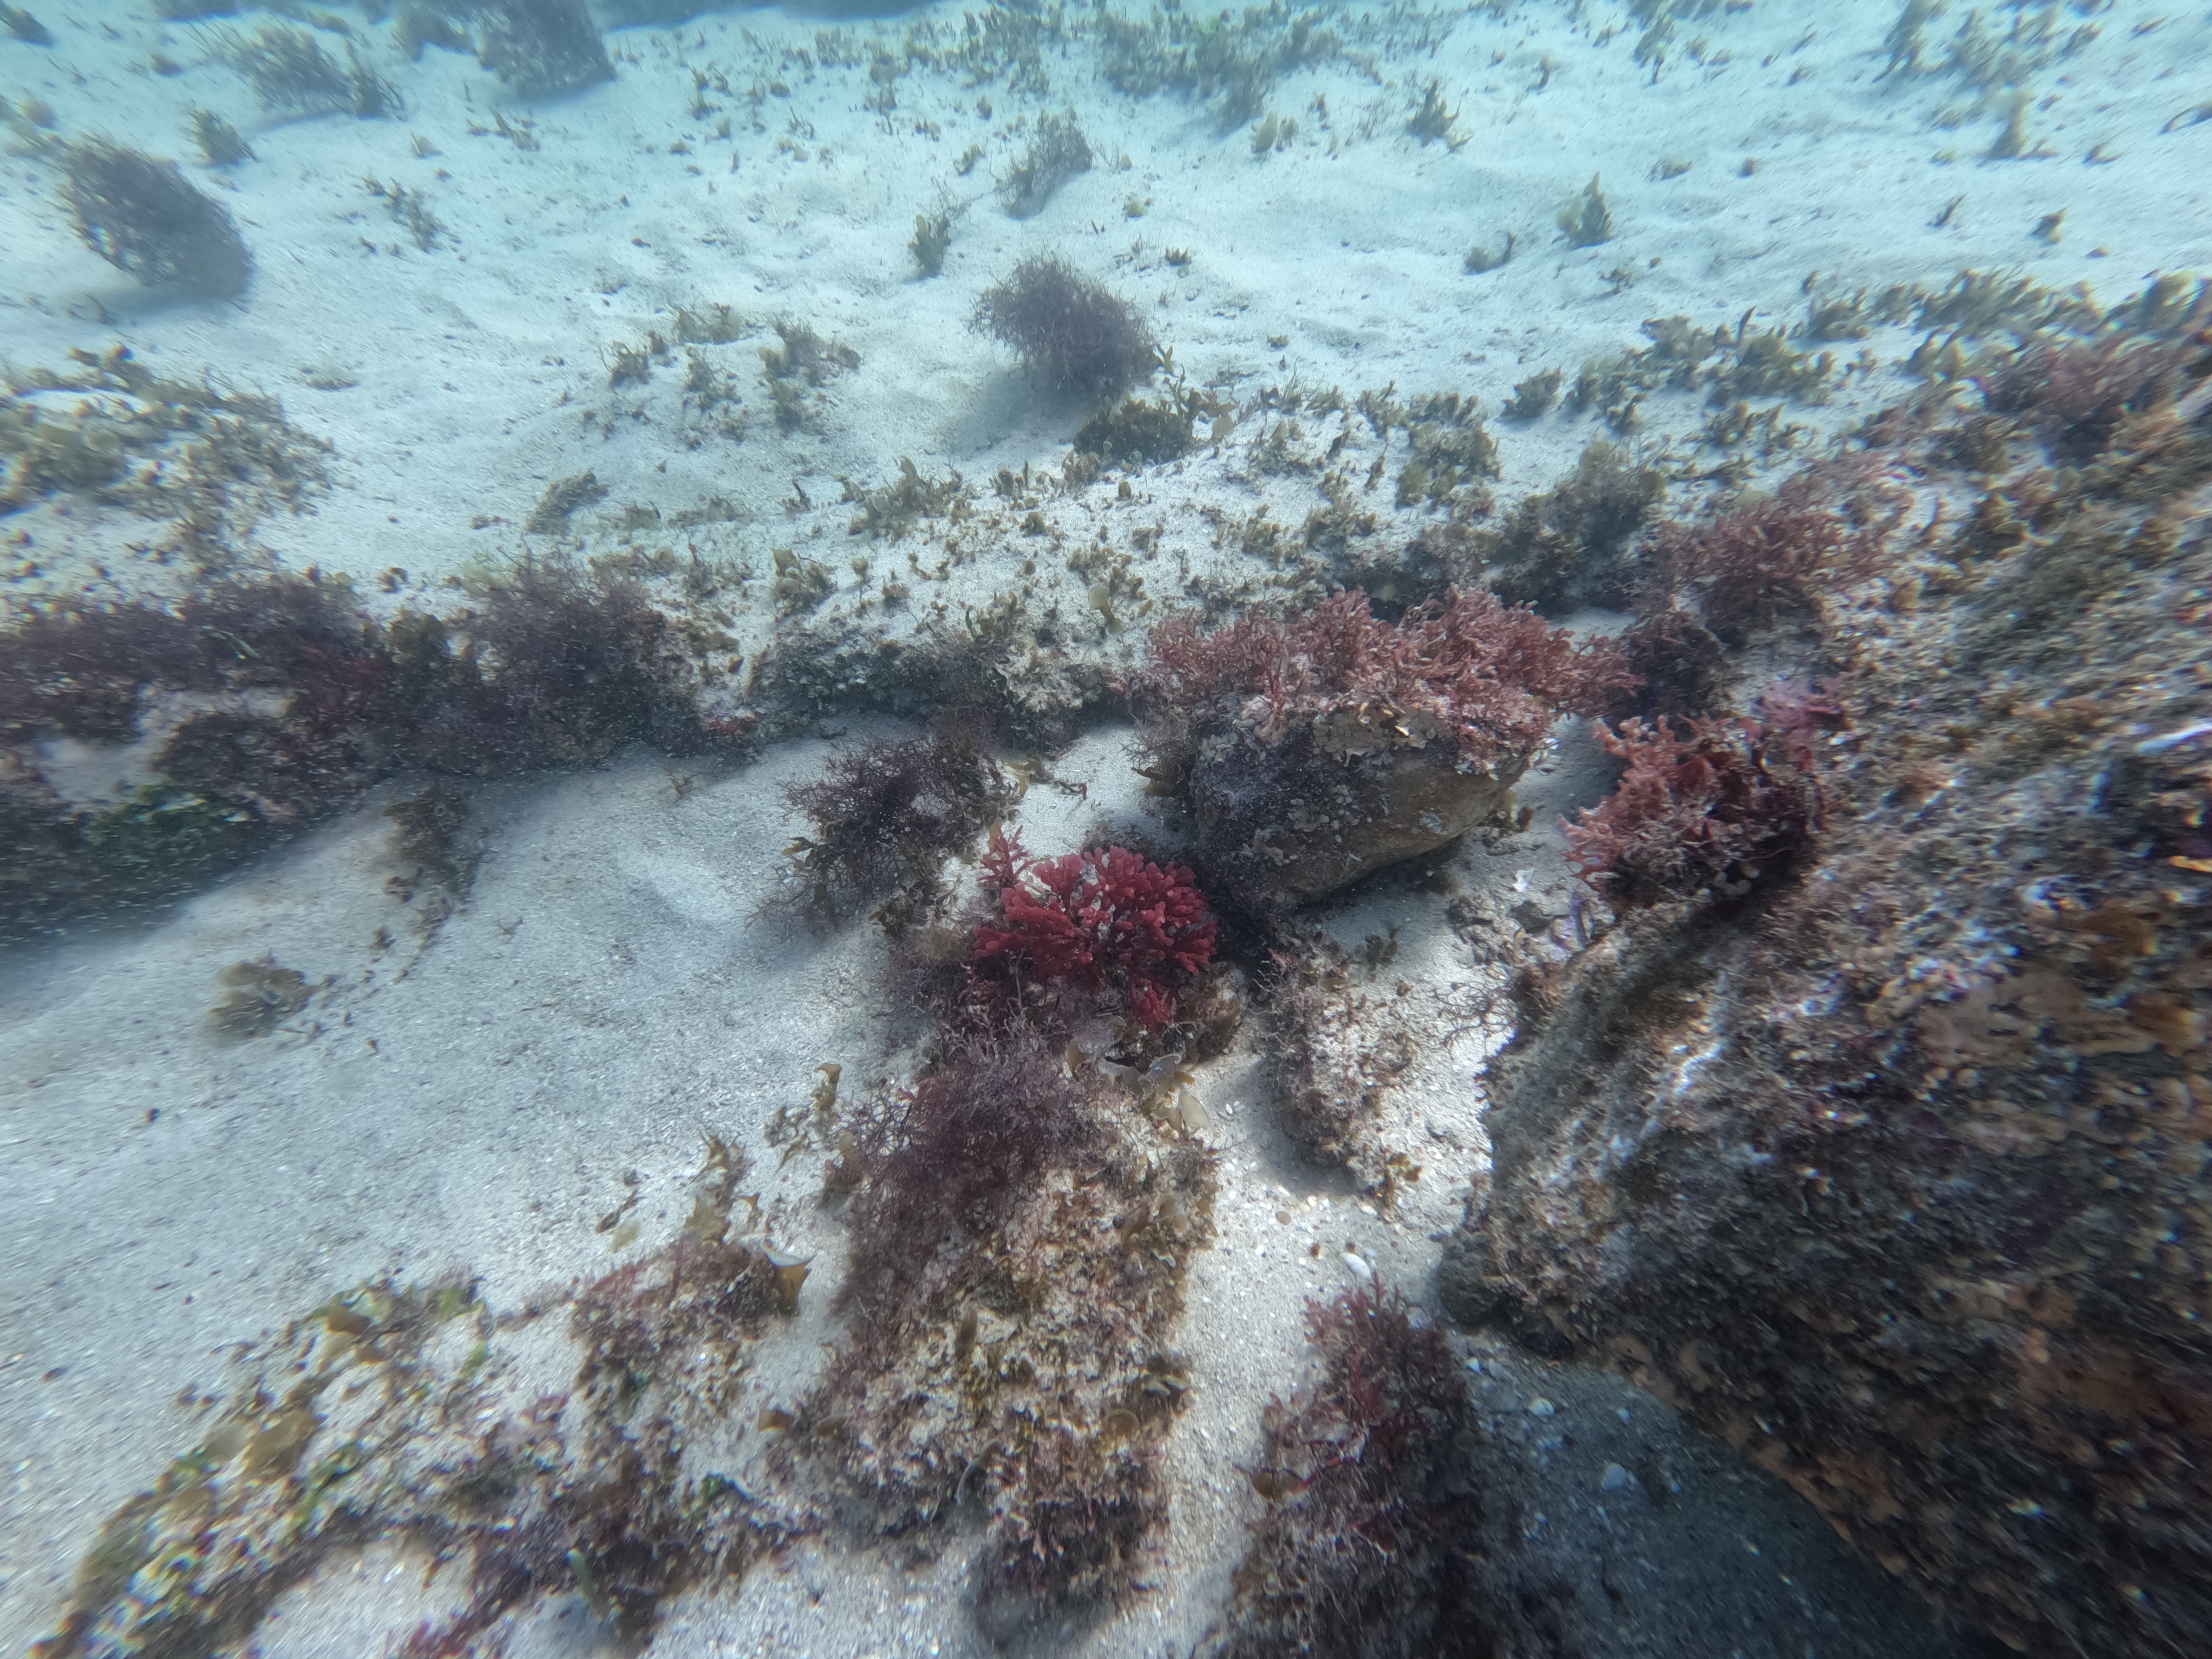

Supplement: Supplementary file 929 [file G0713996.pdf › Ocean2/G0713996.pdf]

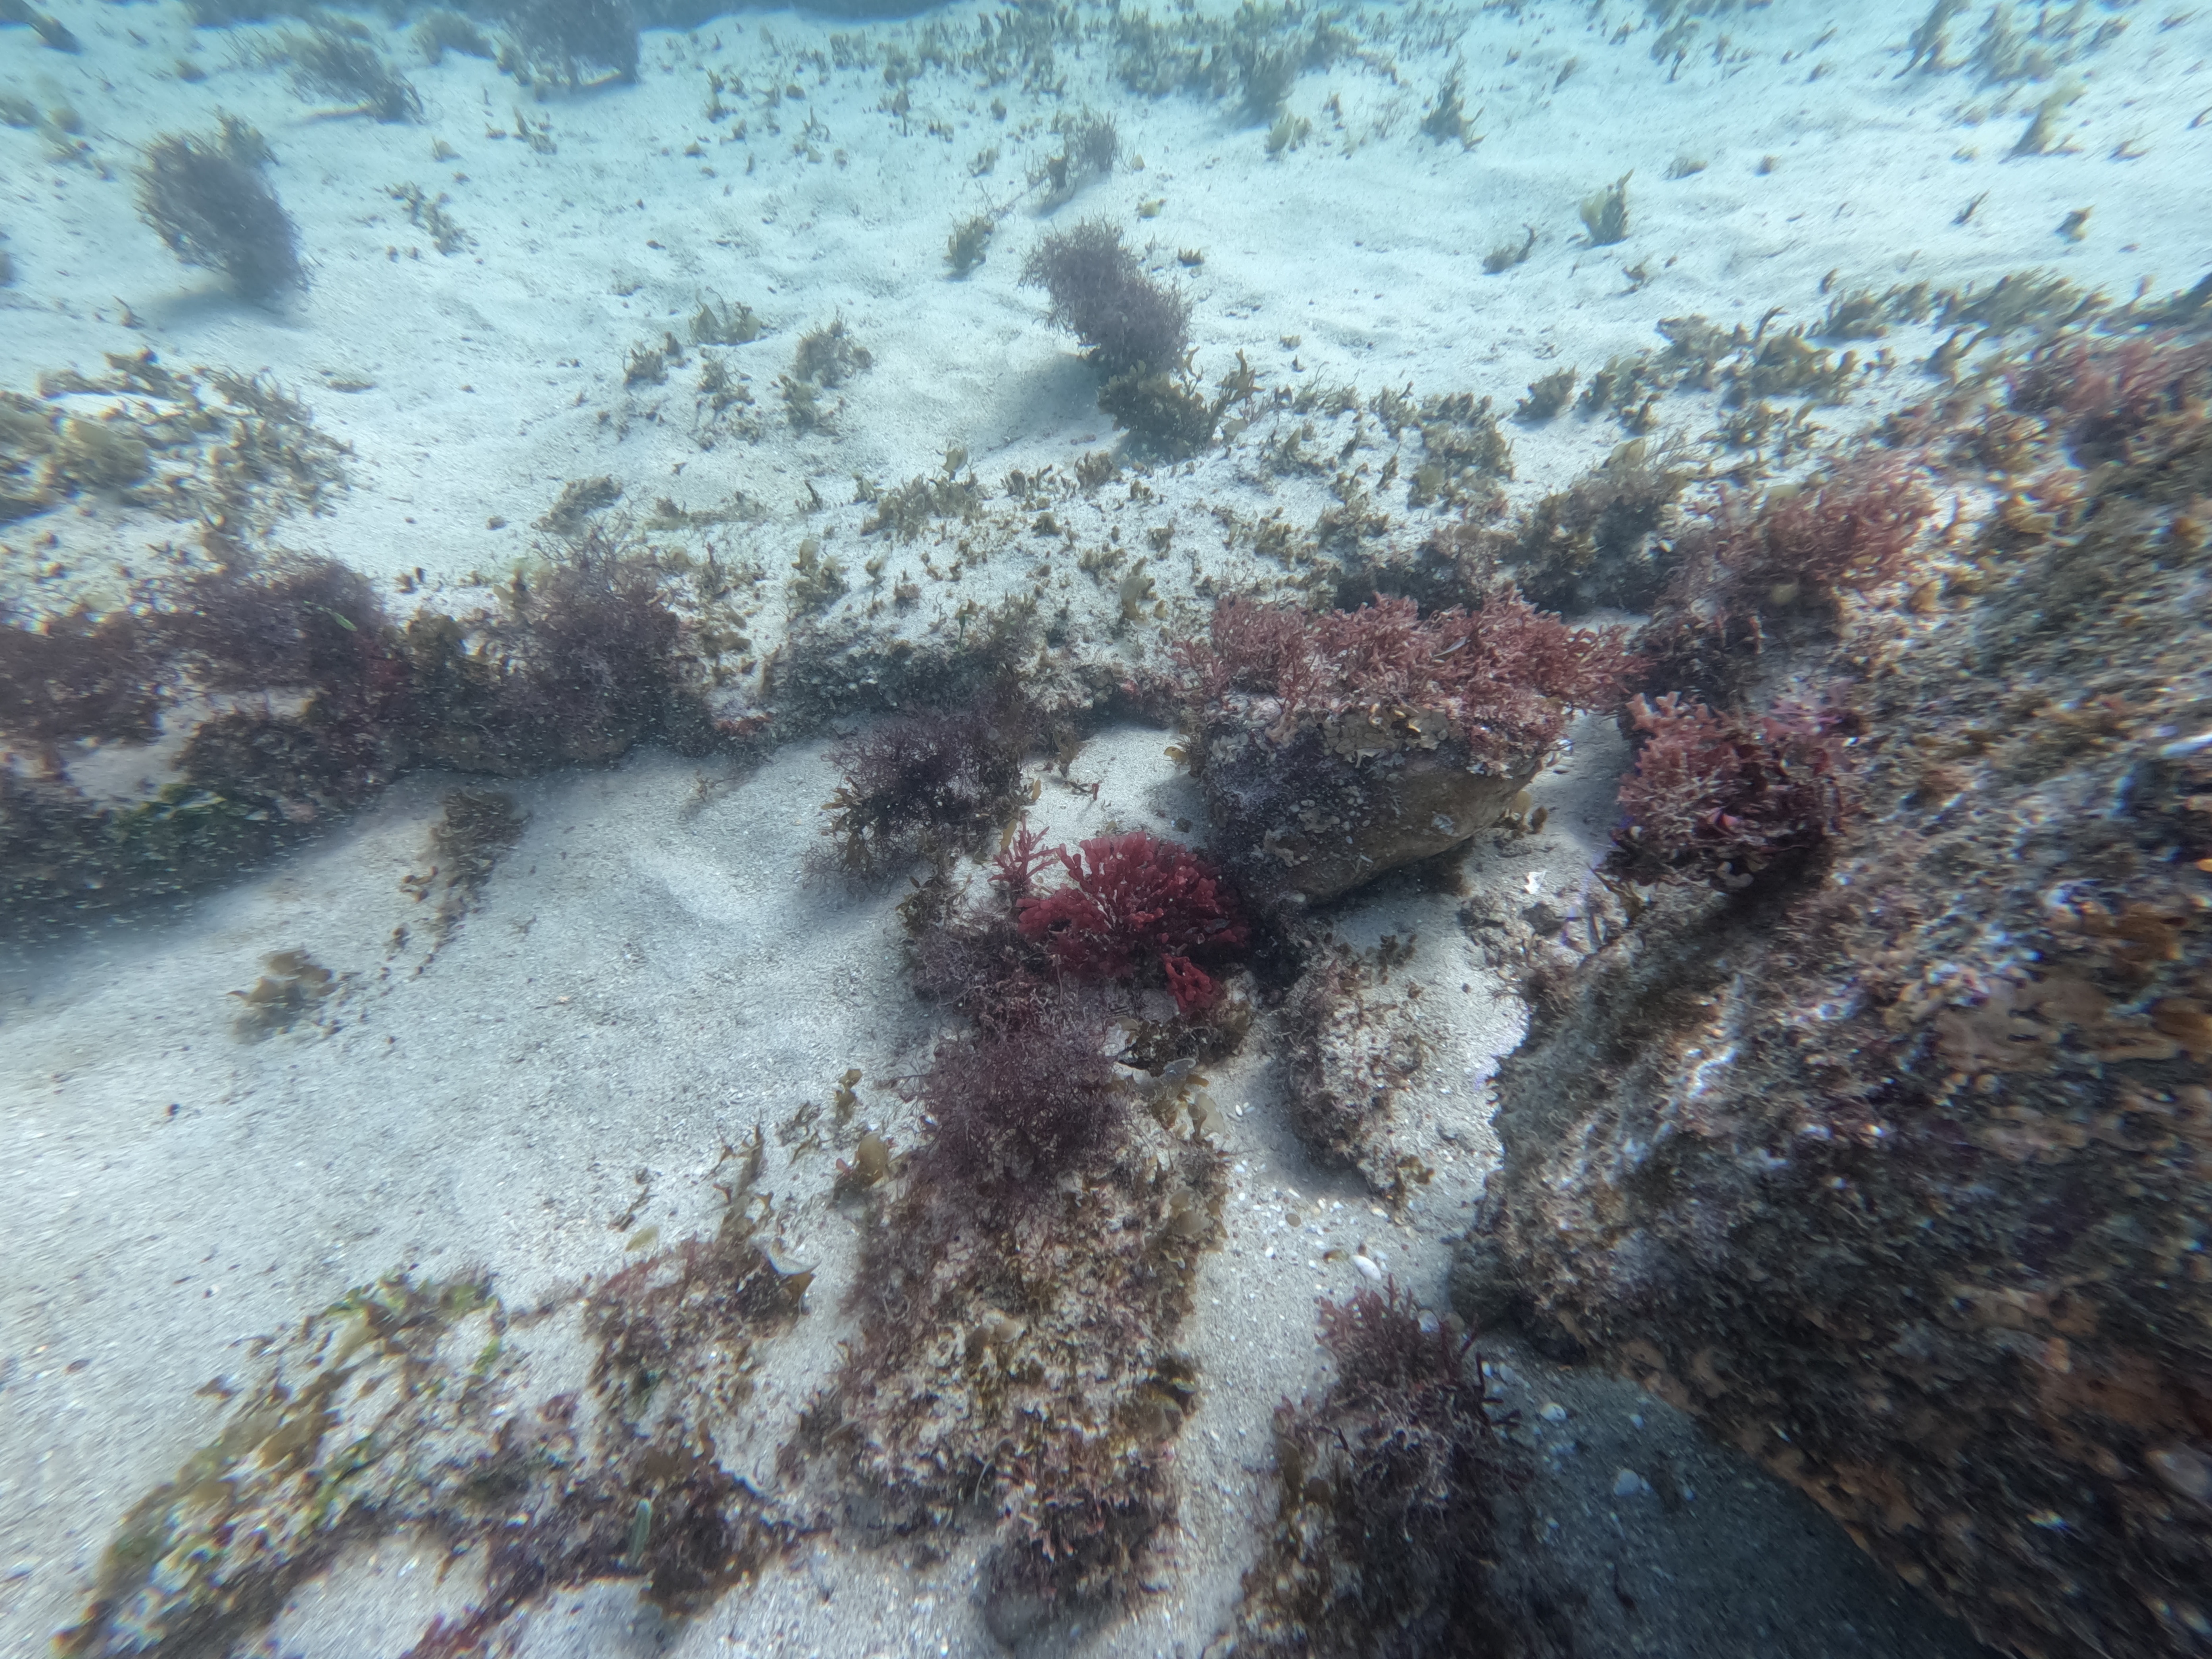

Supplement: Supplementary file 930 [file G0713997.pdf › Ocean2/G0713997.pdf]

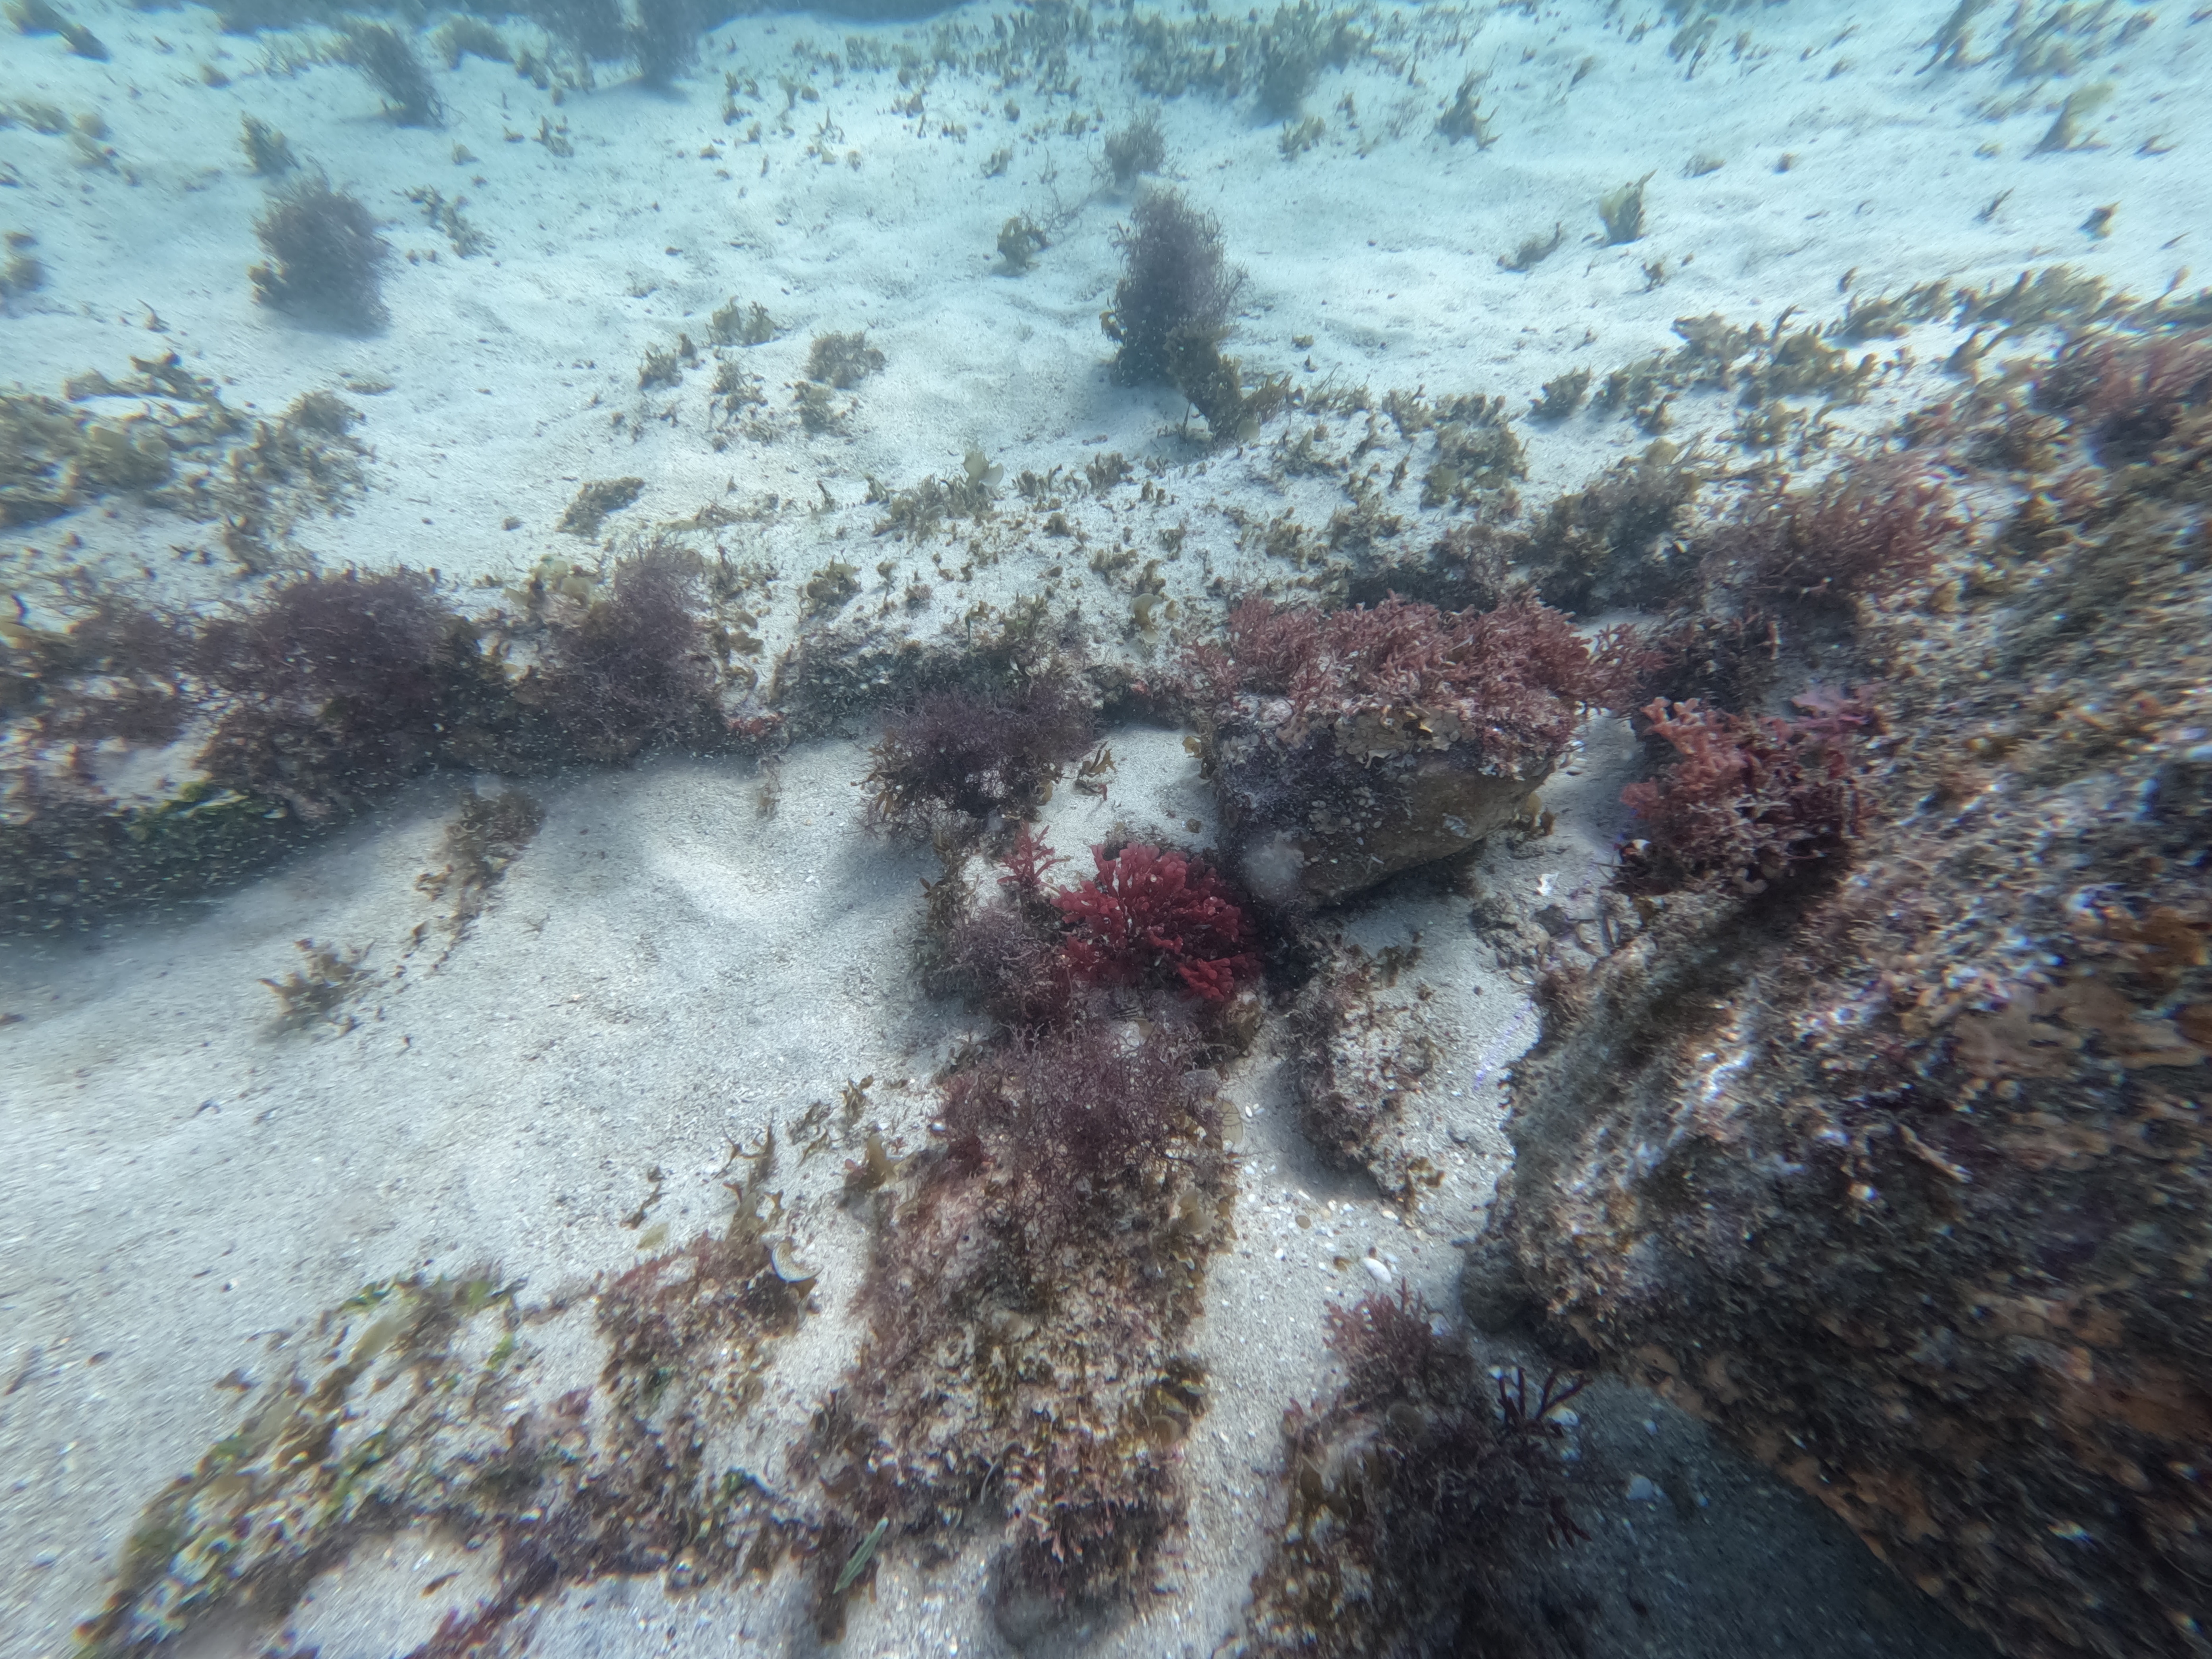

Supplement: Supplementary file 931 [file G0713998.pdf › Ocean2/G0713998.pdf]

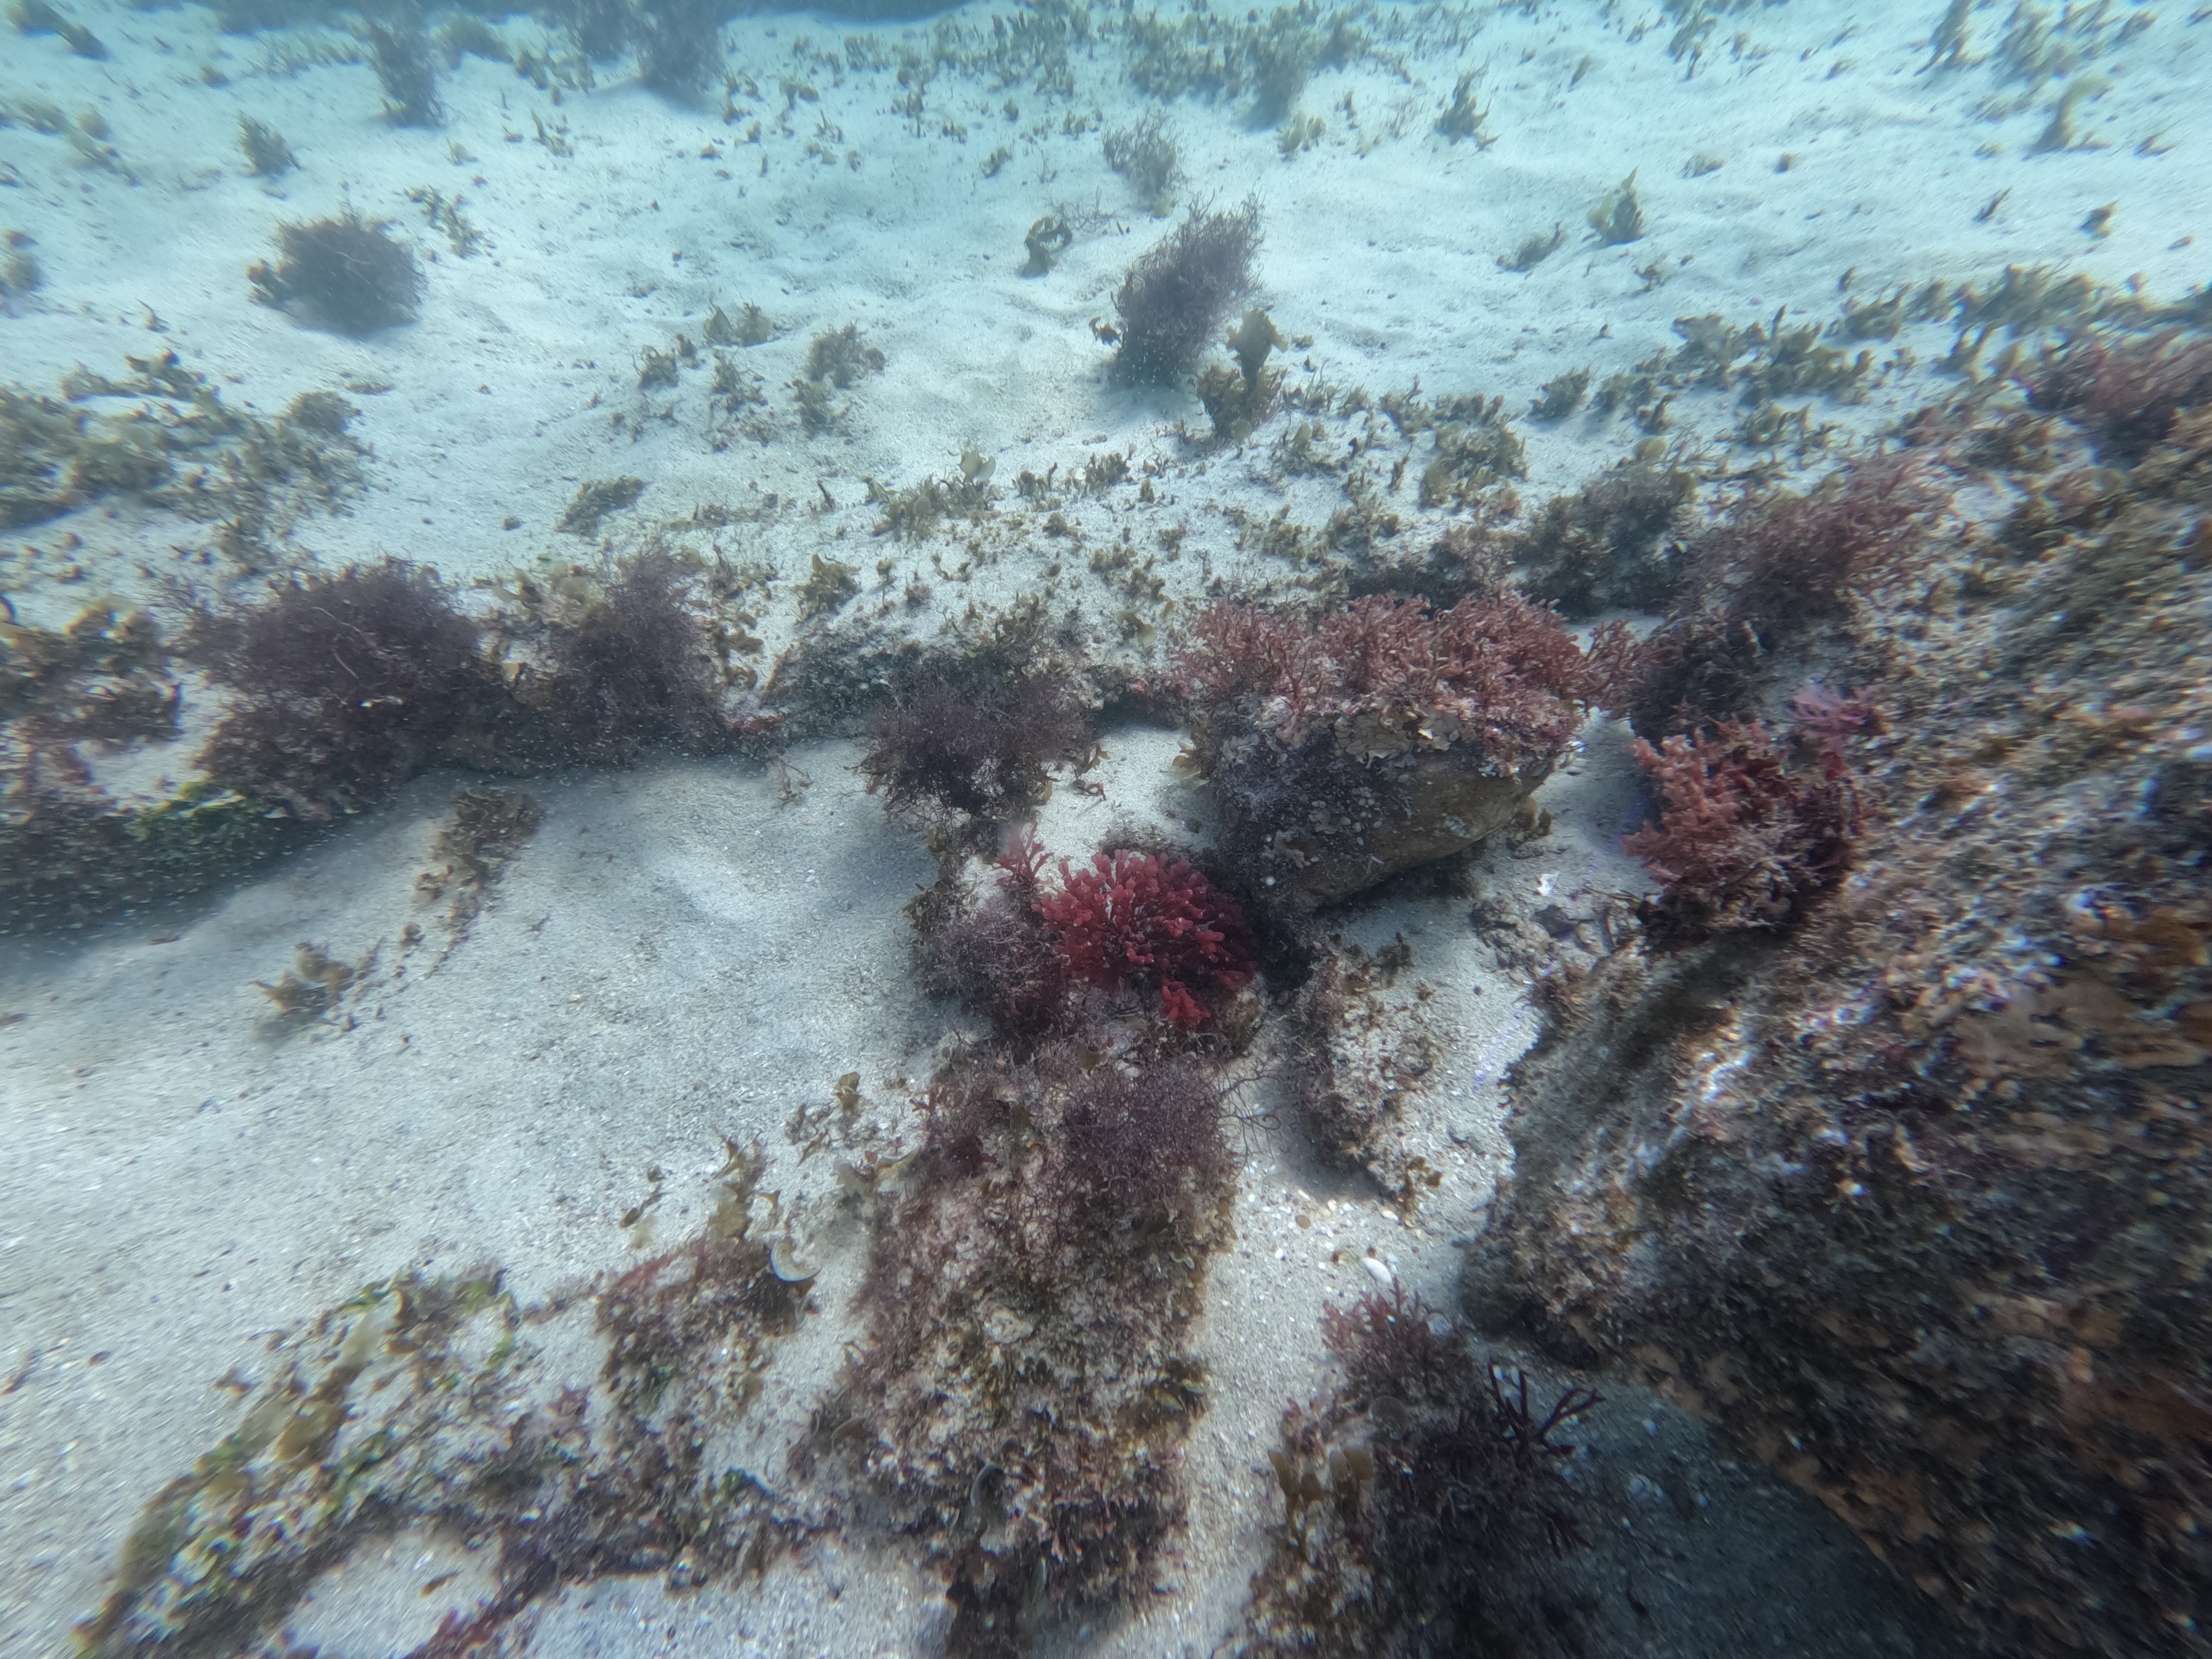

Supplement: Supplementary file 932 [file G0713999.pdf › Ocean2/G0713999.pdf]

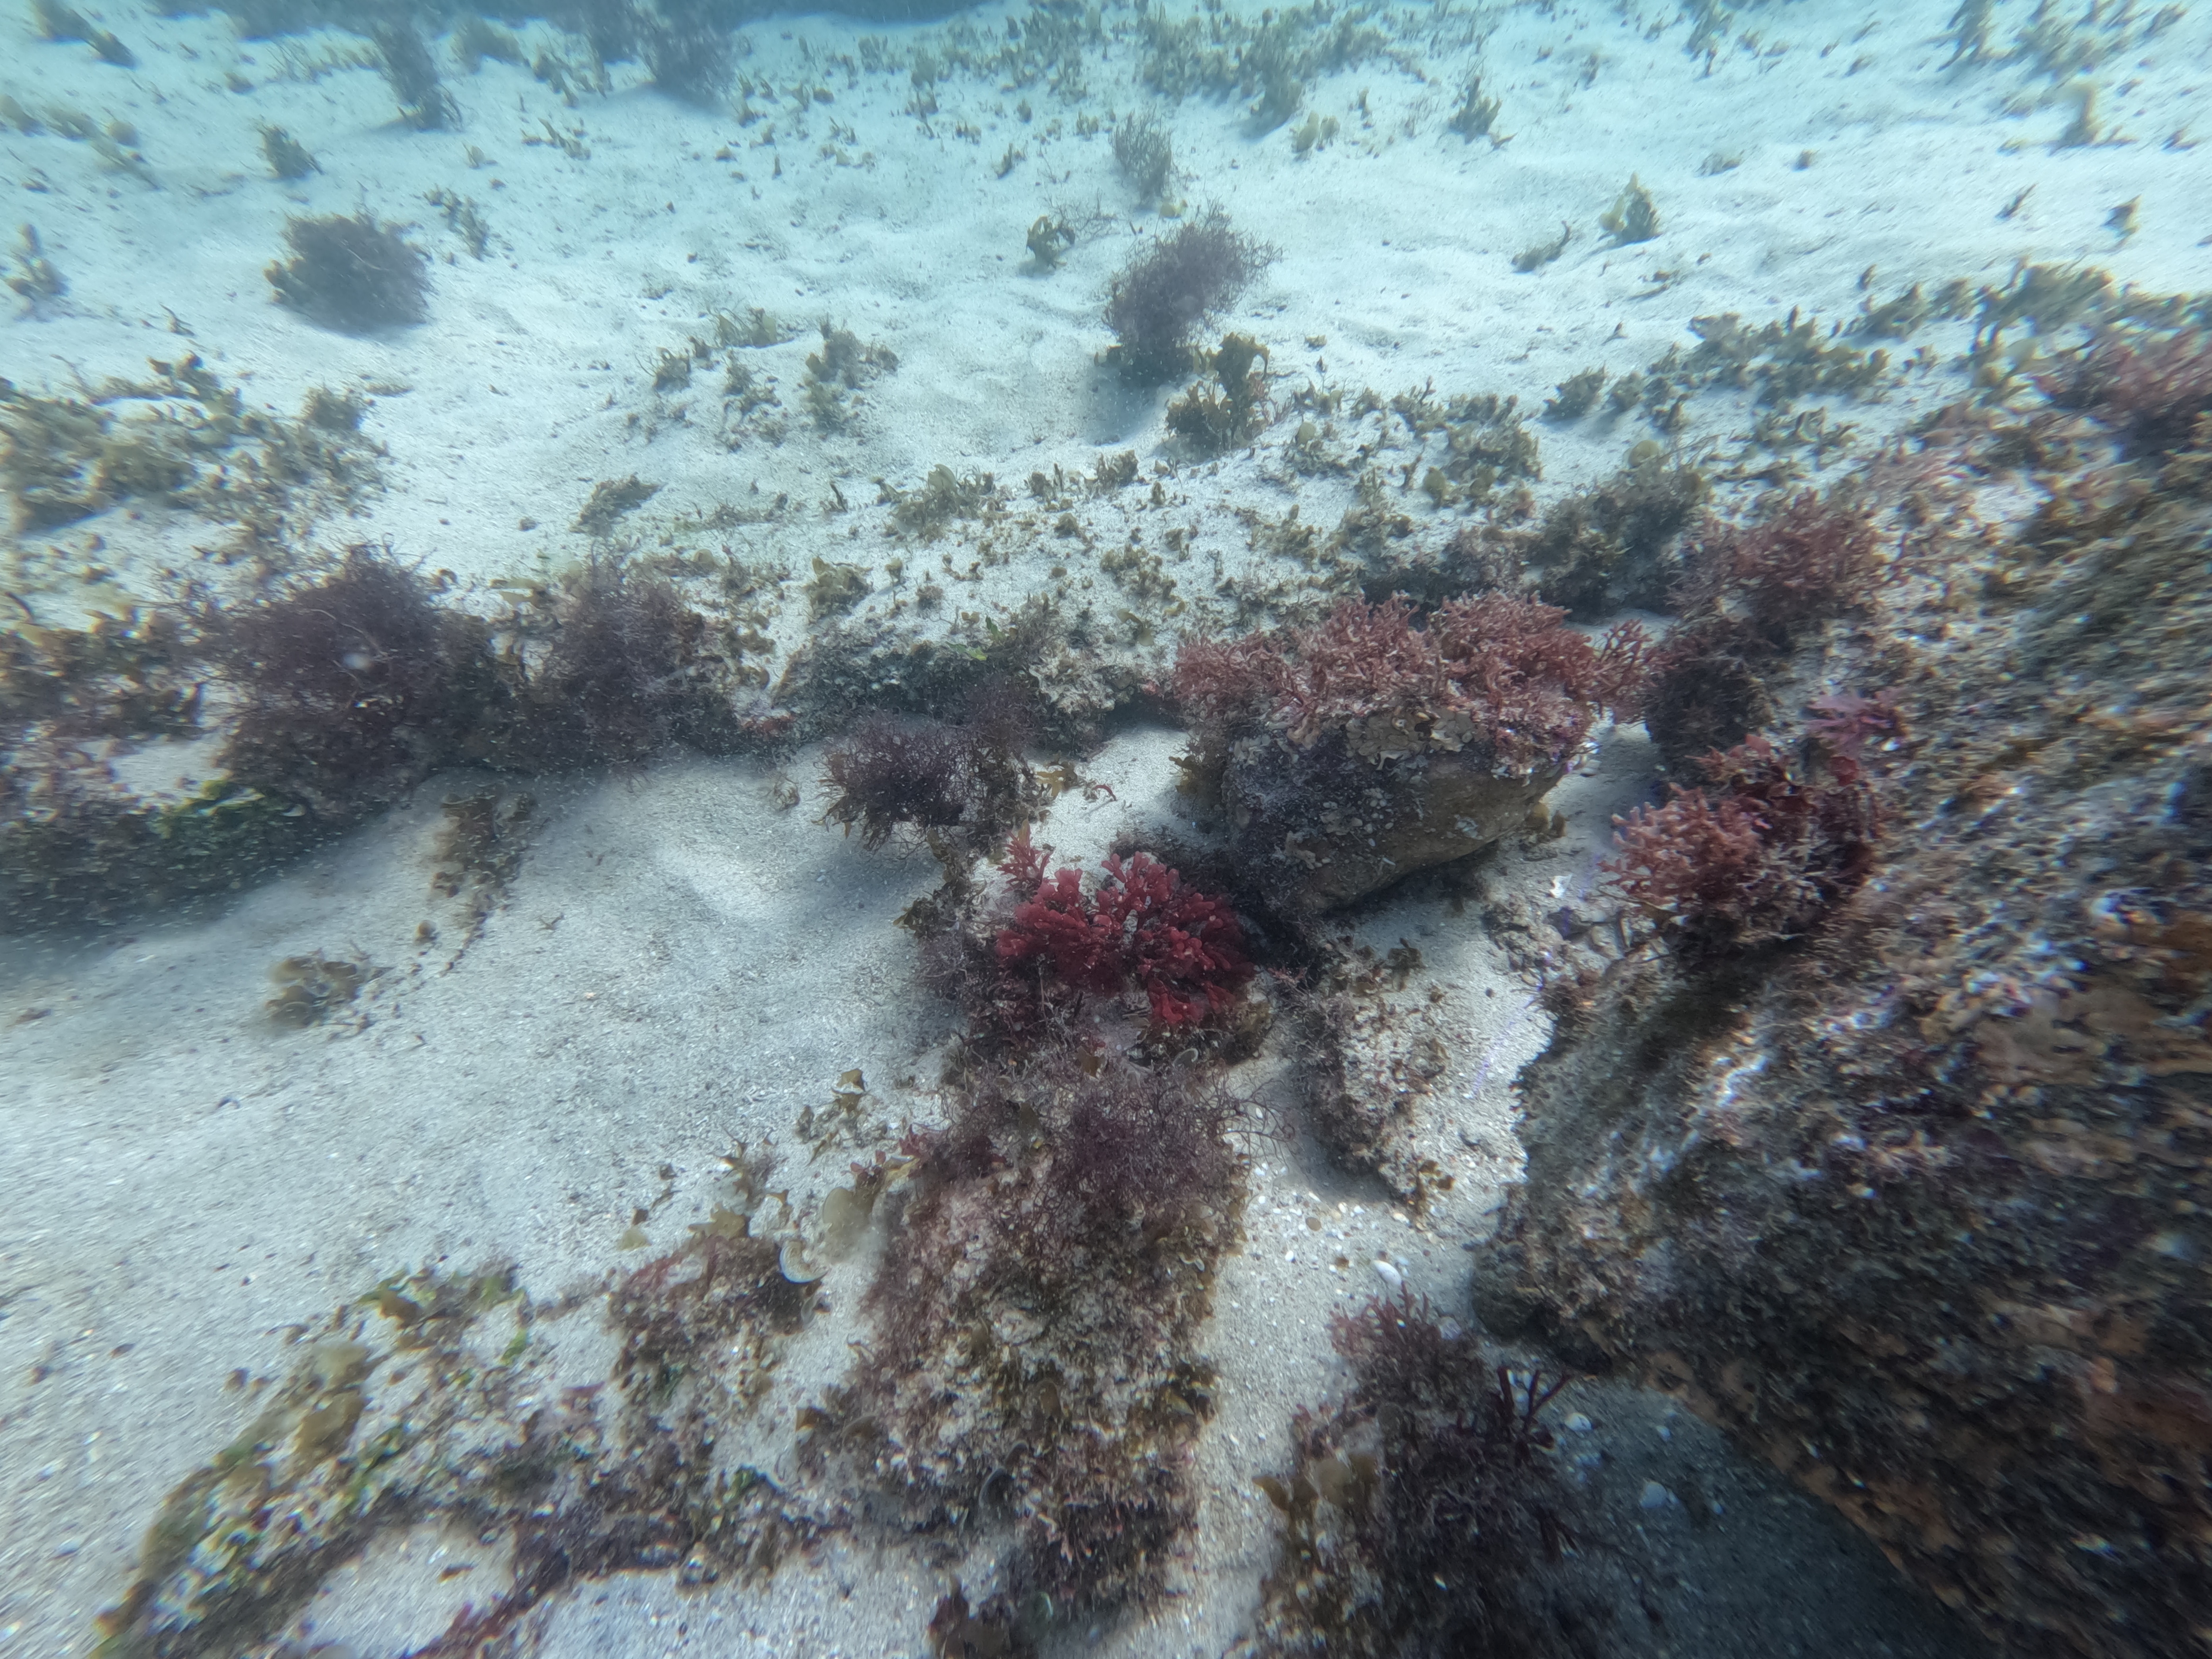

Supplement: Supplementary file 933 [file G0714000.pdf › Ocean2/G0714000.pdf]

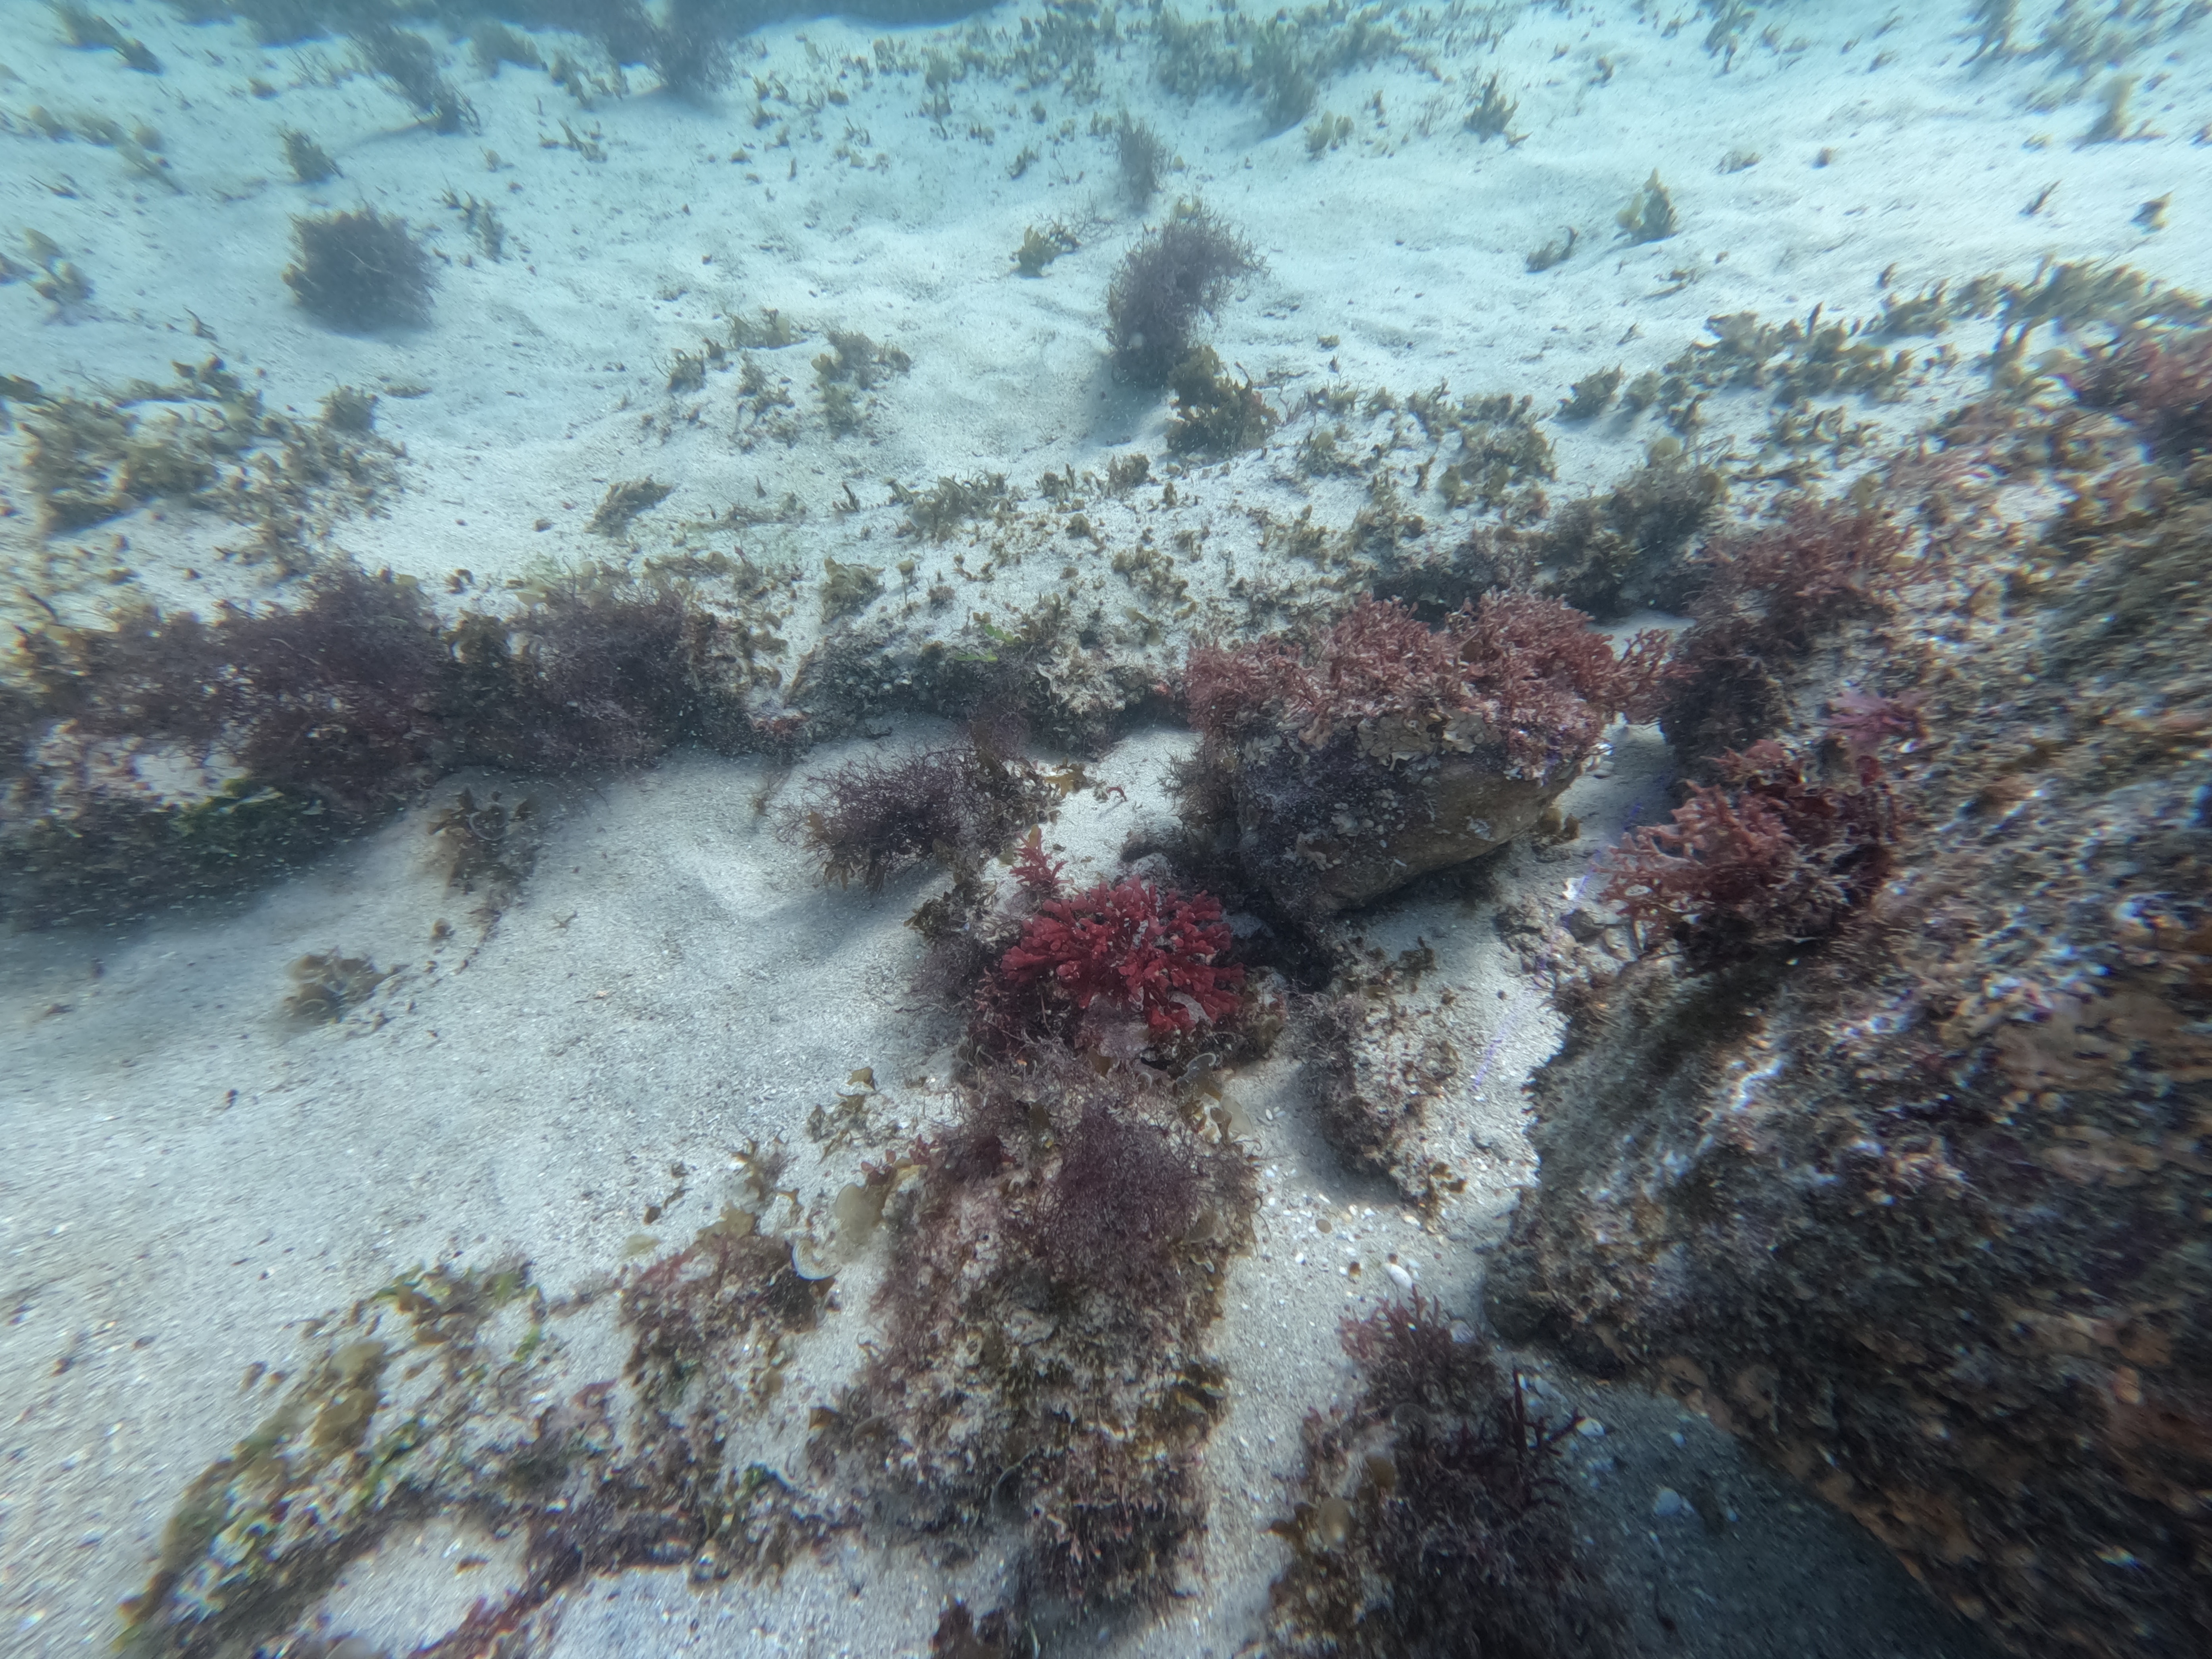

Supplement: Supplementary file 934 [file G0714001.pdf › Ocean2/G0714001.pdf]

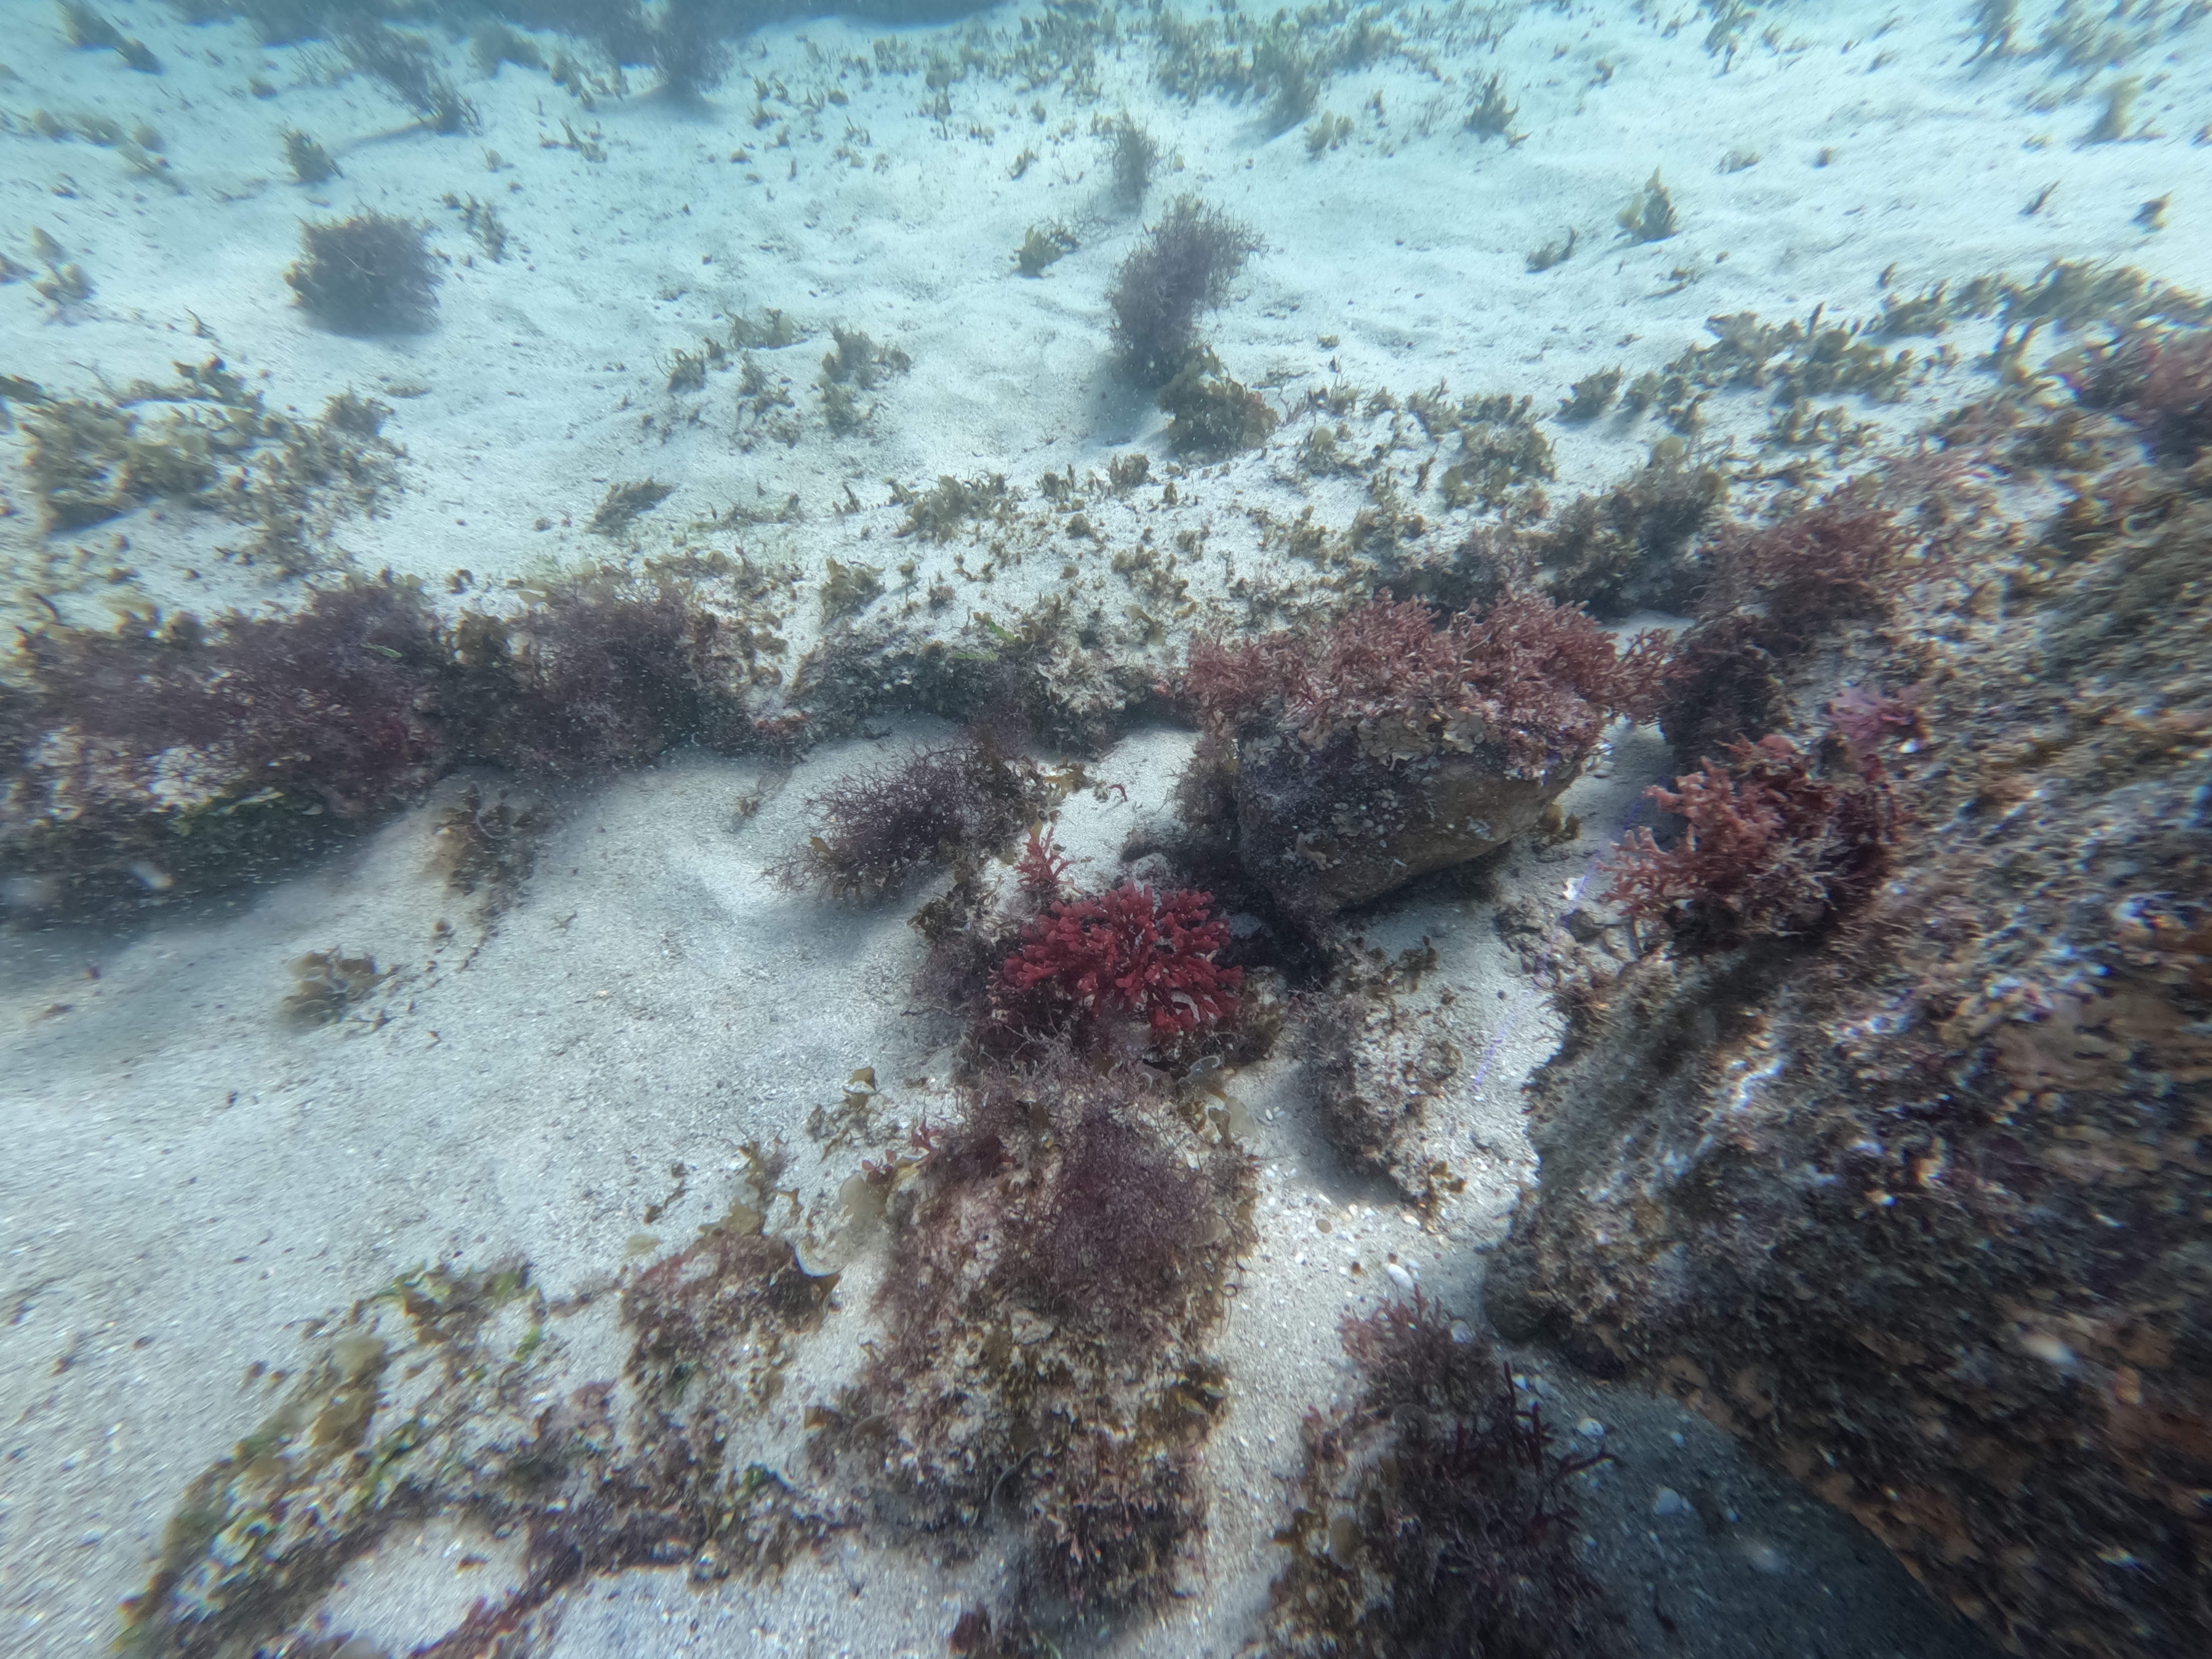

Supplement: Supplementary file 935 [file G0714002.pdf › Ocean2/G0714002.pdf]

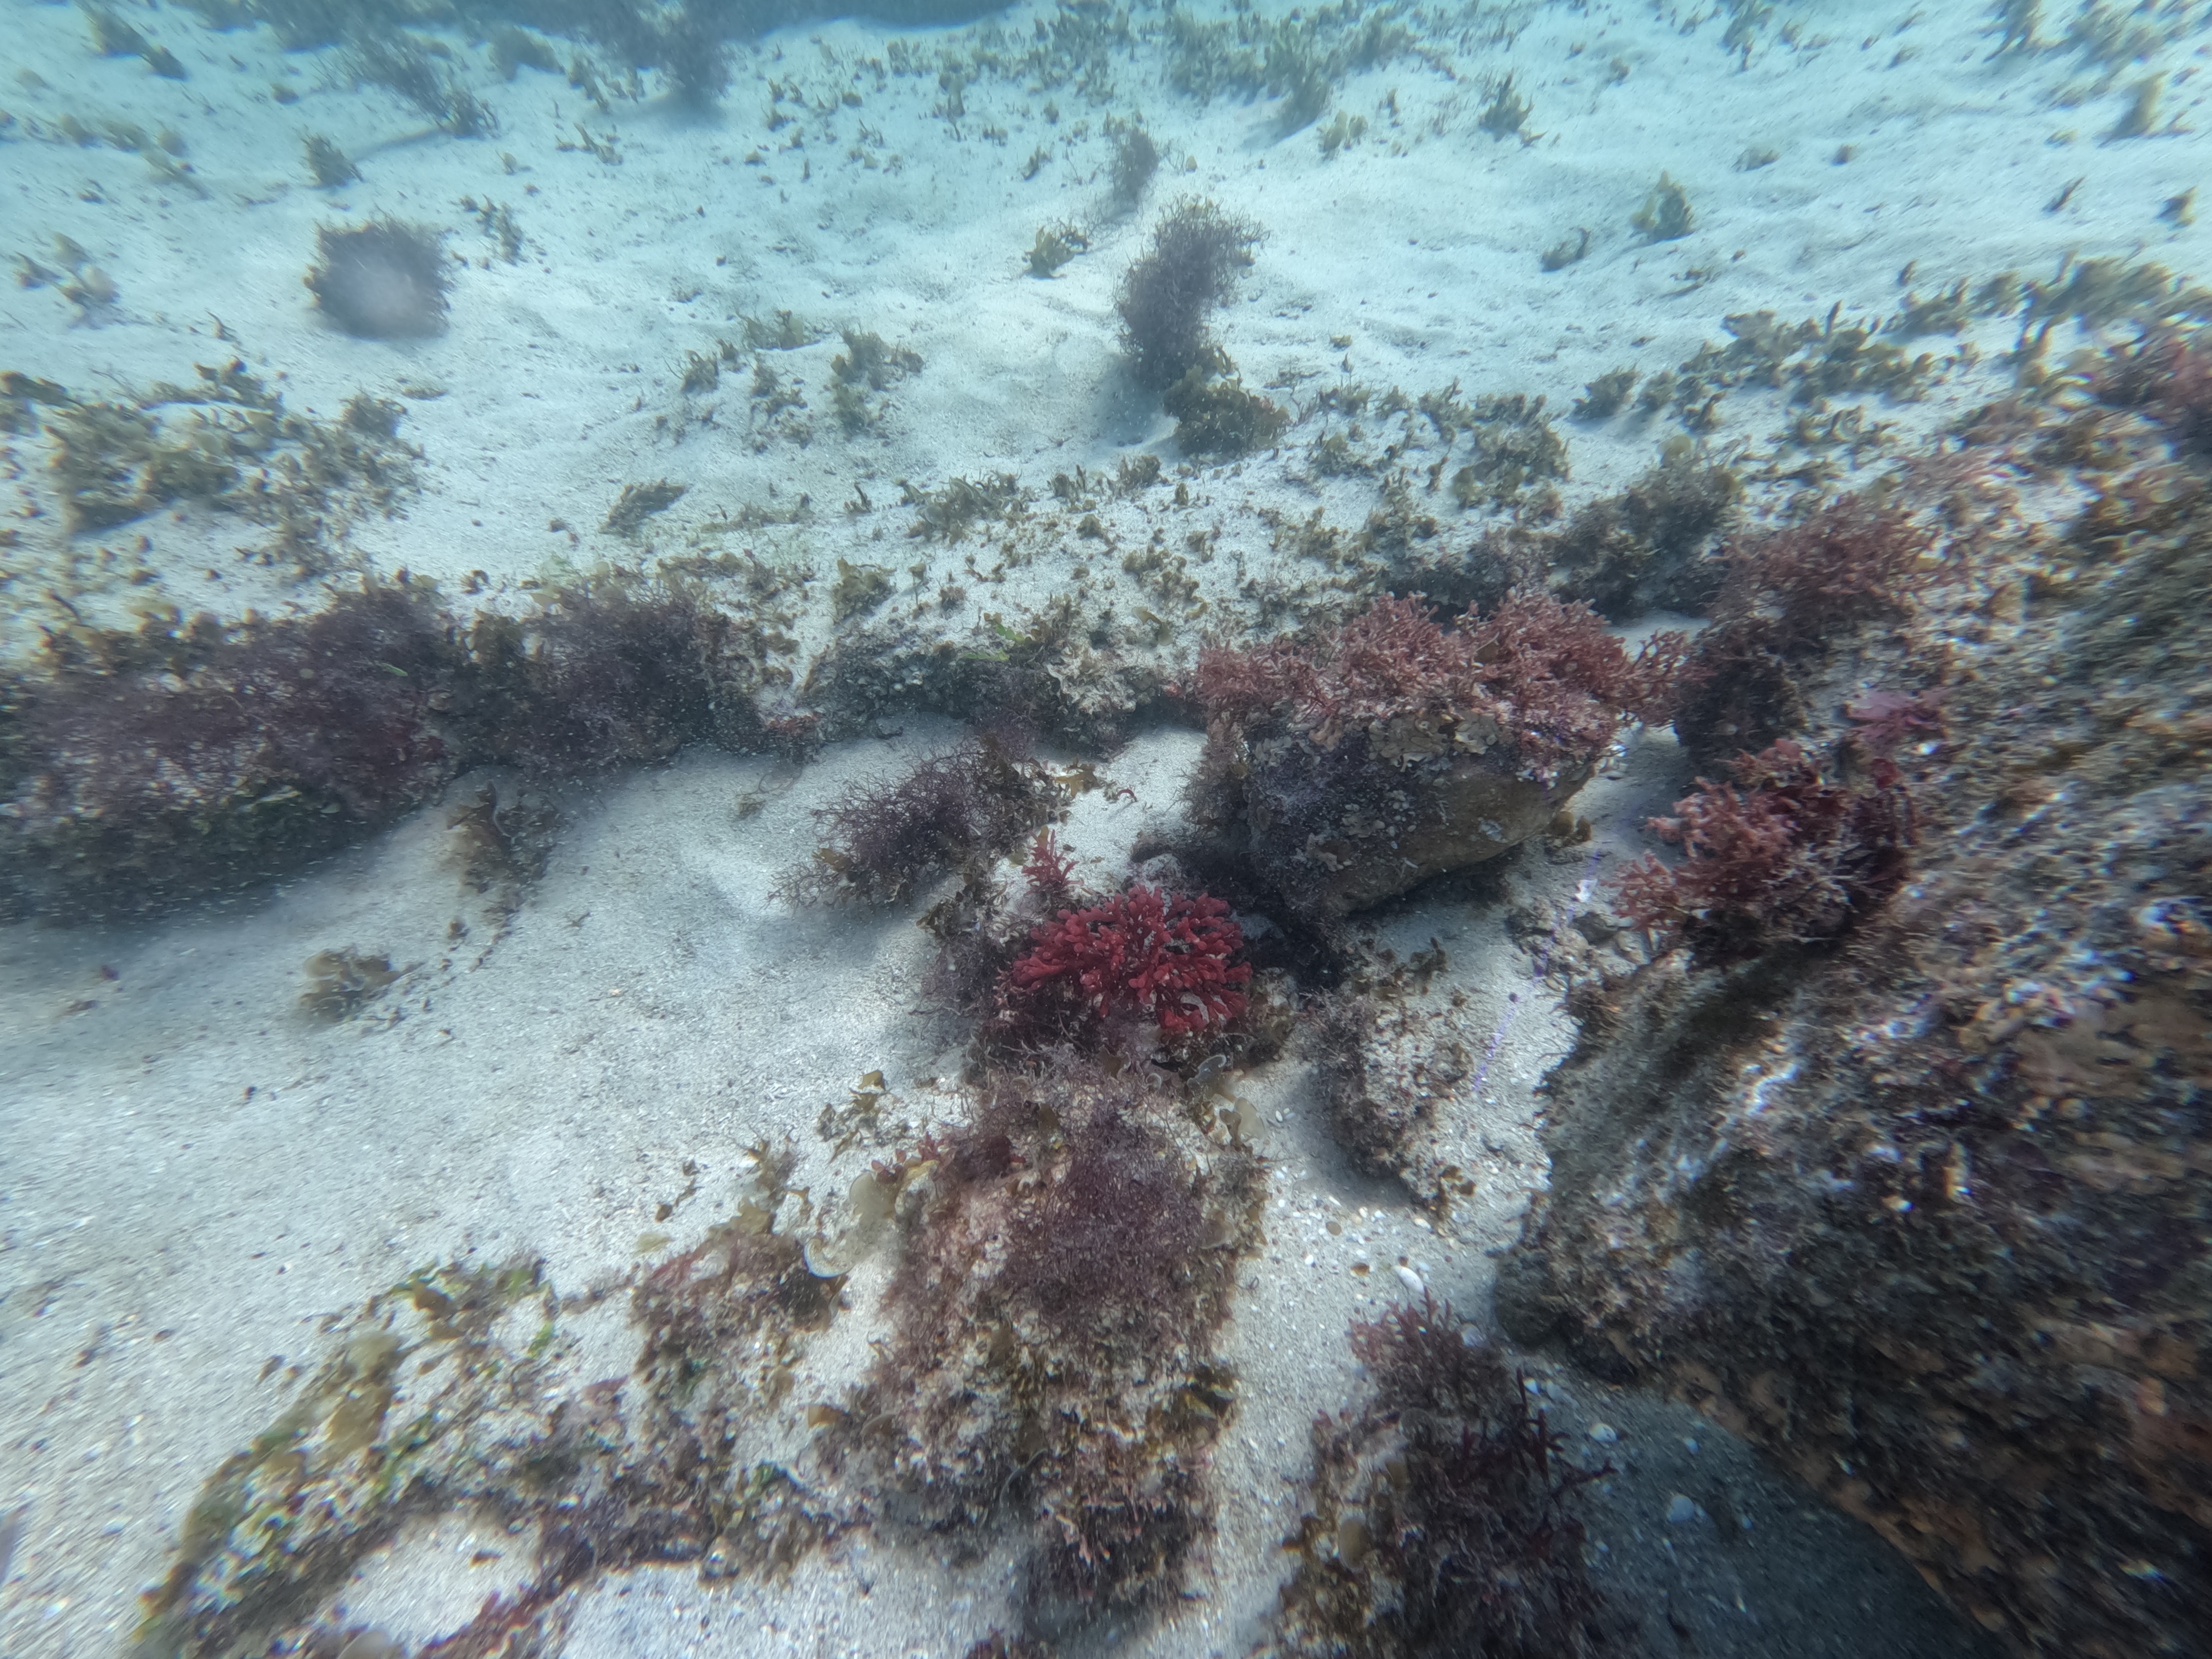

Supplement: Supplementary file 936 [file G0714003.pdf › Ocean2/G0714003.pdf]

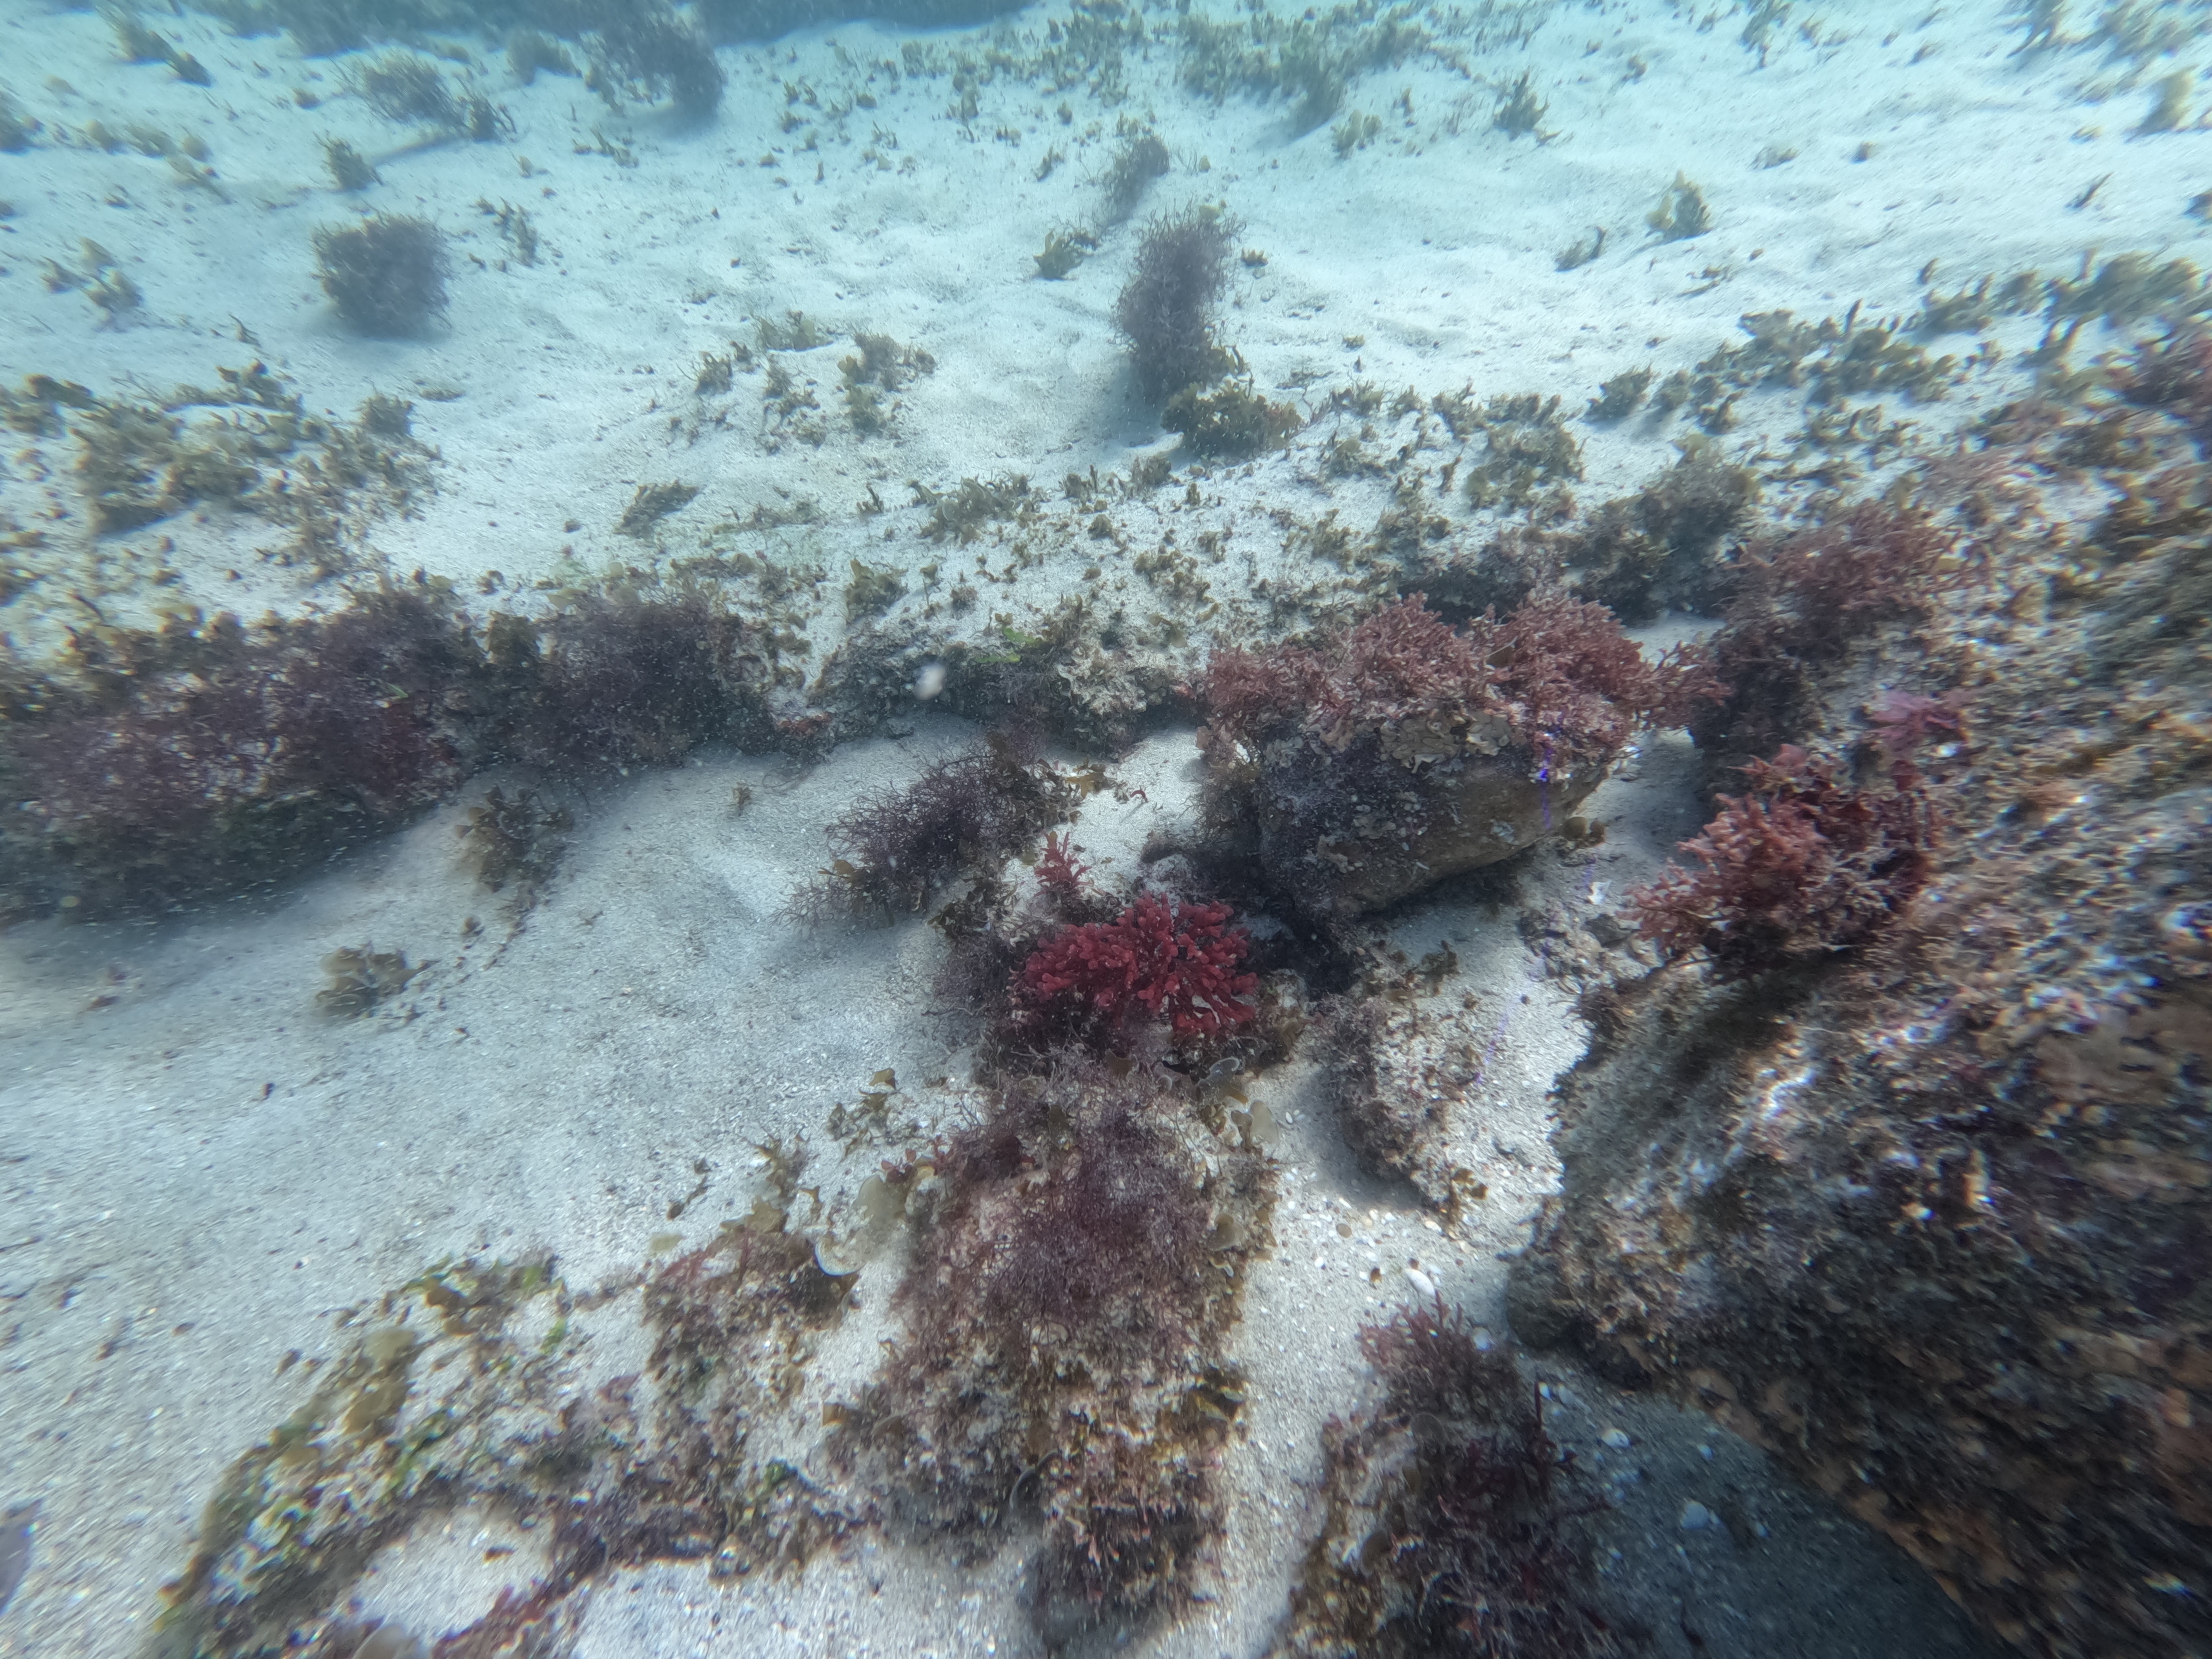

Supplement: Supplementary file 937 [file G0714004.pdf › Ocean2/G0714004.pdf]

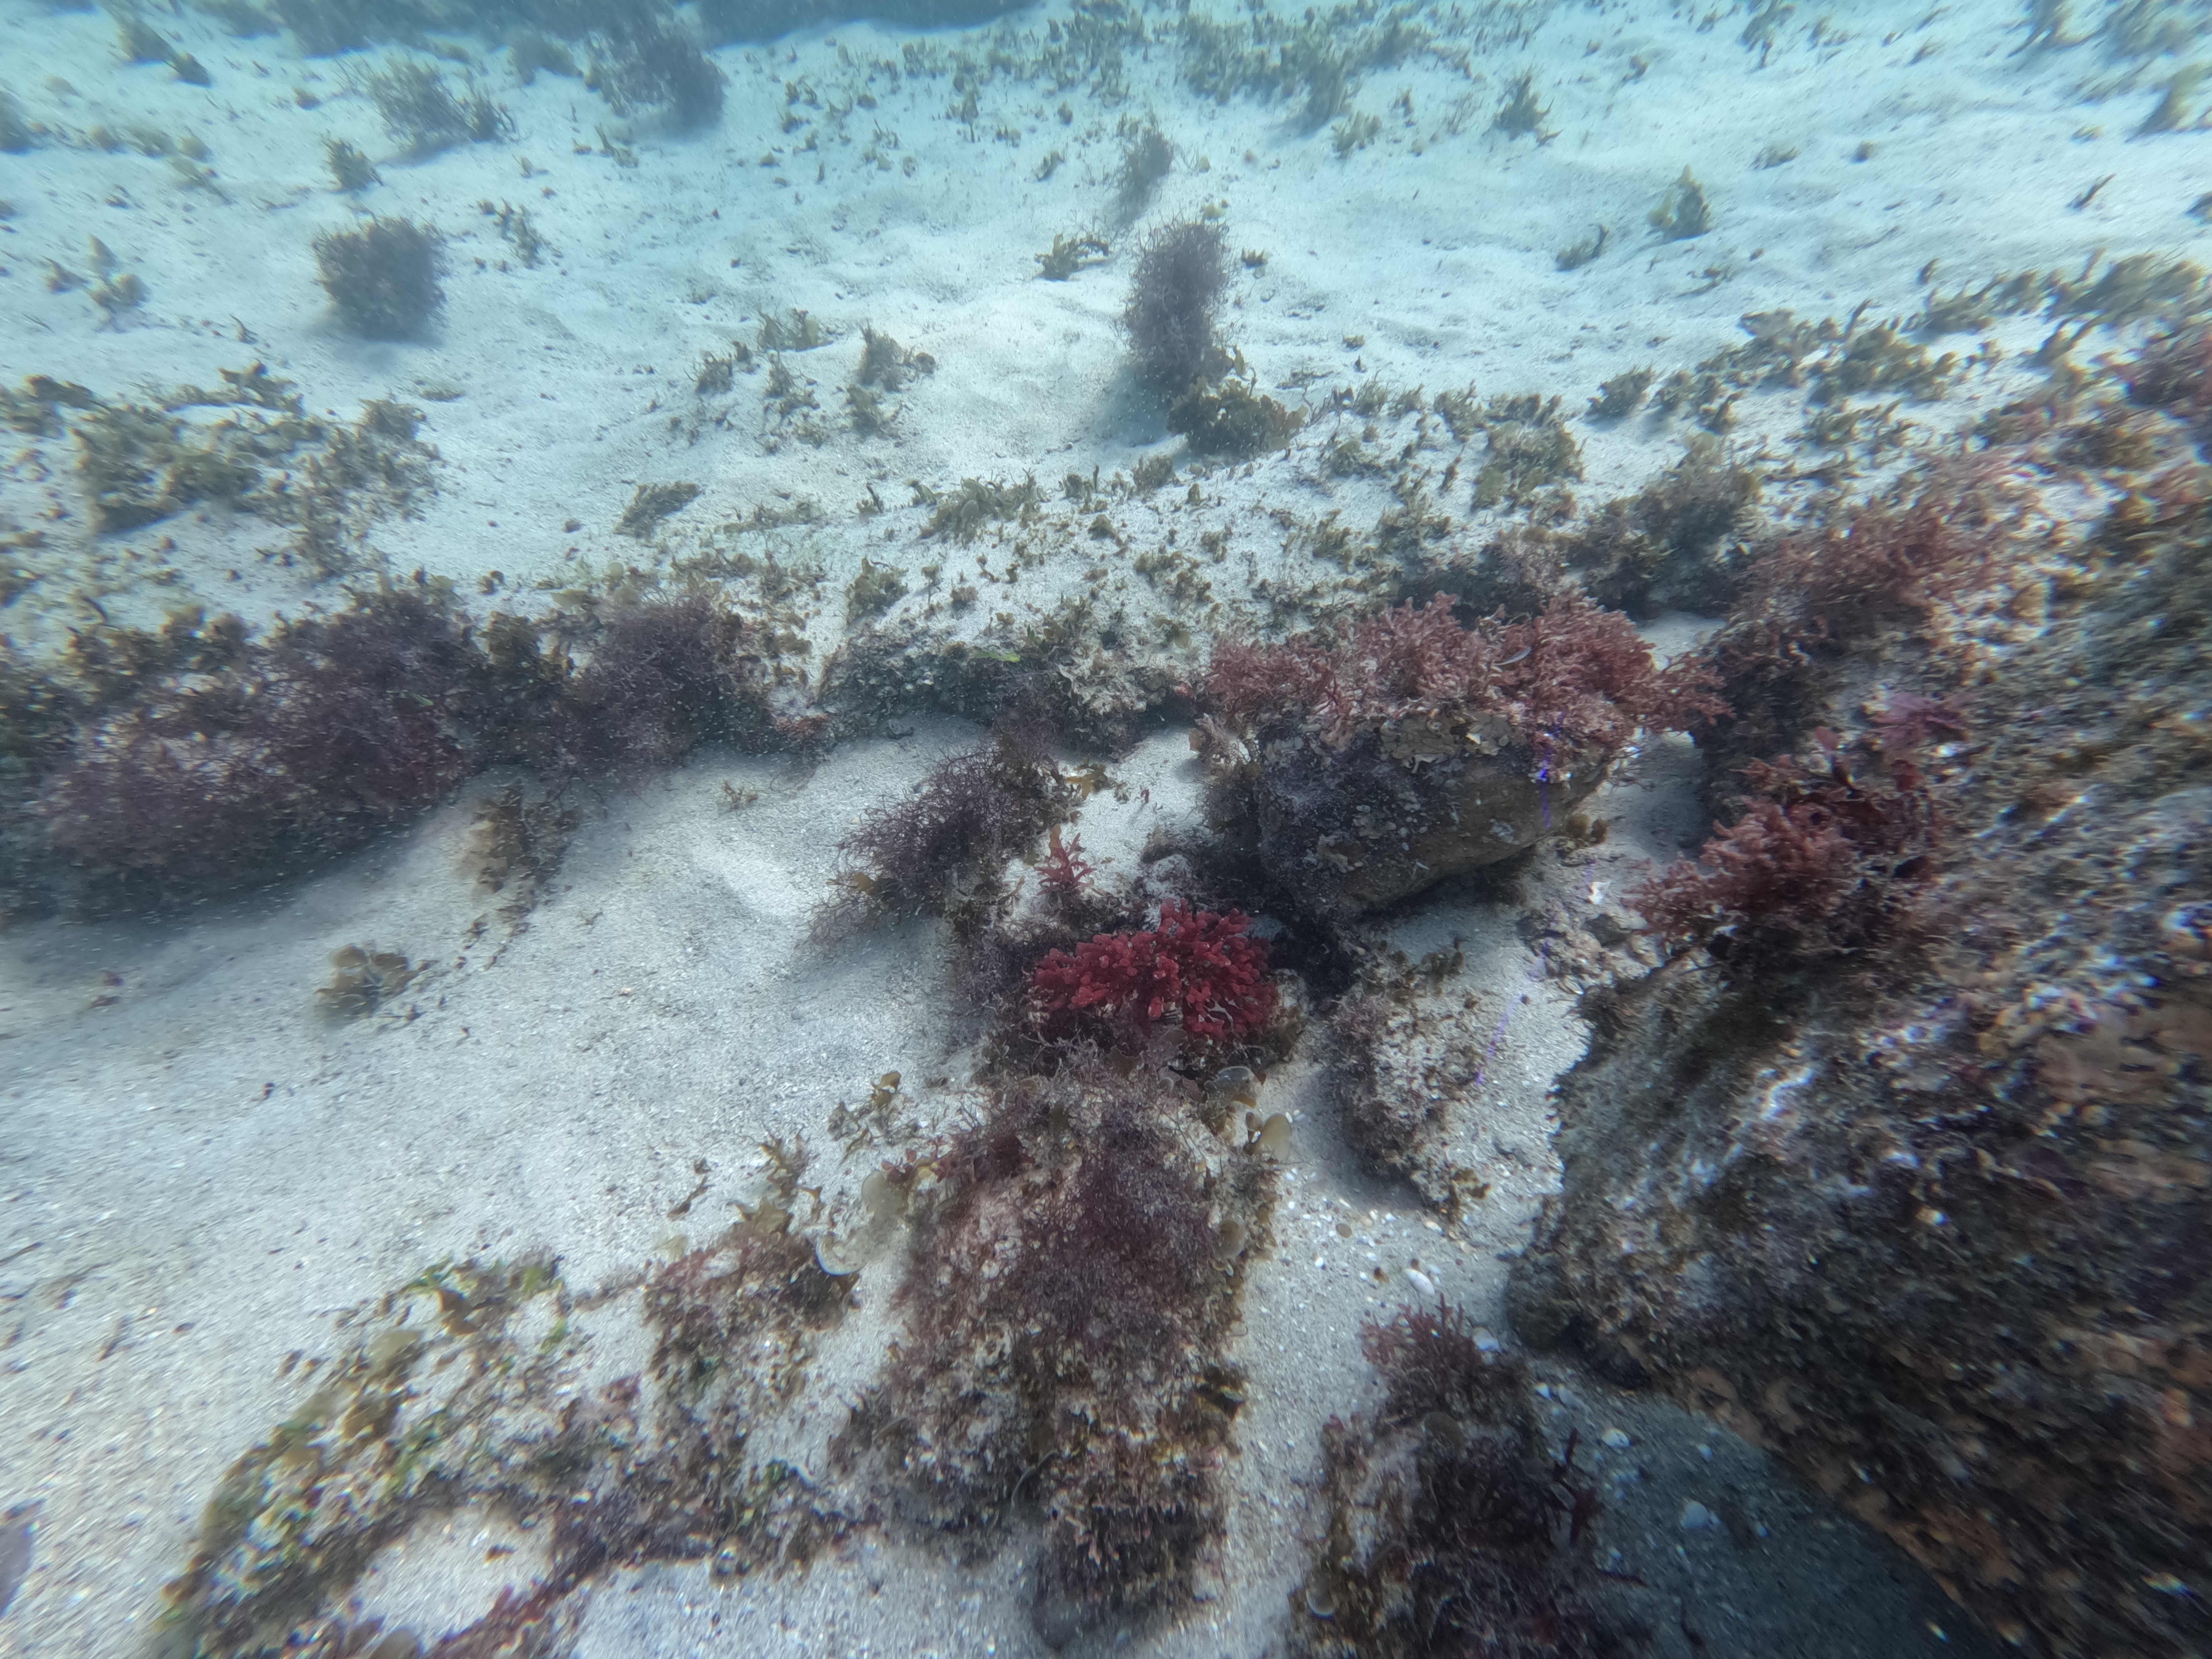

Supplement: Supplementary file 938 [file G0714005.pdf › Ocean2/G0714005.pdf]

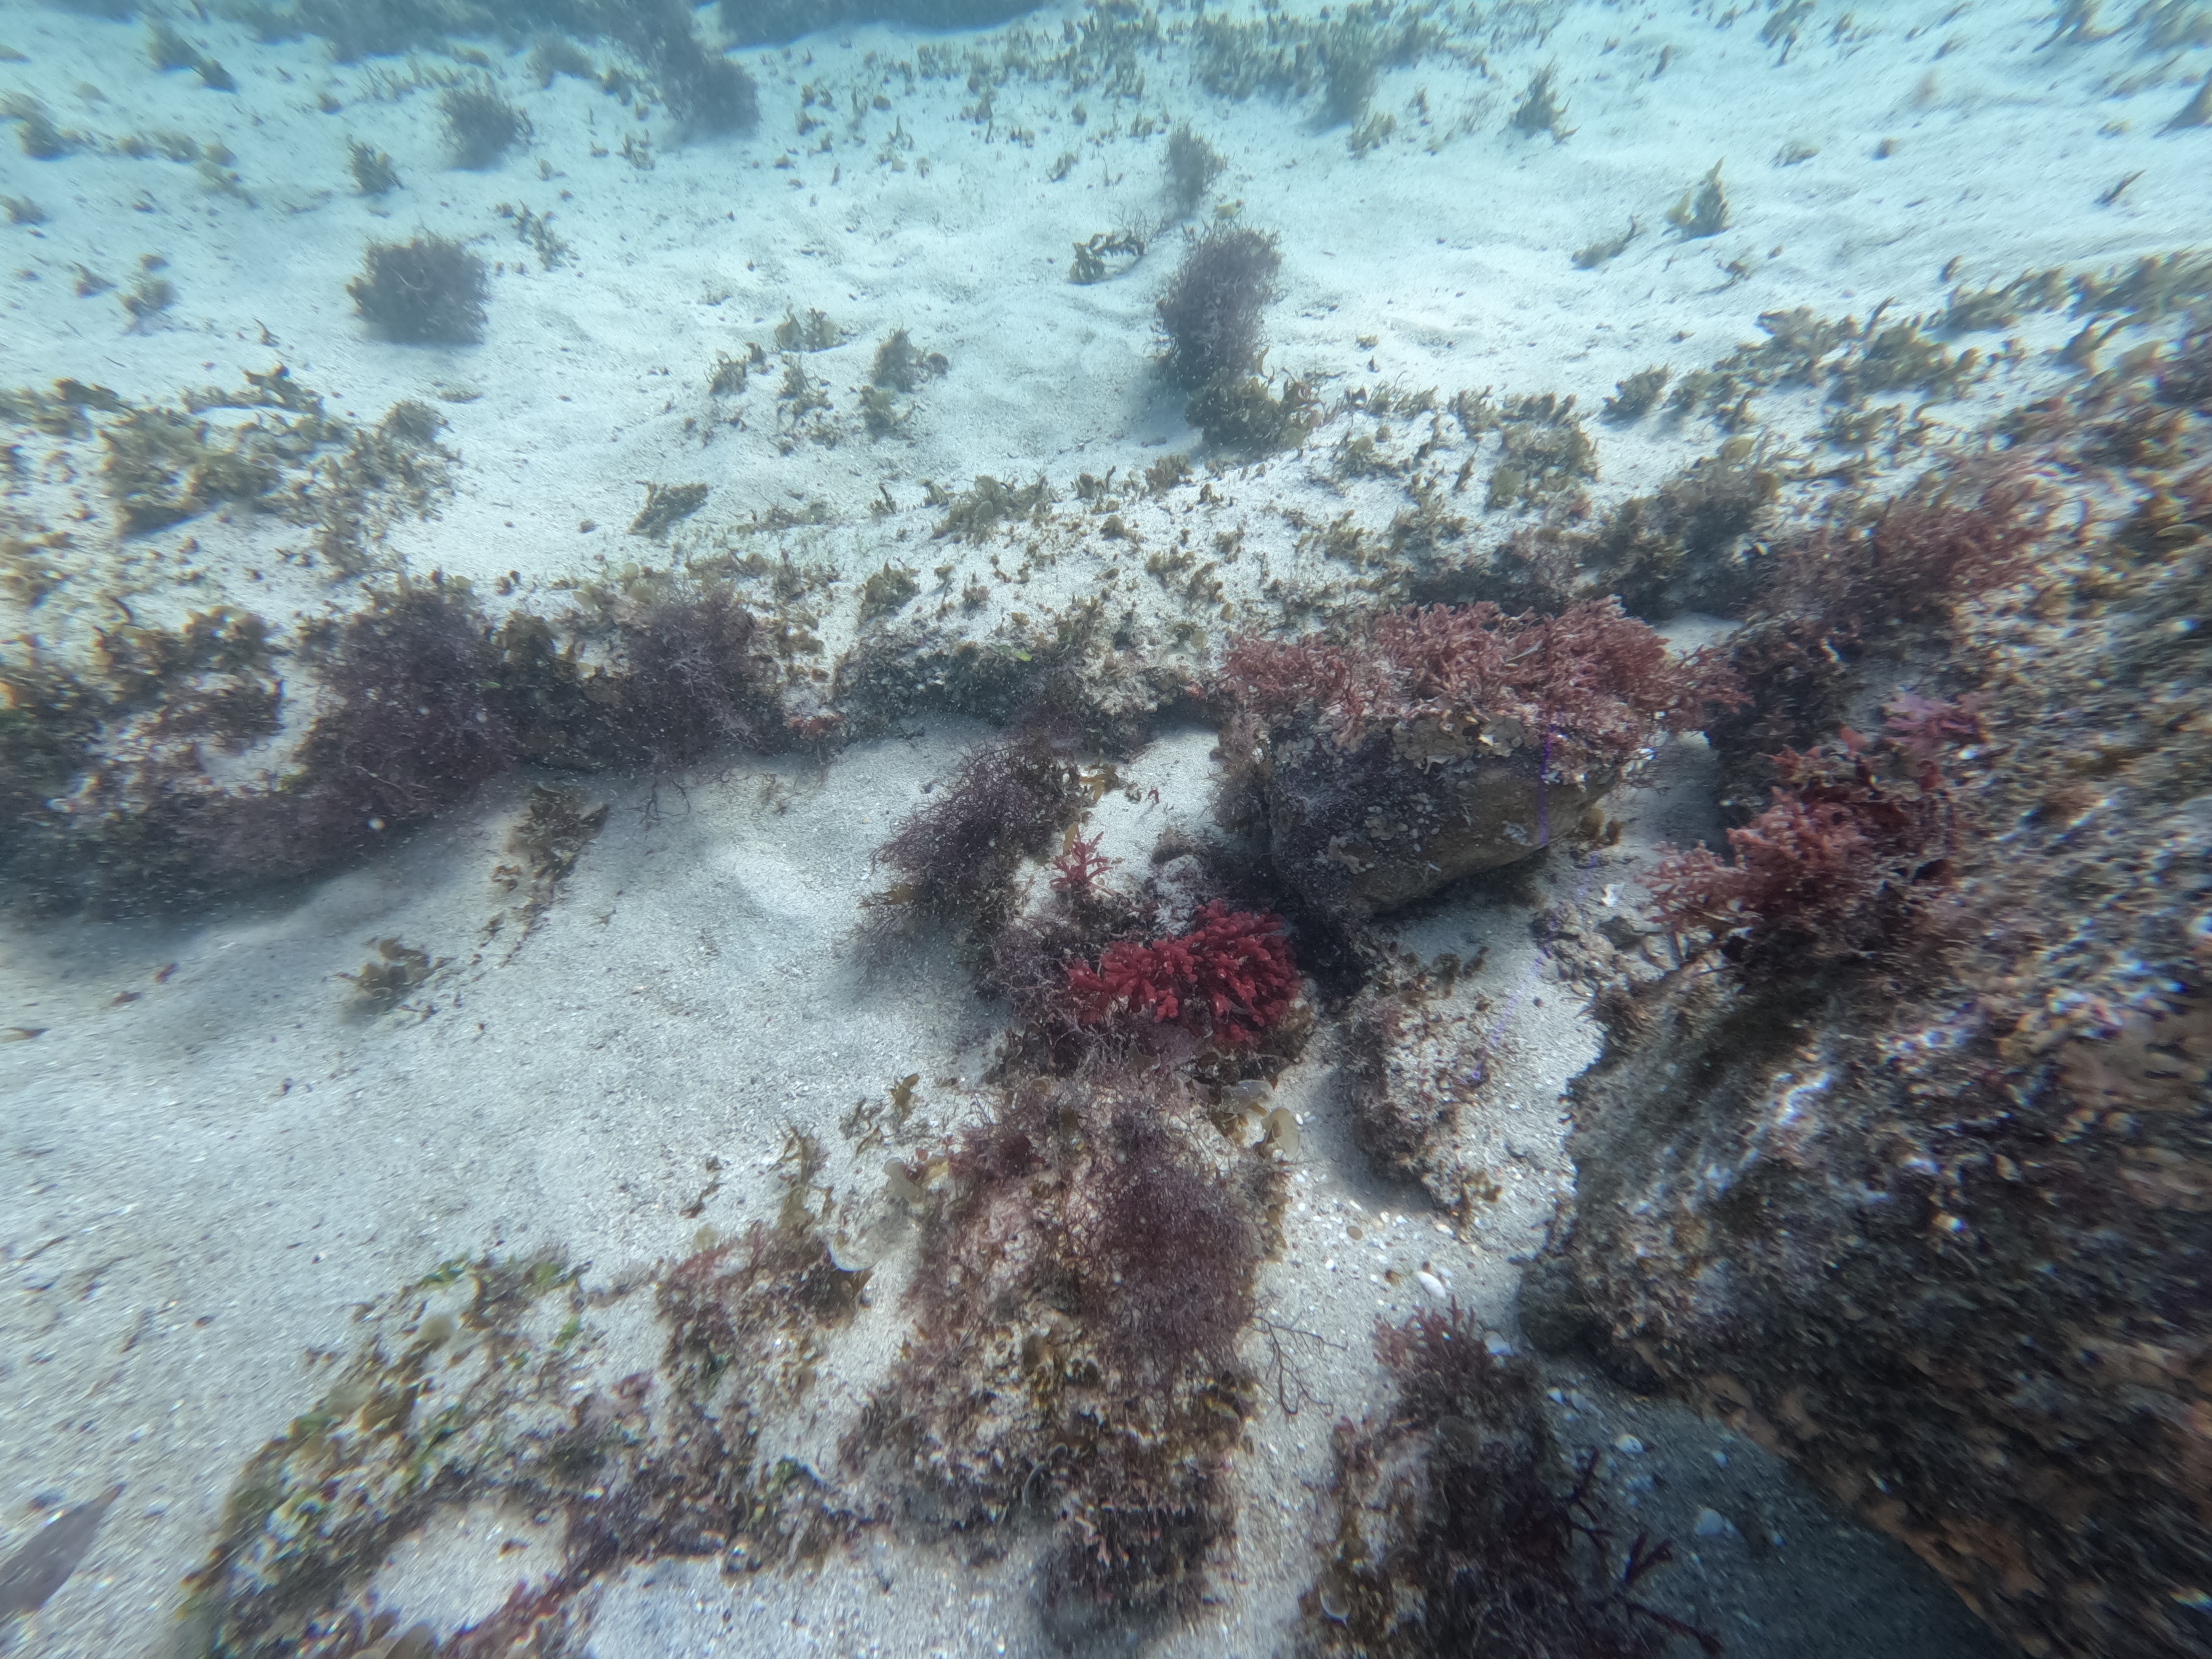

Supplement: Supplementary file 939 [file G0714006.pdf › Ocean2/G0714006.pdf]

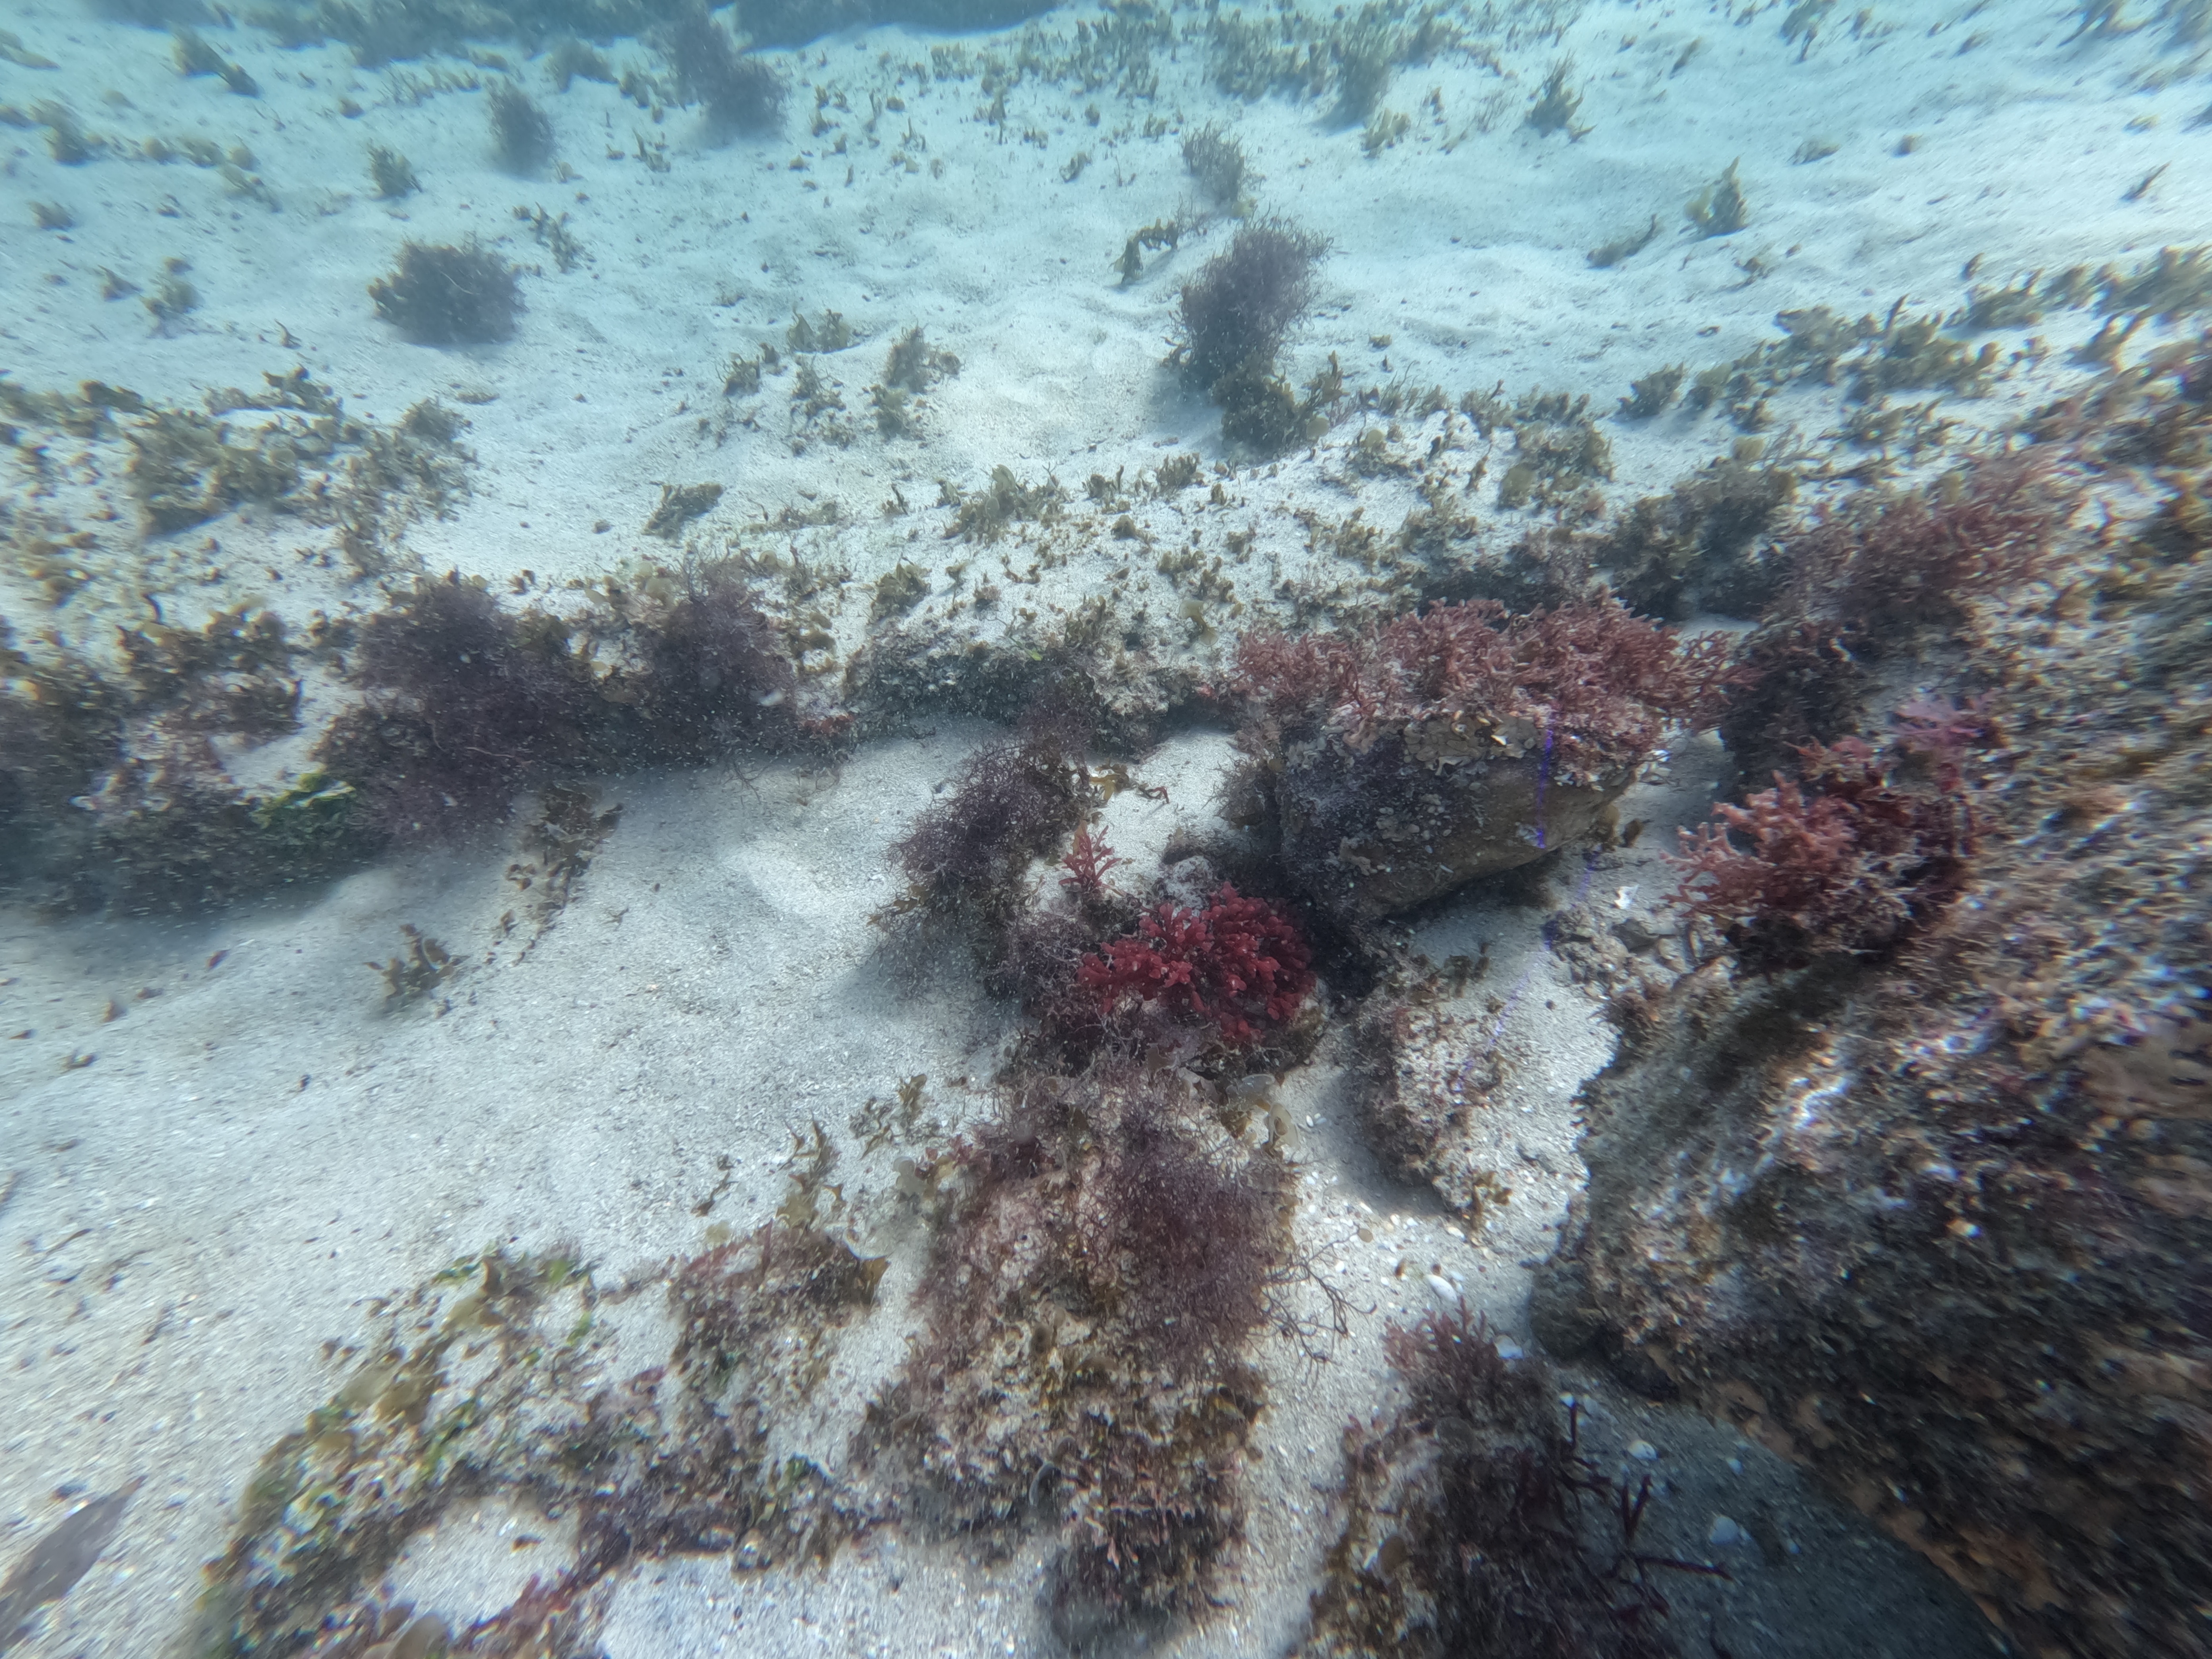

Supplement: Supplementary file 940 [file G0714007.pdf › Ocean2/G0714007.pdf]

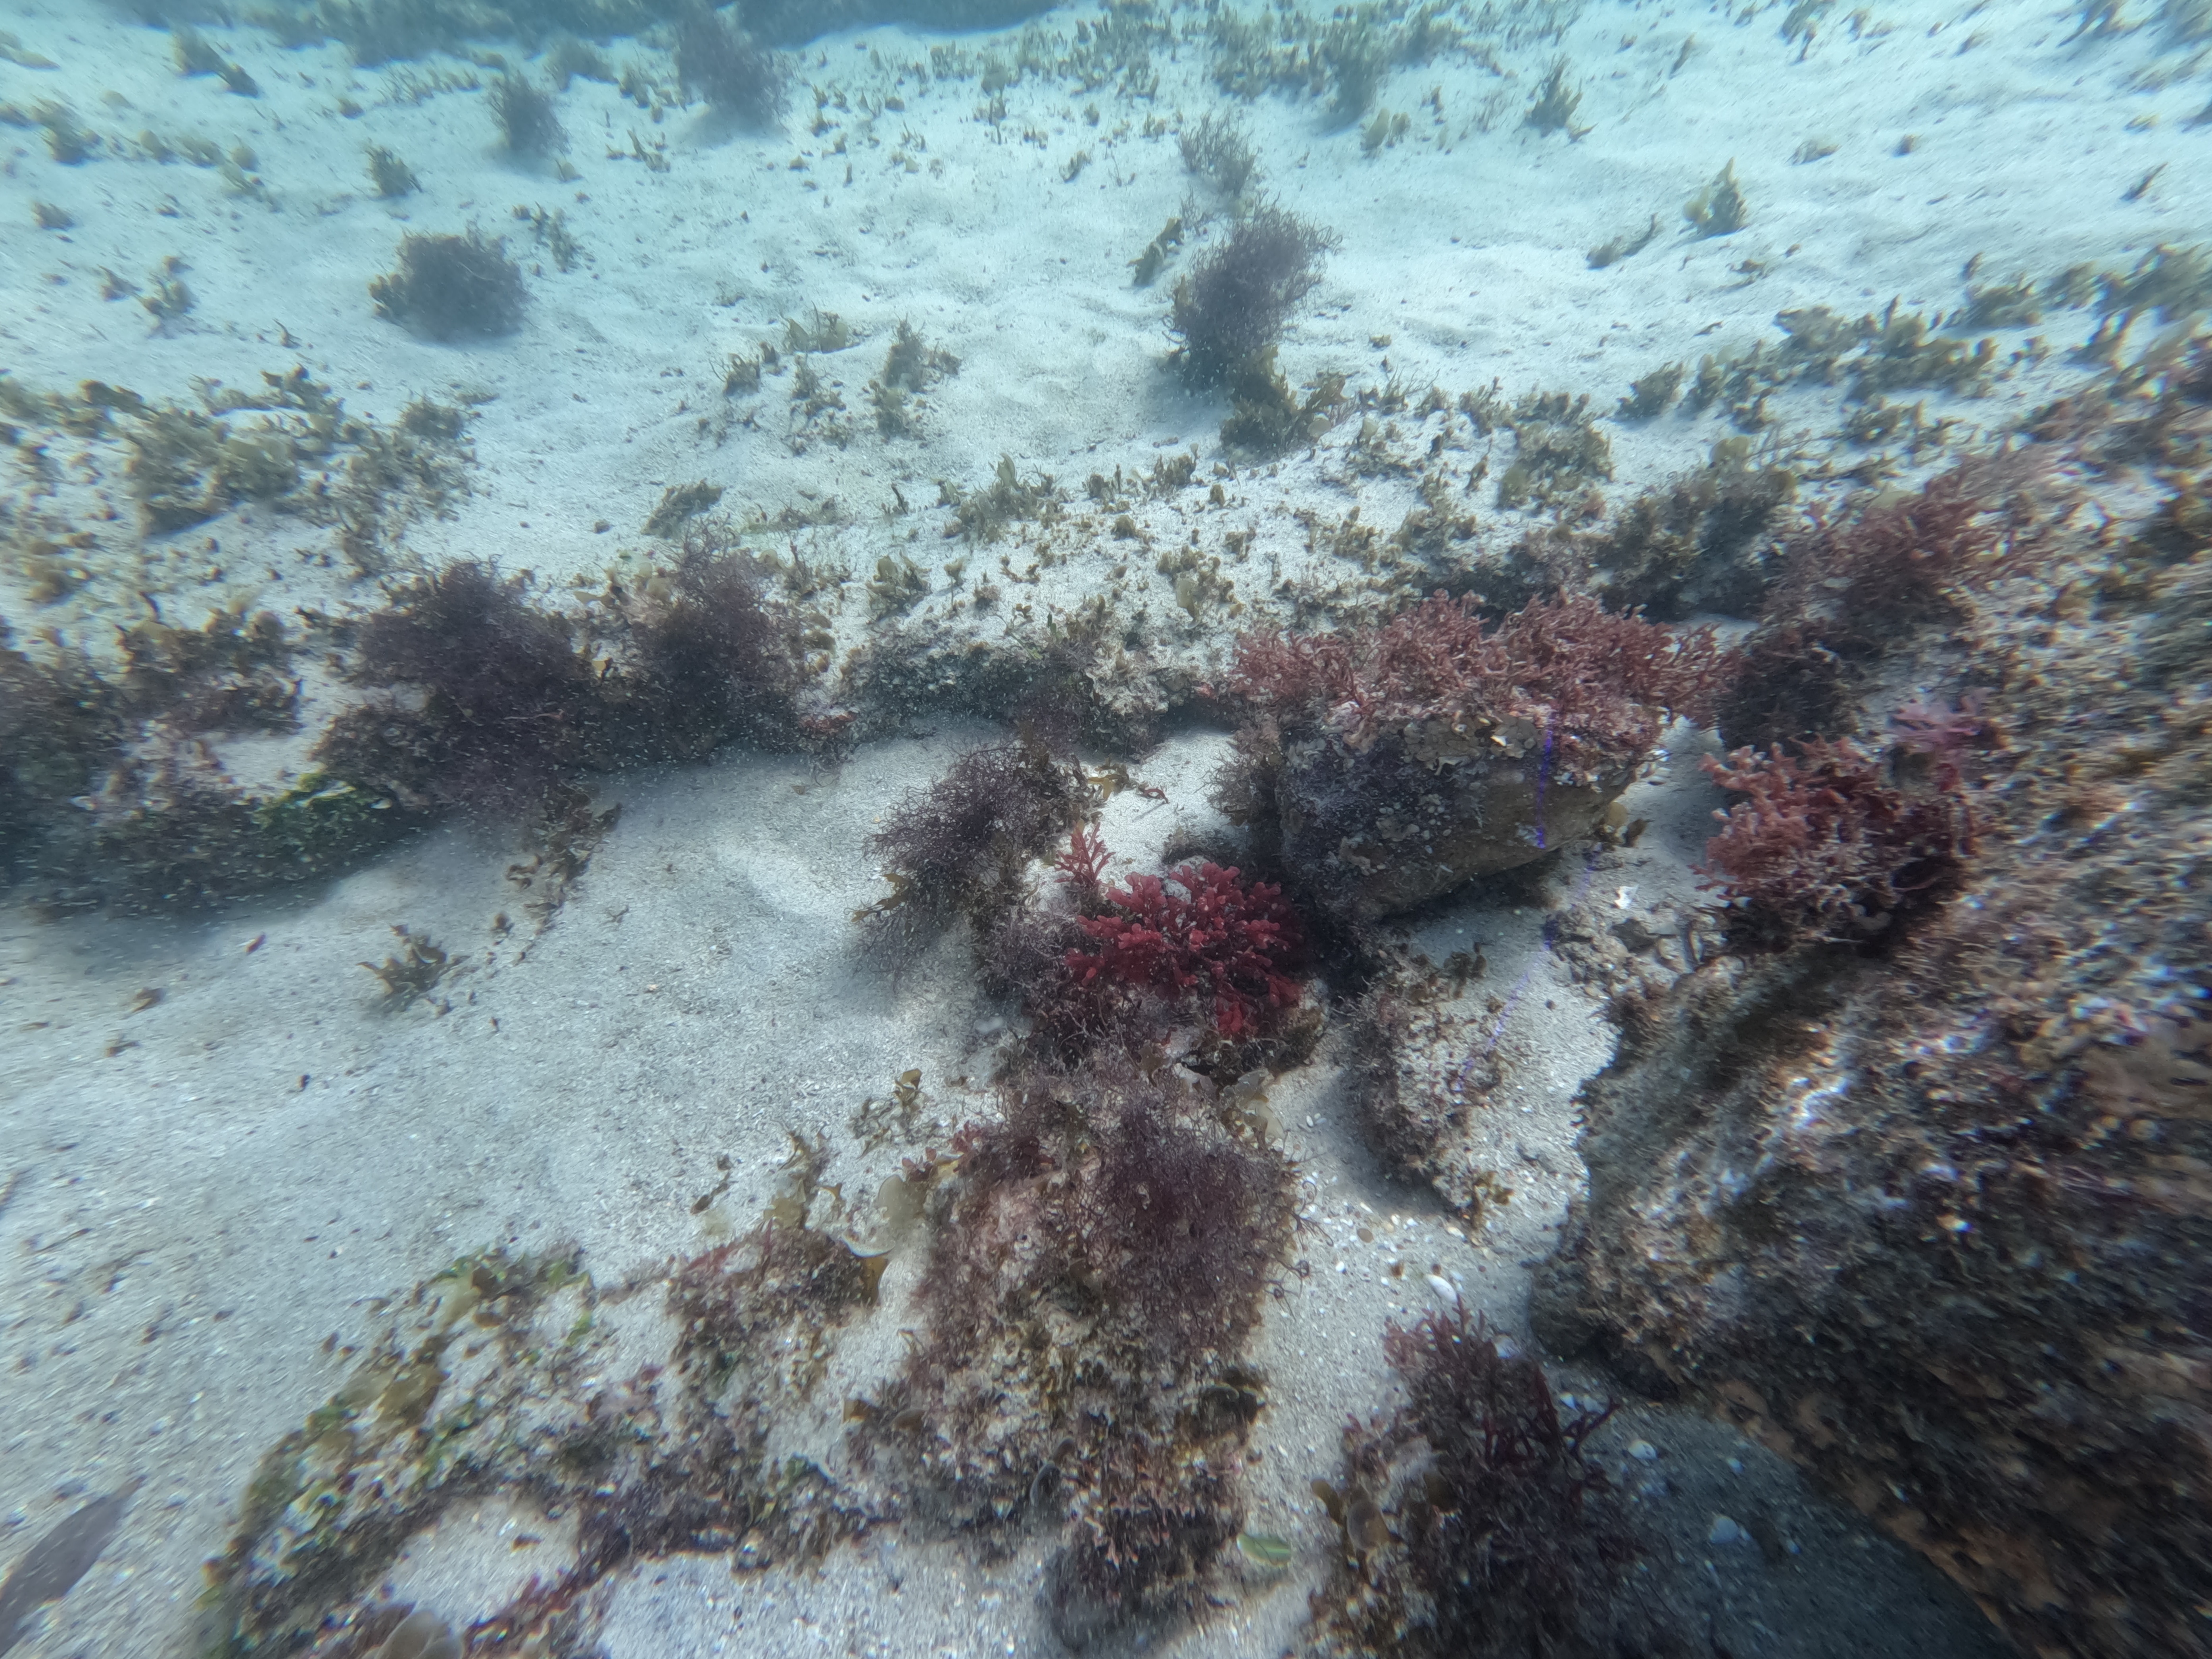

Supplement: Supplementary file 941 [file G0714008.pdf › Ocean2/G0714008.pdf]

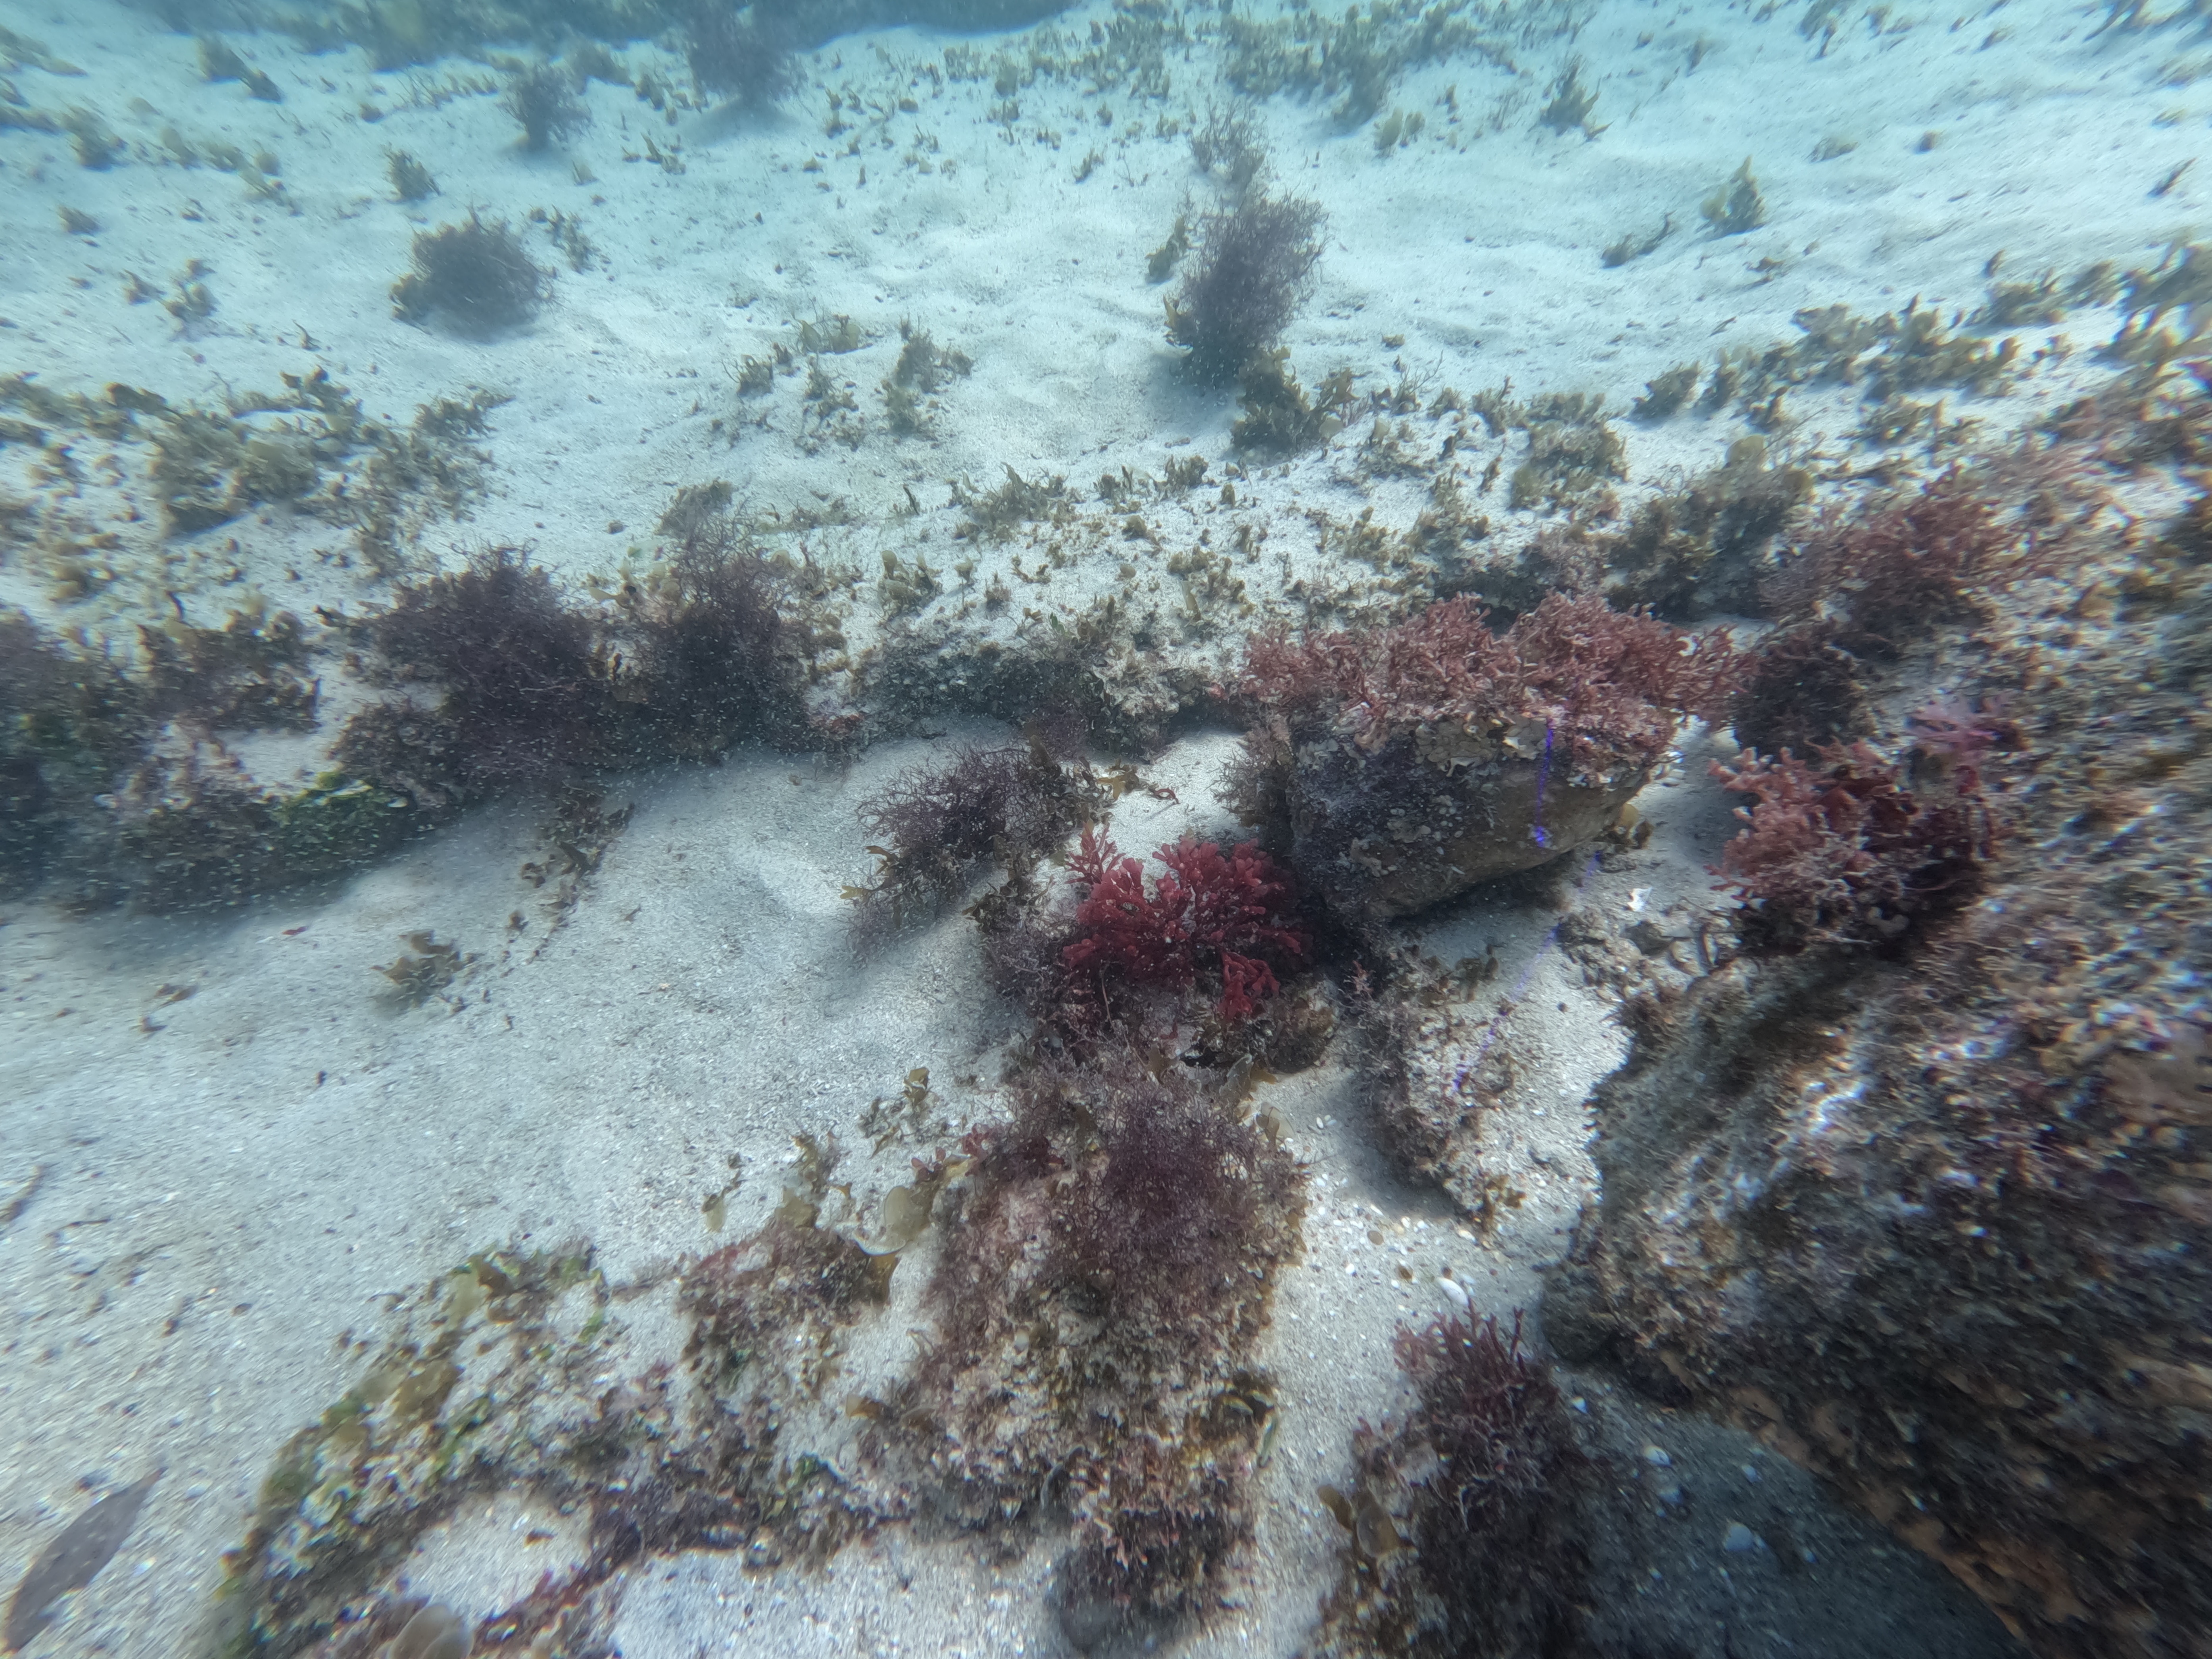

Supplement: Supplementary file 942 [file G0714009.pdf › Ocean2/G0714009.pdf]

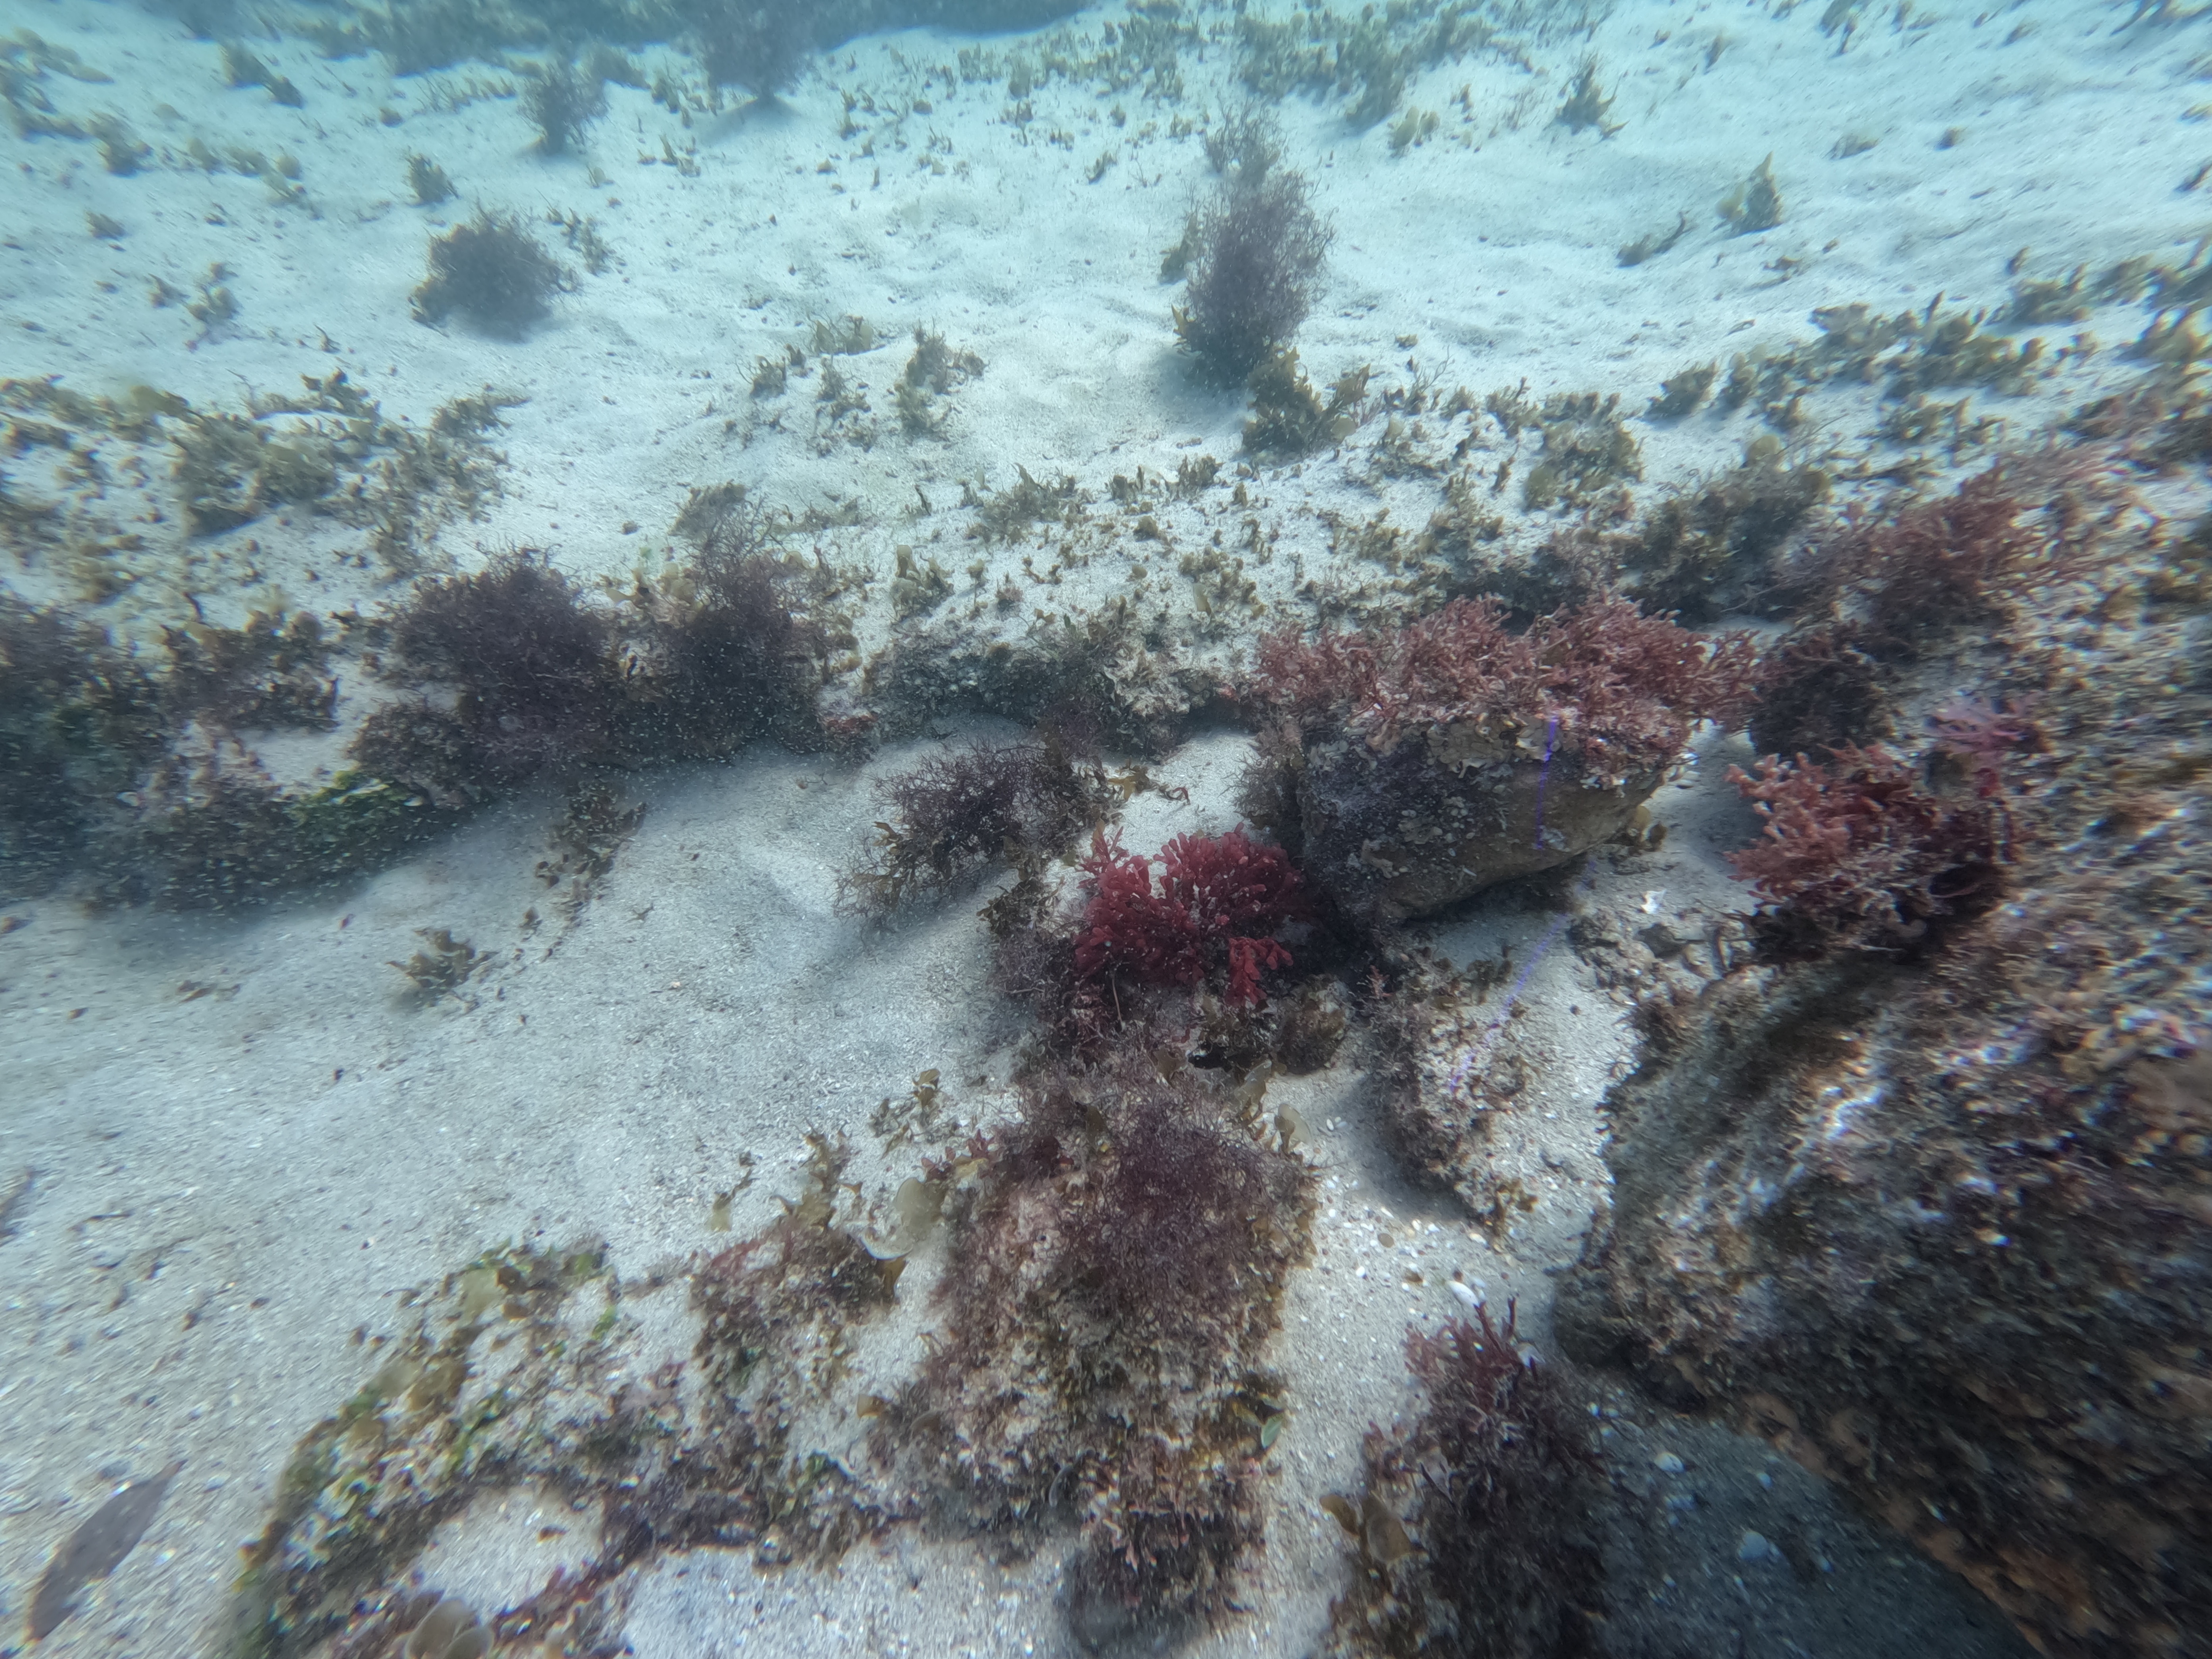

Supplement: Supplementary file 943 [file G0714010.pdf › Ocean2/G0714010.pdf]

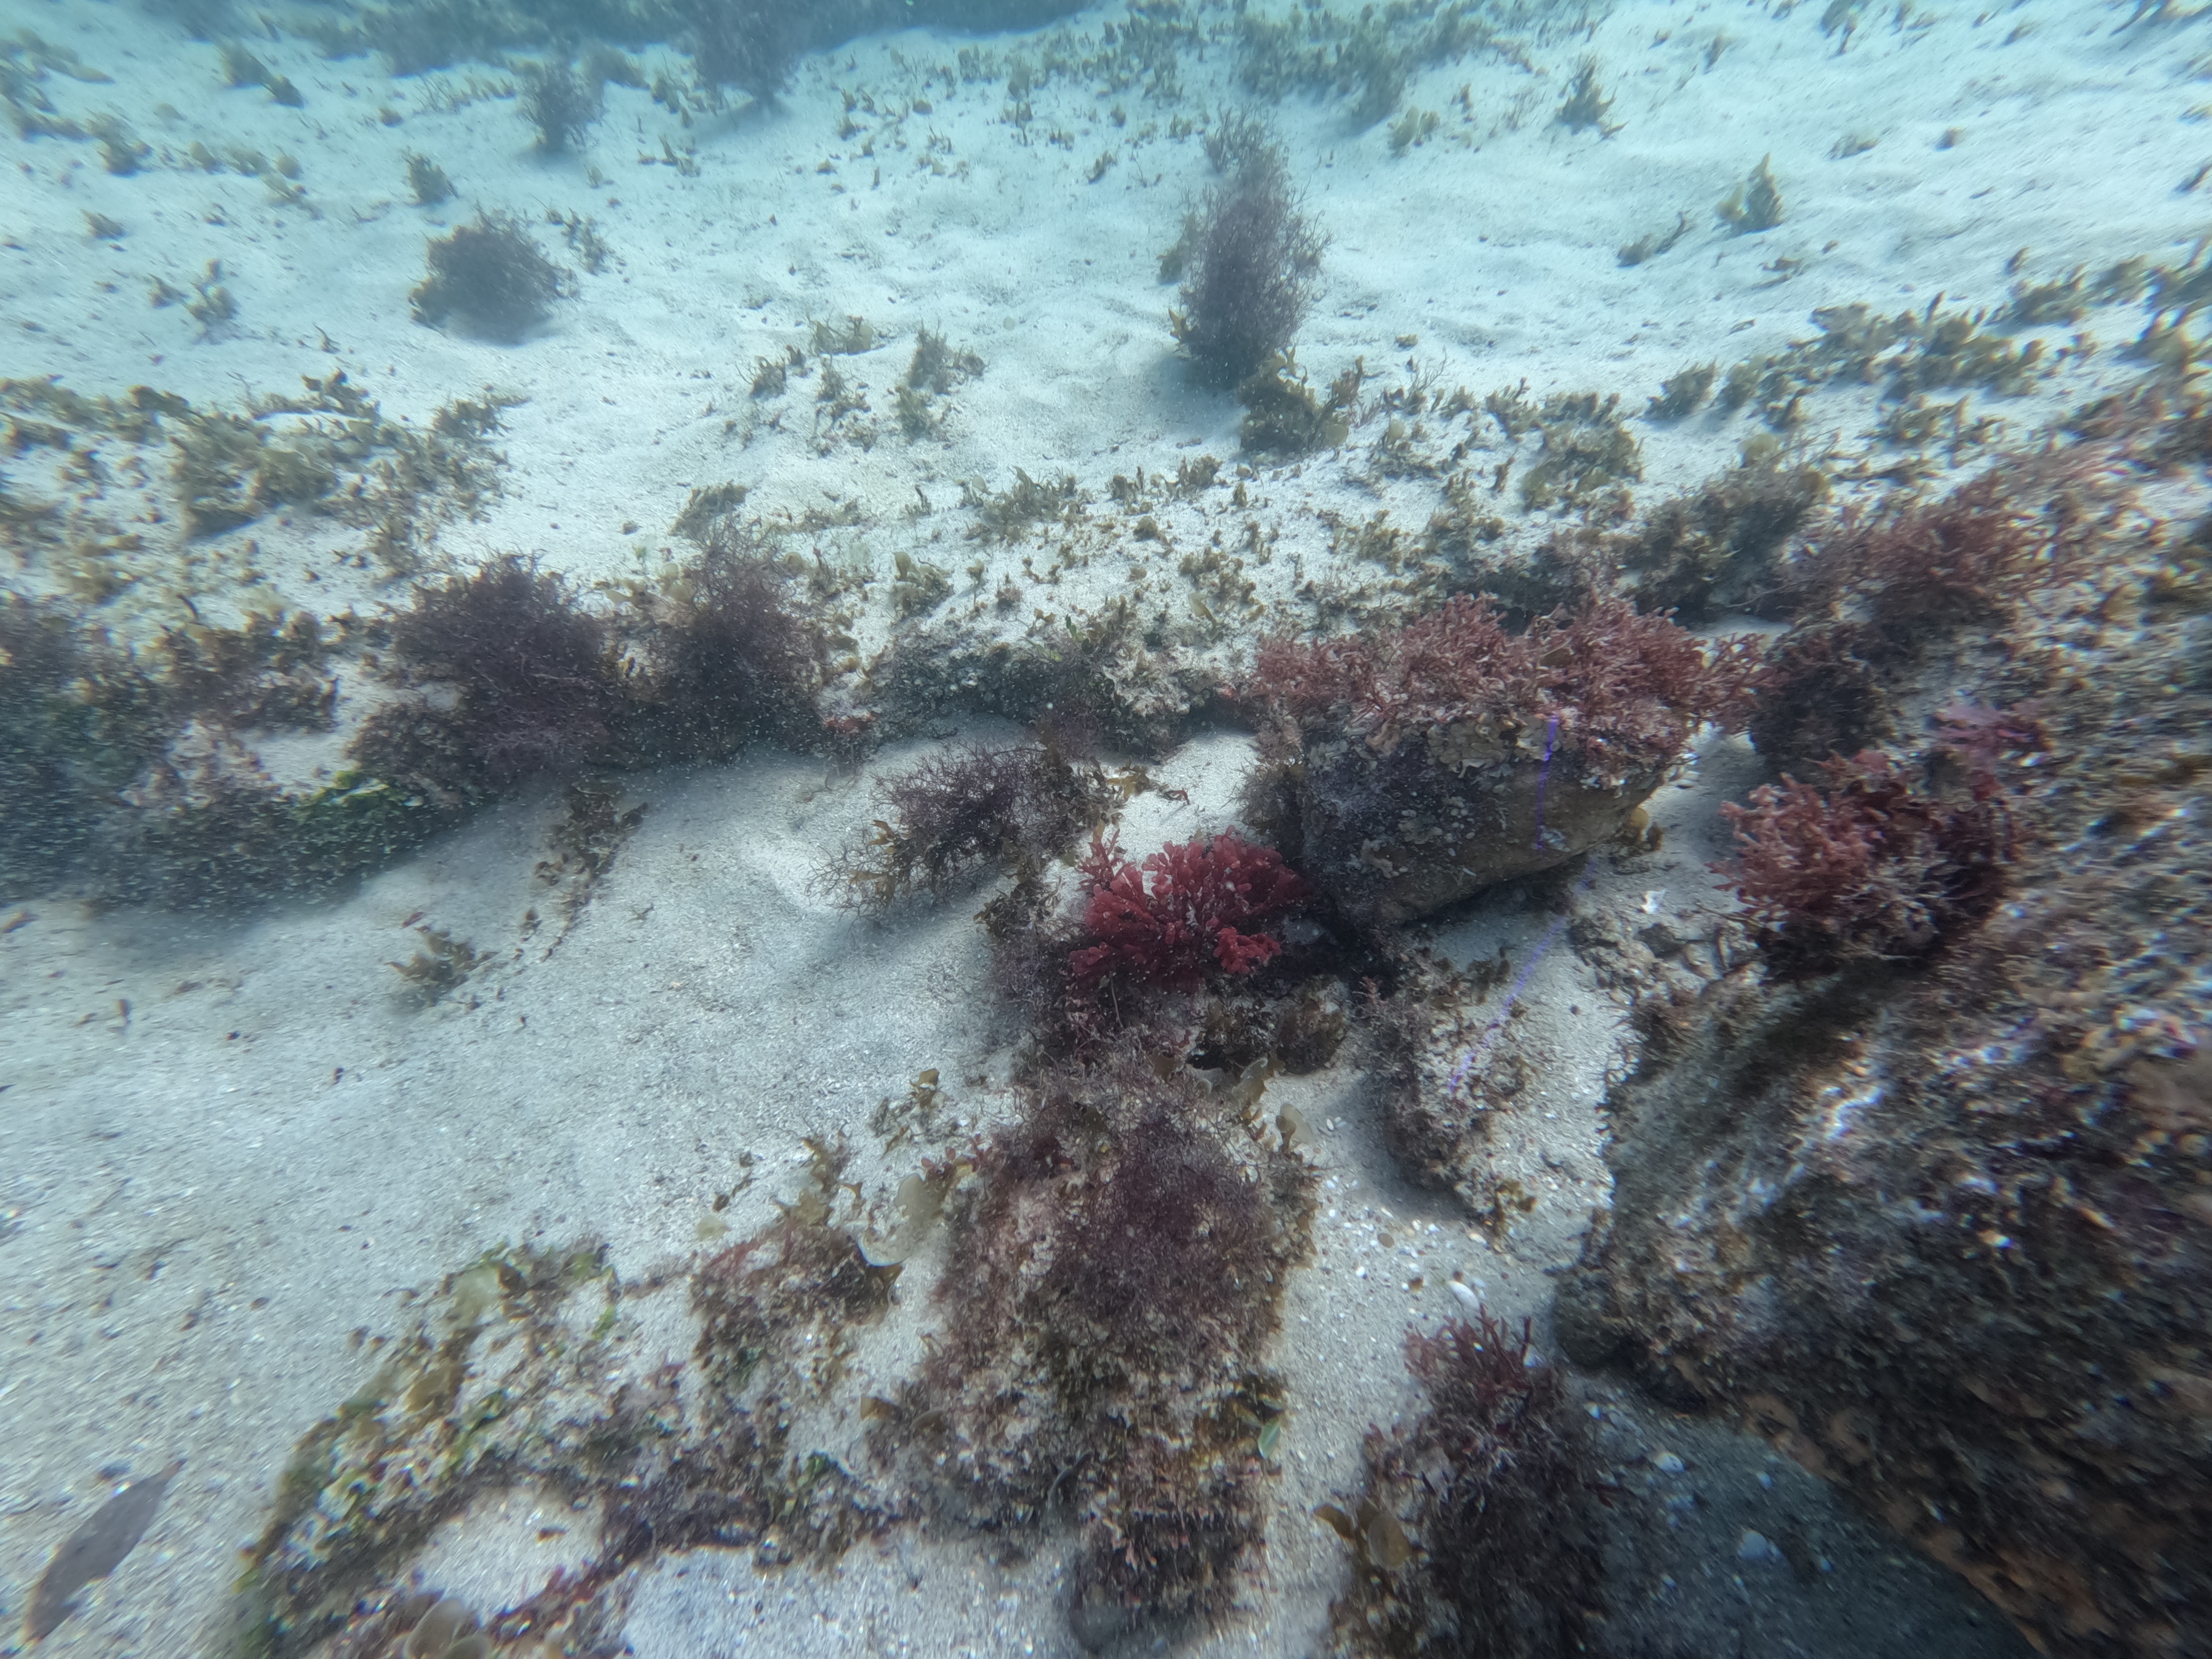

Supplement: Supplementary file 944 [file G0714011.pdf › Ocean2/G0714011.pdf]

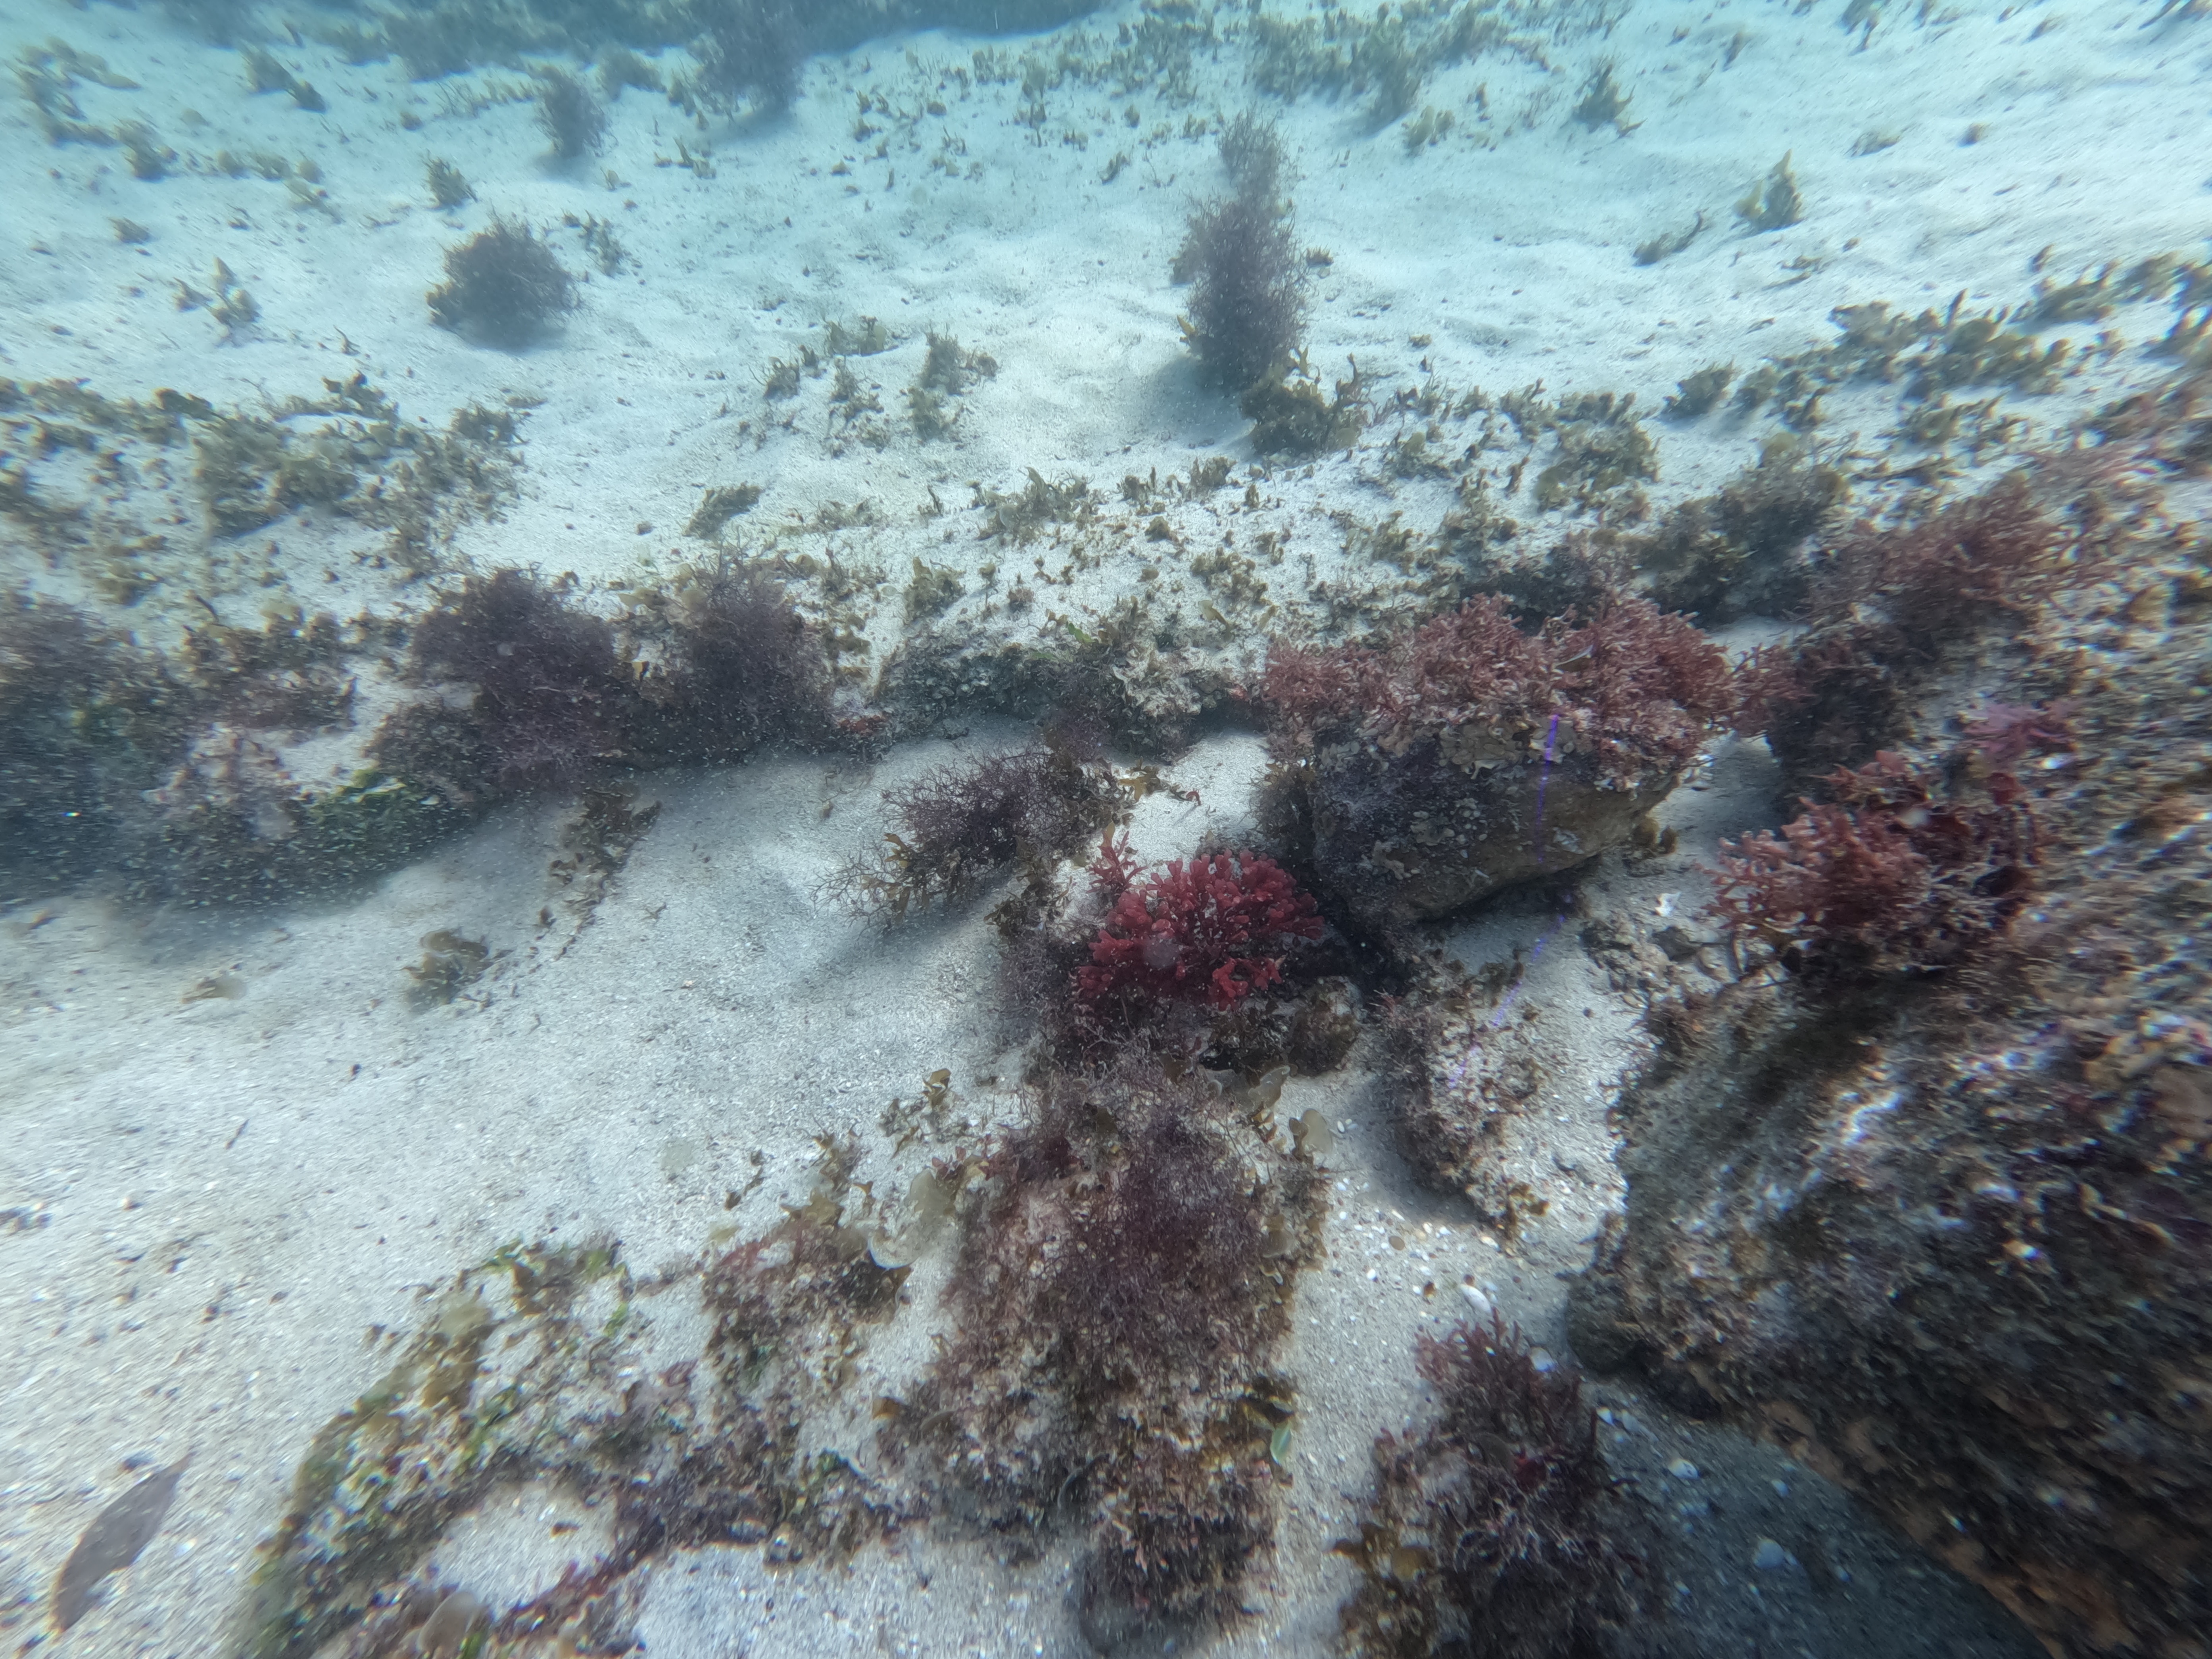

Supplement: Supplementary file 945 [file G0714012.pdf › Ocean2/G0714012.pdf]

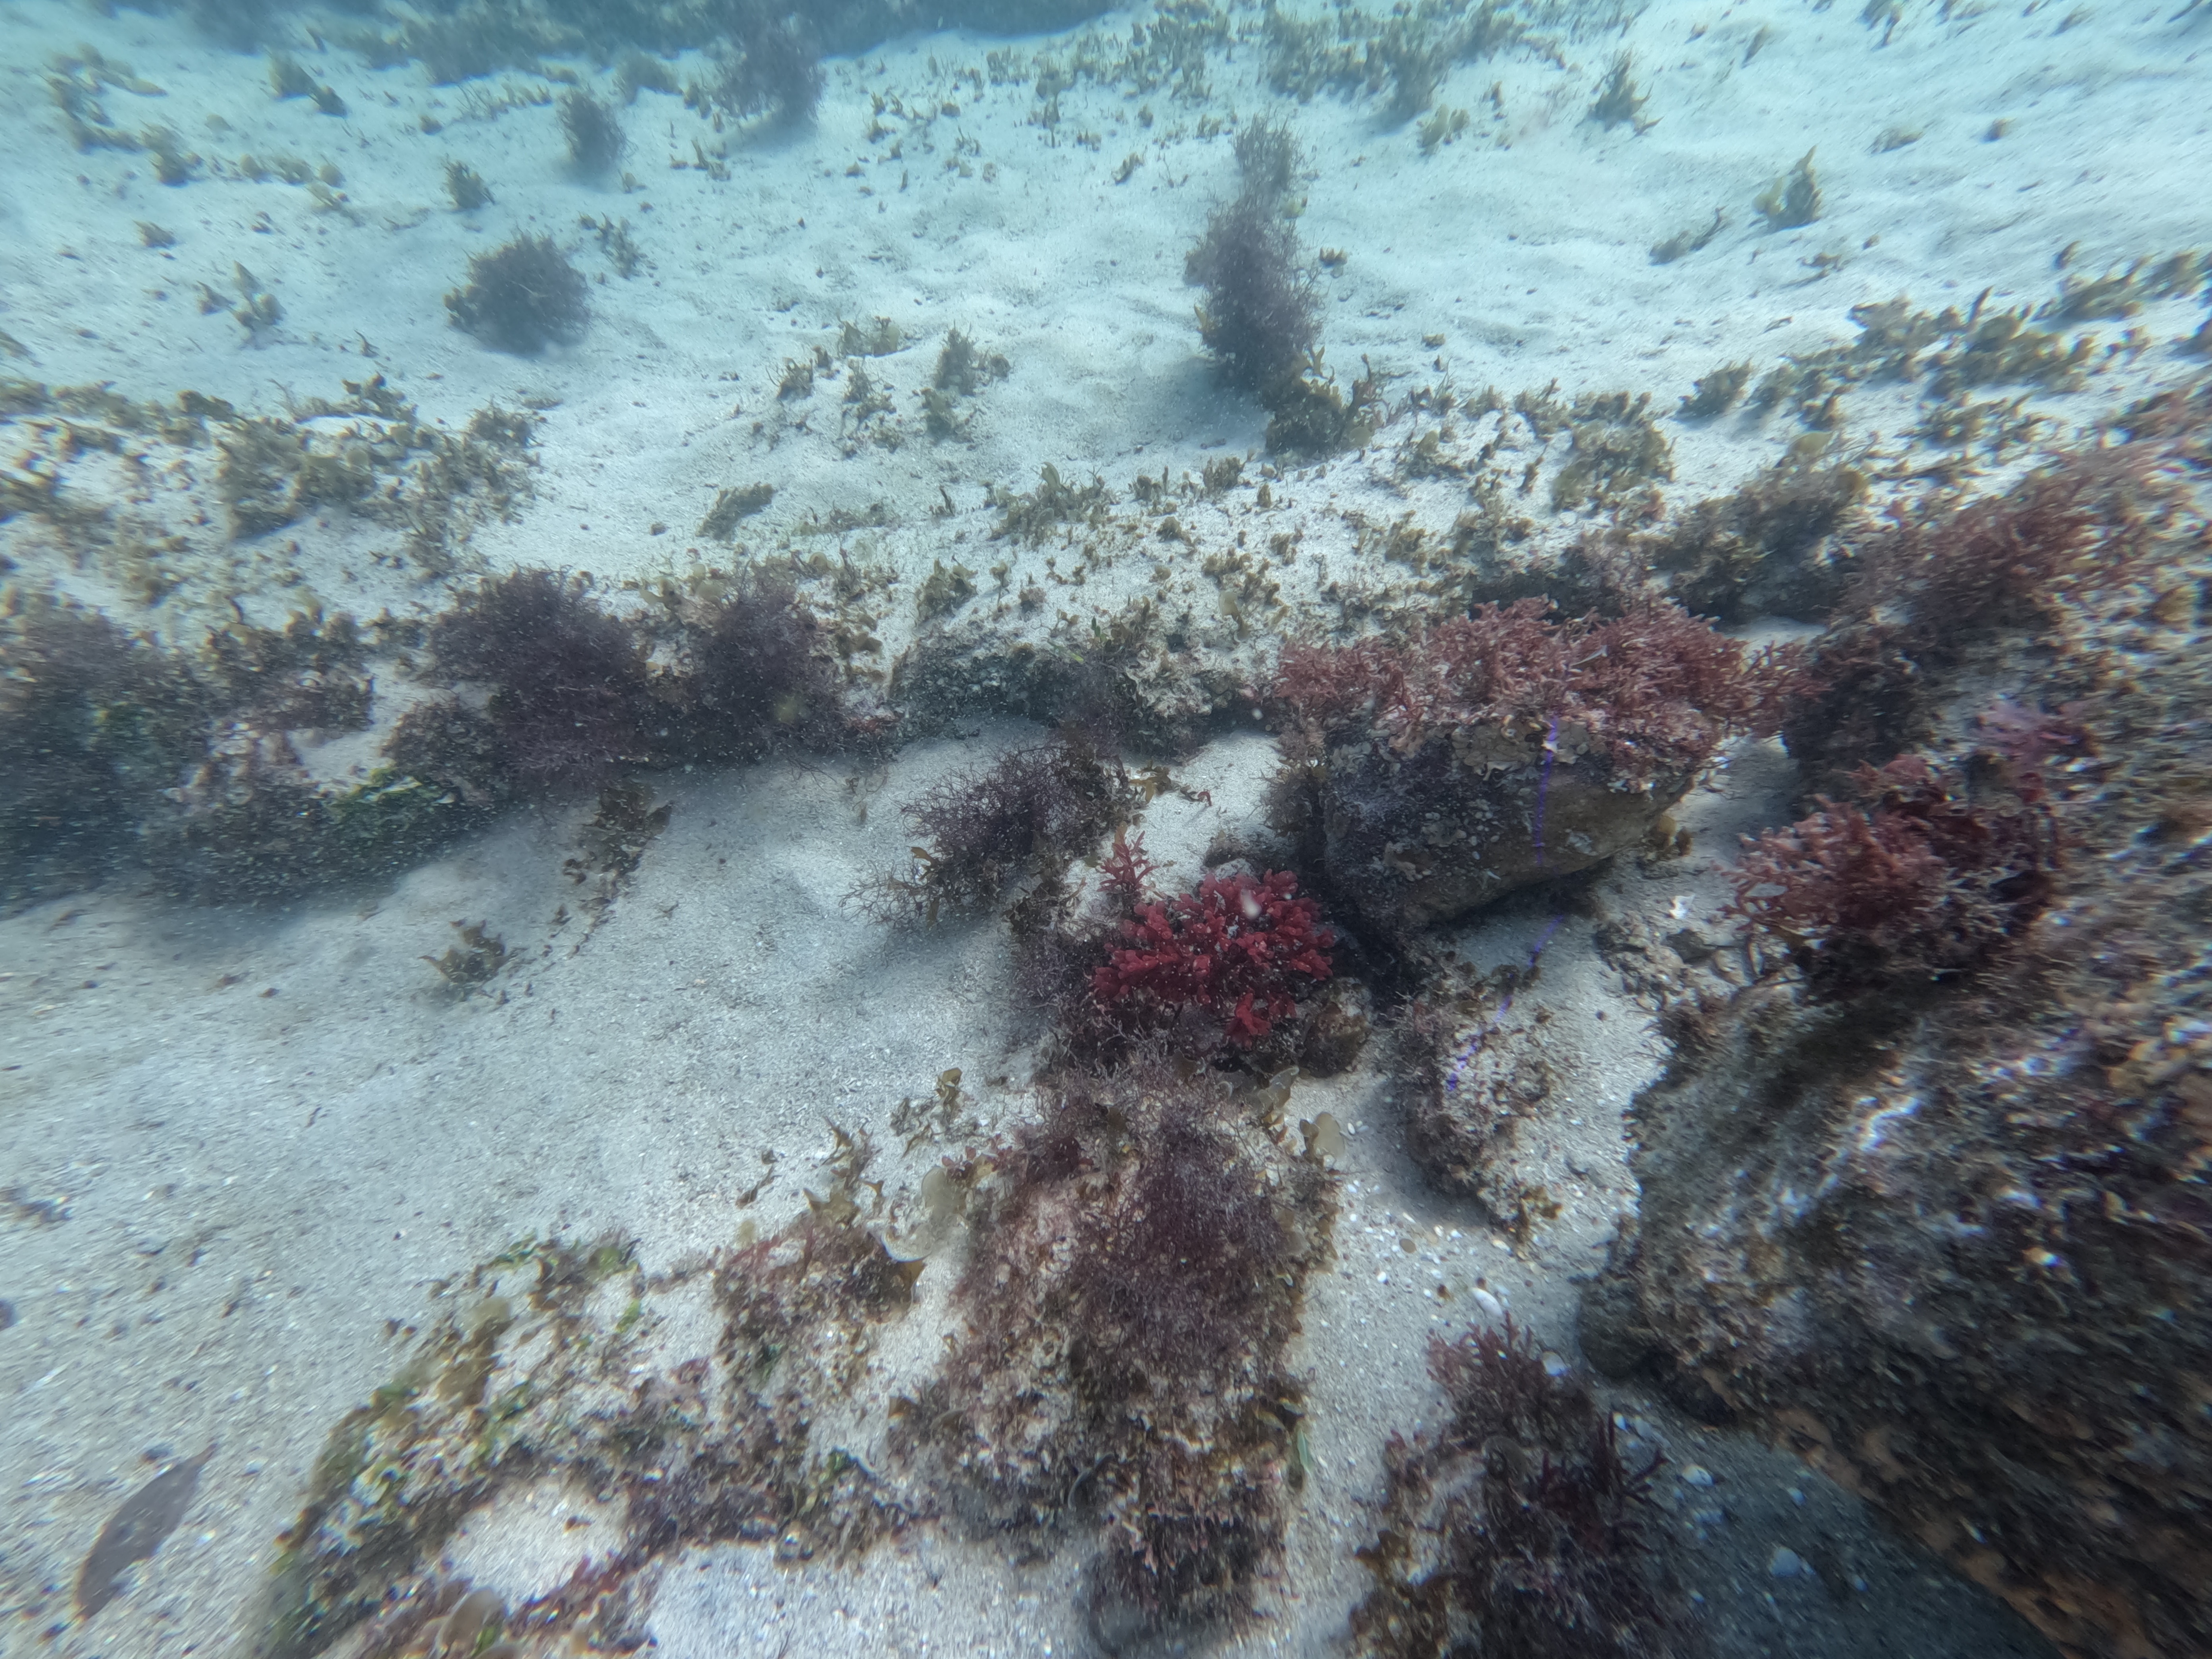

Supplement: Supplementary file 946 [file G0714013.pdf › Ocean2/G0714013.pdf]

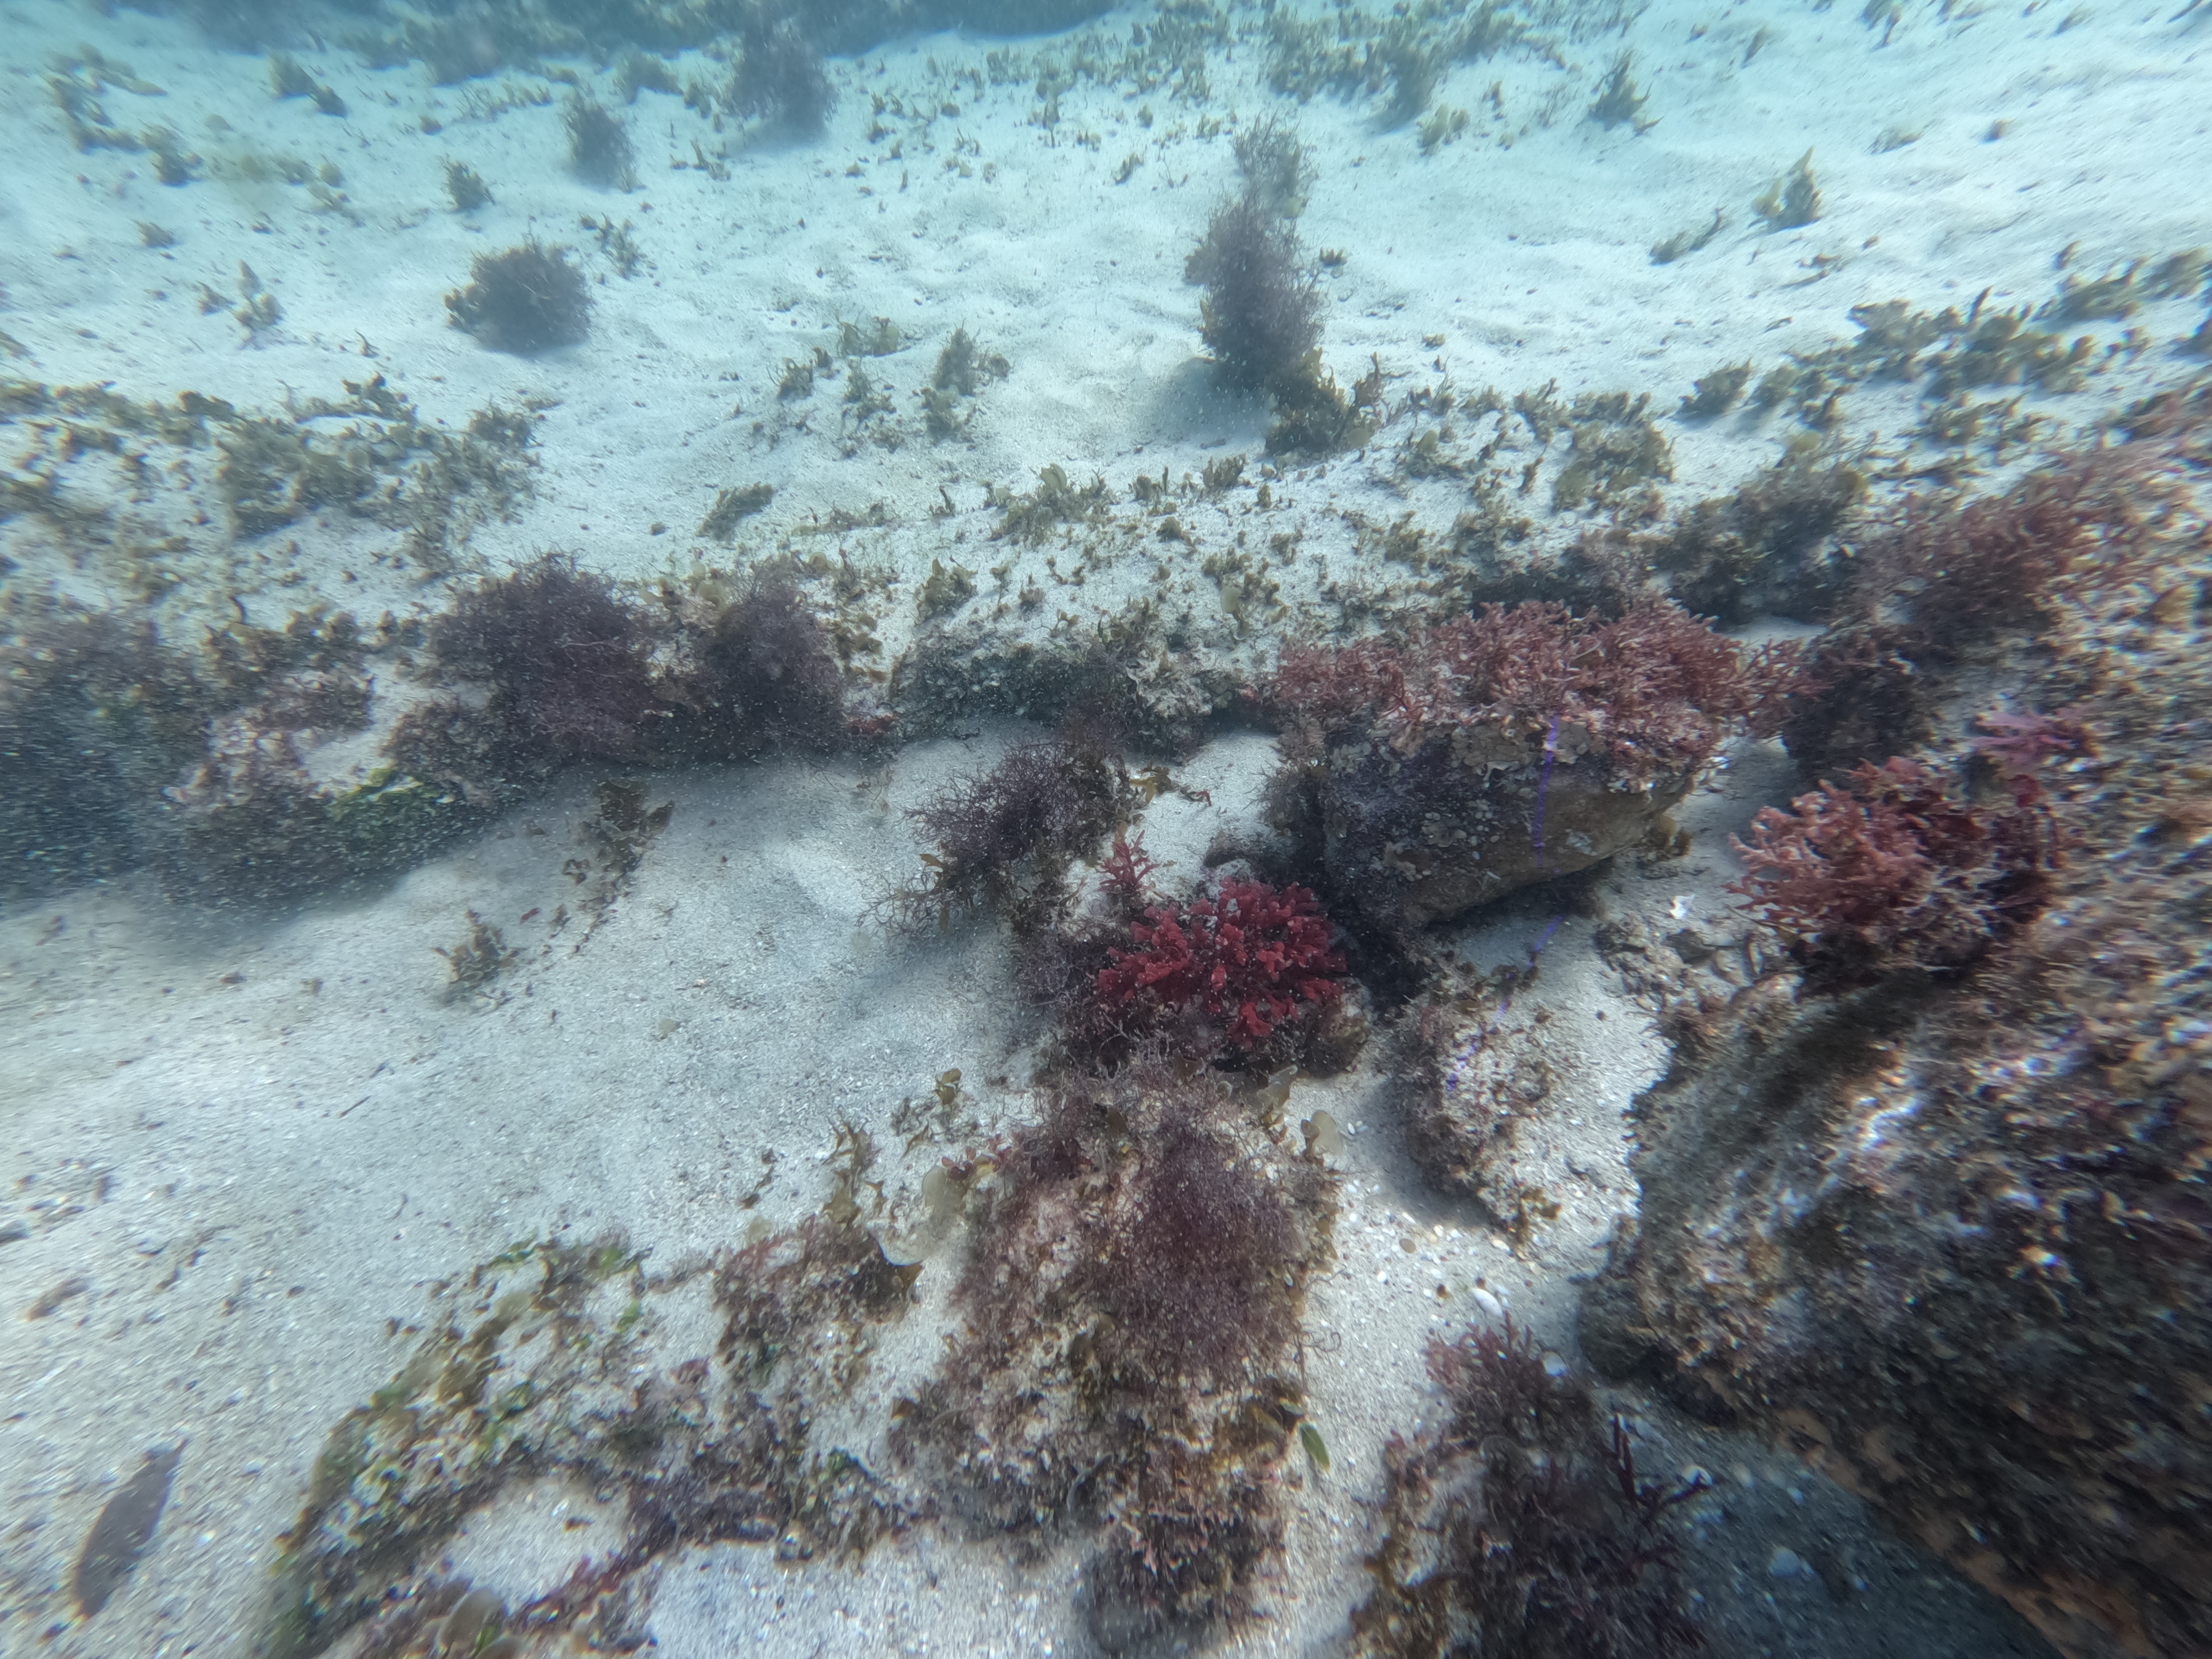

Supplement: Supplementary file 947 [file G0714014.pdf › Ocean2/G0714014.pdf]

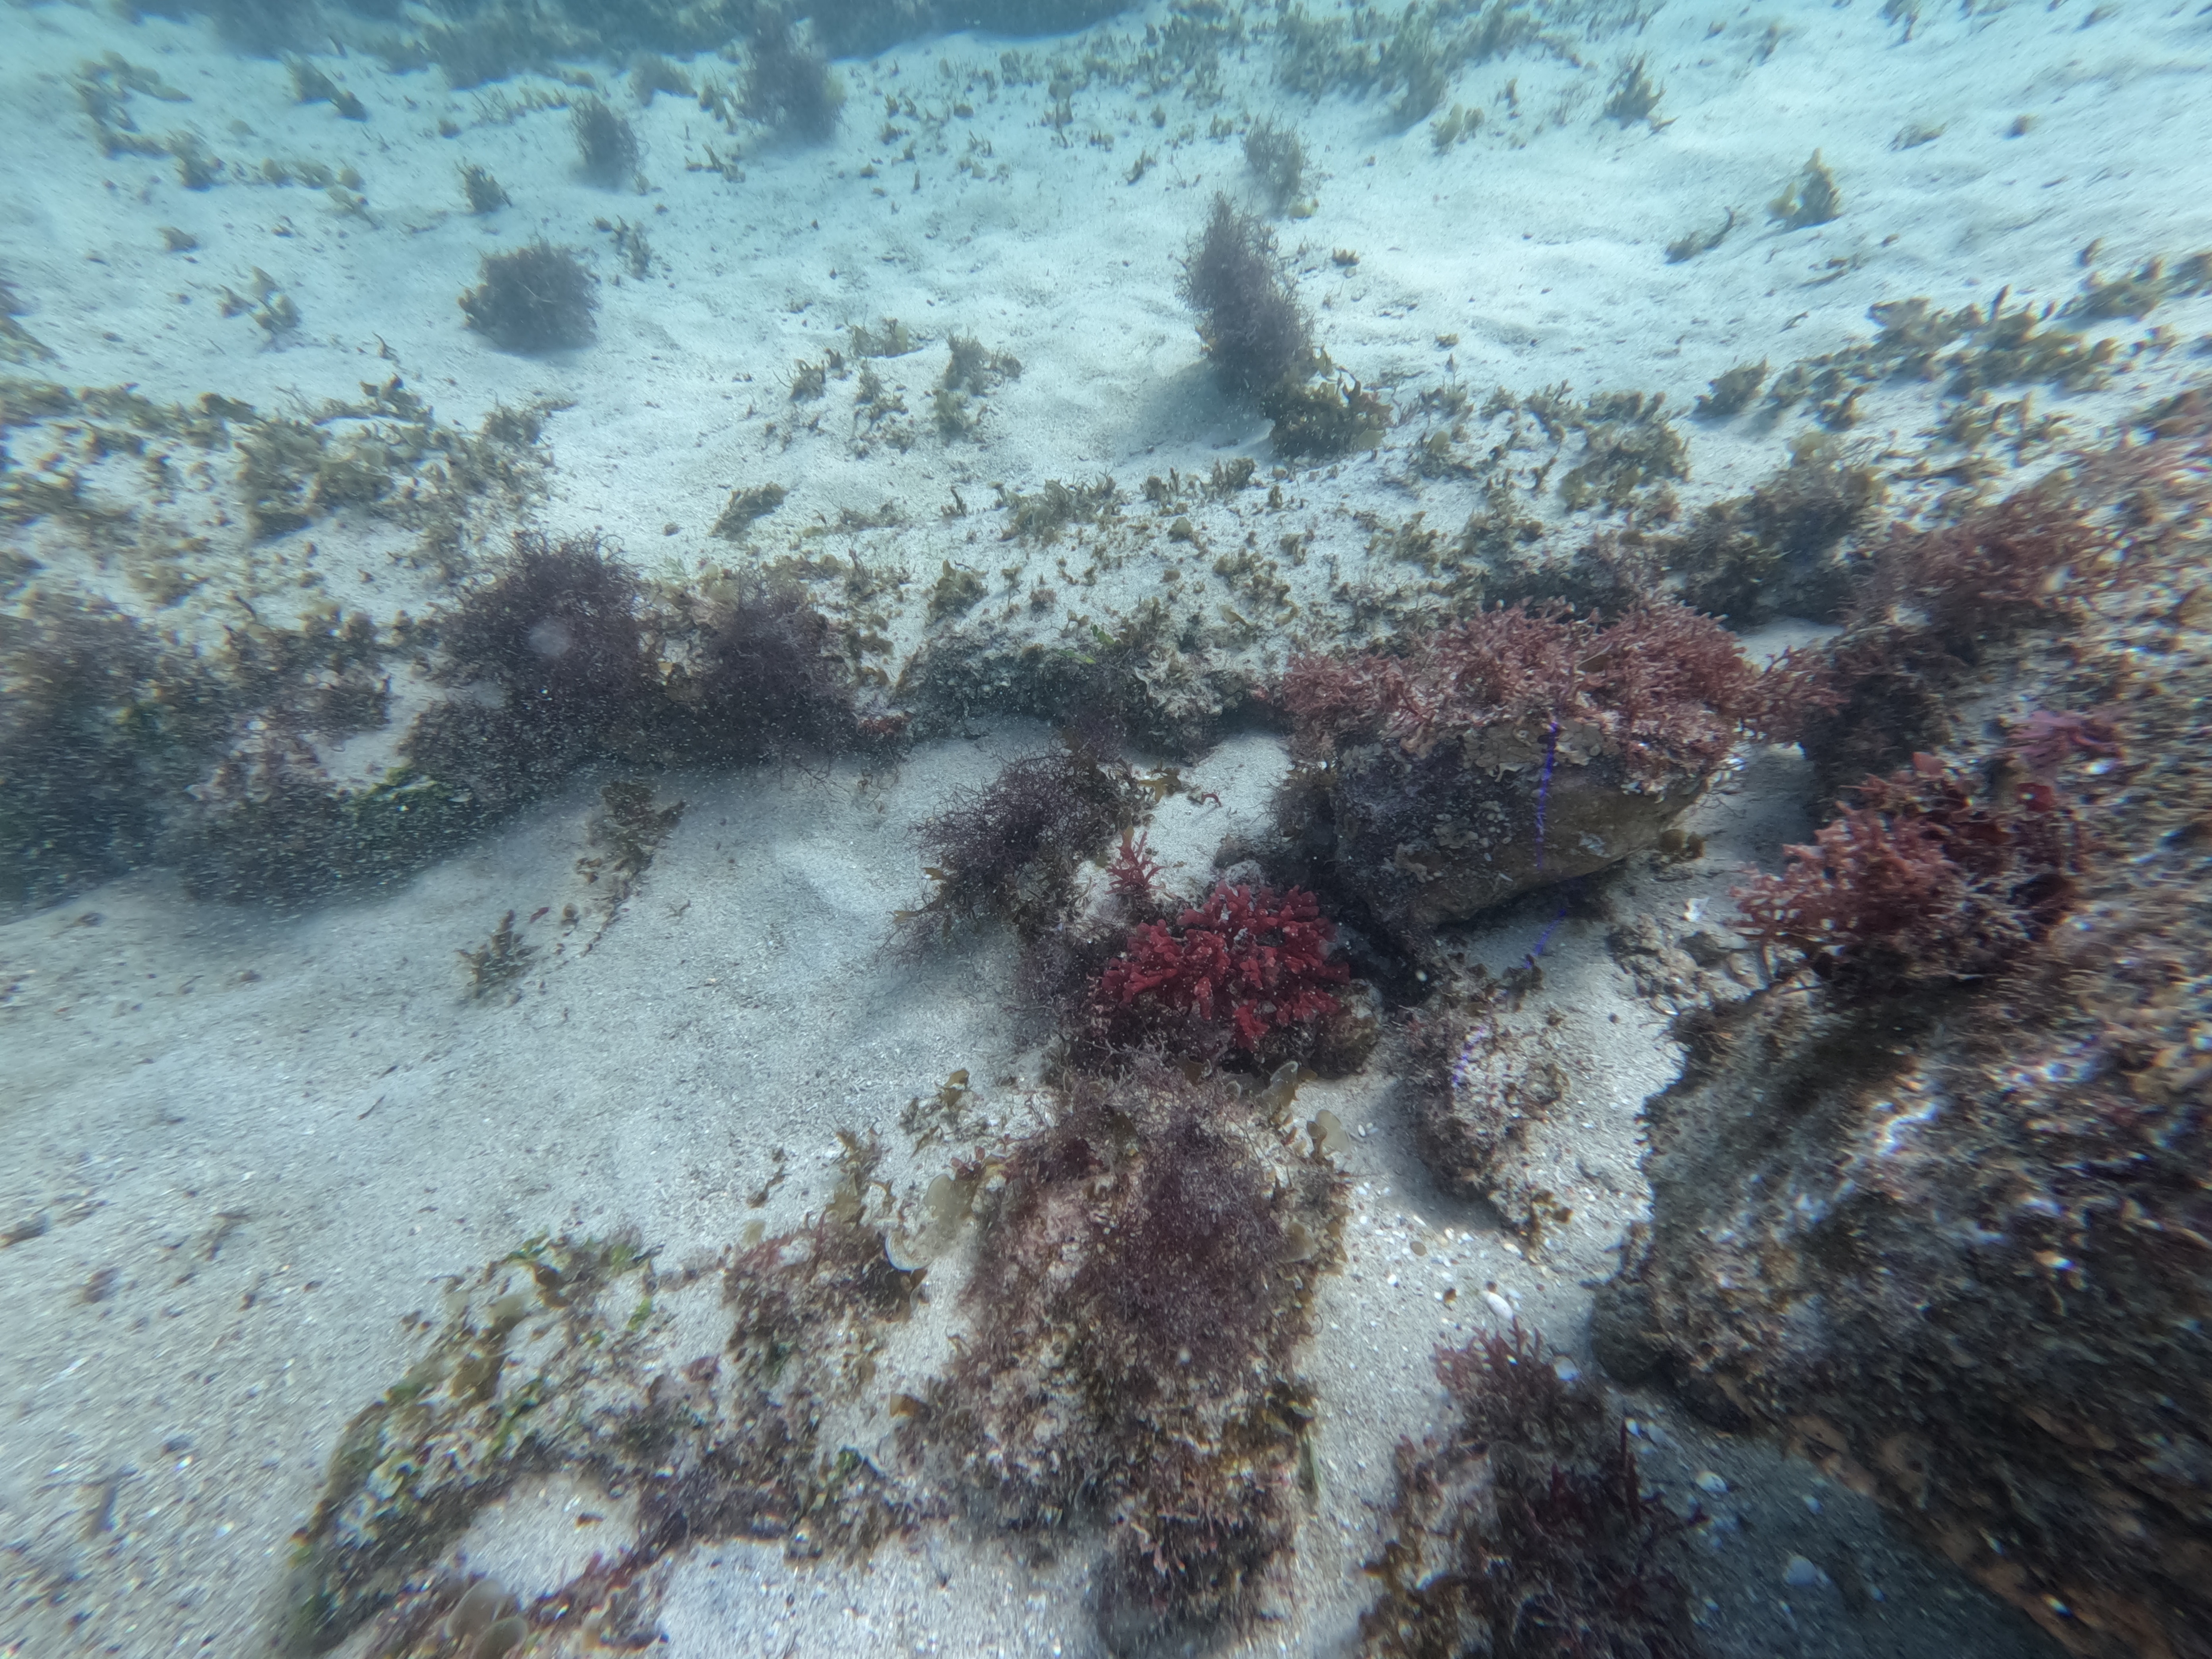

Supplement: Supplementary file 948 [file G0714015.pdf › Ocean2/G0714015.pdf]

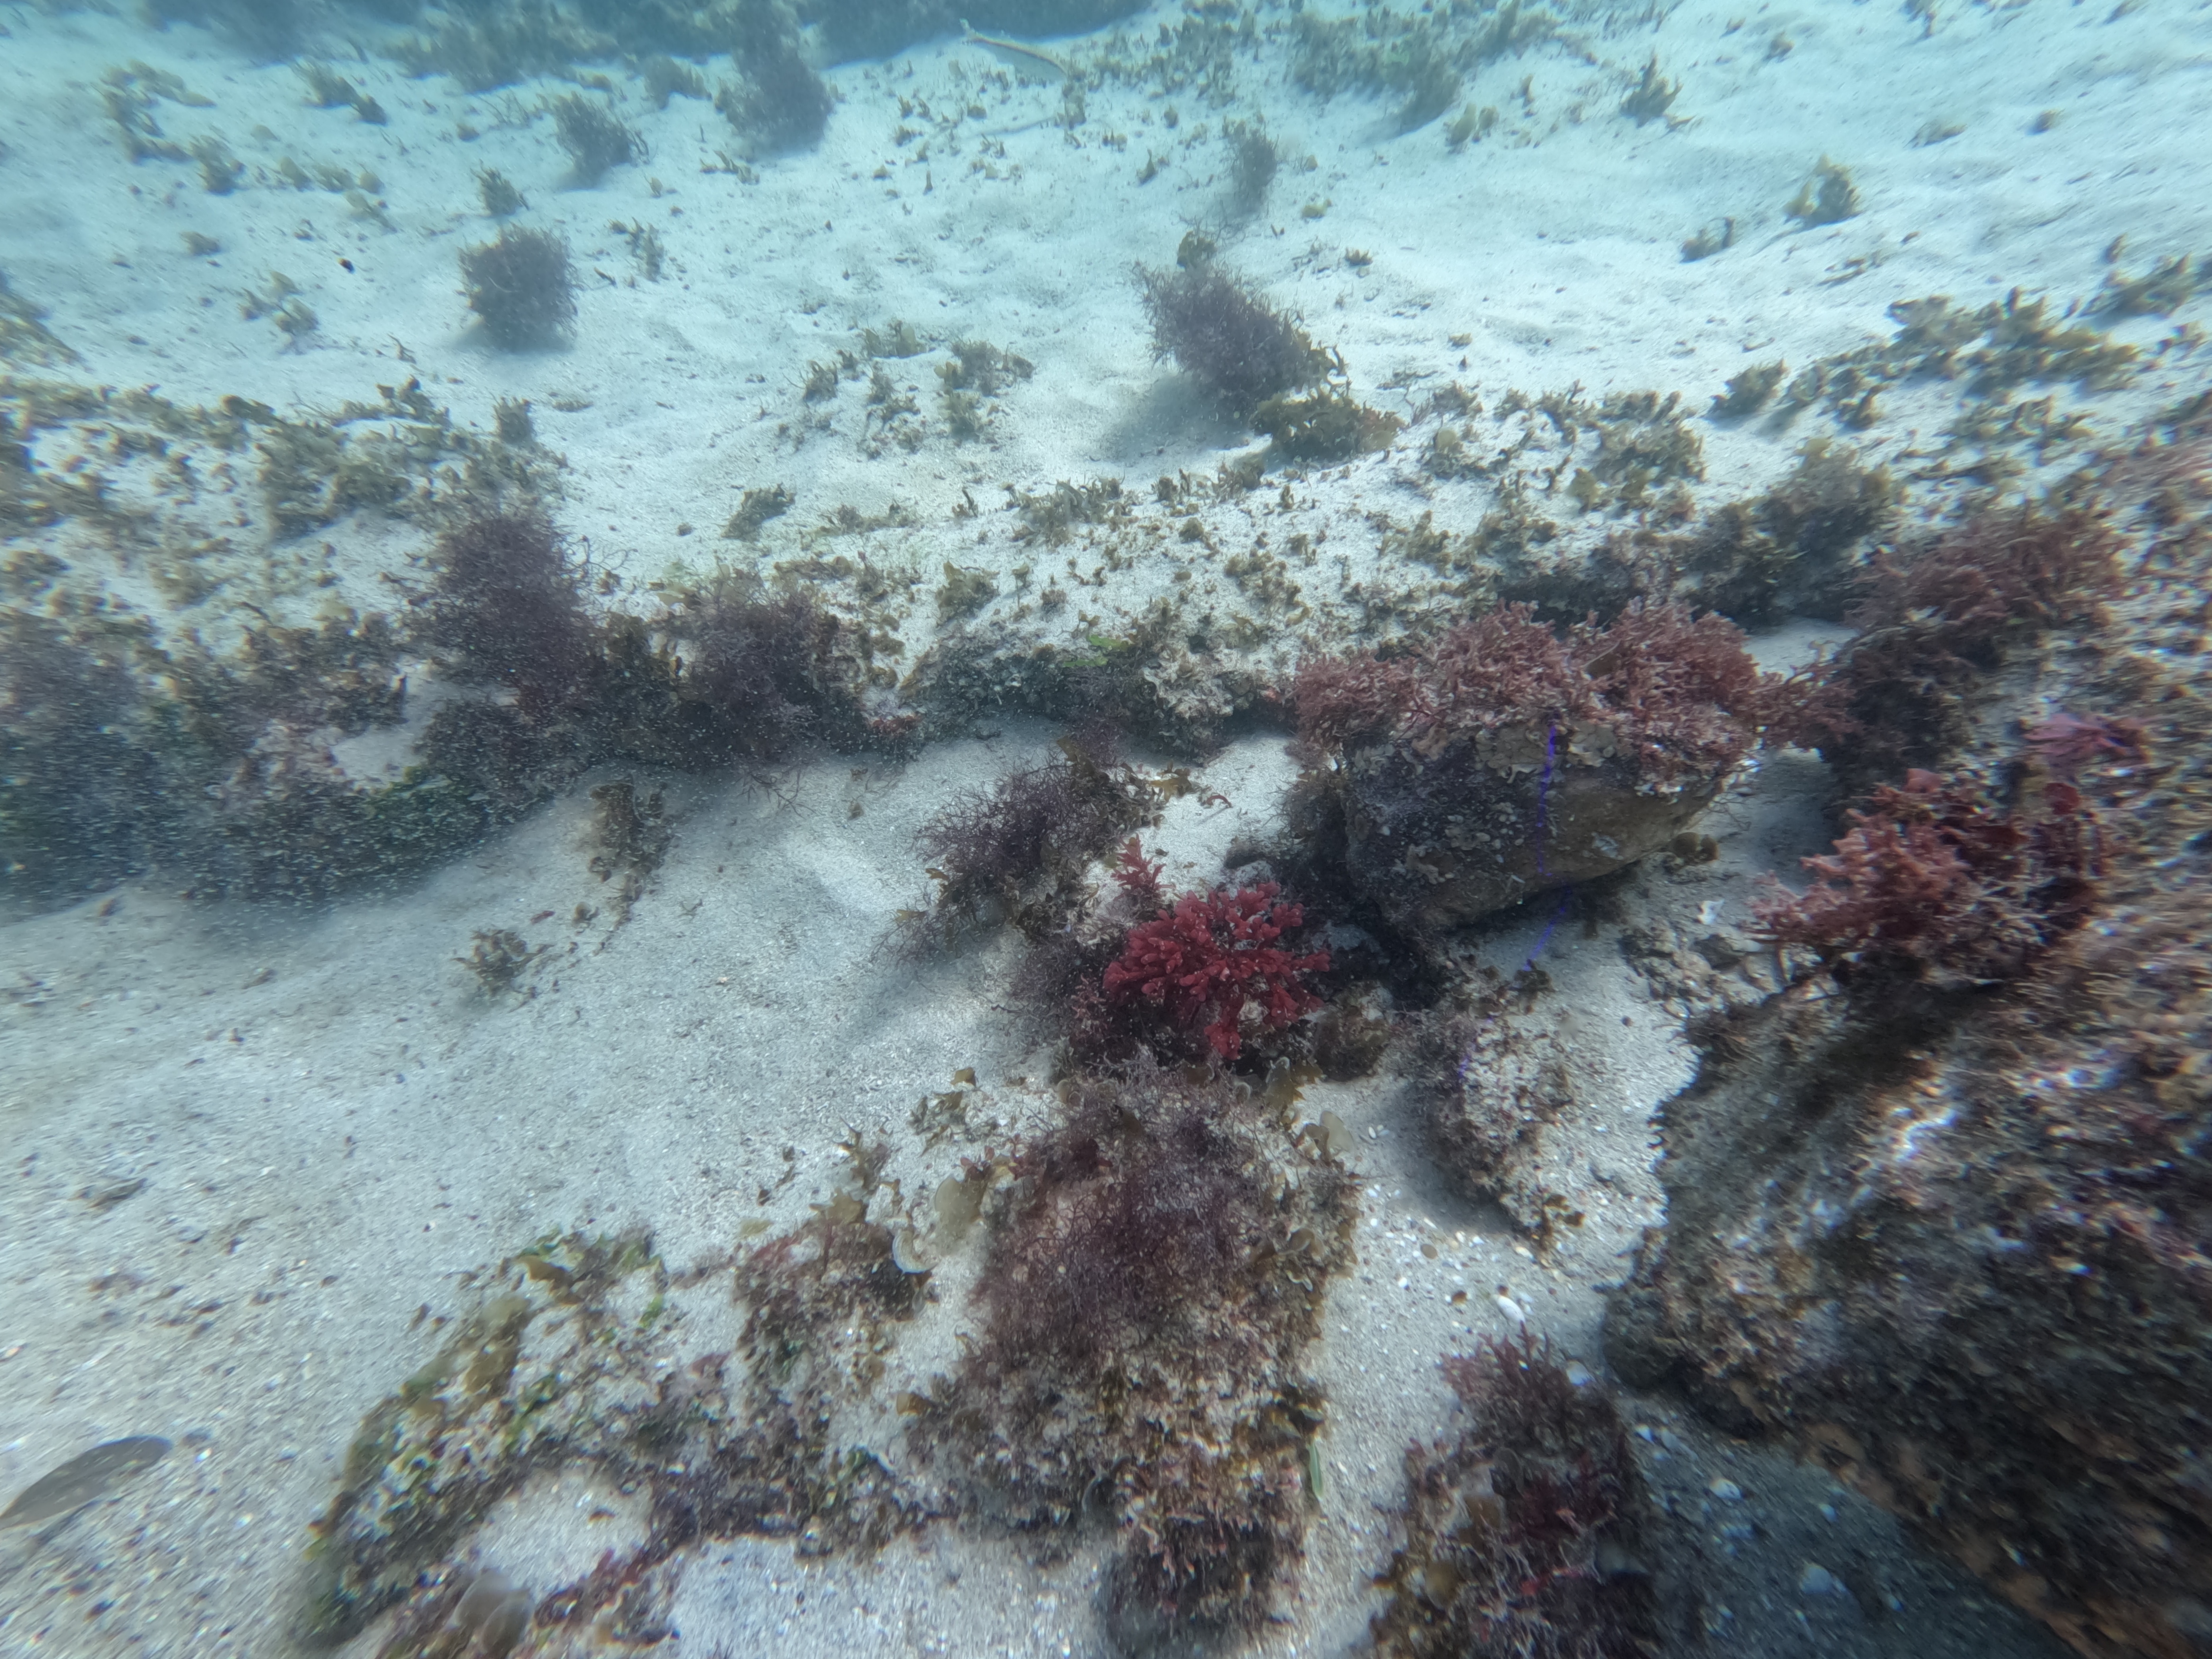

Supplement: Supplementary file 949 [file G0714016.pdf › Ocean2/G0714016.pdf]

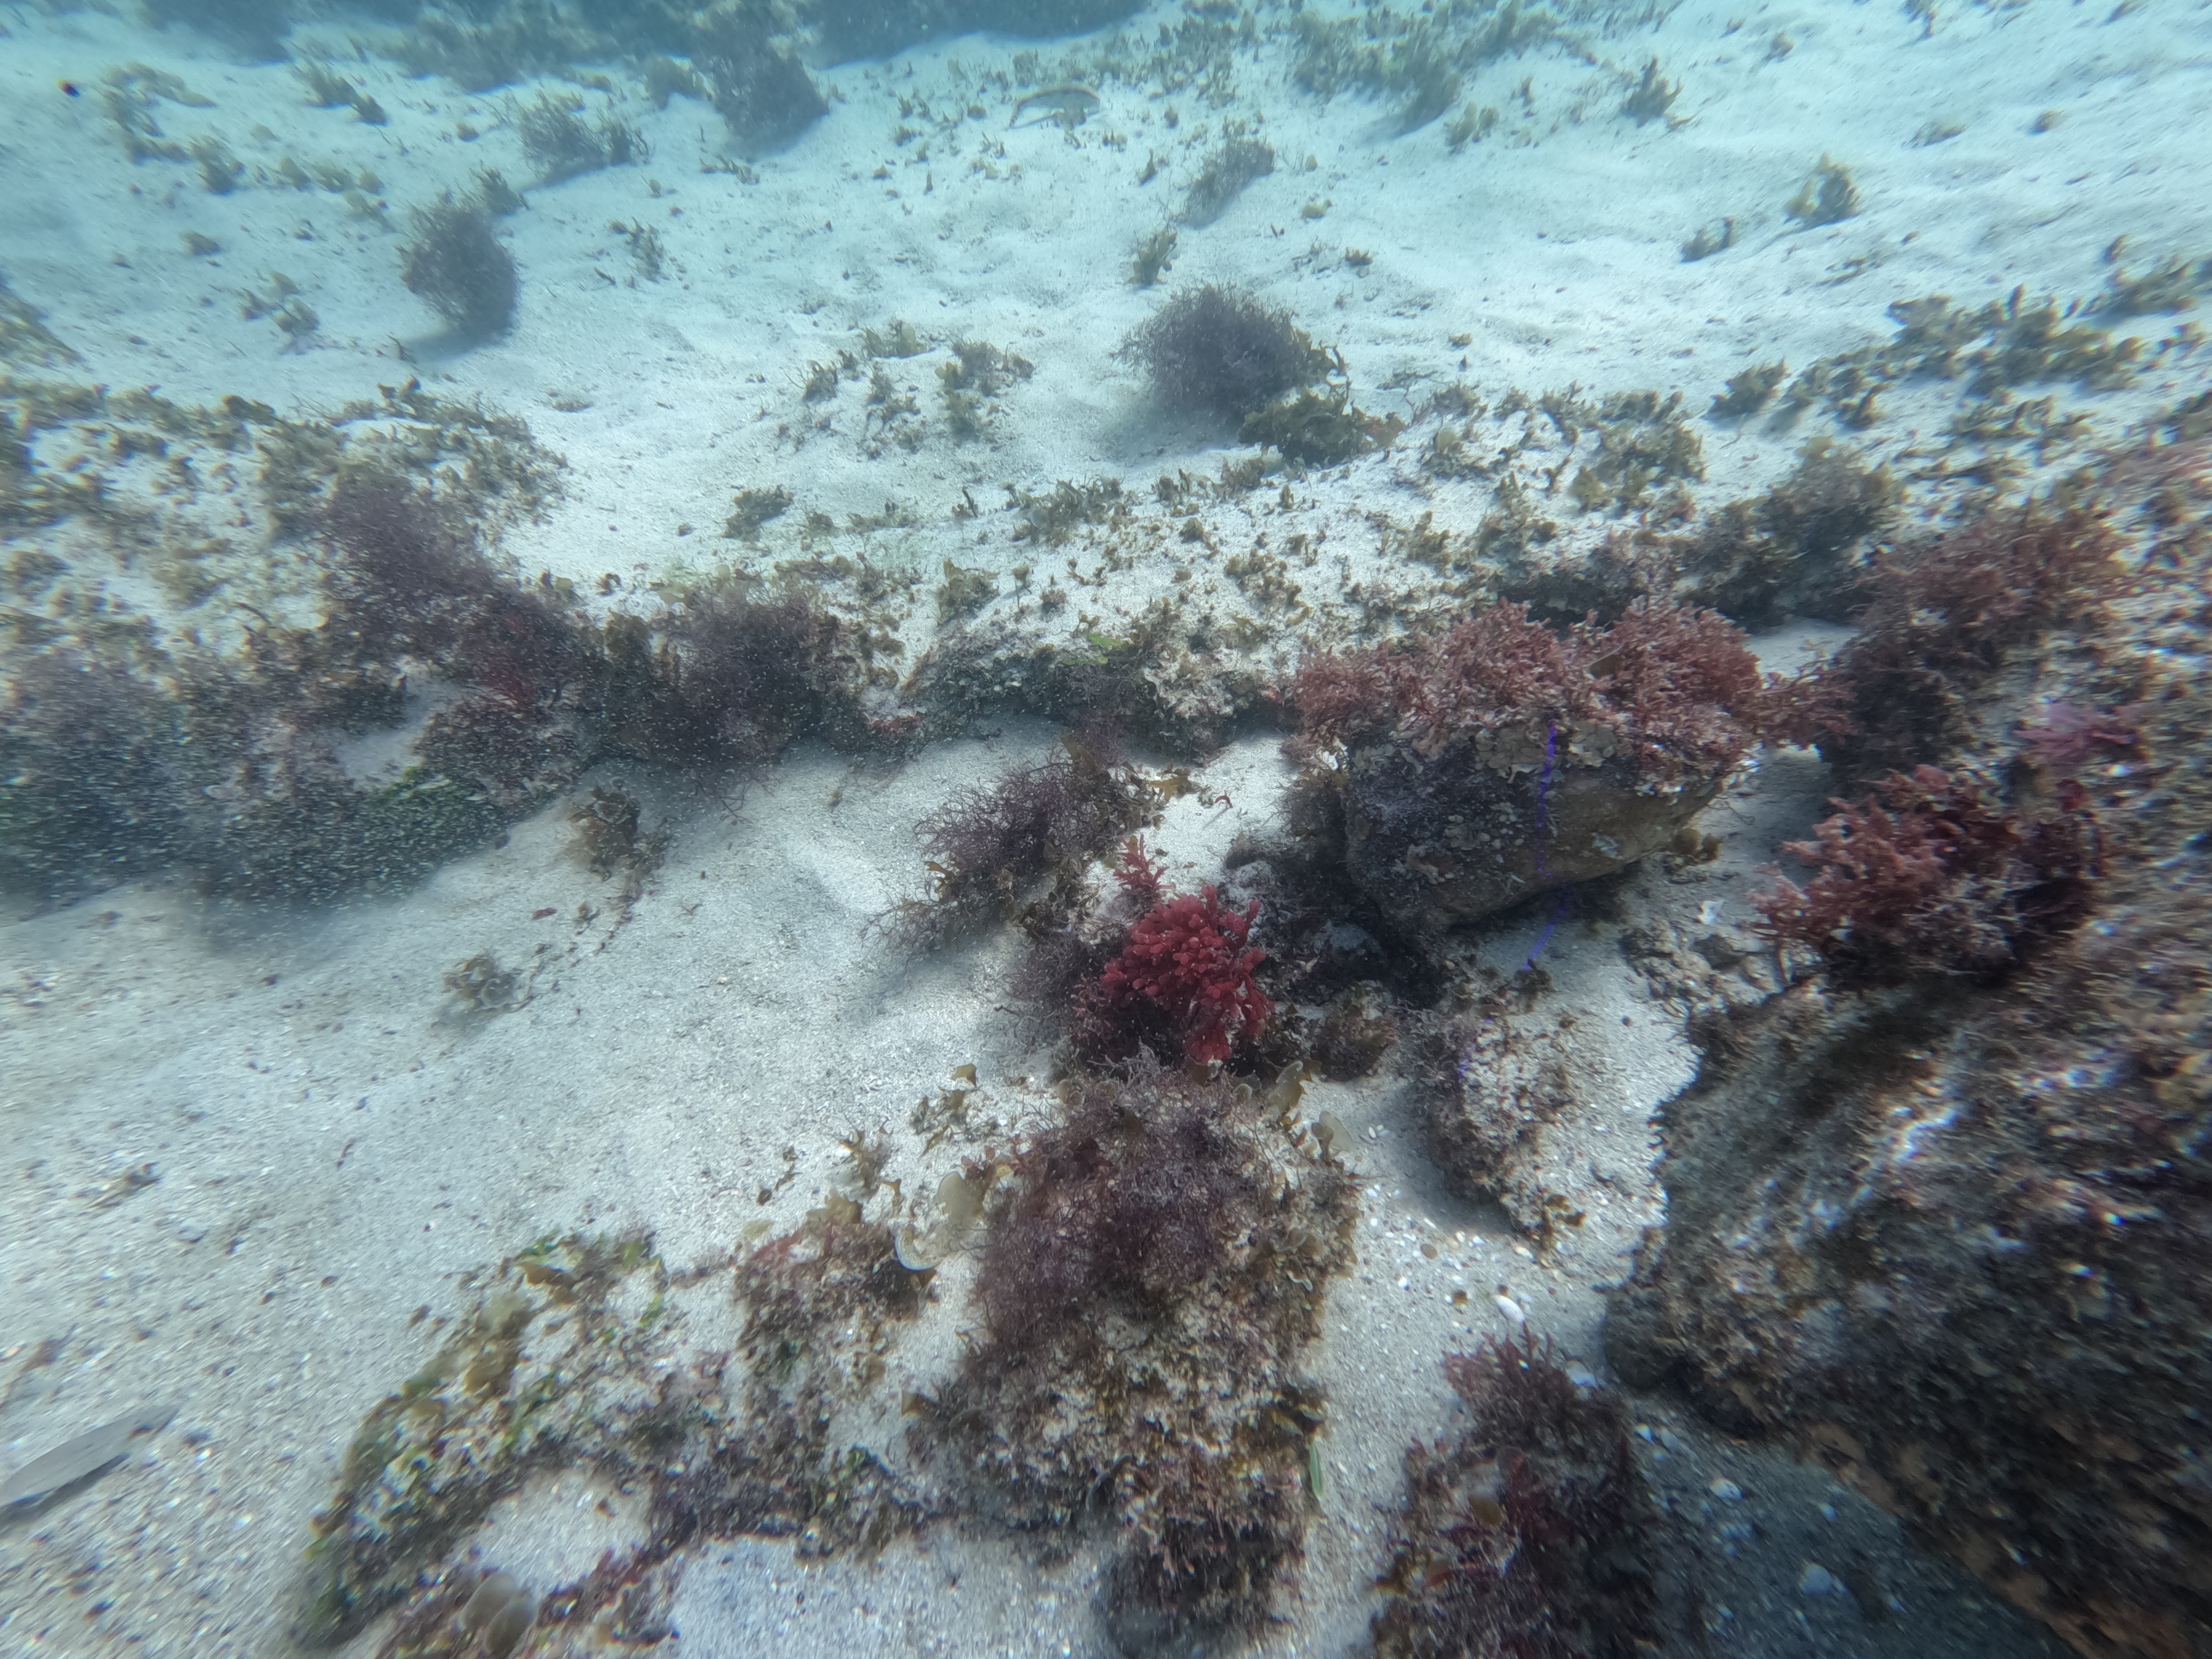

Supplement: Supplementary file 950 [file G0714017.pdf › Ocean2/G0714017.pdf]

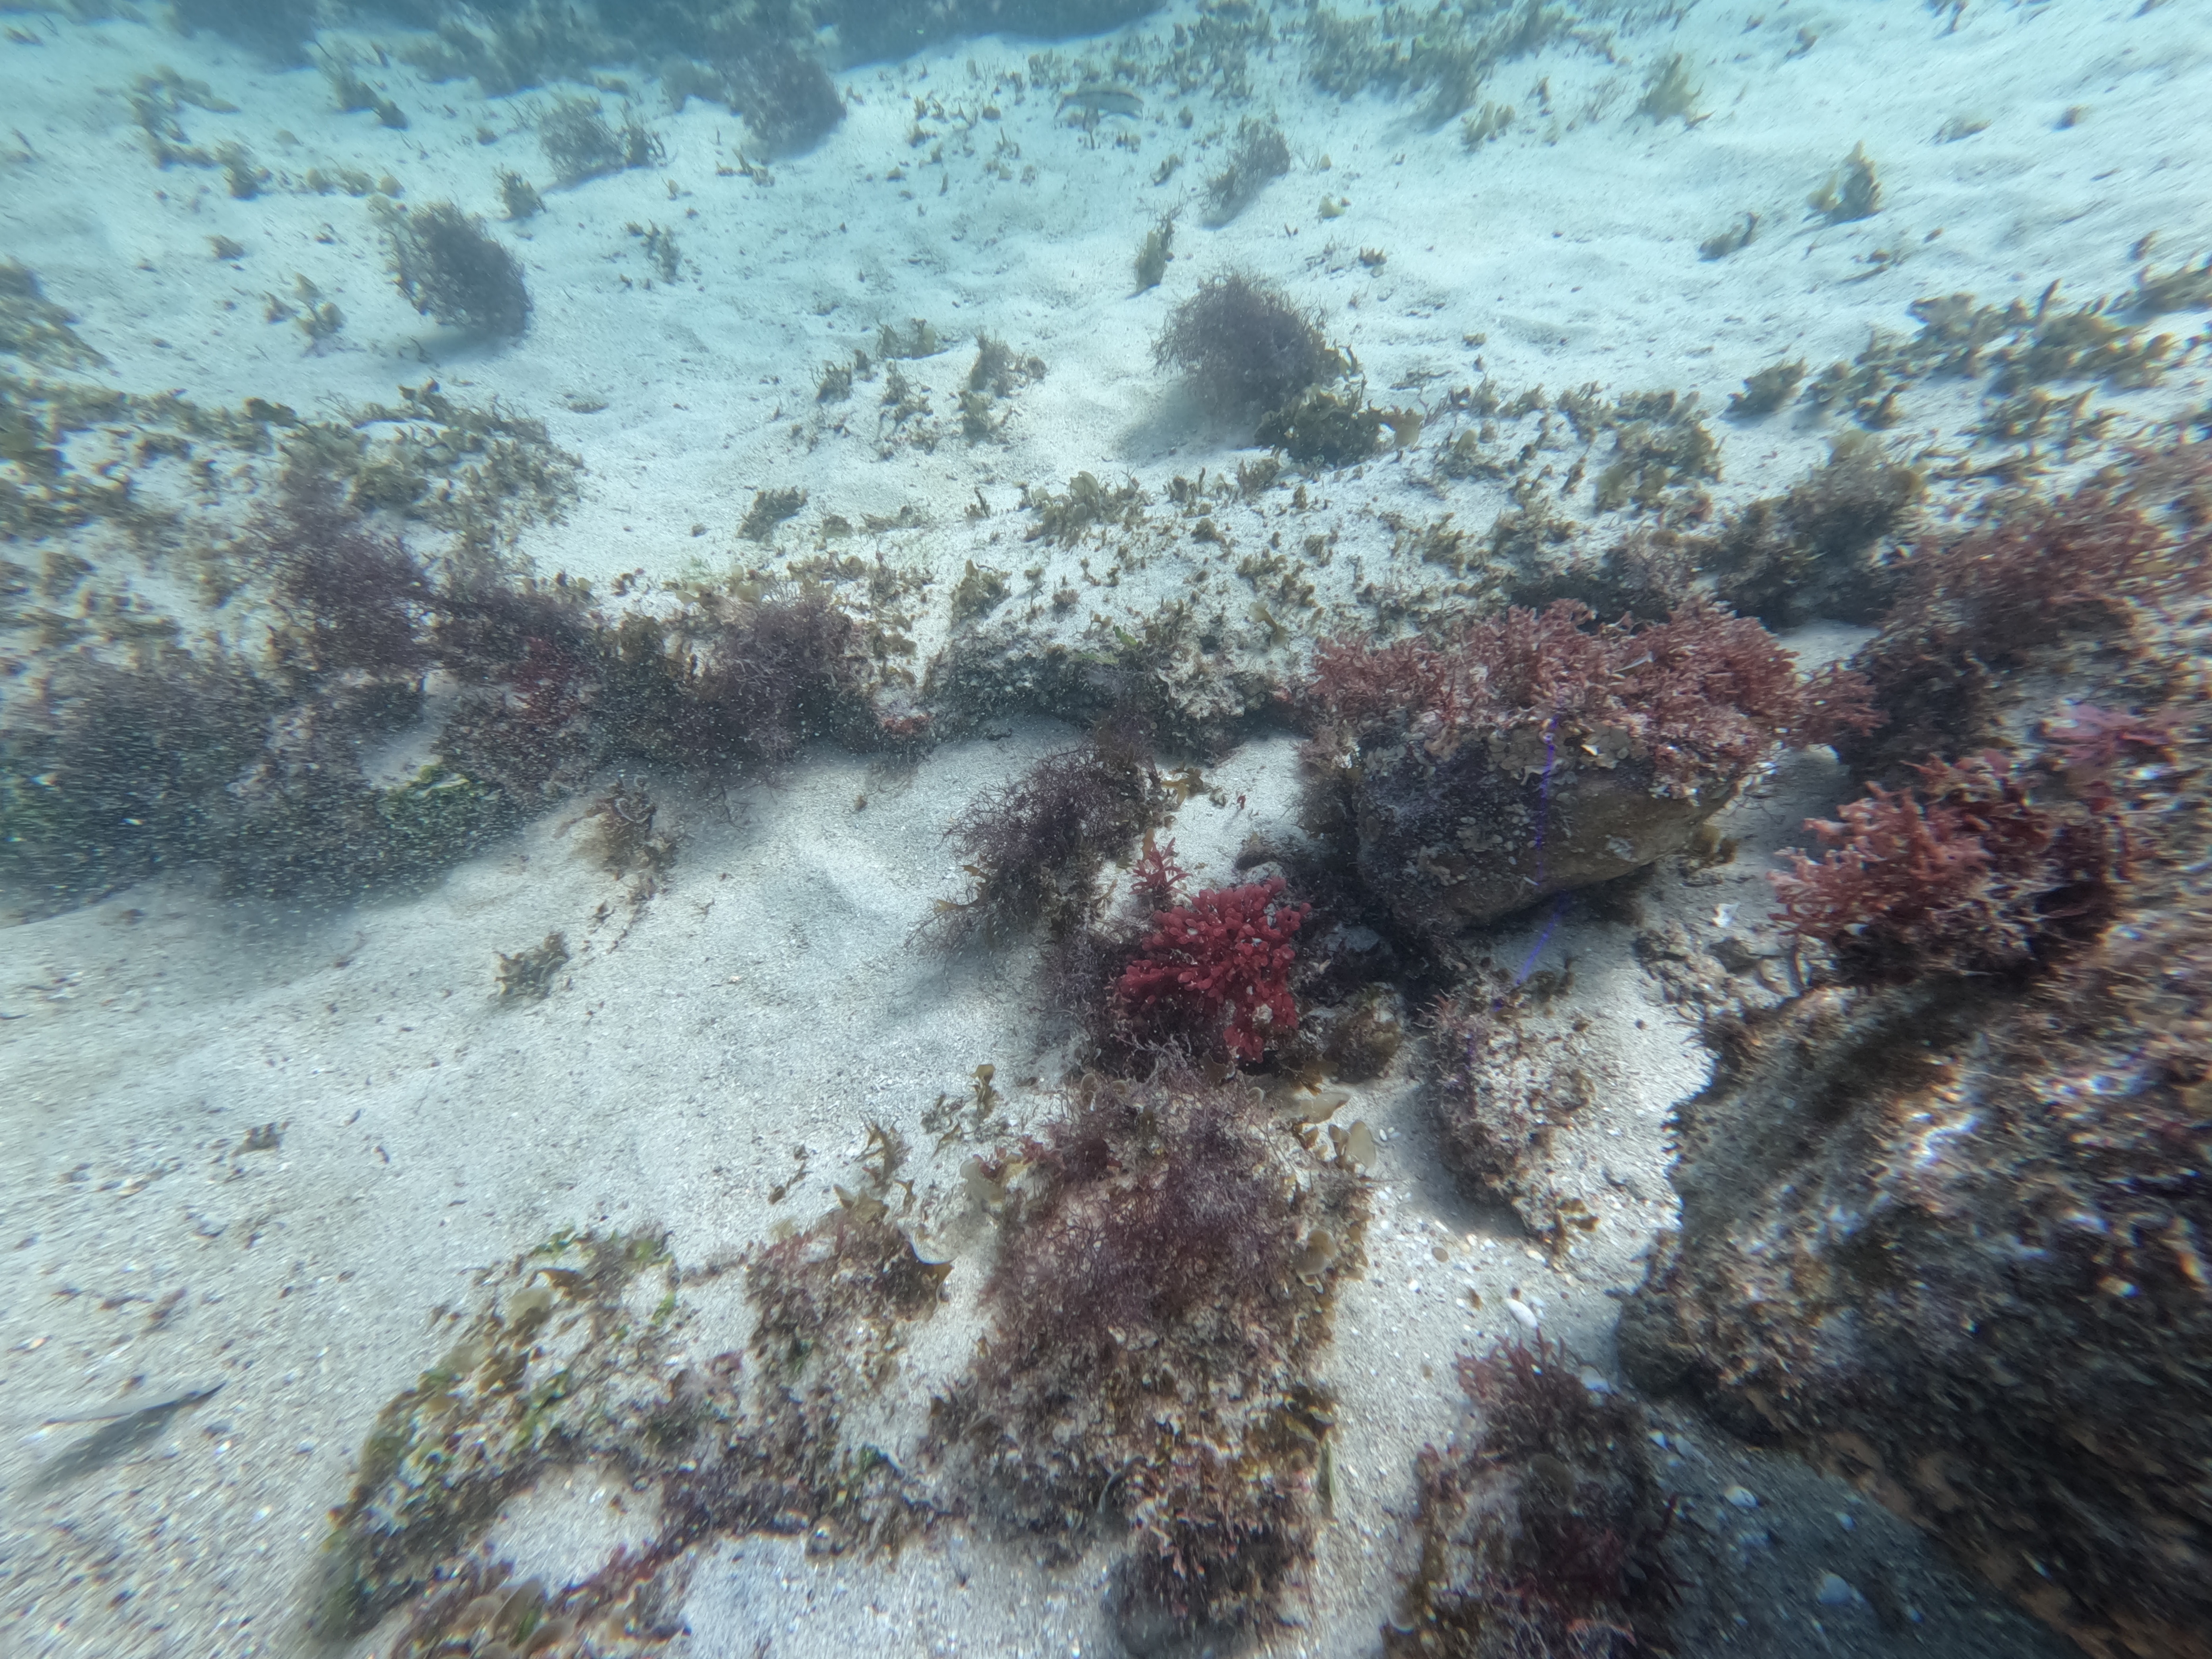

Supplement: Supplementary file 951 [file G0714018.pdf › Ocean2/G0714018.pdf]

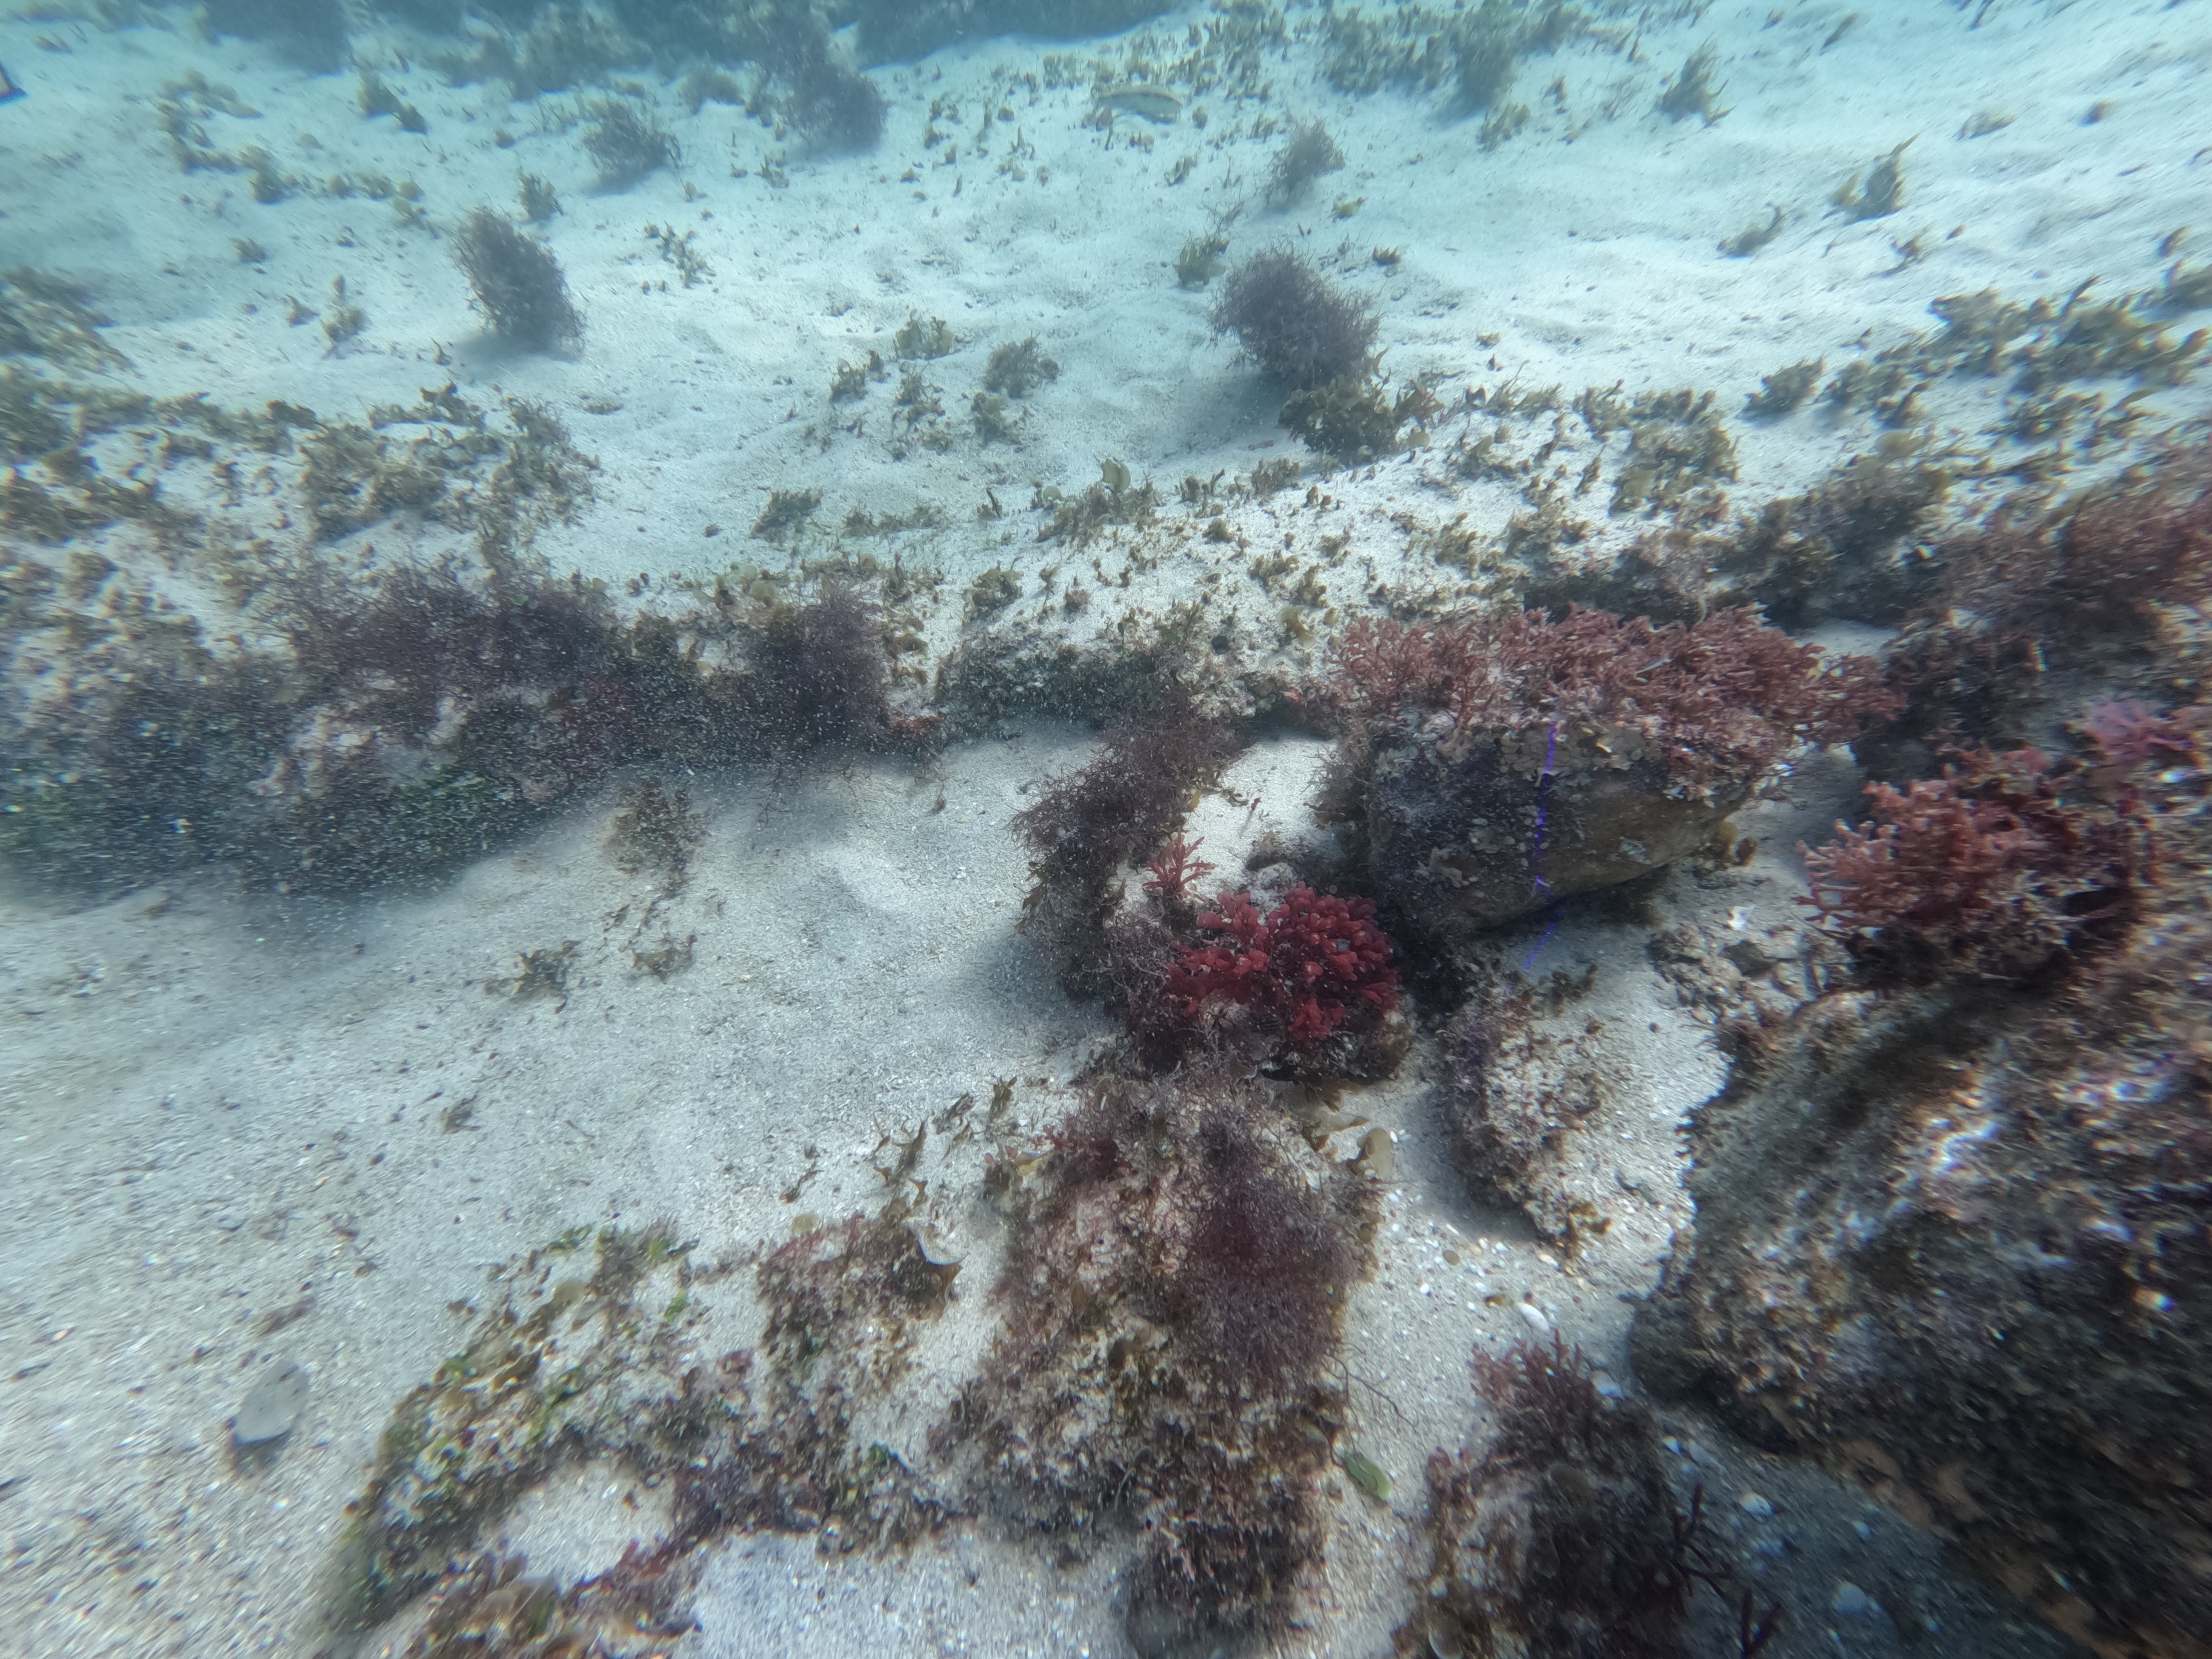

Supplement: Supplementary file 952 [file G0714019.pdf › Ocean2/G0714019.pdf]

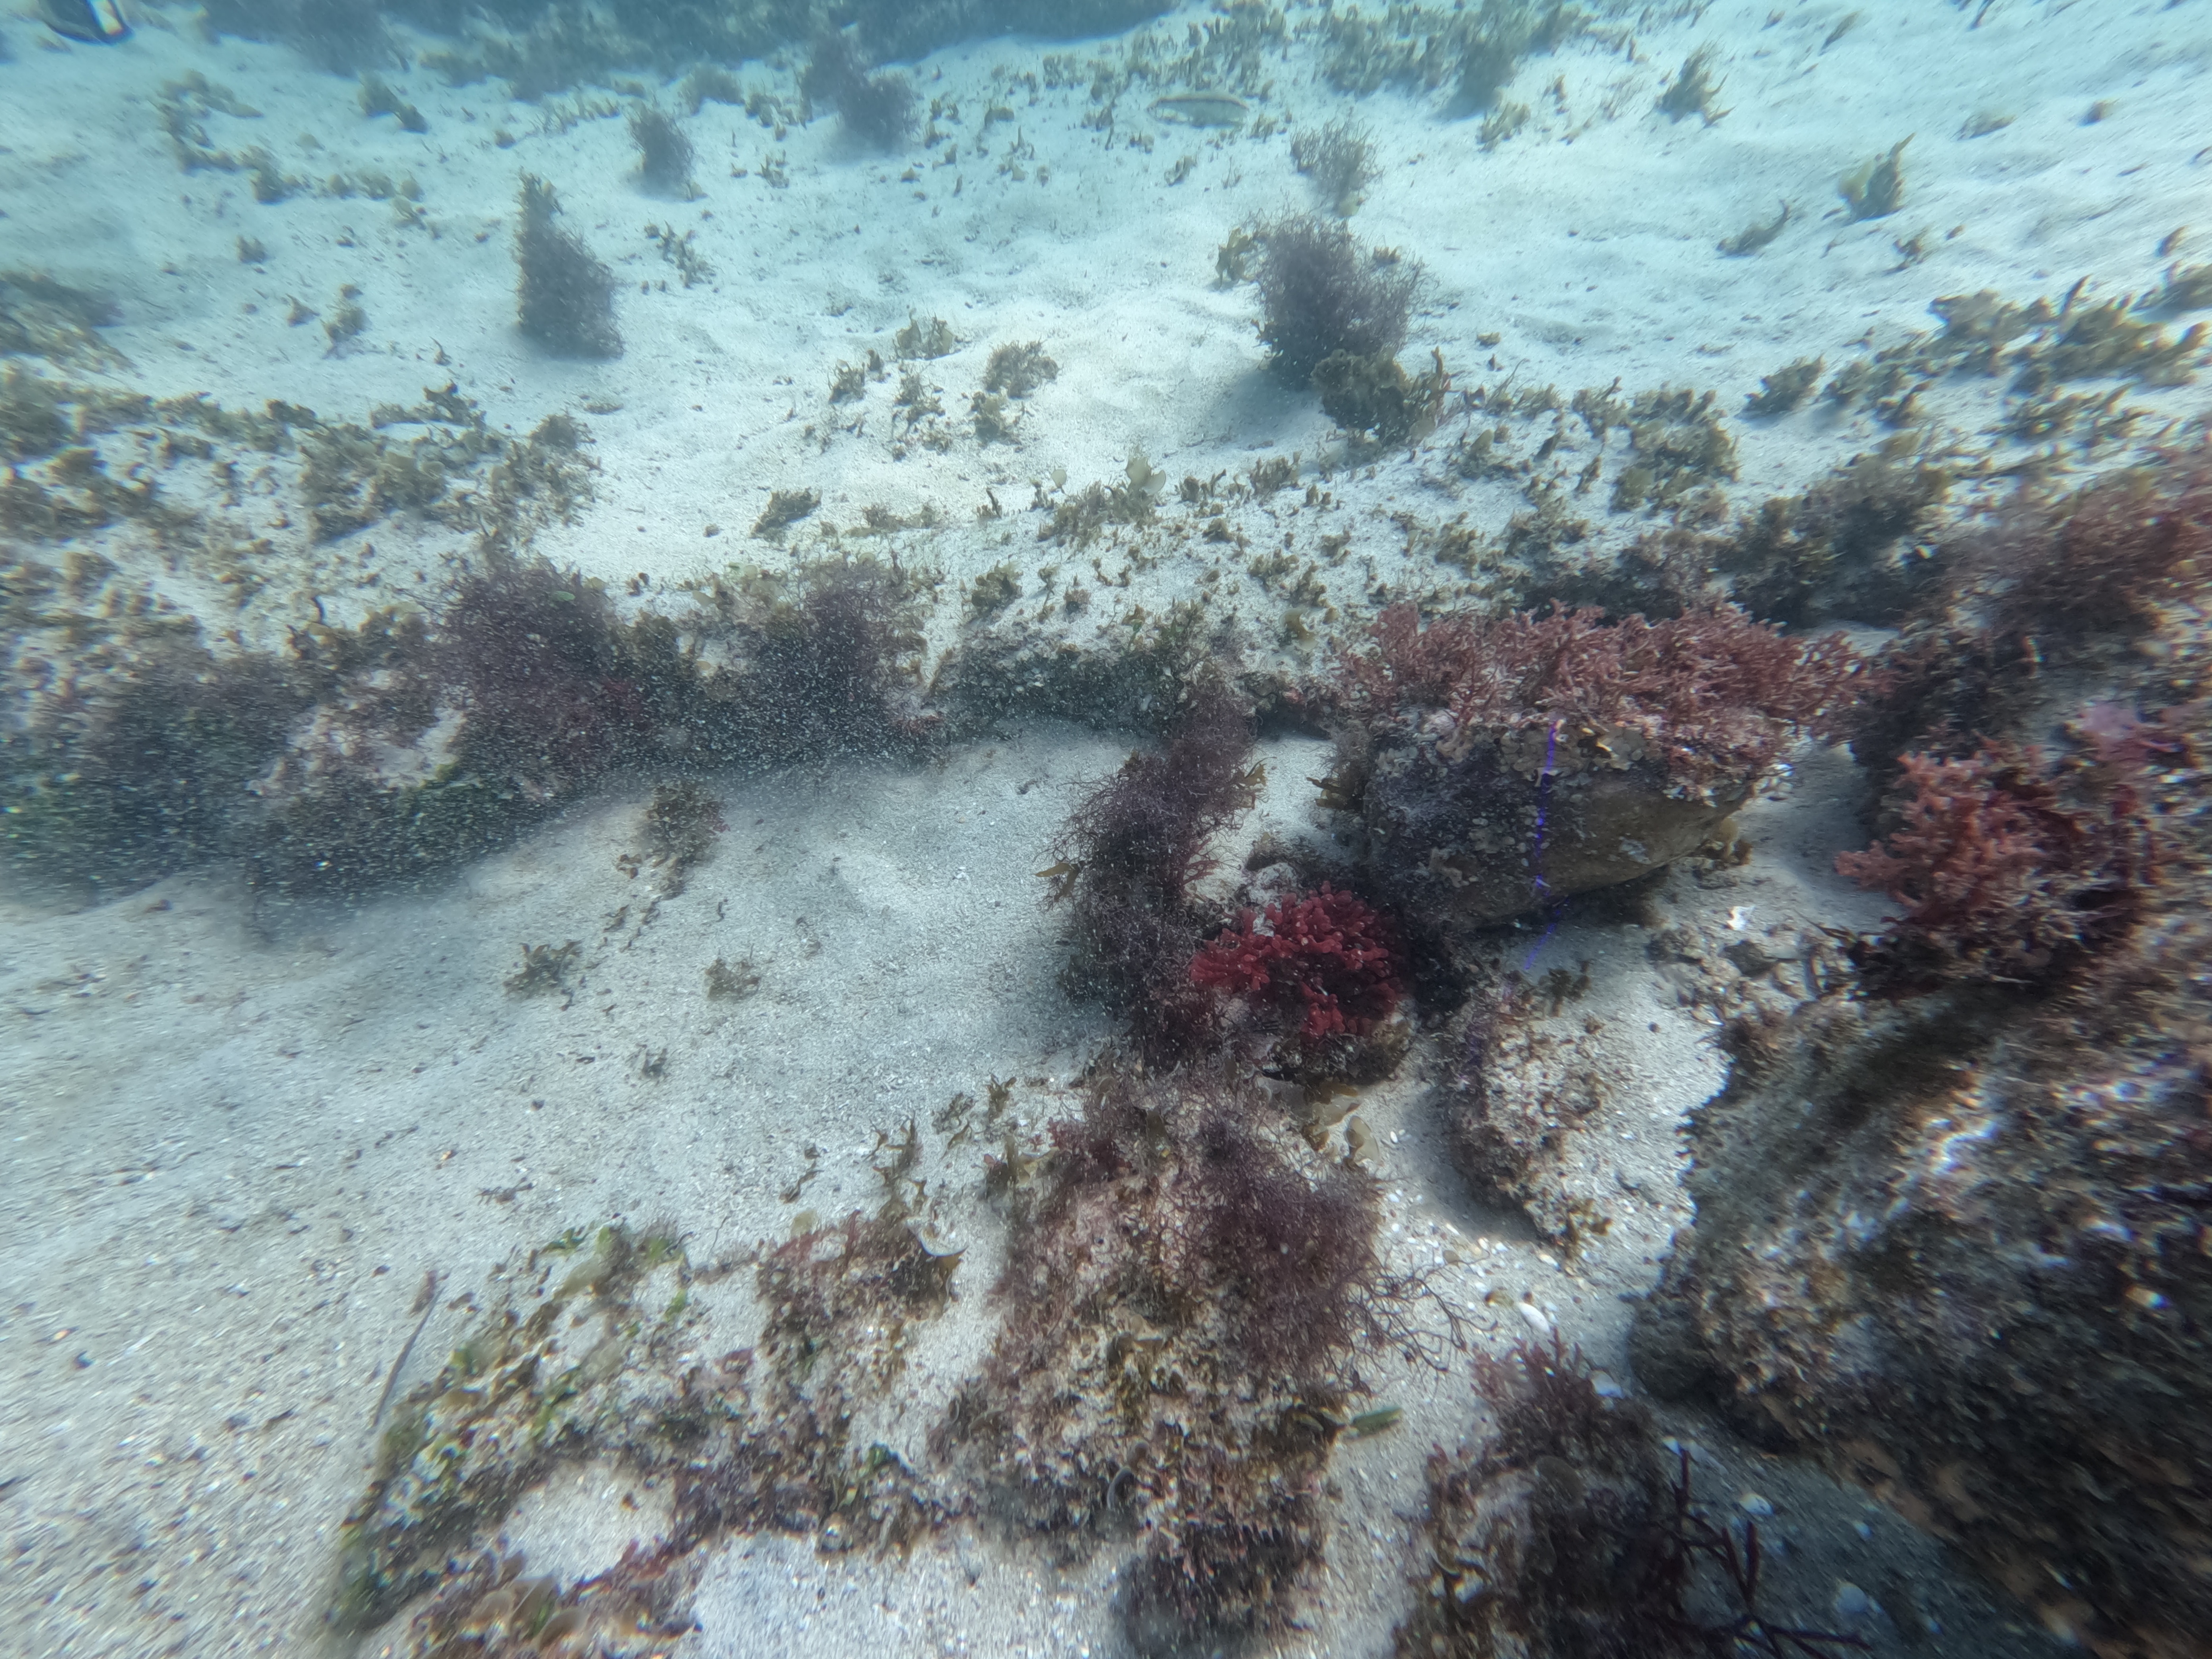

Supplement: Supplementary file 953 [file G0714020.pdf › Ocean2/G0714020.pdf]

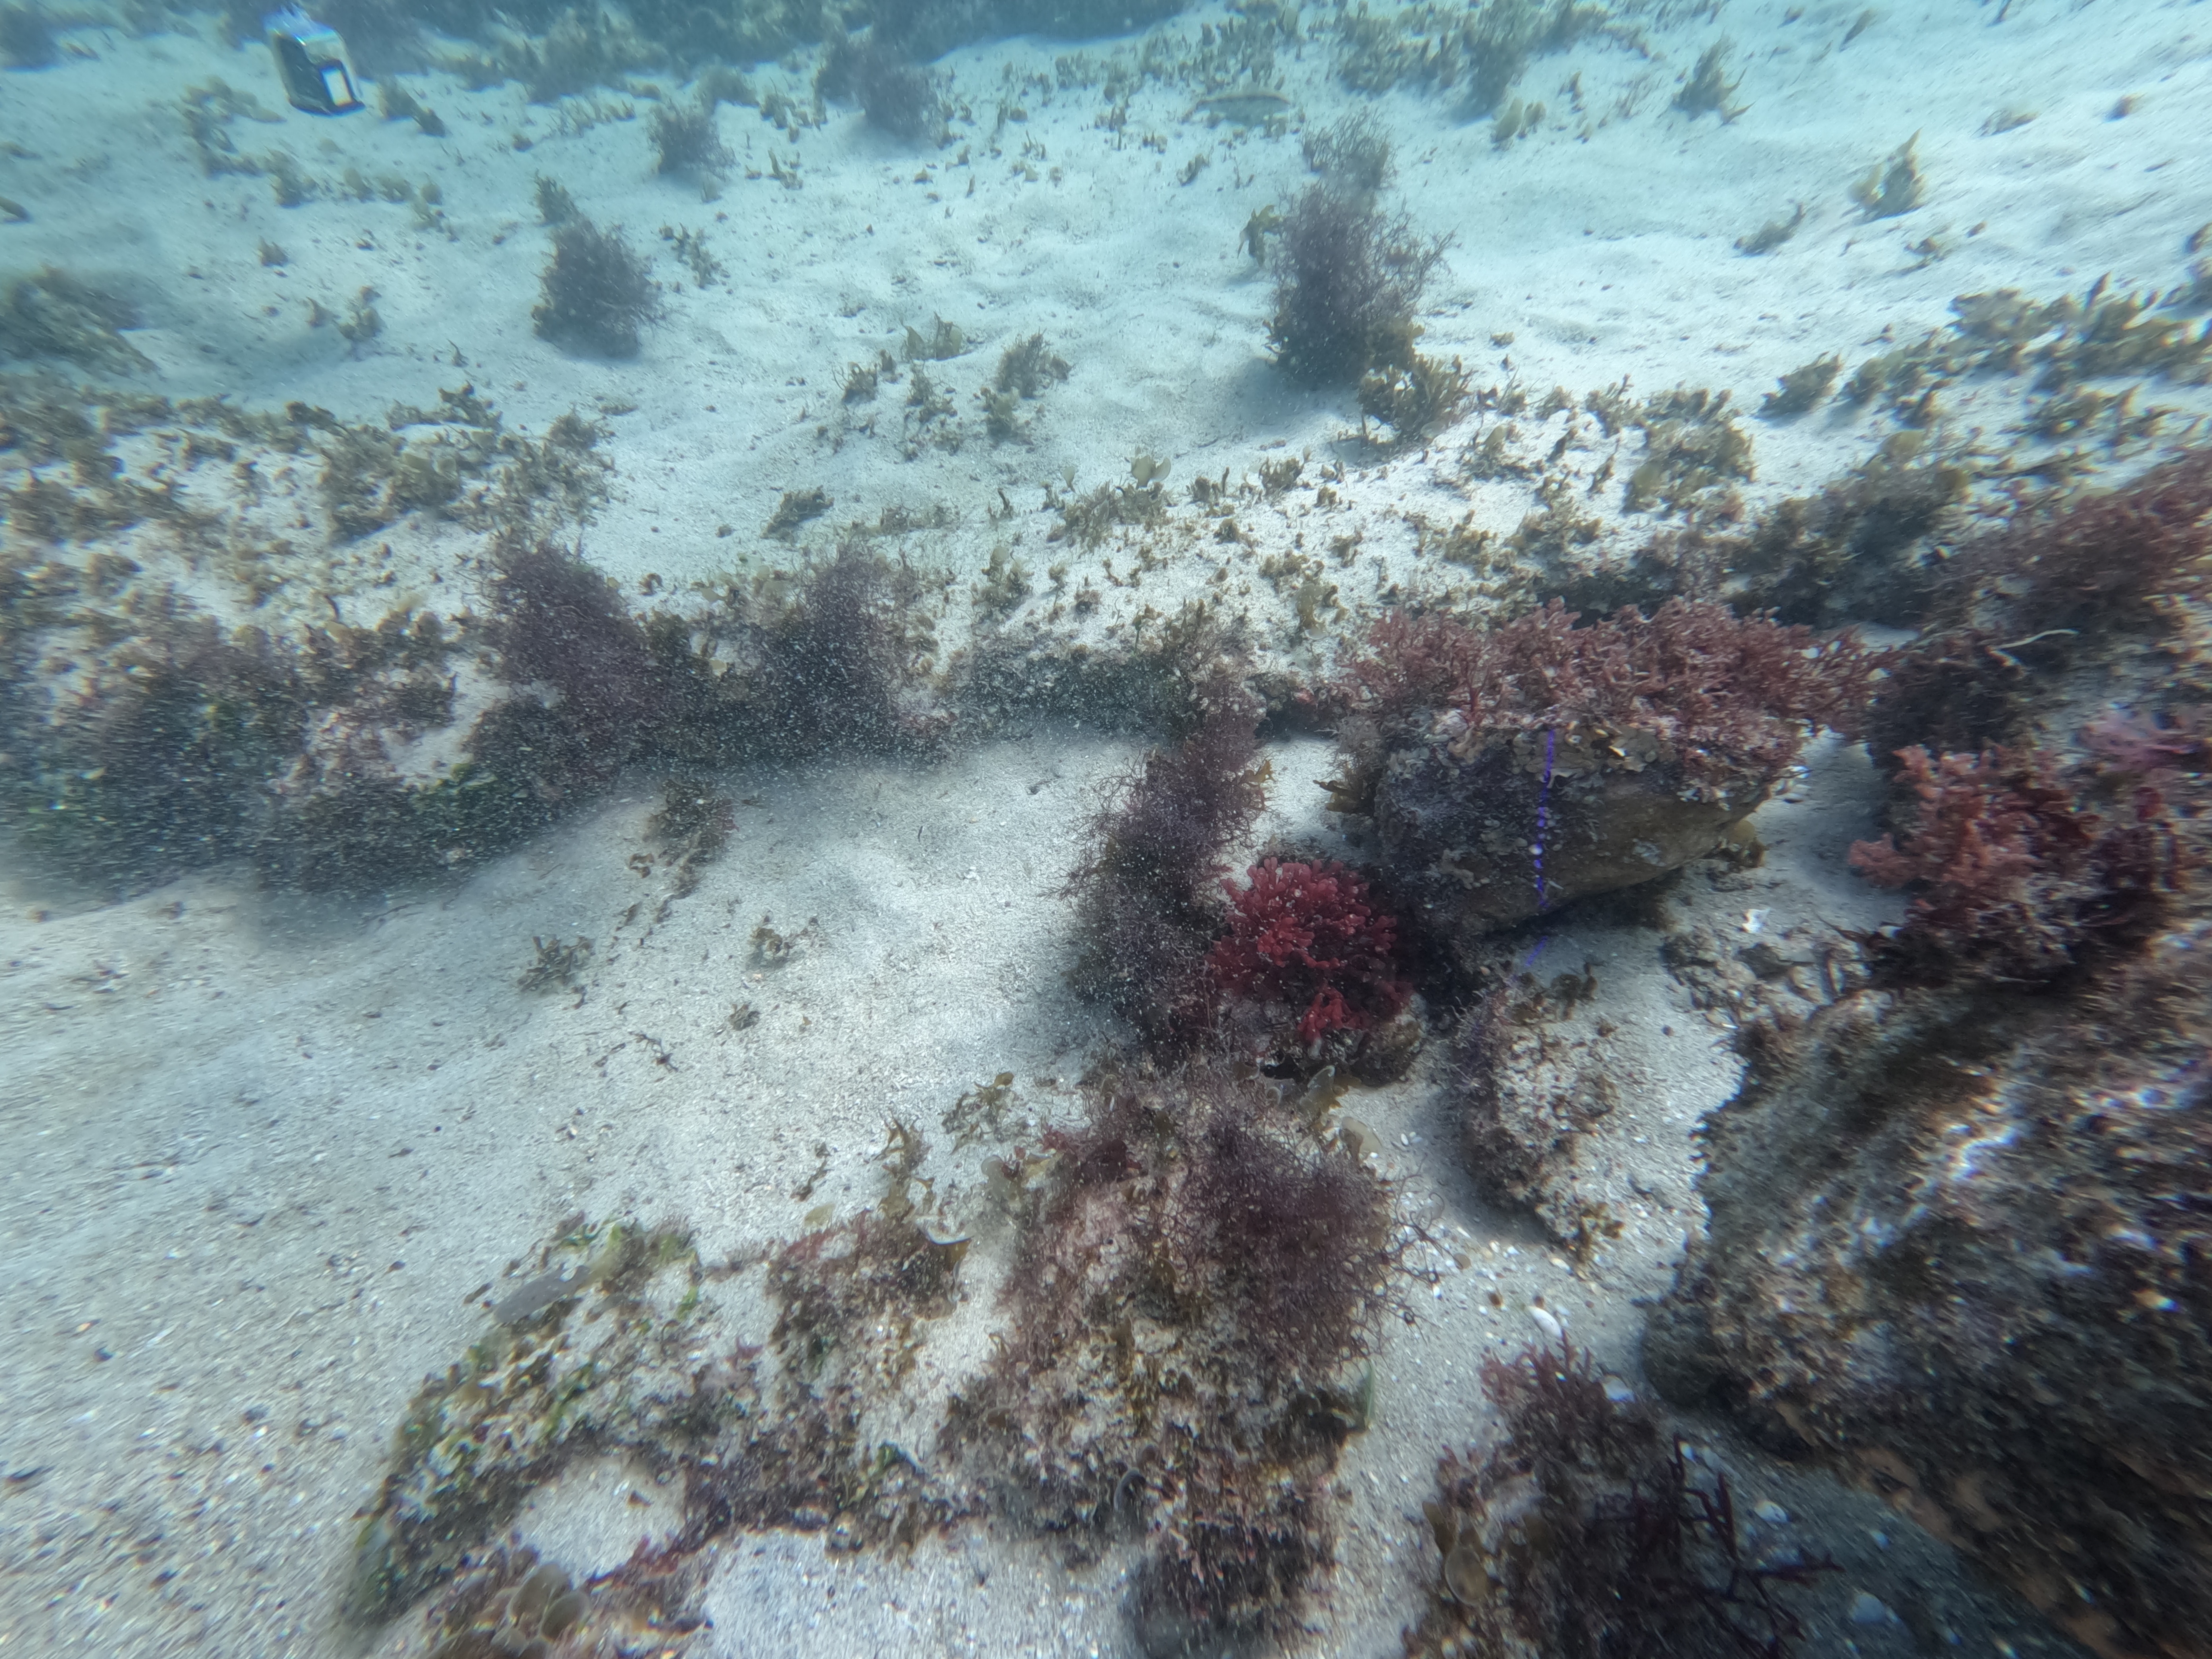

Supplement: Supplementary file 954 [file G0714021.pdf › Ocean2/G0714021.pdf]

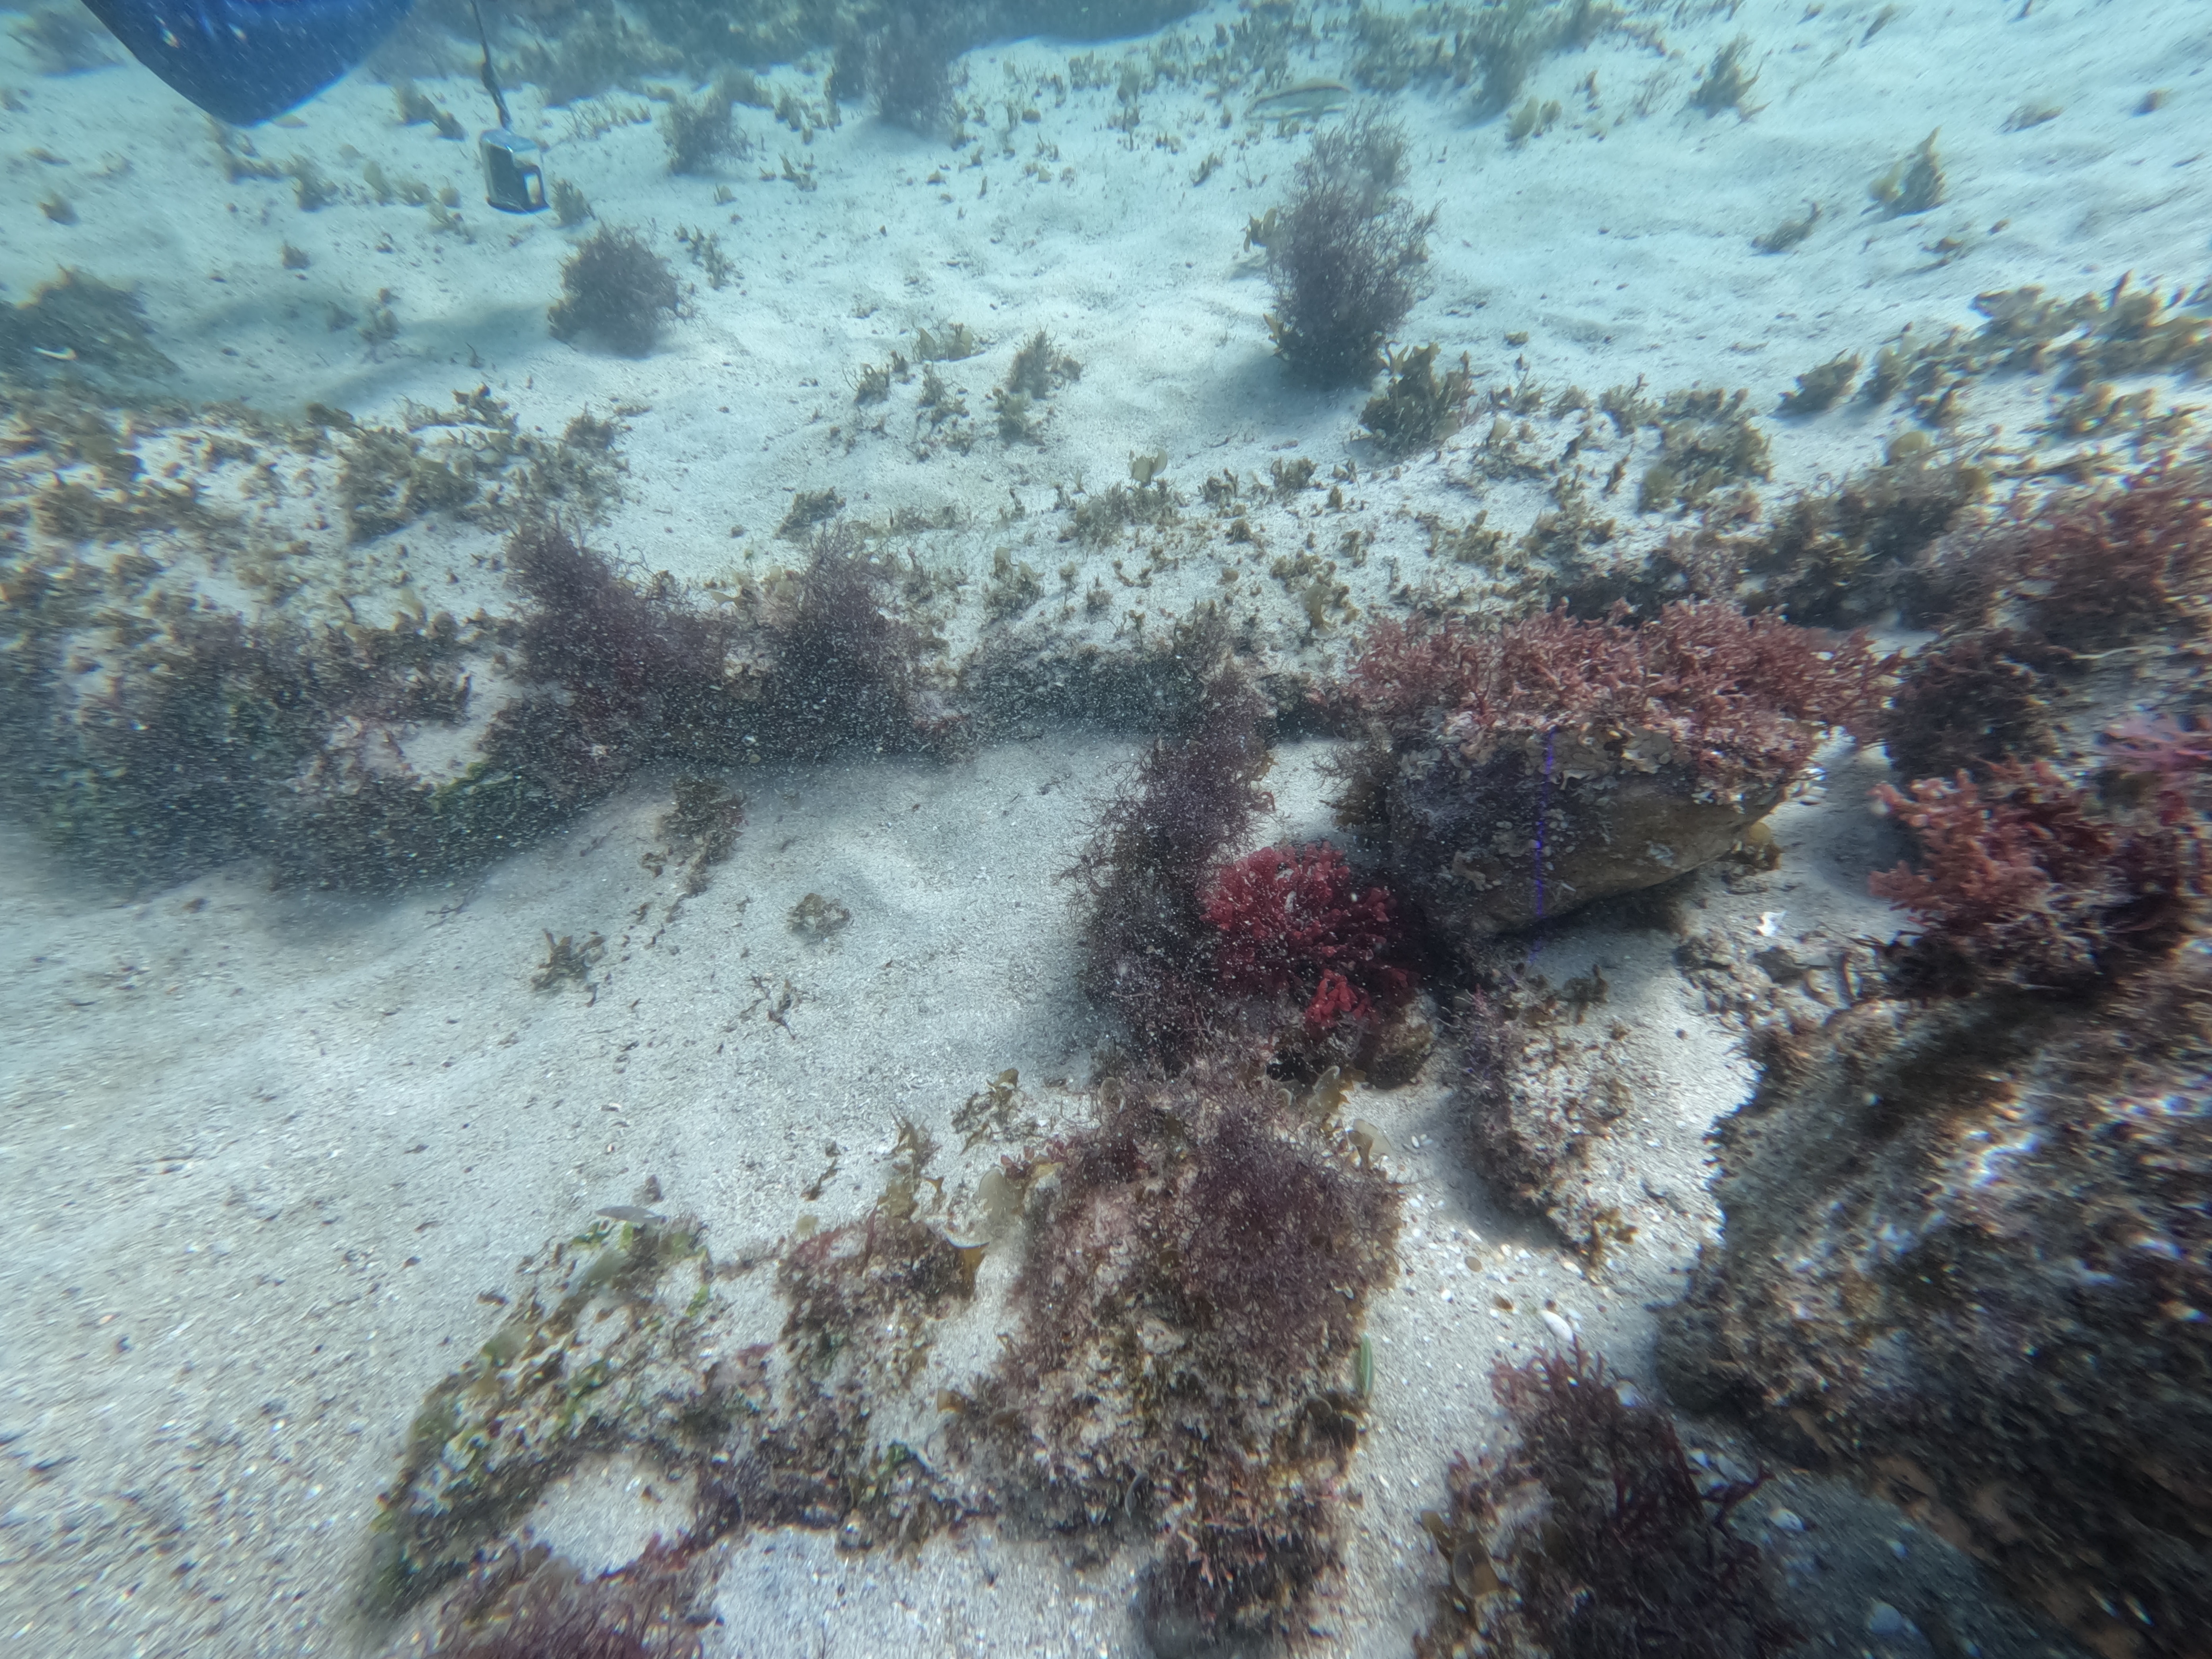

Supplement: Supplementary file 955 [file G0714022.pdf › Ocean2/G0714022.pdf]

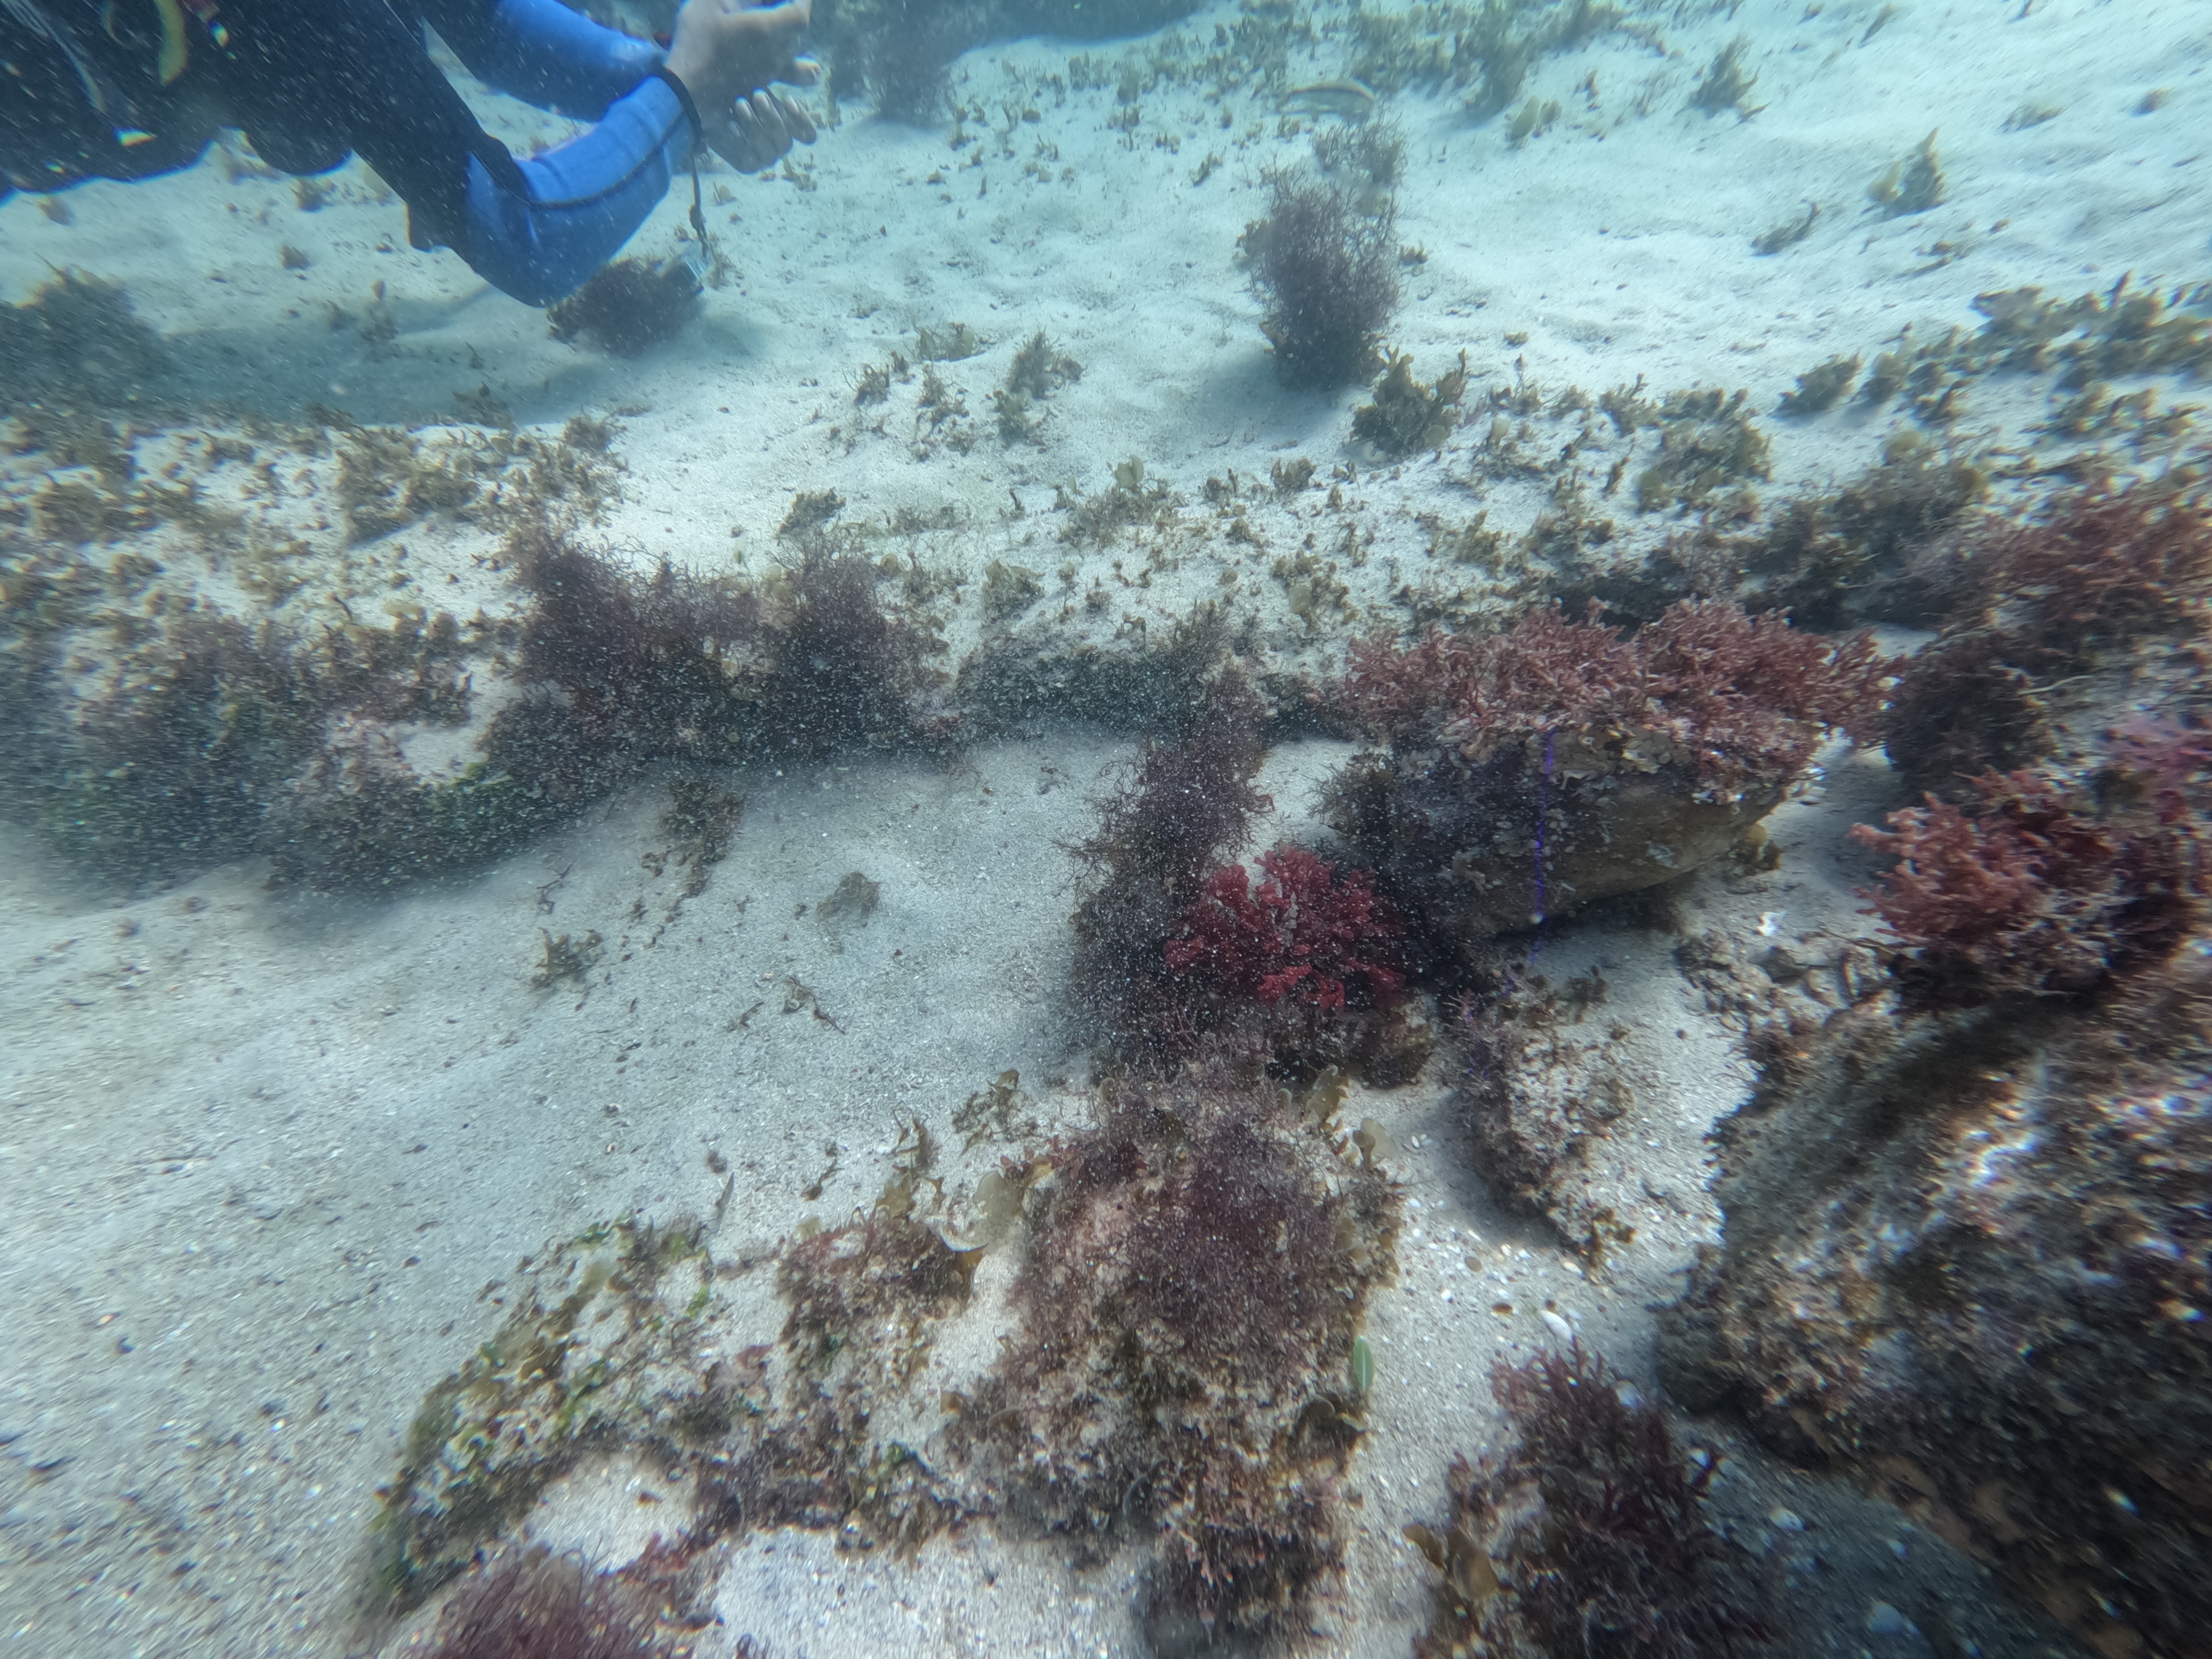

Supplement: Supplementary file 956 [file G0714023.pdf › Ocean2/G0714023.pdf]

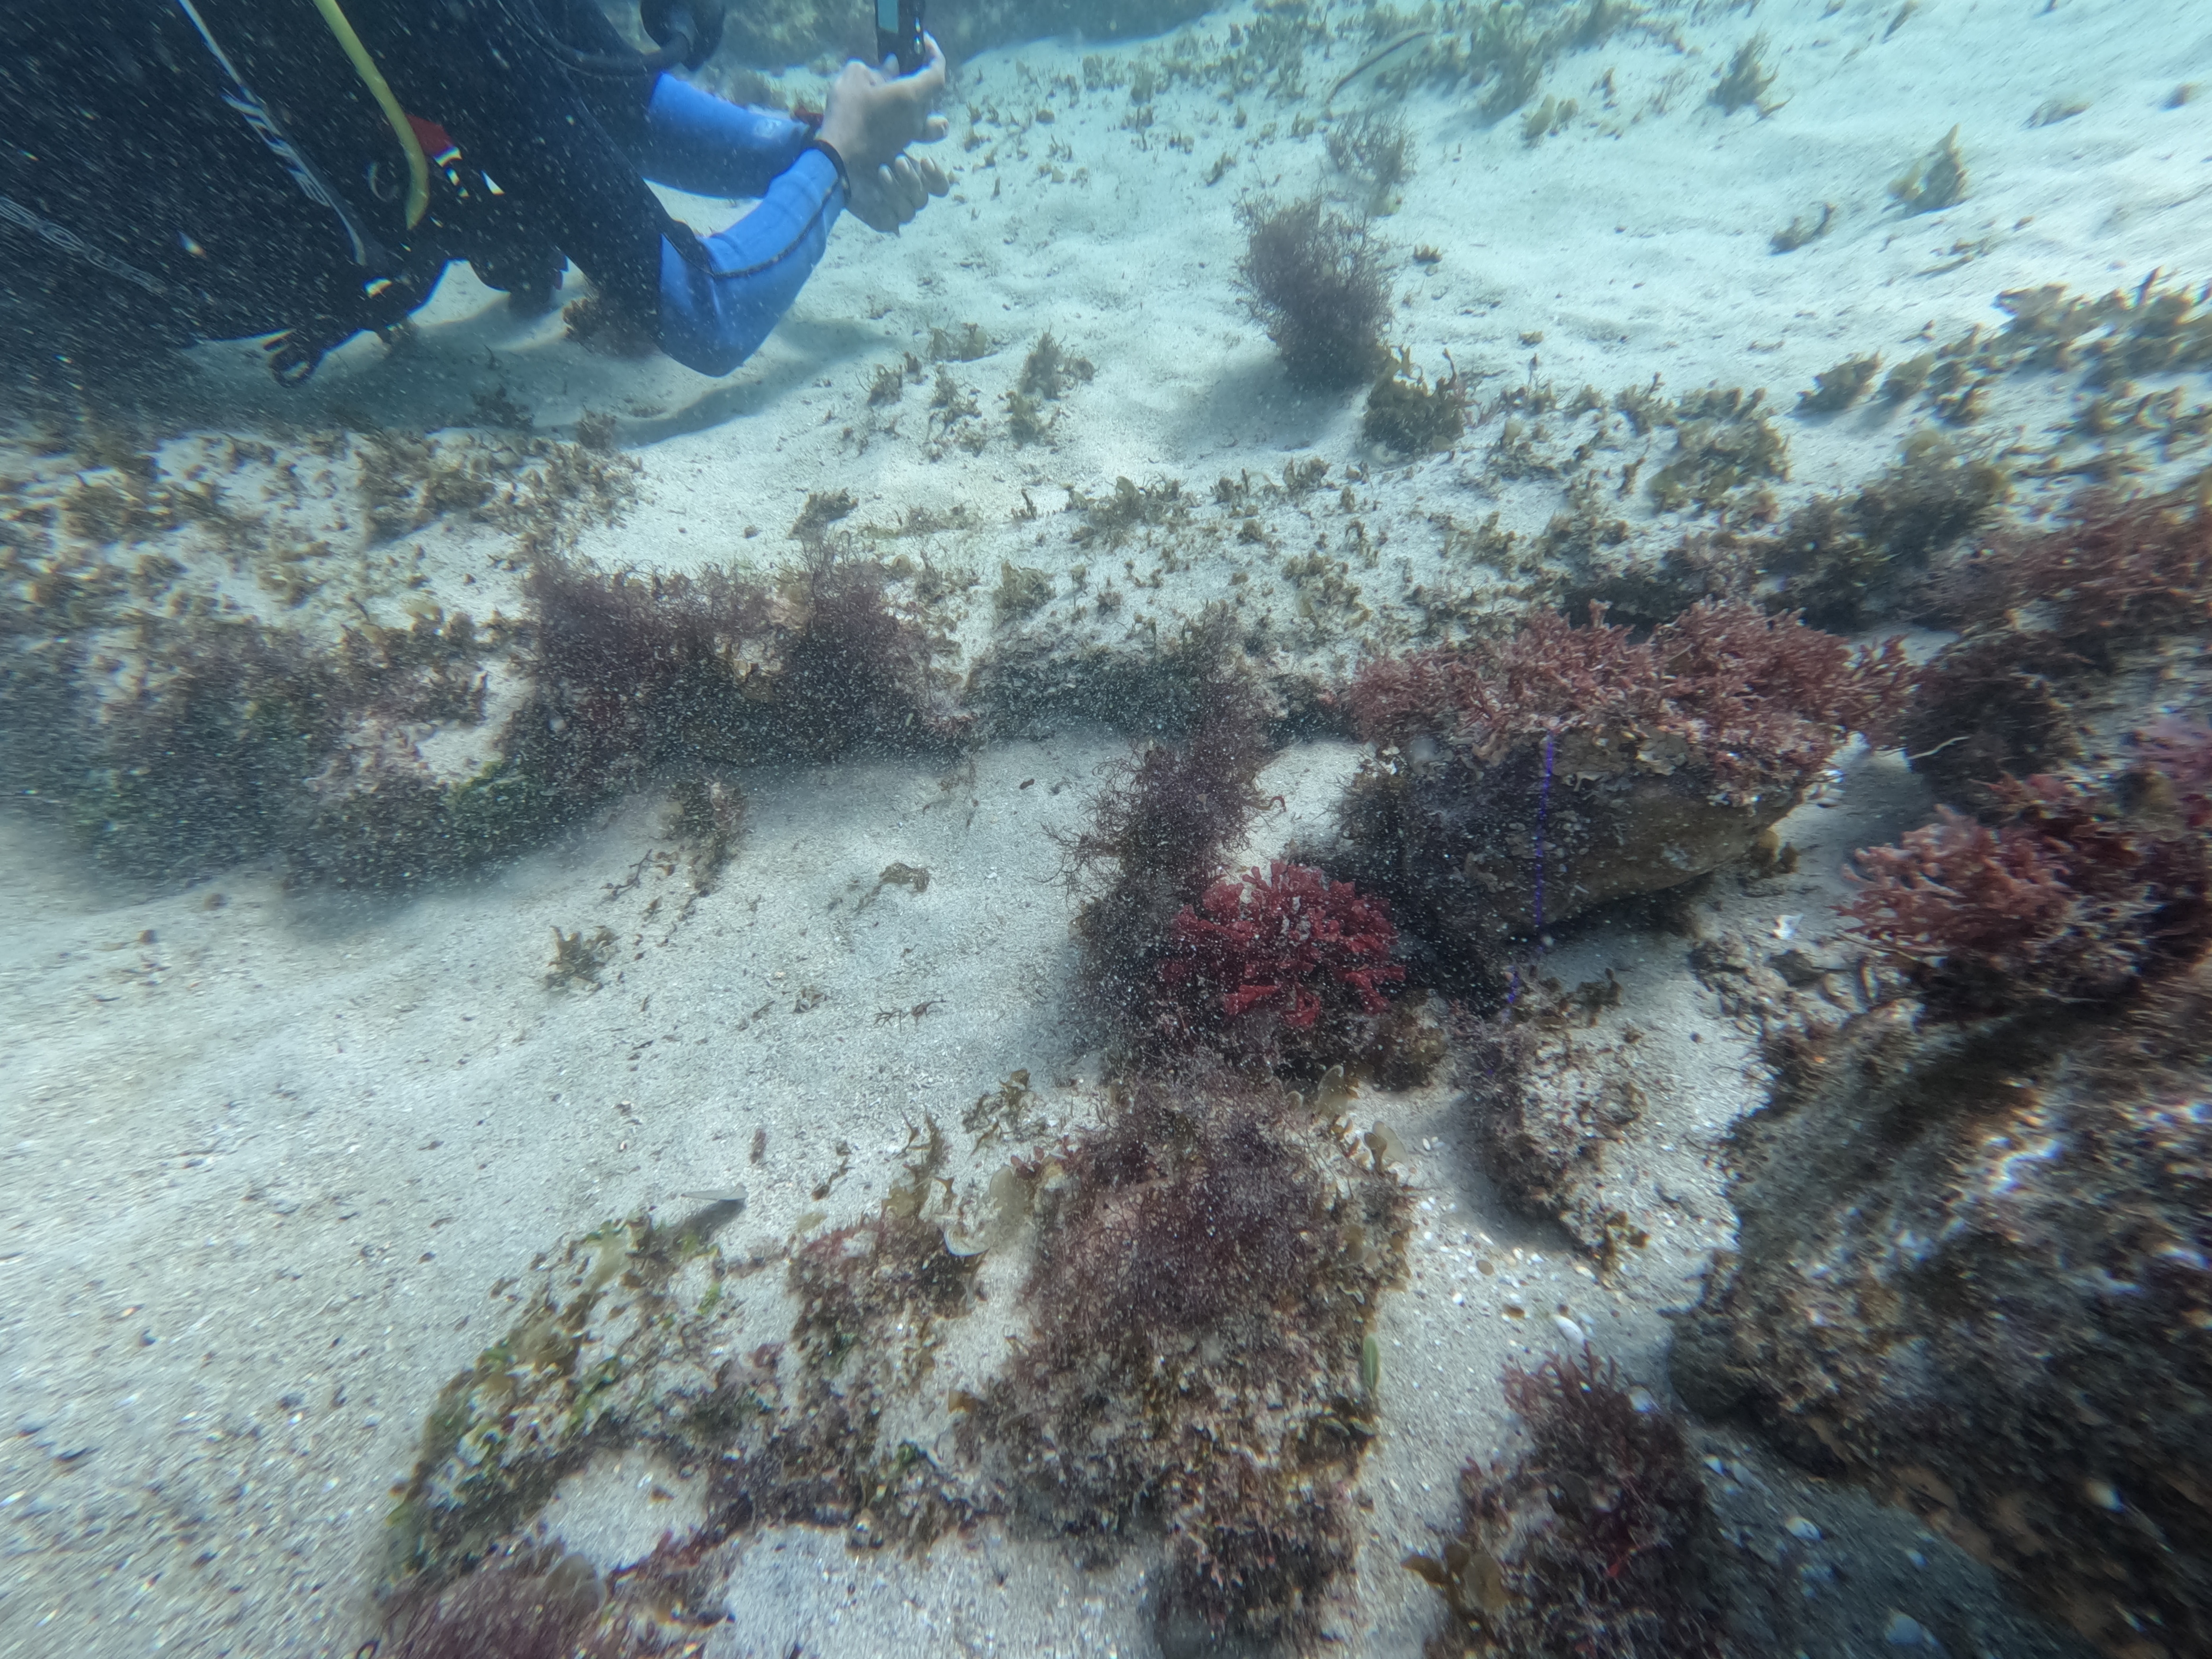

Supplement: Supplementary file 957 [file G0714024.pdf › Ocean2/G0714024.pdf]

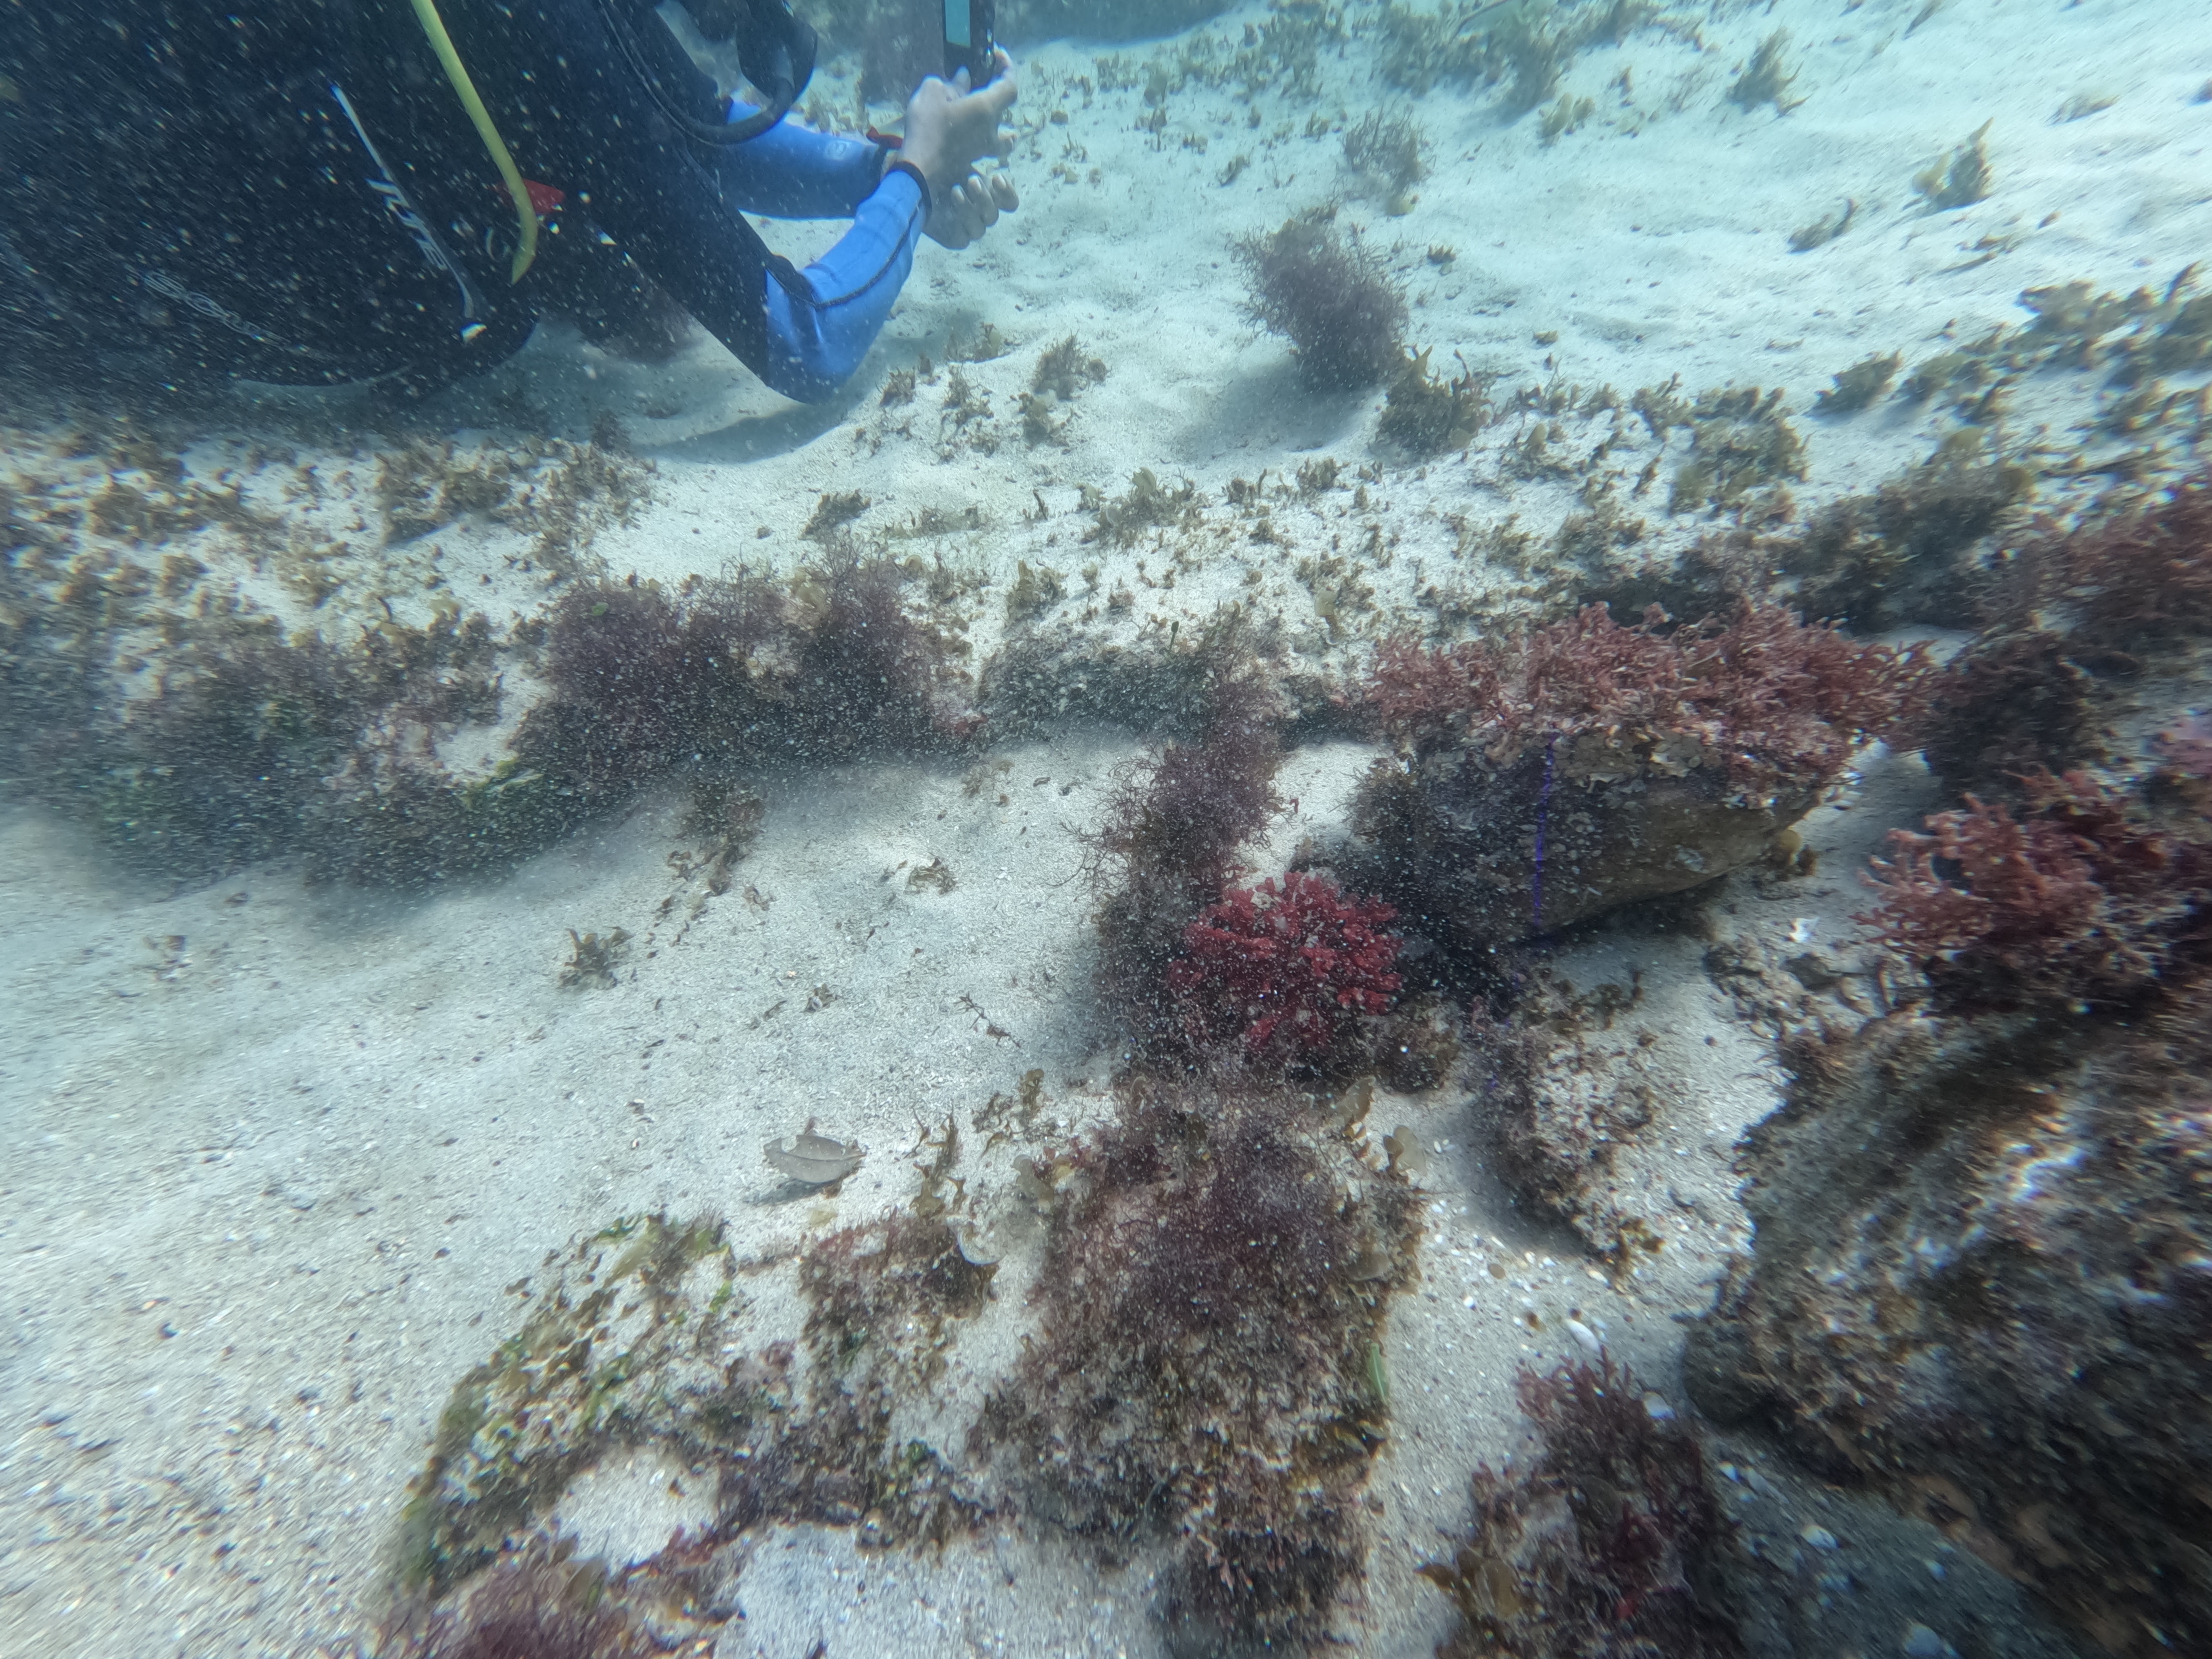

Supplement: Supplementary file 958 [file G0714025.pdf › Ocean2/G0714025.pdf]

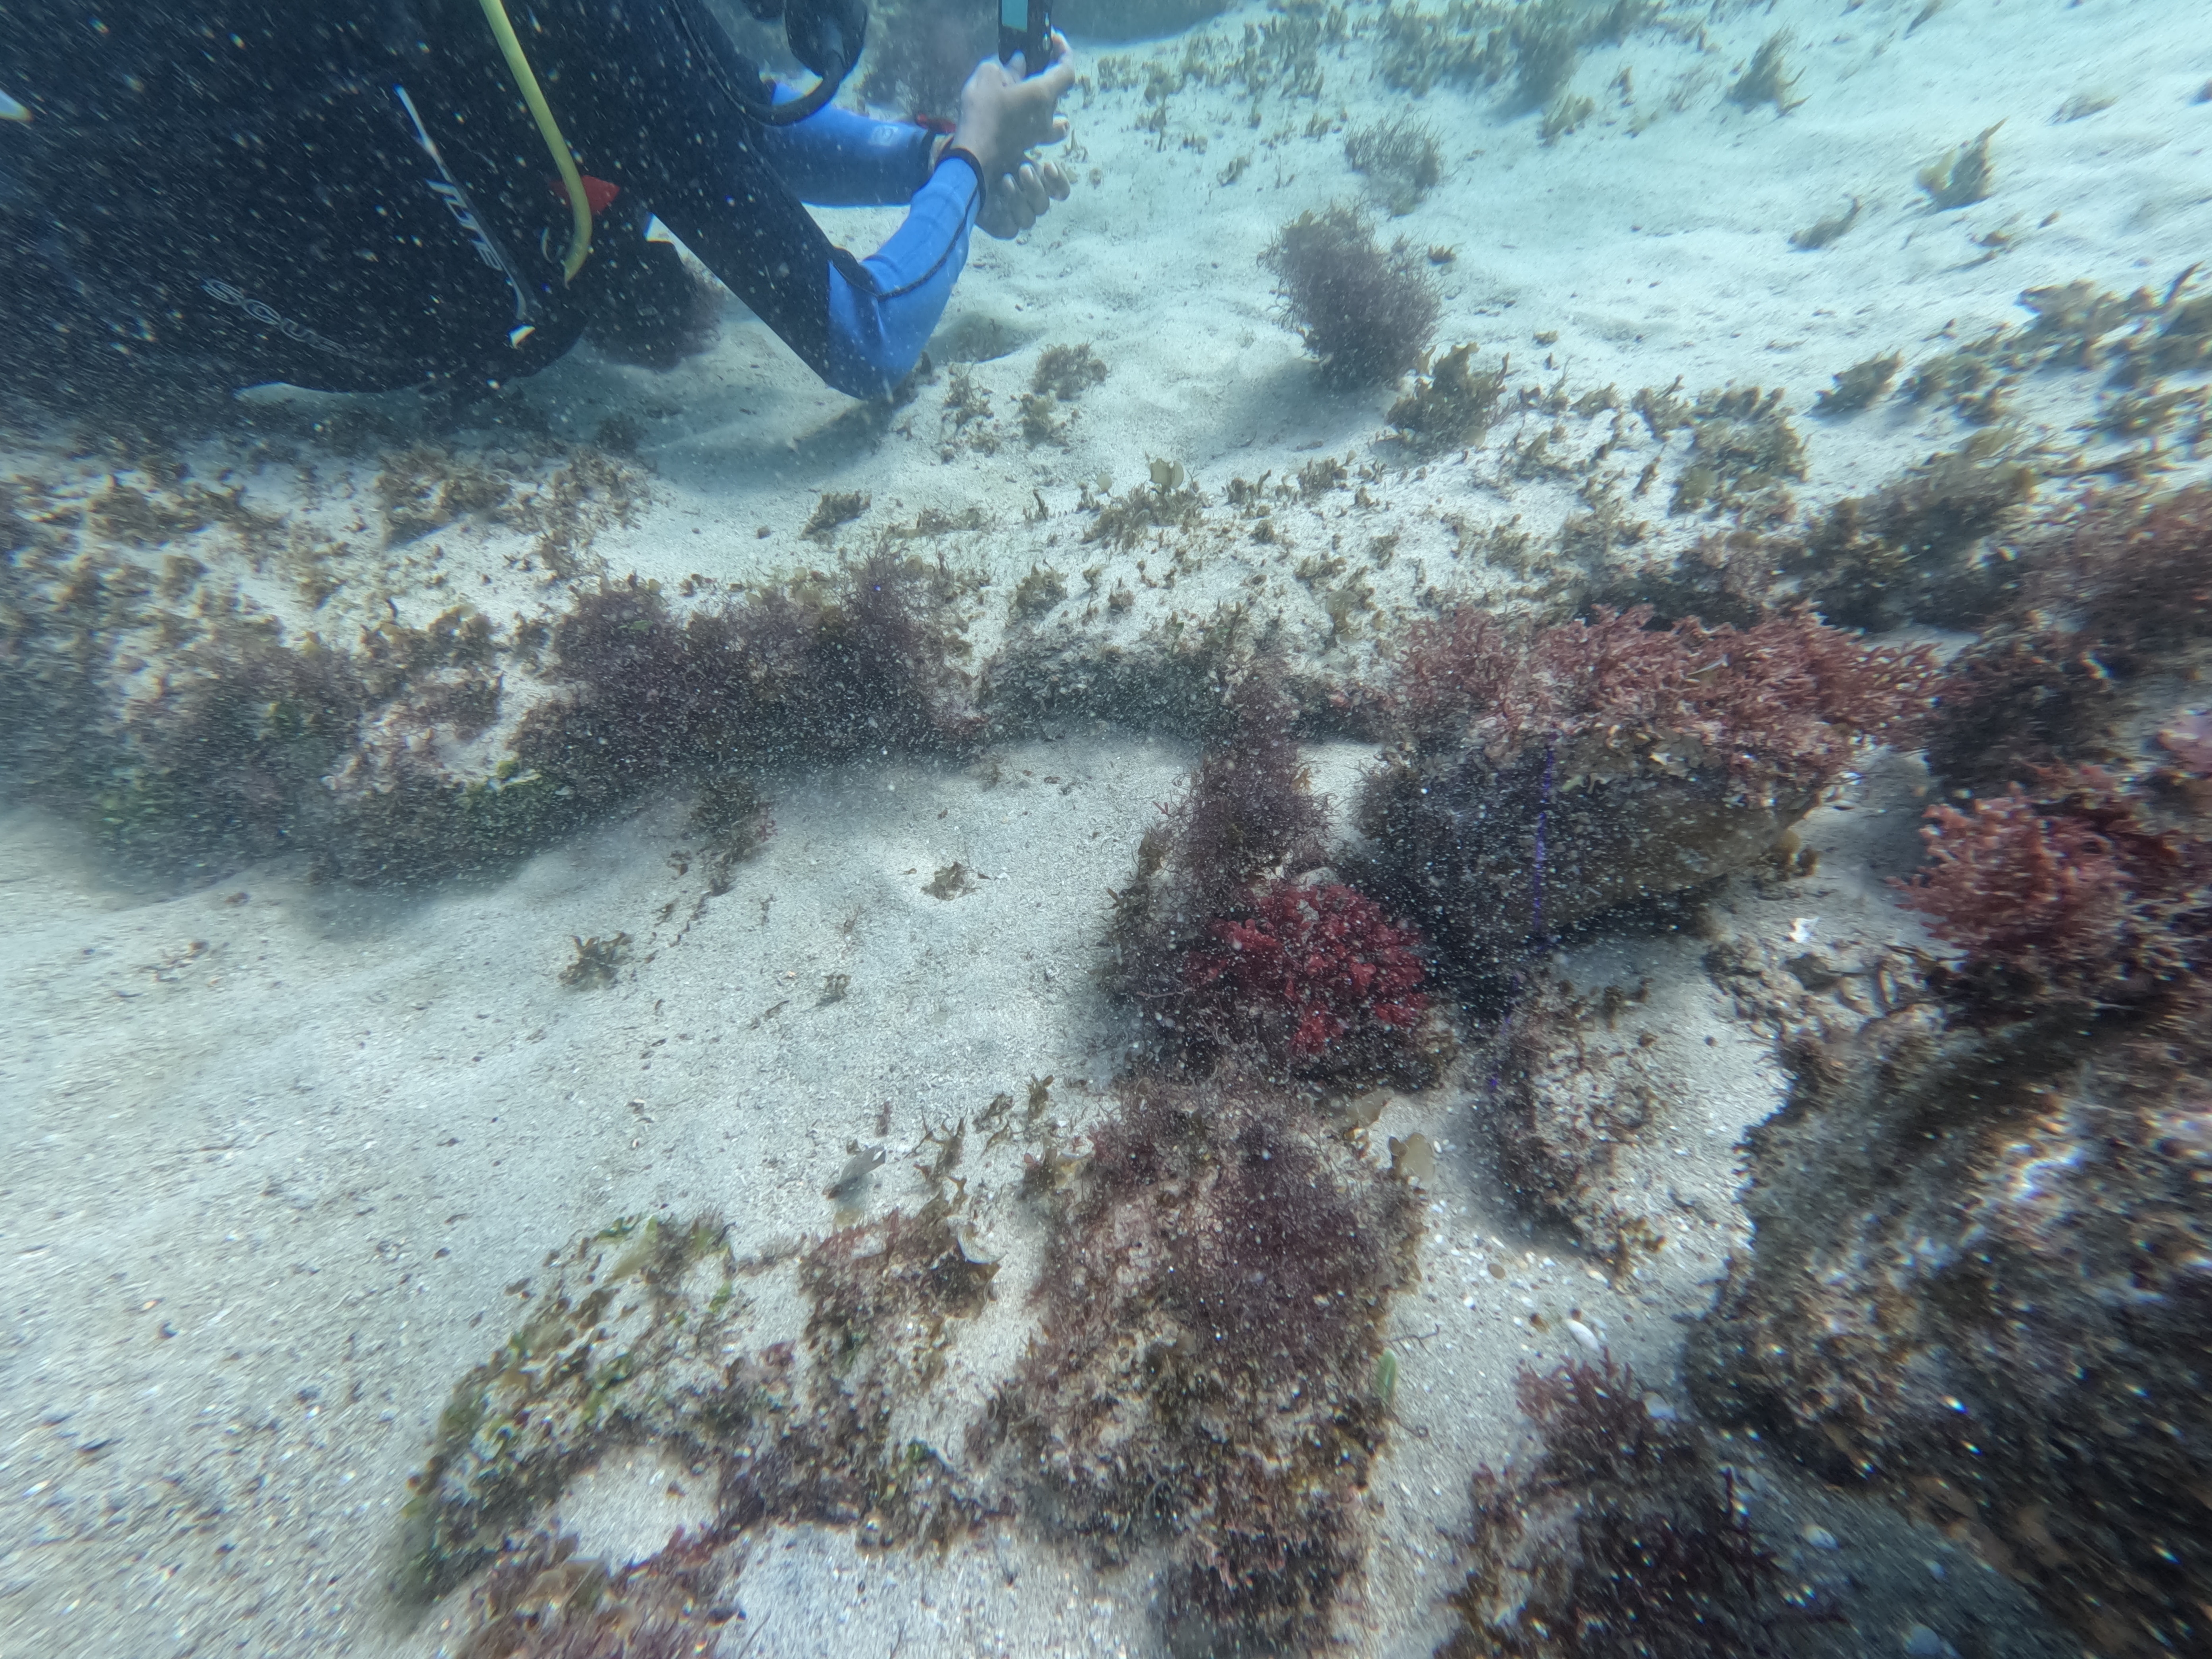

Supplement: Supplementary file 959 [file G0714026.pdf › Ocean2/G0714026.pdf]

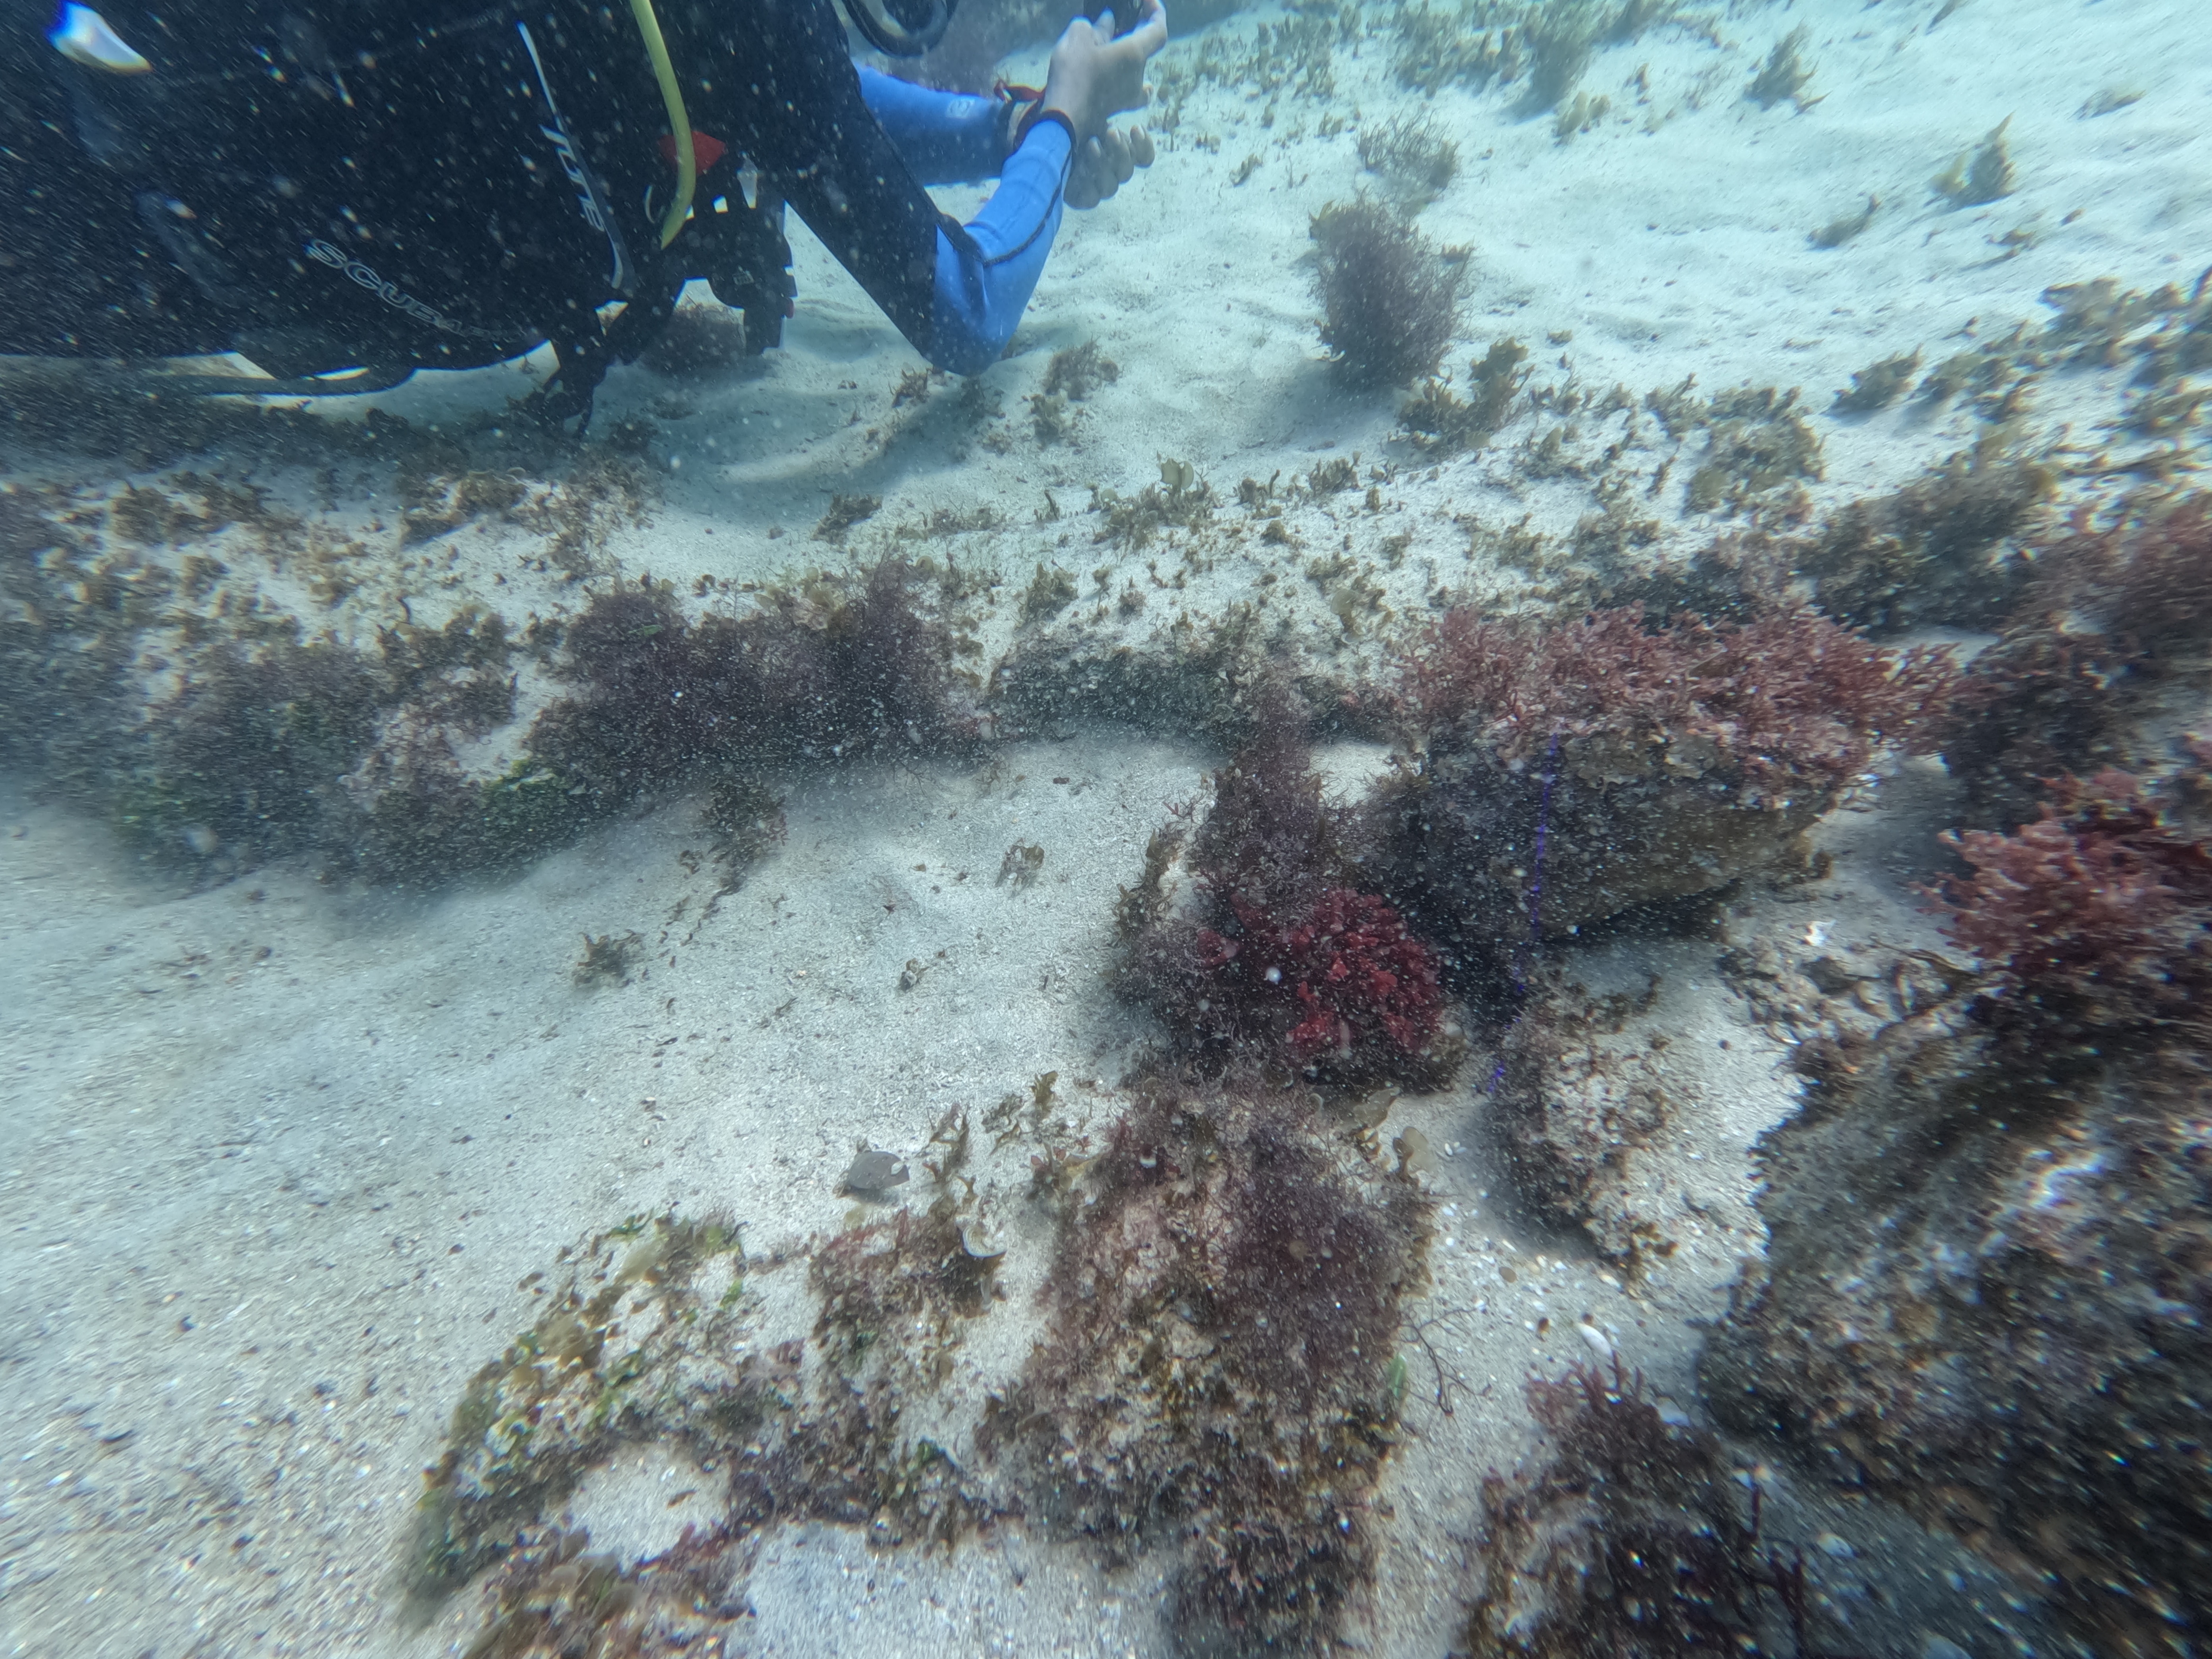

Supplement: Supplementary file 960 [file G0714027.pdf › Ocean2/G0714027.pdf]

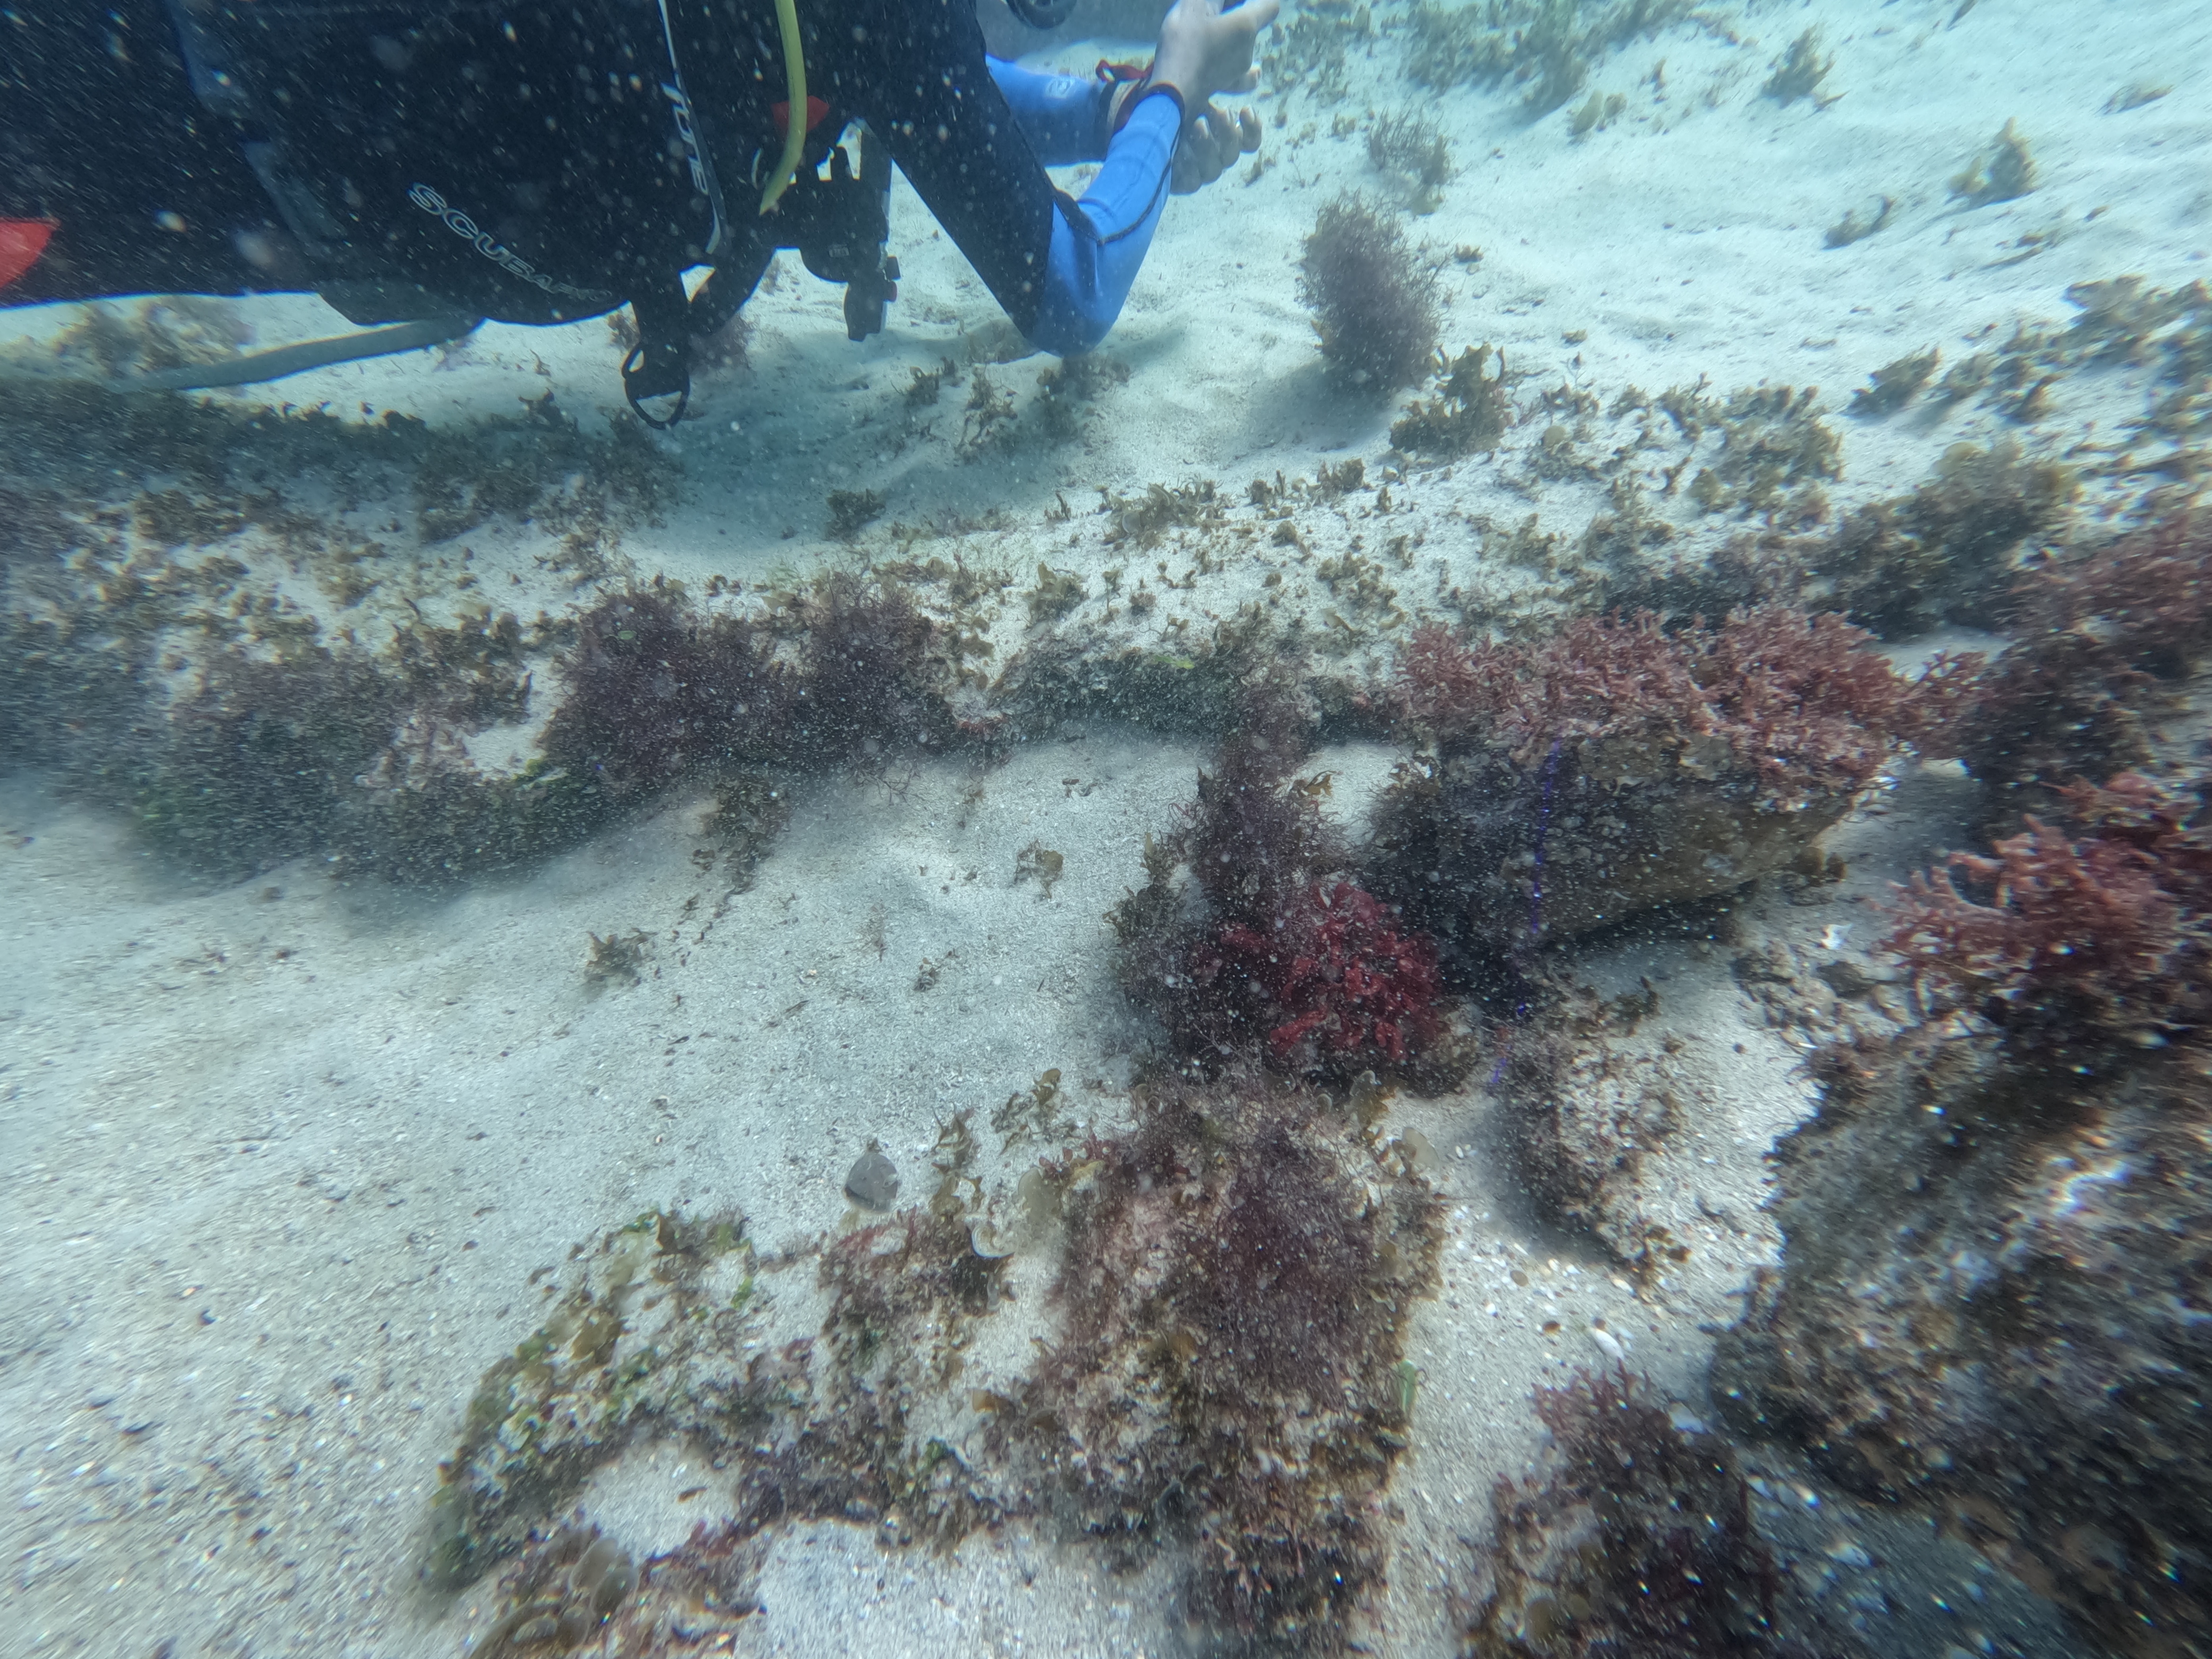

Supplement: Supplementary file 961 [file G0714028.pdf › Ocean2/G0714028.pdf]

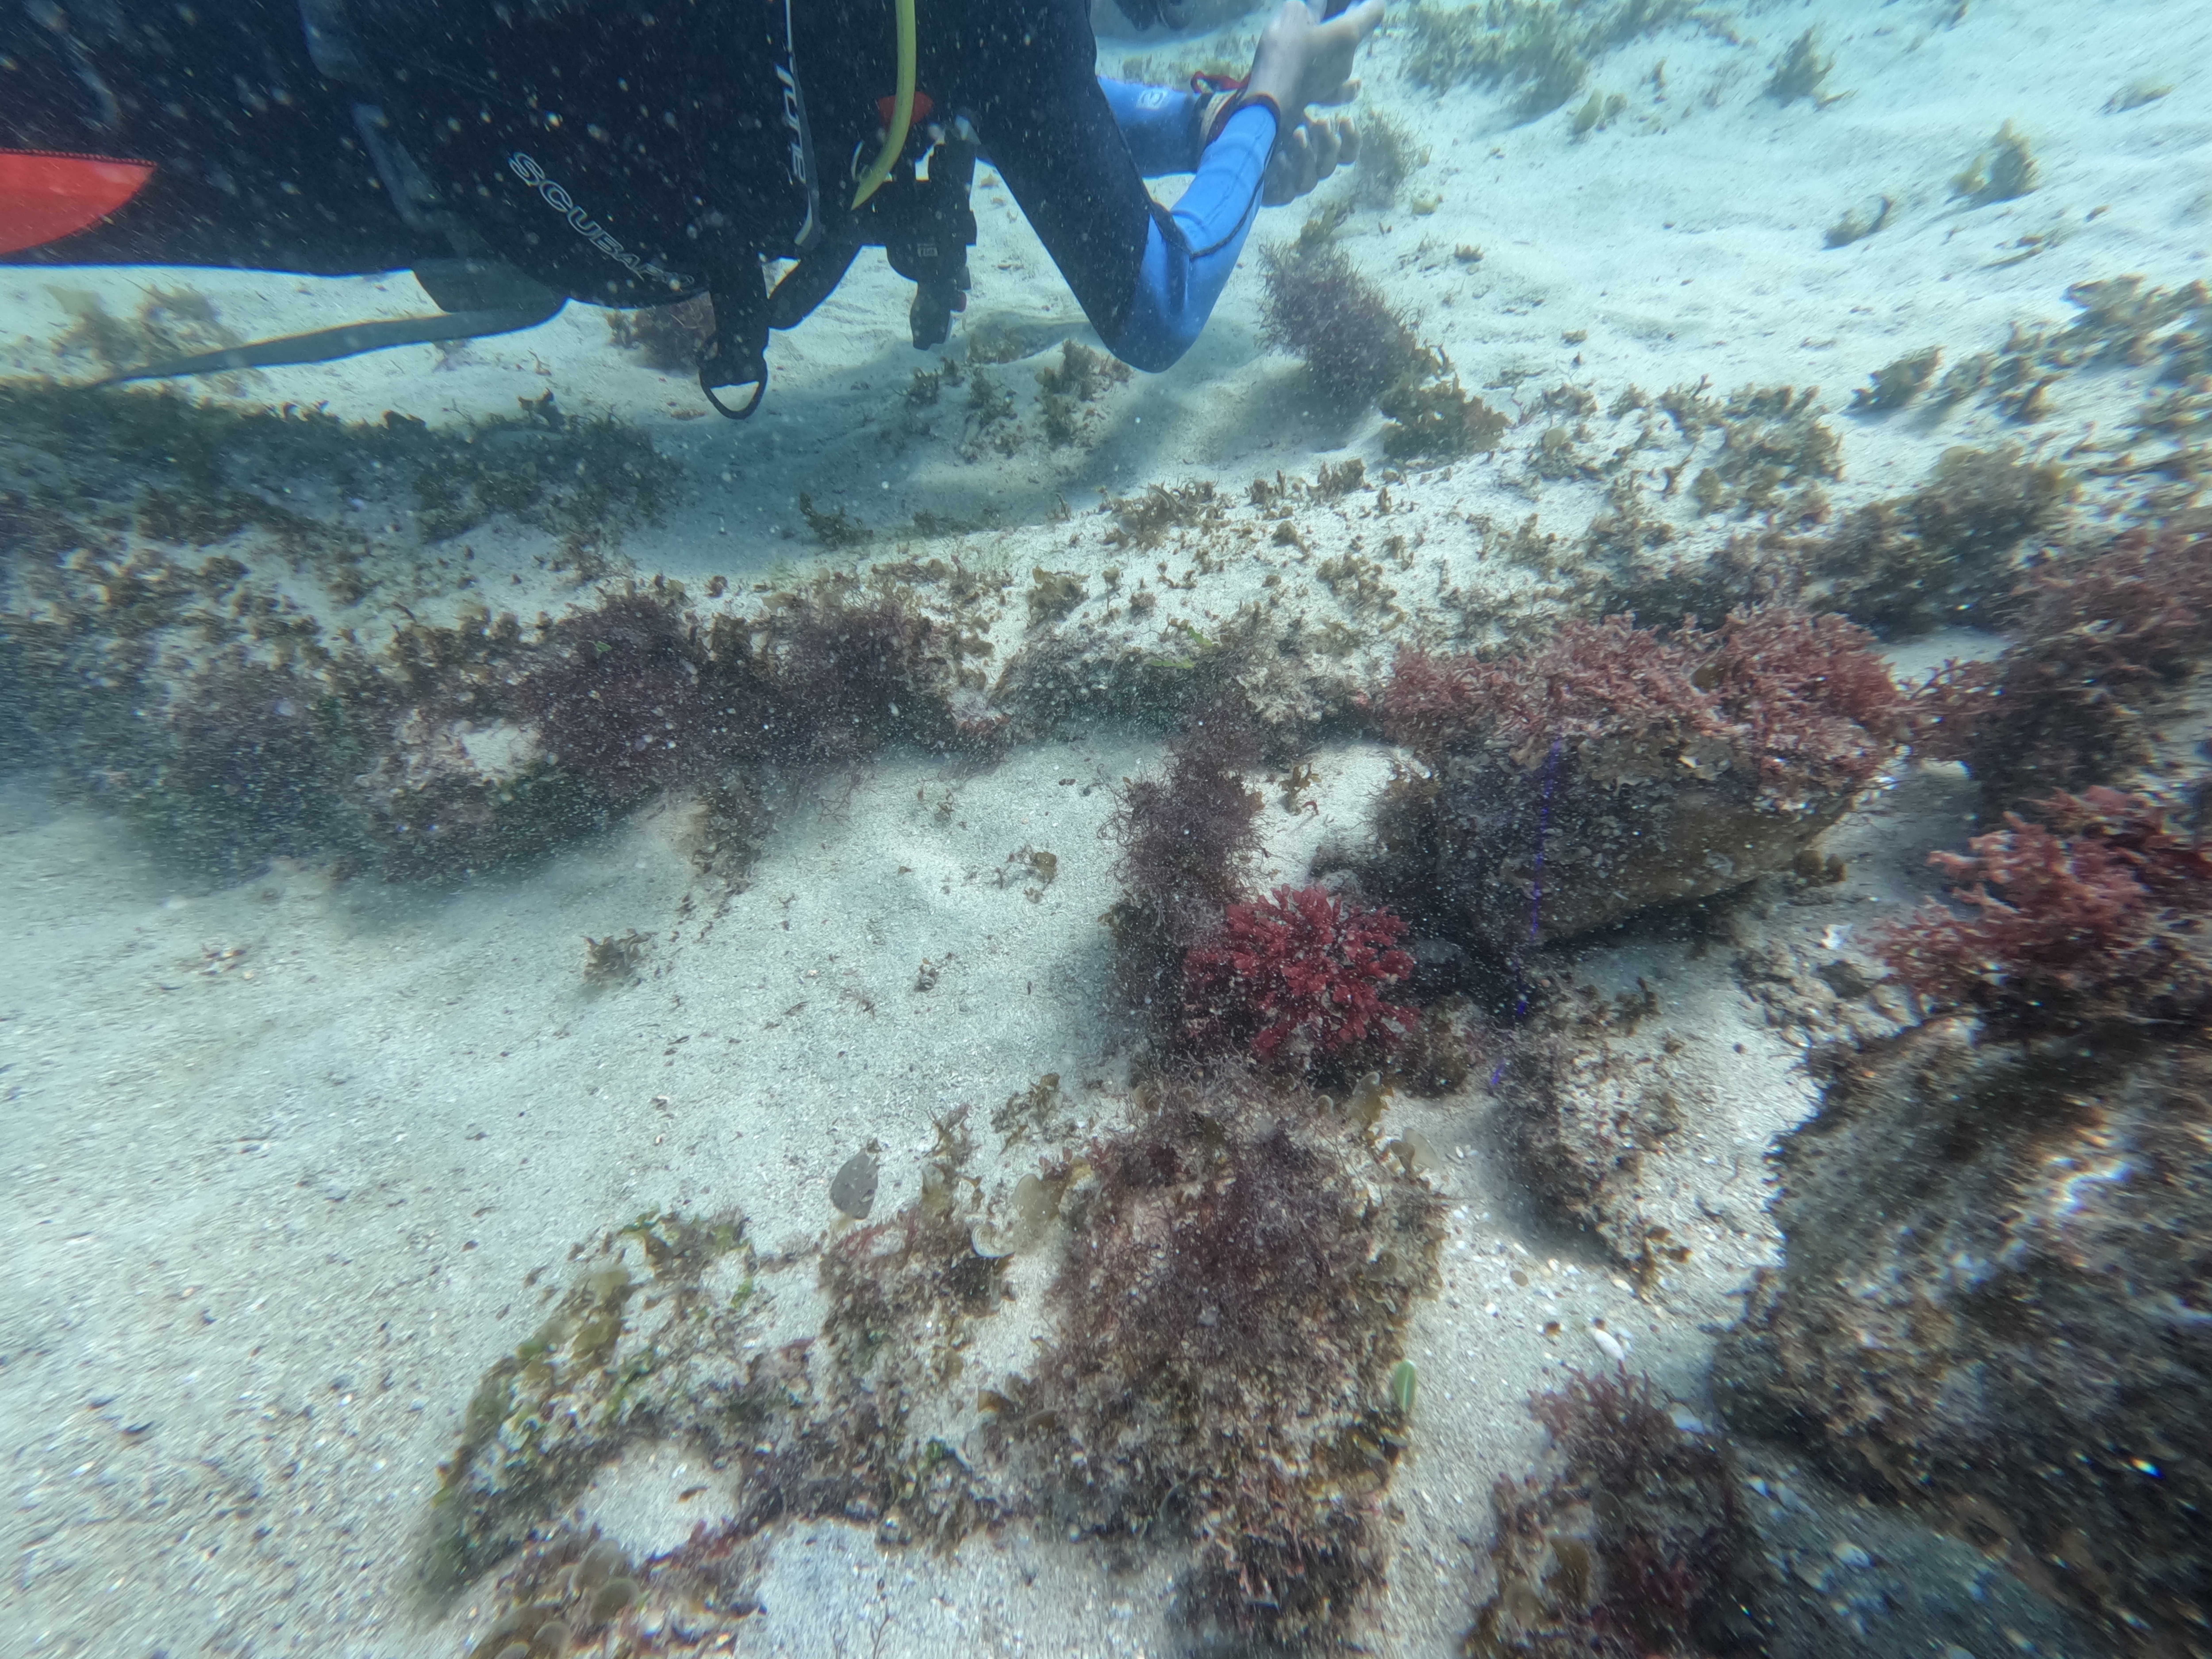

Supplement: Supplementary file 962 [file G0714029.pdf › Ocean2/G0714029.pdf]

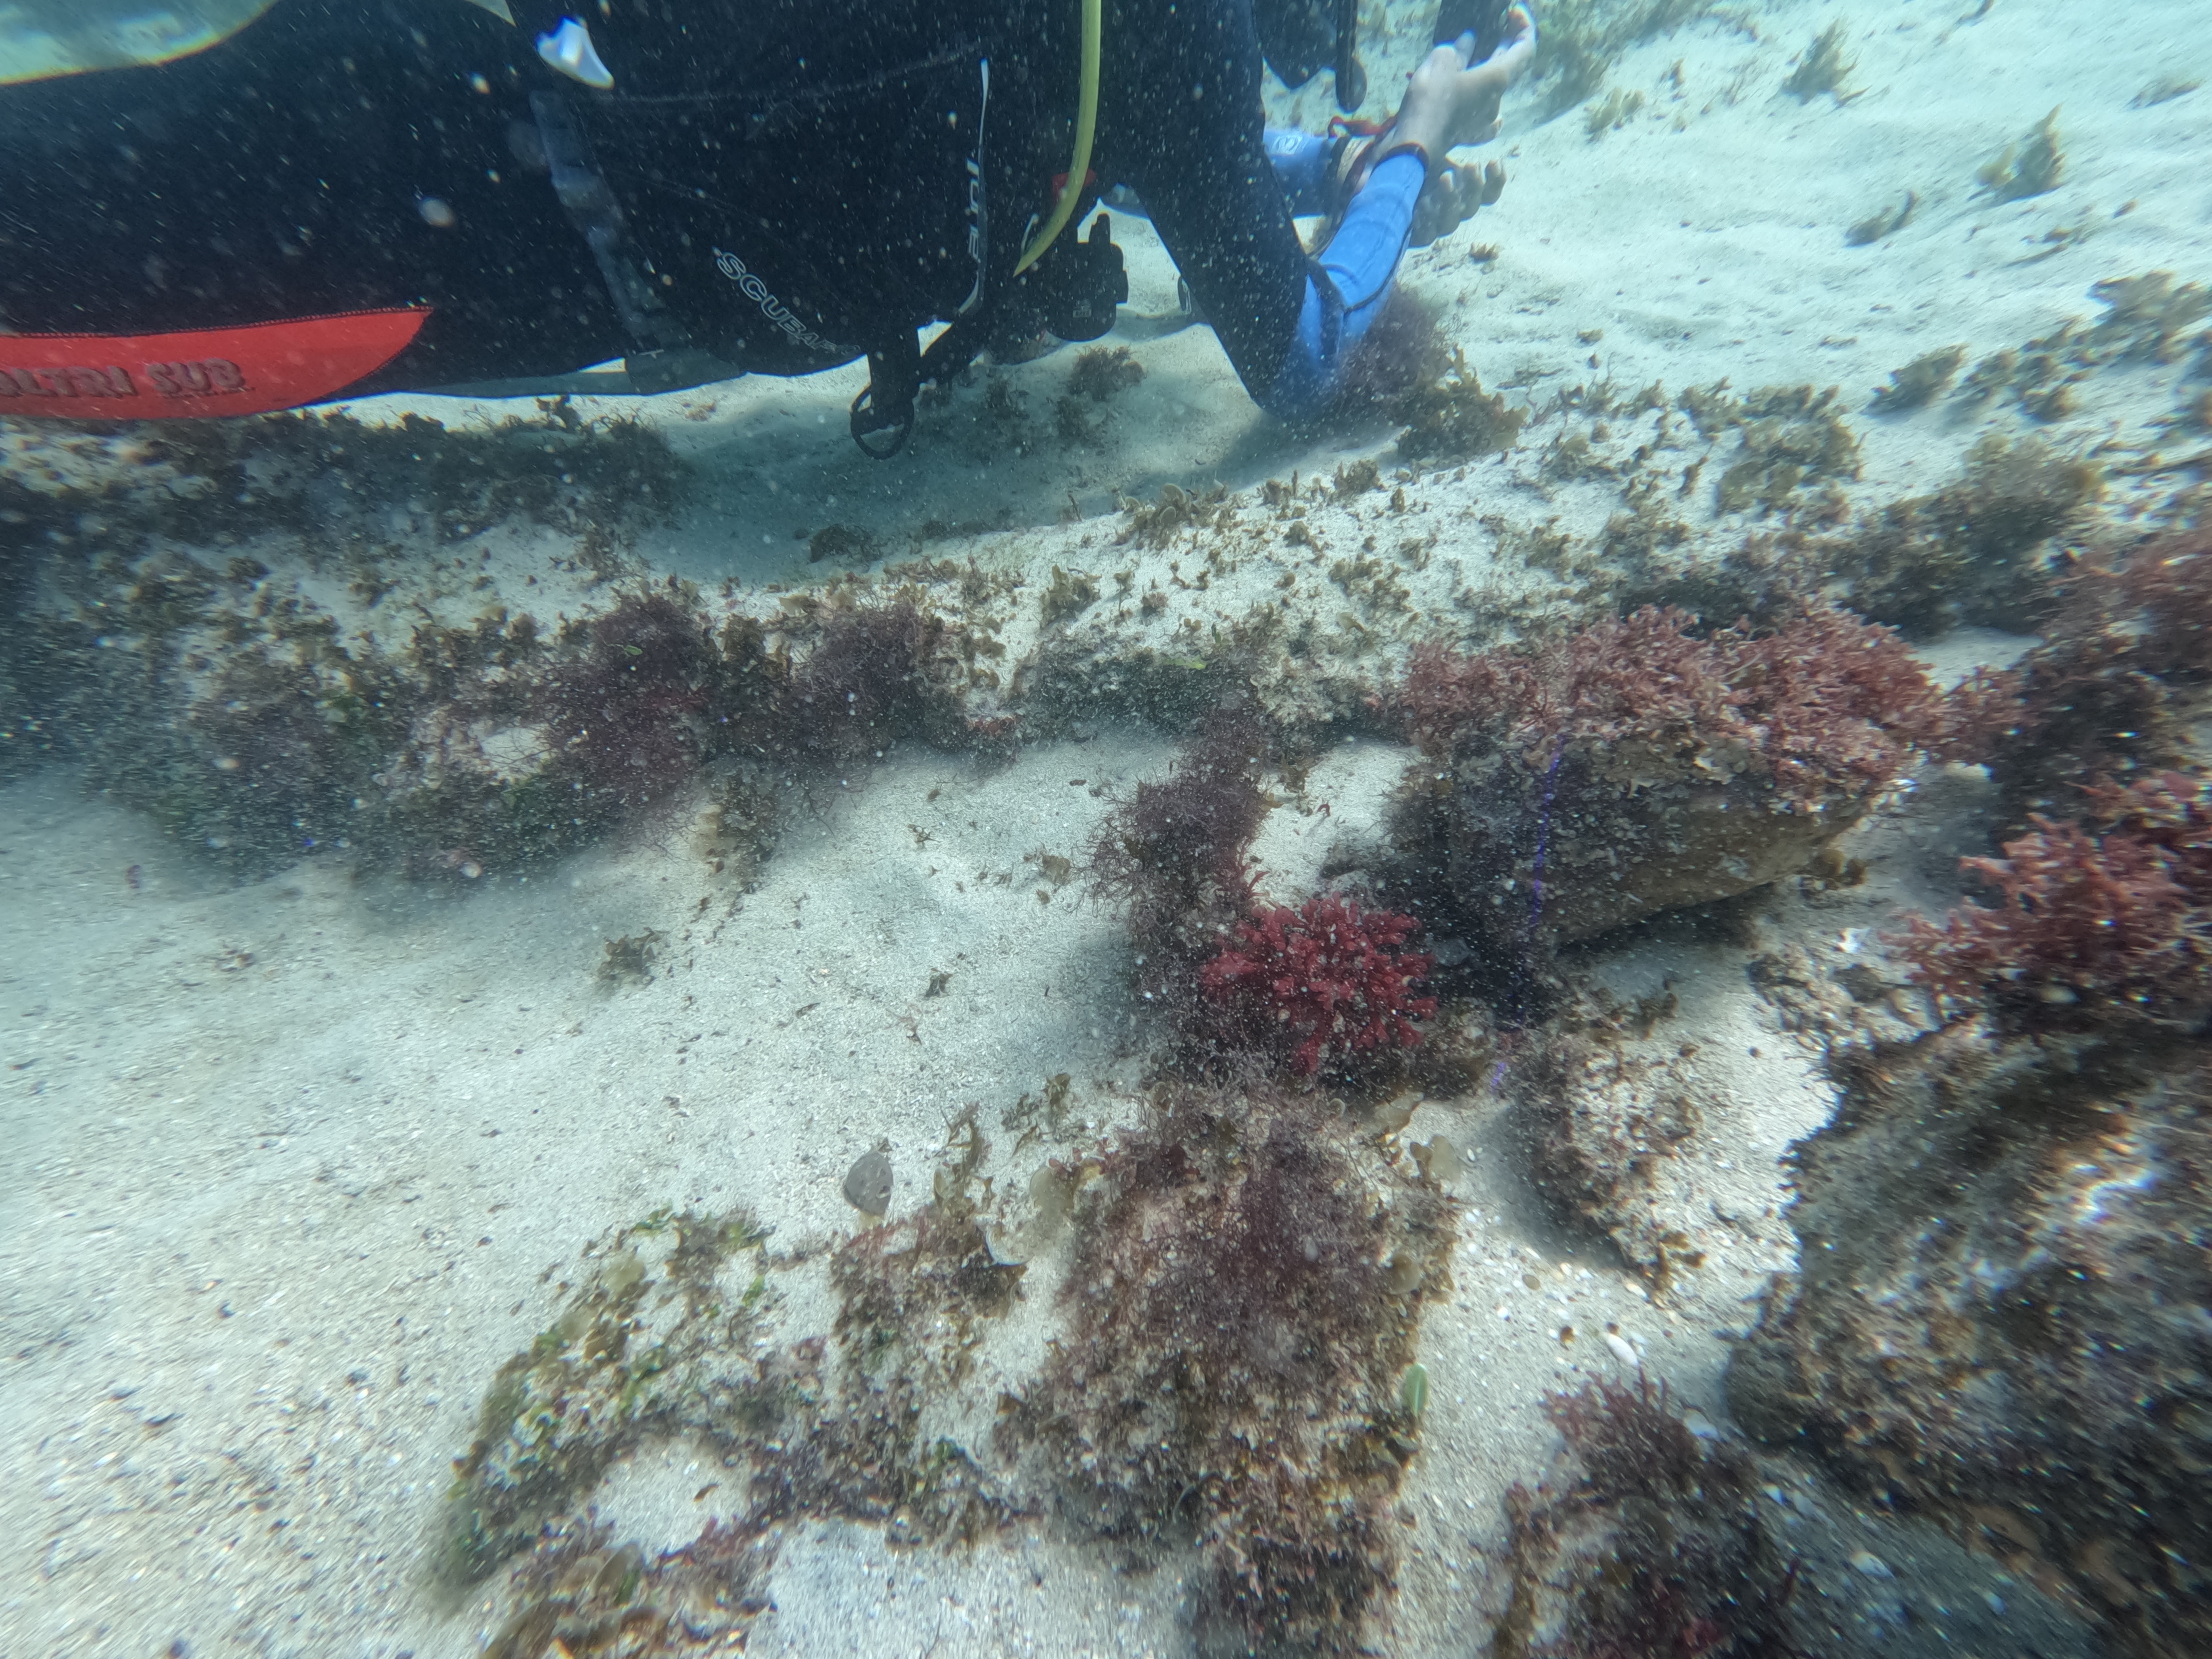

Supplement: Supplementary file 963 [file G0714030.pdf › Ocean2/G0714030.pdf]

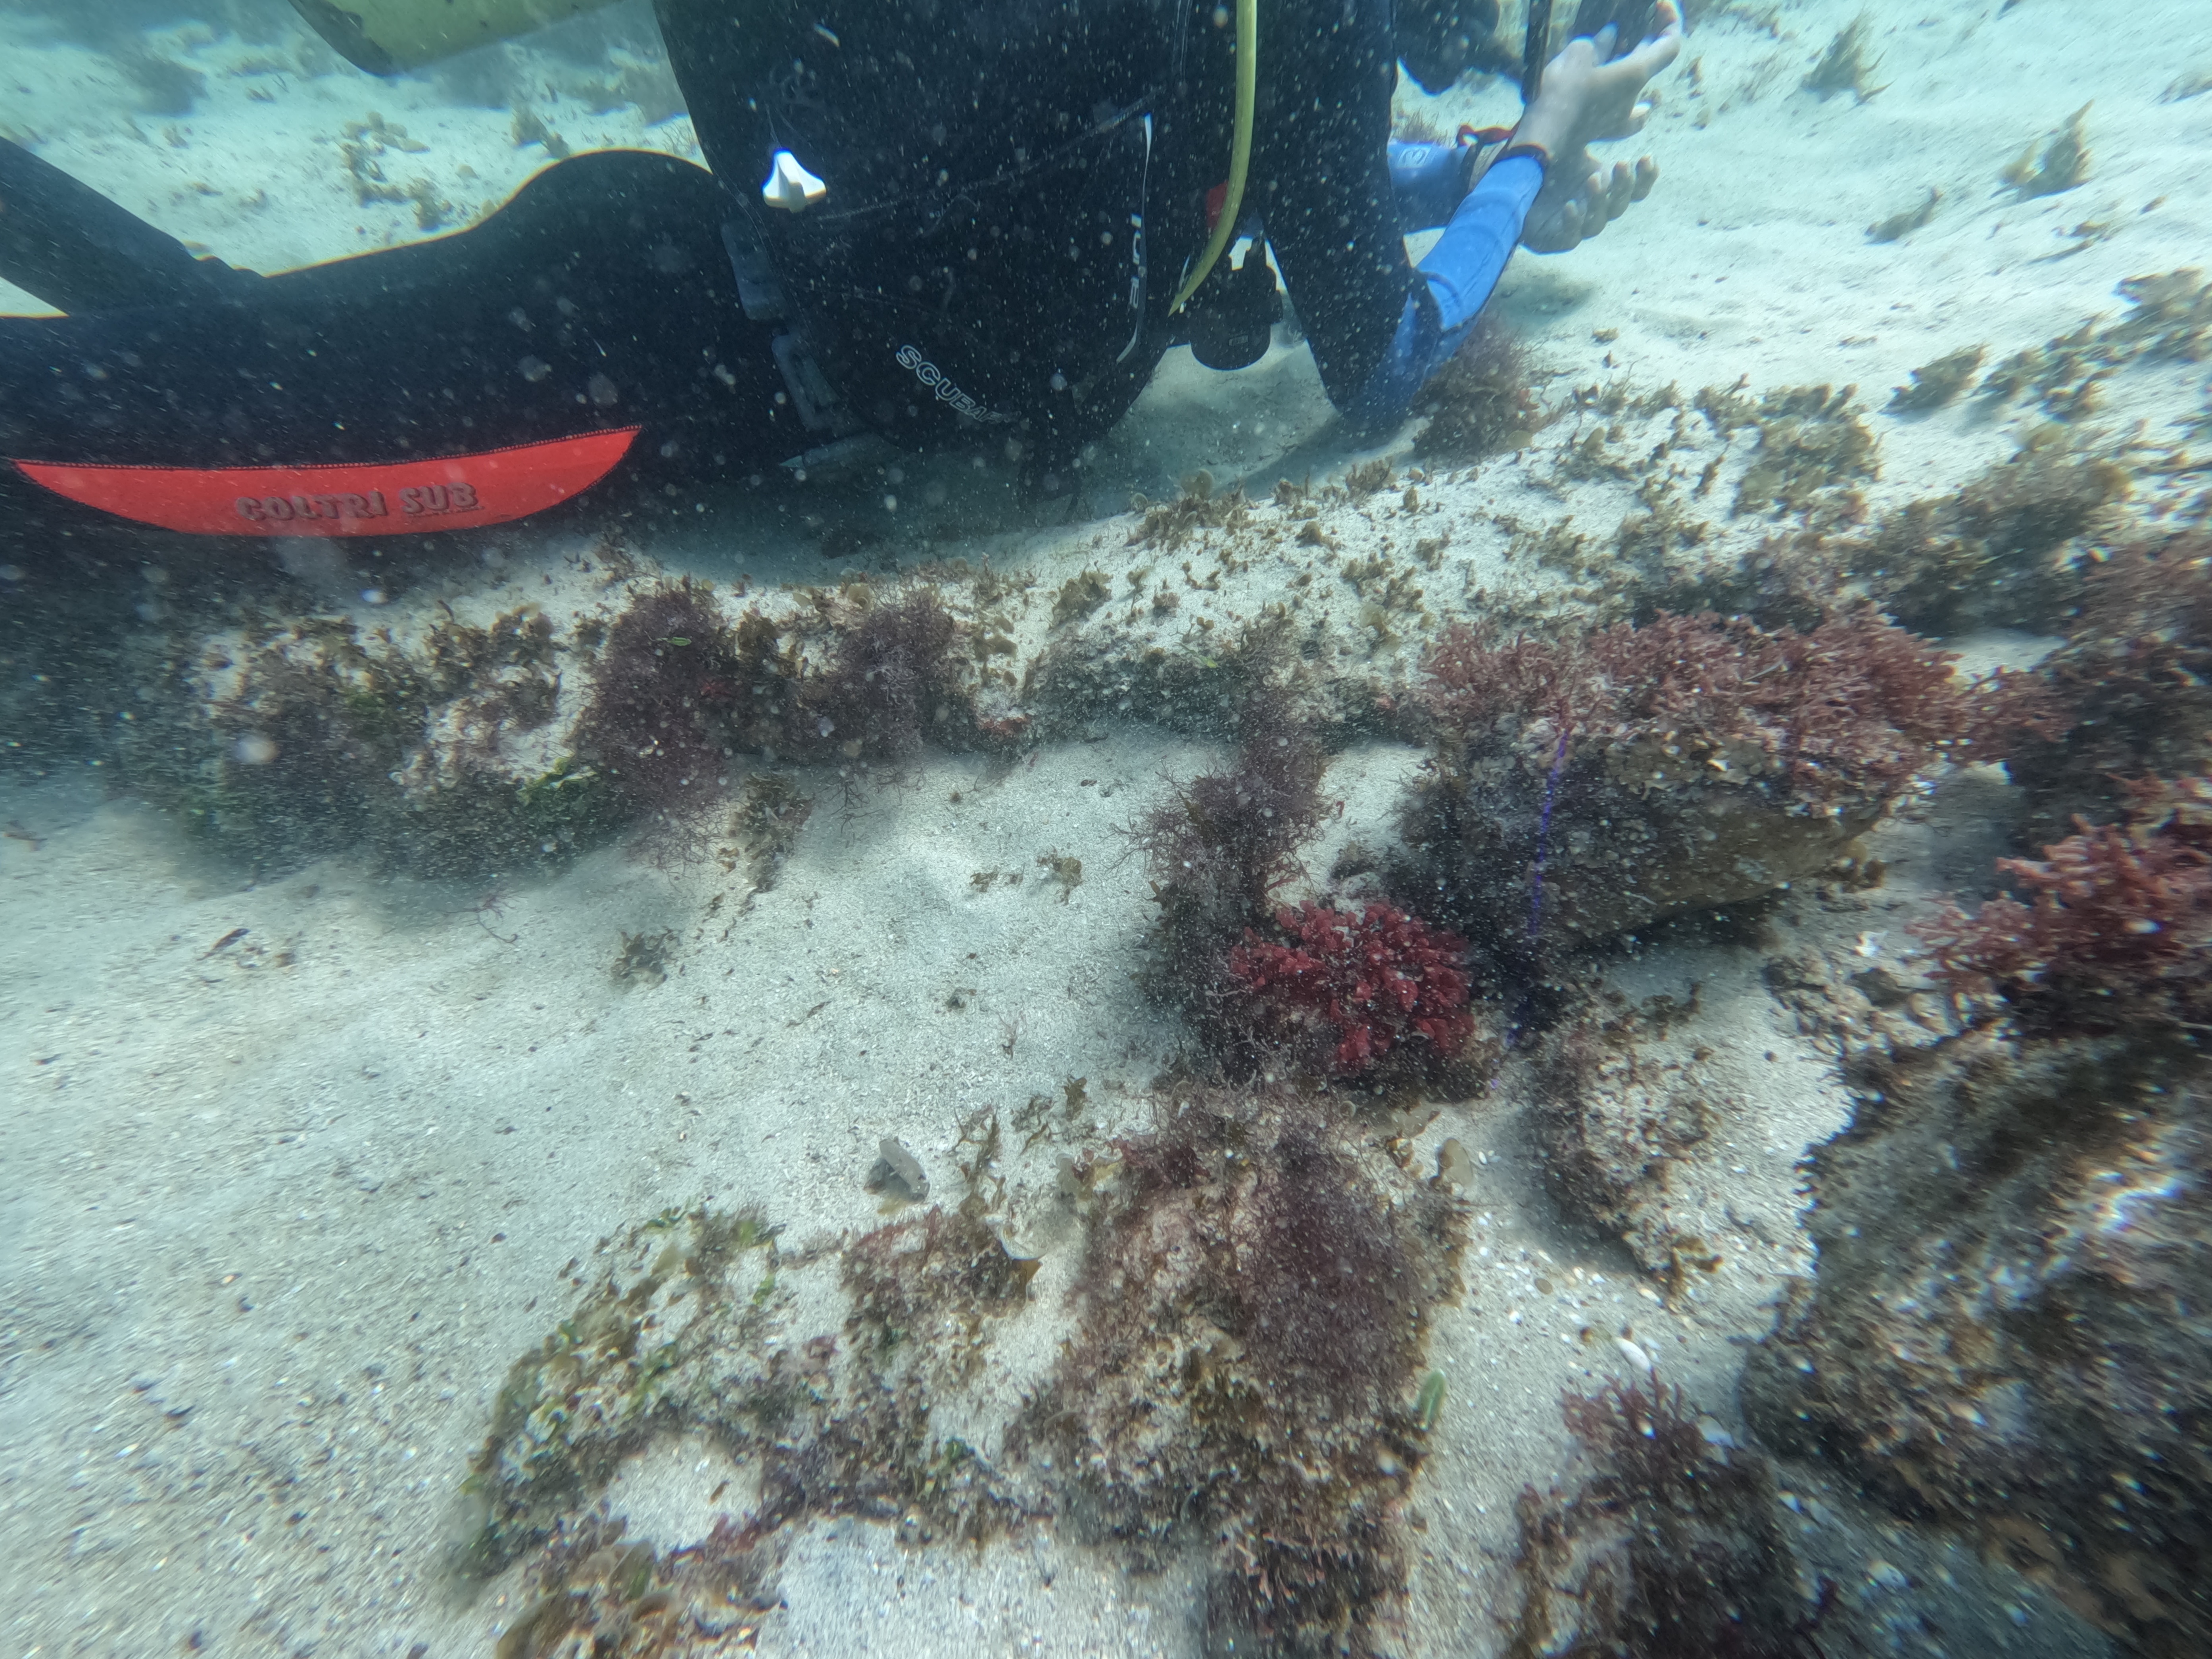

Supplement: Supplementary file 964 [file G0714031.pdf › Ocean2/G0714031.pdf]

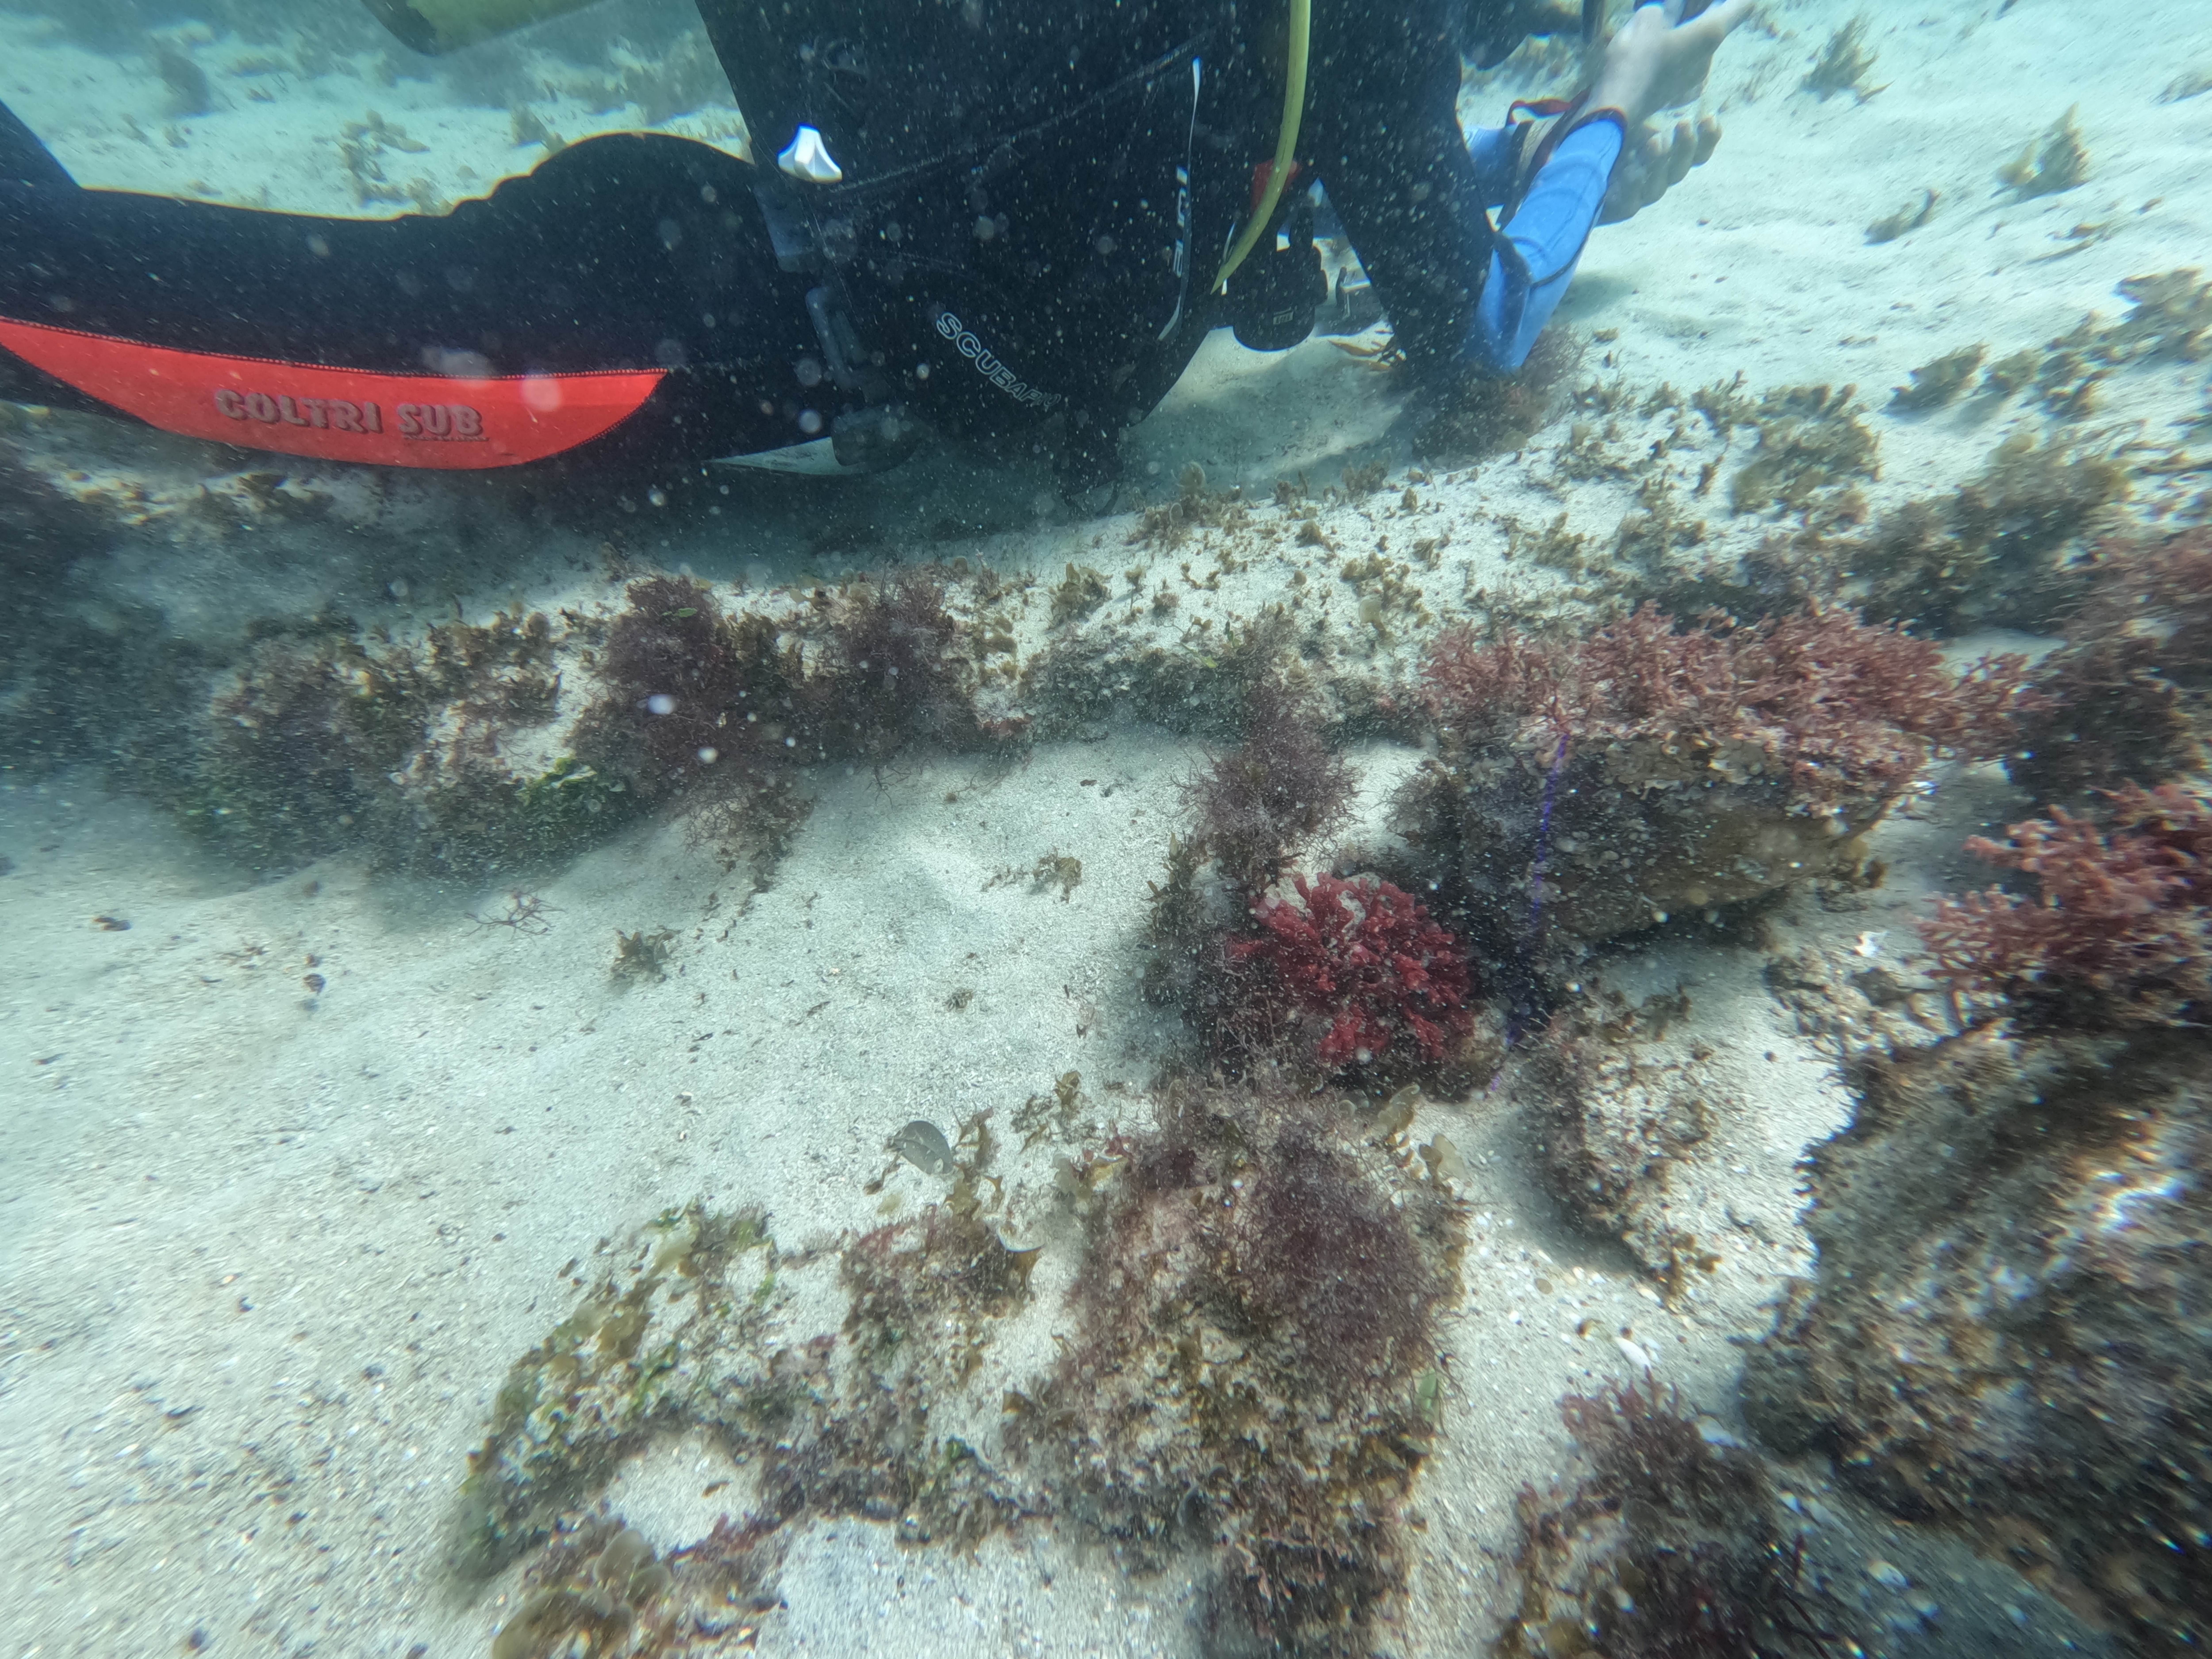

Supplement: Supplementary file 965 [file G0714032.pdf › Ocean2/G0714032.pdf]

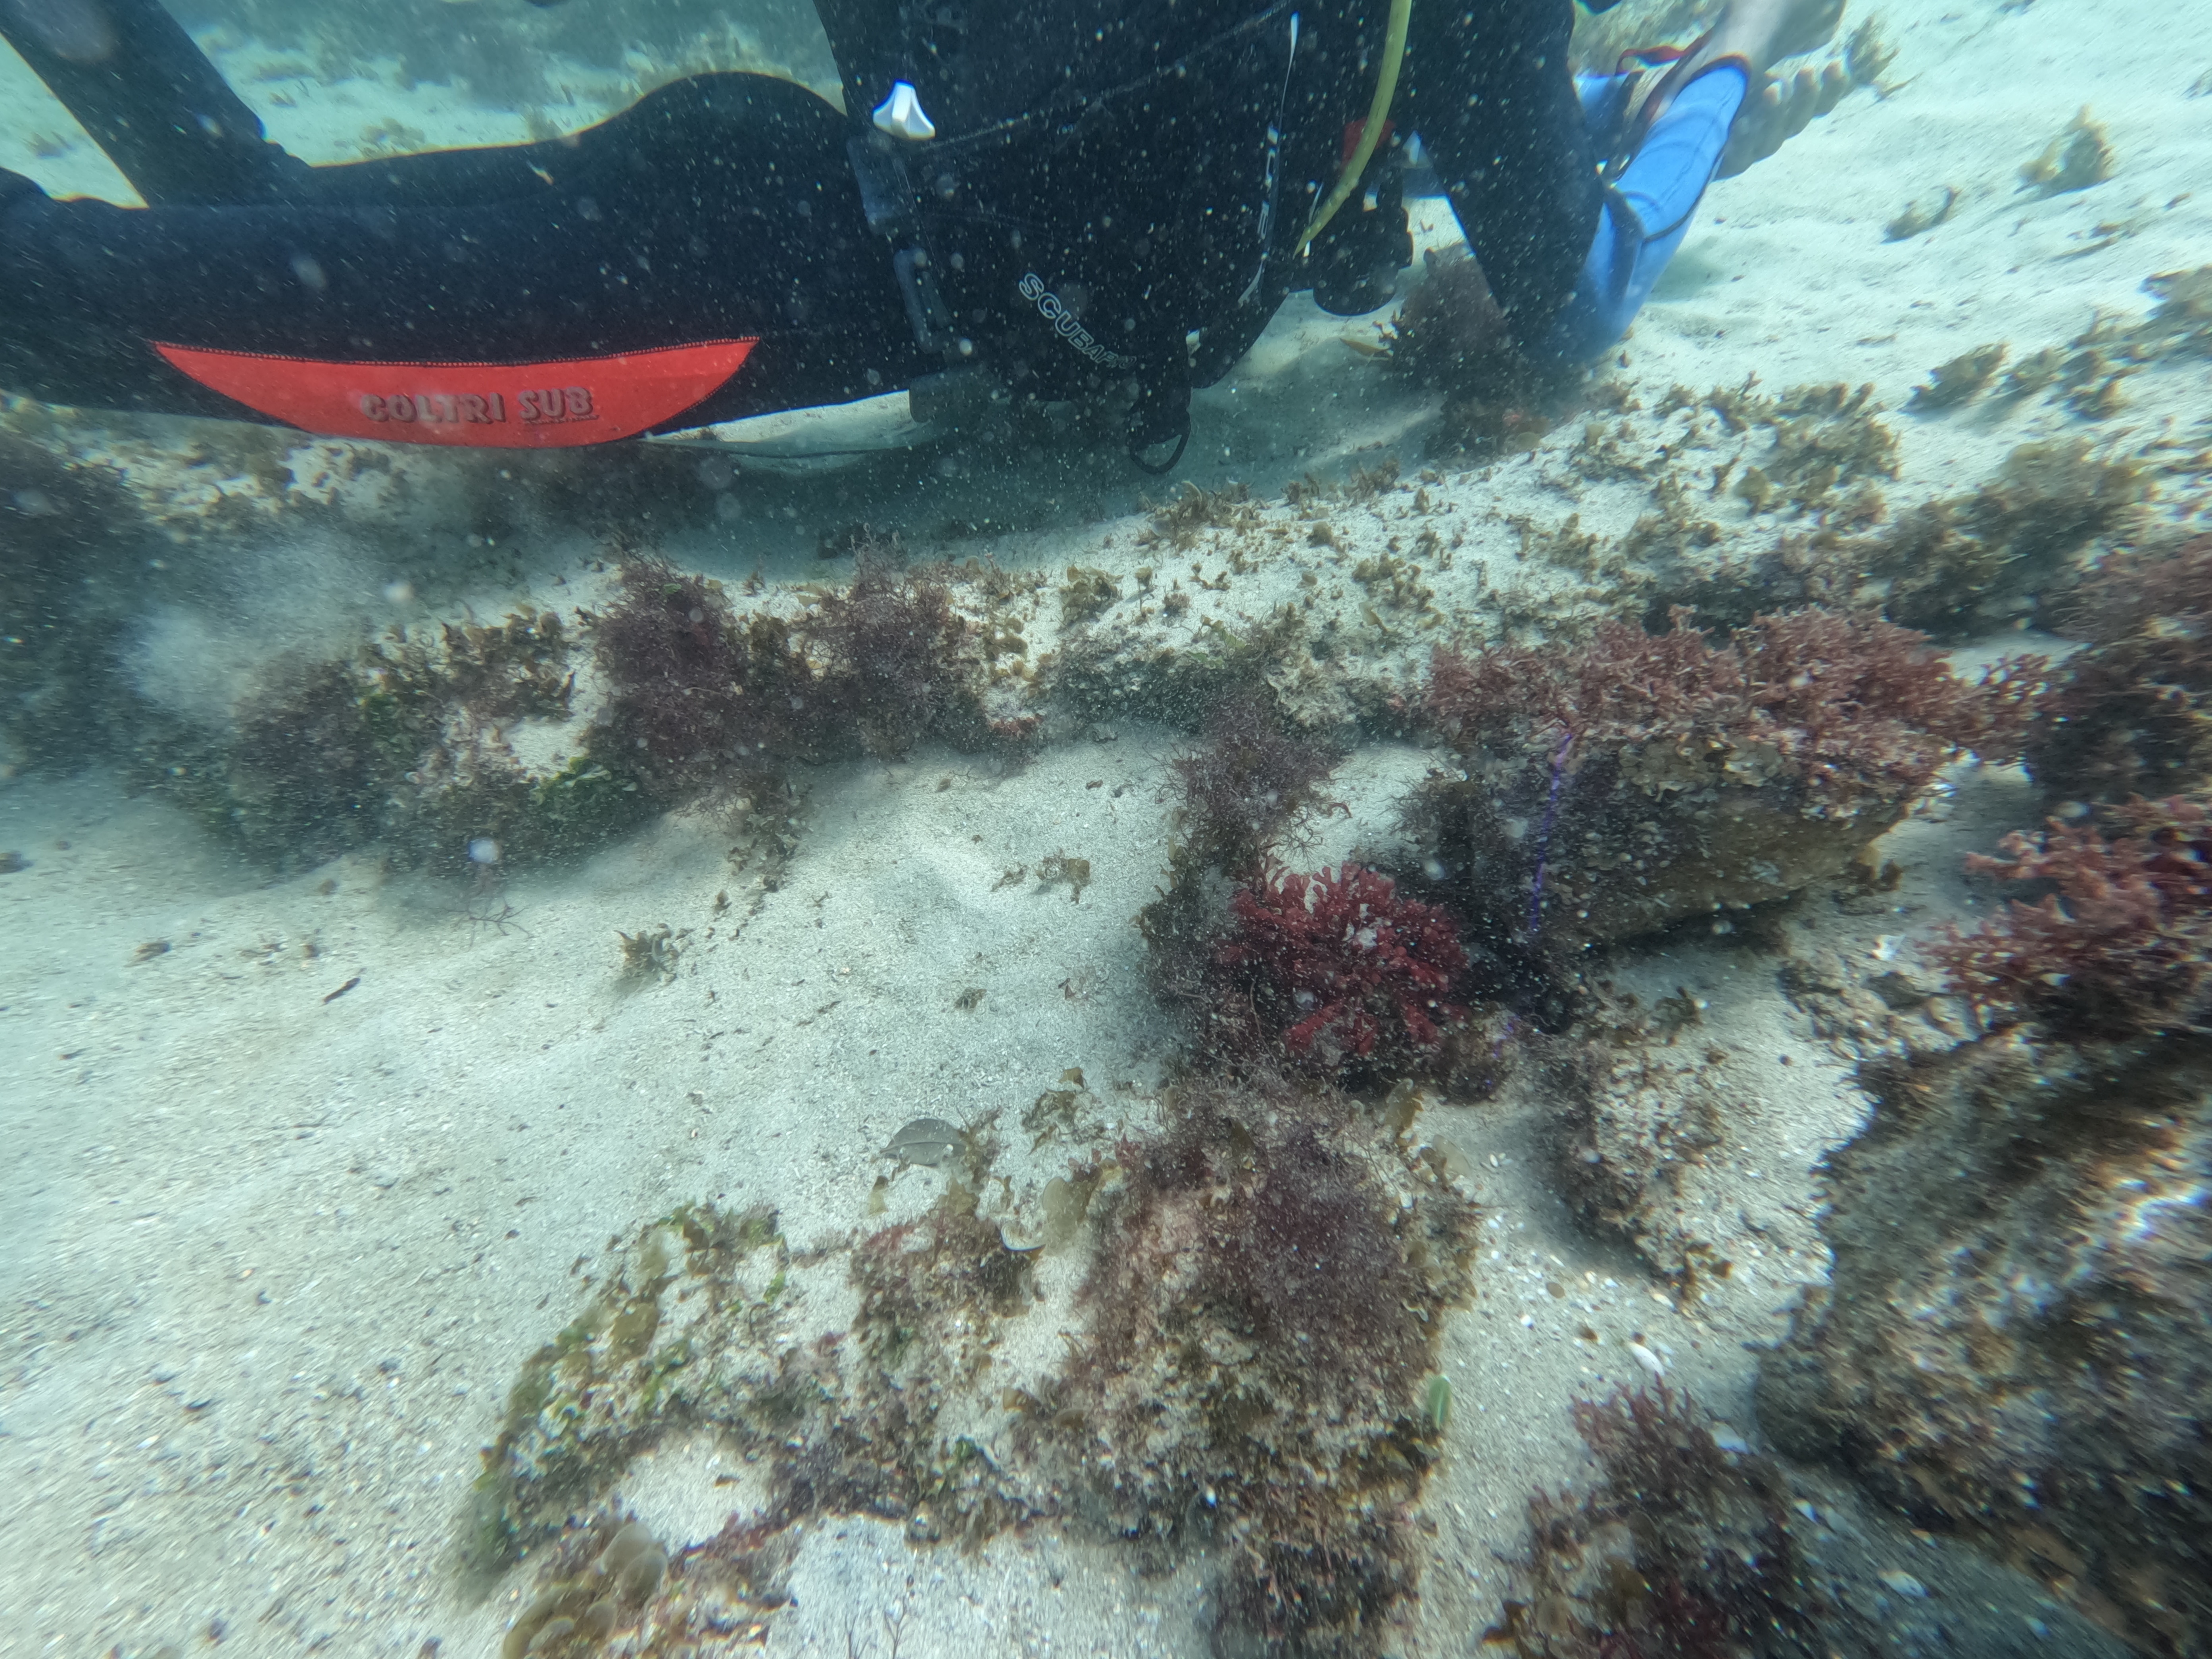

COLTRI SUB

SCUBA

Supplement: Supplementary file 966 [file G0714033.pdf › Ocean2/G0714033.pdf]

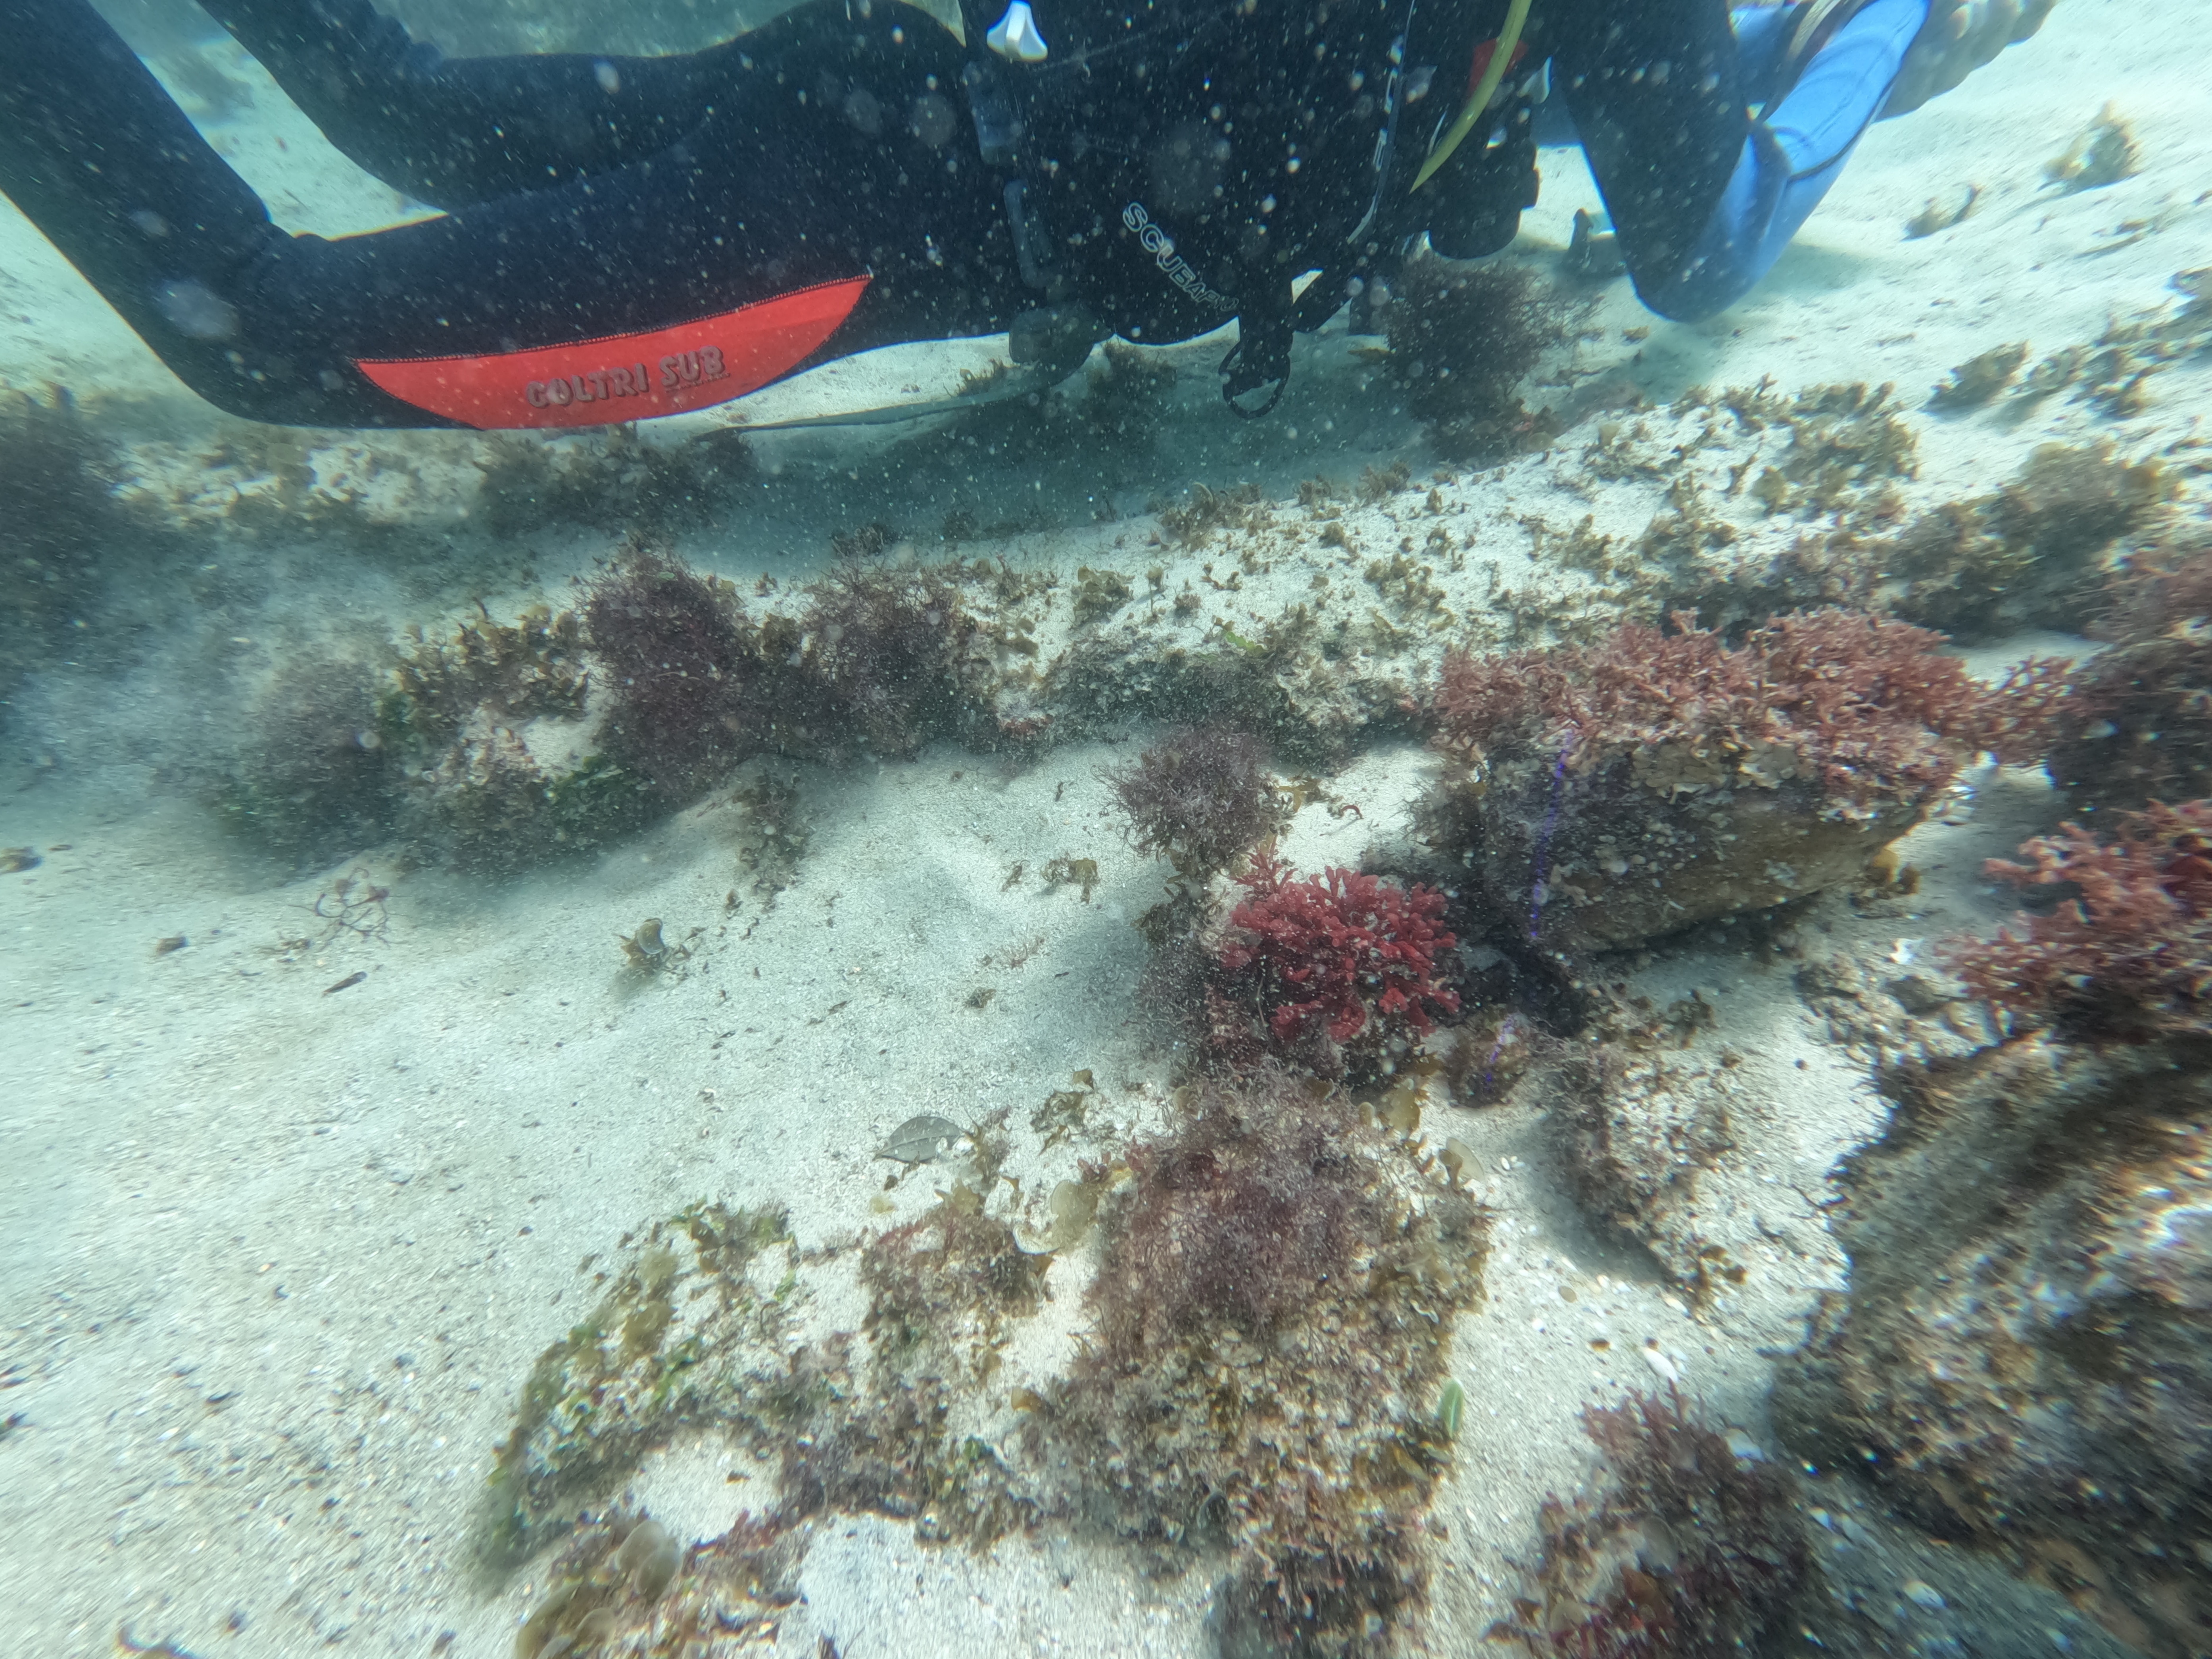

Supplement: Supplementary file 967 [file G0714034.pdf › Ocean2/G0714034.pdf]

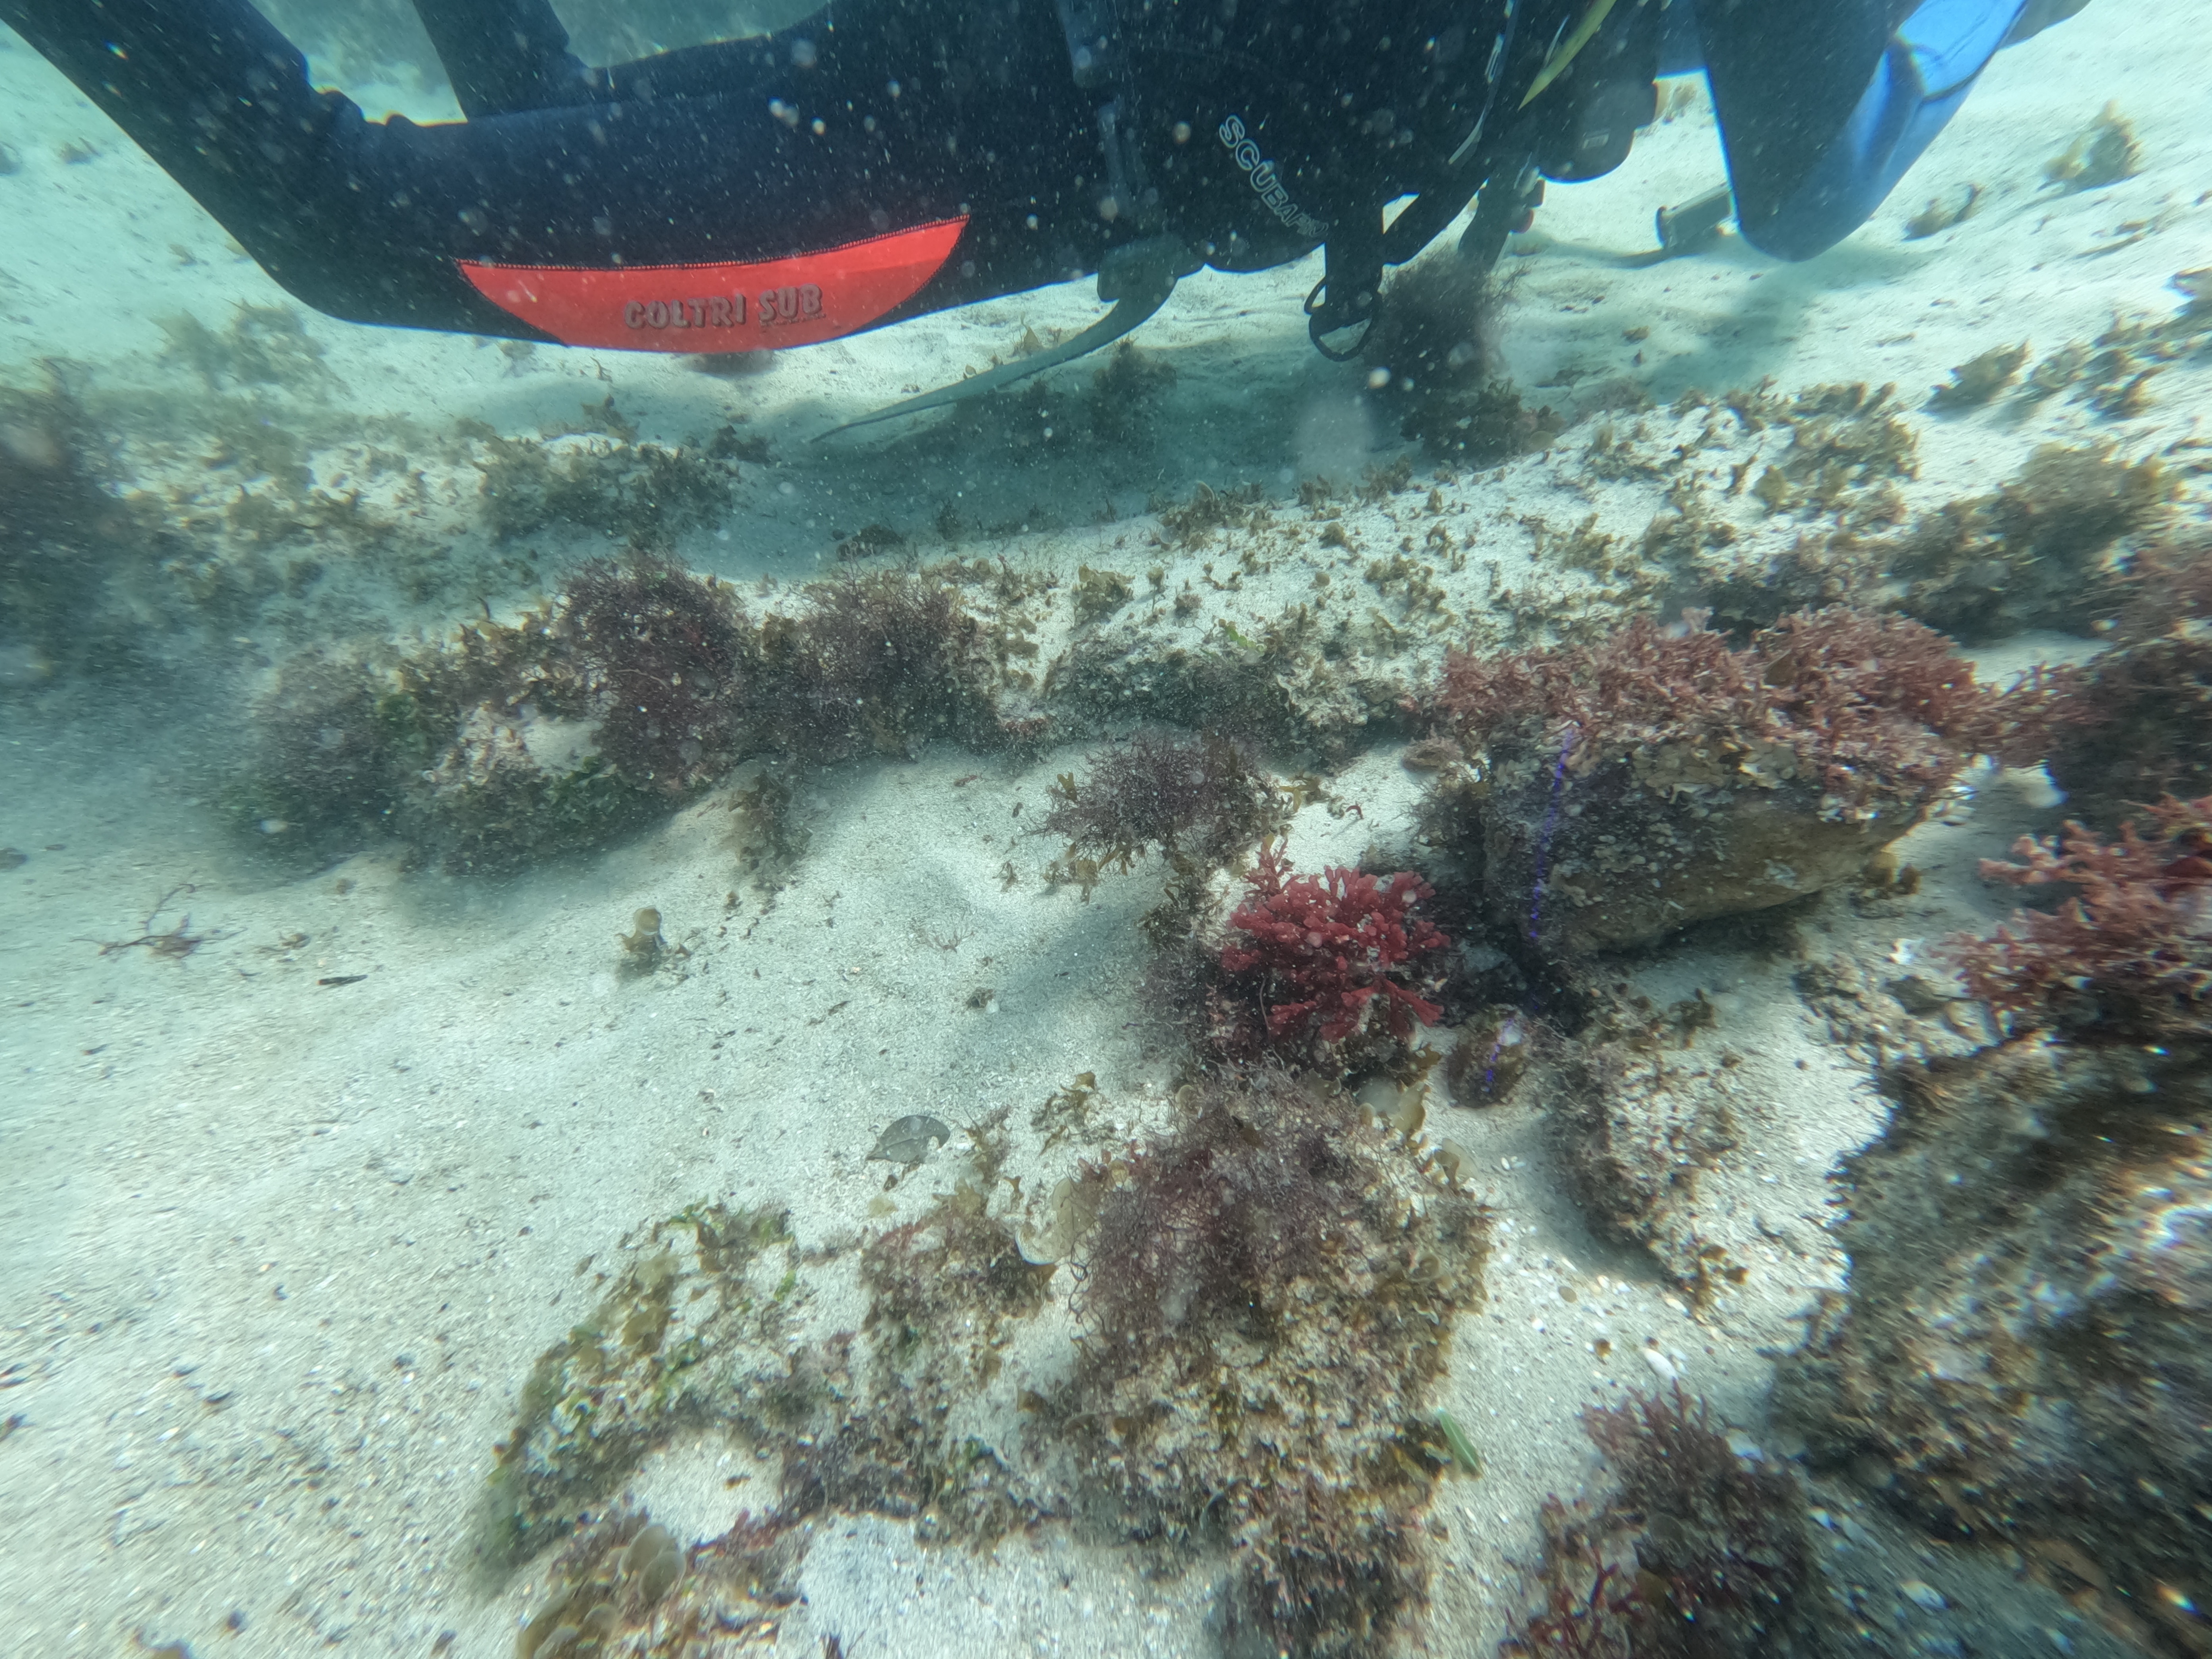

Supplement: Supplementary file 968 [file G0714035.pdf › Ocean2/G0714035.pdf]

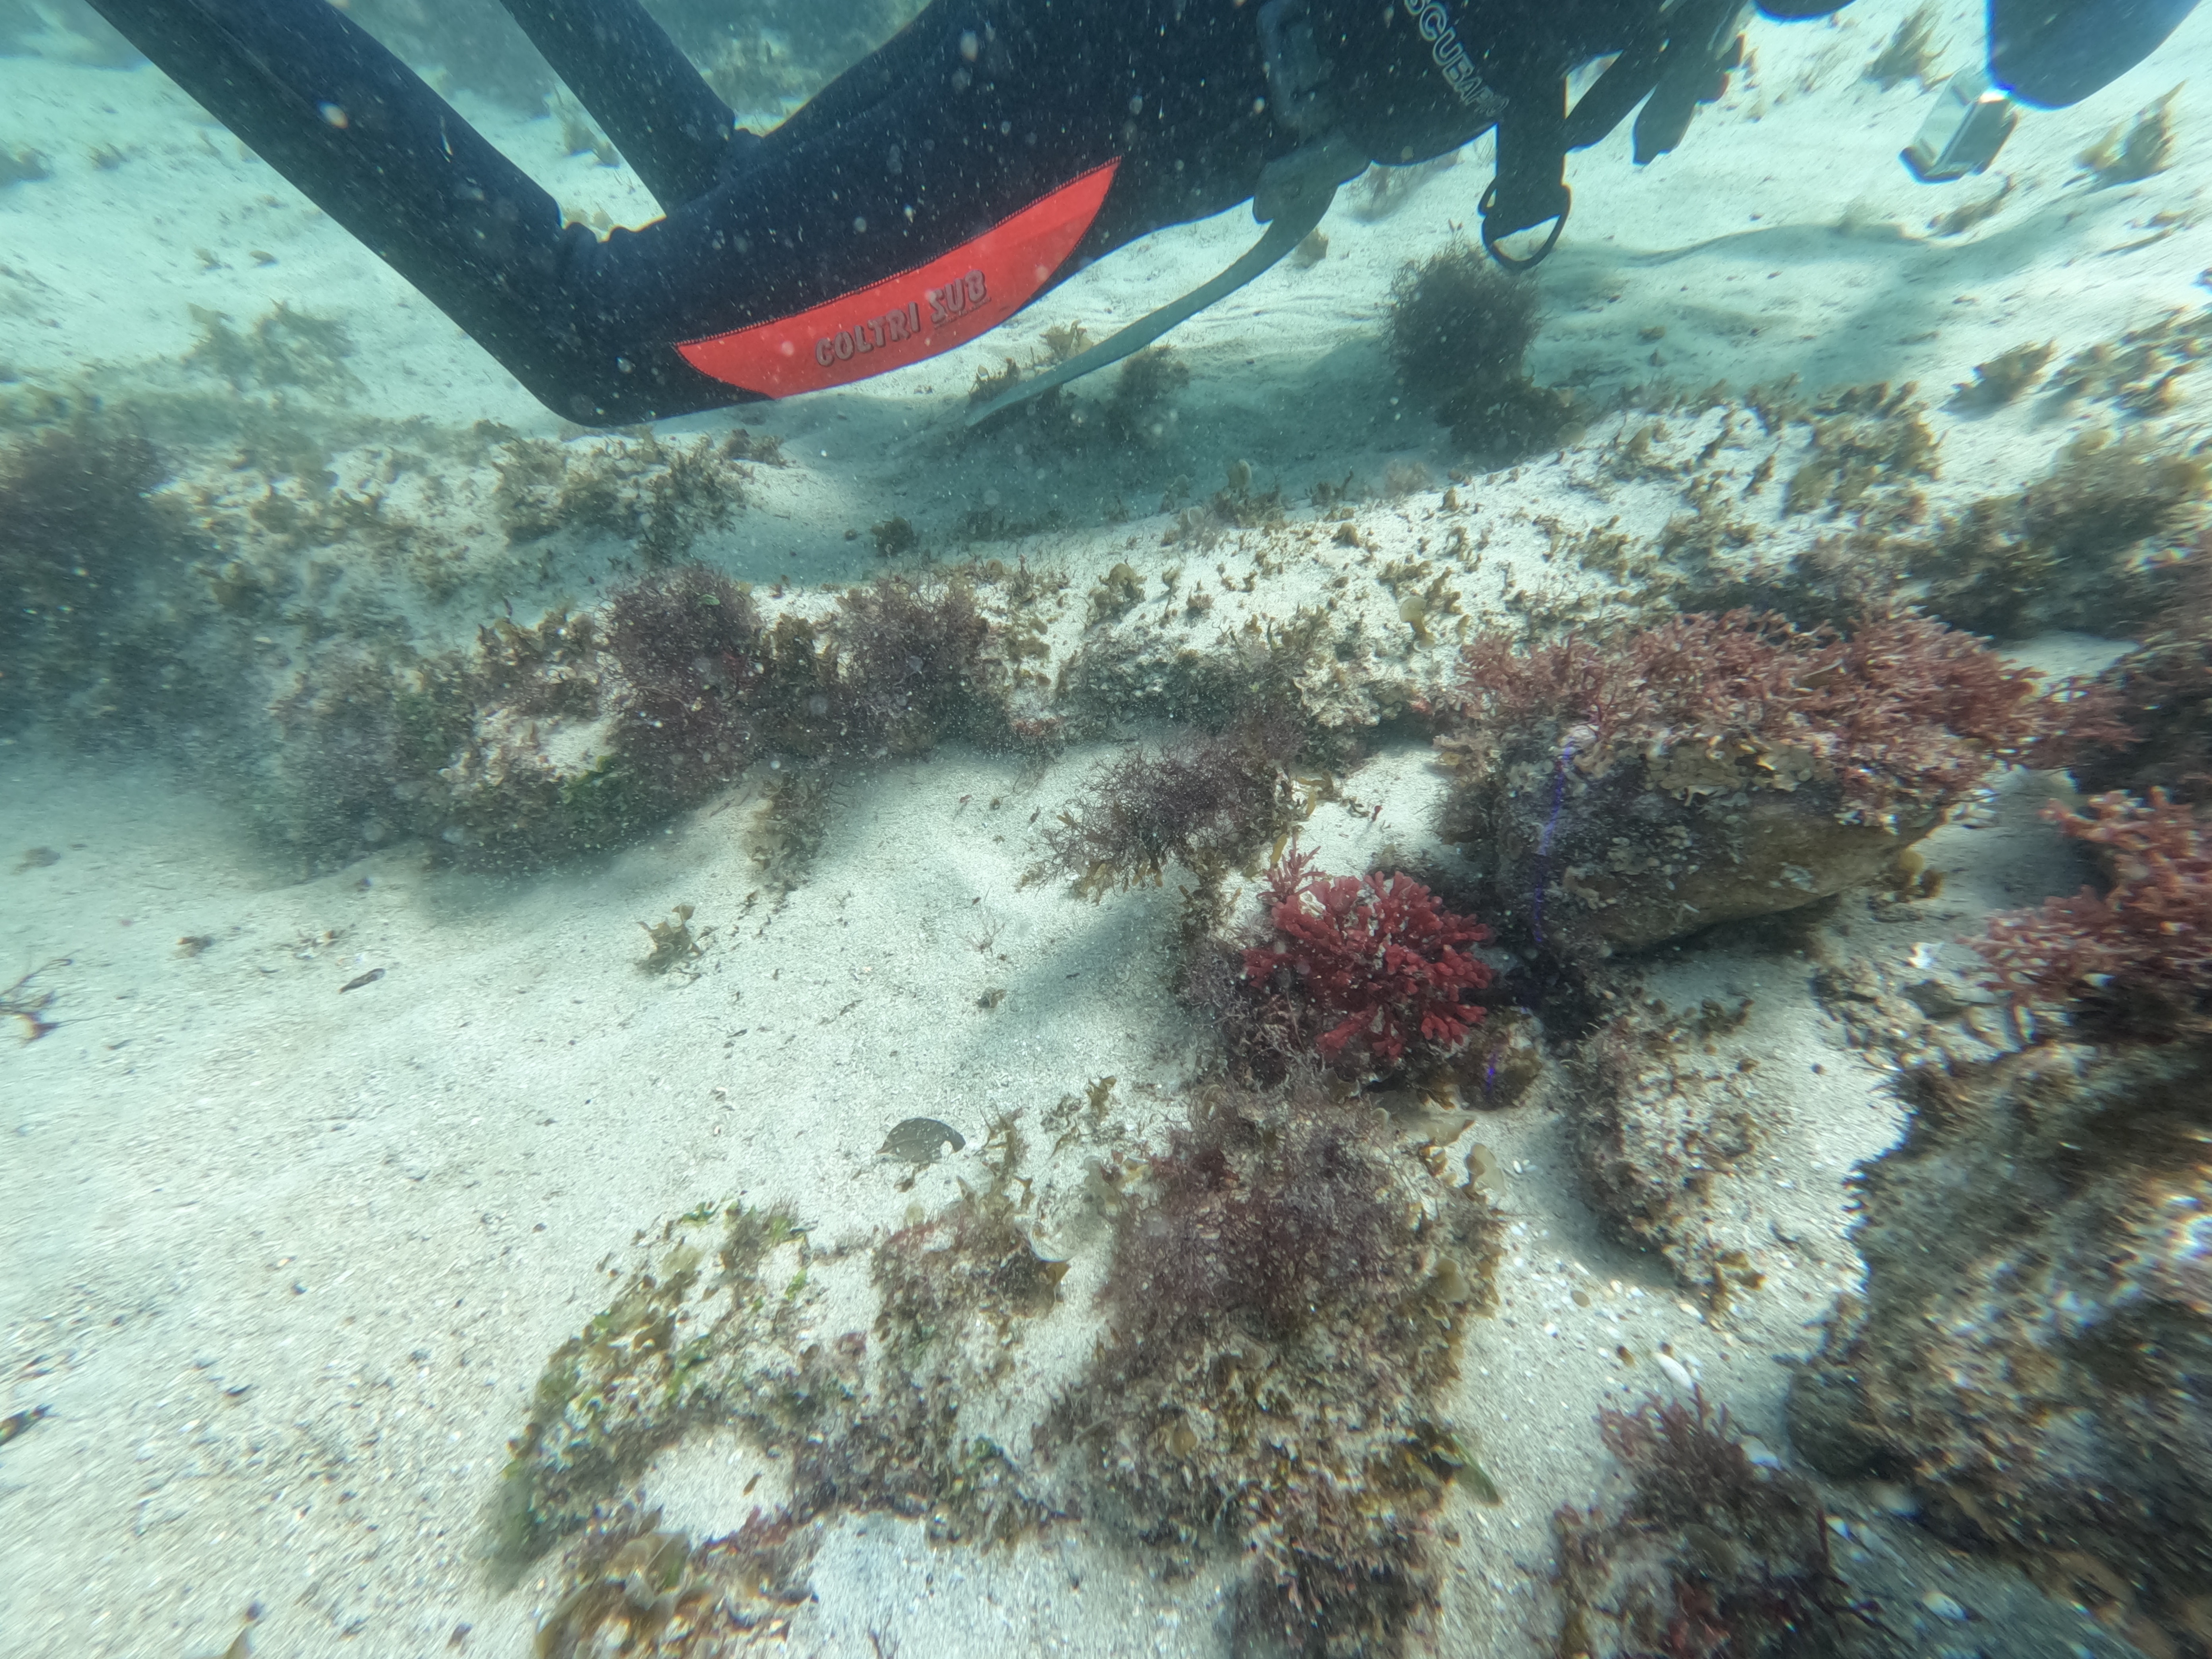

Supplement: Supplementary file 969 [file G0714036.pdf › Ocean2/G0714036.pdf]

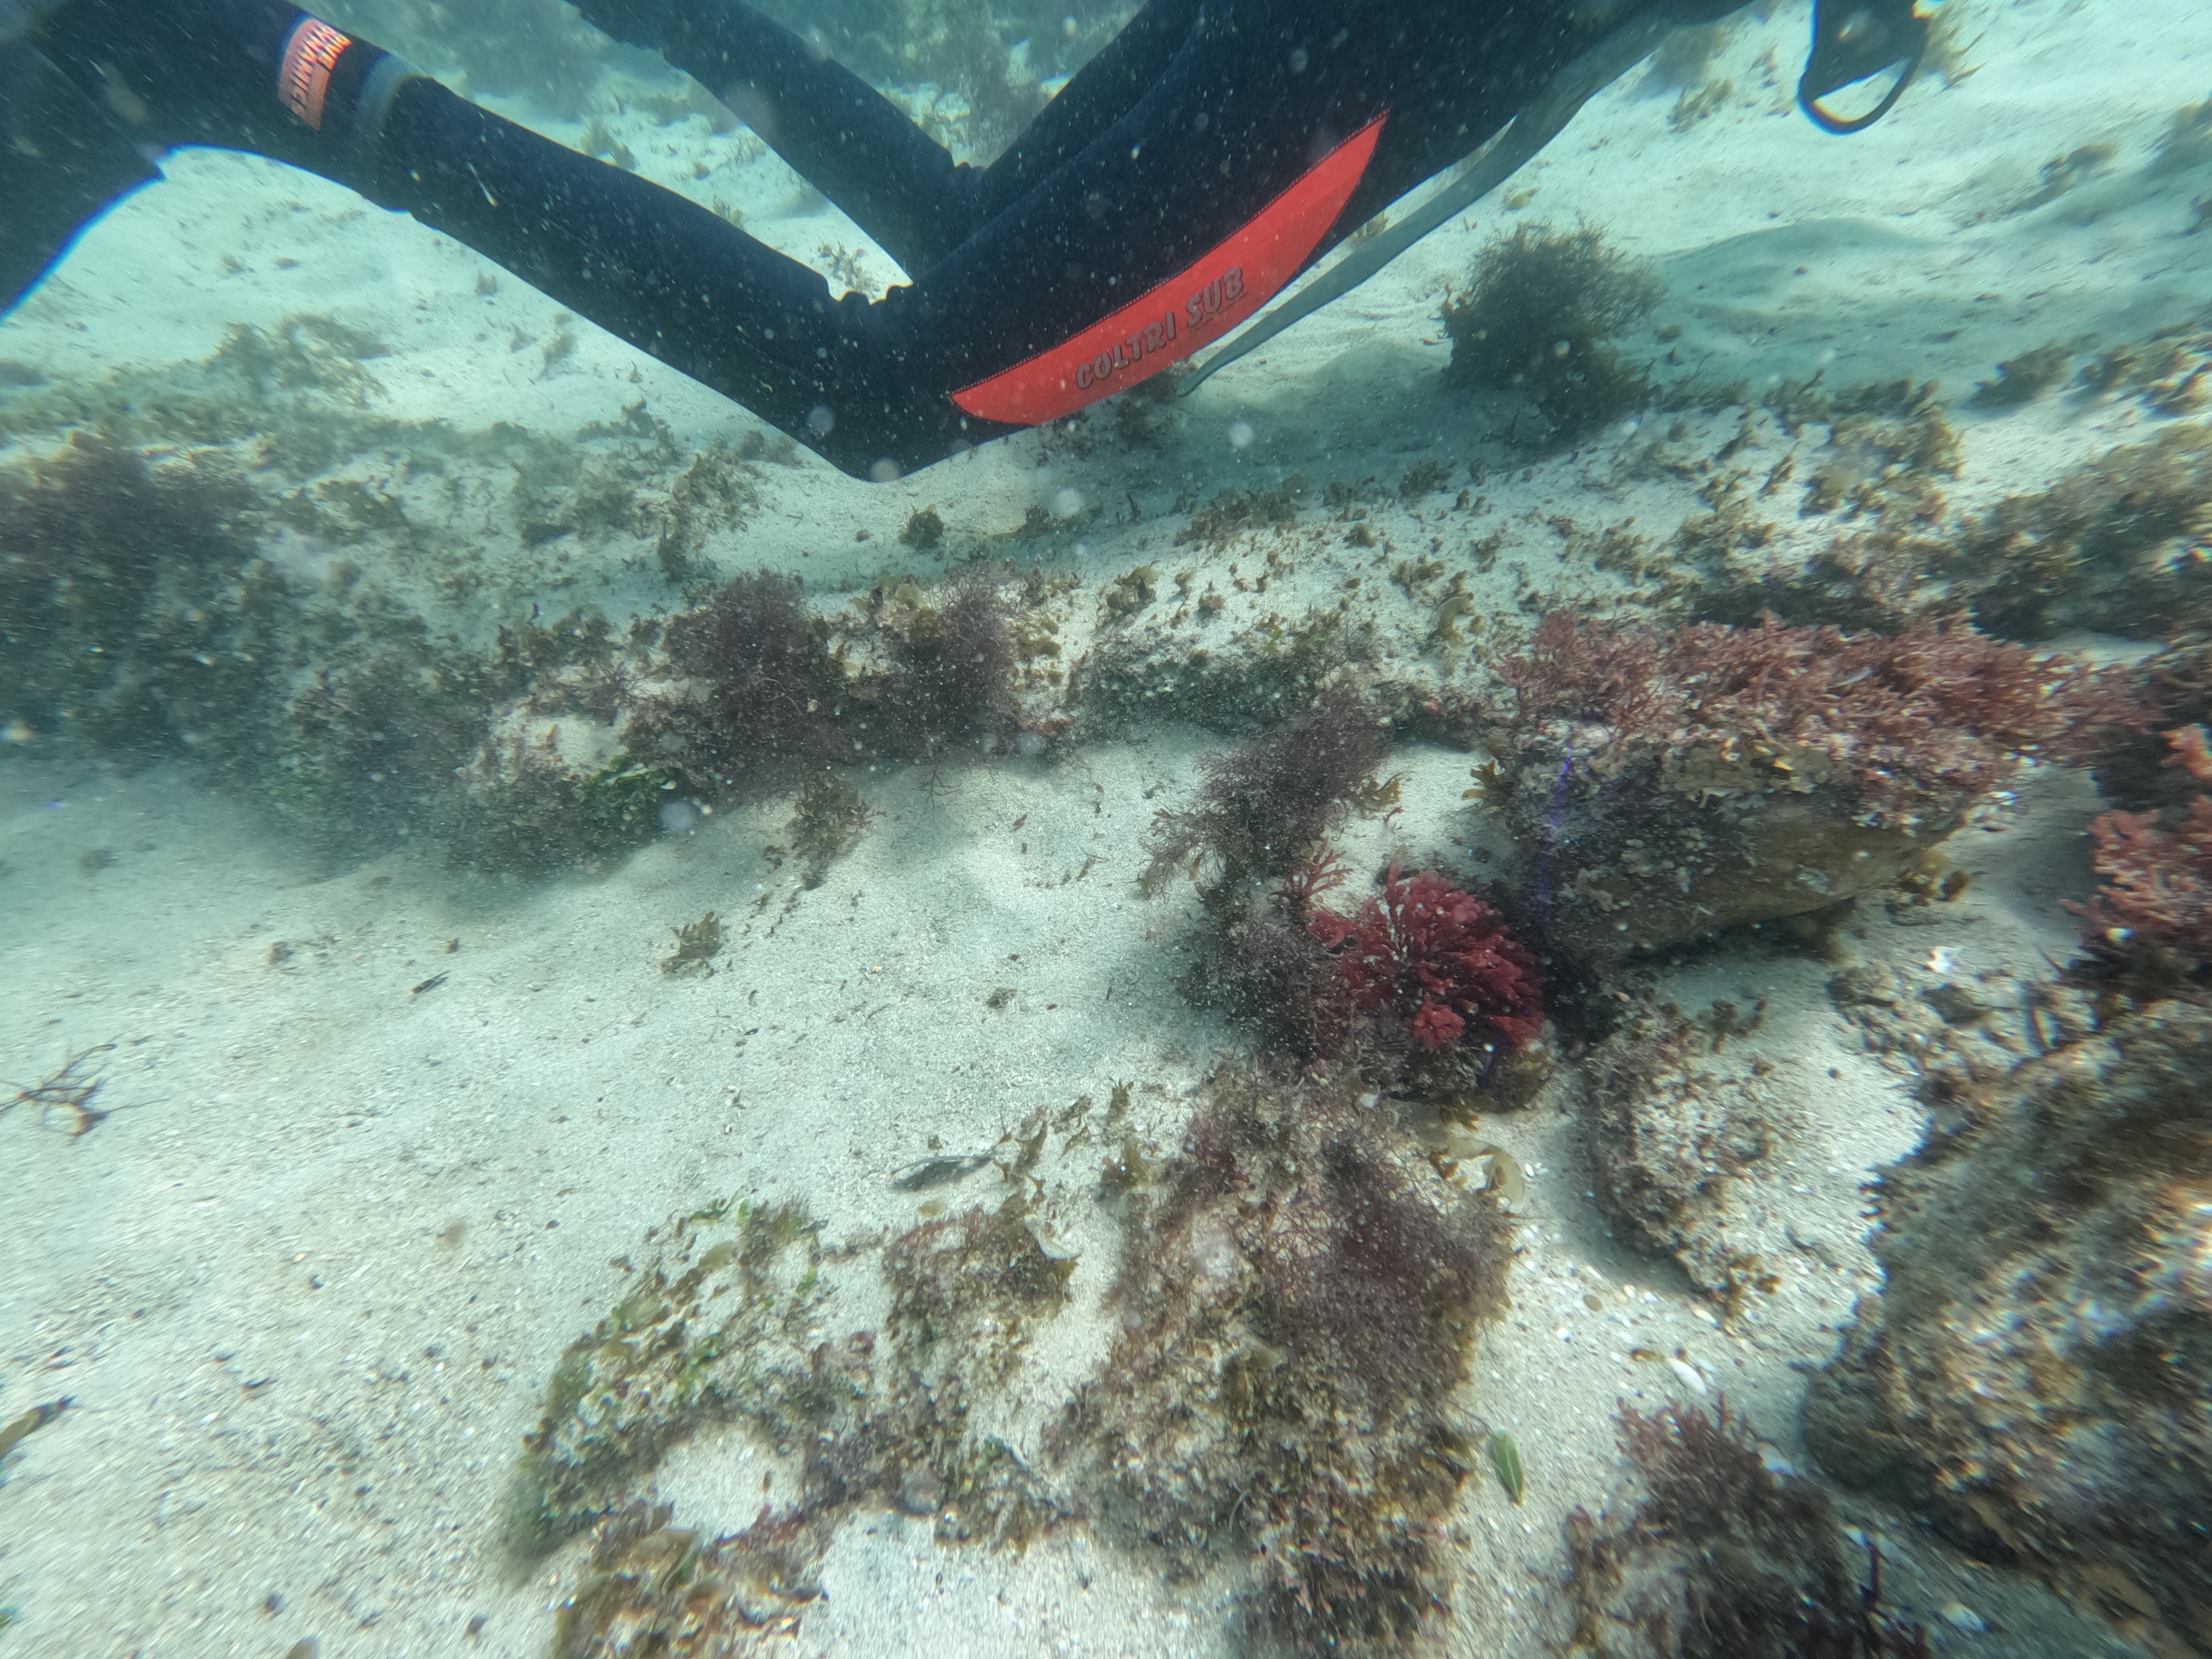

COLTRI SUB

Supplement: Supplementary file 970 [file G0714037.pdf › Ocean2/G0714037.pdf]

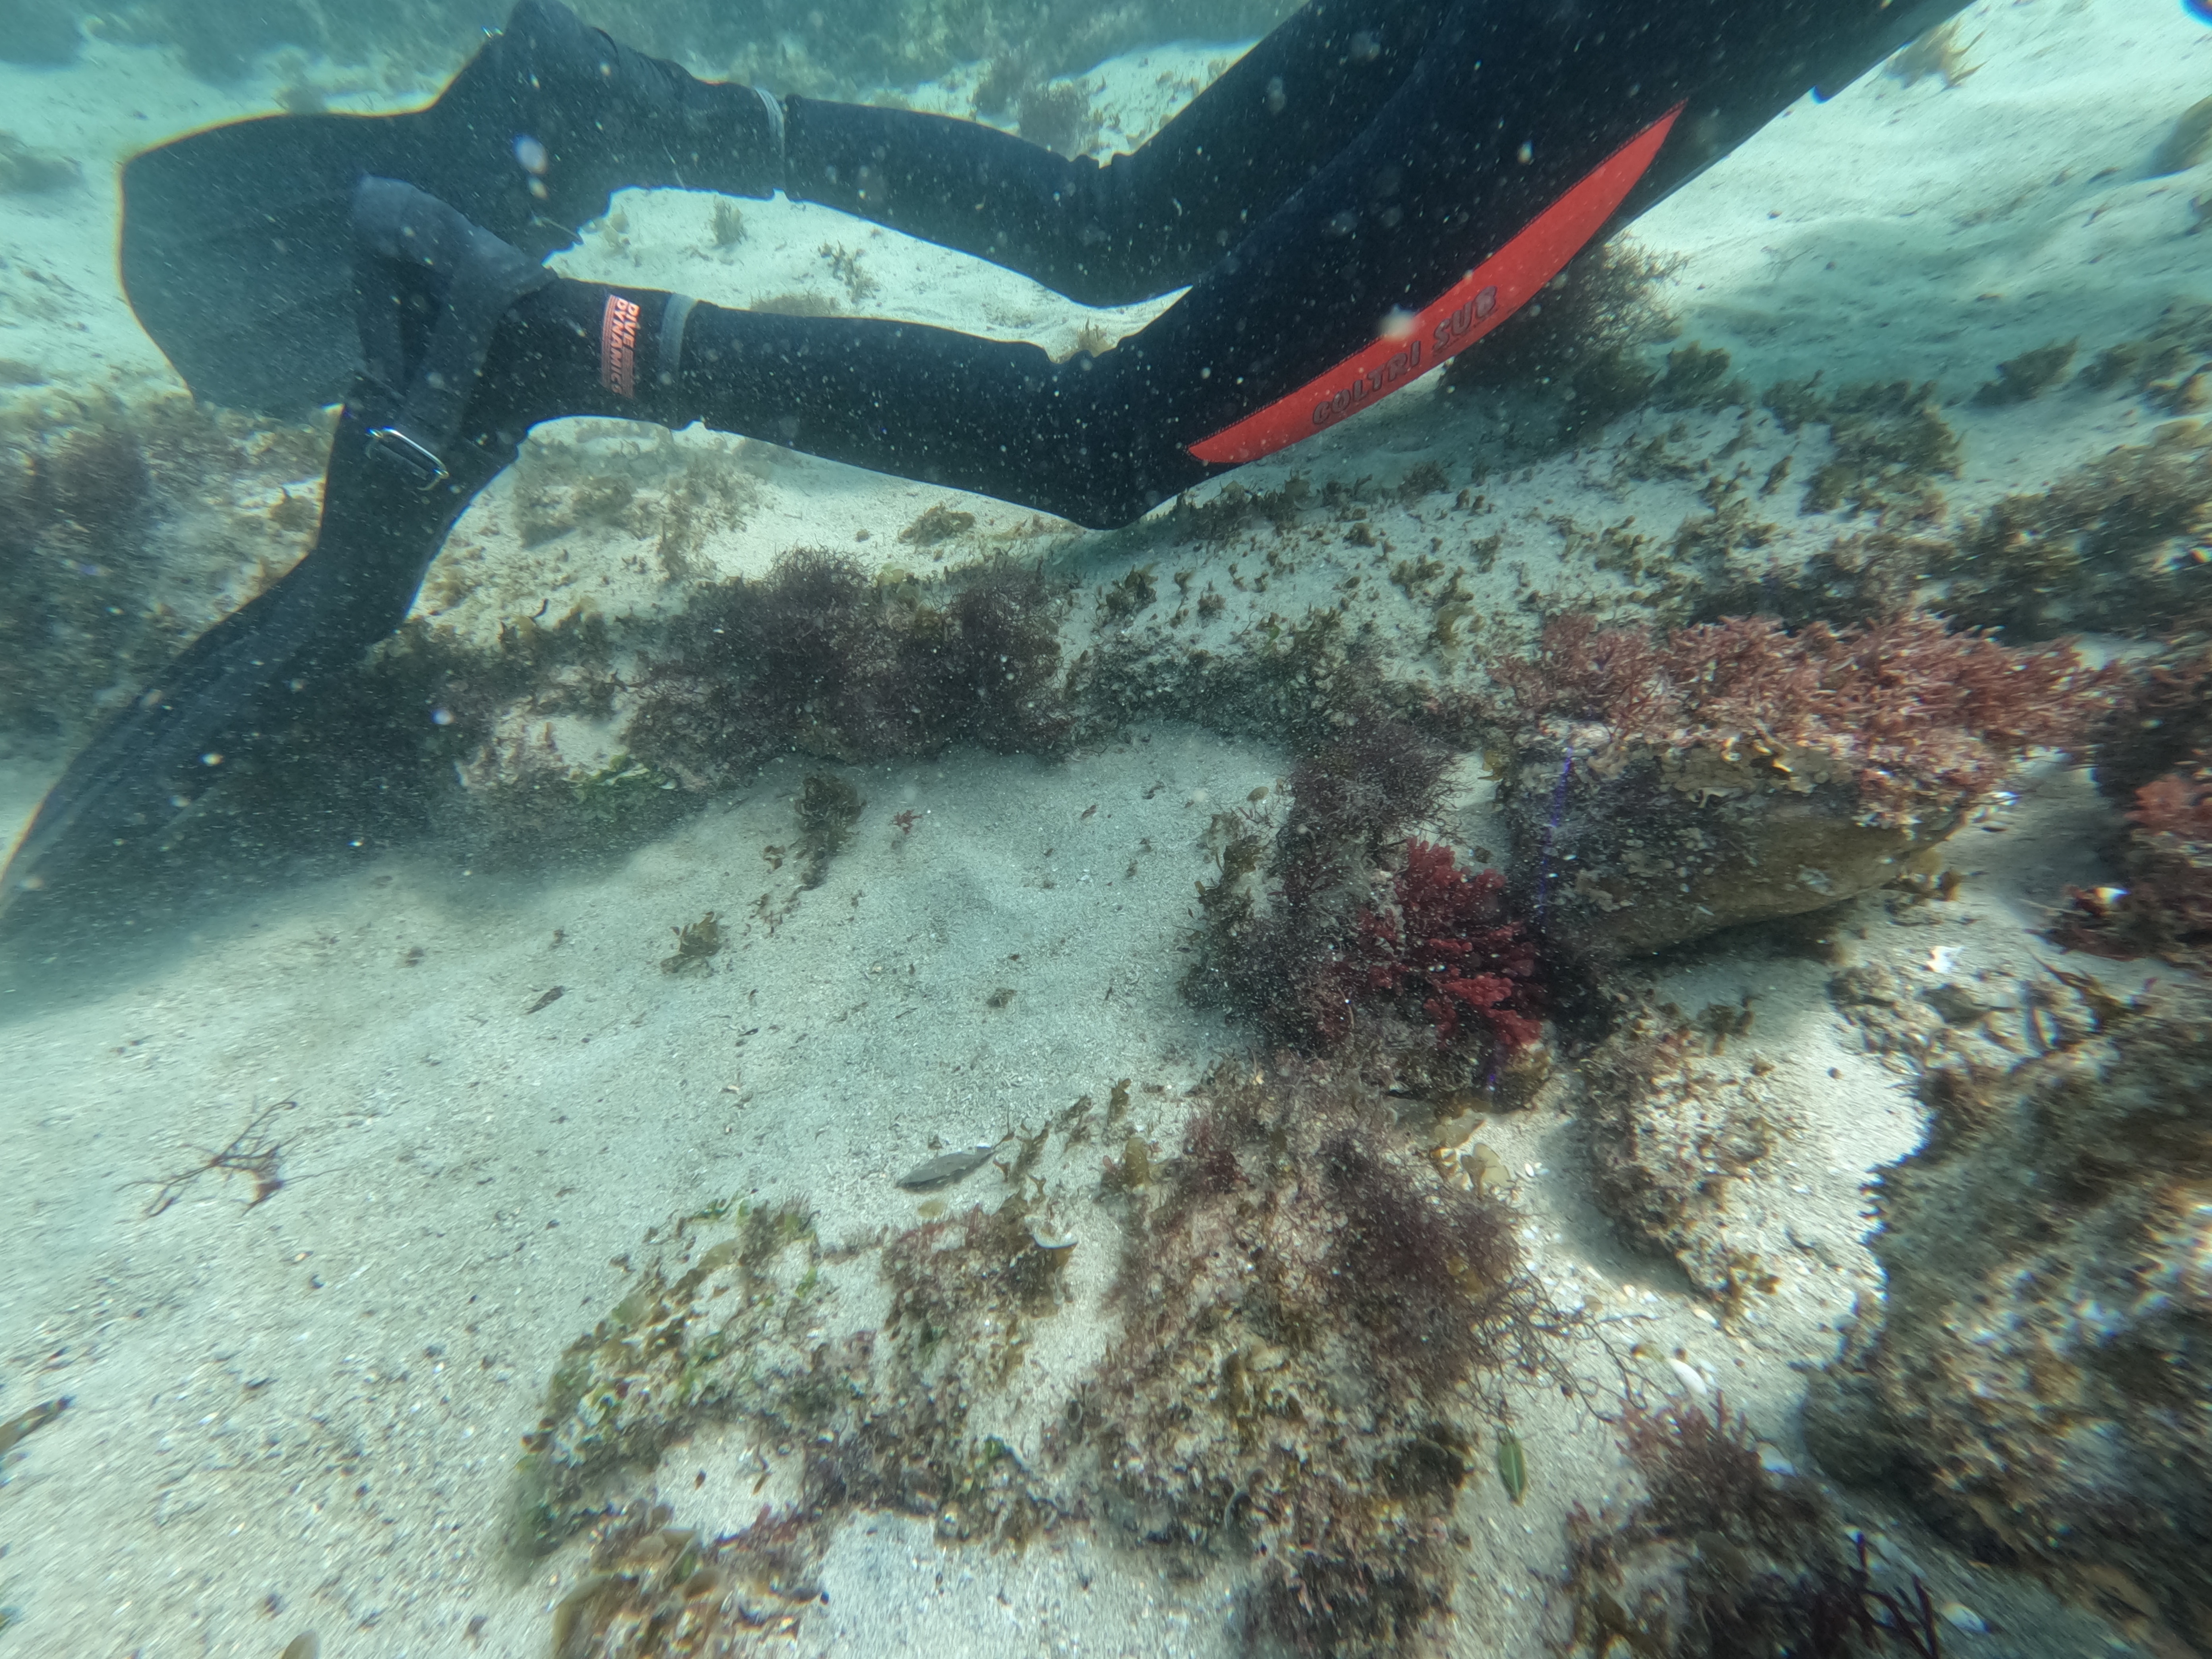

Supplement: Supplementary file 971 [file G0714038.pdf › Ocean2/G0714038.pdf]

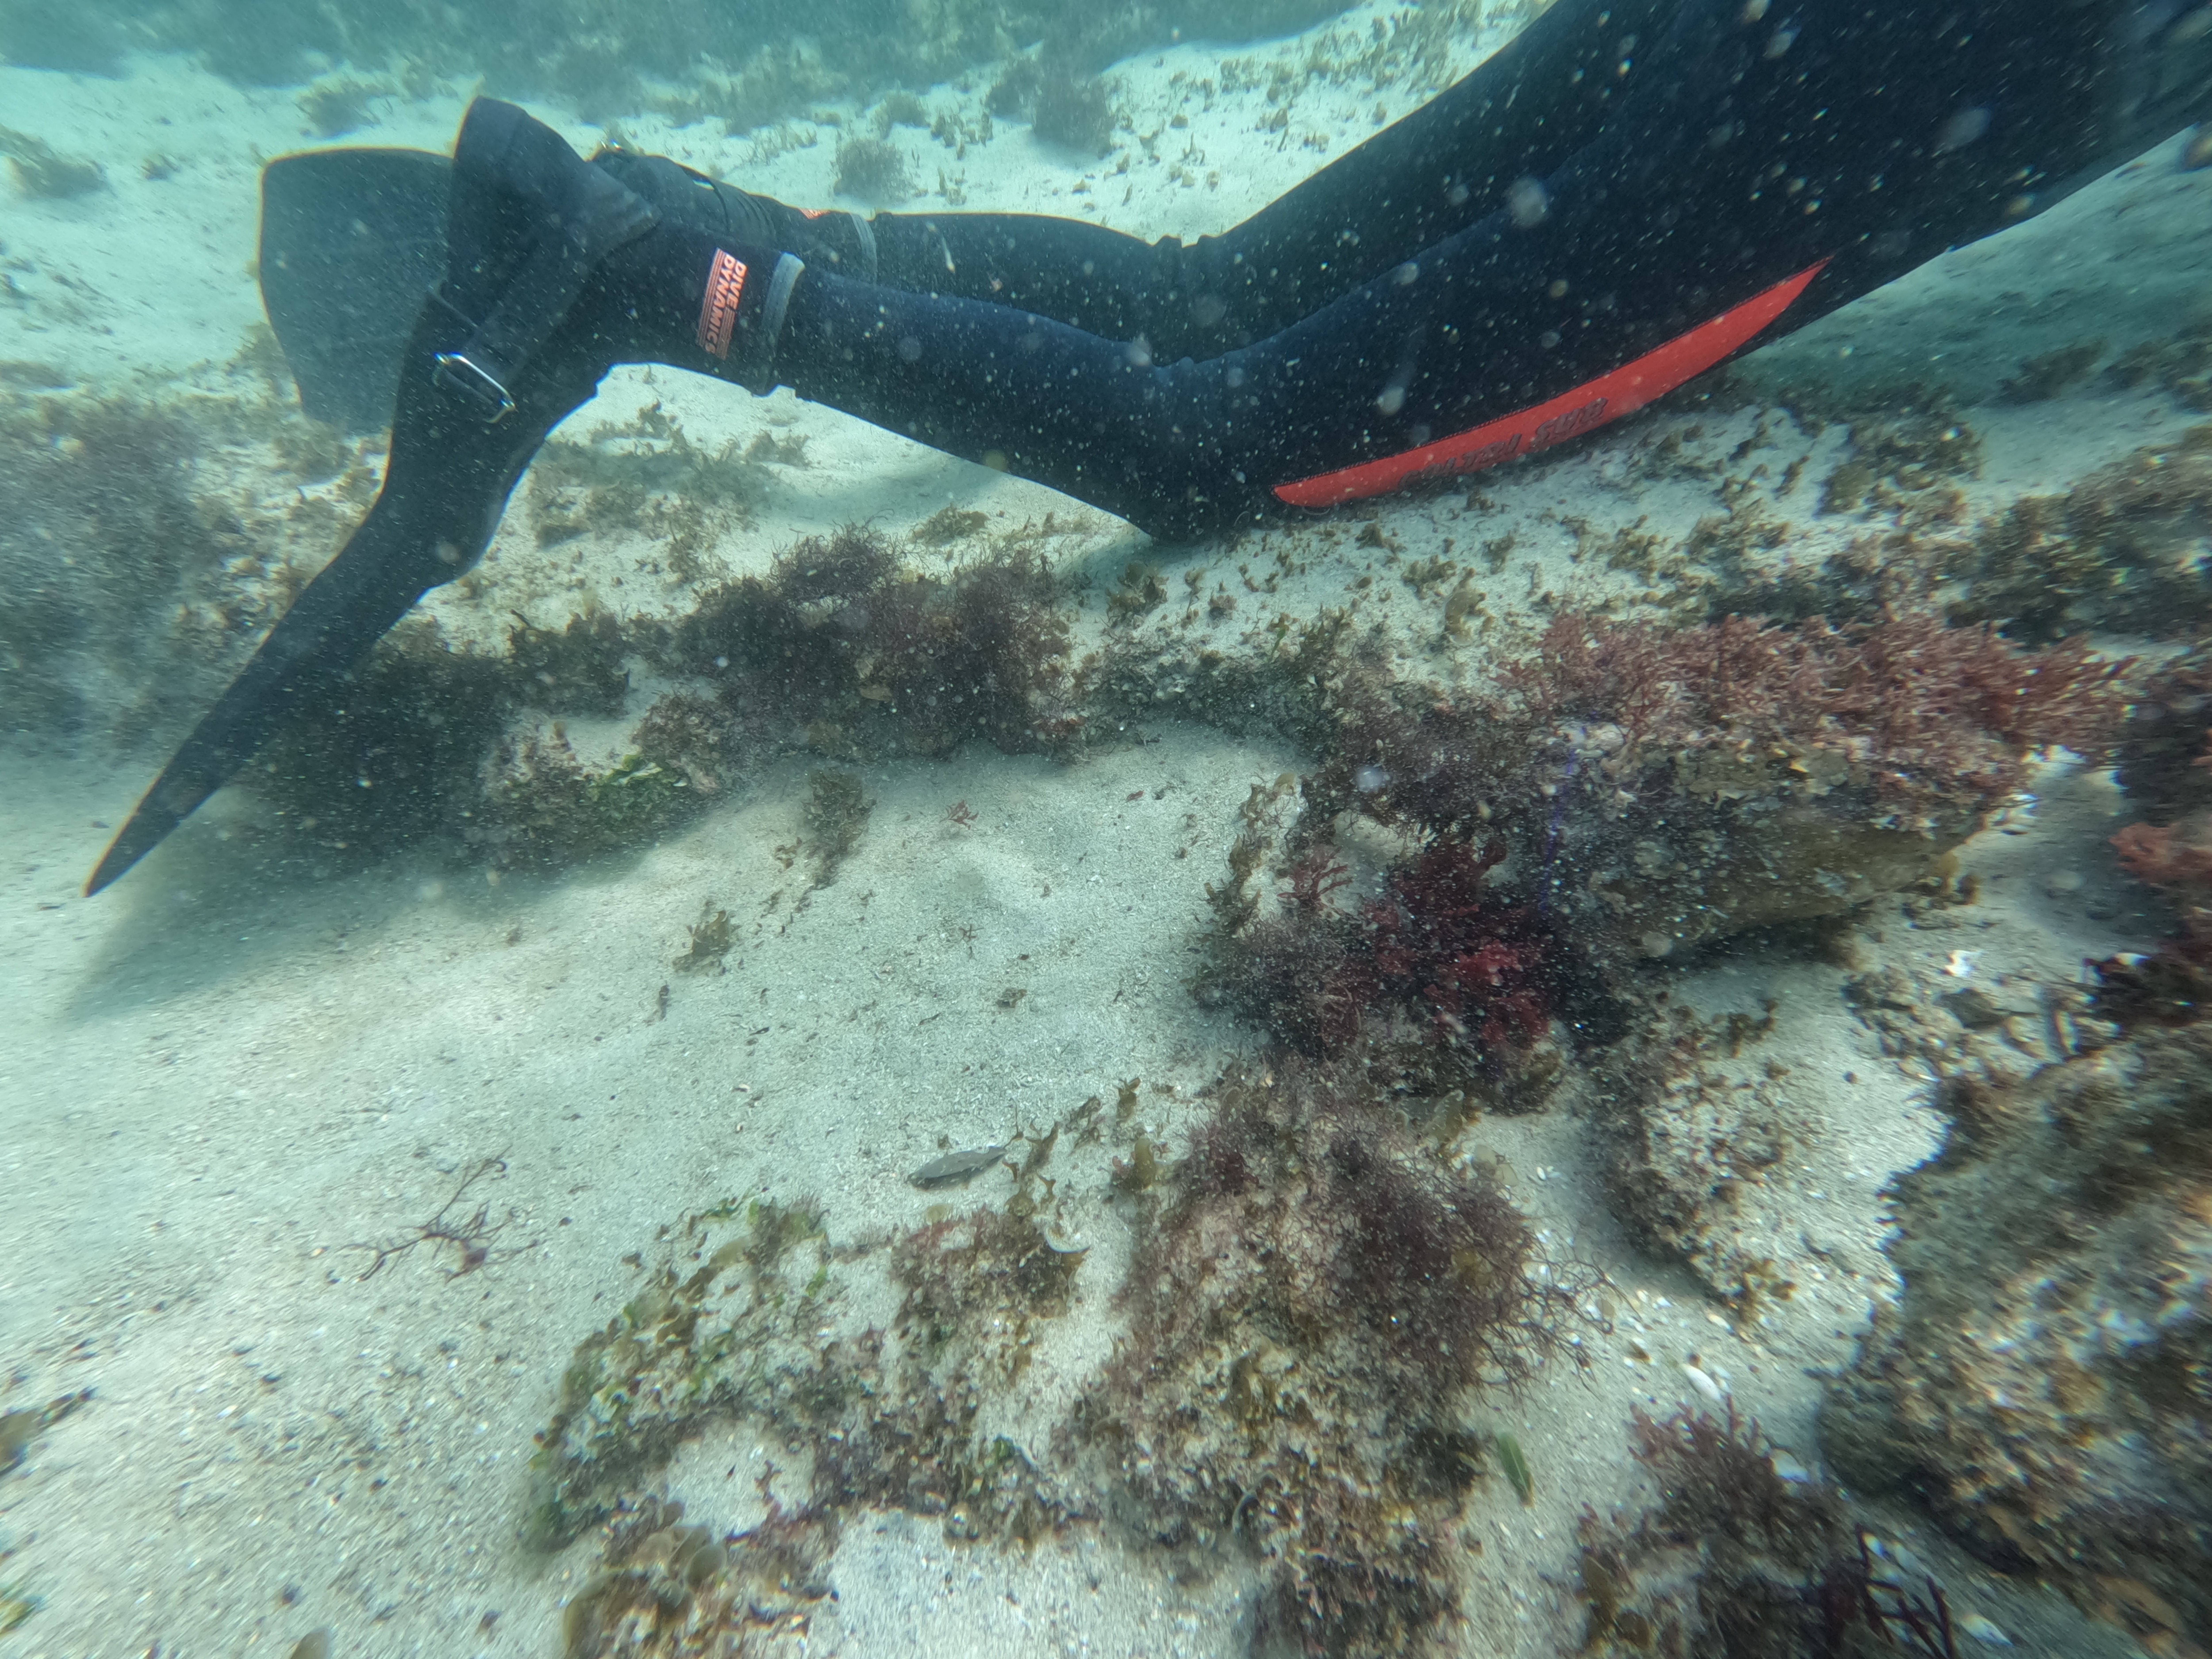

Supplement: Supplementary file 972 [file G0714039.pdf › Ocean2/G0714039.pdf]

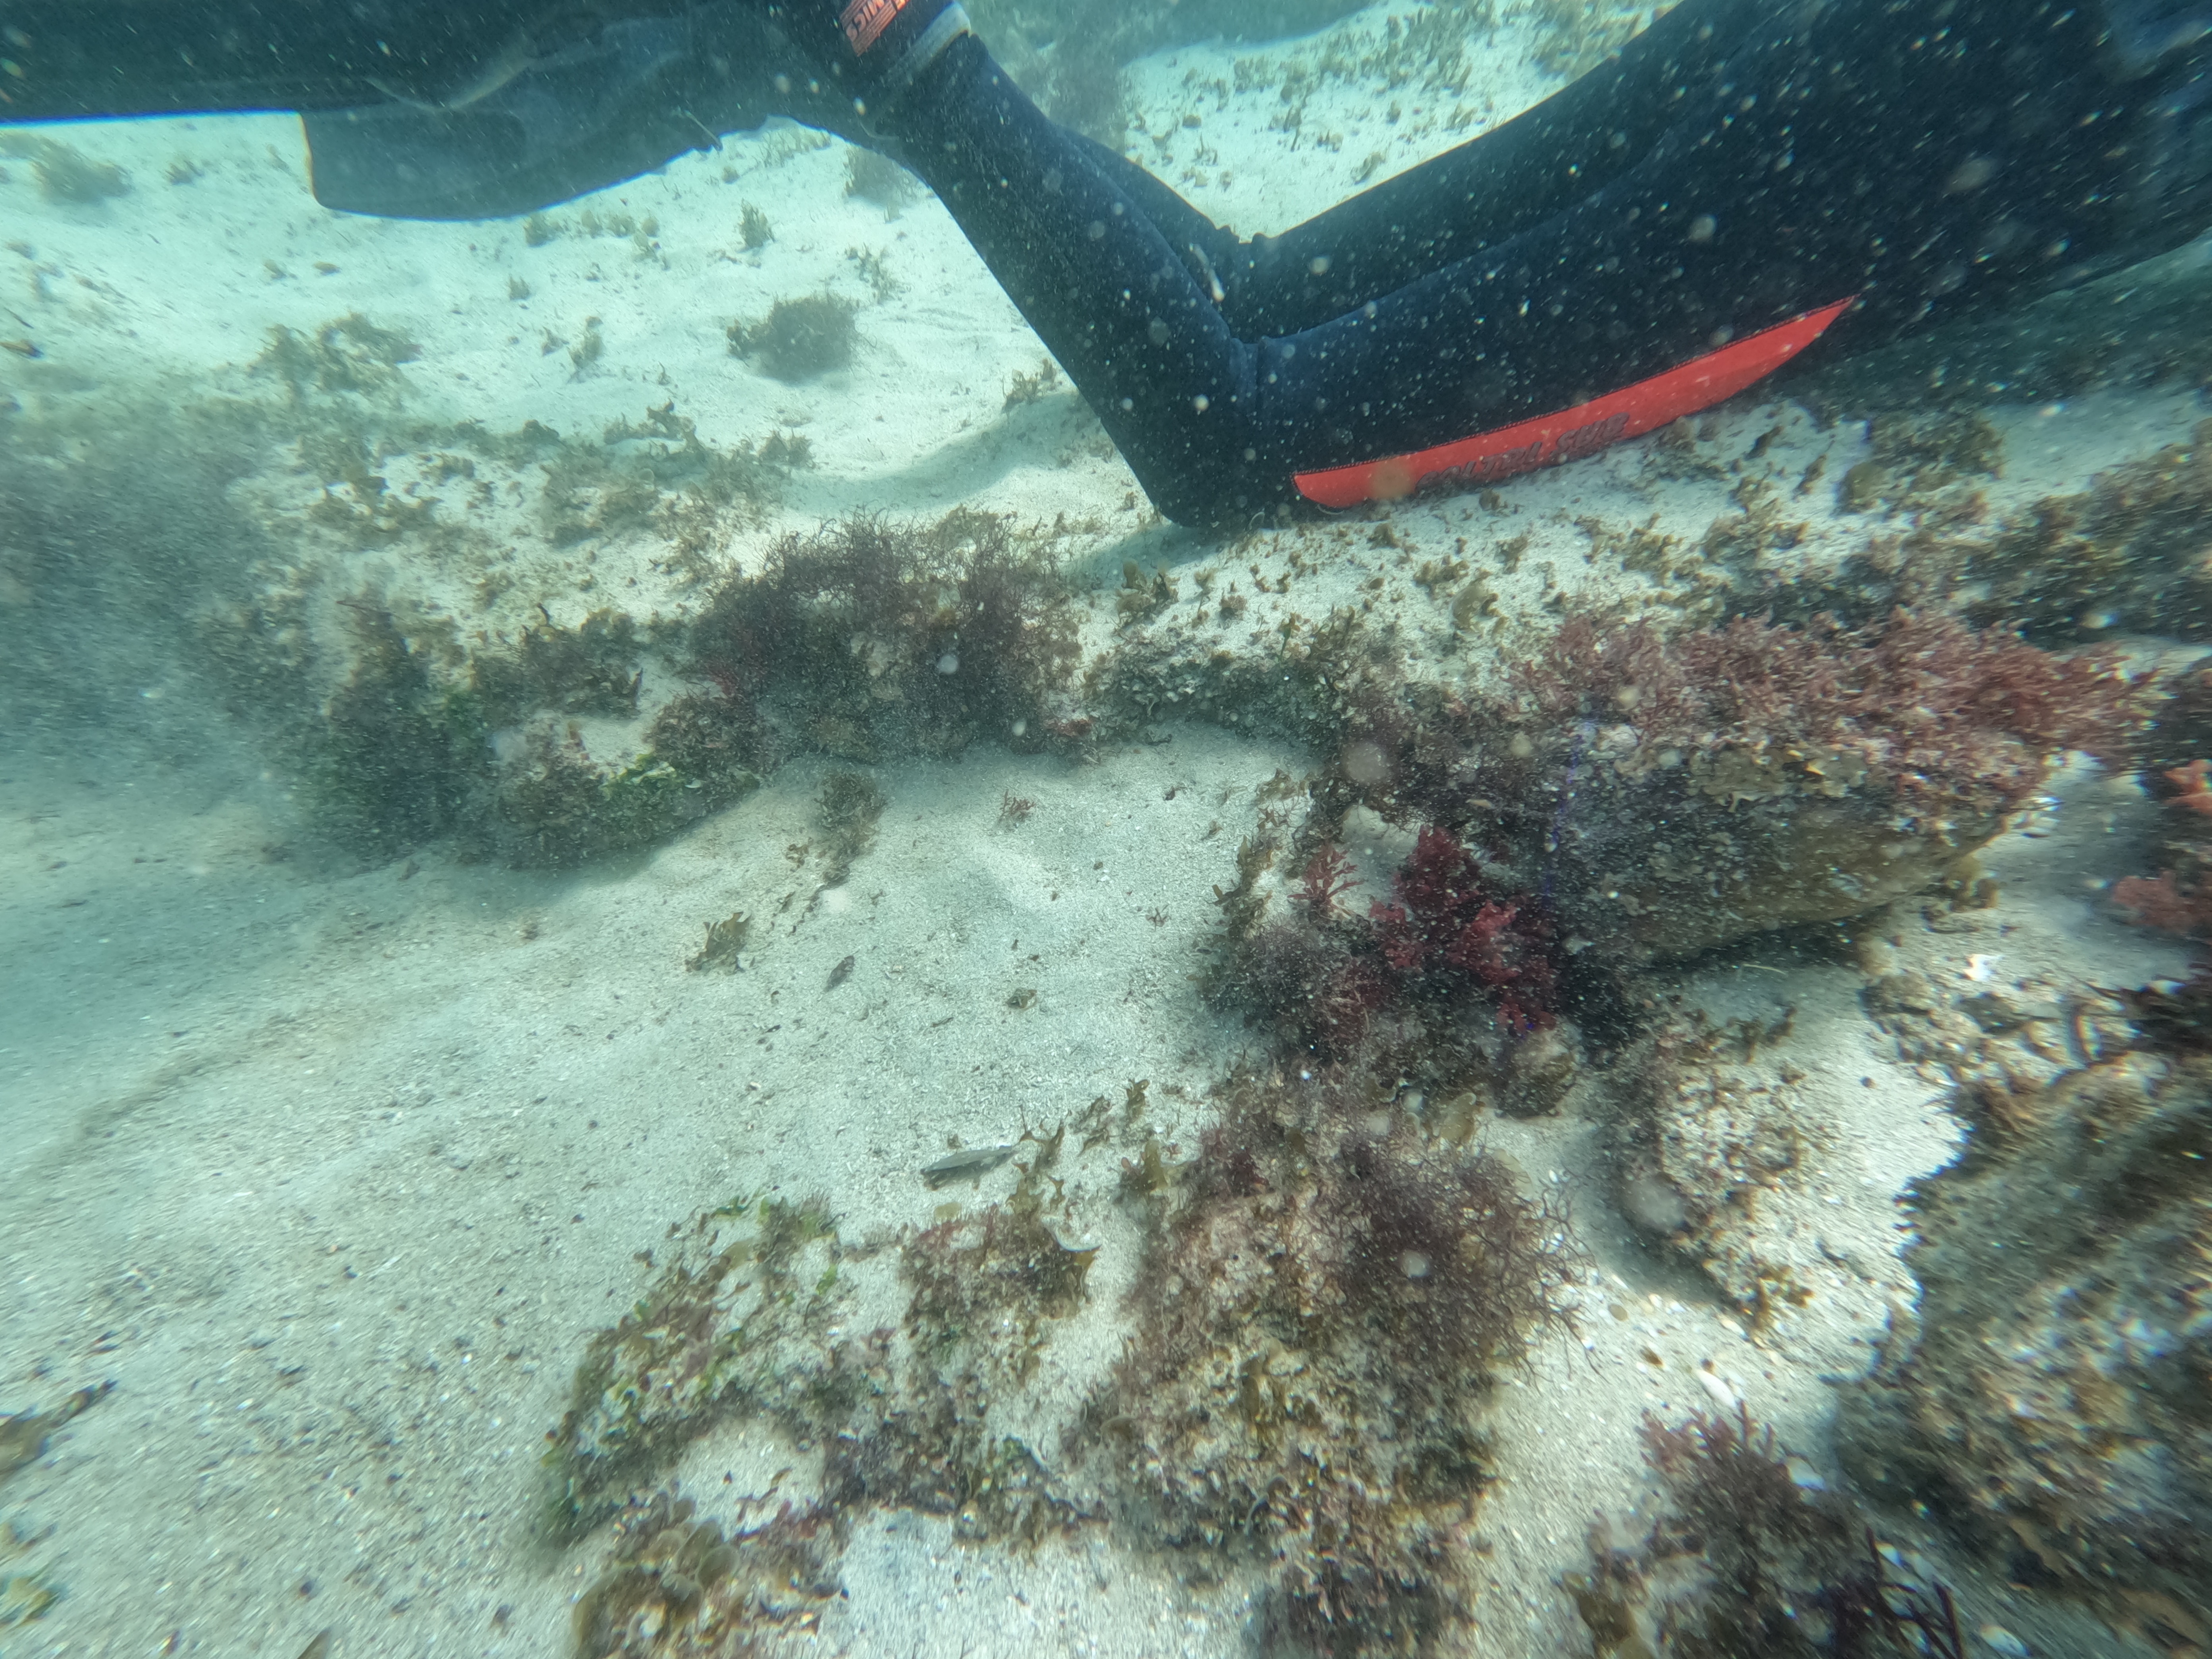

Supplement: Supplementary file 973 [file G0714040.pdf › Ocean2/G0714040.pdf]

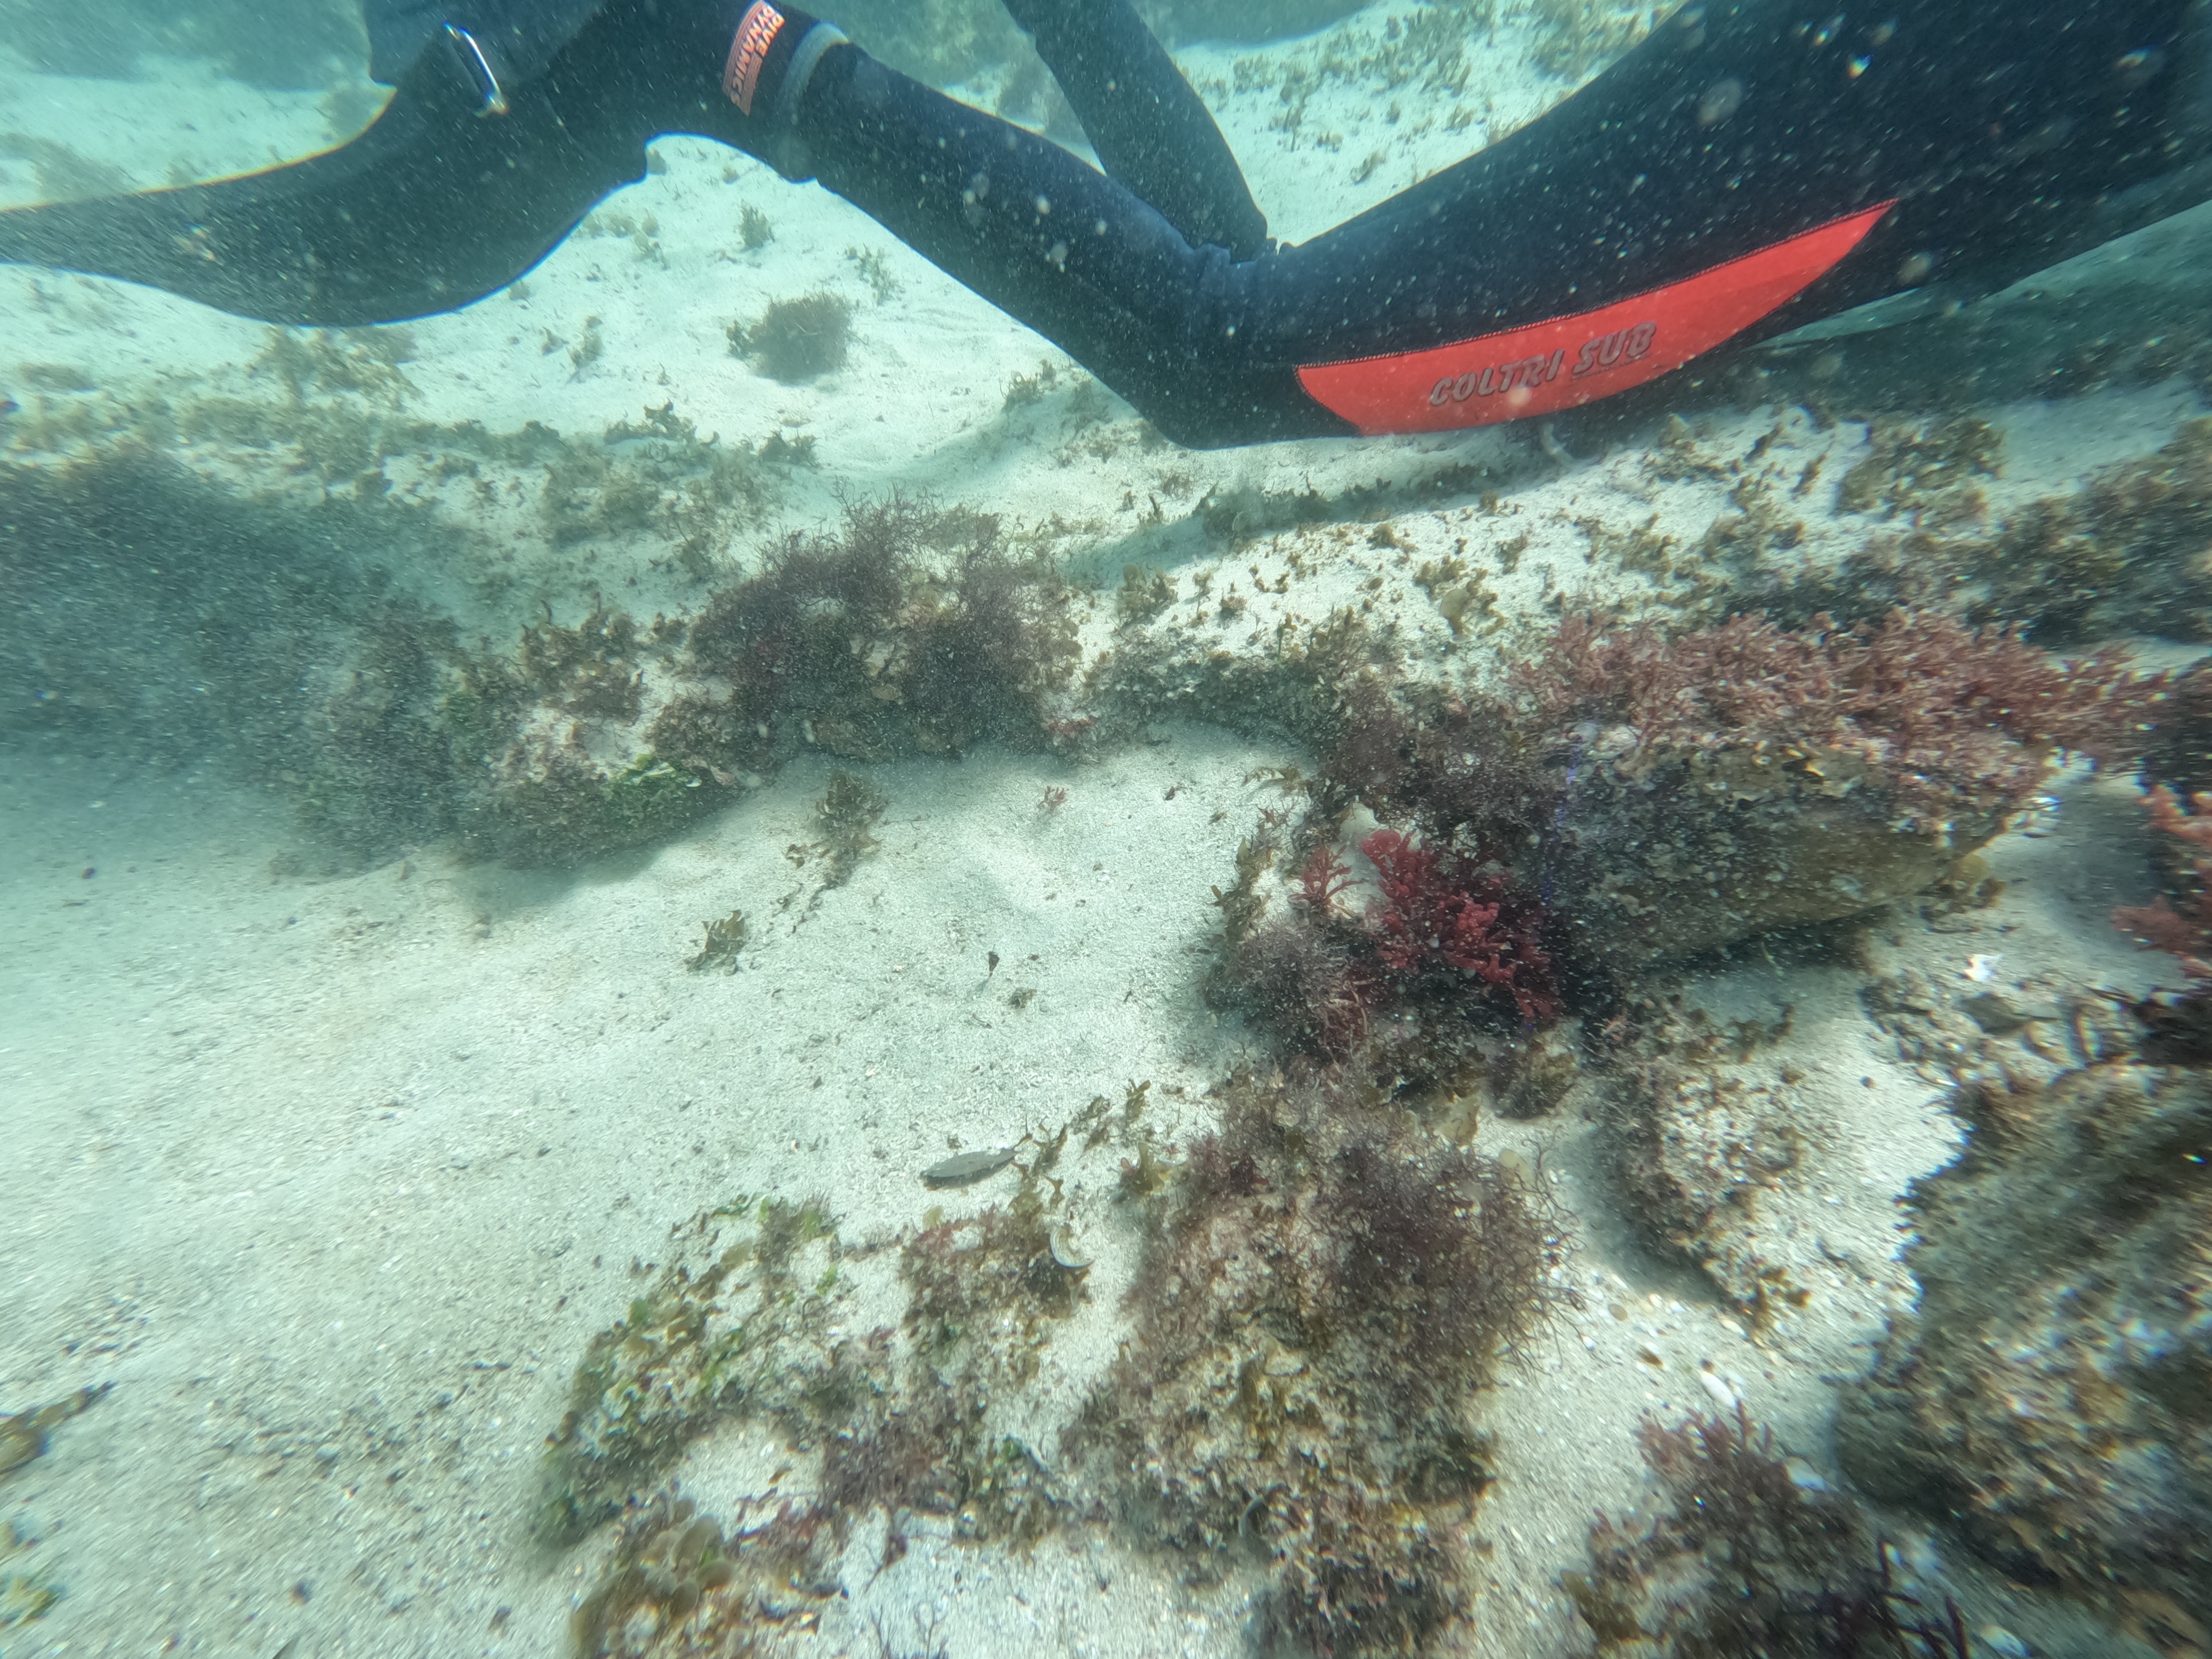

COLTRI SUB

Supplement: Supplementary file 974 [file G0714041.pdf › Ocean2/G0714041.pdf]

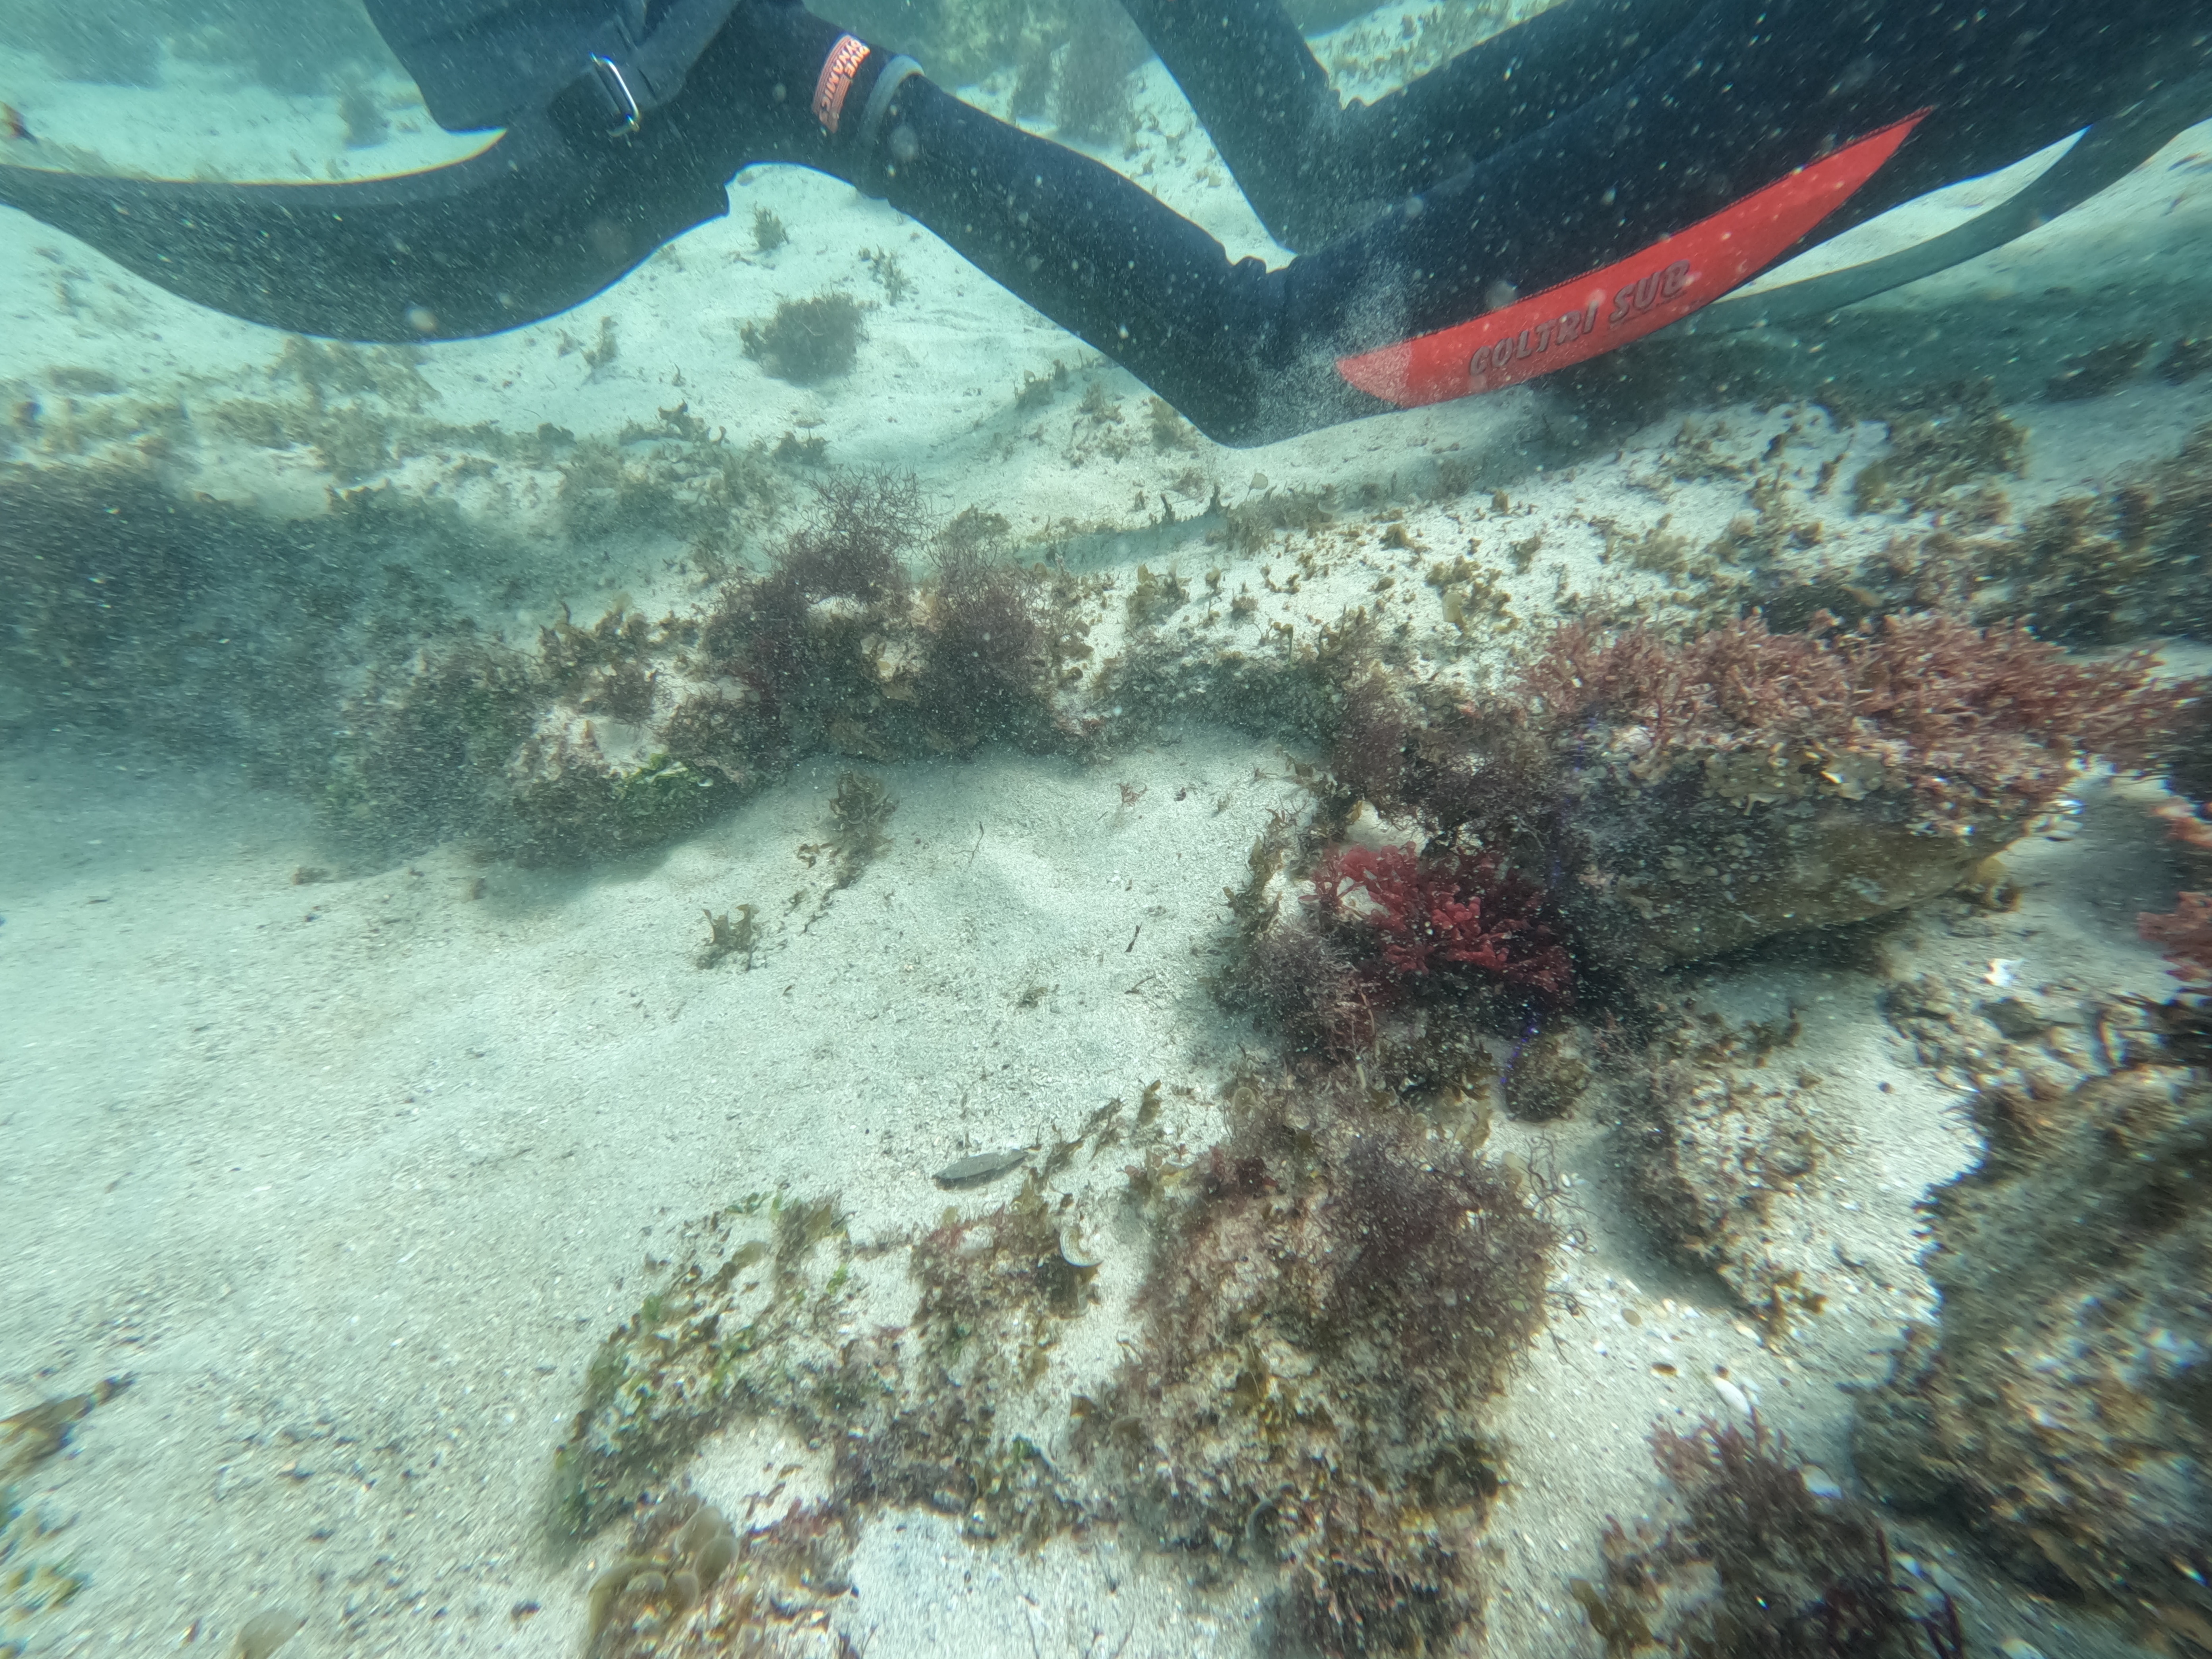

Supplement: Supplementary file 975 [file G0714042.pdf › Ocean2/G0714042.pdf]

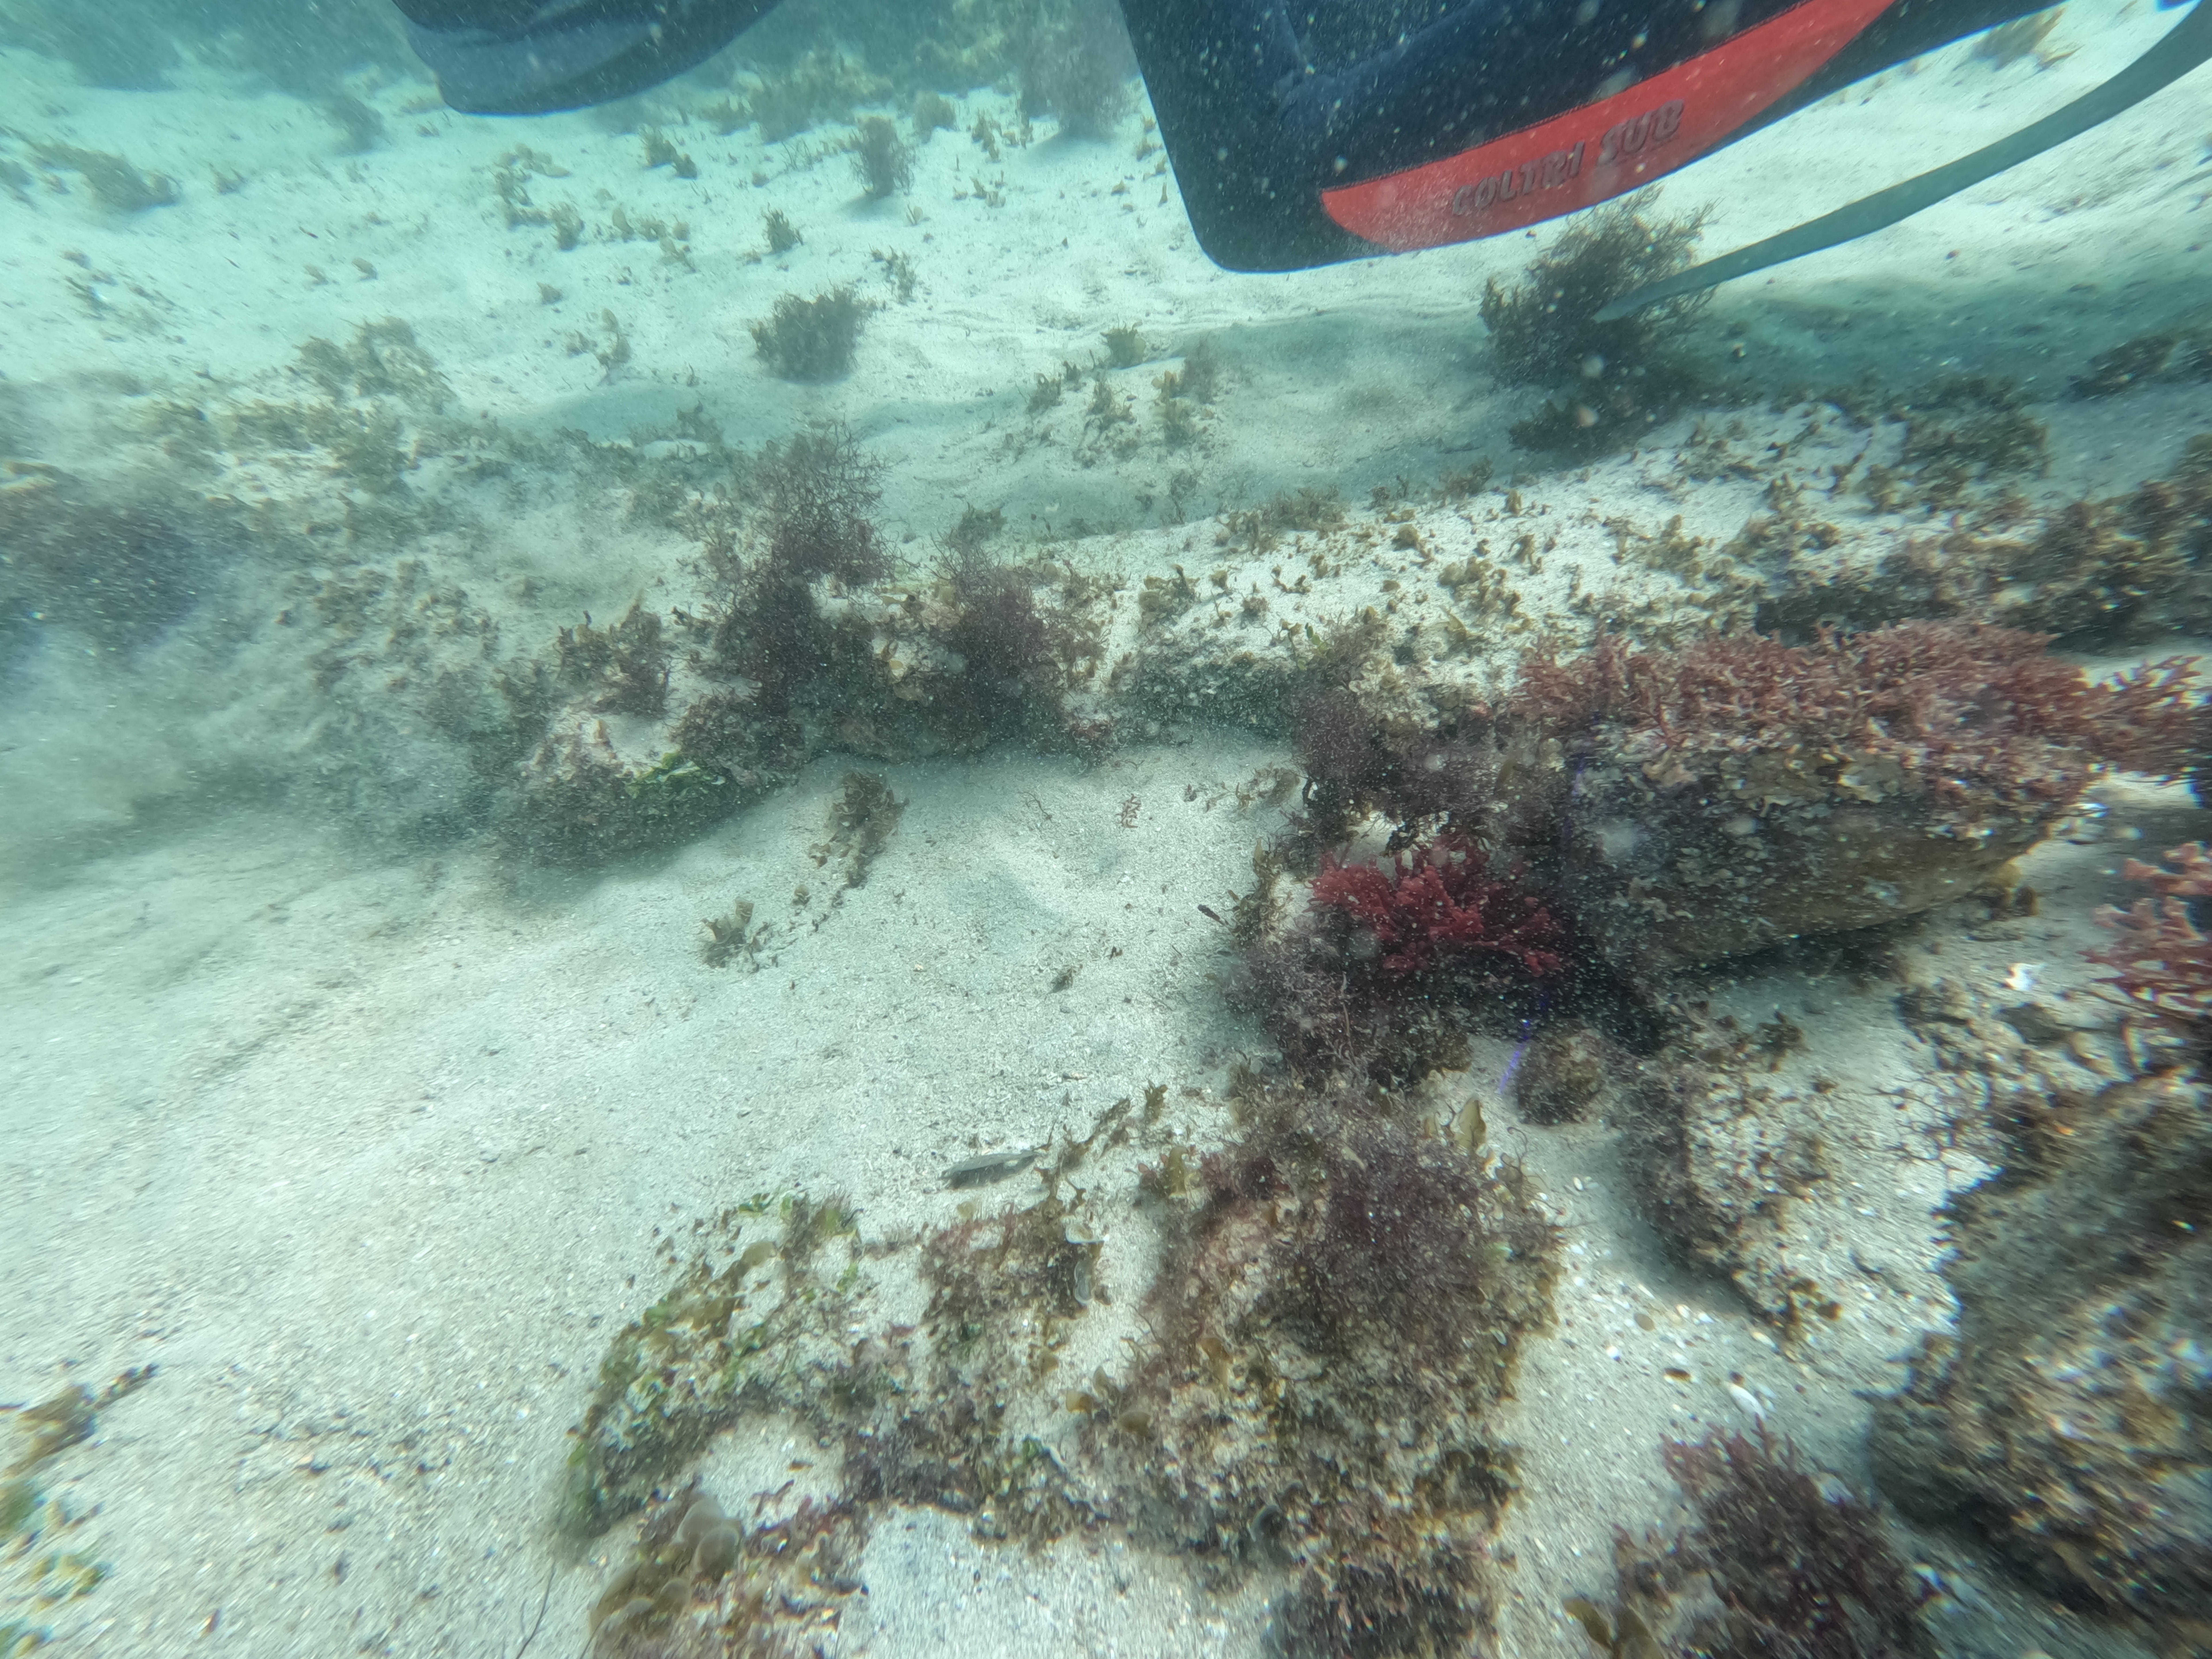

Supplement: Supplementary file 976 [file G0714043.pdf › Ocean2/G0714043.pdf]

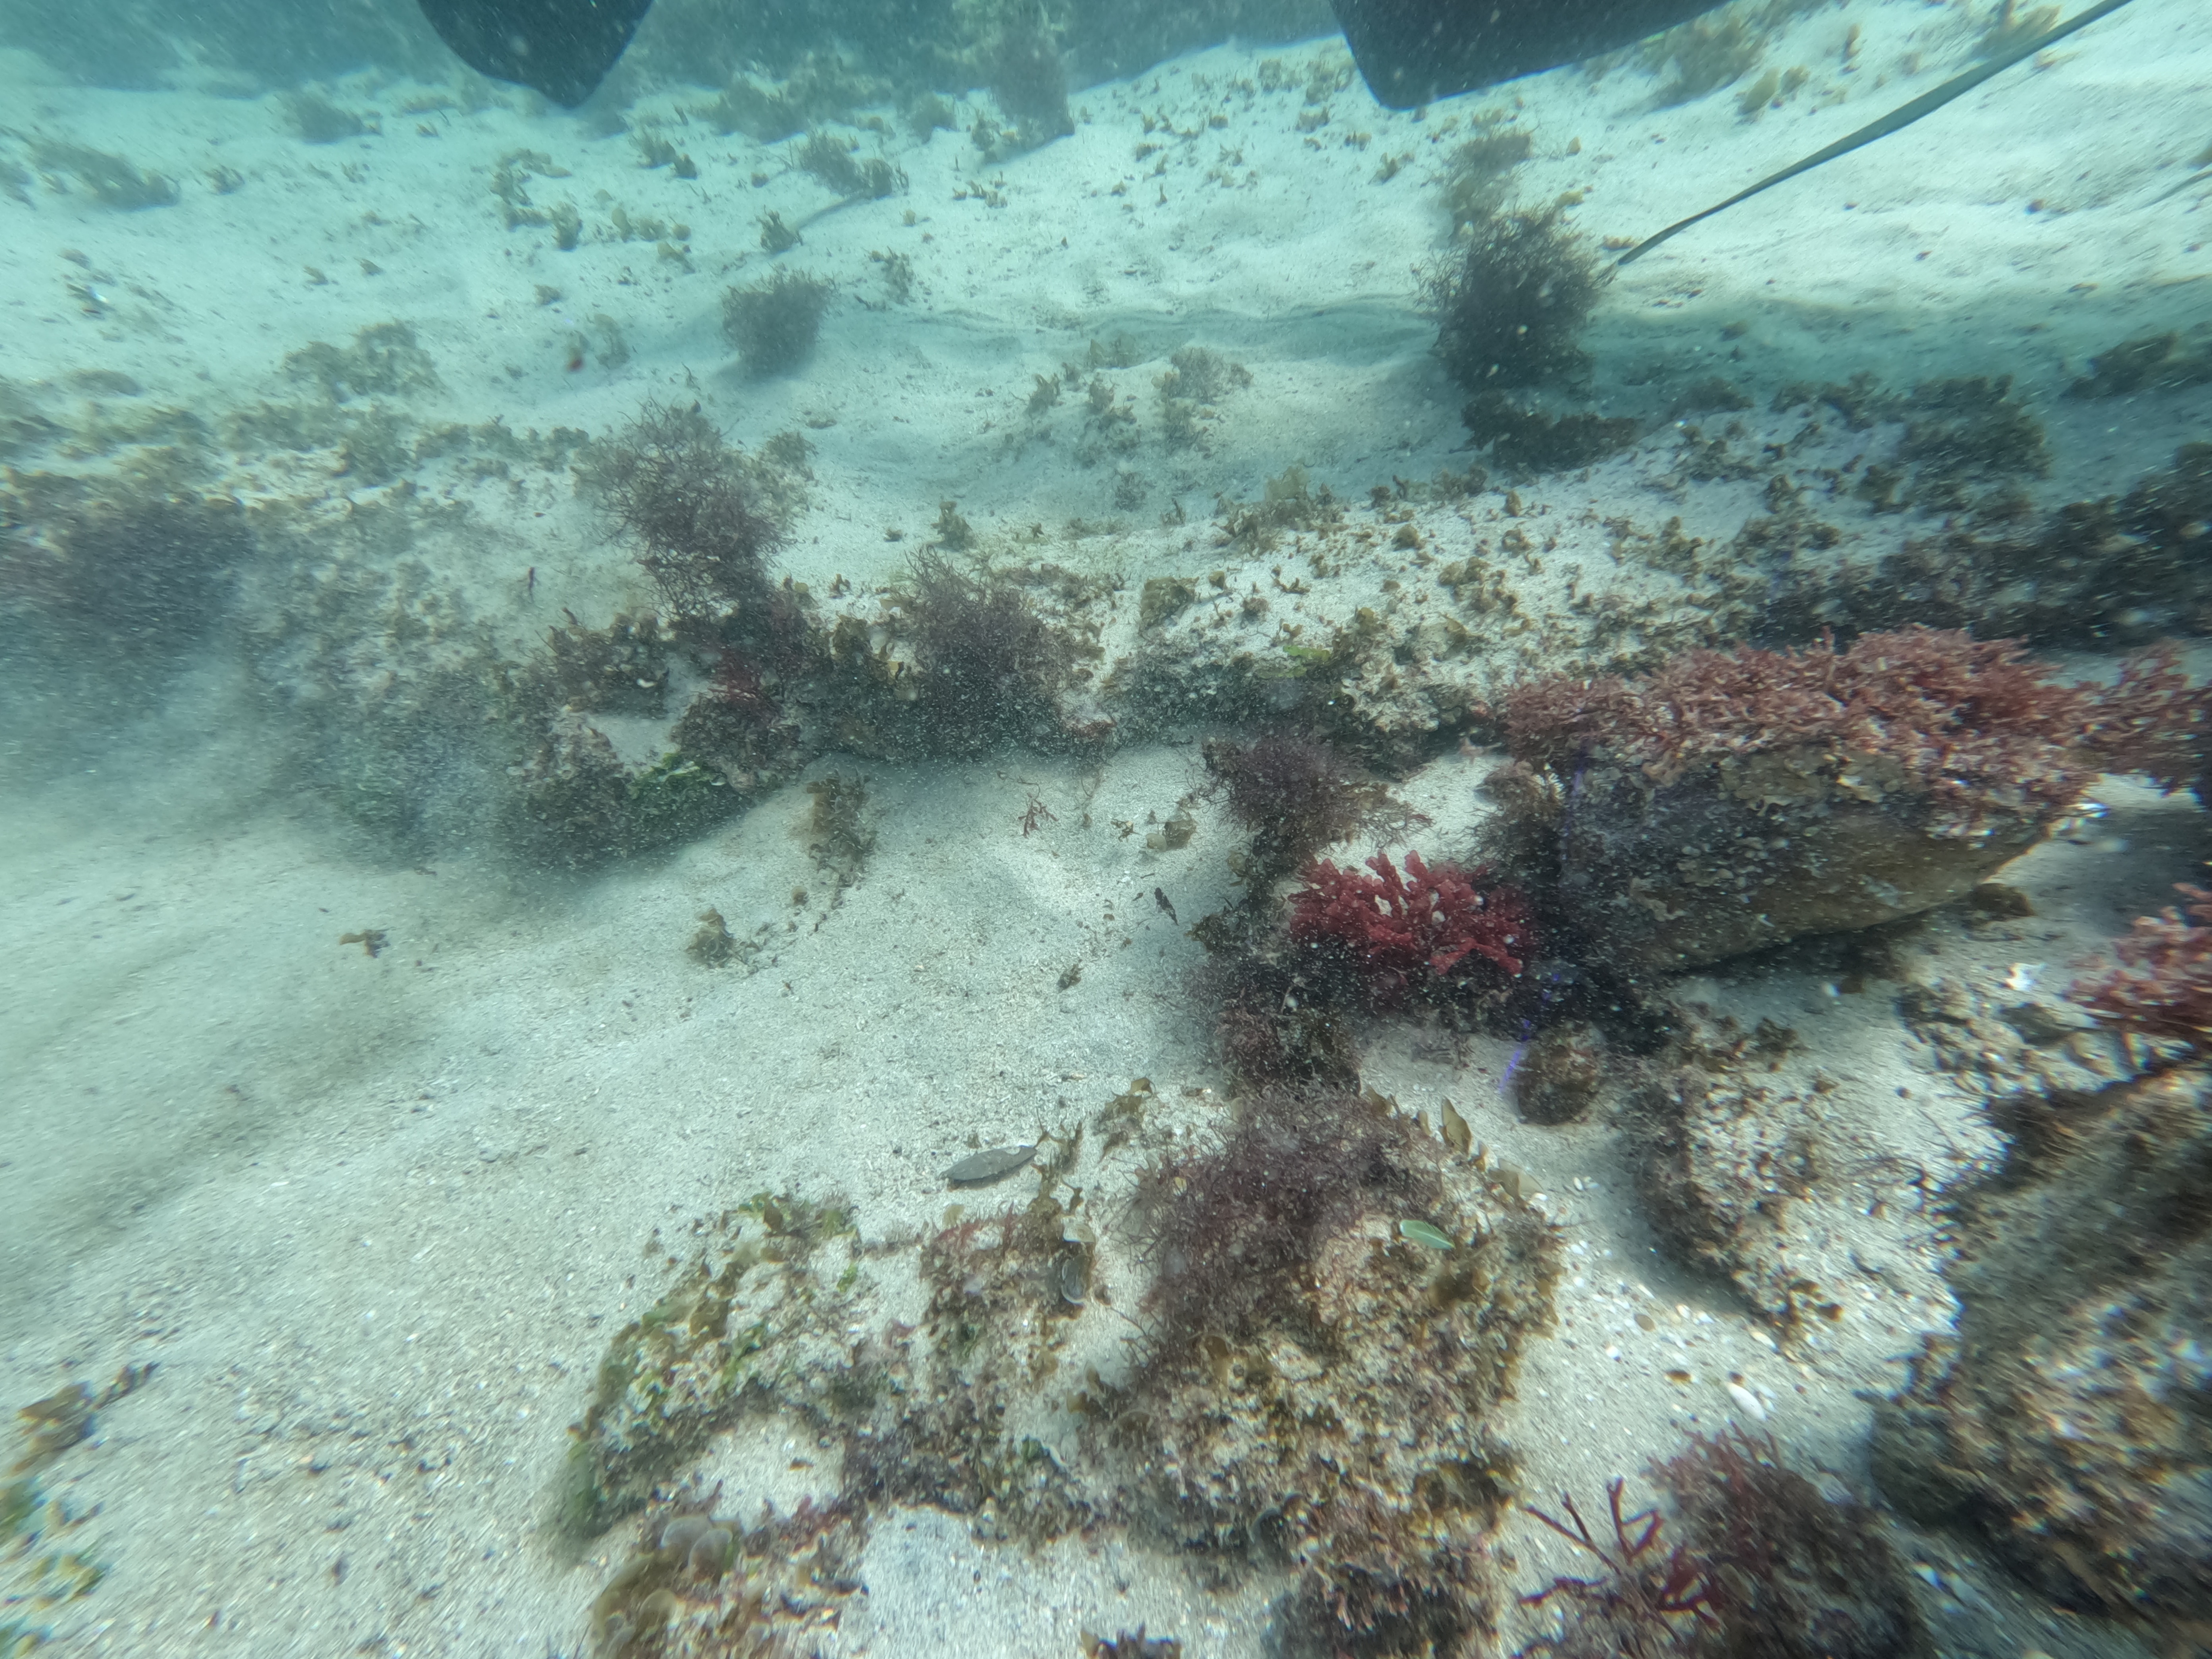

Supplement: Supplementary file 977 [file G0714044.pdf › Ocean2/G0714044.pdf]

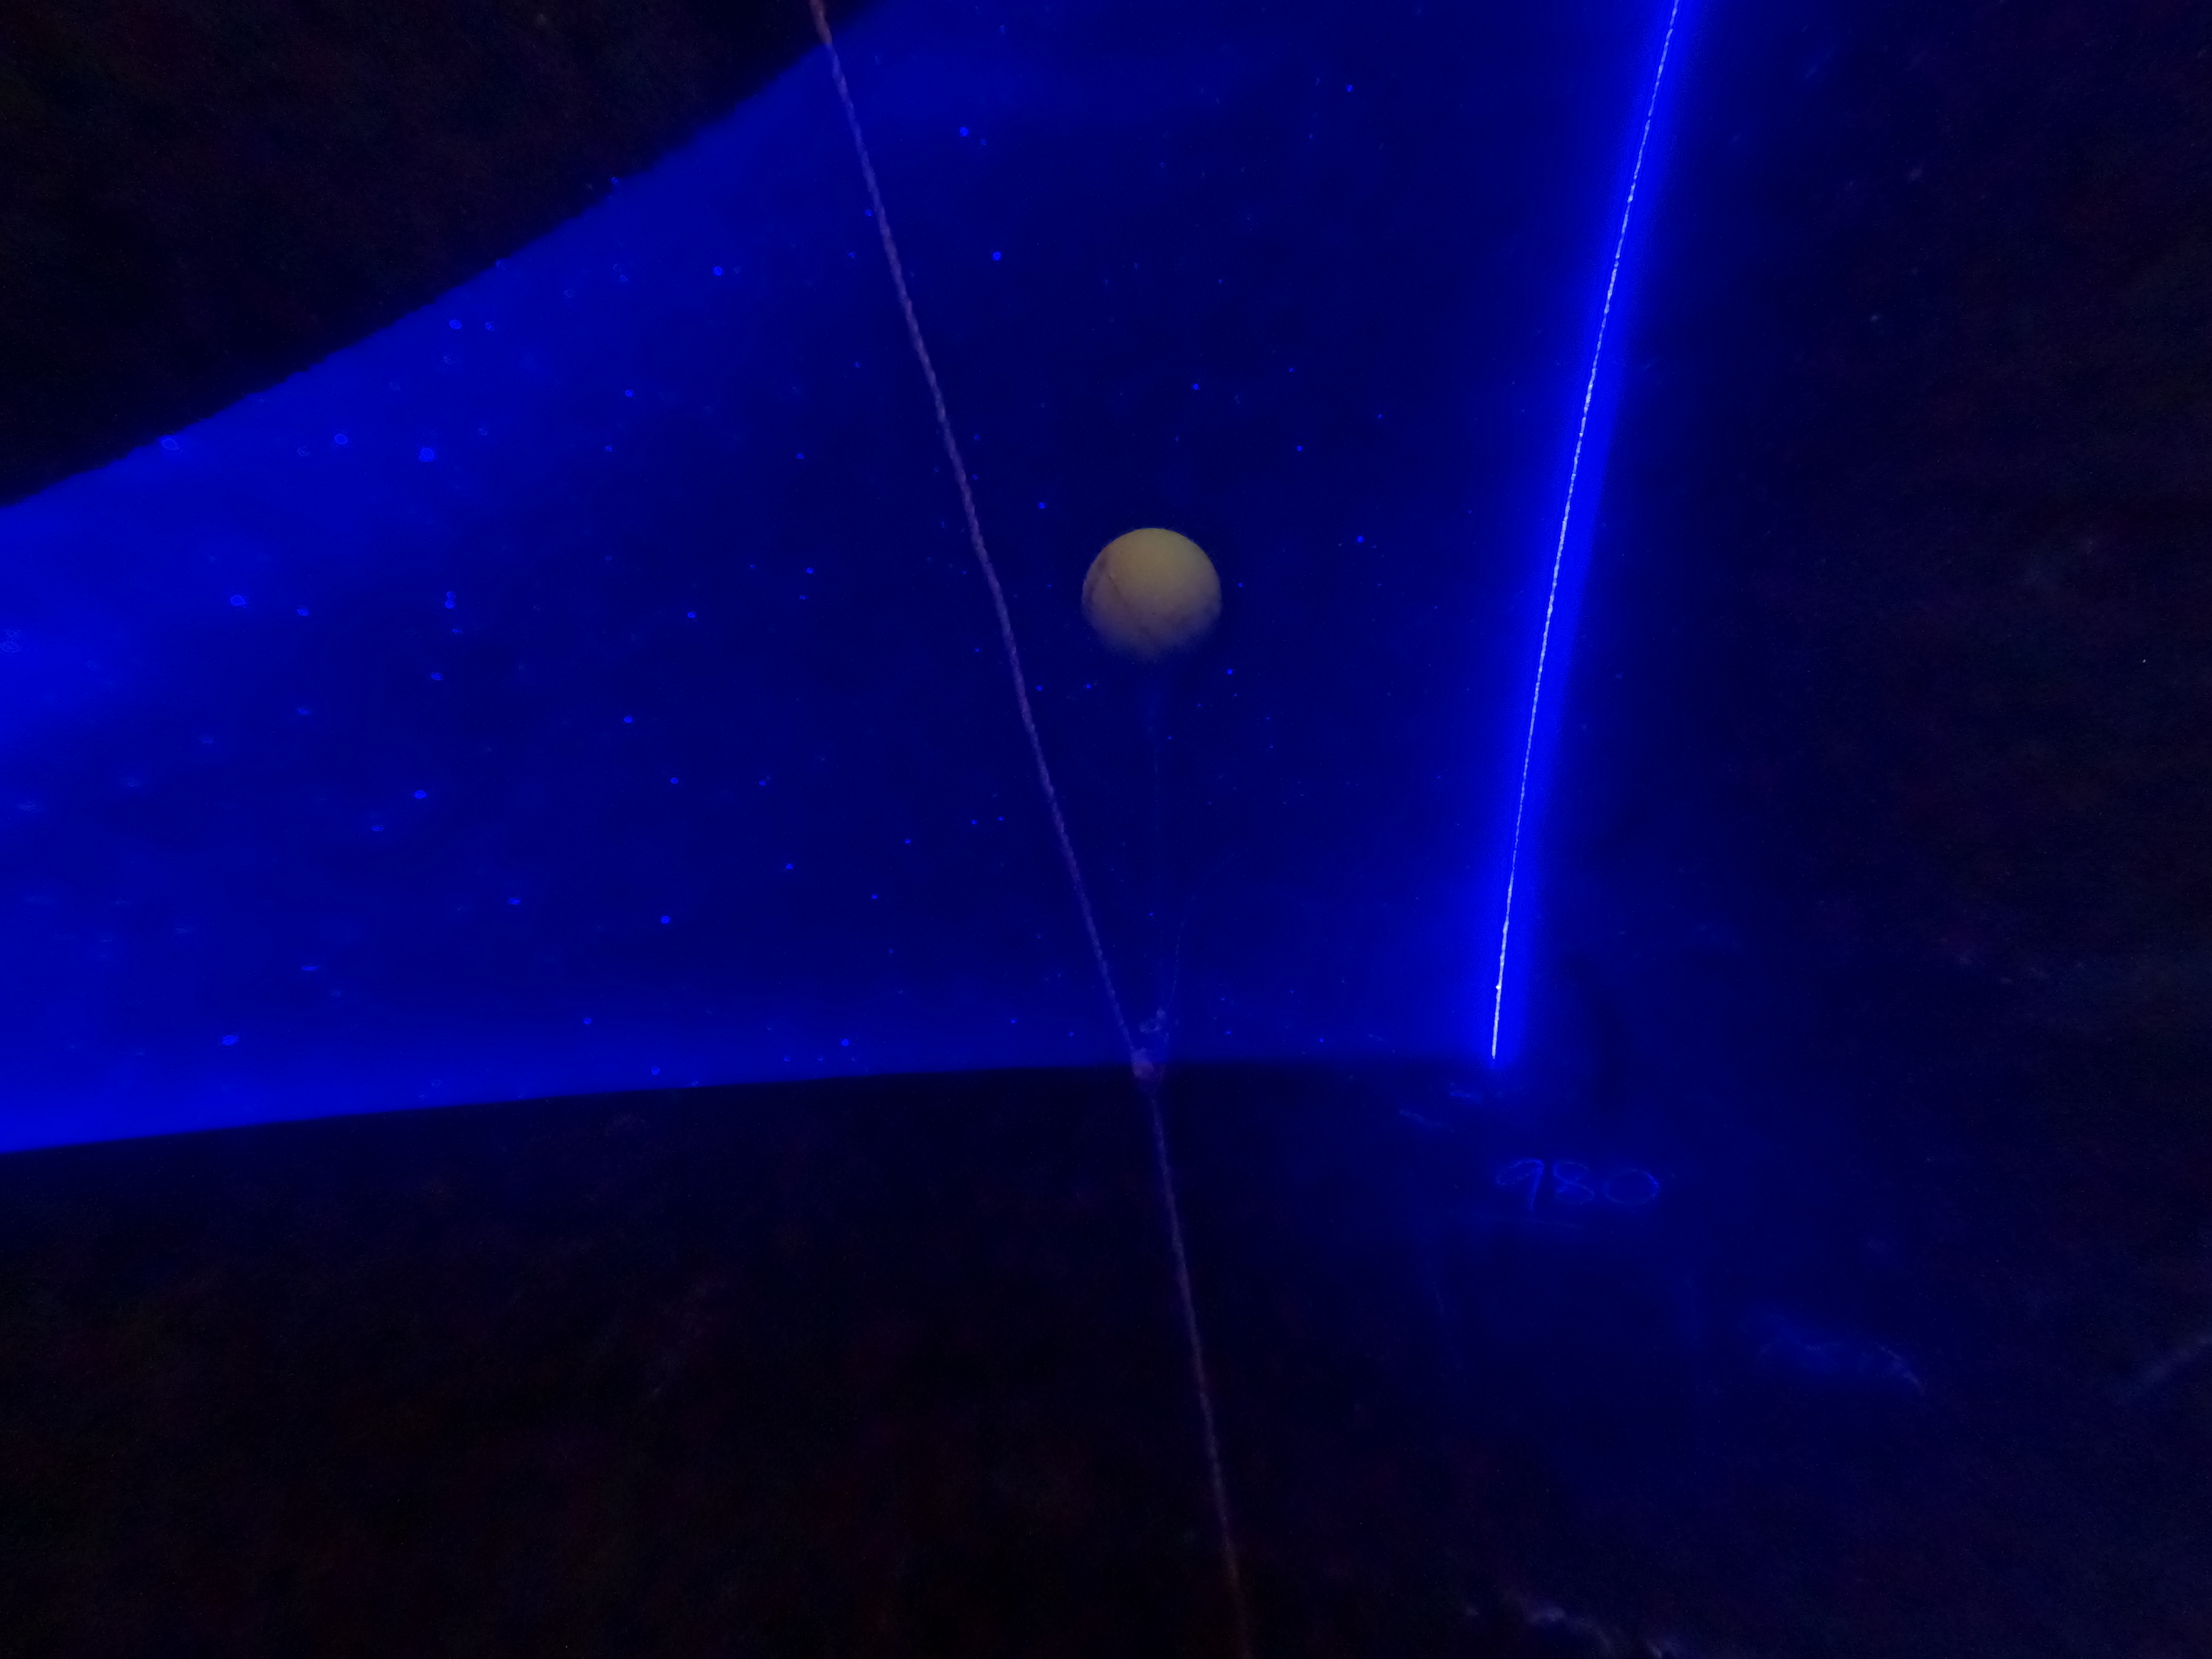

980

Supplement: Supplementary file 978 [file G0031332.pdf › 10/G0031332.pdf]

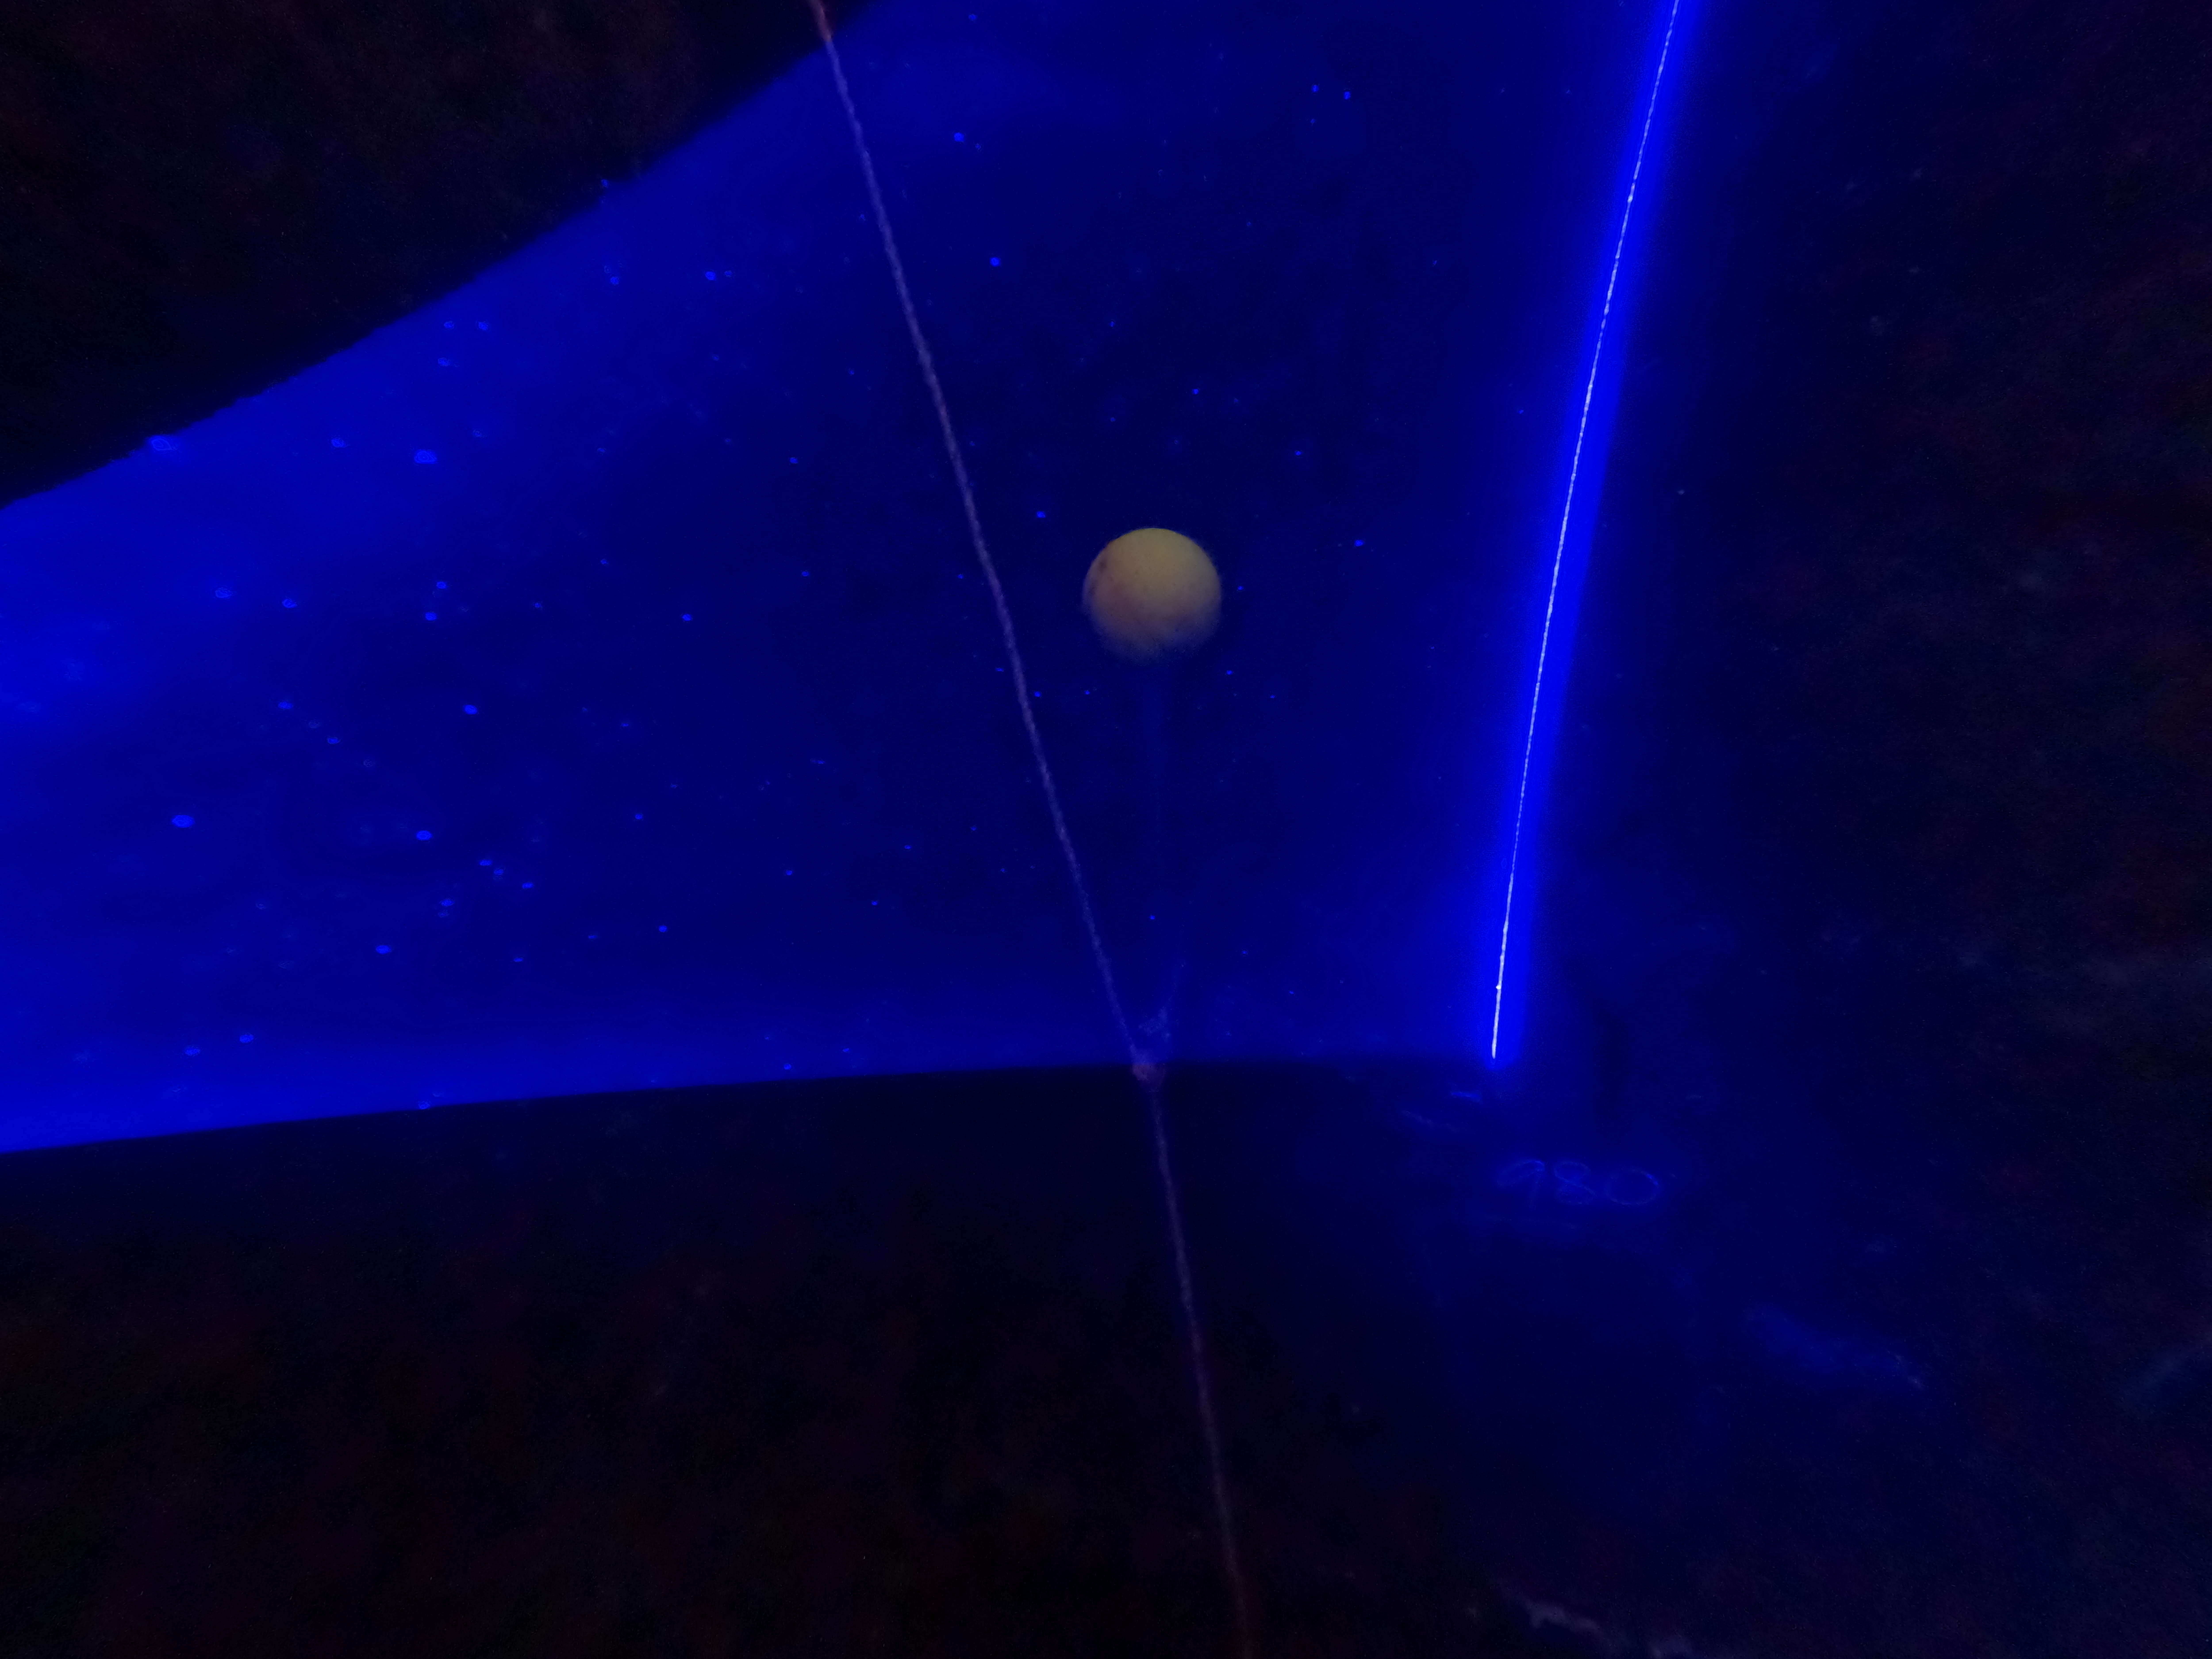

Supplement: Supplementary file 979 [file G0031333.pdf › 10/G0031333.pdf]

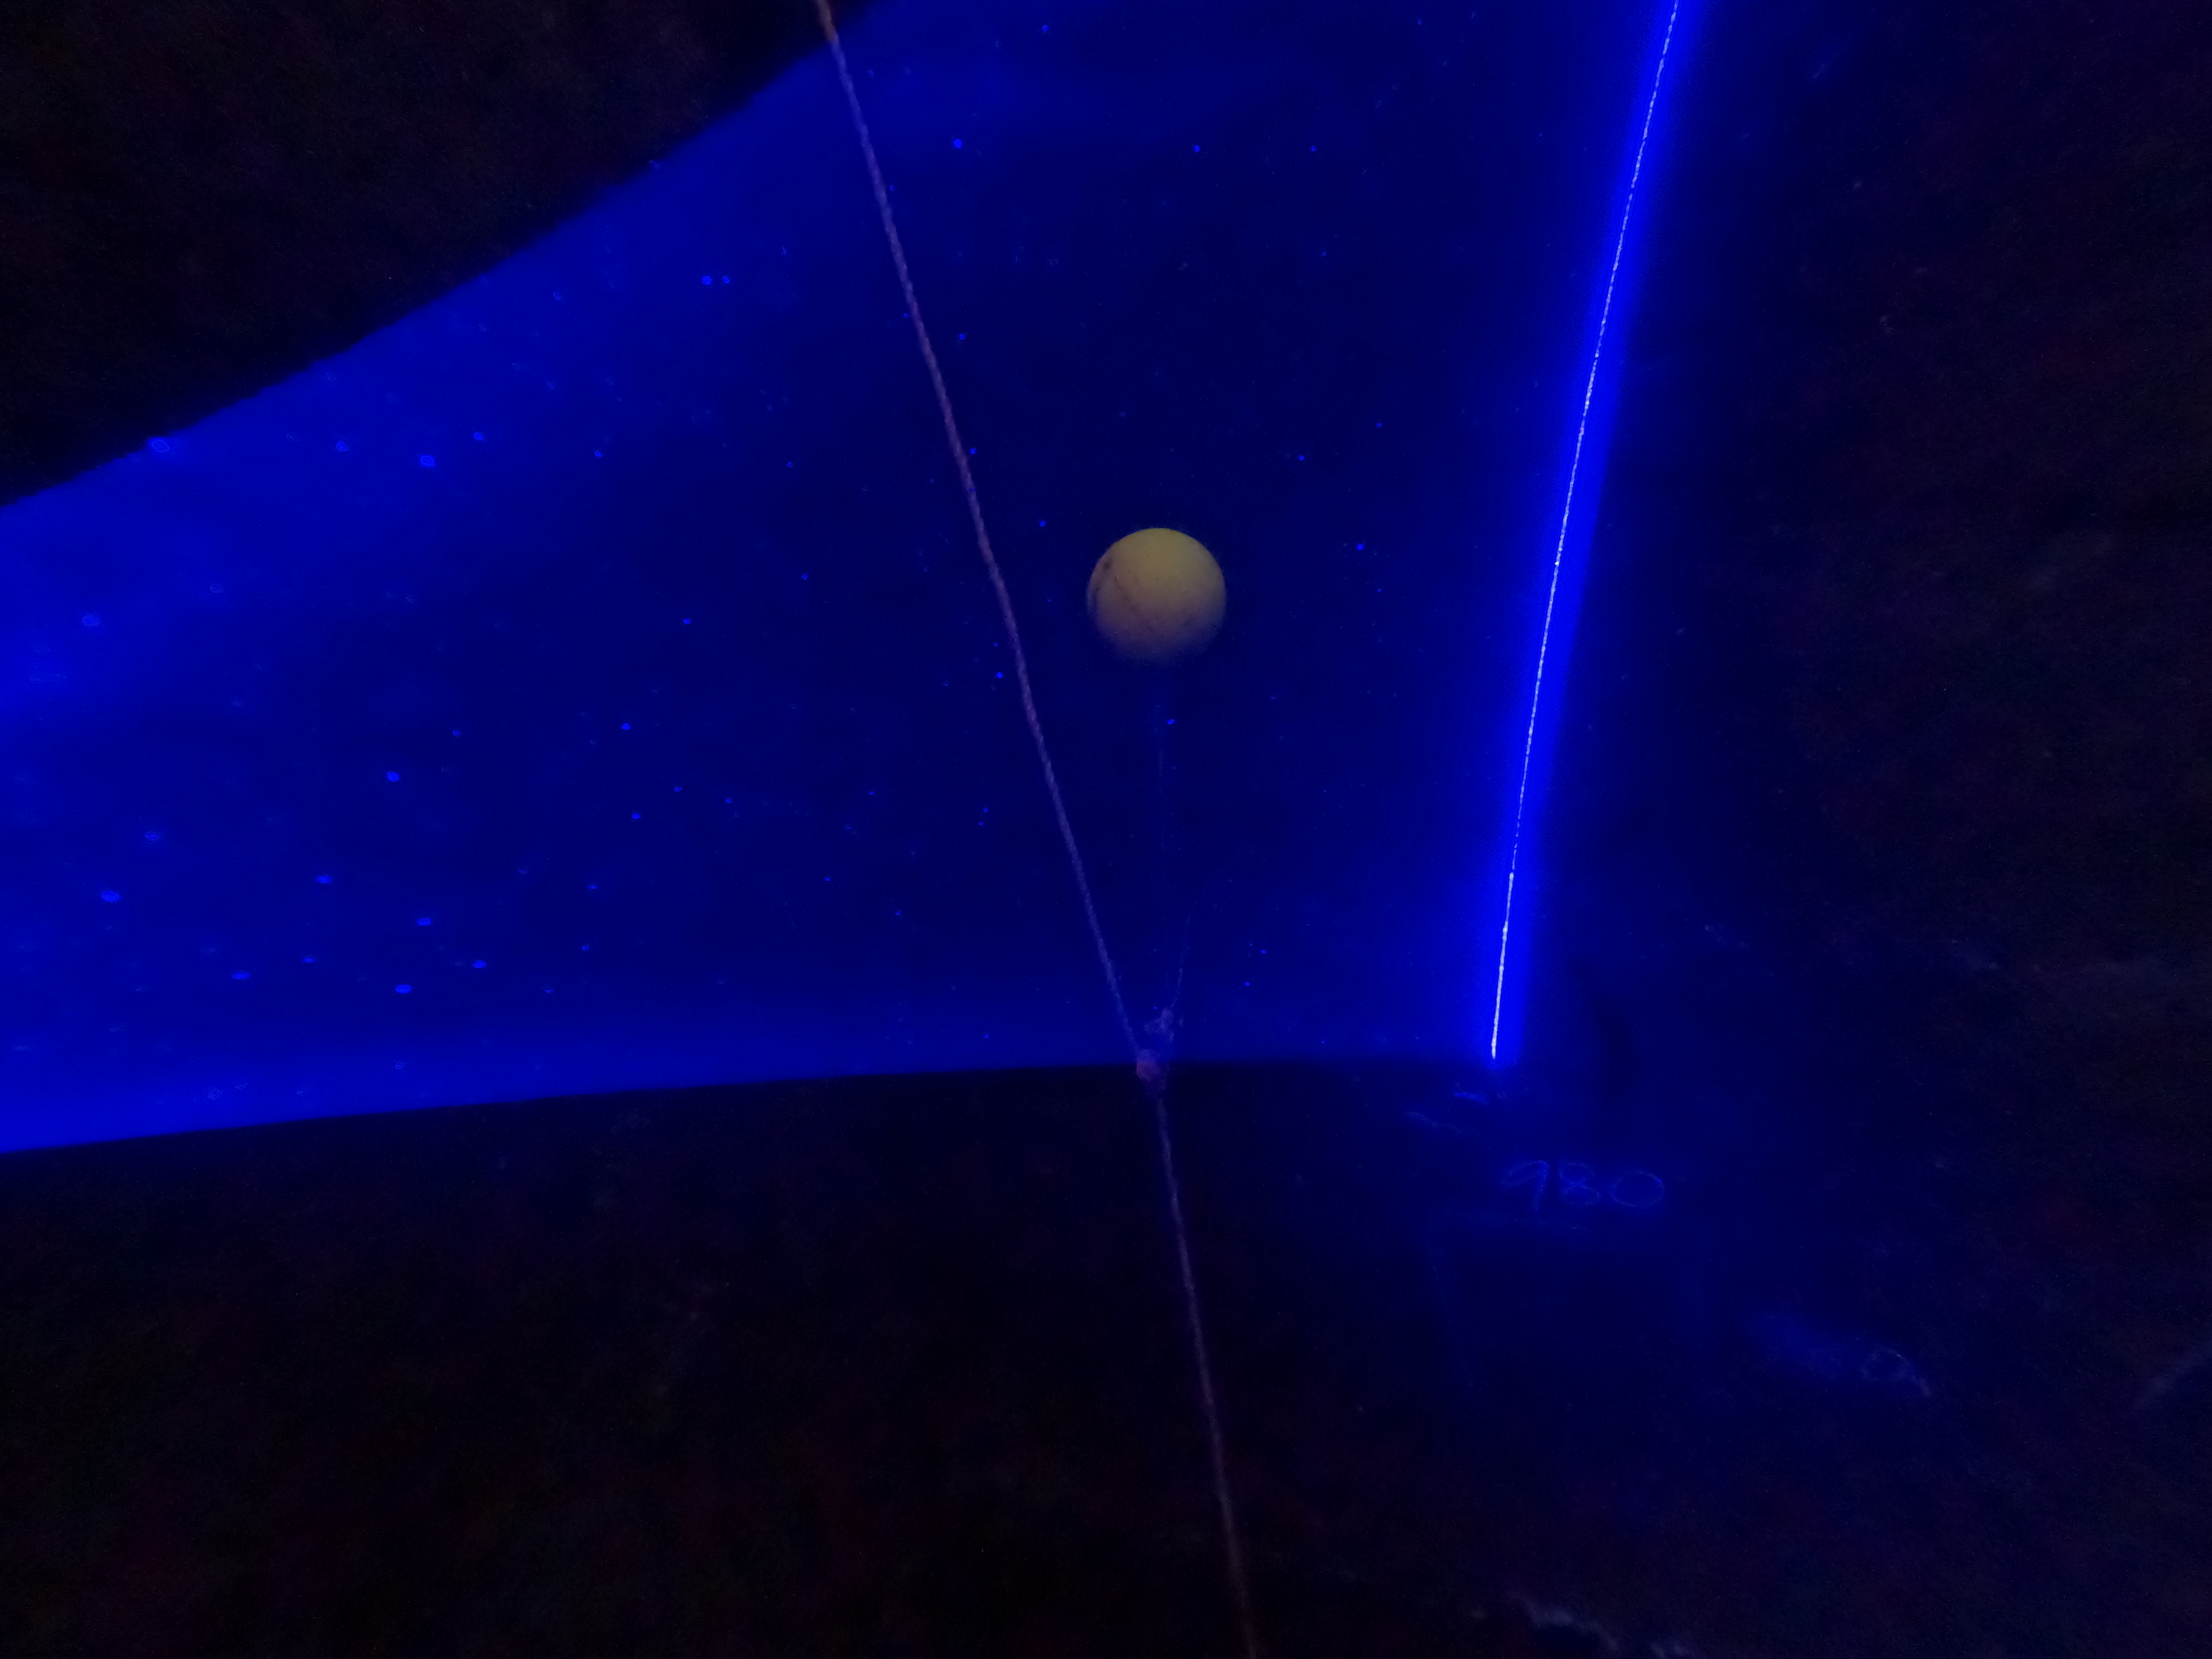

980

Supplement: Supplementary file 980 [file G0031334.pdf › 10/G0031334.pdf]

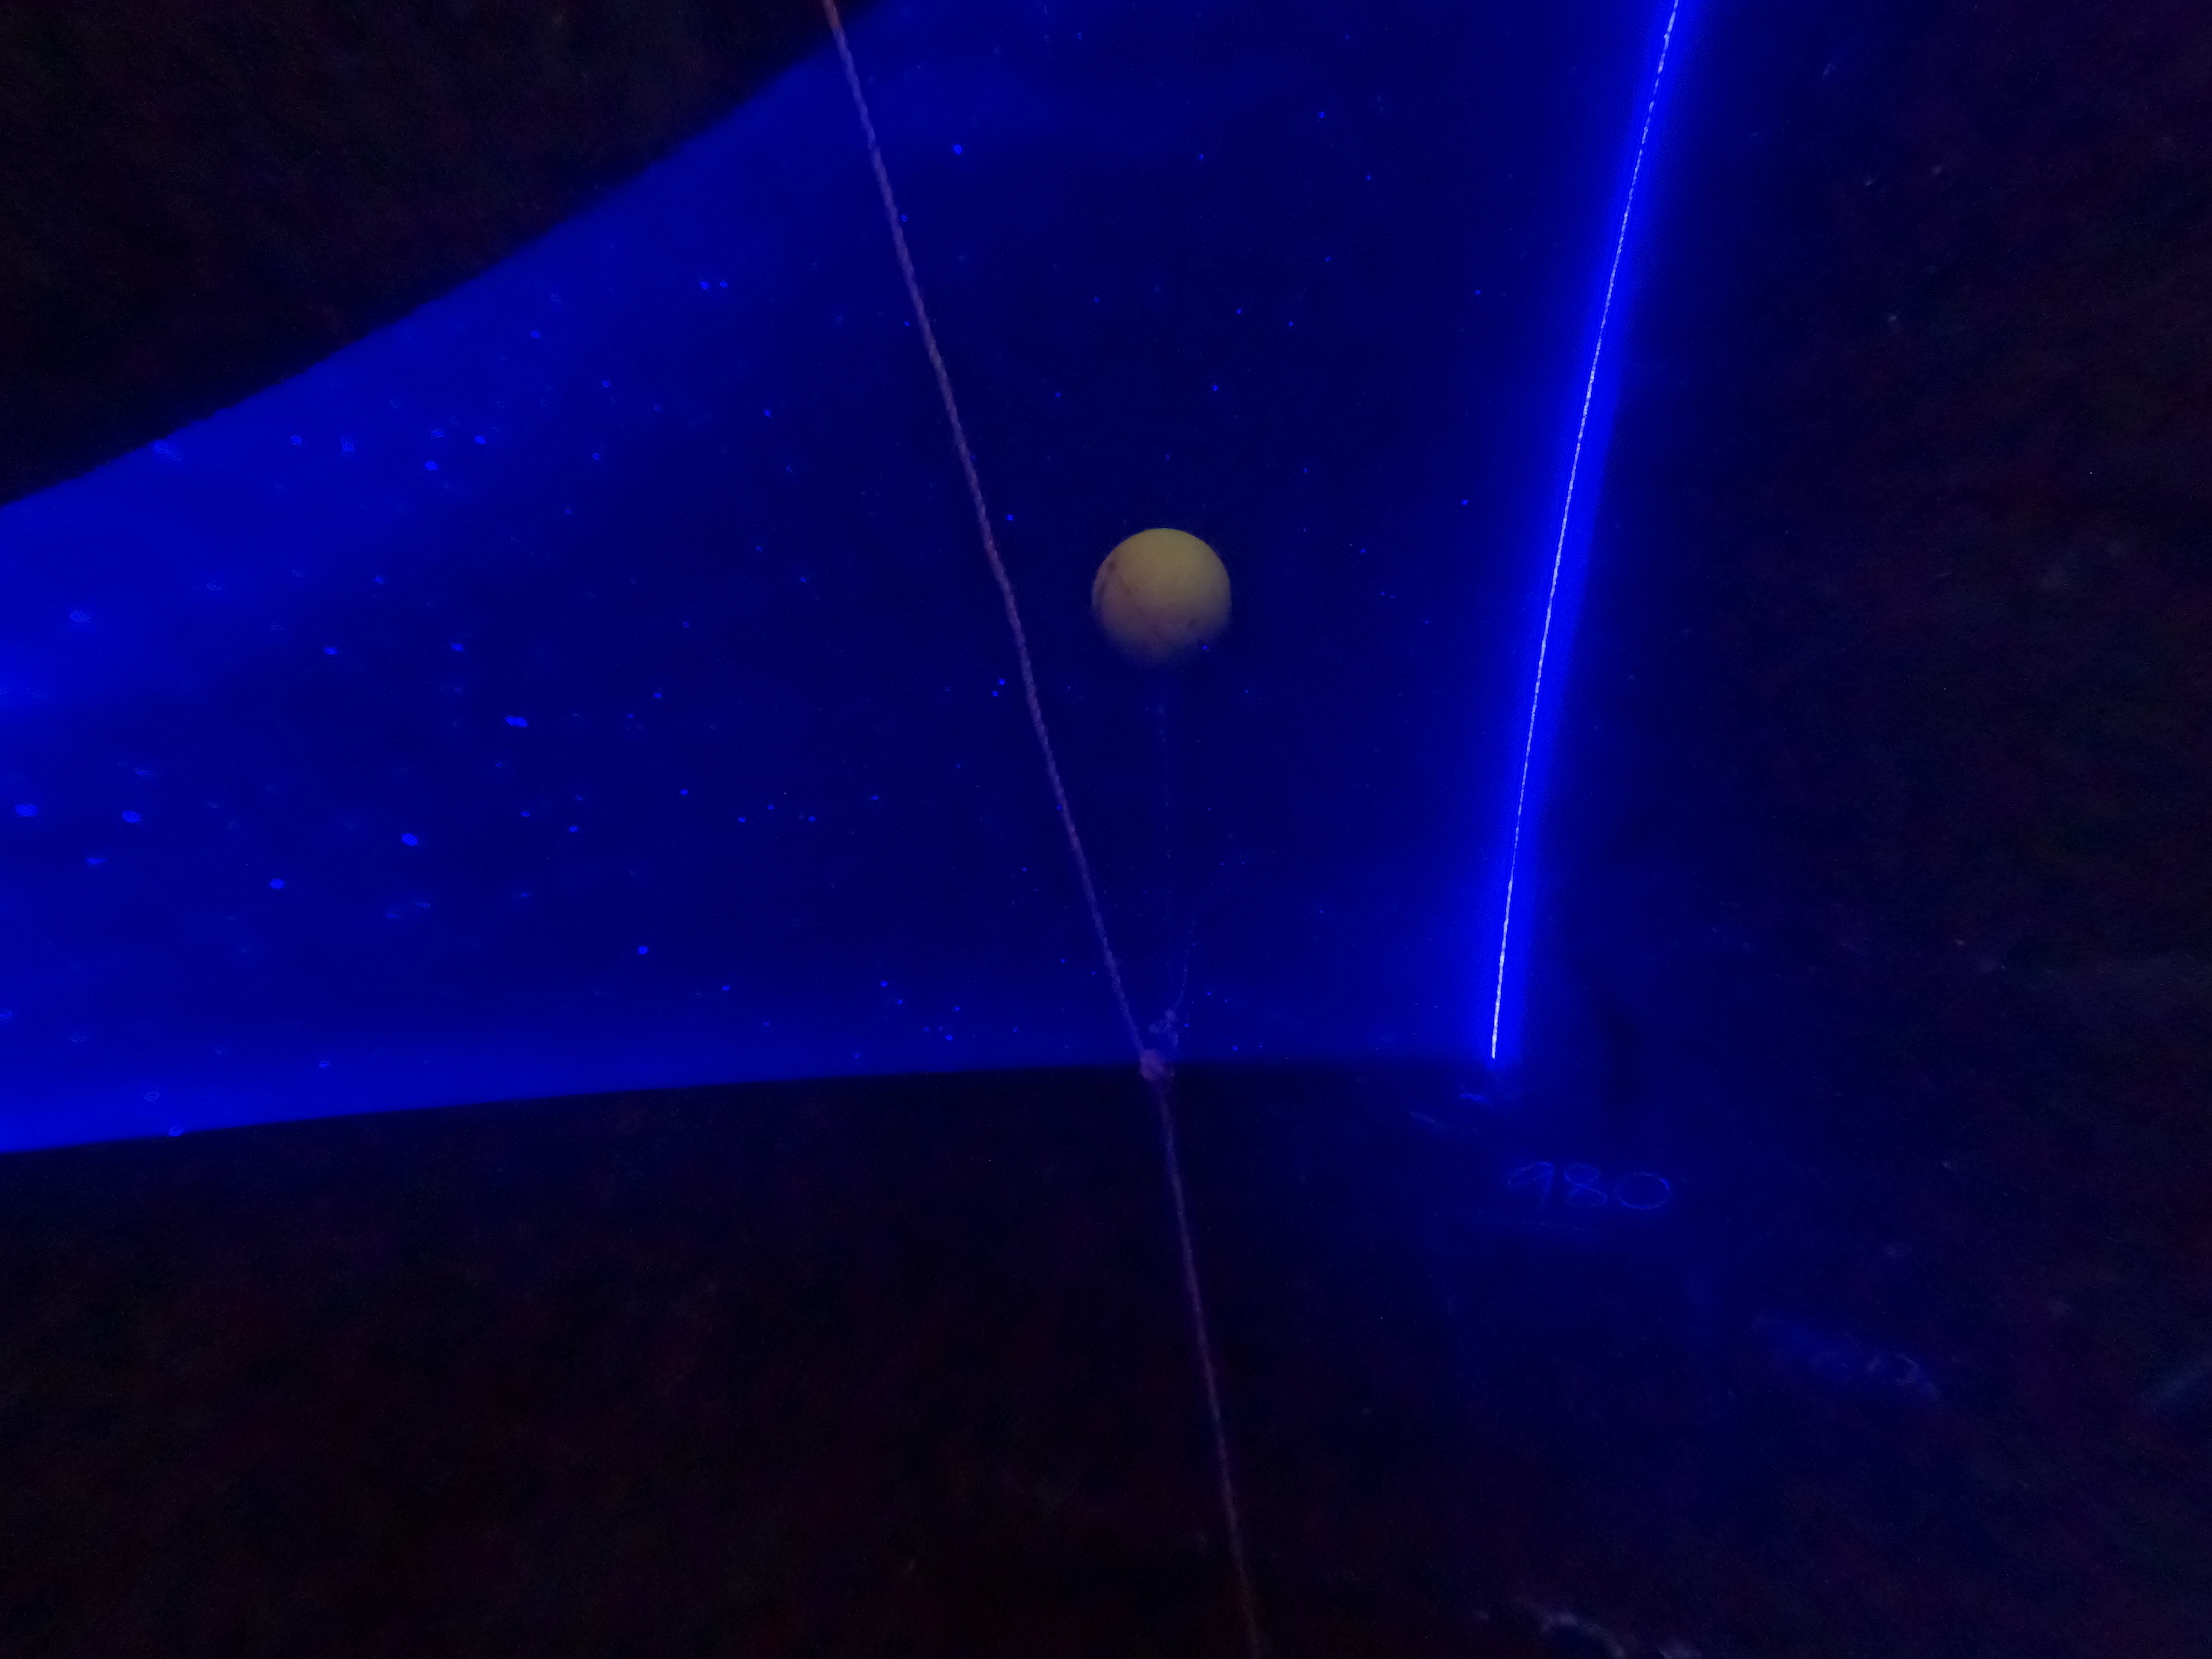

980

Supplement: Supplementary file 981 [file G0031335.pdf › 10/G0031335.pdf]

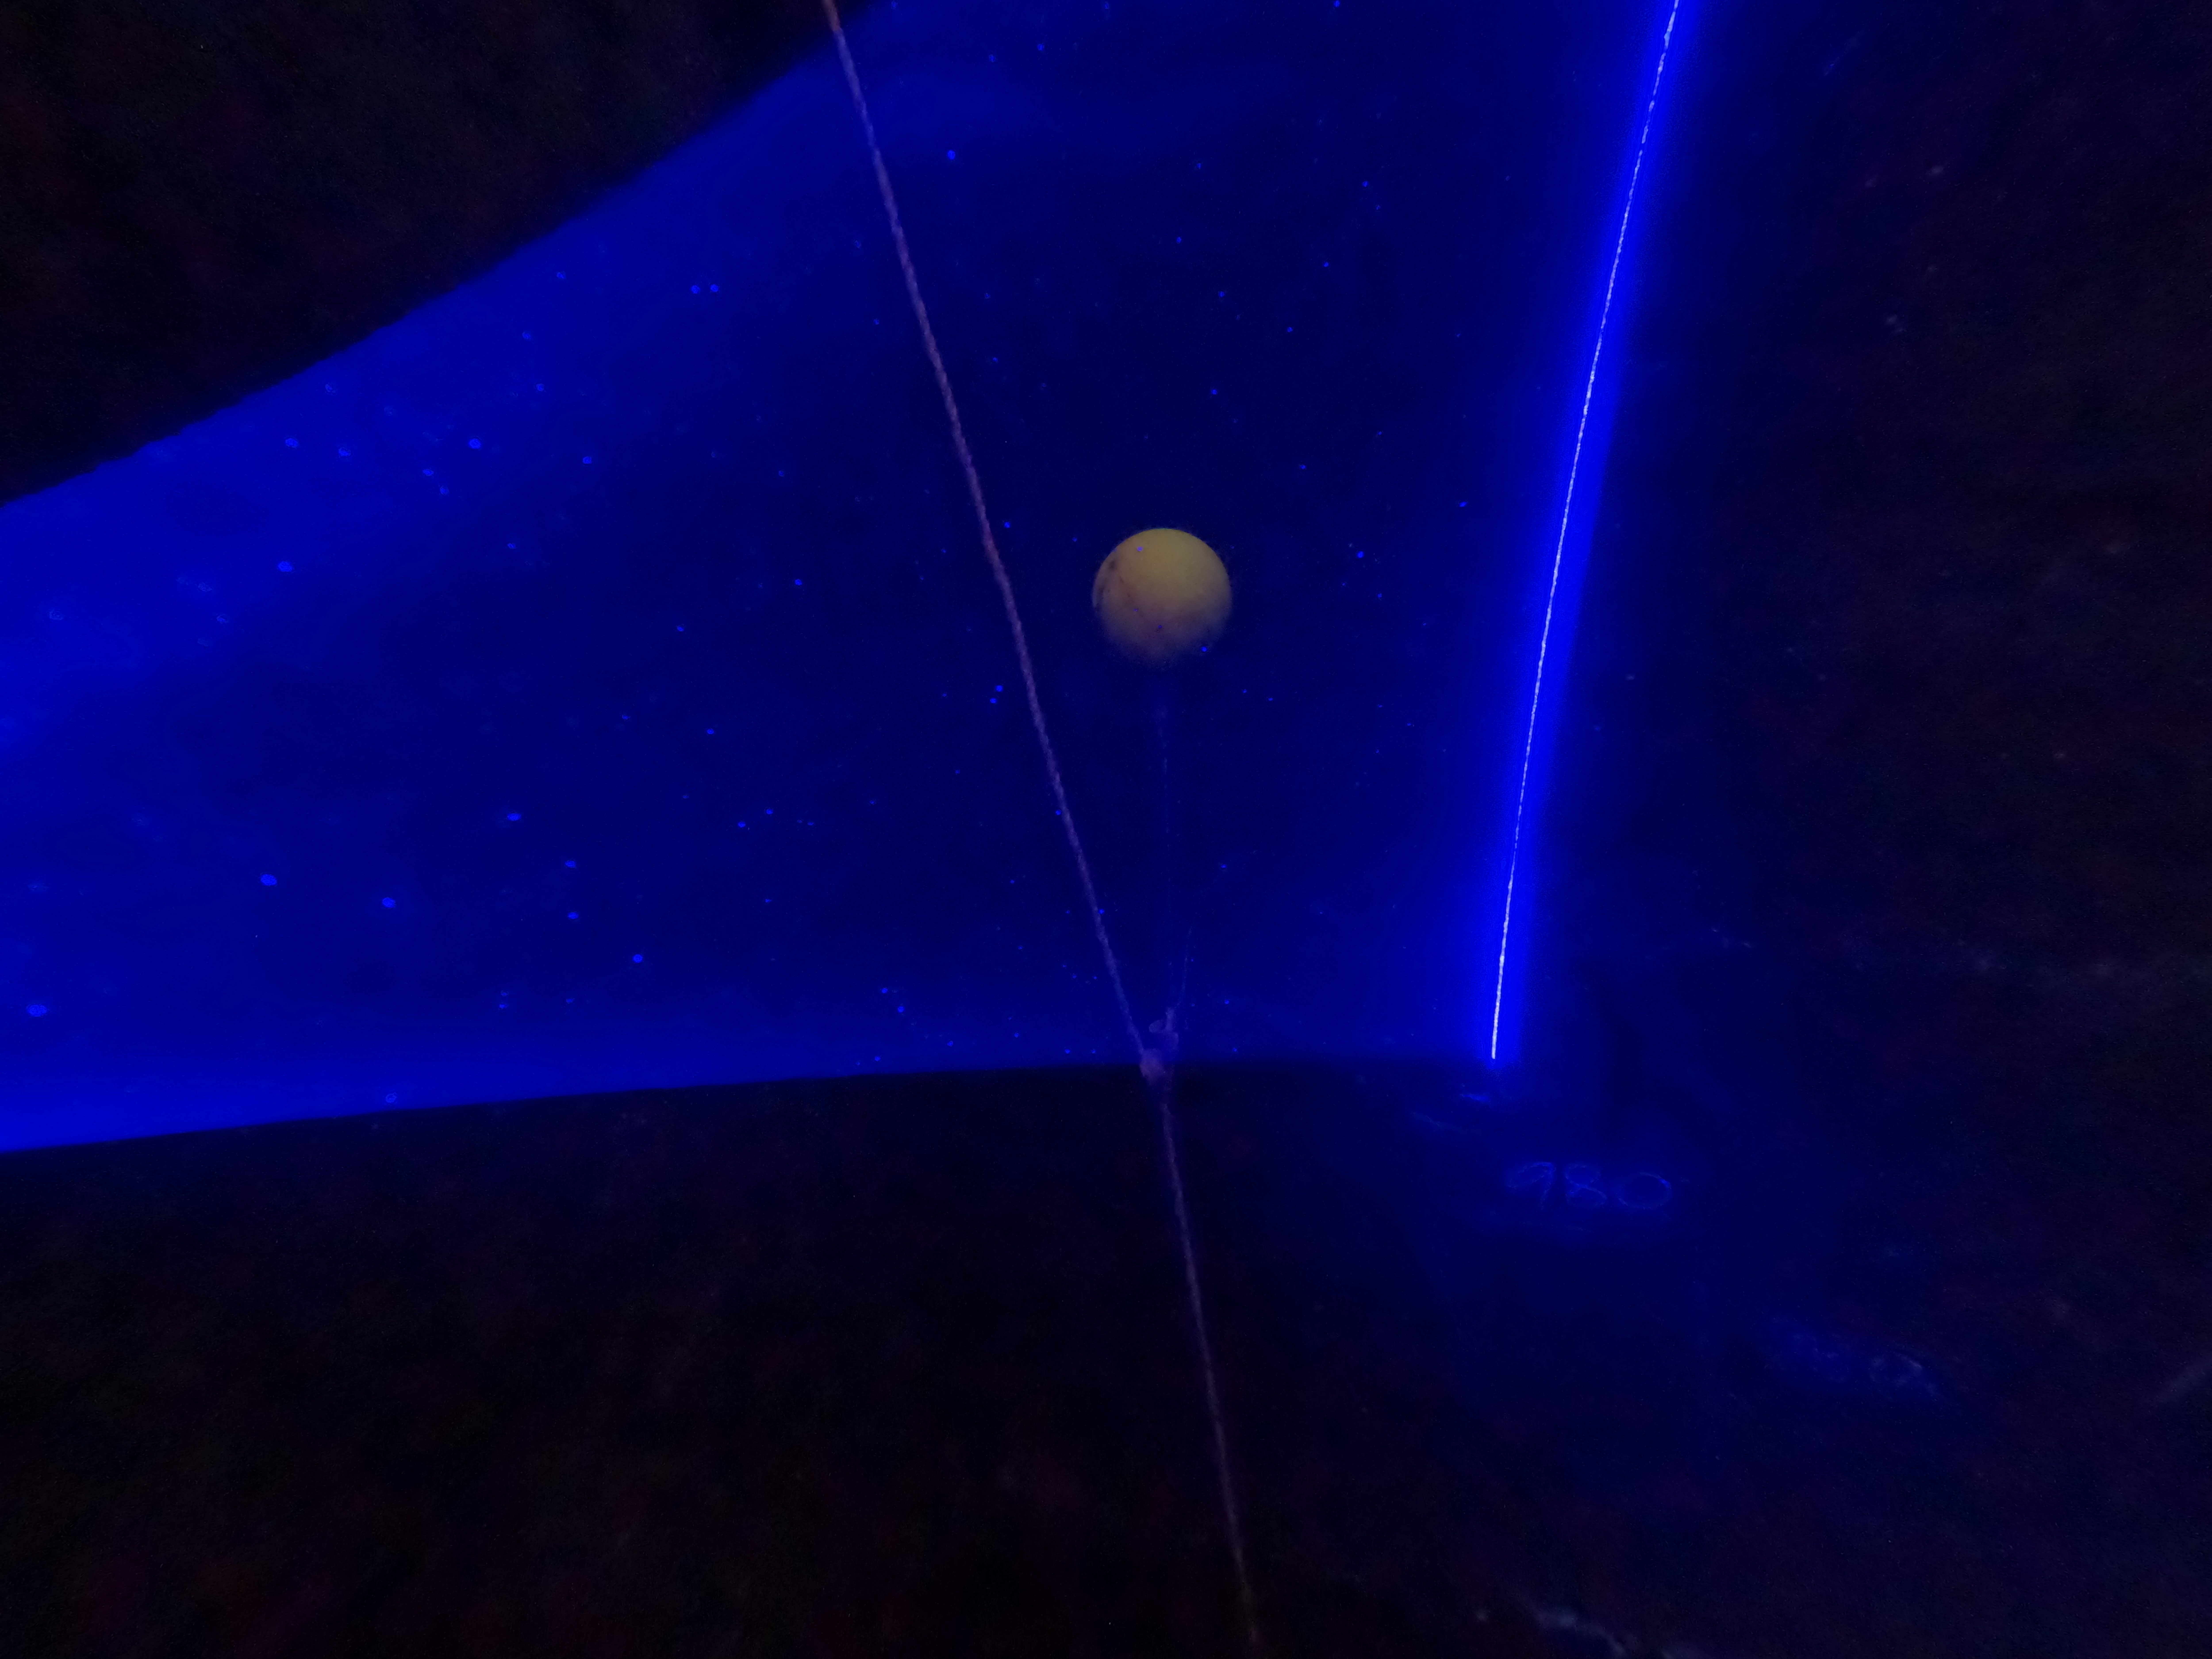

Supplement: Supplementary file 982 [file G0031336.pdf › 10/G0031336.pdf]

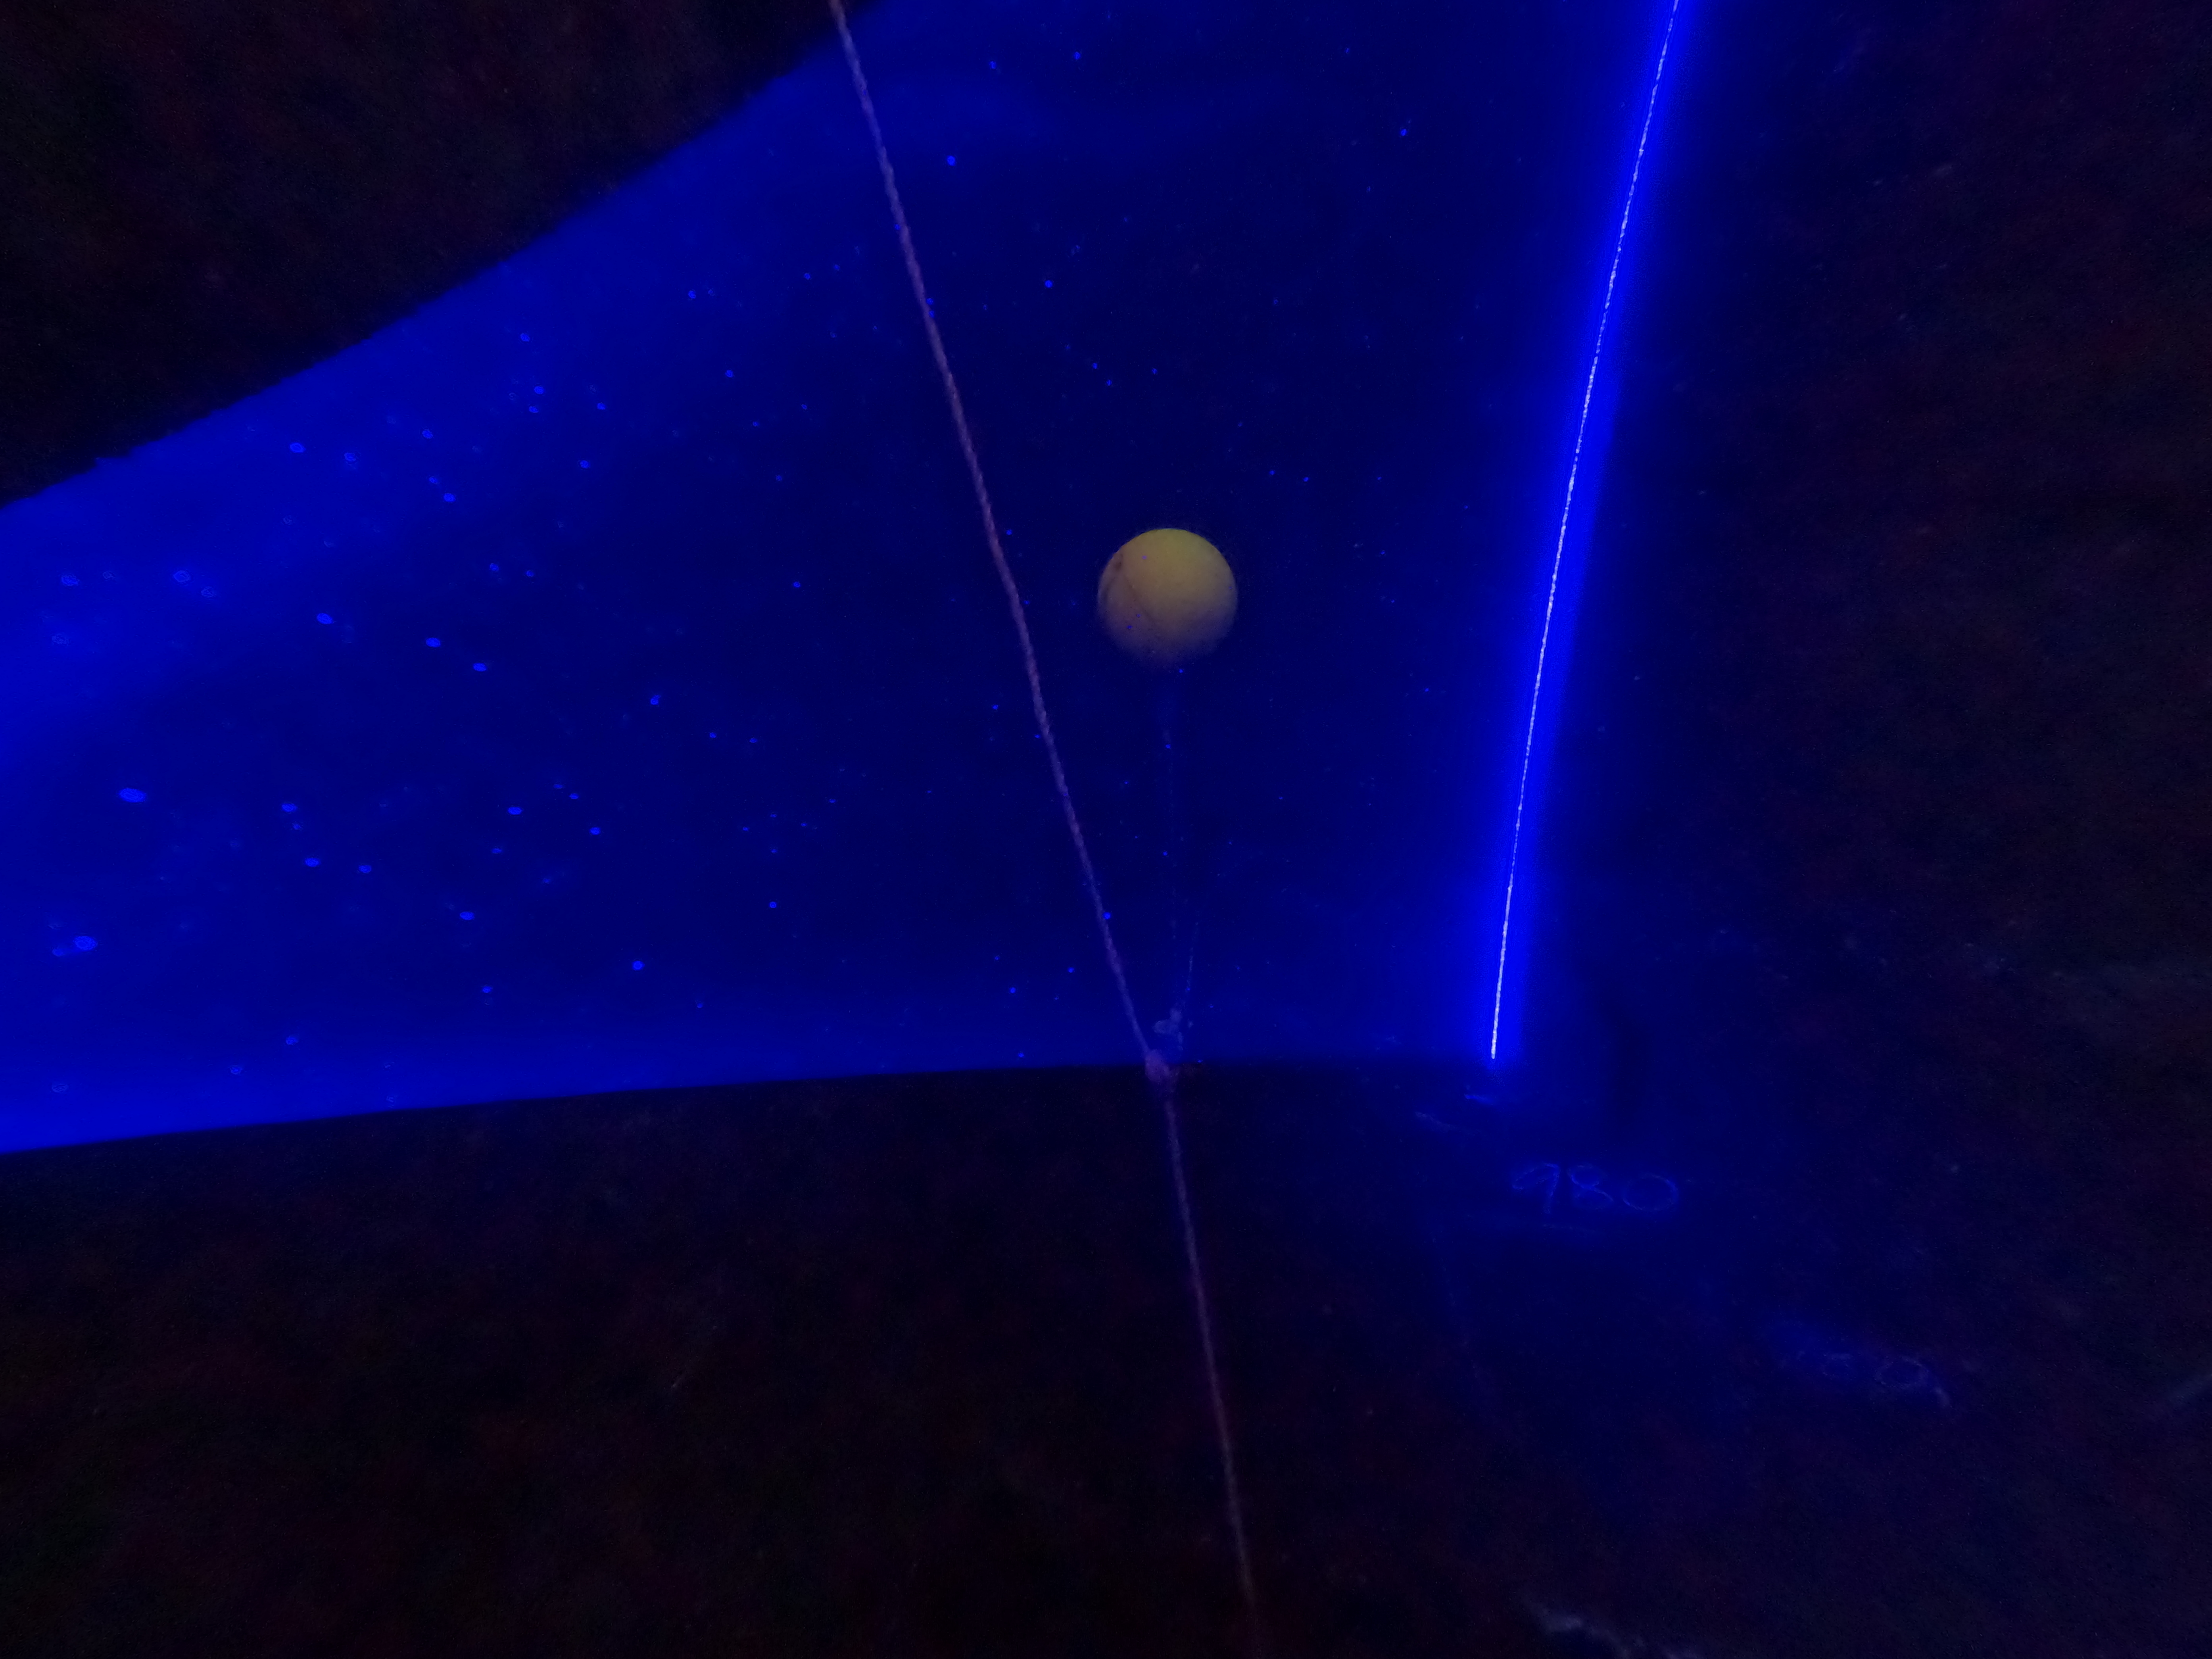

Supplement: Supplementary file 983 [file G0031337.pdf › 10/G0031337.pdf]

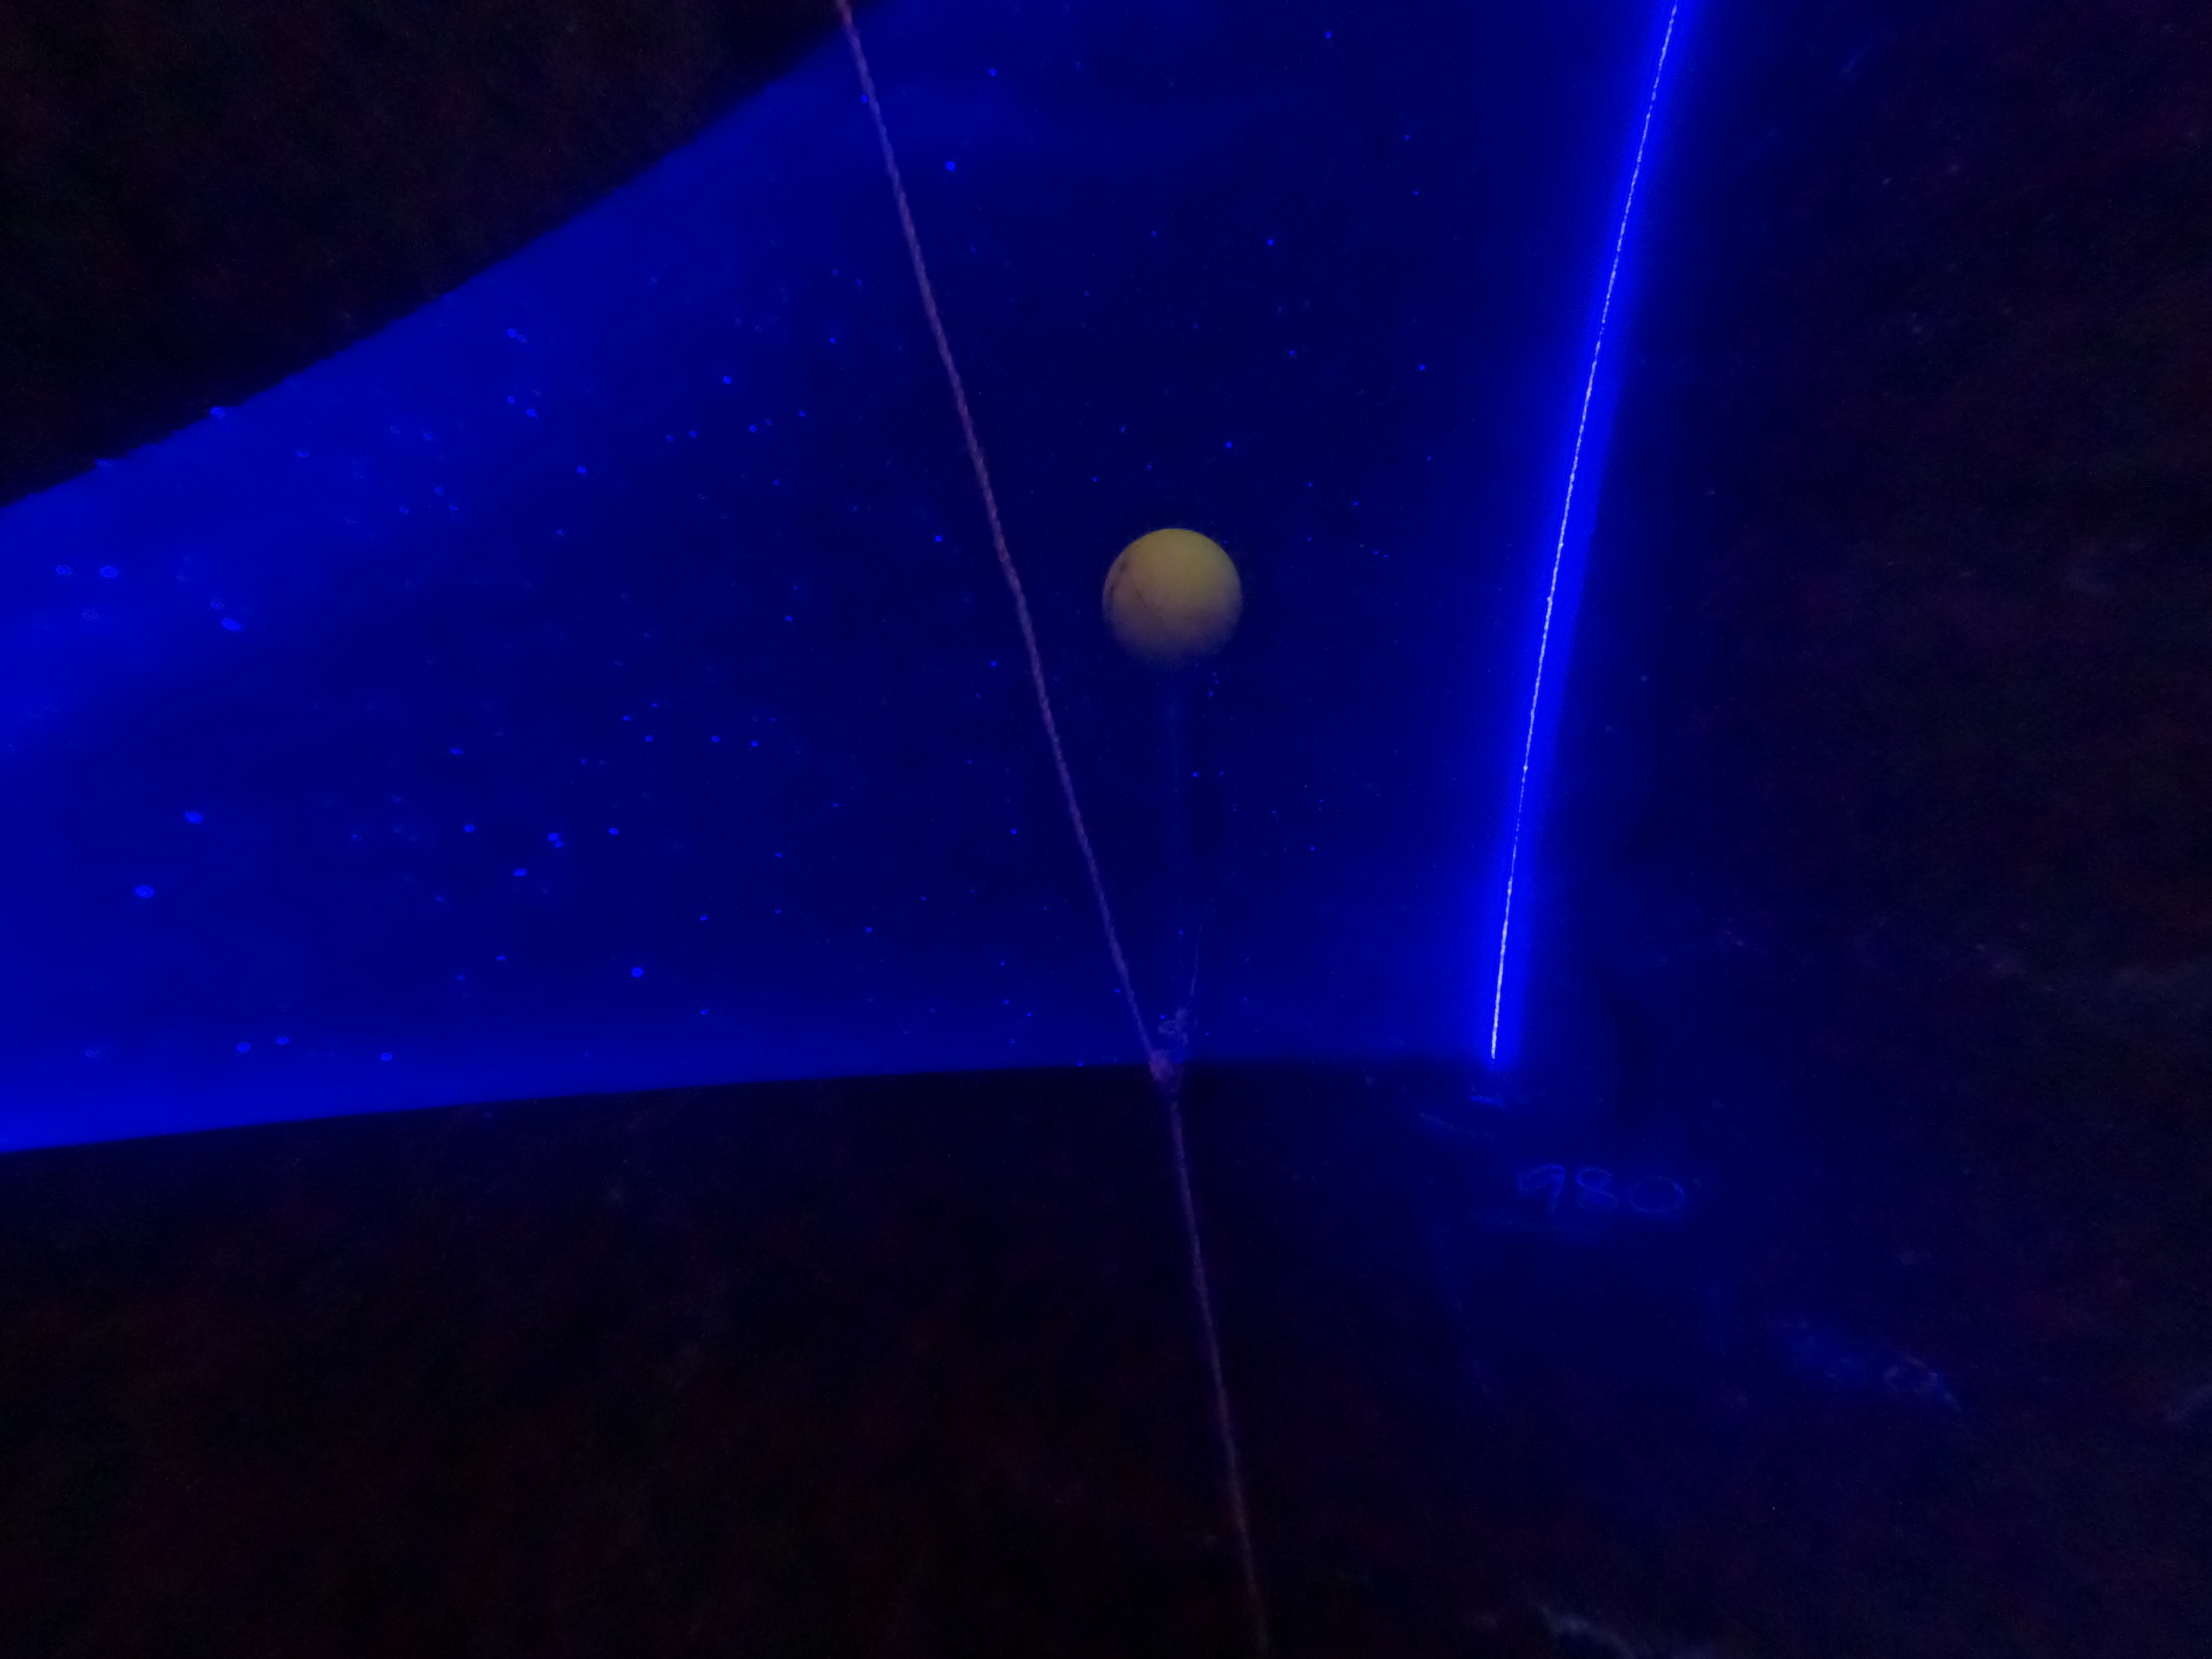

980

Supplement: Supplementary file 984 [file G0031338.pdf › 10/G0031338.pdf]

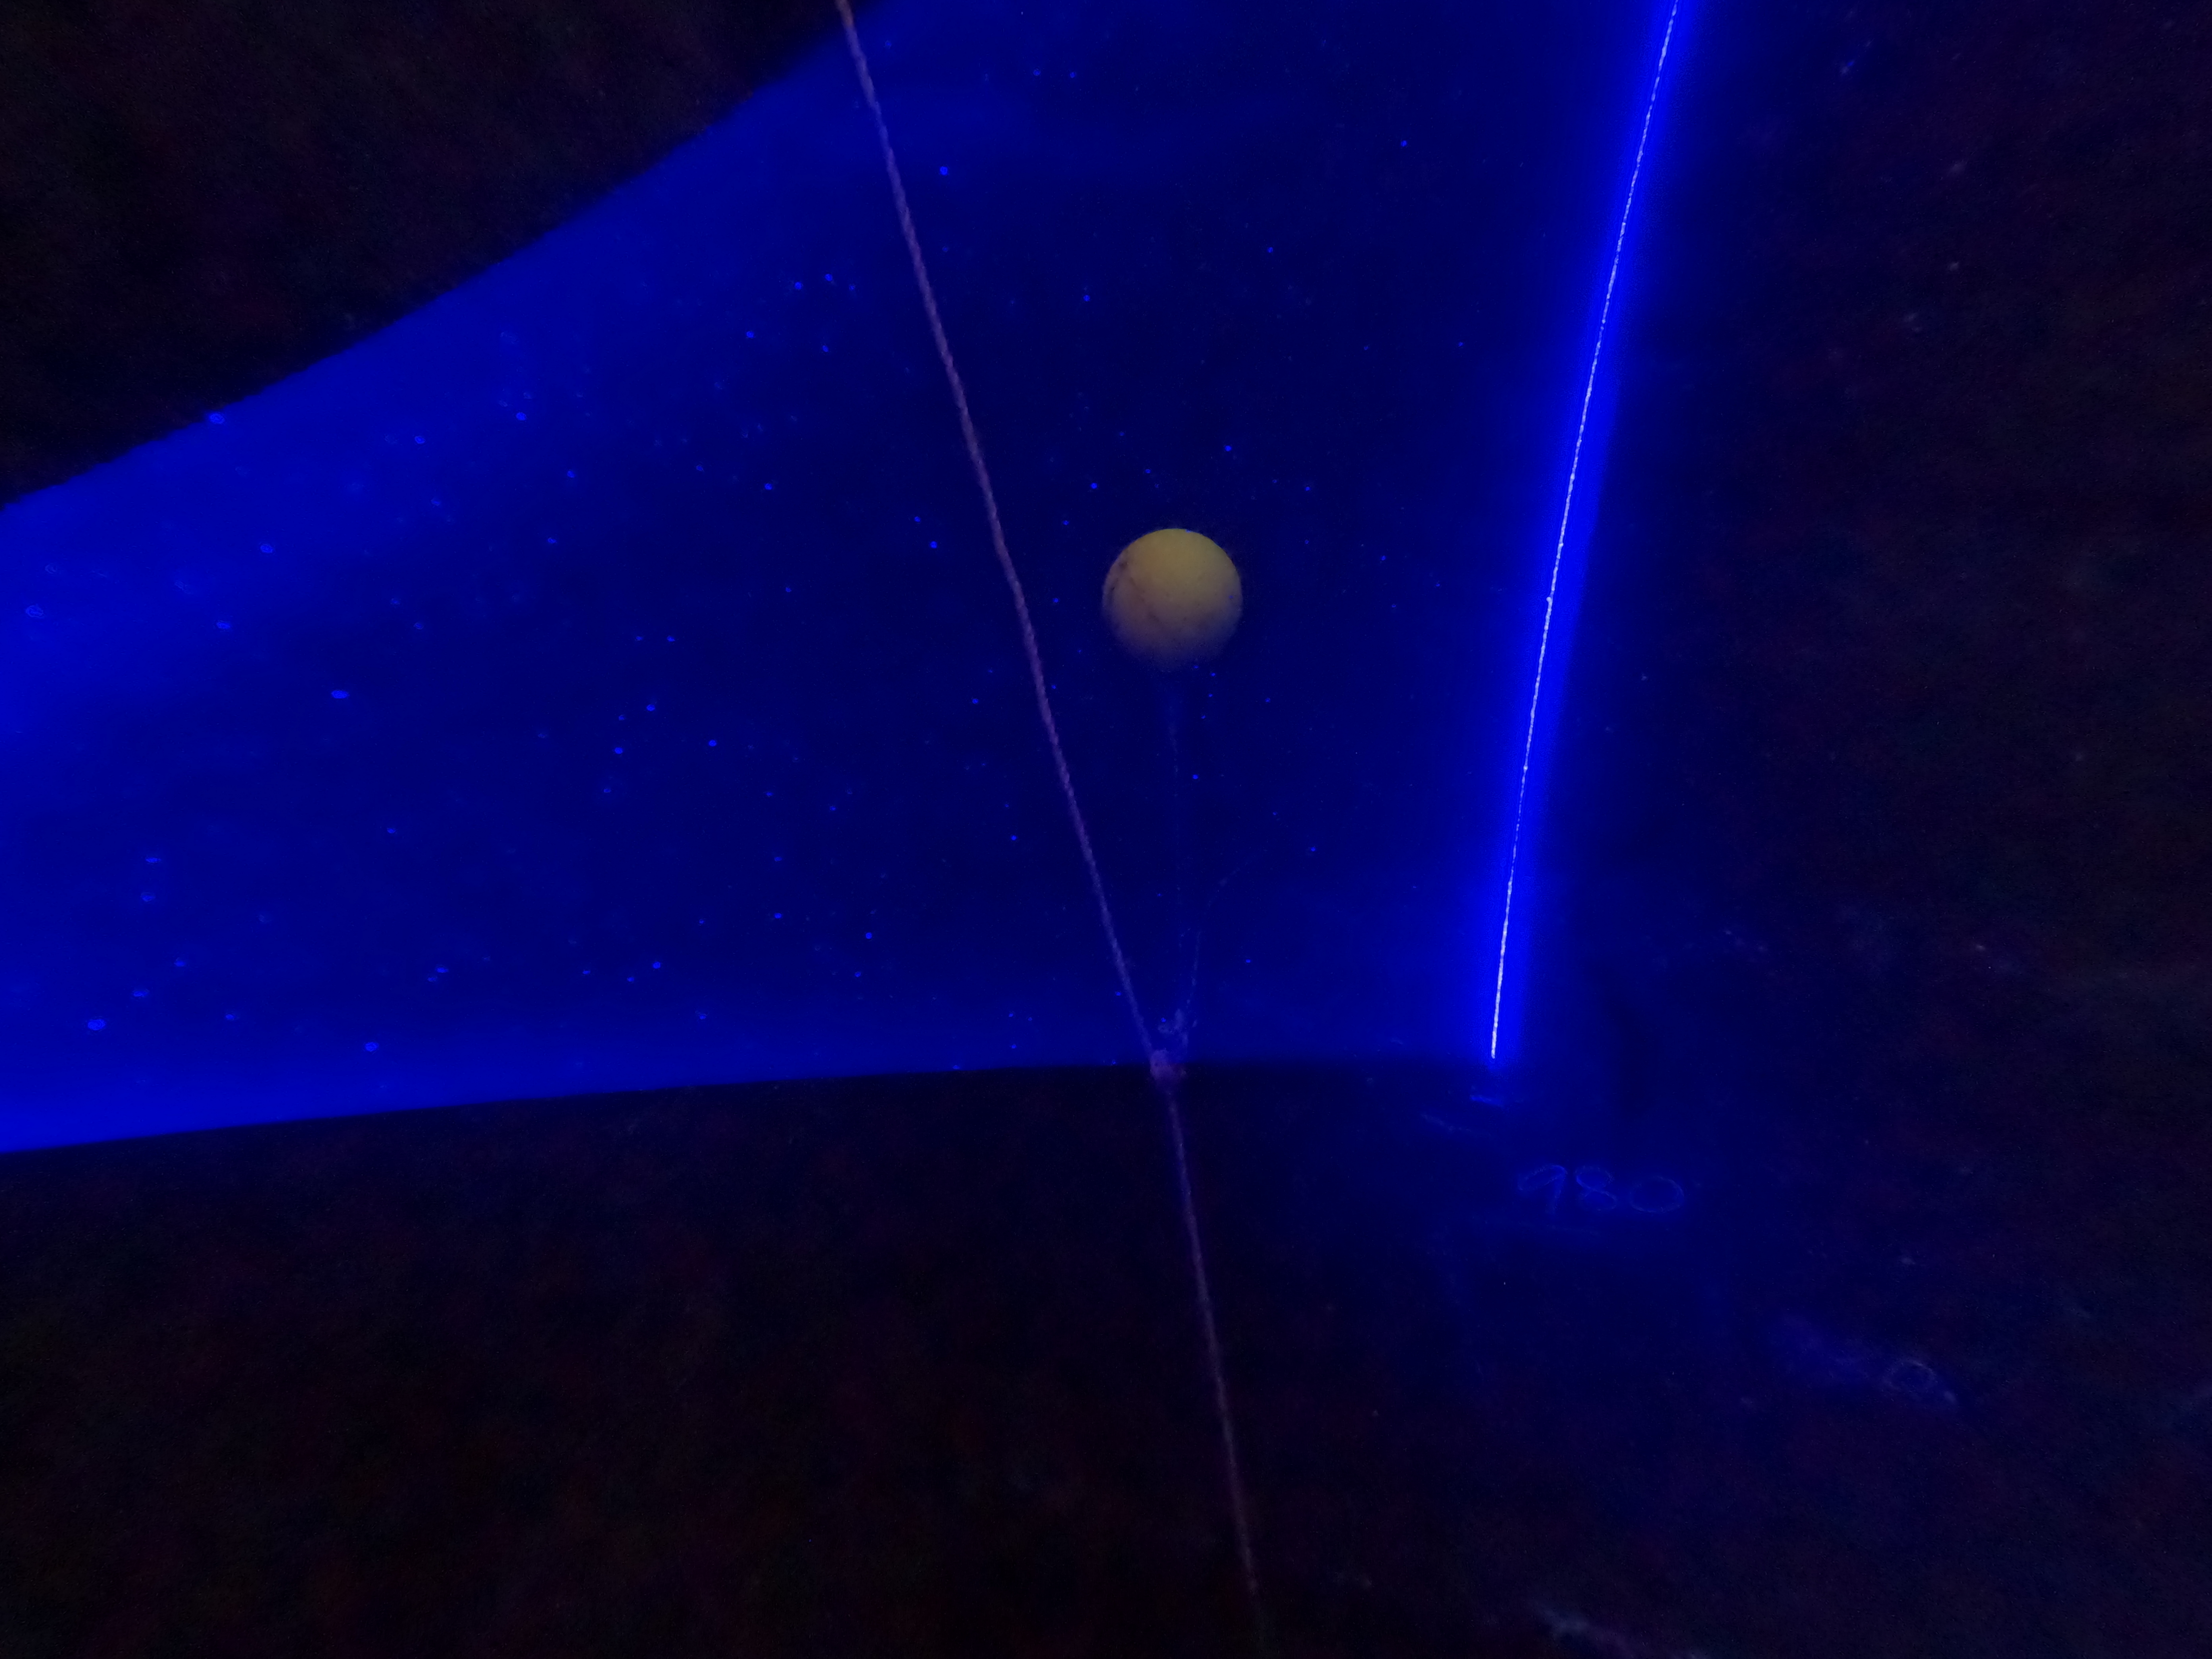

980

Supplement: Supplementary file 985 [file G0031339.pdf › 10/G0031339.pdf]

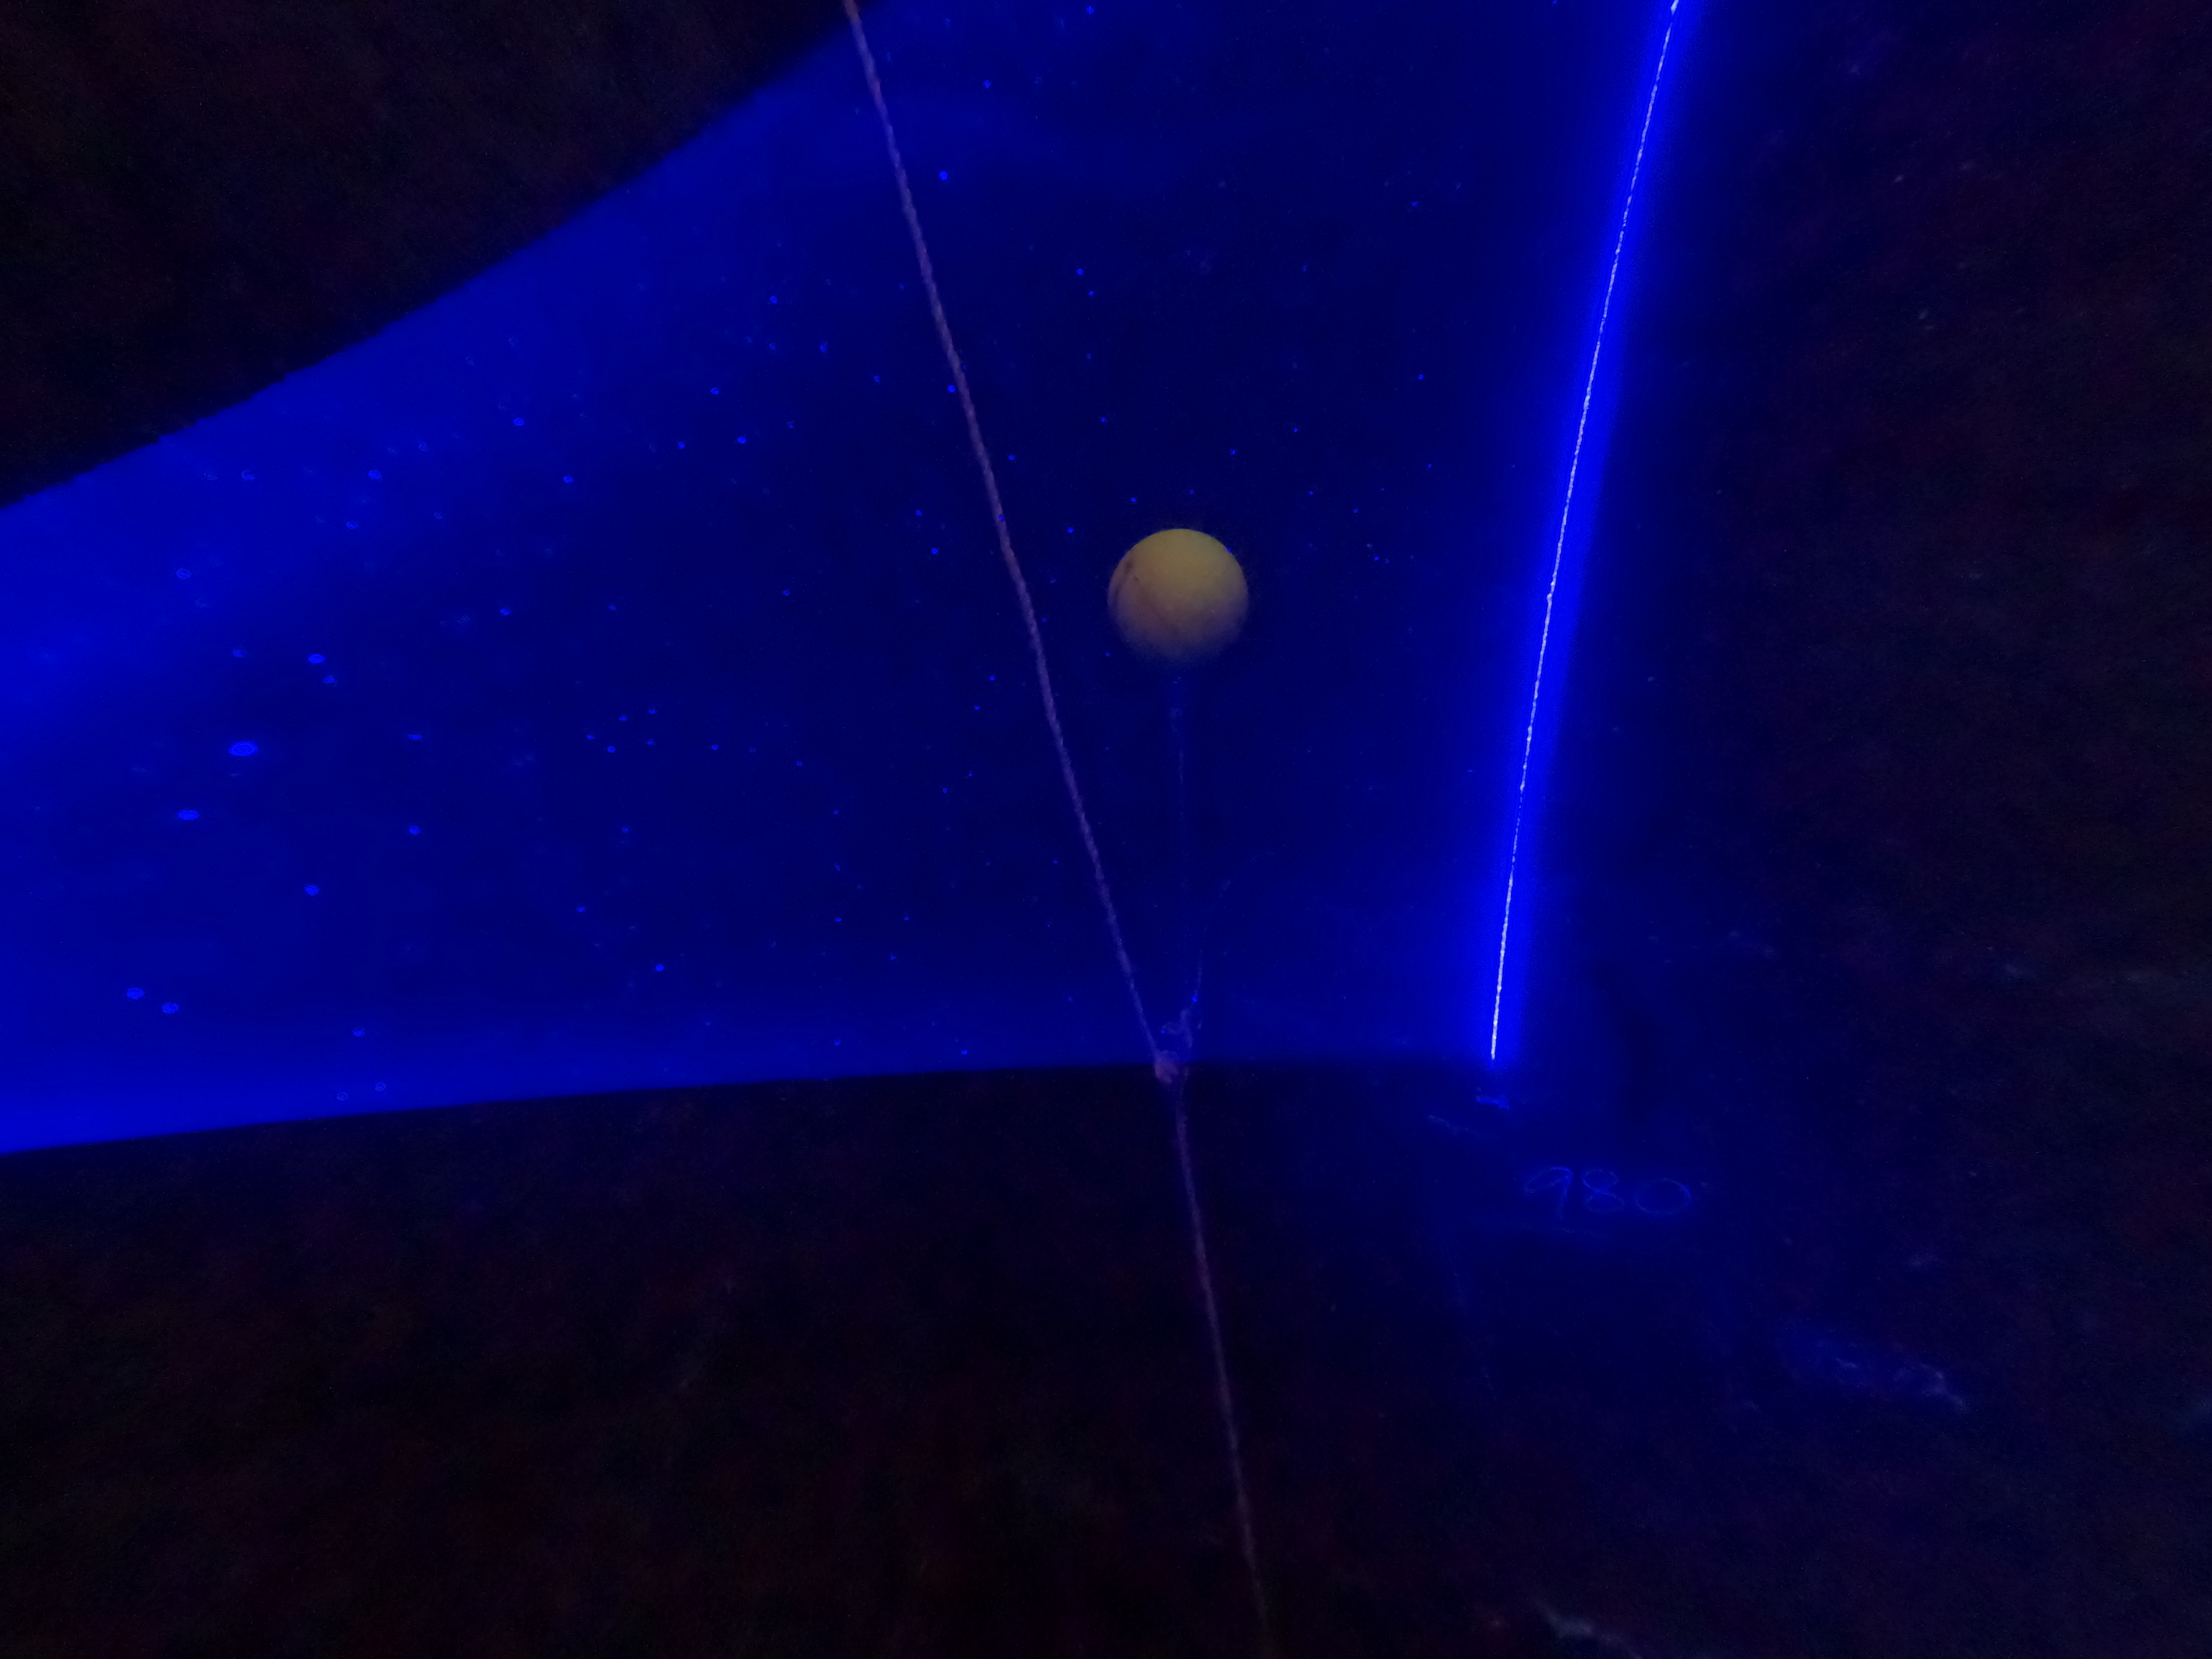

980

Supplement: Supplementary file 986 [file G0031340.pdf › 10/G0031340.pdf]

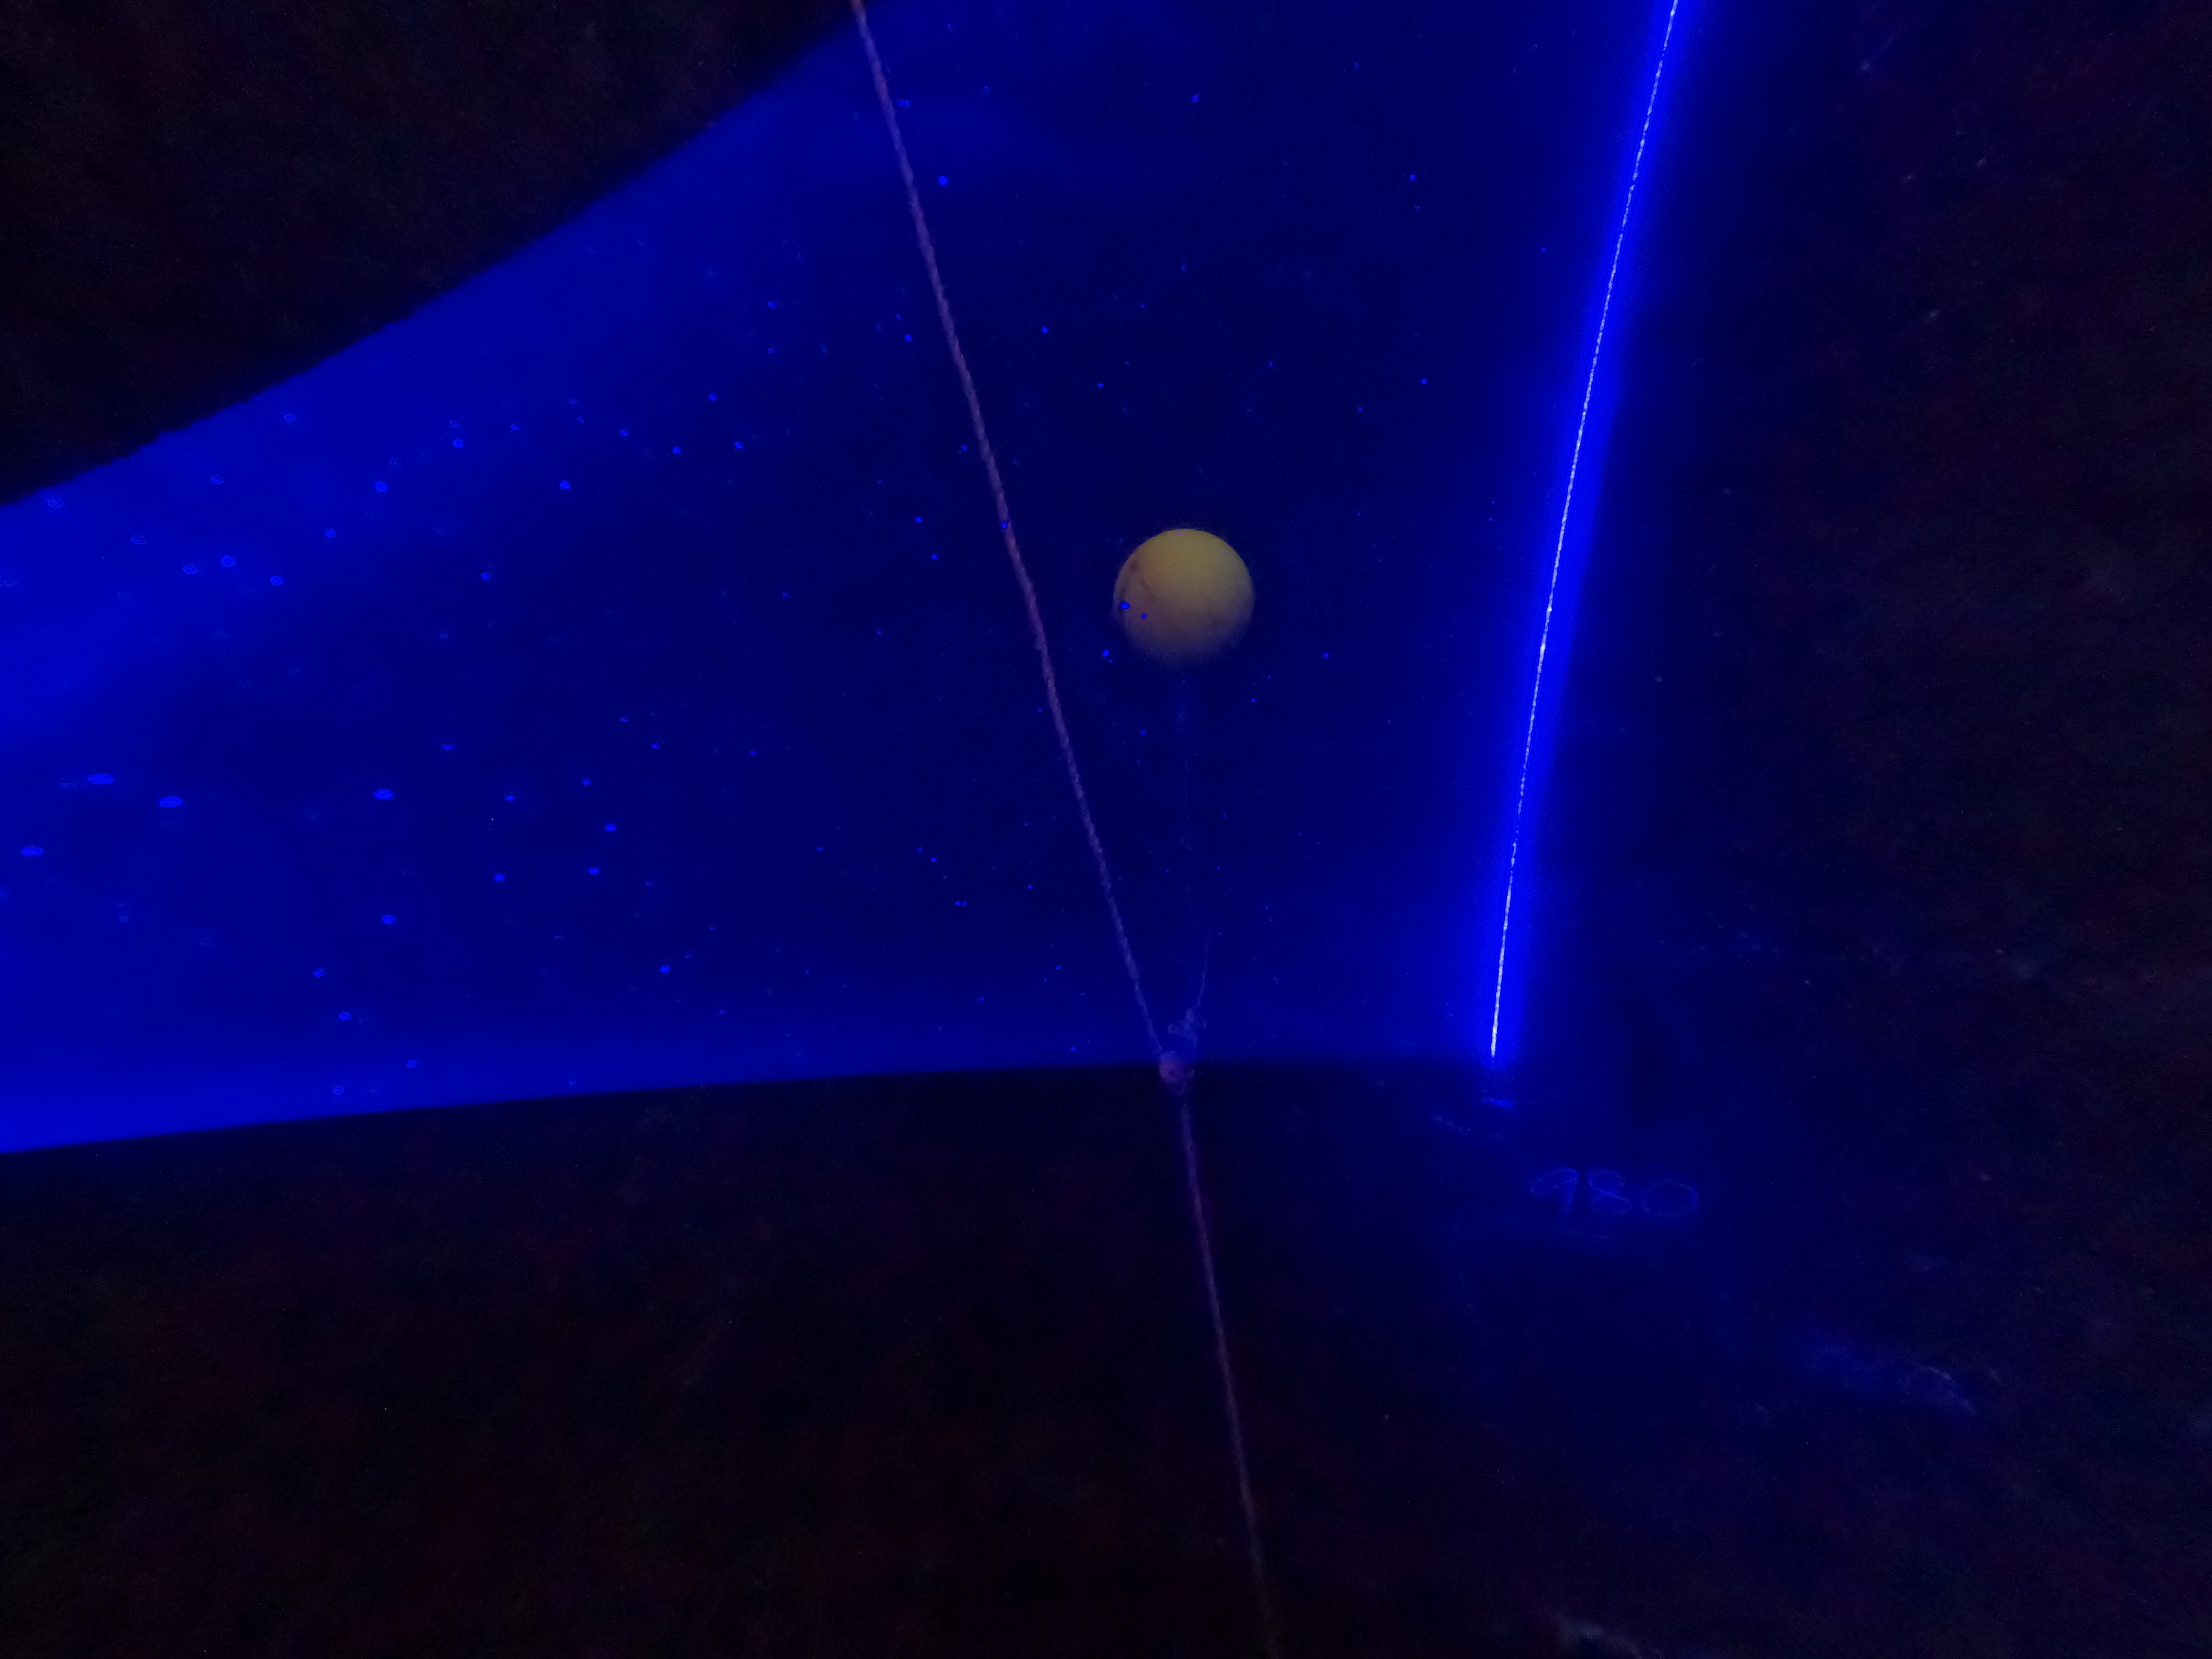

980

Supplement: Supplementary file 987 [file G0031341.pdf › 10/G0031341.pdf]

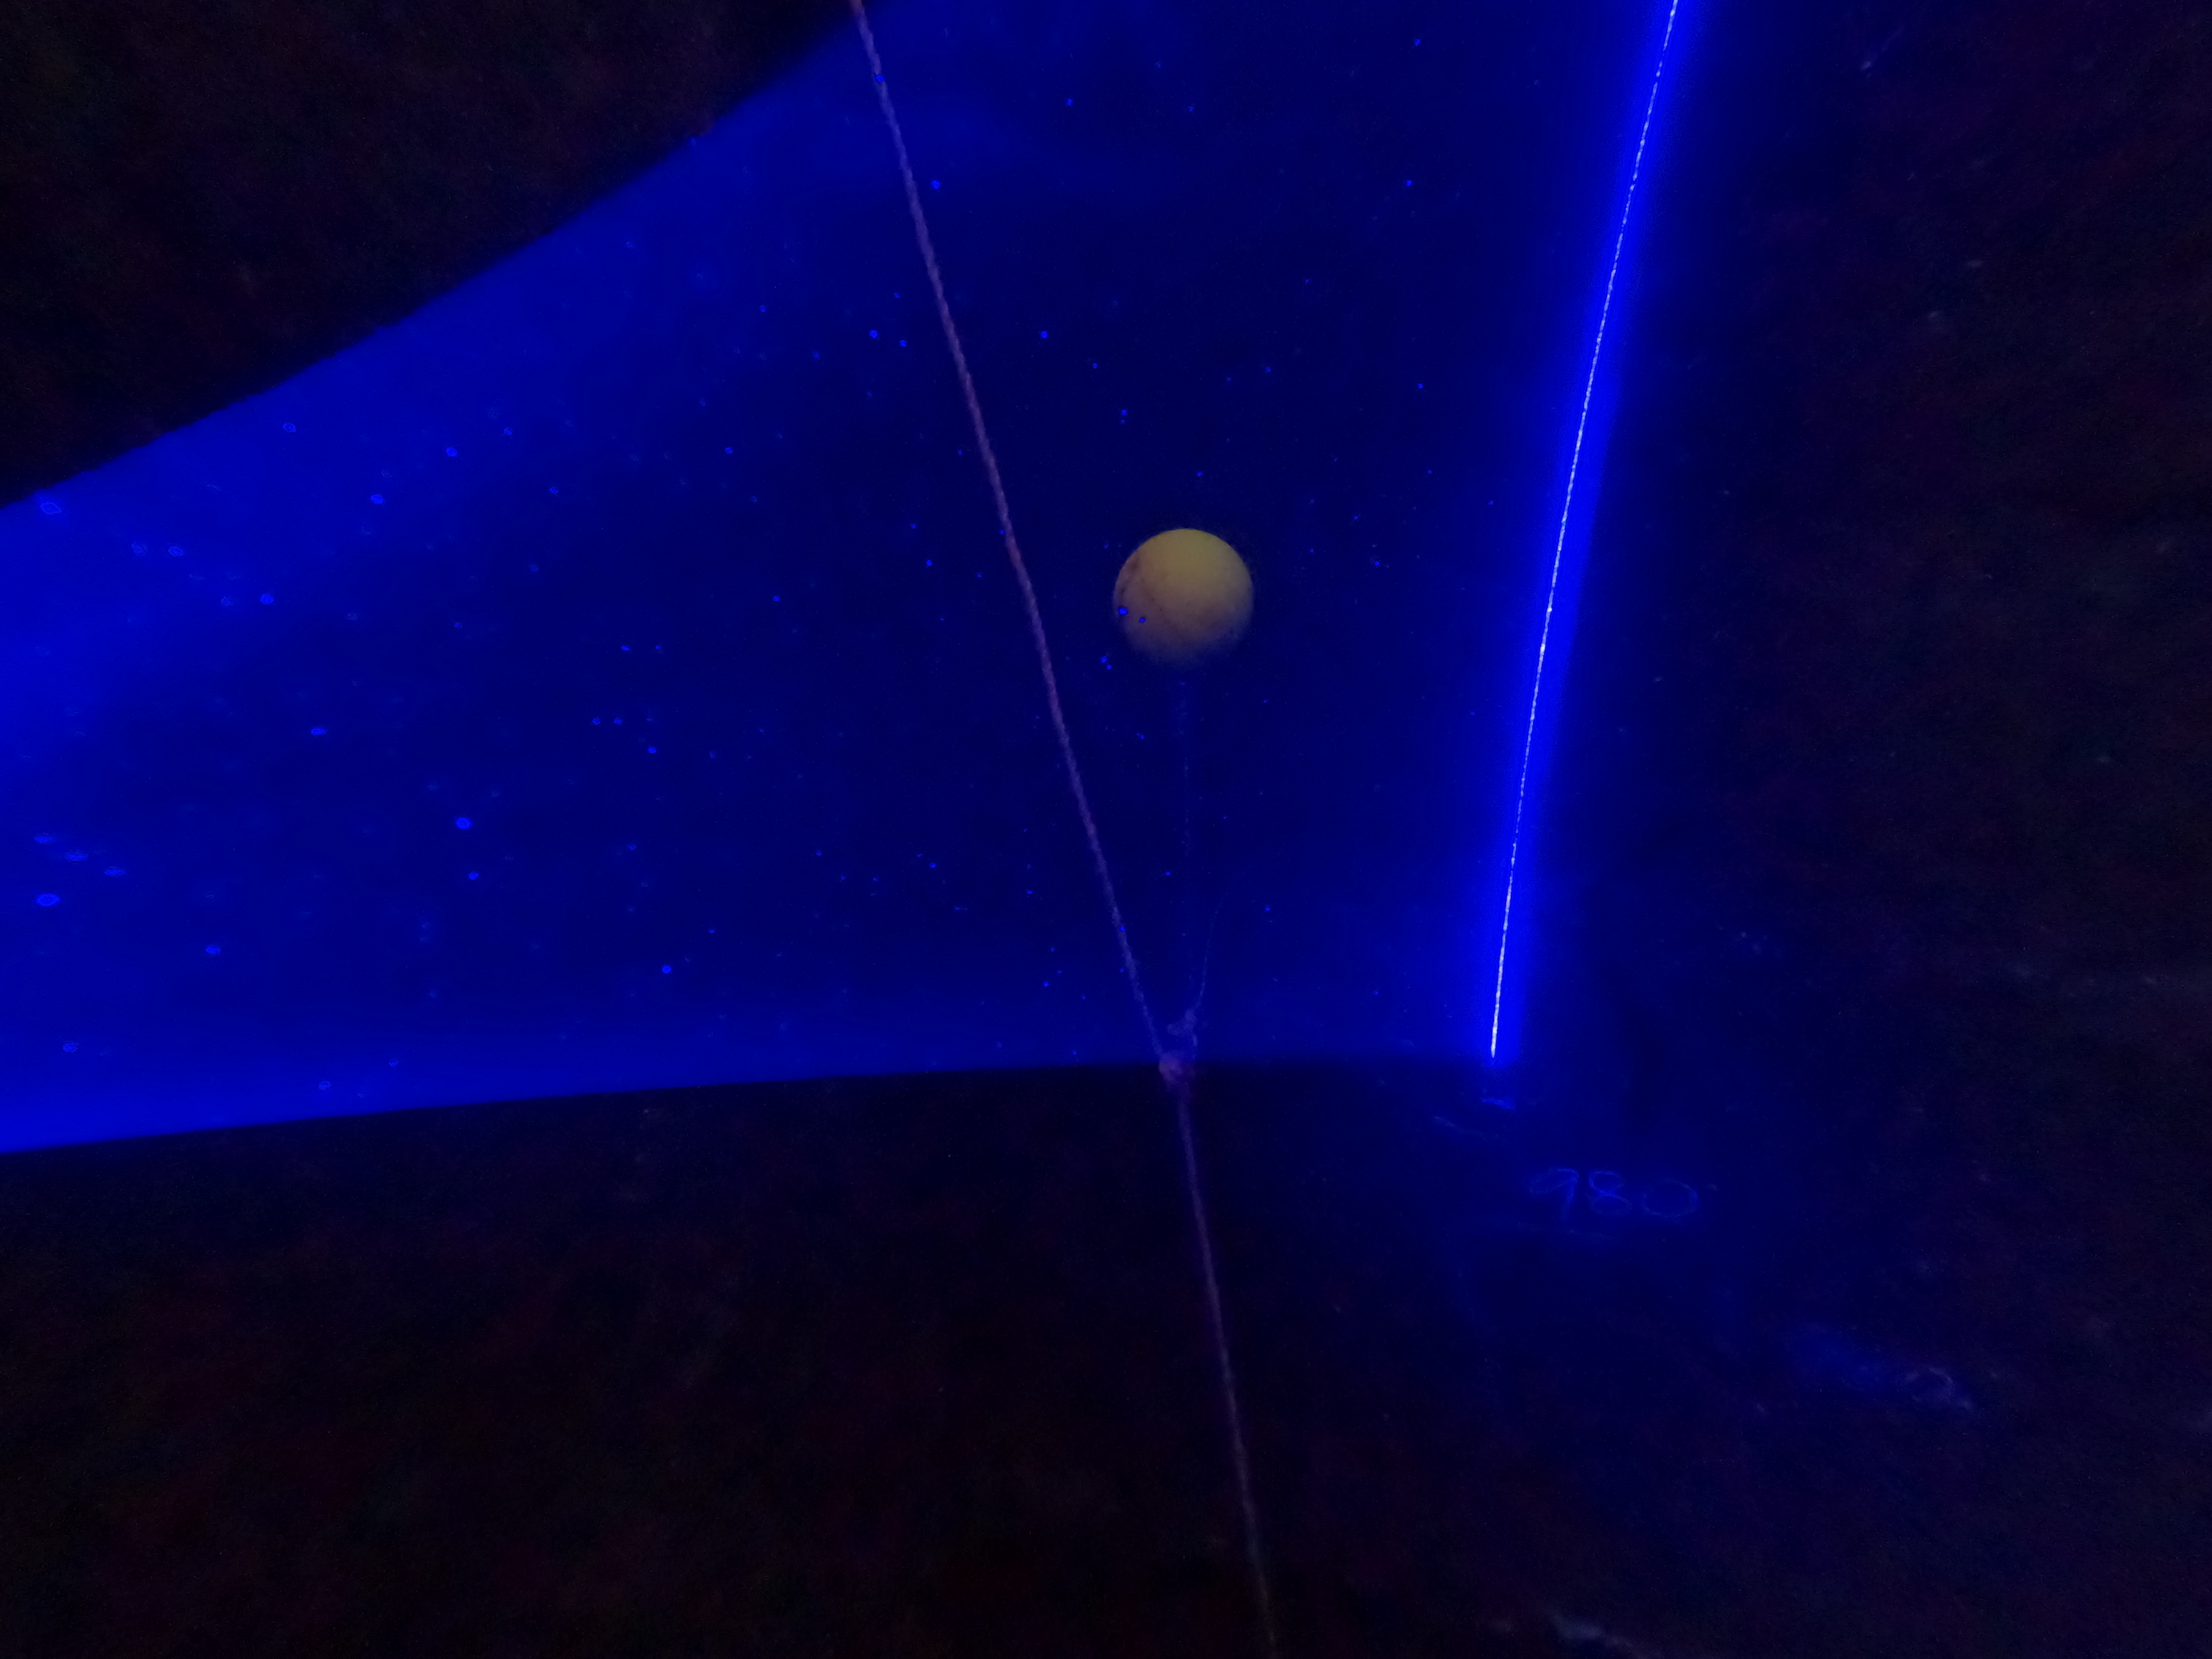

980

Supplement: Supplementary file 988 [file G0031342.pdf › 10/G0031342.pdf]

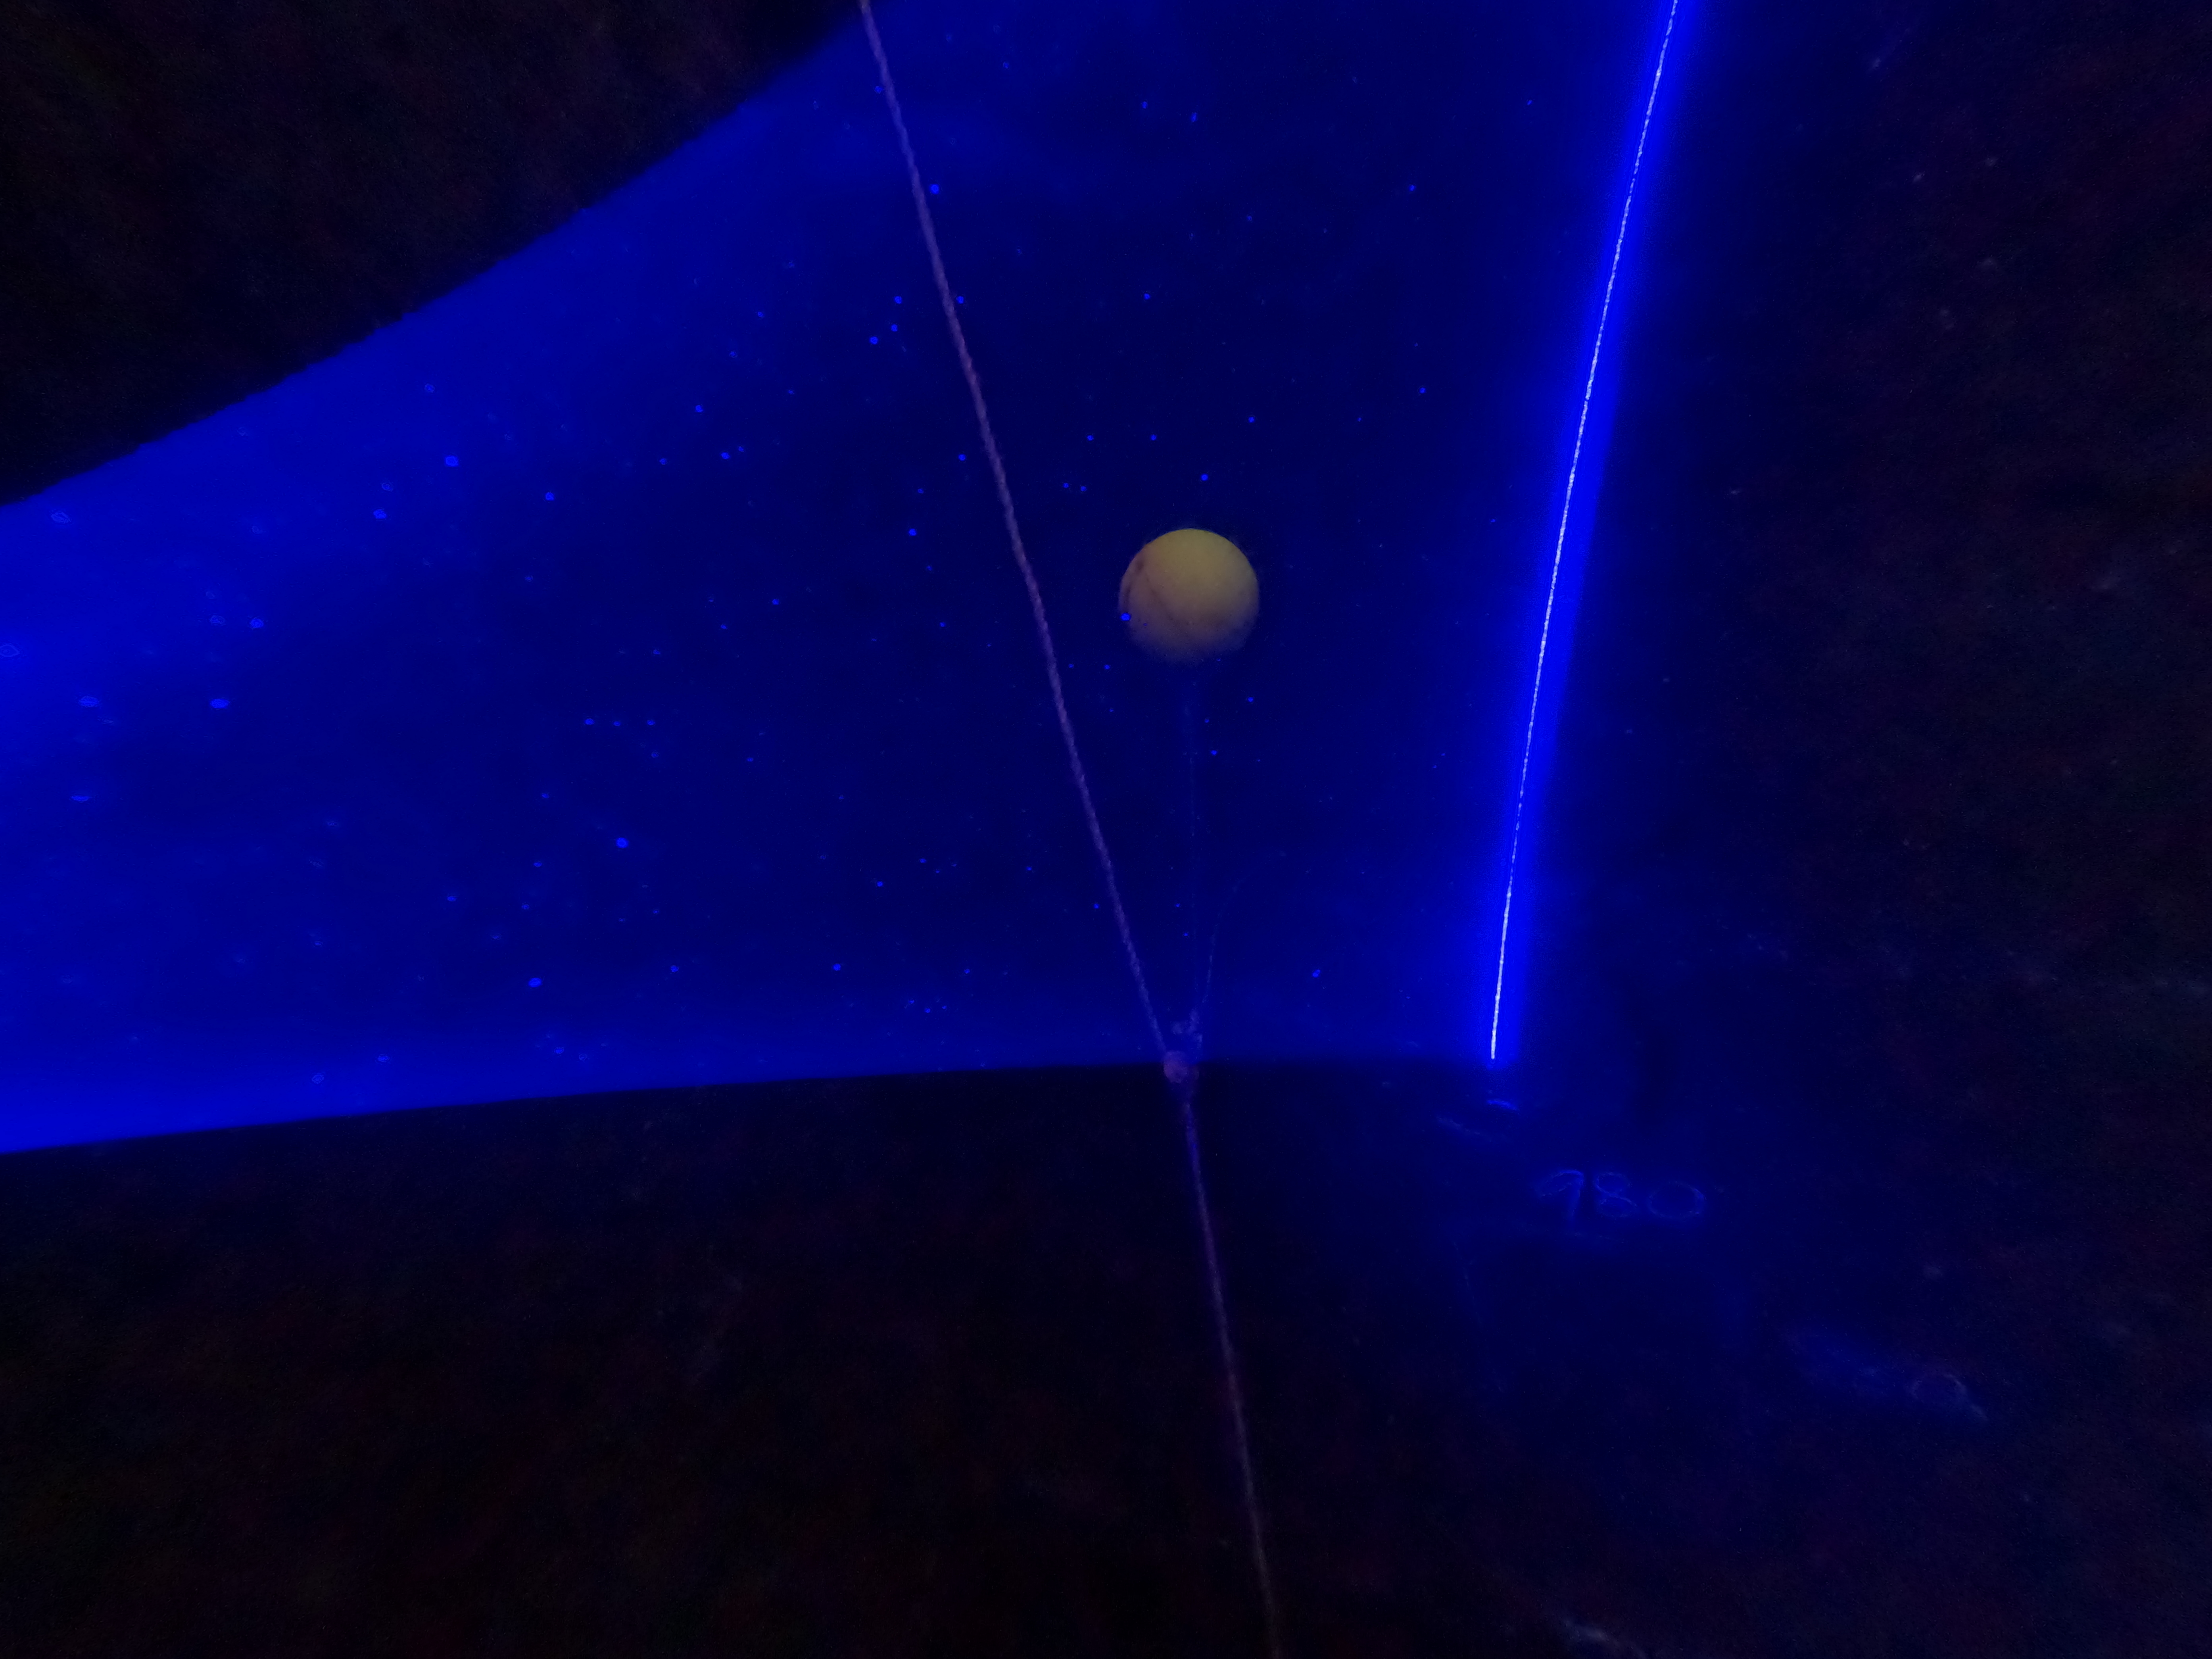

980

980

Supplement: Supplementary file 989 [file G0031343.pdf › 10/G0031343.pdf]

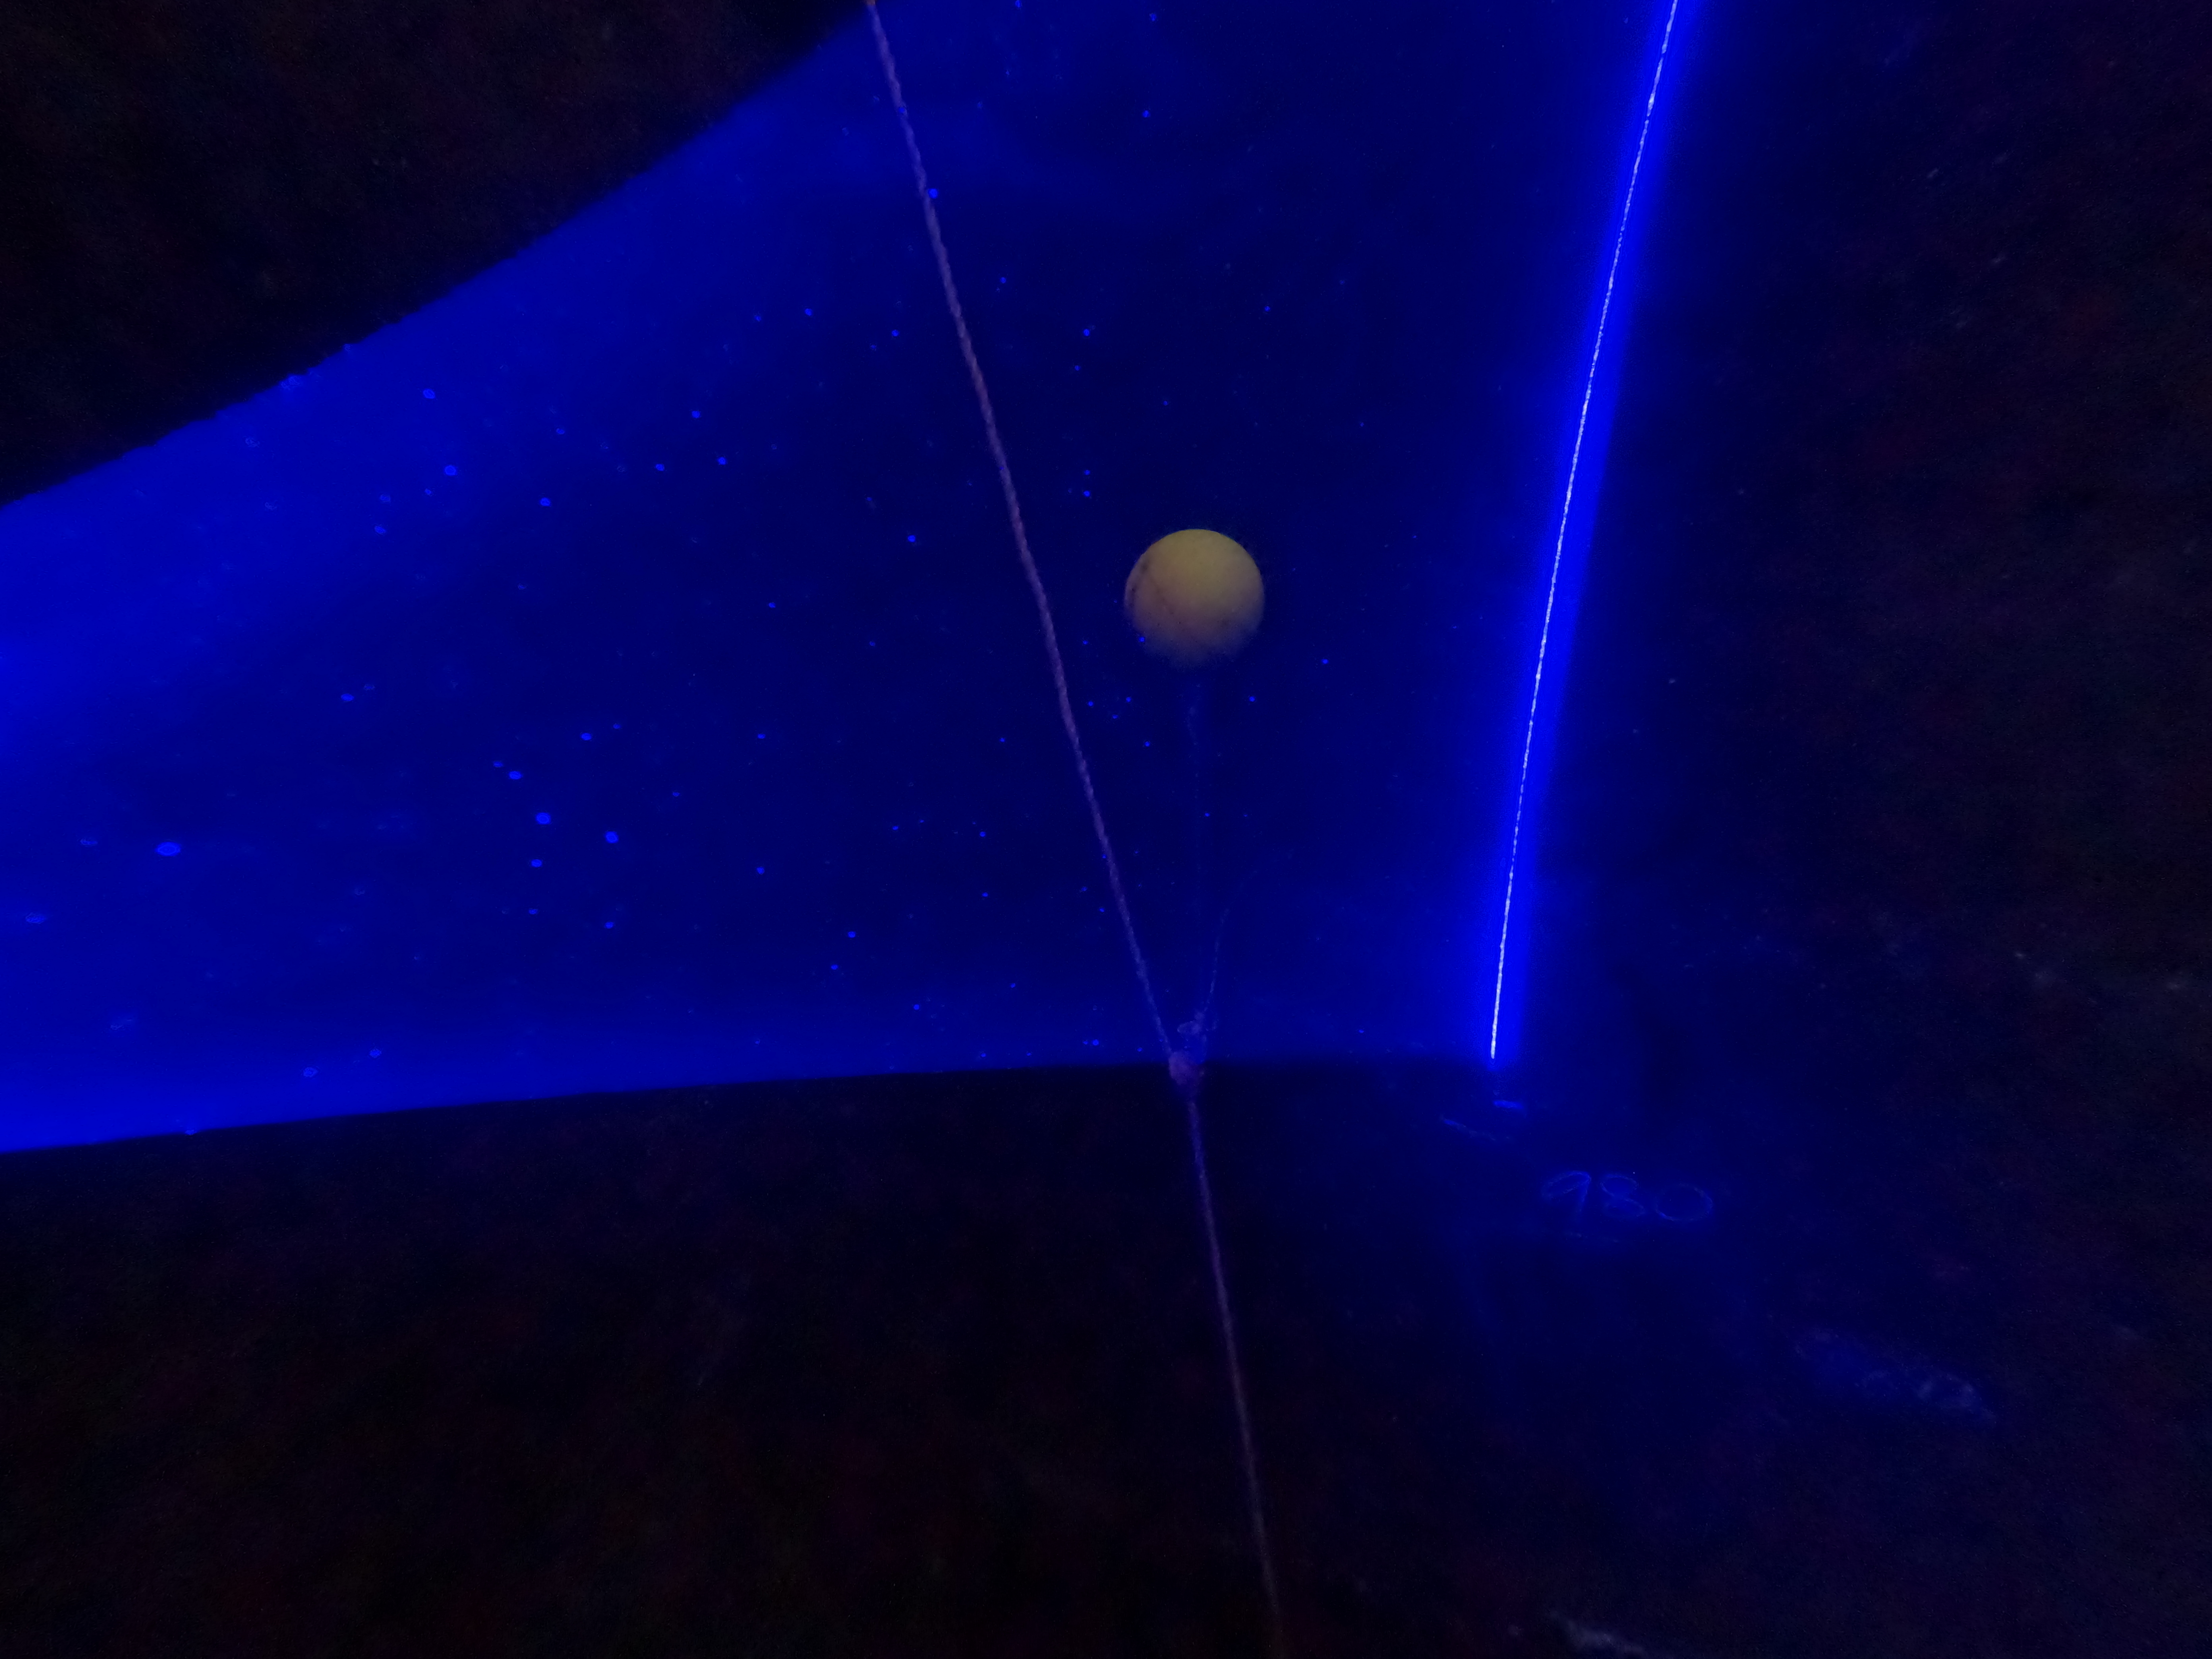

Supplement: Supplementary file 990 [file G0031344.pdf › 10/G0031344.pdf]

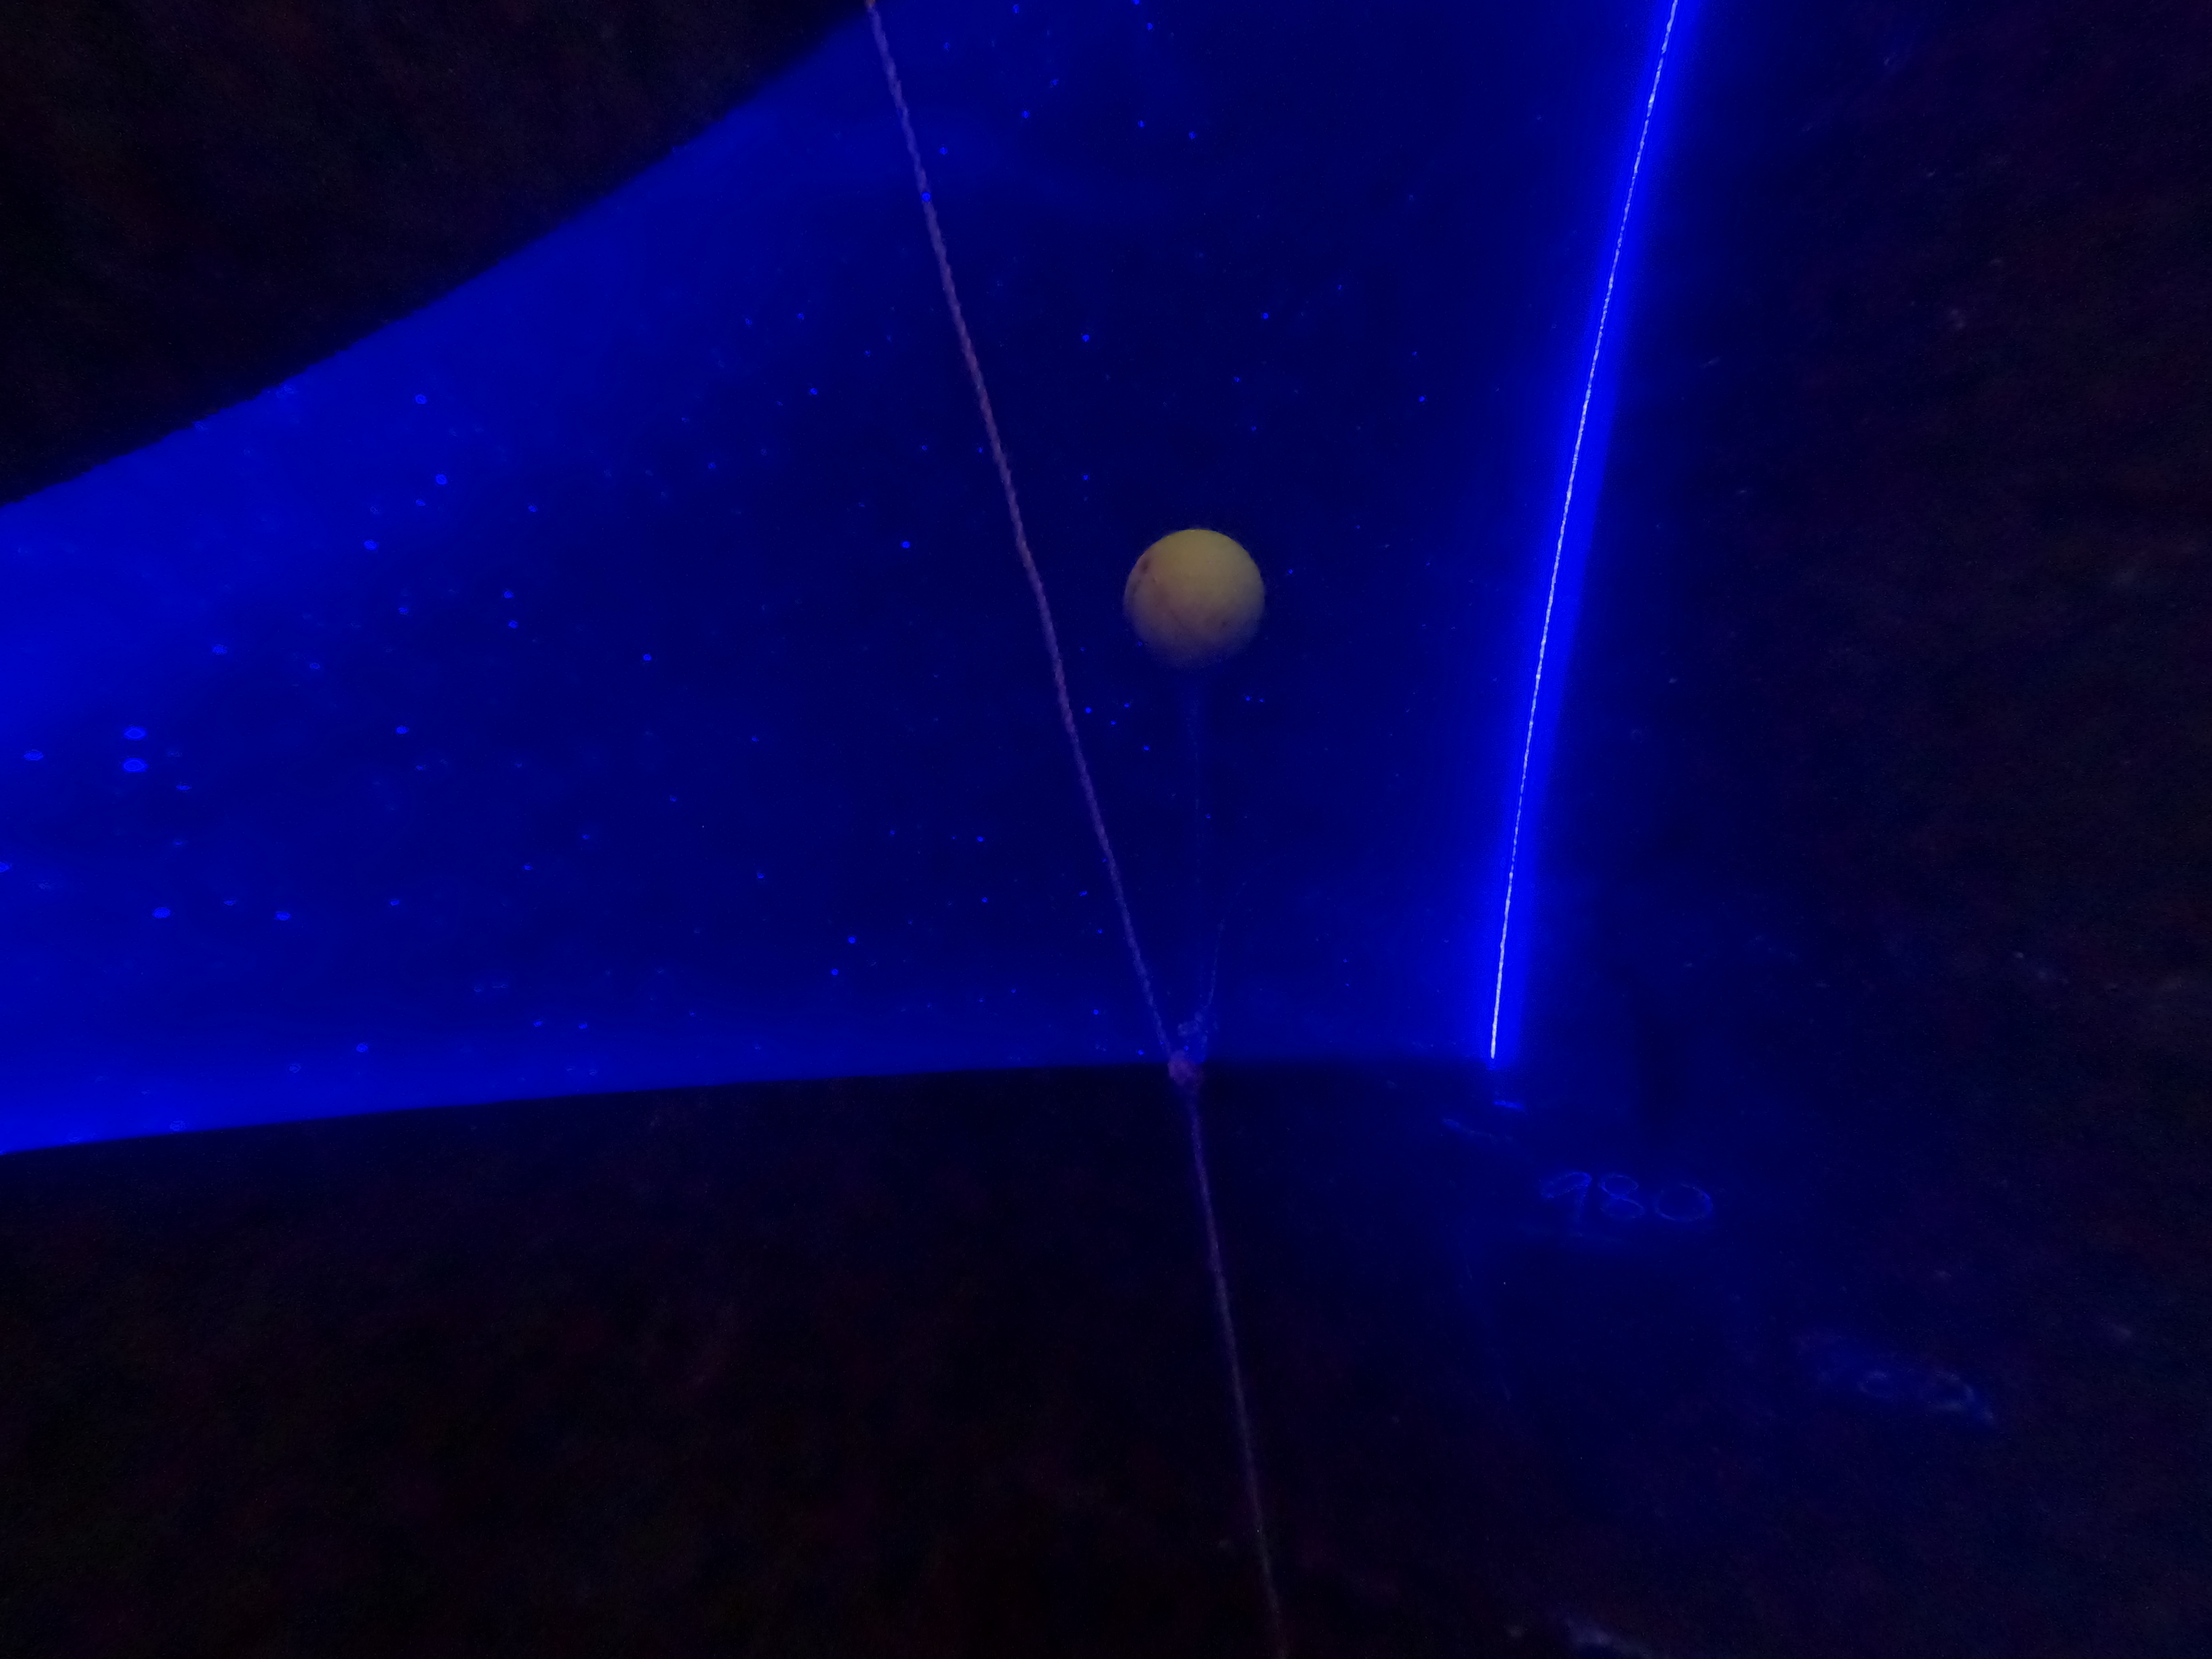

980

100

Supplement: Supplementary file 991 [file G0031345.pdf › 10/G0031345.pdf]

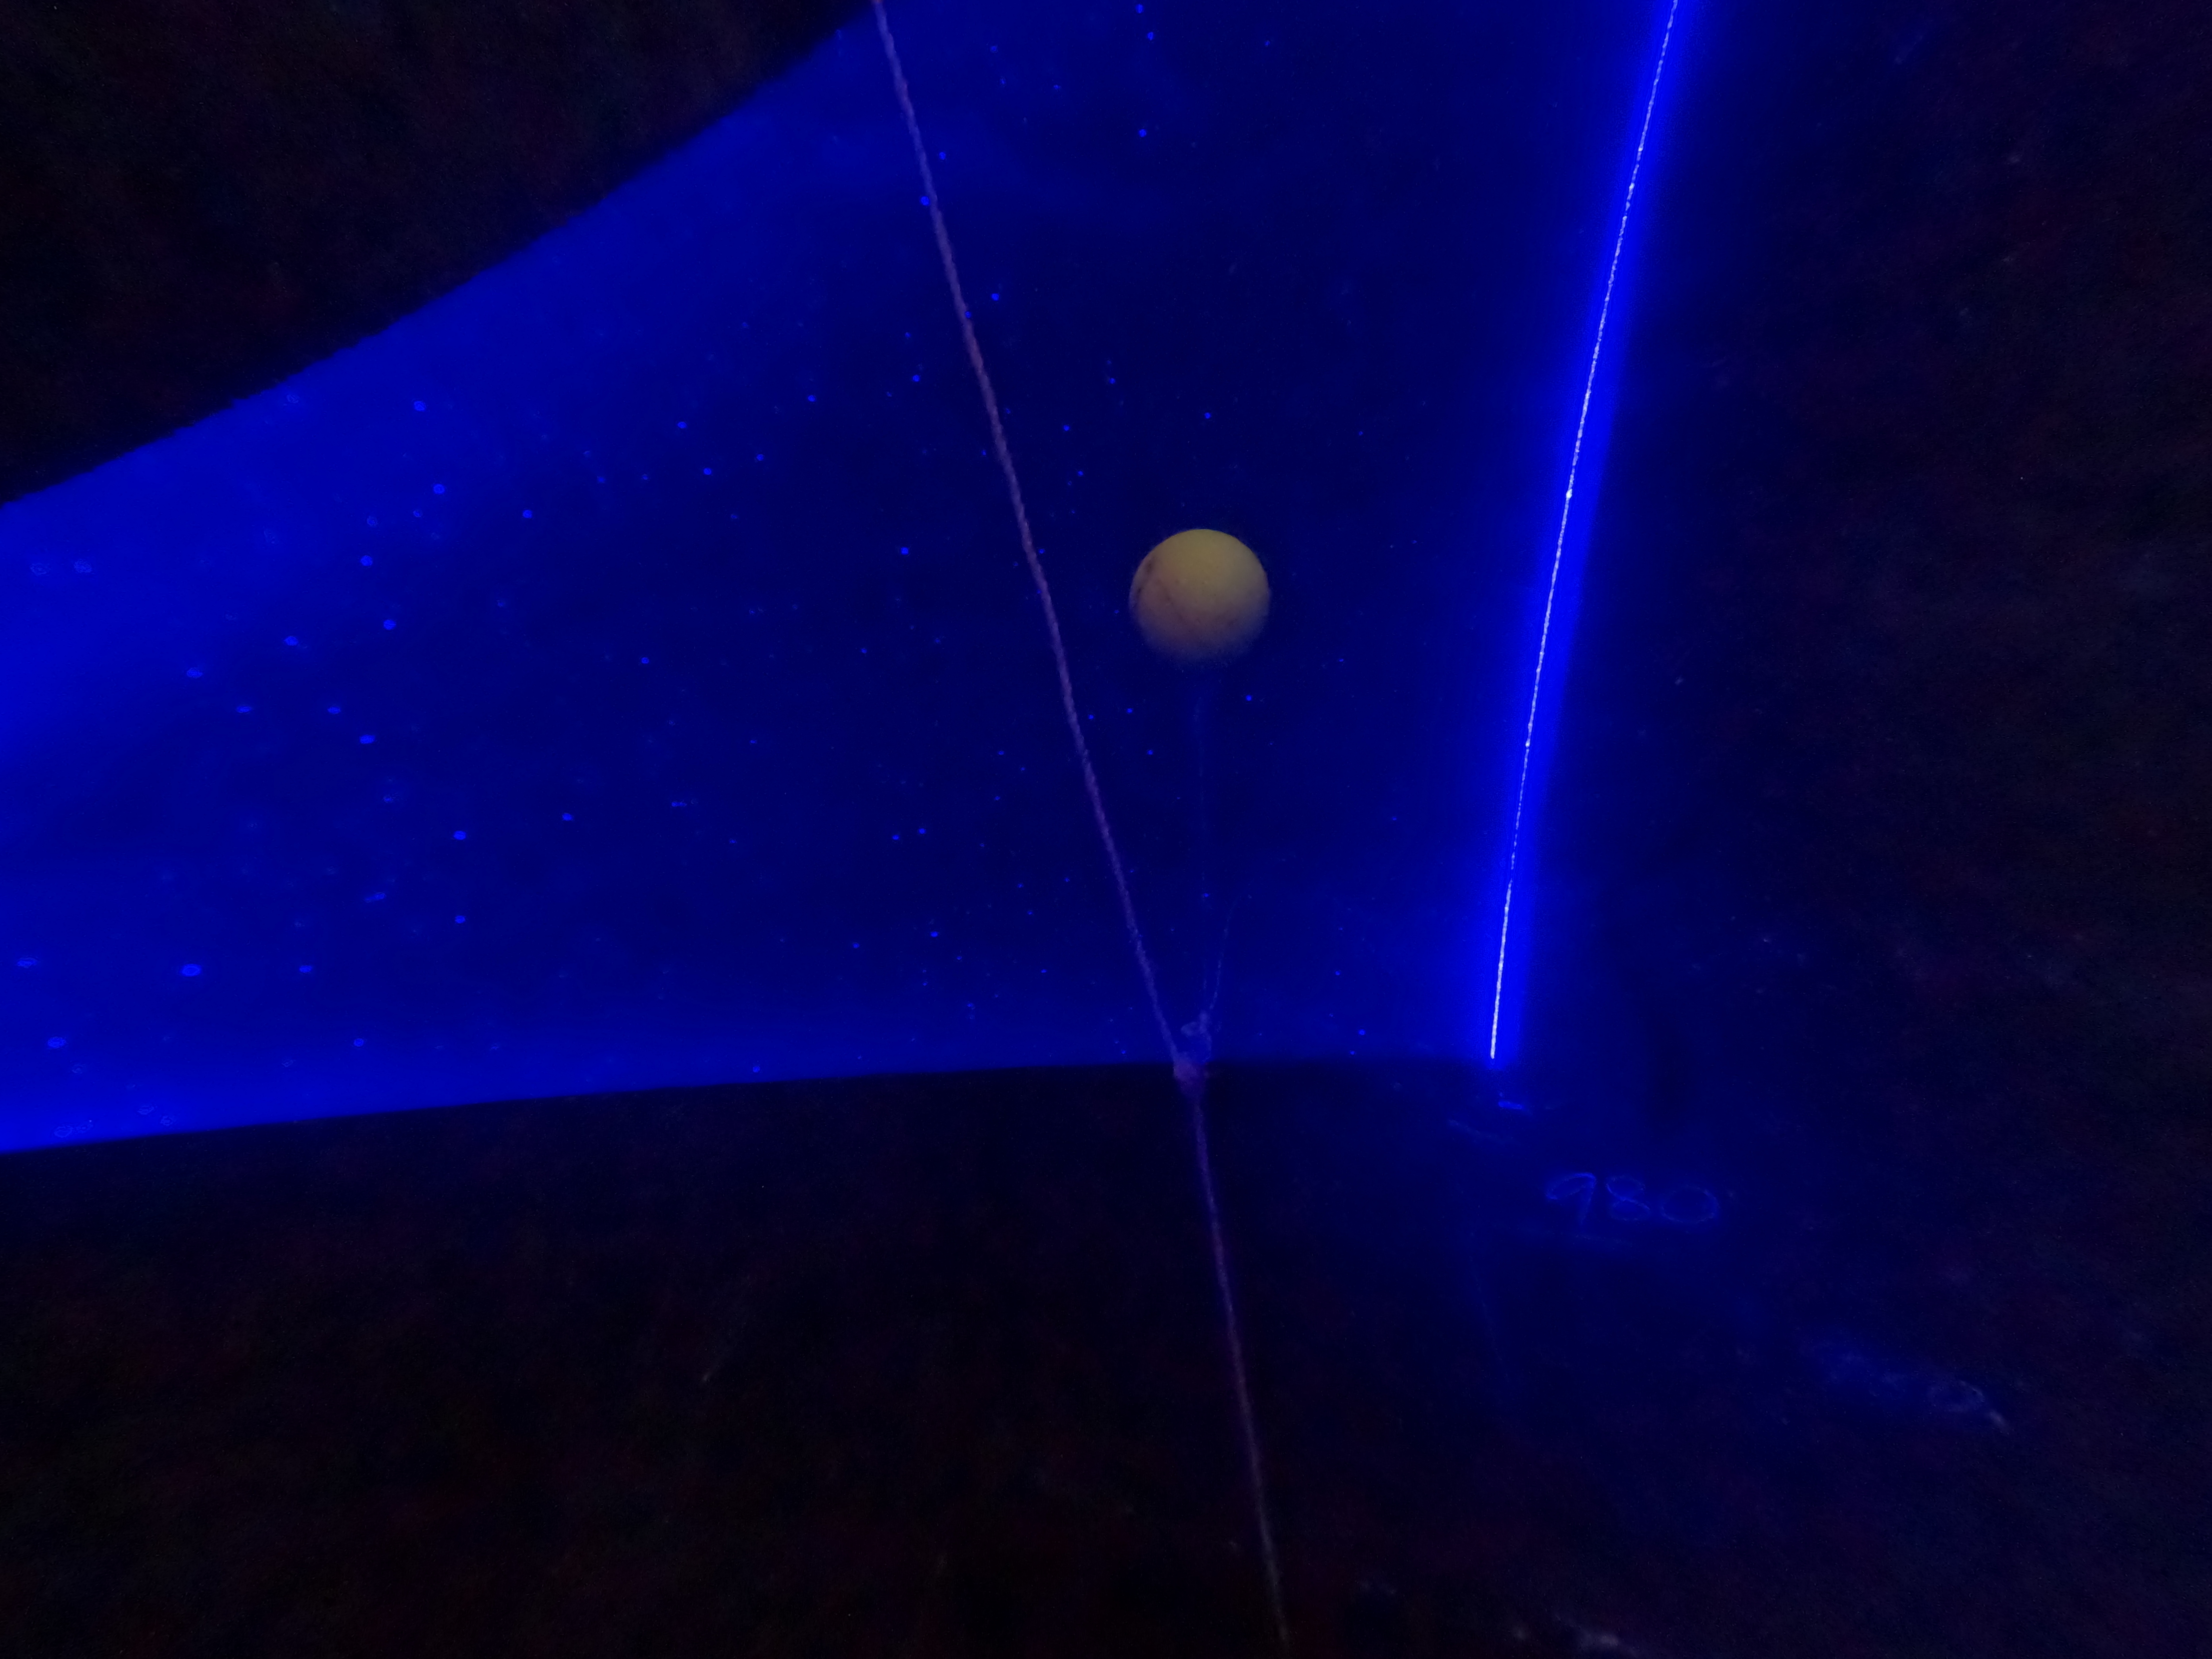

980

Supplement: Supplementary file 992 [file G0031346.pdf › 10/G0031346.pdf]

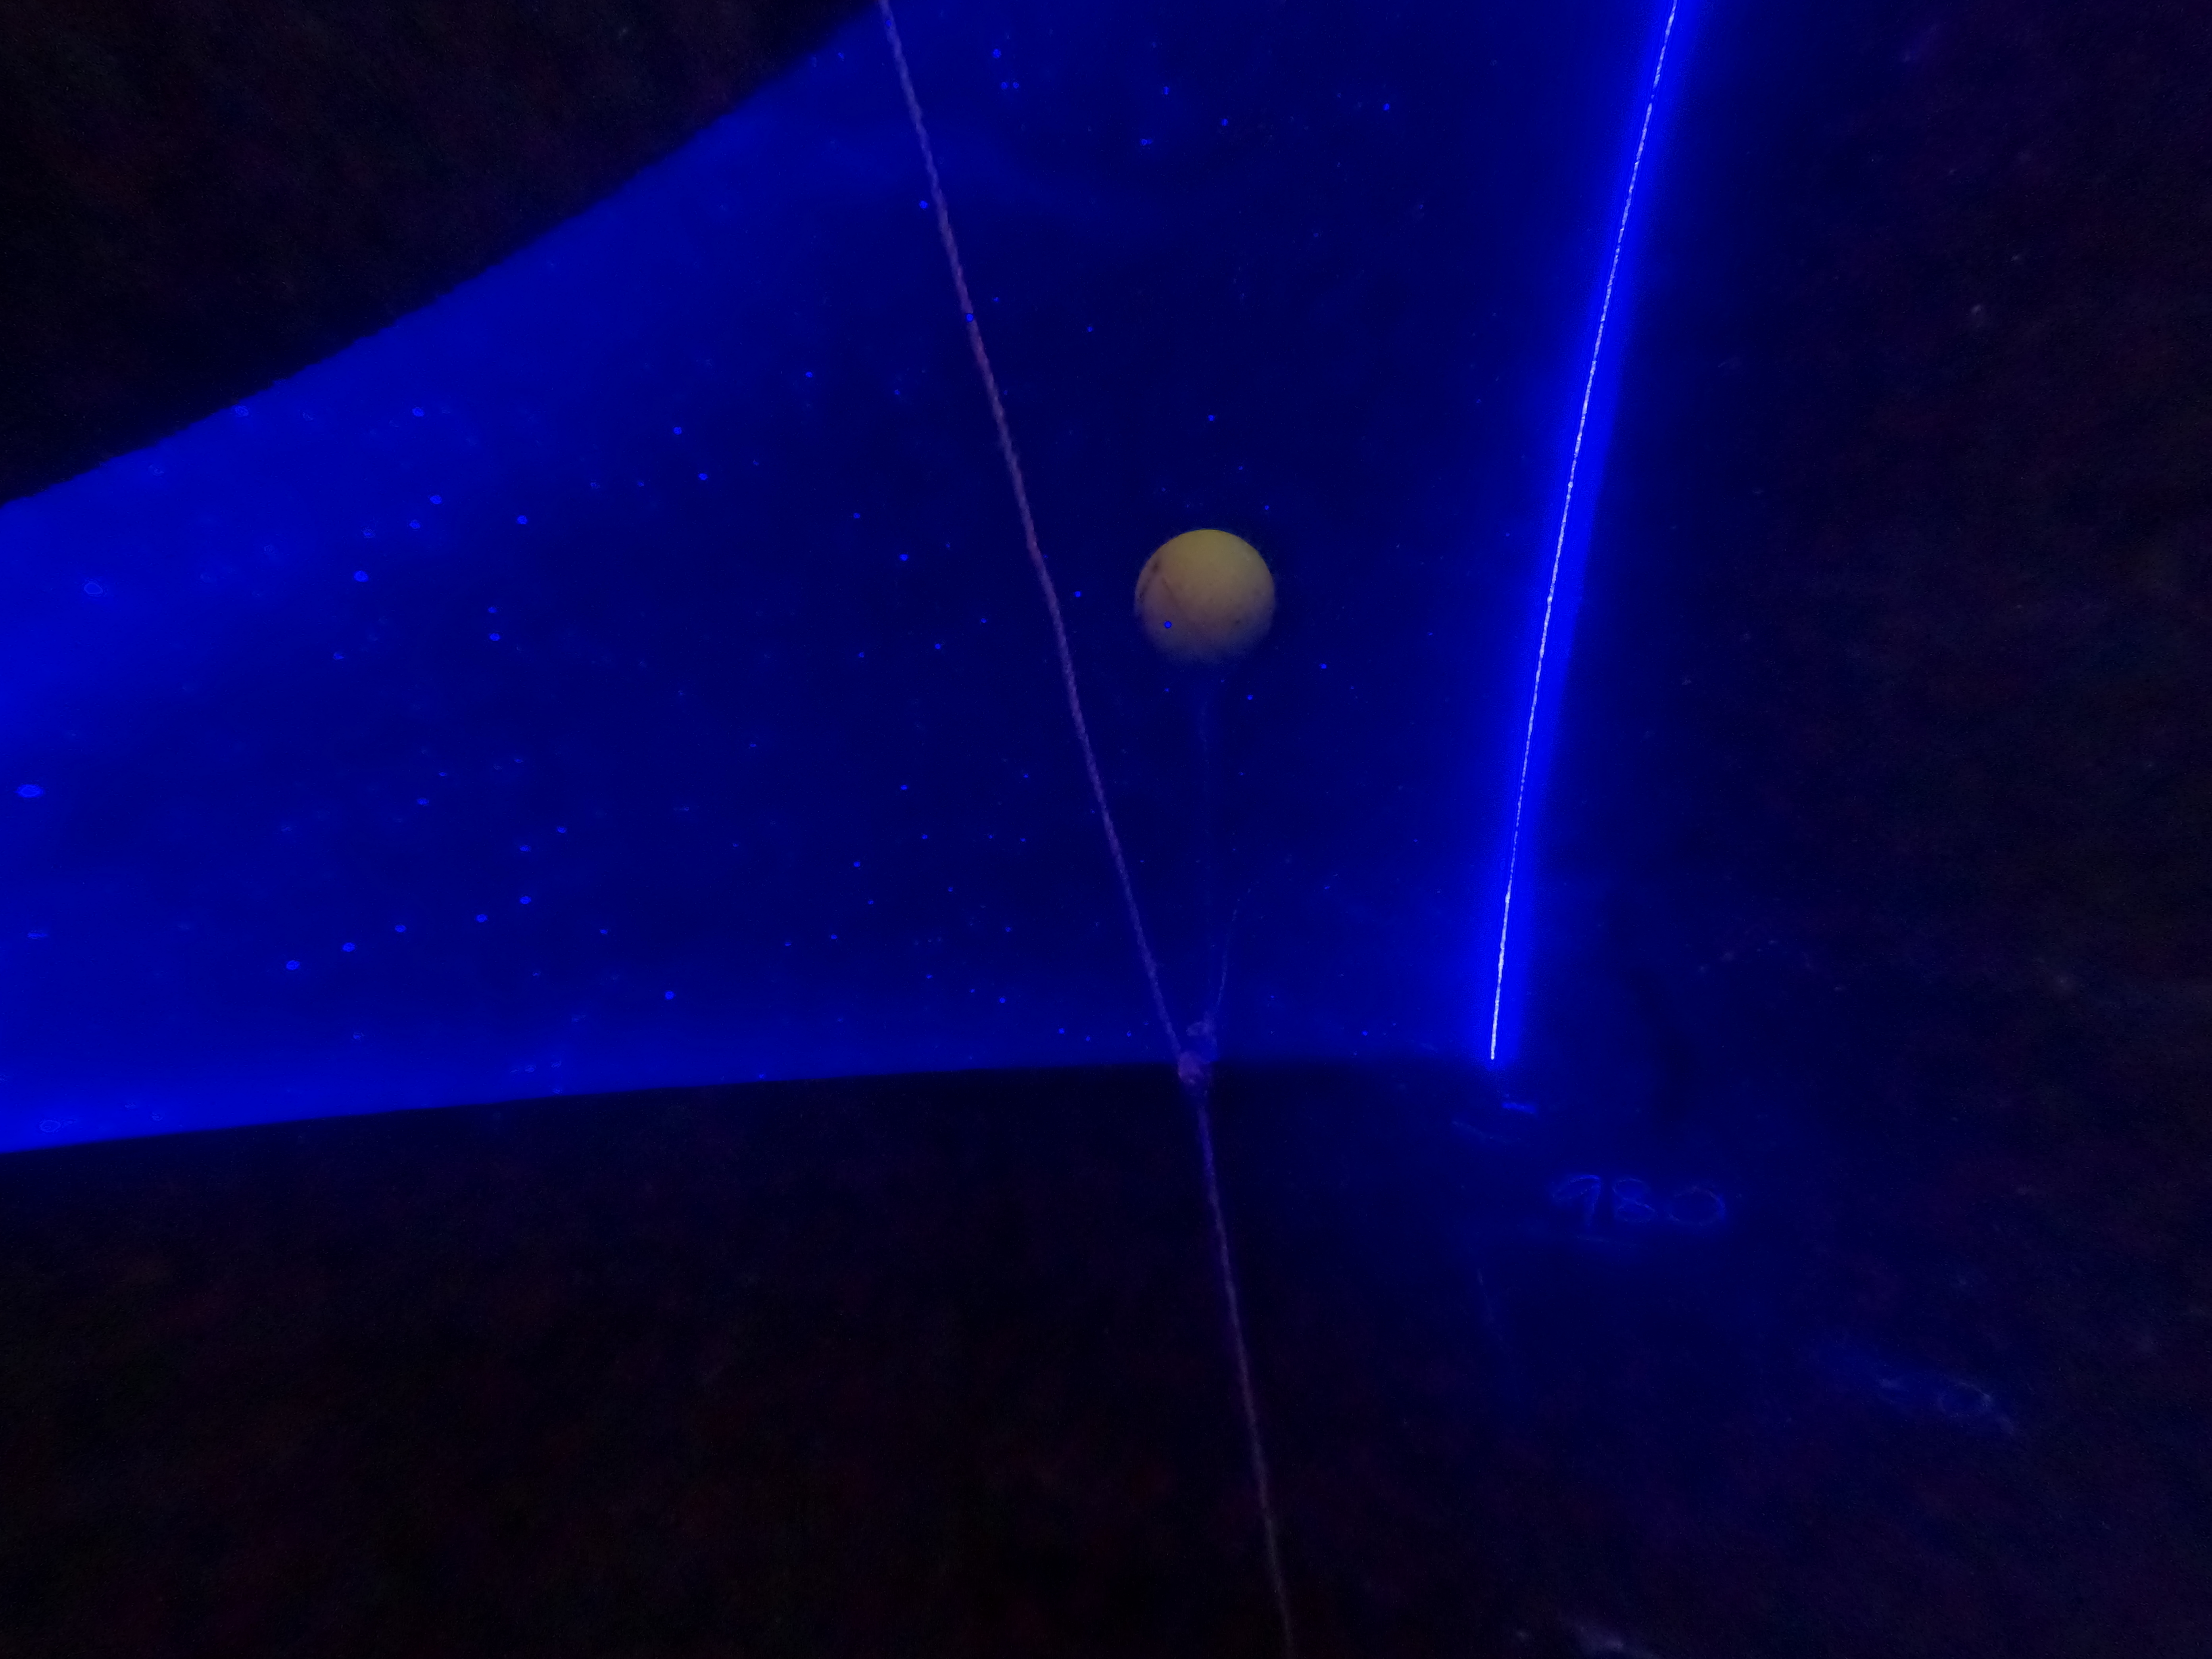

Supplement: Supplementary file 993 [file G0031347.pdf › 10/G0031347.pdf]

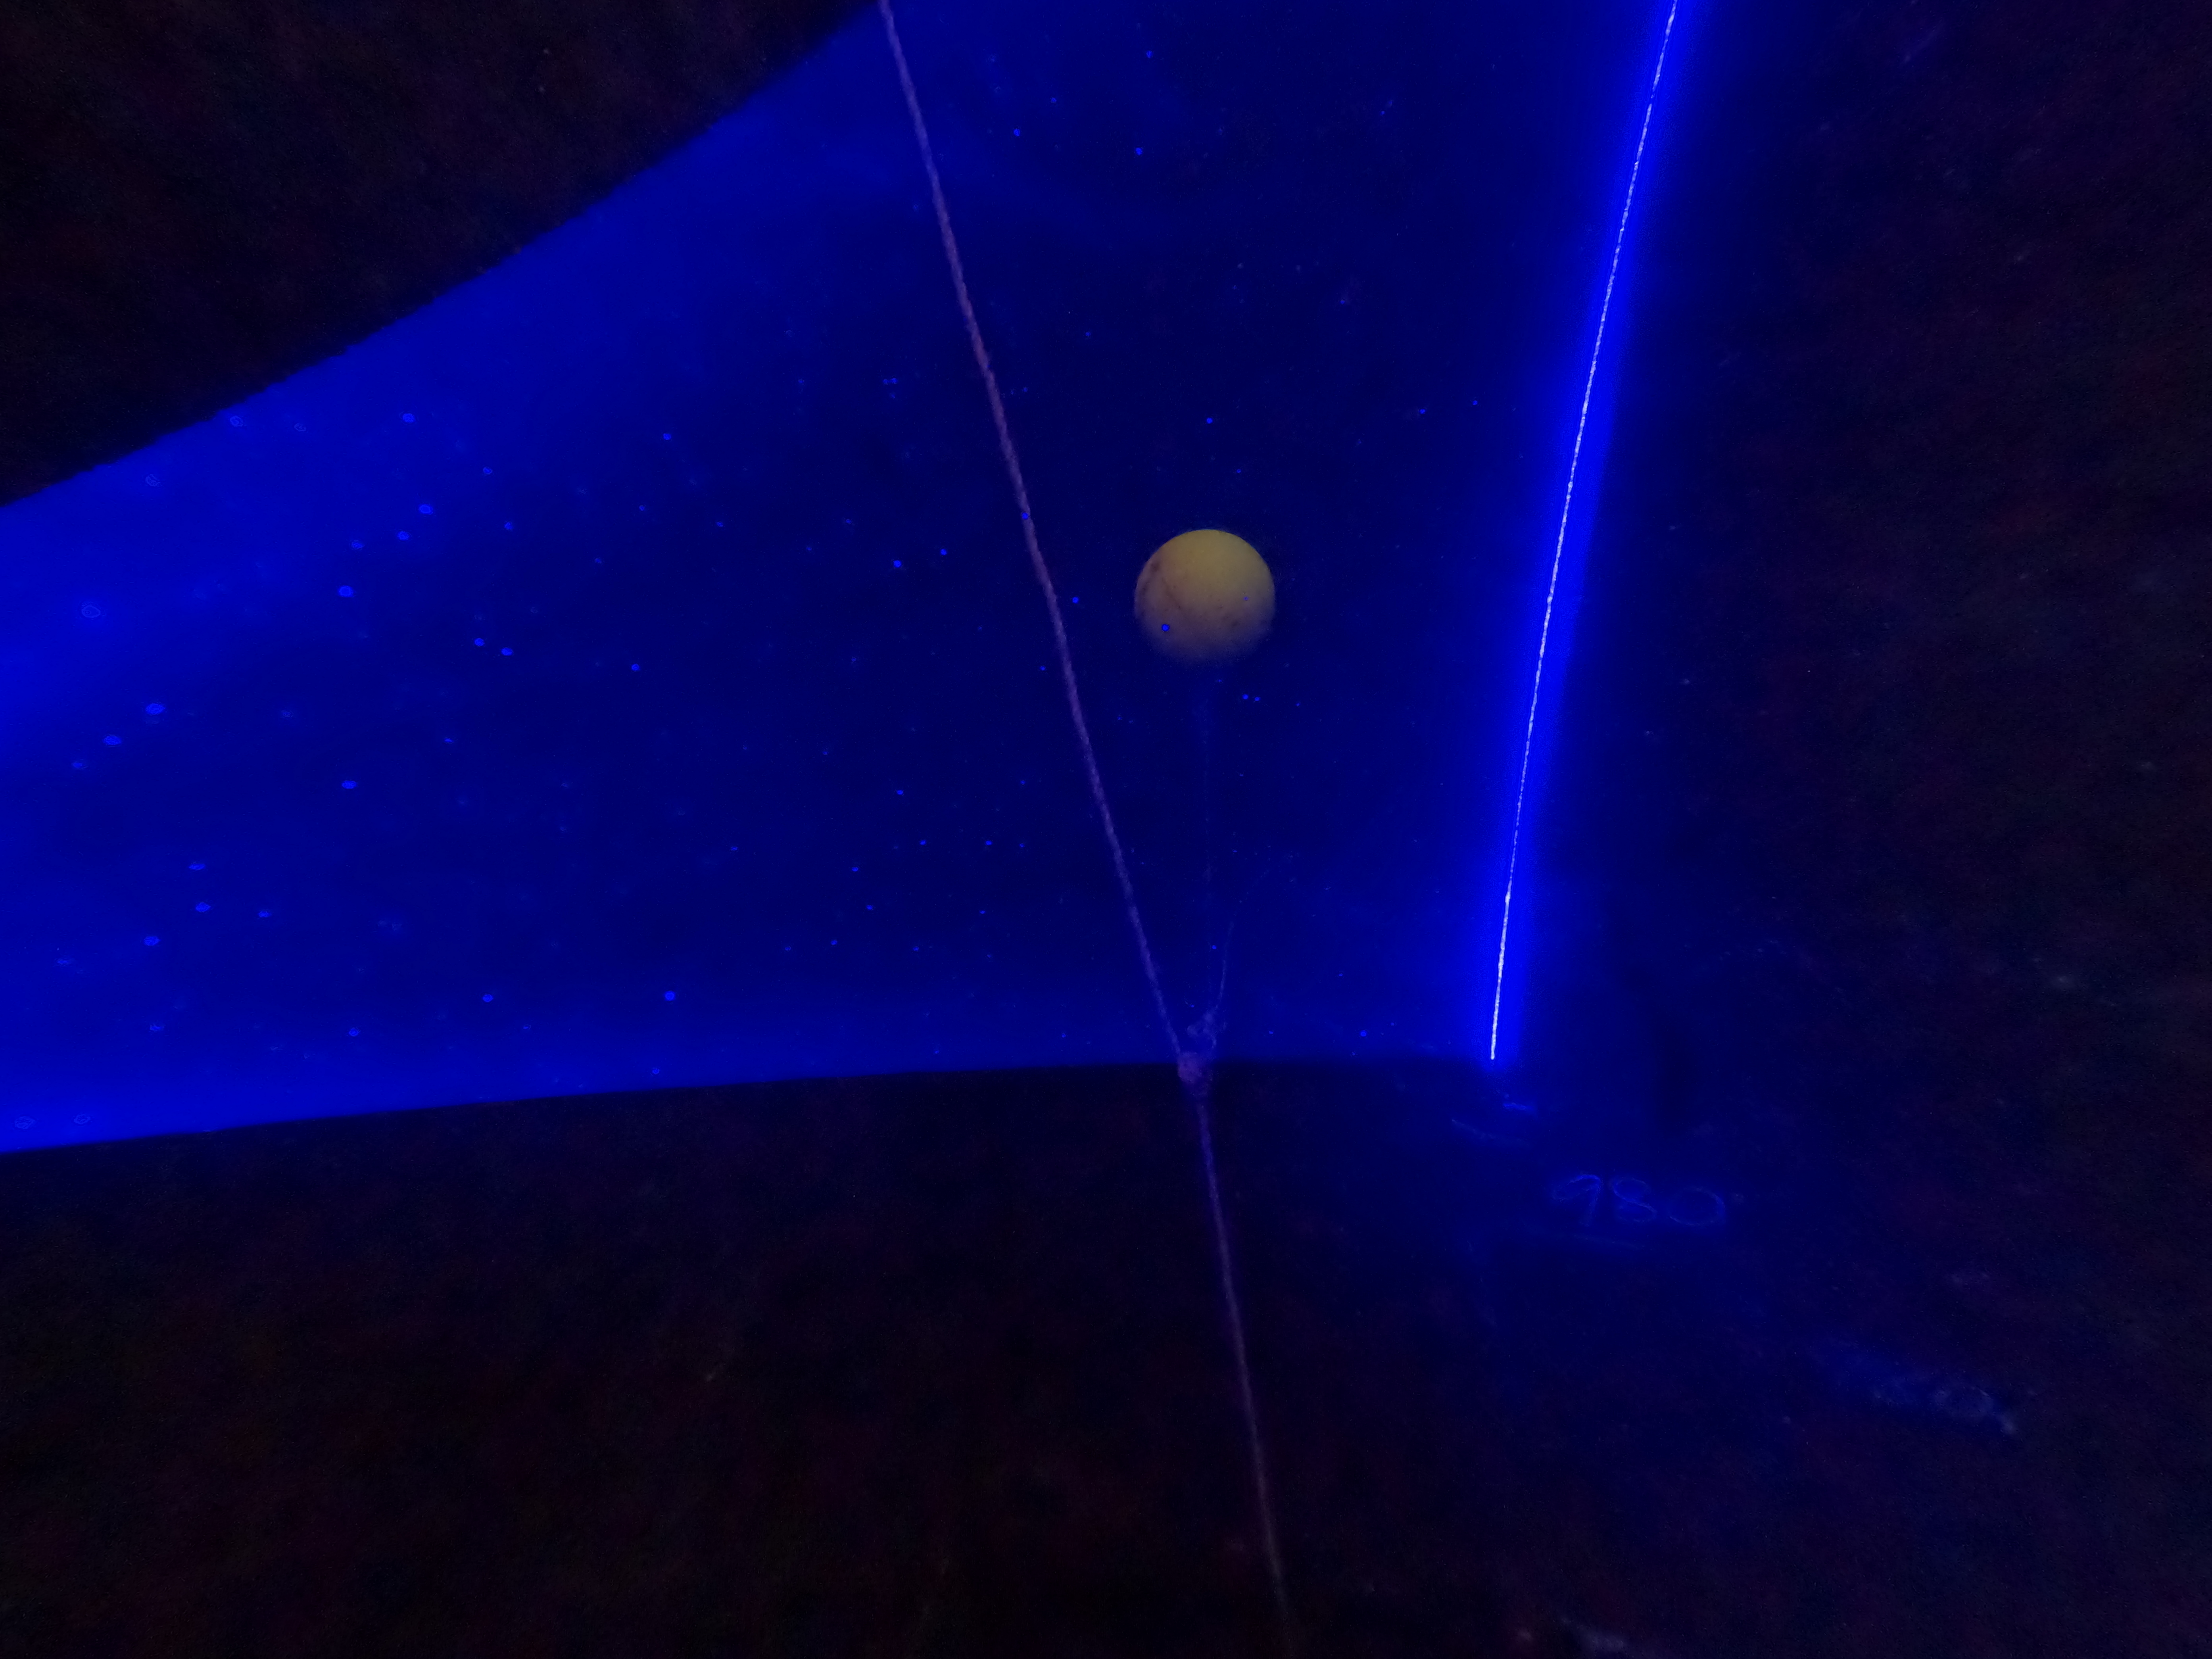

980

Supplement: Supplementary file 994 [file G0031348.pdf › 10/G0031348.pdf]

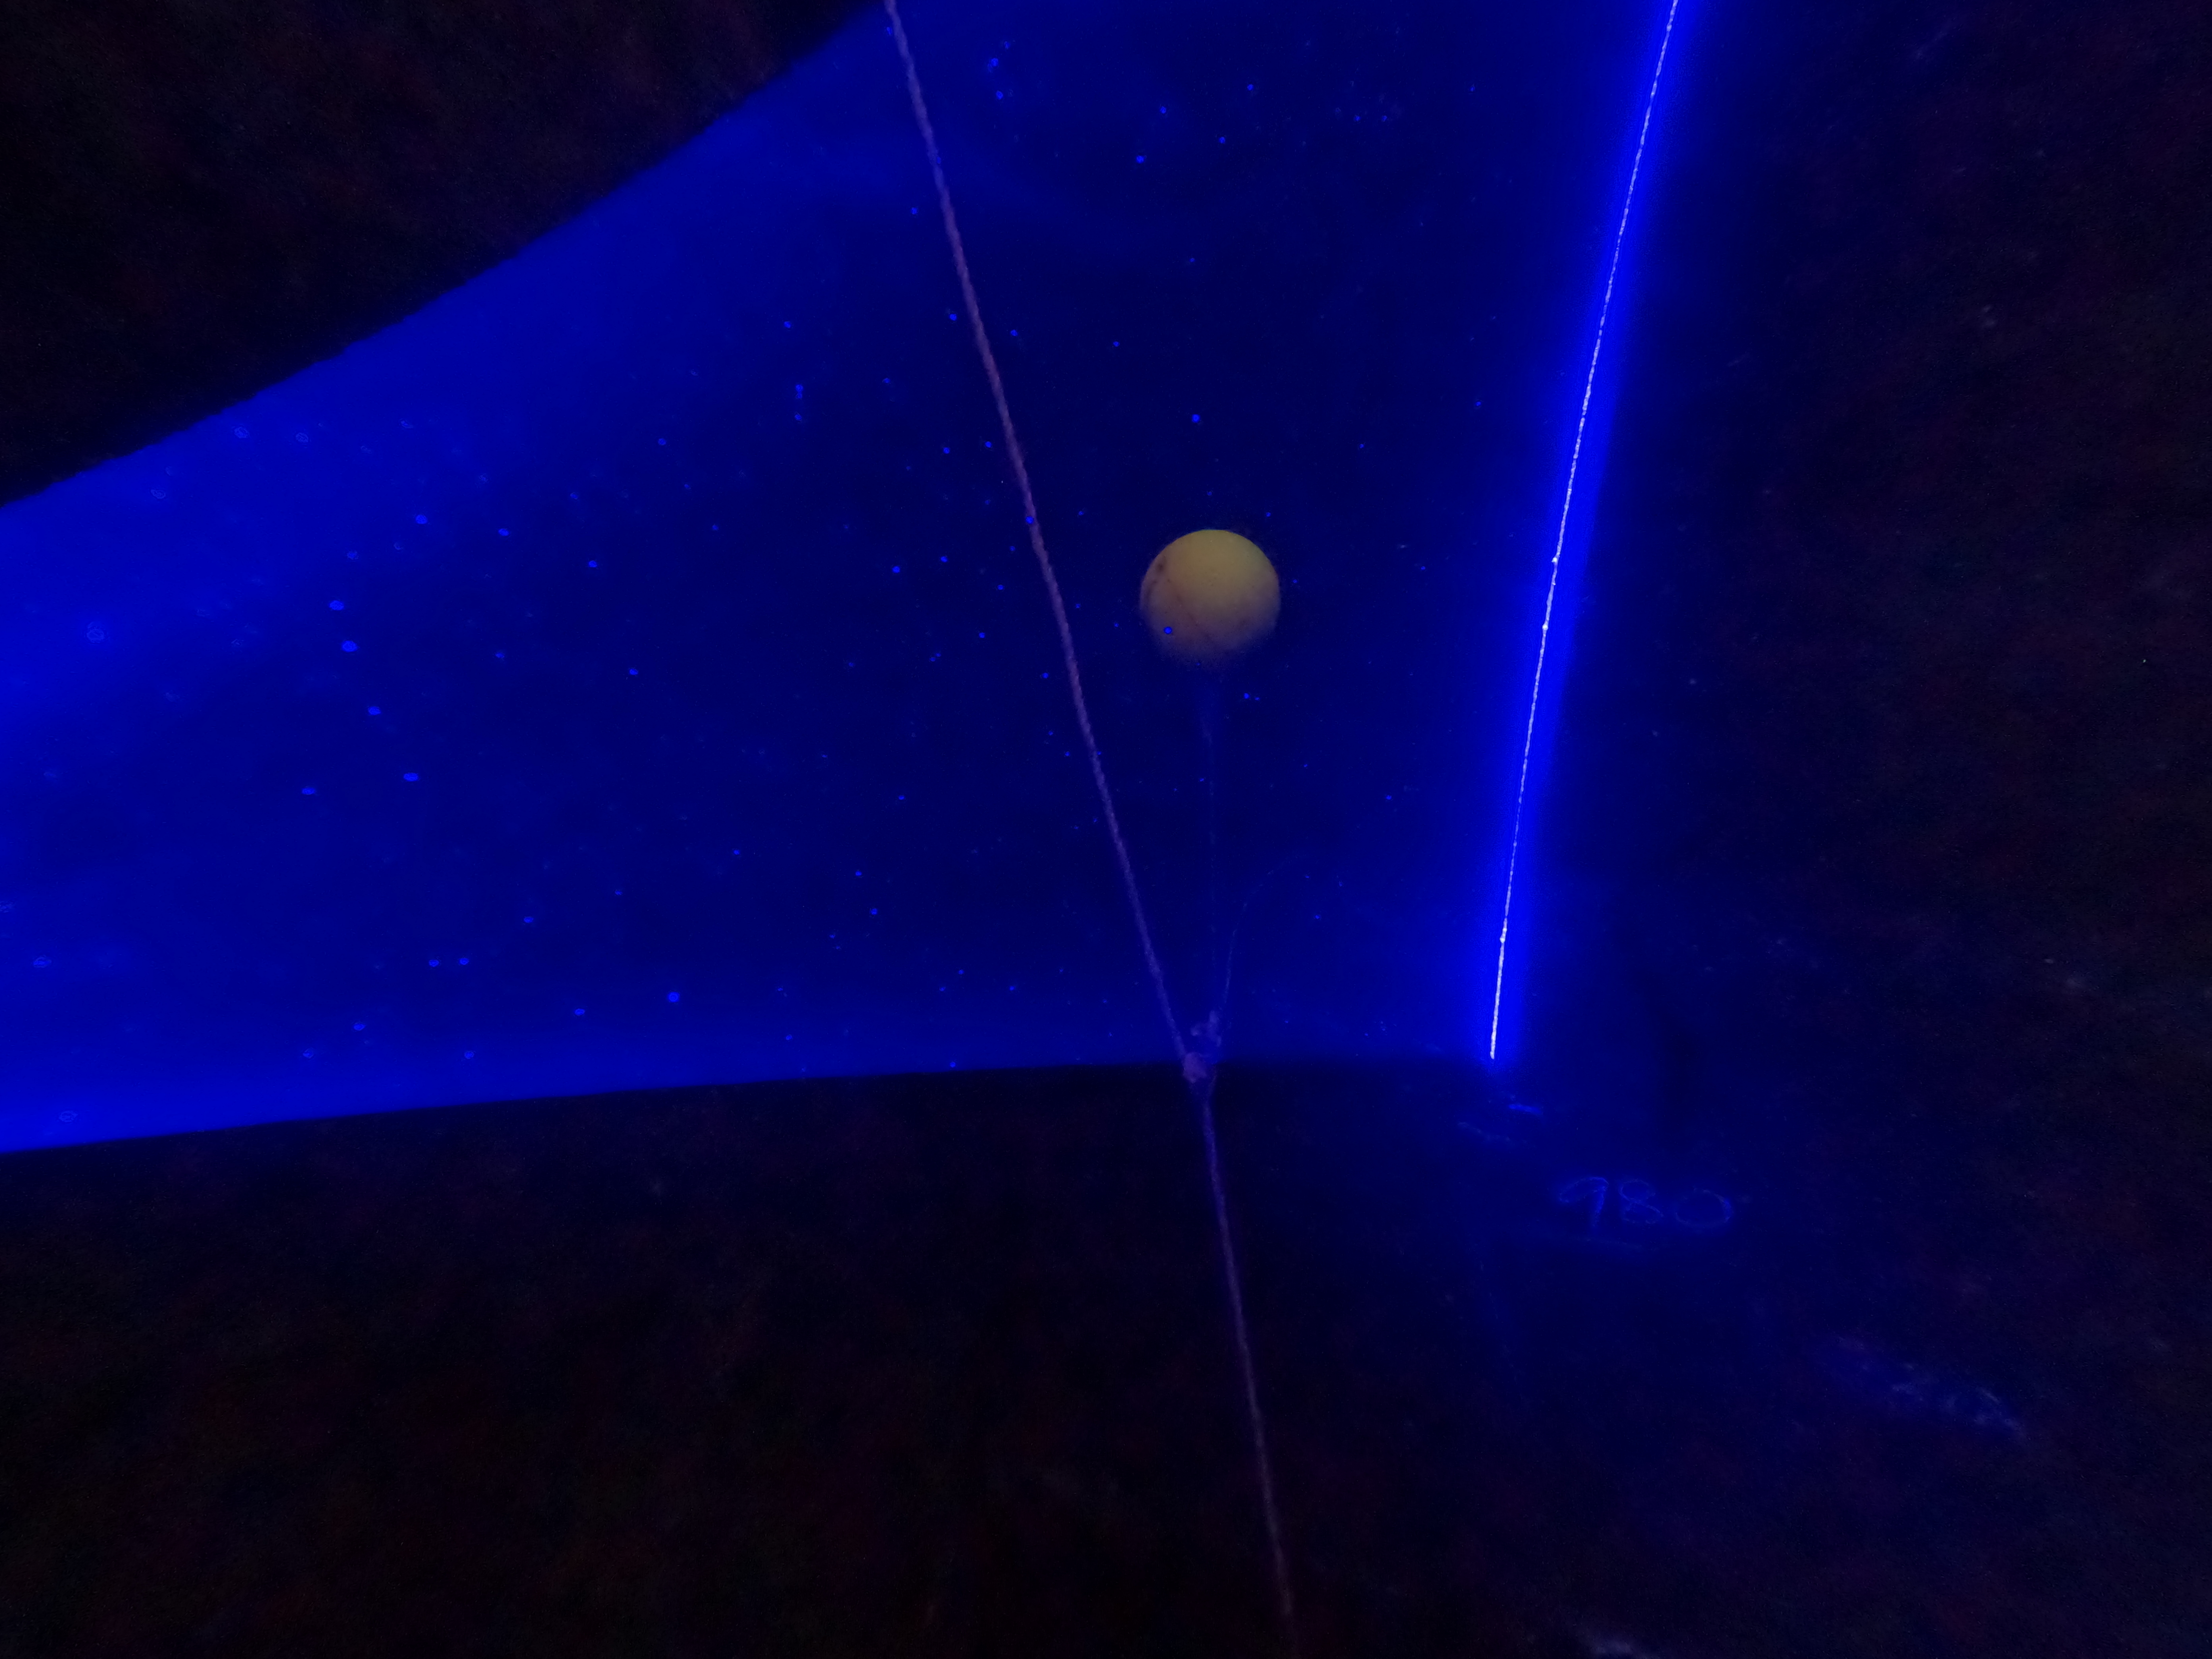

980

Supplement: Supplementary file 995 [file G0031349.pdf › 10/G0031349.pdf]

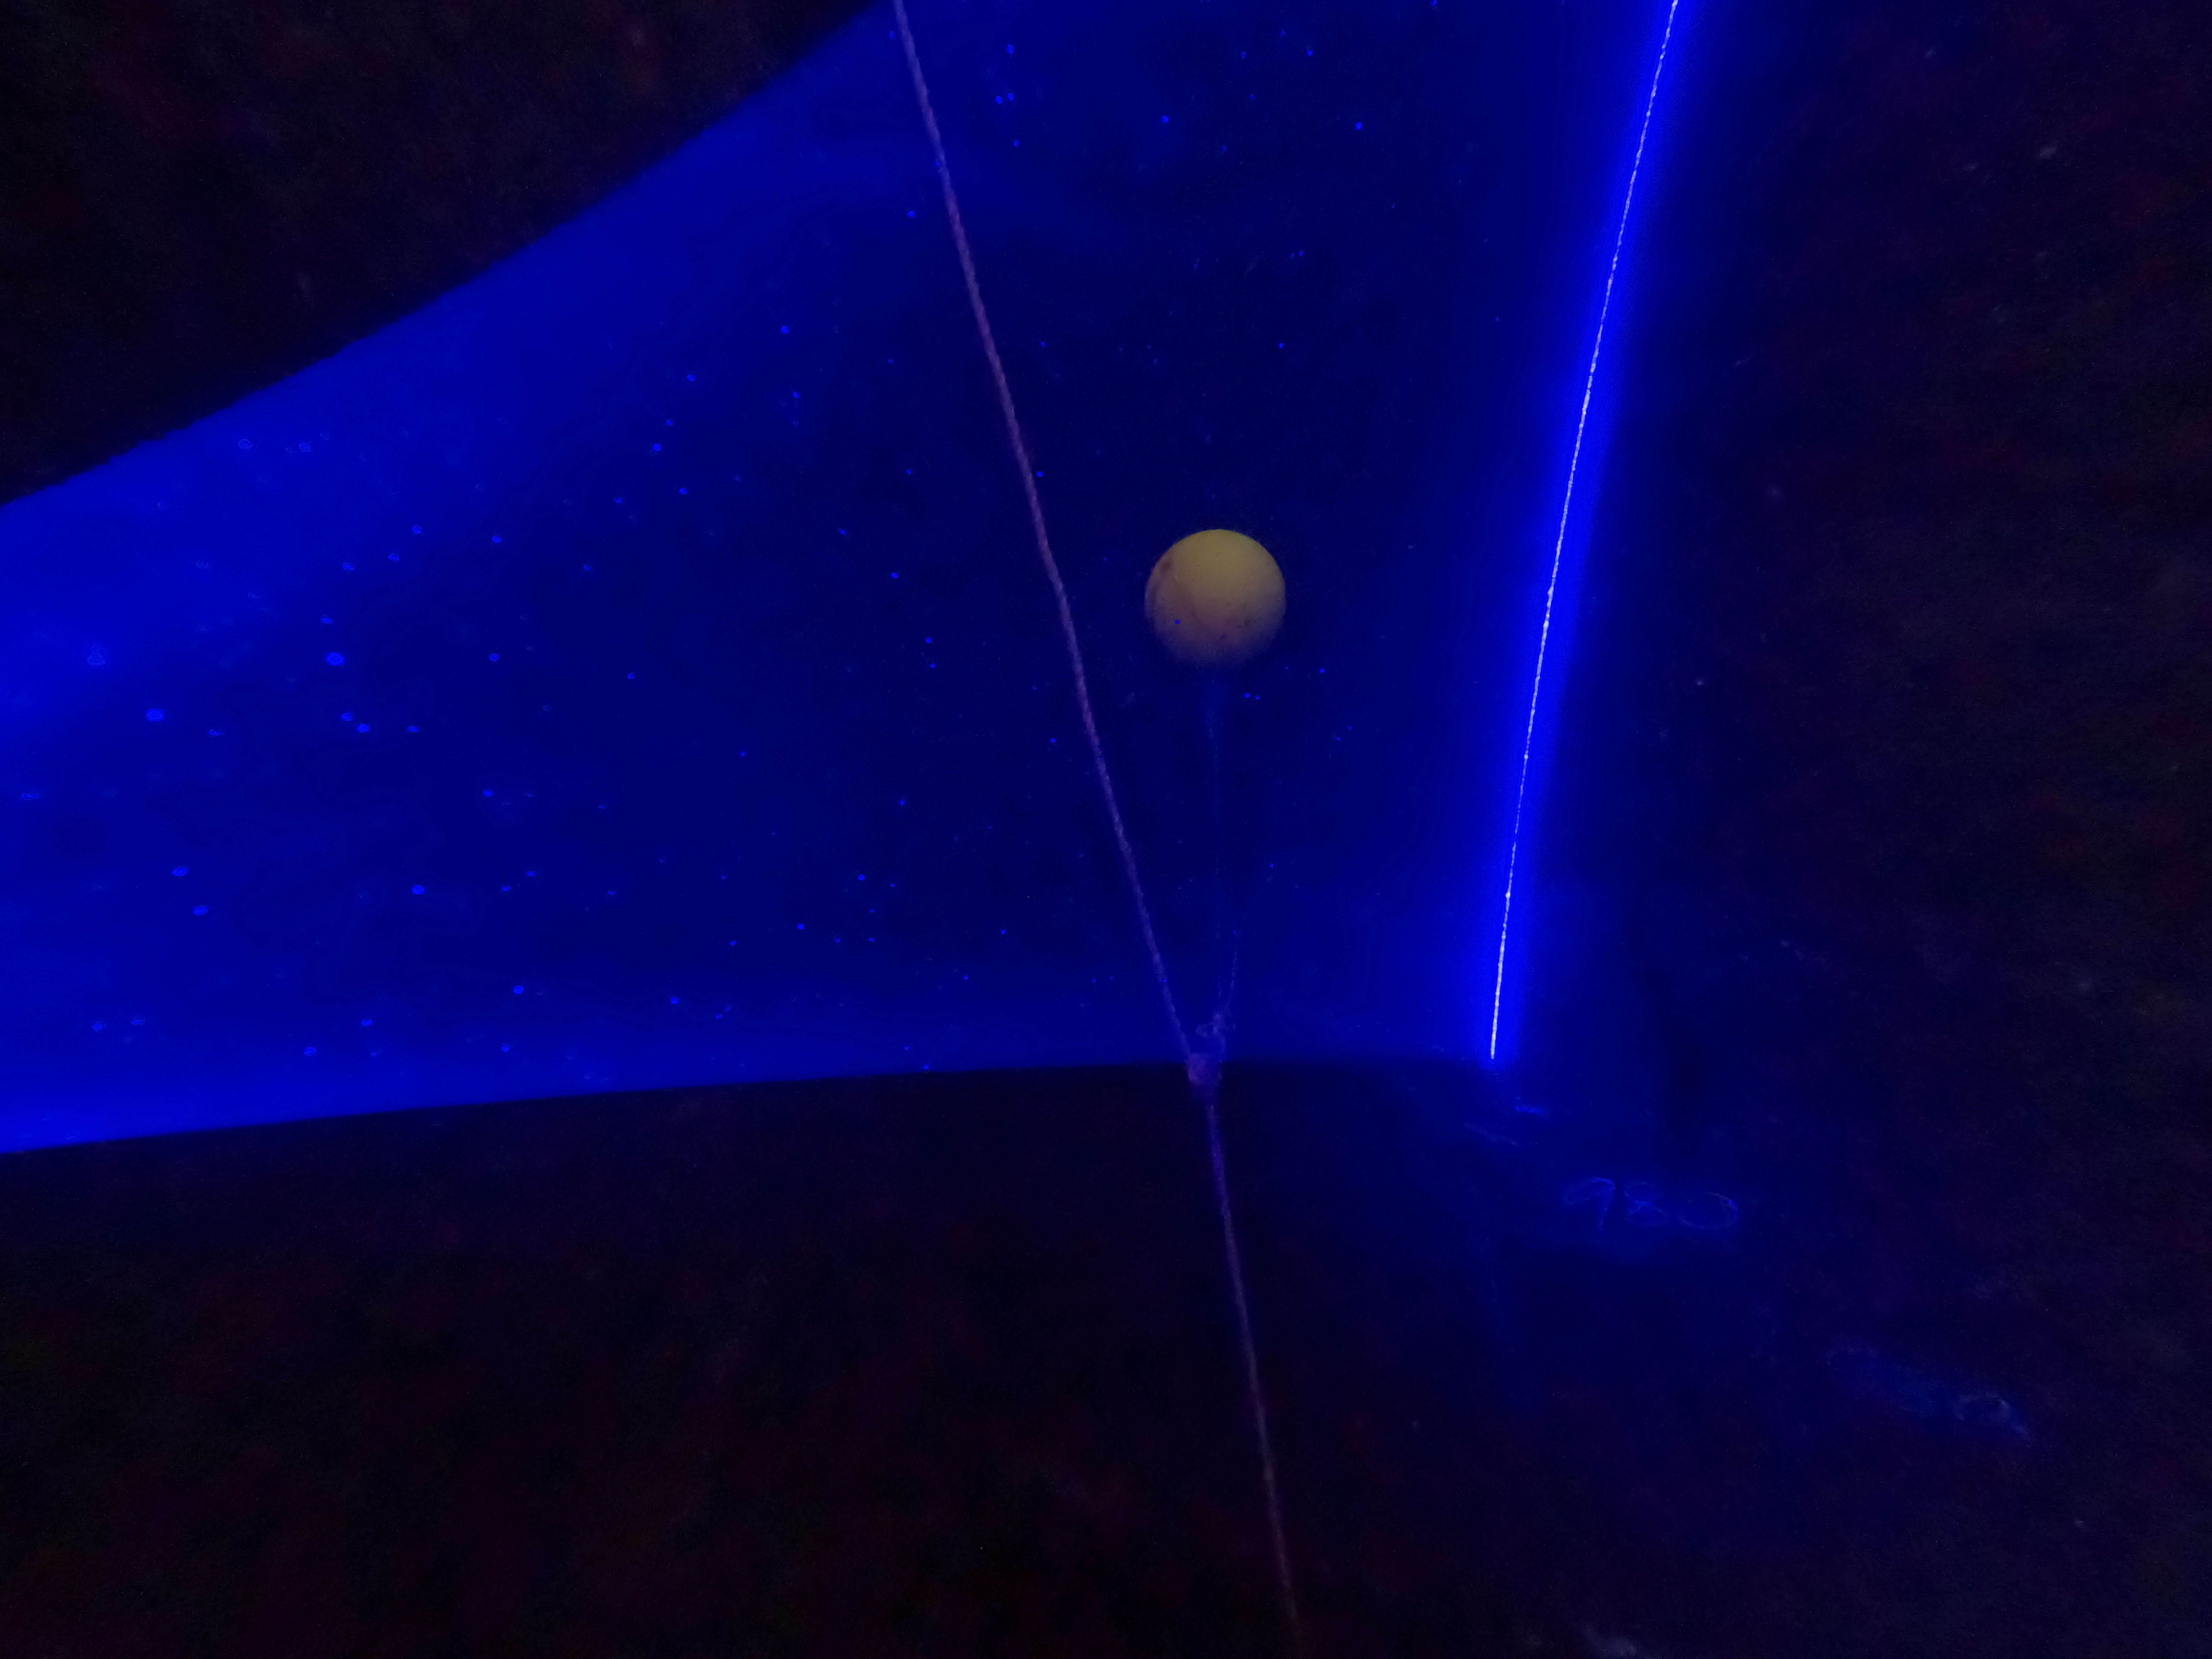

Supplement: Supplementary file 996 [file G0031350.pdf › 10/G0031350.pdf]

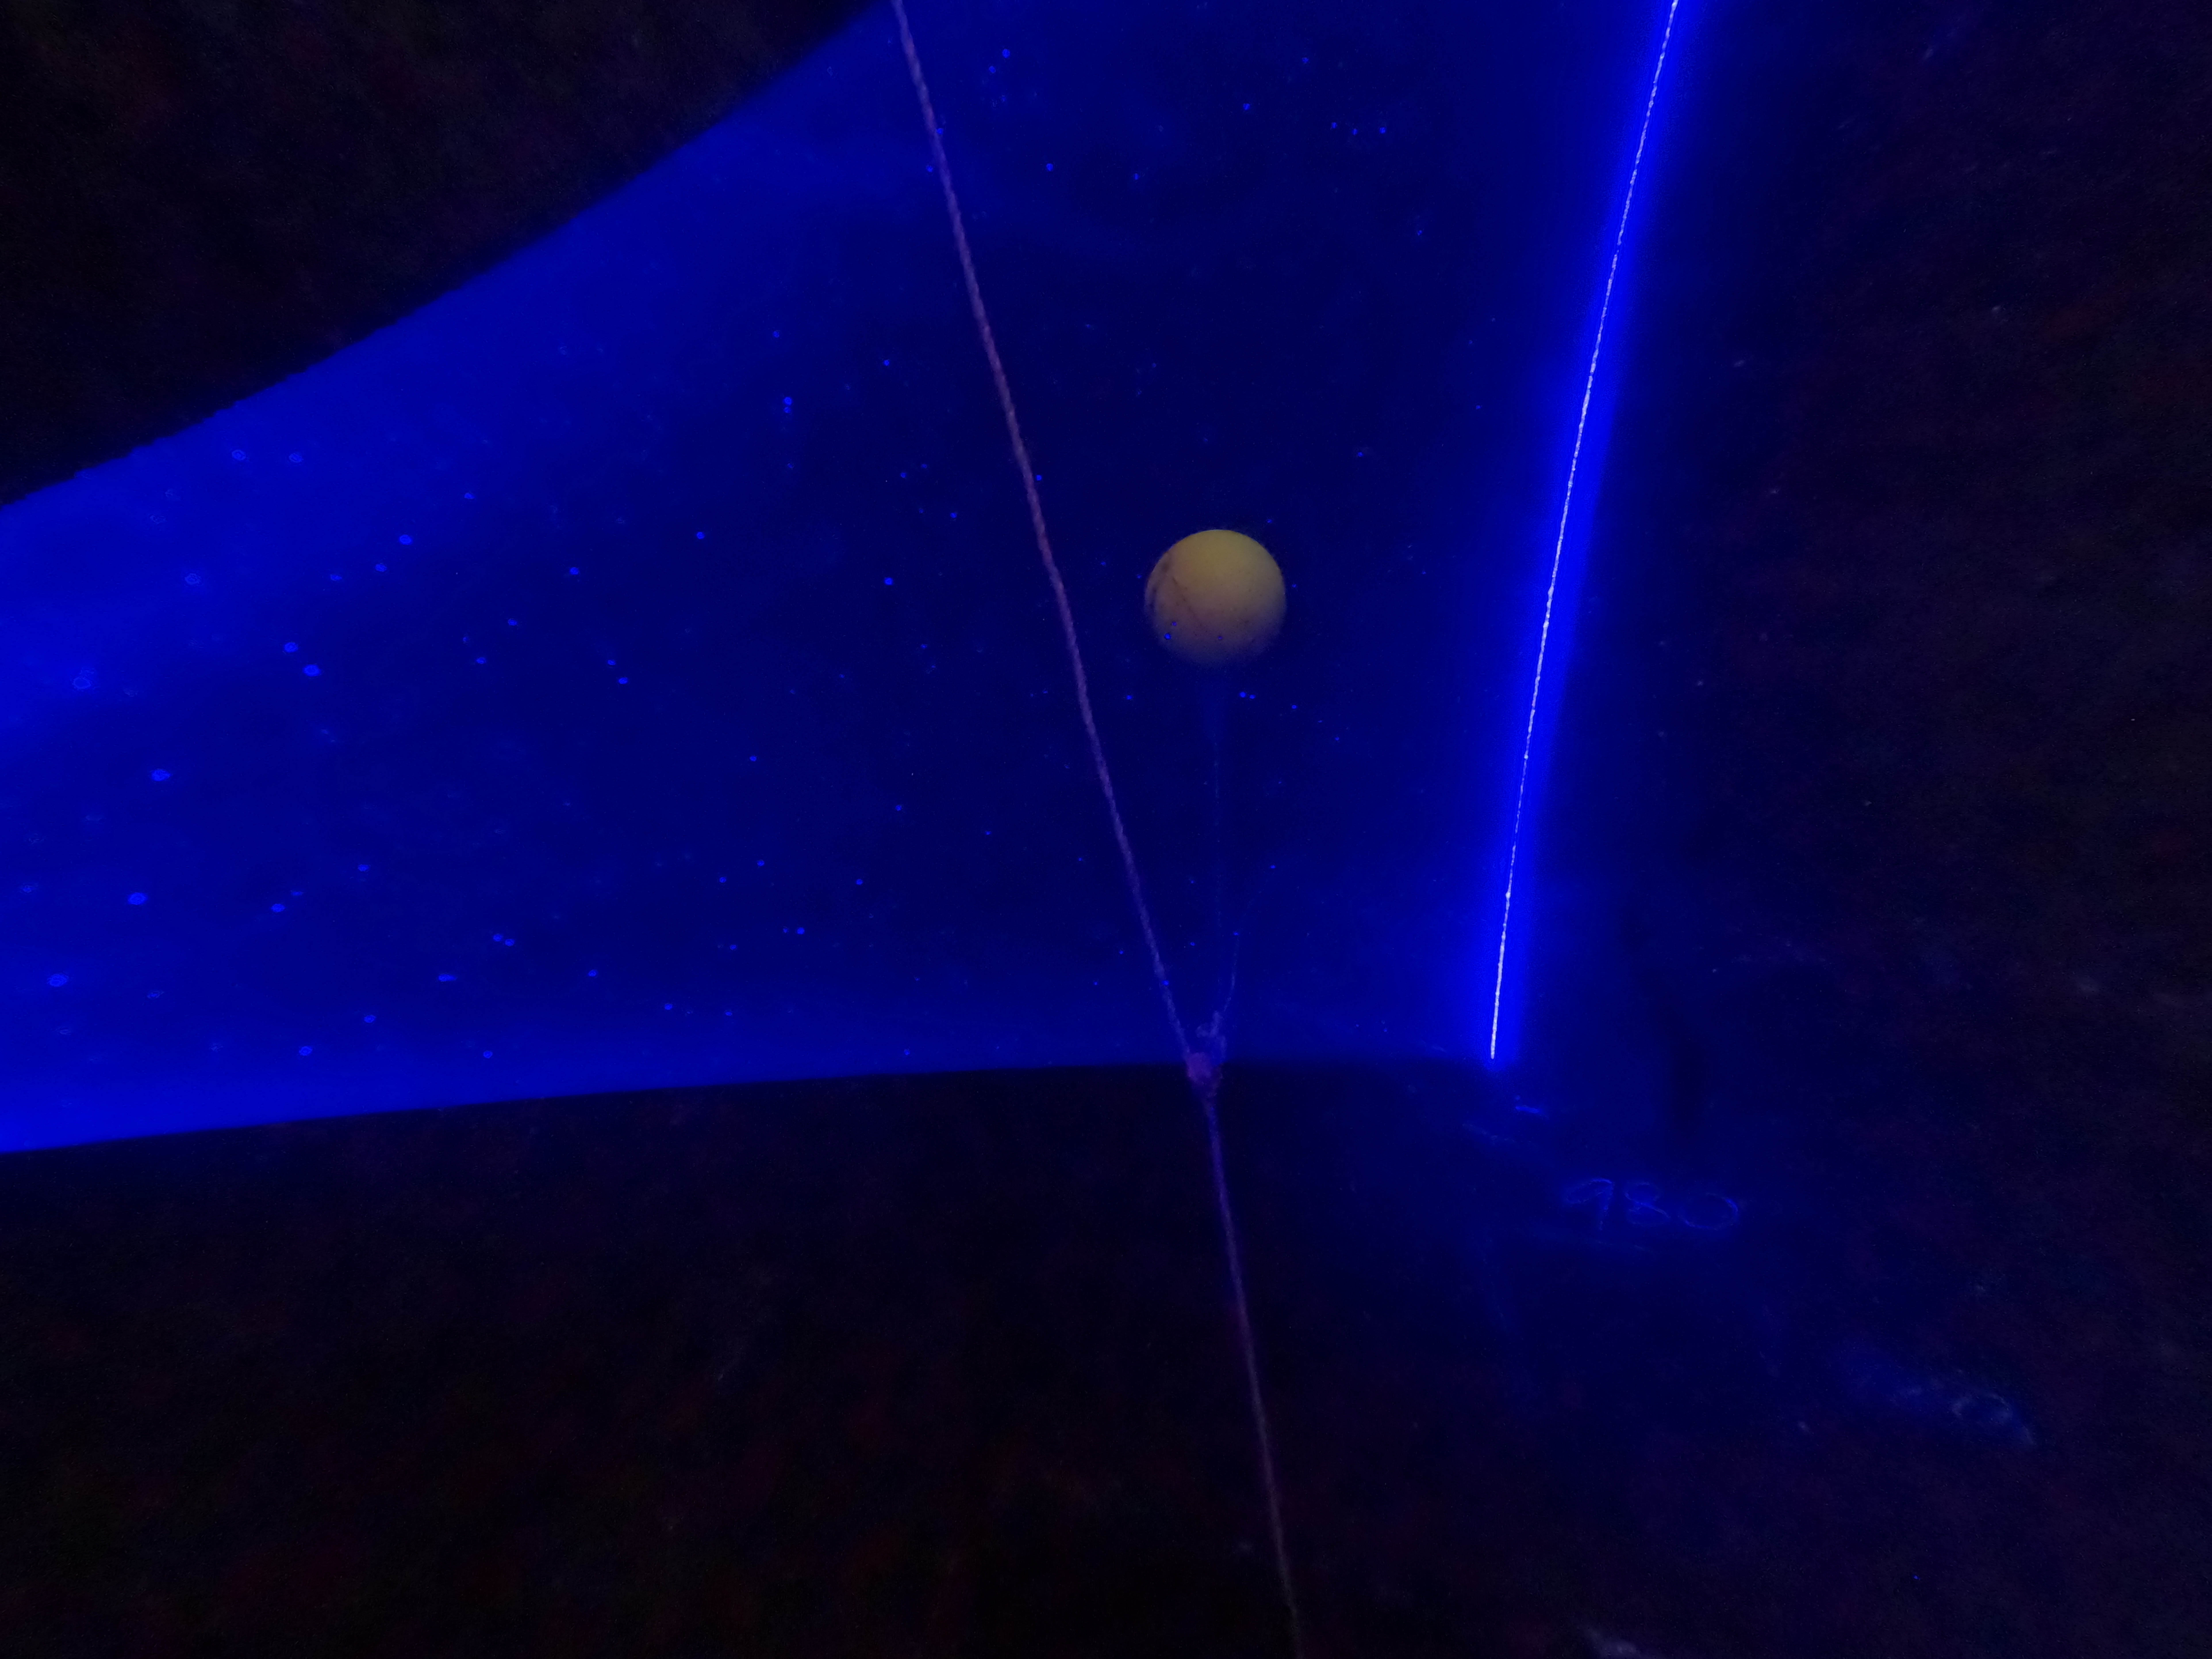

980

Supplement: Supplementary file 997 [file G0031351.pdf › 10/G0031351.pdf]

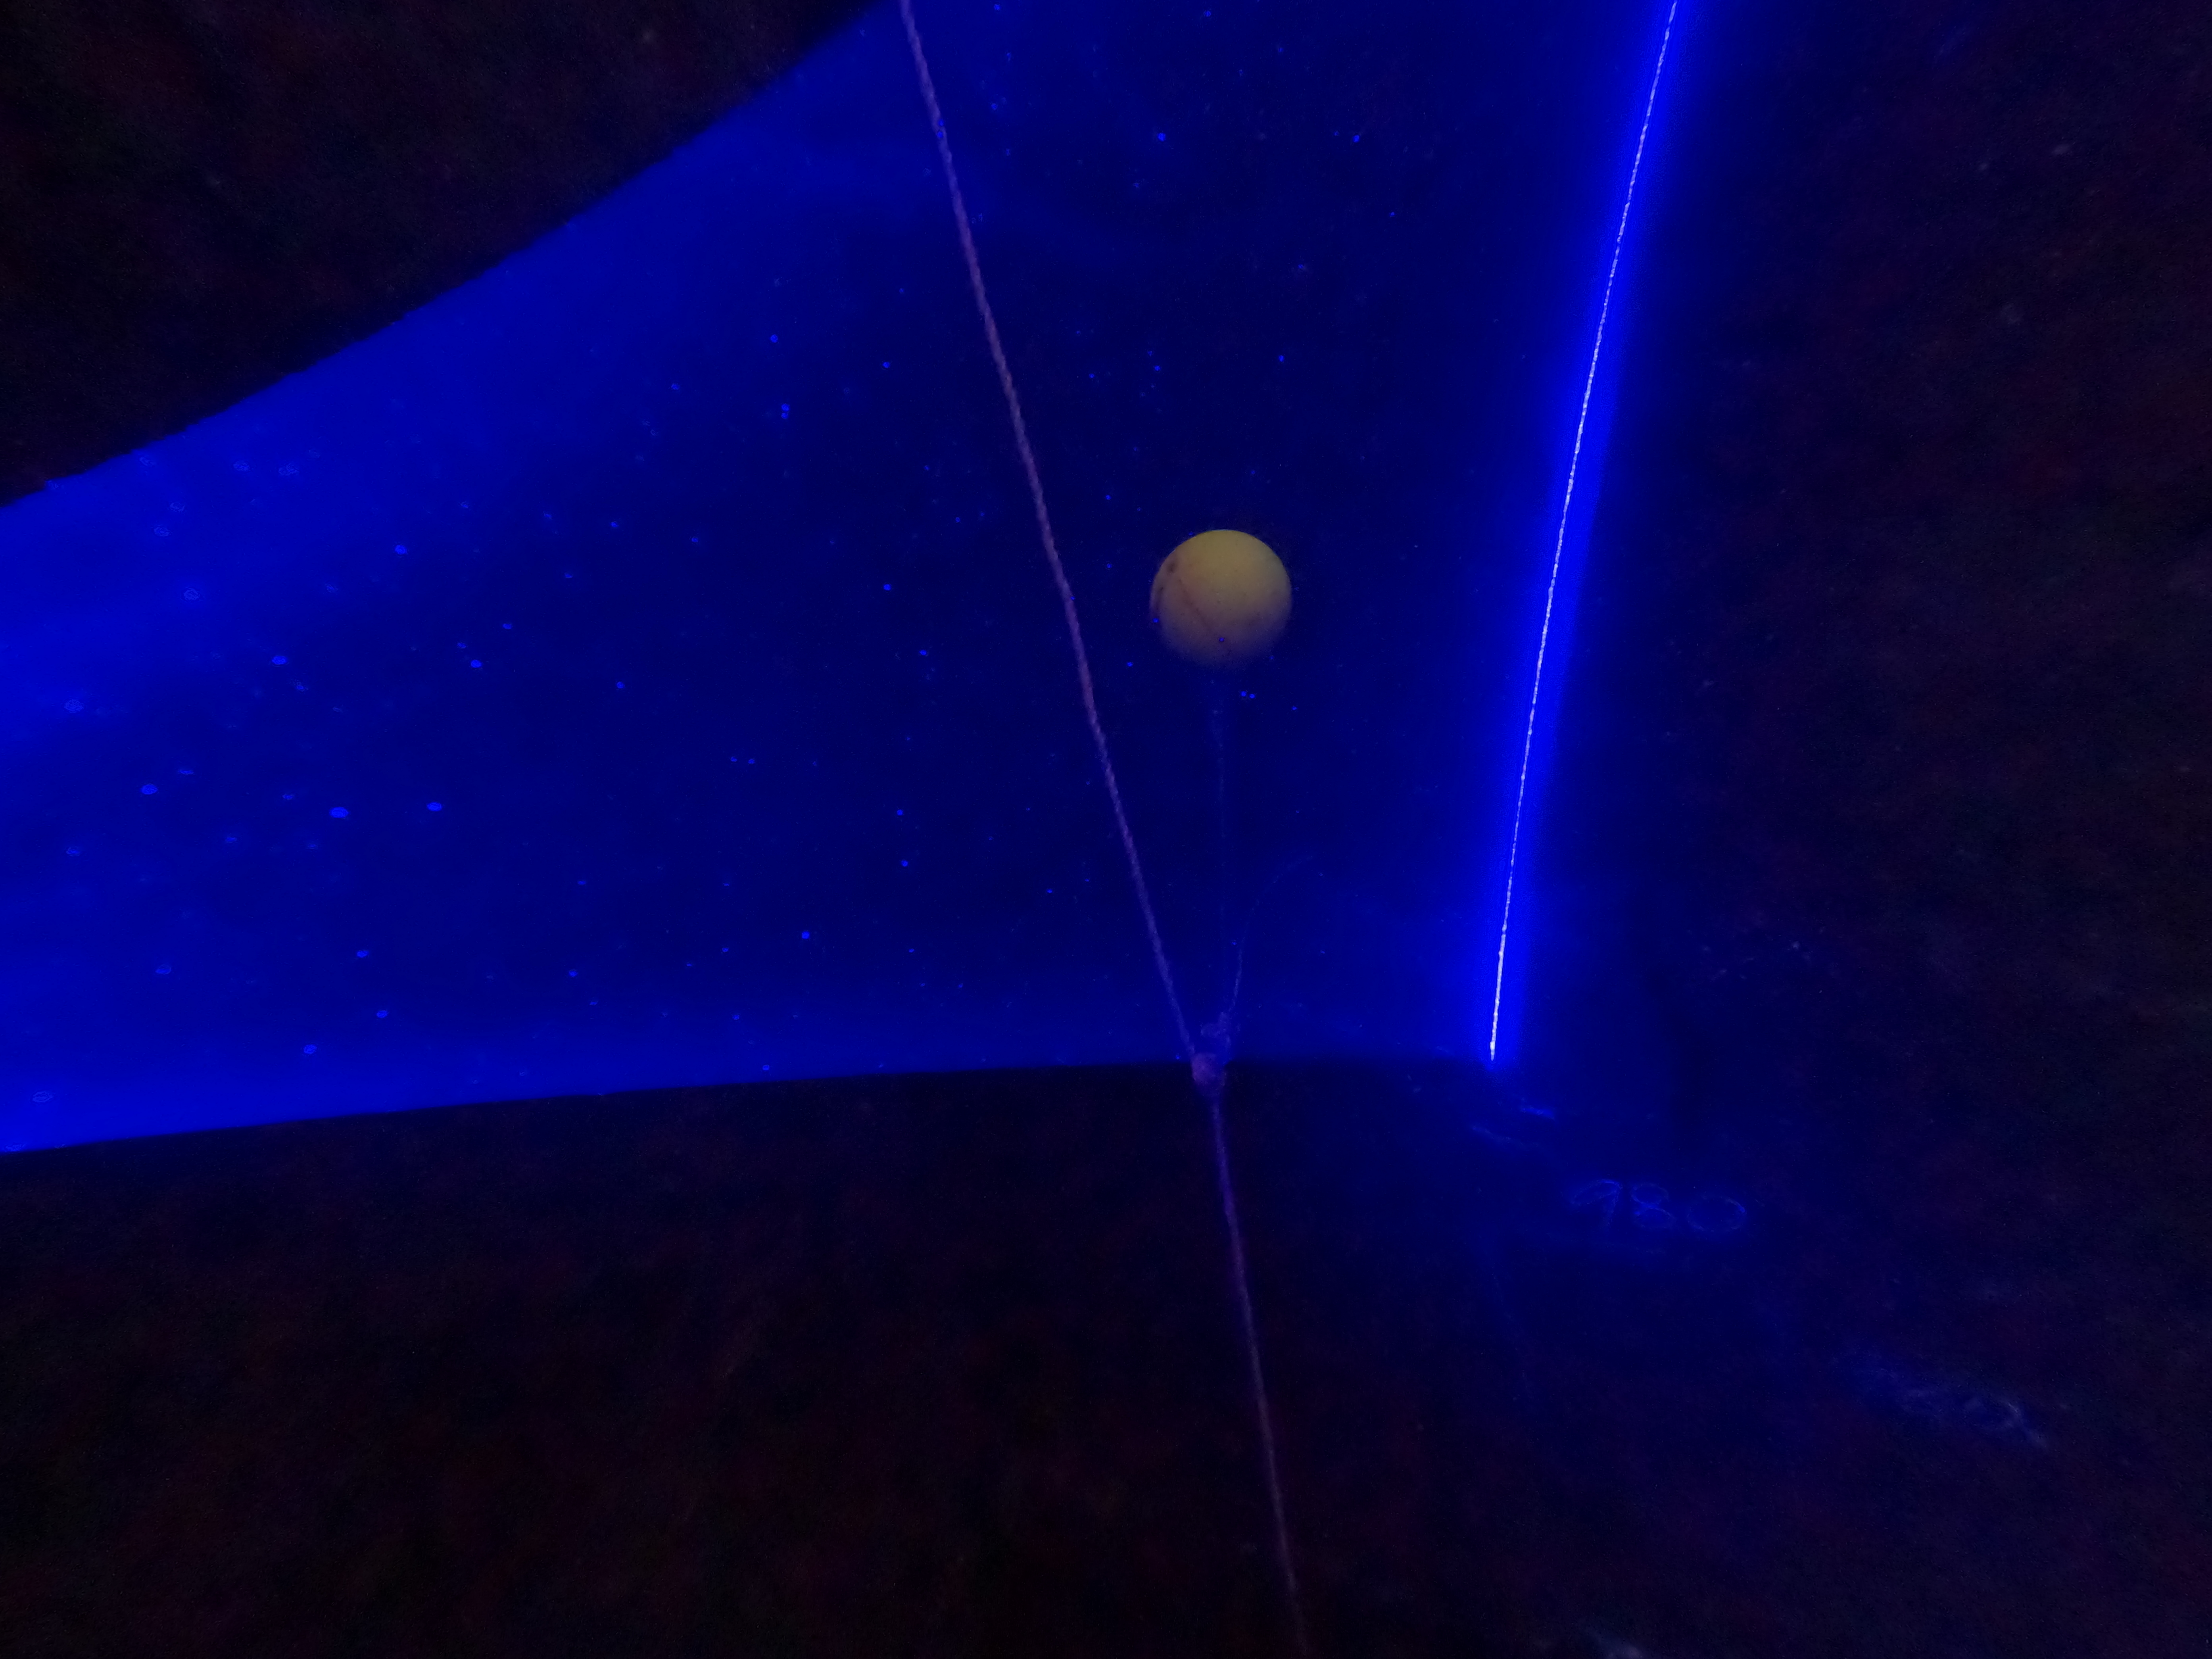

Supplement: Supplementary file 998 [file G0031352.pdf › 10/G0031352.pdf]

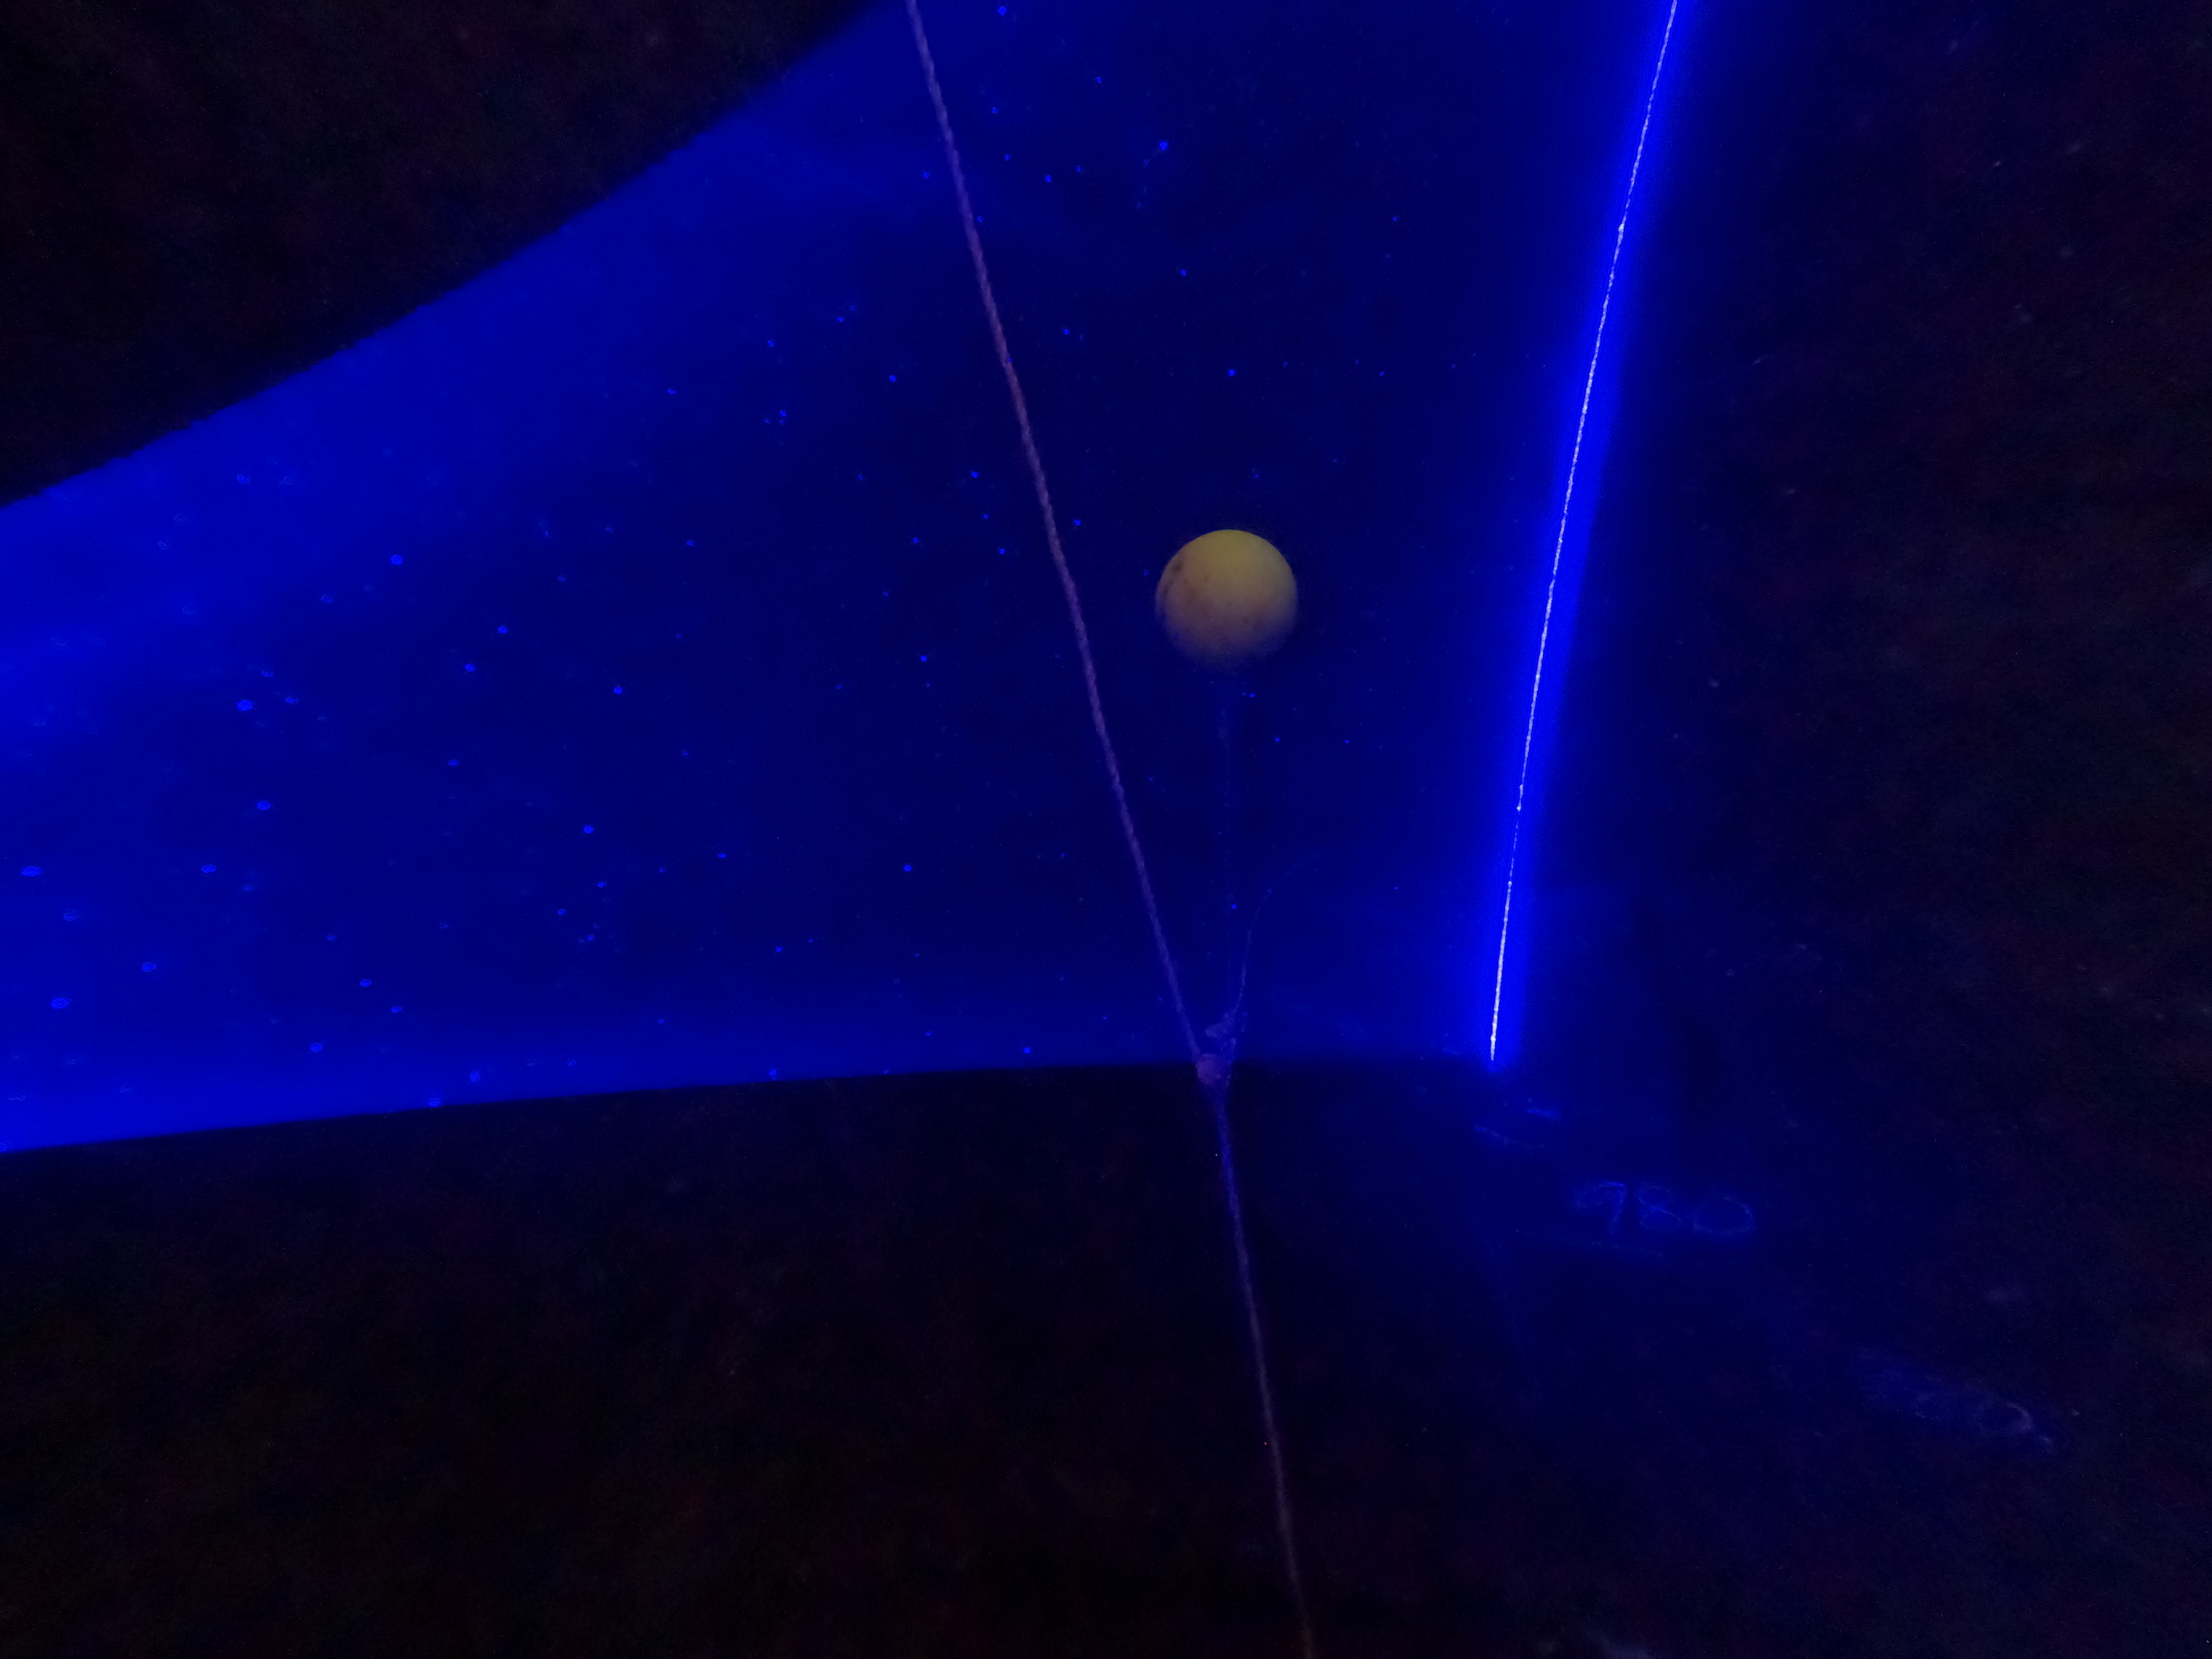

Supplement: Supplementary file 999 [file G0031353.pdf › 10/G0031353.pdf]

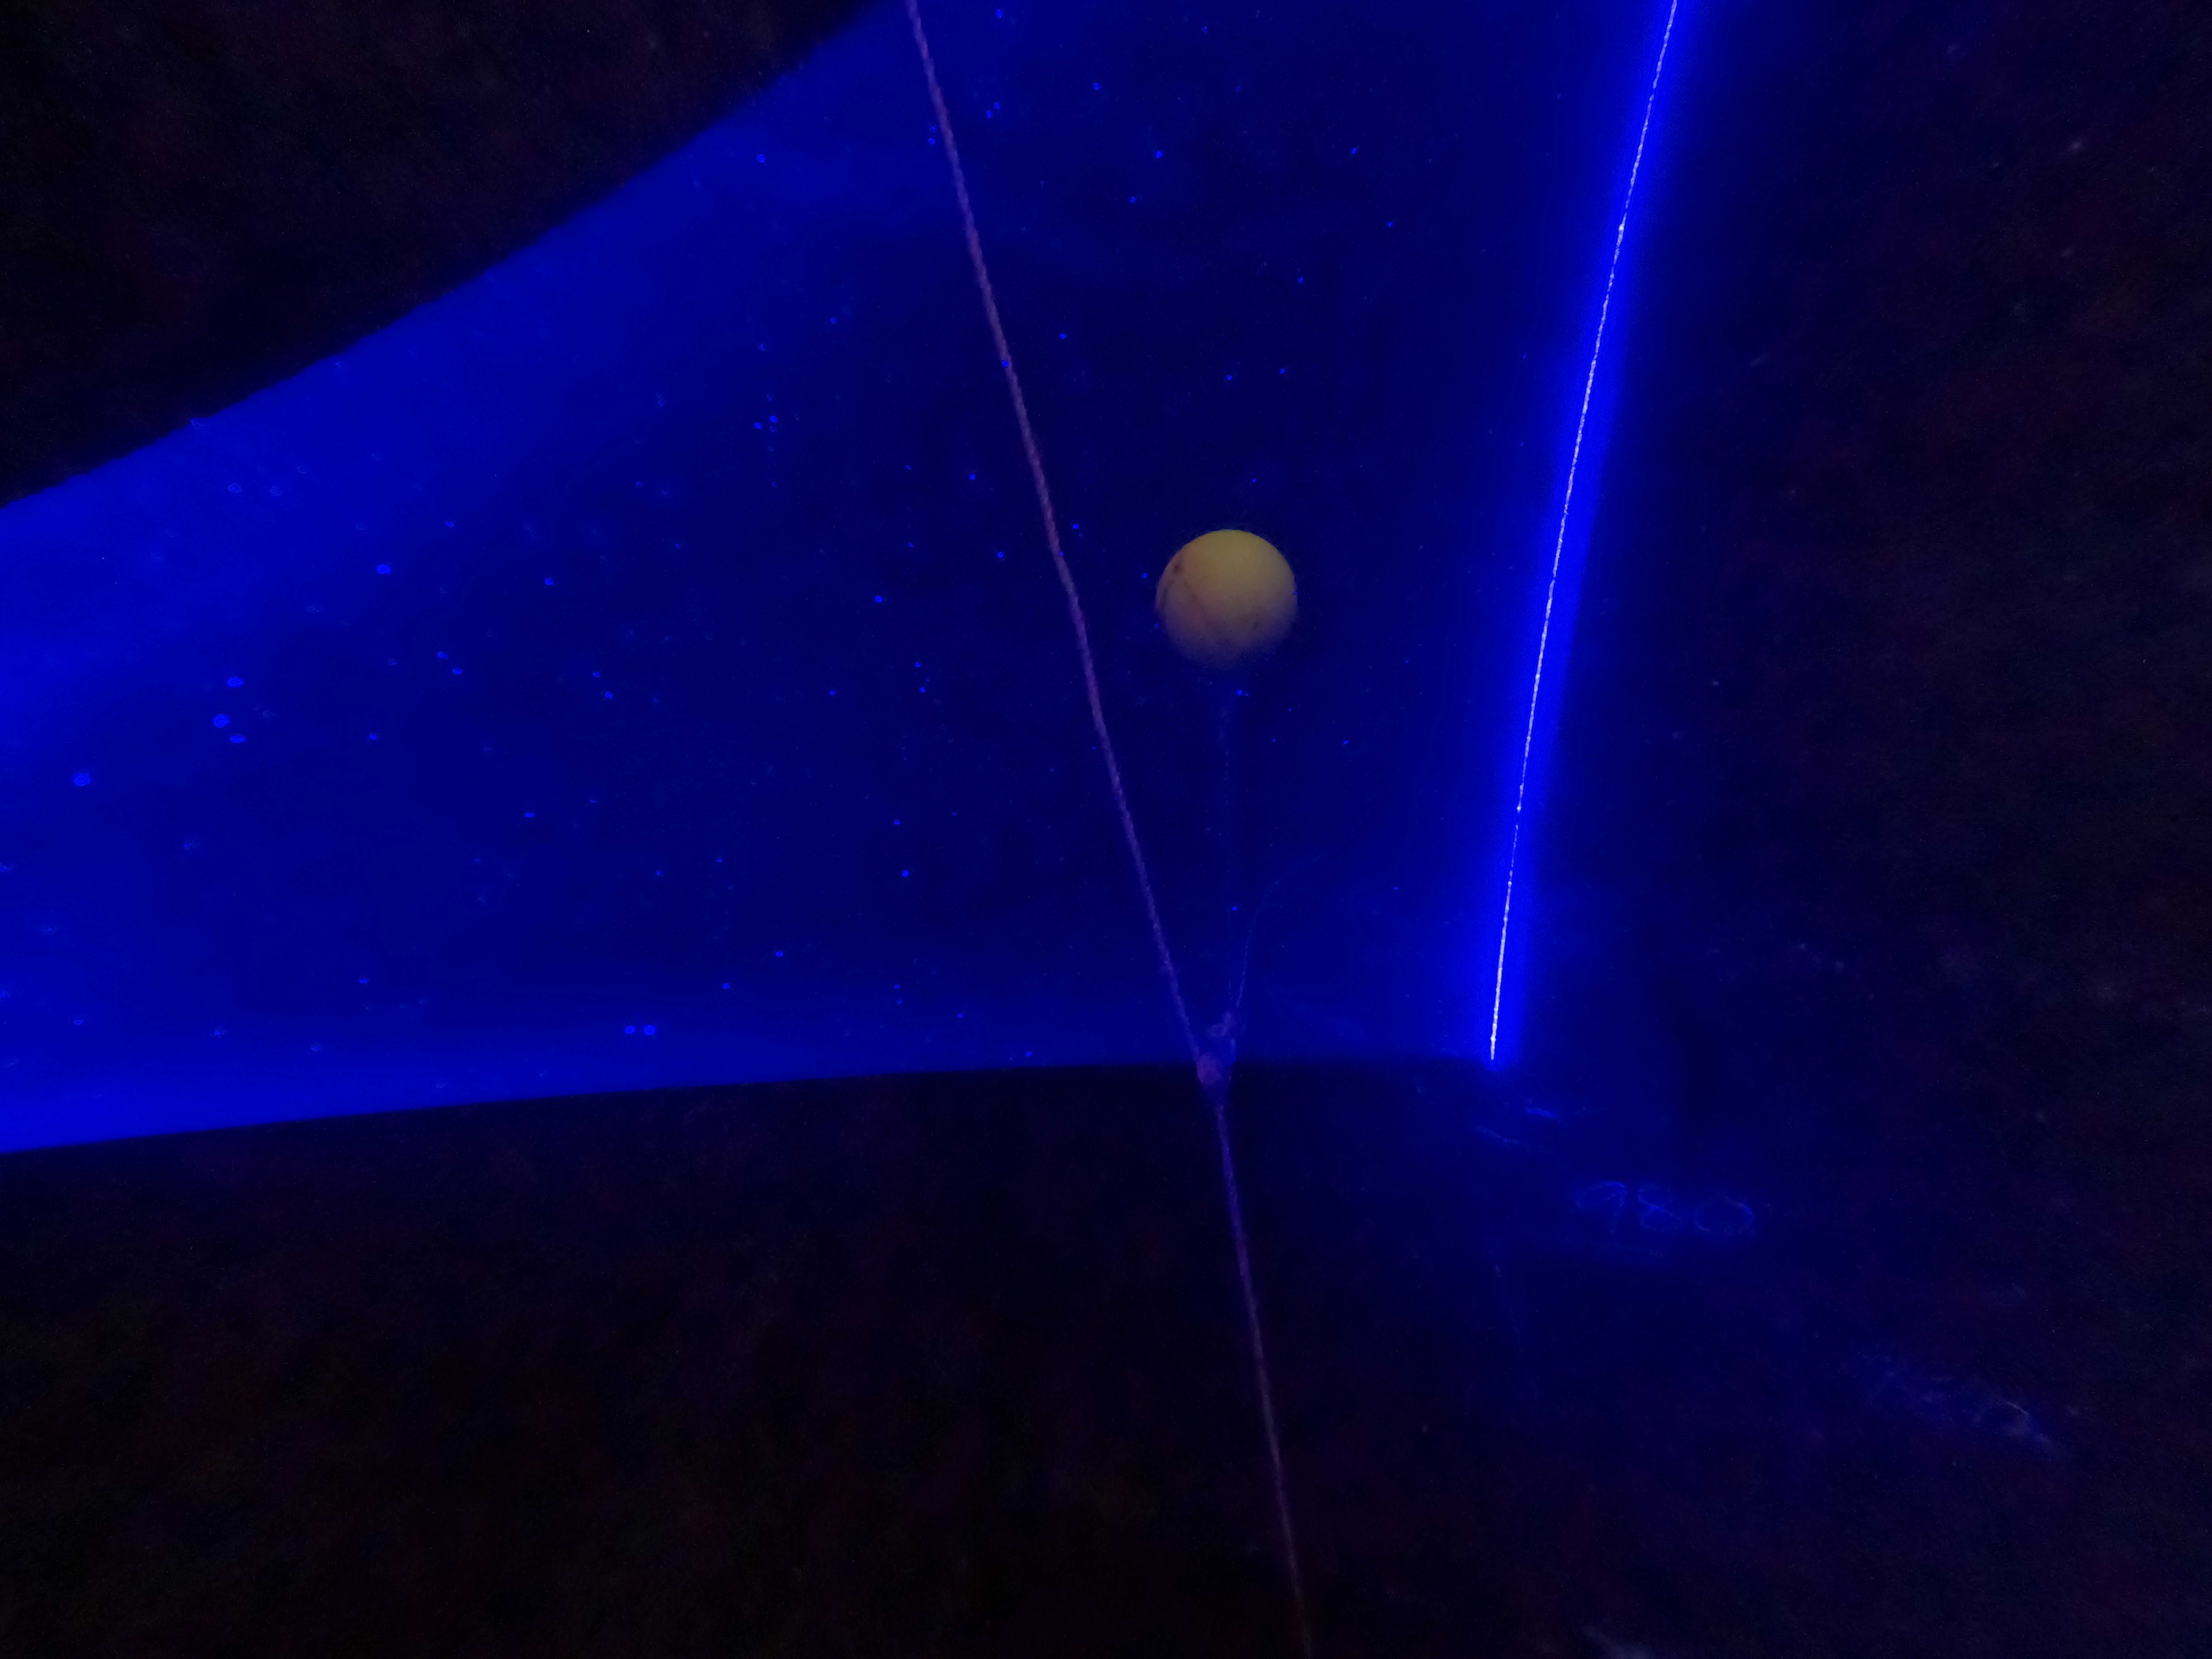

980

Supplement: Supplementary file 1000 [file G0031354.pdf › 10/G0031354.pdf]
