# Supplementary figures and images for: 3D reconstruction of shallow sea environment using direct system calibration and faint laser line extraction (part 11 of 35)
Source: Research Square preprint supplement (doi:10.21203/rs.3.rs-5262658/v1), 2024-12-02

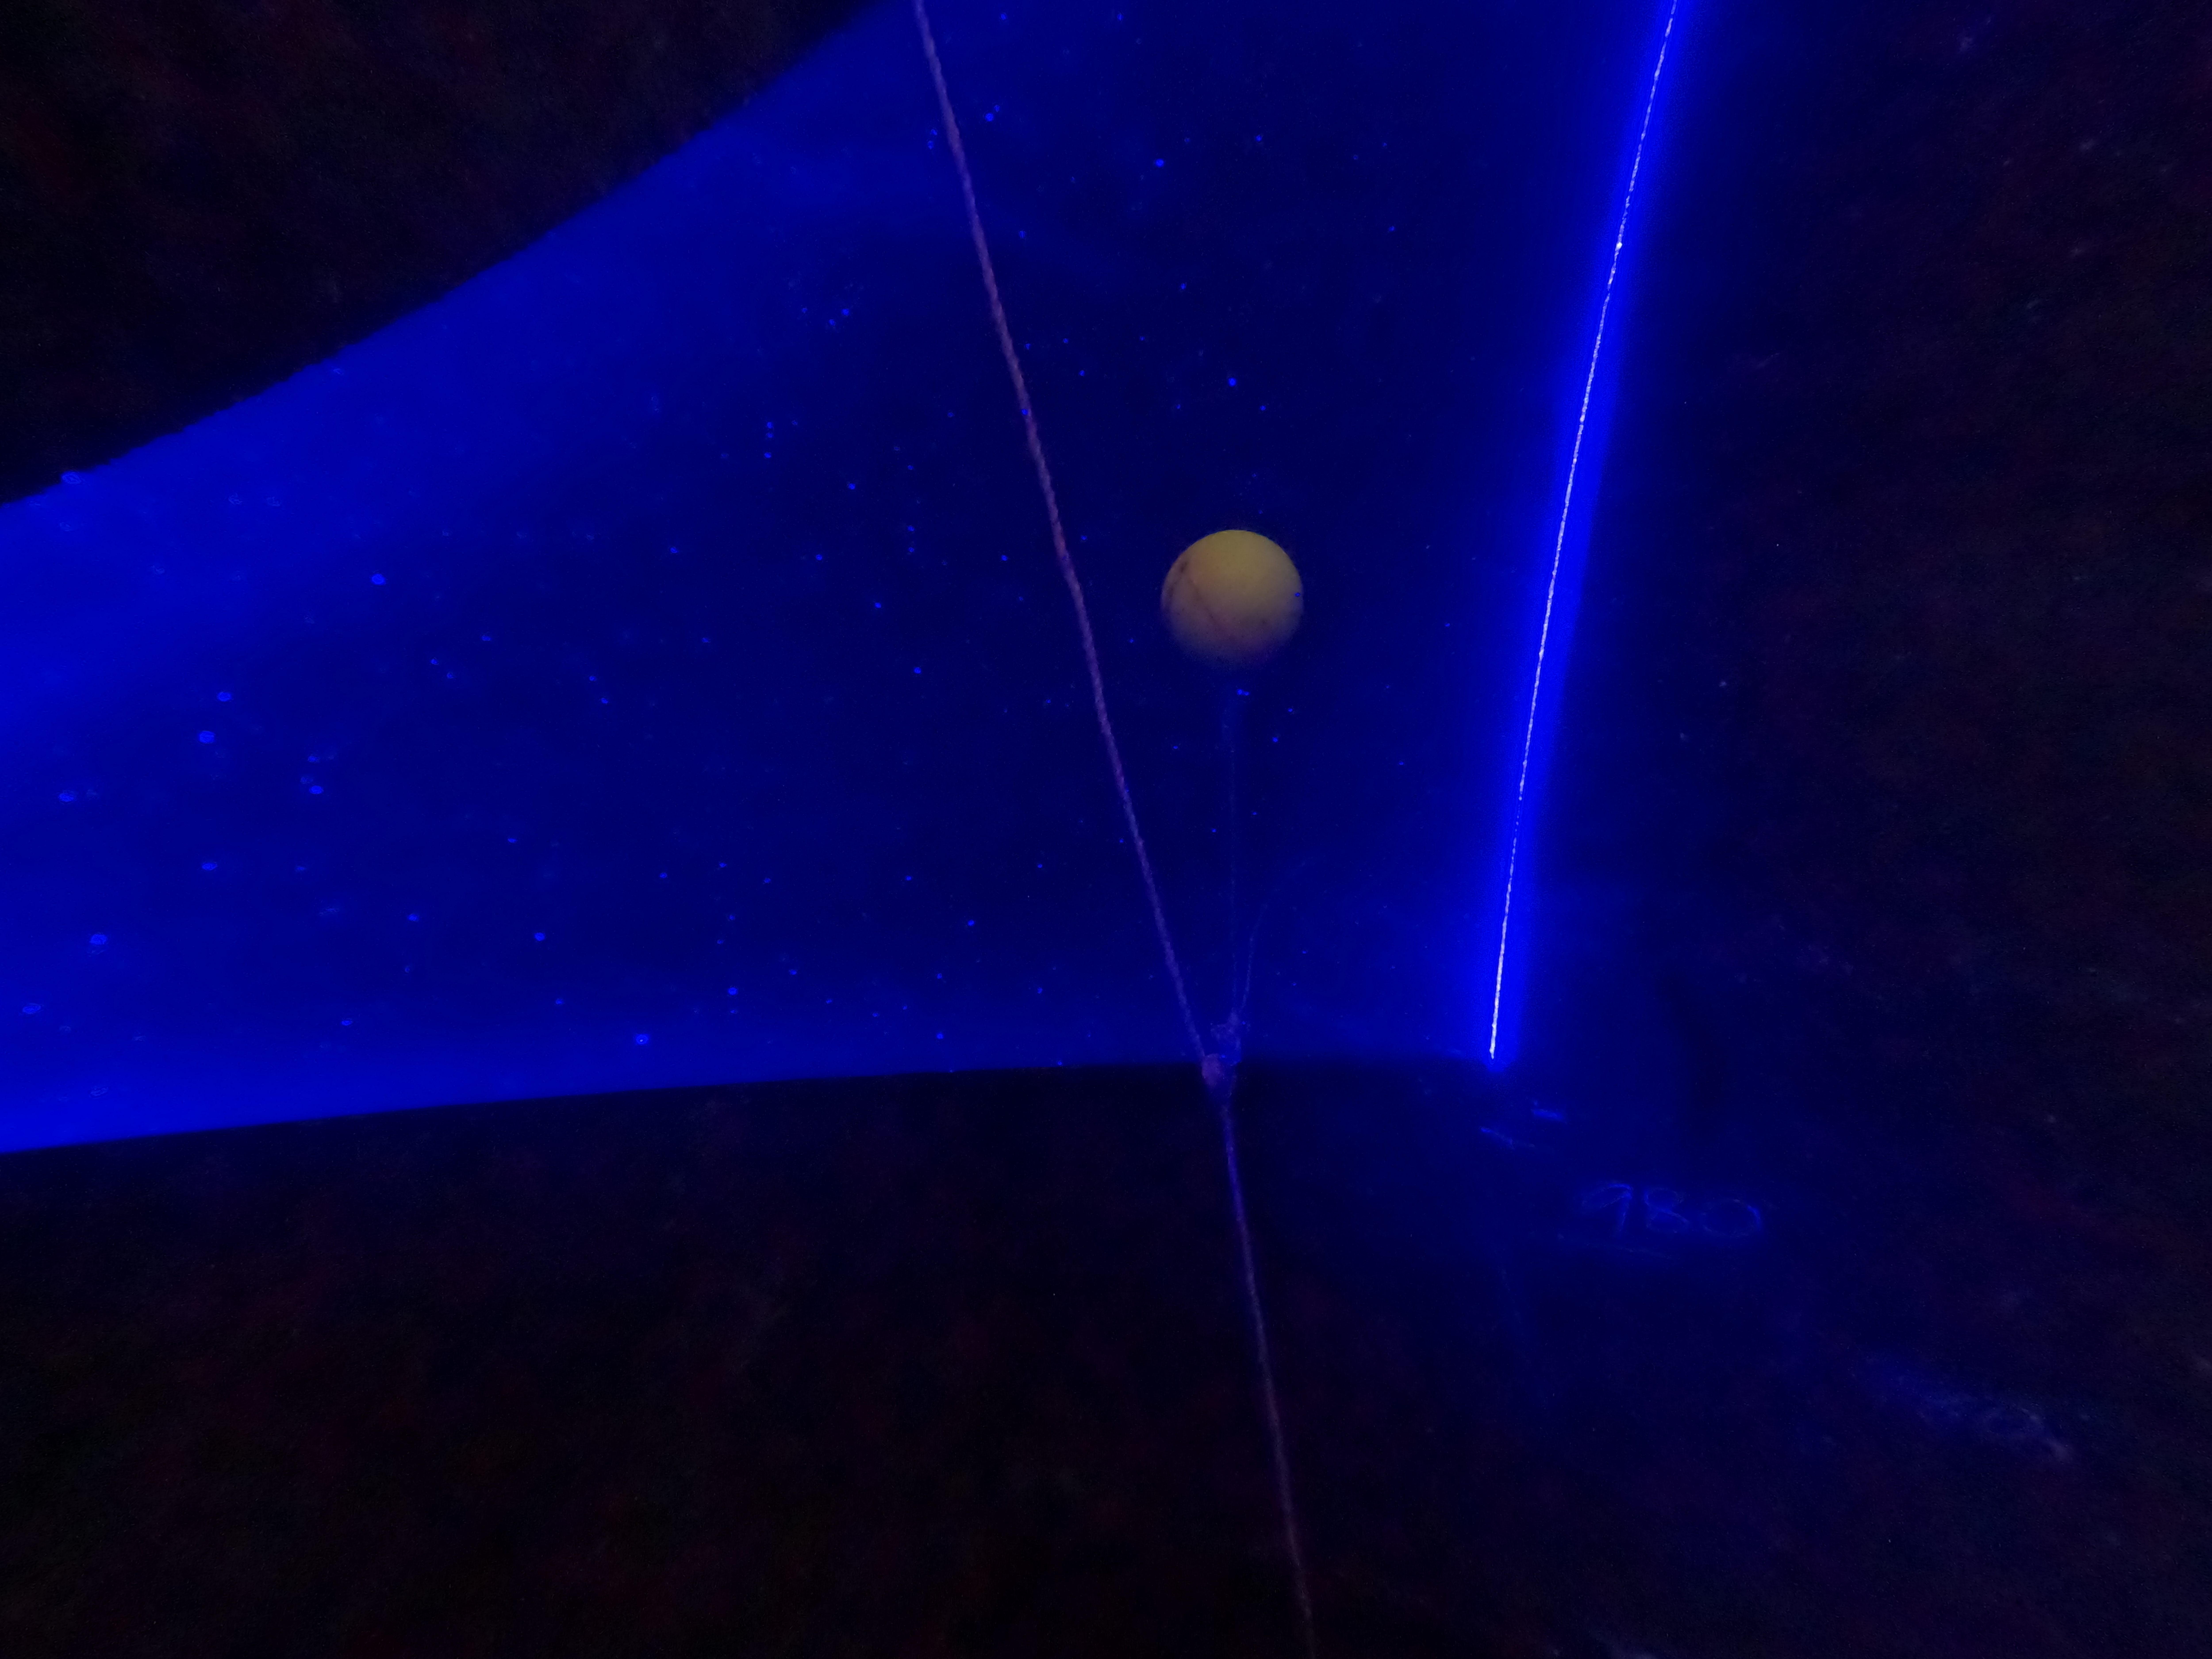

Supplement: Supplementary file 1001 [file G0031355.pdf › 10/G0031355.pdf]

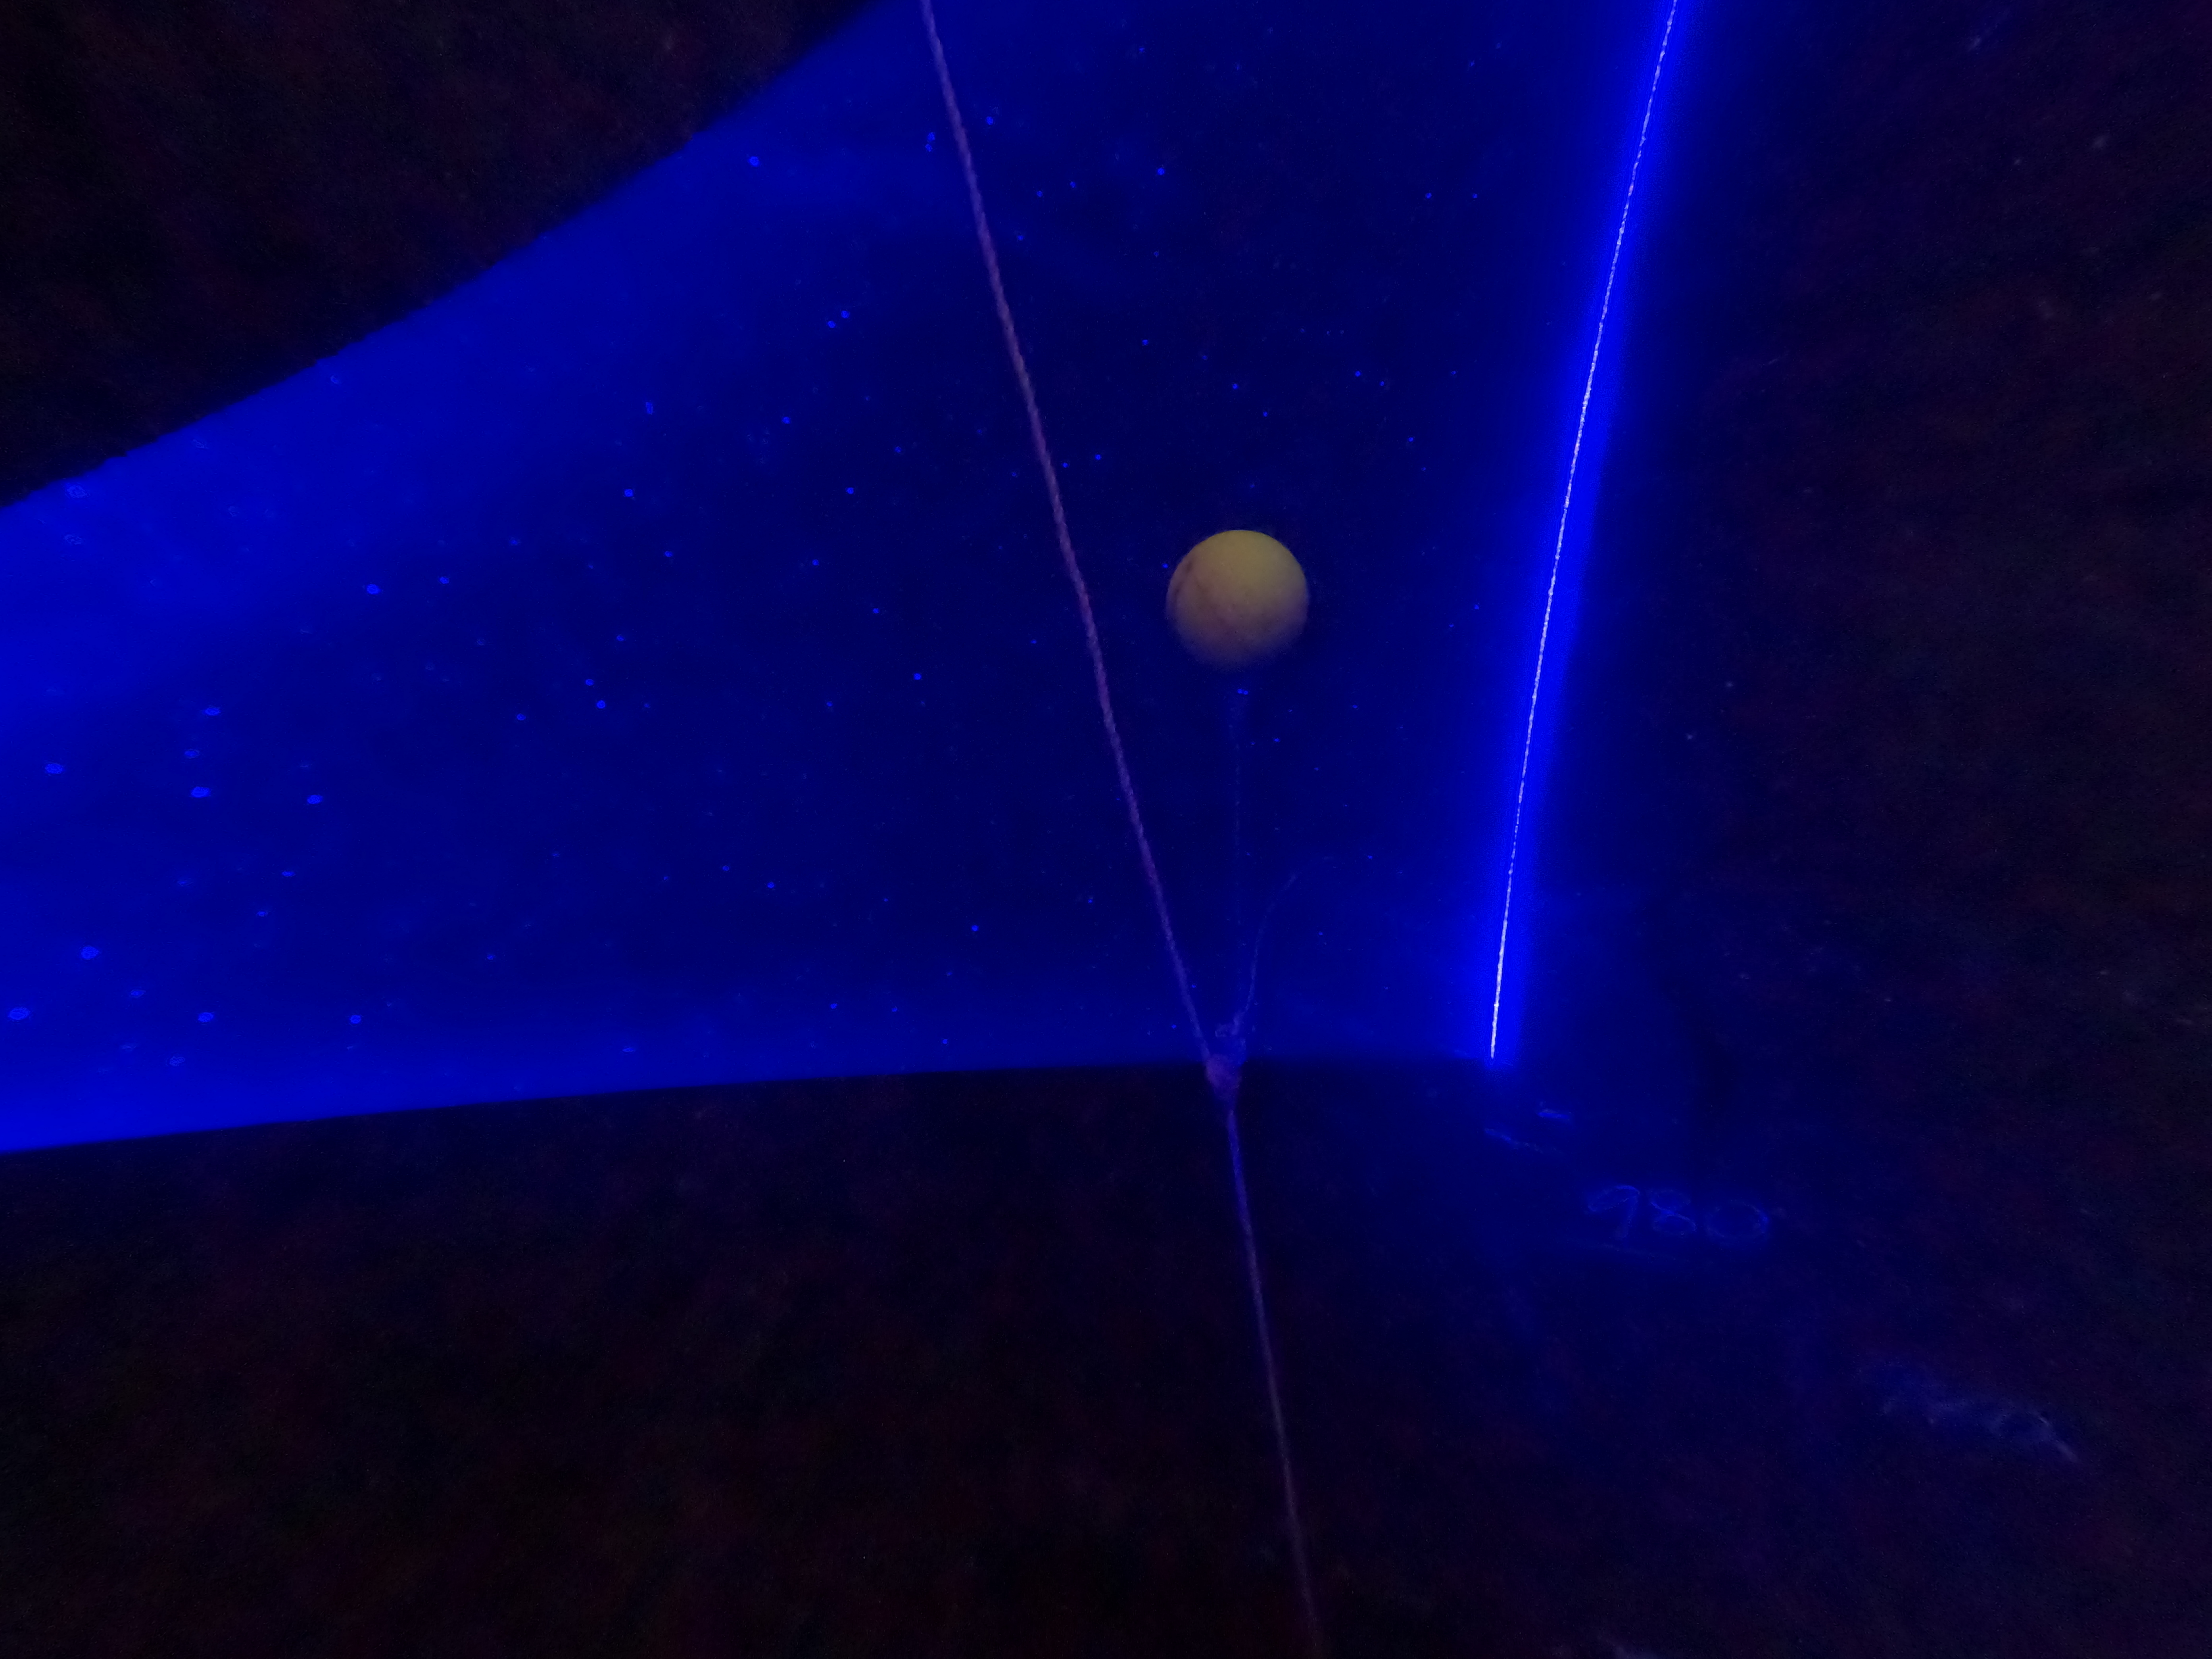

980

Supplement: Supplementary file 1002 [file G0031356.pdf › 10/G0031356.pdf]

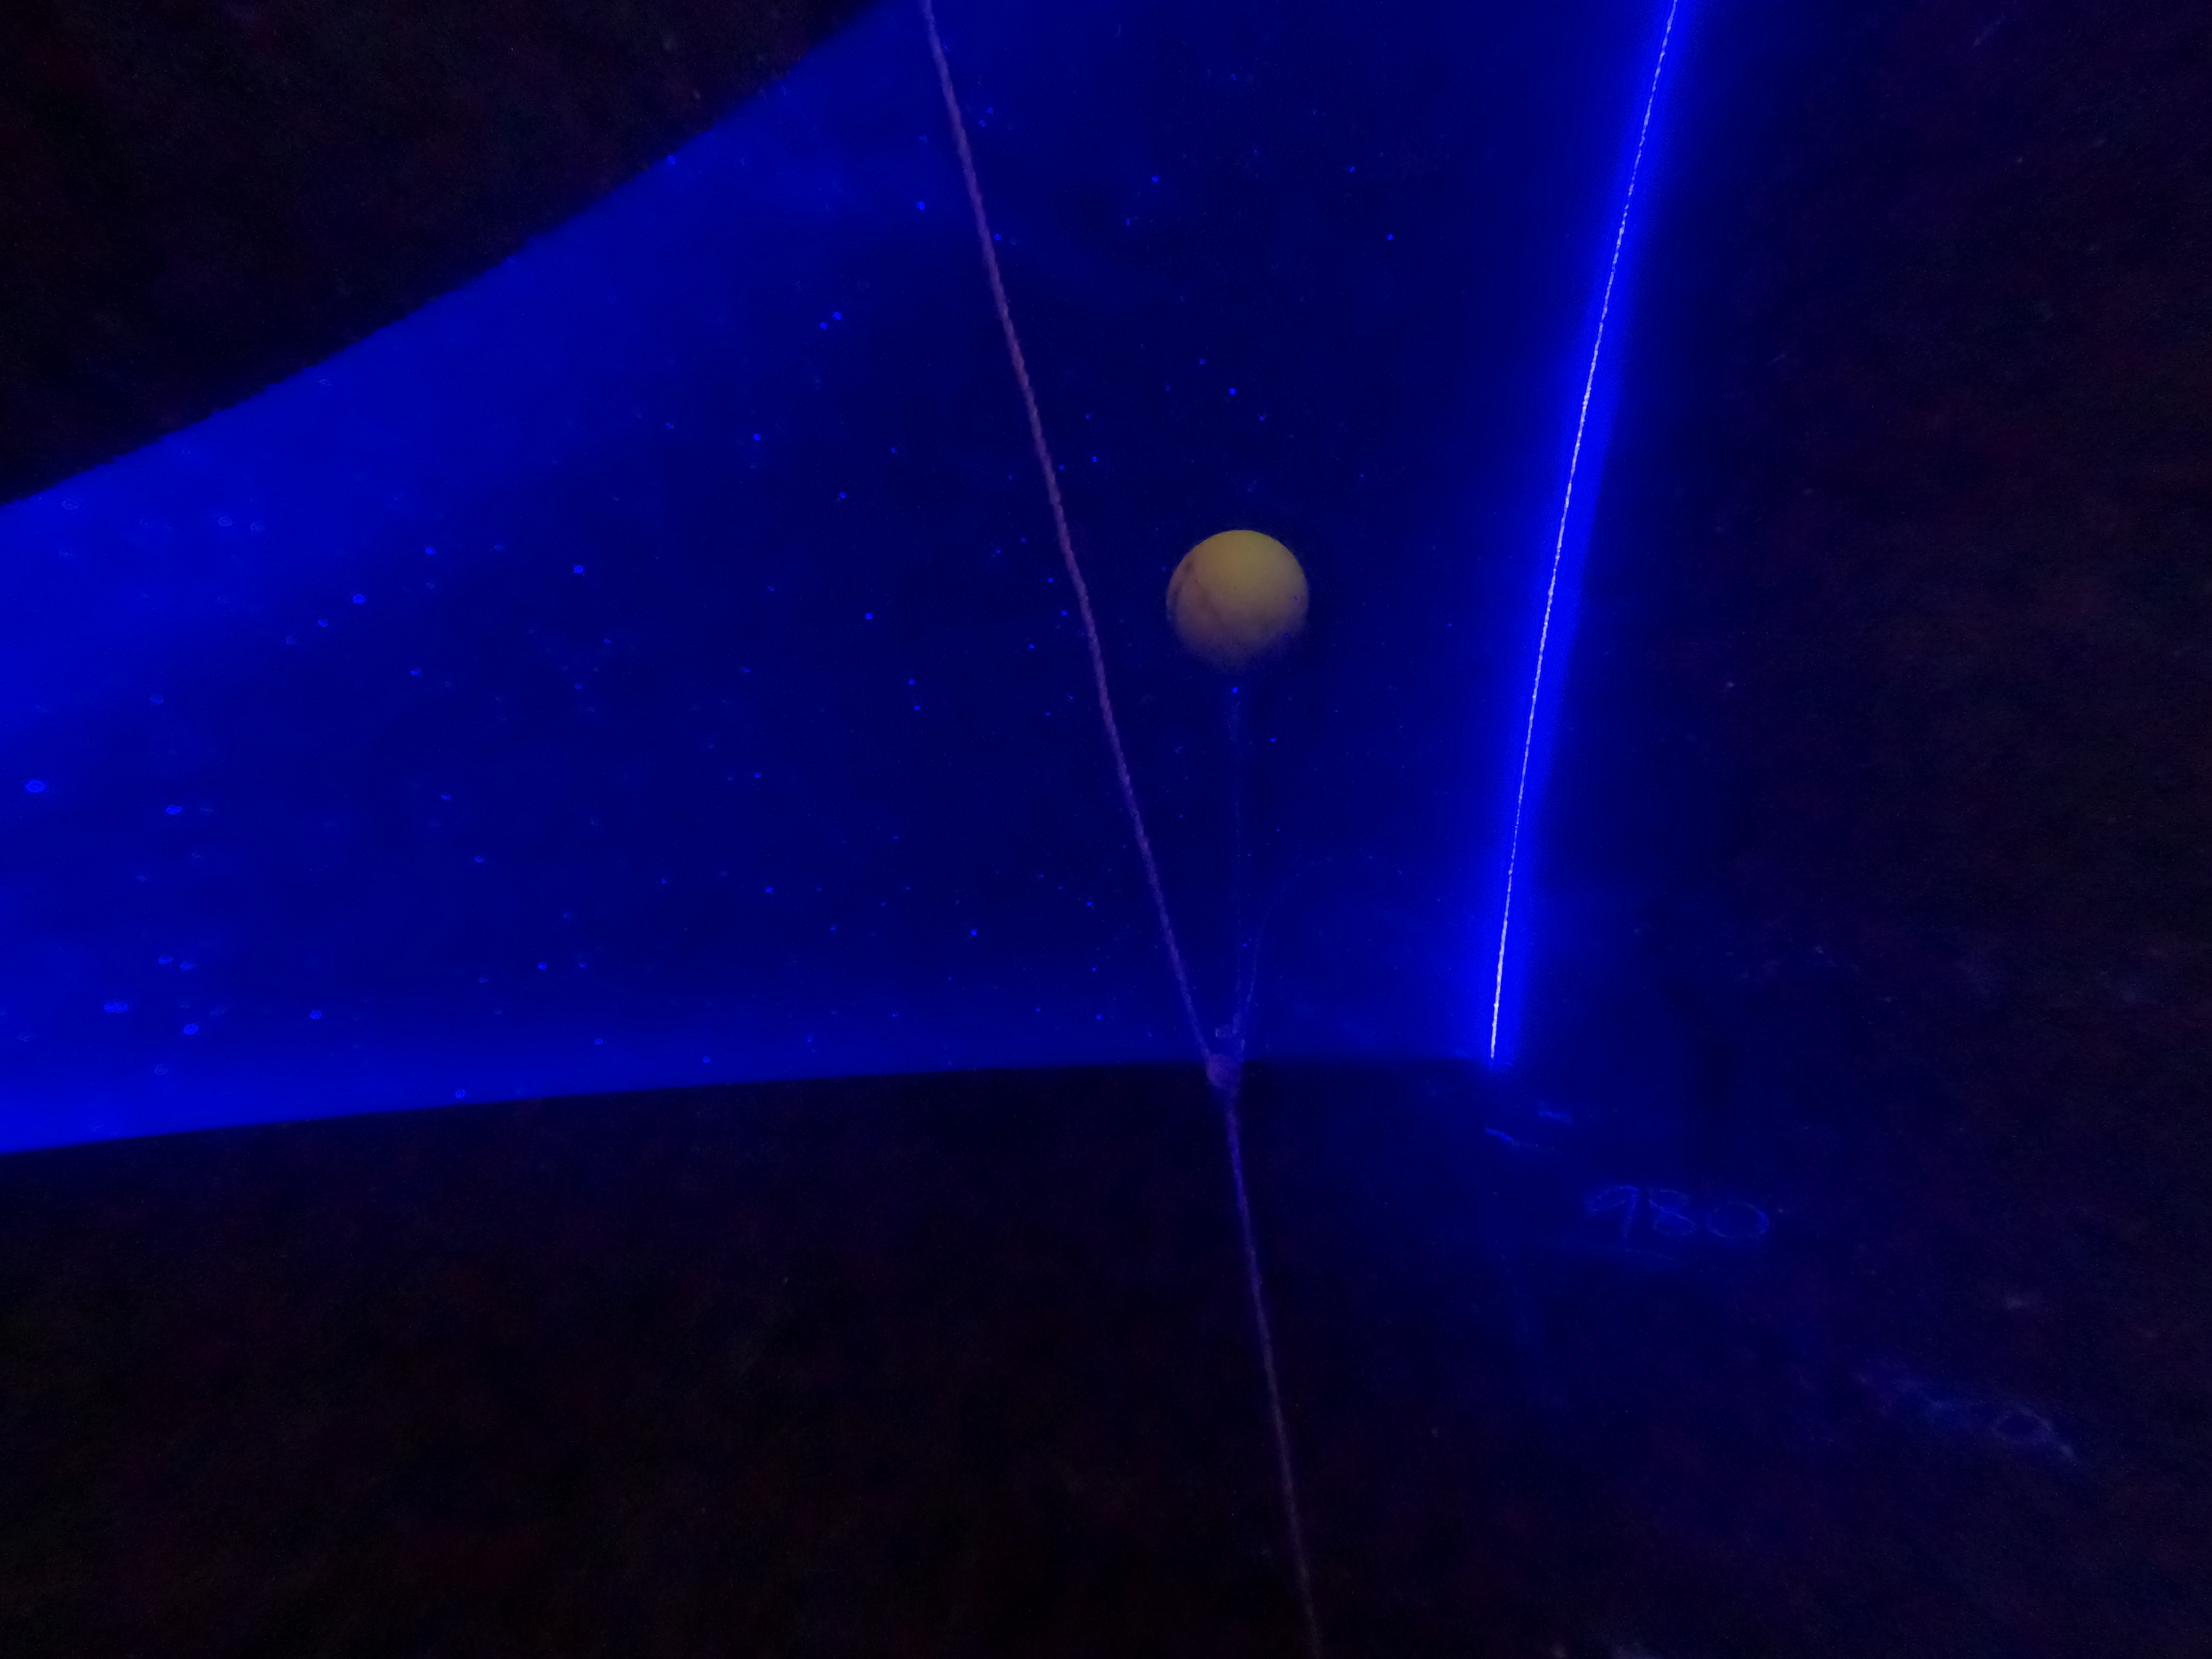

Supplement: Supplementary file 1003 [file G0031357.pdf › 10/G0031357.pdf]

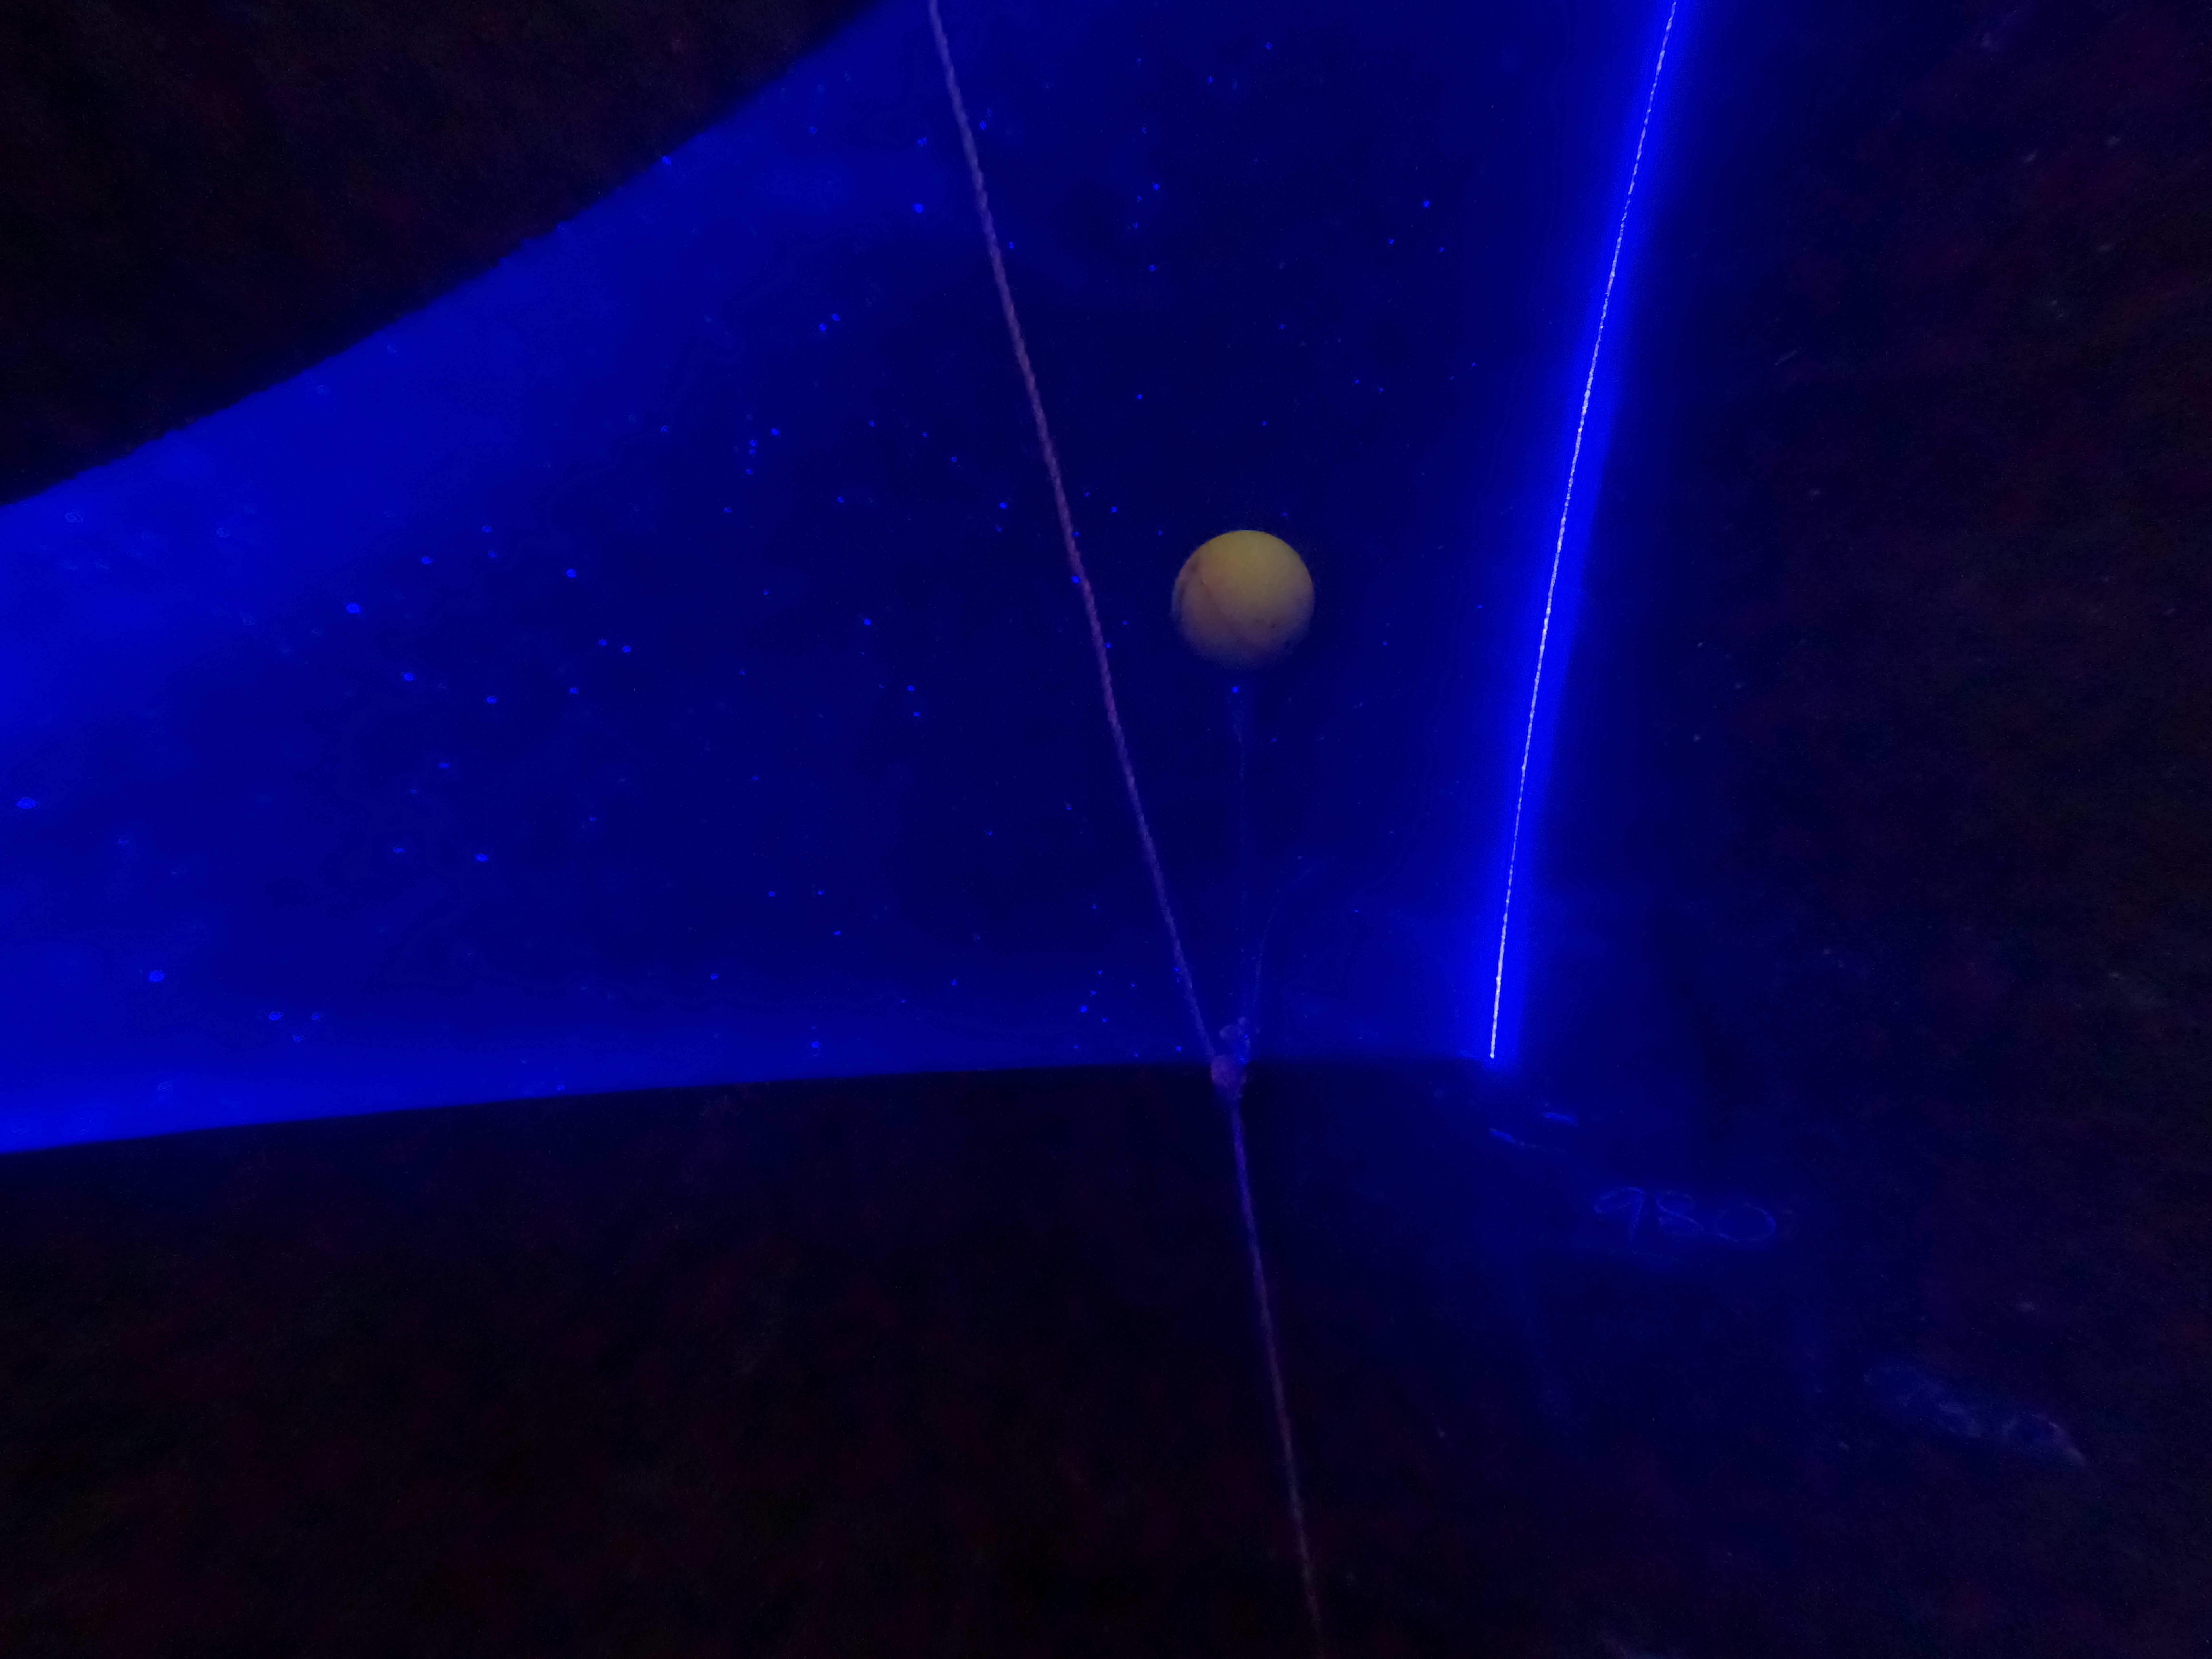

Supplement: Supplementary file 1004 [file G0031358.pdf › 10/G0031358.pdf]

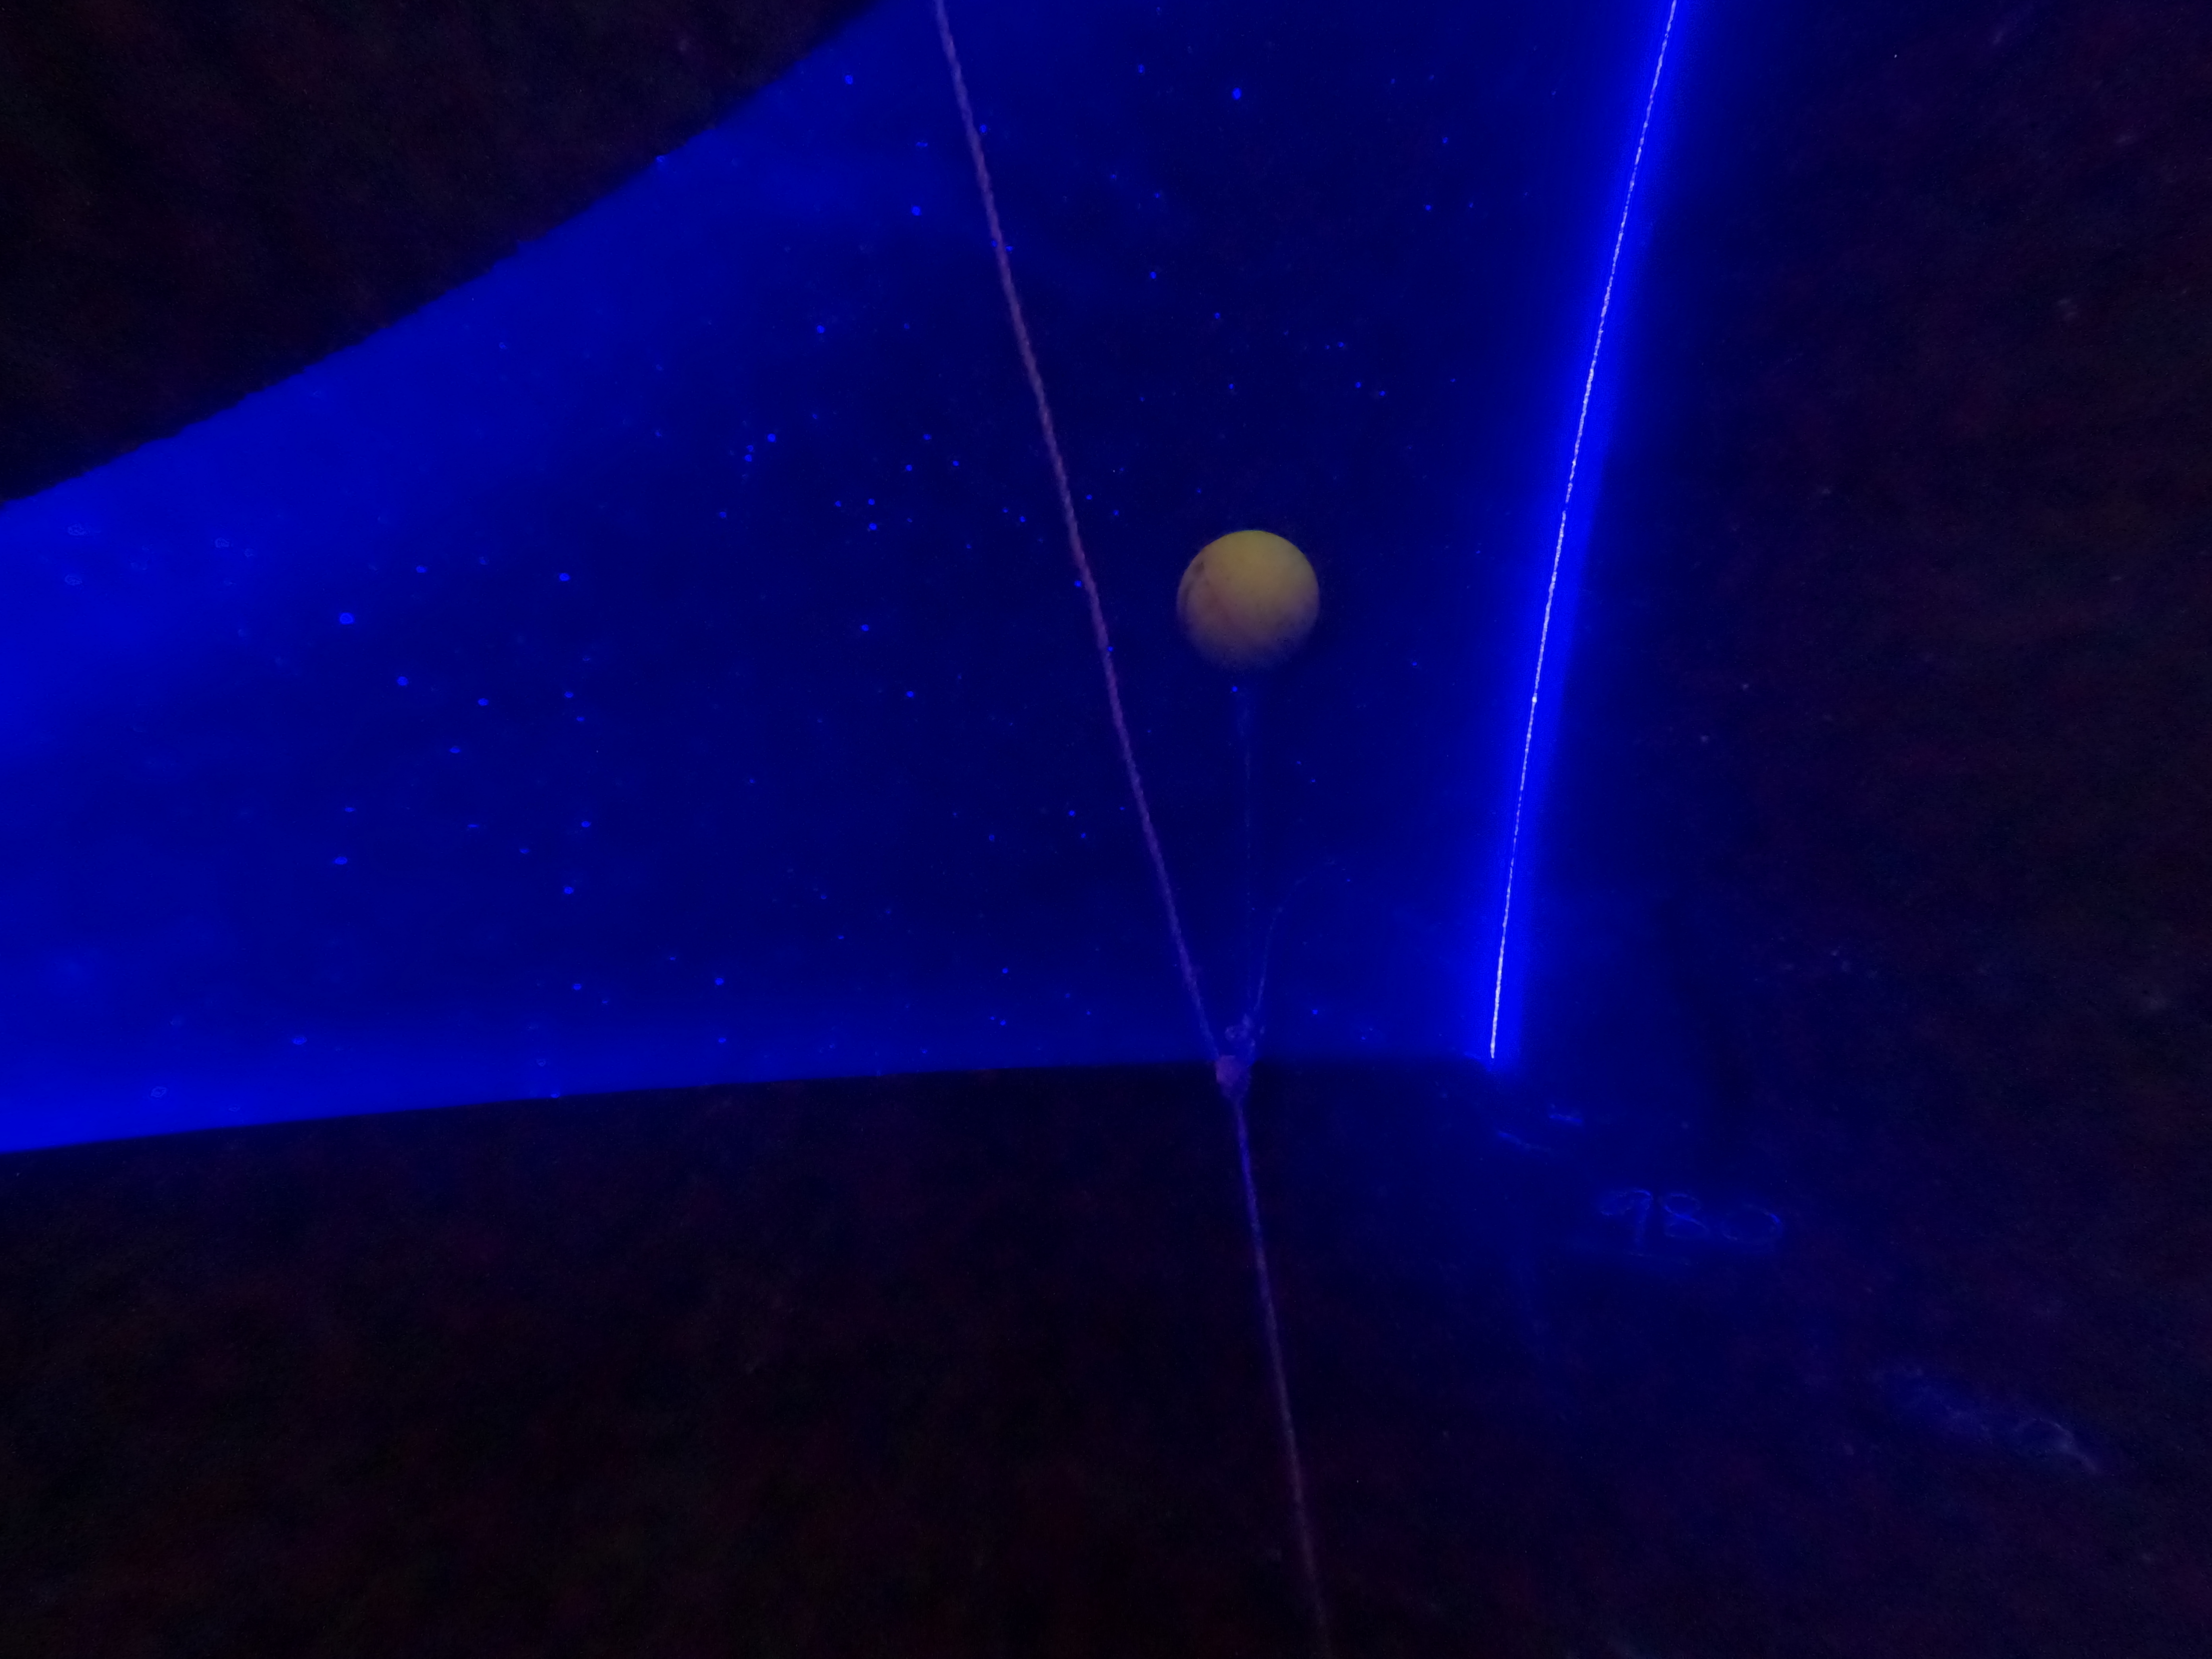

Supplement: Supplementary file 1005 [file G0031359.pdf › 10/G0031359.pdf]

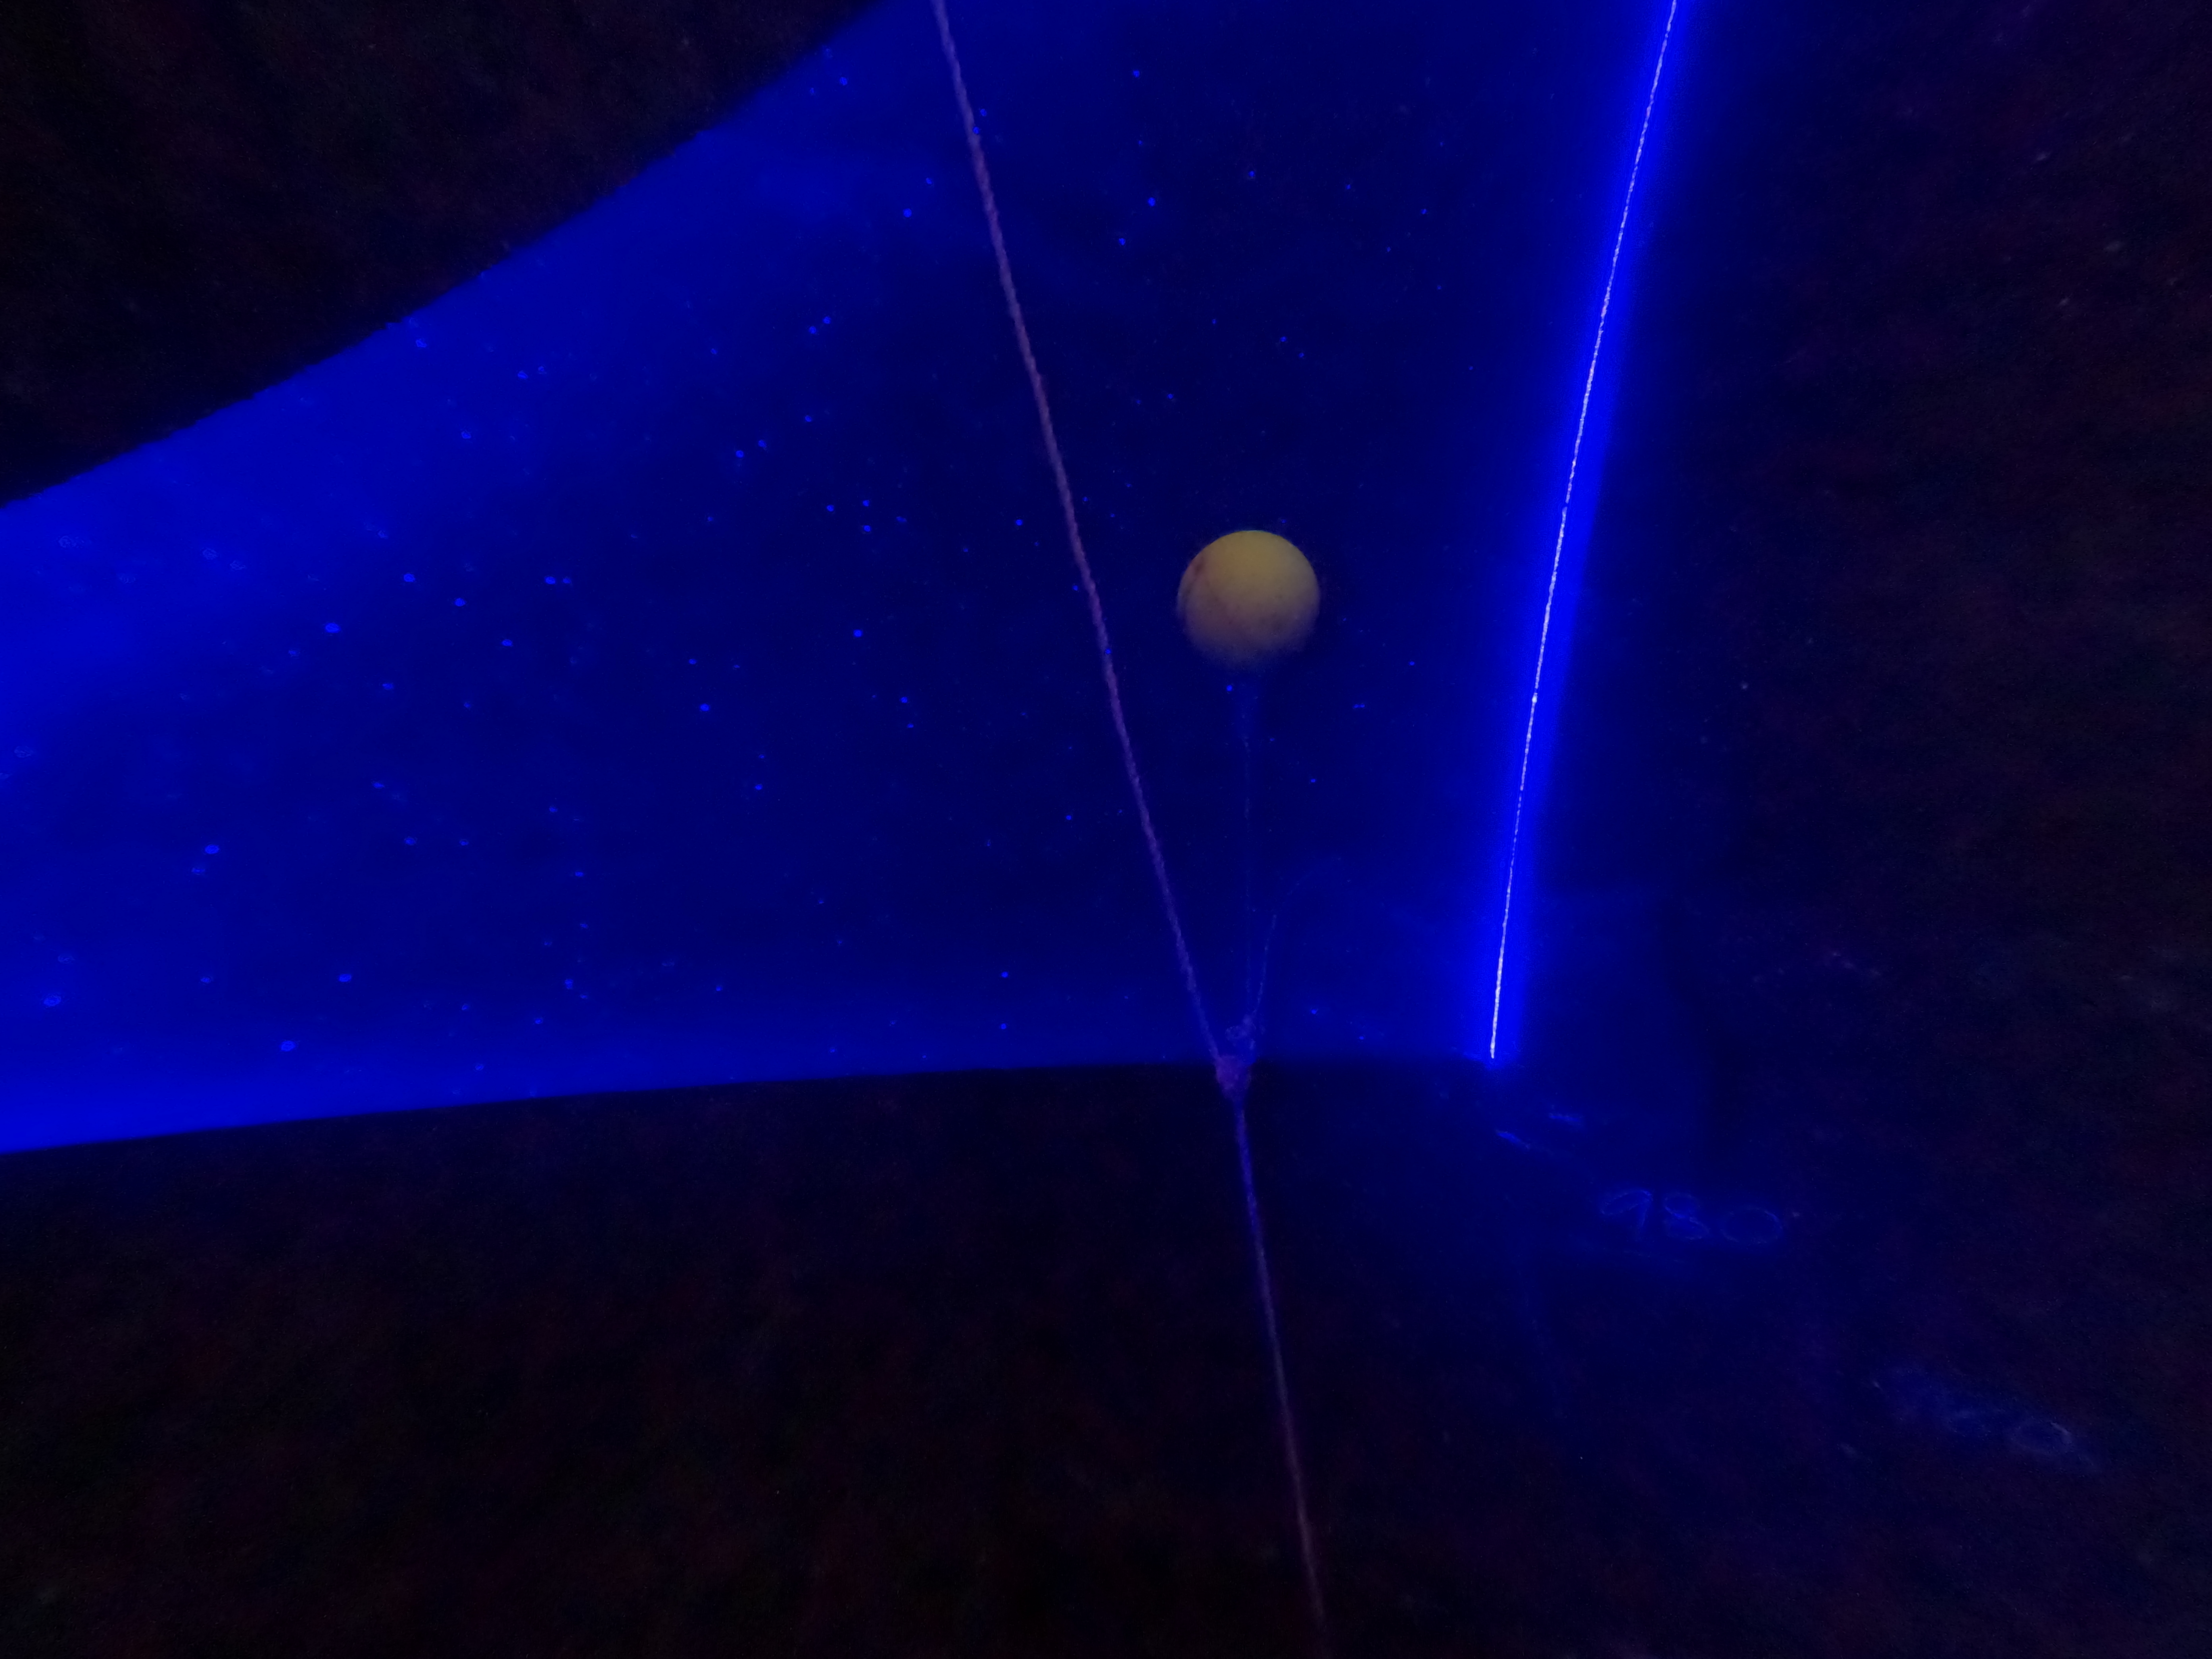

Supplement: Supplementary file 1006 [file G0031360.pdf › 10/G0031360.pdf]

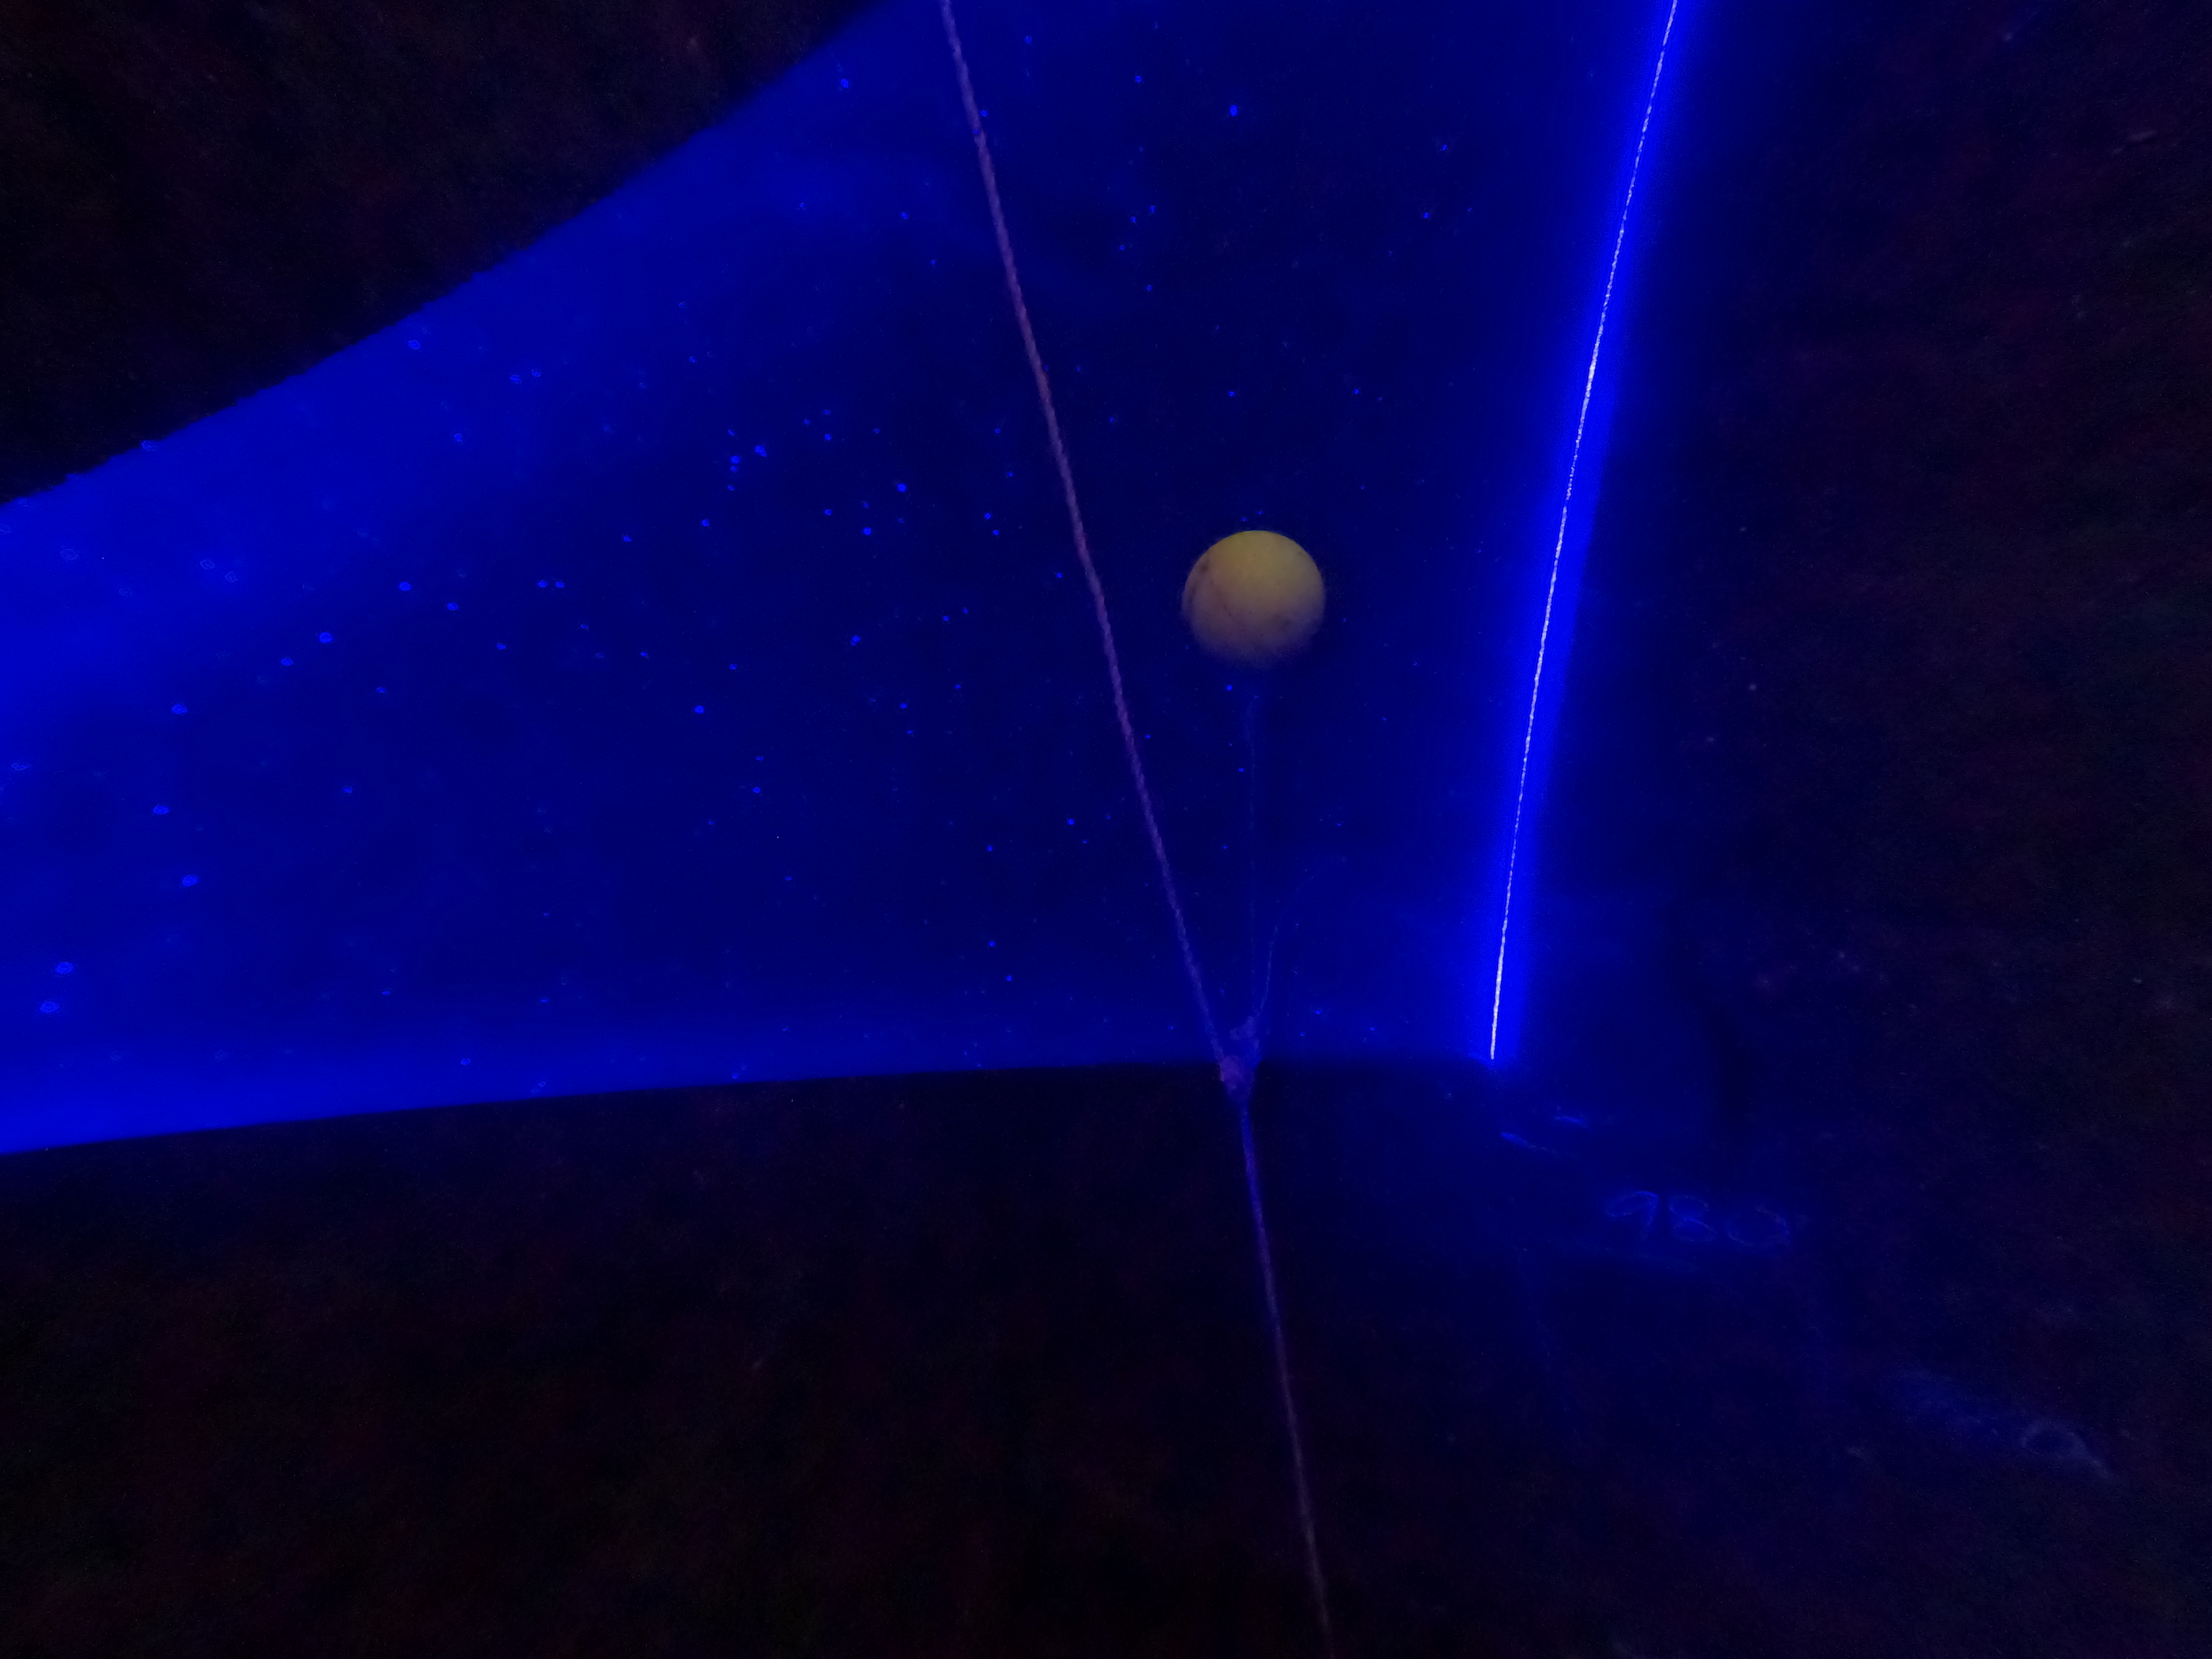

980

Supplement: Supplementary file 1007 [file G0031361.pdf › 10/G0031361.pdf]

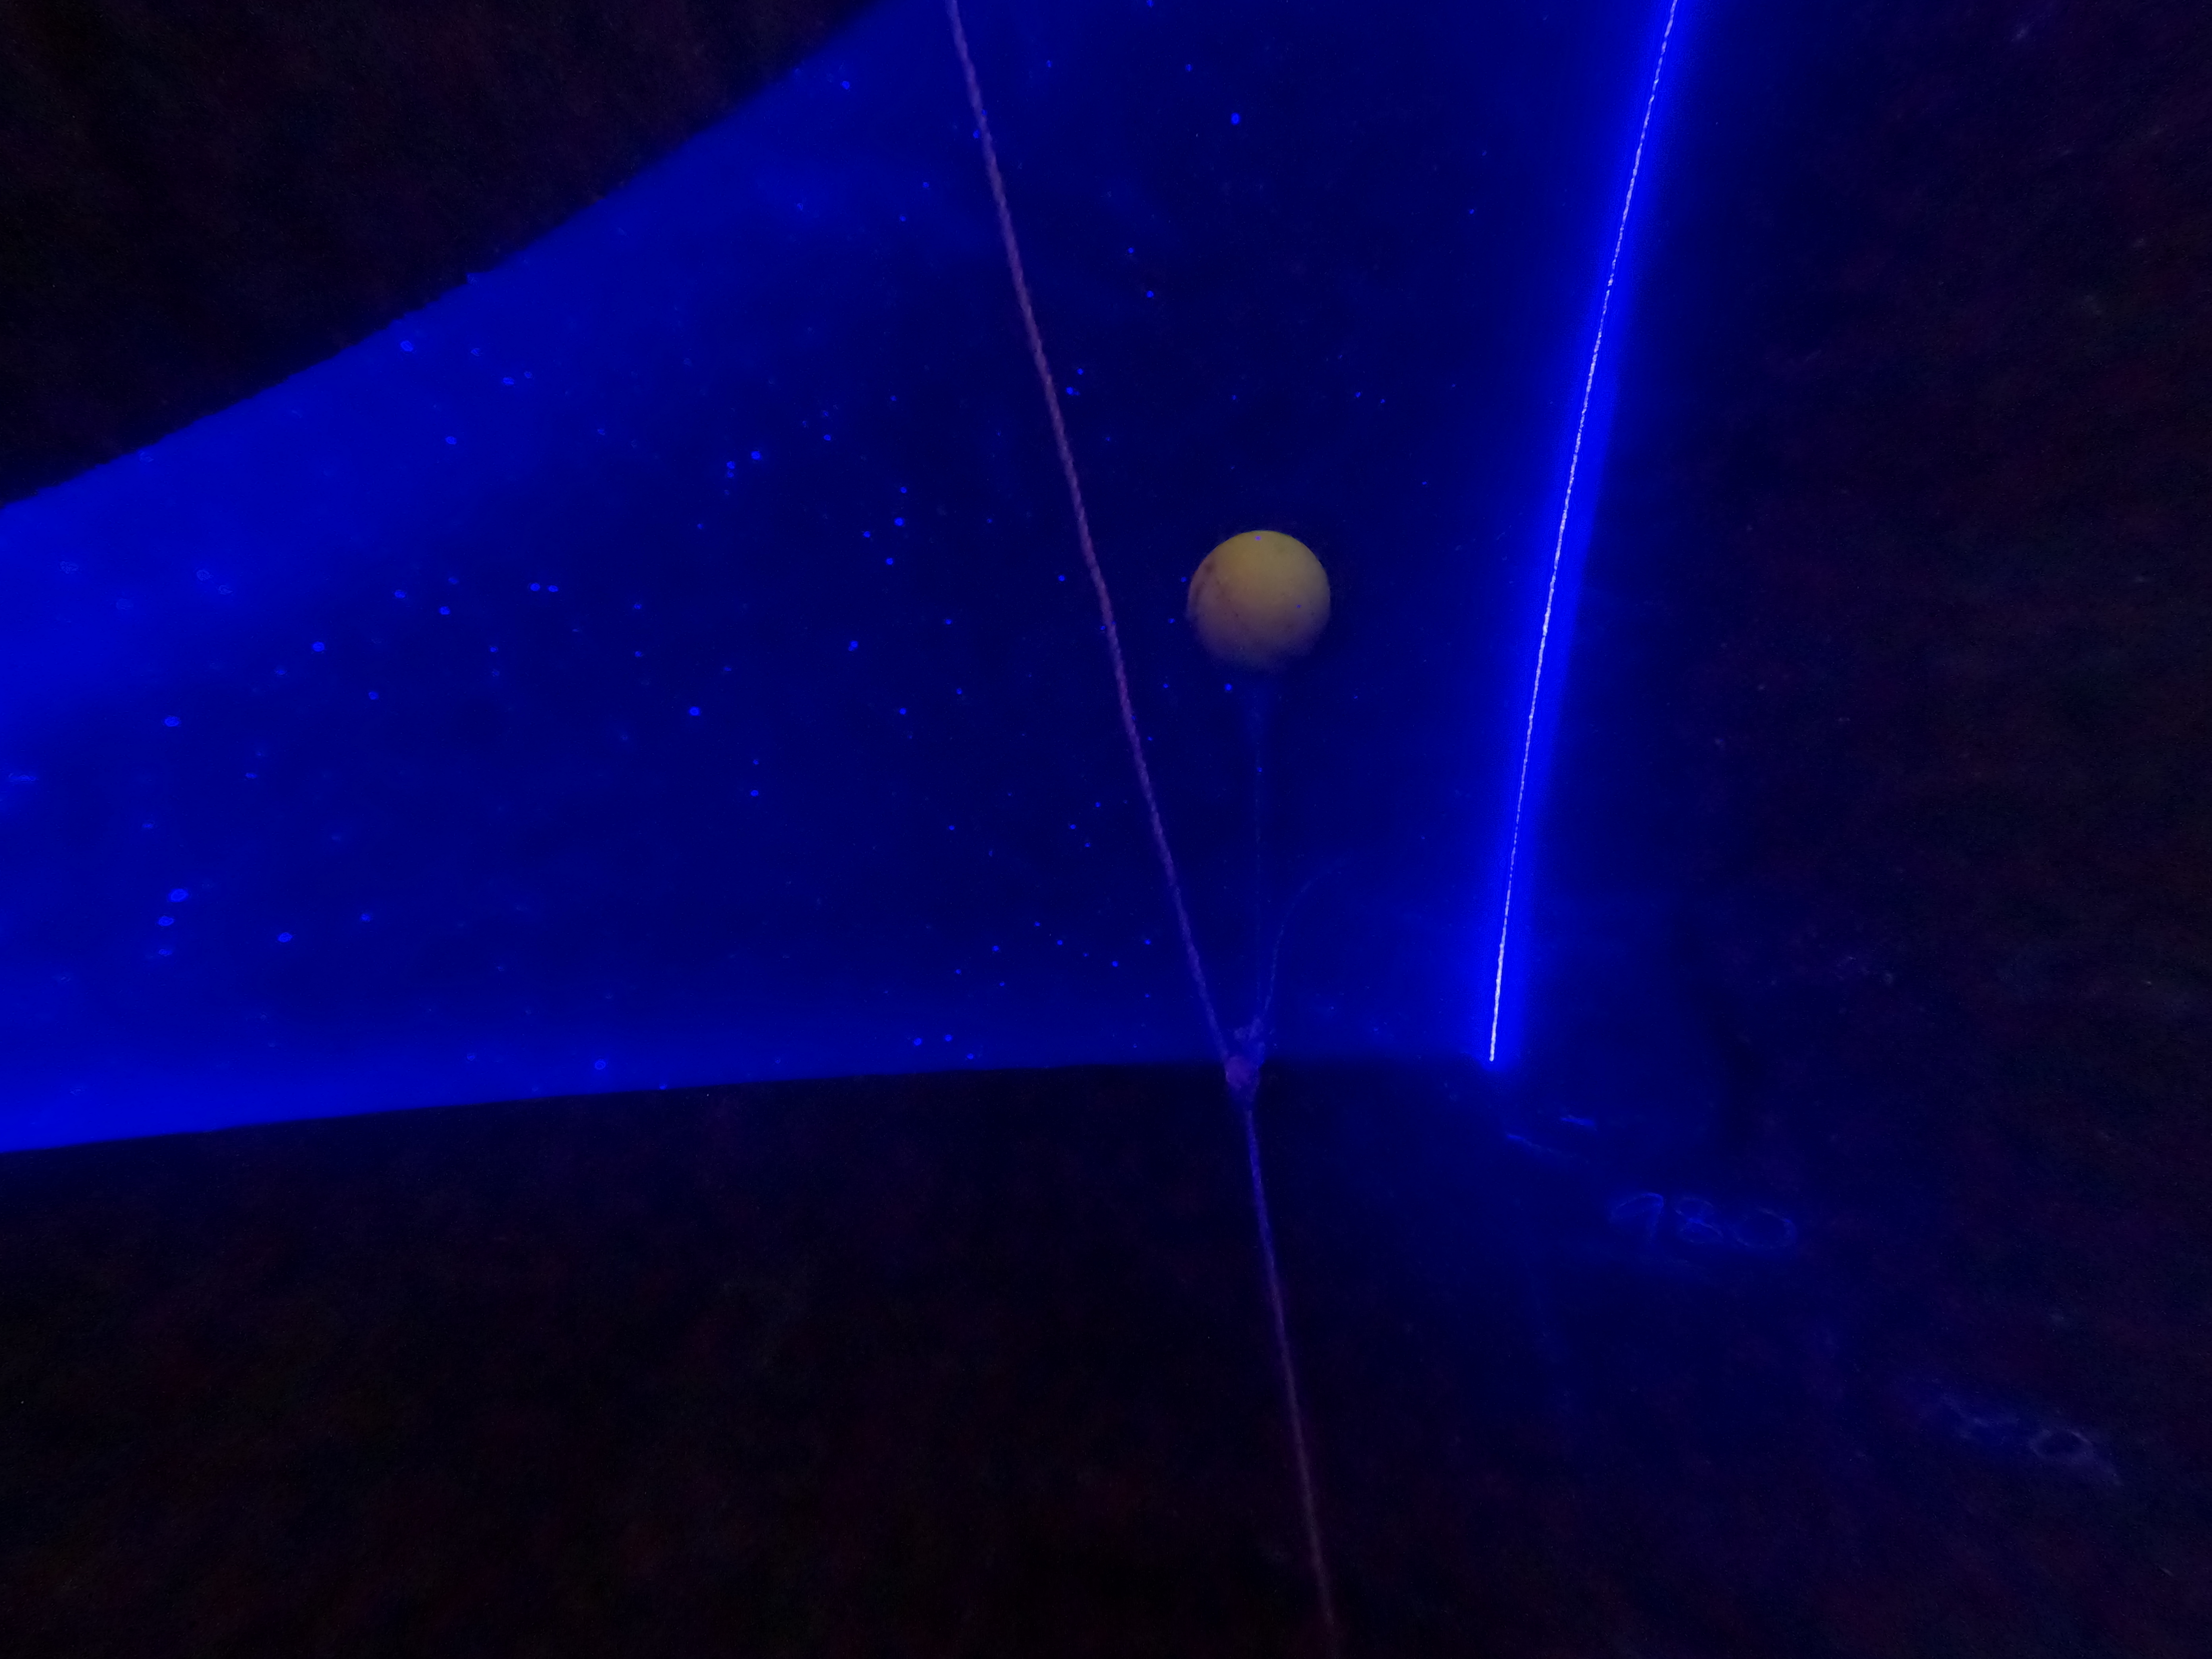

980

50

Supplement: Supplementary file 1008 [file G0031362.pdf › 10/G0031362.pdf]

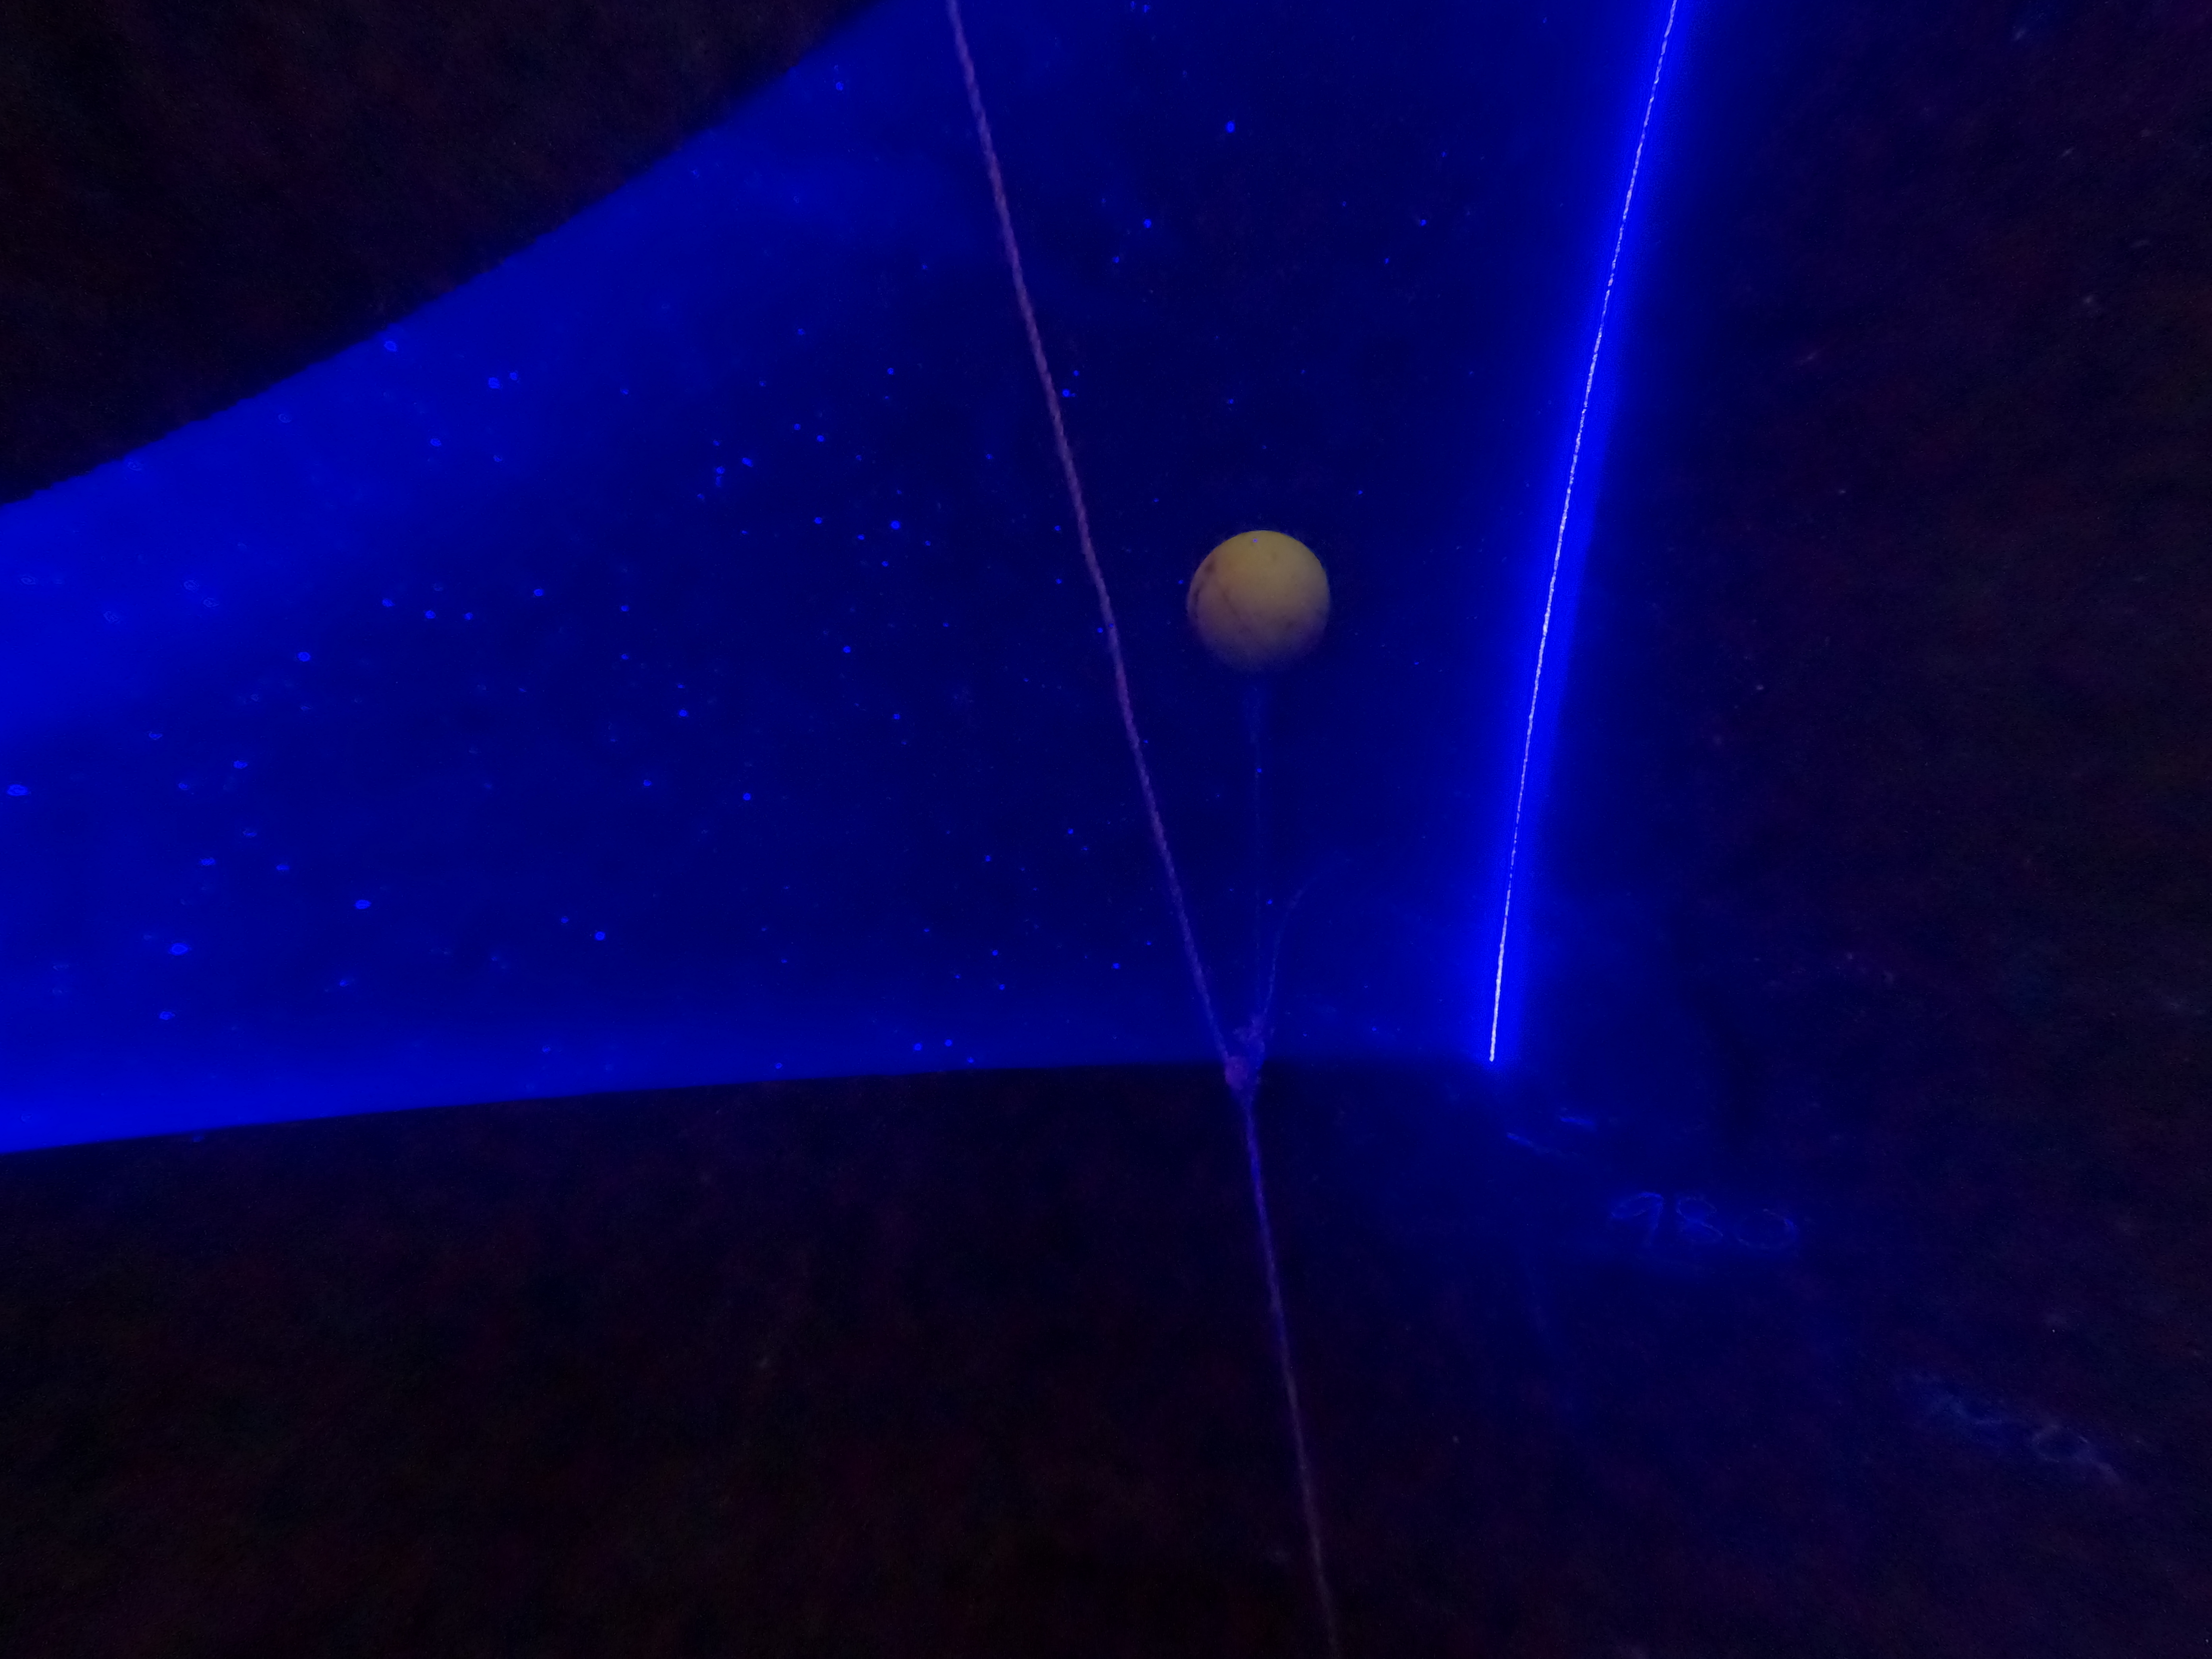

980

Supplement: Supplementary file 1009 [file G0031363.pdf › 10/G0031363.pdf]

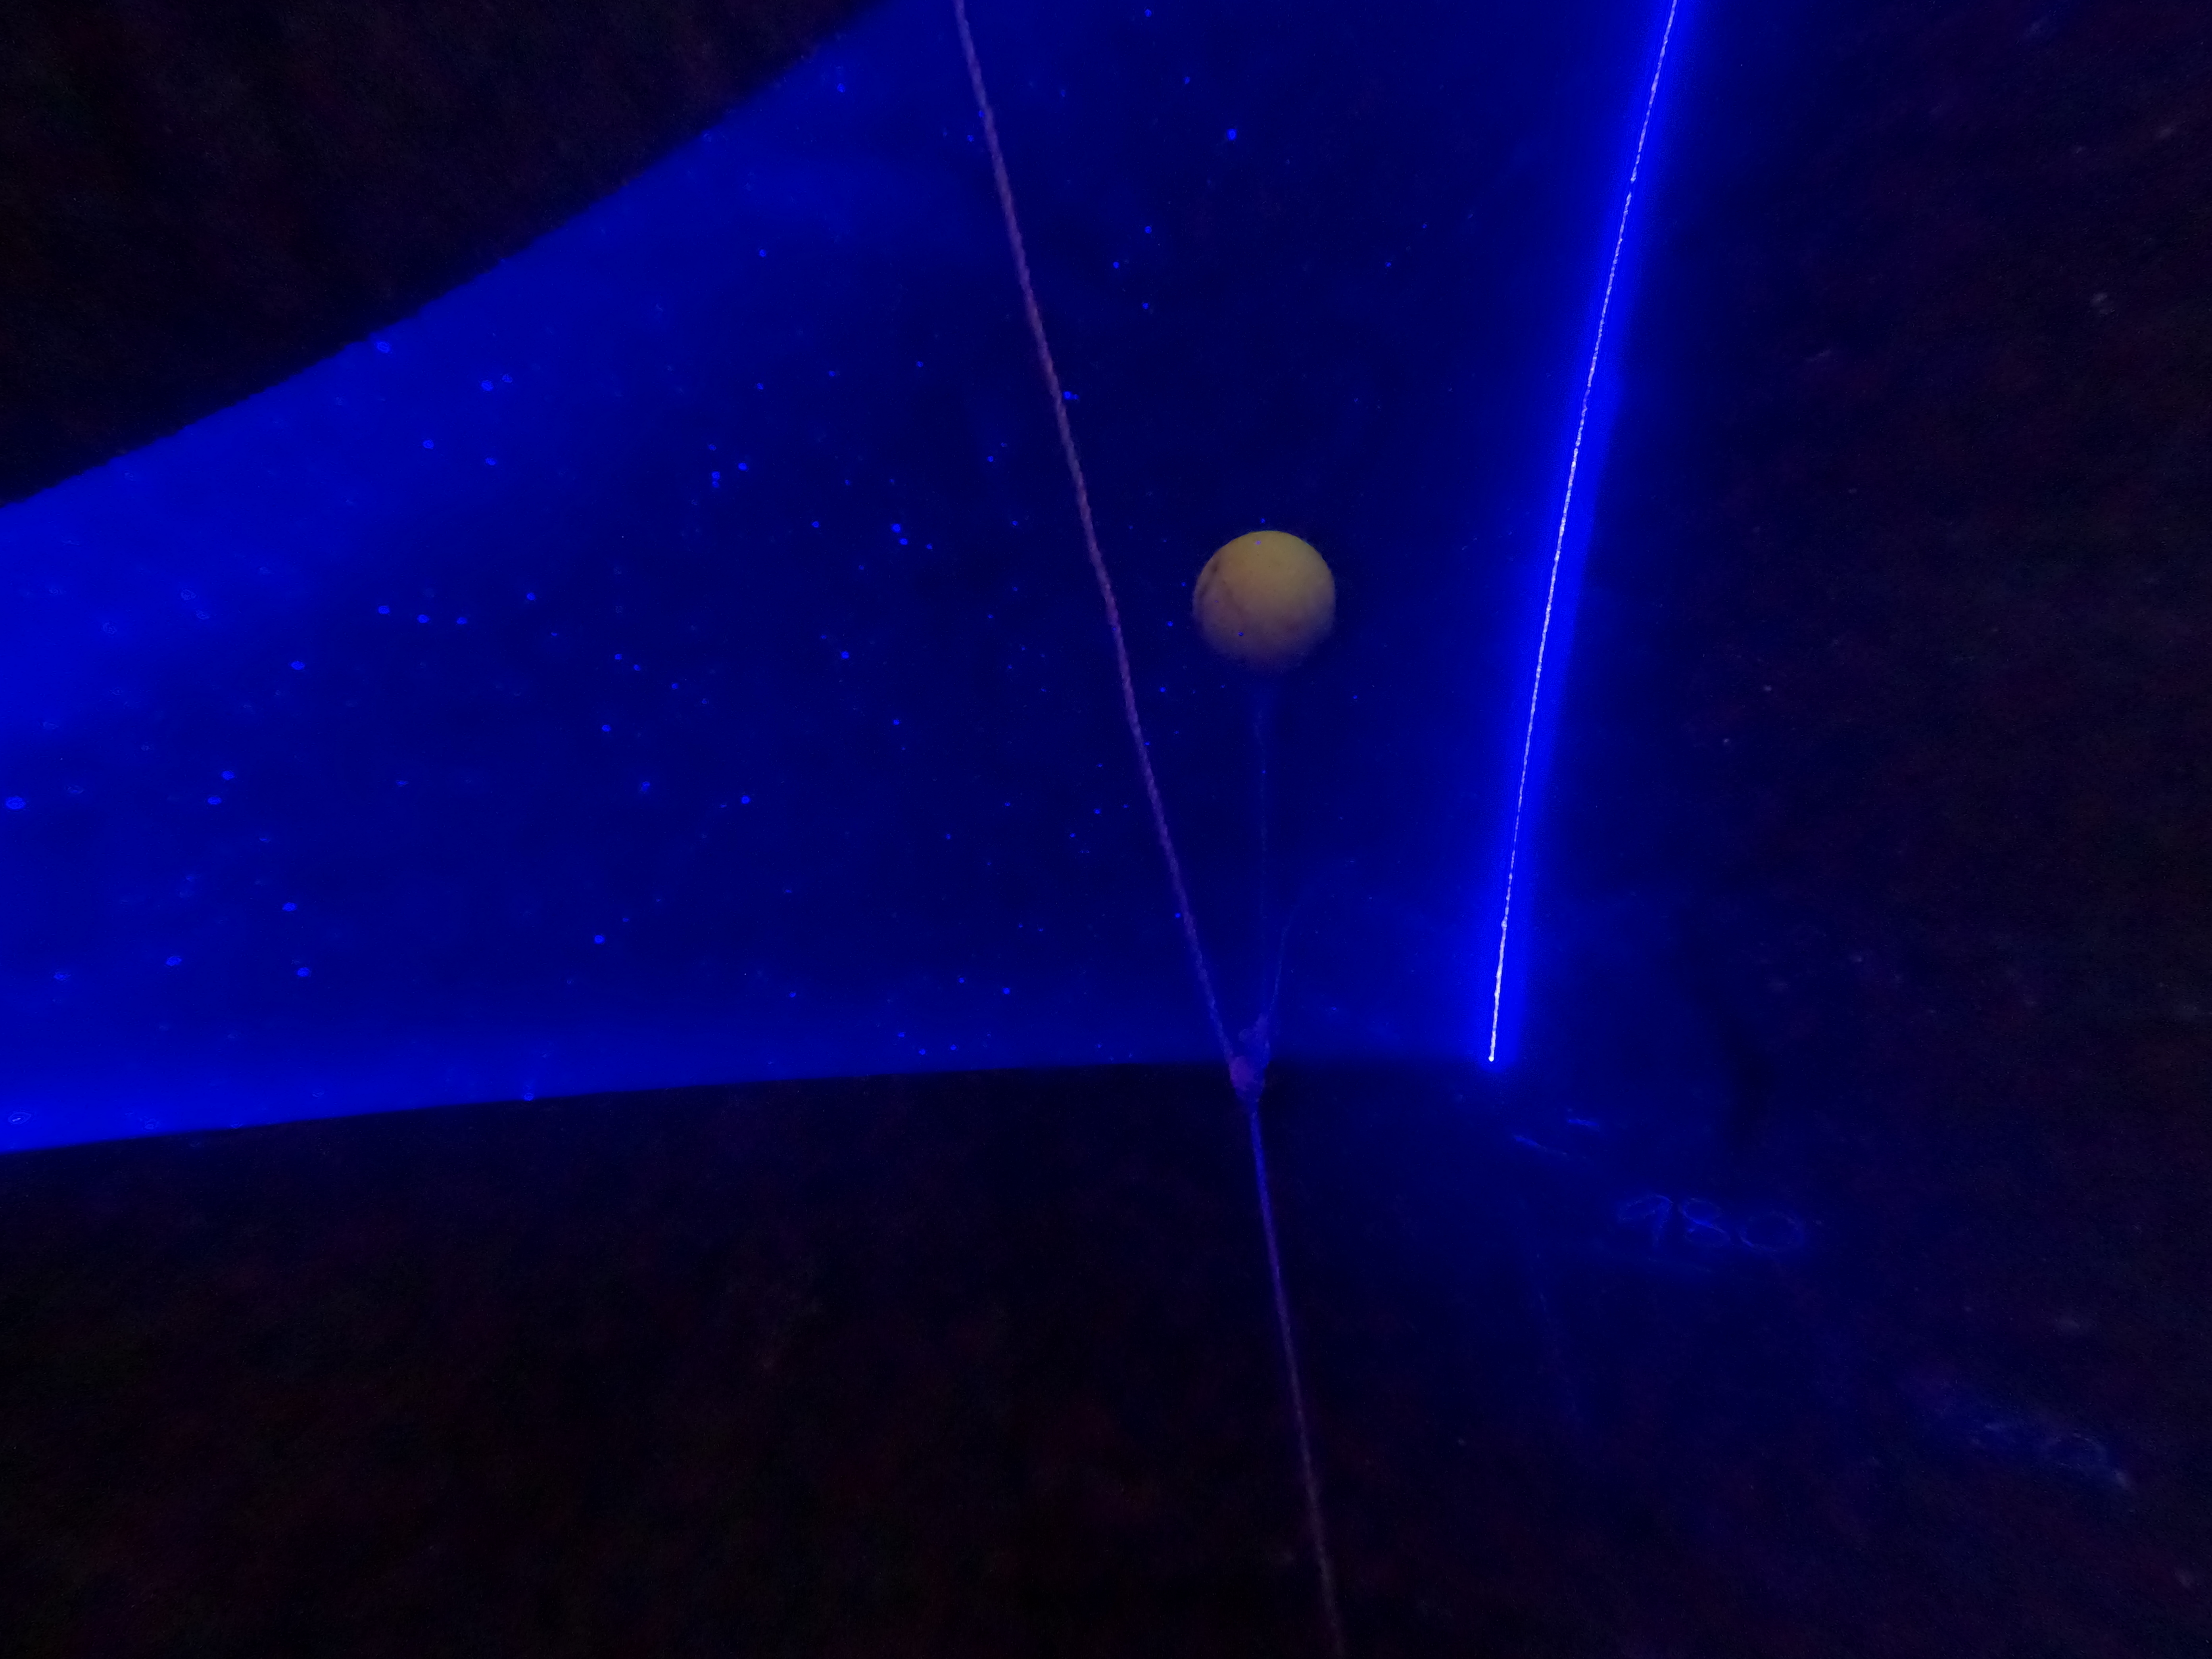

980

Supplement: Supplementary file 1010 [file G0031364.pdf › 10/G0031364.pdf]

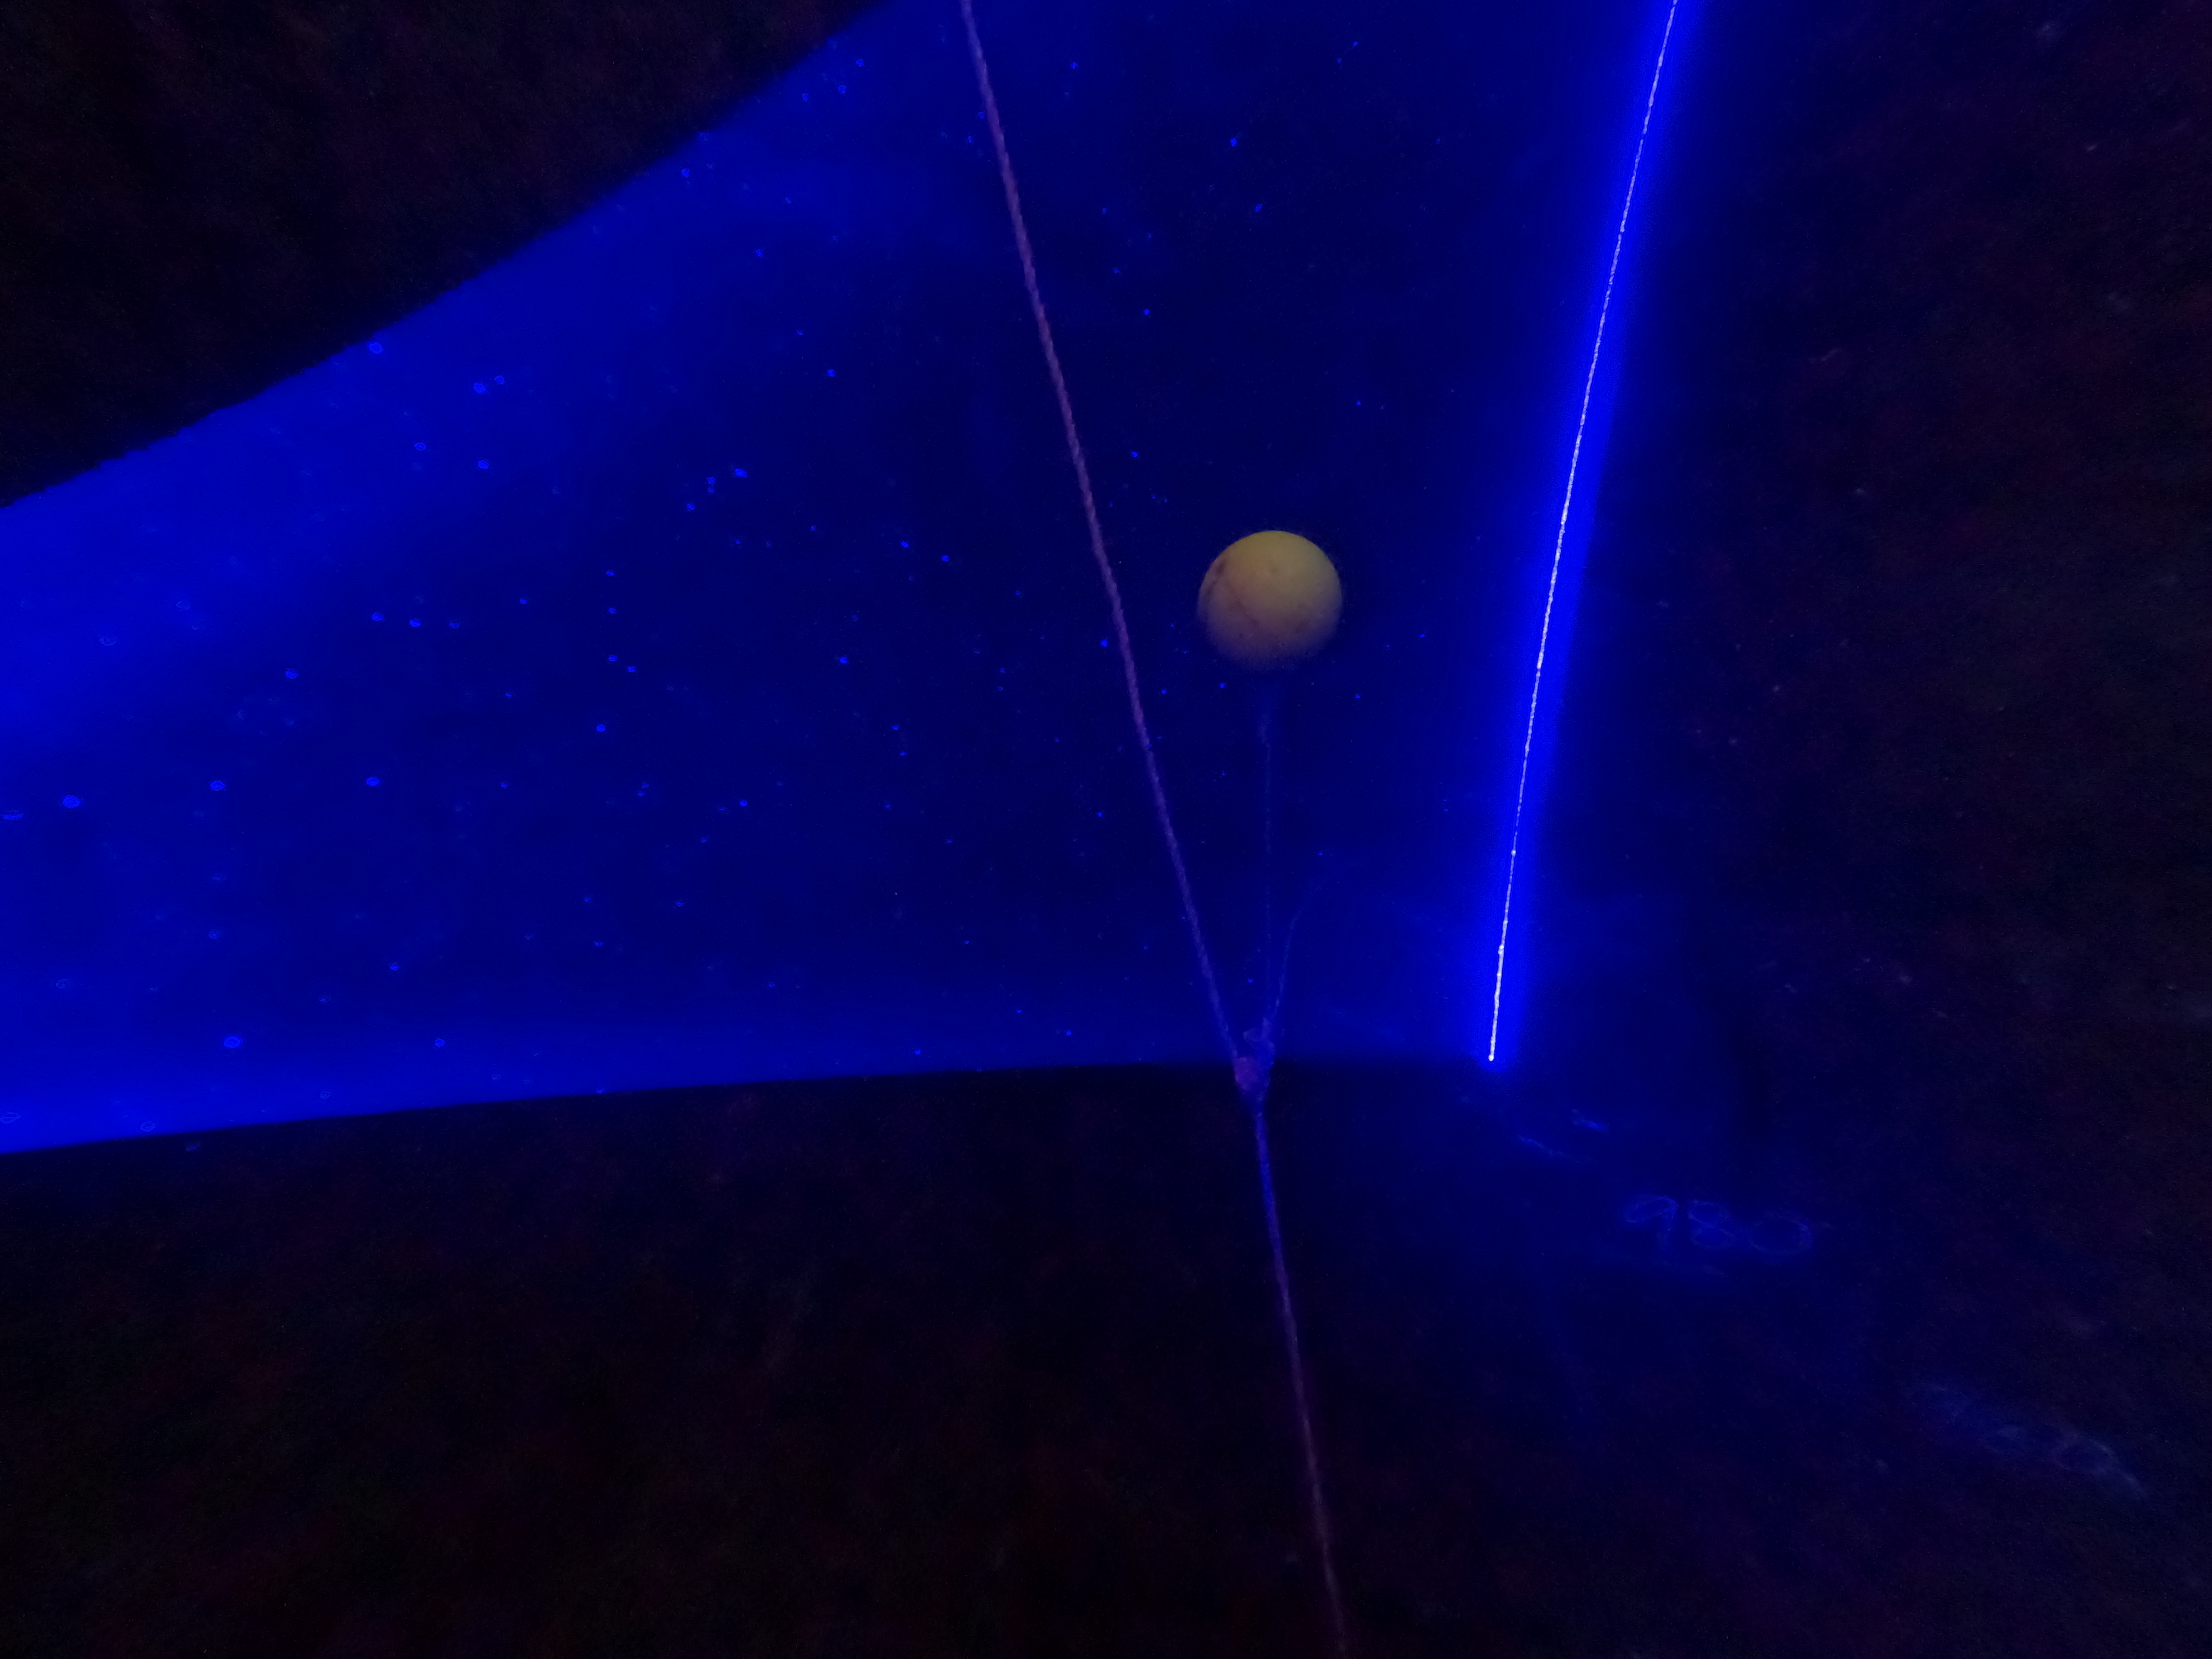

Supplement: Supplementary file 1011 [file G0031365.pdf › 10/G0031365.pdf]

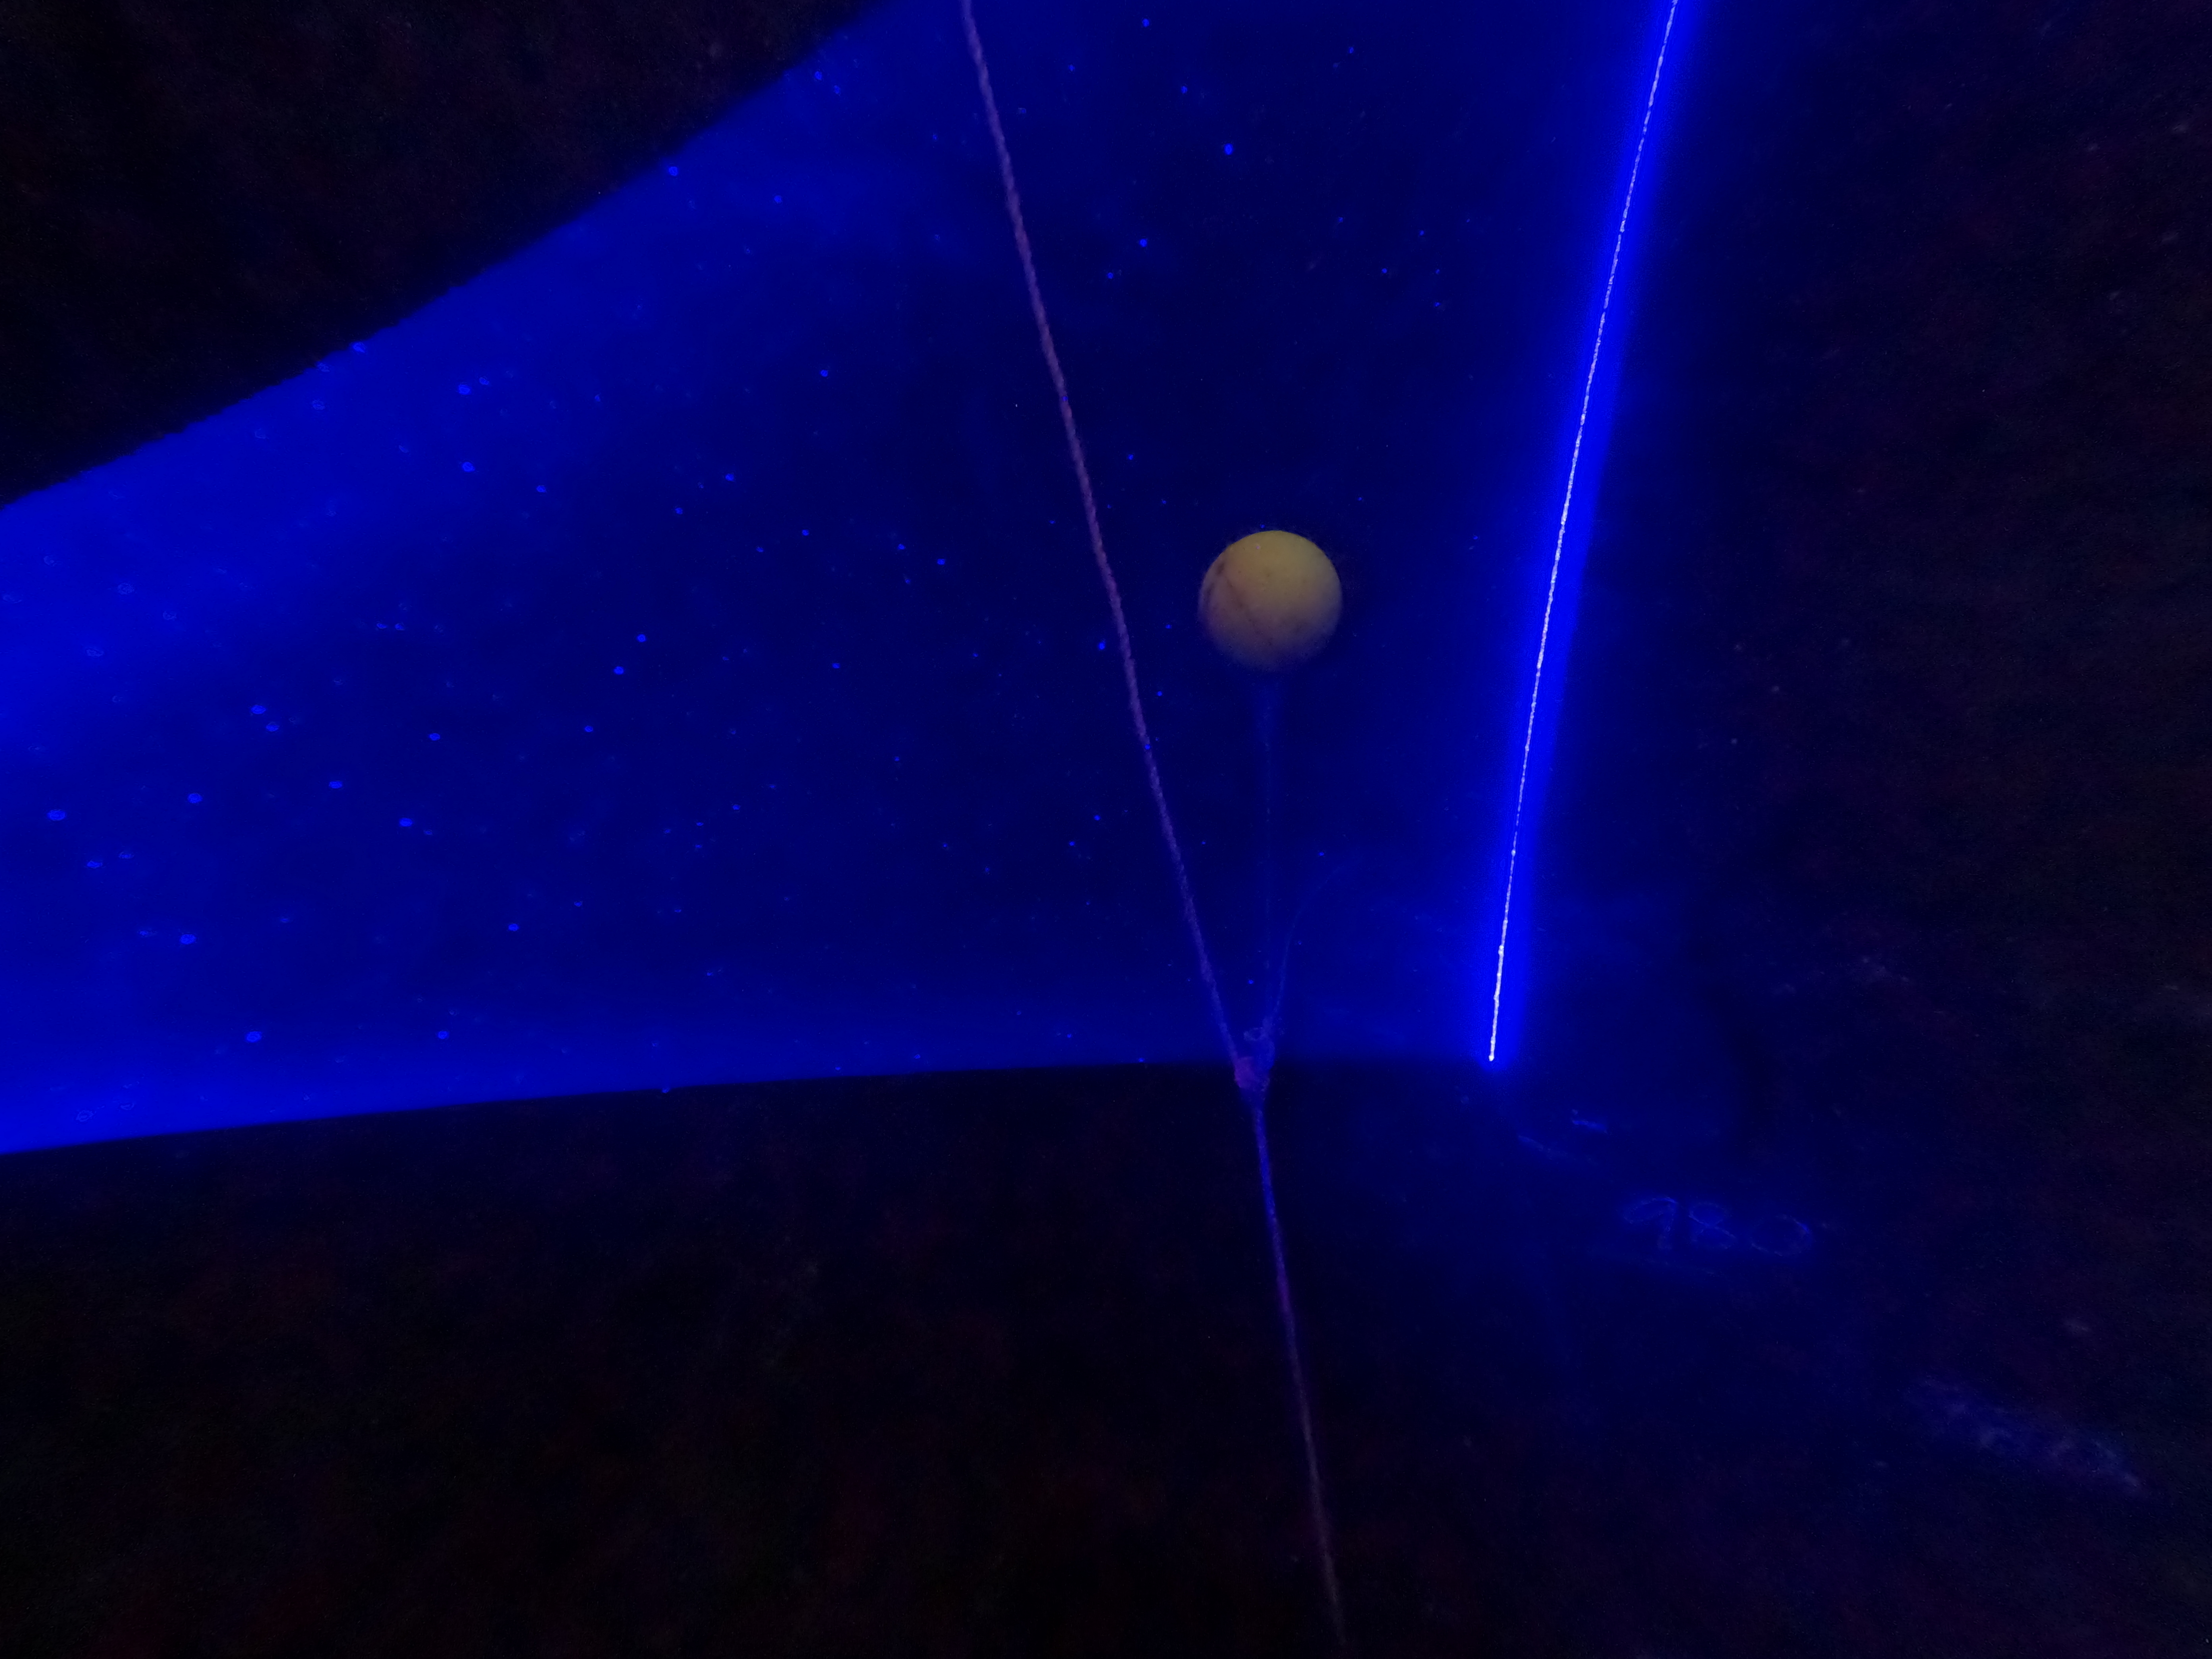

Supplement: Supplementary file 1012 [file G0031366.pdf › 10/G0031366.pdf]

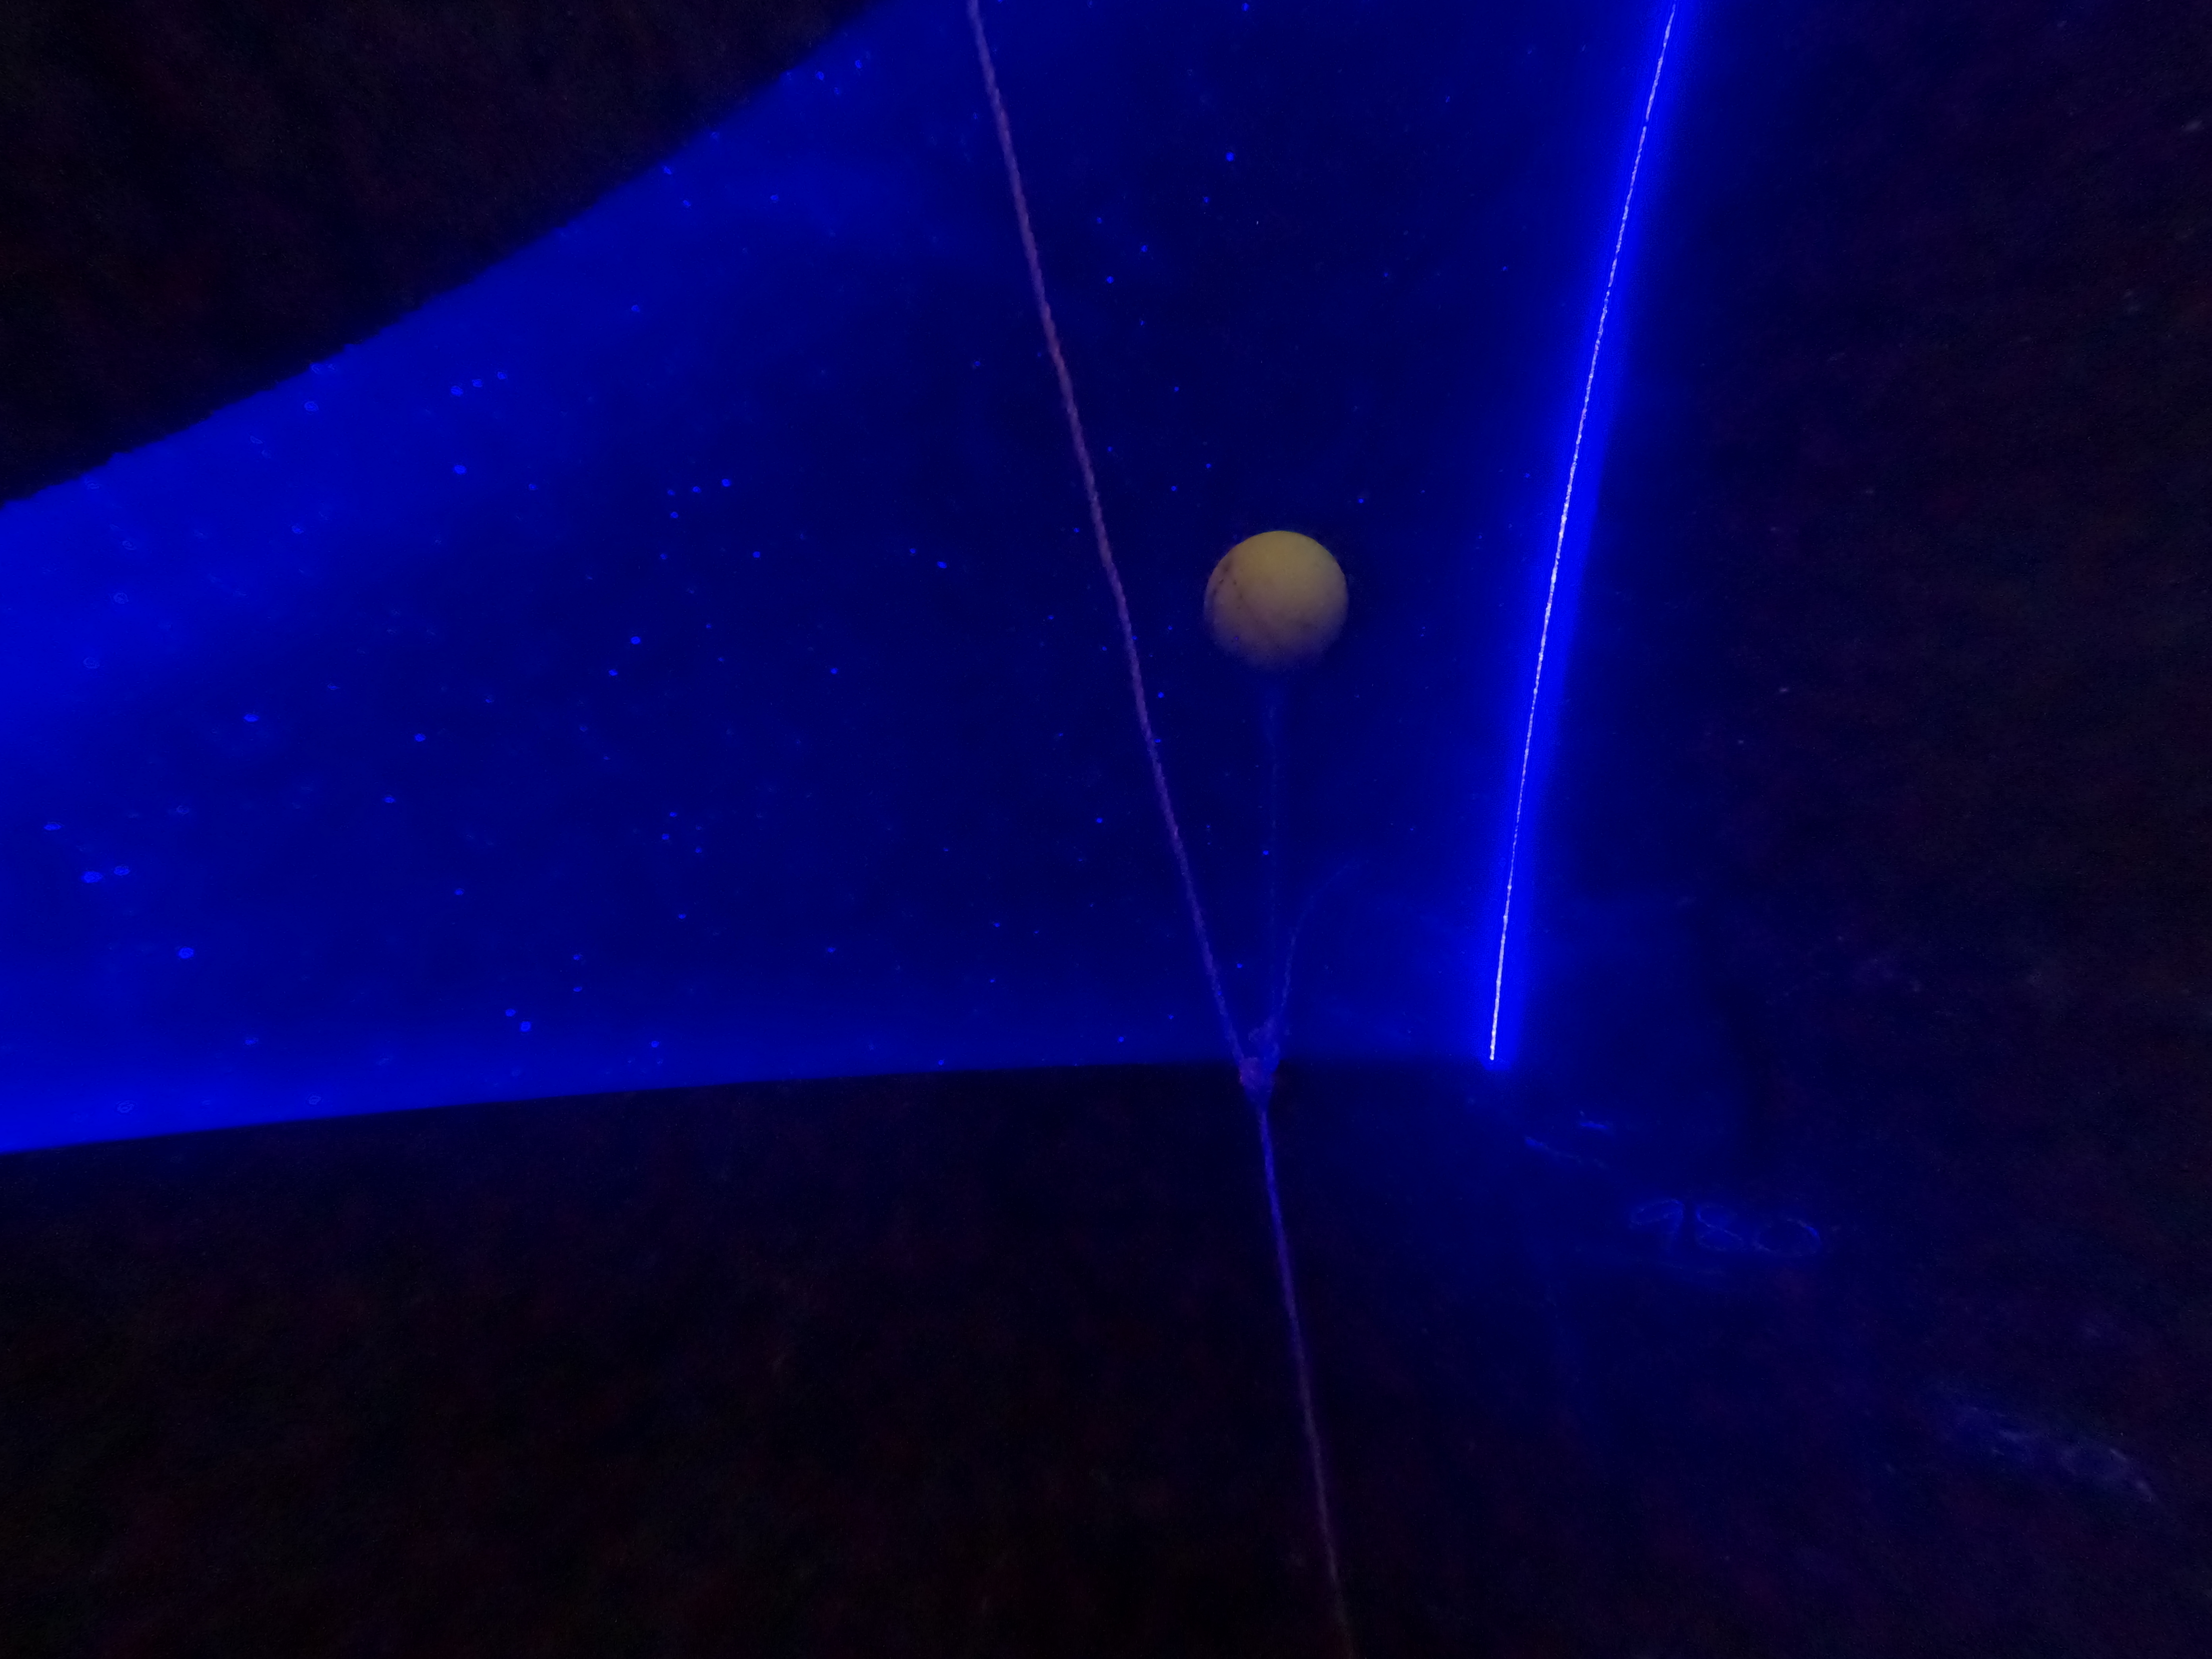

980

Supplement: Supplementary file 1013 [file G0031367.pdf › 10/G0031367.pdf]

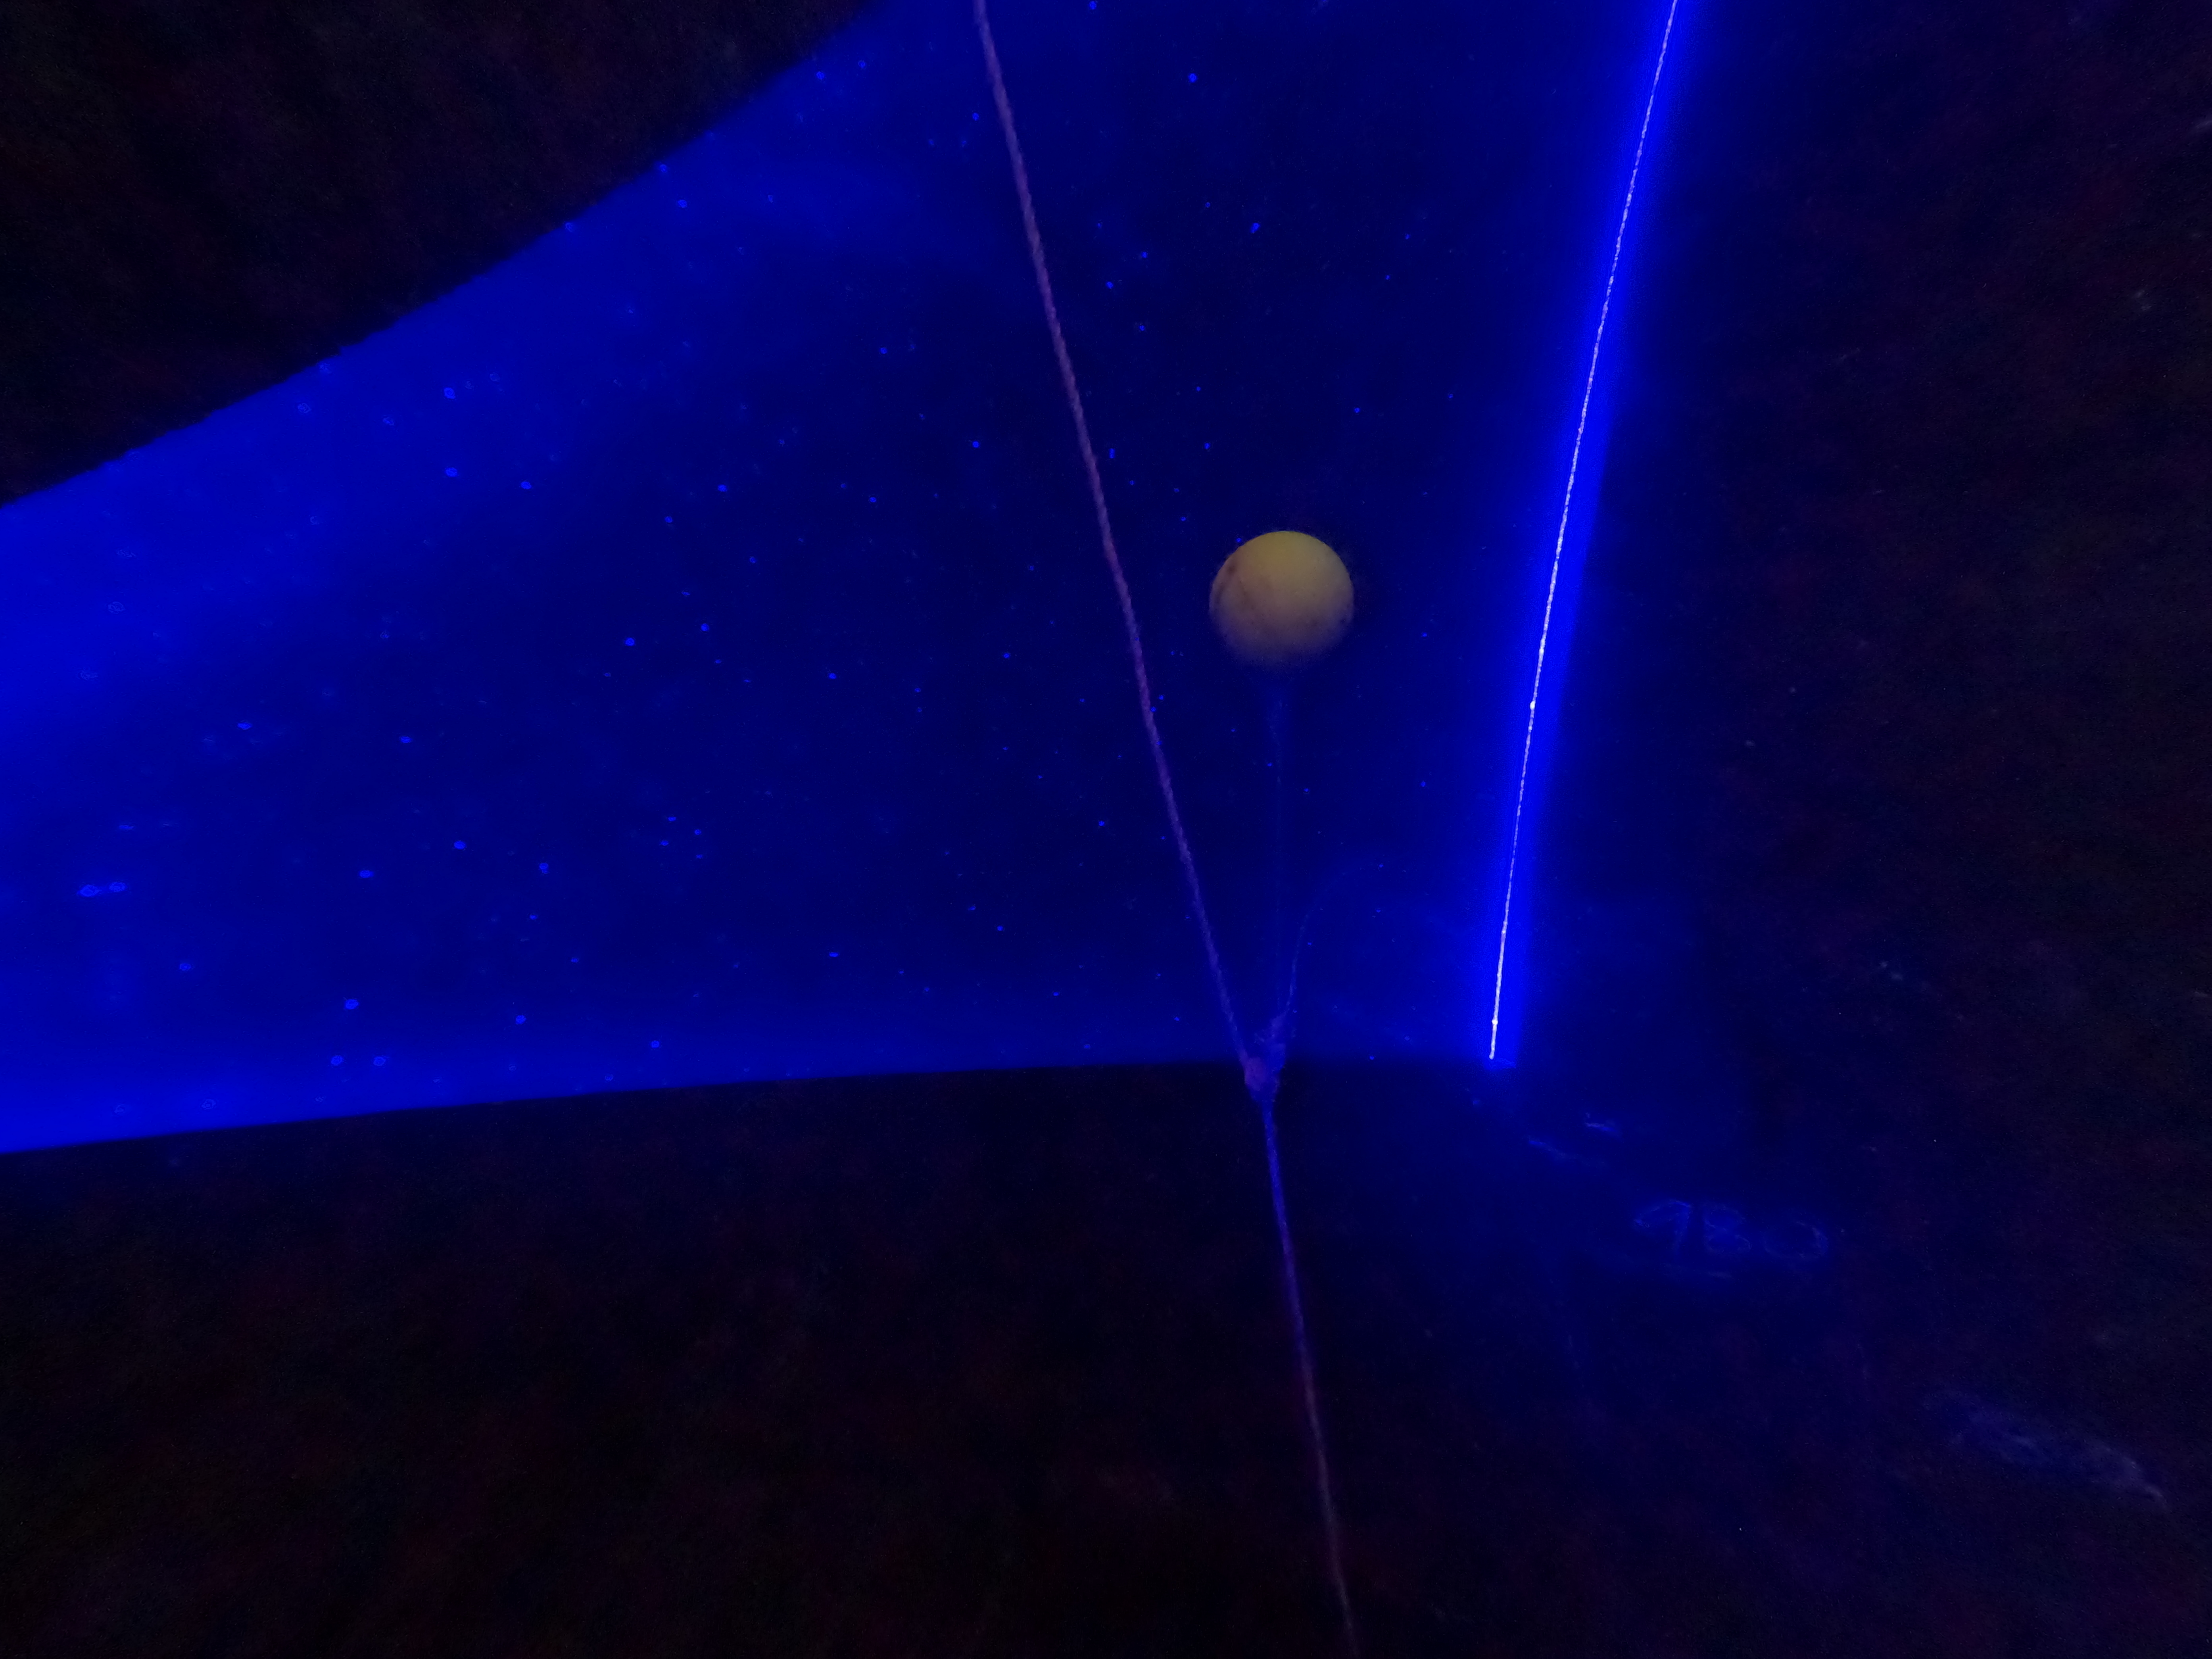

Supplement: Supplementary file 1014 [file G0031368.pdf › 10/G0031368.pdf]

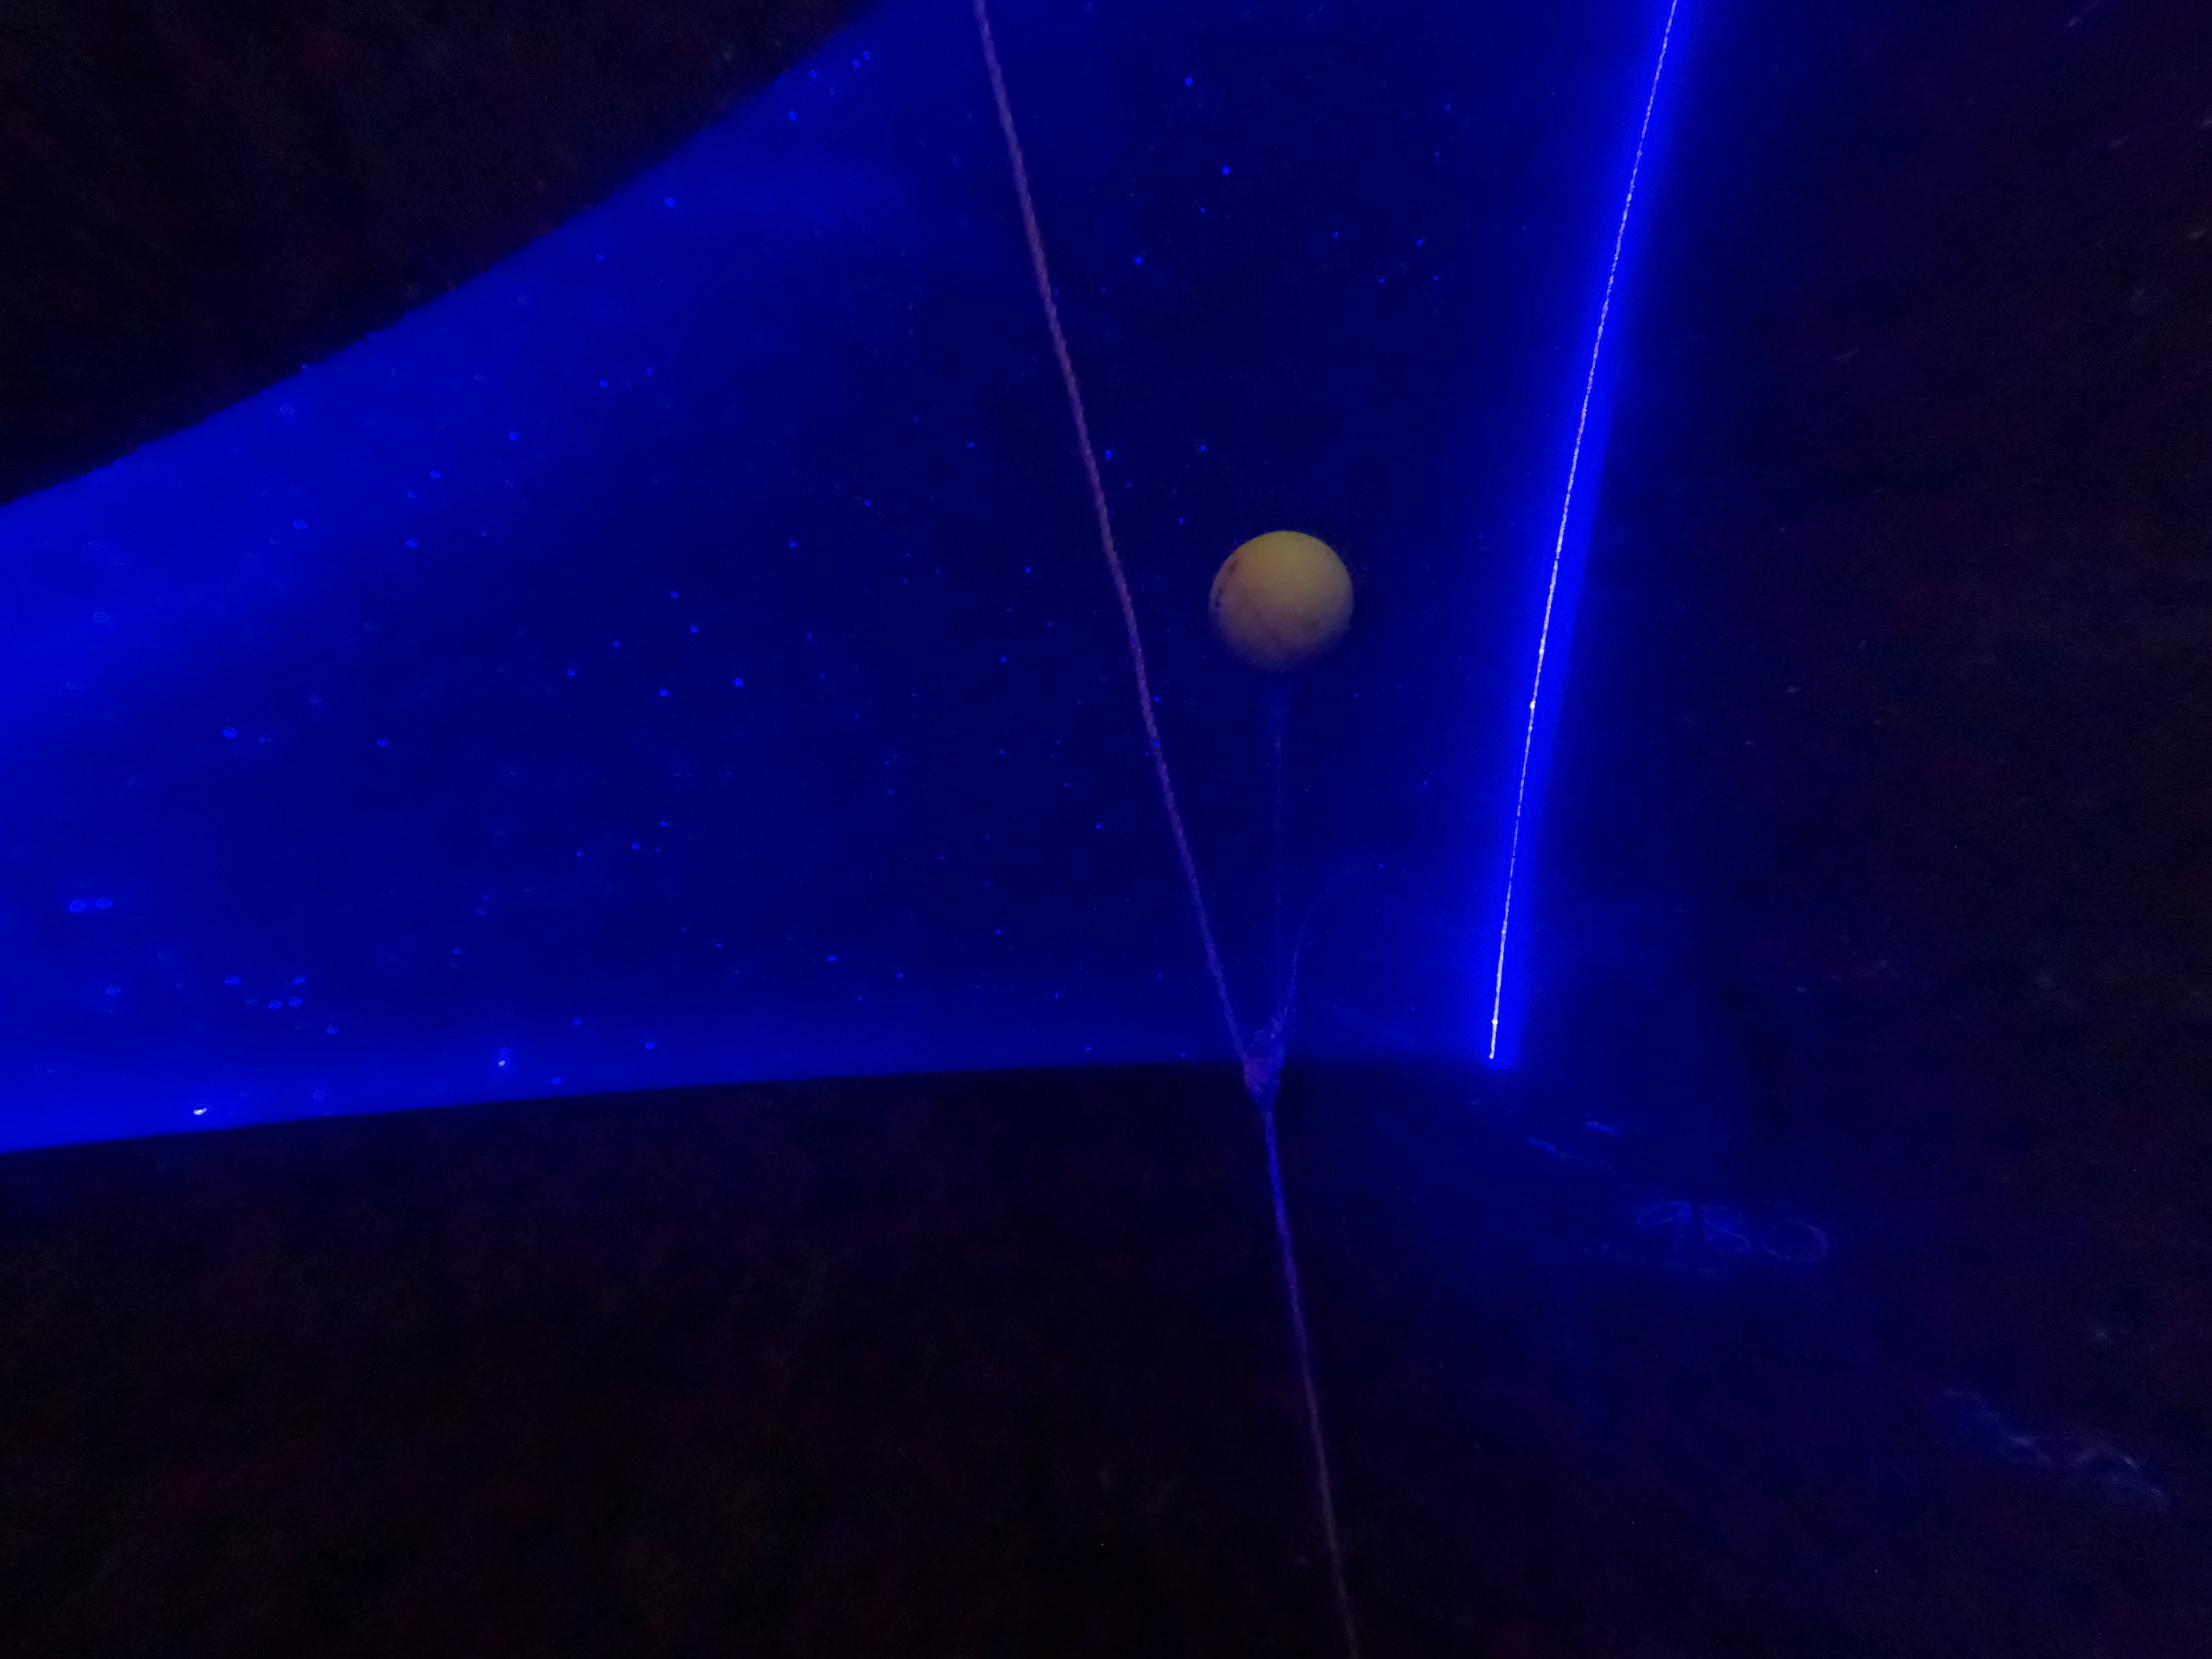

Supplement: Supplementary file 1015 [file G0031369.pdf › 10/G0031369.pdf]

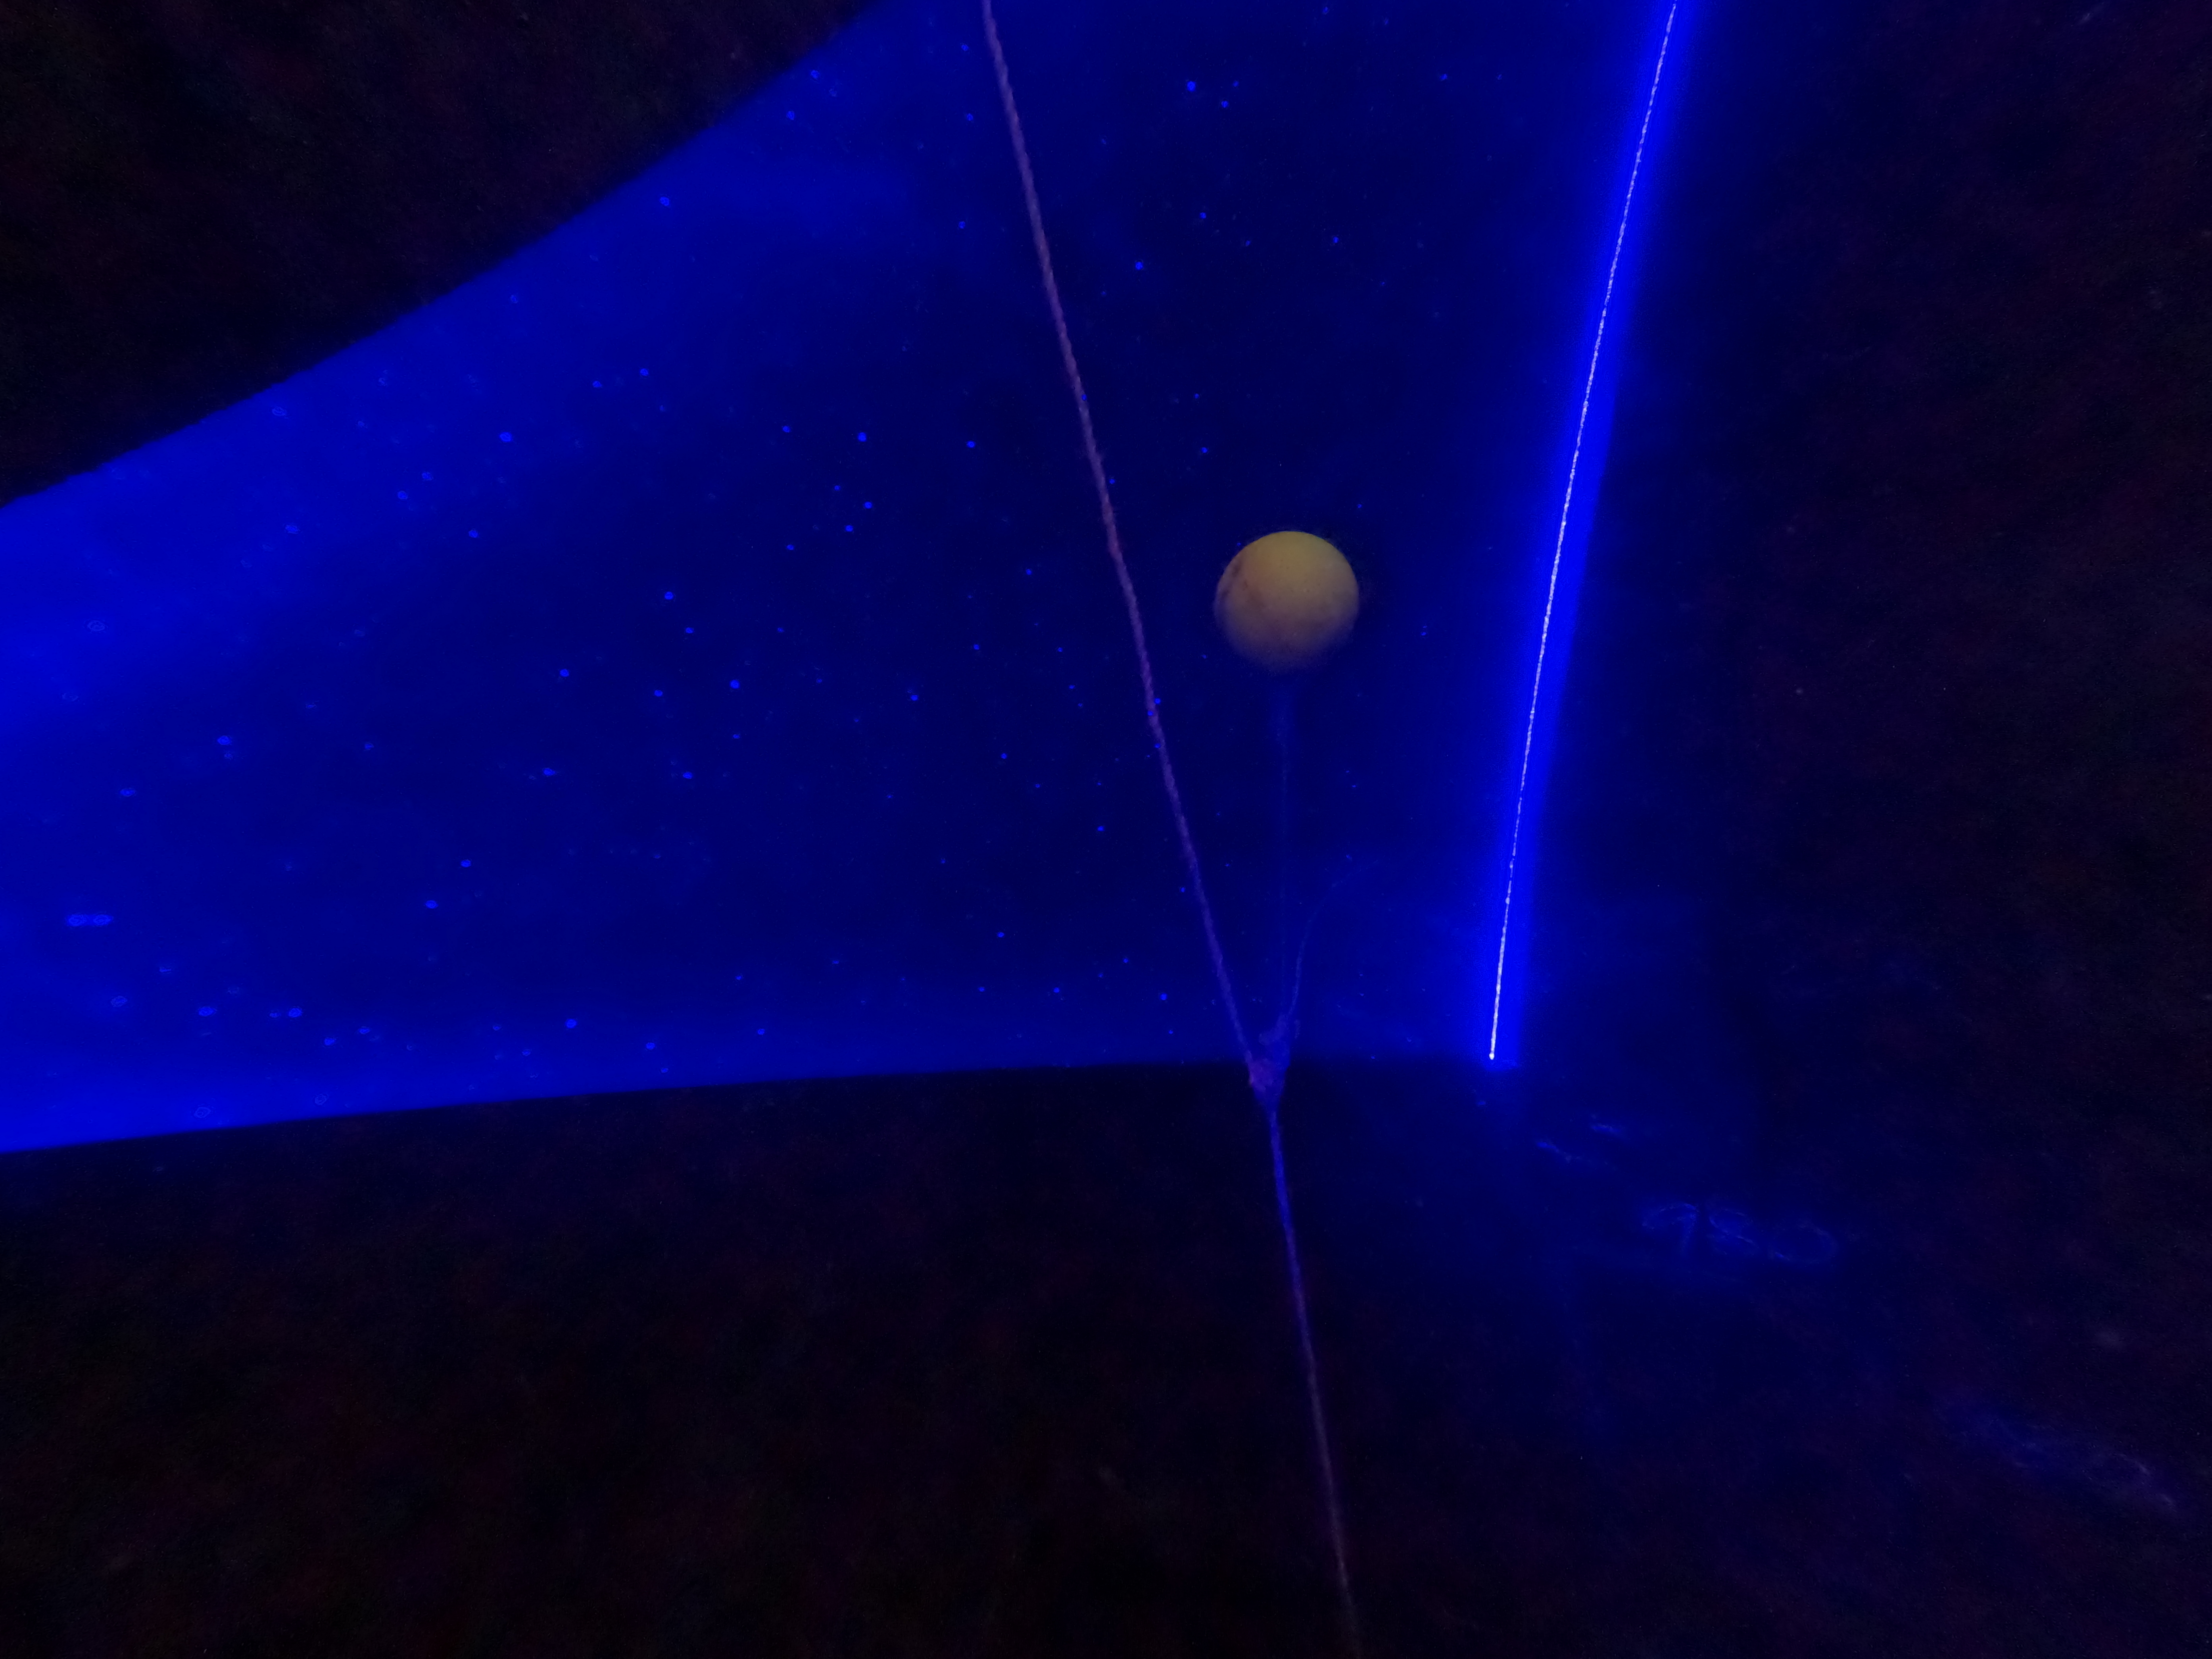

Supplement: Supplementary file 1016 [file G0031370.pdf › 10/G0031370.pdf]

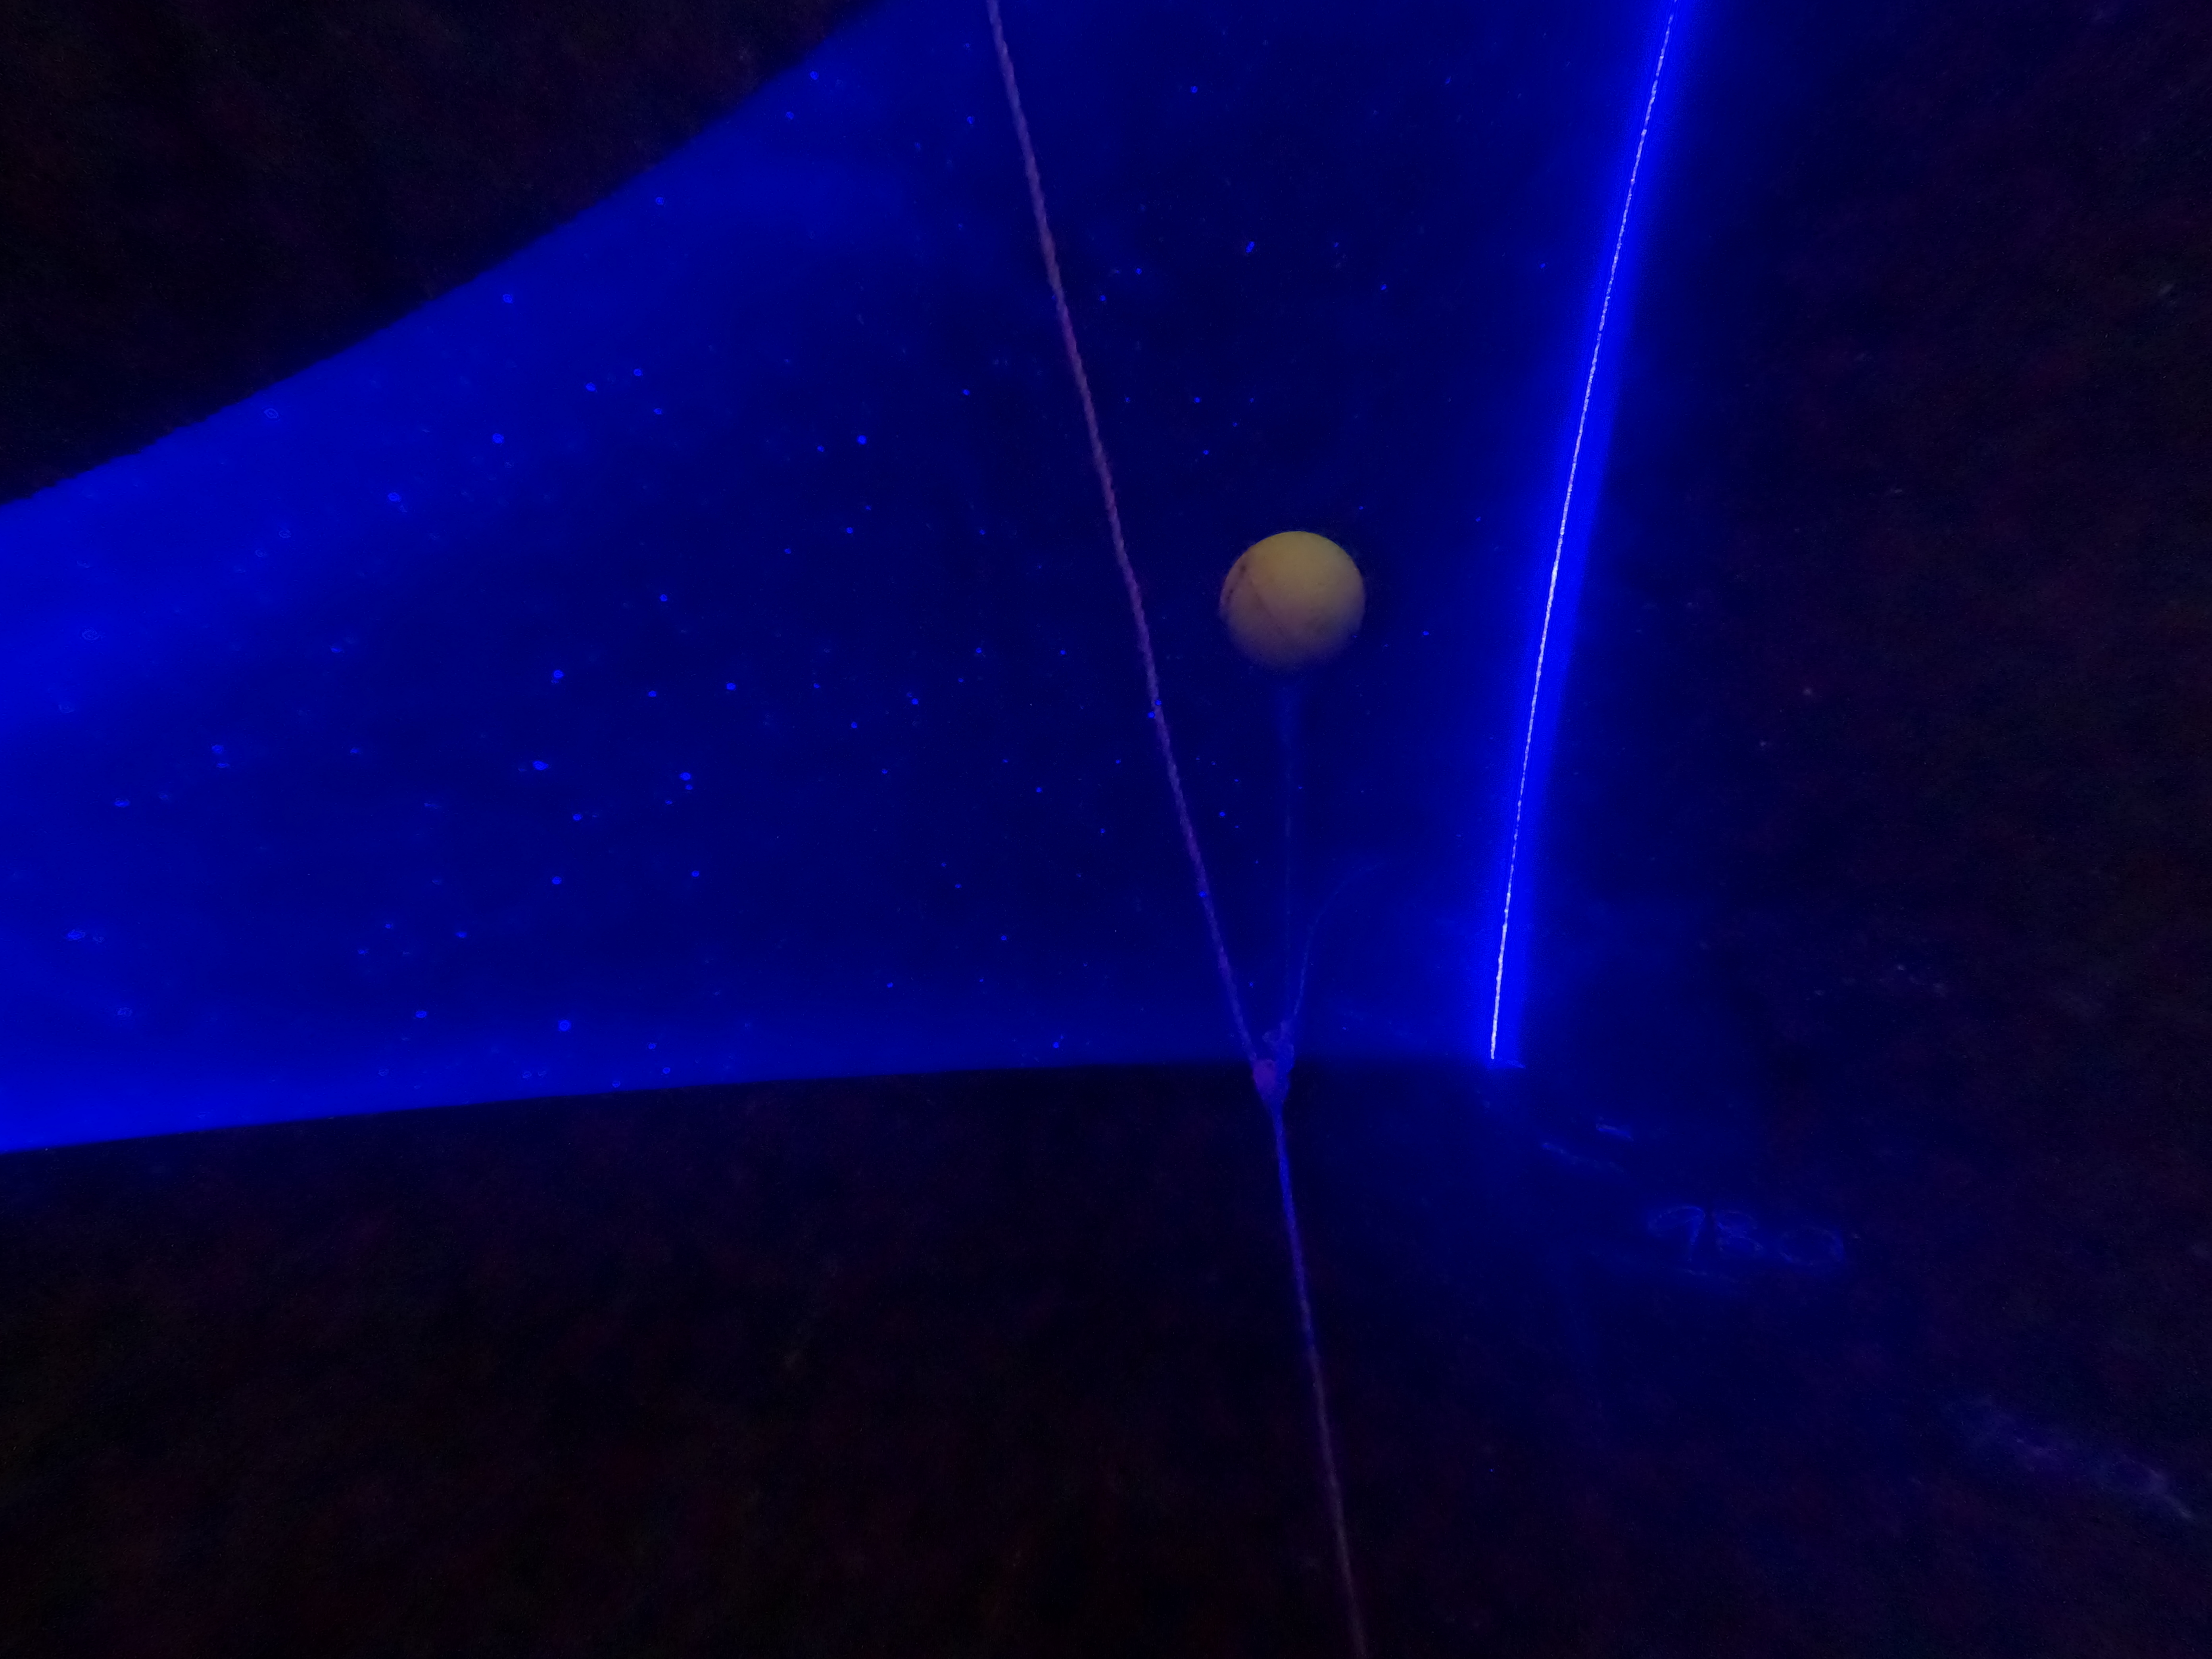

Supplement: Supplementary file 1017 [file G0031371.pdf › 10/G0031371.pdf]

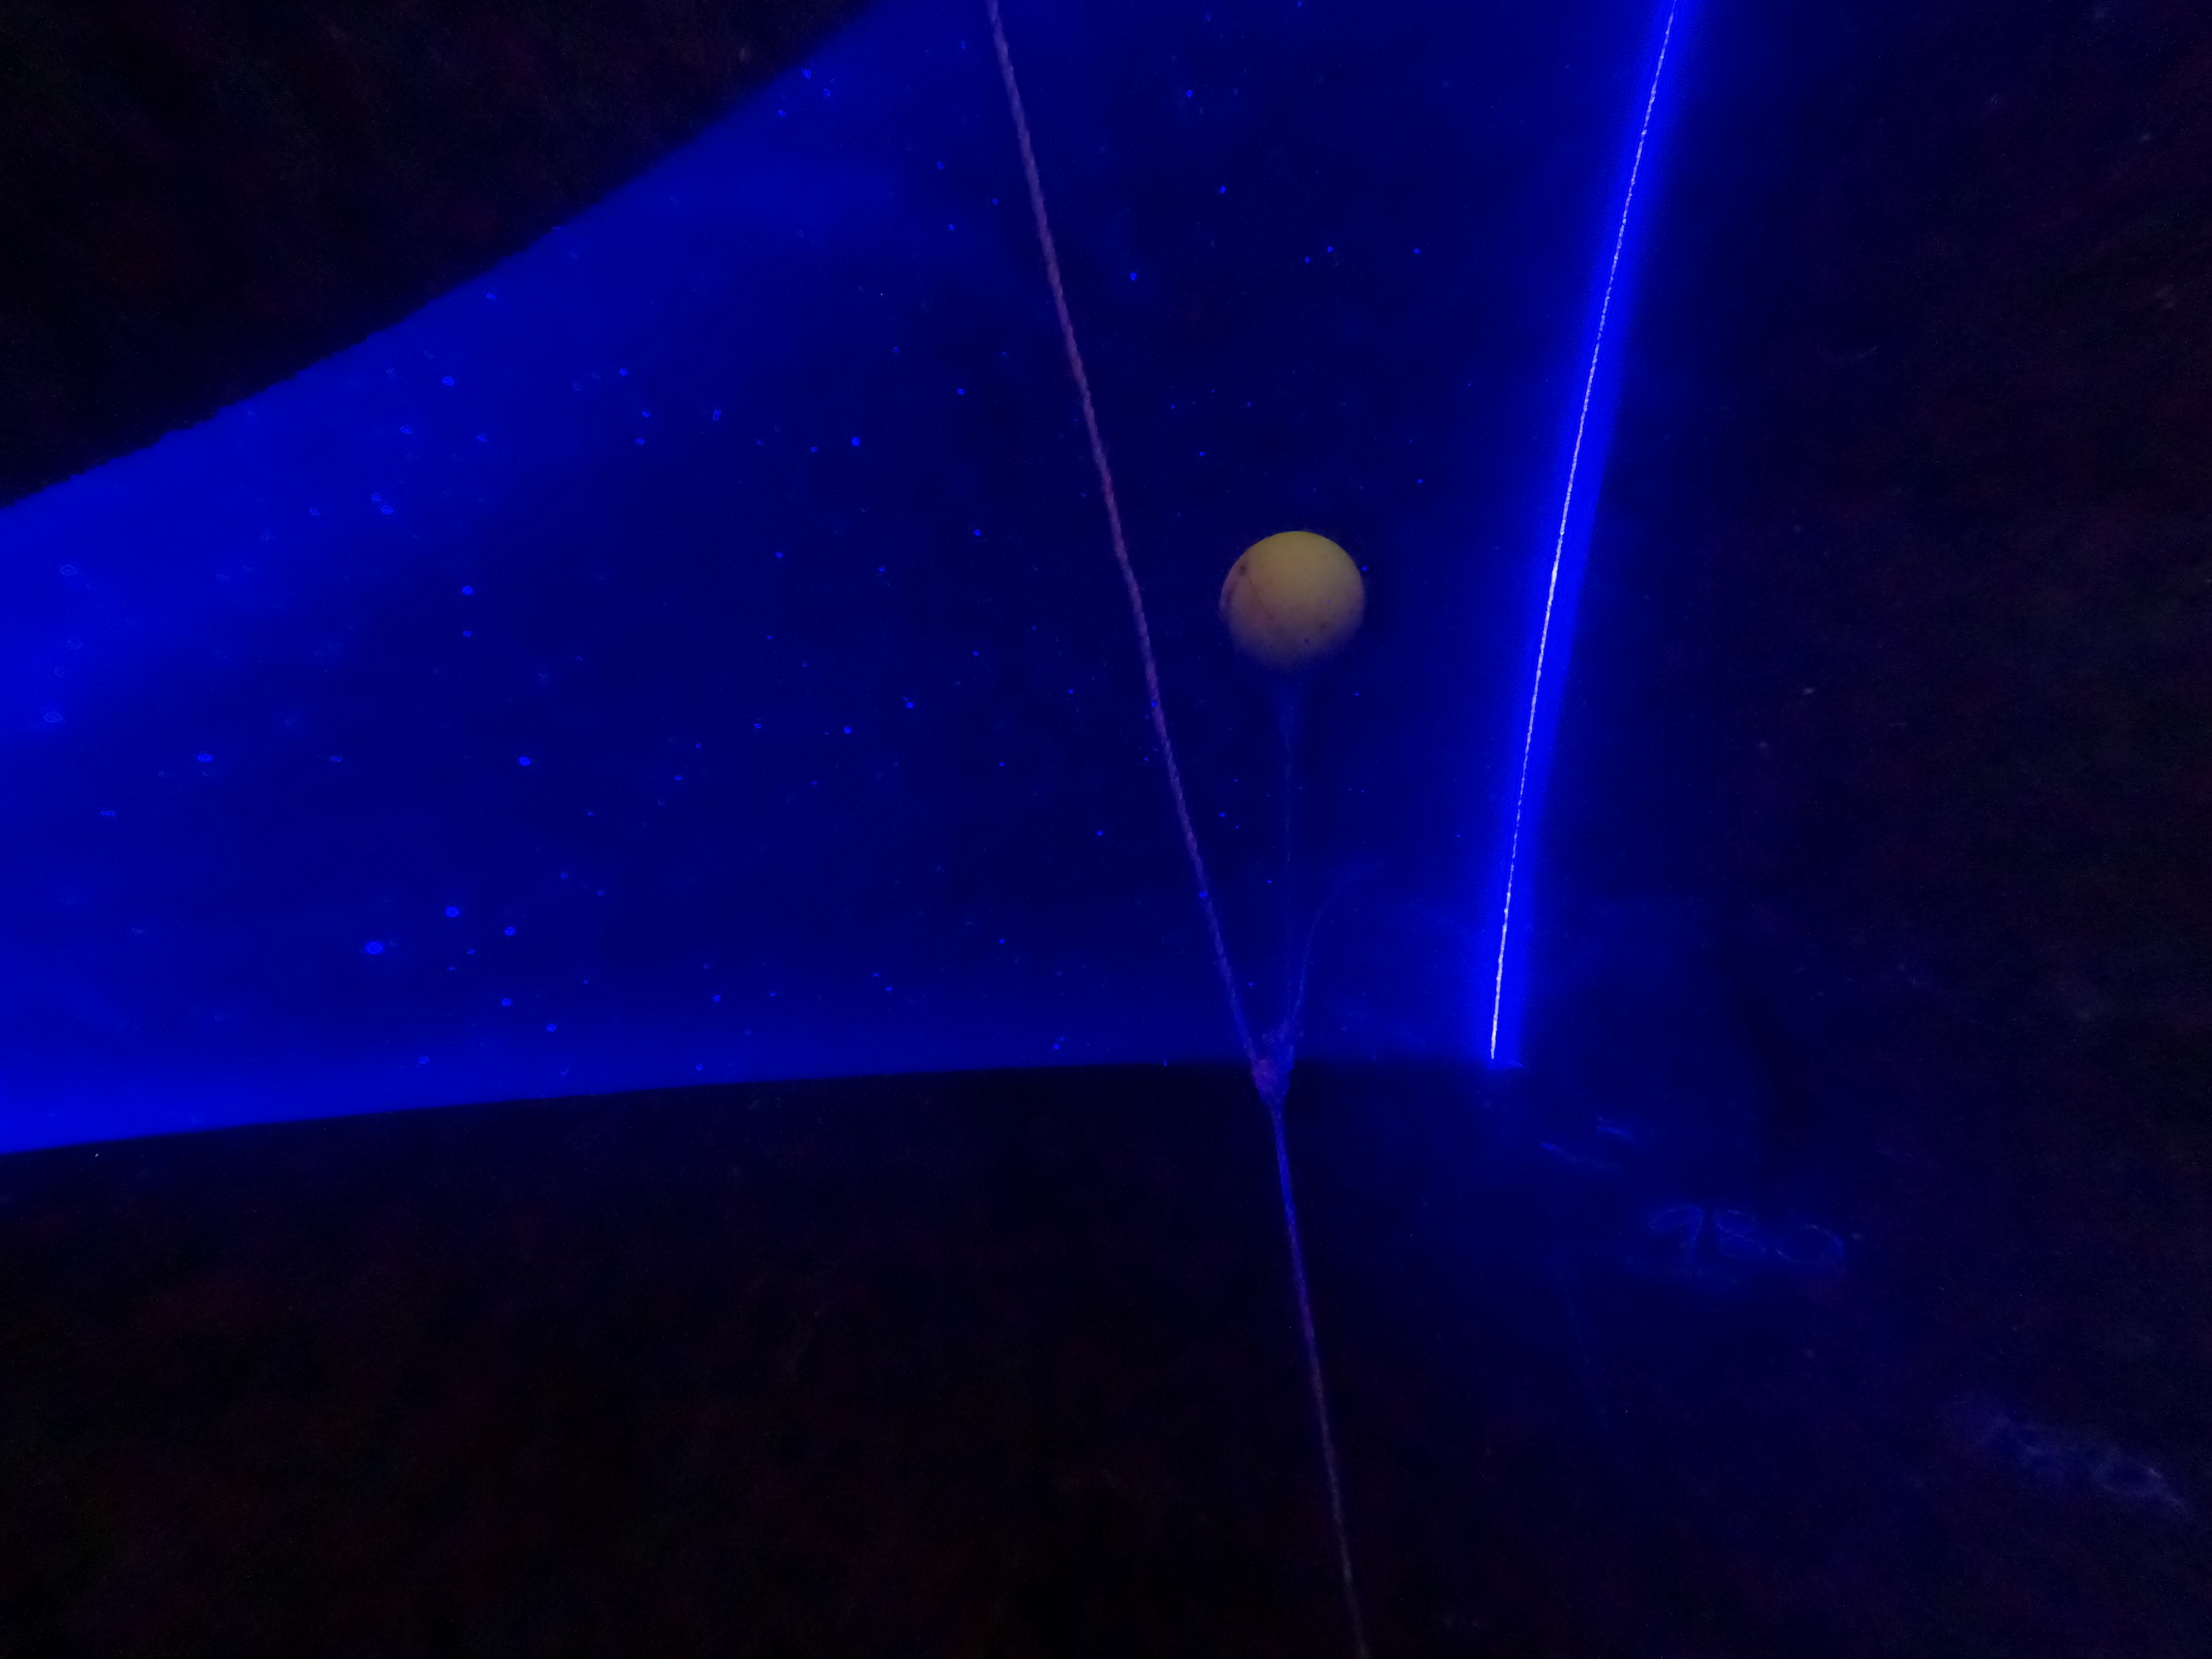

Supplement: Supplementary file 1018 [file G0031372.pdf › 10/G0031372.pdf]

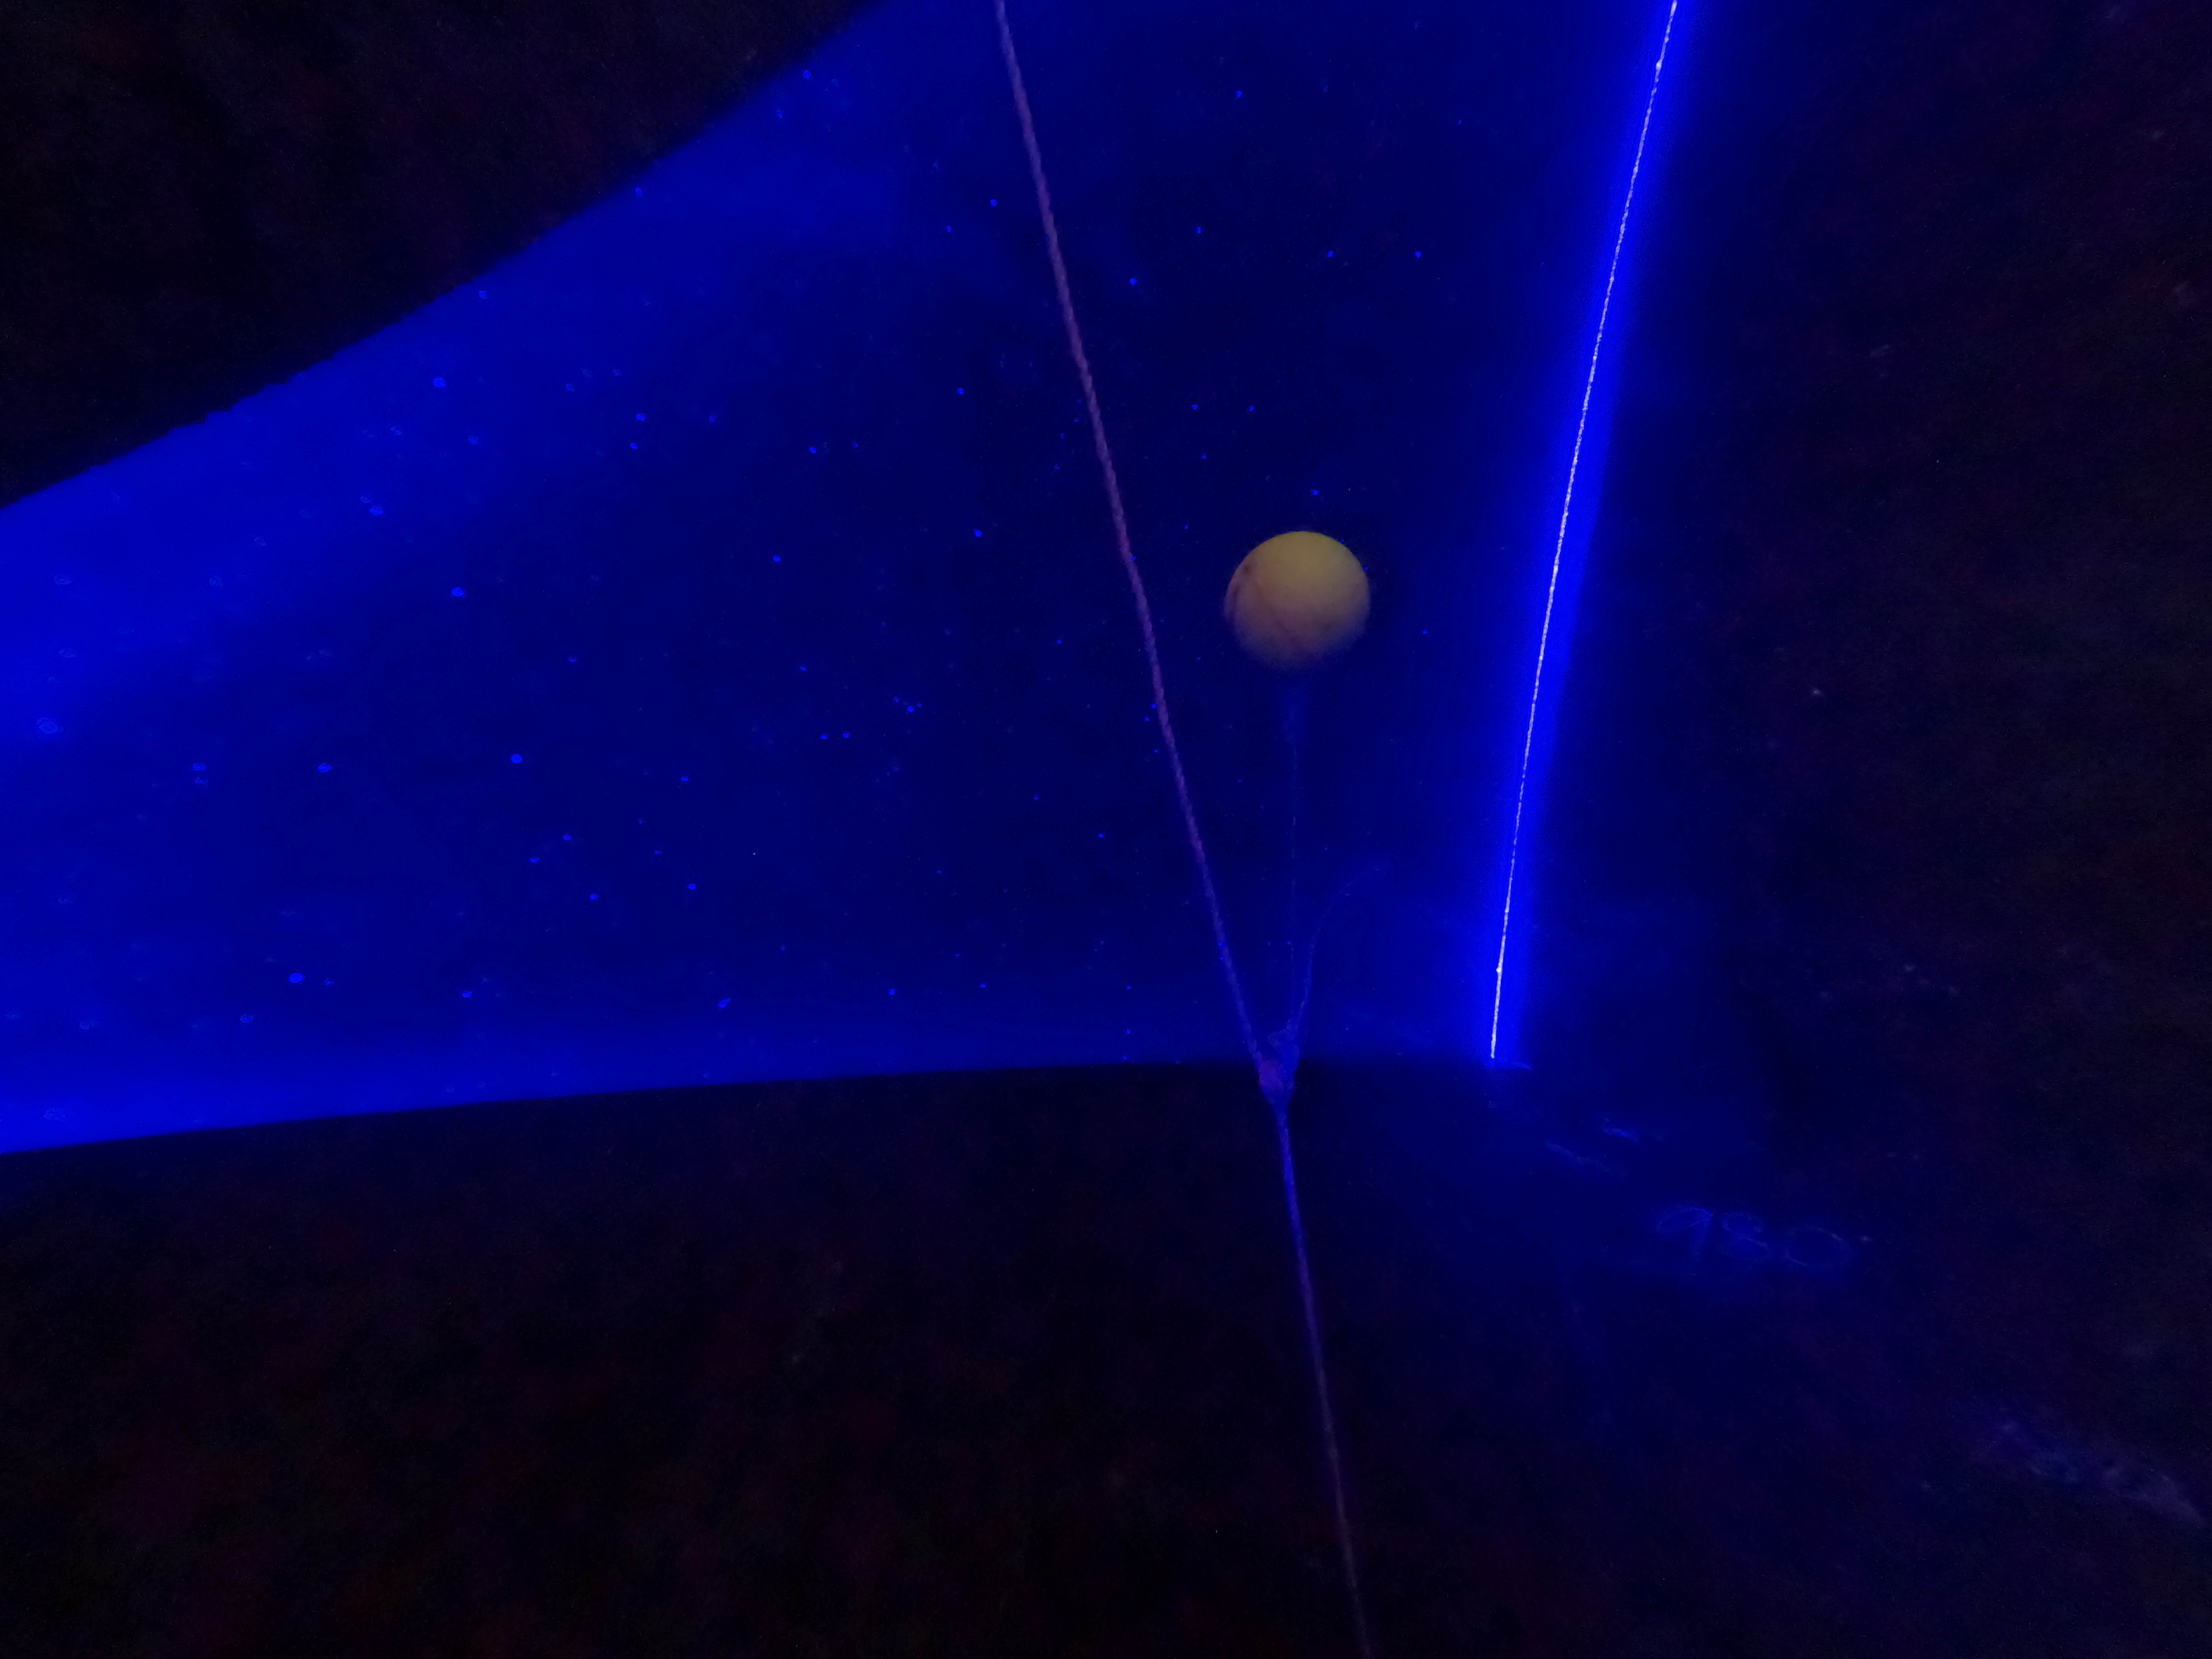

Supplement: Supplementary file 1019 [file G0031373.pdf › 10/G0031373.pdf]

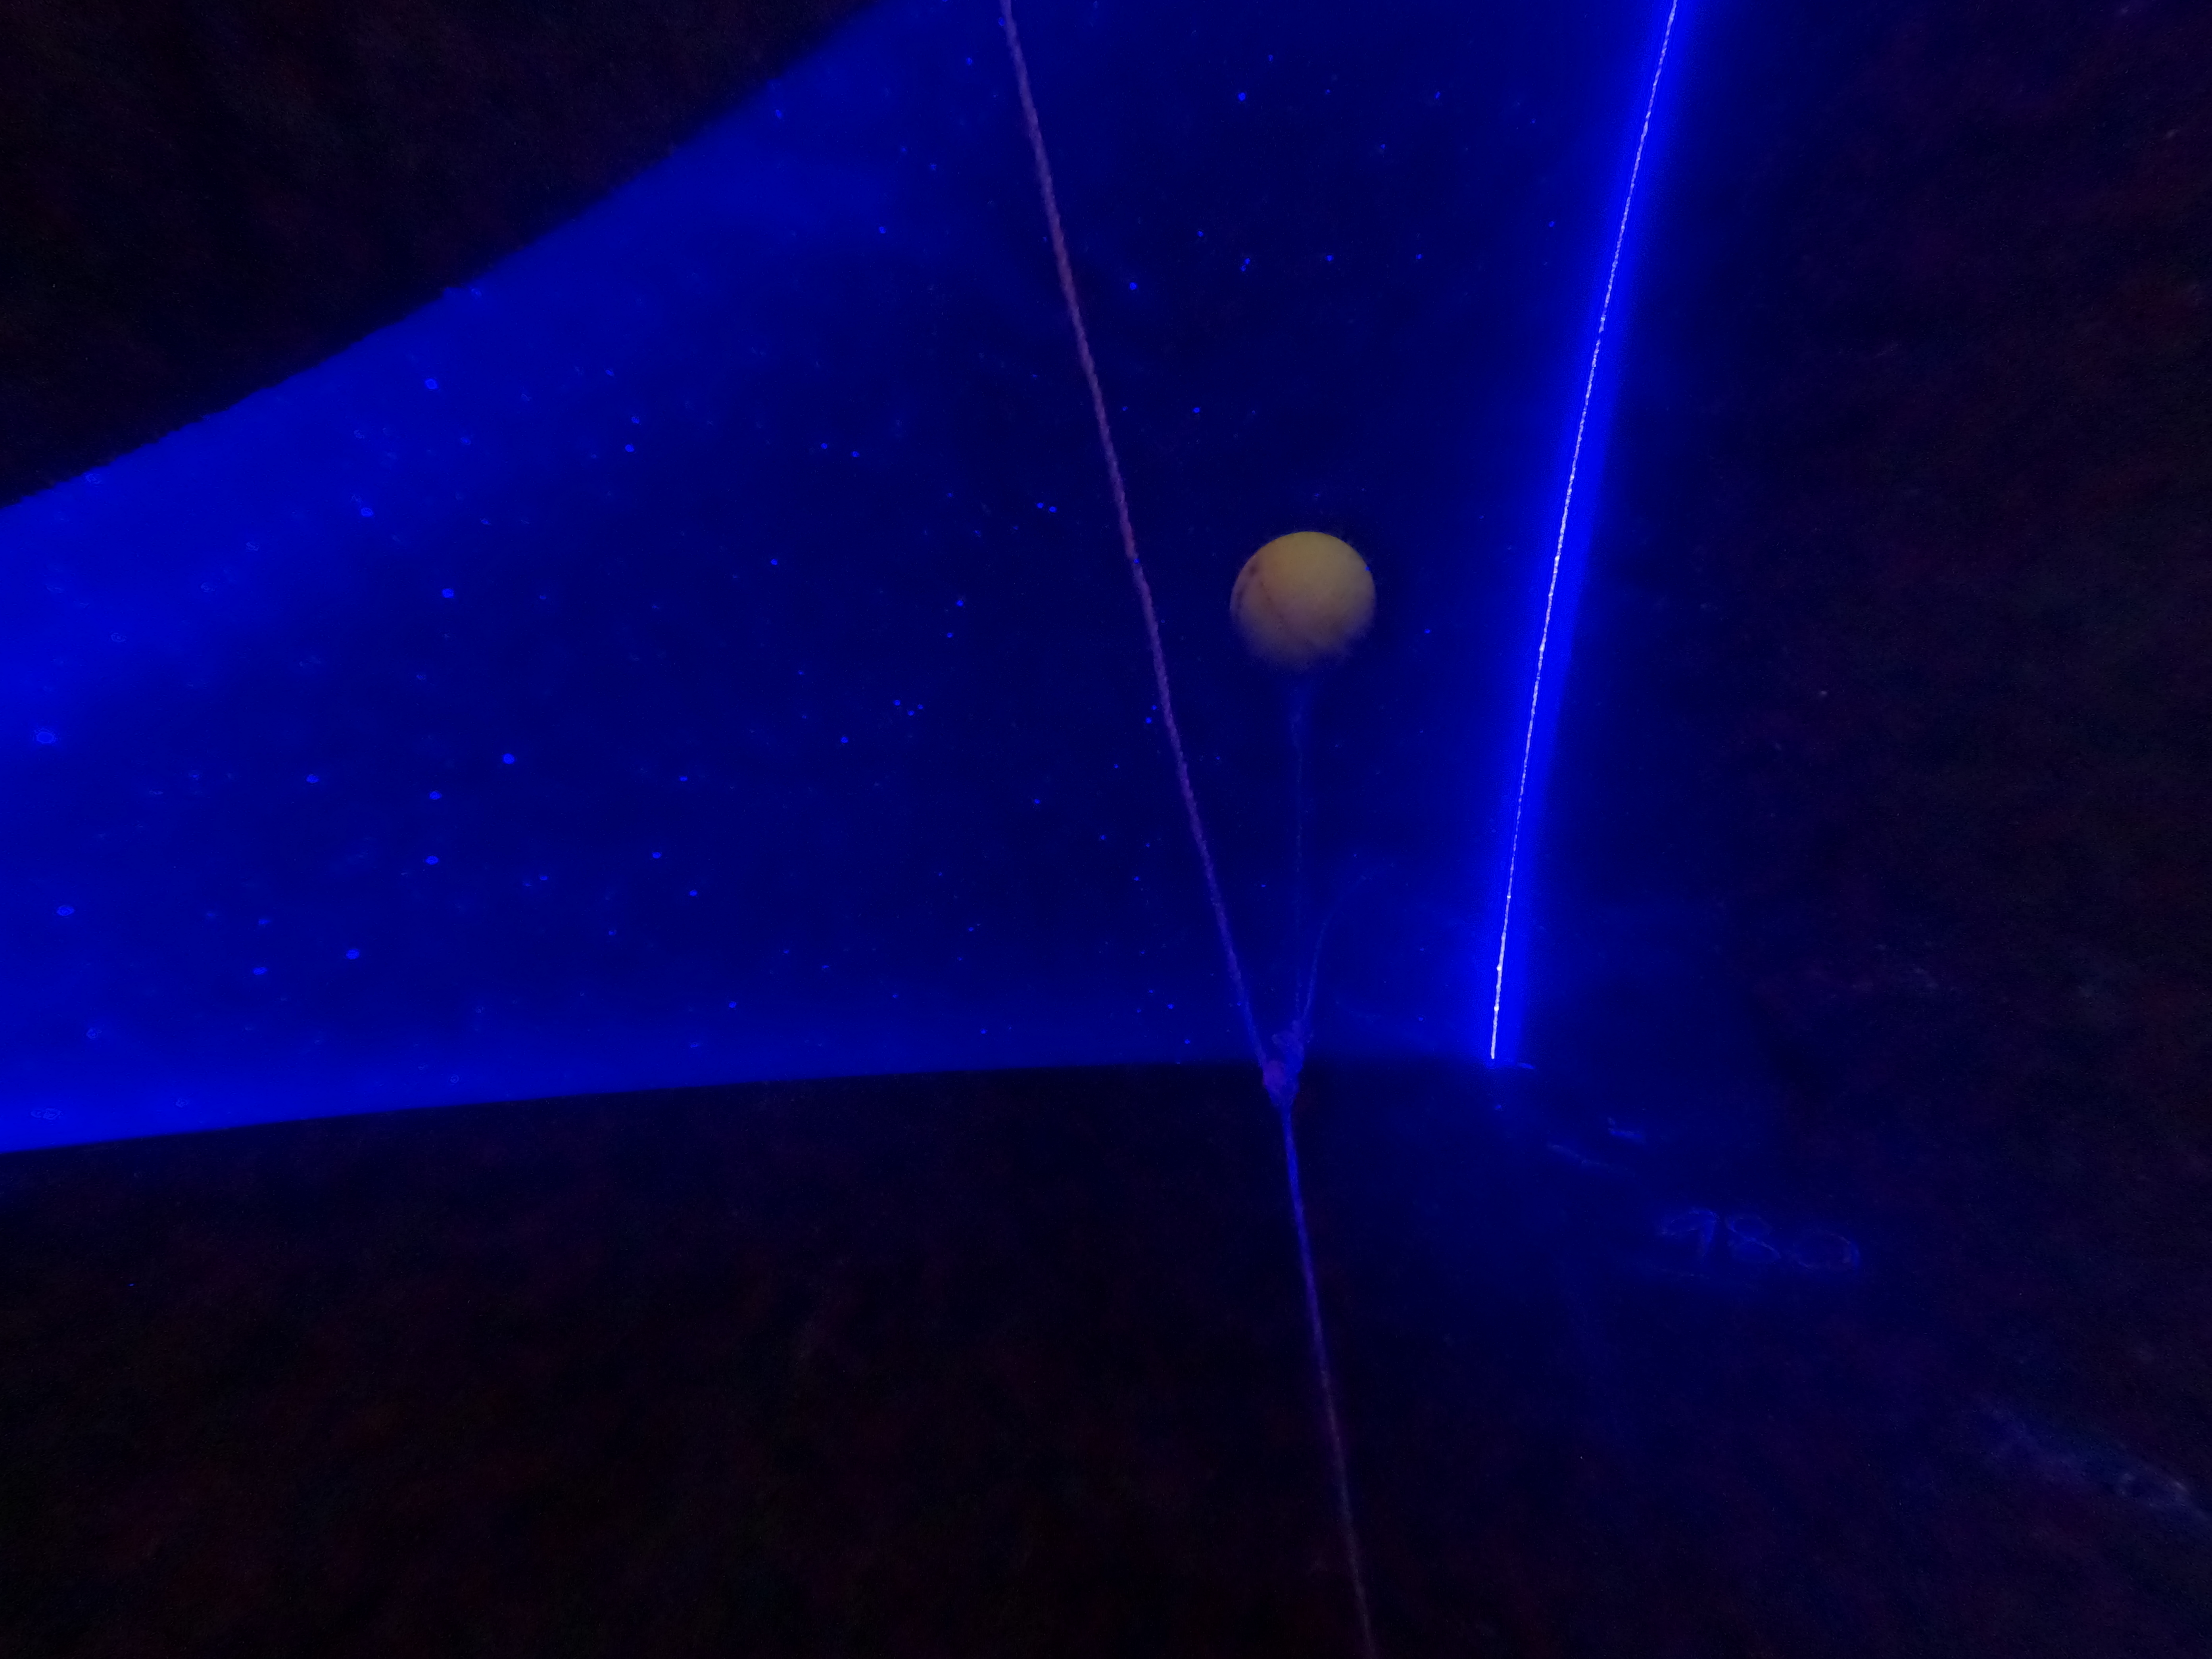

980

Supplement: Supplementary file 1020 [file G0031374.pdf › 10/G0031374.pdf]

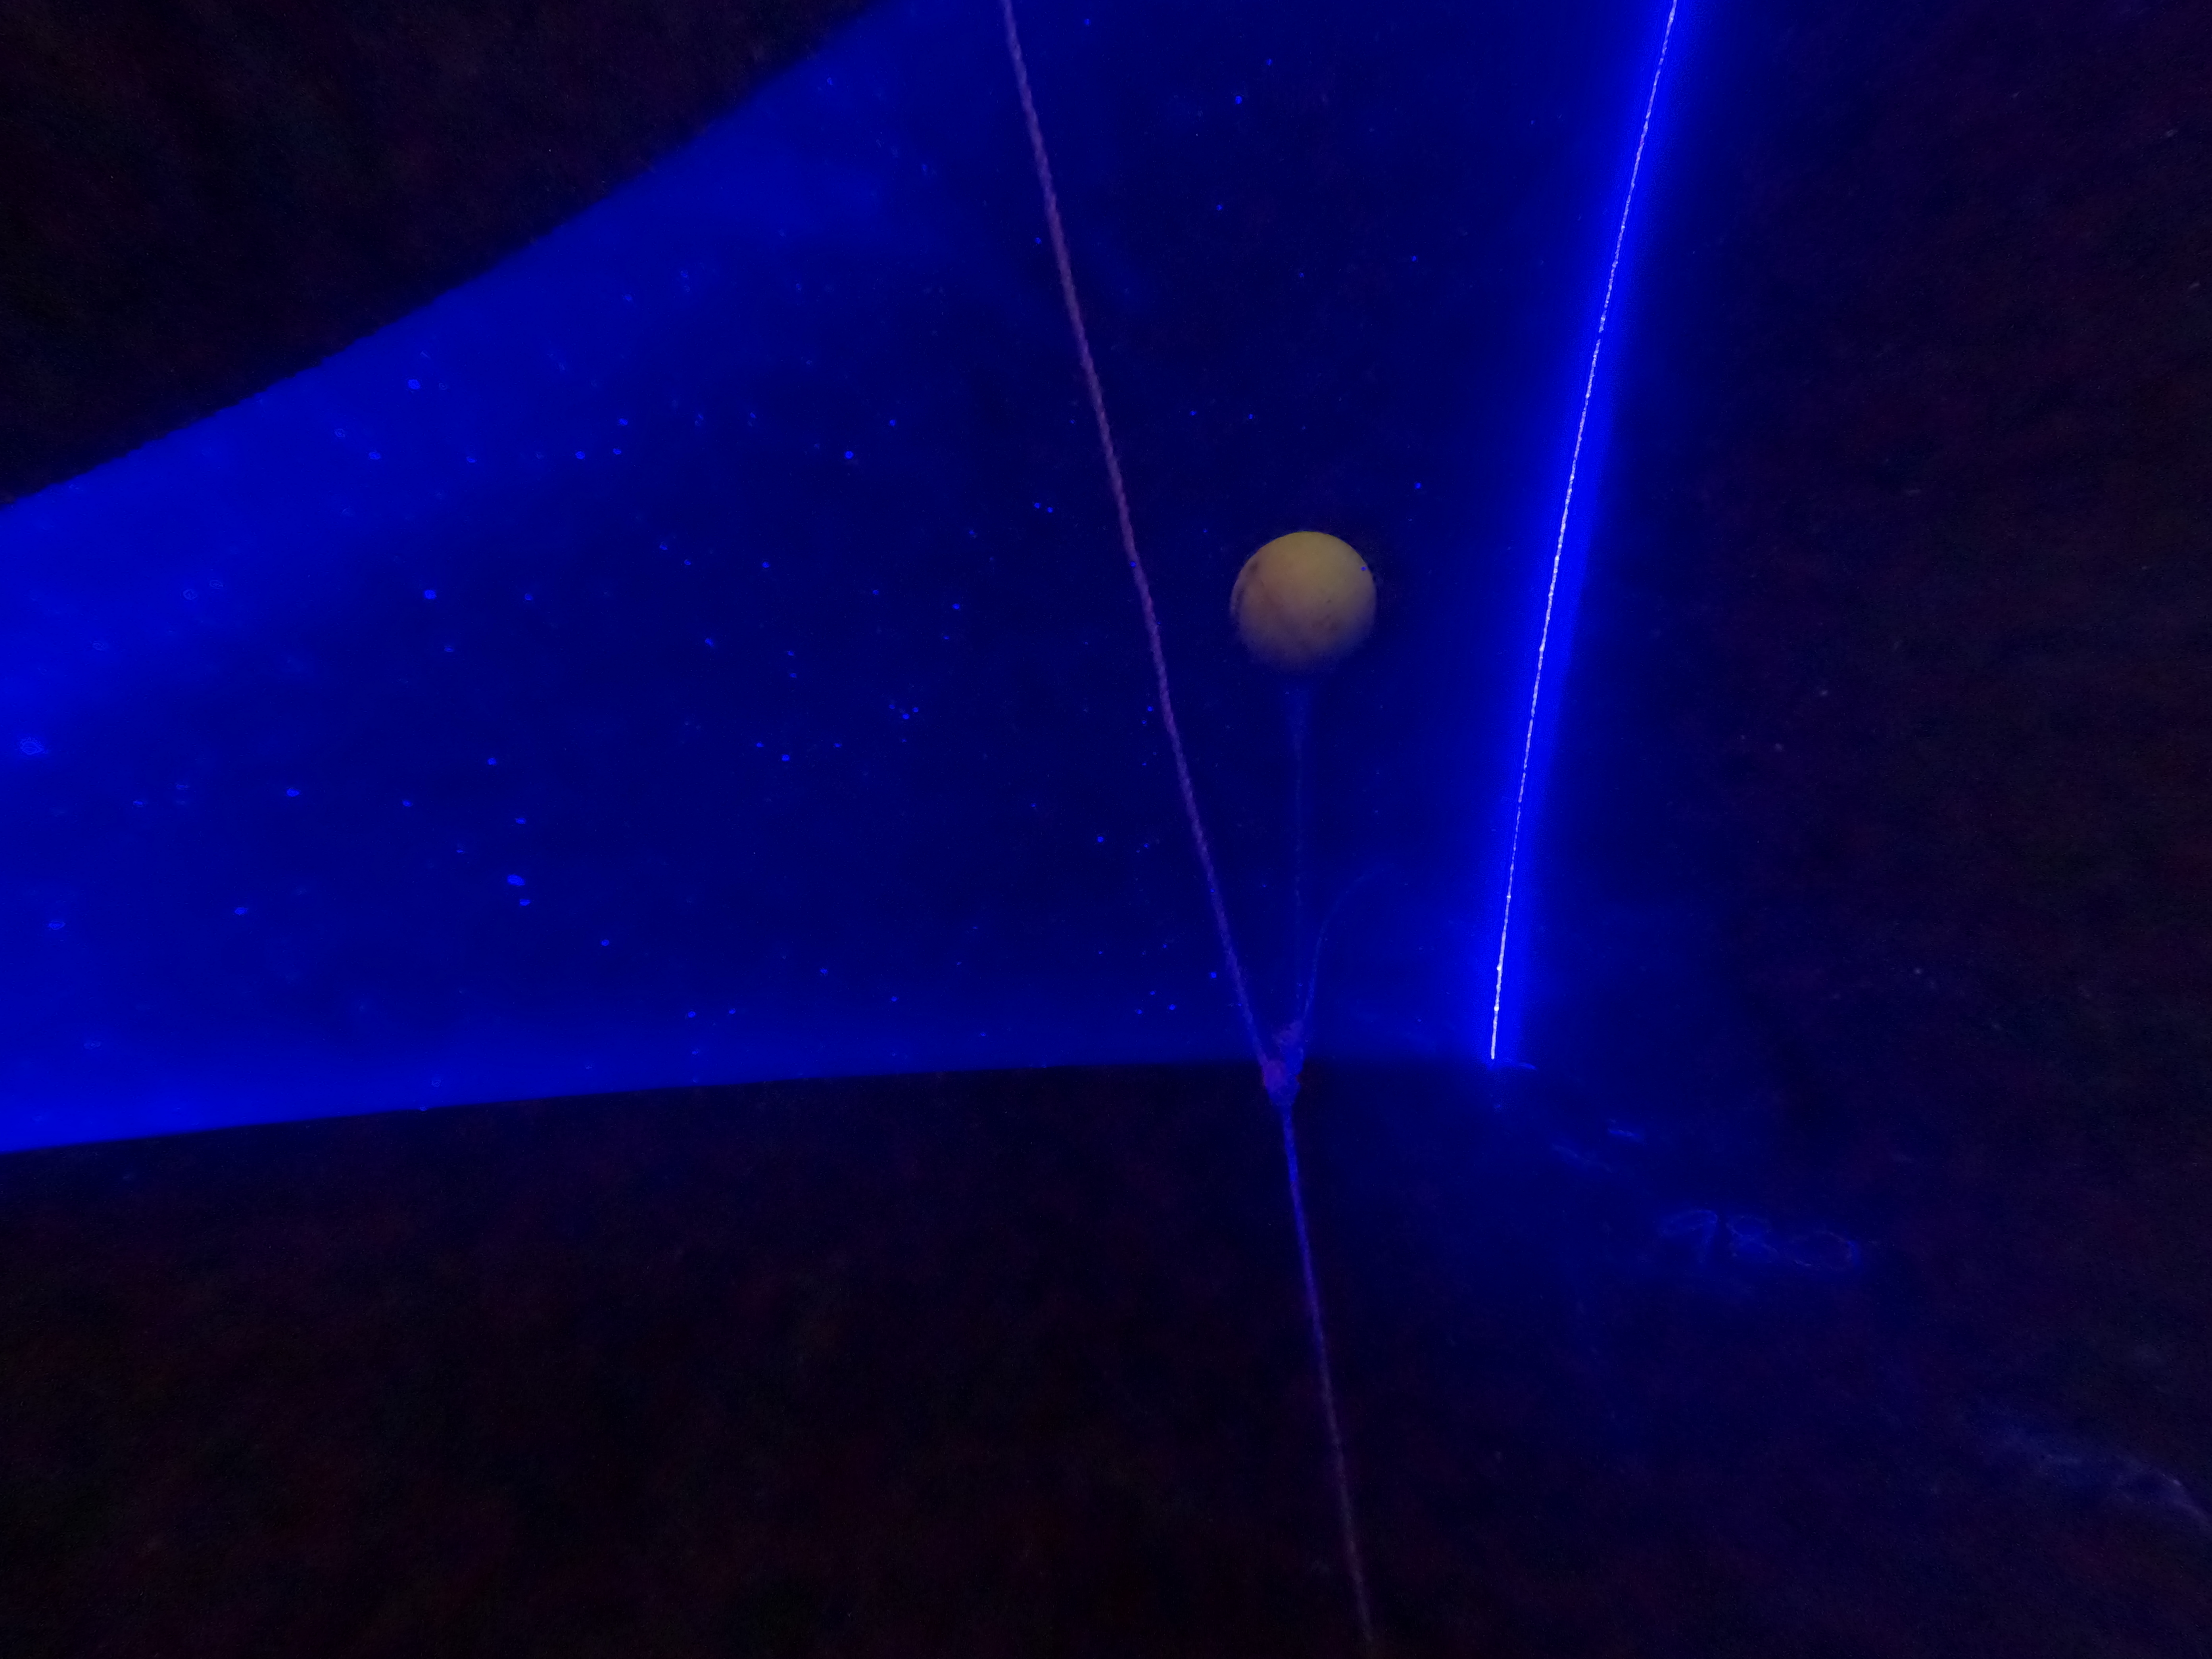

Supplement: Supplementary file 1021 [file G0031375.pdf › 10/G0031375.pdf]

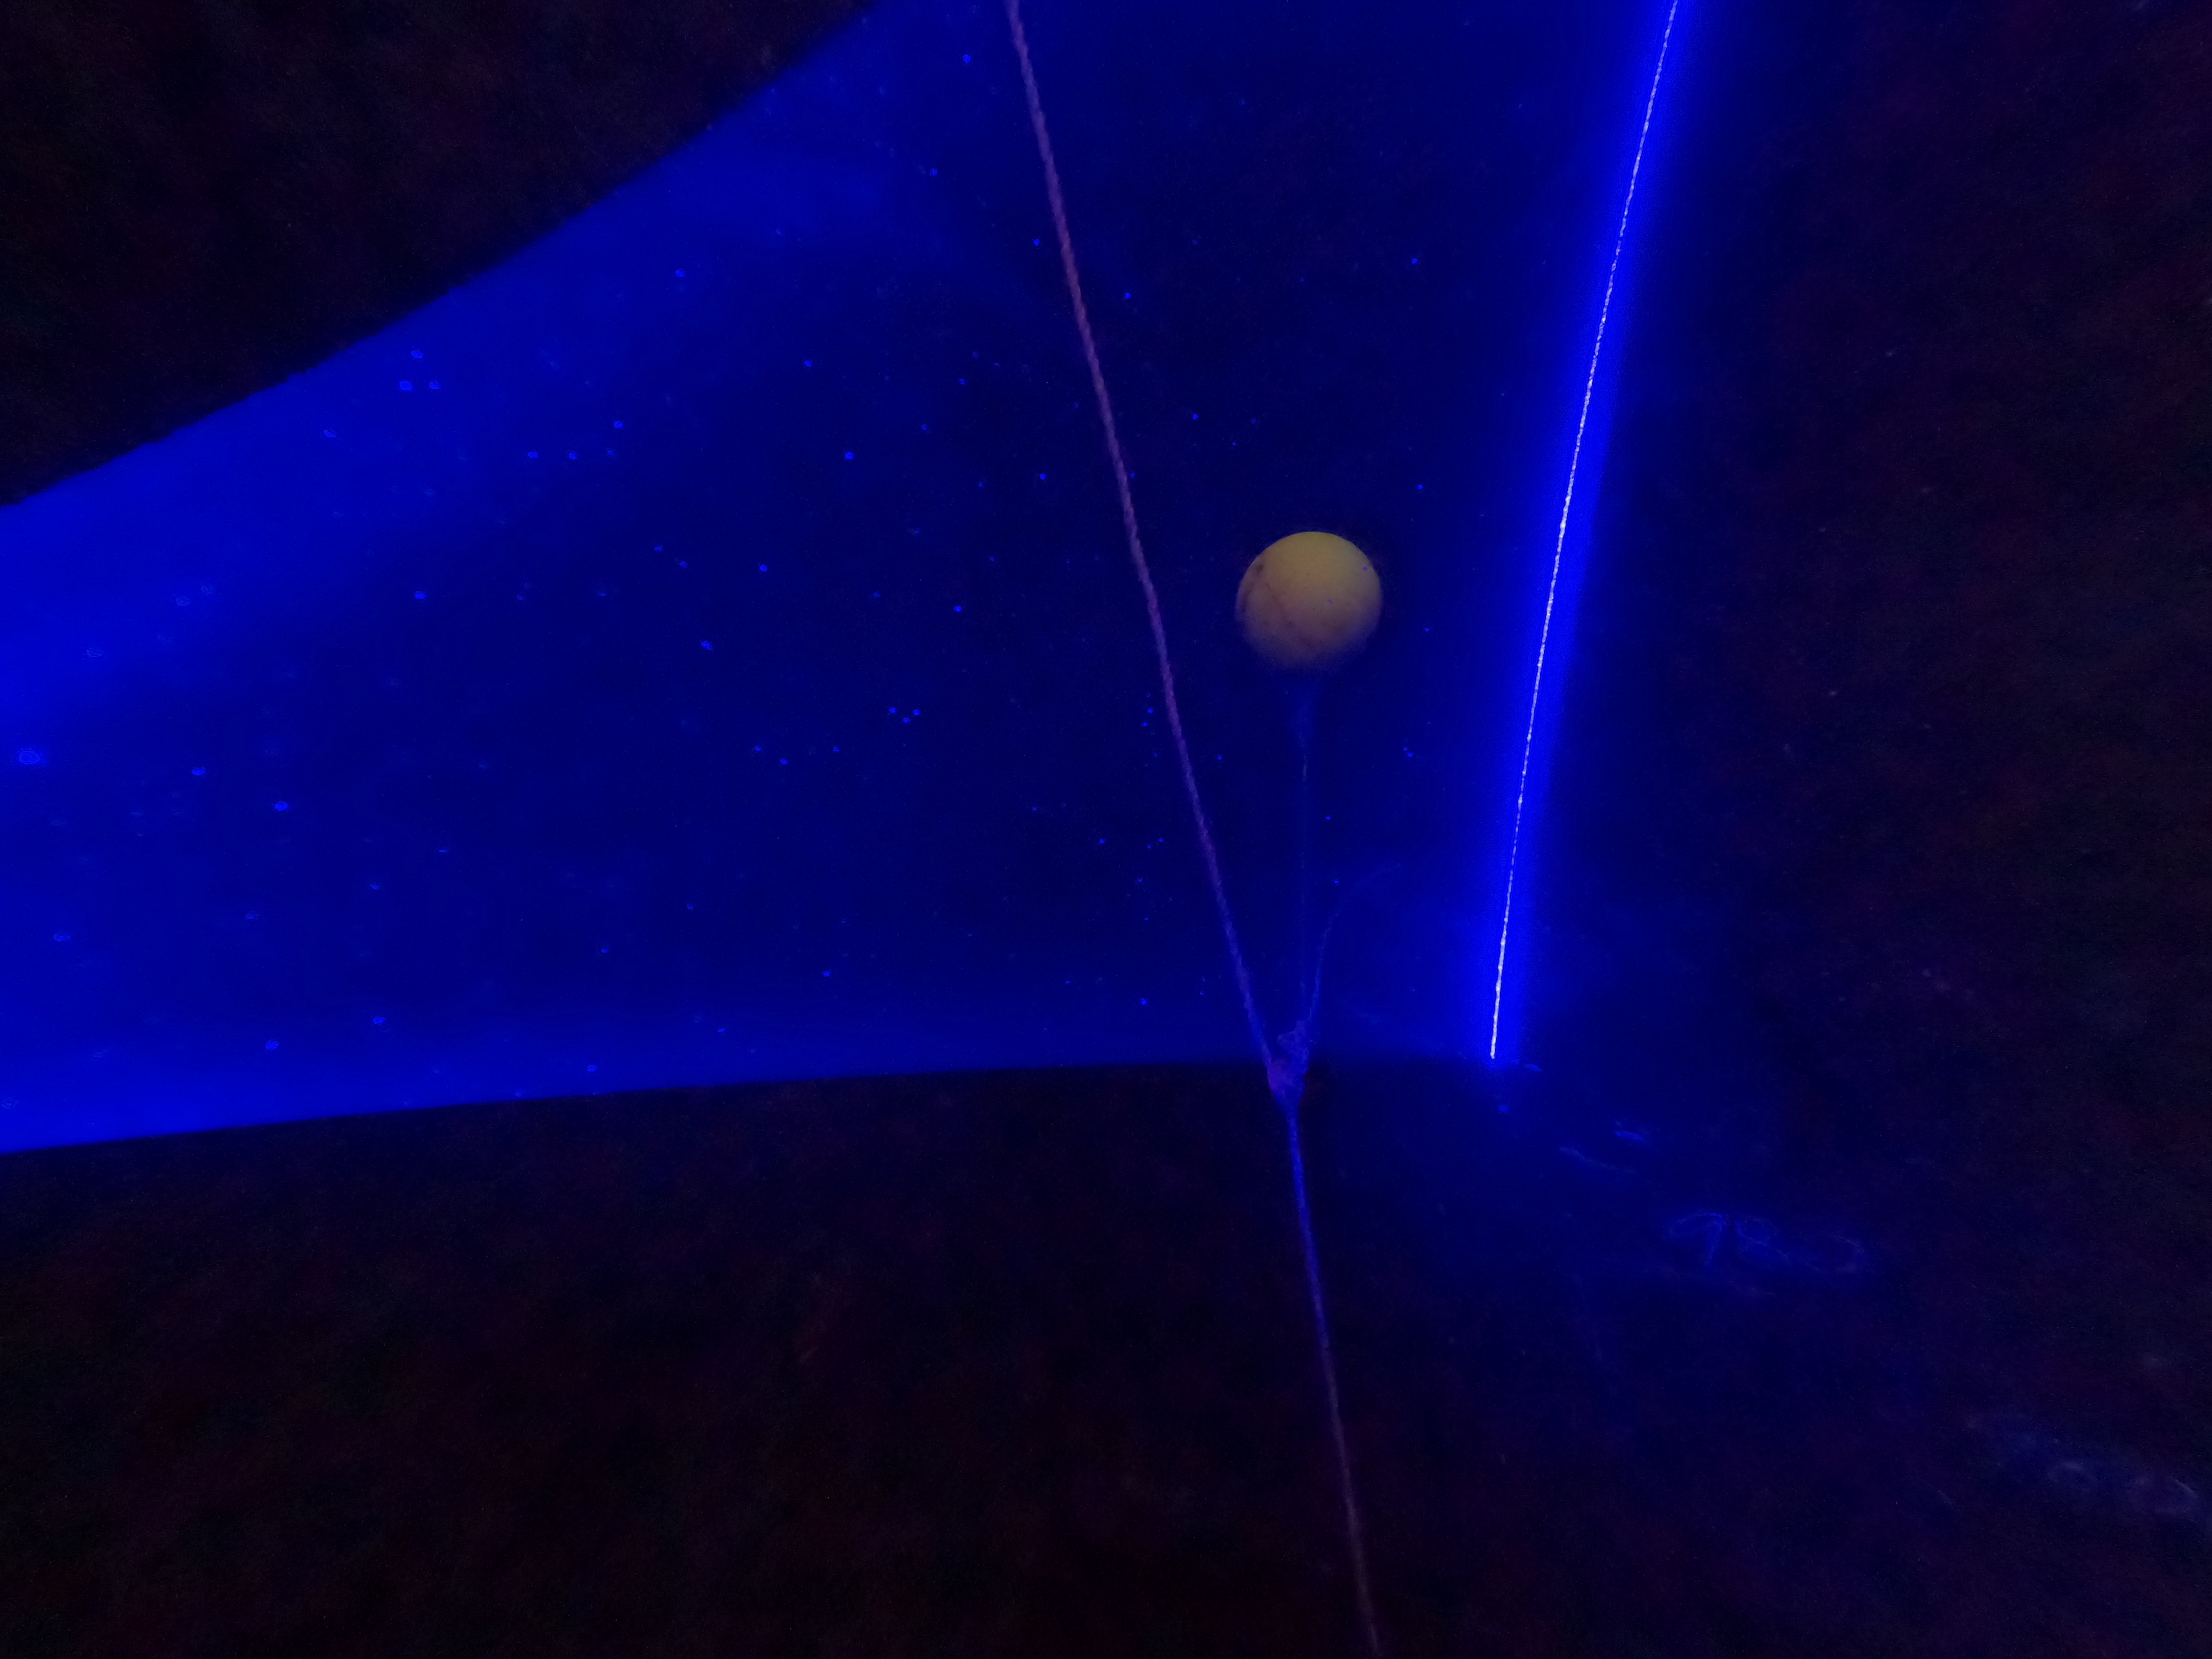

Supplement: Supplementary file 1022 [file G0031376.pdf › 10/G0031376.pdf]

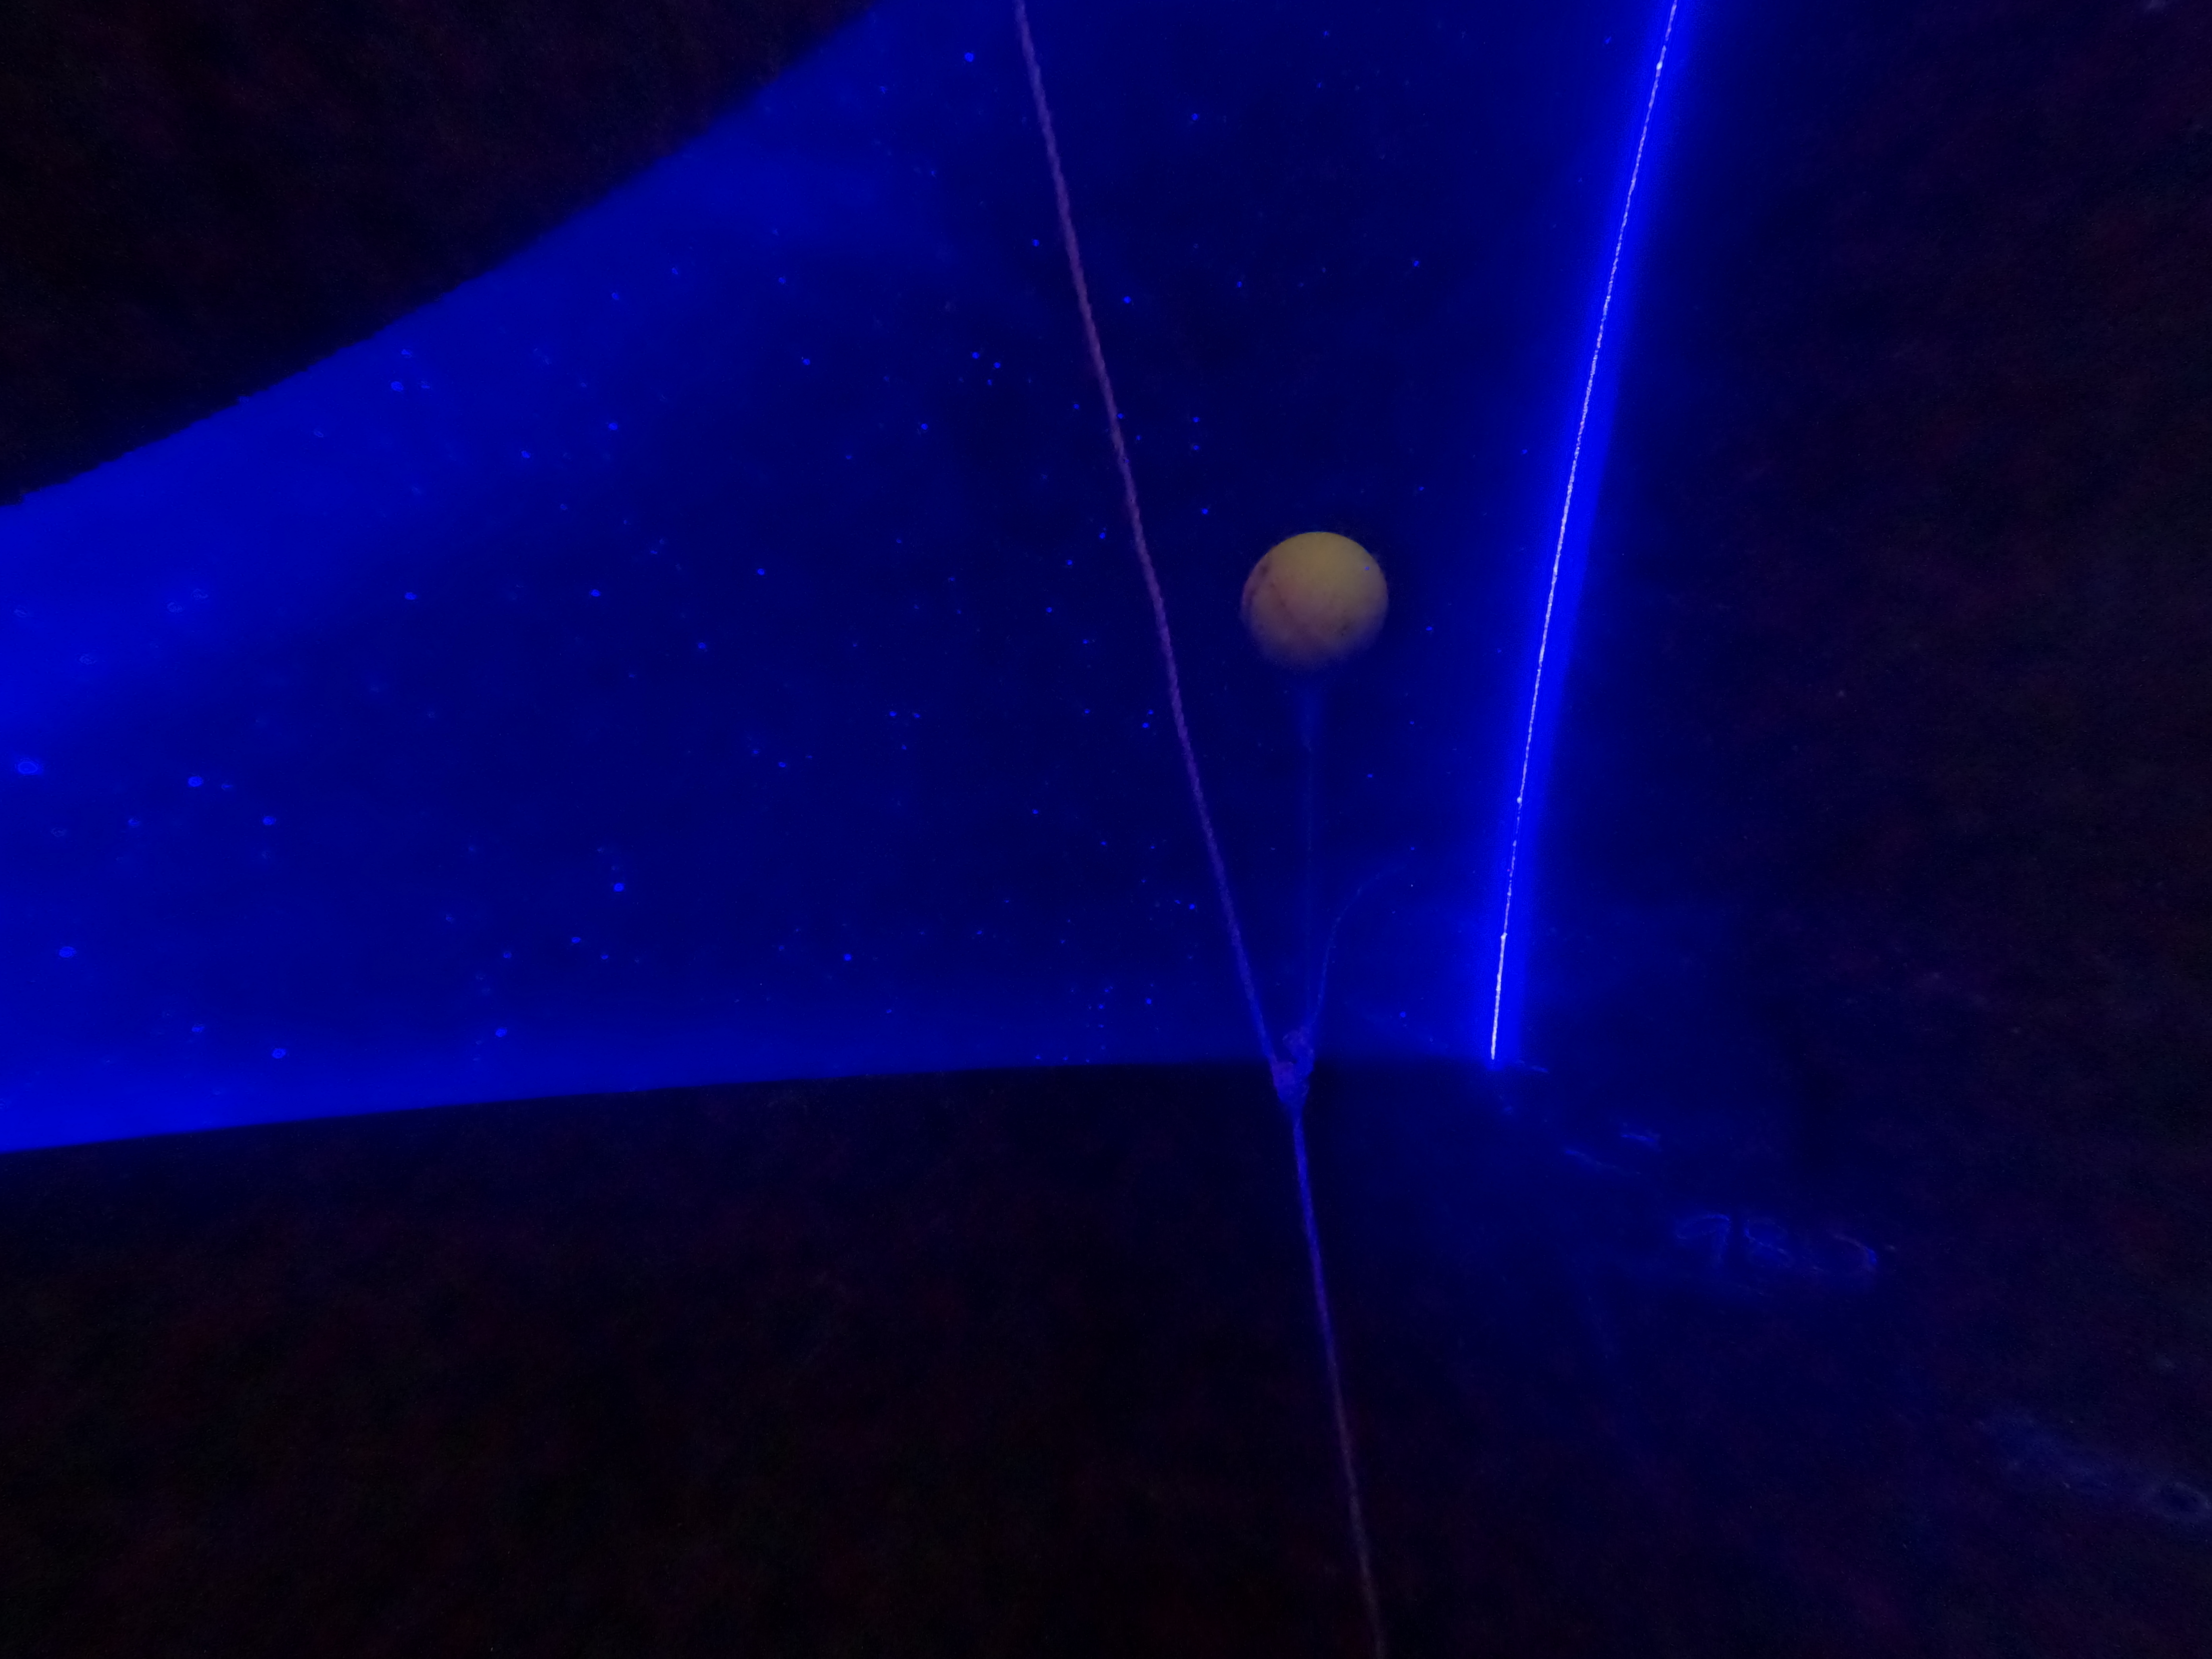

Supplement: Supplementary file 1023 [file G0031377.pdf › 10/G0031377.pdf]

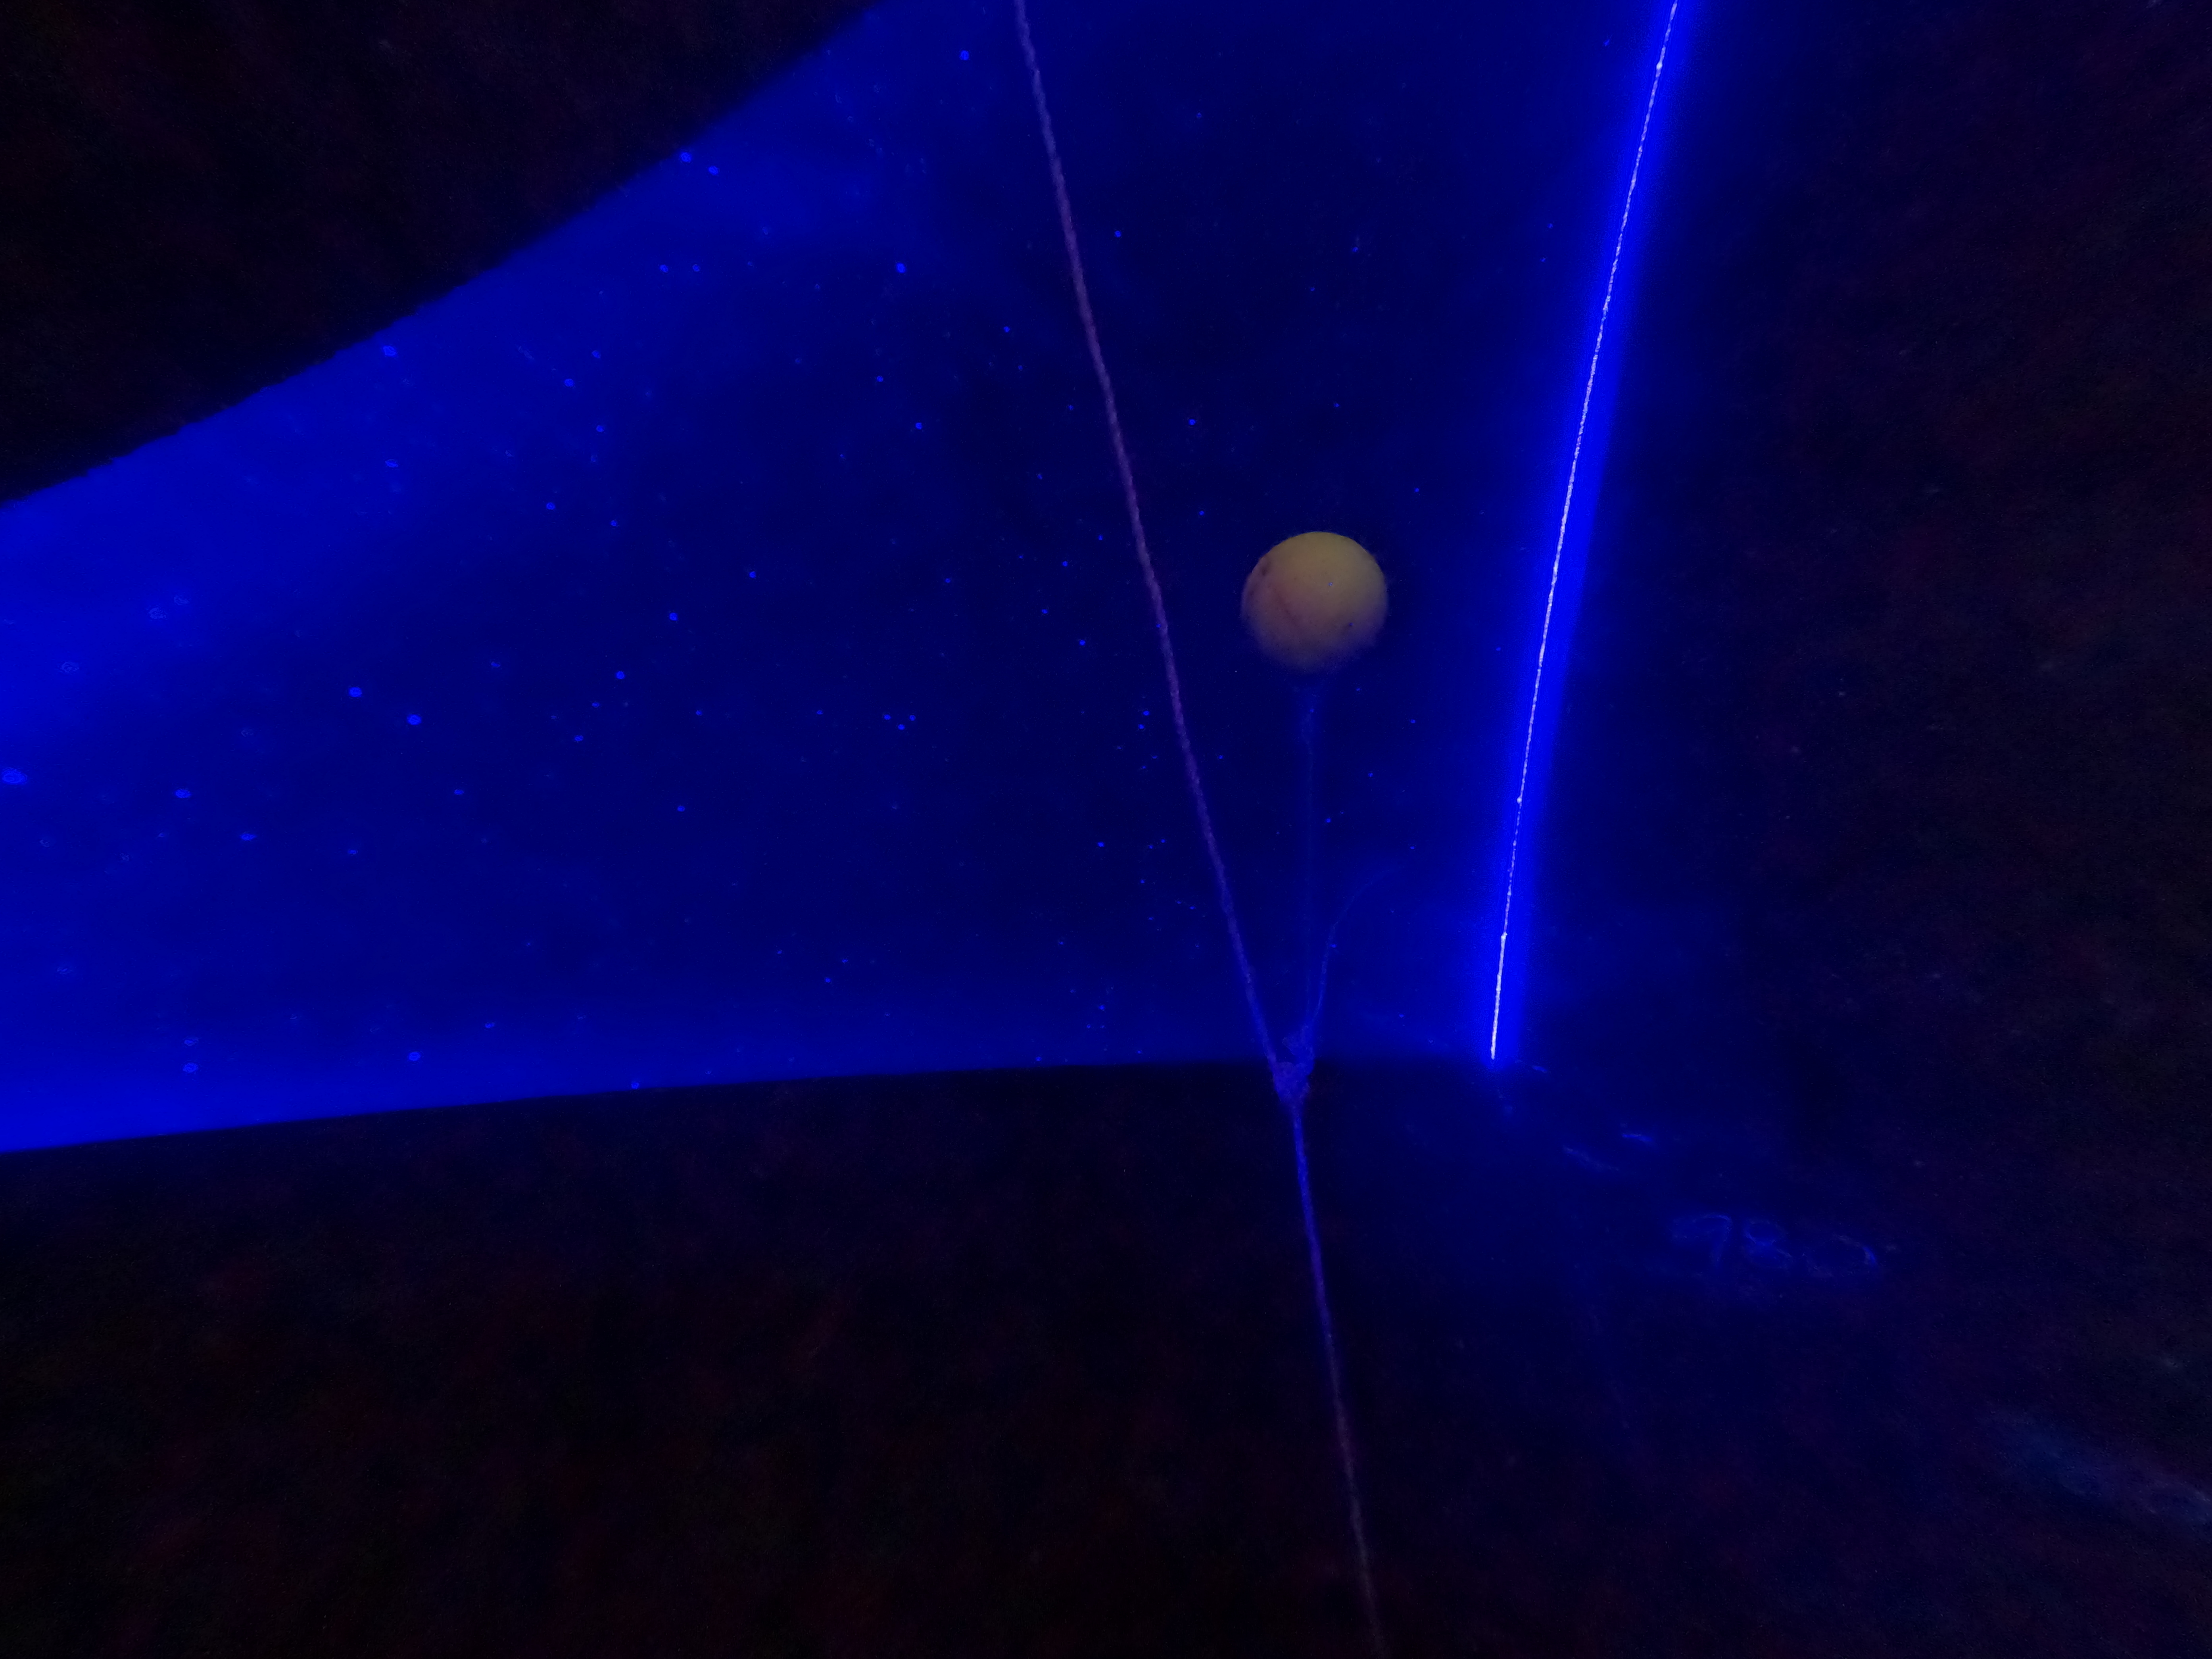

Supplement: Supplementary file 1024 [file G0031378.pdf › 10/G0031378.pdf]

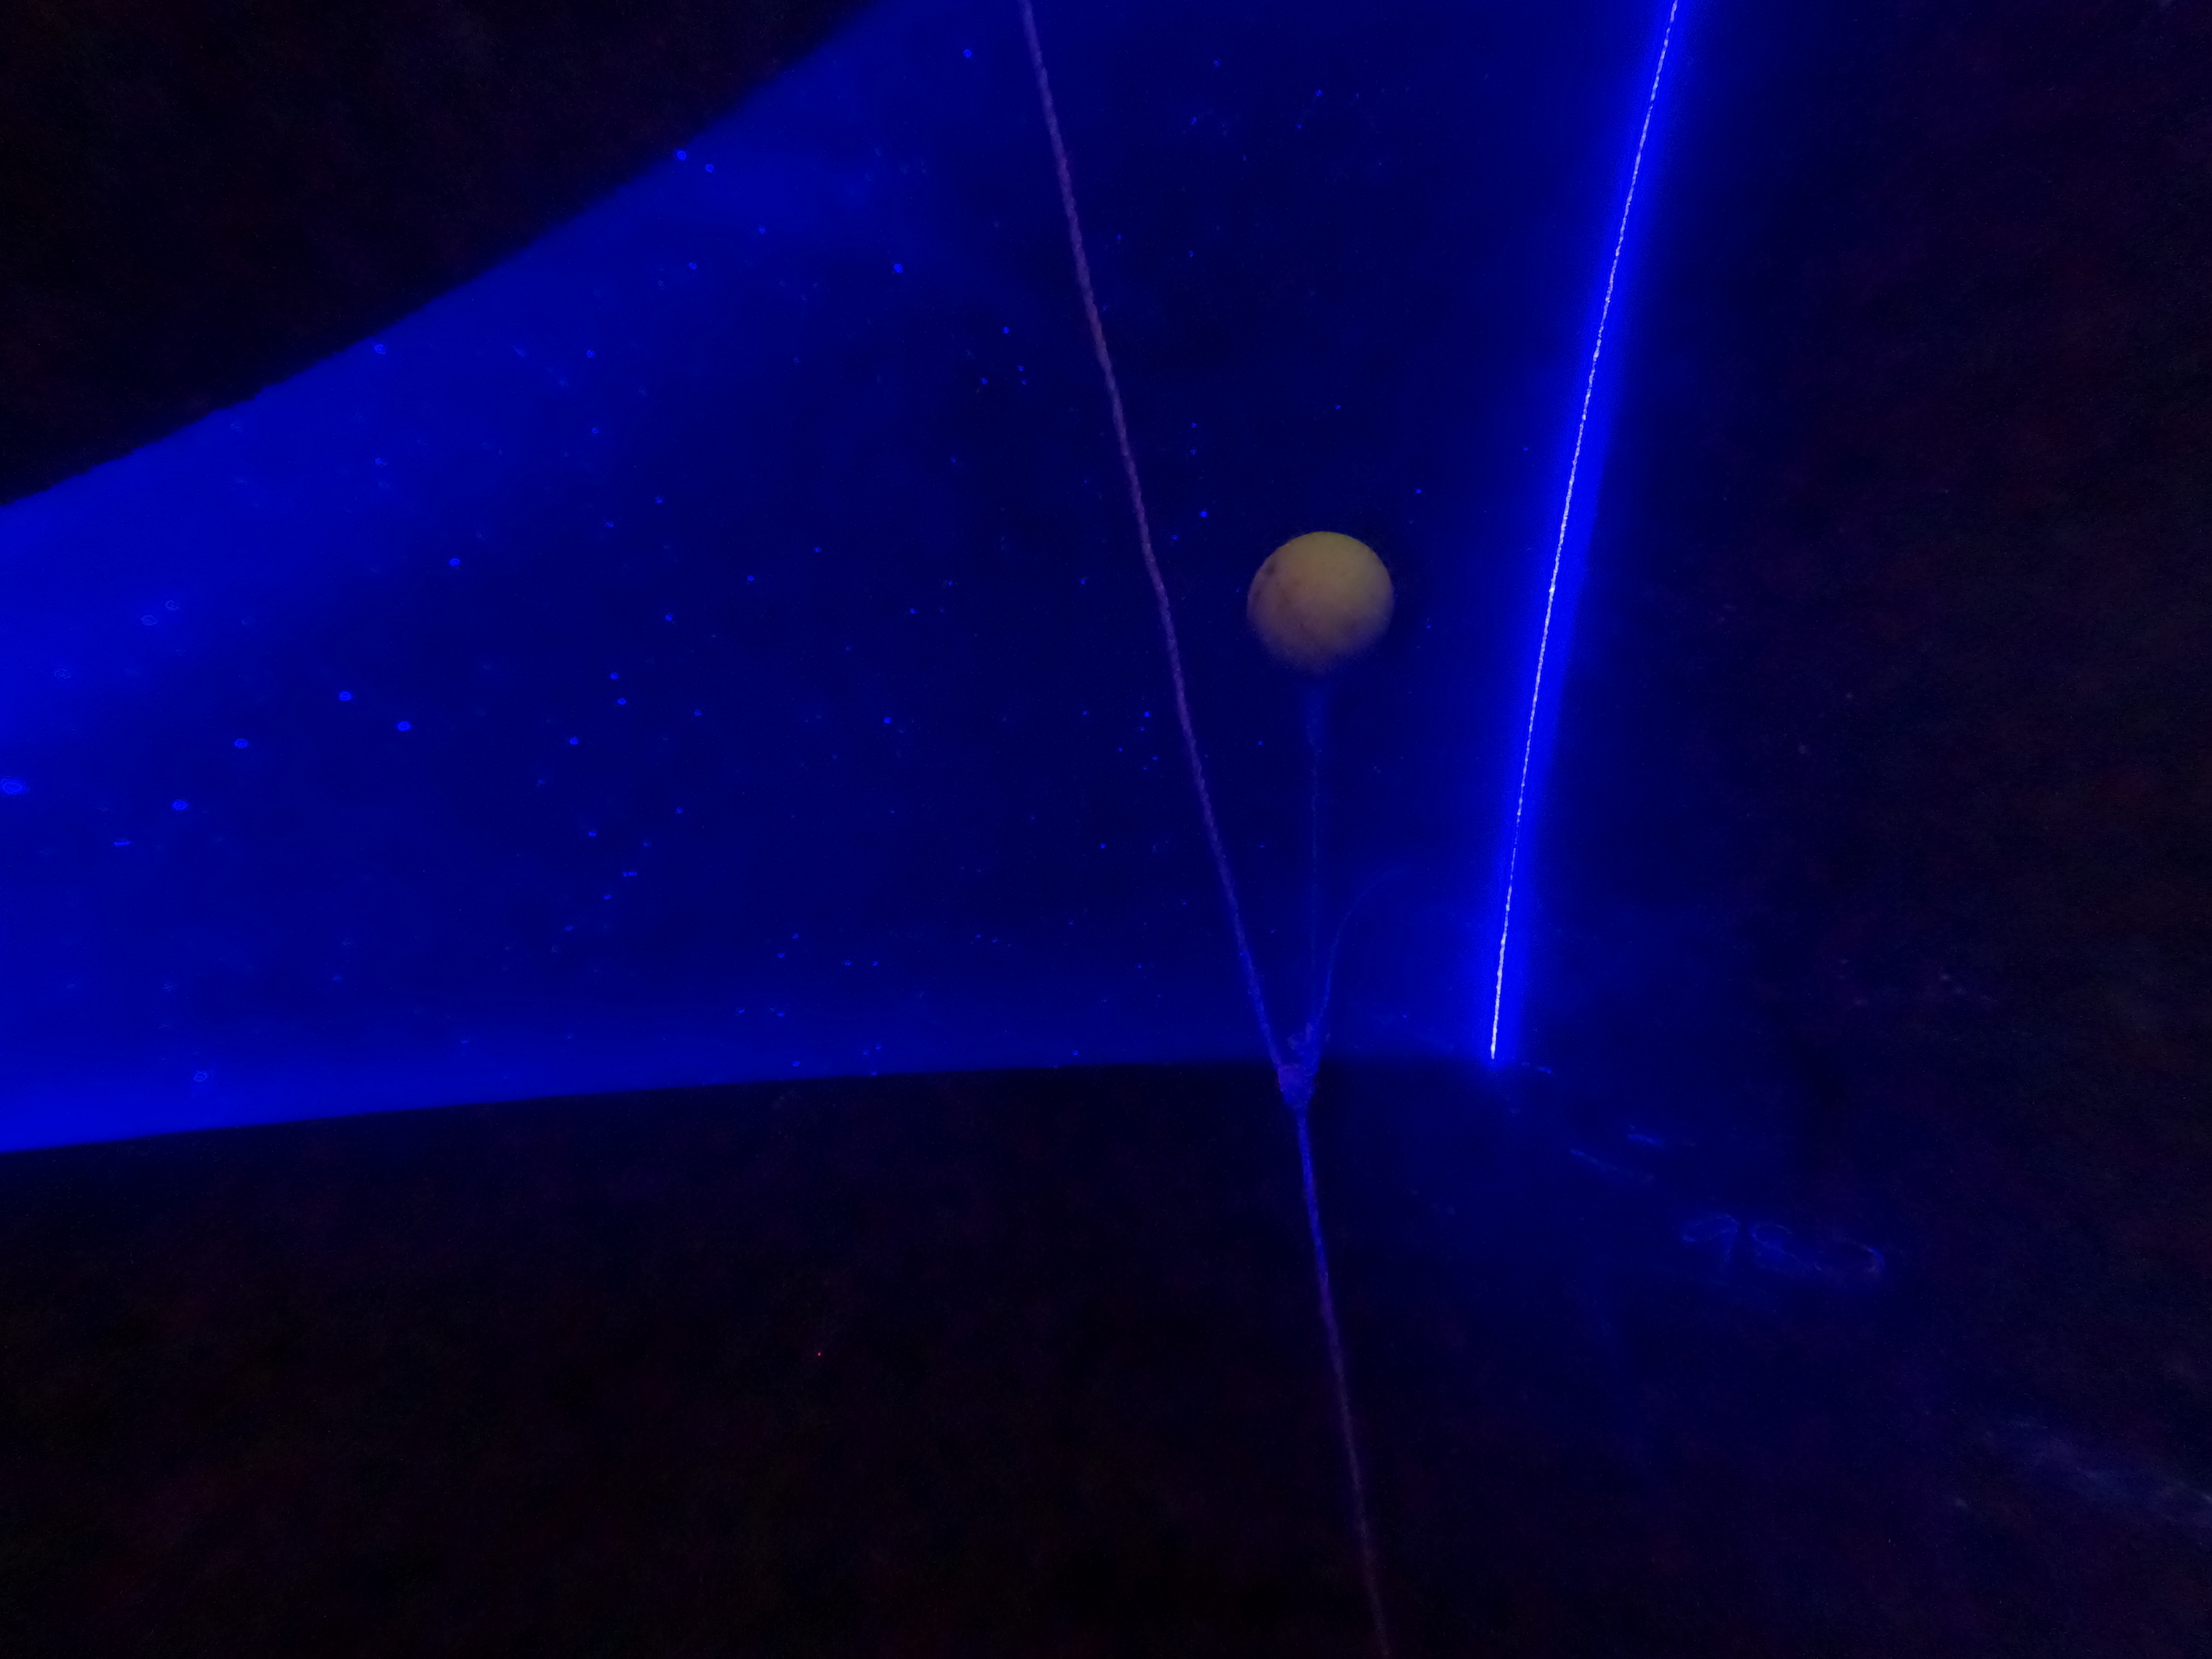

Supplement: Supplementary file 1025 [file G0031379.pdf › 10/G0031379.pdf]

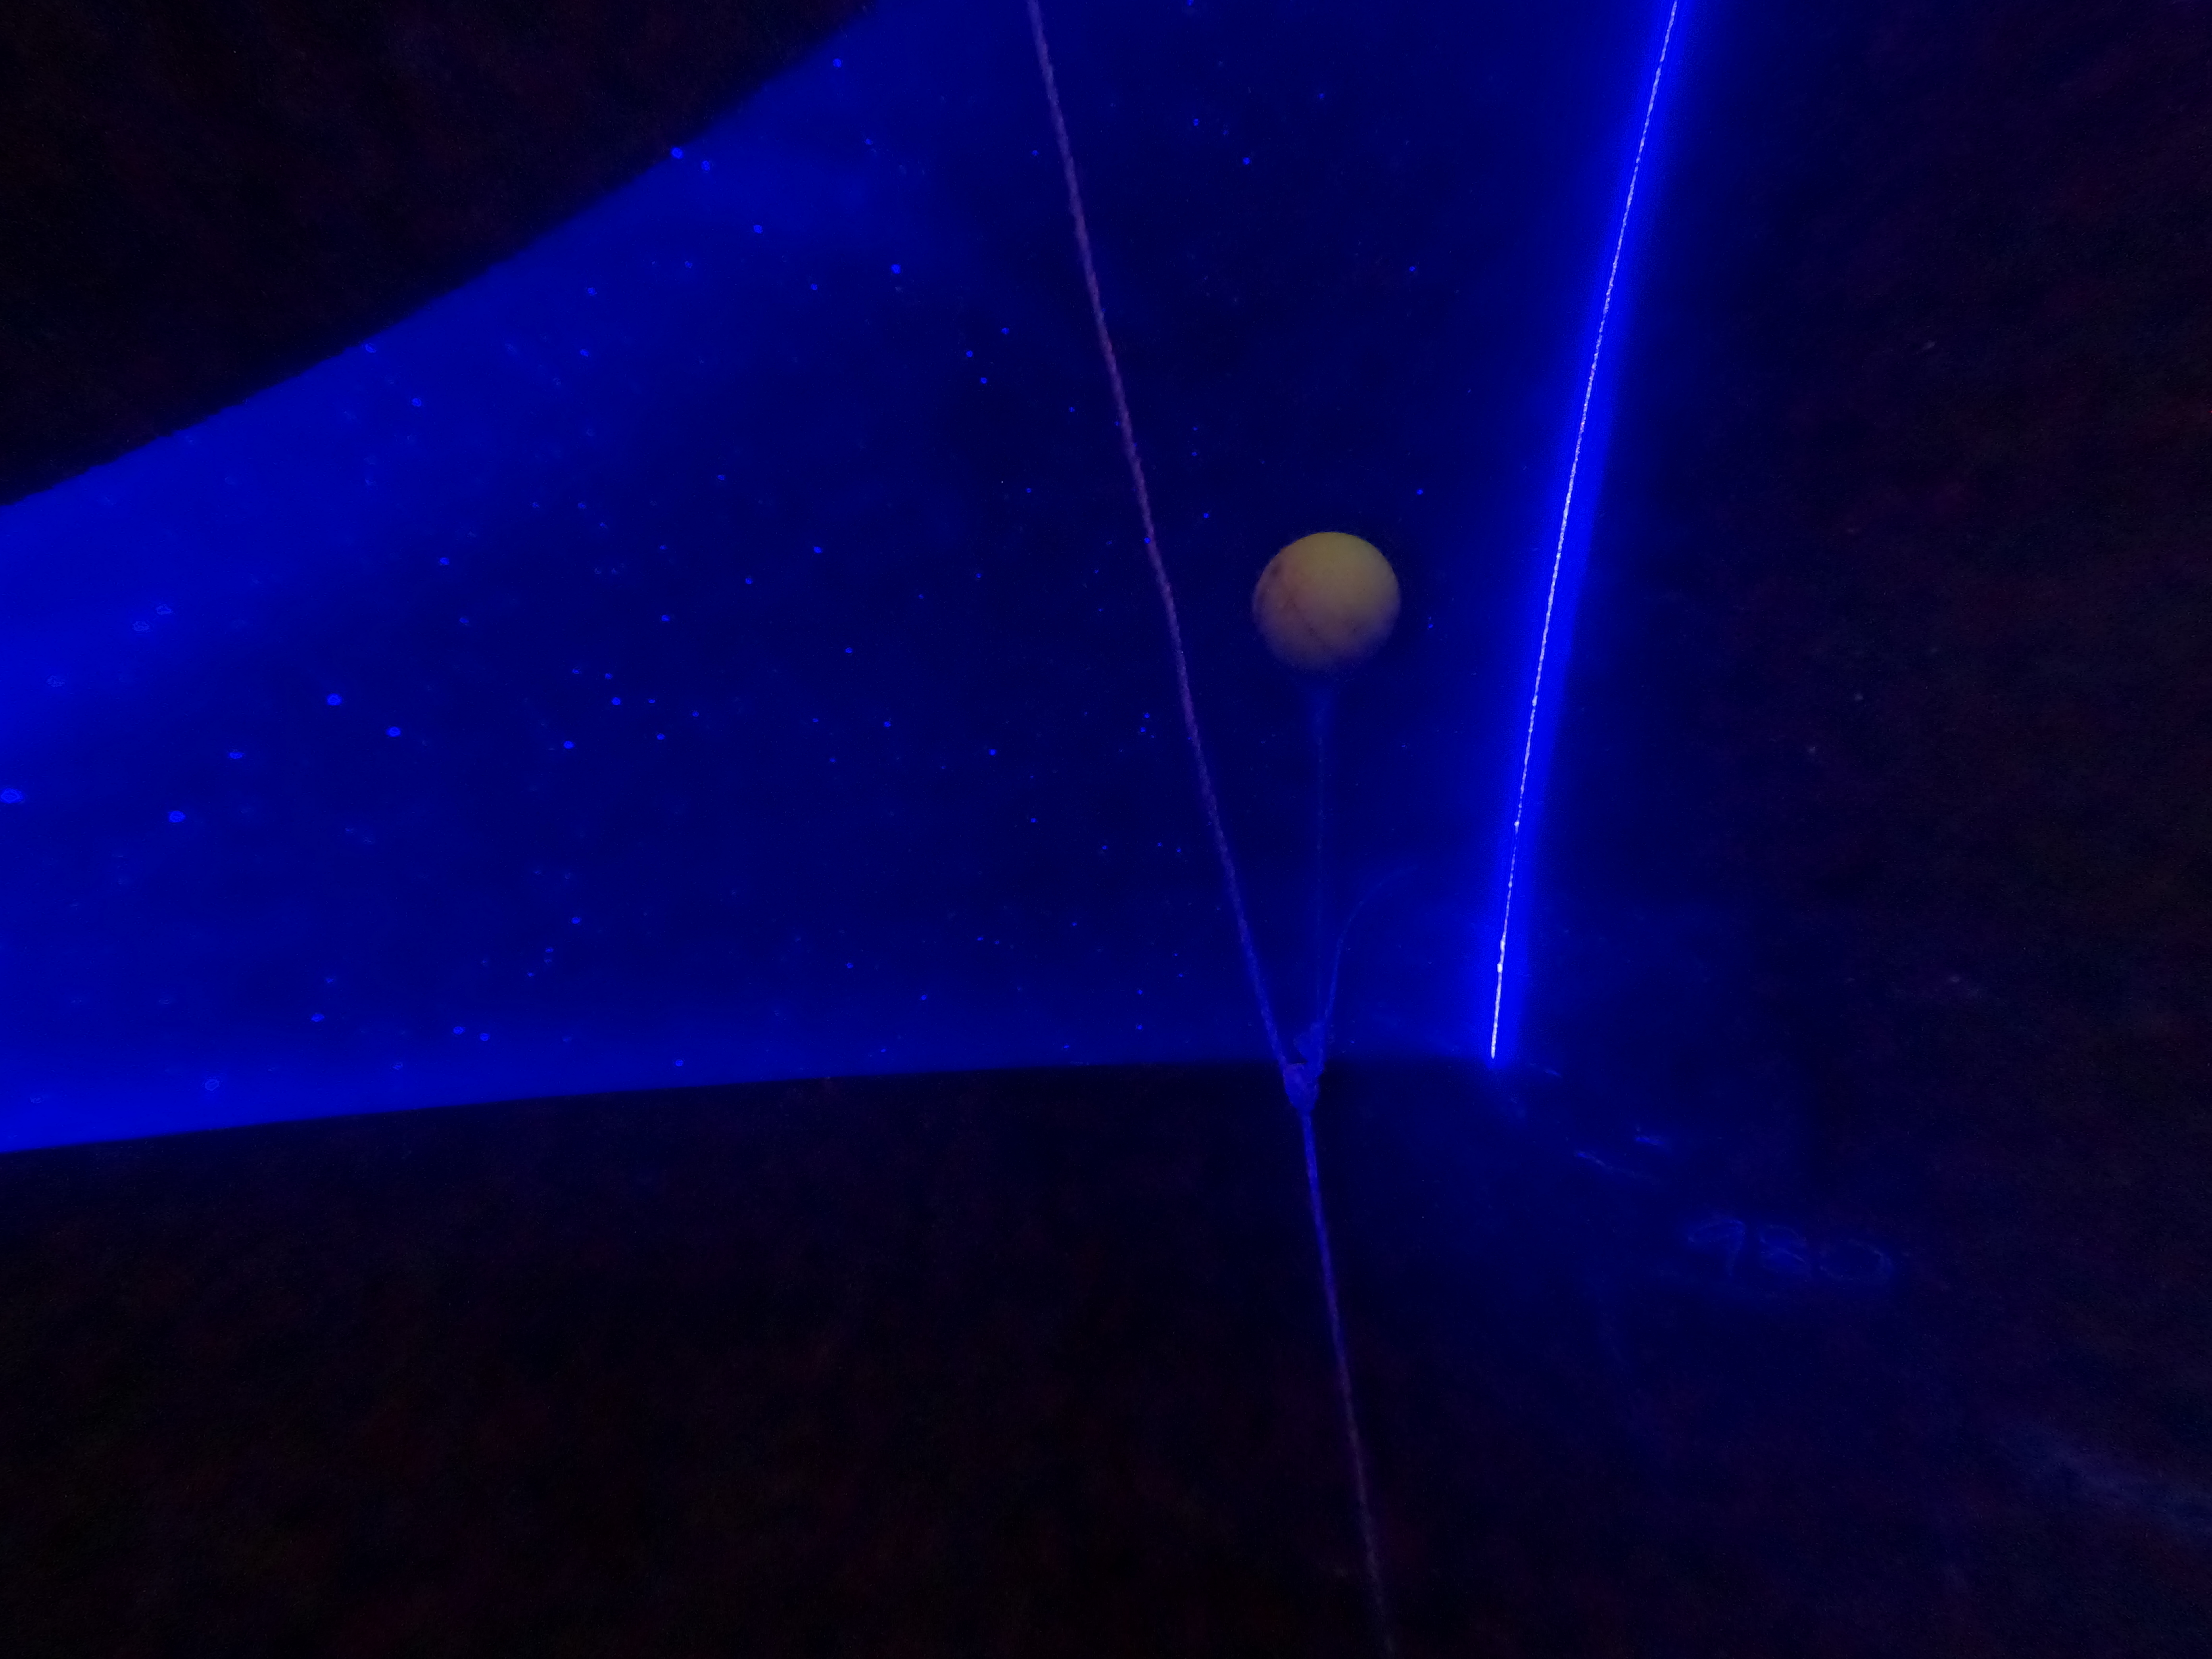

Supplement: Supplementary file 1026 [file G0031380.pdf › 10/G0031380.pdf]

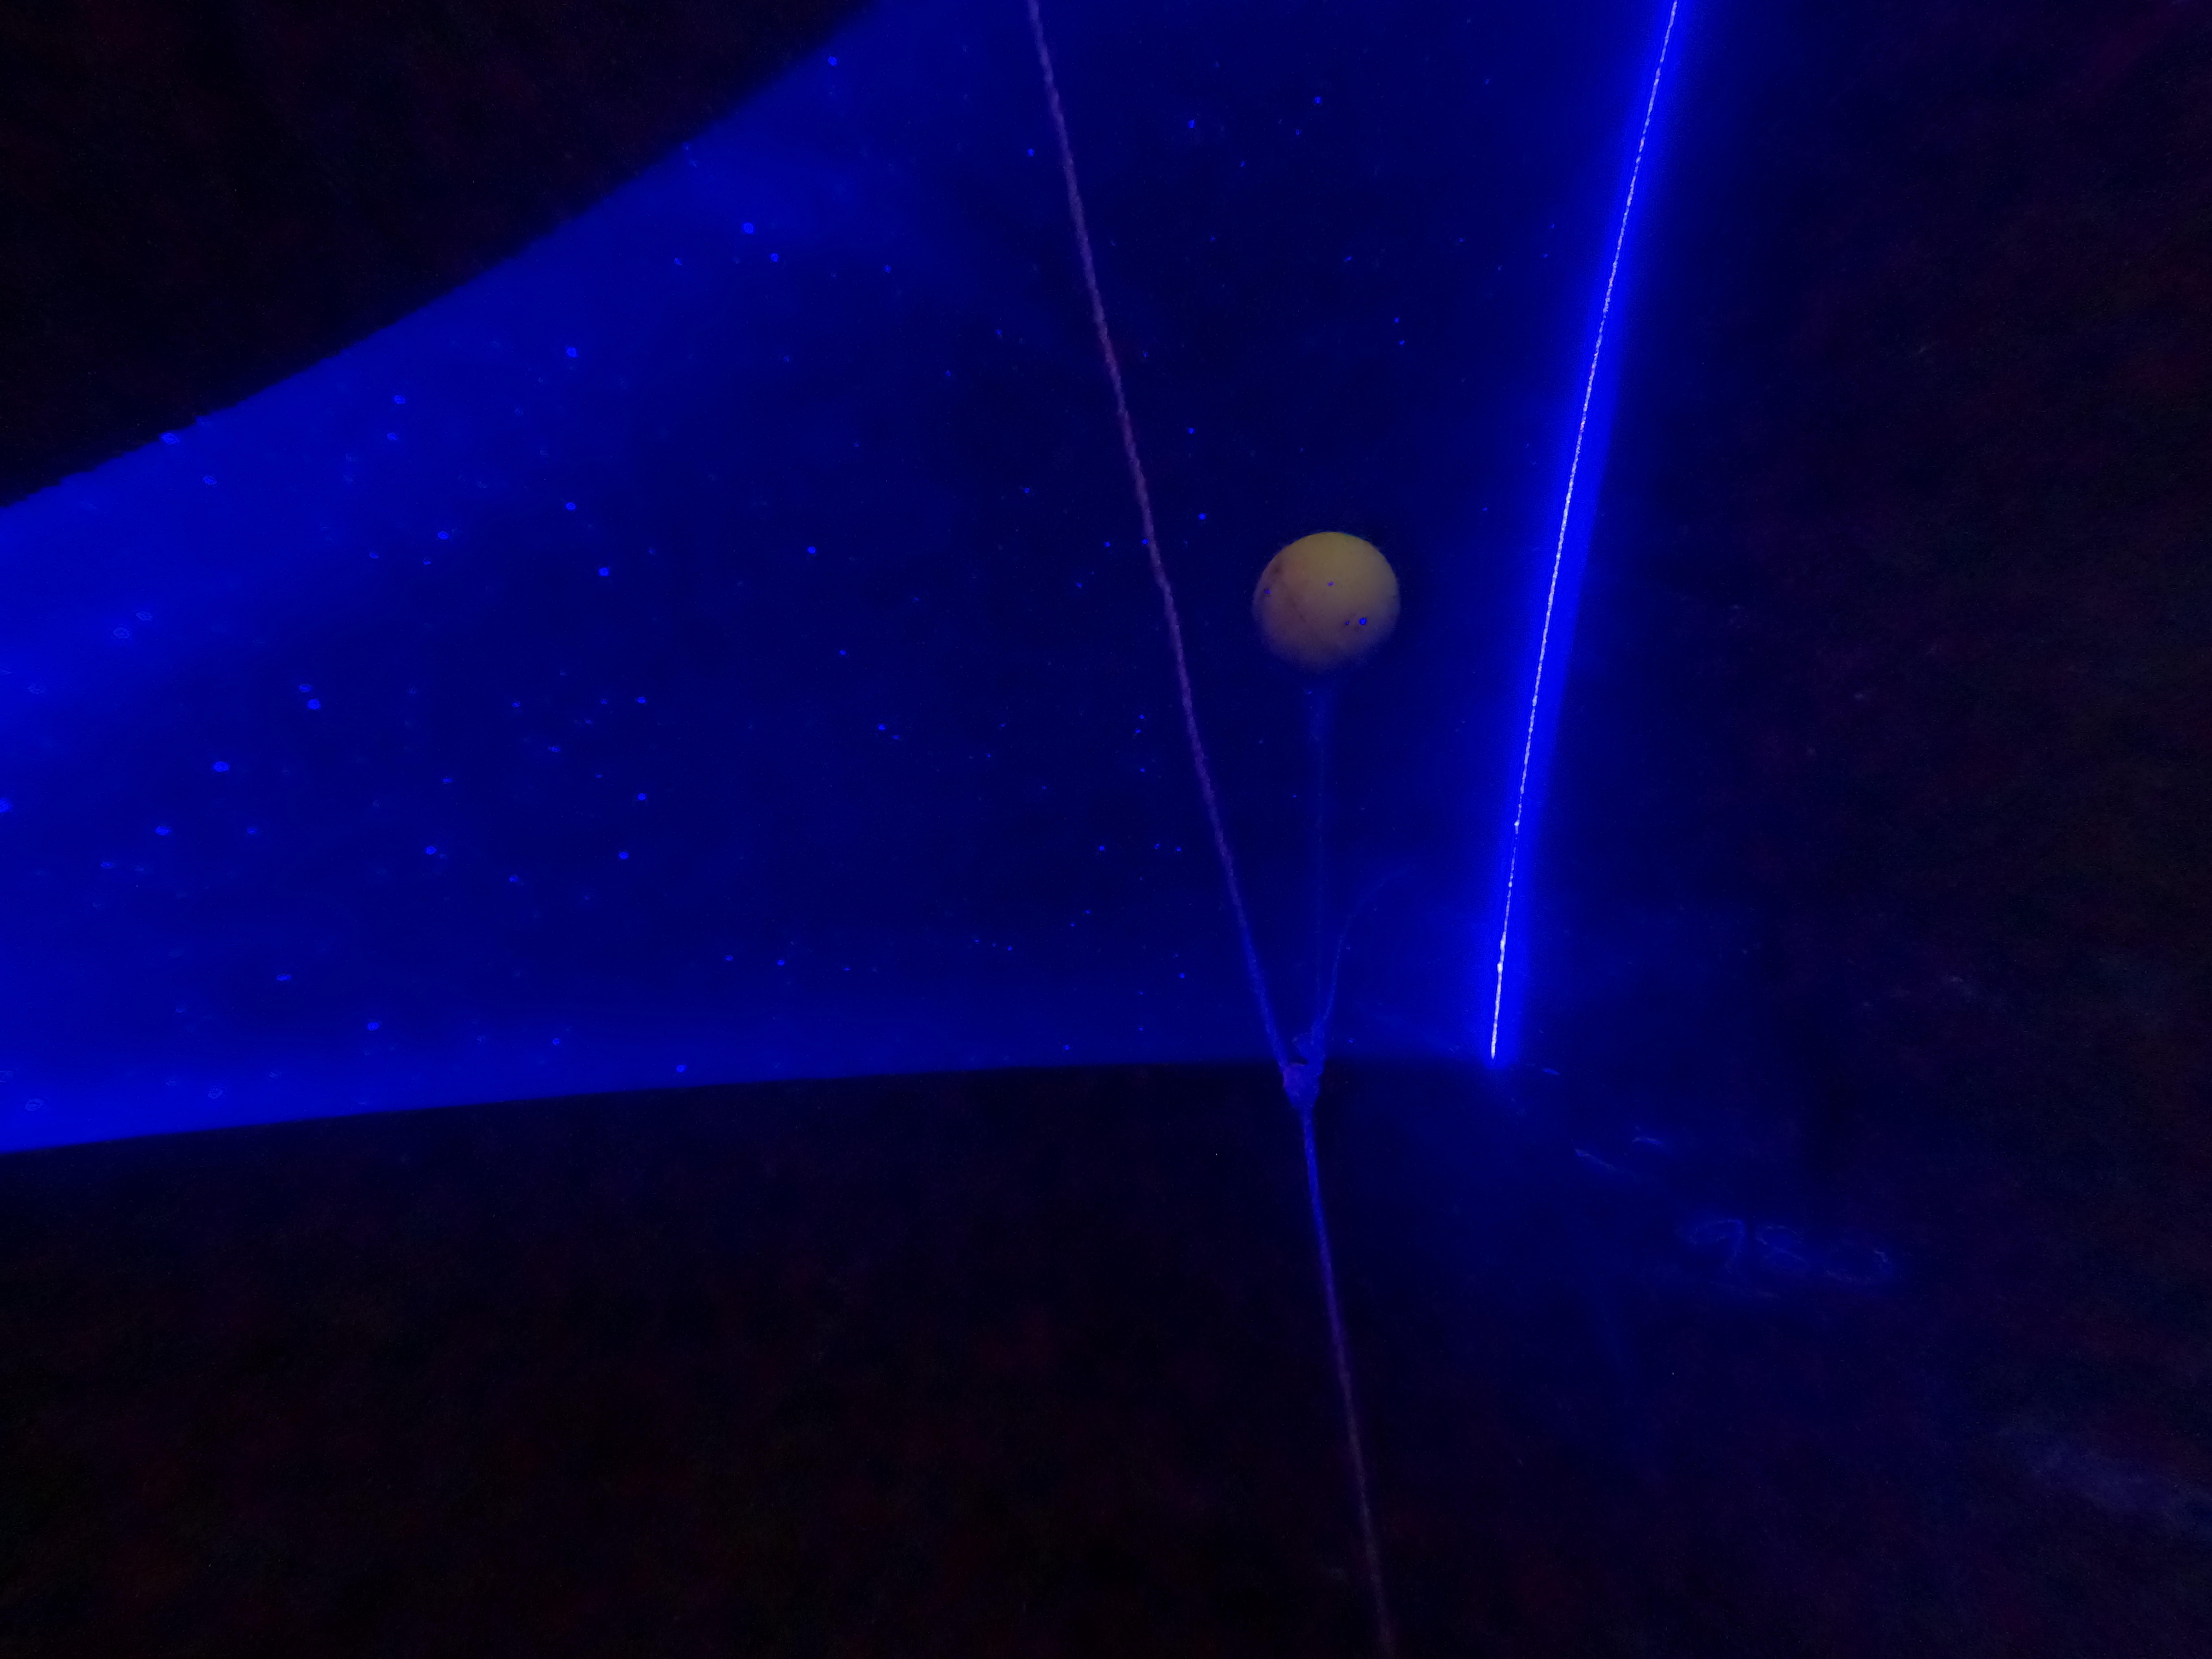

Supplement: Supplementary file 1027 [file G0031381.pdf › 10/G0031381.pdf]

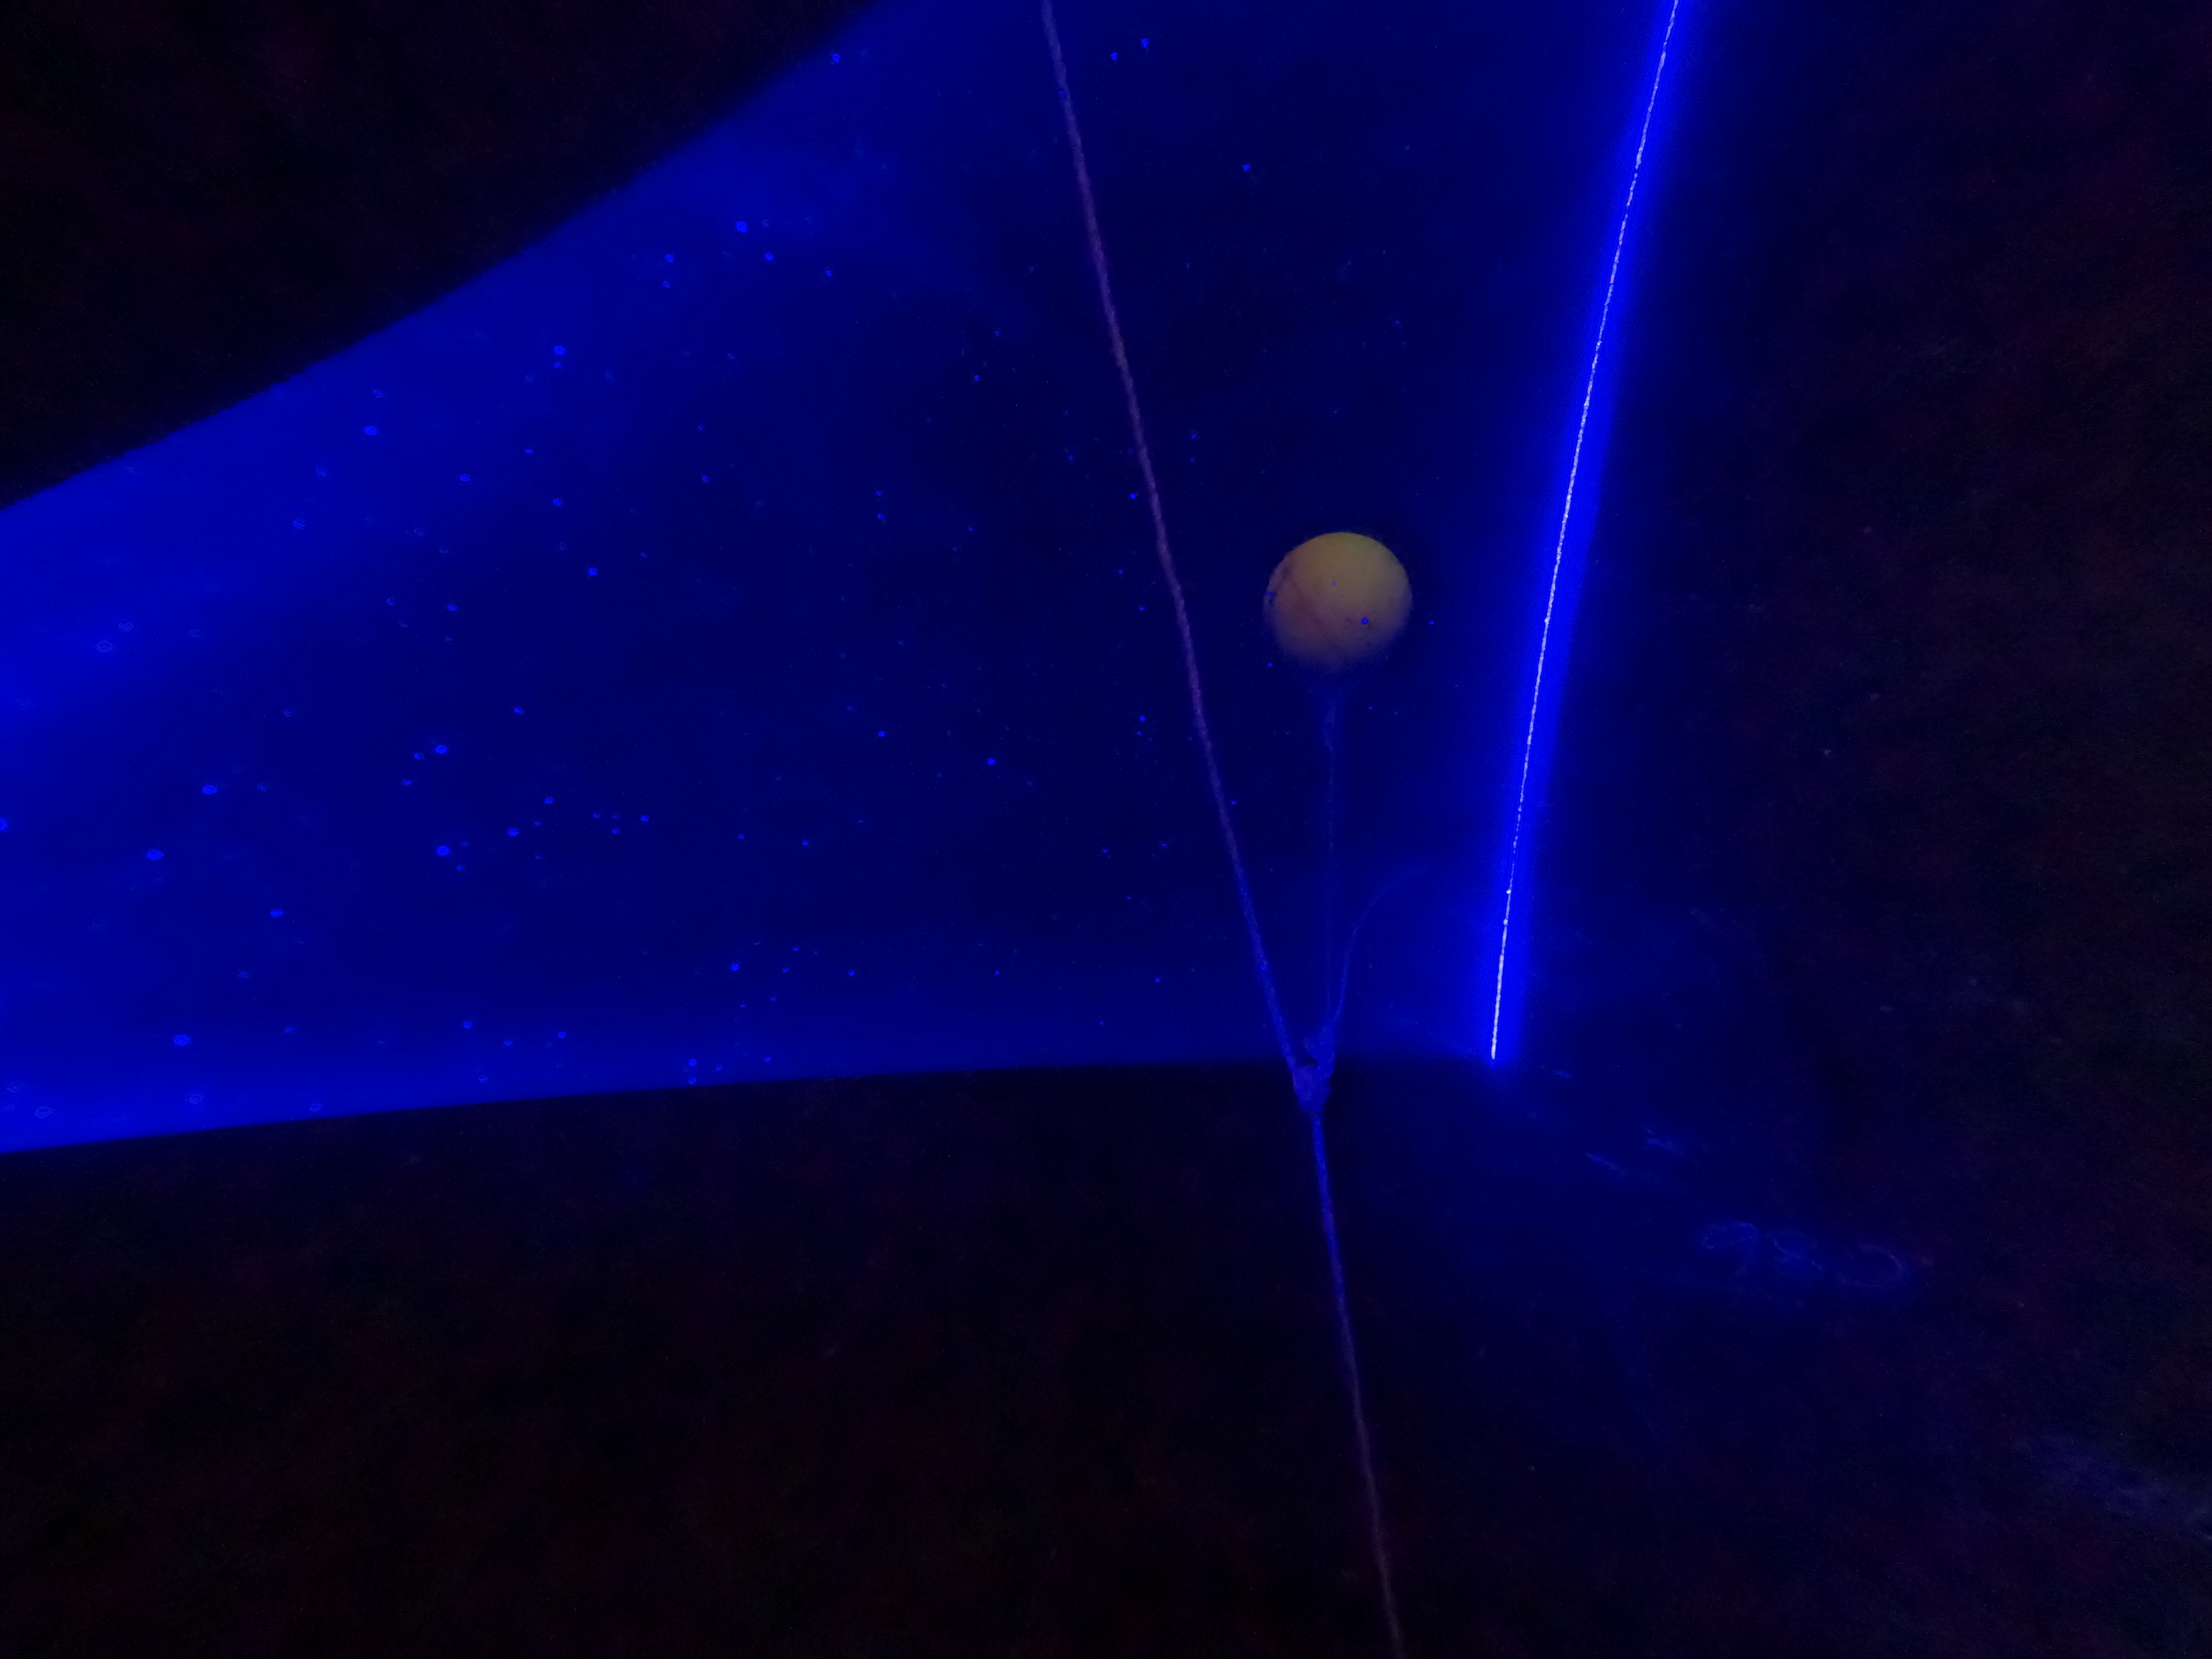

Supplement: Supplementary file 1029 [file G0031383.pdf › 10/G0031383.pdf]

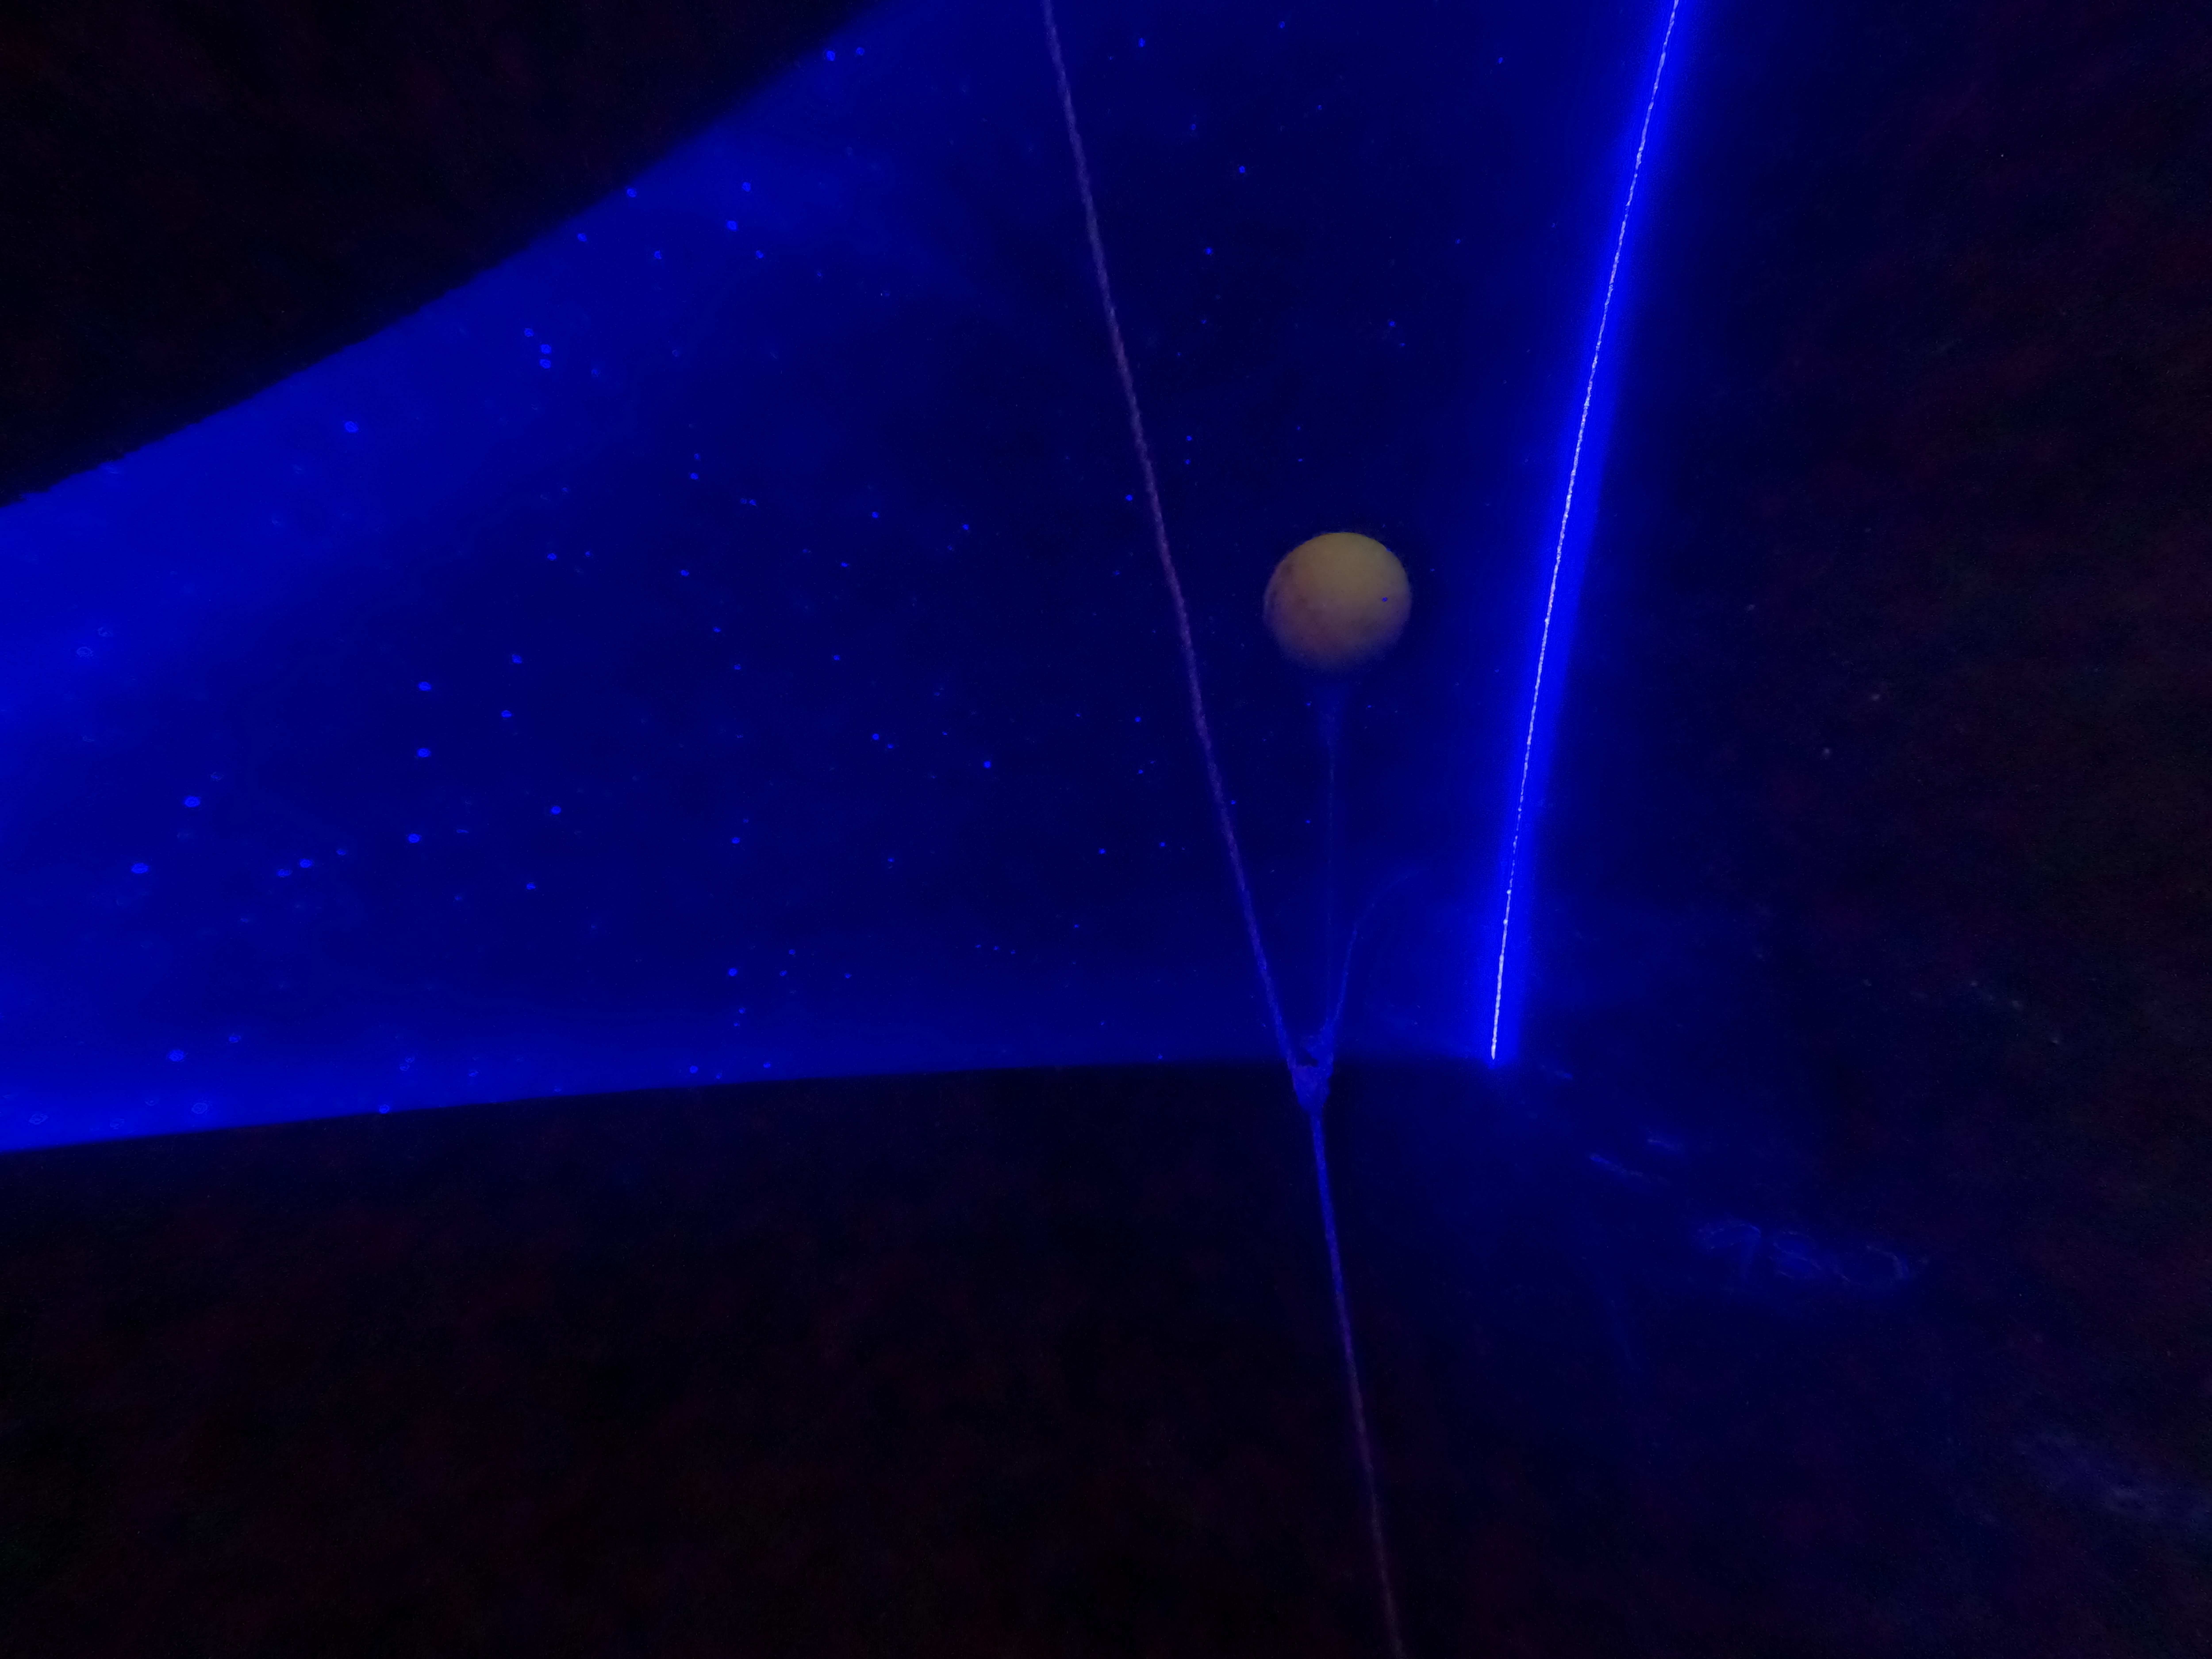

Supplement: Supplementary file 1030 [file G0031384.pdf › 10/G0031384.pdf]

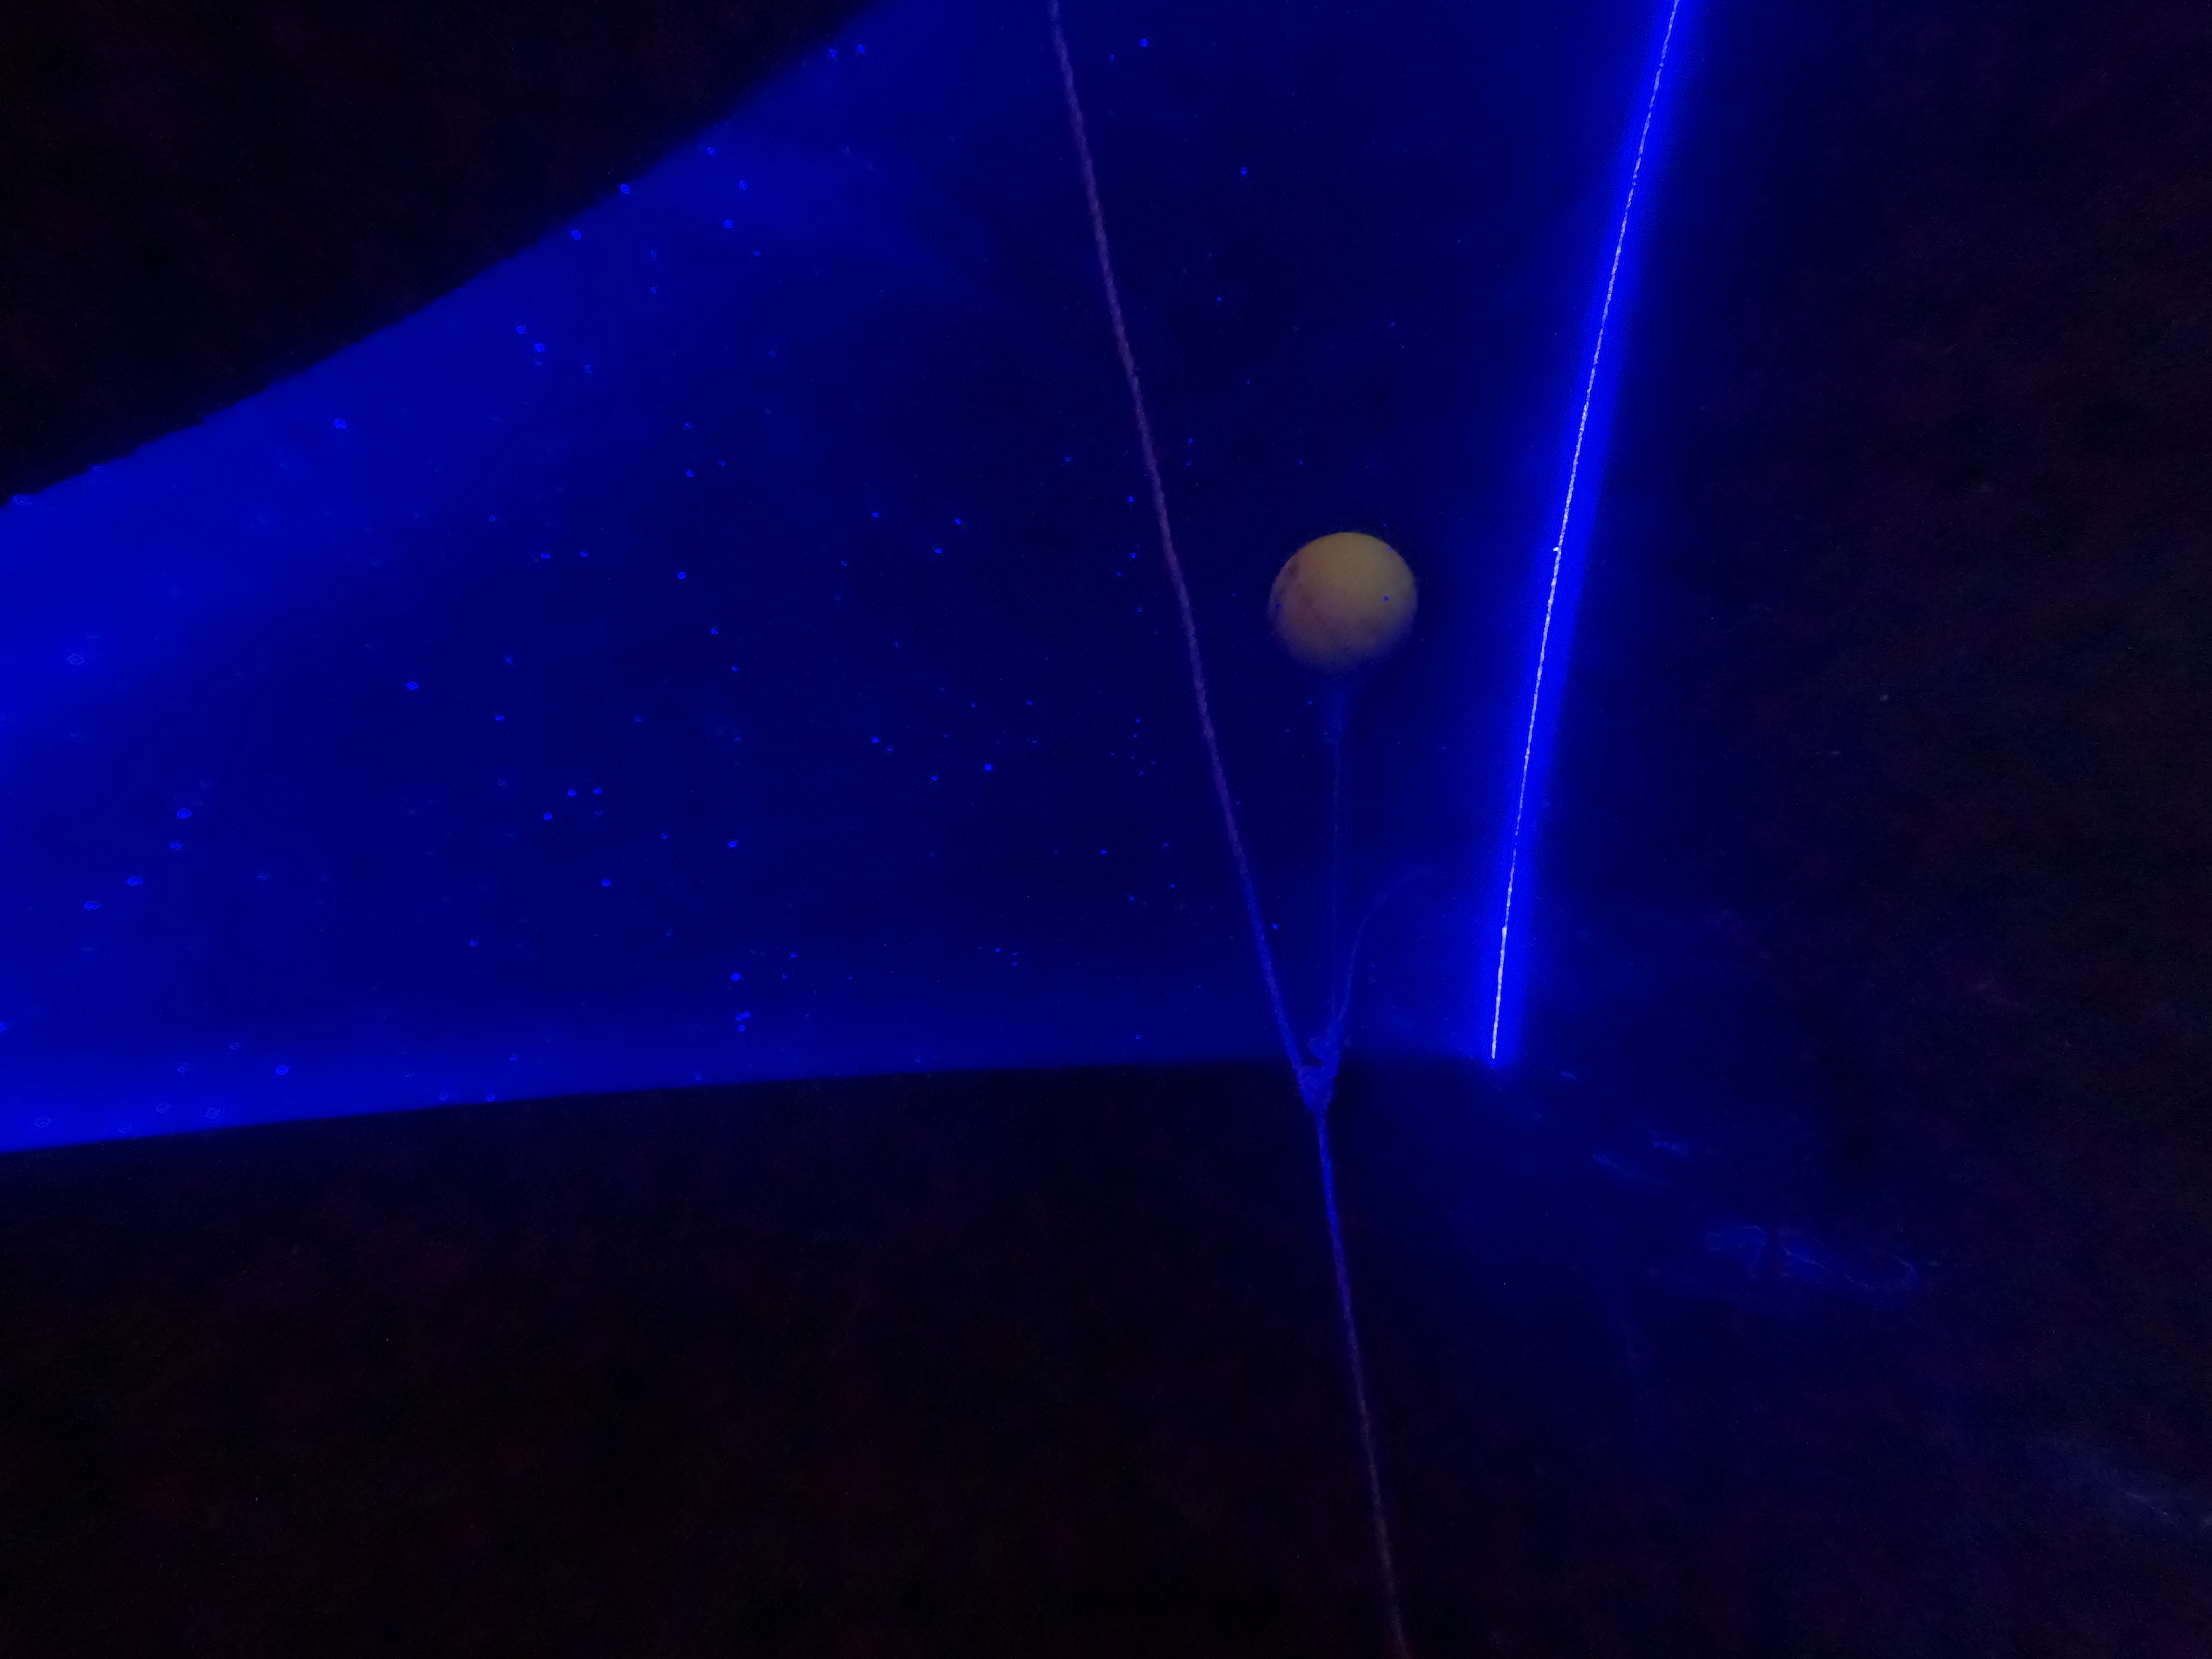

Supplement: Supplementary file 1031 [file G0031385.pdf › 10/G0031385.pdf]

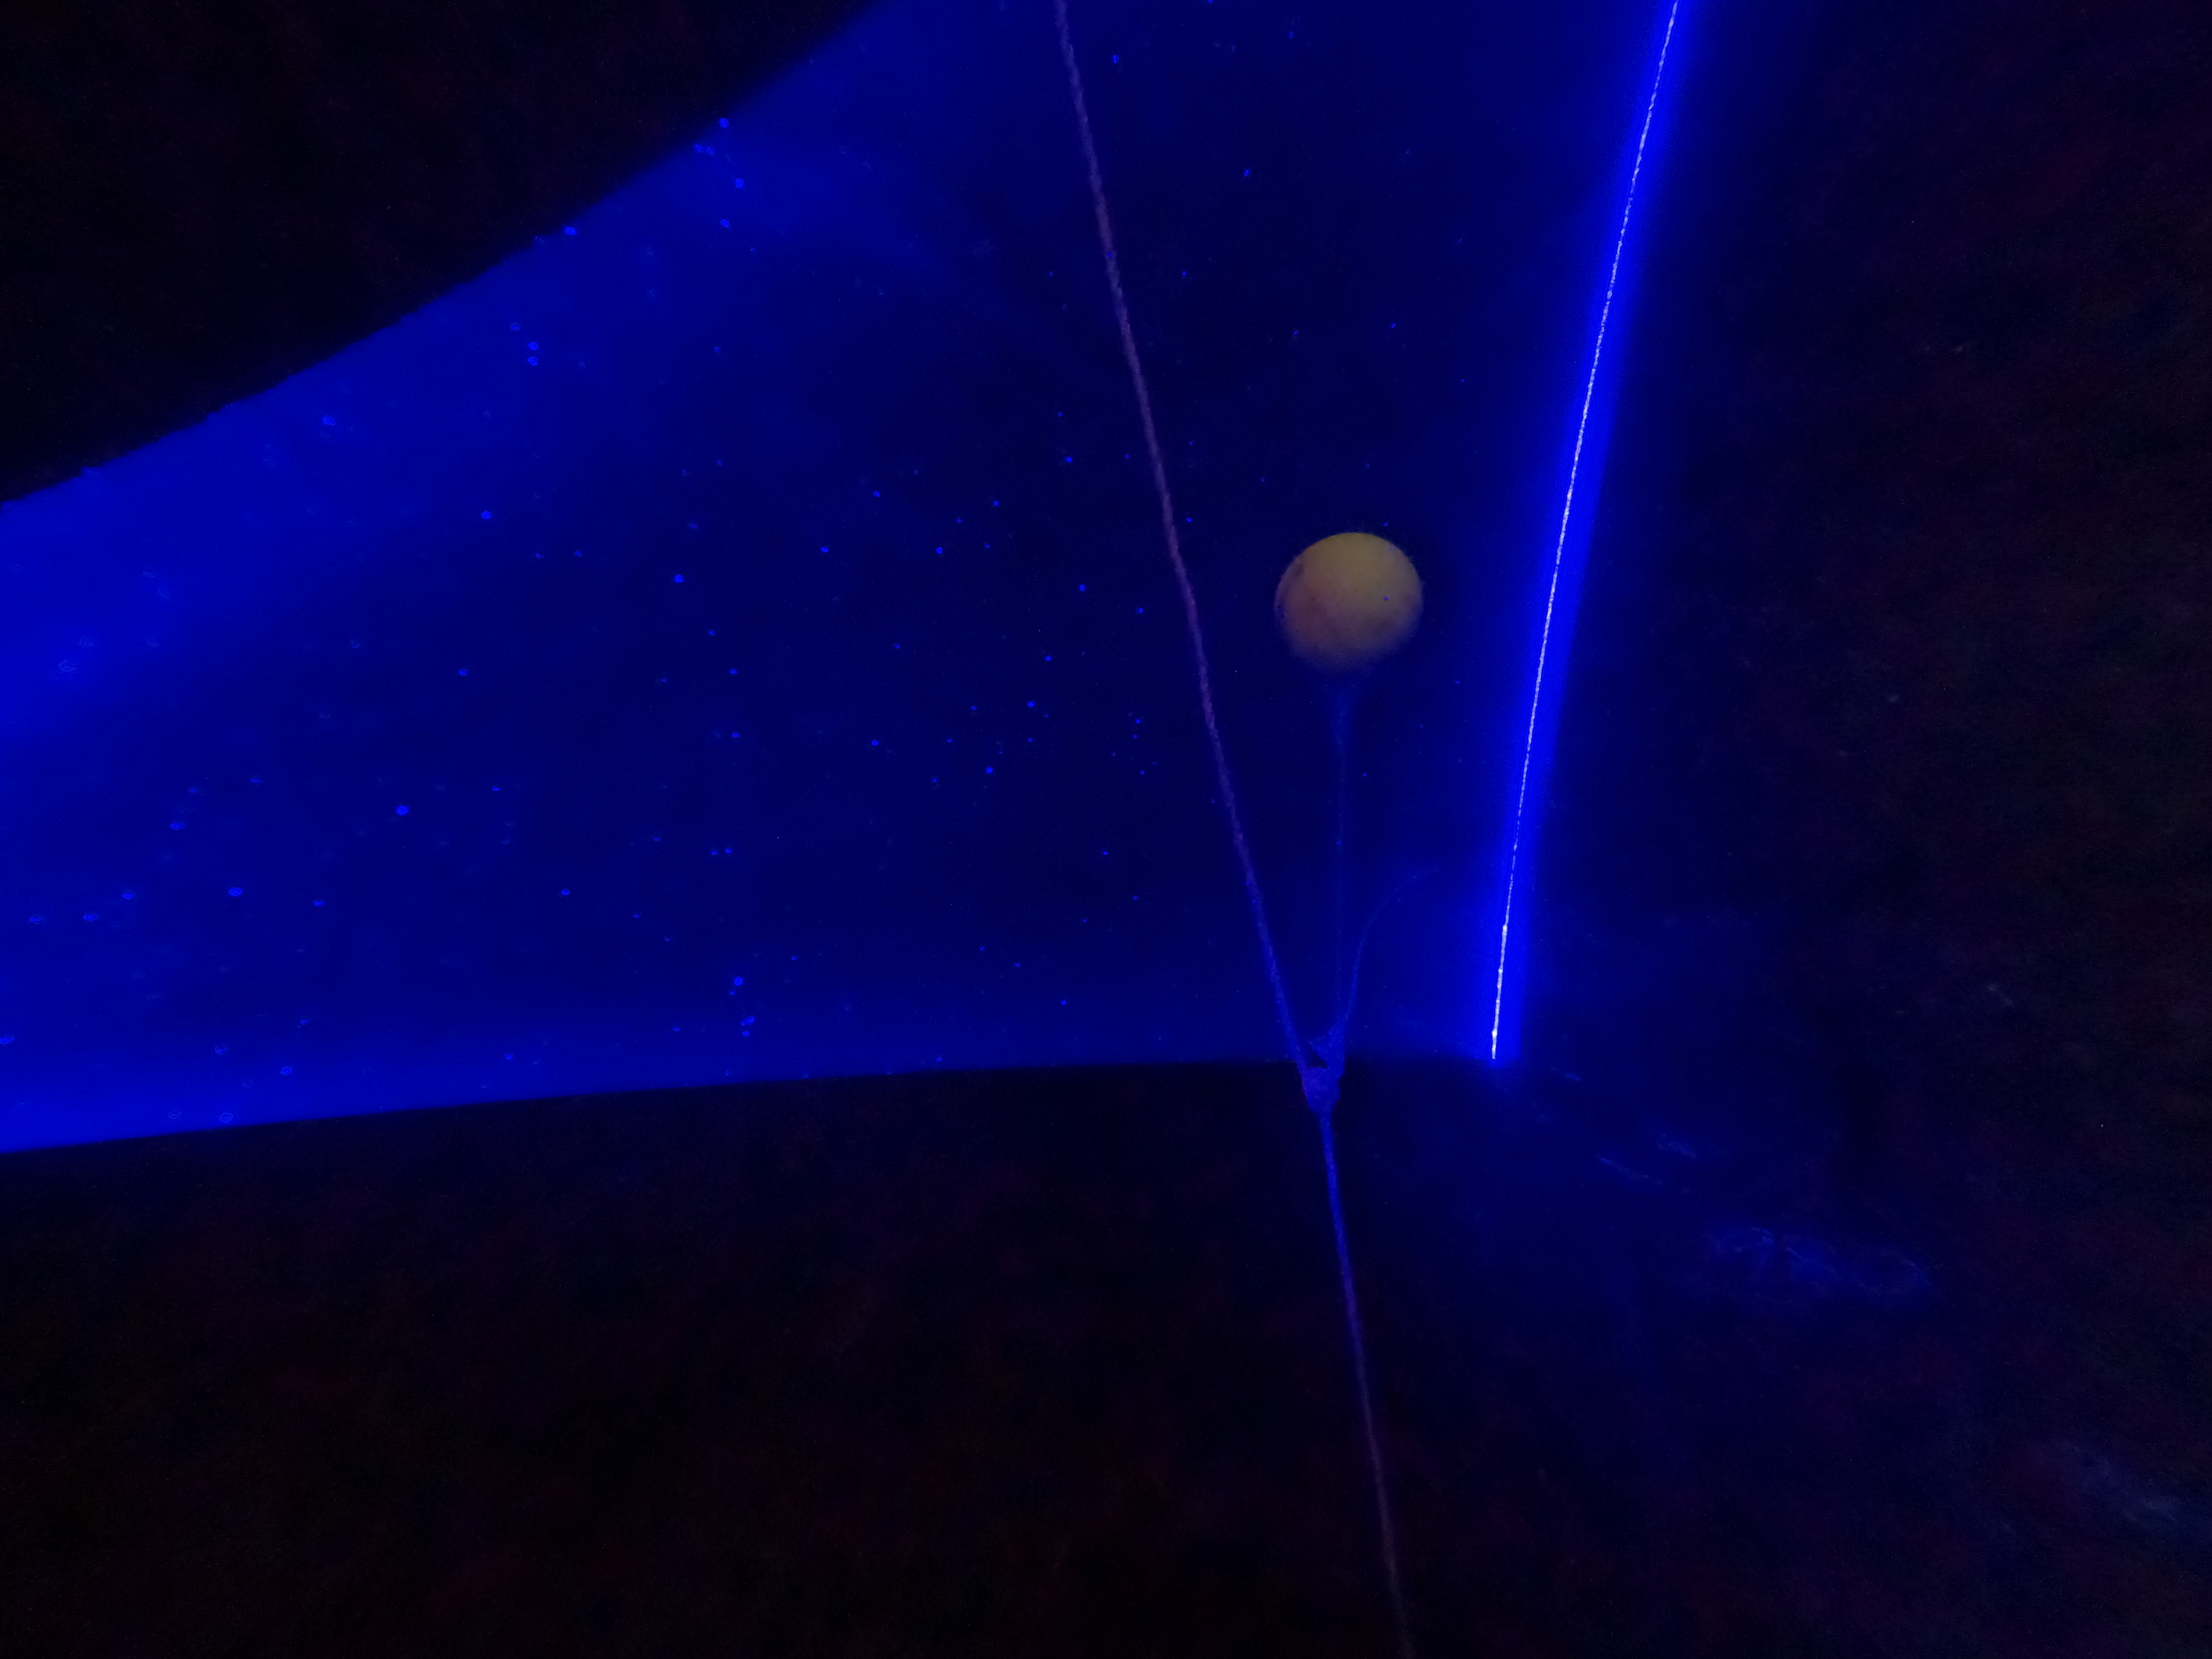

Supplement: Supplementary file 1032 [file G0031386.pdf › 10/G0031386.pdf]

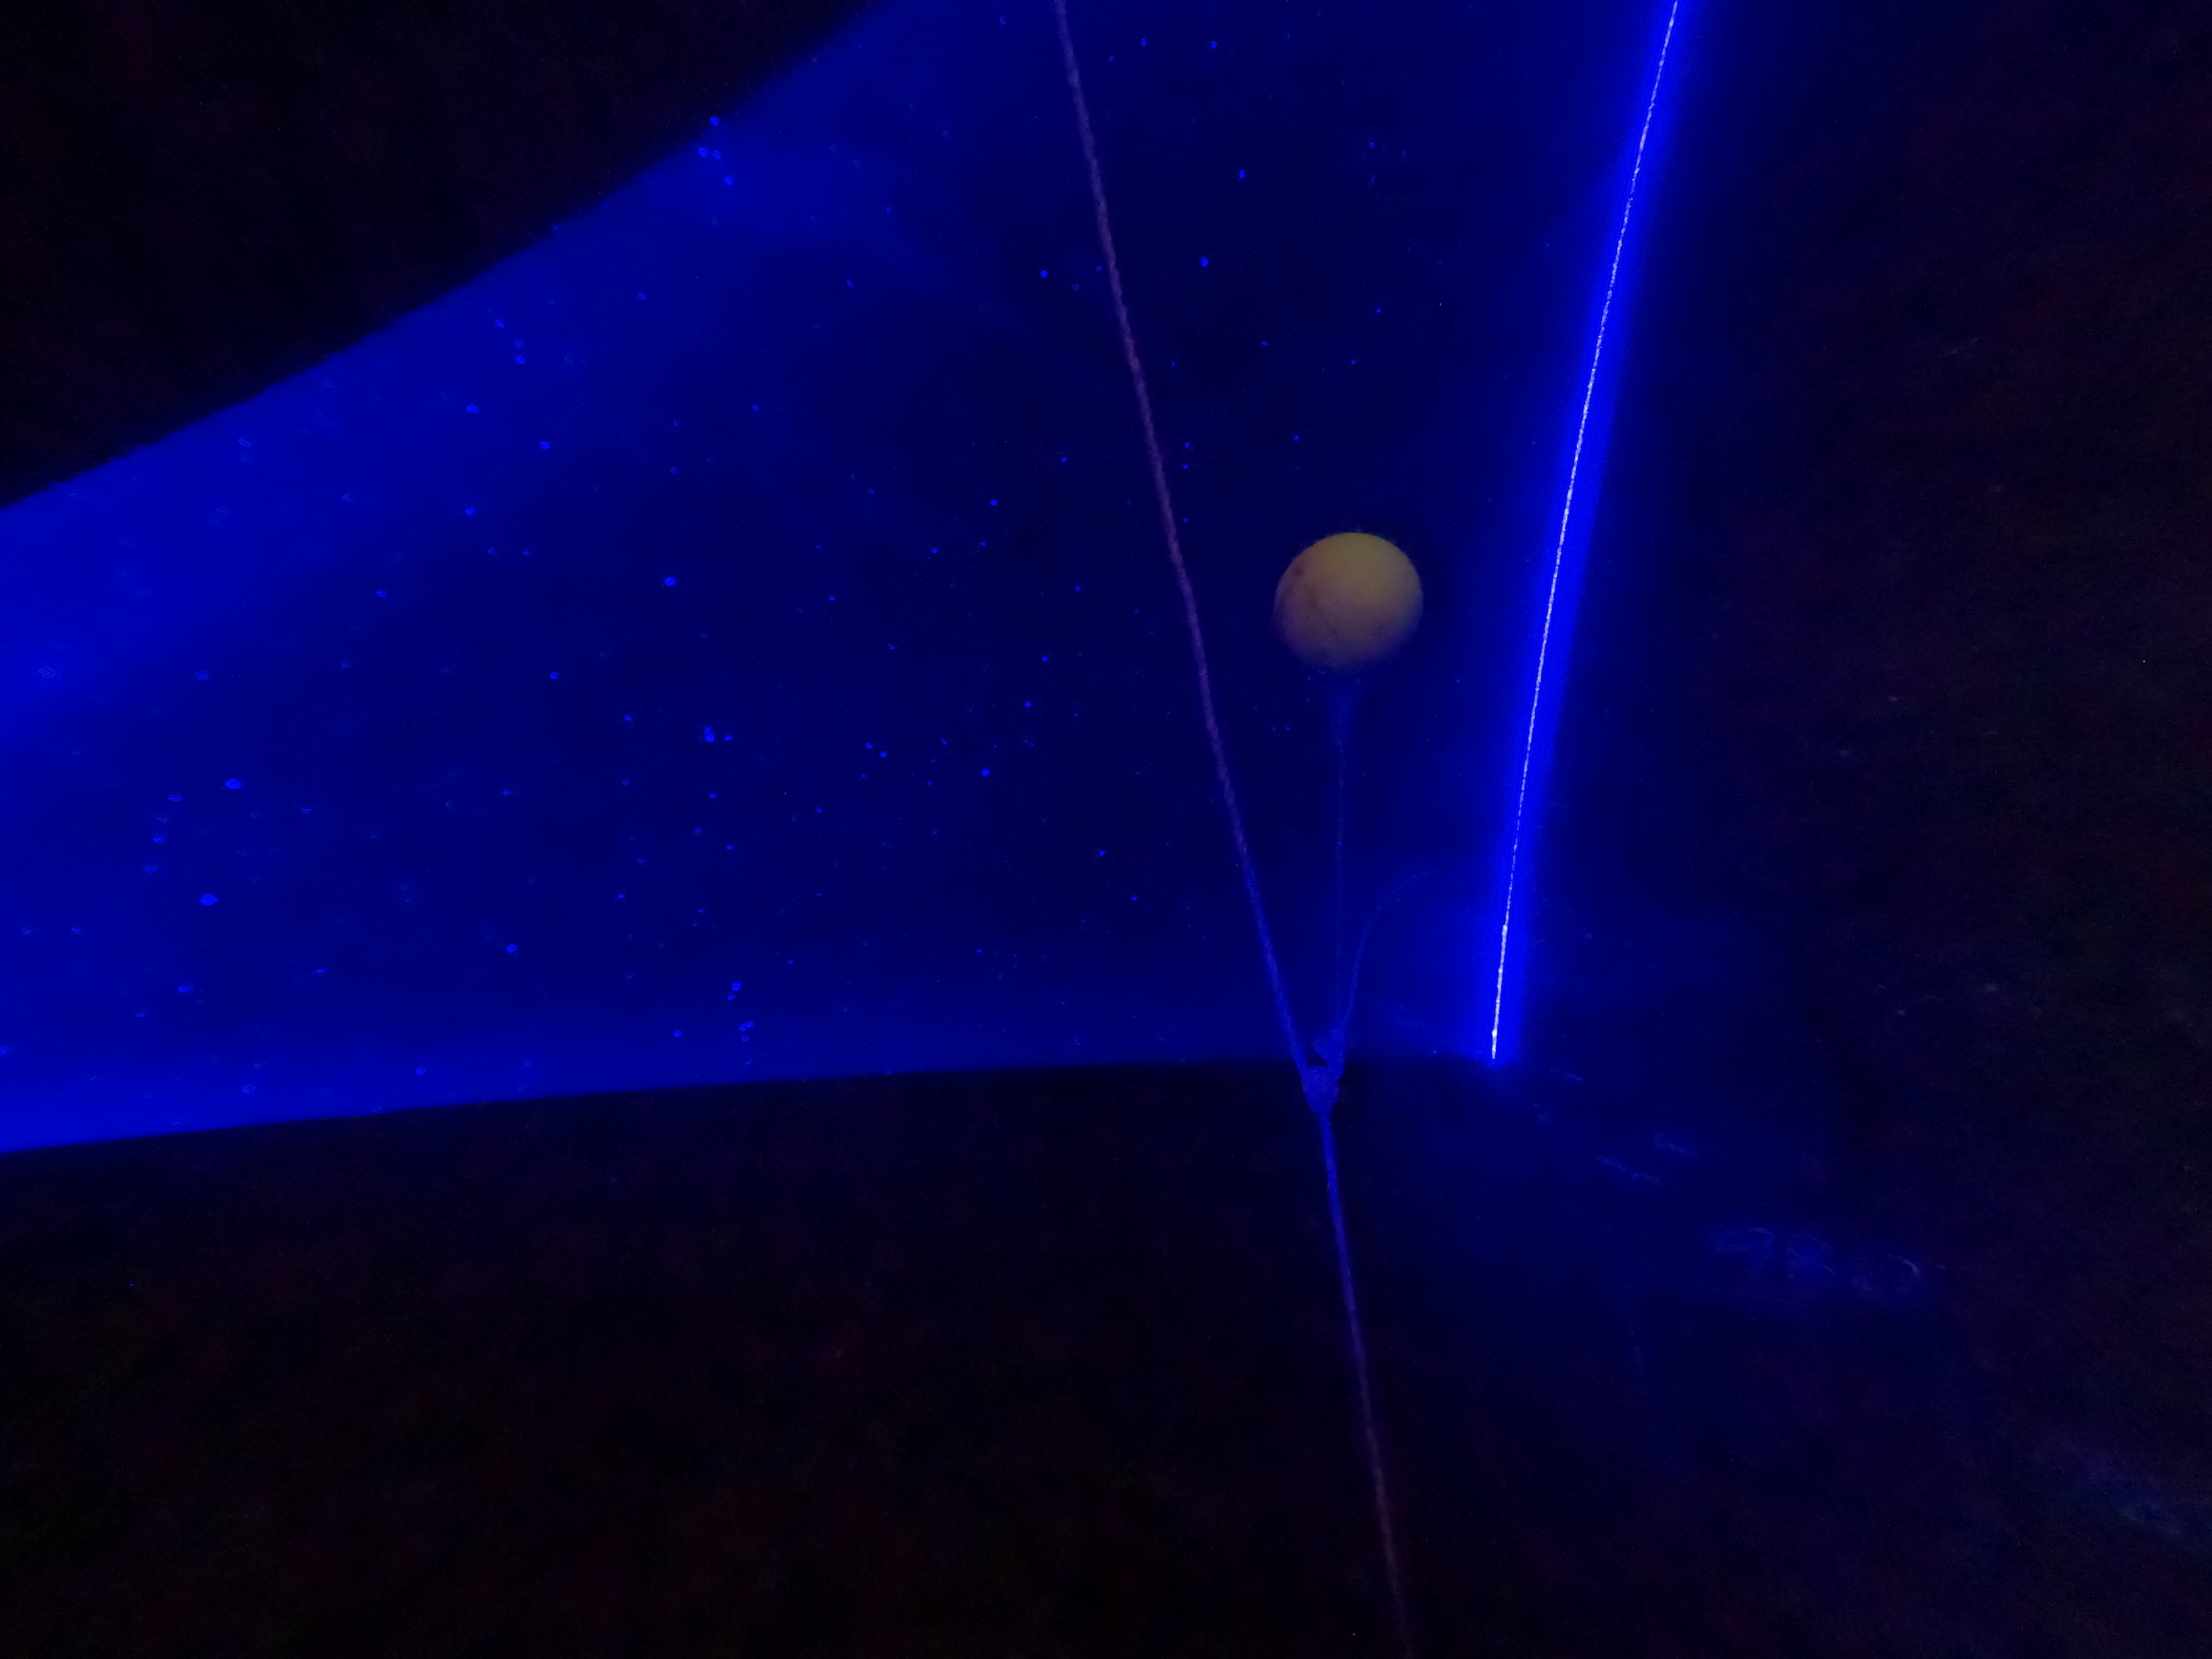

Supplement: Supplementary file 1033 [file G0031387.pdf › 10/G0031387.pdf]

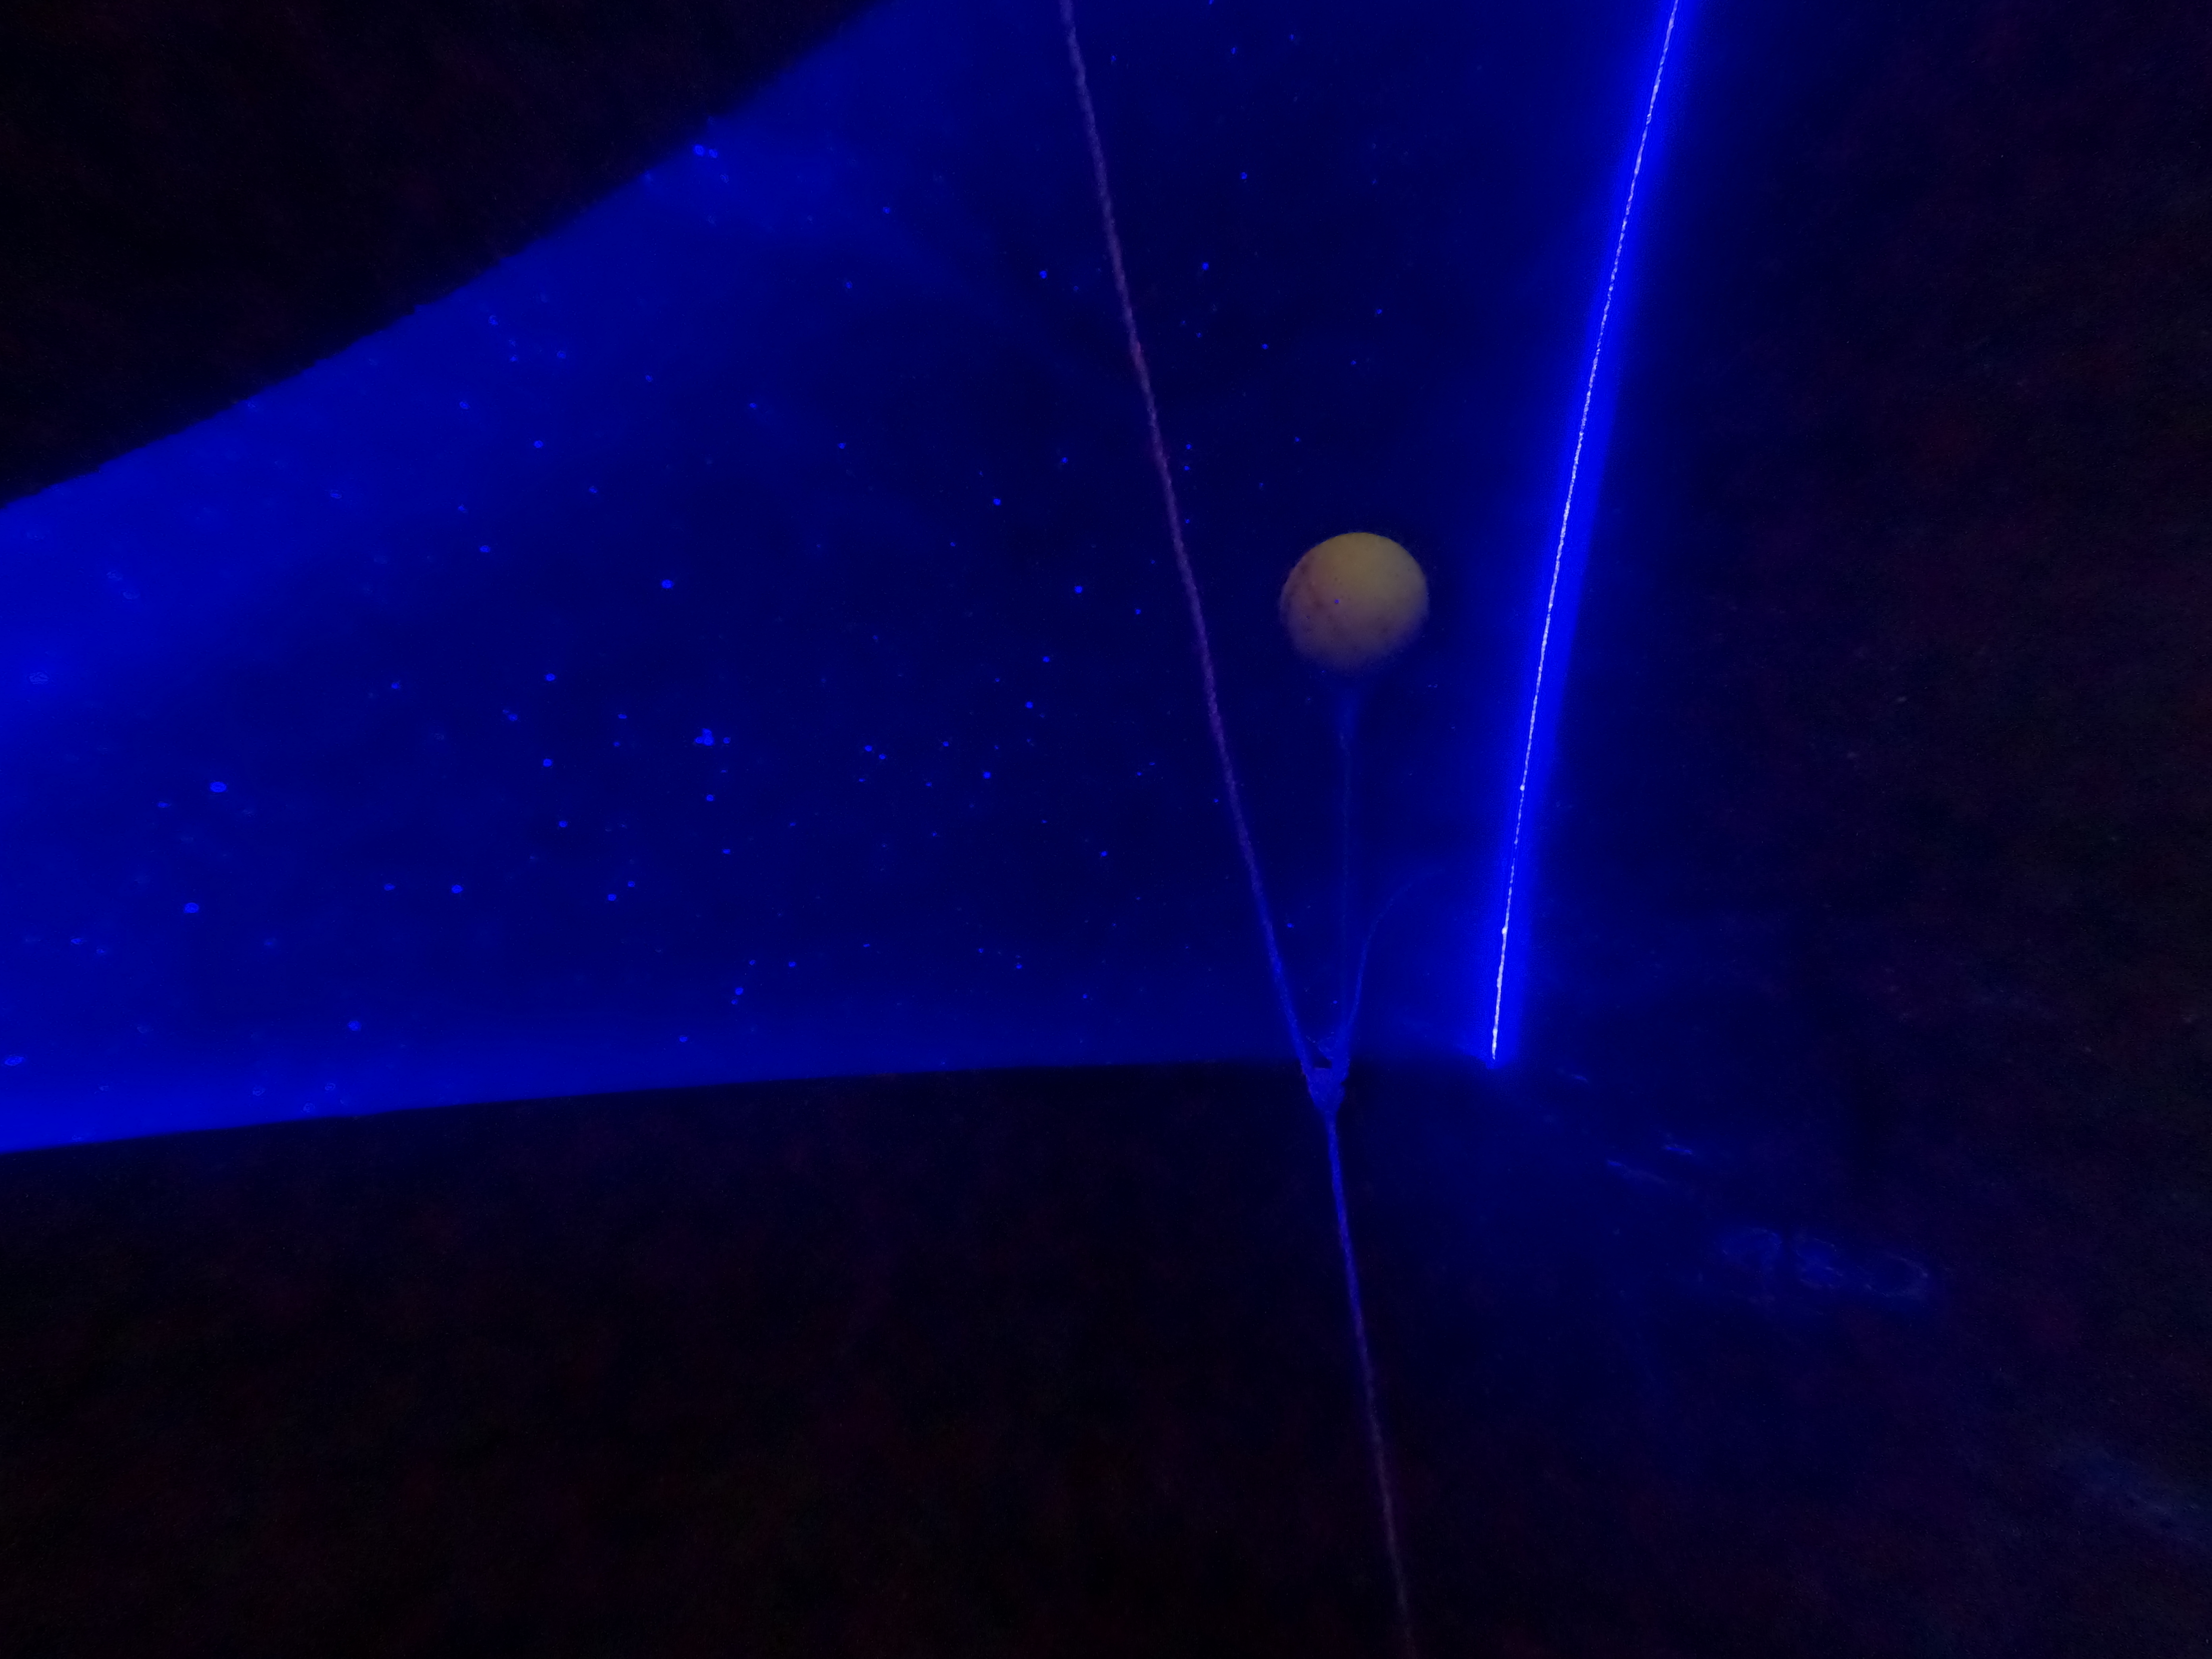

Supplement: Supplementary file 1034 [file G0031388.pdf › 10/G0031388.pdf]

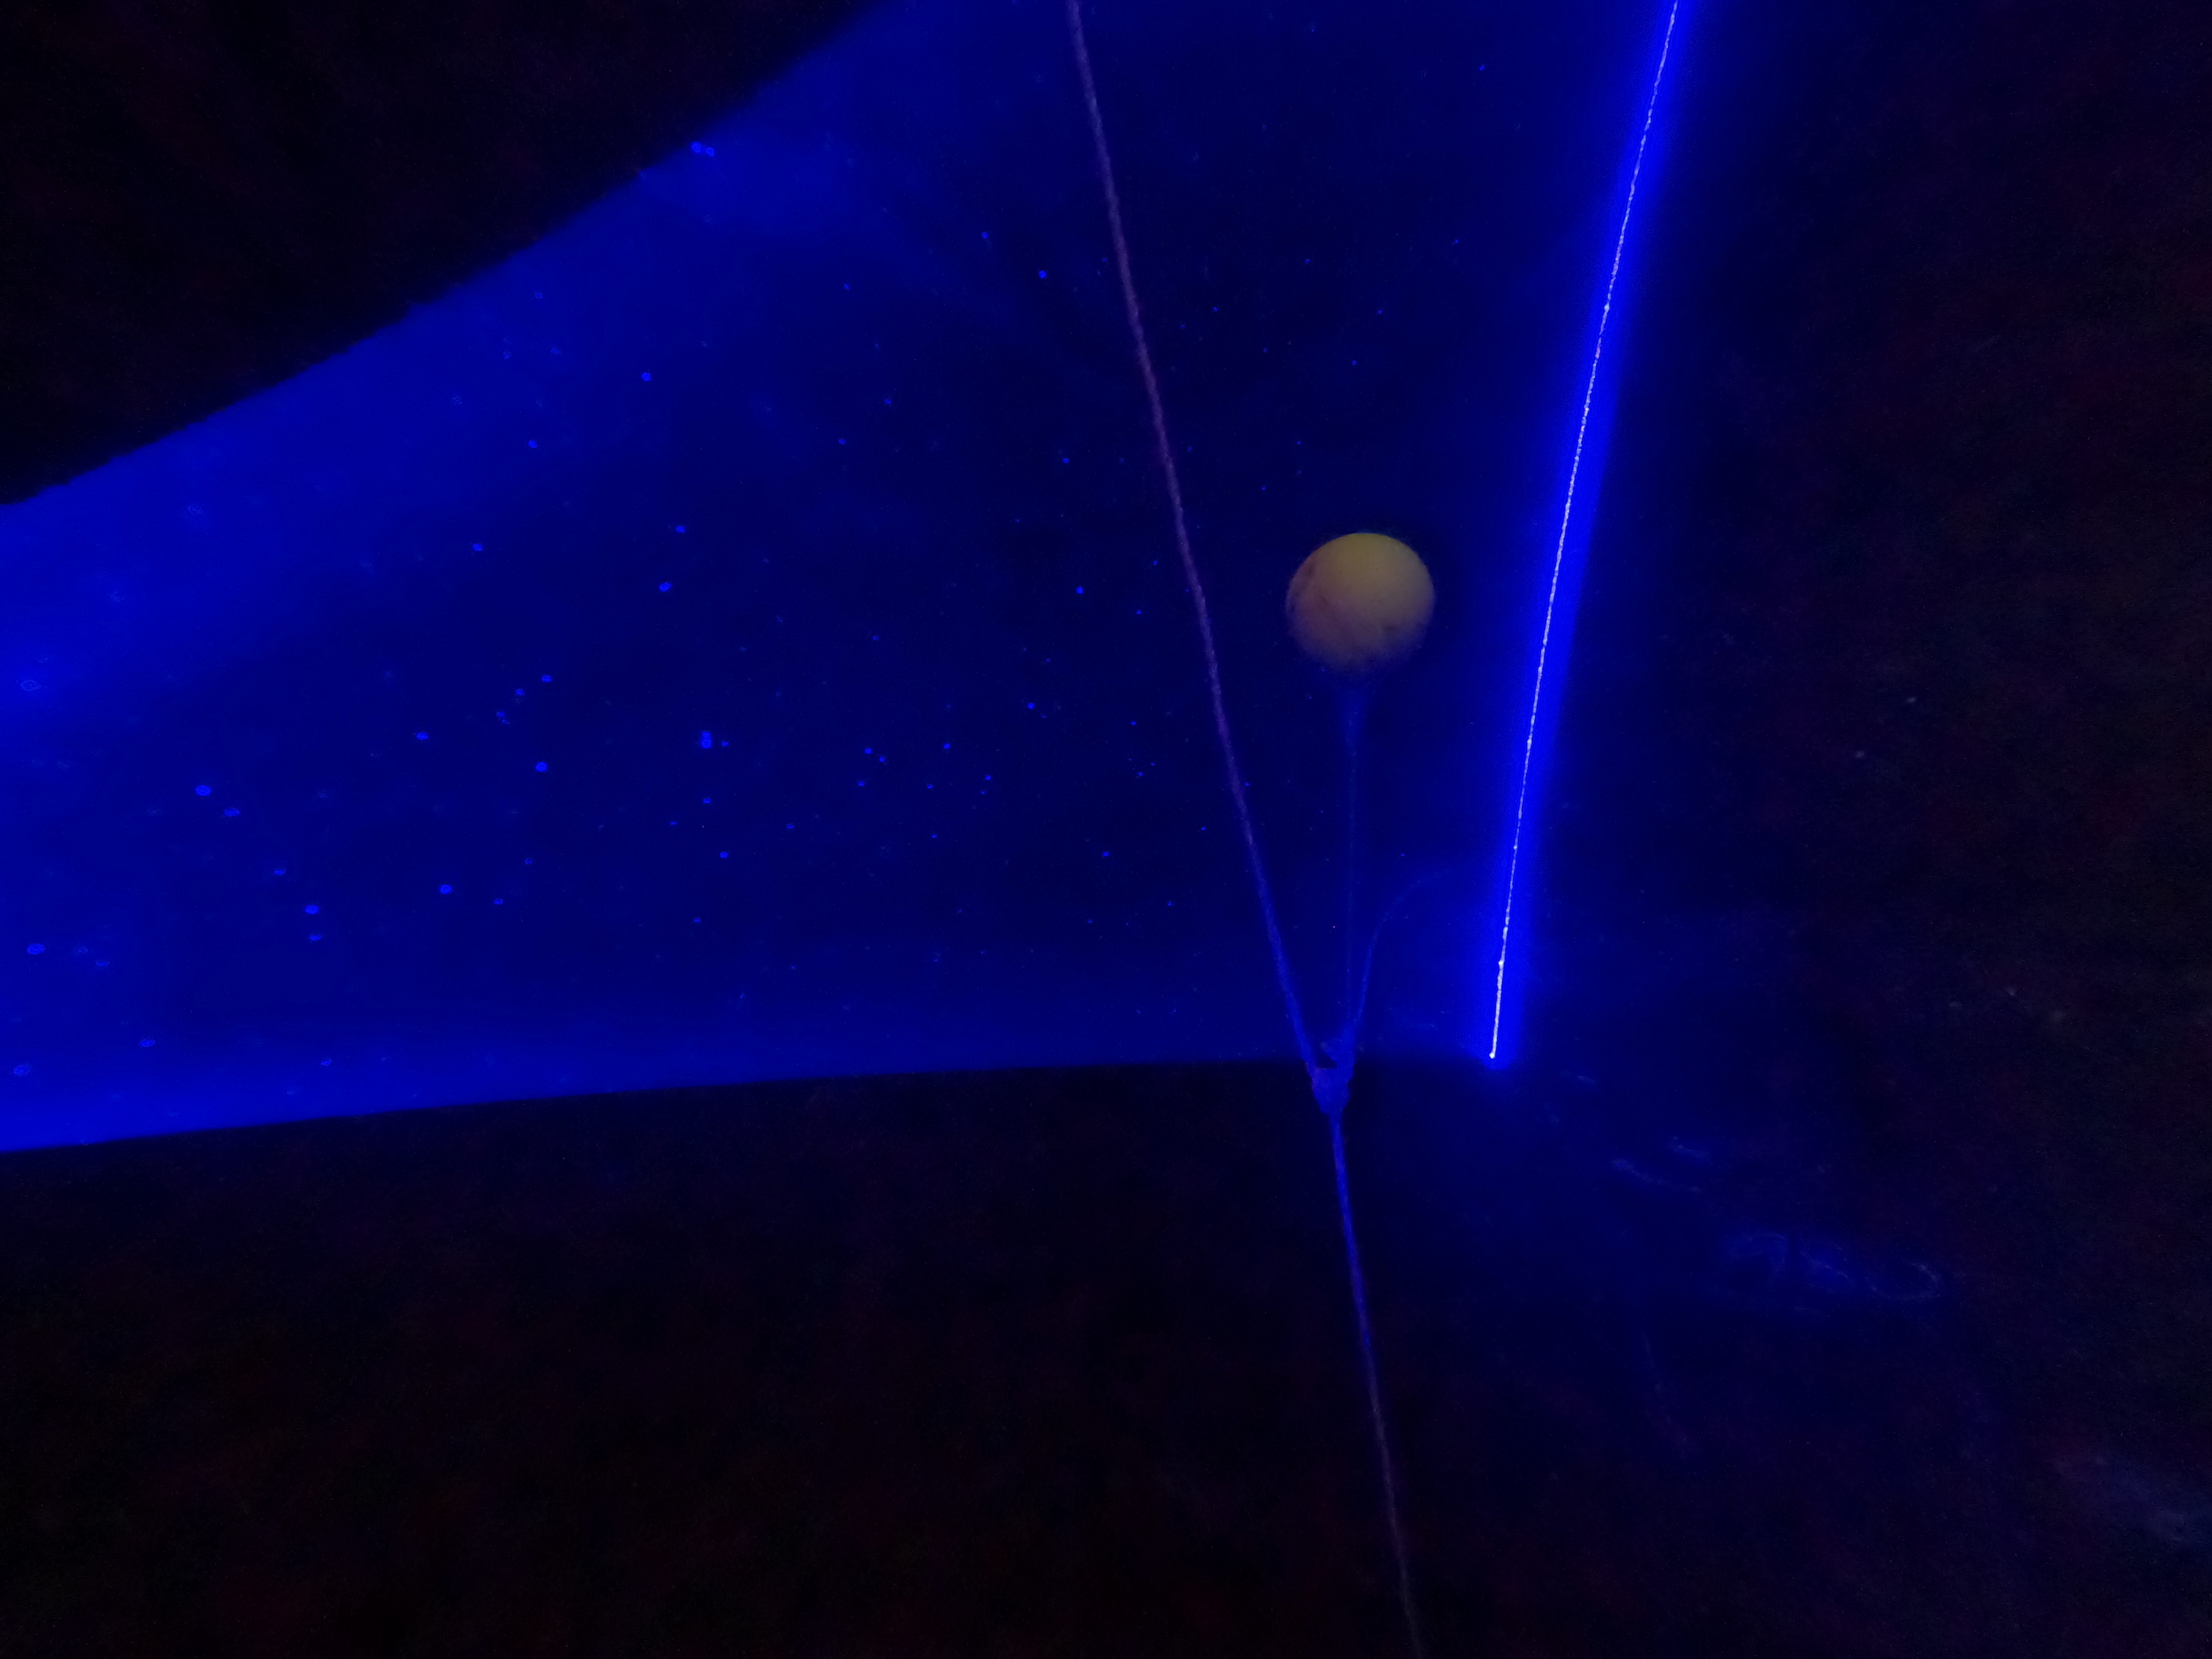

Supplement: Supplementary file 1035 [file G0031389.pdf › 10/G0031389.pdf]

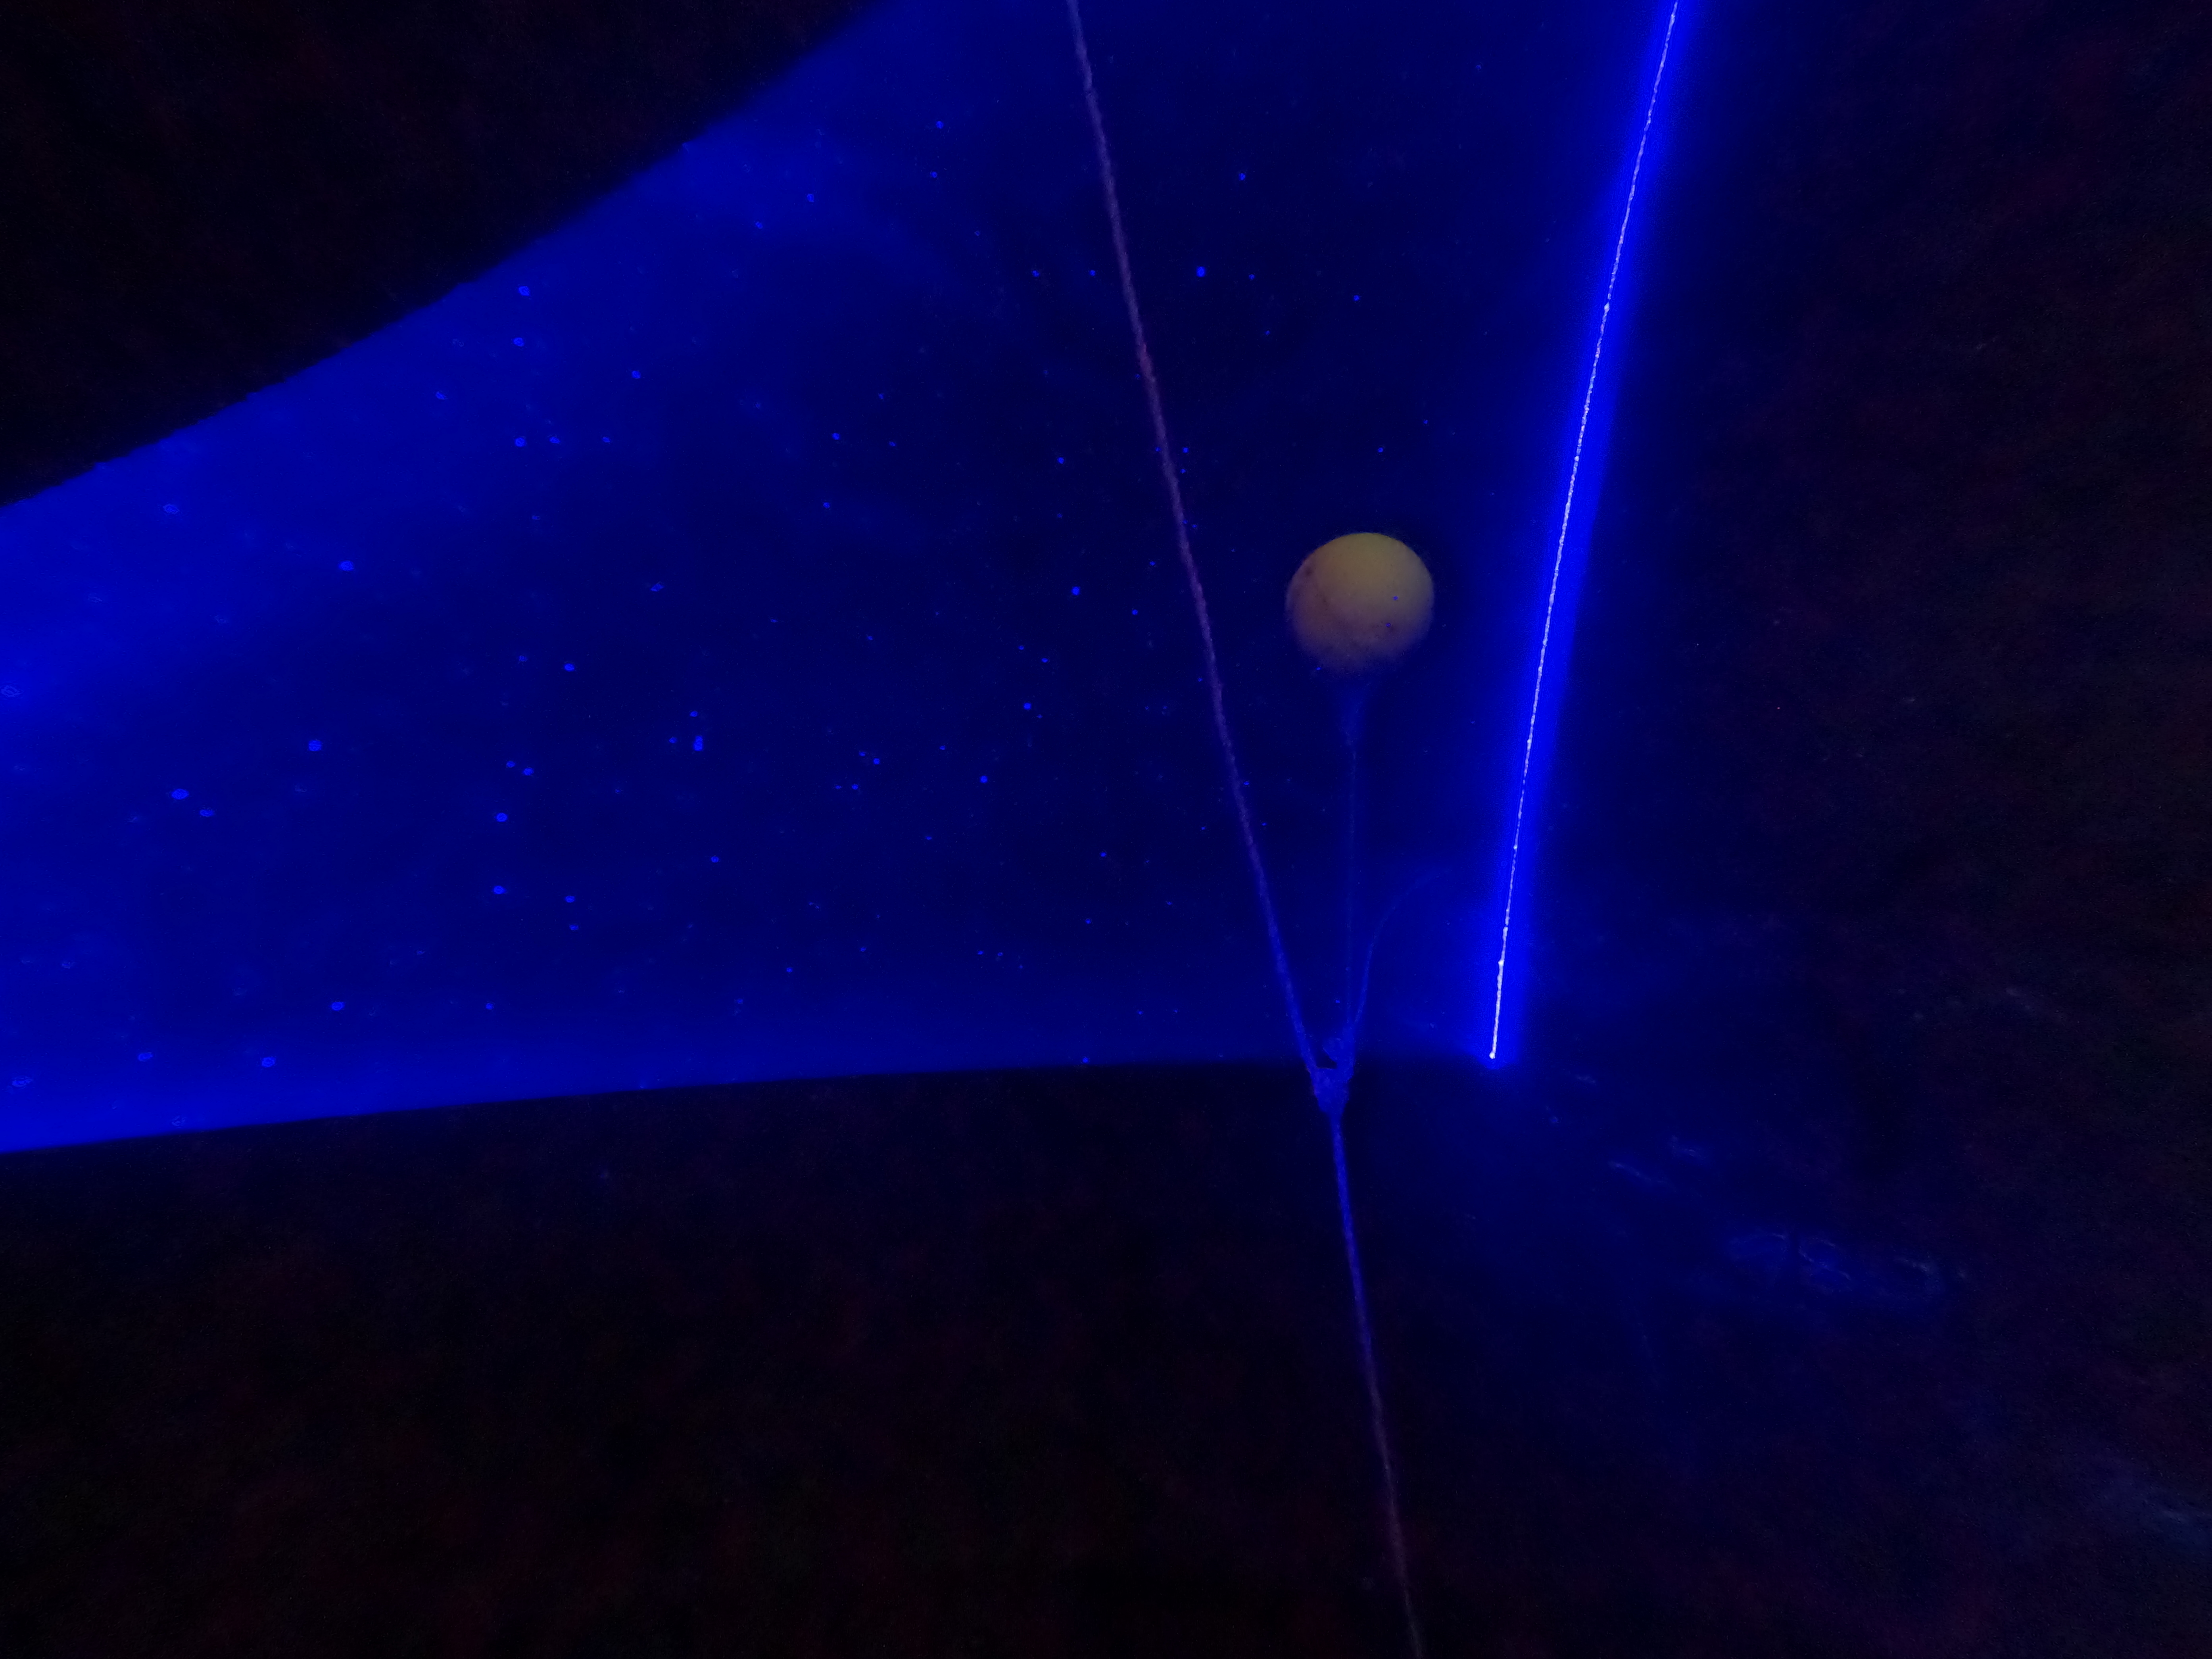

Supplement: Supplementary file 1036 [file G0031390.pdf › 10/G0031390.pdf]

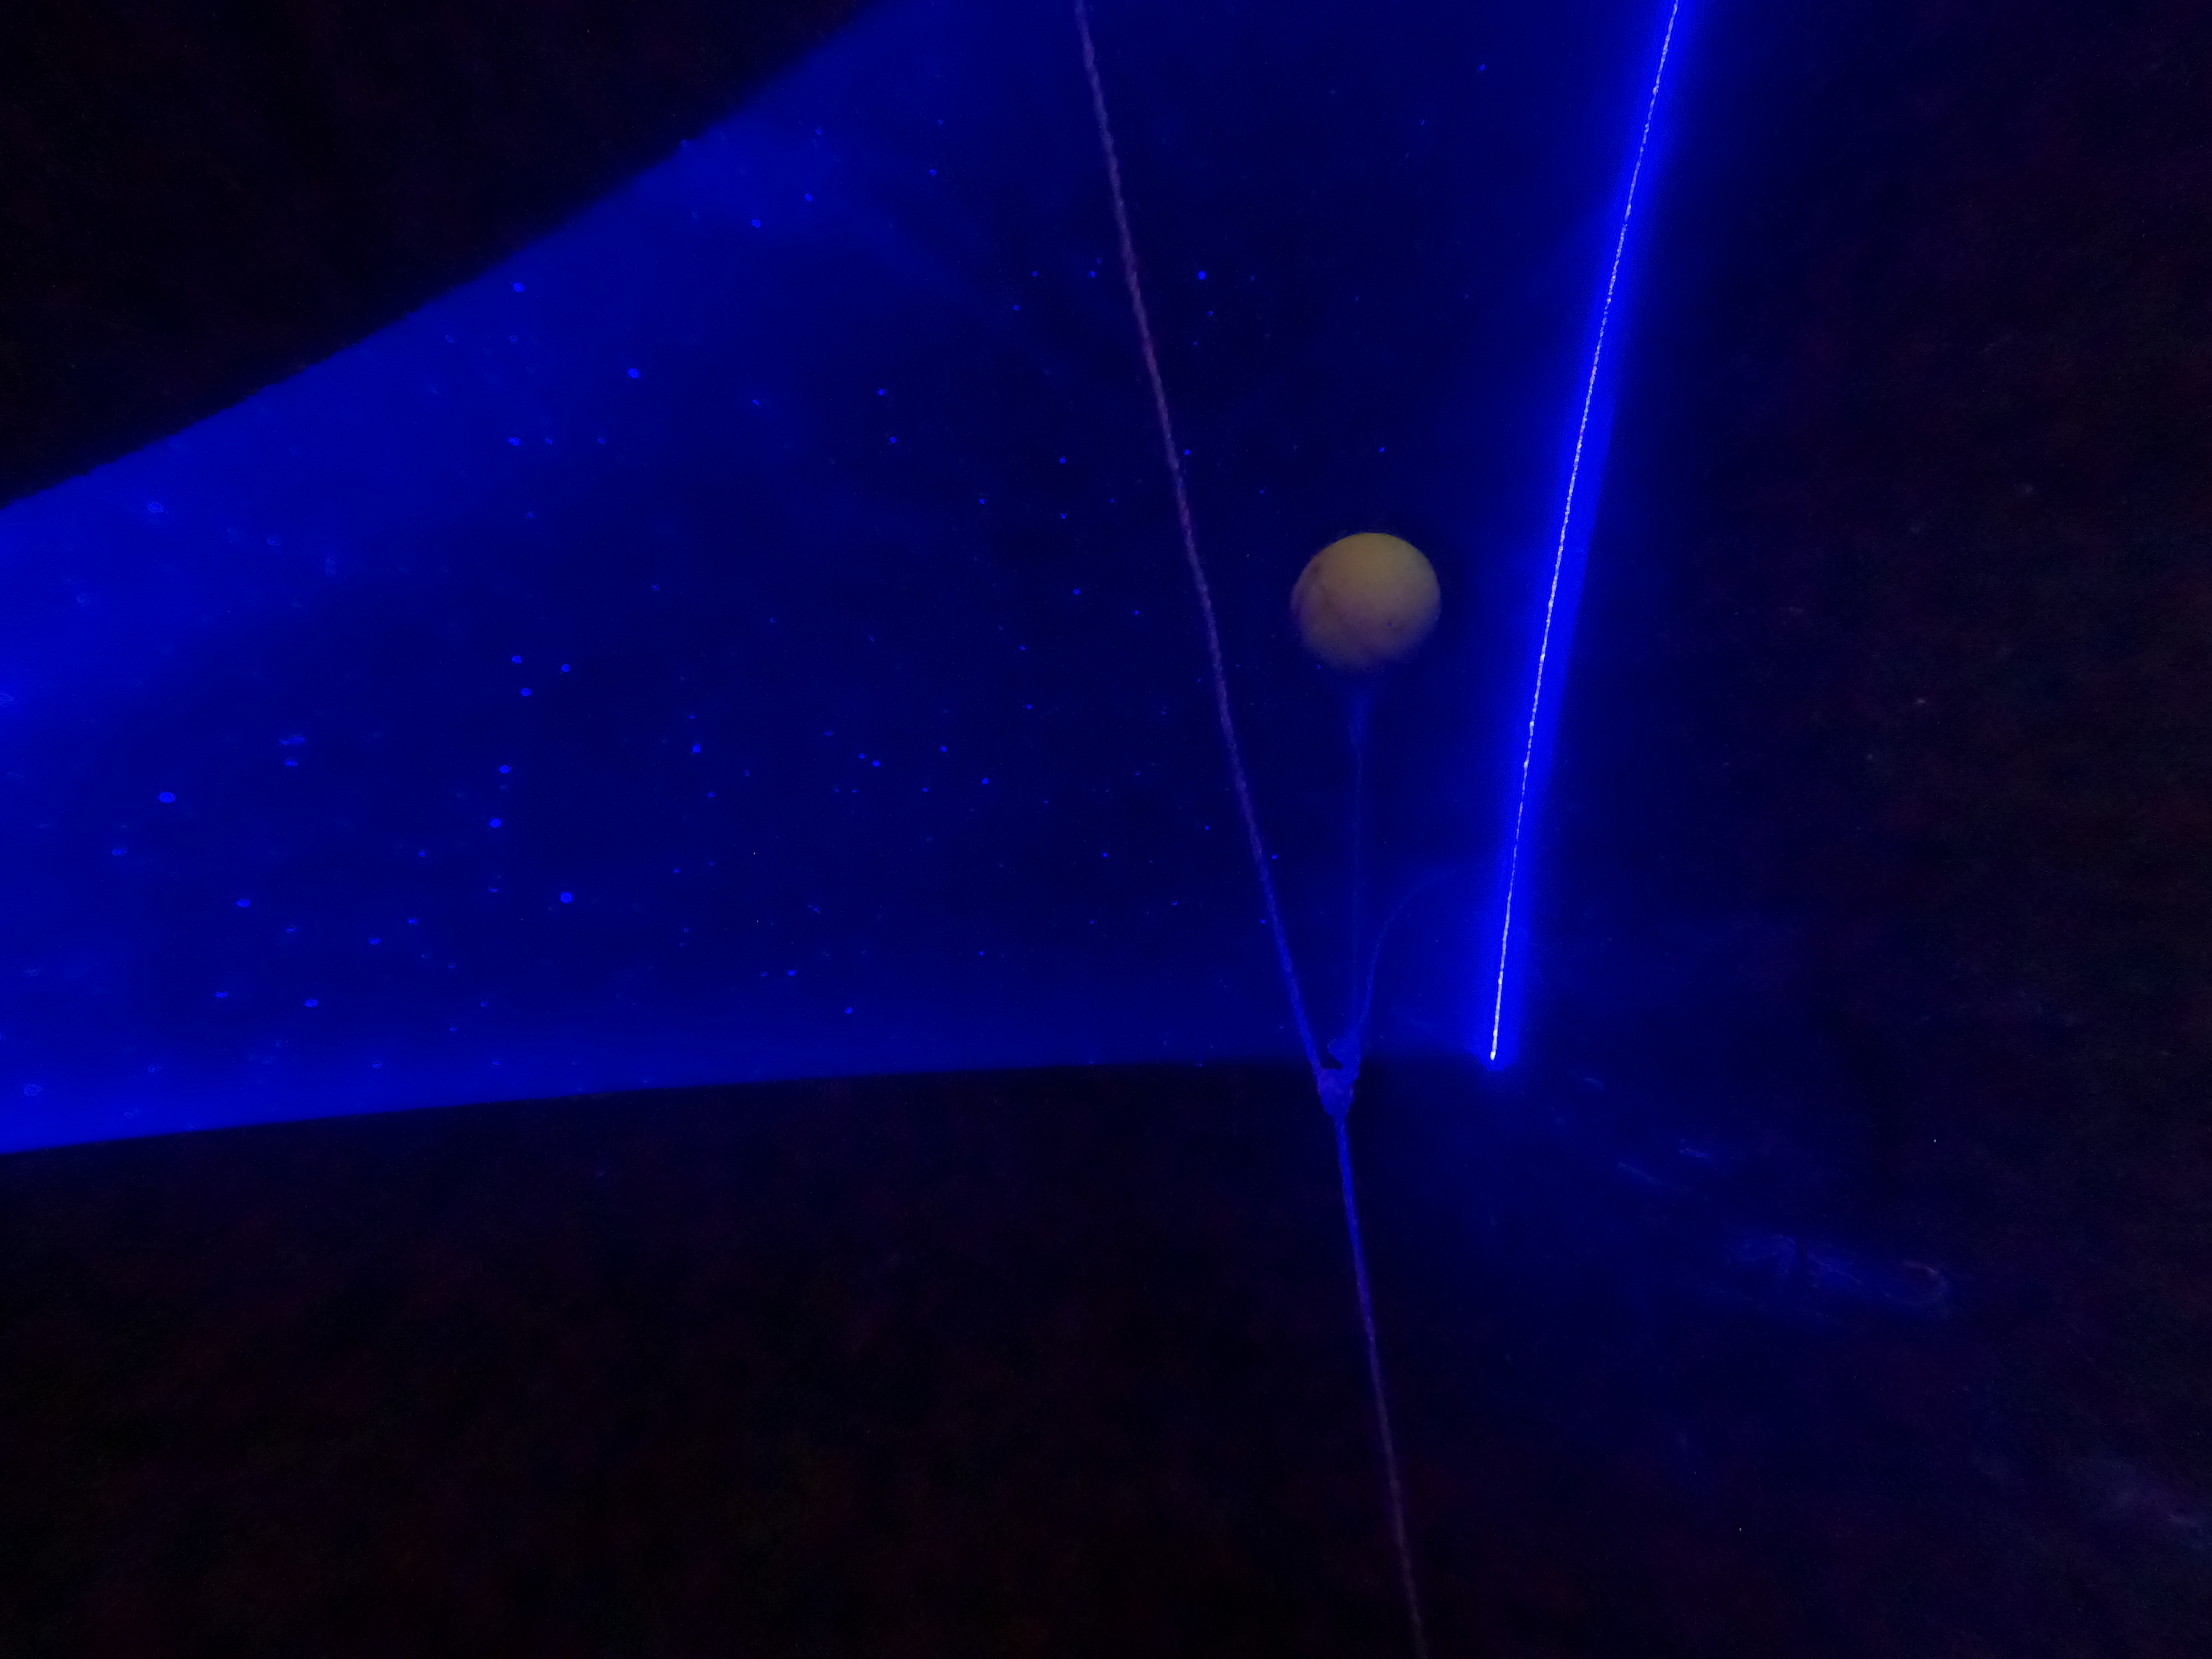

Supplement: Supplementary file 1037 [file G0031391.pdf › 10/G0031391.pdf]

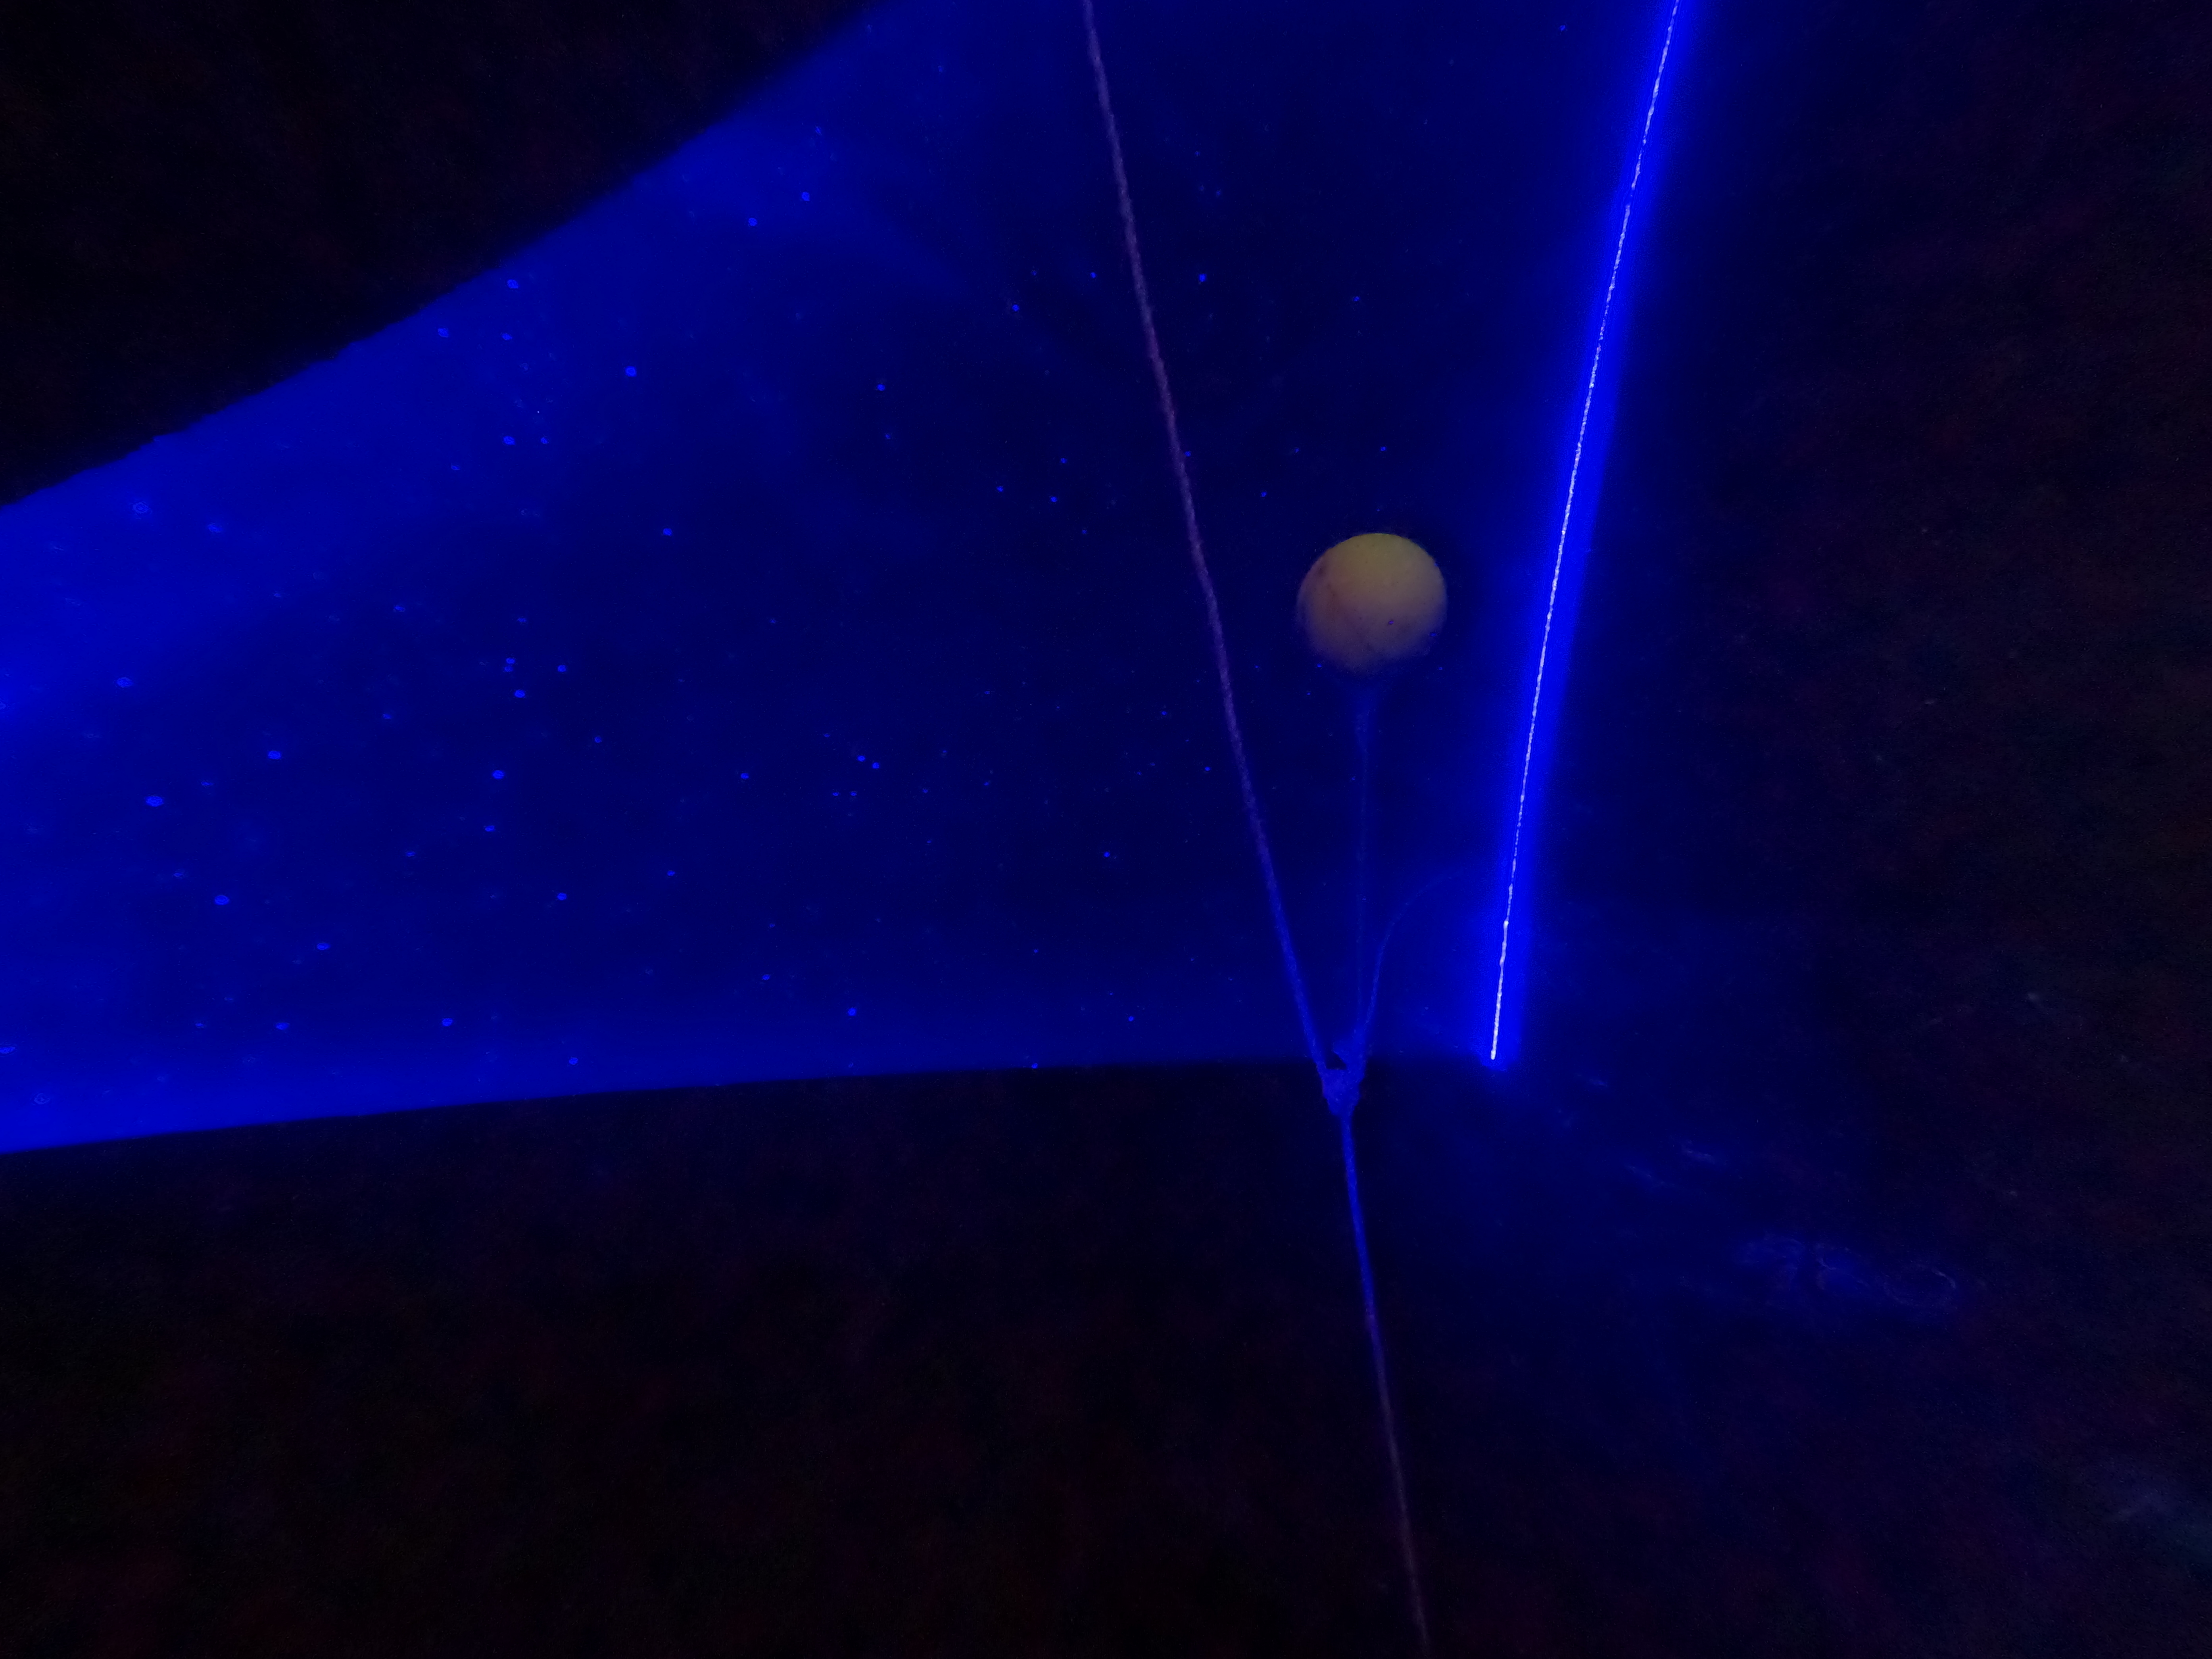

Supplement: Supplementary file 1038 [file G0031392.pdf › 10/G0031392.pdf]

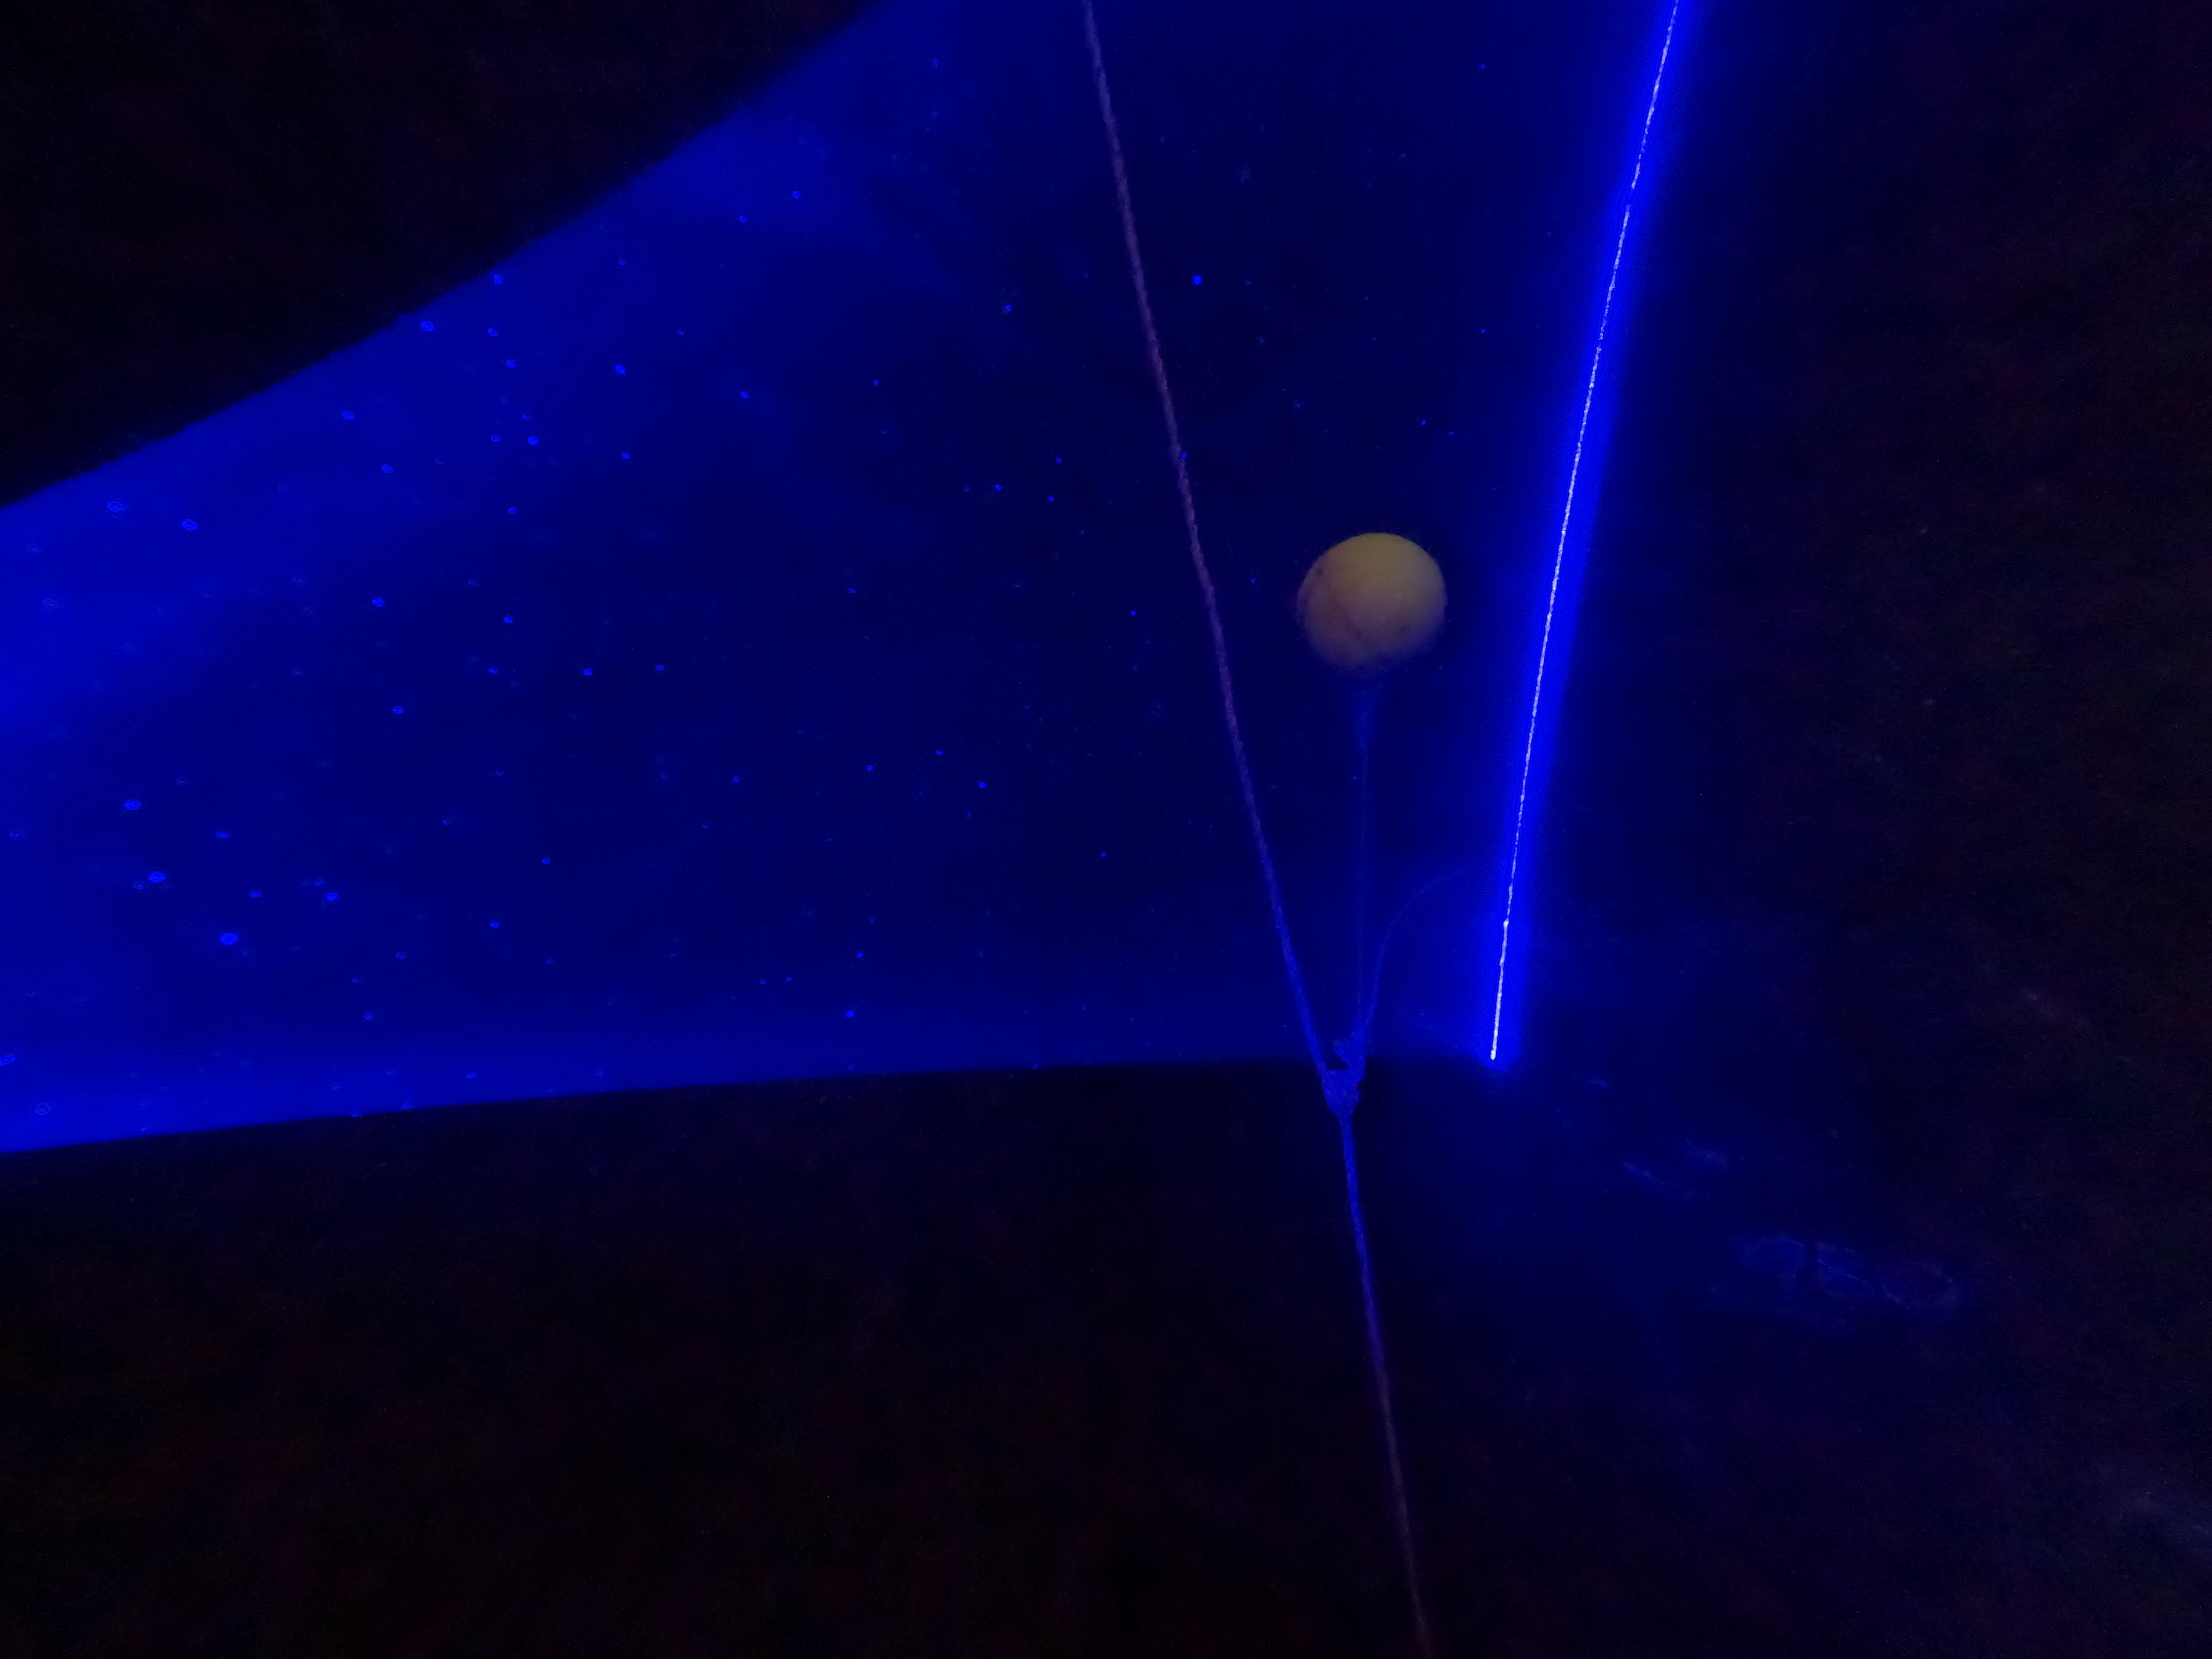

Supplement: Supplementary file 1039 [file G0031393.pdf › 10/G0031393.pdf]

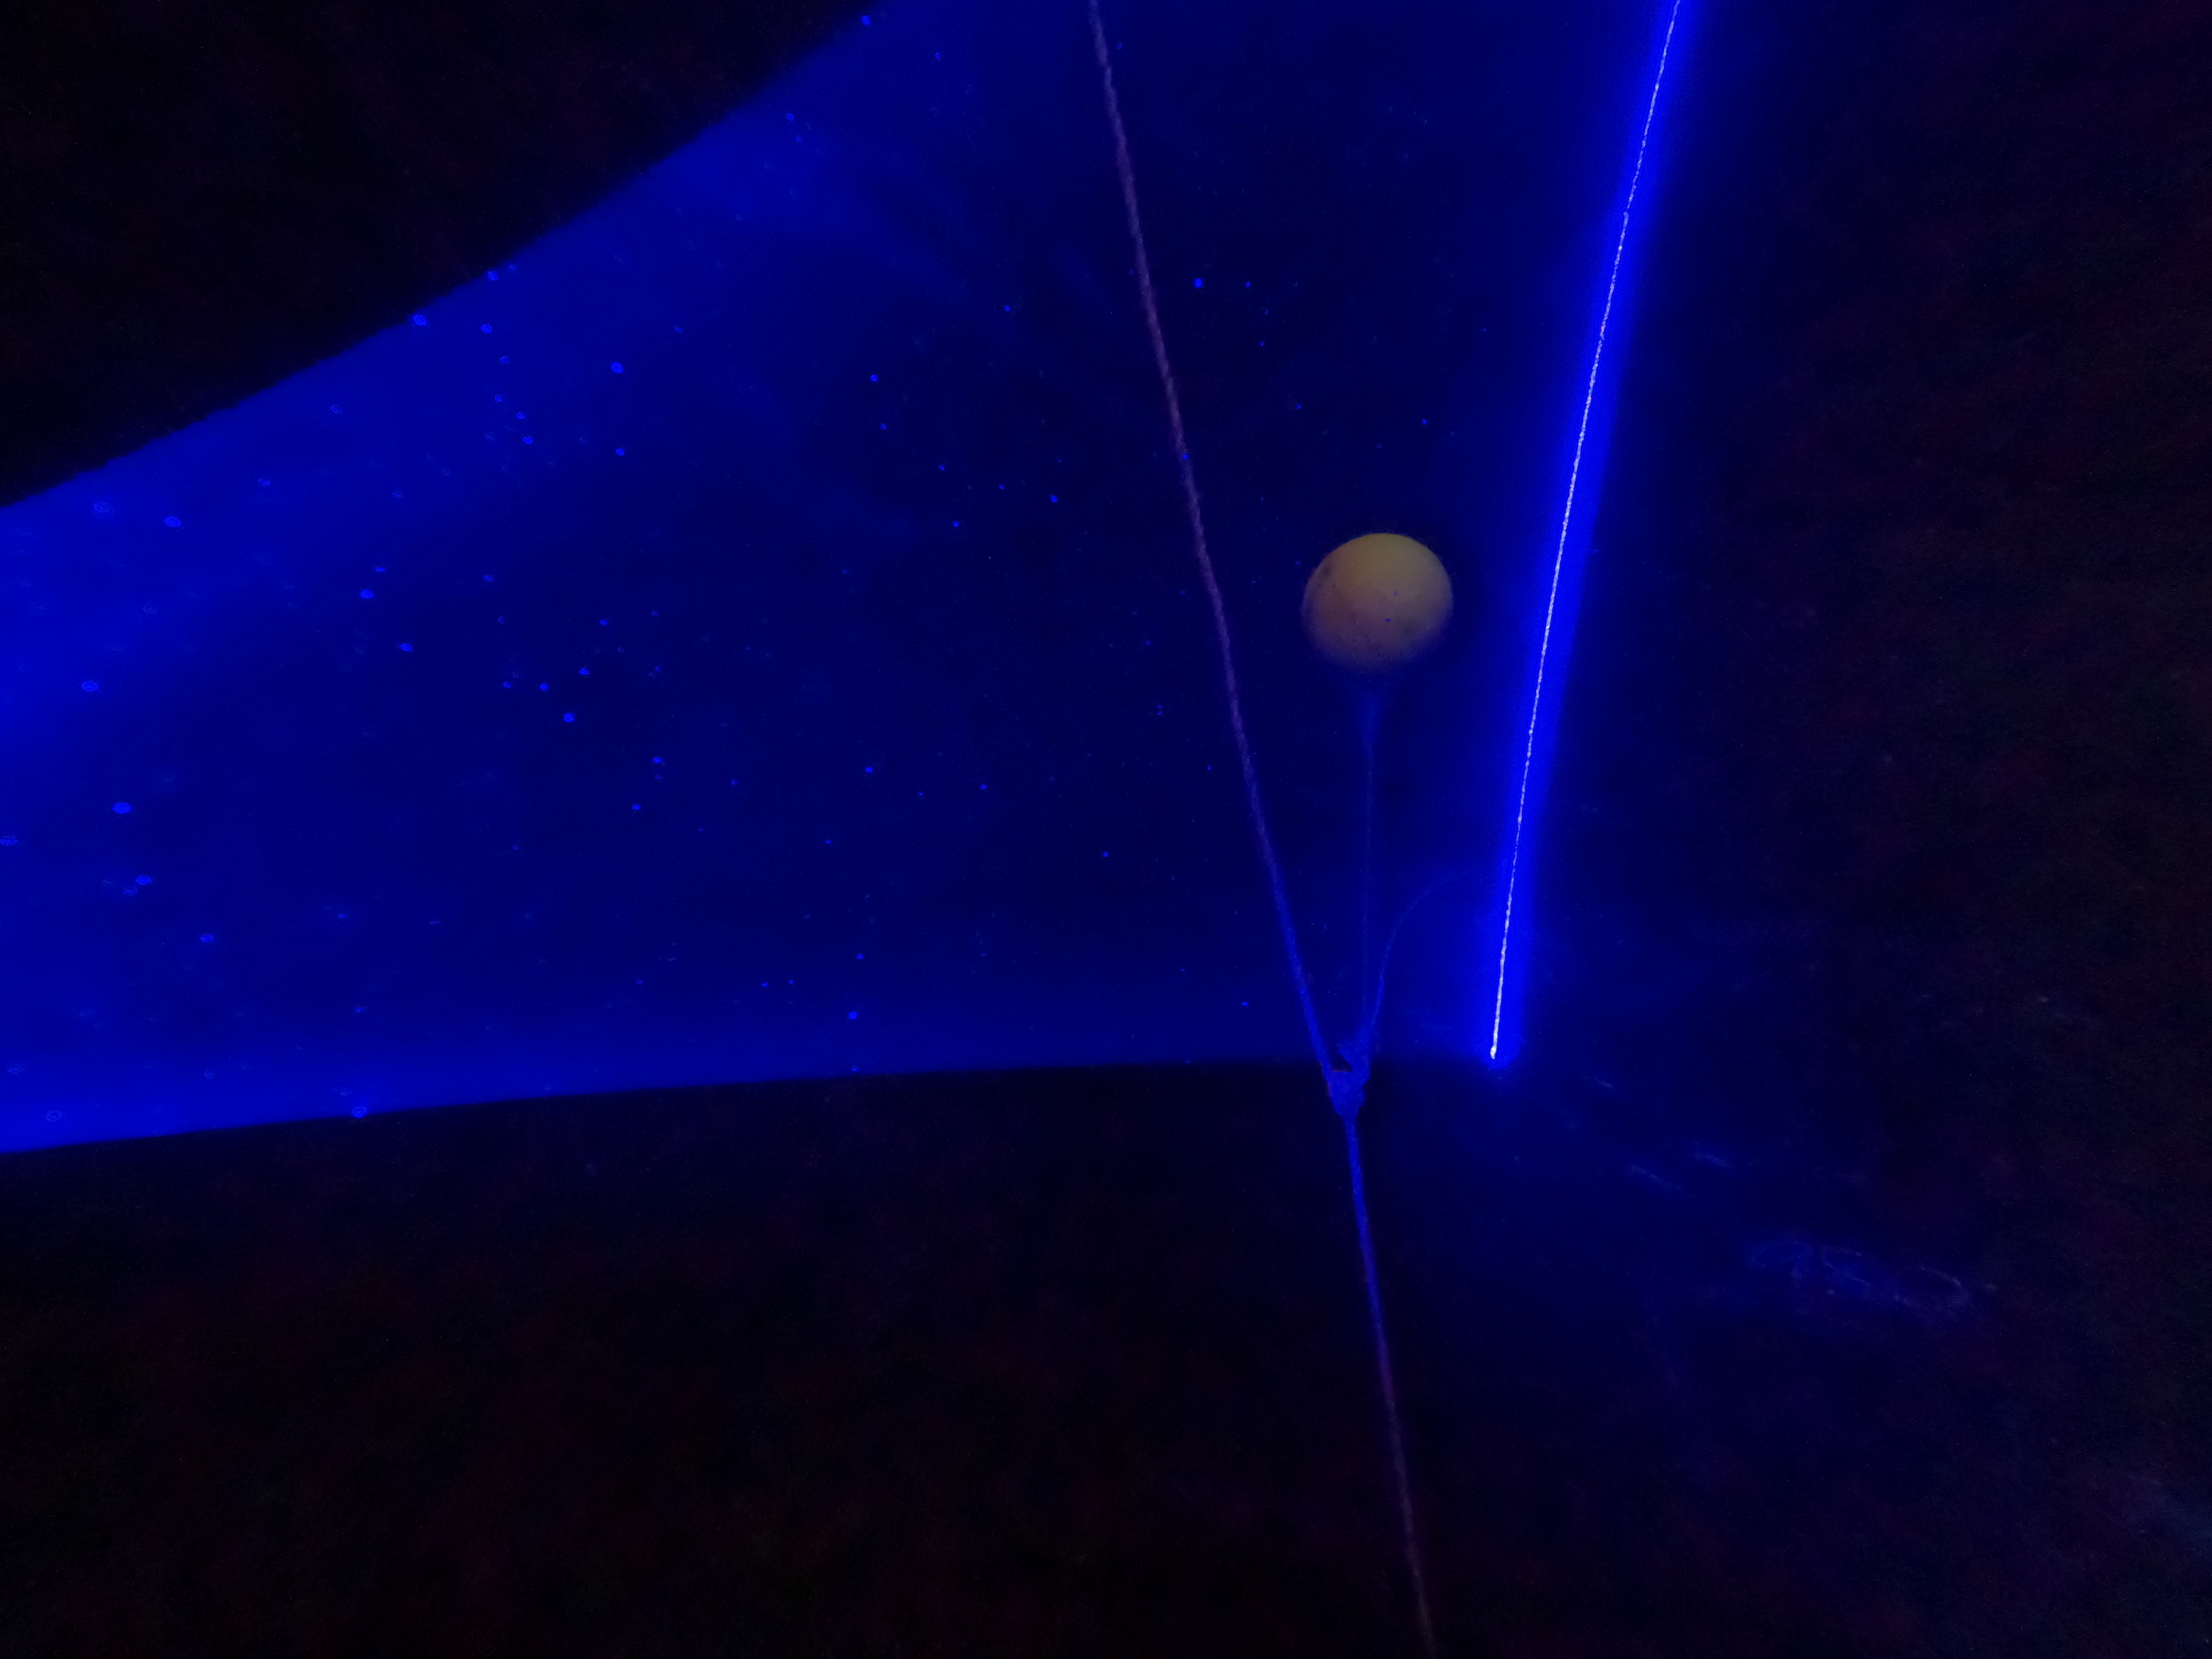

Supplement: Supplementary file 1040 [file G0031394.pdf › 10/G0031394.pdf]

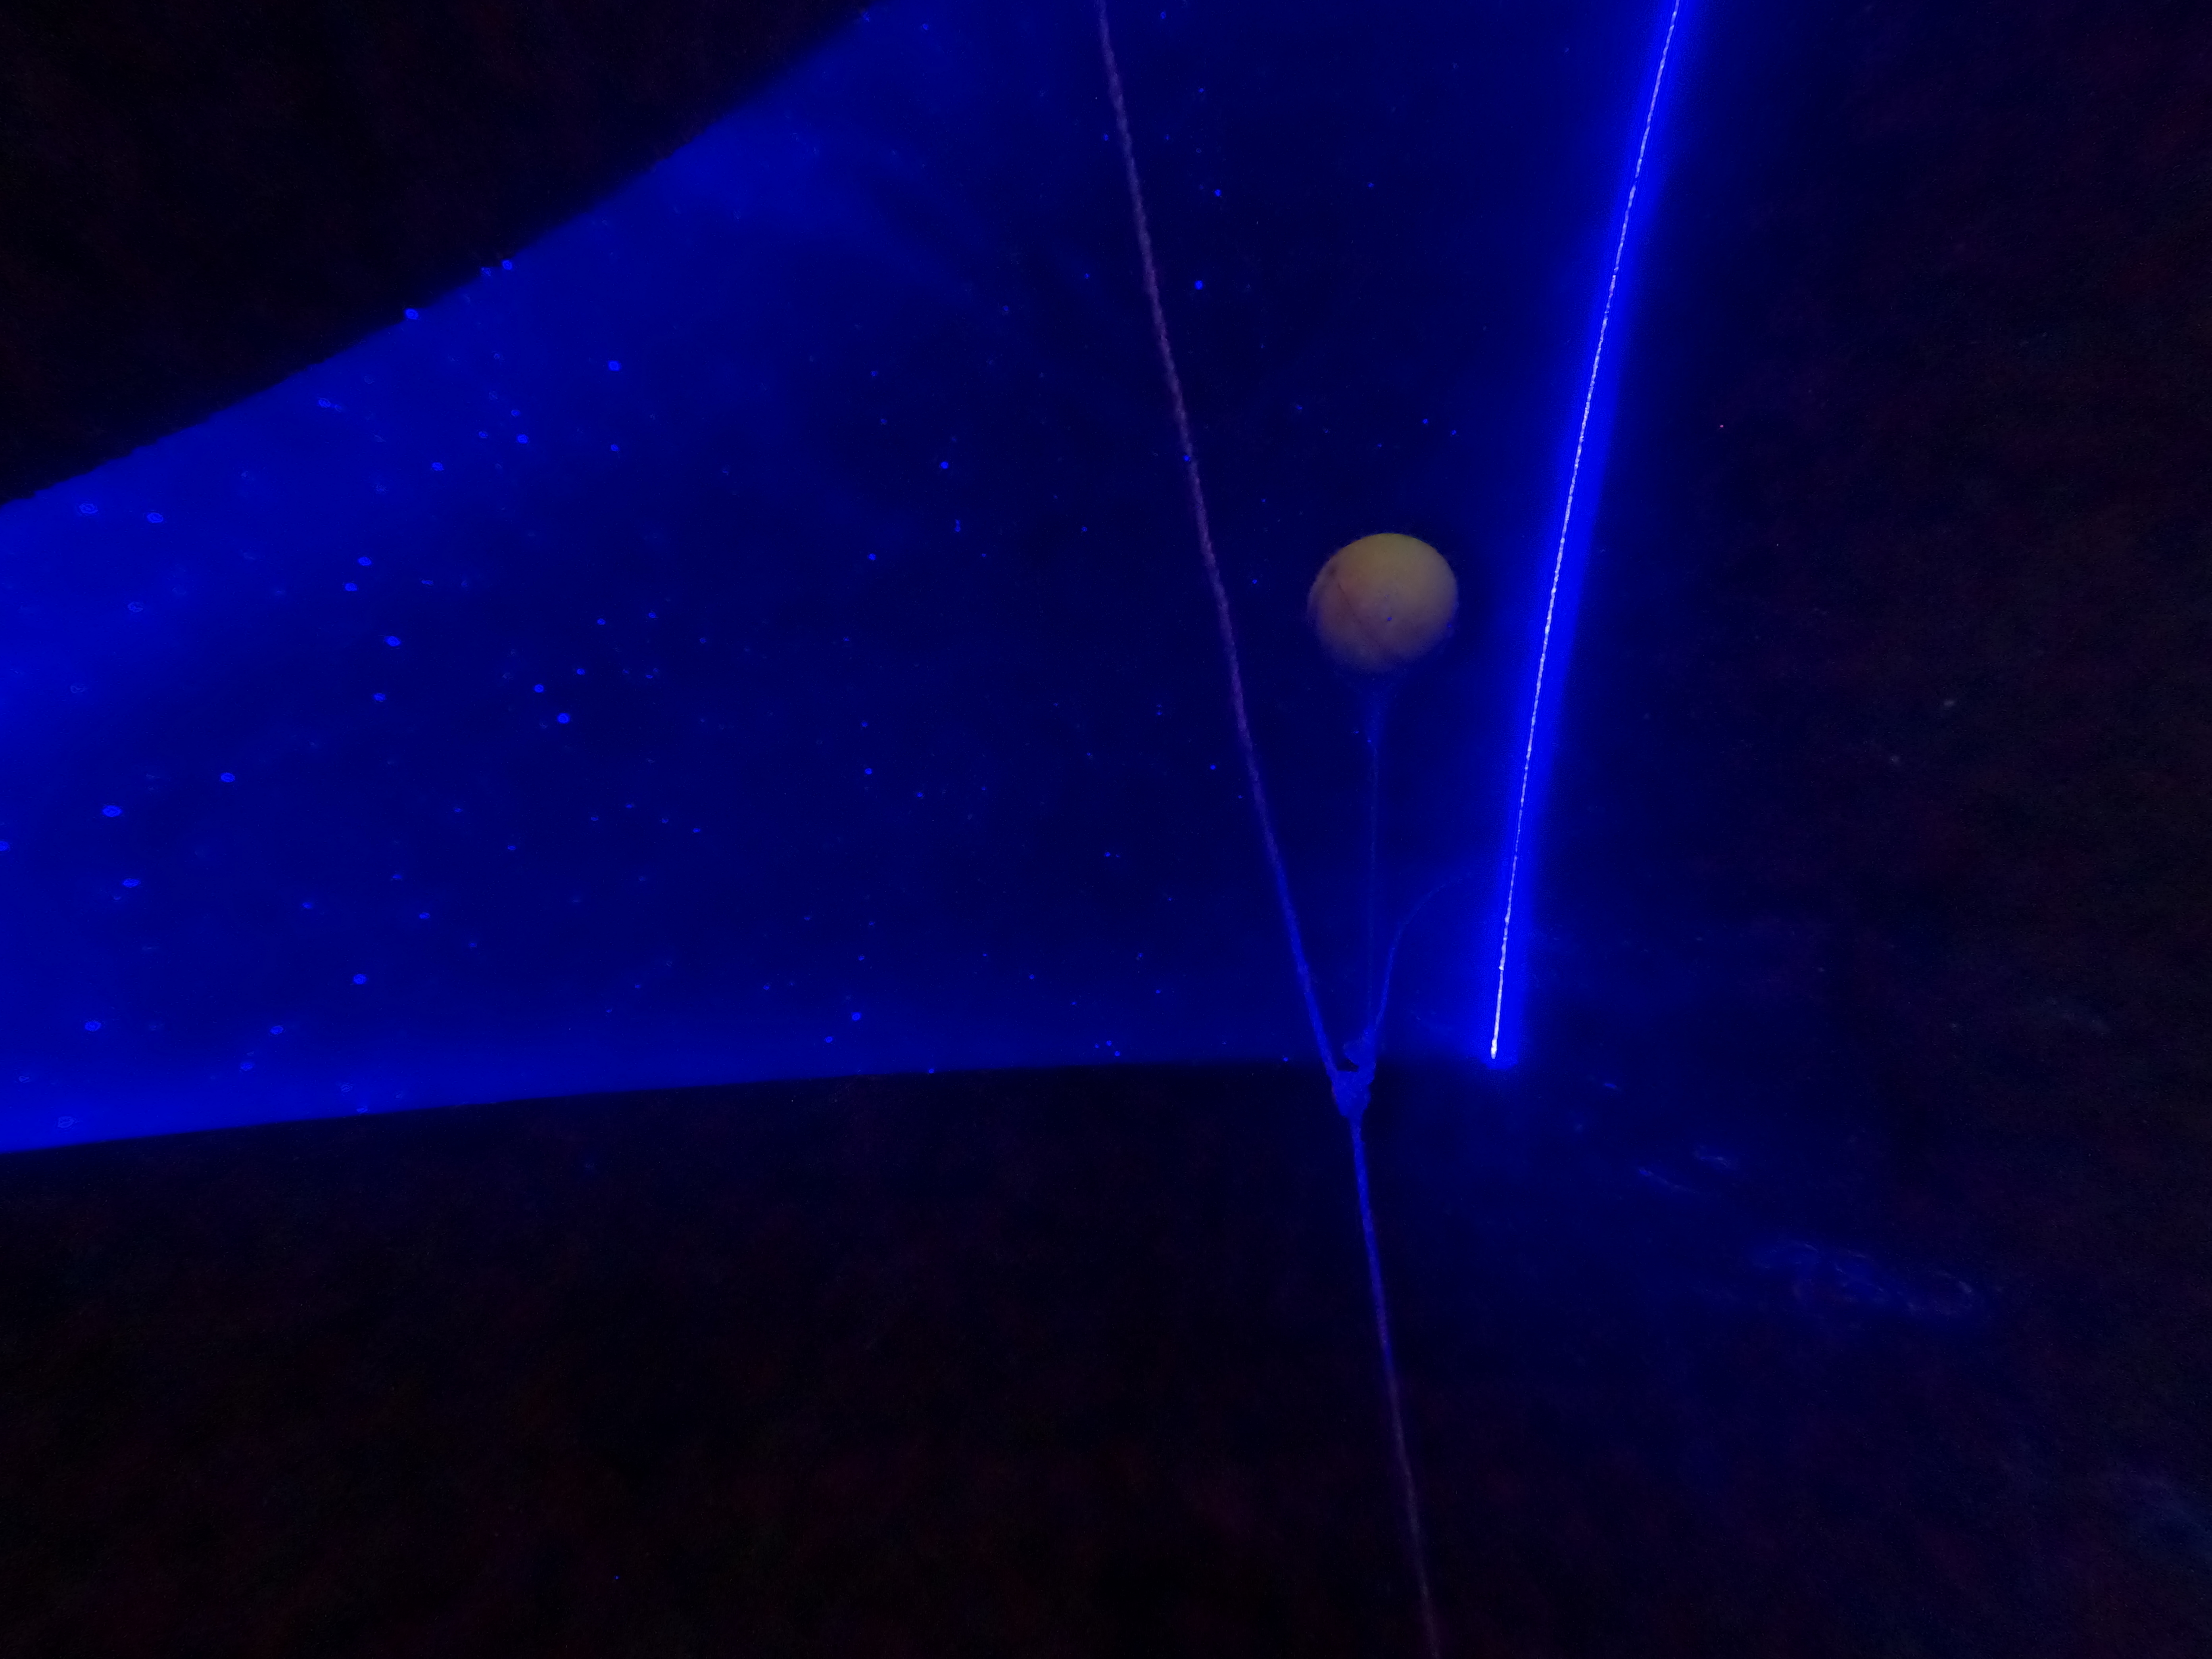

Supplement: Supplementary file 1041 [file G0031395.pdf › 10/G0031395.pdf]

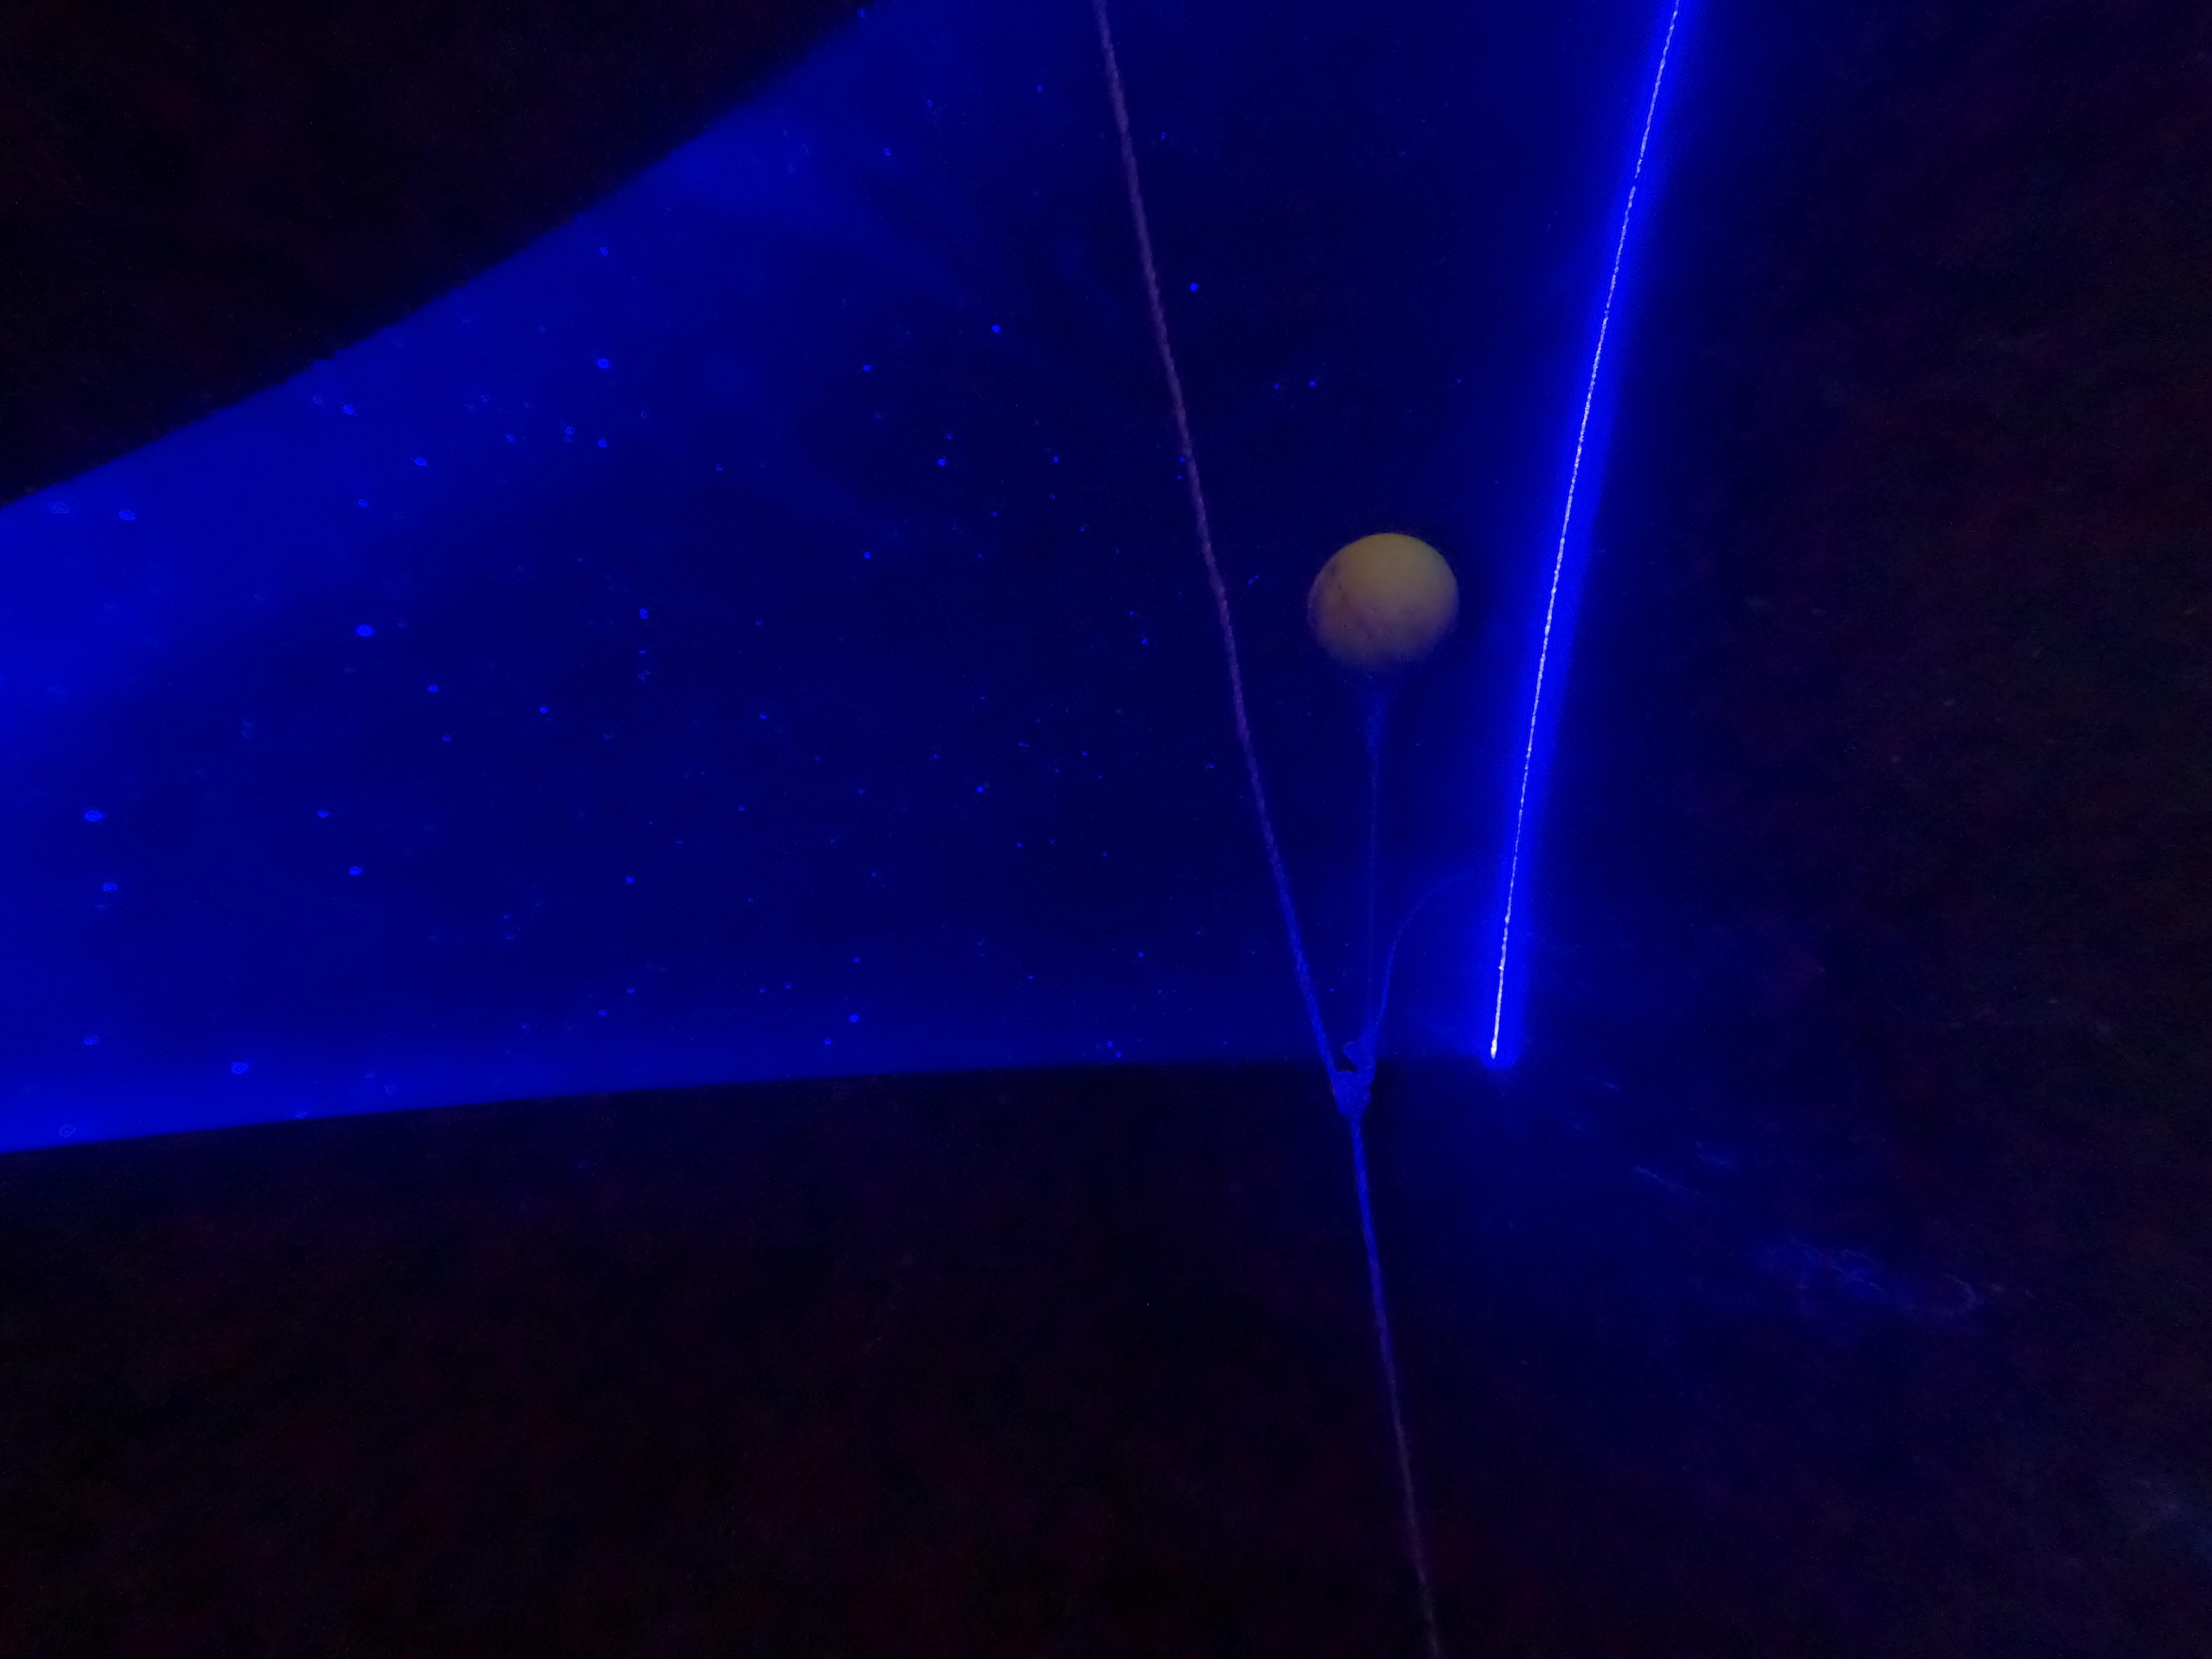

Supplement: Supplementary file 1042 [file G0031396.pdf › 10/G0031396.pdf]

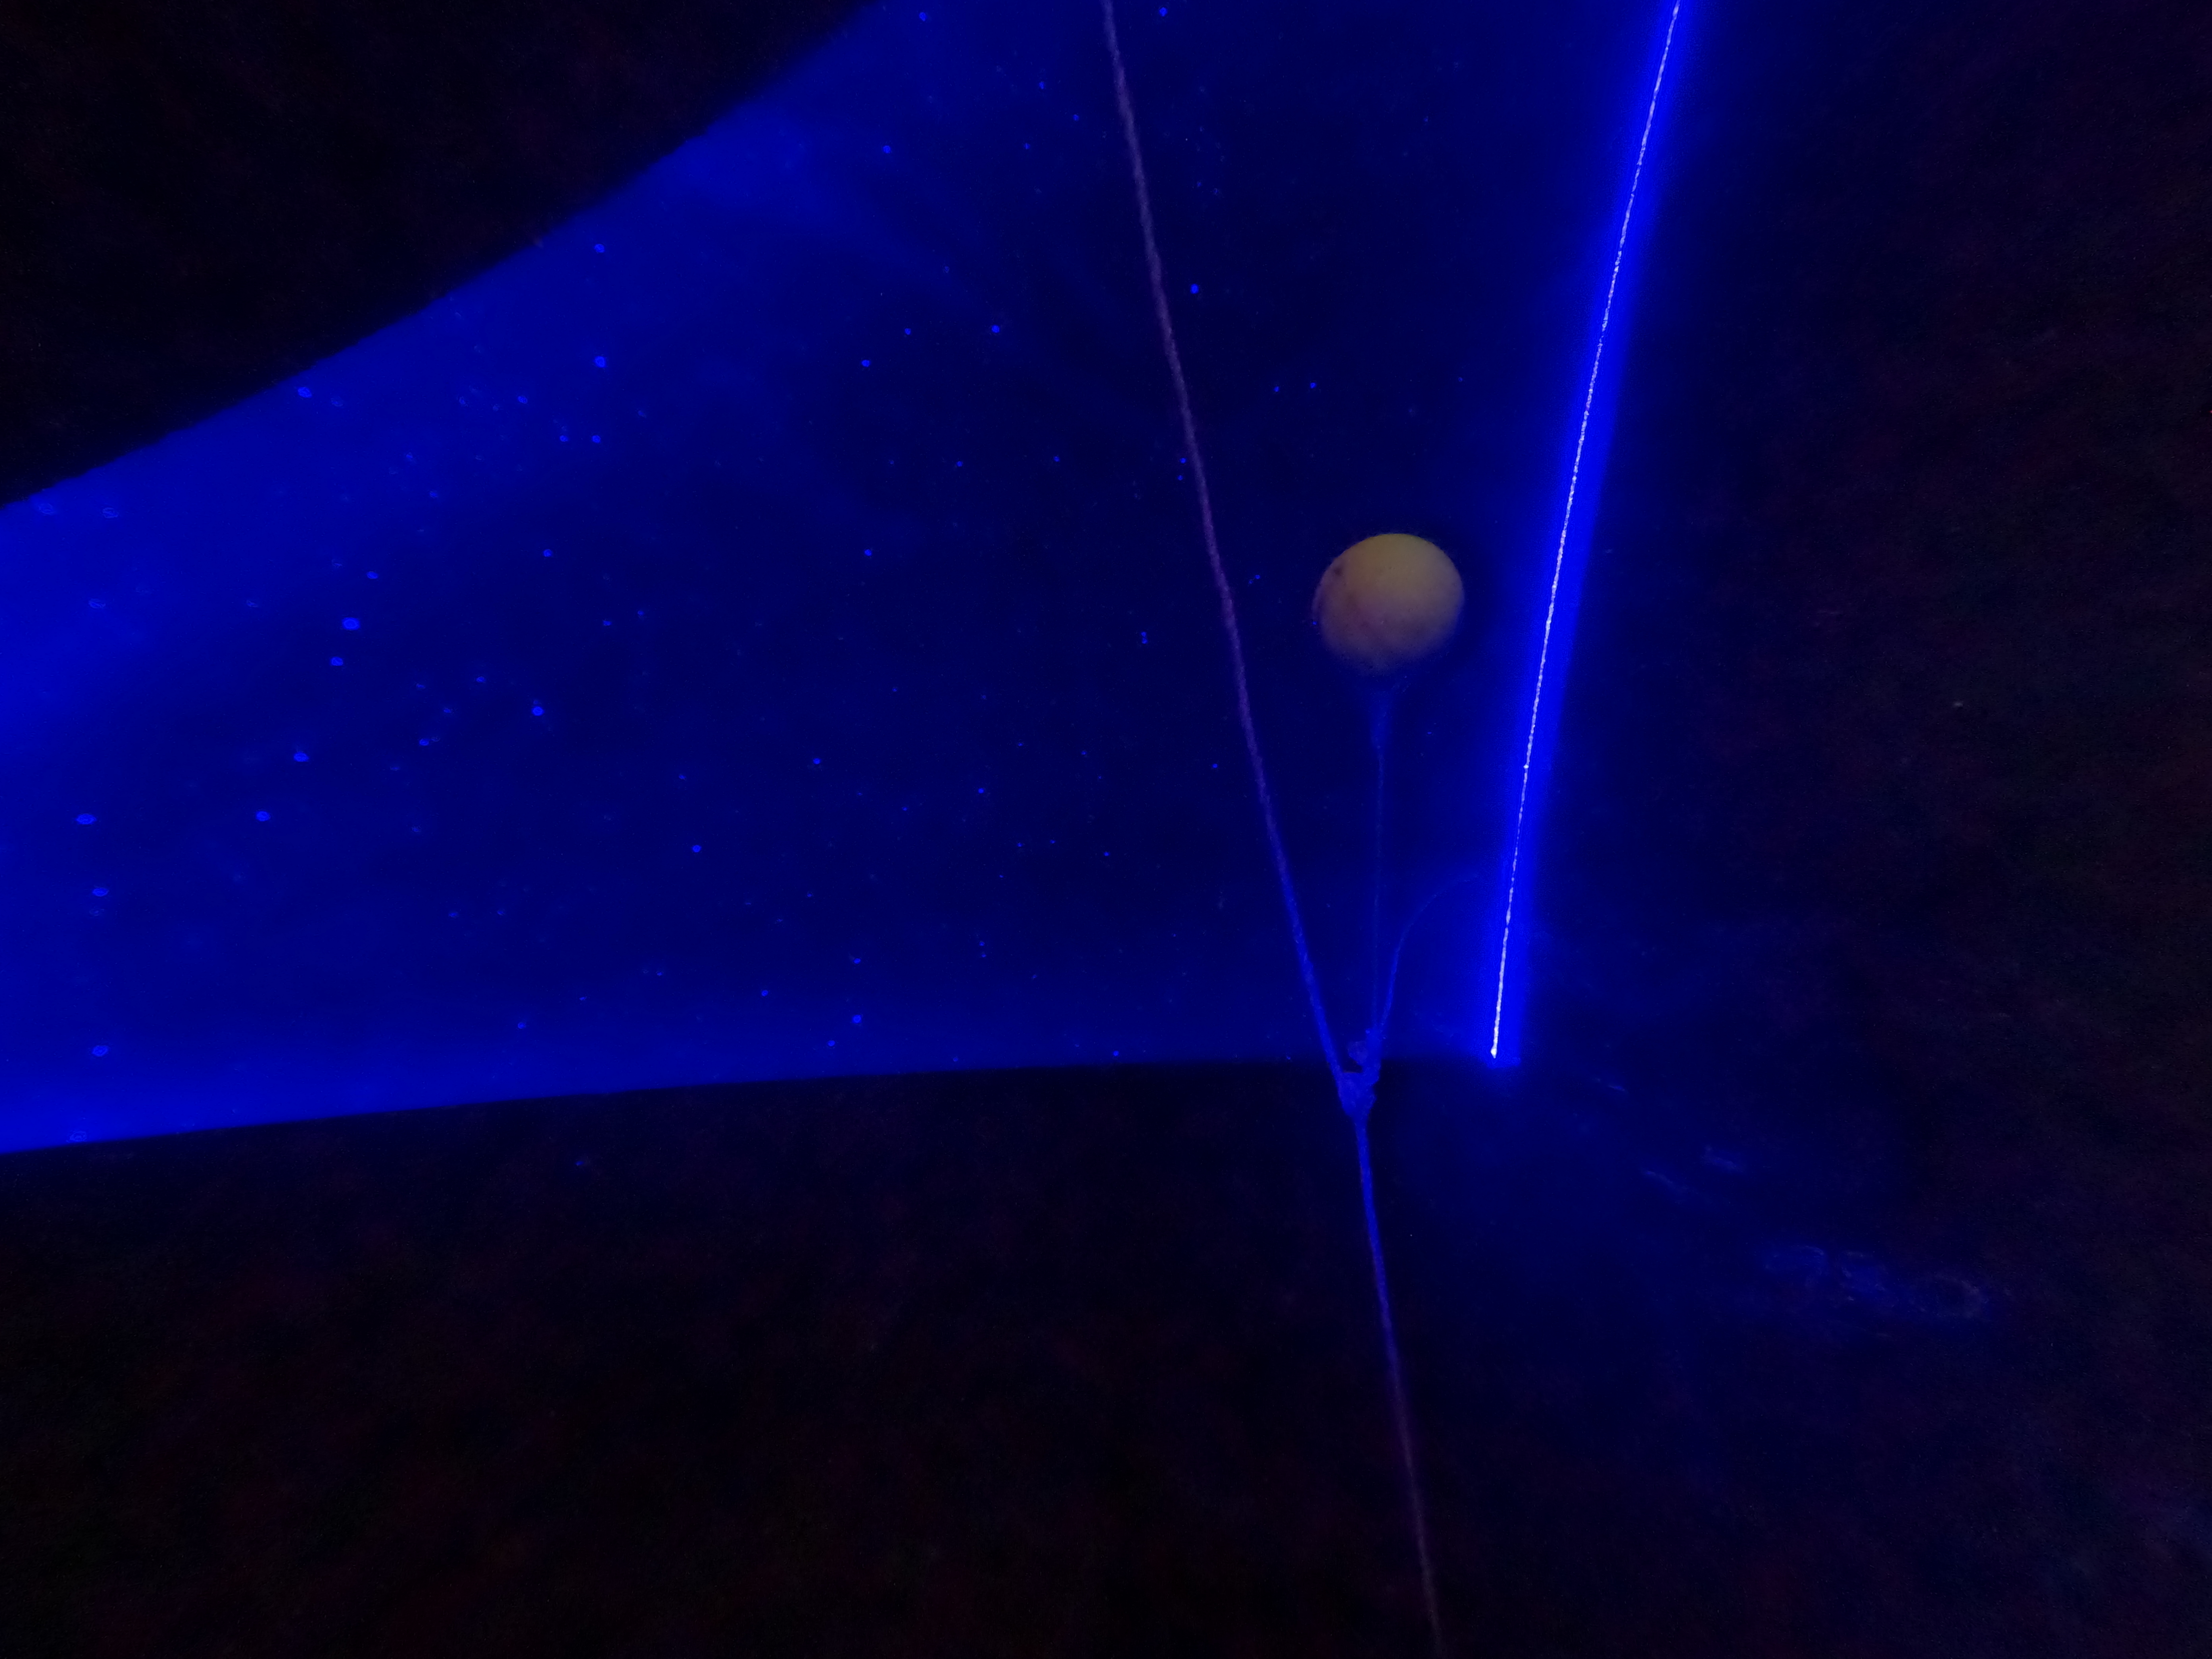

Supplement: Supplementary file 1043 [file G0031397.pdf › 10/G0031397.pdf]

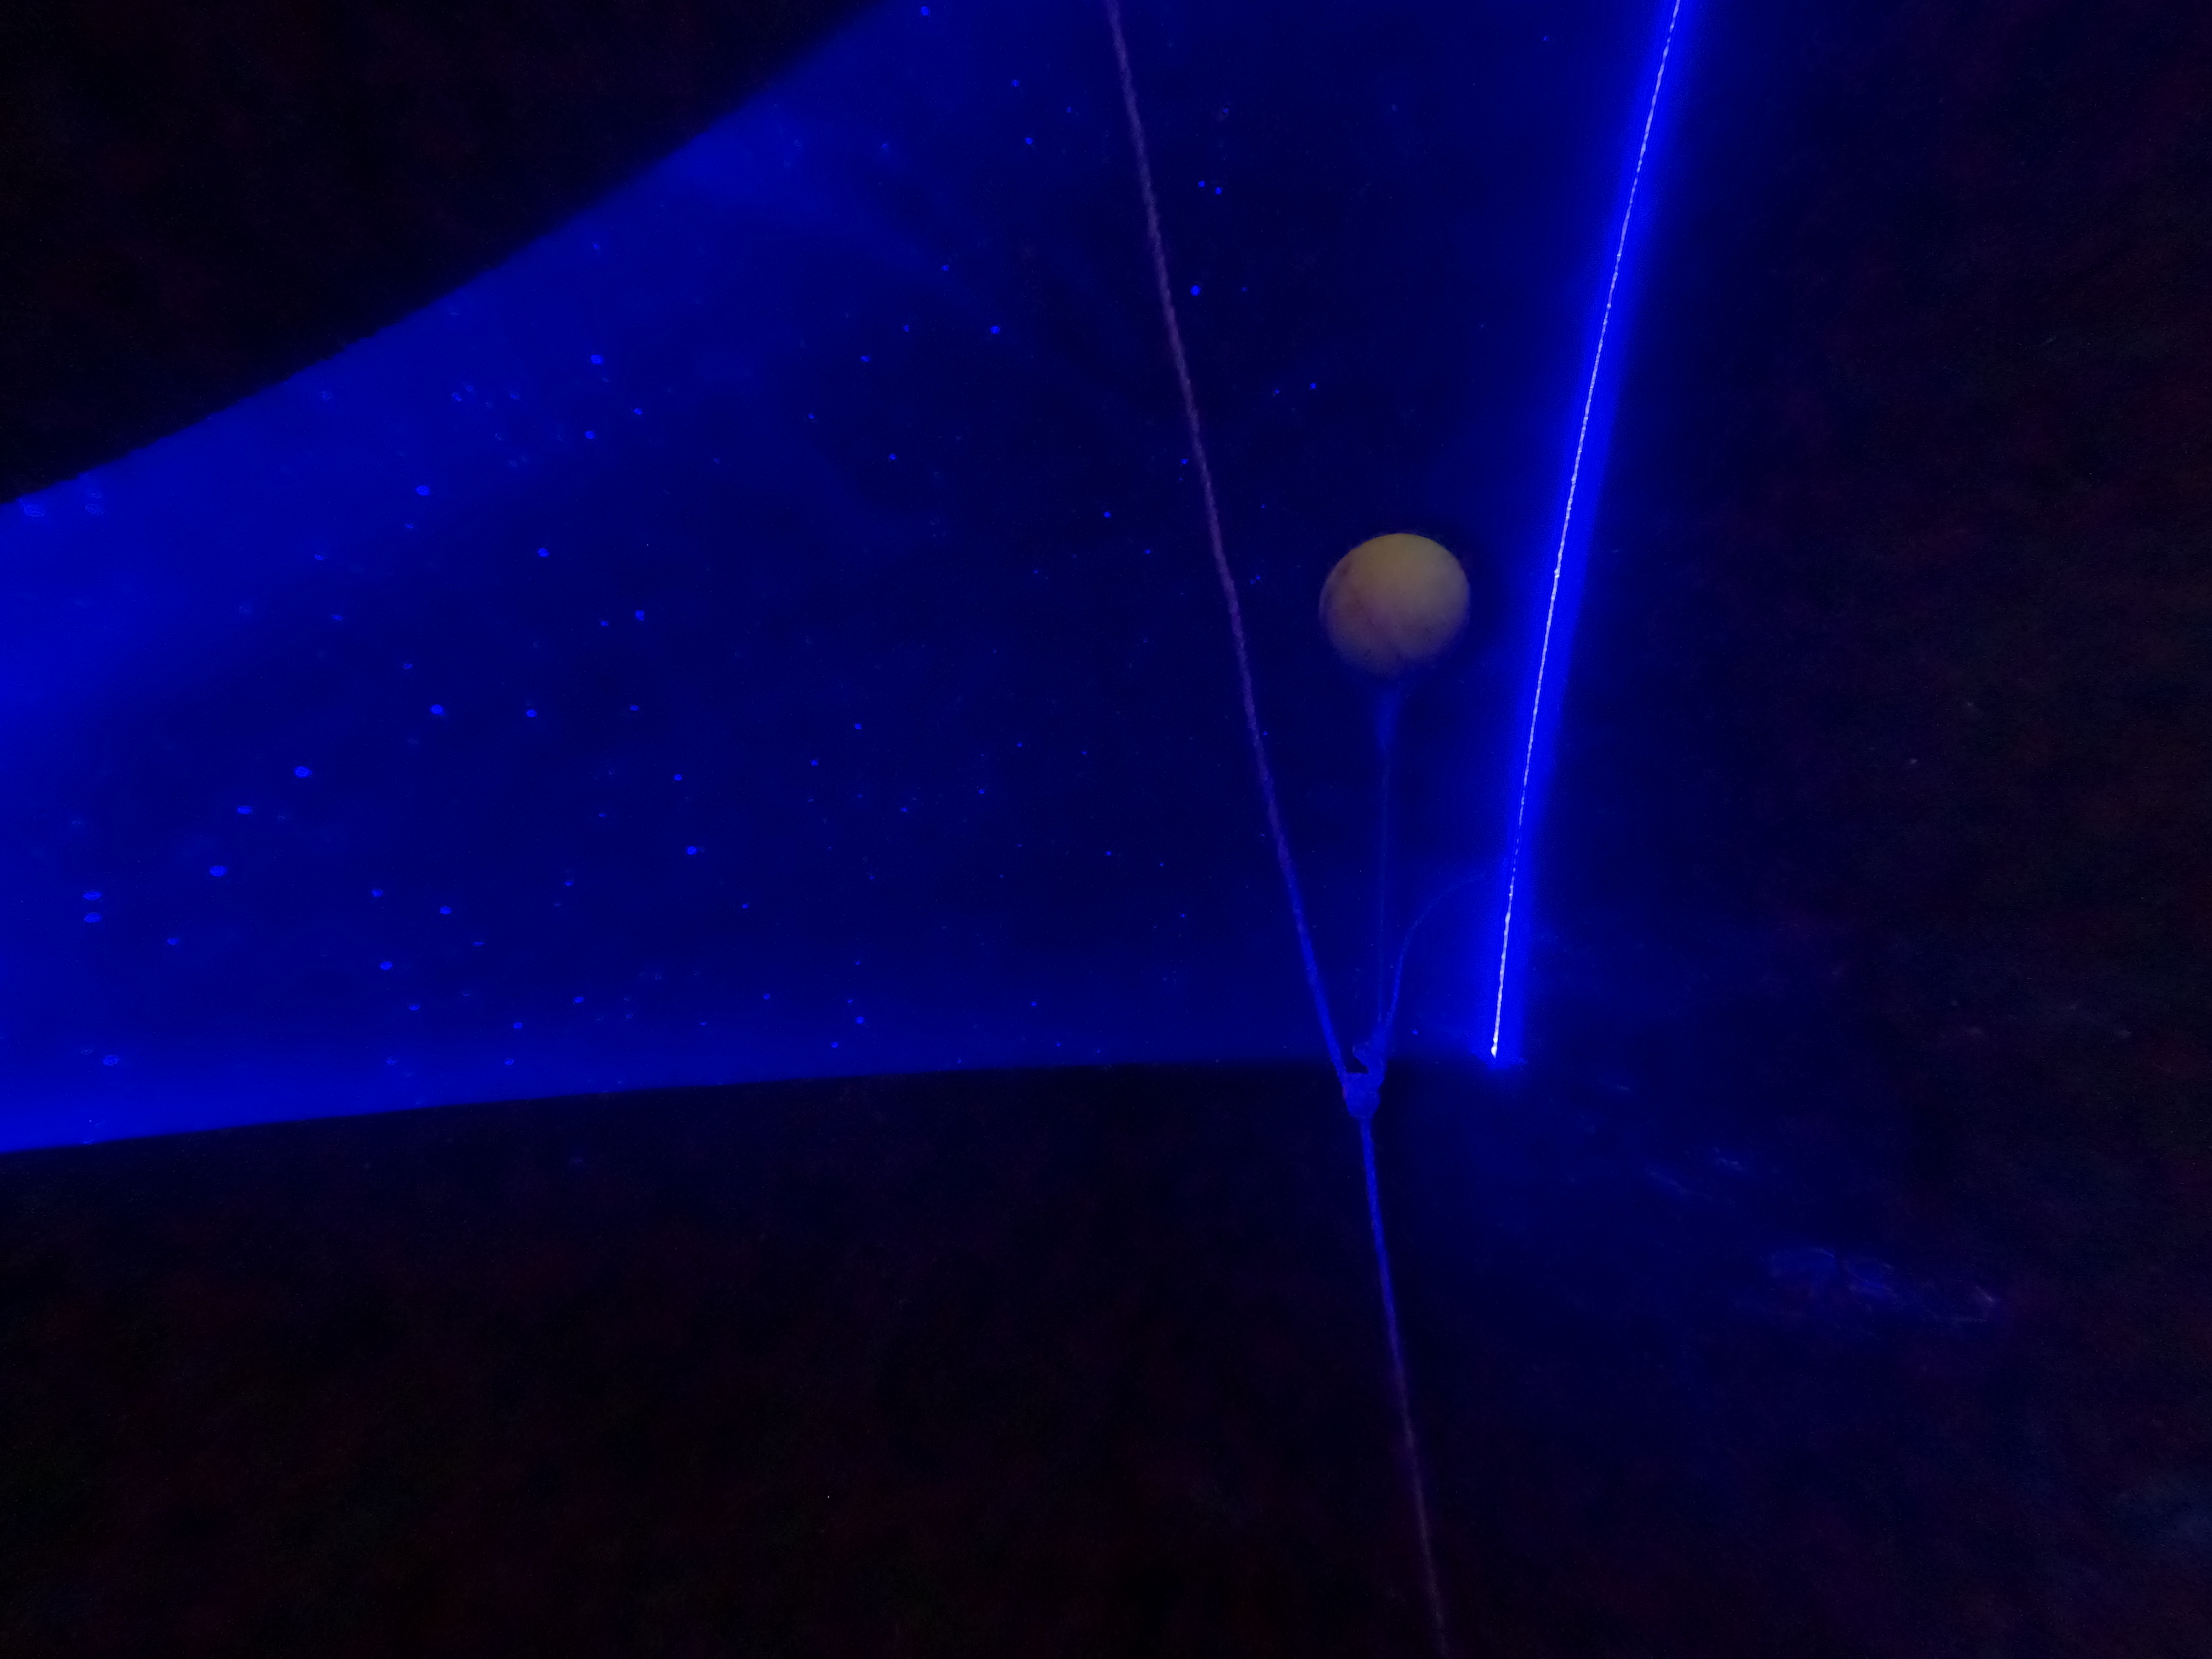

Supplement: Supplementary file 1044 [file G0031398.pdf › 10/G0031398.pdf]

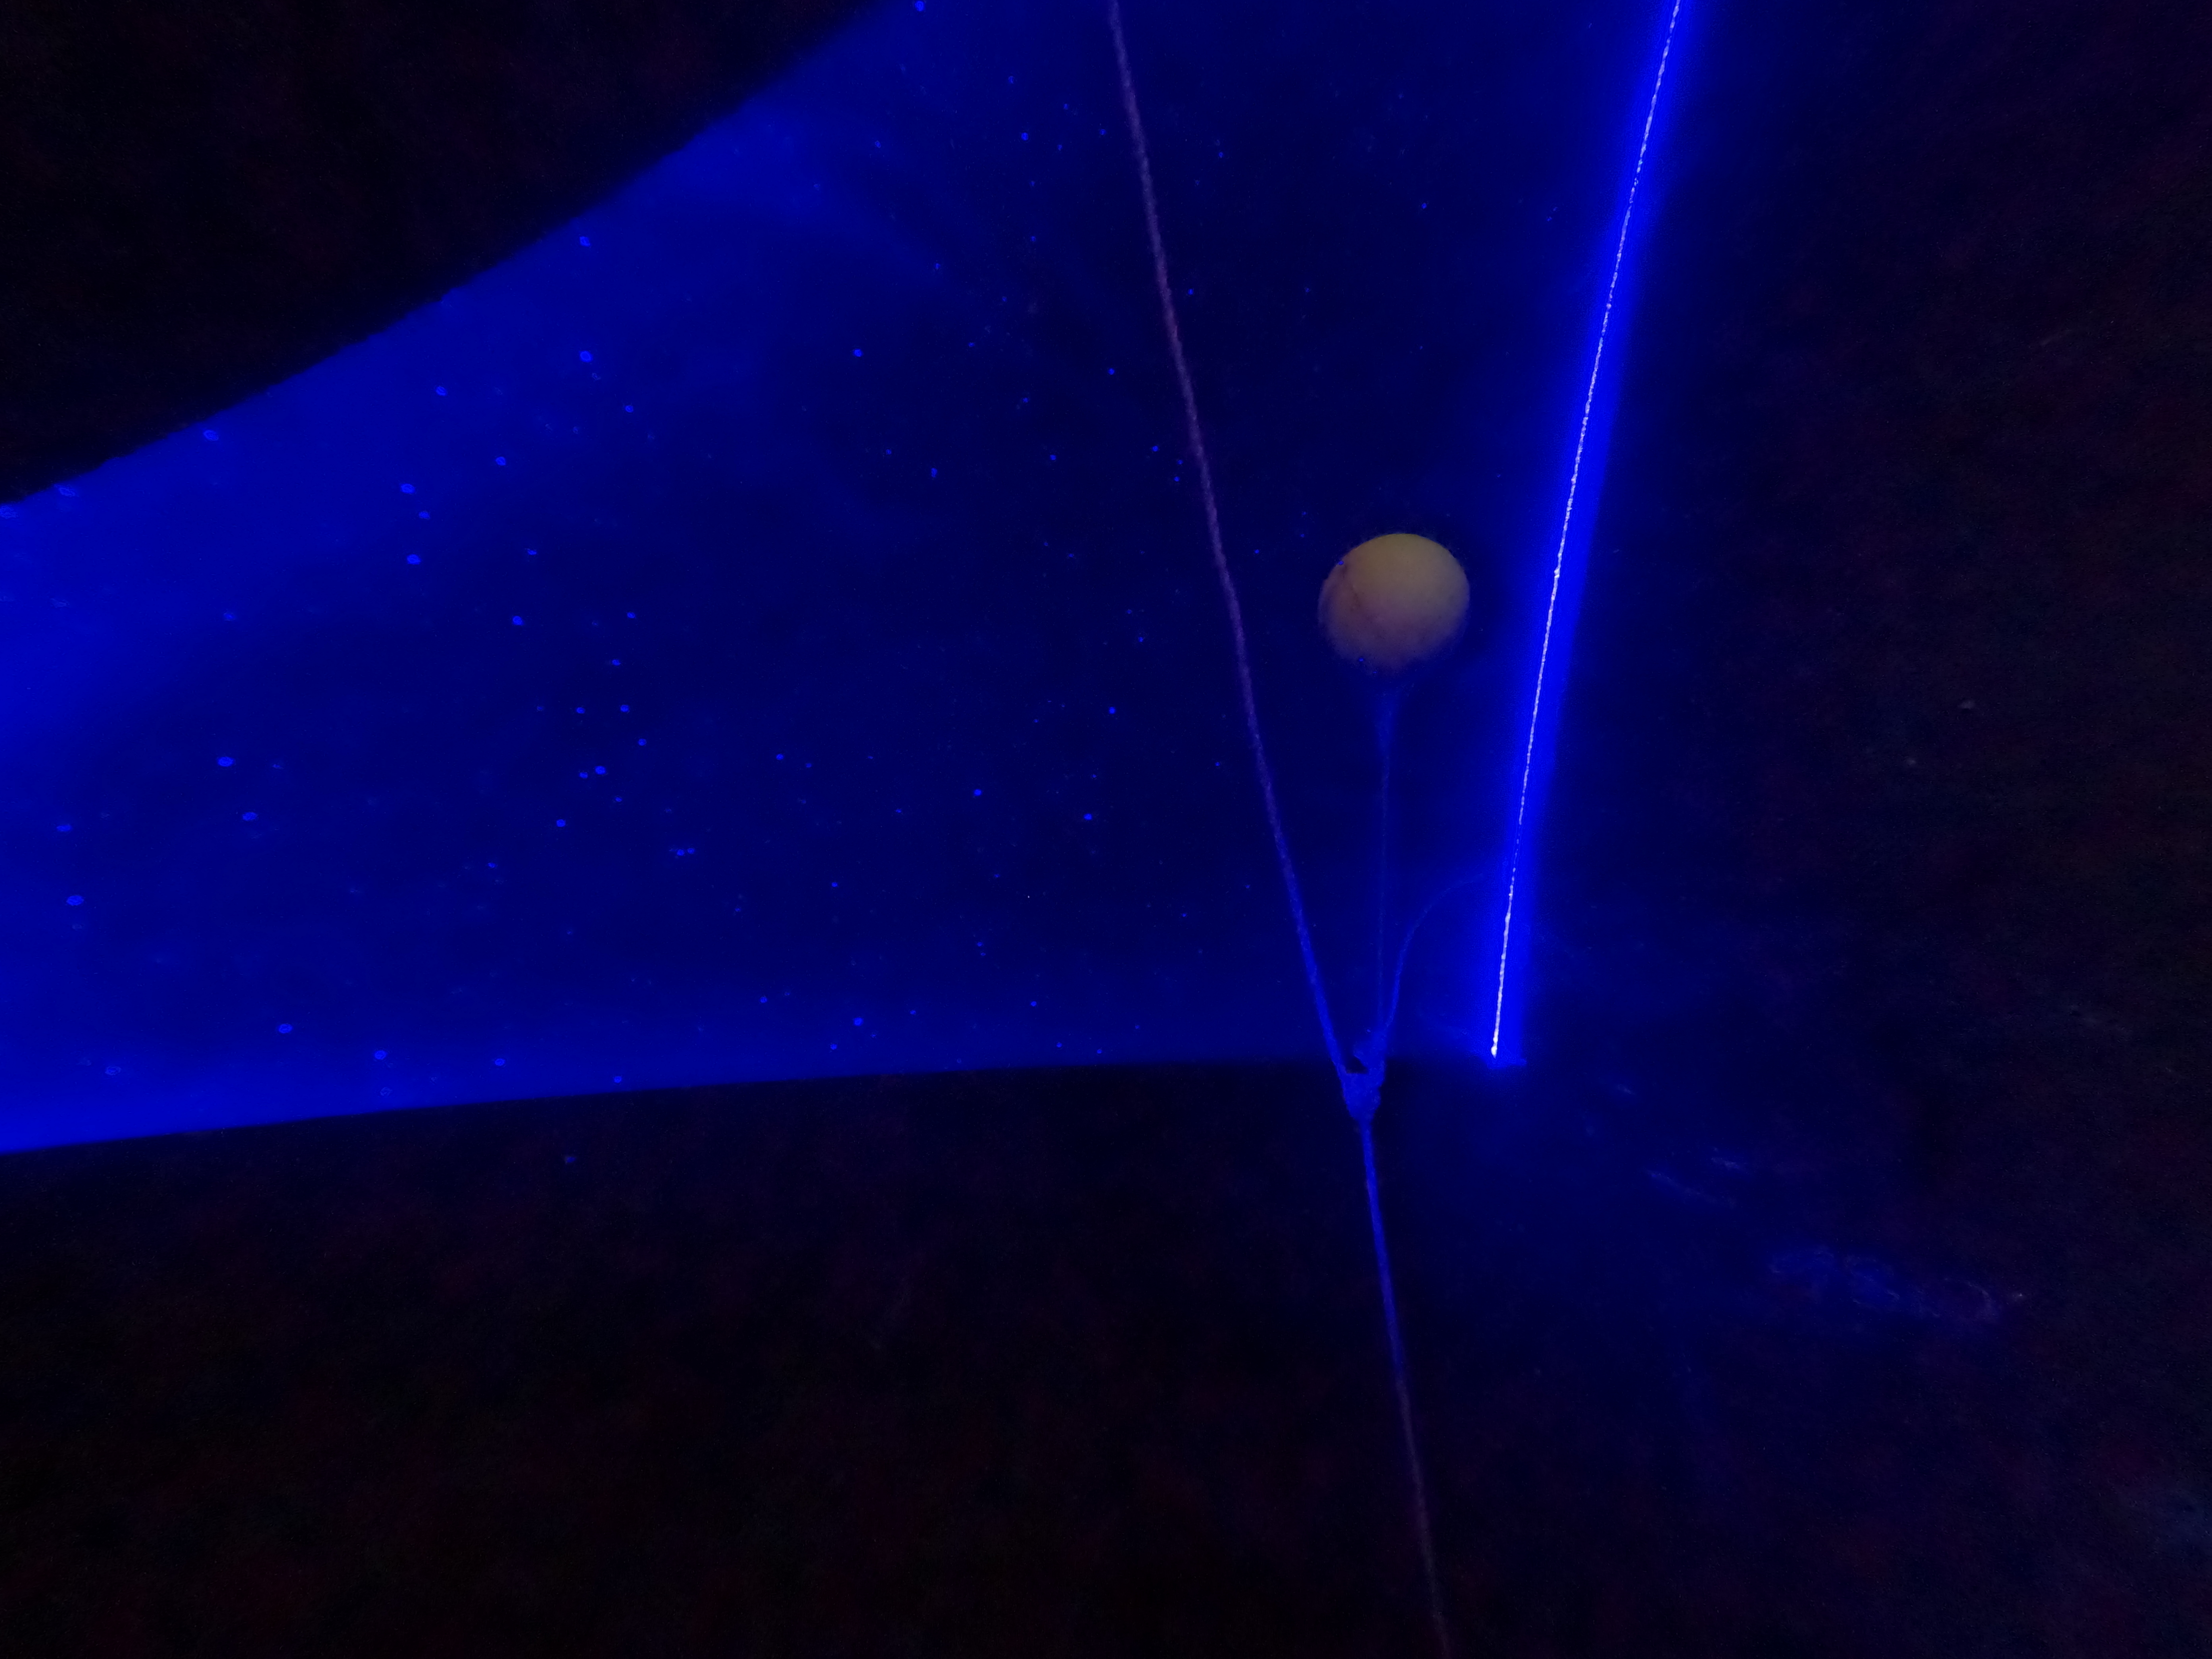

Supplement: Supplementary file 1045 [file G0031399.pdf › 10/G0031399.pdf]

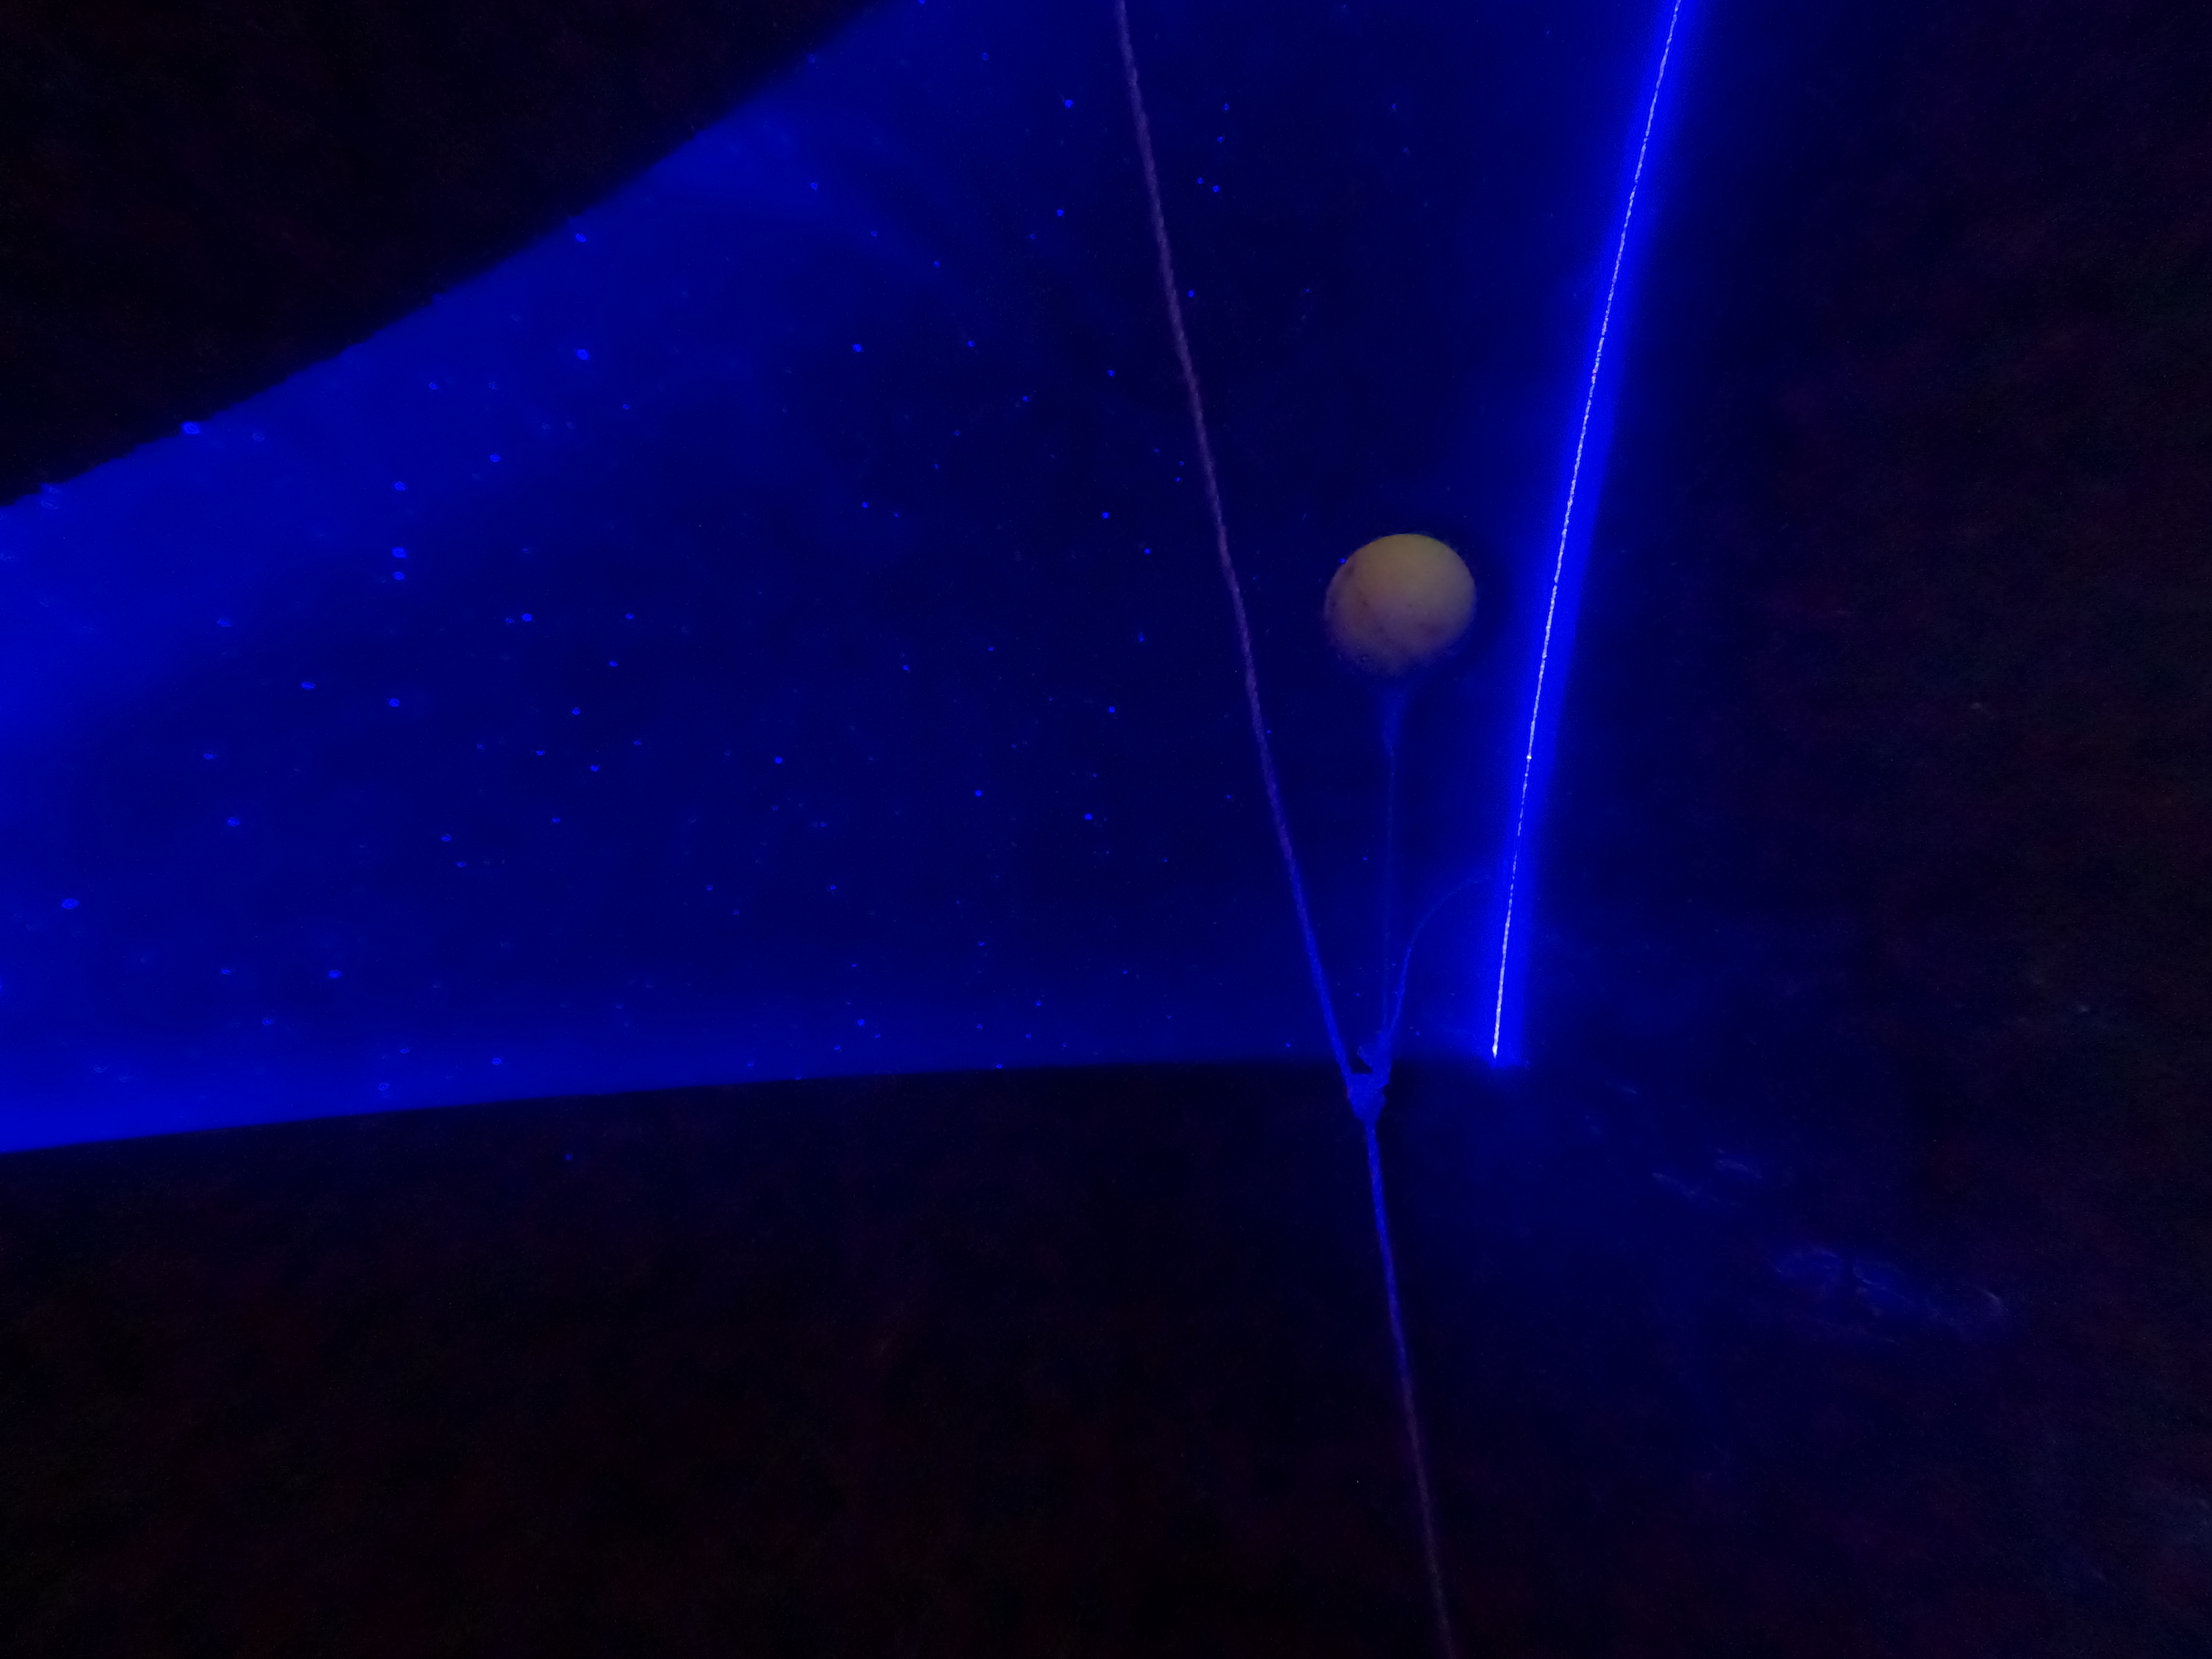

Supplement: Supplementary file 1046 [file G0031400.pdf › 10/G0031400.pdf]

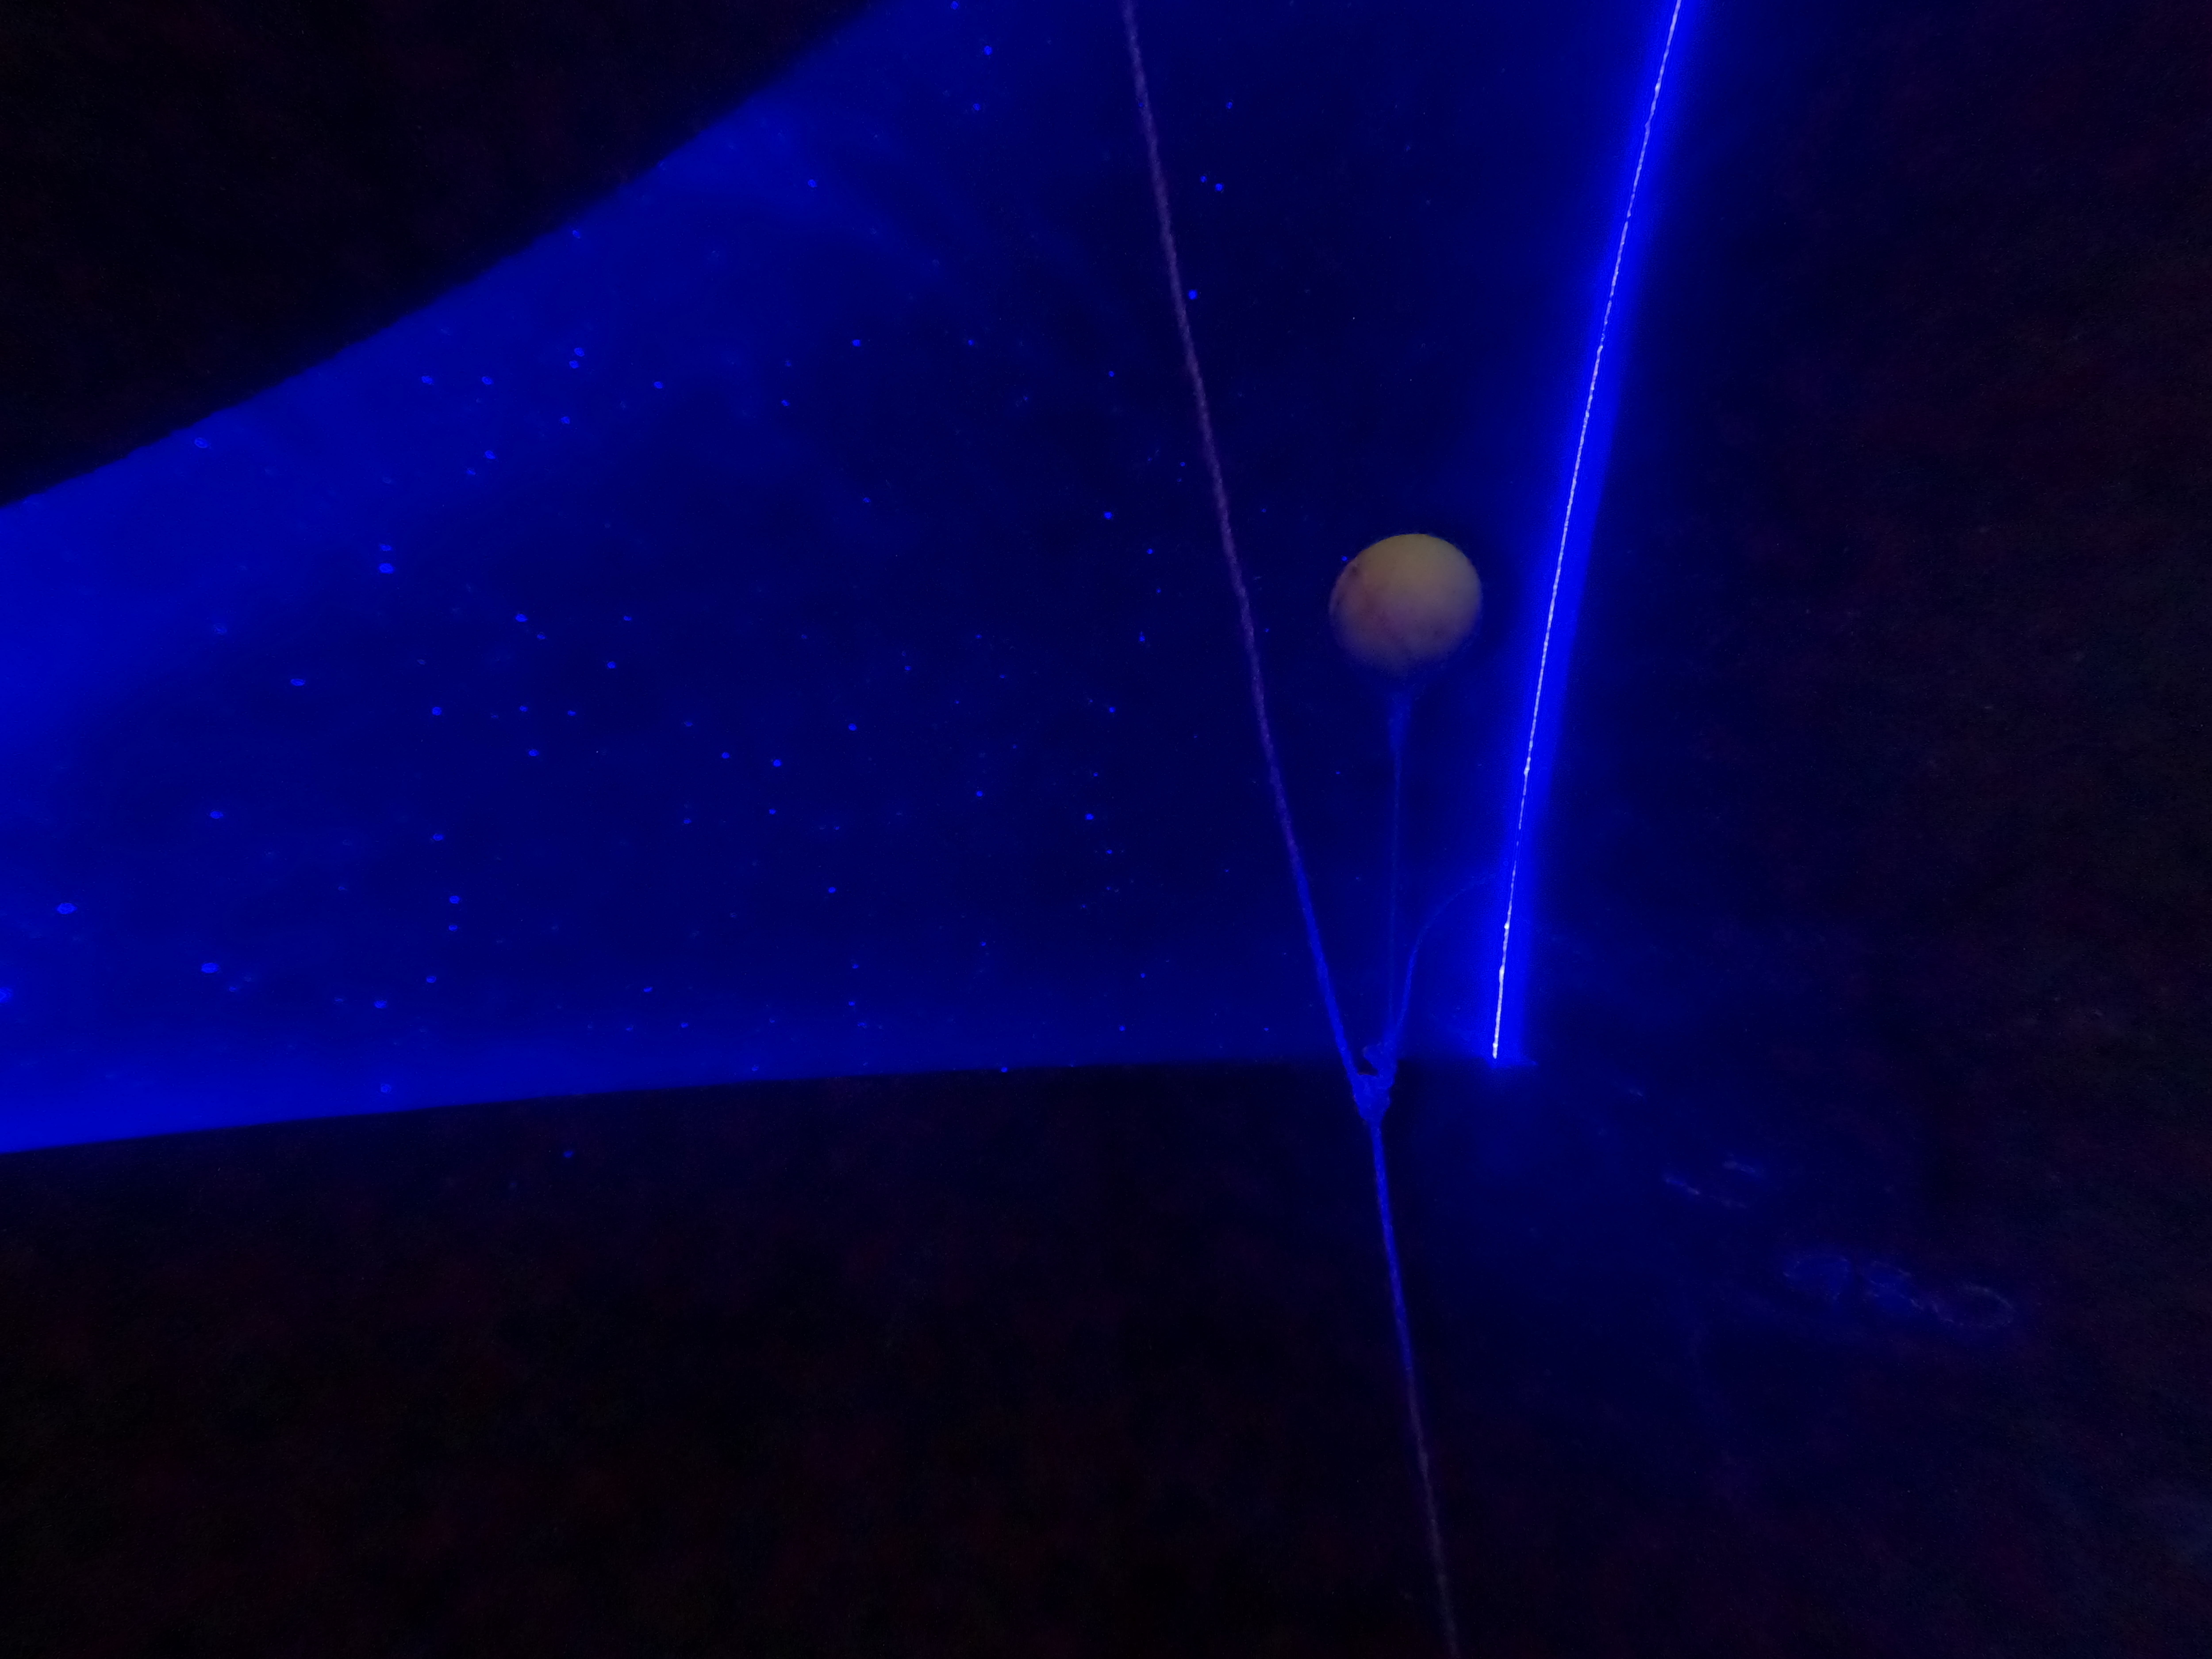

Supplement: Supplementary file 1047 [file G0031401.pdf › 10/G0031401.pdf]

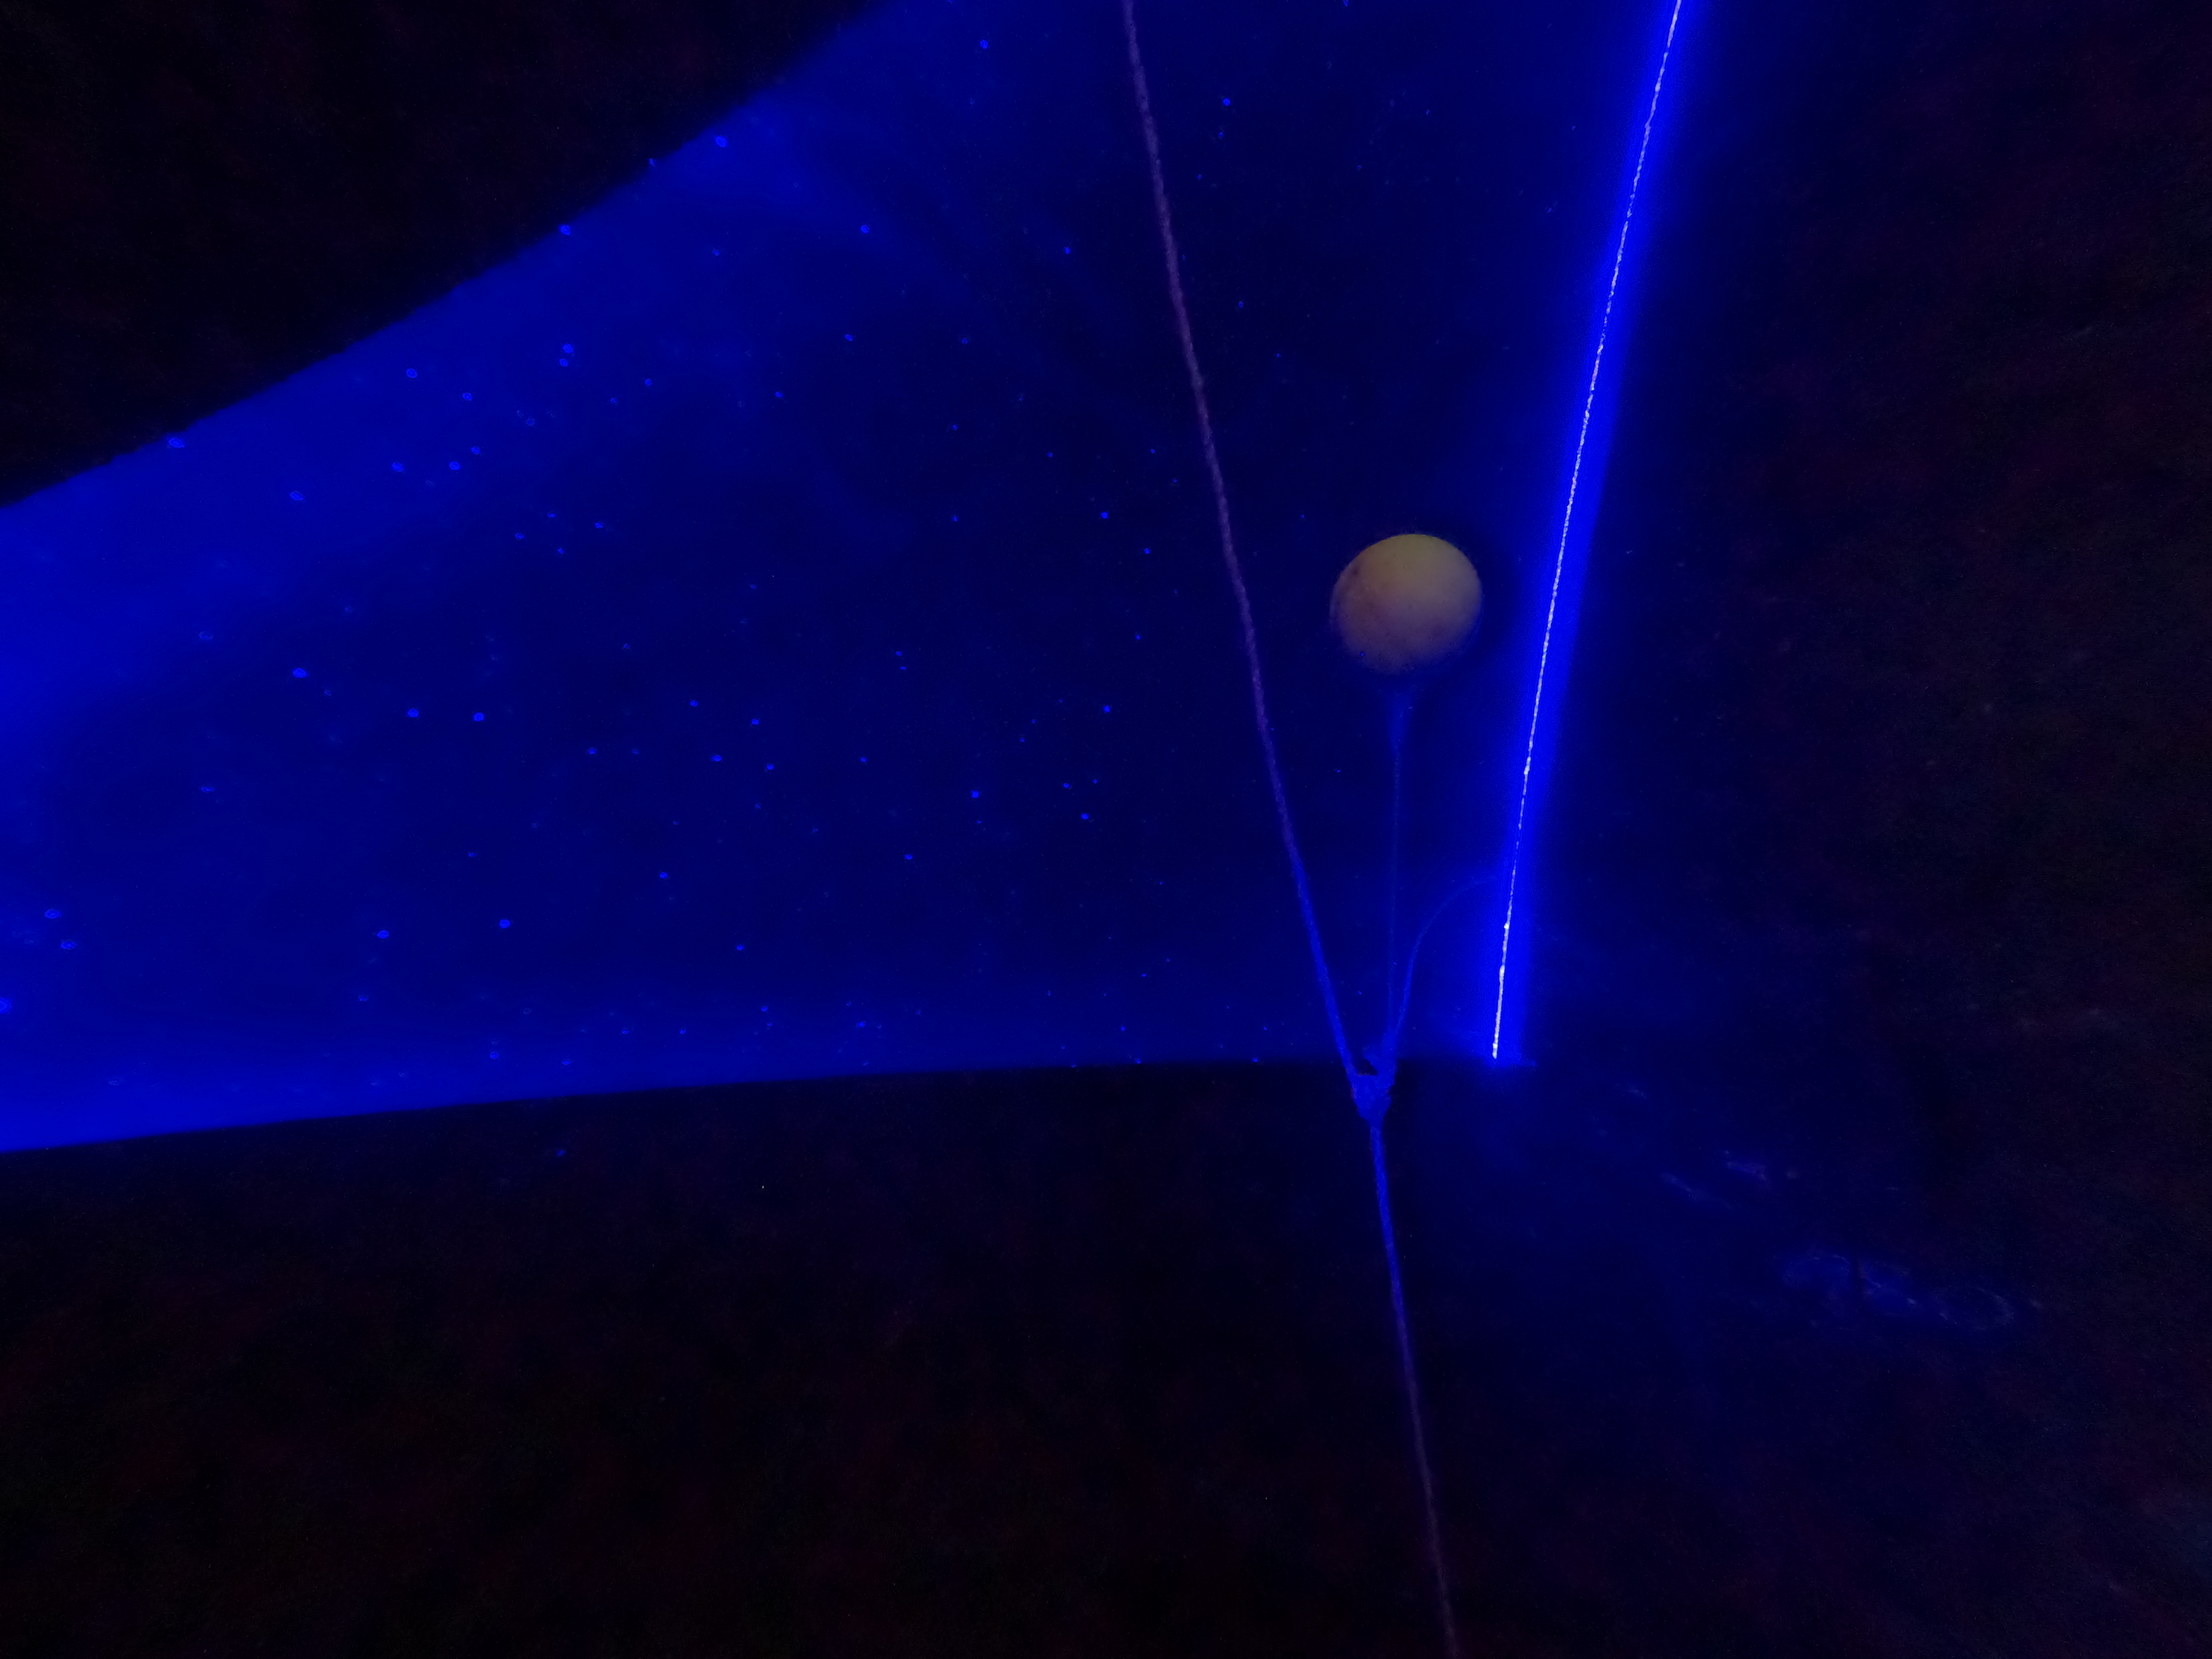

Supplement: Supplementary file 1048 [file G0031402.pdf › 10/G0031402.pdf]

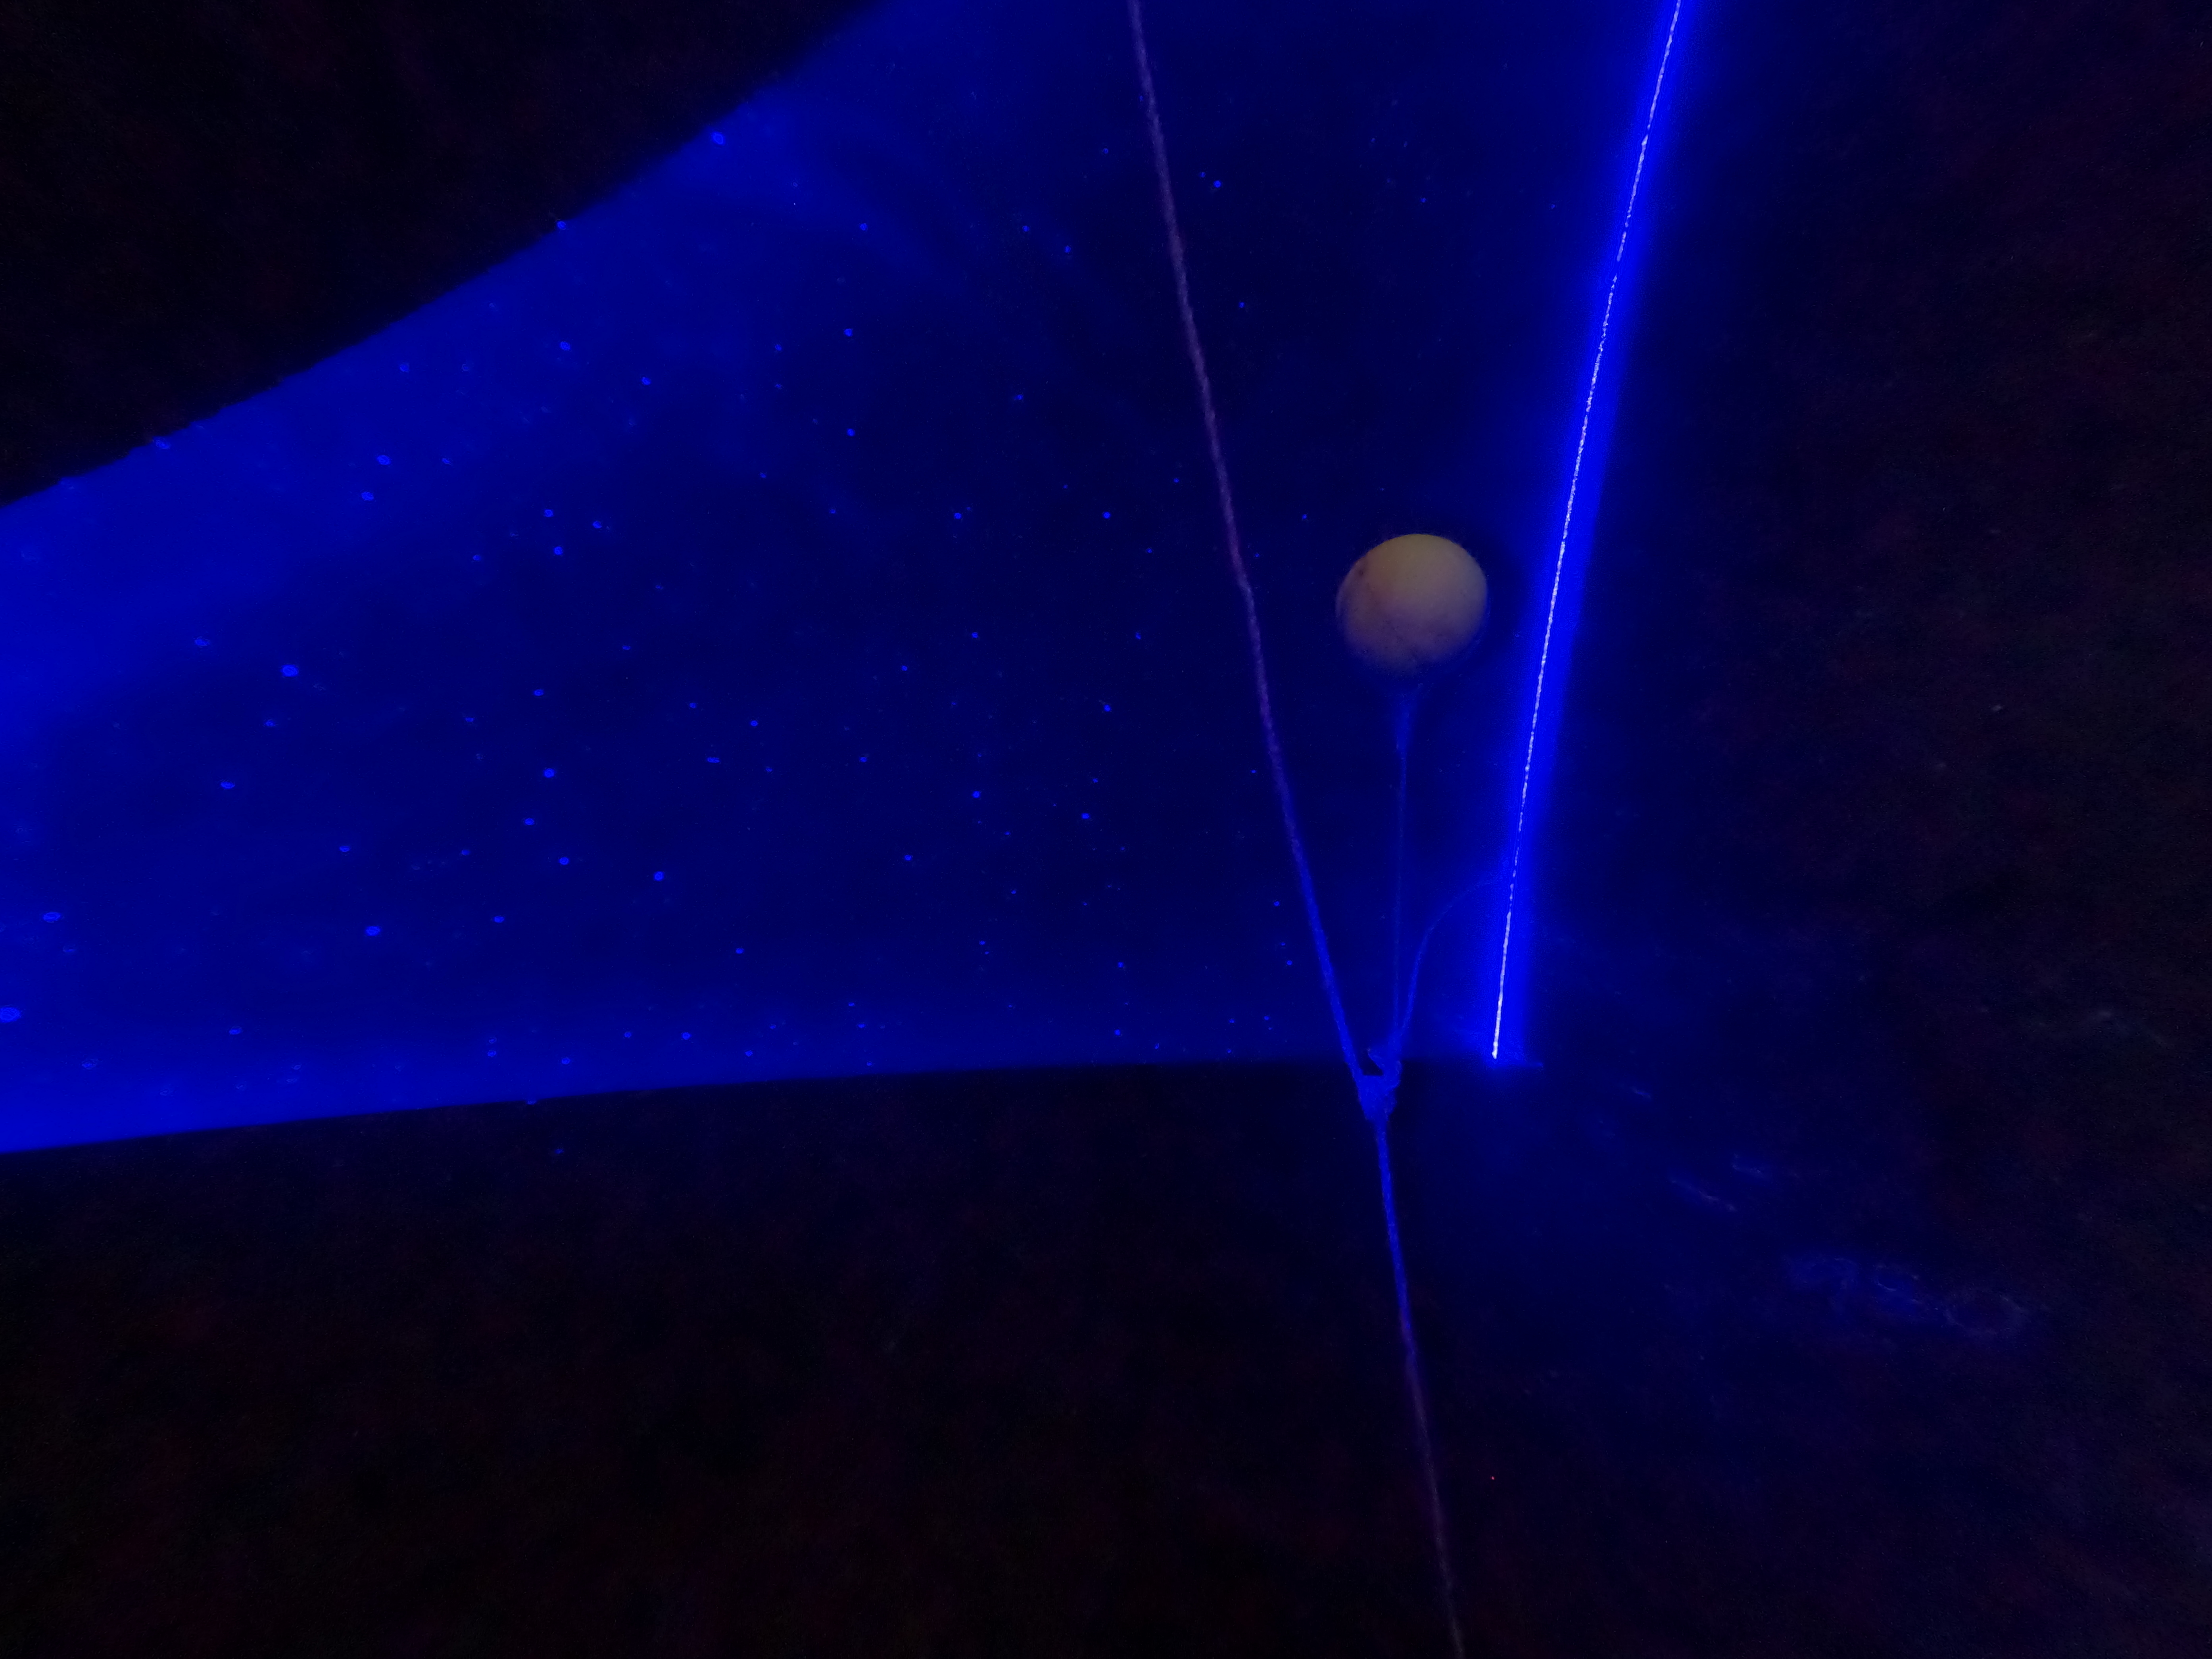

Supplement: Supplementary file 1049 [file G0031403.pdf › 10/G0031403.pdf]

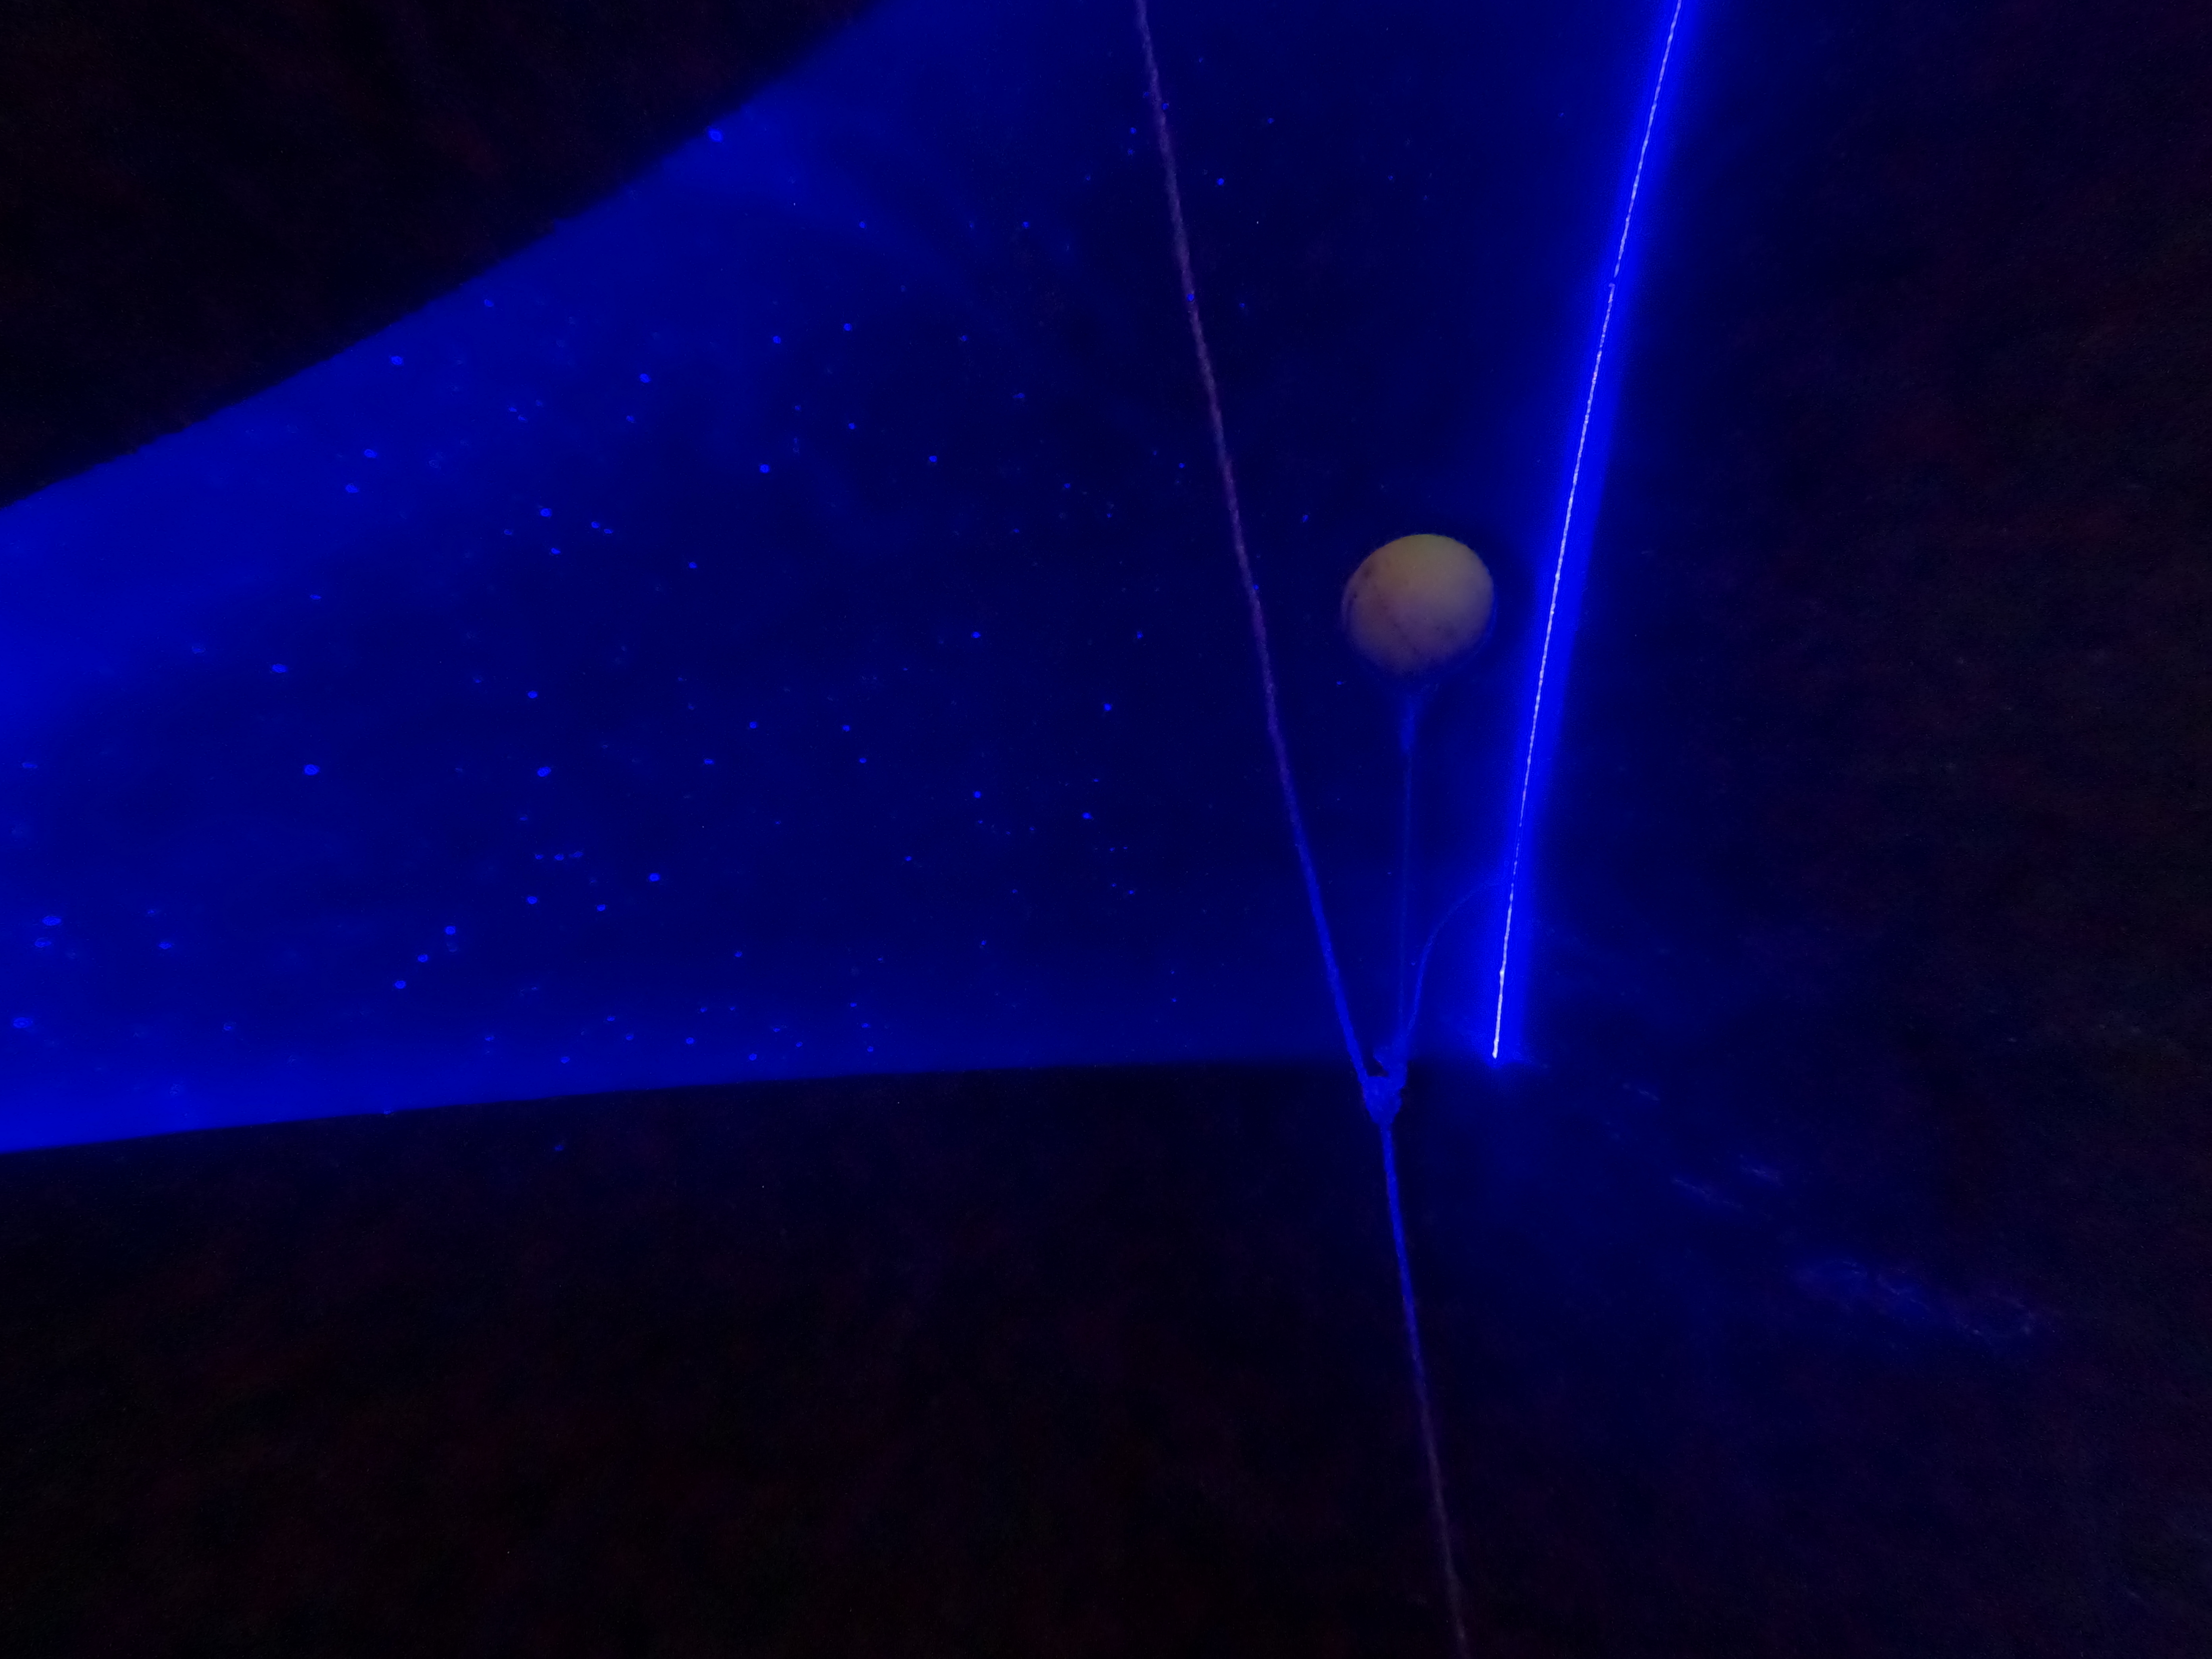

Supplement: Supplementary file 1050 [file G0031404.pdf › 10/G0031404.pdf]

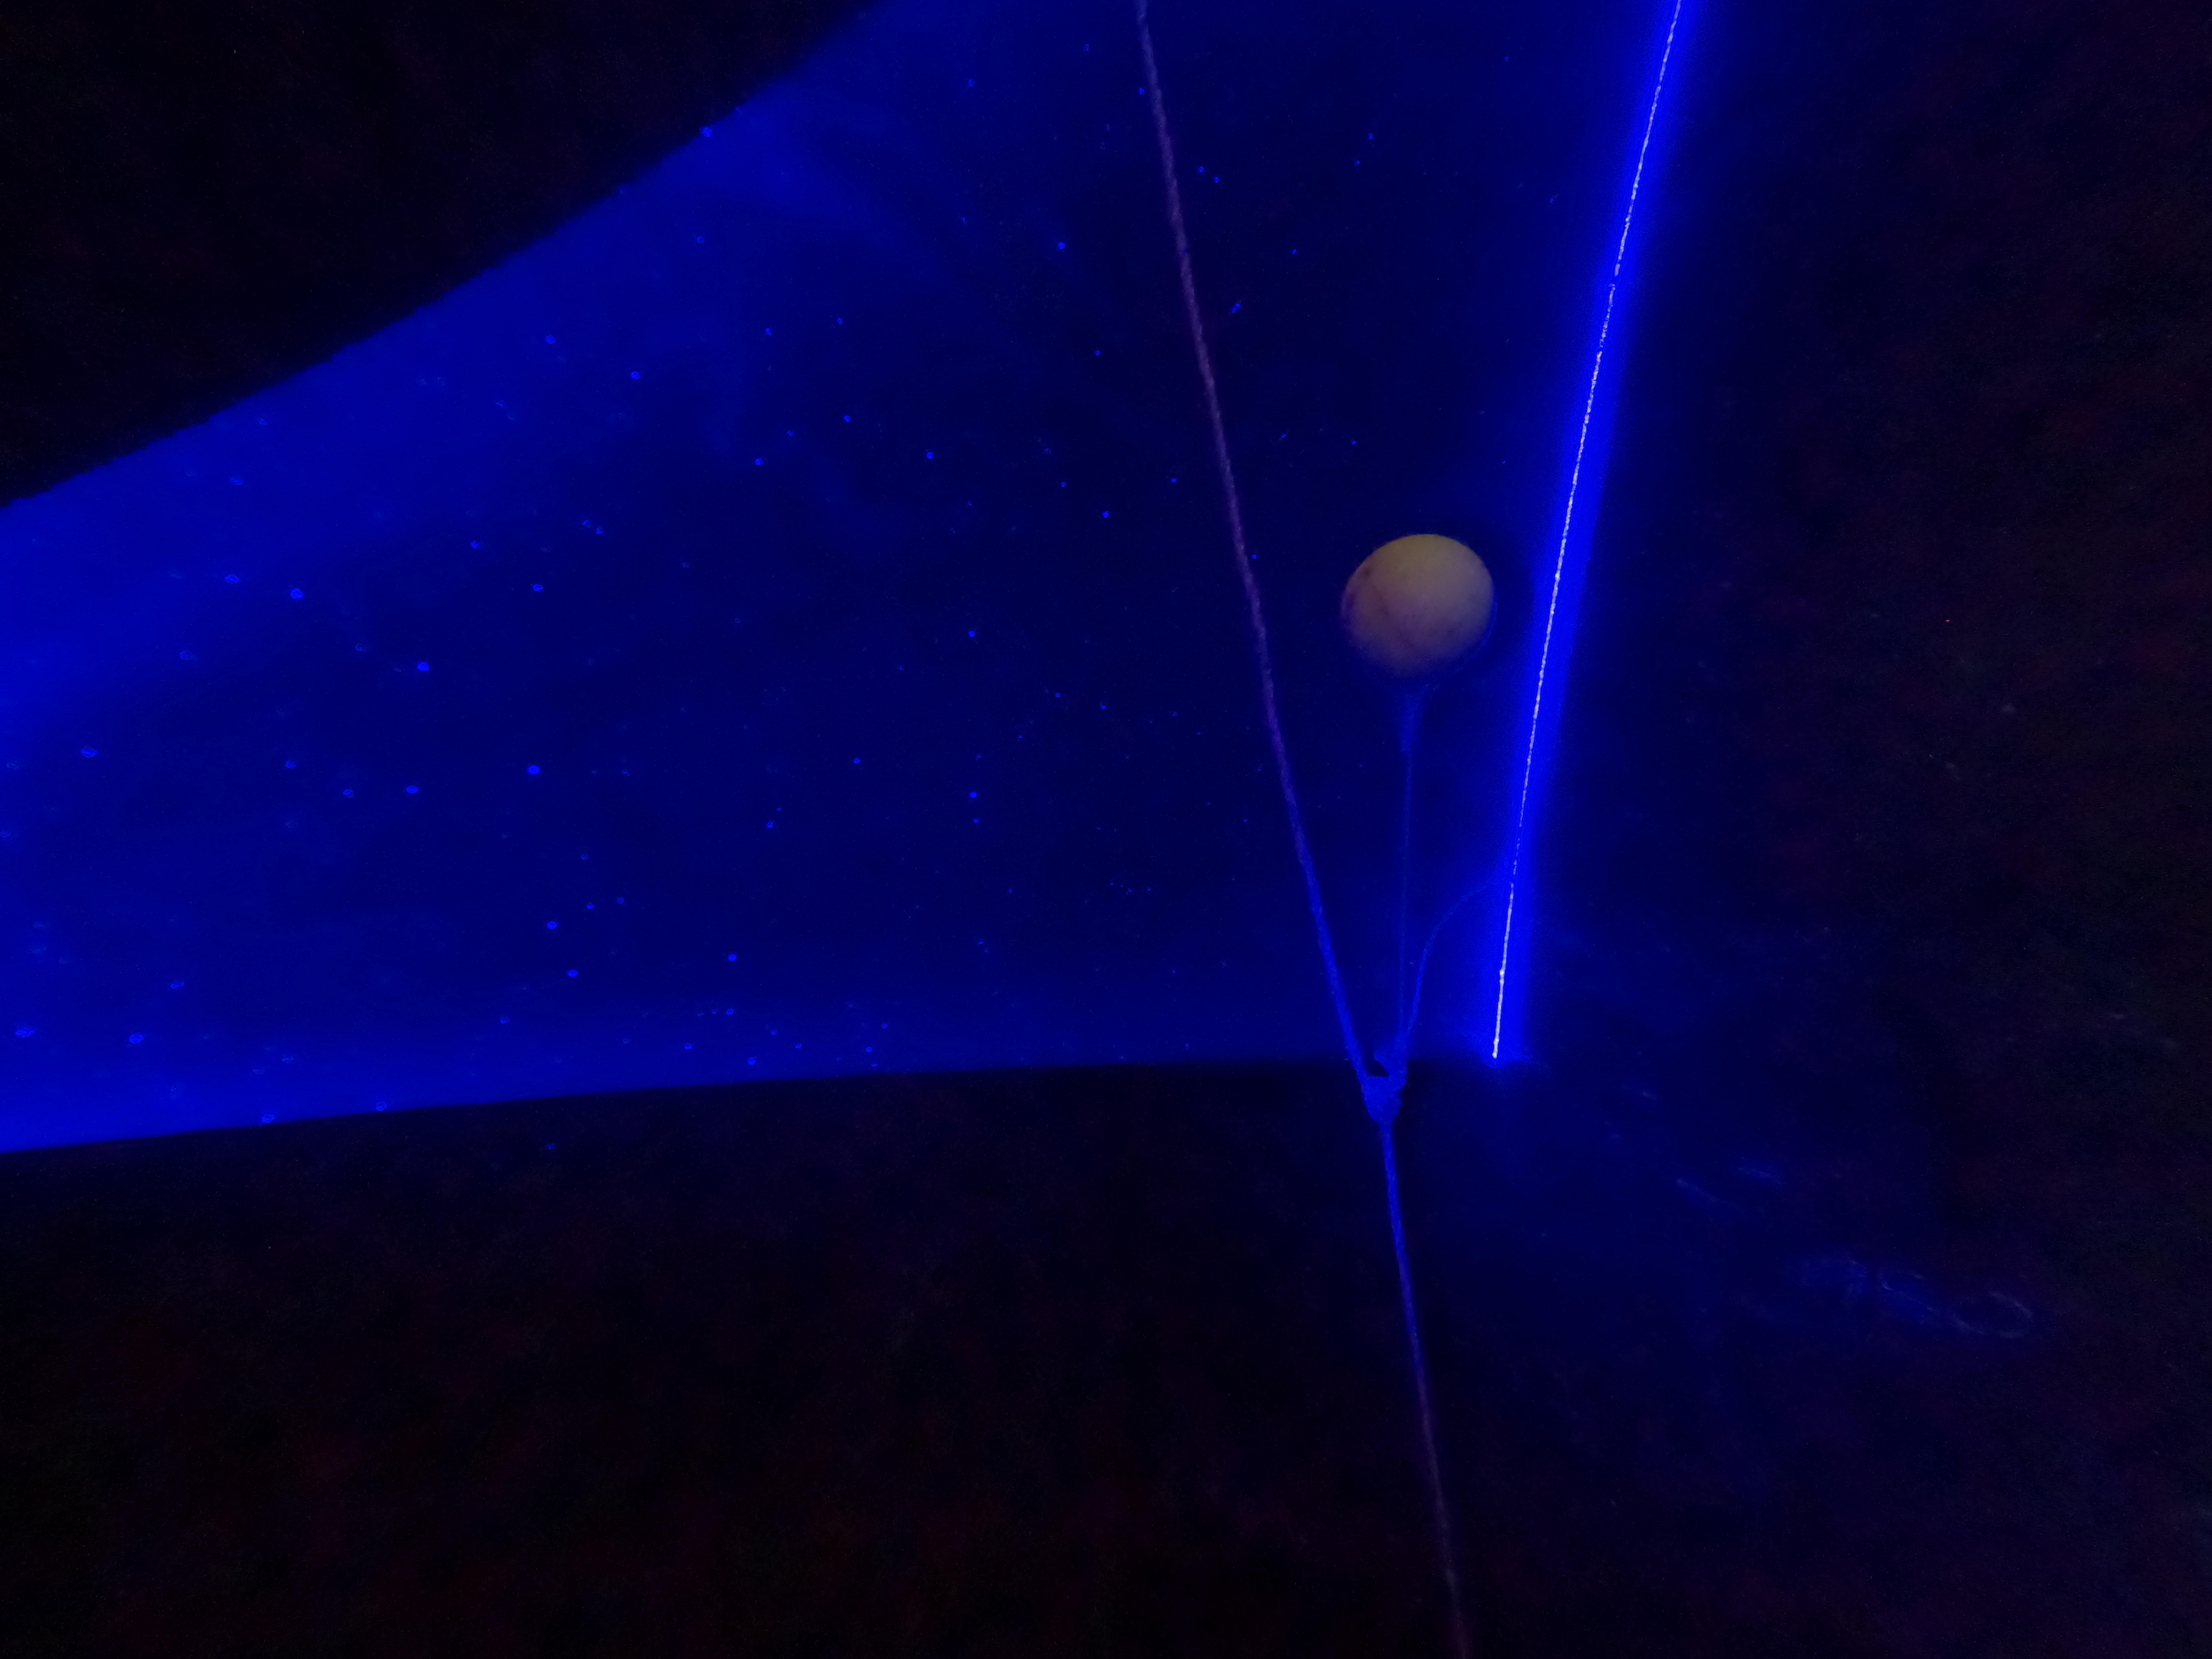

Supplement: Supplementary file 1051 [file G0031405.pdf › 10/G0031405.pdf]

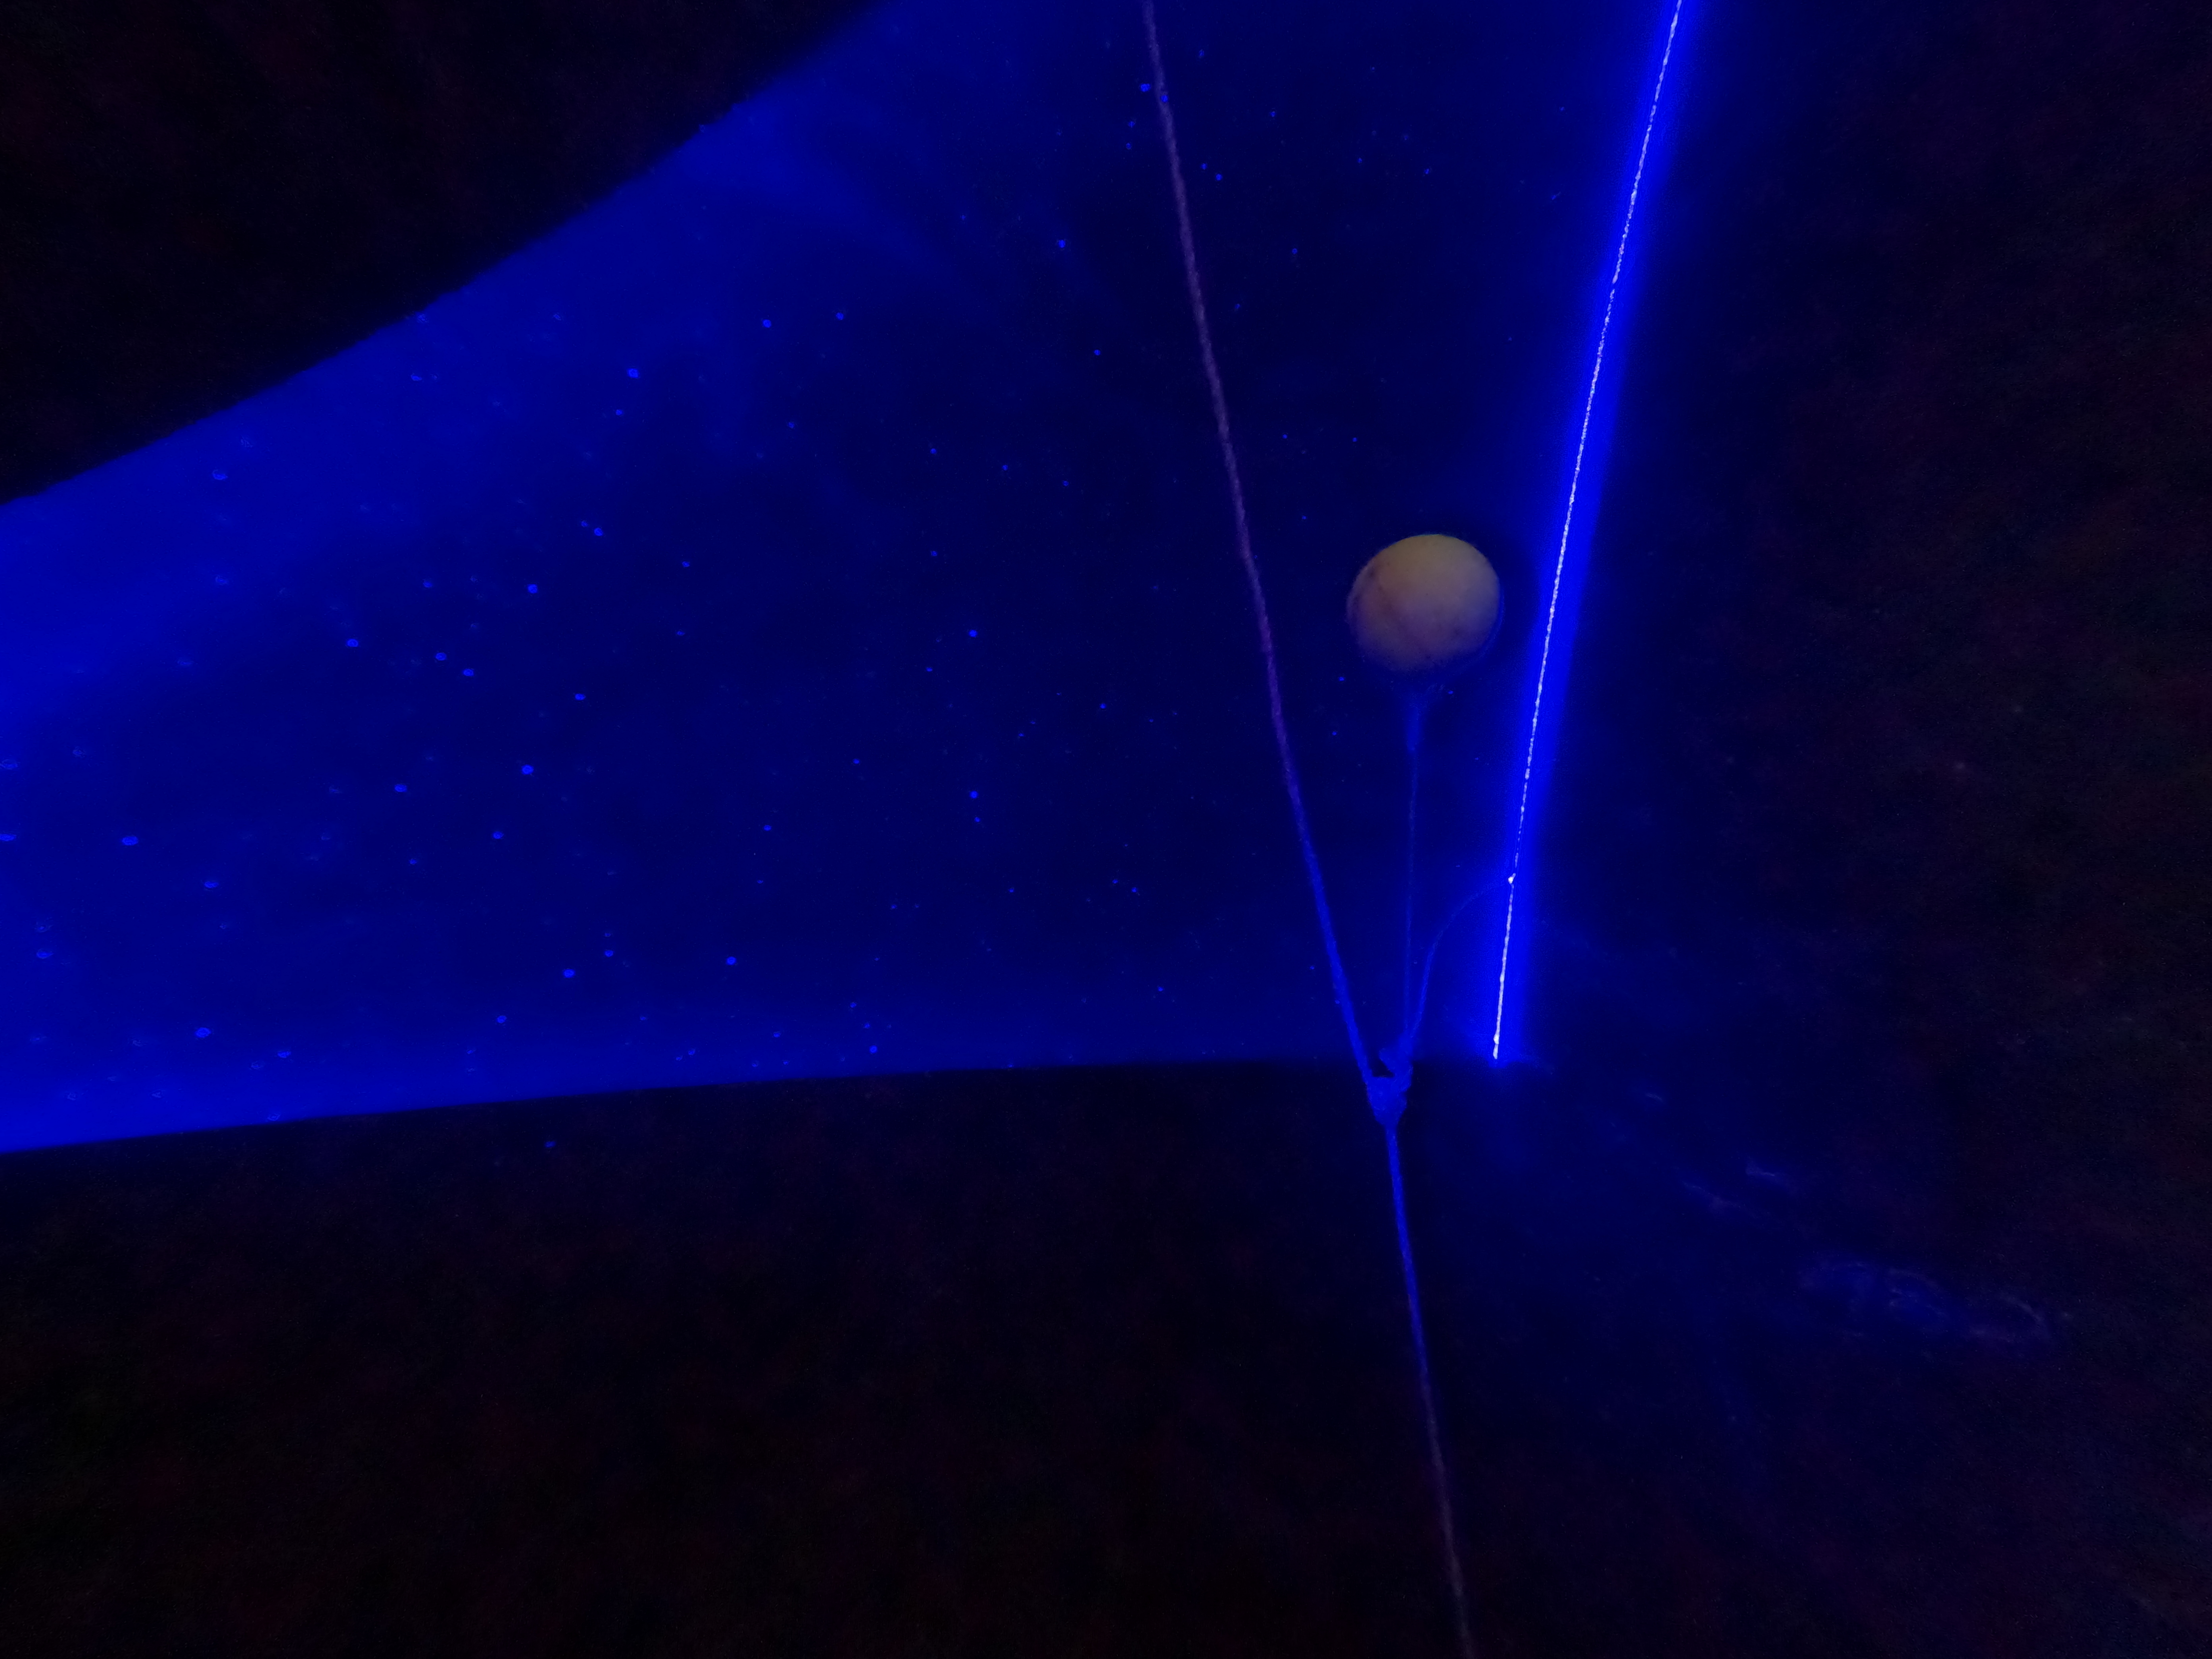

Supplement: Supplementary file 1052 [file G0031406.pdf › 10/G0031406.pdf]

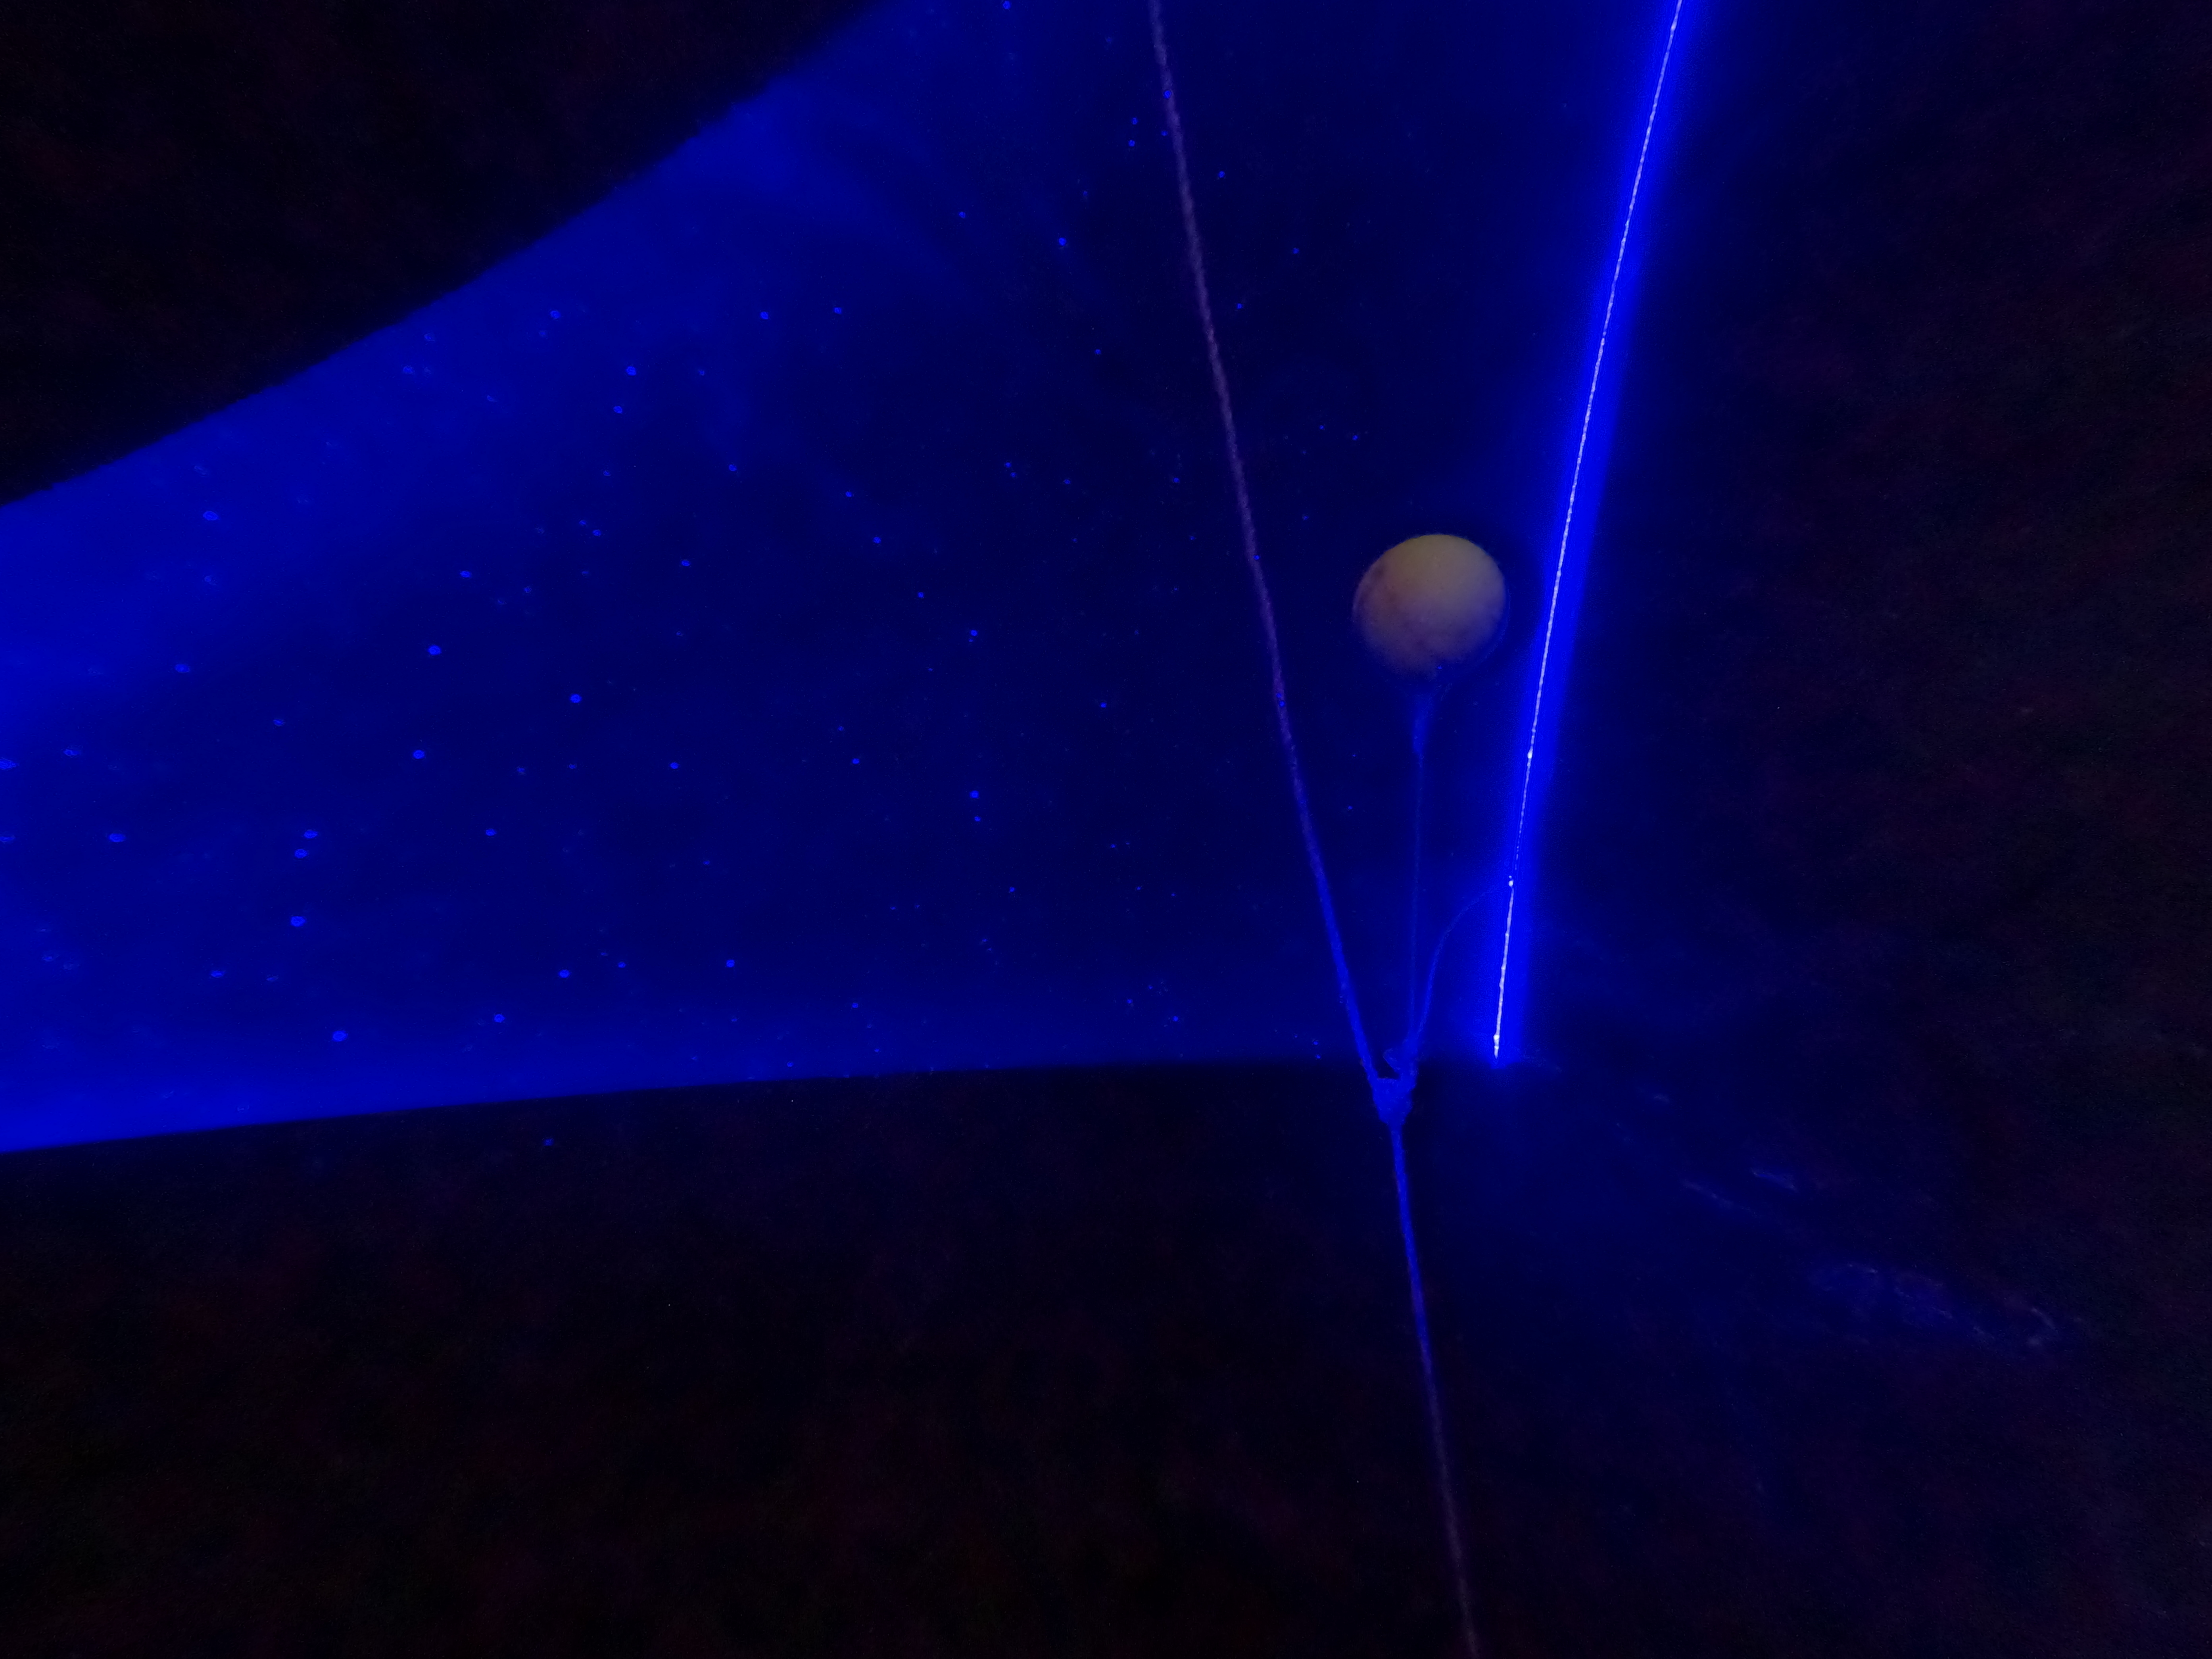

Supplement: Supplementary file 1053 [file G0031407.pdf › 10/G0031407.pdf]

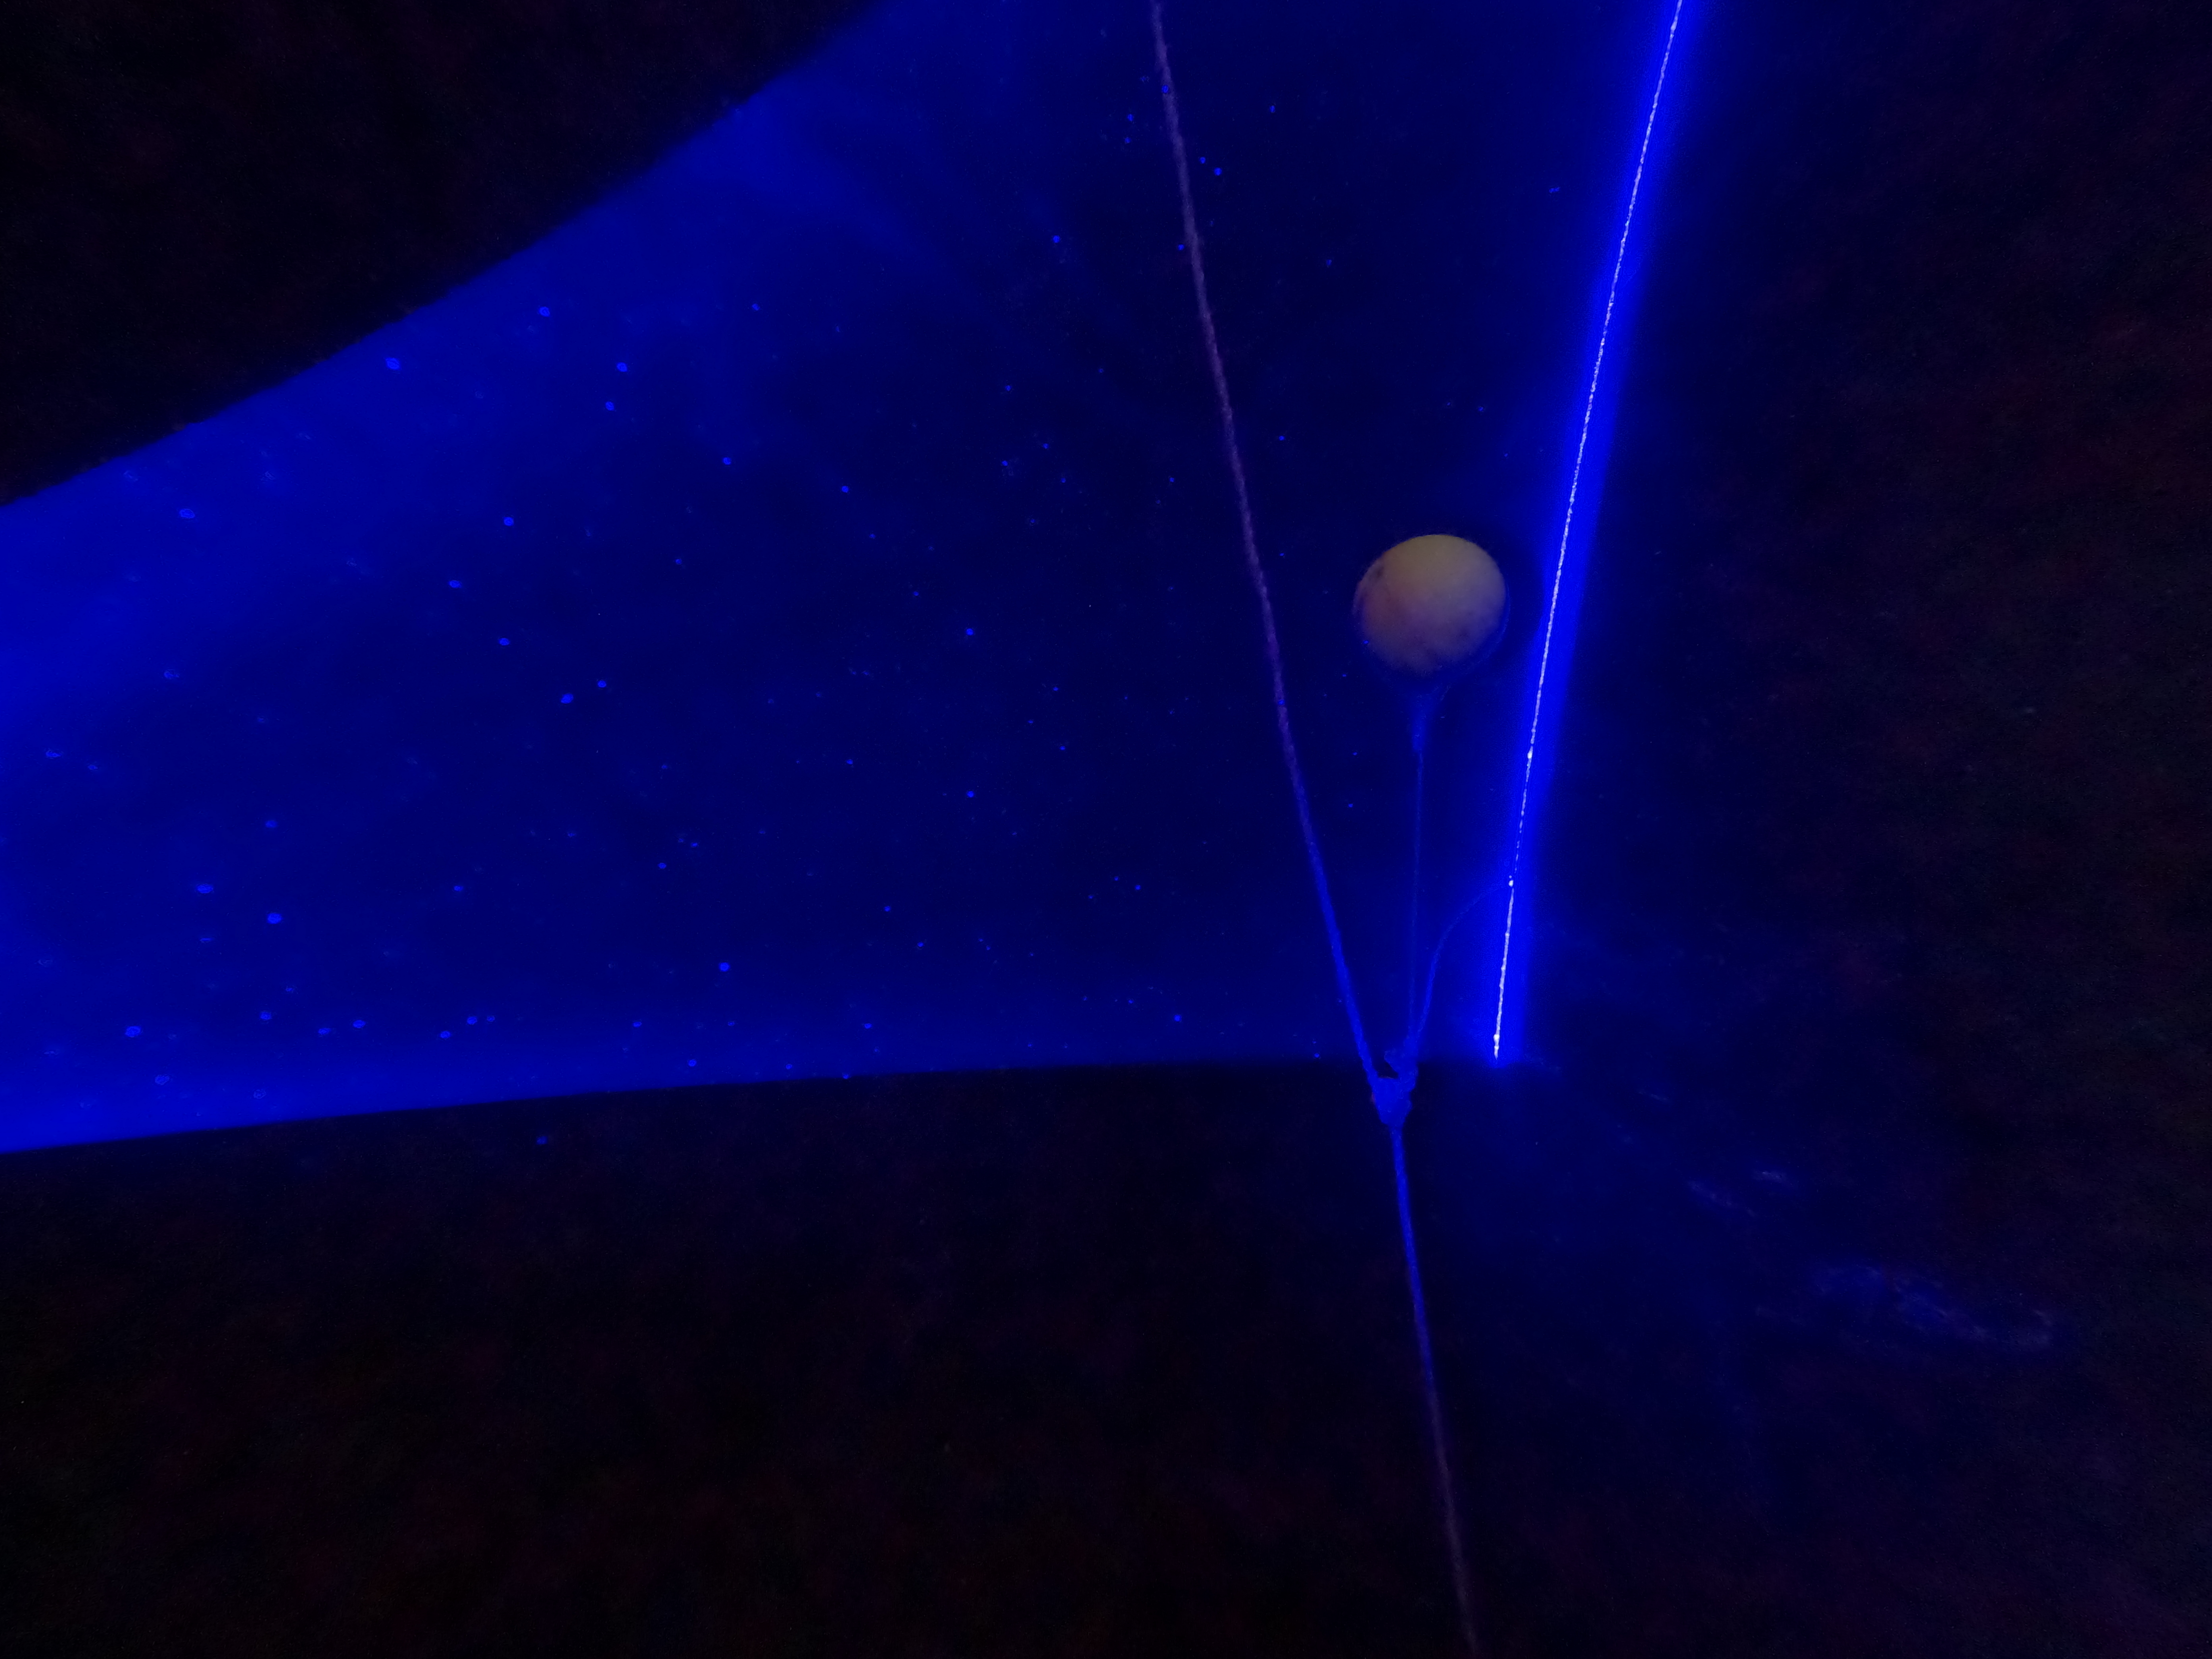

Supplement: Supplementary file 1054 [file G0031408.pdf › 10/G0031408.pdf]

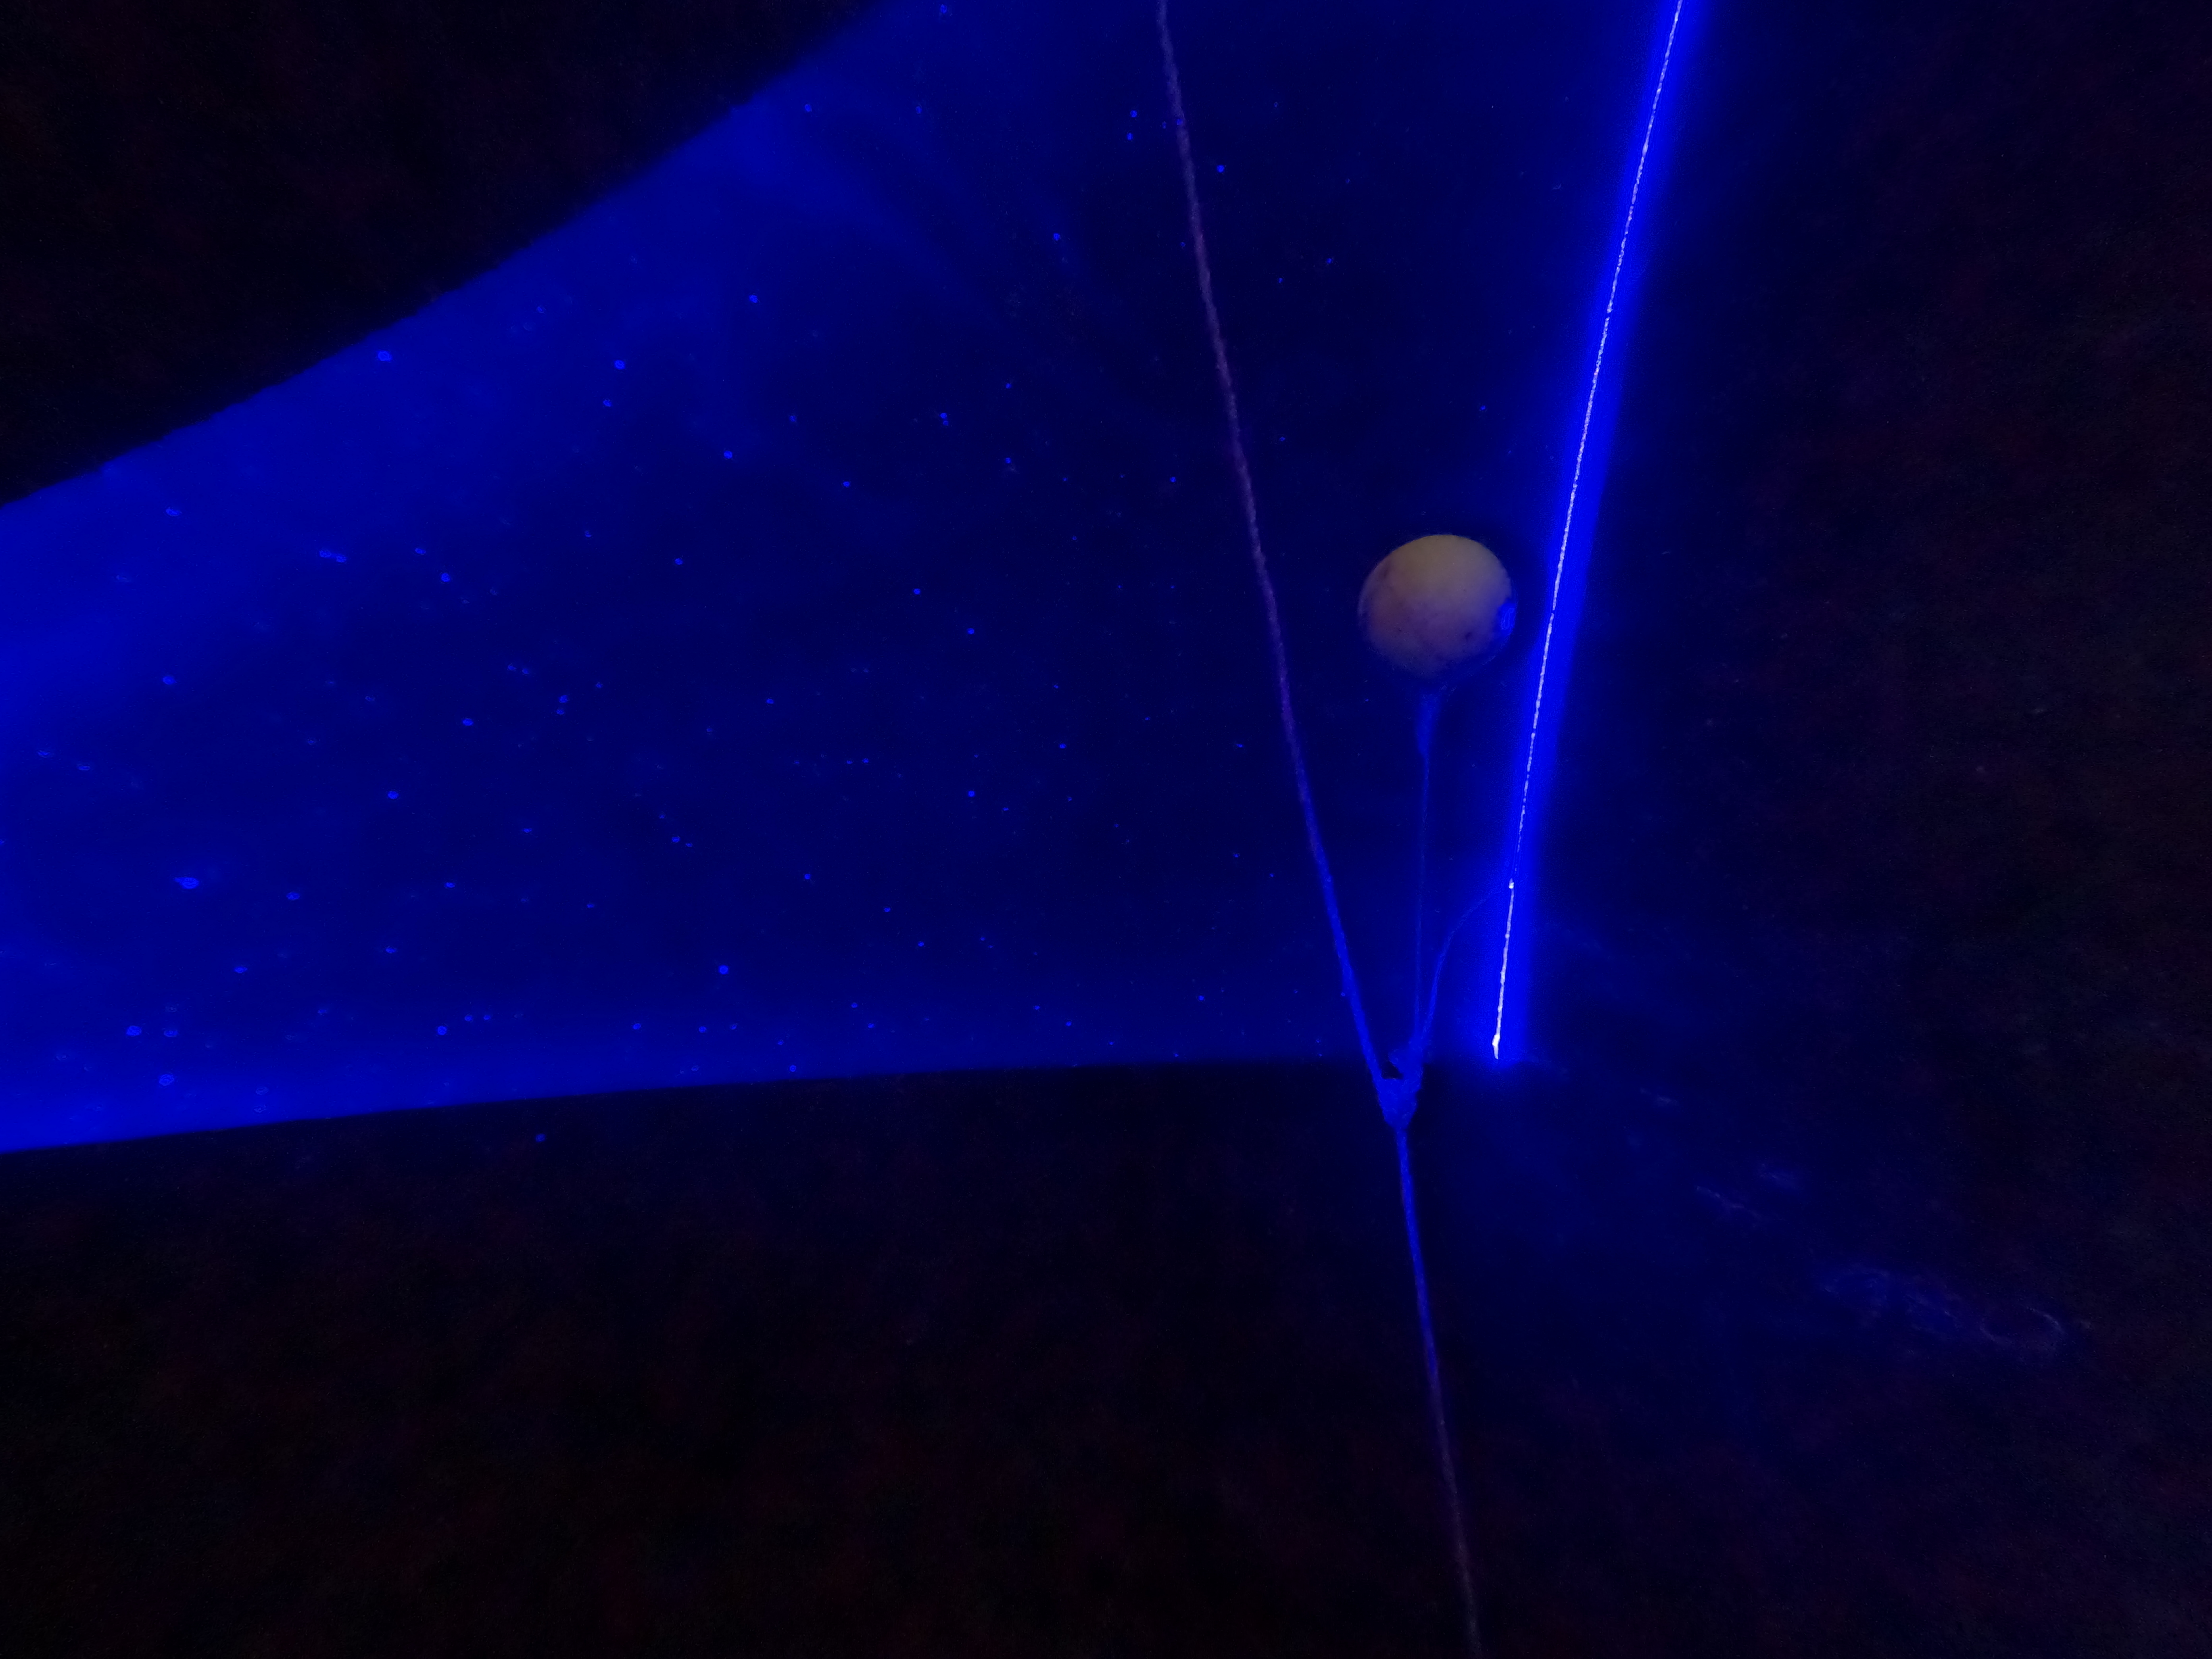

Supplement: Supplementary file 1055 [file G0031409.pdf › 10/G0031409.pdf]

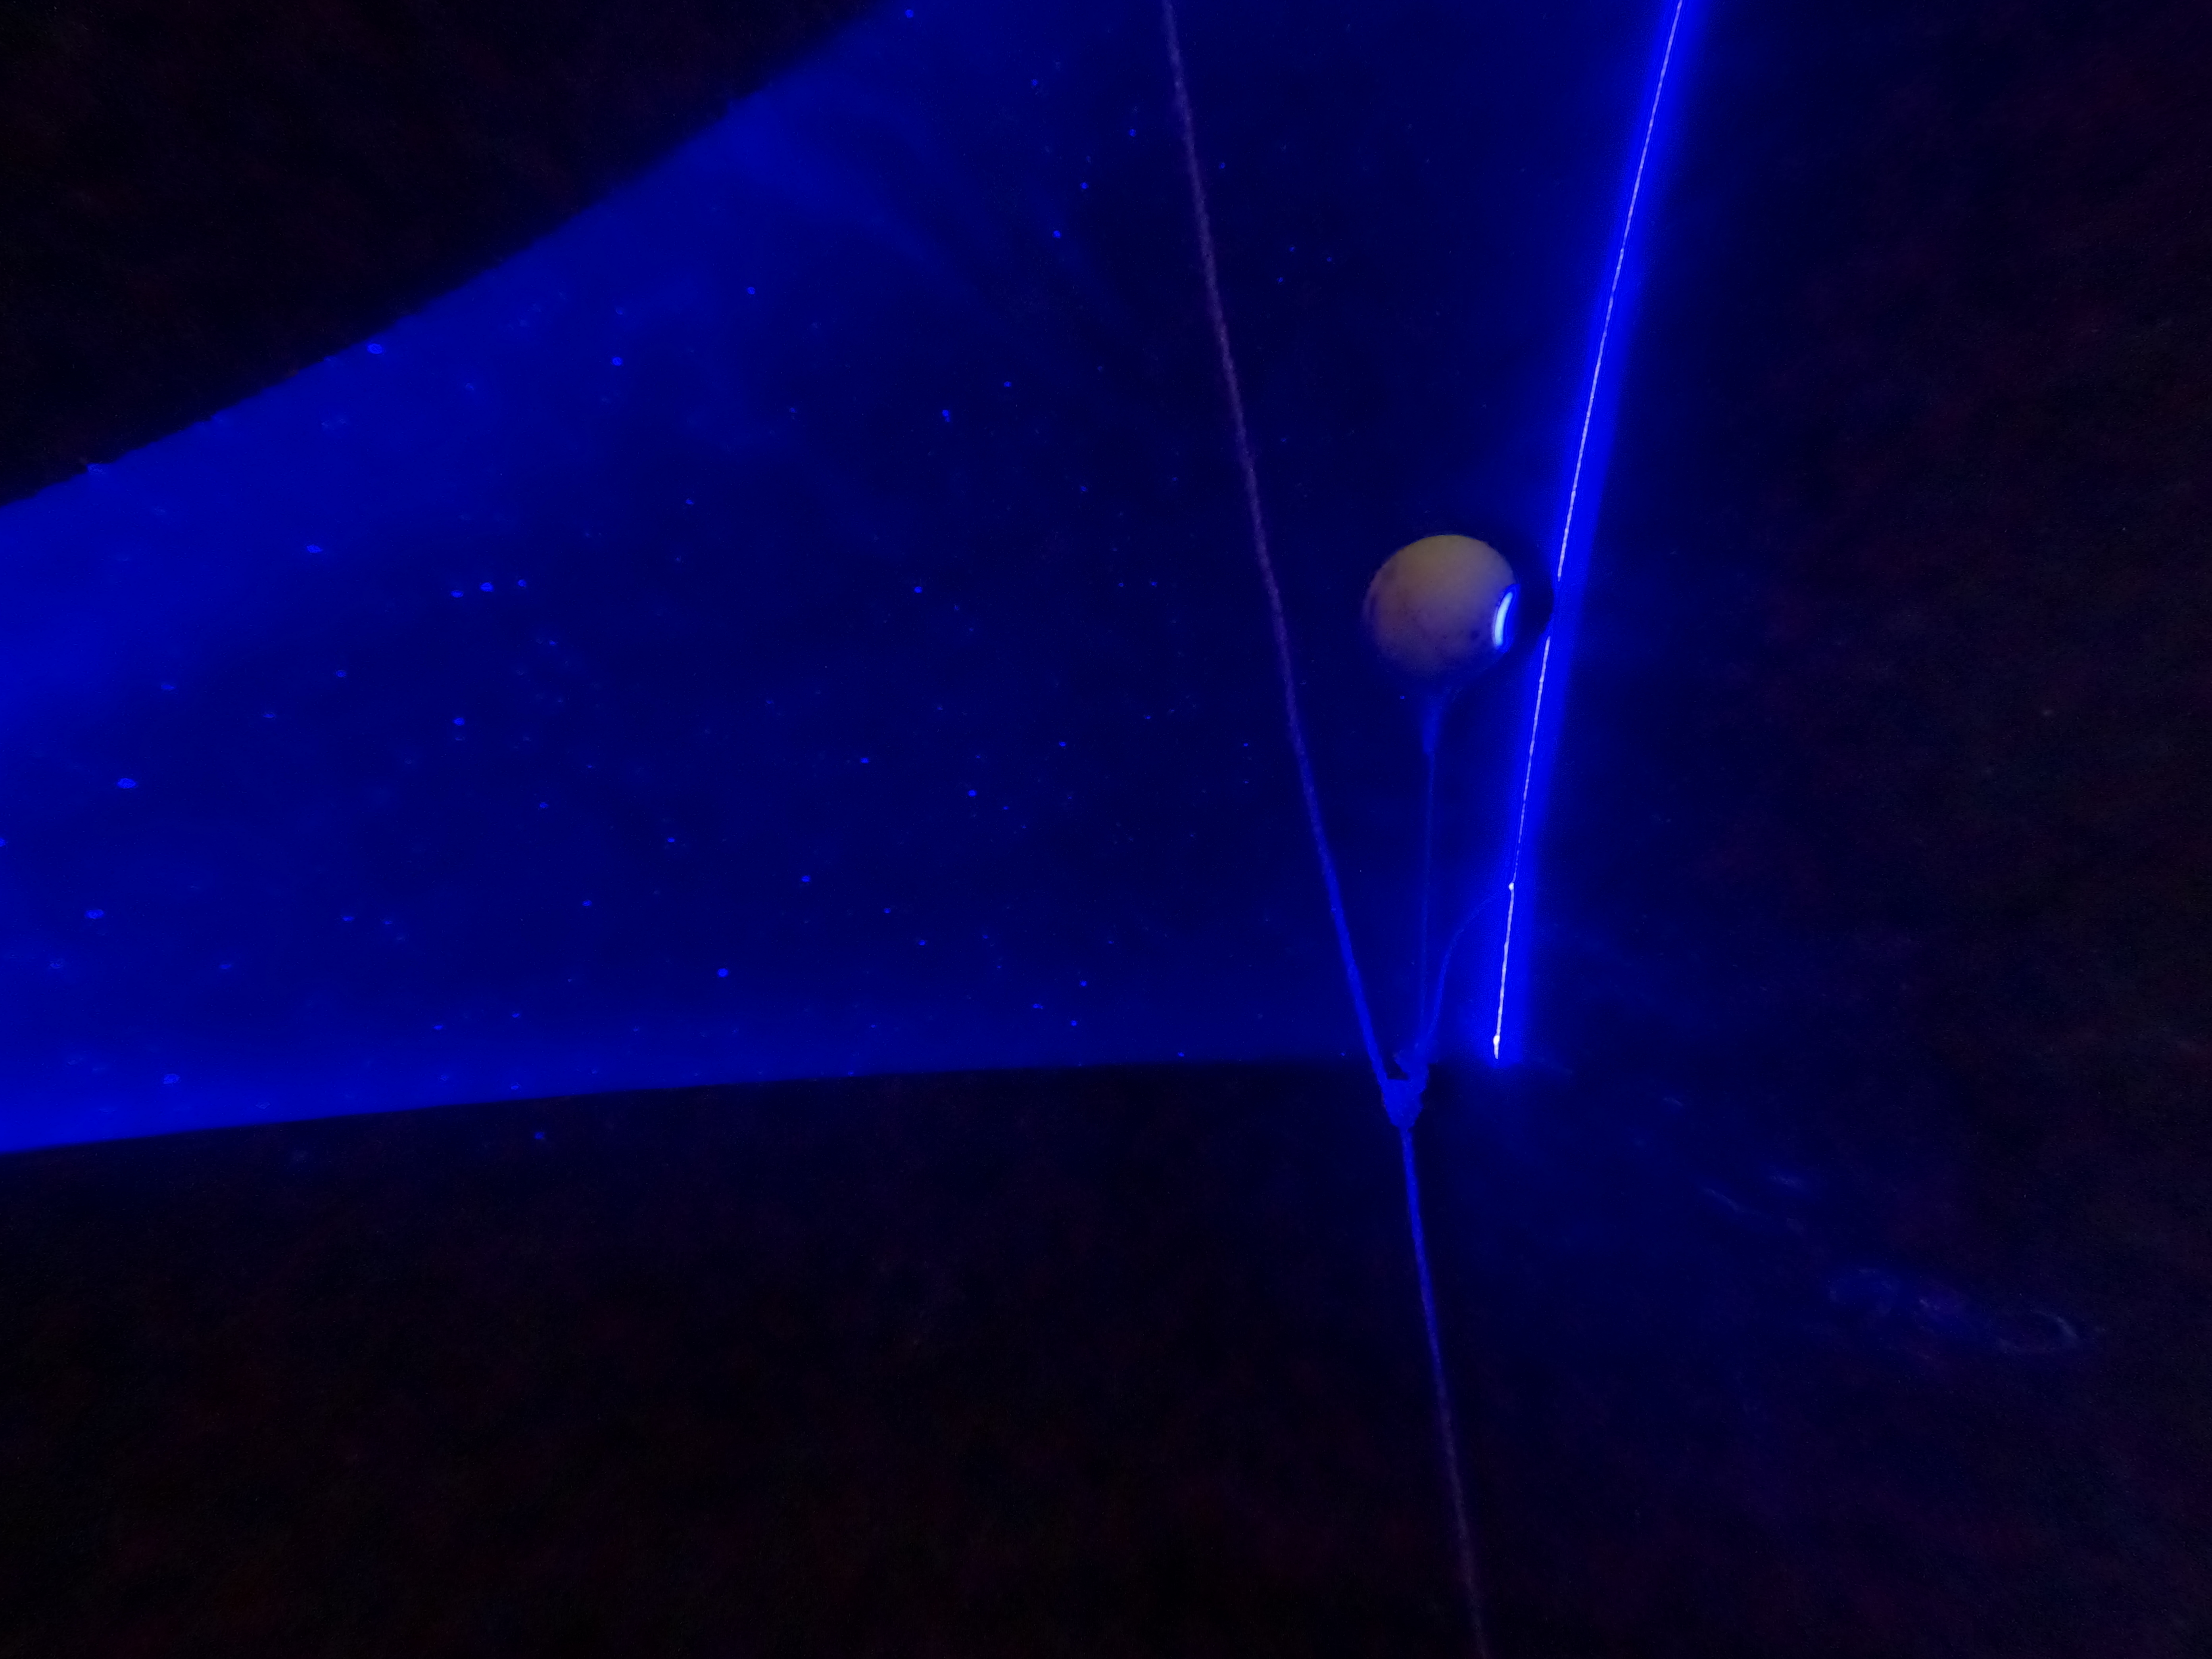

Supplement: Supplementary file 1056 [file G0031410.pdf › 10/G0031410.pdf]

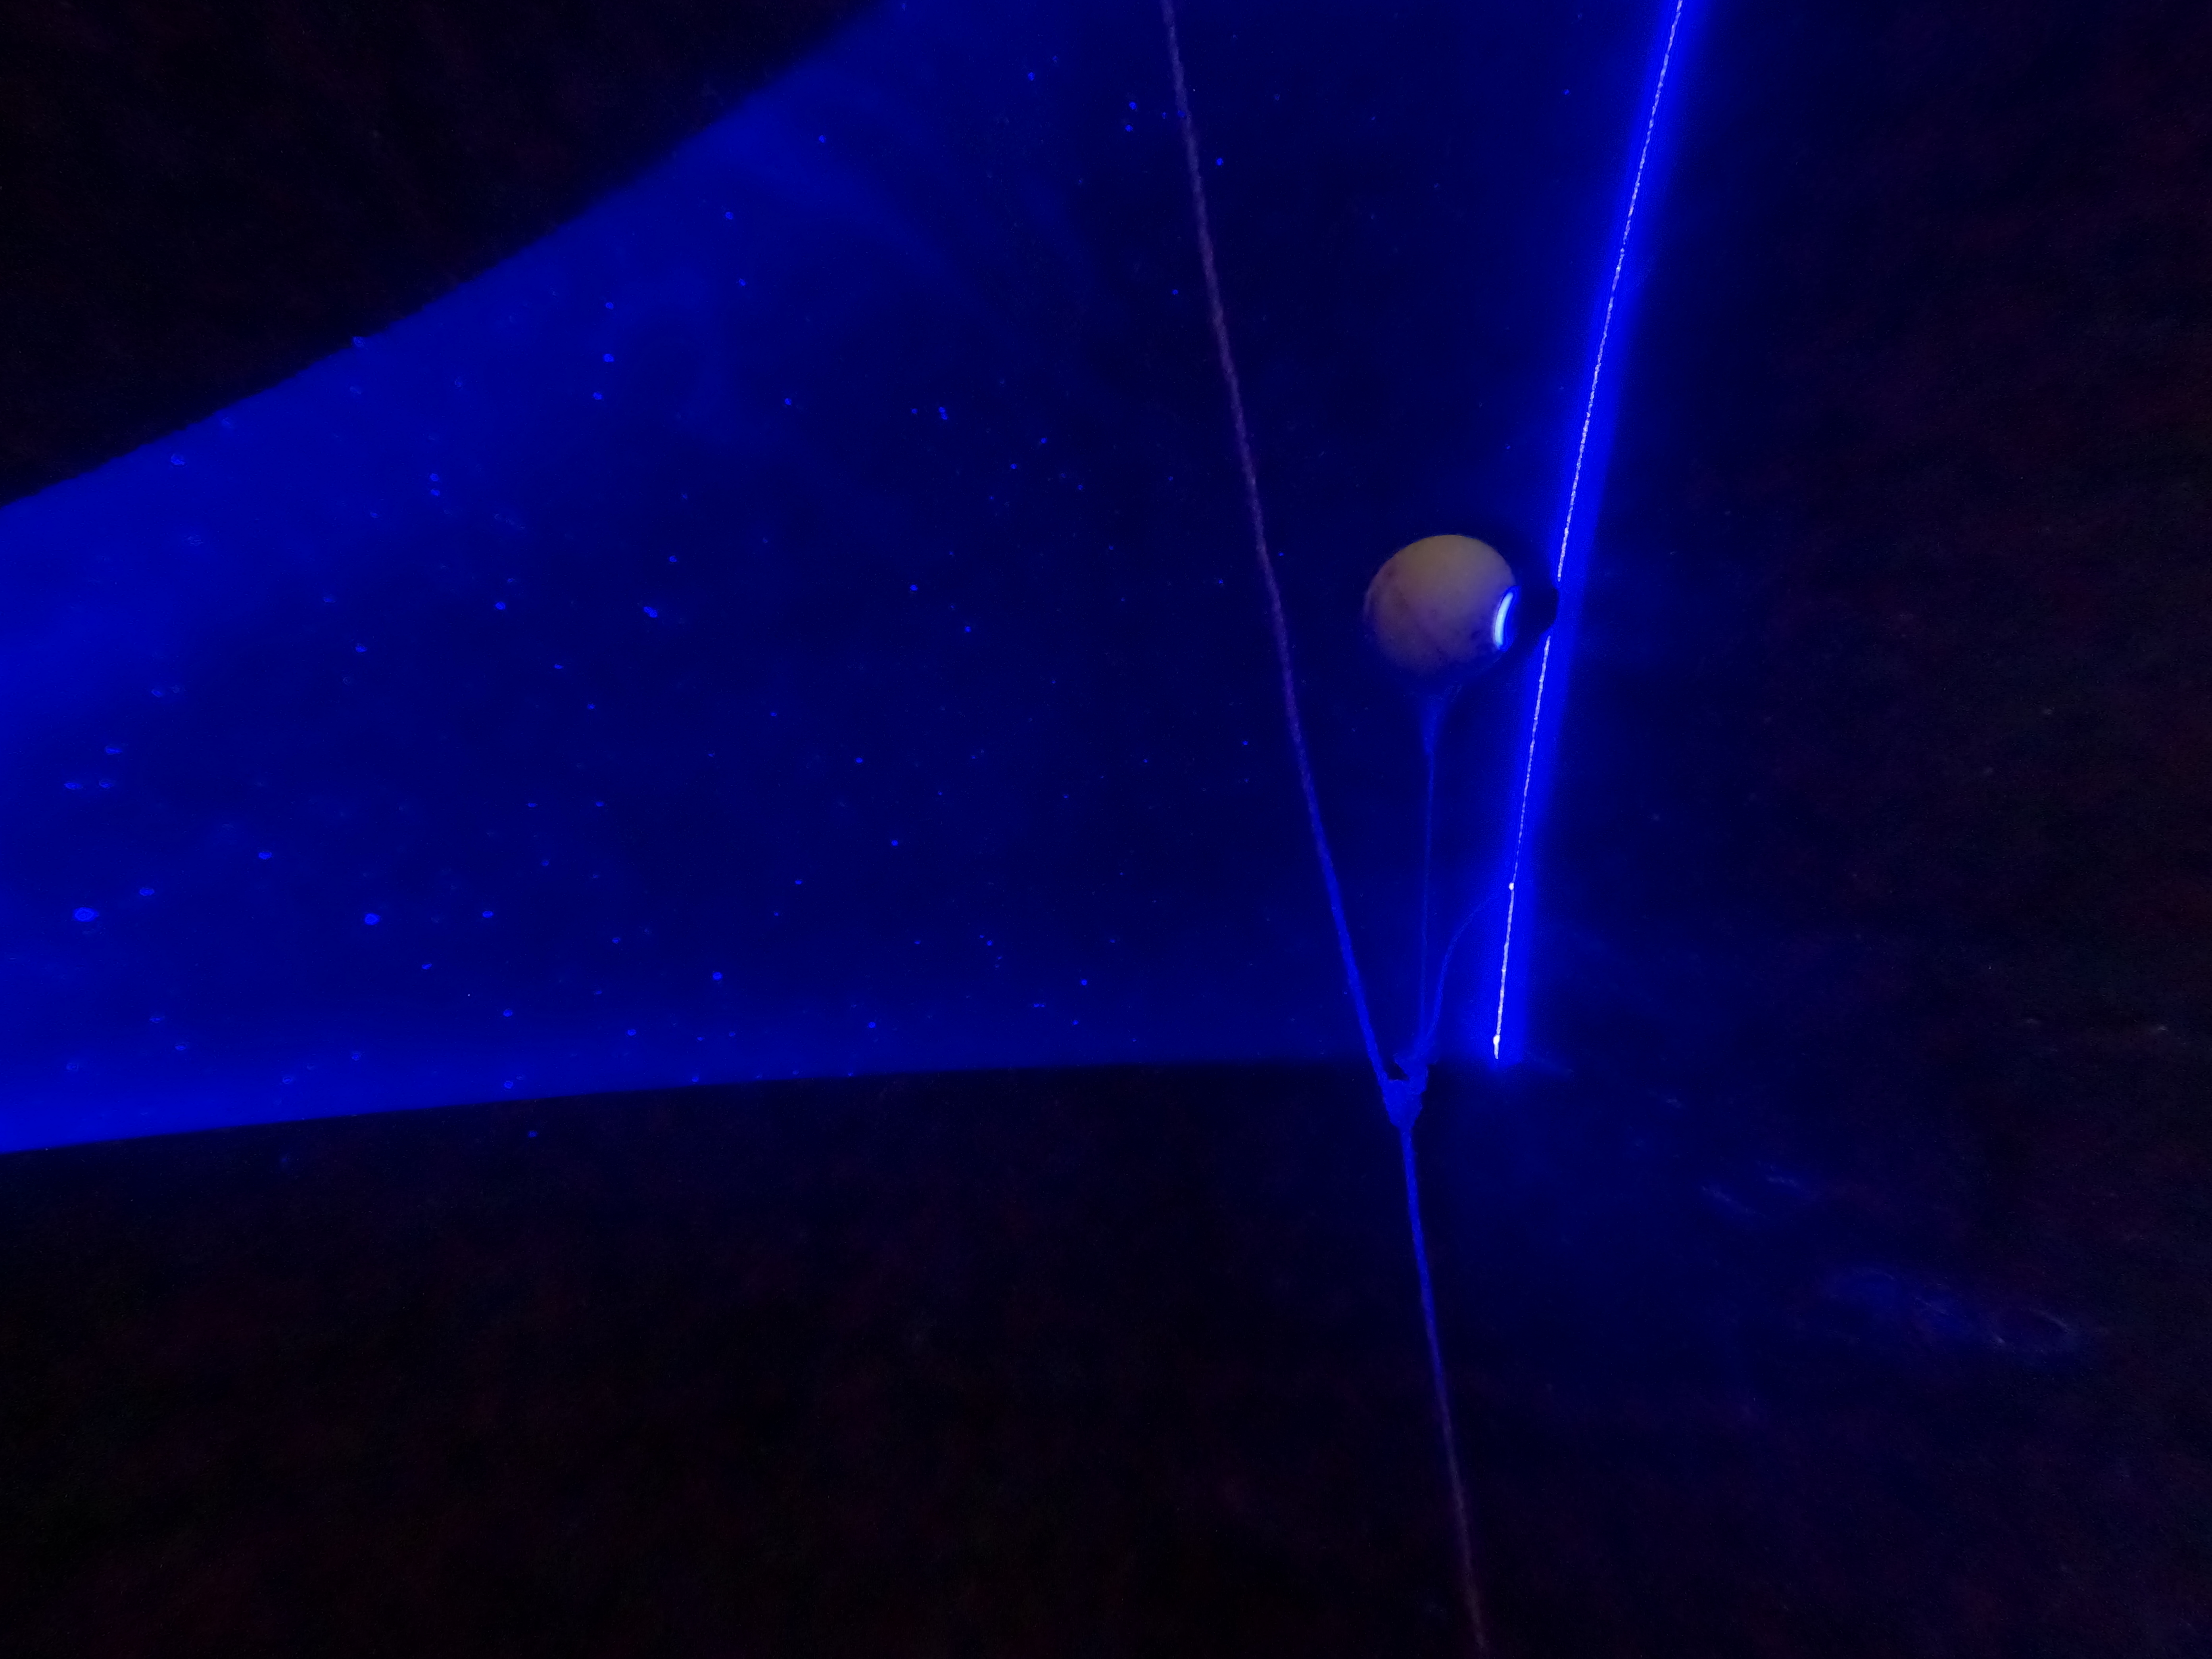

Supplement: Supplementary file 1057 [file G0031411.pdf › 10/G0031411.pdf]

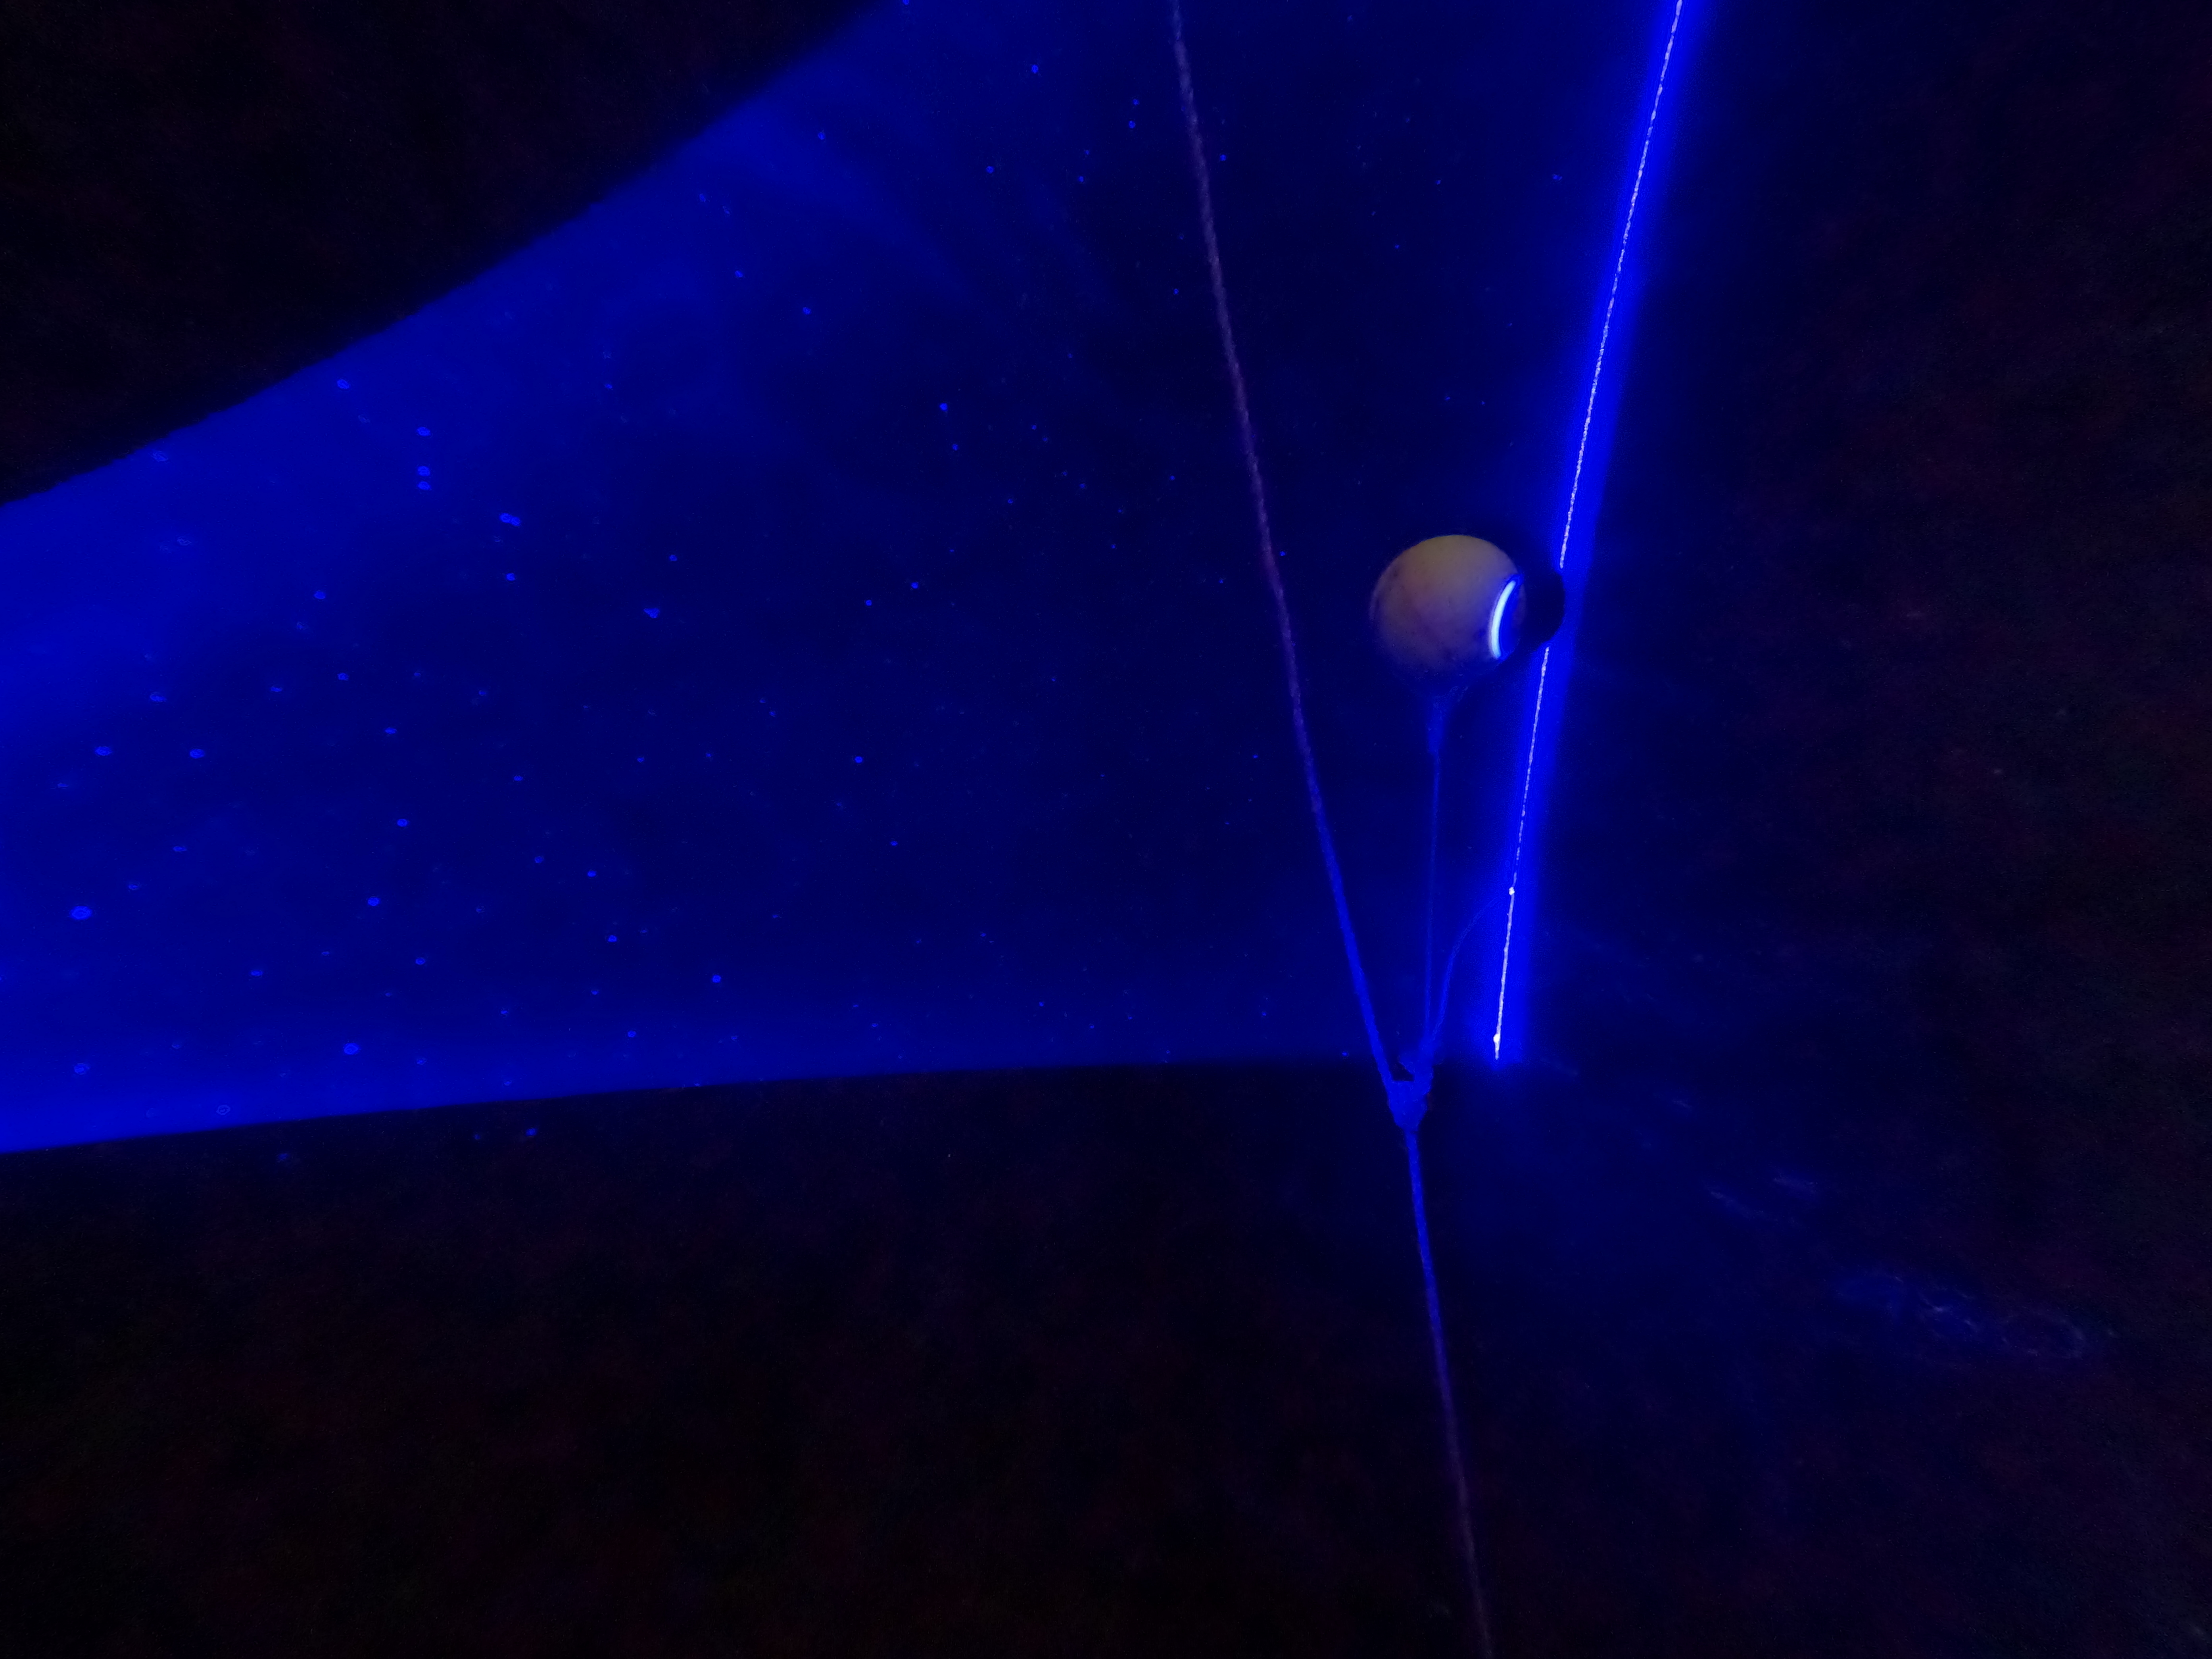

Supplement: Supplementary file 1058 [file G0031412.pdf › 10/G0031412.pdf]

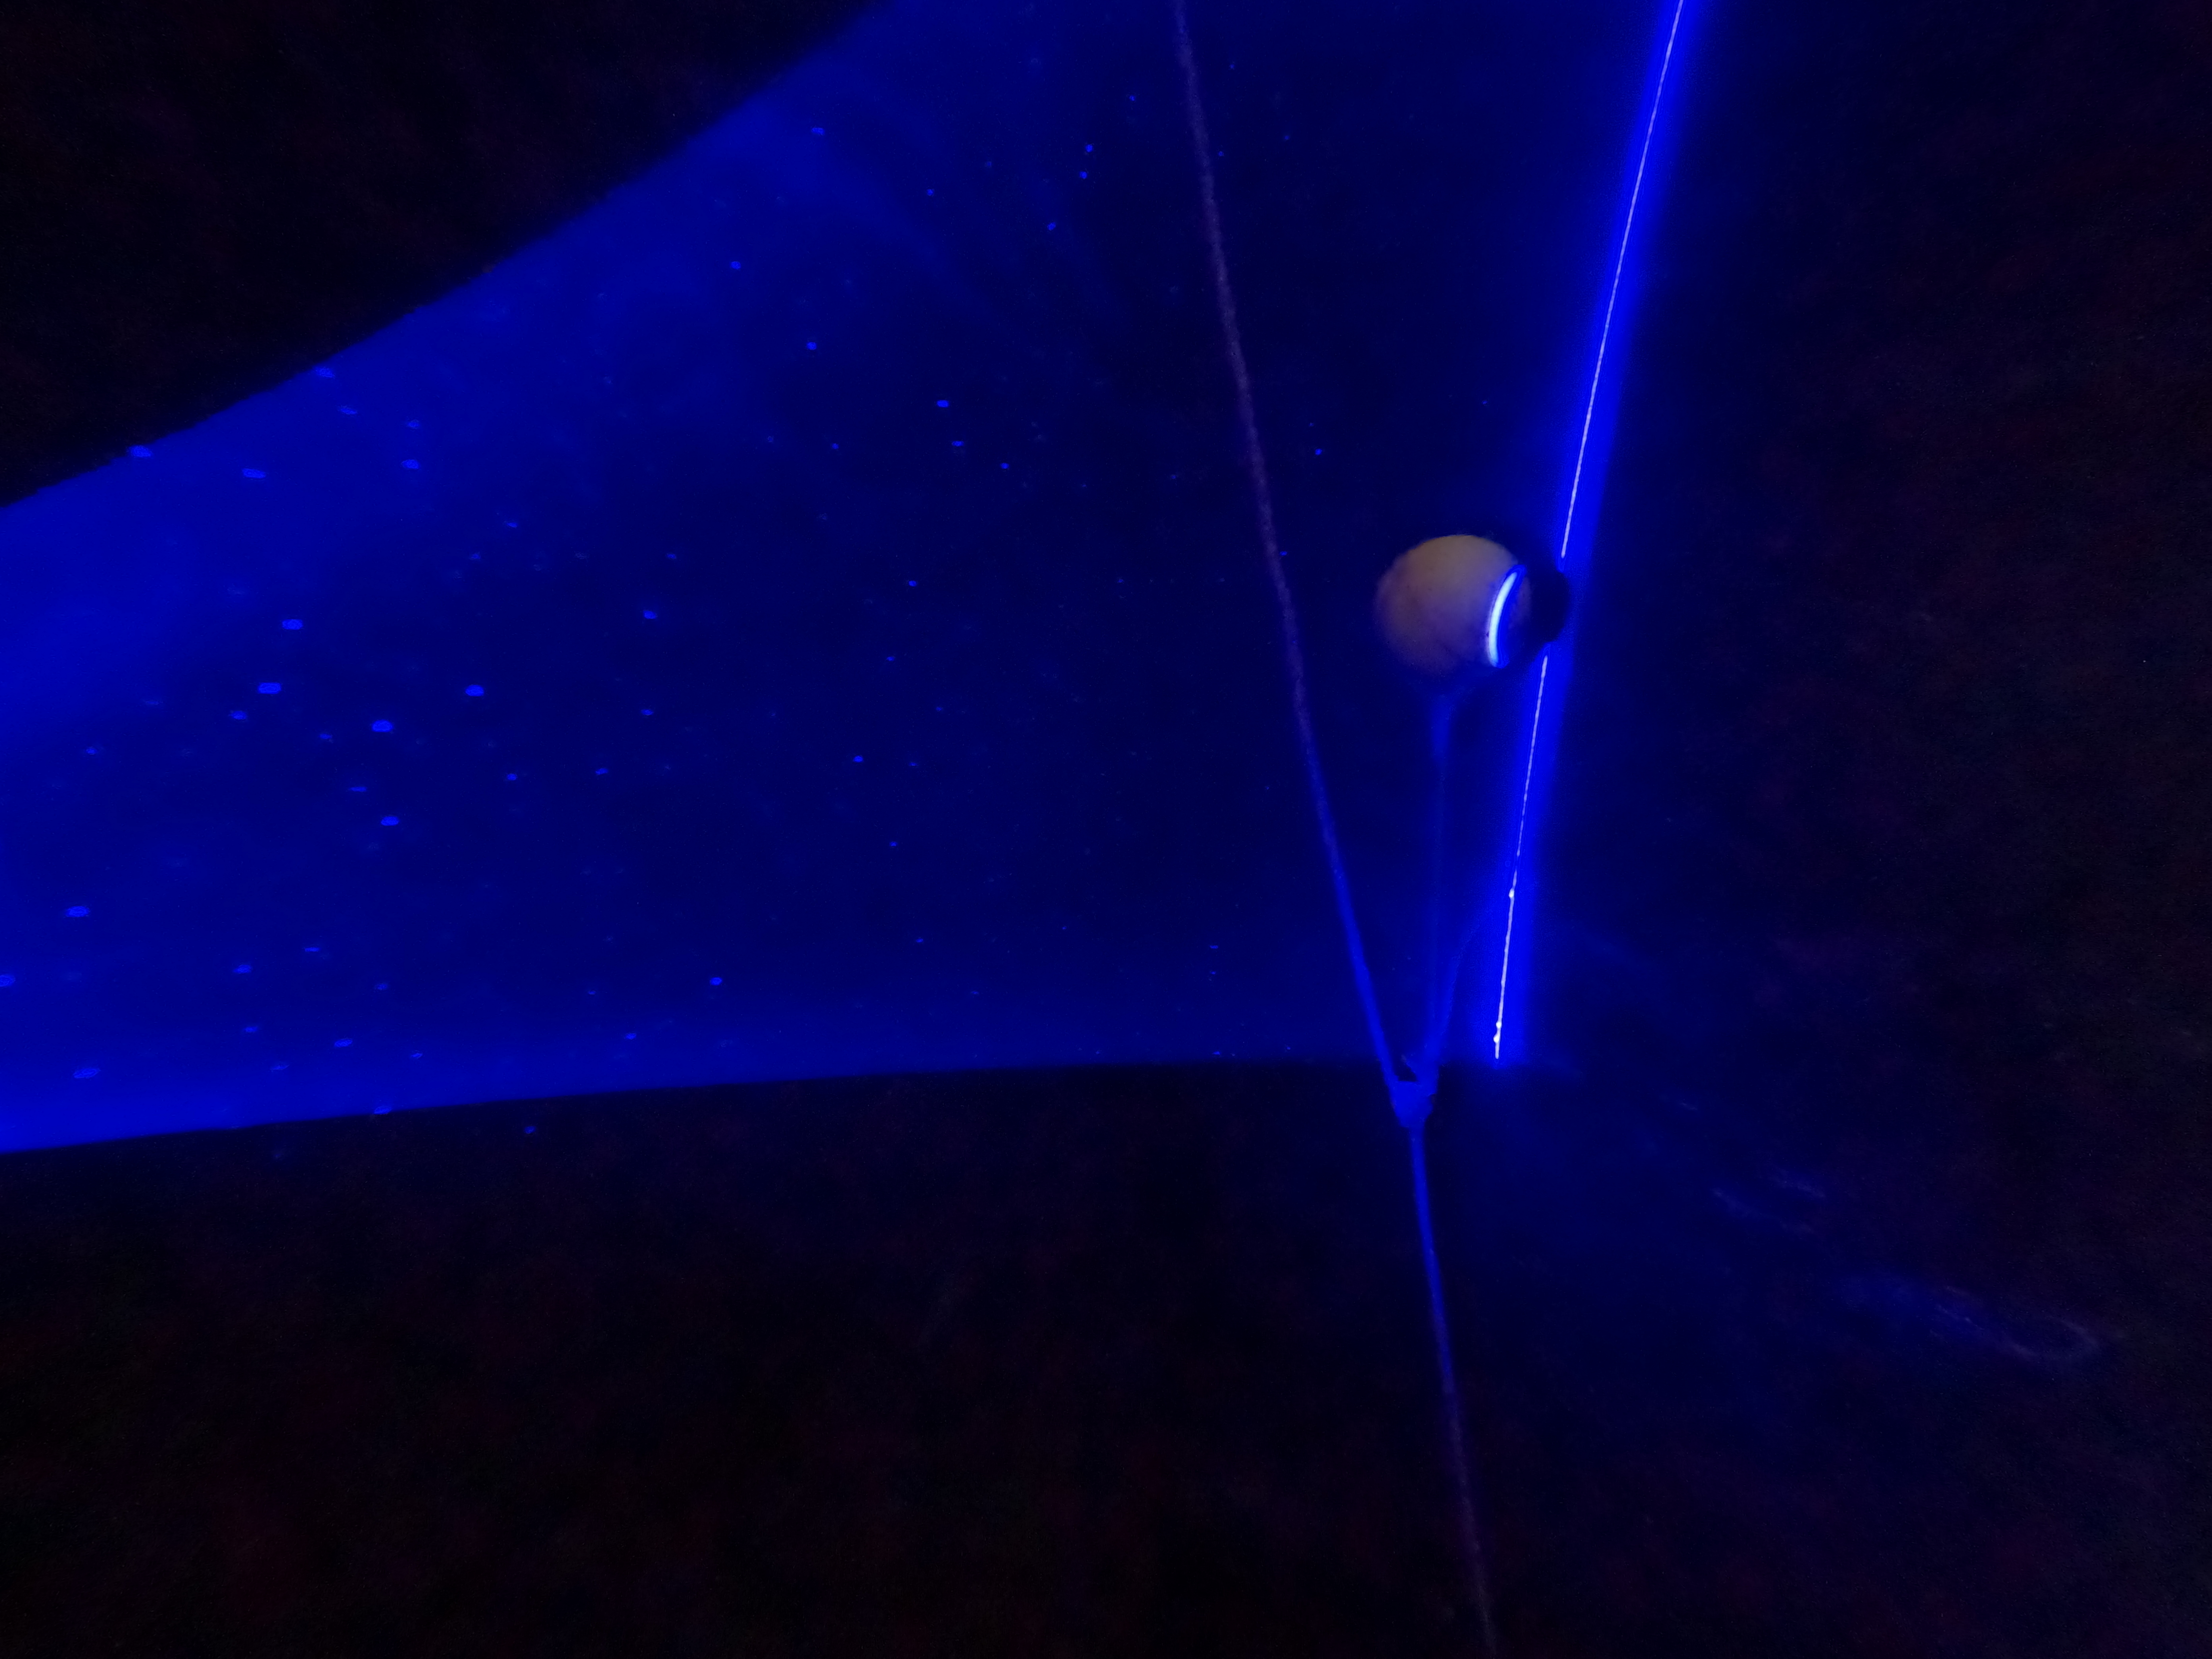

Supplement: Supplementary file 1059 [file G0031413.pdf › 10/G0031413.pdf]

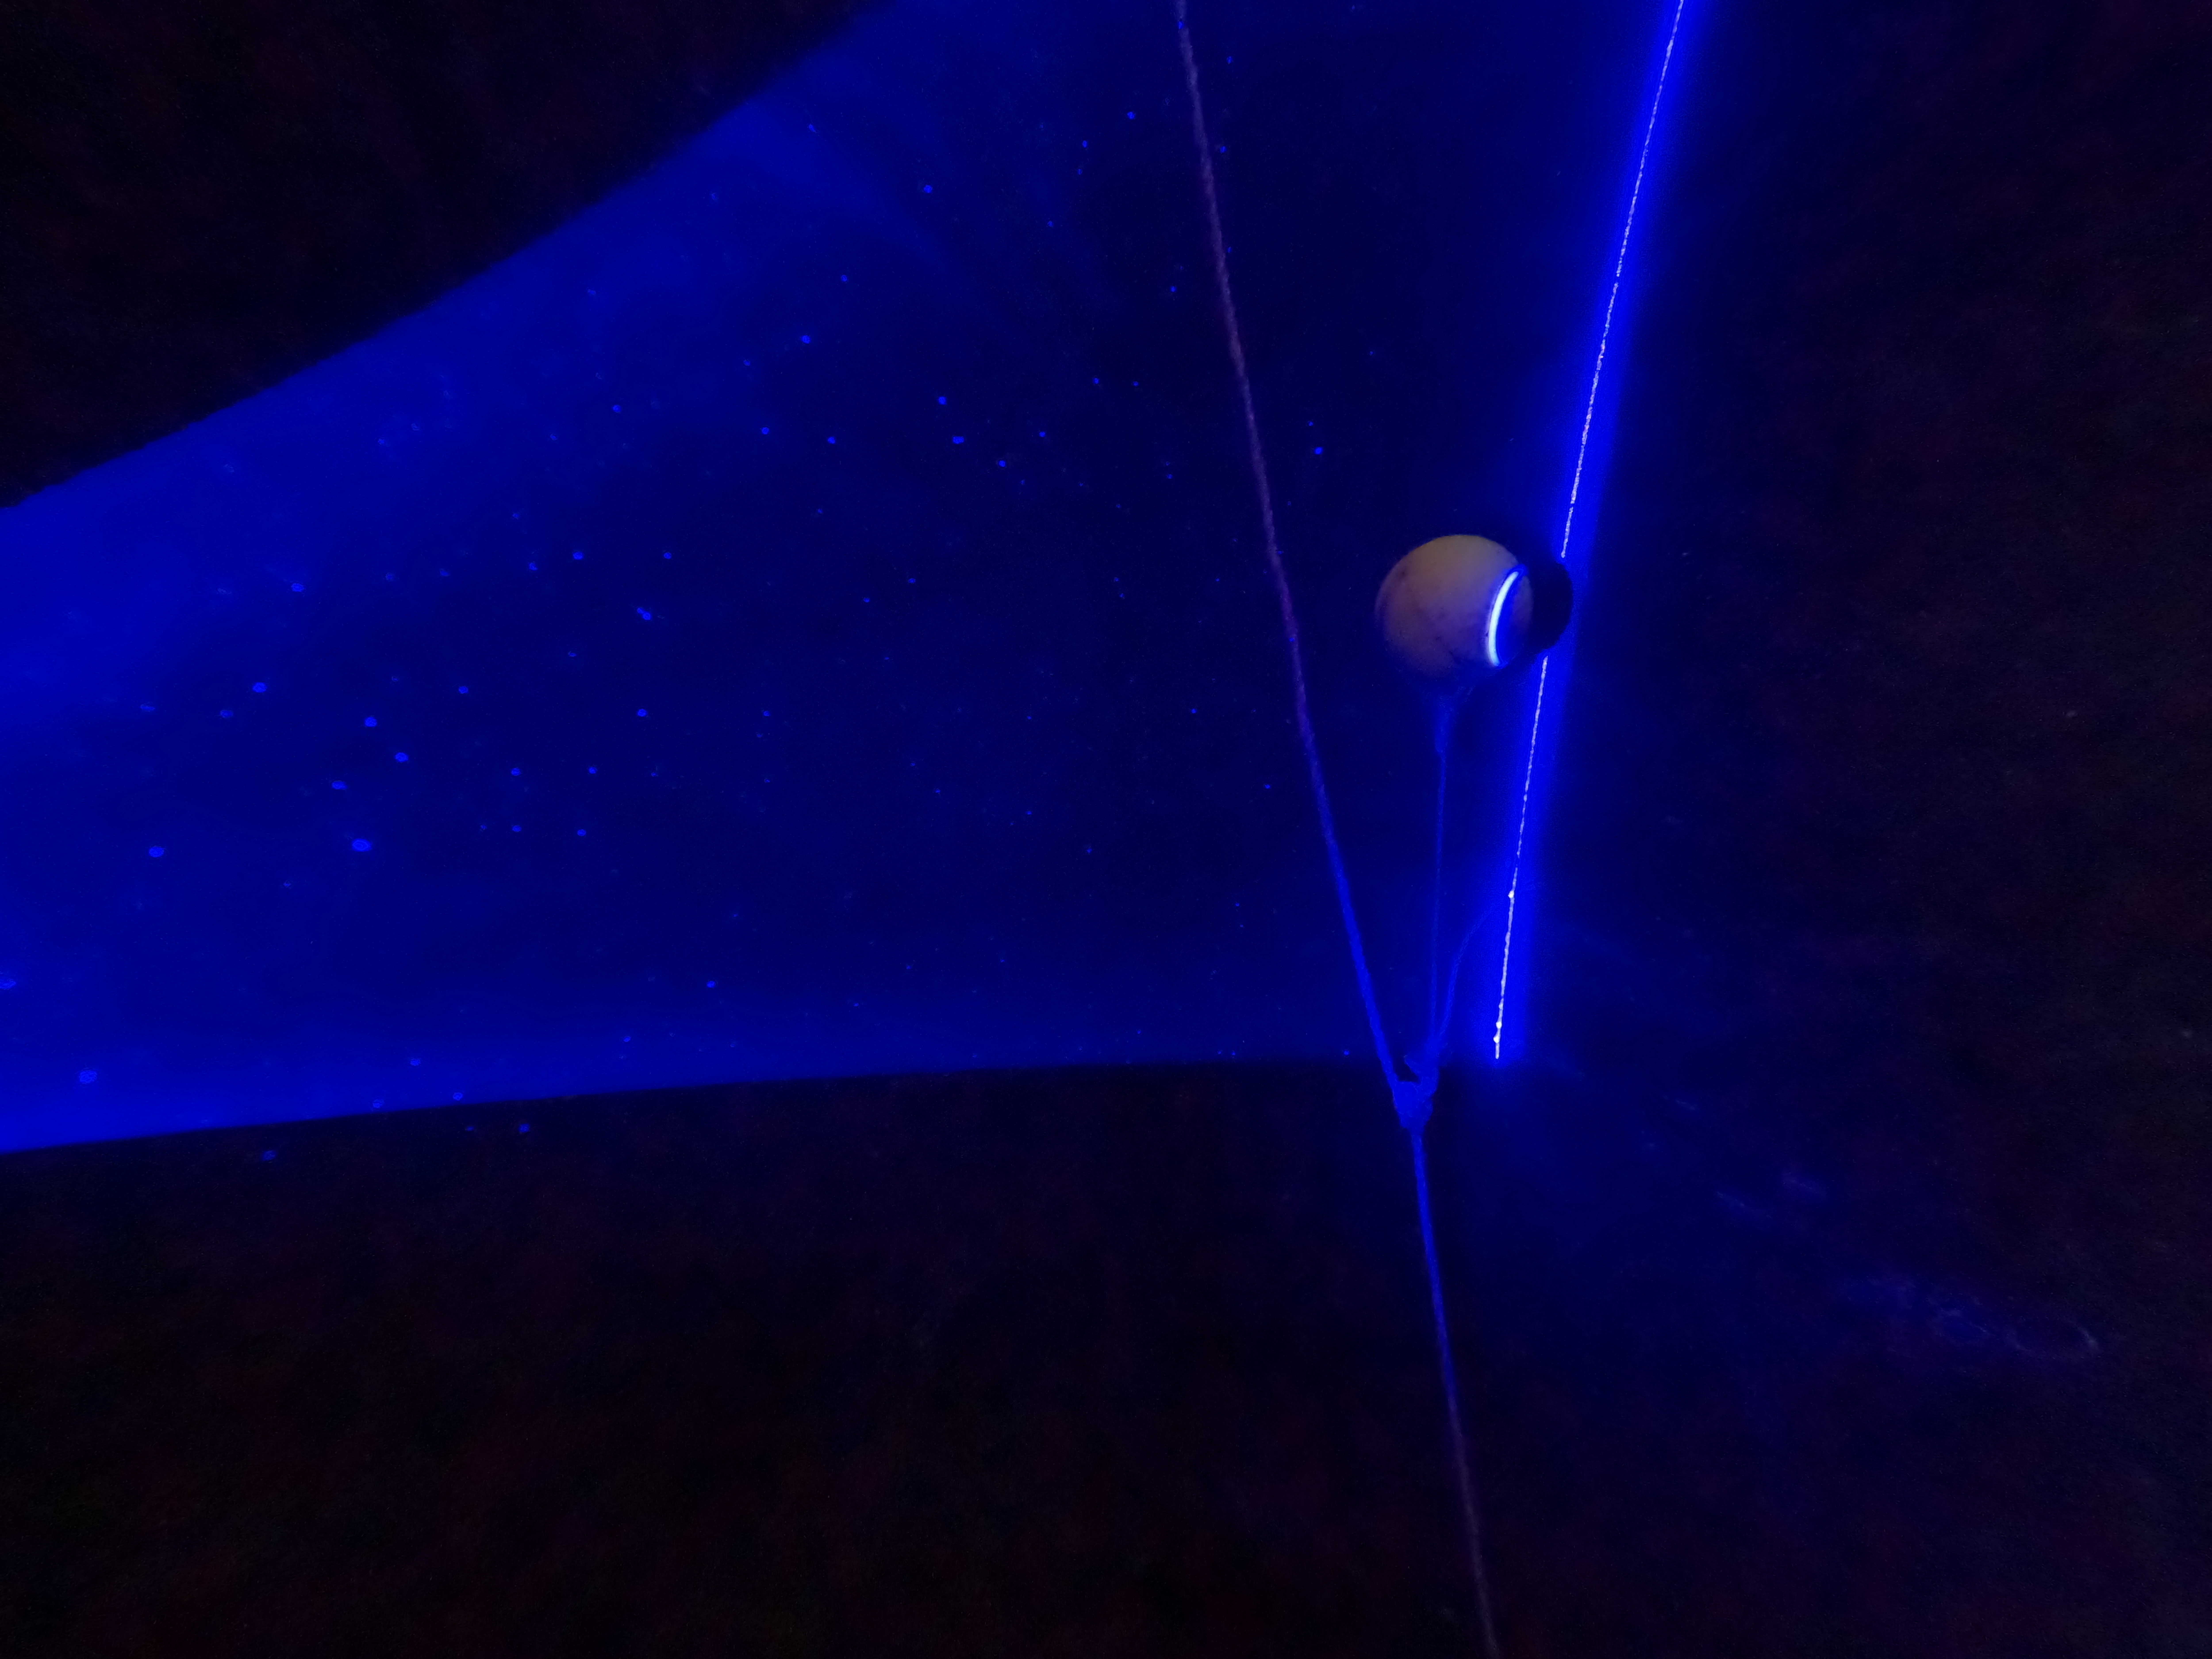

Supplement: Supplementary file 1060 [file G0031414.pdf › 10/G0031414.pdf]

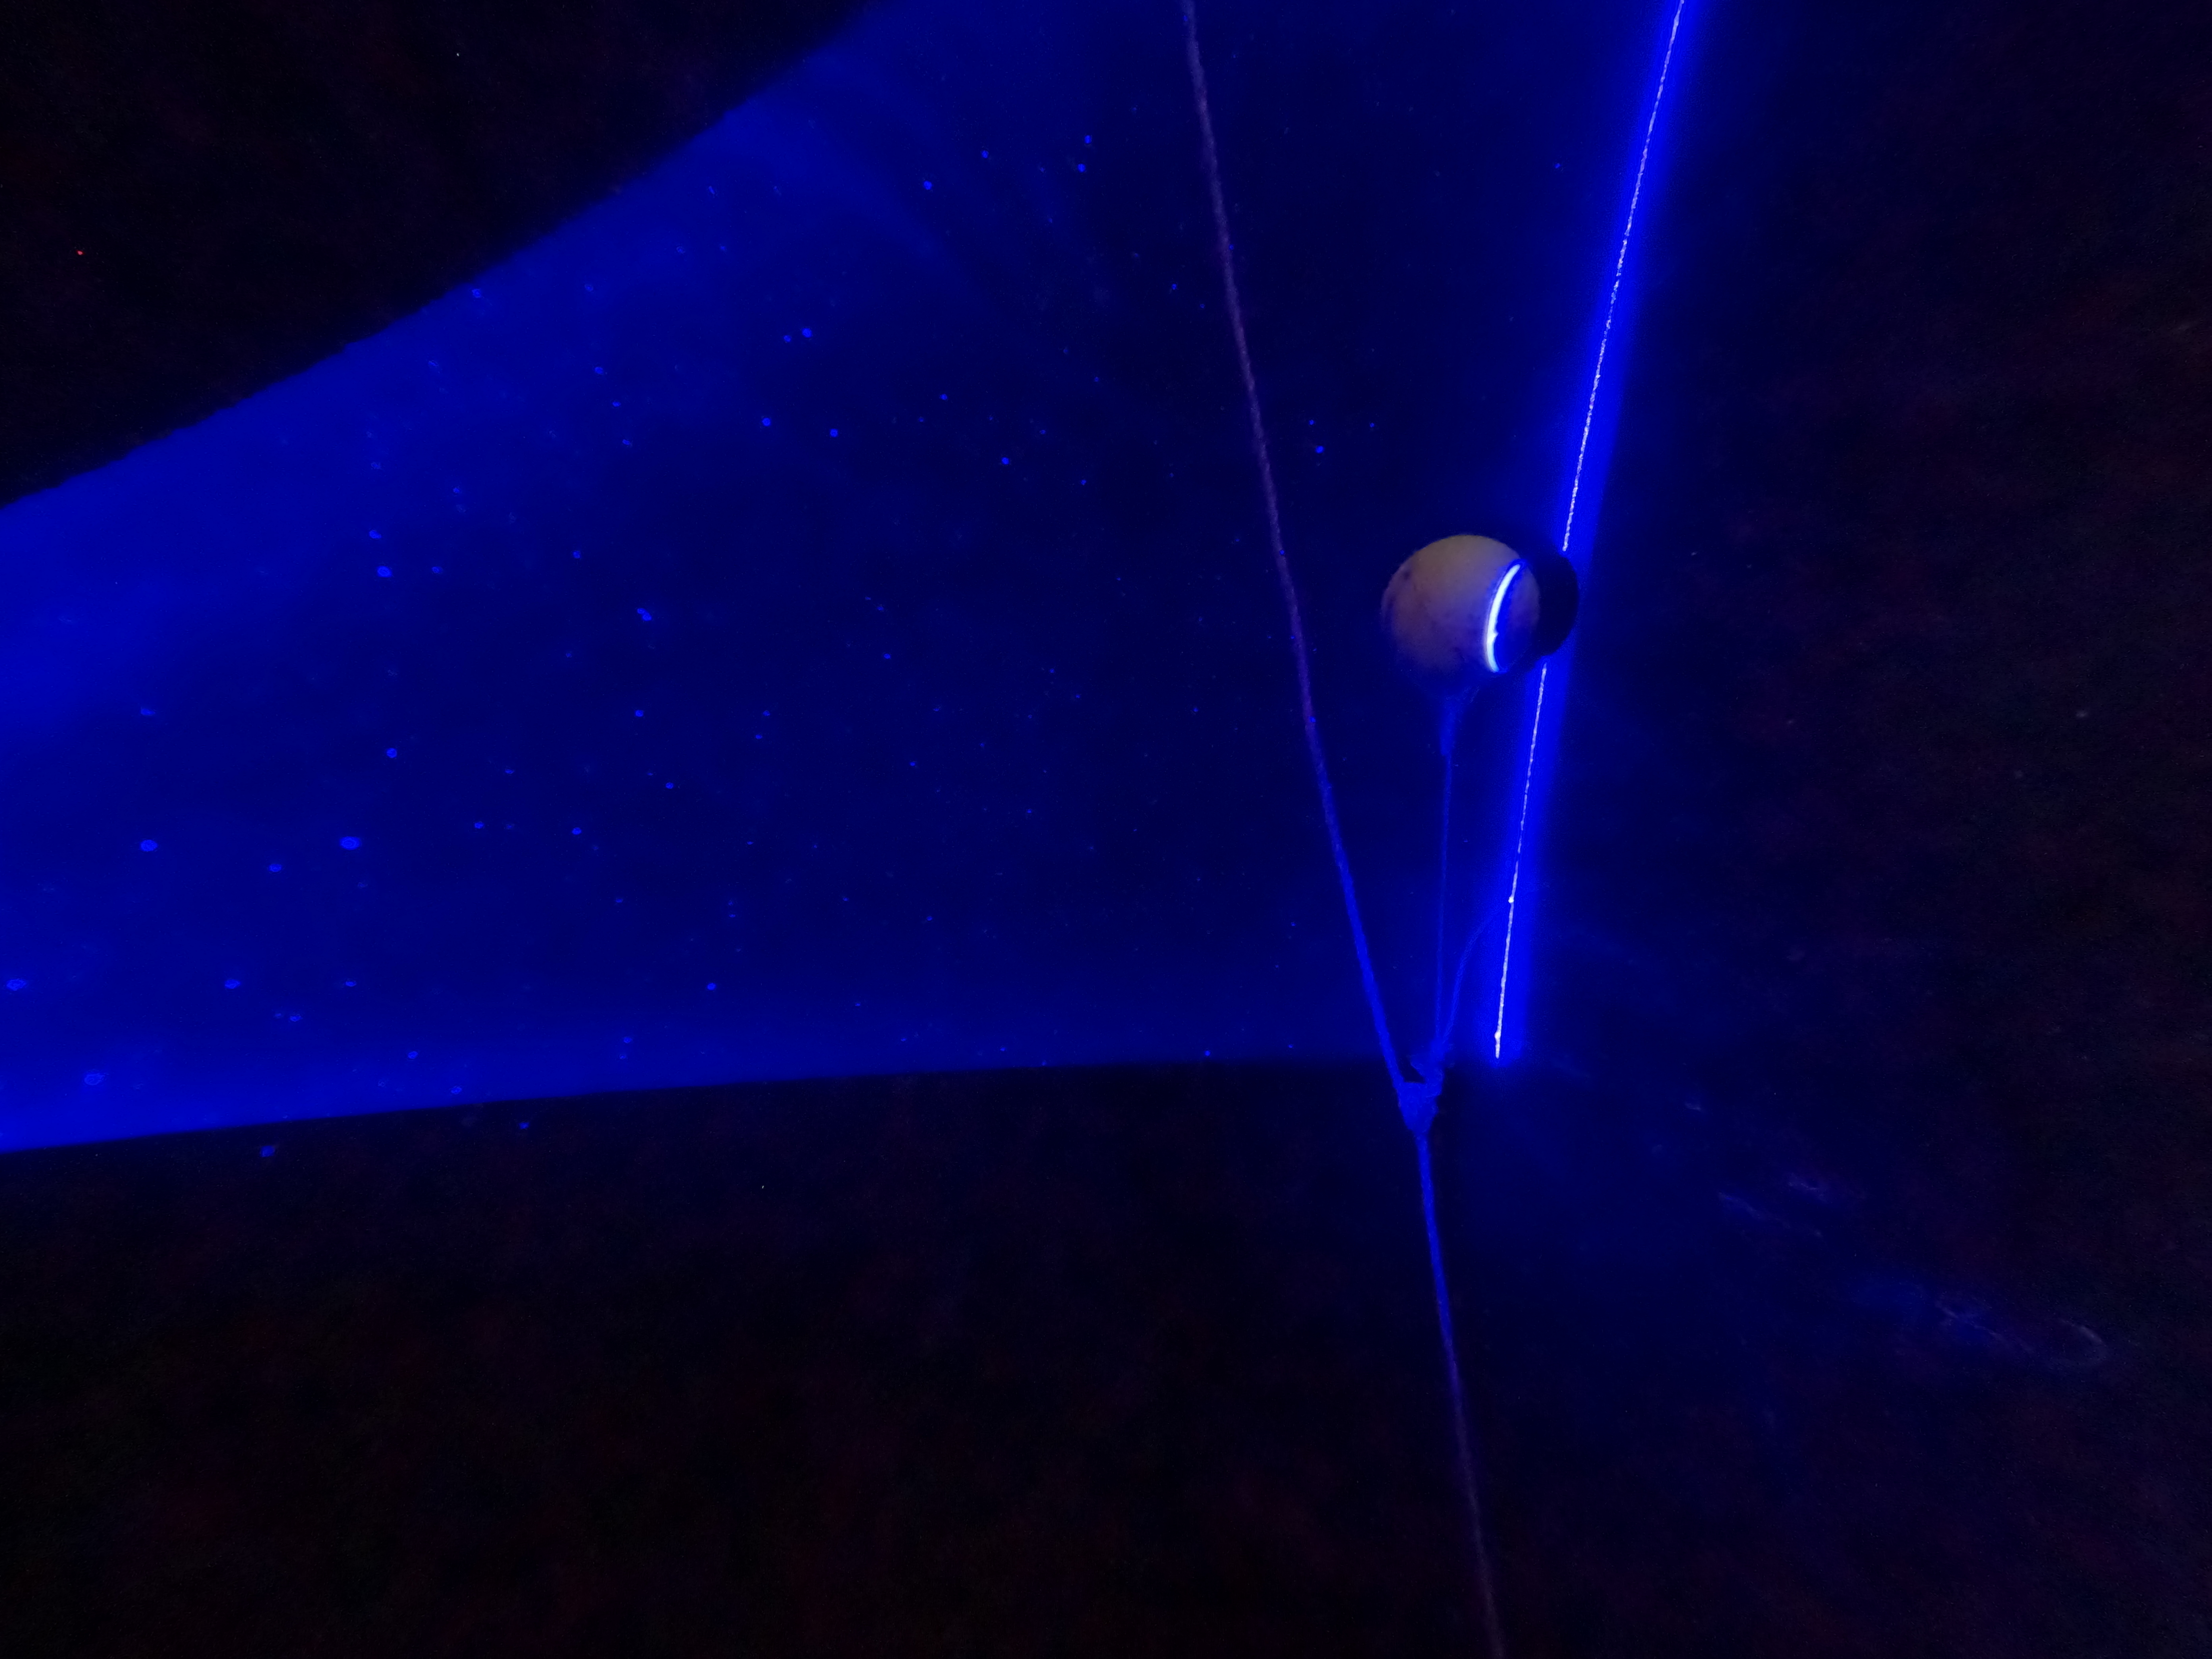

Supplement: Supplementary file 1061 [file G0031415.pdf › 10/G0031415.pdf]

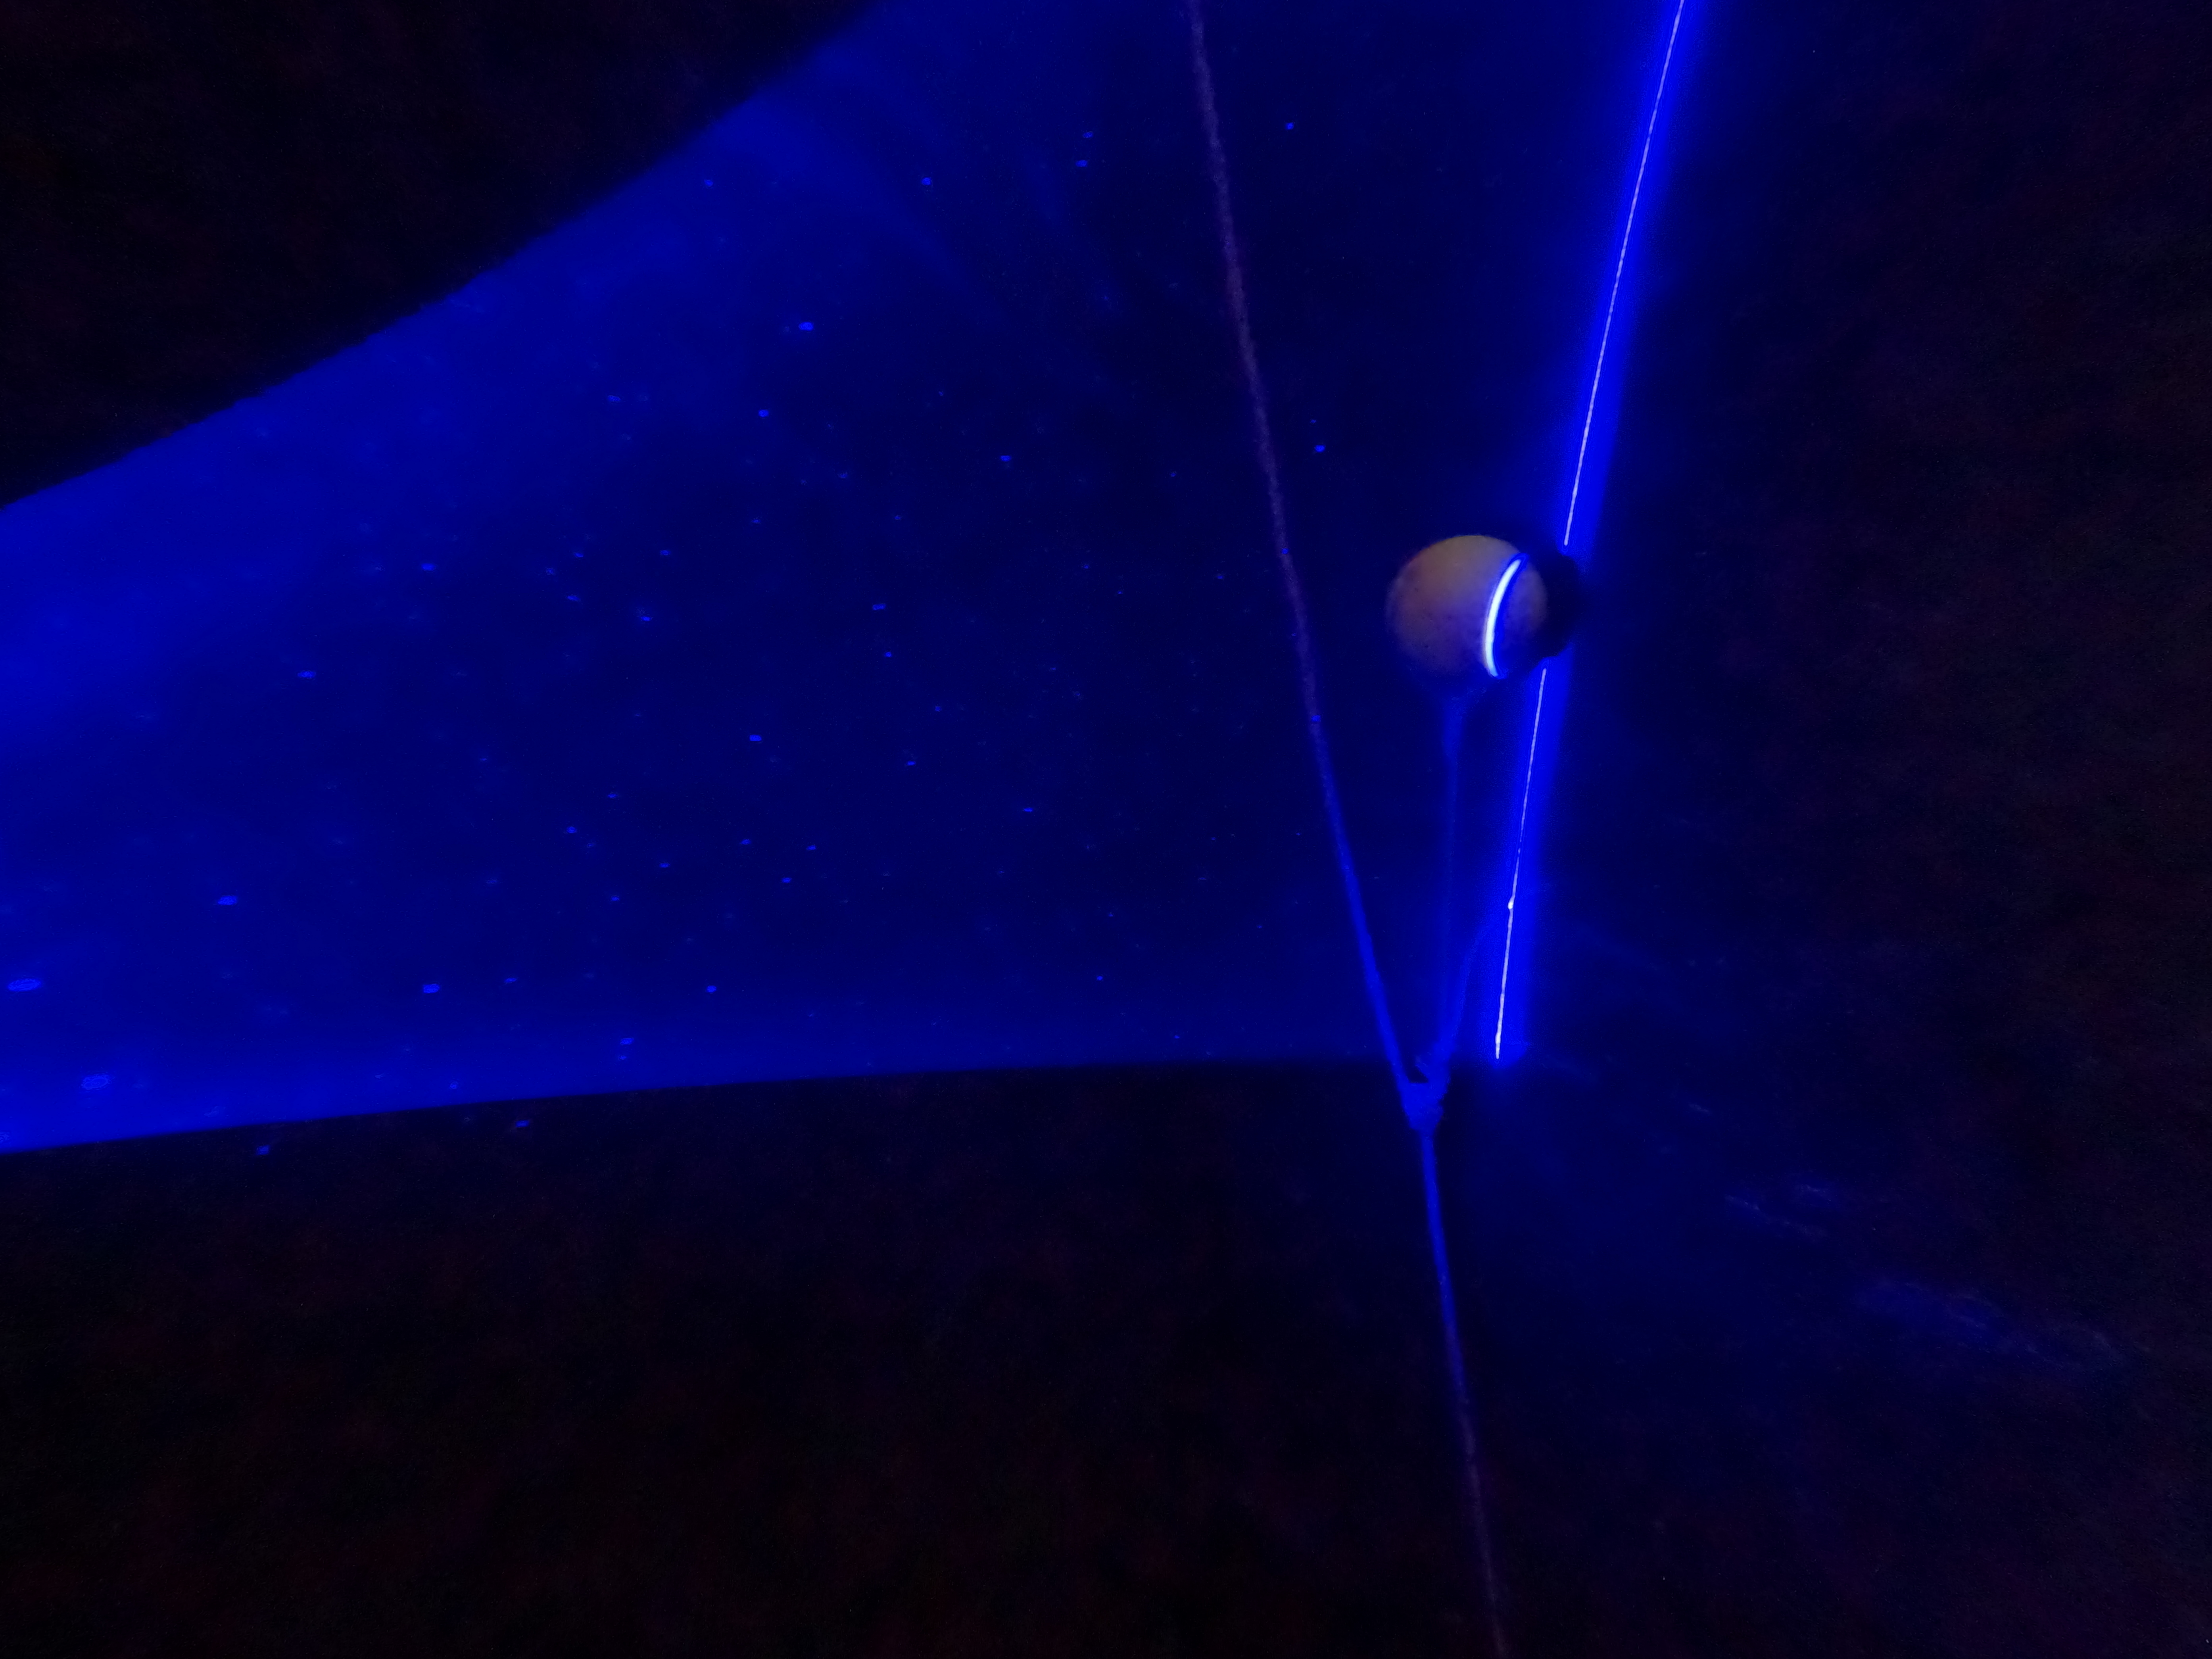

Supplement: Supplementary file 1062 [file G0031416.pdf › 10/G0031416.pdf]

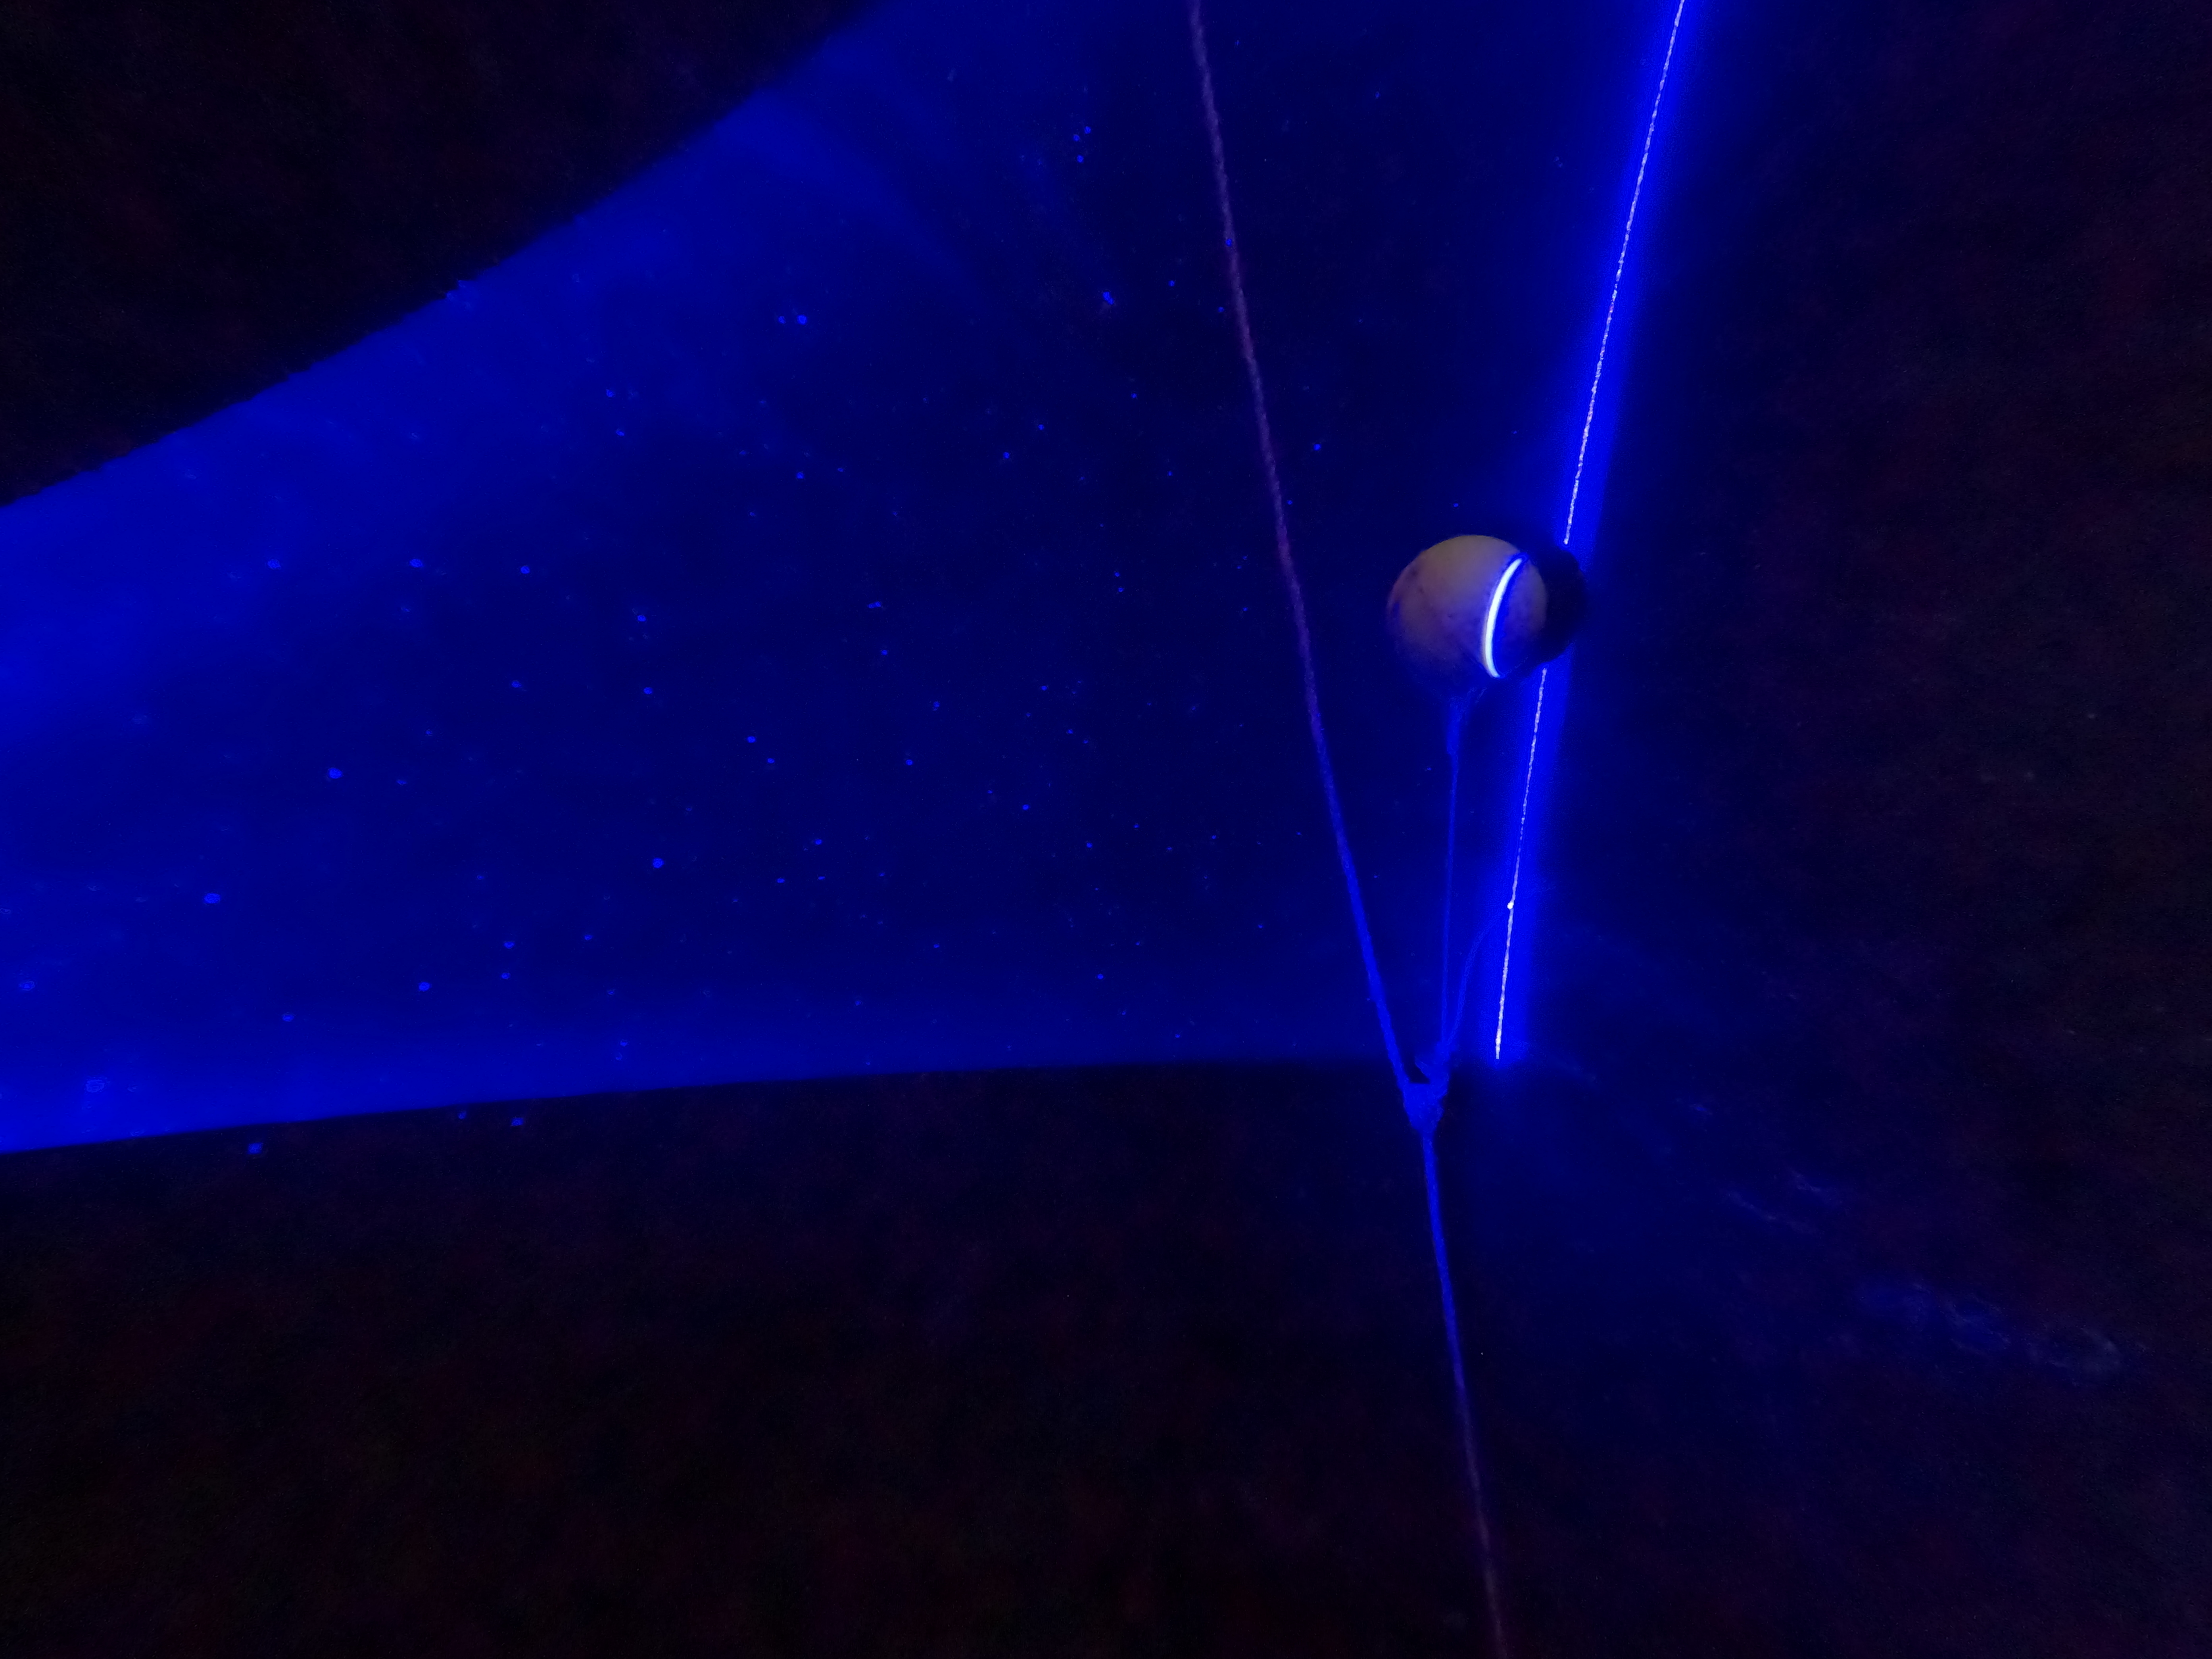

Supplement: Supplementary file 1063 [file G0031417.pdf › 10/G0031417.pdf]

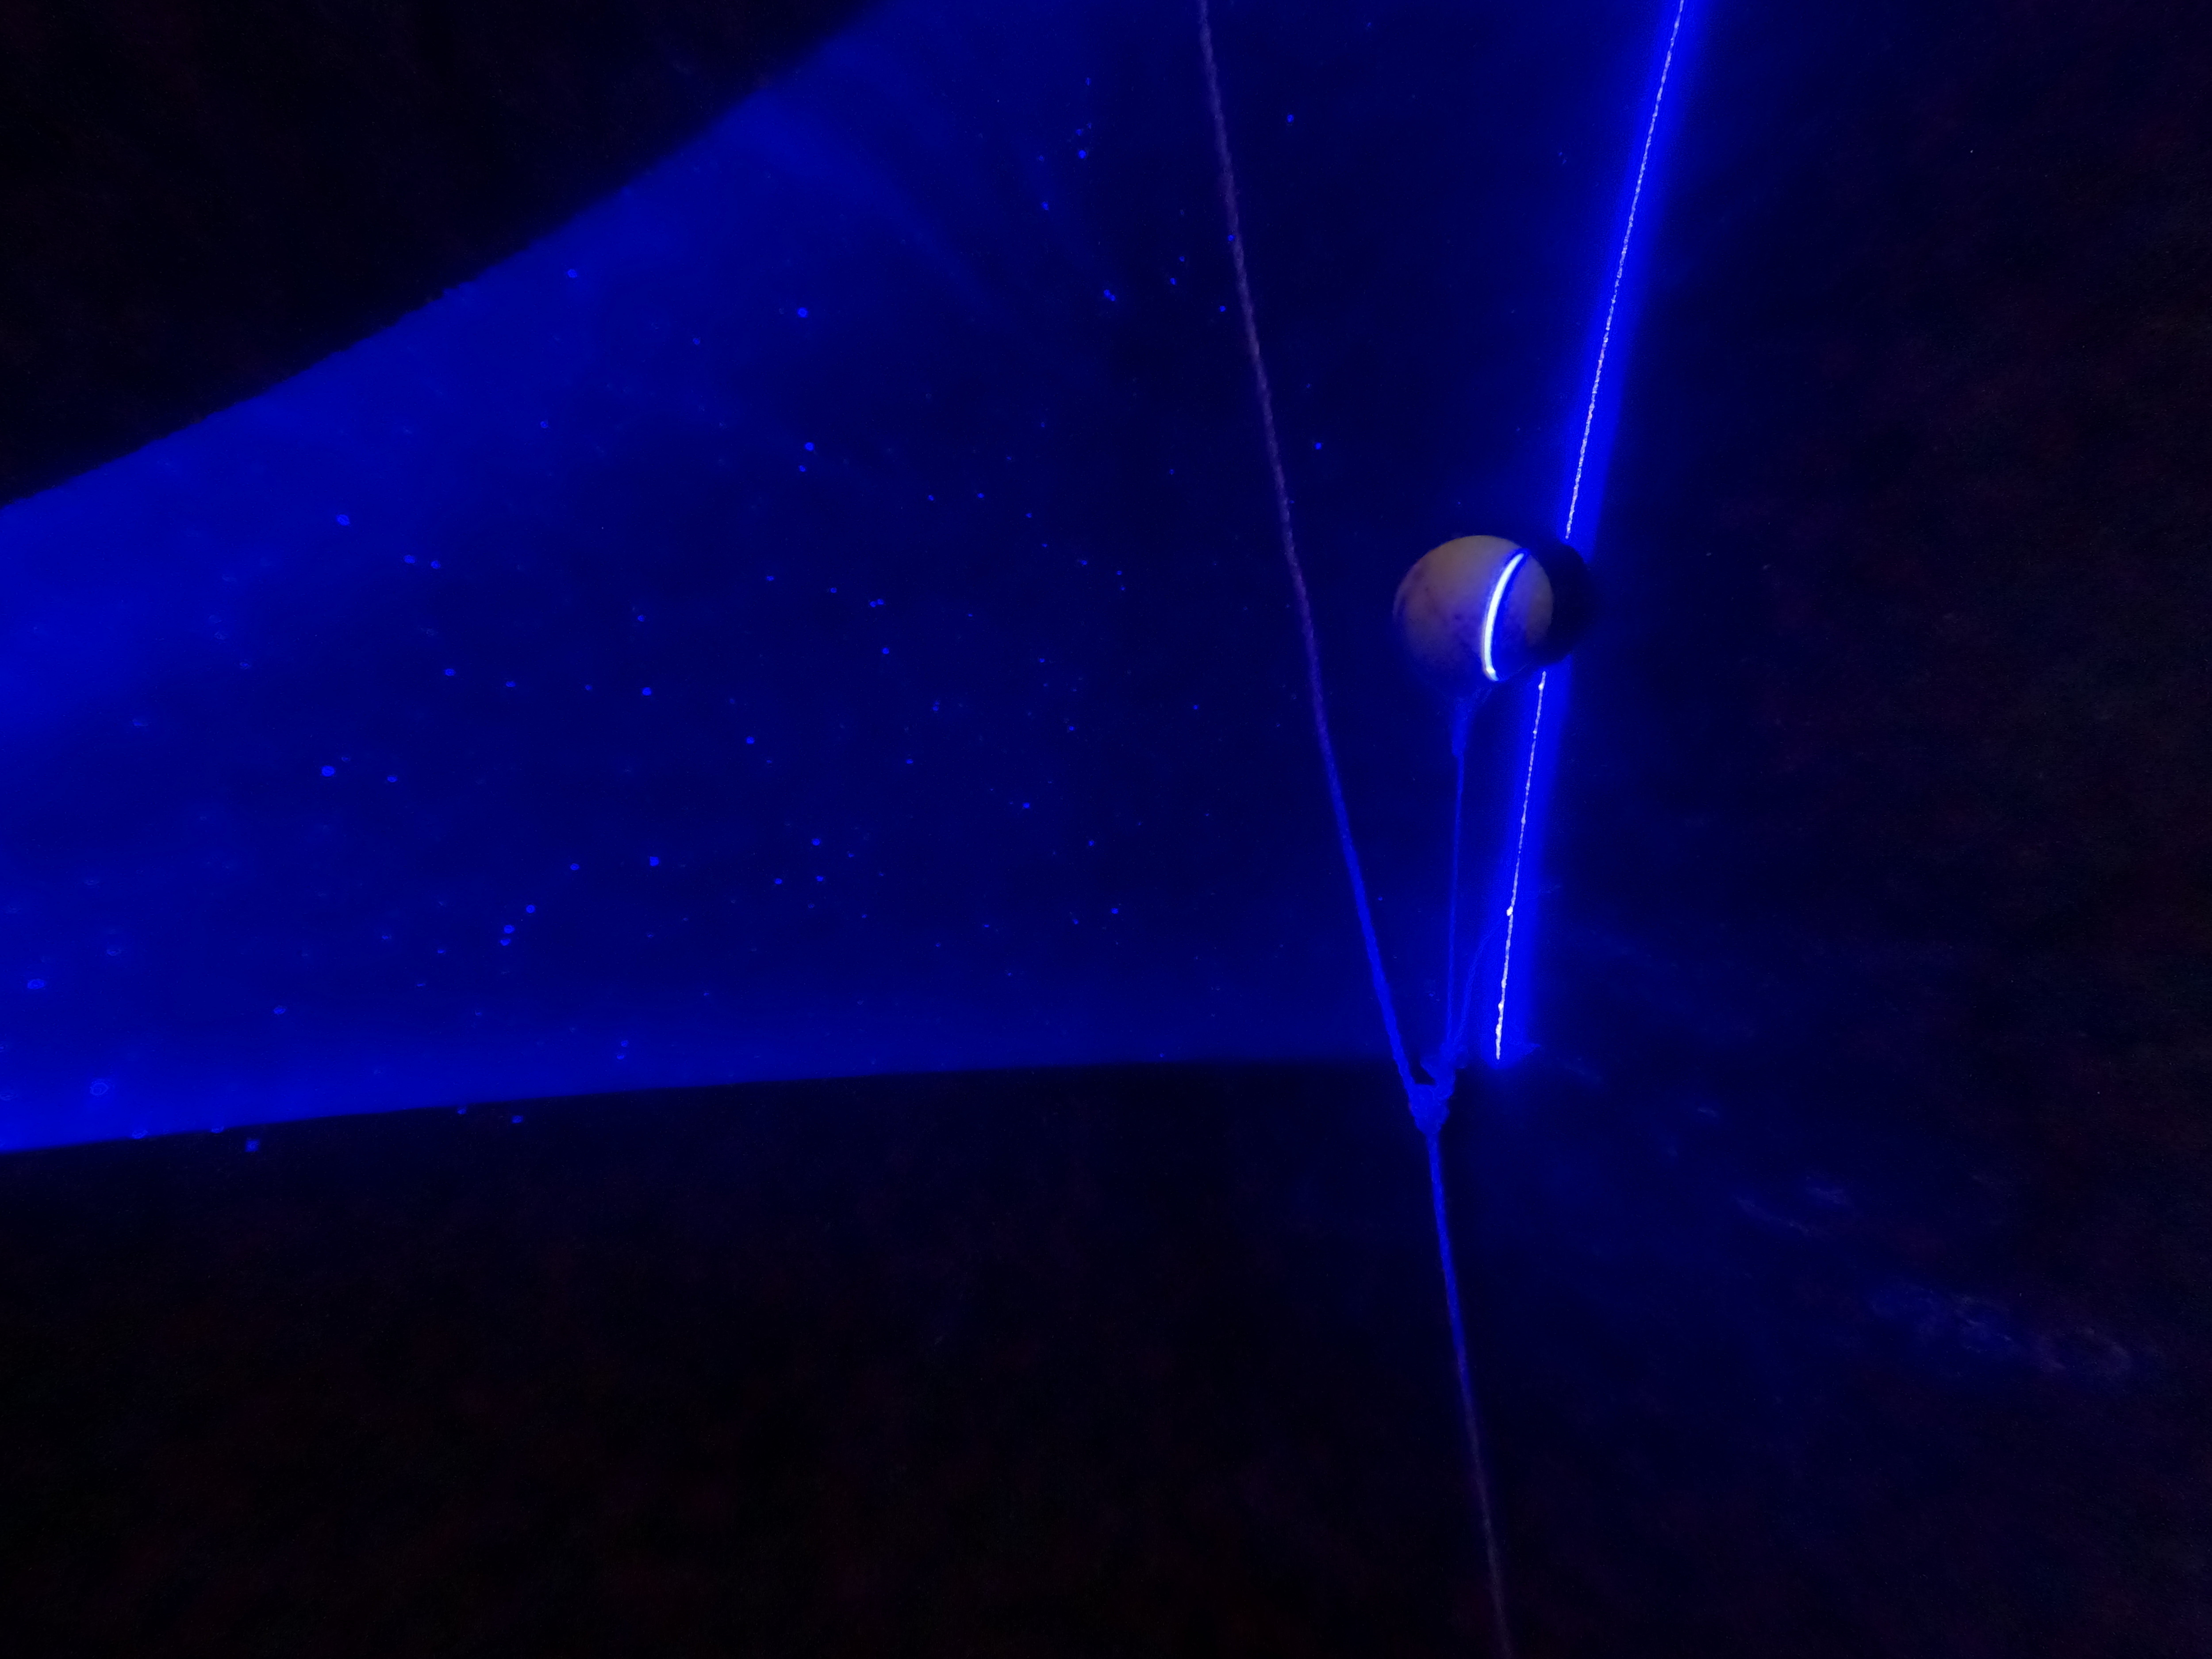

Supplement: Supplementary file 1064 [file G0031418.pdf › 10/G0031418.pdf]

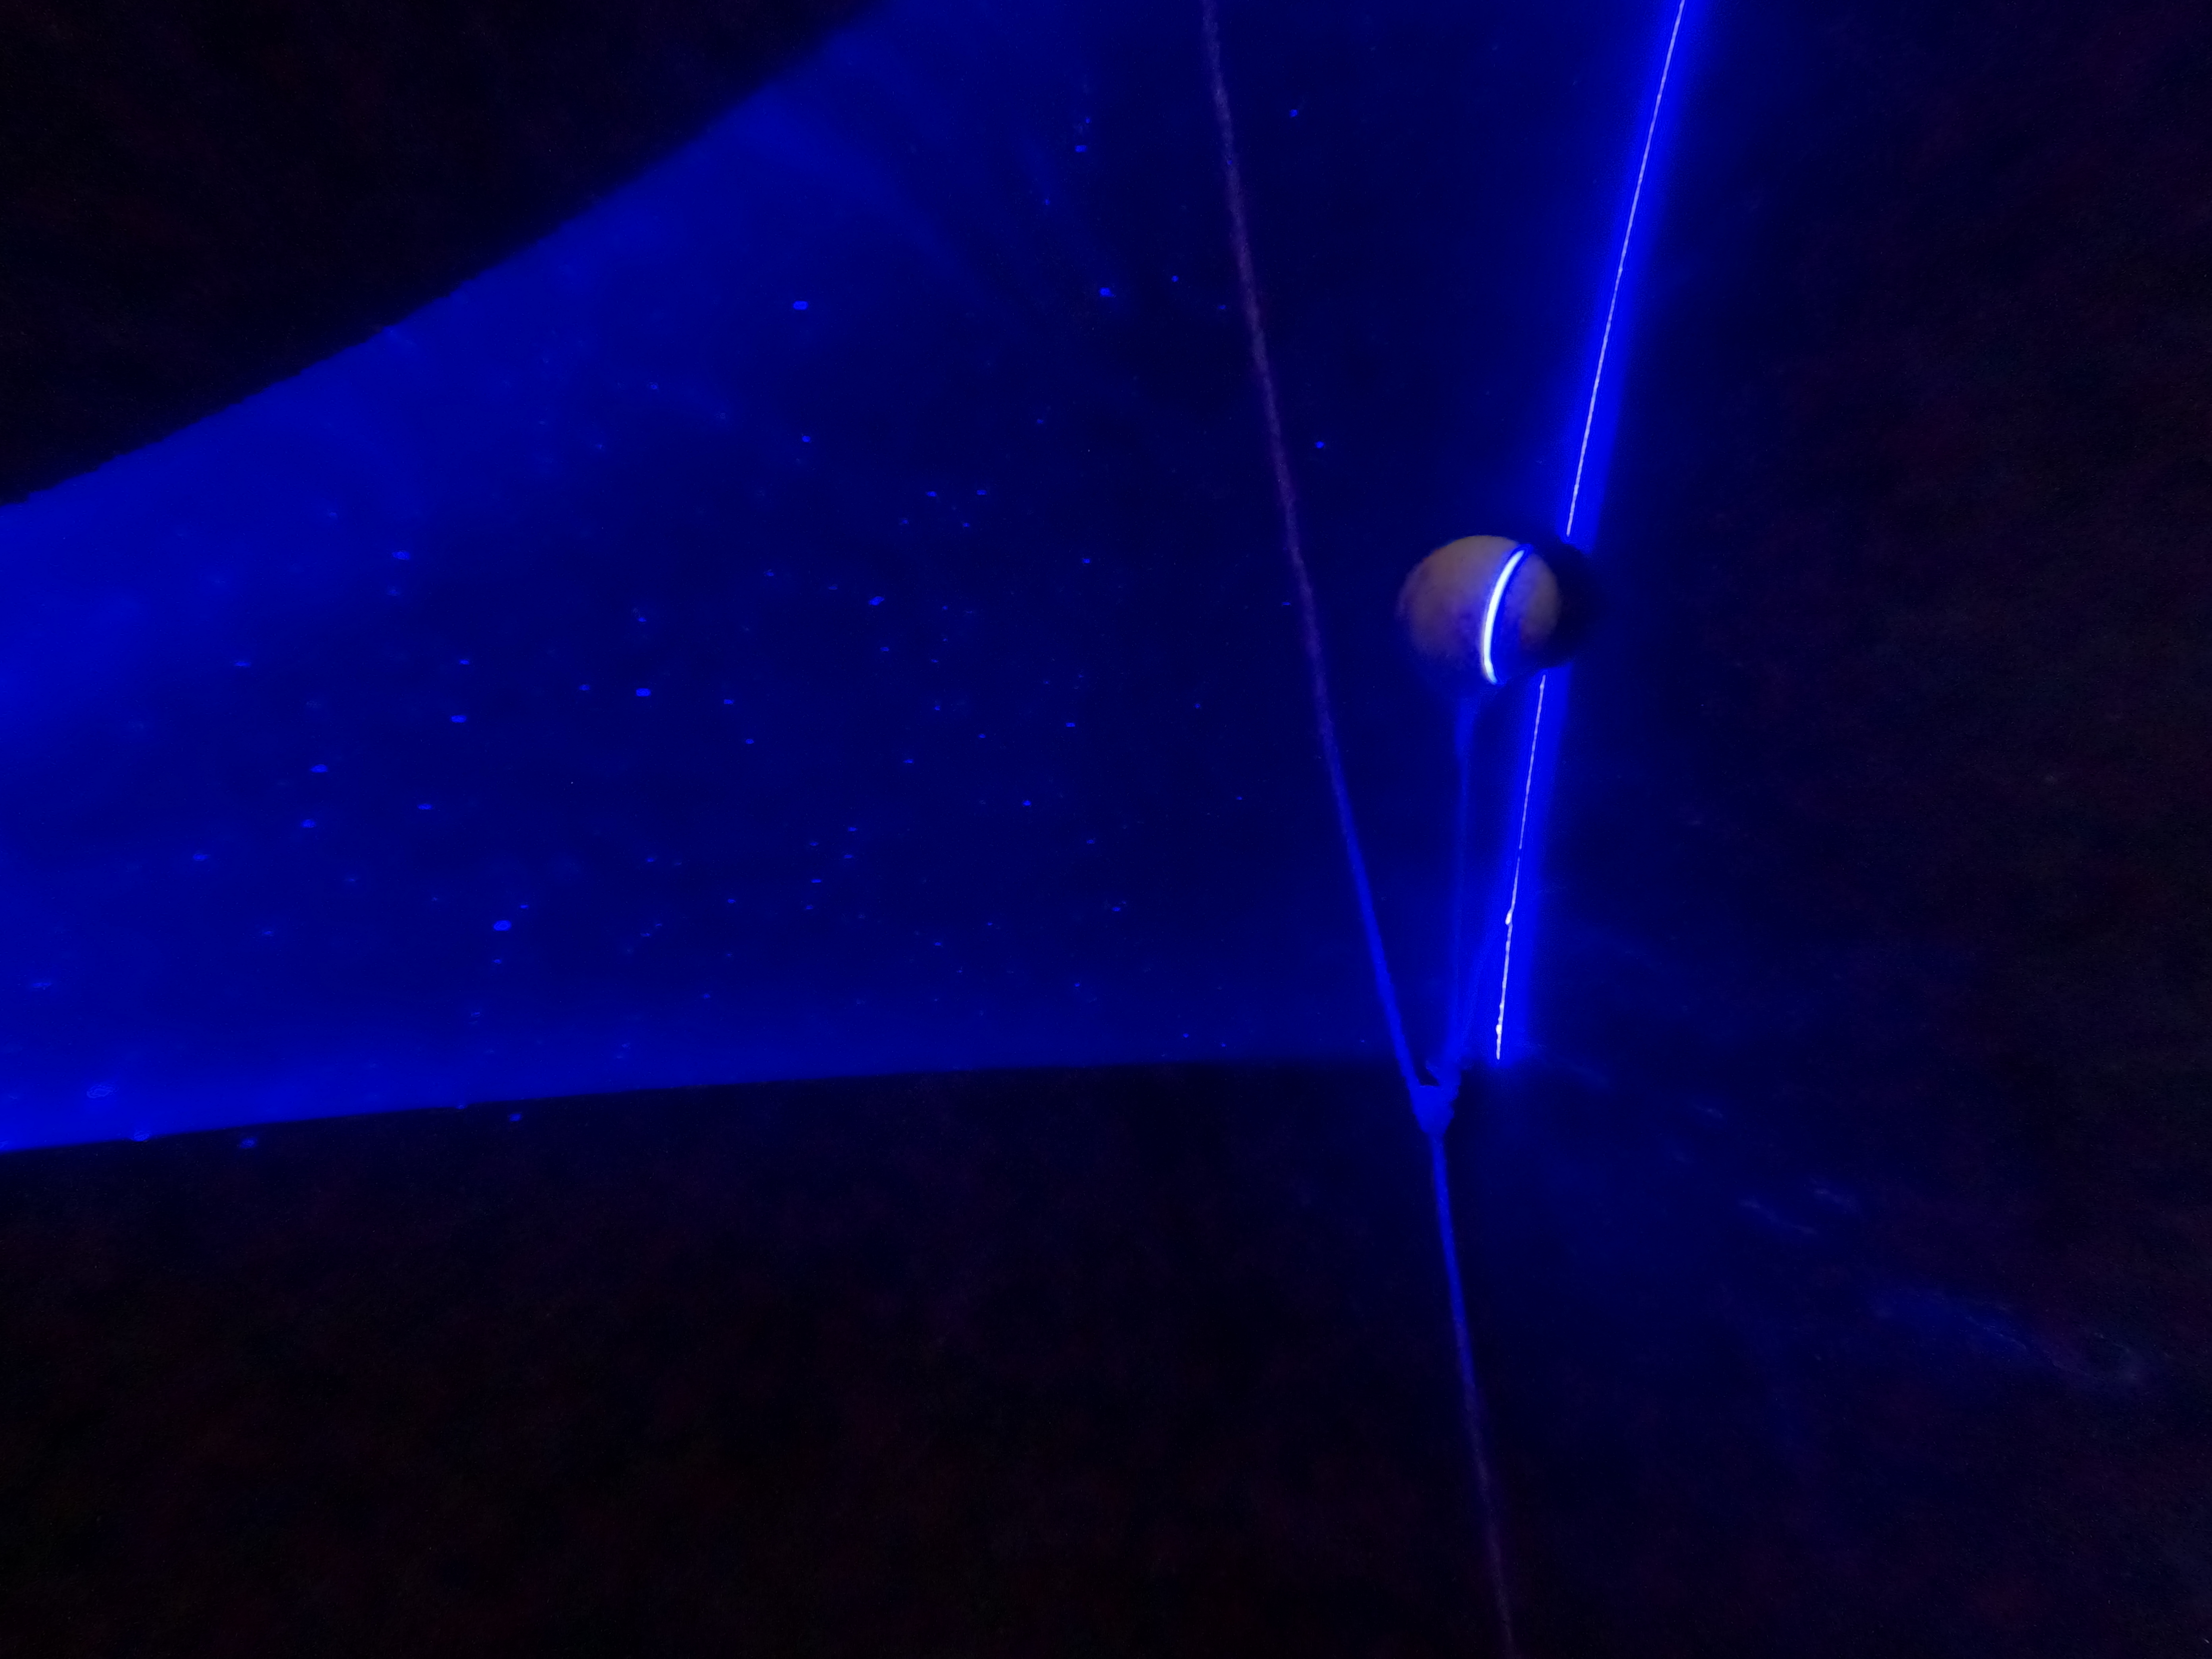

Supplement: Supplementary file 1065 [file G0031419.pdf › 10/G0031419.pdf]

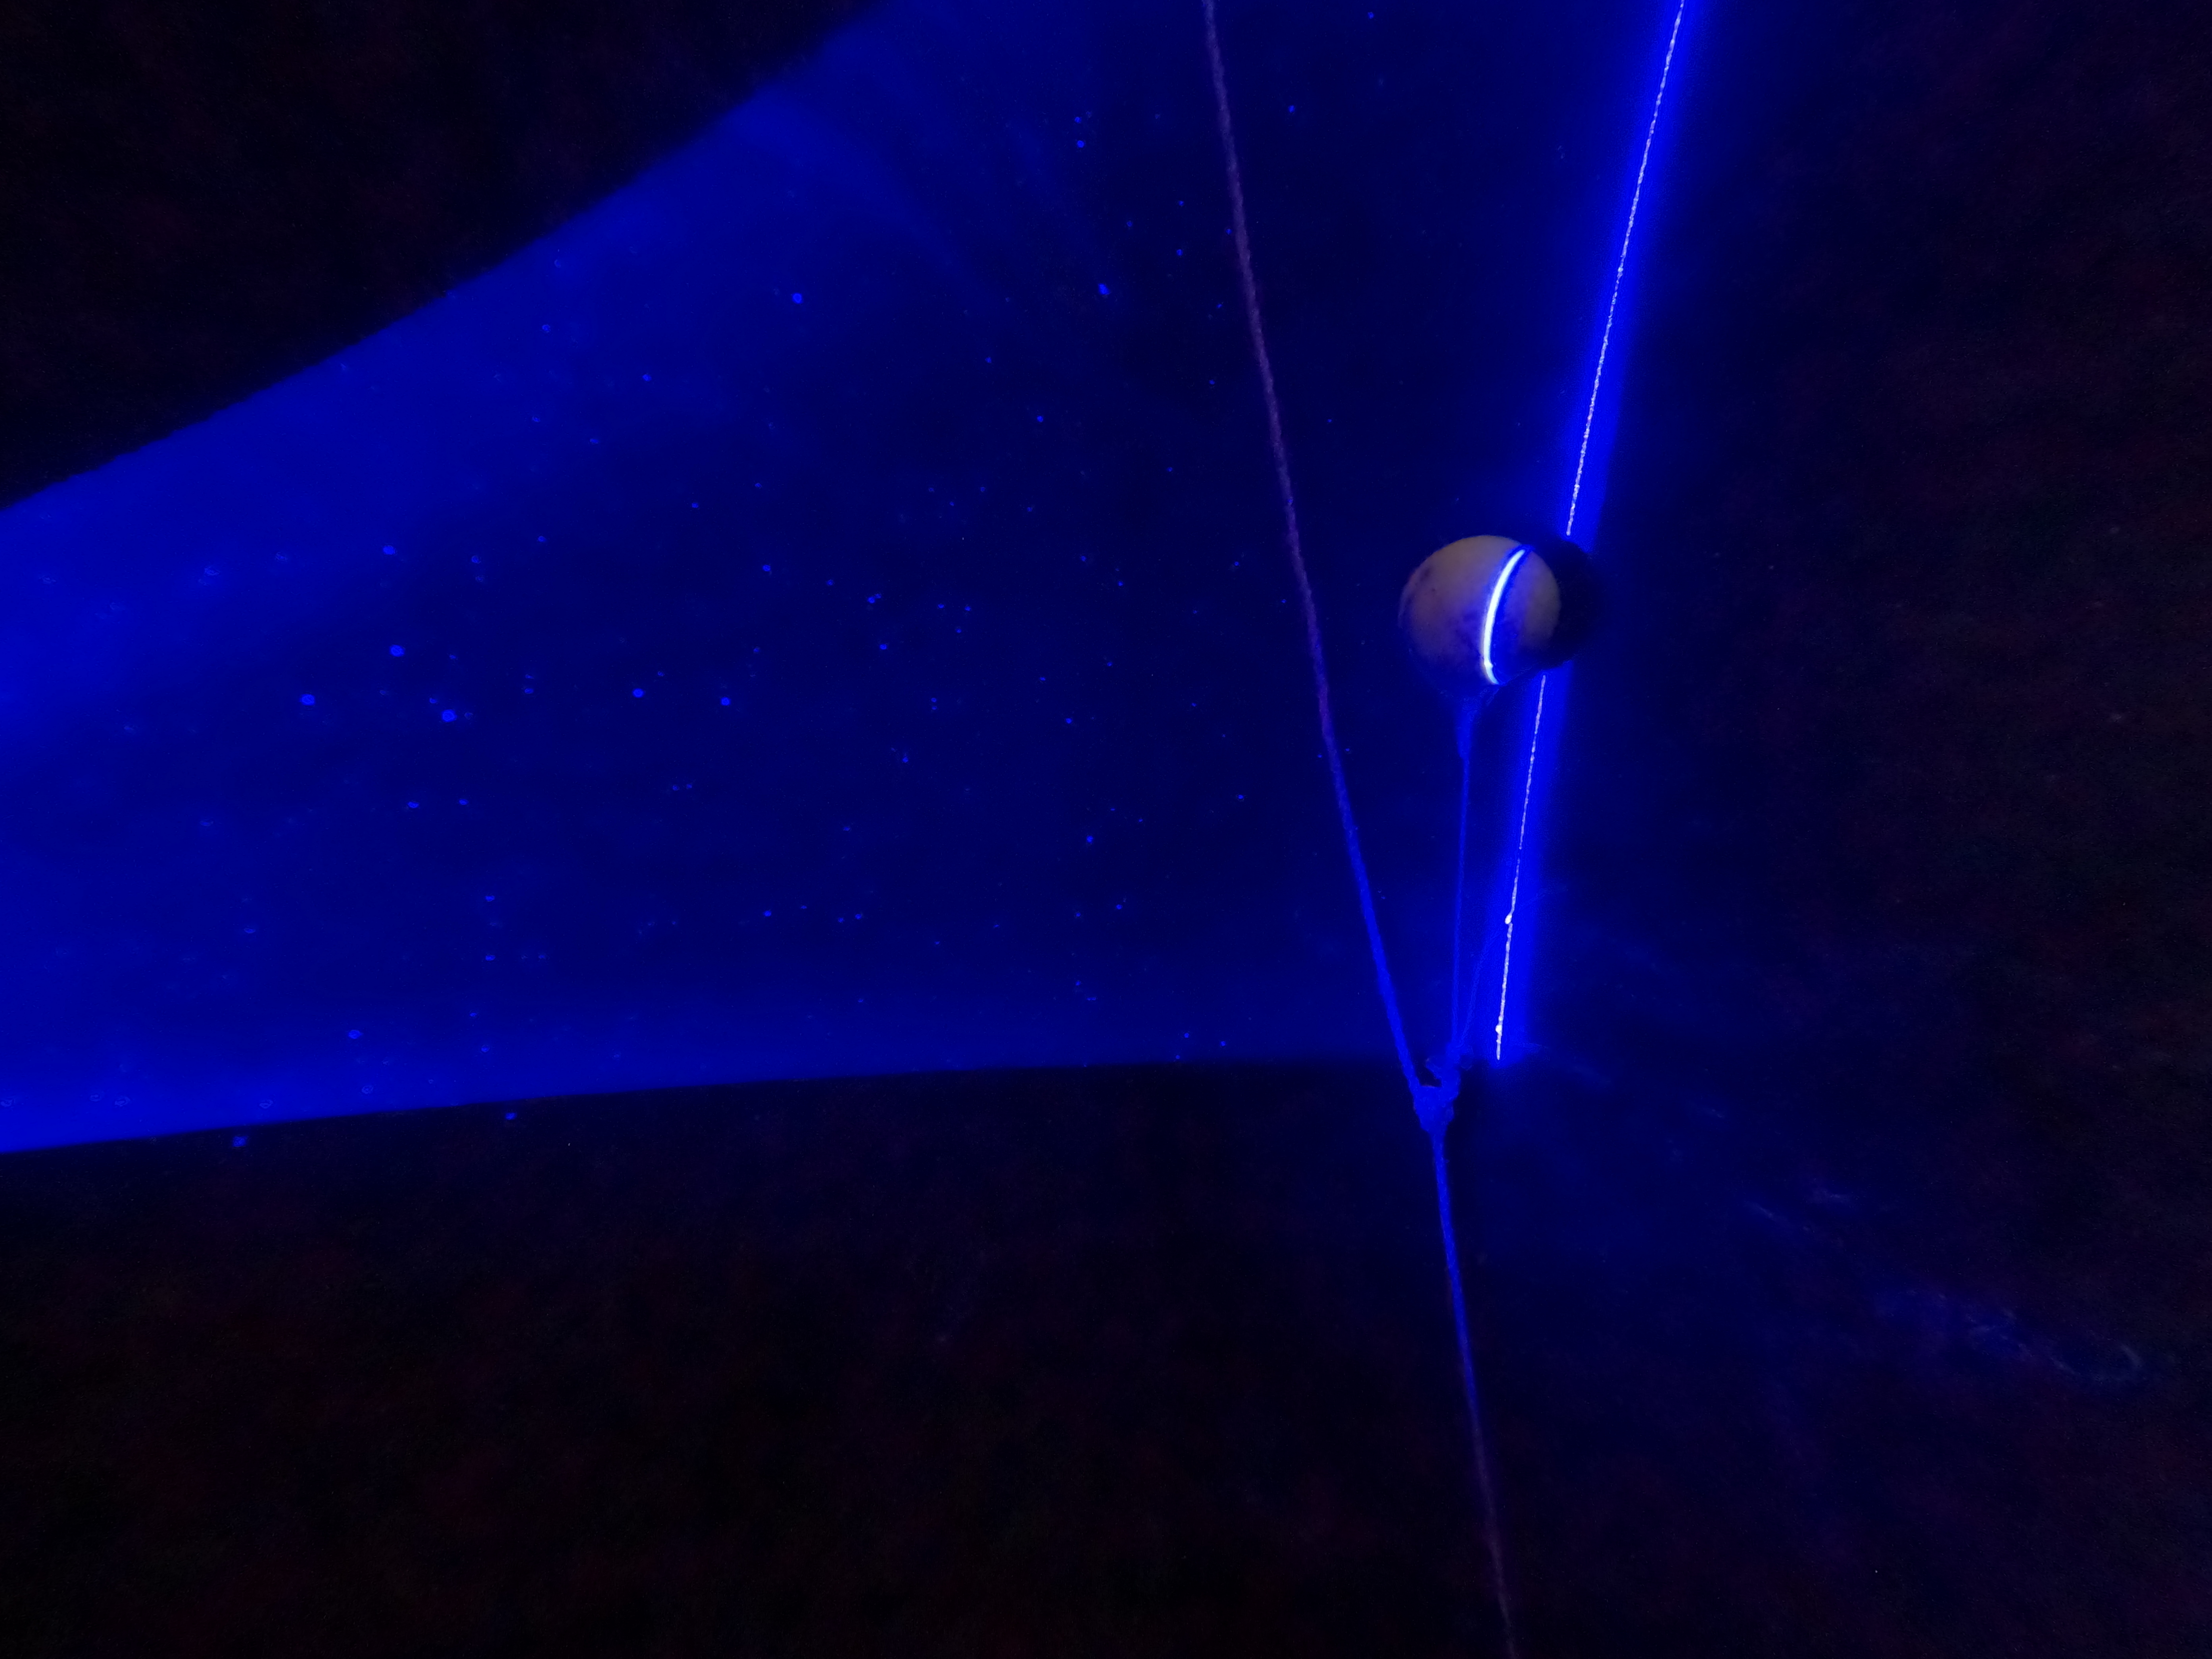

Supplement: Supplementary file 1066 [file G0031420.pdf › 10/G0031420.pdf]

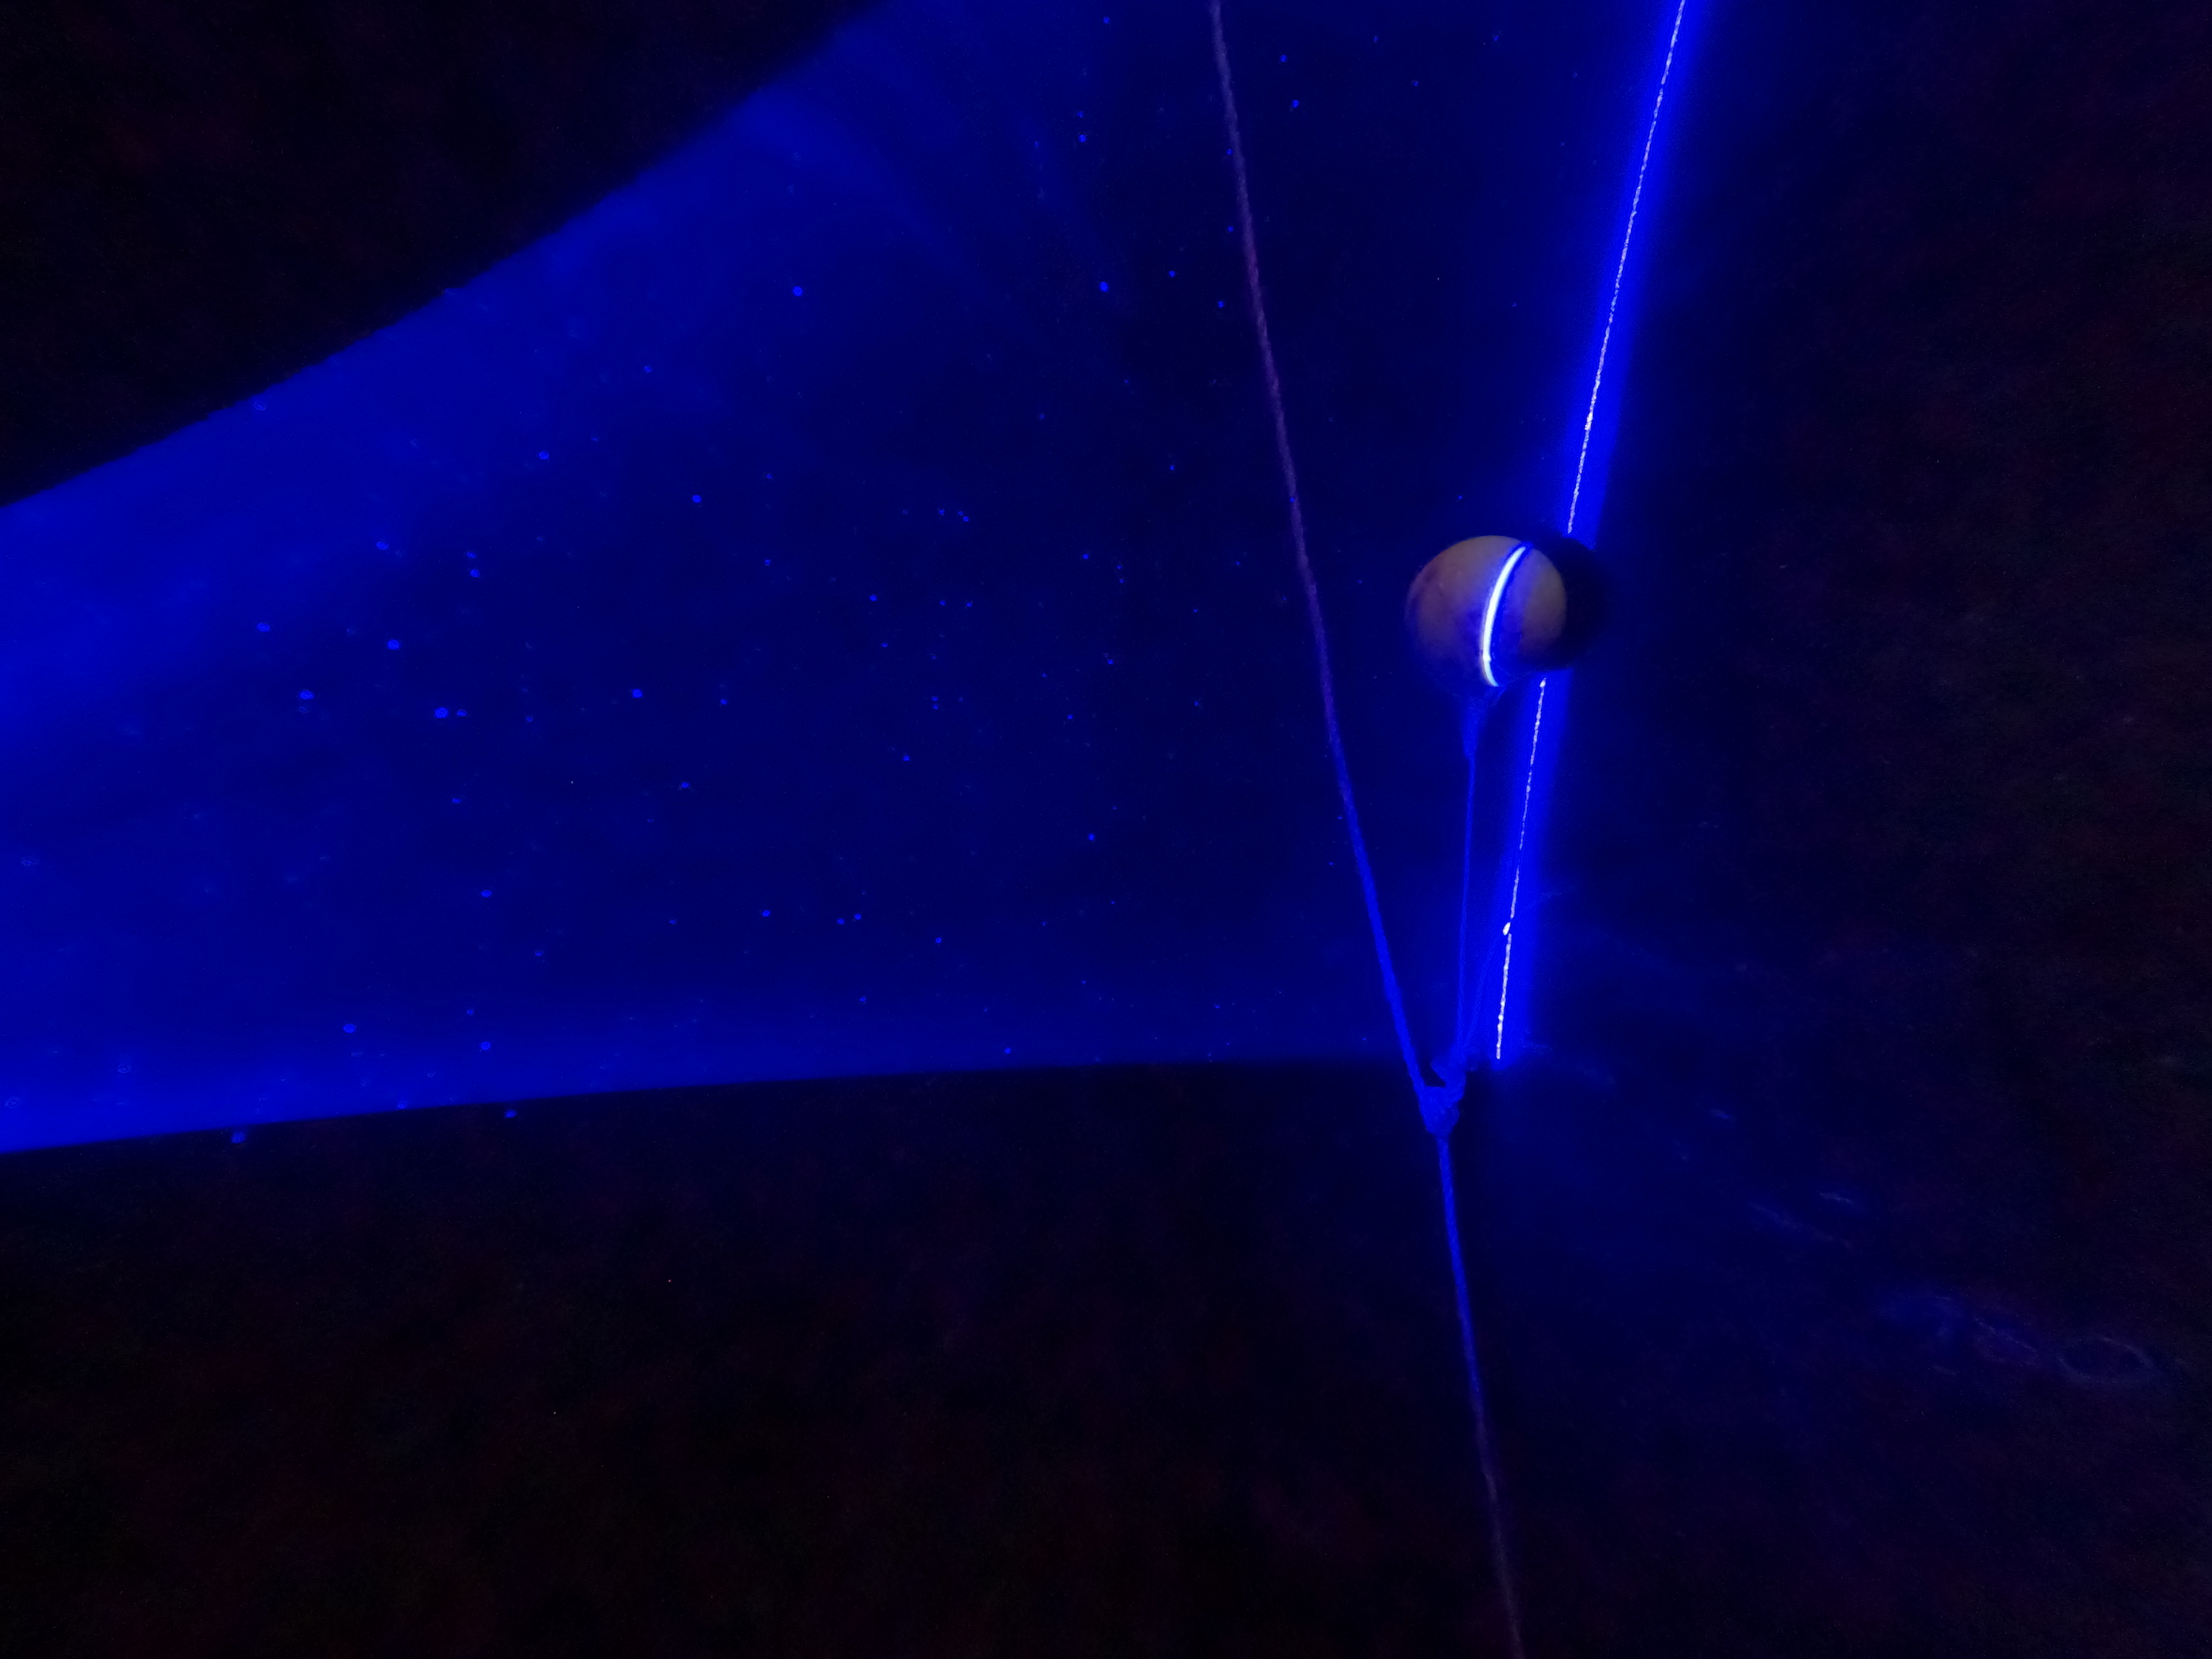

Supplement: Supplementary file 1067 [file G0031421.pdf › 10/G0031421.pdf]

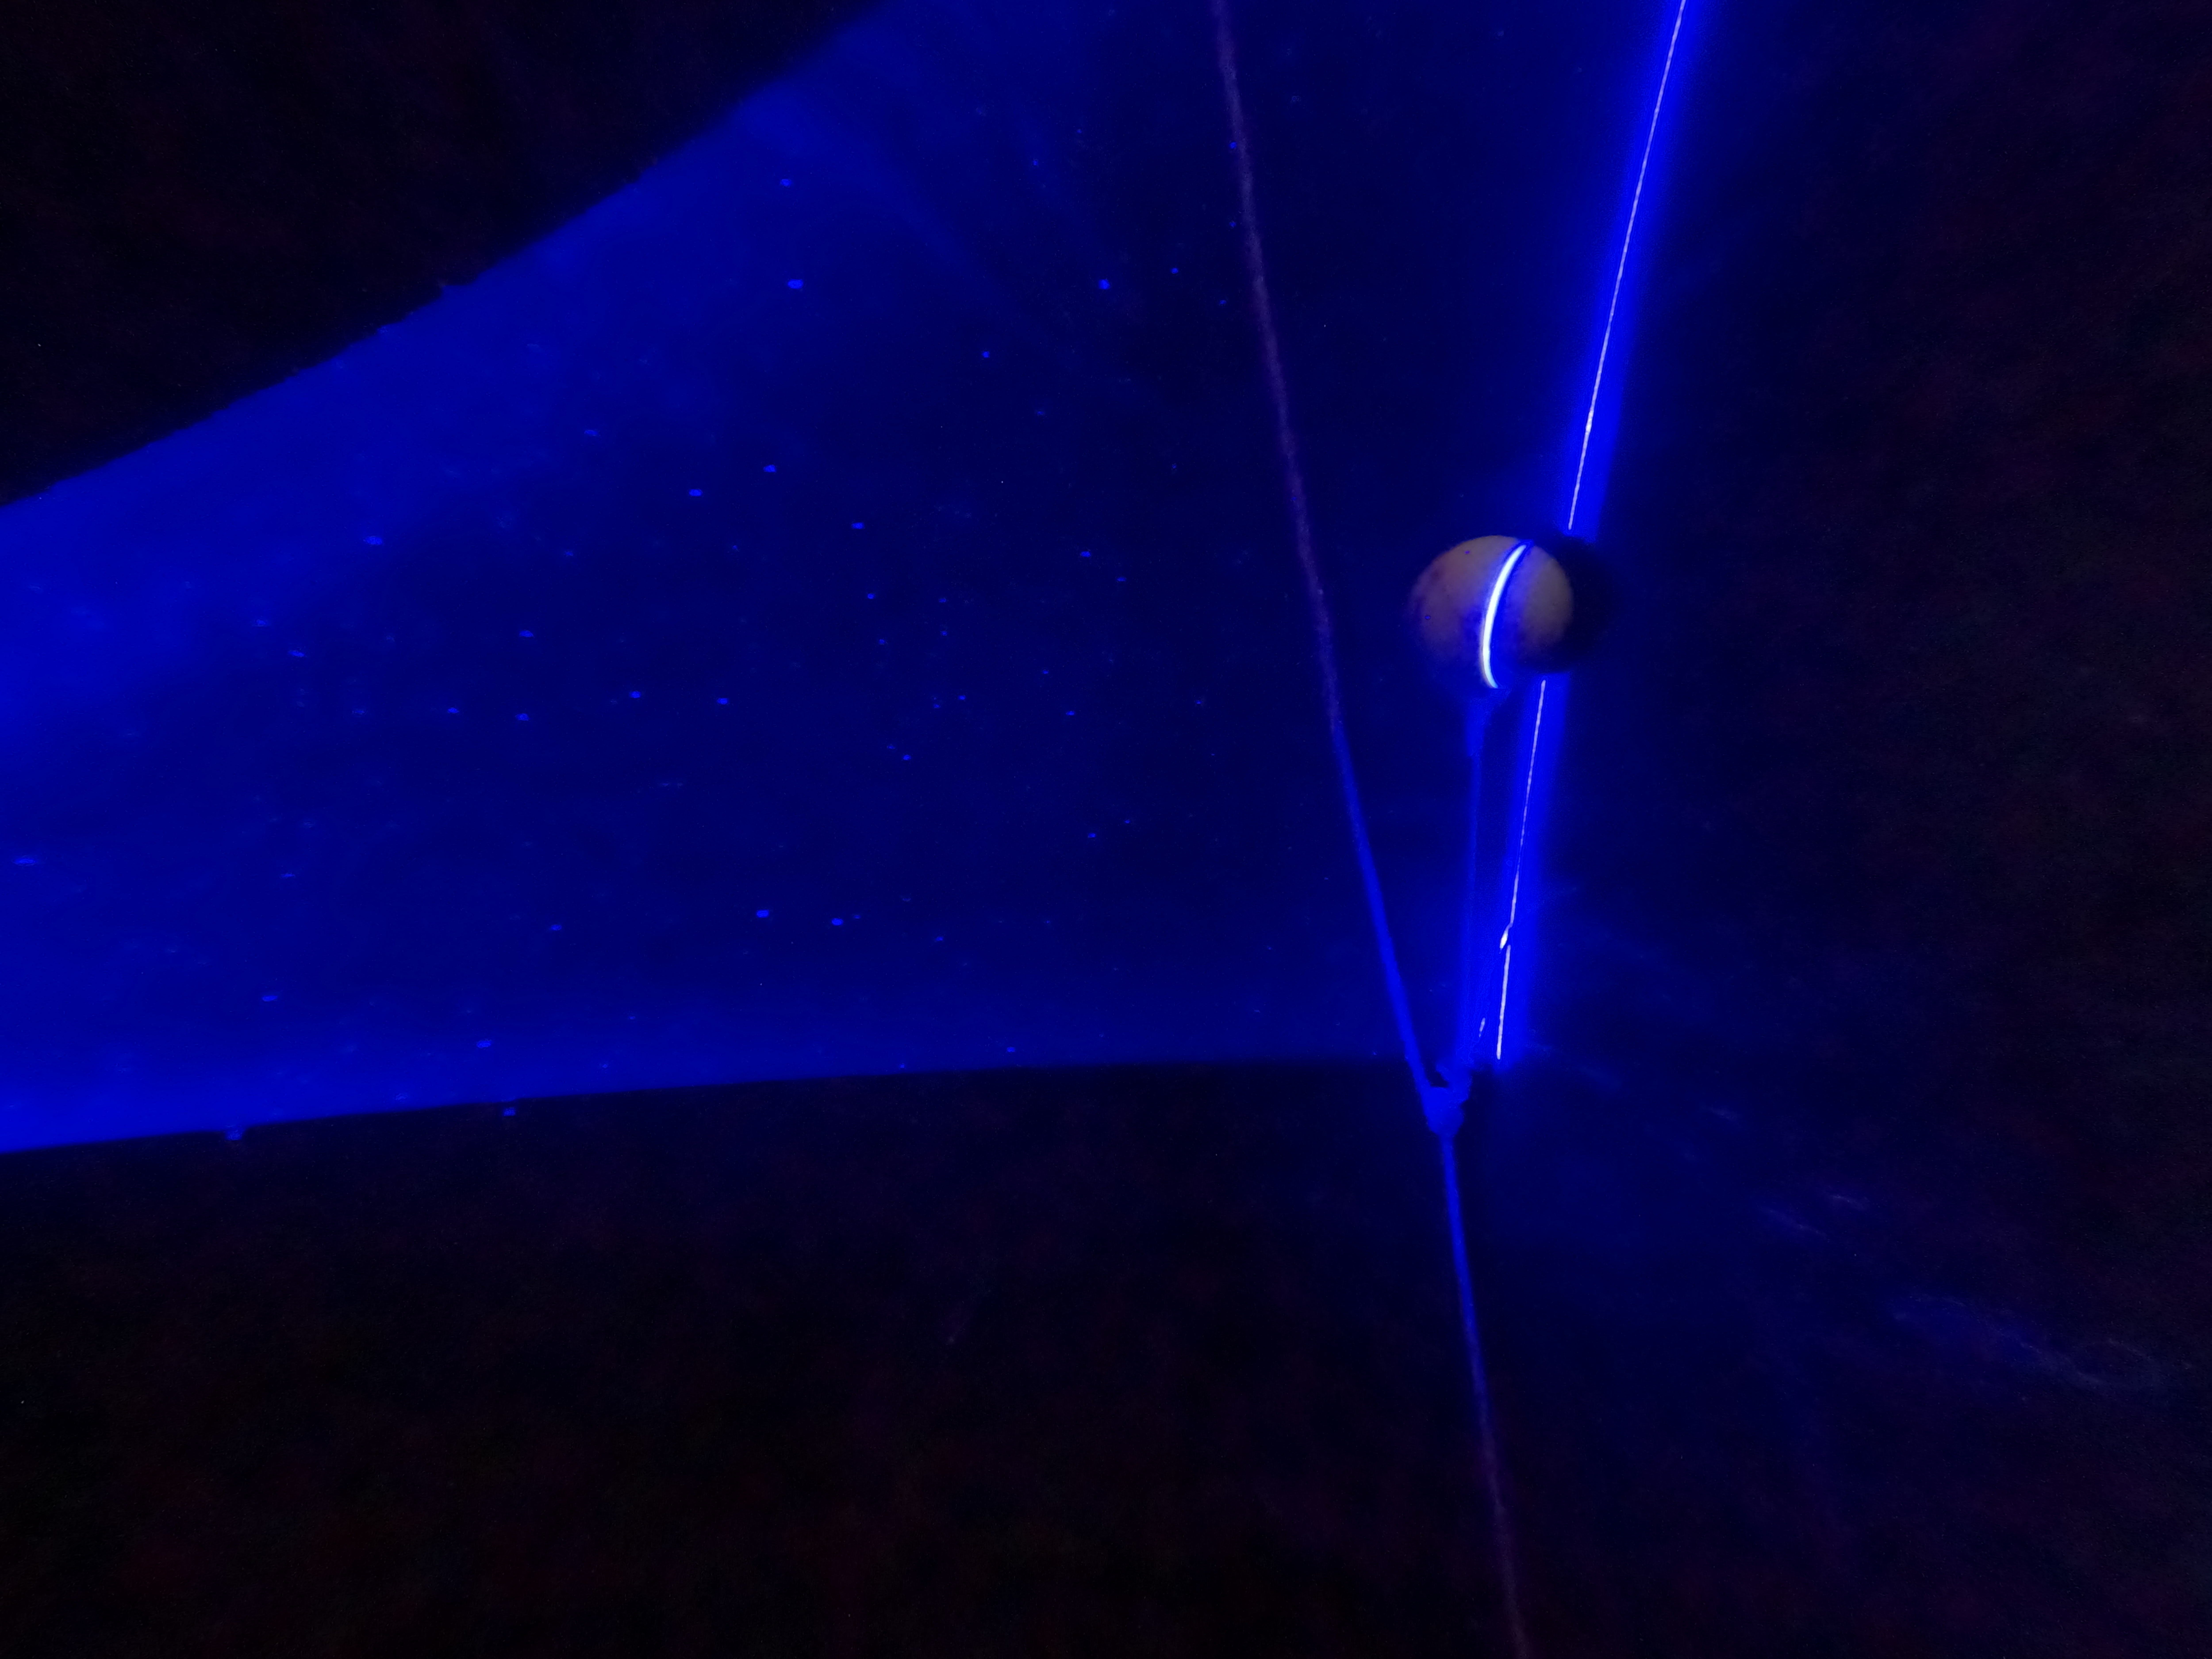

Supplement: Supplementary file 1068 [file G0031422.pdf › 10/G0031422.pdf]

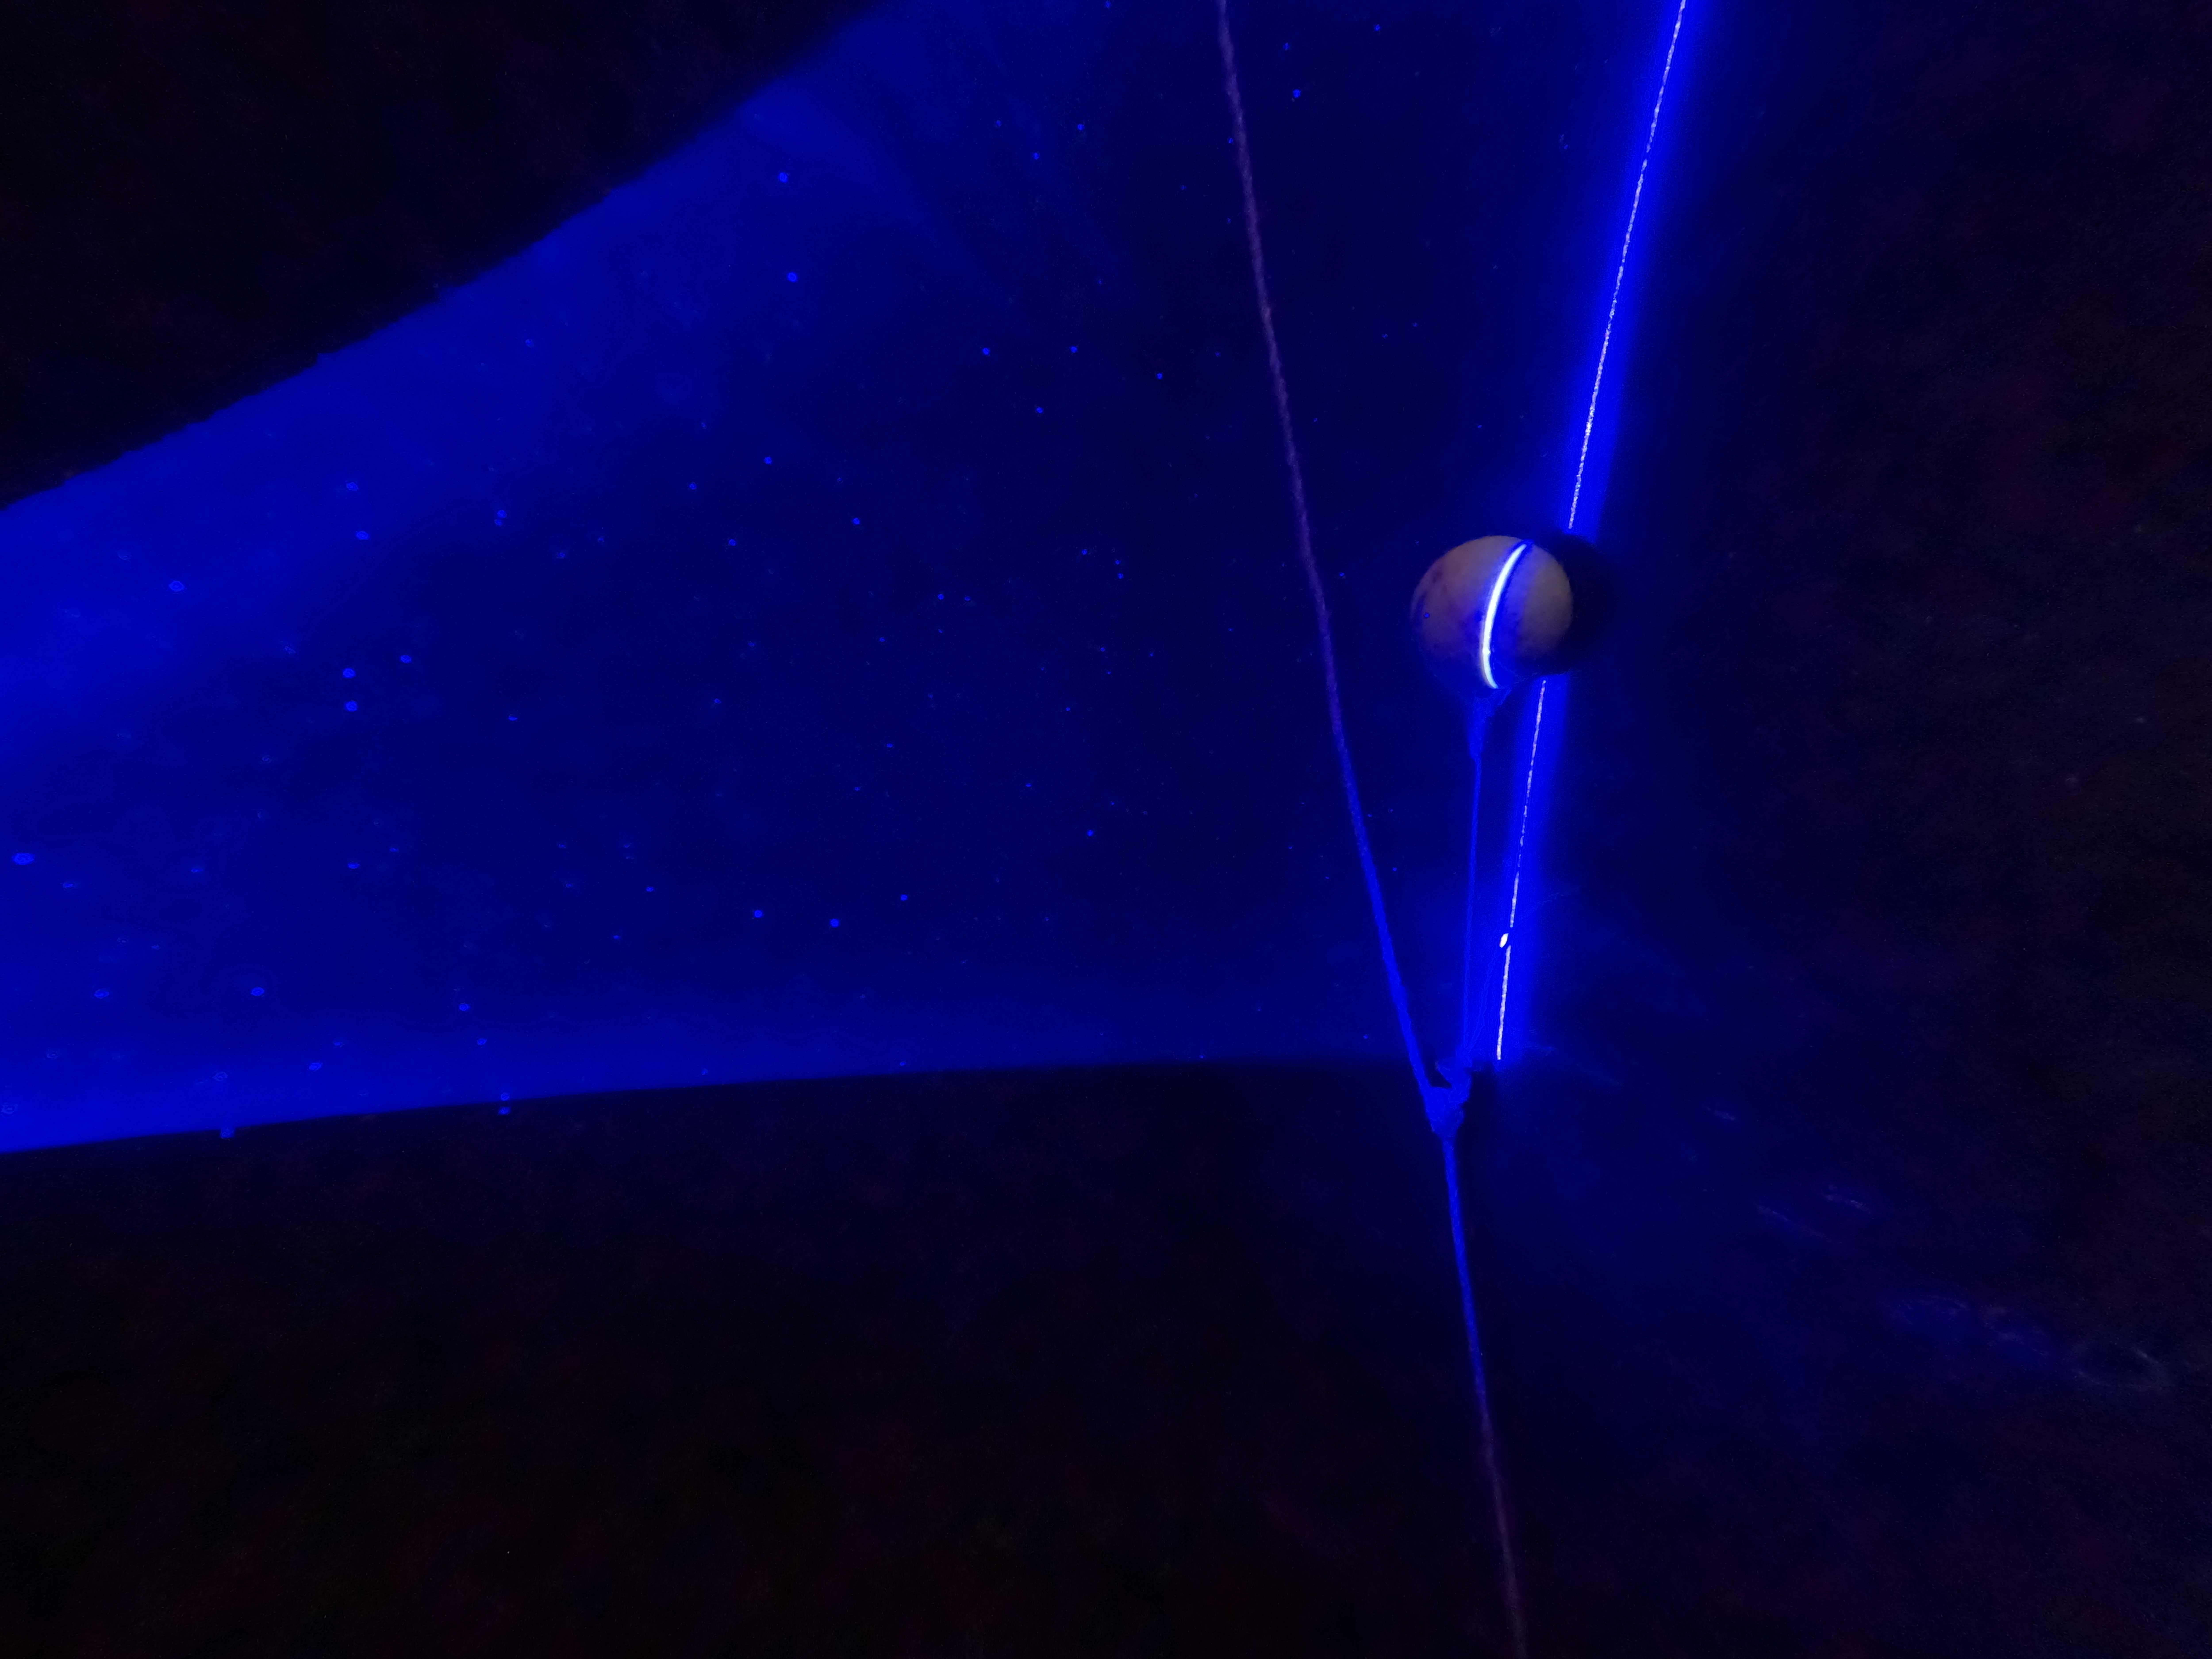

Supplement: Supplementary file 1069 [file G0031423.pdf › 10/G0031423.pdf]

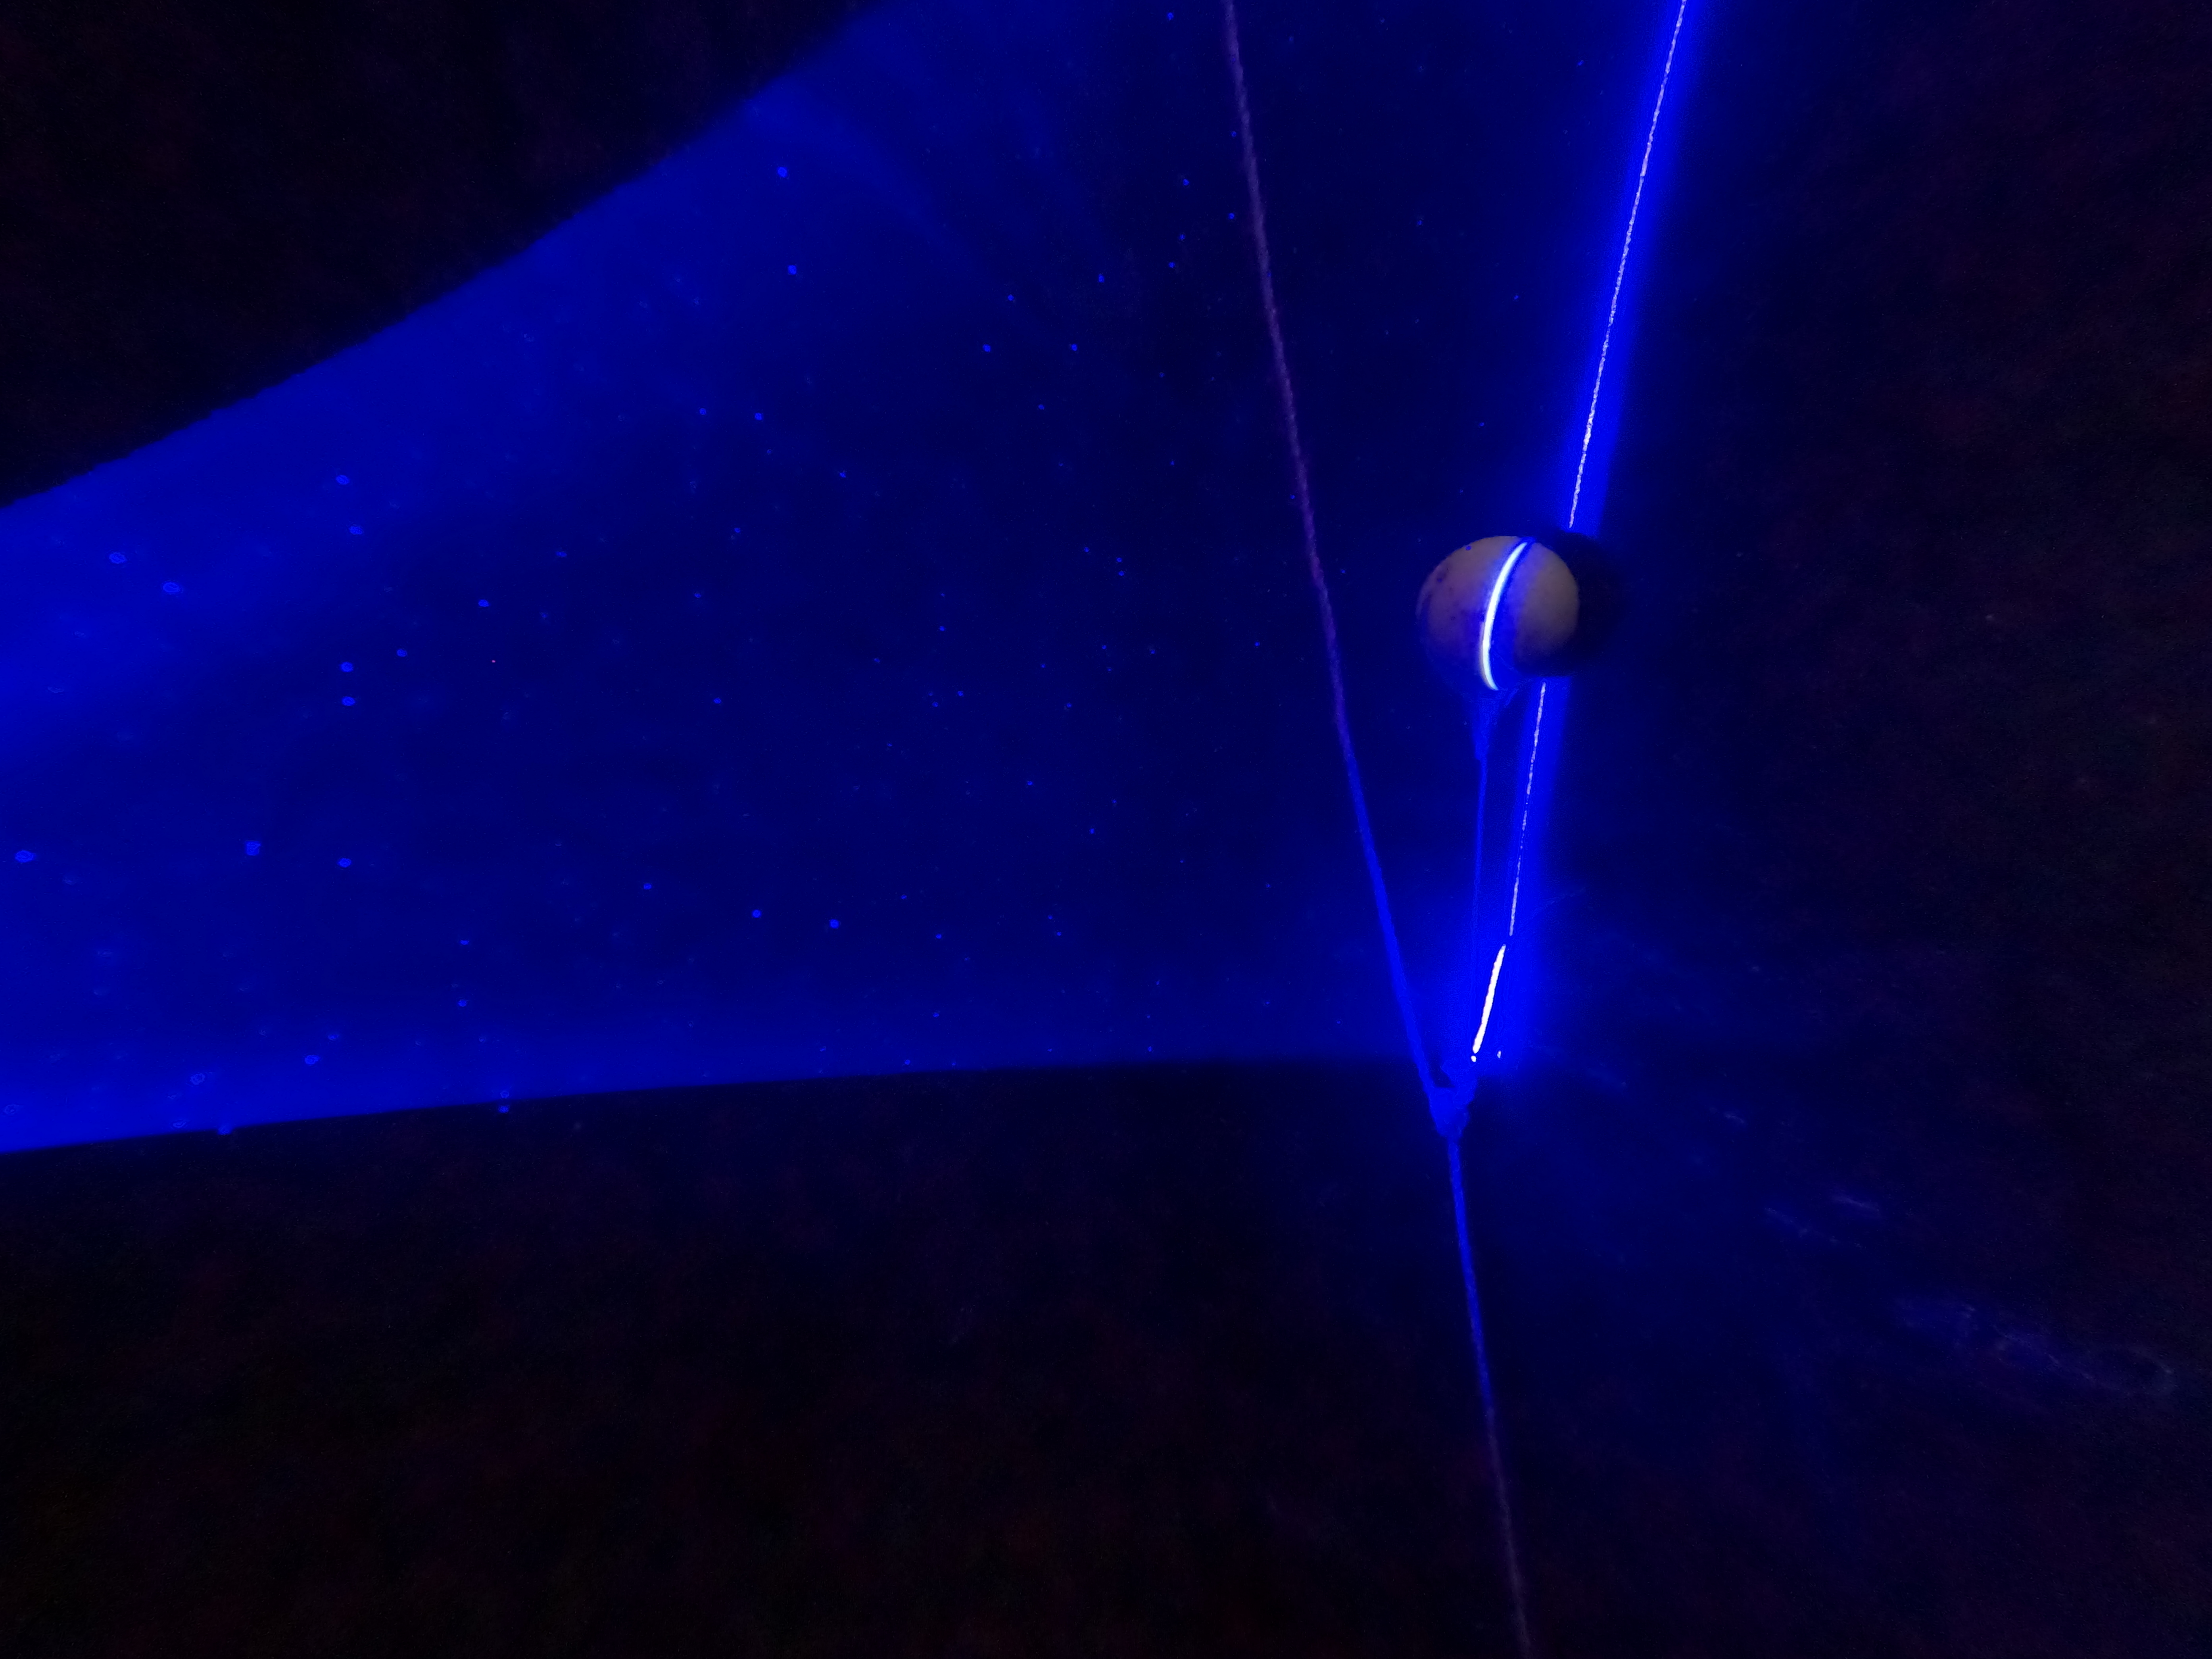

Supplement: Supplementary file 1070 [file G0031424.pdf › 10/G0031424.pdf]

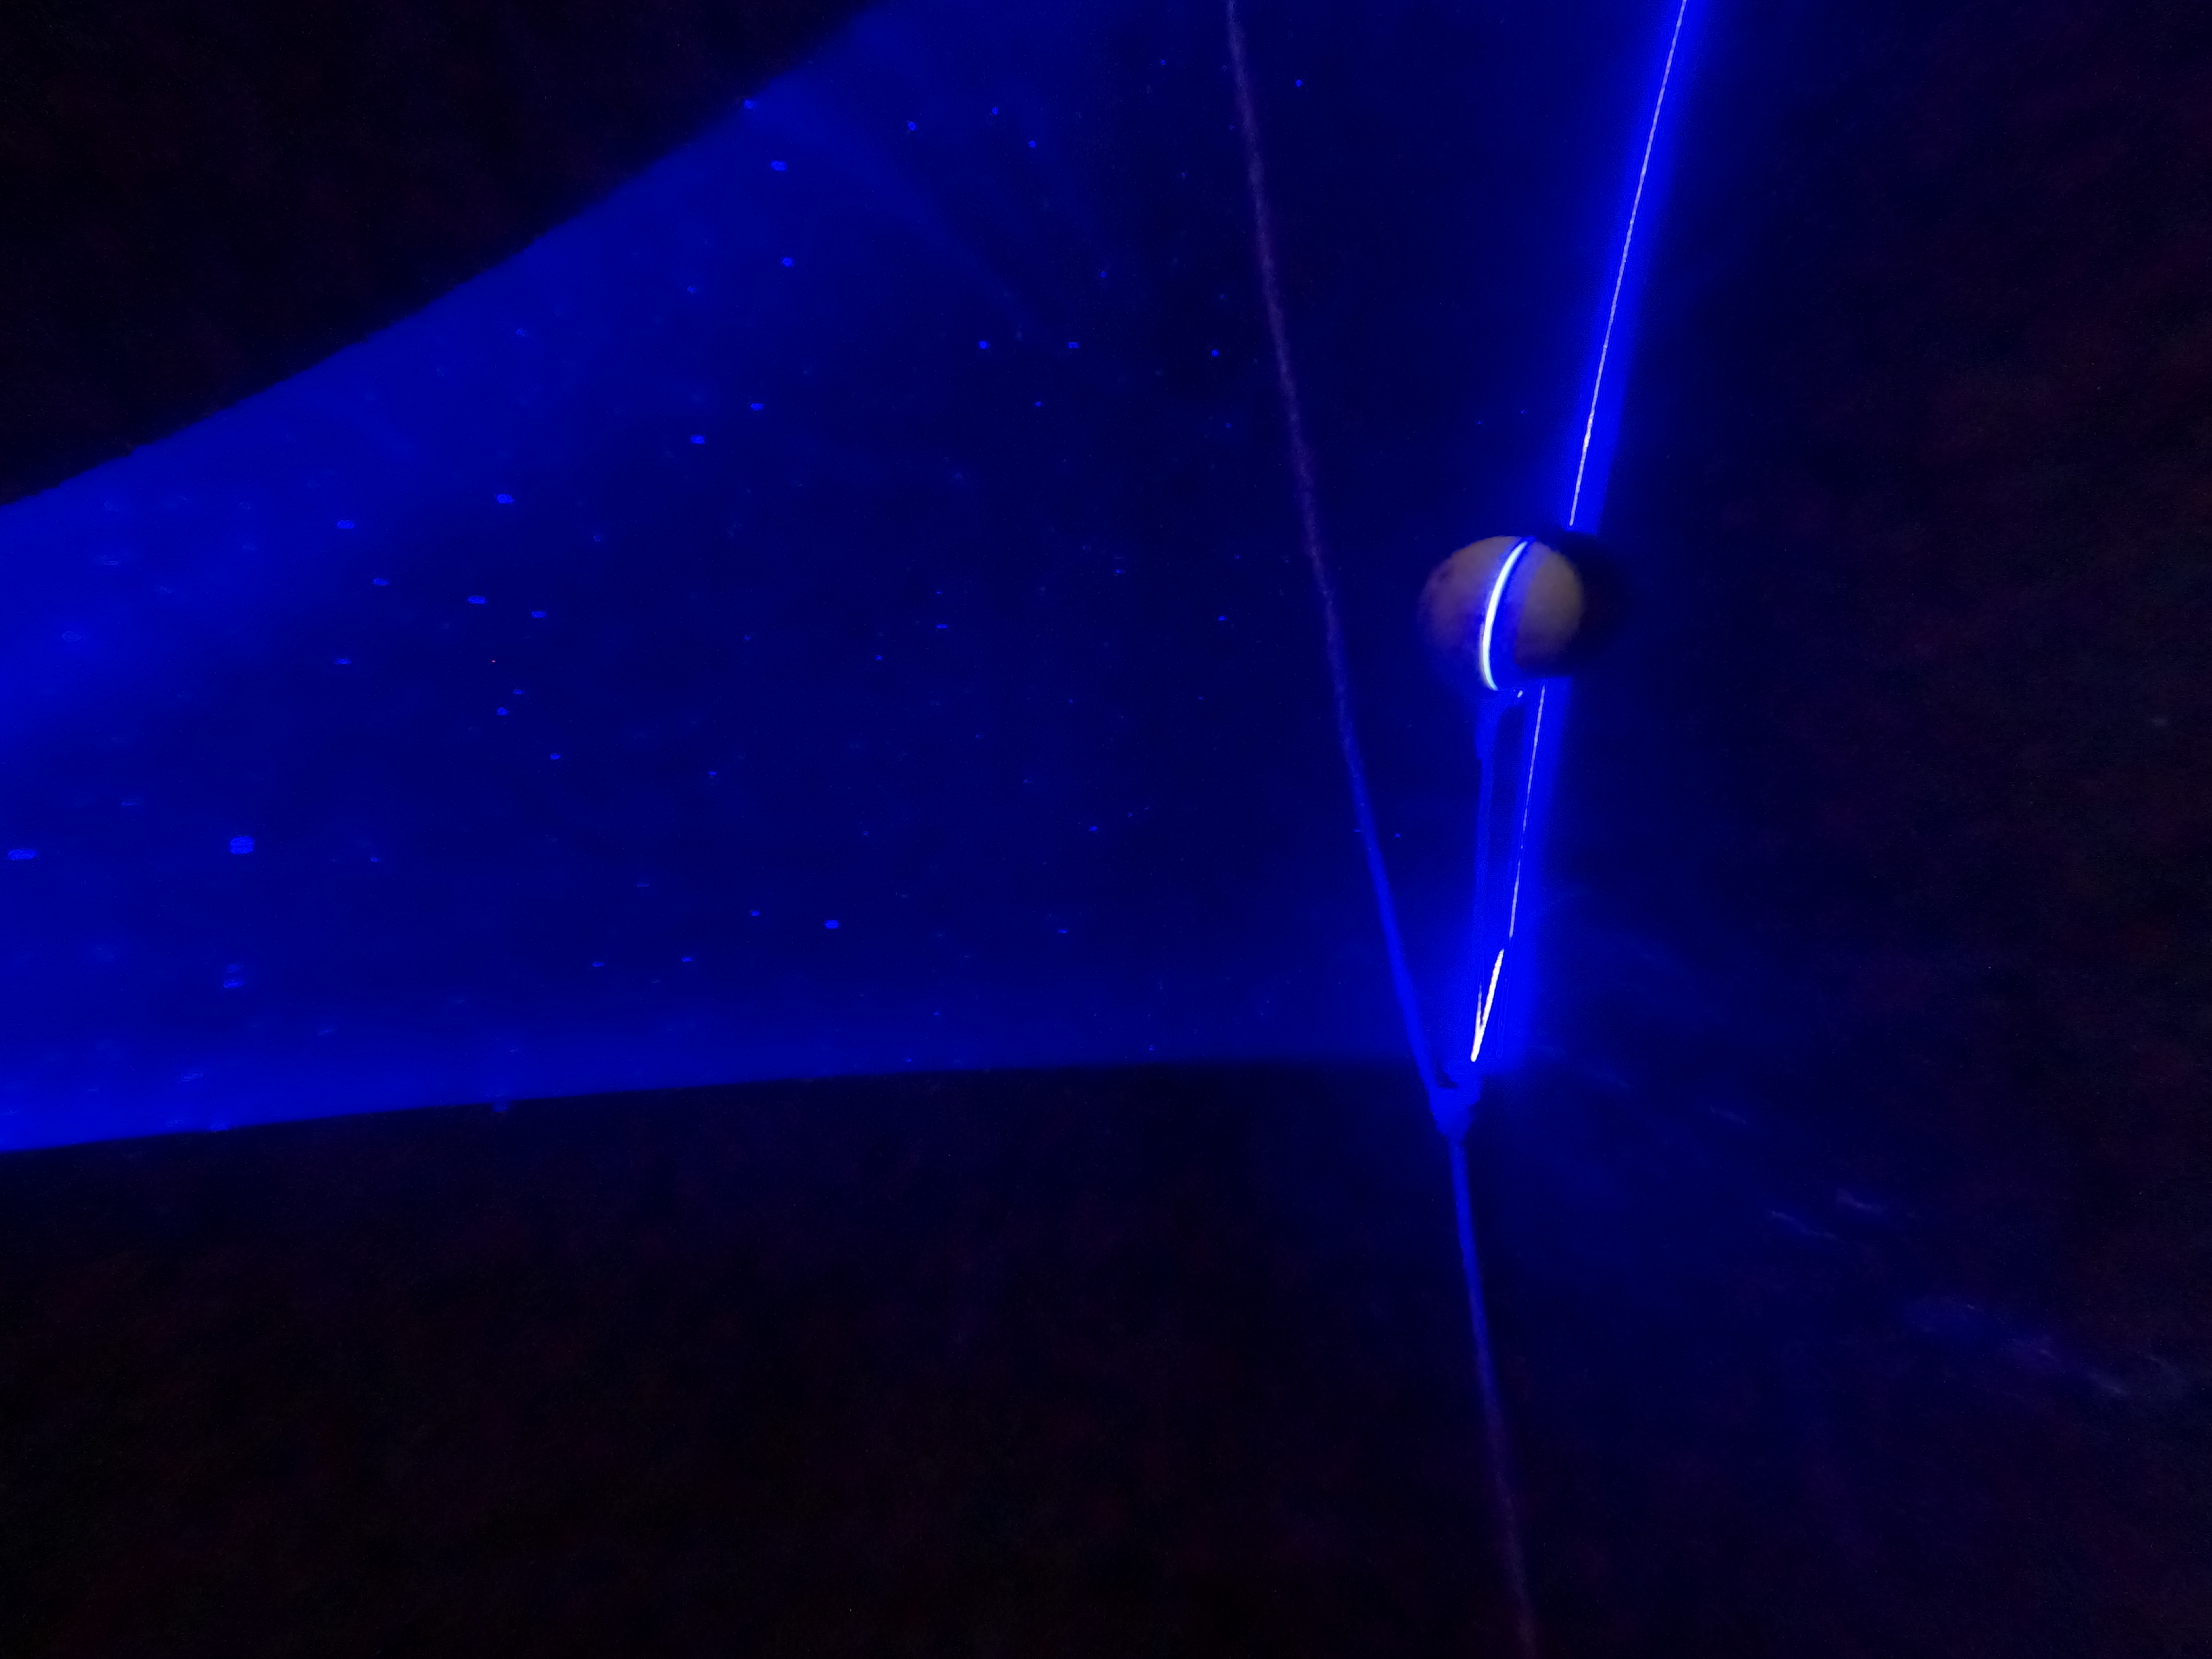

Supplement: Supplementary file 1071 [file G0031425.pdf › 10/G0031425.pdf]

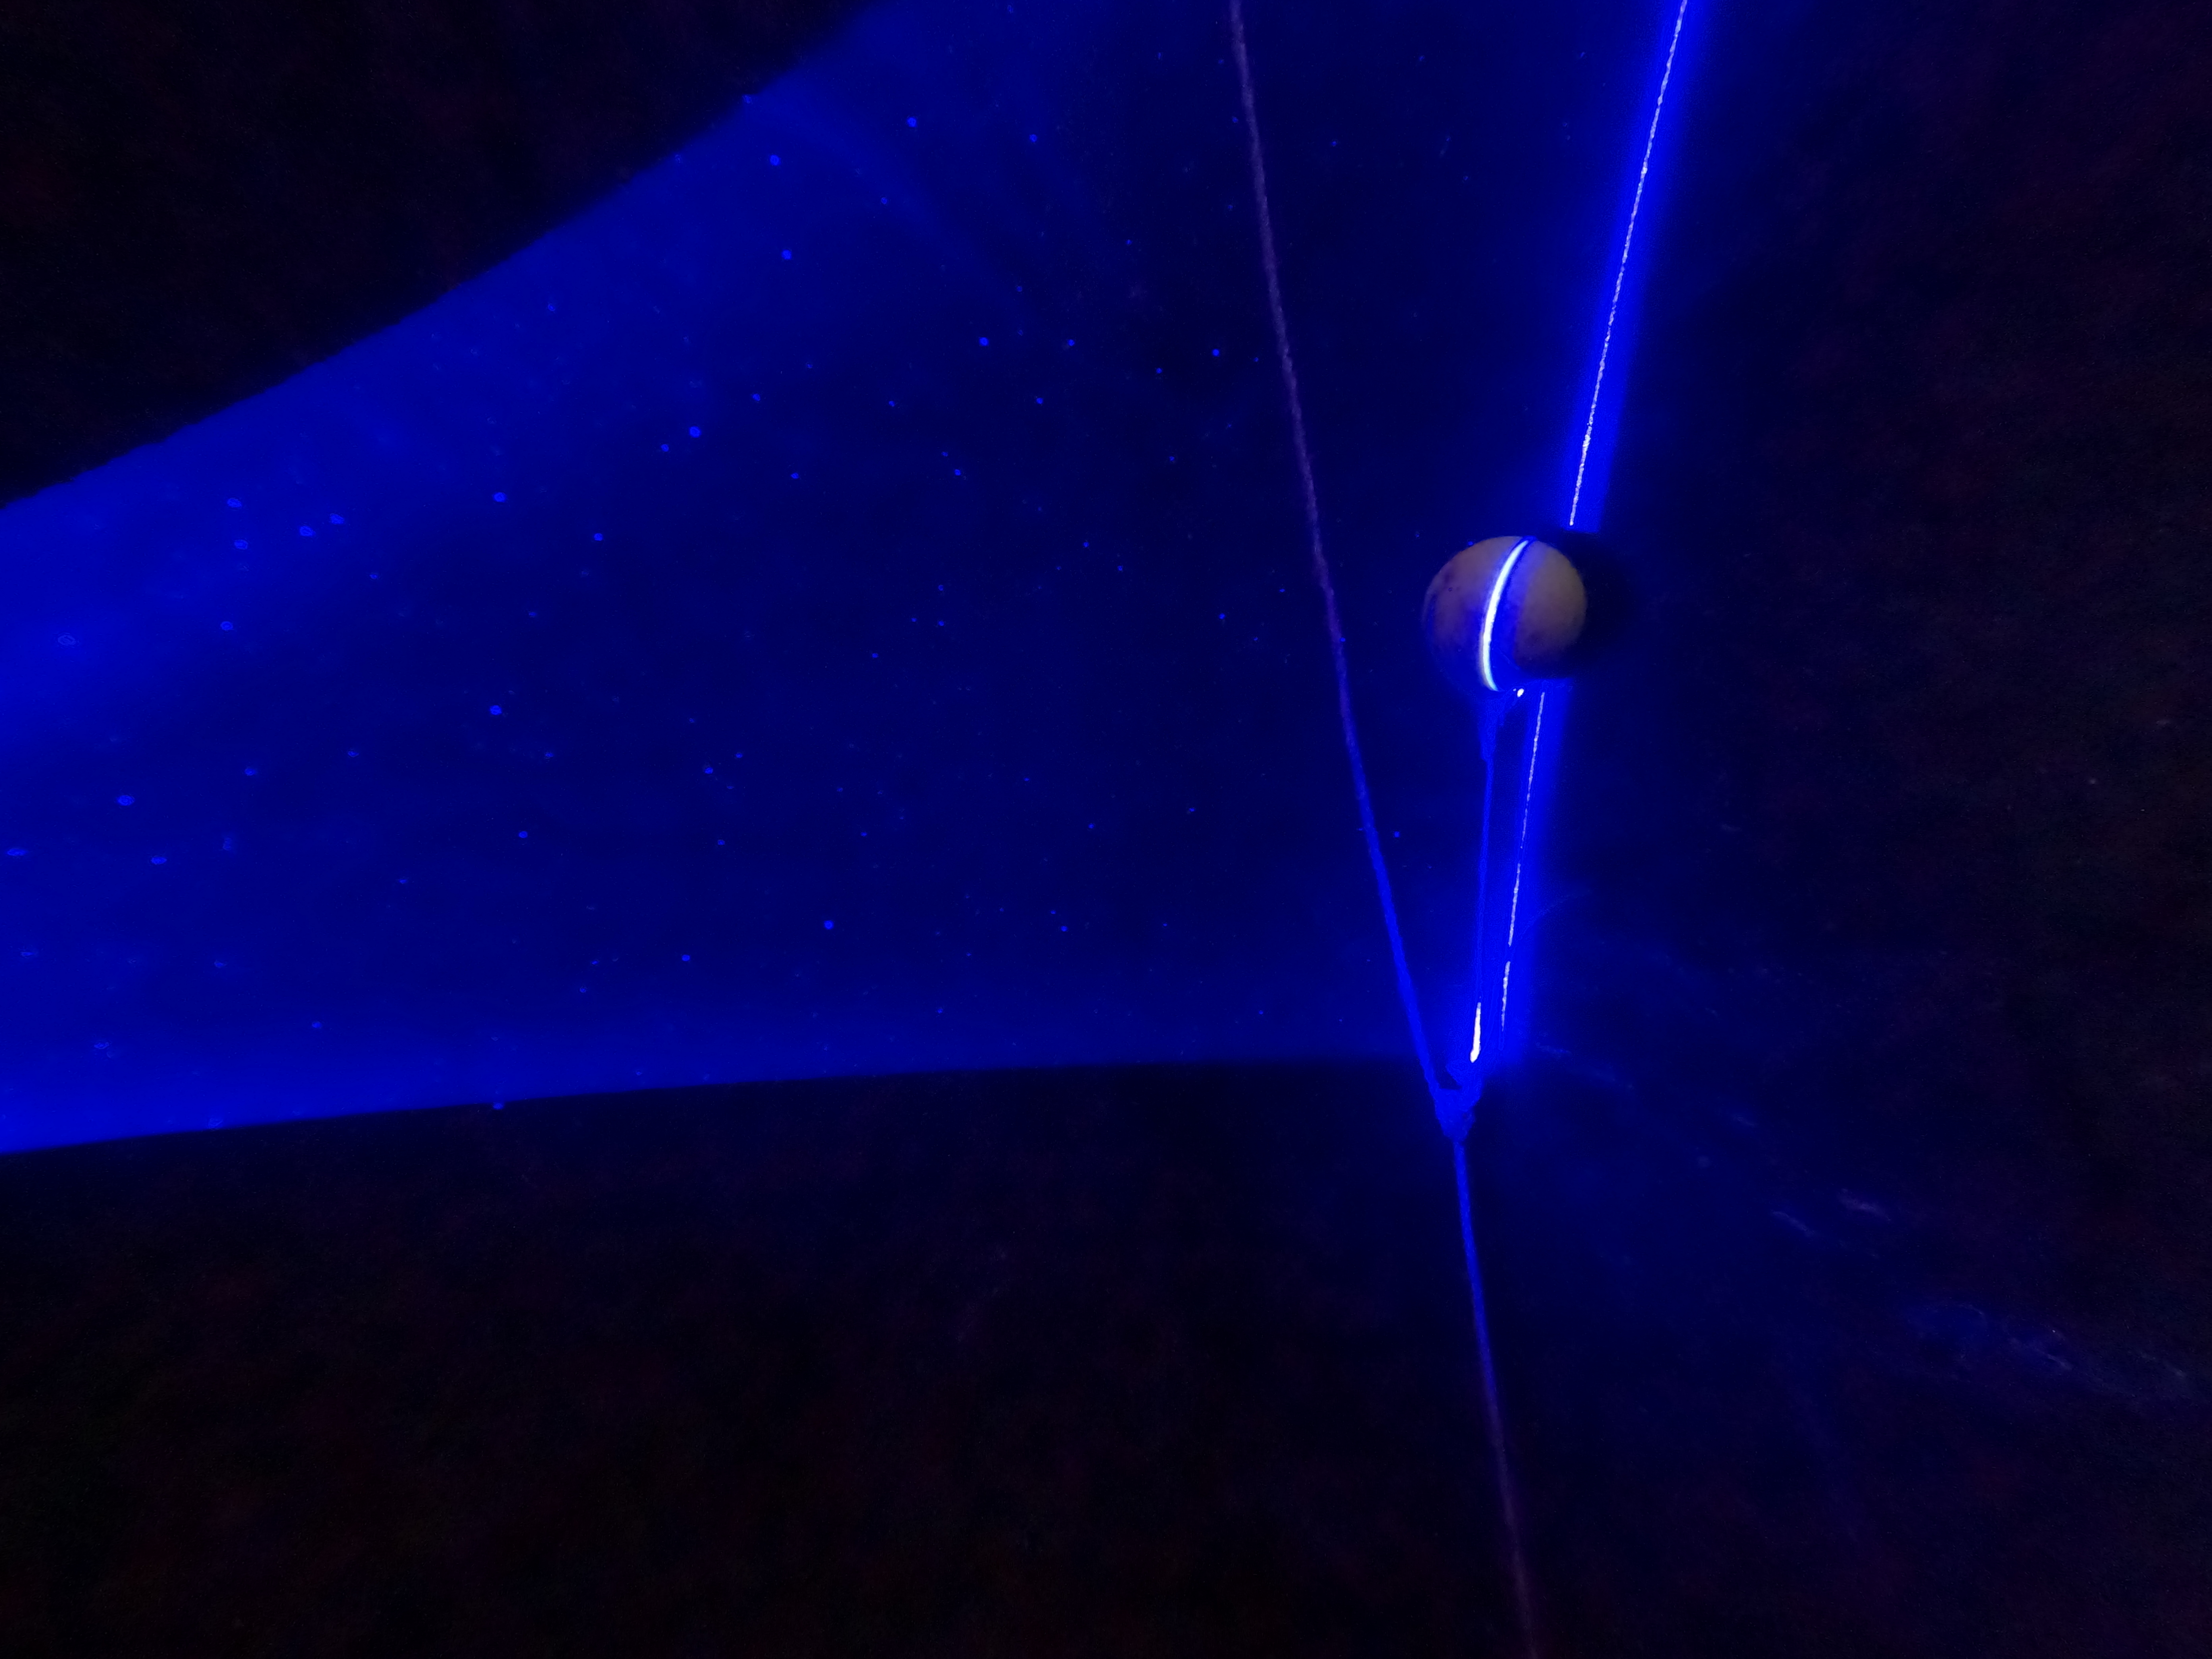

Supplement: Supplementary file 1072 [file G0031426.pdf › 10/G0031426.pdf]

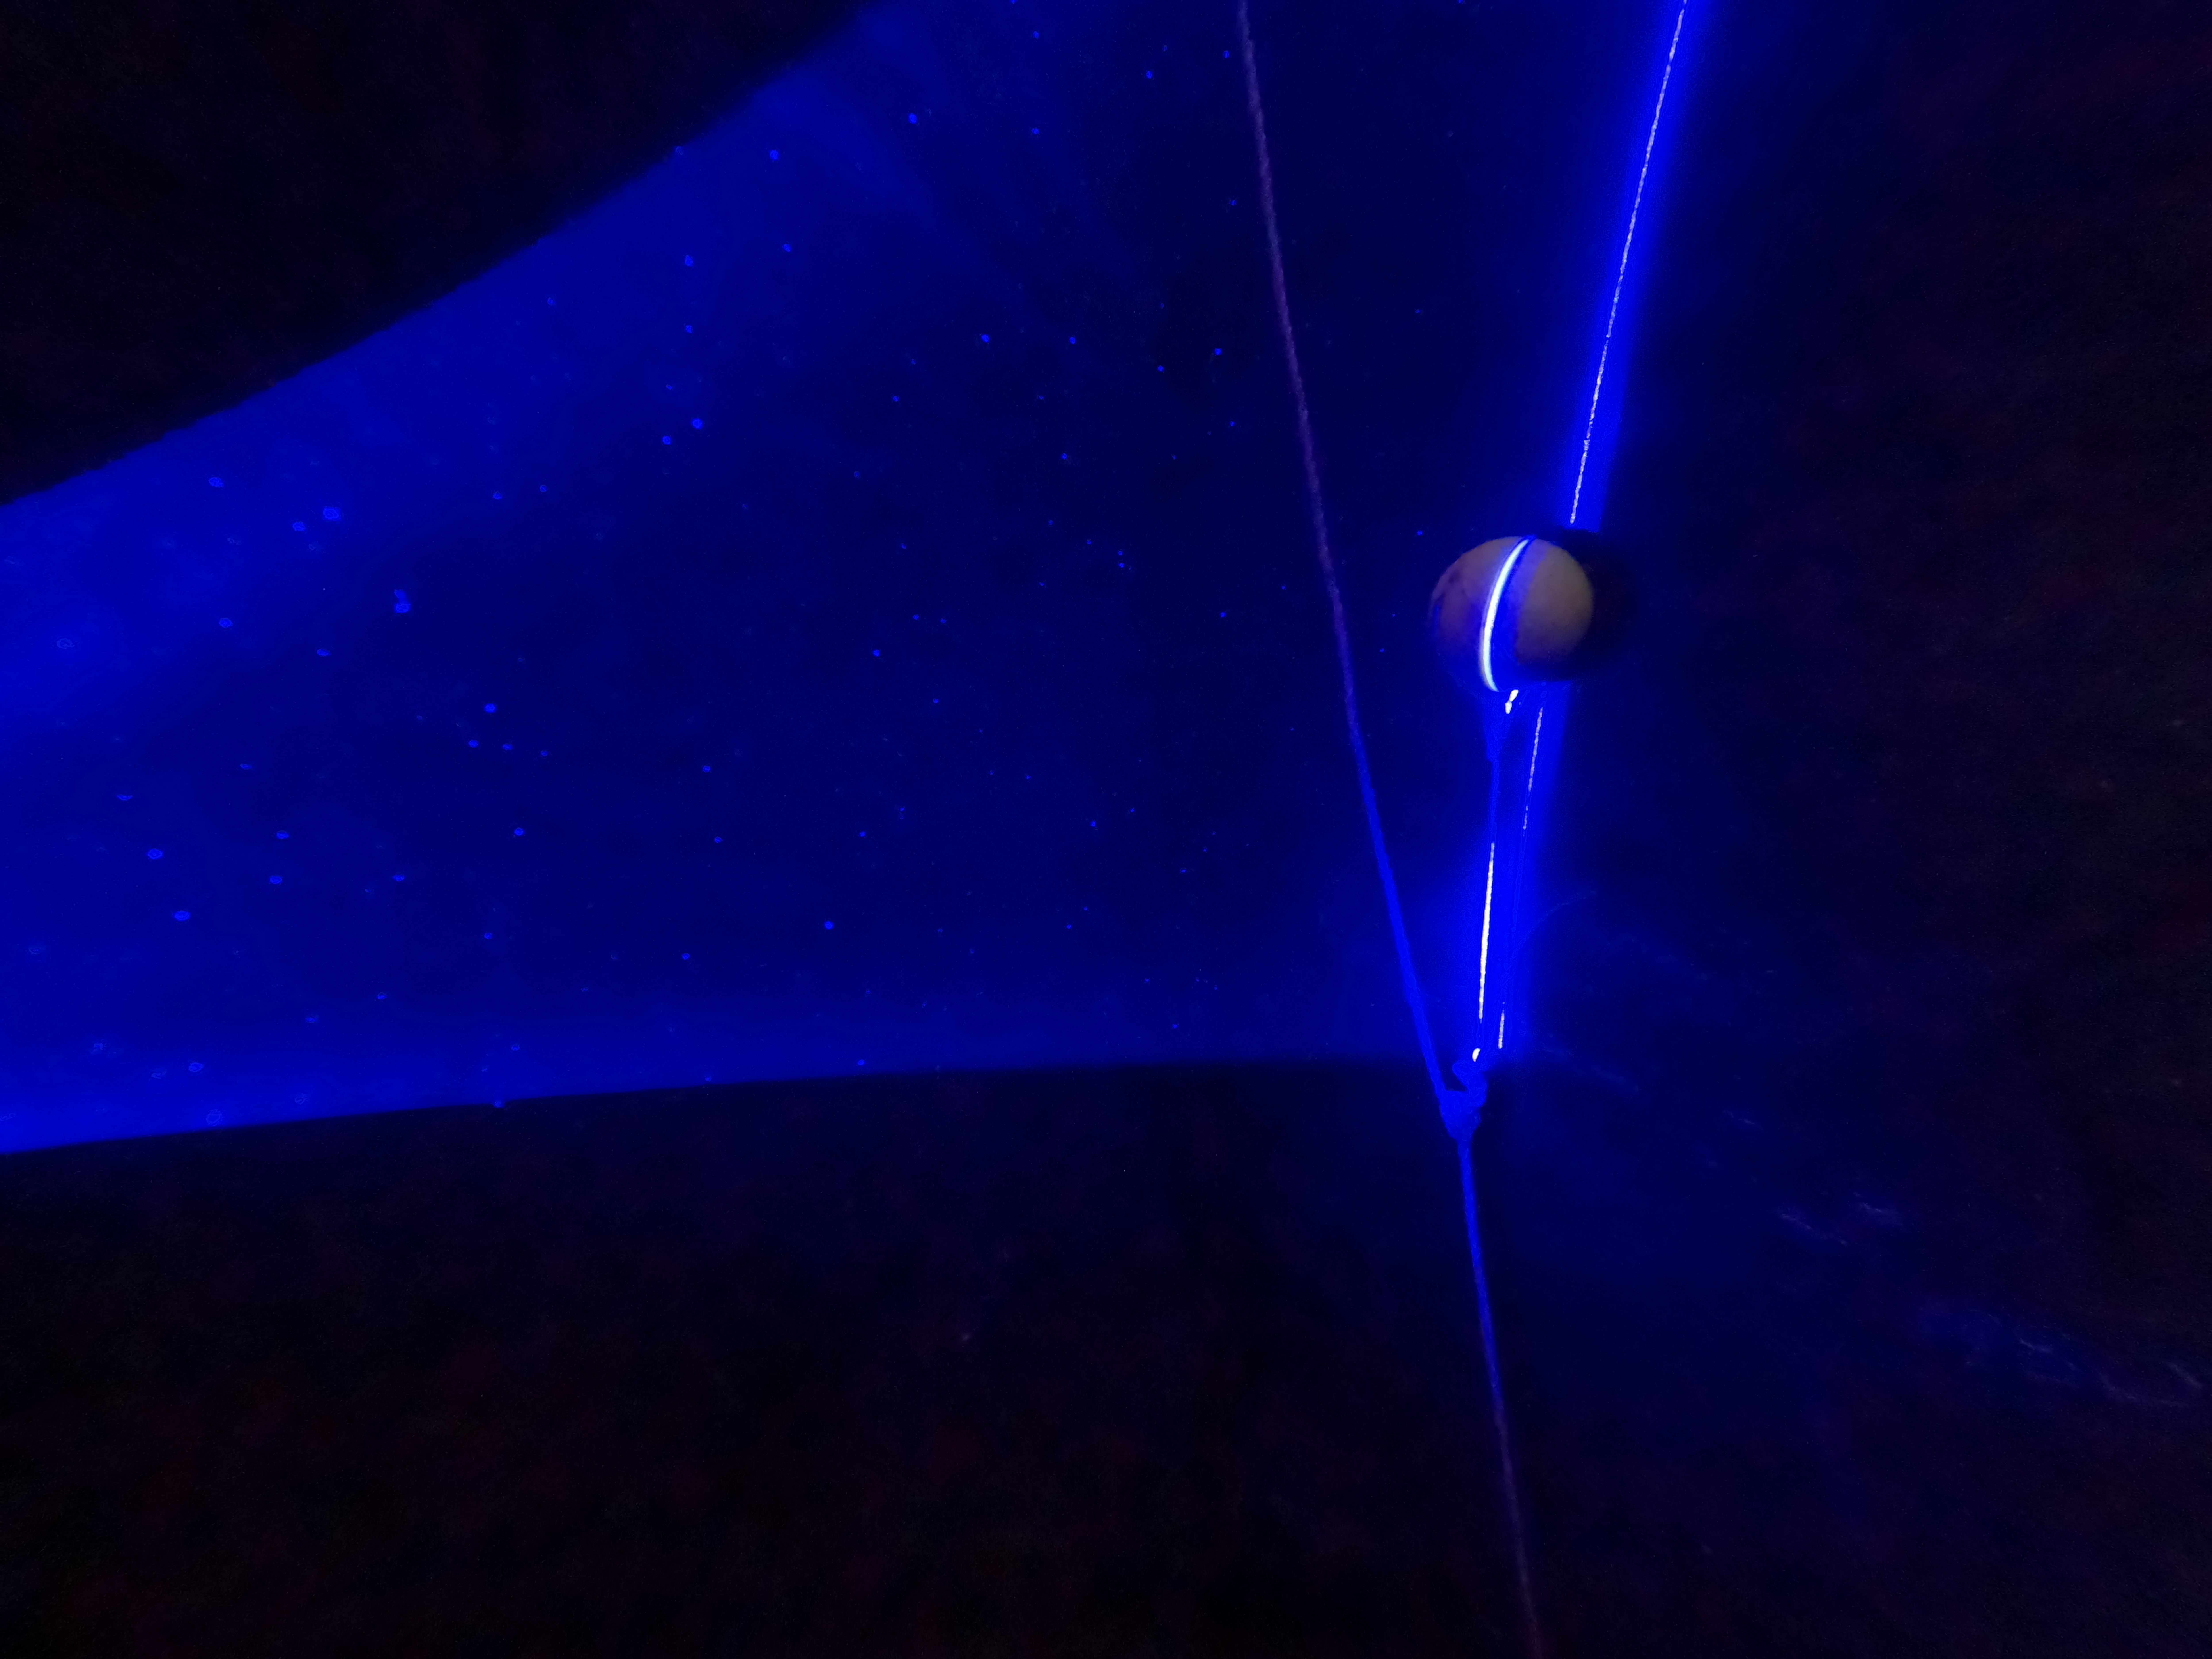

Supplement: Supplementary file 1073 [file G0031427.pdf › 10/G0031427.pdf]

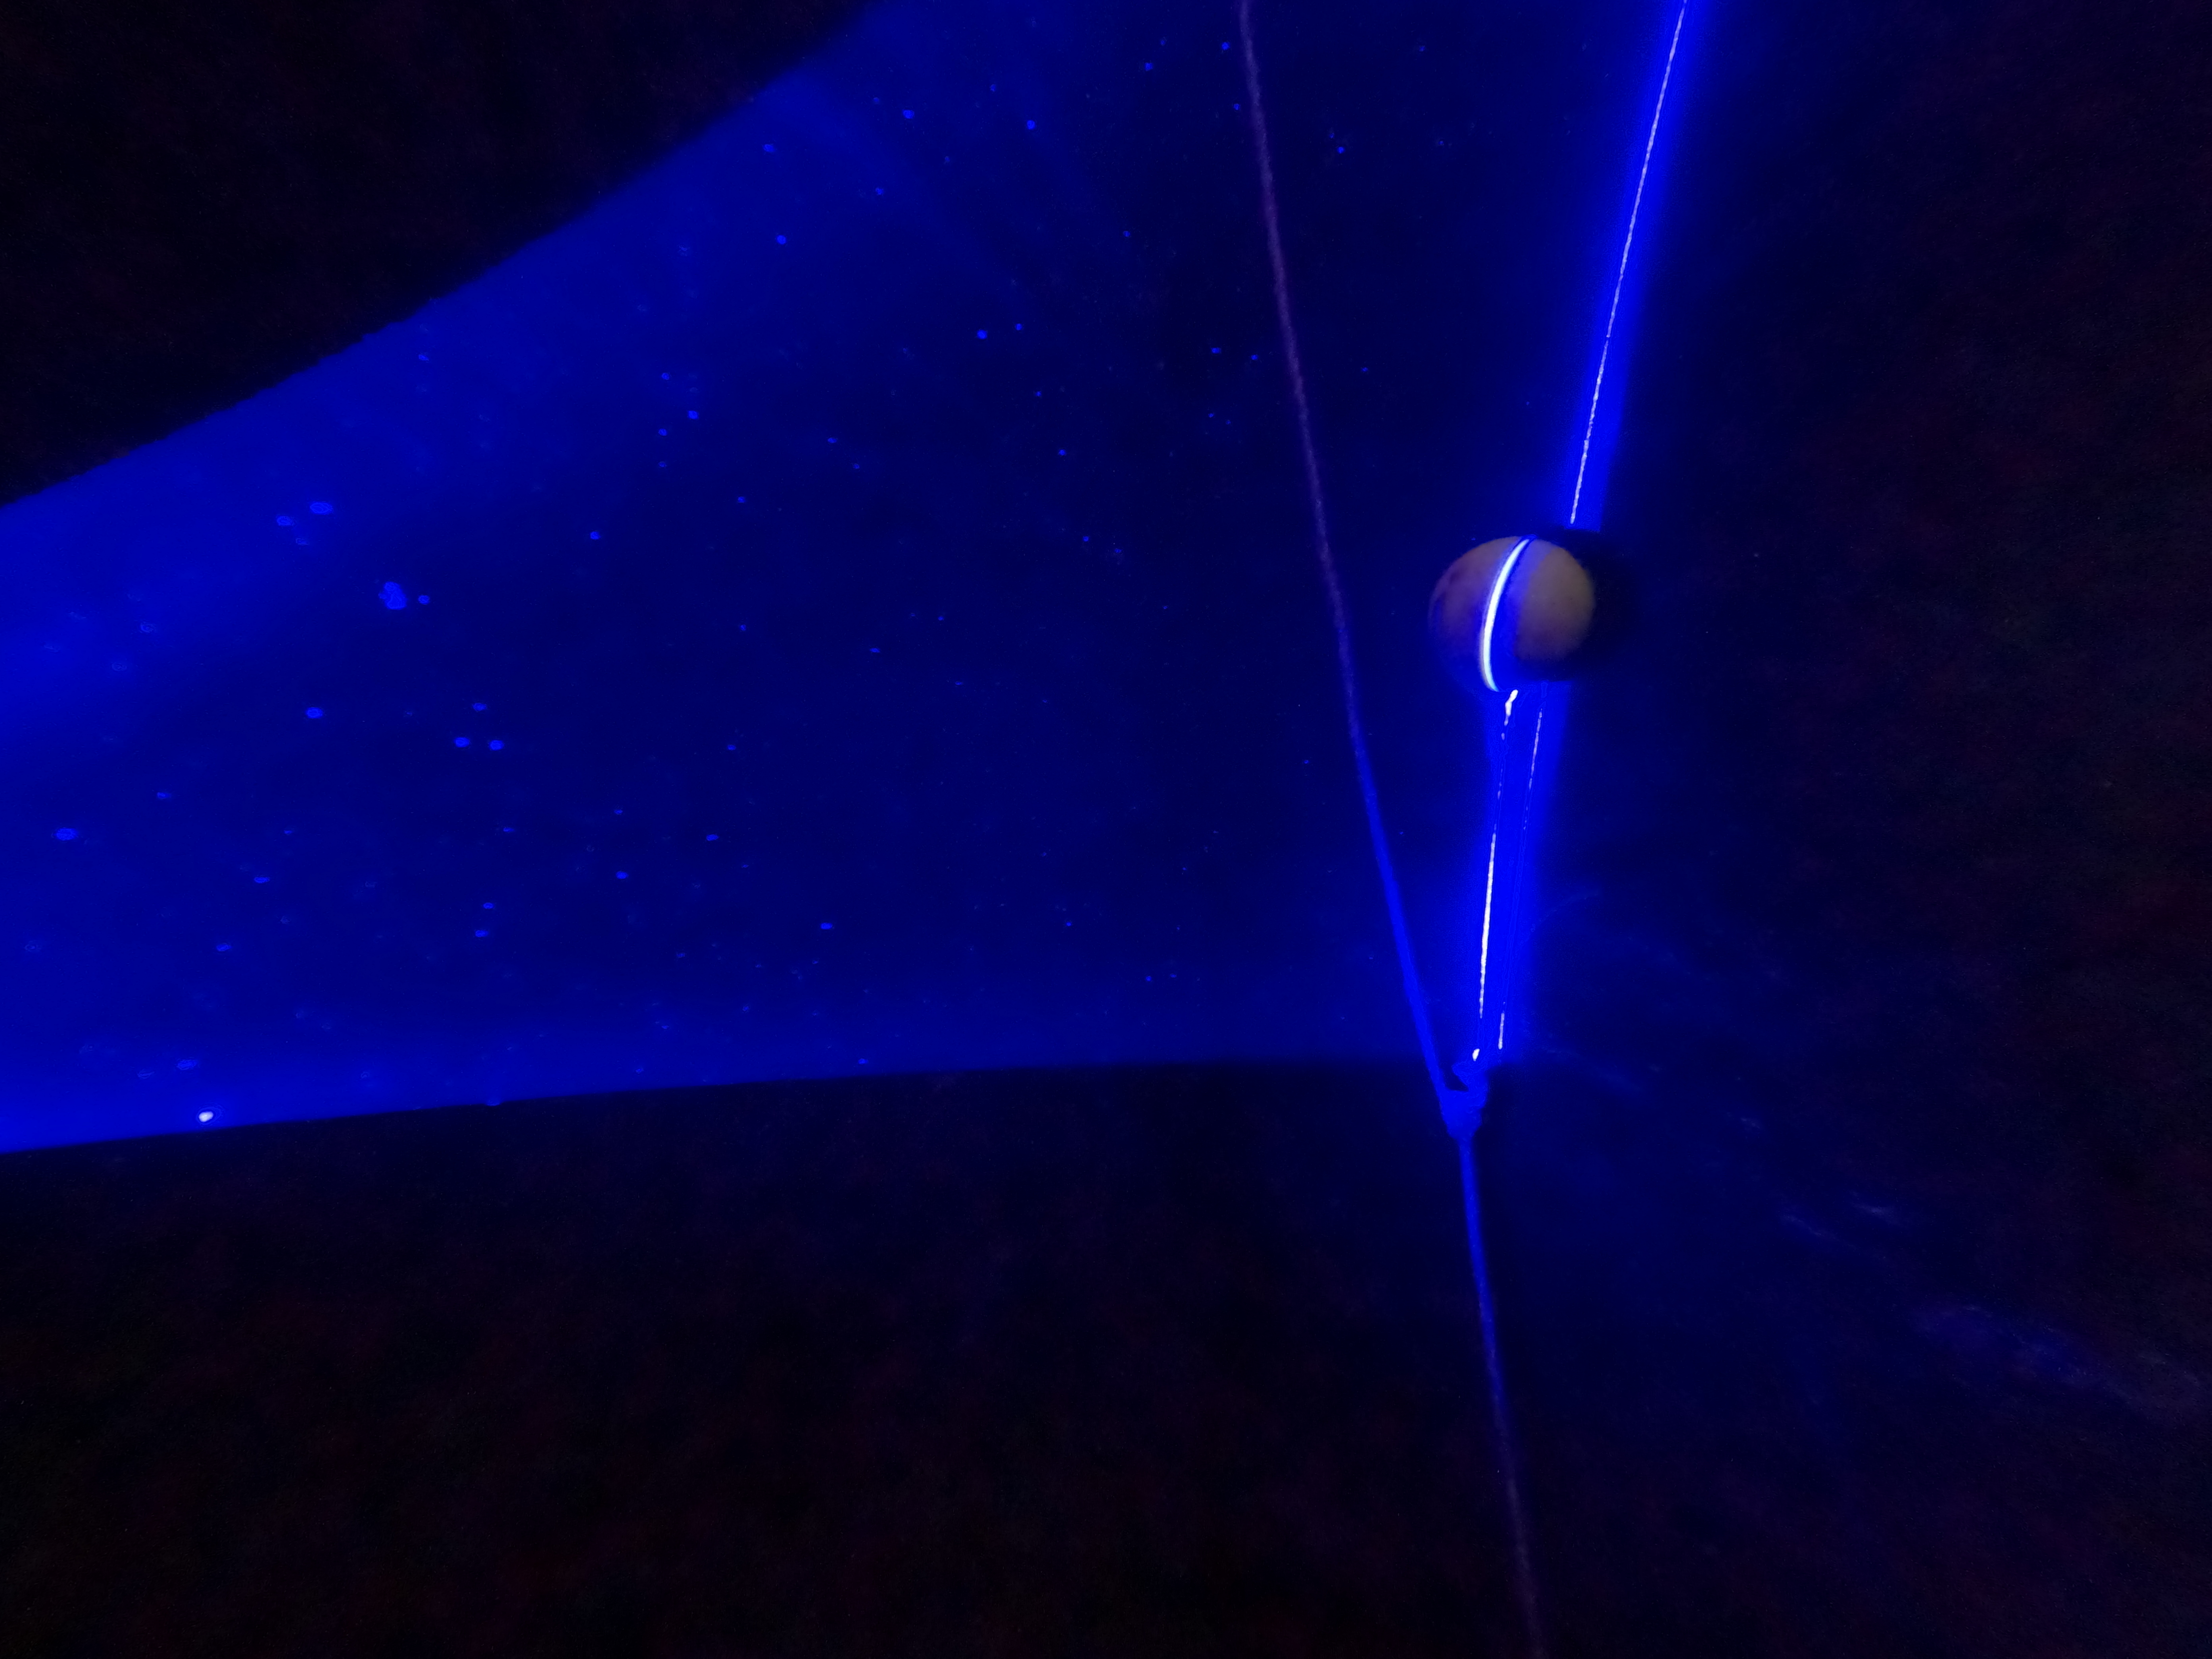

Supplement: Supplementary file 1074 [file G0031428.pdf › 10/G0031428.pdf]

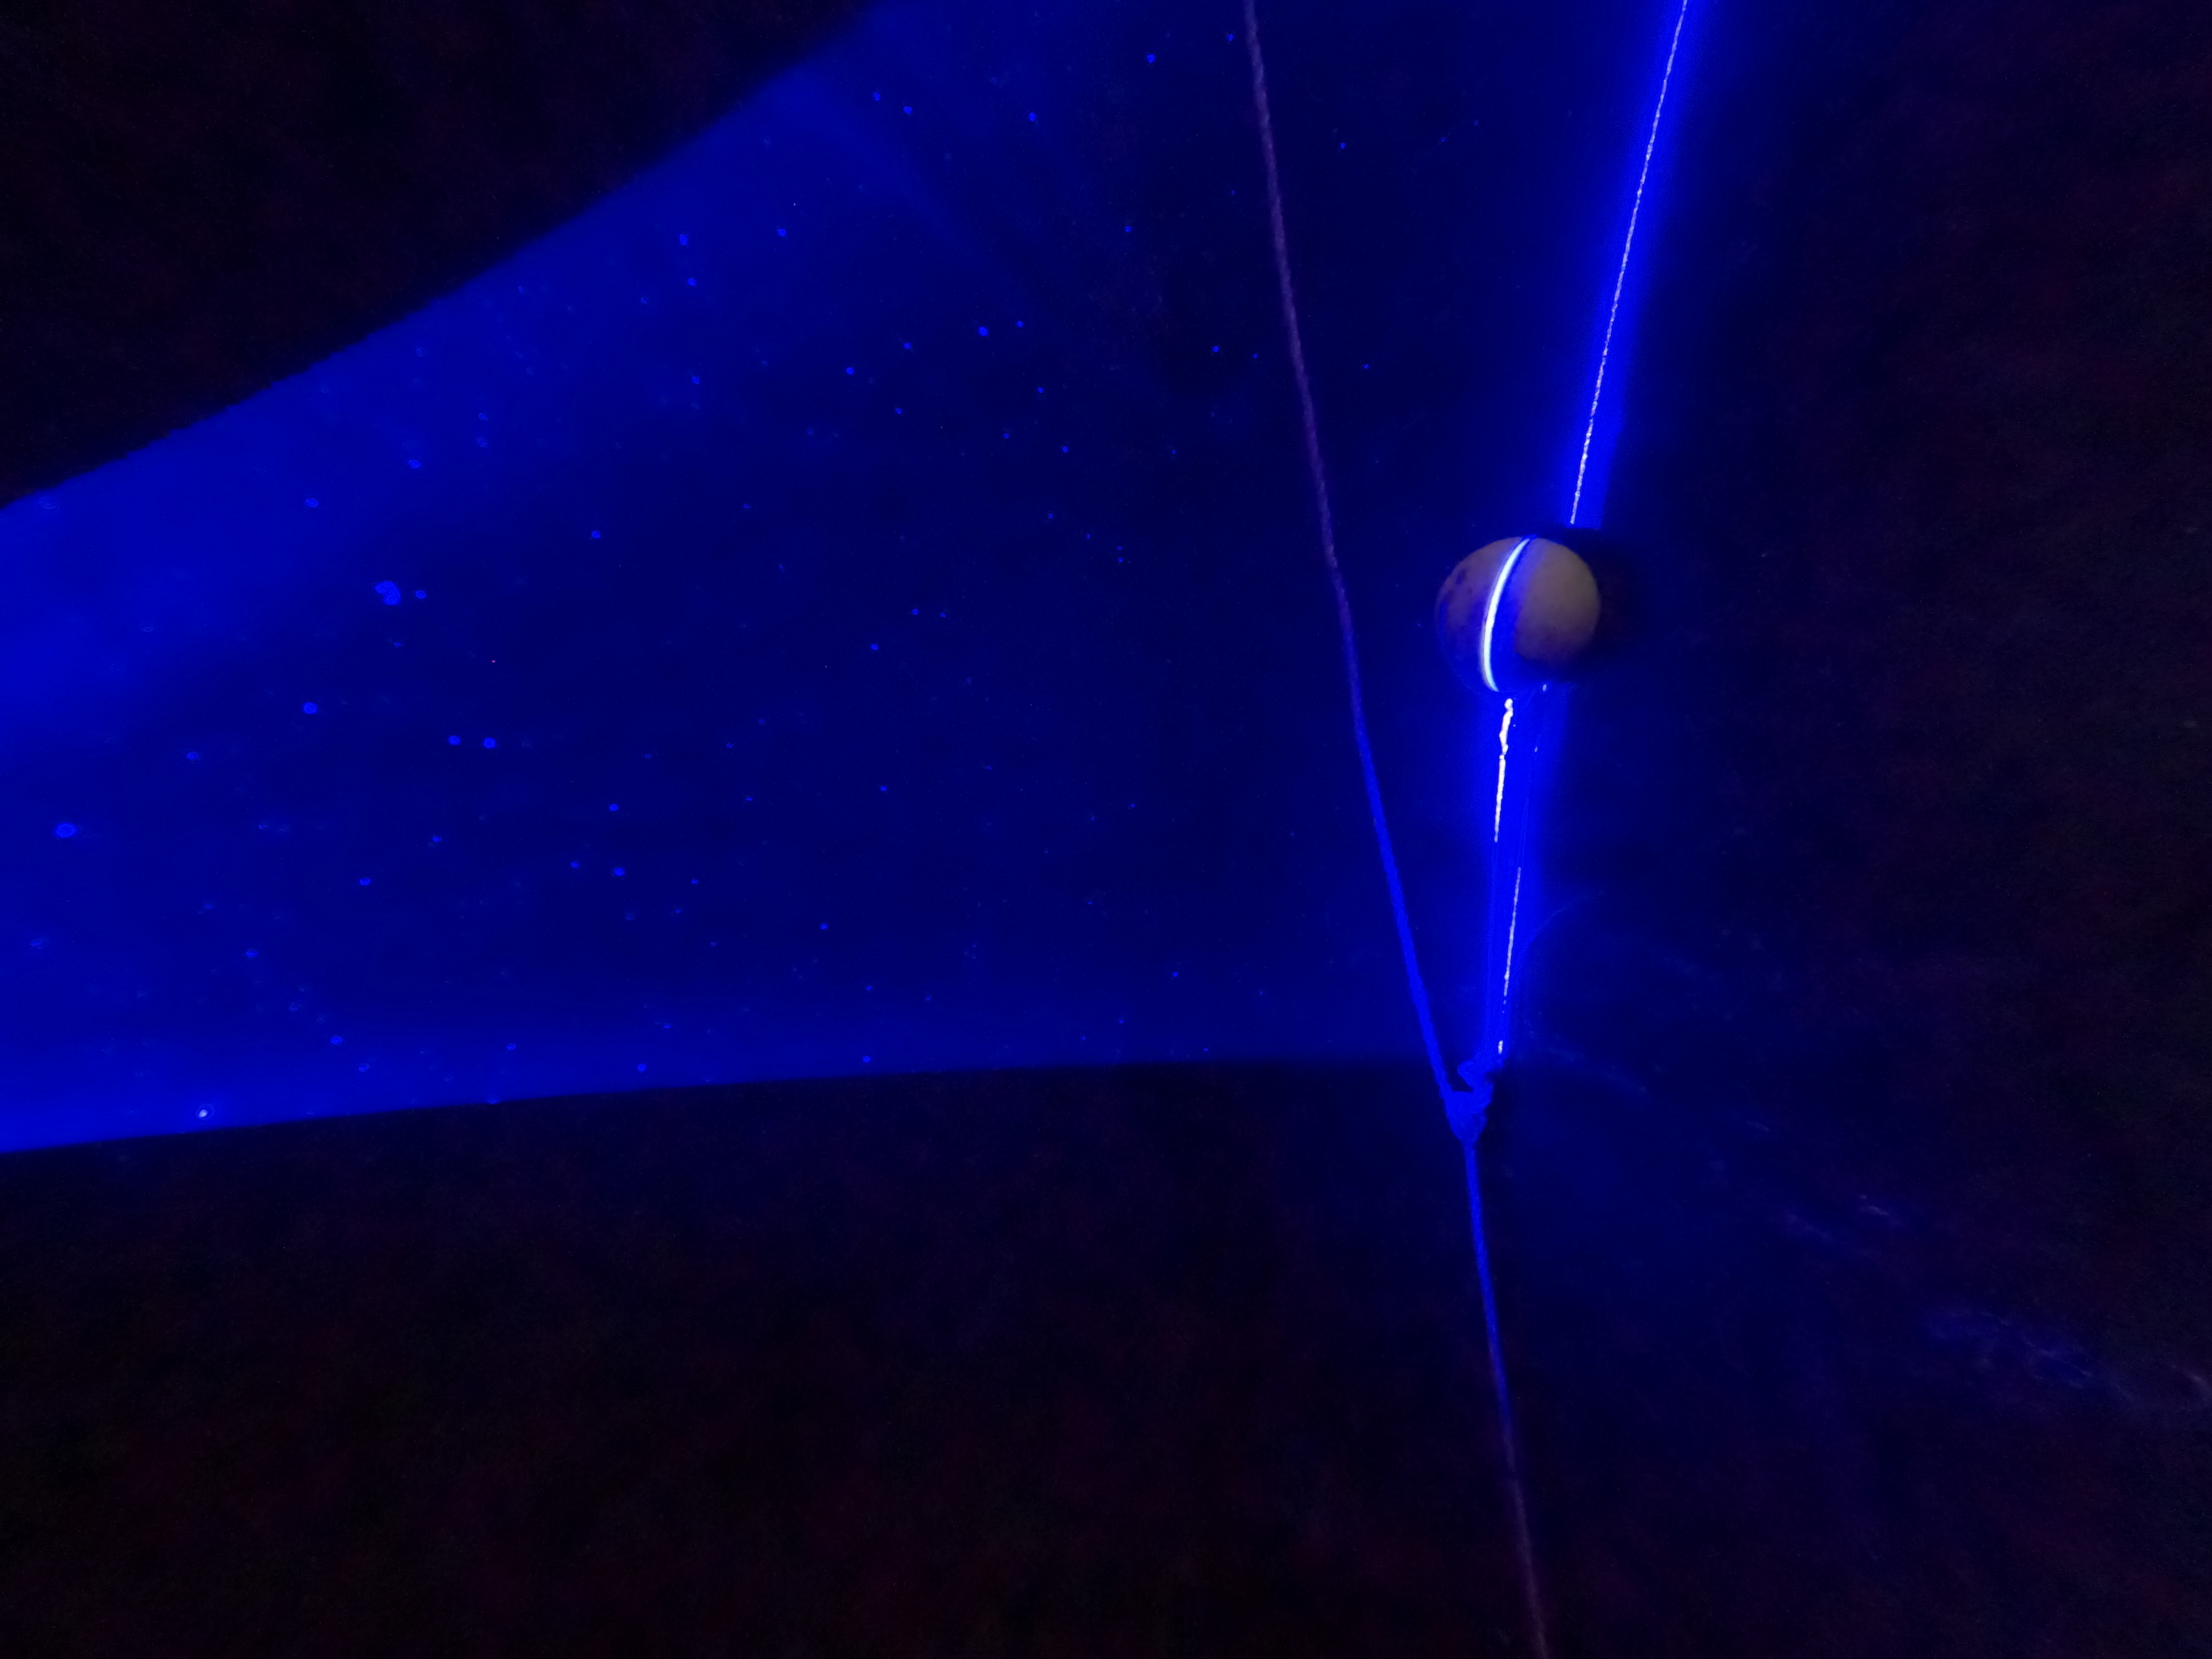

Supplement: Supplementary file 1075 [file G0031429.pdf › 10/G0031429.pdf]

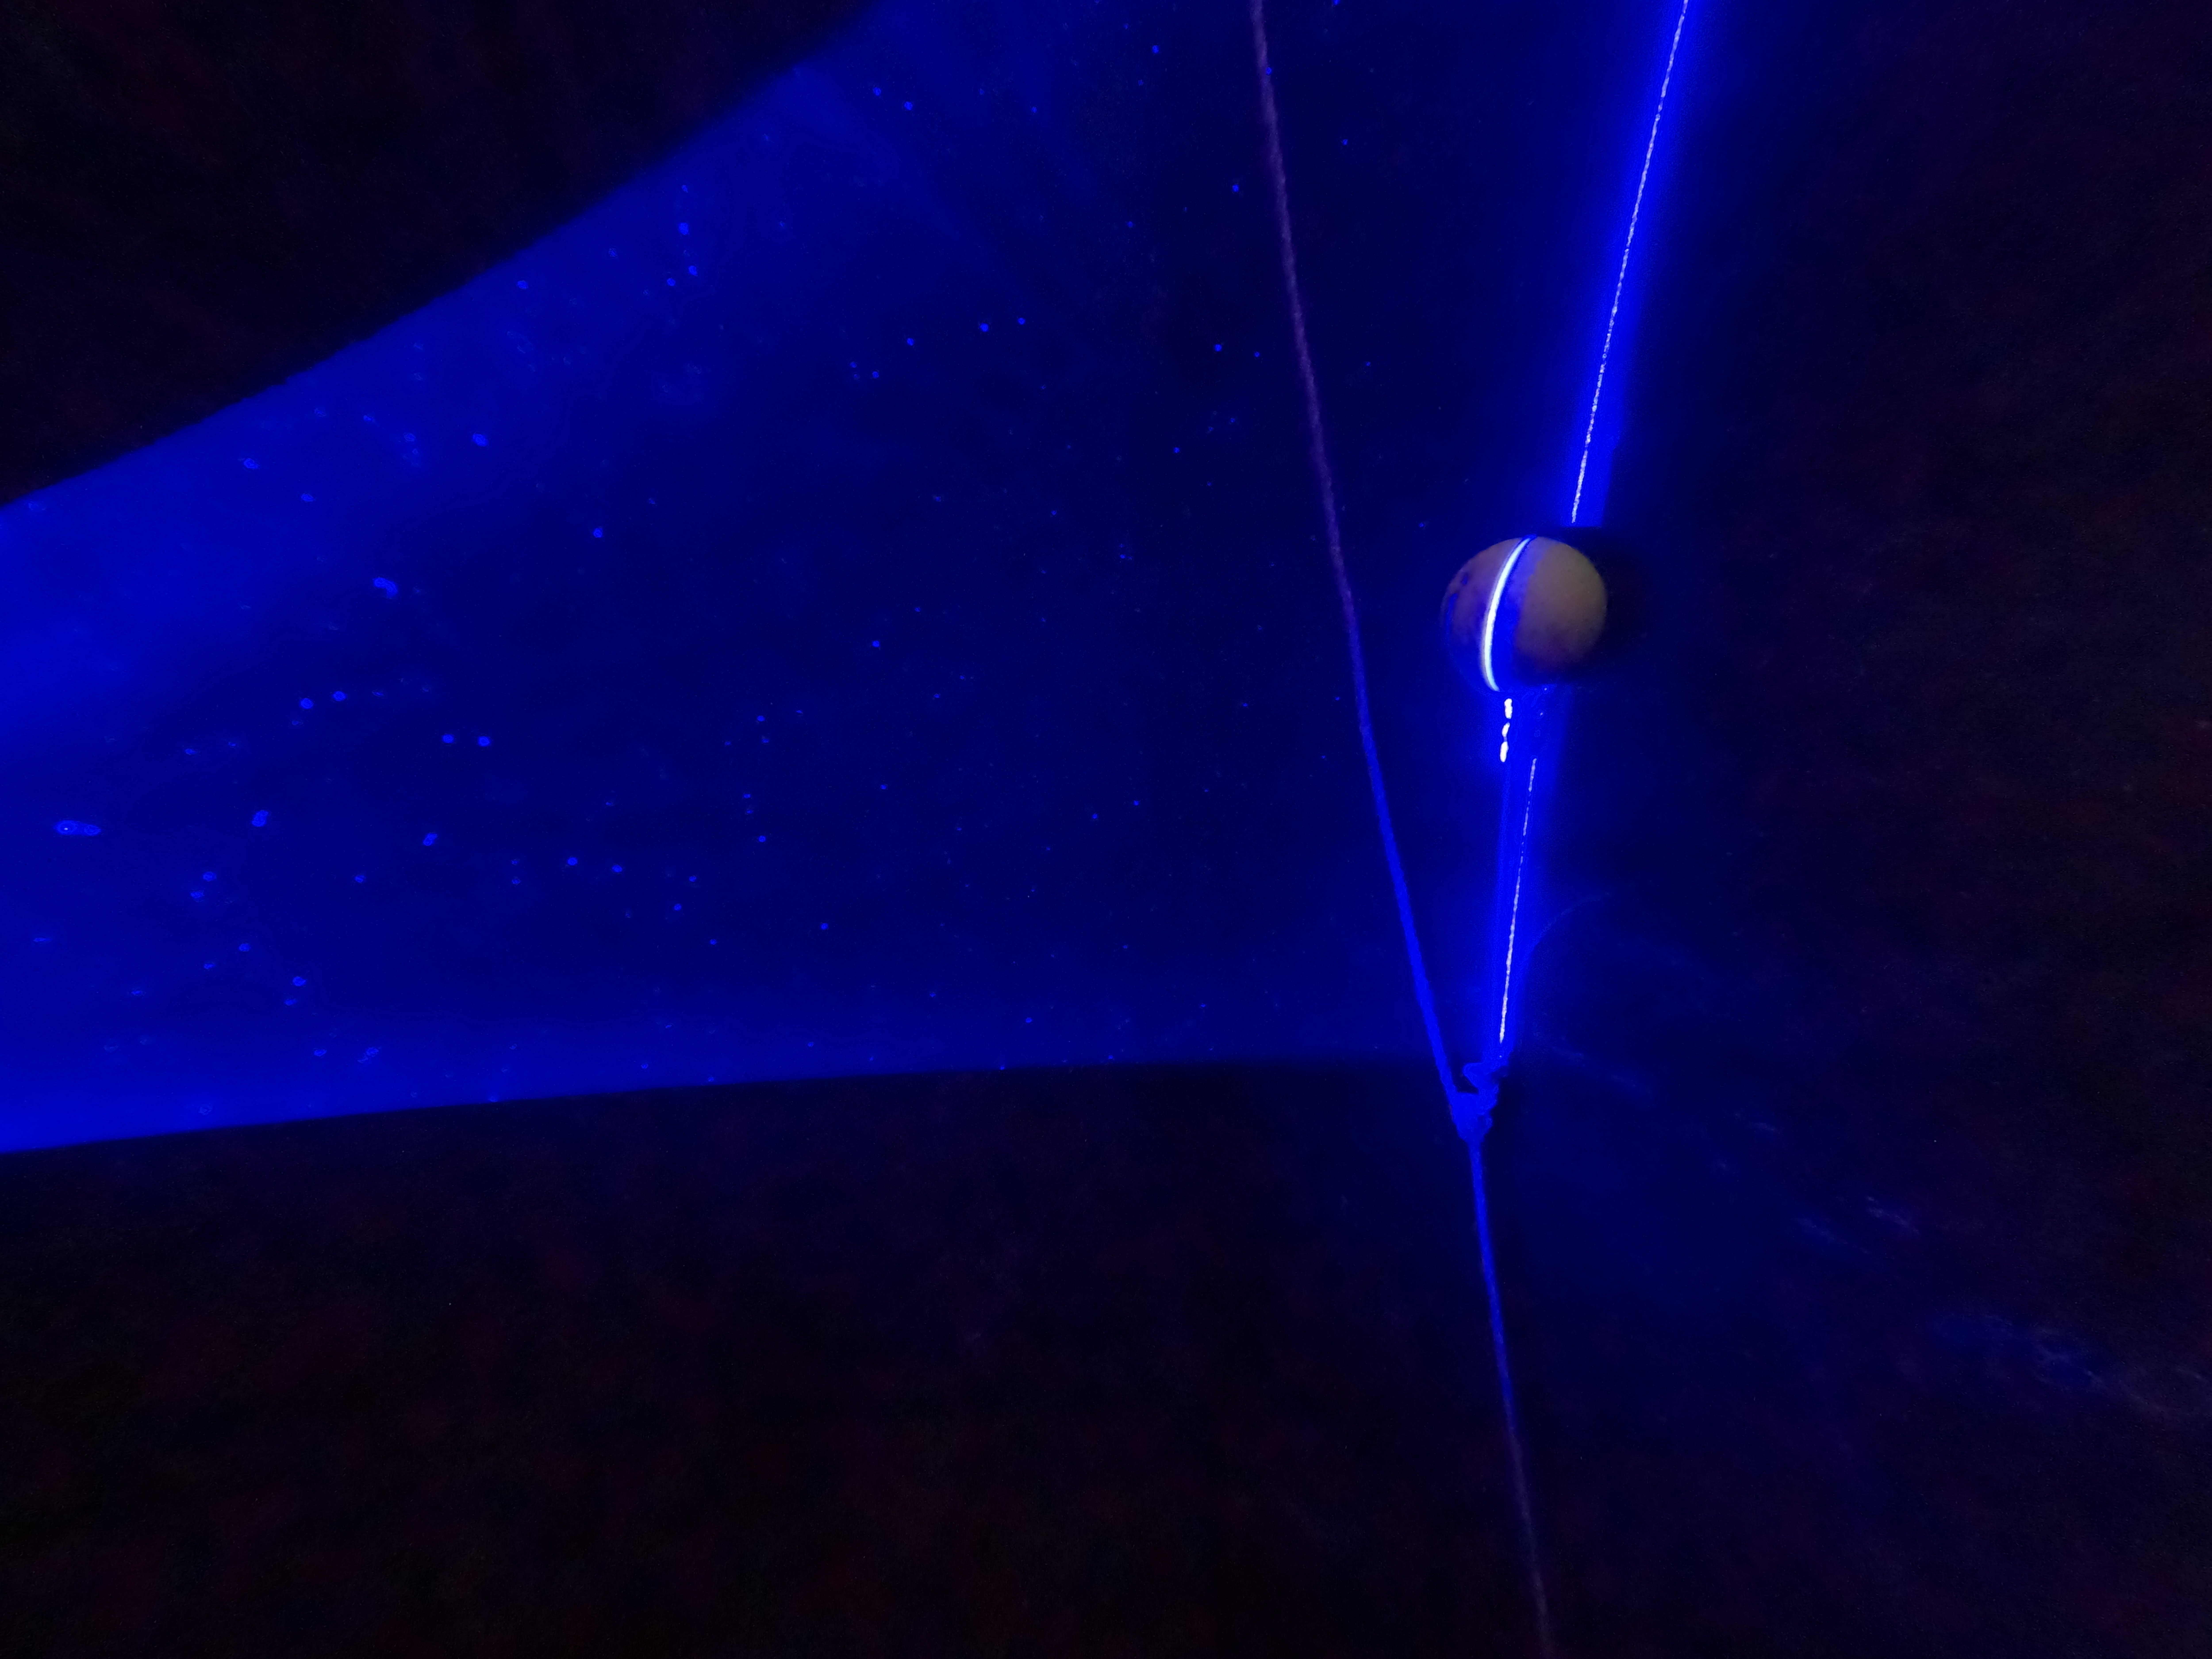

Supplement: Supplementary file 1076 [file G0031430.pdf › 10/G0031430.pdf]

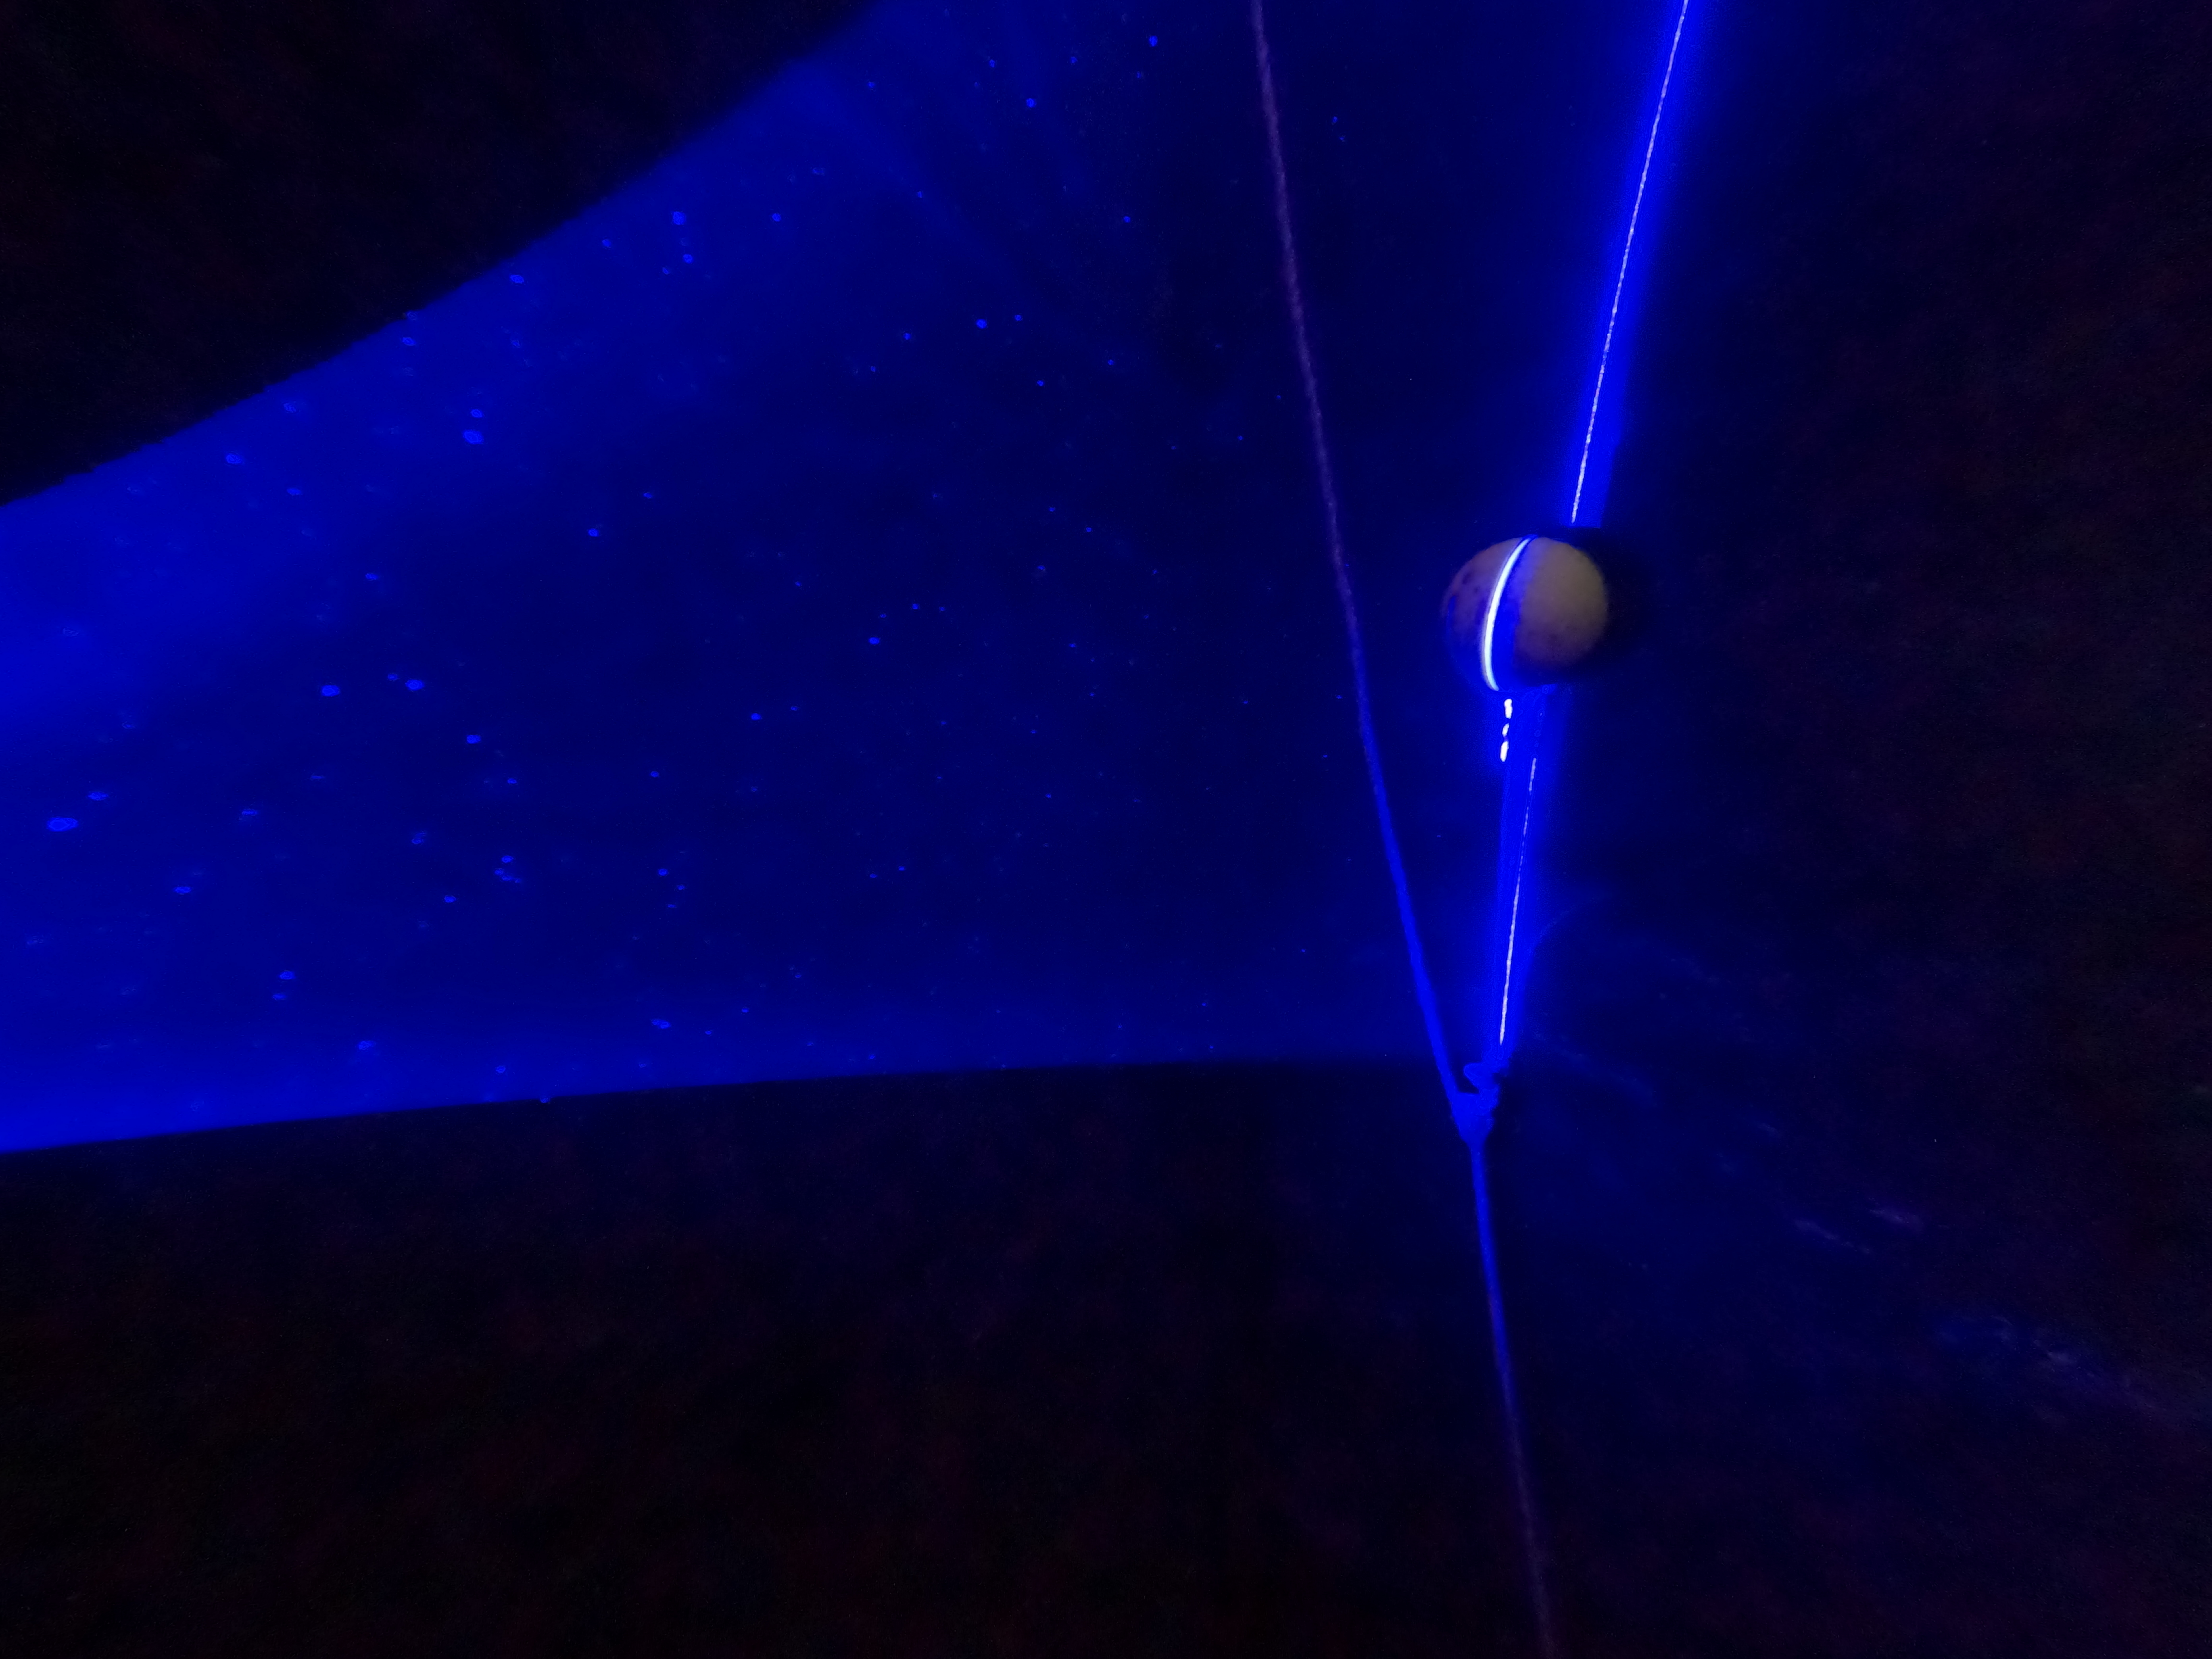

Supplement: Supplementary file 1077 [file G0031431.pdf › 10/G0031431.pdf]

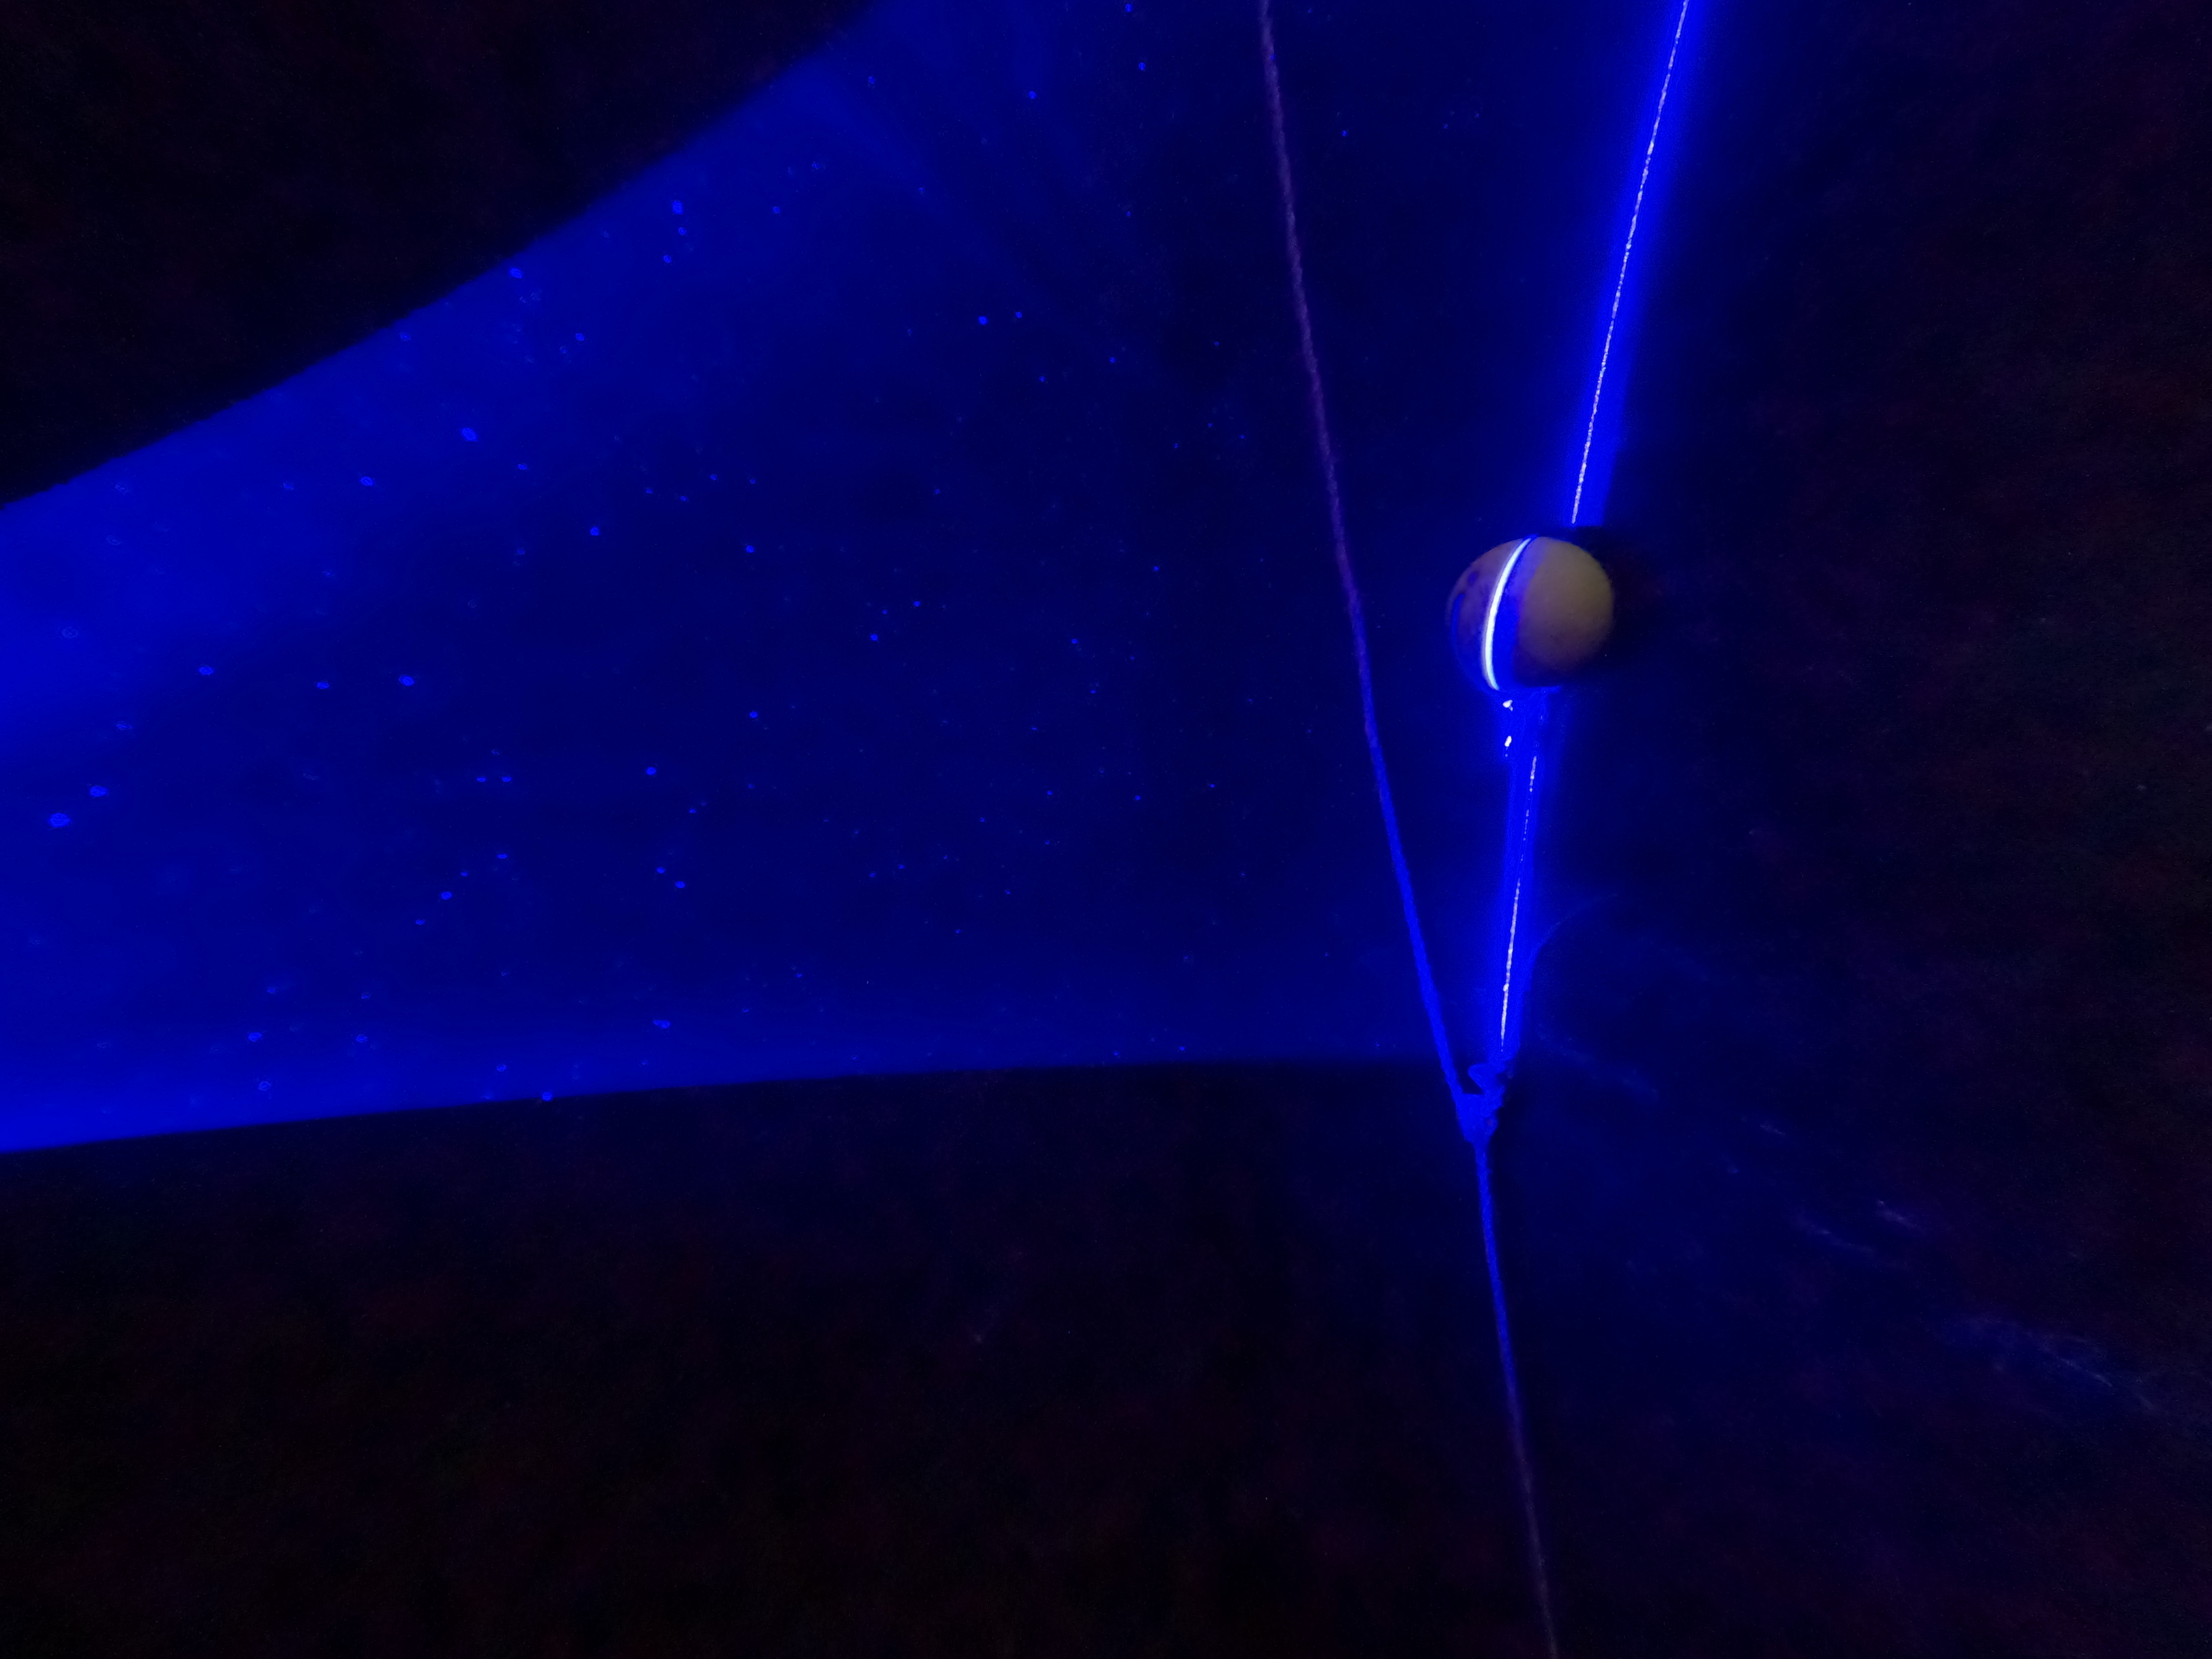

Supplement: Supplementary file 1078 [file G0031432.pdf › 10/G0031432.pdf]

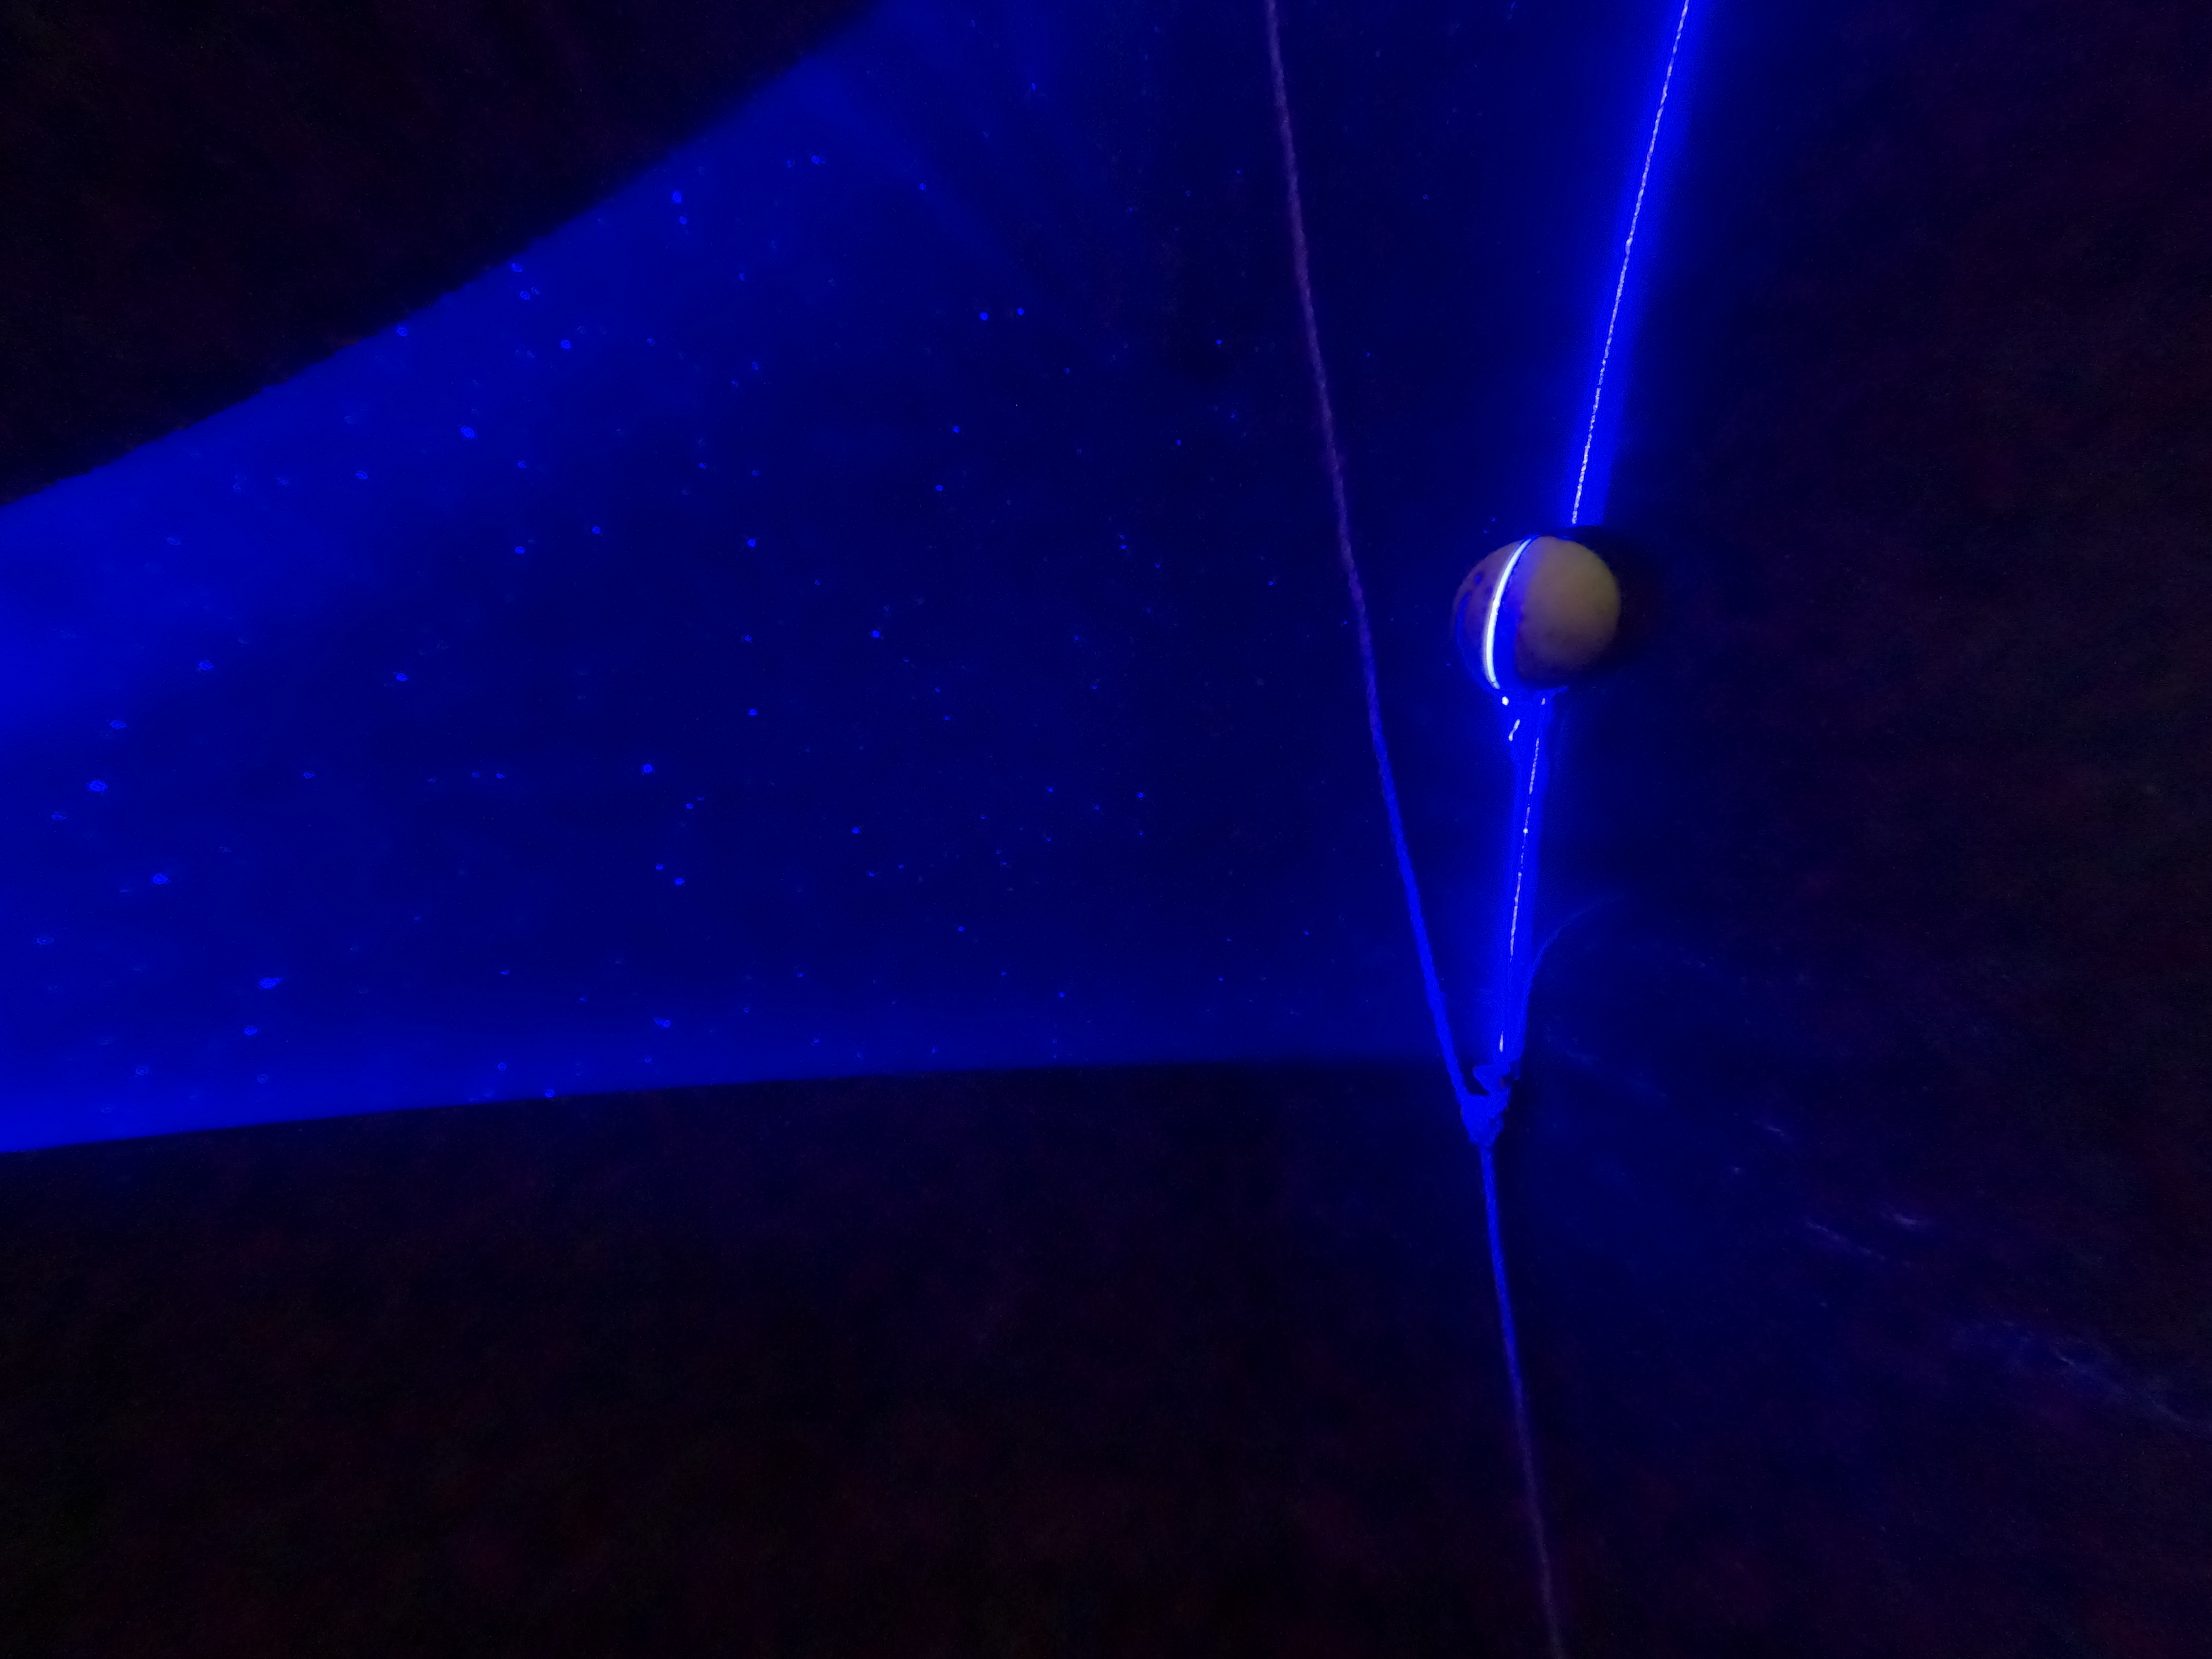

Supplement: Supplementary file 1079 [file G0031433.pdf › 10/G0031433.pdf]

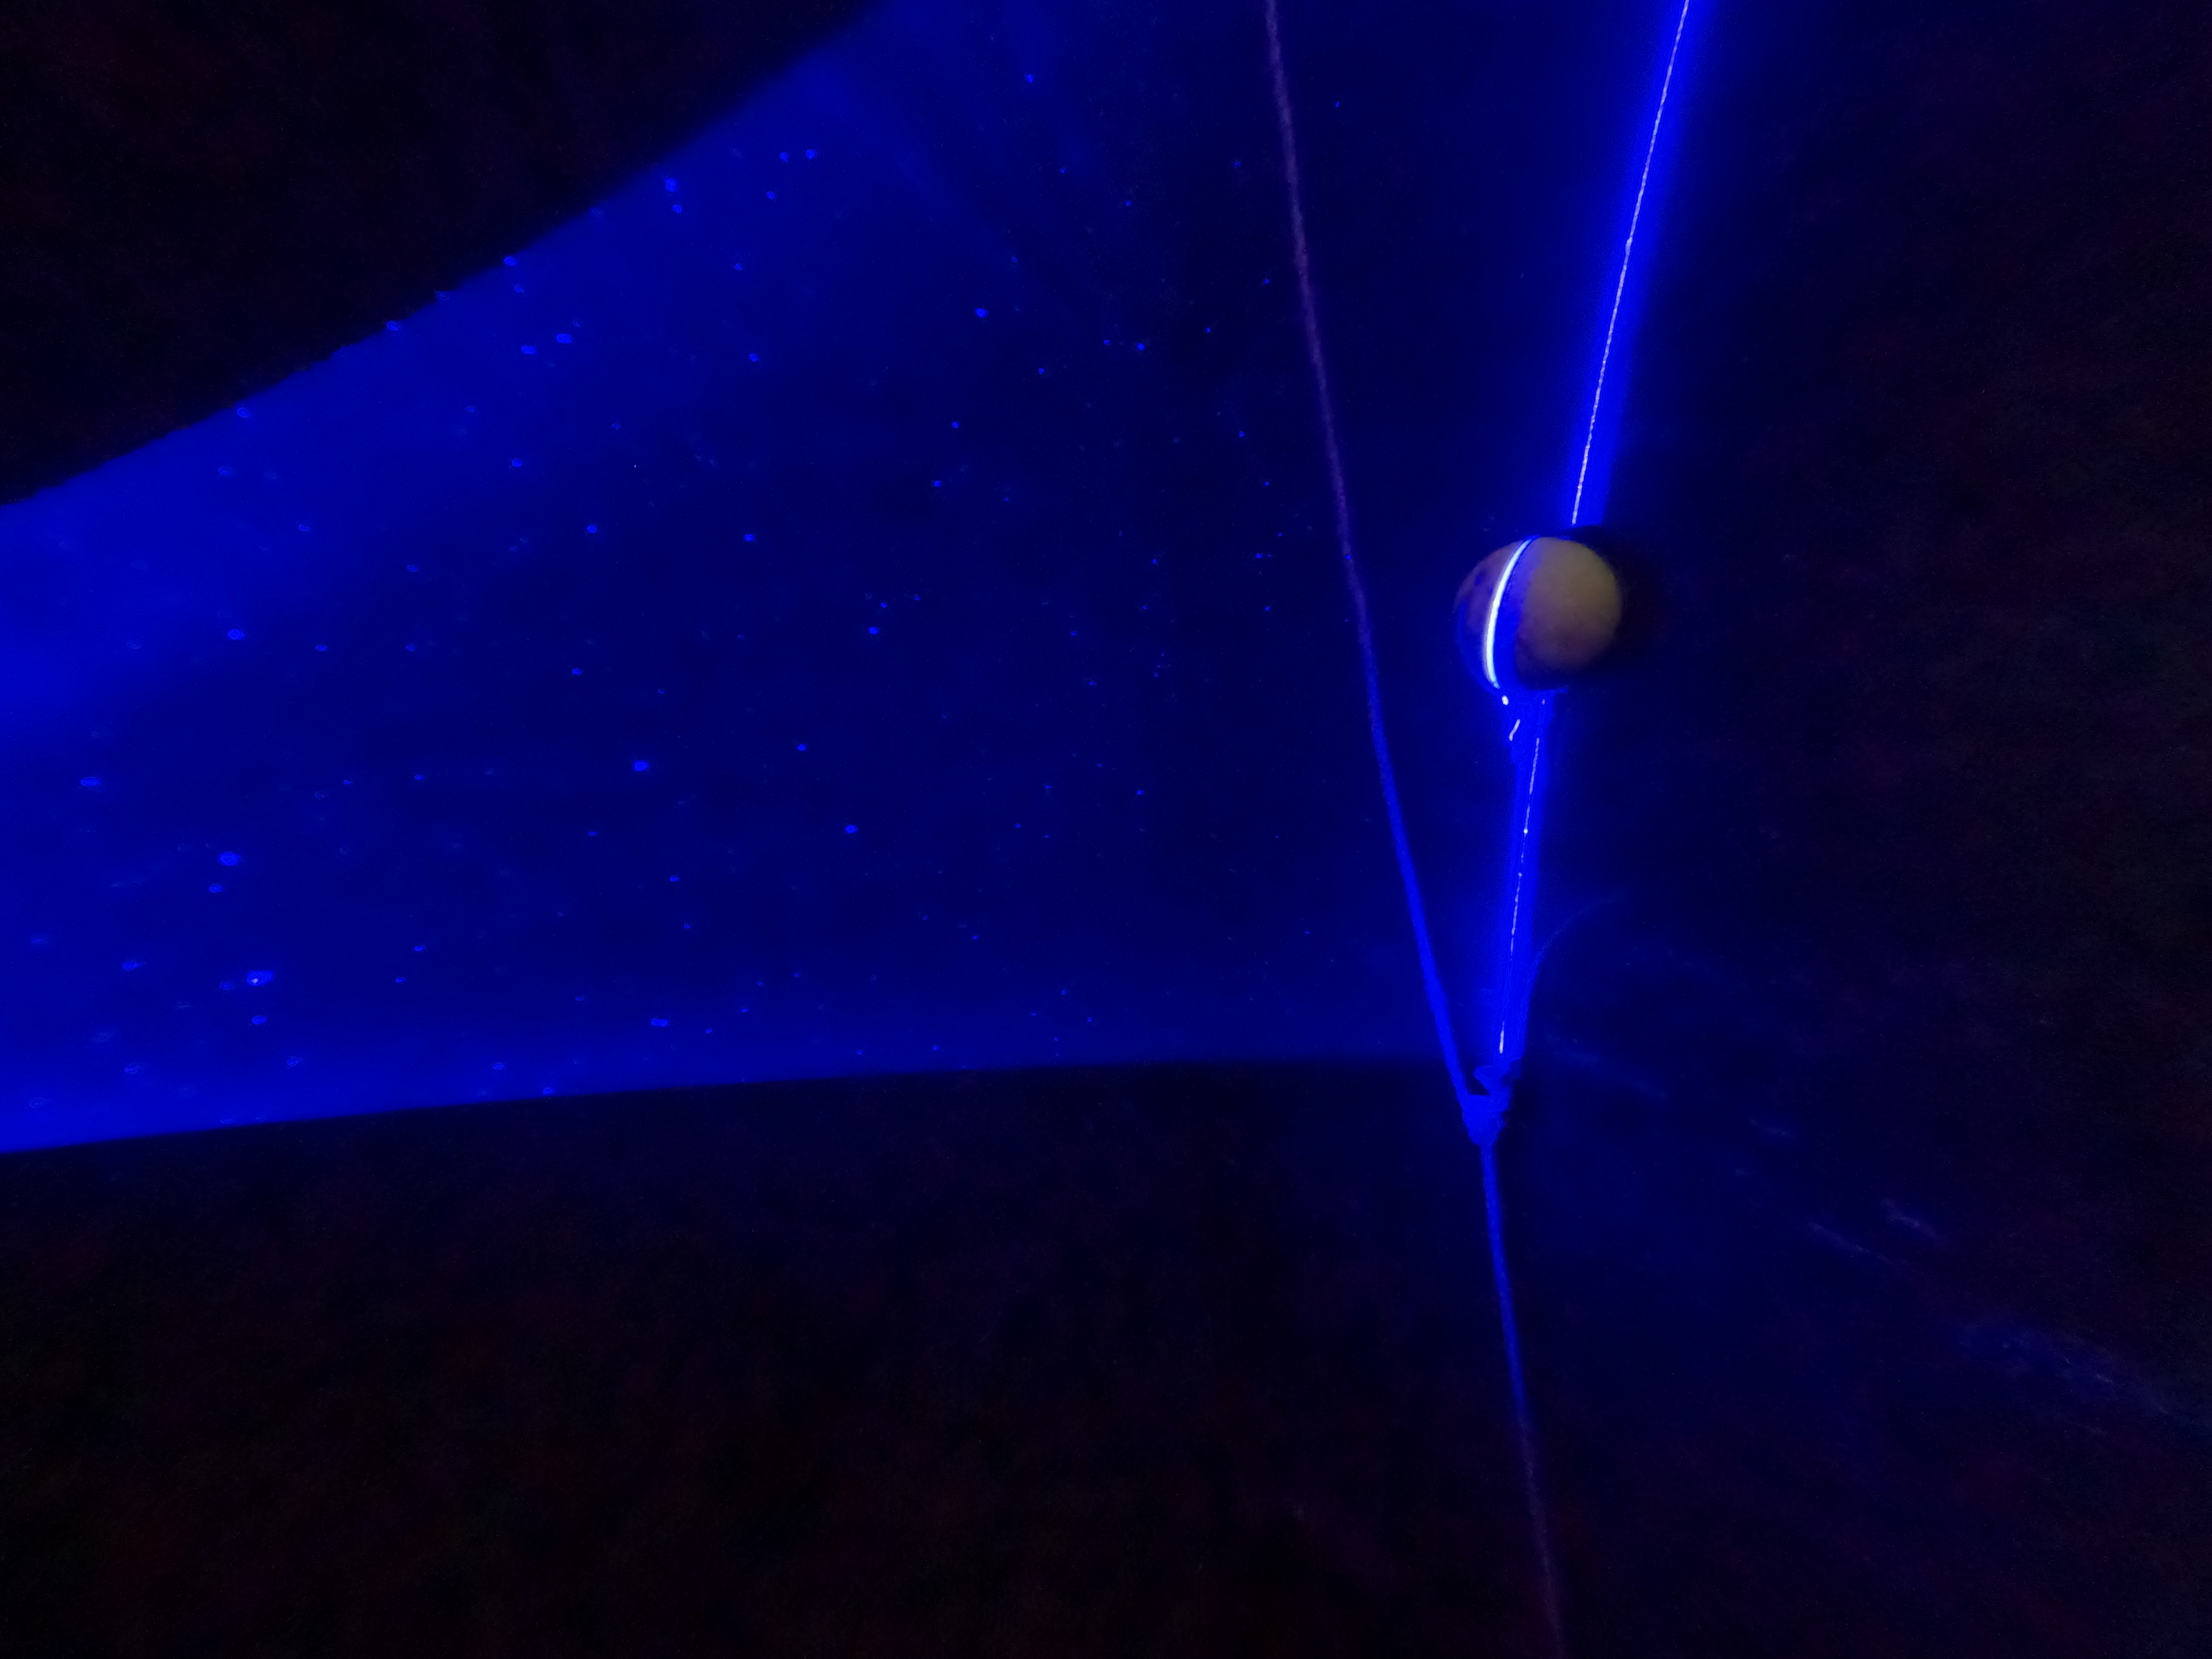

Supplement: Supplementary file 1080 [file G0031434.pdf › 10/G0031434.pdf]

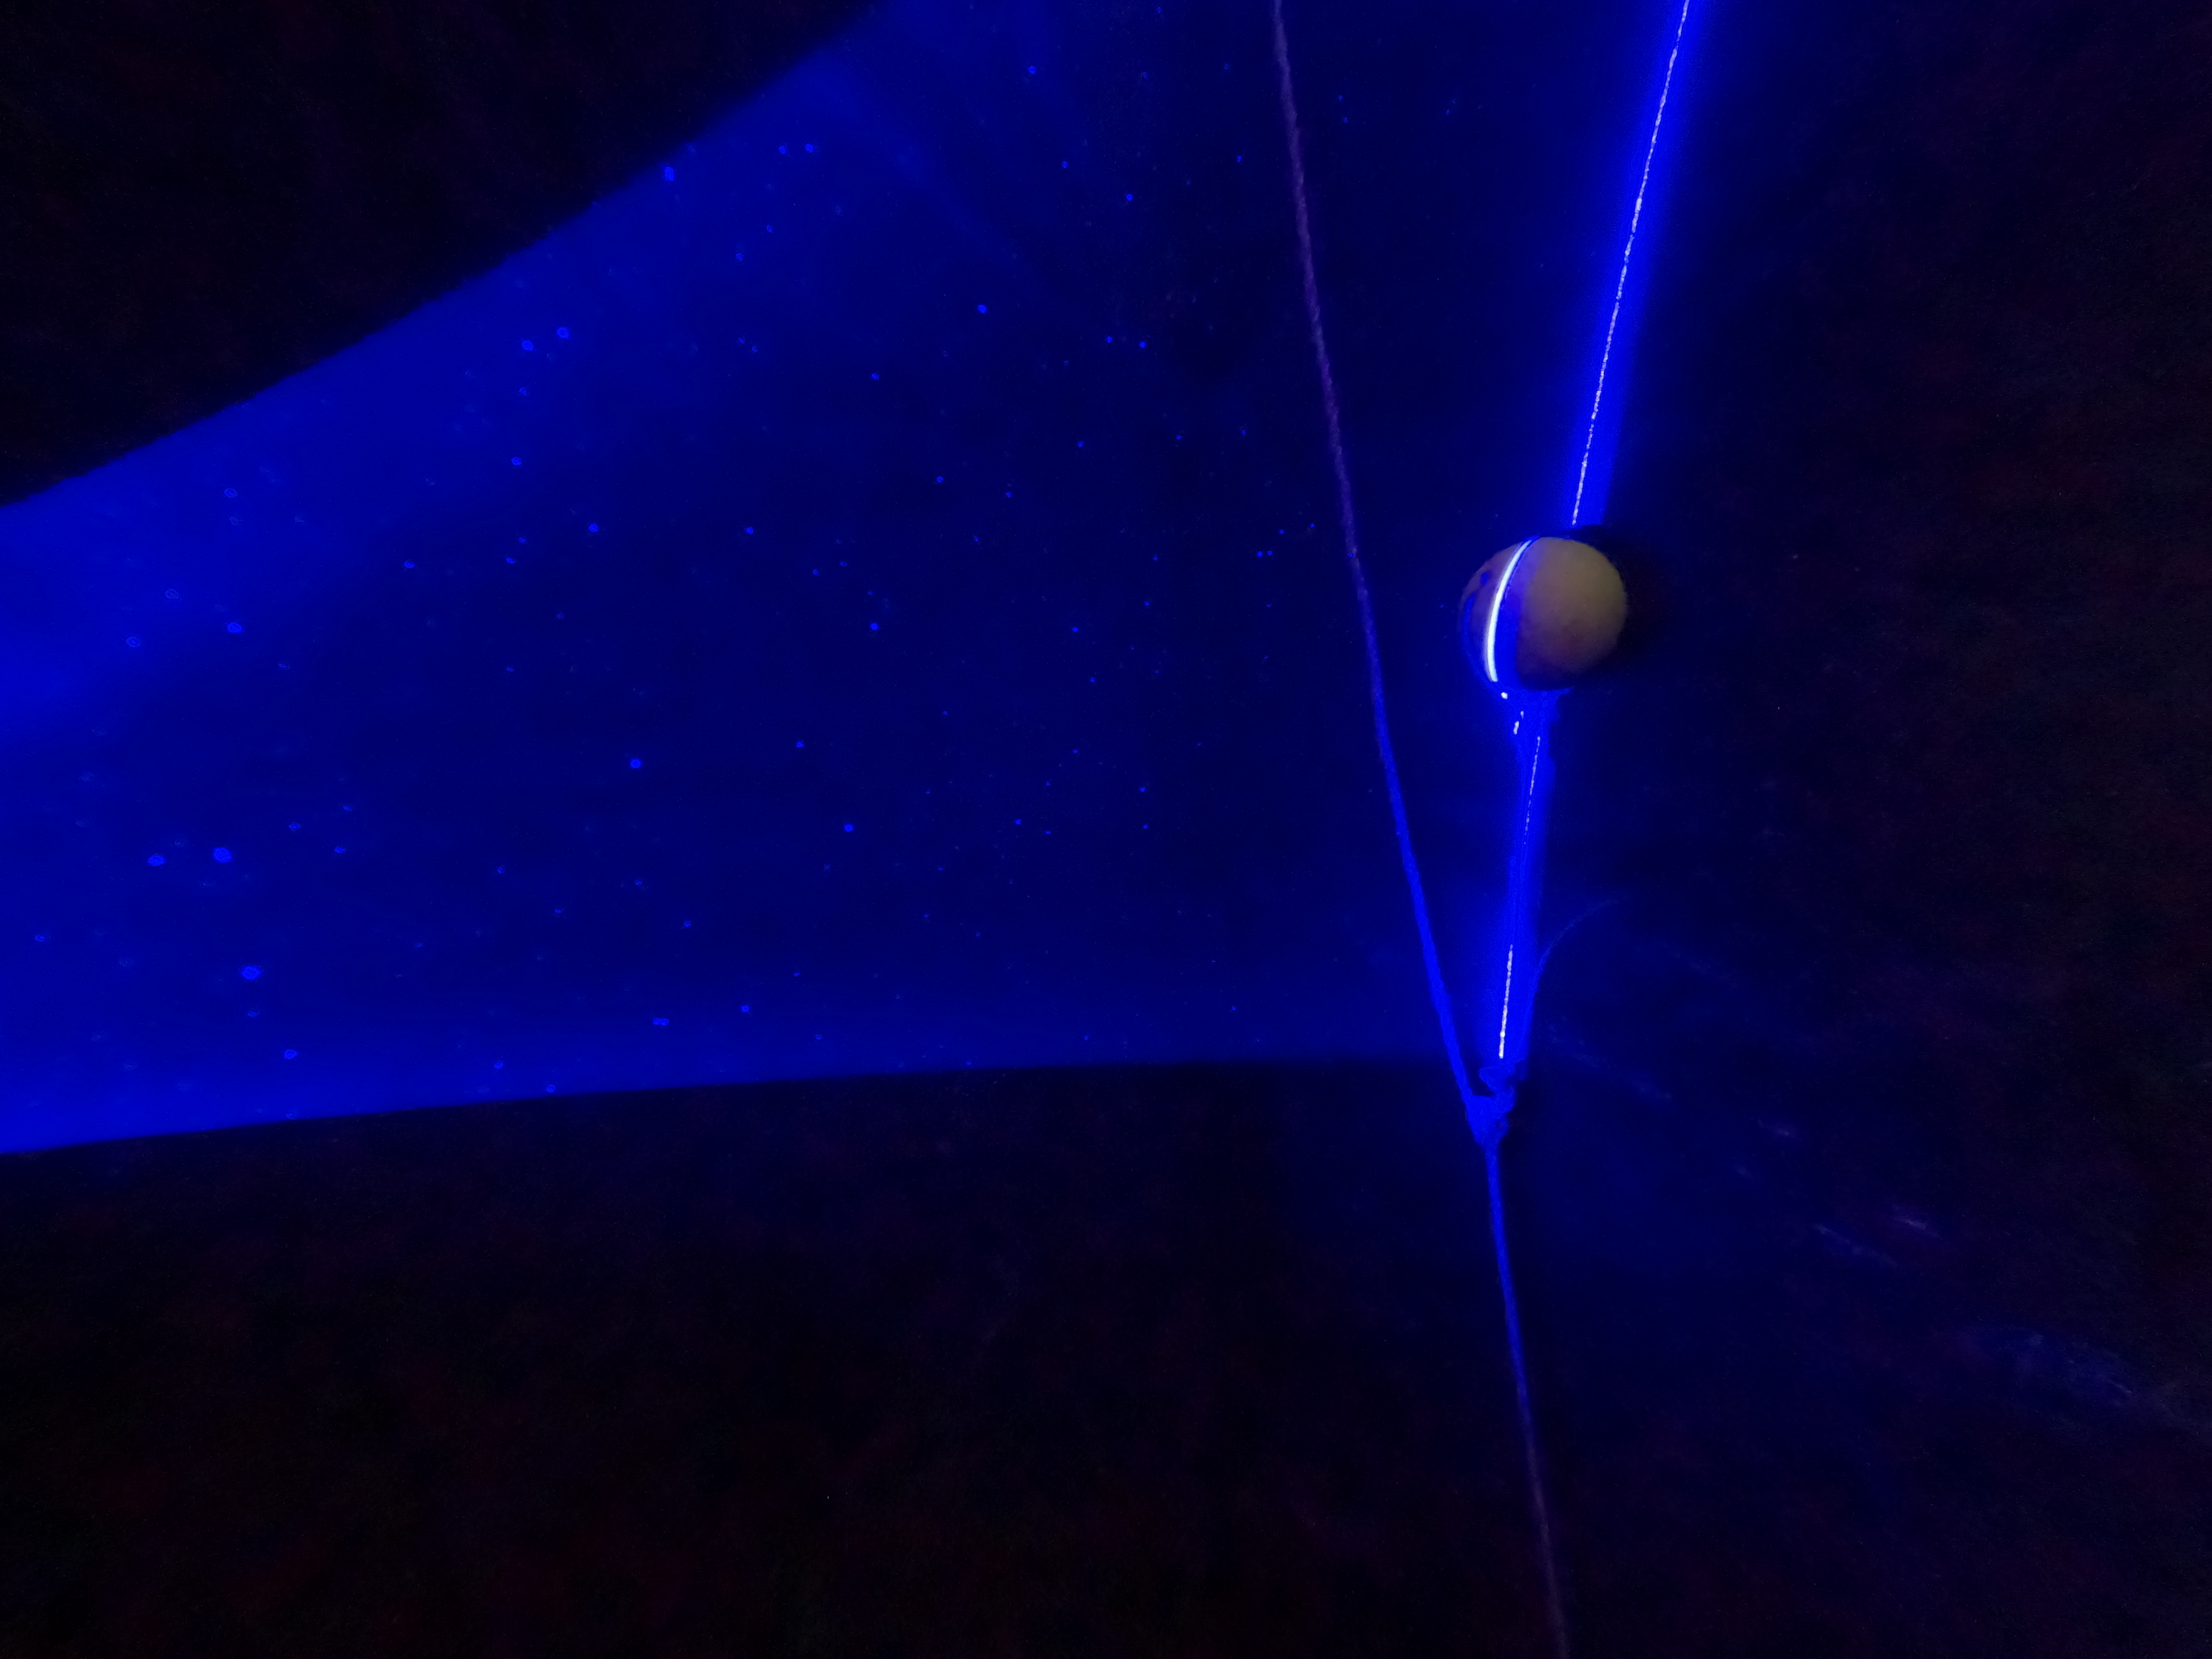

Supplement: Supplementary file 1081 [file G0031435.pdf › 10/G0031435.pdf]

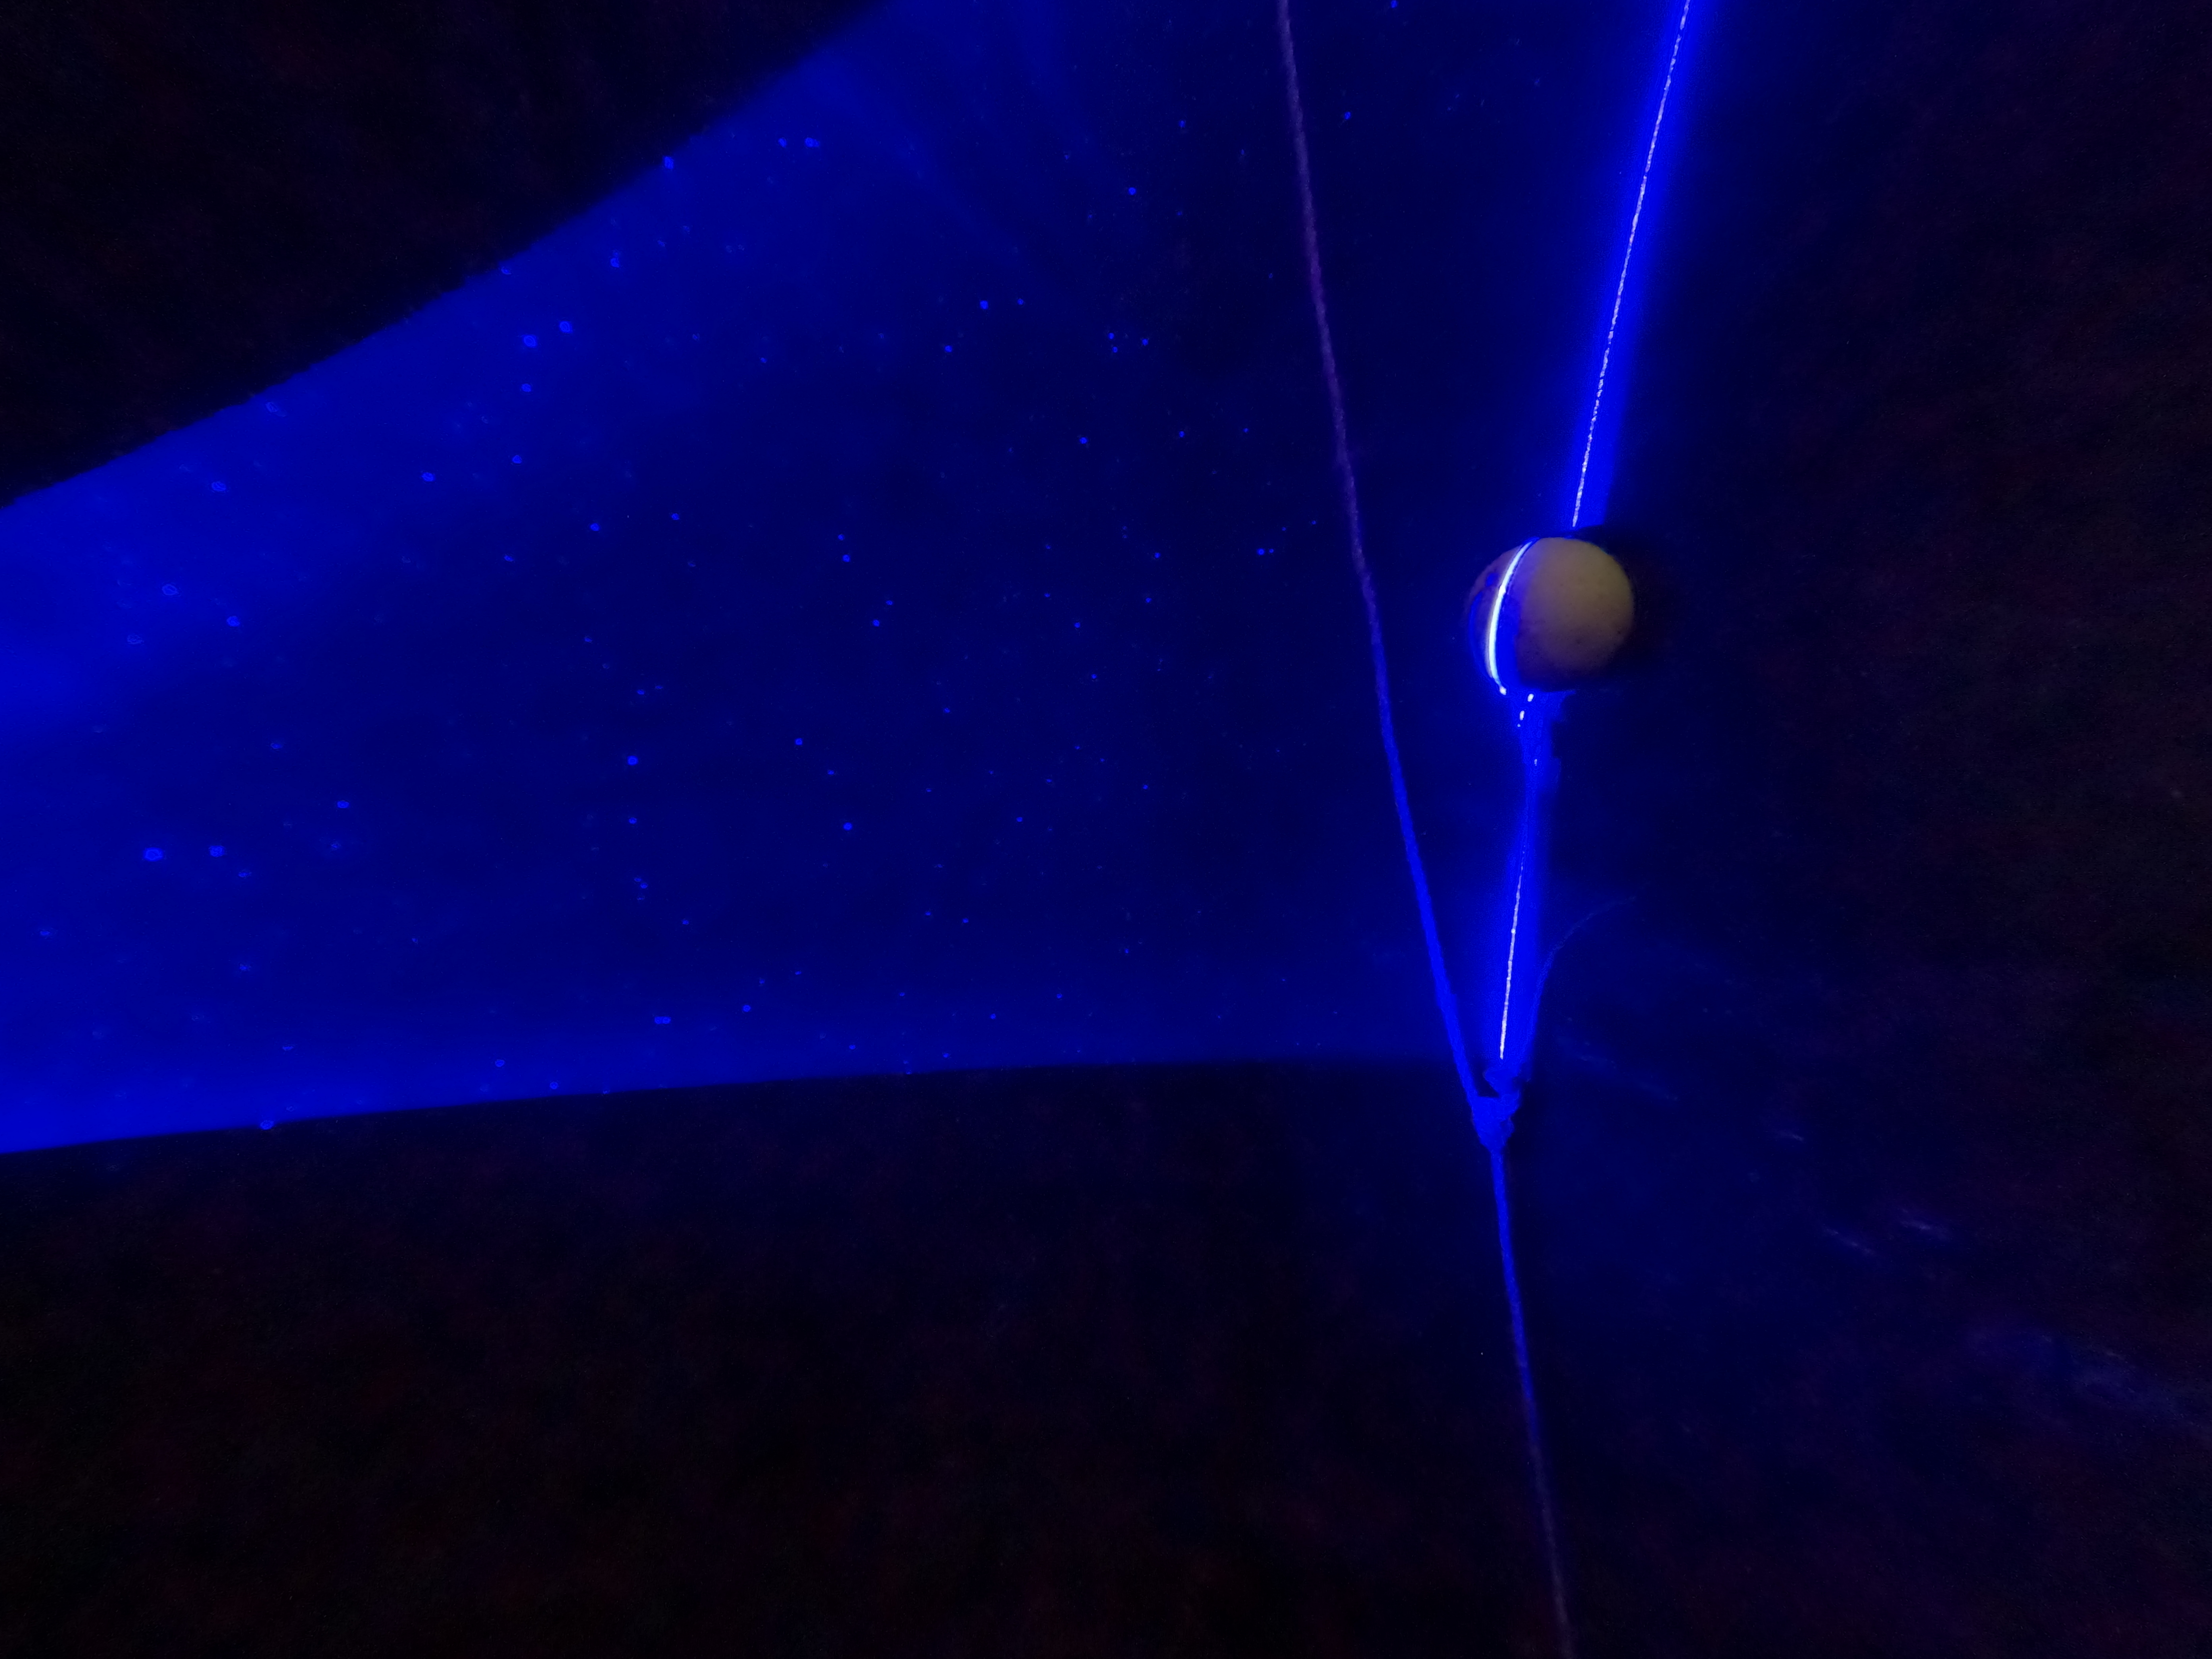

Supplement: Supplementary file 1082 [file G0031436.pdf › 10/G0031436.pdf]

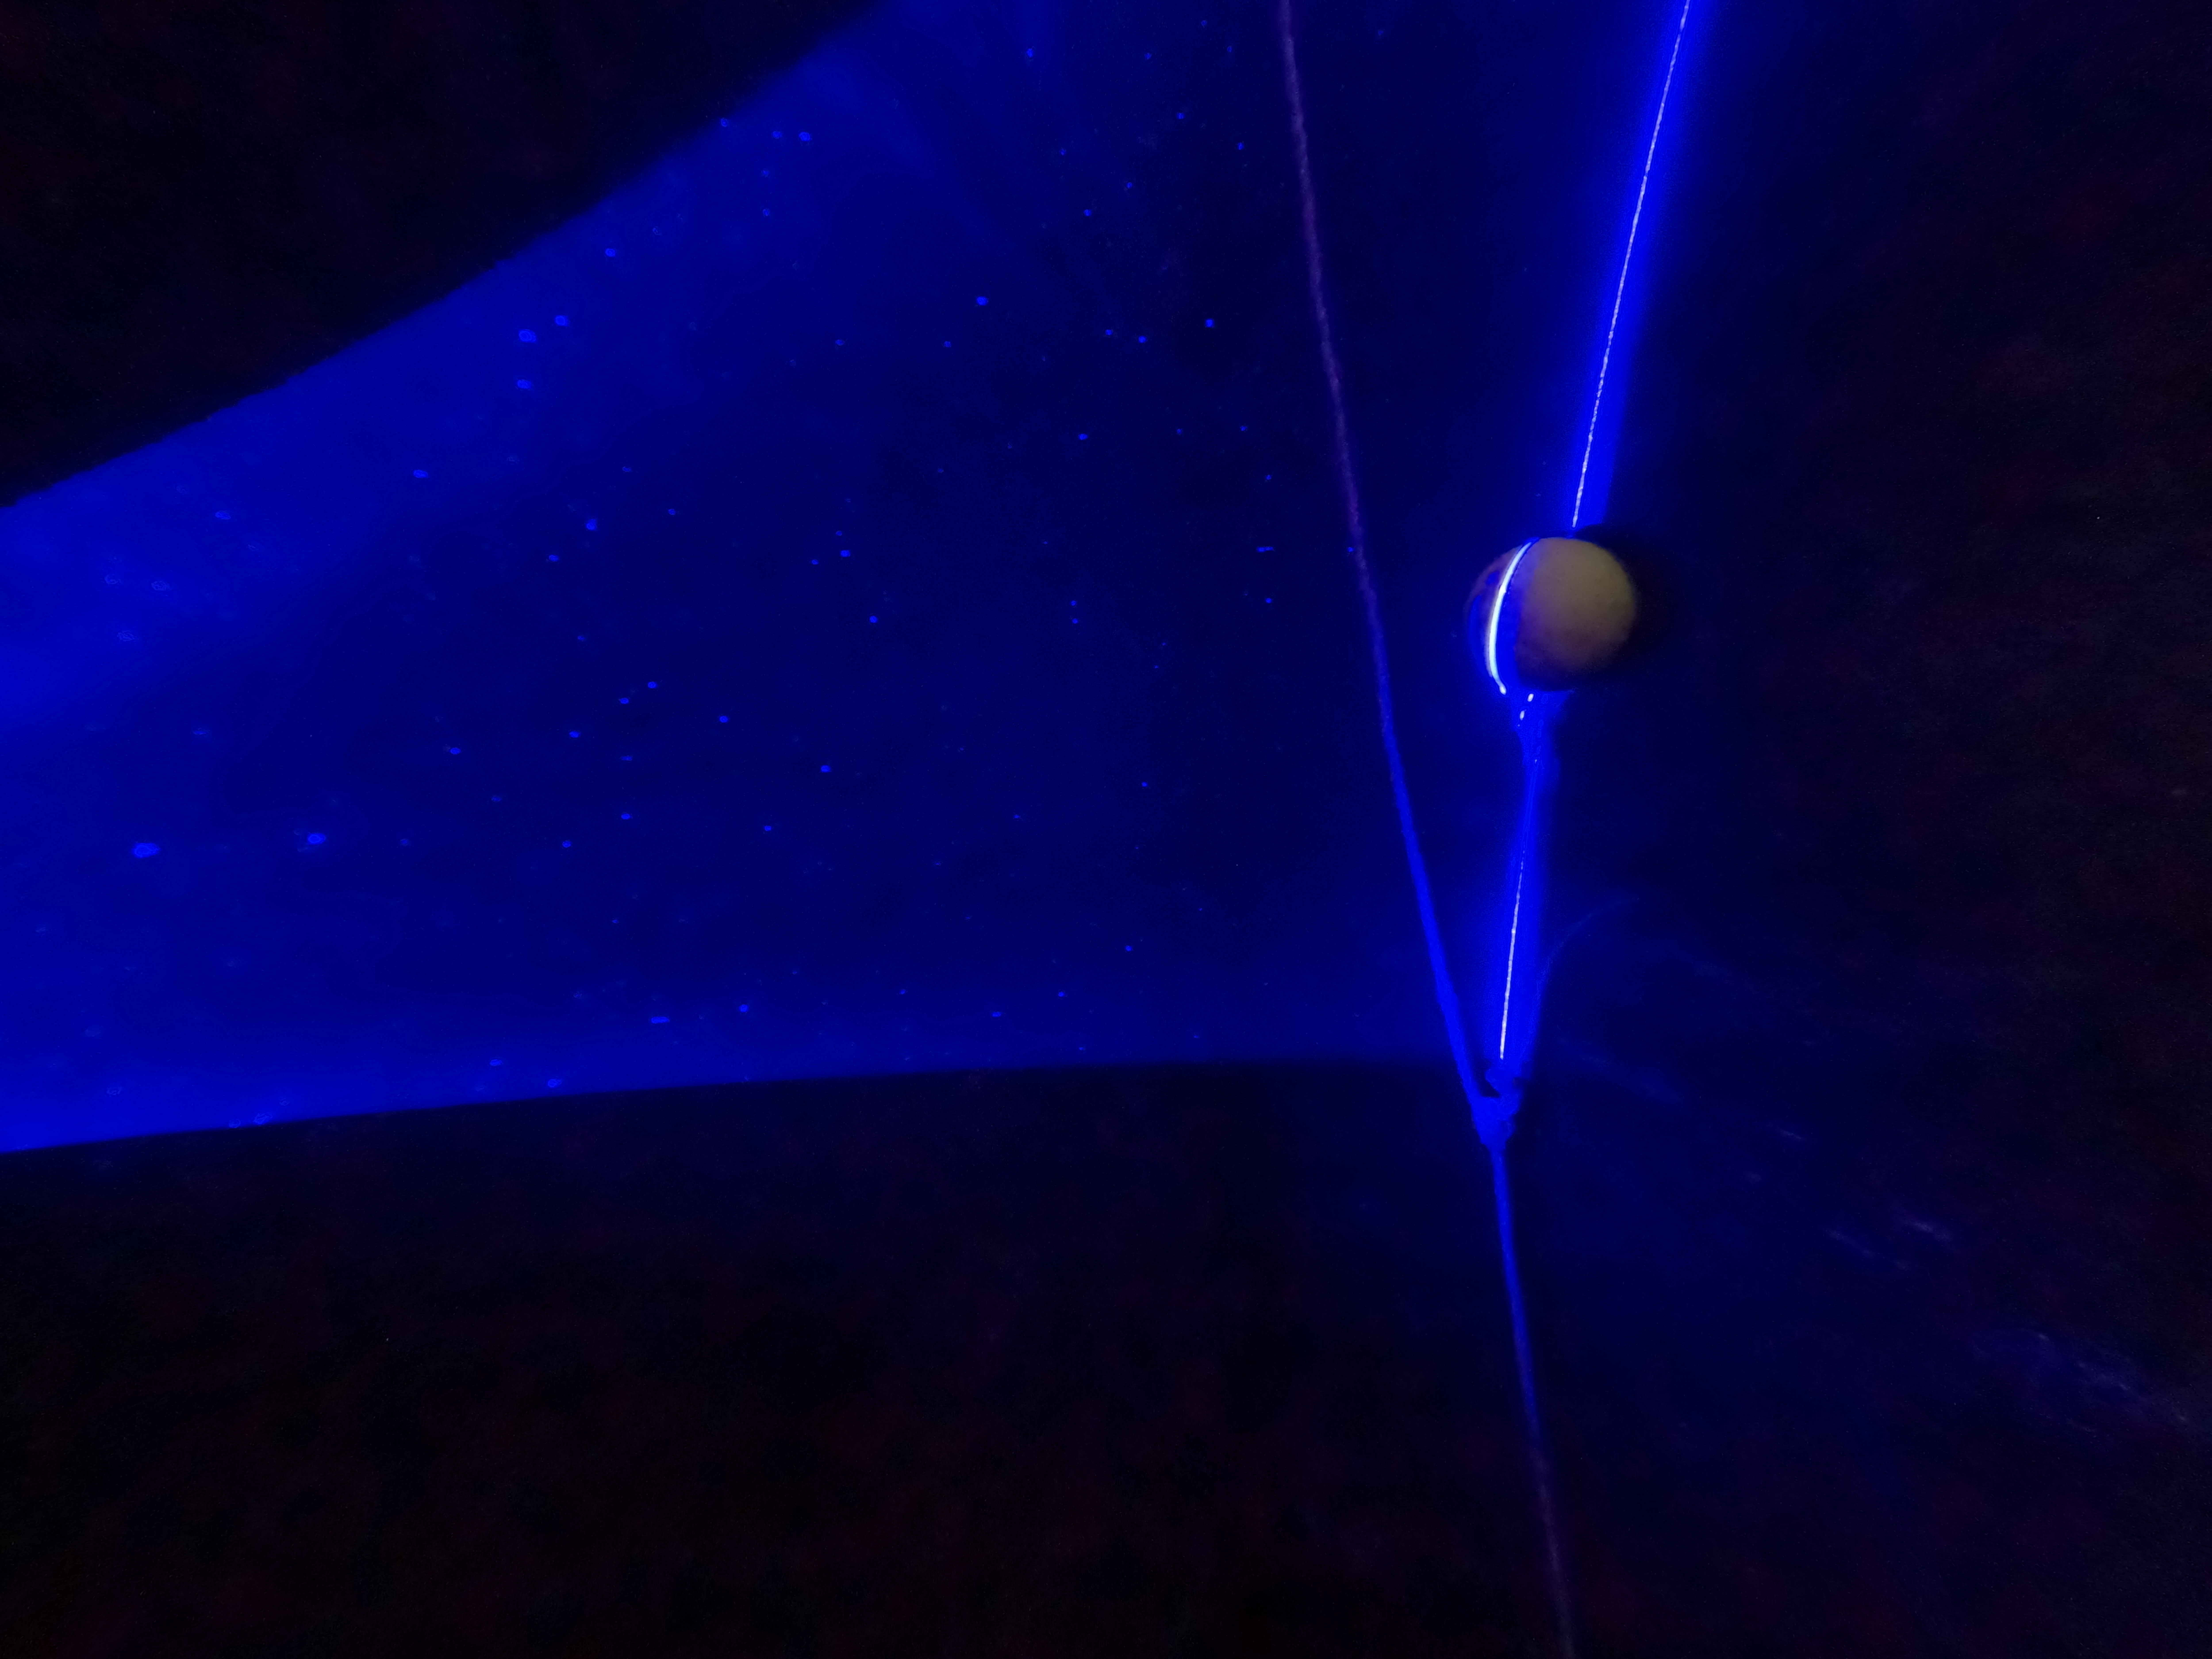

Supplement: Supplementary file 1083 [file G0031437.pdf › 10/G0031437.pdf]

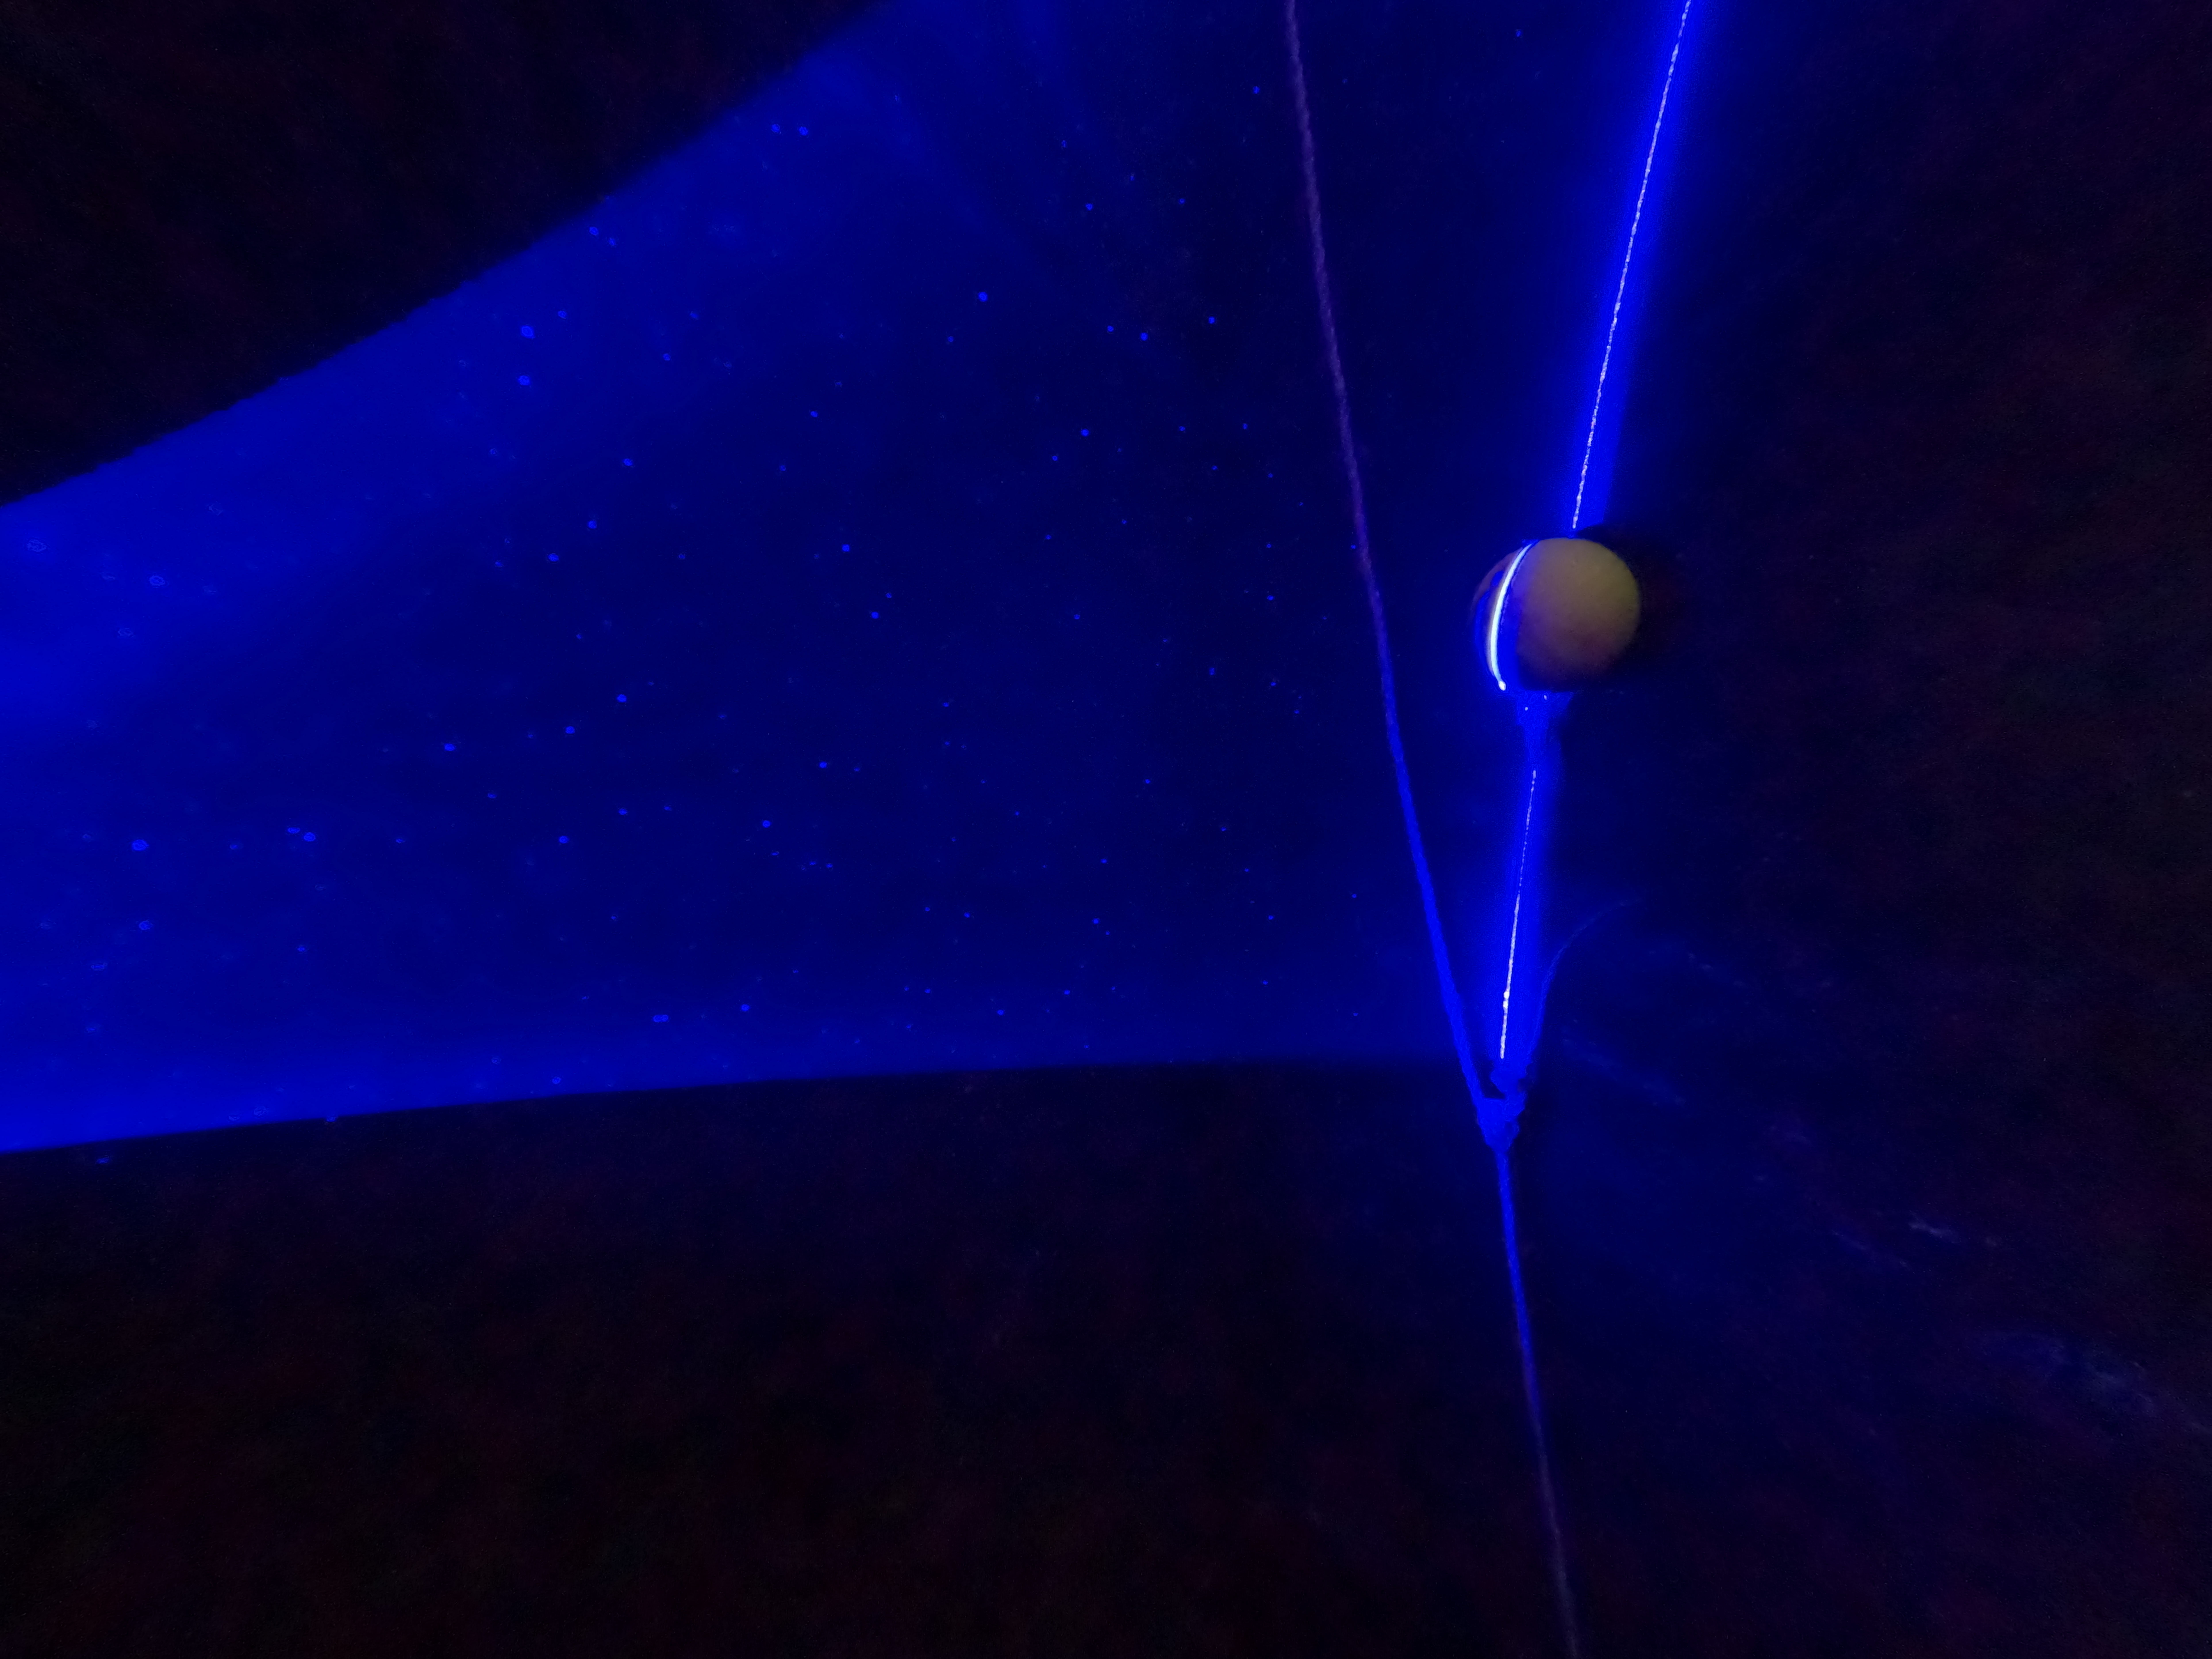

Supplement: Supplementary file 1084 [file G0031438.pdf › 10/G0031438.pdf]

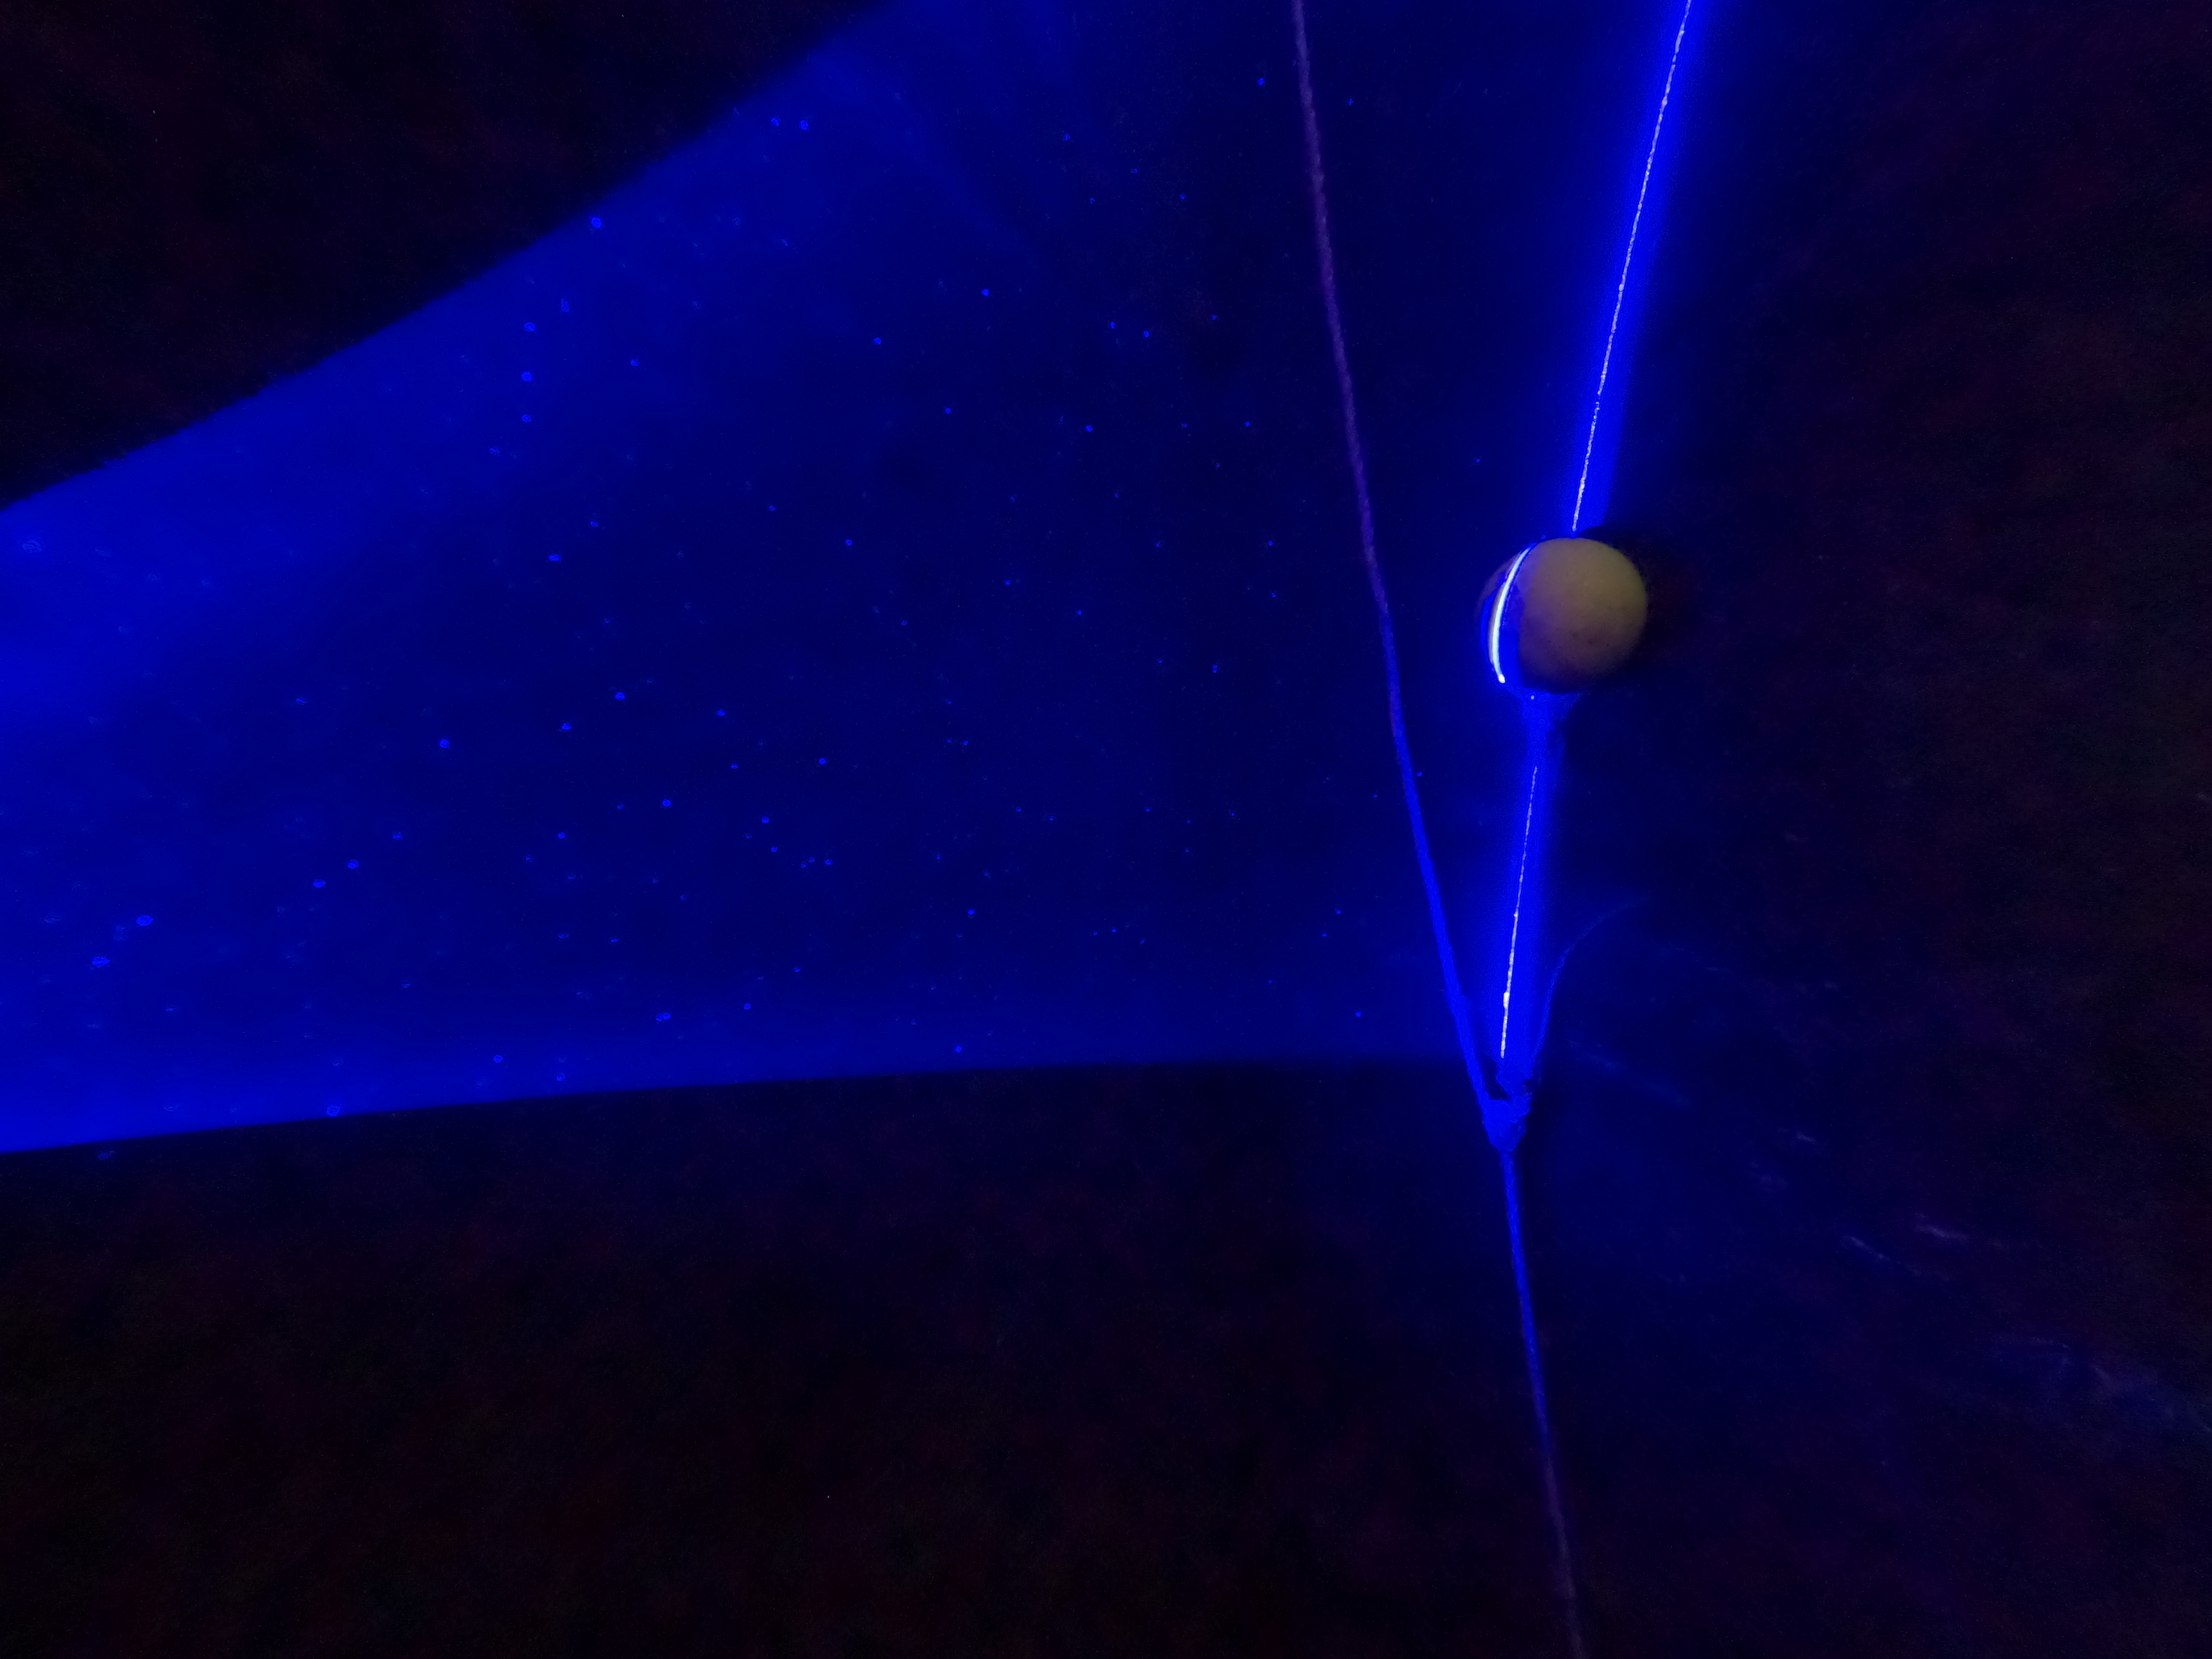

Supplement: Supplementary file 1085 [file G0031439.pdf › 10/G0031439.pdf]

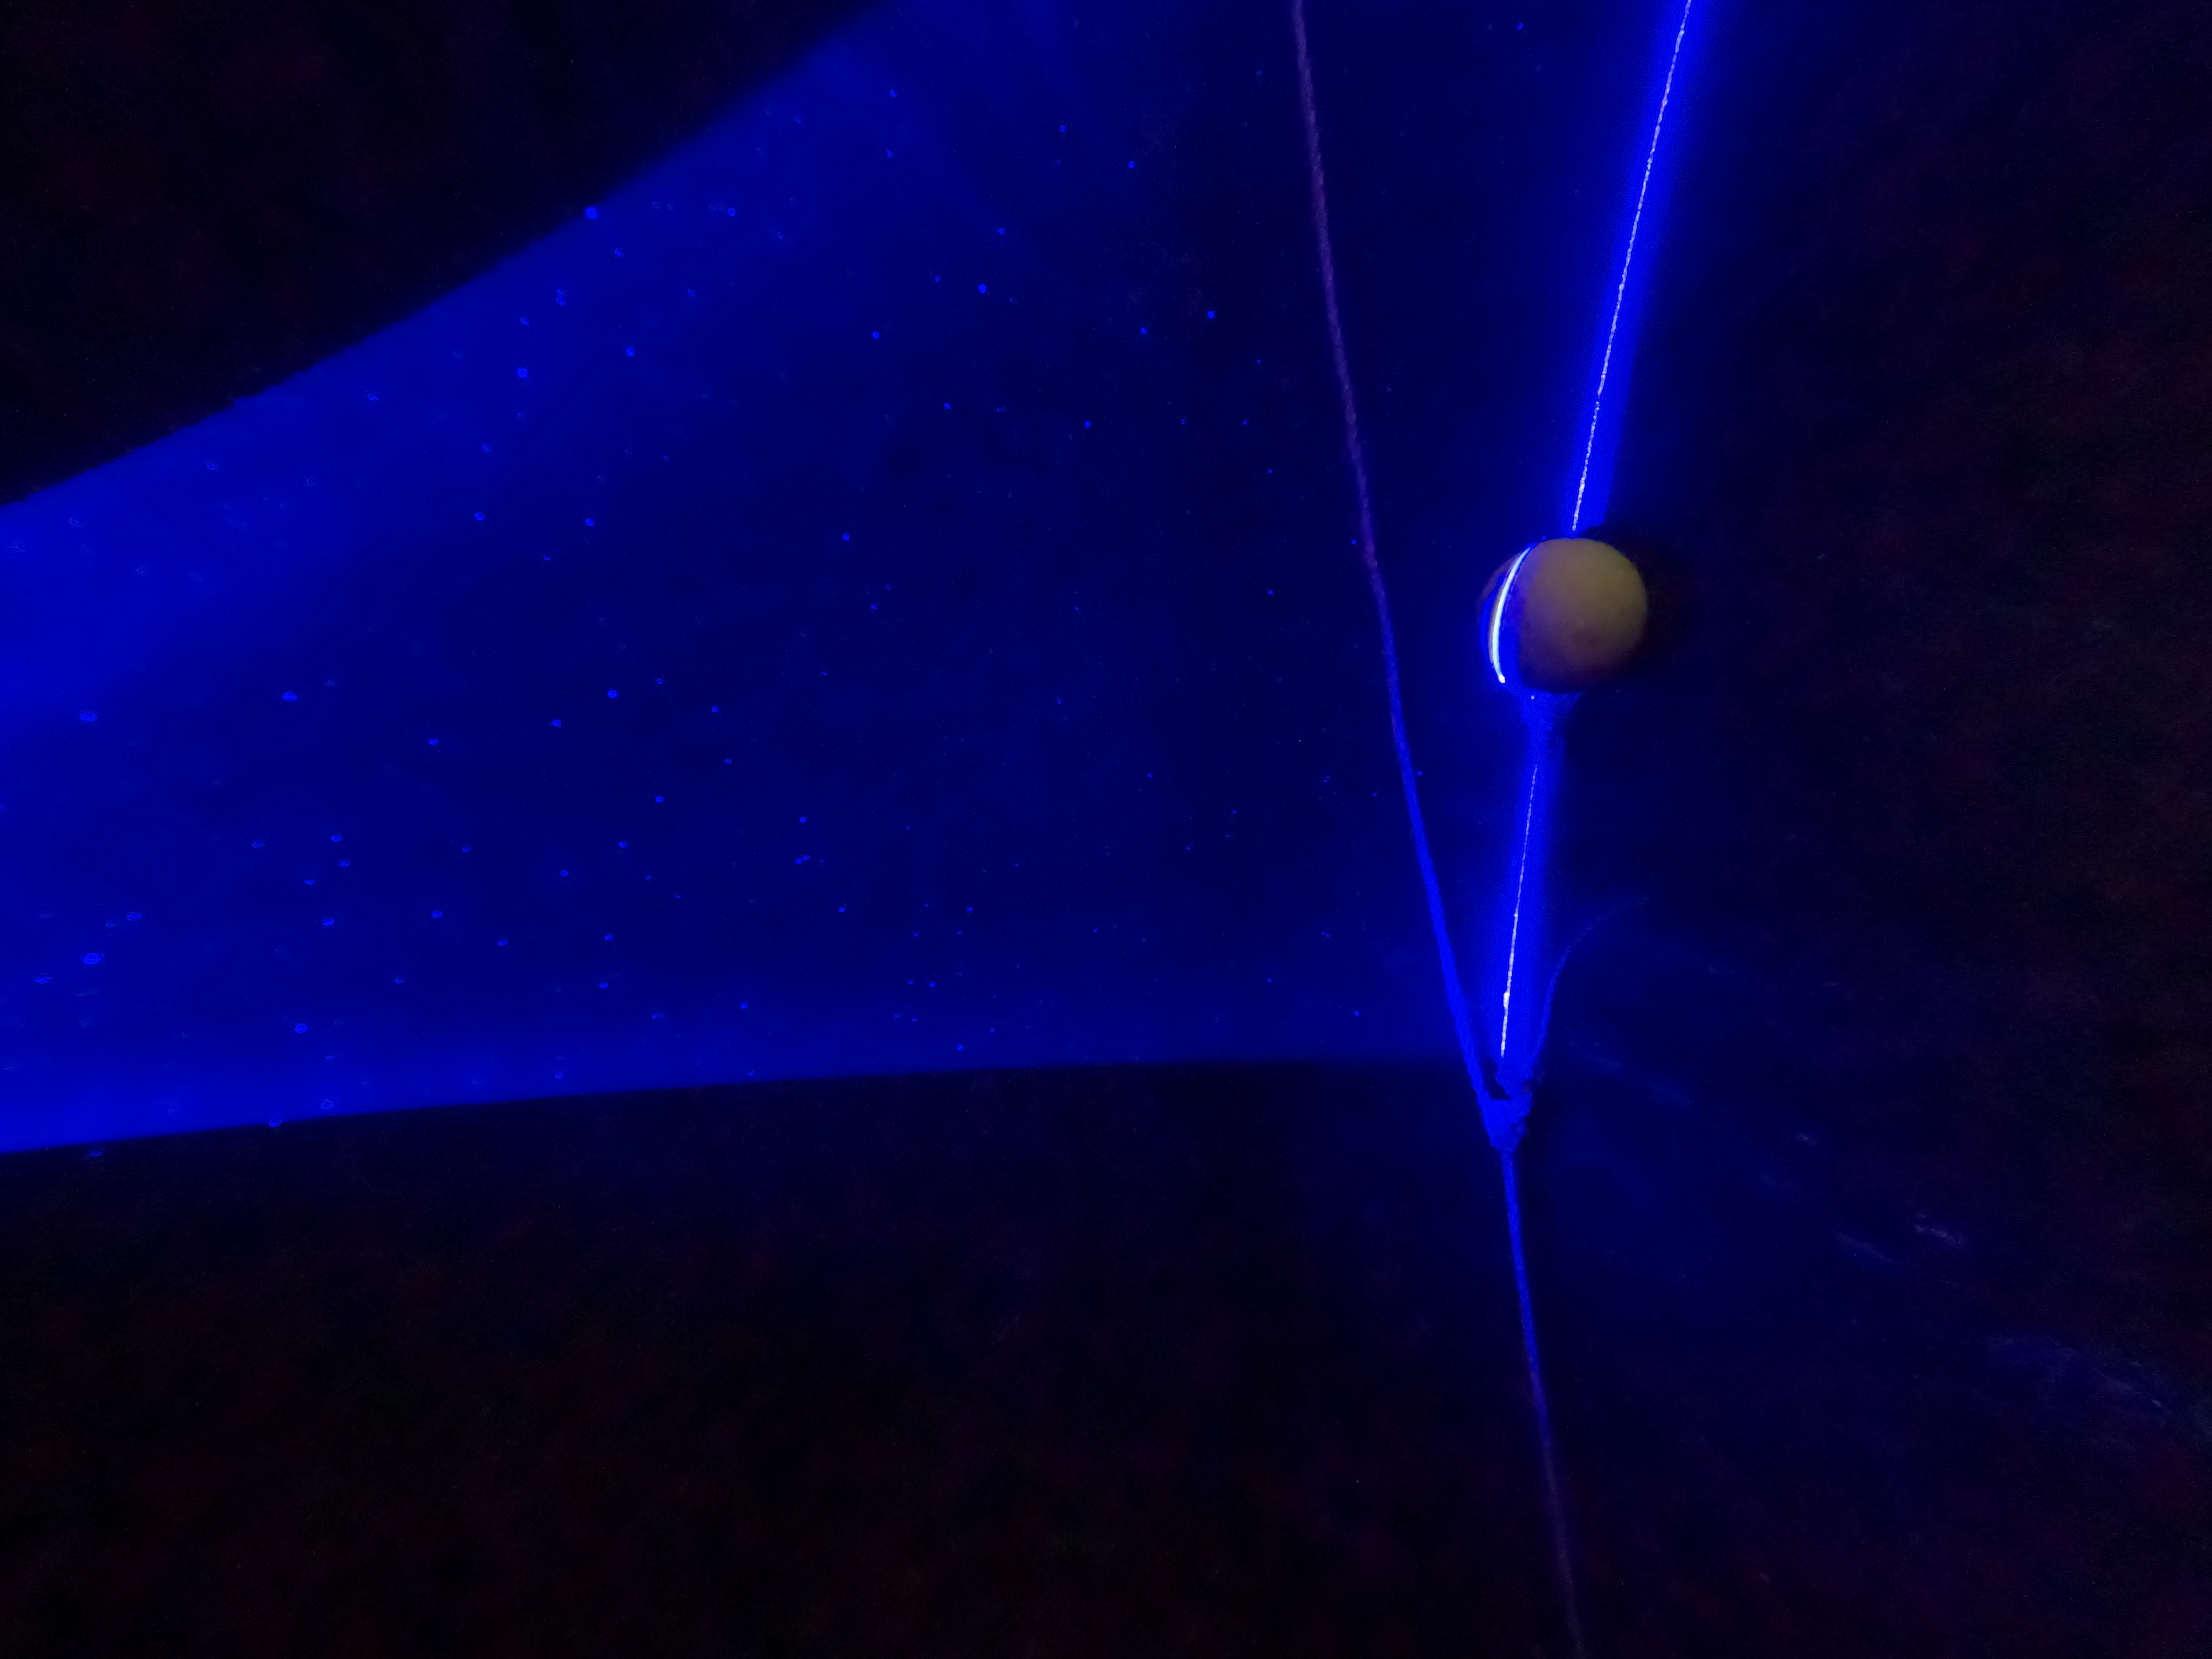

Supplement: Supplementary file 1086 [file G0031440.pdf › 10/G0031440.pdf]

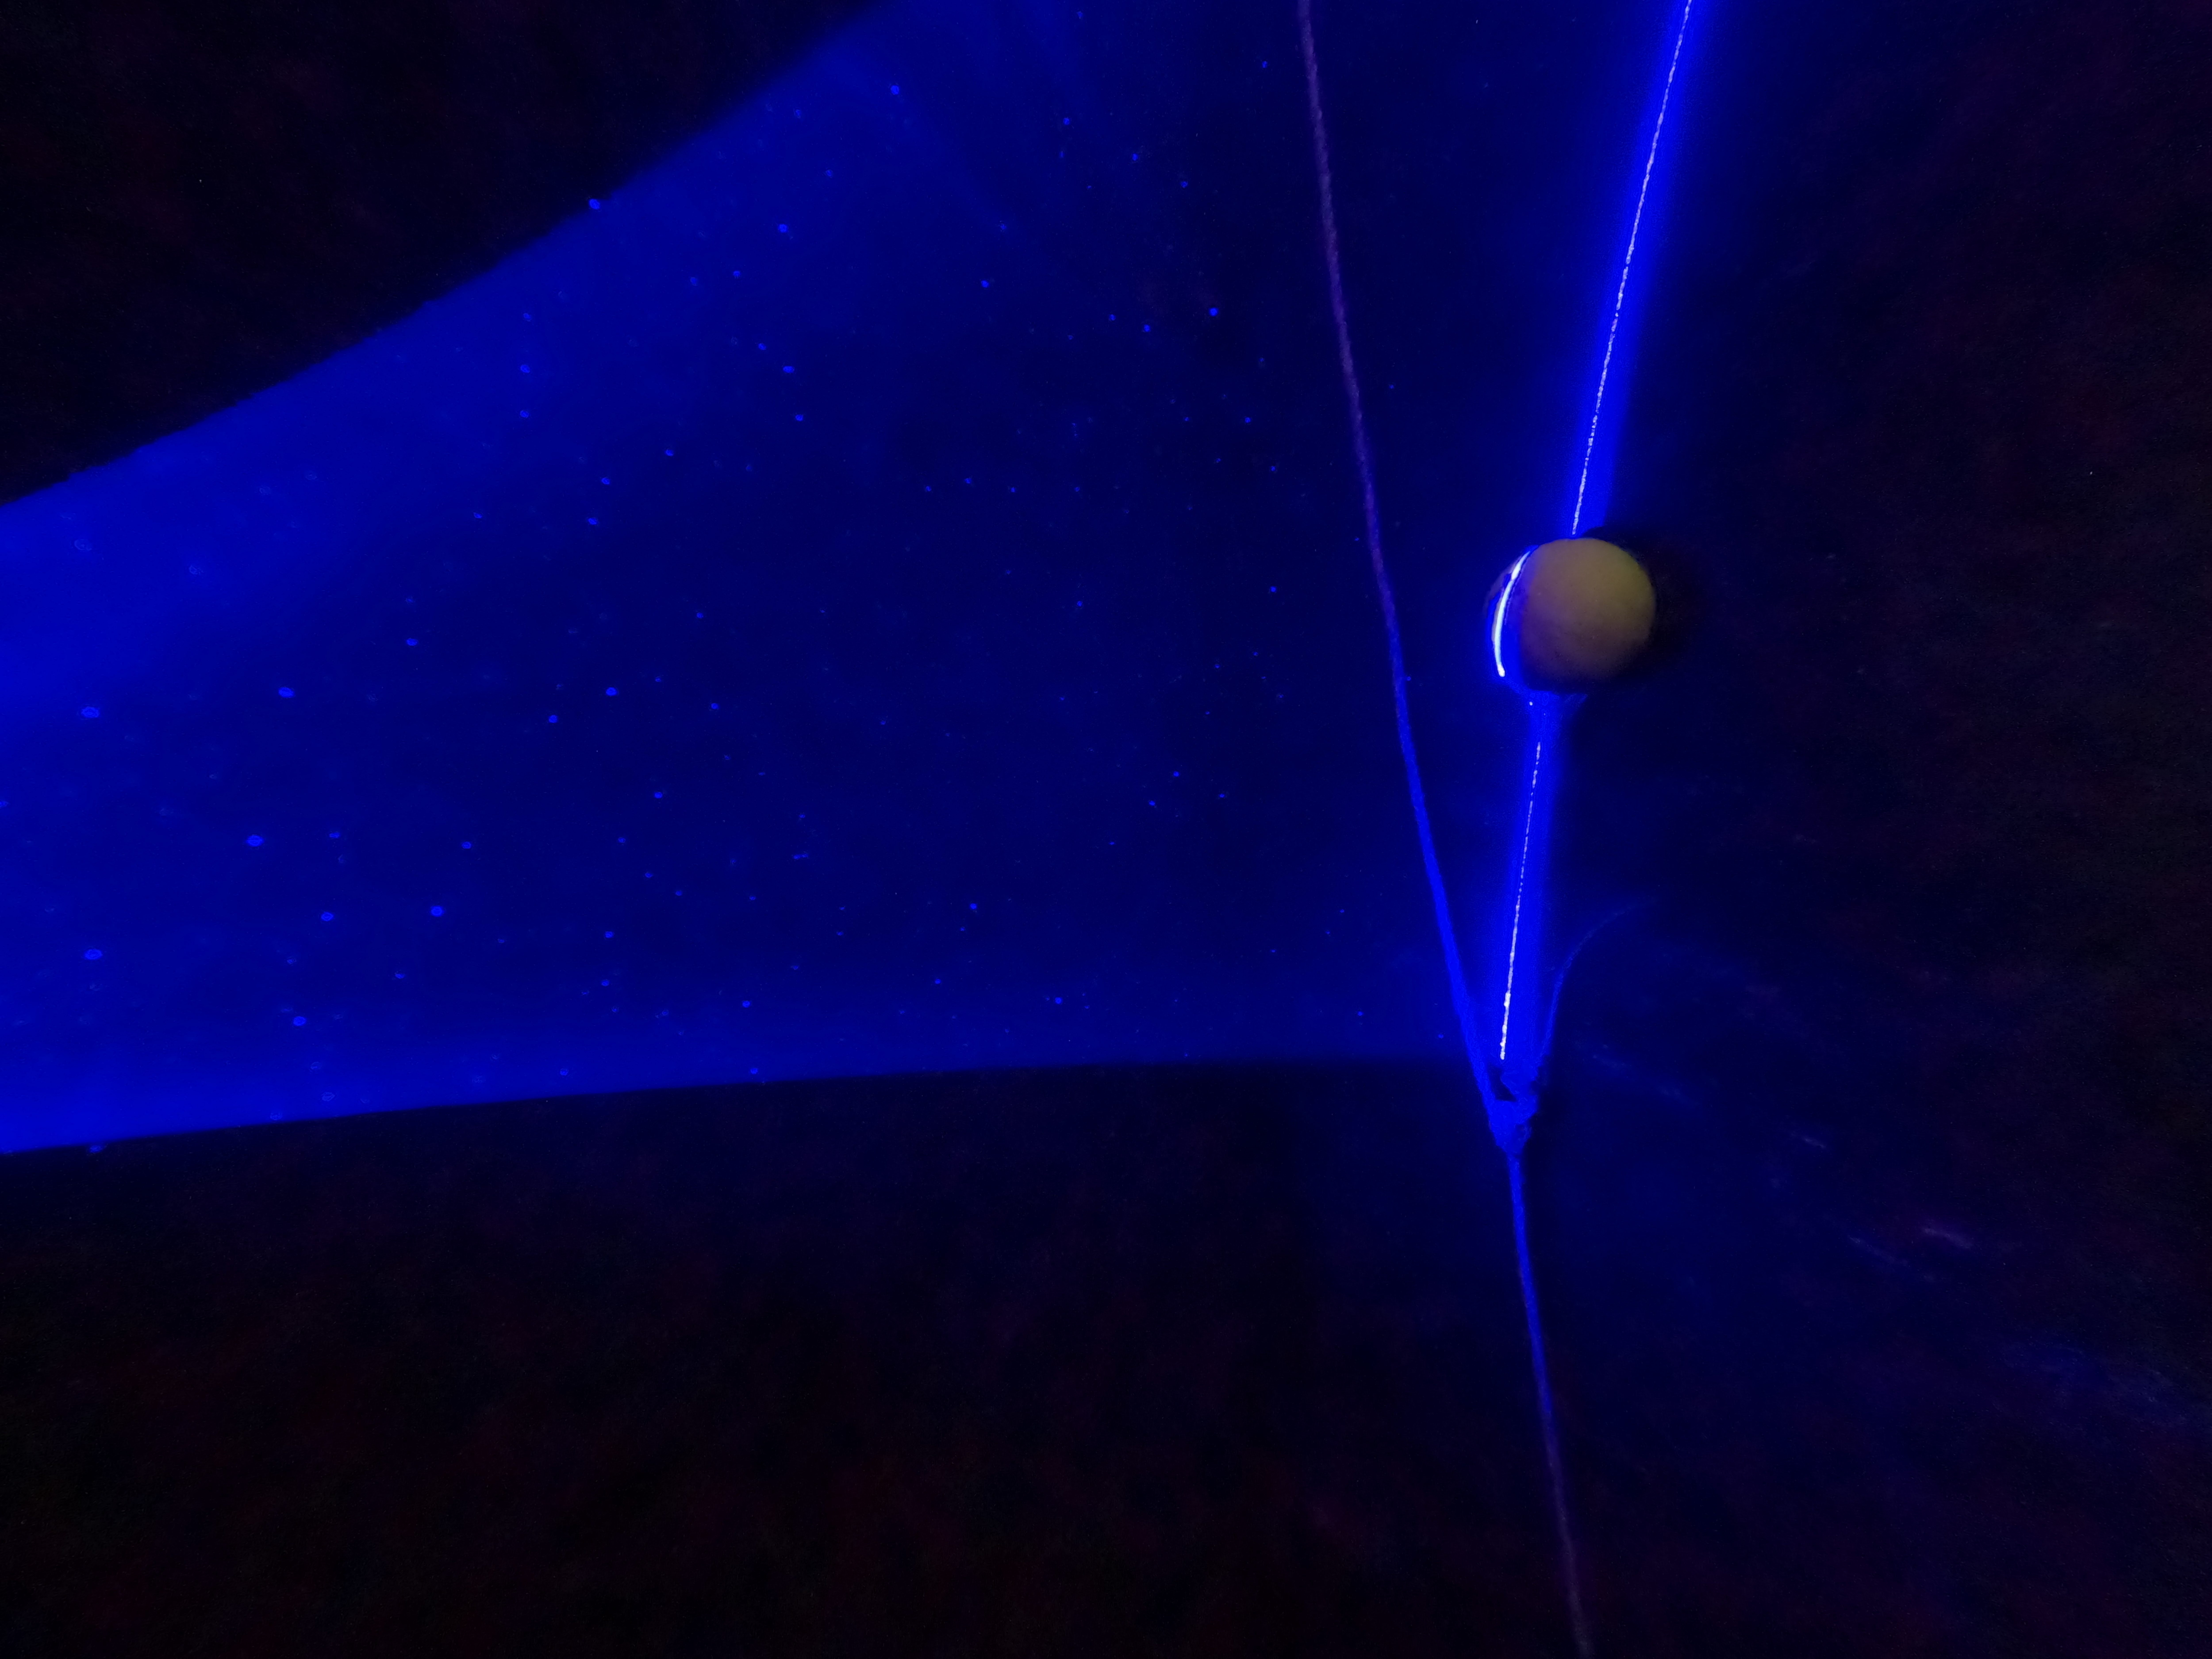

Supplement: Supplementary file 1087 [file G0031441.pdf › 10/G0031441.pdf]

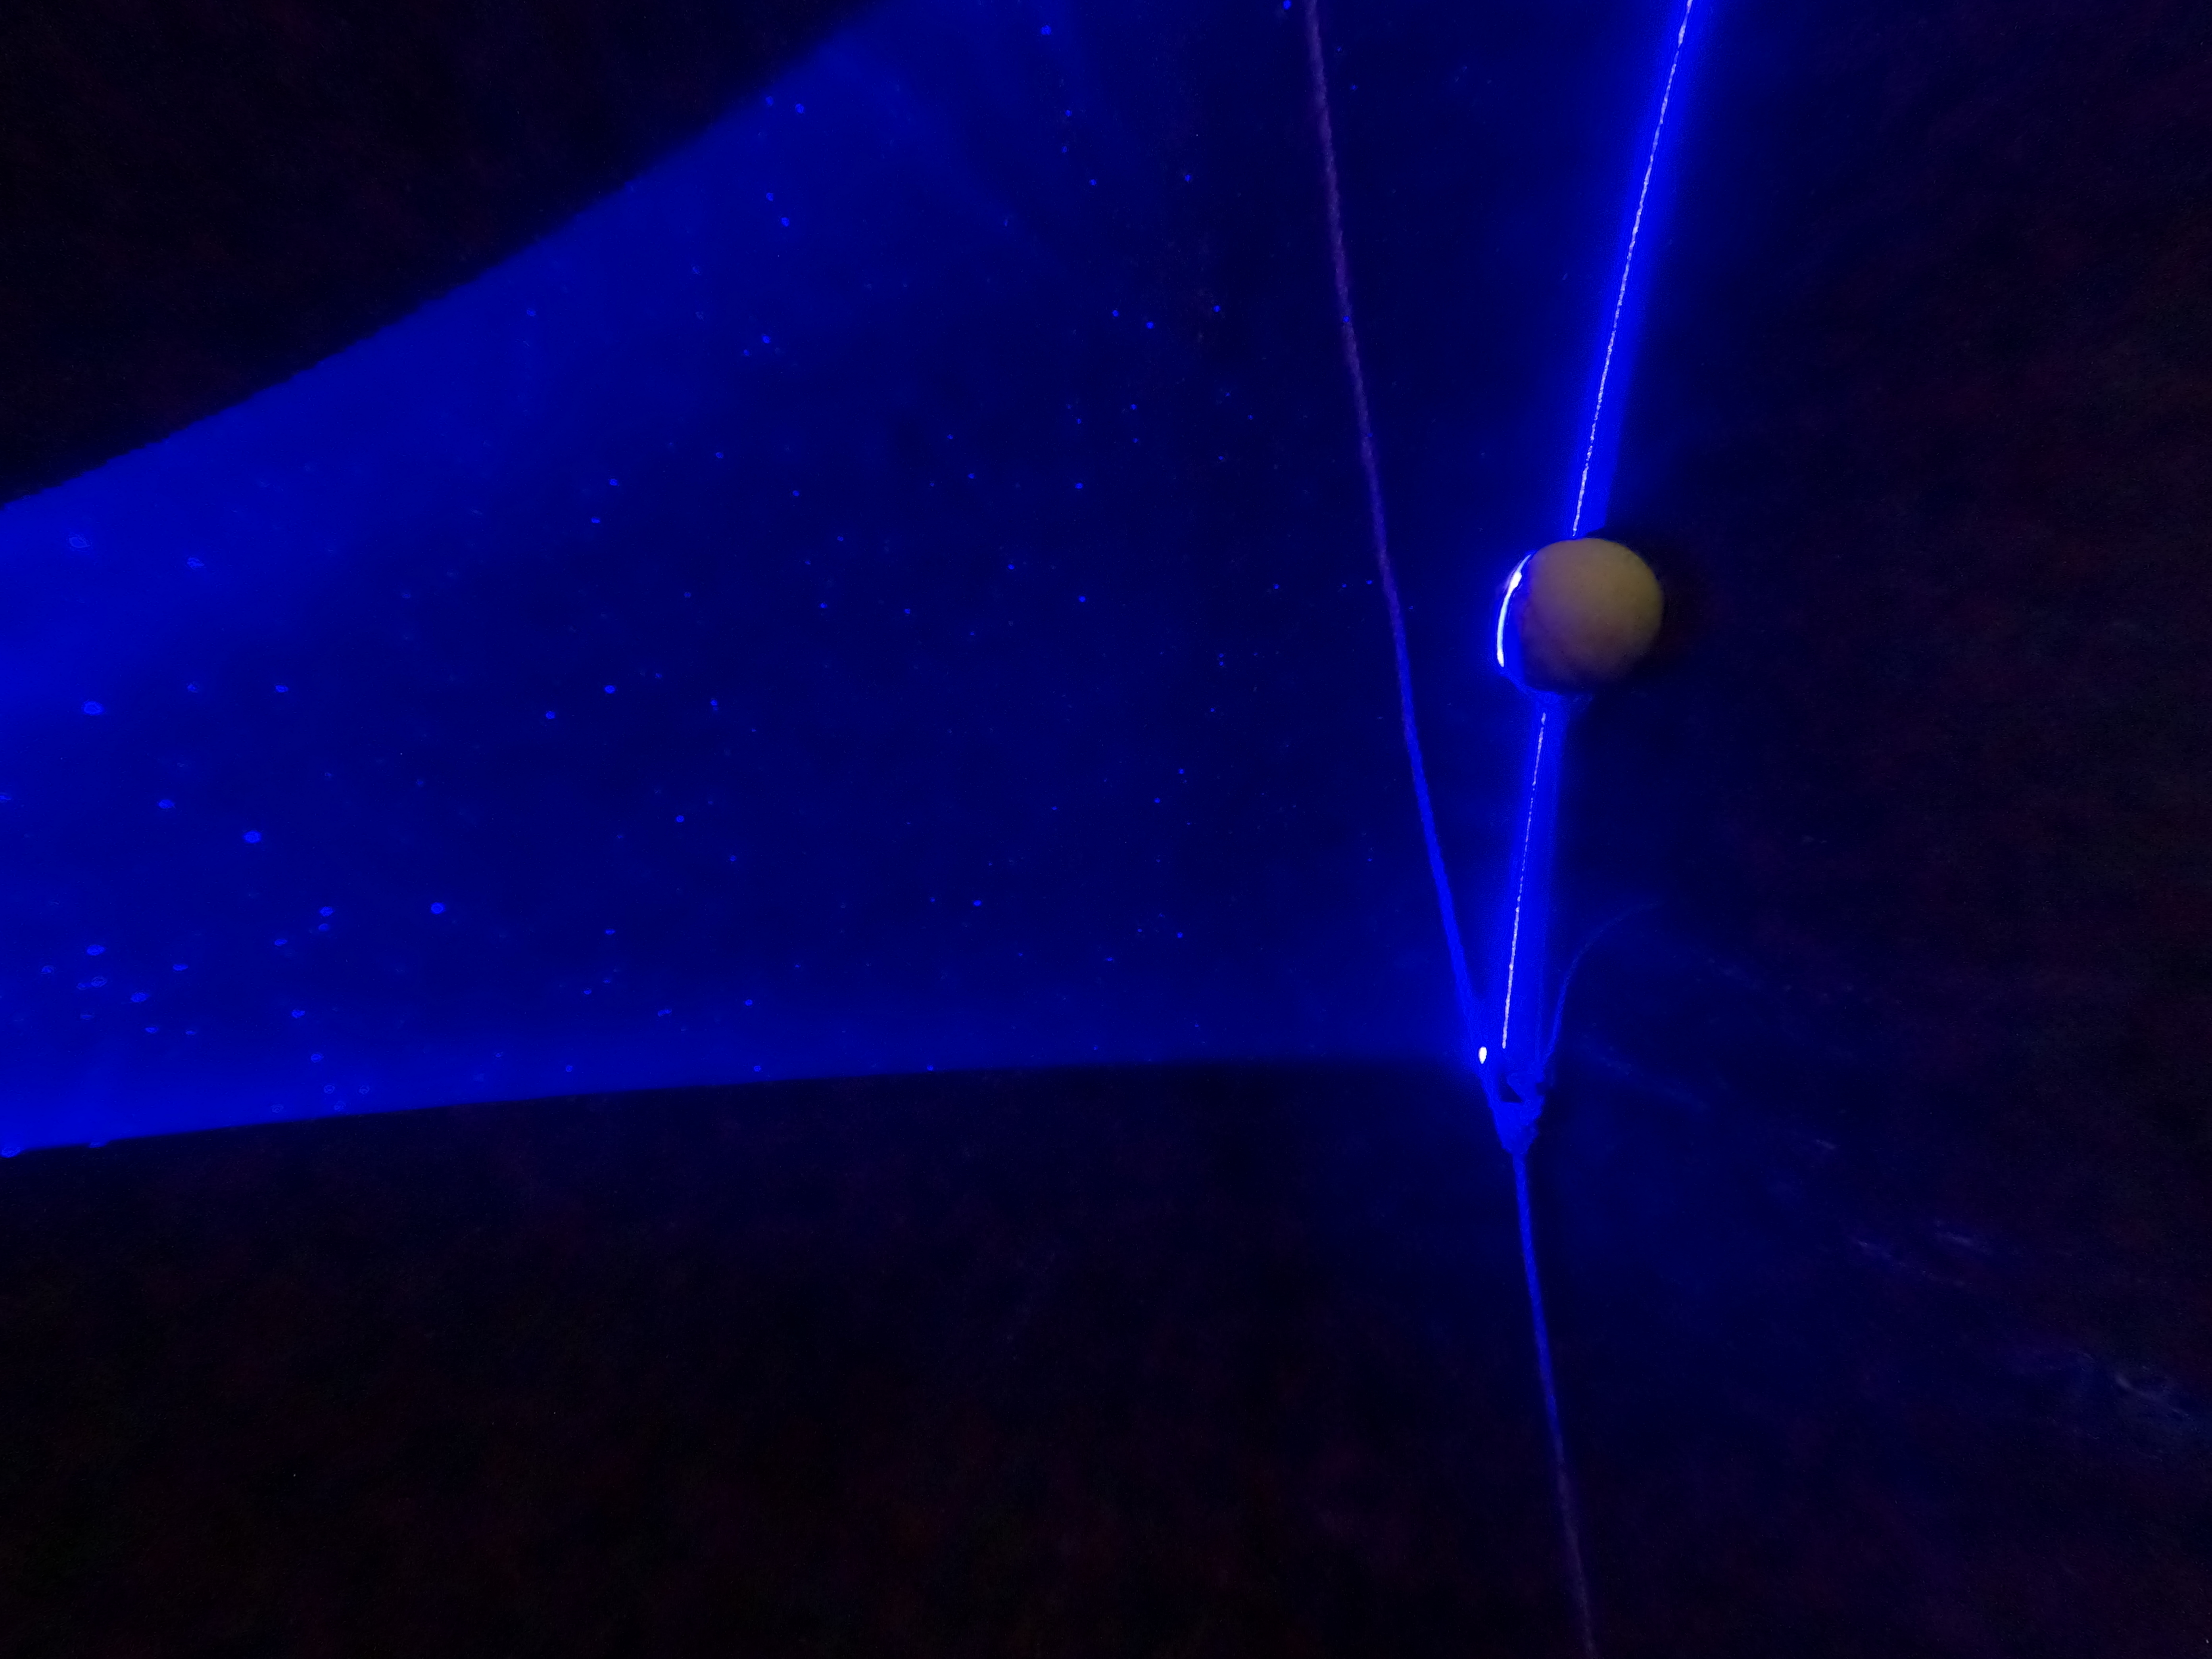

Supplement: Supplementary file 1088 [file G0031442.pdf › 10/G0031442.pdf]

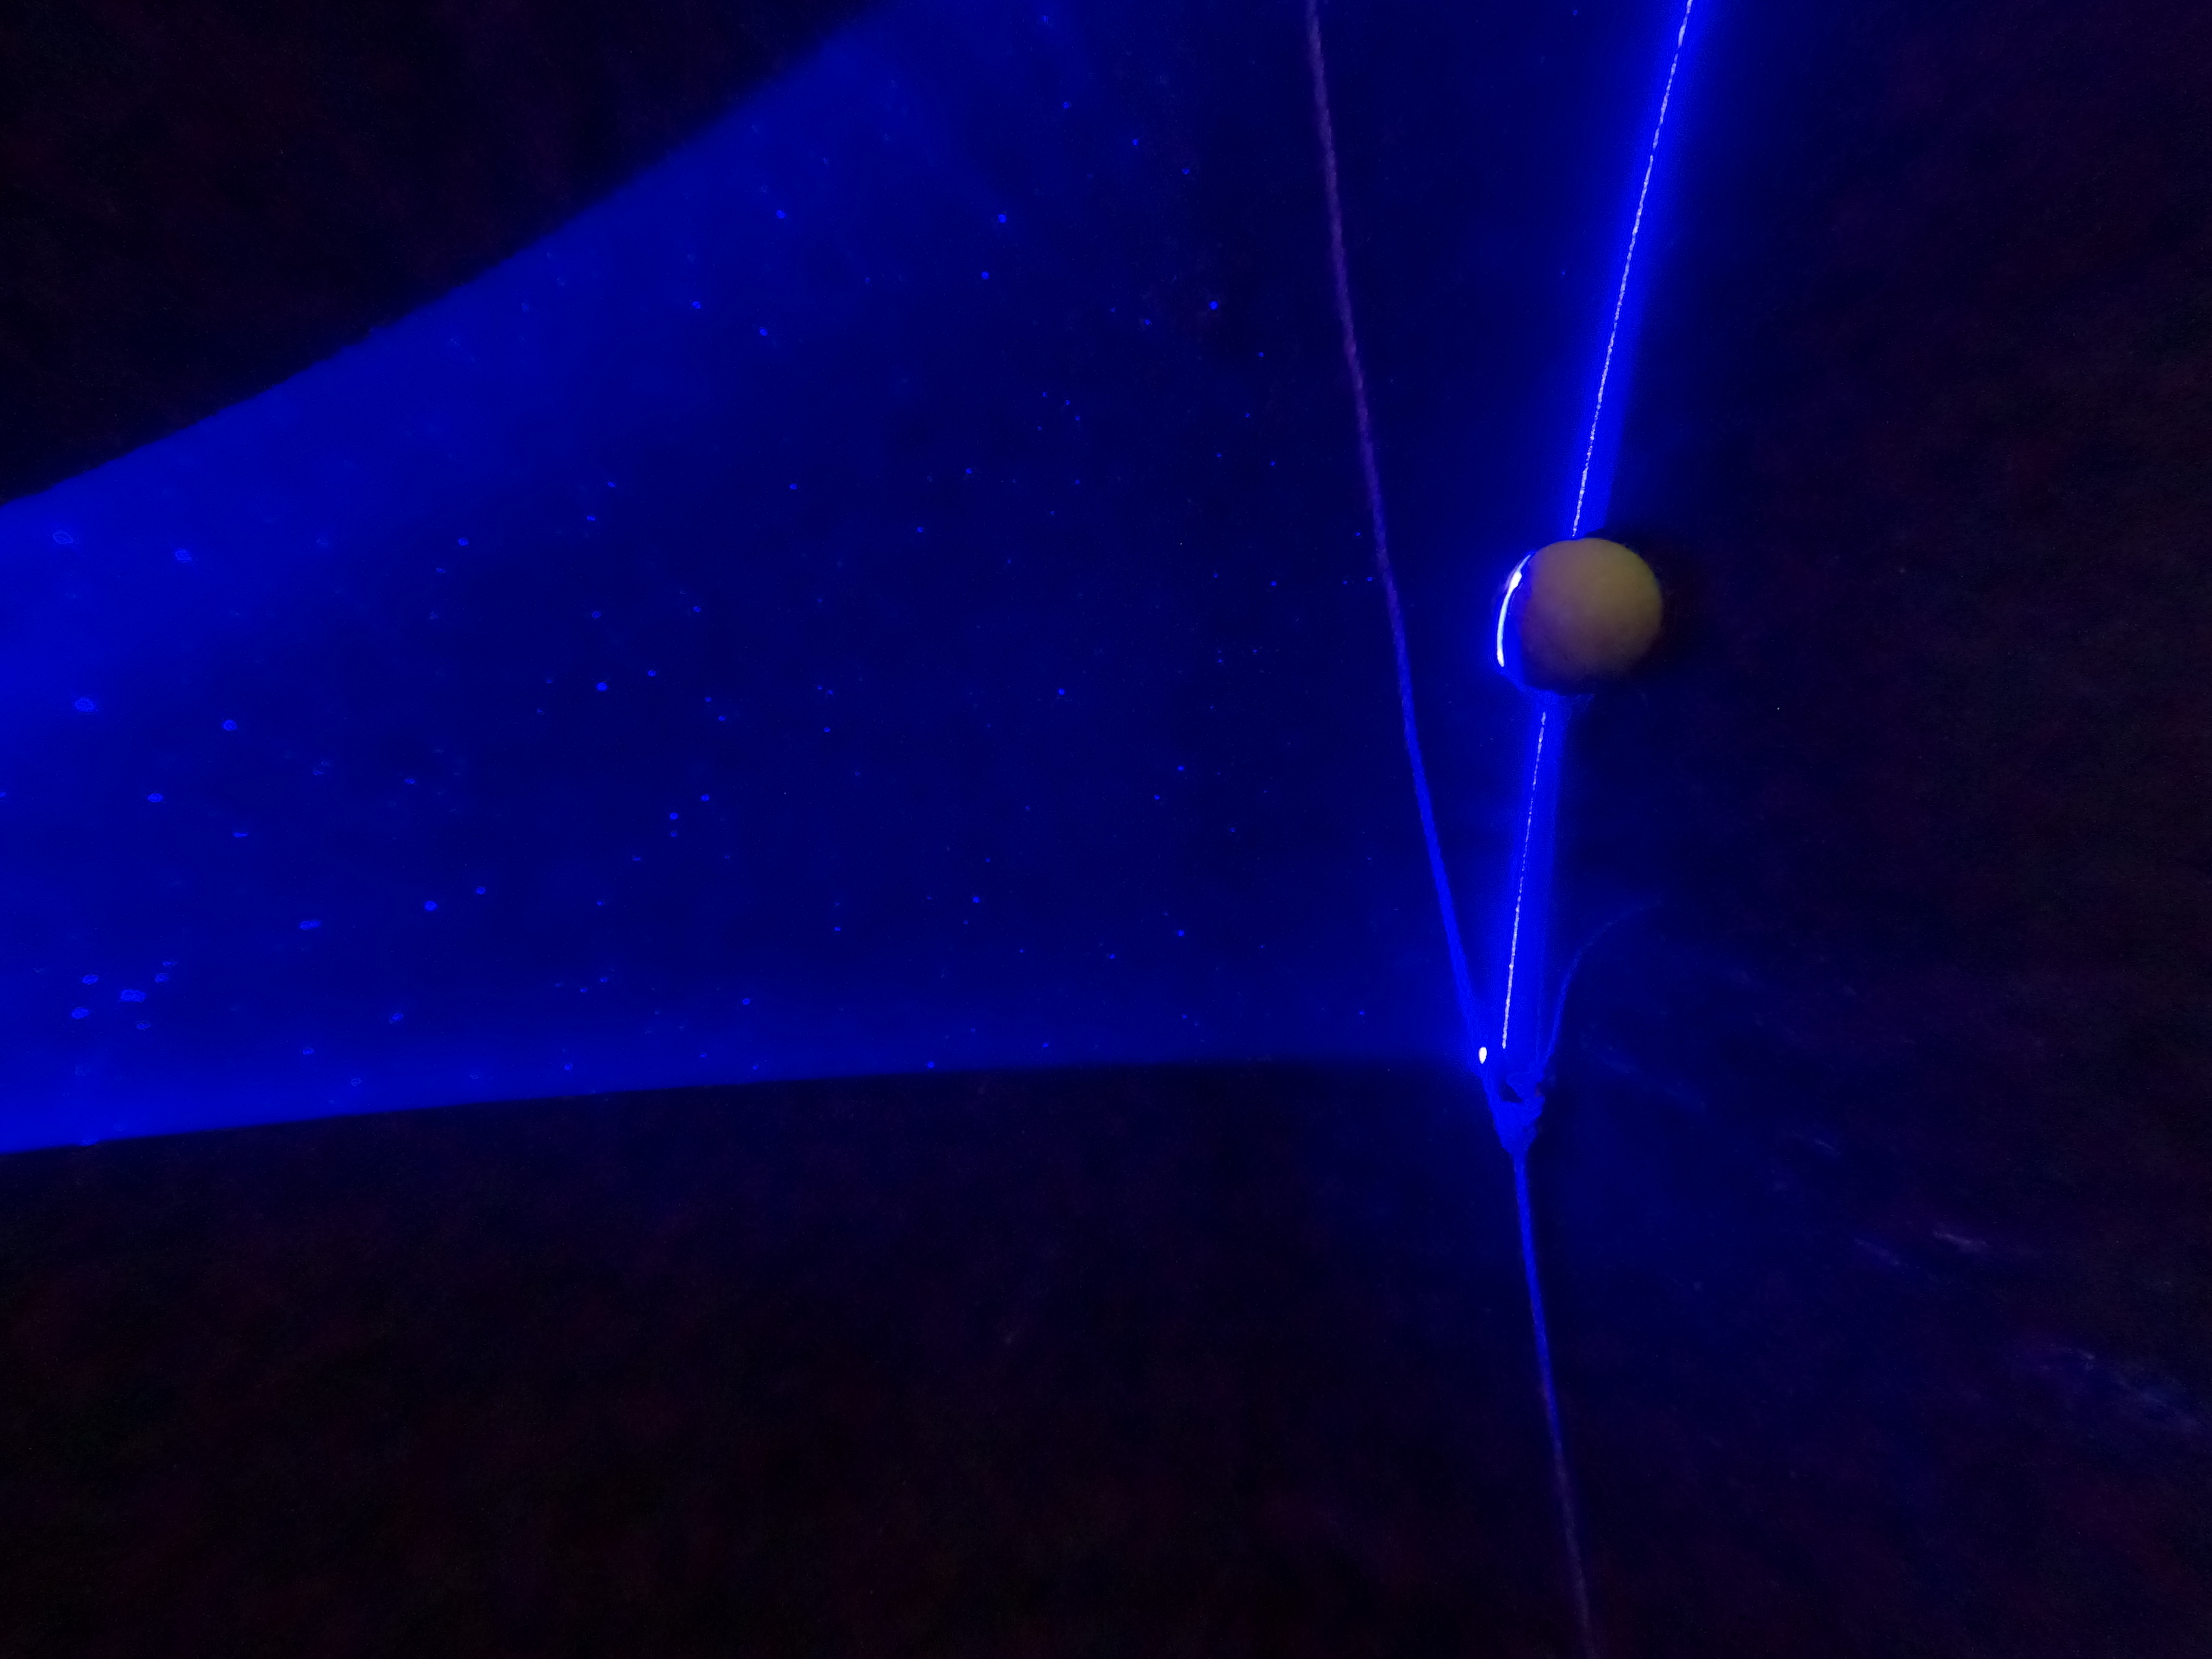

Supplement: Supplementary file 1089 [file G0031443.pdf › 10/G0031443.pdf]

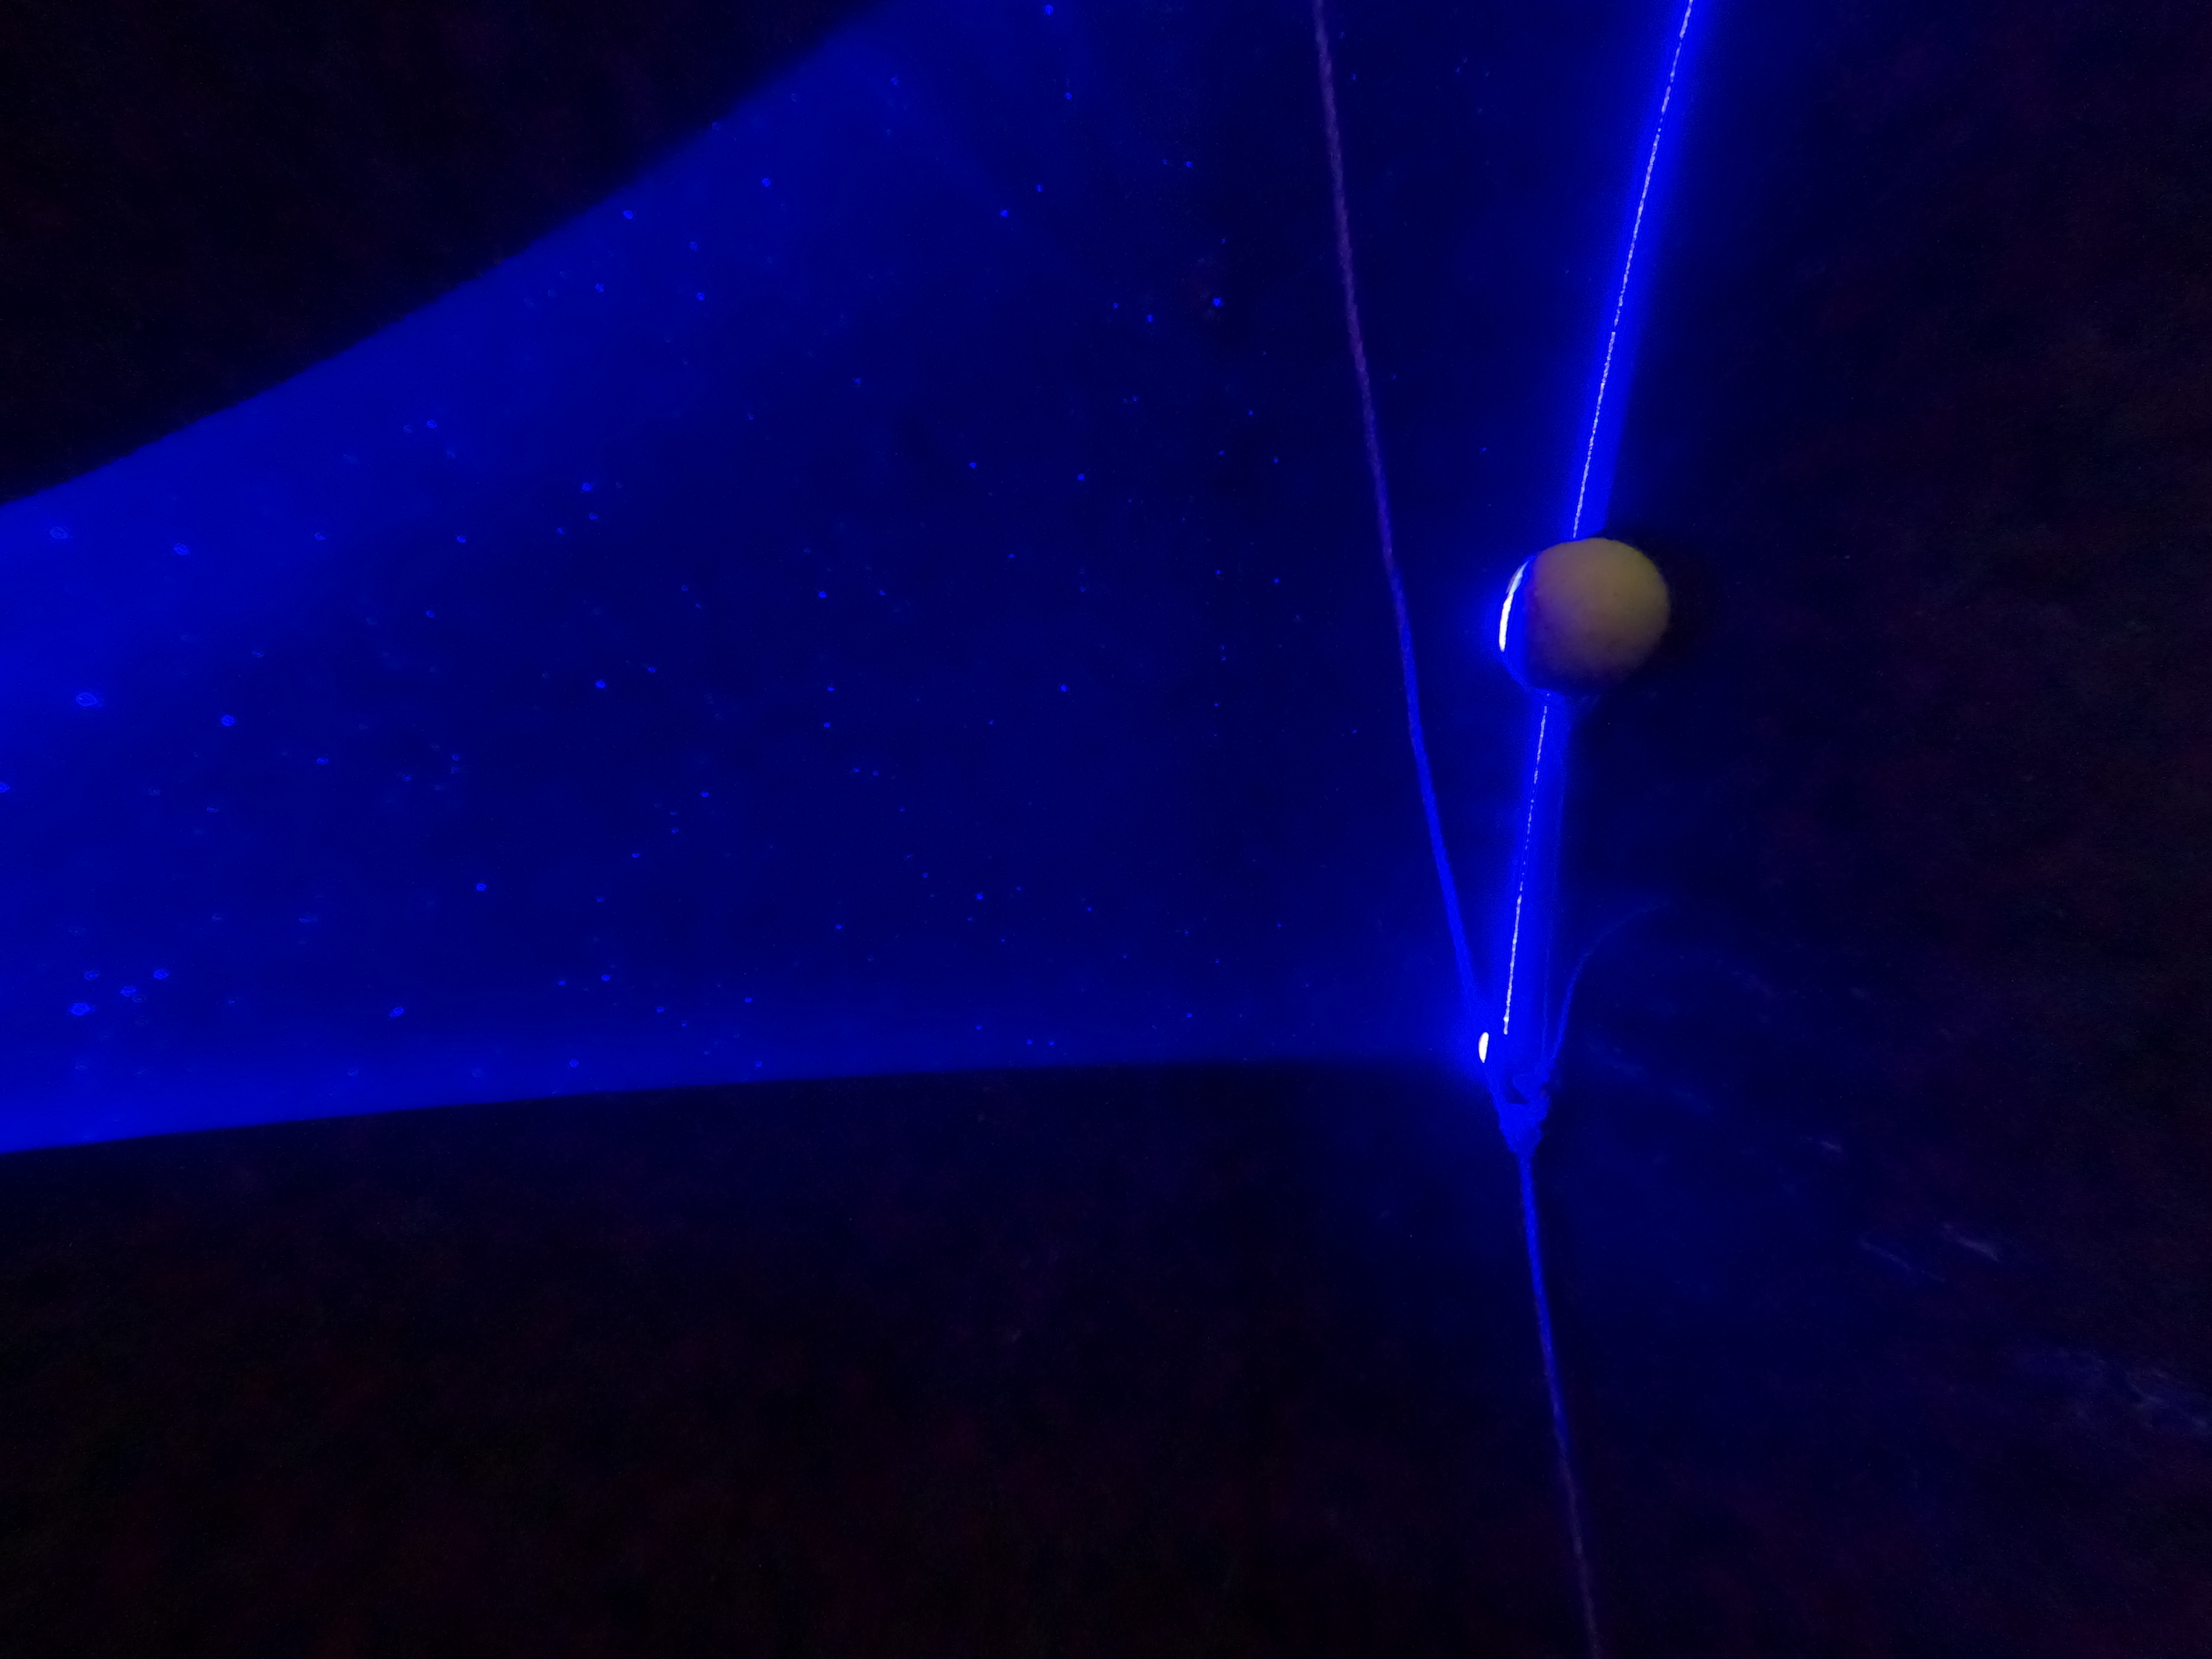

Supplement: Supplementary file 1090 [file G0031444.pdf › 10/G0031444.pdf]

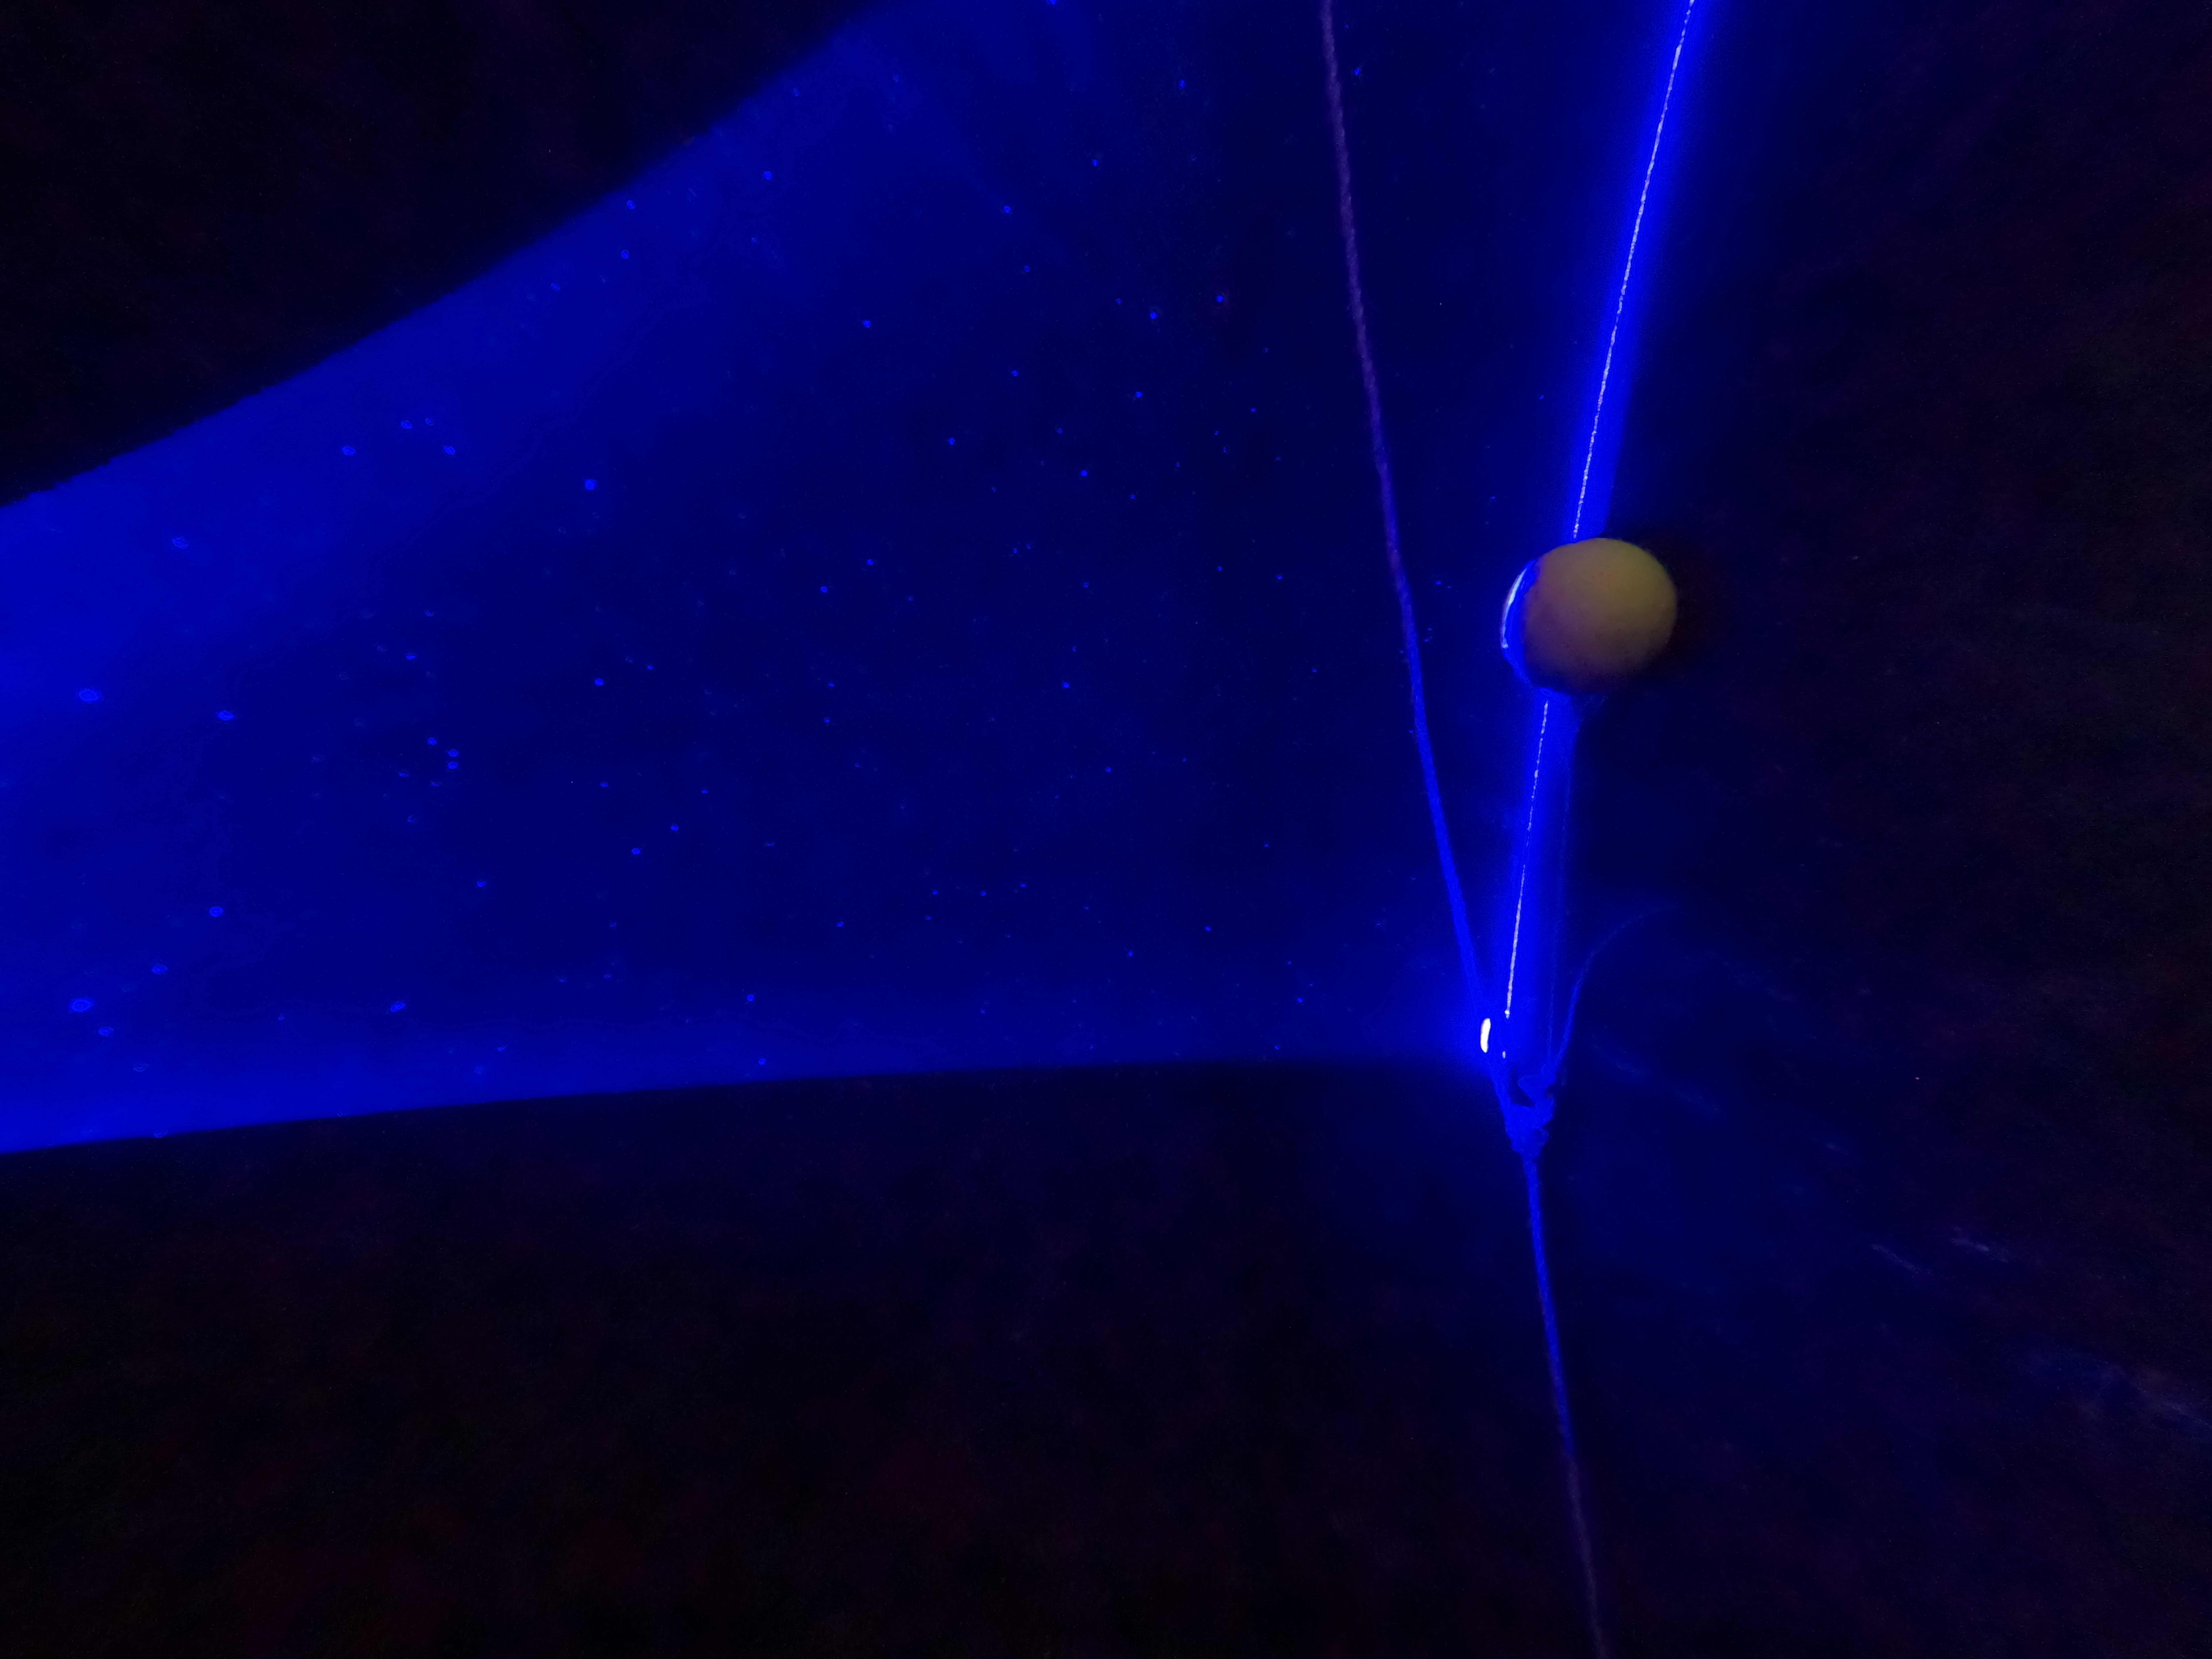

Supplement: Supplementary file 1091 [file G0031445.pdf › 10/G0031445.pdf]

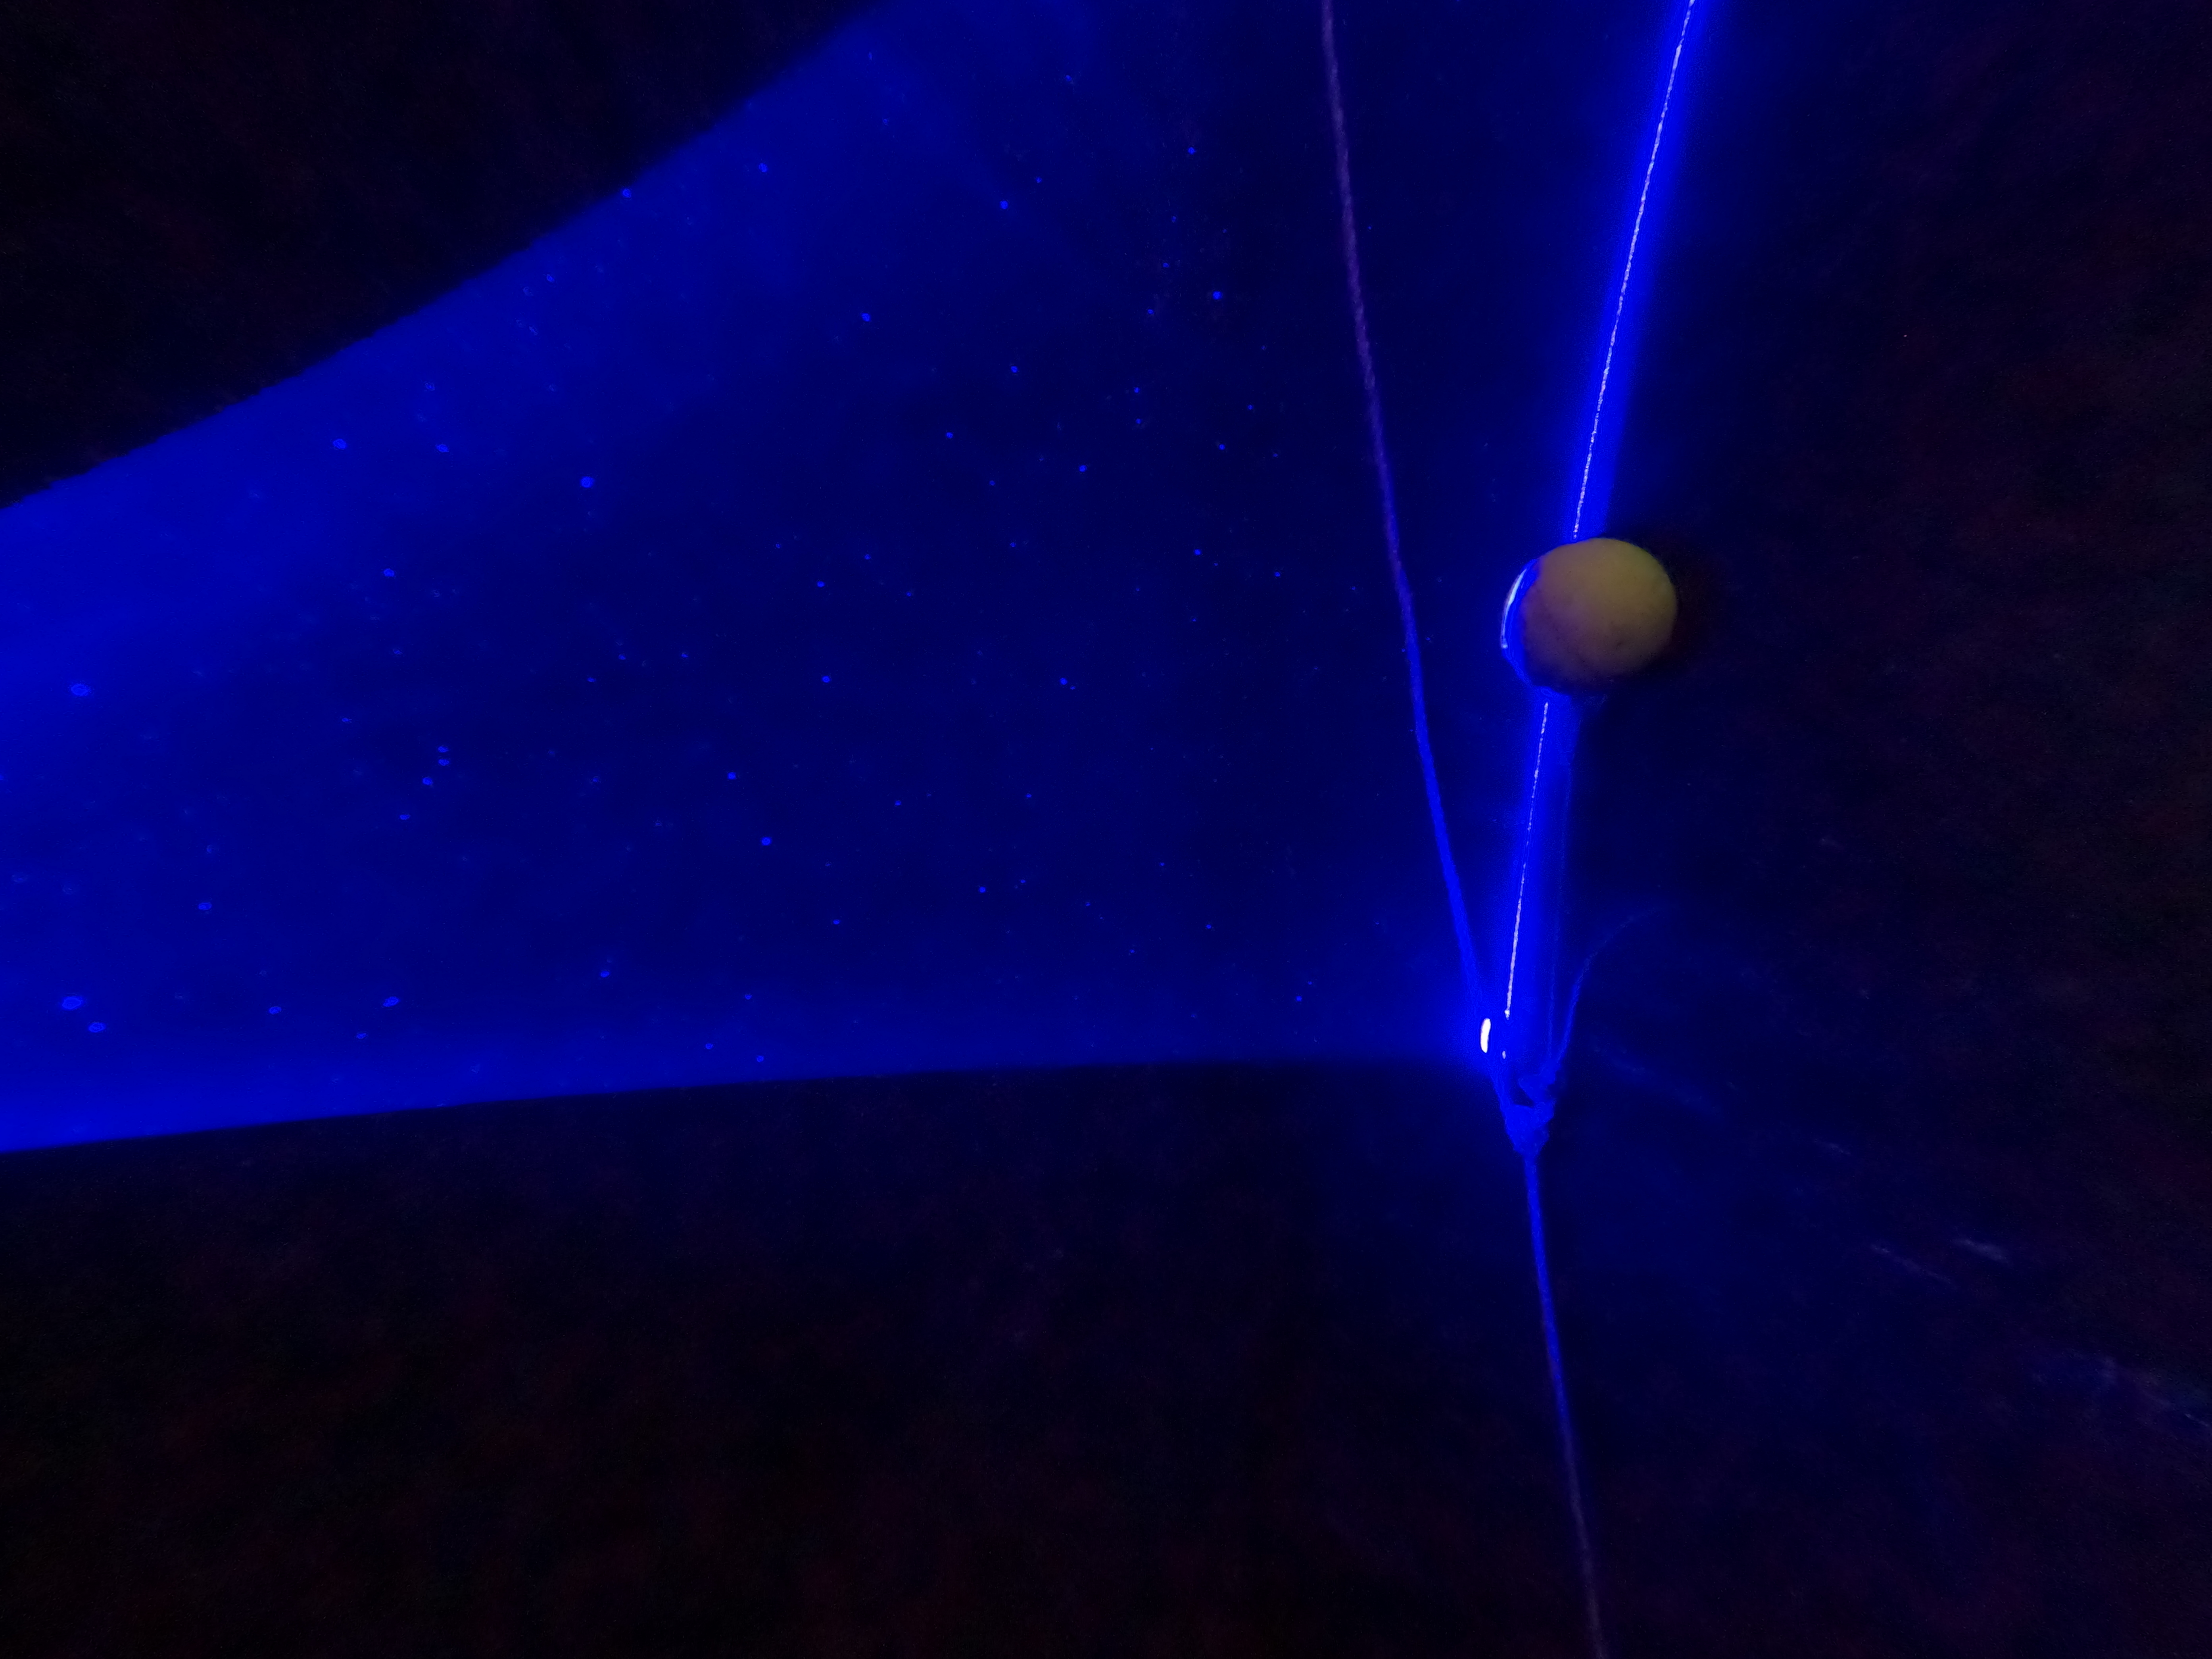

Supplement: Supplementary file 1092 [file G0031446.pdf › 10/G0031446.pdf]

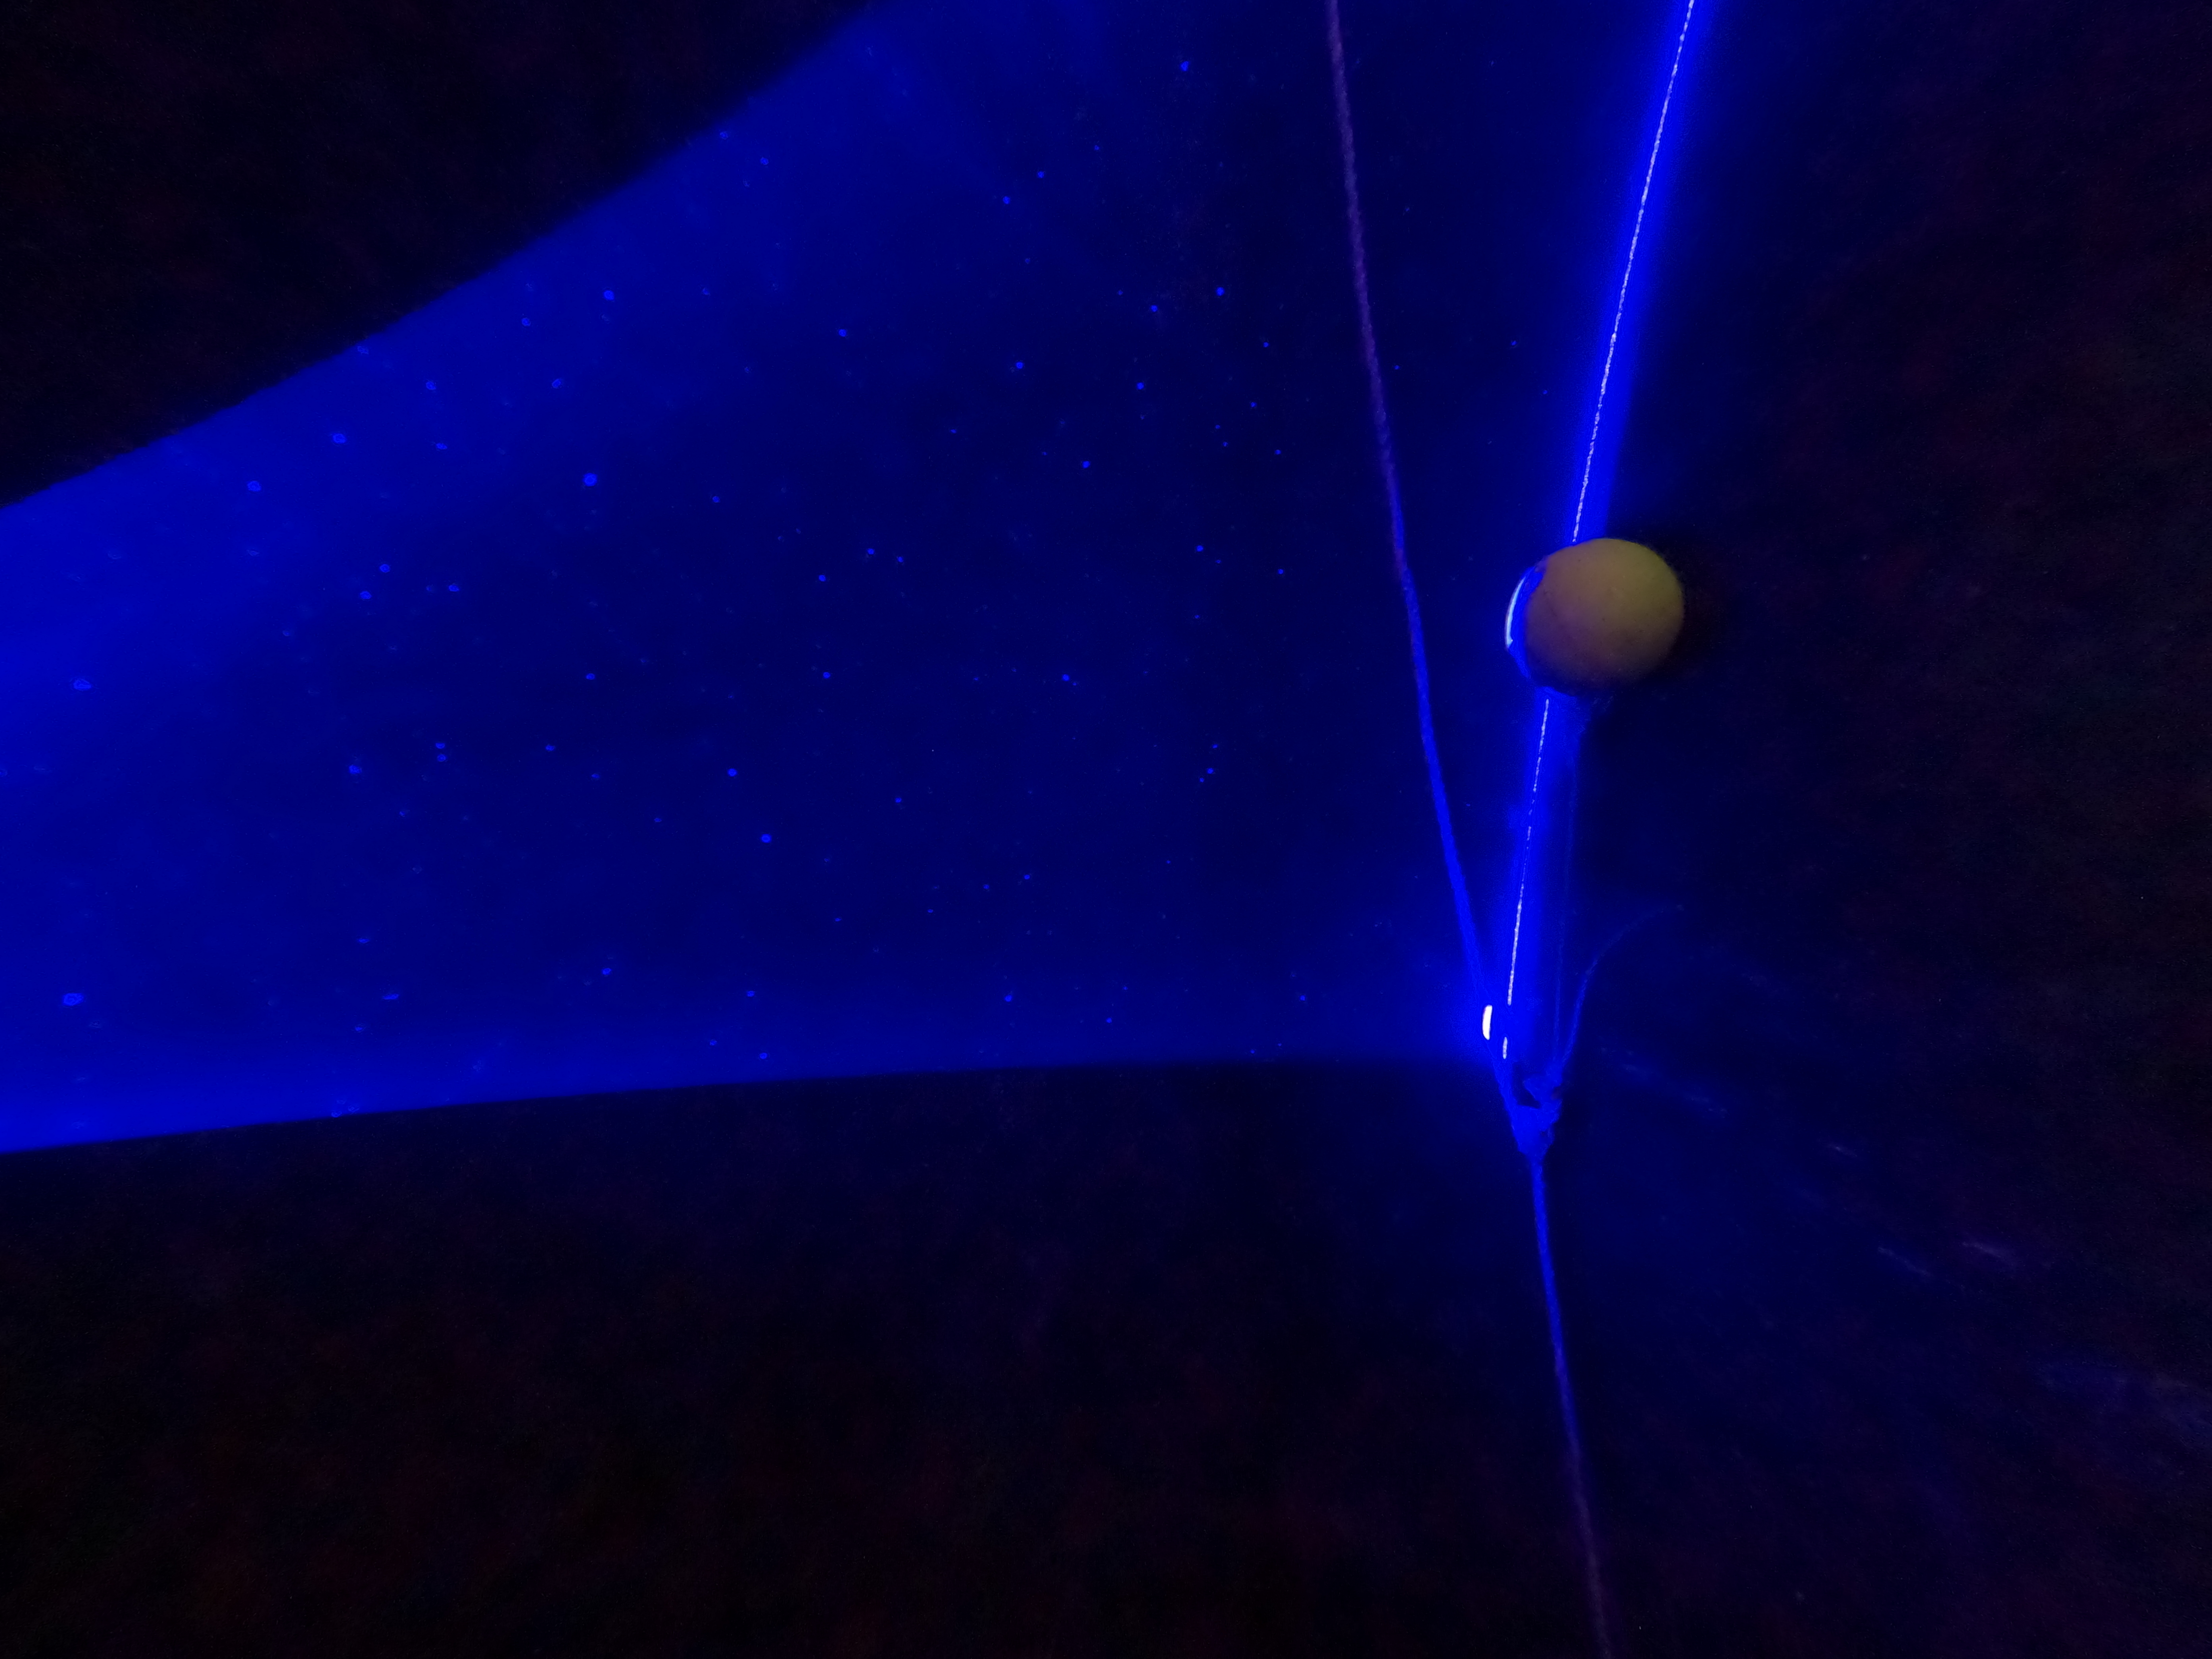

Supplement: Supplementary file 1093 [file G0031447.pdf › 10/G0031447.pdf]

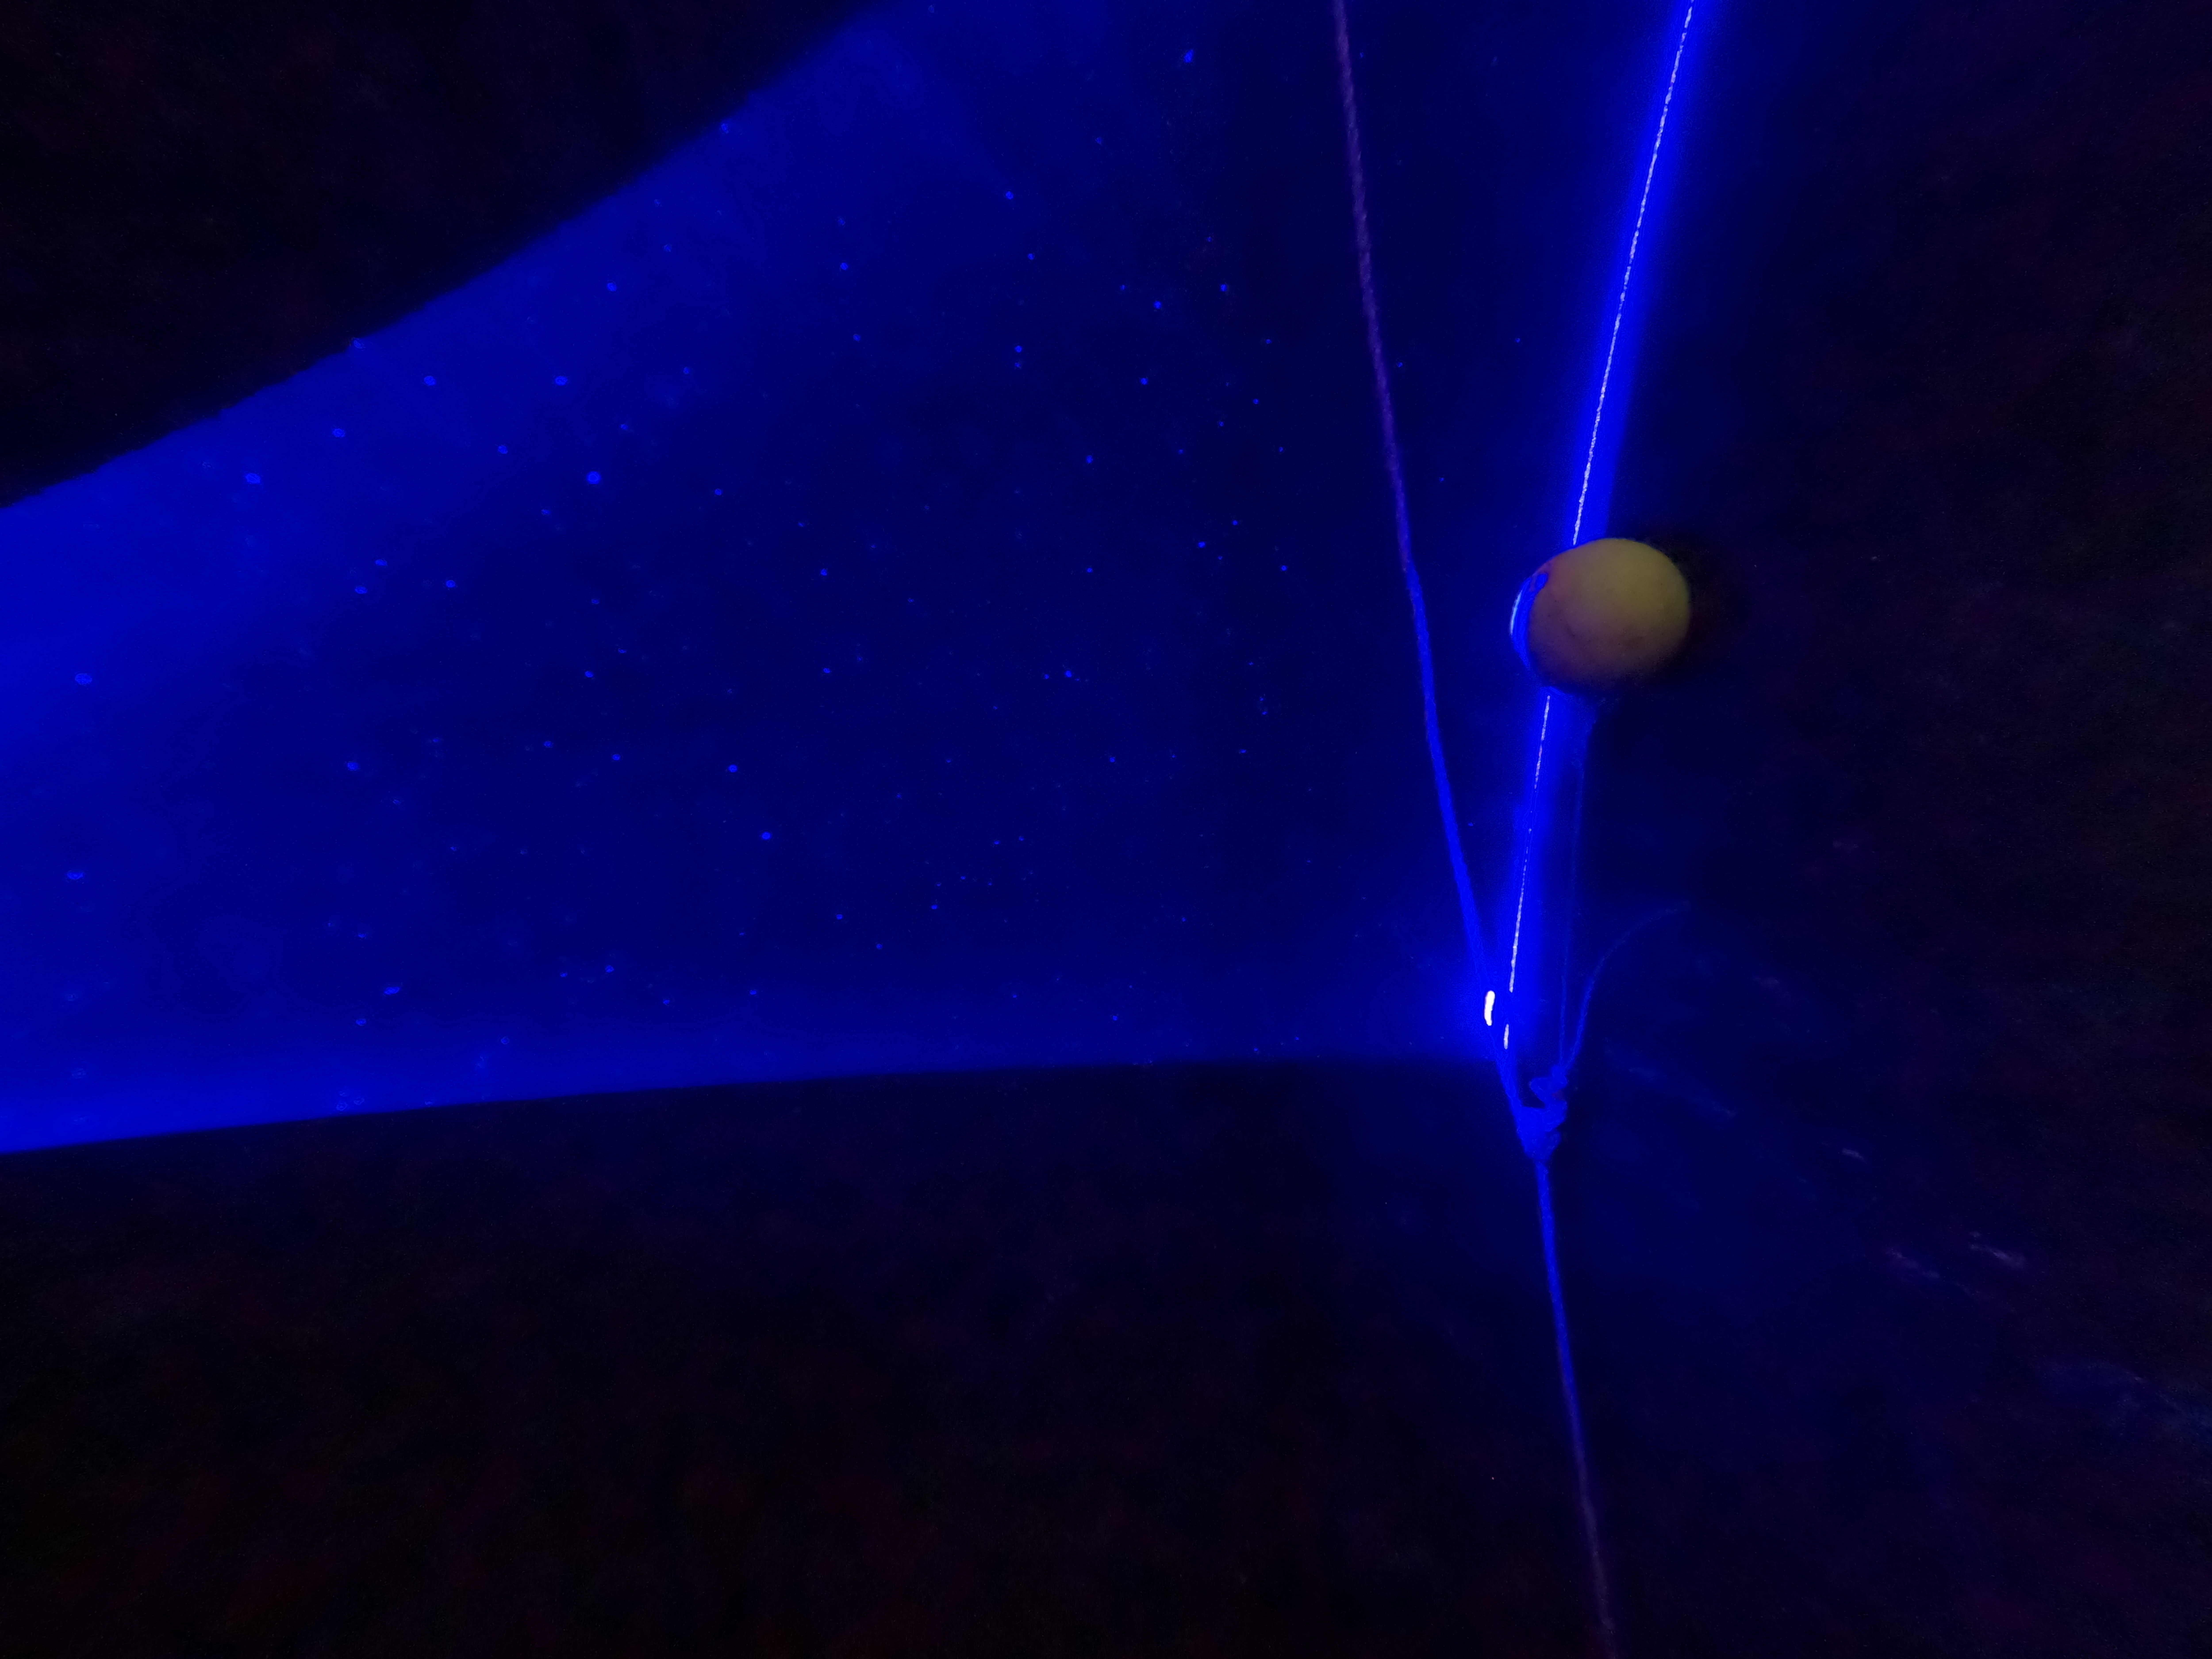

Supplement: Supplementary file 1094 [file G0031448.pdf › 10/G0031448.pdf]

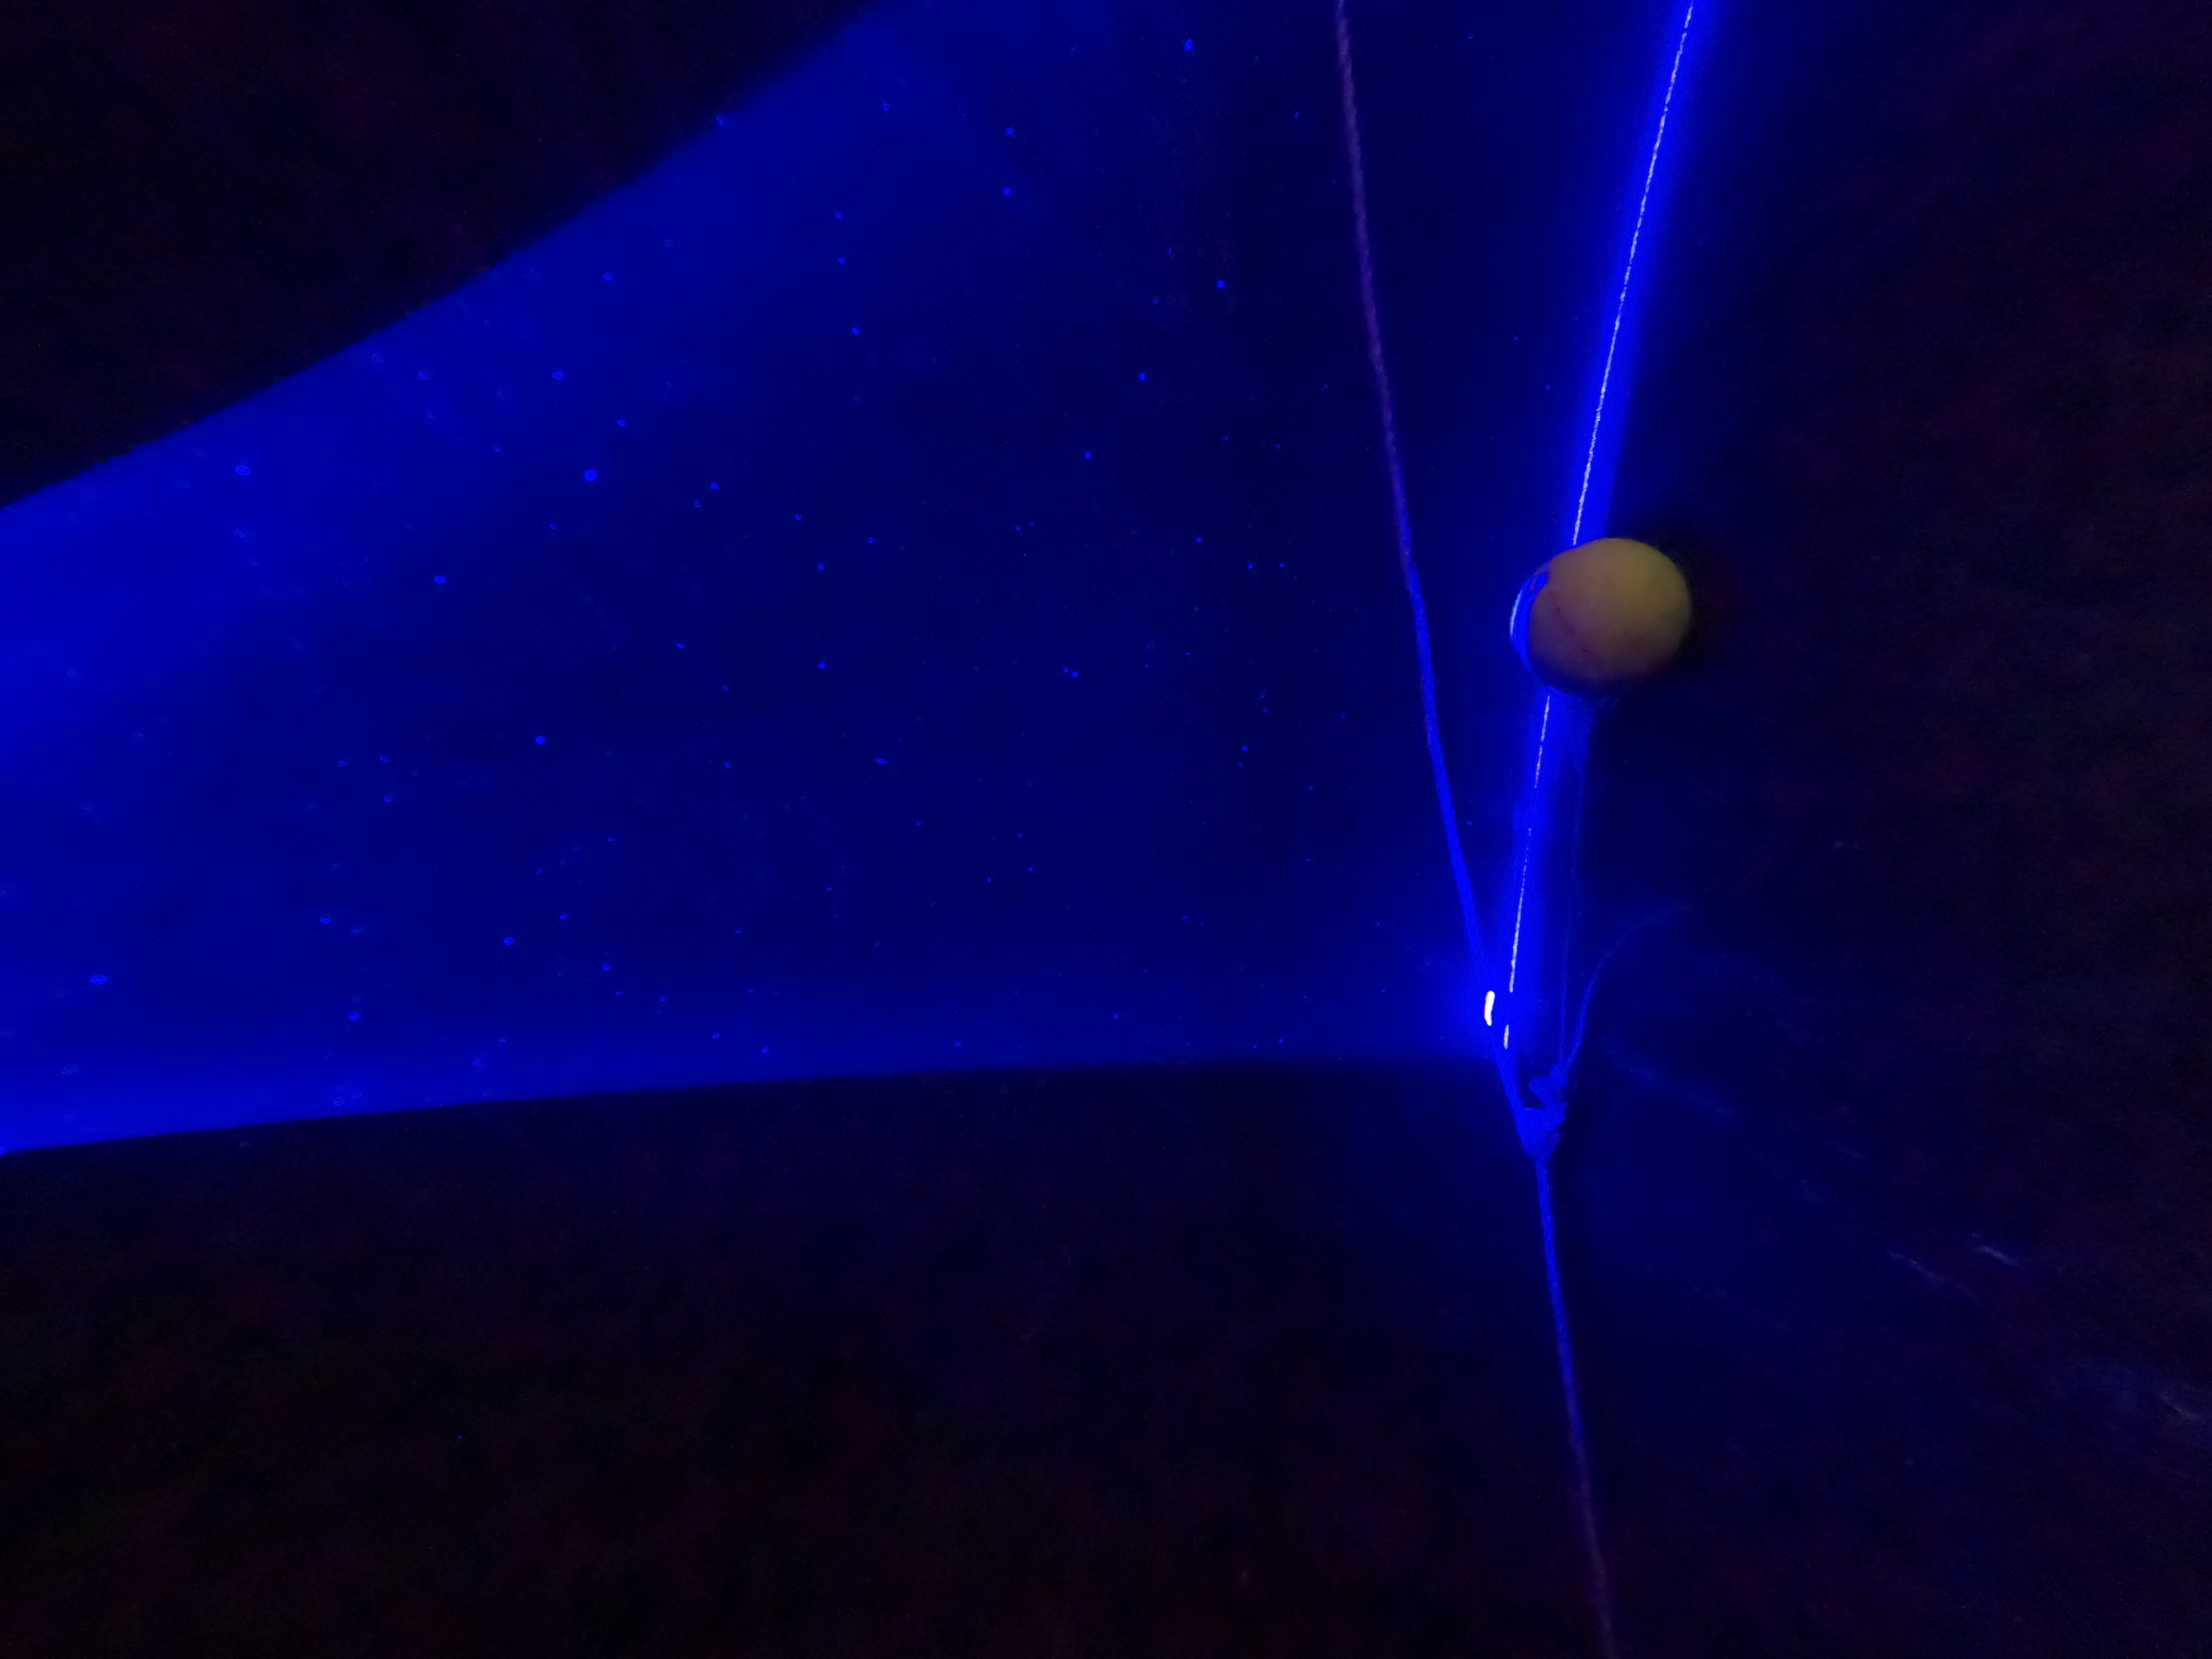

Supplement: Supplementary file 1095 [file G0031449.pdf › 10/G0031449.pdf]

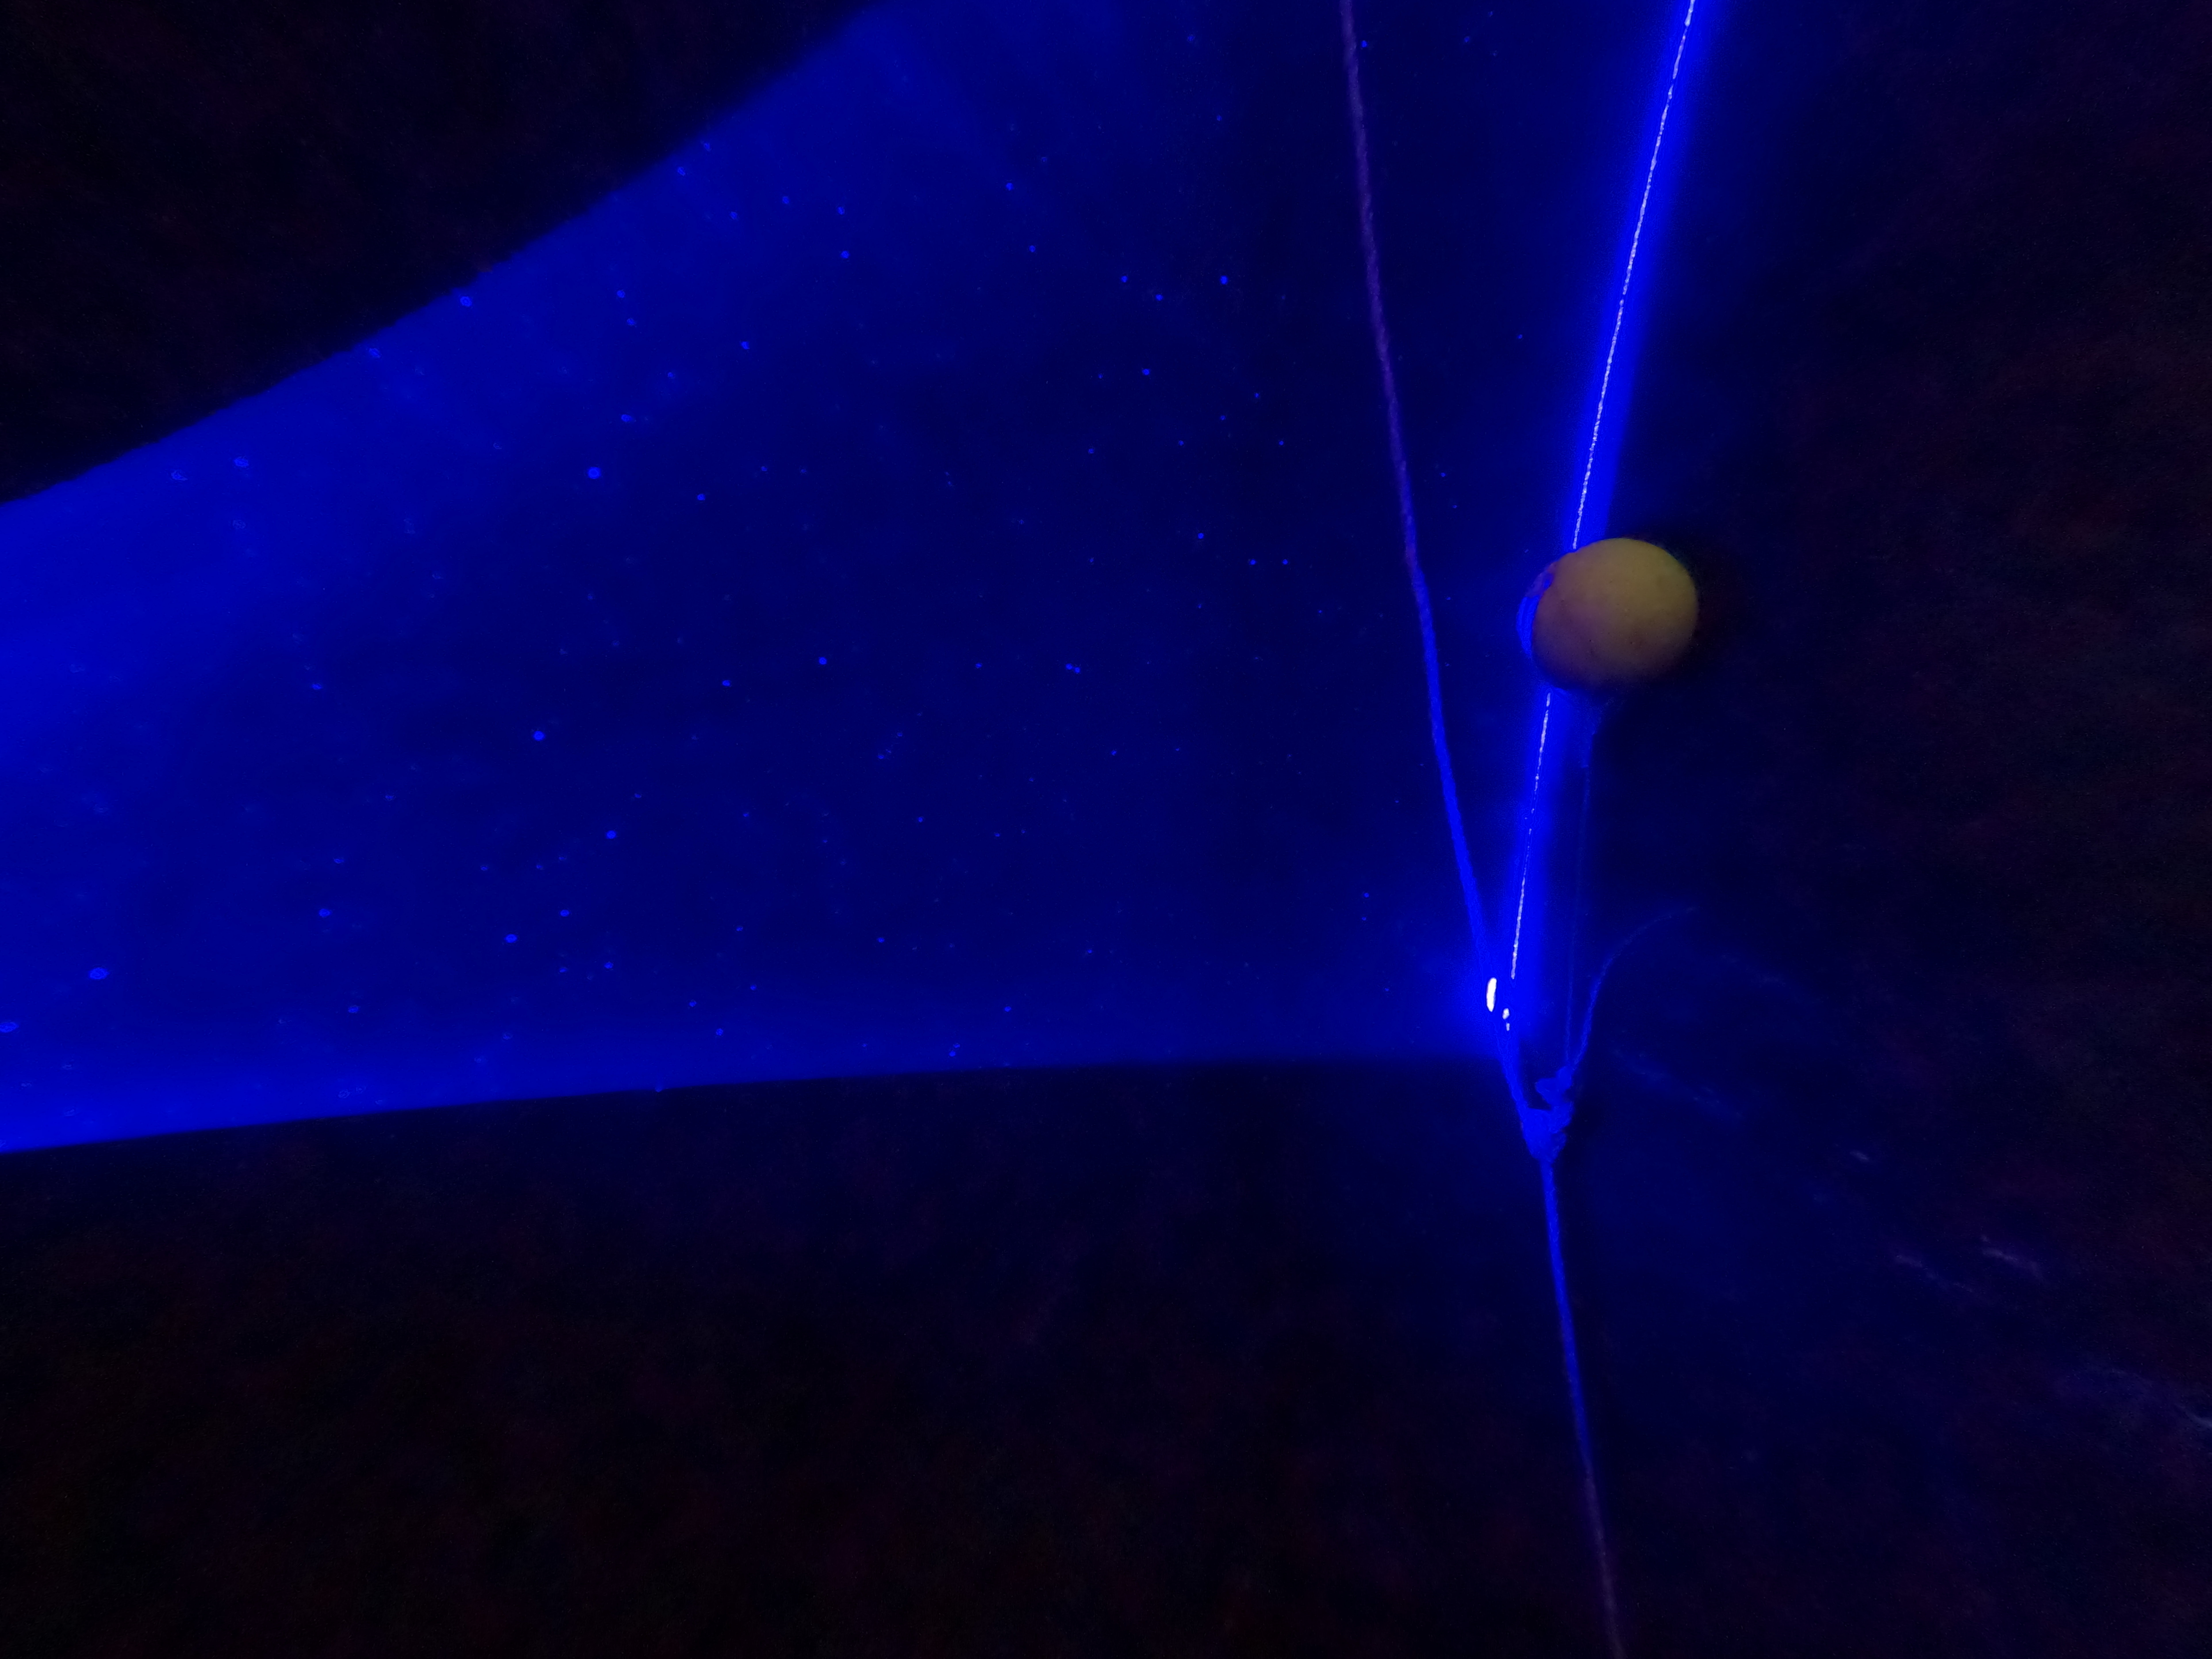

Supplement: Supplementary file 1096 [file G0031450.pdf › 10/G0031450.pdf]

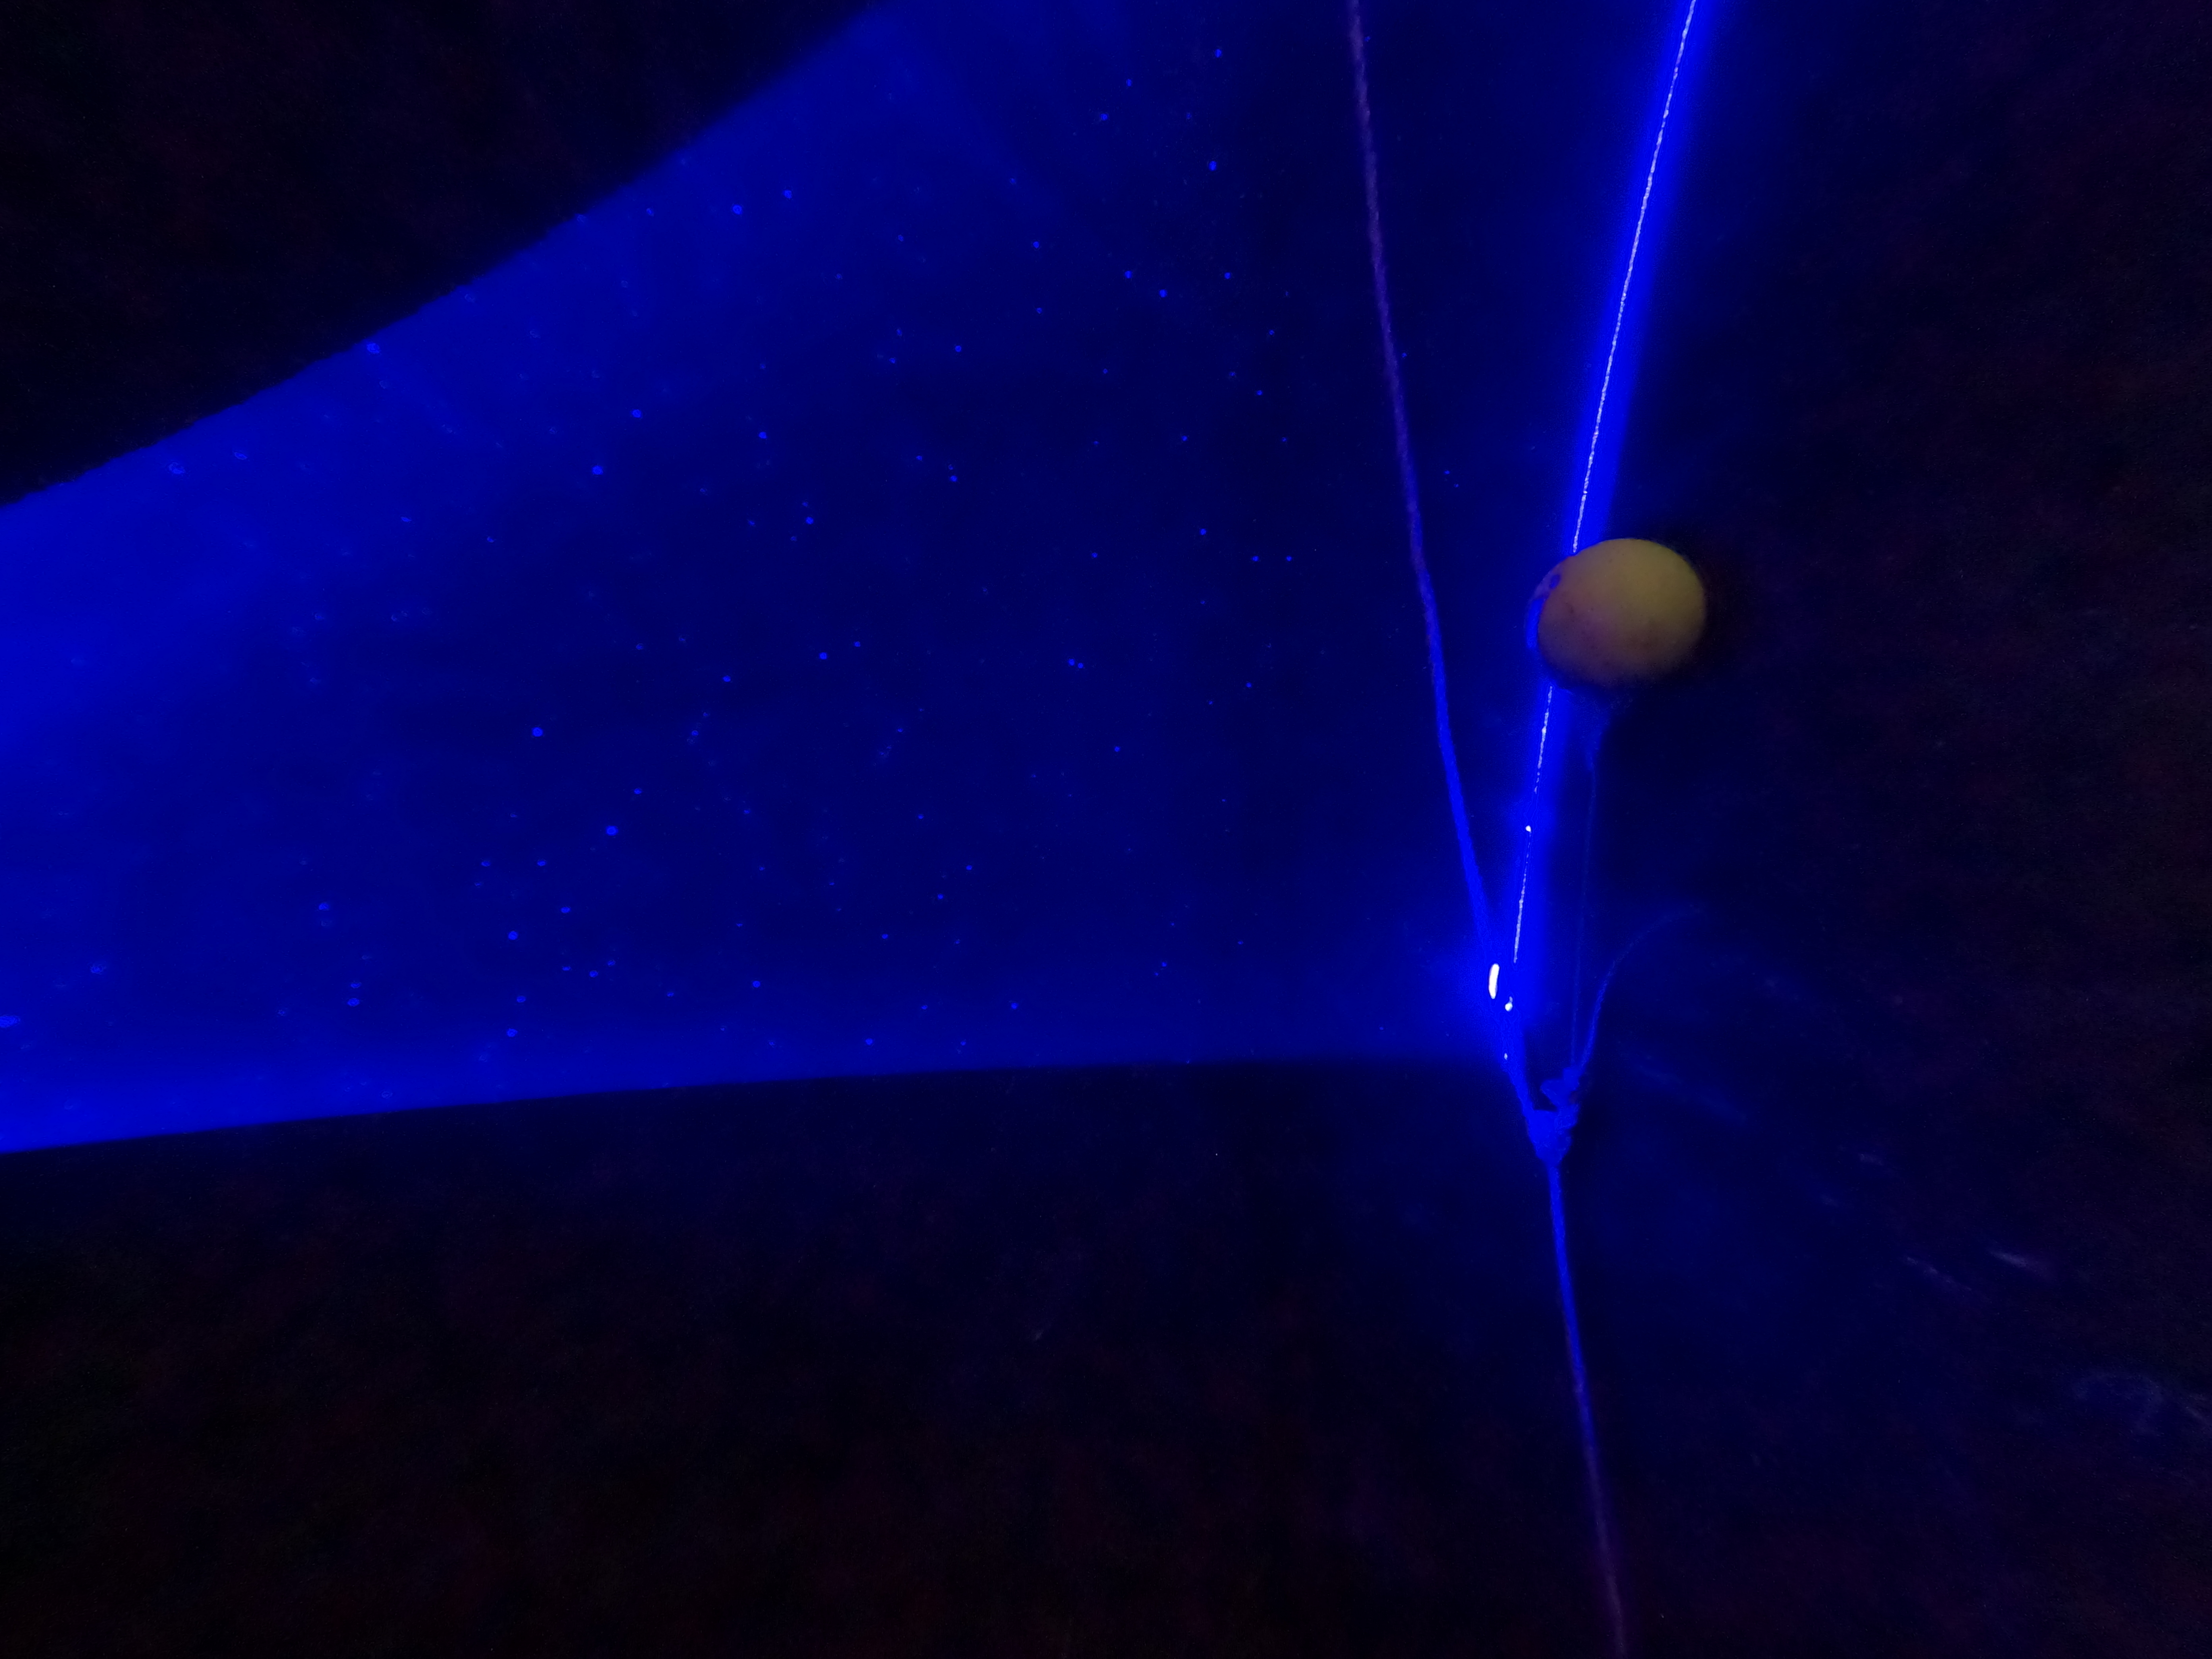

Supplement: Supplementary file 1097 [file G0031451.pdf › 10/G0031451.pdf]

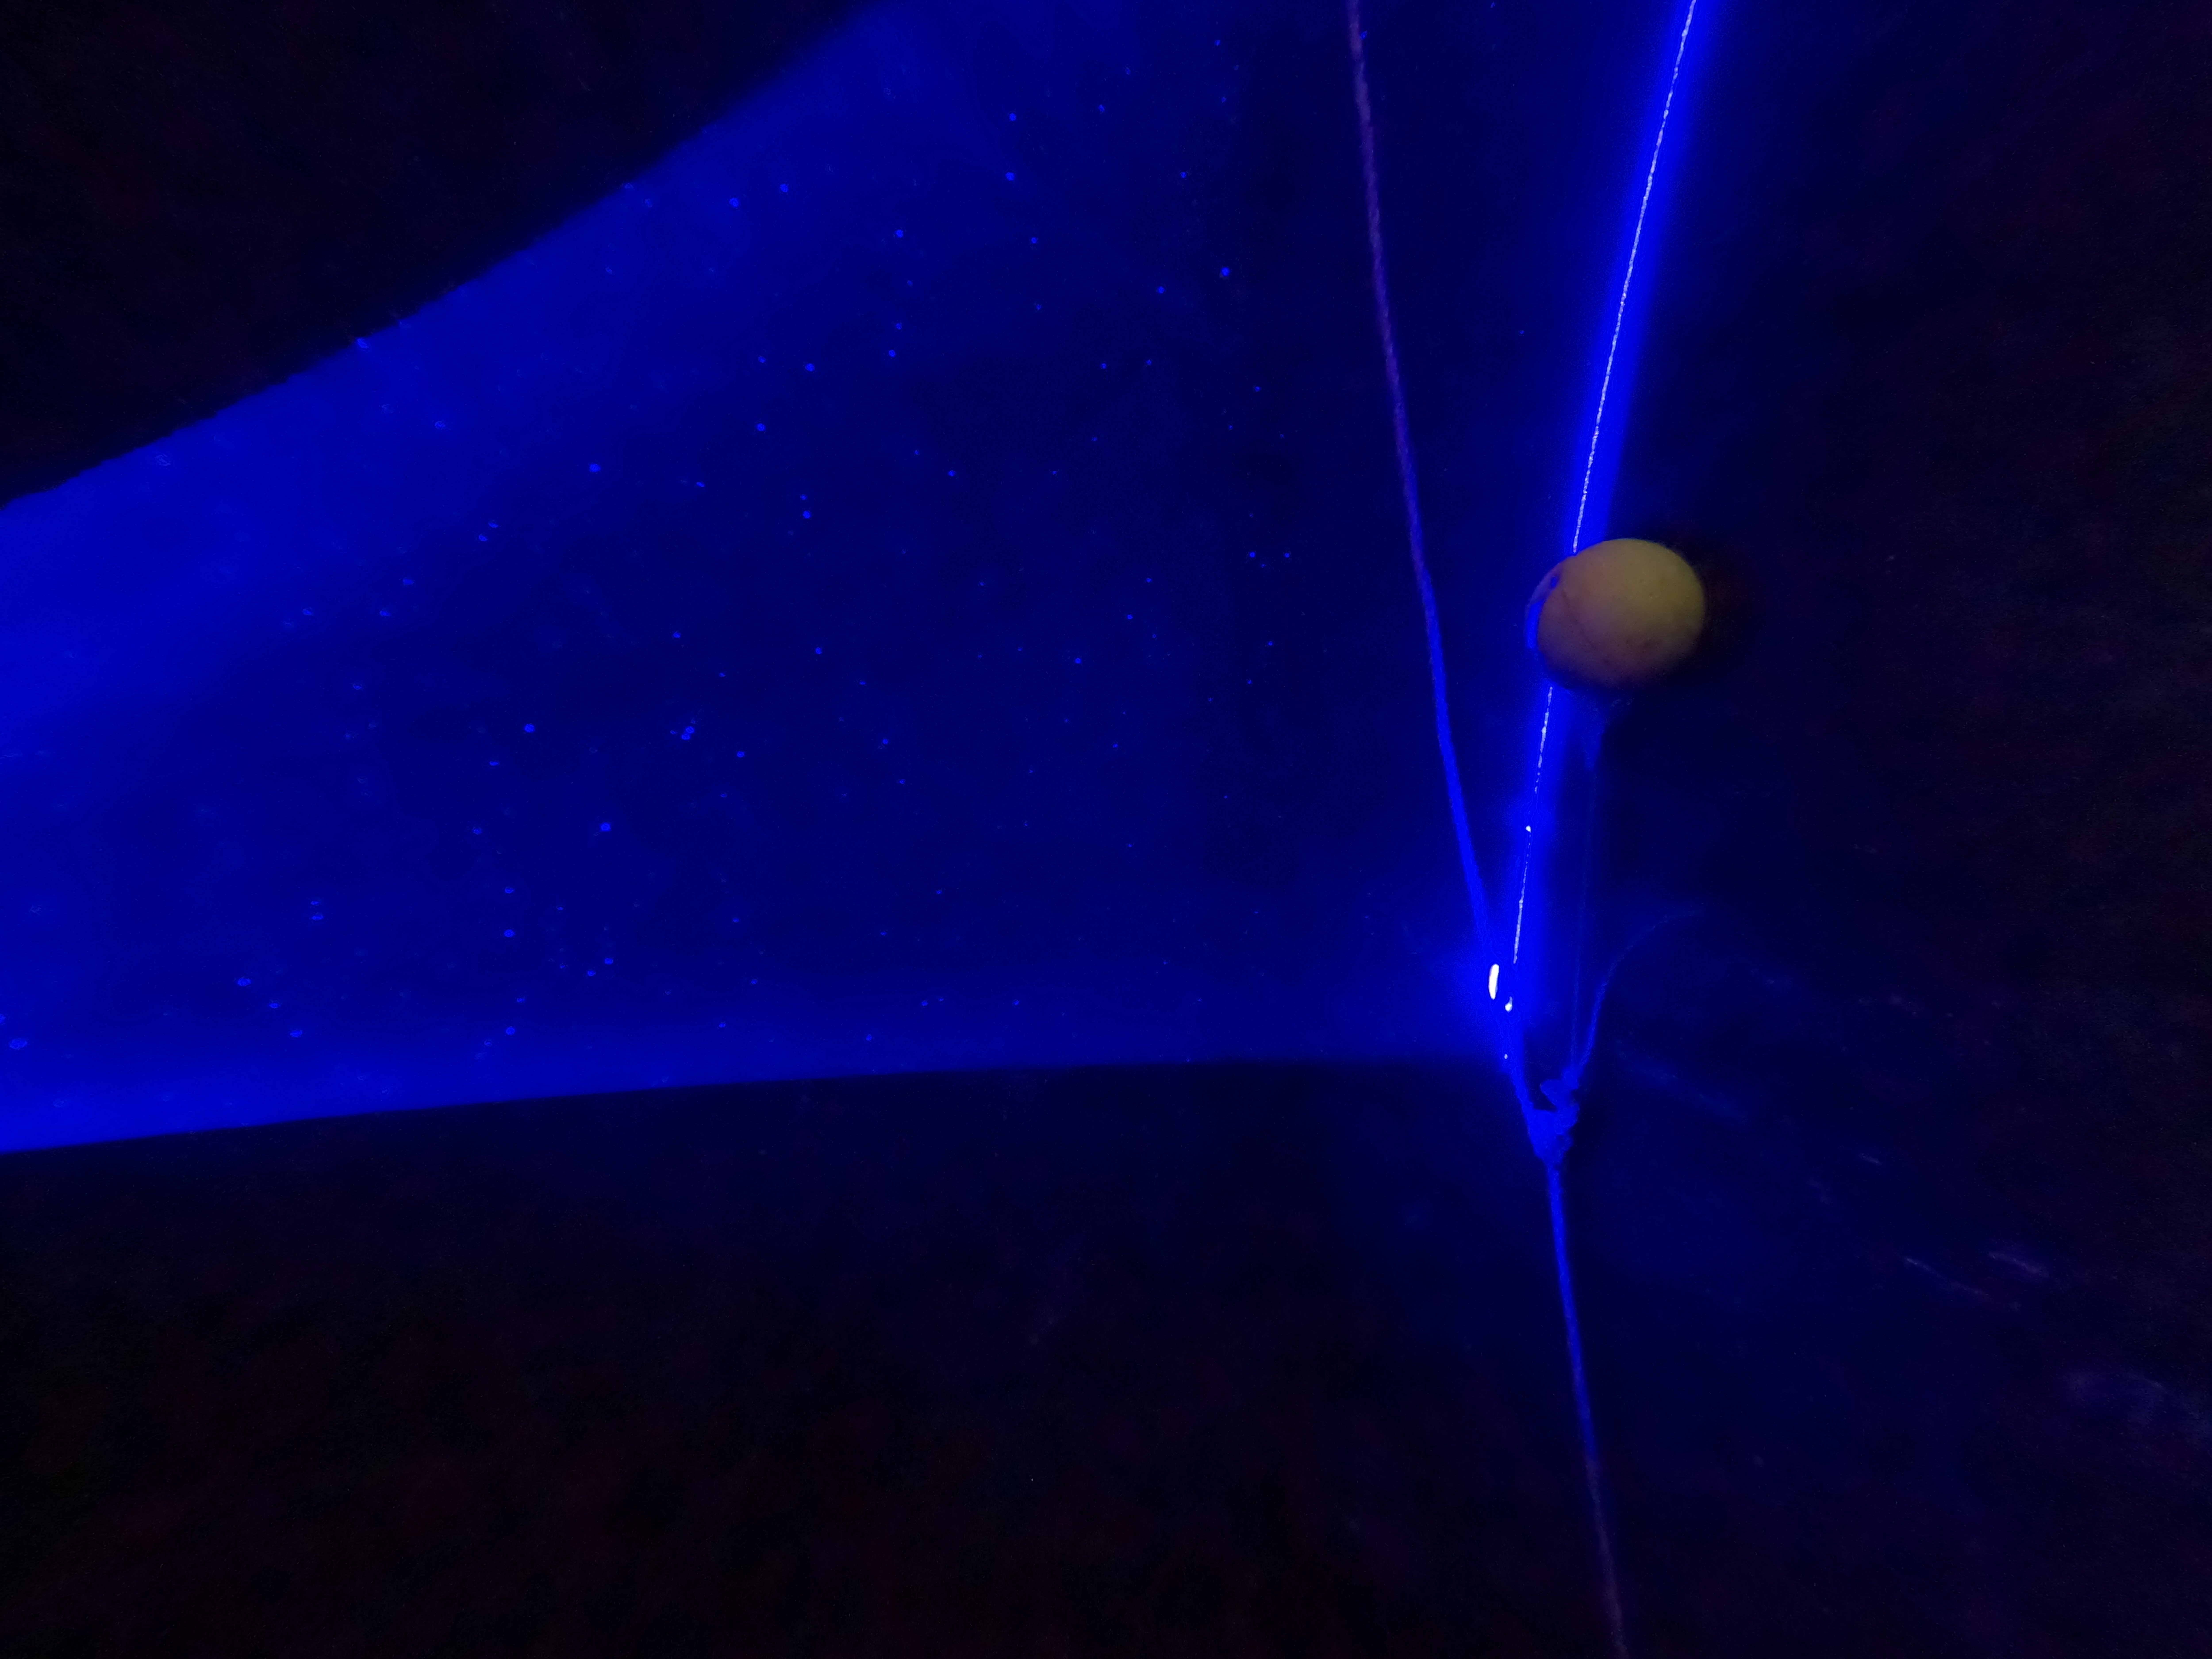

Supplement: Supplementary file 1098 [file G0031452.pdf › 10/G0031452.pdf]

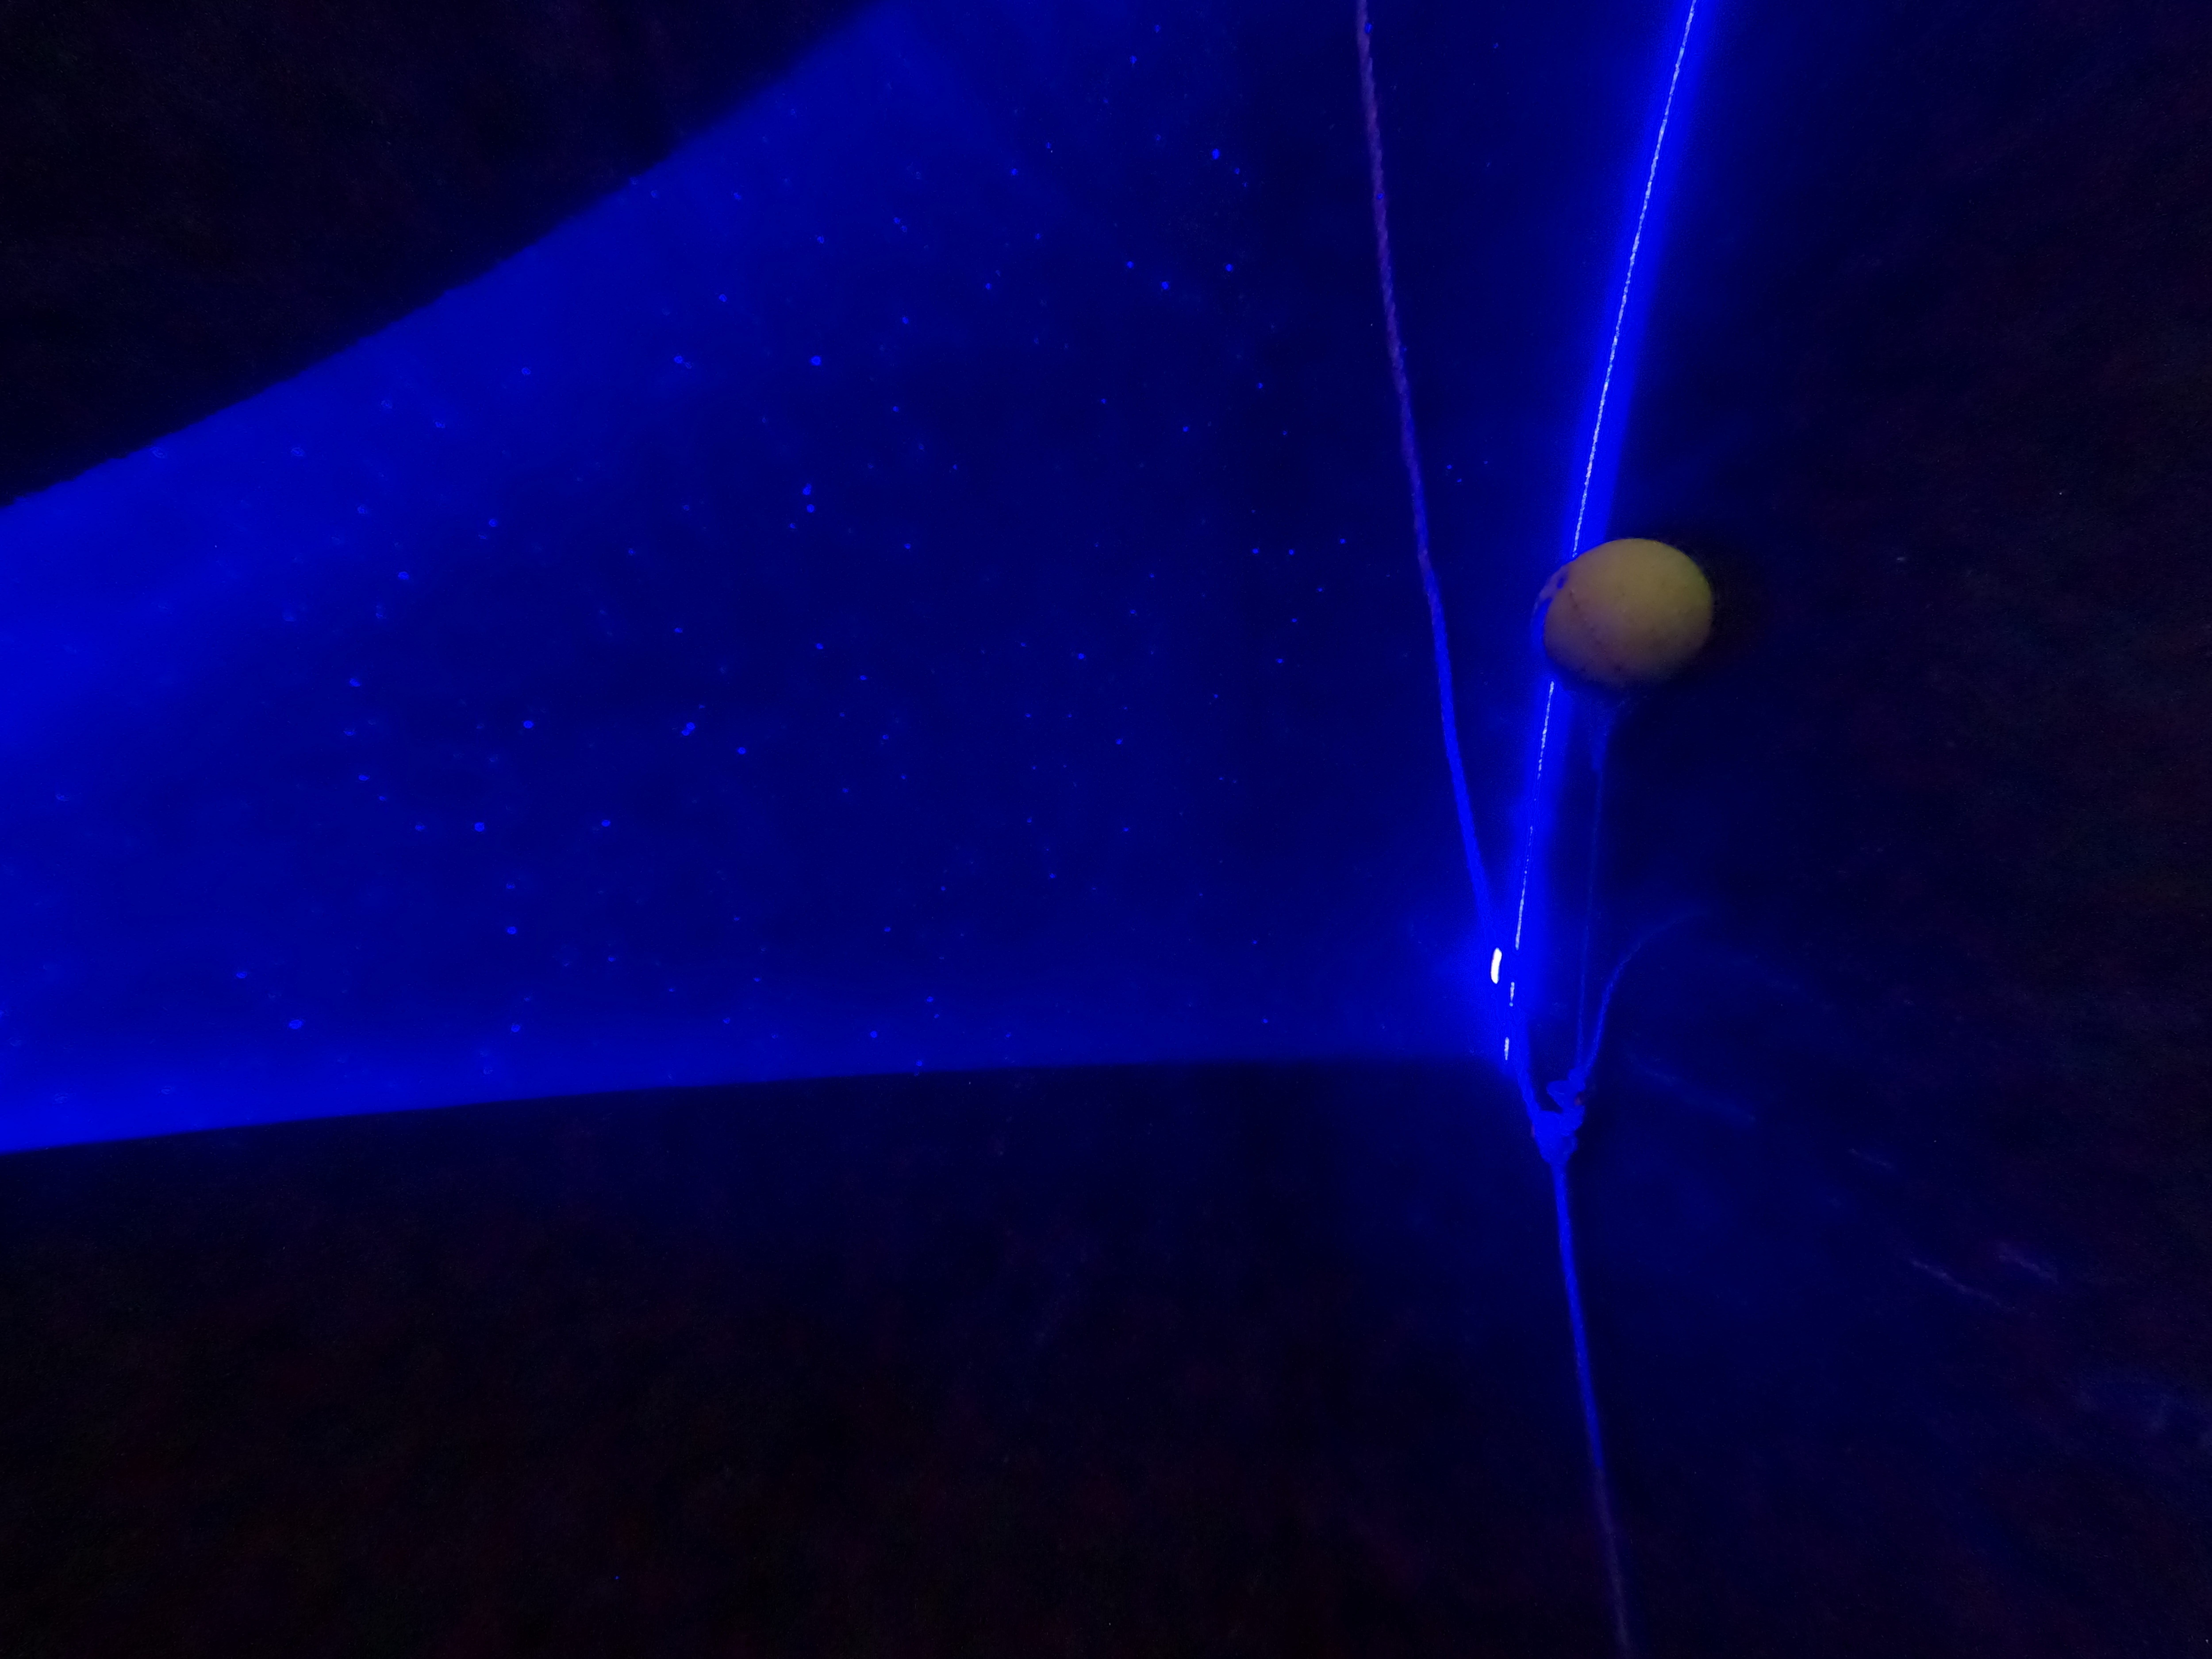

Supplement: Supplementary file 1099 [file G0031453.pdf › 10/G0031453.pdf]

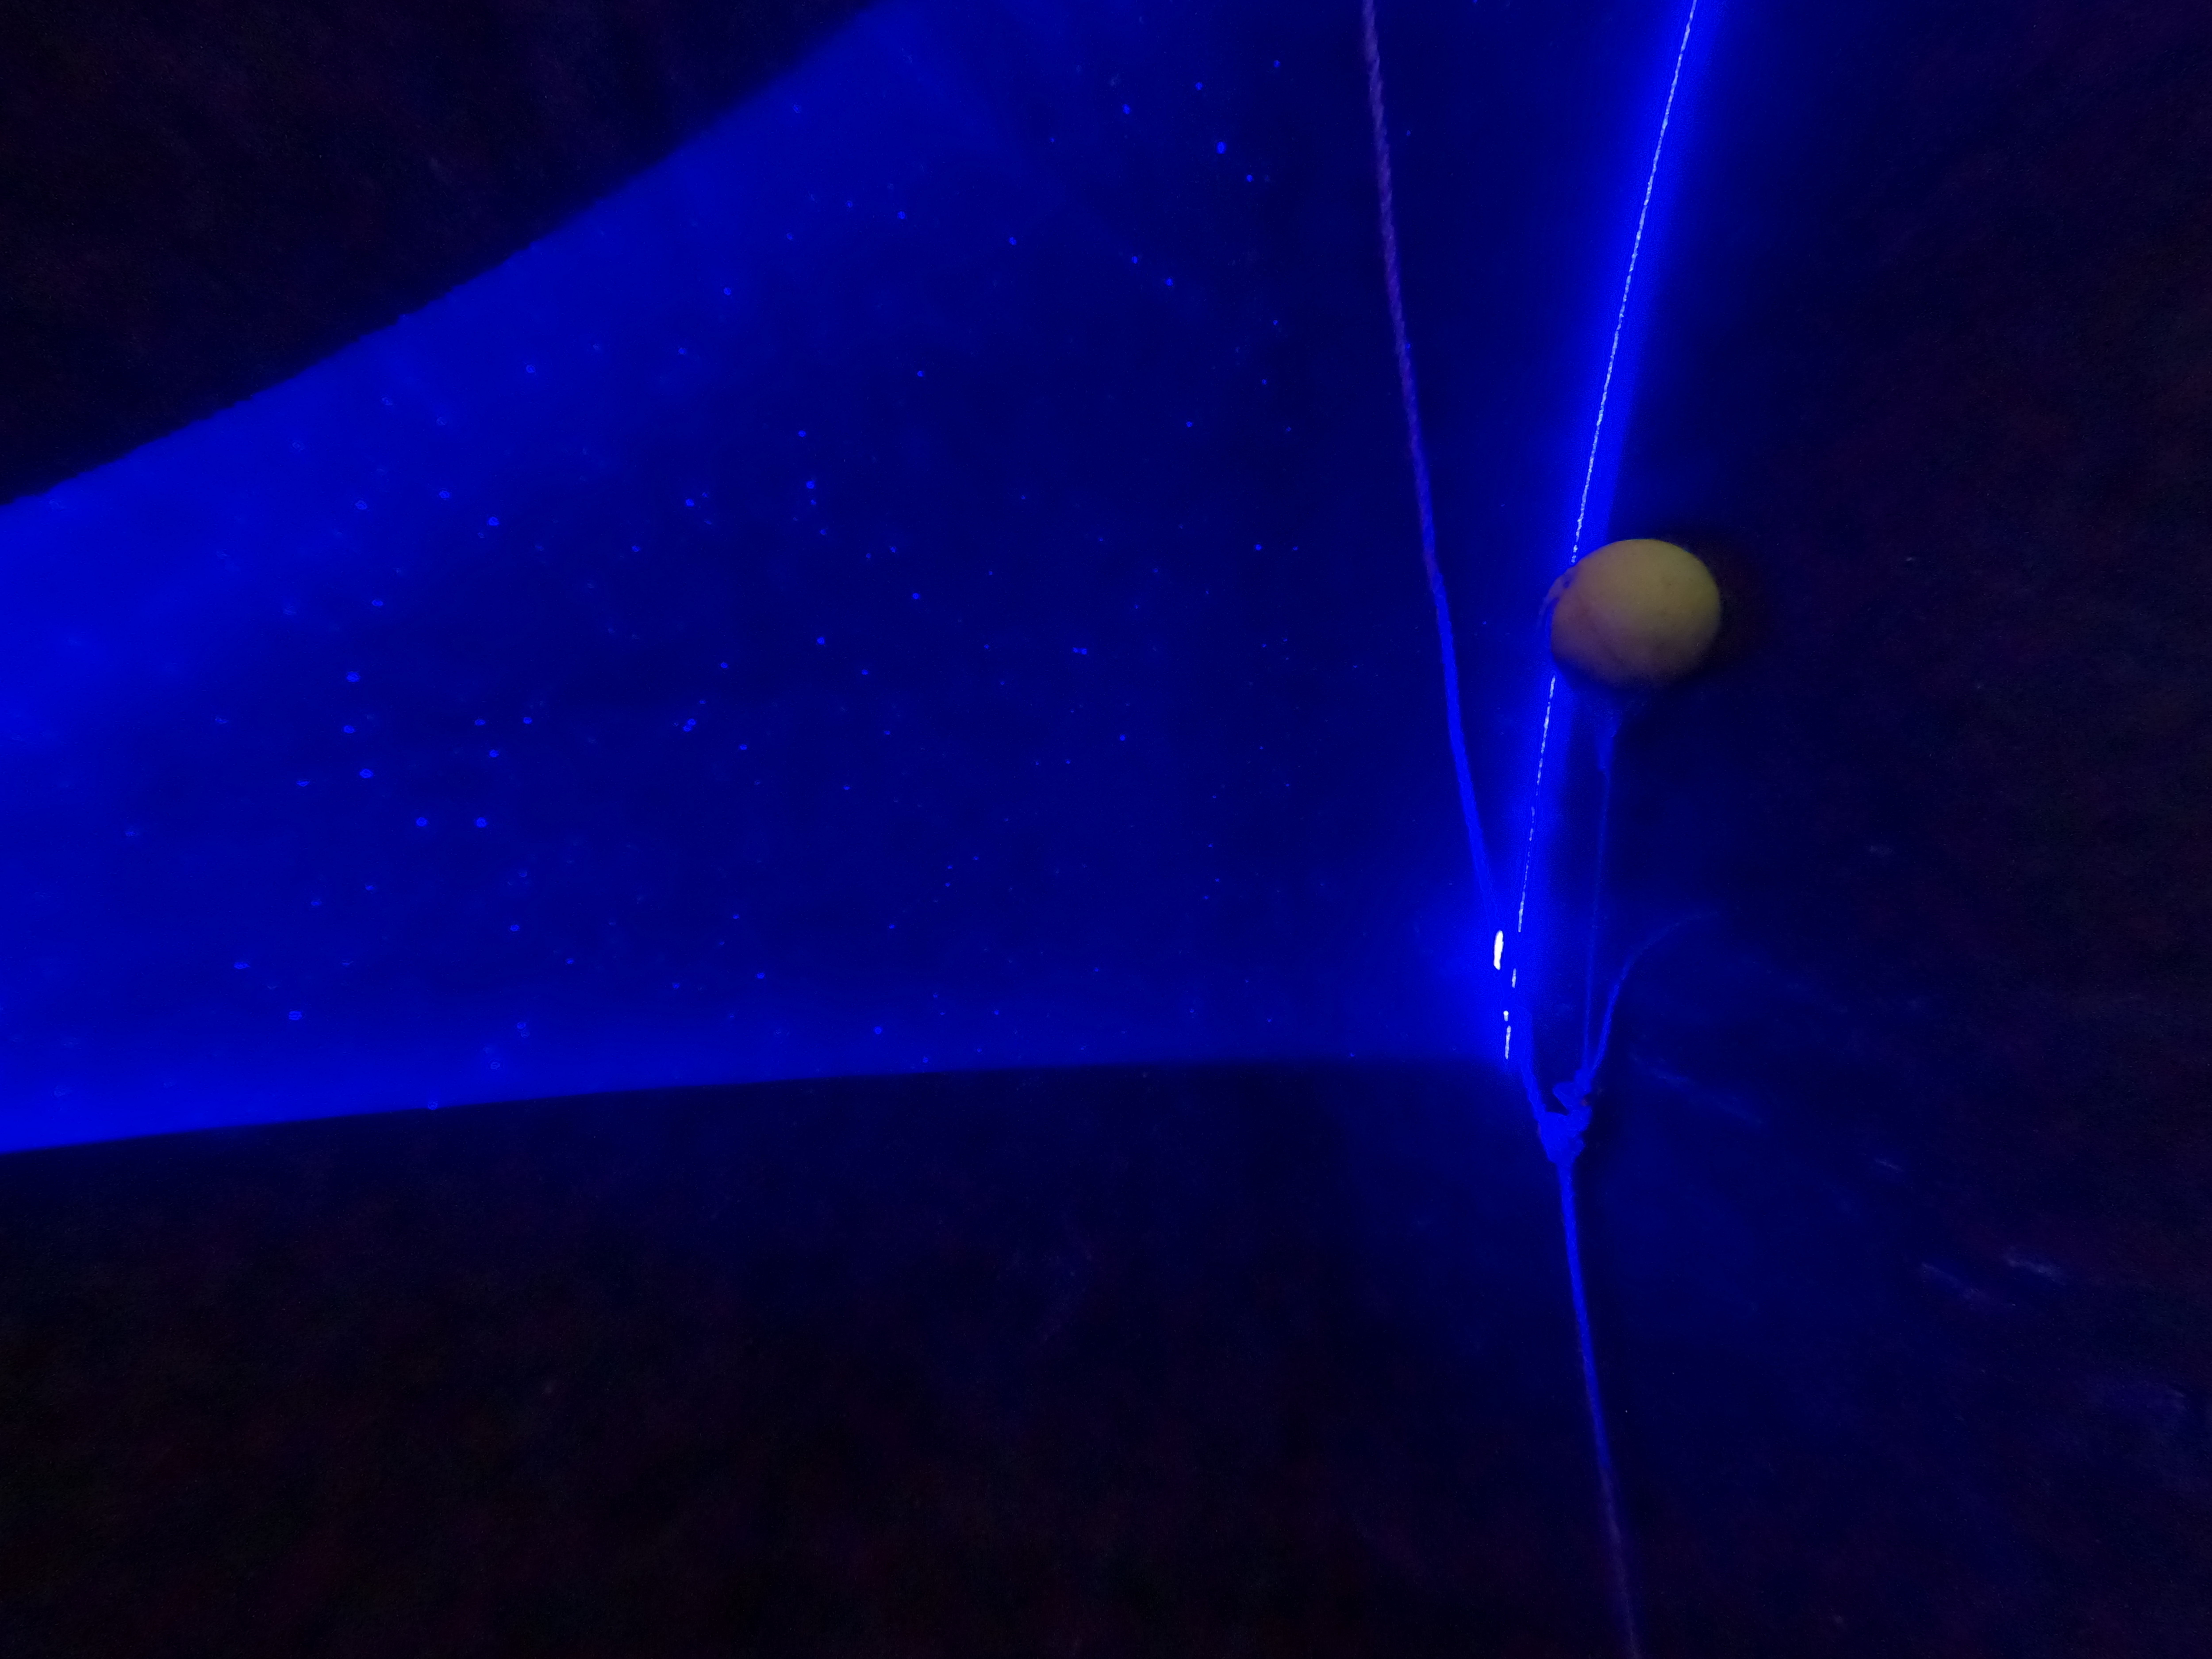

Supplement: Supplementary file 1100 [file G0031454.pdf › 10/G0031454.pdf]

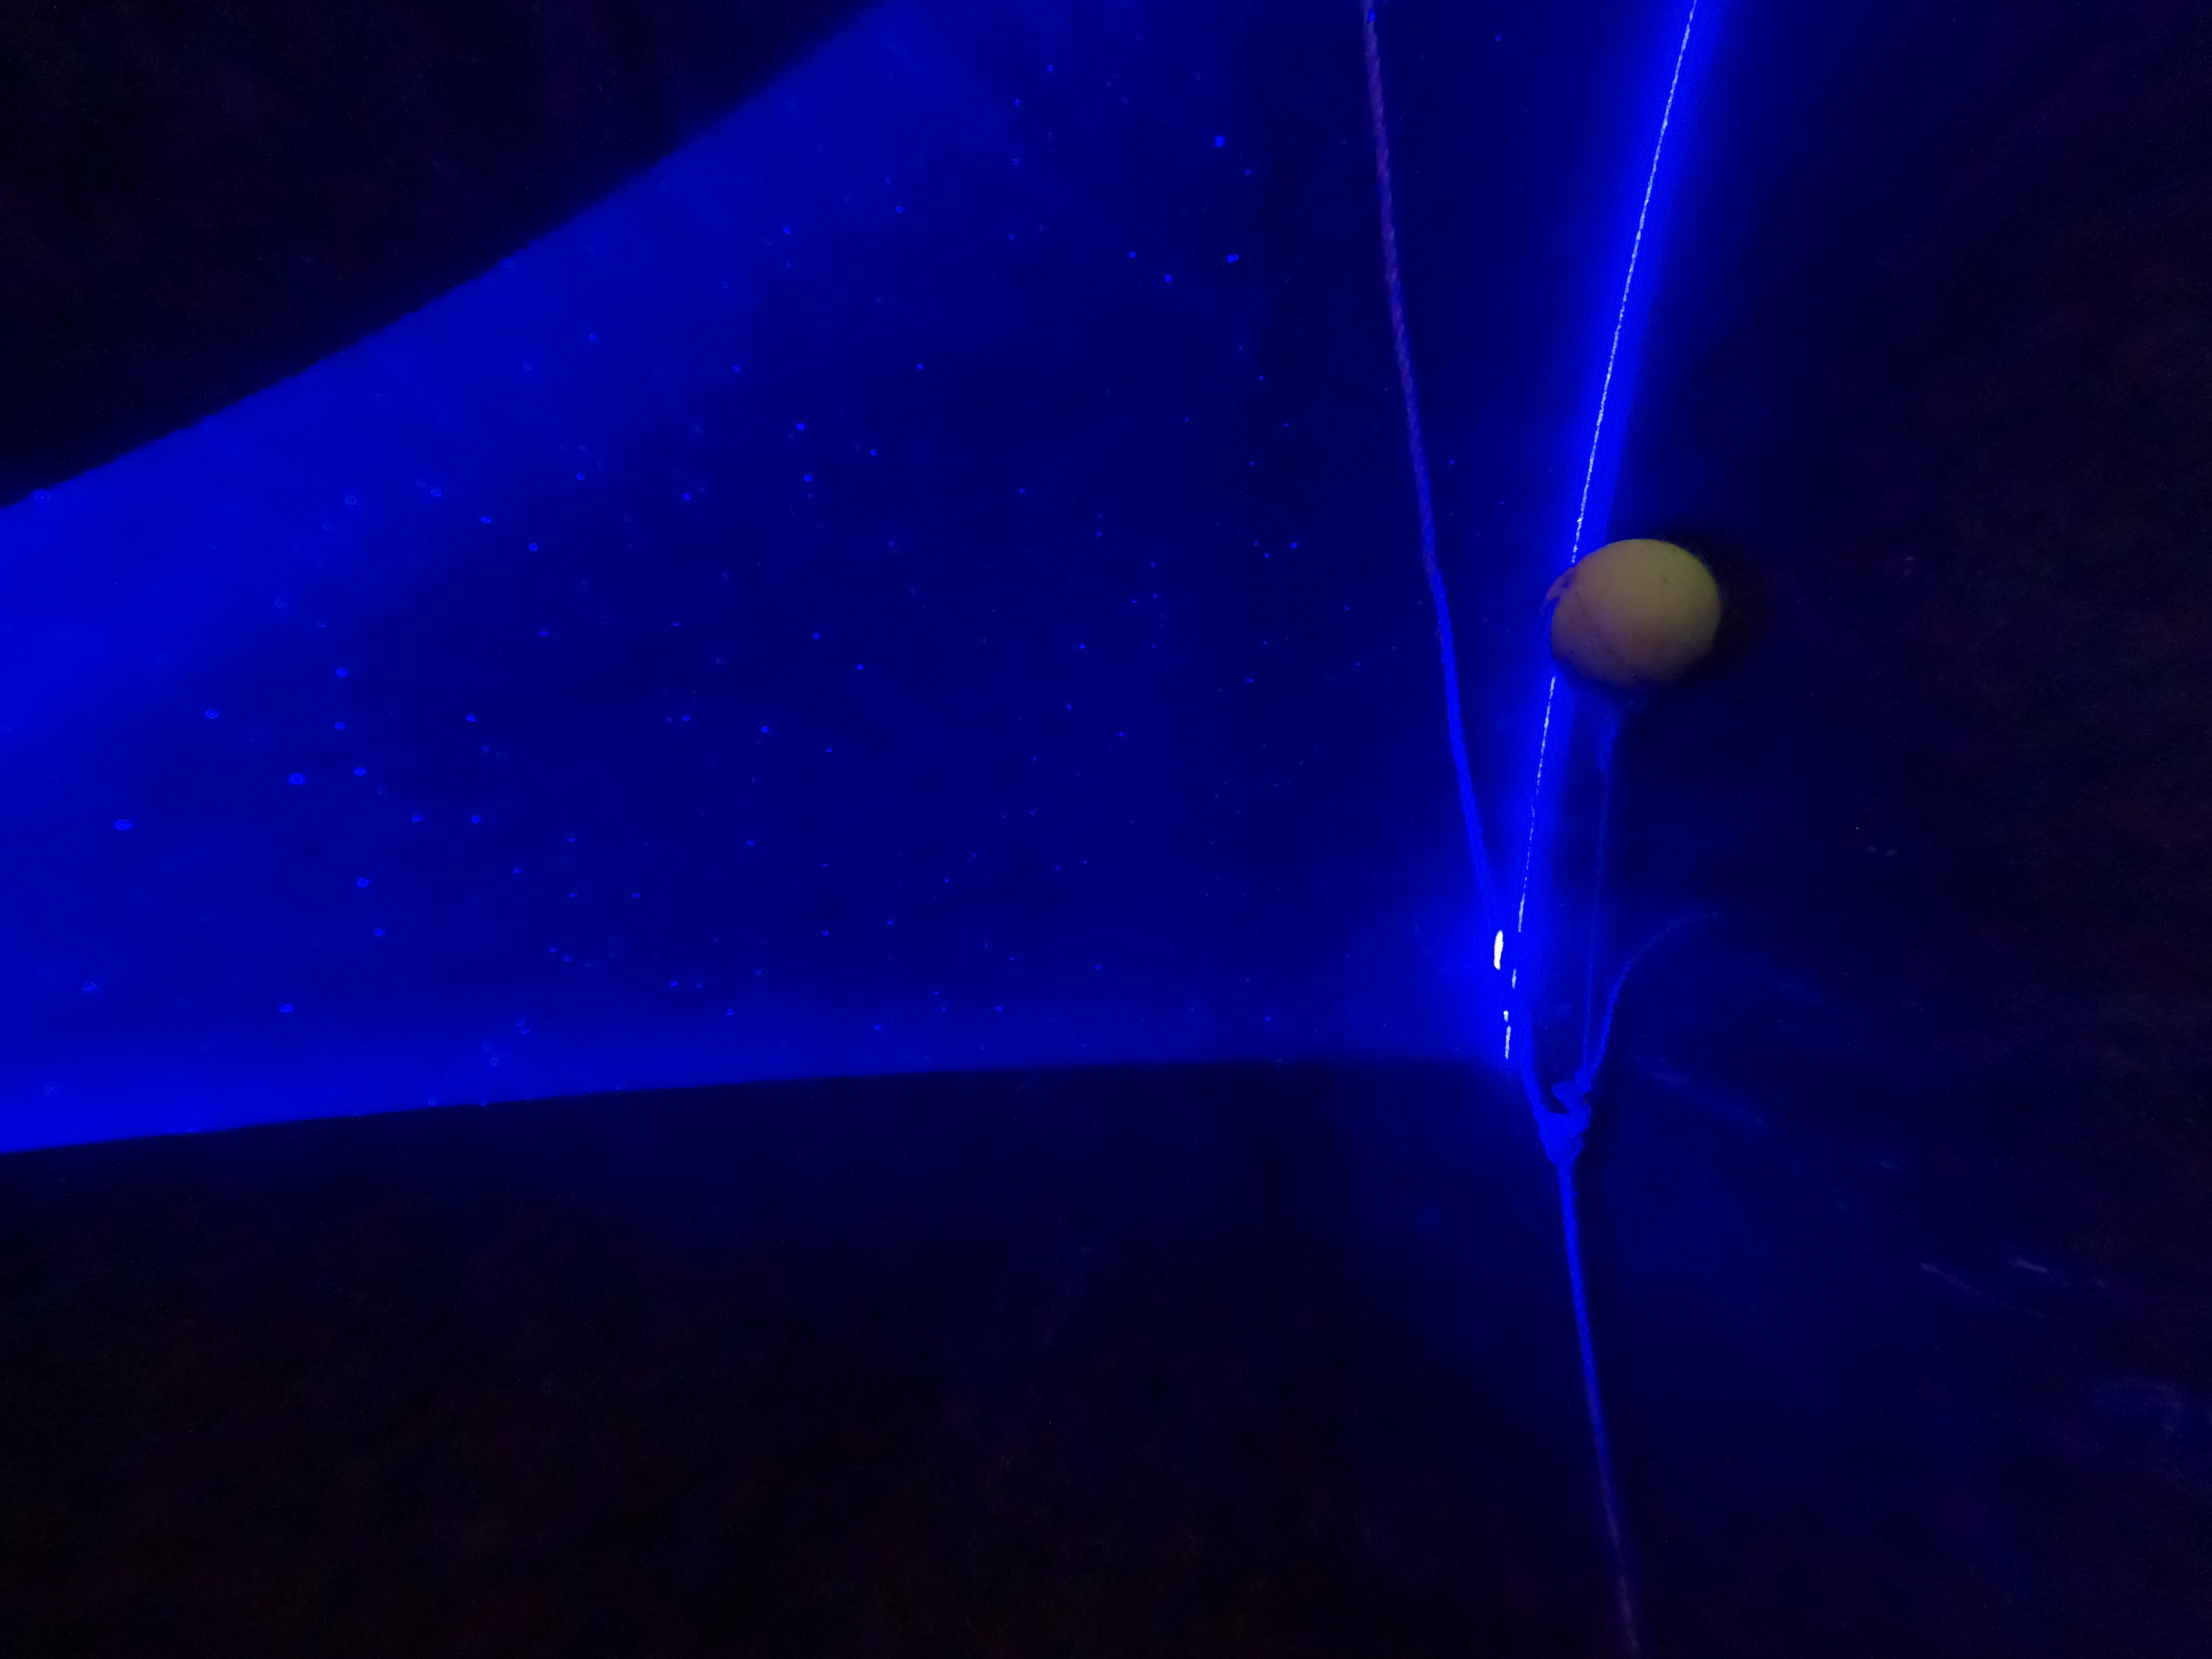

Supplement: Supplementary file 1101 [file G0031455.pdf › 10/G0031455.pdf]
