# Supplementary figures and images for: 3D reconstruction of shallow sea environment using direct system calibration and faint laser line extraction (part 12 of 35)
Source: Research Square preprint supplement (doi:10.21203/rs.3.rs-5262658/v1), 2024-12-02

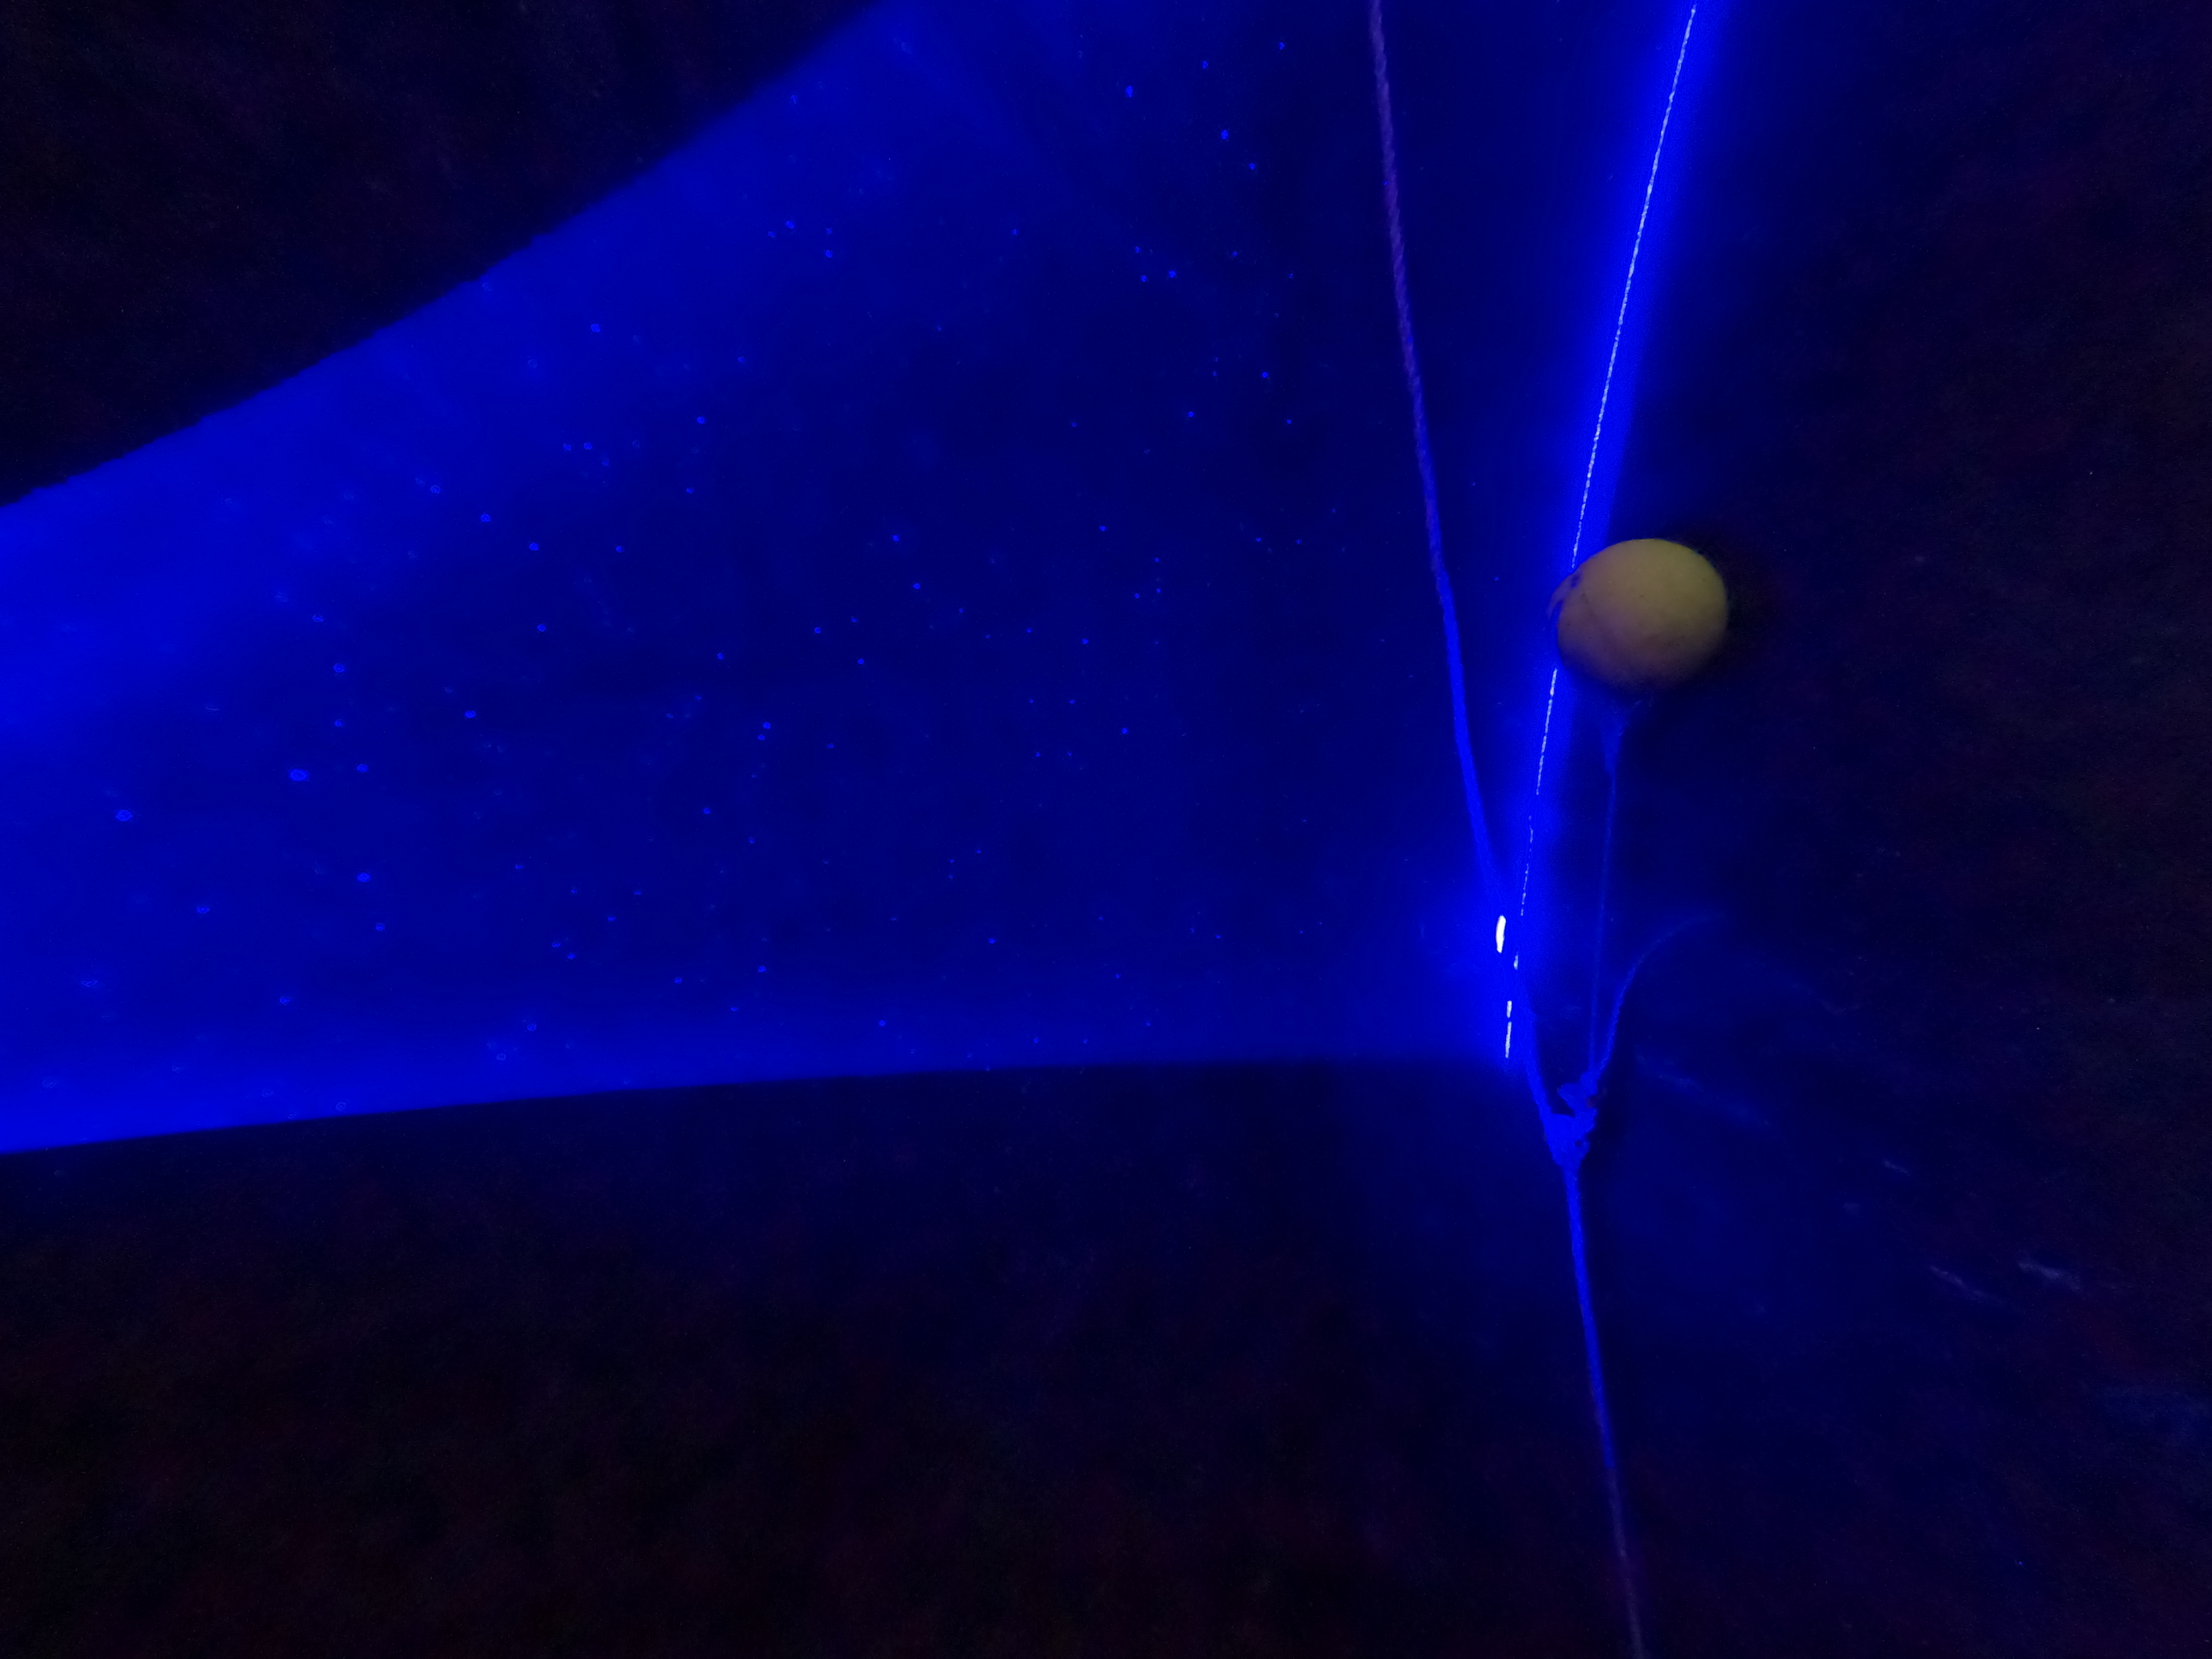

Supplement: Supplementary file 1102 [file G0031456.pdf › 10/G0031456.pdf]

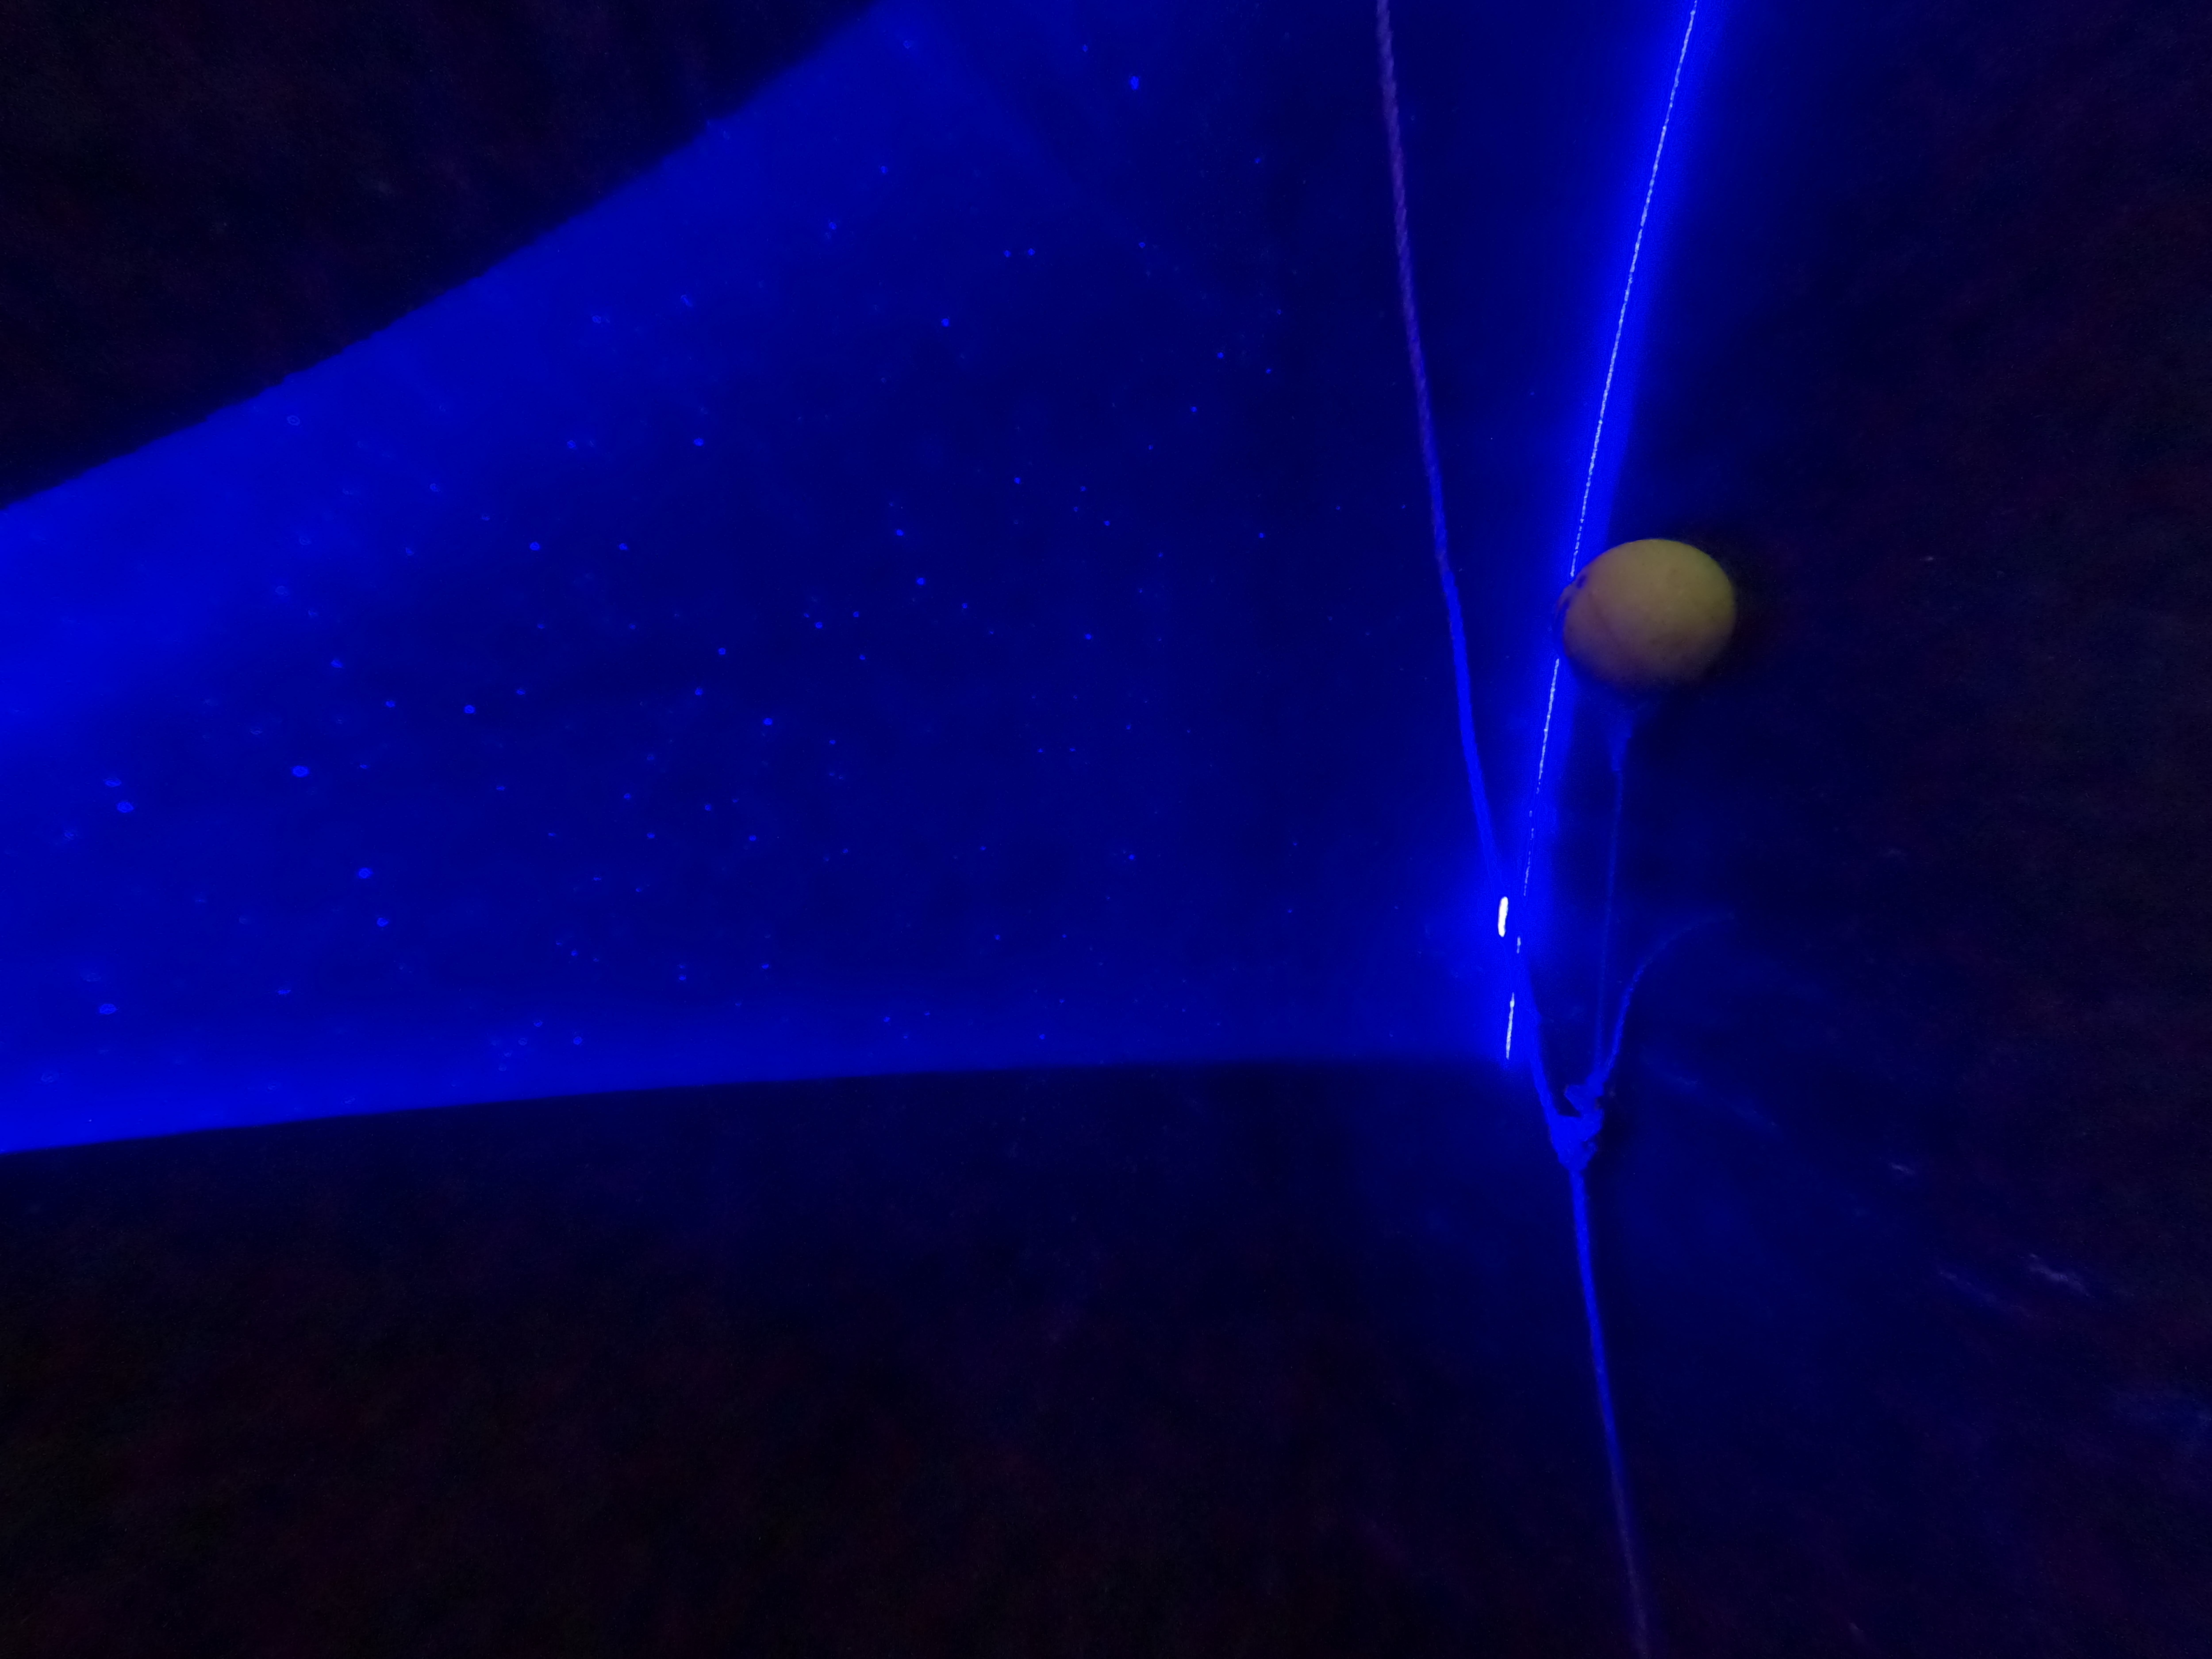

Supplement: Supplementary file 1103 [file G0031457.pdf › 10/G0031457.pdf]

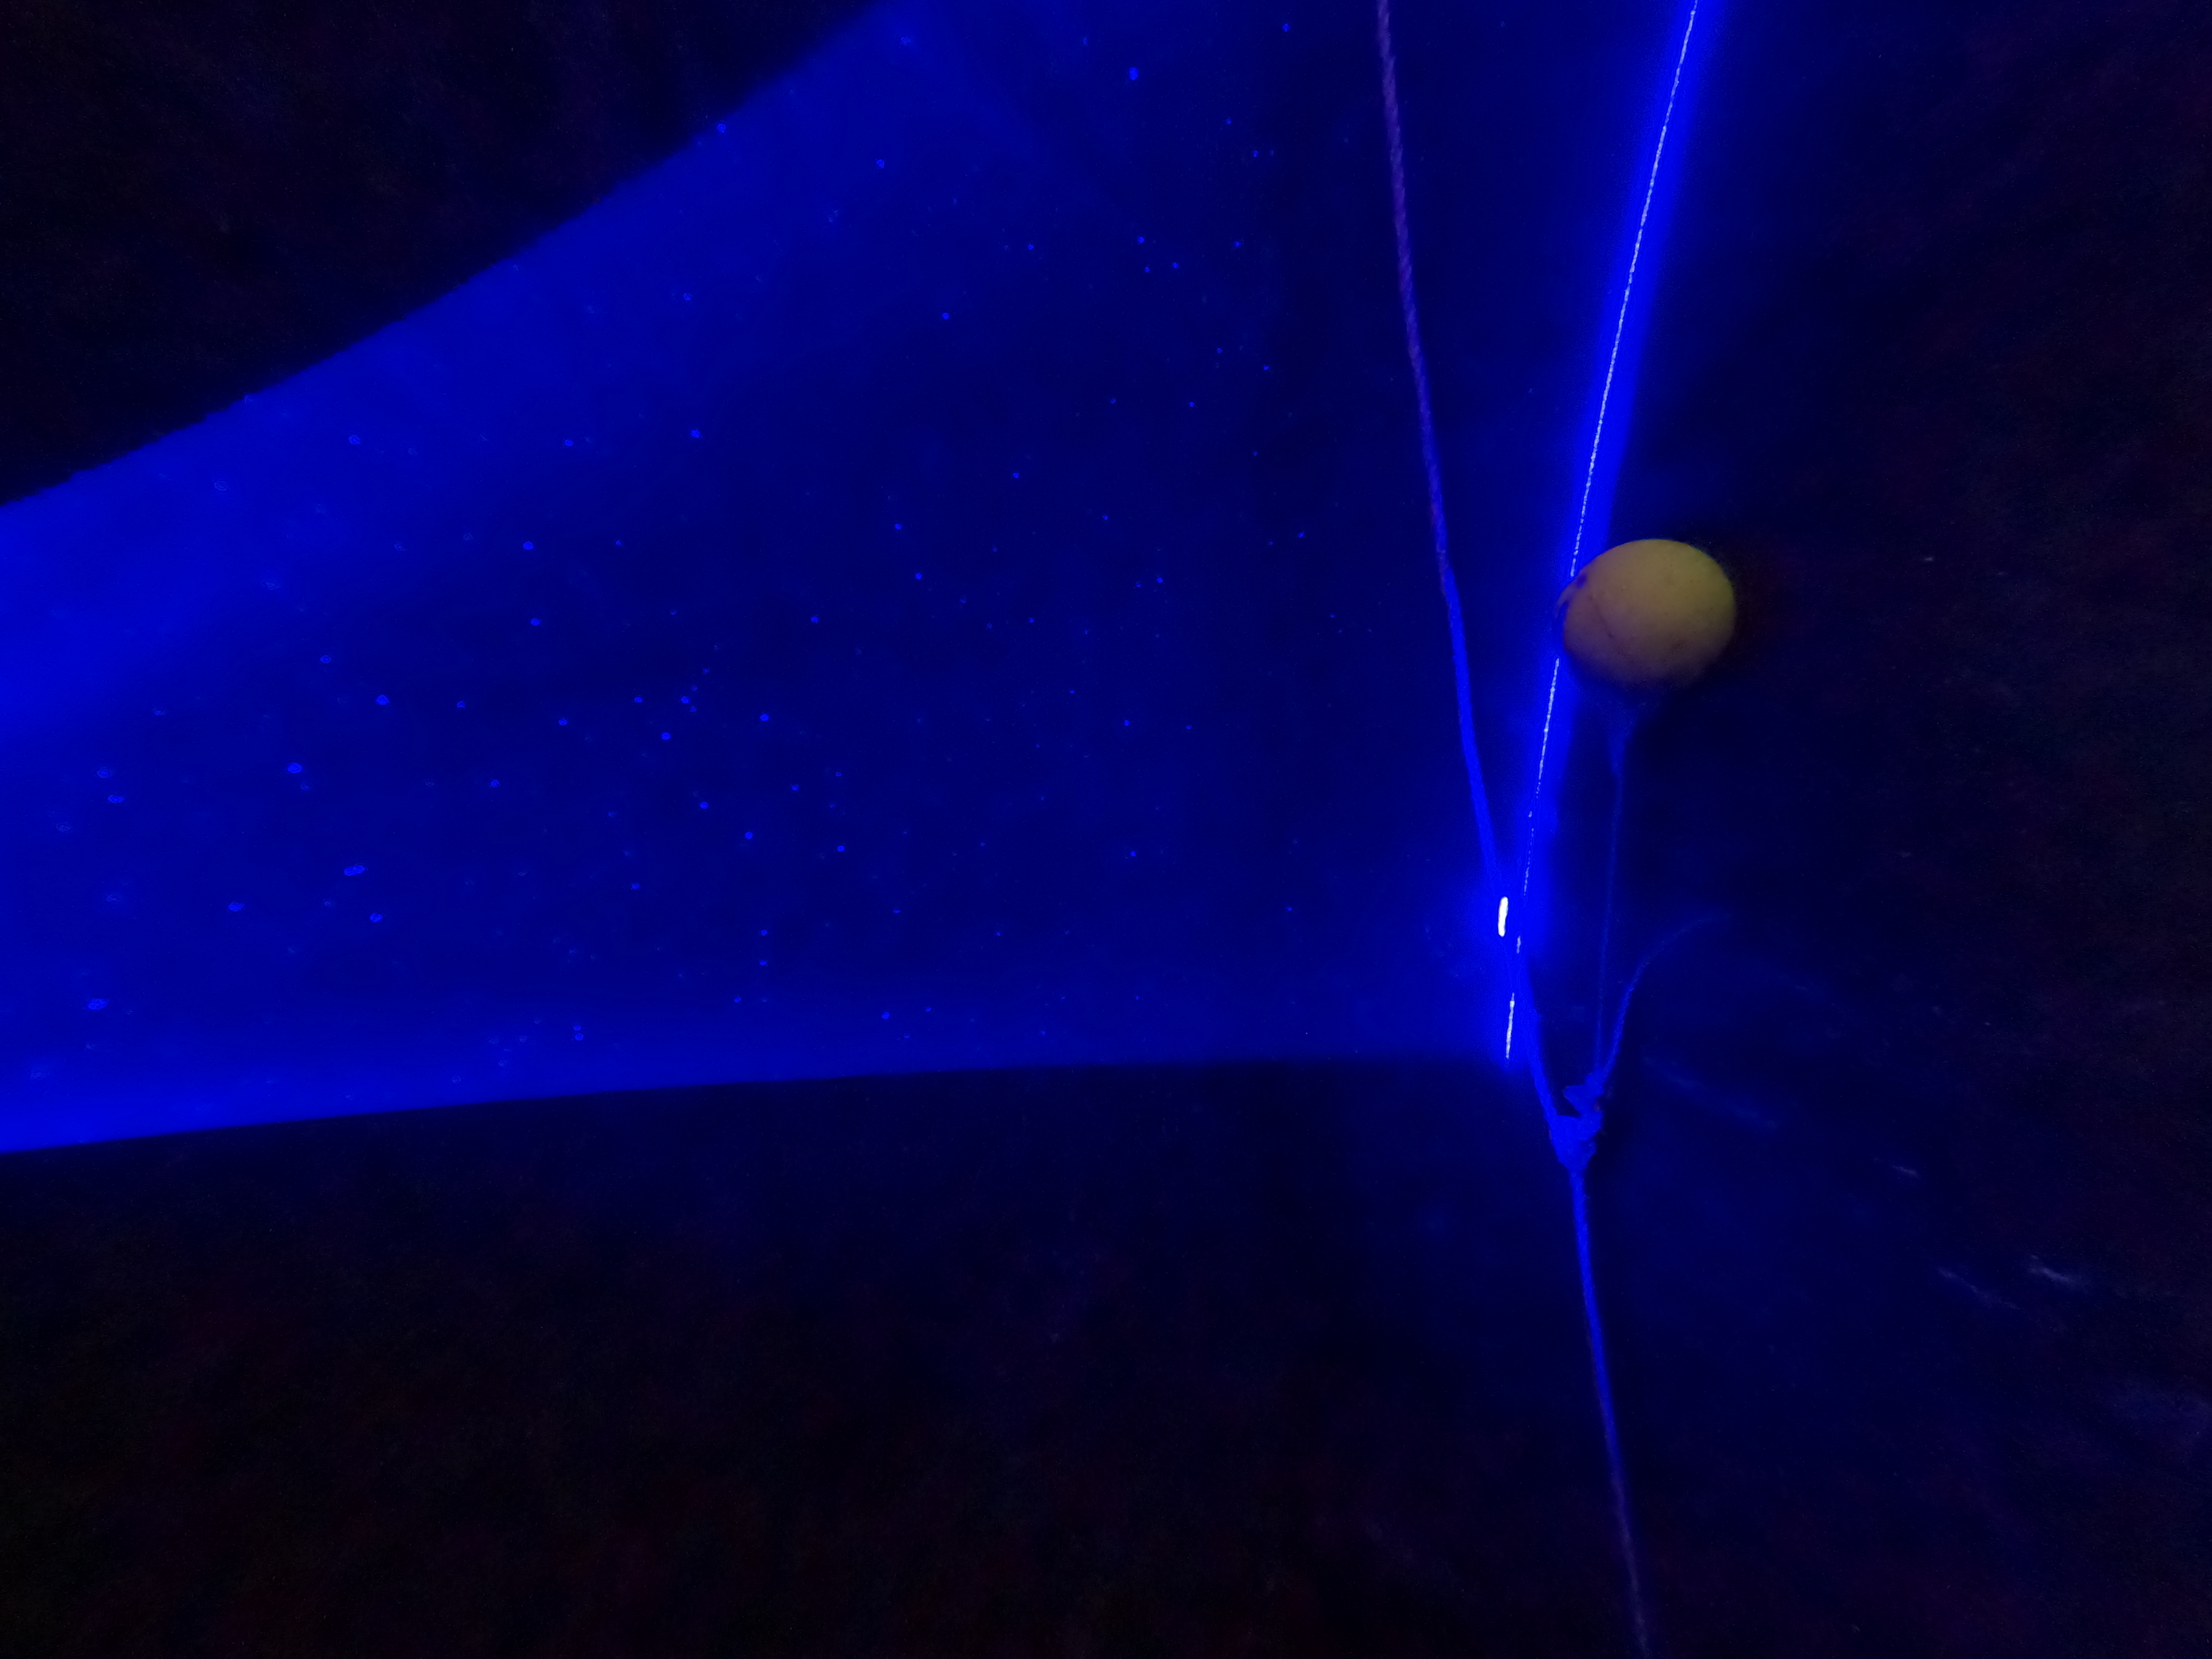

Supplement: Supplementary file 1104 [file G0031458.pdf › 10/G0031458.pdf]

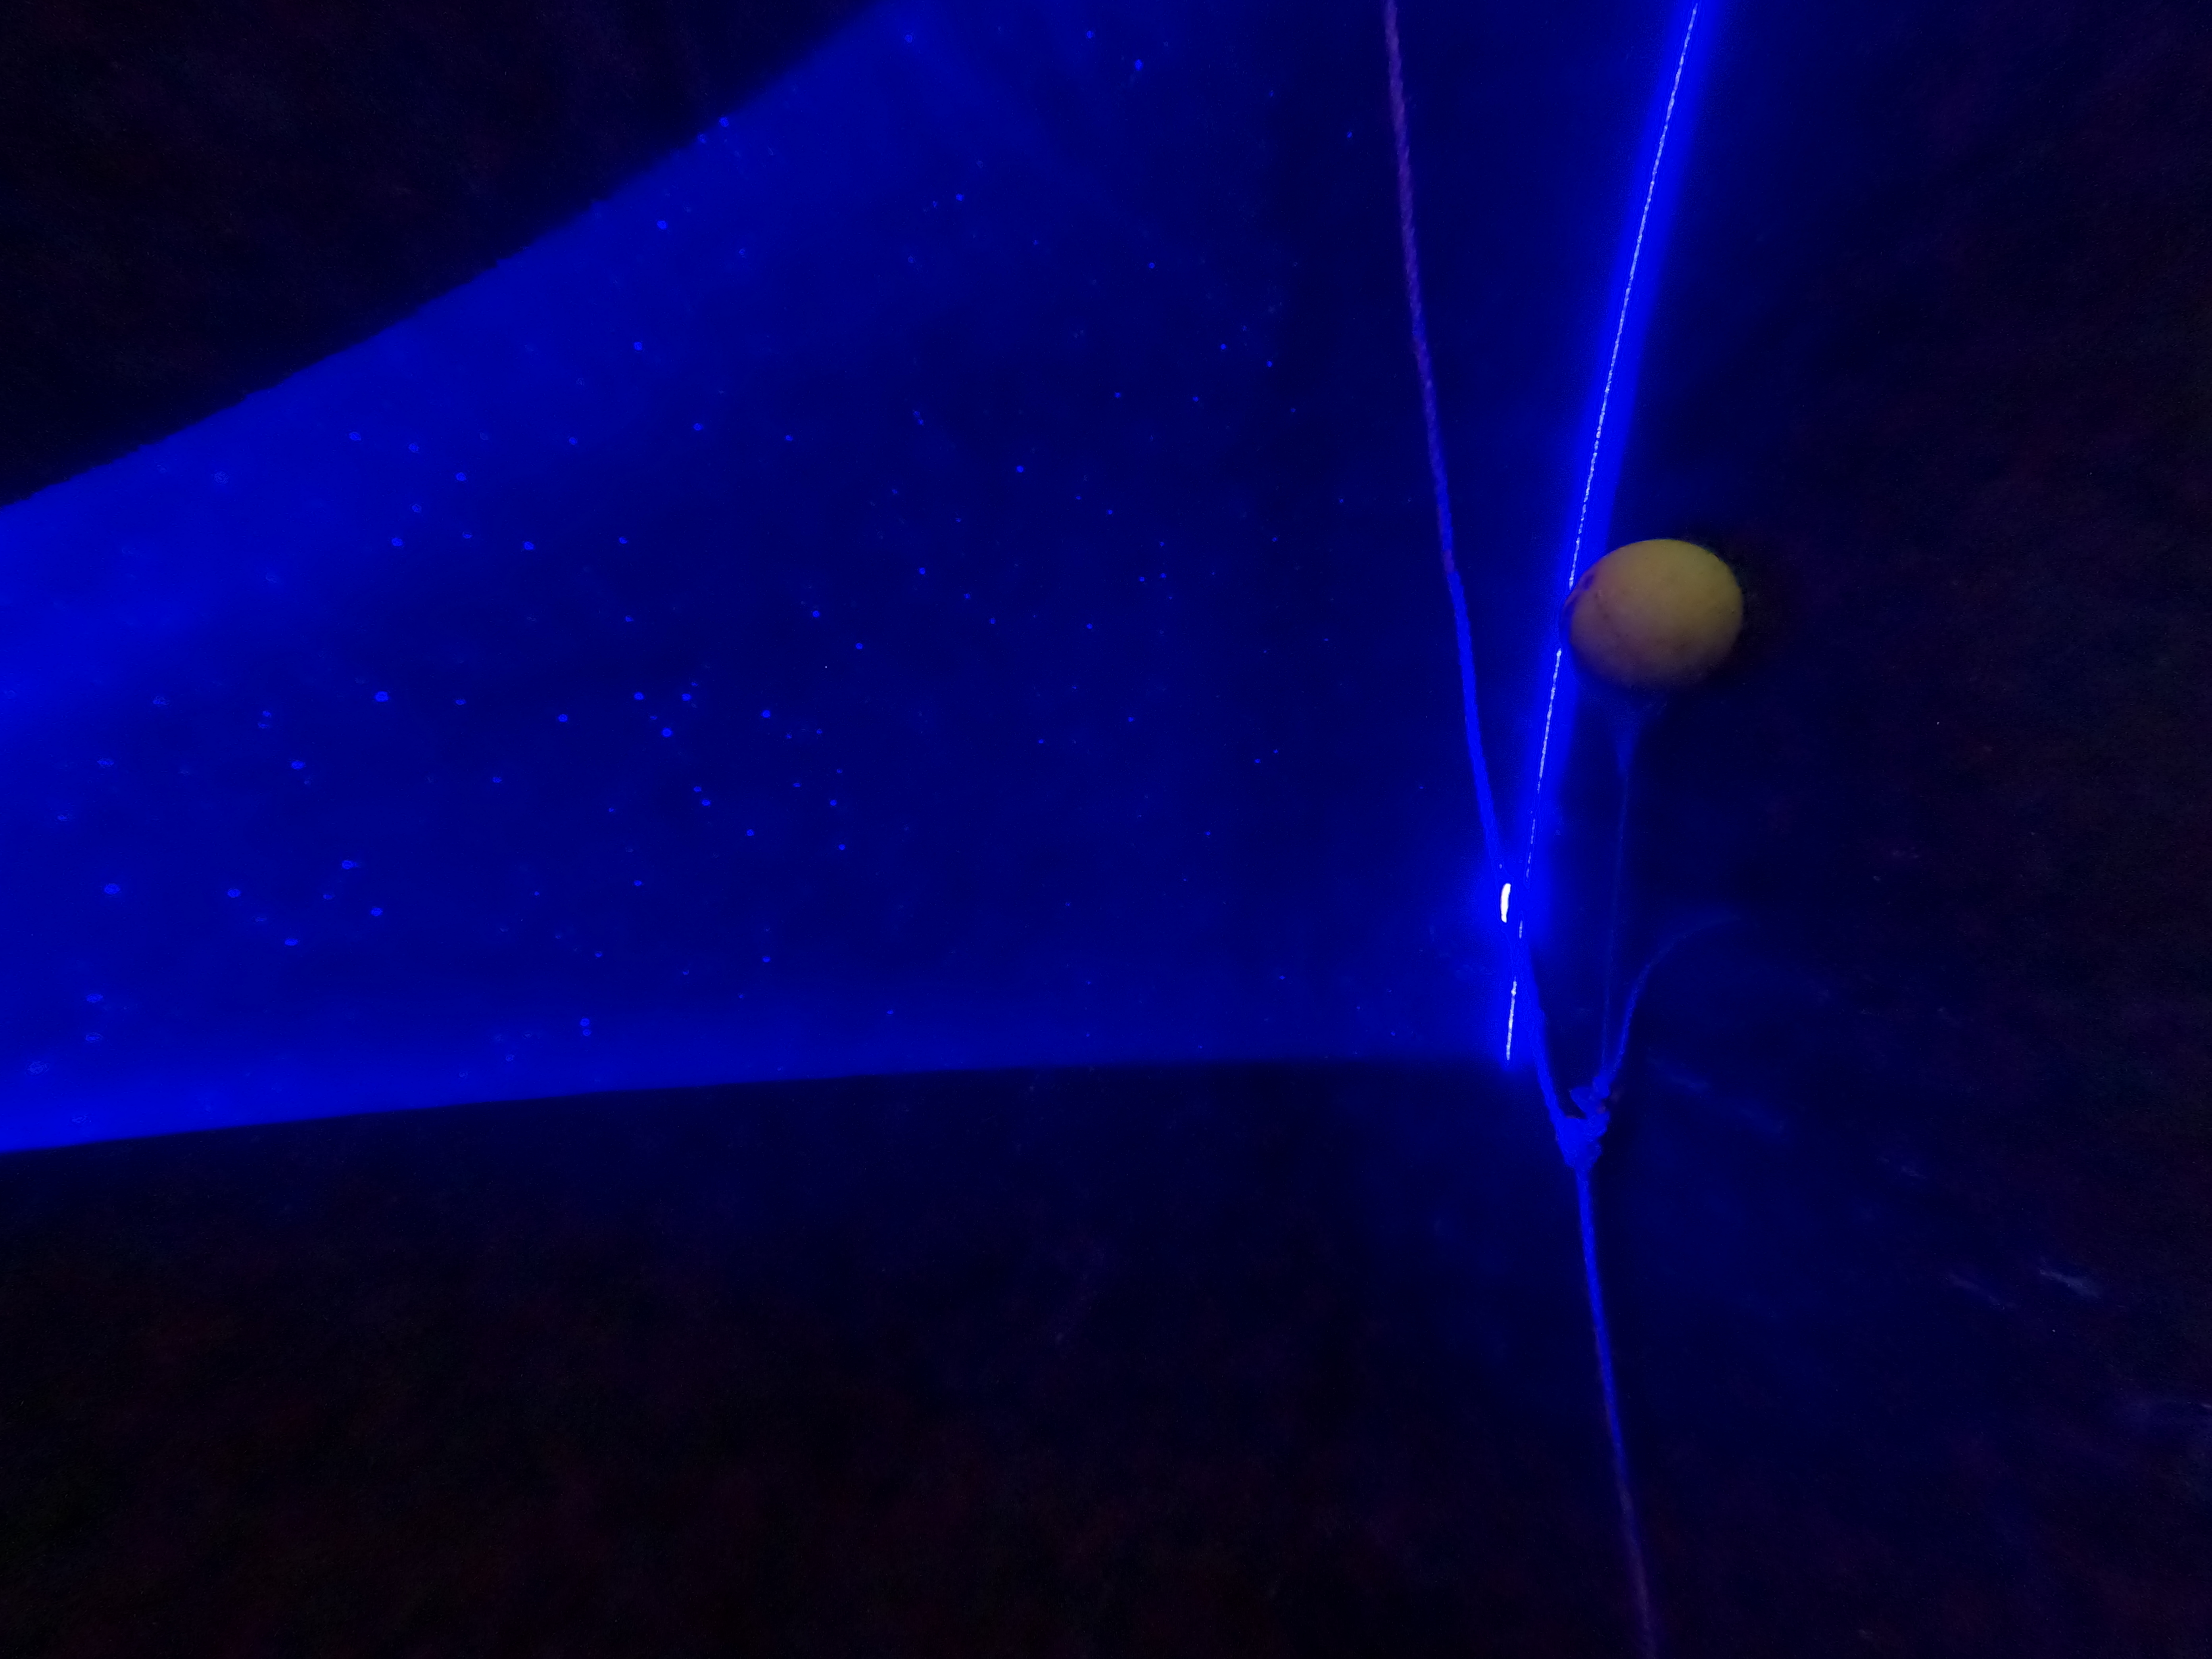

Supplement: Supplementary file 1105 [file G0031459.pdf › 10/G0031459.pdf]

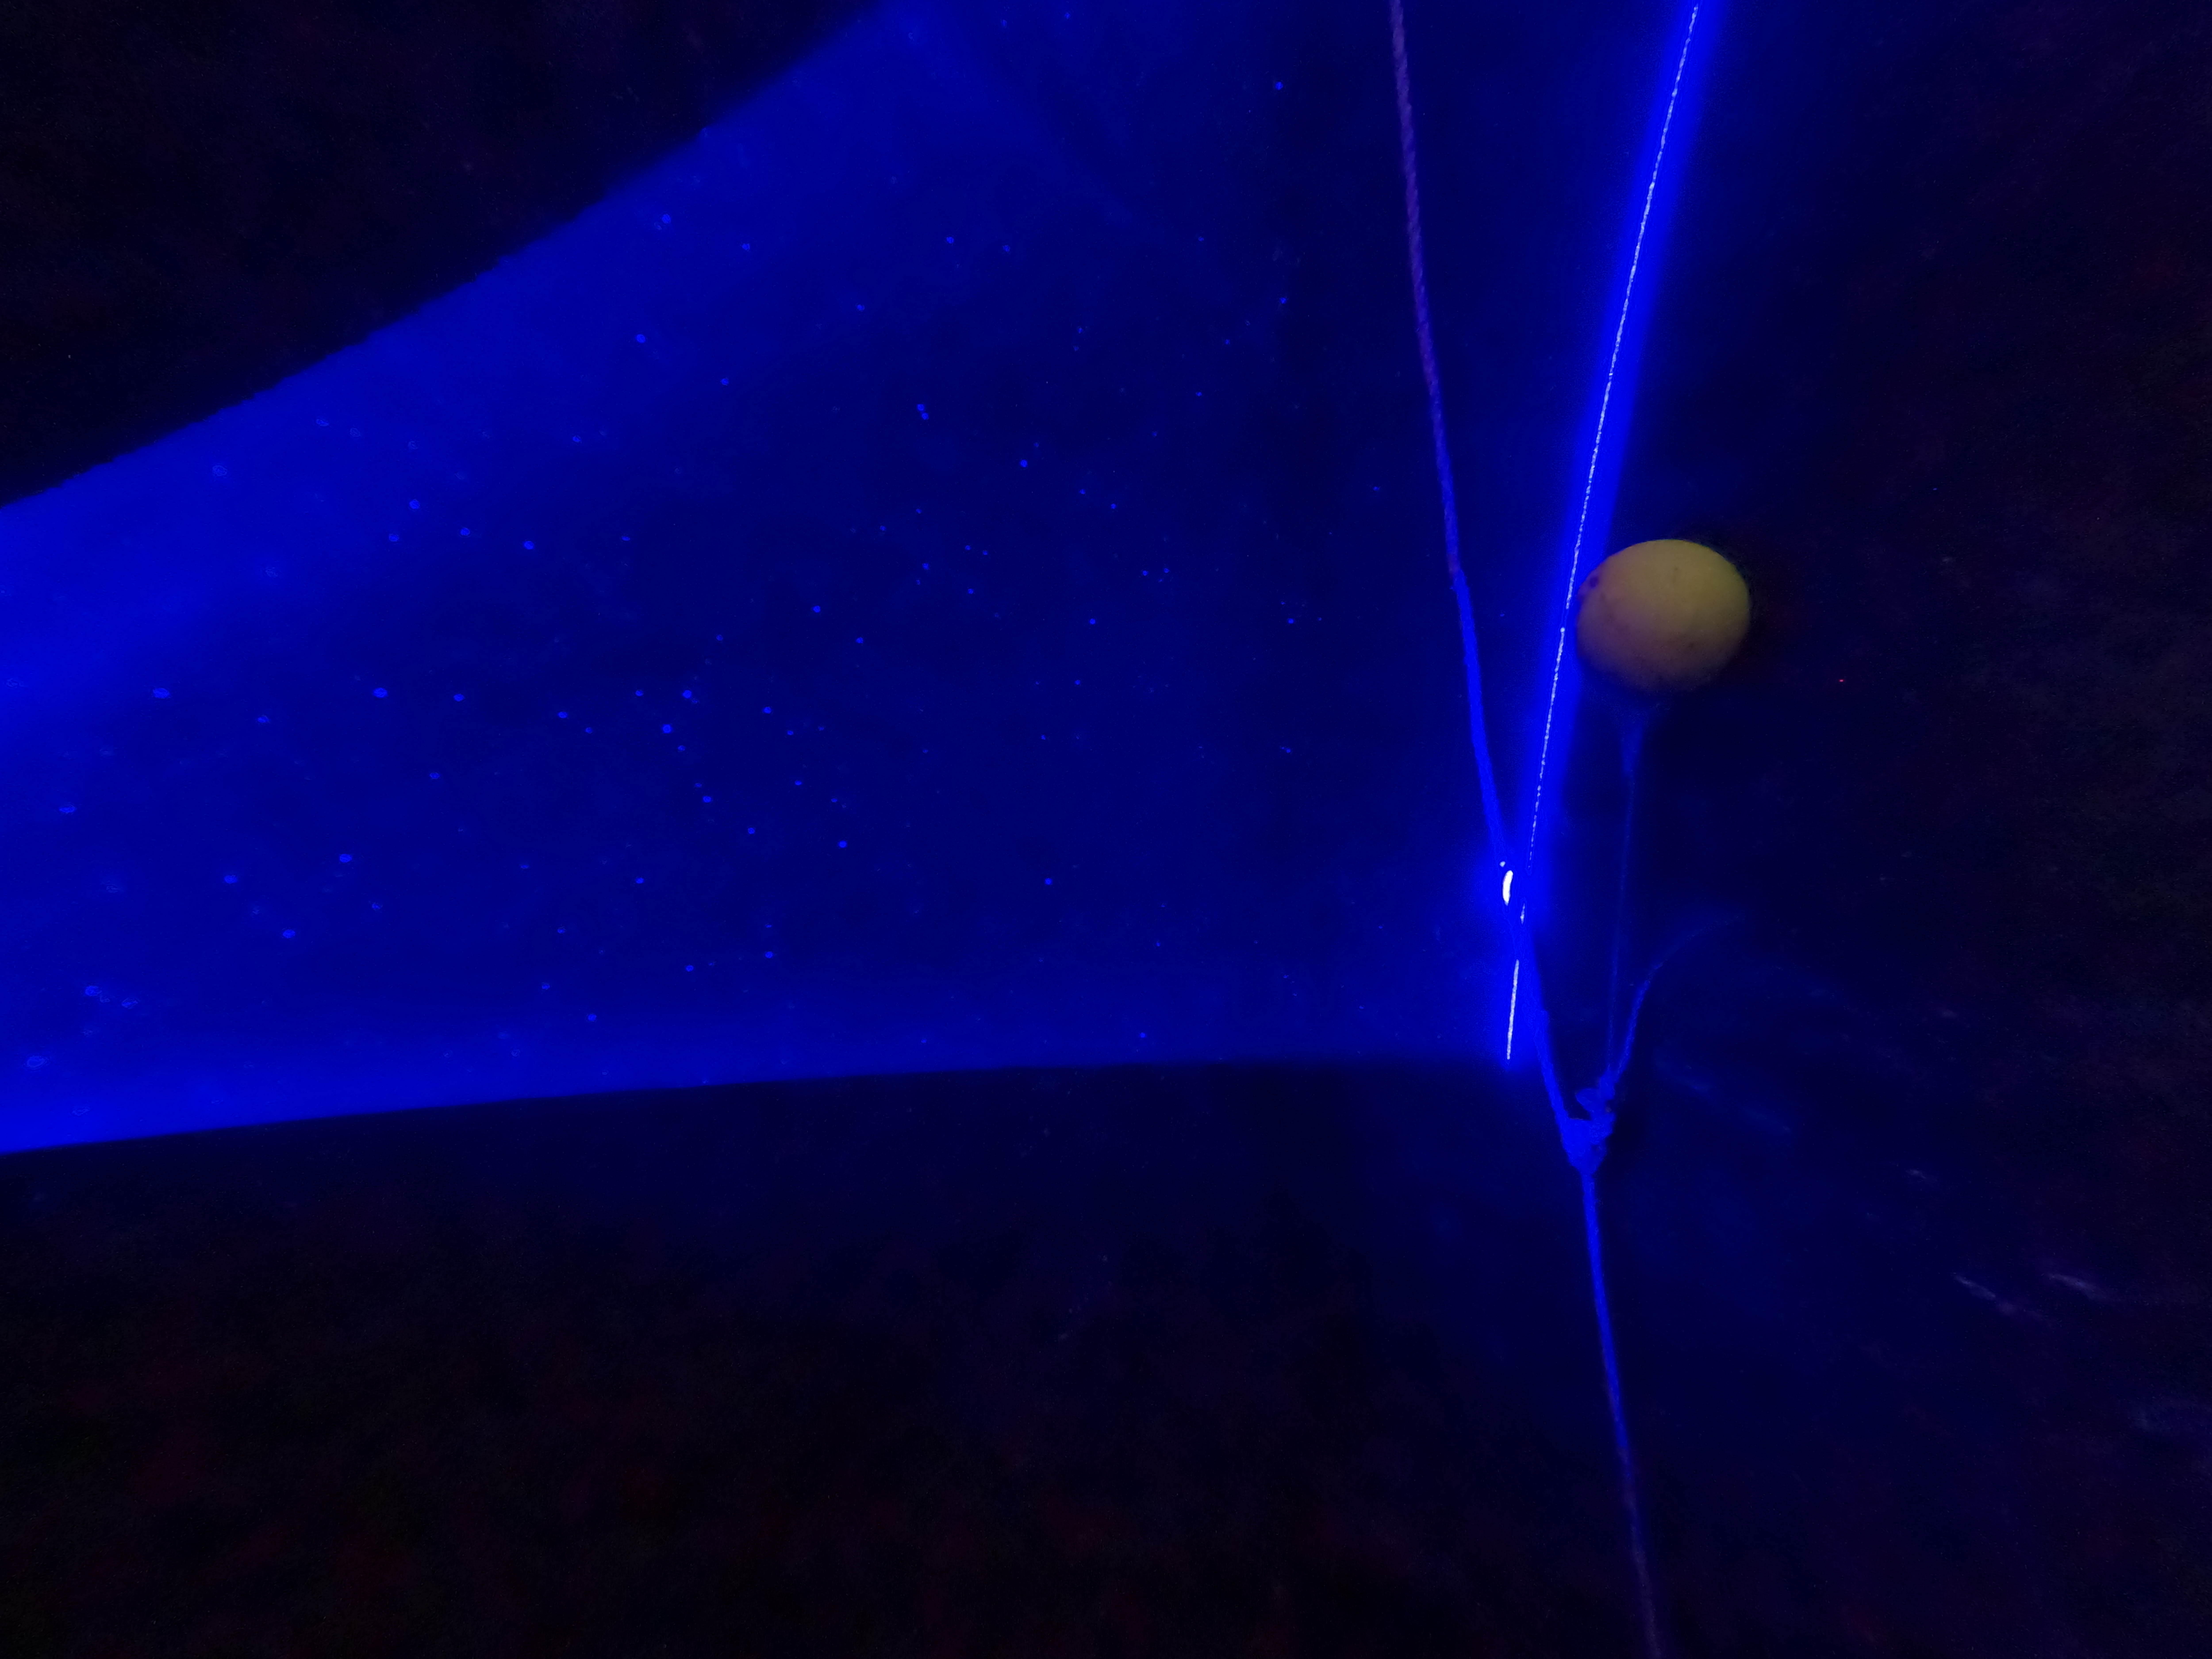

Supplement: Supplementary file 1106 [file G0031460.pdf › 10/G0031460.pdf]

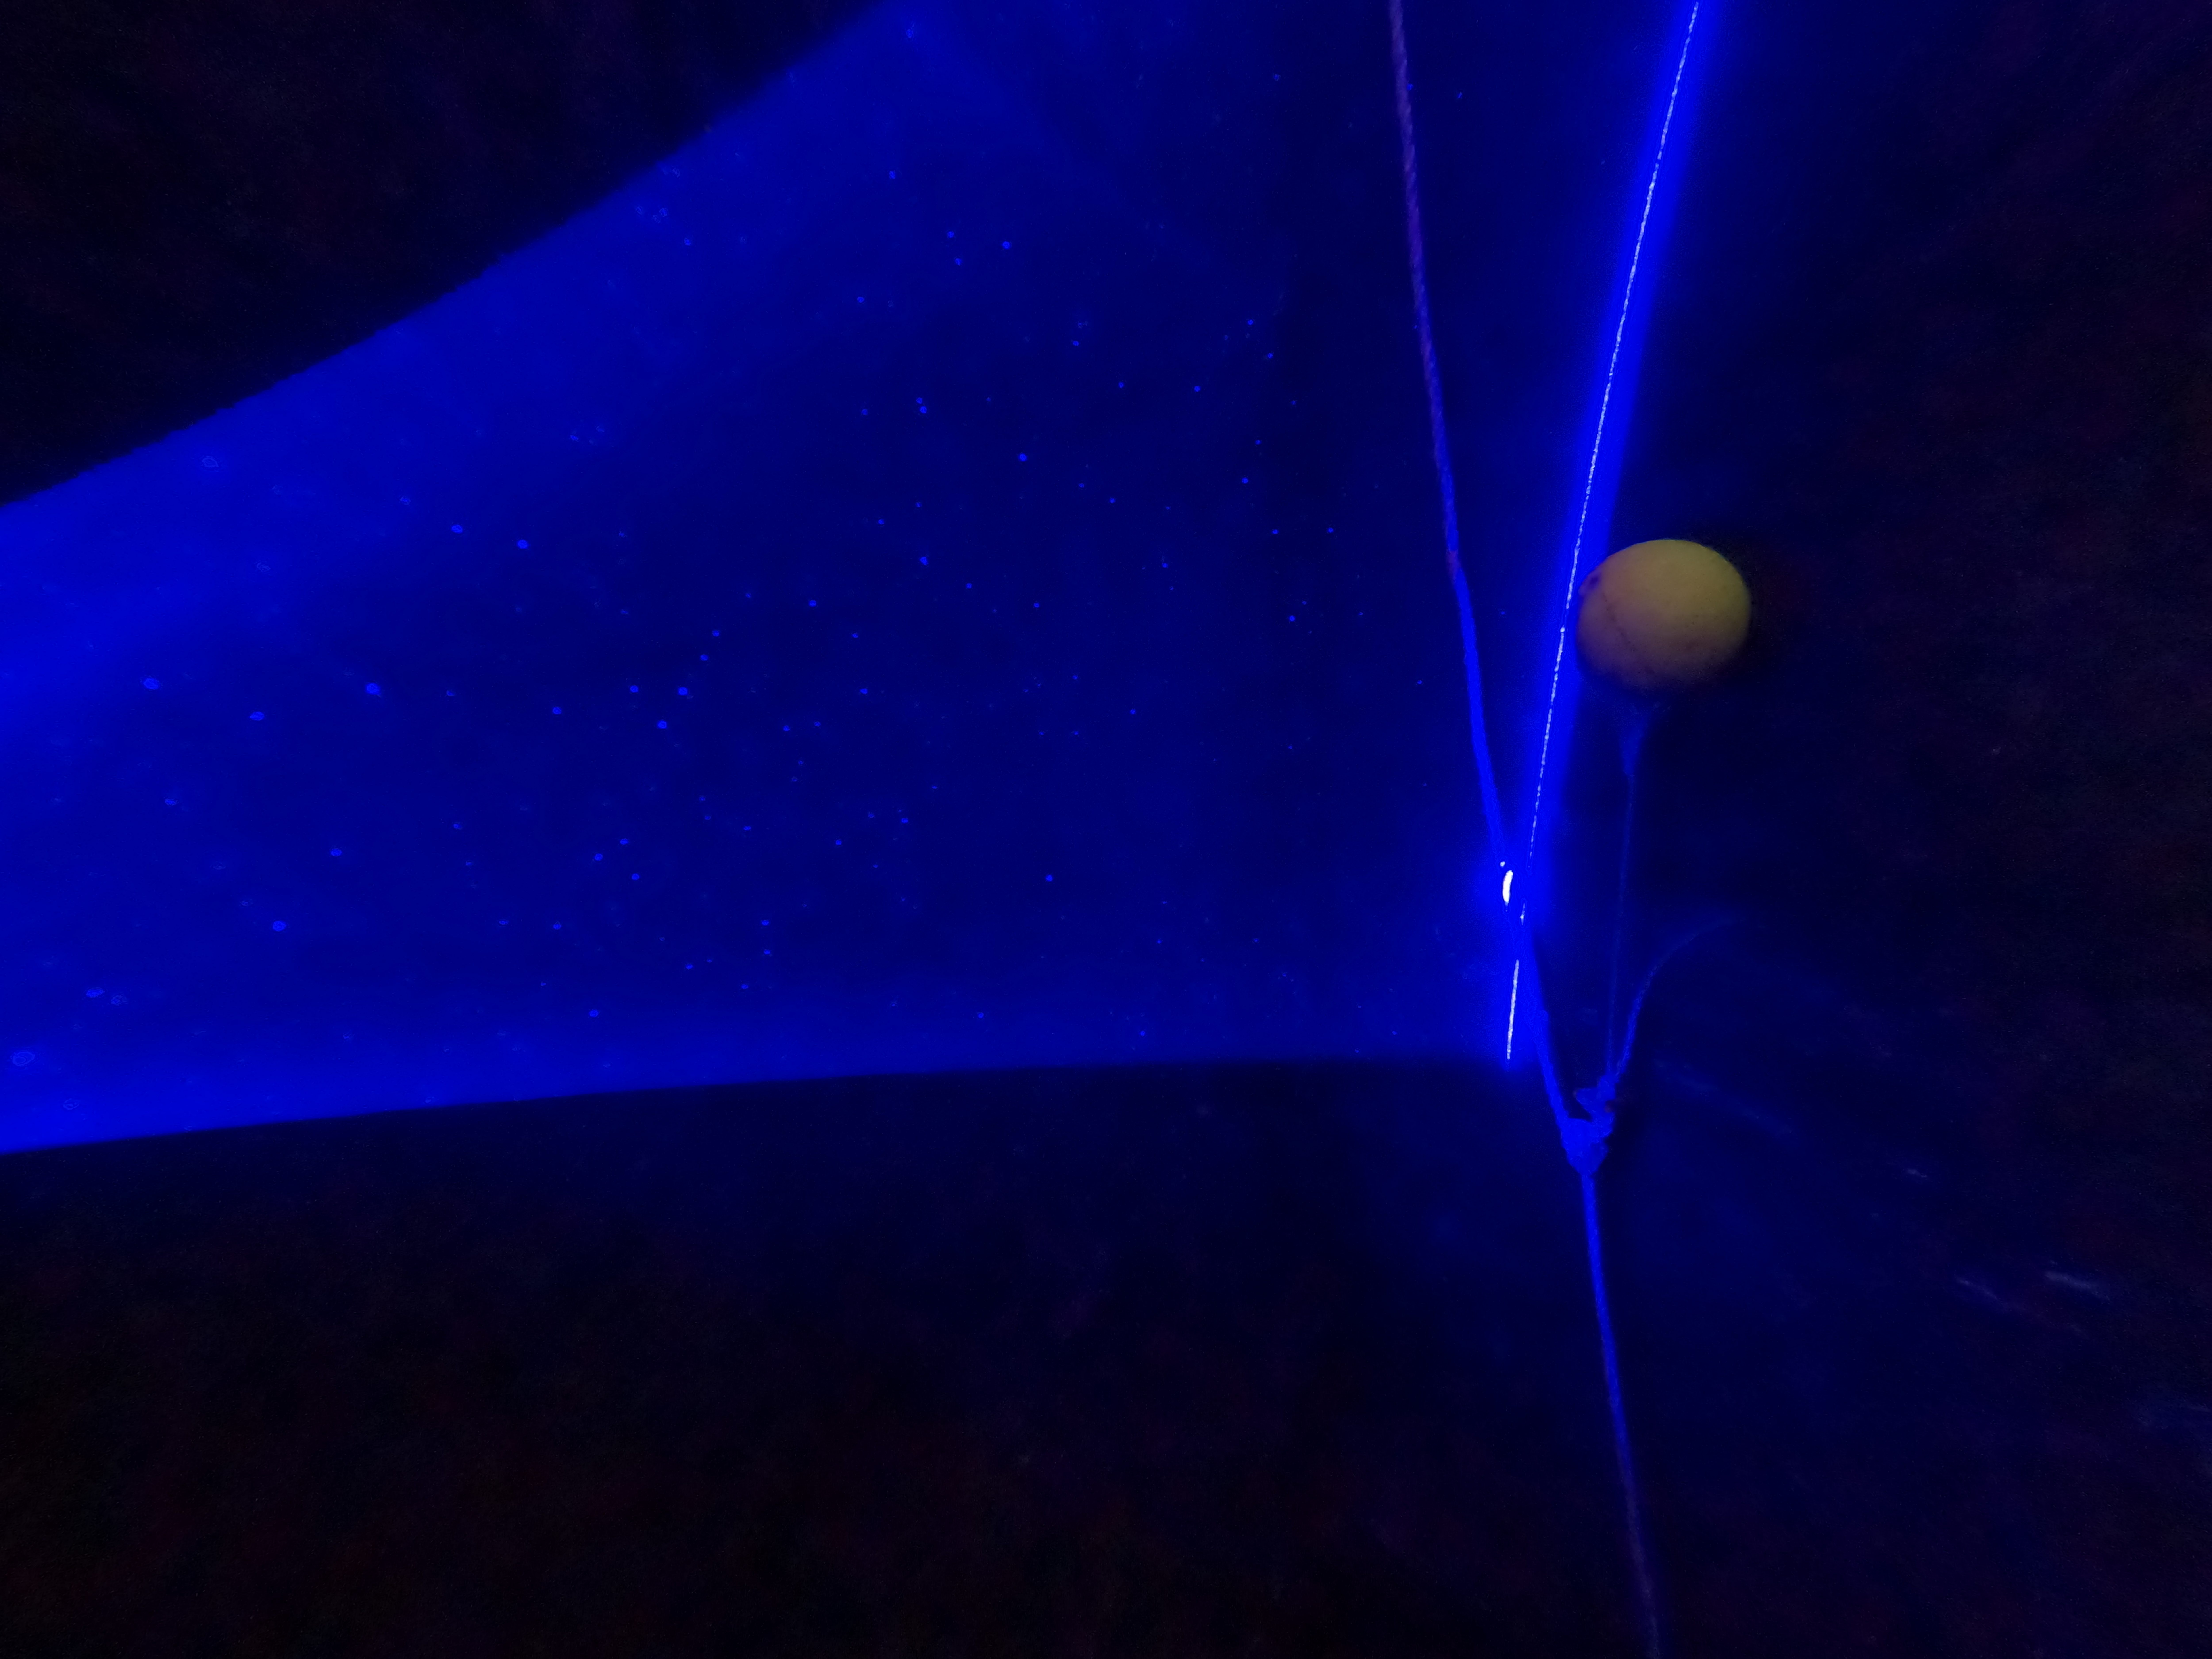

Supplement: Supplementary file 1107 [file G0031461.pdf › 10/G0031461.pdf]

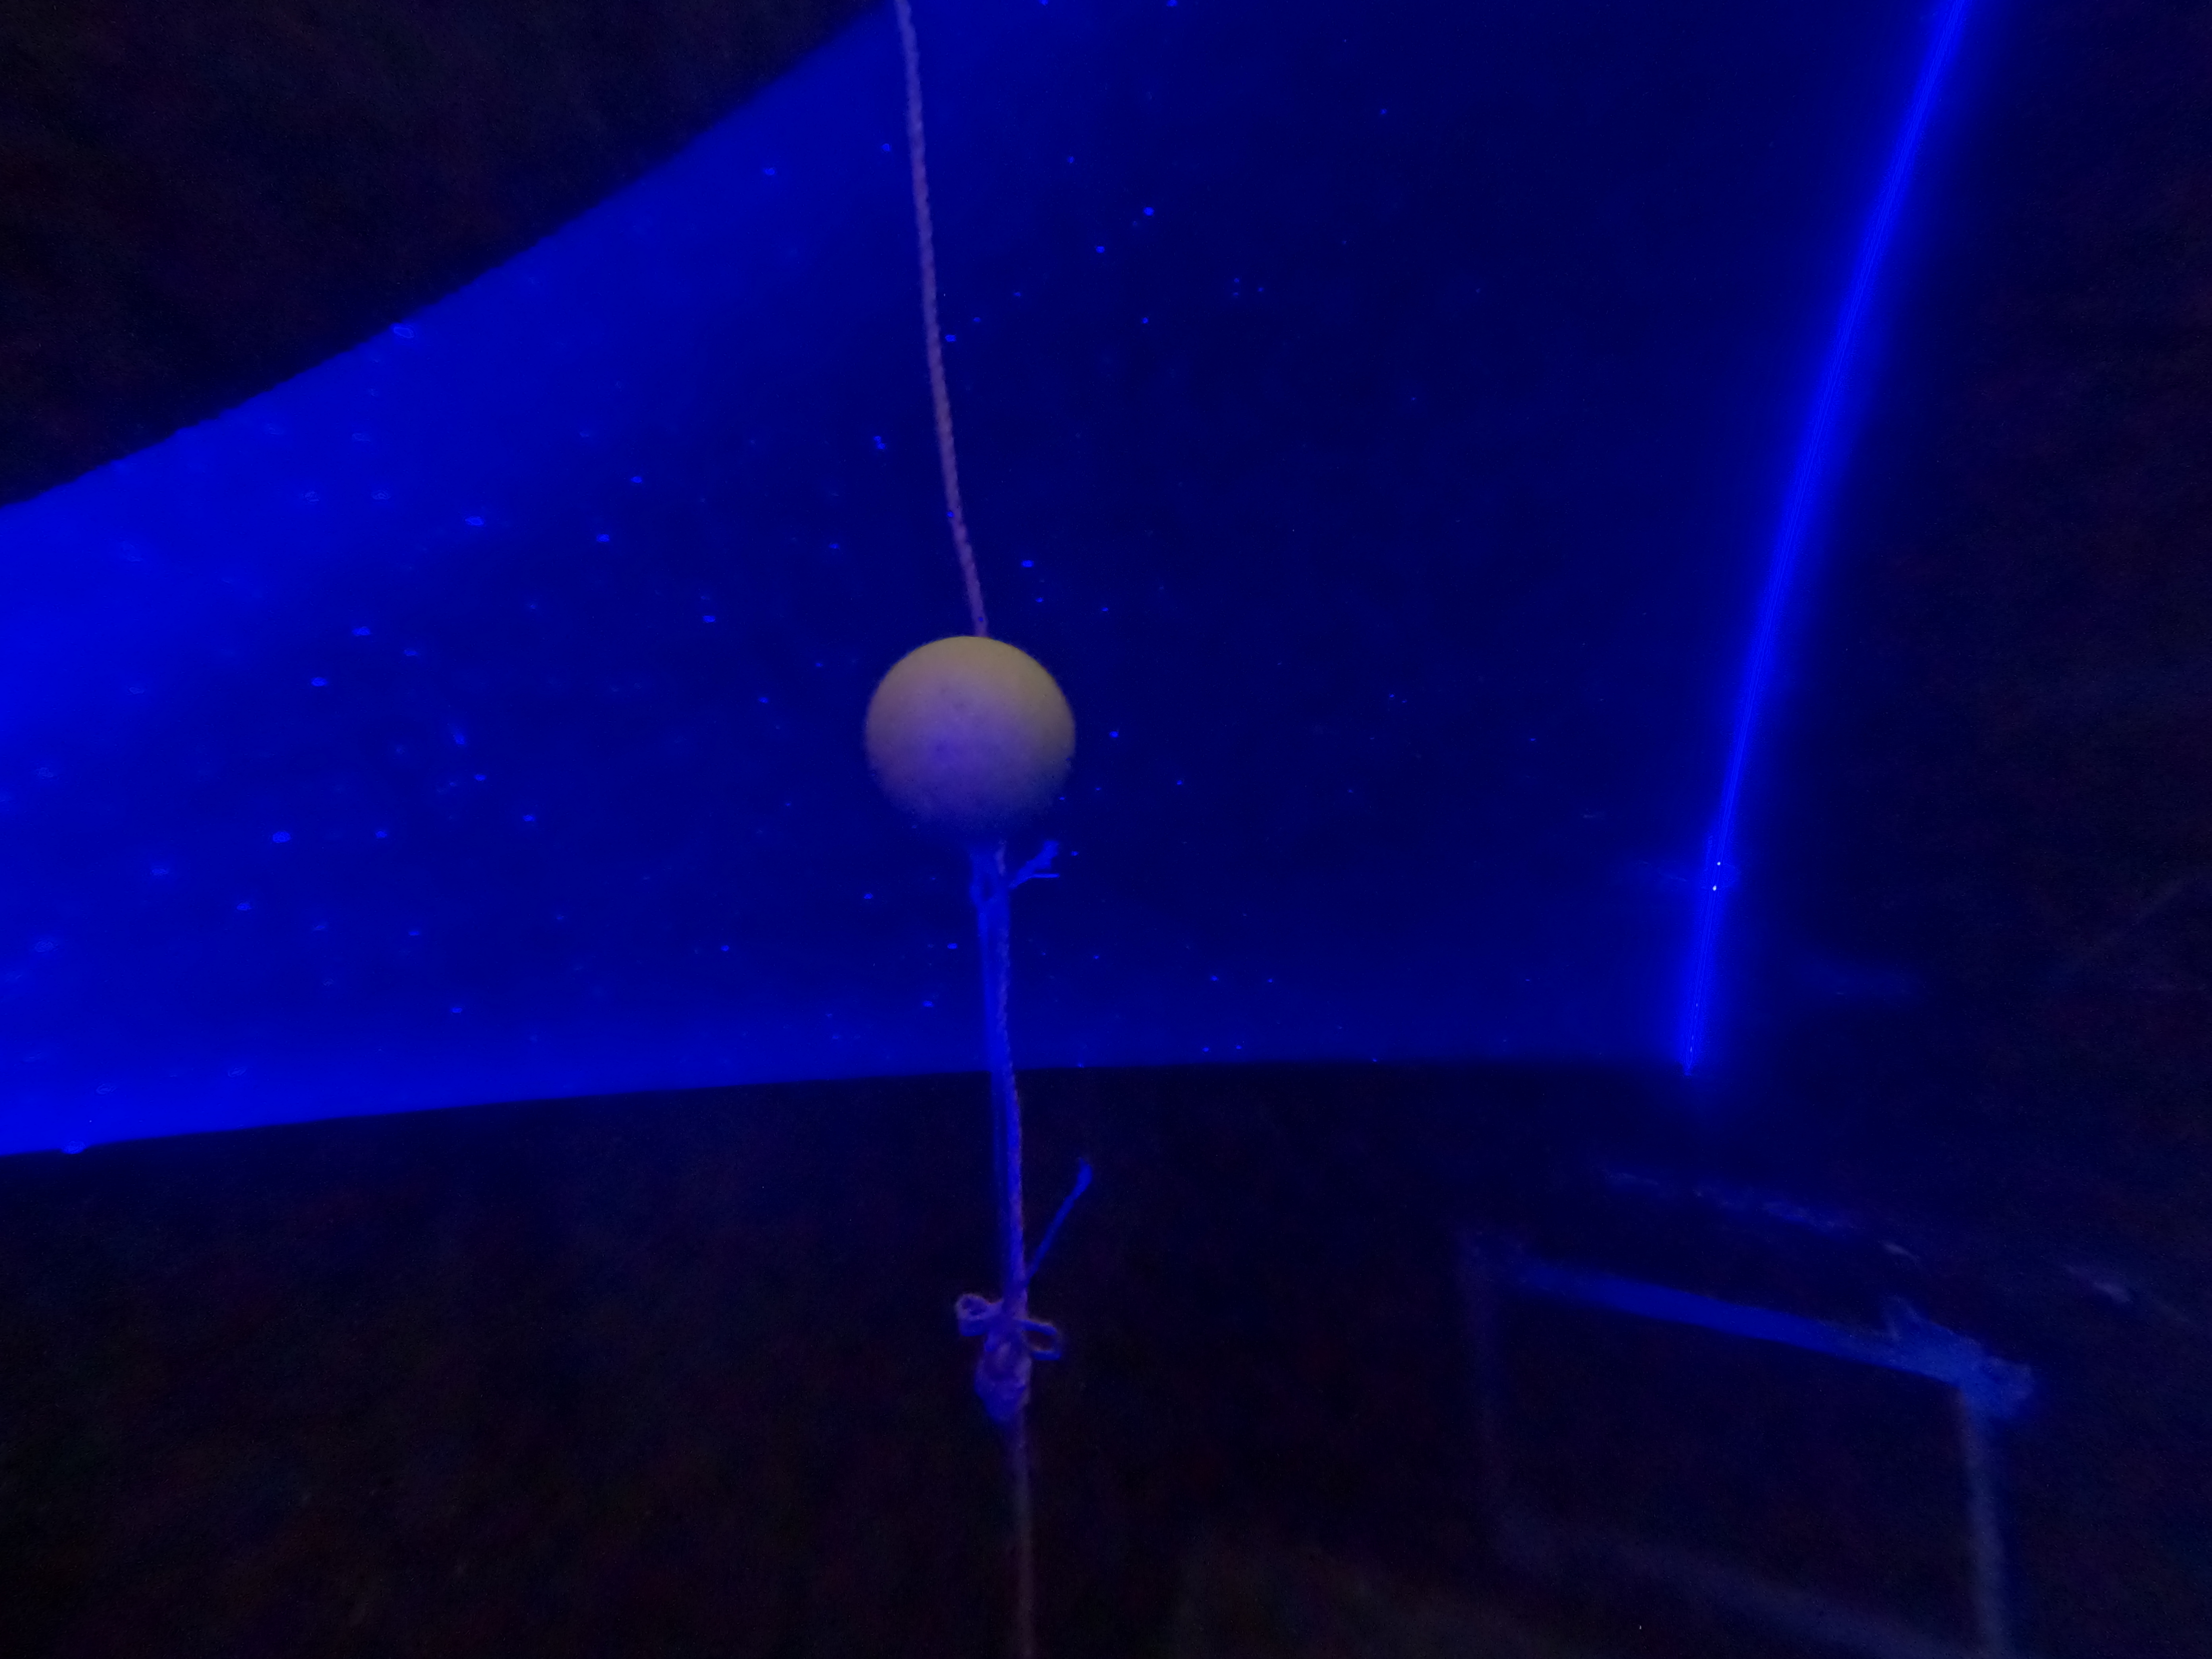

Supplement: Supplementary file 1108 [file G0032822.pdf › 7/G0032822.pdf]

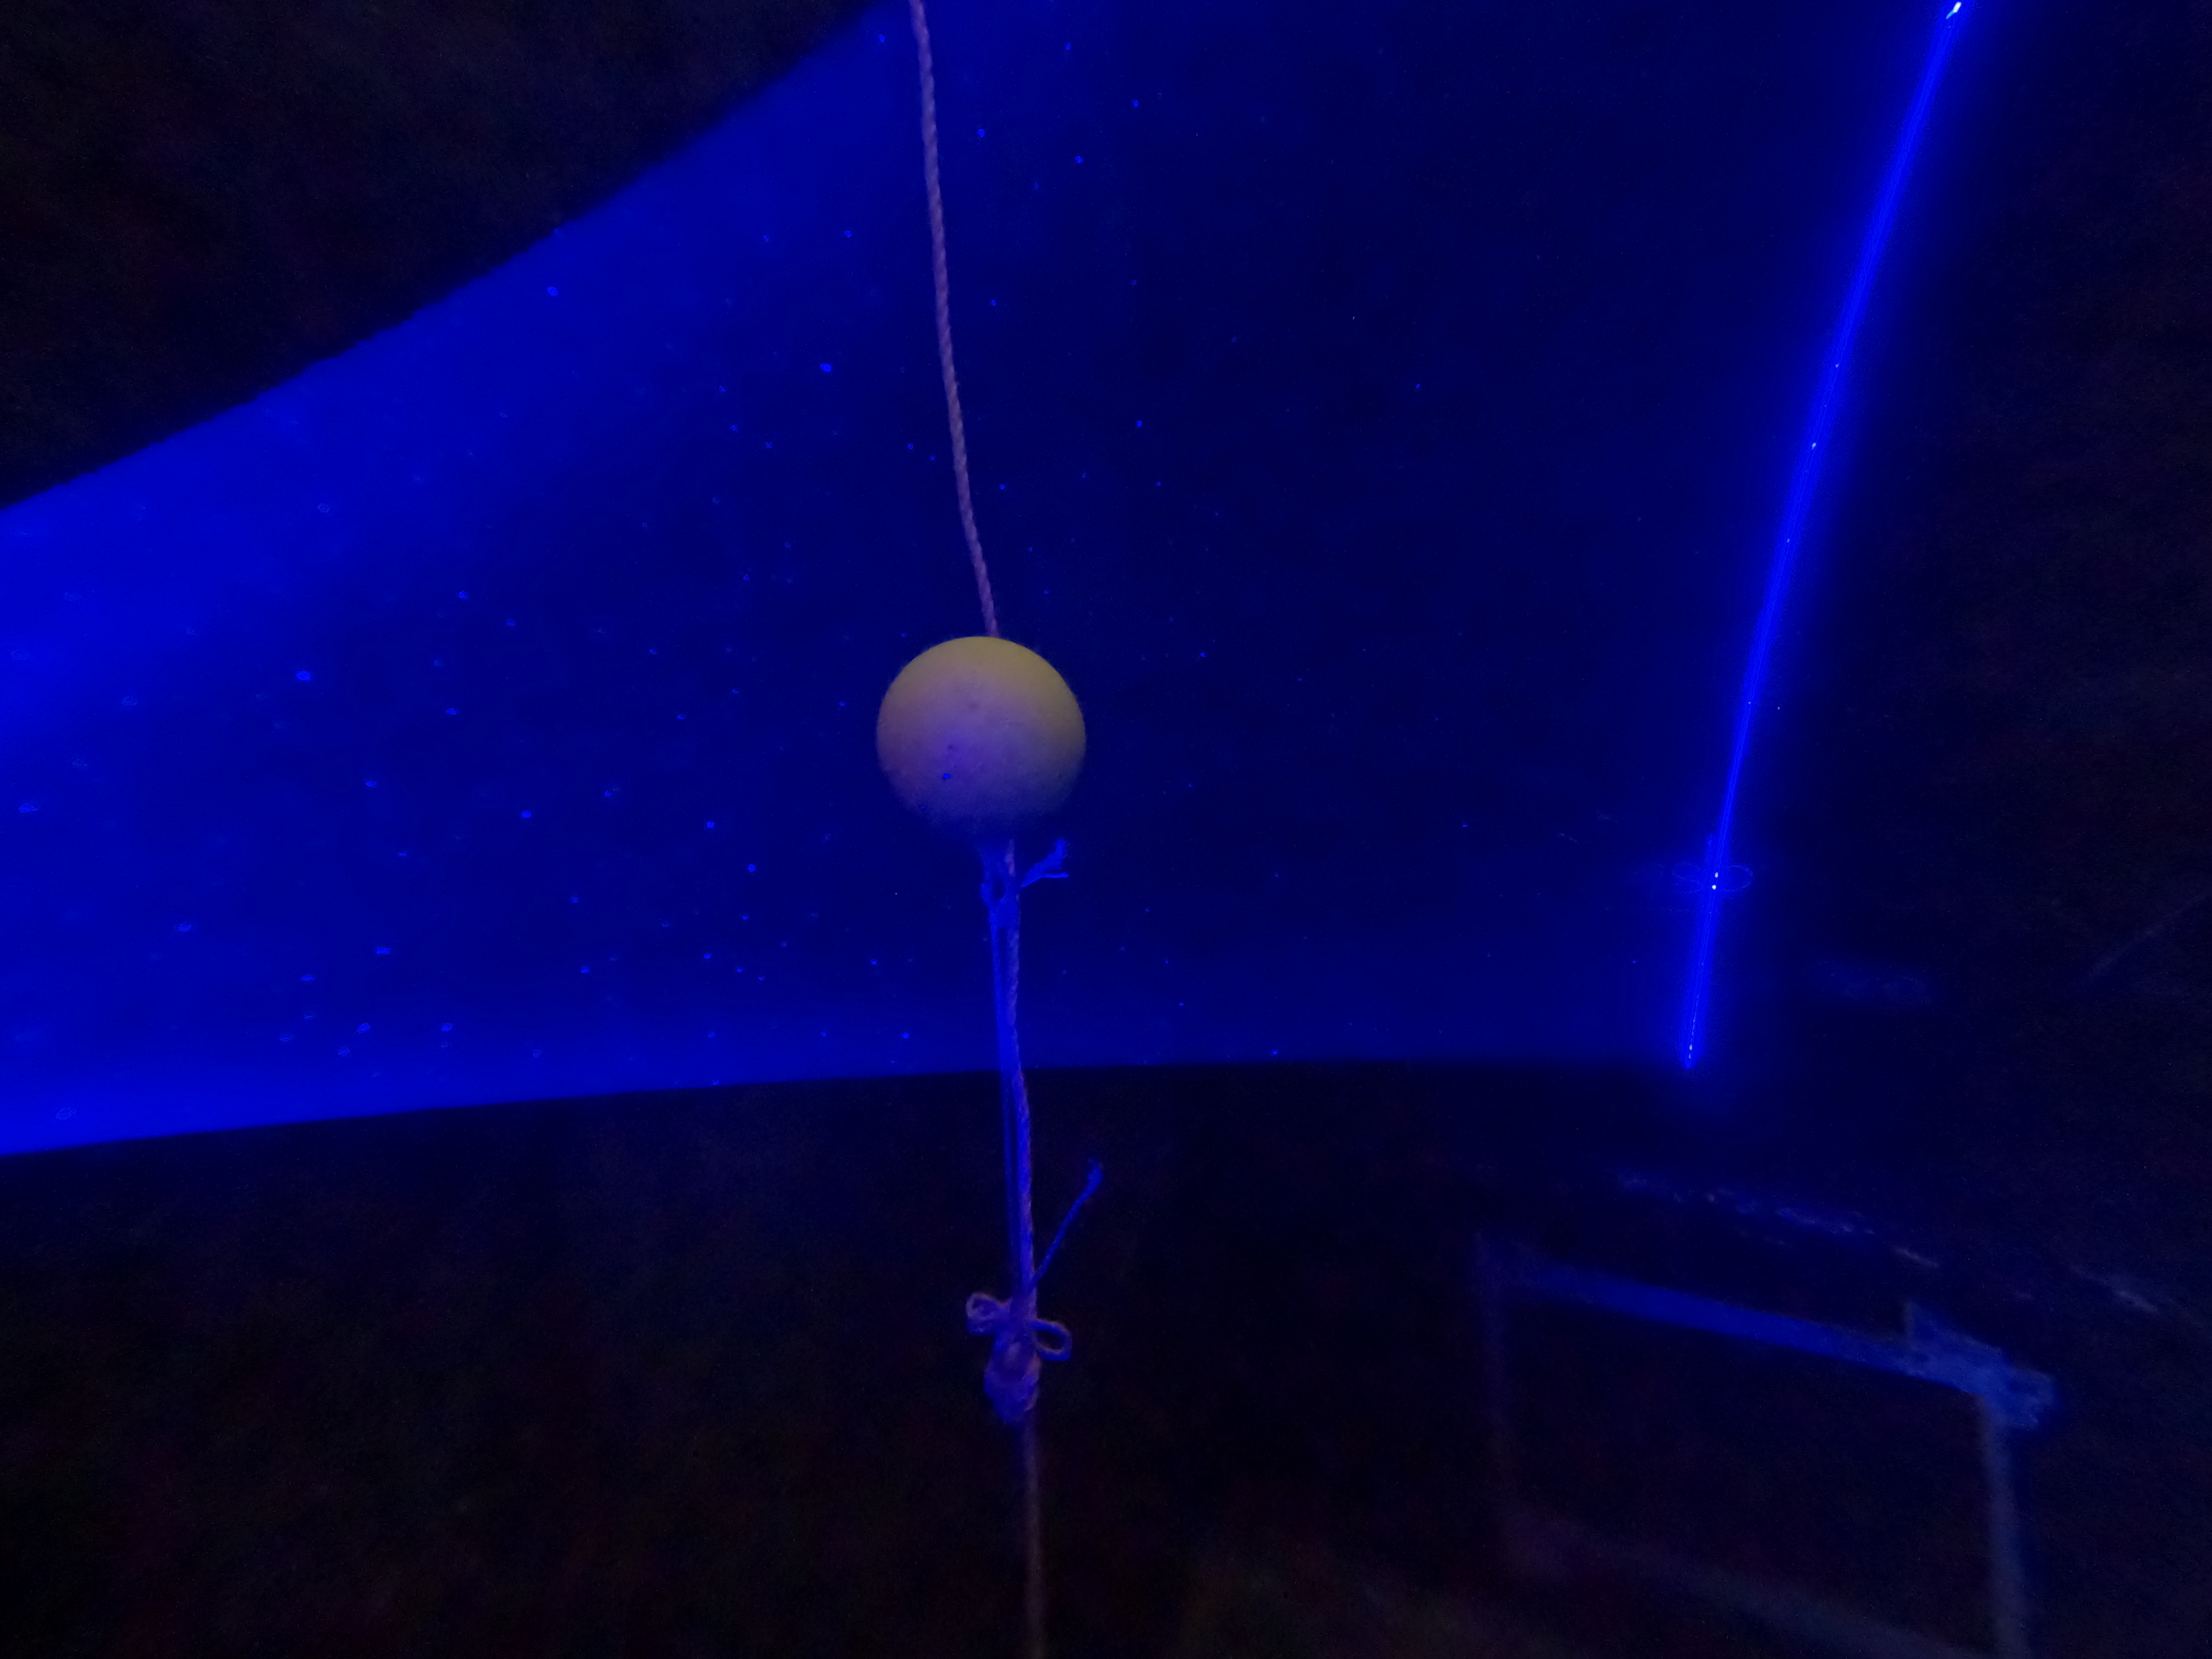

Supplement: Supplementary file 1109 [file G0032823.pdf › 7/G0032823.pdf]

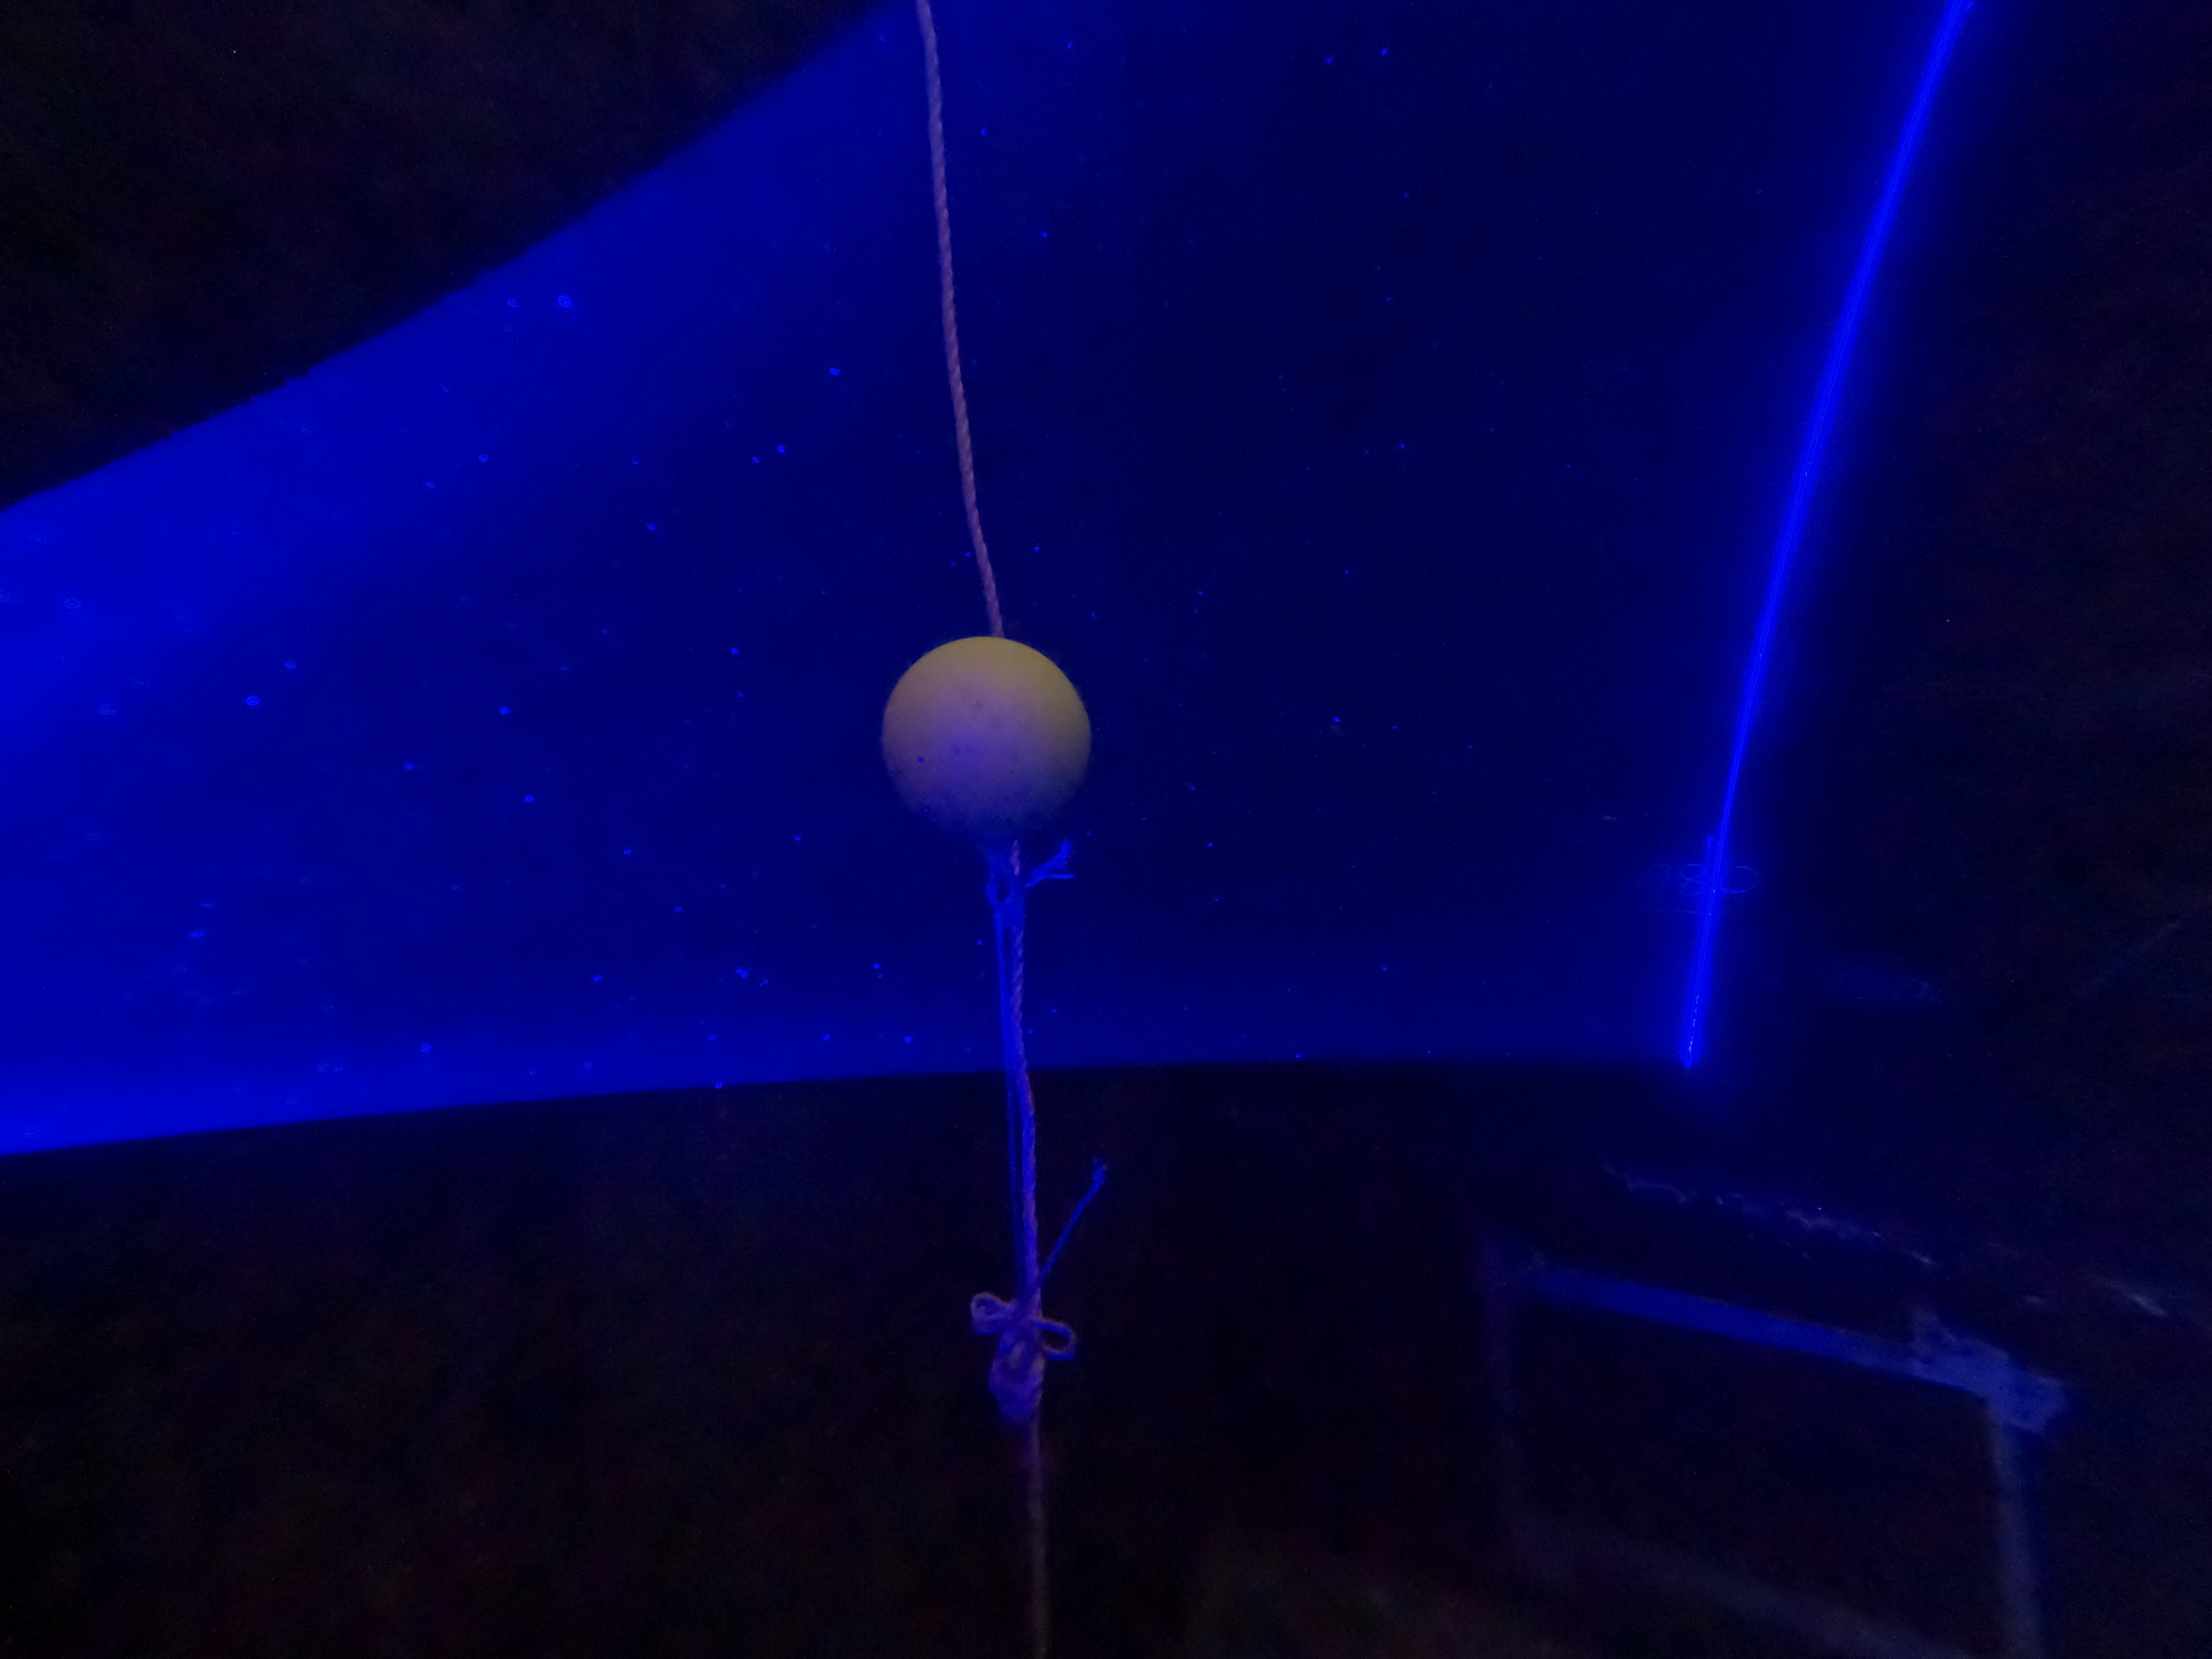

Supplement: Supplementary file 1110 [file G0032824.pdf › 7/G0032824.pdf]

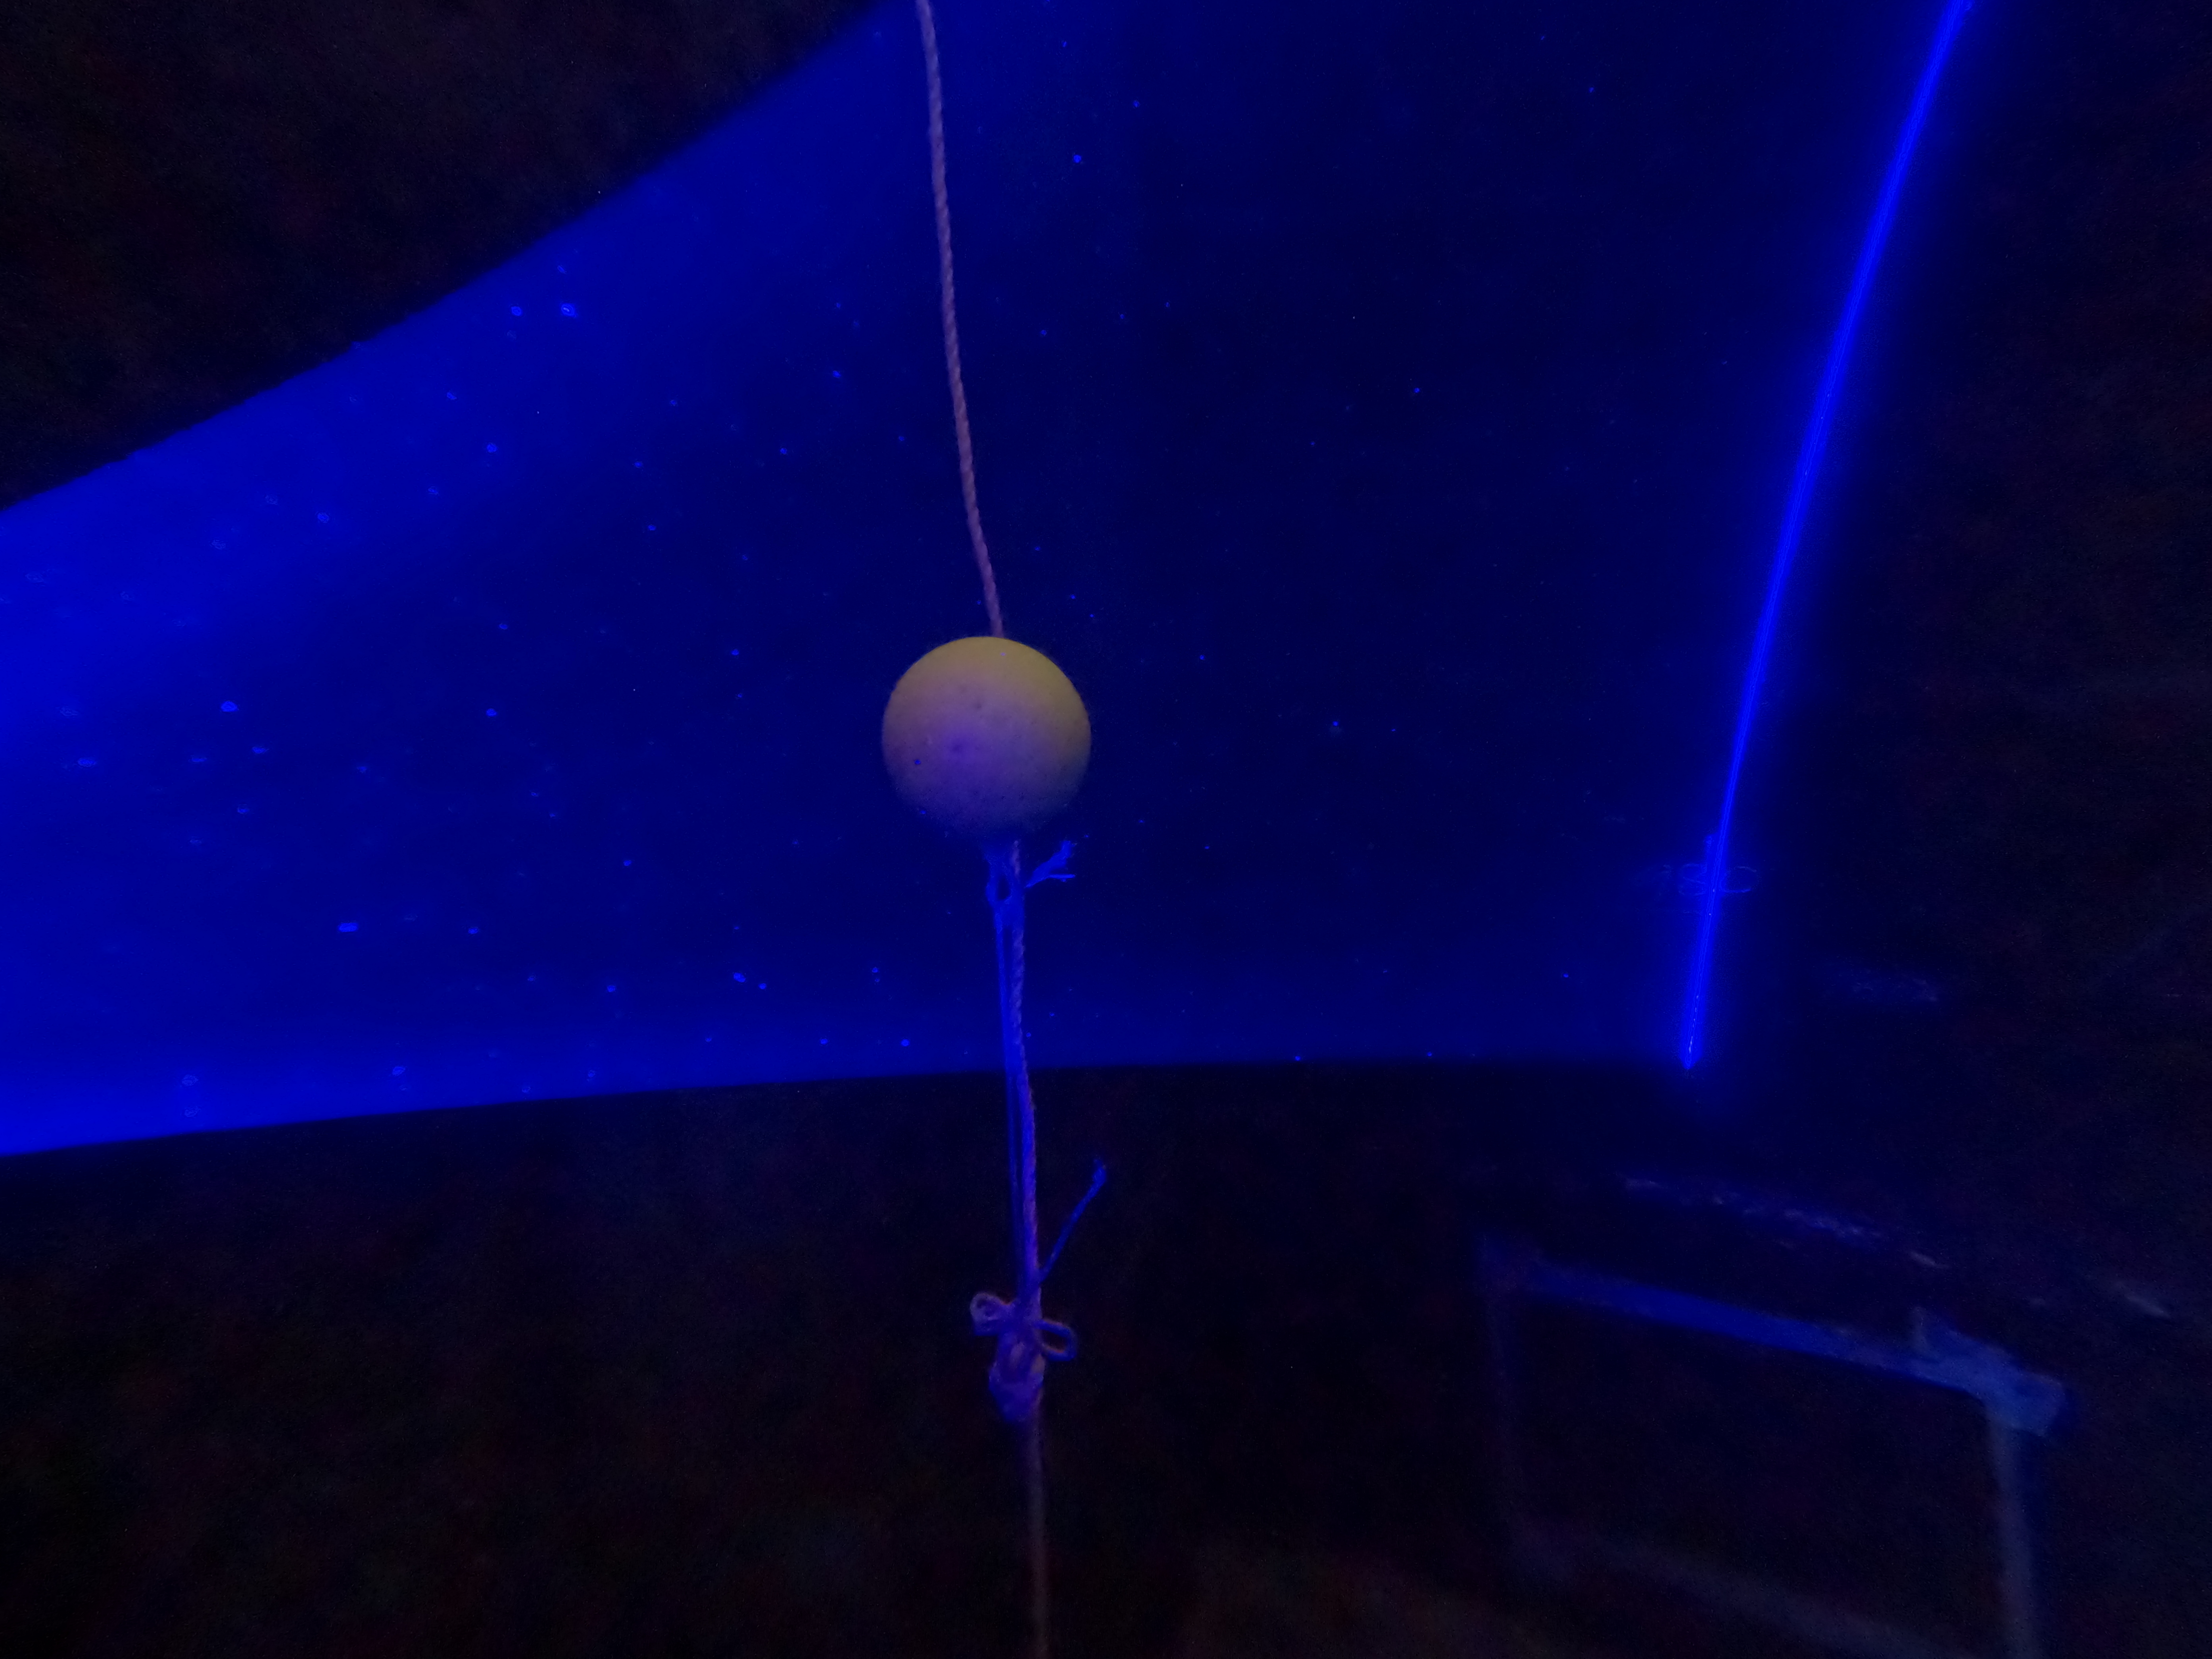

Supplement: Supplementary file 1111 [file G0032825.pdf › 7/G0032825.pdf]

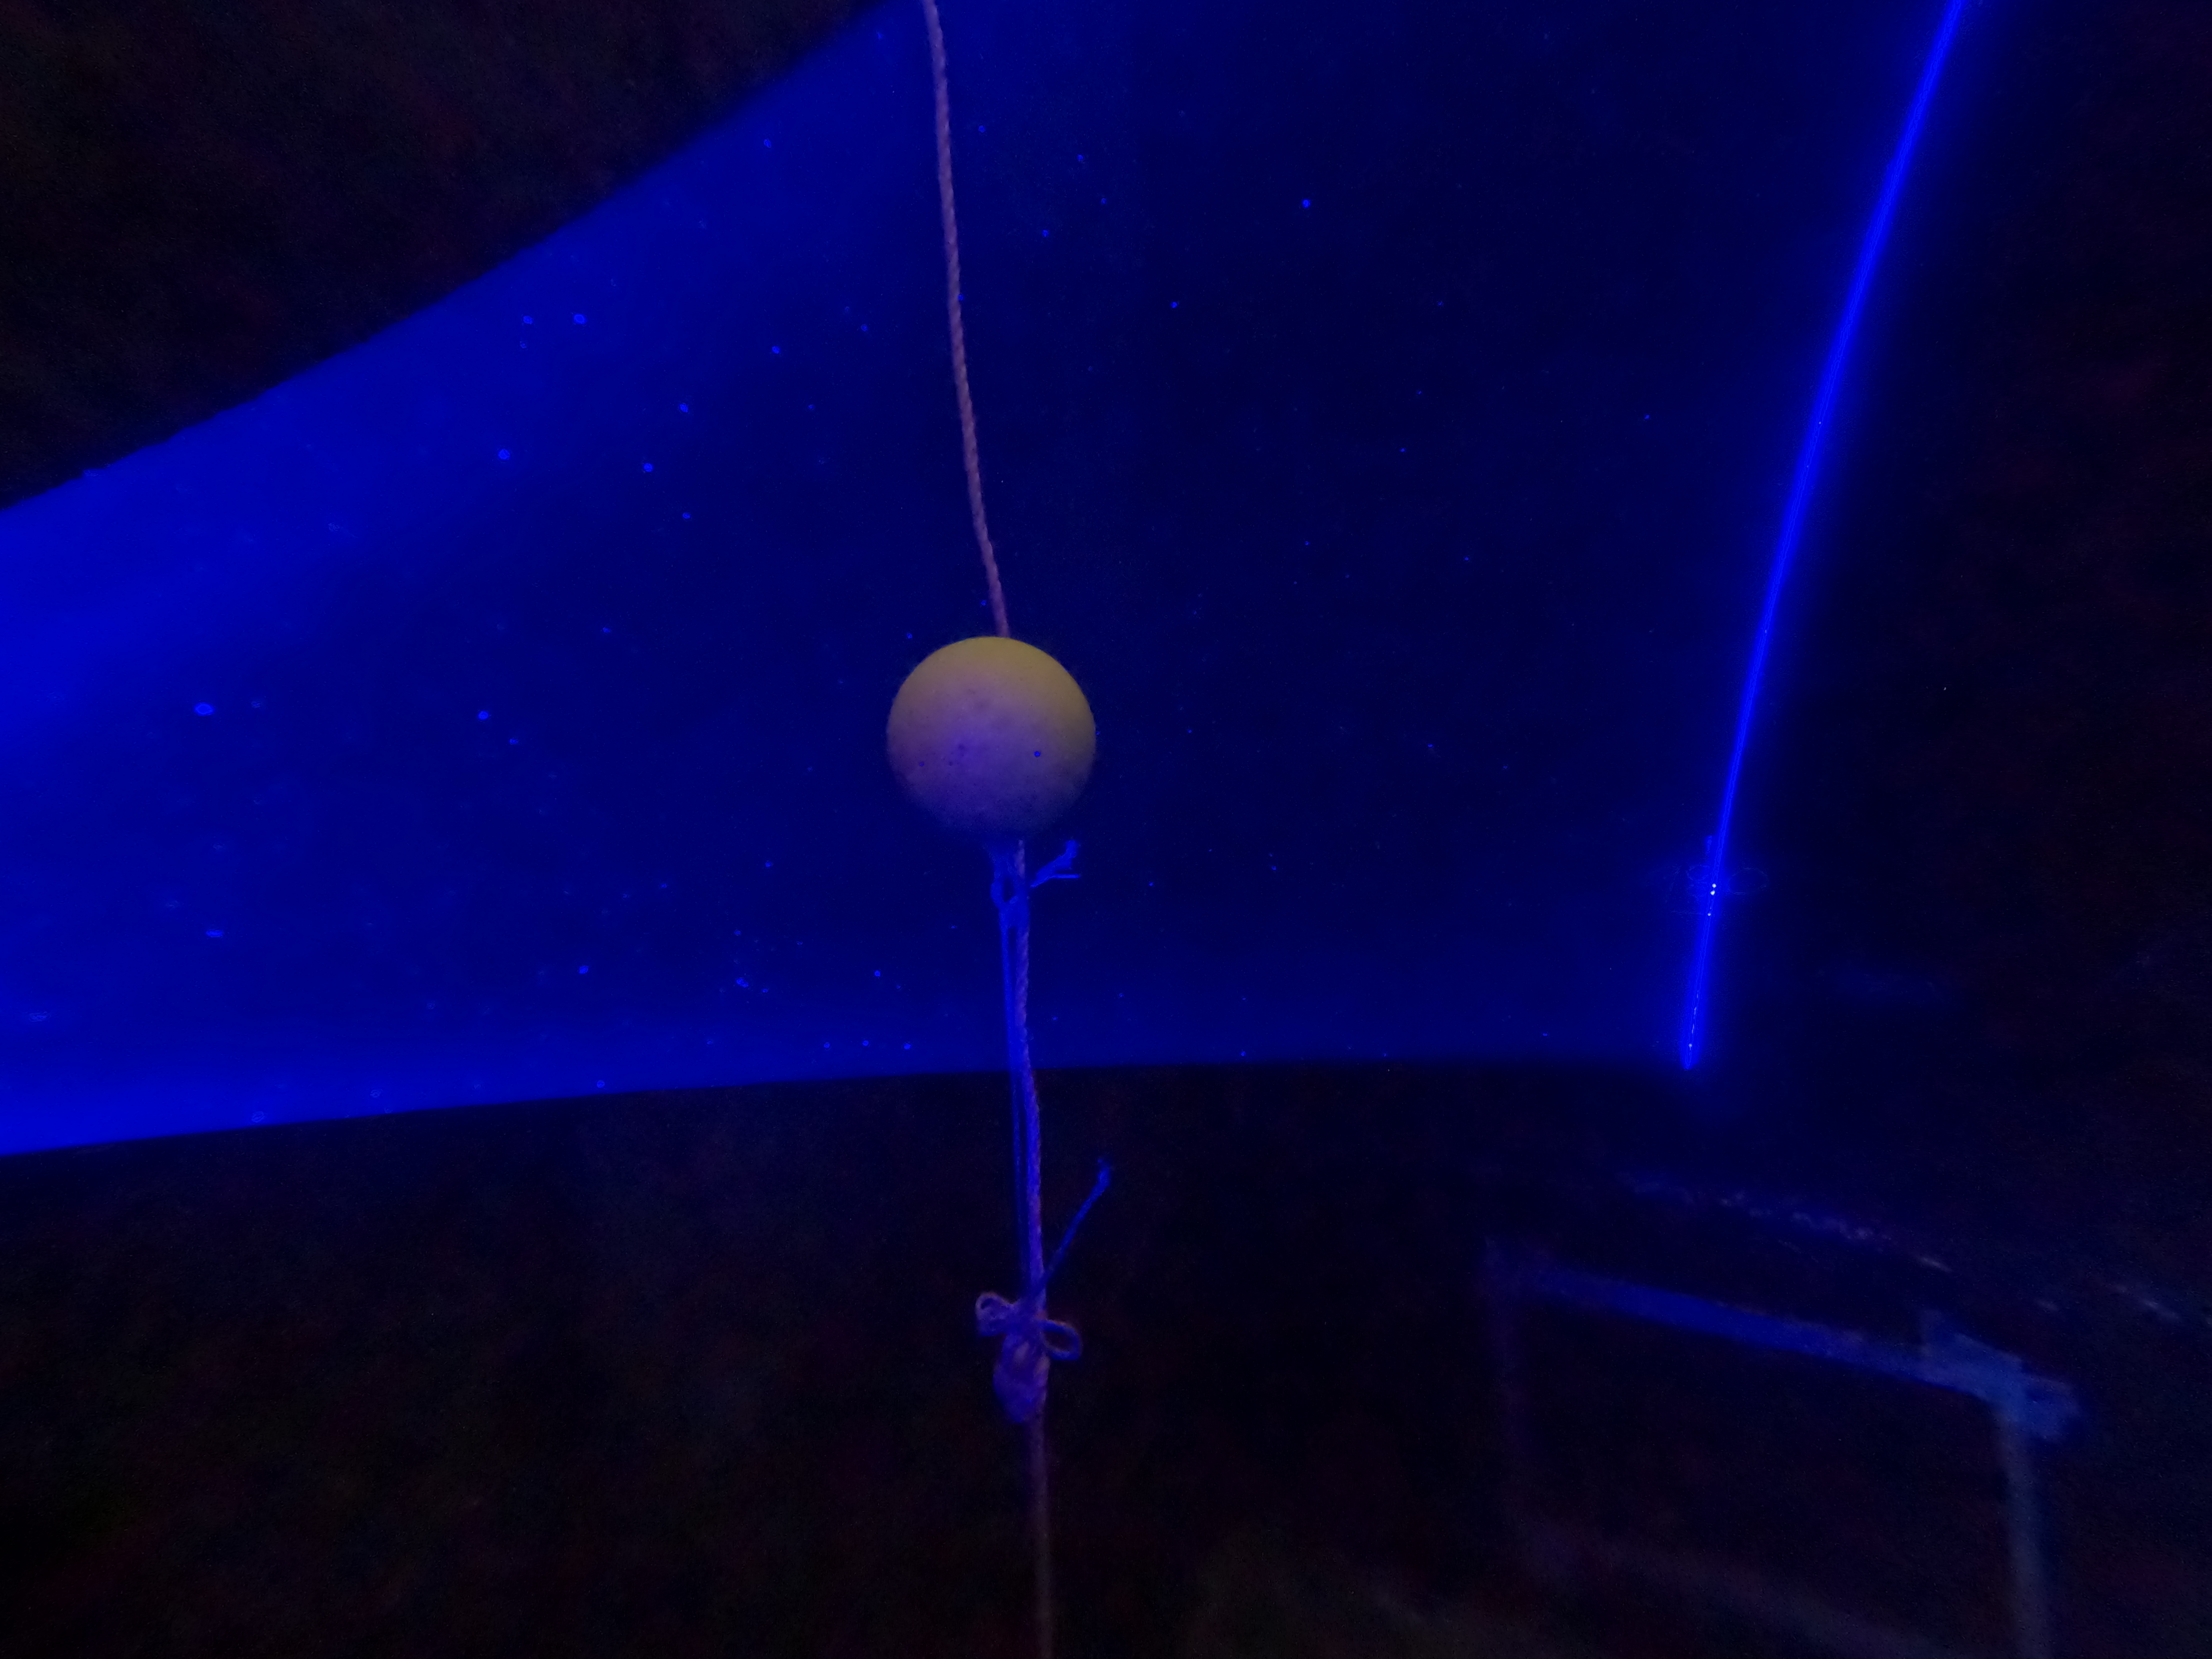

Supplement: Supplementary file 1112 [file G0032826.pdf › 7/G0032826.pdf]

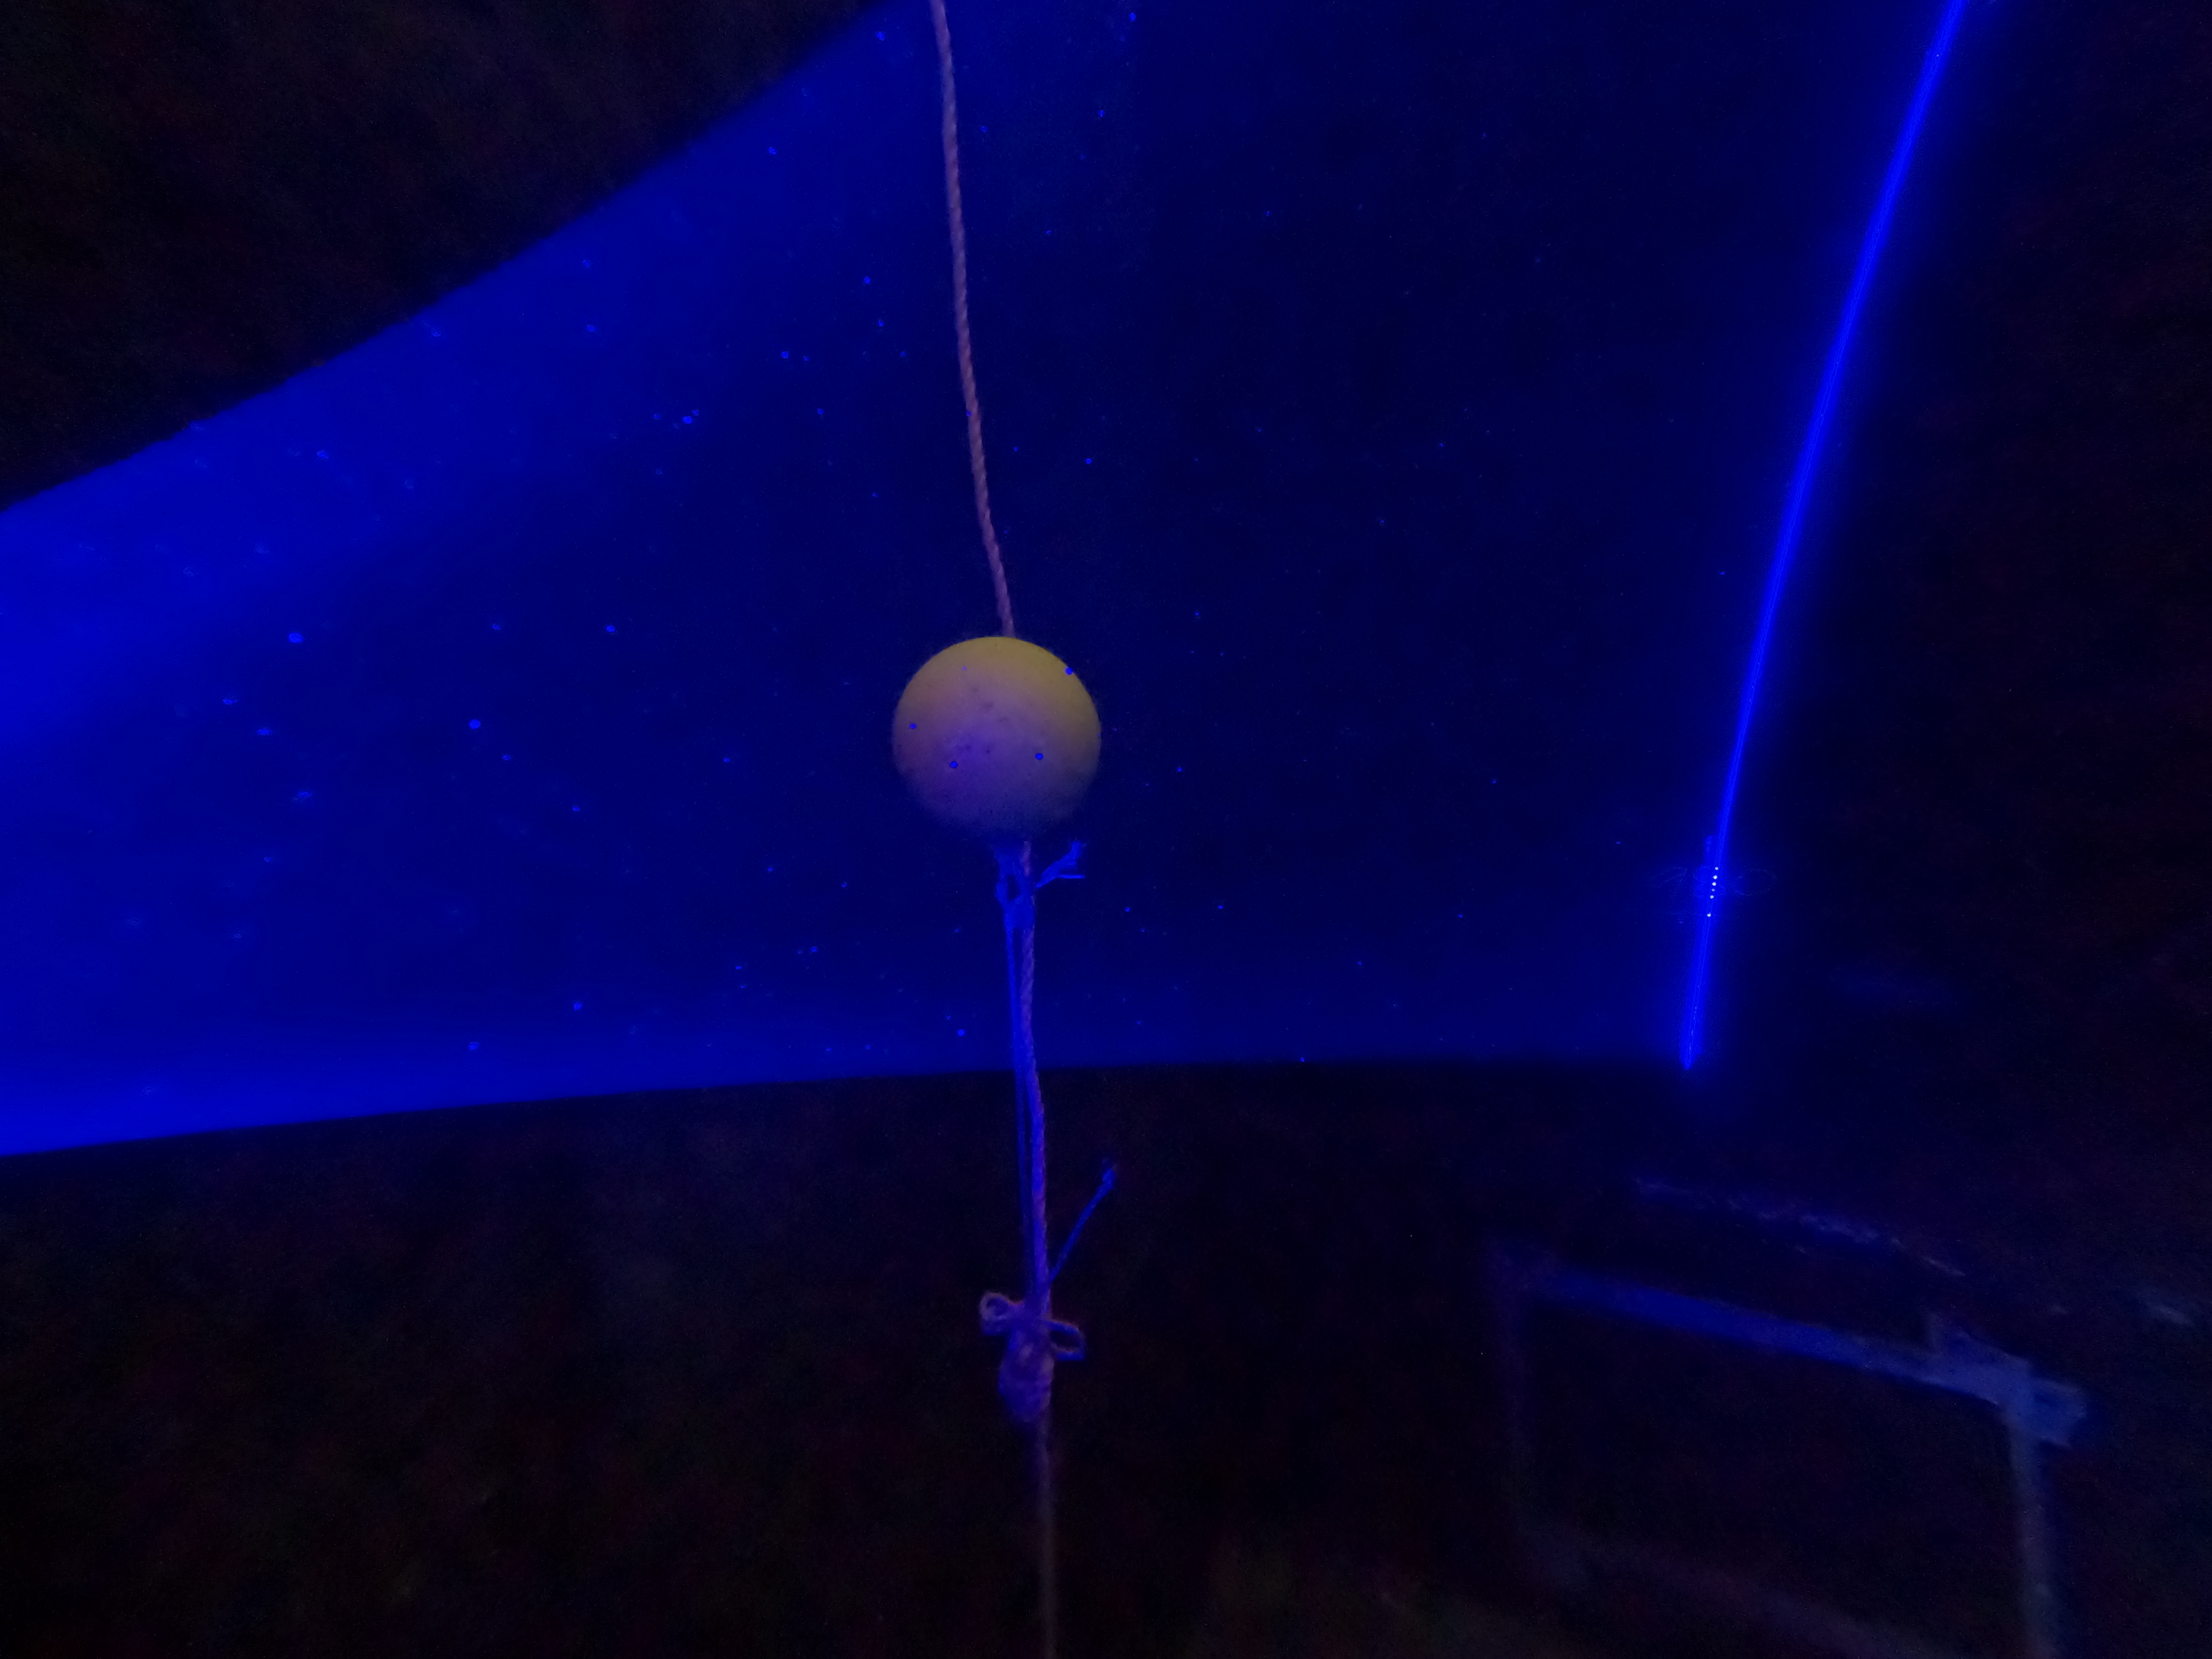

Supplement: Supplementary file 1113 [file G0032827.pdf › 7/G0032827.pdf]

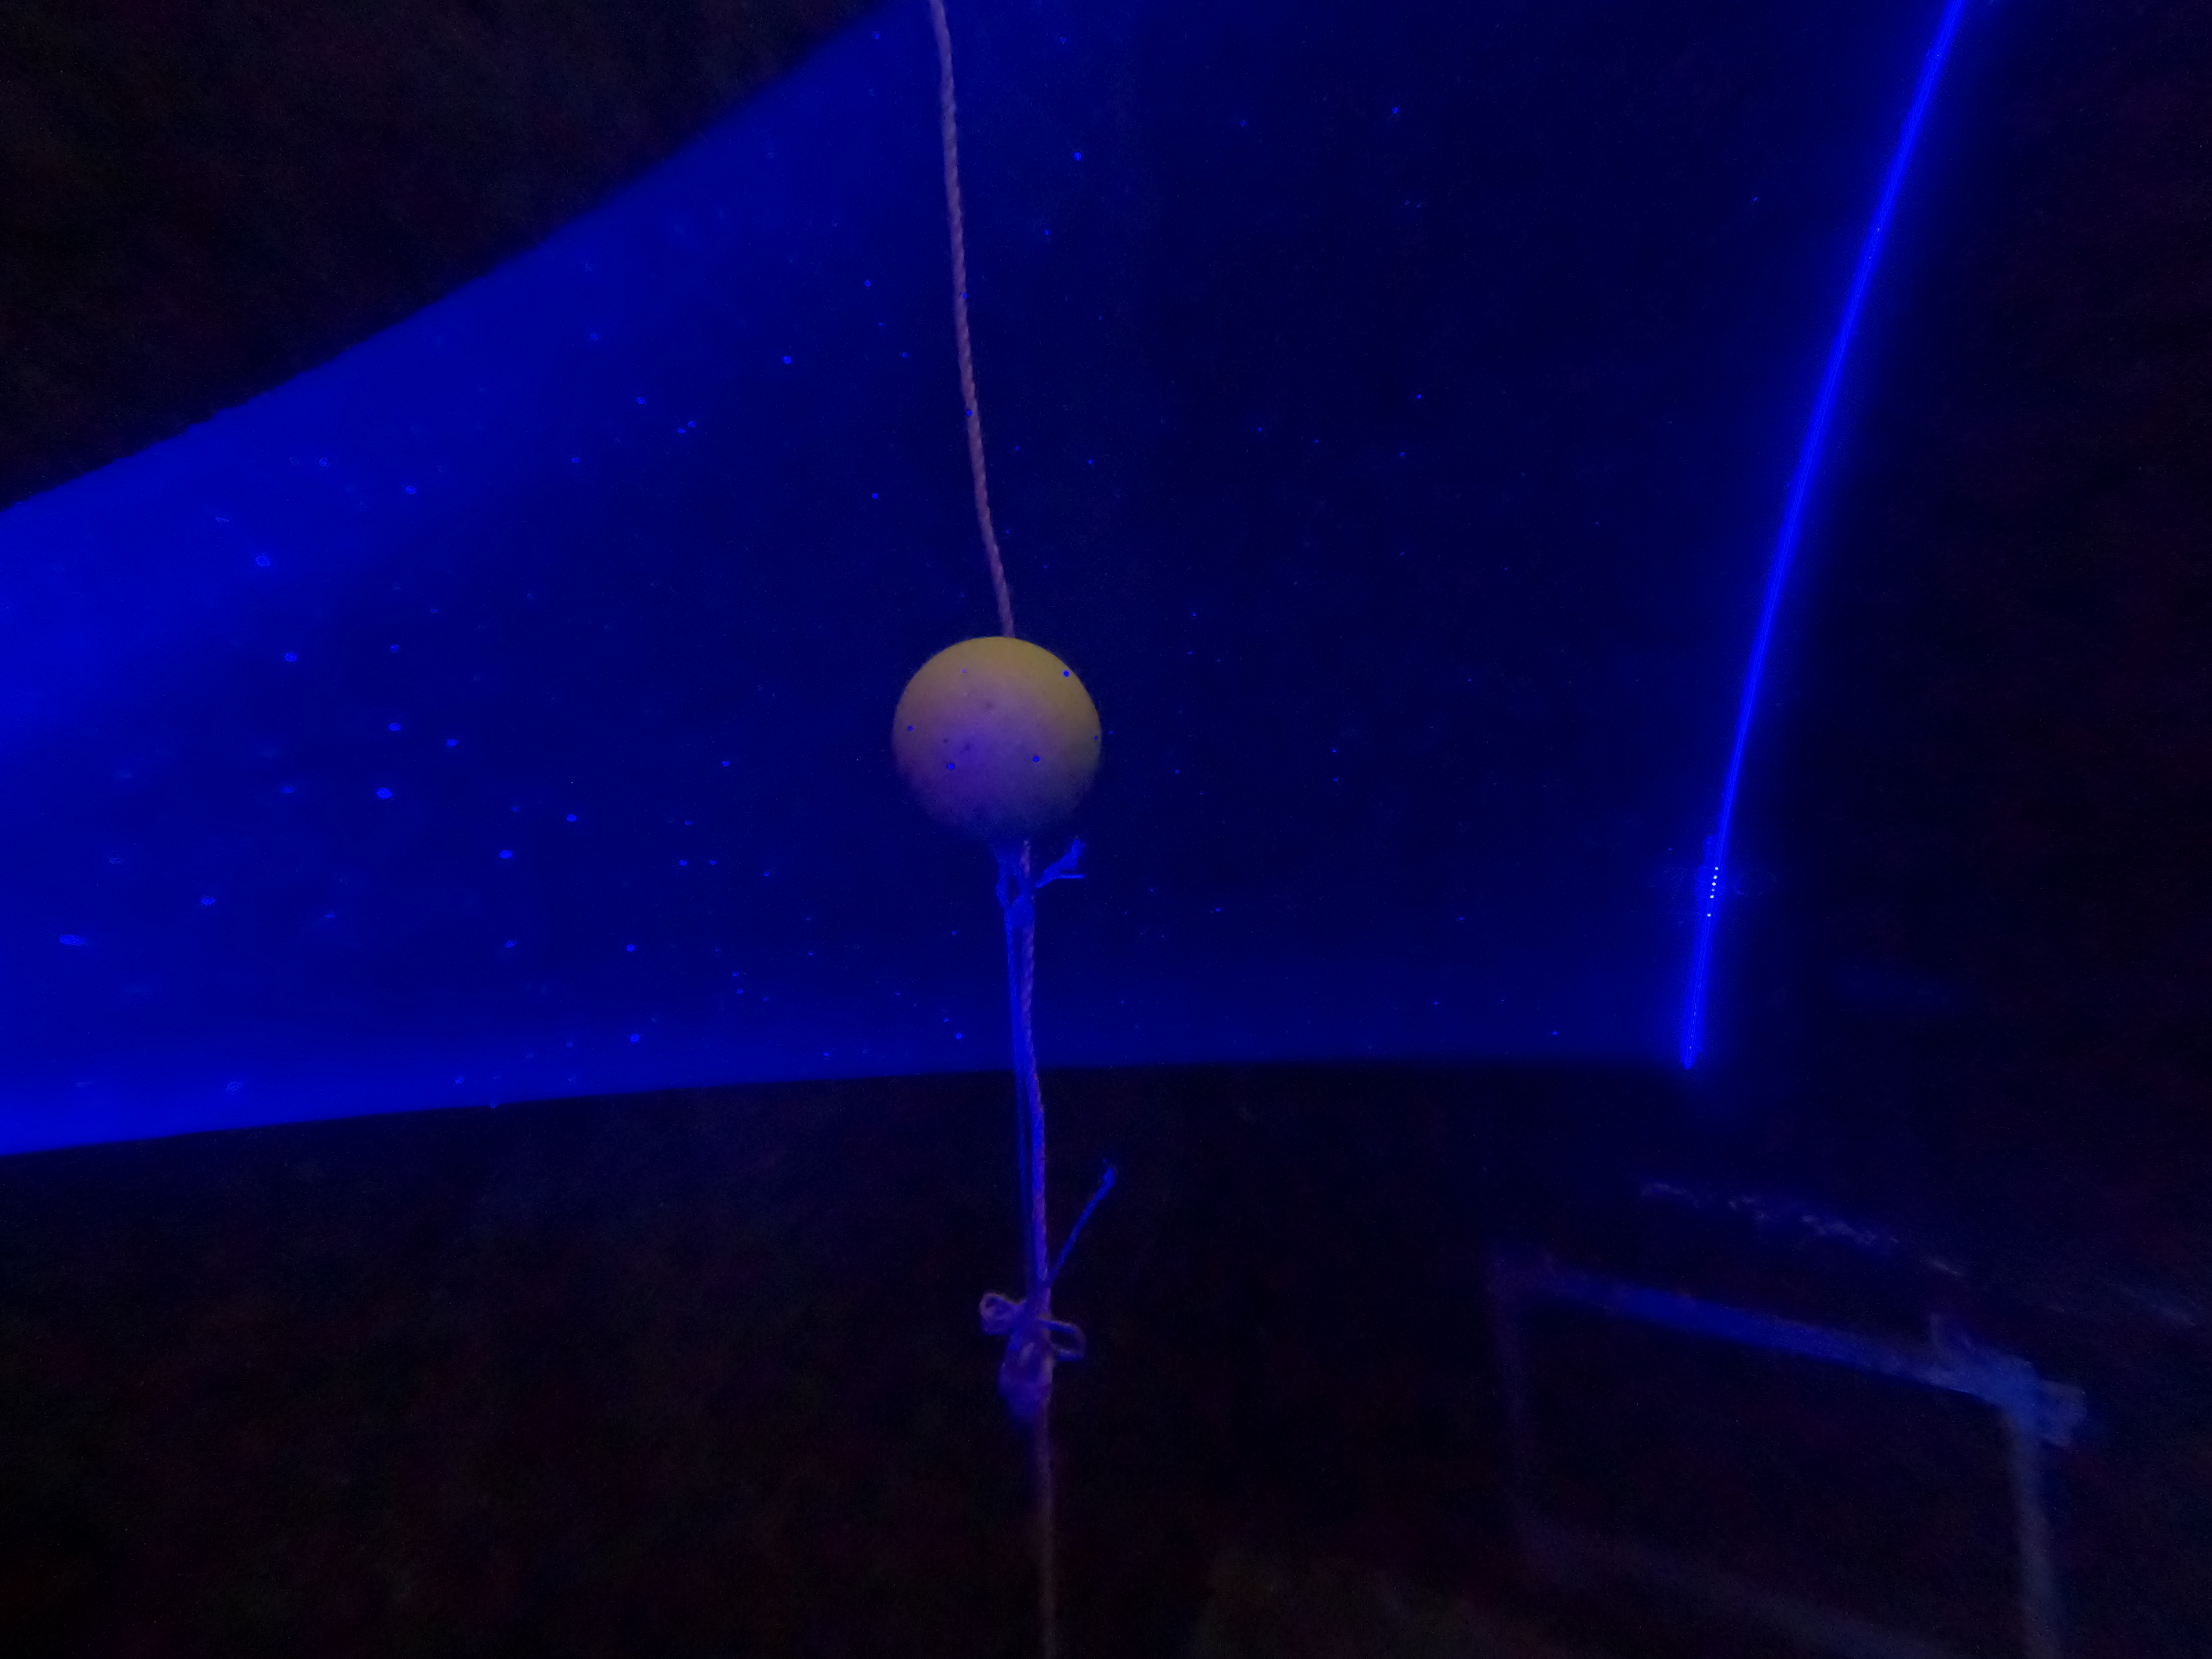

Supplement: Supplementary file 1114 [file G0032828.pdf › 7/G0032828.pdf]

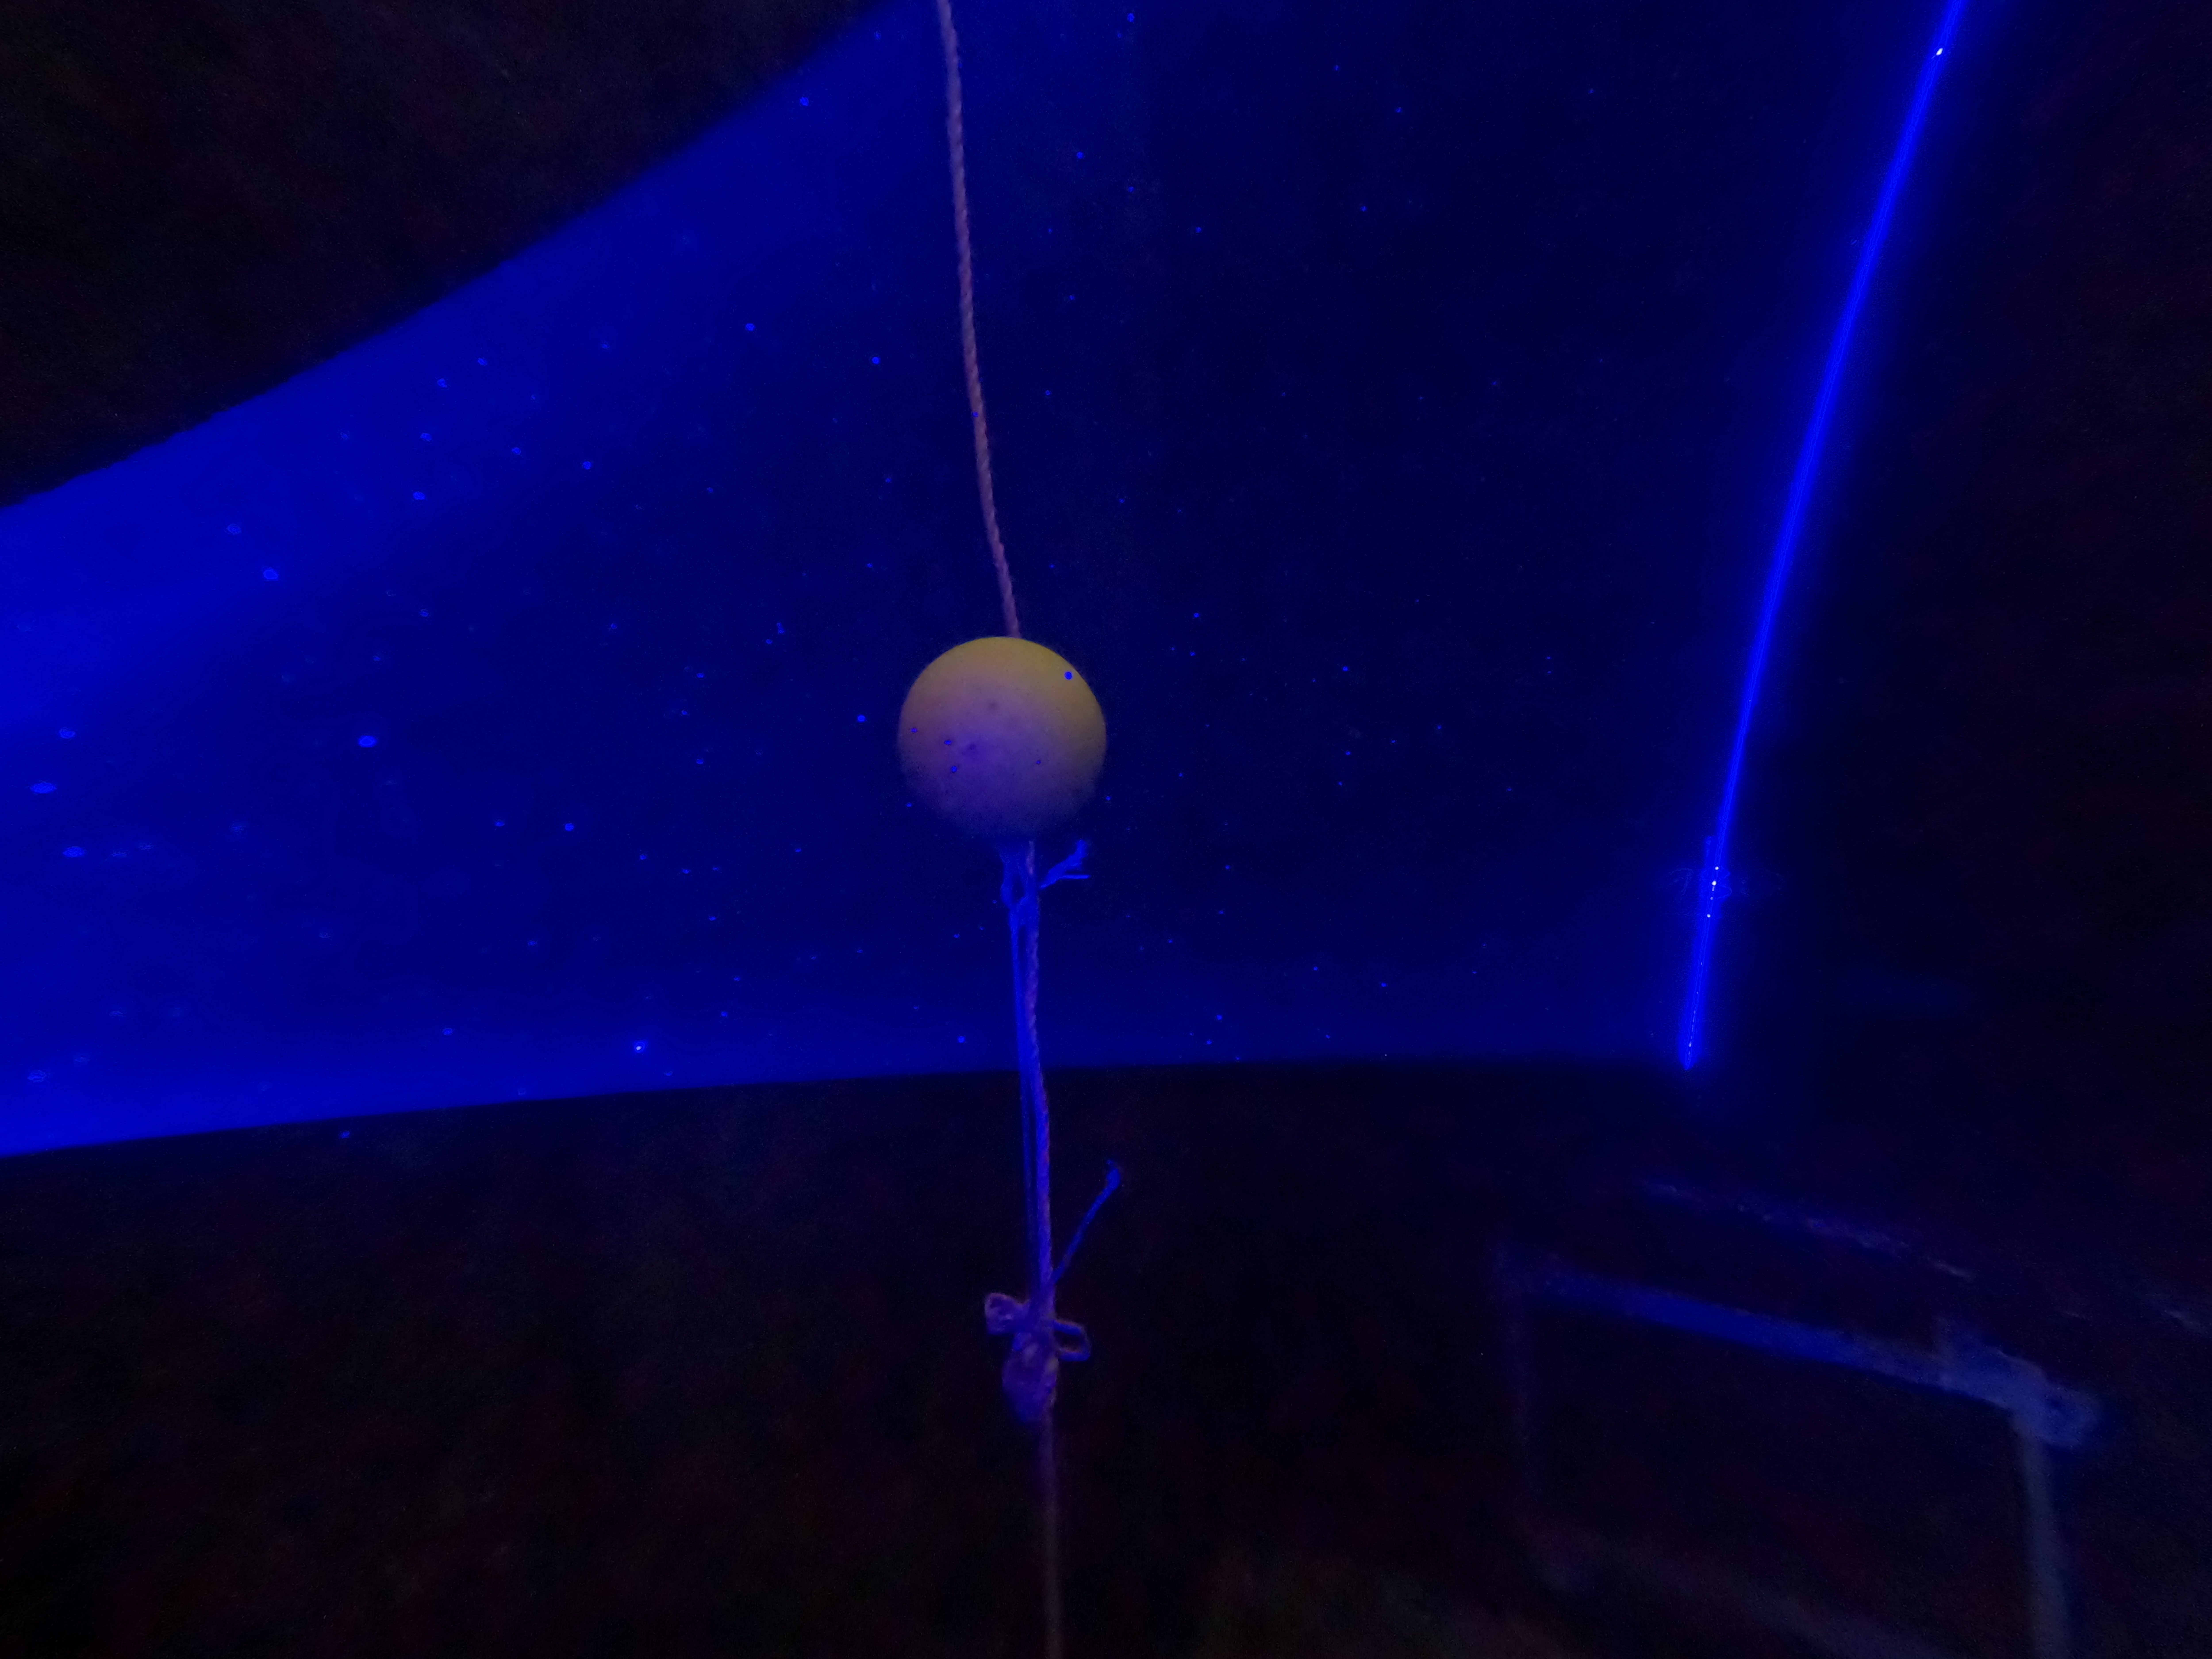

Supplement: Supplementary file 1115 [file G0032829.pdf › 7/G0032829.pdf]

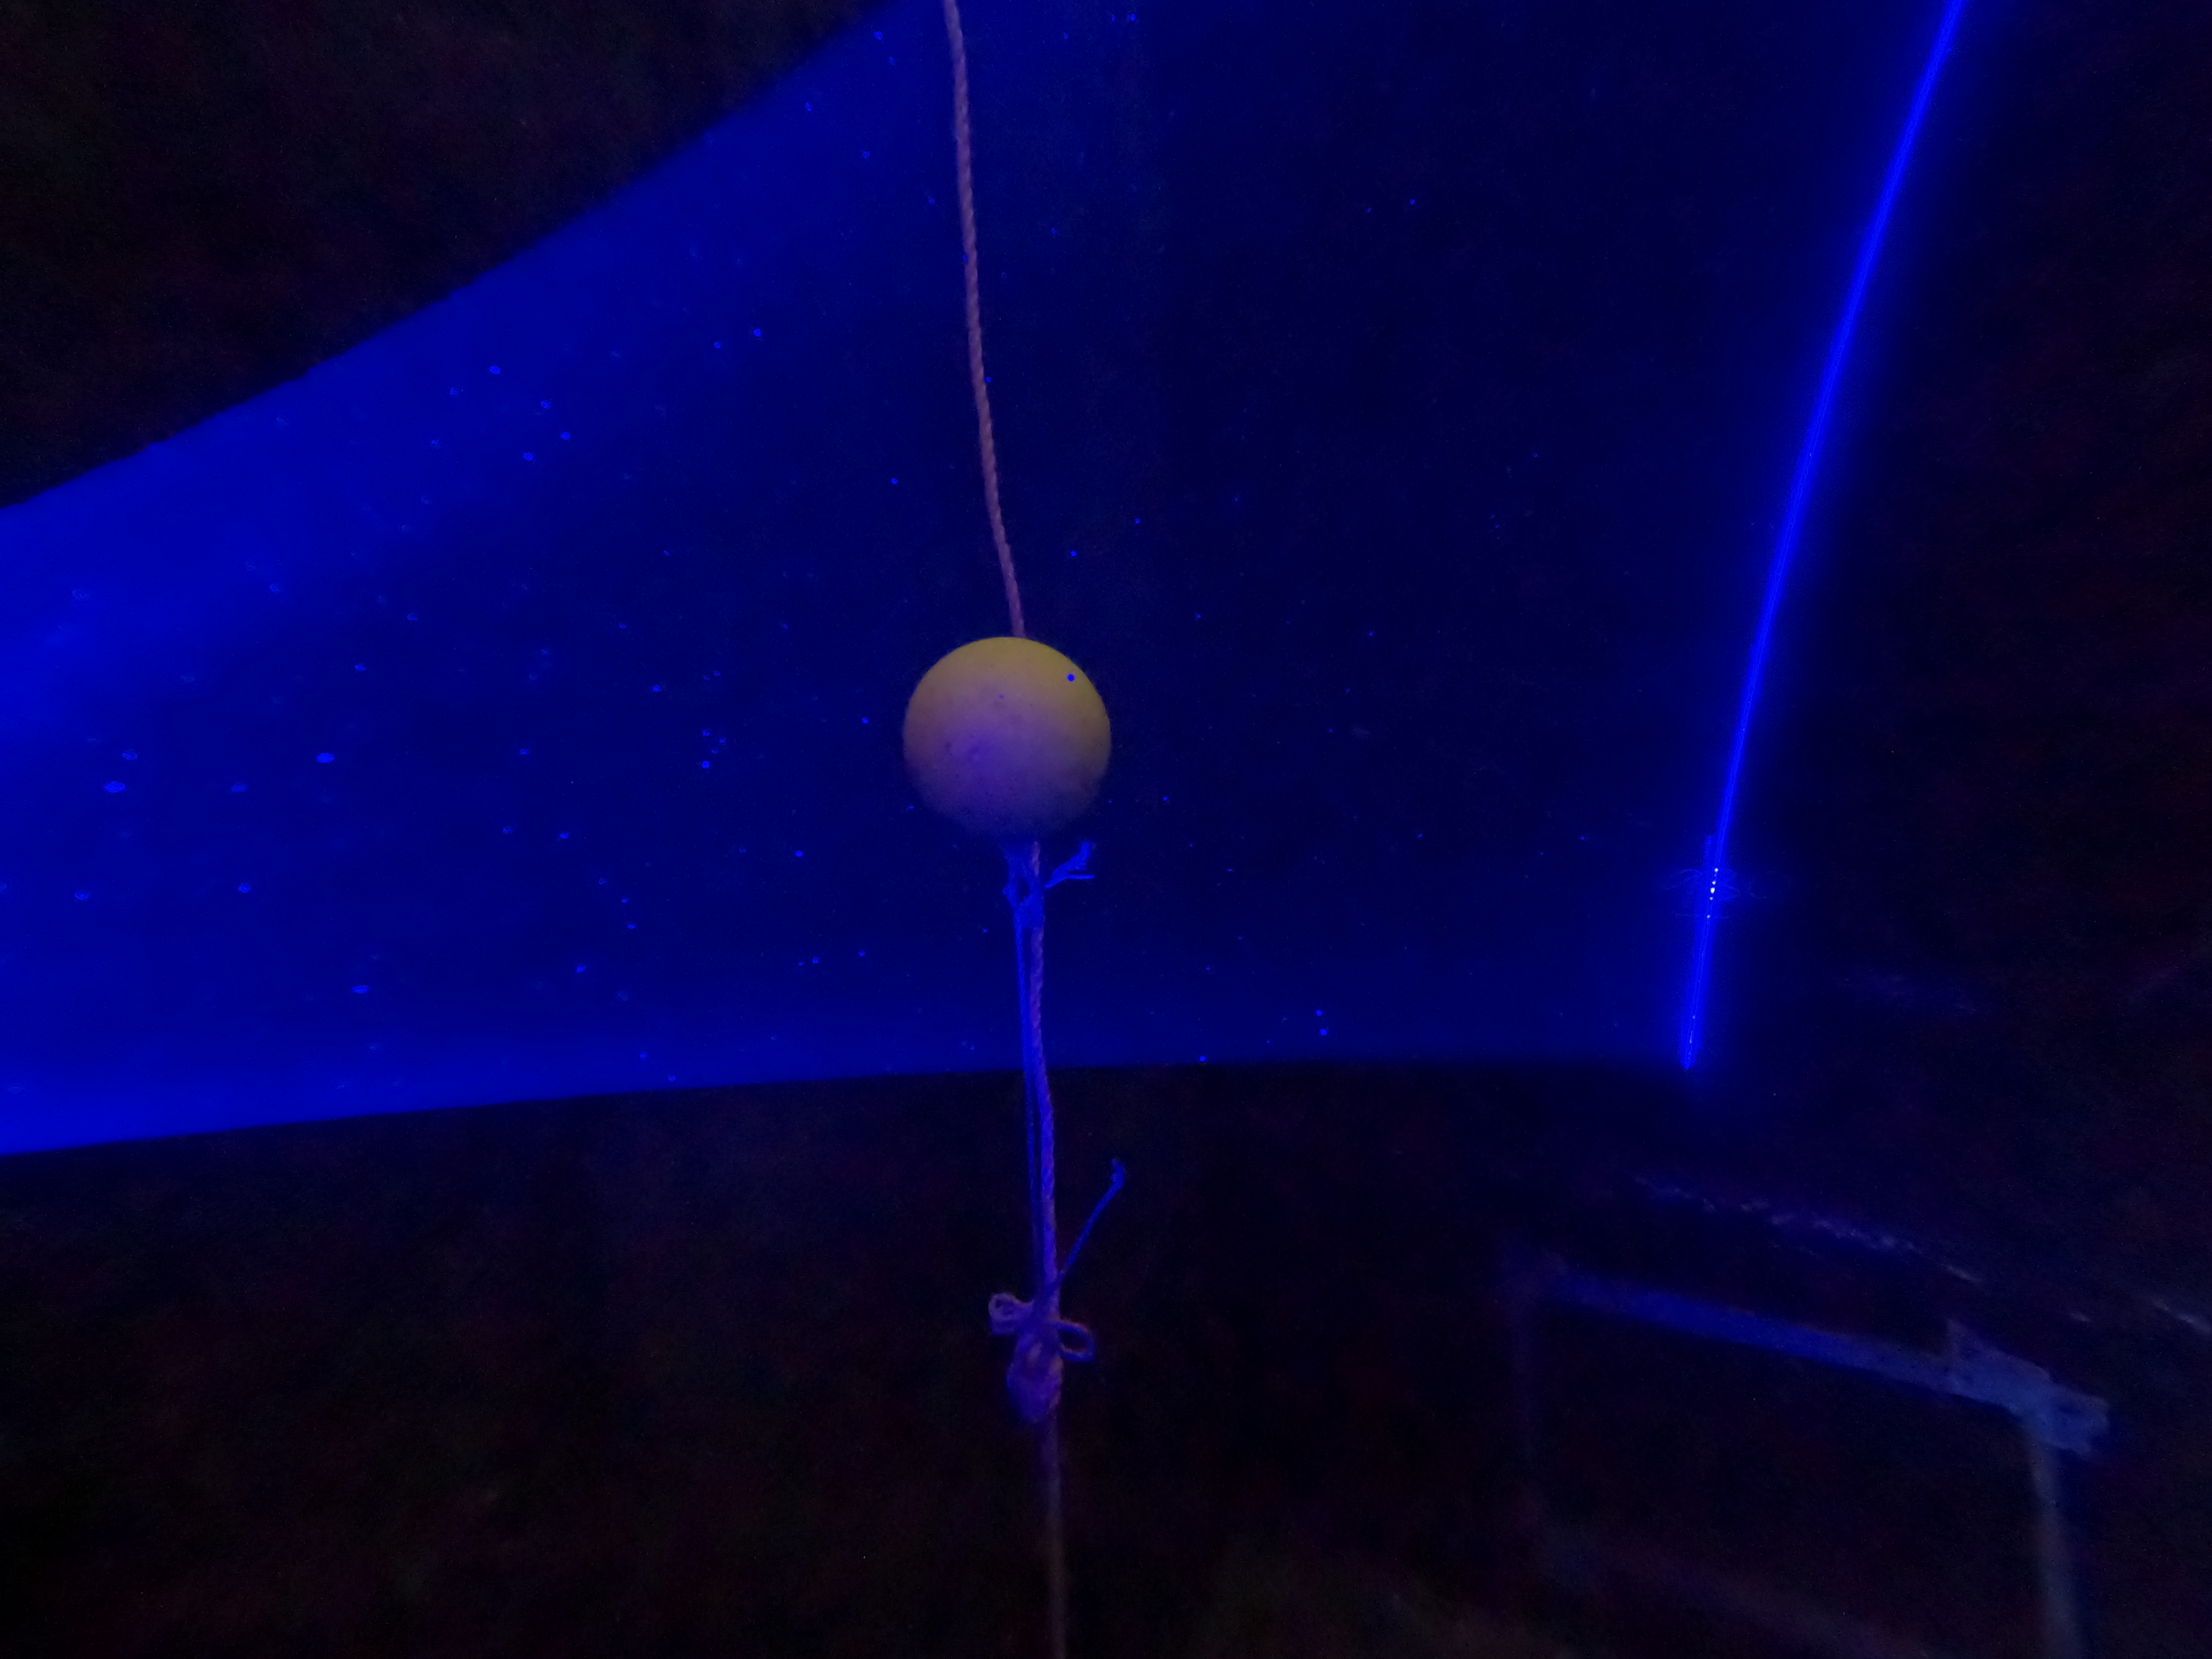

Supplement: Supplementary file 1116 [file G0032830.pdf › 7/G0032830.pdf]

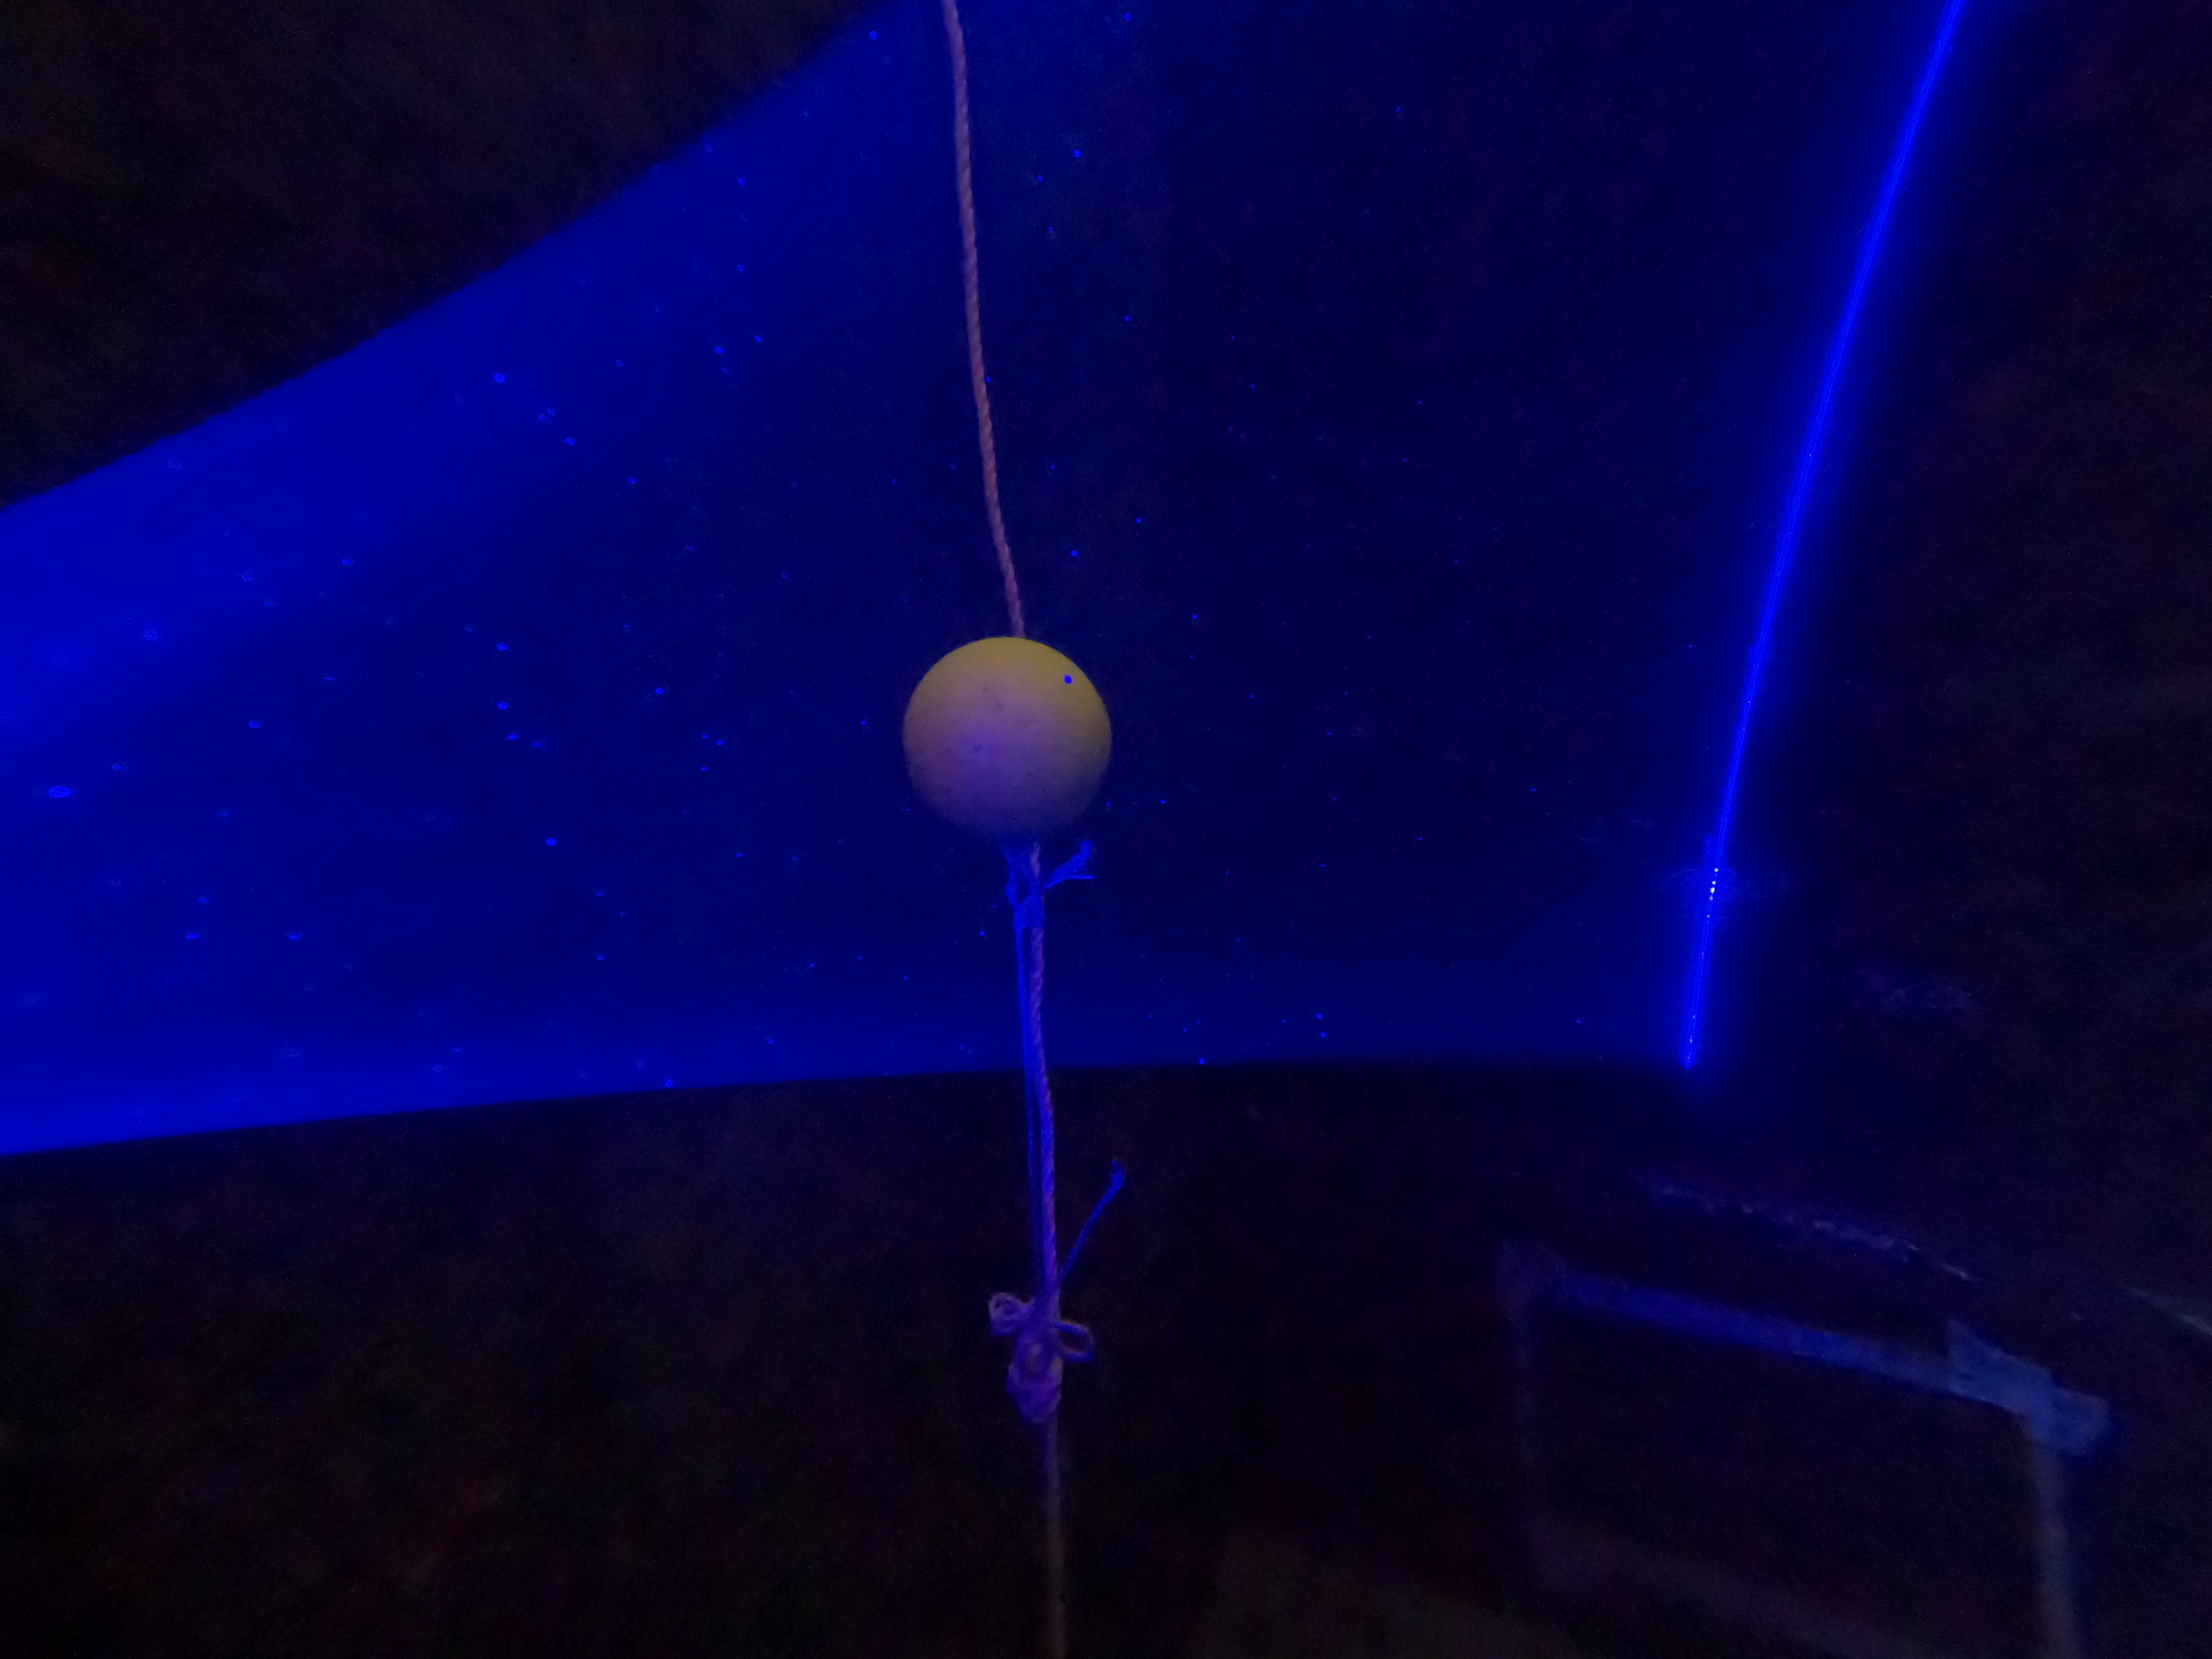

Supplement: Supplementary file 1117 [file G0032831.pdf › 7/G0032831.pdf]

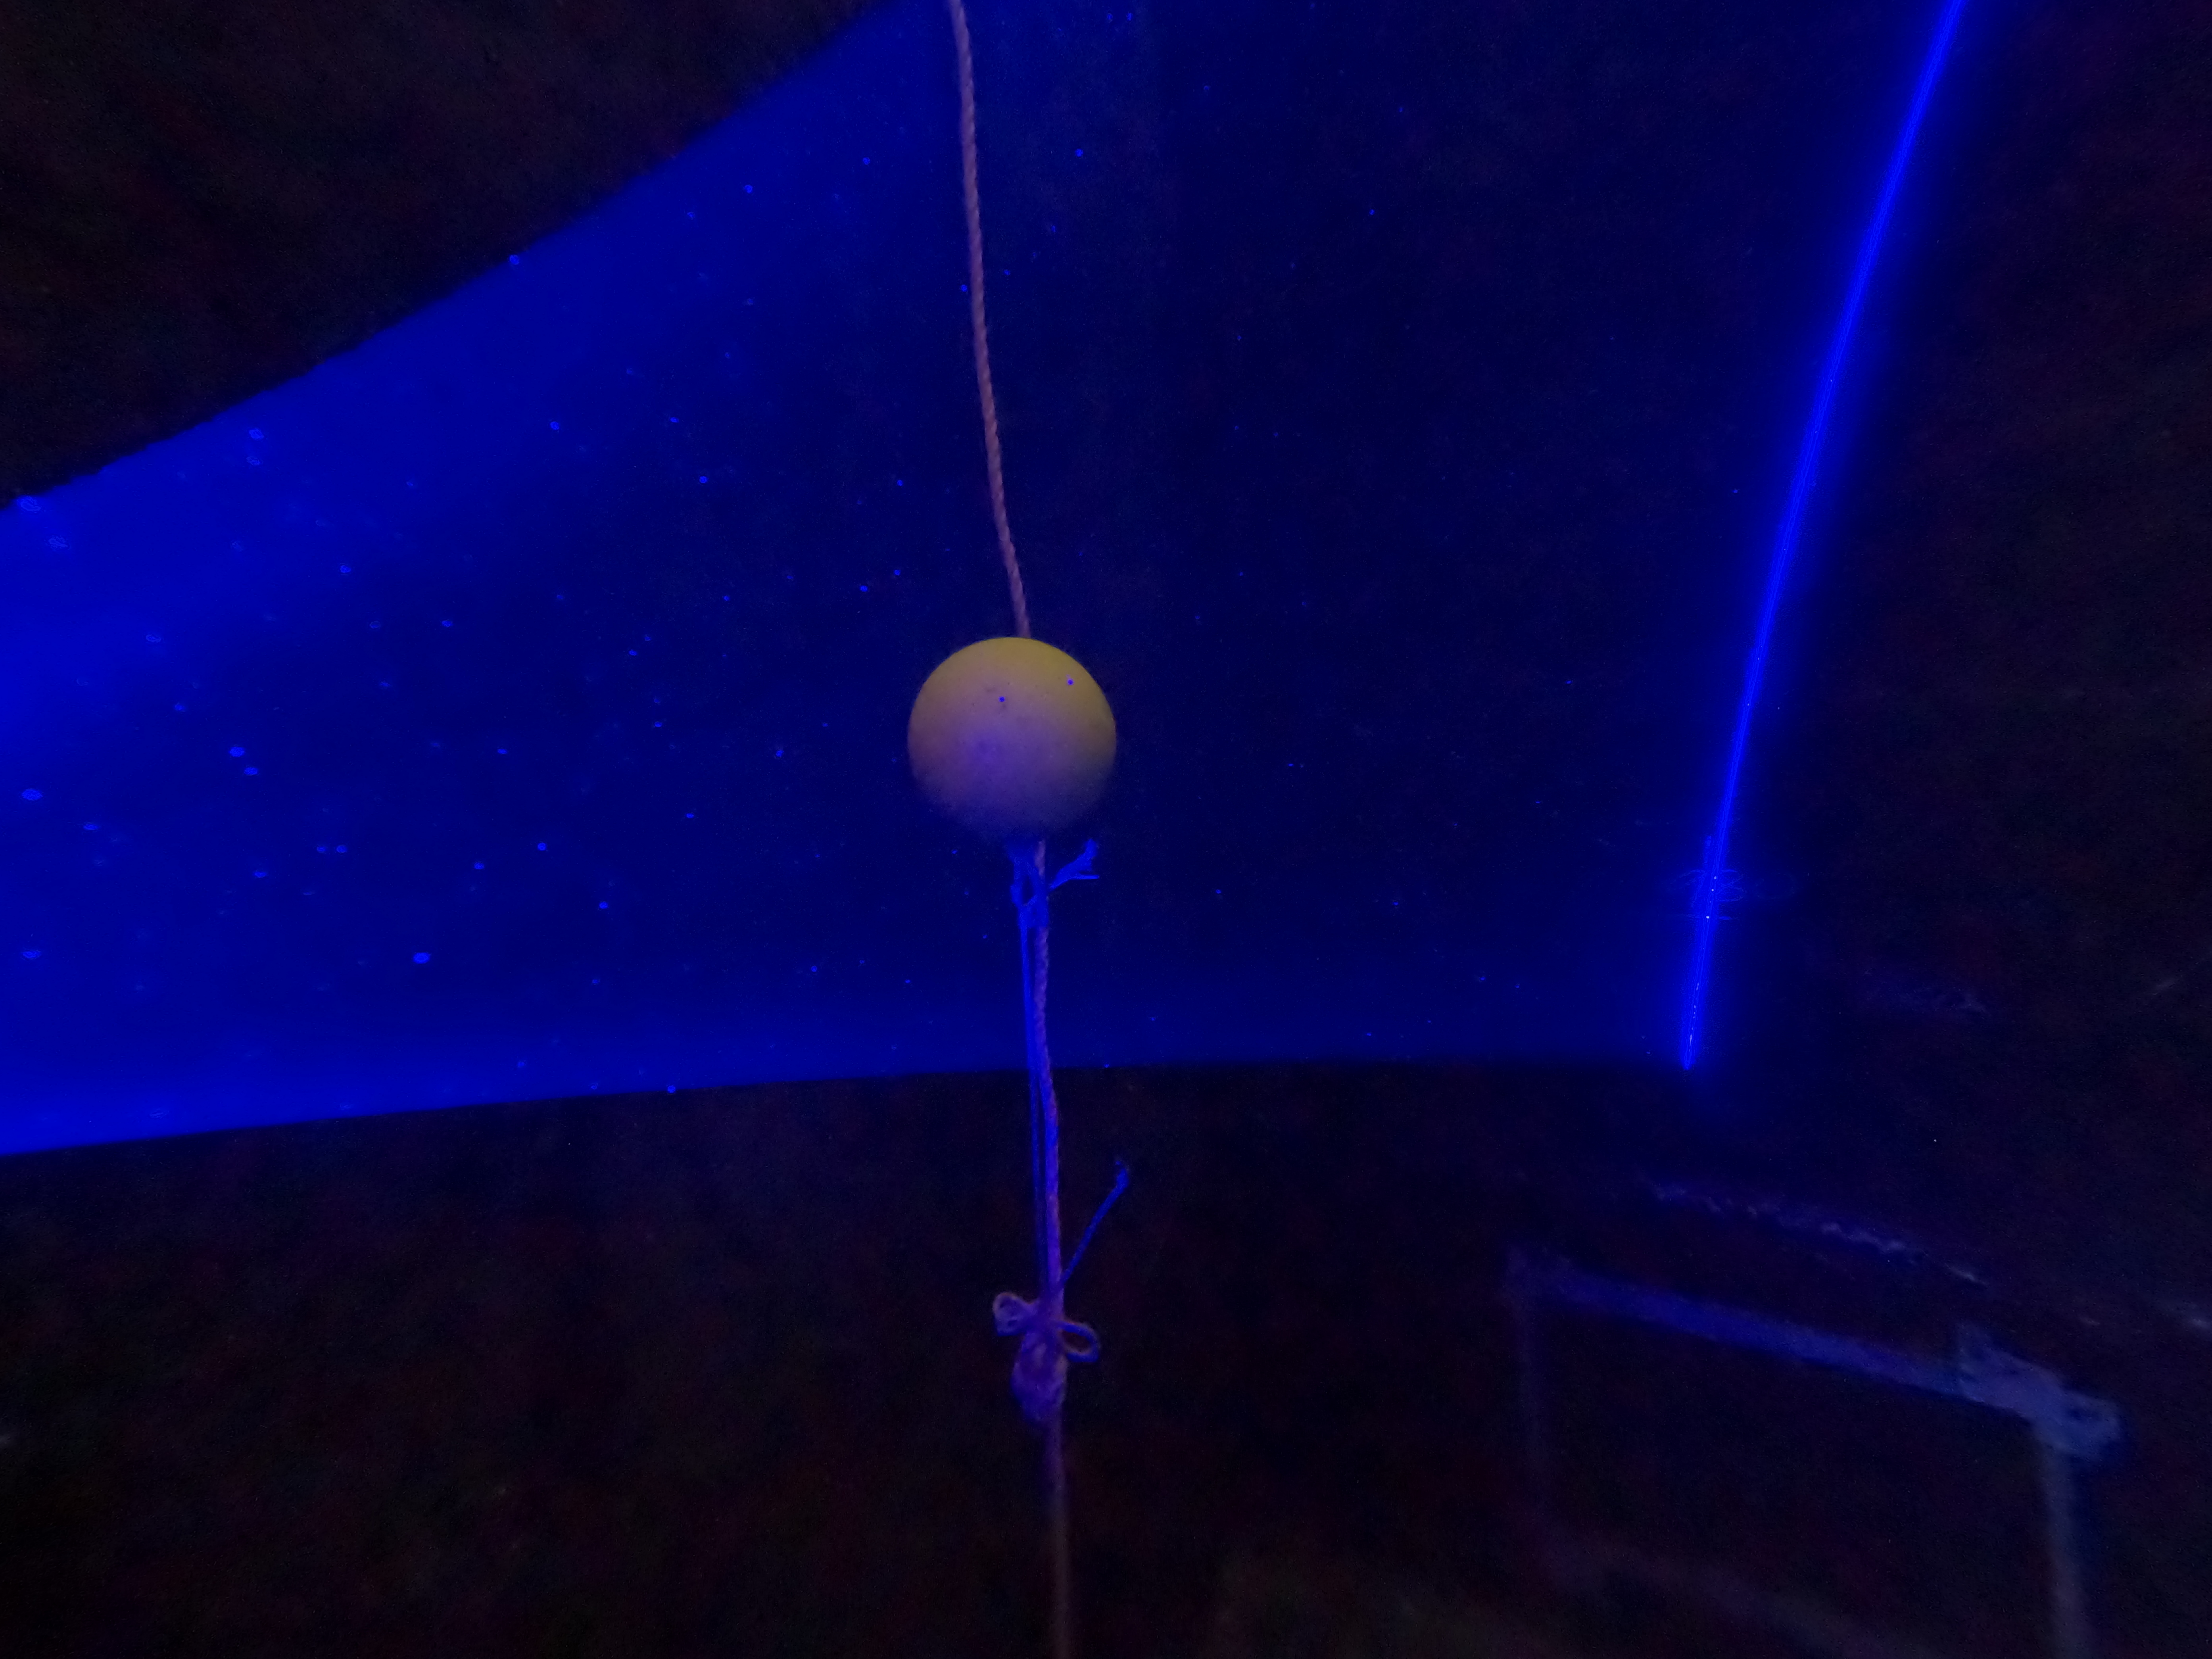

Supplement: Supplementary file 1118 [file G0032832.pdf › 7/G0032832.pdf]

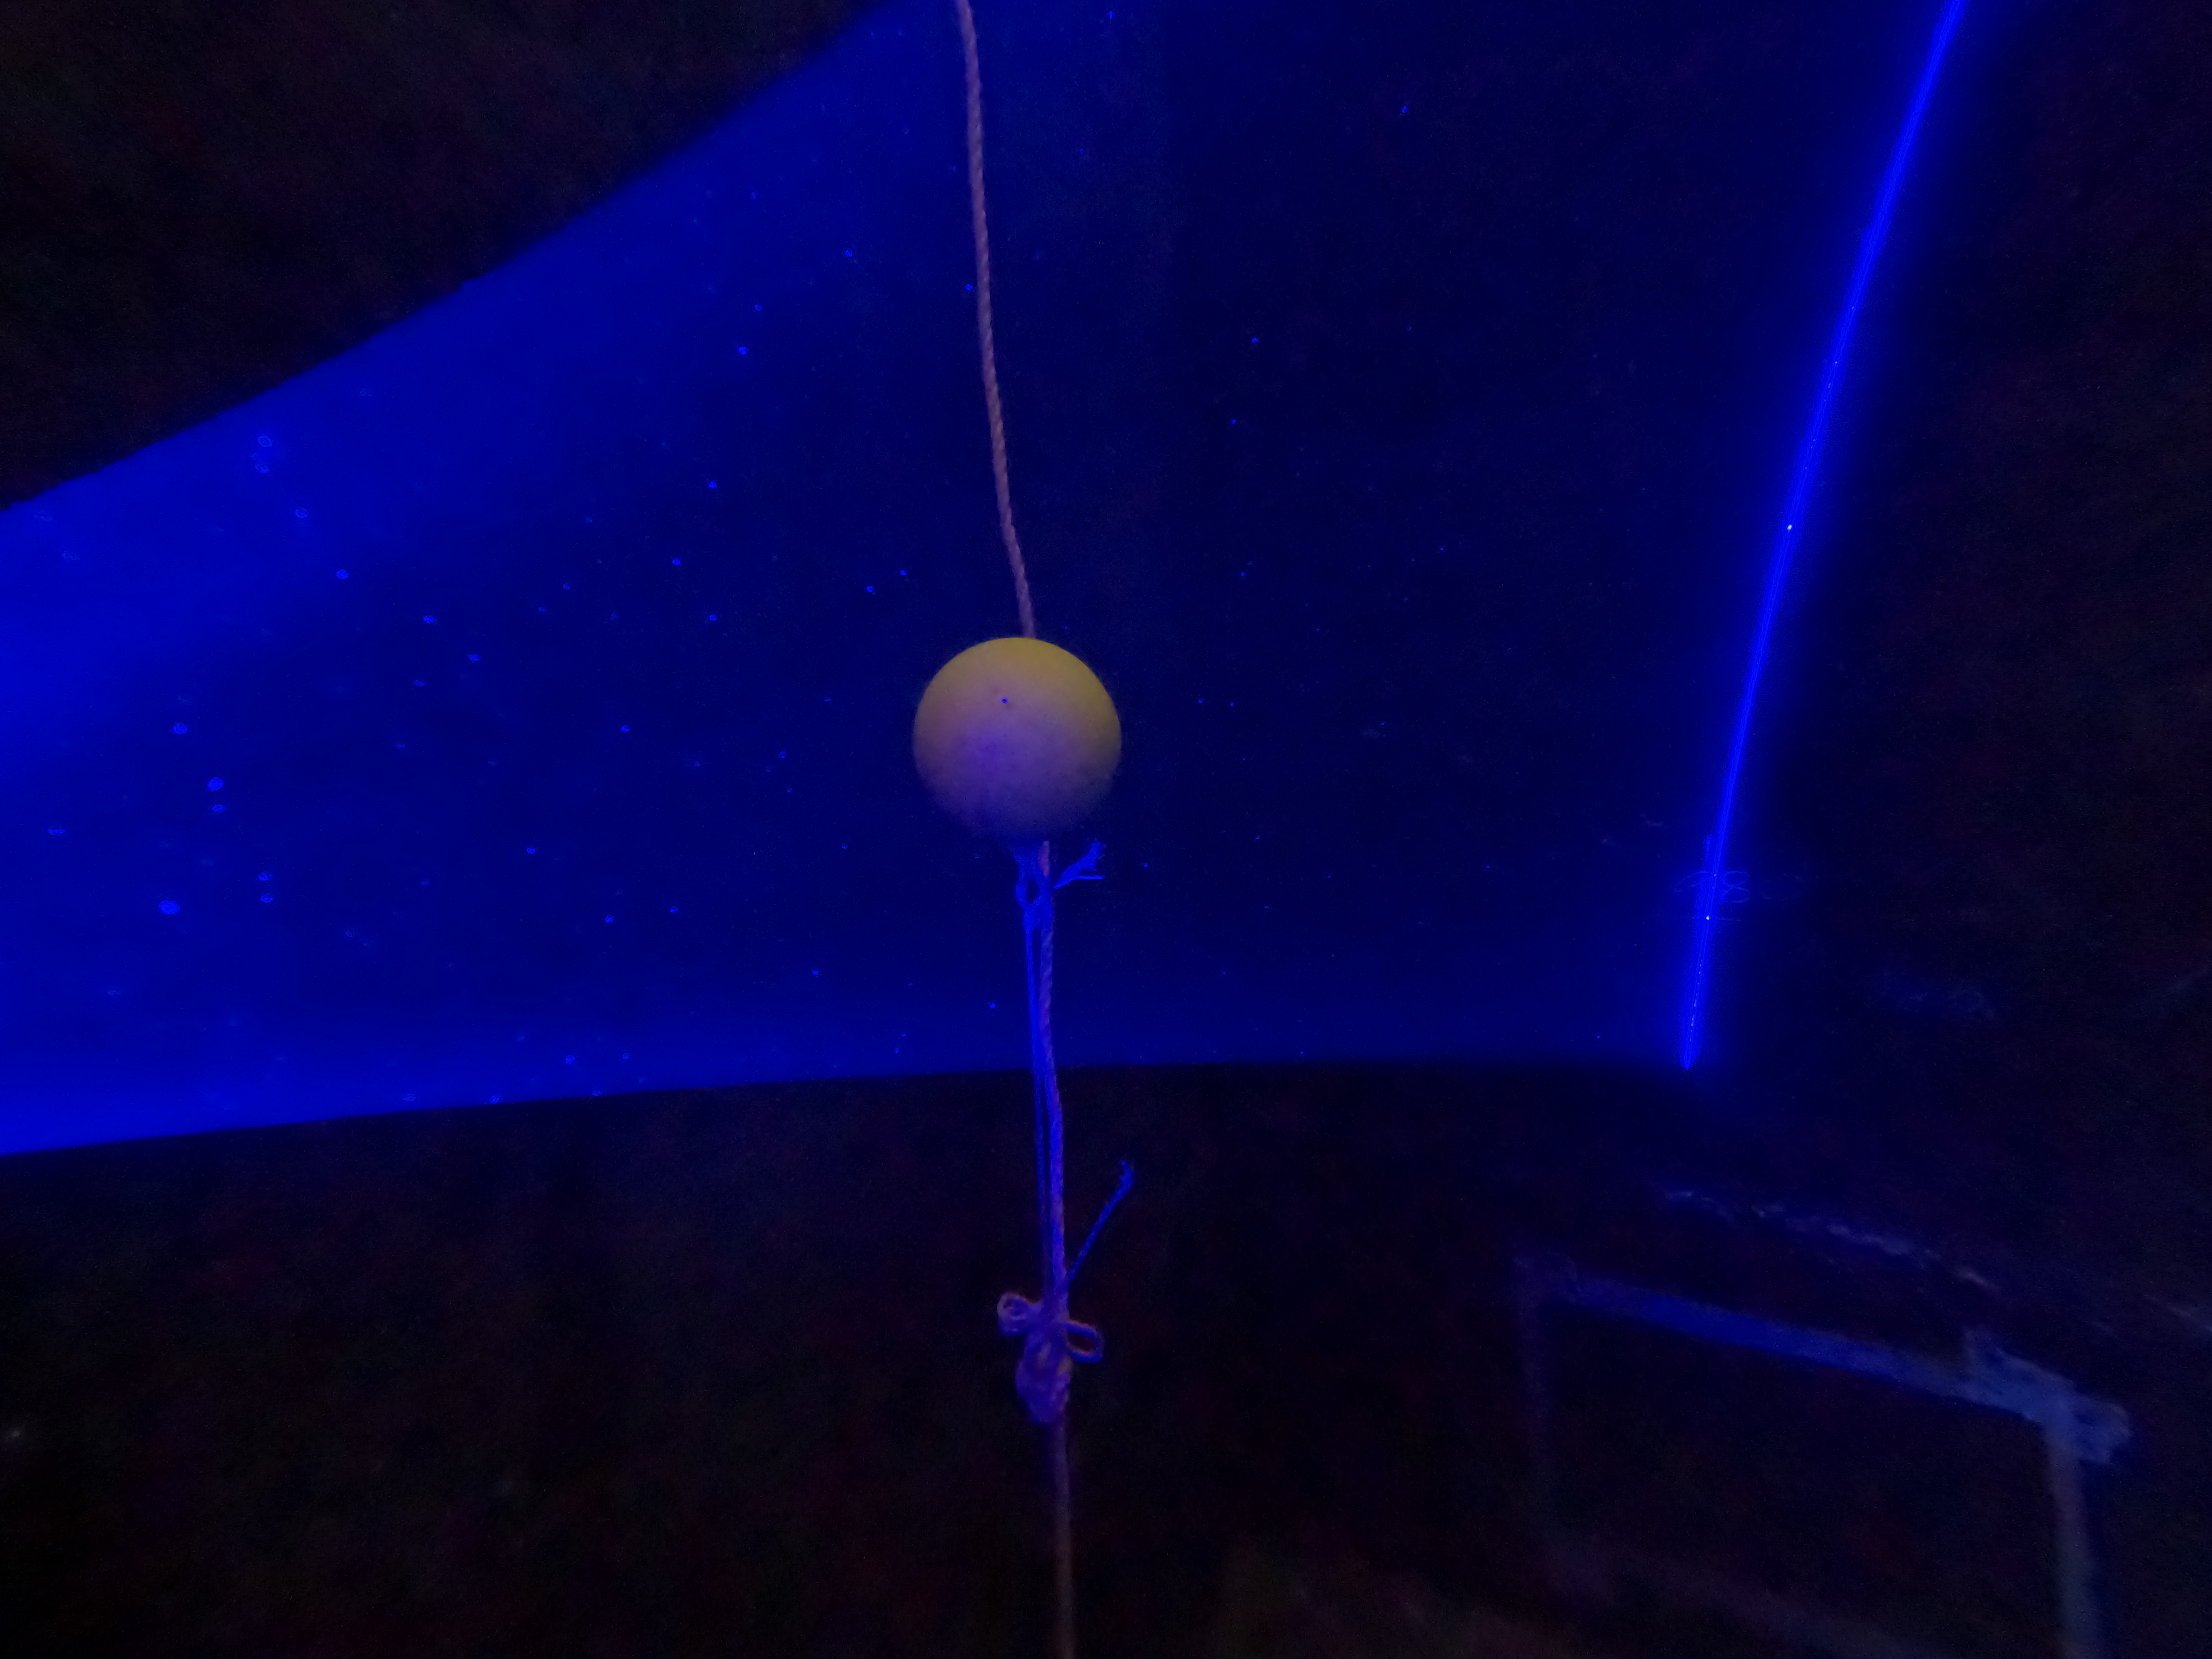

Supplement: Supplementary file 1119 [file G0032833.pdf › 7/G0032833.pdf]

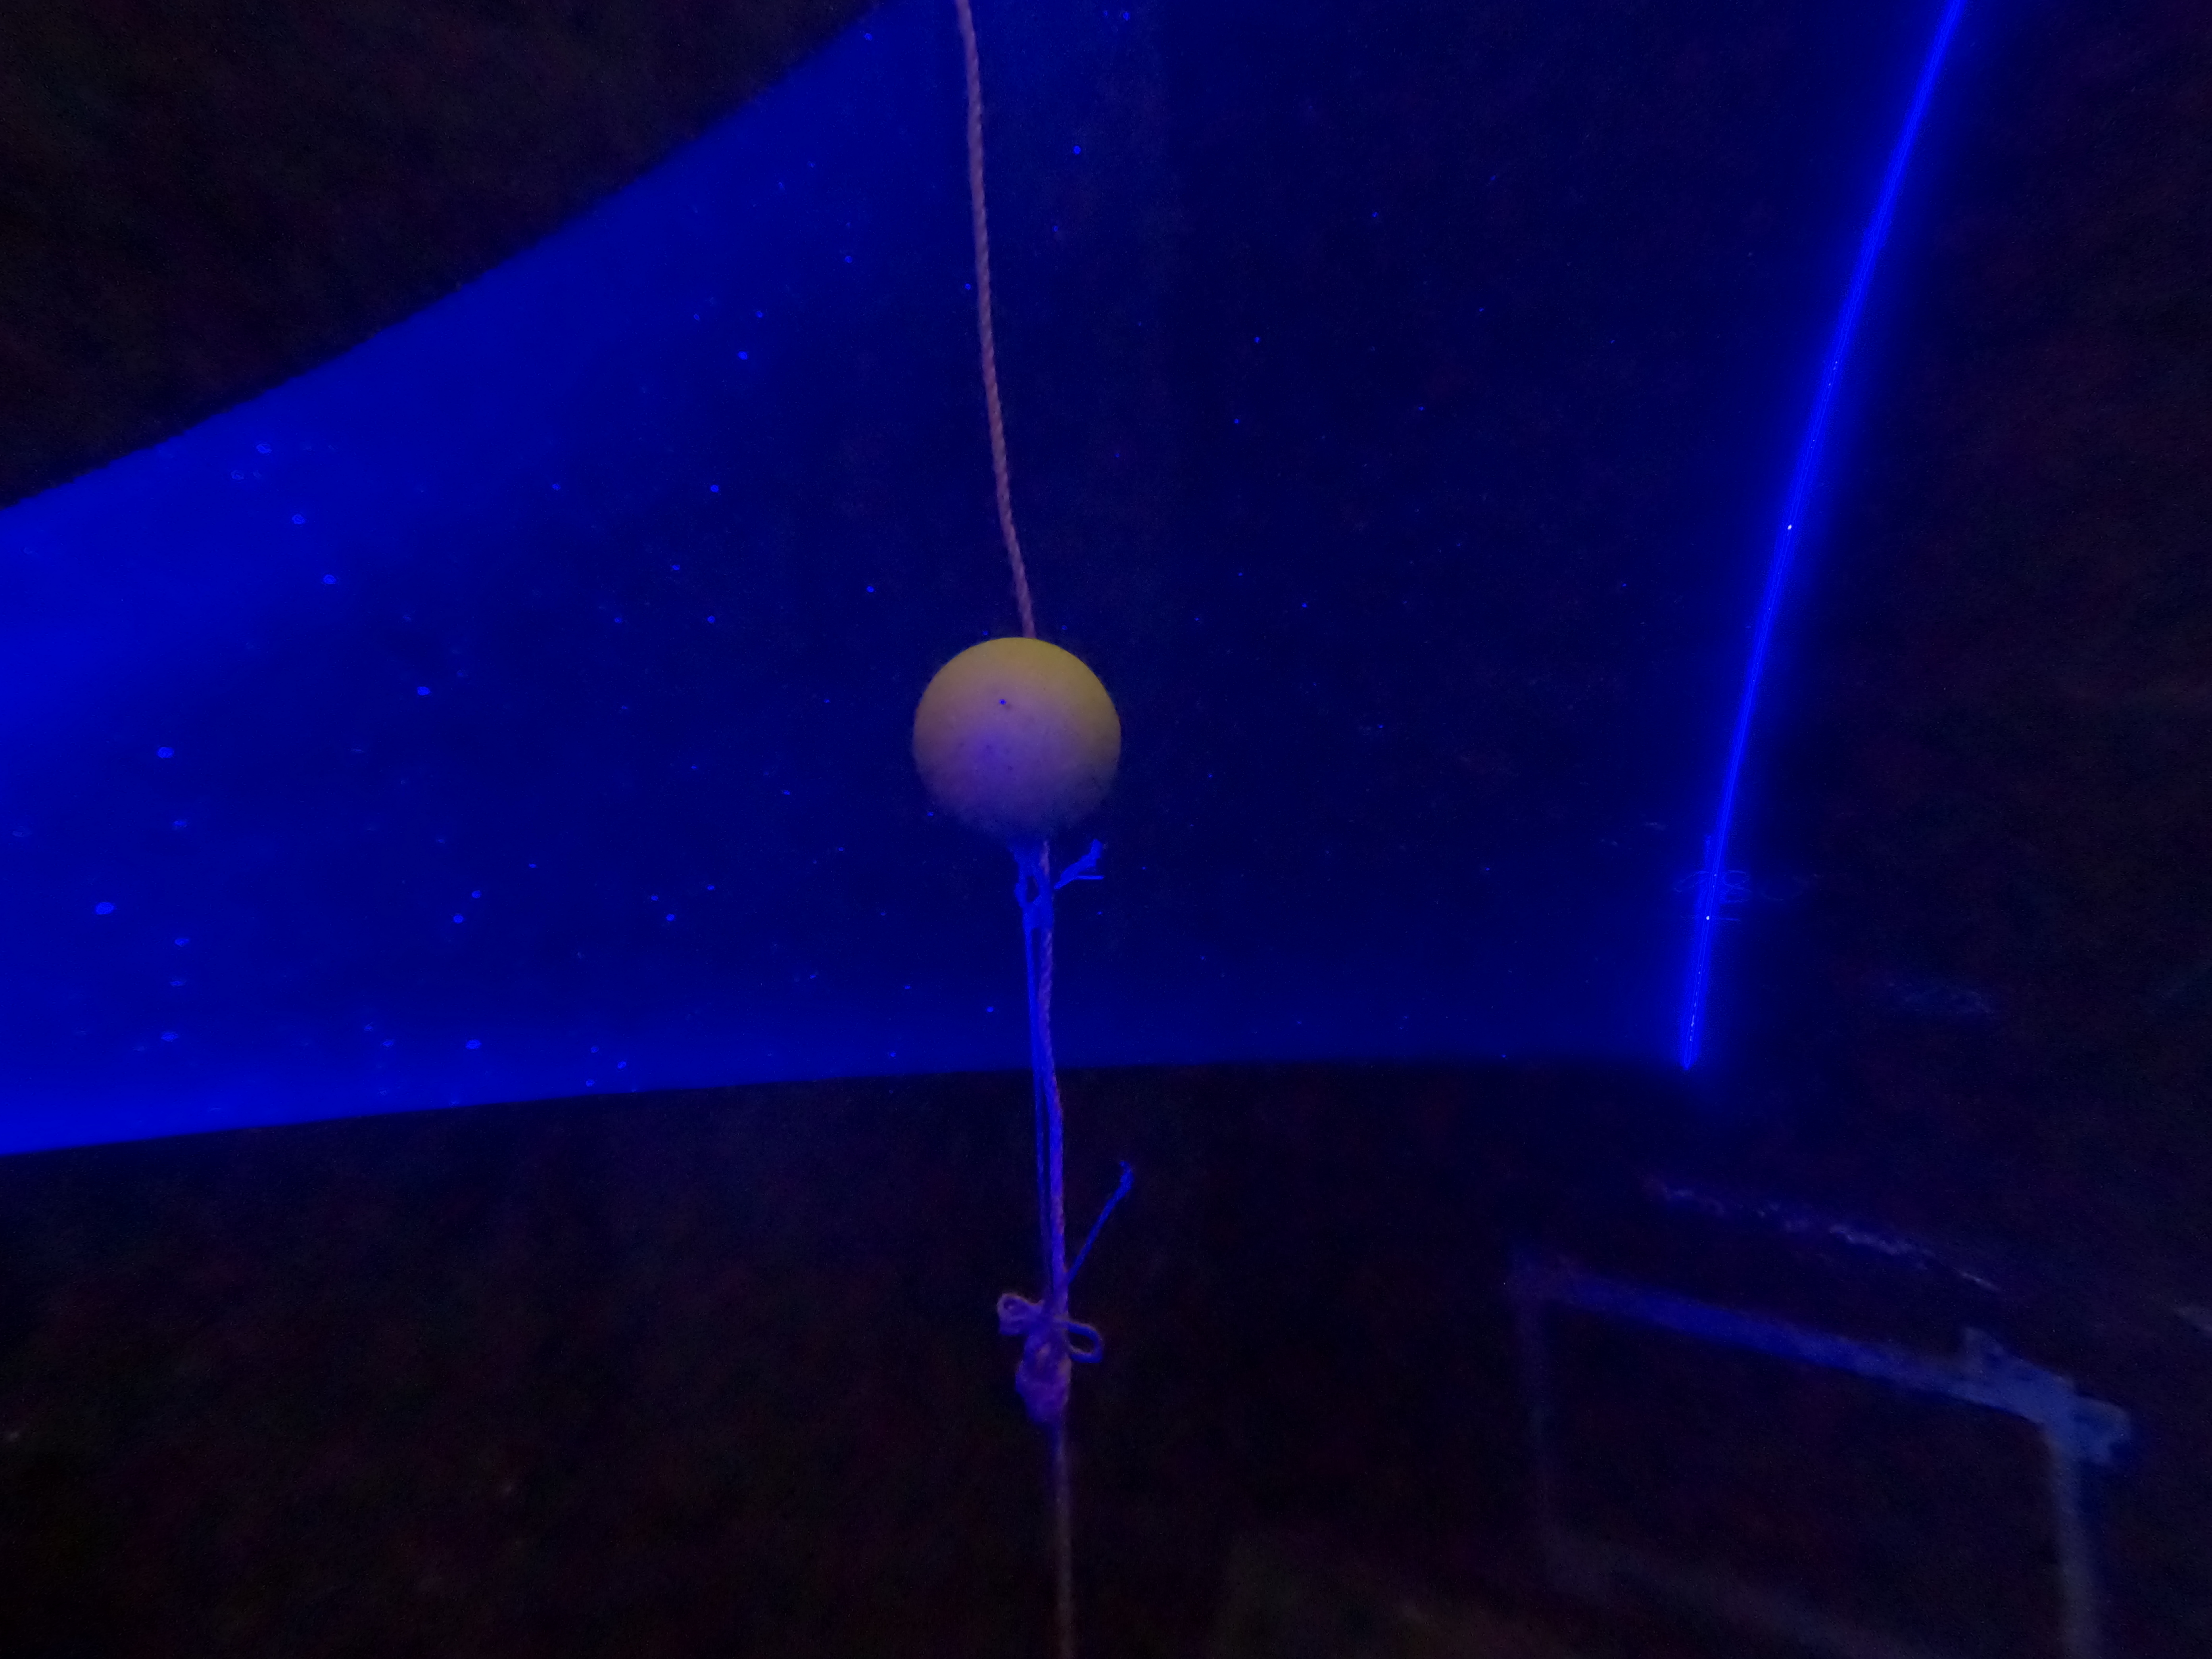

Supplement: Supplementary file 1120 [file G0032834.pdf › 7/G0032834.pdf]

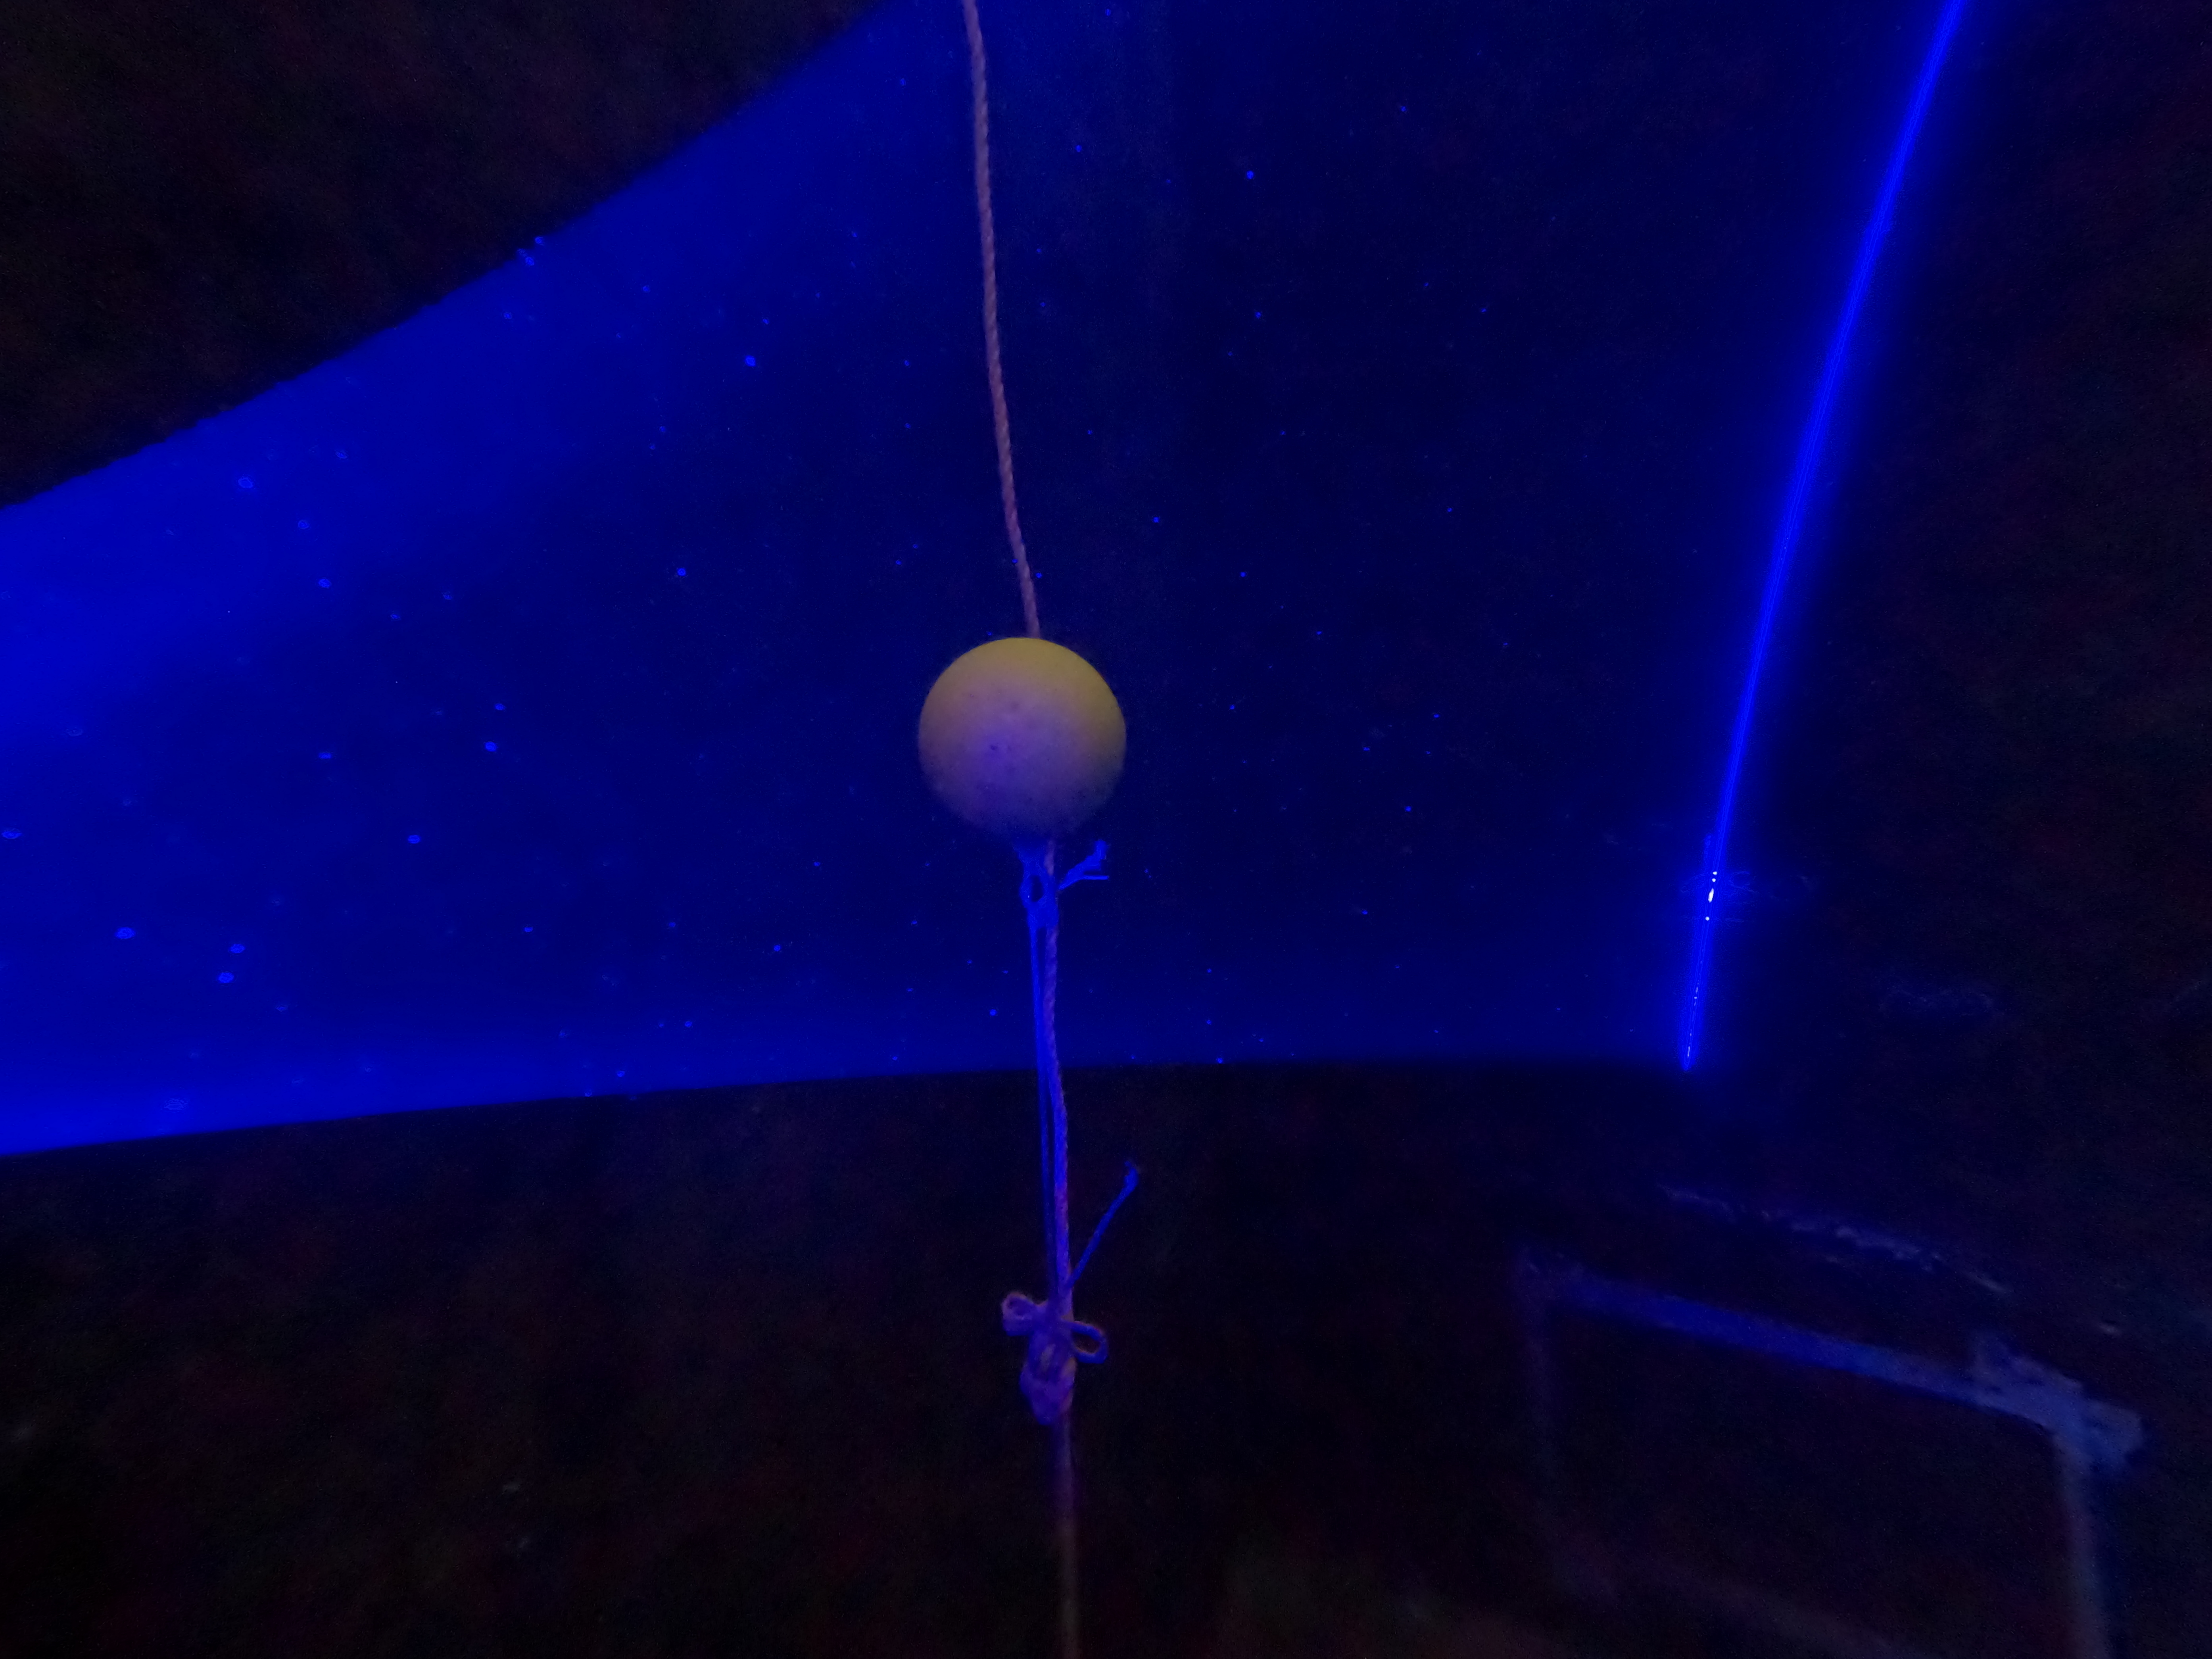

Supplement: Supplementary file 1121 [file G0032835.pdf › 7/G0032835.pdf]

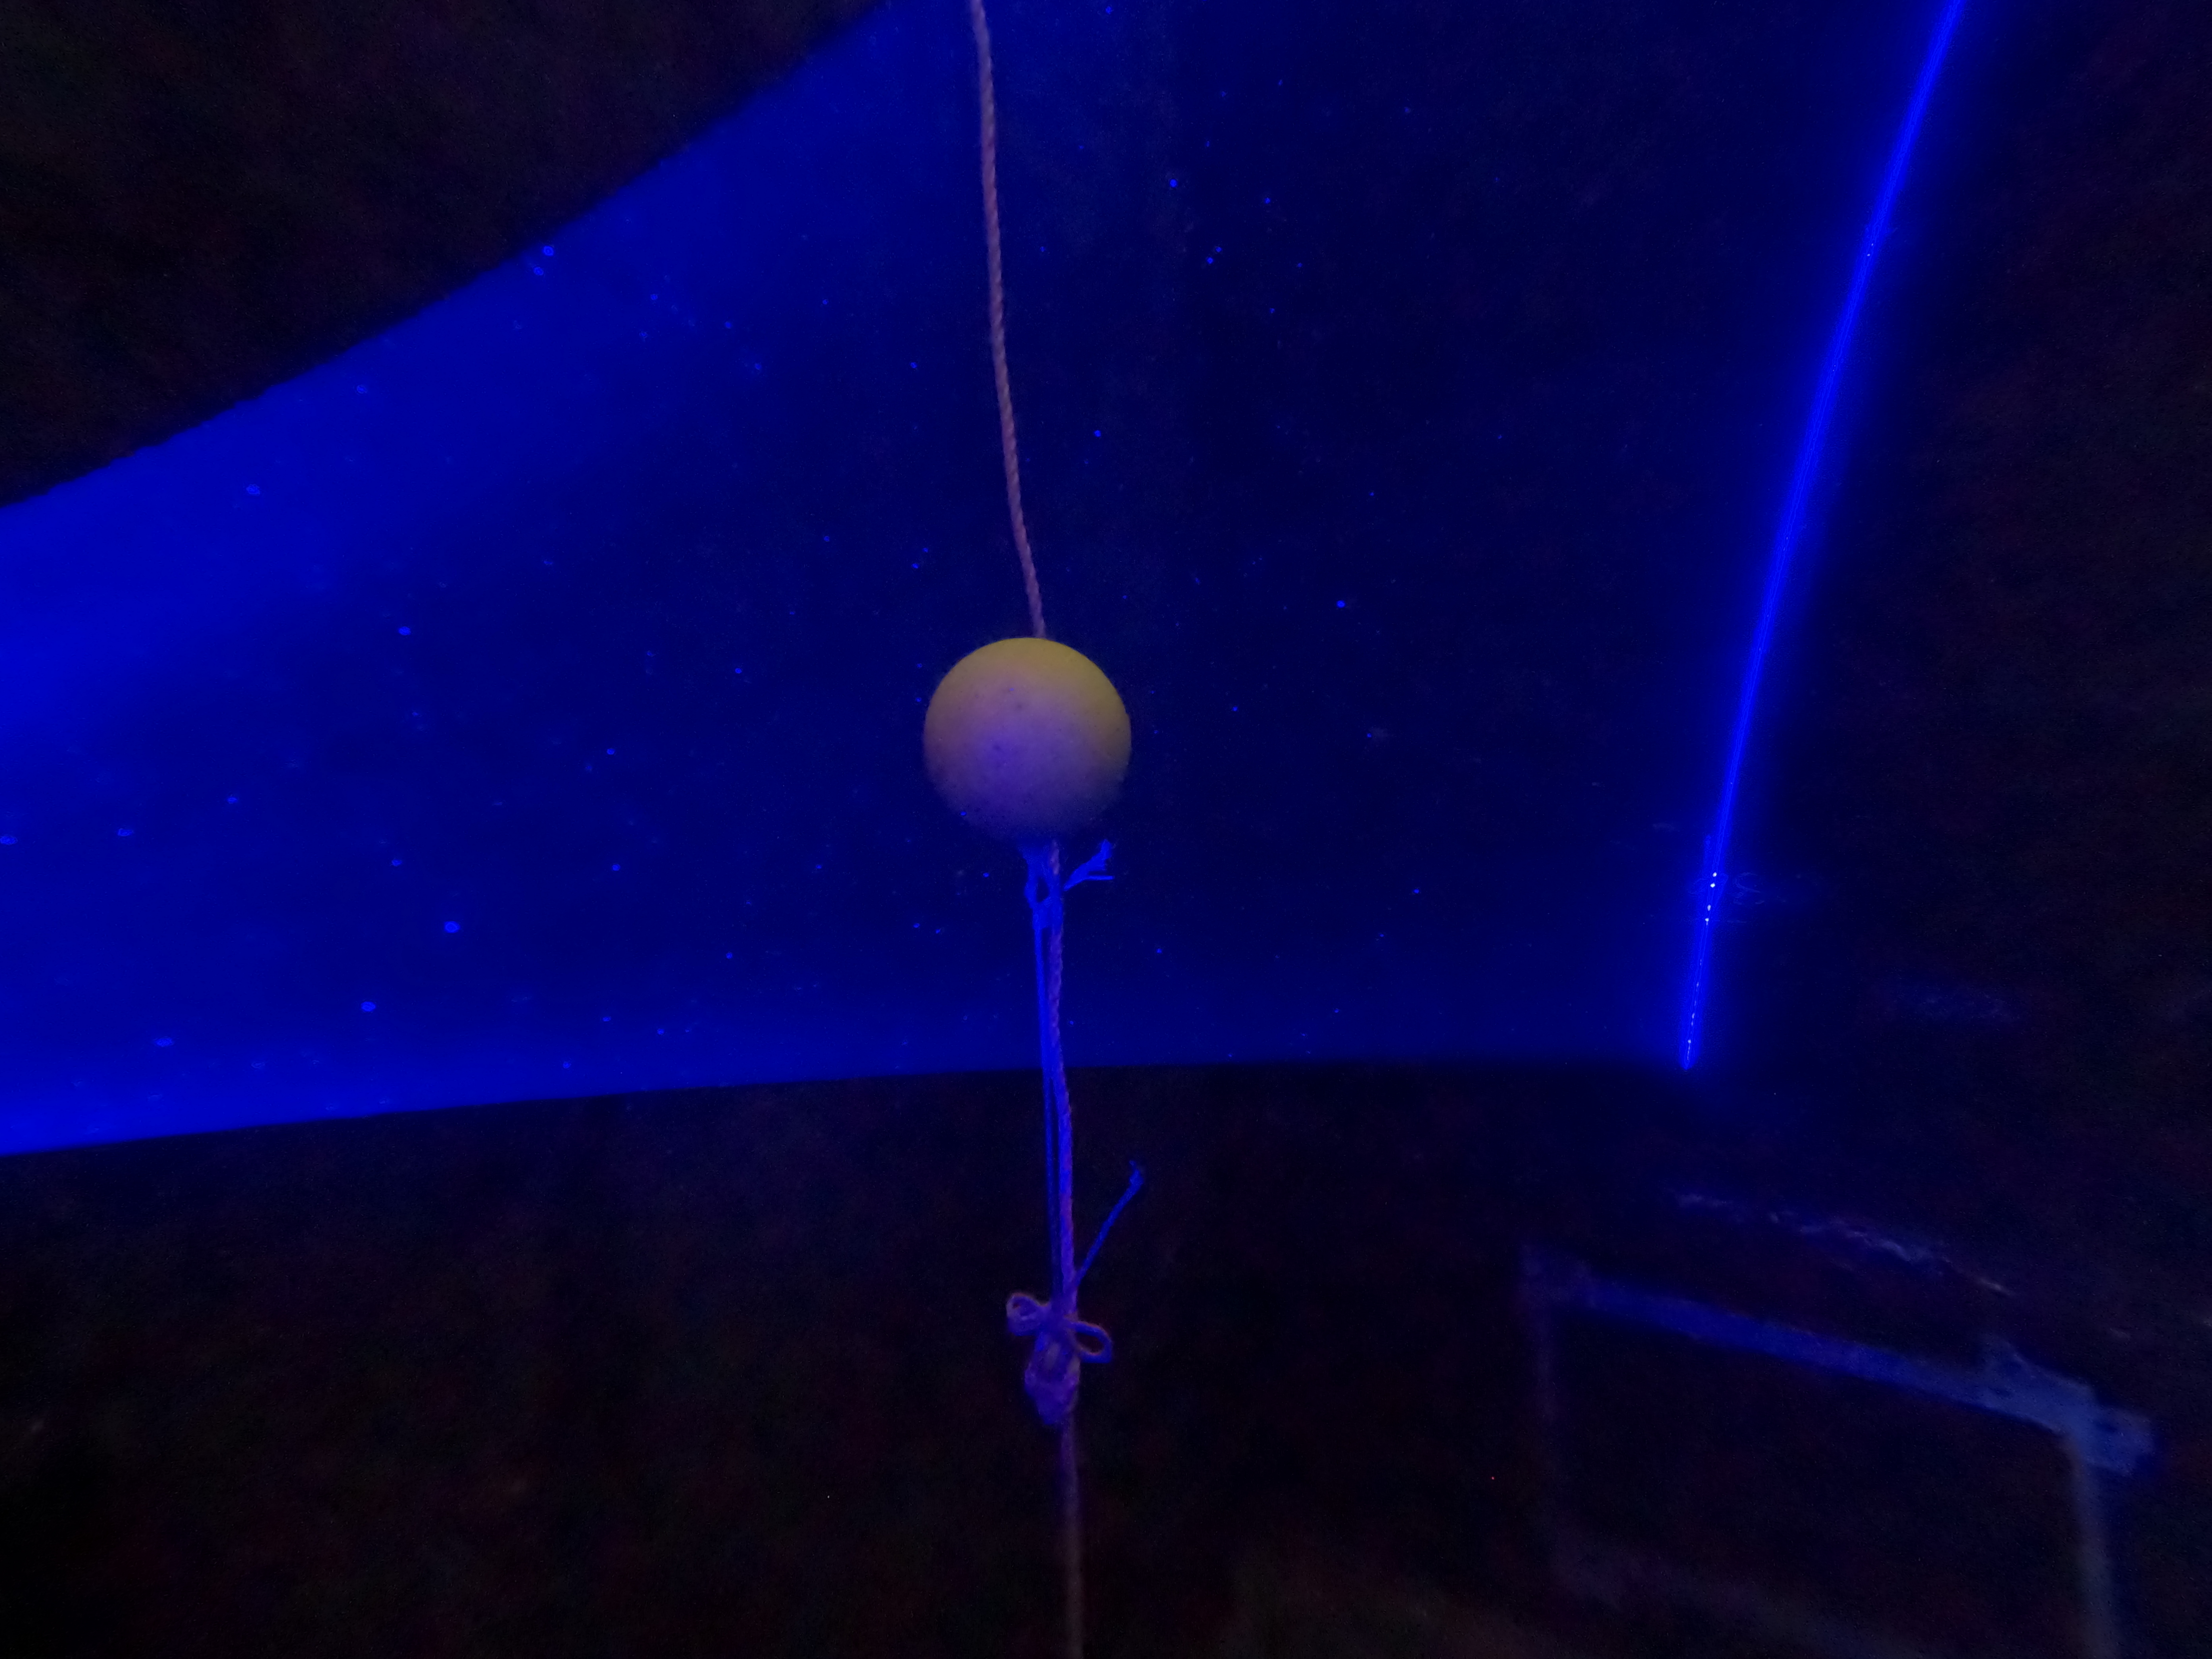

Supplement: Supplementary file 1122 [file G0032836.pdf › 7/G0032836.pdf]

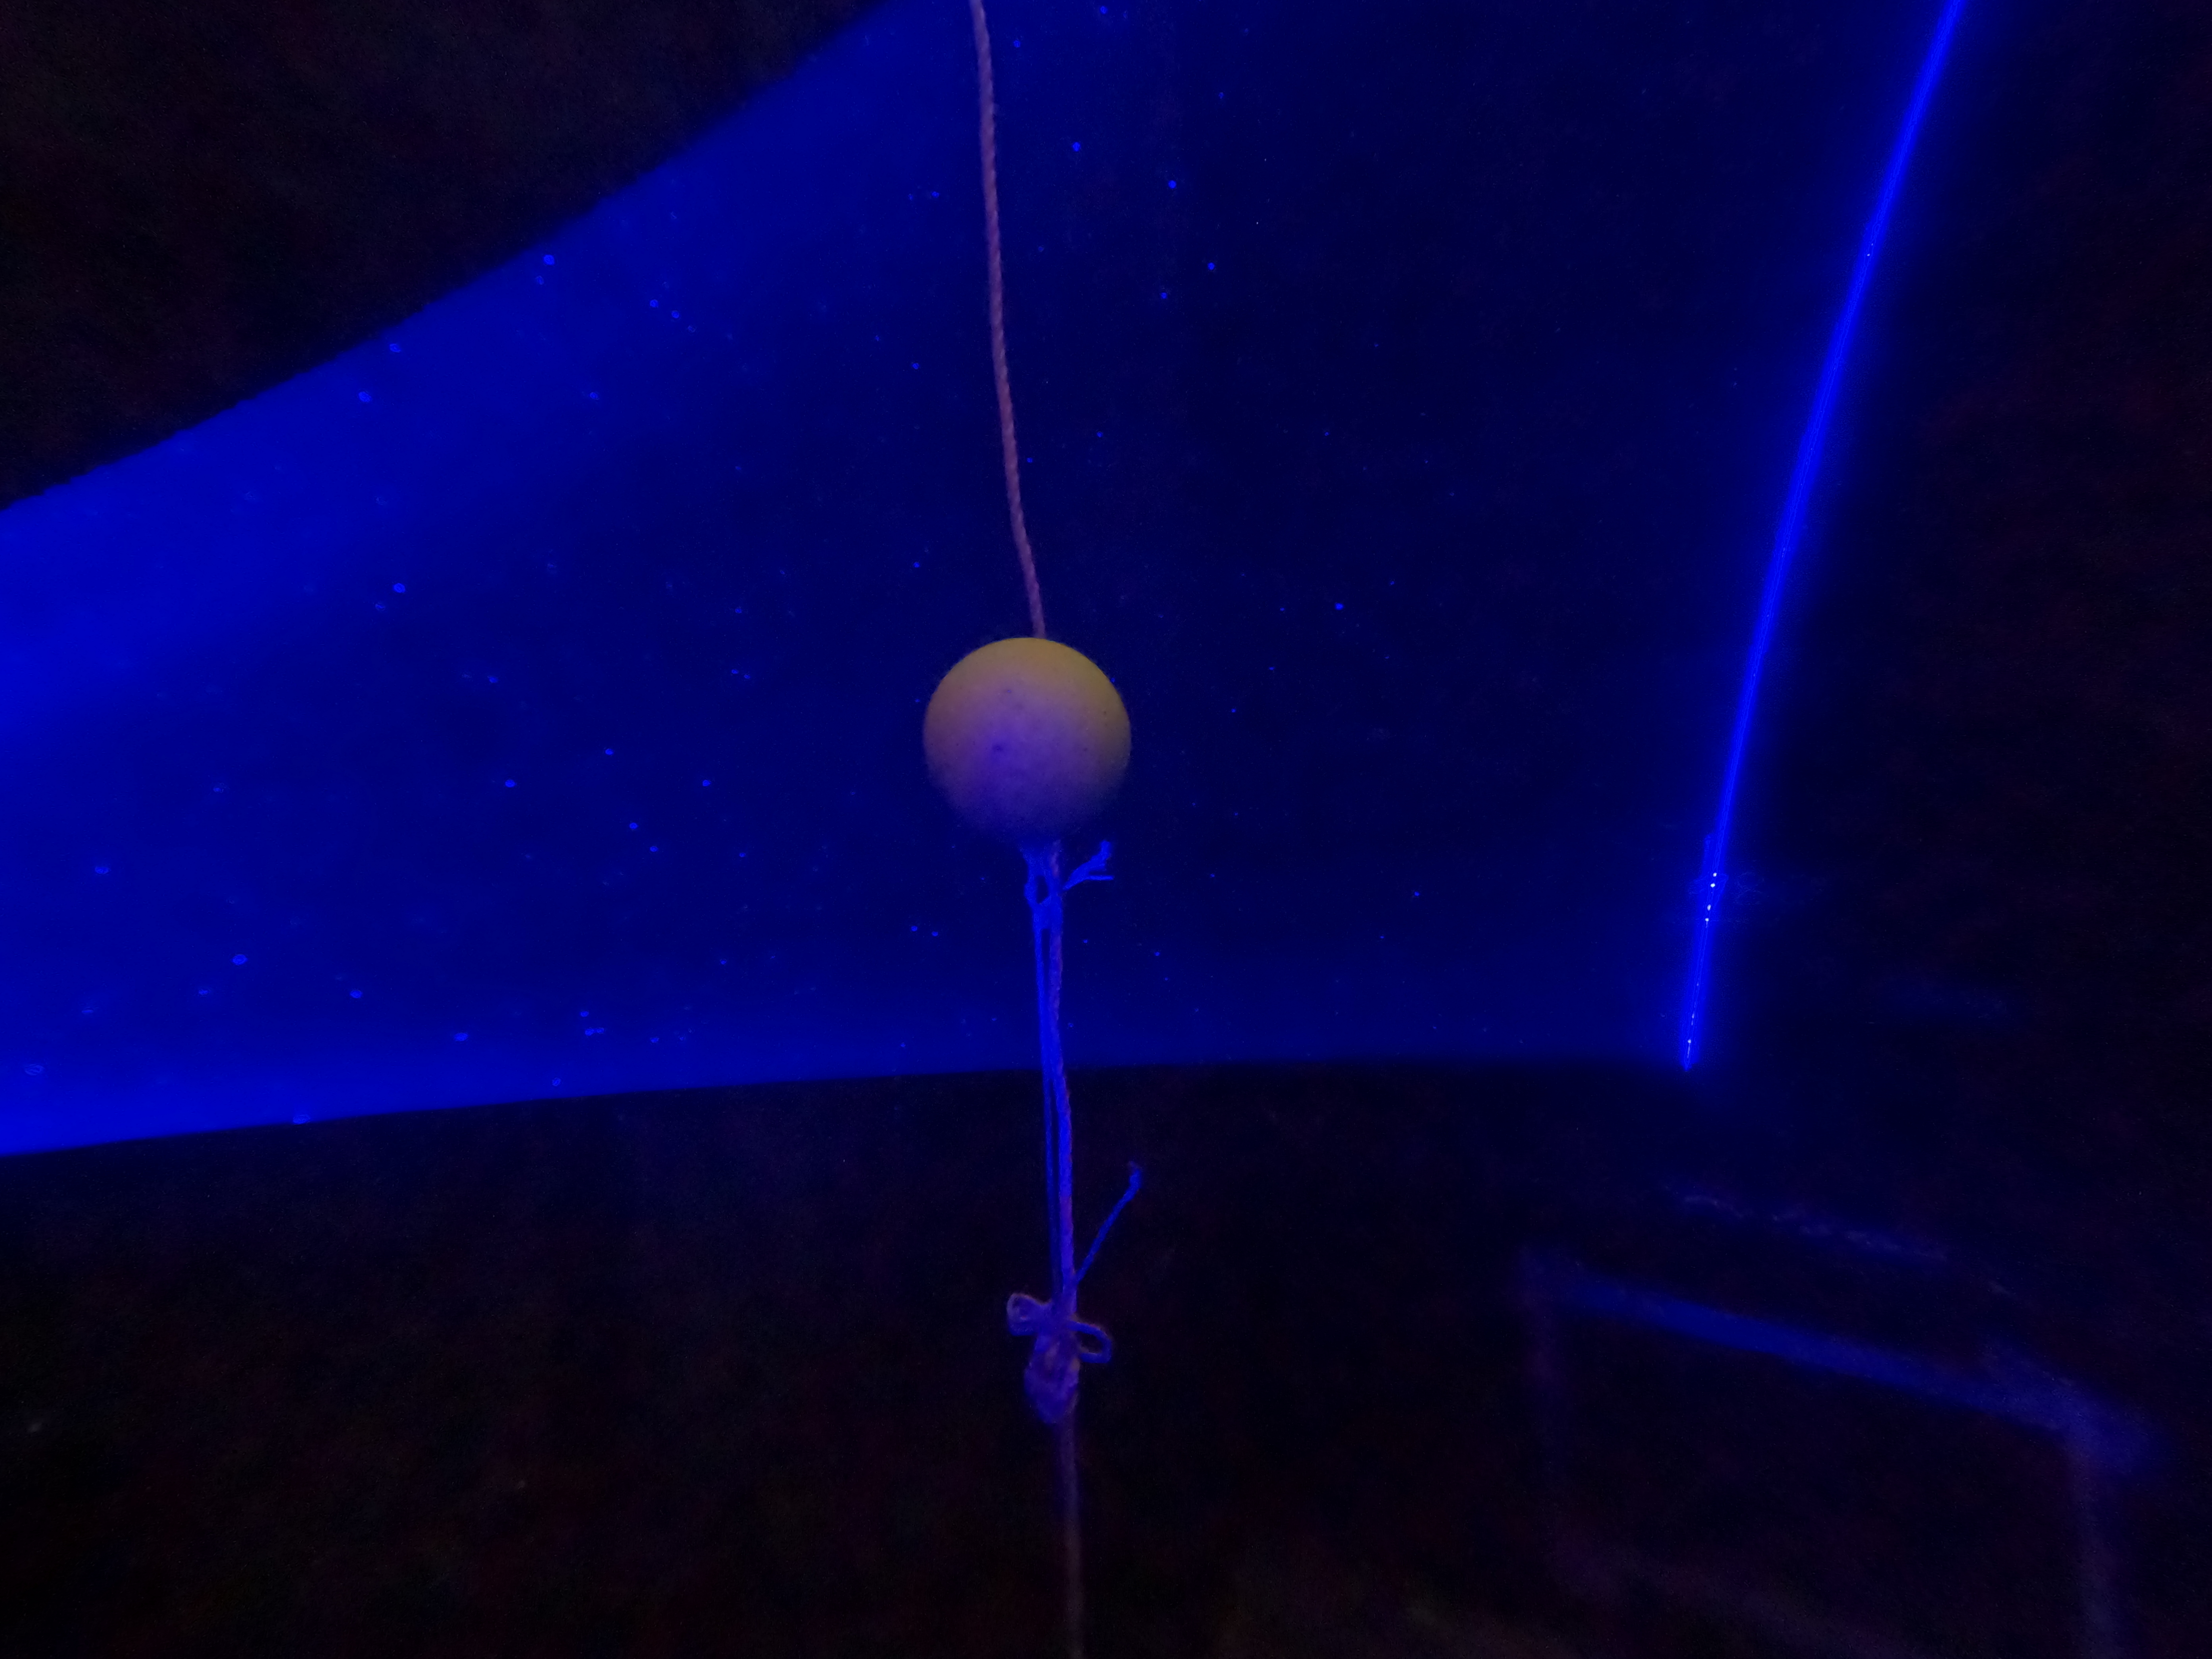

Supplement: Supplementary file 1123 [file G0032837.pdf › 7/G0032837.pdf]

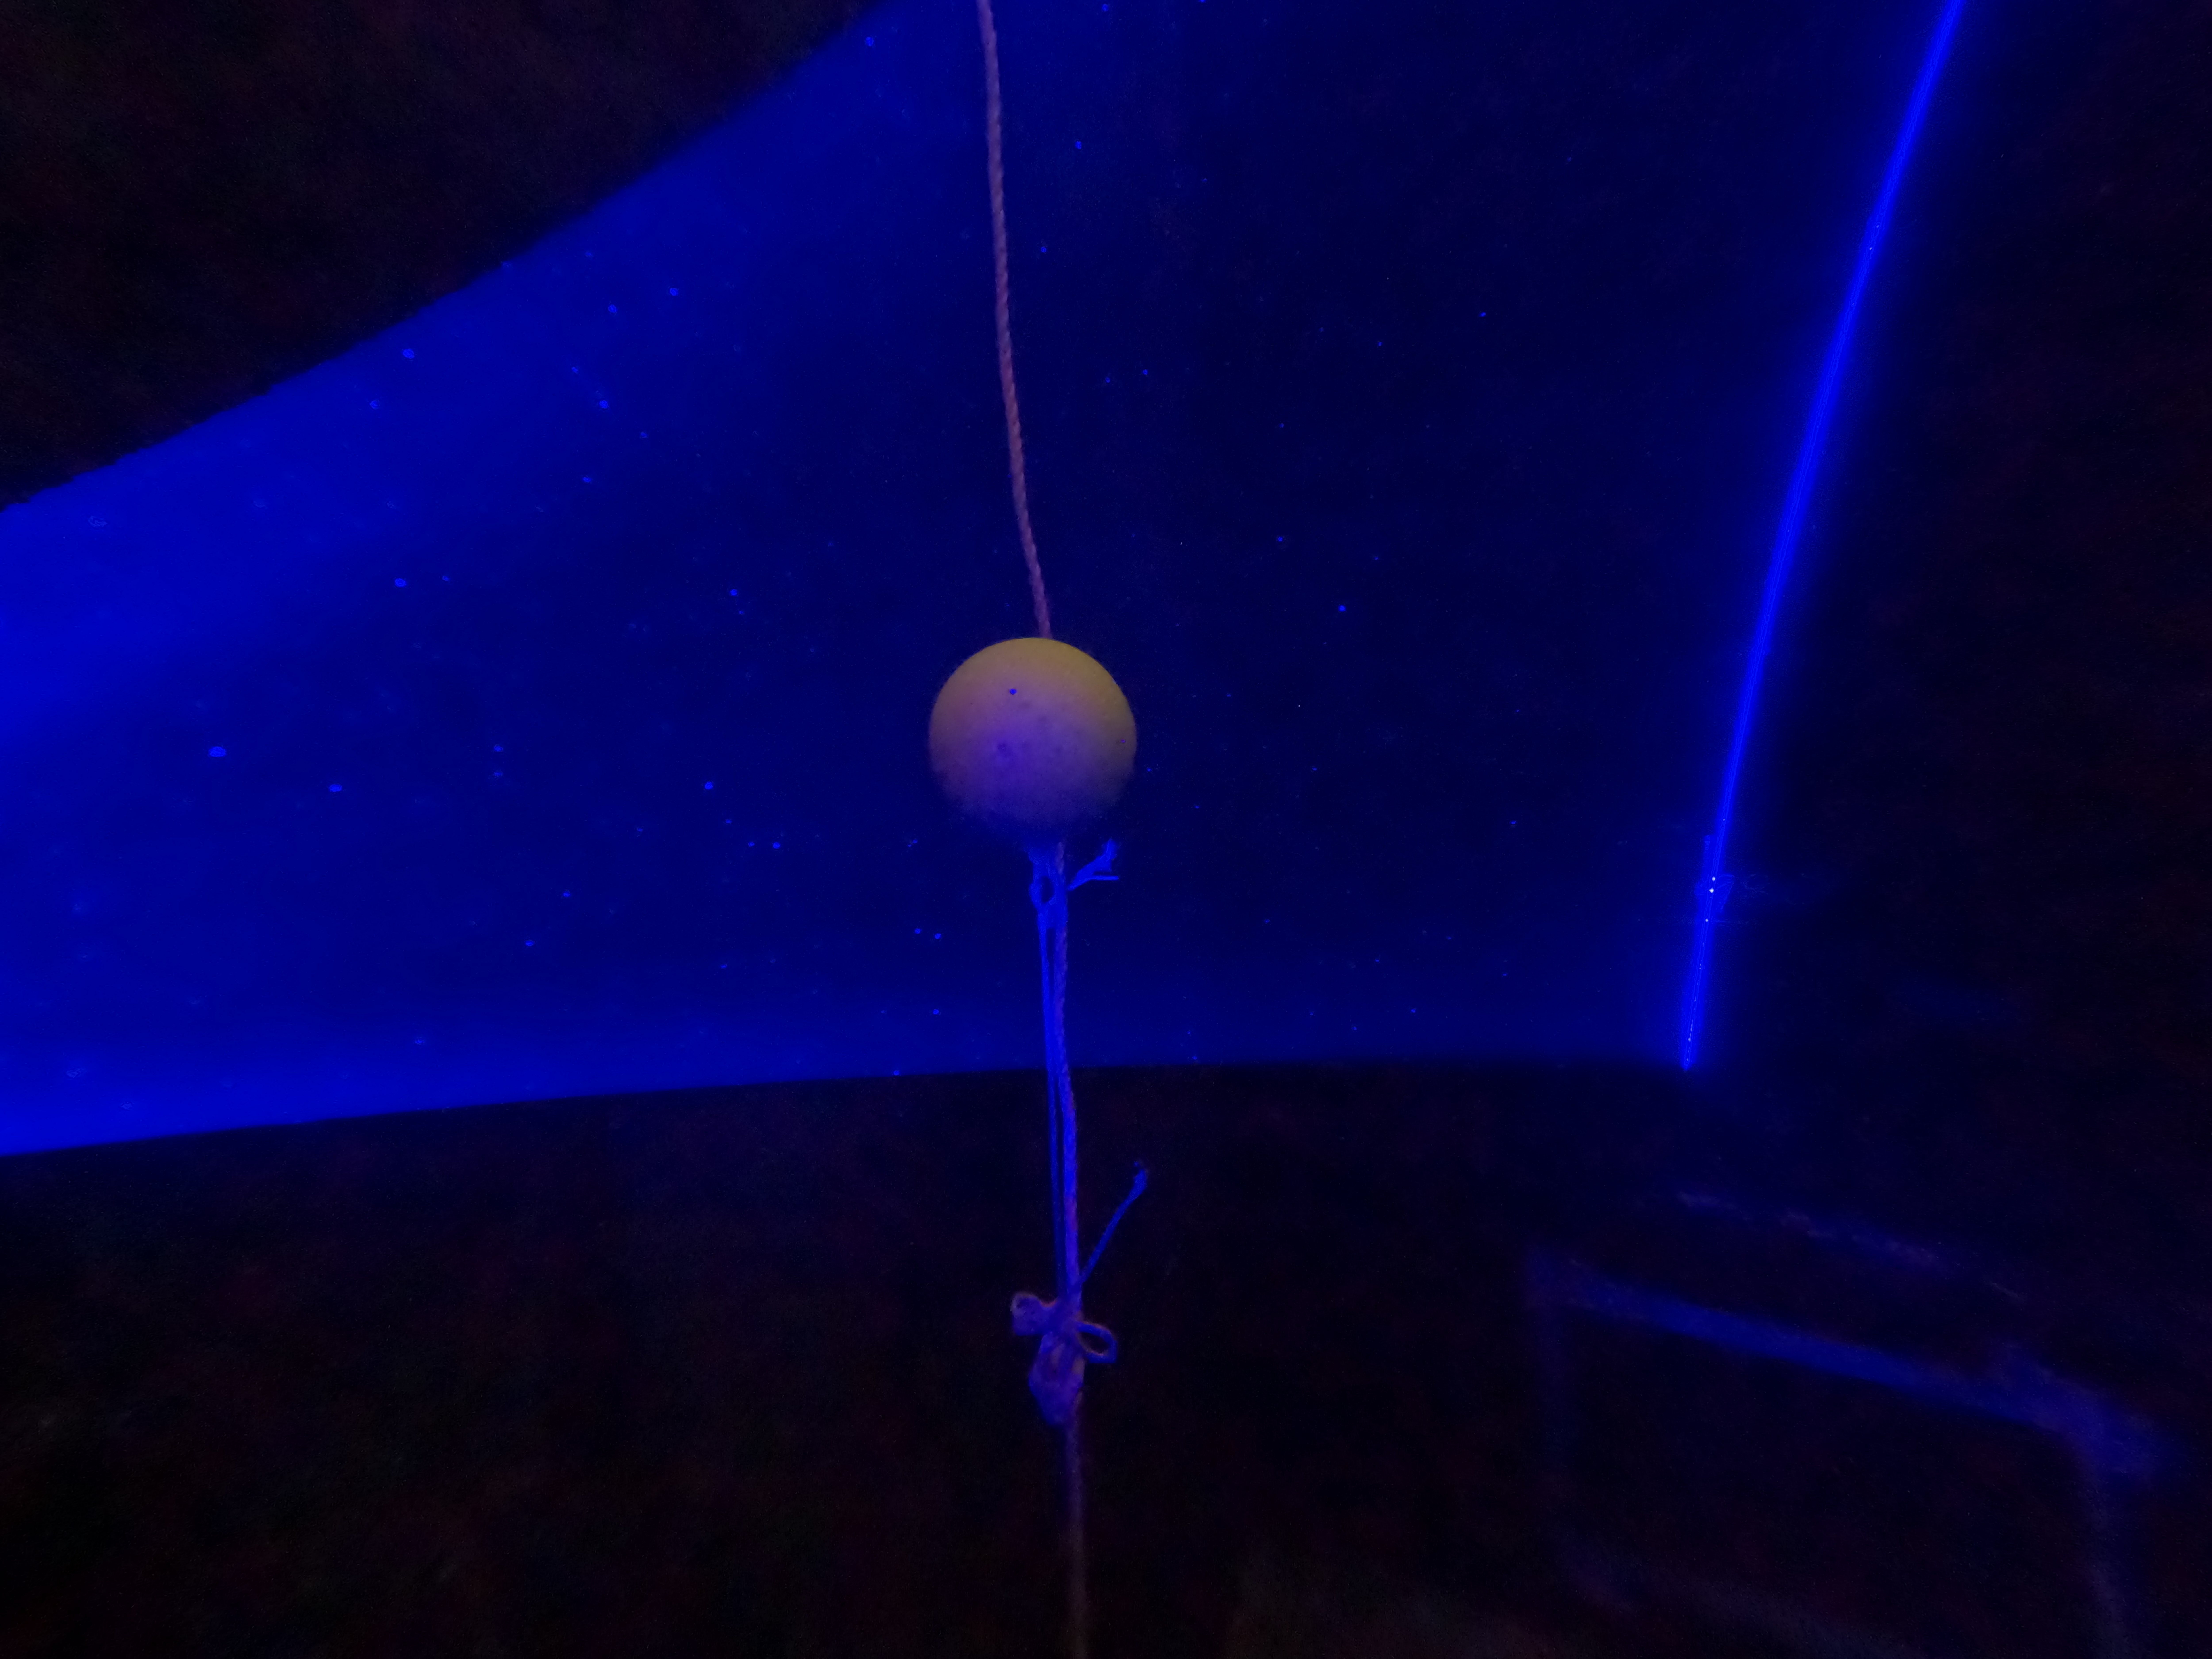

Supplement: Supplementary file 1124 [file G0032838.pdf › 7/G0032838.pdf]

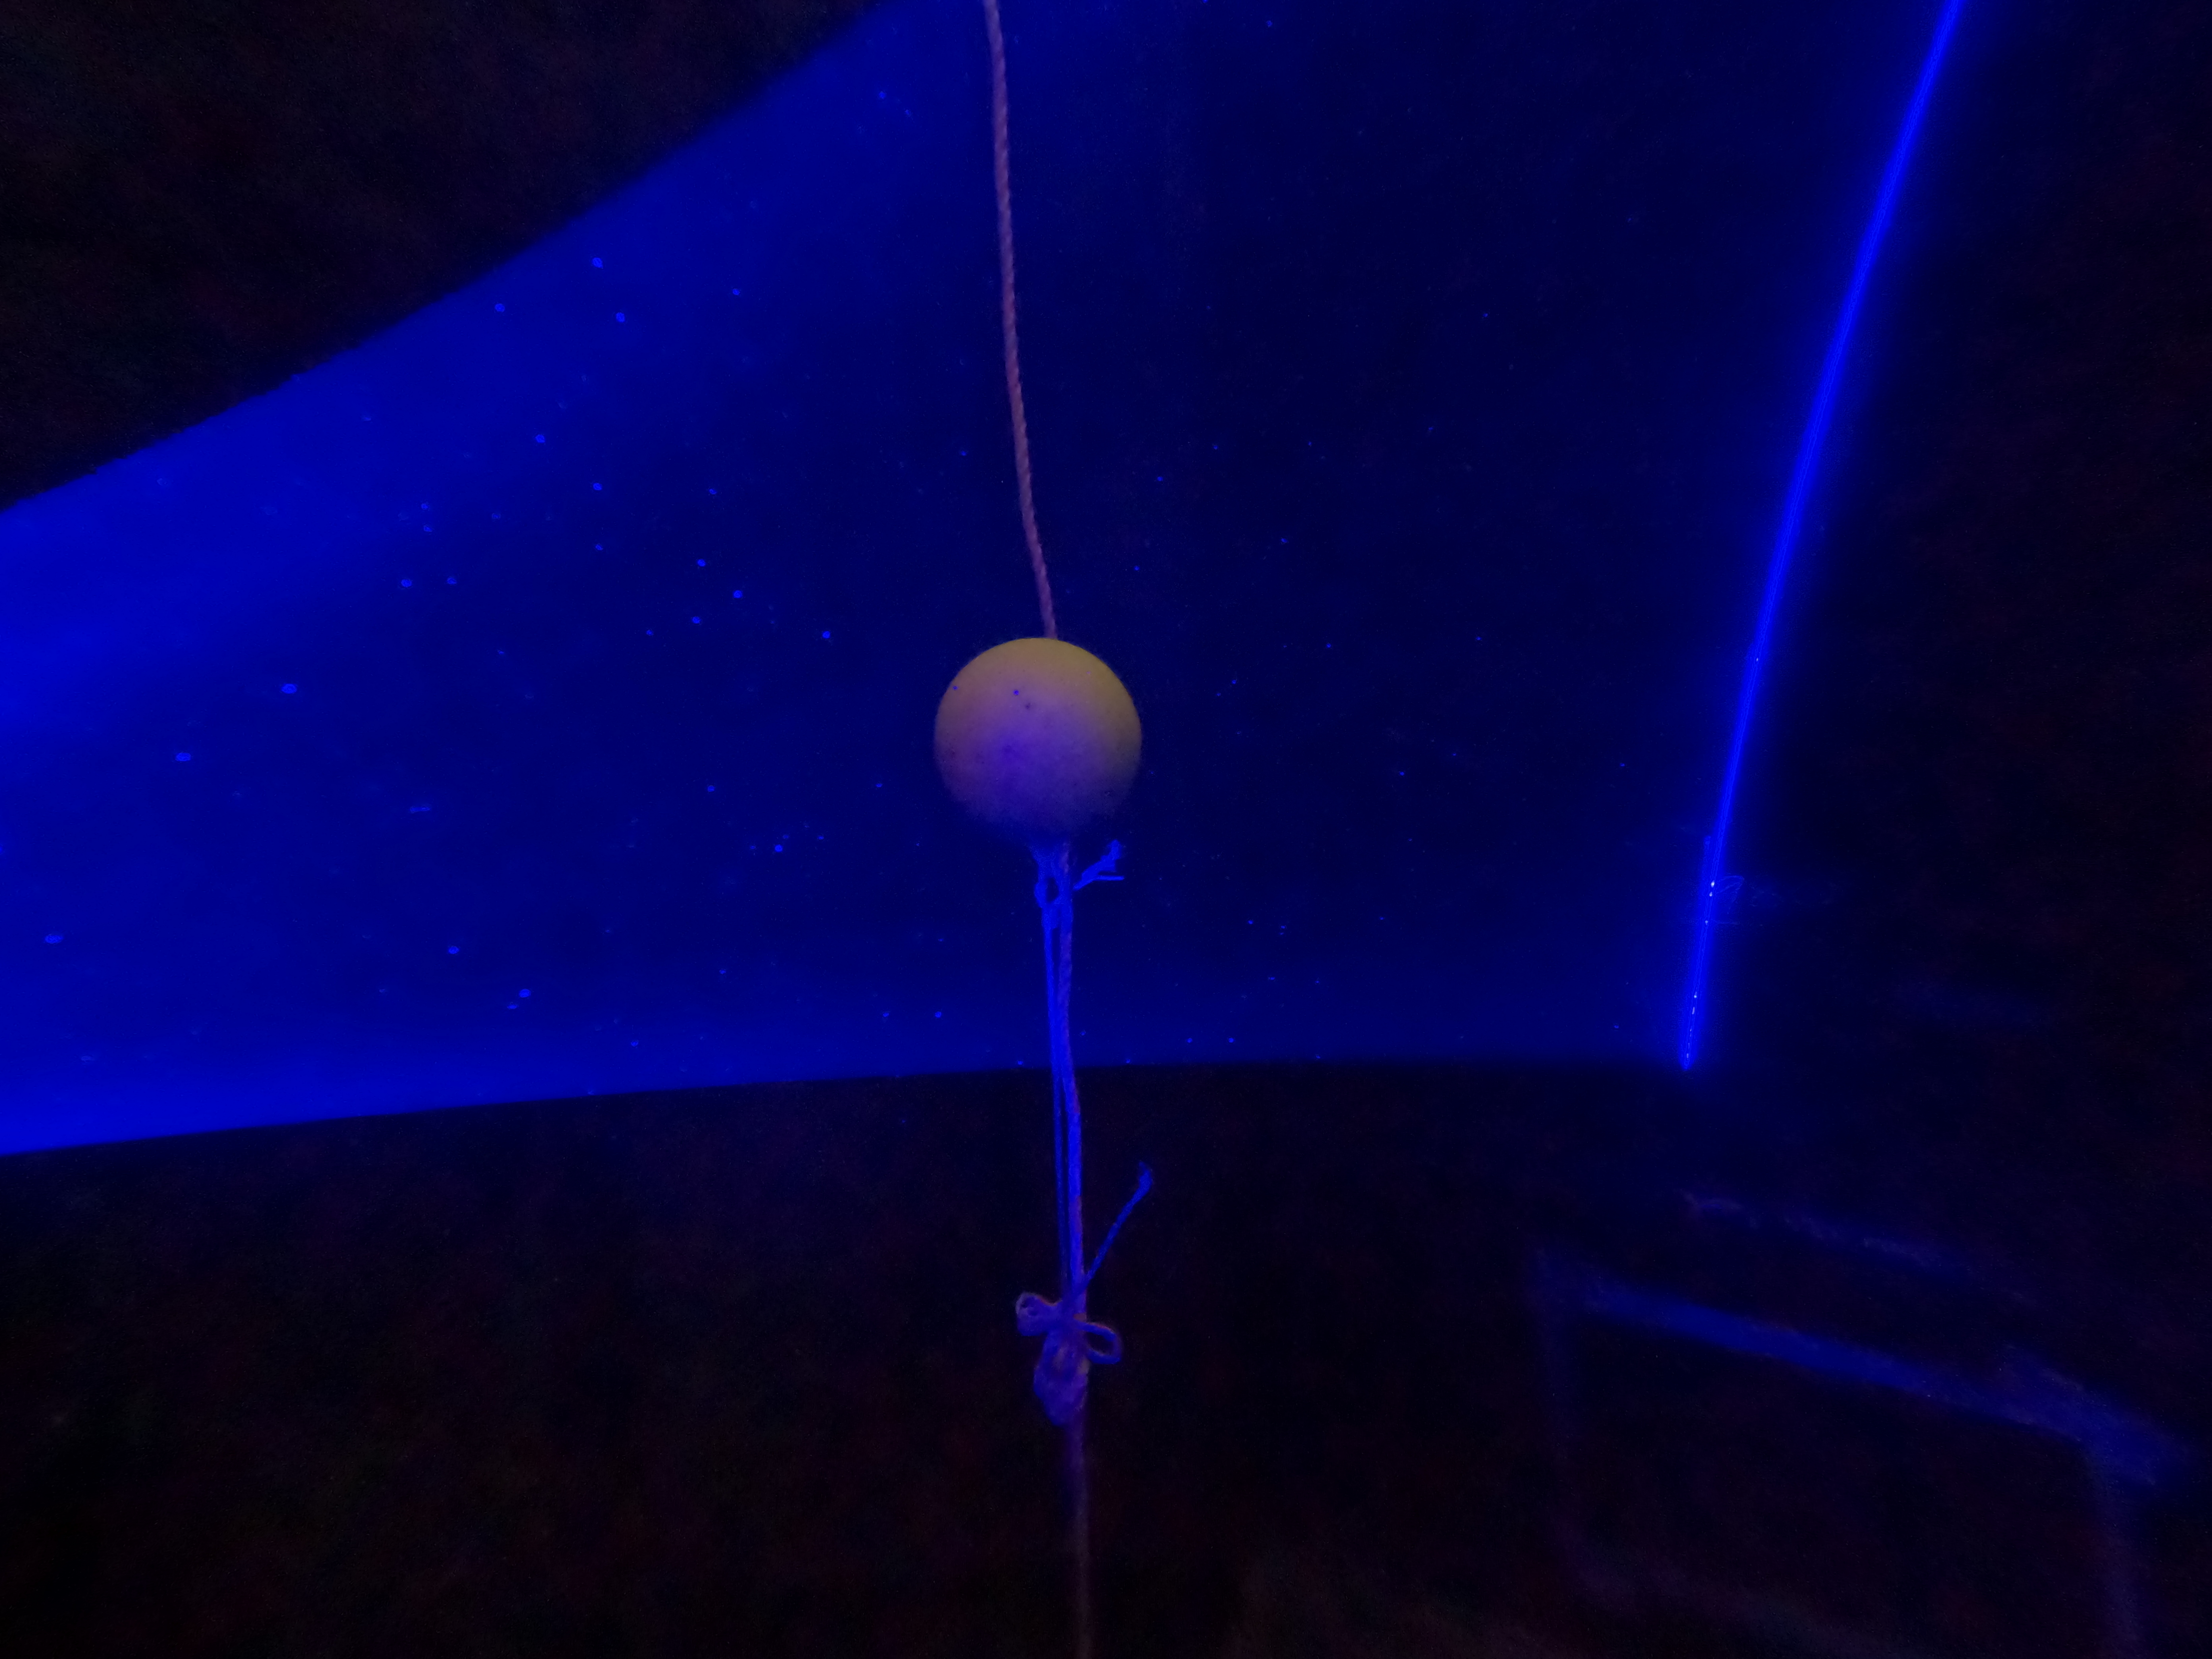

Supplement: Supplementary file 1125 [file G0032839.pdf › 7/G0032839.pdf]

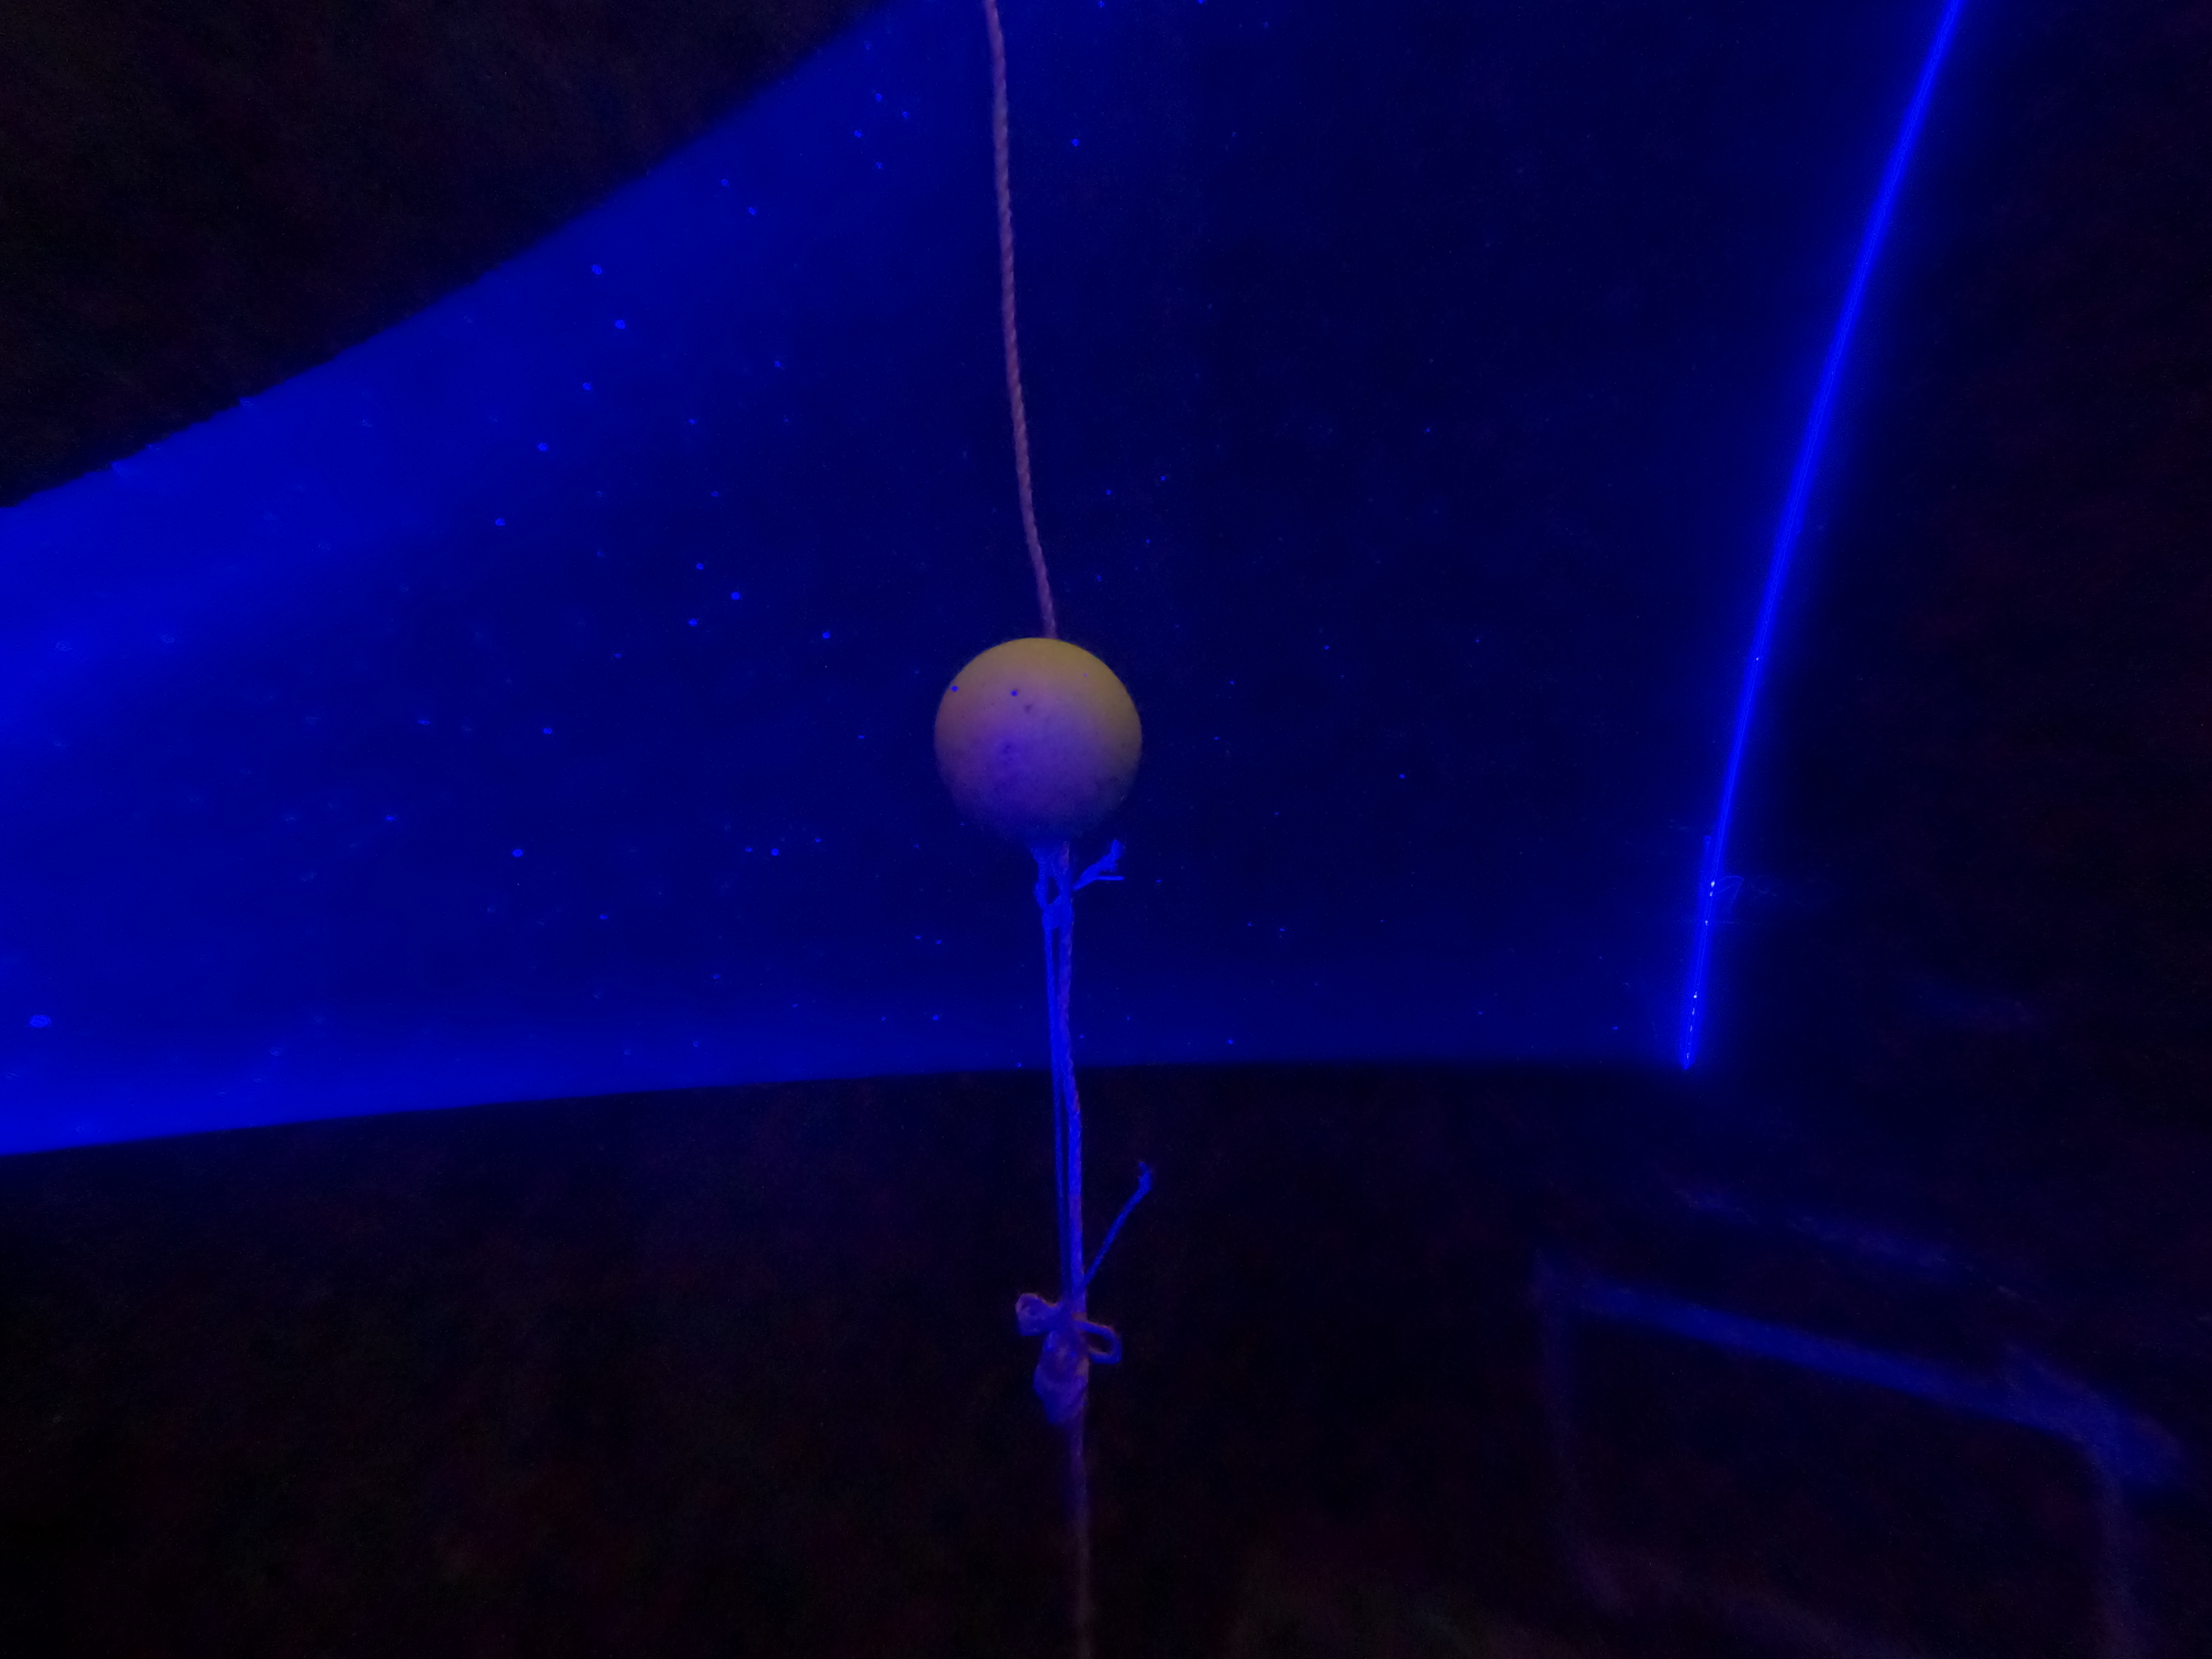

Supplement: Supplementary file 1126 [file G0032840.pdf › 7/G0032840.pdf]

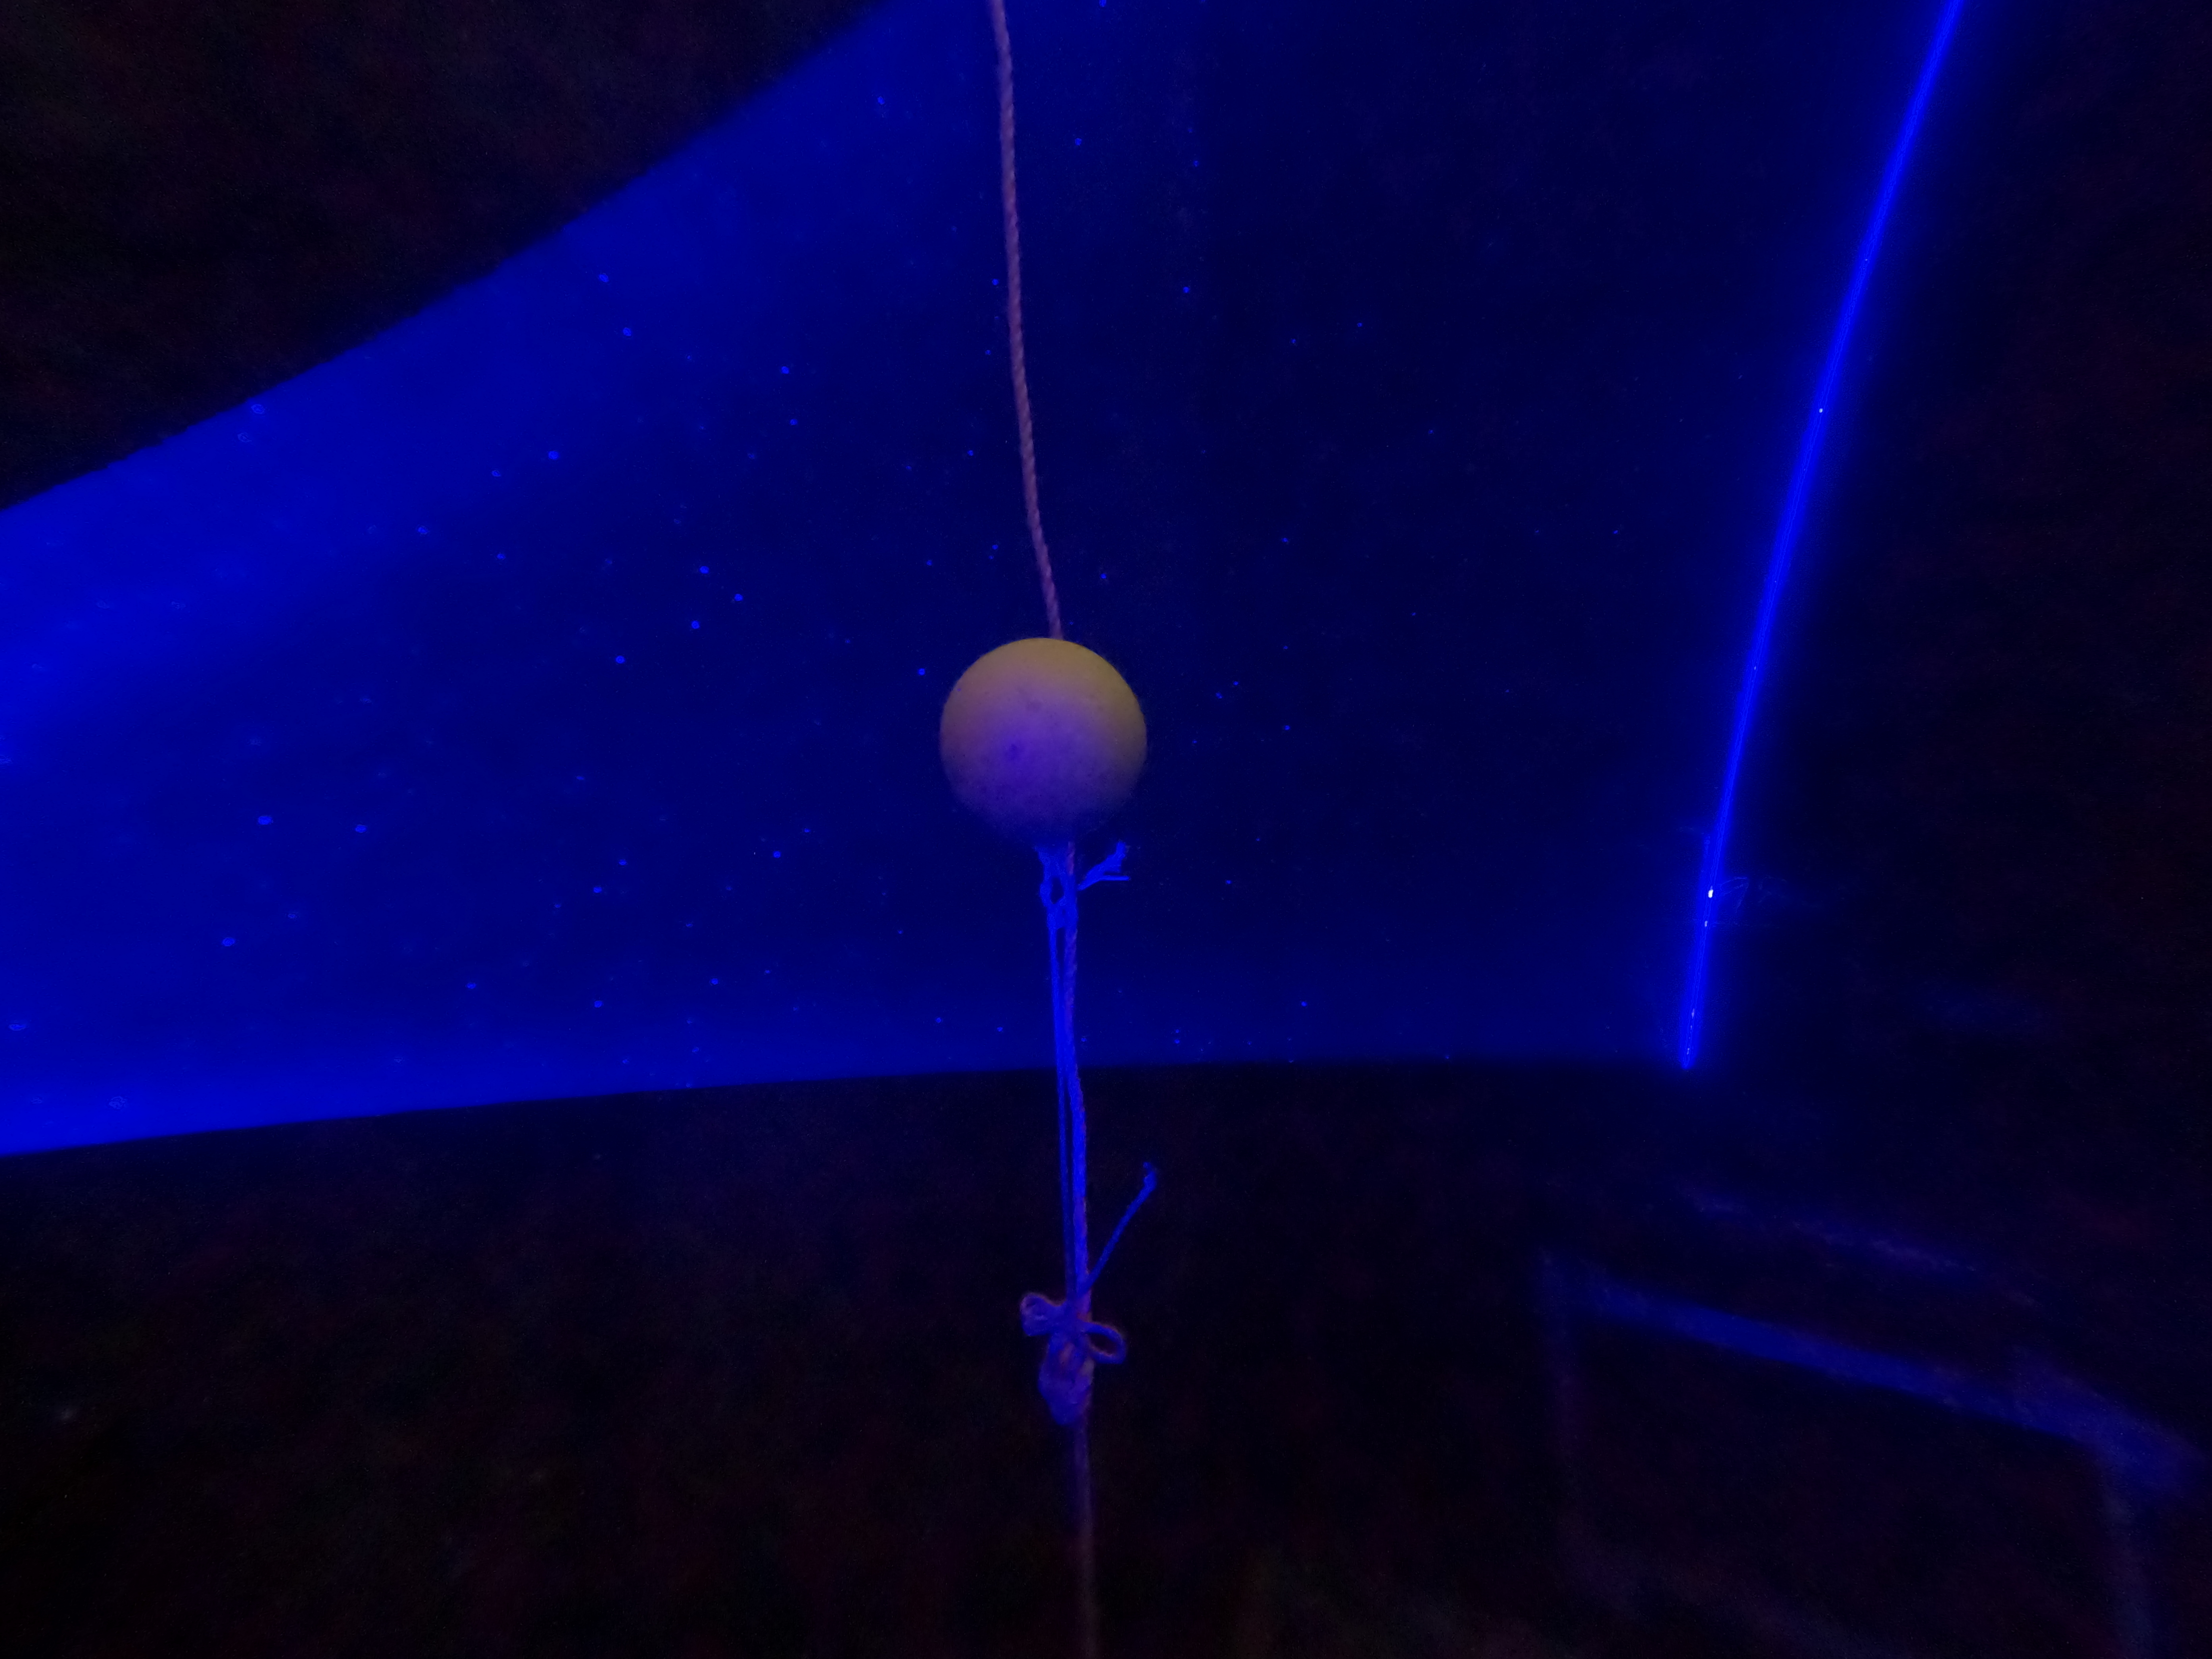

Supplement: Supplementary file 1127 [file G0032841.pdf › 7/G0032841.pdf]

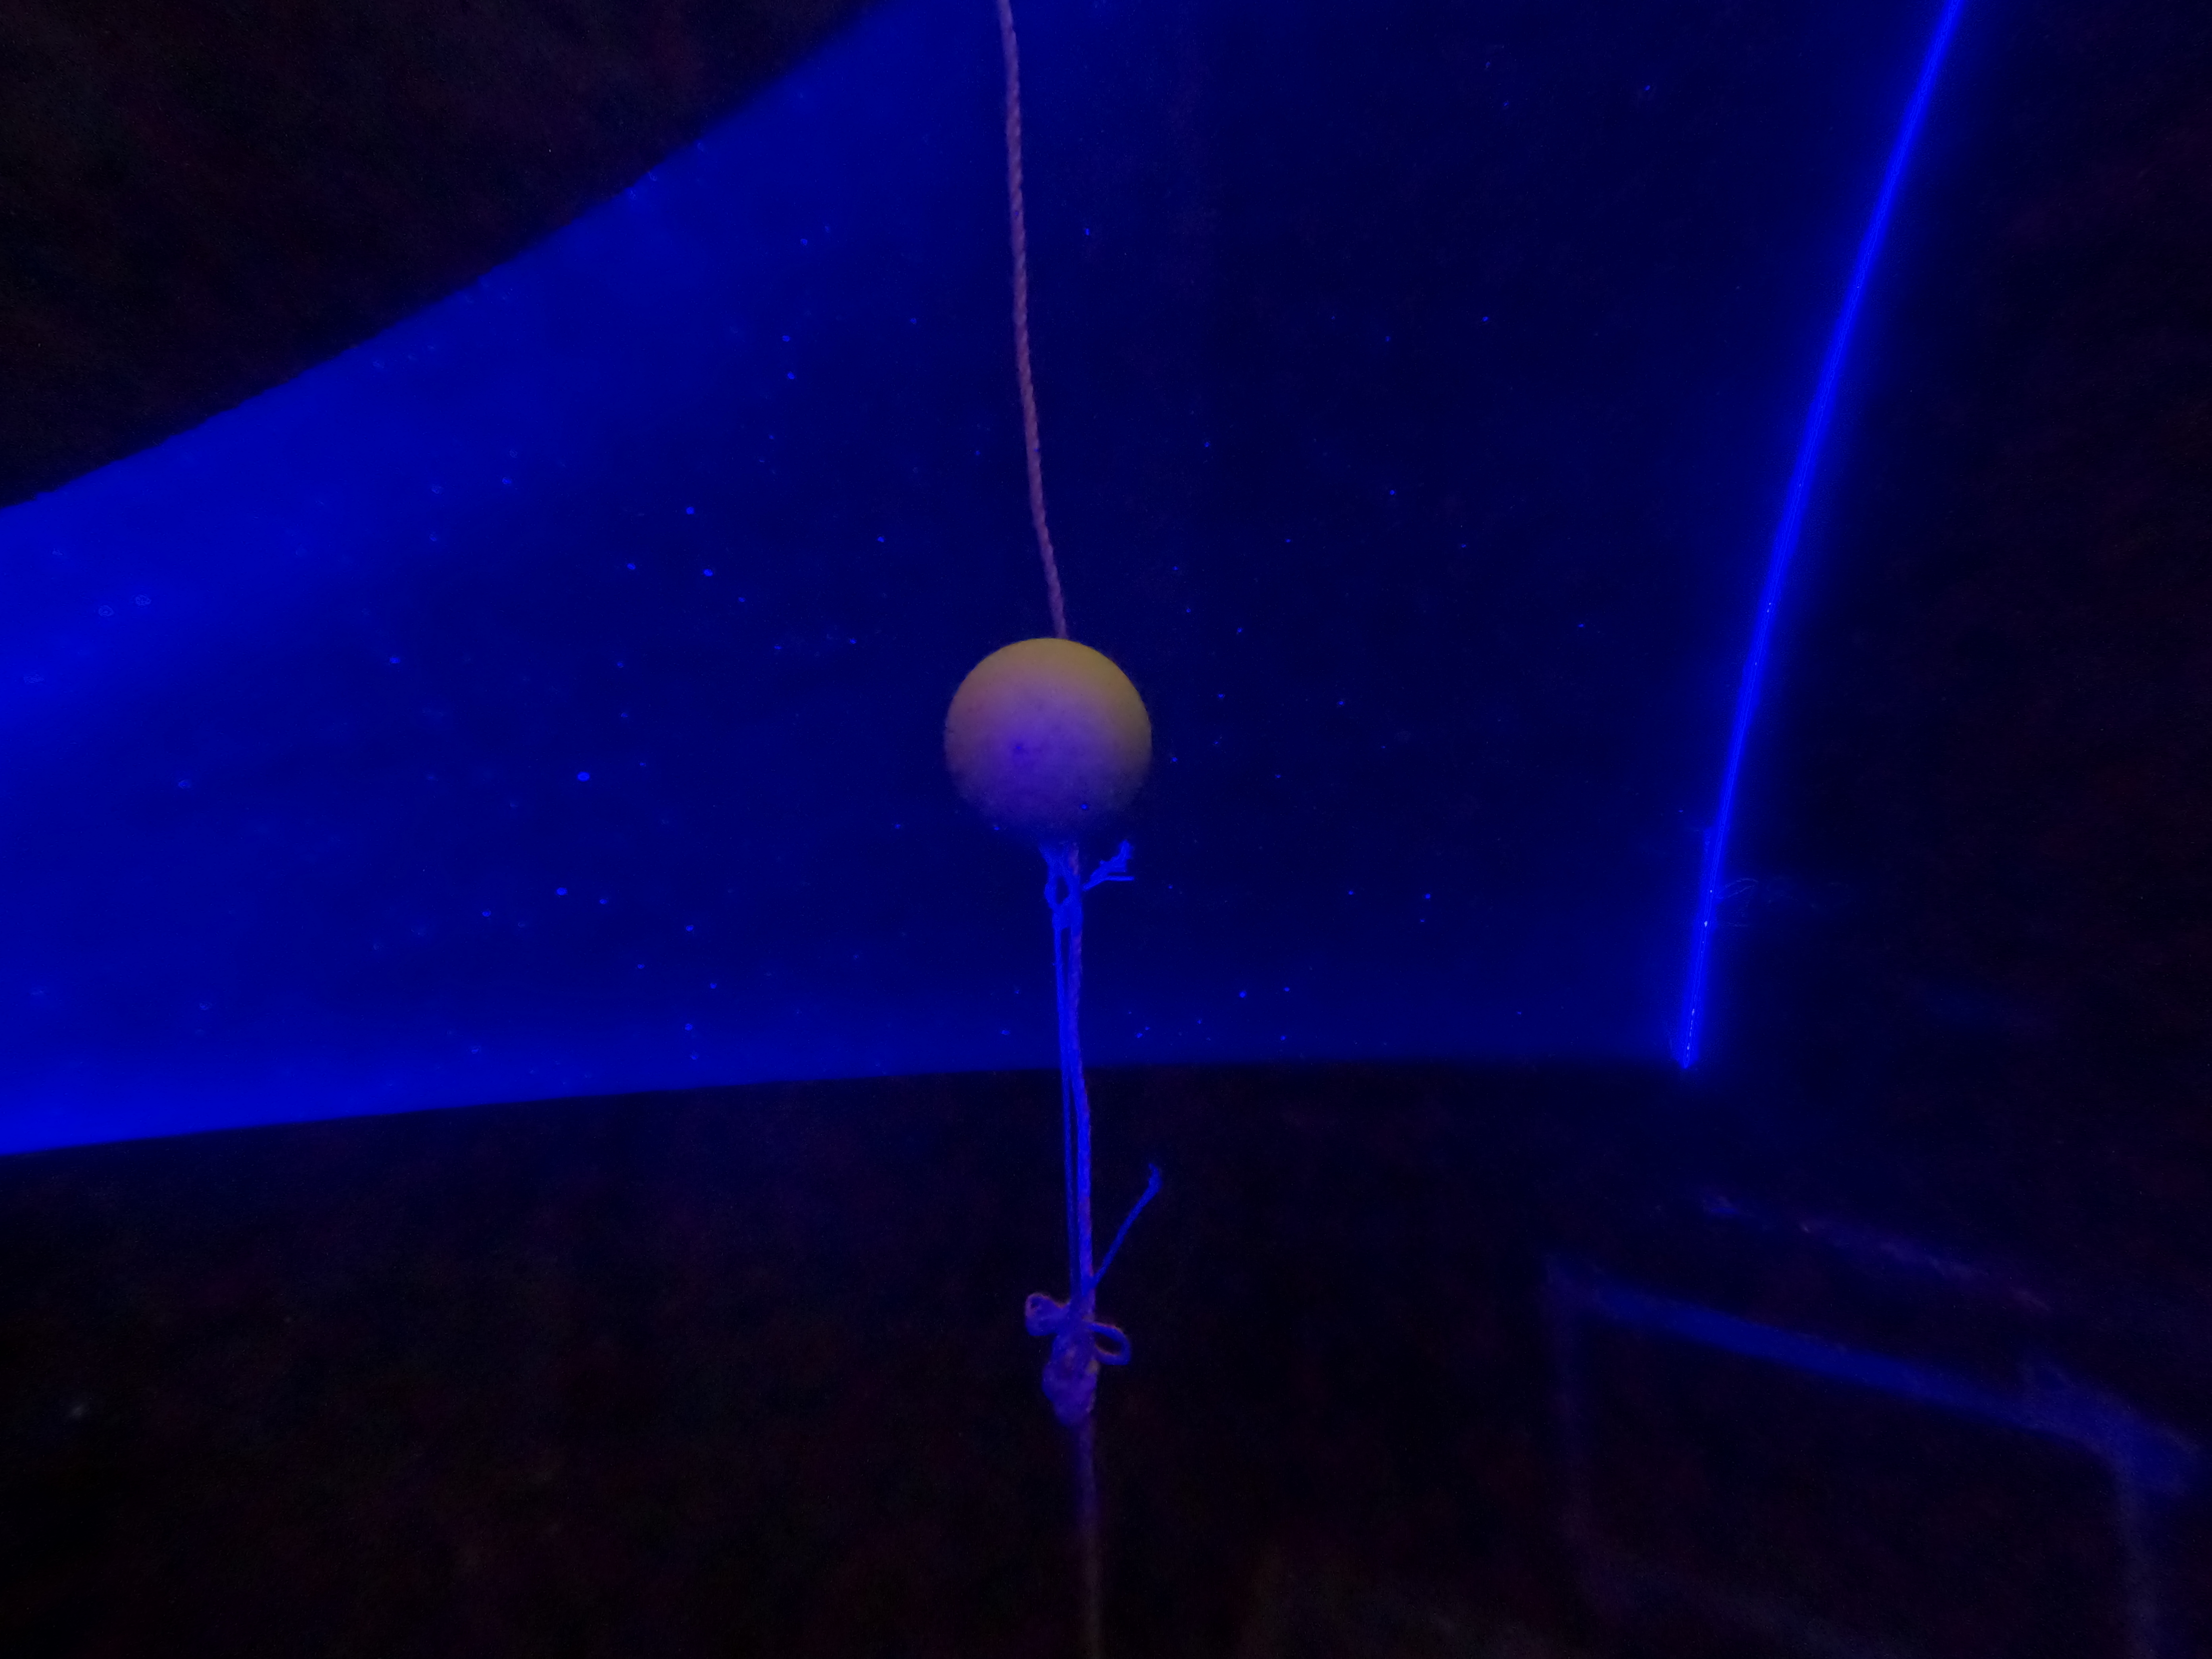

Supplement: Supplementary file 1128 [file G0032842.pdf › 7/G0032842.pdf]

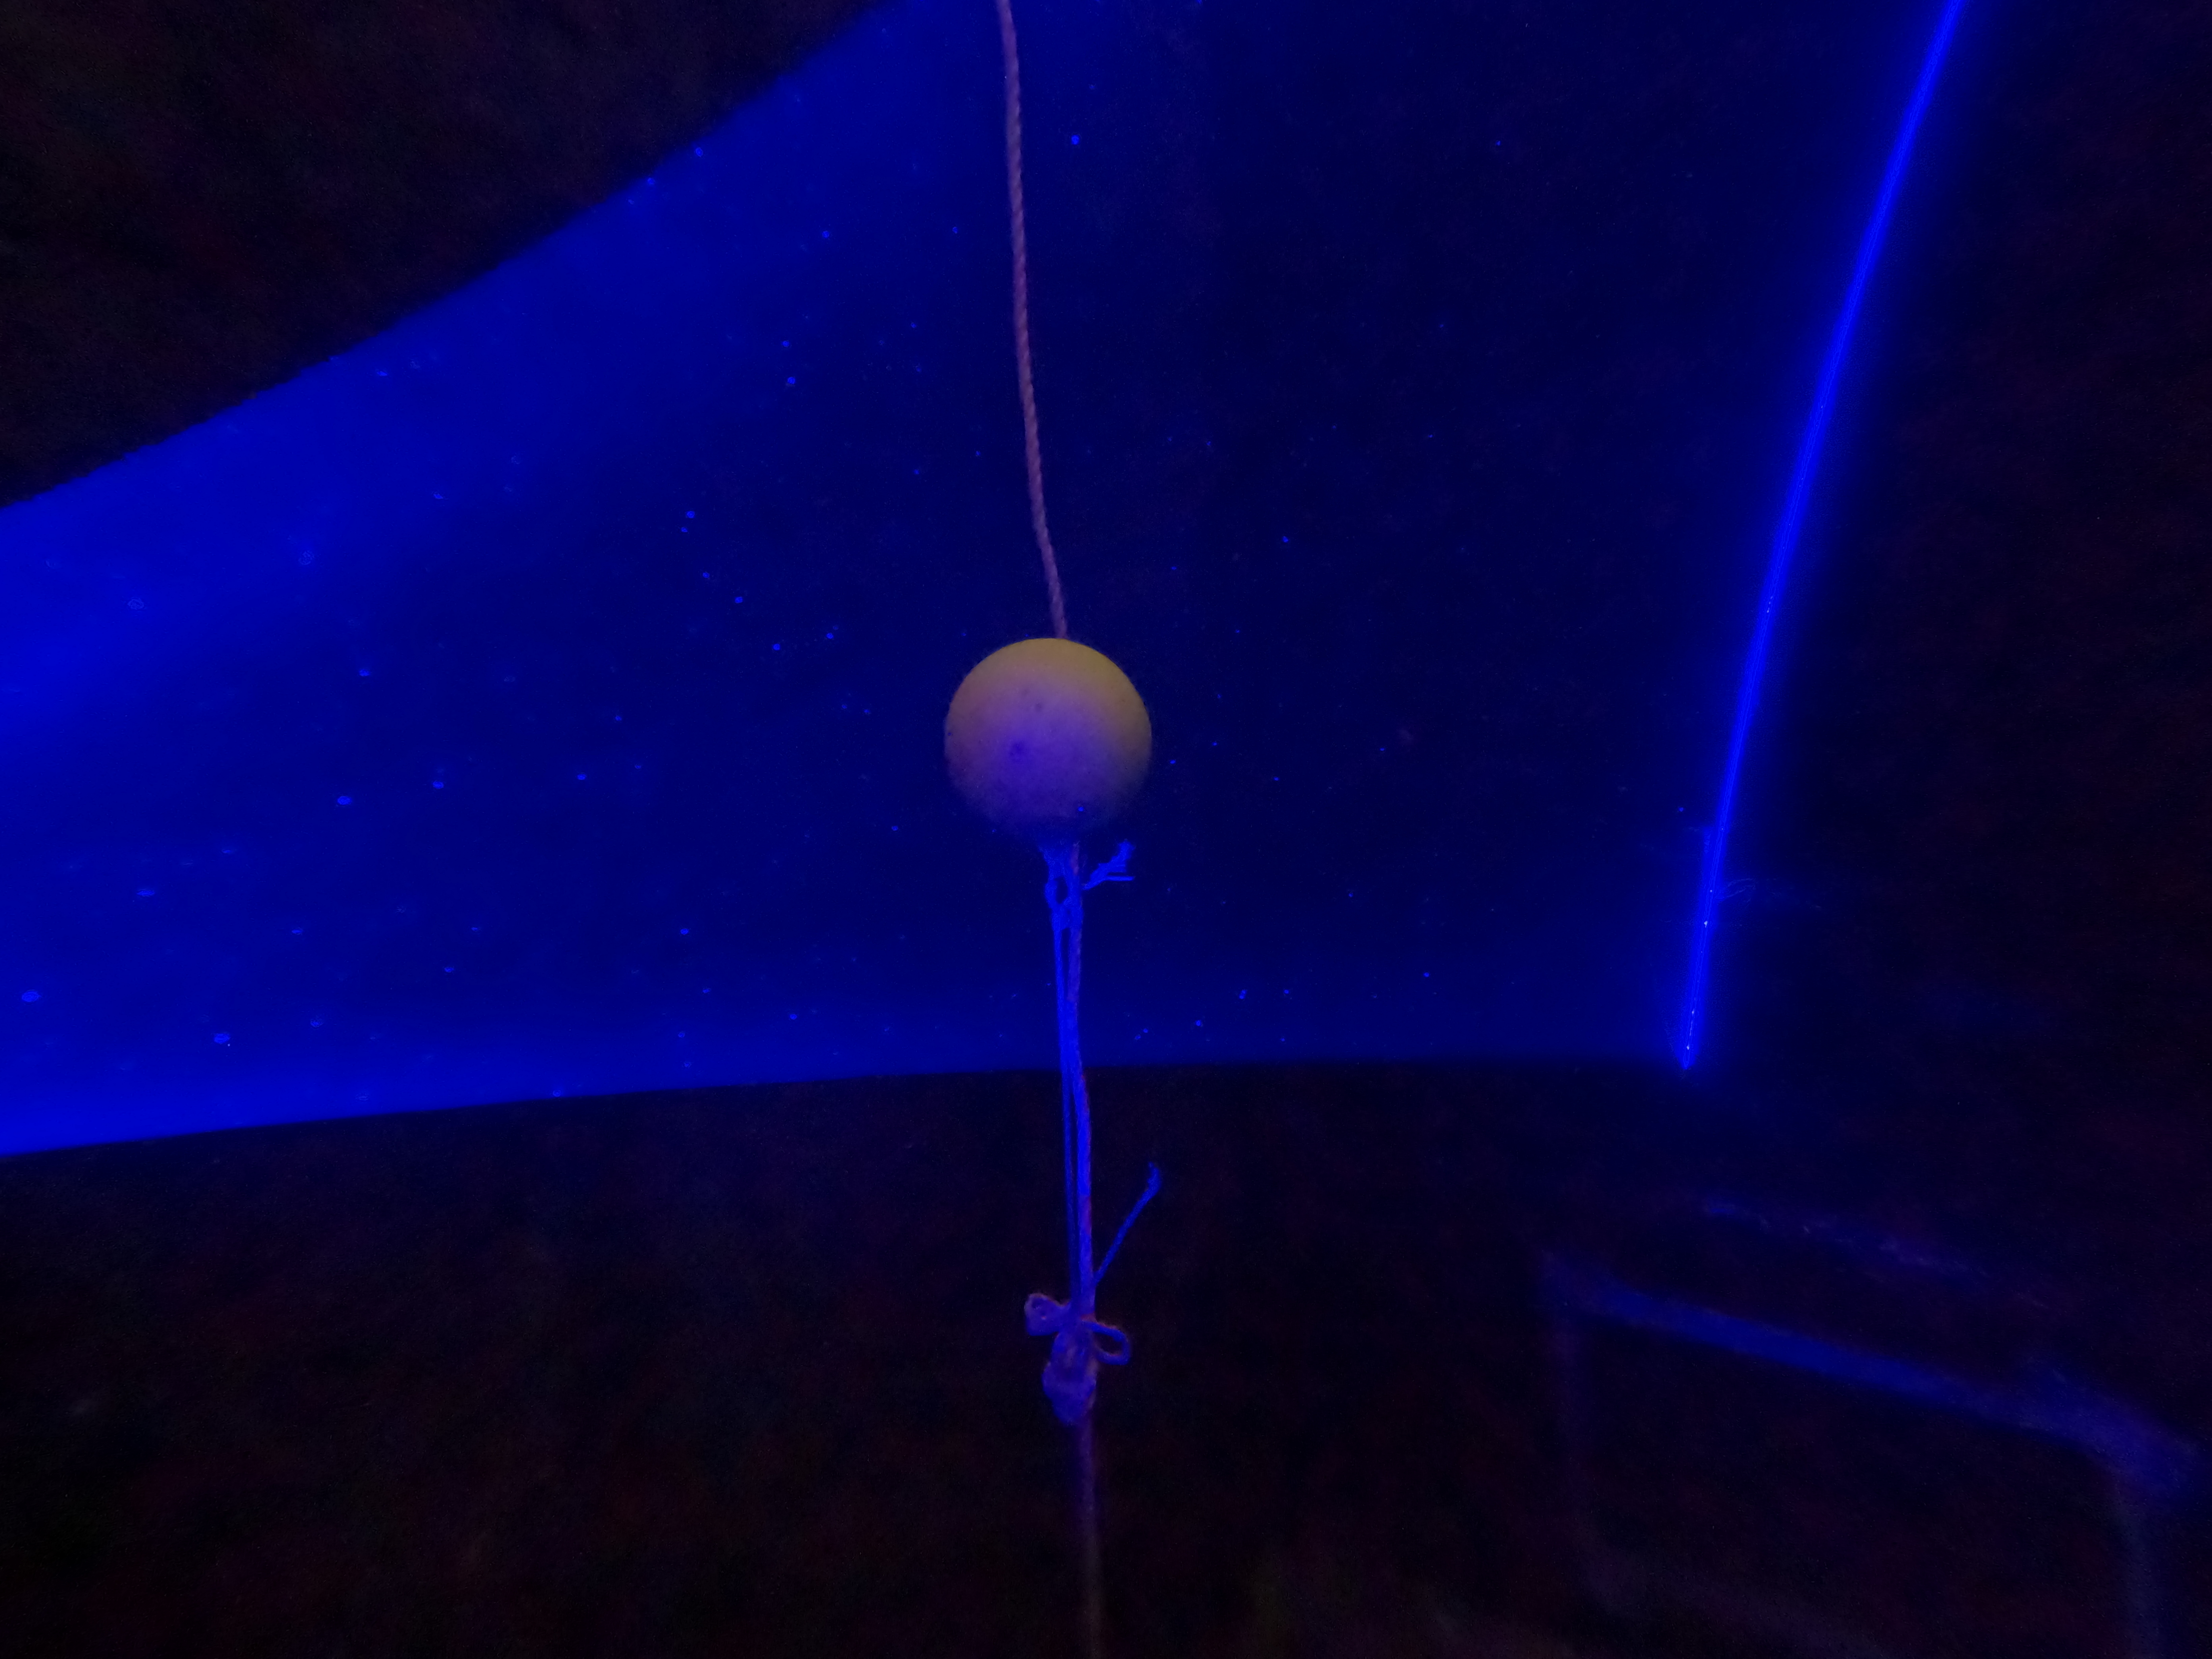

Supplement: Supplementary file 1129 [file G0032843.pdf › 7/G0032843.pdf]

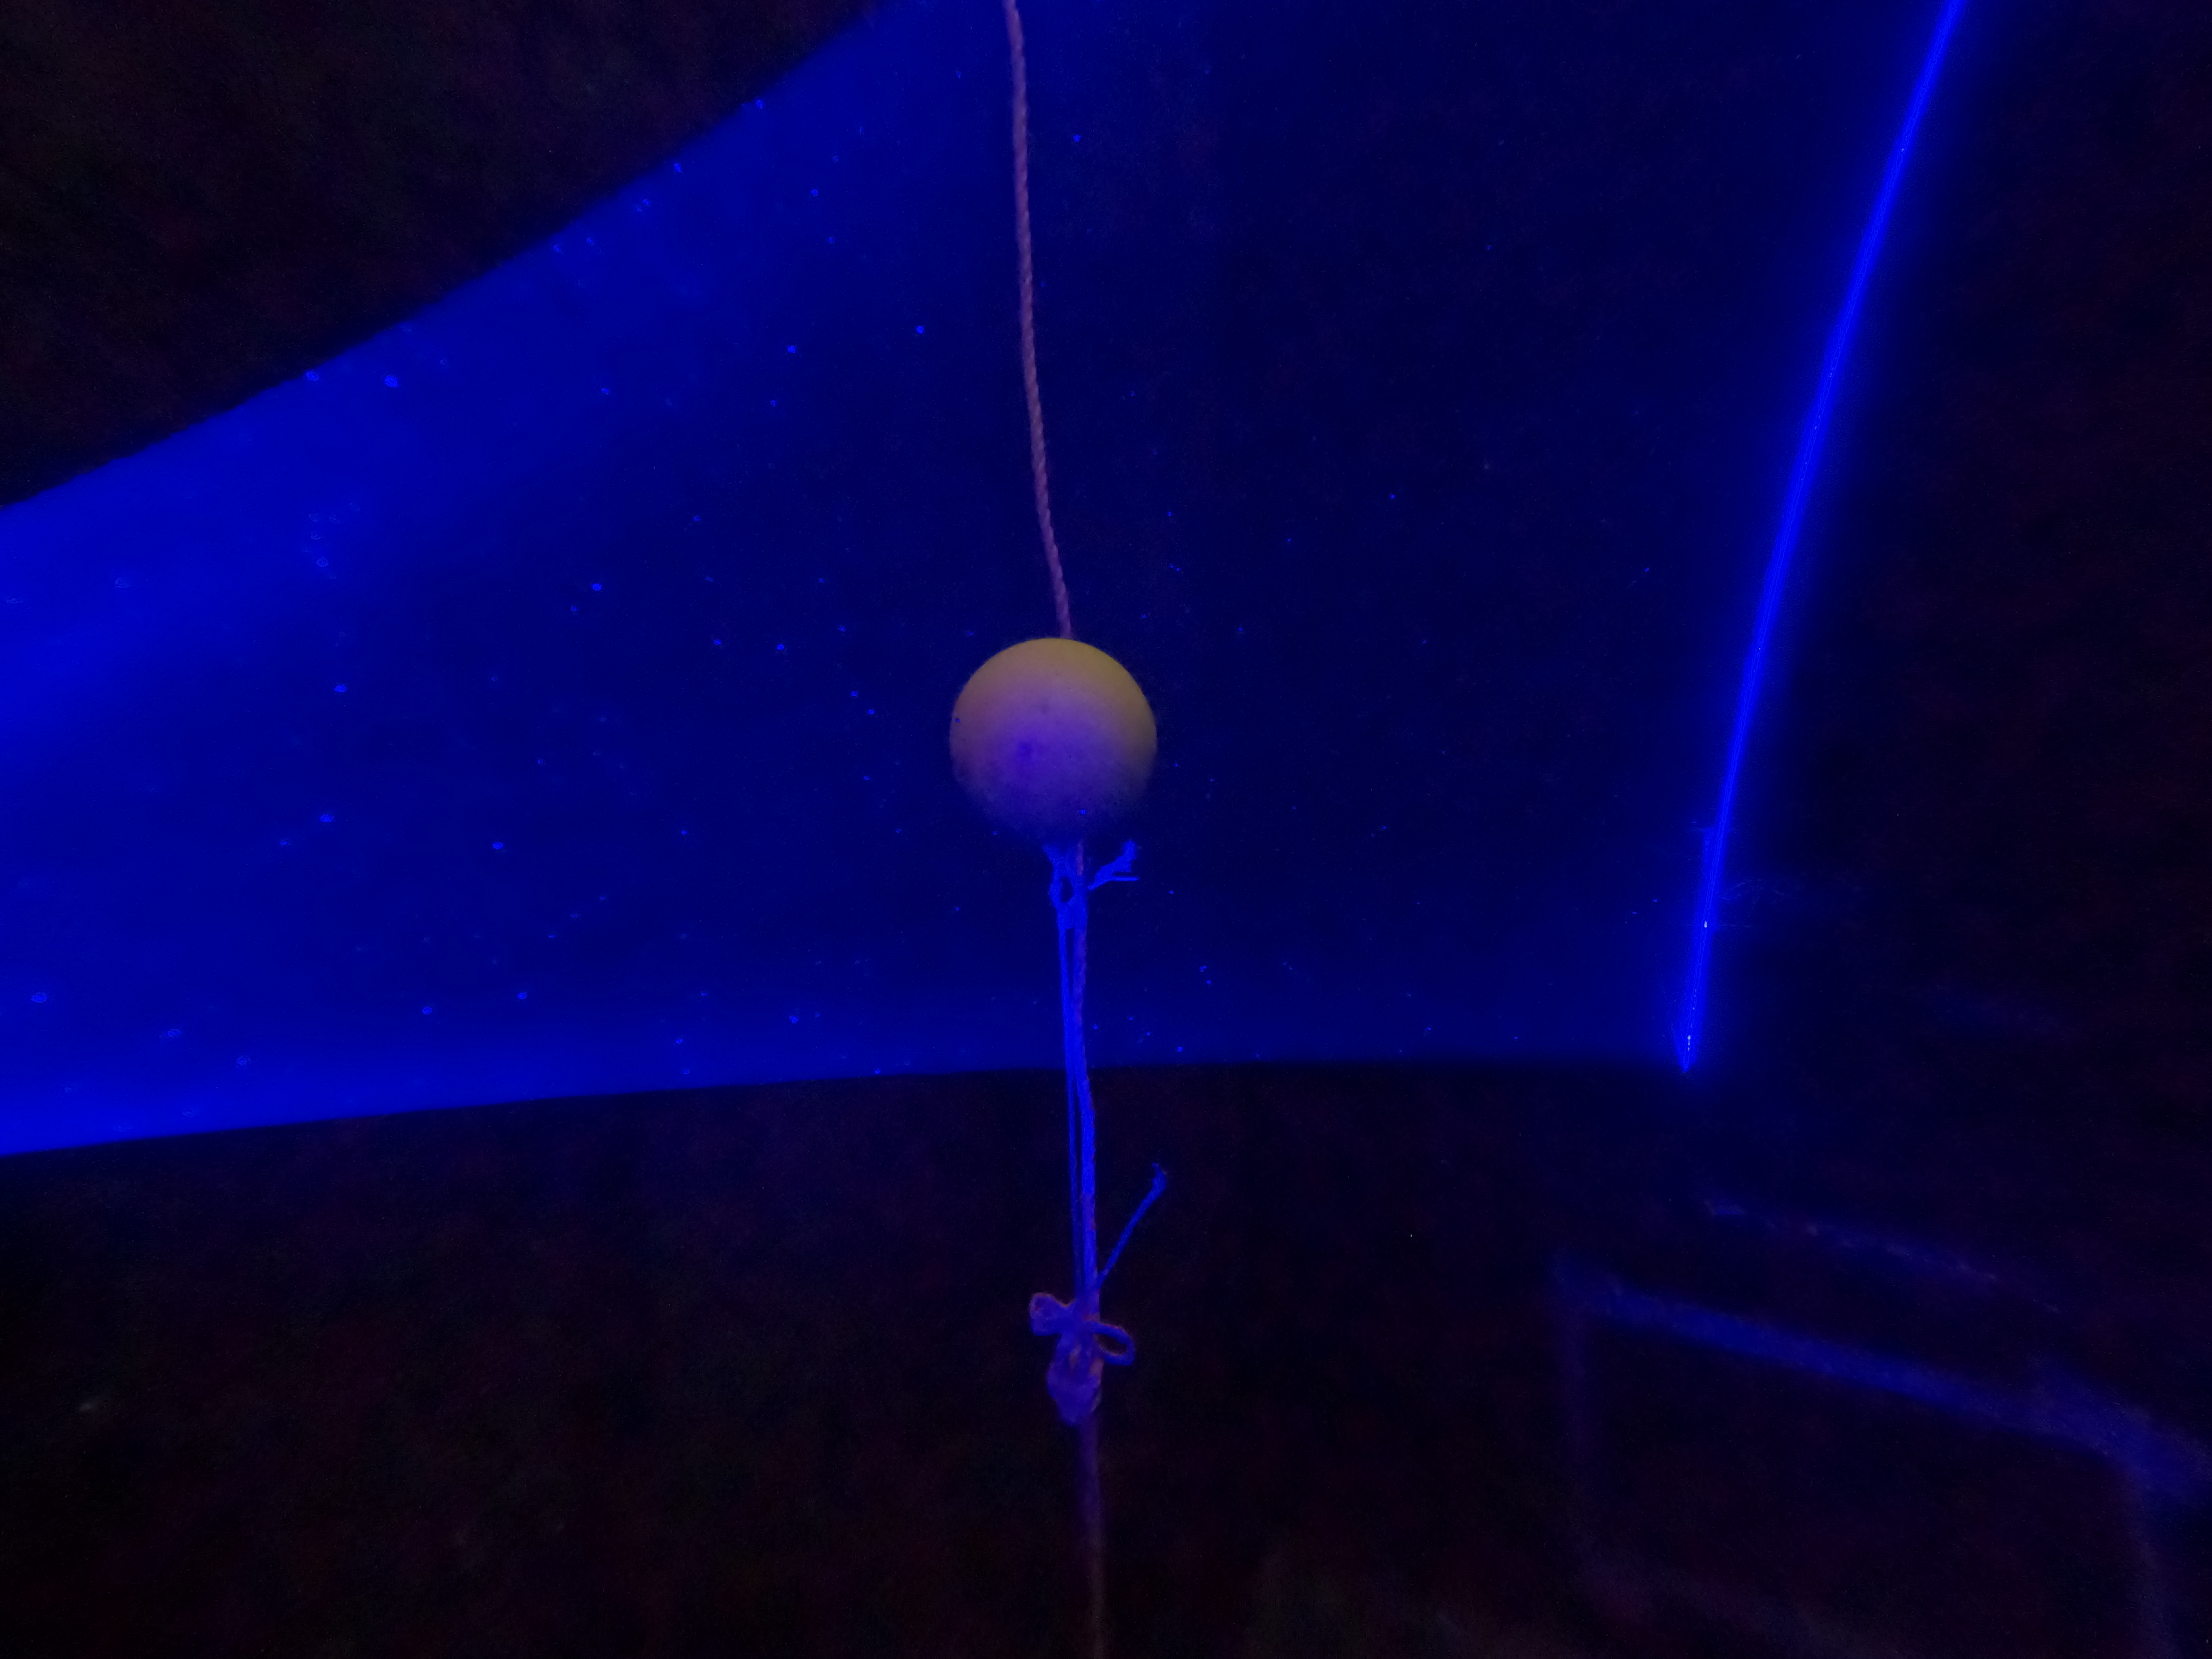

Supplement: Supplementary file 1130 [file G0032844.pdf › 7/G0032844.pdf]

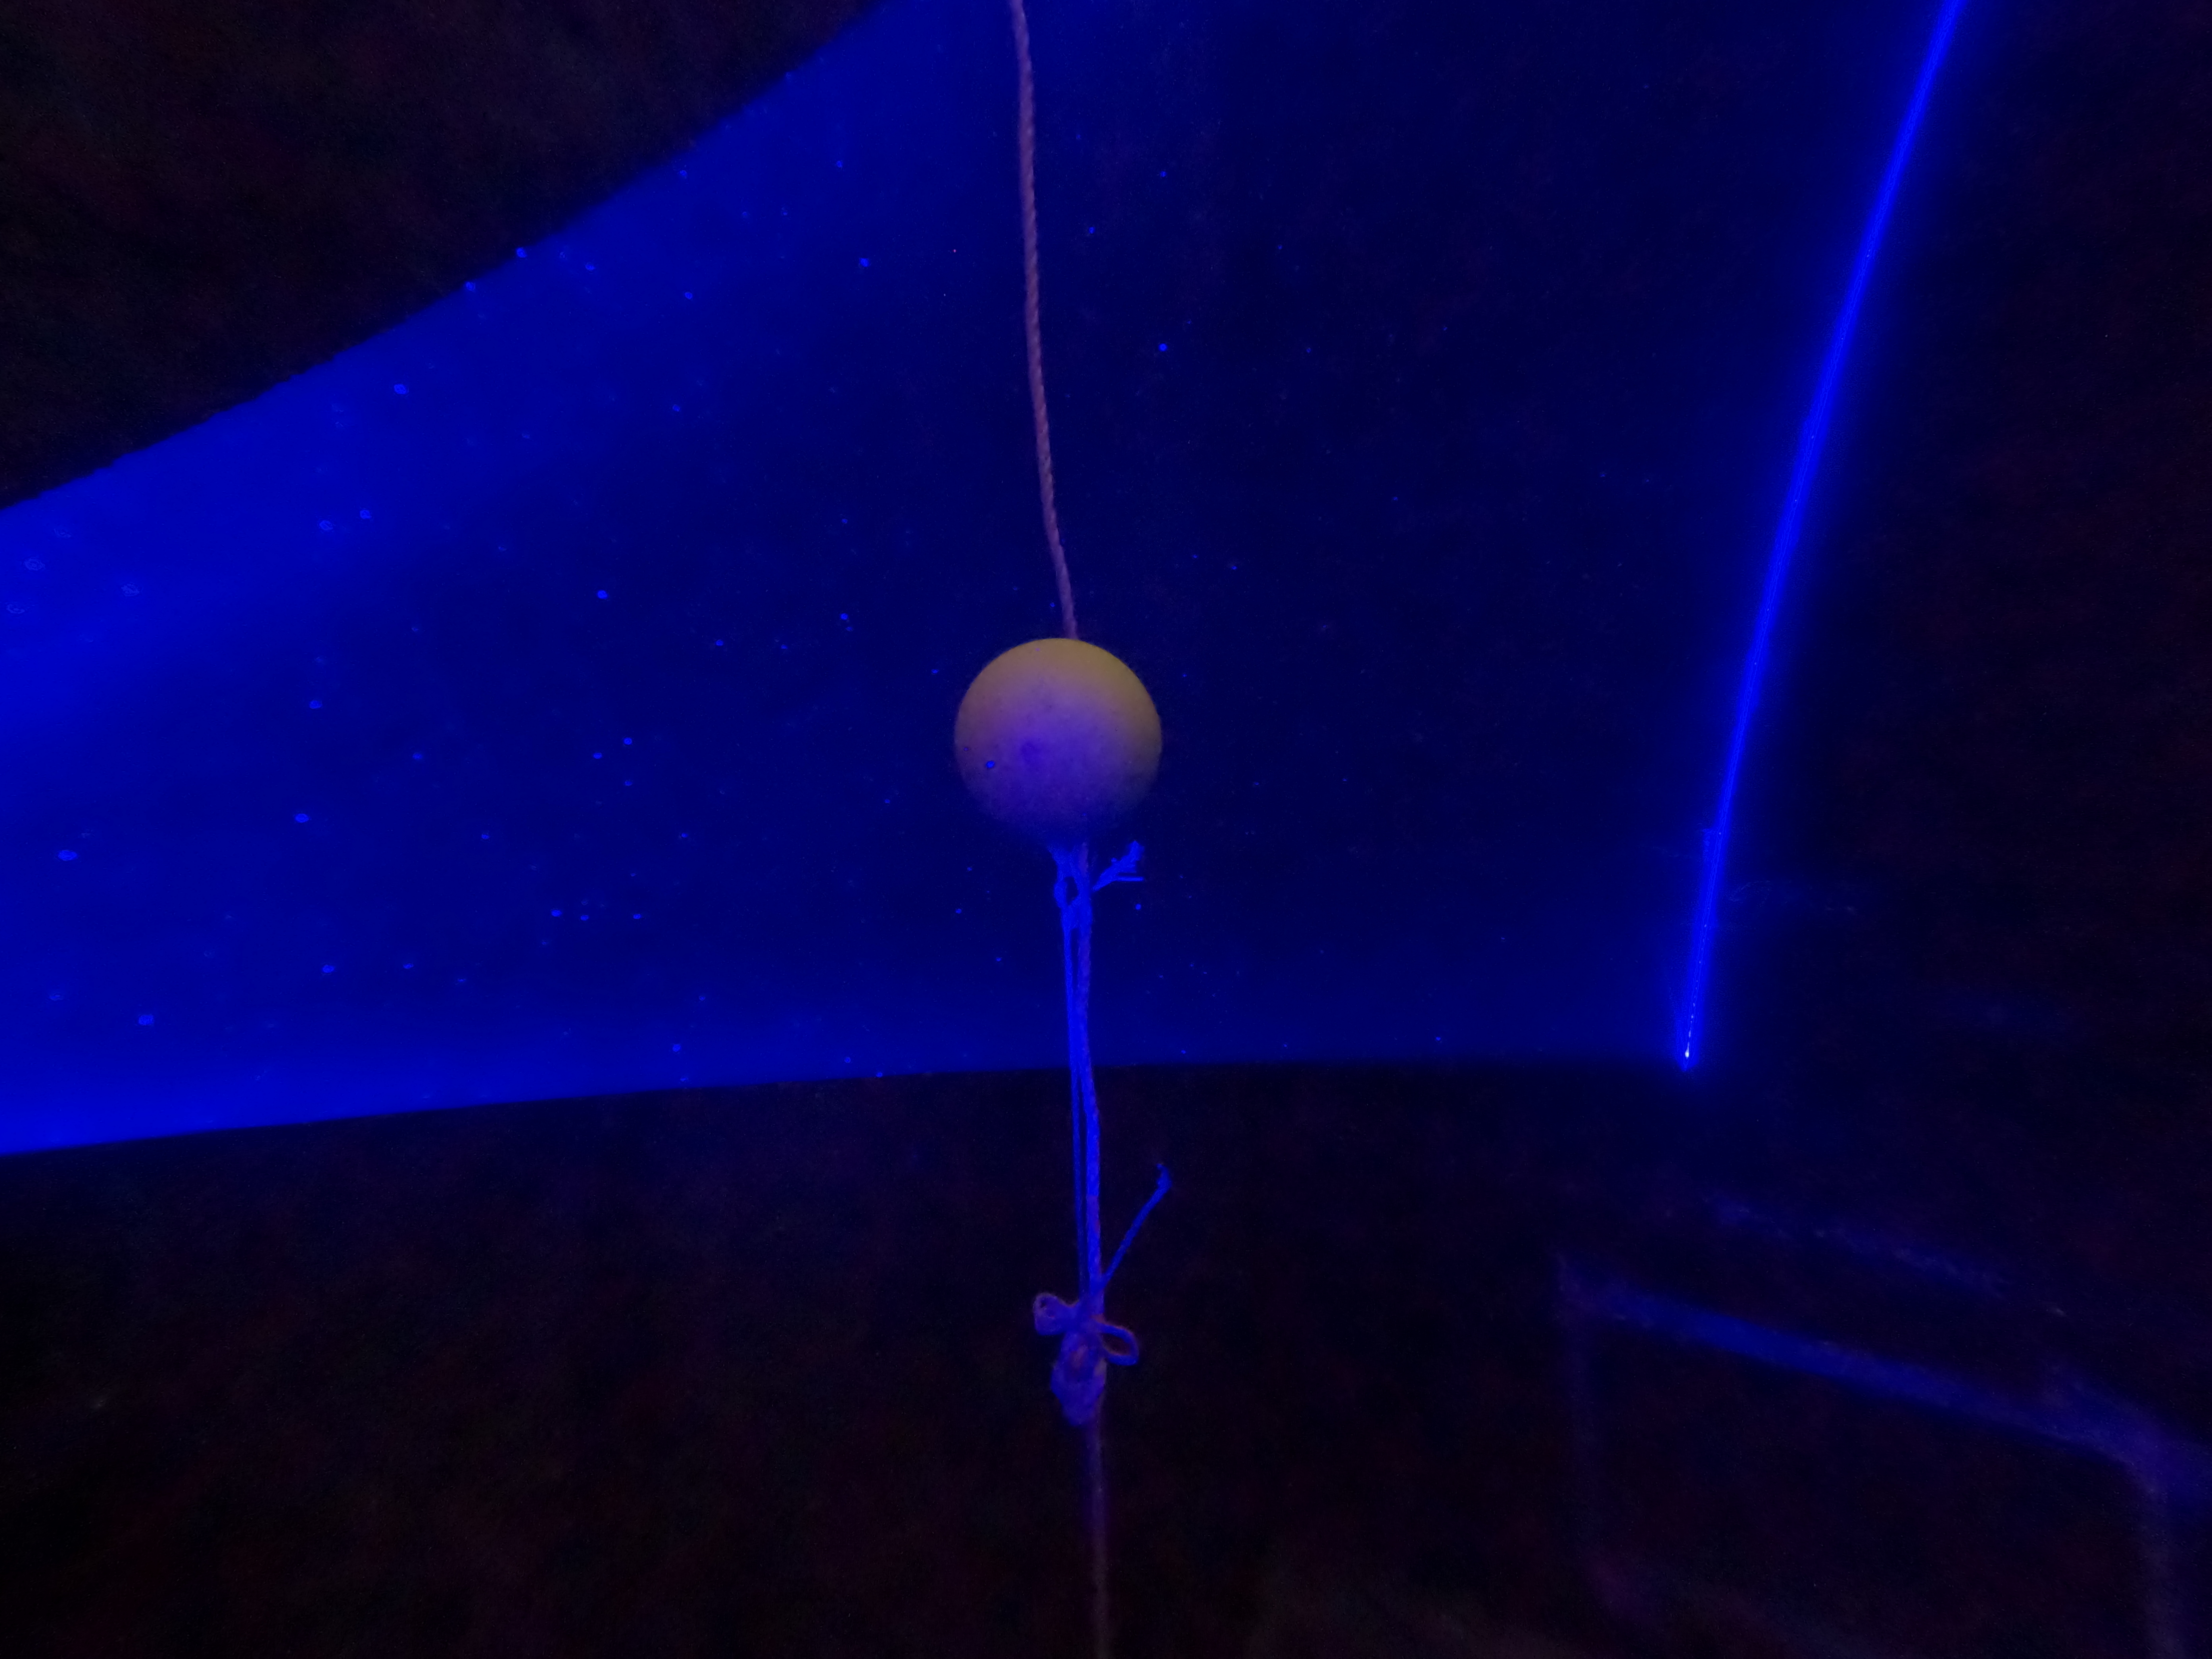

Supplement: Supplementary file 1131 [file G0032845.pdf › 7/G0032845.pdf]

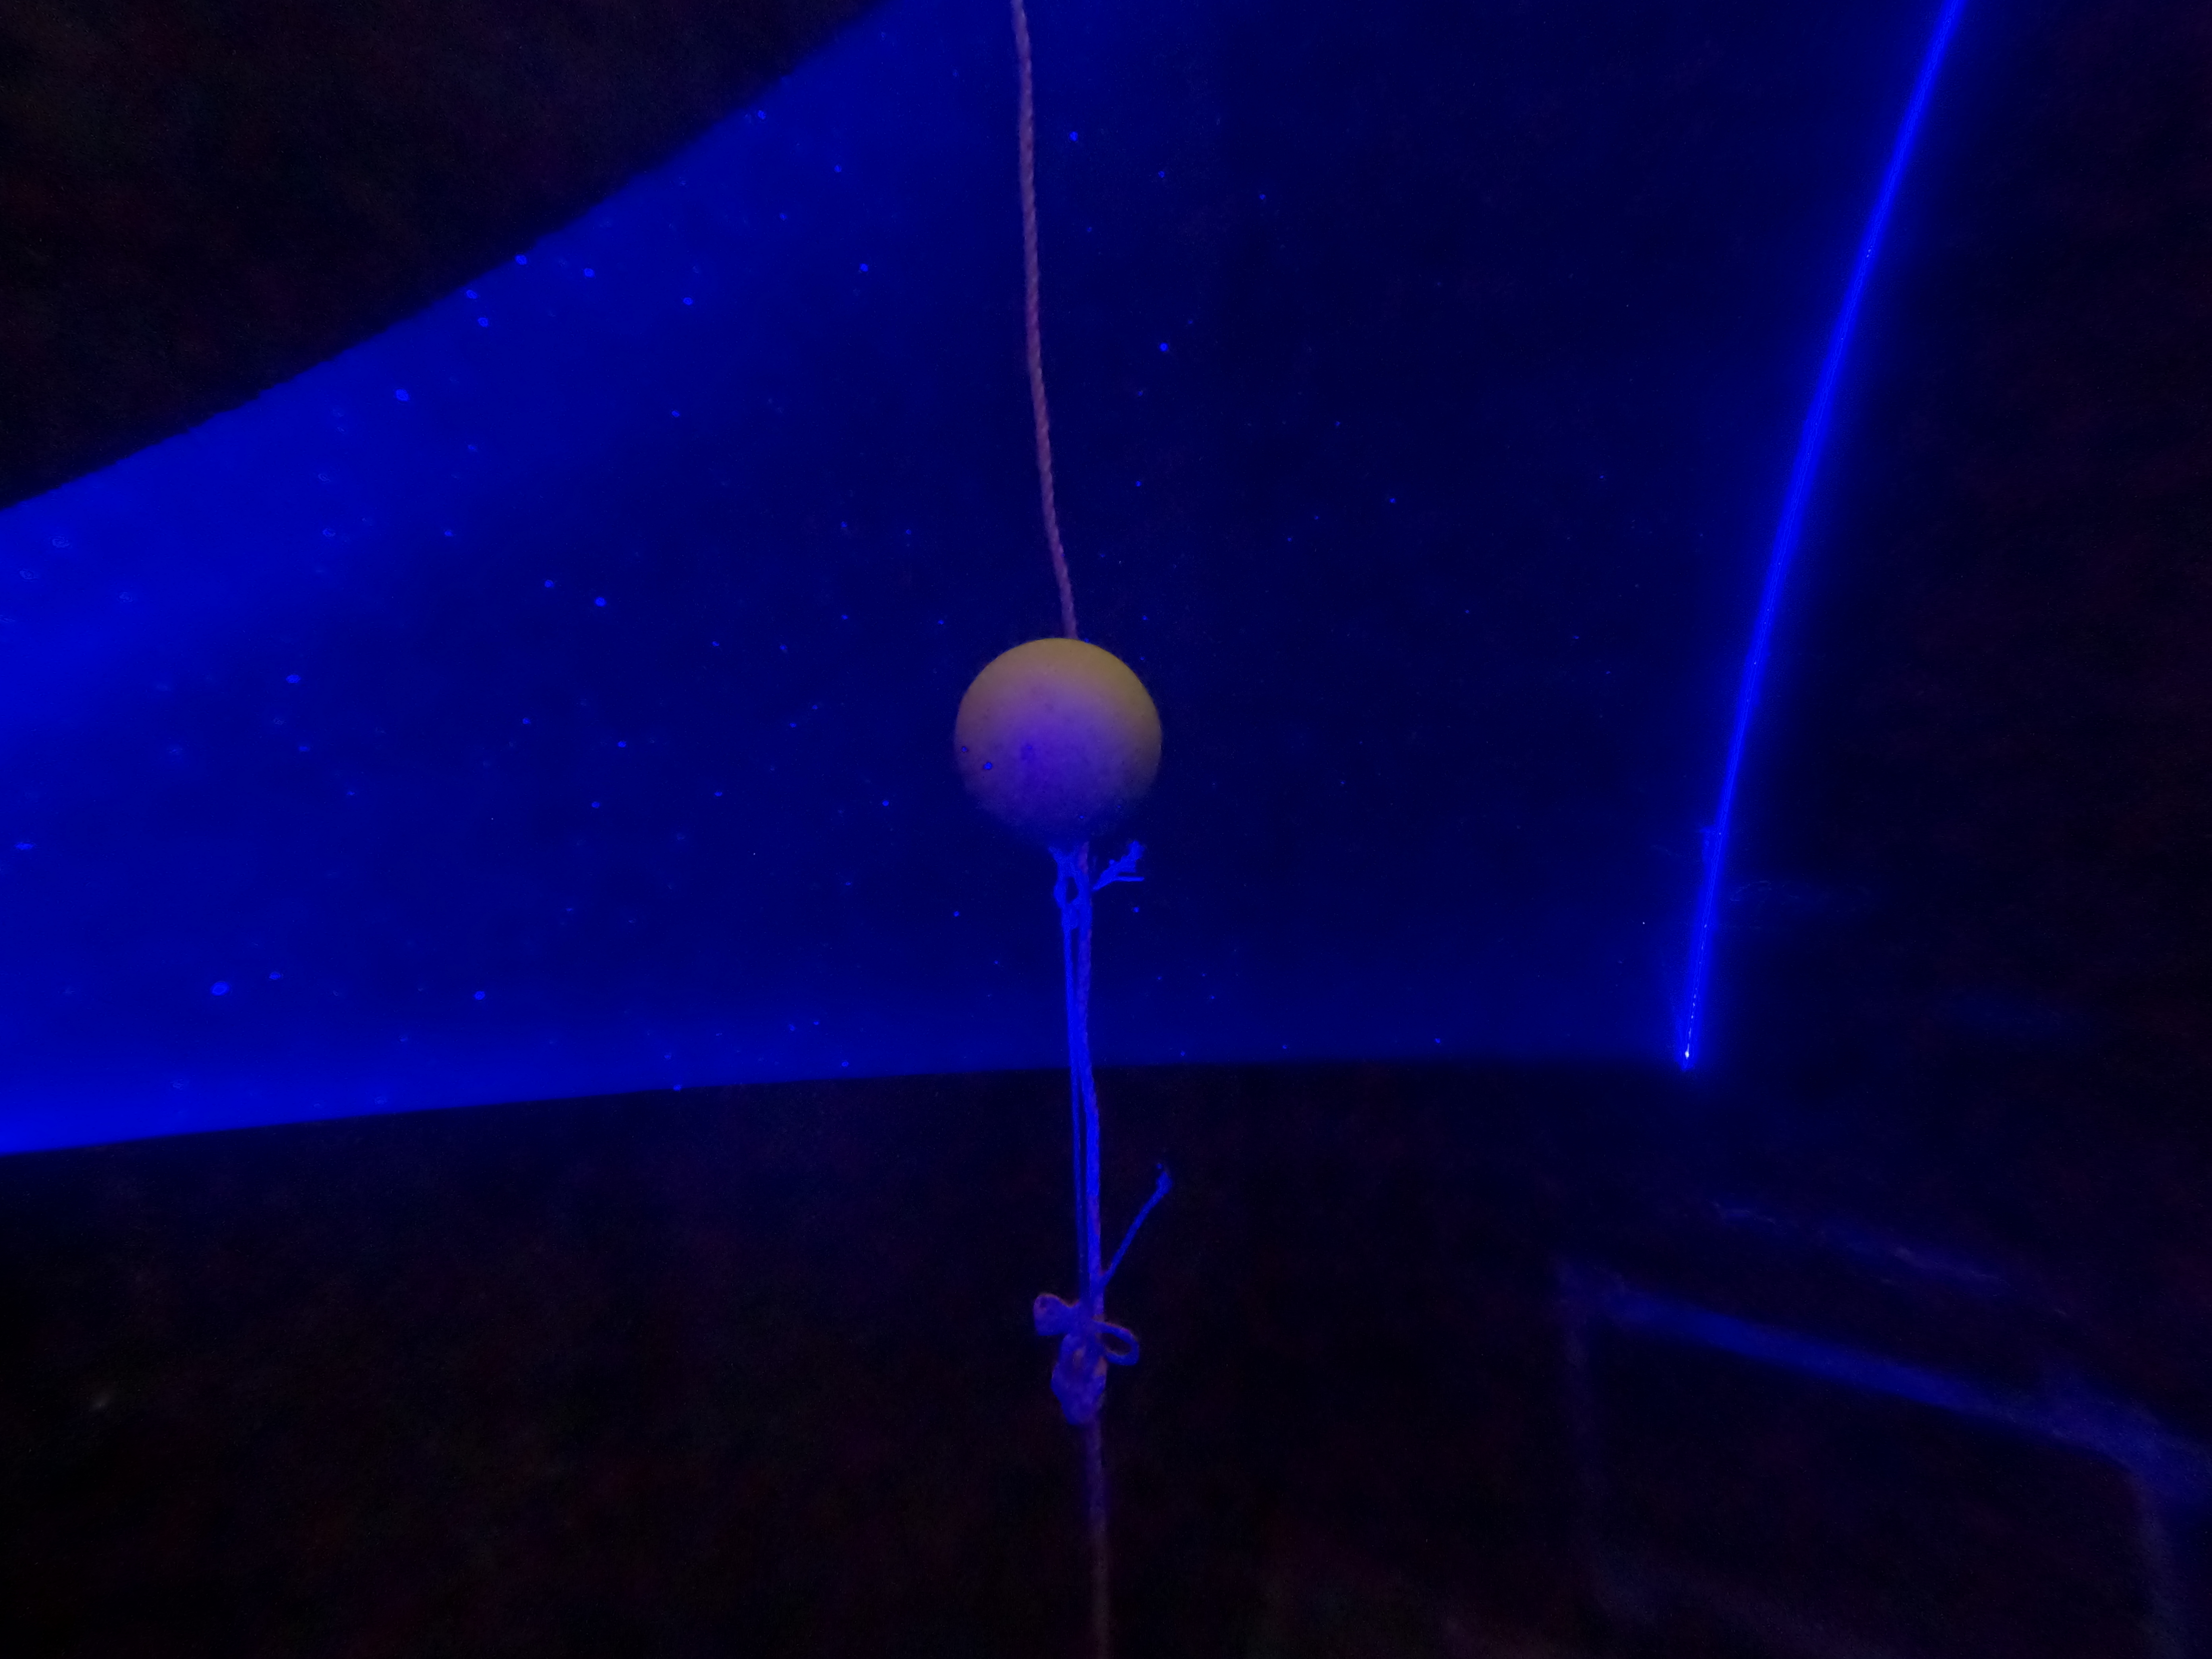

Supplement: Supplementary file 1132 [file G0032846.pdf › 7/G0032846.pdf]

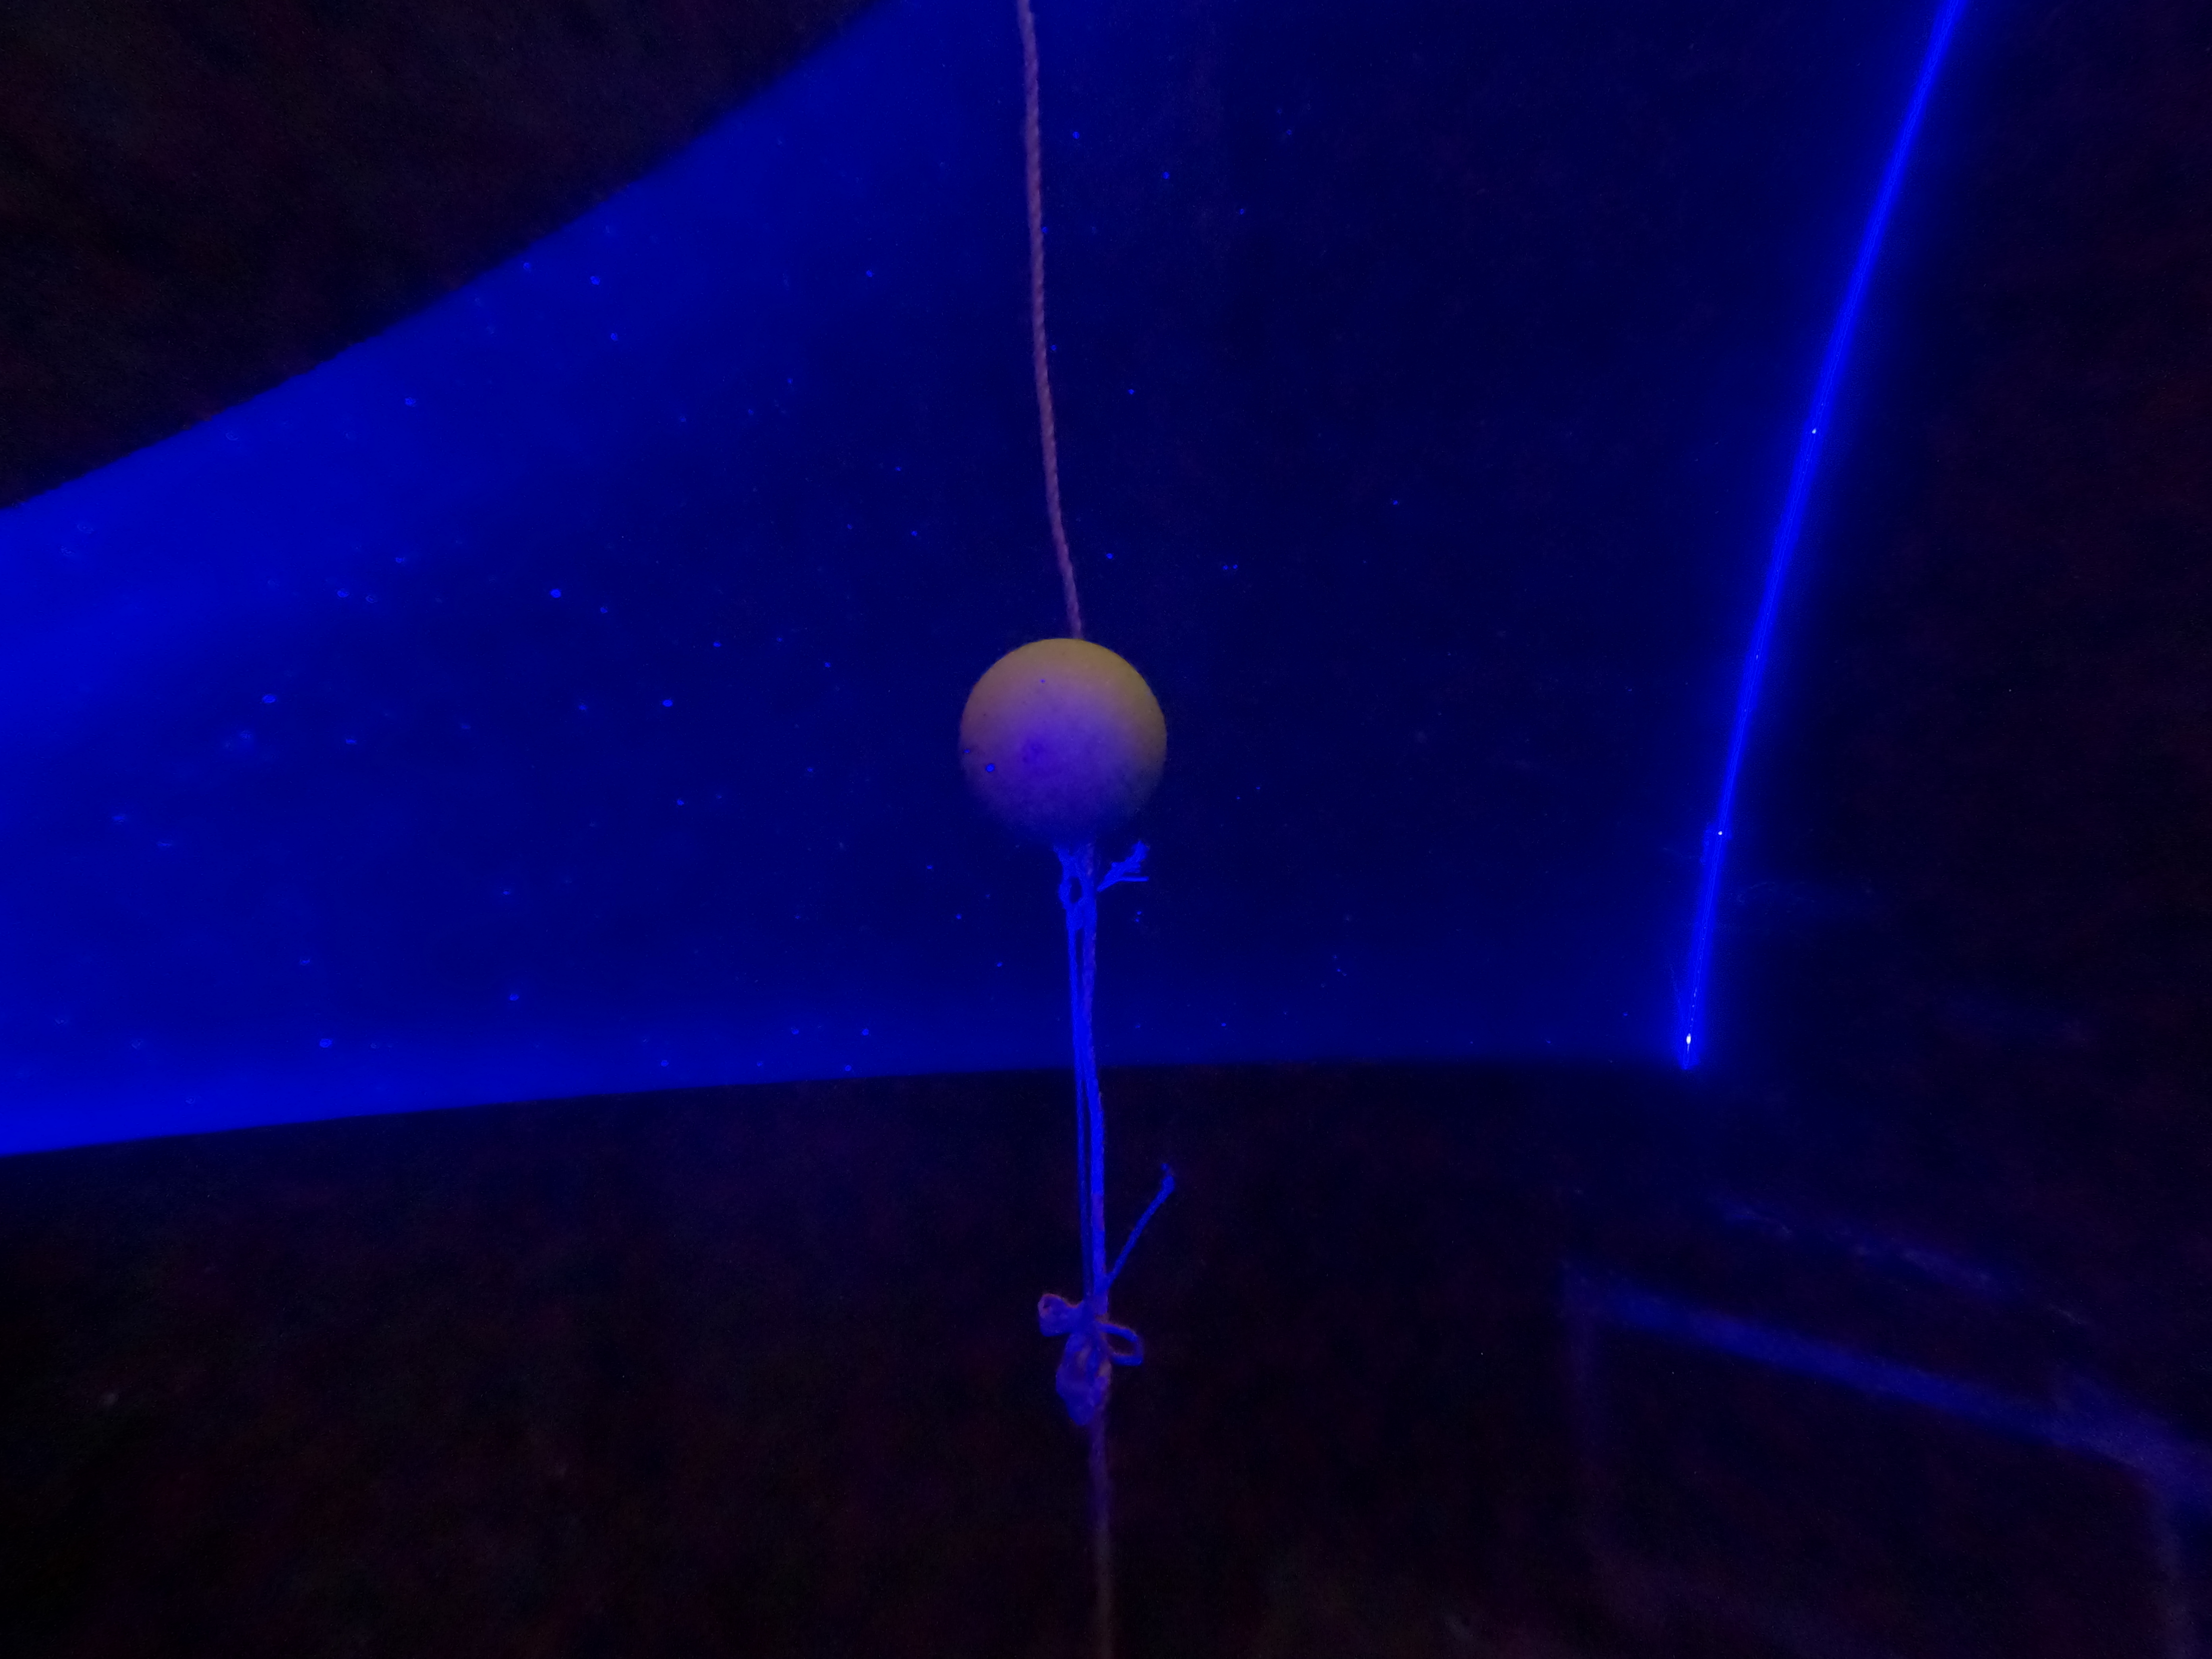

Supplement: Supplementary file 1133 [file G0032847.pdf › 7/G0032847.pdf]

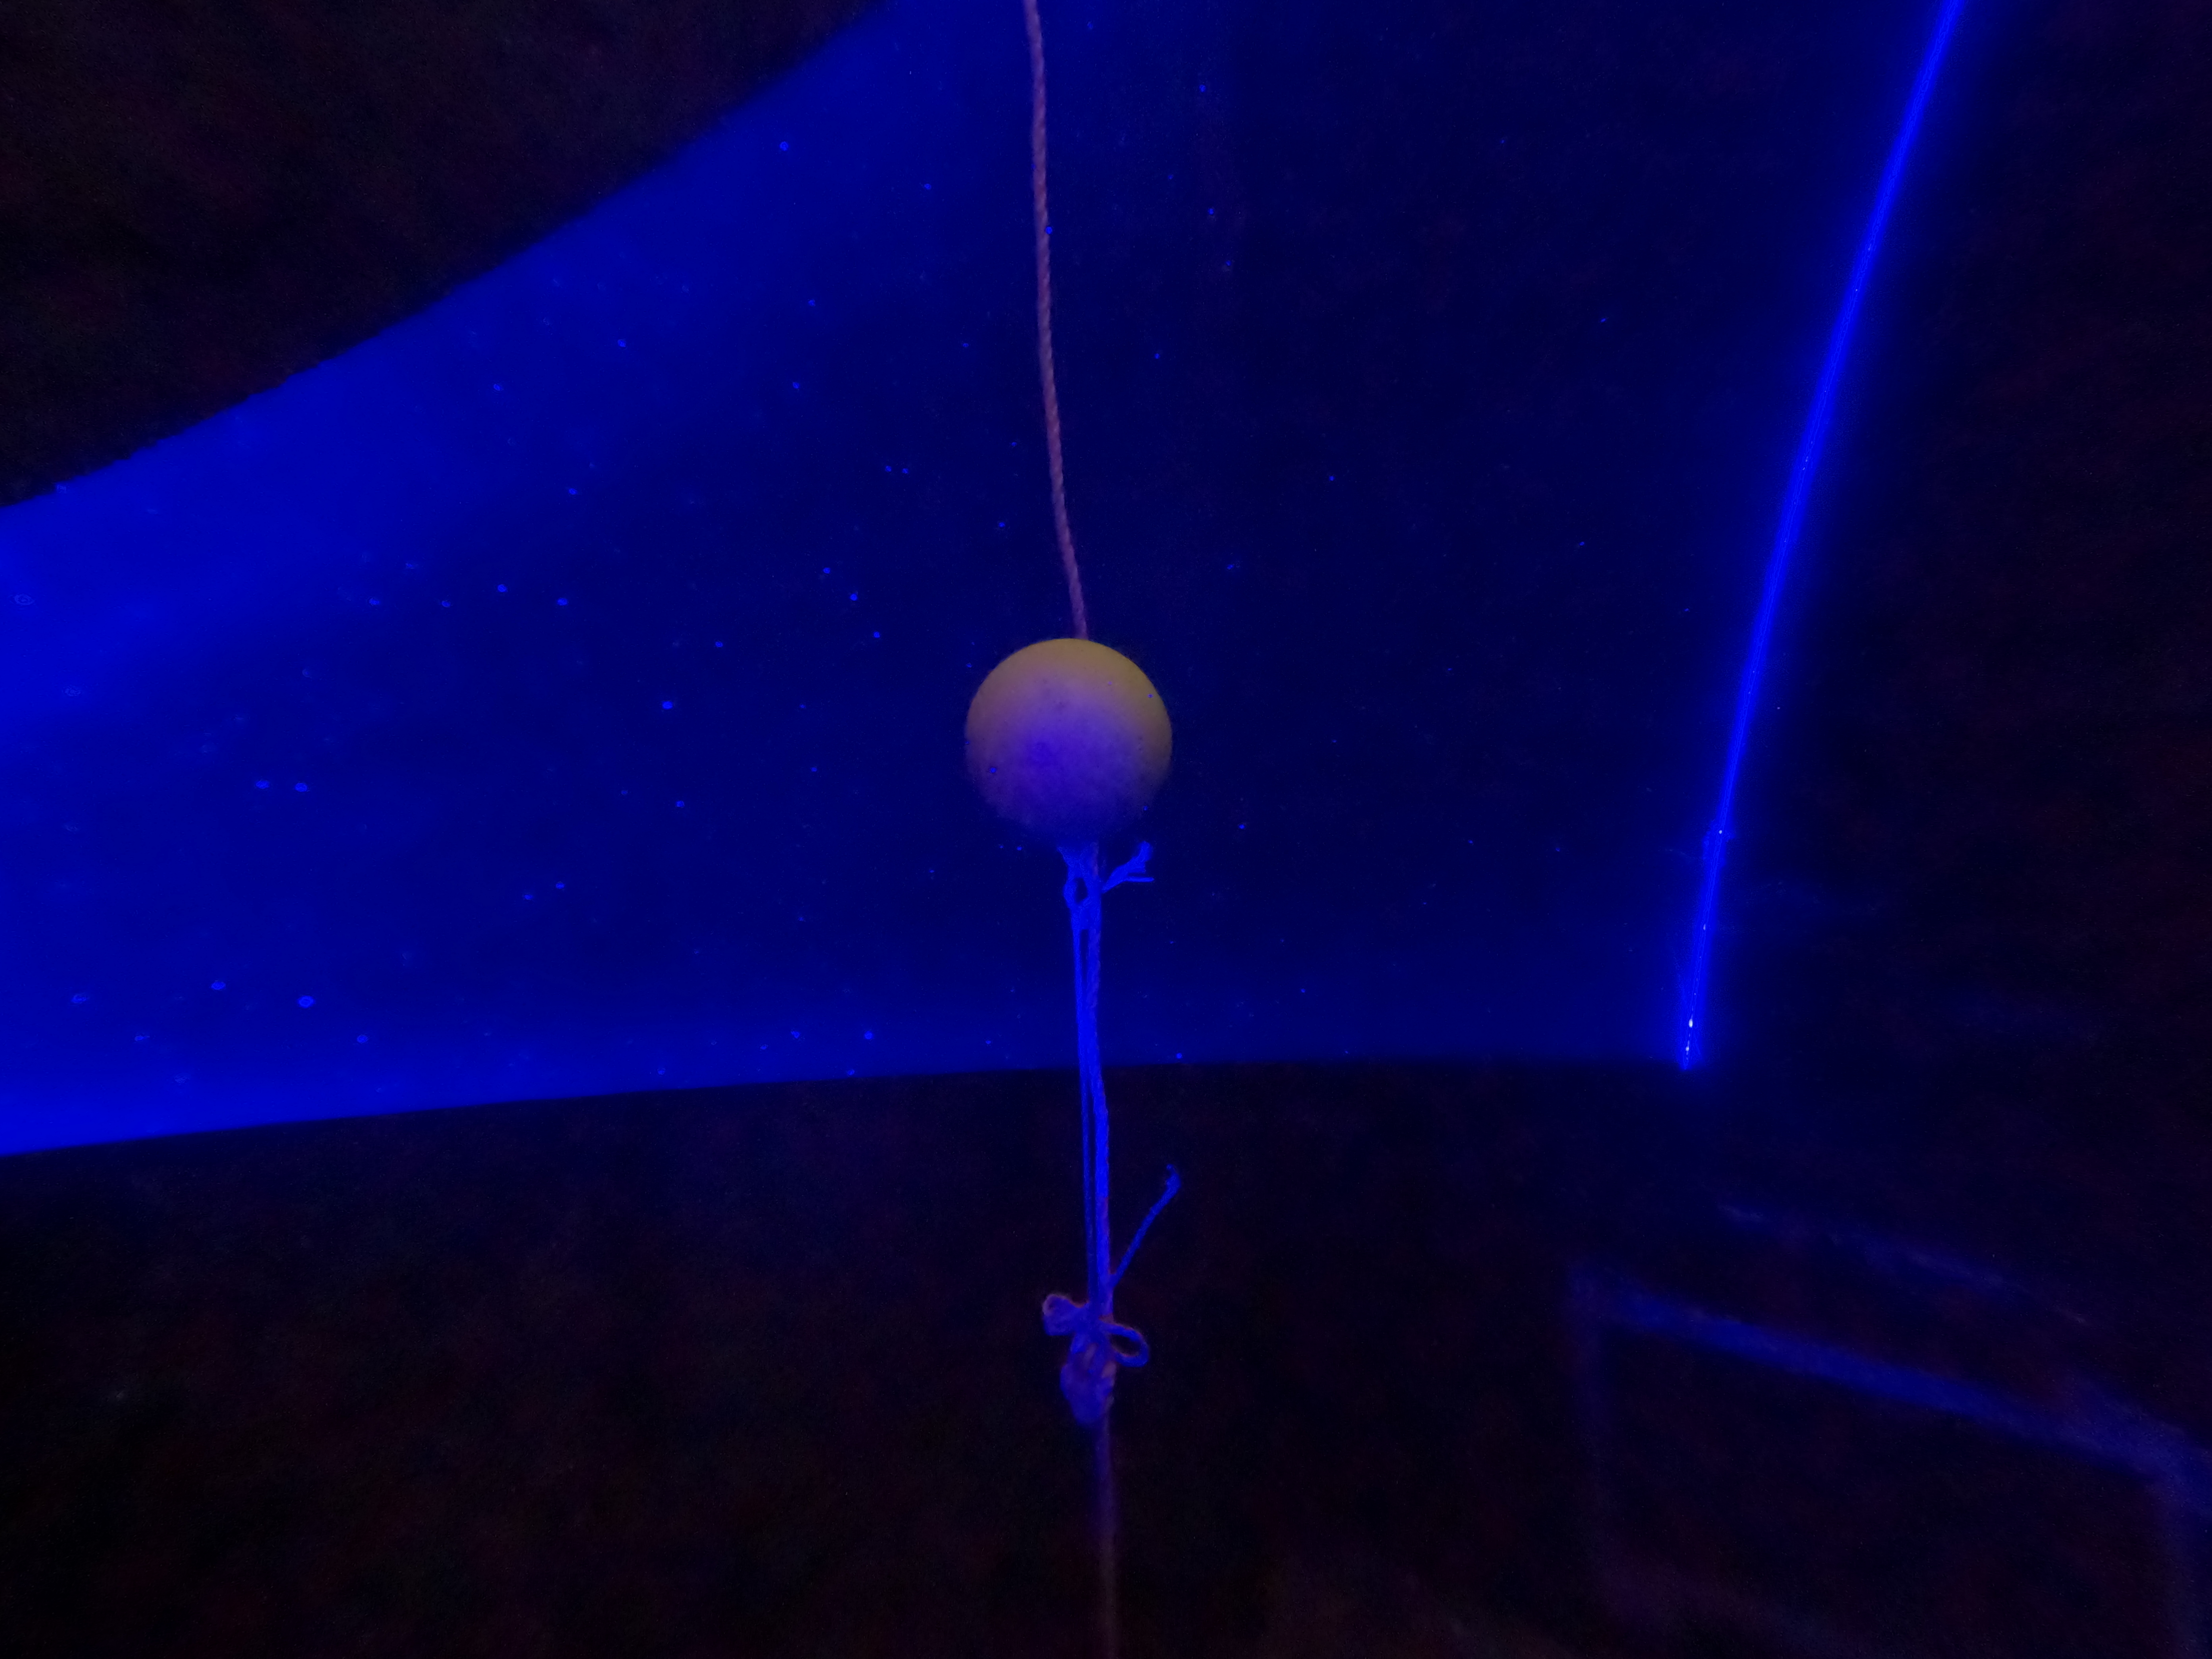

Supplement: Supplementary file 1134 [file G0032848.pdf › 7/G0032848.pdf]

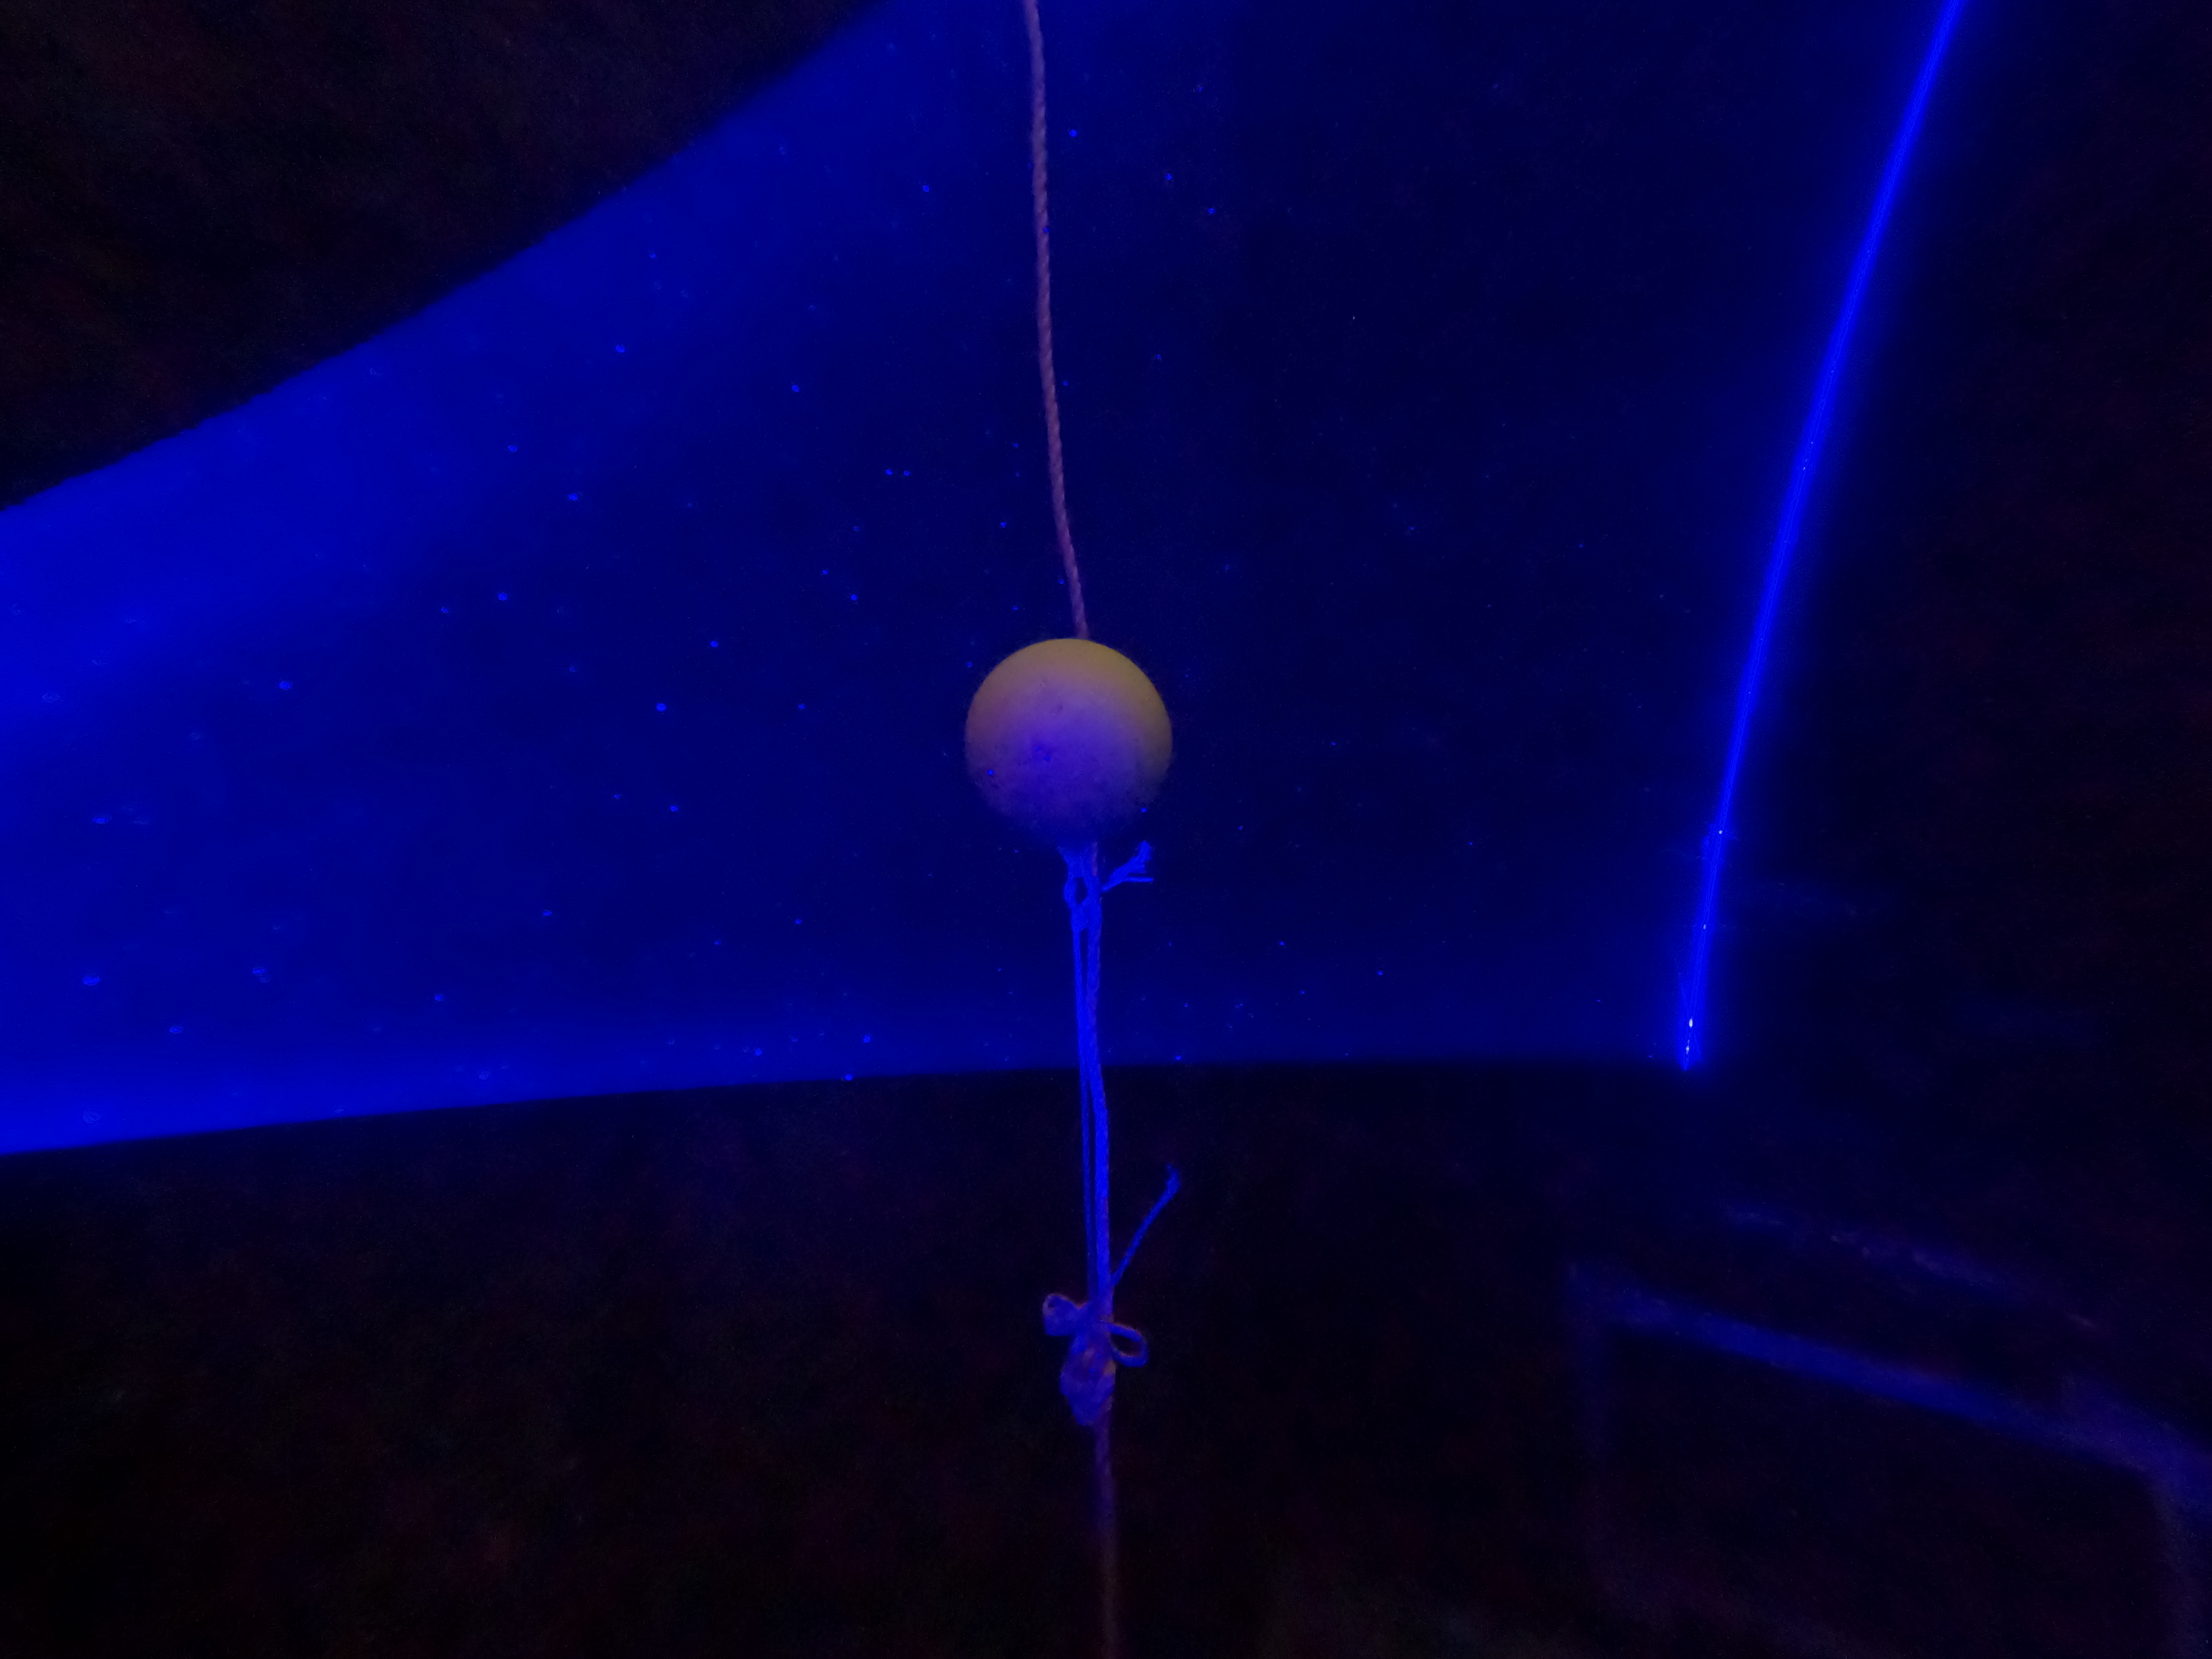

Supplement: Supplementary file 1135 [file G0032849.pdf › 7/G0032849.pdf]

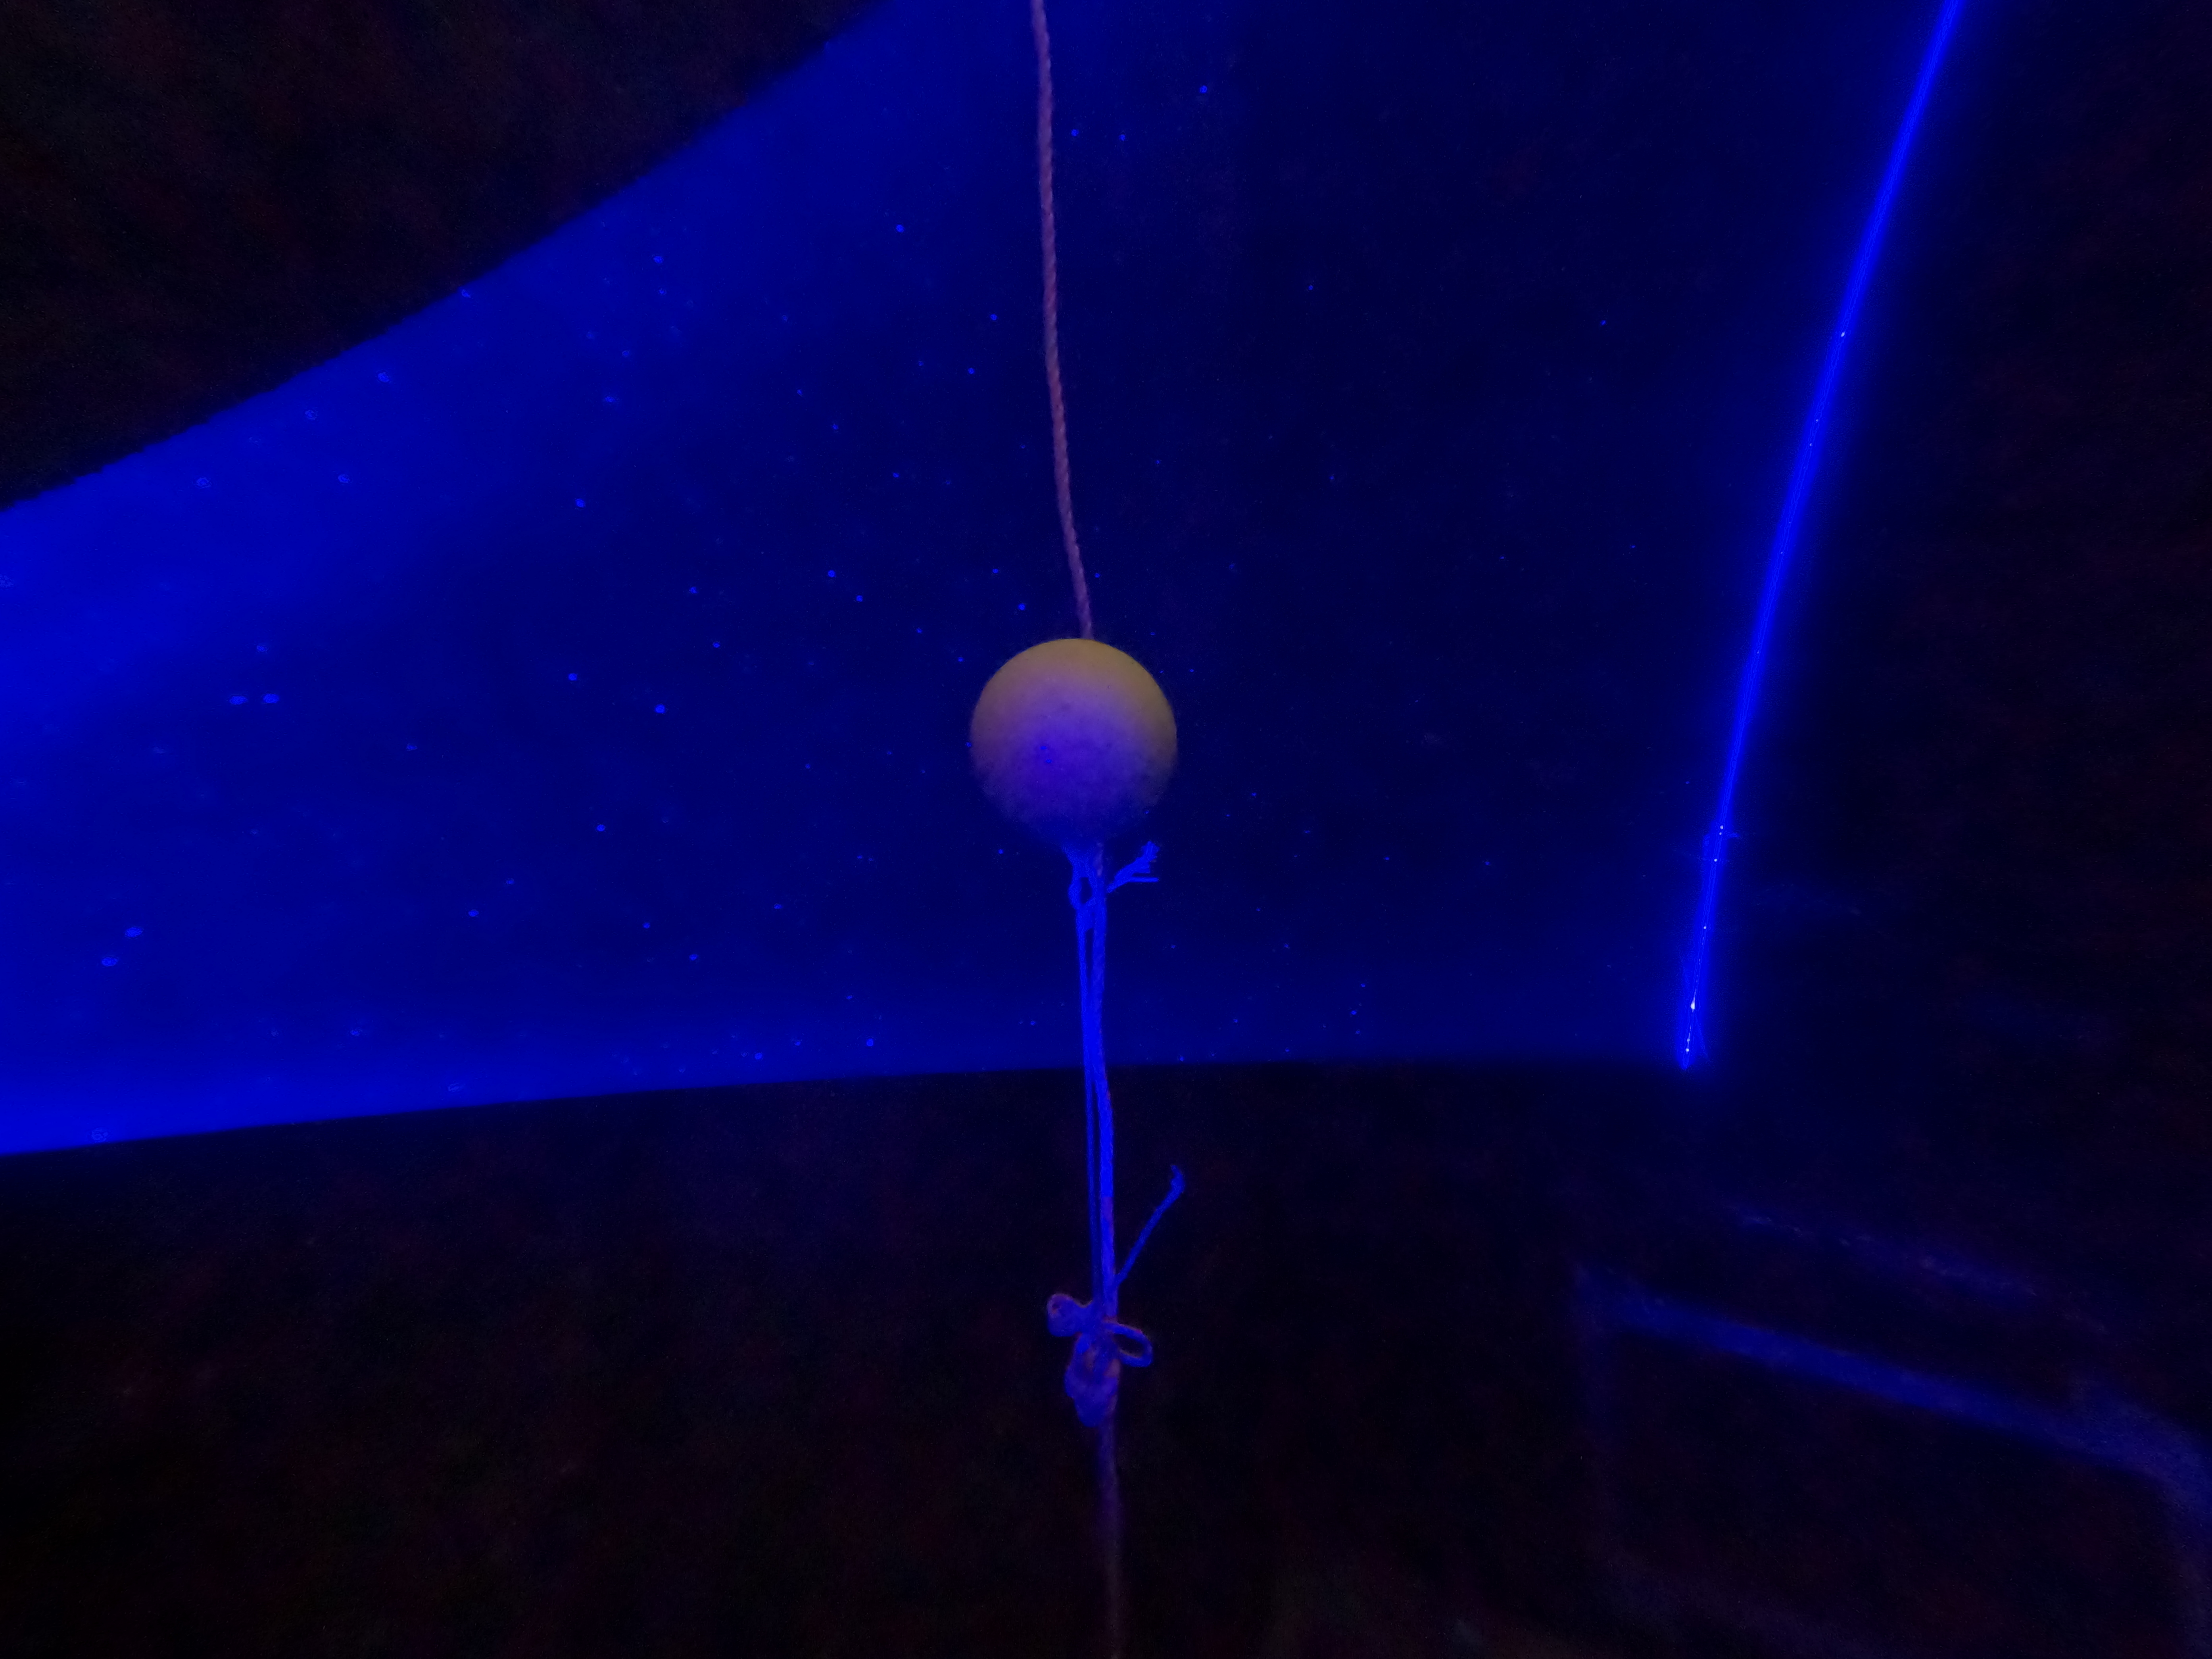

Supplement: Supplementary file 1136 [file G0032850.pdf › 7/G0032850.pdf]

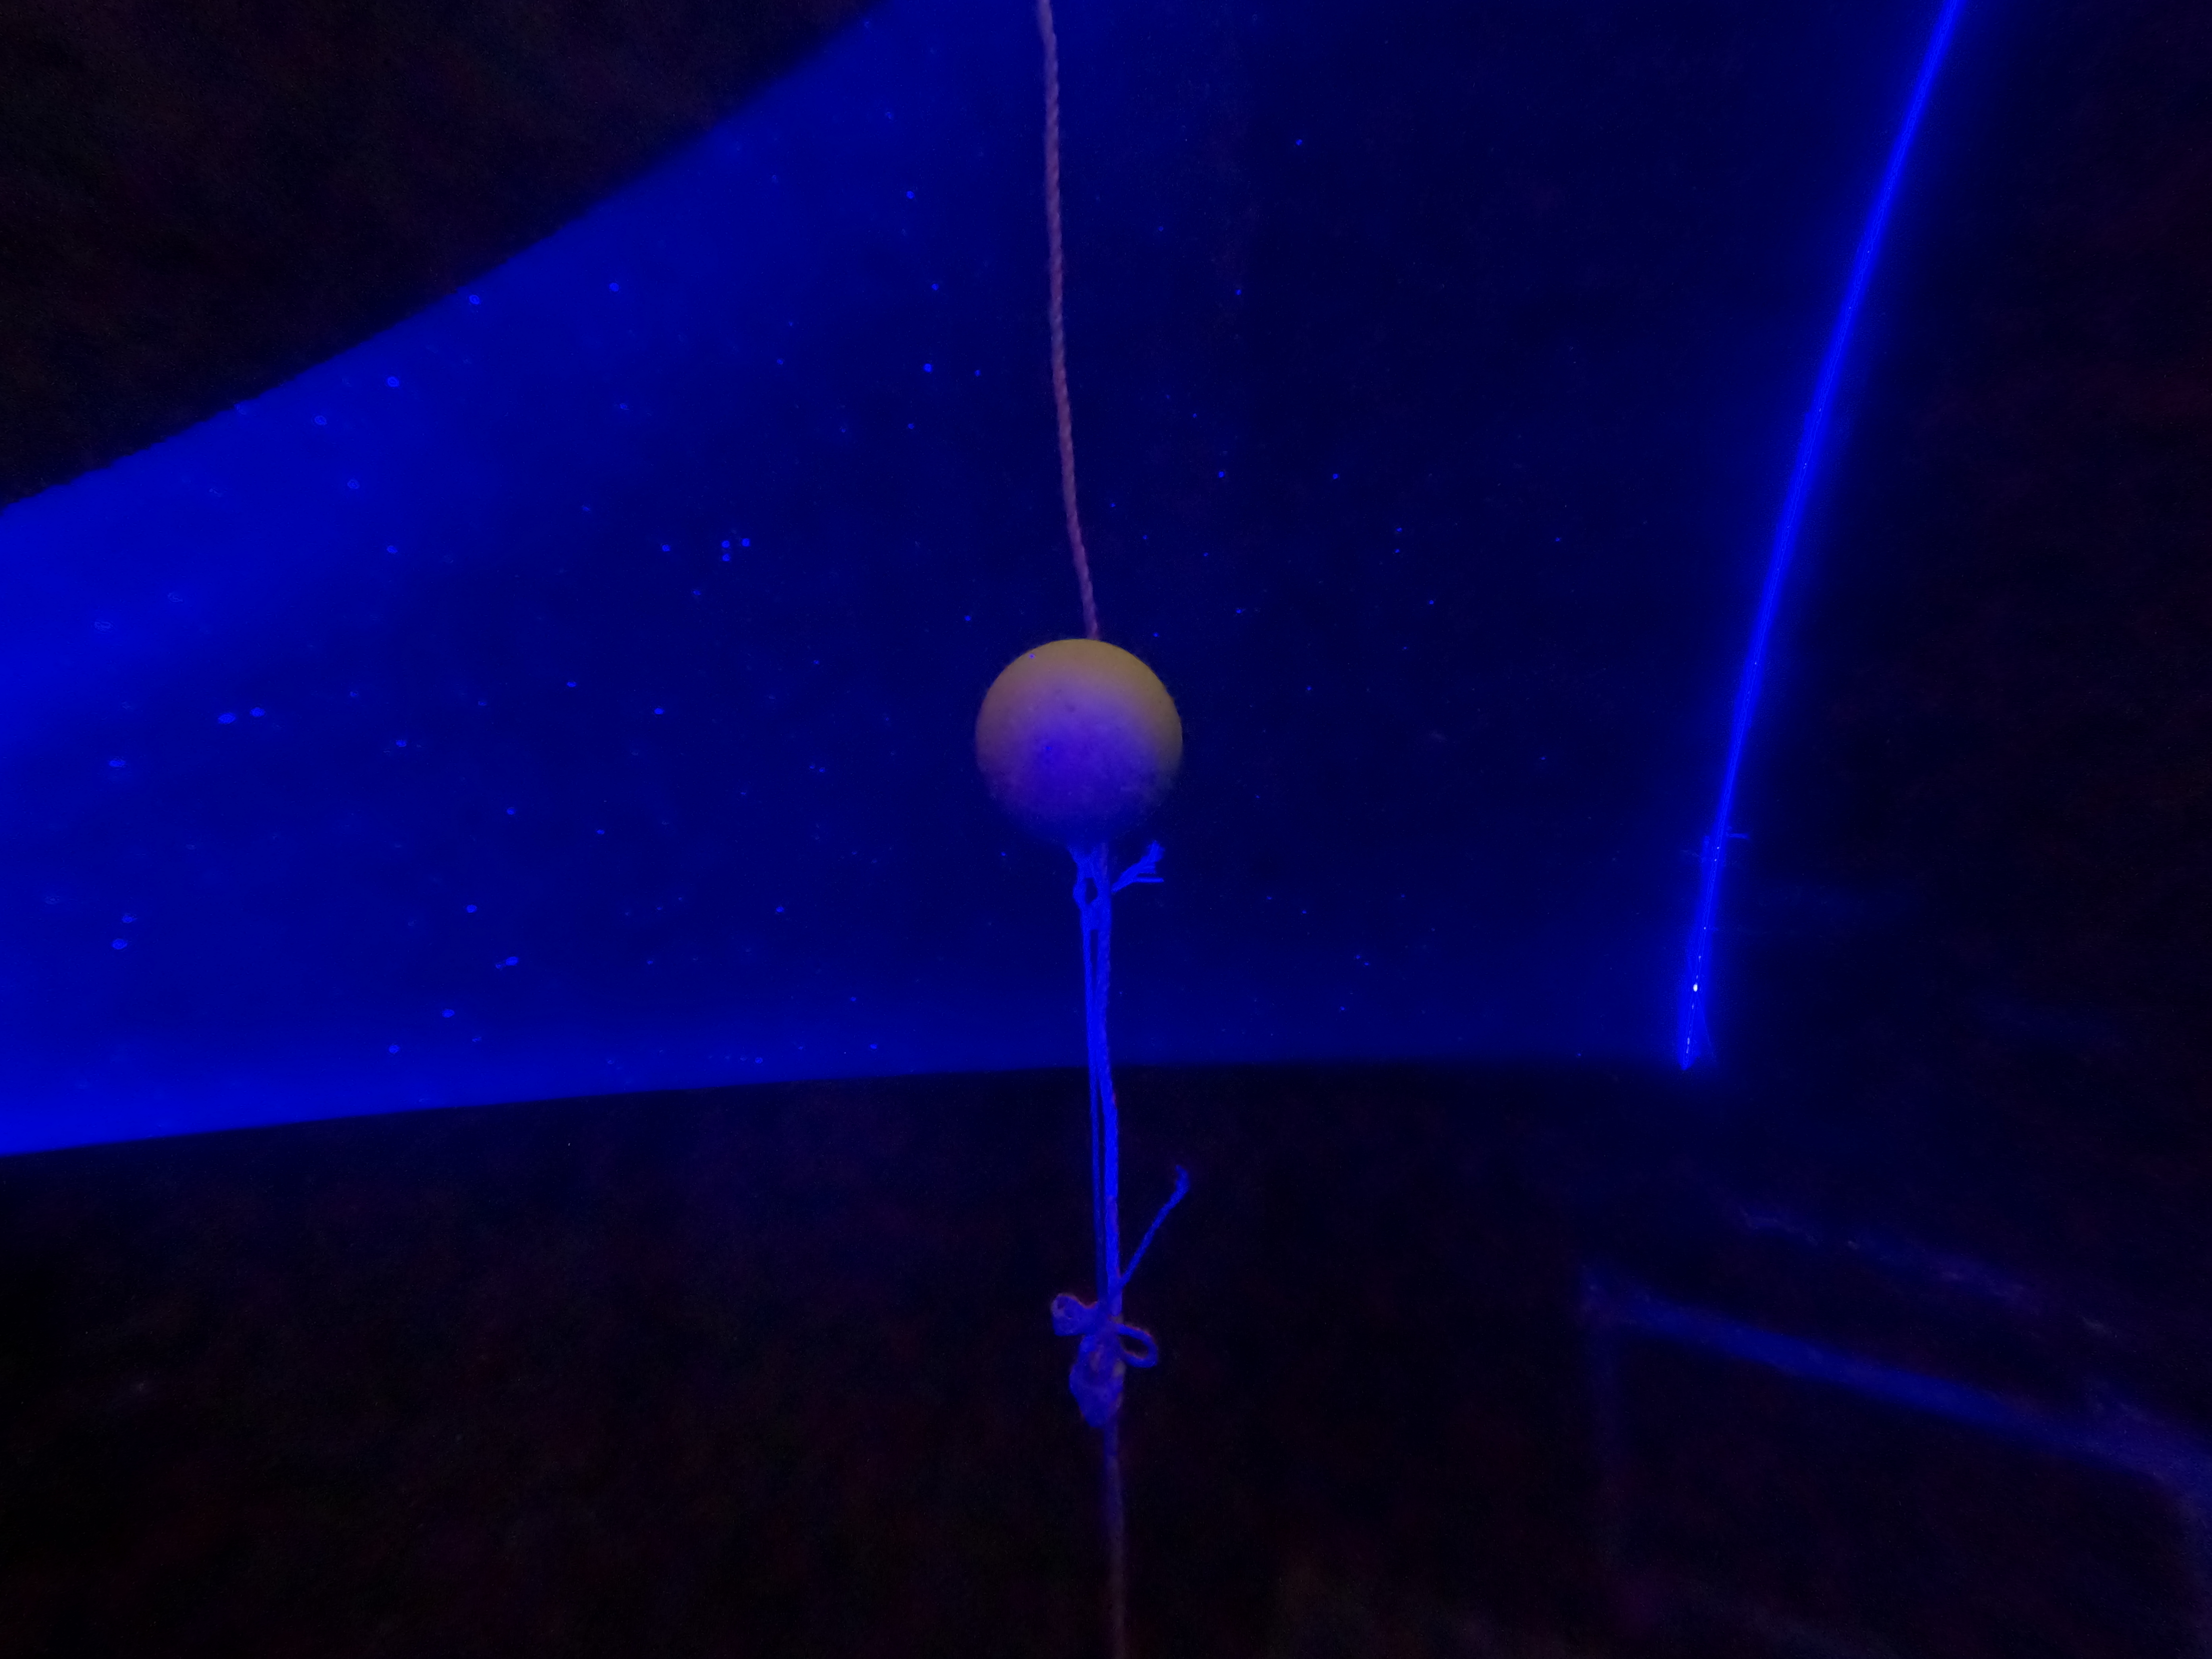

Supplement: Supplementary file 1137 [file G0032851.pdf › 7/G0032851.pdf]

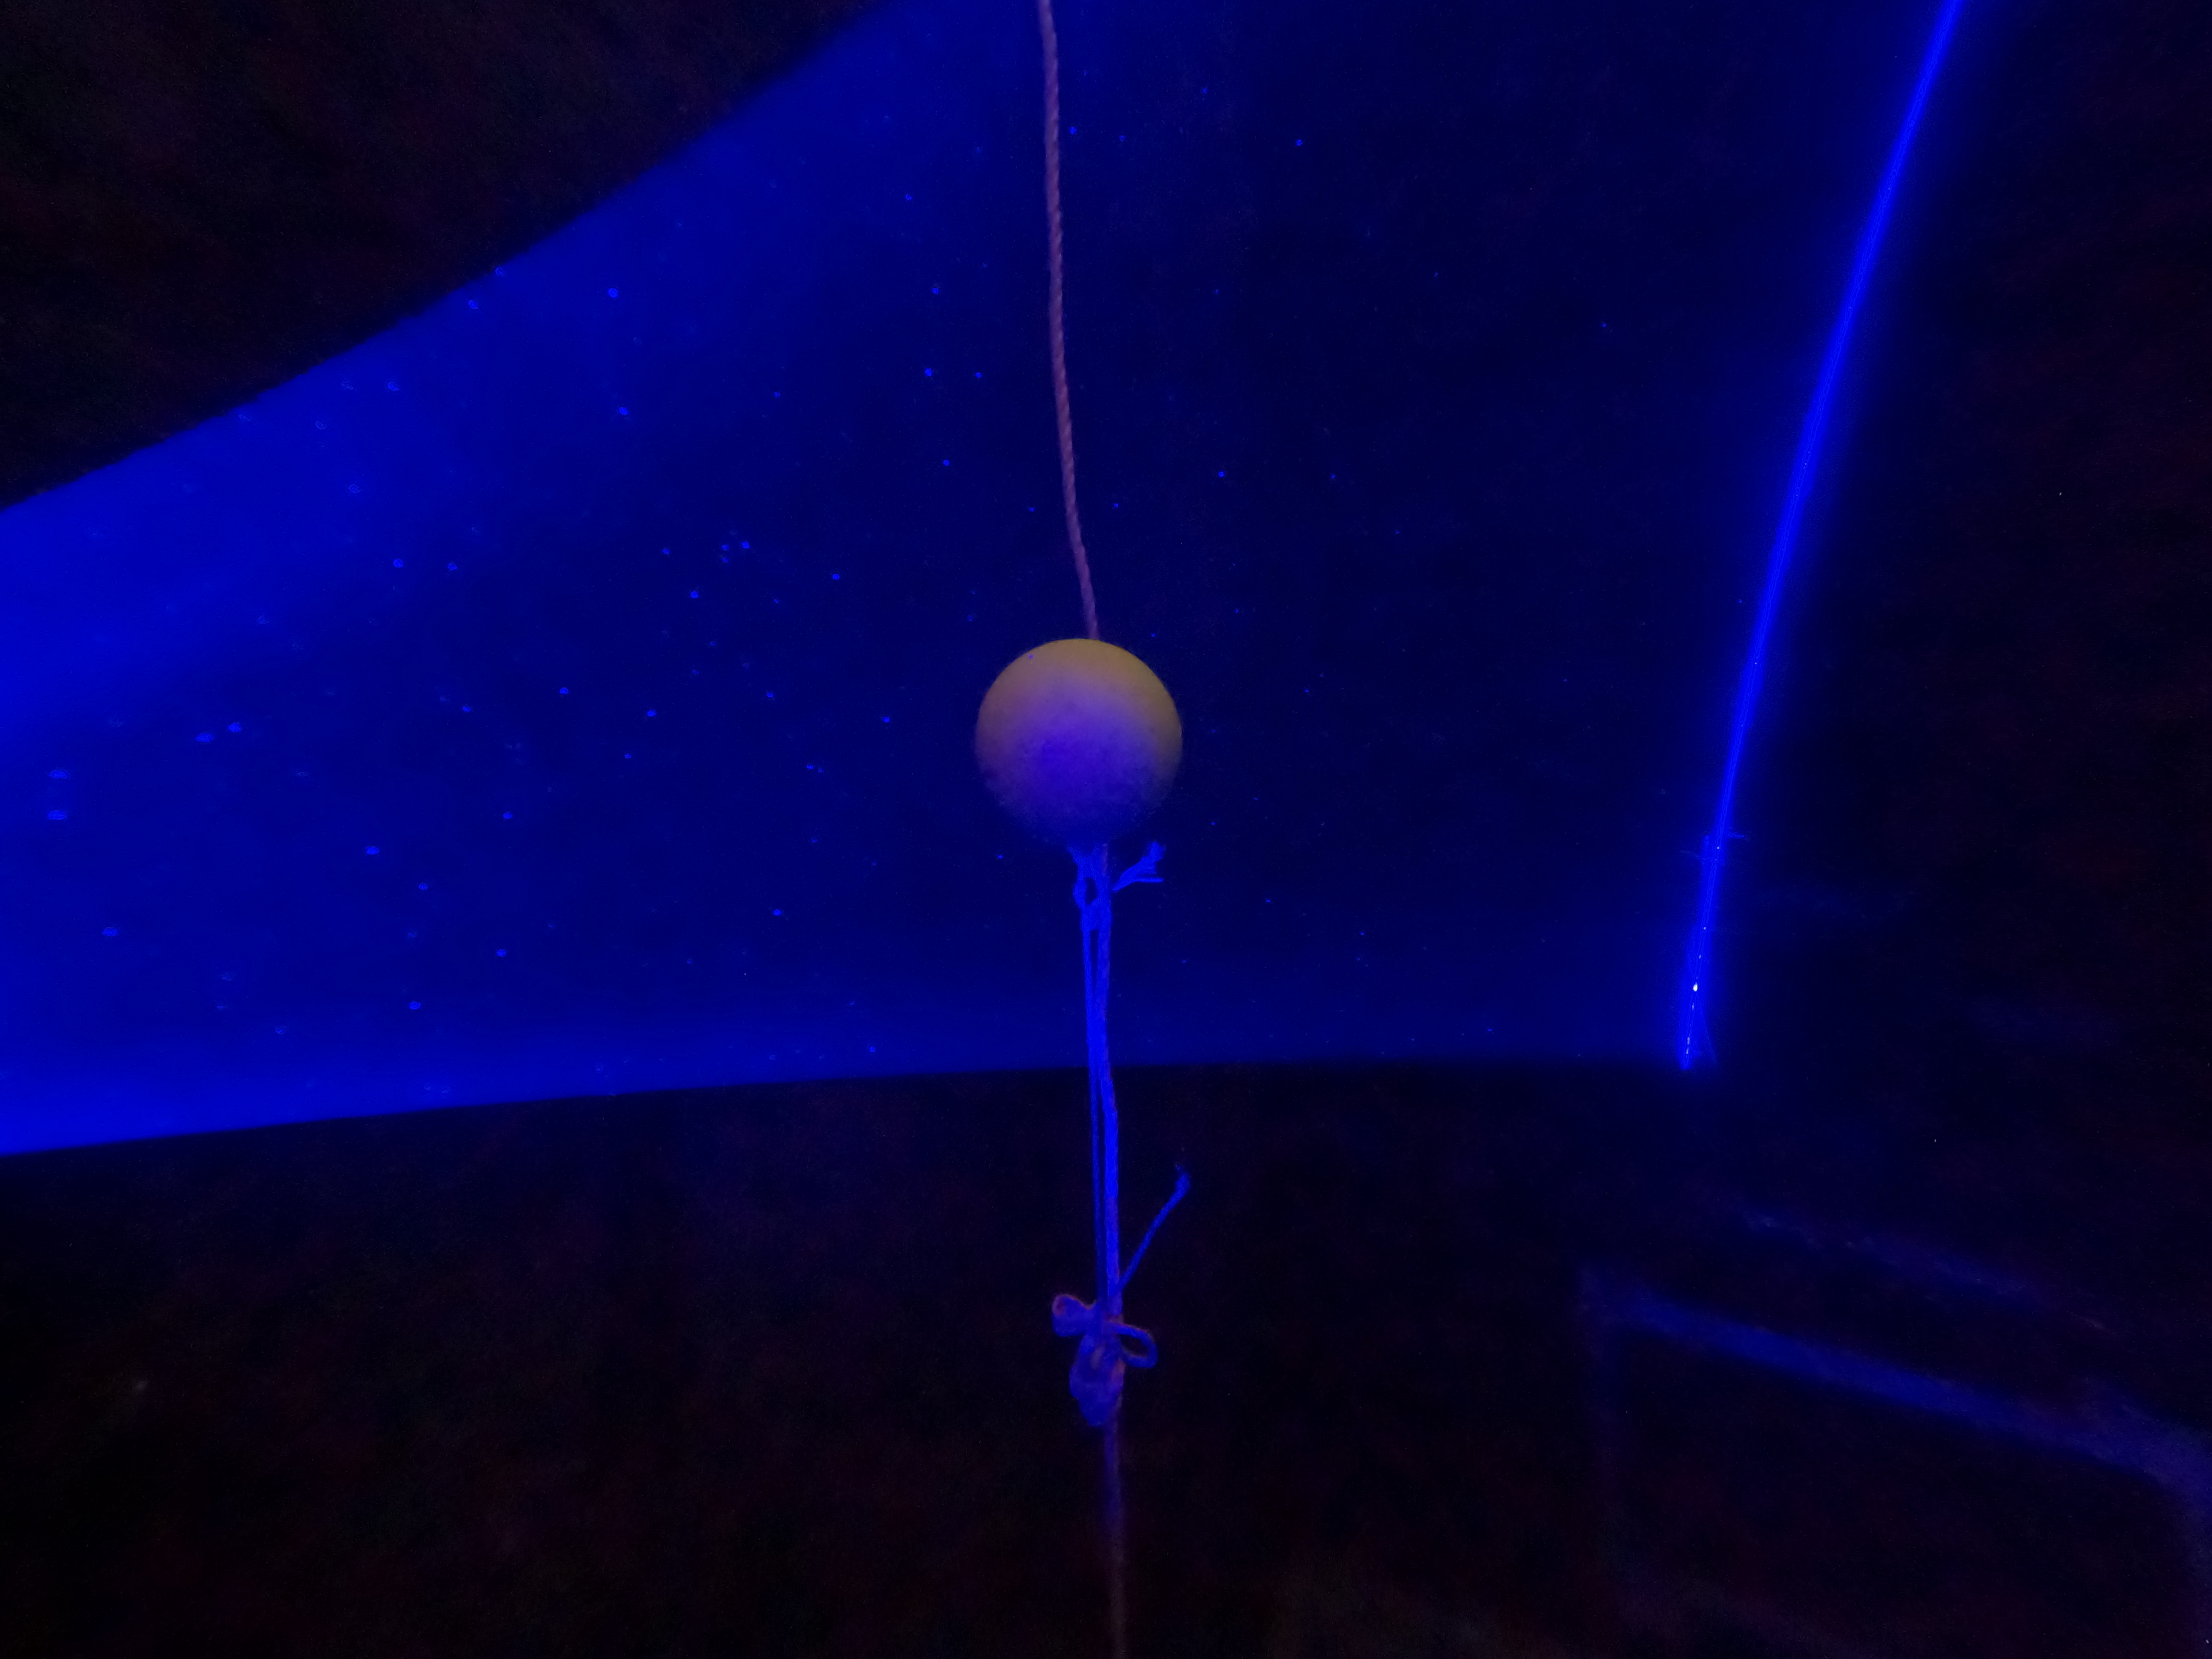

Supplement: Supplementary file 1138 [file G0032852.pdf › 7/G0032852.pdf]

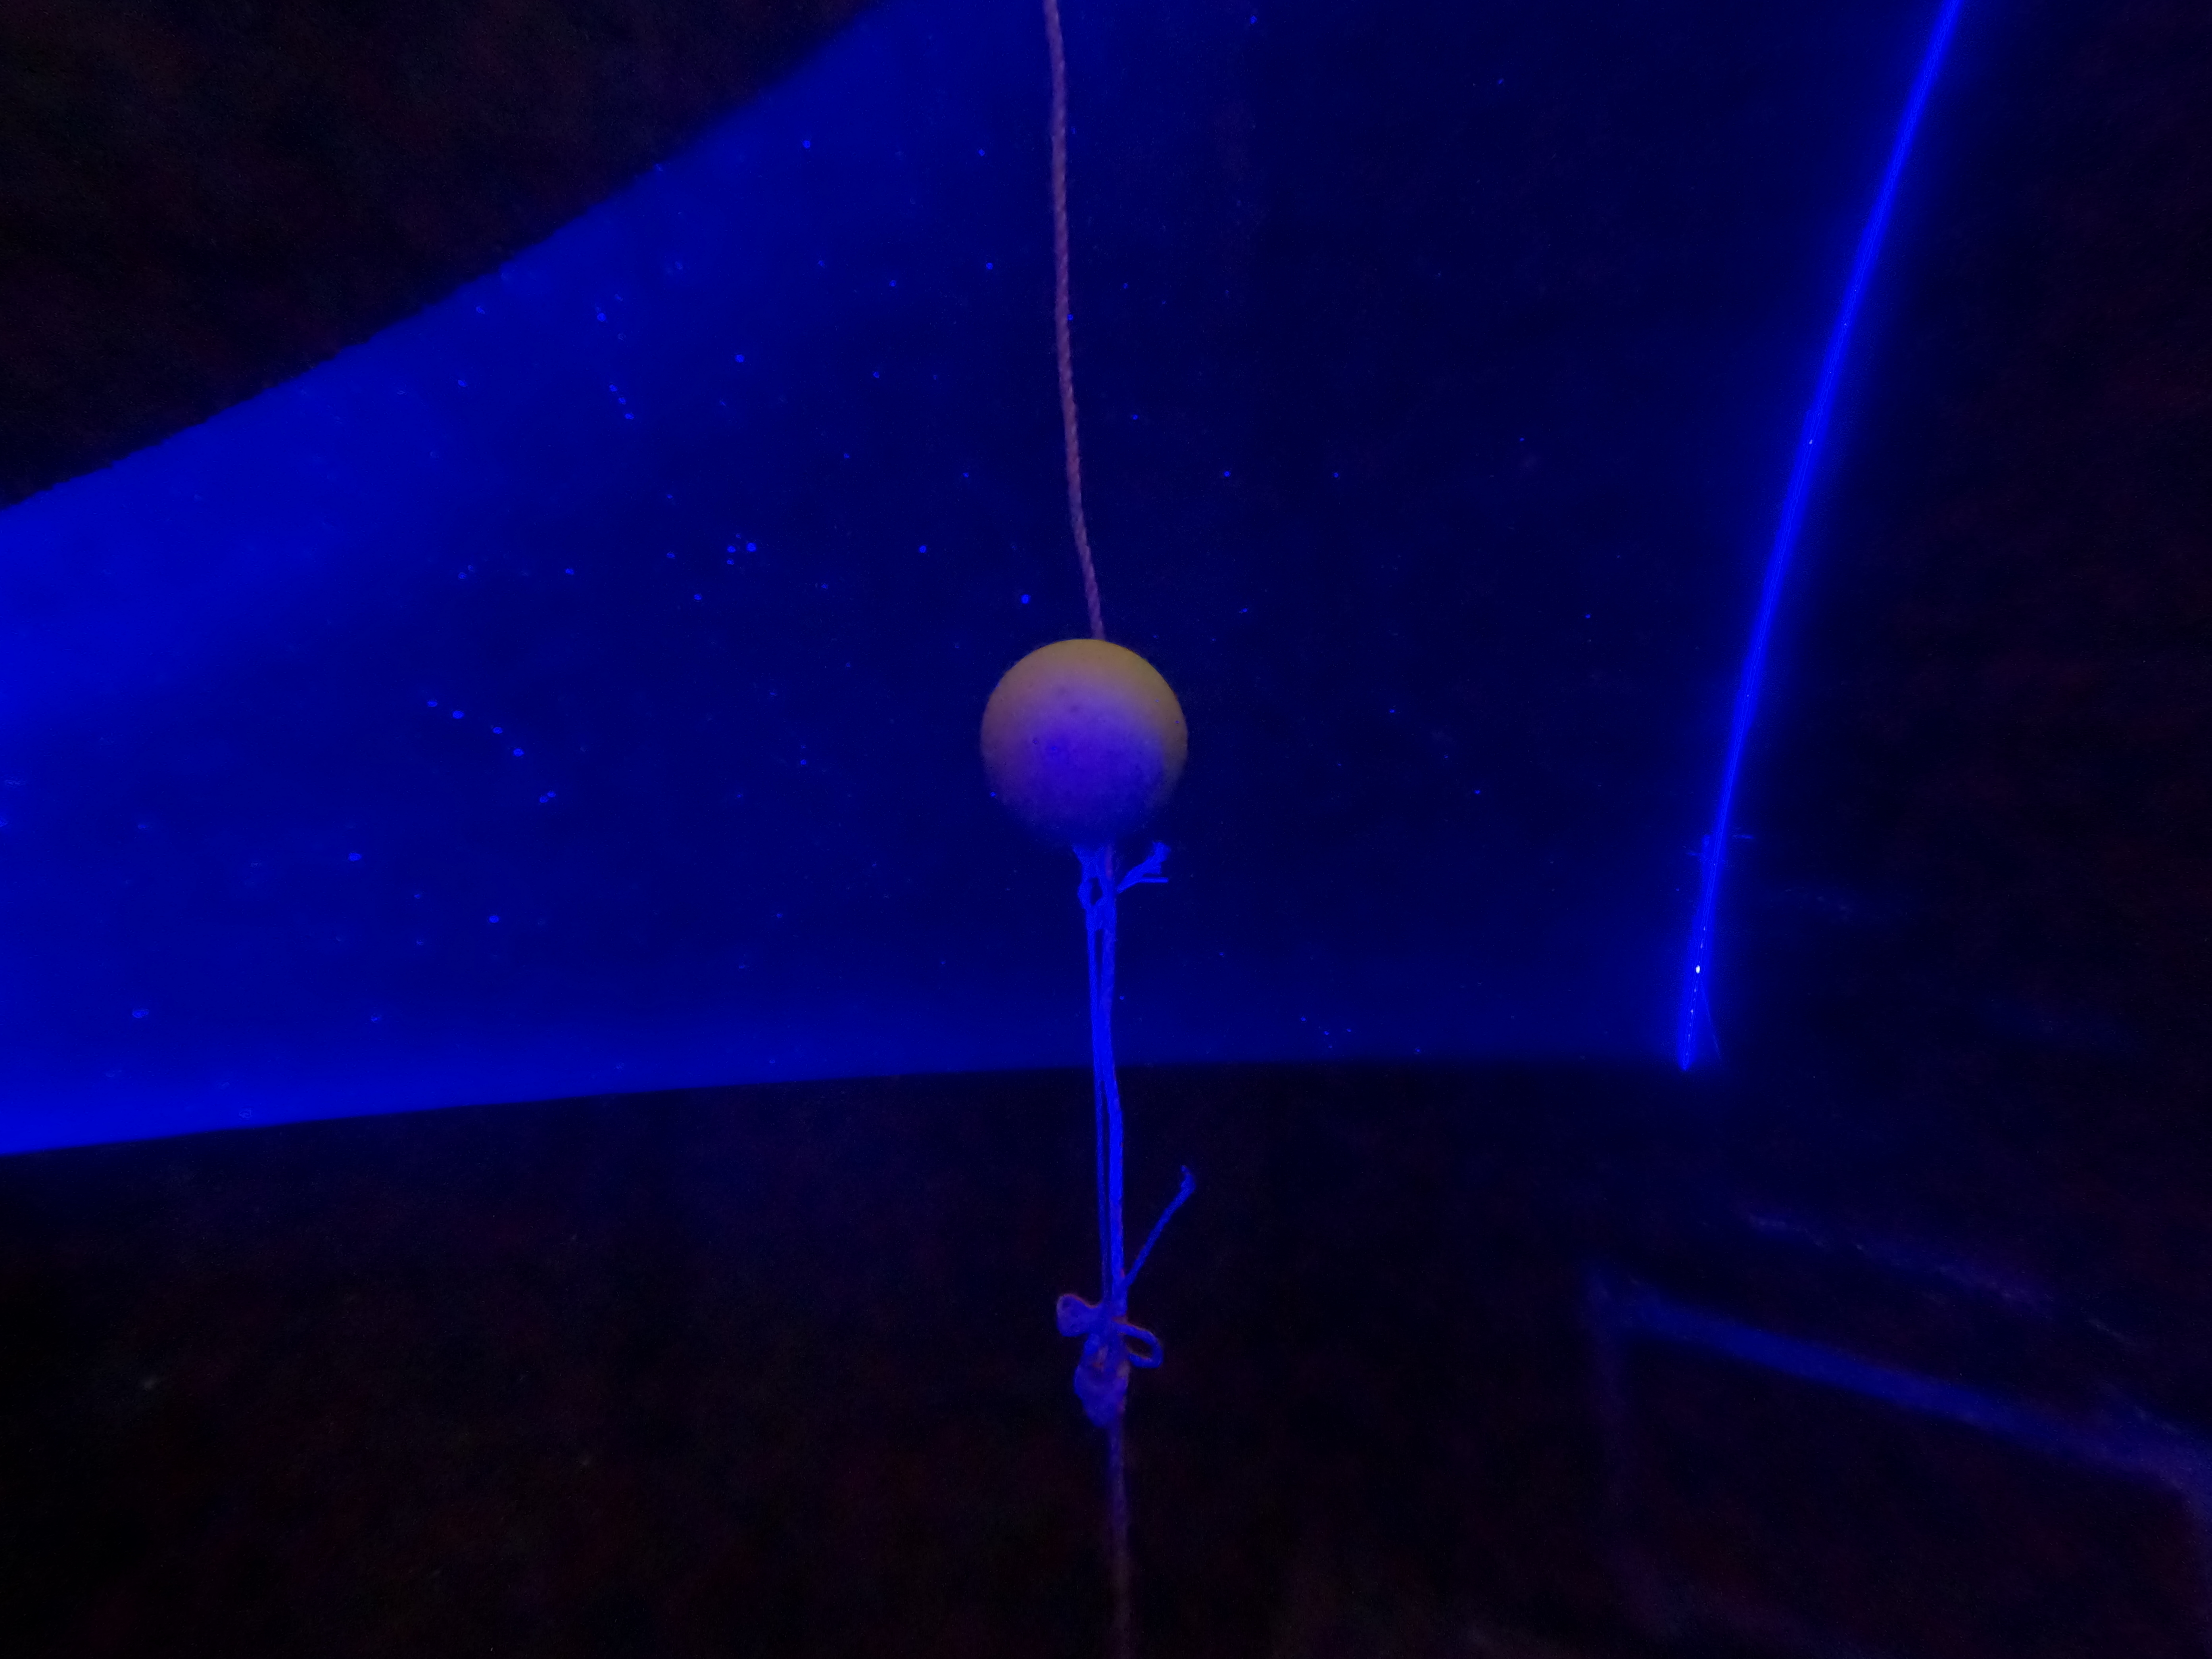

Supplement: Supplementary file 1139 [file G0032853.pdf › 7/G0032853.pdf]

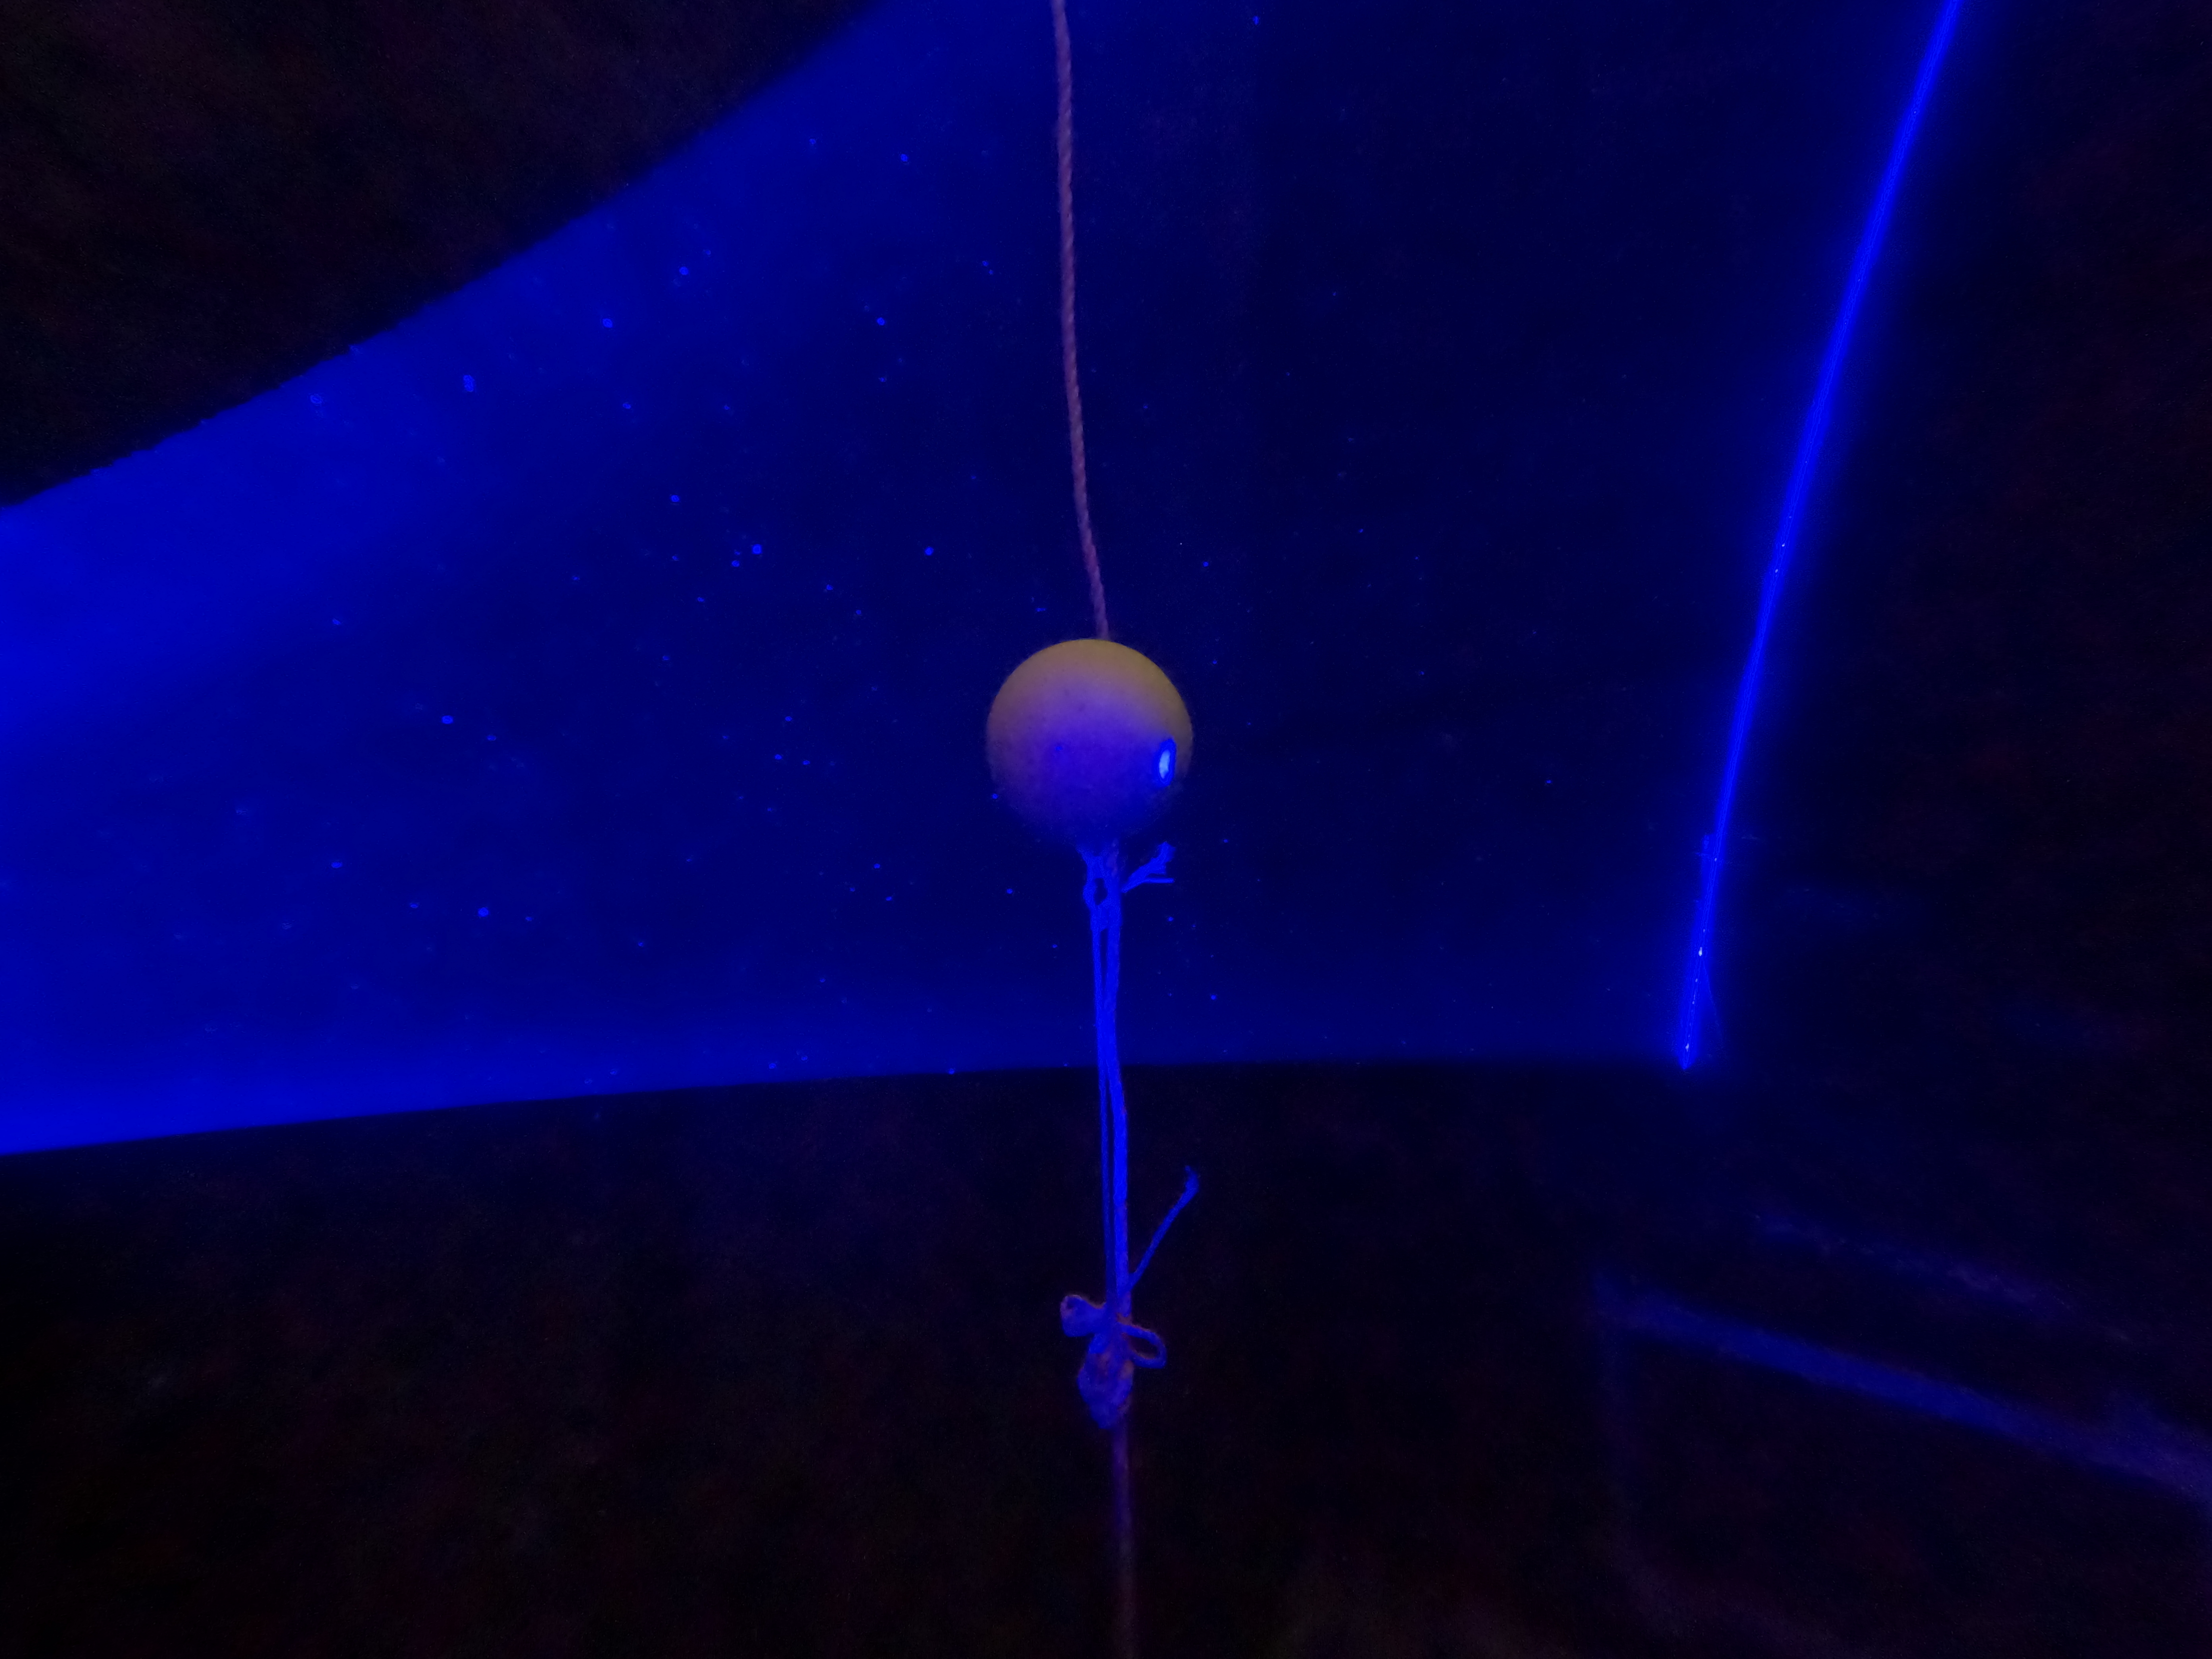

Supplement: Supplementary file 1140 [file G0032854.pdf › 7/G0032854.pdf]

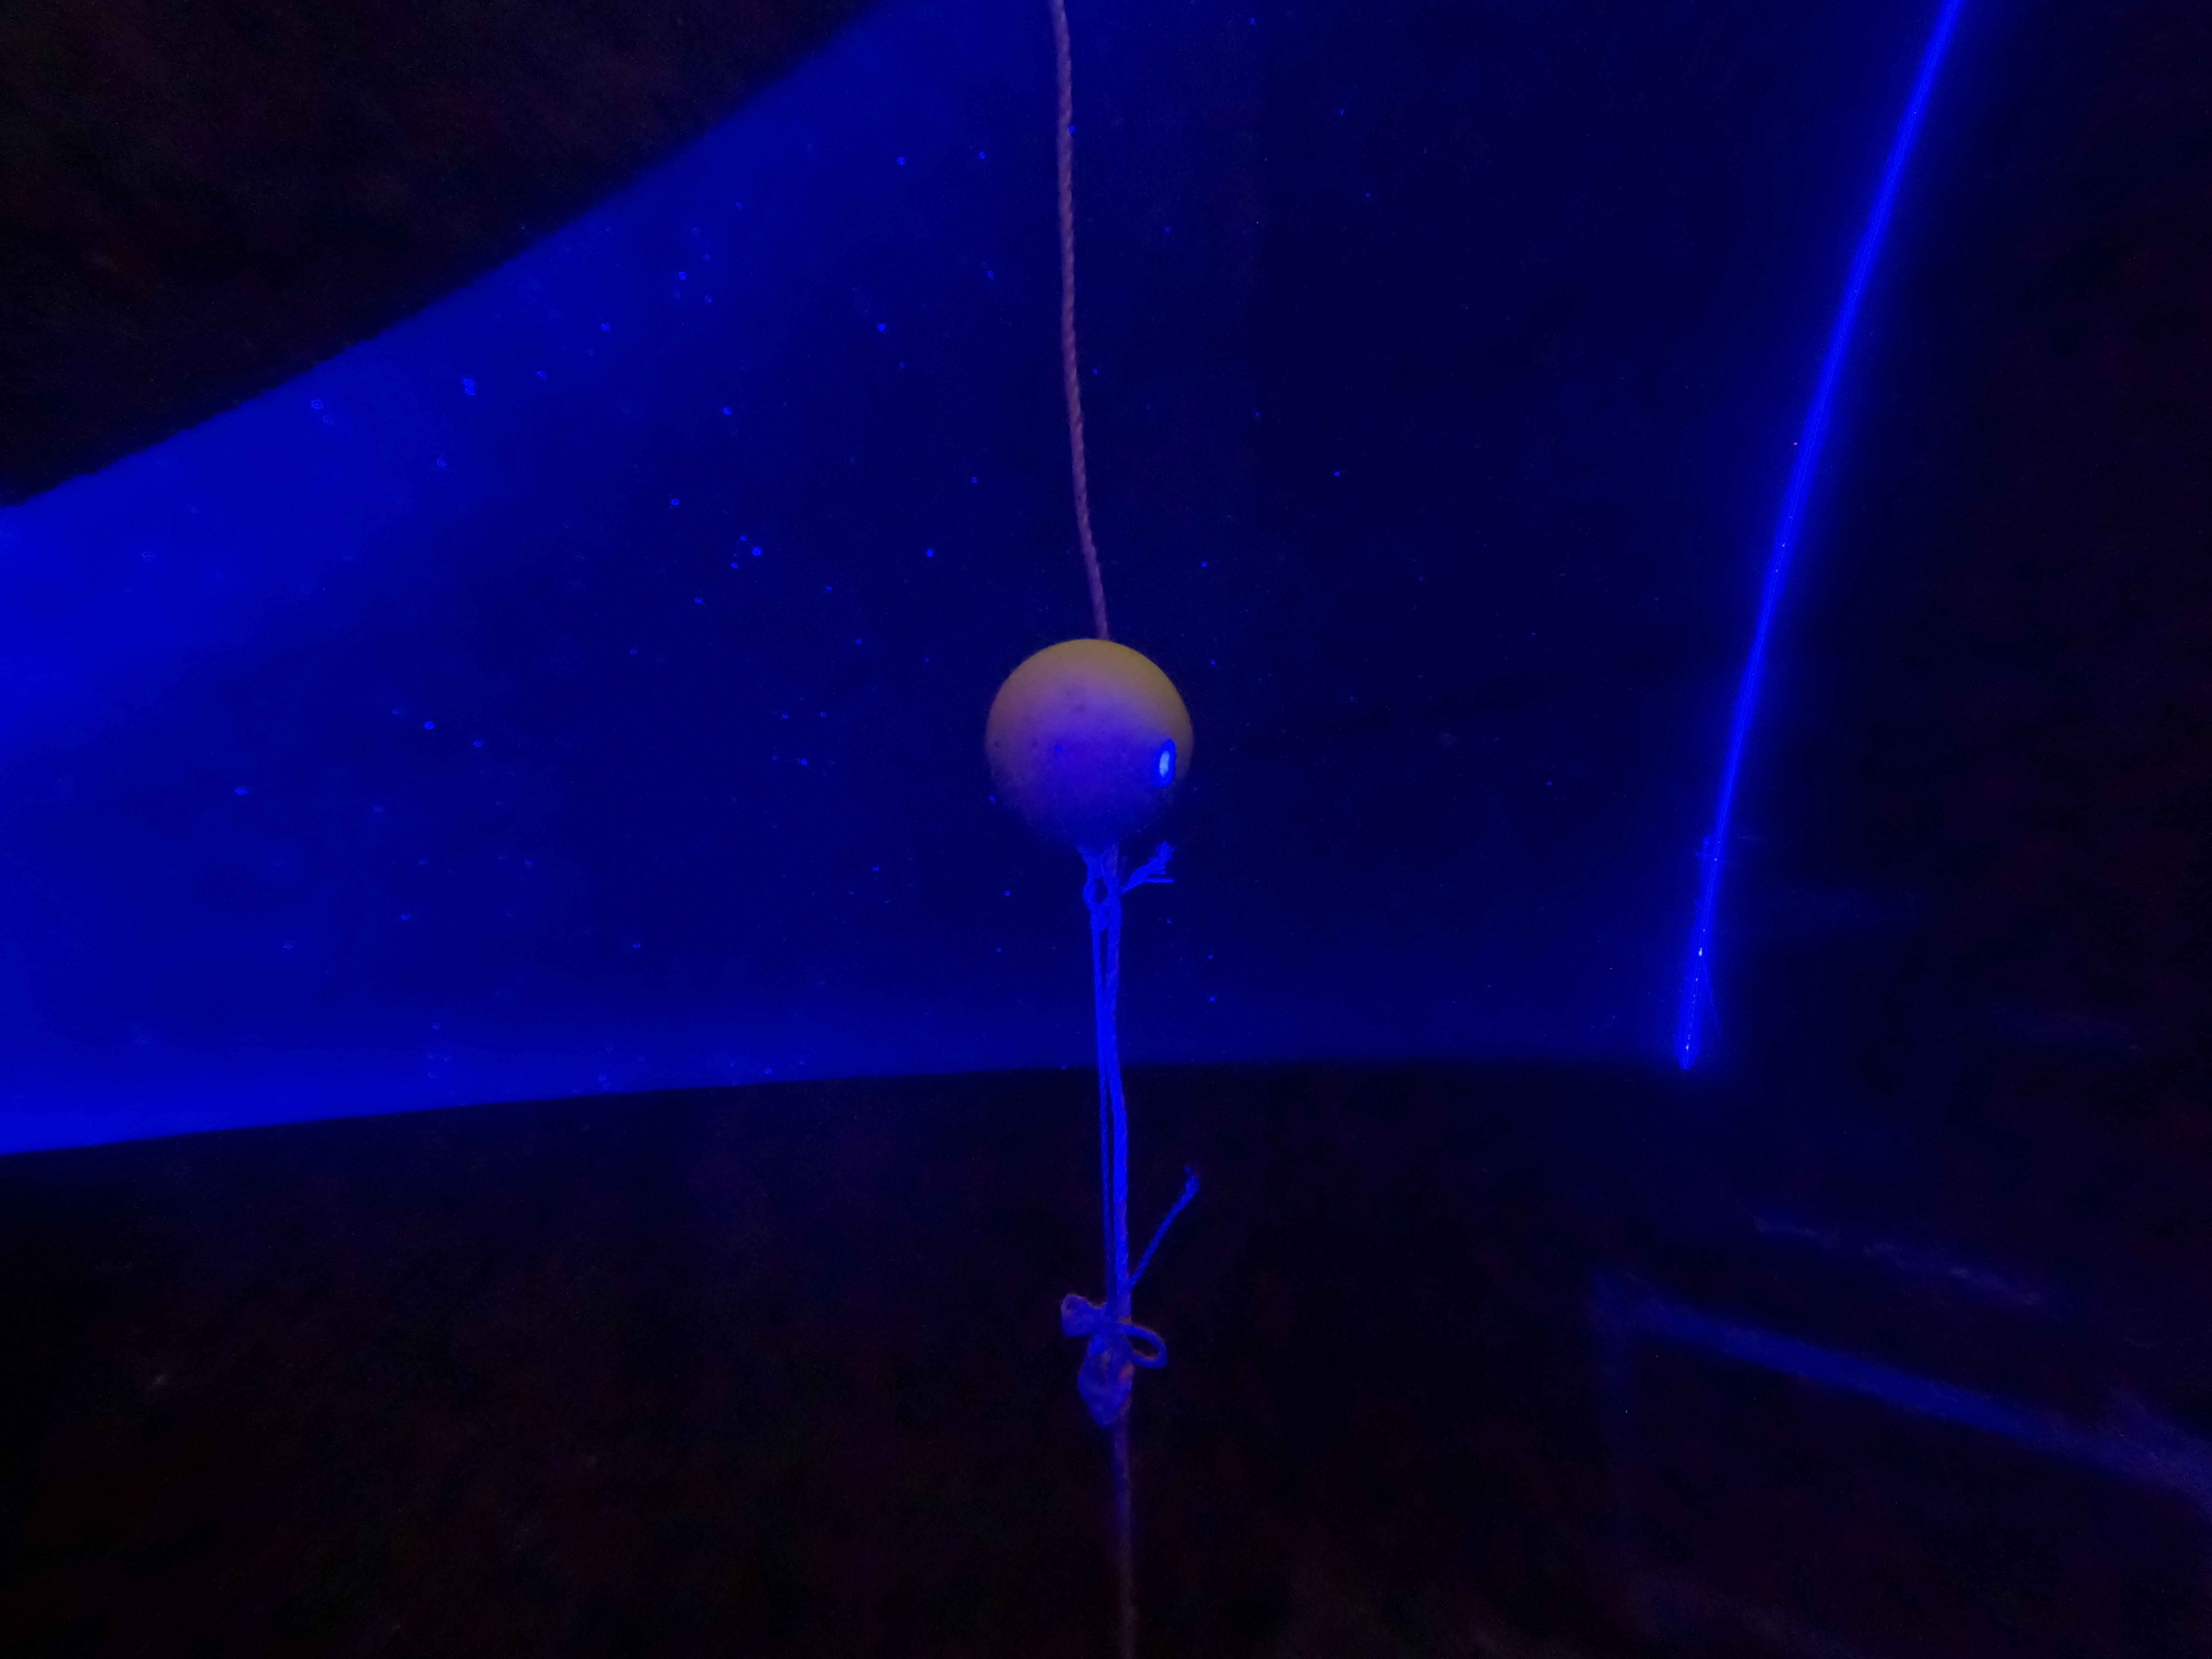

Supplement: Supplementary file 1141 [file G0032855.pdf › 7/G0032855.pdf]

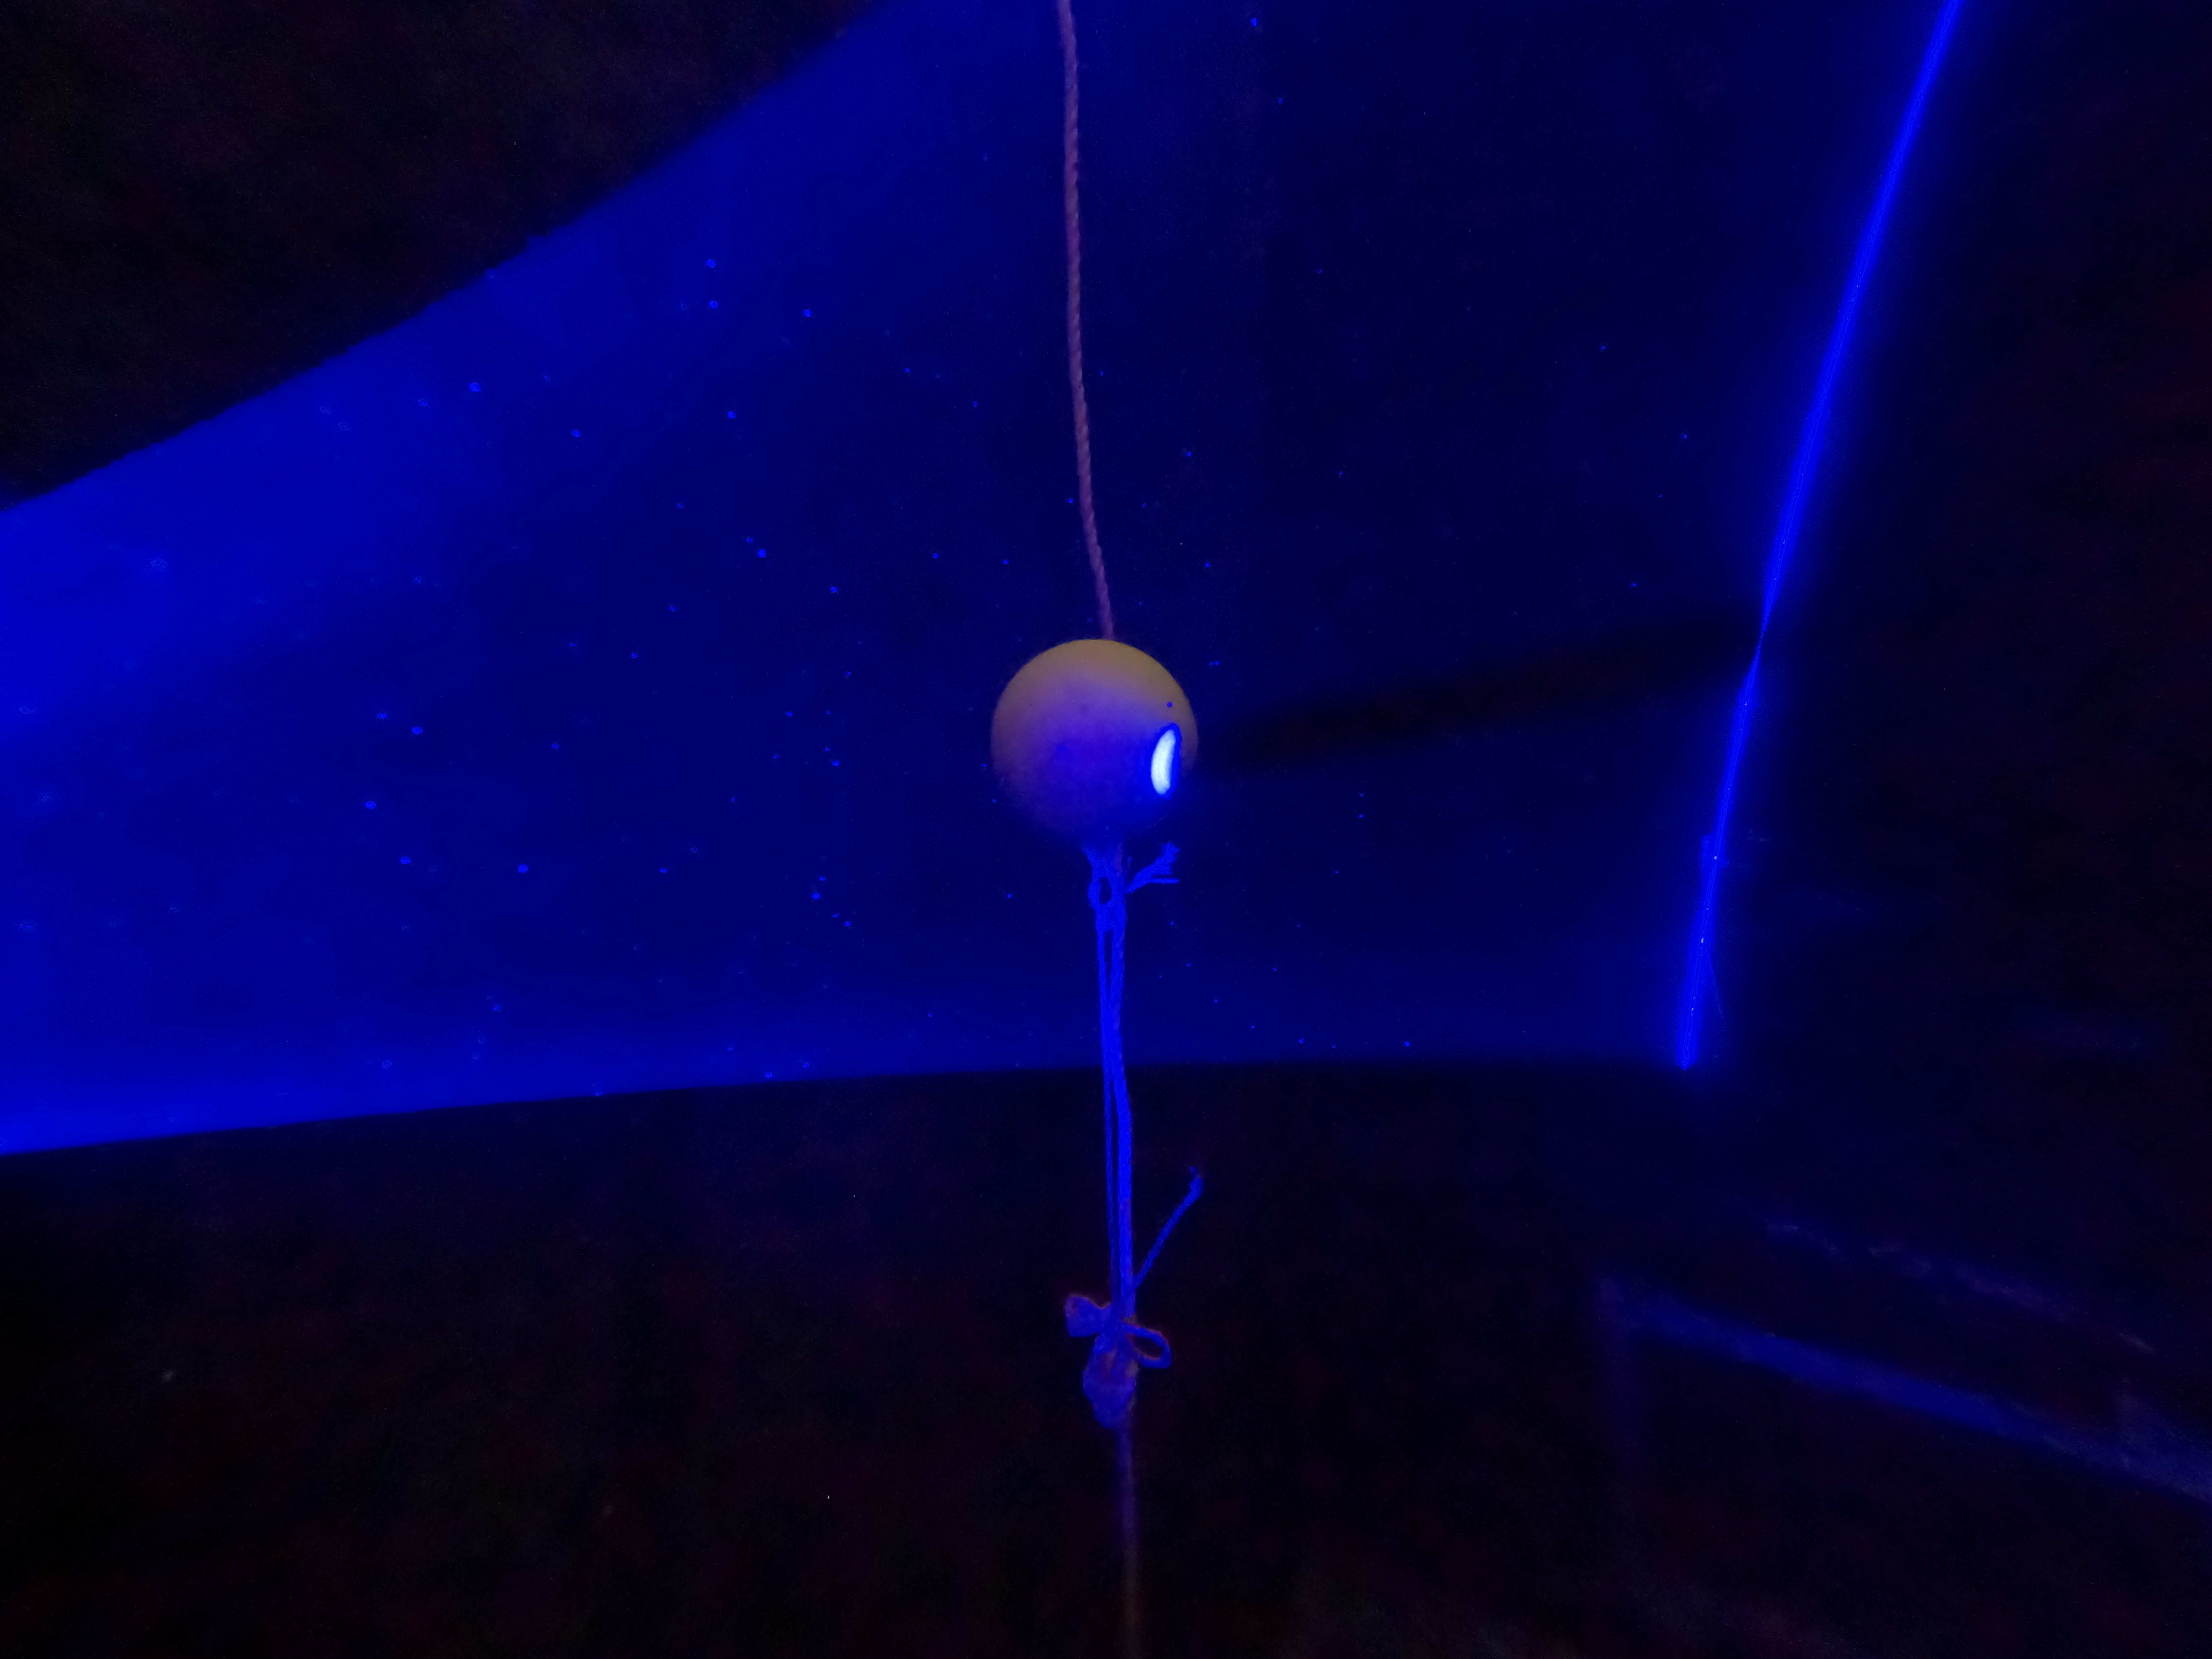

Supplement: Supplementary file 1142 [file G0032856.pdf › 7/G0032856.pdf]

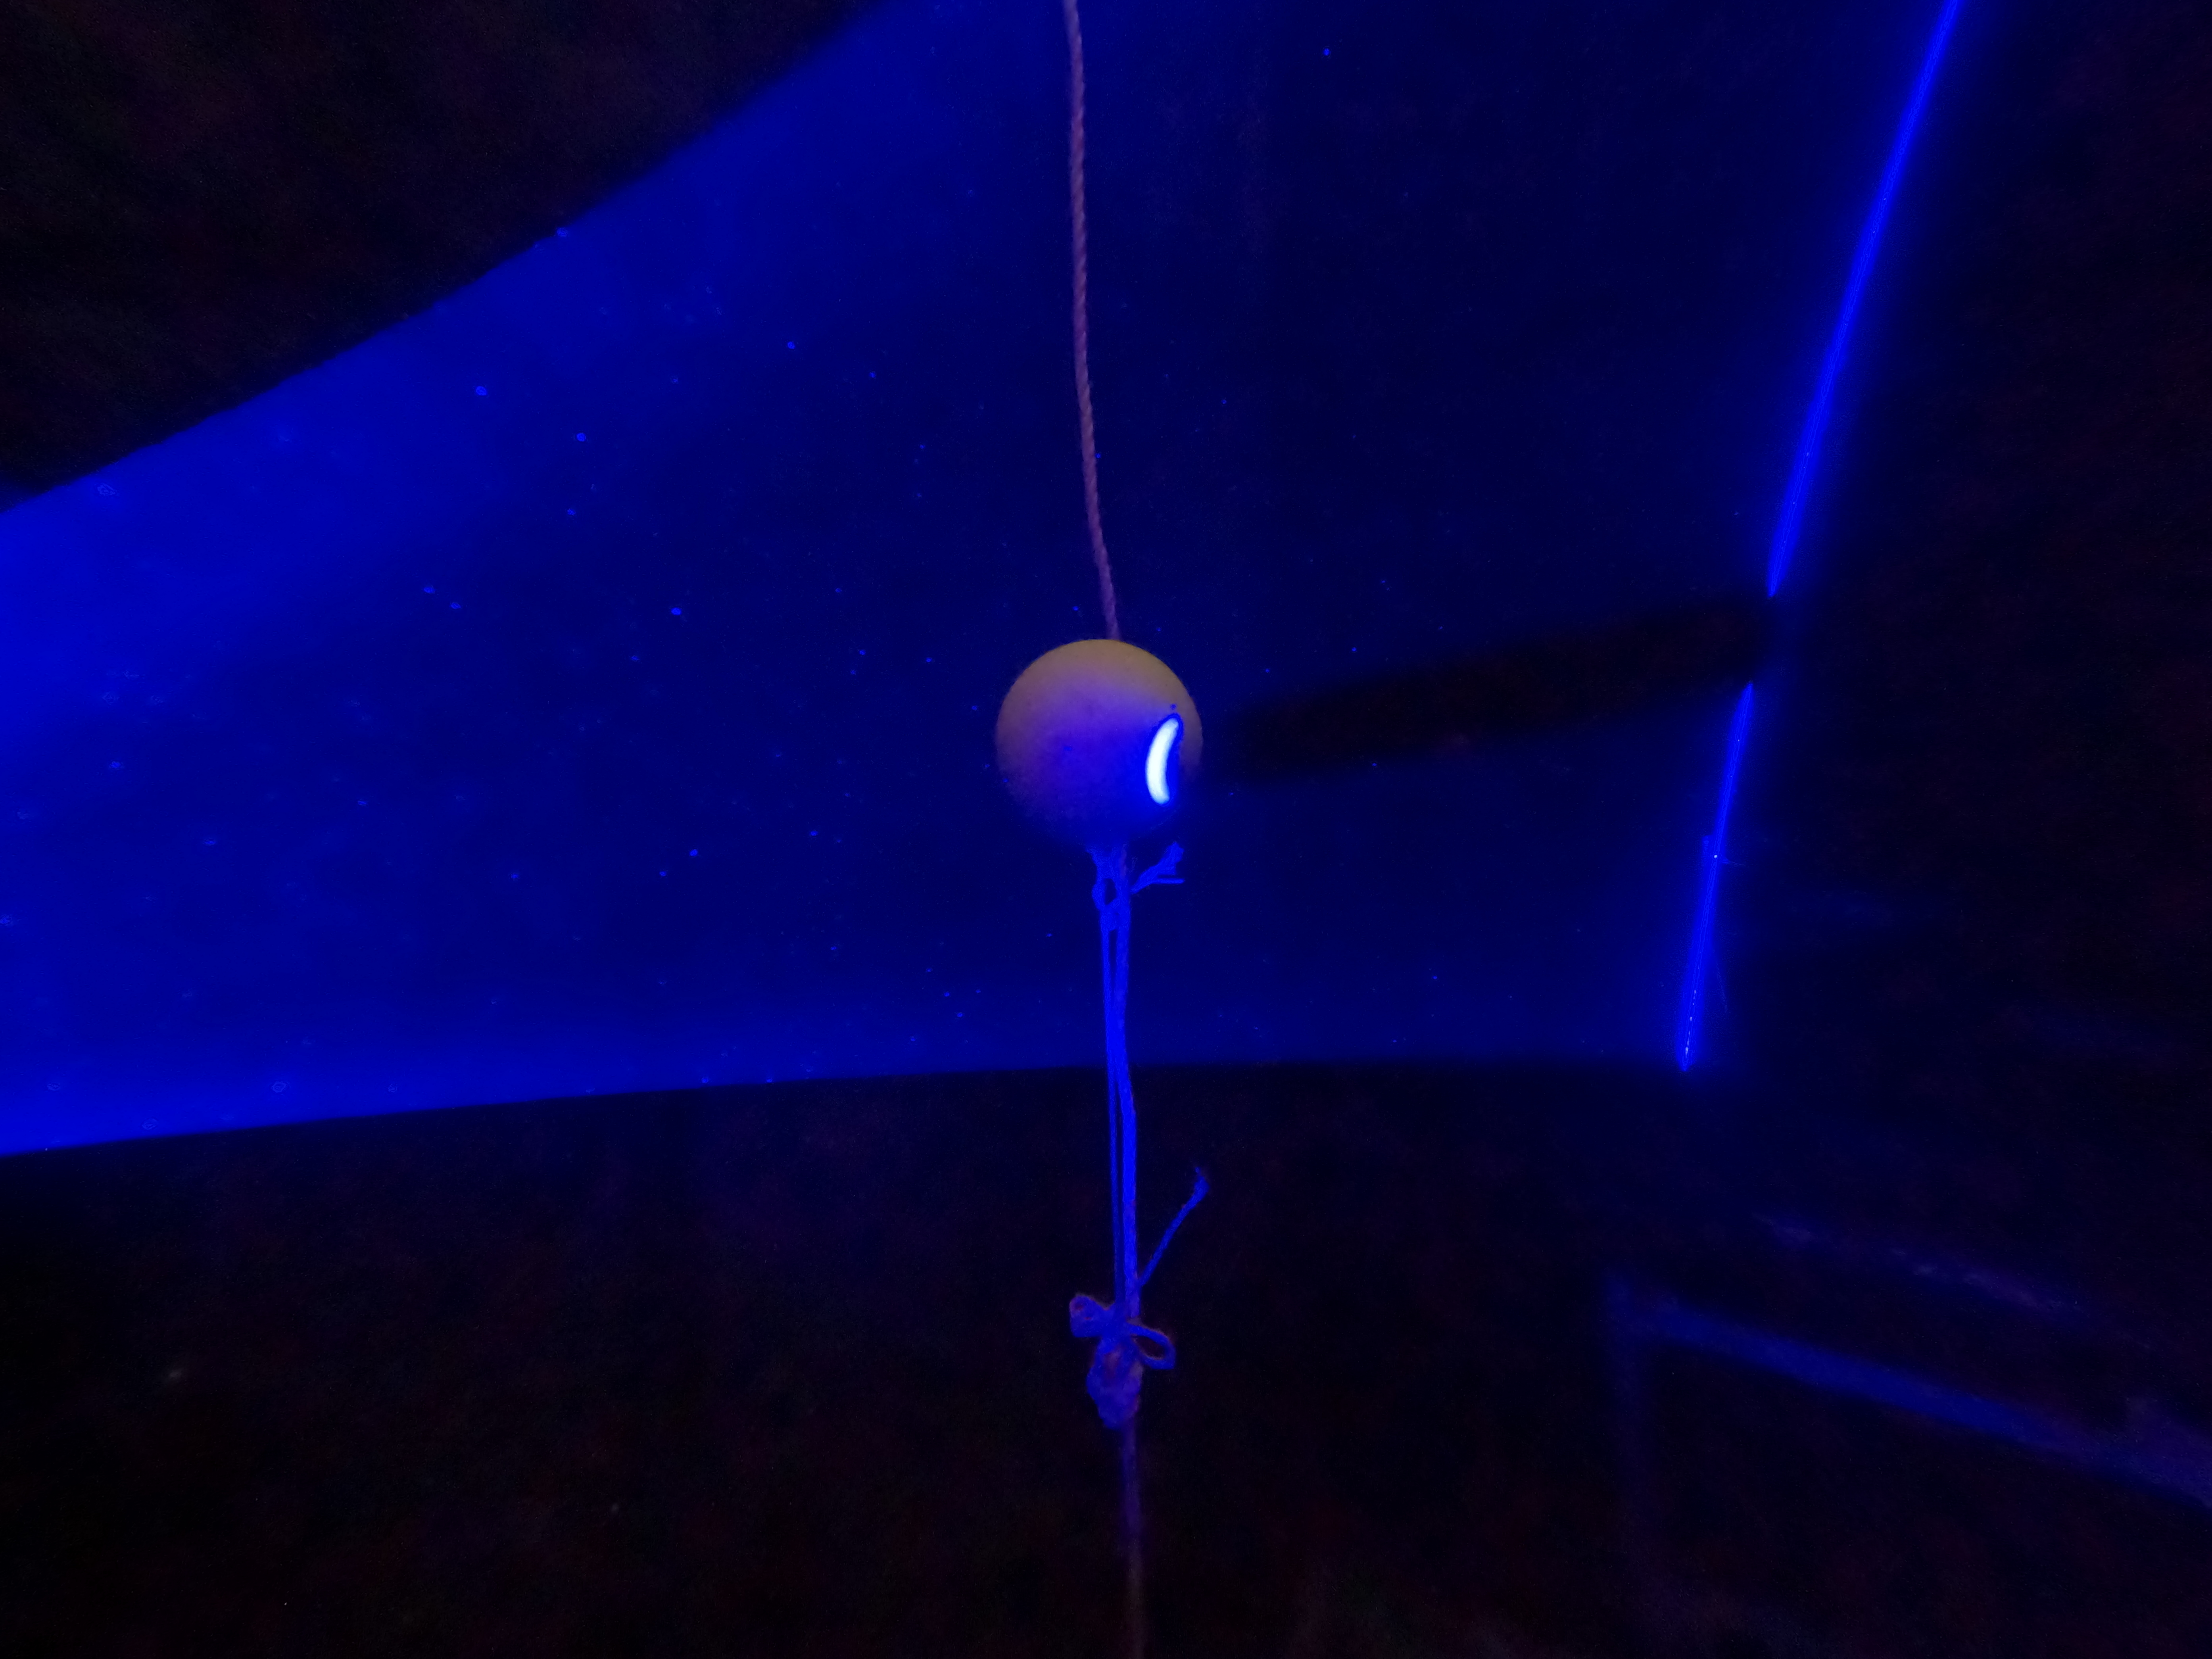

Supplement: Supplementary file 1143 [file G0032857.pdf › 7/G0032857.pdf]

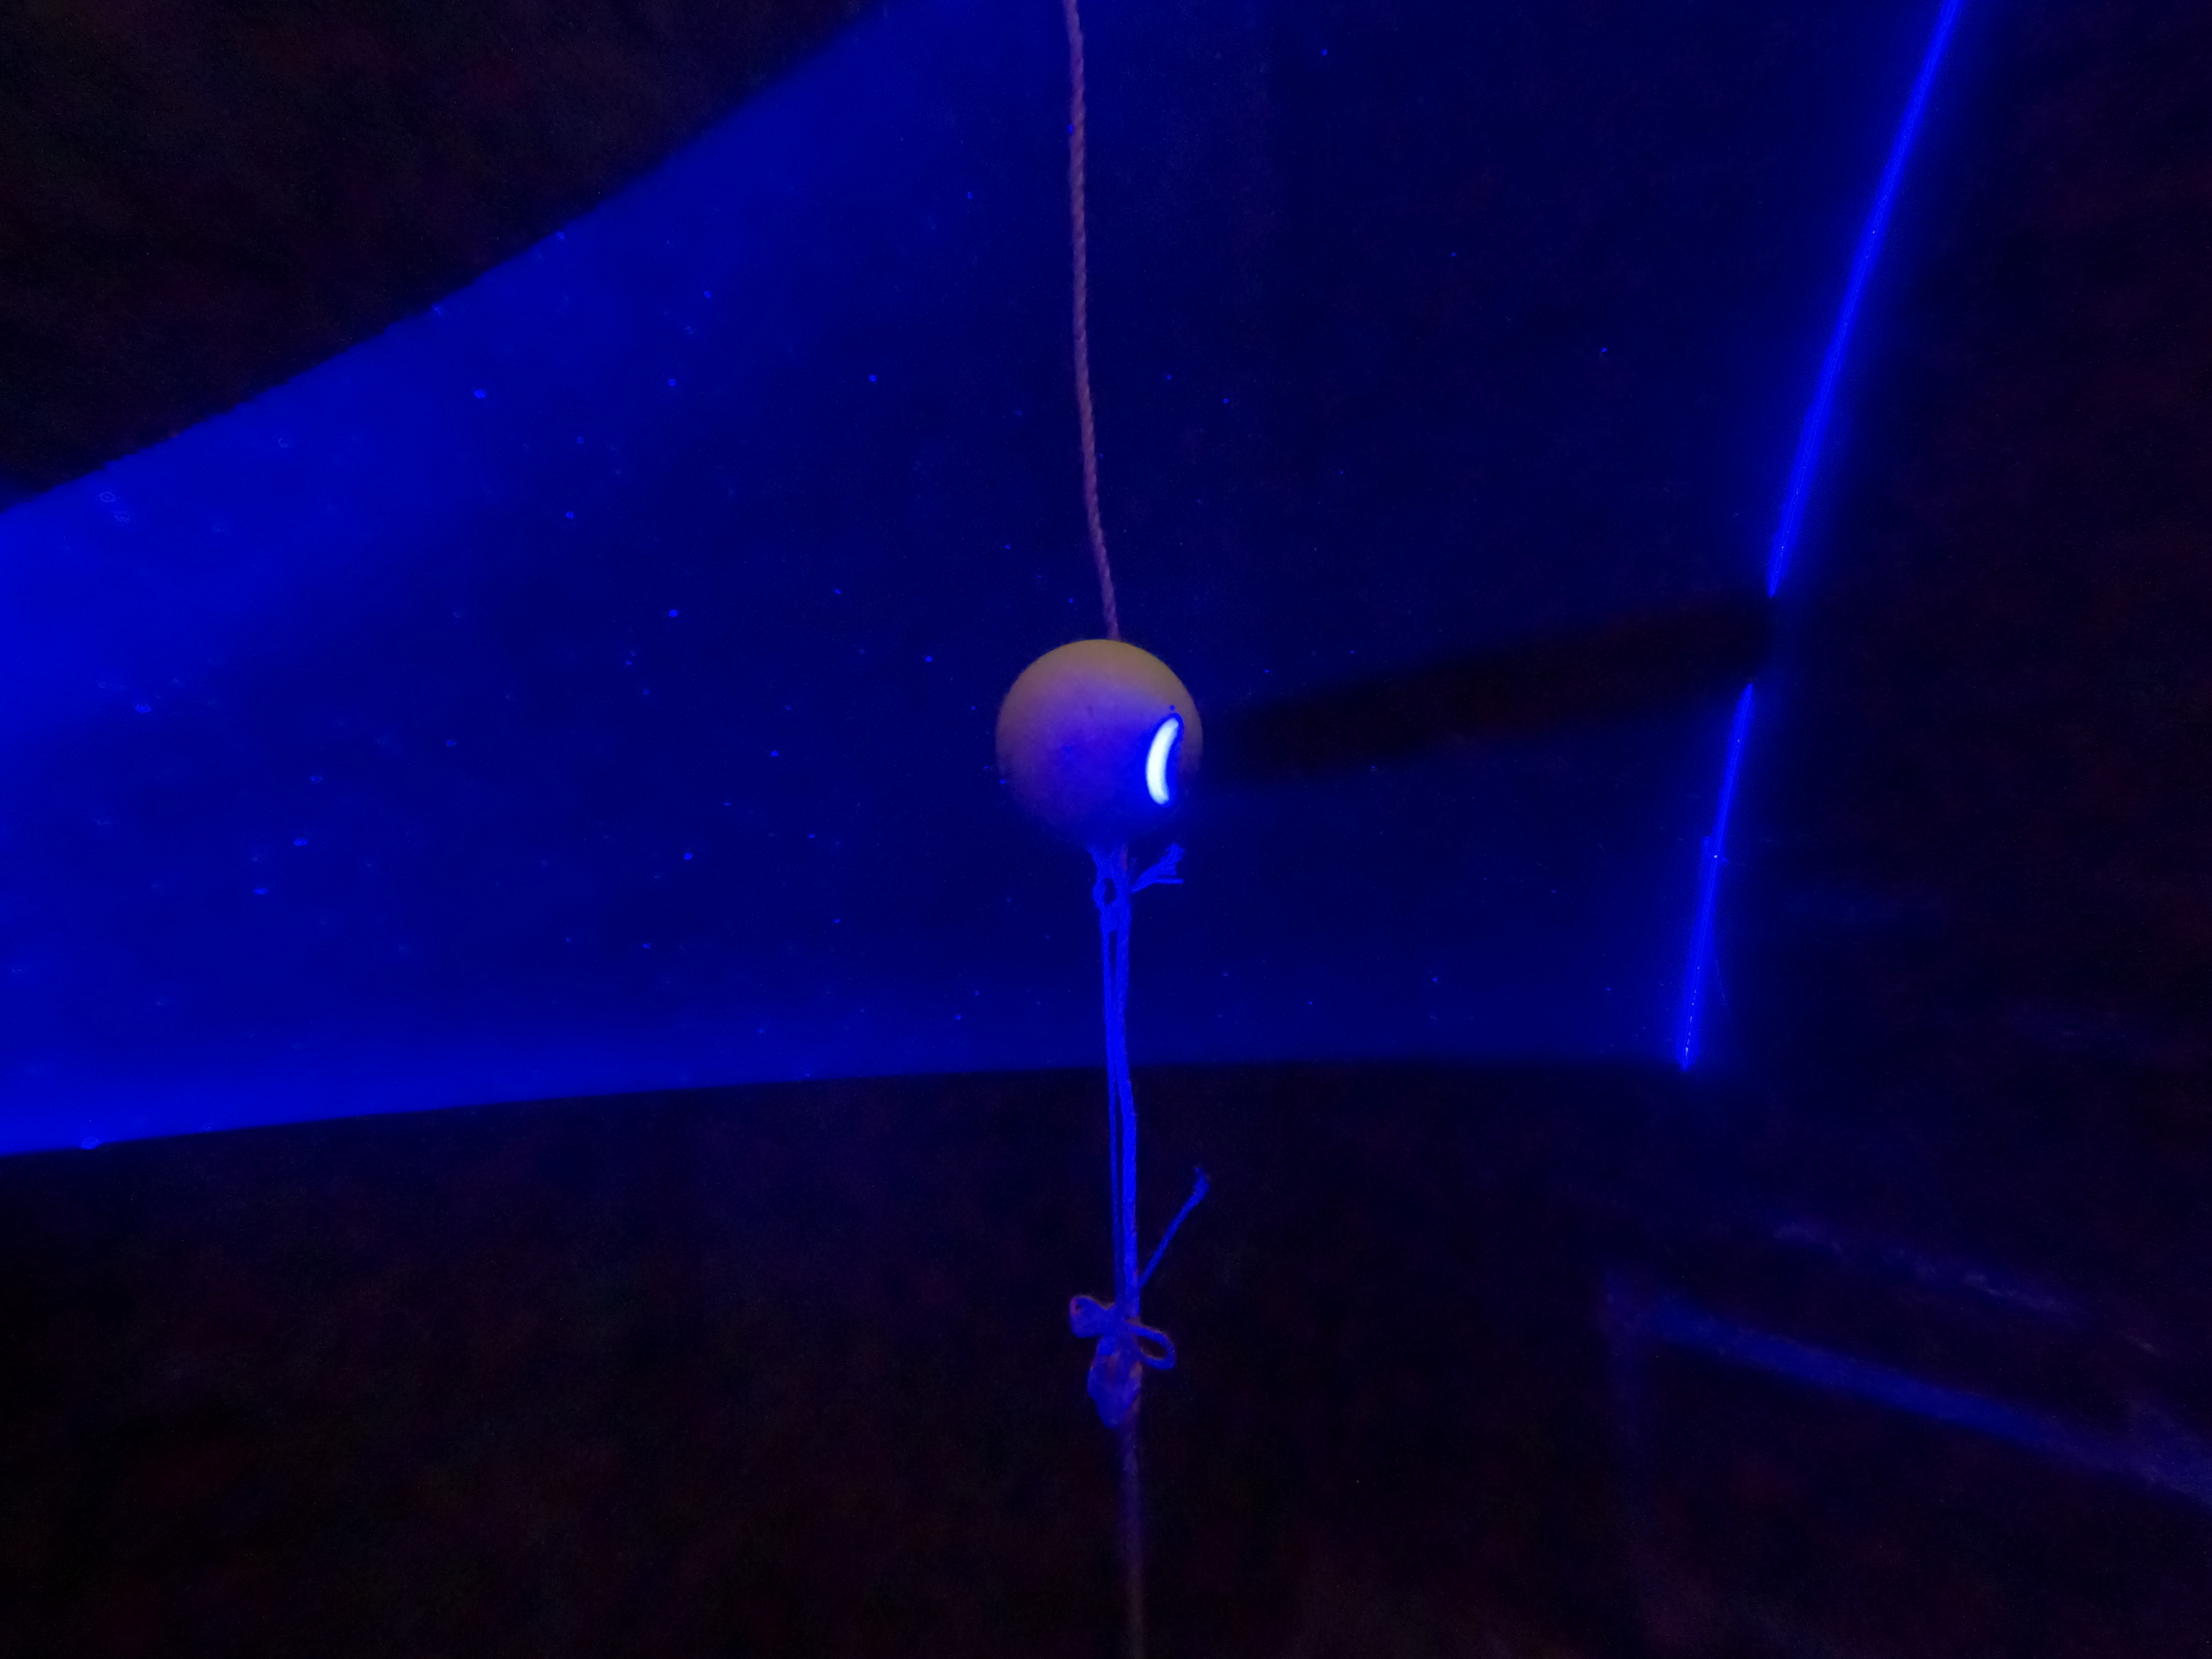

Supplement: Supplementary file 1144 [file G0032858.pdf › 7/G0032858.pdf]

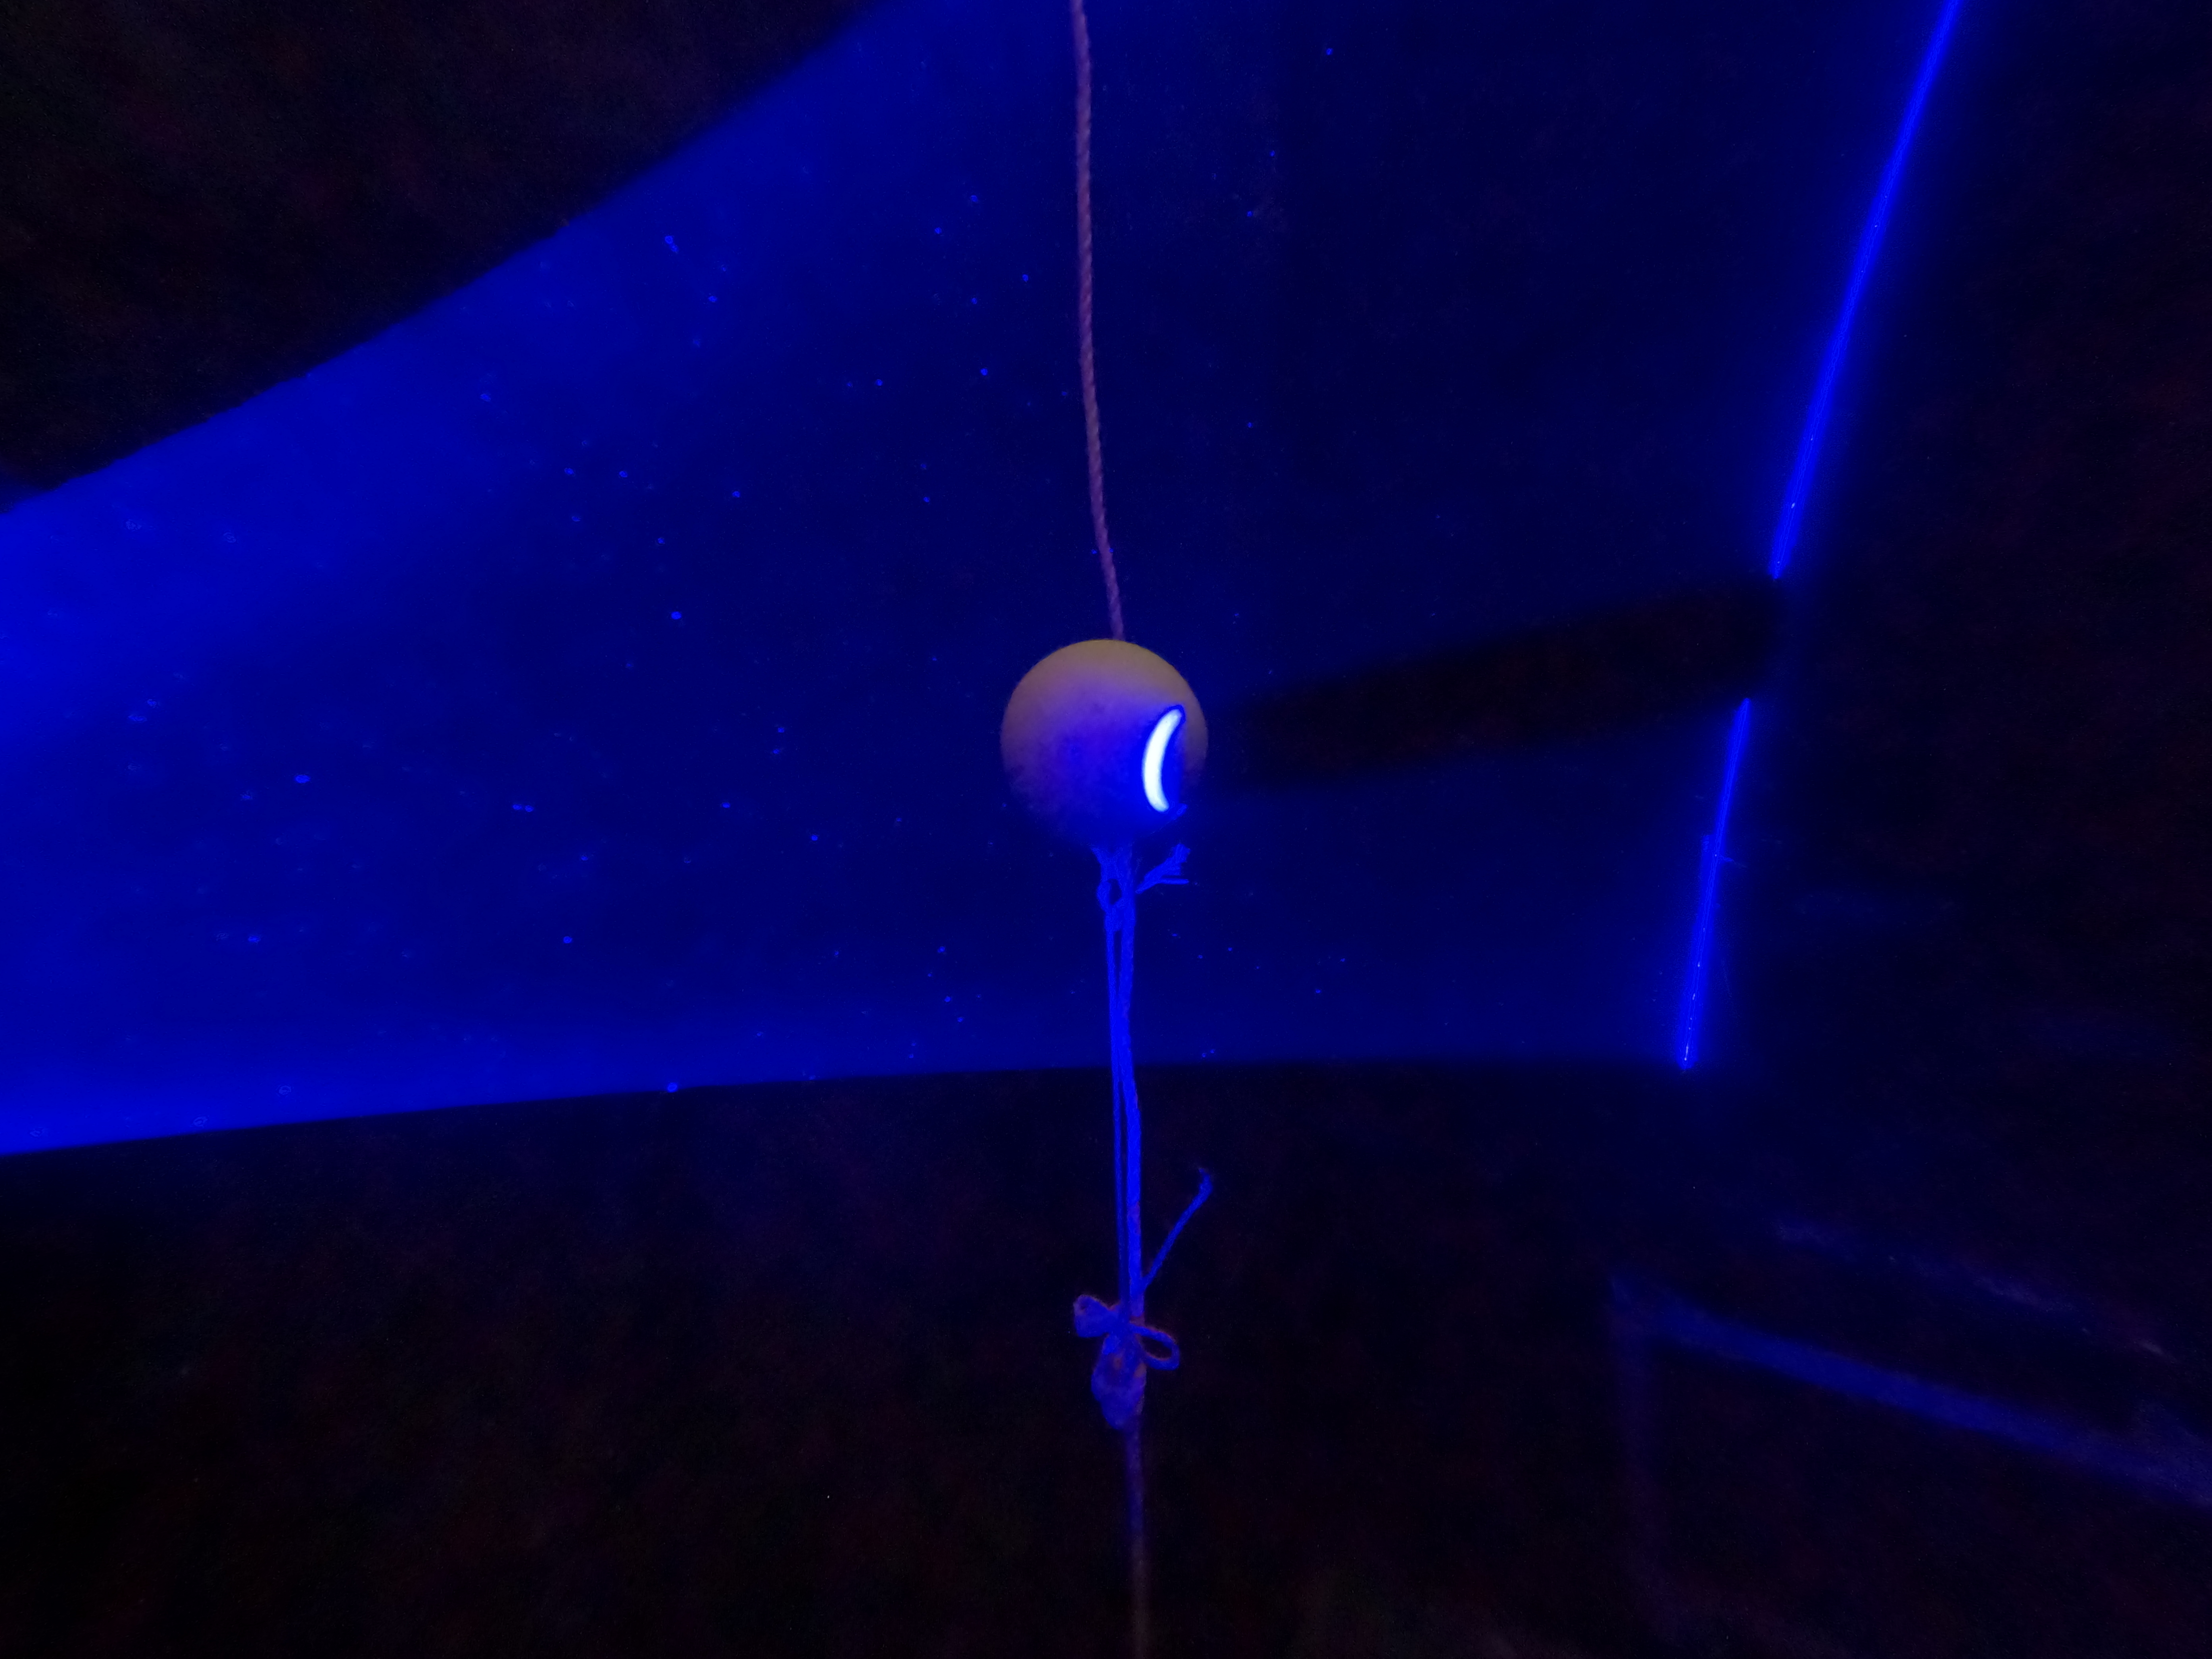

Supplement: Supplementary file 1145 [file G0032859.pdf › 7/G0032859.pdf]

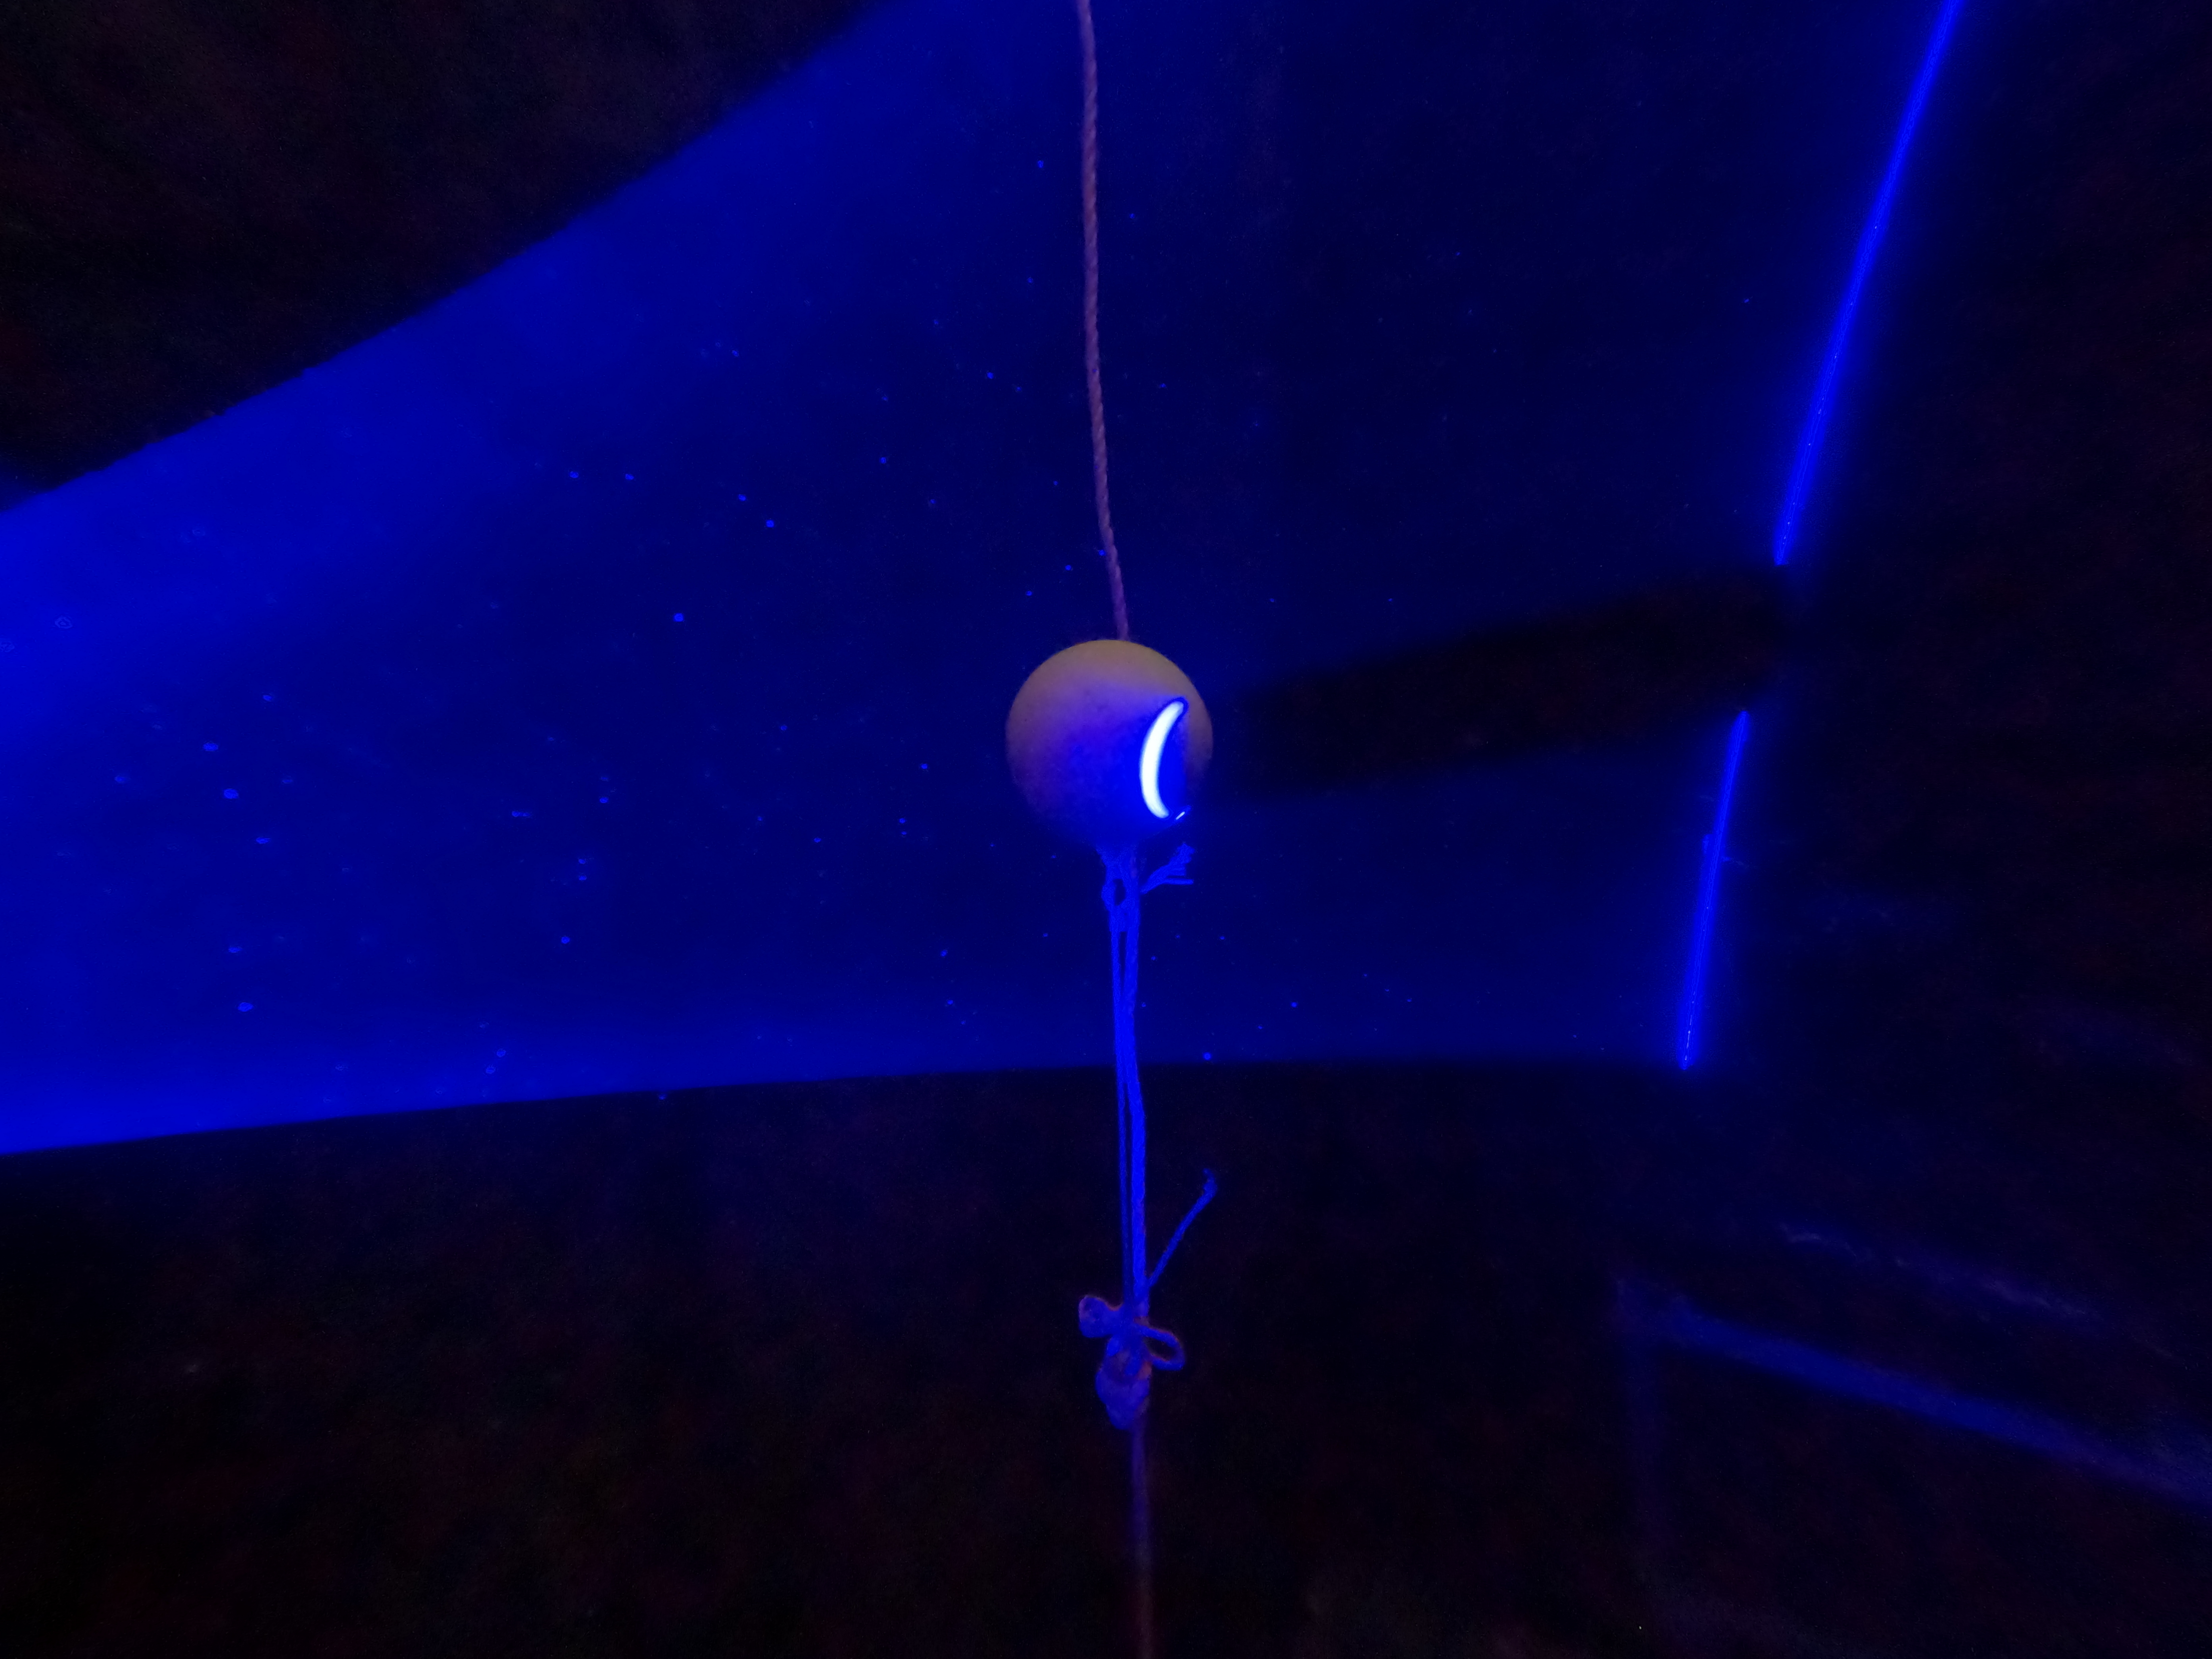

Supplement: Supplementary file 1146 [file G0032860.pdf › 7/G0032860.pdf]

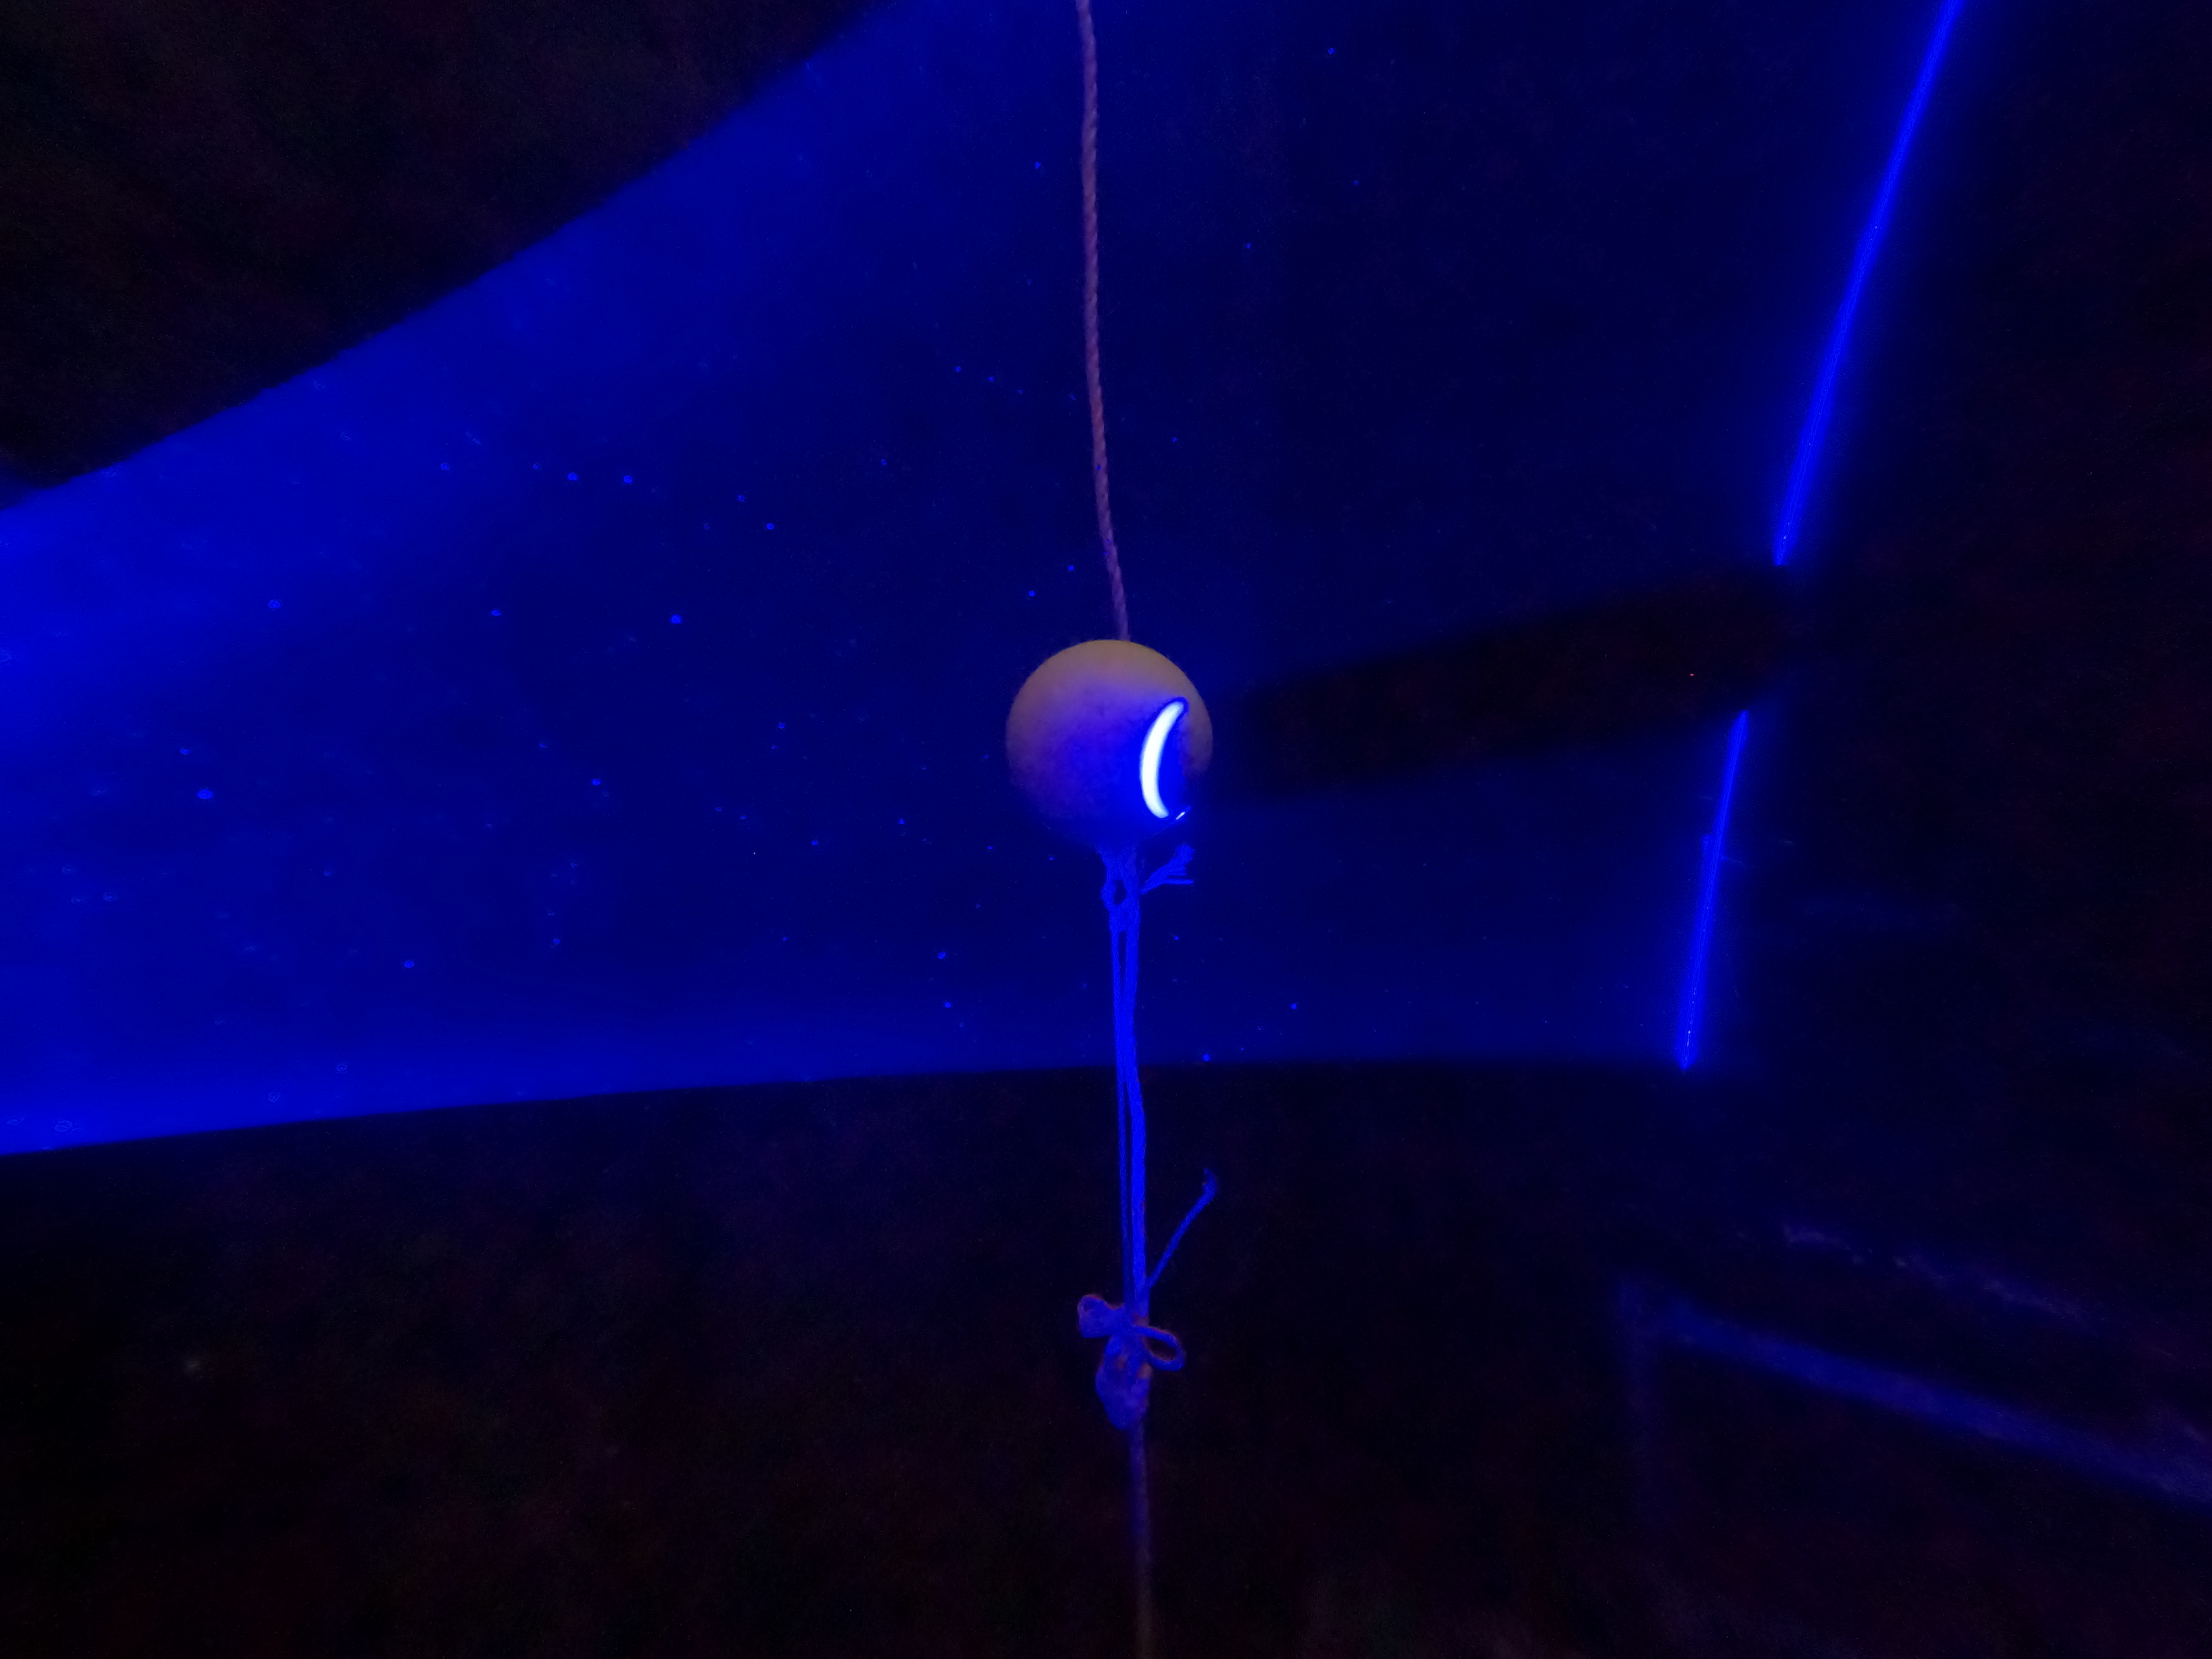

Supplement: Supplementary file 1147 [file G0032861.pdf › 7/G0032861.pdf]

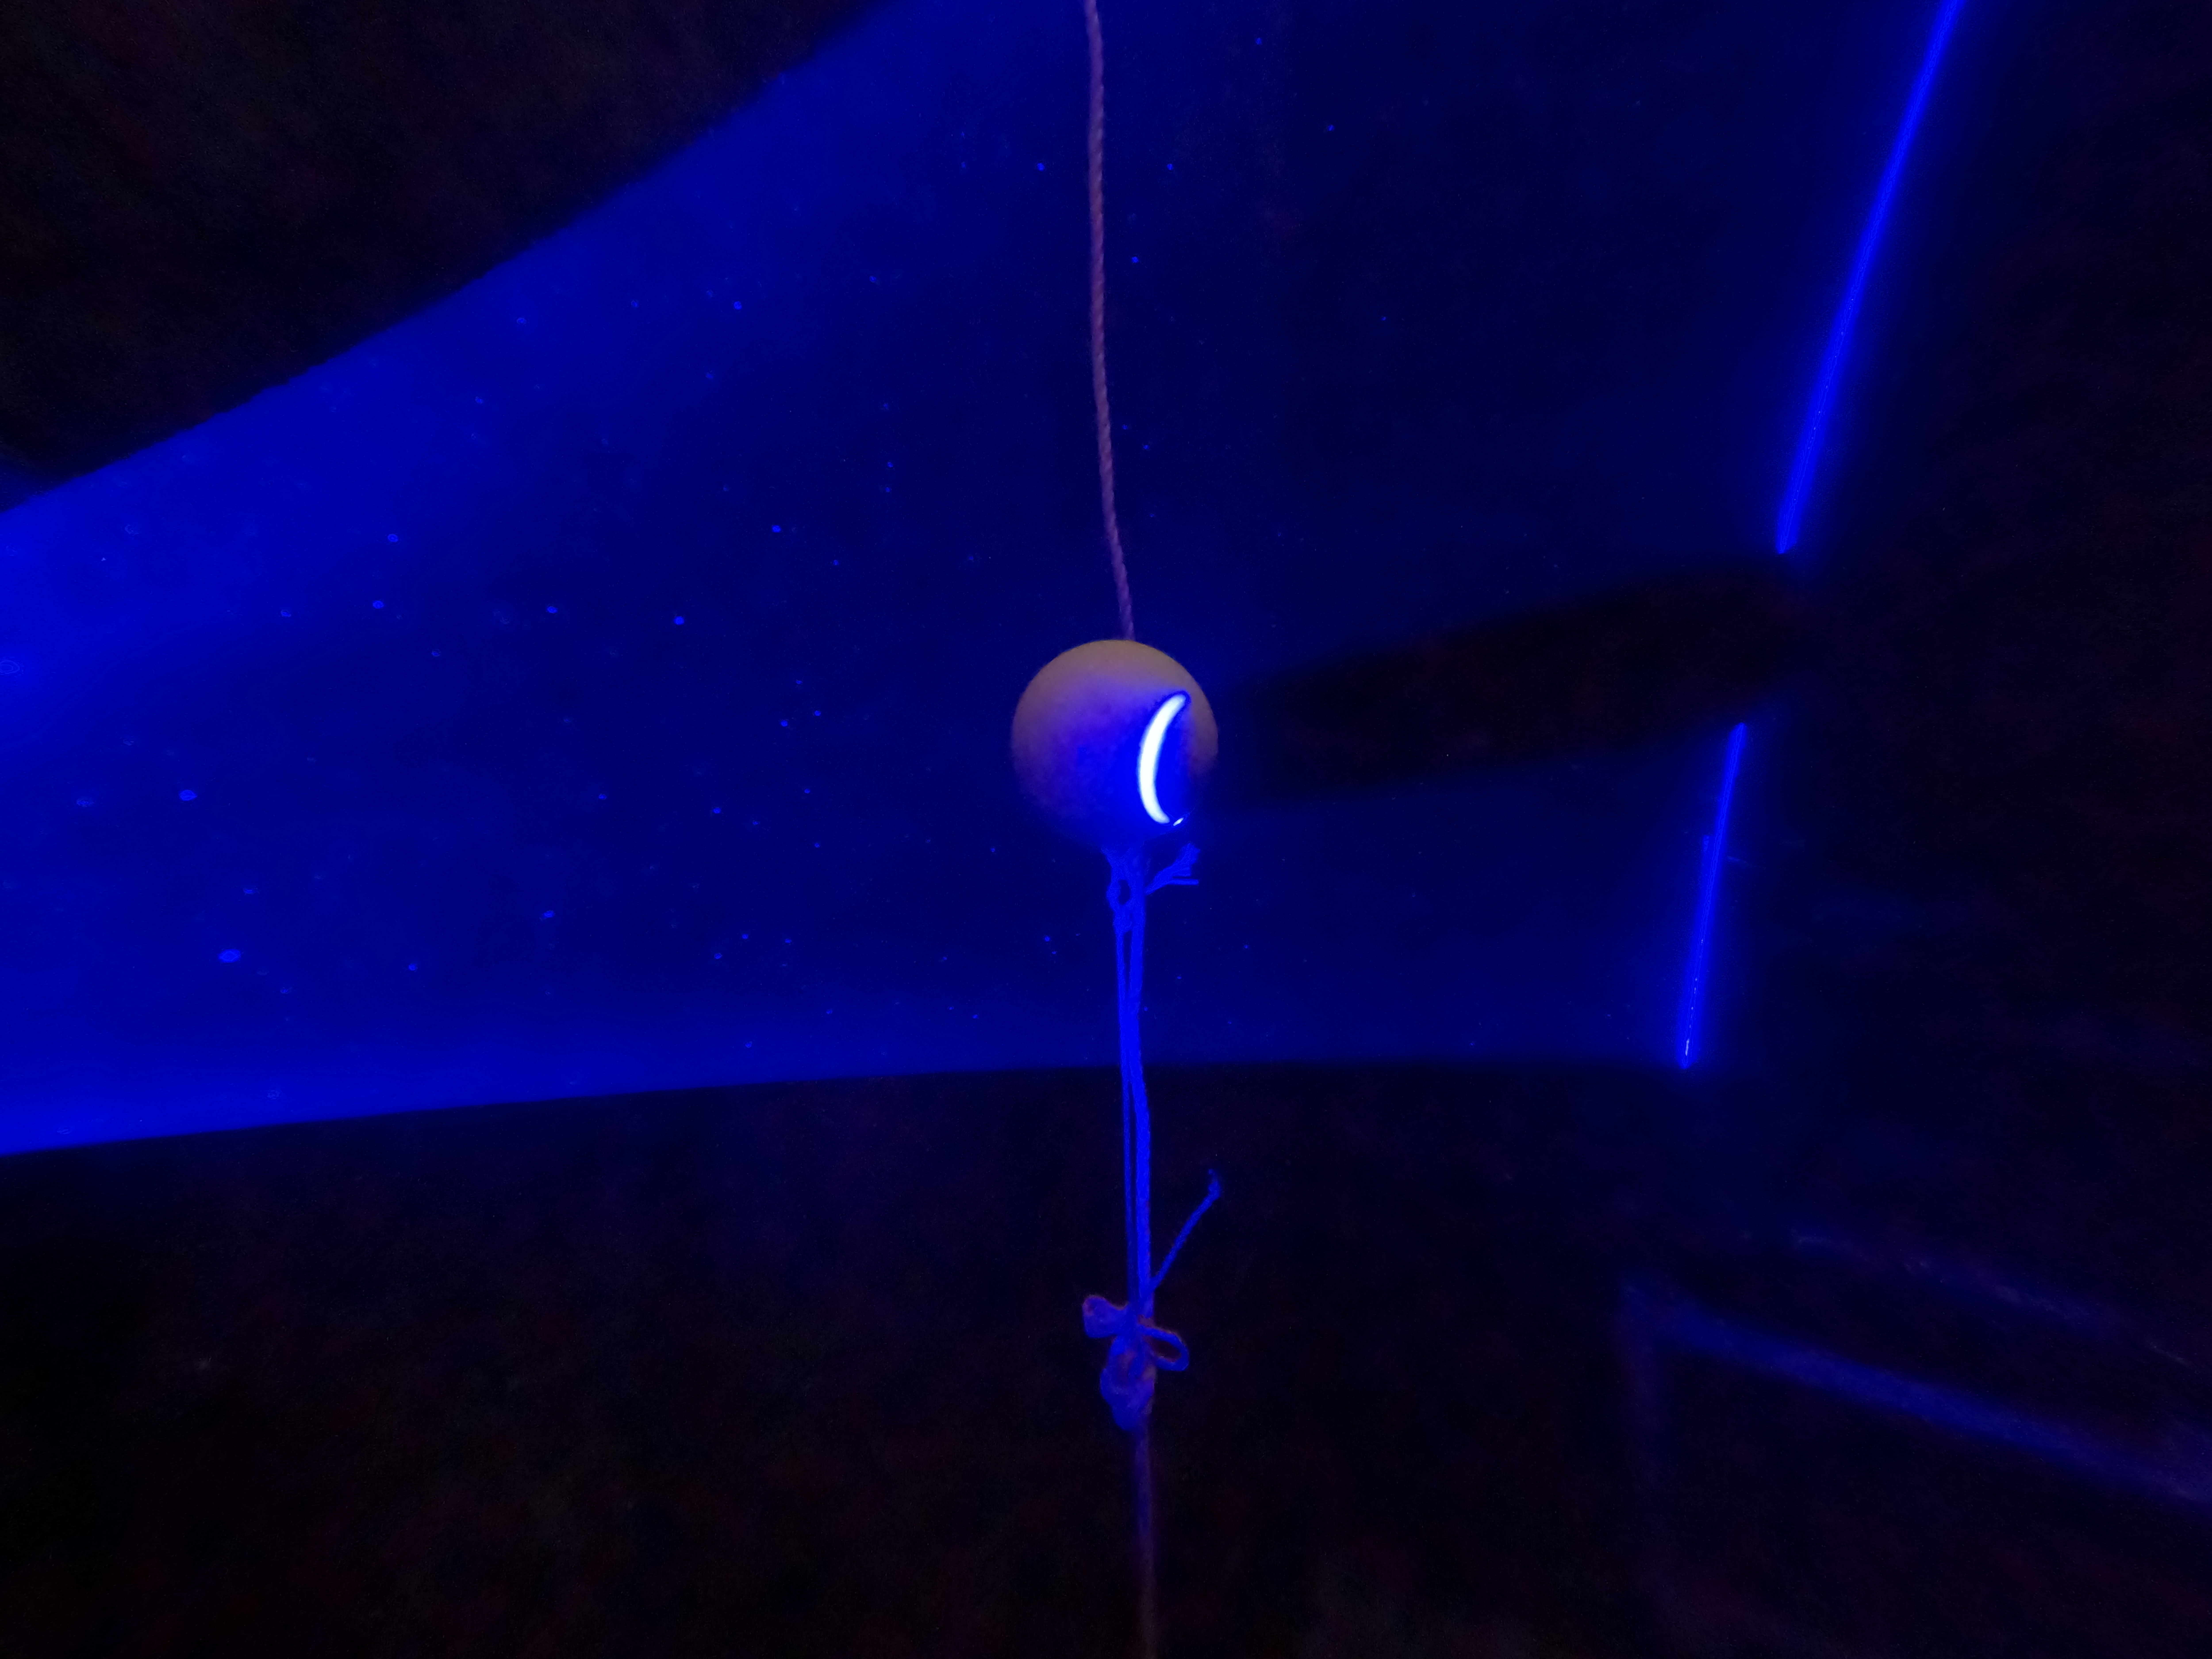

Supplement: Supplementary file 1148 [file G0032862.pdf › 7/G0032862.pdf]

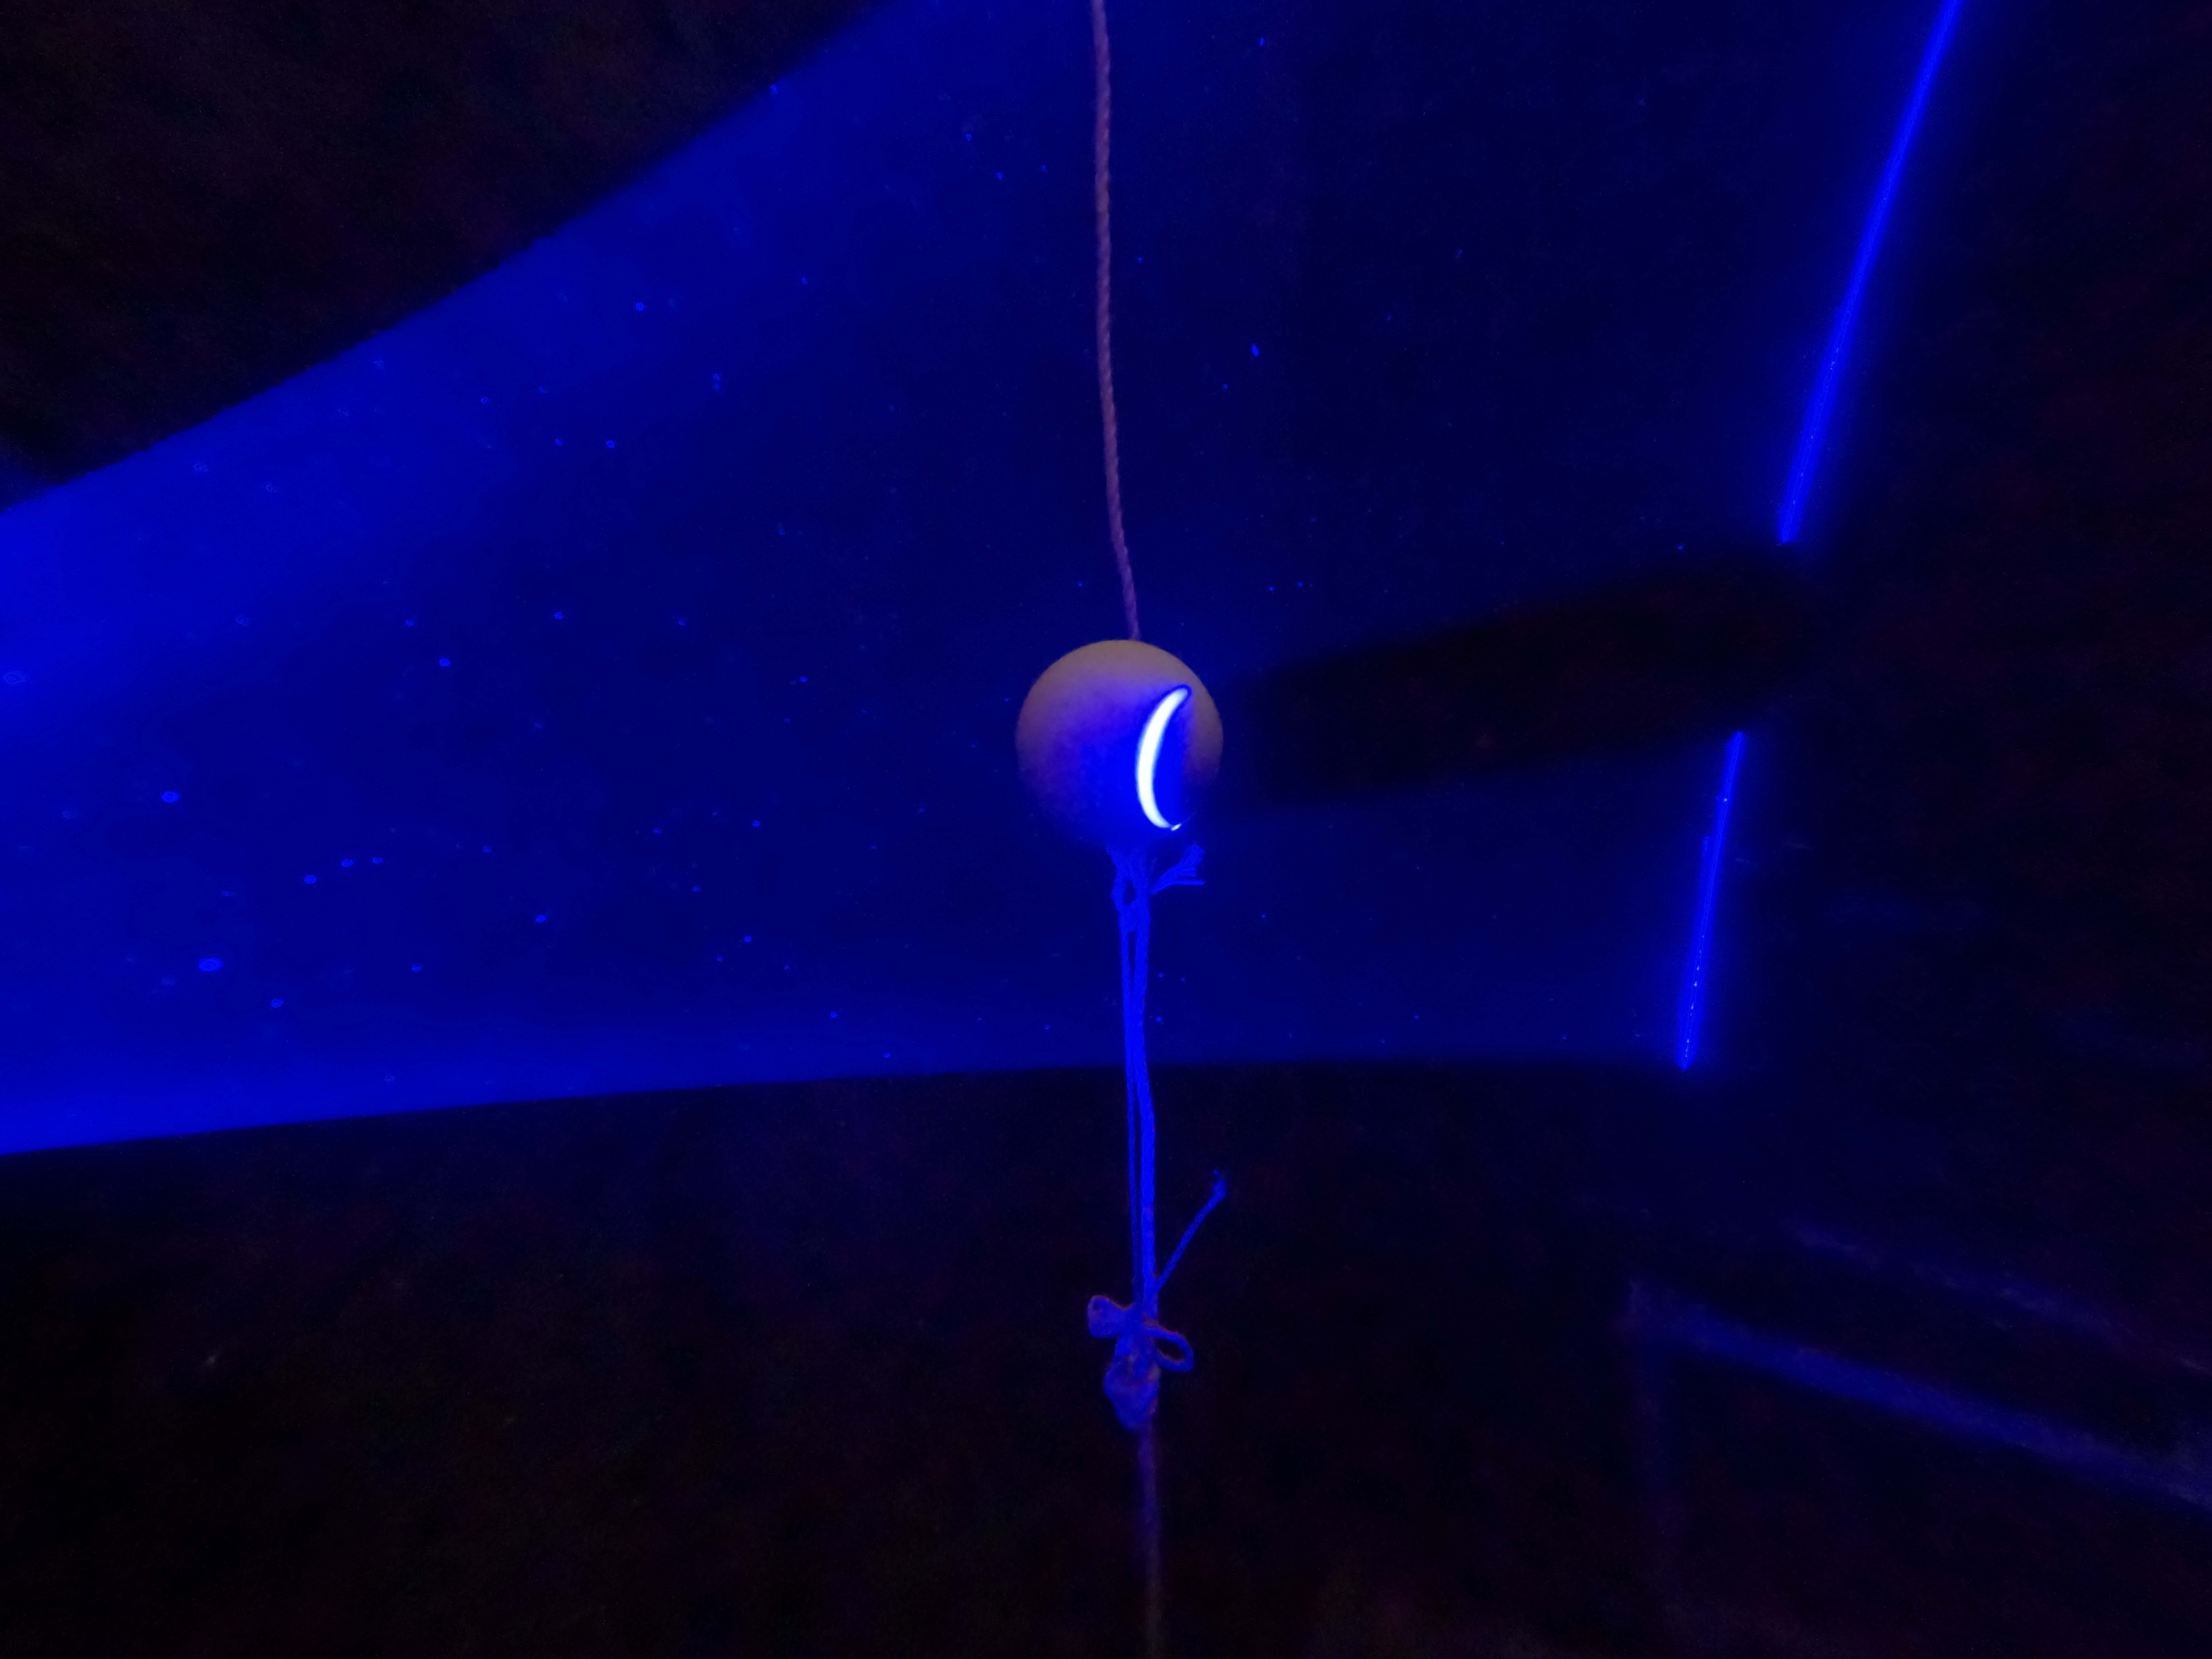

Supplement: Supplementary file 1149 [file G0032863.pdf › 7/G0032863.pdf]

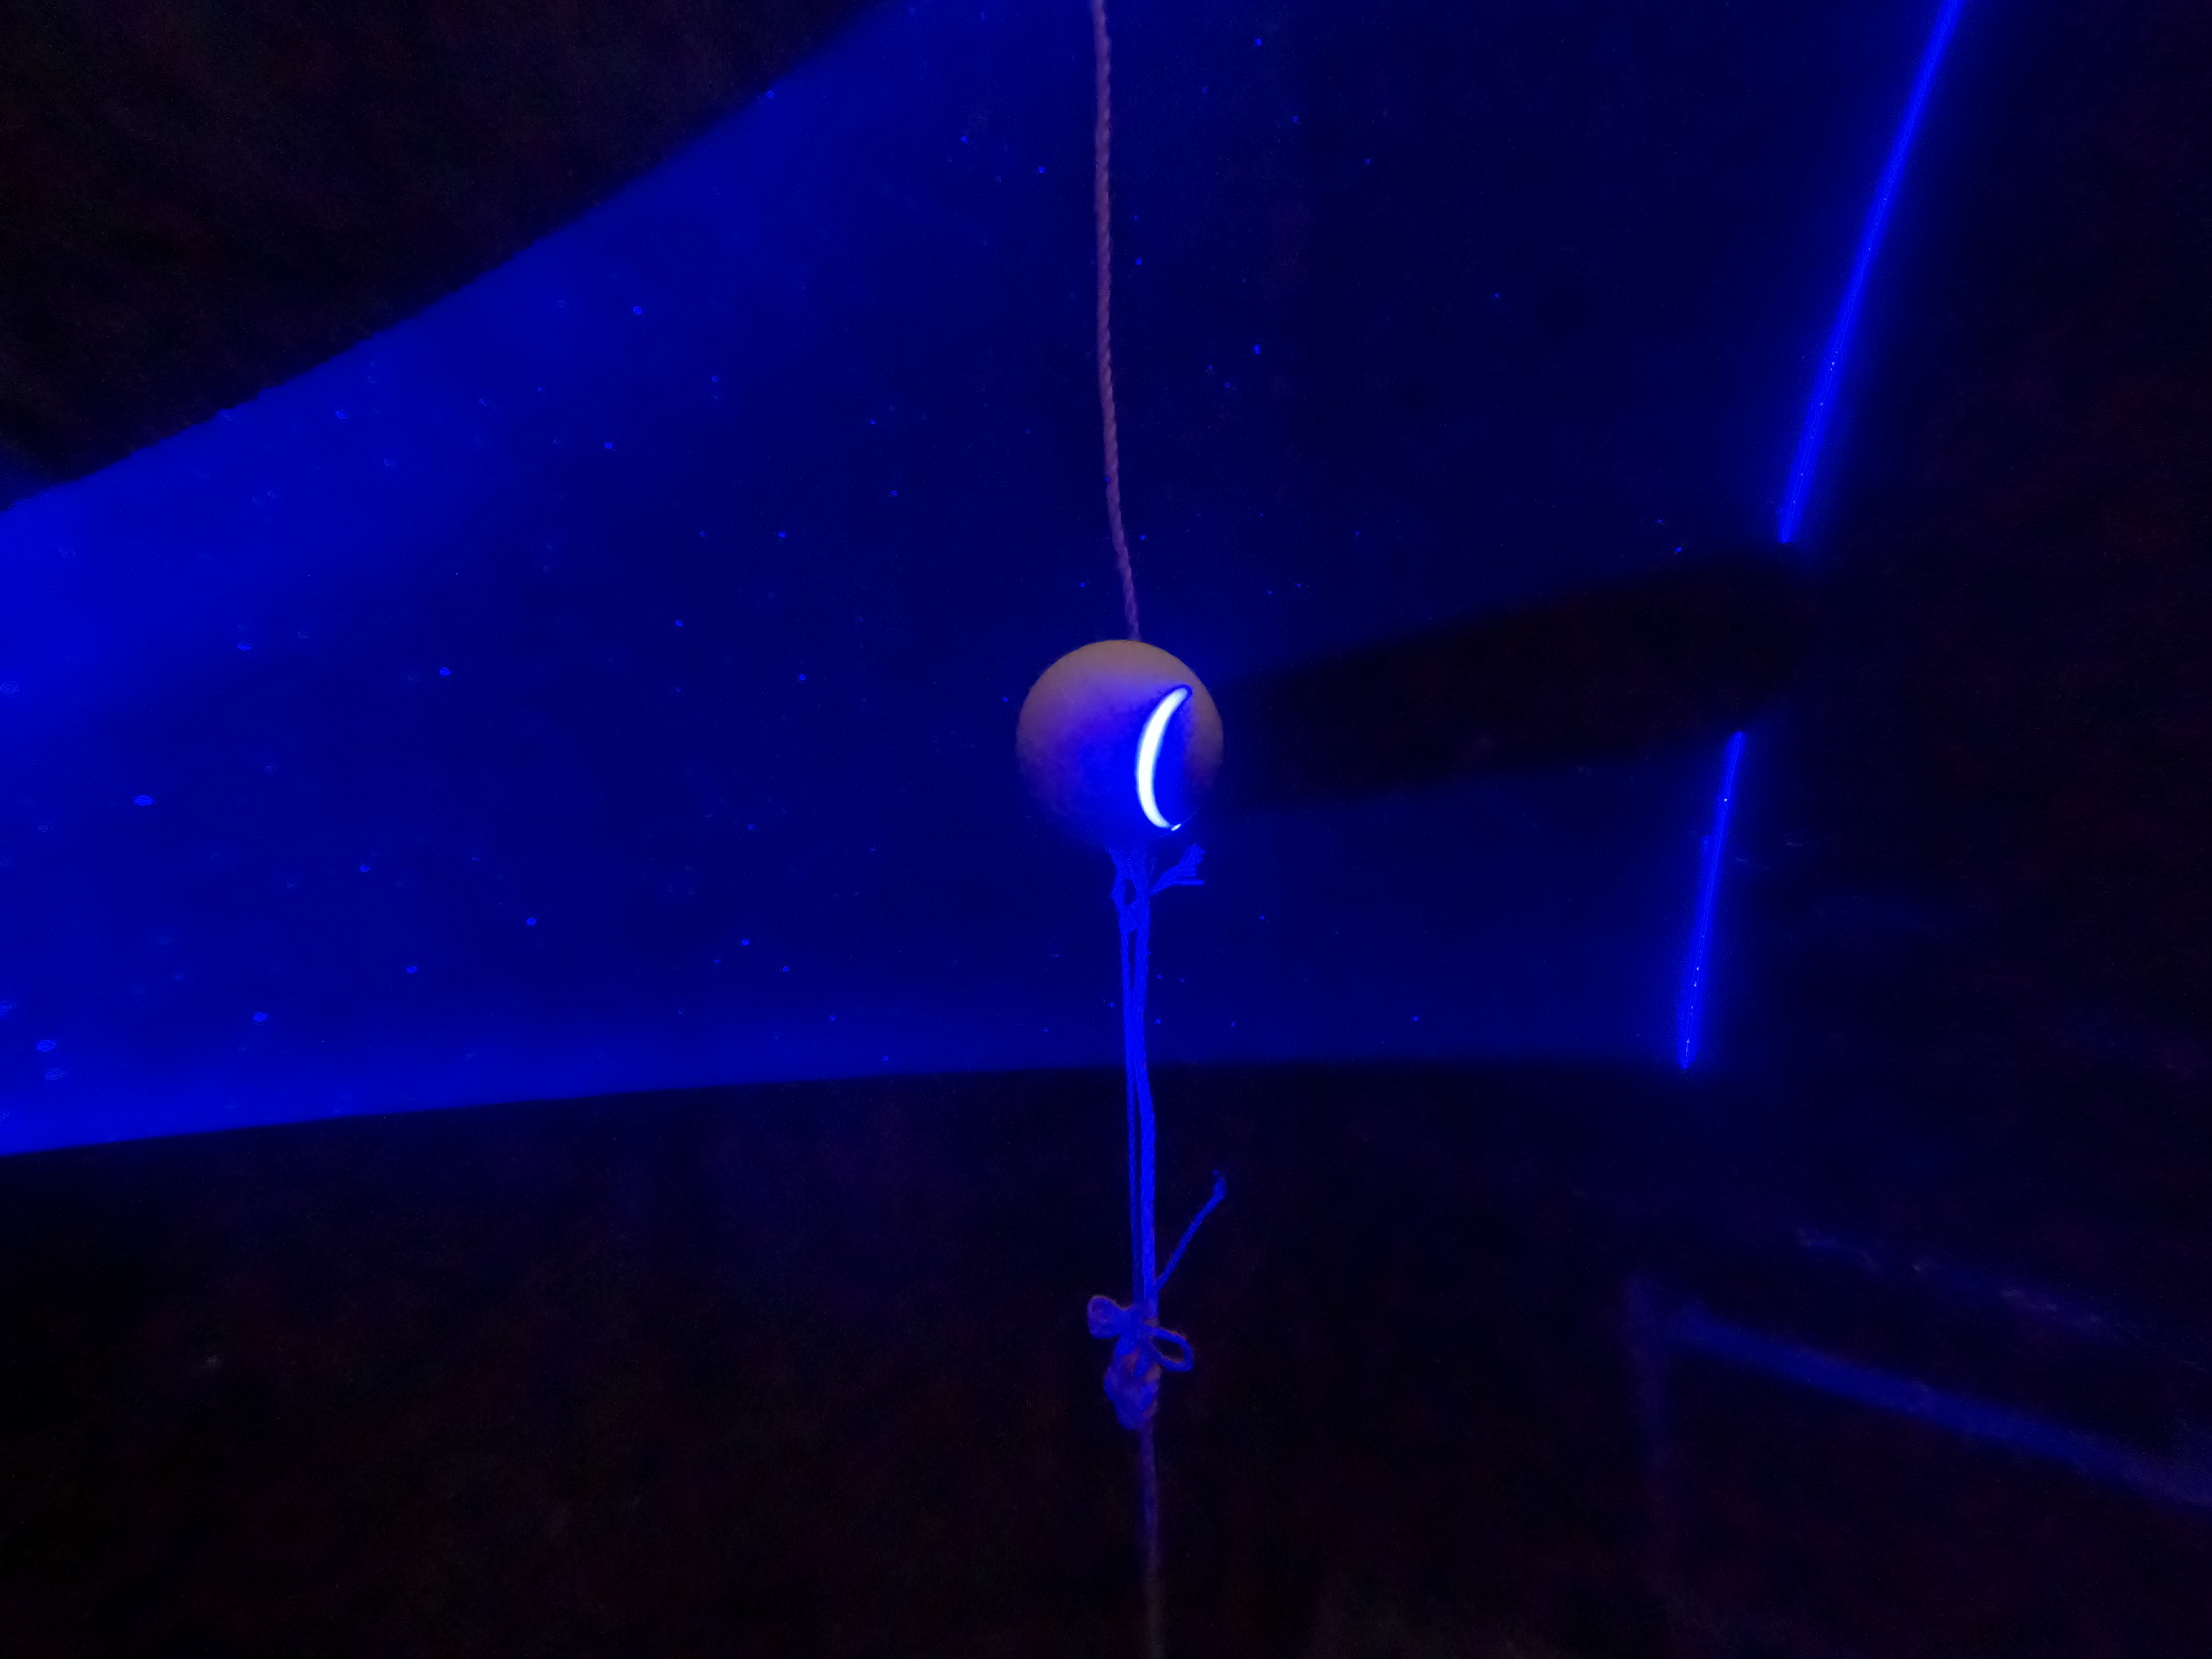

Supplement: Supplementary file 1150 [file G0032864.pdf › 7/G0032864.pdf]

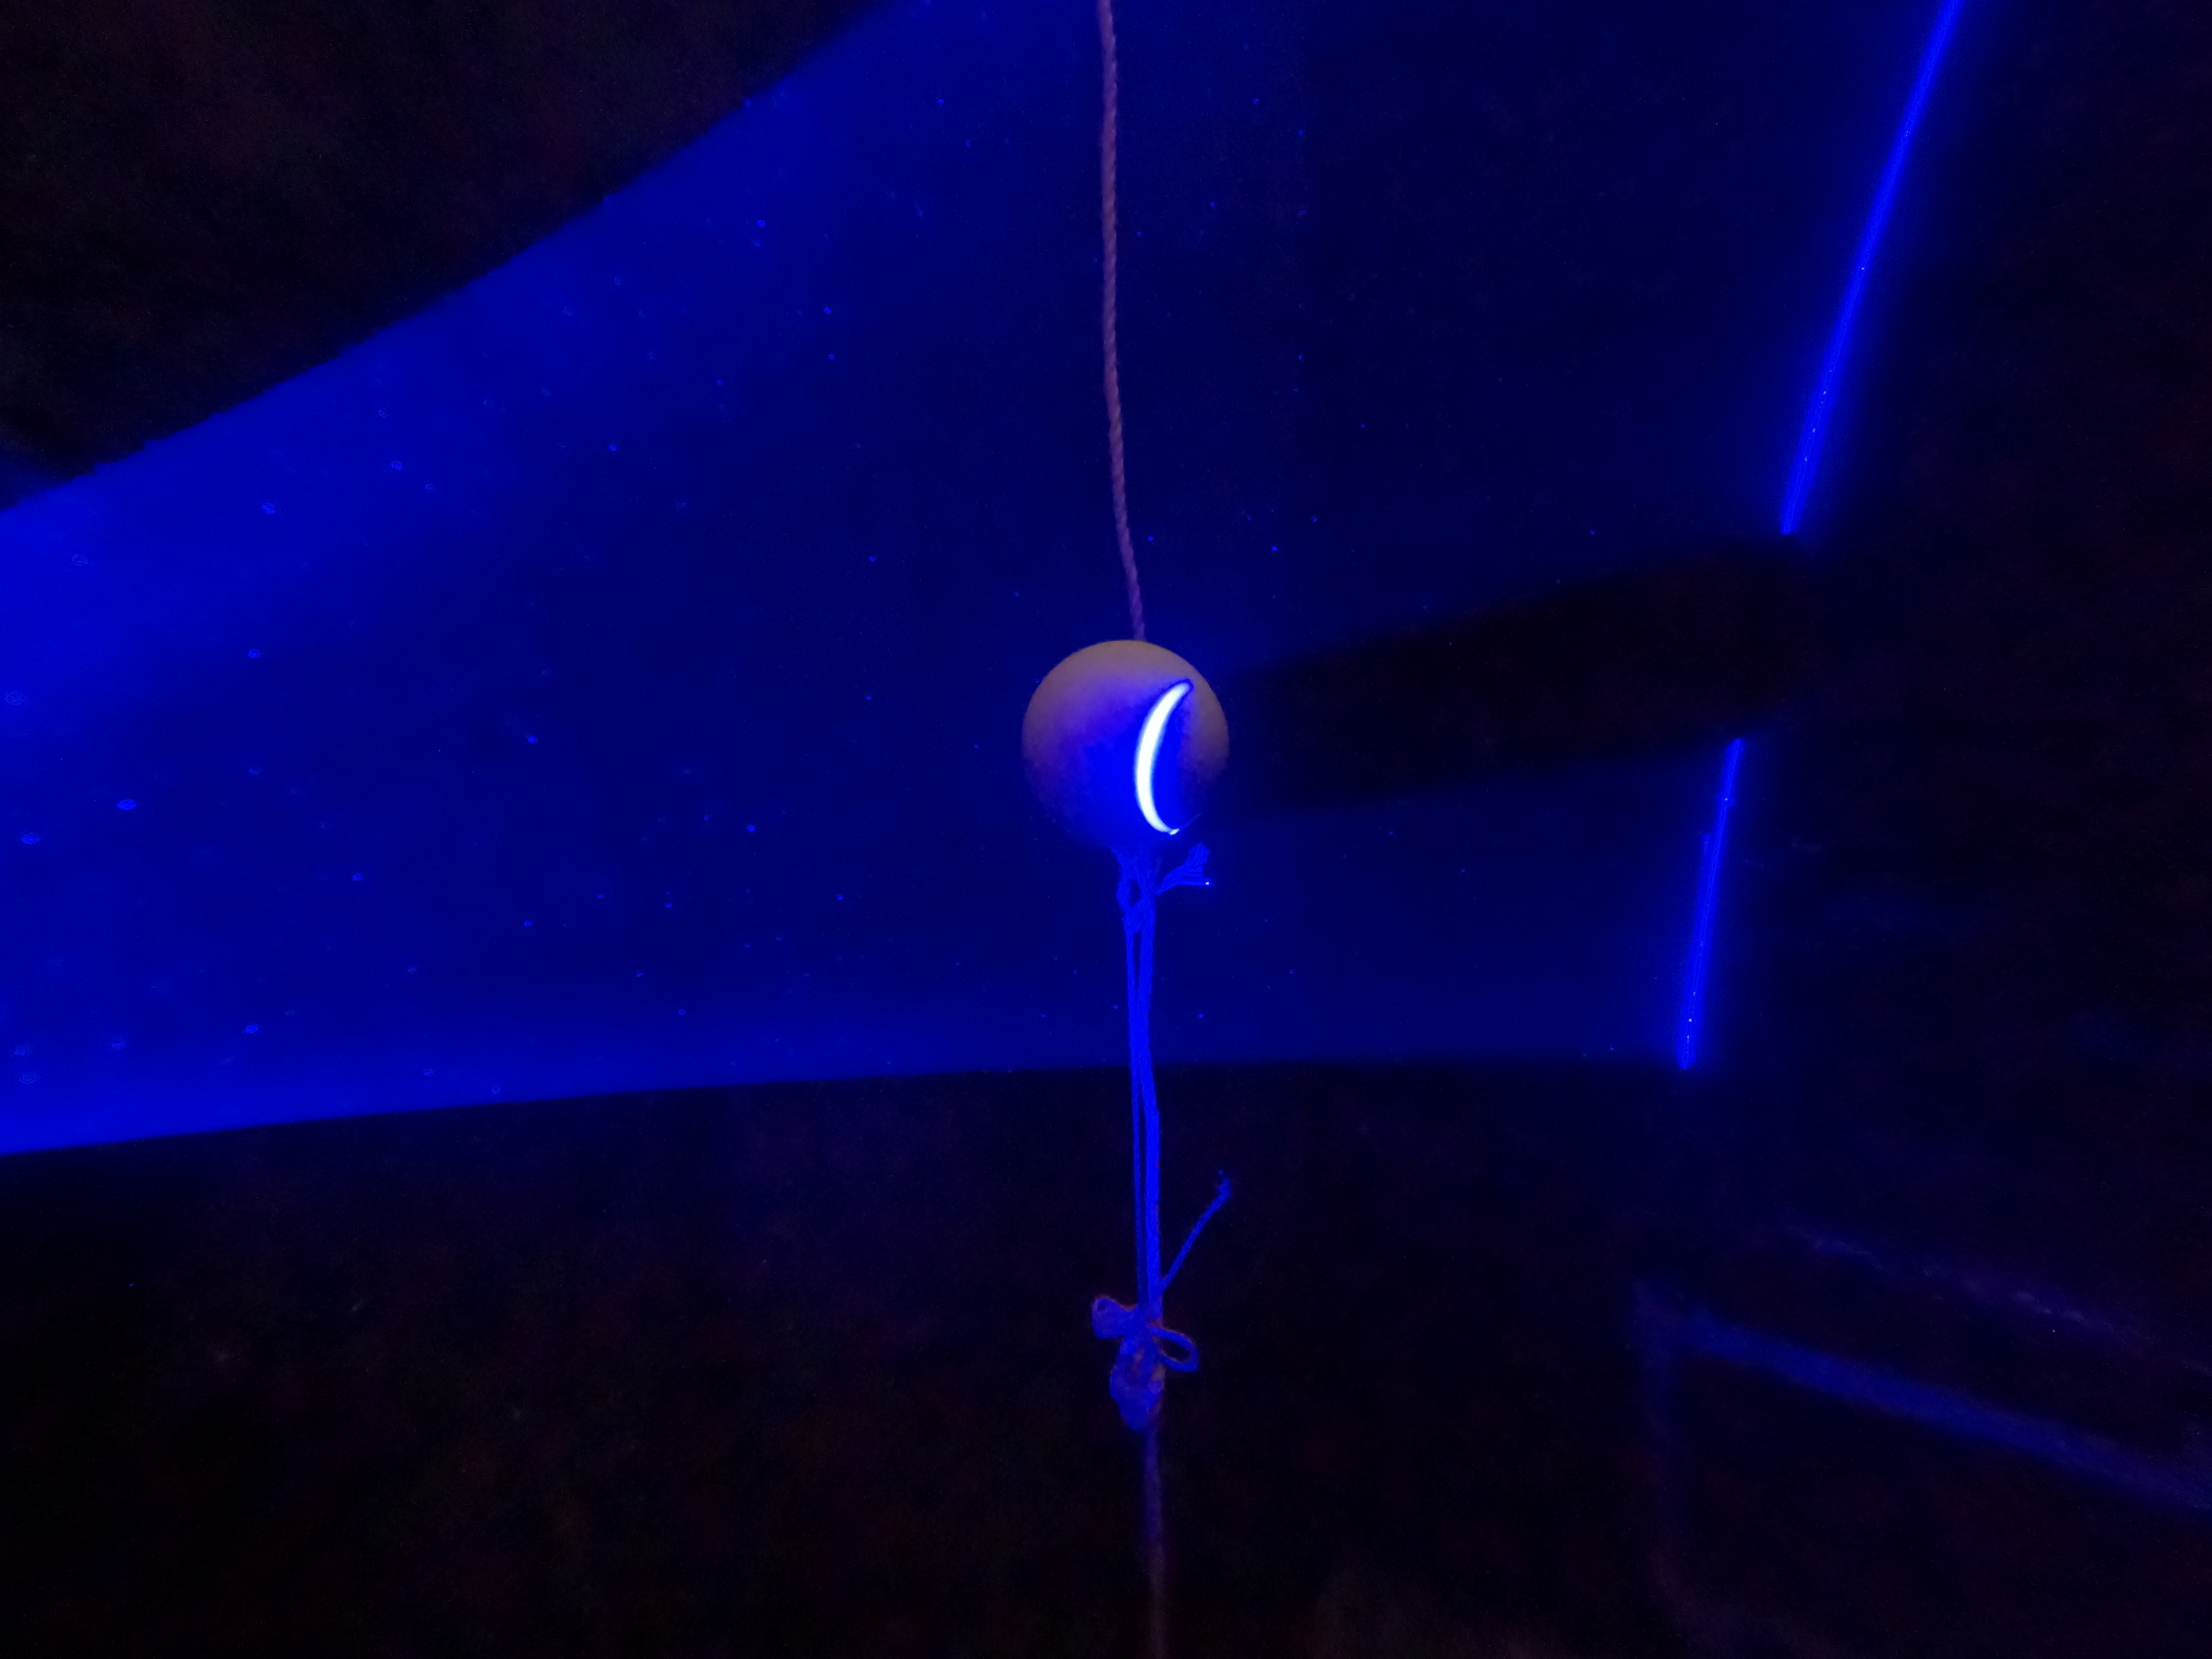

Supplement: Supplementary file 1151 [file G0032865.pdf › 7/G0032865.pdf]

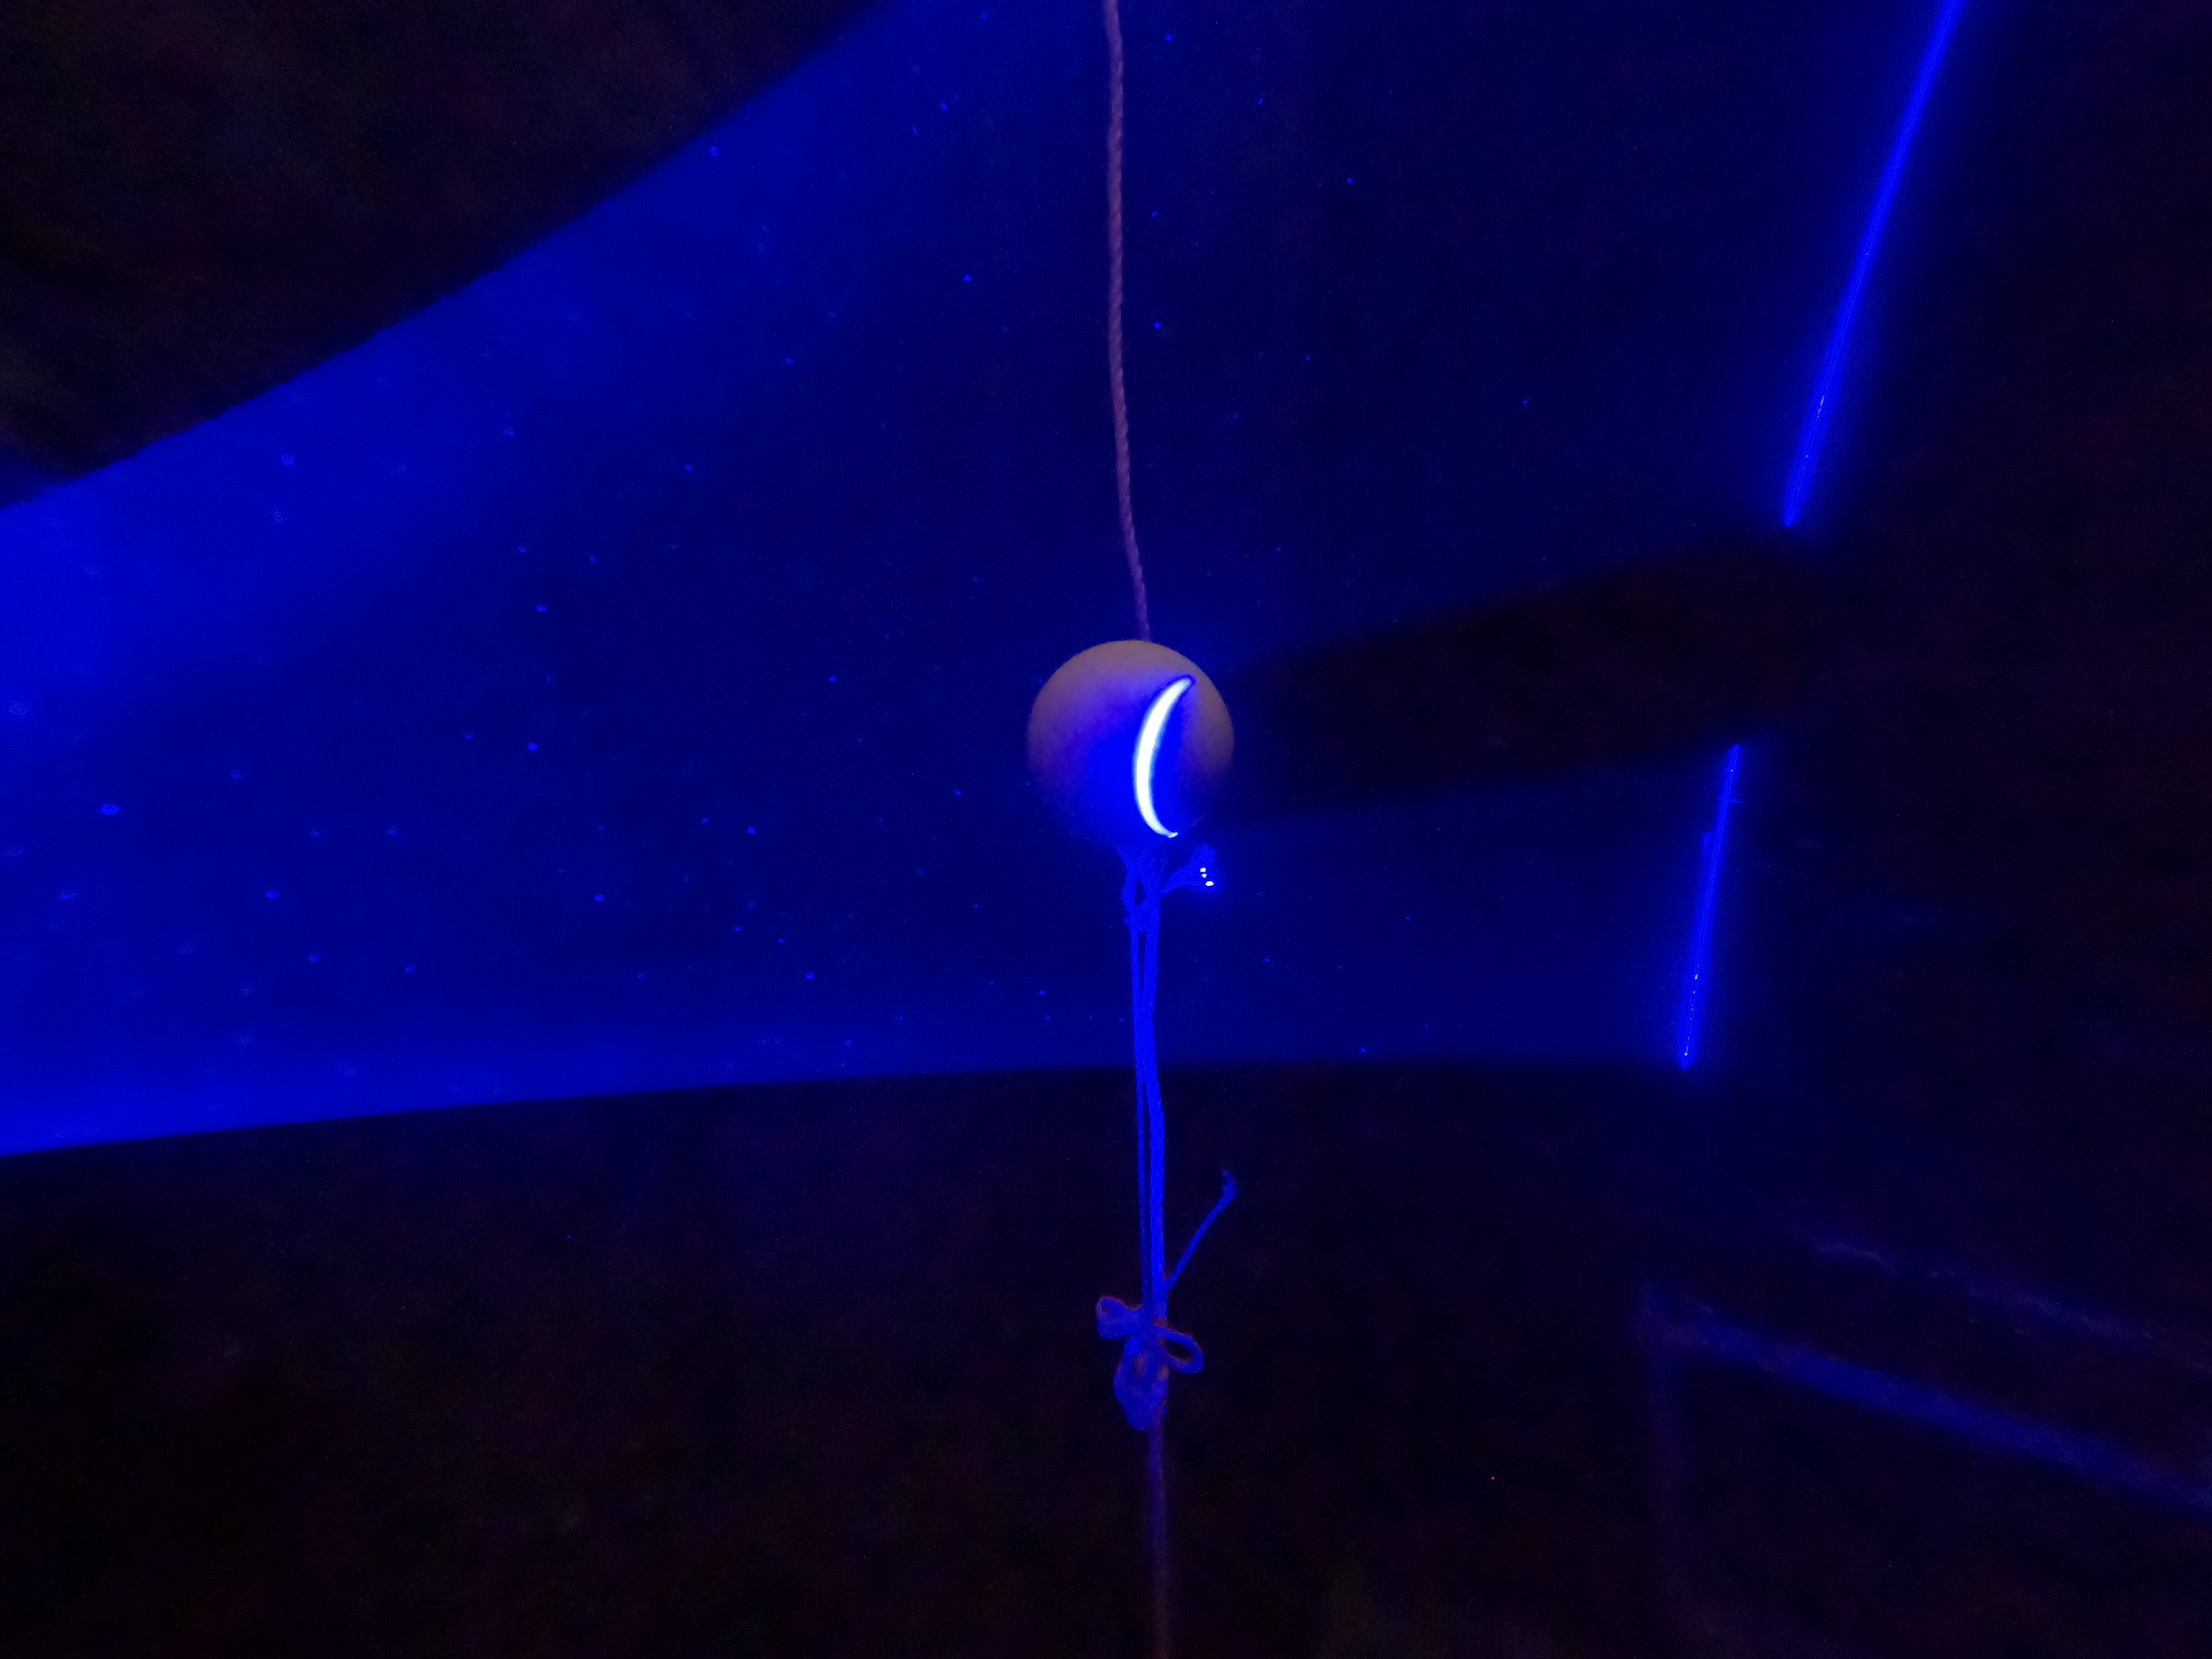

Supplement: Supplementary file 1152 [file G0032866.pdf › 7/G0032866.pdf]

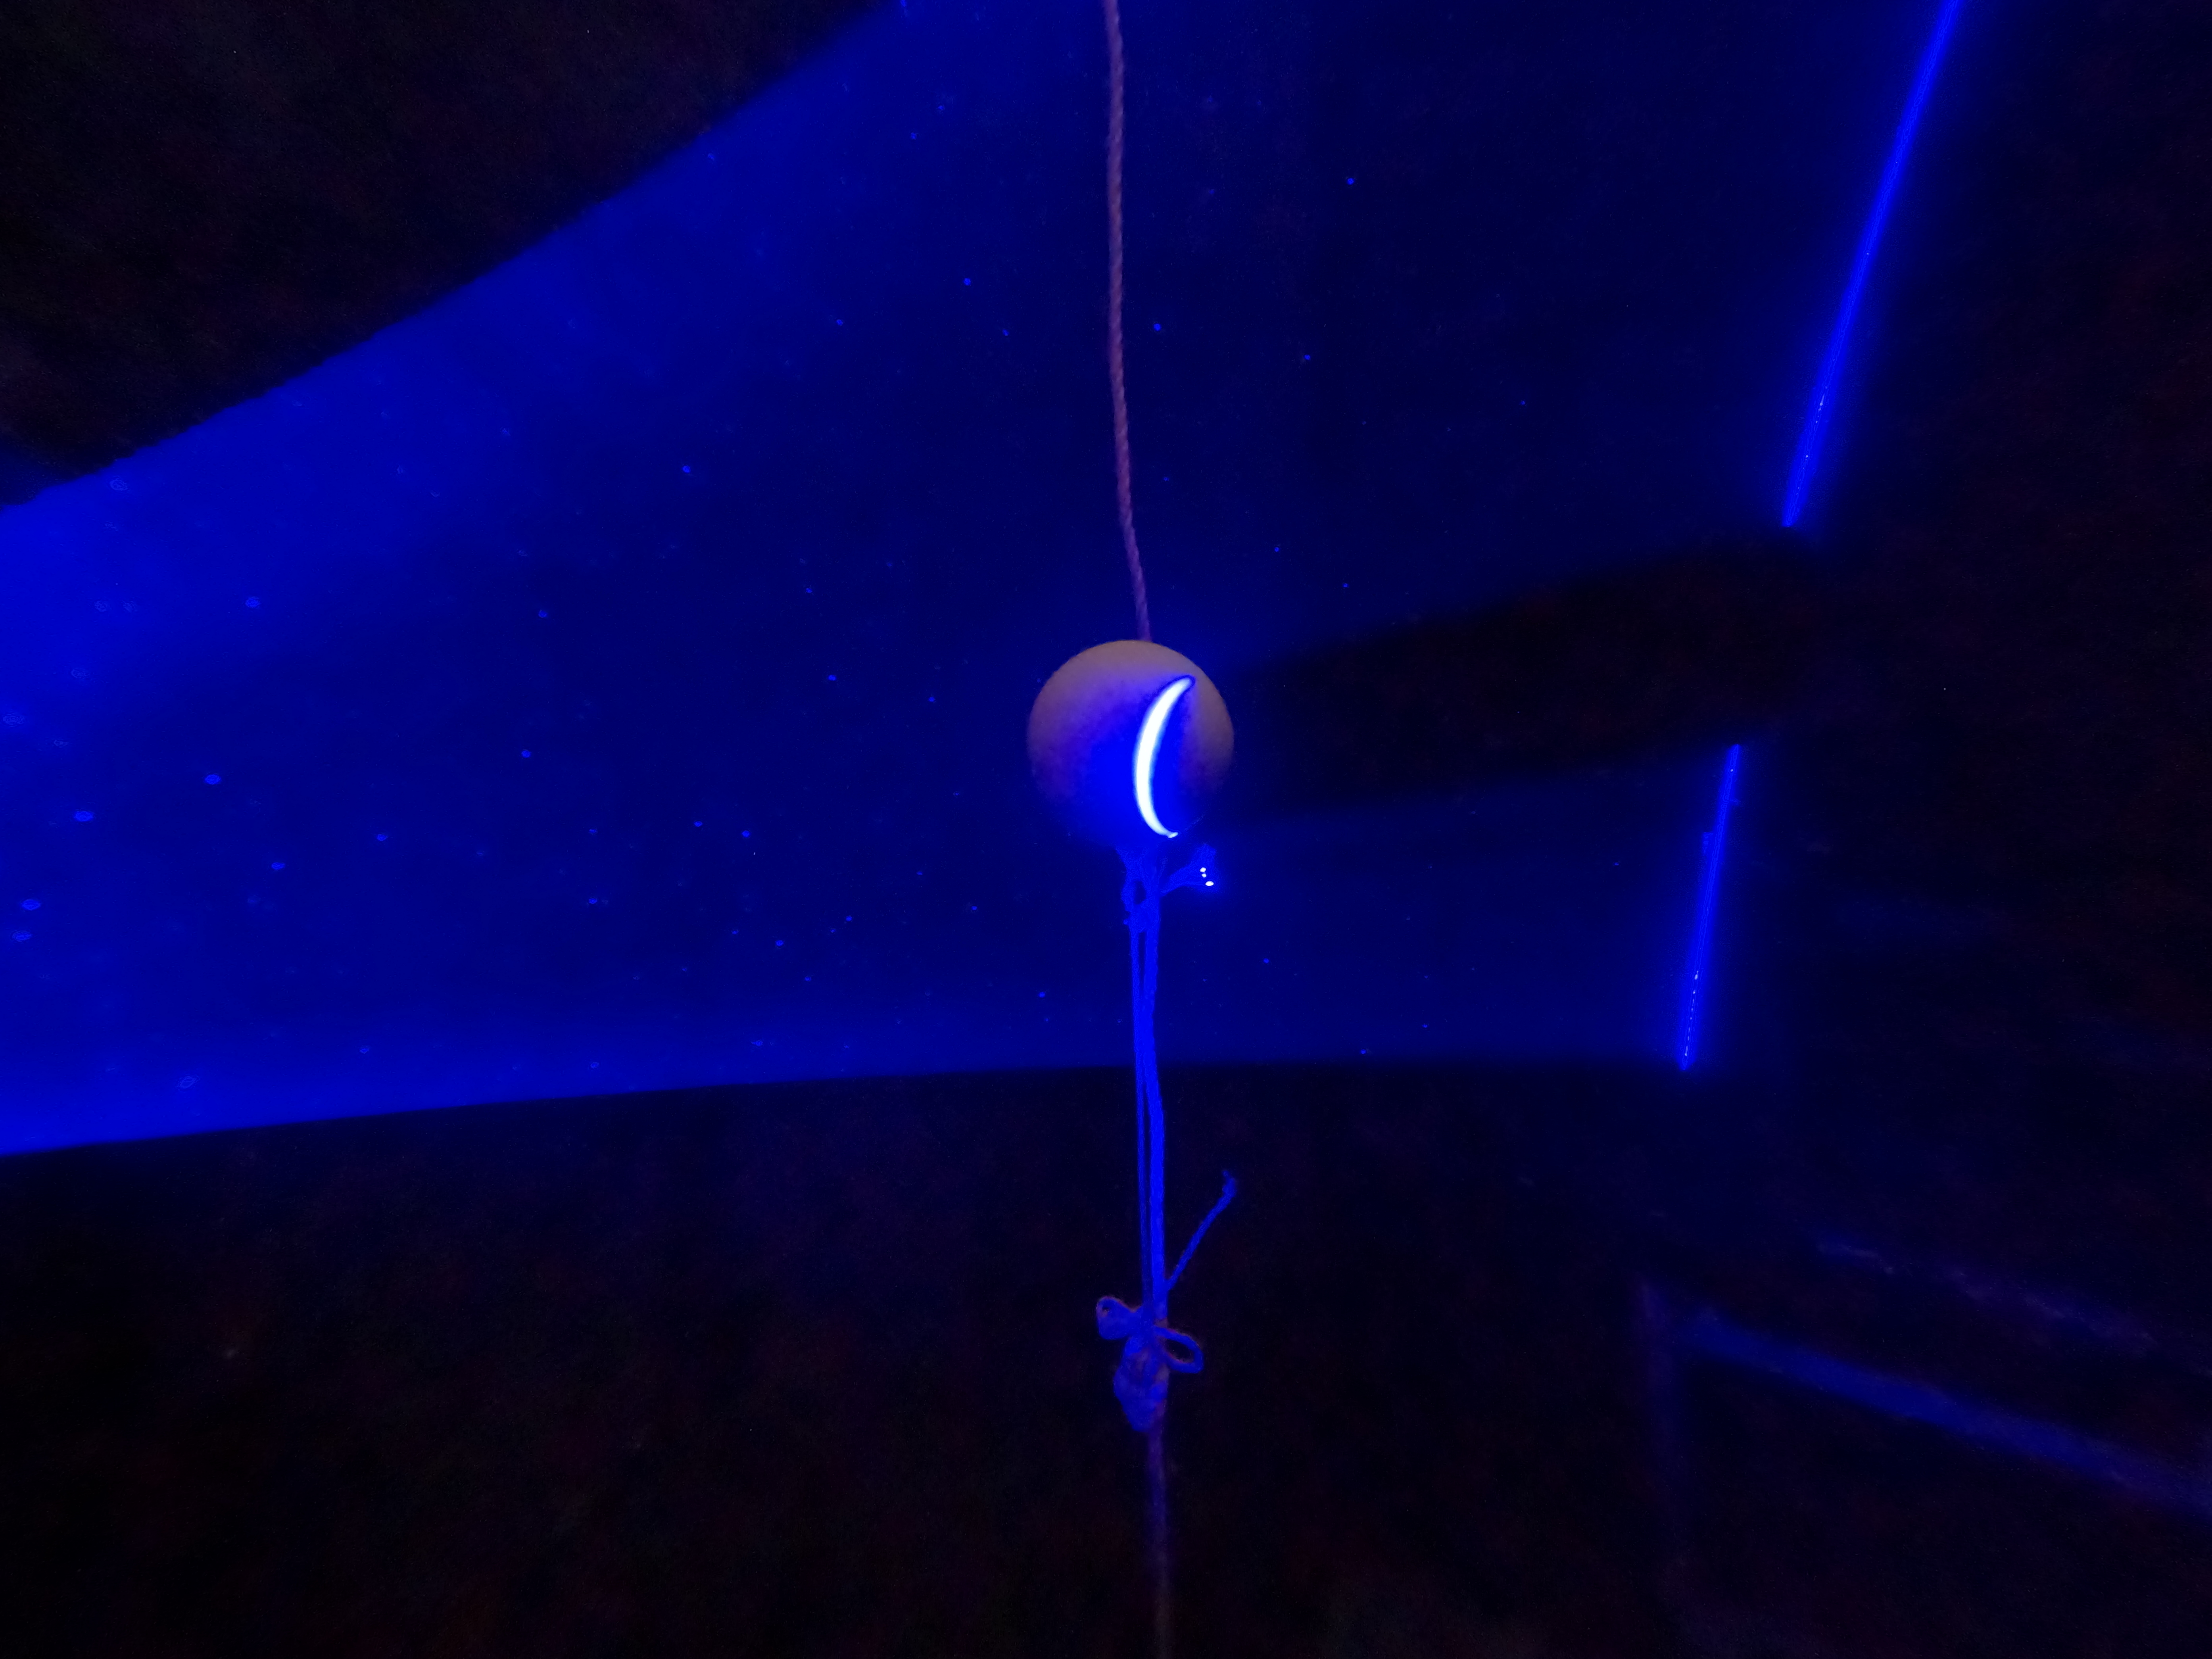

Supplement: Supplementary file 1153 [file G0032867.pdf › 7/G0032867.pdf]

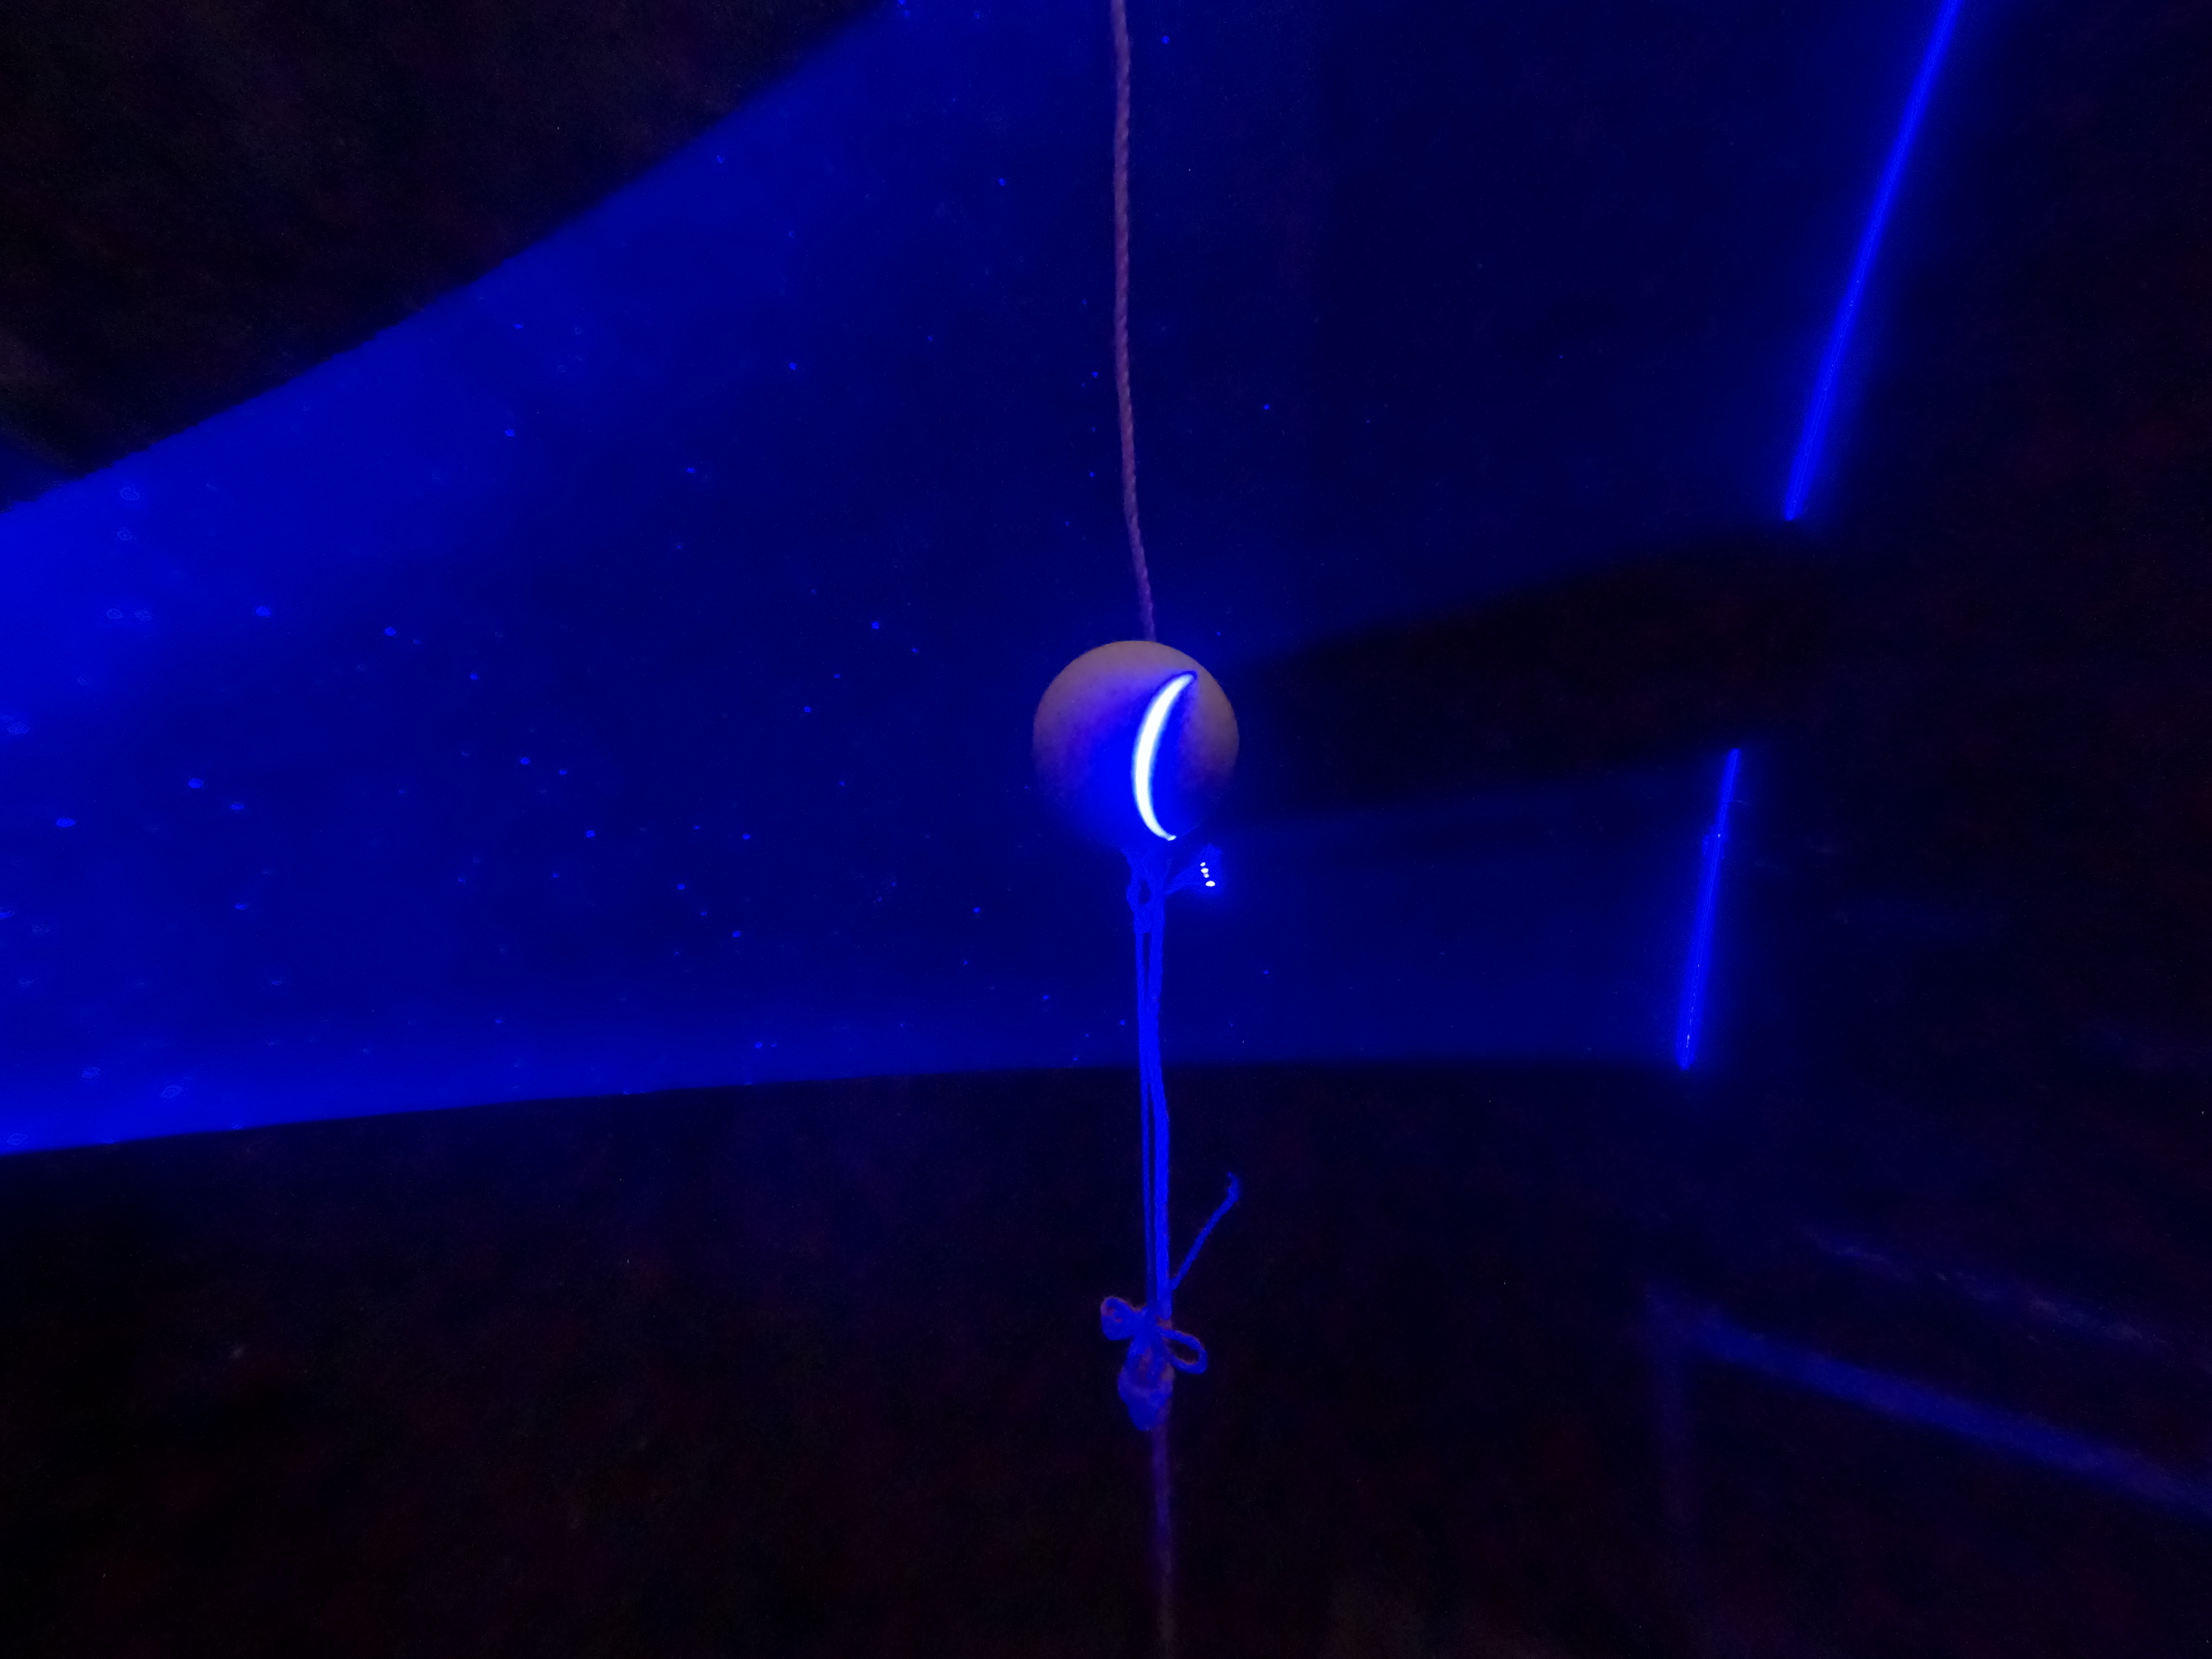

Supplement: Supplementary file 1154 [file G0032868.pdf › 7/G0032868.pdf]

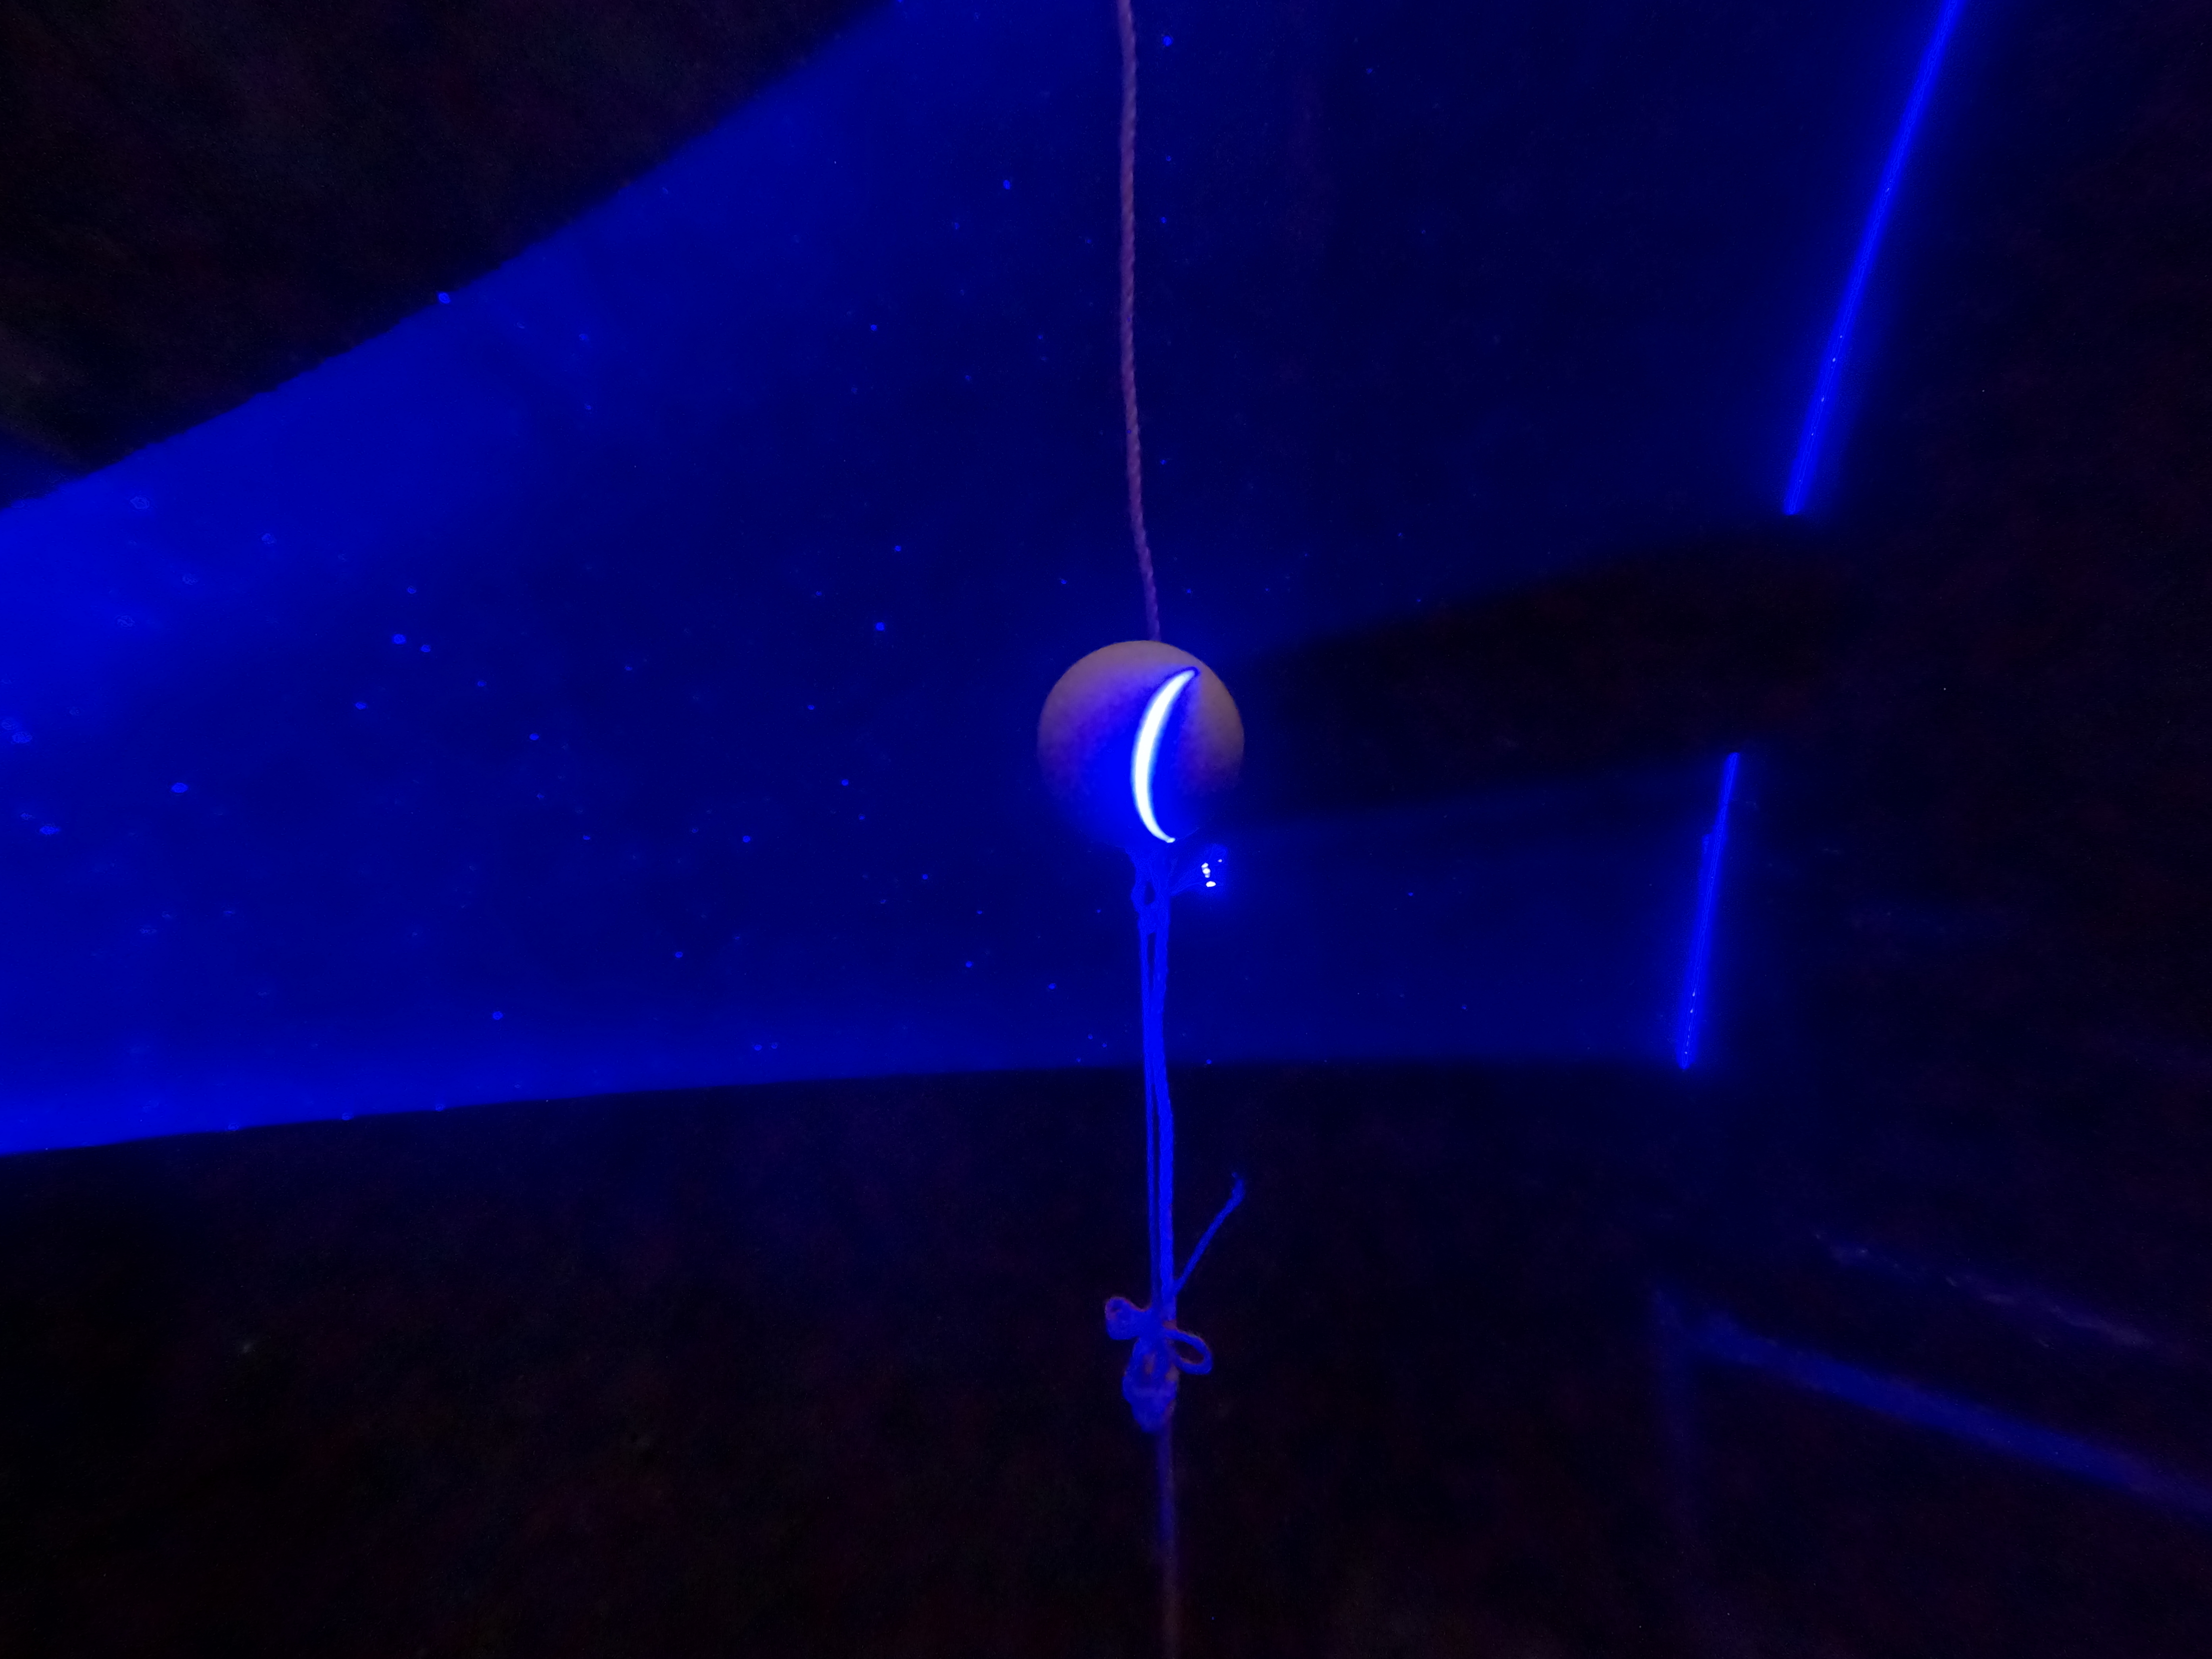

Supplement: Supplementary file 1155 [file G0032869.pdf › 7/G0032869.pdf]

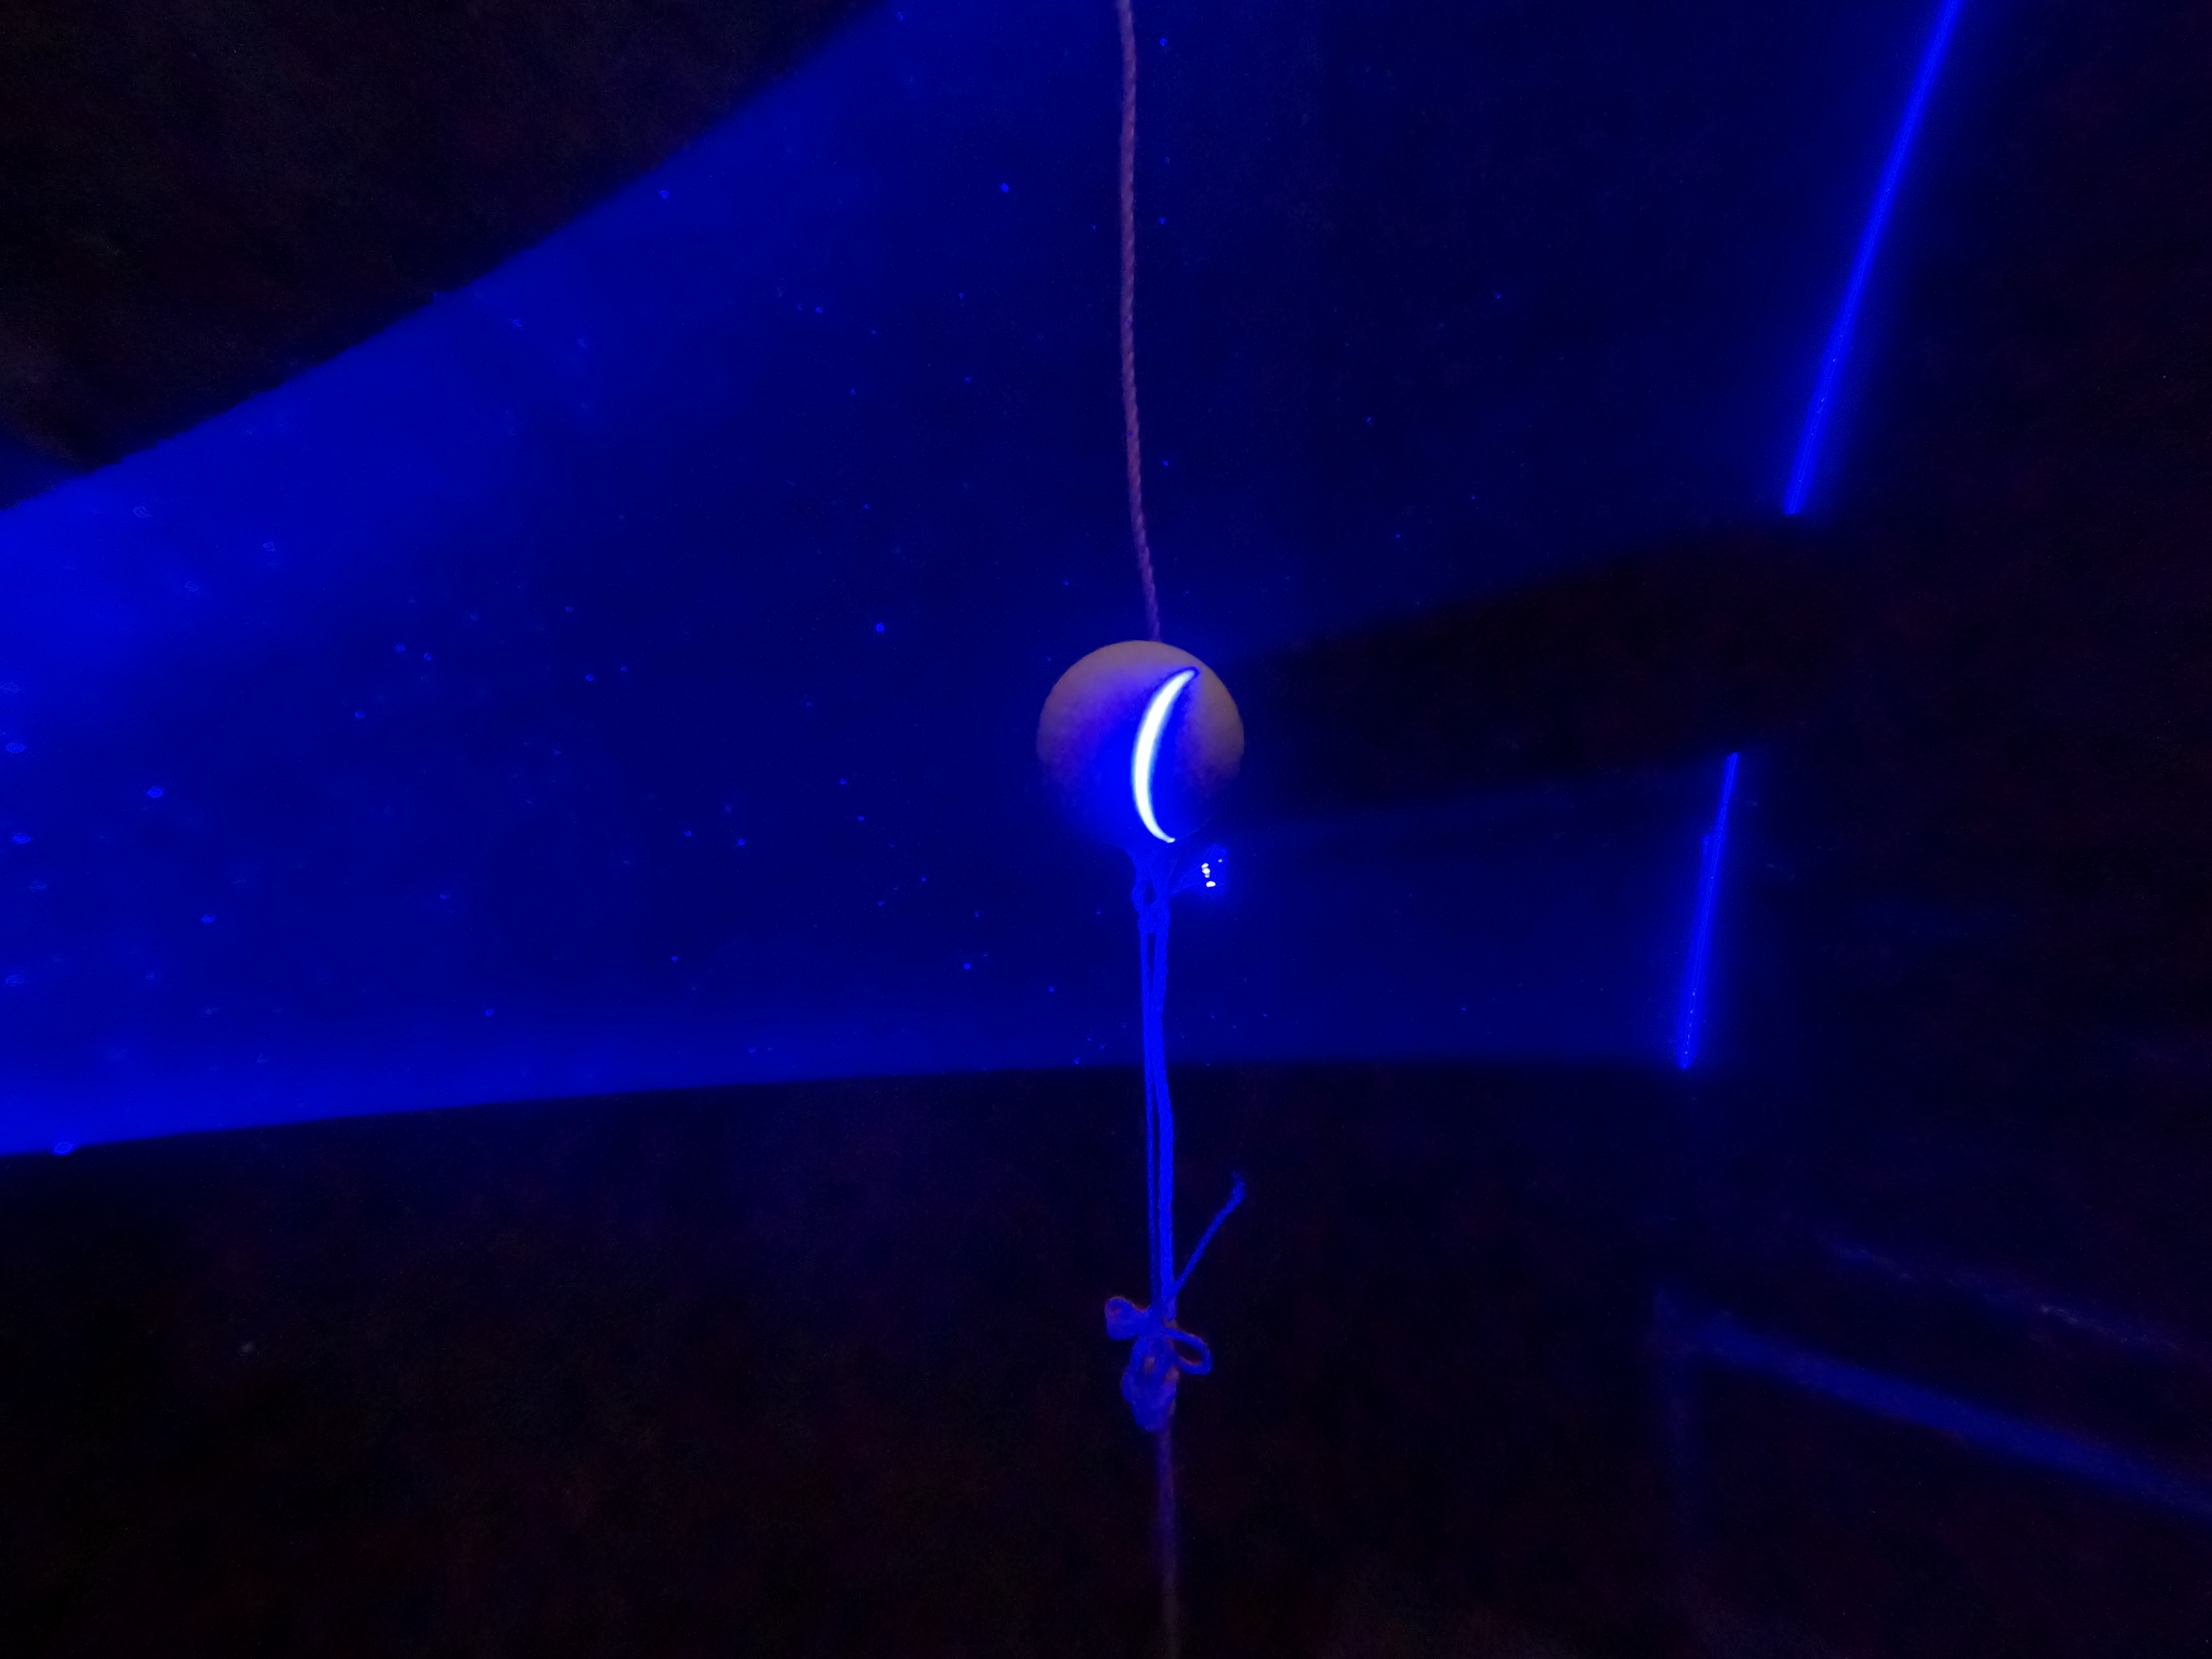

Supplement: Supplementary file 1156 [file G0032870.pdf › 7/G0032870.pdf]

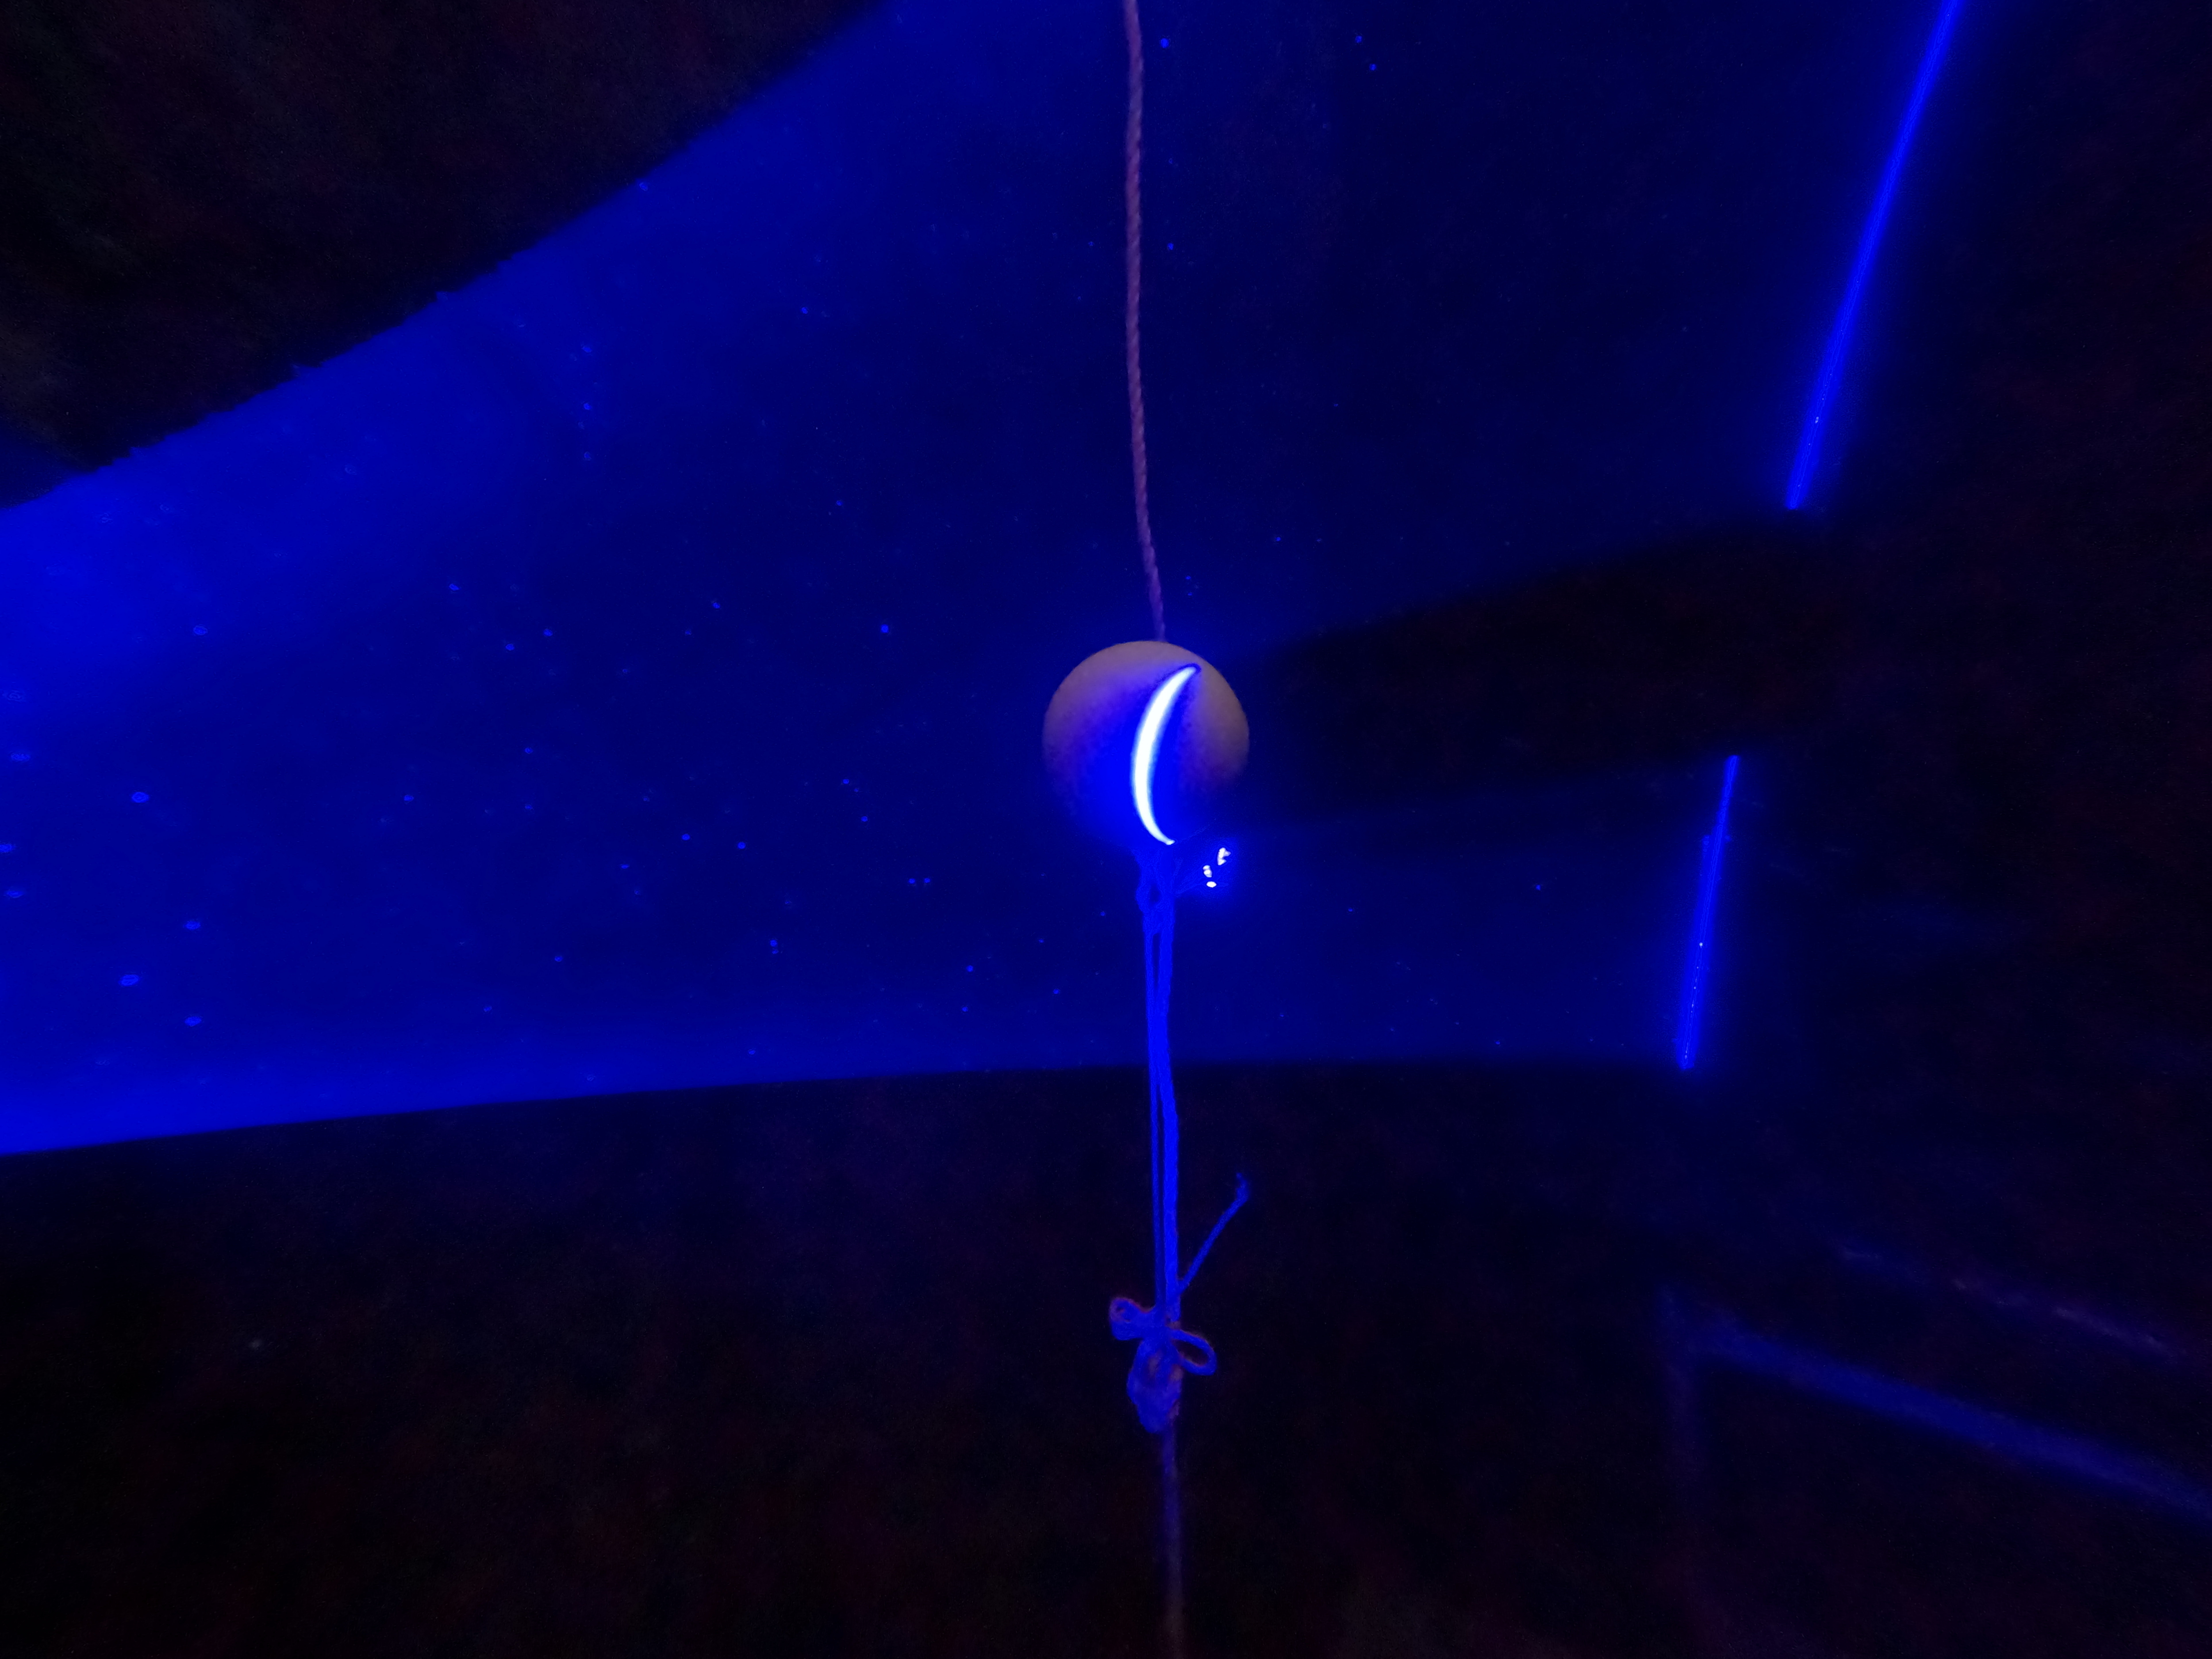

Supplement: Supplementary file 1157 [file G0032871.pdf › 7/G0032871.pdf]

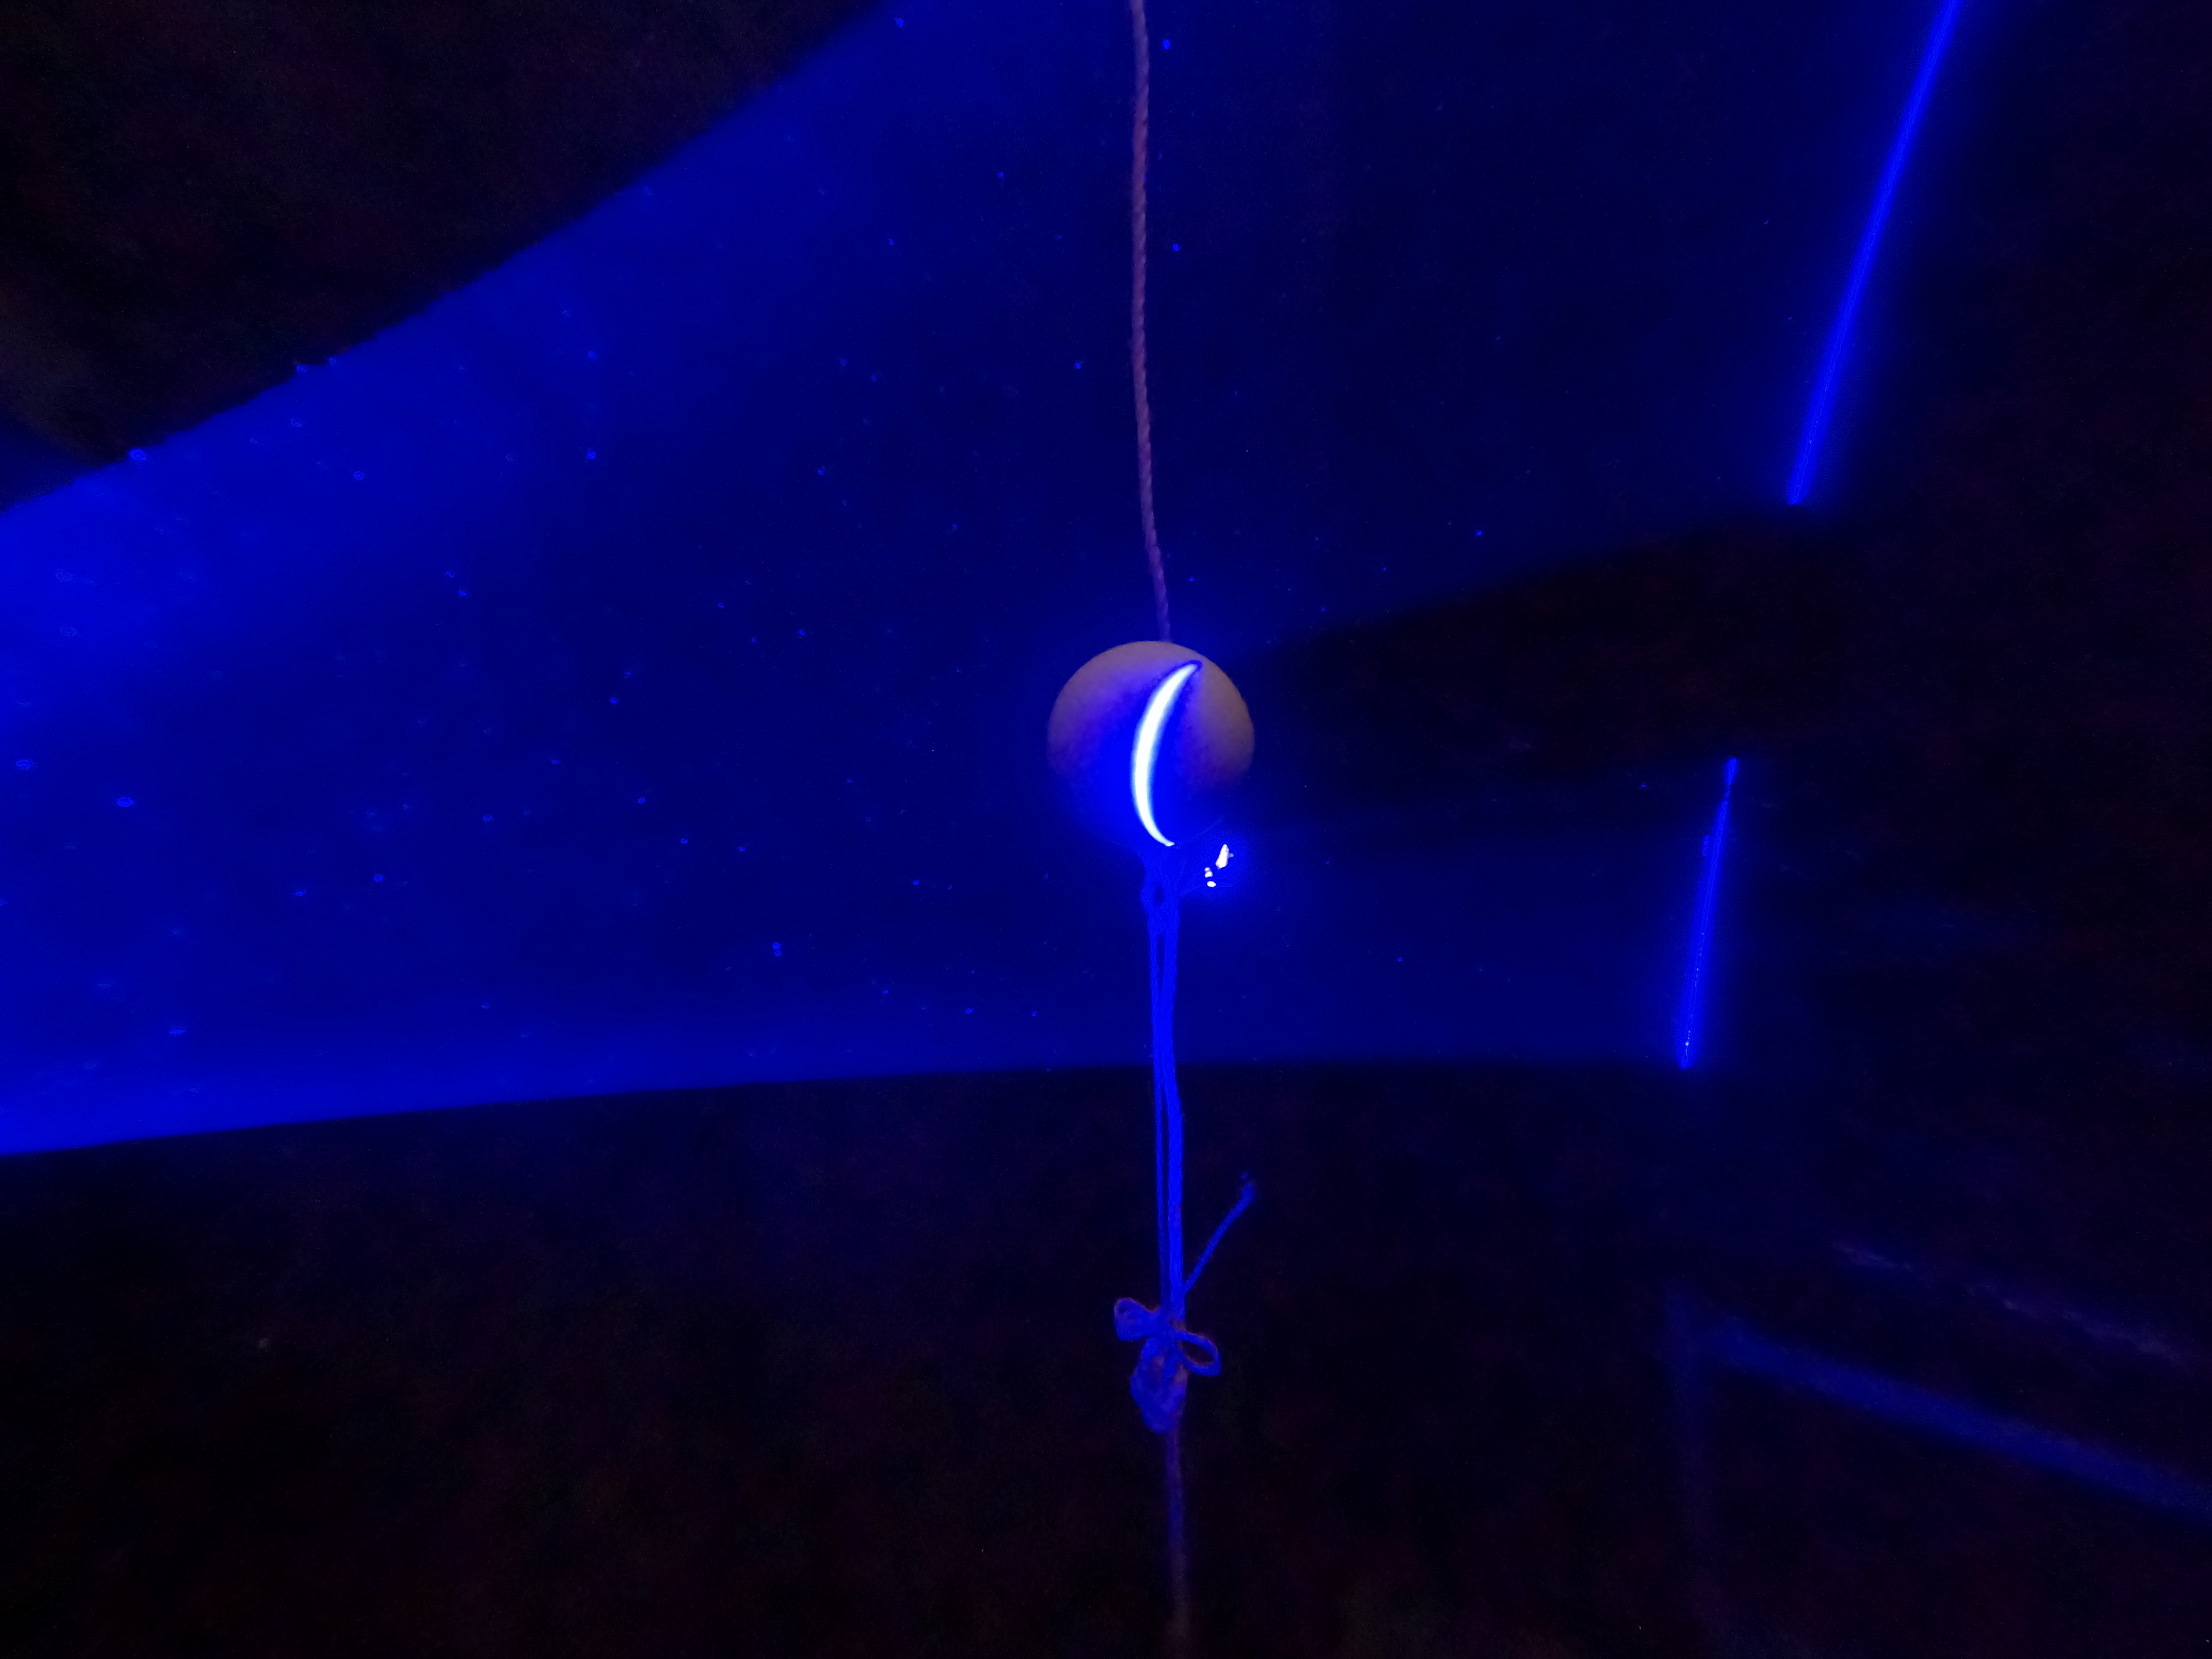

Supplement: Supplementary file 1158 [file G0032872.pdf › 7/G0032872.pdf]

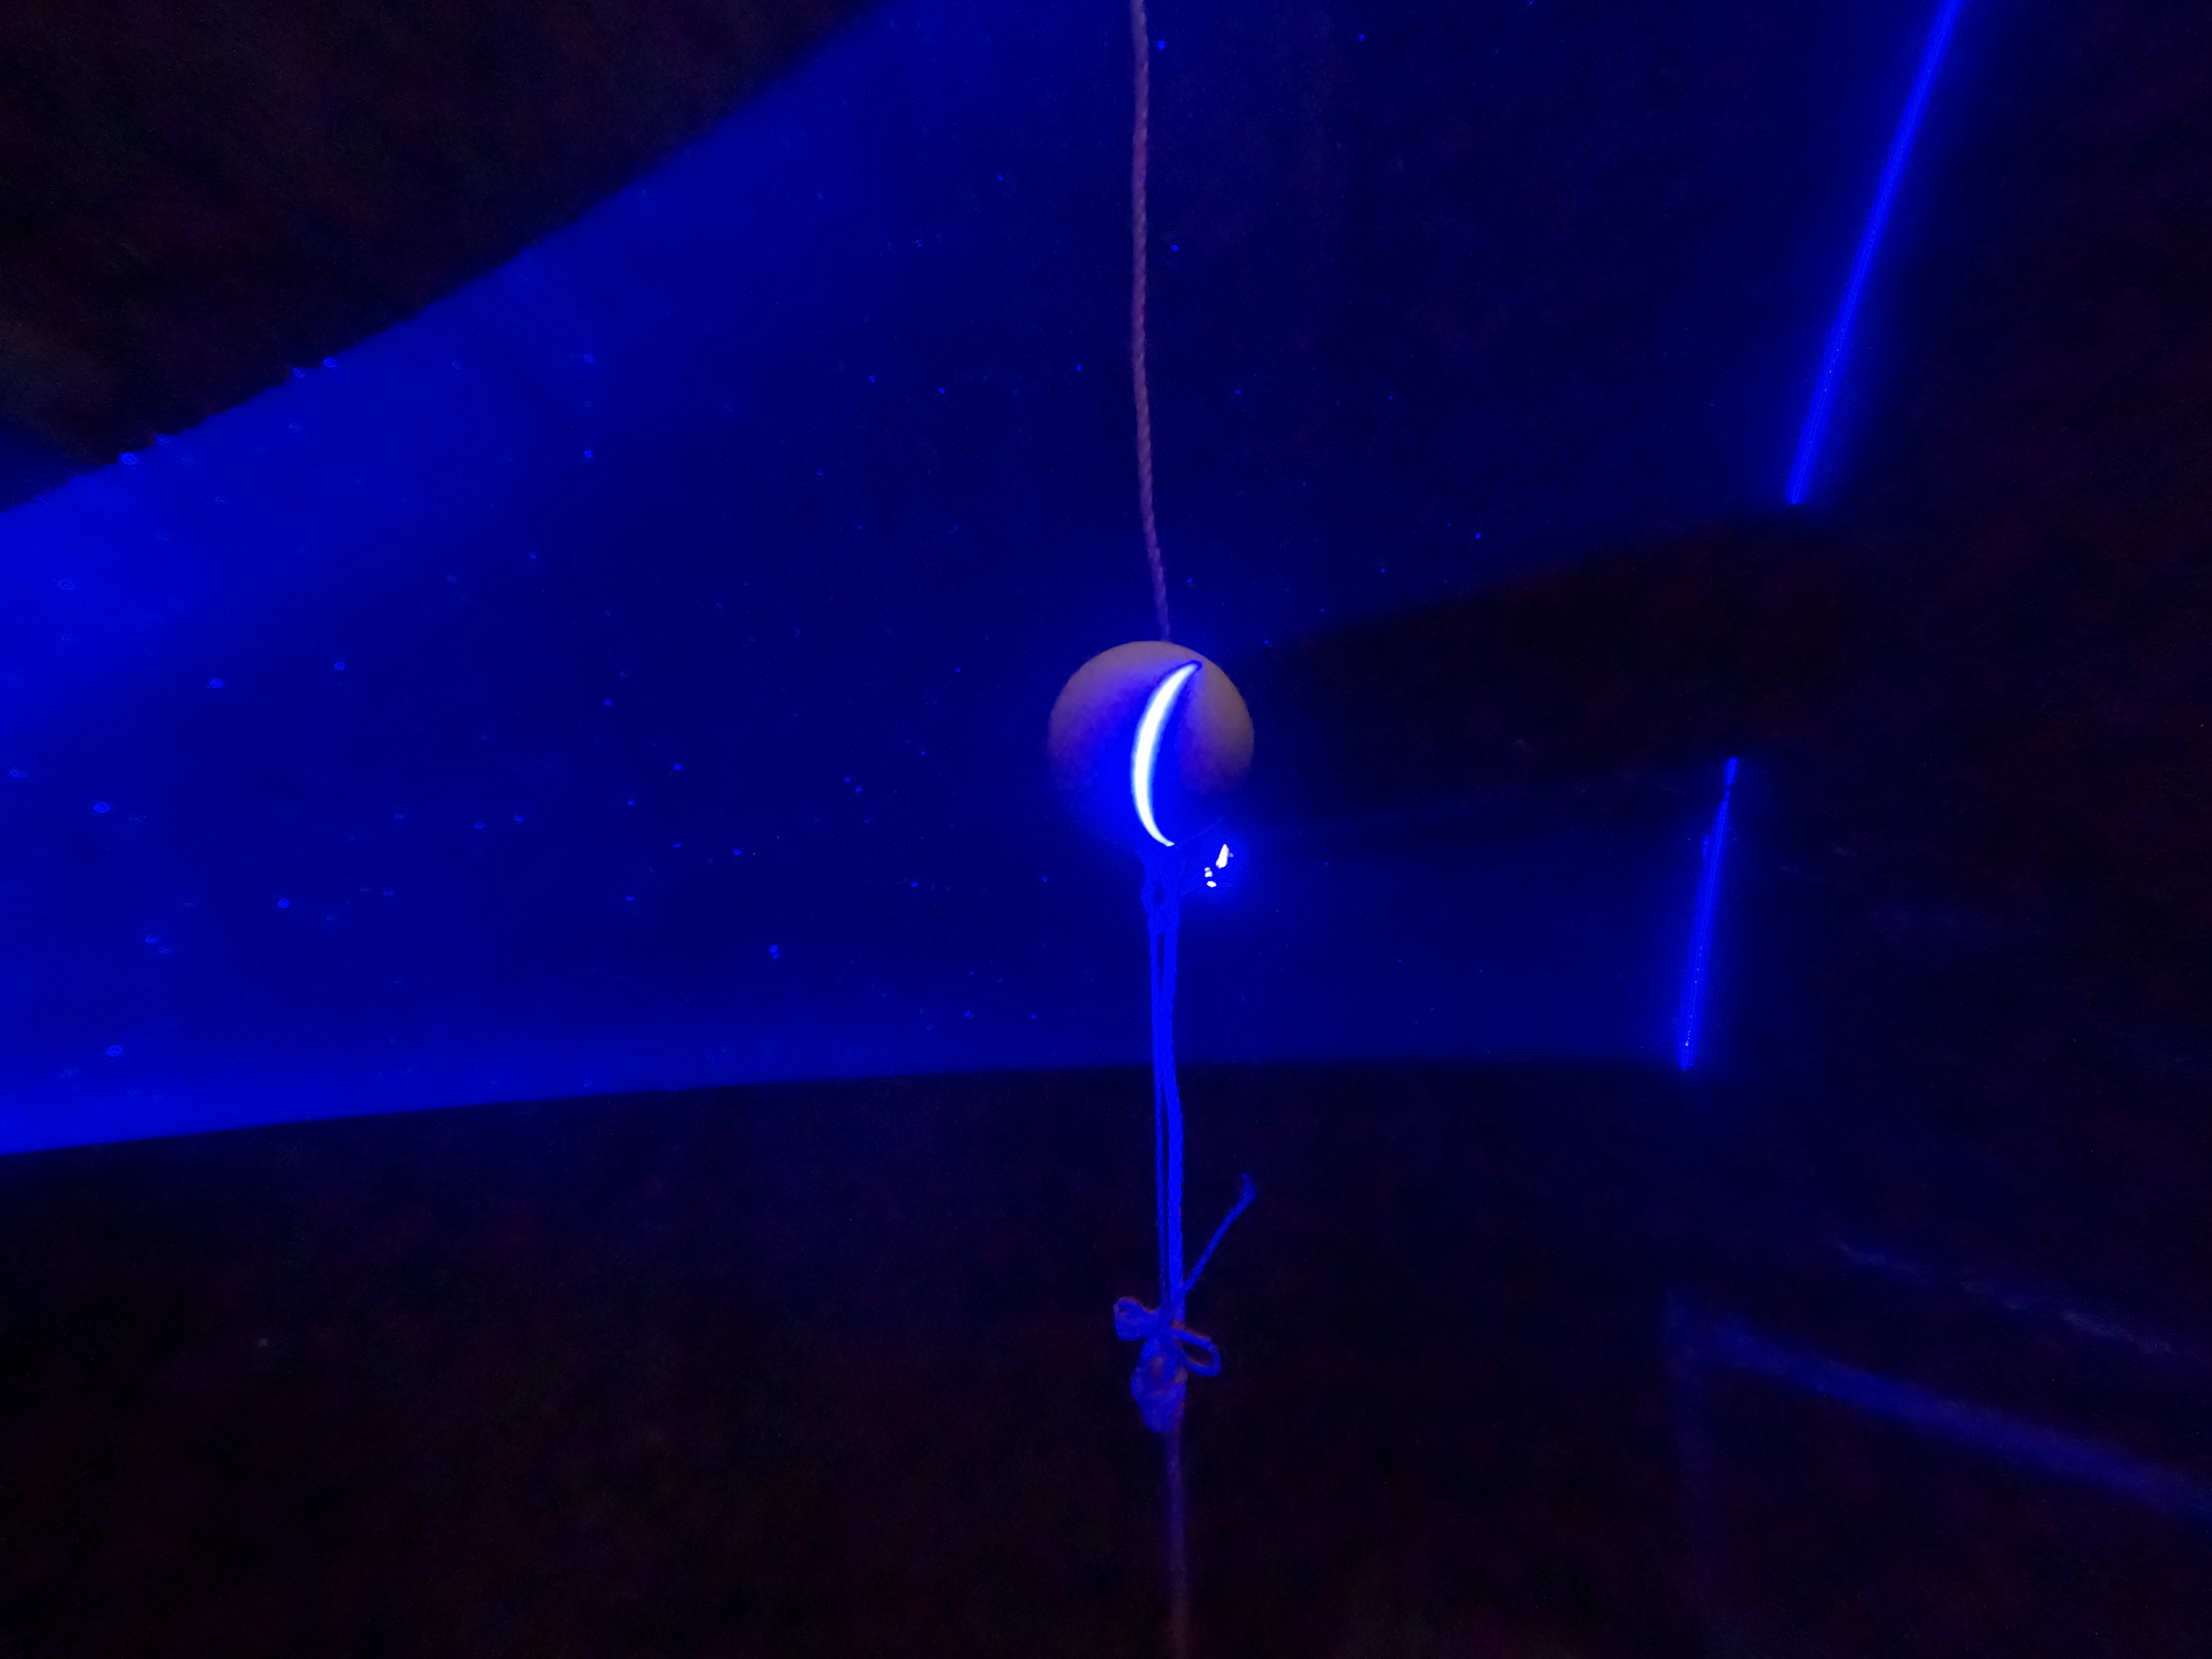

Supplement: Supplementary file 1159 [file G0032873.pdf › 7/G0032873.pdf]

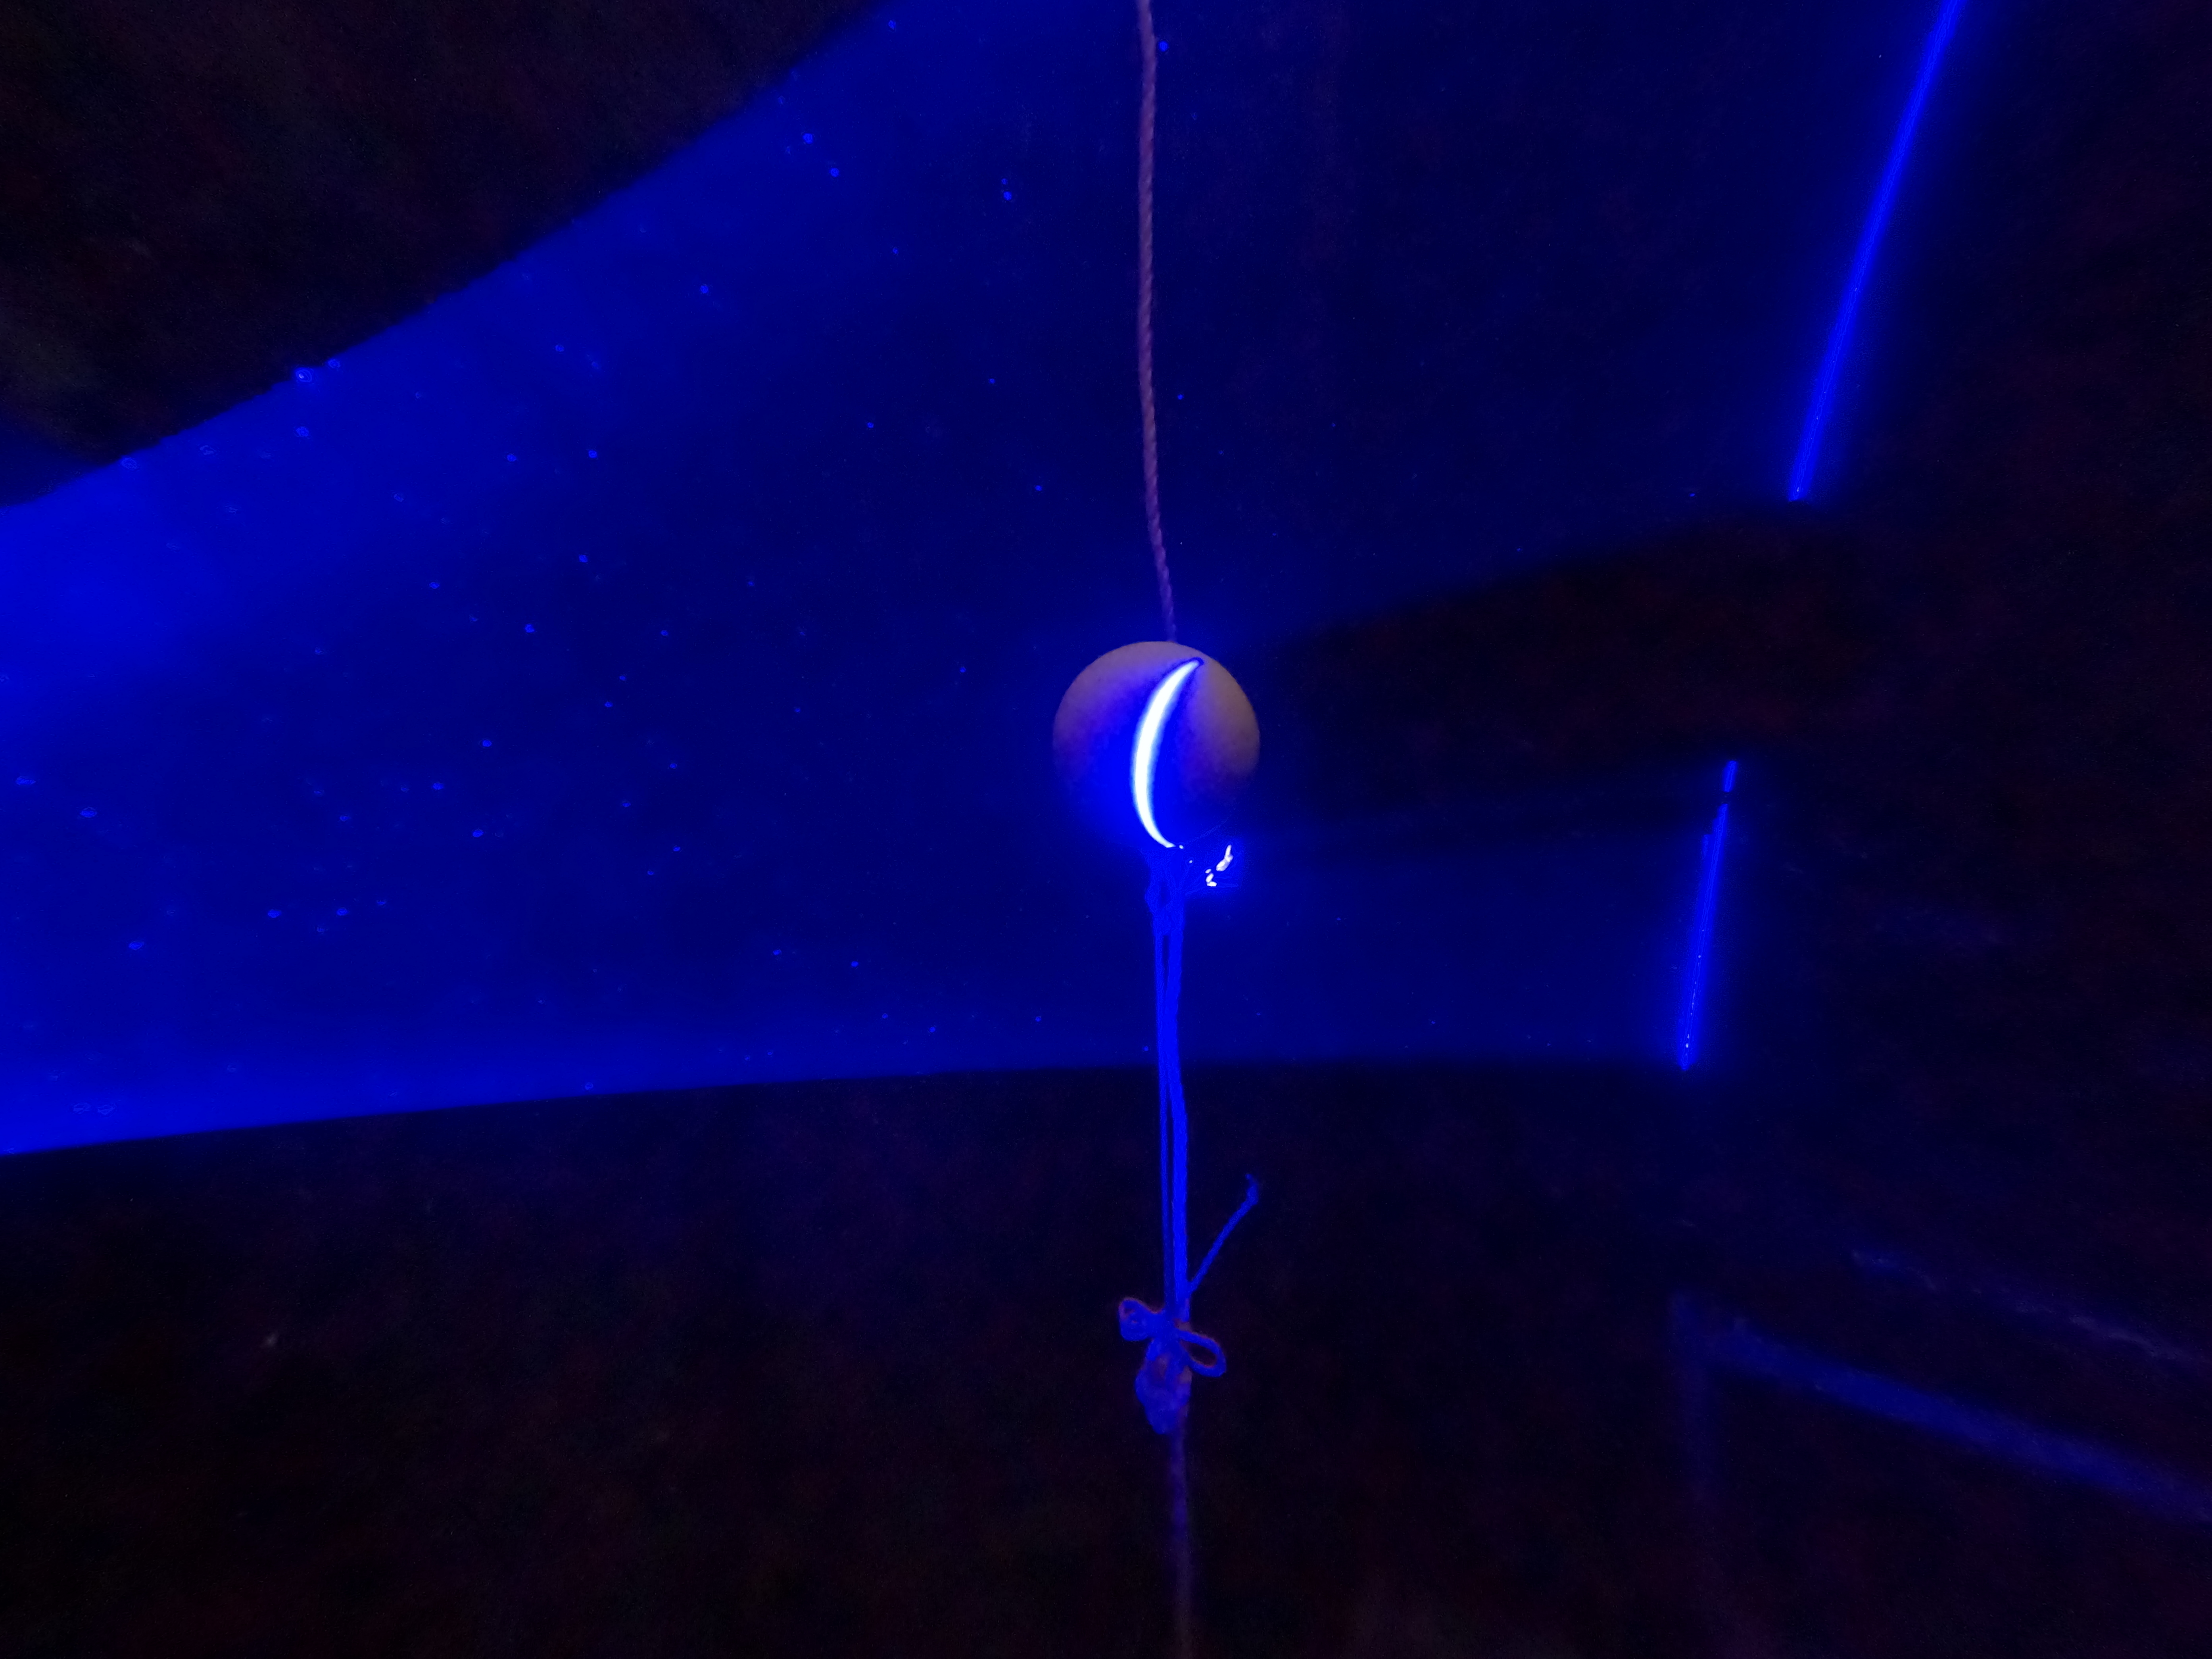

Supplement: Supplementary file 1160 [file G0032874.pdf › 7/G0032874.pdf]

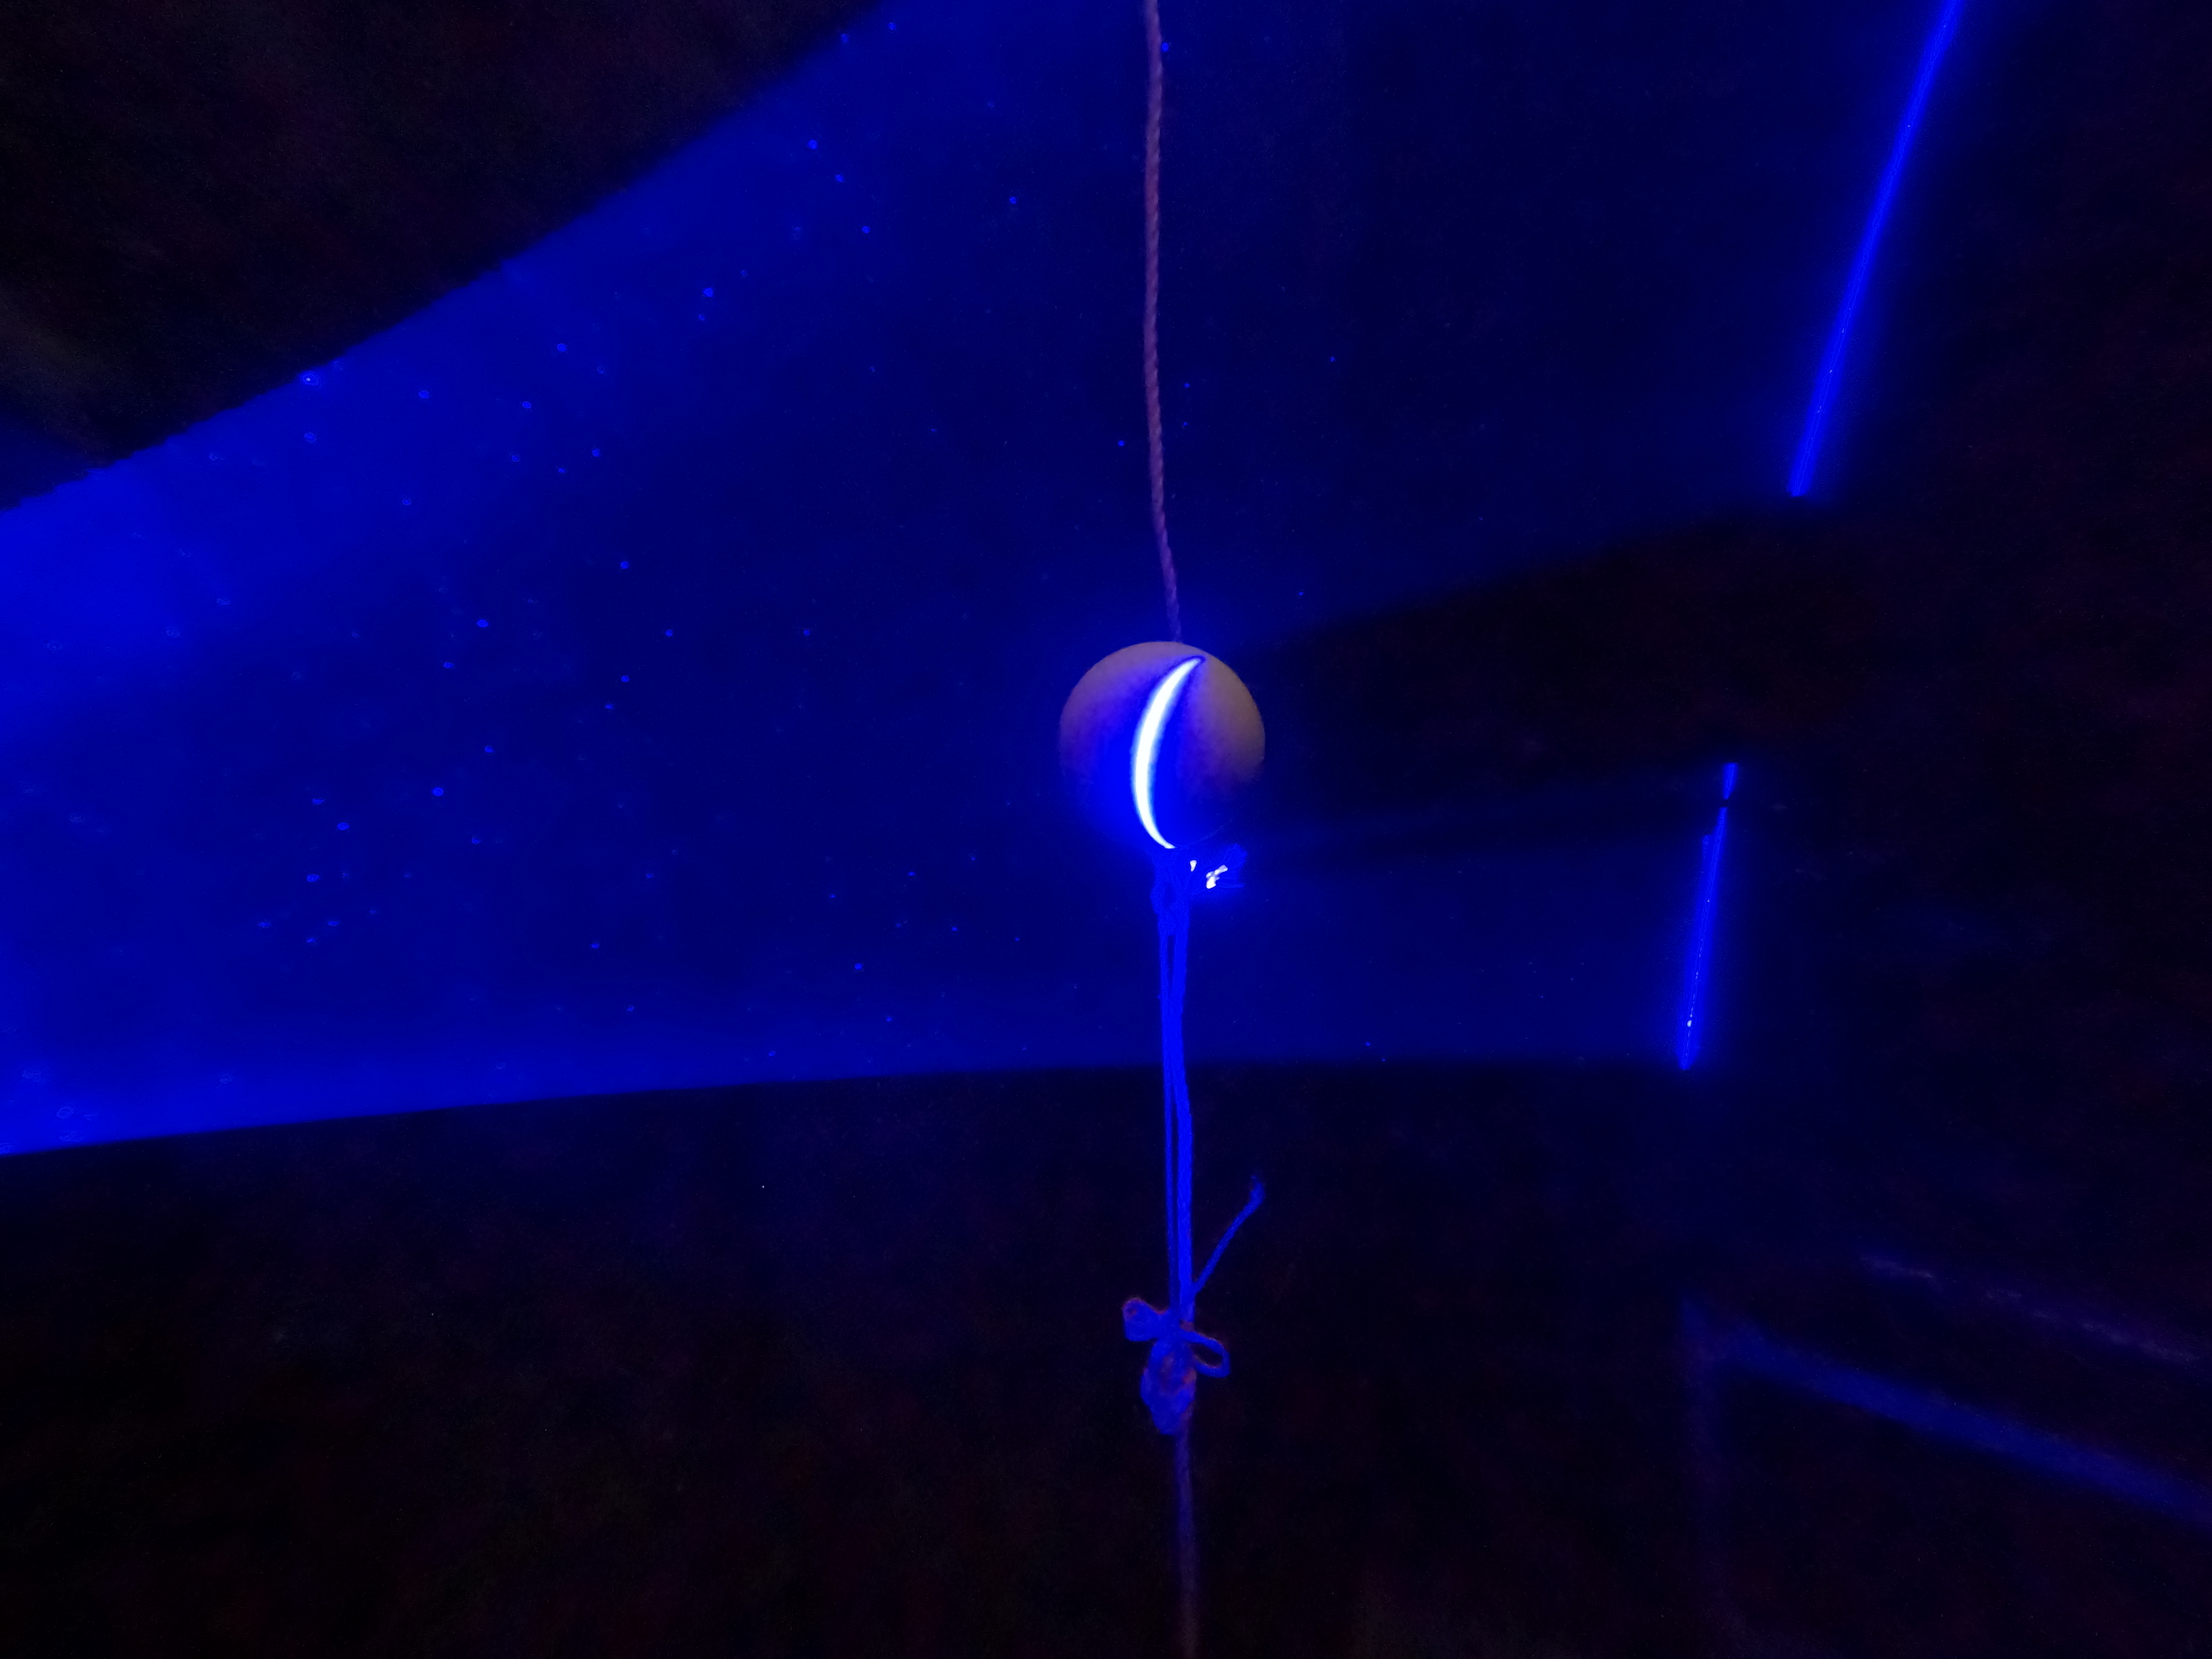

Supplement: Supplementary file 1161 [file G0032875.pdf › 7/G0032875.pdf]

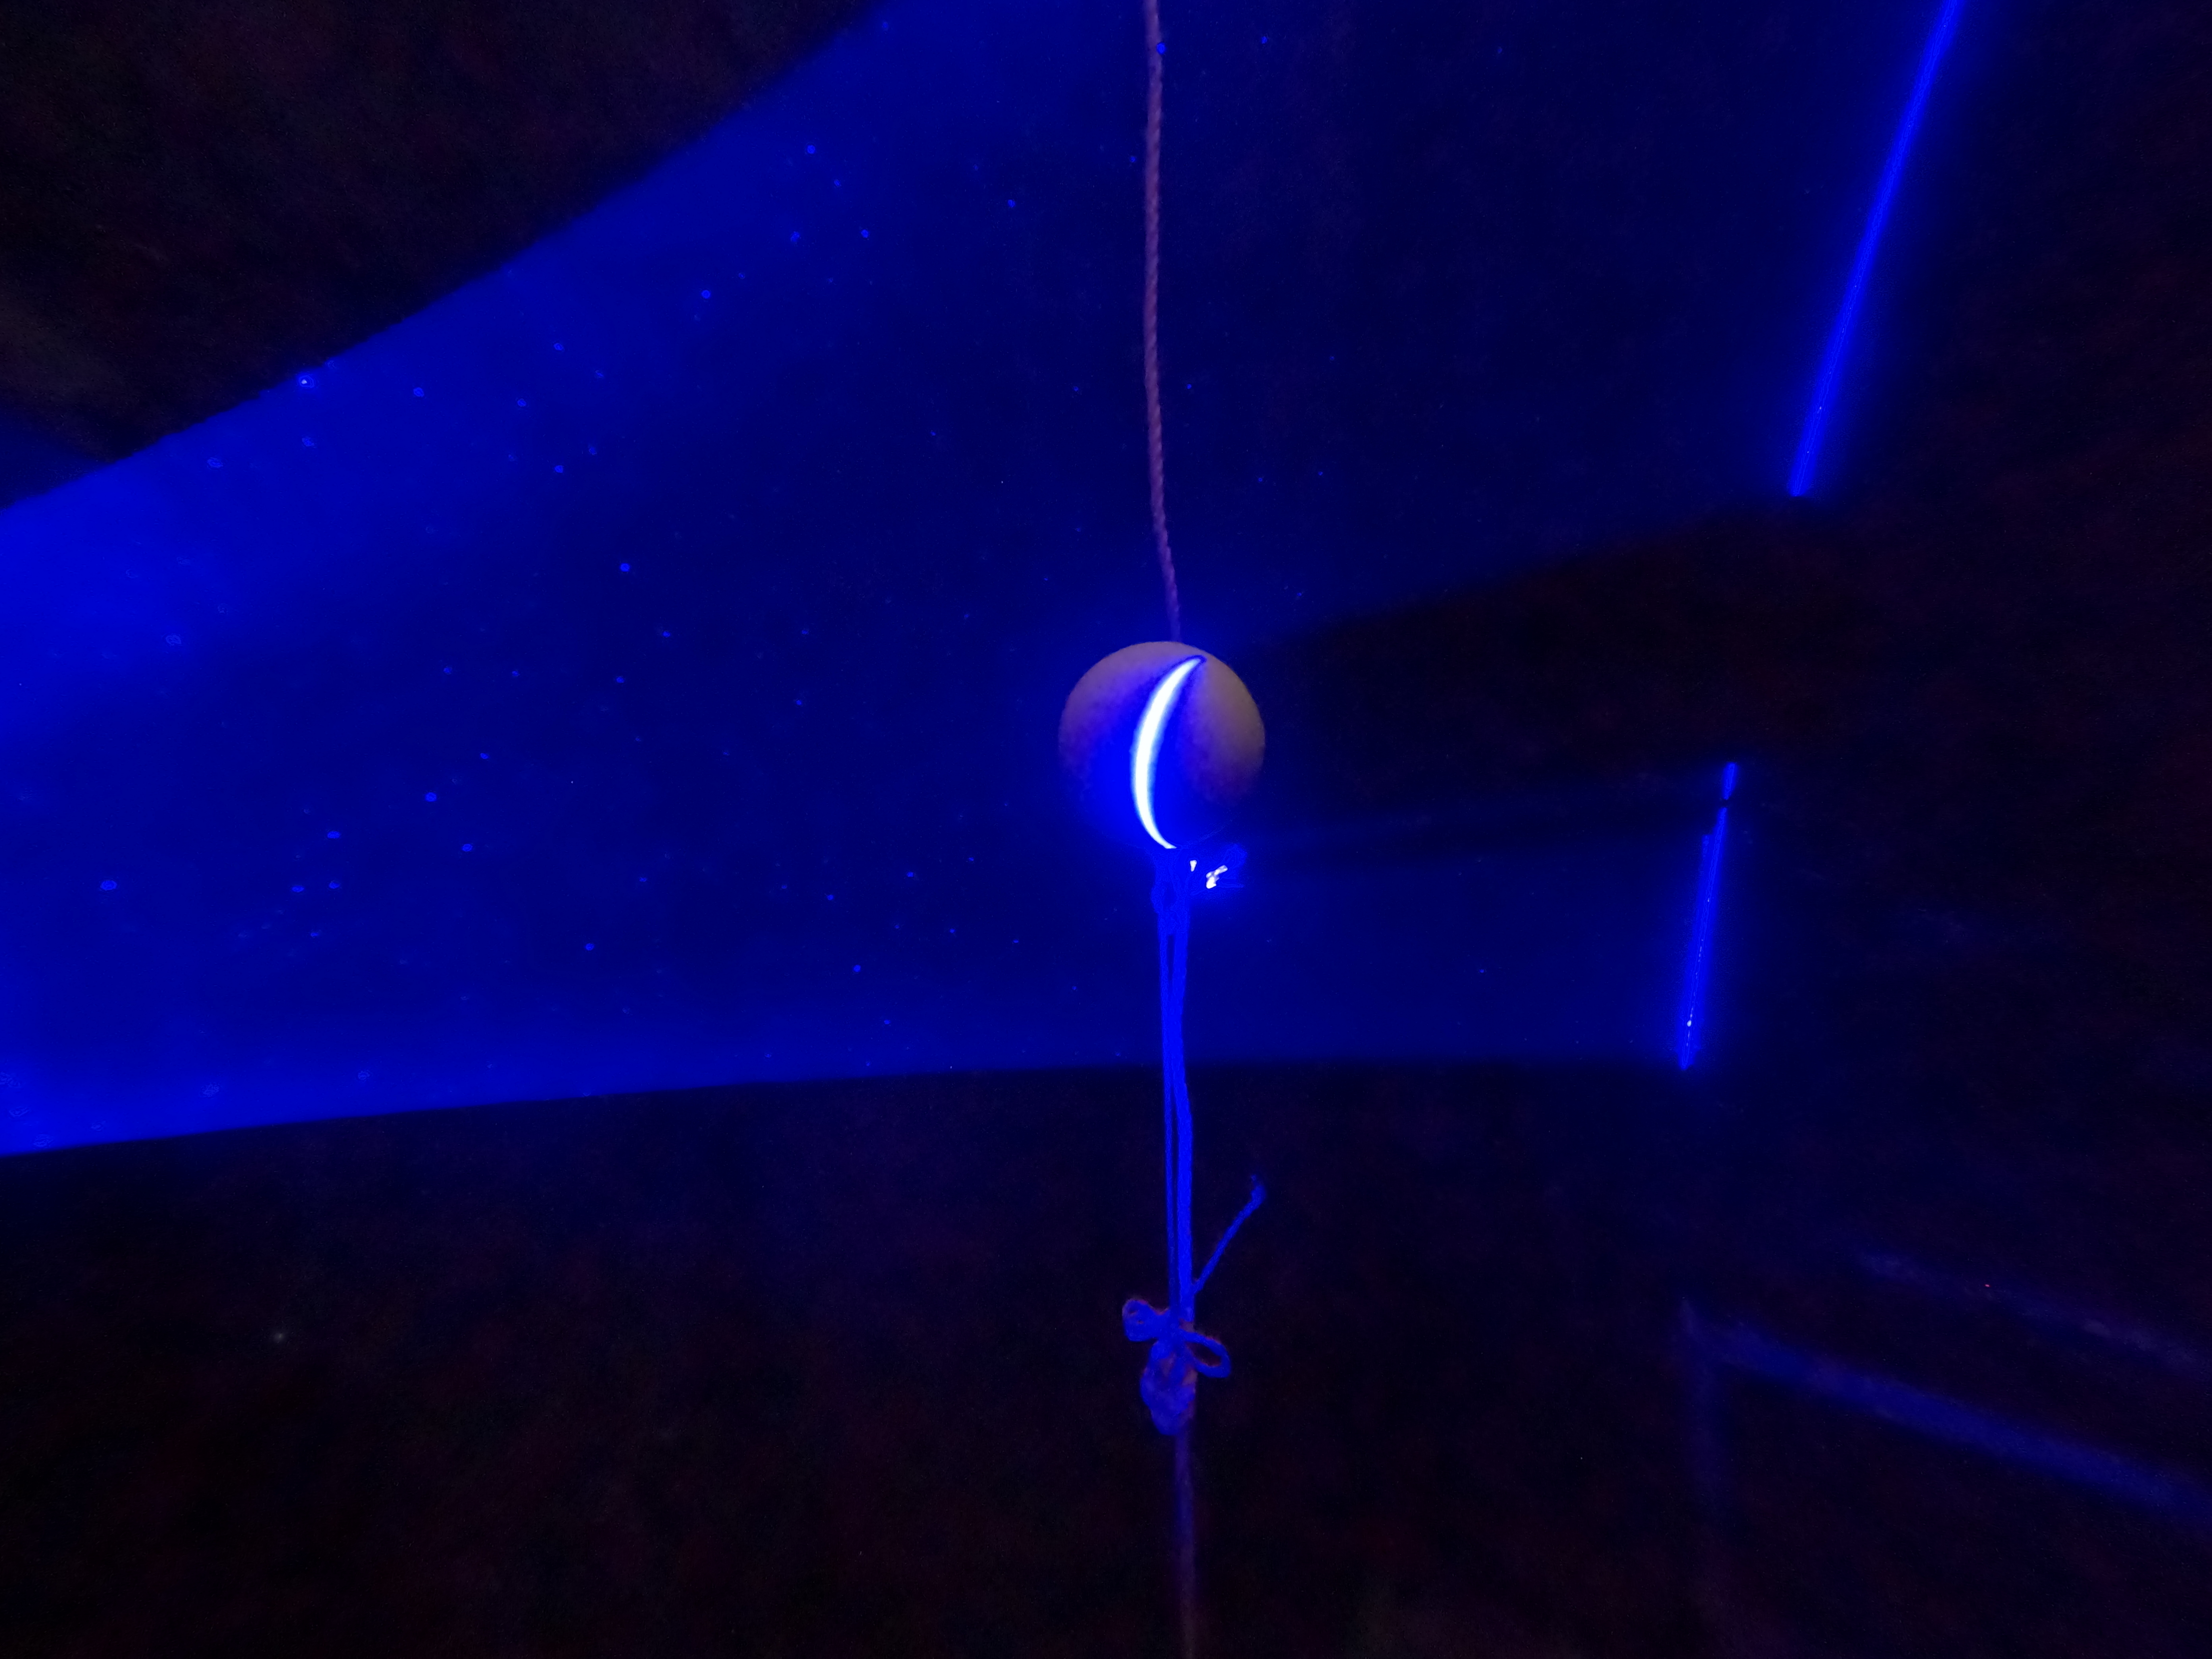

Supplement: Supplementary file 1162 [file G0032876.pdf › 7/G0032876.pdf]

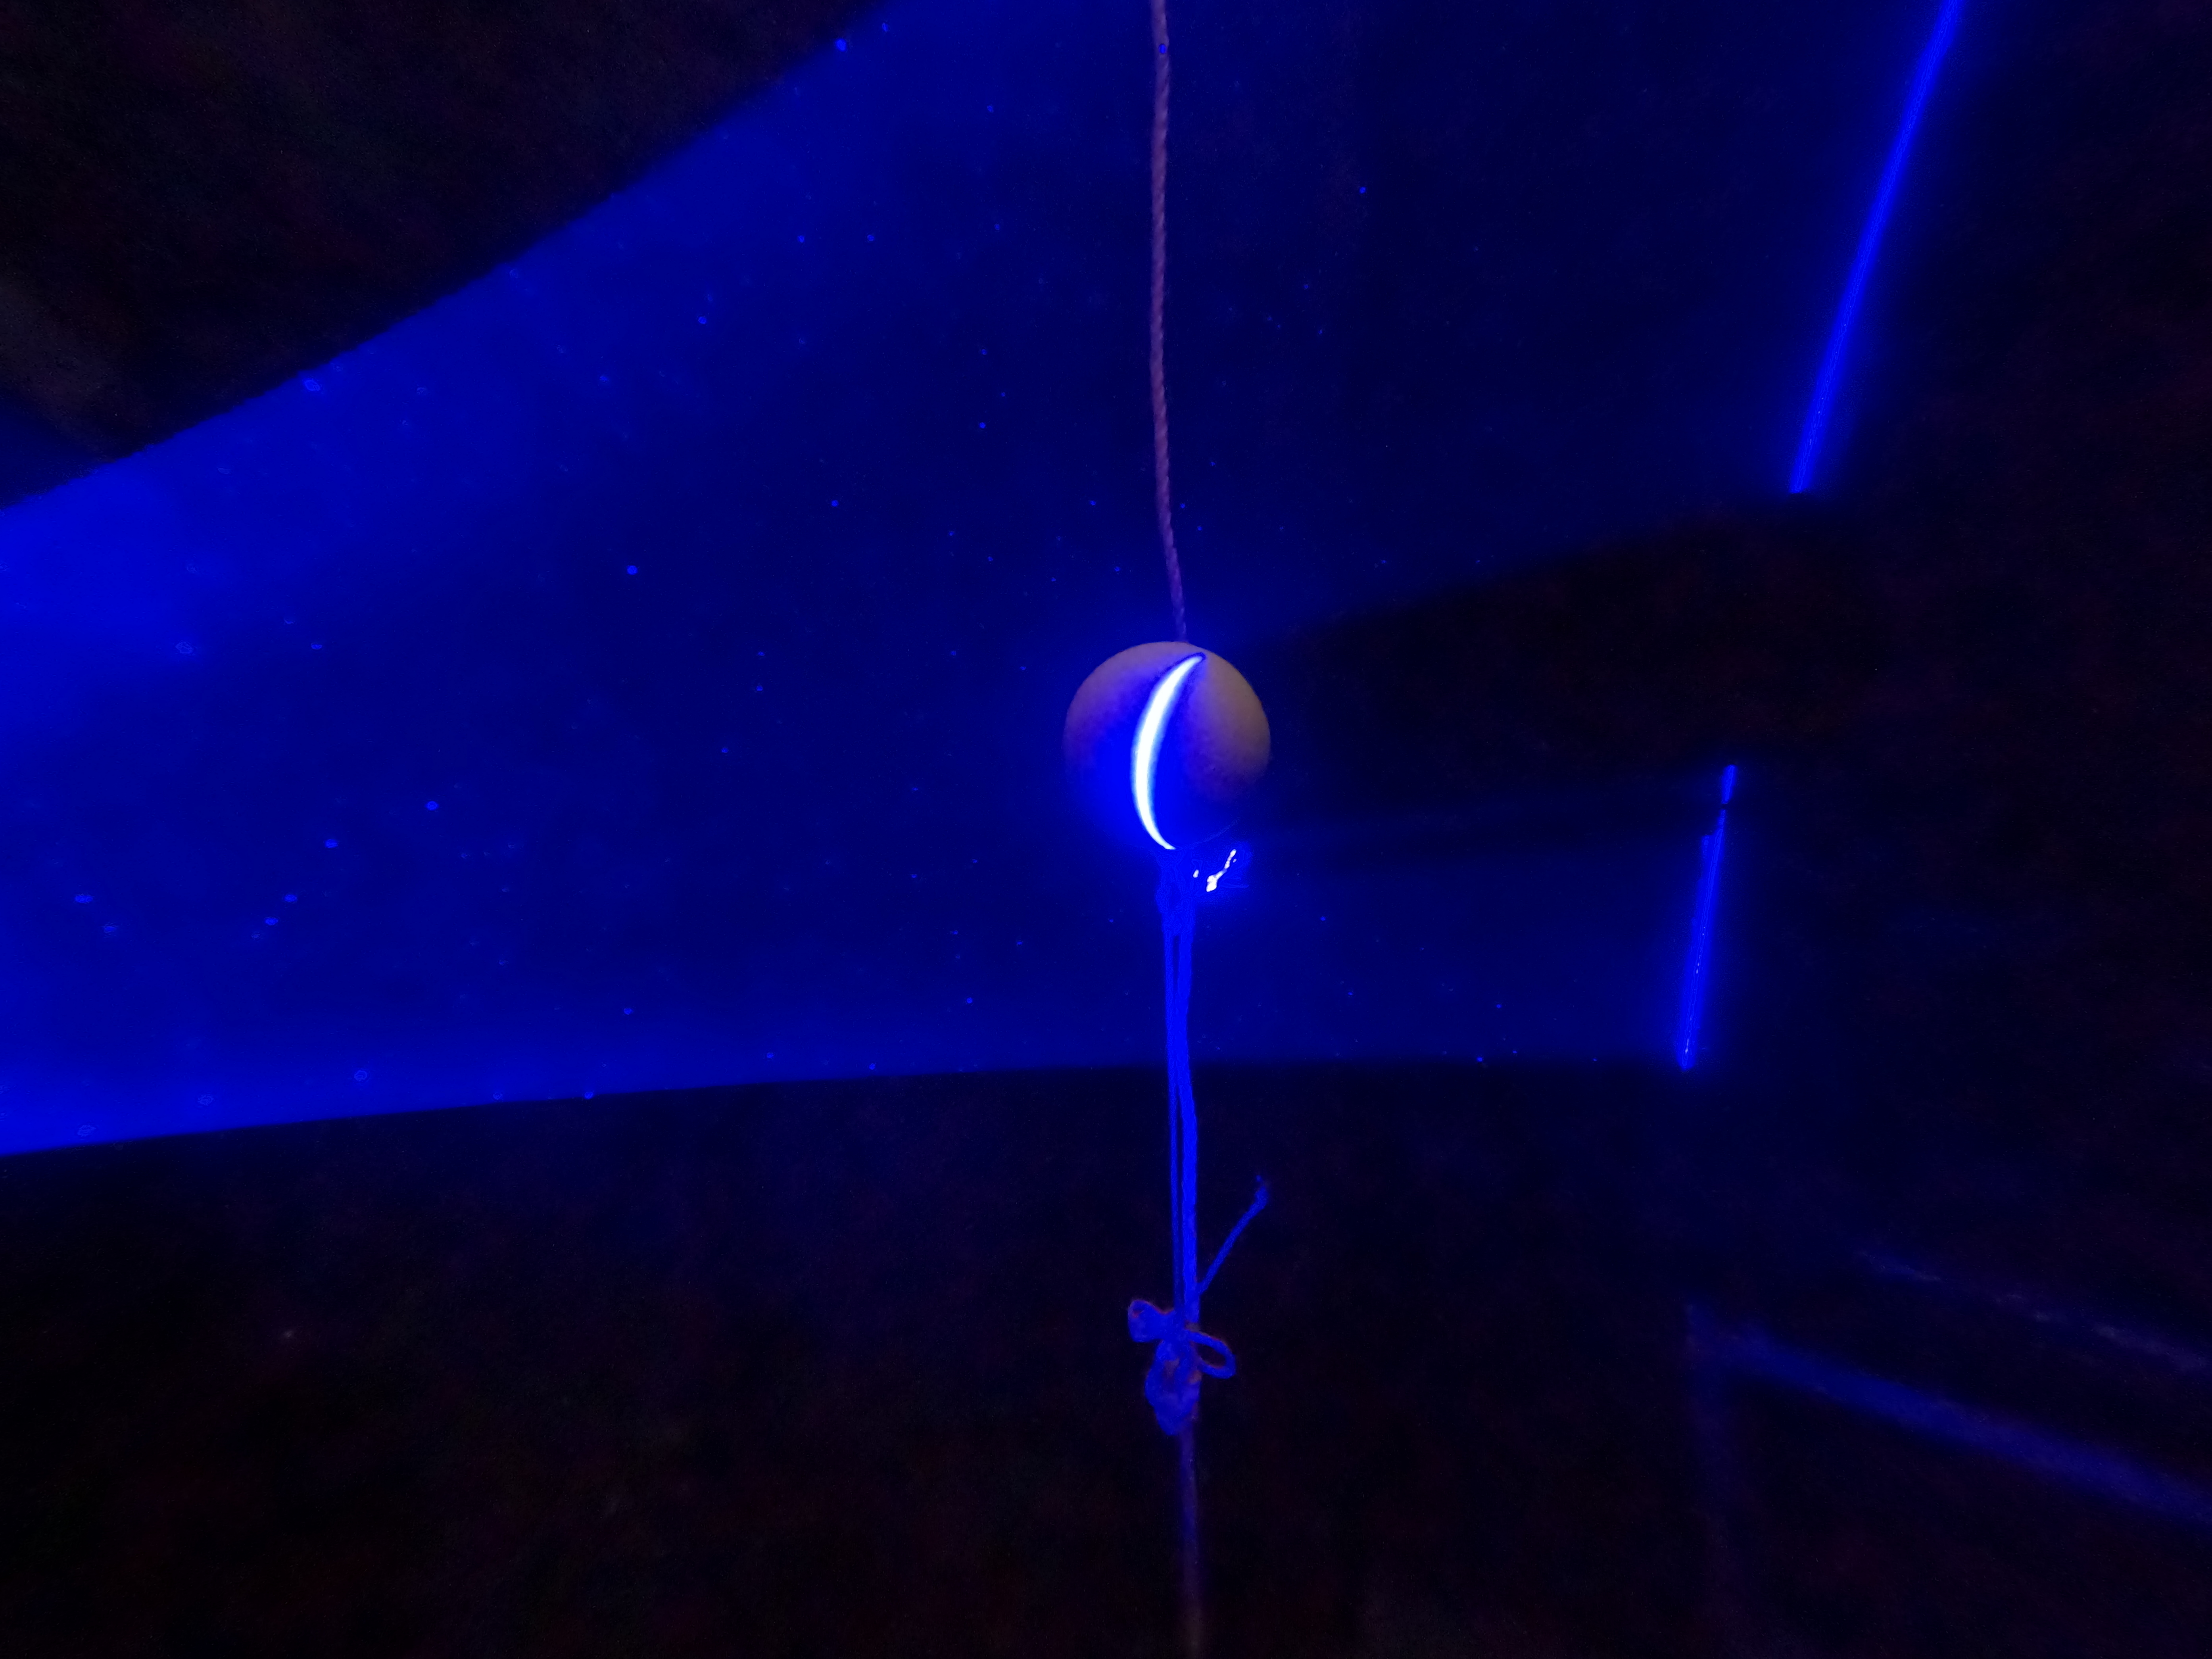

Supplement: Supplementary file 1163 [file G0032877.pdf › 7/G0032877.pdf]

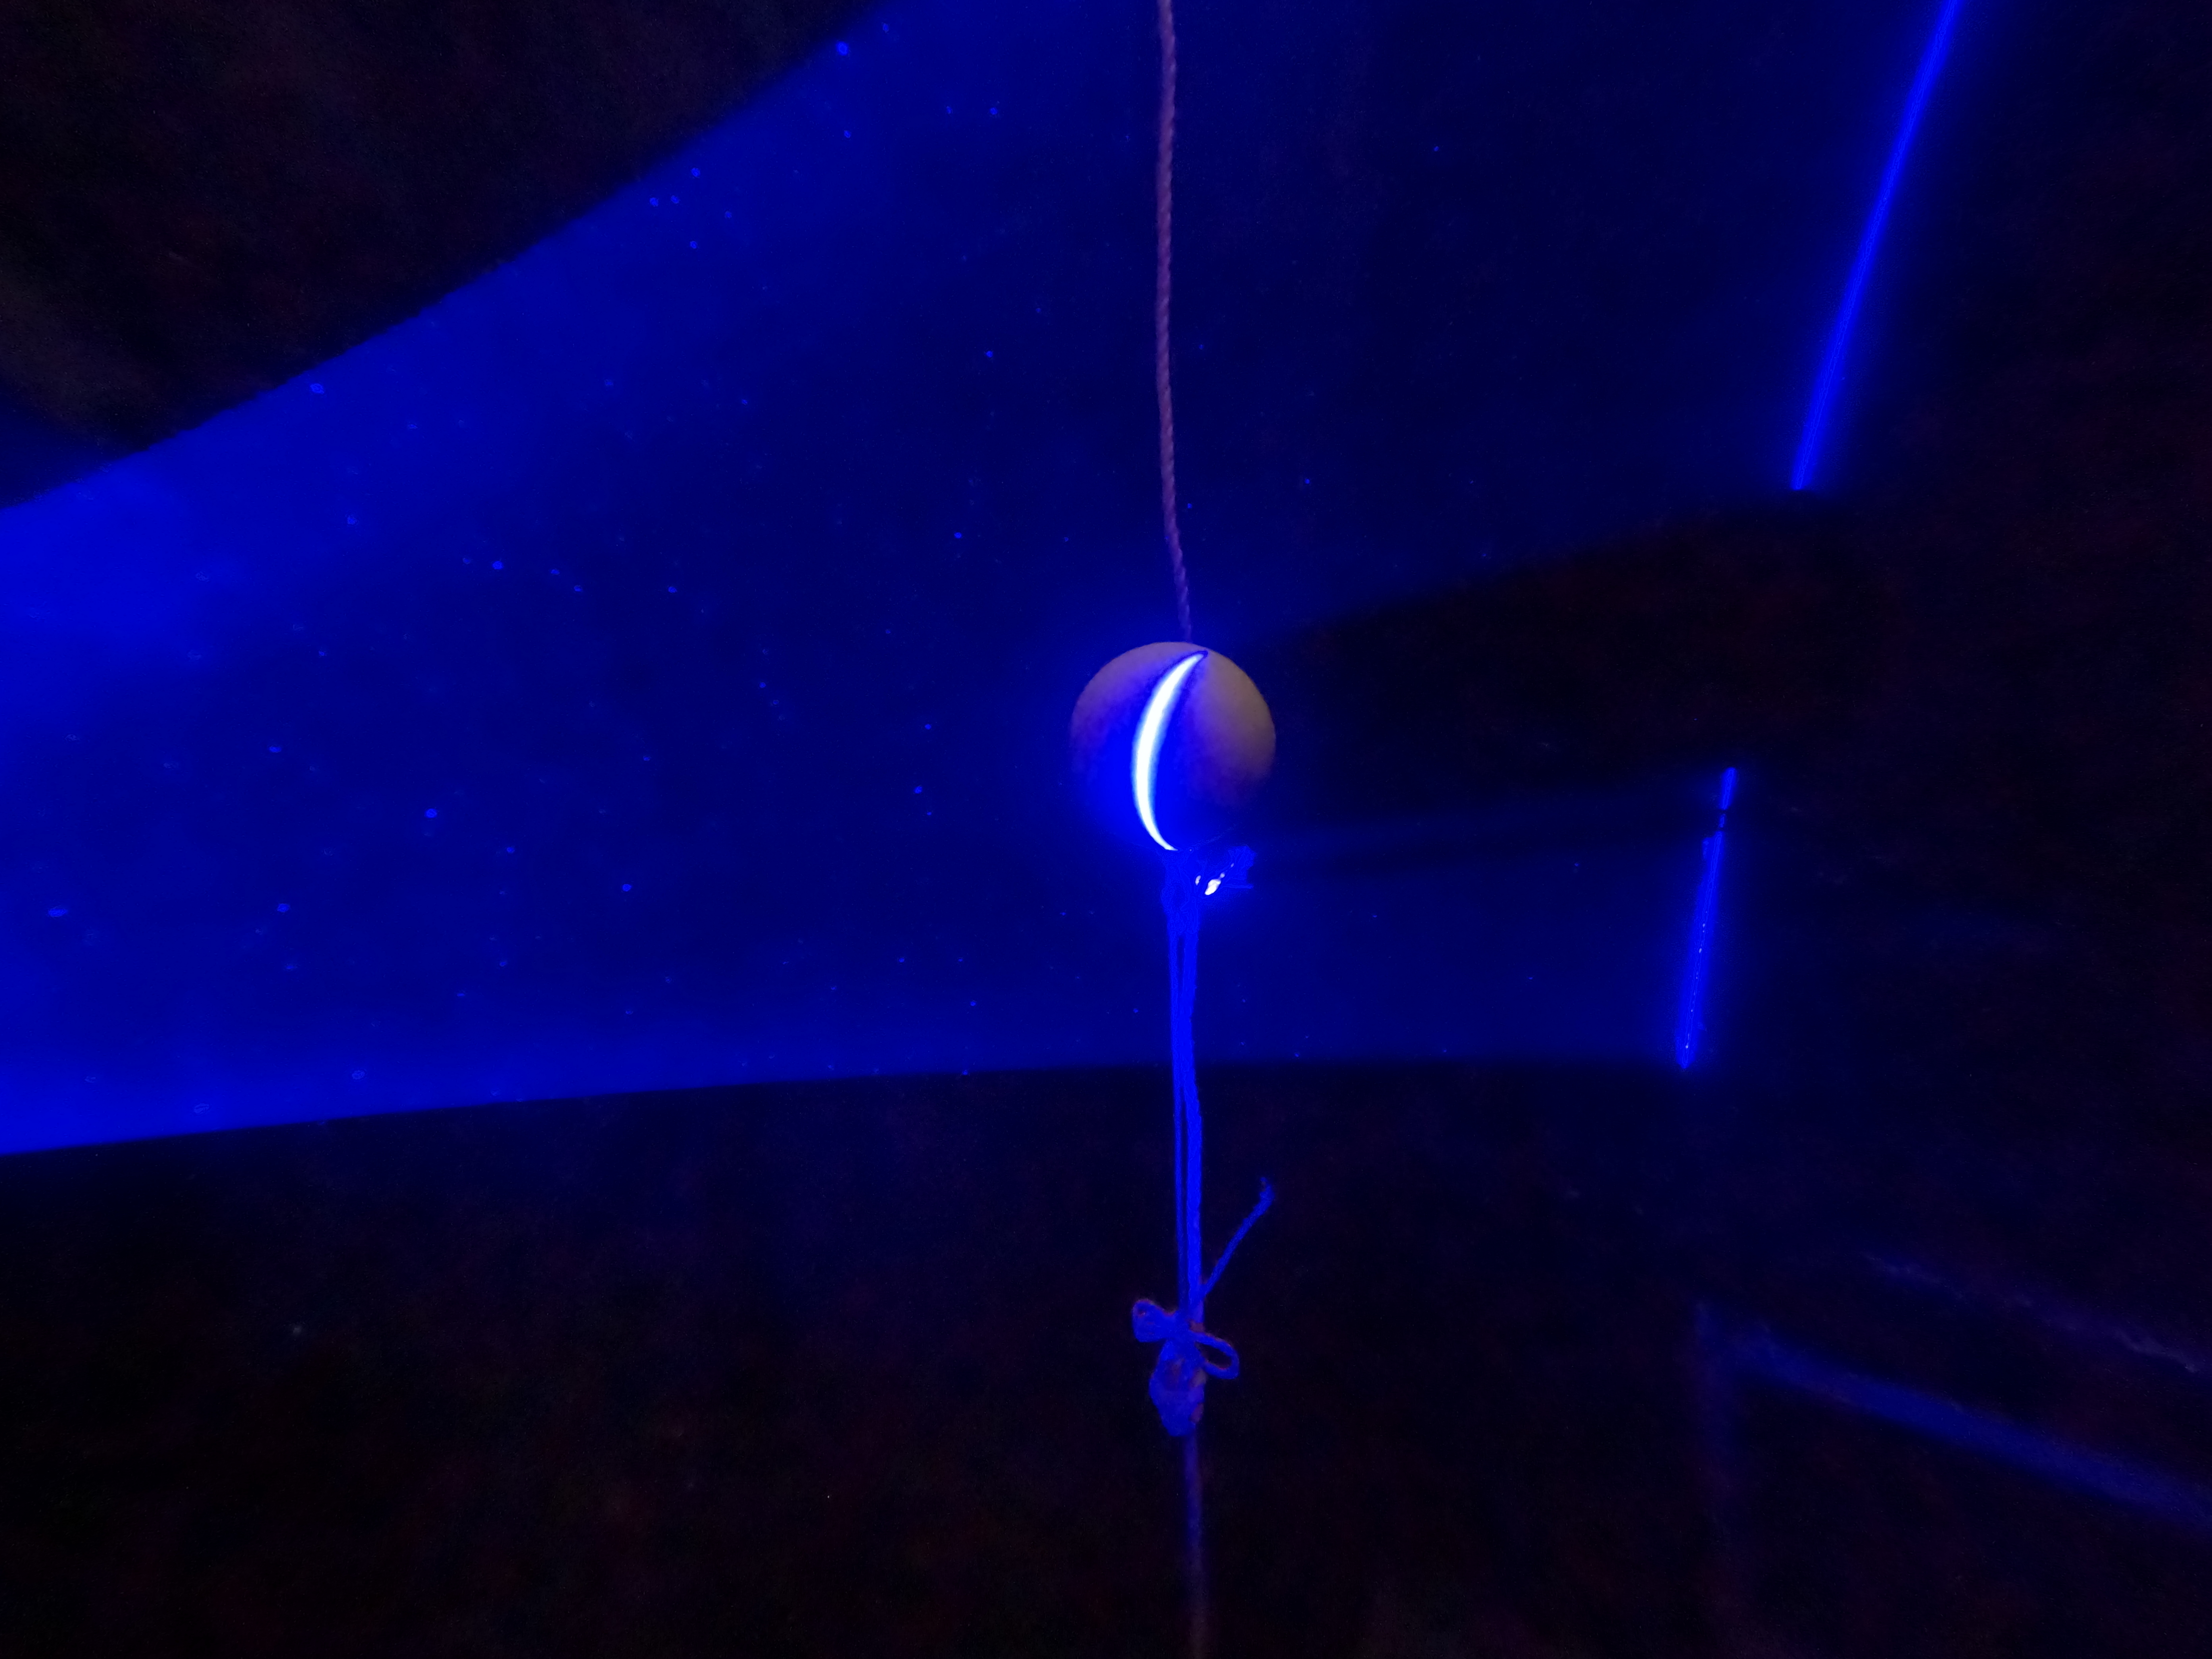

Supplement: Supplementary file 1164 [file G0032878.pdf › 7/G0032878.pdf]

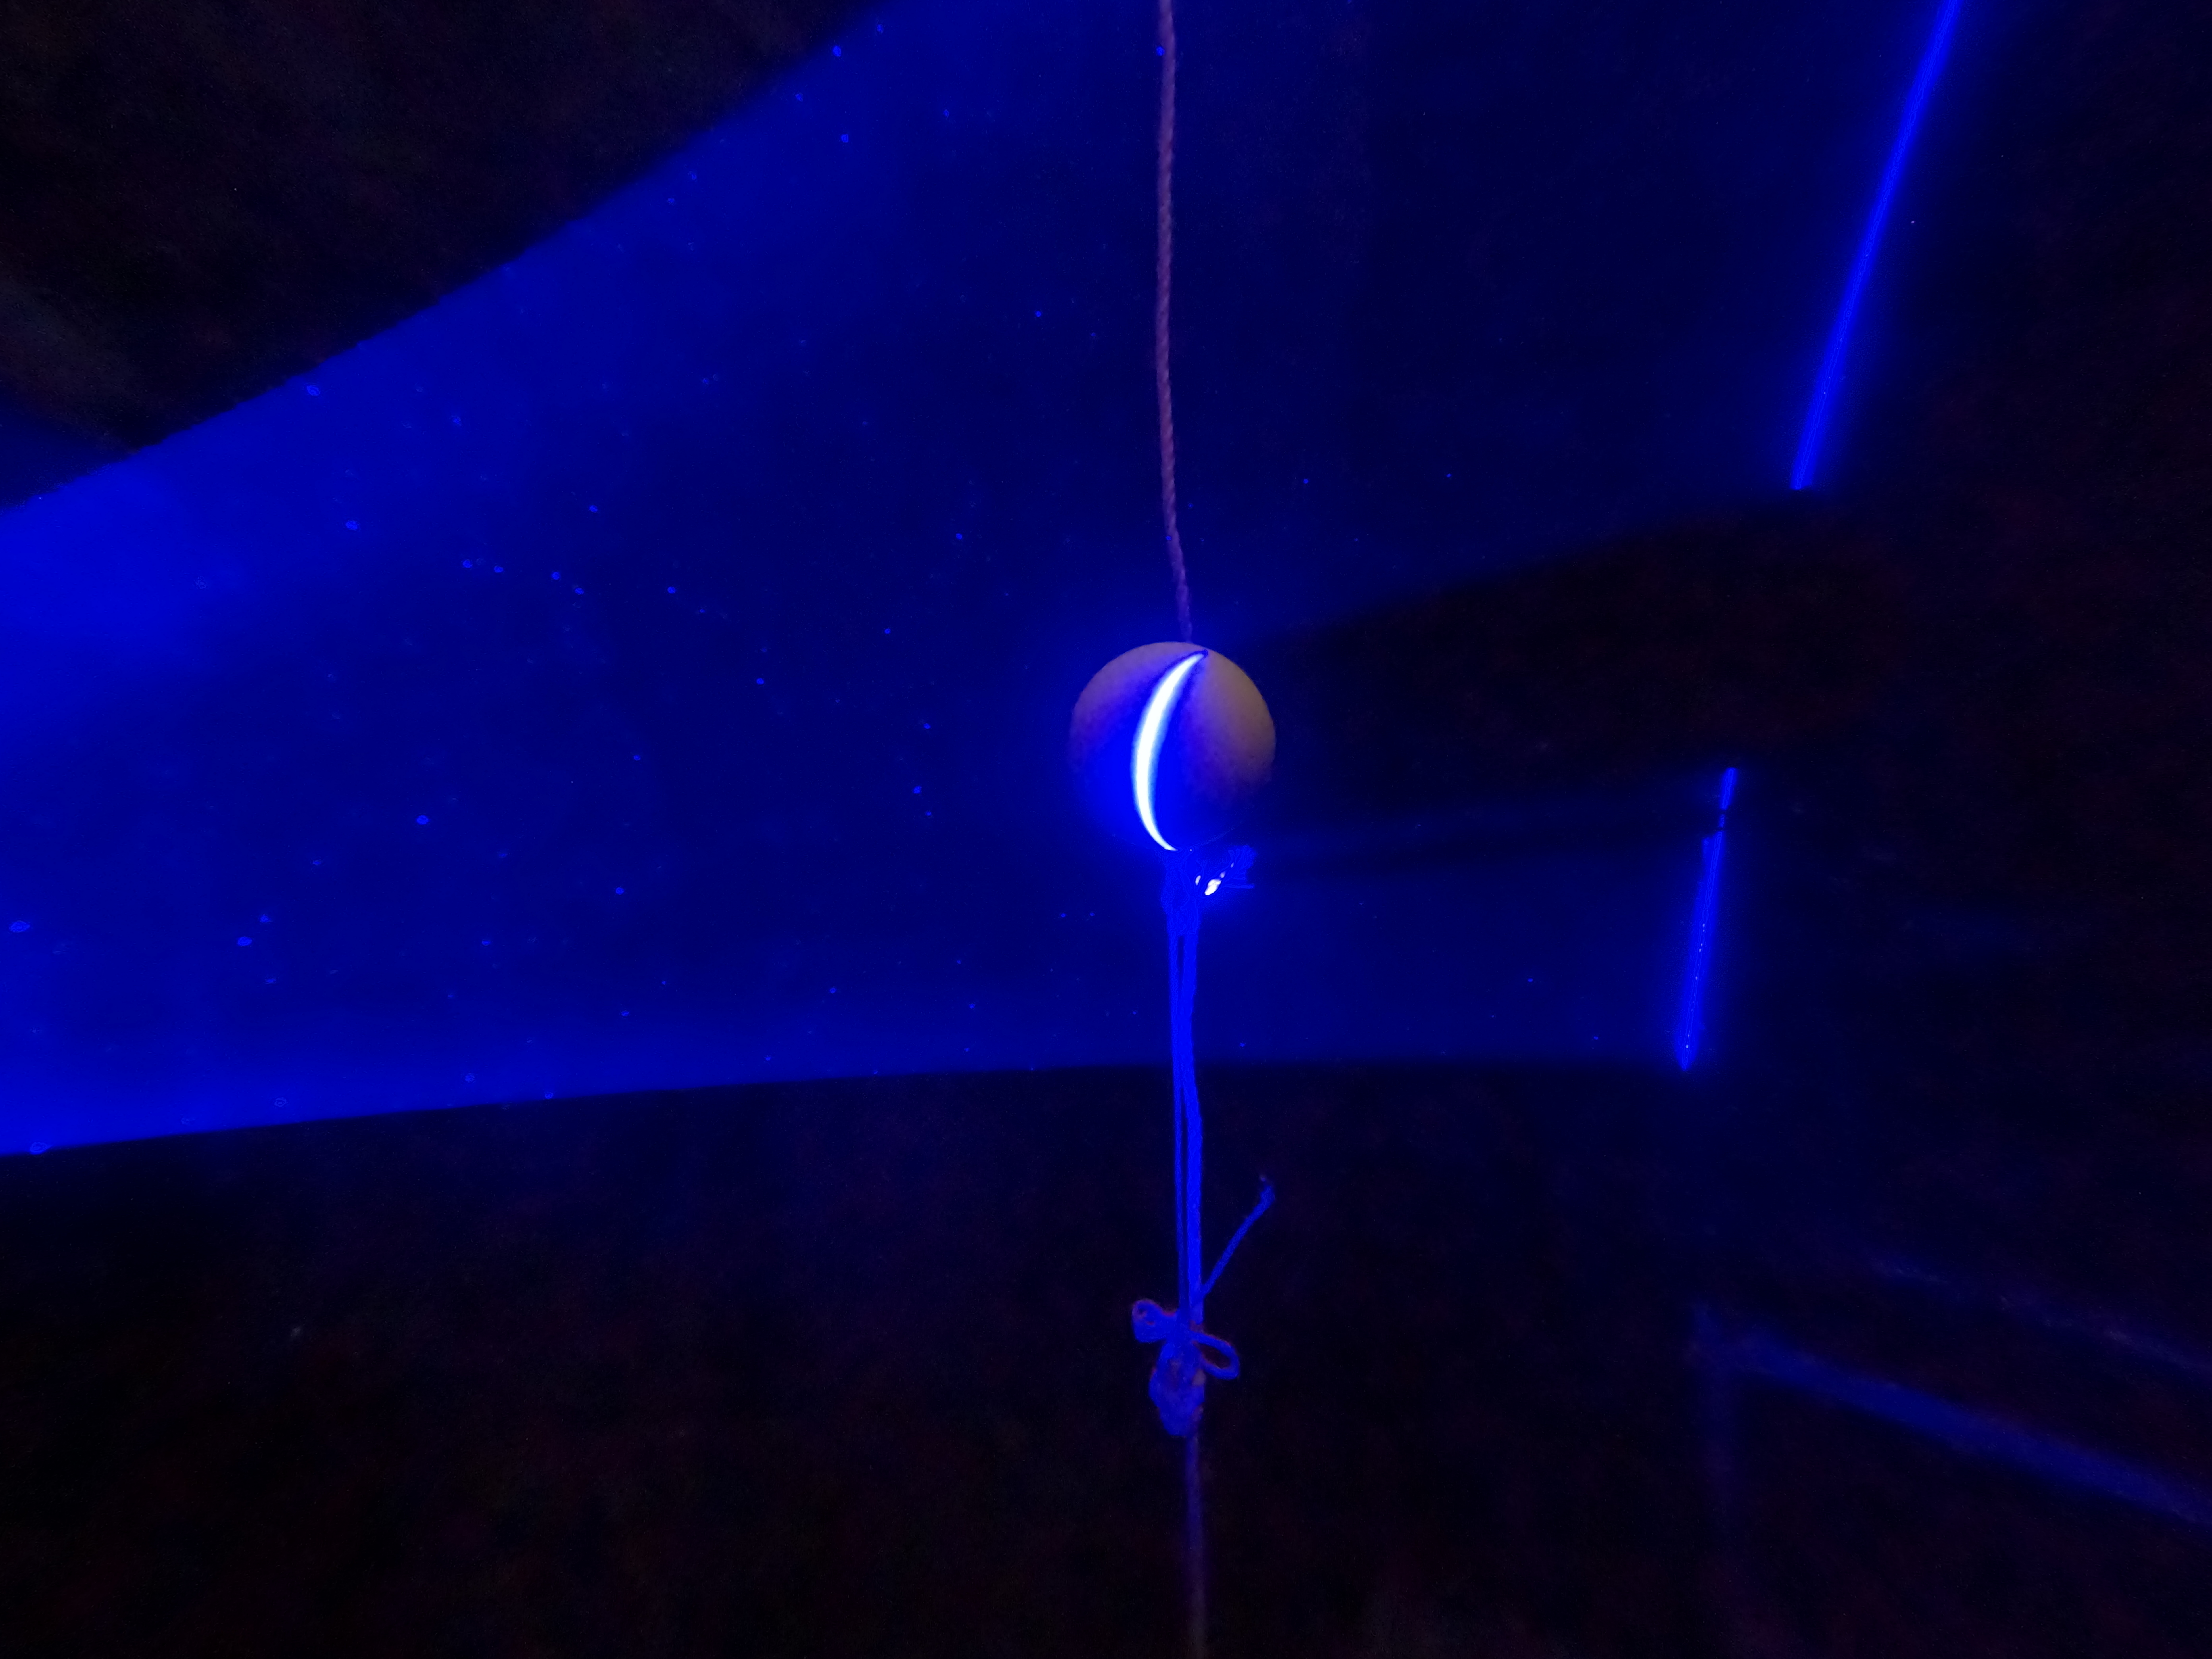

Supplement: Supplementary file 1165 [file G0032879.pdf › 7/G0032879.pdf]

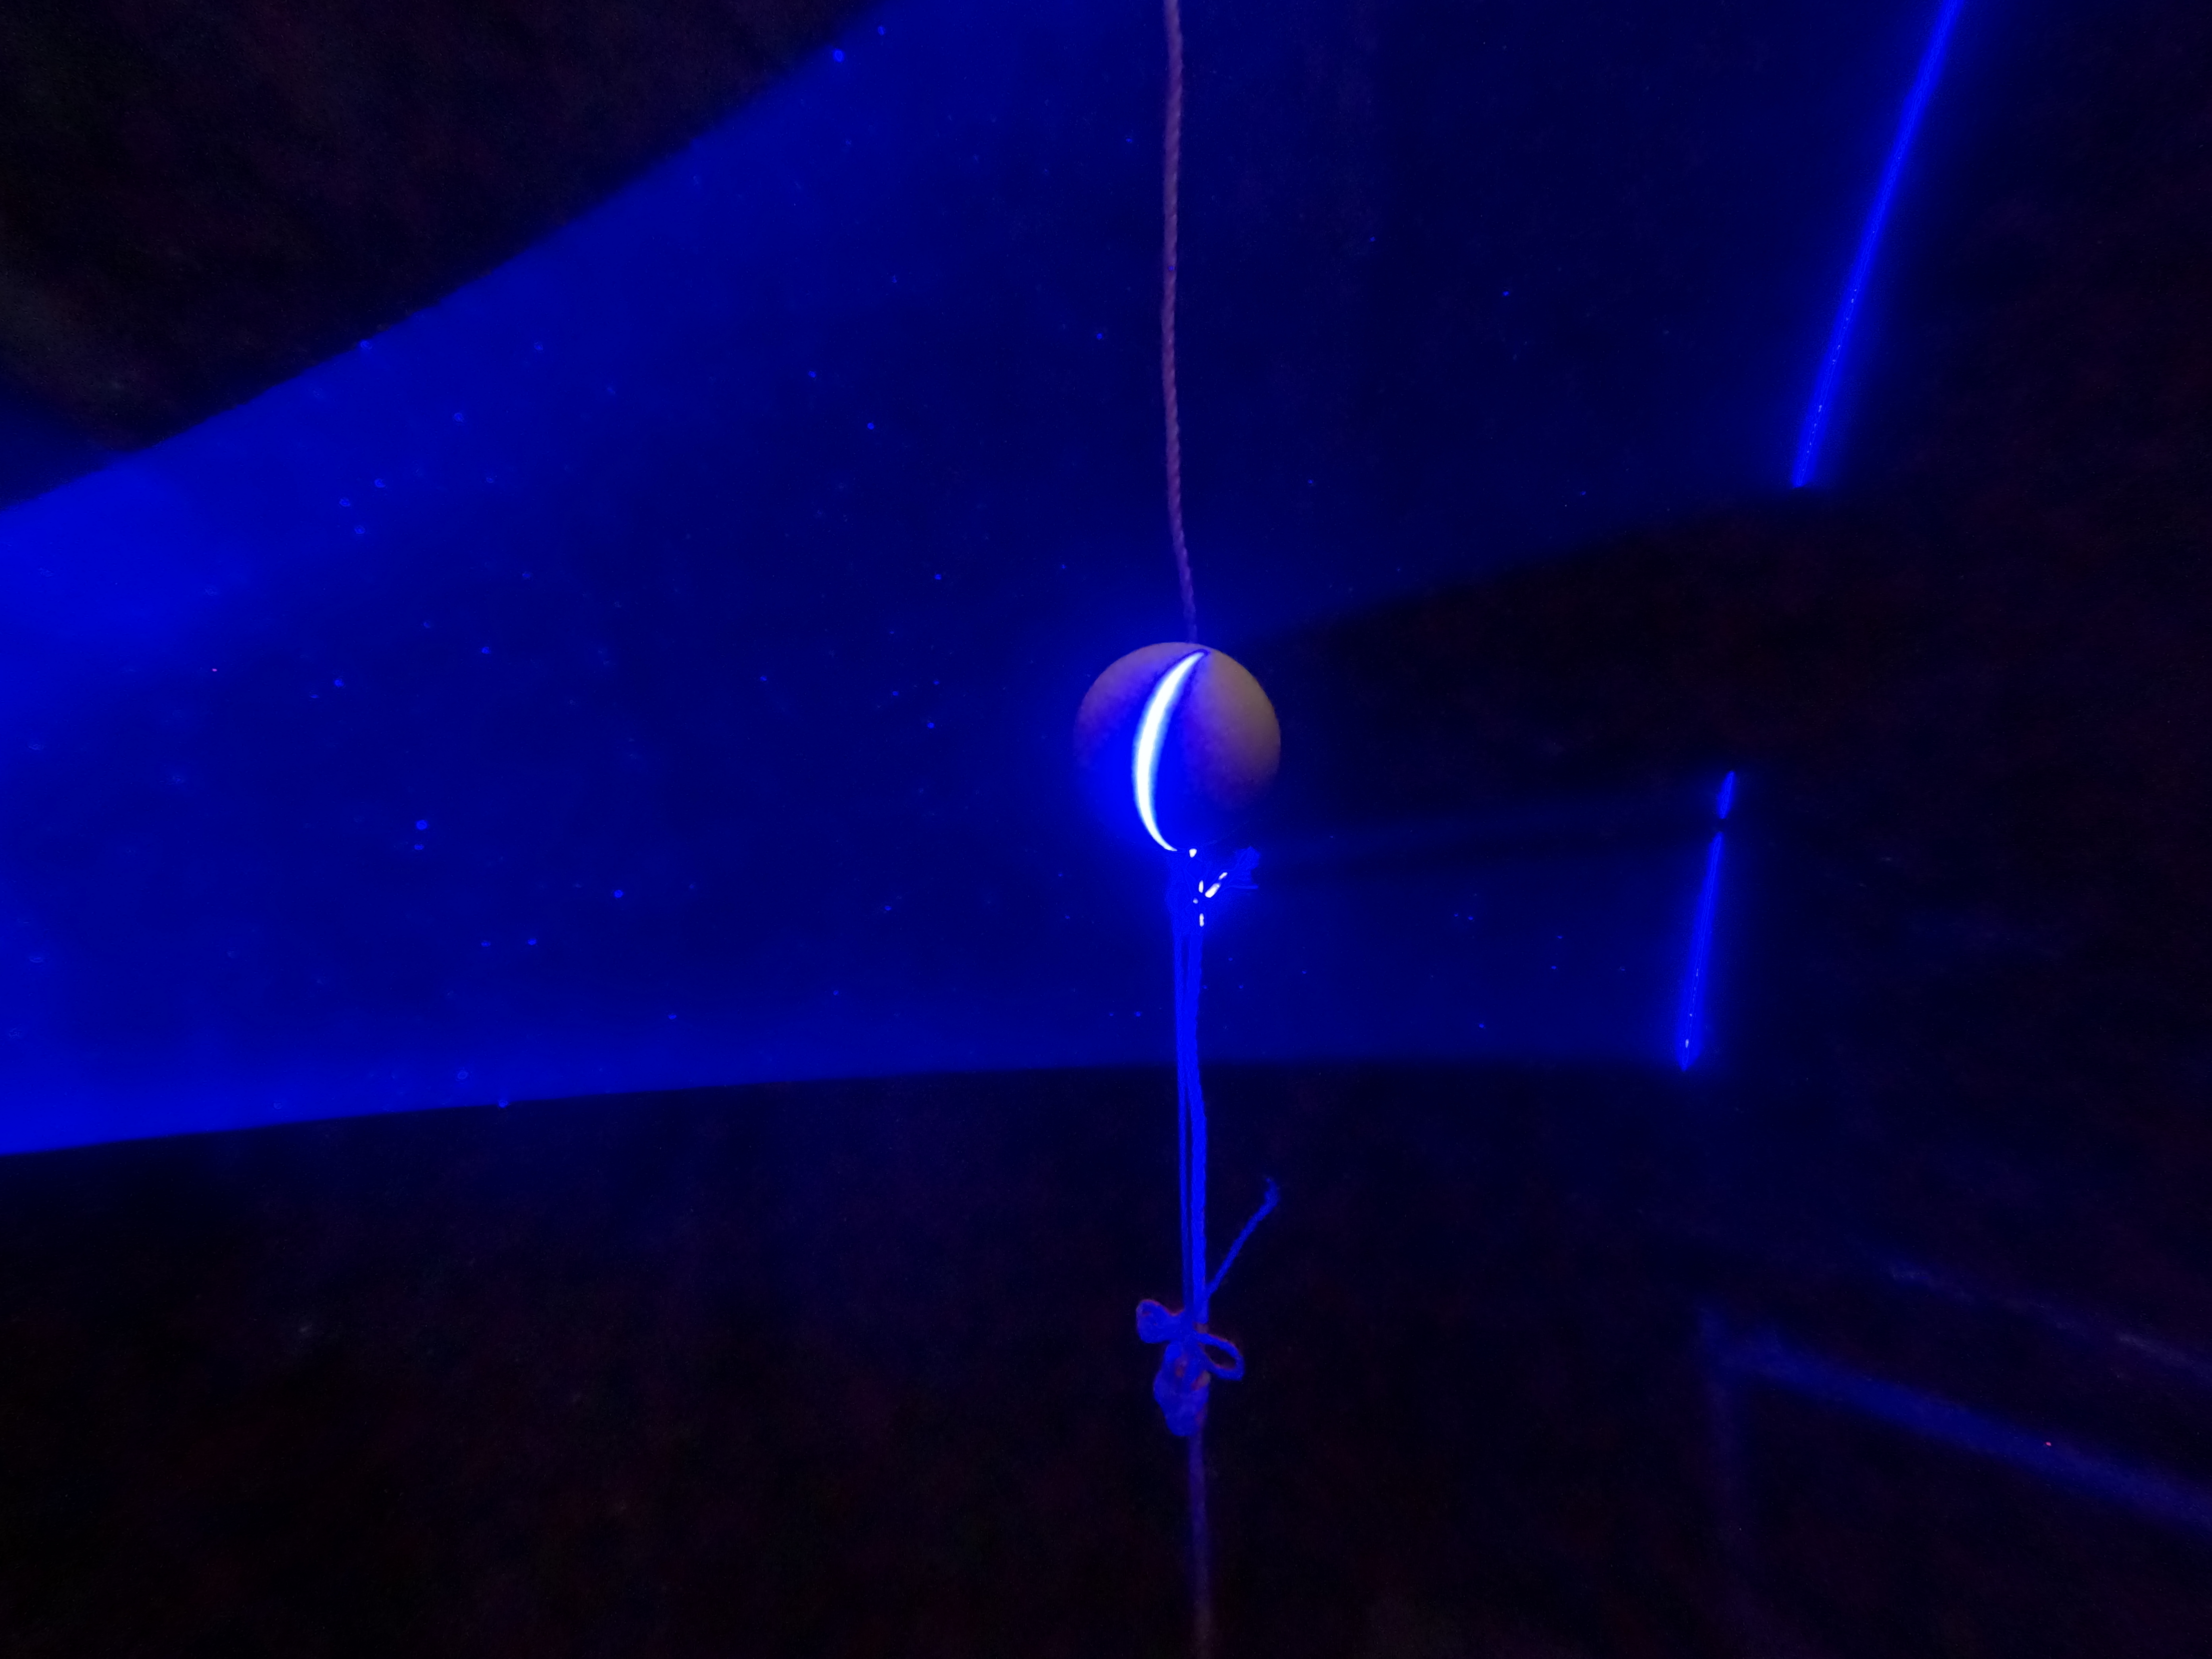

Supplement: Supplementary file 1166 [file G0032880.pdf › 7/G0032880.pdf]

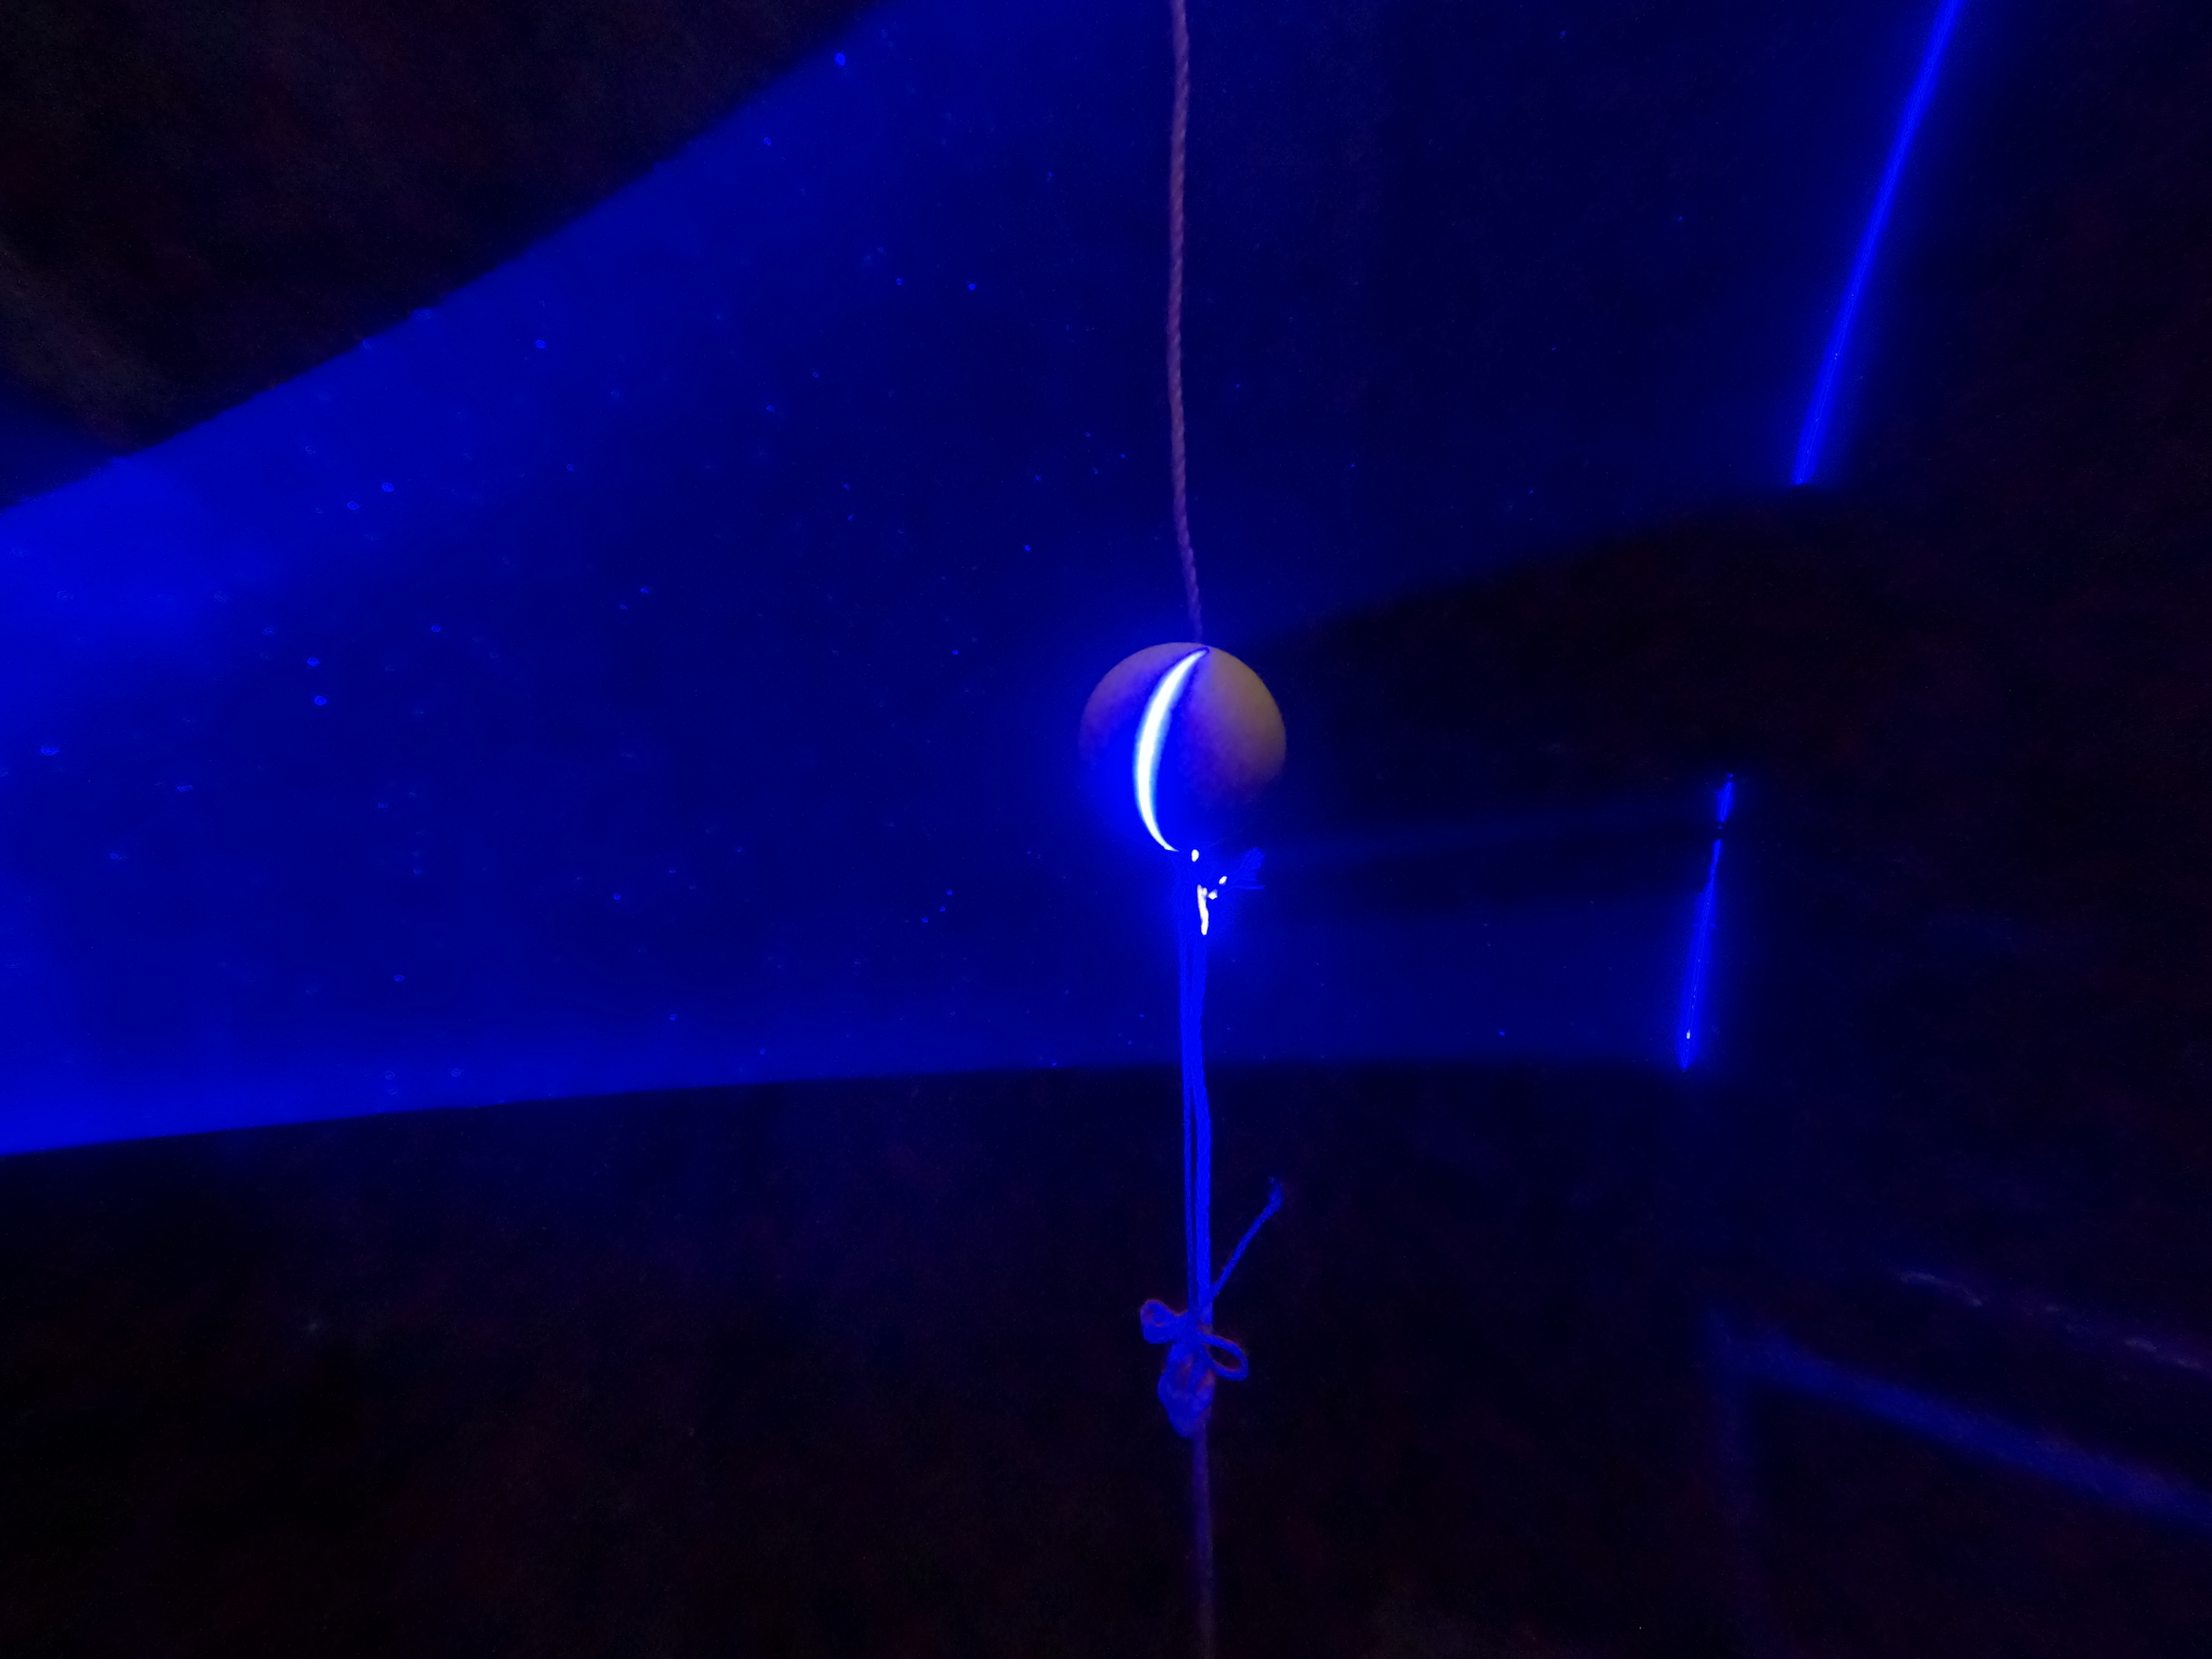

Supplement: Supplementary file 1167 [file G0032881.pdf › 7/G0032881.pdf]

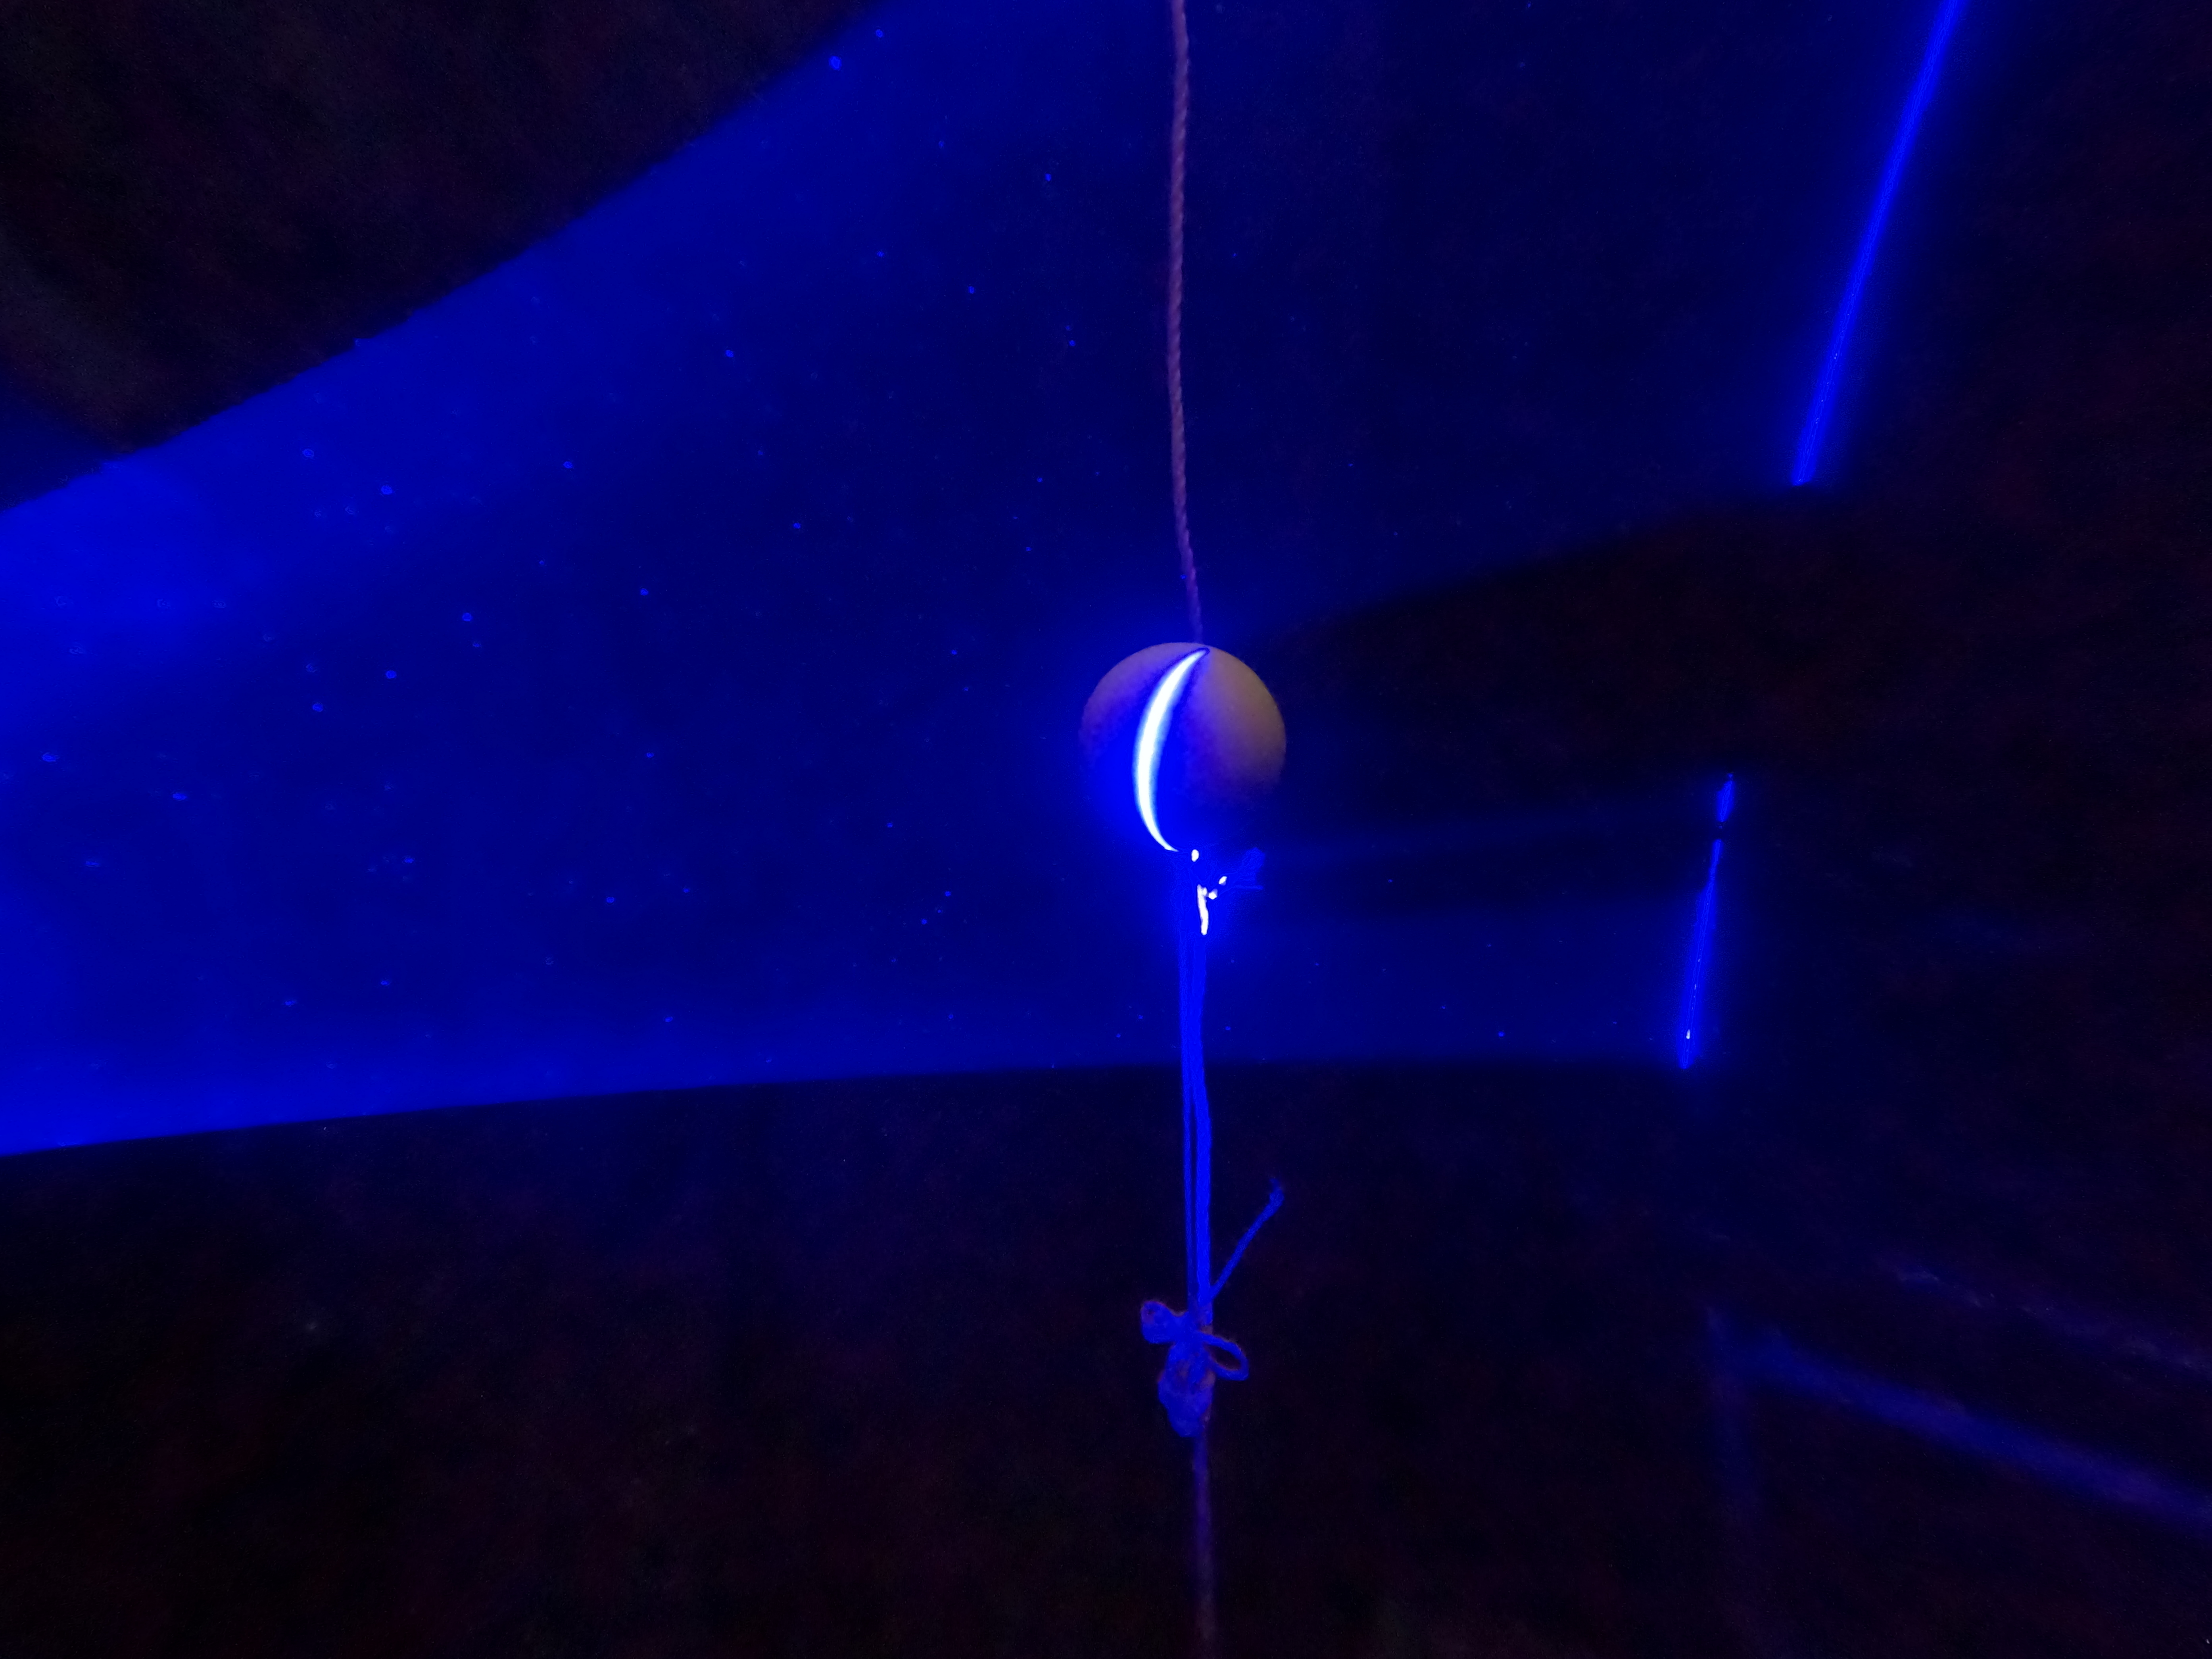

Supplement: Supplementary file 1168 [file G0032882.pdf › 7/G0032882.pdf]

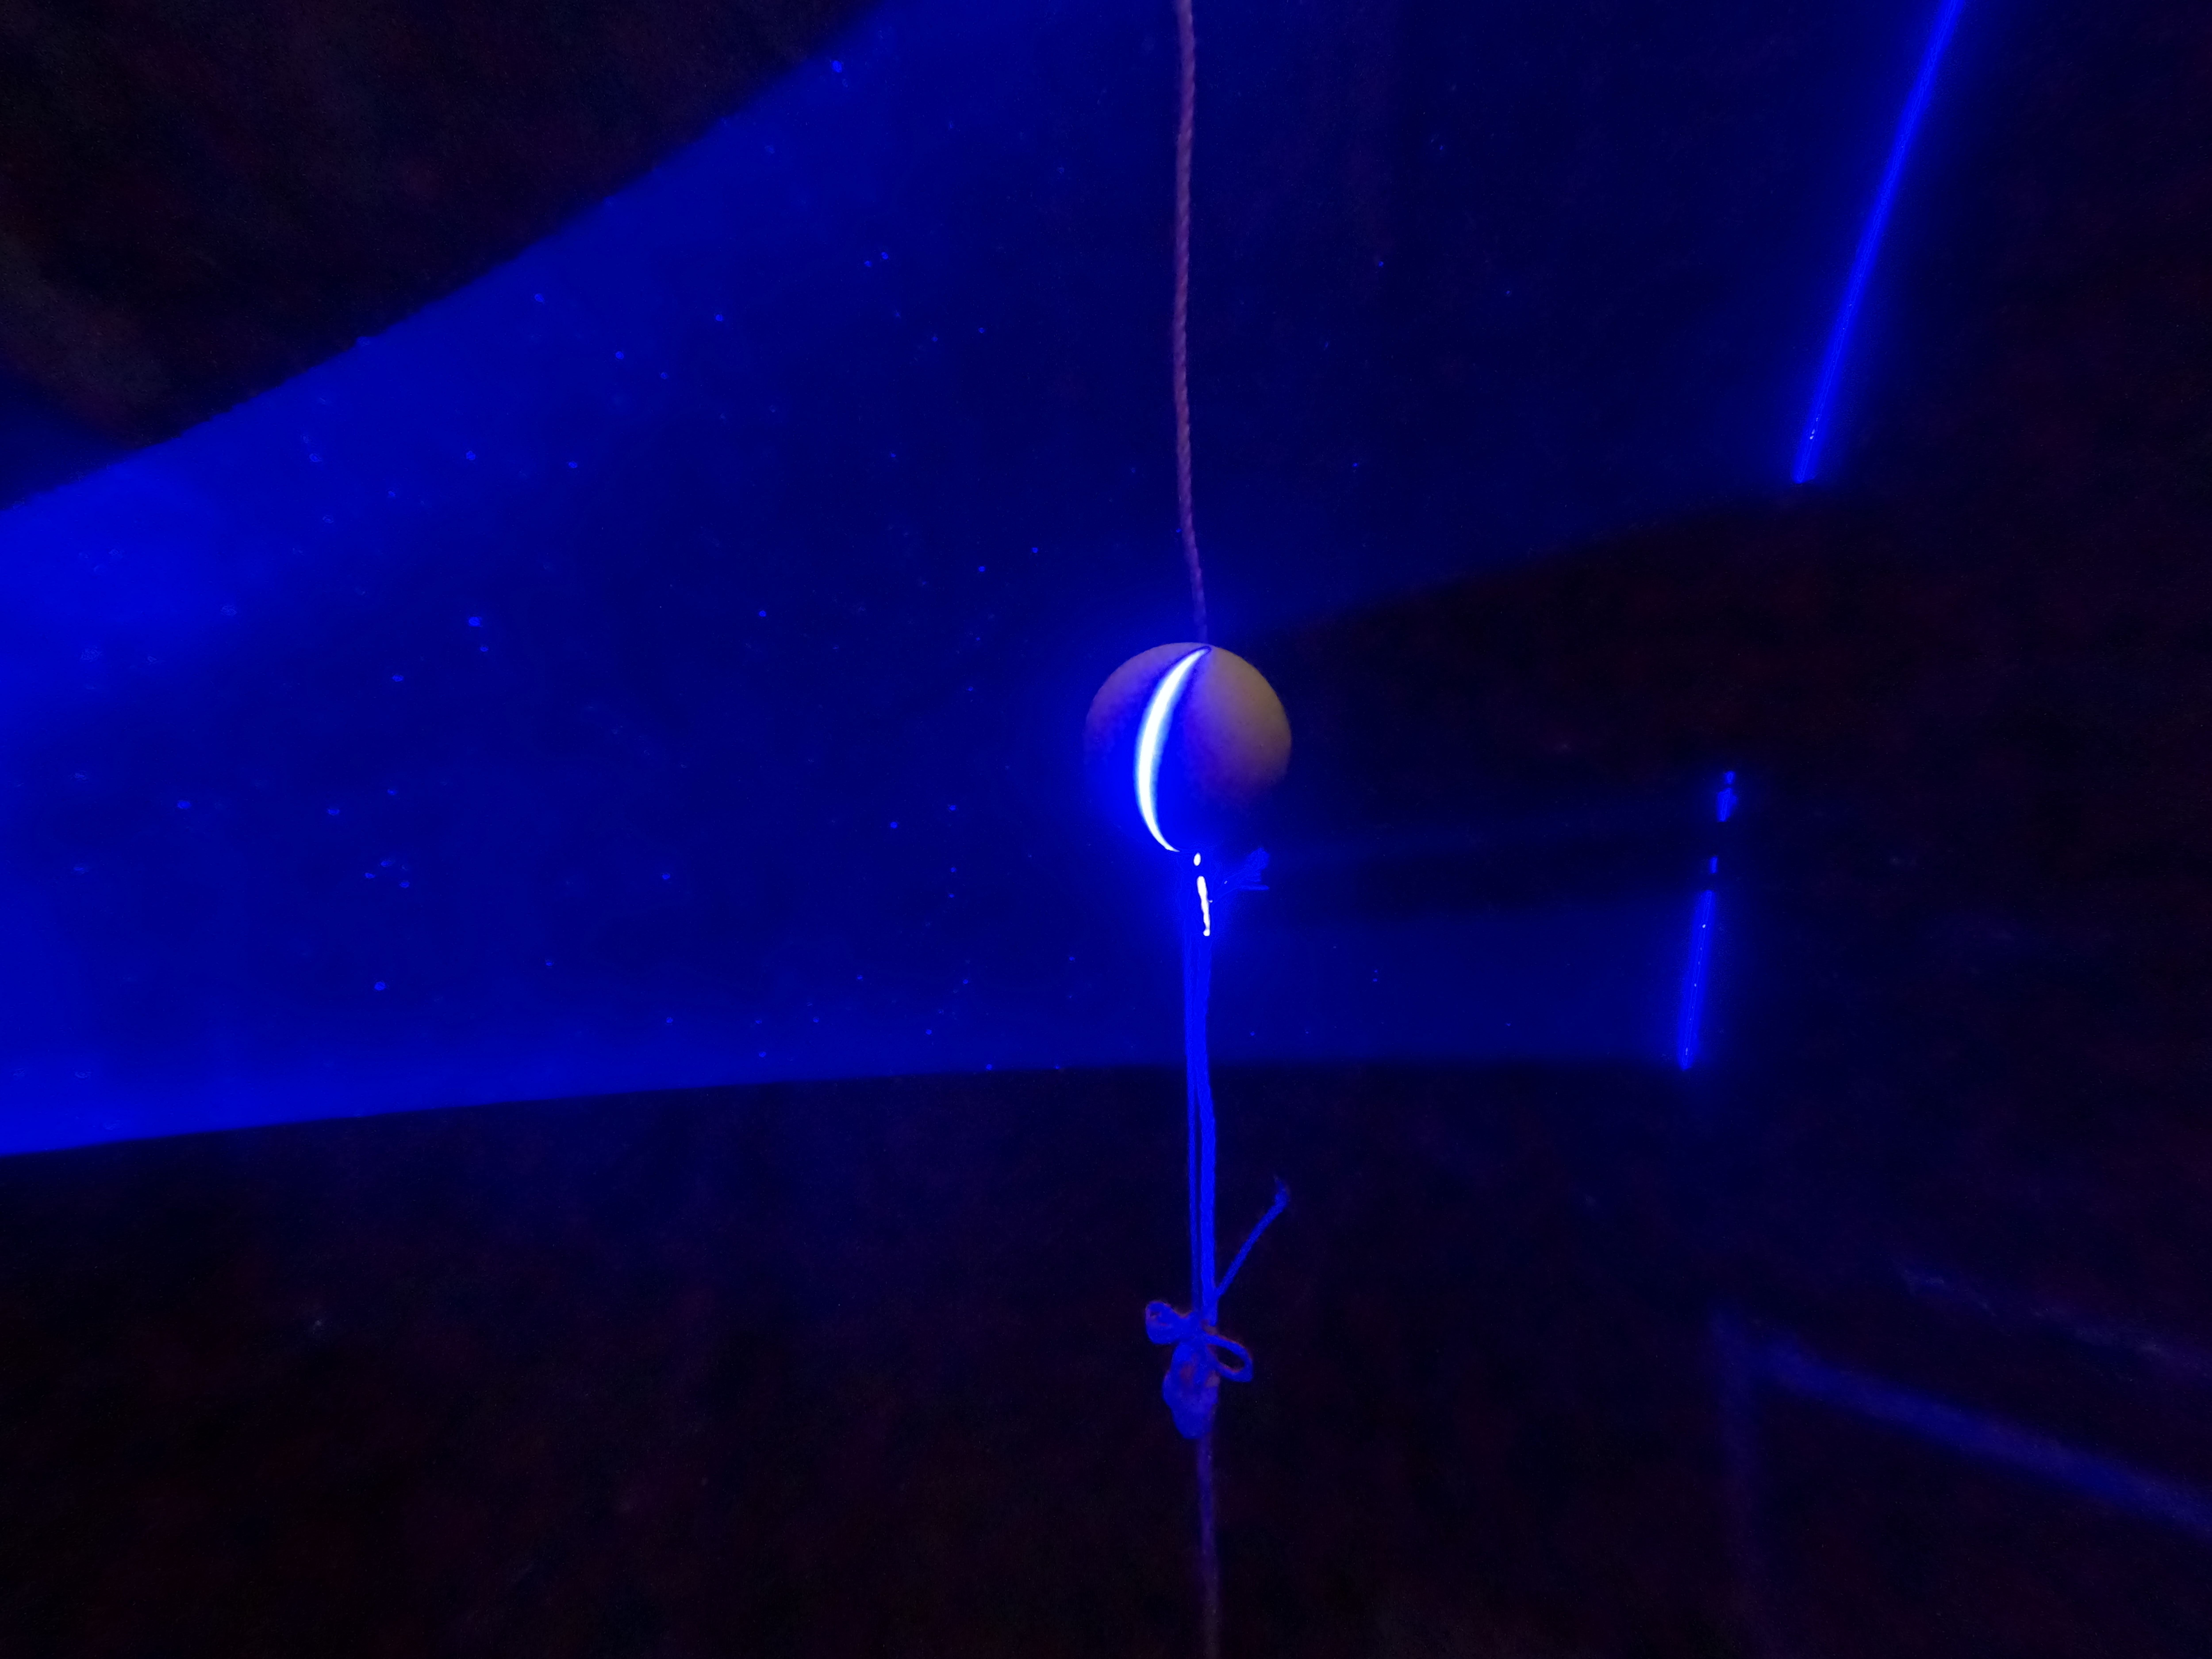

Supplement: Supplementary file 1169 [file G0032883.pdf › 7/G0032883.pdf]

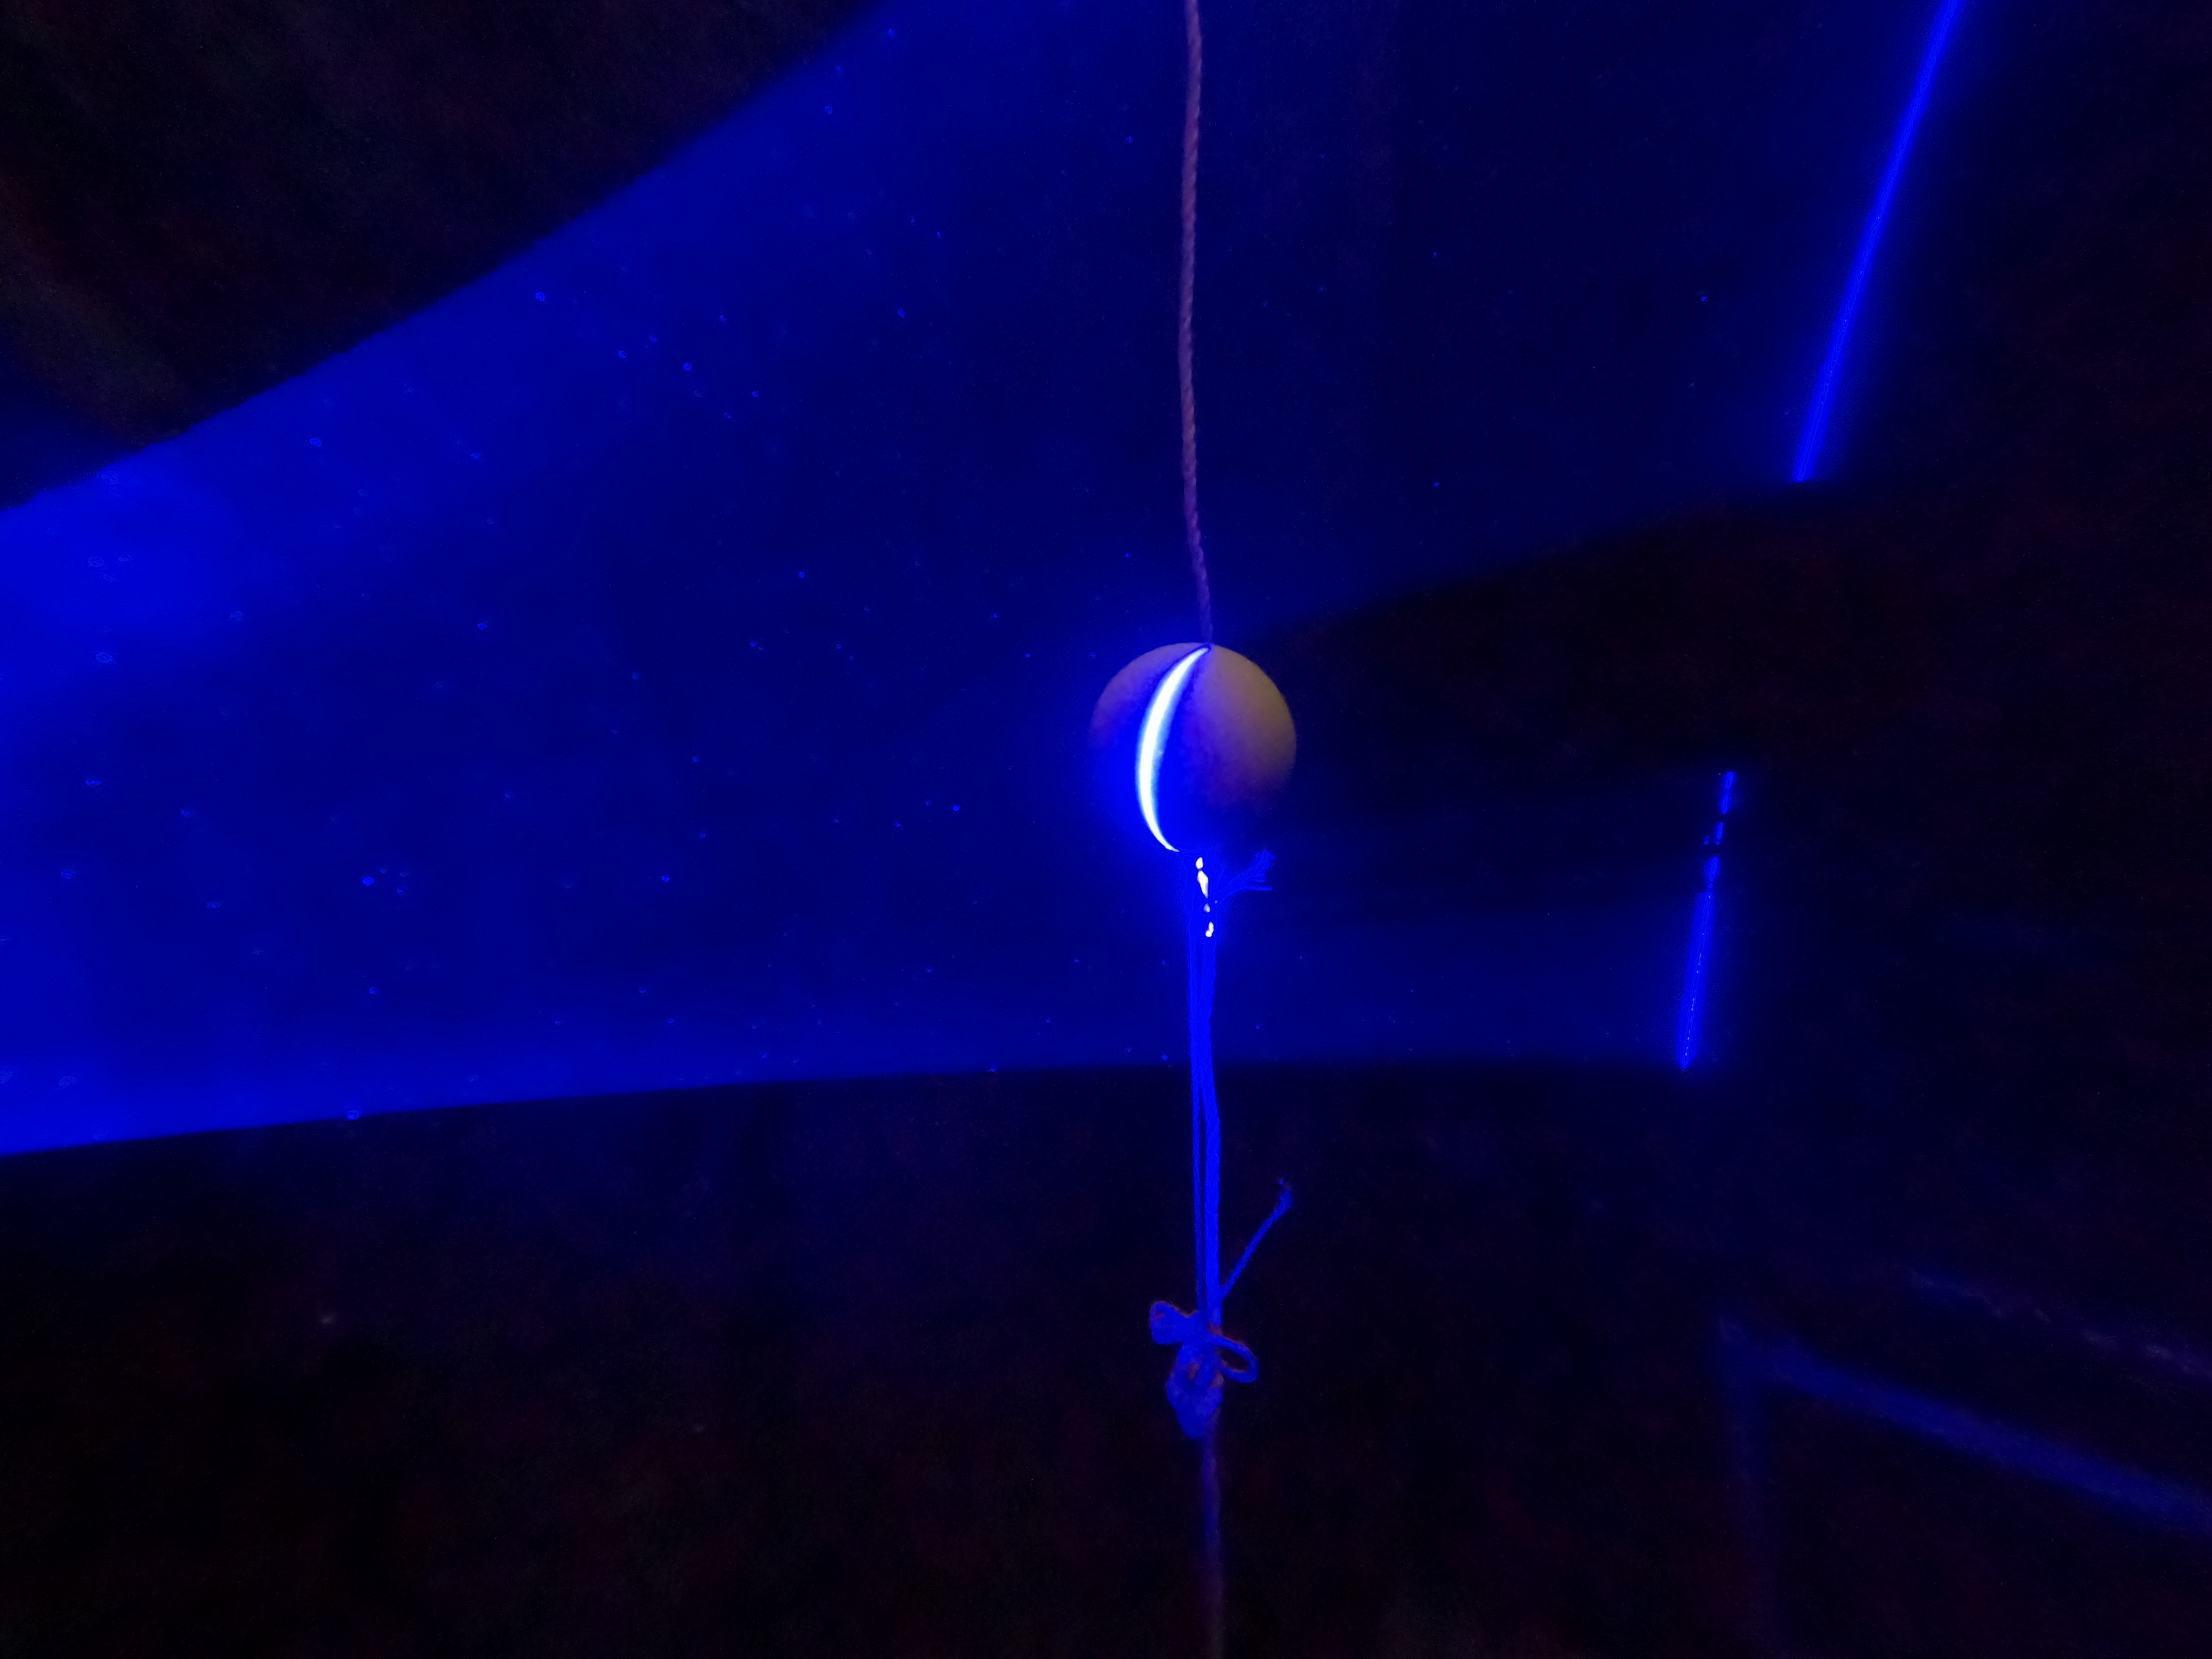

Supplement: Supplementary file 1170 [file G0032884.pdf › 7/G0032884.pdf]

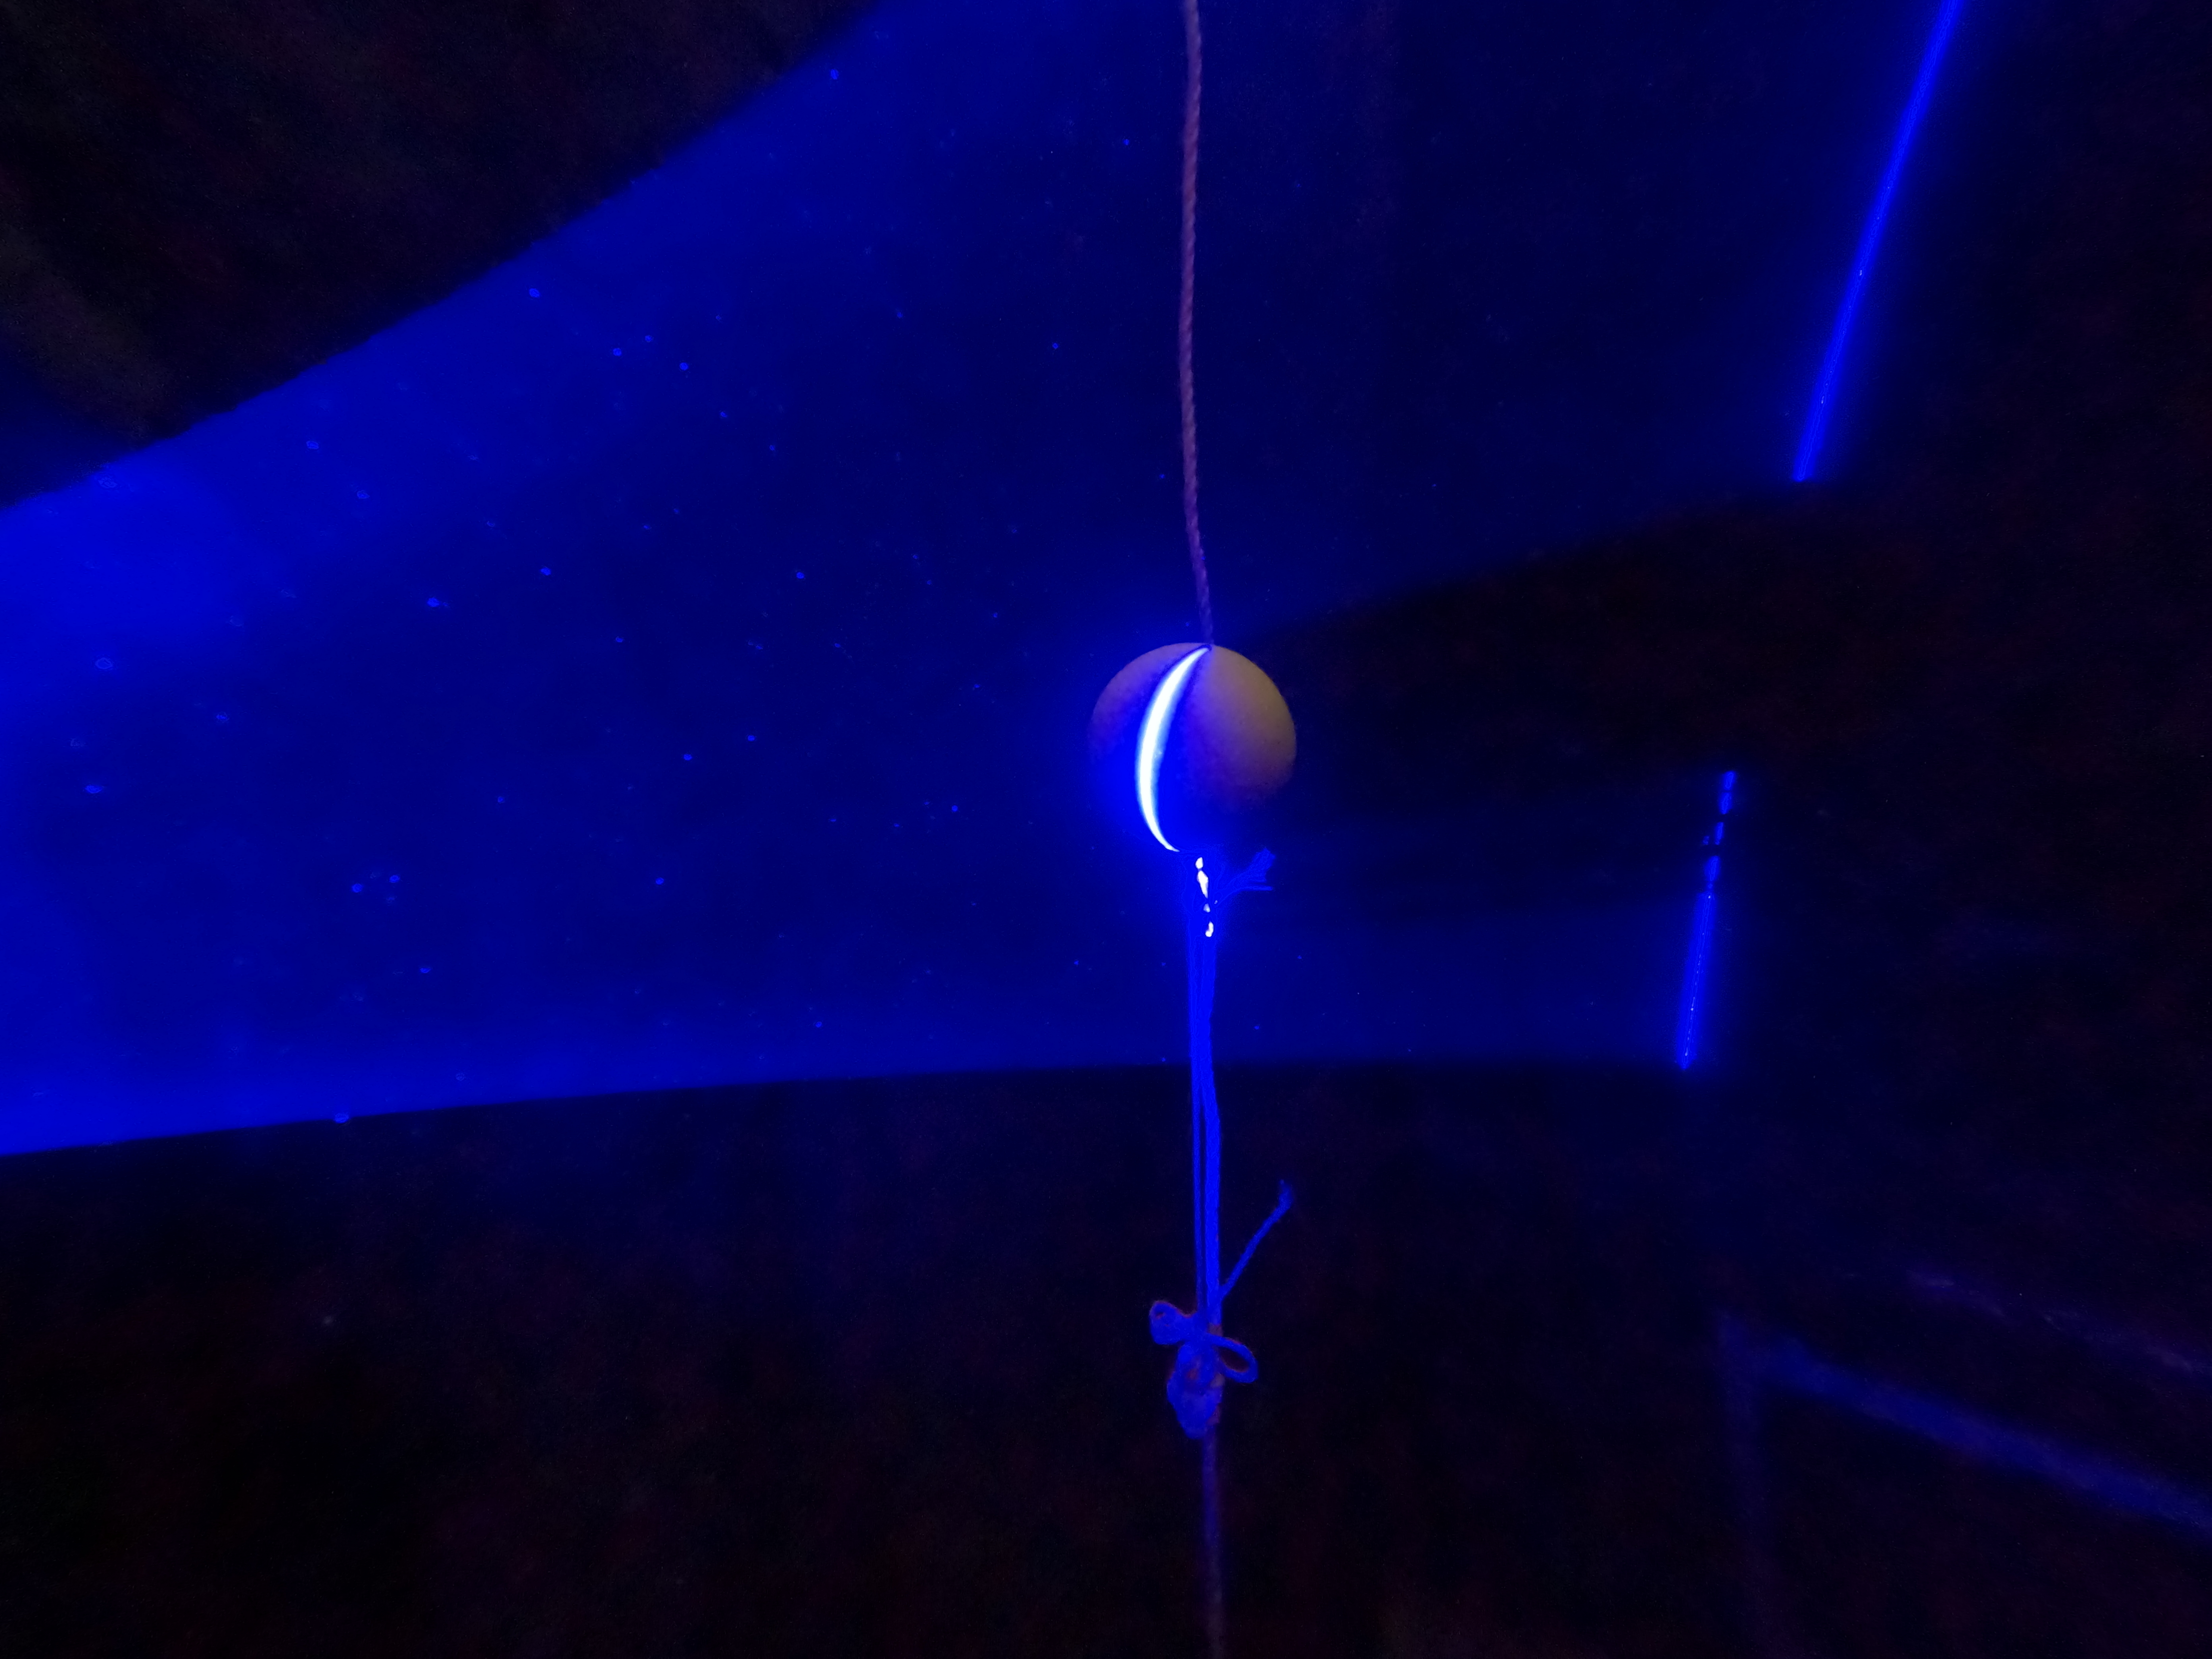

Supplement: Supplementary file 1171 [file G0032885.pdf › 7/G0032885.pdf]

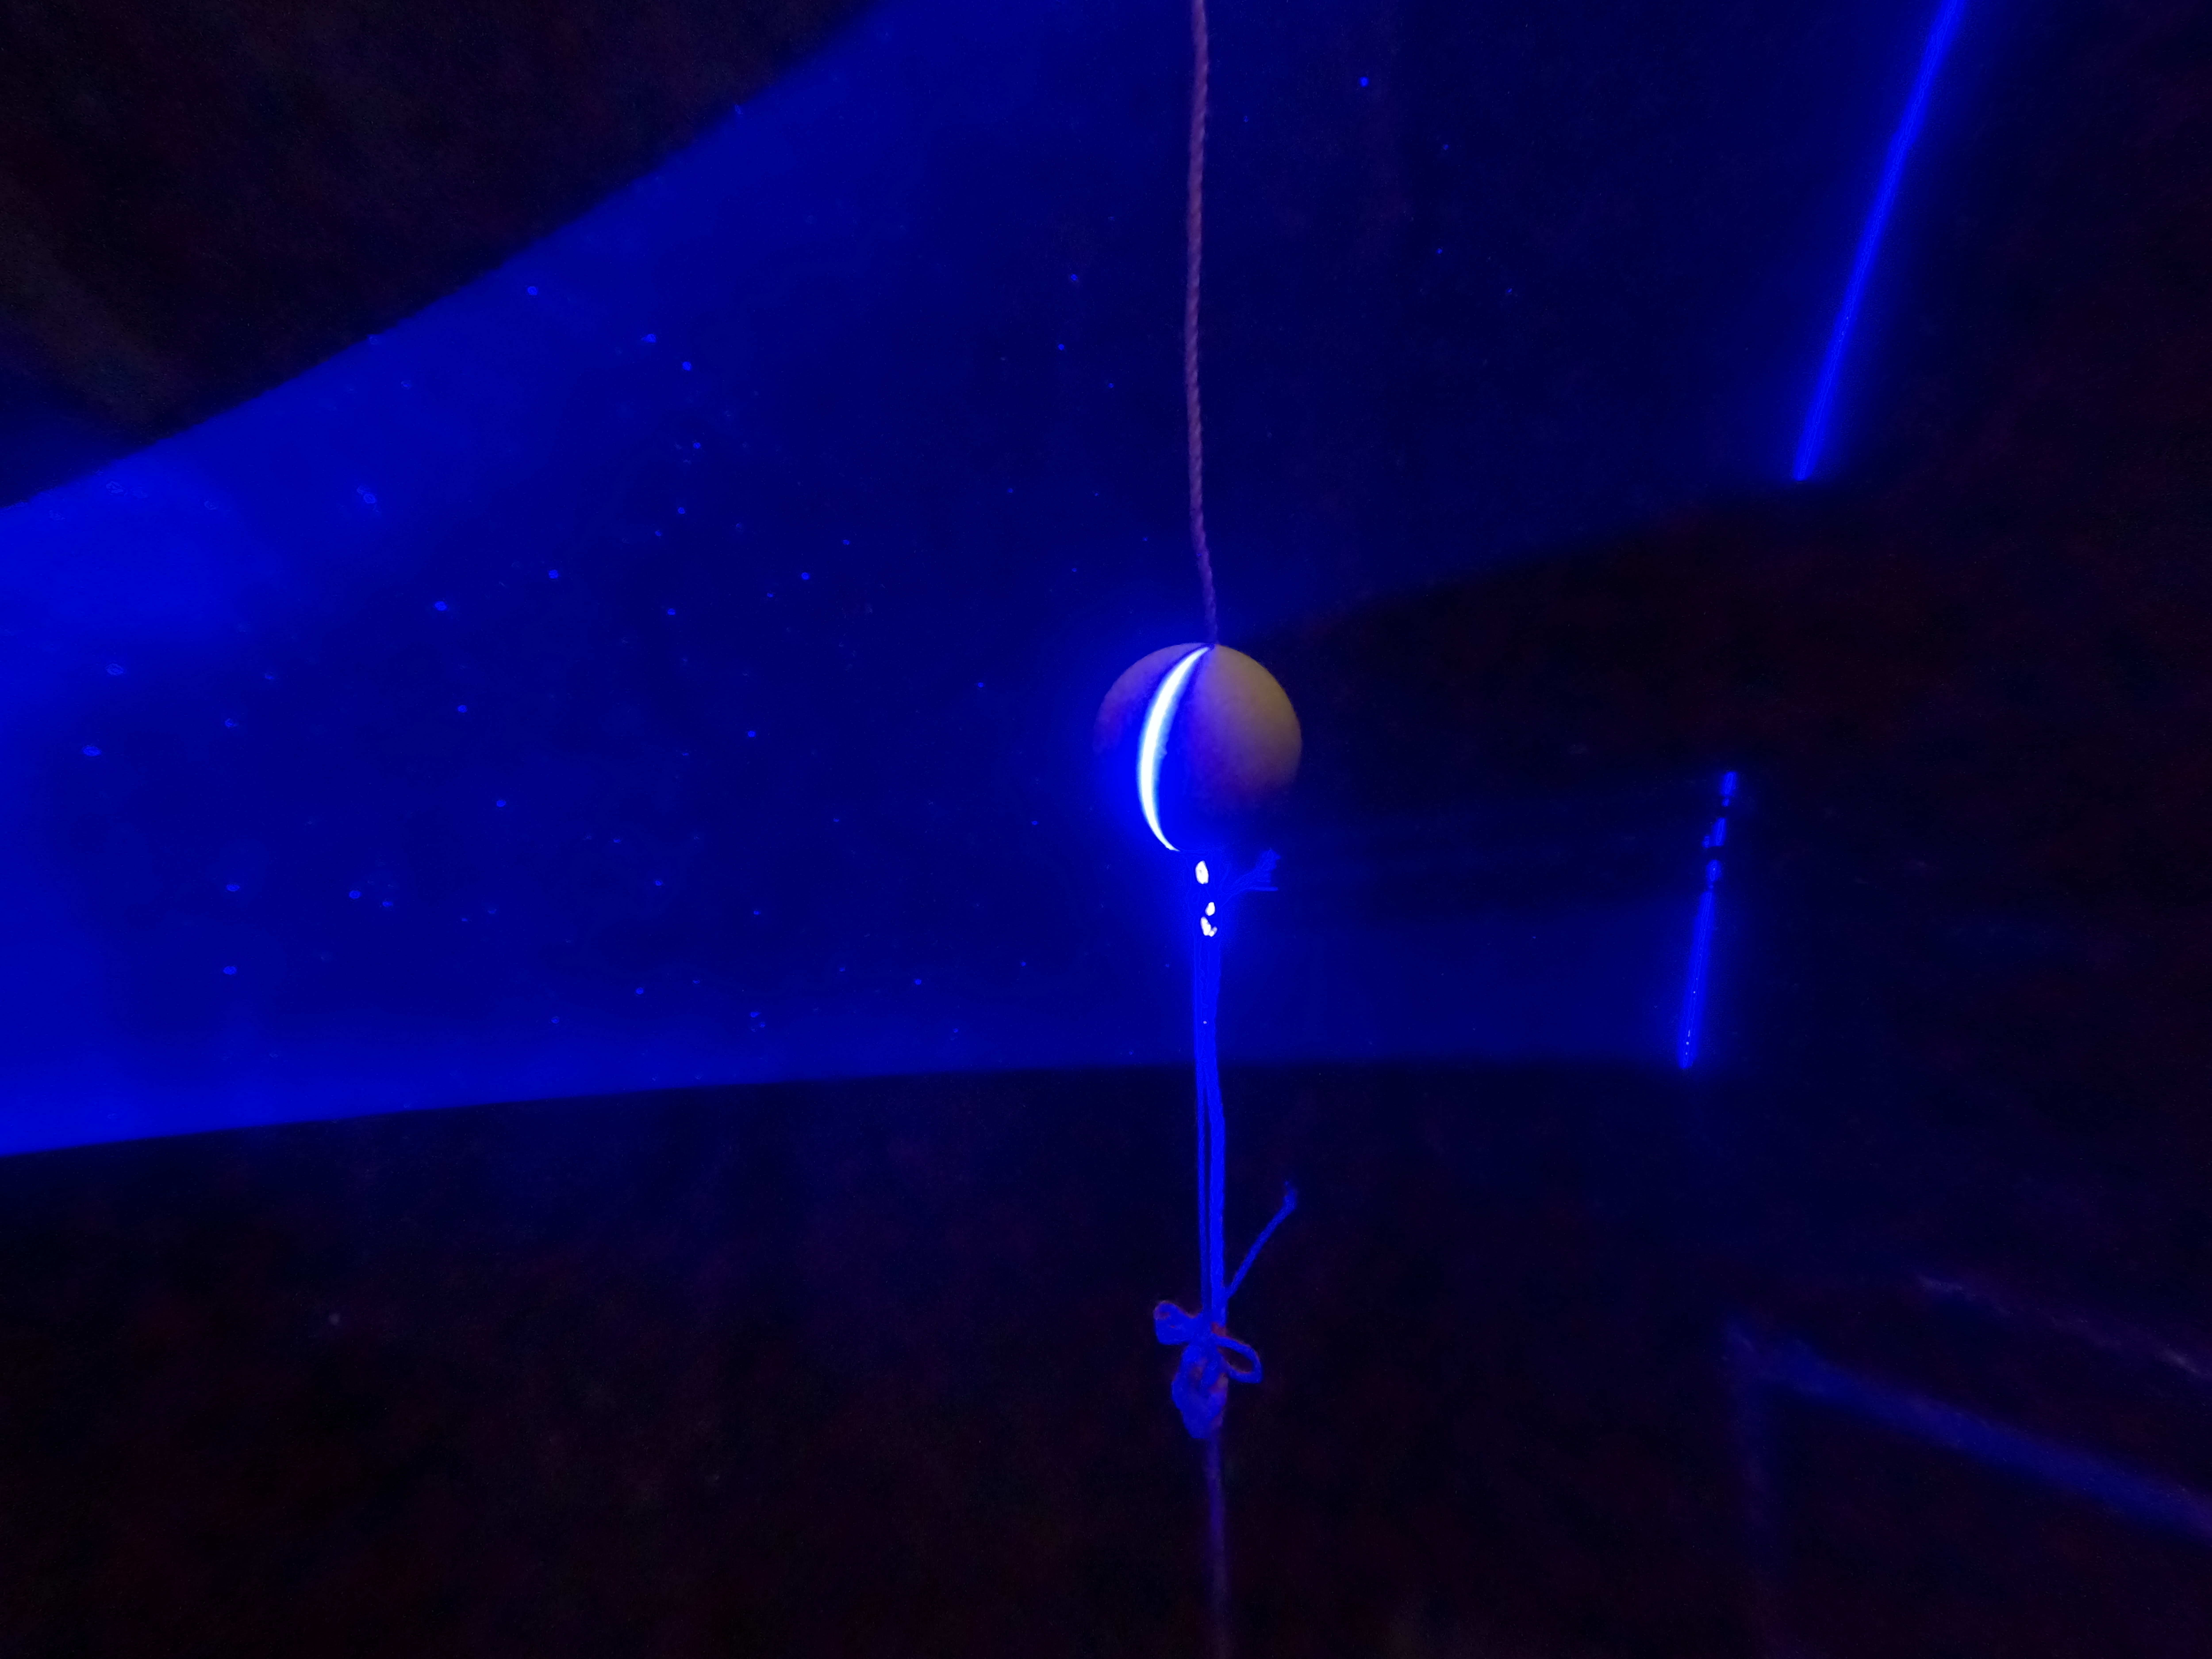

Supplement: Supplementary file 1172 [file G0032886.pdf › 7/G0032886.pdf]

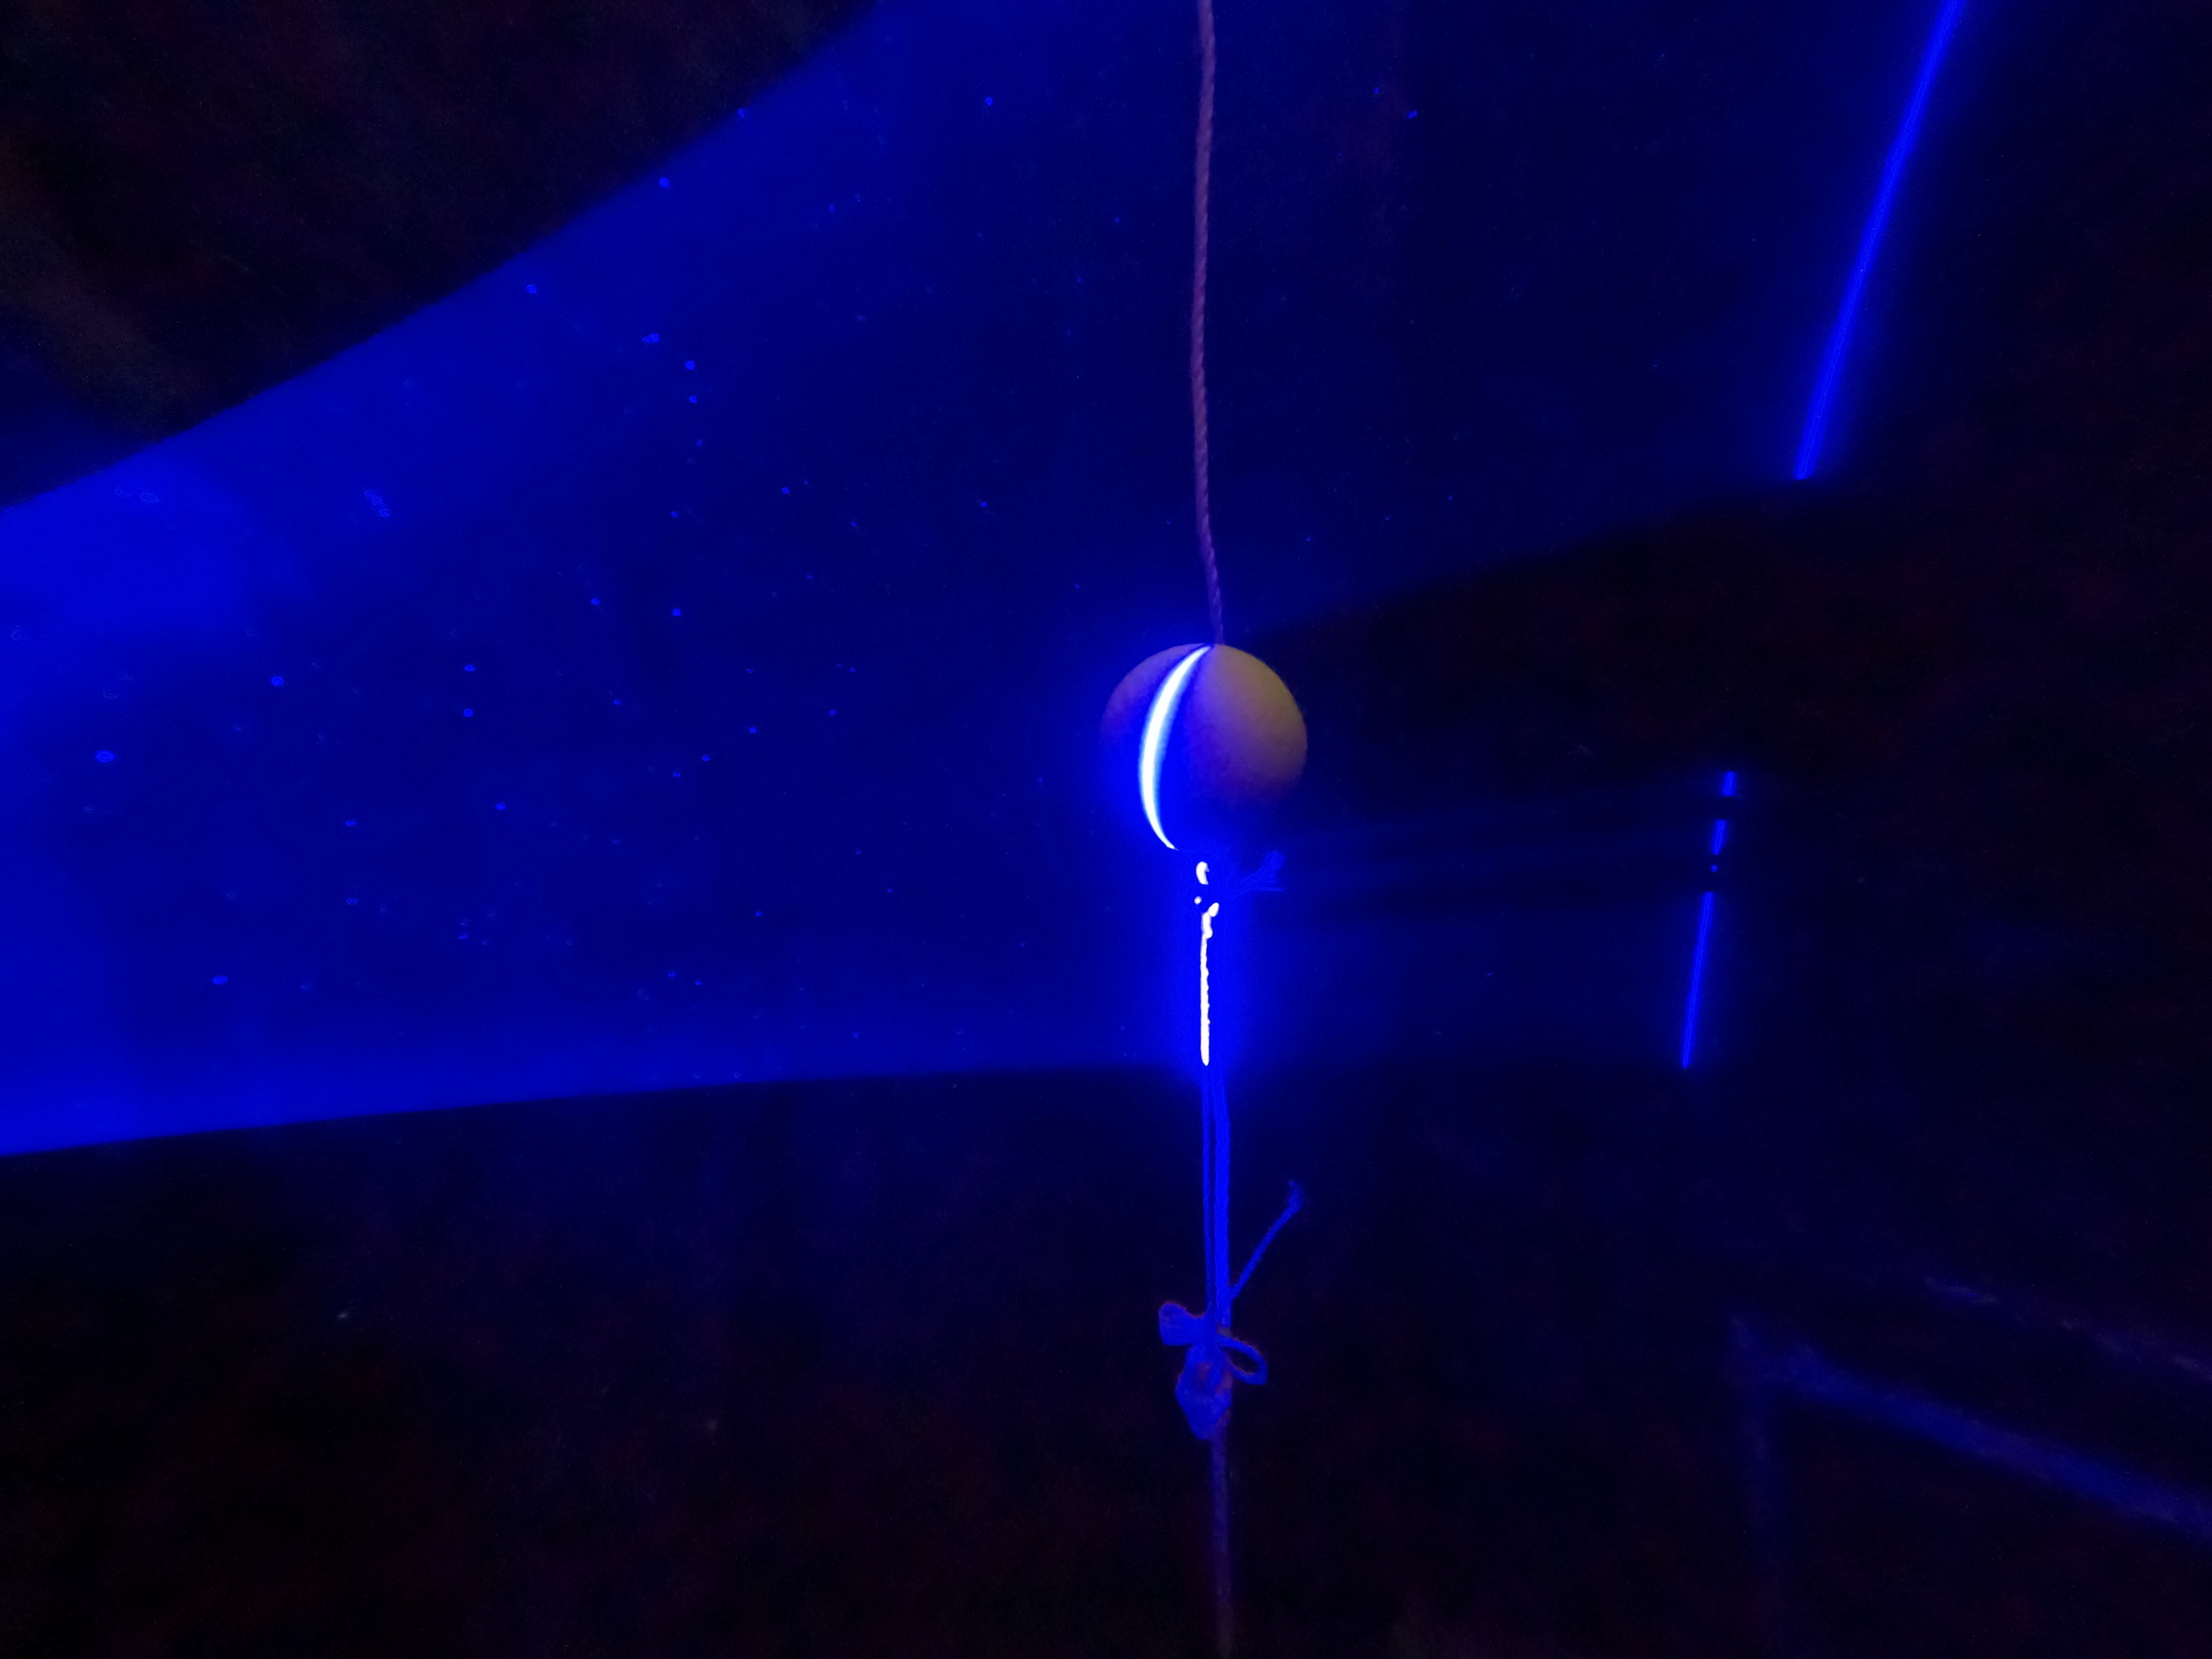

Supplement: Supplementary file 1173 [file G0032887.pdf › 7/G0032887.pdf]

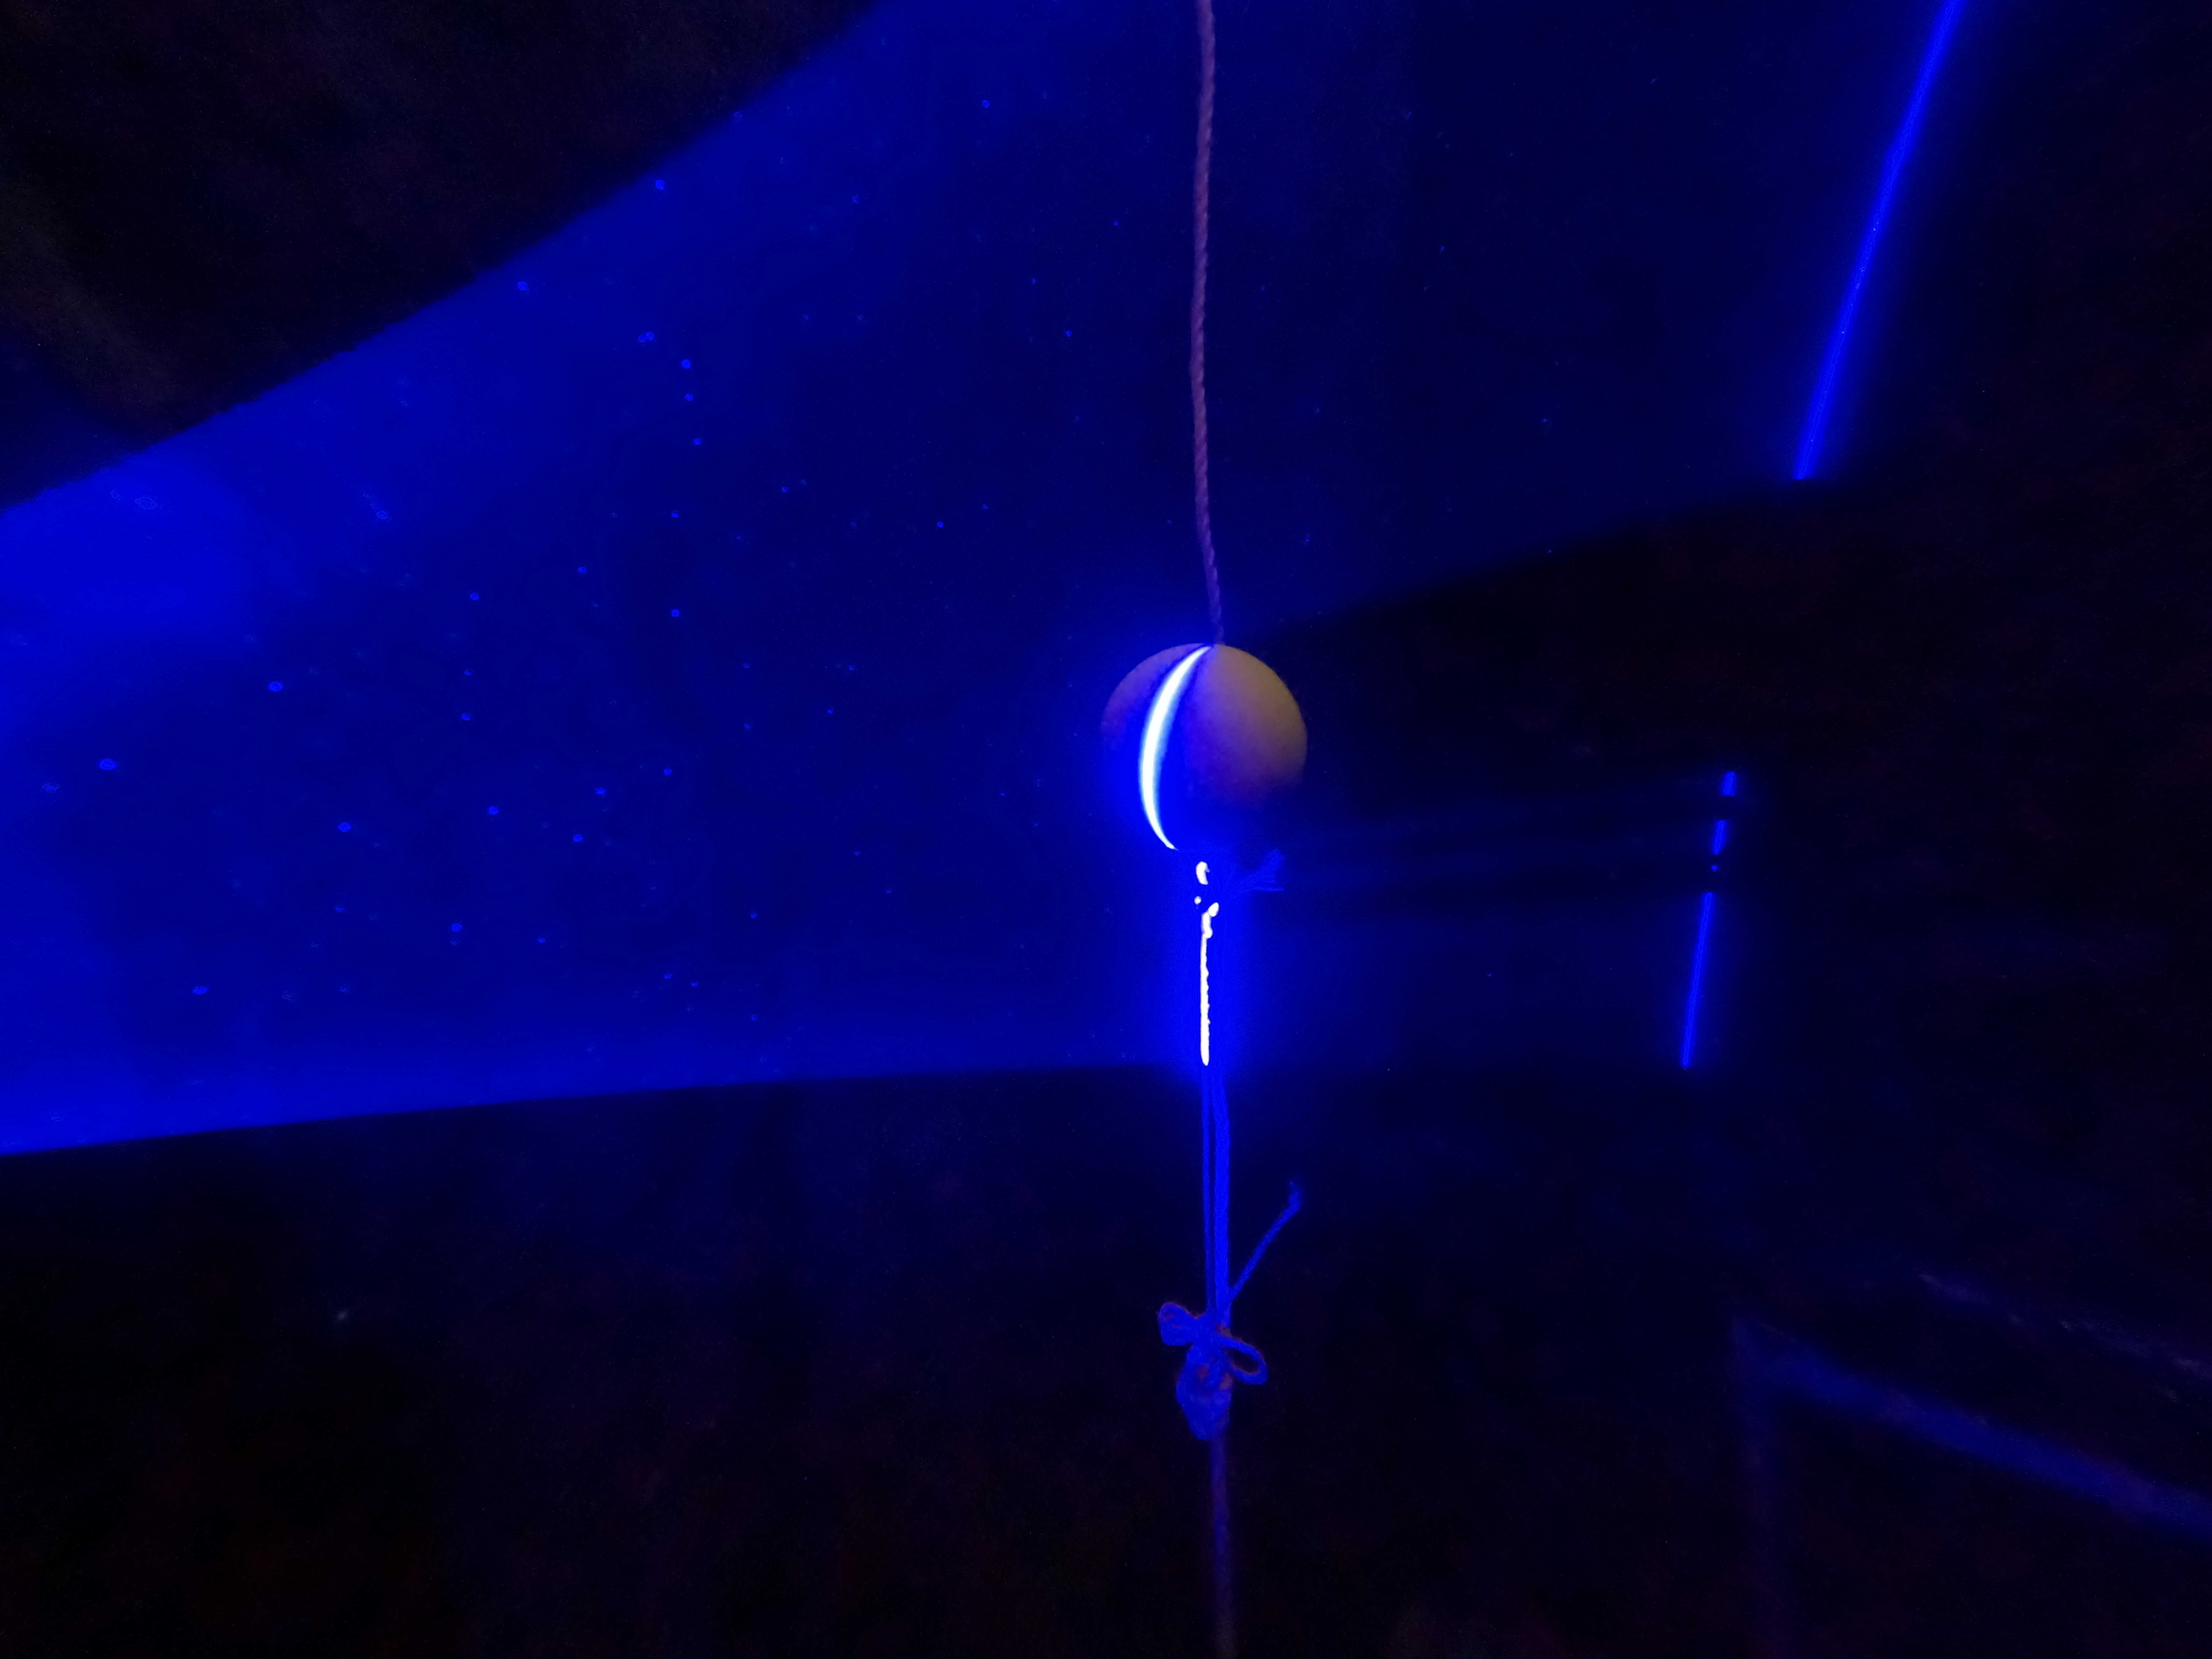

Supplement: Supplementary file 1174 [file G0032888.pdf › 7/G0032888.pdf]

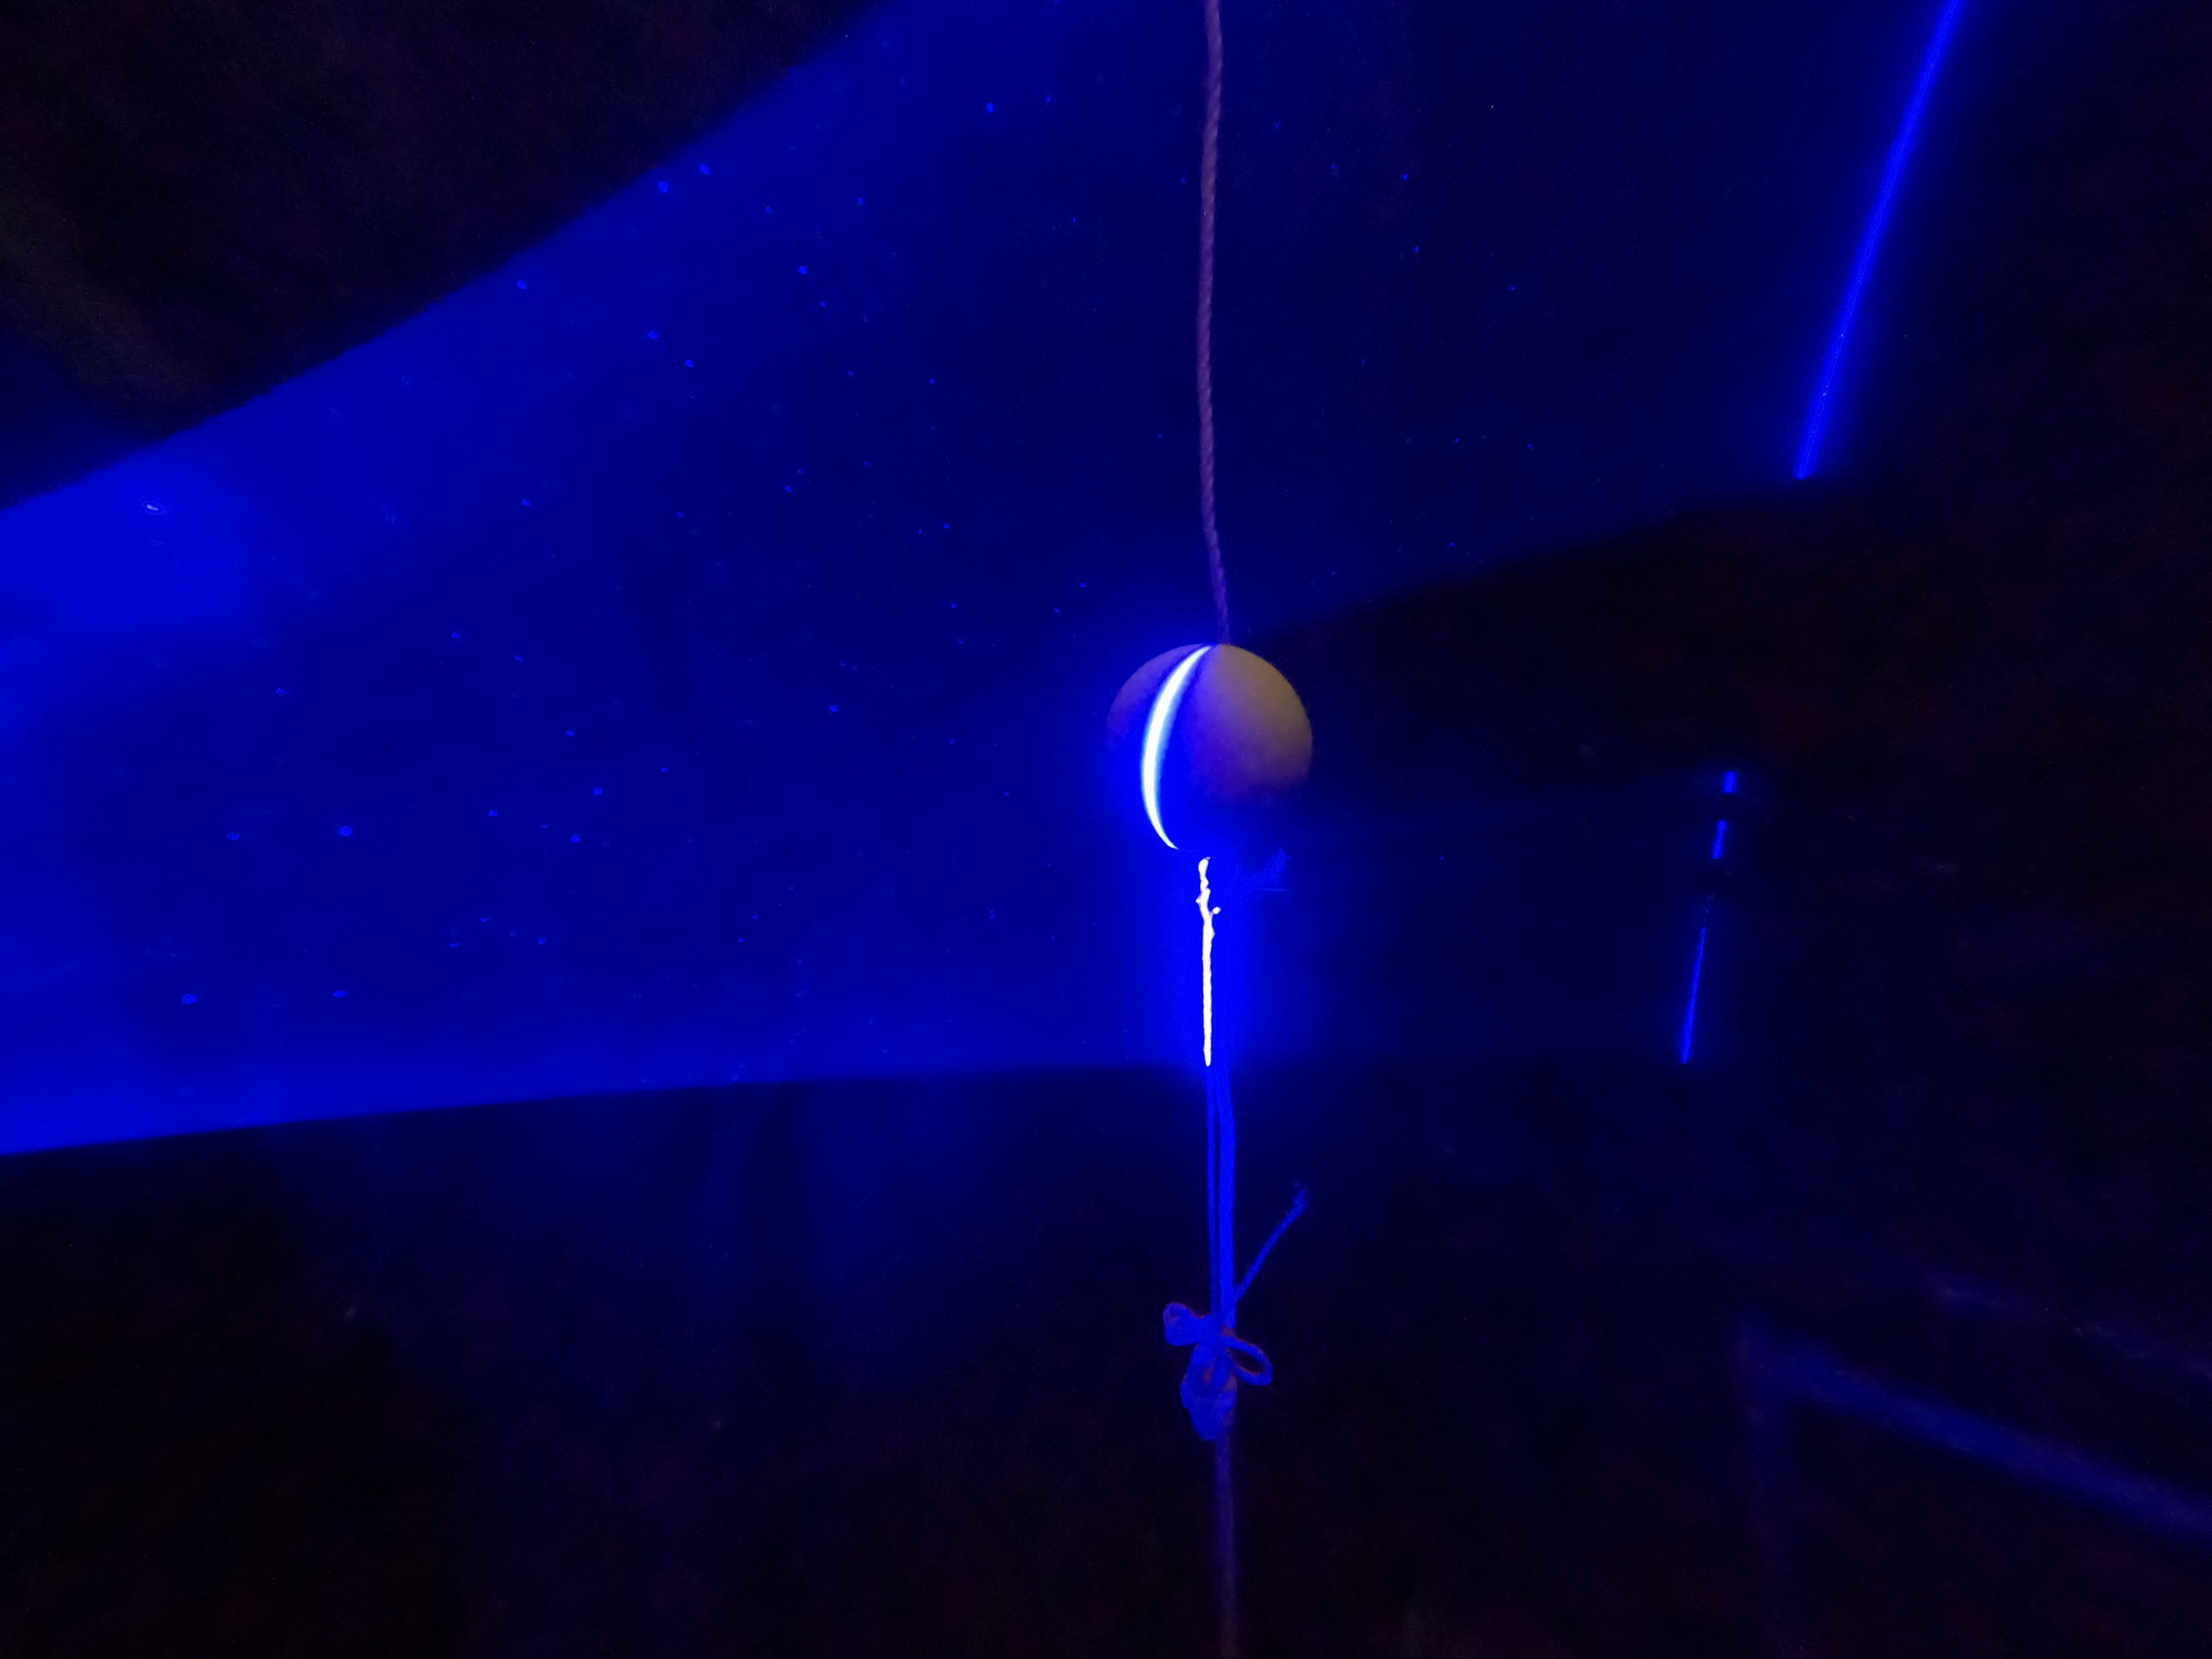

Supplement: Supplementary file 1175 [file G0032889.pdf › 7/G0032889.pdf]

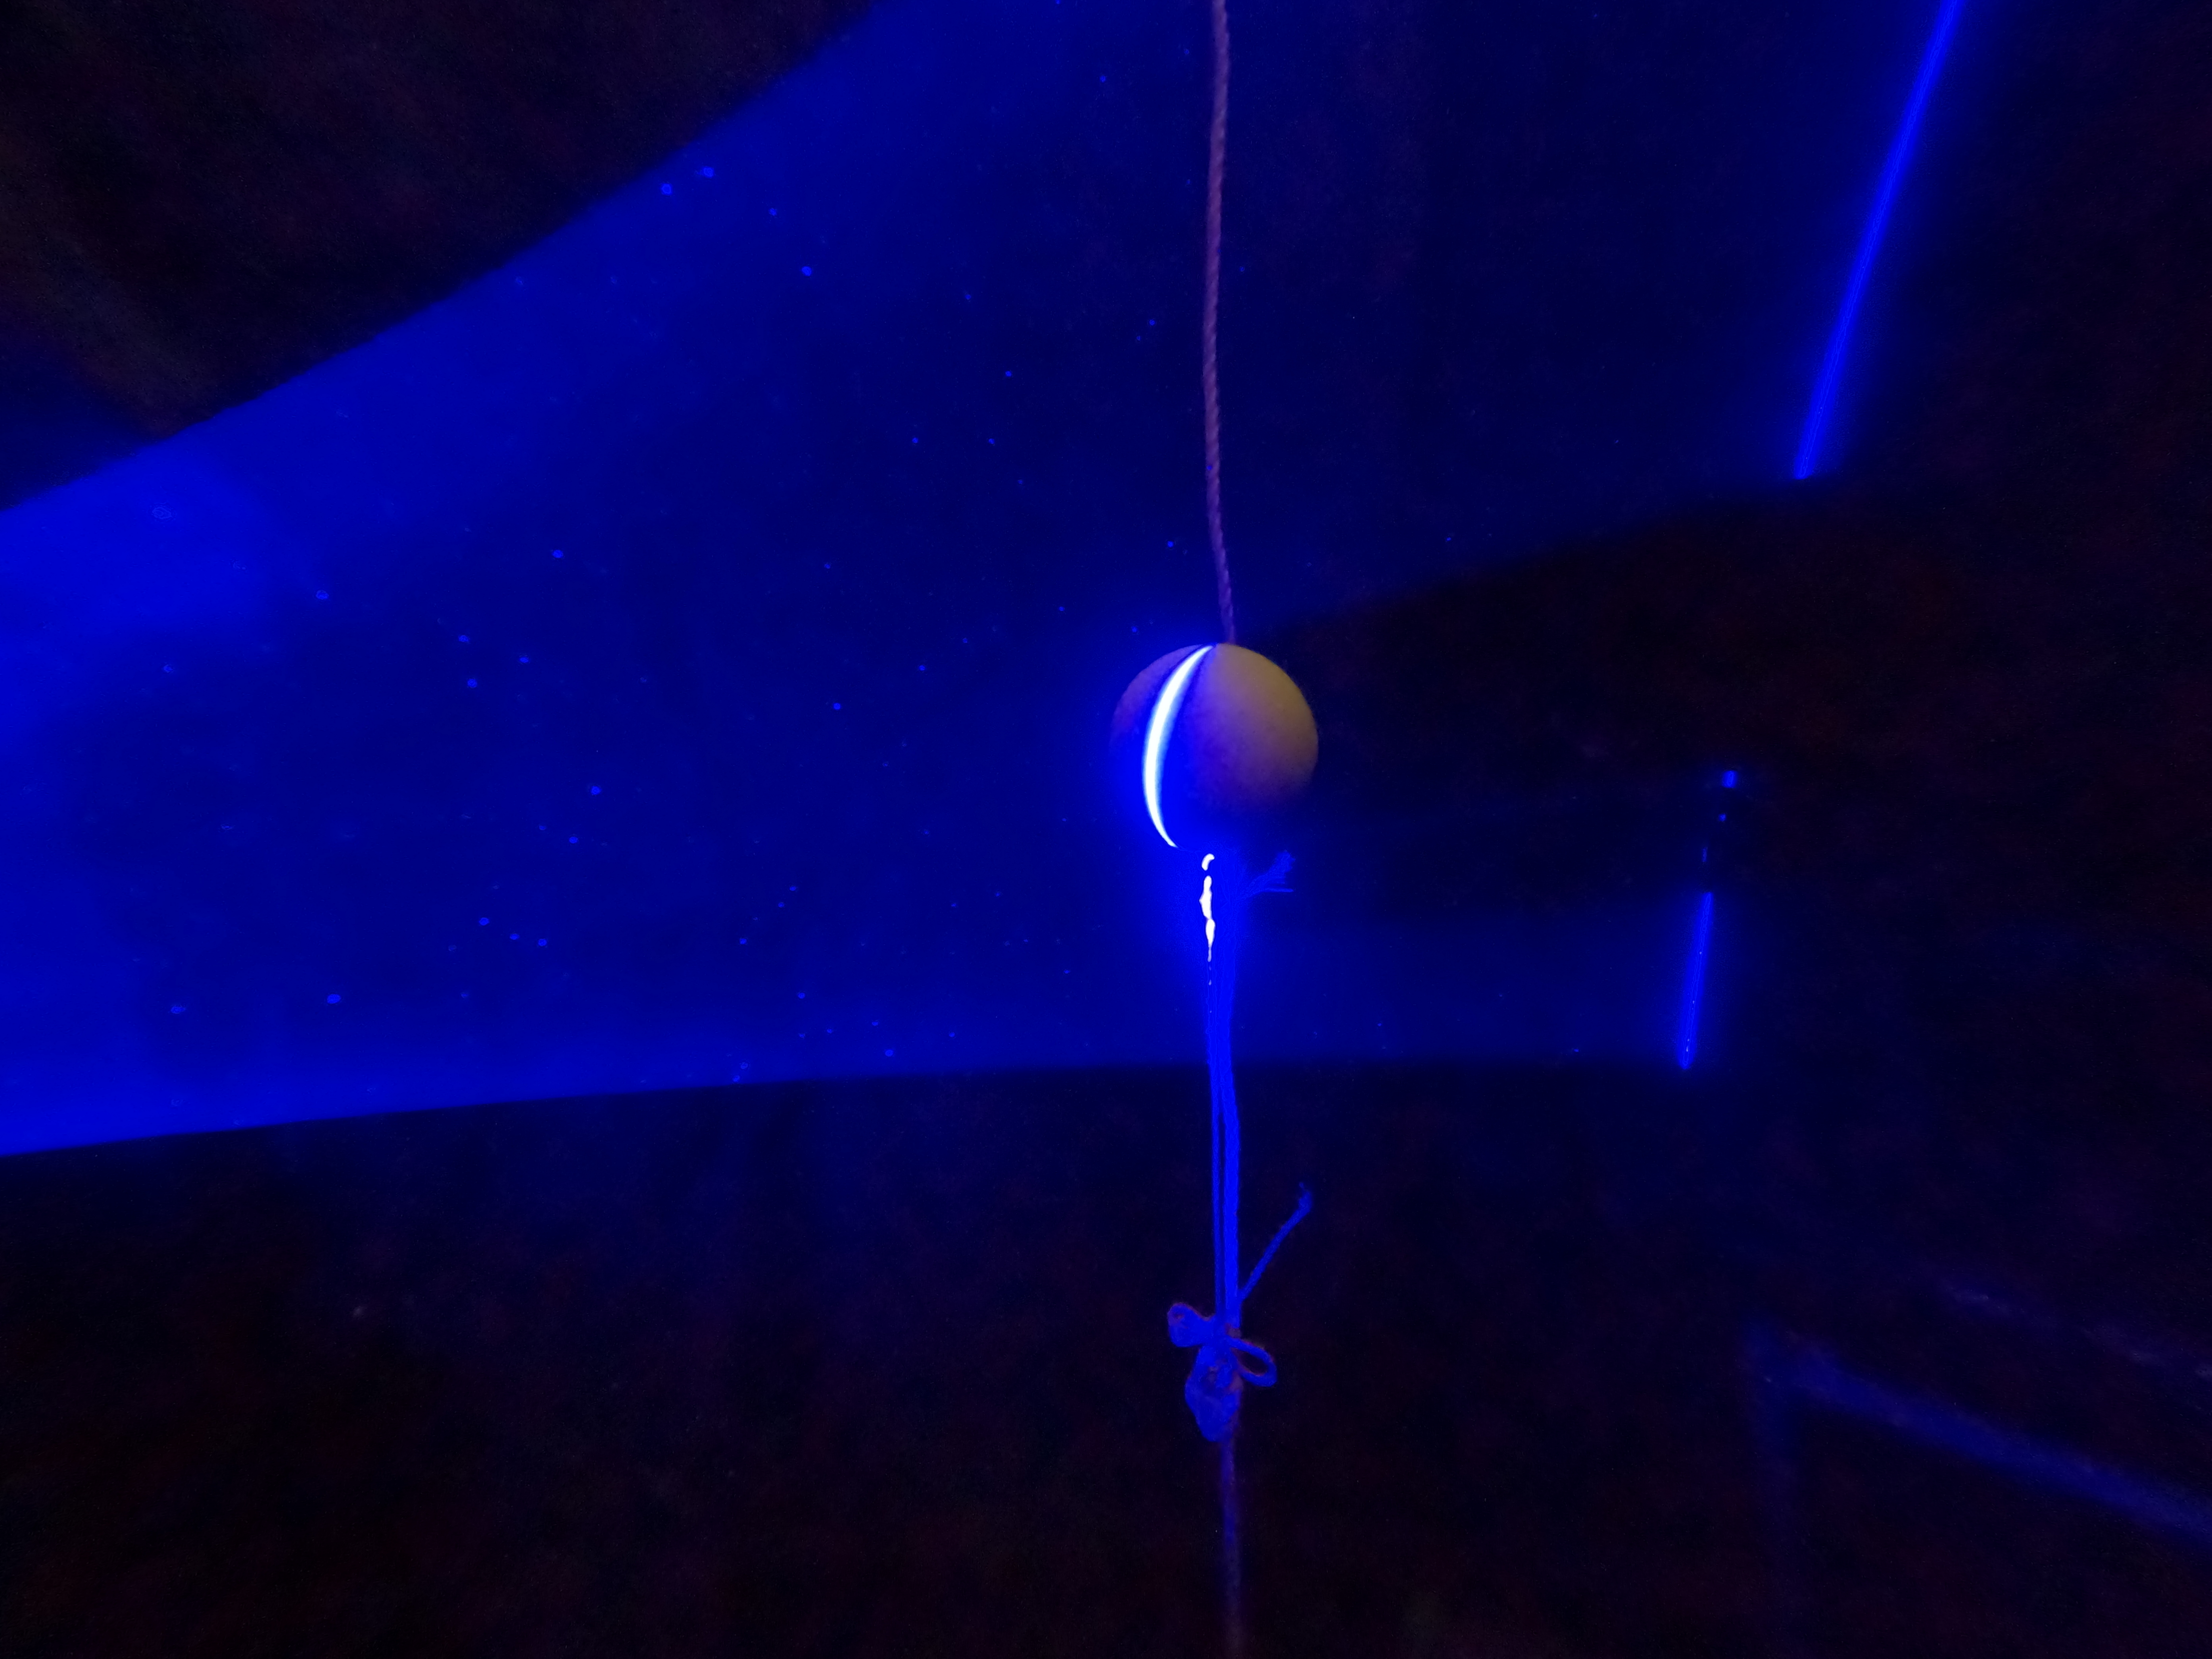

Supplement: Supplementary file 1176 [file G0032890.pdf › 7/G0032890.pdf]

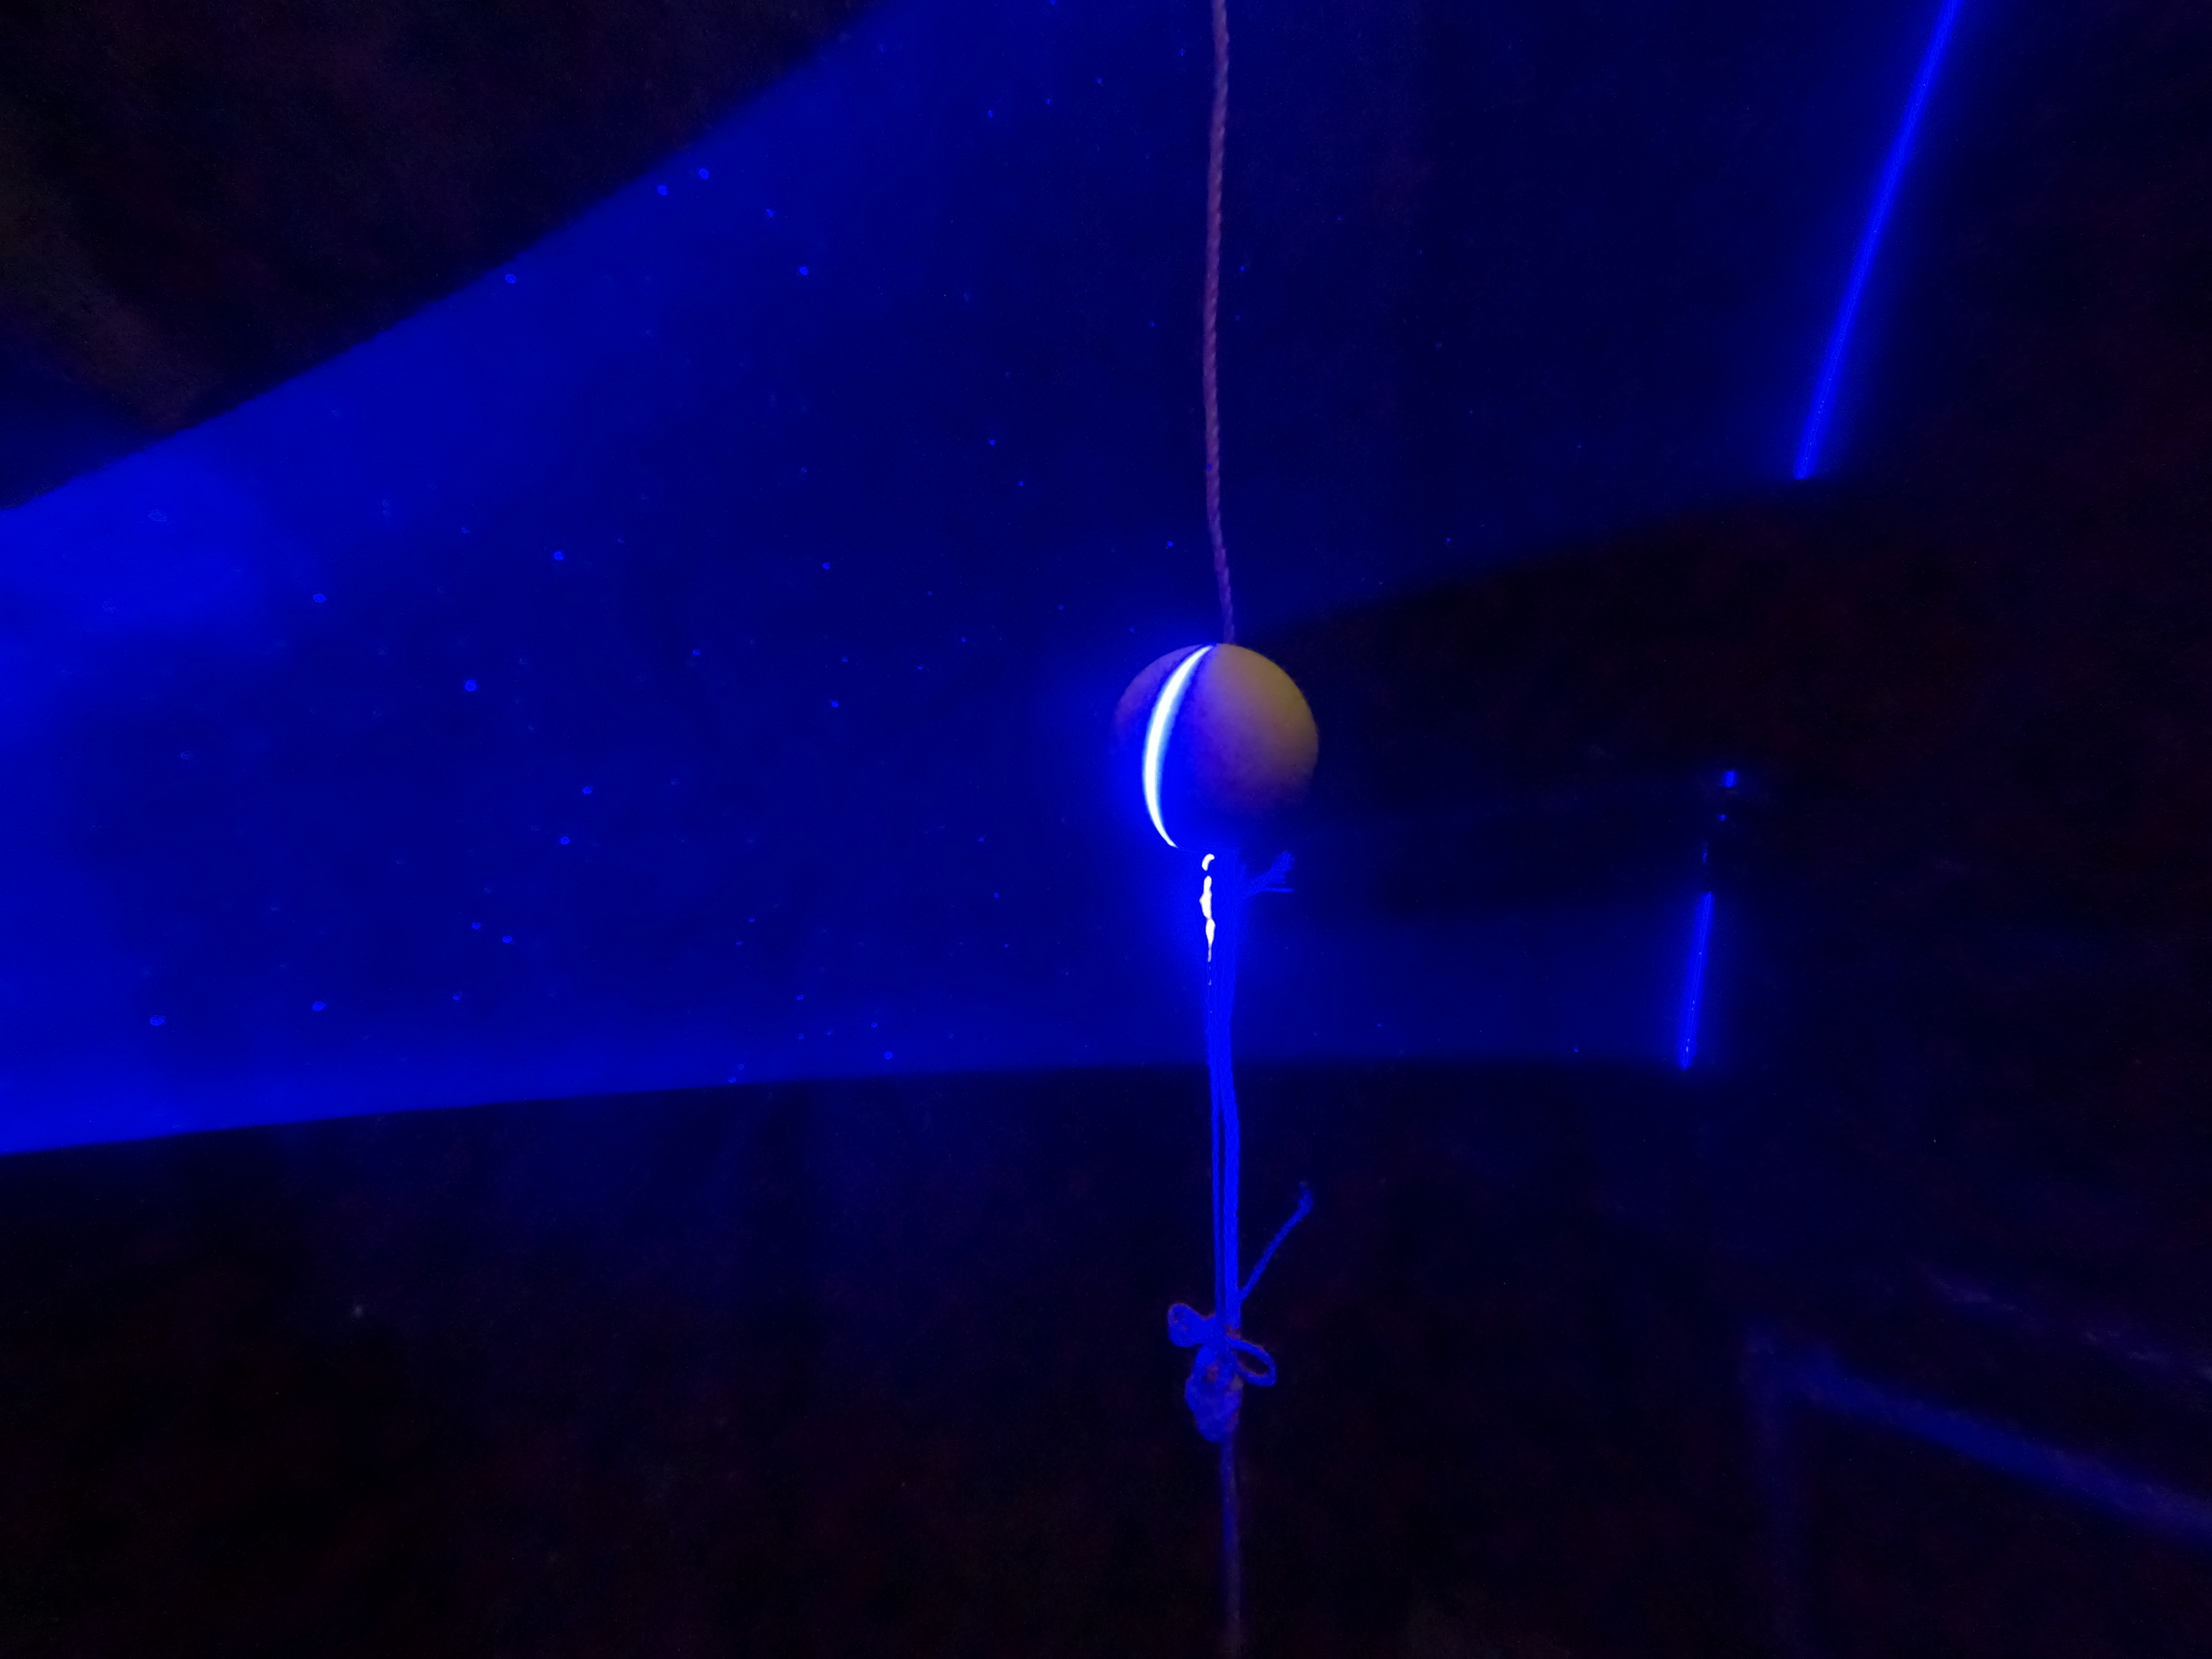

Supplement: Supplementary file 1177 [file G0032891.pdf › 7/G0032891.pdf]

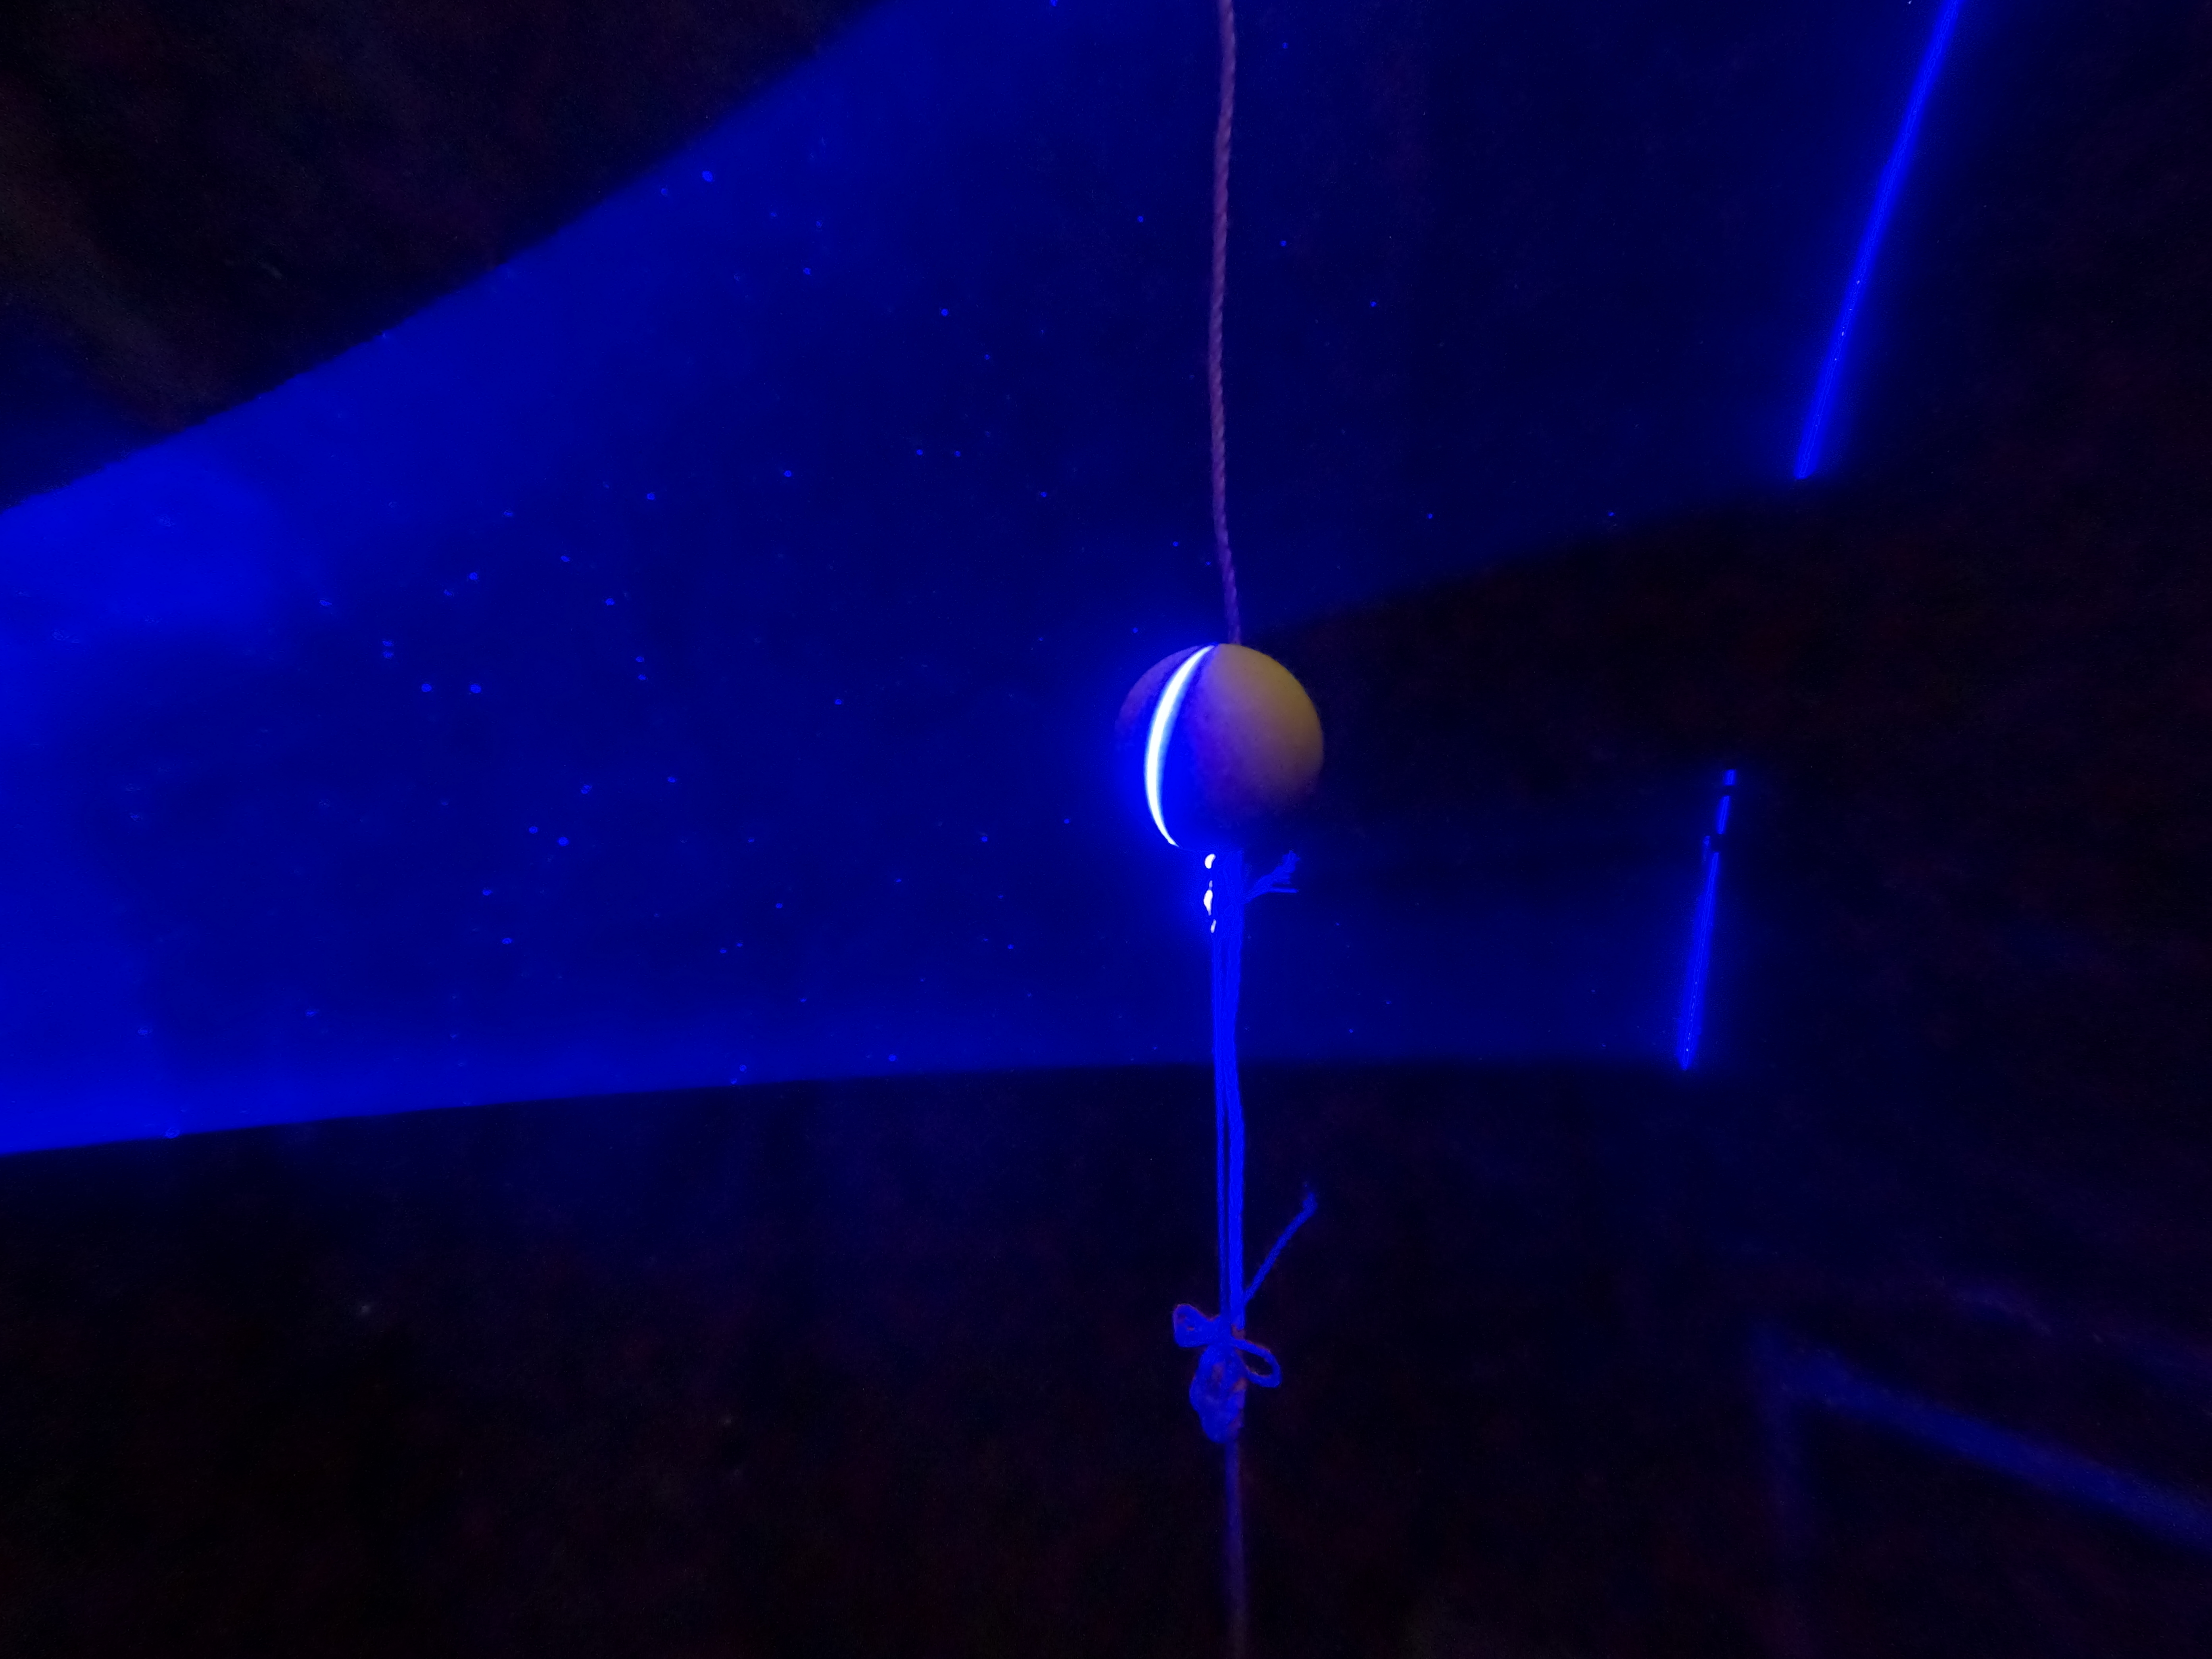

Supplement: Supplementary file 1178 [file G0032892.pdf › 7/G0032892.pdf]

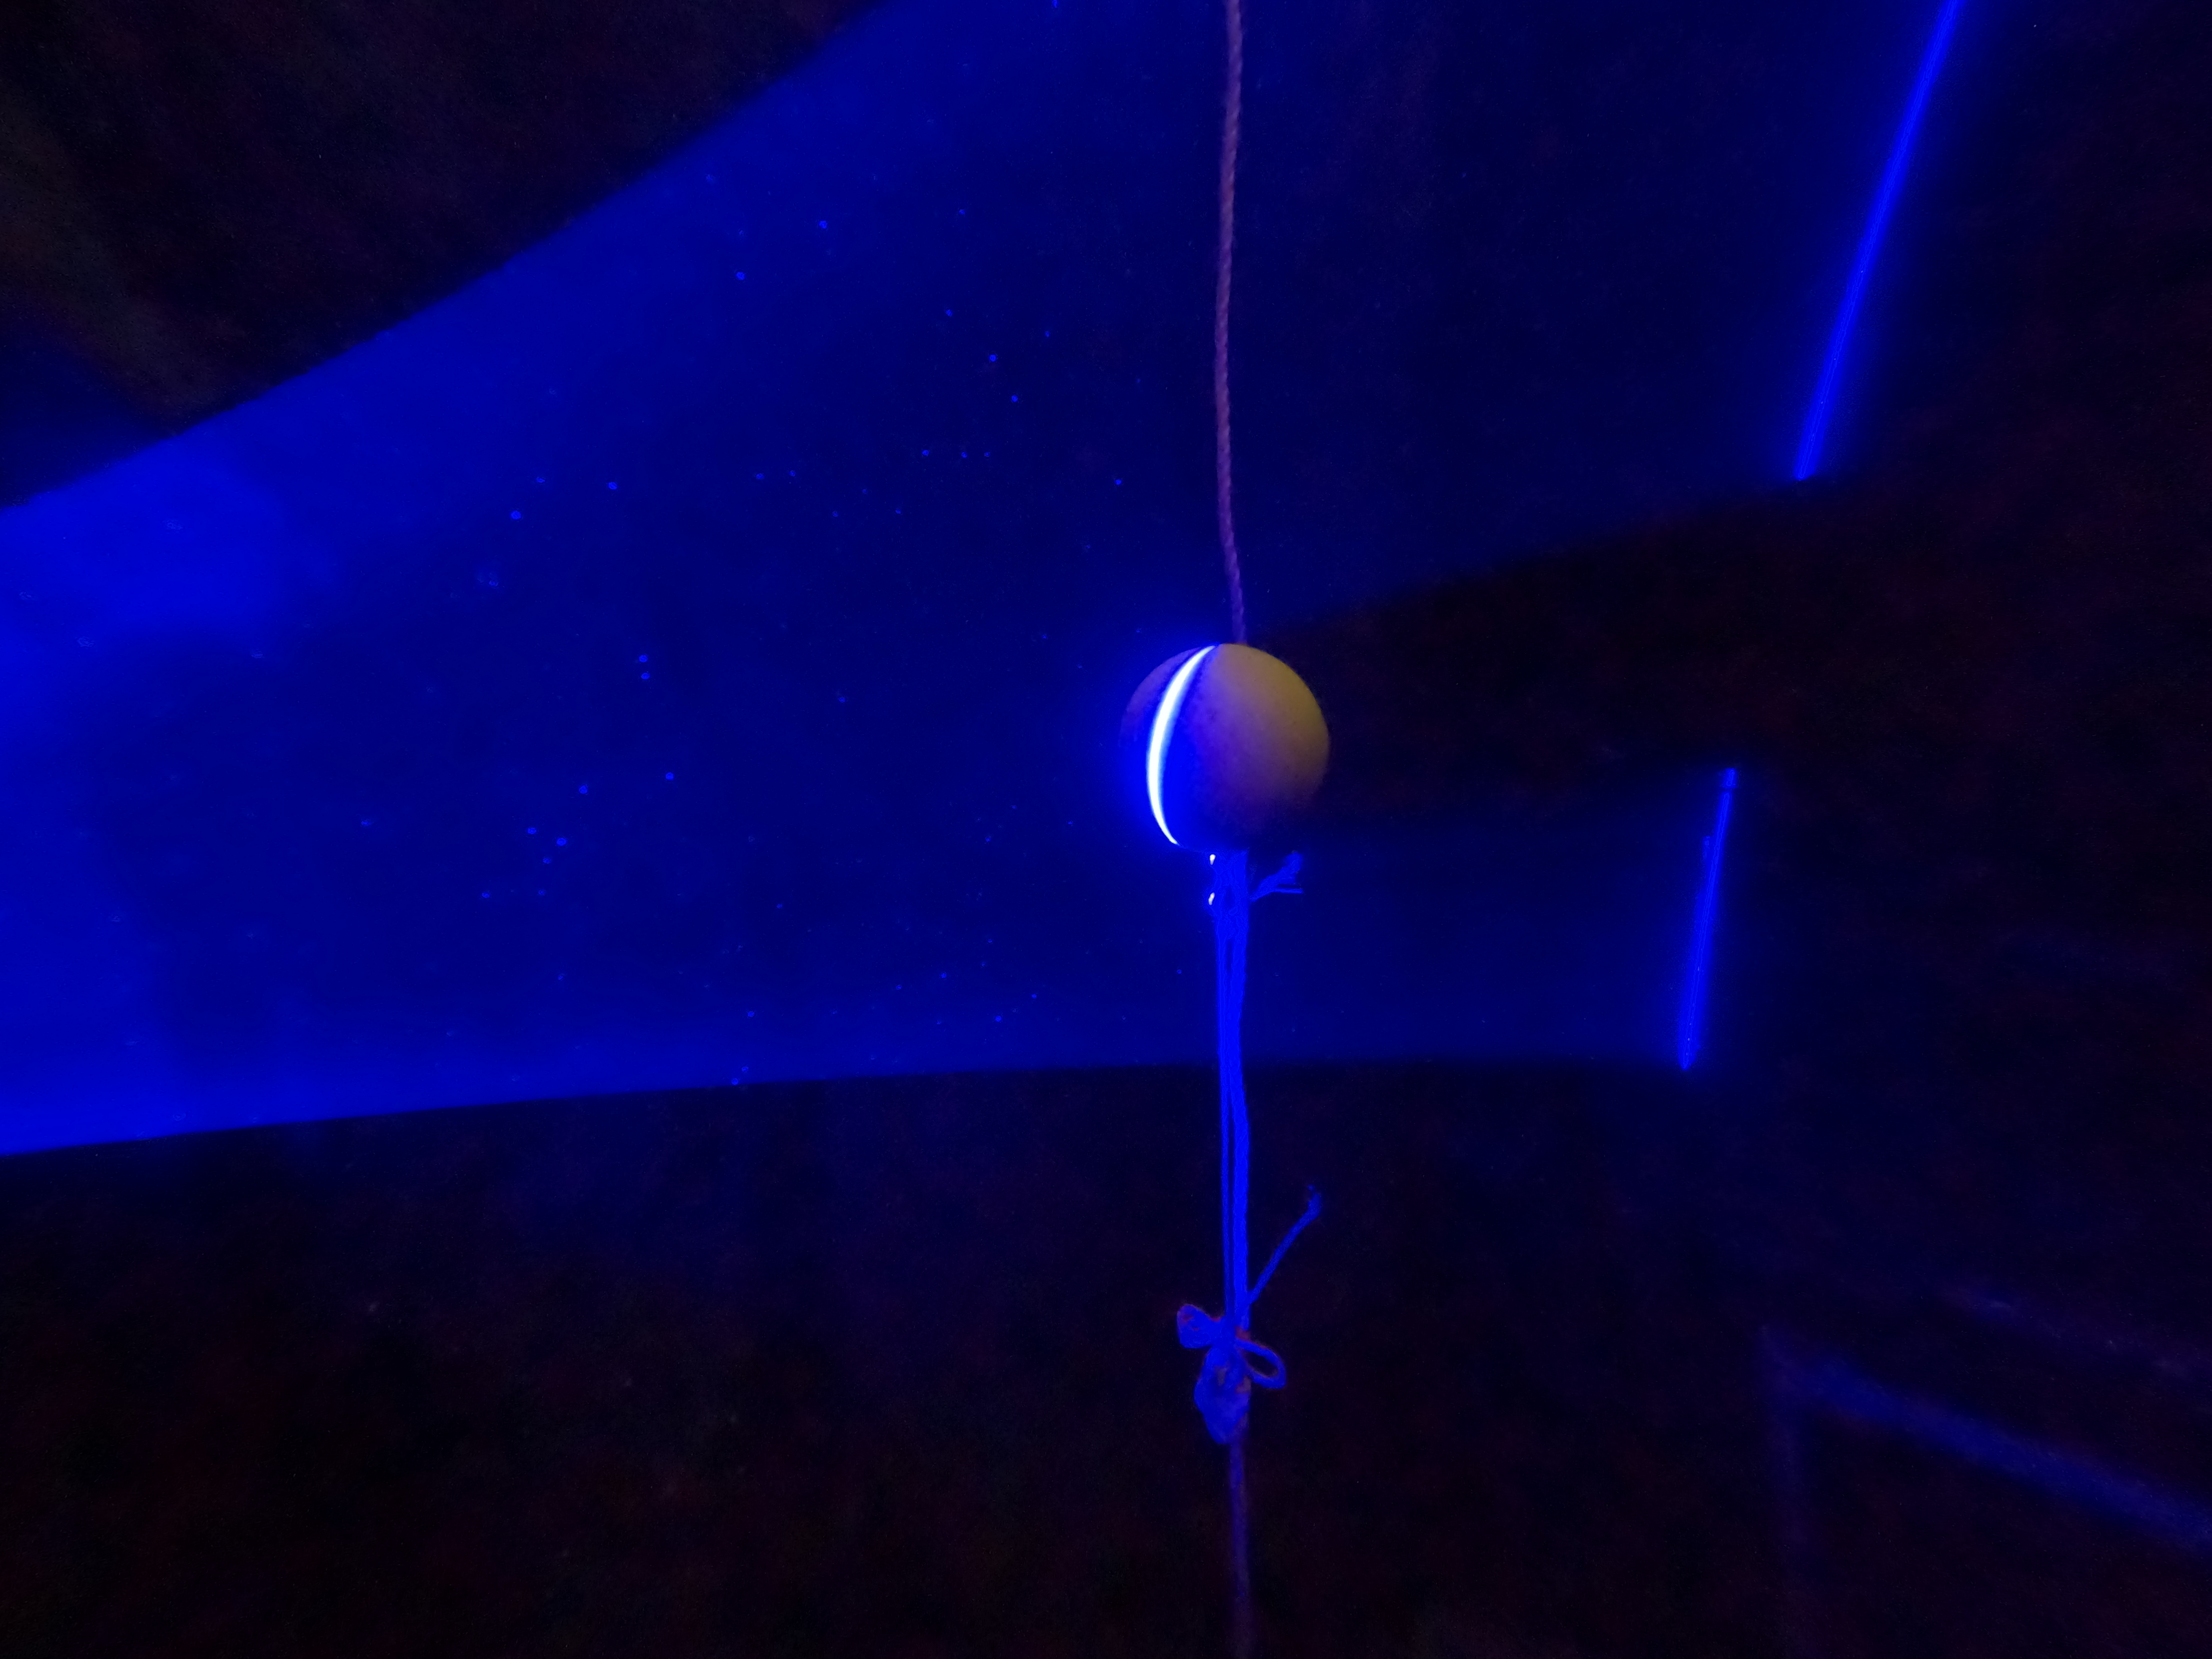

Supplement: Supplementary file 1179 [file G0032893.pdf › 7/G0032893.pdf]

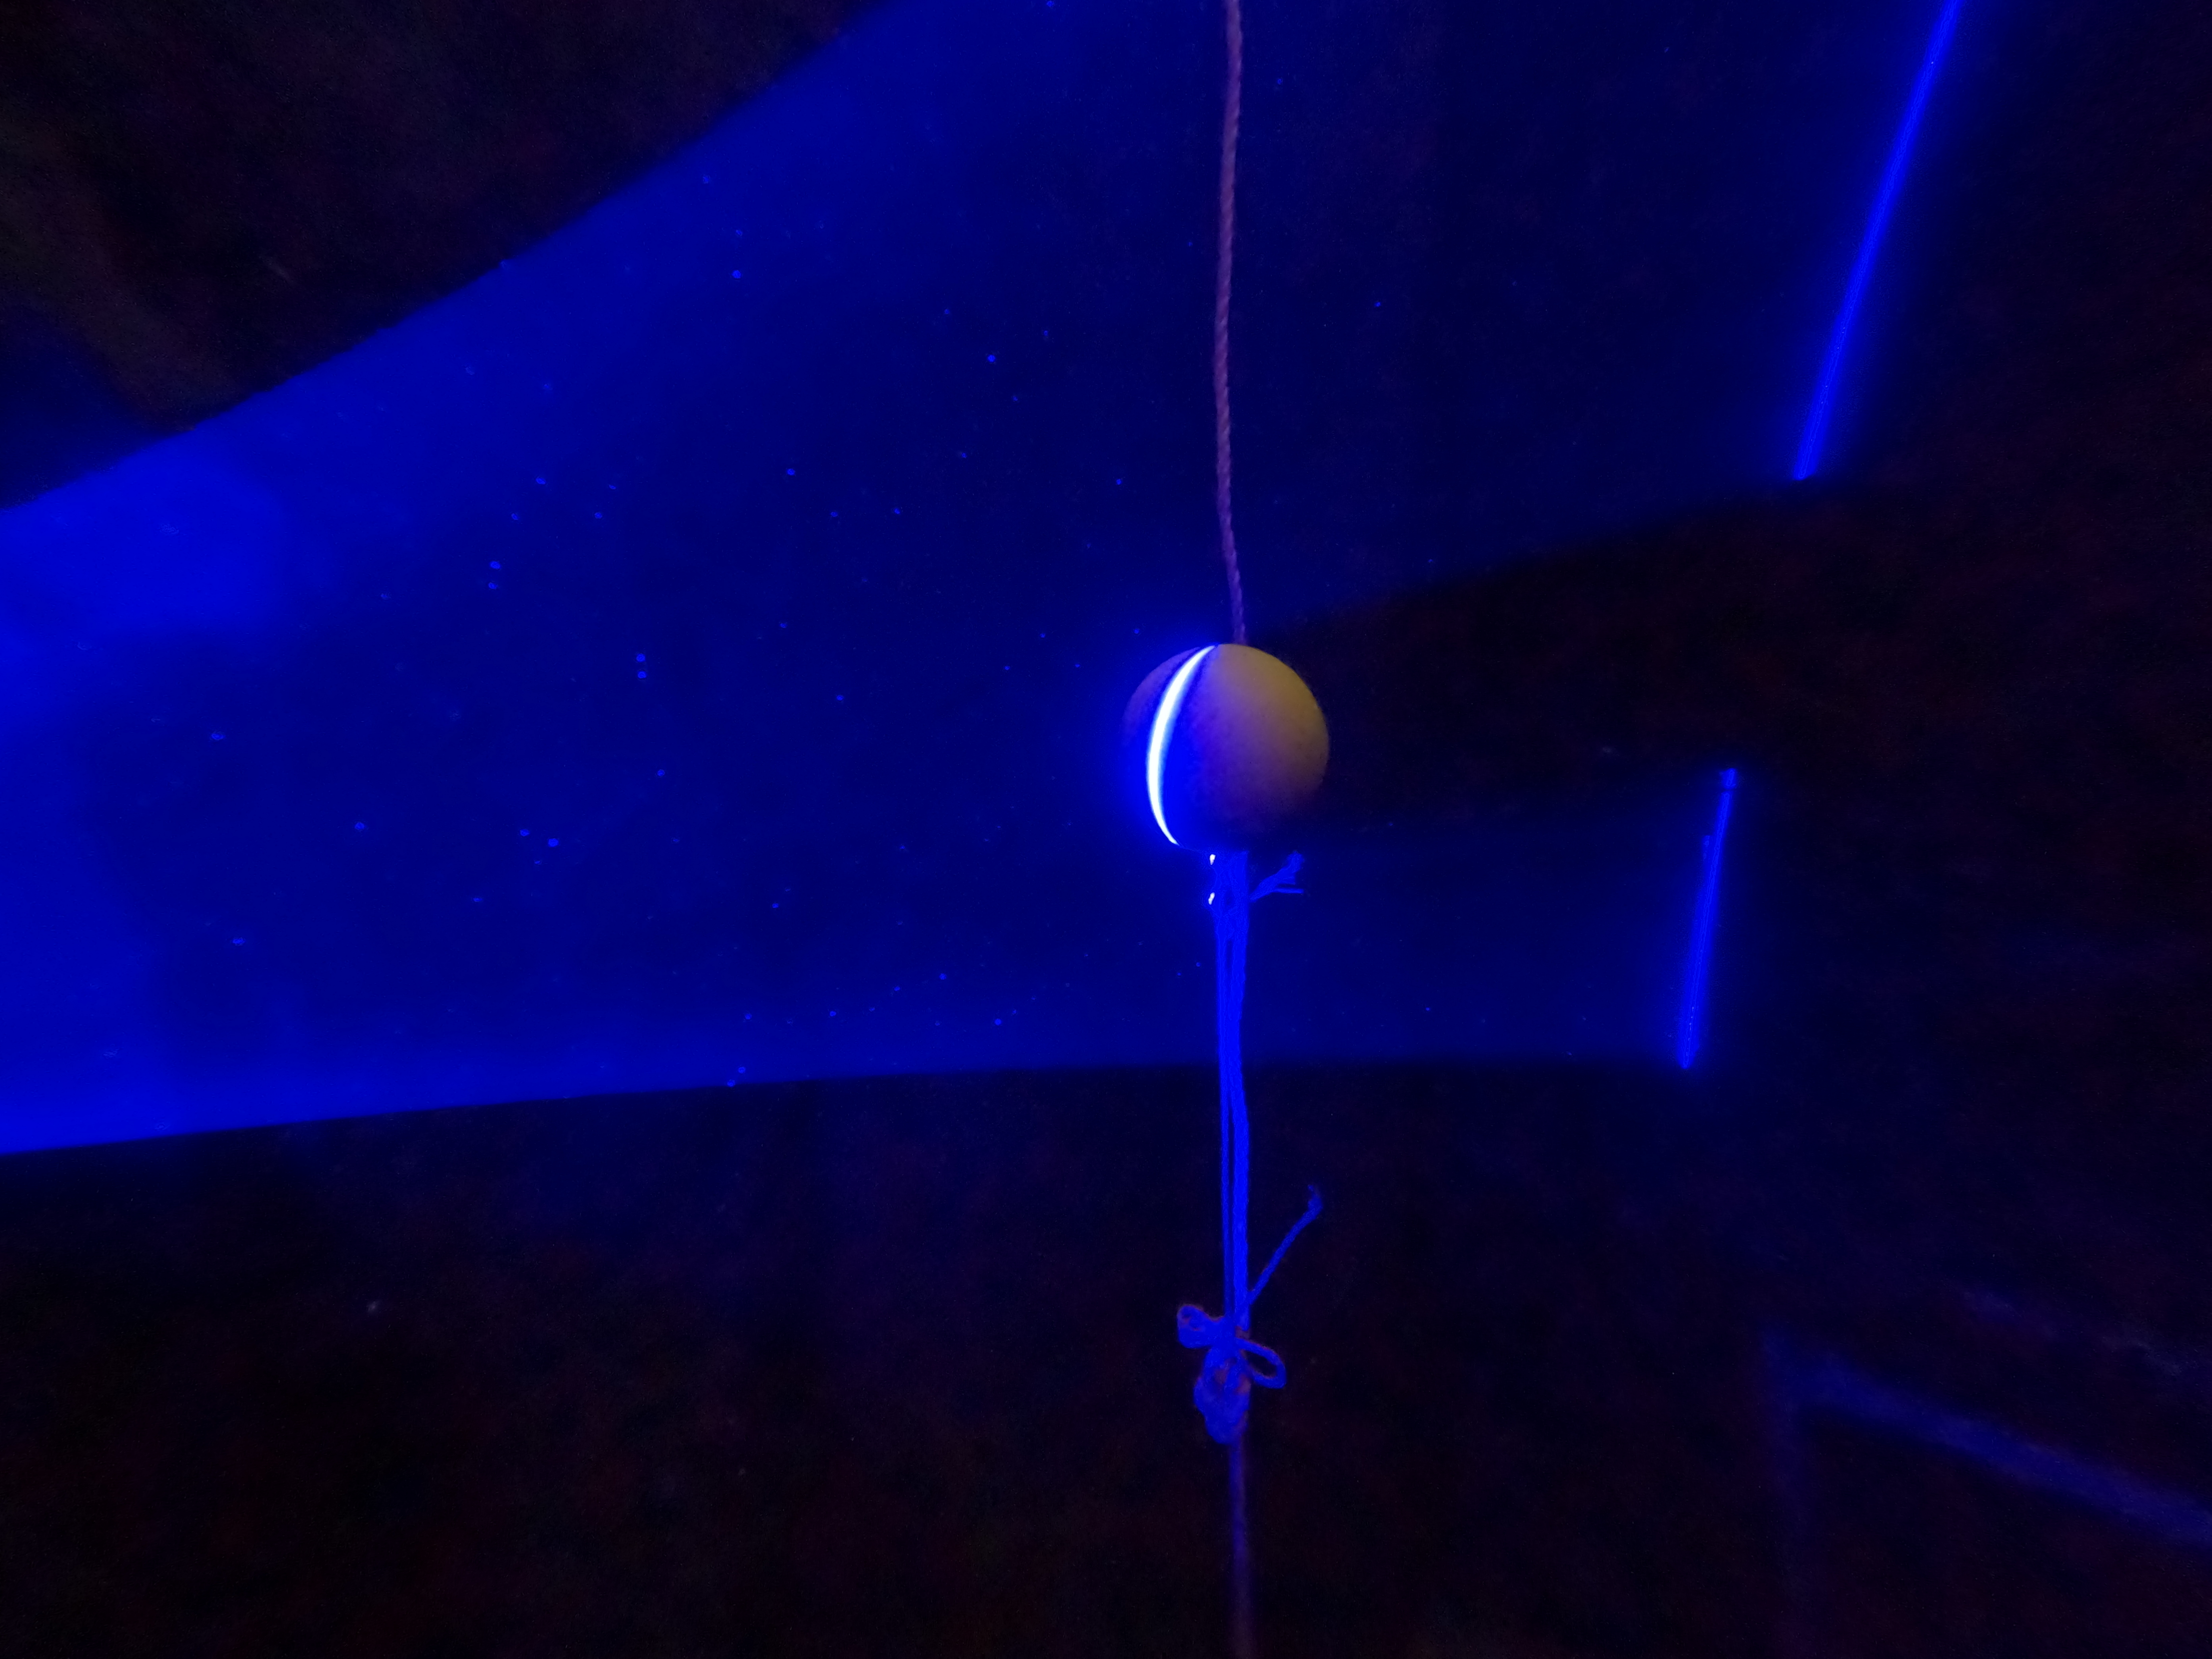

Supplement: Supplementary file 1180 [file G0032894.pdf › 7/G0032894.pdf]

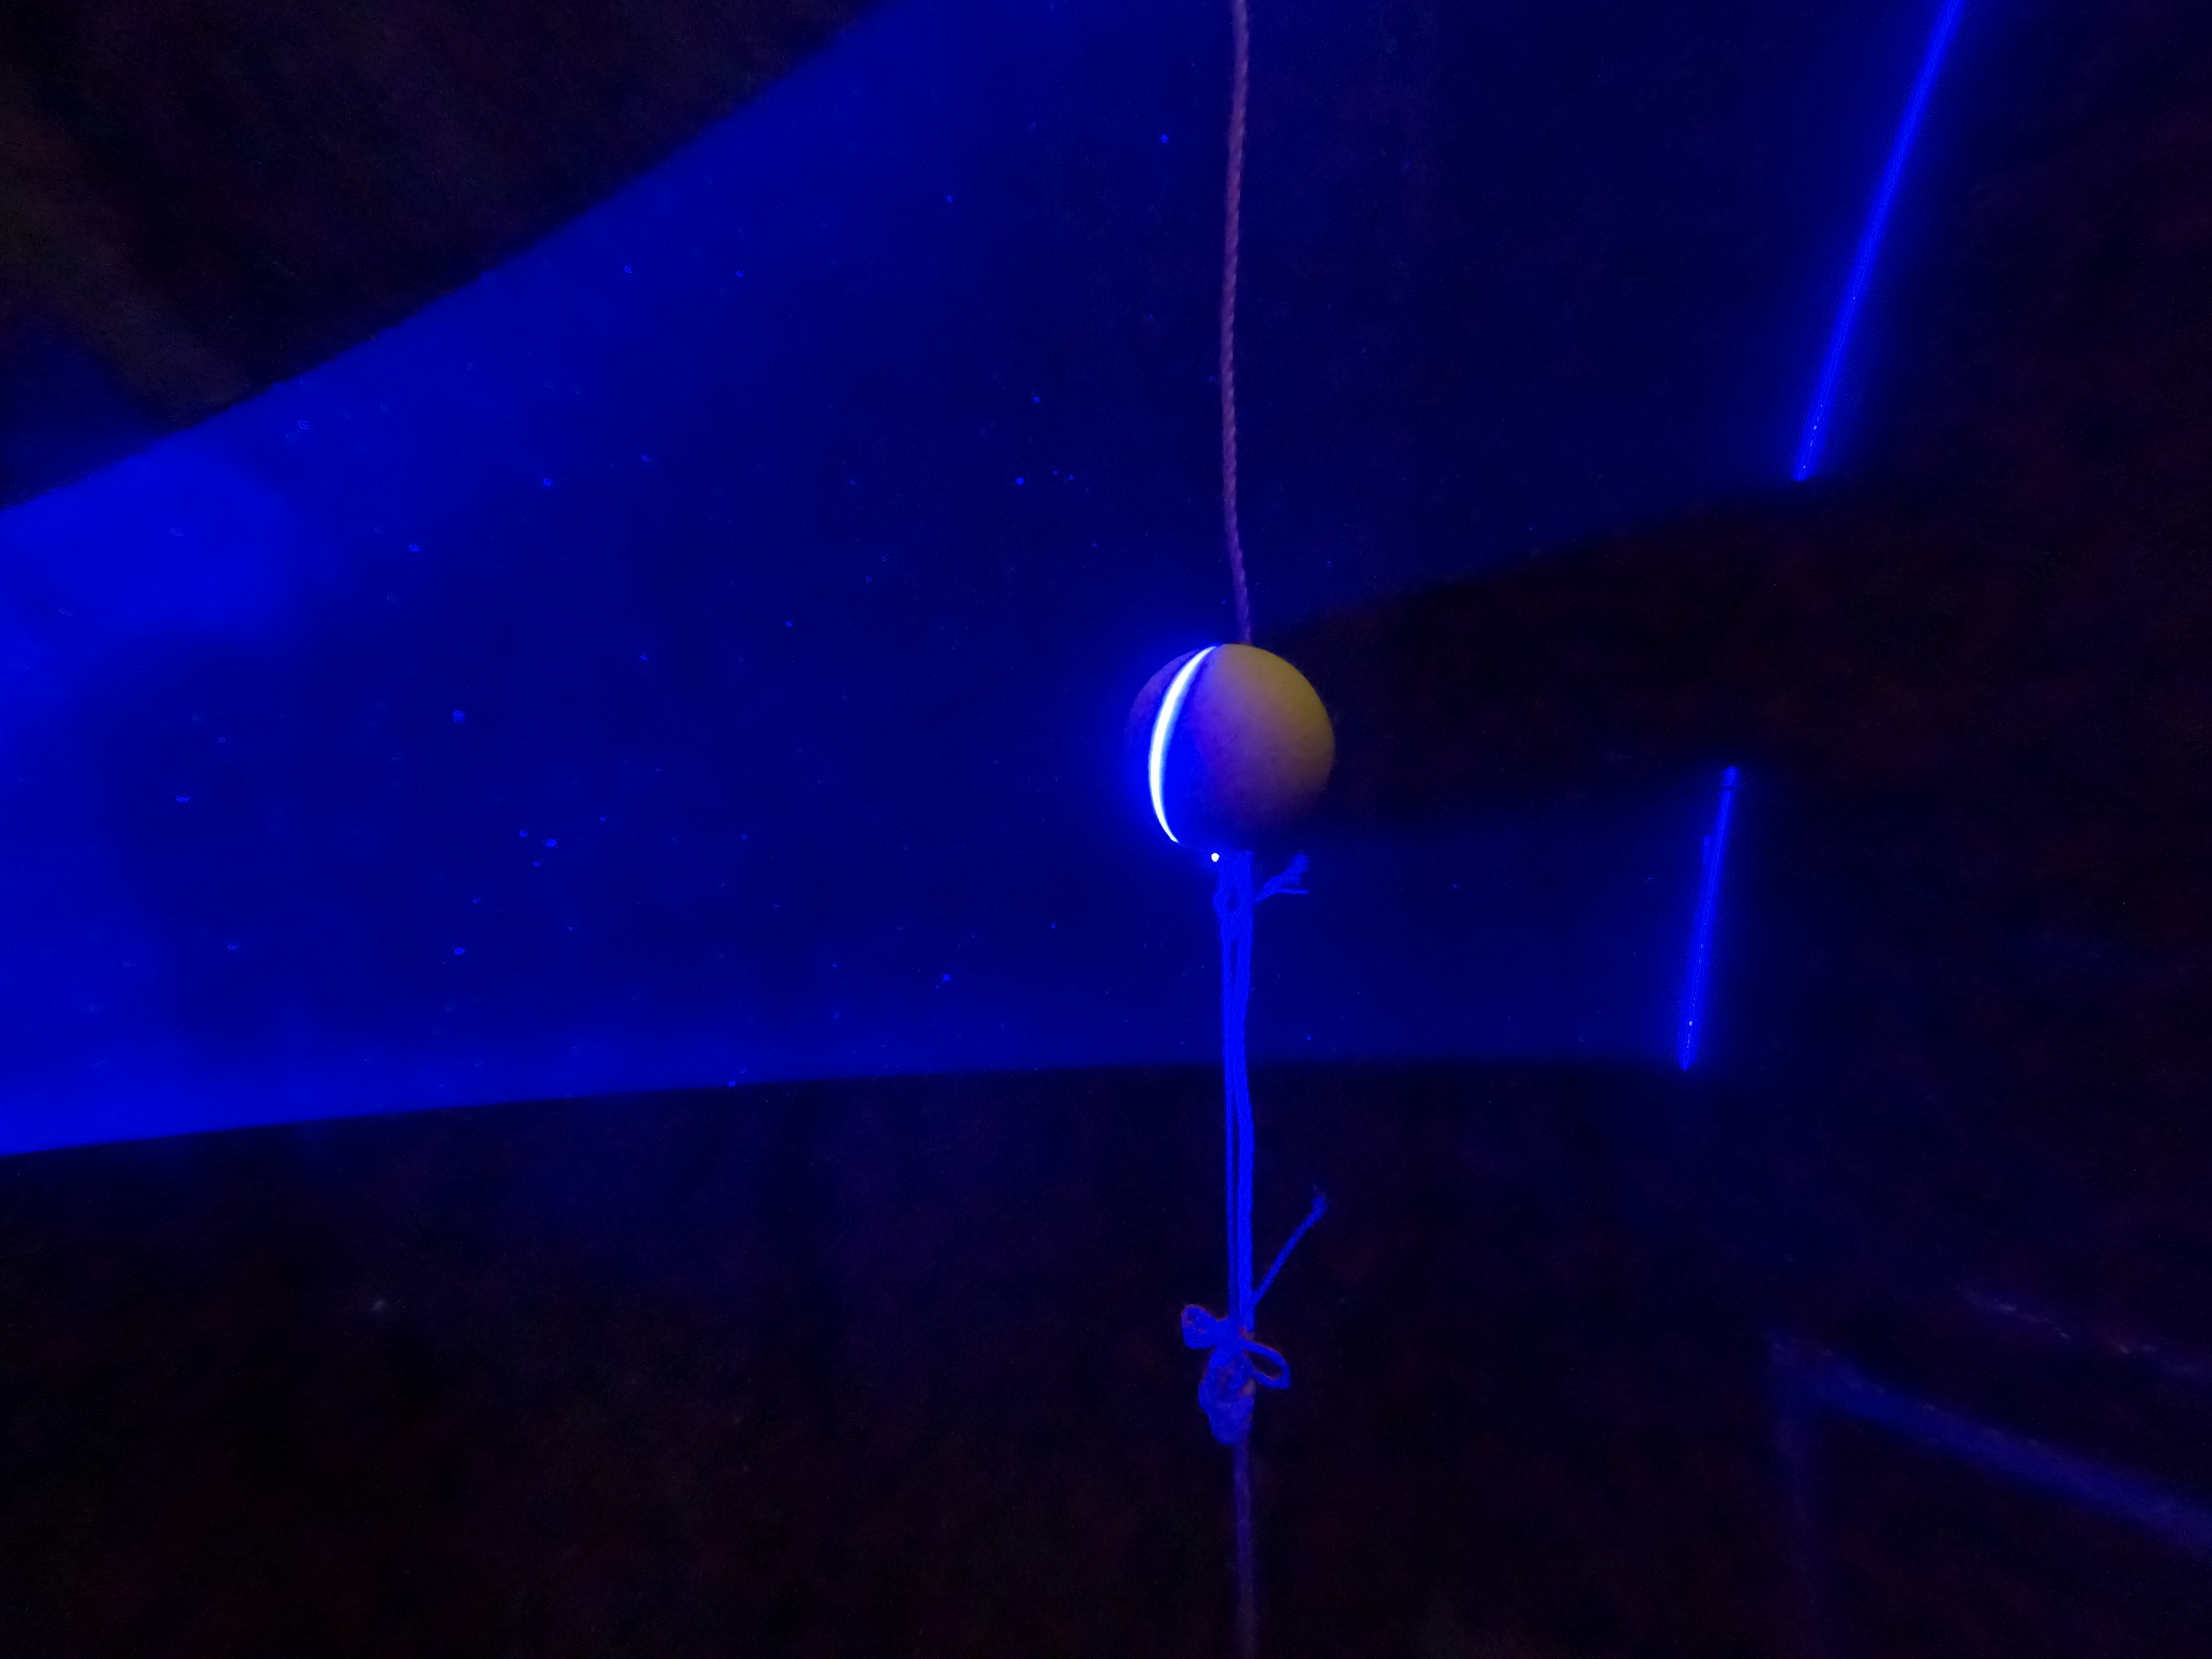

Supplement: Supplementary file 1181 [file G0032895.pdf › 7/G0032895.pdf]

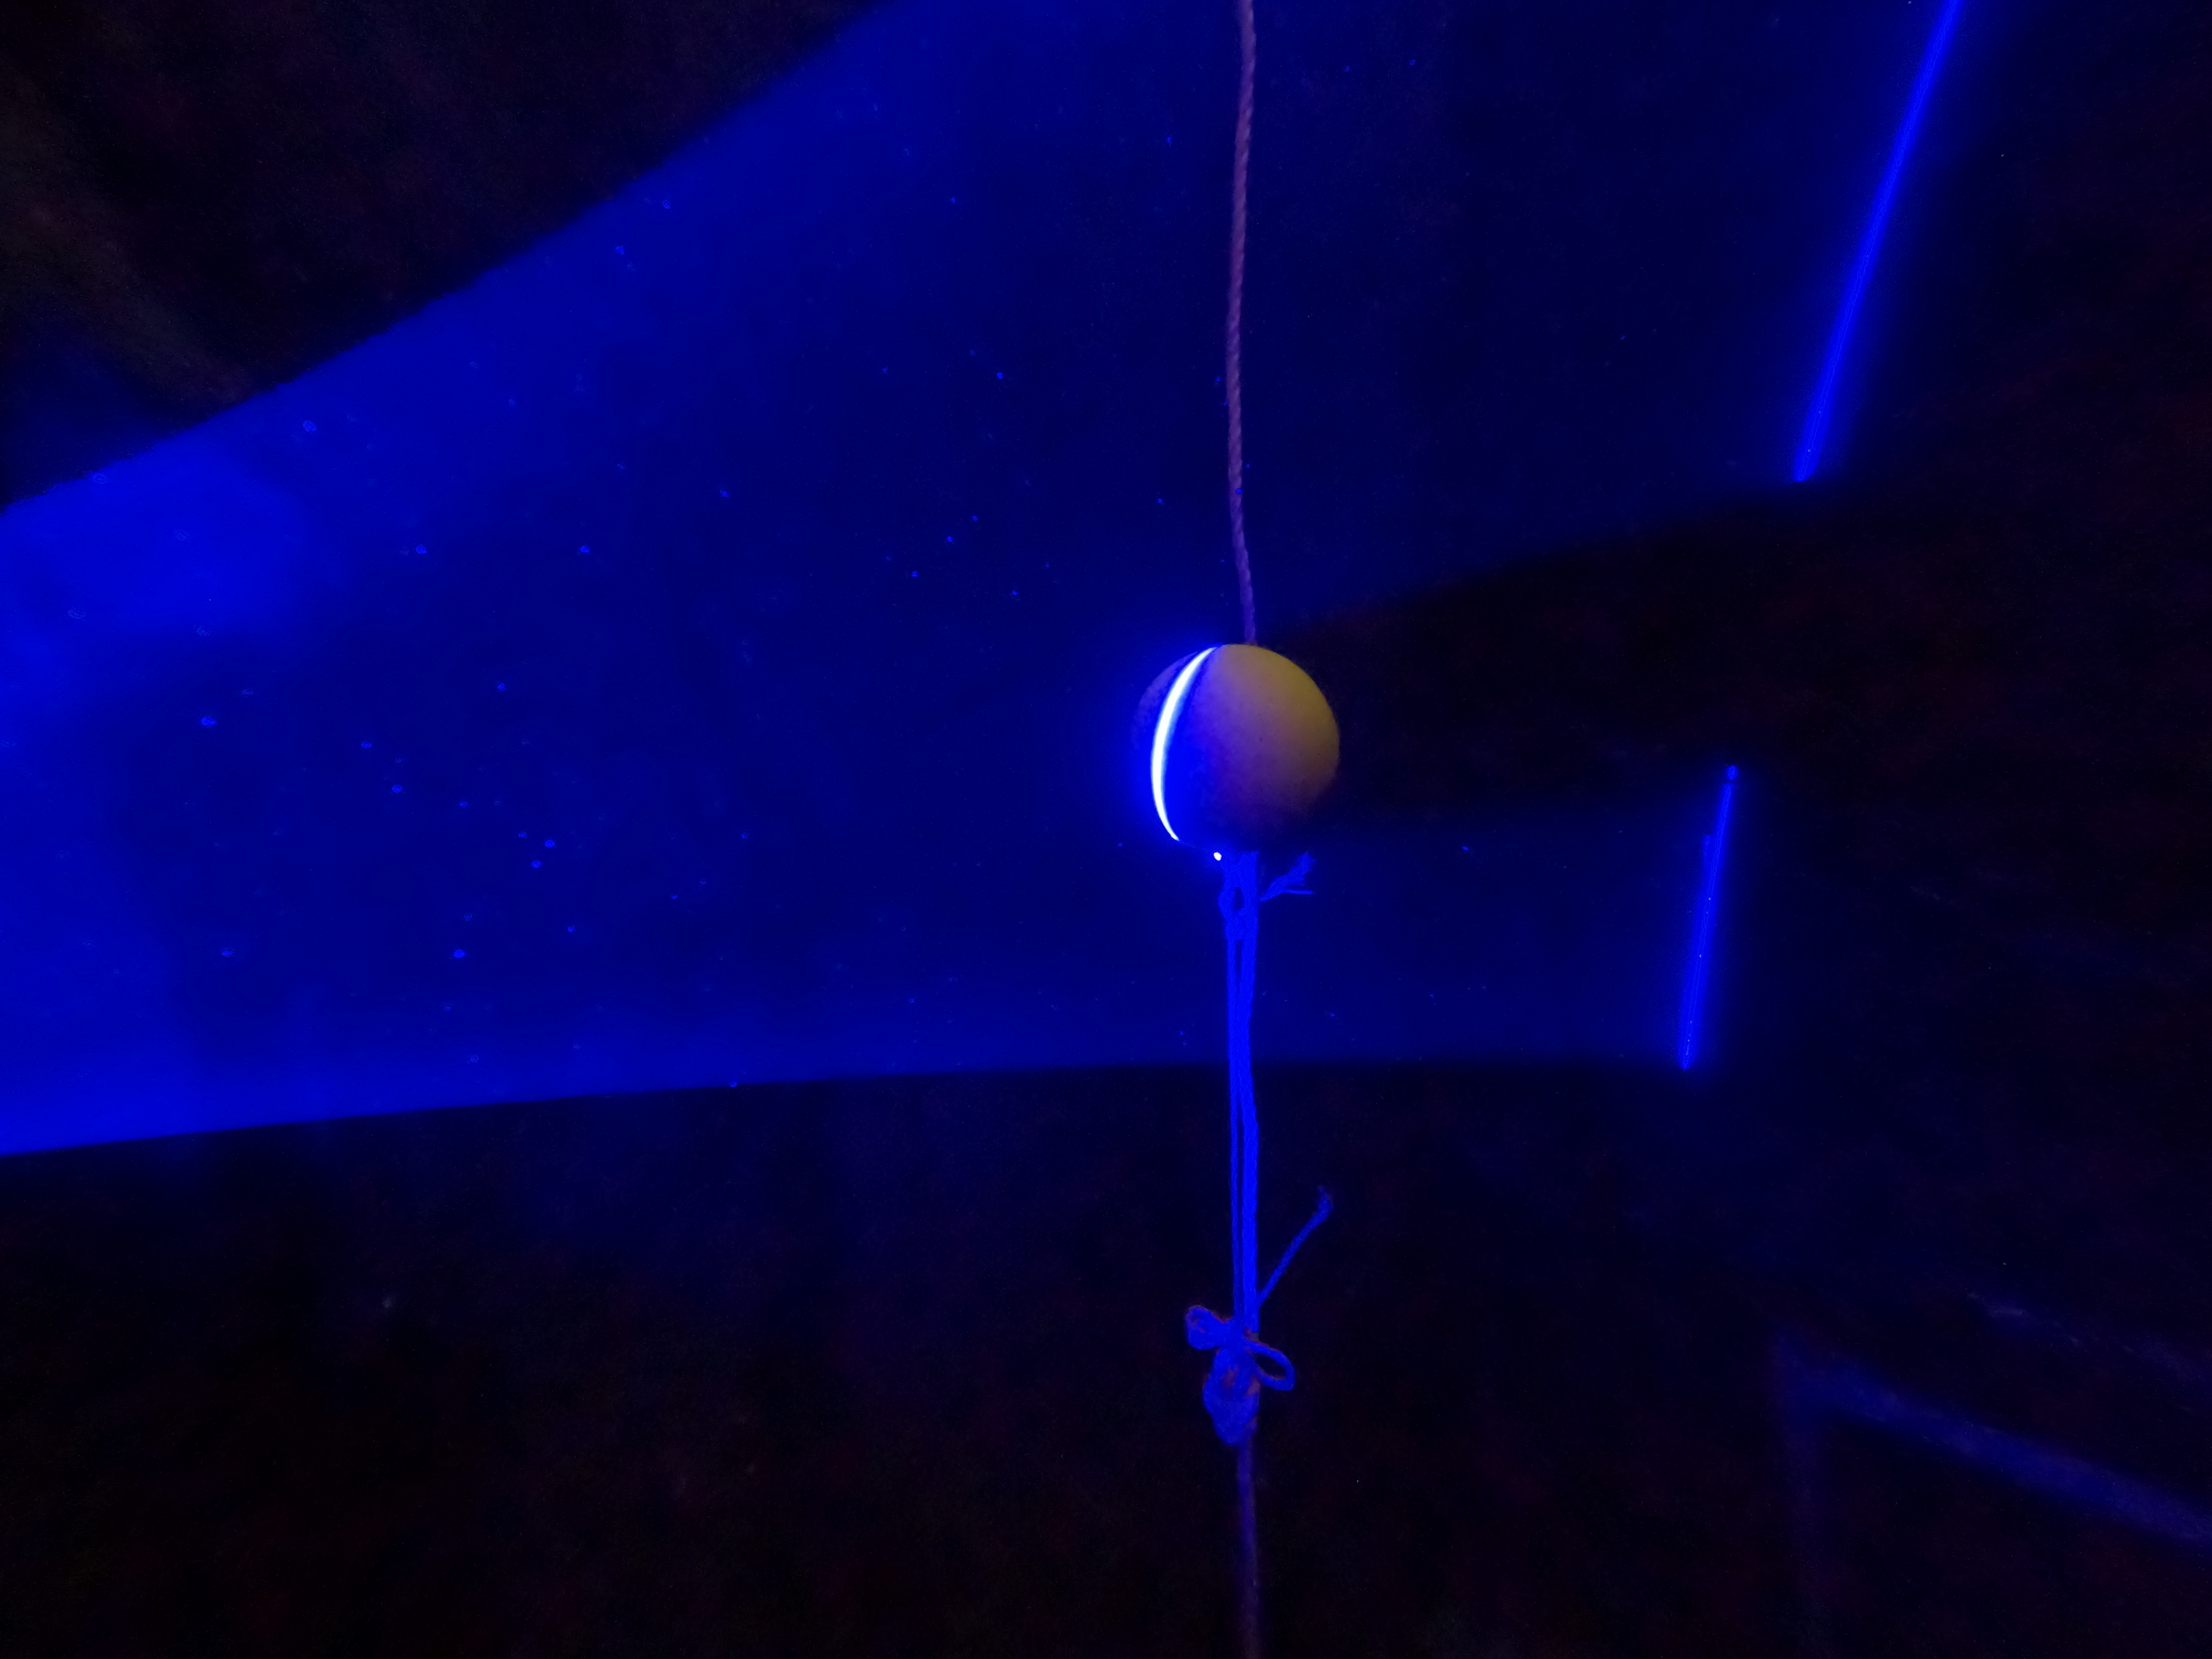

Supplement: Supplementary file 1182 [file G0032896.pdf › 7/G0032896.pdf]

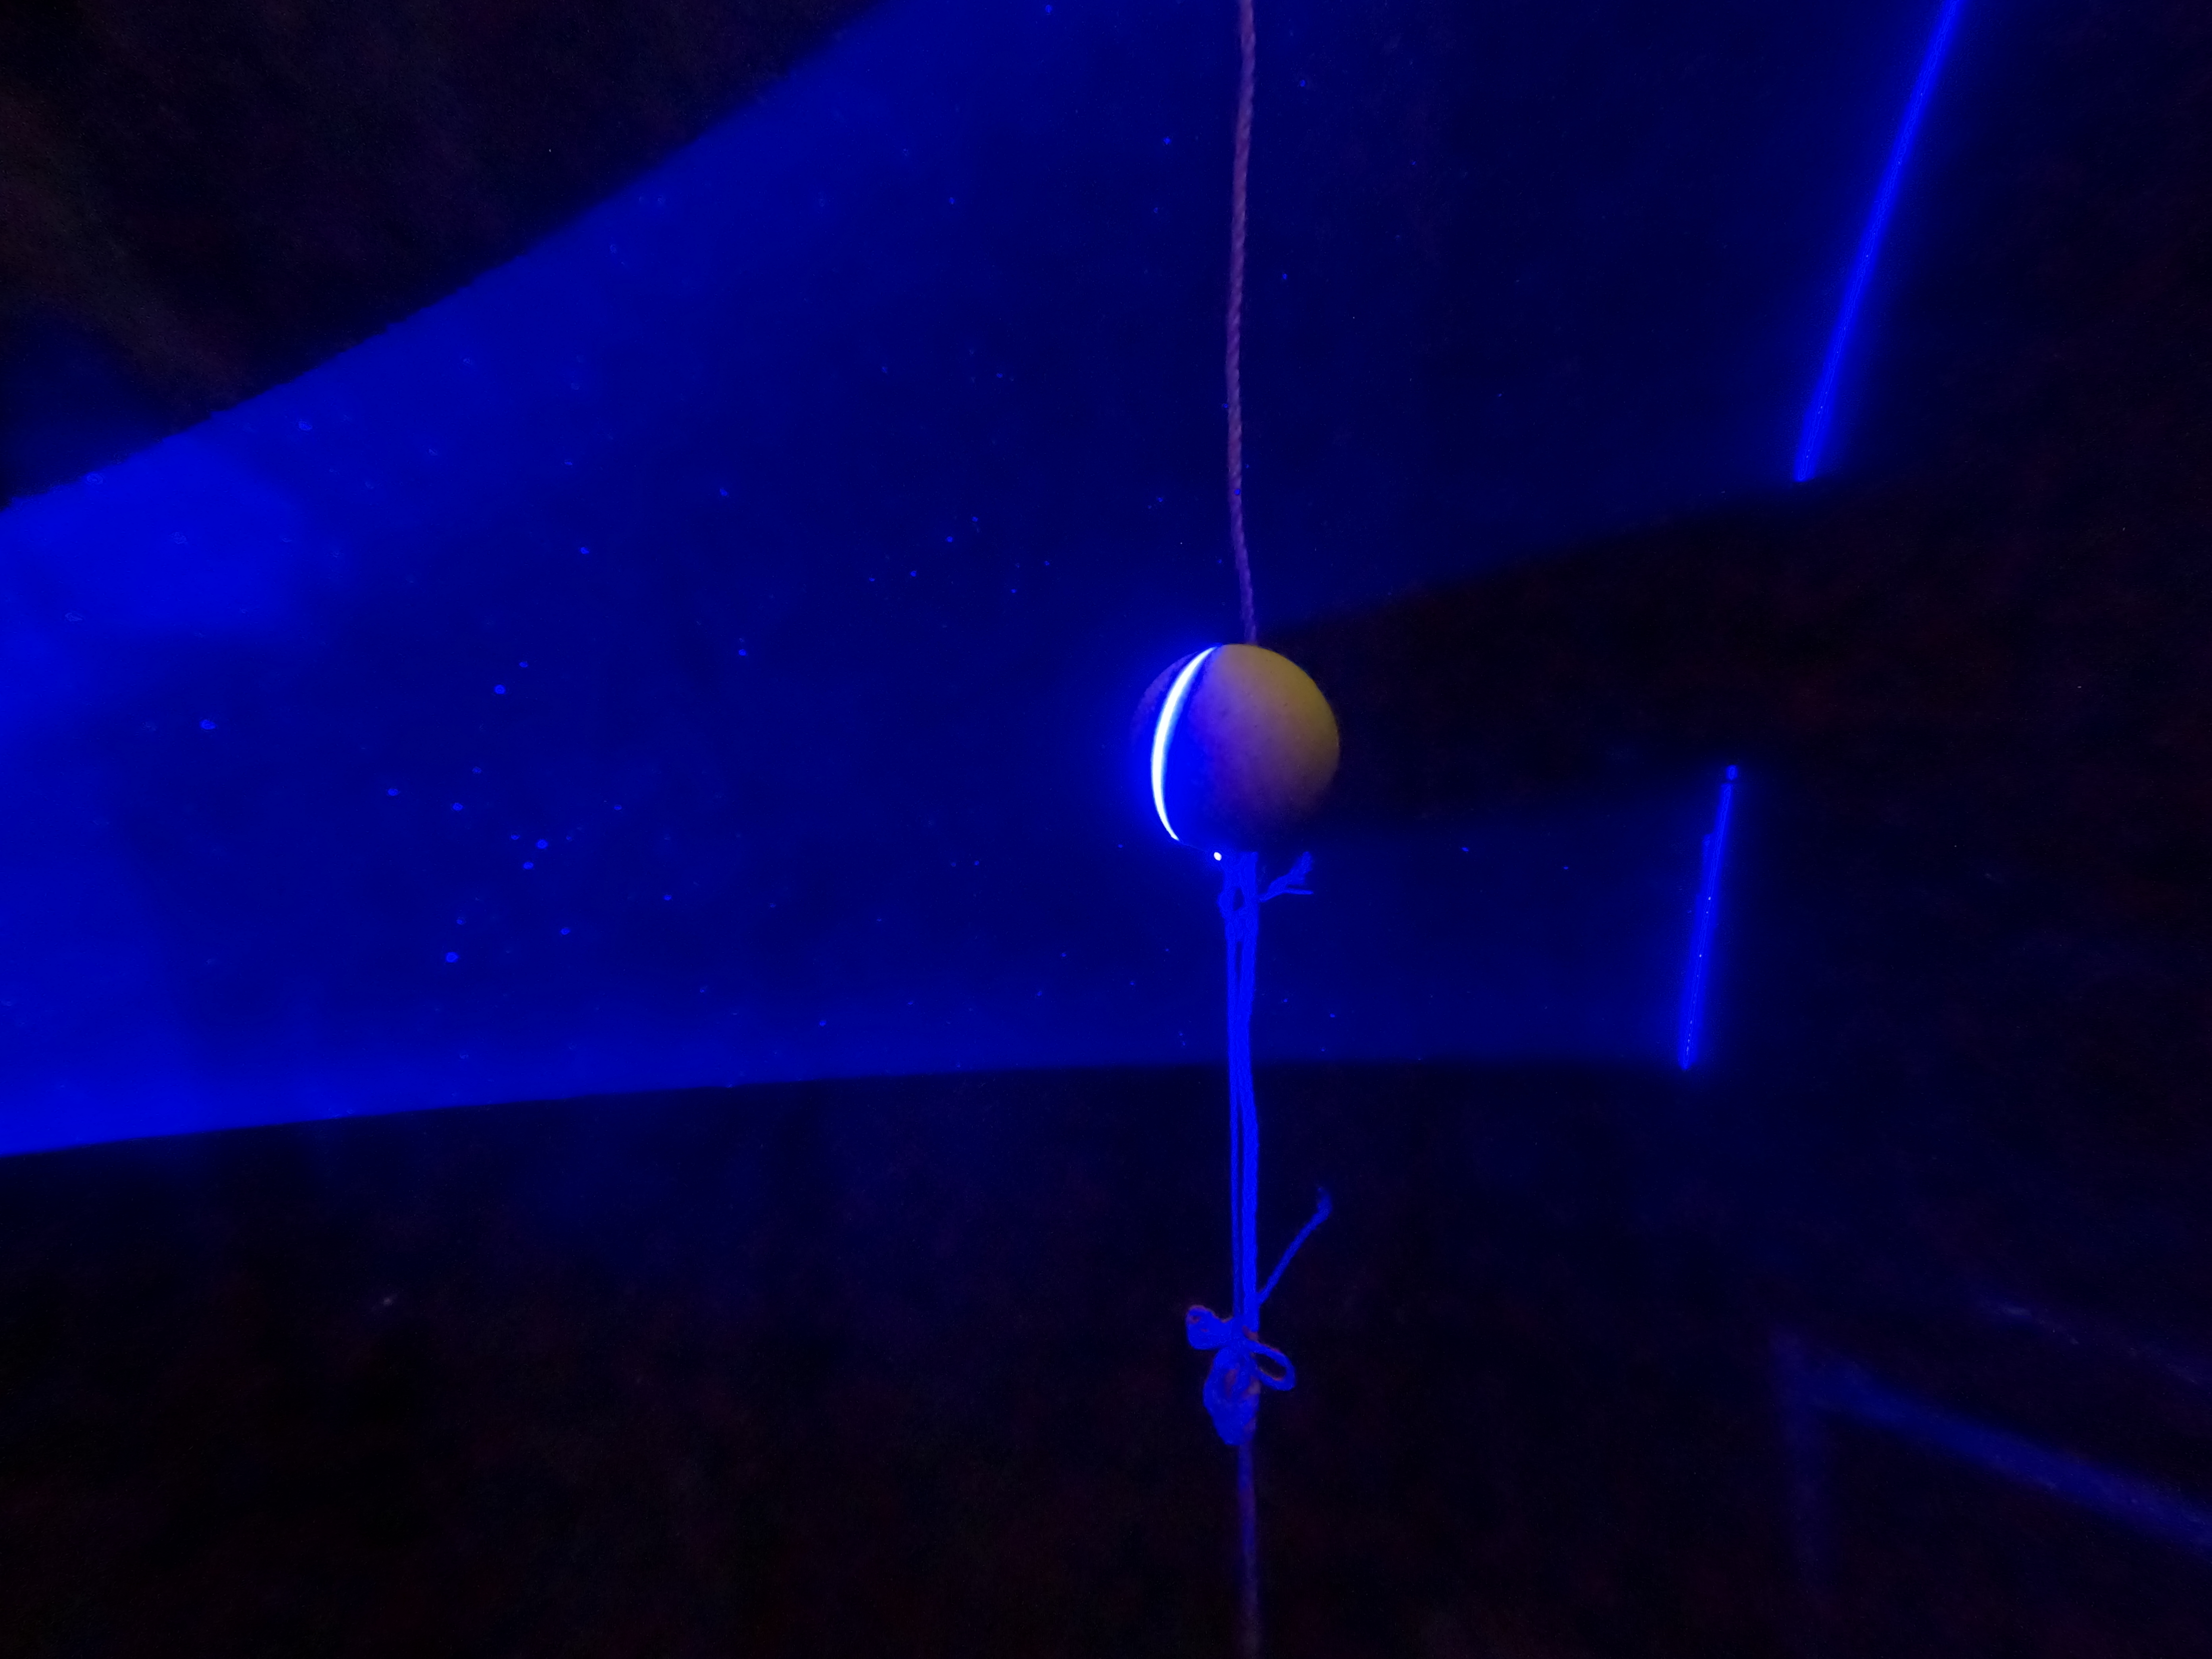

Supplement: Supplementary file 1183 [file G0032897.pdf › 7/G0032897.pdf]

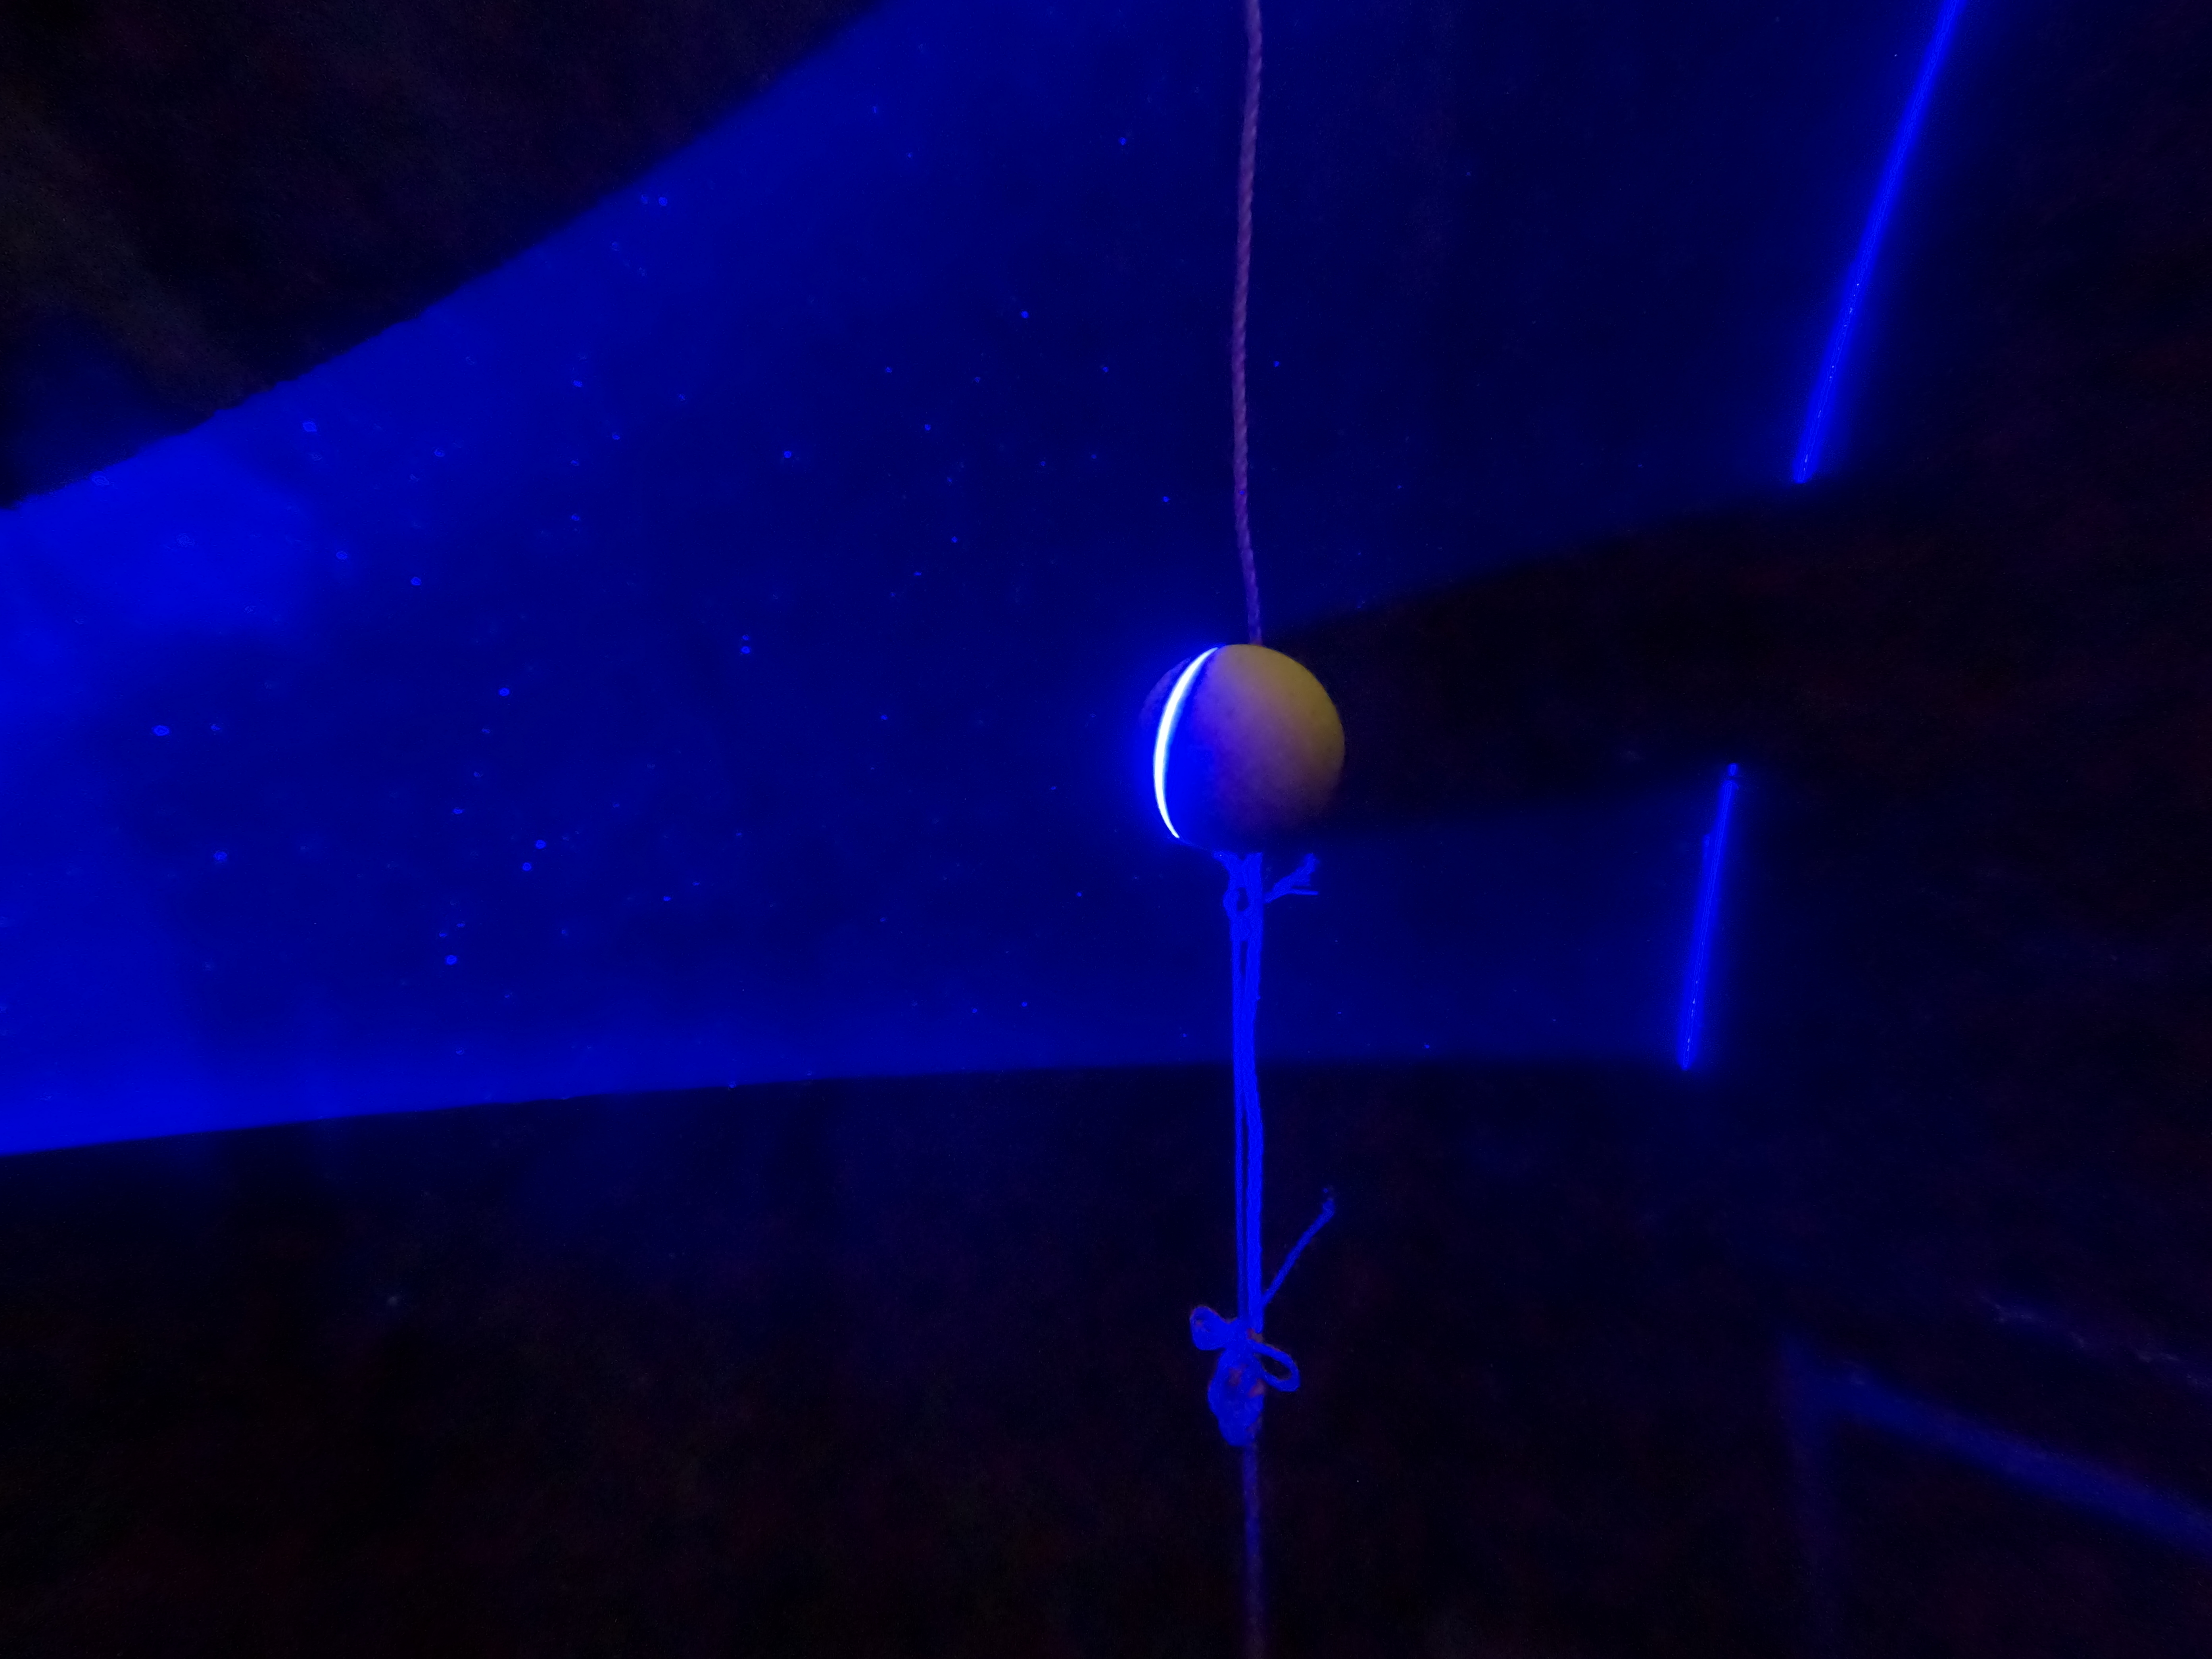

Supplement: Supplementary file 1184 [file G0032898.pdf › 7/G0032898.pdf]

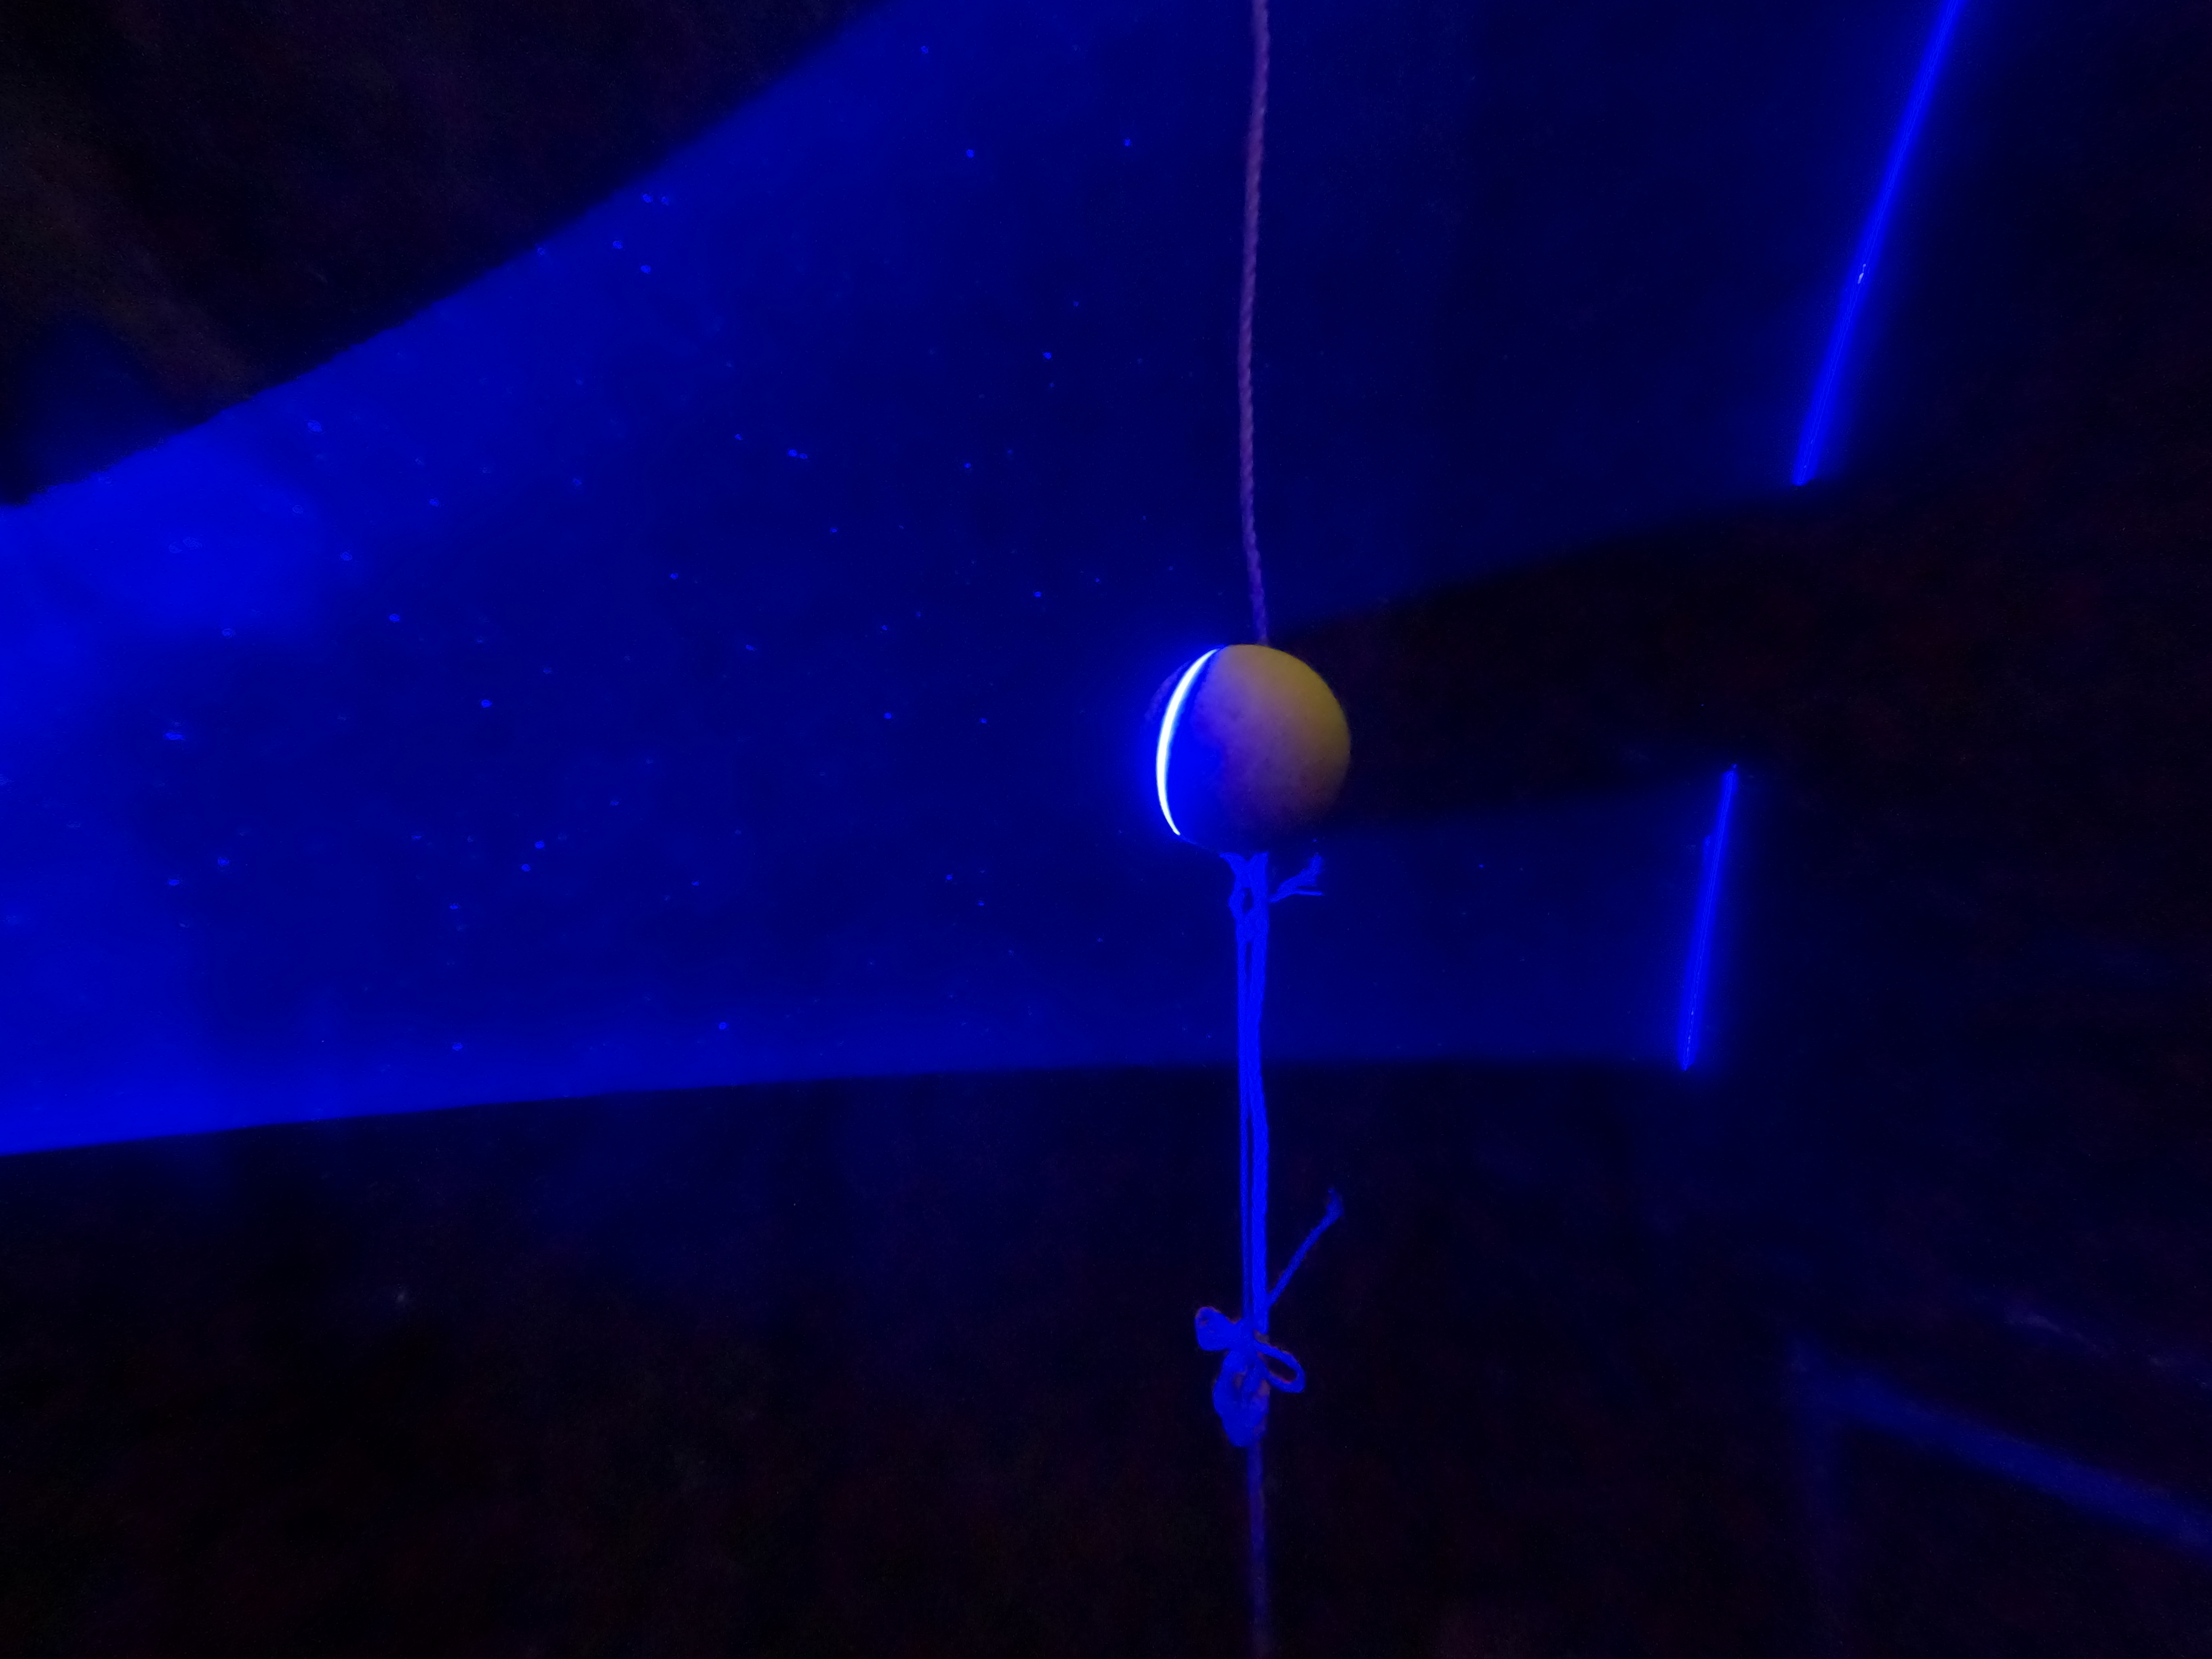

Supplement: Supplementary file 1185 [file G0032899.pdf › 7/G0032899.pdf]

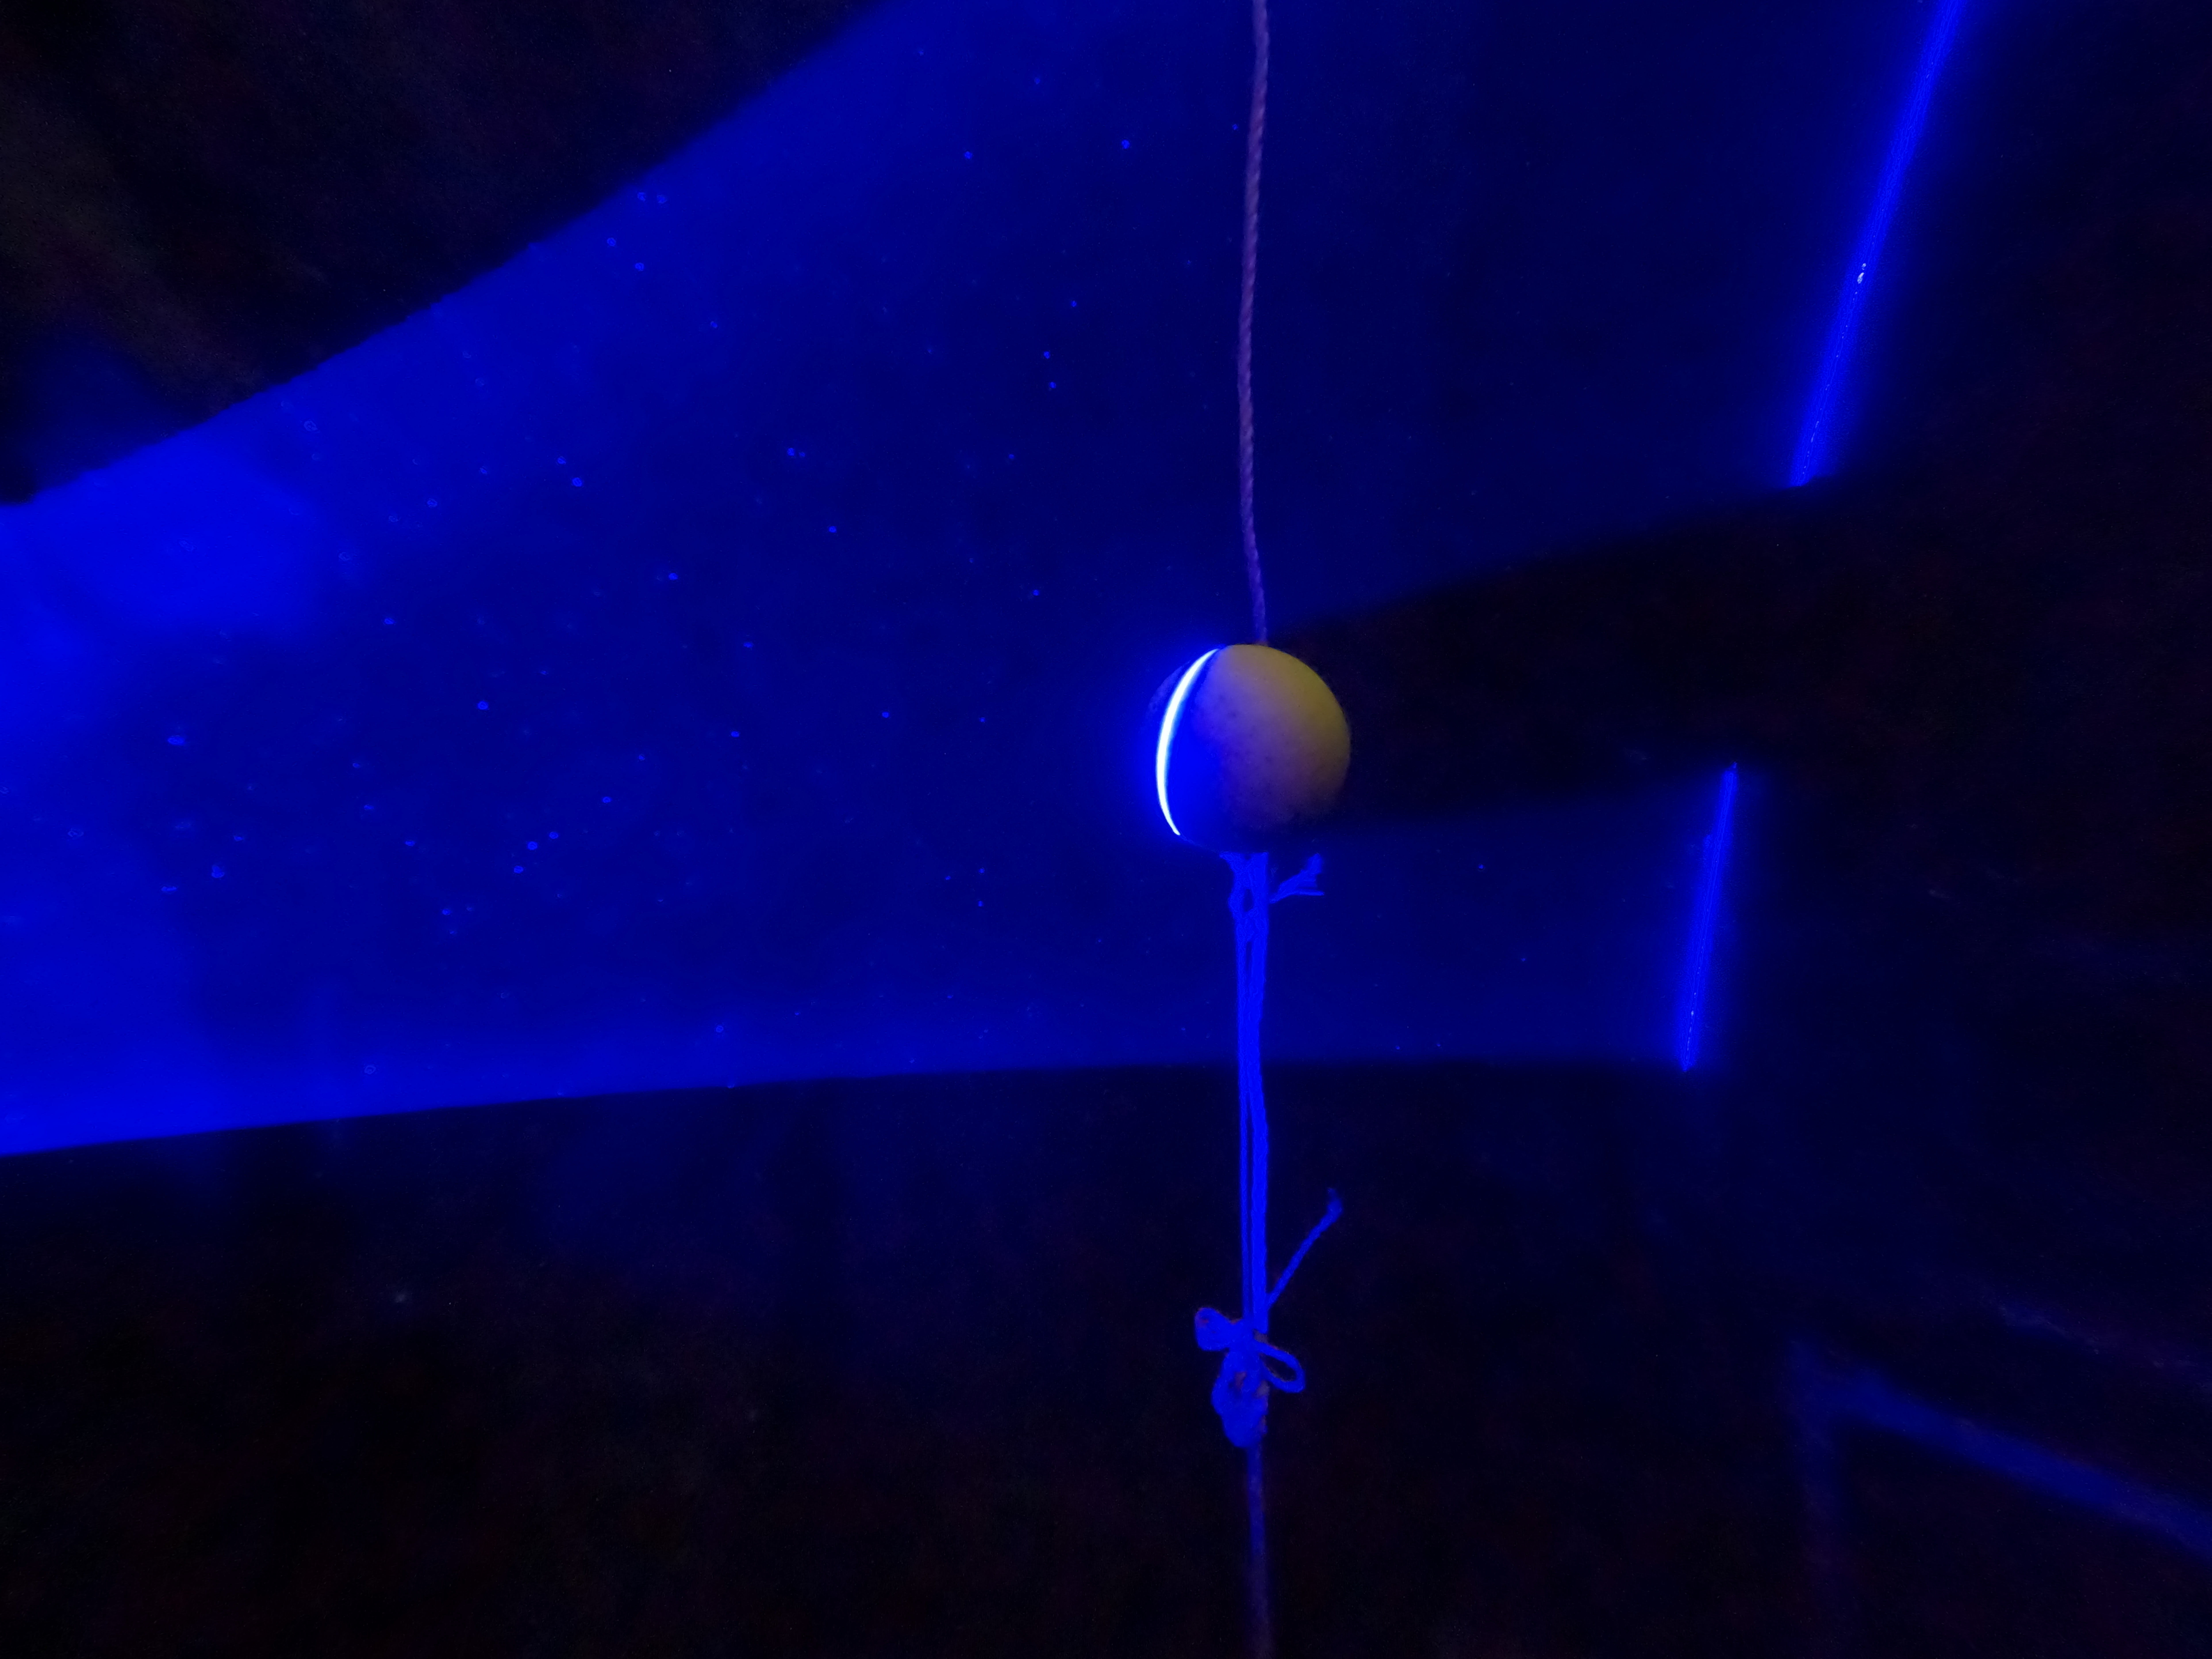

Supplement: Supplementary file 1186 [file G0032900.pdf › 7/G0032900.pdf]

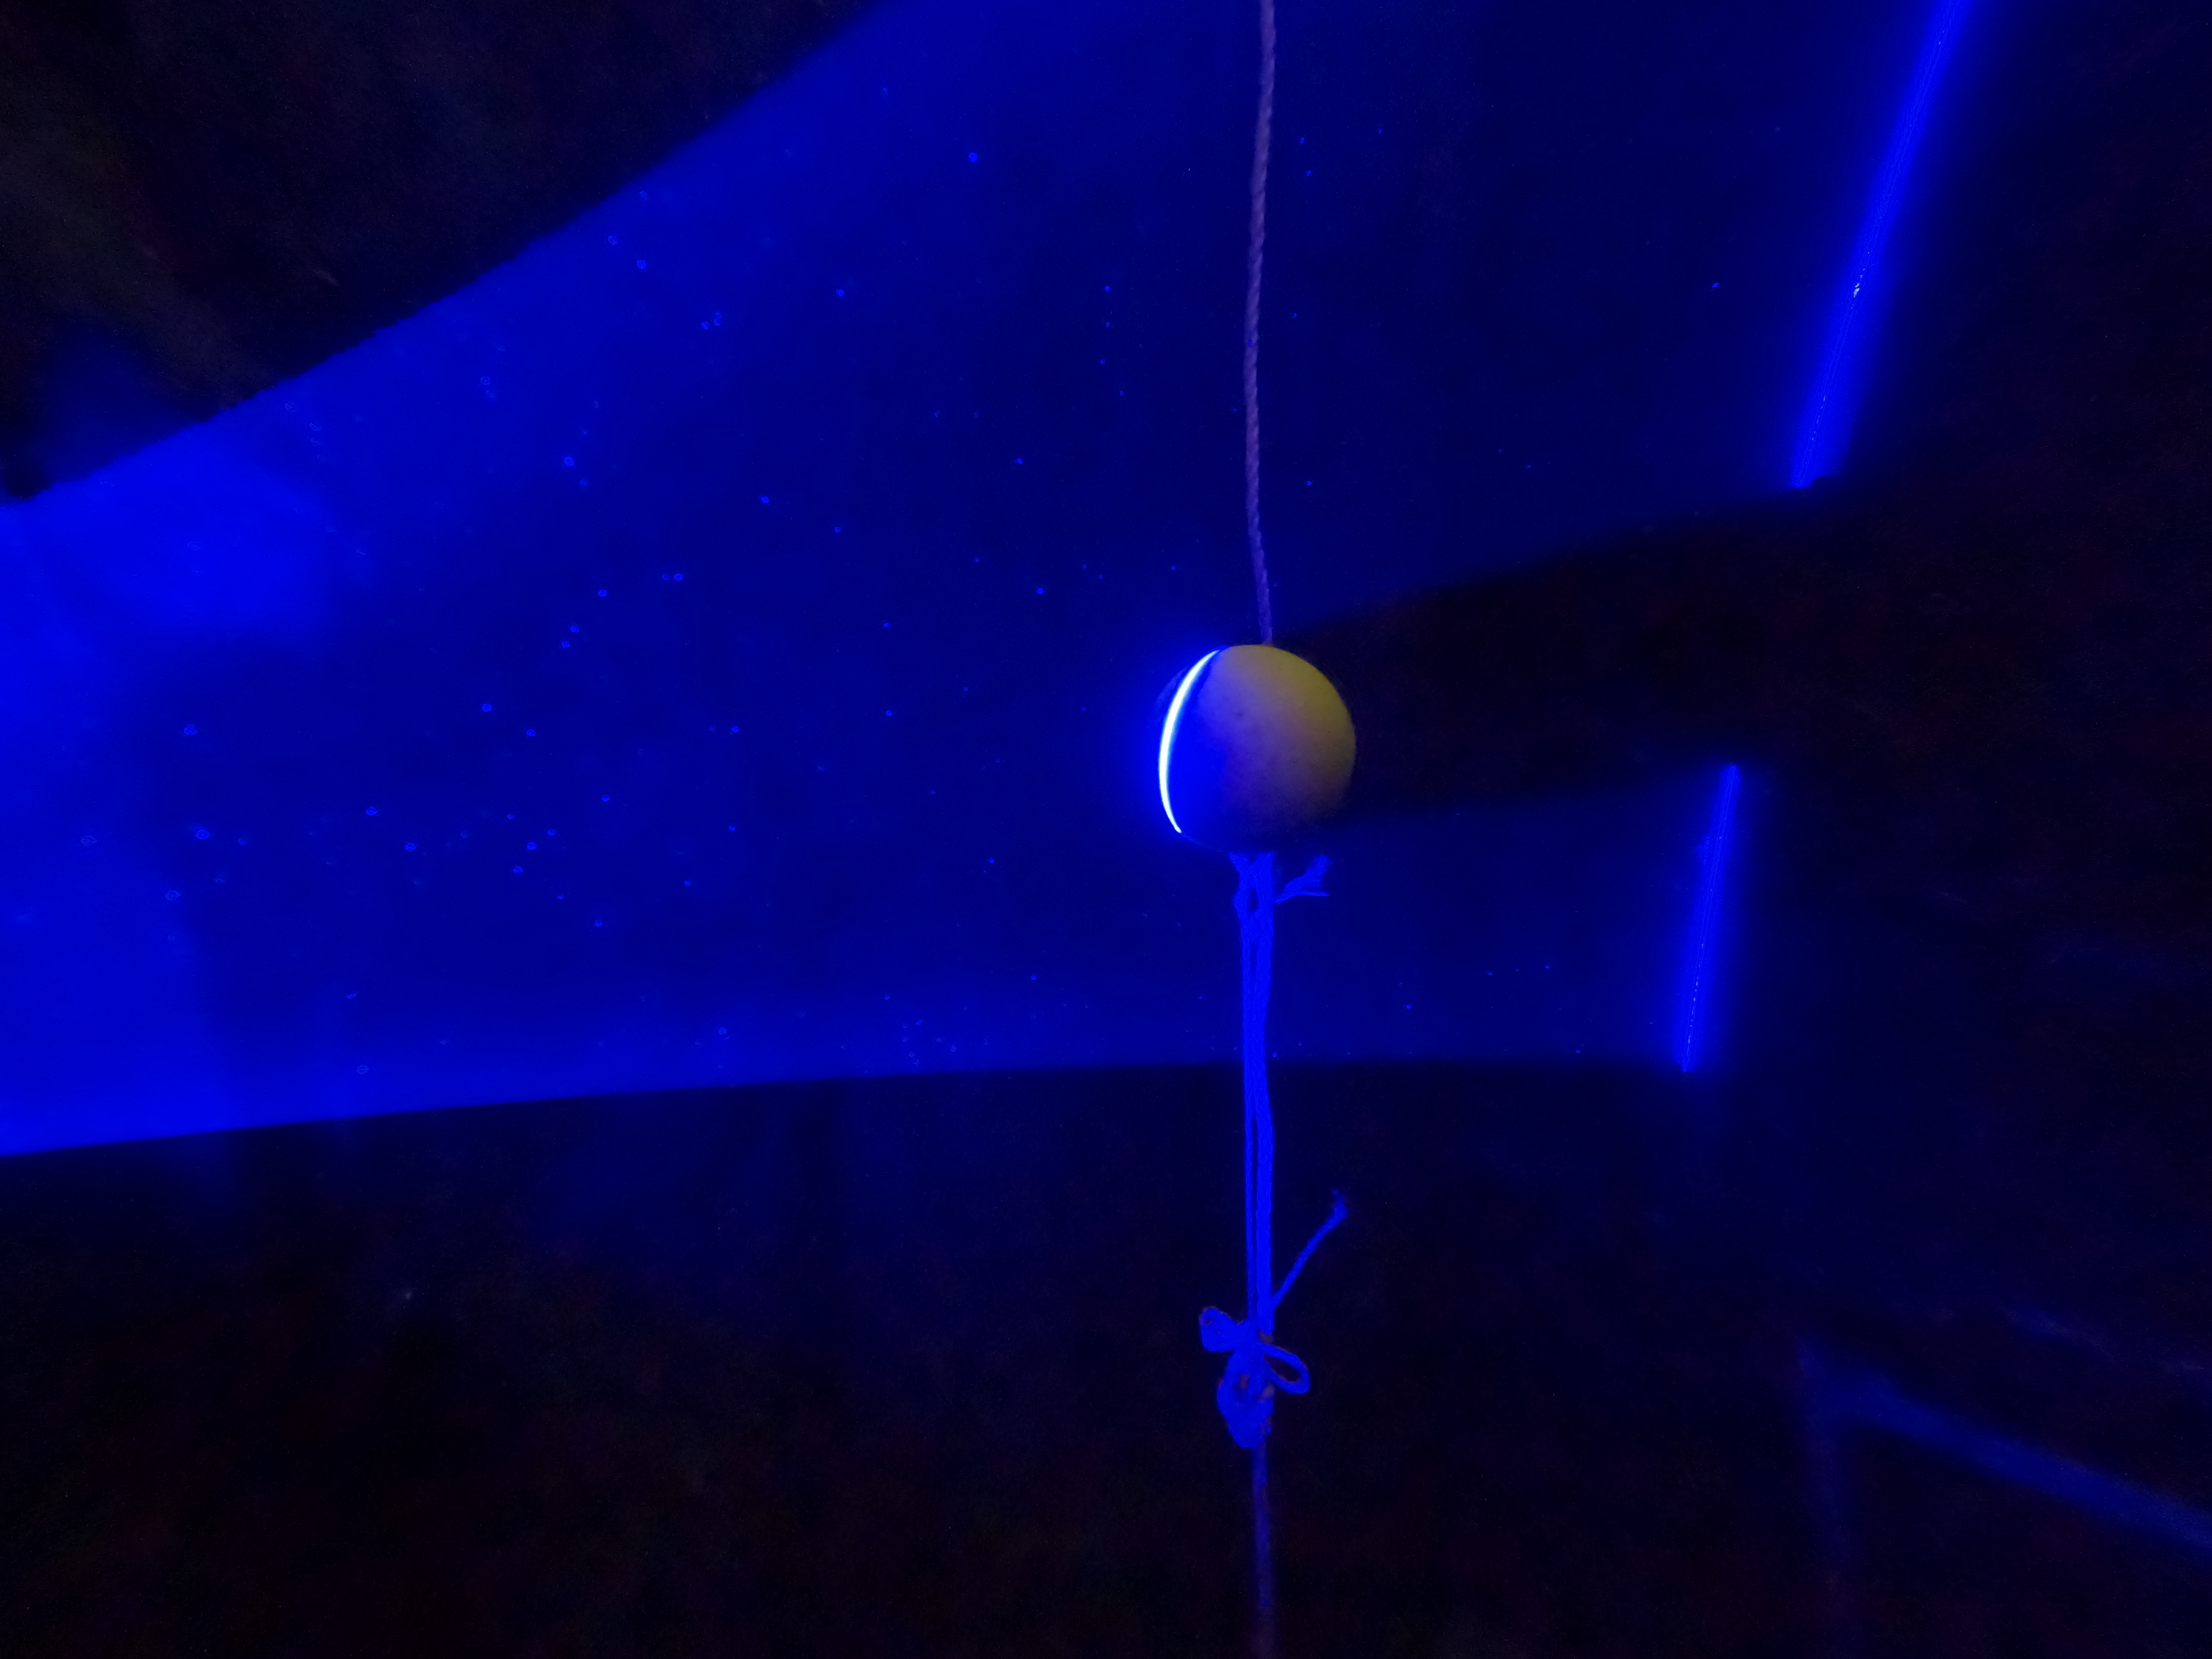

Supplement: Supplementary file 1187 [file G0032901.pdf › 7/G0032901.pdf]

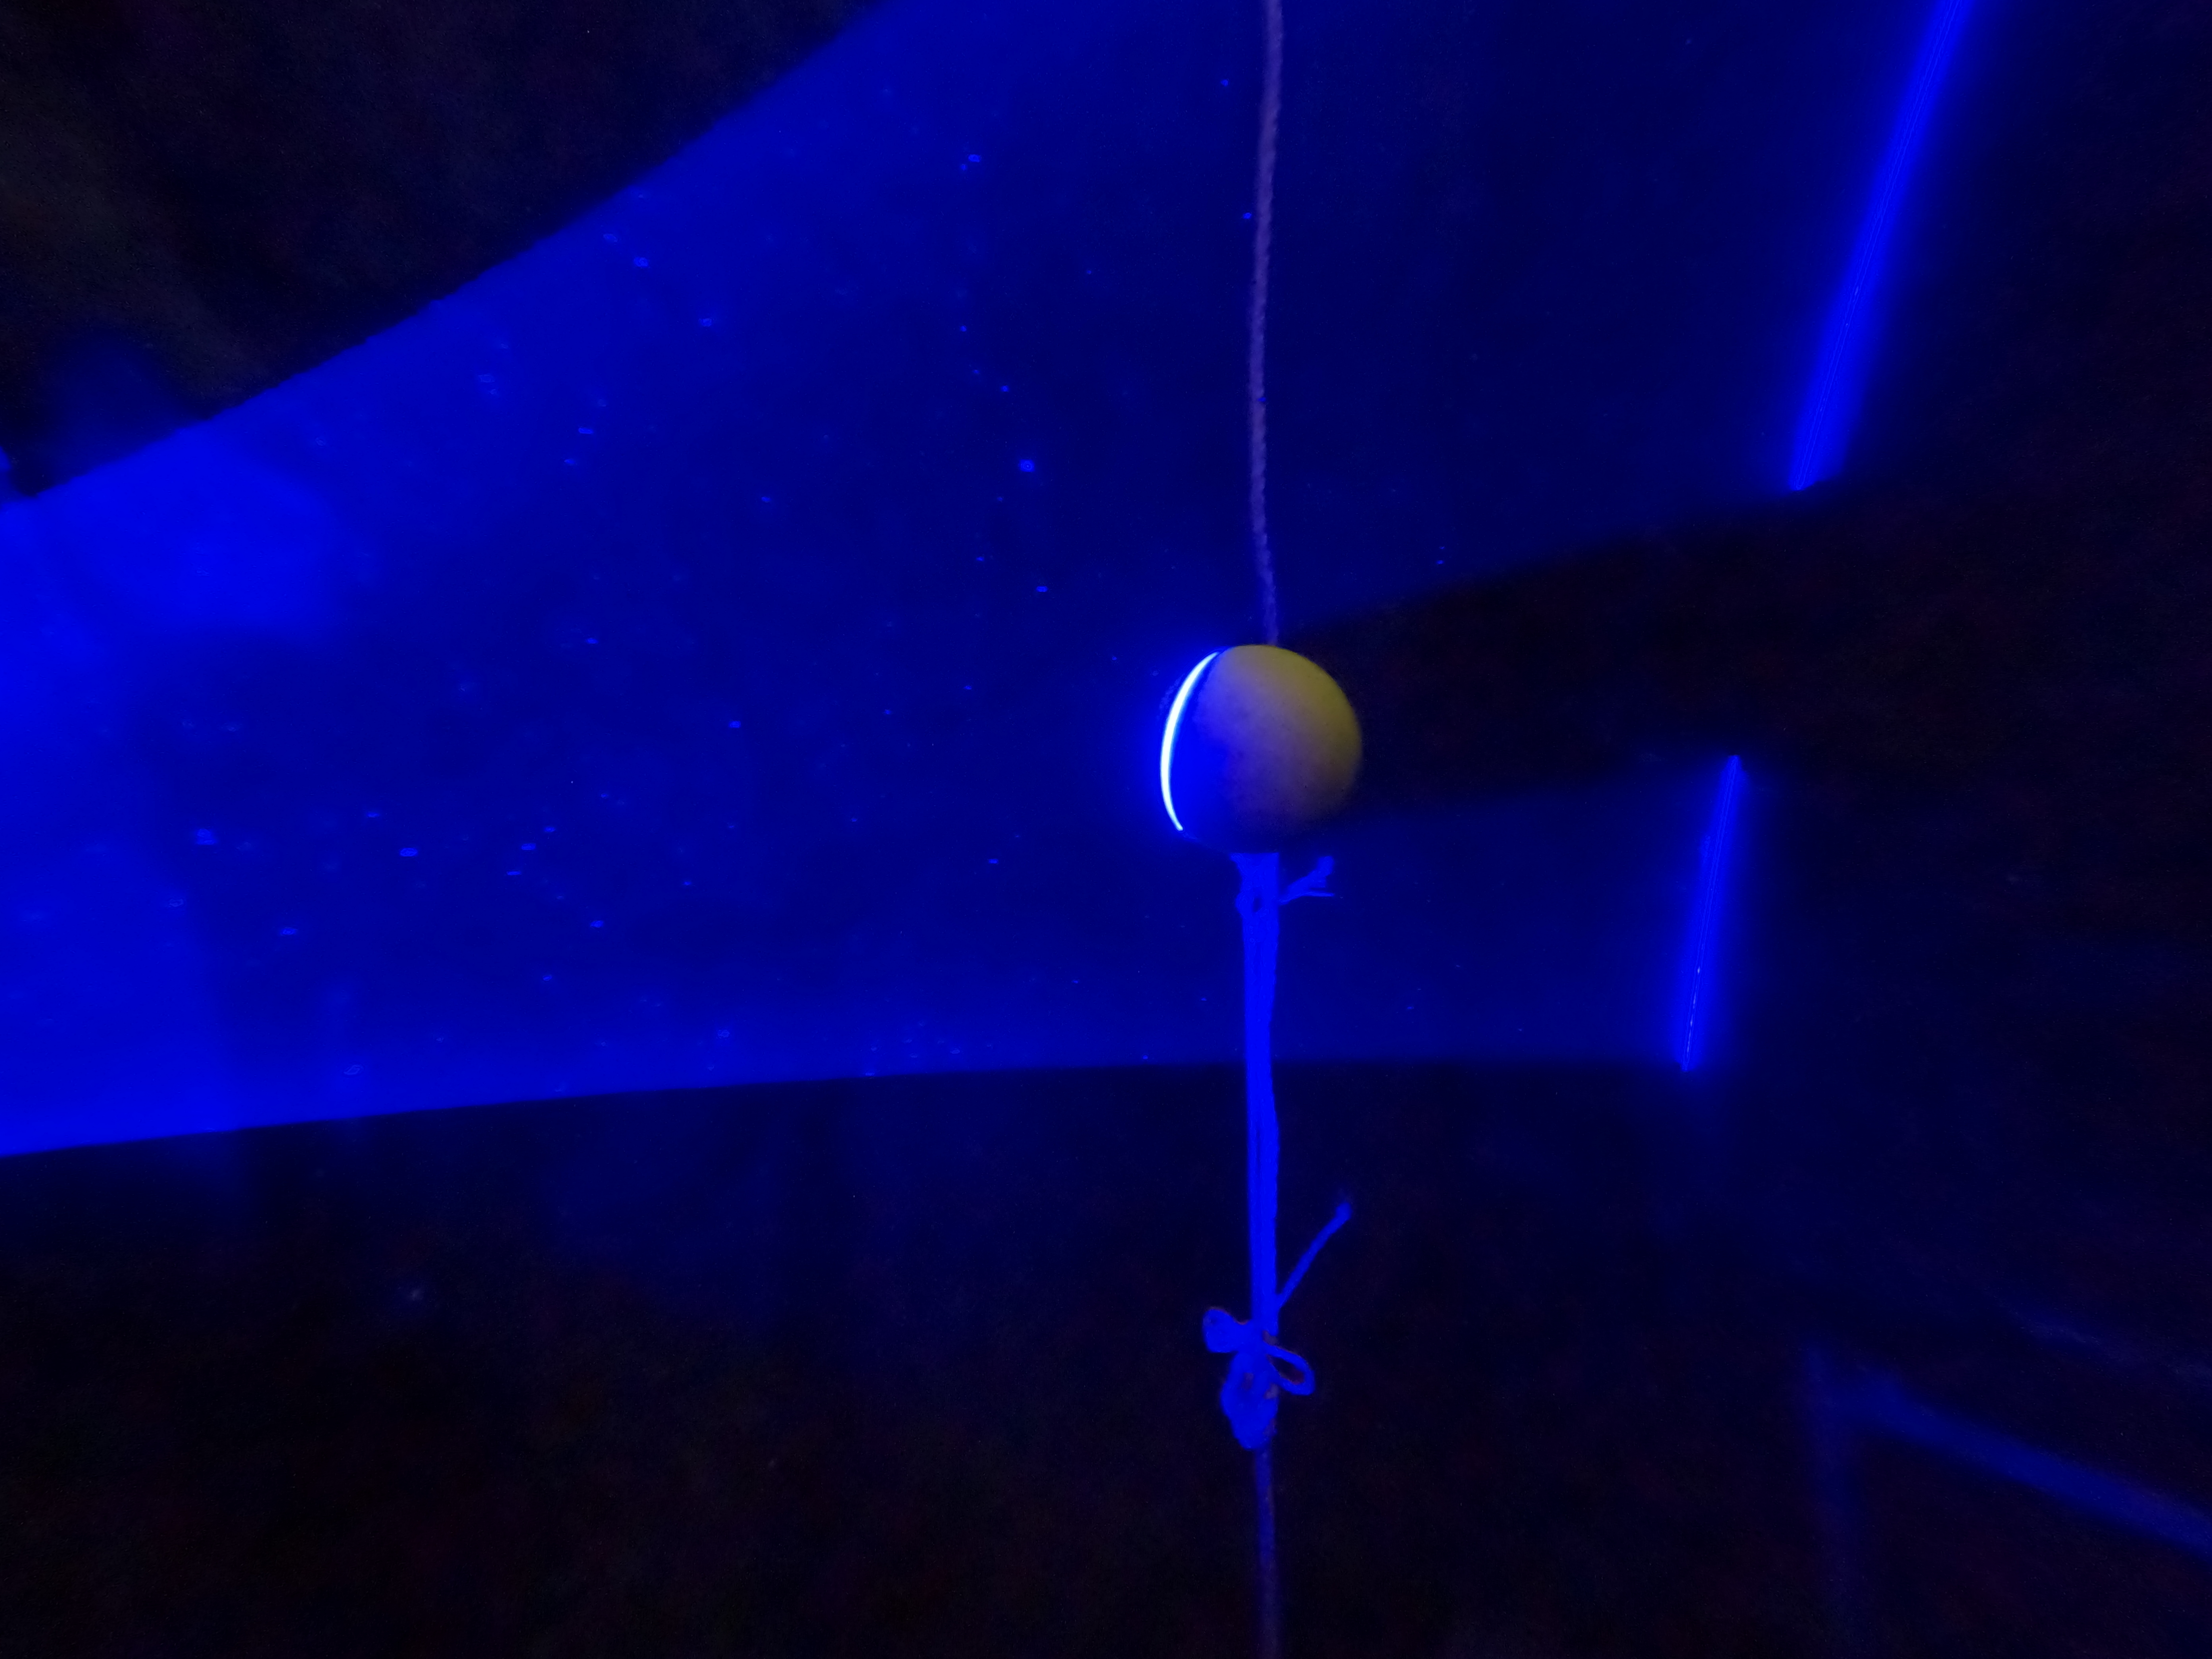

Supplement: Supplementary file 1188 [file G0032902.pdf › 7/G0032902.pdf]

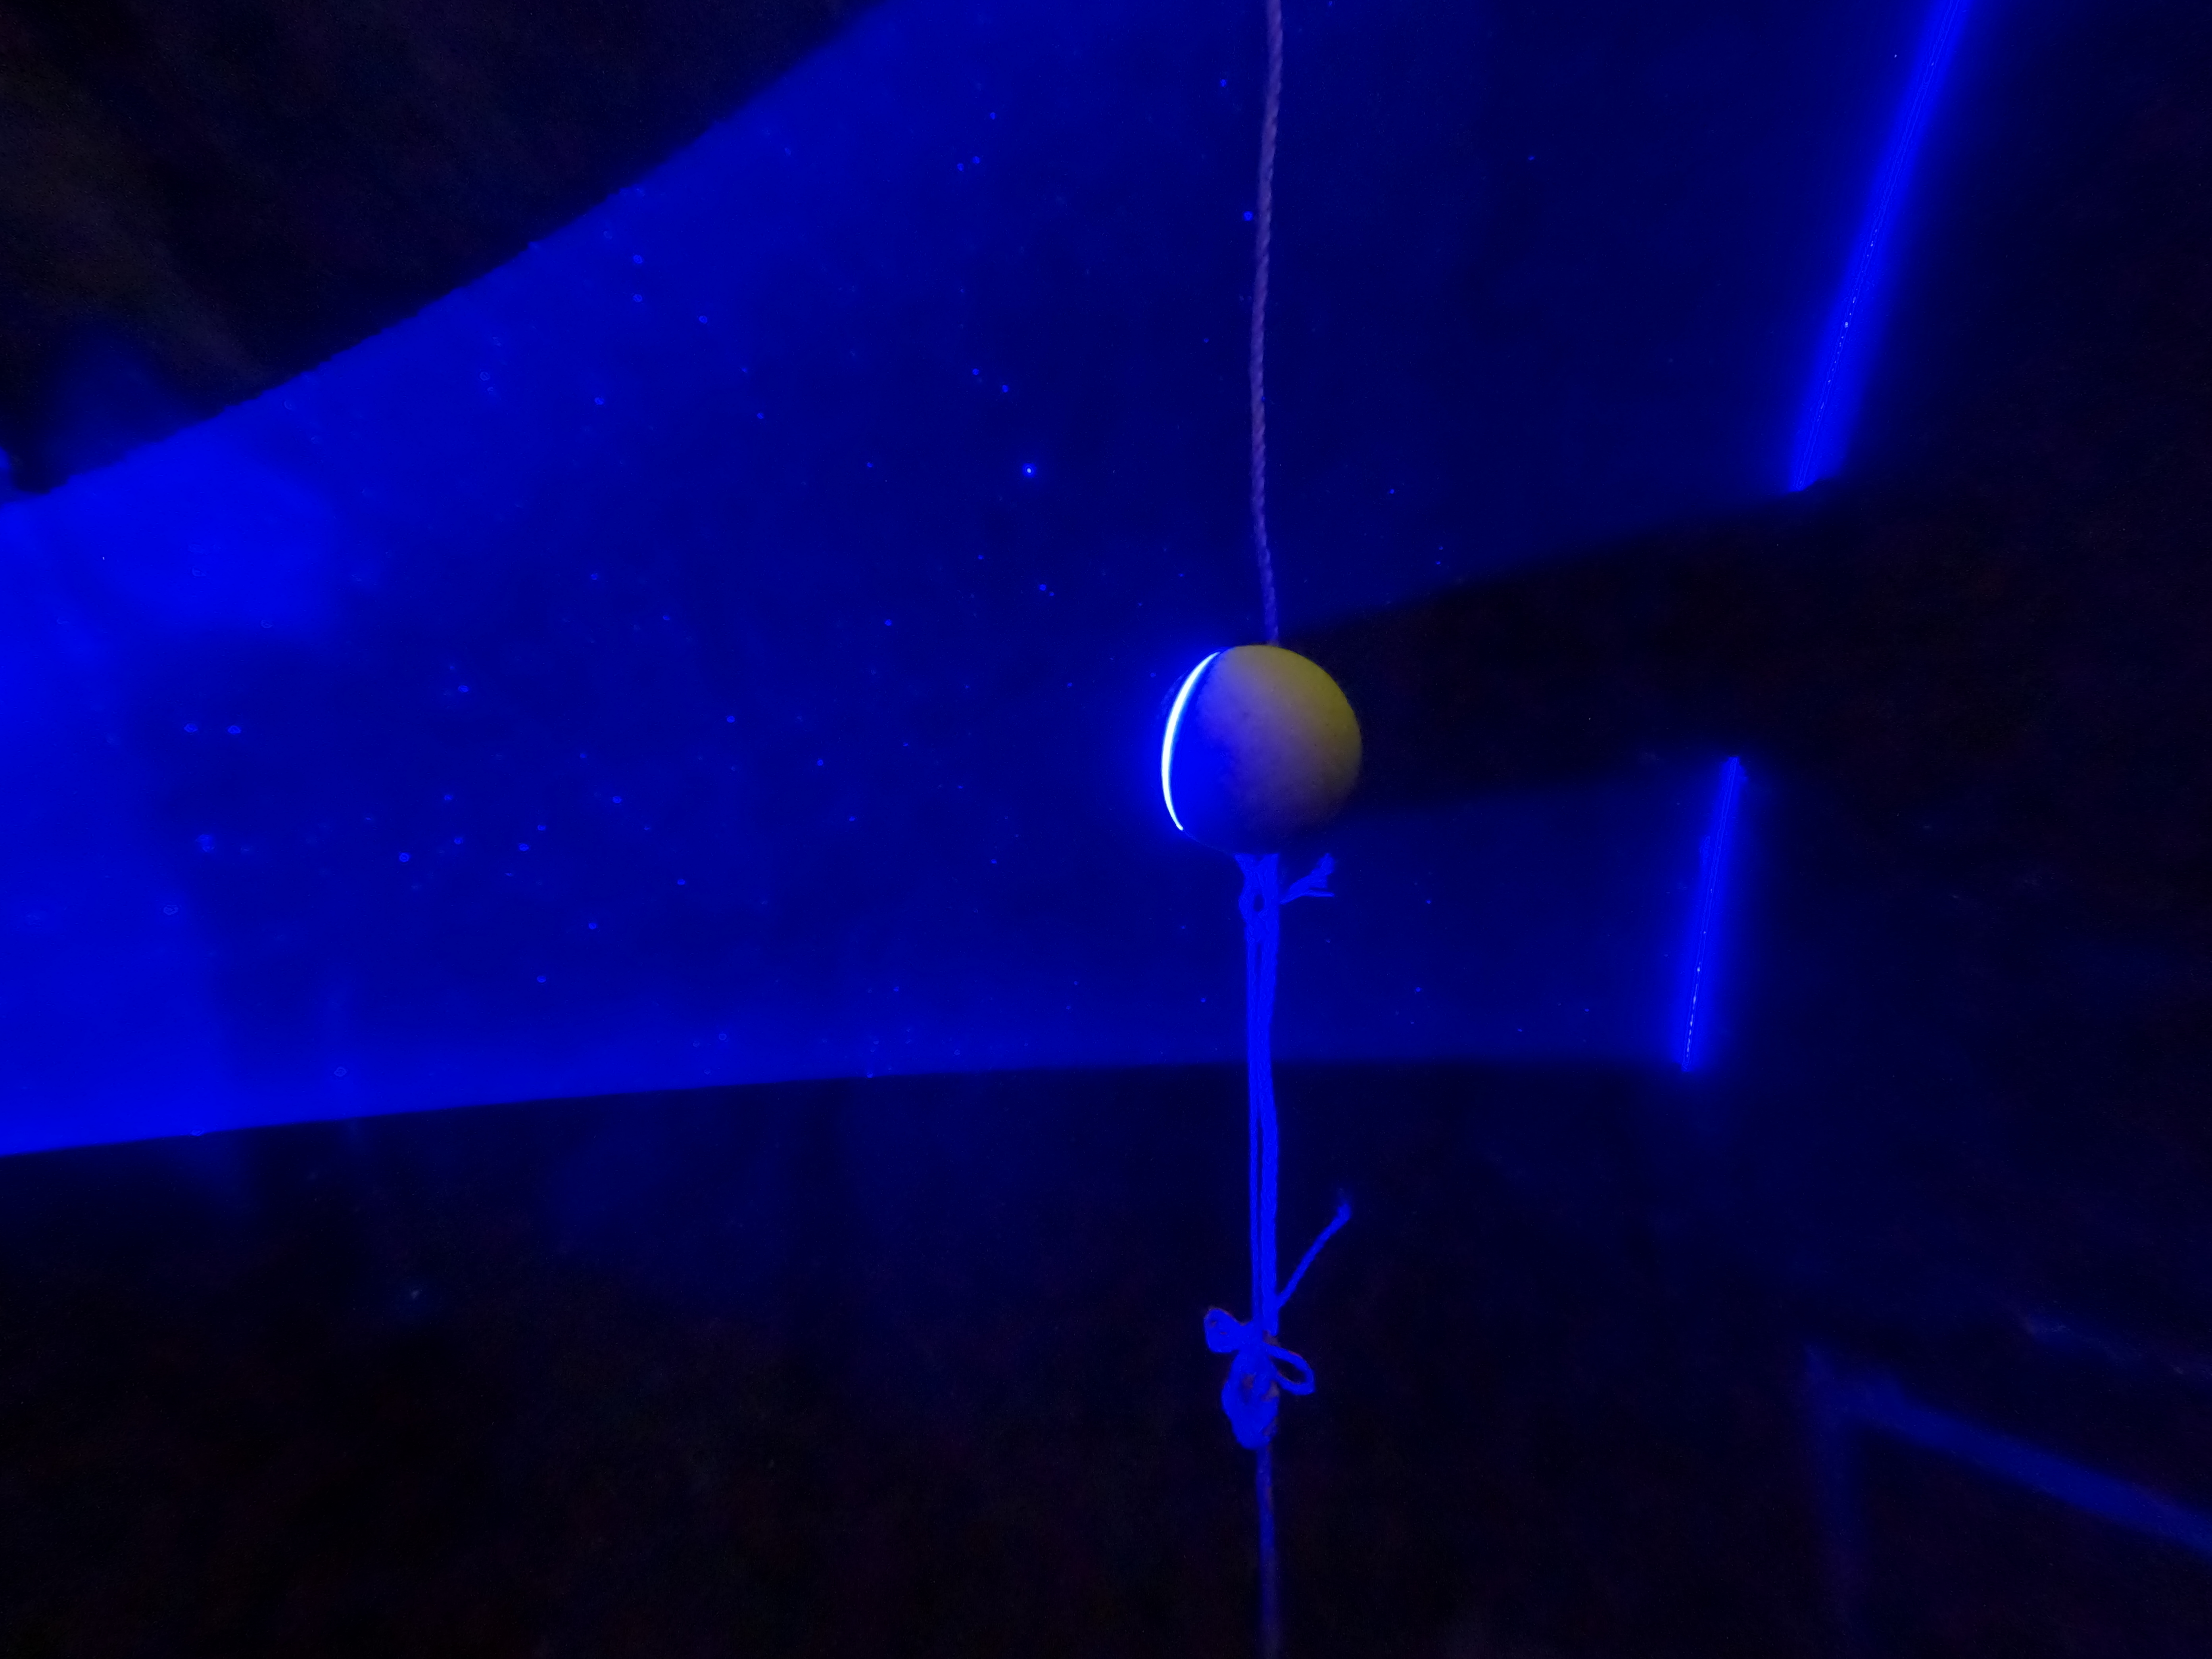

Supplement: Supplementary file 1189 [file G0032903.pdf › 7/G0032903.pdf]

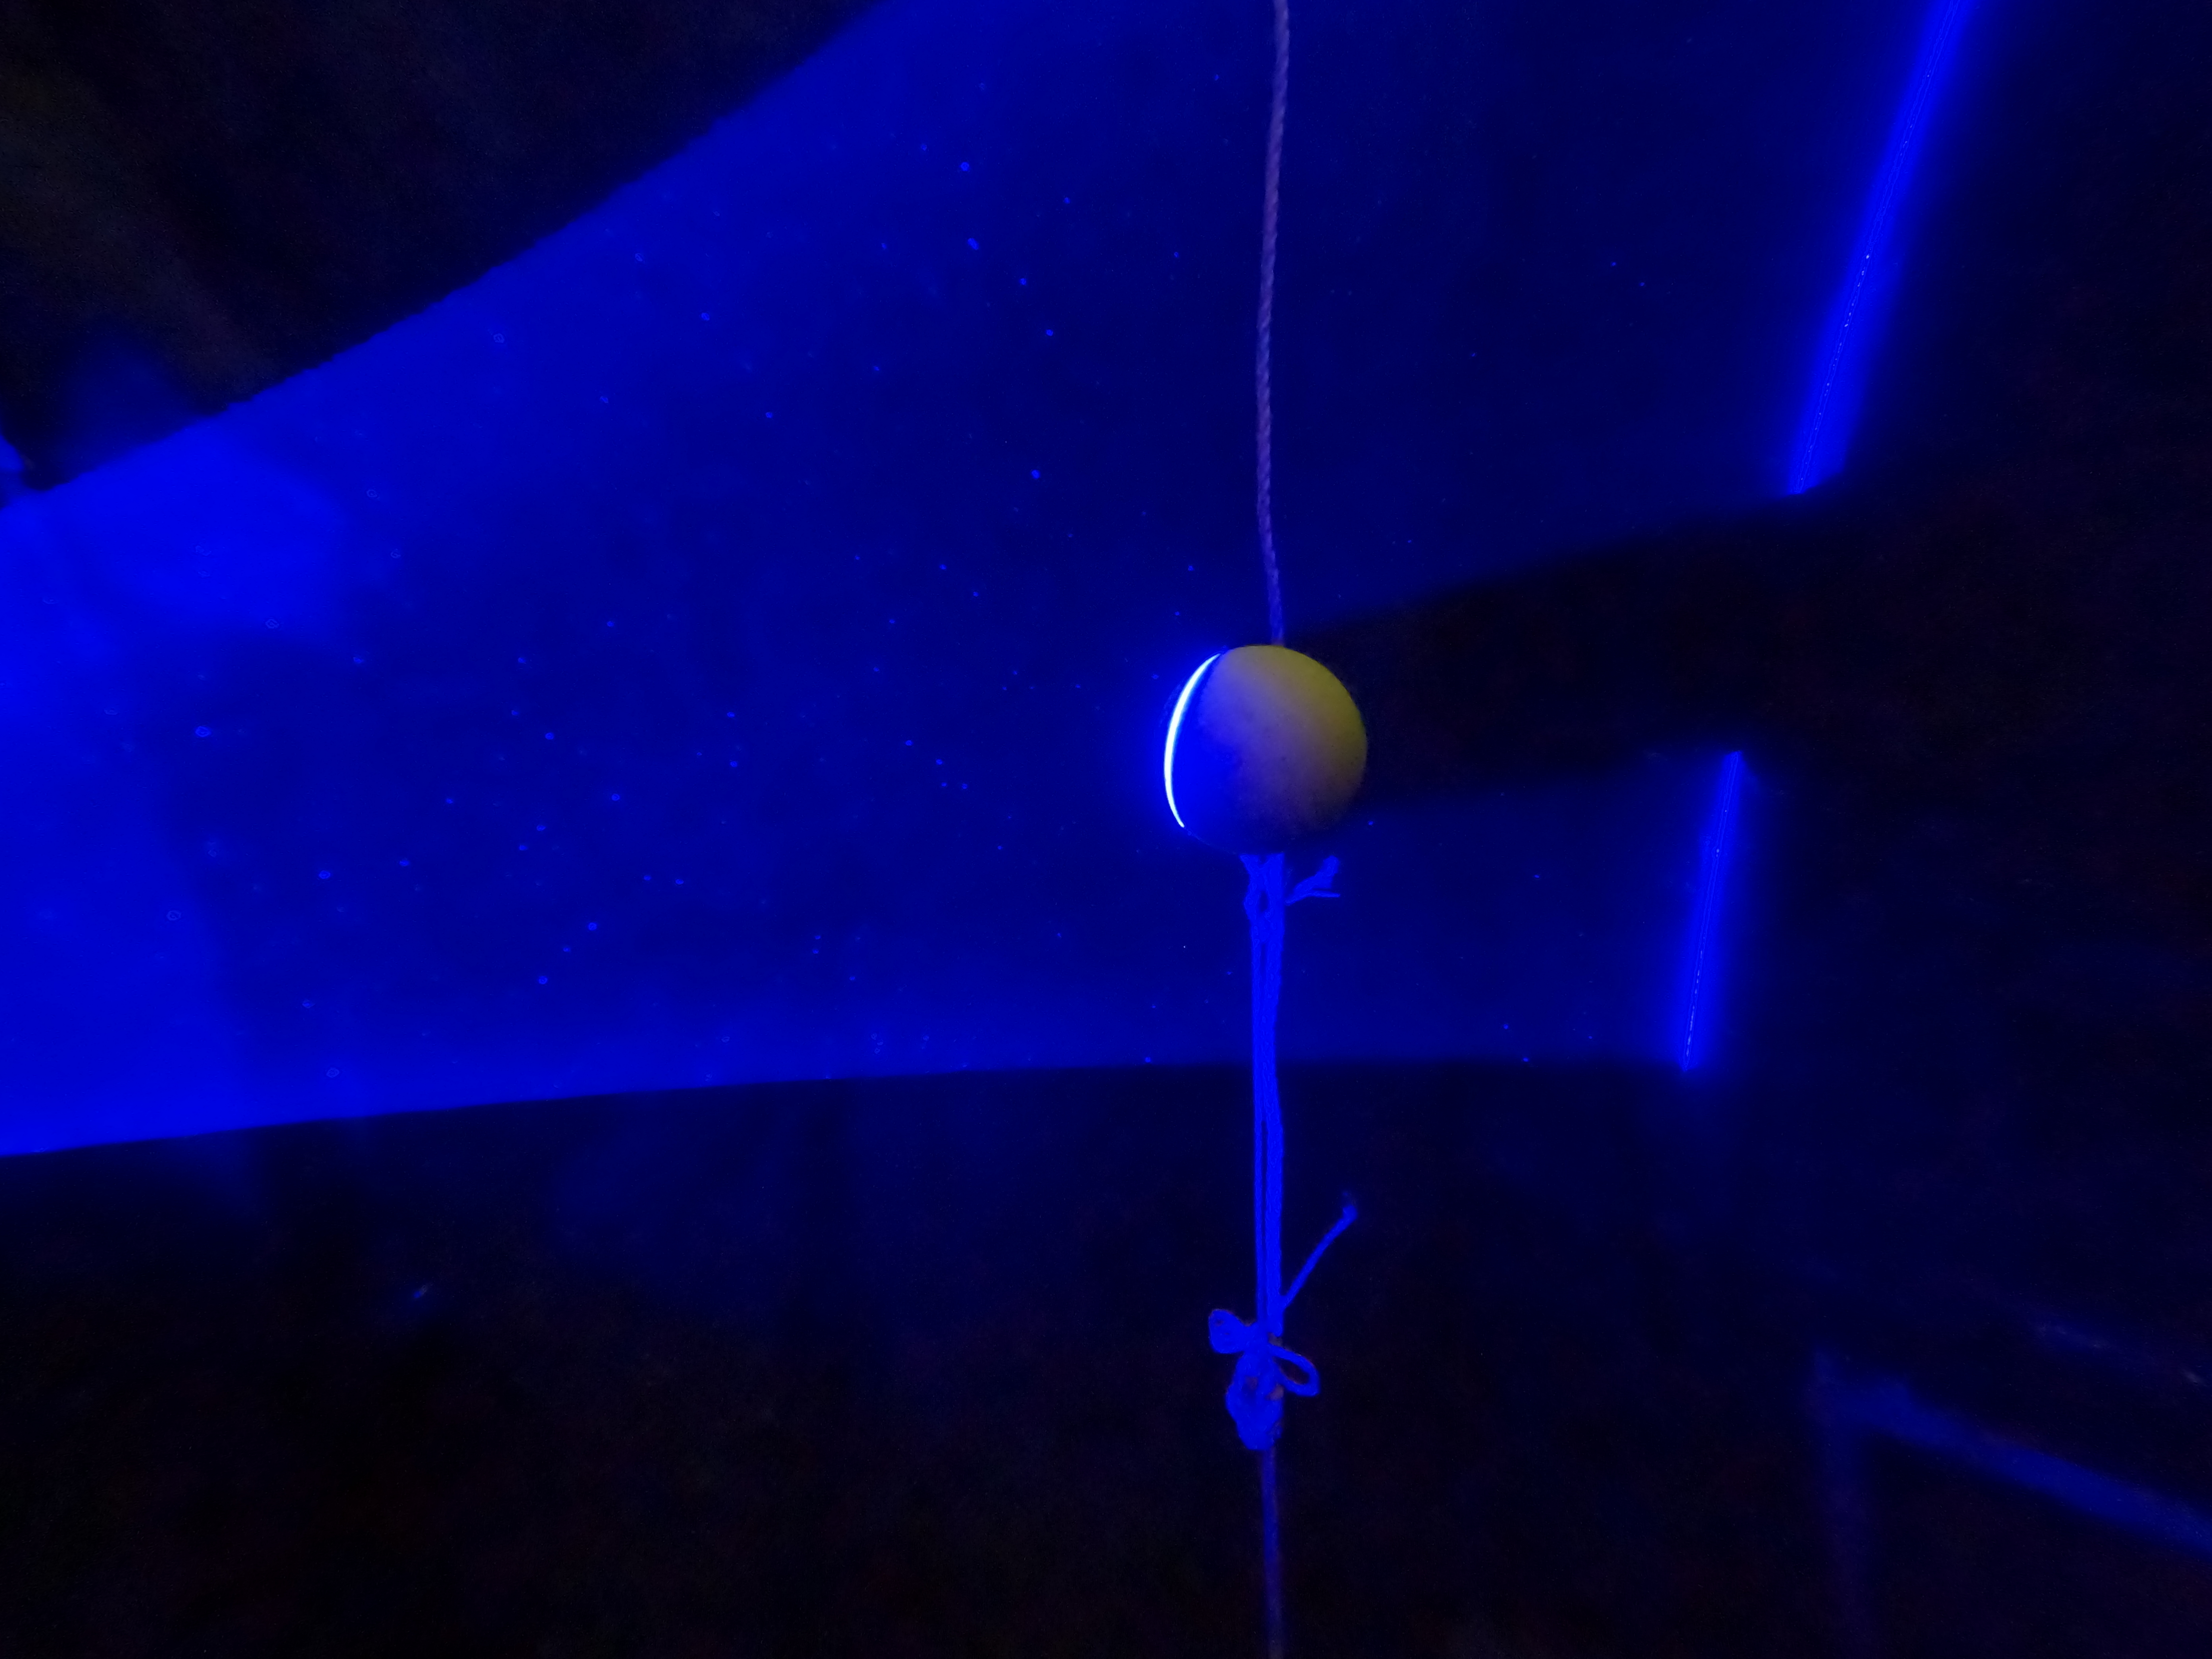

Supplement: Supplementary file 1190 [file G0032904.pdf › 7/G0032904.pdf]

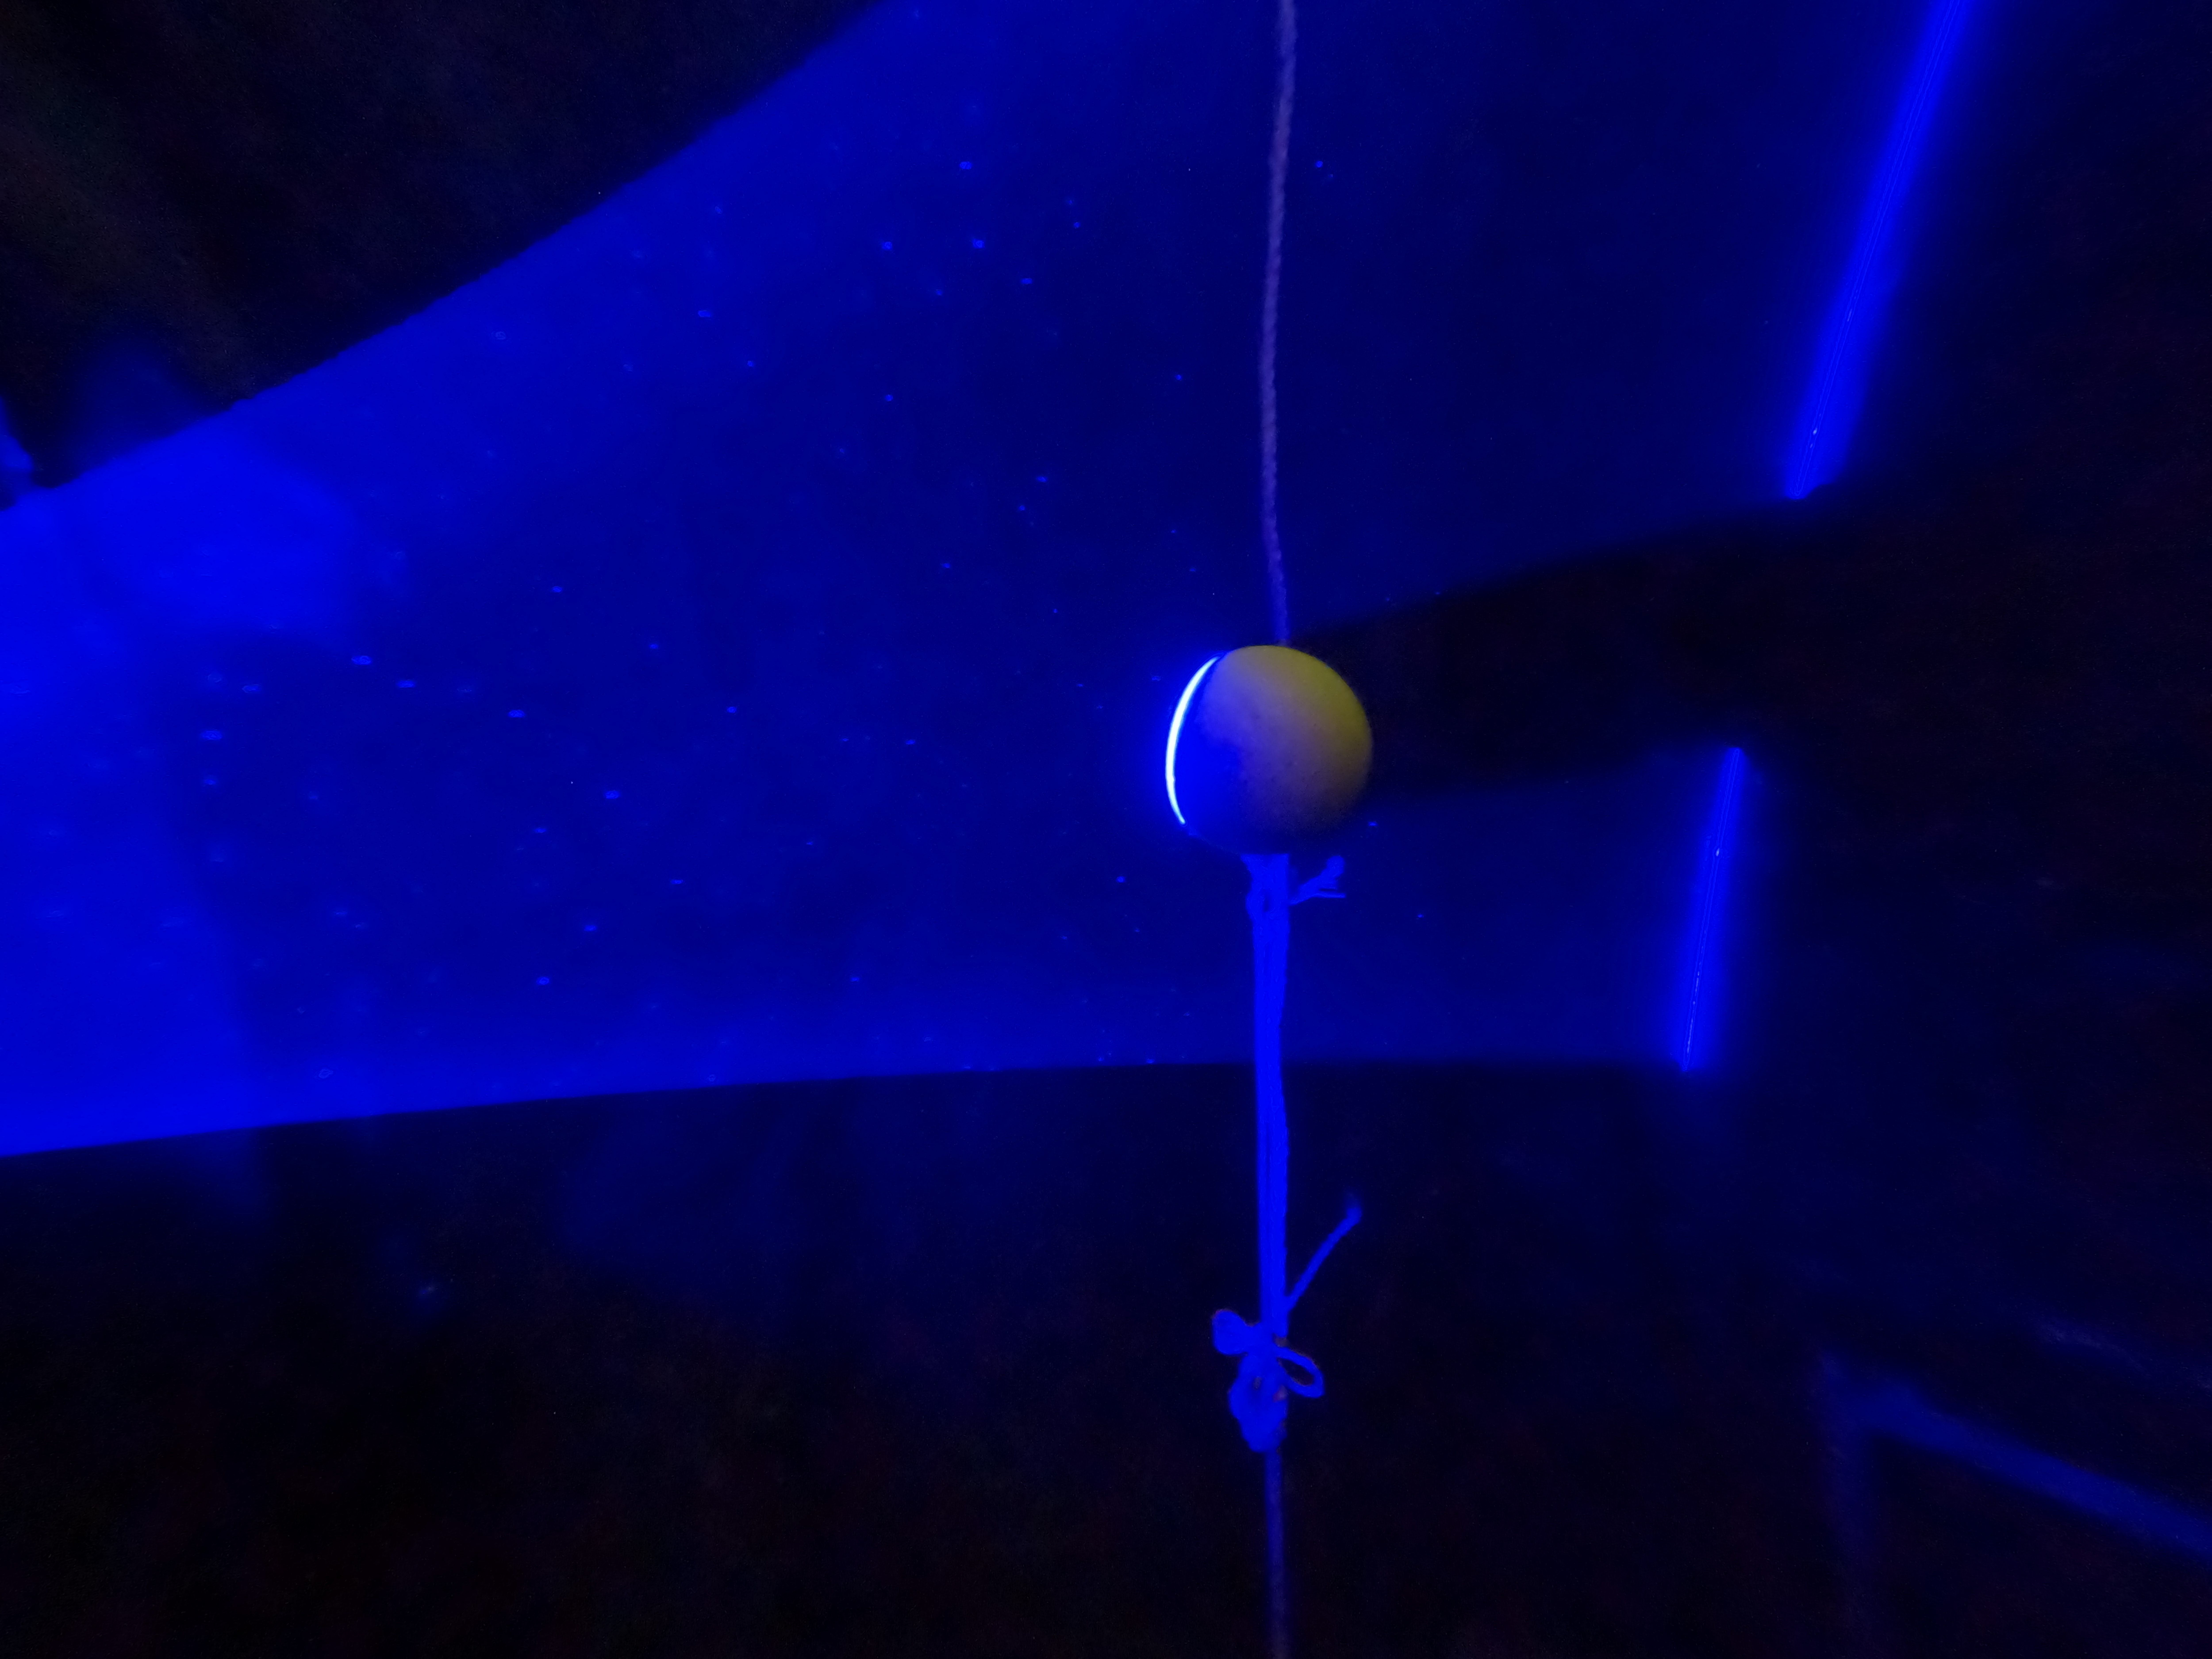

Supplement: Supplementary file 1191 [file G0032905.pdf › 7/G0032905.pdf]

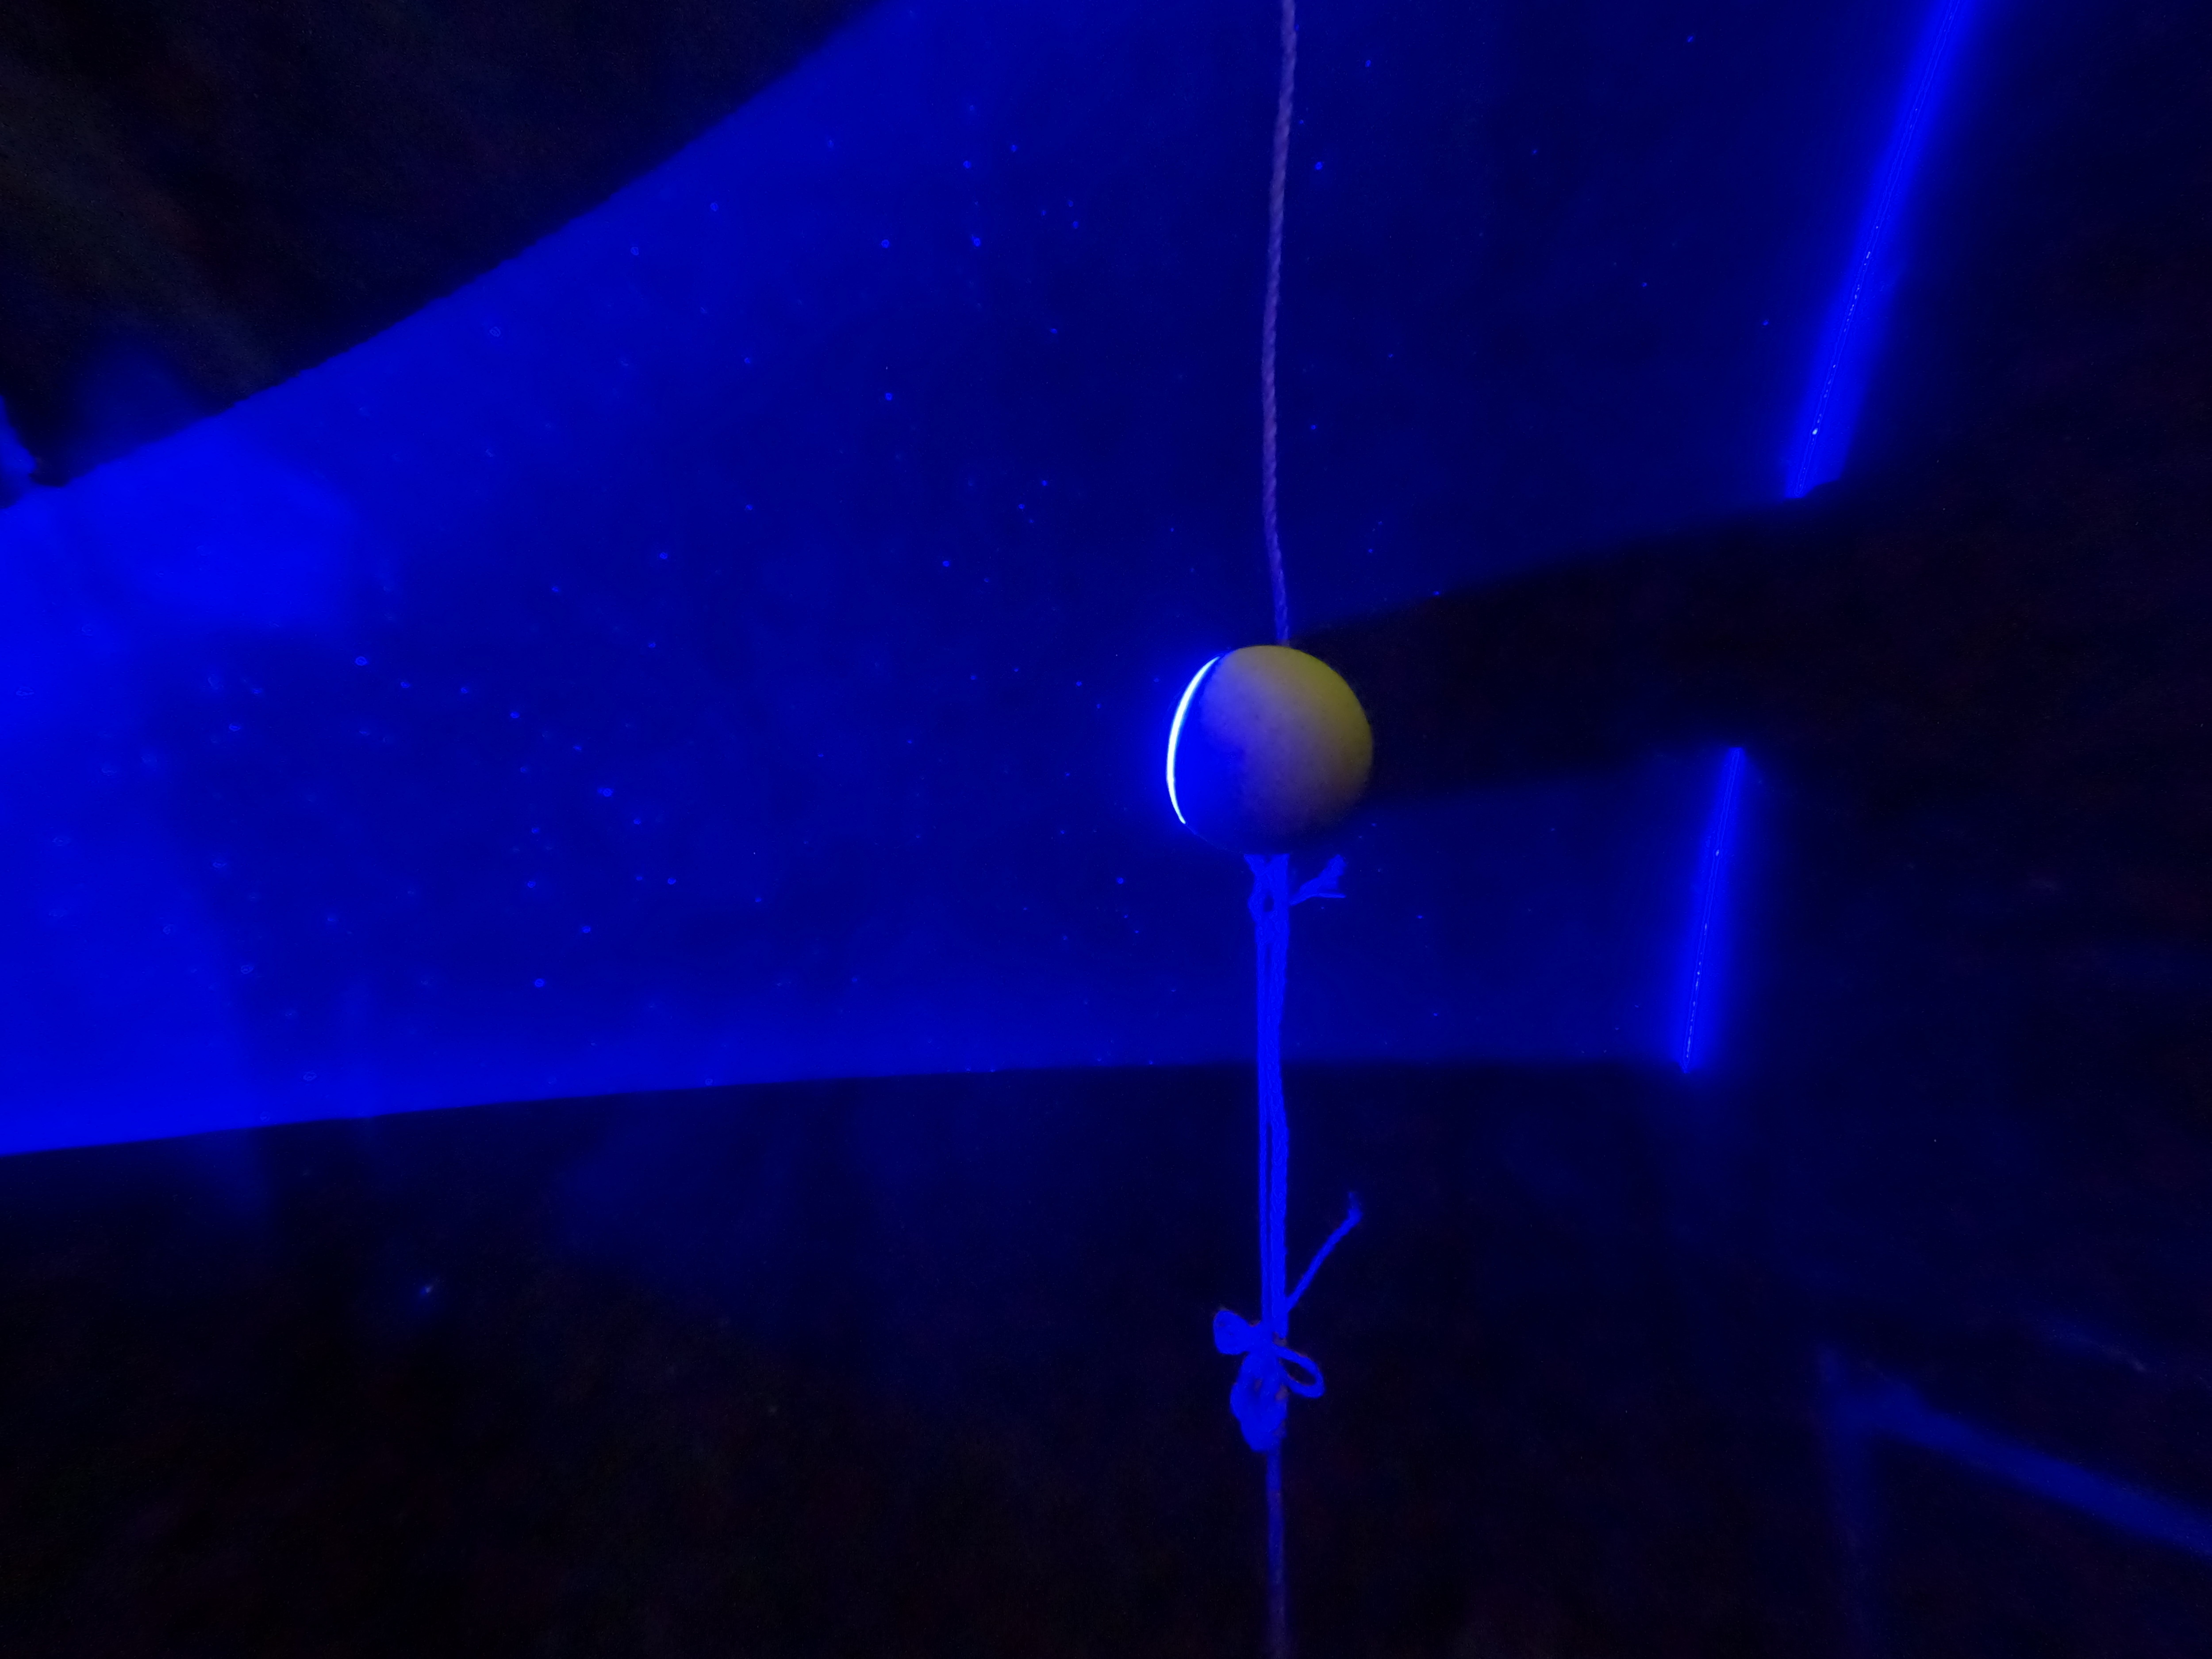

Supplement: Supplementary file 1192 [file G0032906.pdf › 7/G0032906.pdf]

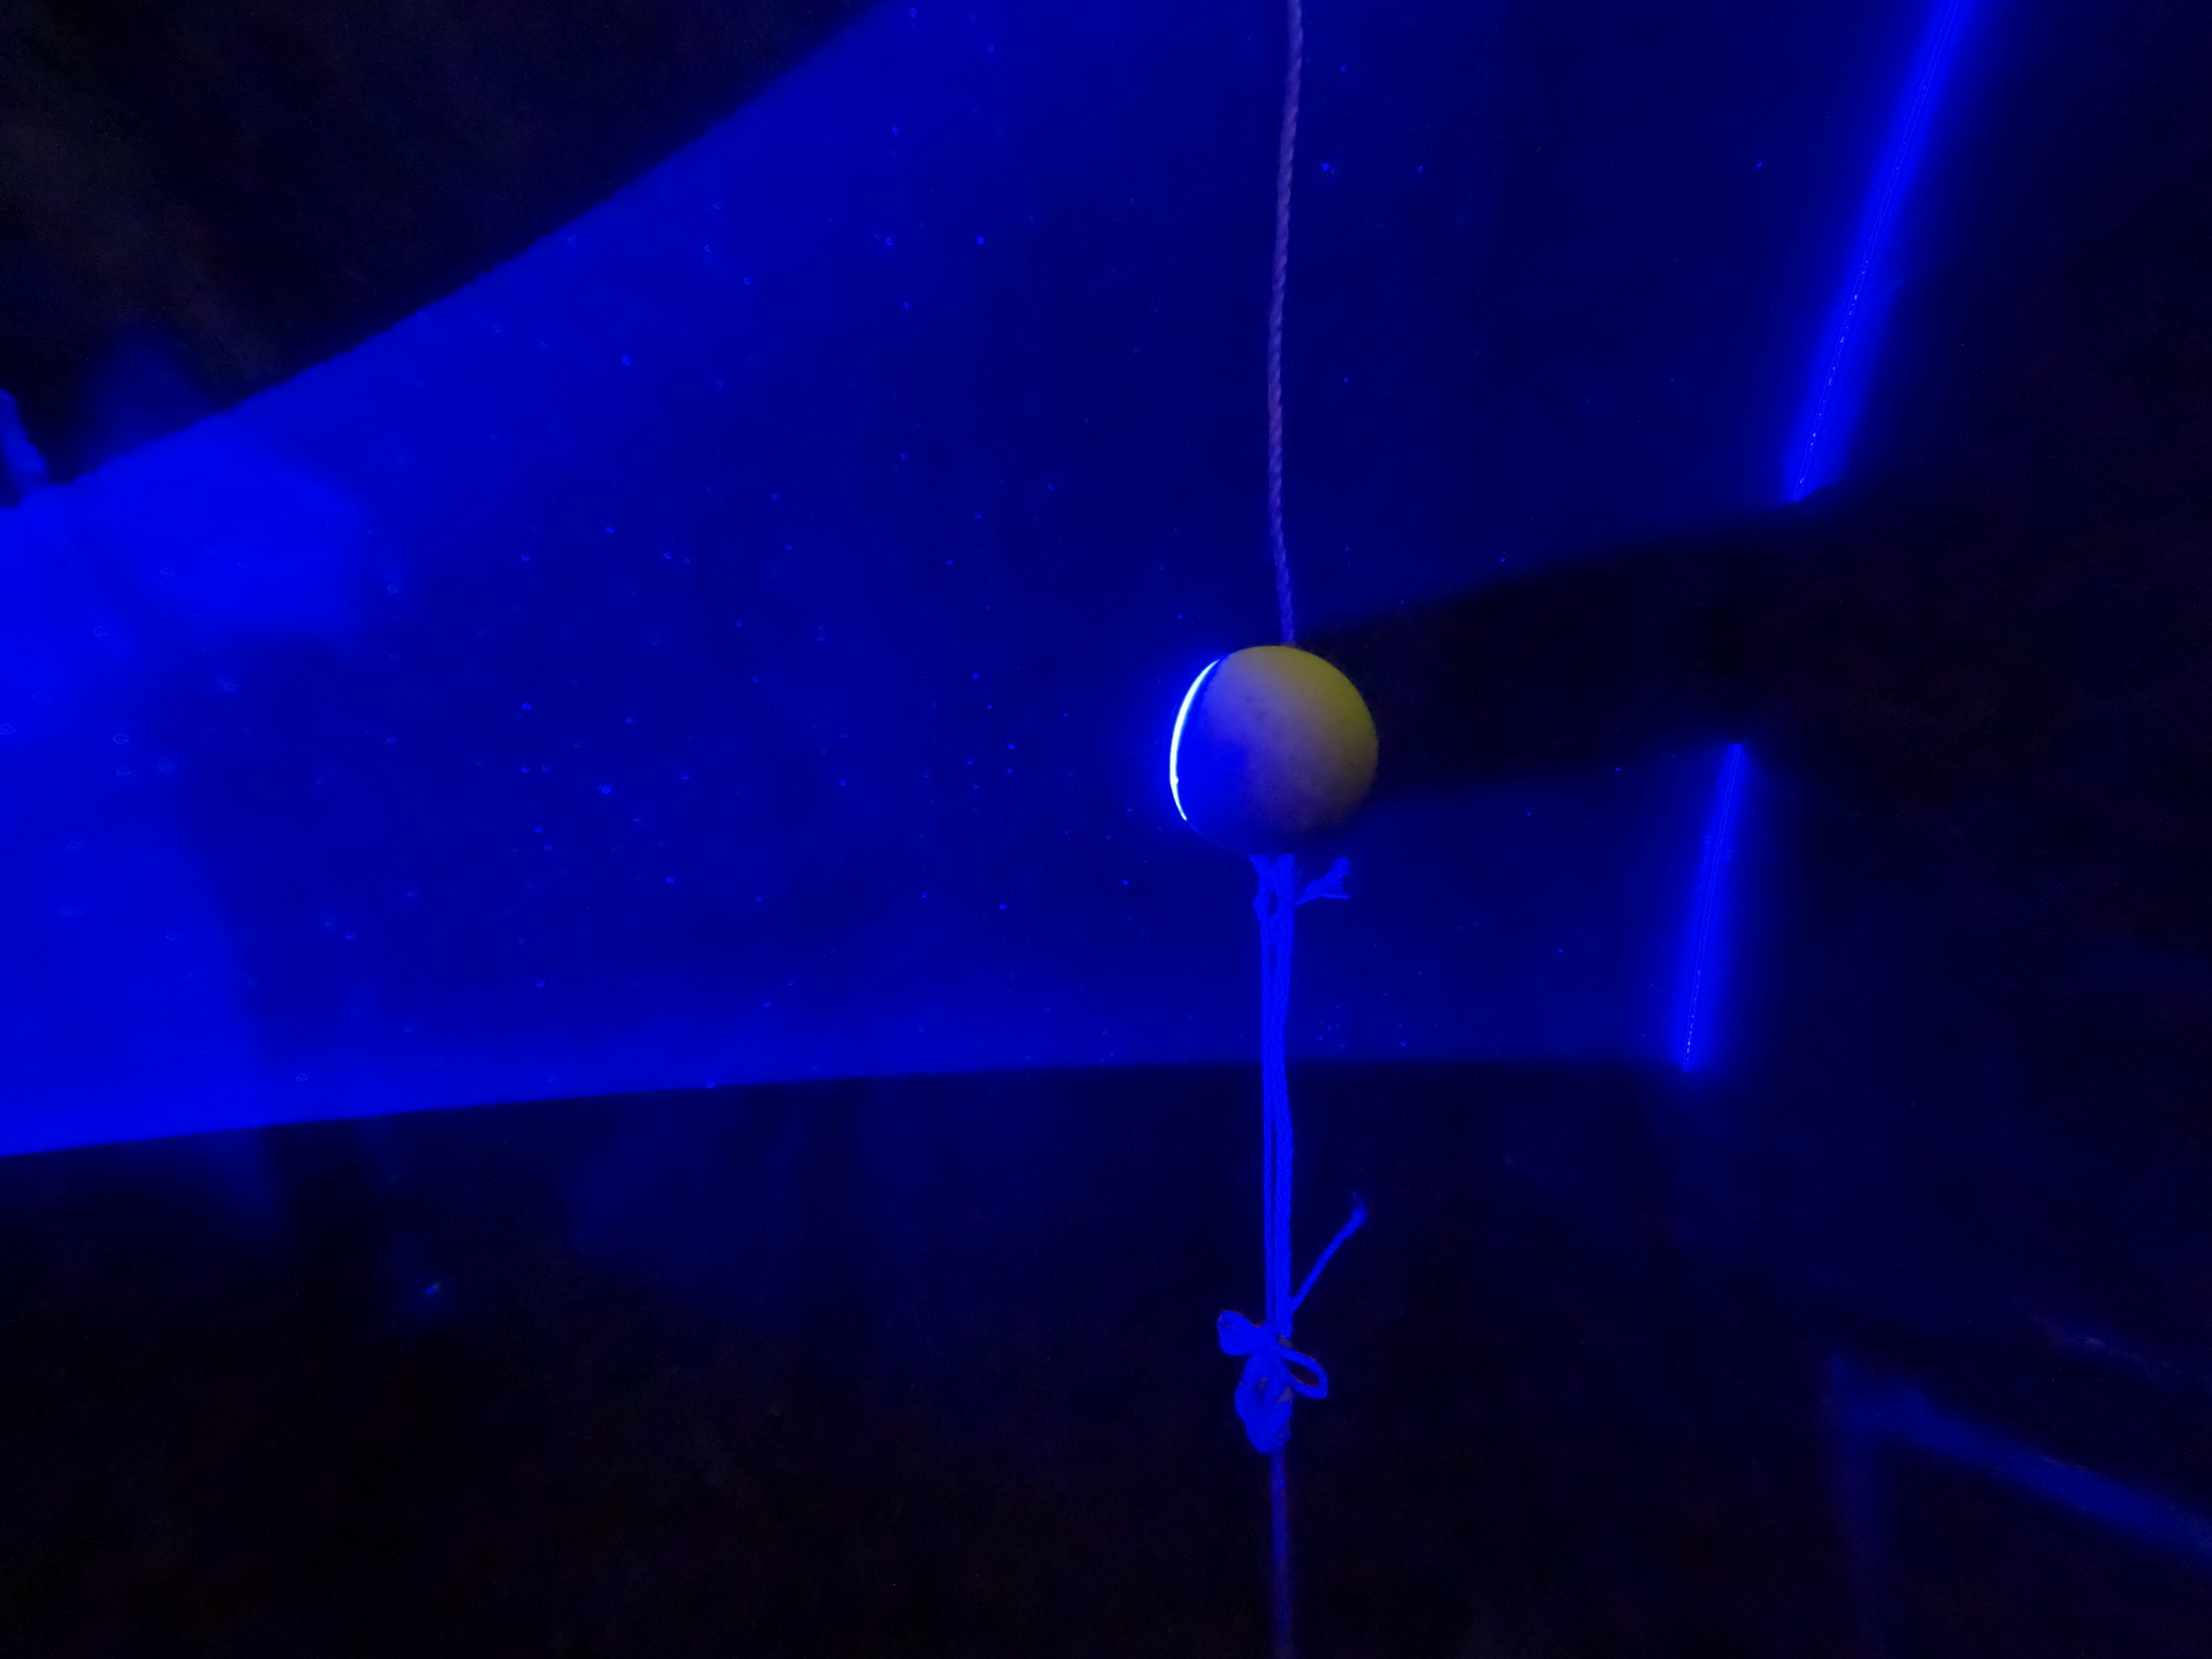

Supplement: Supplementary file 1193 [file G0032907.pdf › 7/G0032907.pdf]

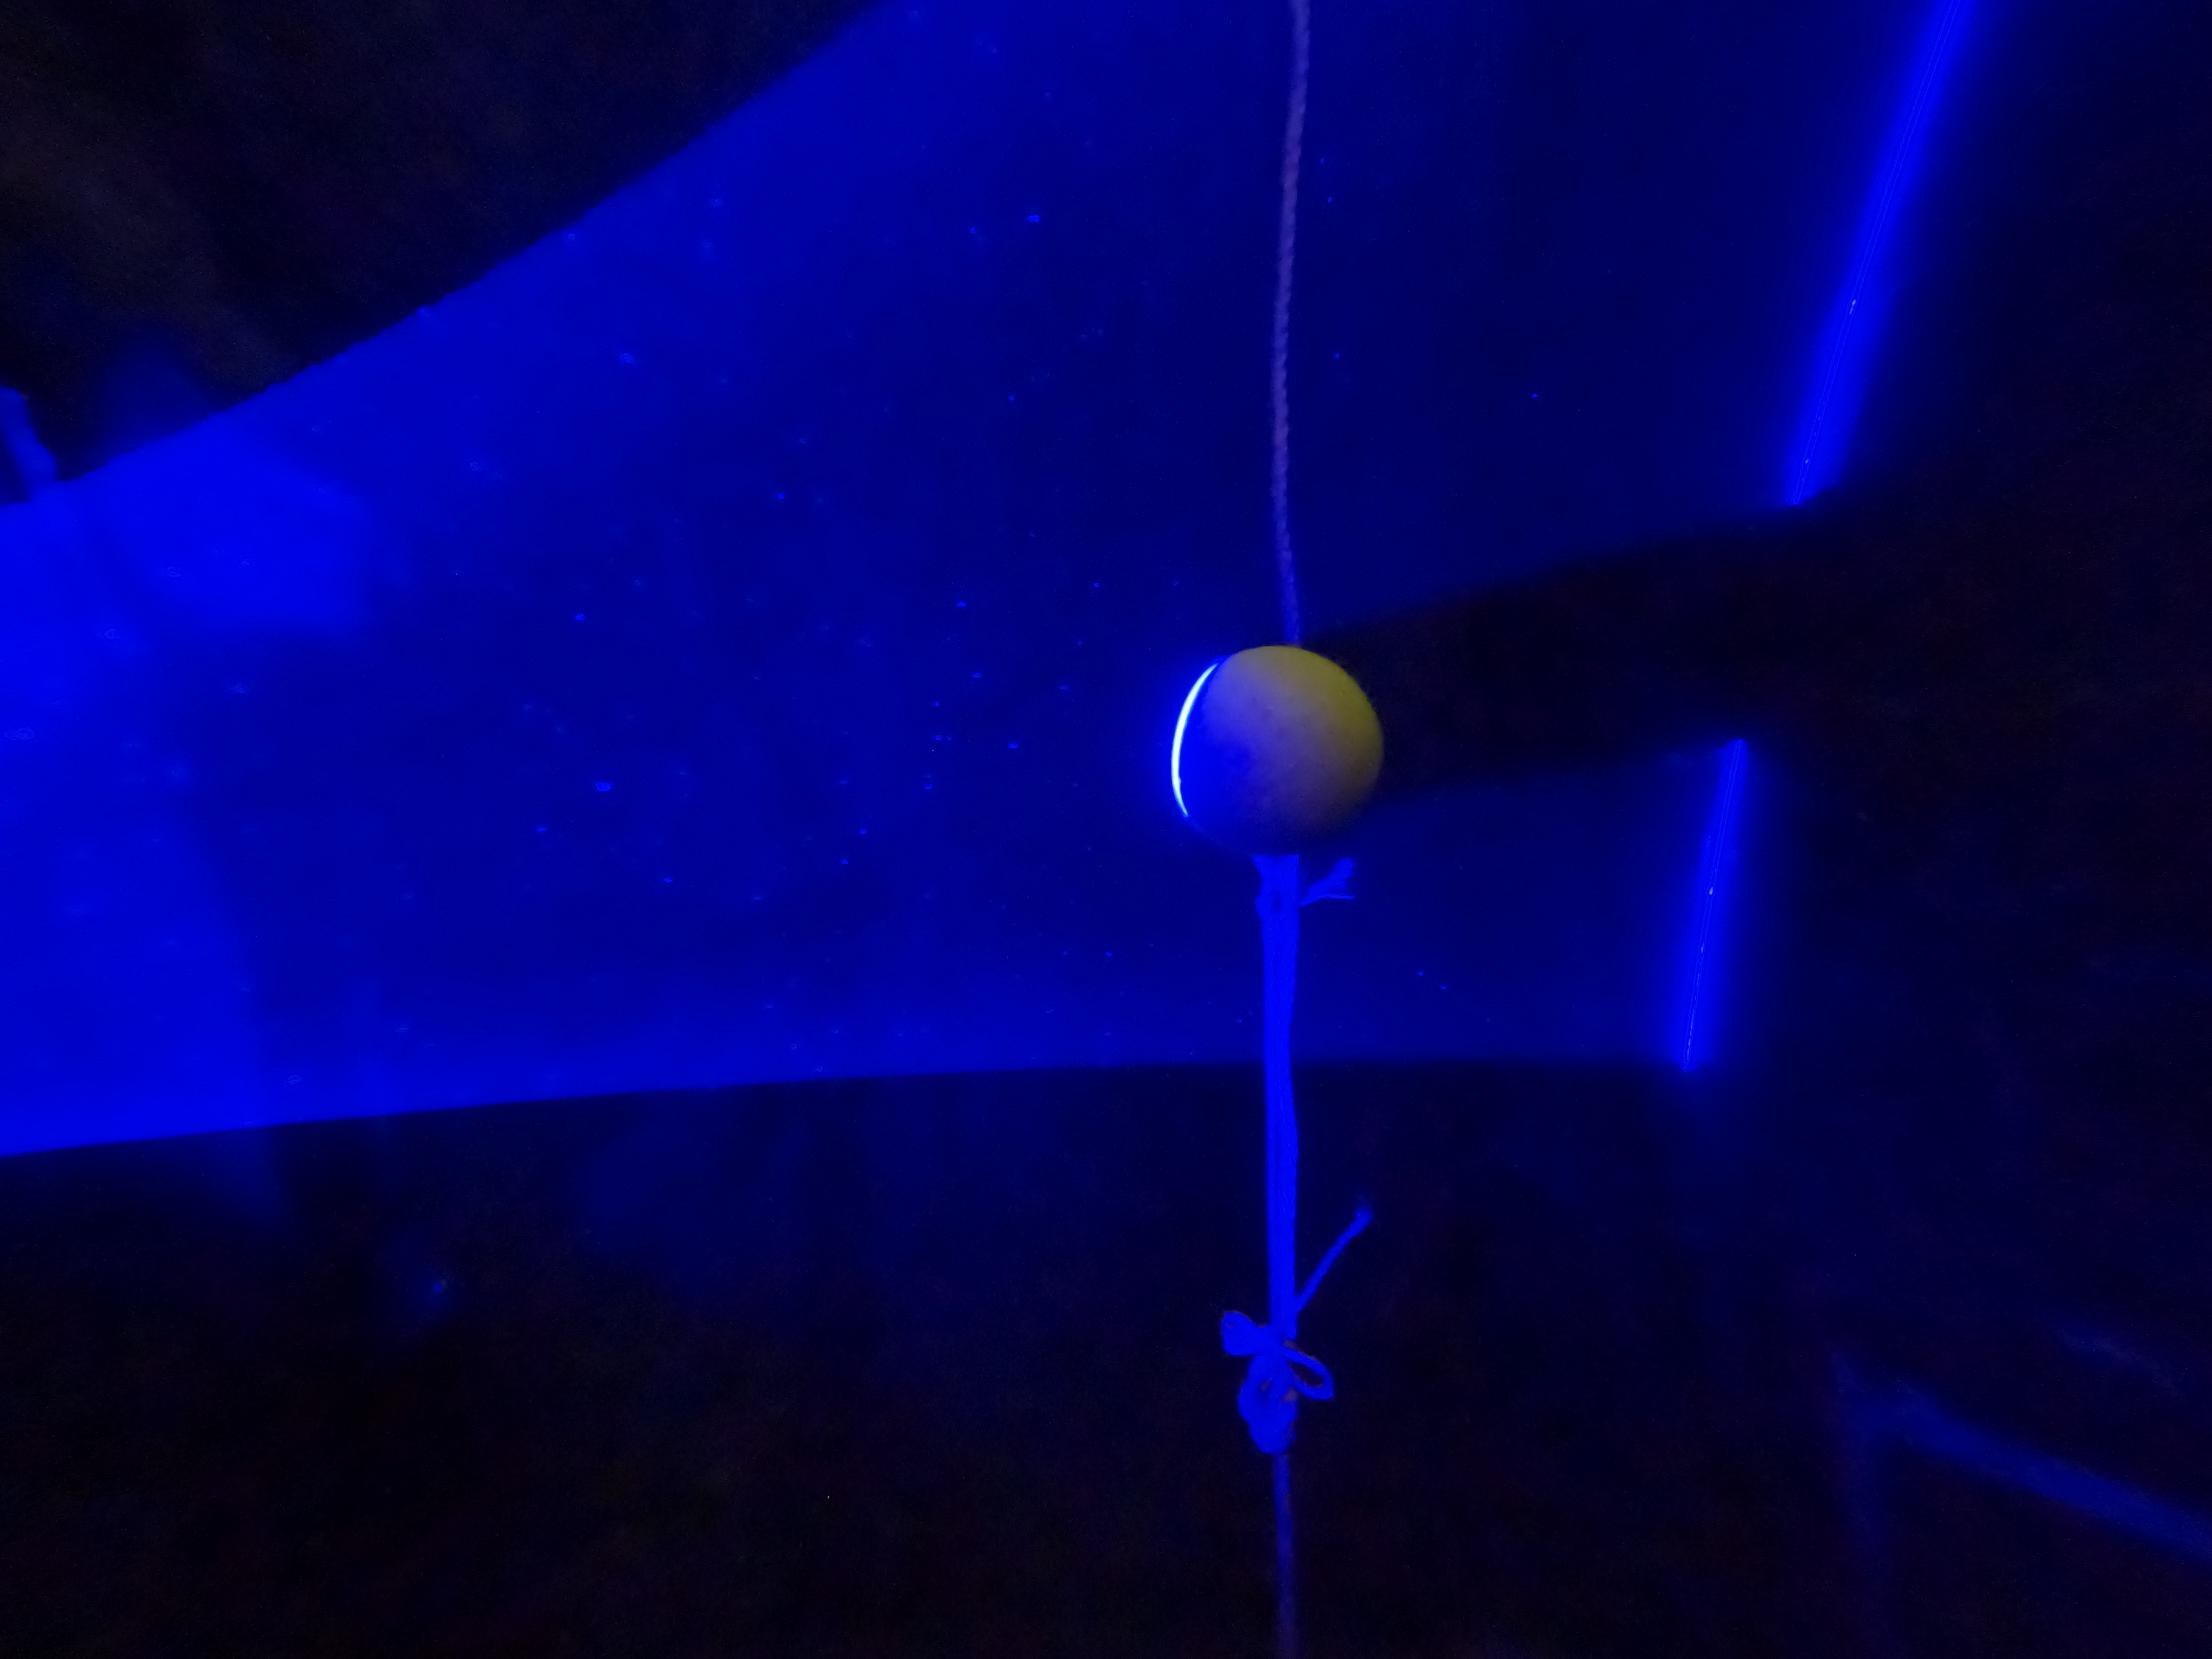

Supplement: Supplementary file 1194 [file G0032908.pdf › 7/G0032908.pdf]

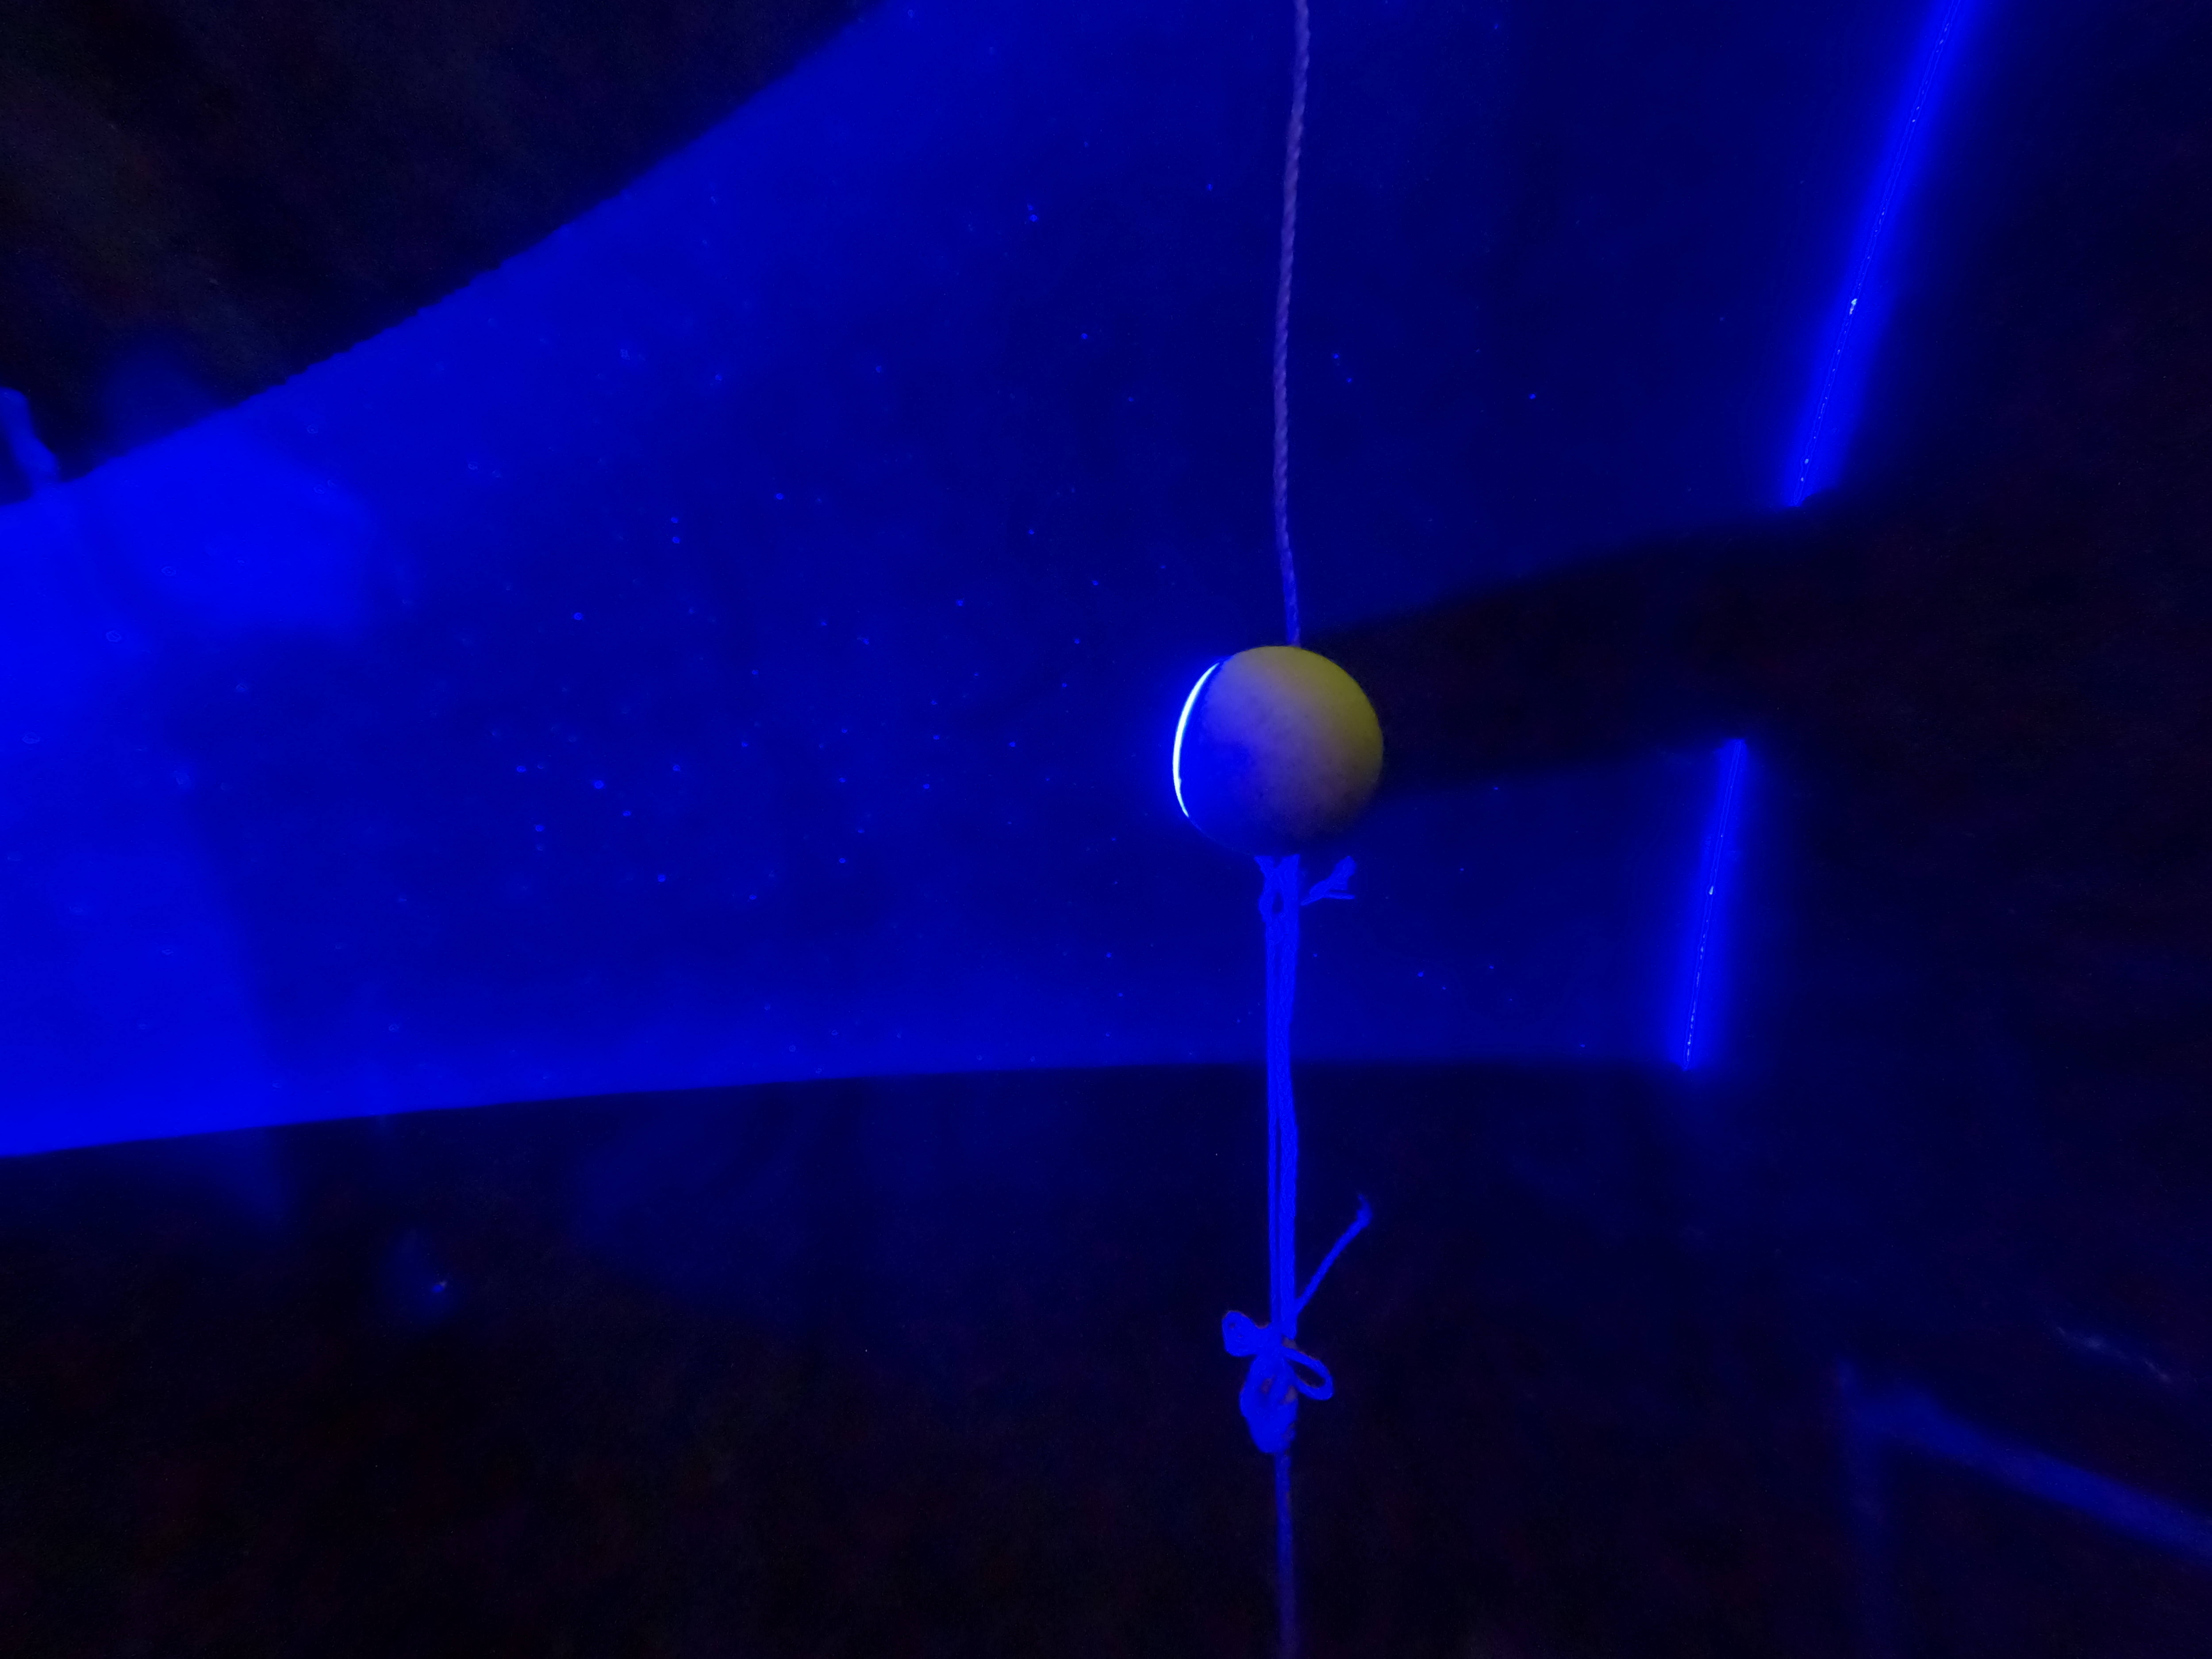

Supplement: Supplementary file 1195 [file G0032909.pdf › 7/G0032909.pdf]

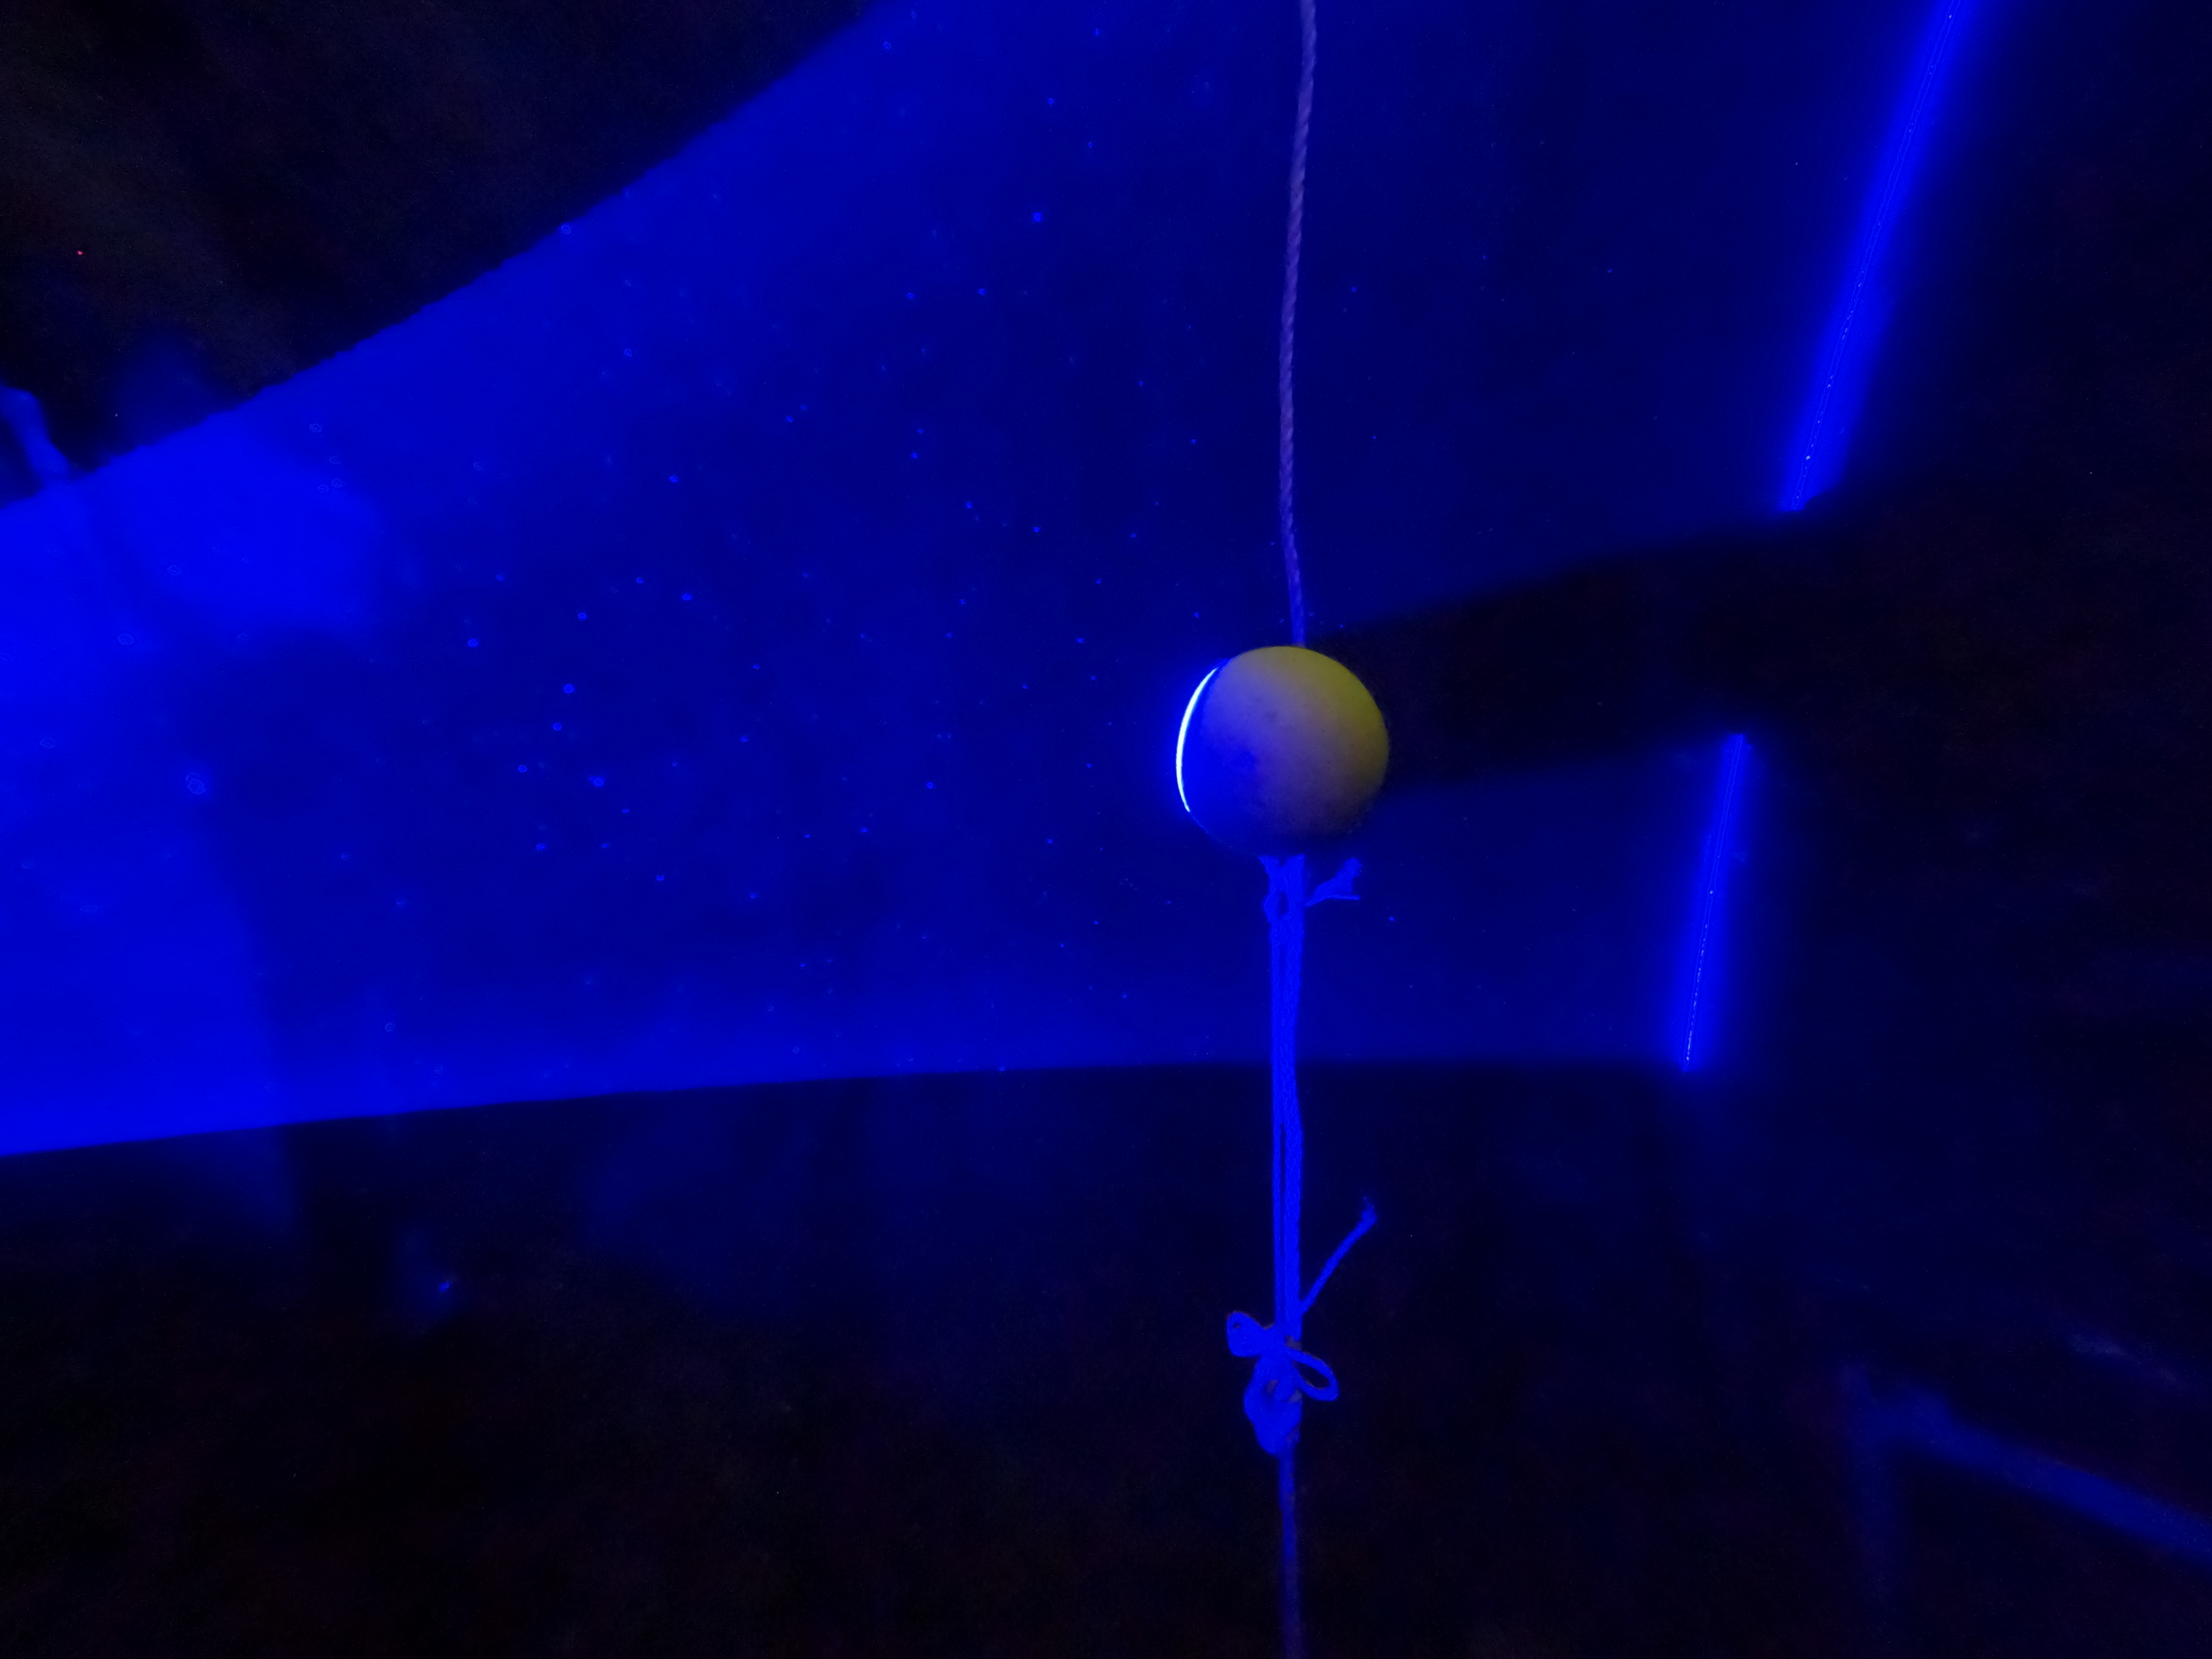

Supplement: Supplementary file 1196 [file G0032910.pdf › 7/G0032910.pdf]

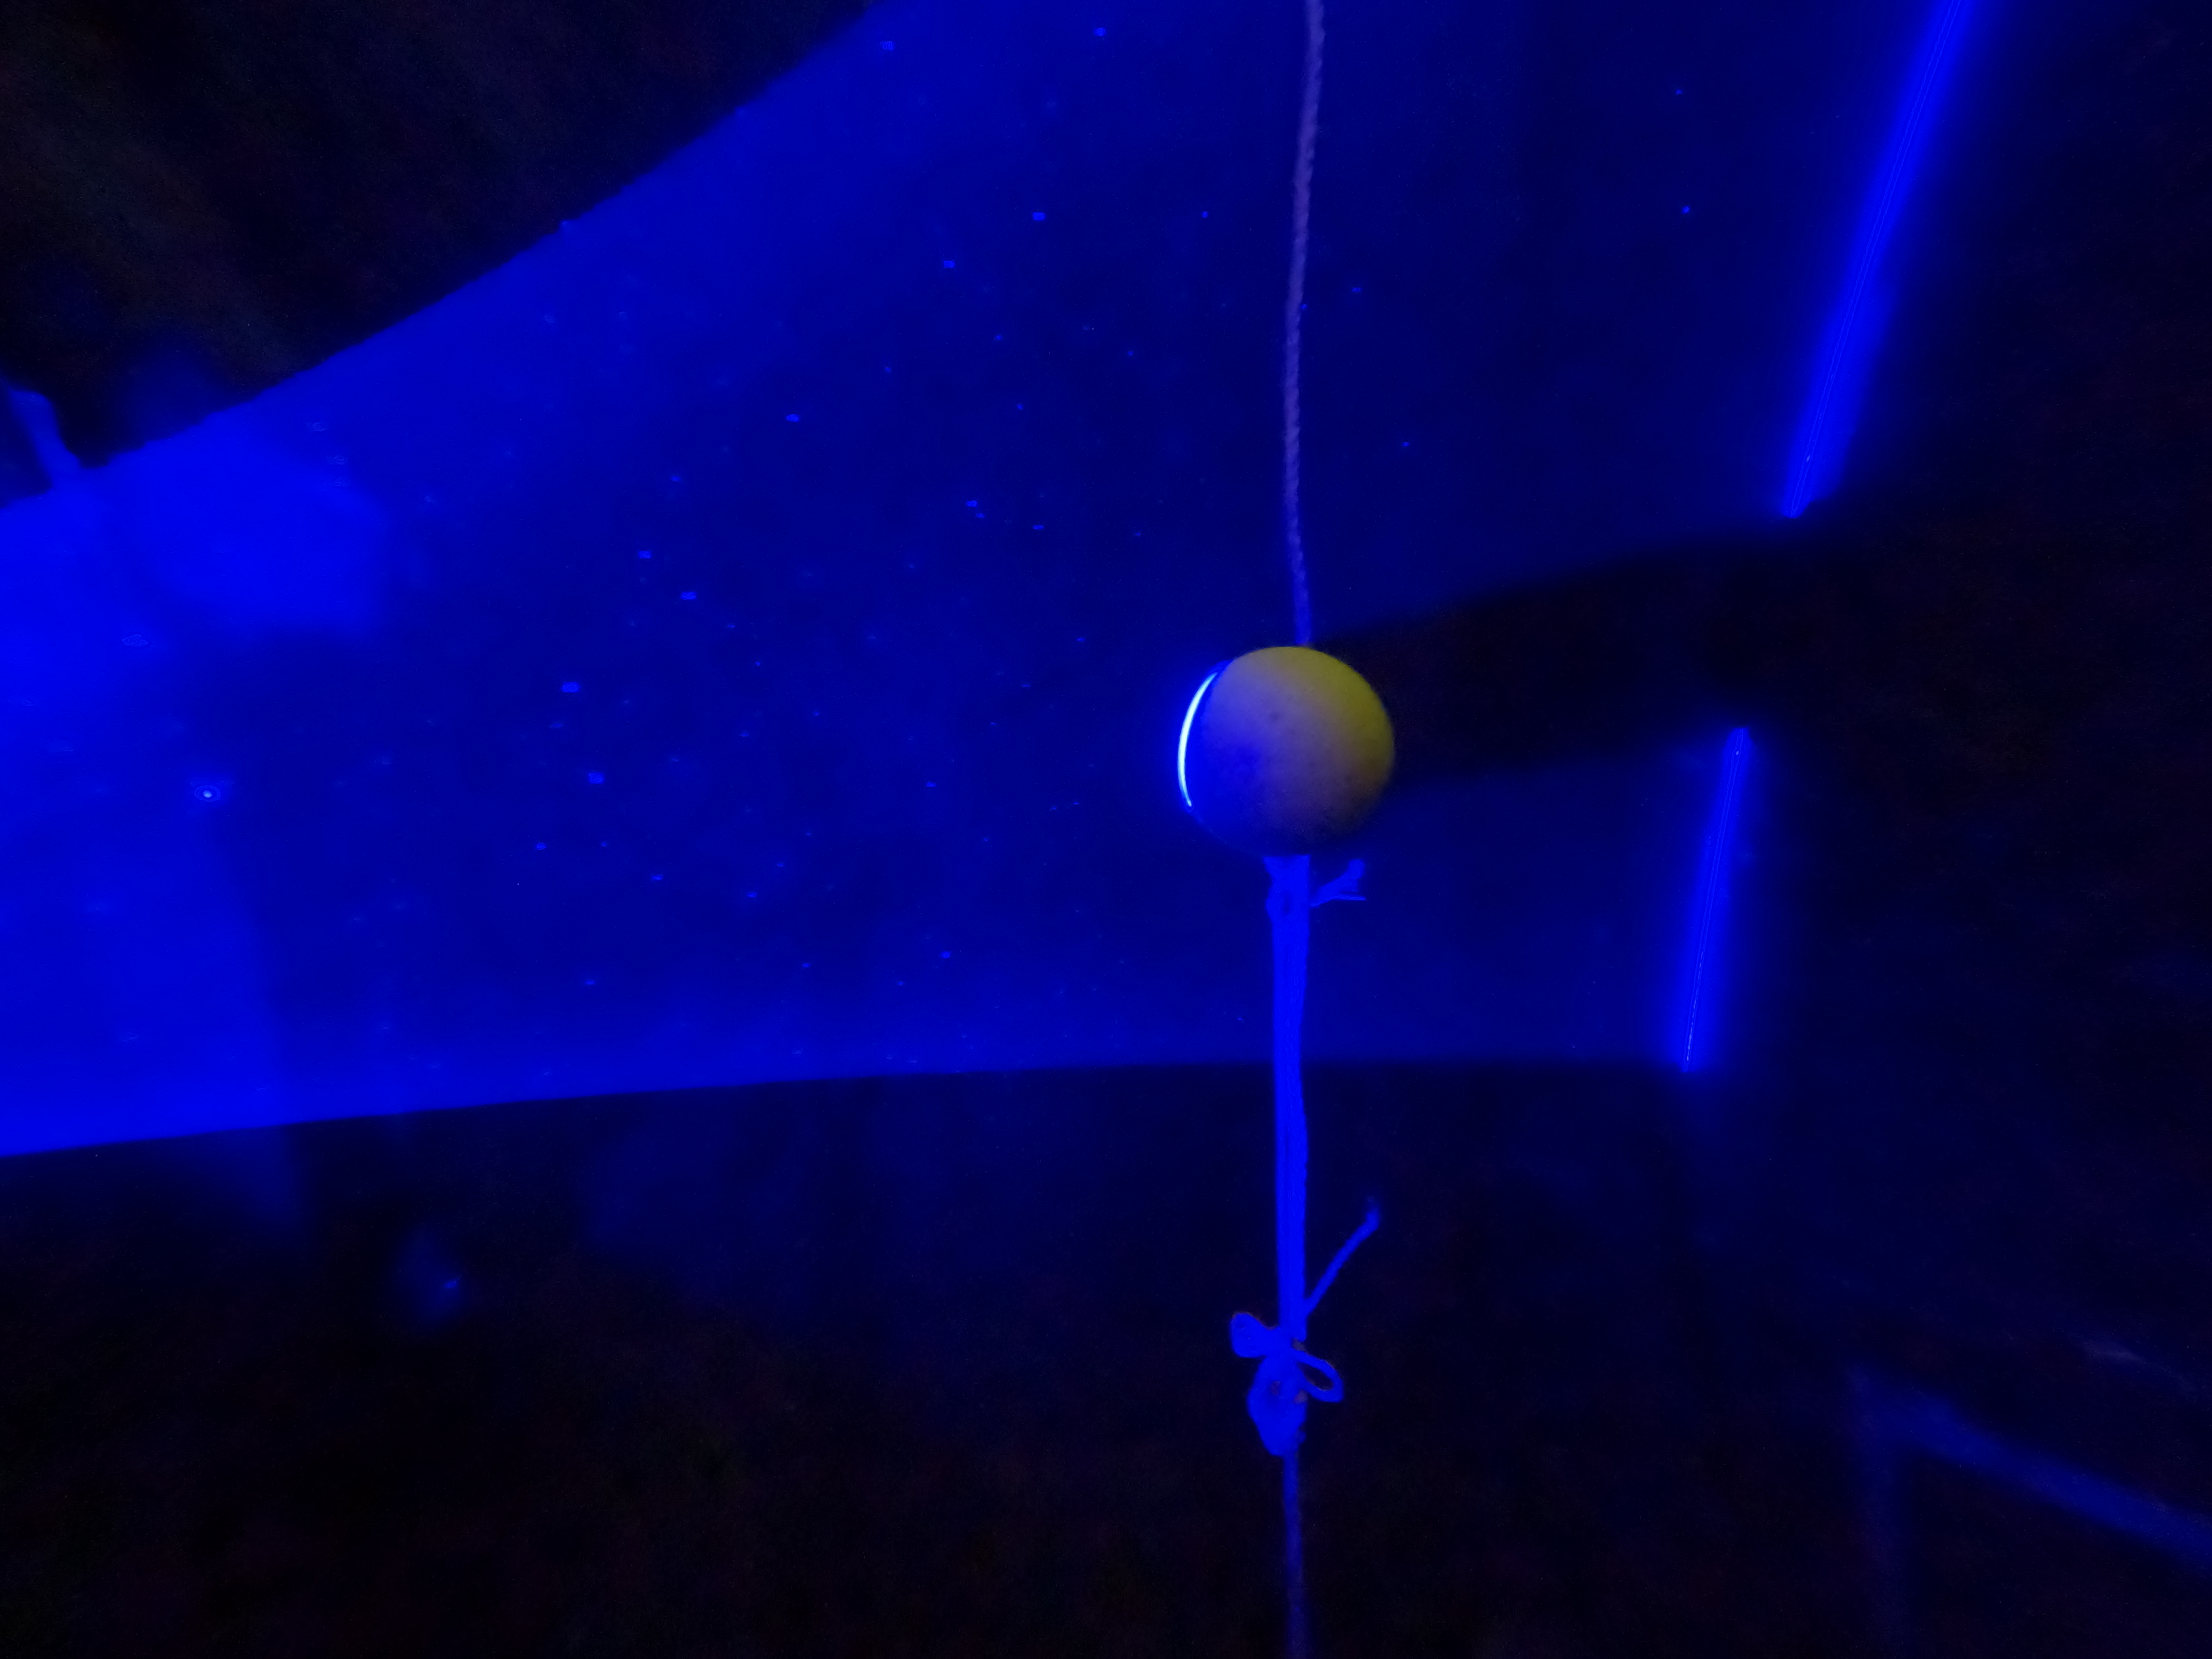

Supplement: Supplementary file 1197 [file G0032911.pdf › 7/G0032911.pdf]

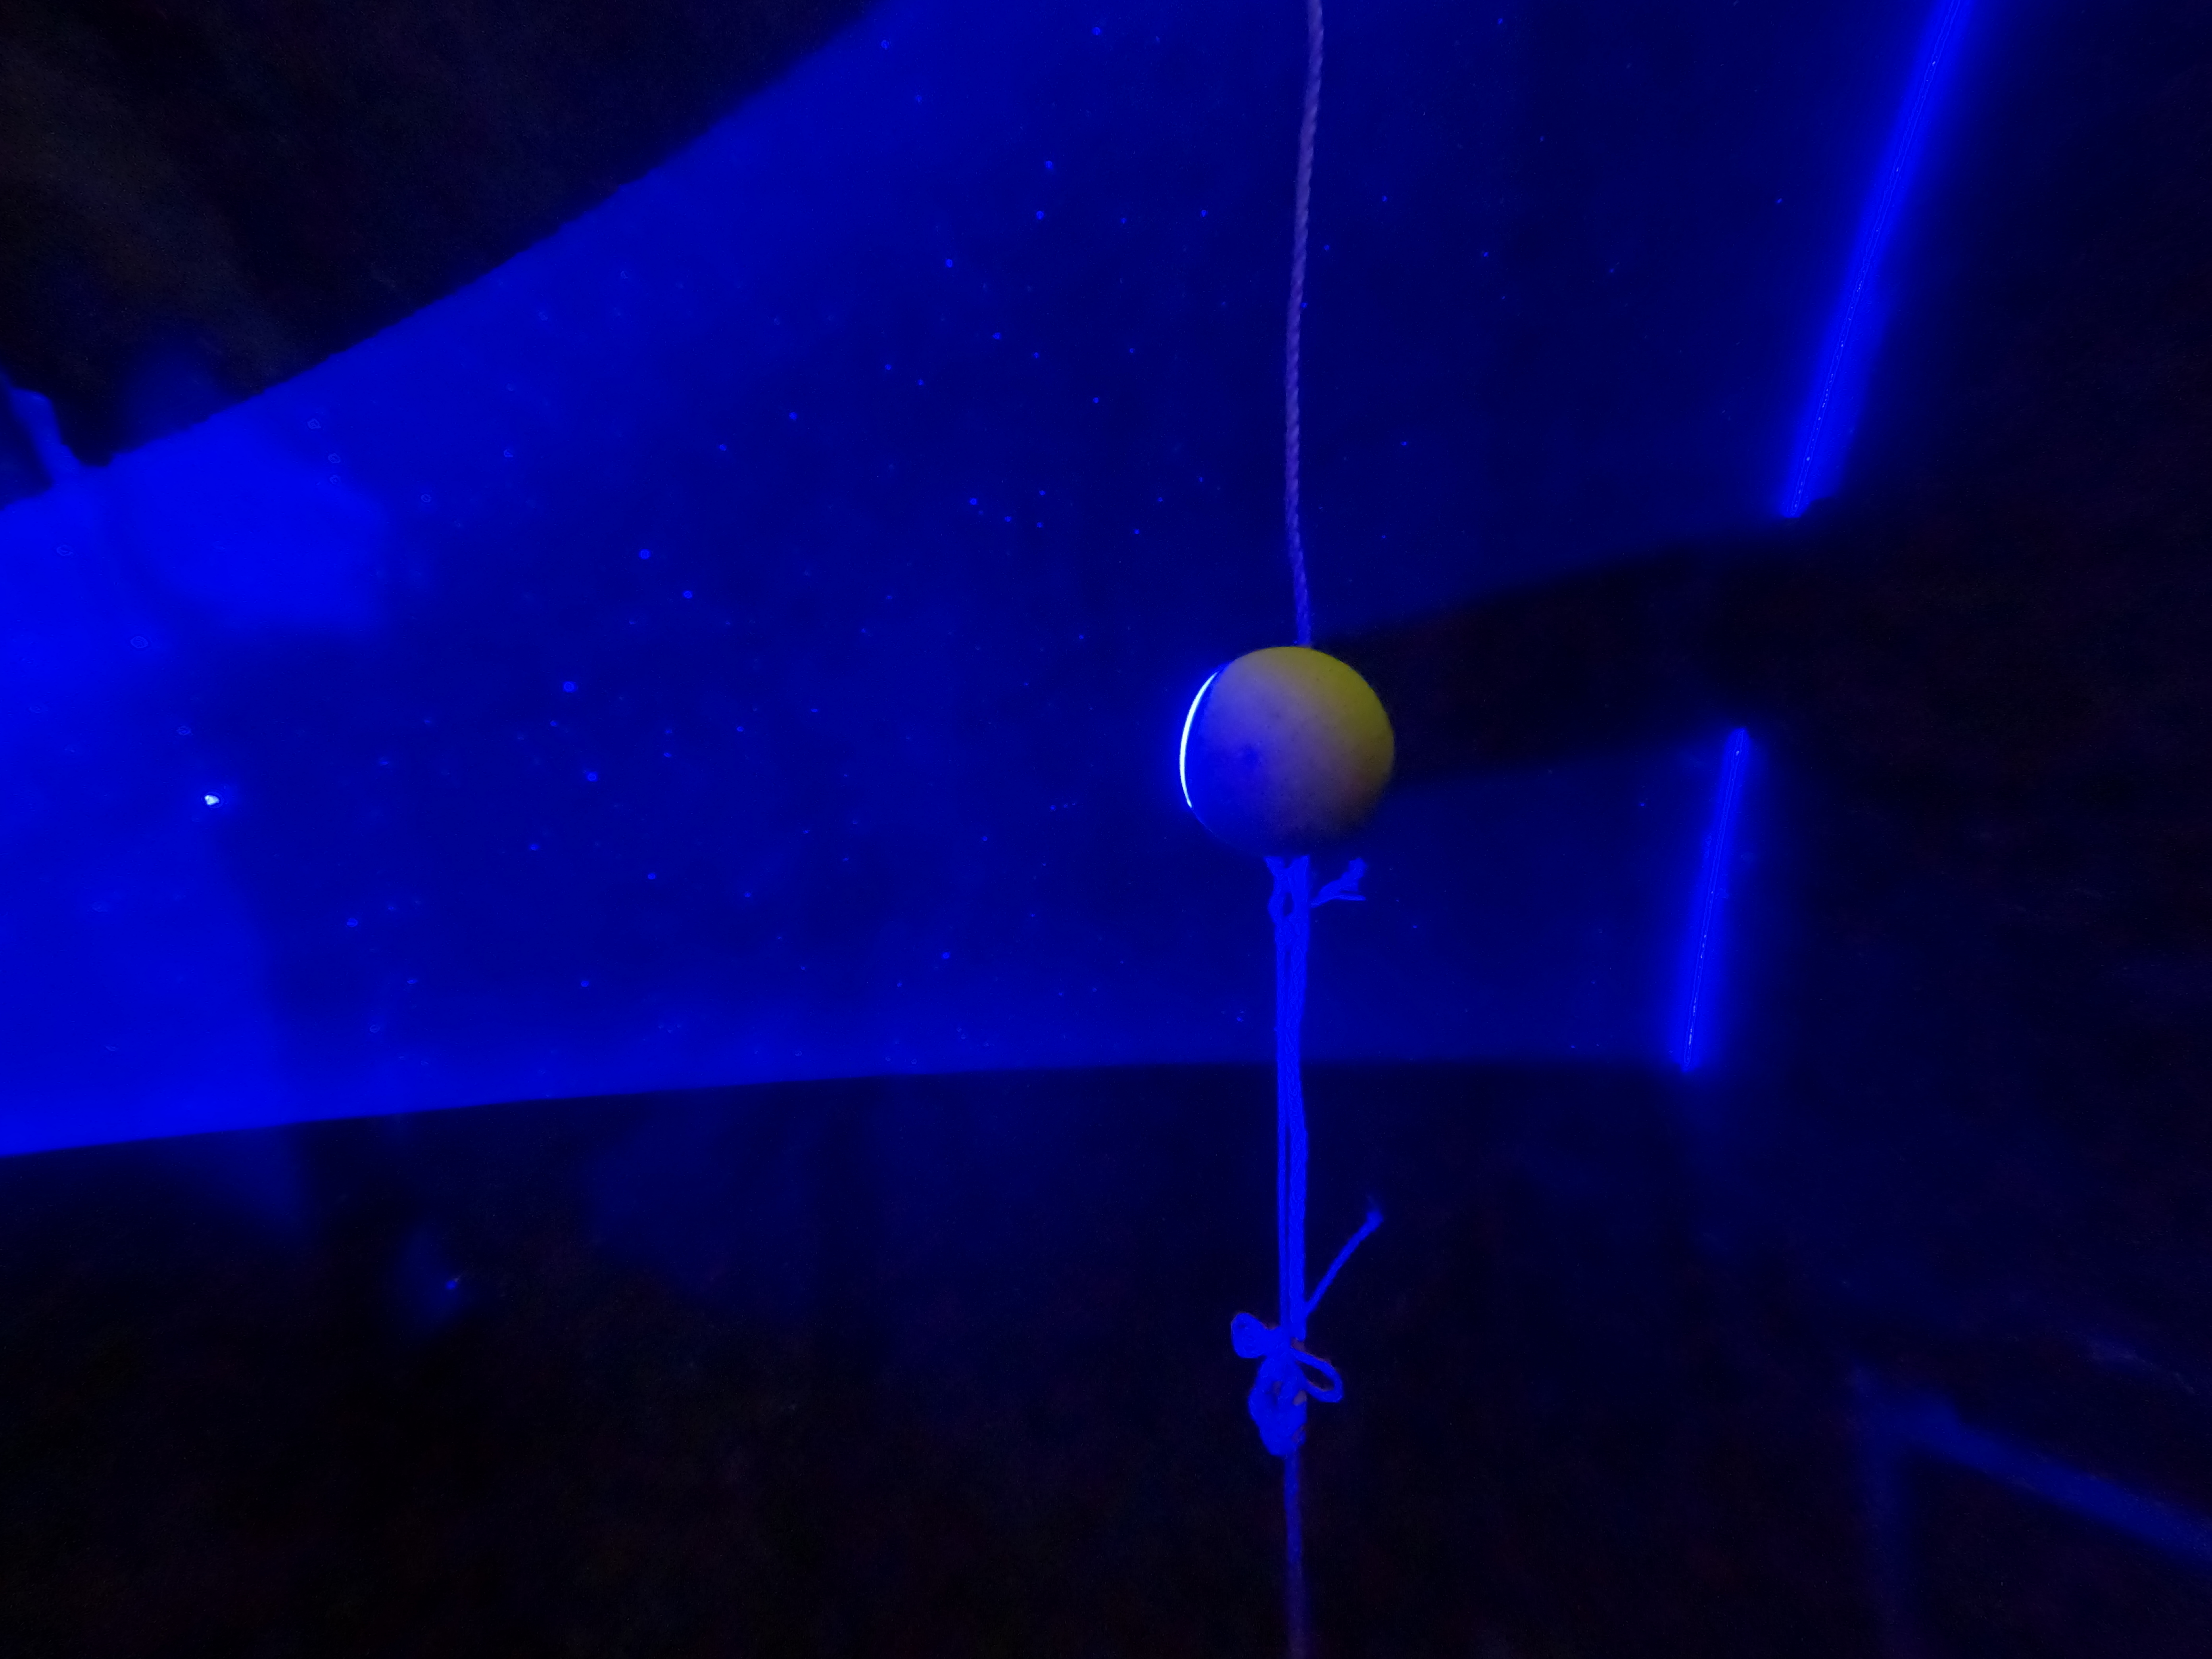

Supplement: Supplementary file 1198 [file G0032912.pdf › 7/G0032912.pdf]

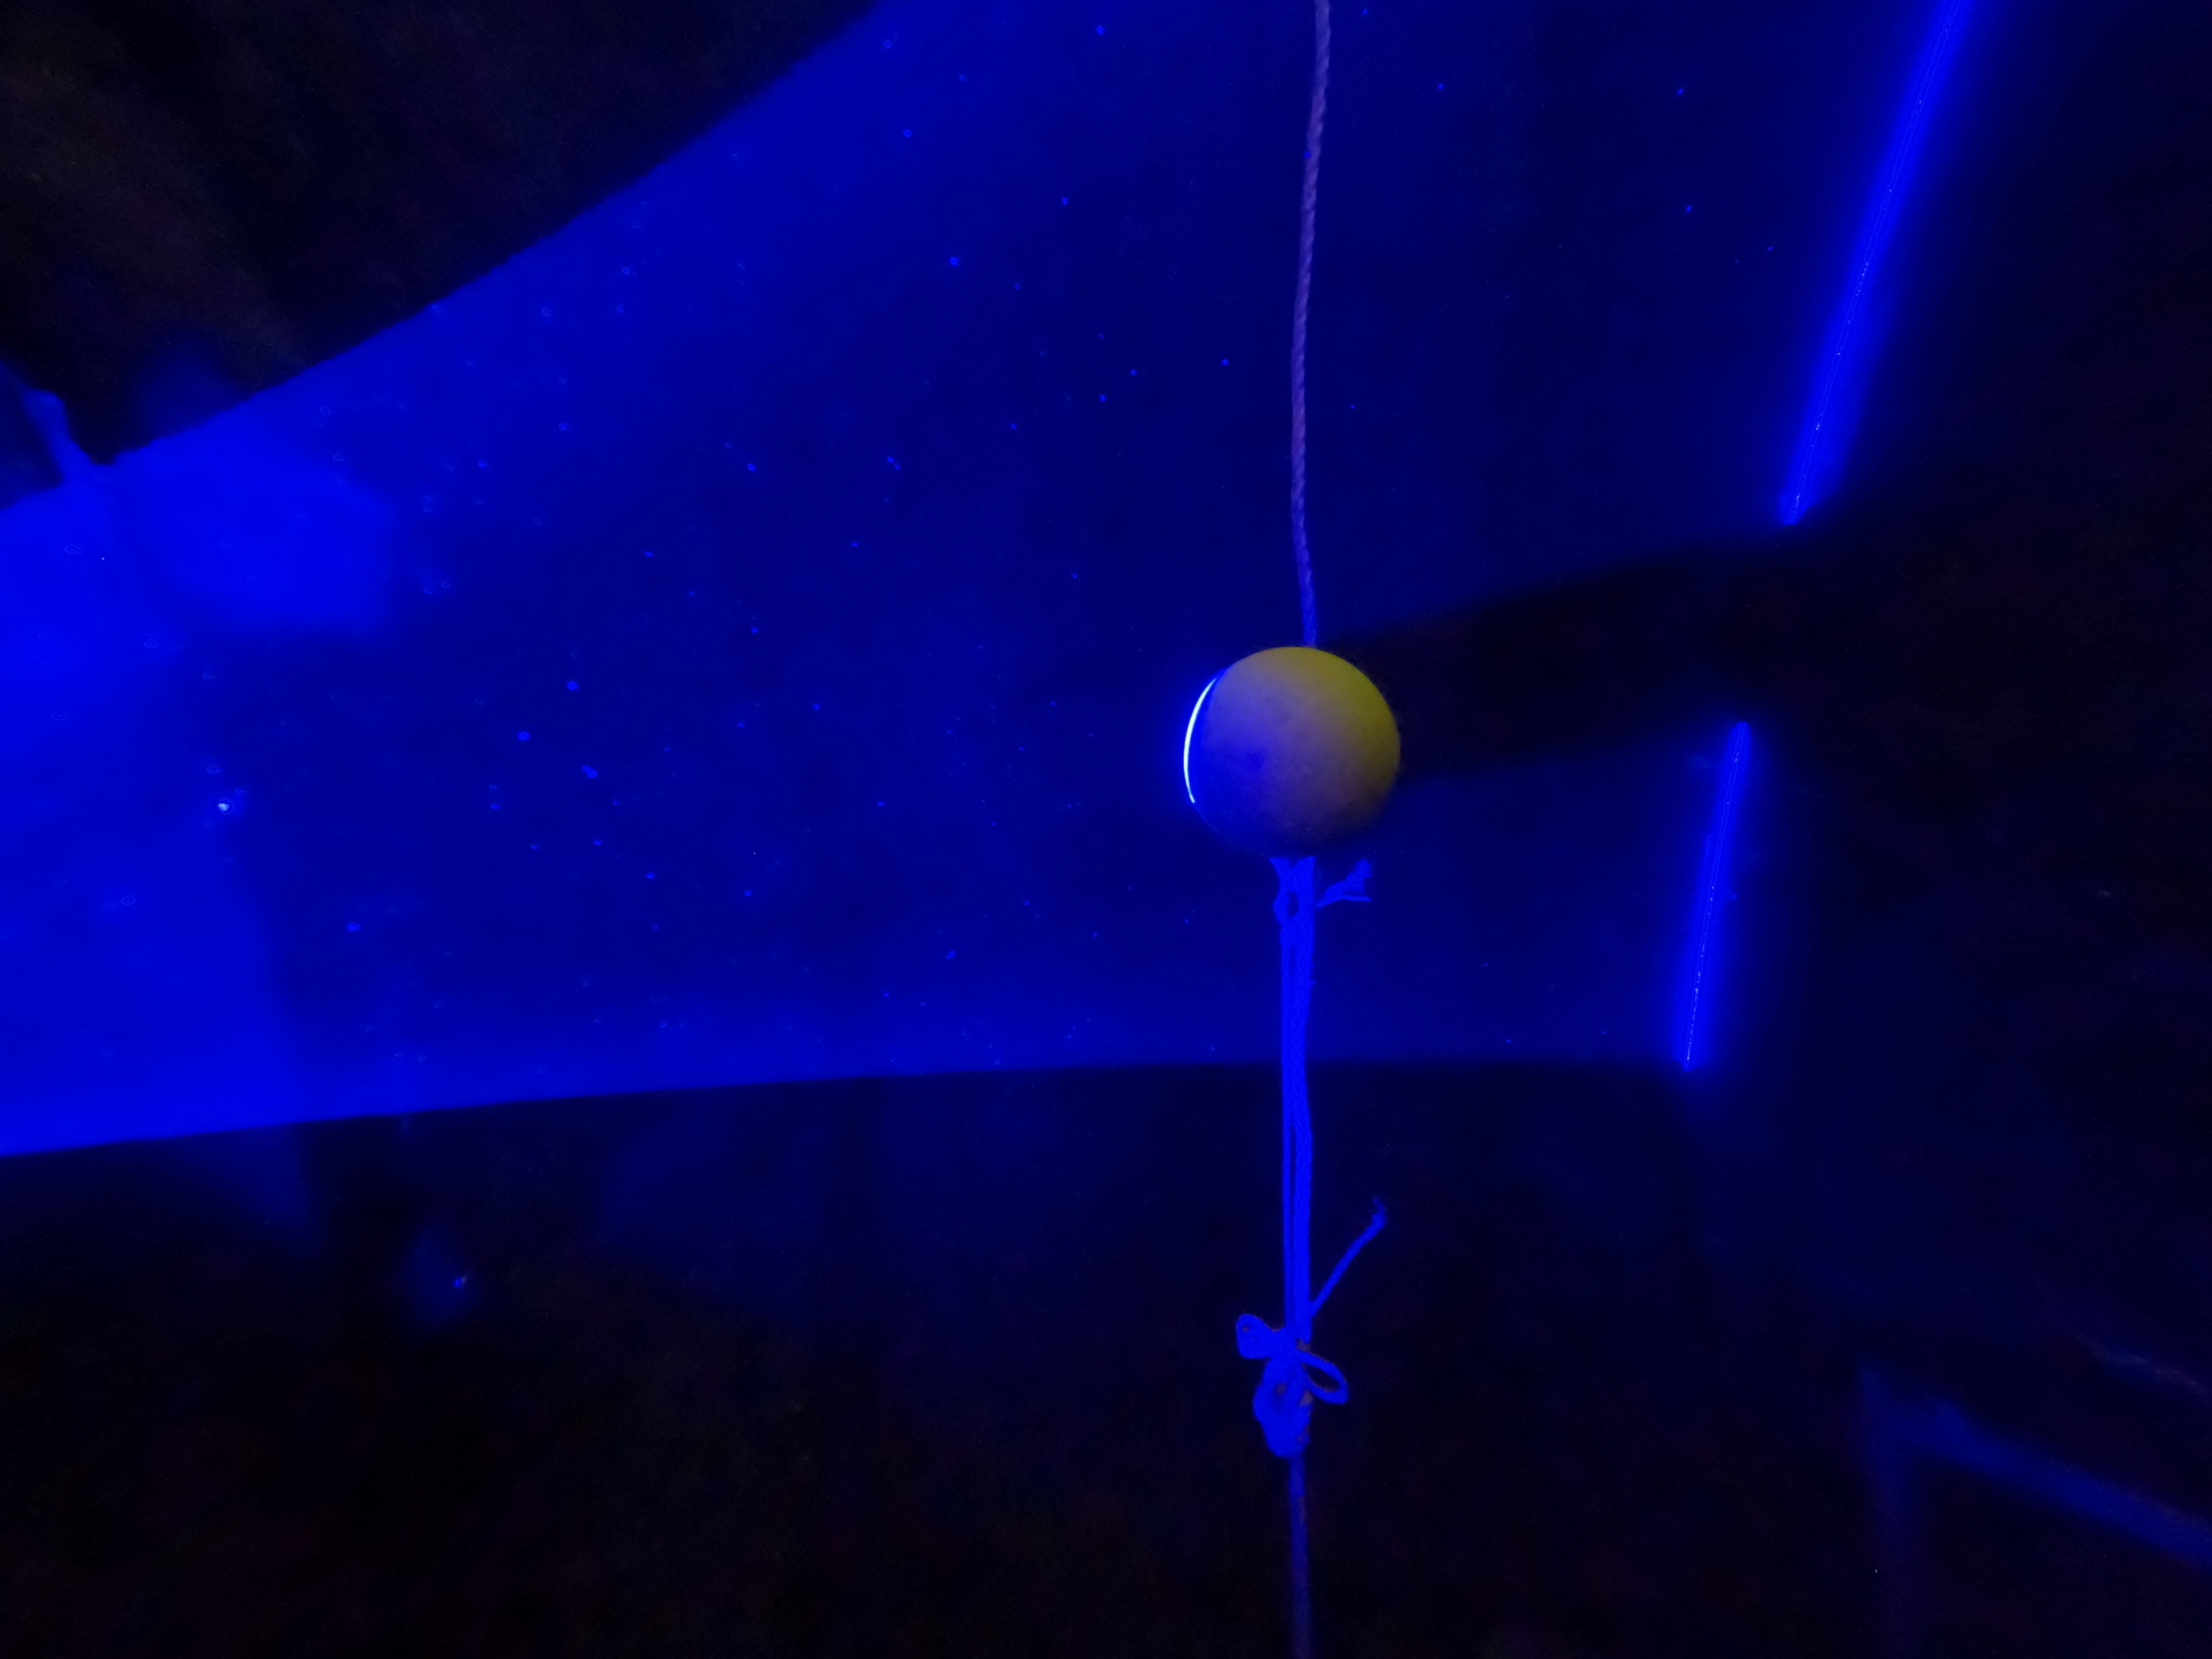

Supplement: Supplementary file 1199 [file G0032913.pdf › 7/G0032913.pdf]

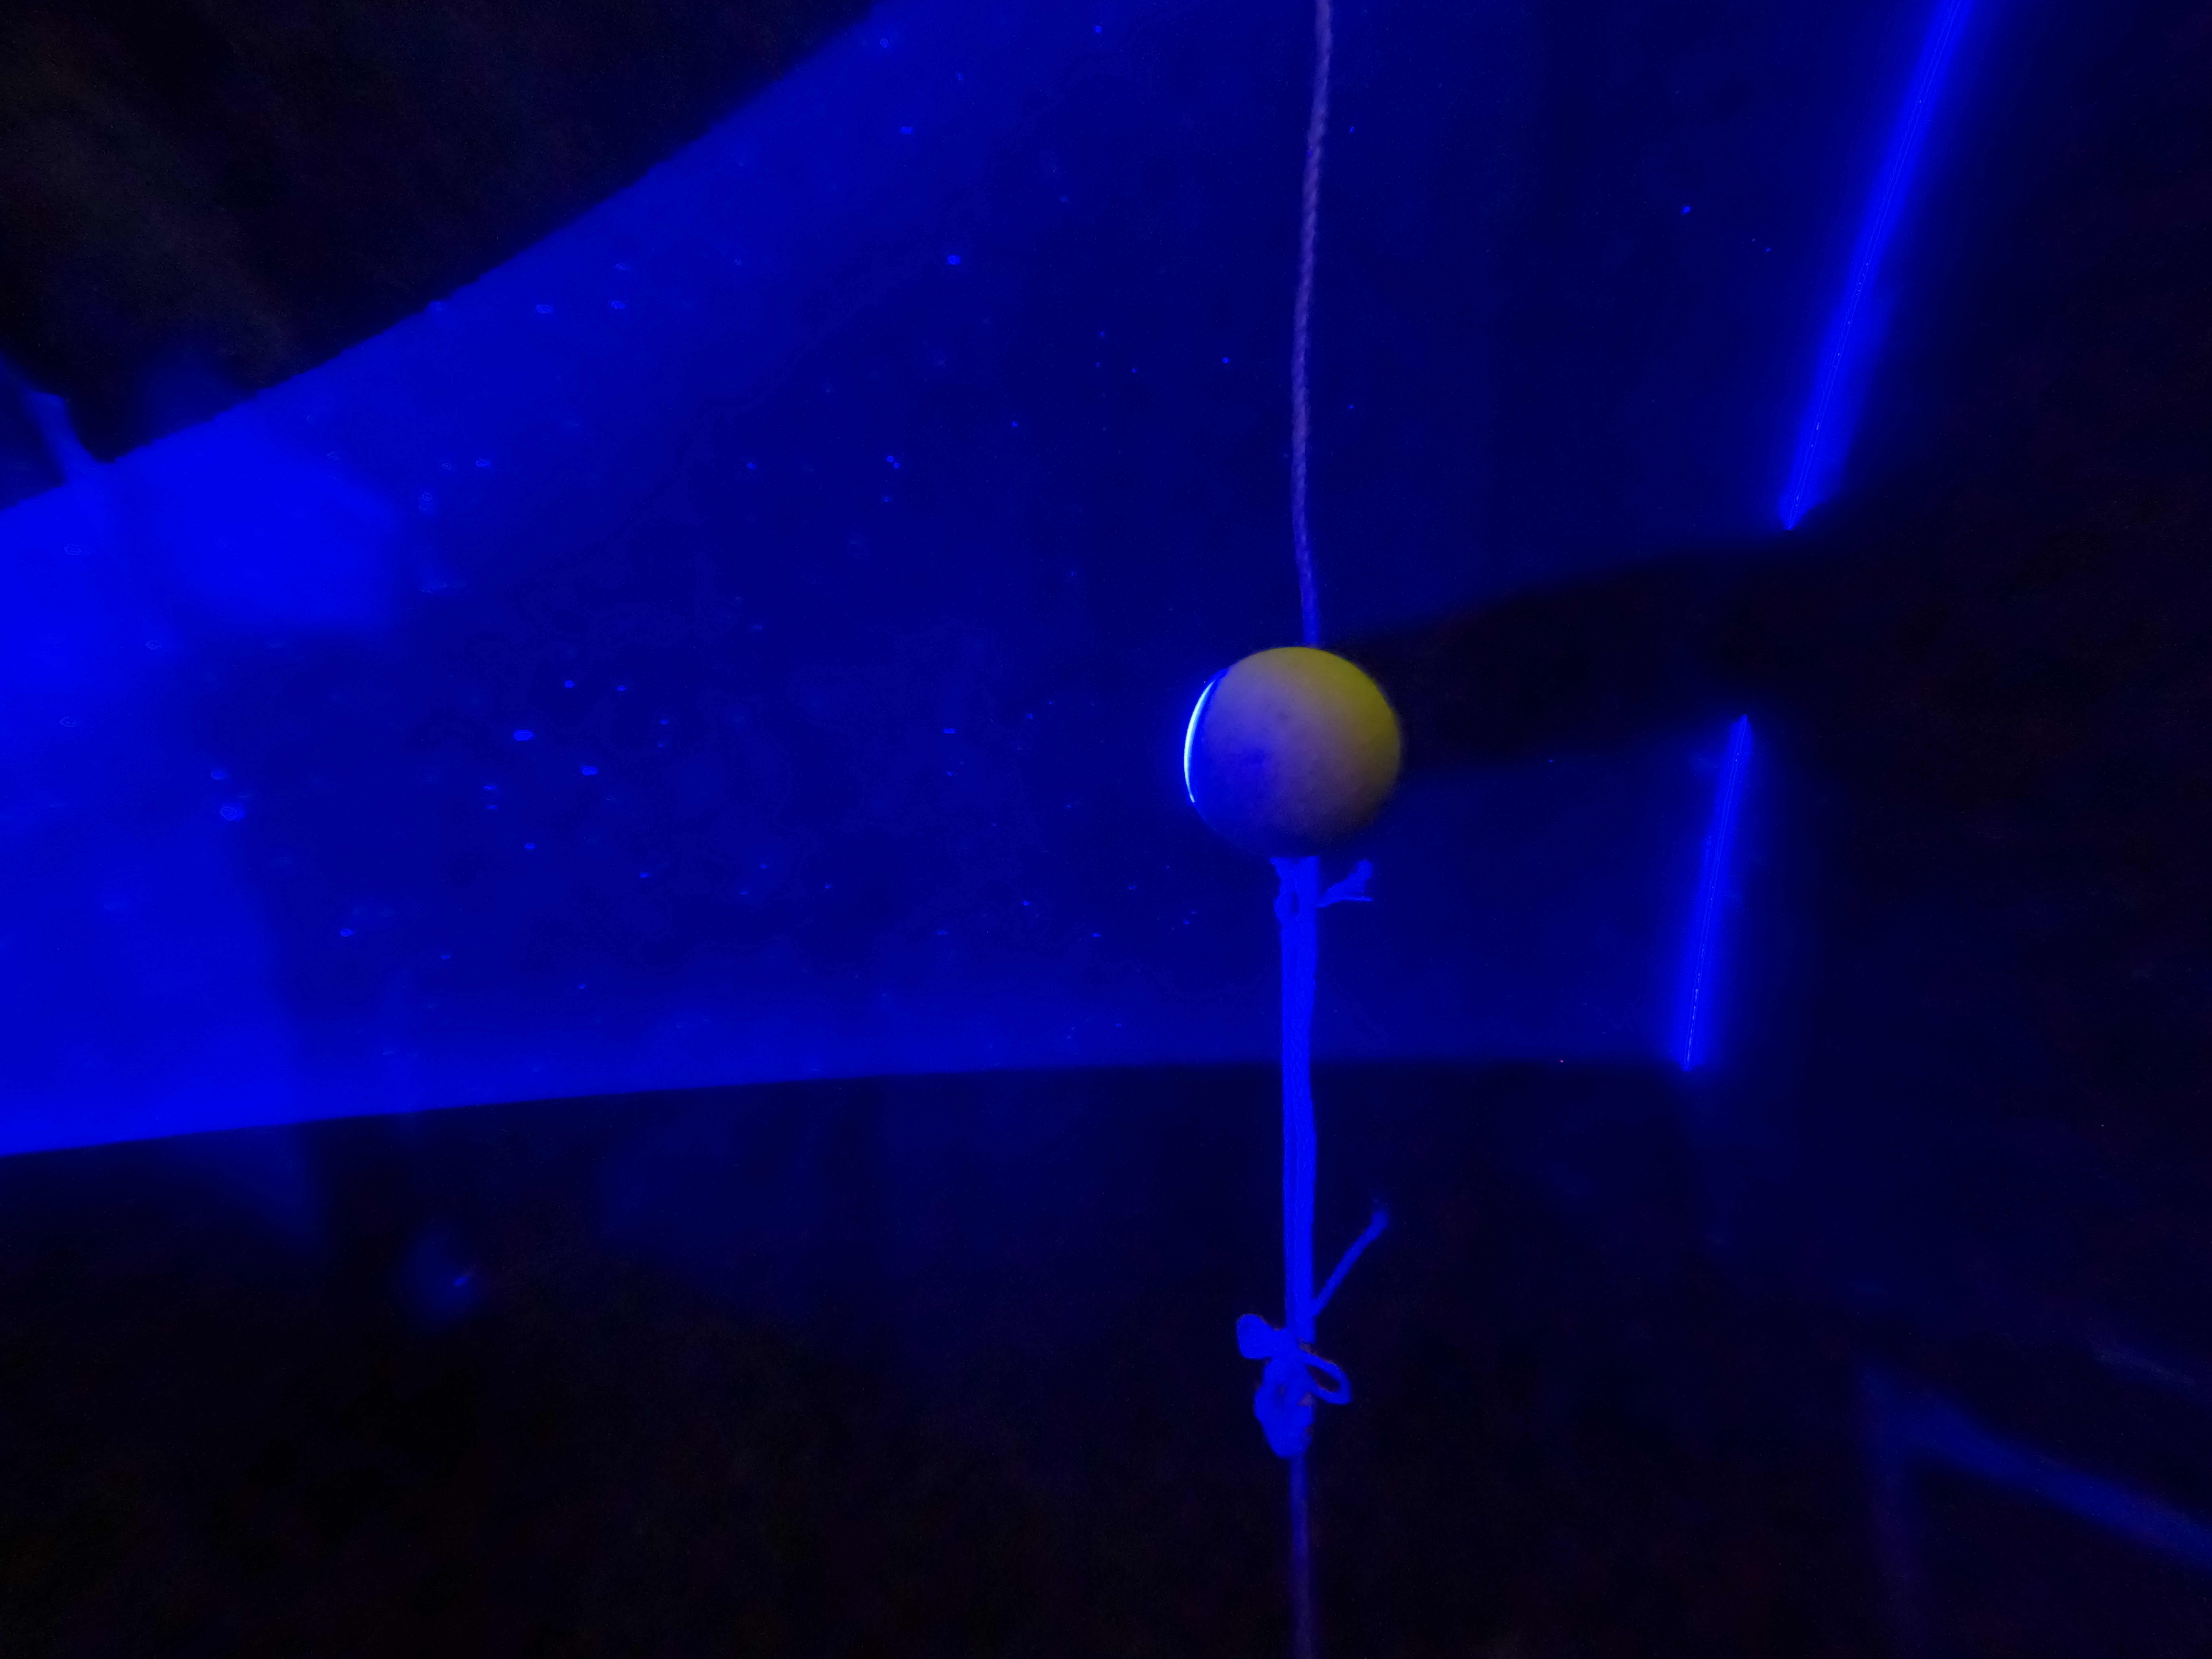

Supplement: Supplementary file 1200 [file G0032914.pdf › 7/G0032914.pdf]

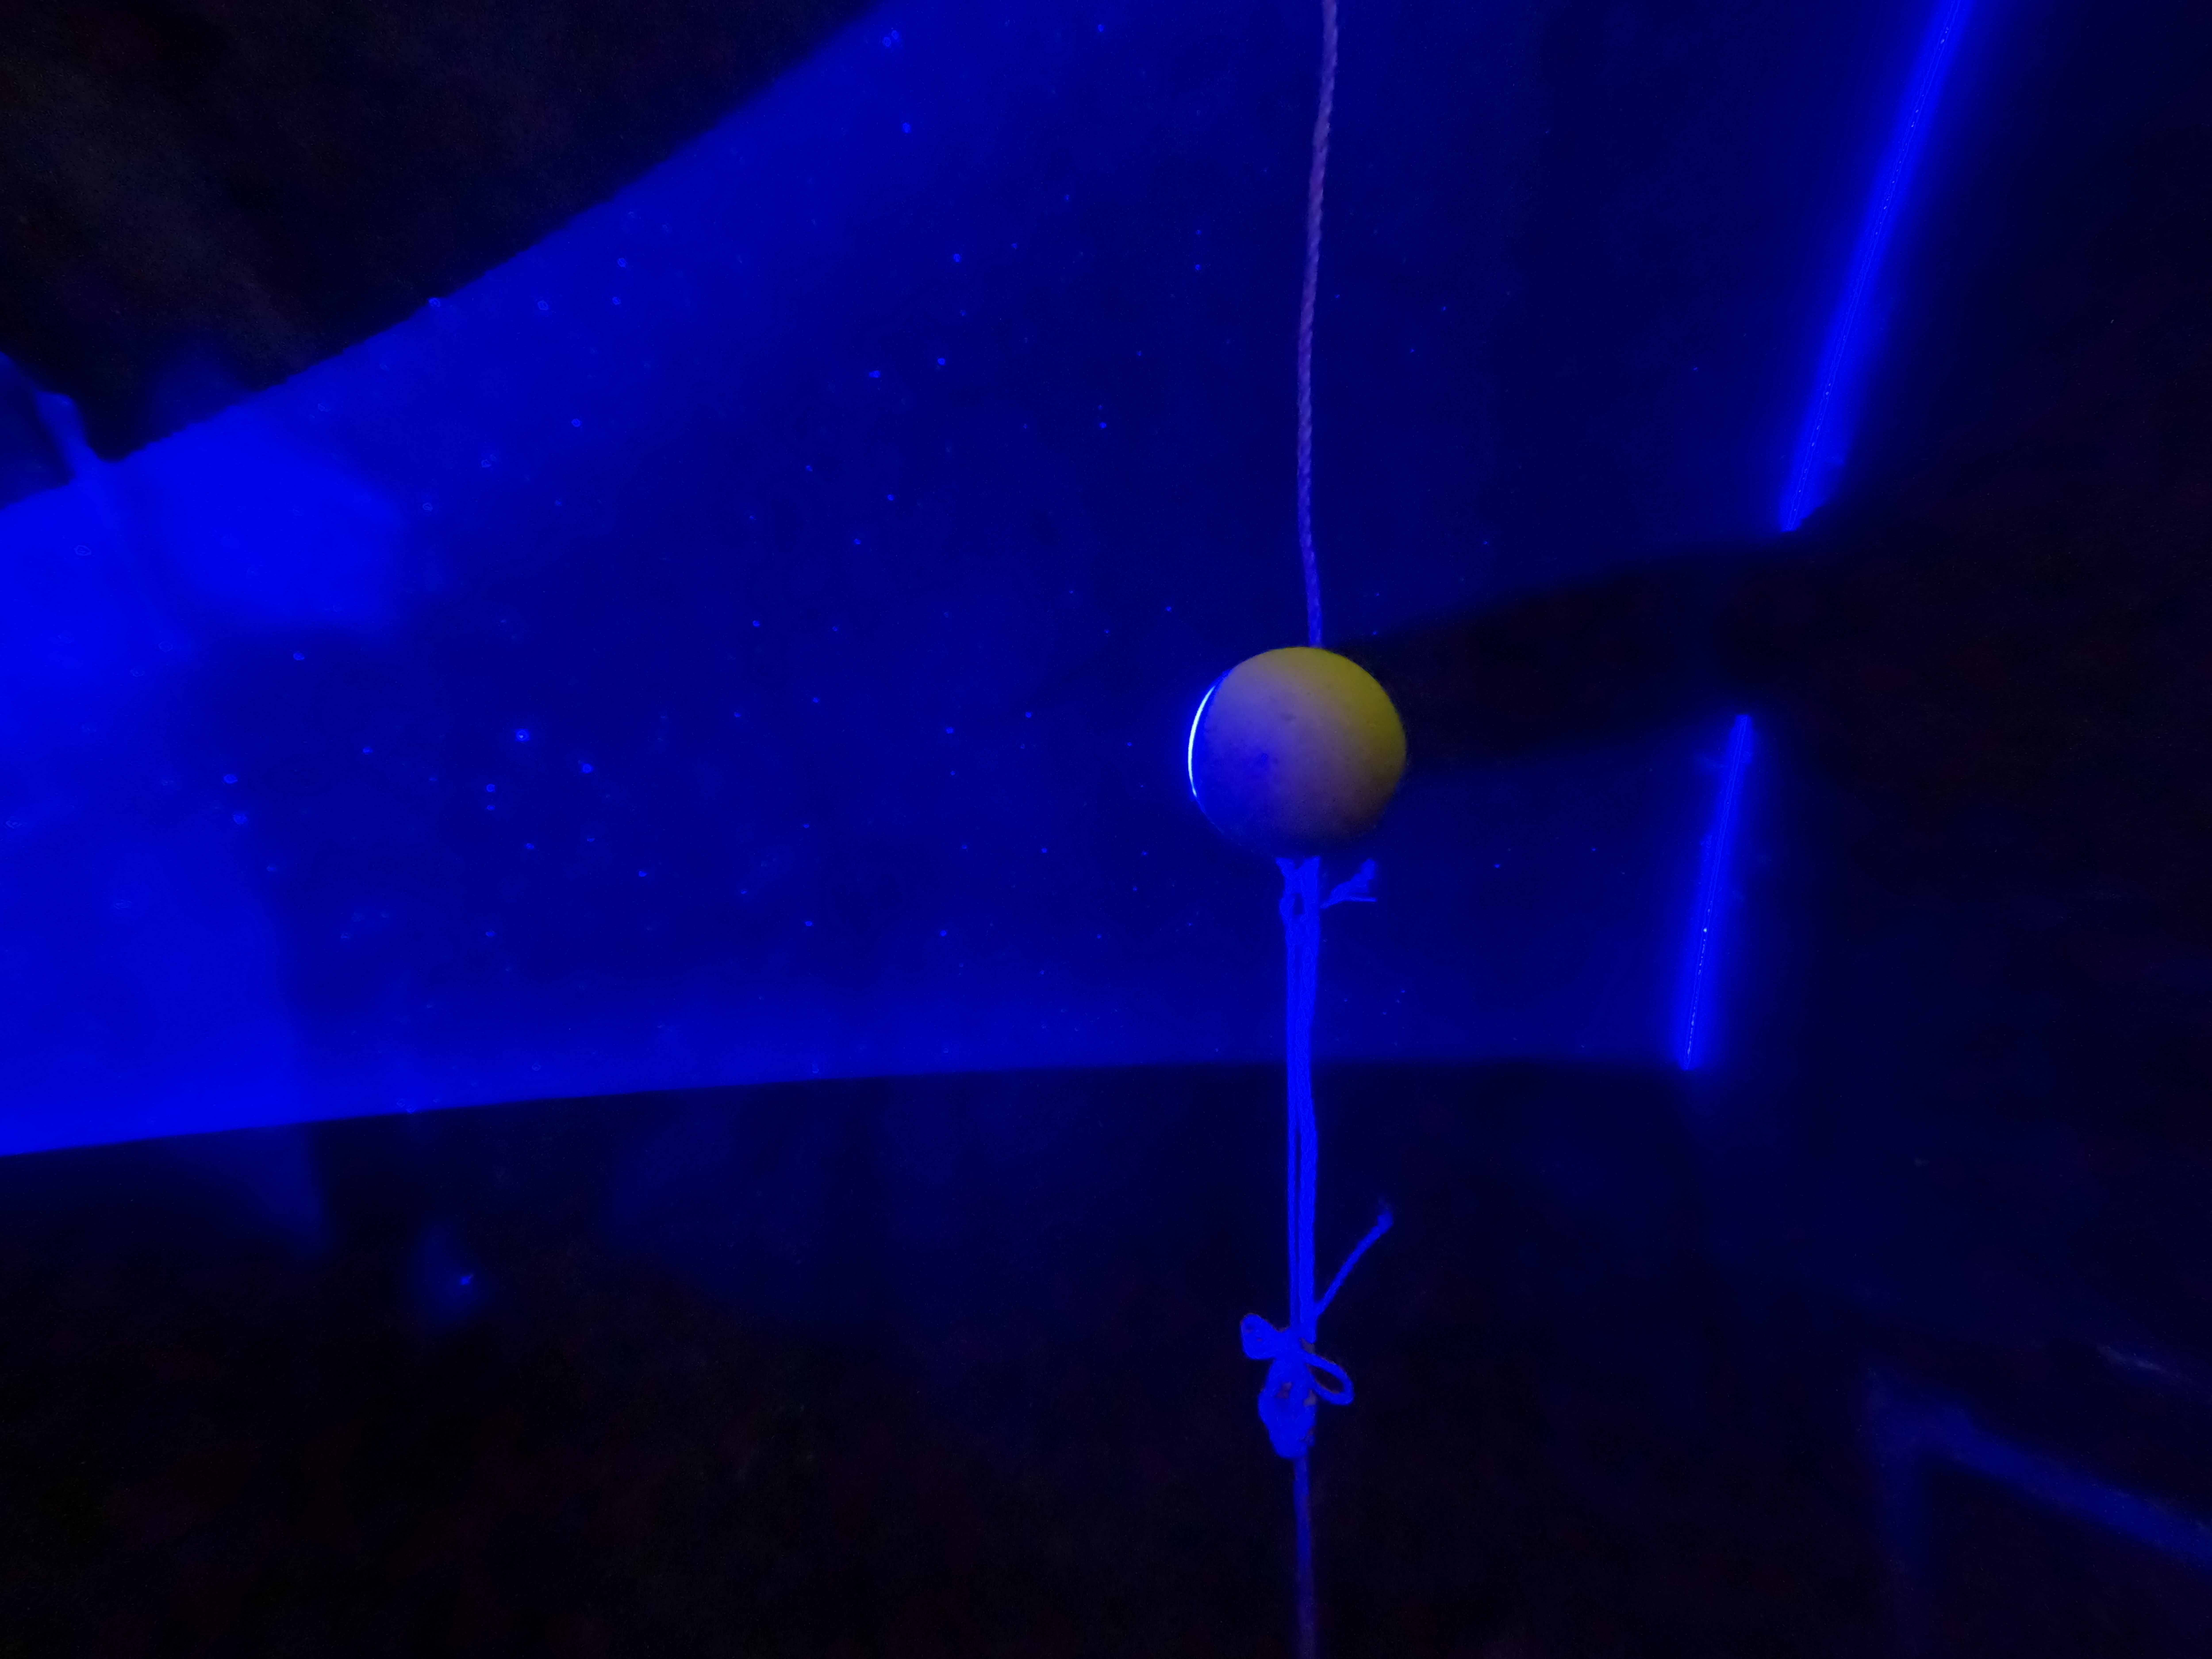

Supplement: Supplementary file 1201 [file G0032915.pdf › 7/G0032915.pdf]
