# Supplementary figures and images for: 3D reconstruction of shallow sea environment using direct system calibration and faint laser line extraction (part 13 of 35)
Source: Research Square preprint supplement (doi:10.21203/rs.3.rs-5262658/v1), 2024-12-02

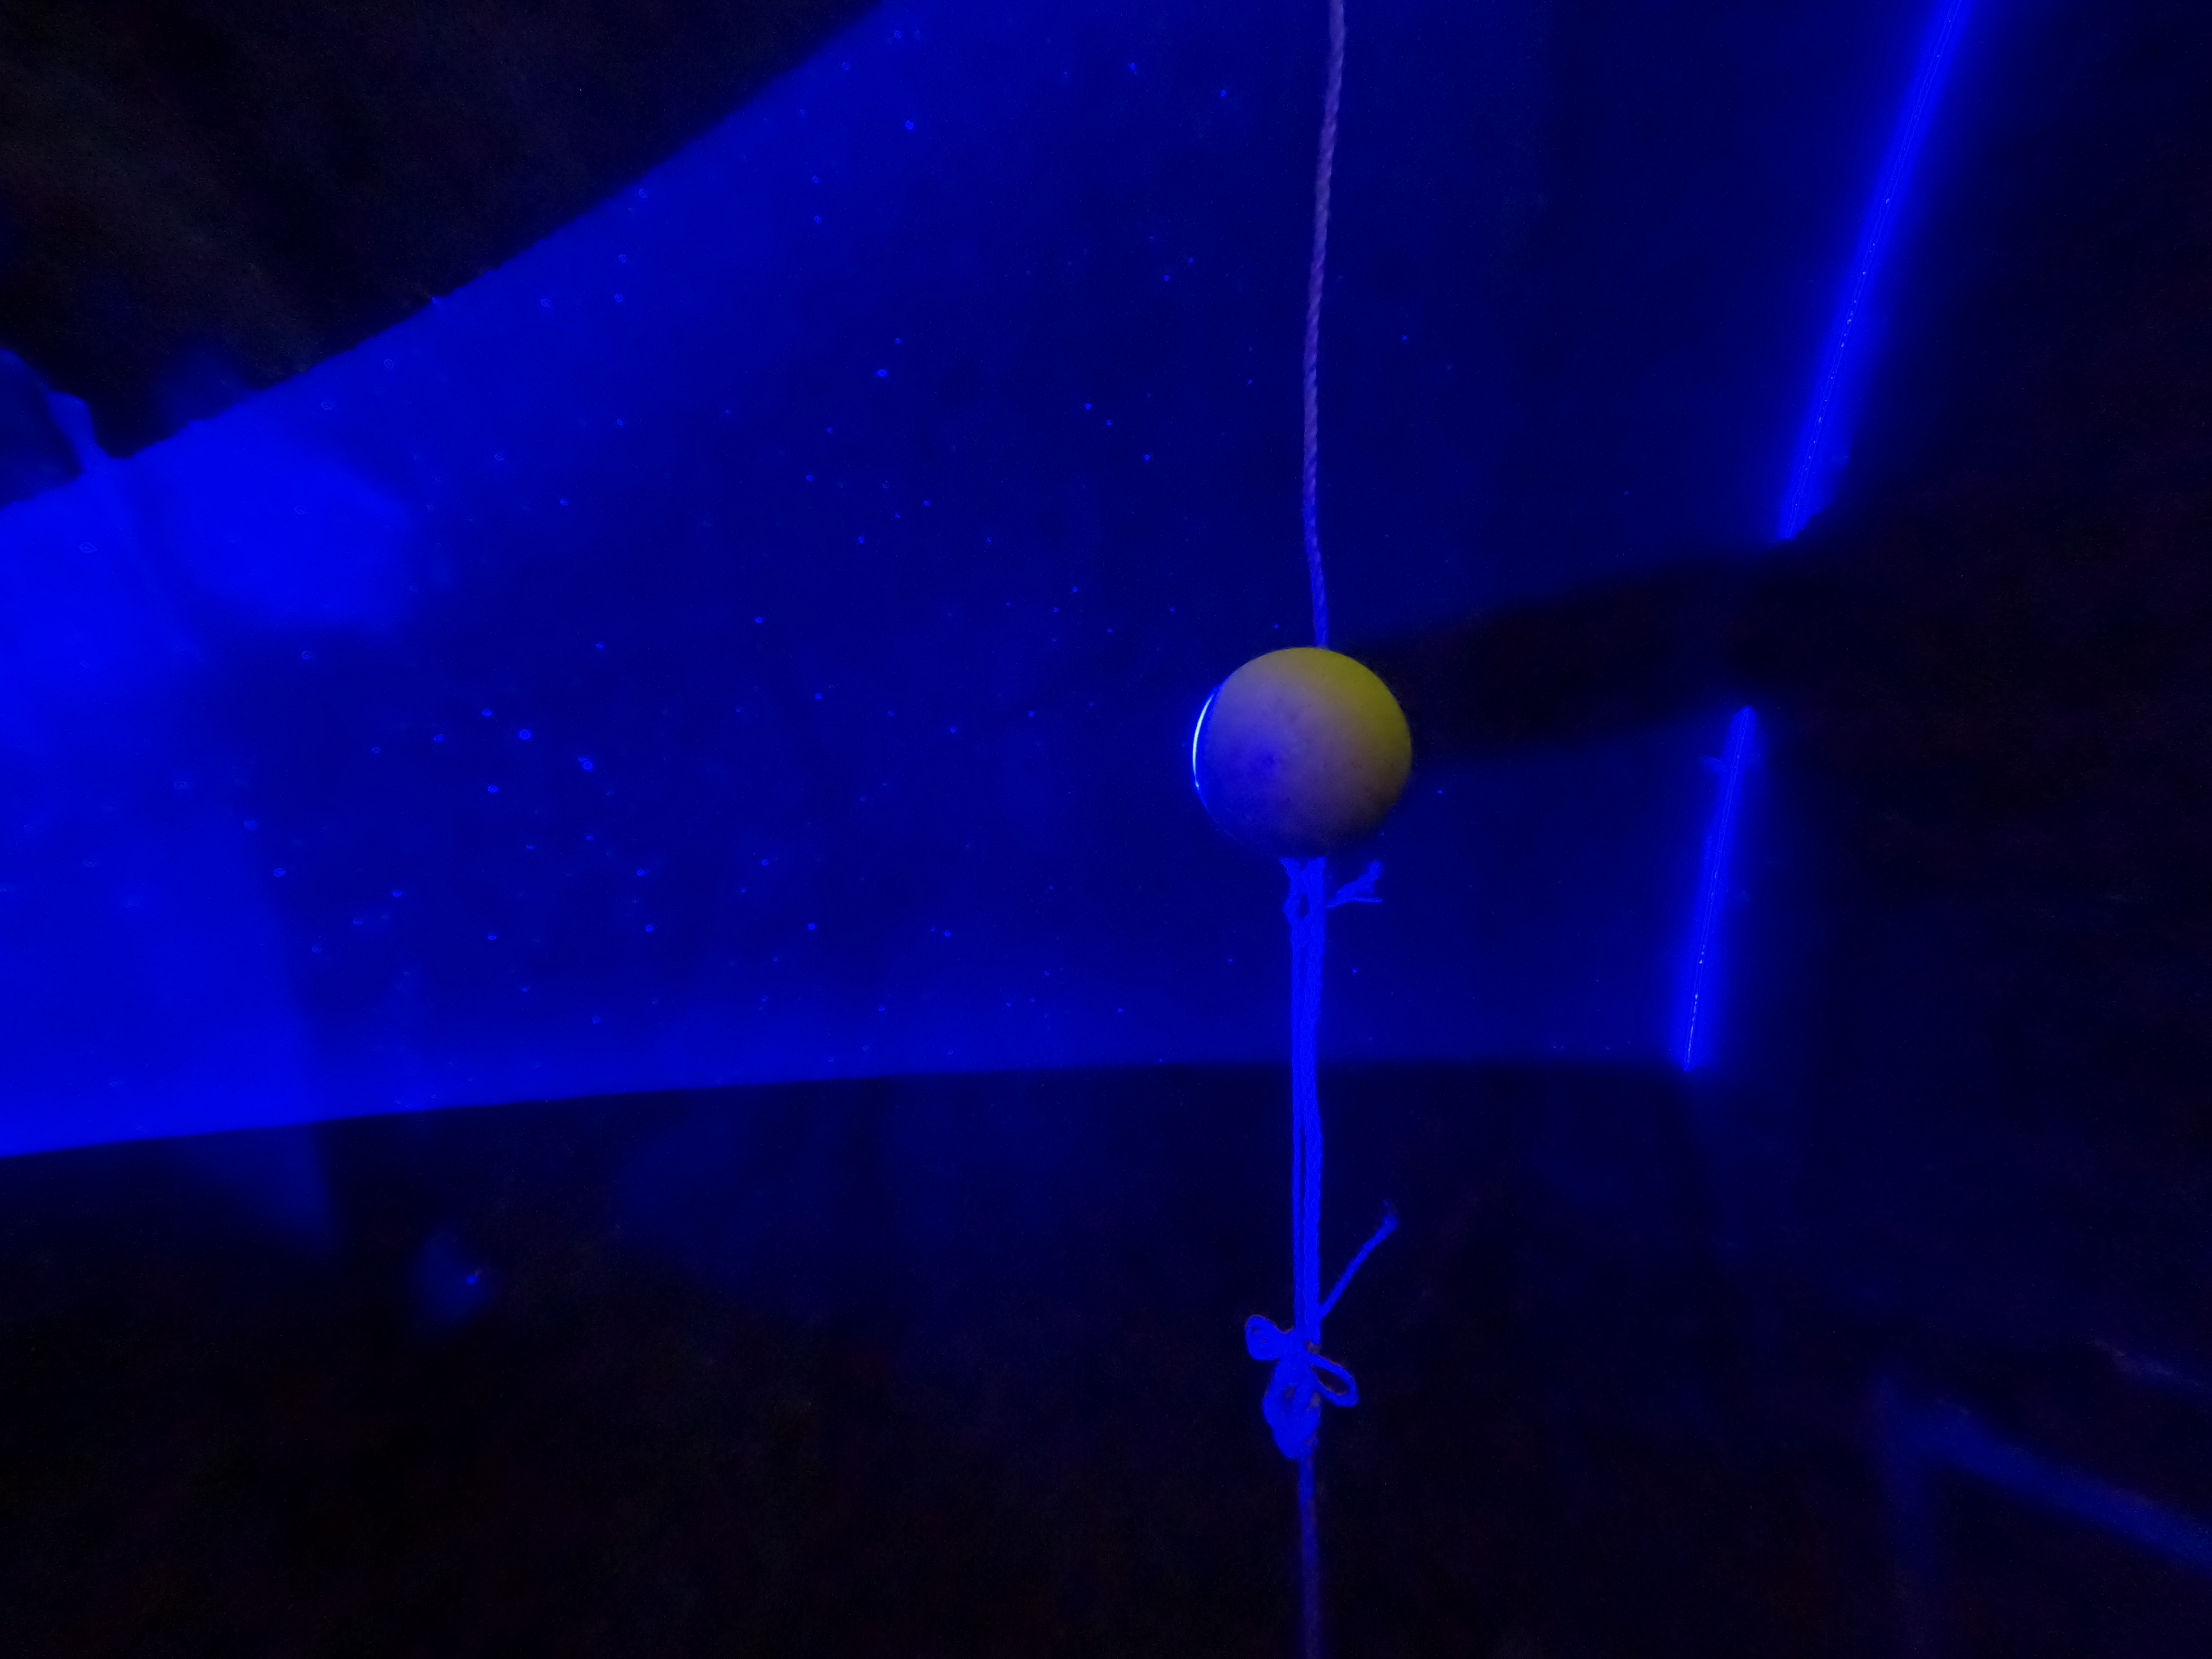

Supplement: Supplementary file 1202 [file G0032916.pdf › 7/G0032916.pdf]

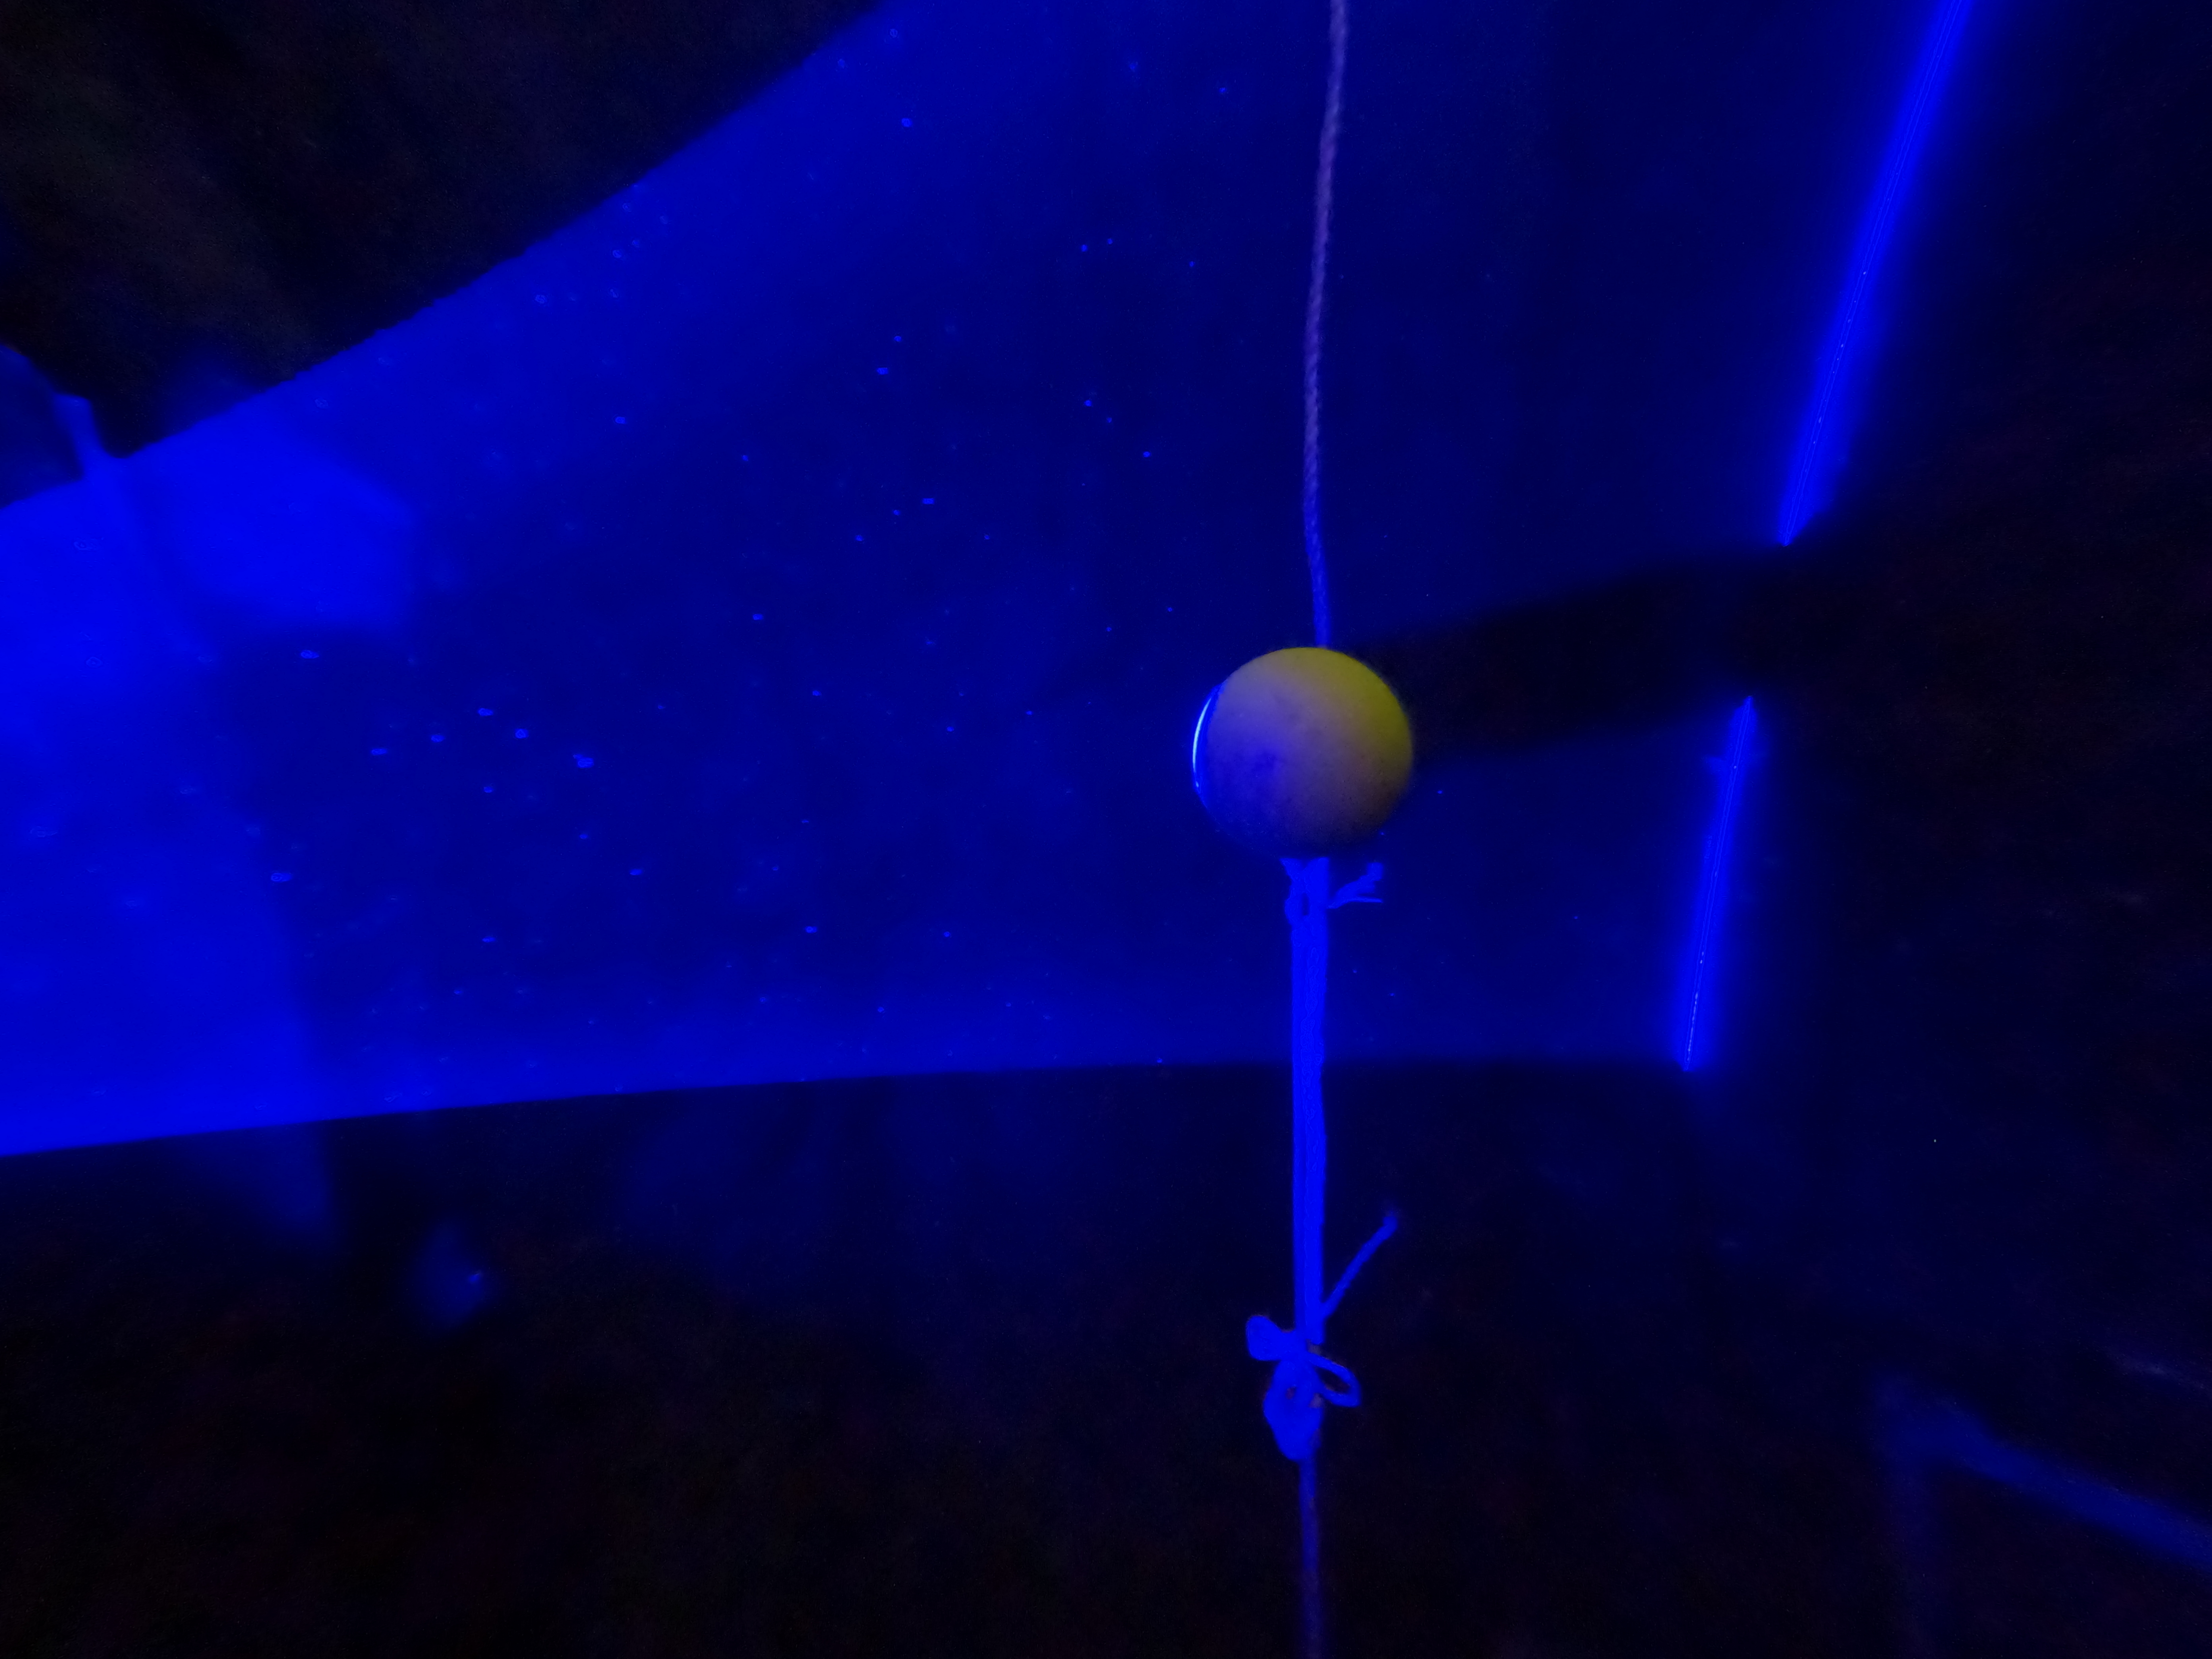

Supplement: Supplementary file 1203 [file G0032917.pdf › 7/G0032917.pdf]

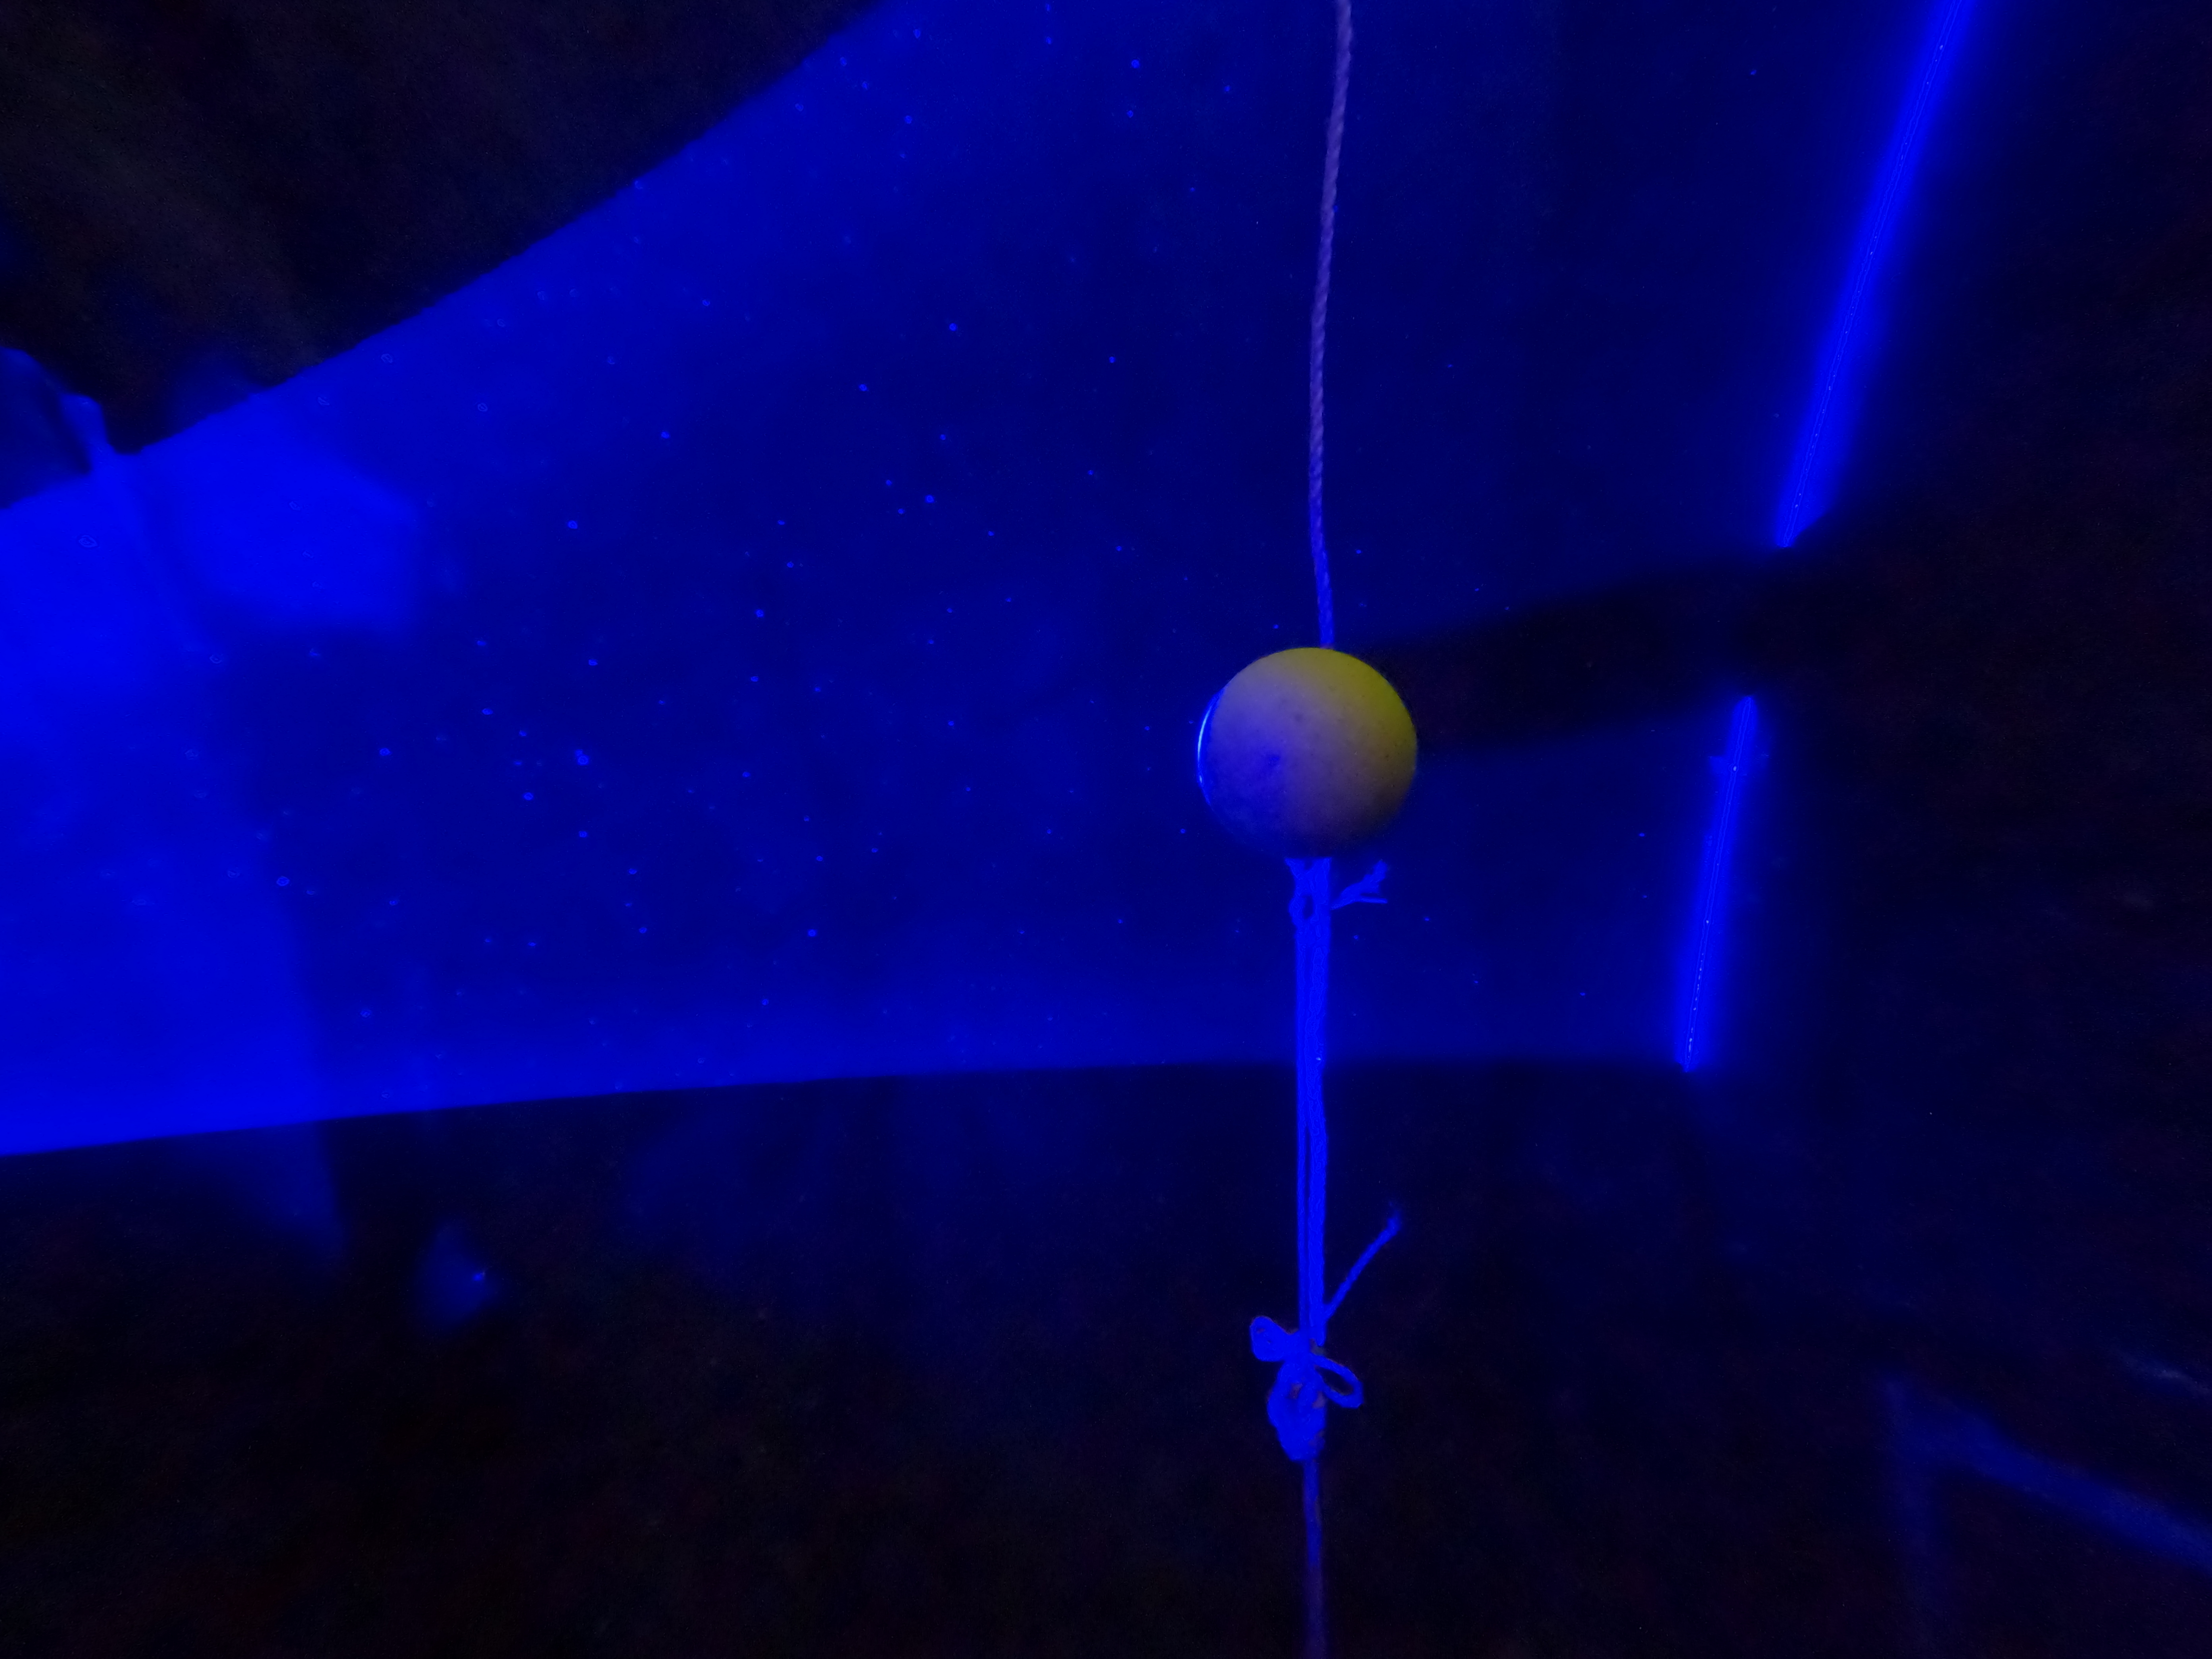

Supplement: Supplementary file 1204 [file G0032918.pdf › 7/G0032918.pdf]

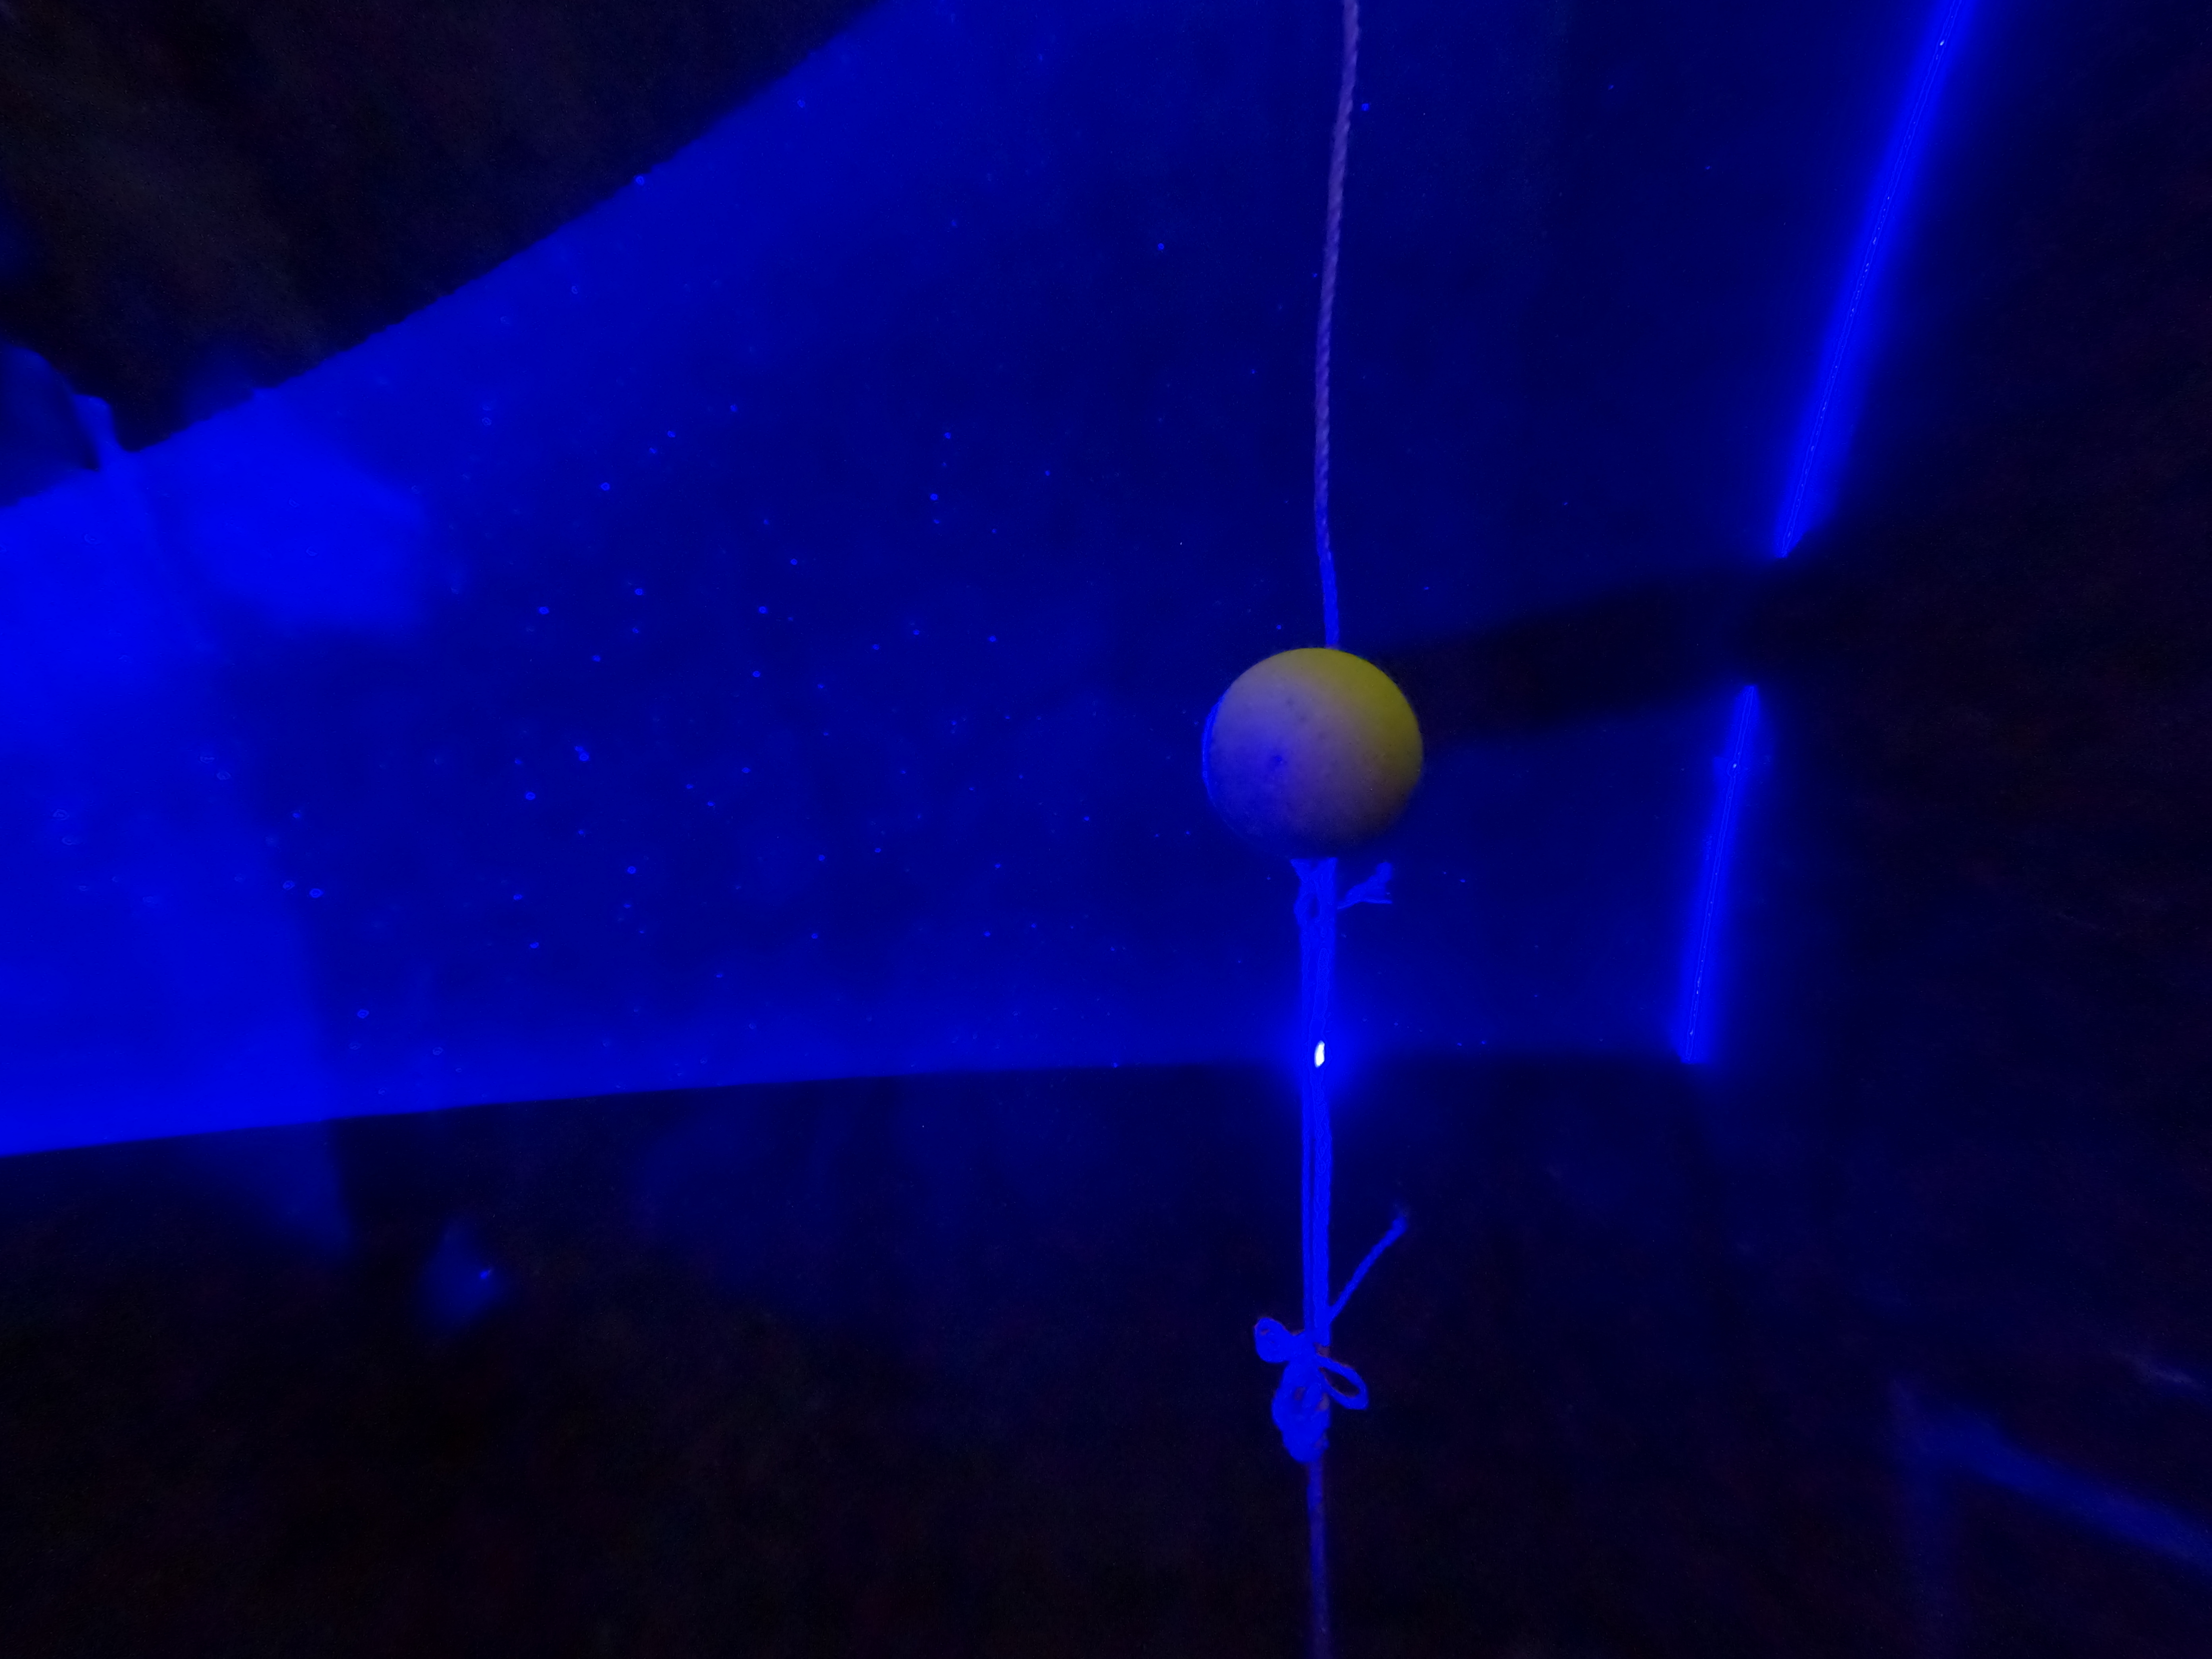

Supplement: Supplementary file 1205 [file G0032919.pdf › 7/G0032919.pdf]

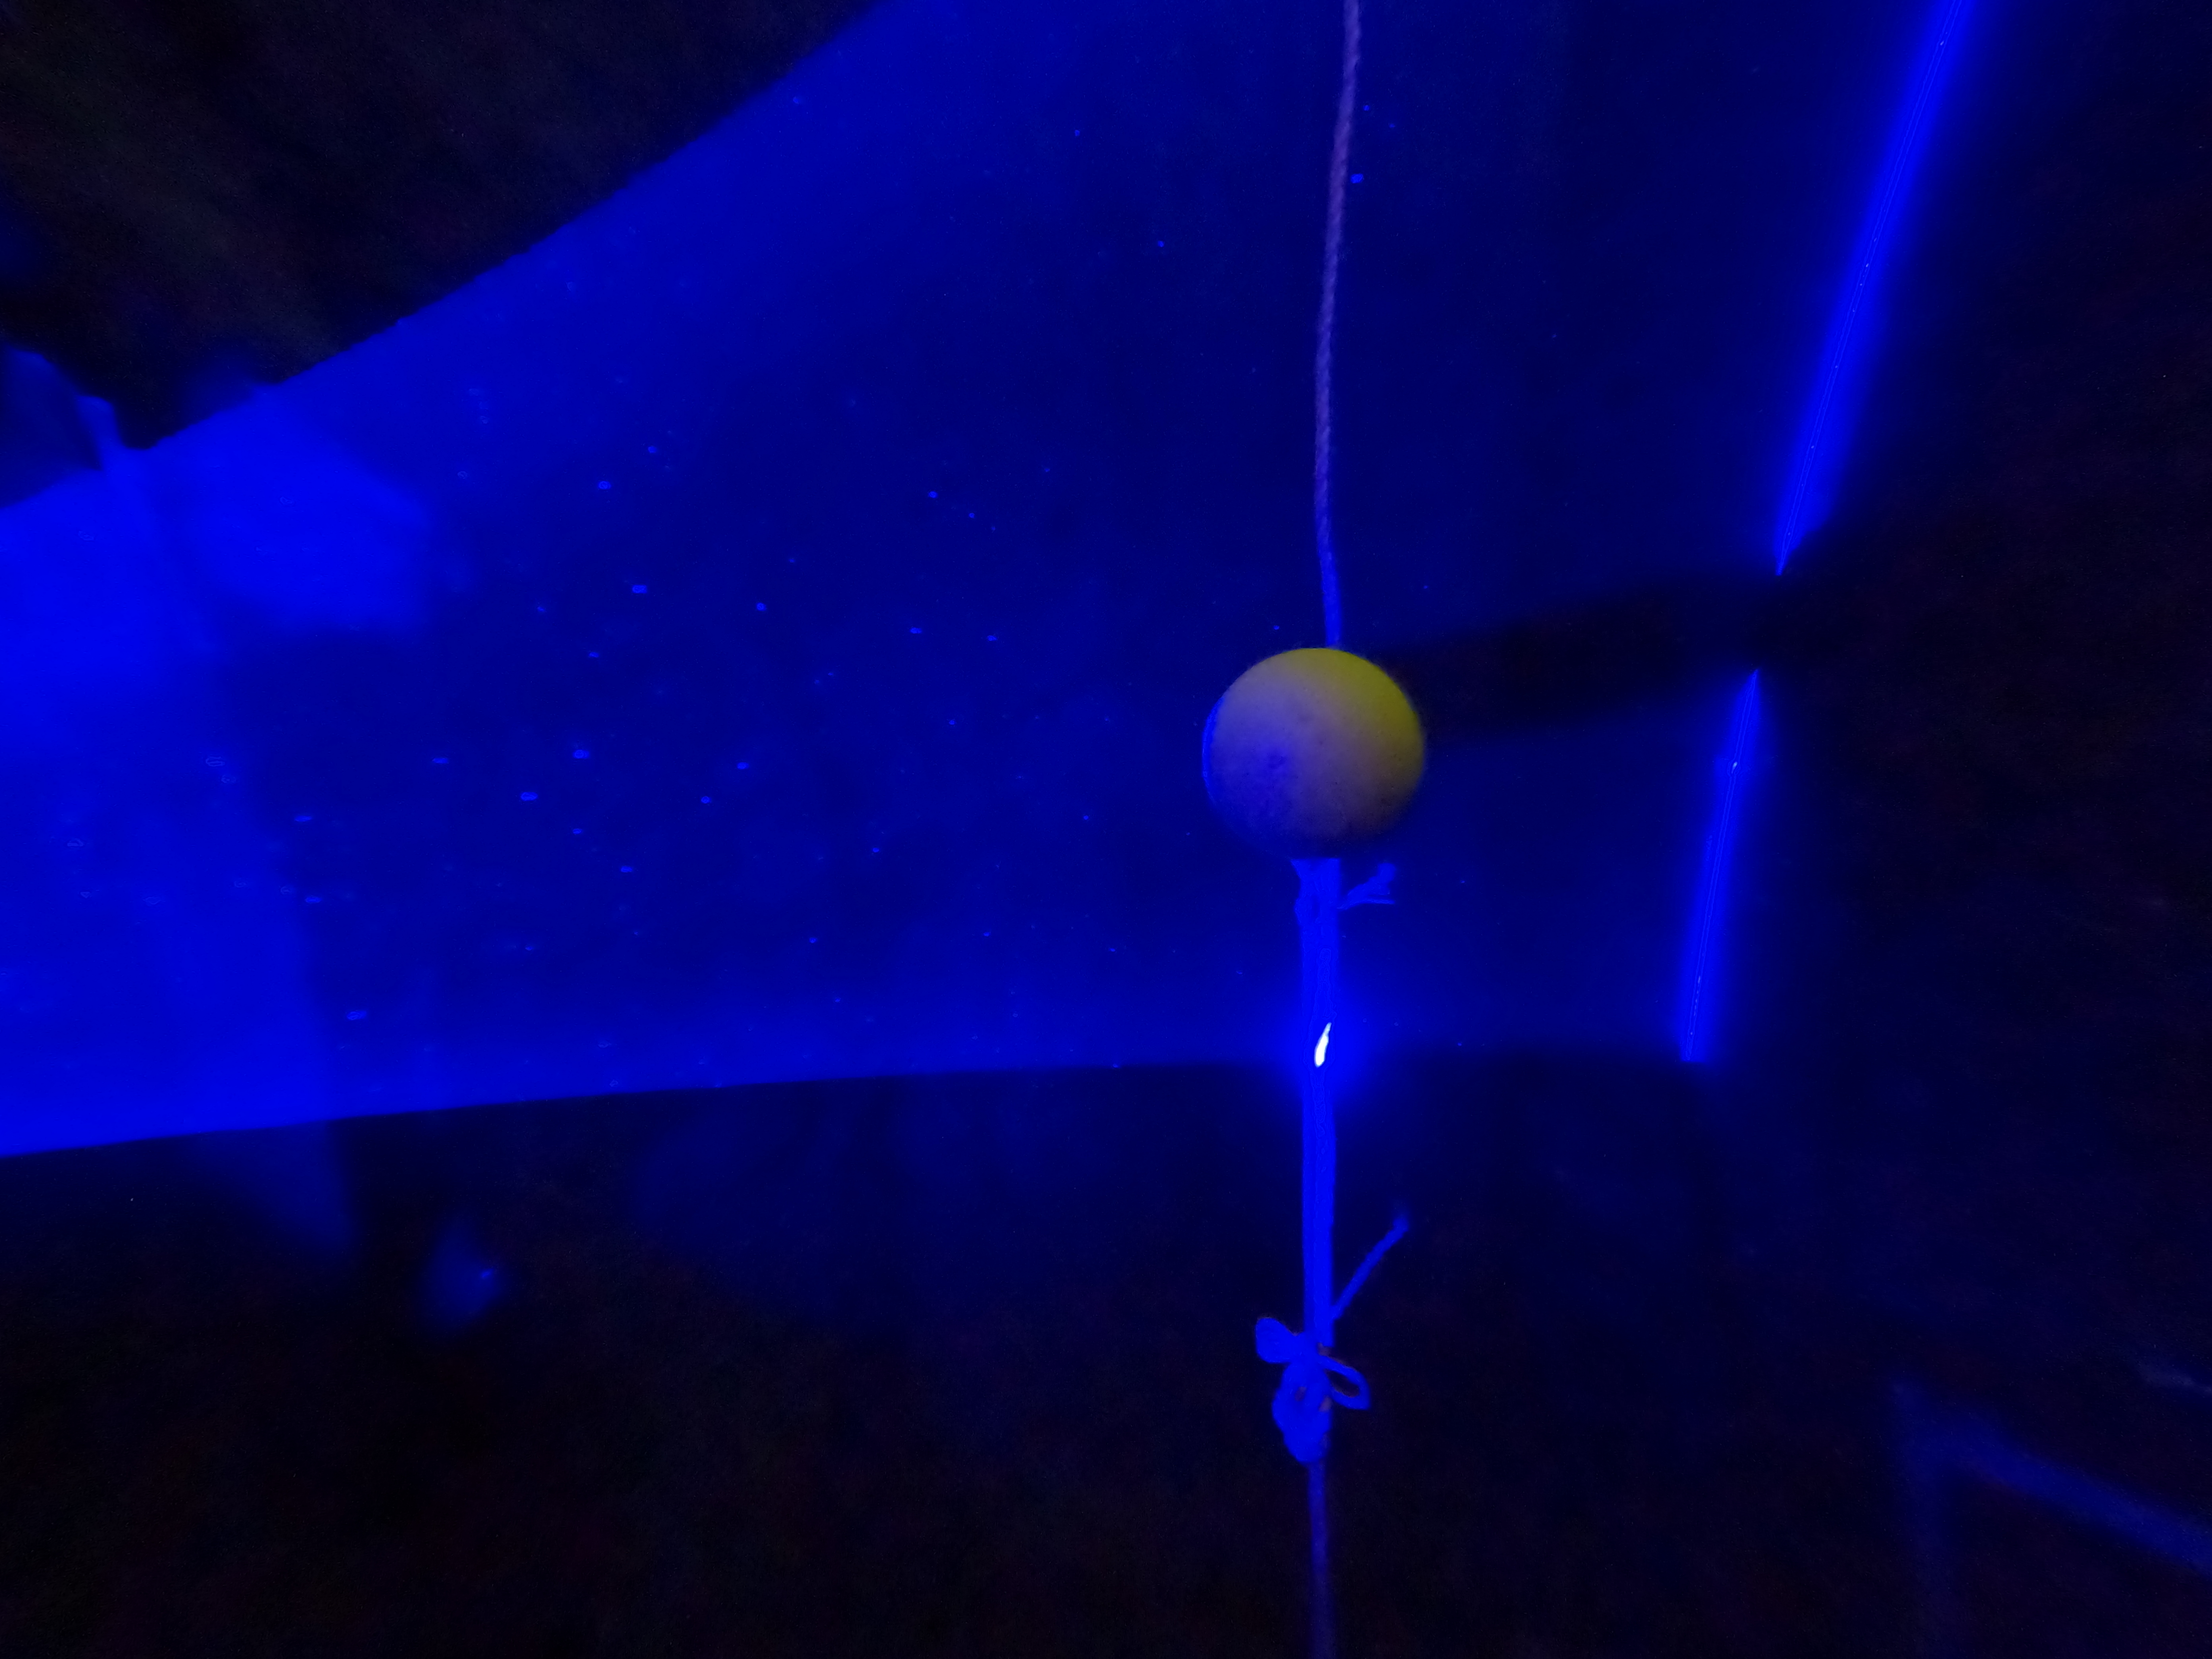

Supplement: Supplementary file 1206 [file G0032920.pdf › 7/G0032920.pdf]

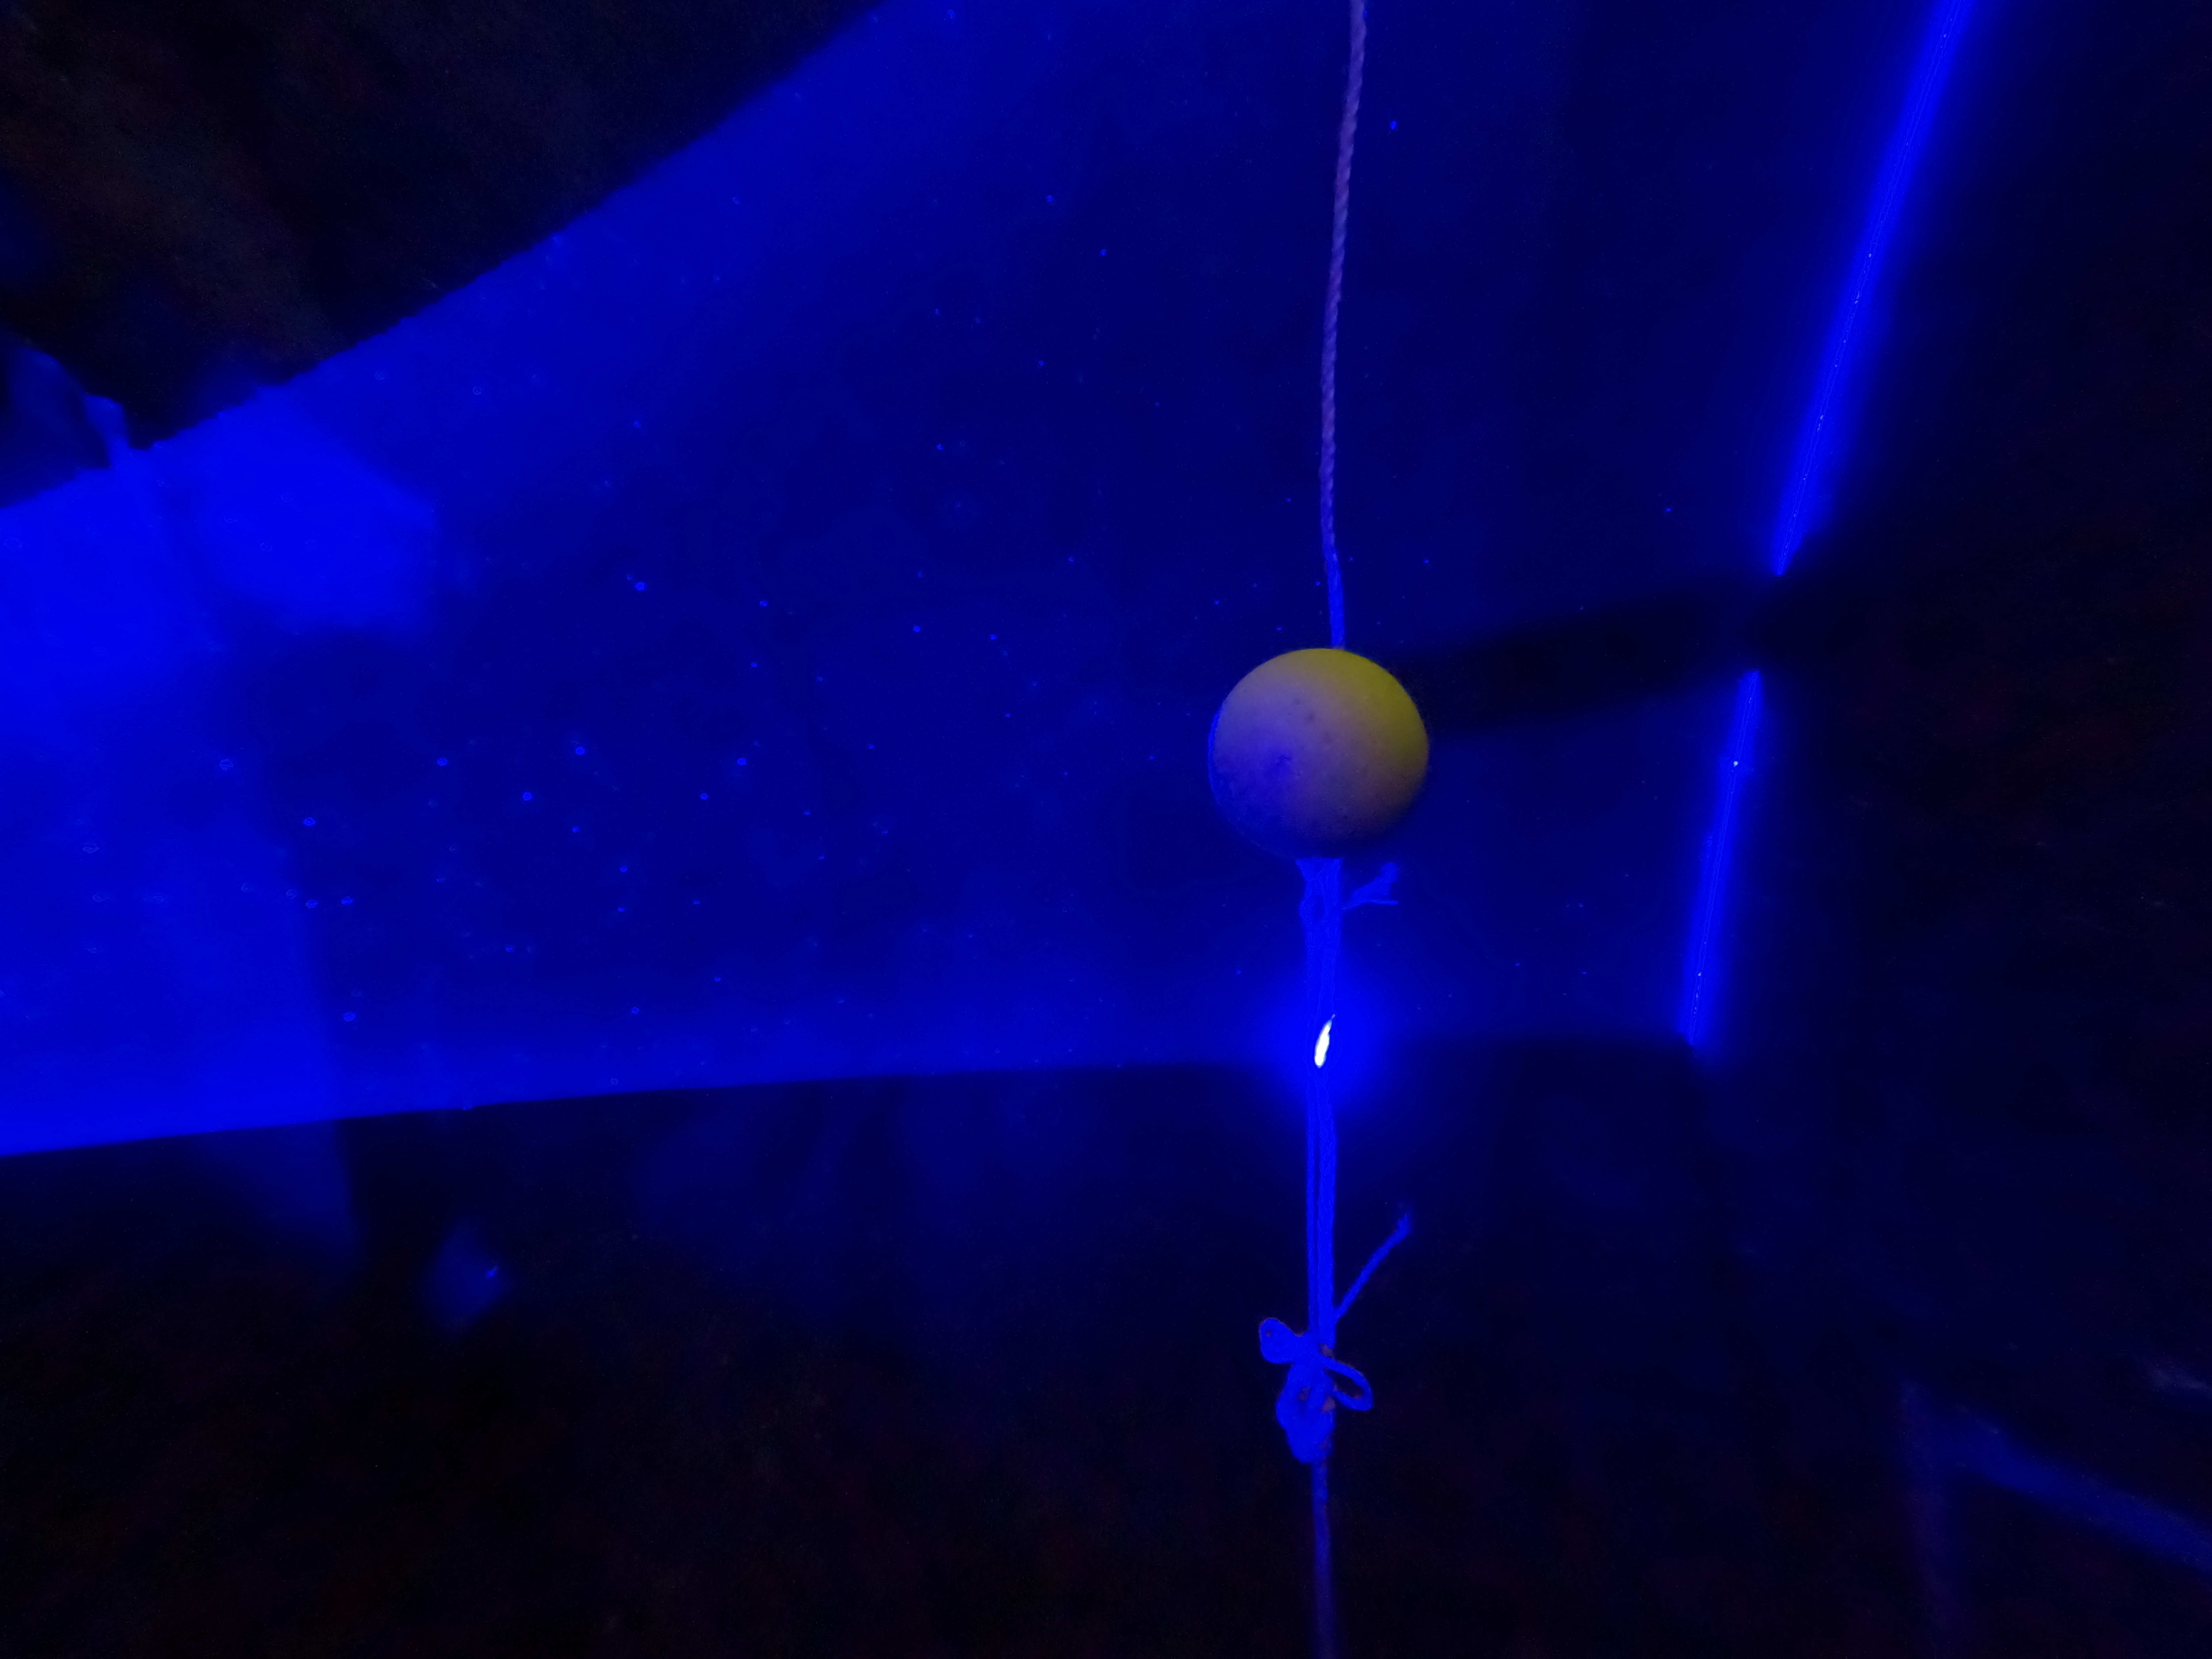

Supplement: Supplementary file 1207 [file G0032921.pdf › 7/G0032921.pdf]

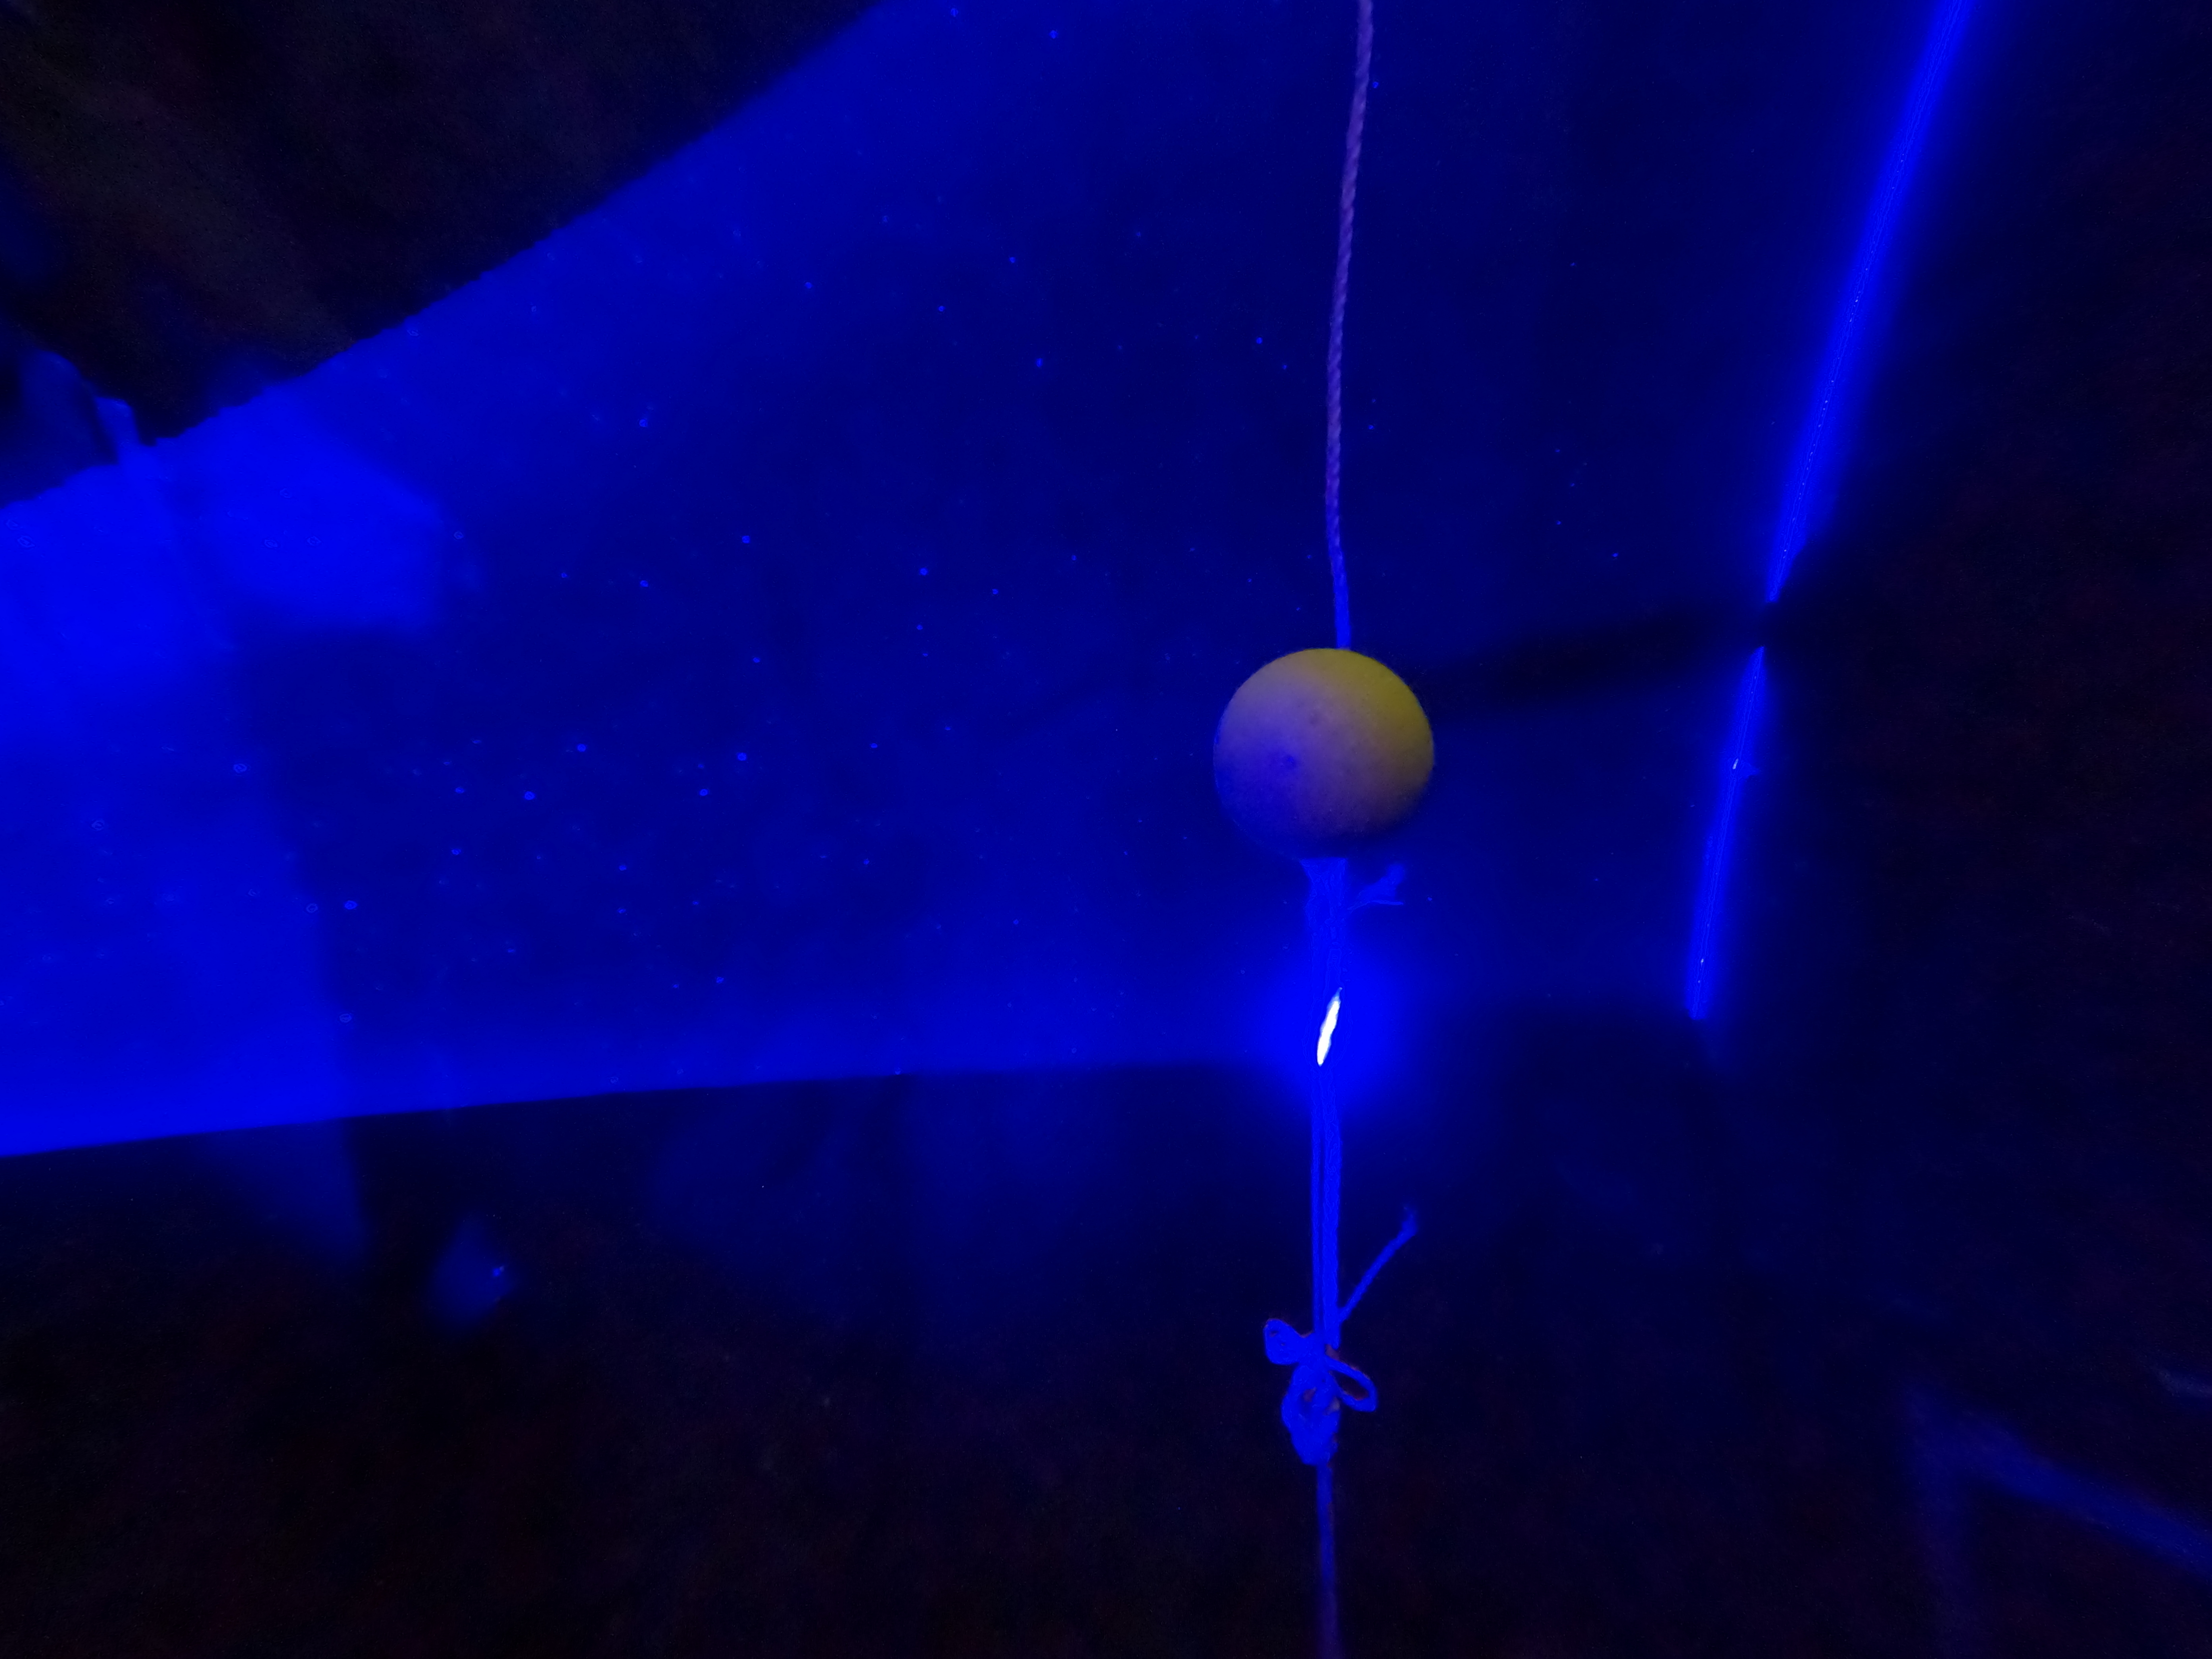

Supplement: Supplementary file 1208 [file G0032922.pdf › 7/G0032922.pdf]

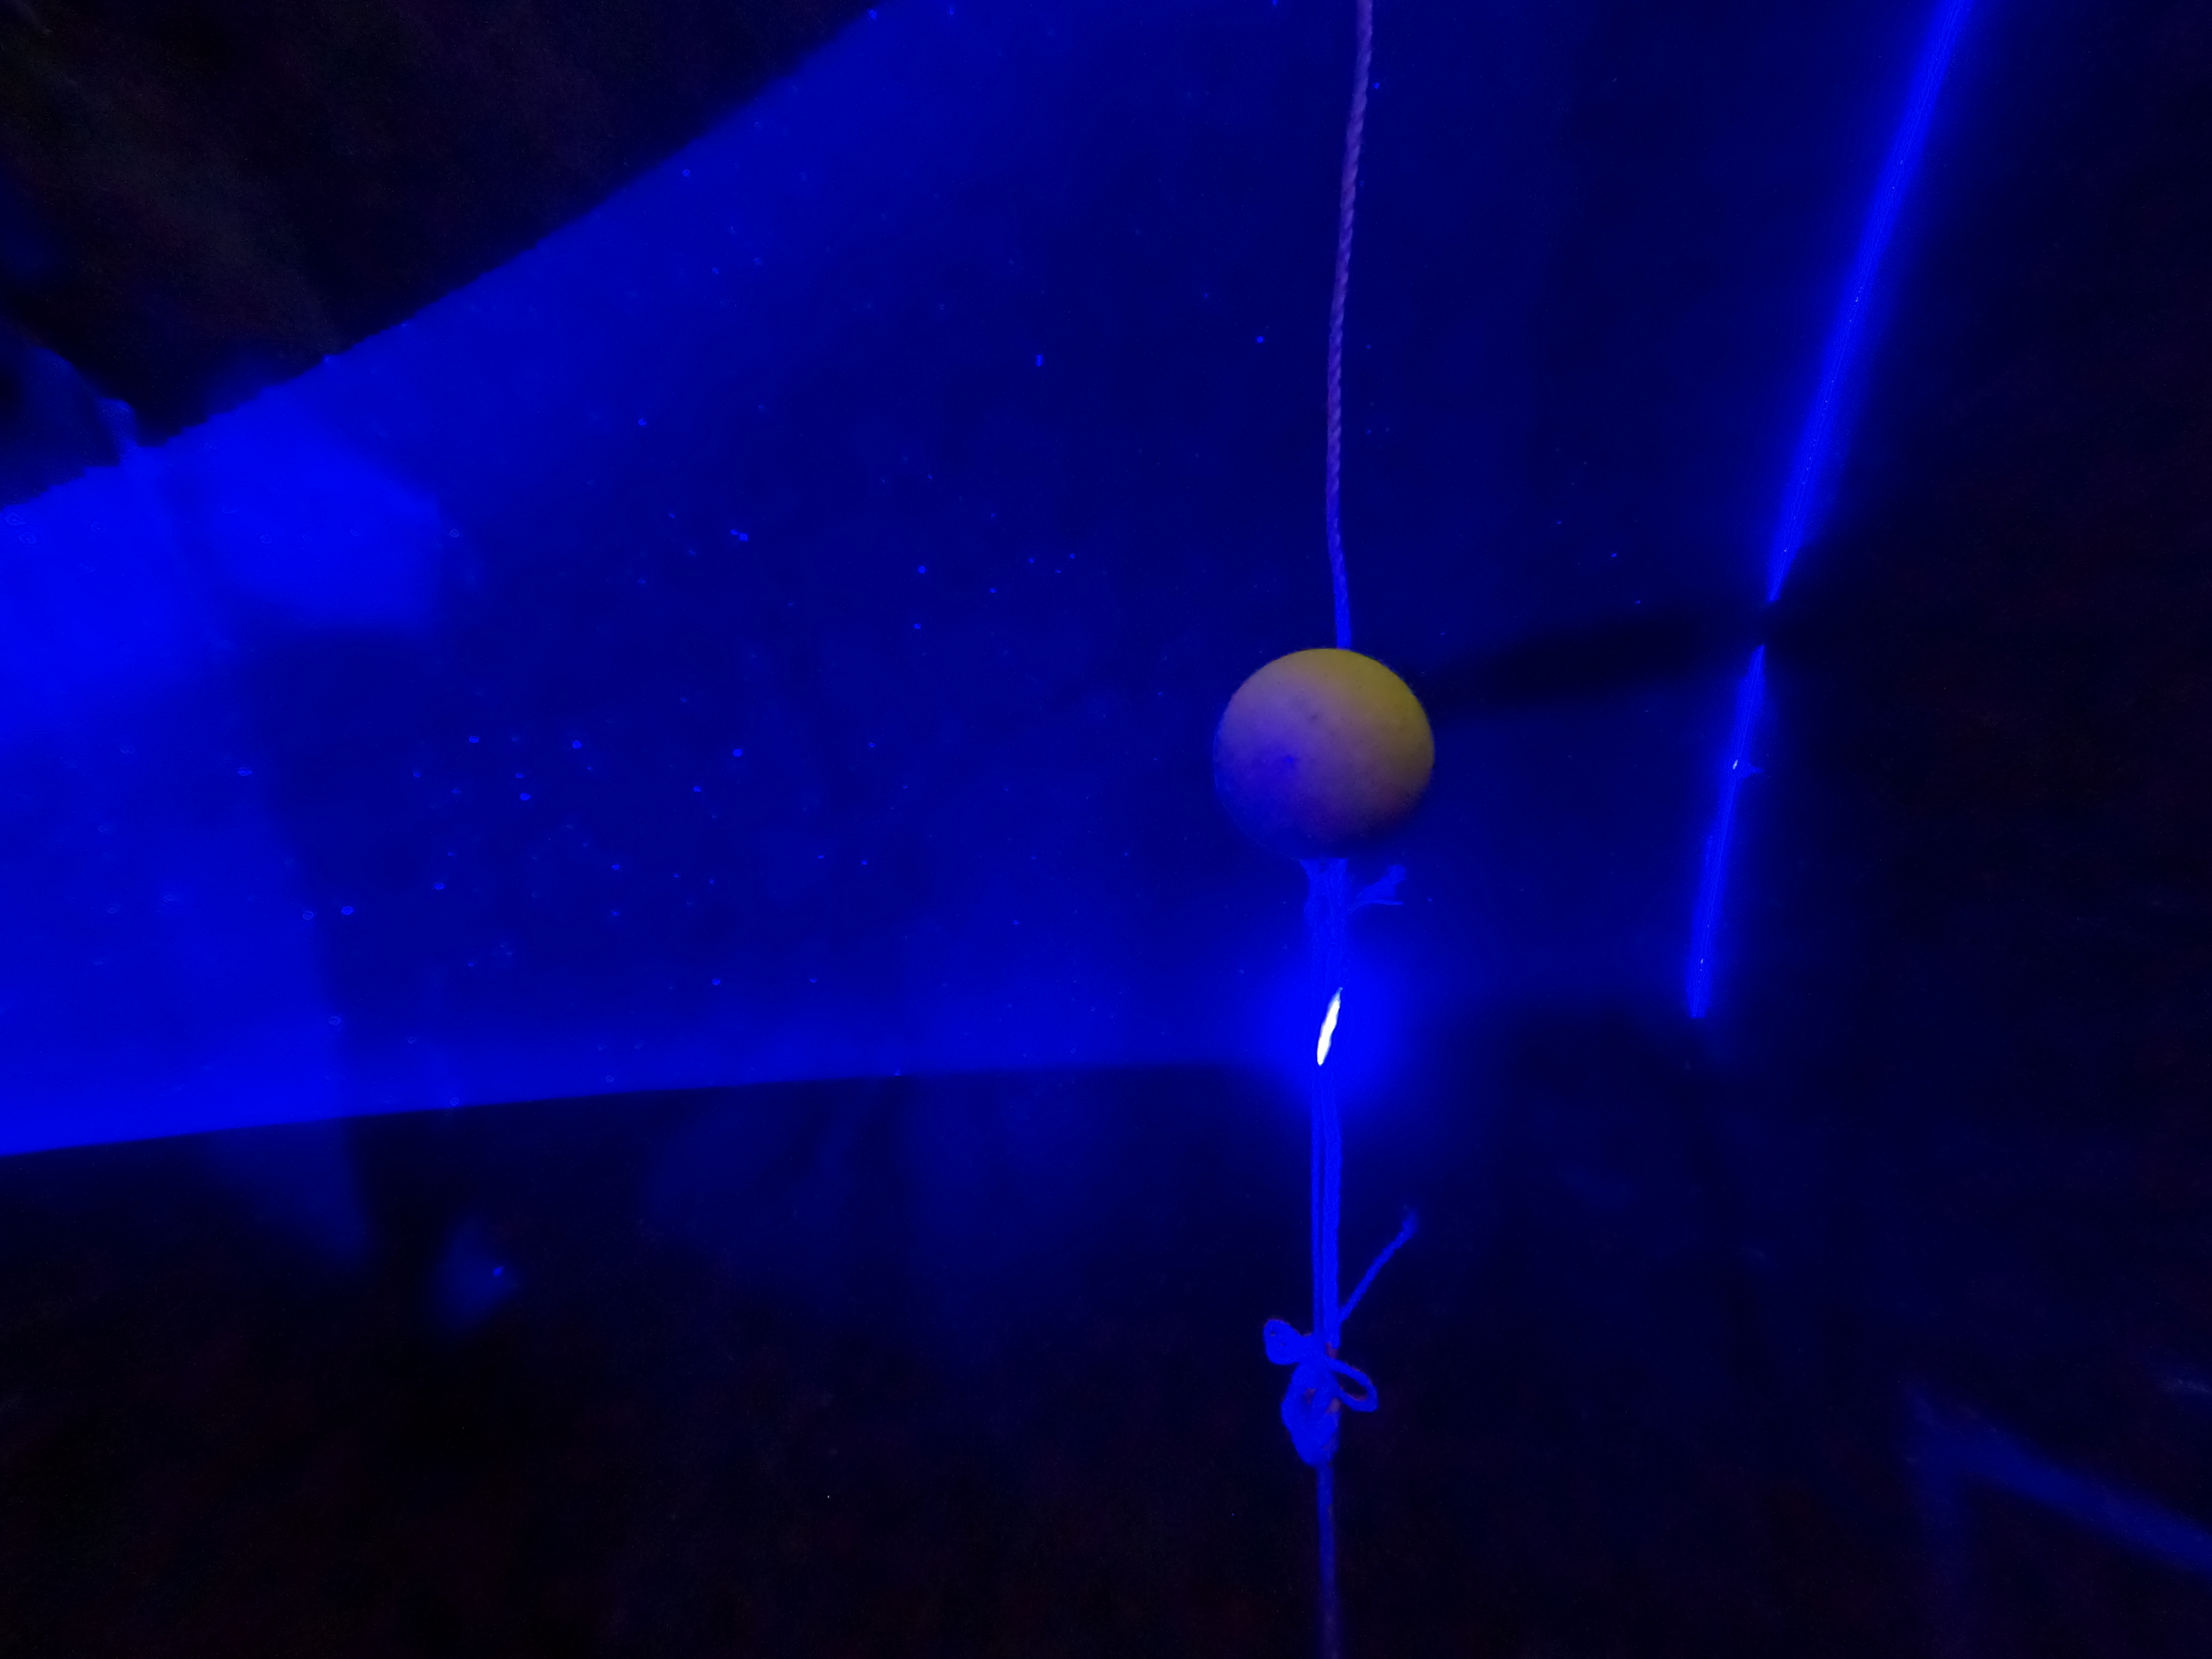

Supplement: Supplementary file 1209 [file G0032923.pdf › 7/G0032923.pdf]

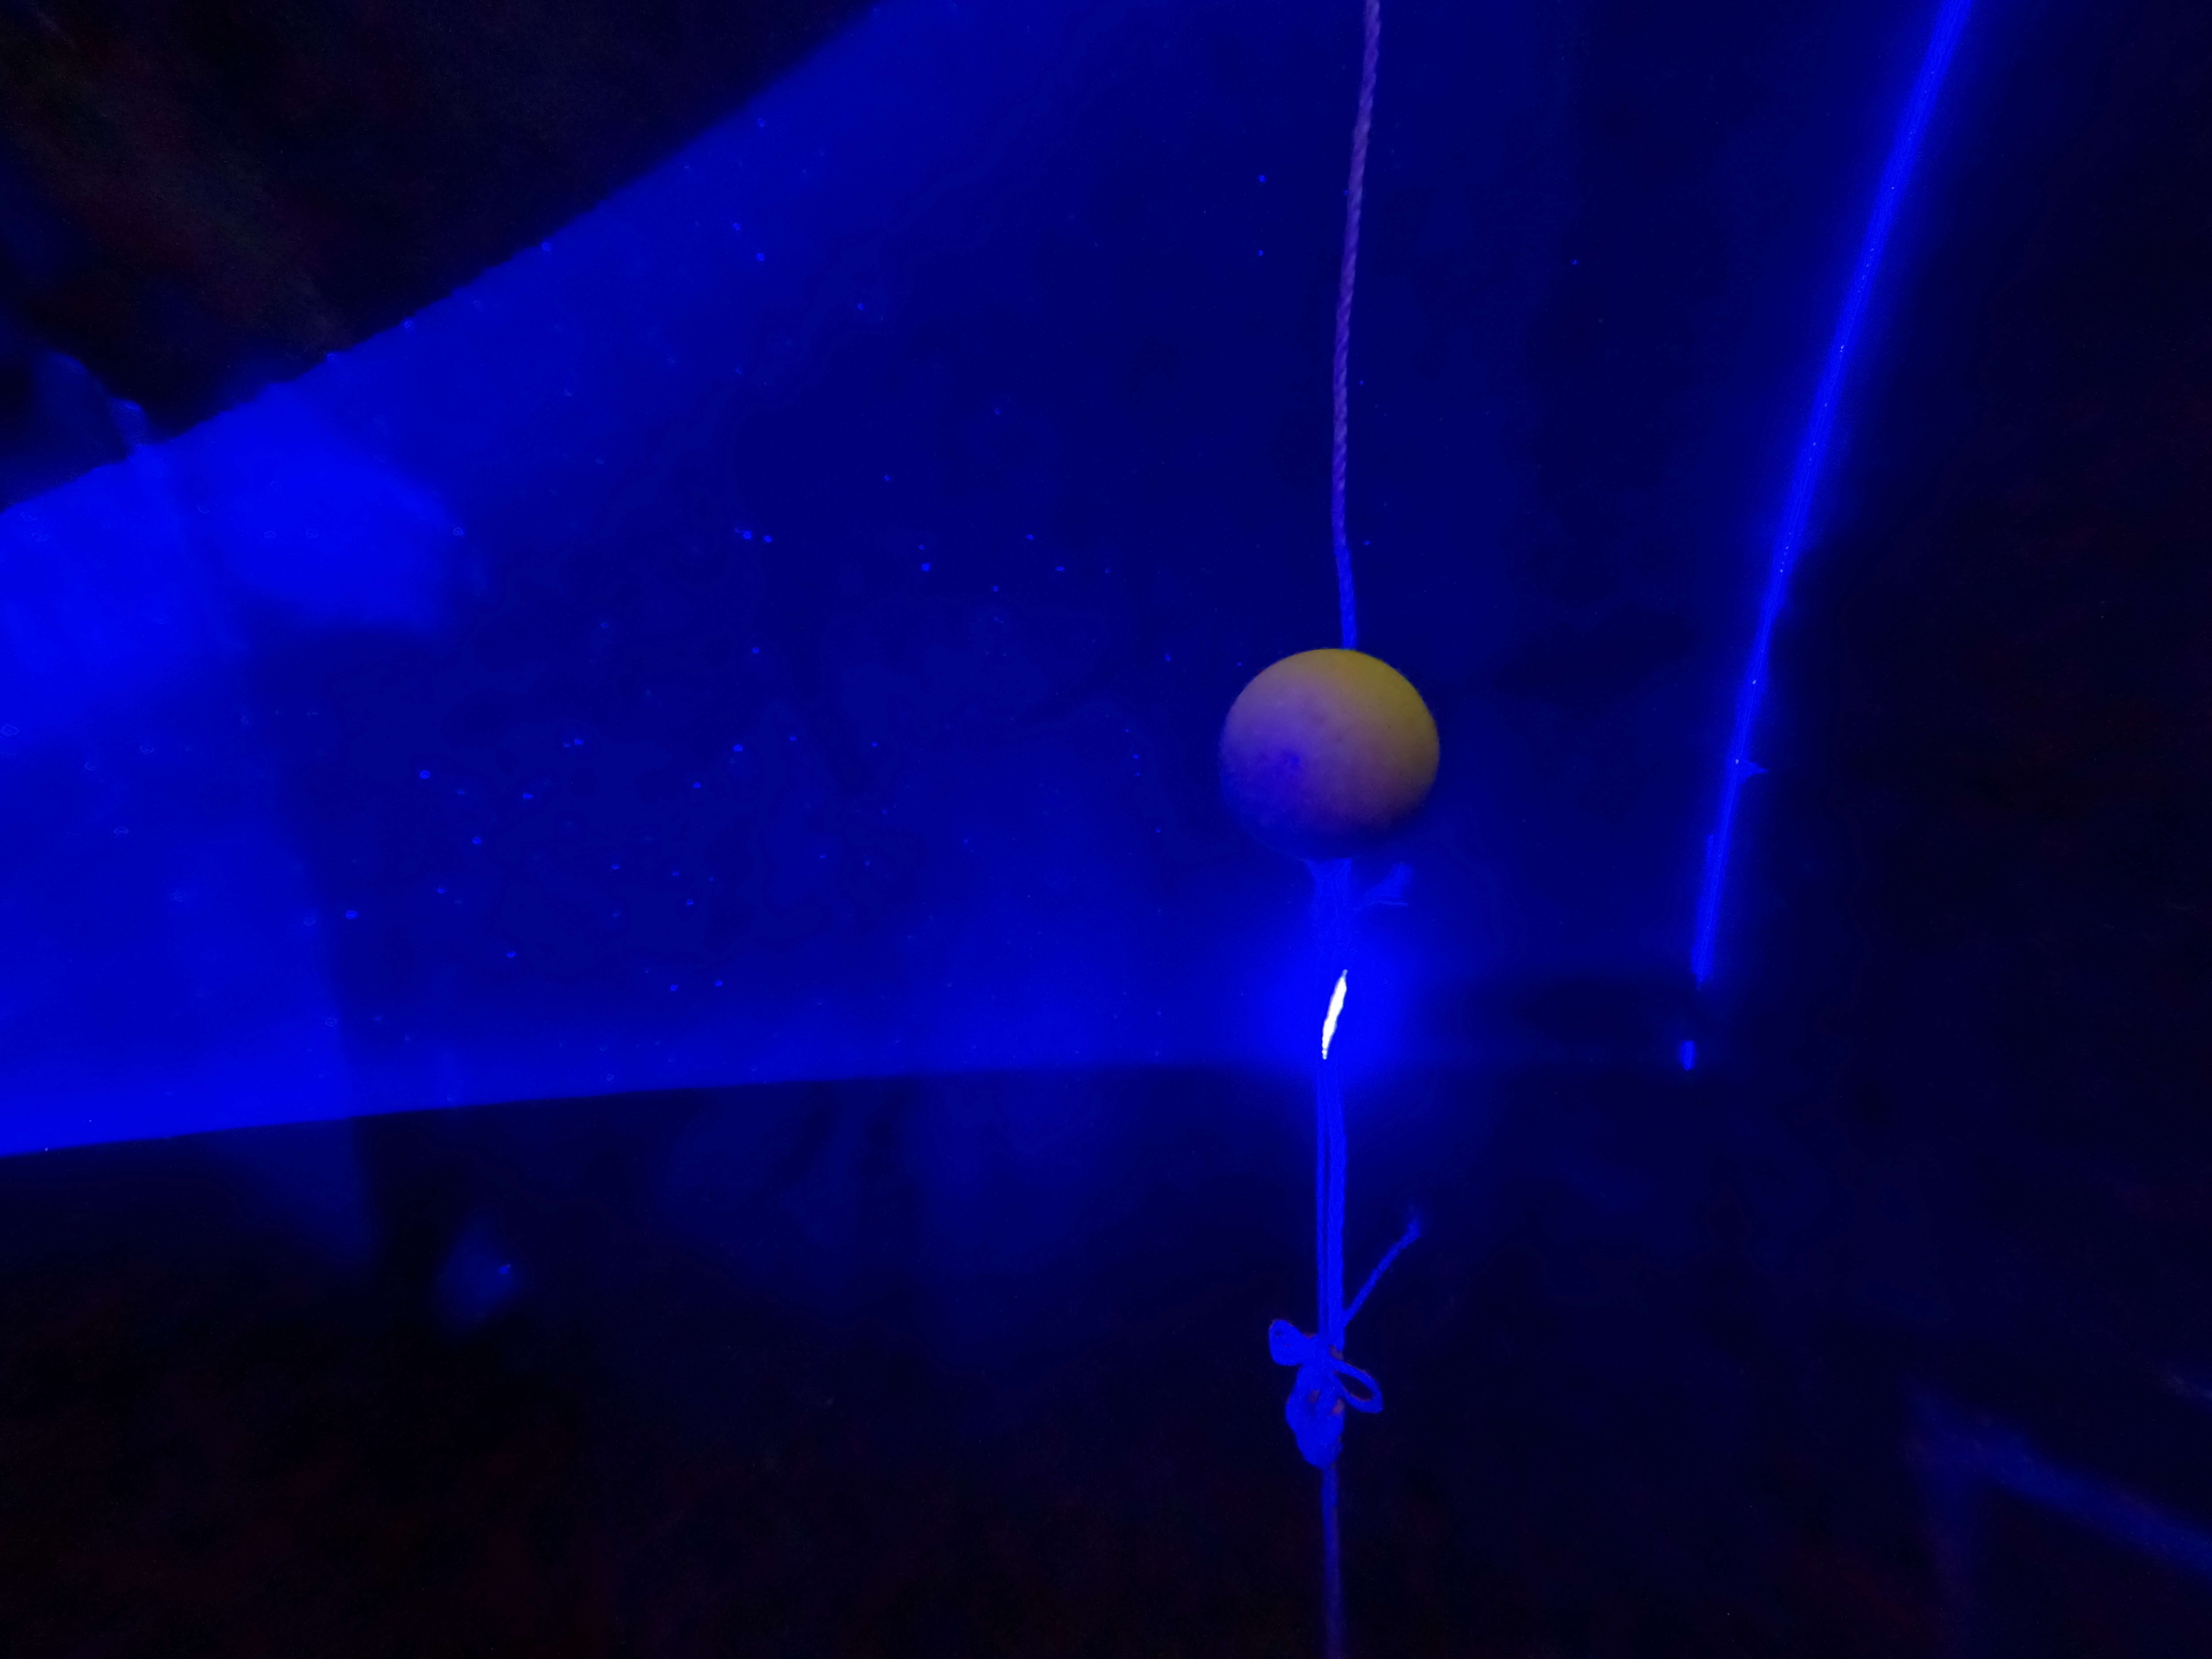

Supplement: Supplementary file 1210 [file G0032924.pdf › 7/G0032924.pdf]

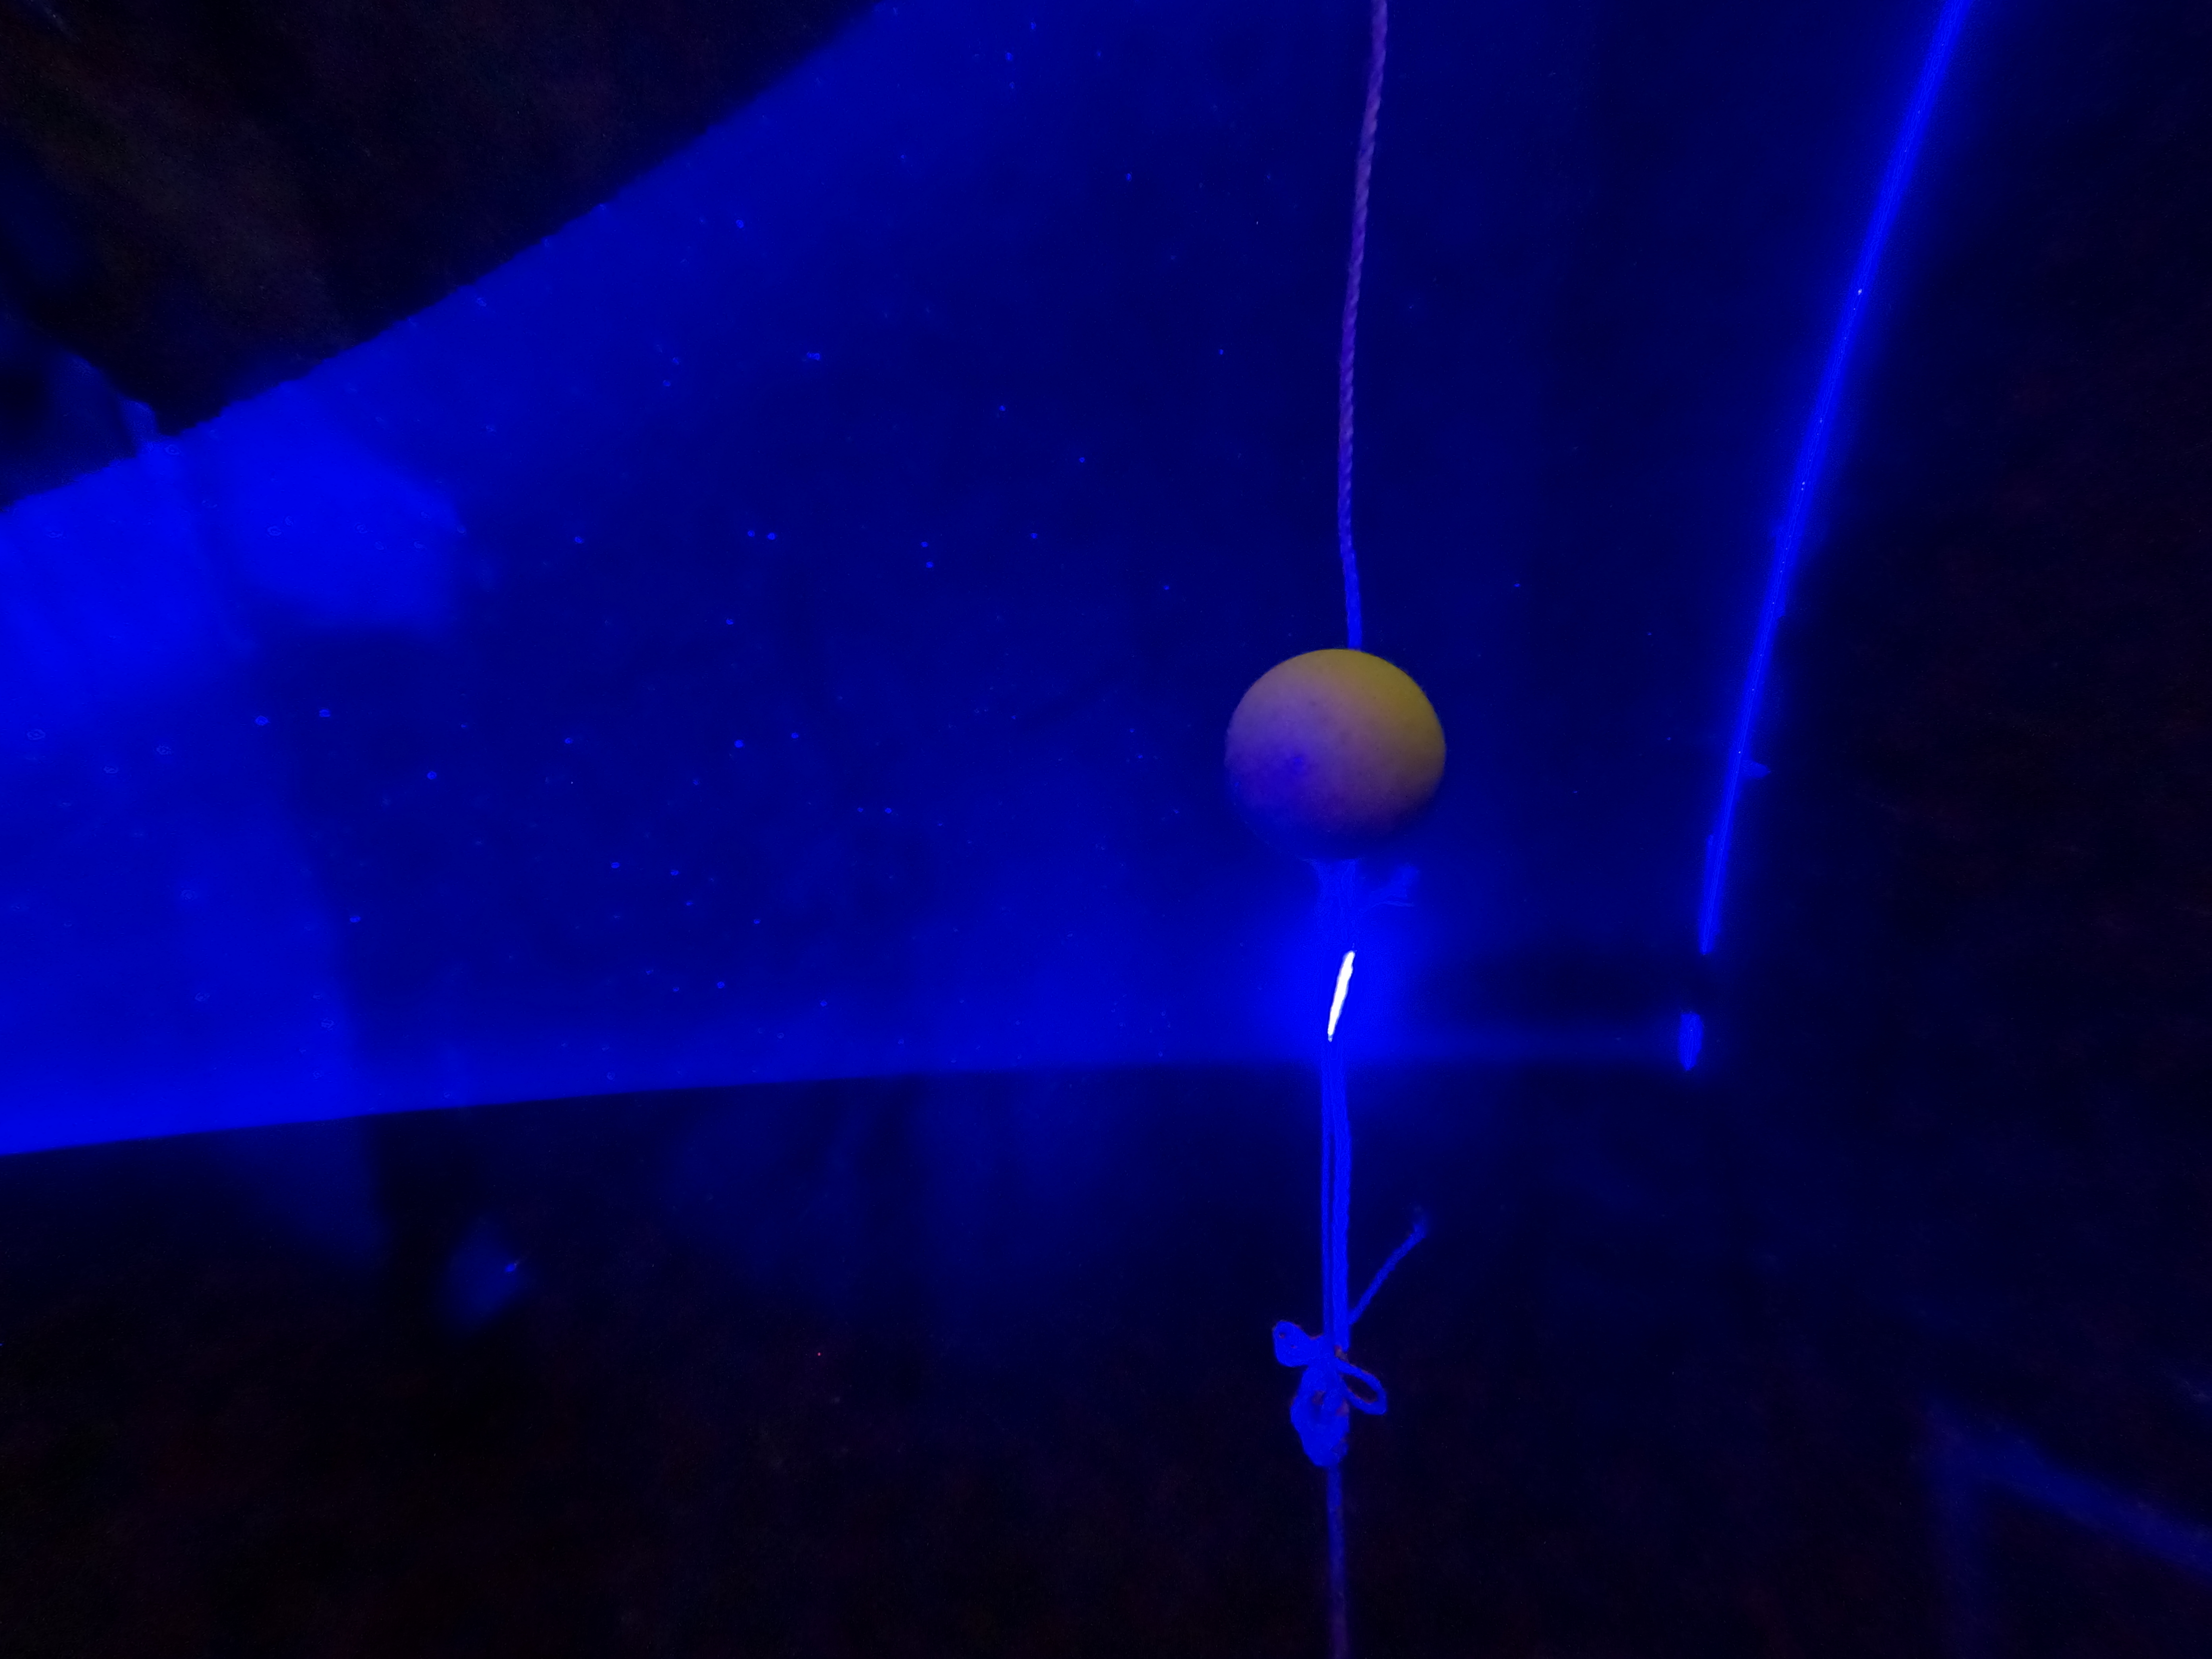

Supplement: Supplementary file 1211 [file G0032925.pdf › 7/G0032925.pdf]

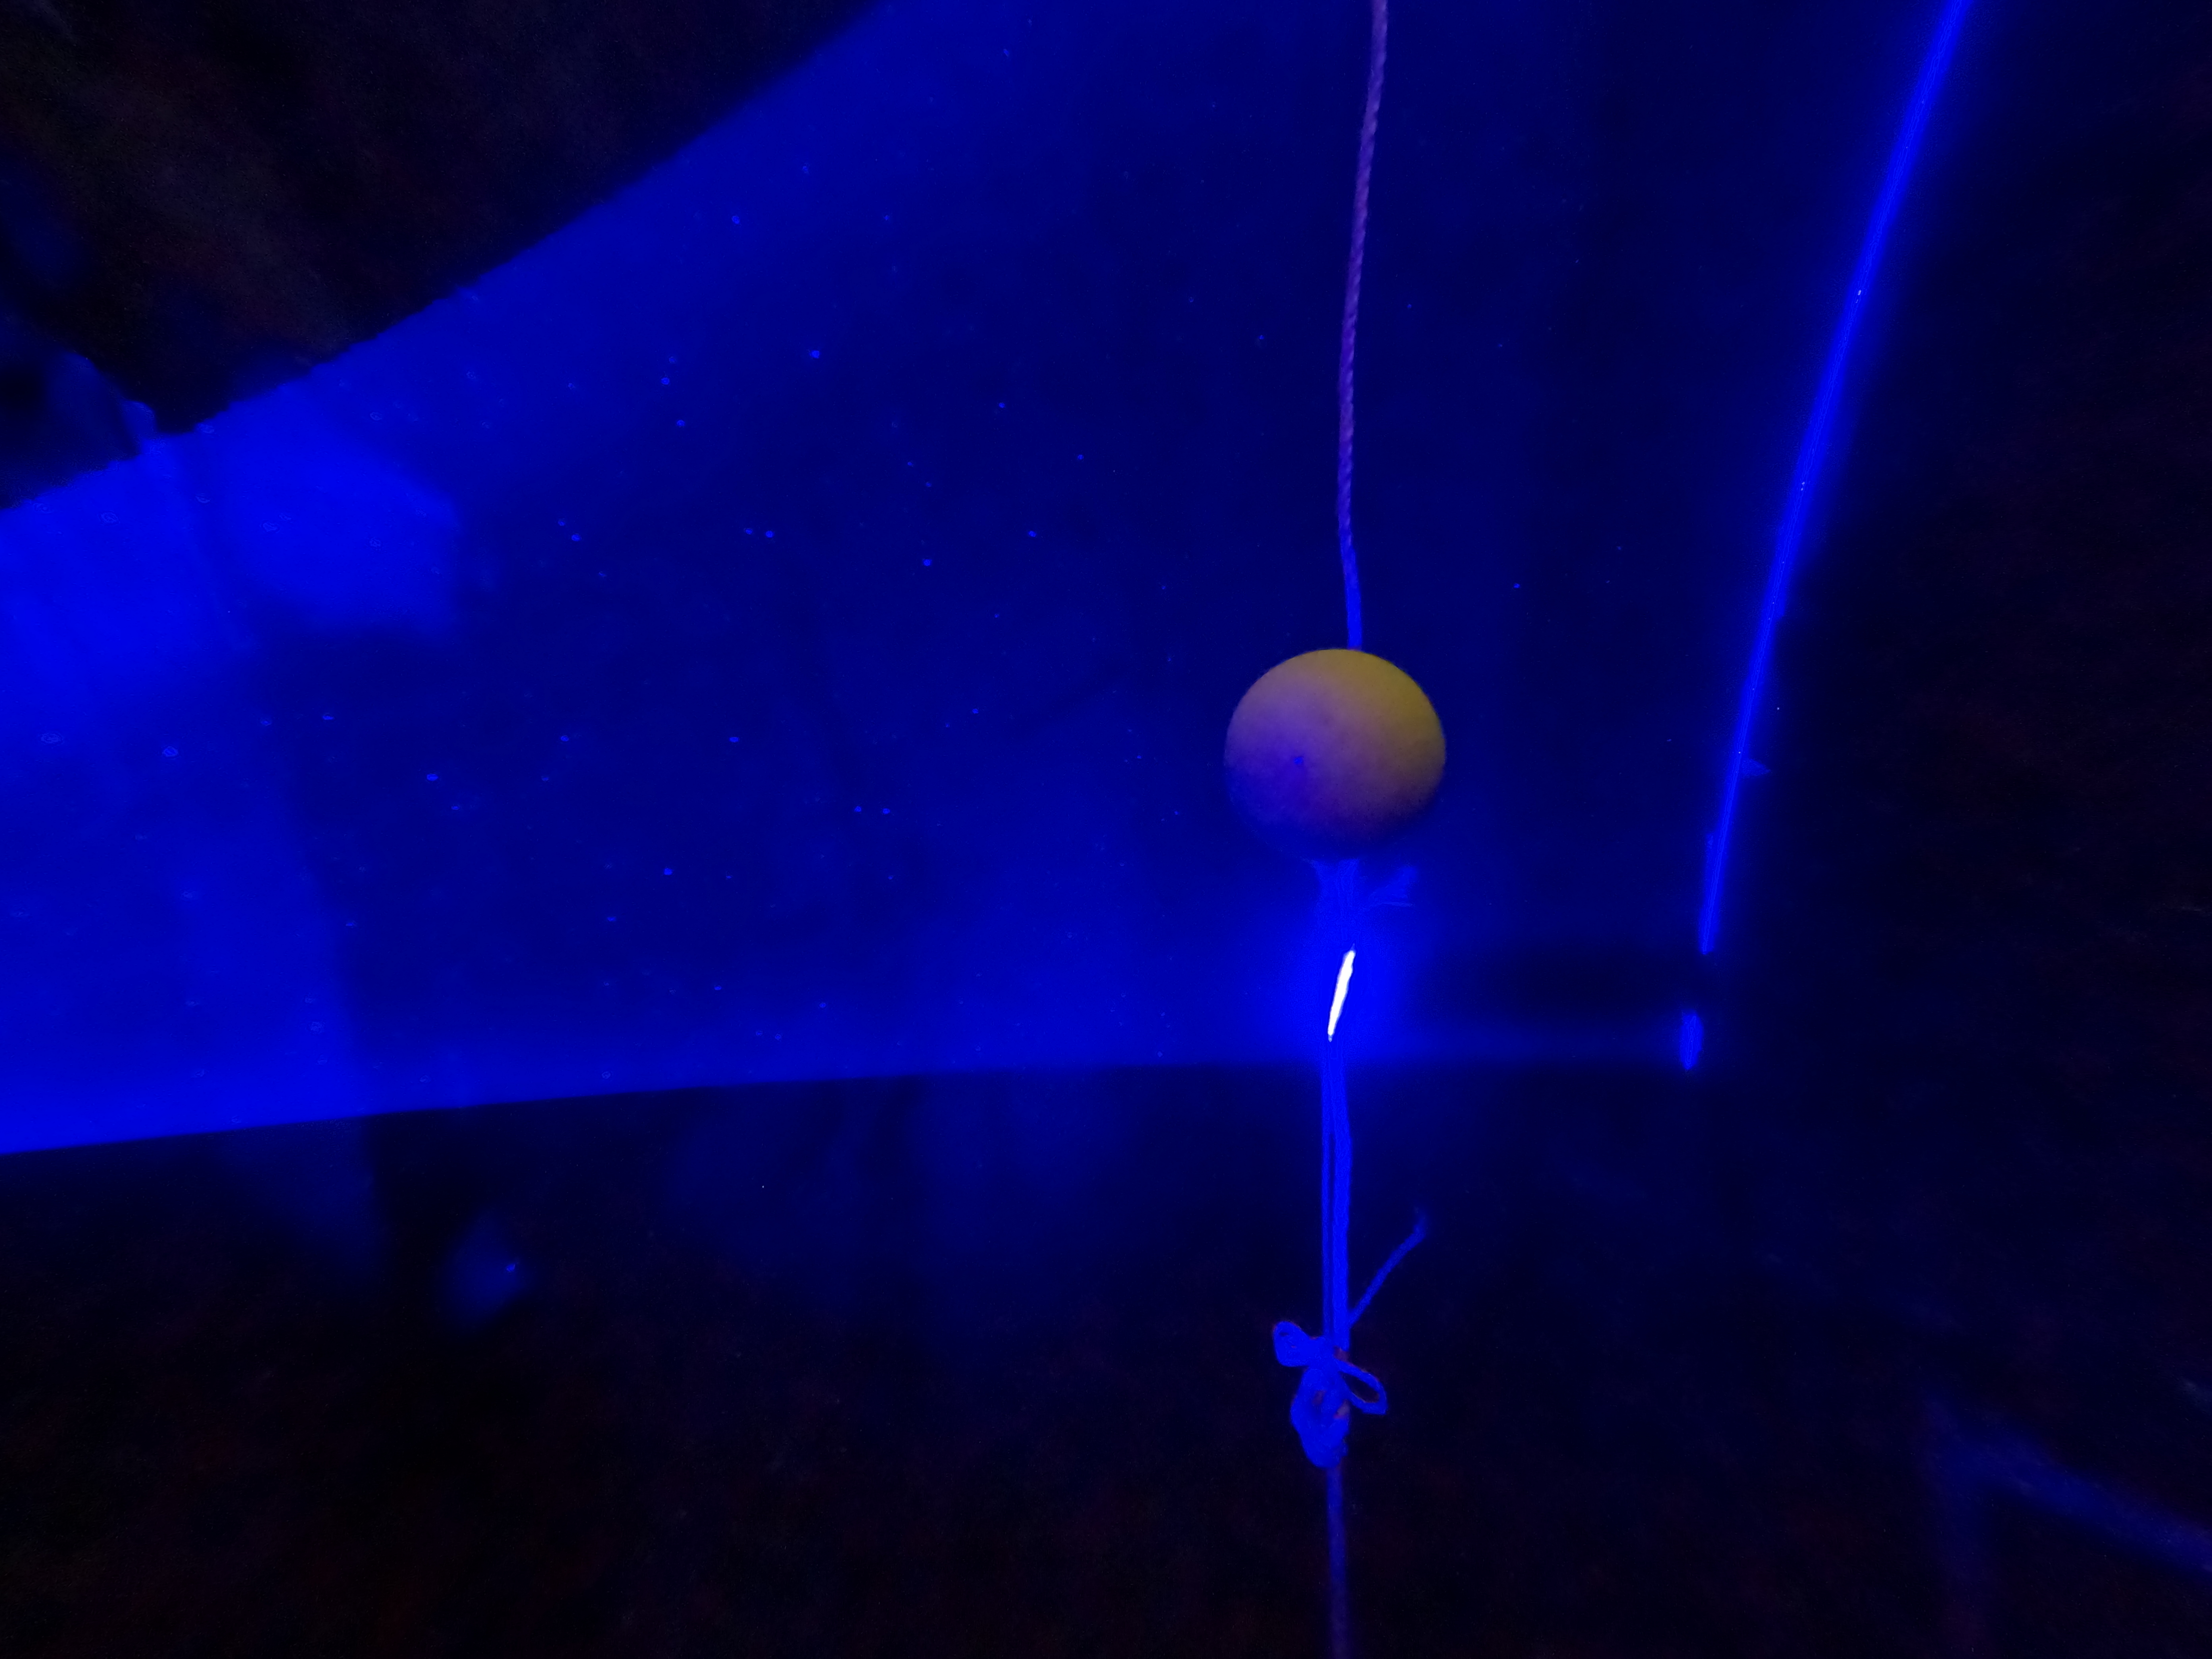

Supplement: Supplementary file 1212 [file G0032926.pdf › 7/G0032926.pdf]

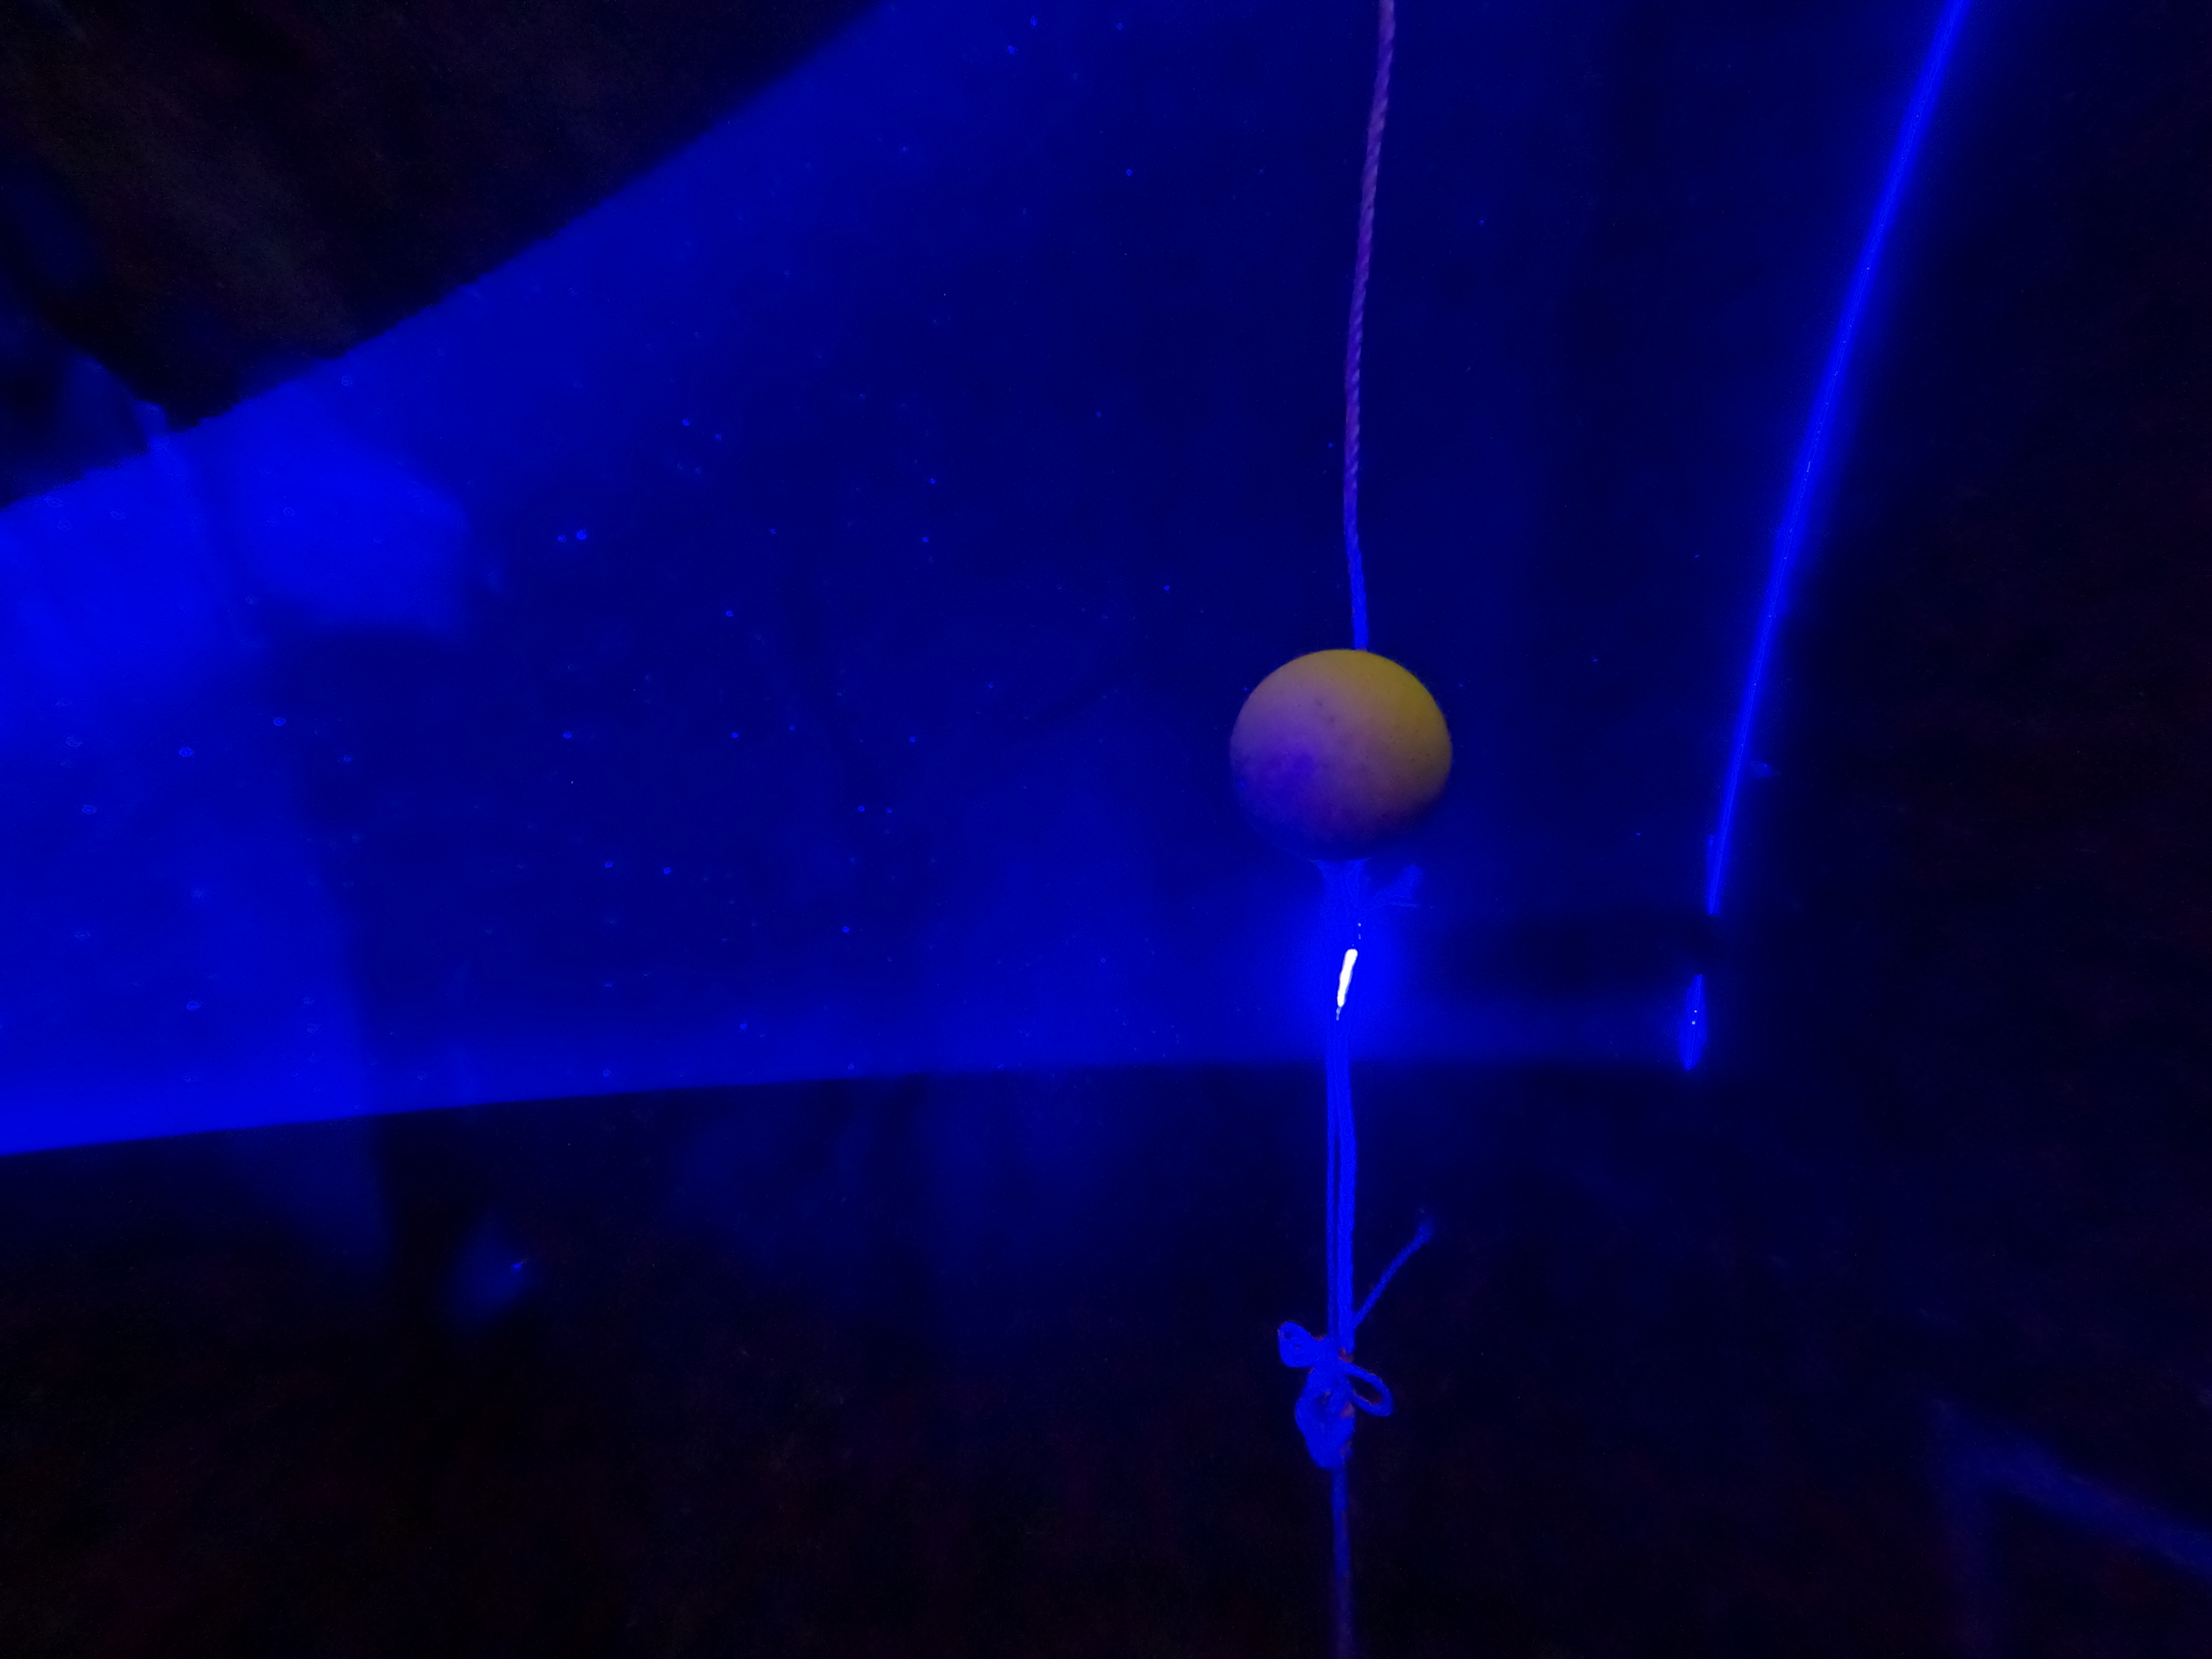

Supplement: Supplementary file 1213 [file G0032927.pdf › 7/G0032927.pdf]

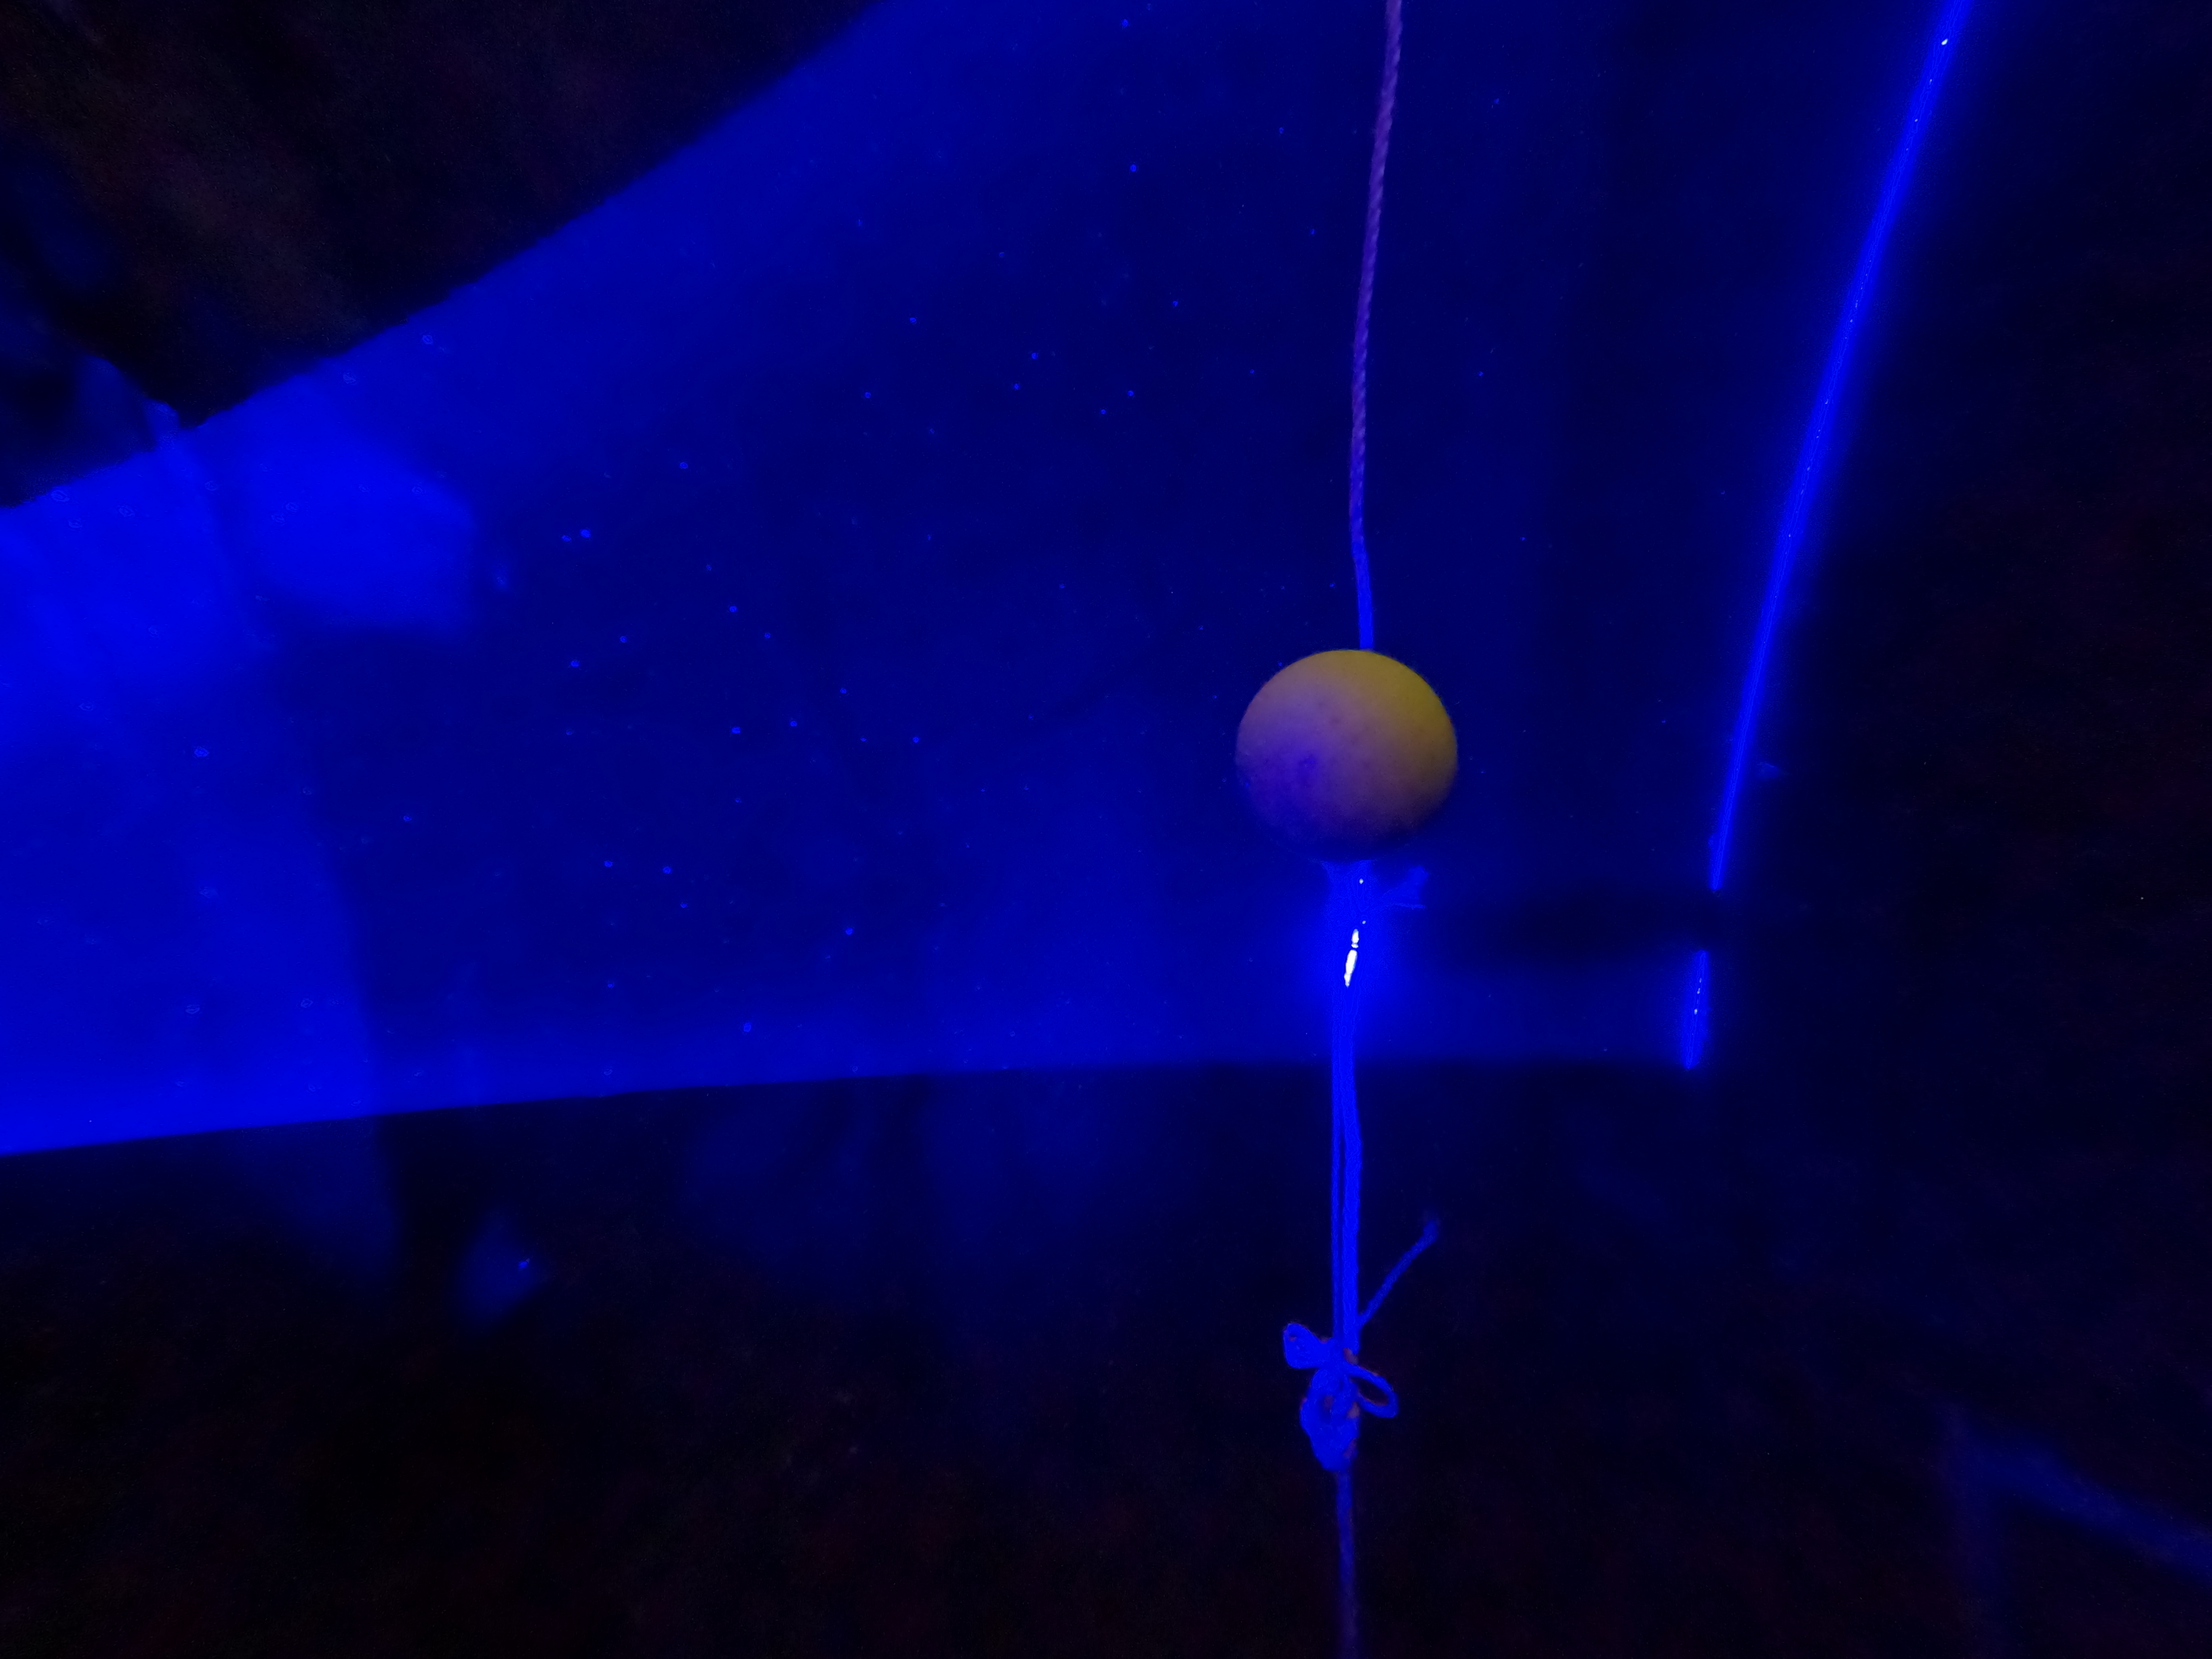

Supplement: Supplementary file 1214 [file G0032928.pdf › 7/G0032928.pdf]

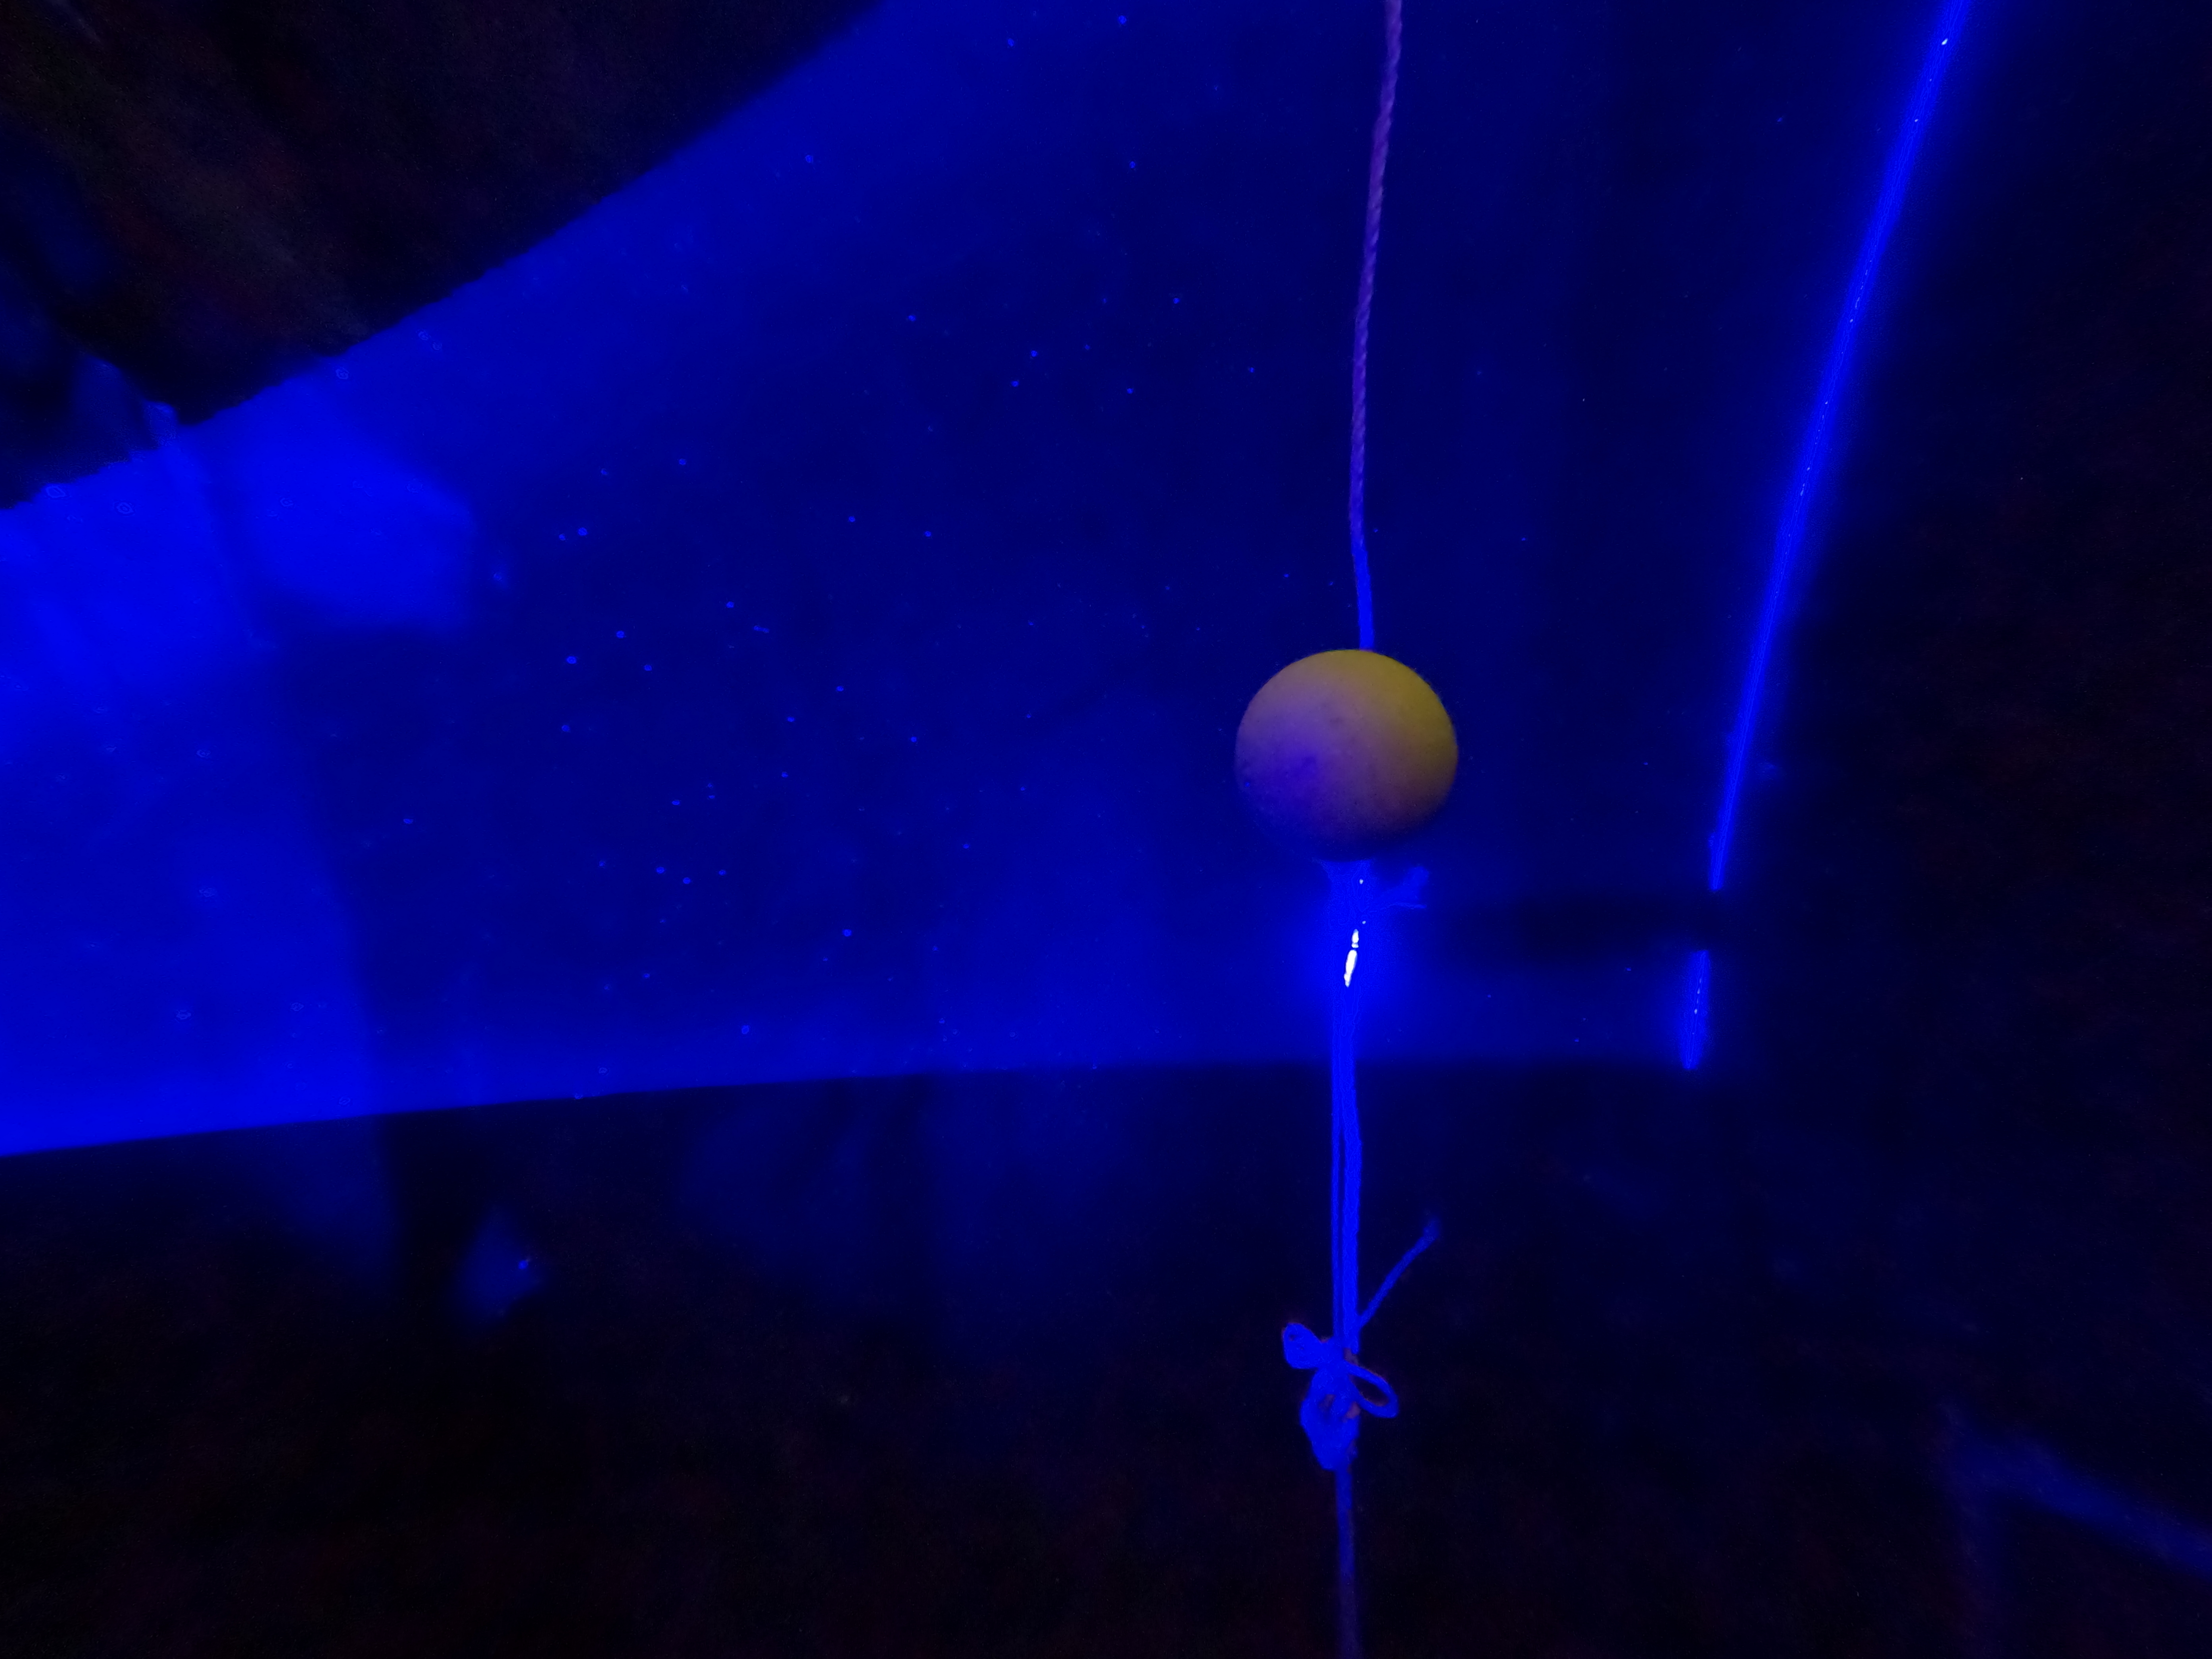

Supplement: Supplementary file 1215 [file G0032929.pdf › 7/G0032929.pdf]

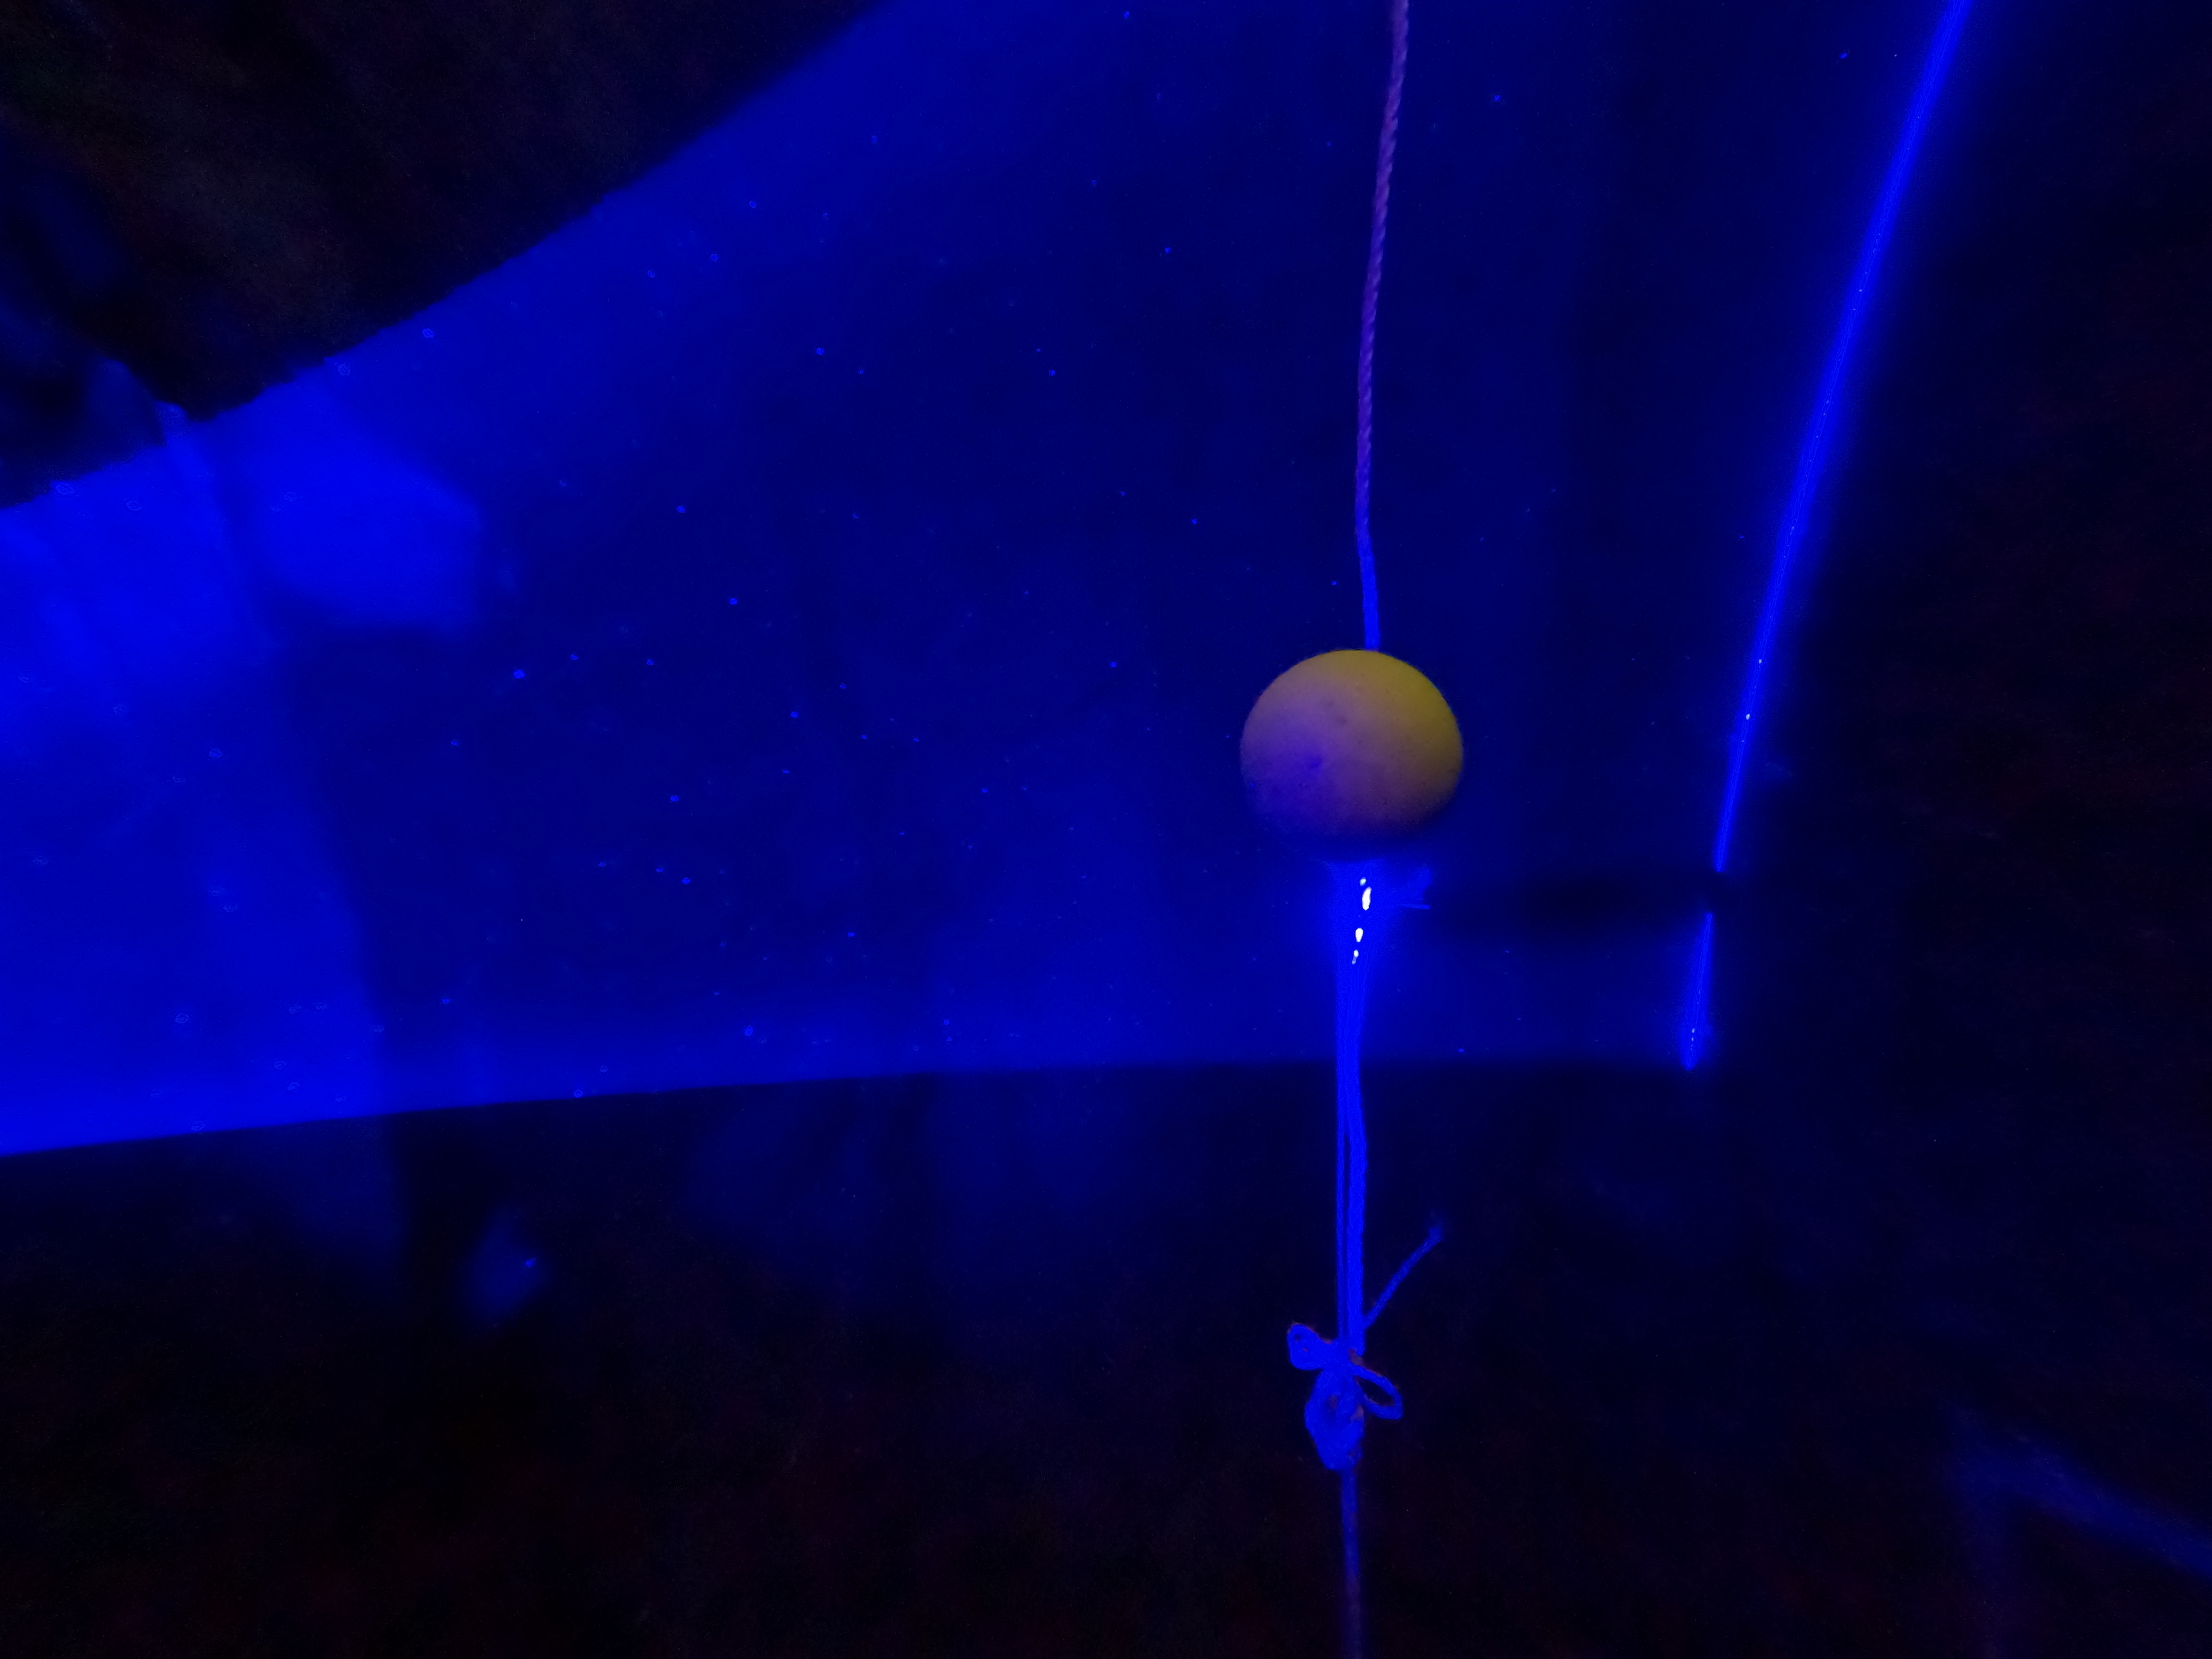

Supplement: Supplementary file 1216 [file G0032930.pdf › 7/G0032930.pdf]

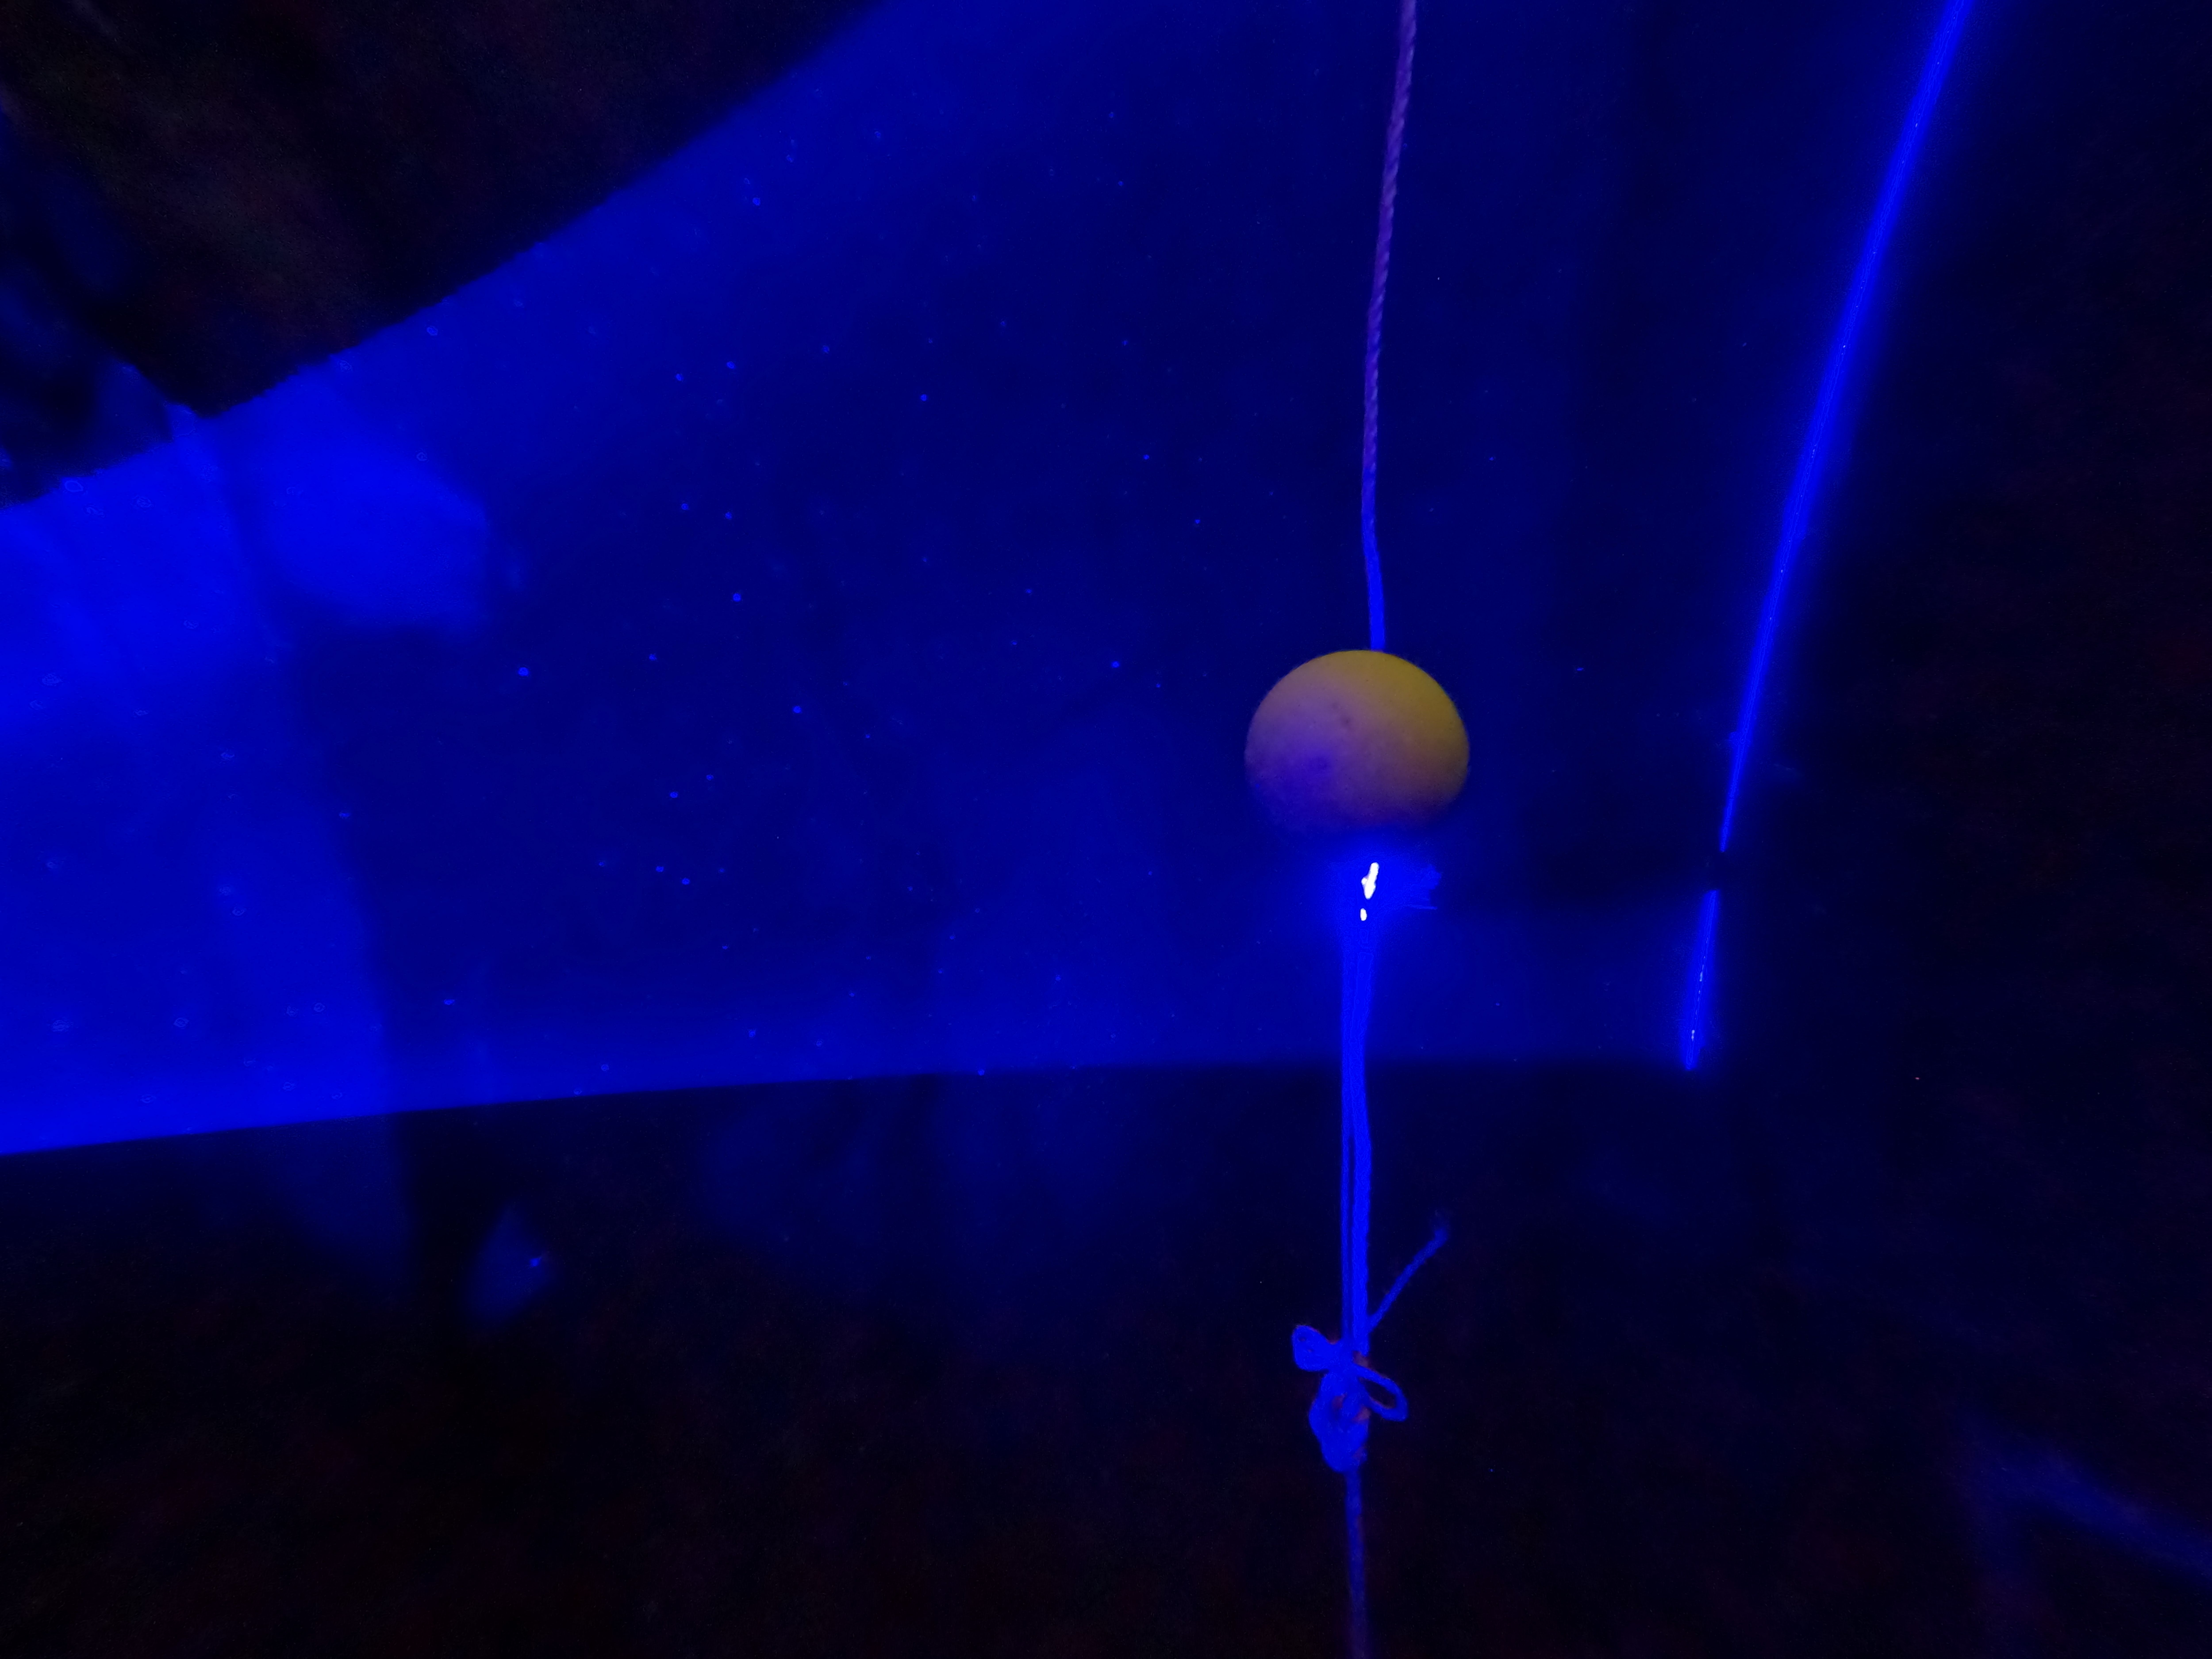

Supplement: Supplementary file 1217 [file G0032931.pdf › 7/G0032931.pdf]

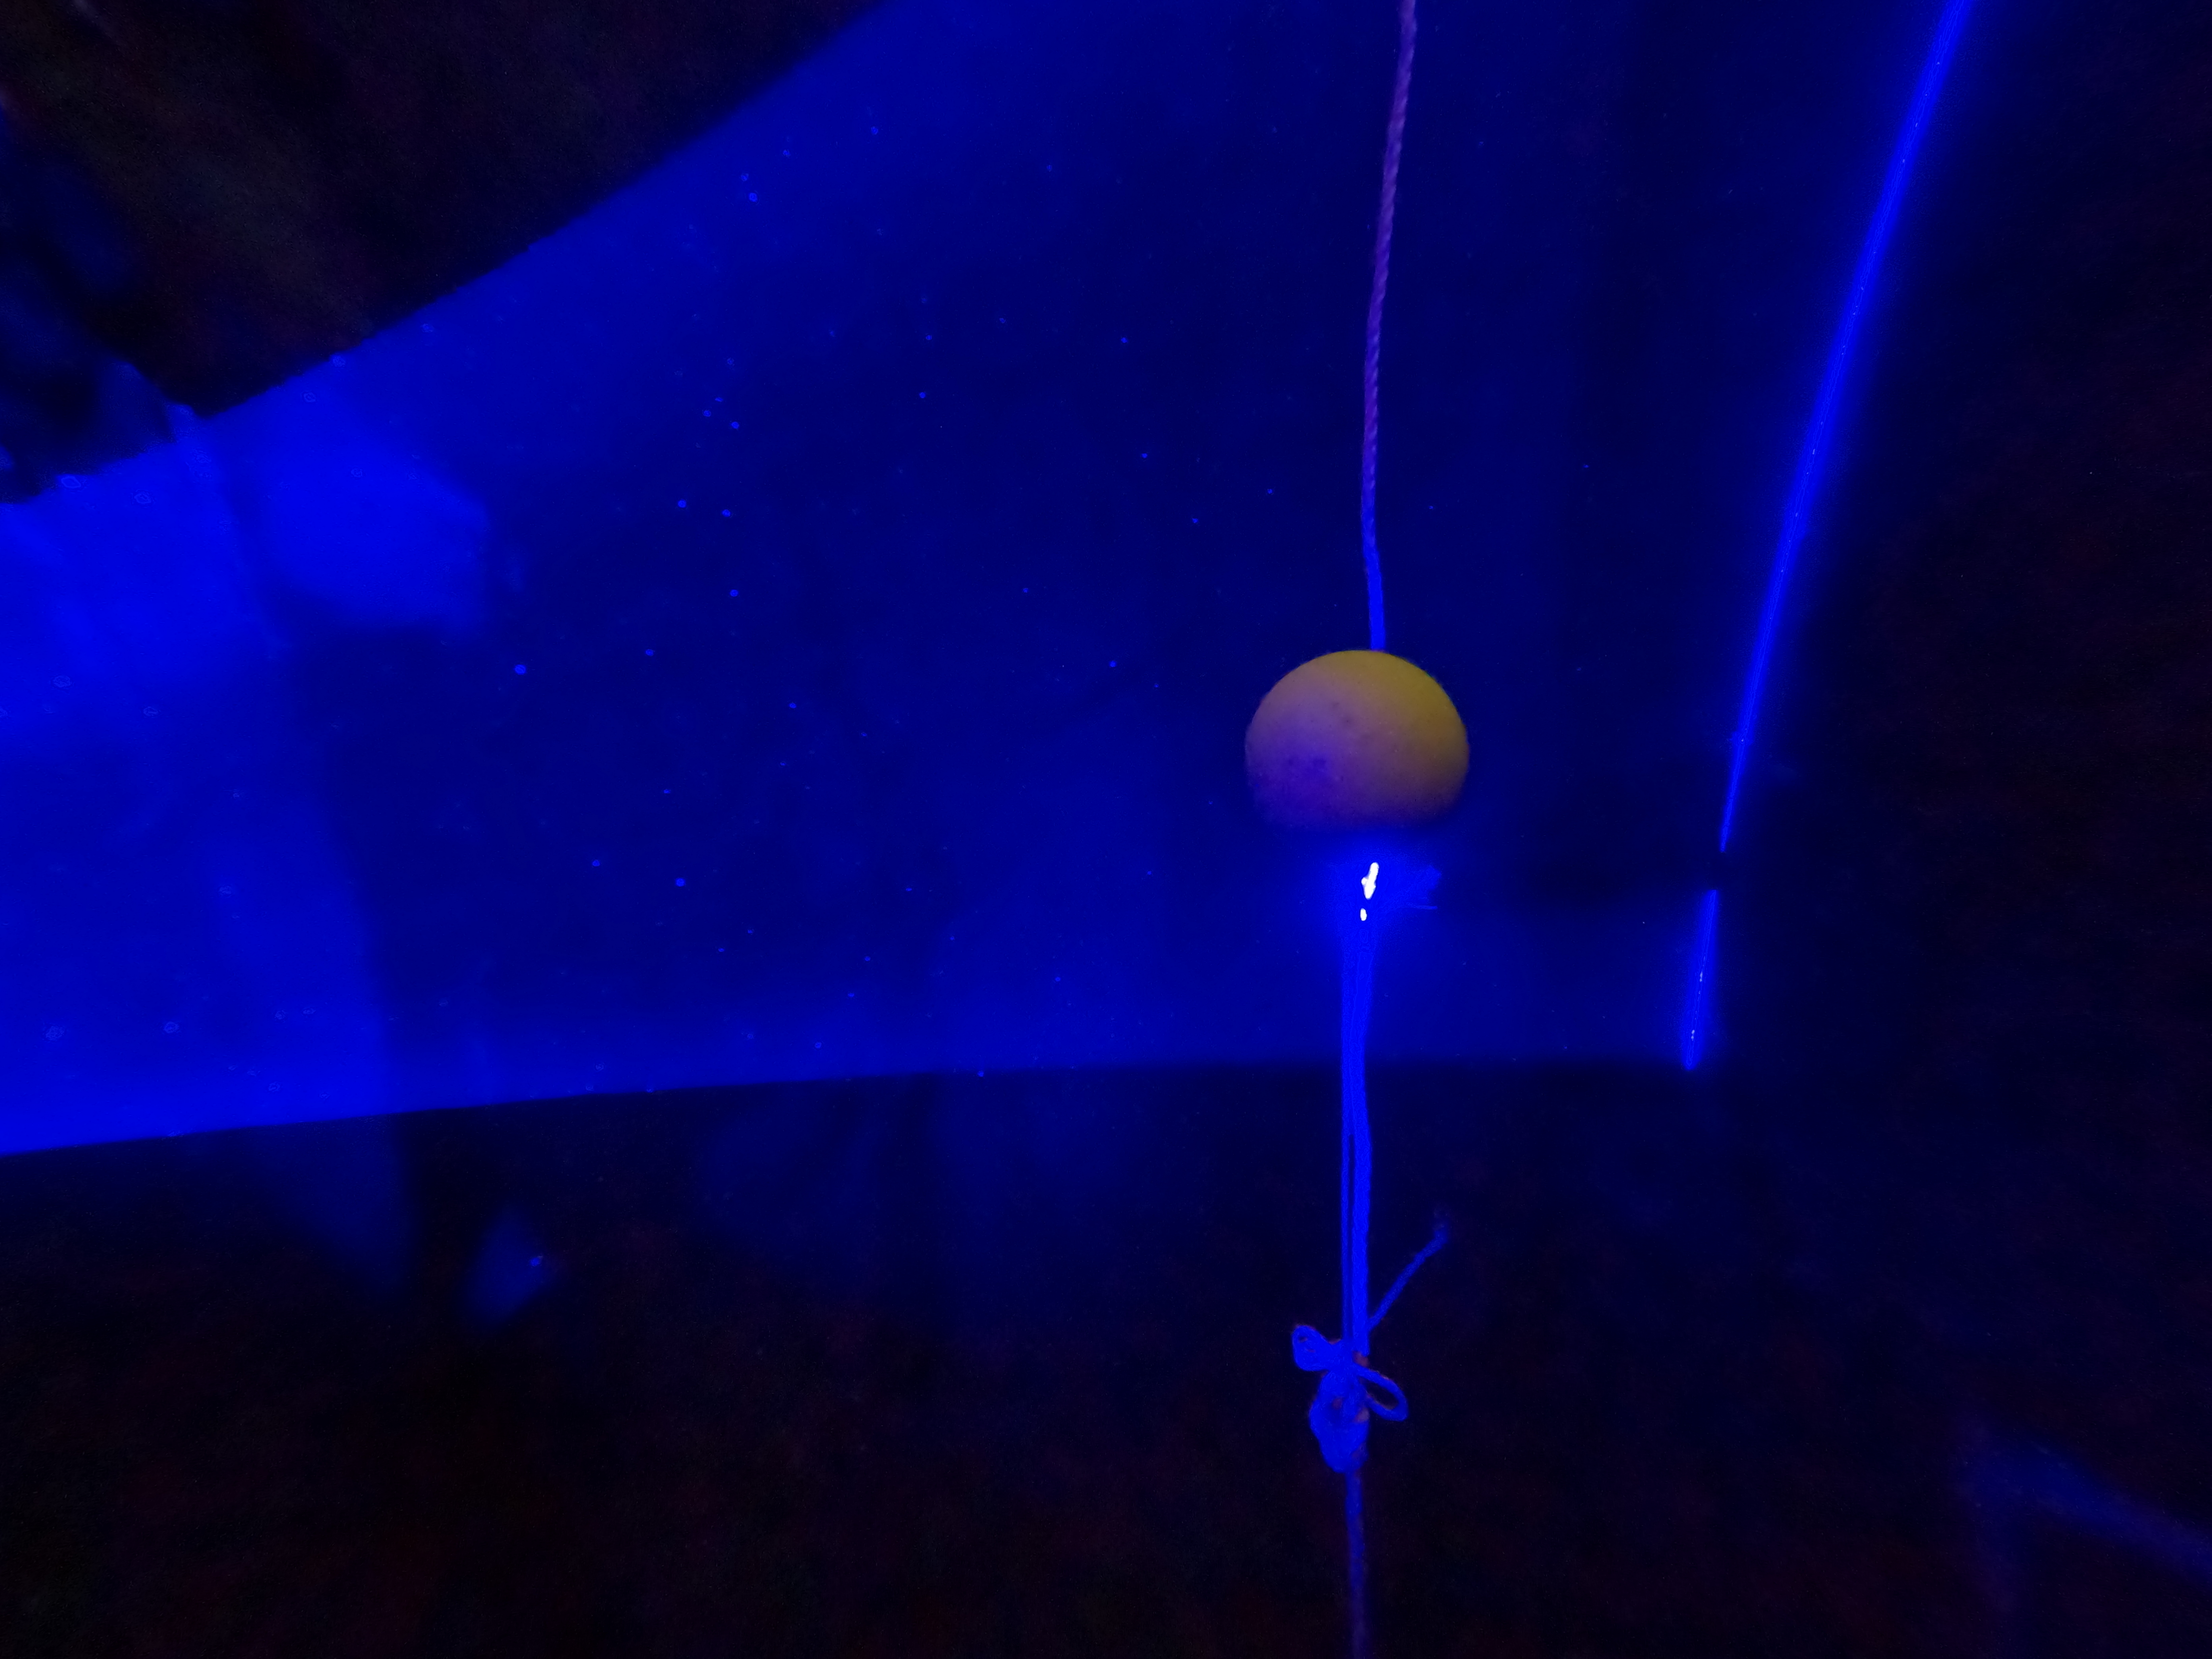

Supplement: Supplementary file 1218 [file G0032932.pdf › 7/G0032932.pdf]

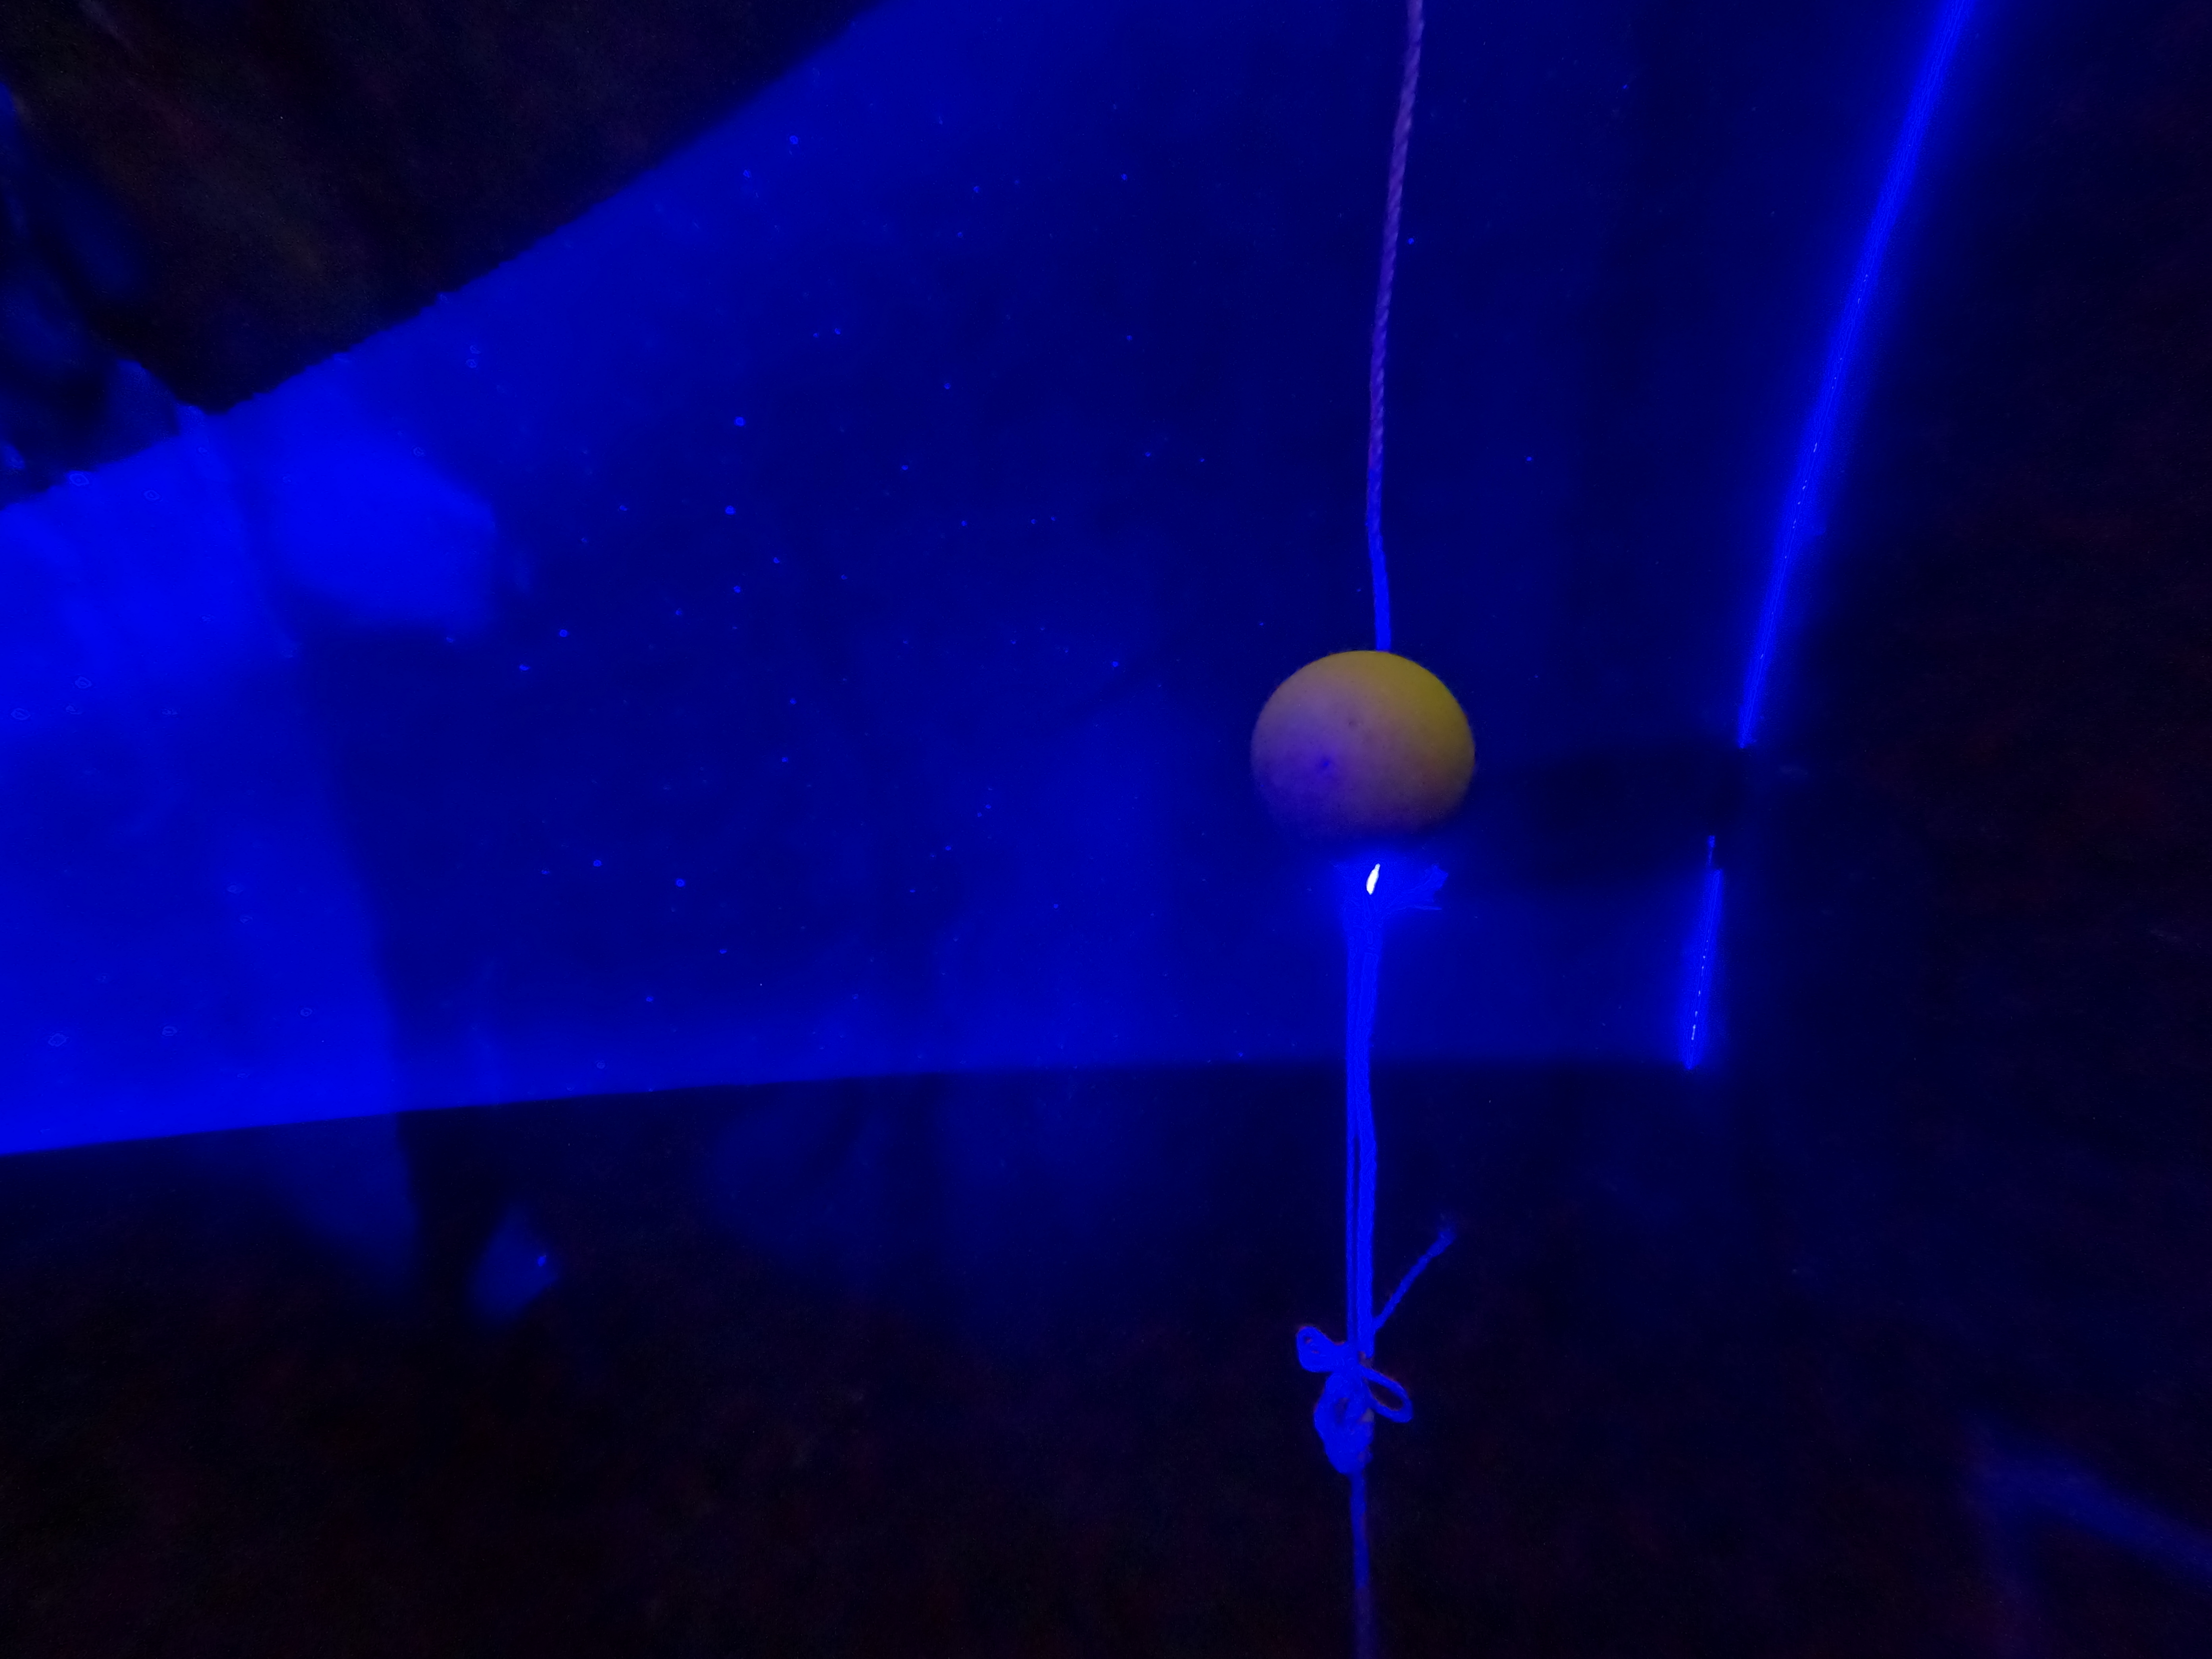

Supplement: Supplementary file 1219 [file G0032933.pdf › 7/G0032933.pdf]

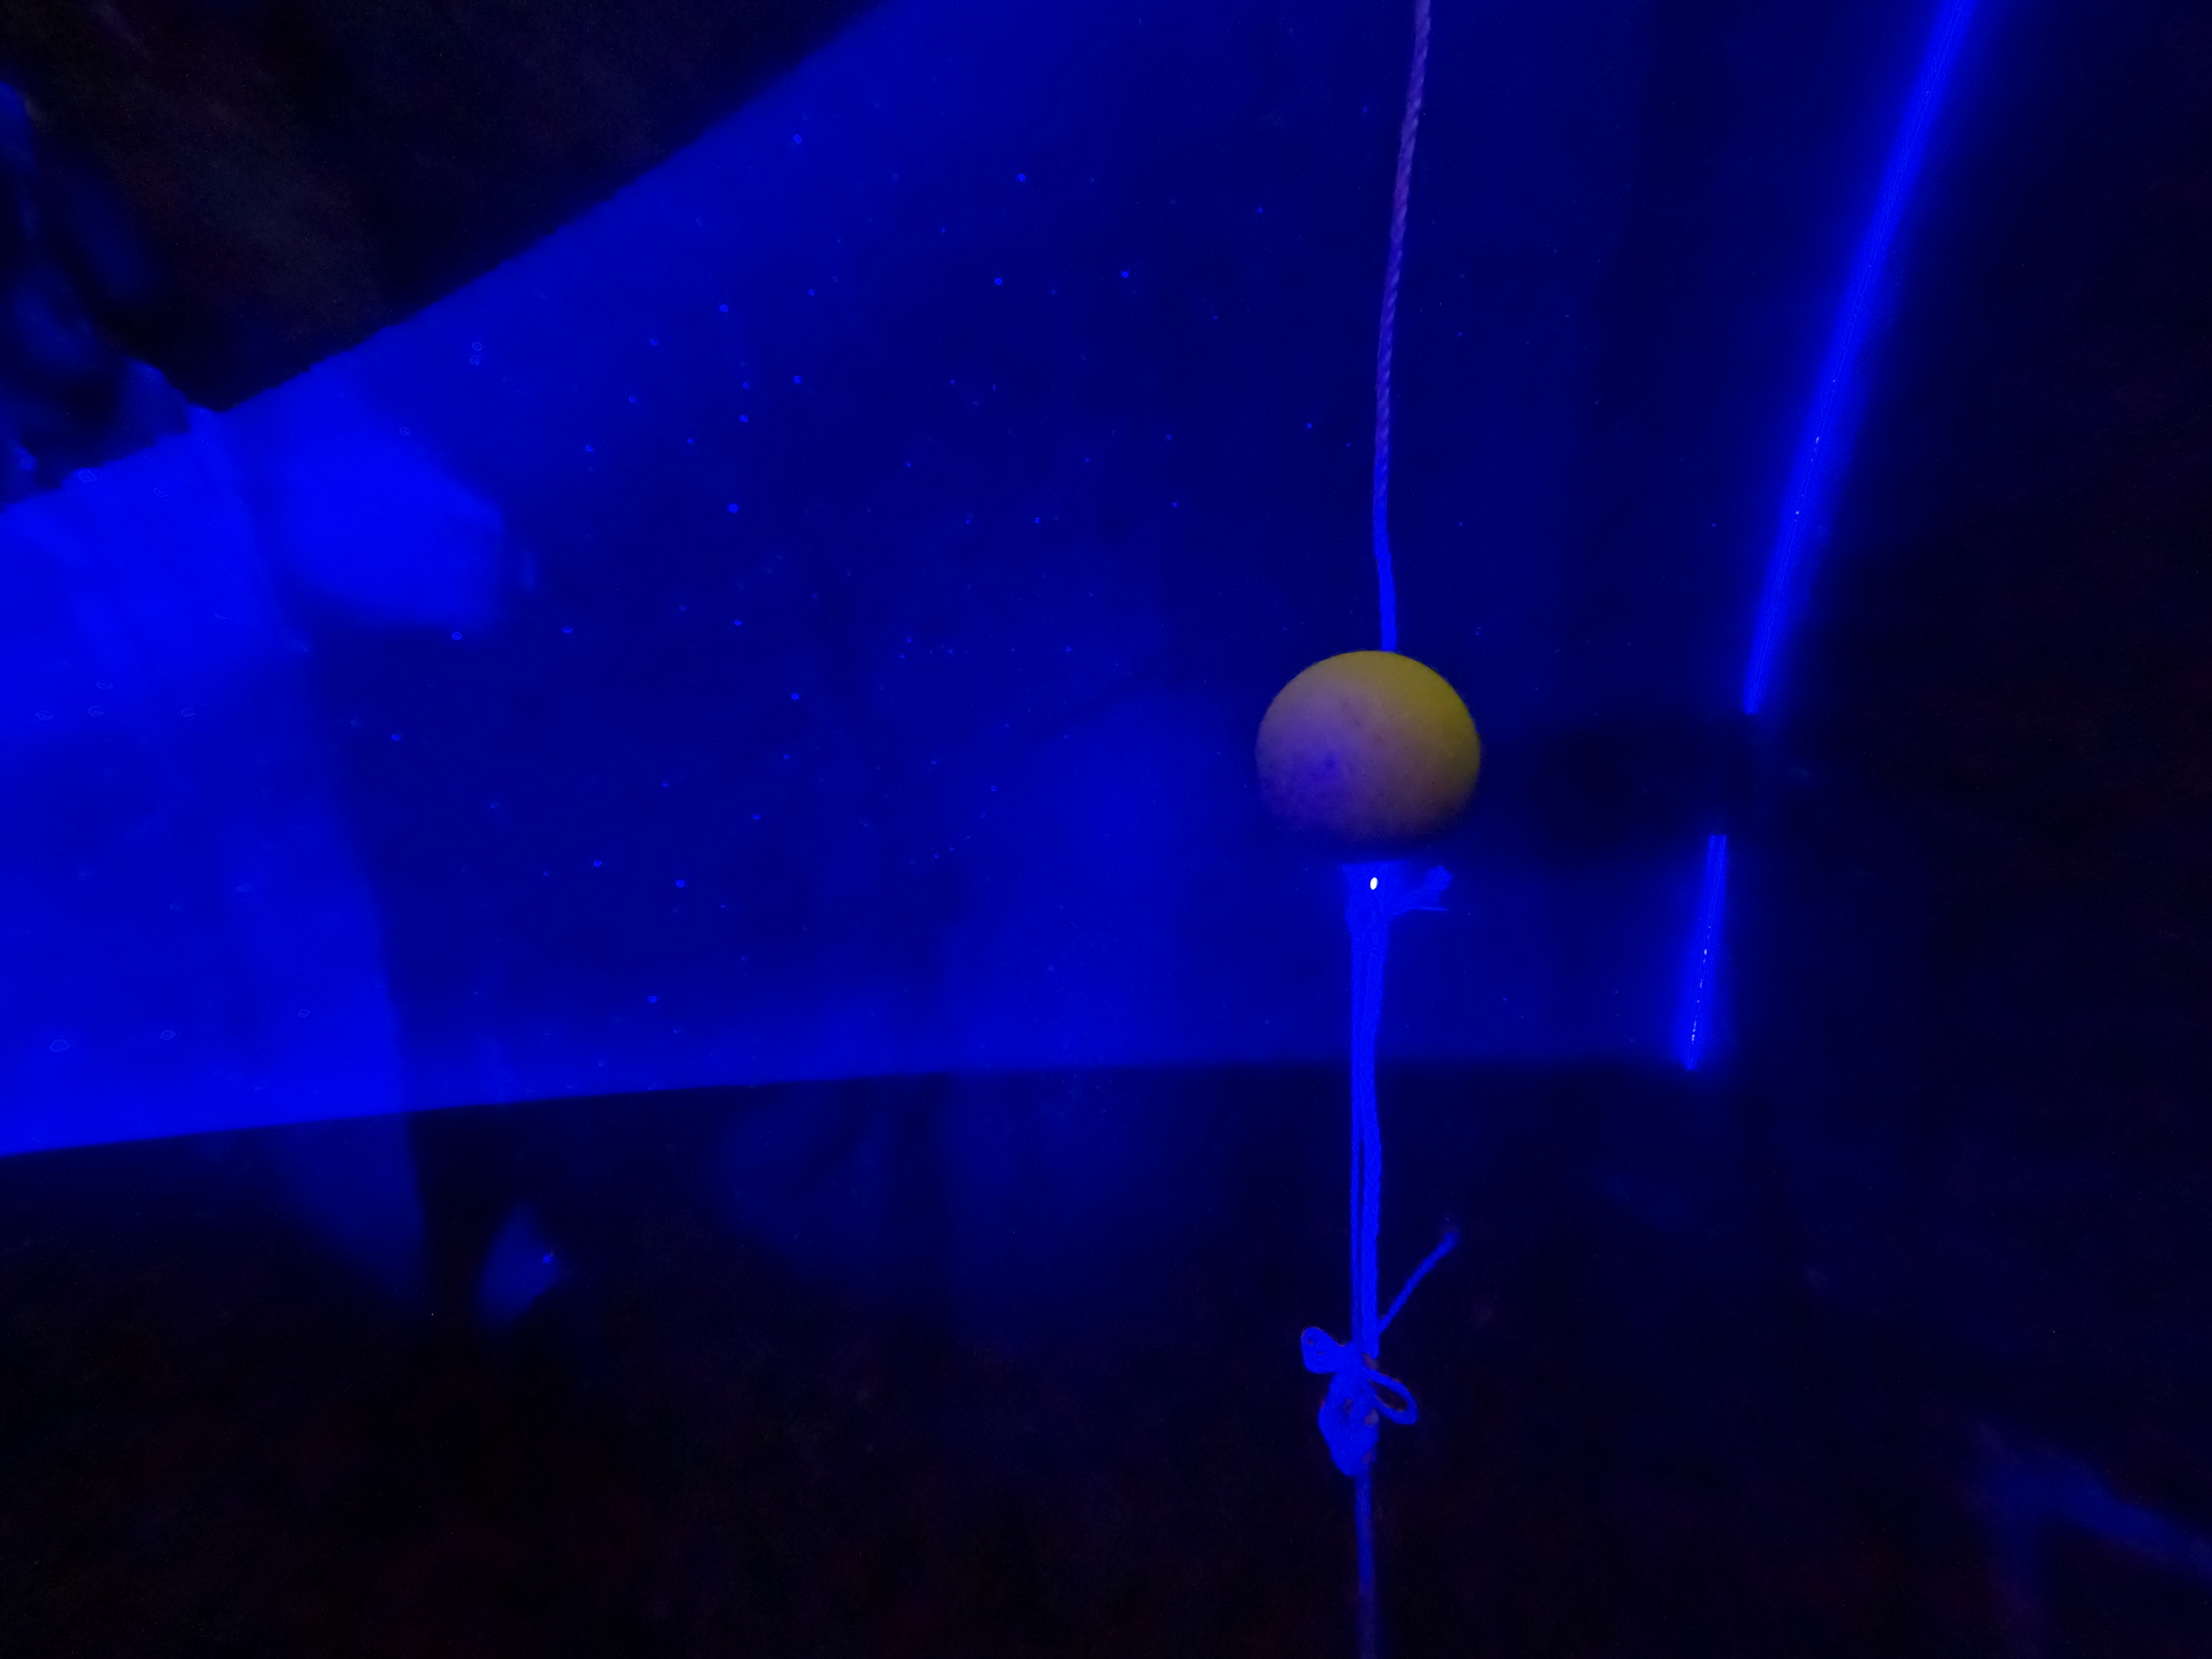

Supplement: Supplementary file 1220 [file G0032934.pdf › 7/G0032934.pdf]

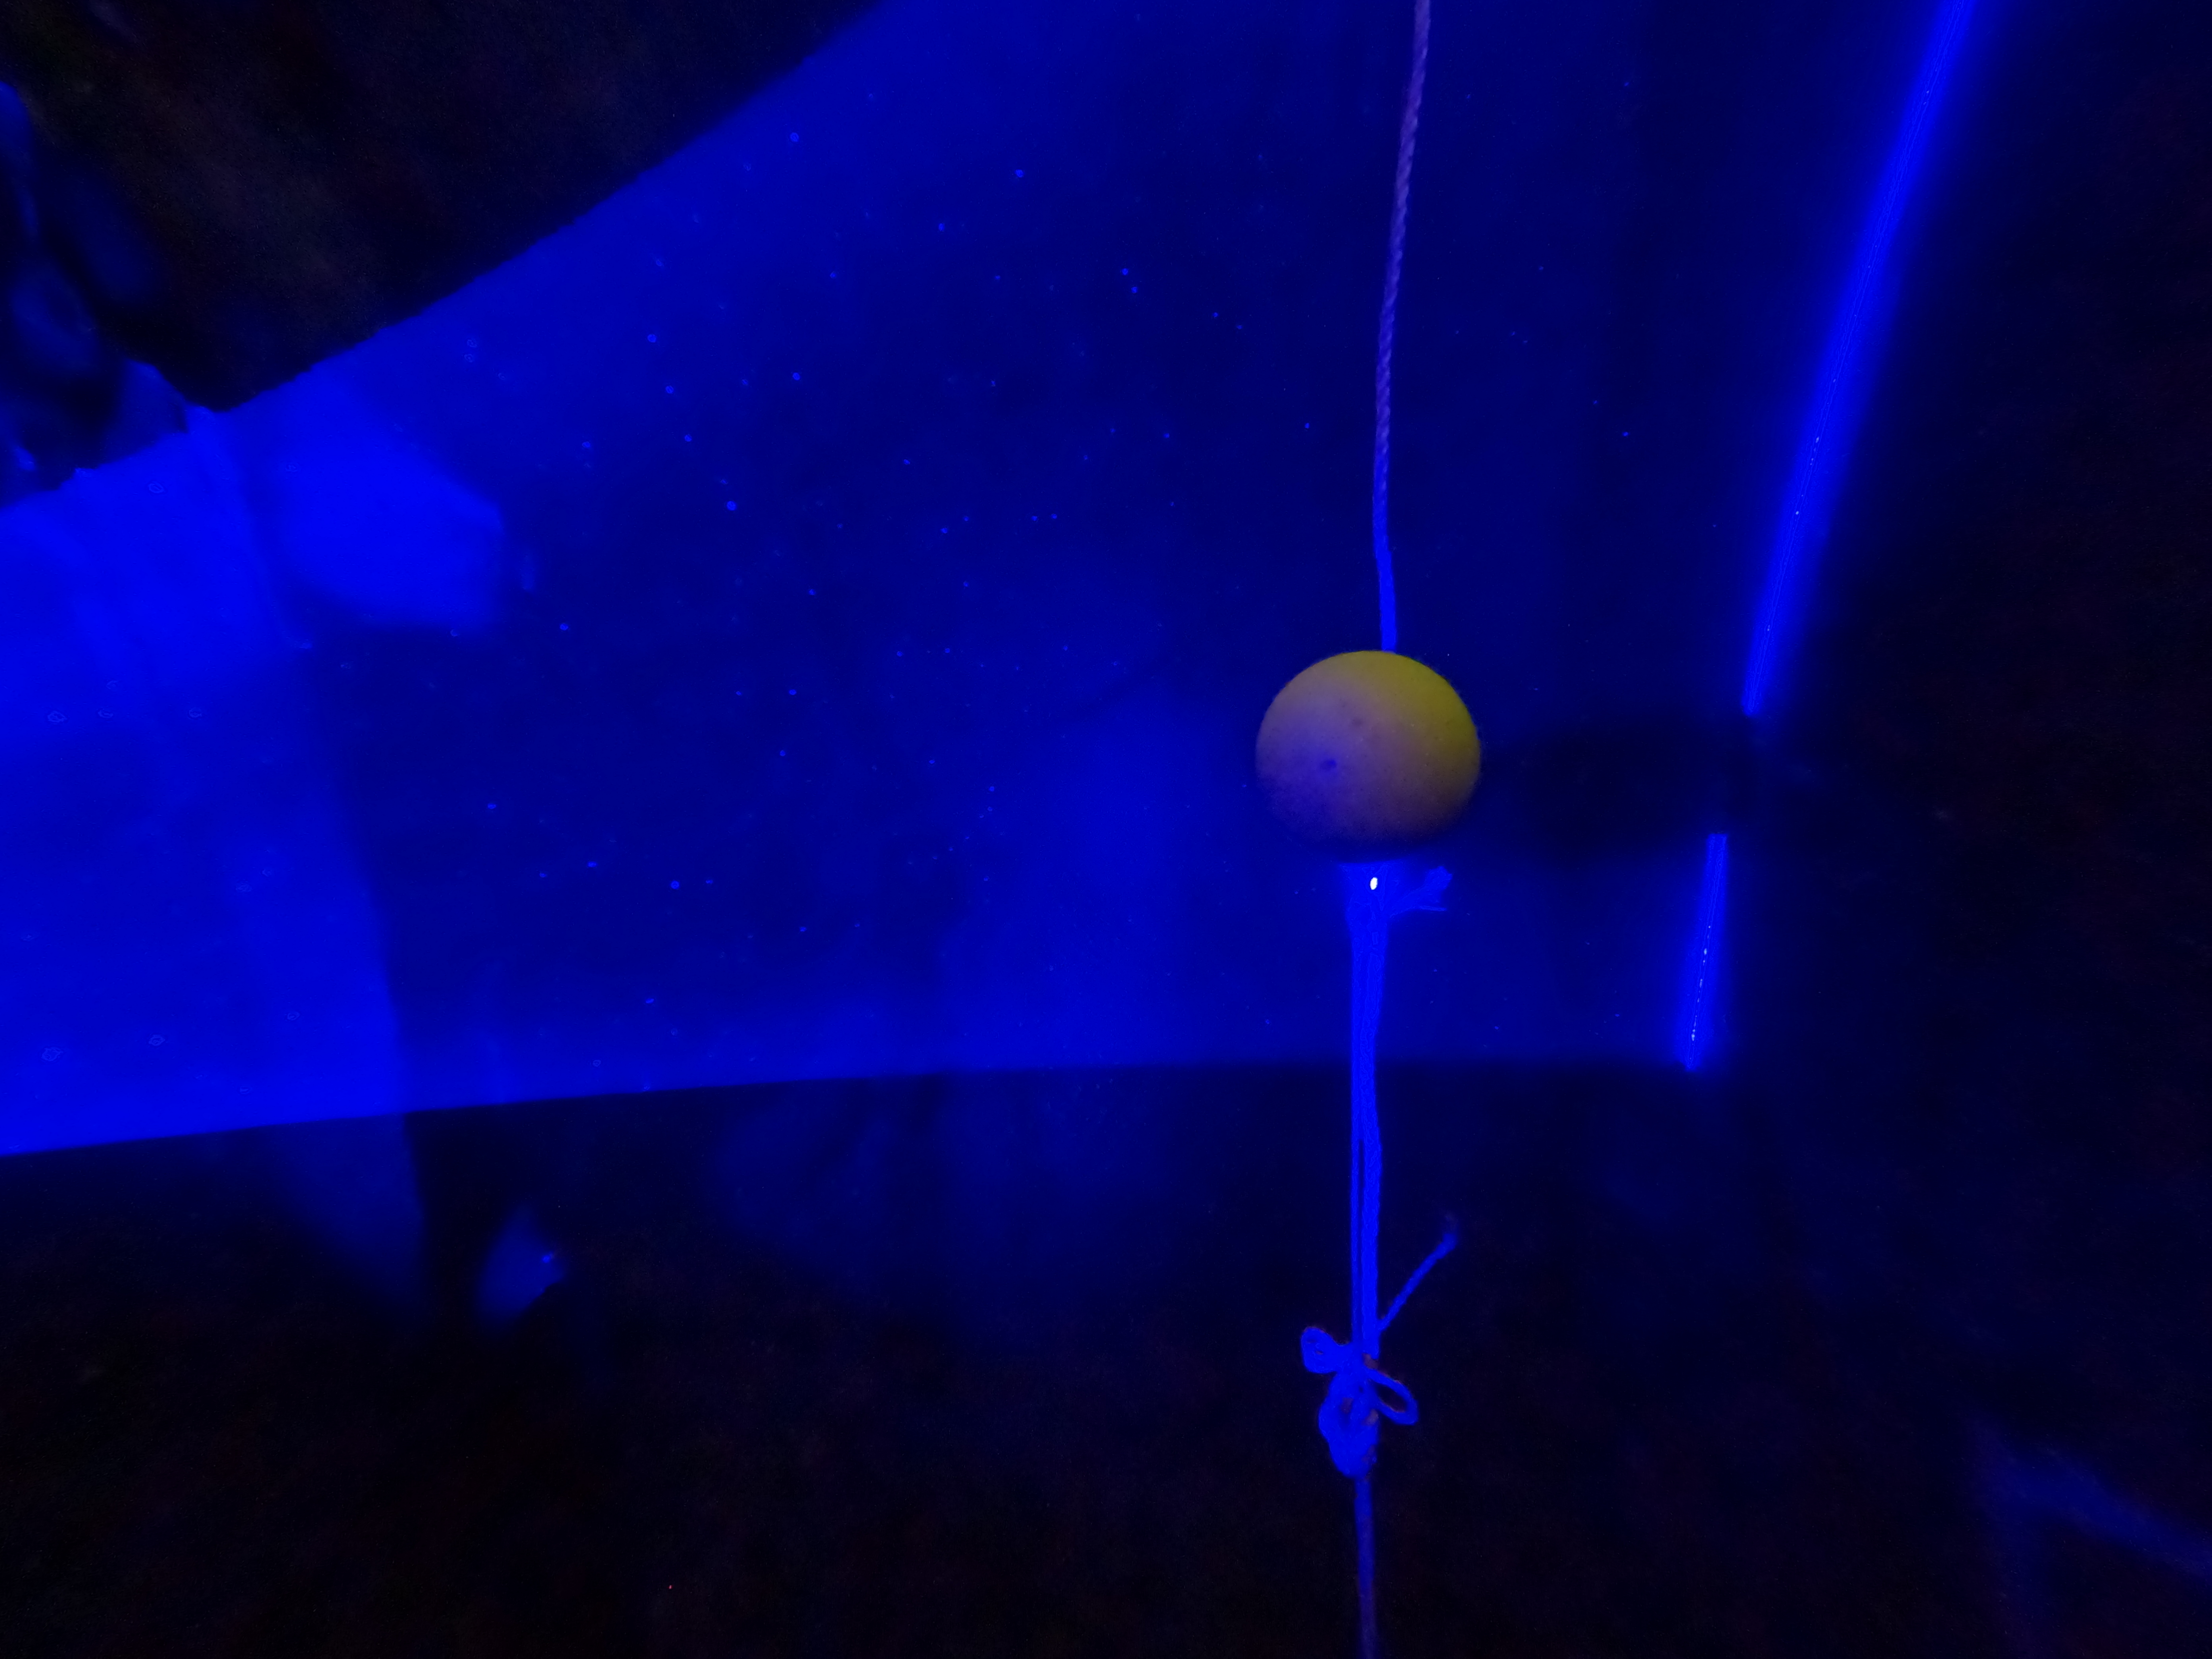

Supplement: Supplementary file 1221 [file G0032935.pdf › 7/G0032935.pdf]

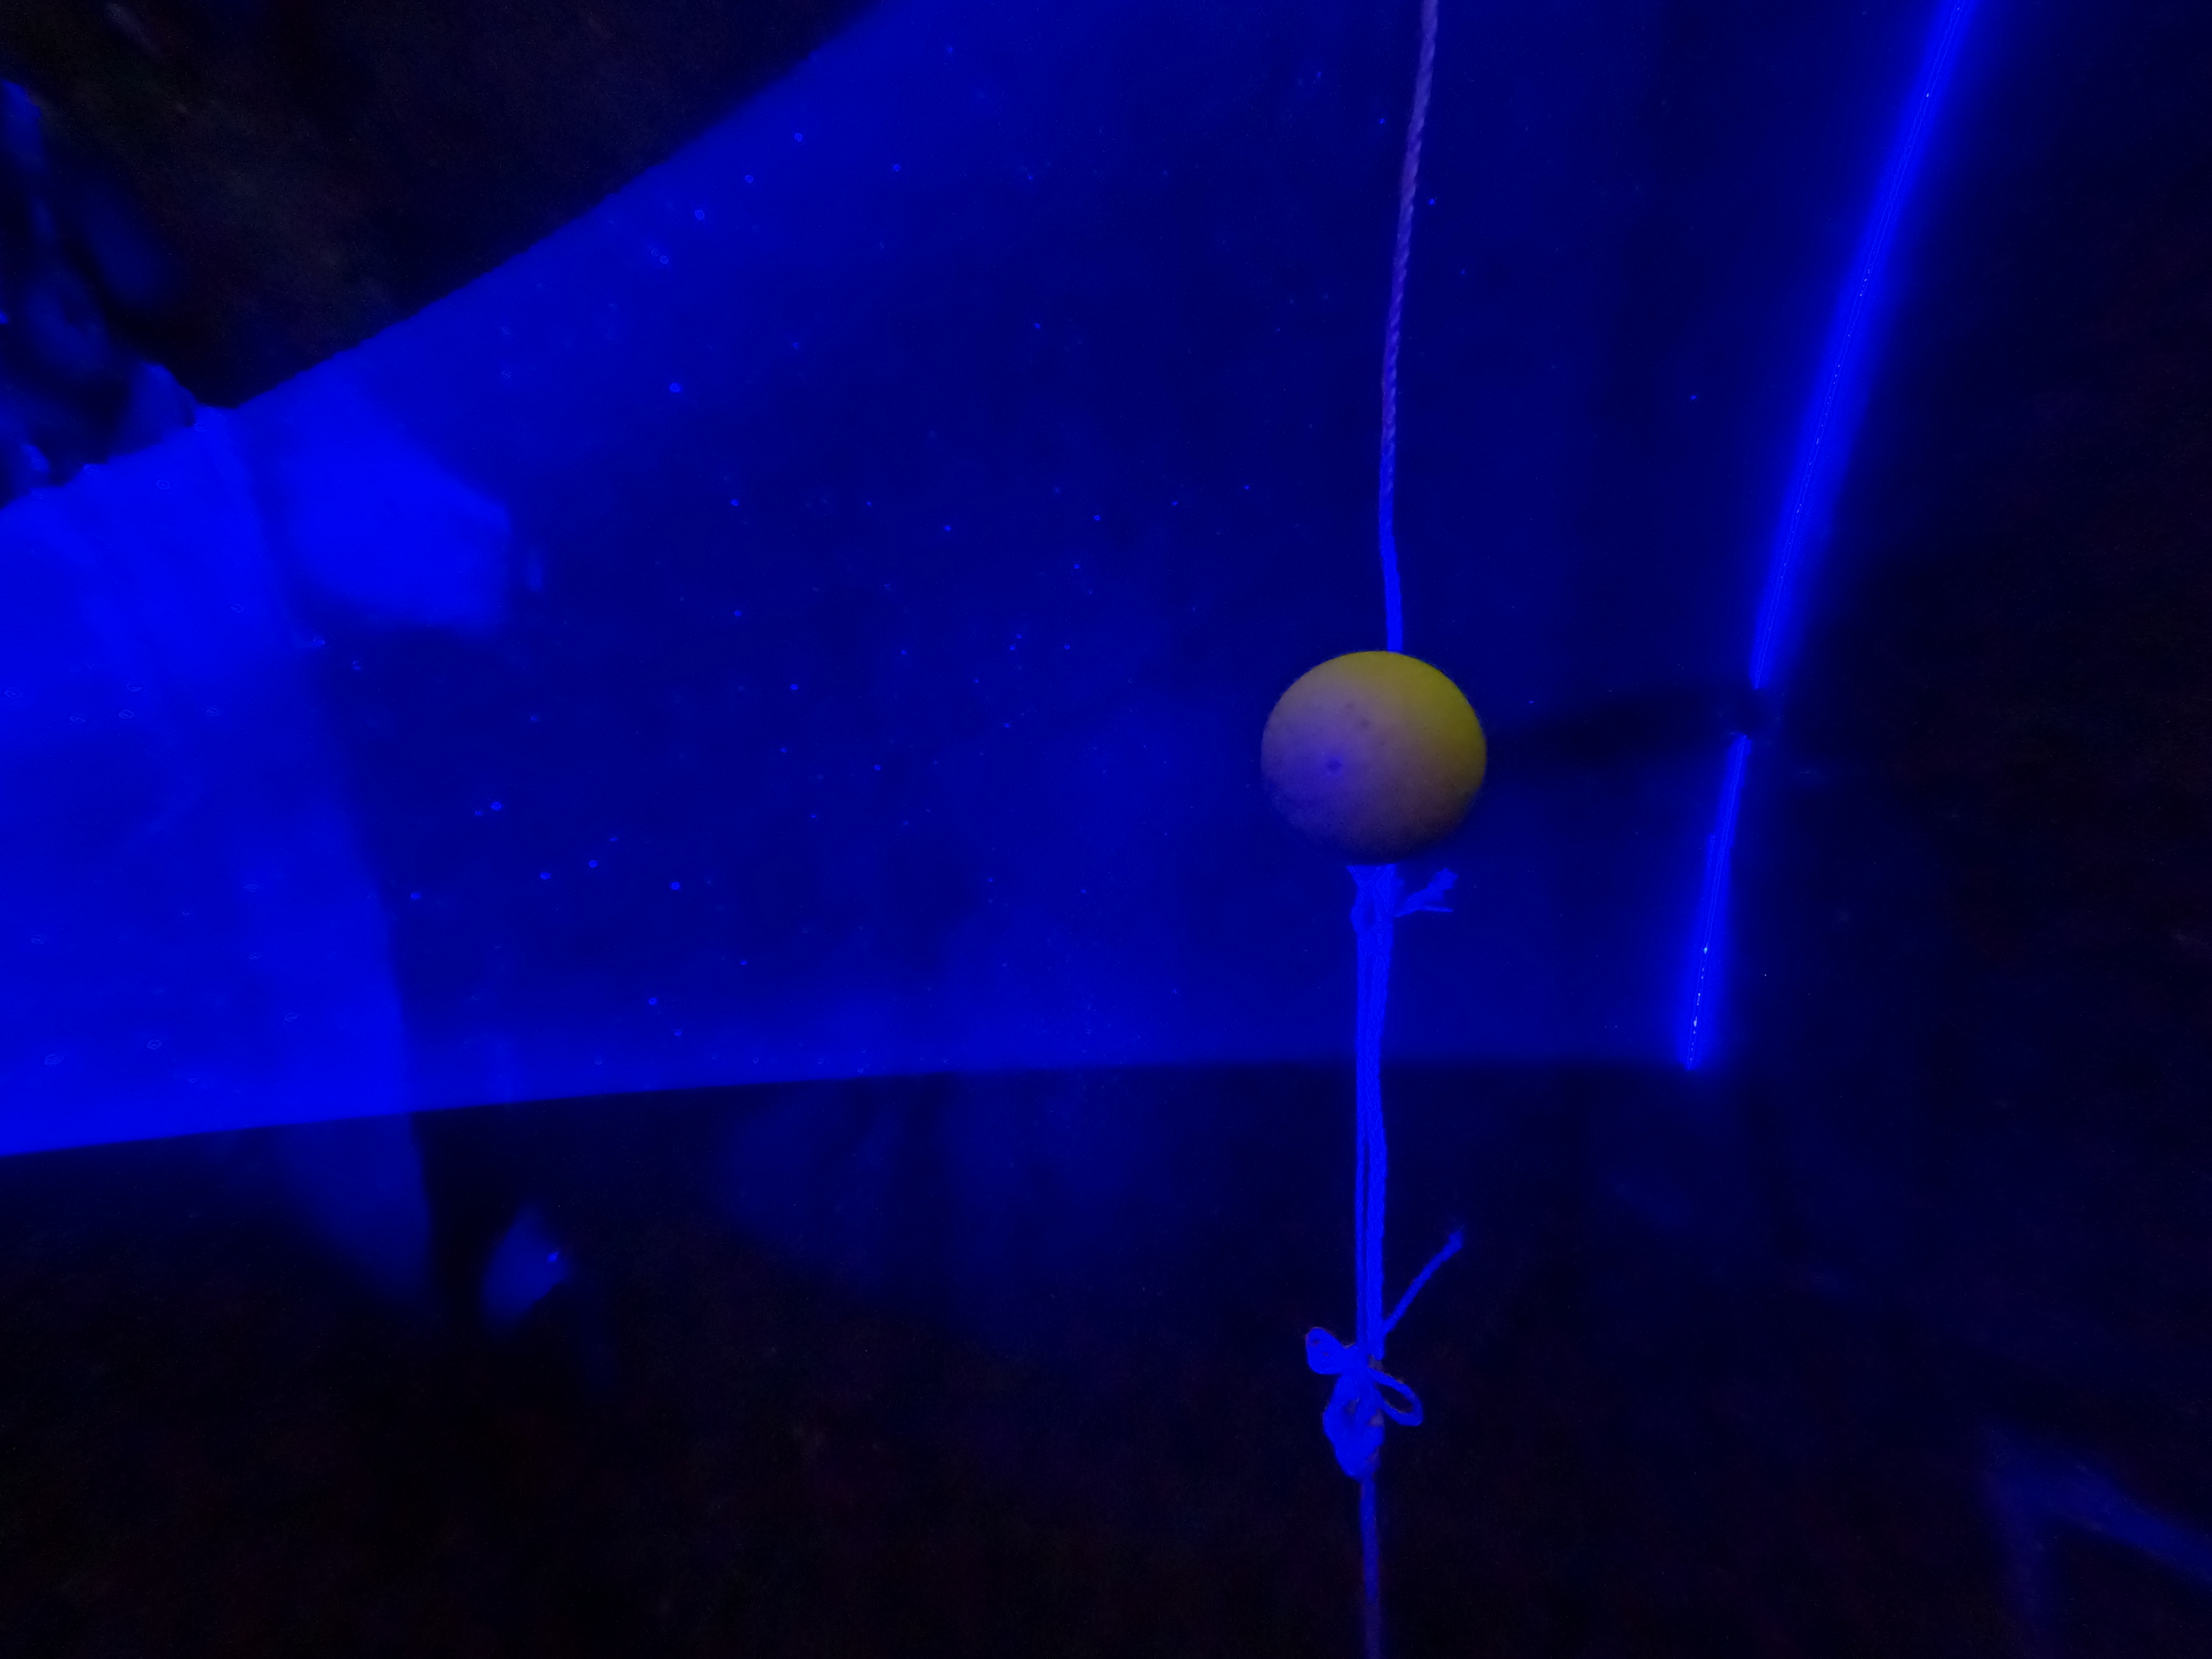

Supplement: Supplementary file 1222 [file G0032936.pdf › 7/G0032936.pdf]

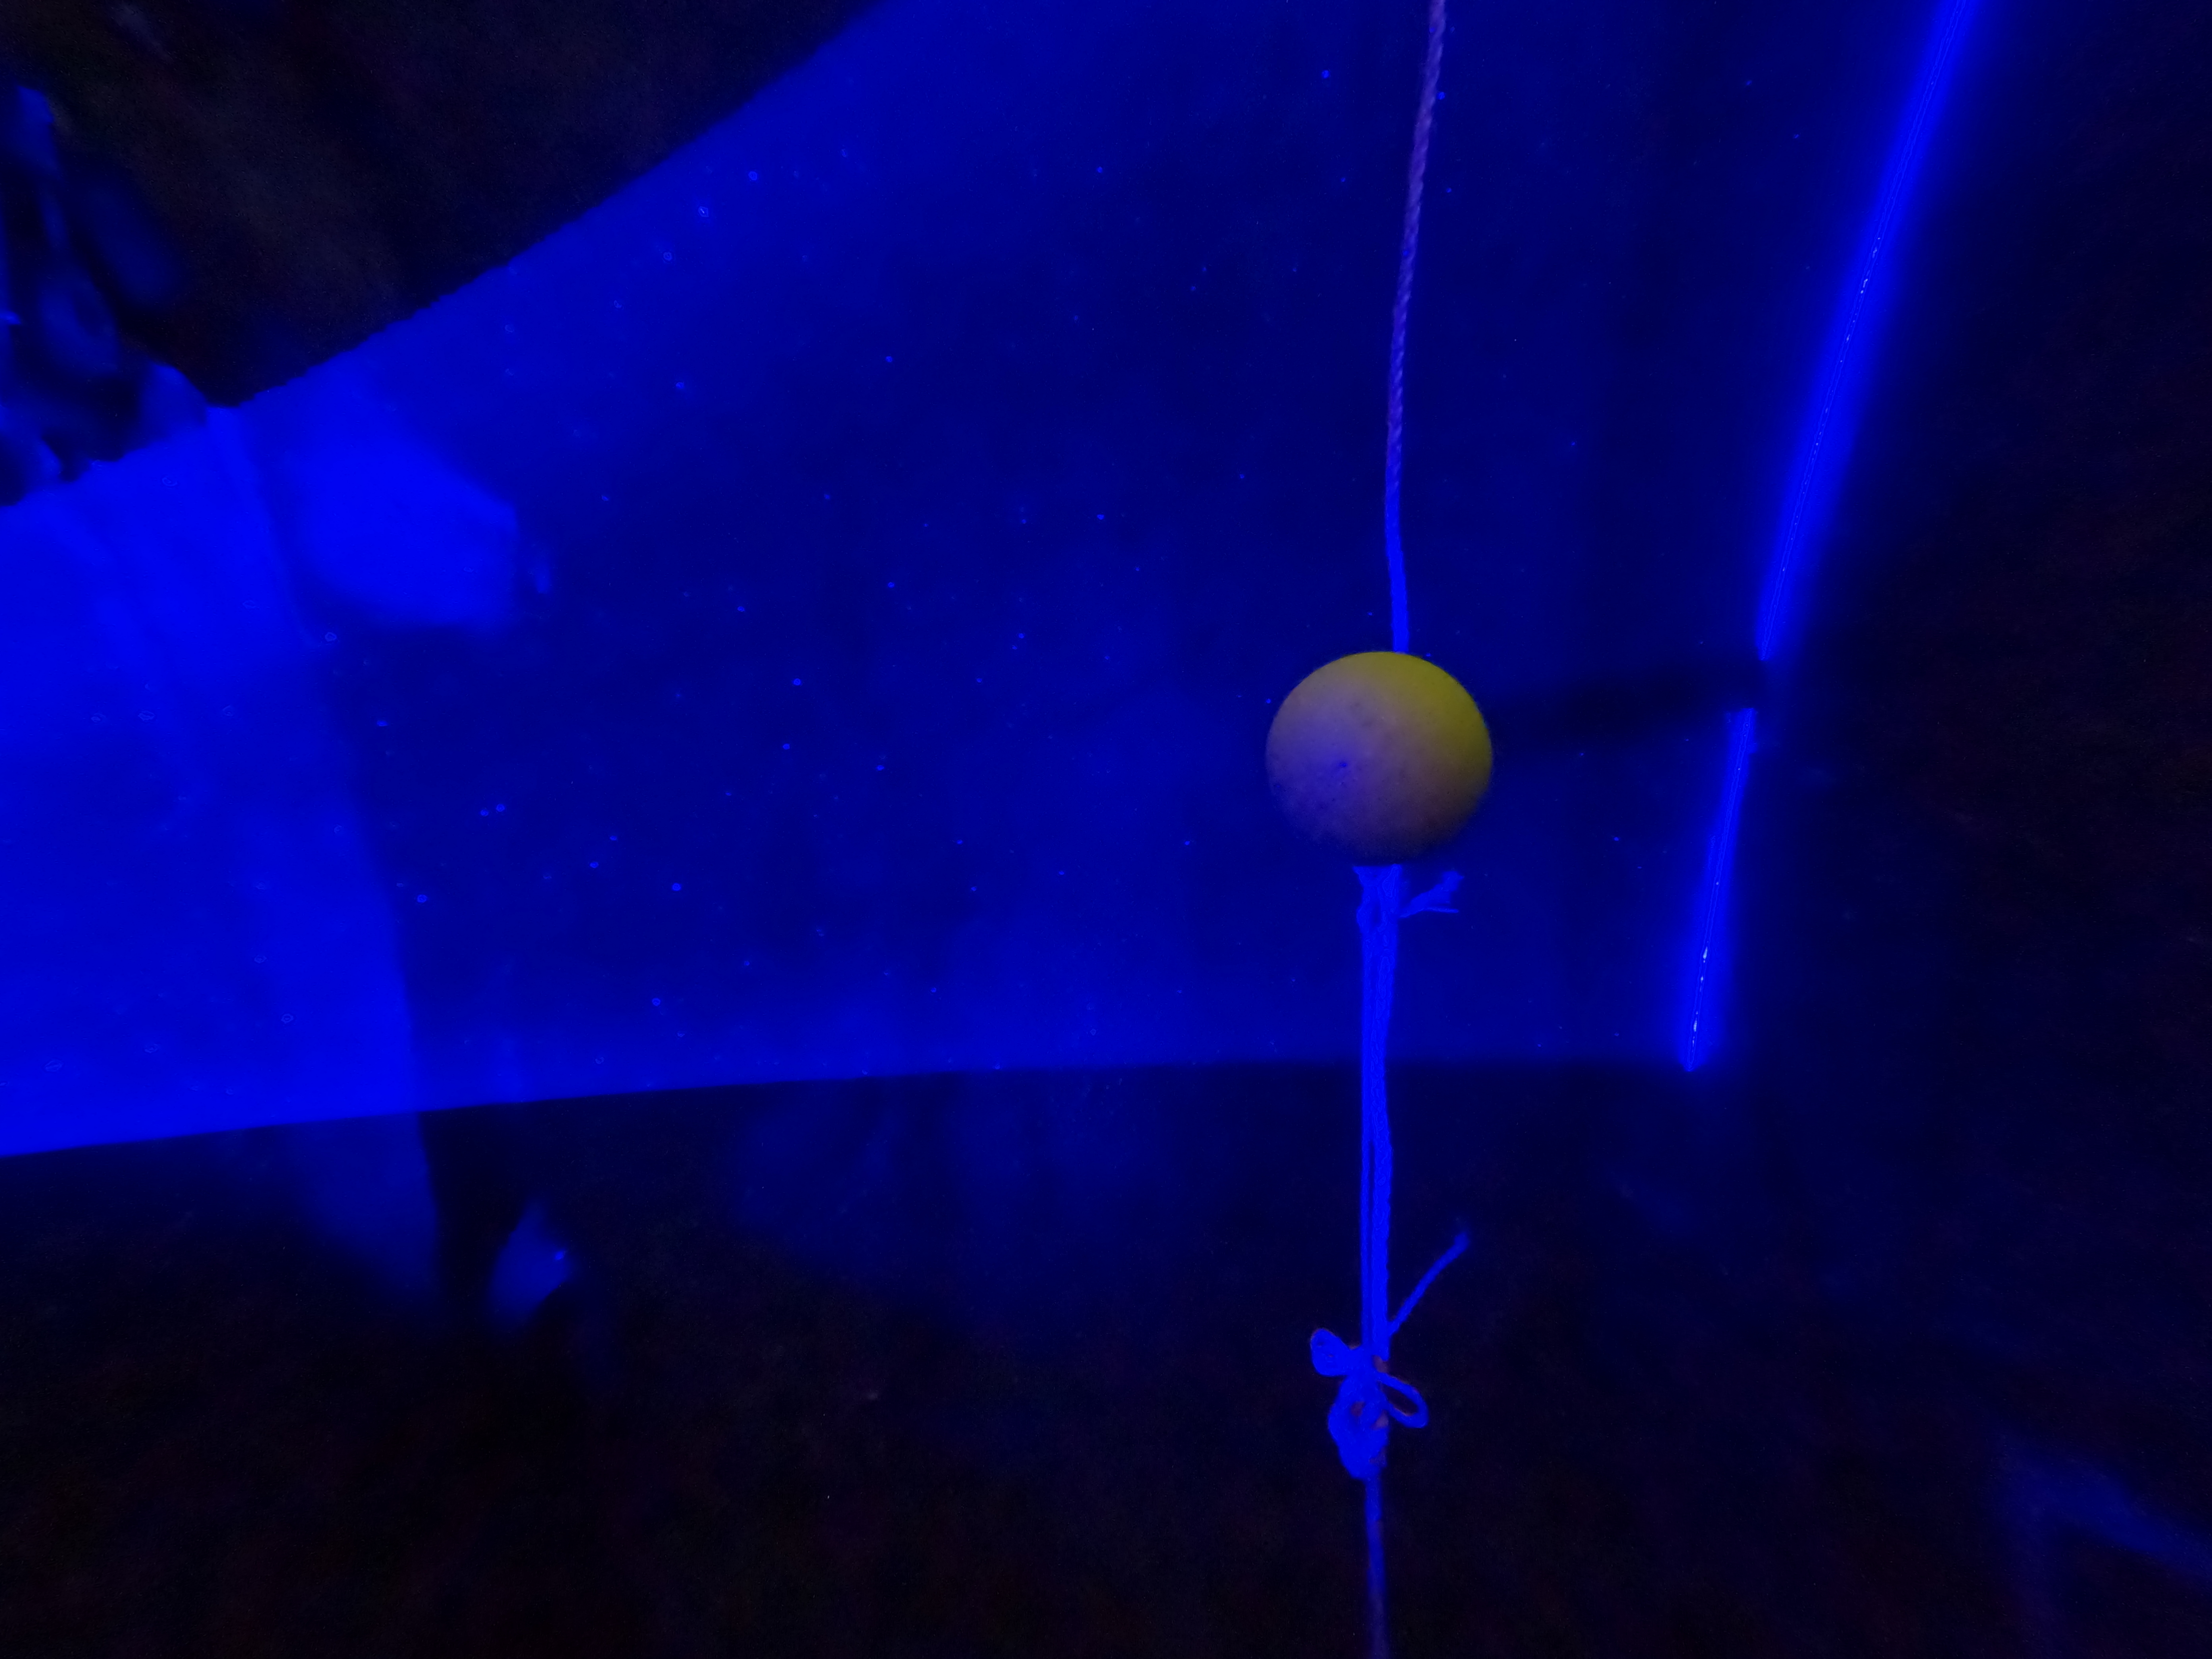

Supplement: Supplementary file 1223 [file G0032937.pdf › 7/G0032937.pdf]

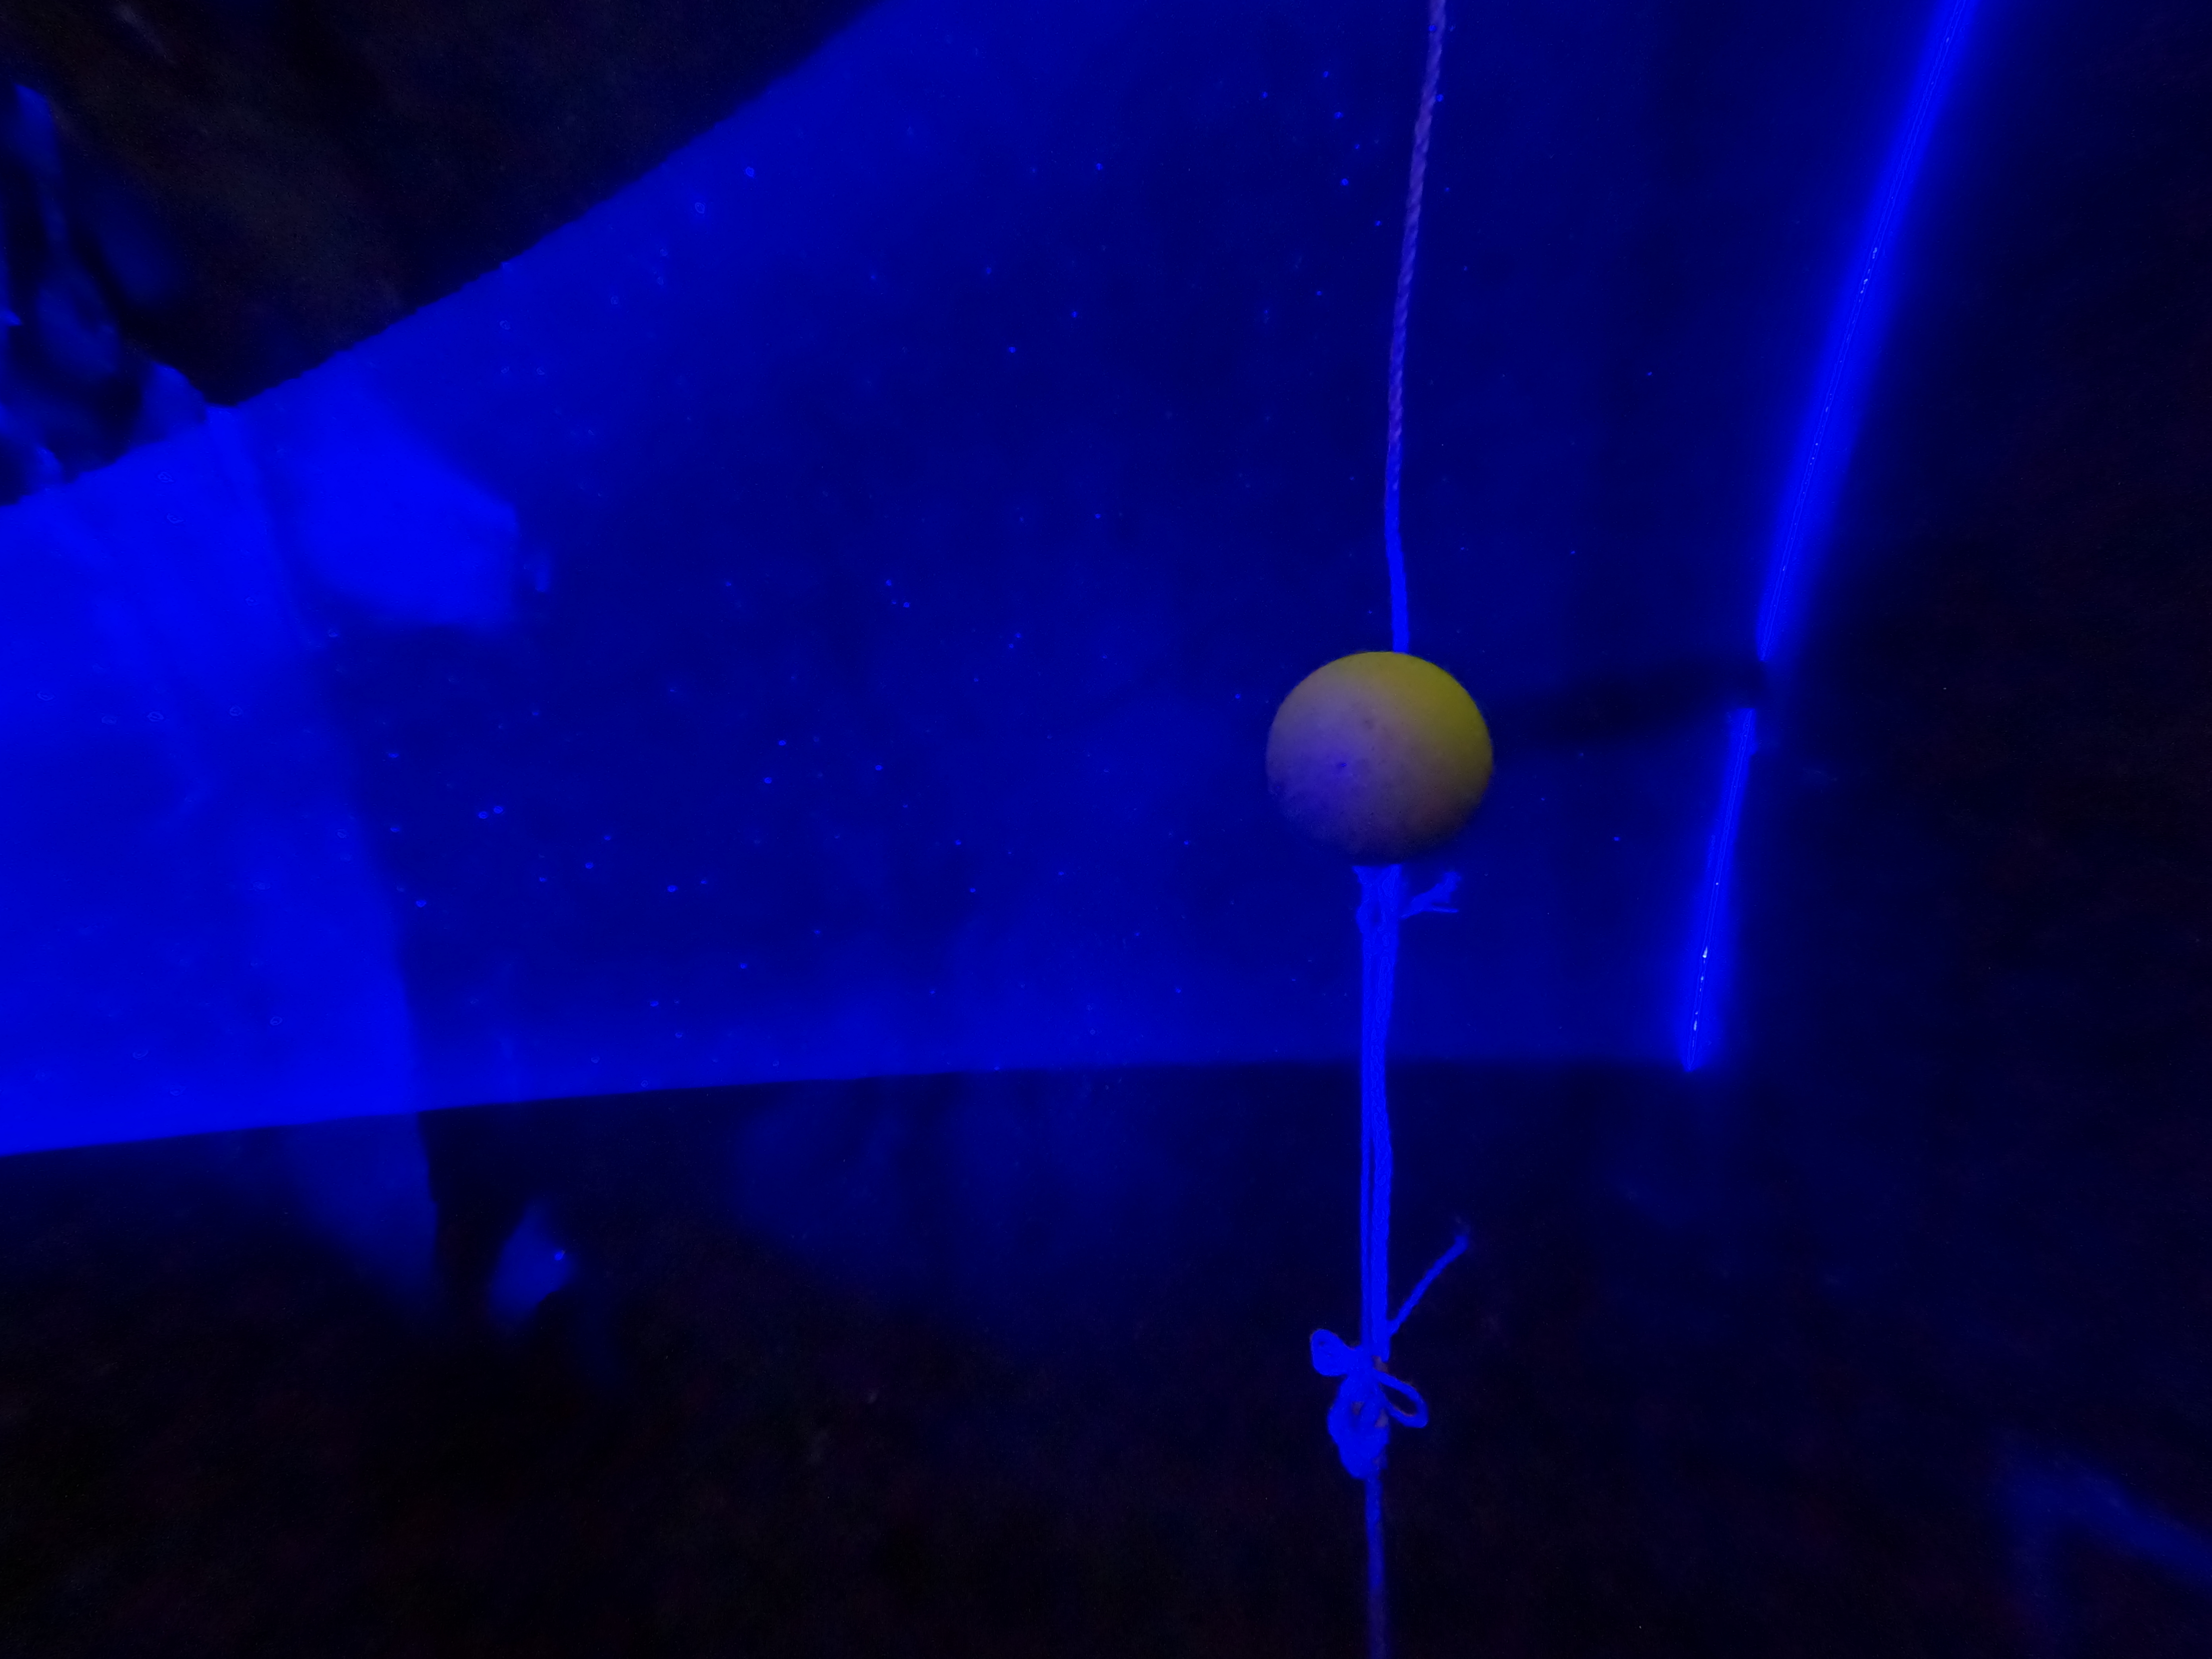

Supplement: Supplementary file 1224 [file G0032938.pdf › 7/G0032938.pdf]

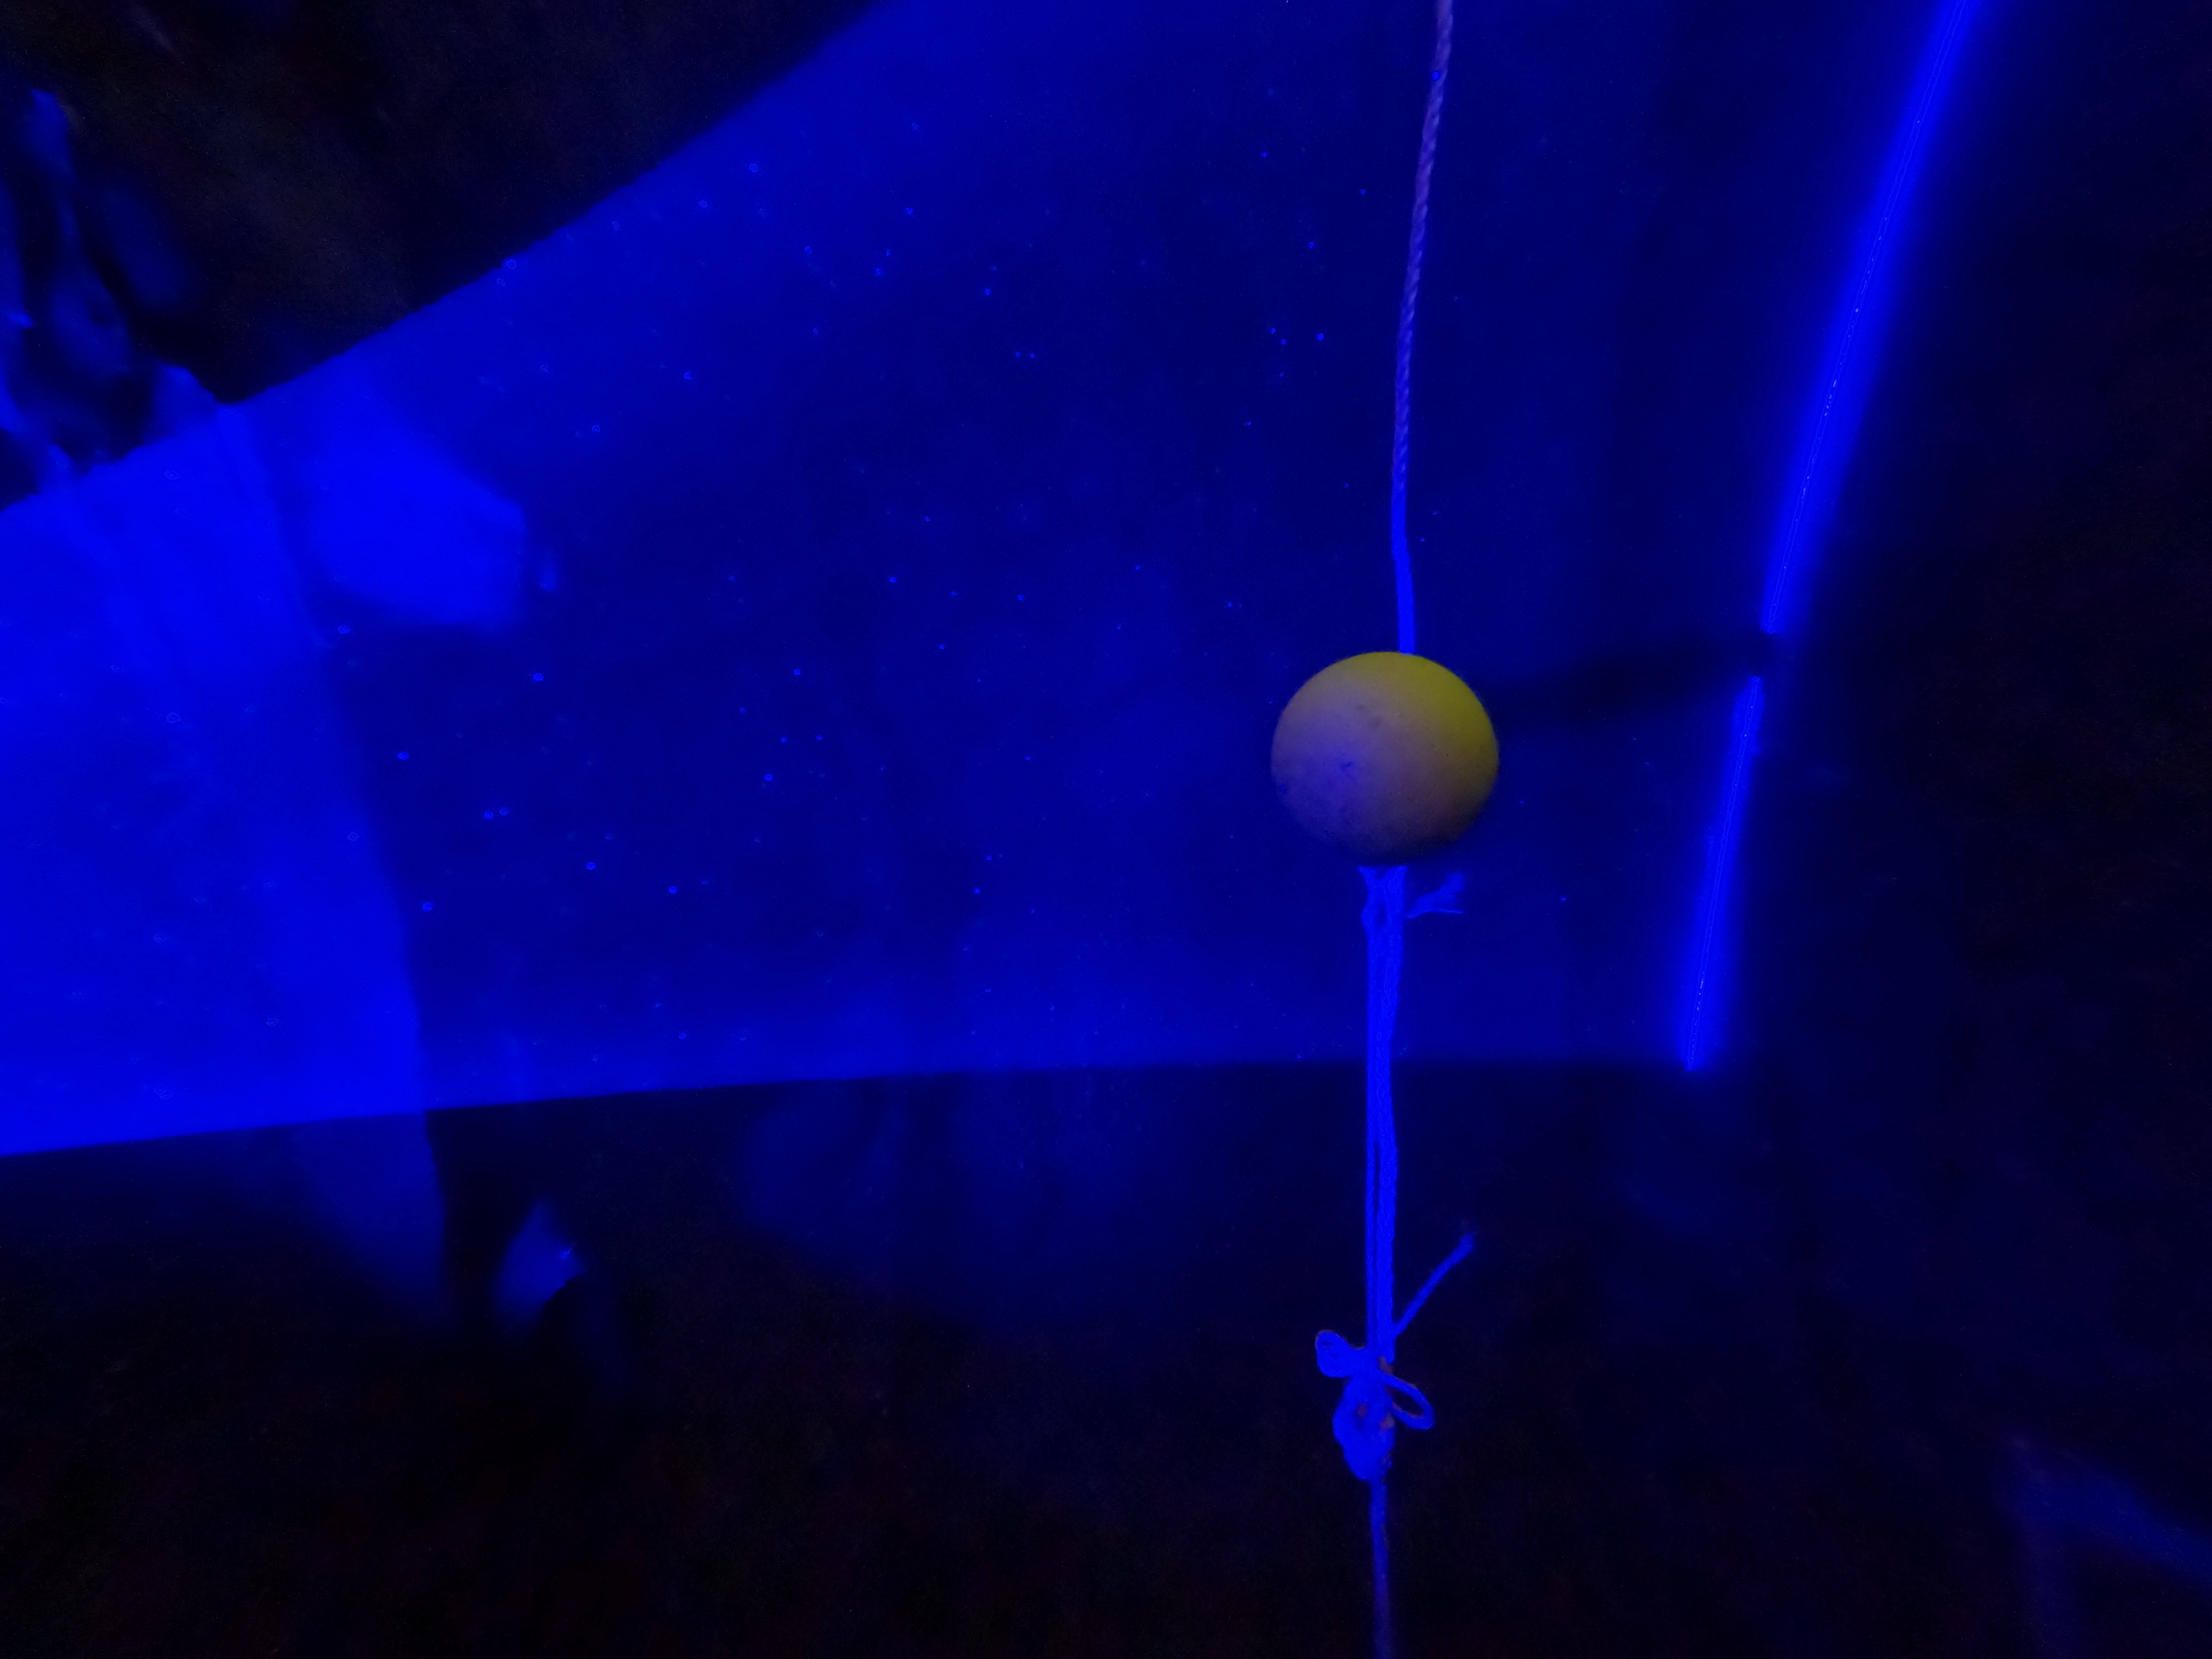

Supplement: Supplementary file 1225 [file G0032939.pdf › 7/G0032939.pdf]

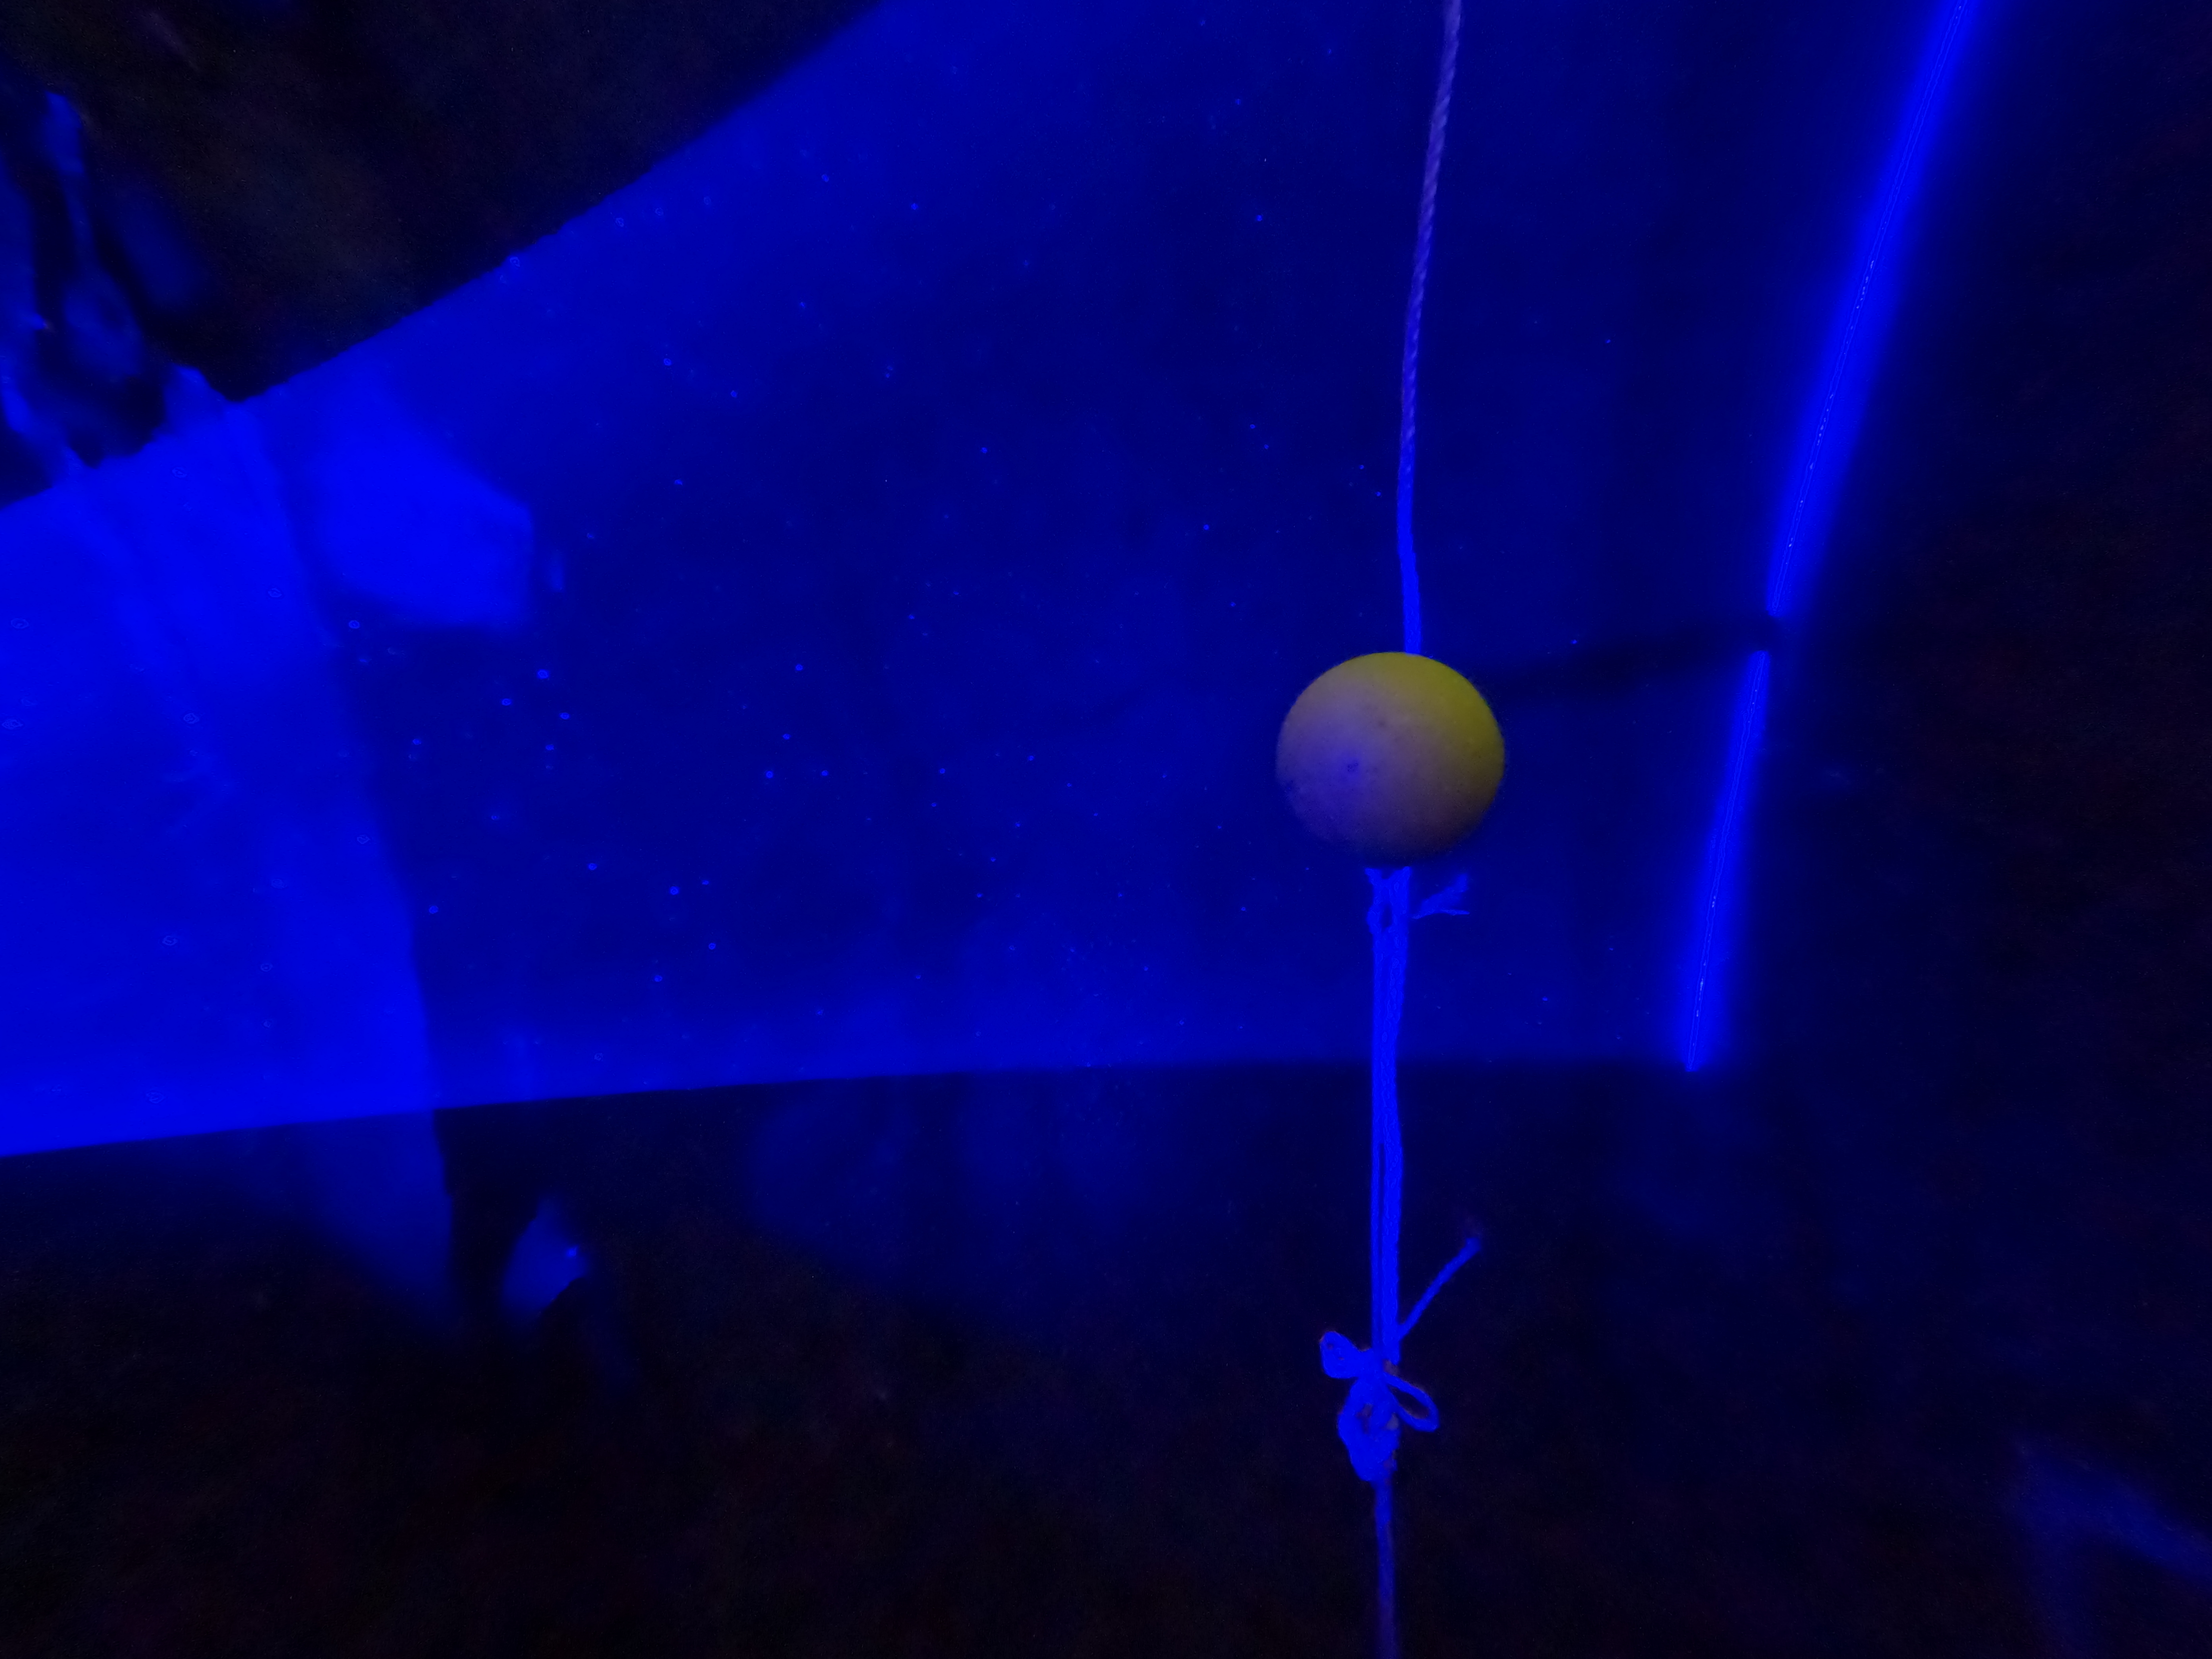

Supplement: Supplementary file 1226 [file G0032940.pdf › 7/G0032940.pdf]

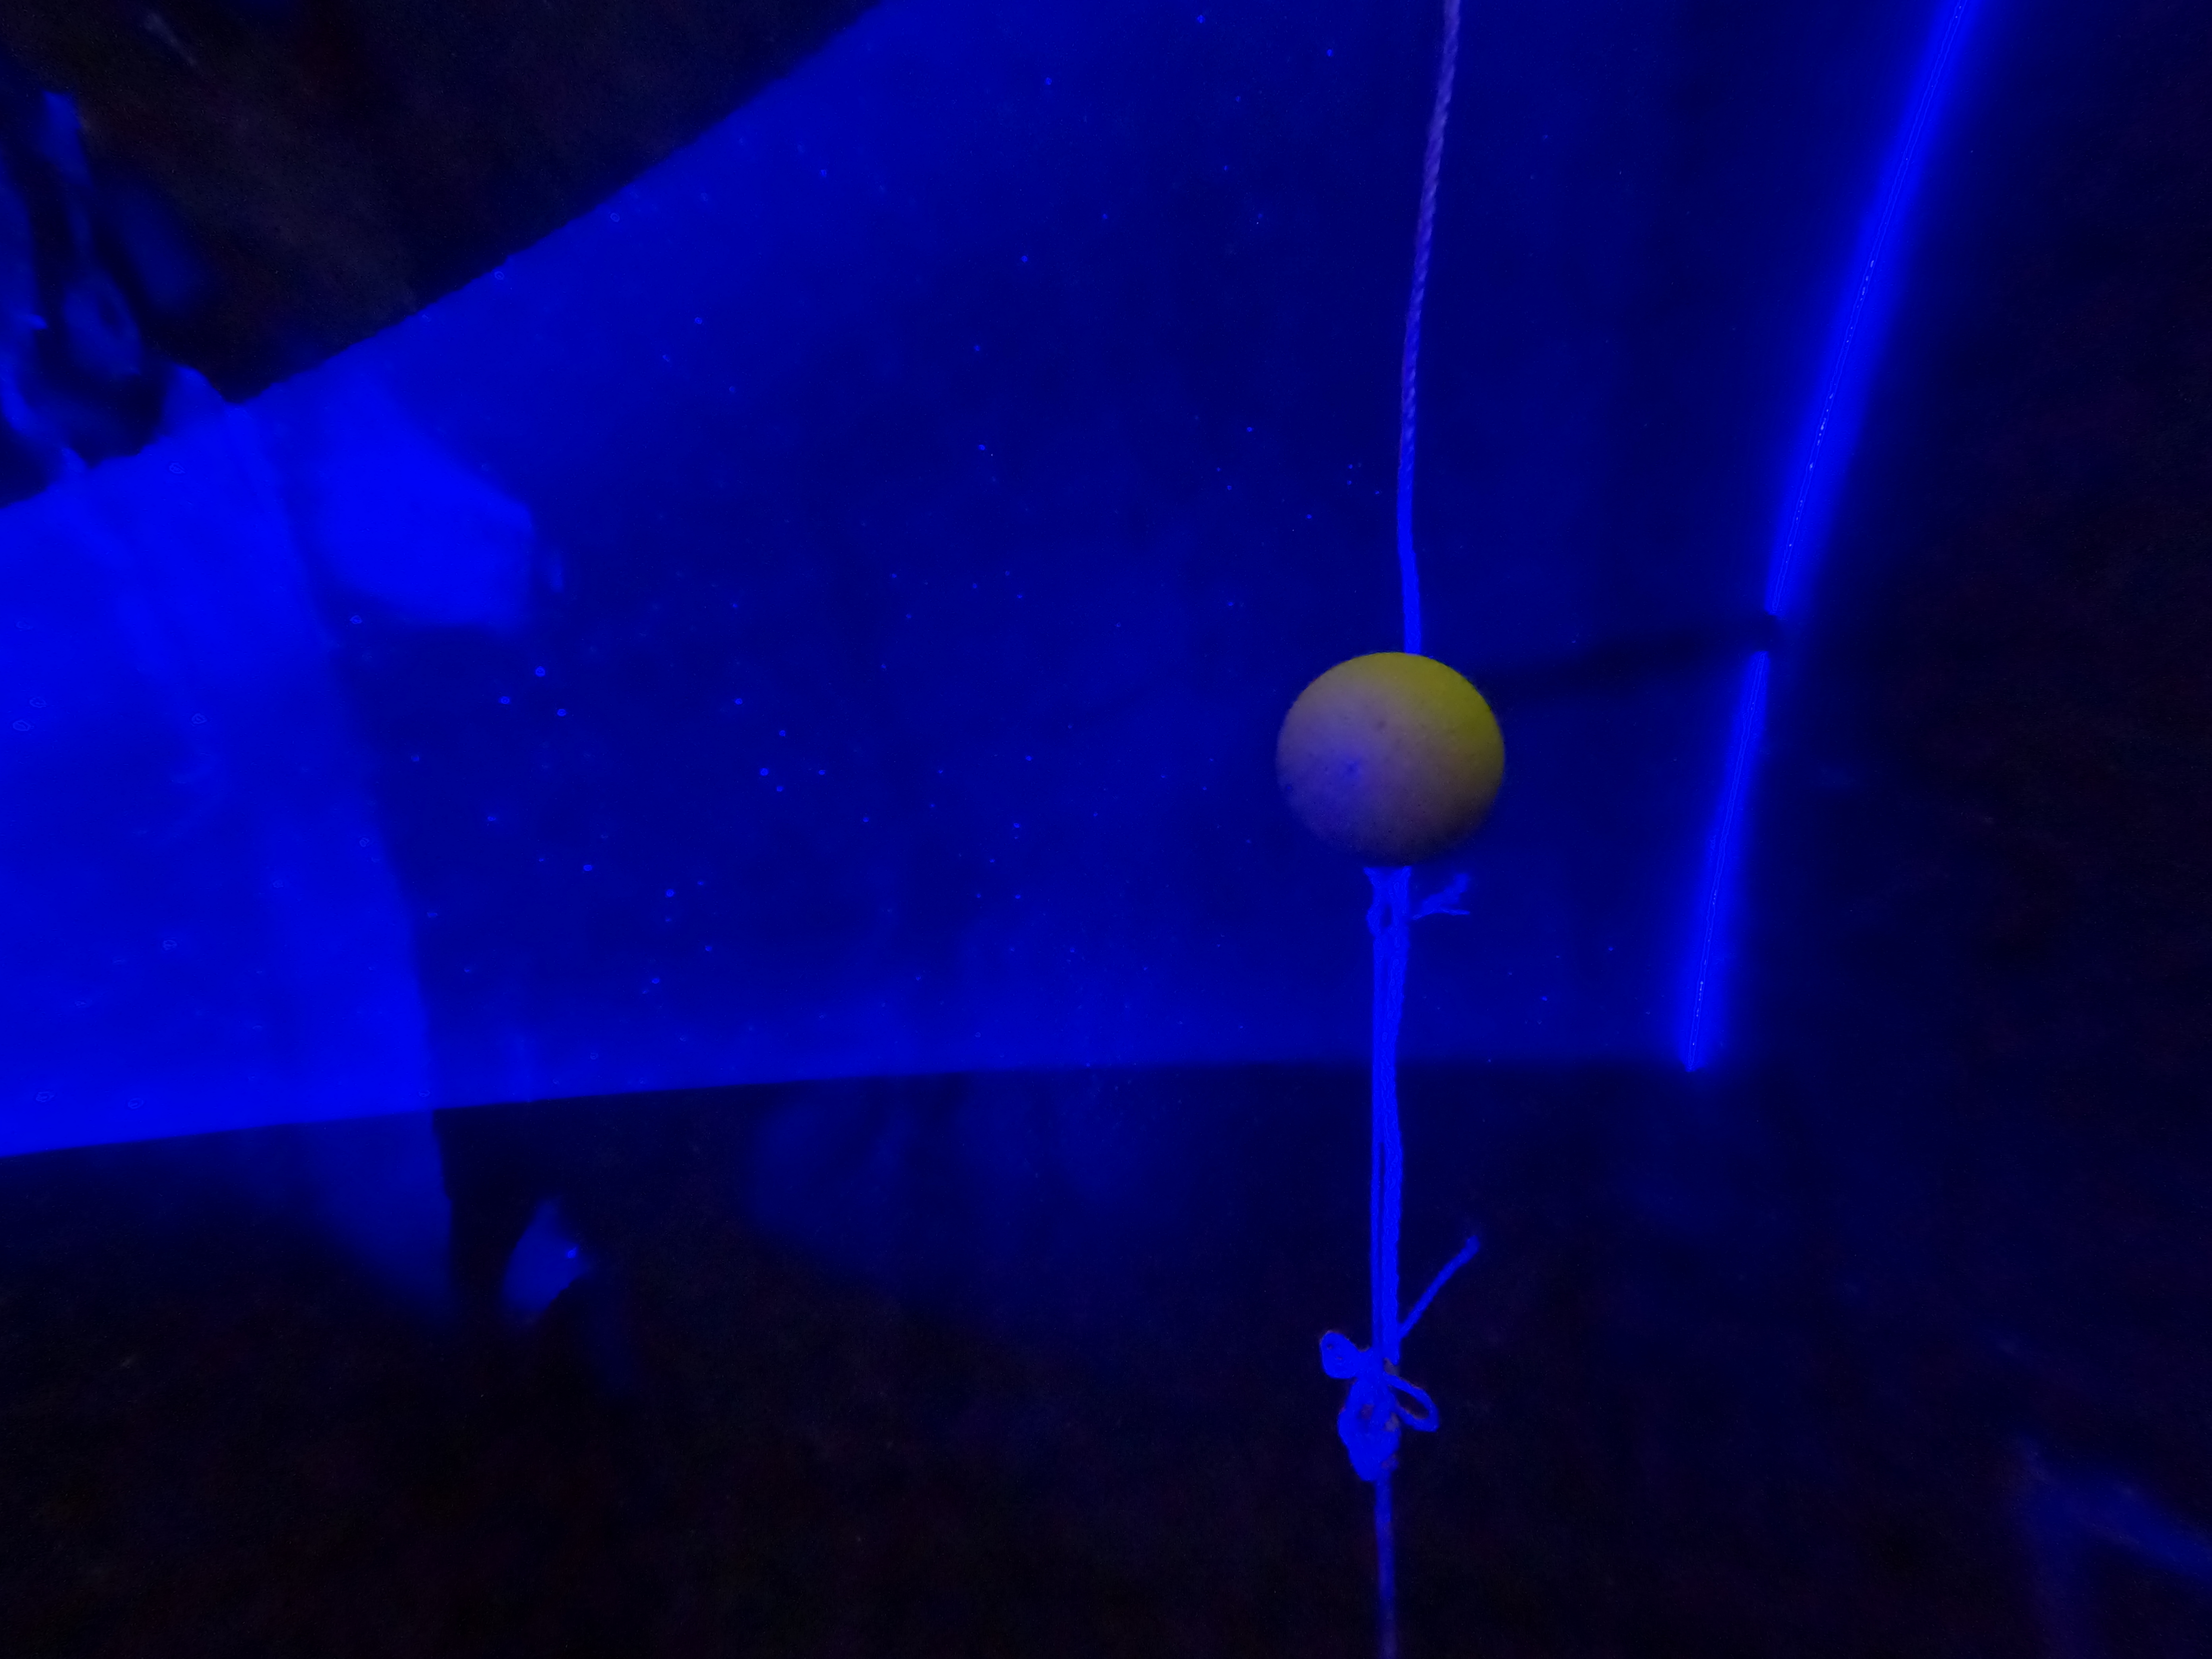

Supplement: Supplementary file 1227 [file G0032941.pdf › 7/G0032941.pdf]

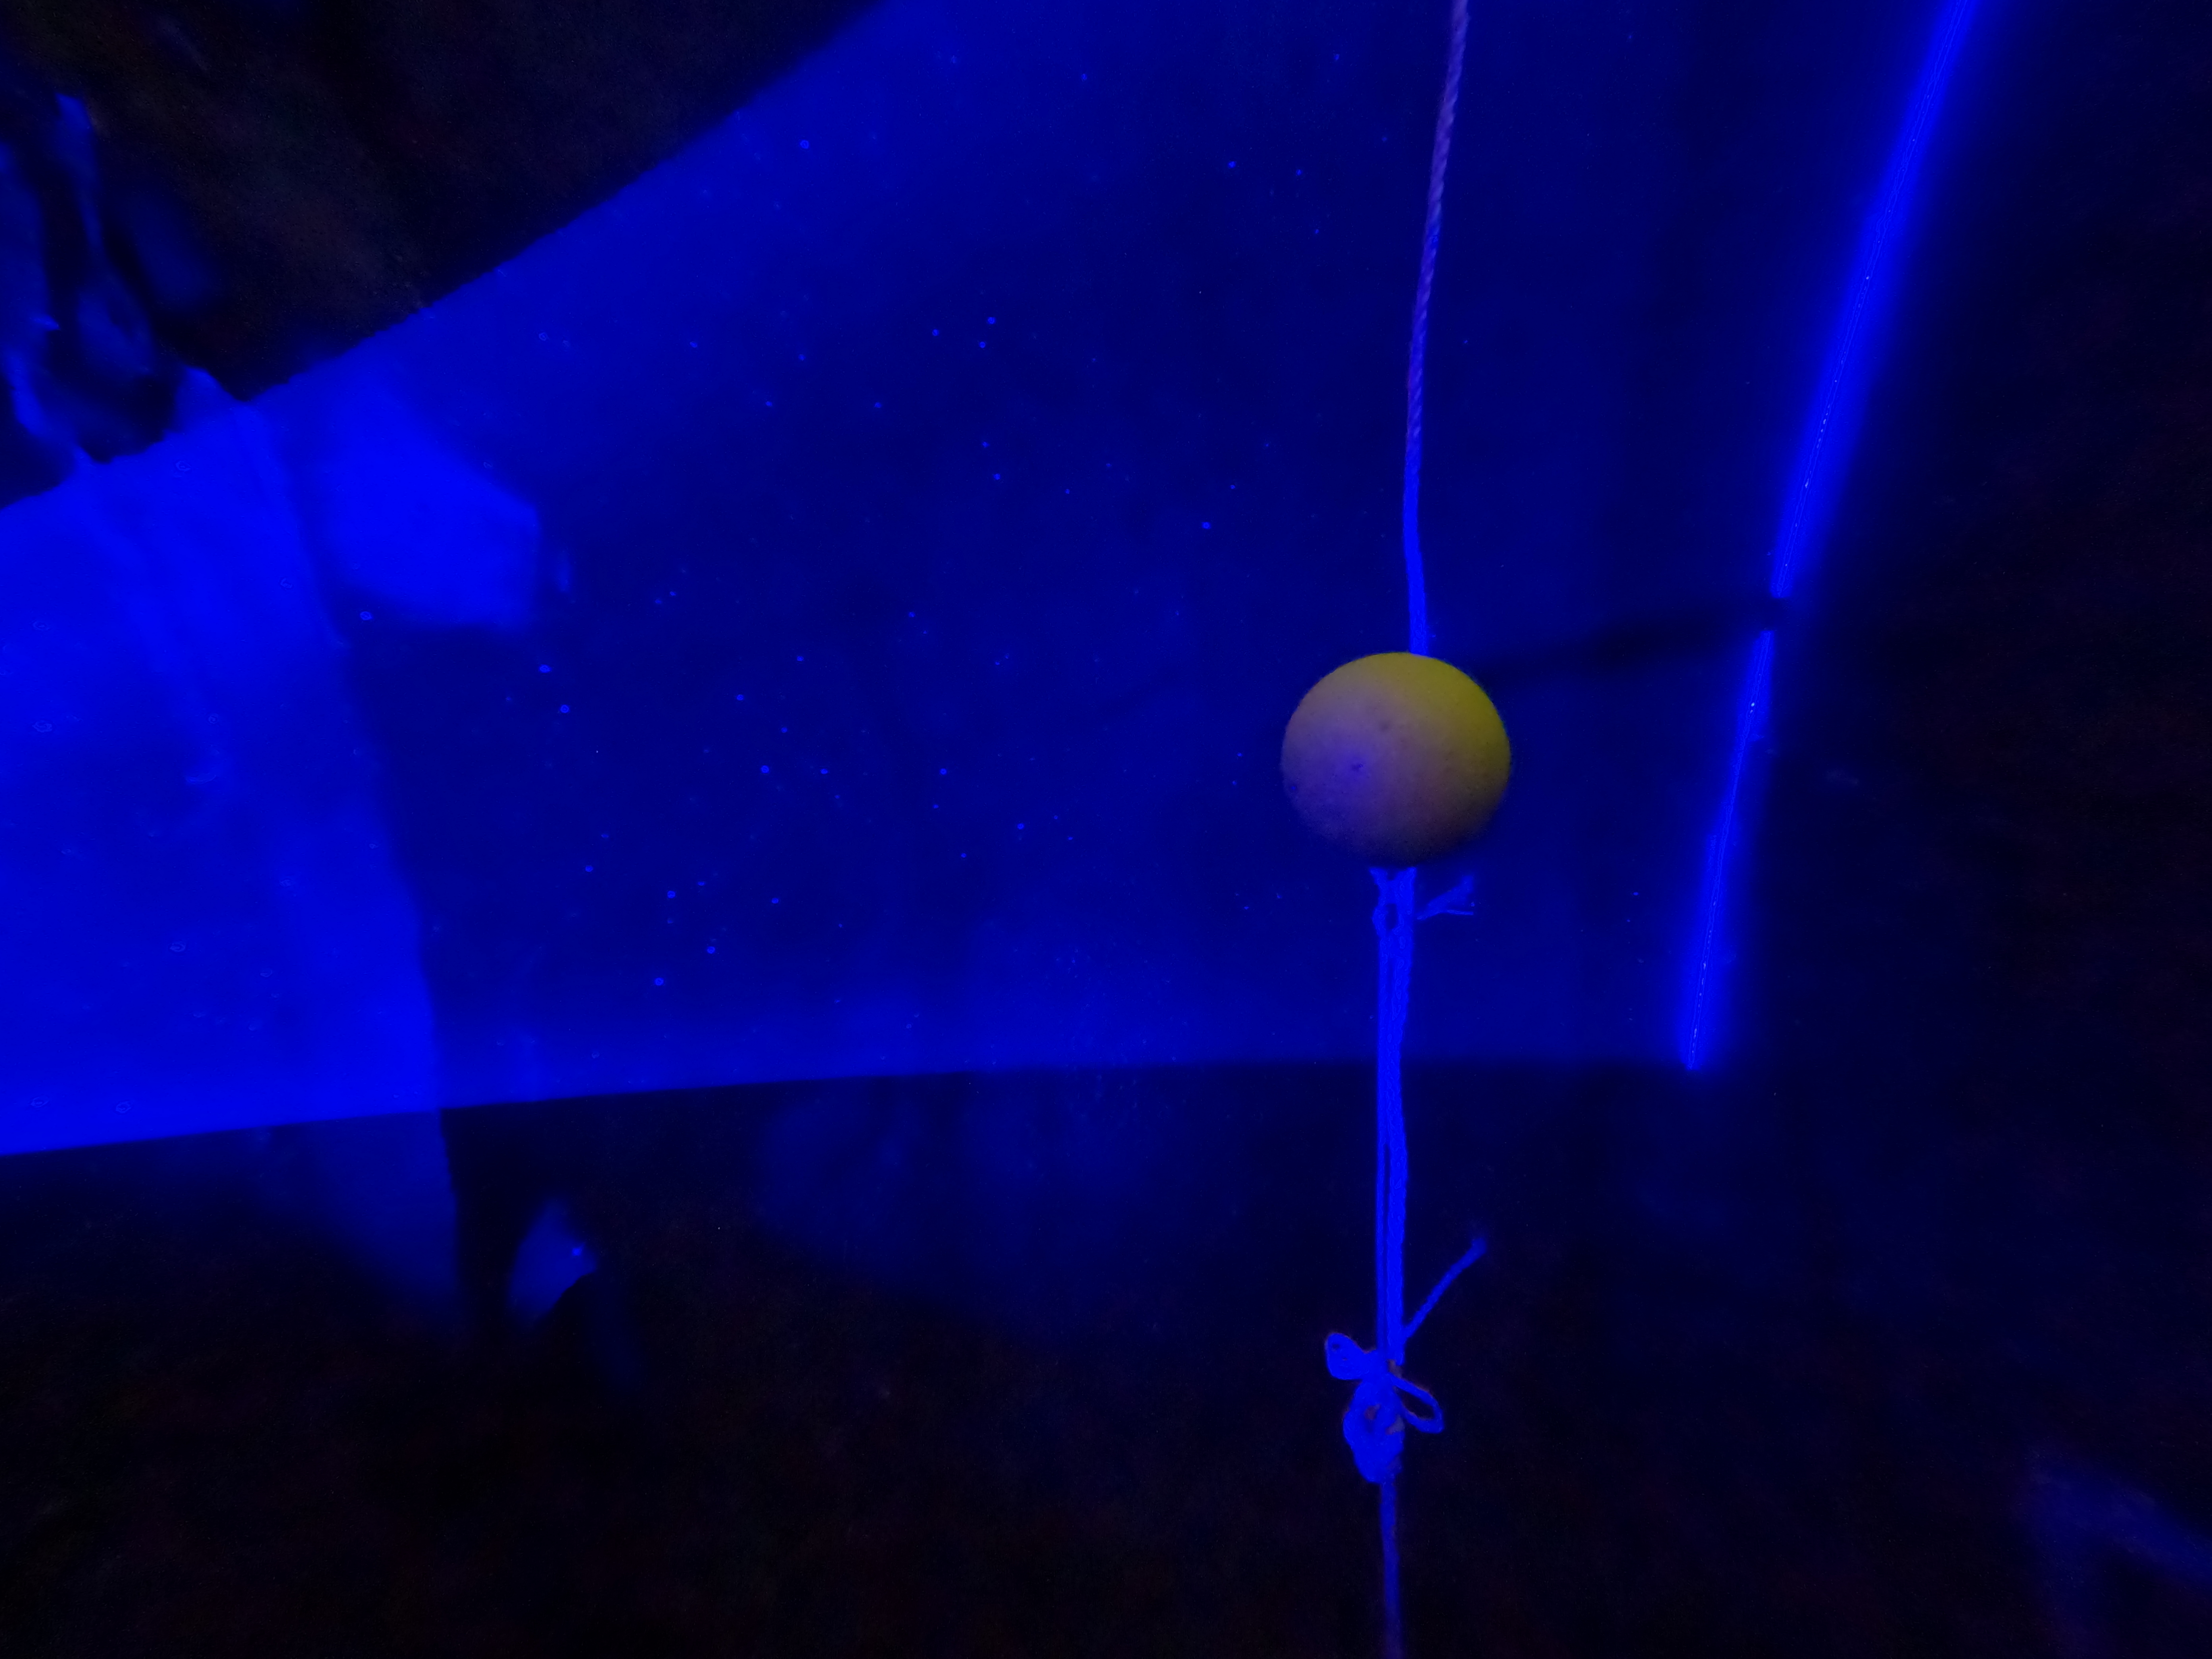

Supplement: Supplementary file 1228 [file G0032942.pdf › 7/G0032942.pdf]

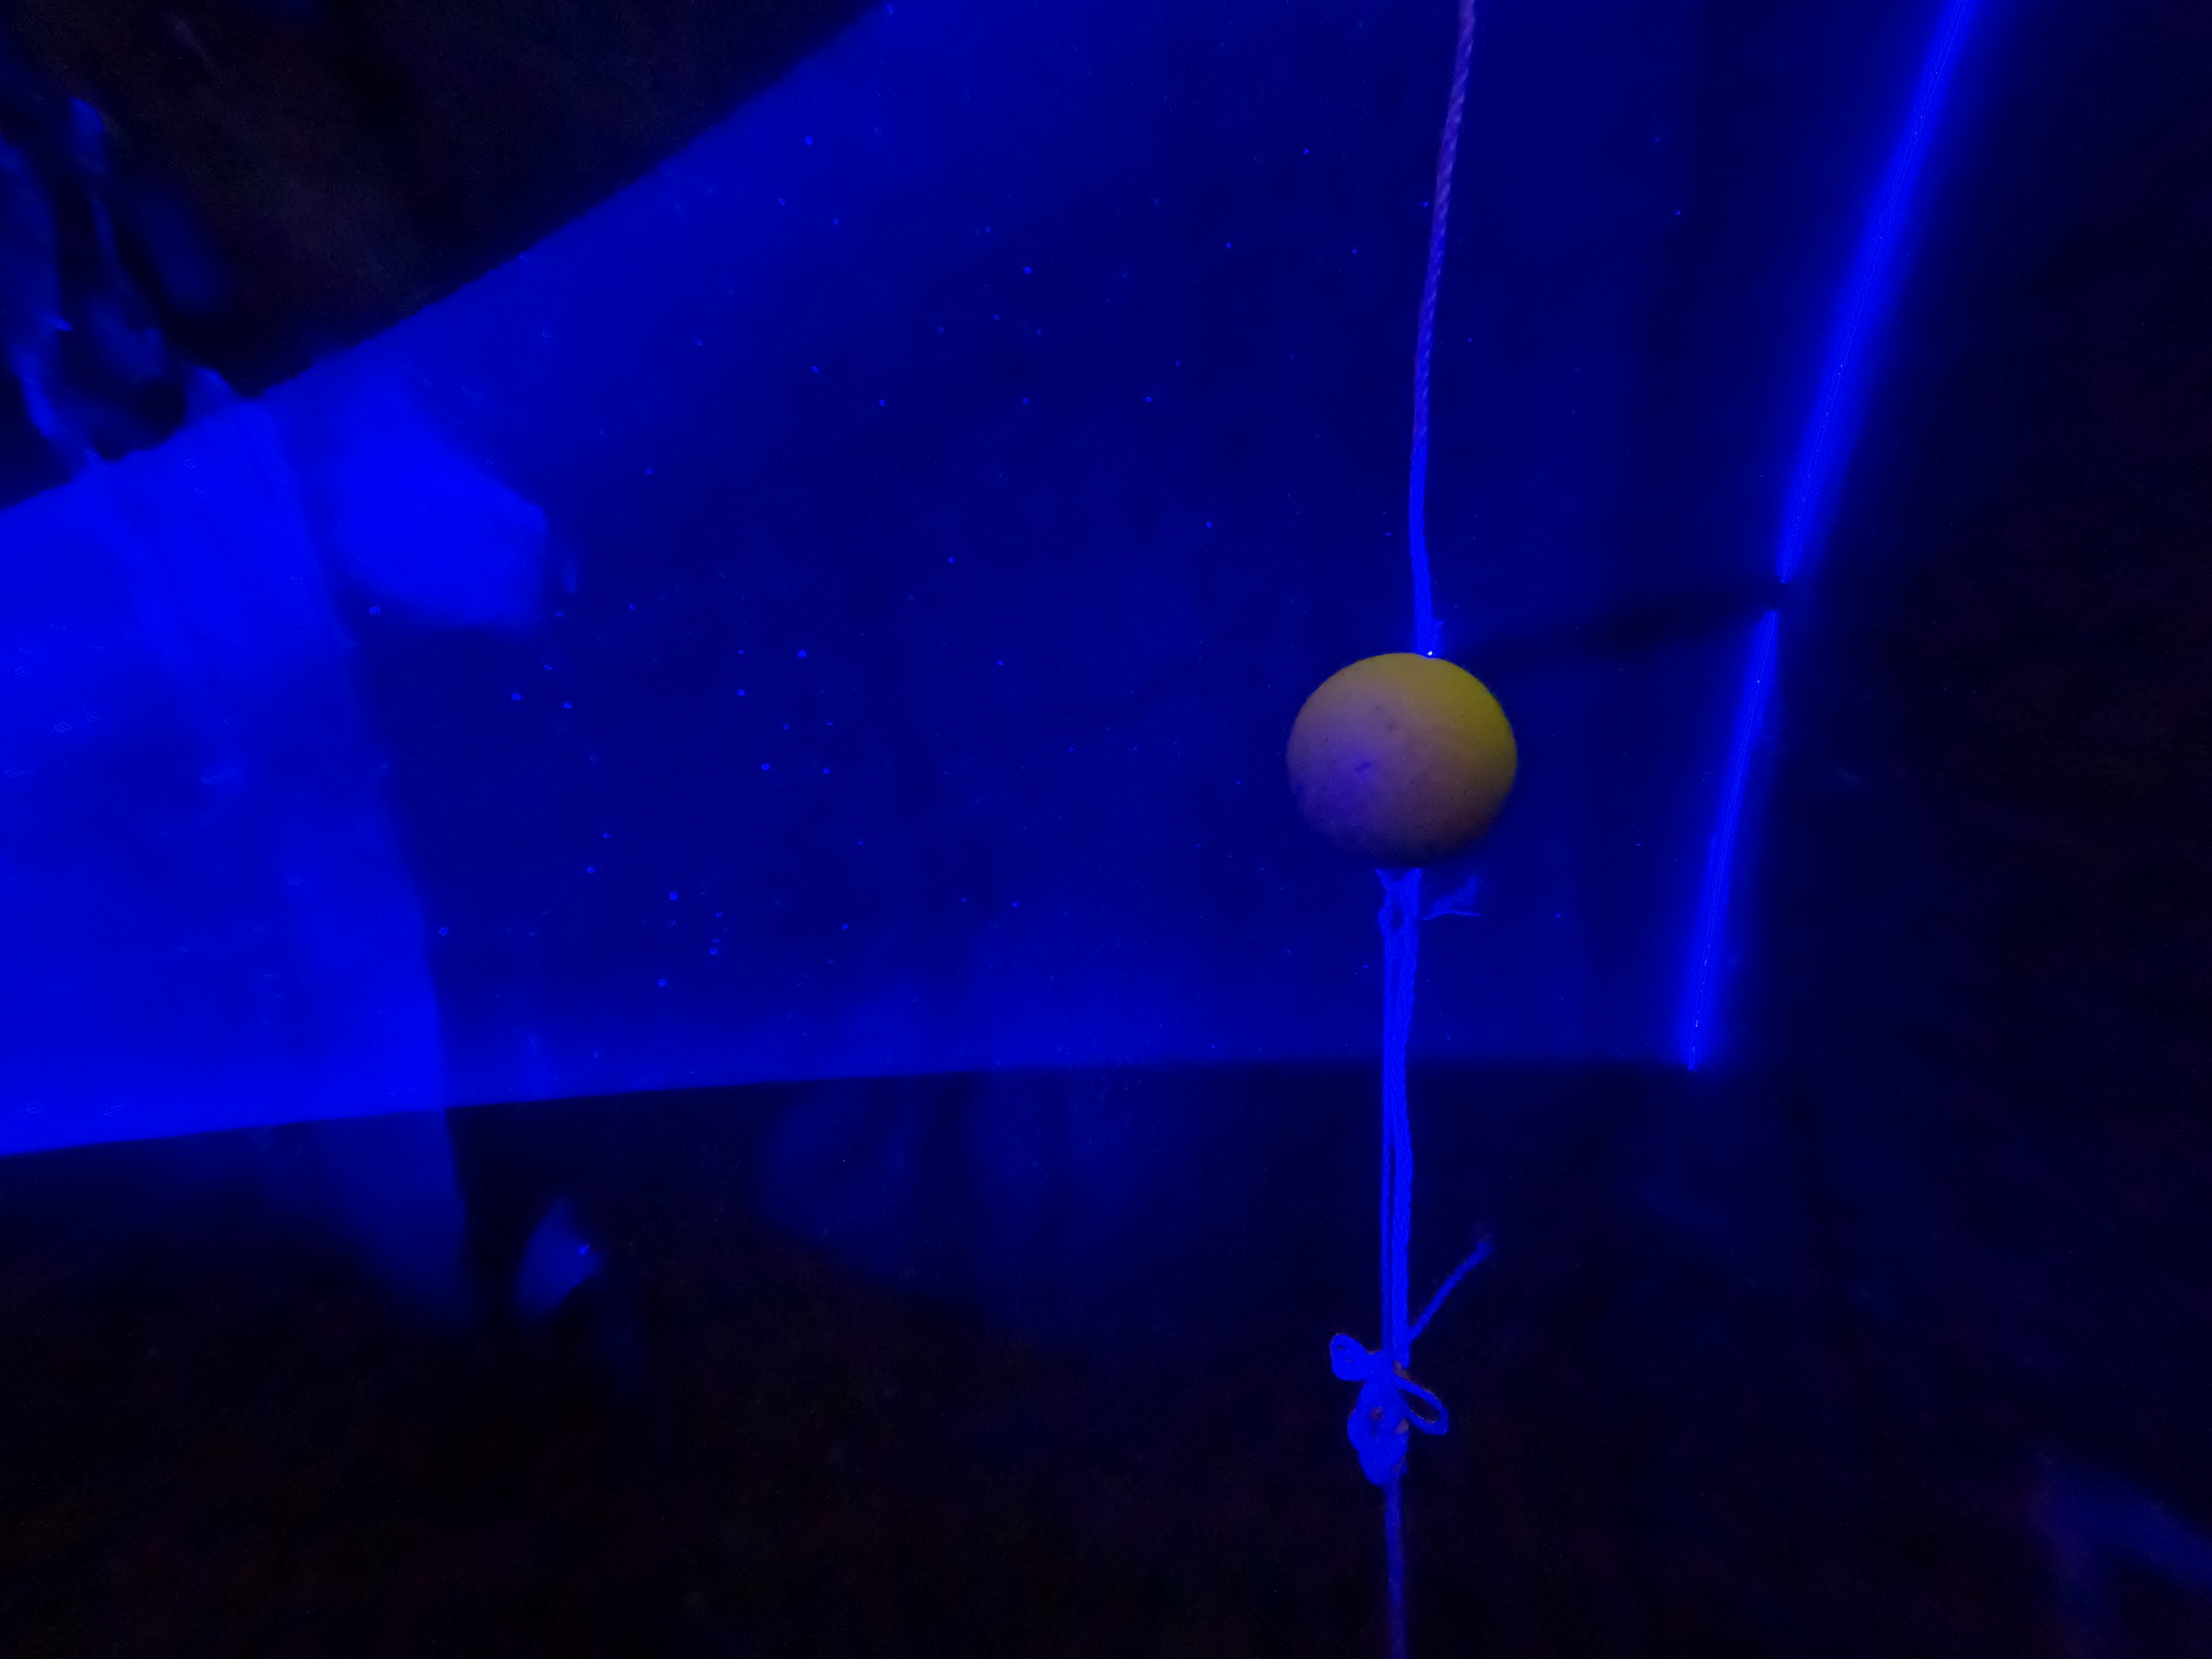

Supplement: Supplementary file 1229 [file G0032943.pdf › 7/G0032943.pdf]

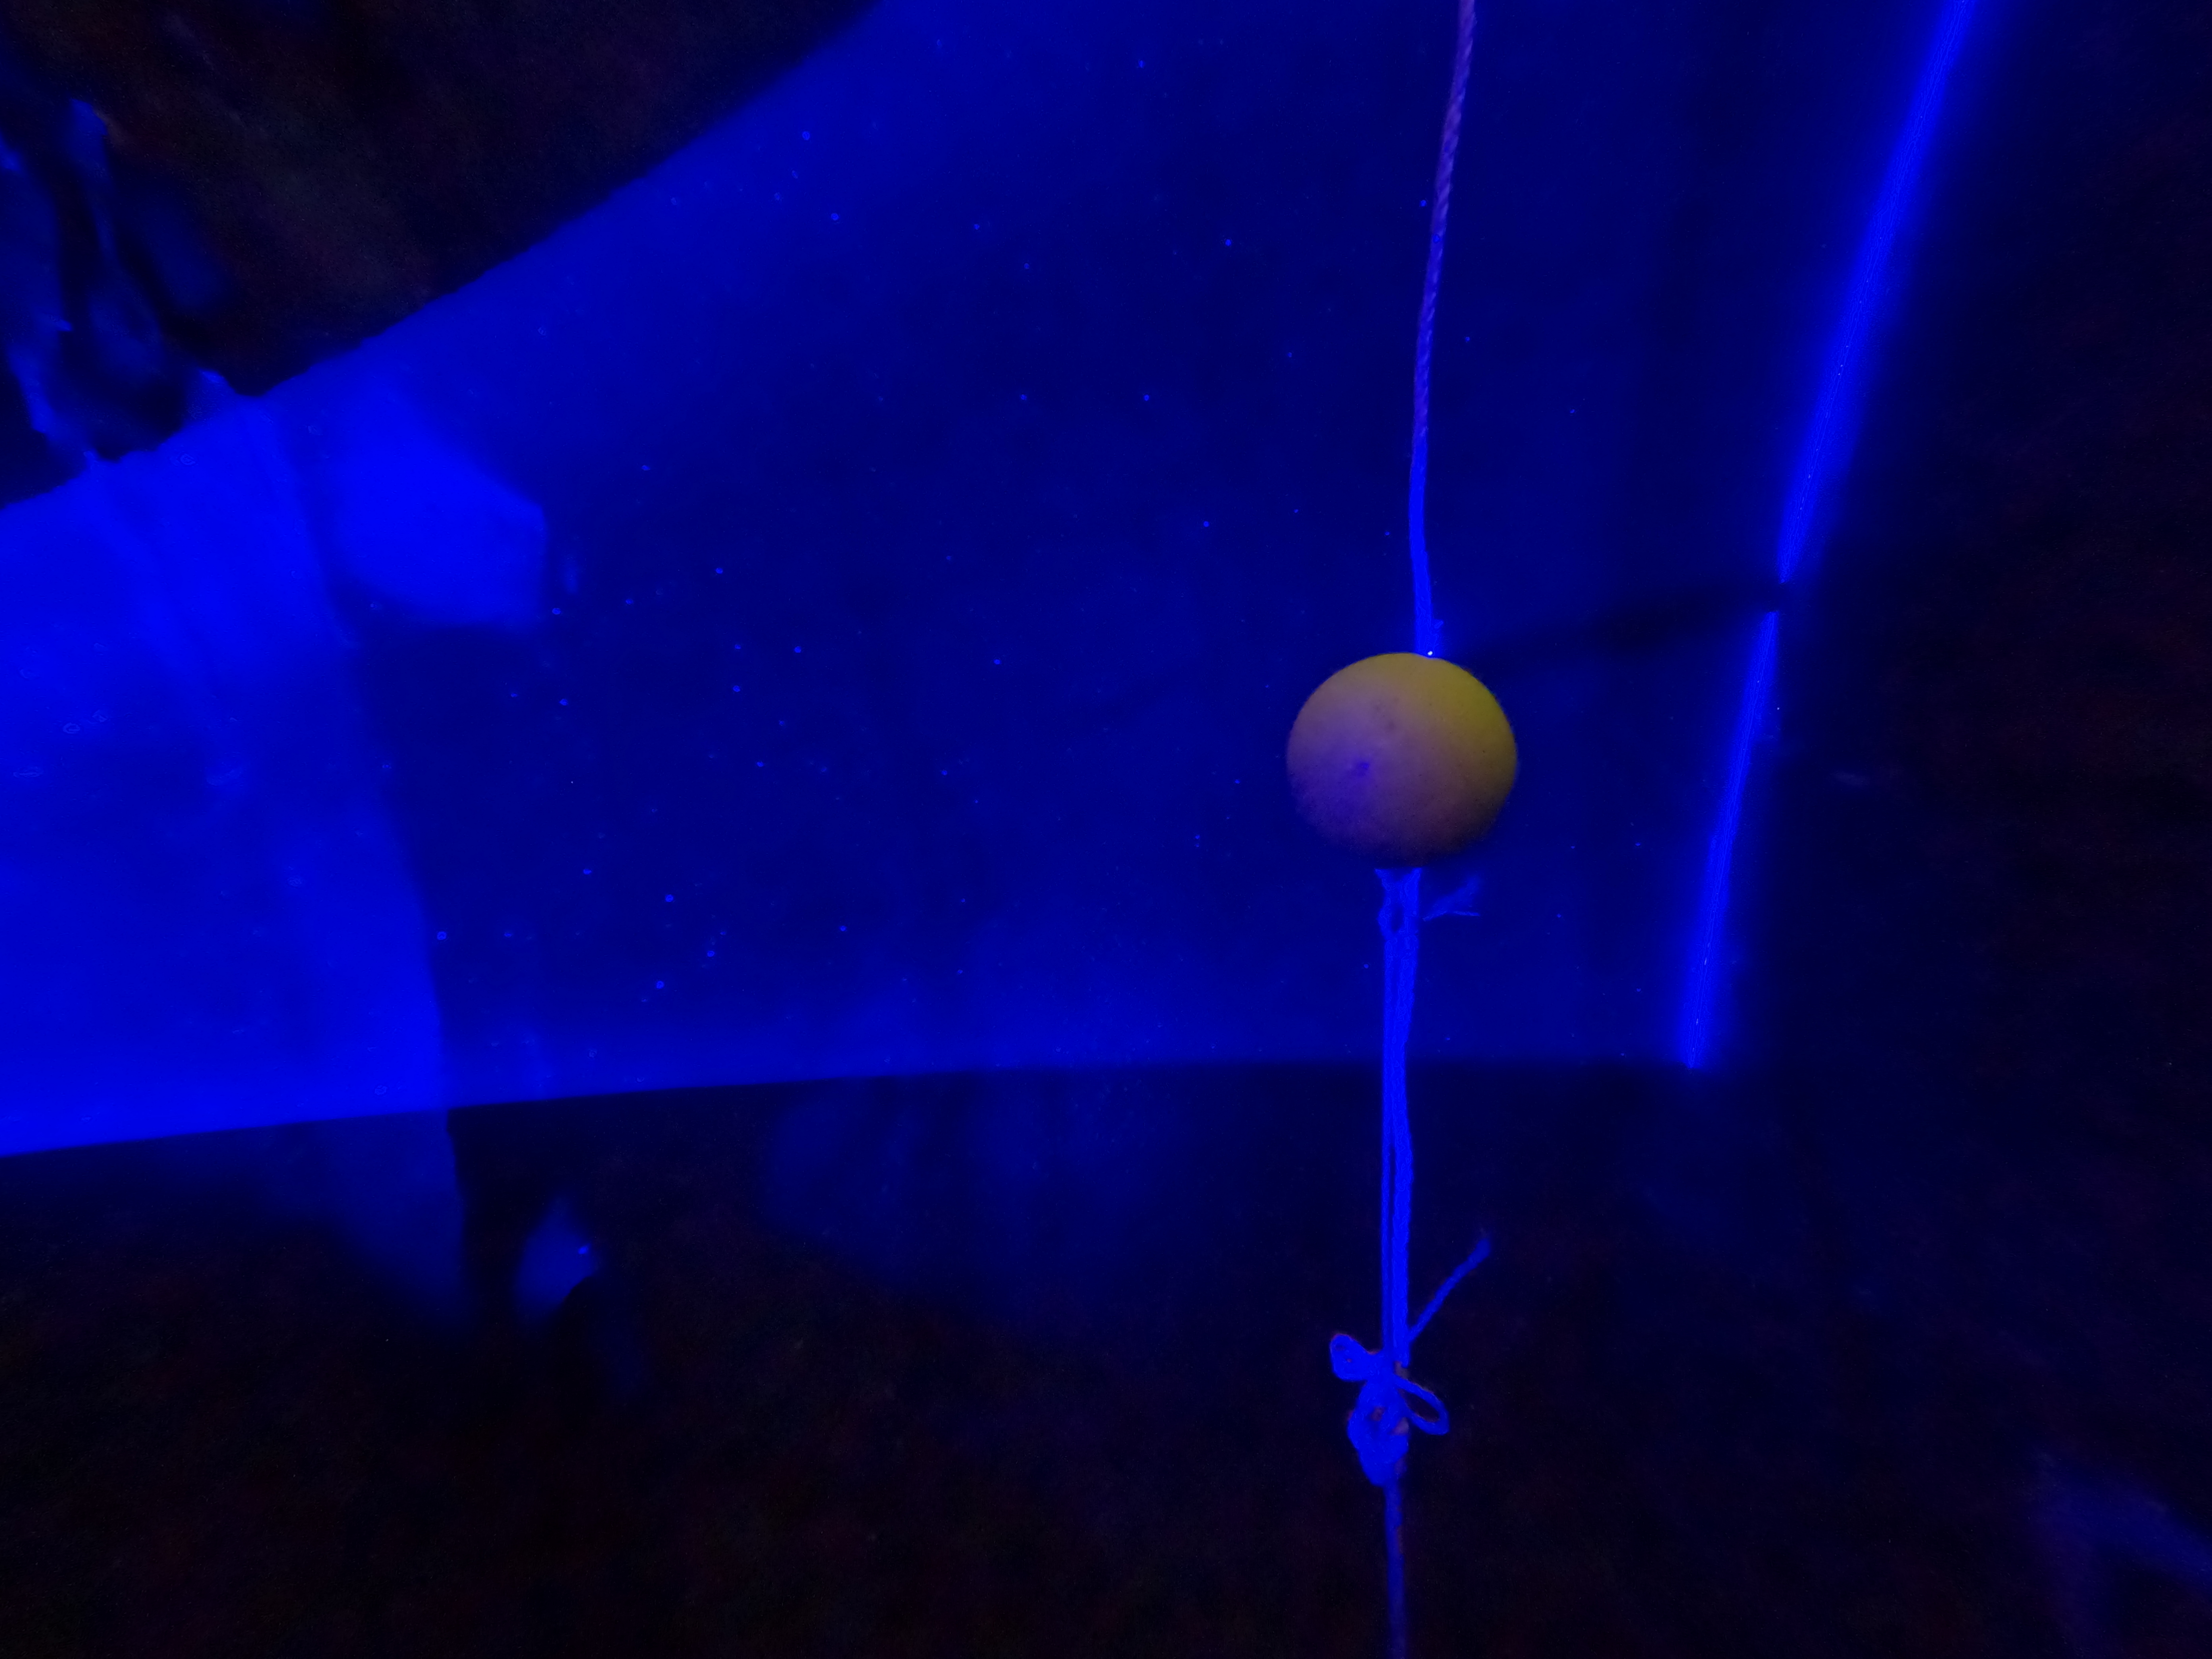

Supplement: Supplementary file 1230 [file G0032944.pdf › 7/G0032944.pdf]

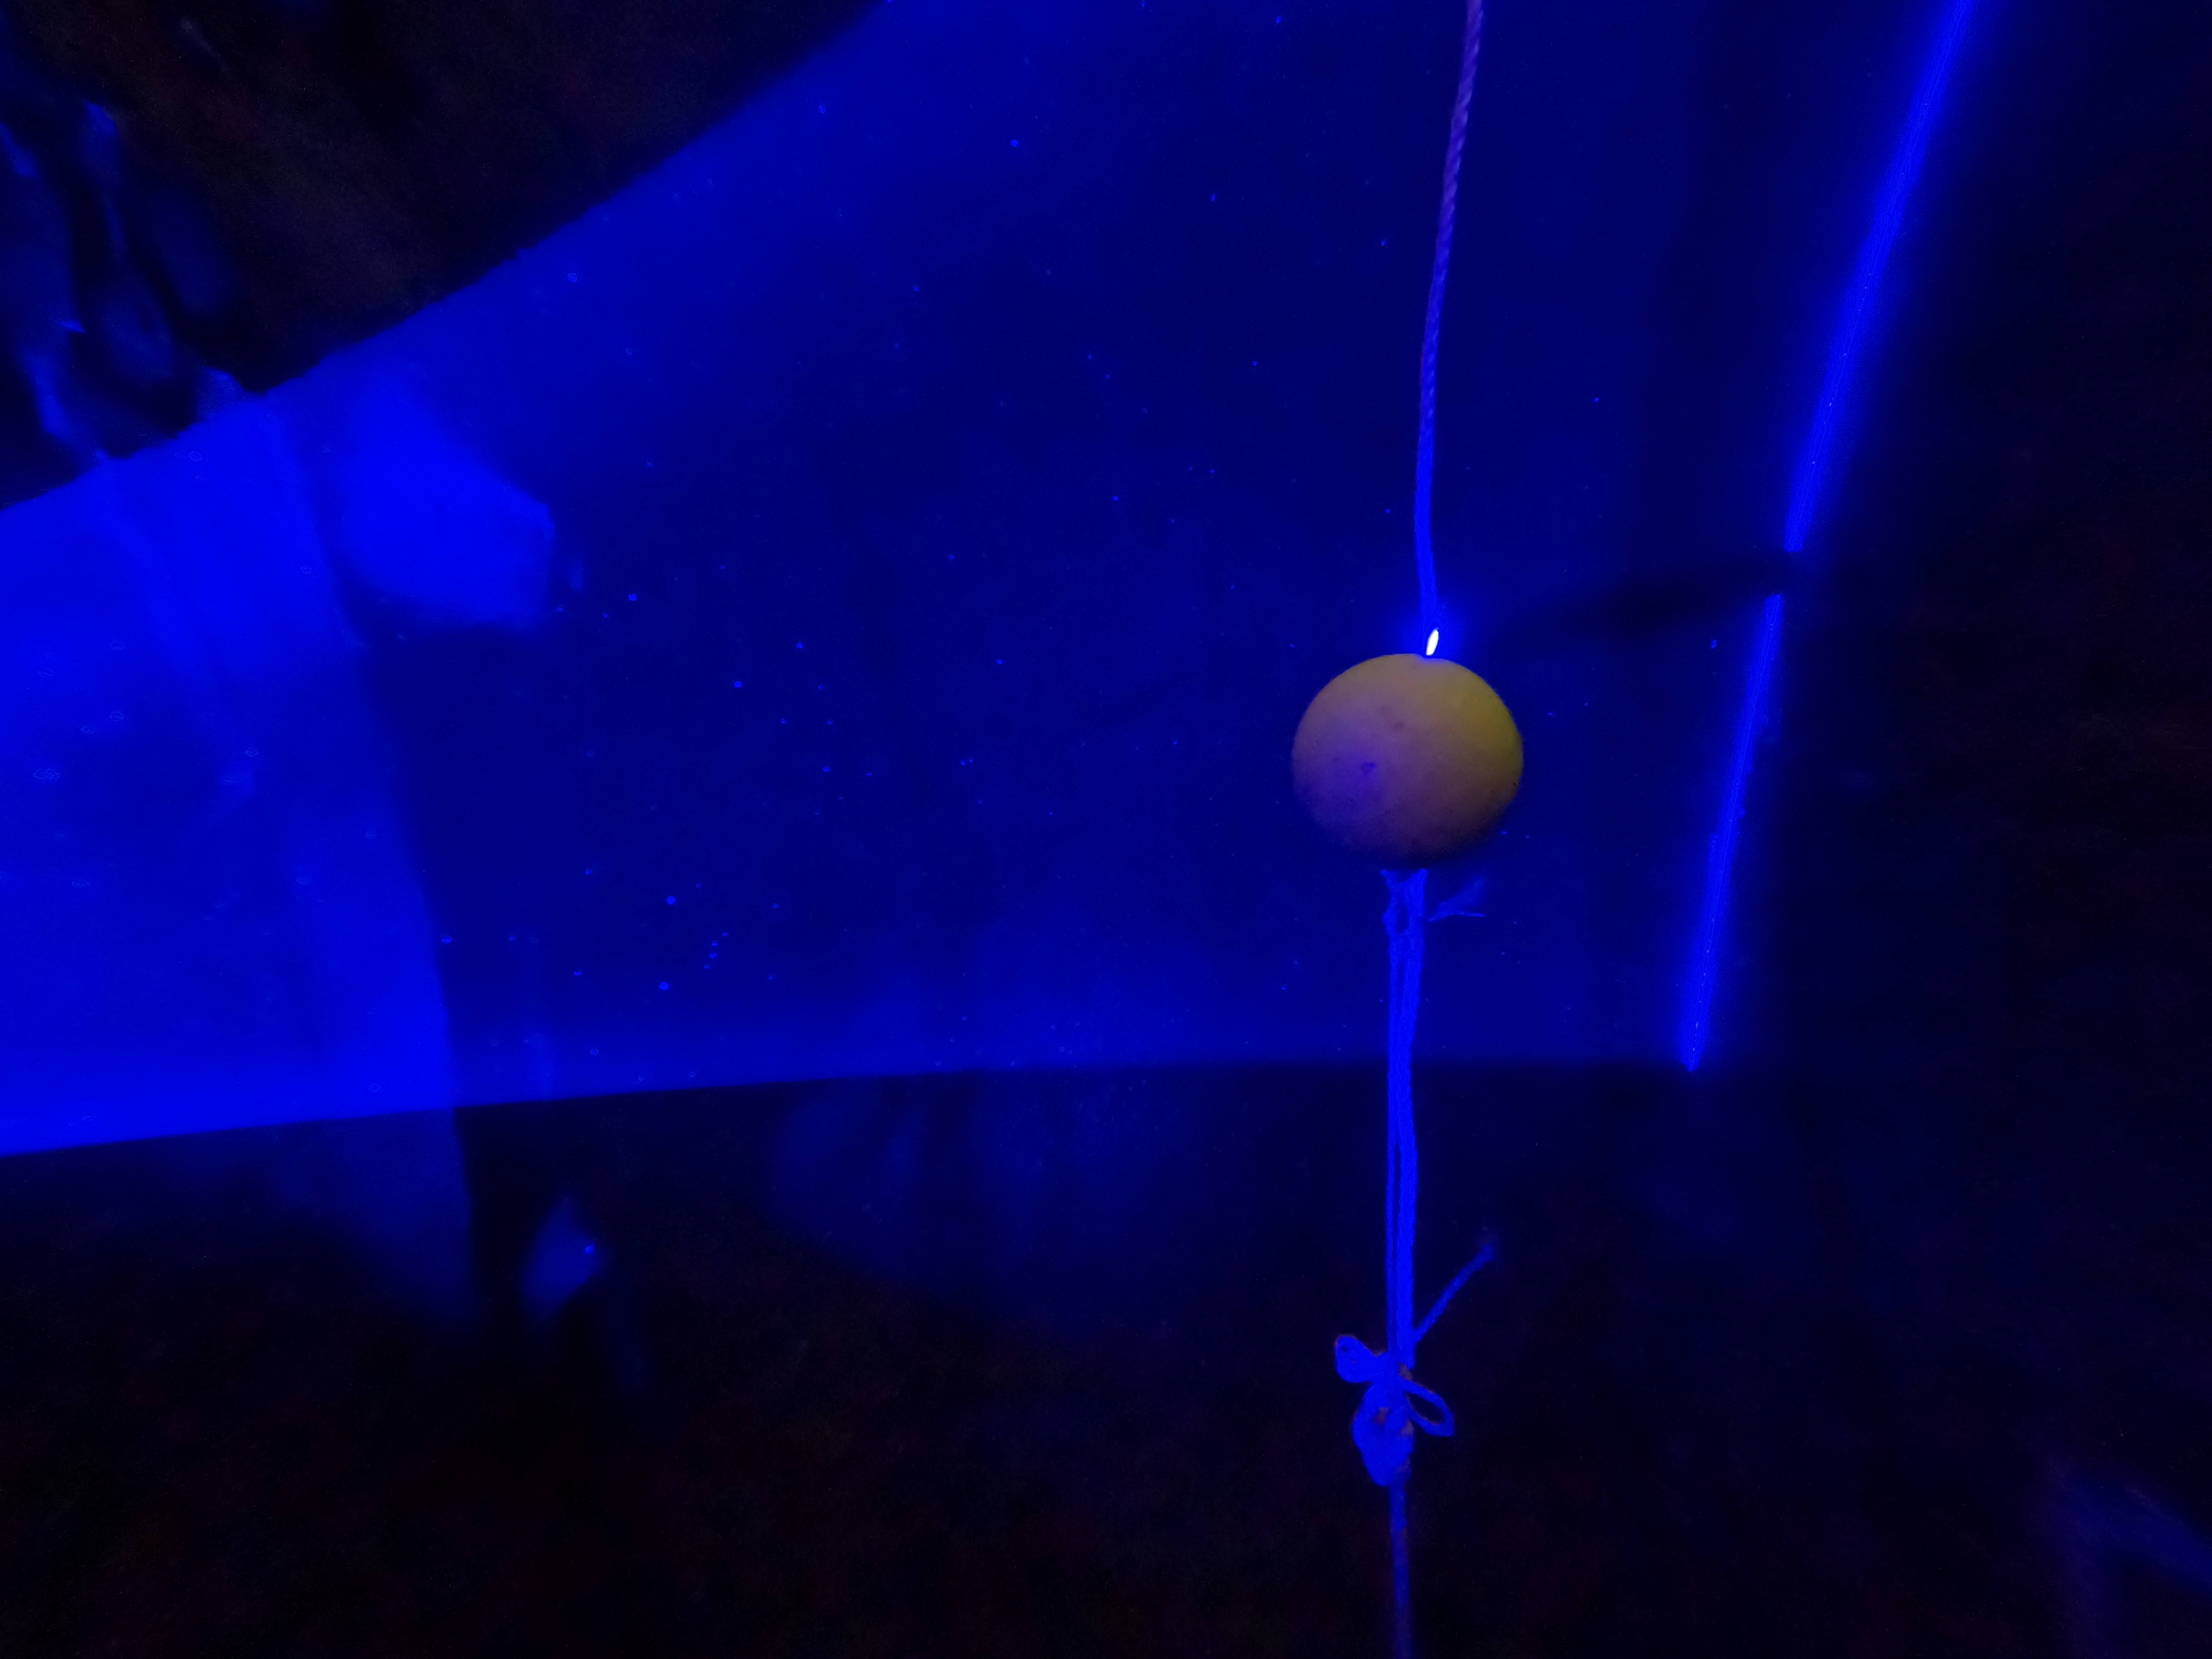

Supplement: Supplementary file 1231 [file G0032945.pdf › 7/G0032945.pdf]

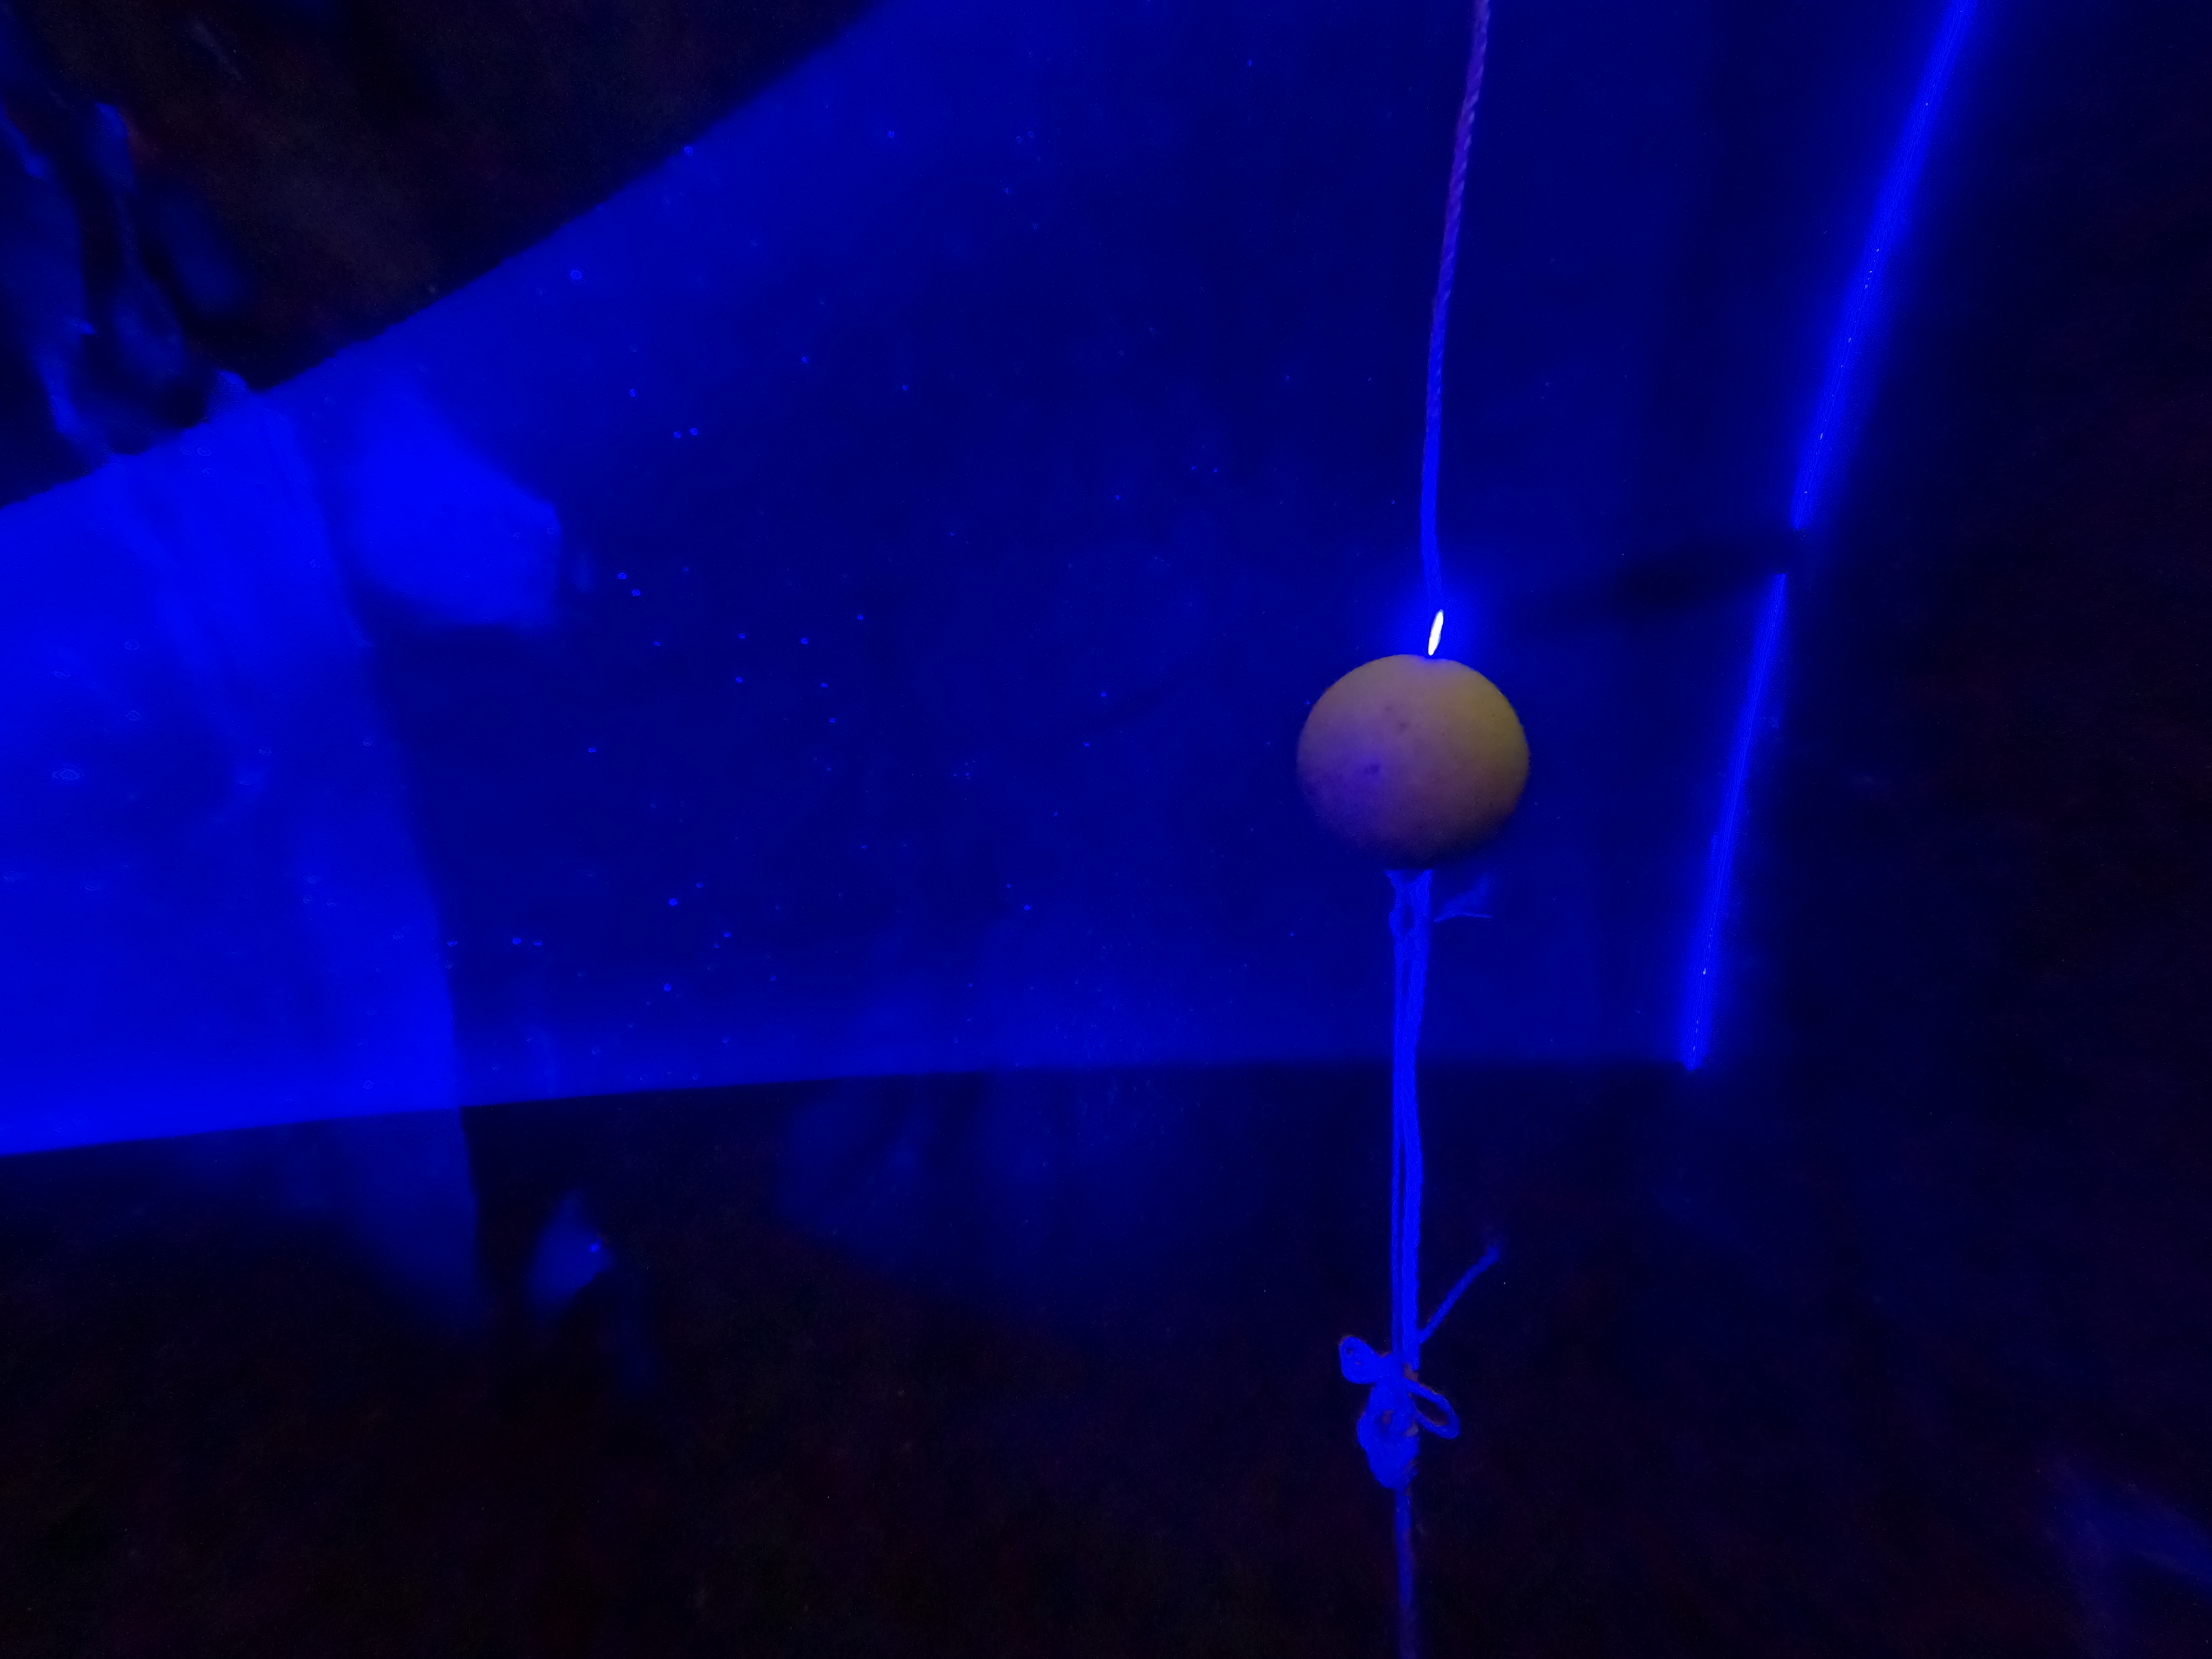

Supplement: Supplementary file 1232 [file G0032946.pdf › 7/G0032946.pdf]

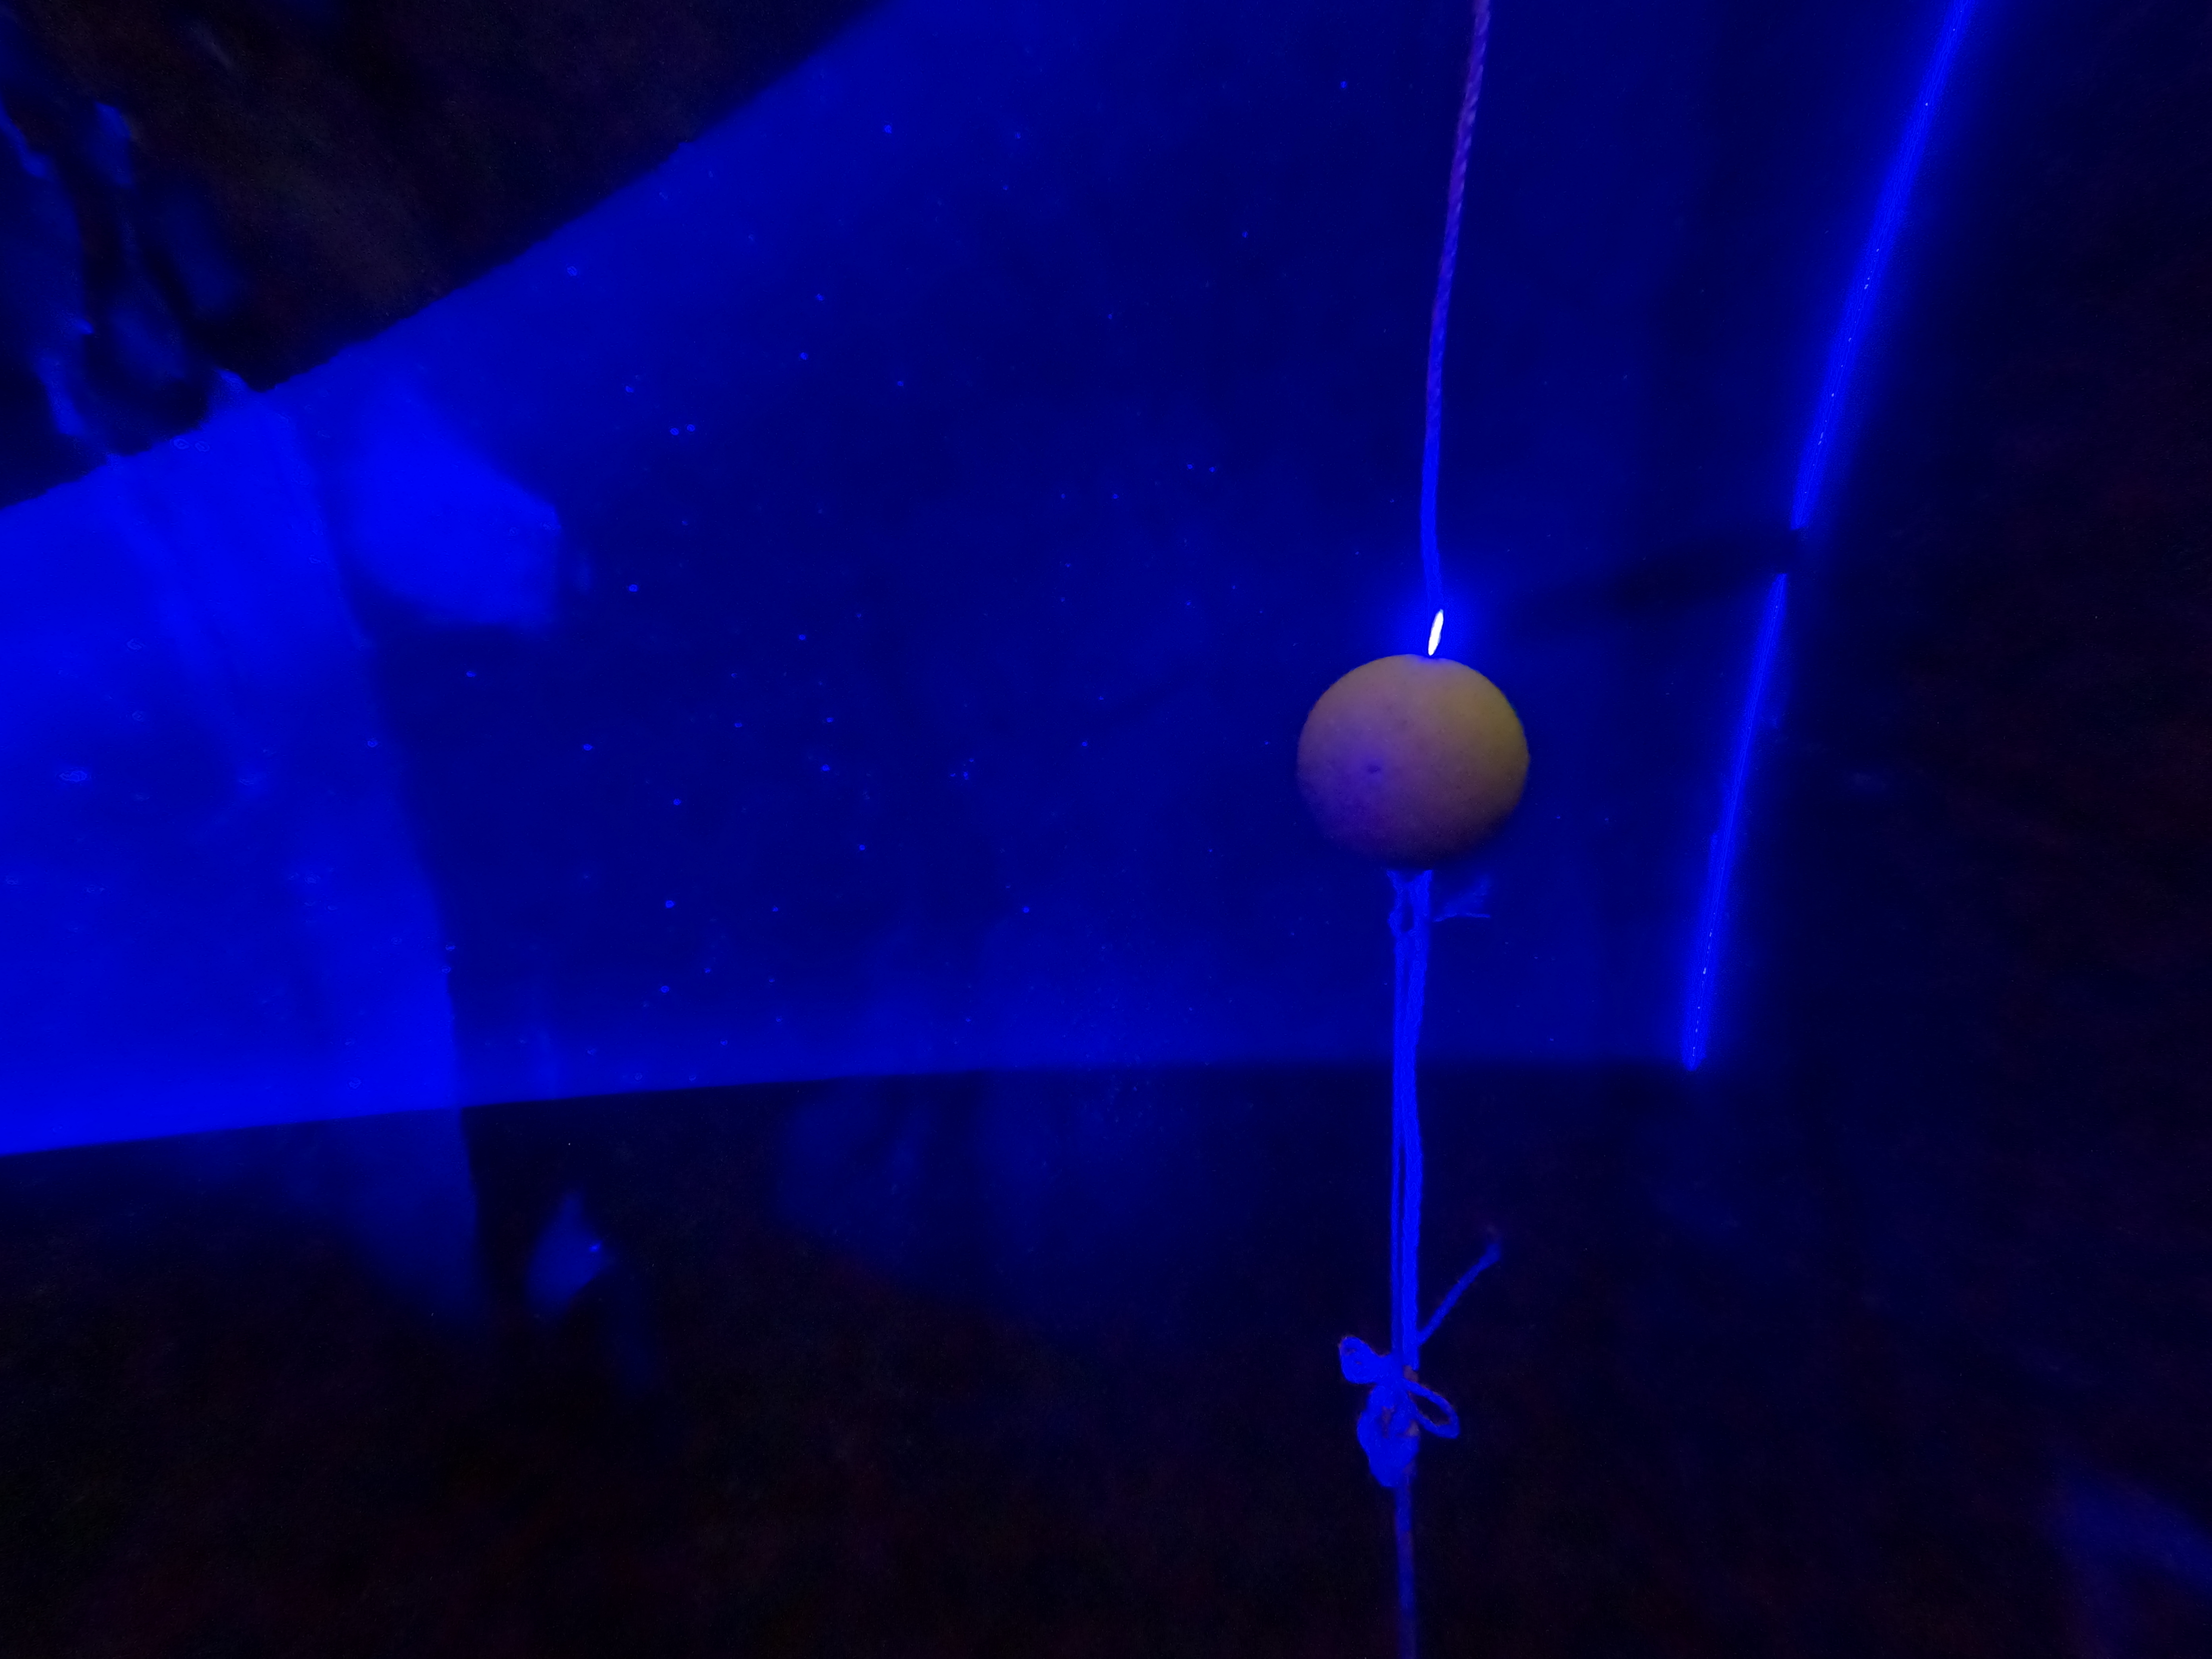

Supplement: Supplementary file 1233 [file G0032947.pdf › 7/G0032947.pdf]

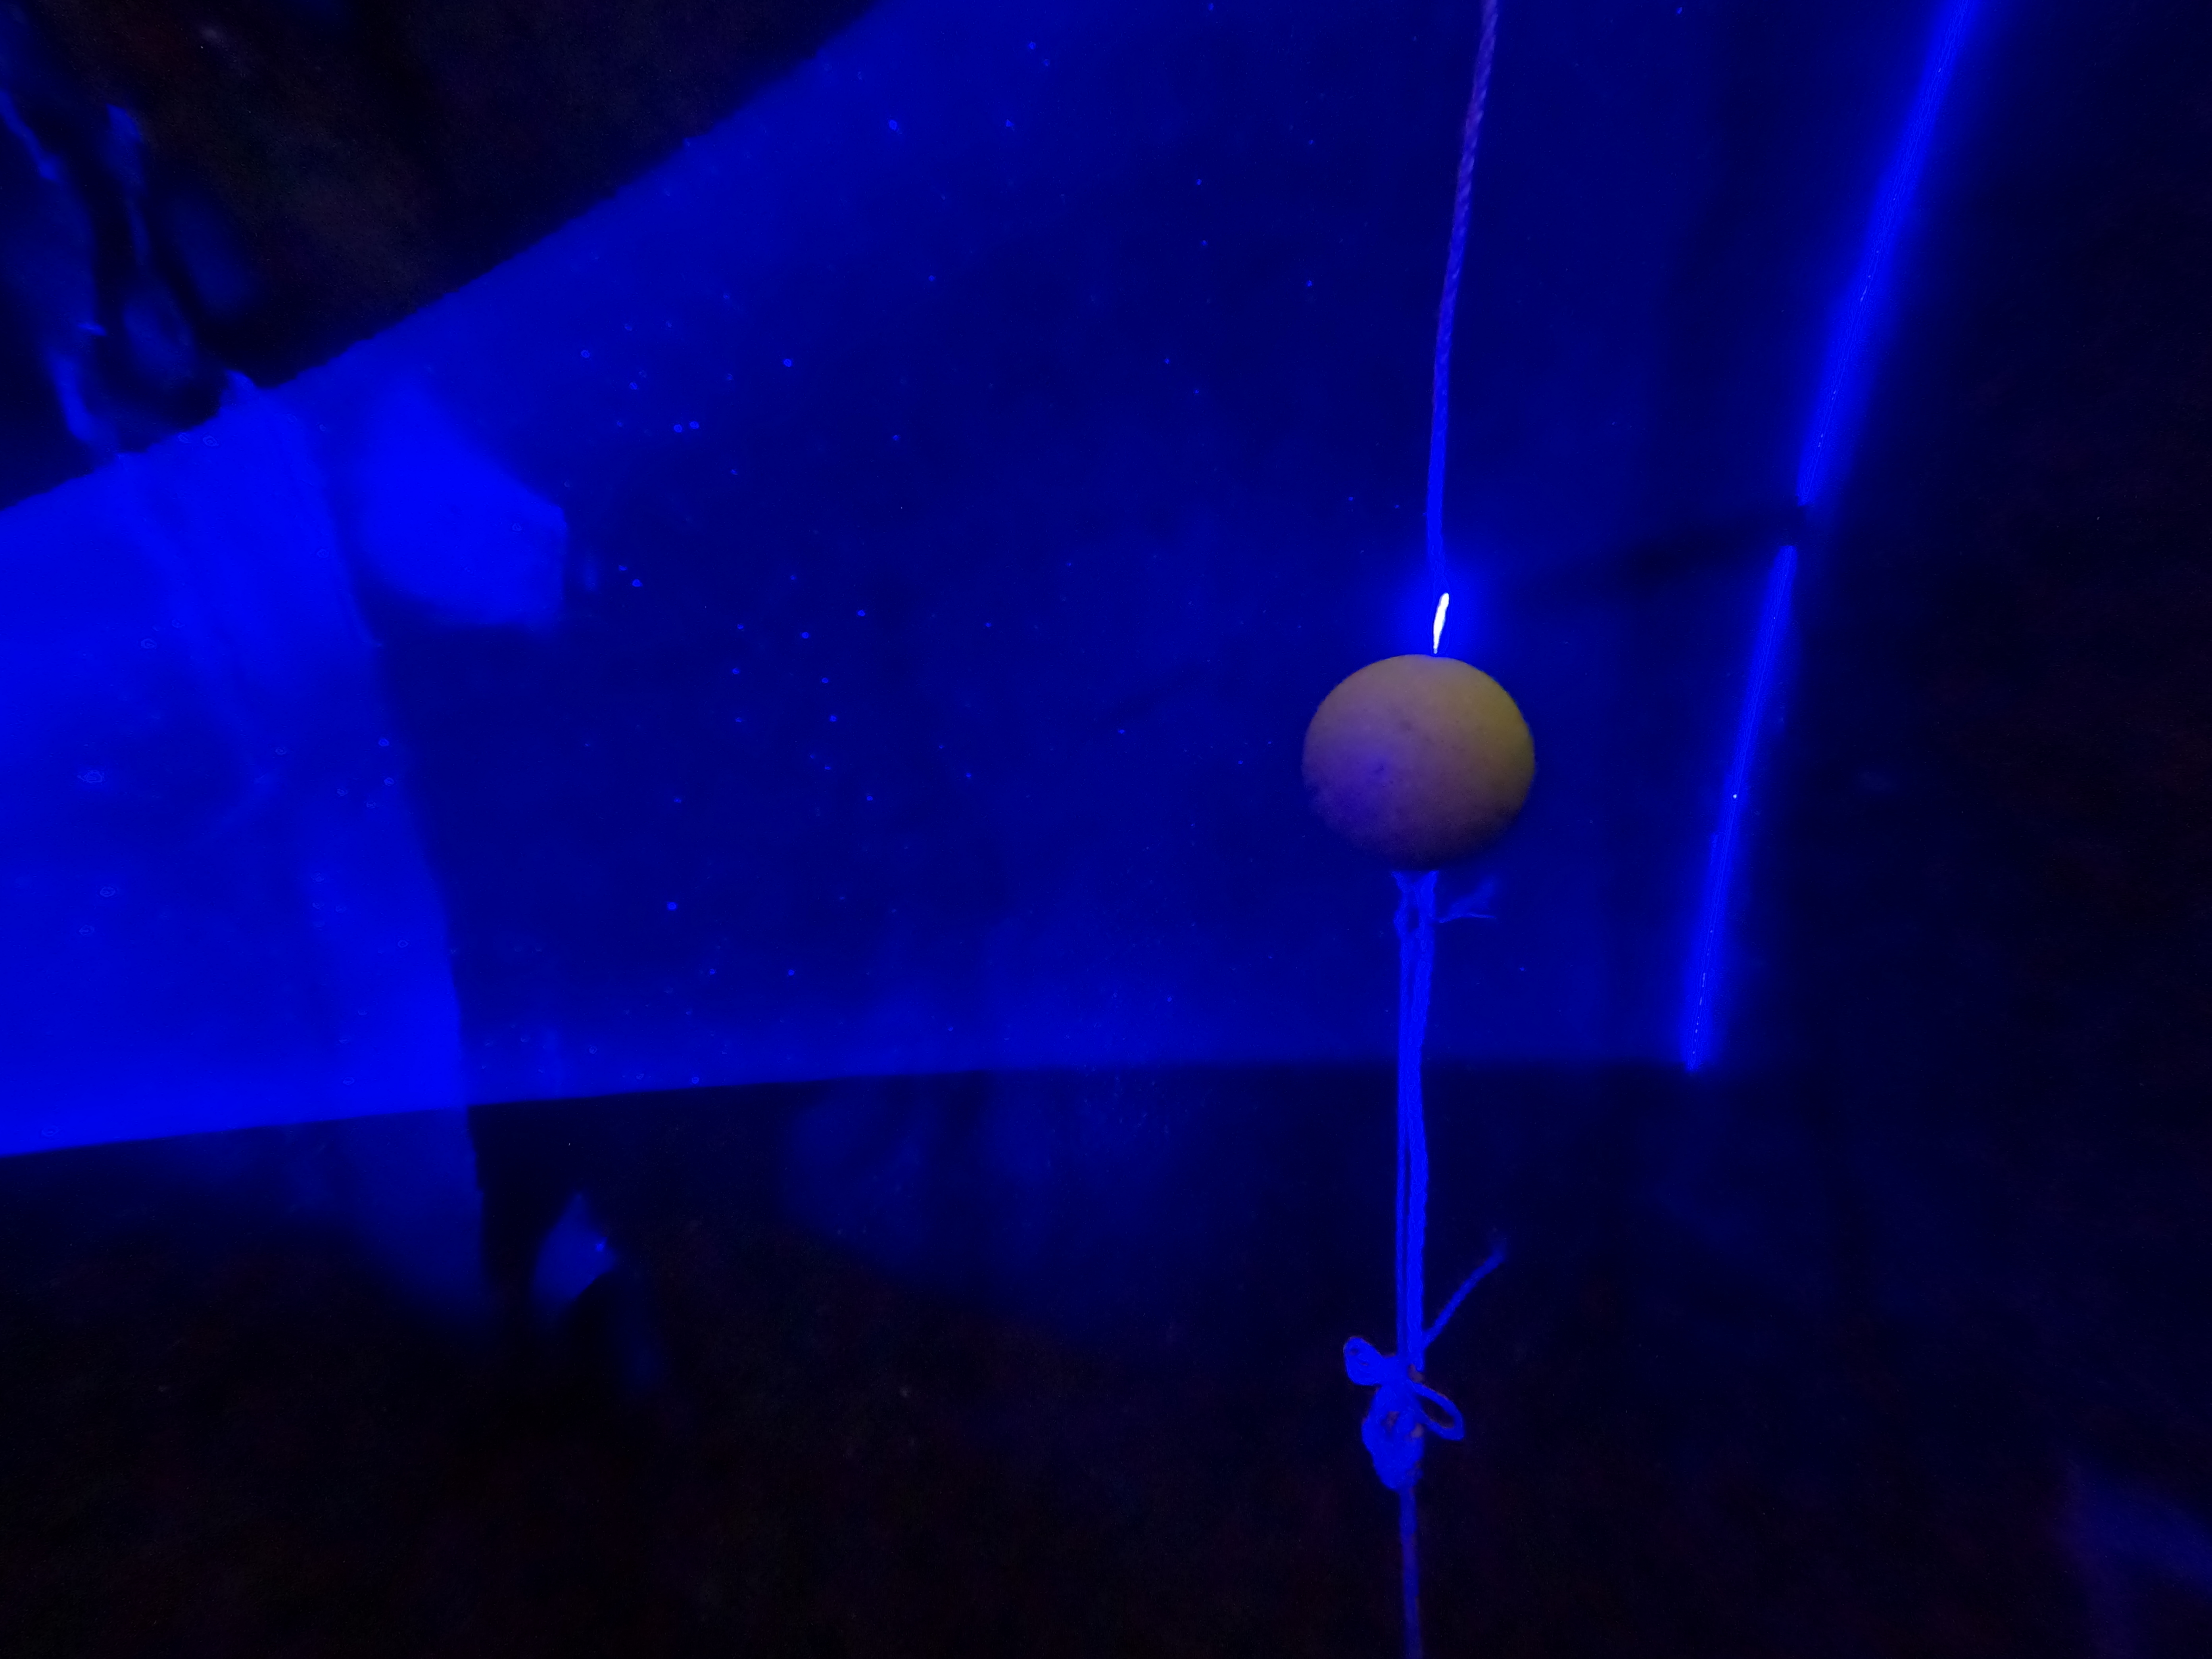

Supplement: Supplementary file 1234 [file G0032948.pdf › 7/G0032948.pdf]

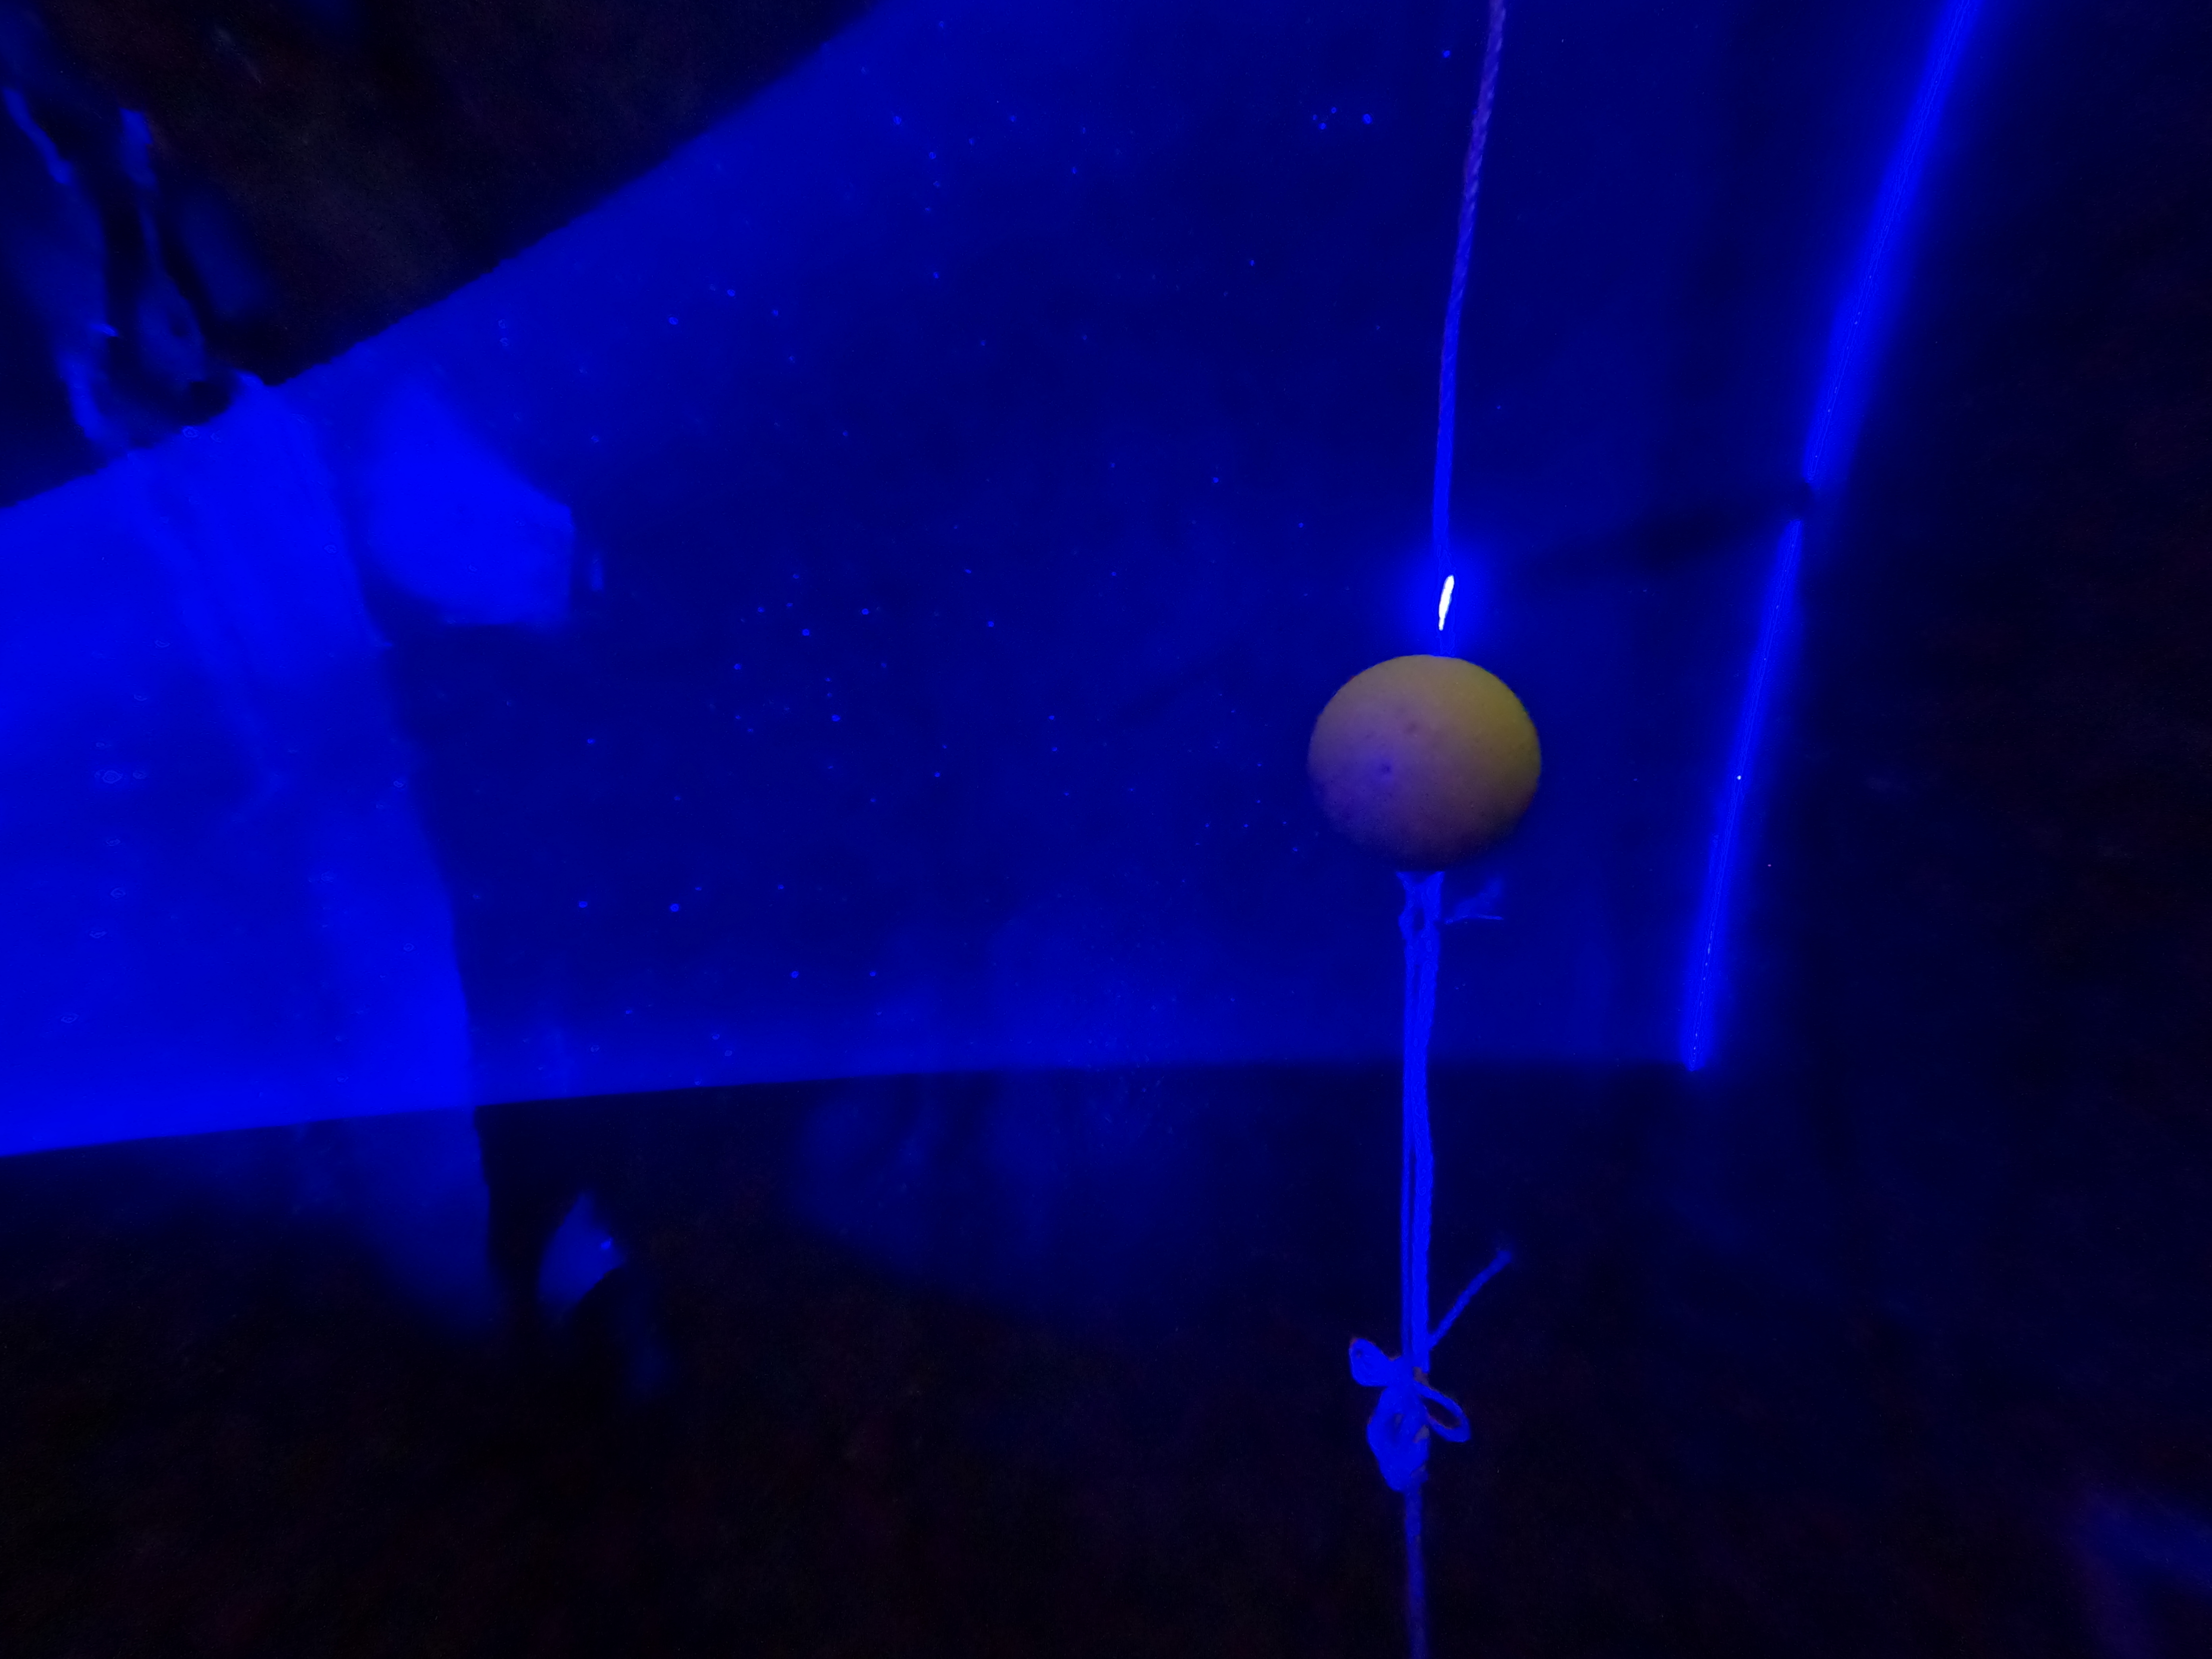

Supplement: Supplementary file 1235 [file G0032949.pdf › 7/G0032949.pdf]

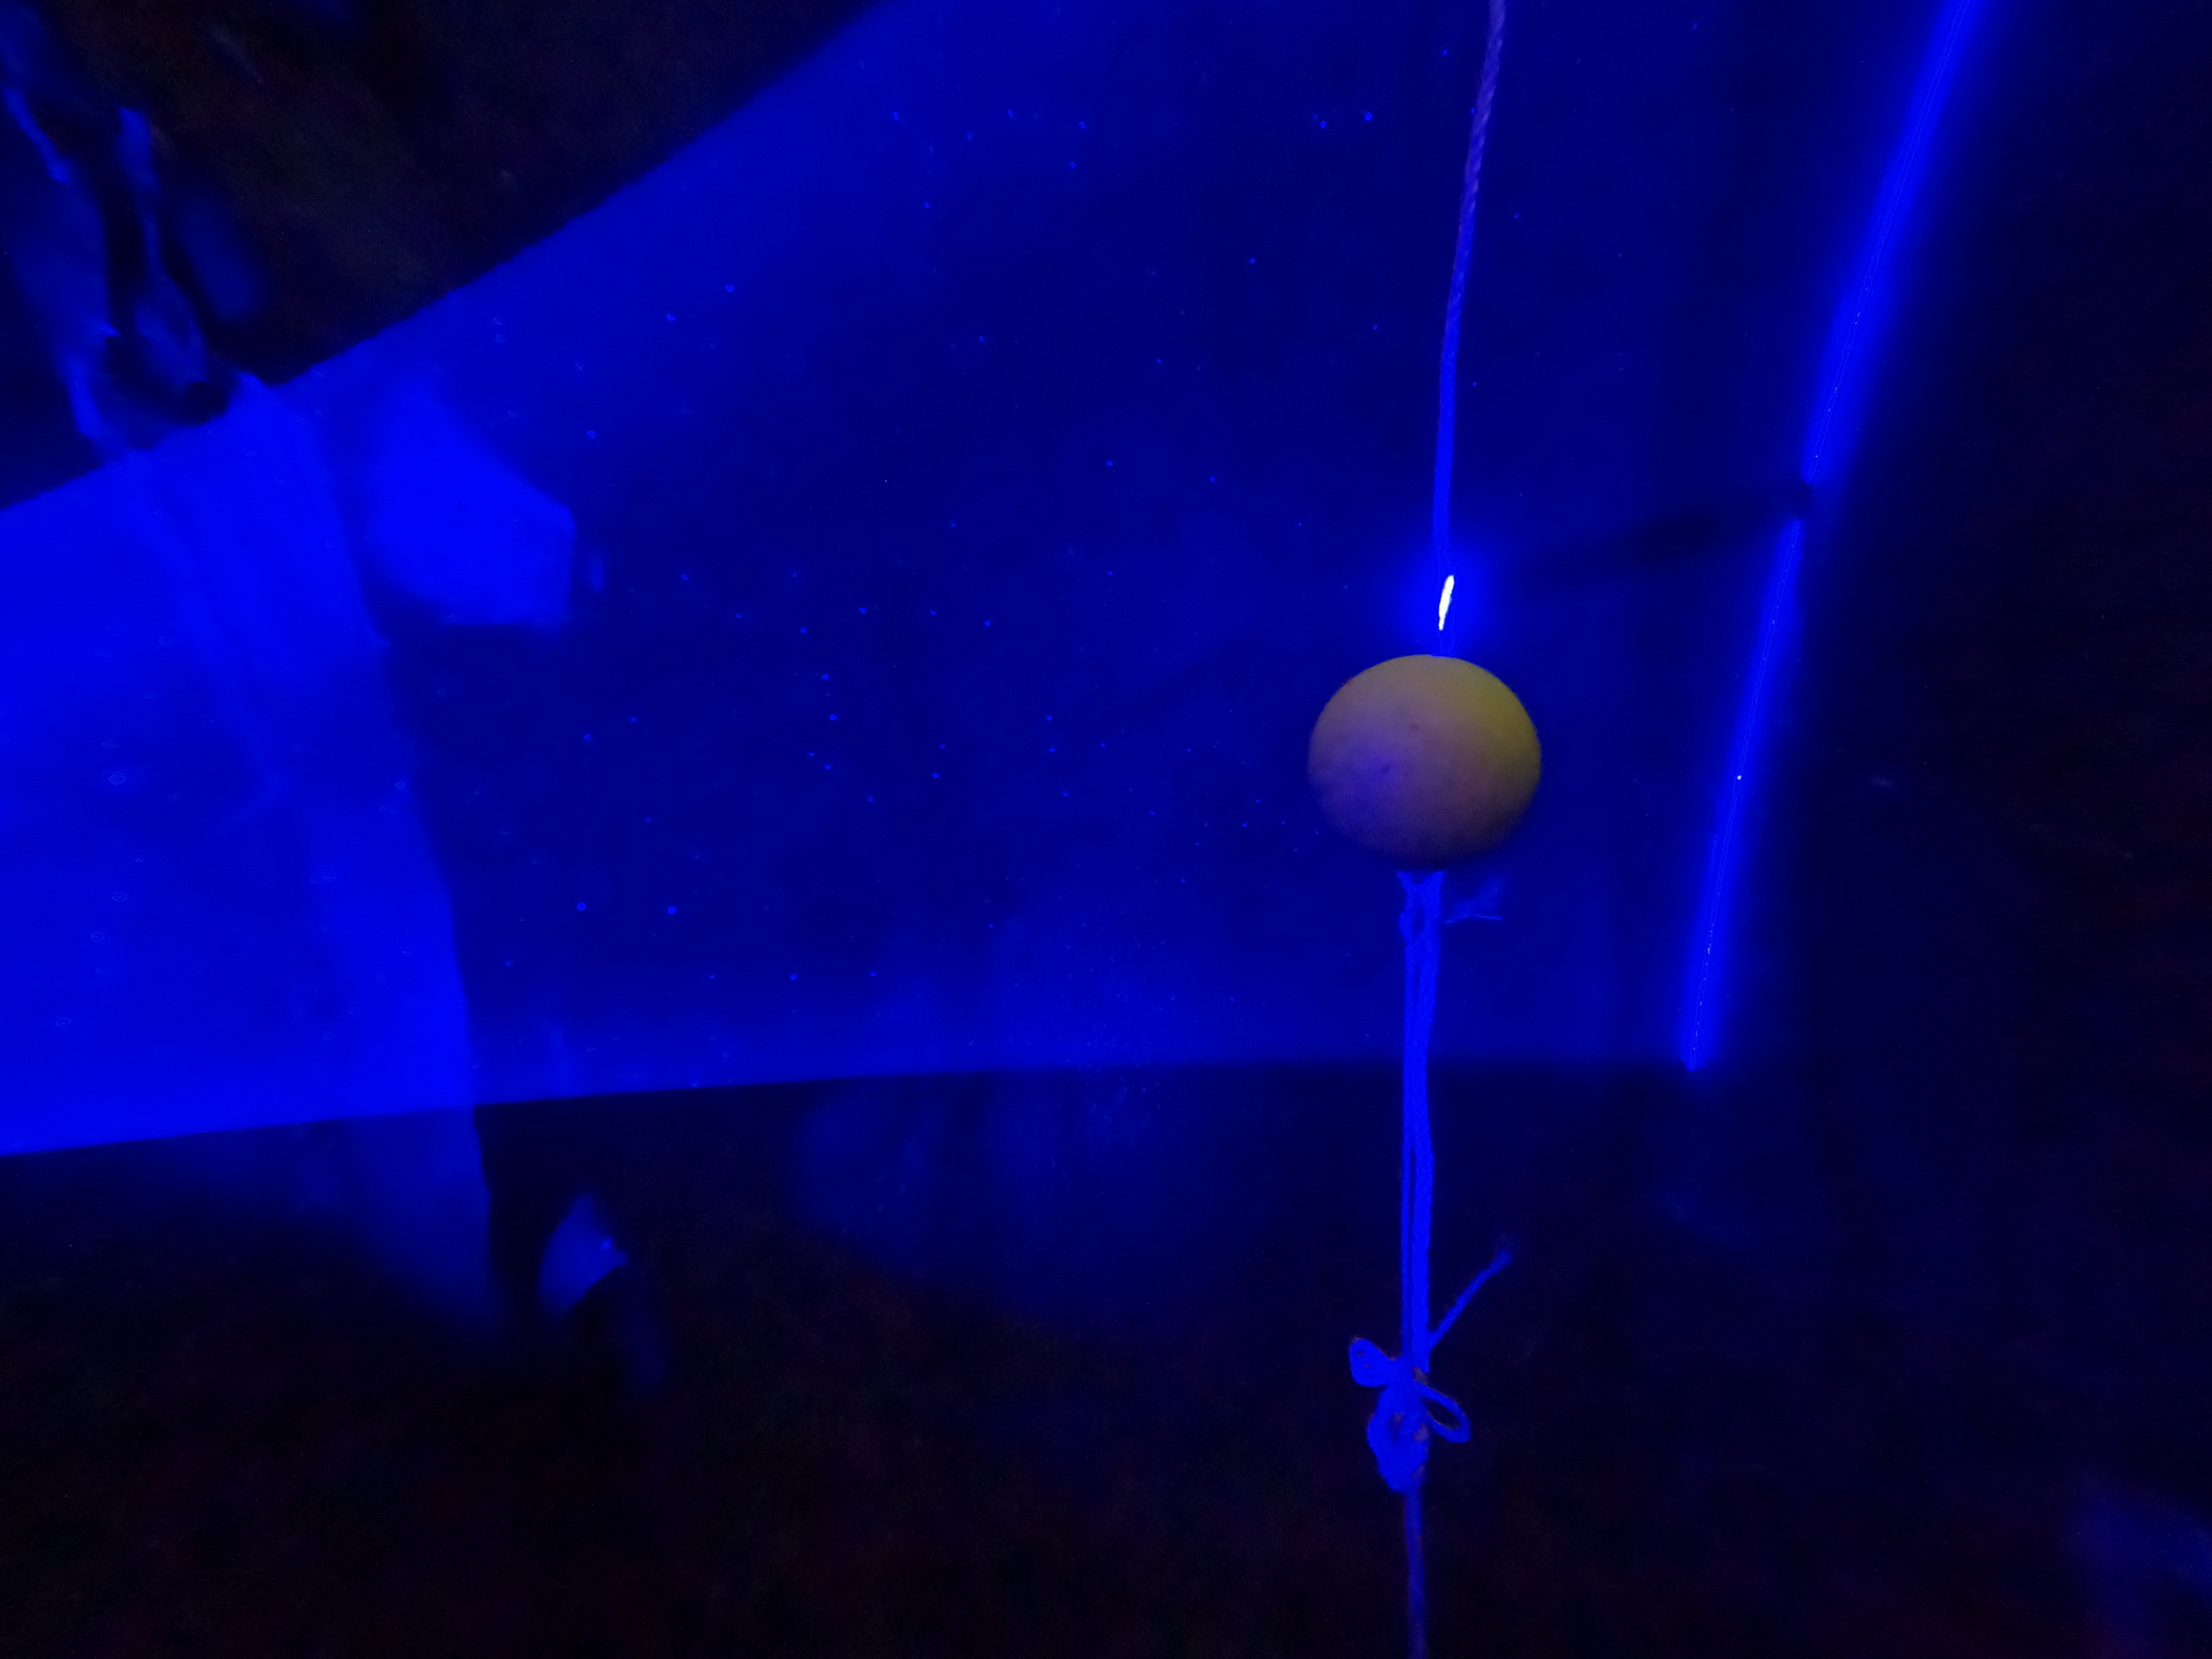

Supplement: Supplementary file 1236 [file G0032950.pdf › 7/G0032950.pdf]

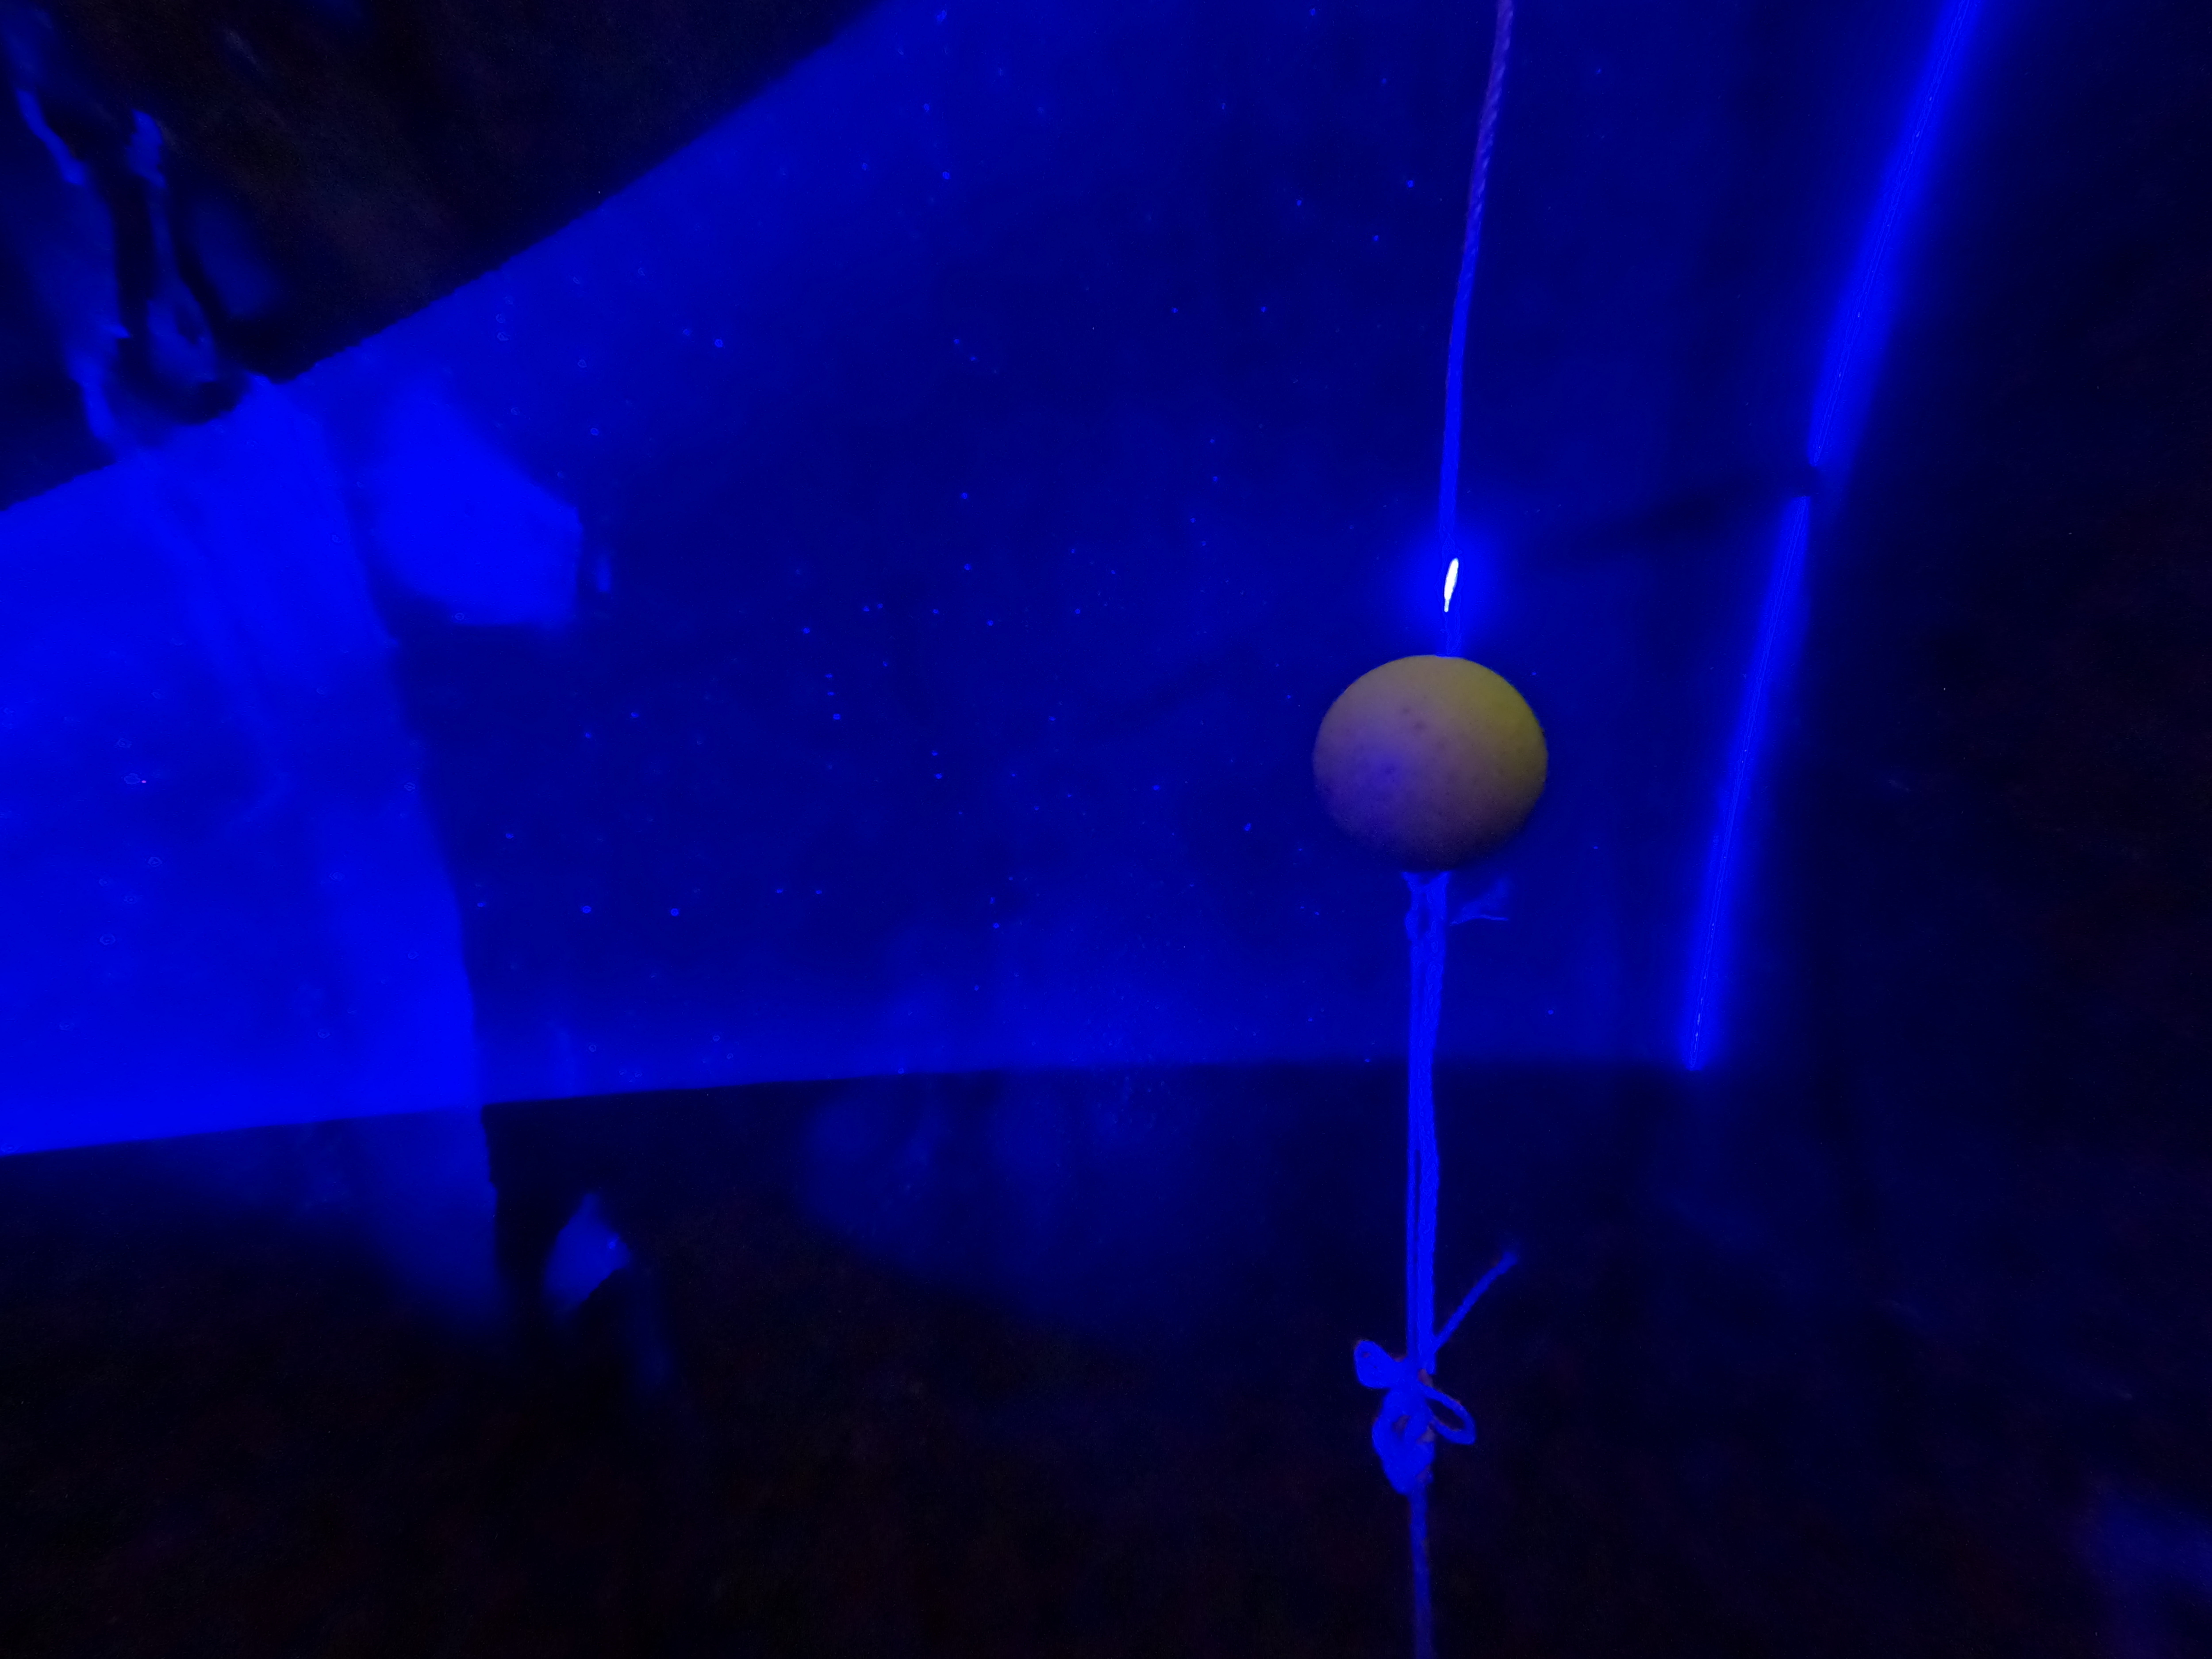

Supplement: Supplementary file 1237 [file G0032951.pdf › 7/G0032951.pdf]

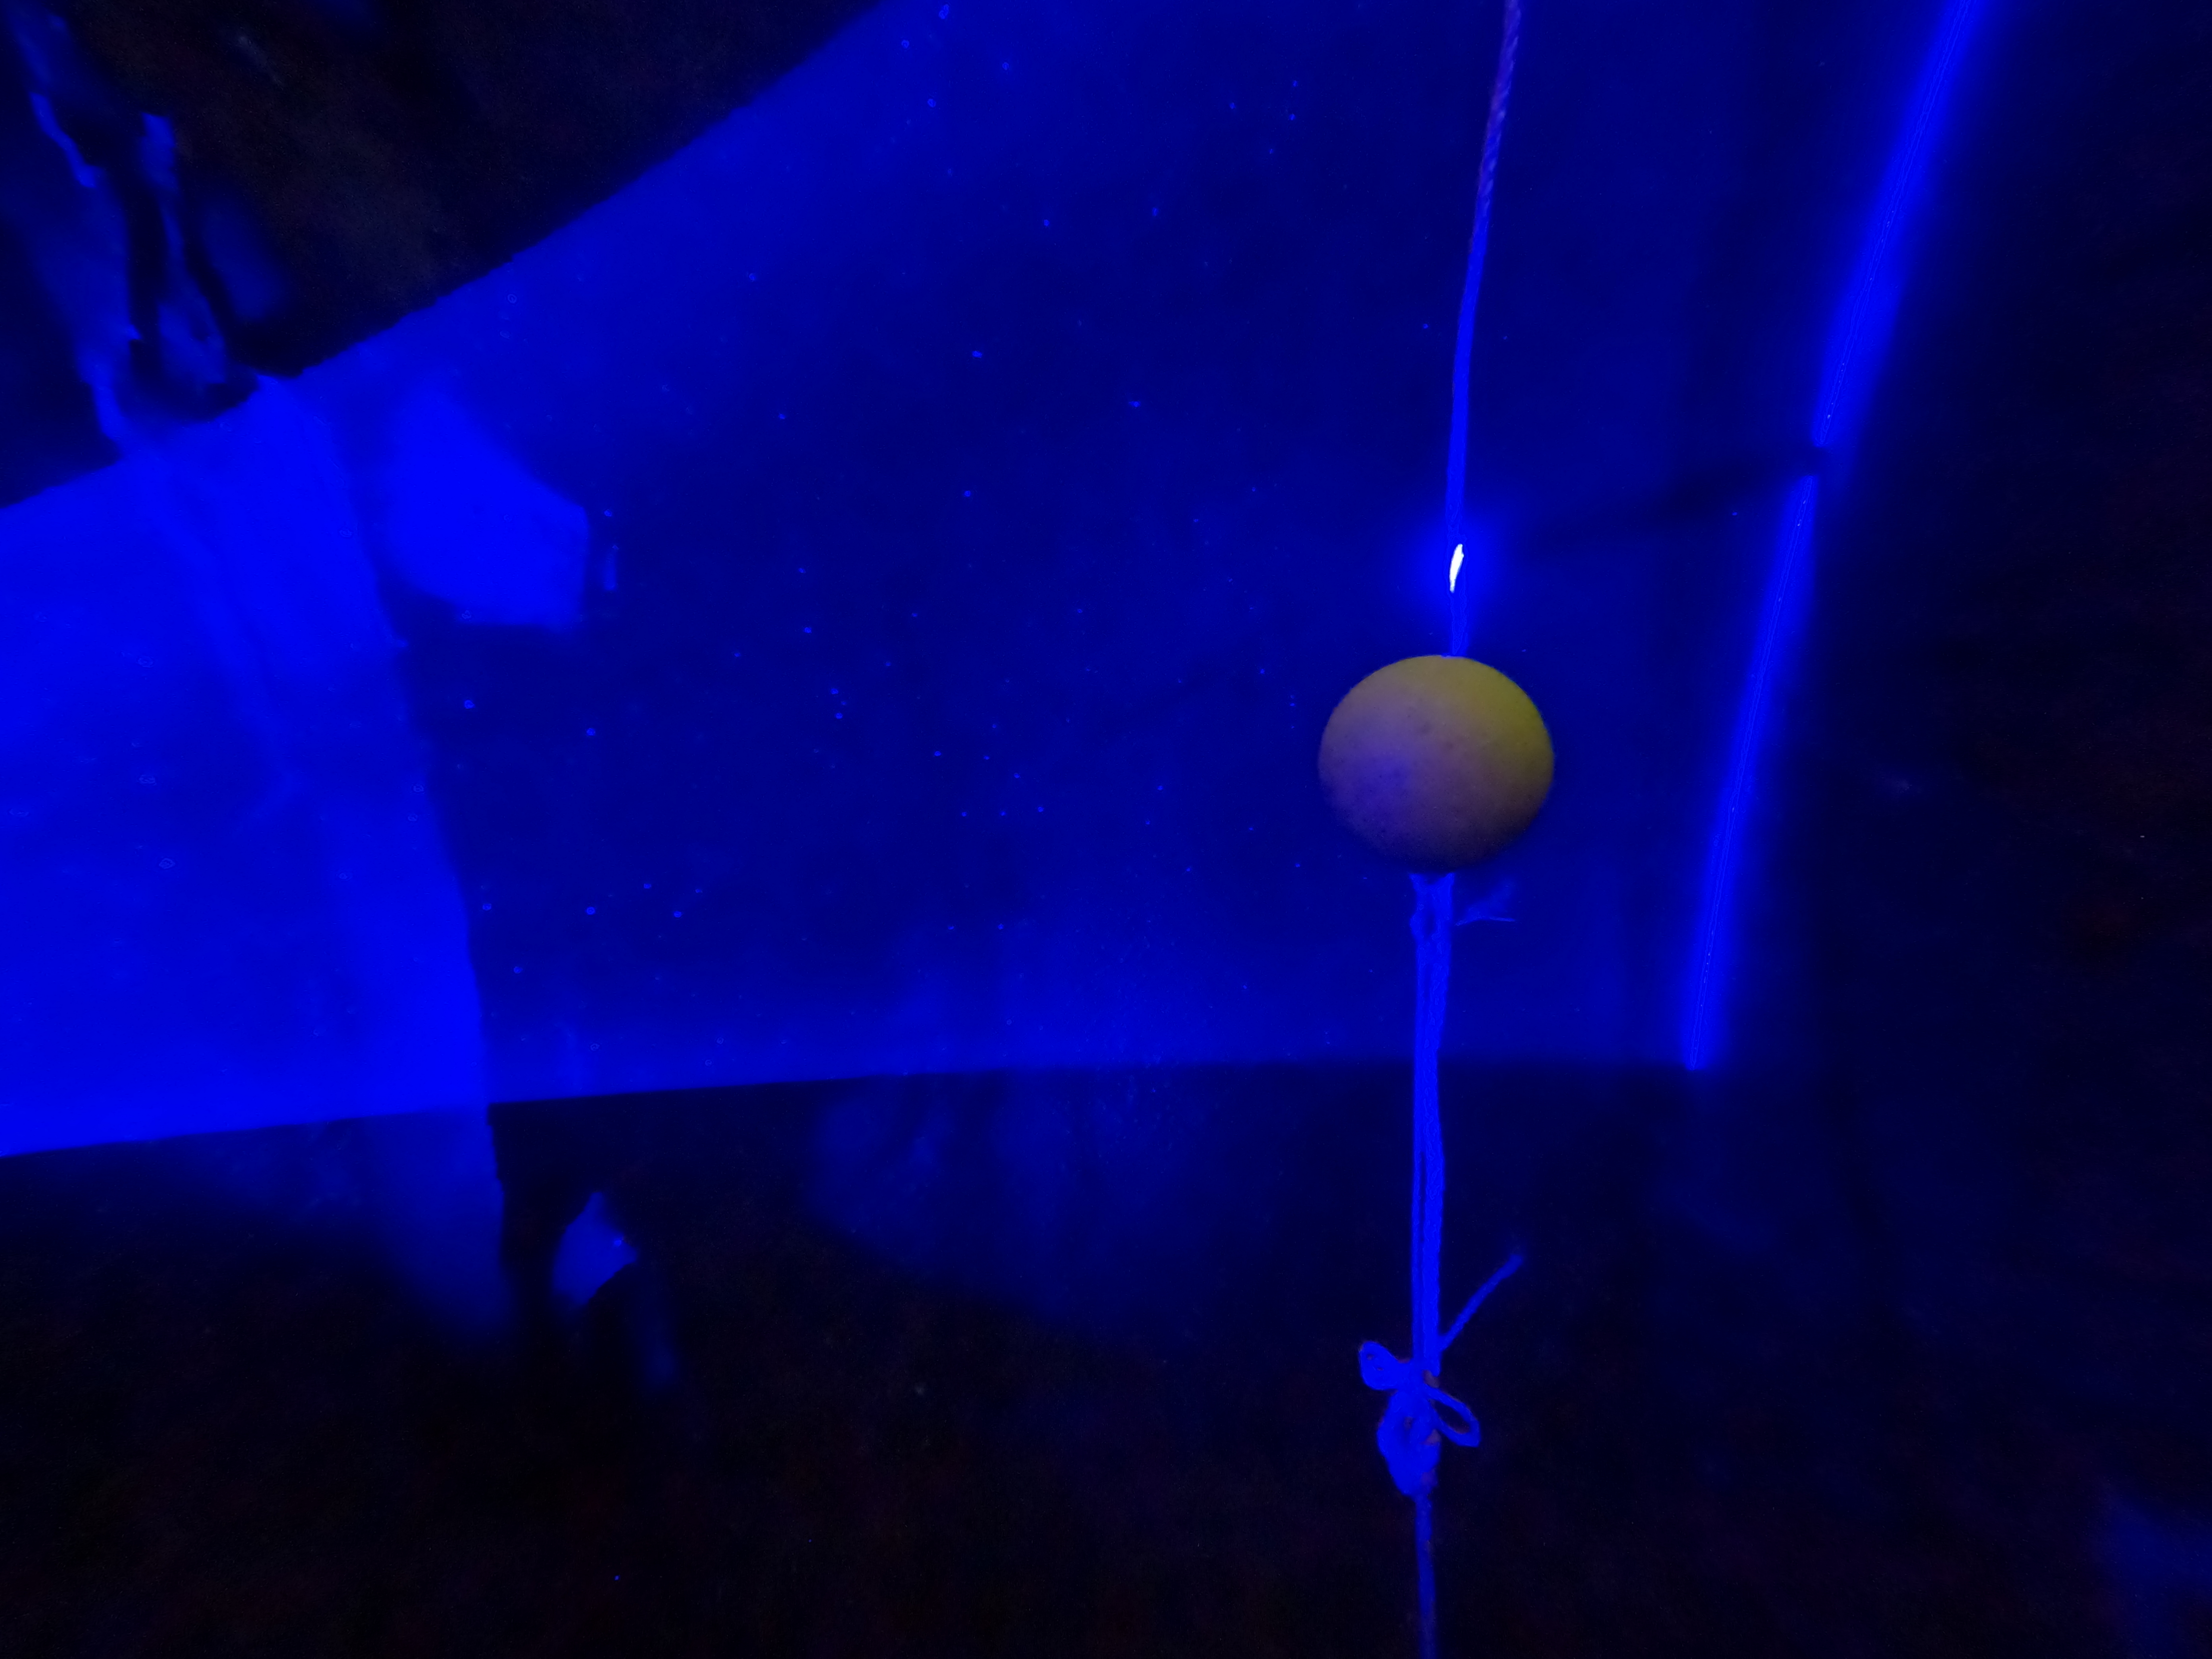

Supplement: Supplementary file 1238 [file G0032952.pdf › 7/G0032952.pdf]

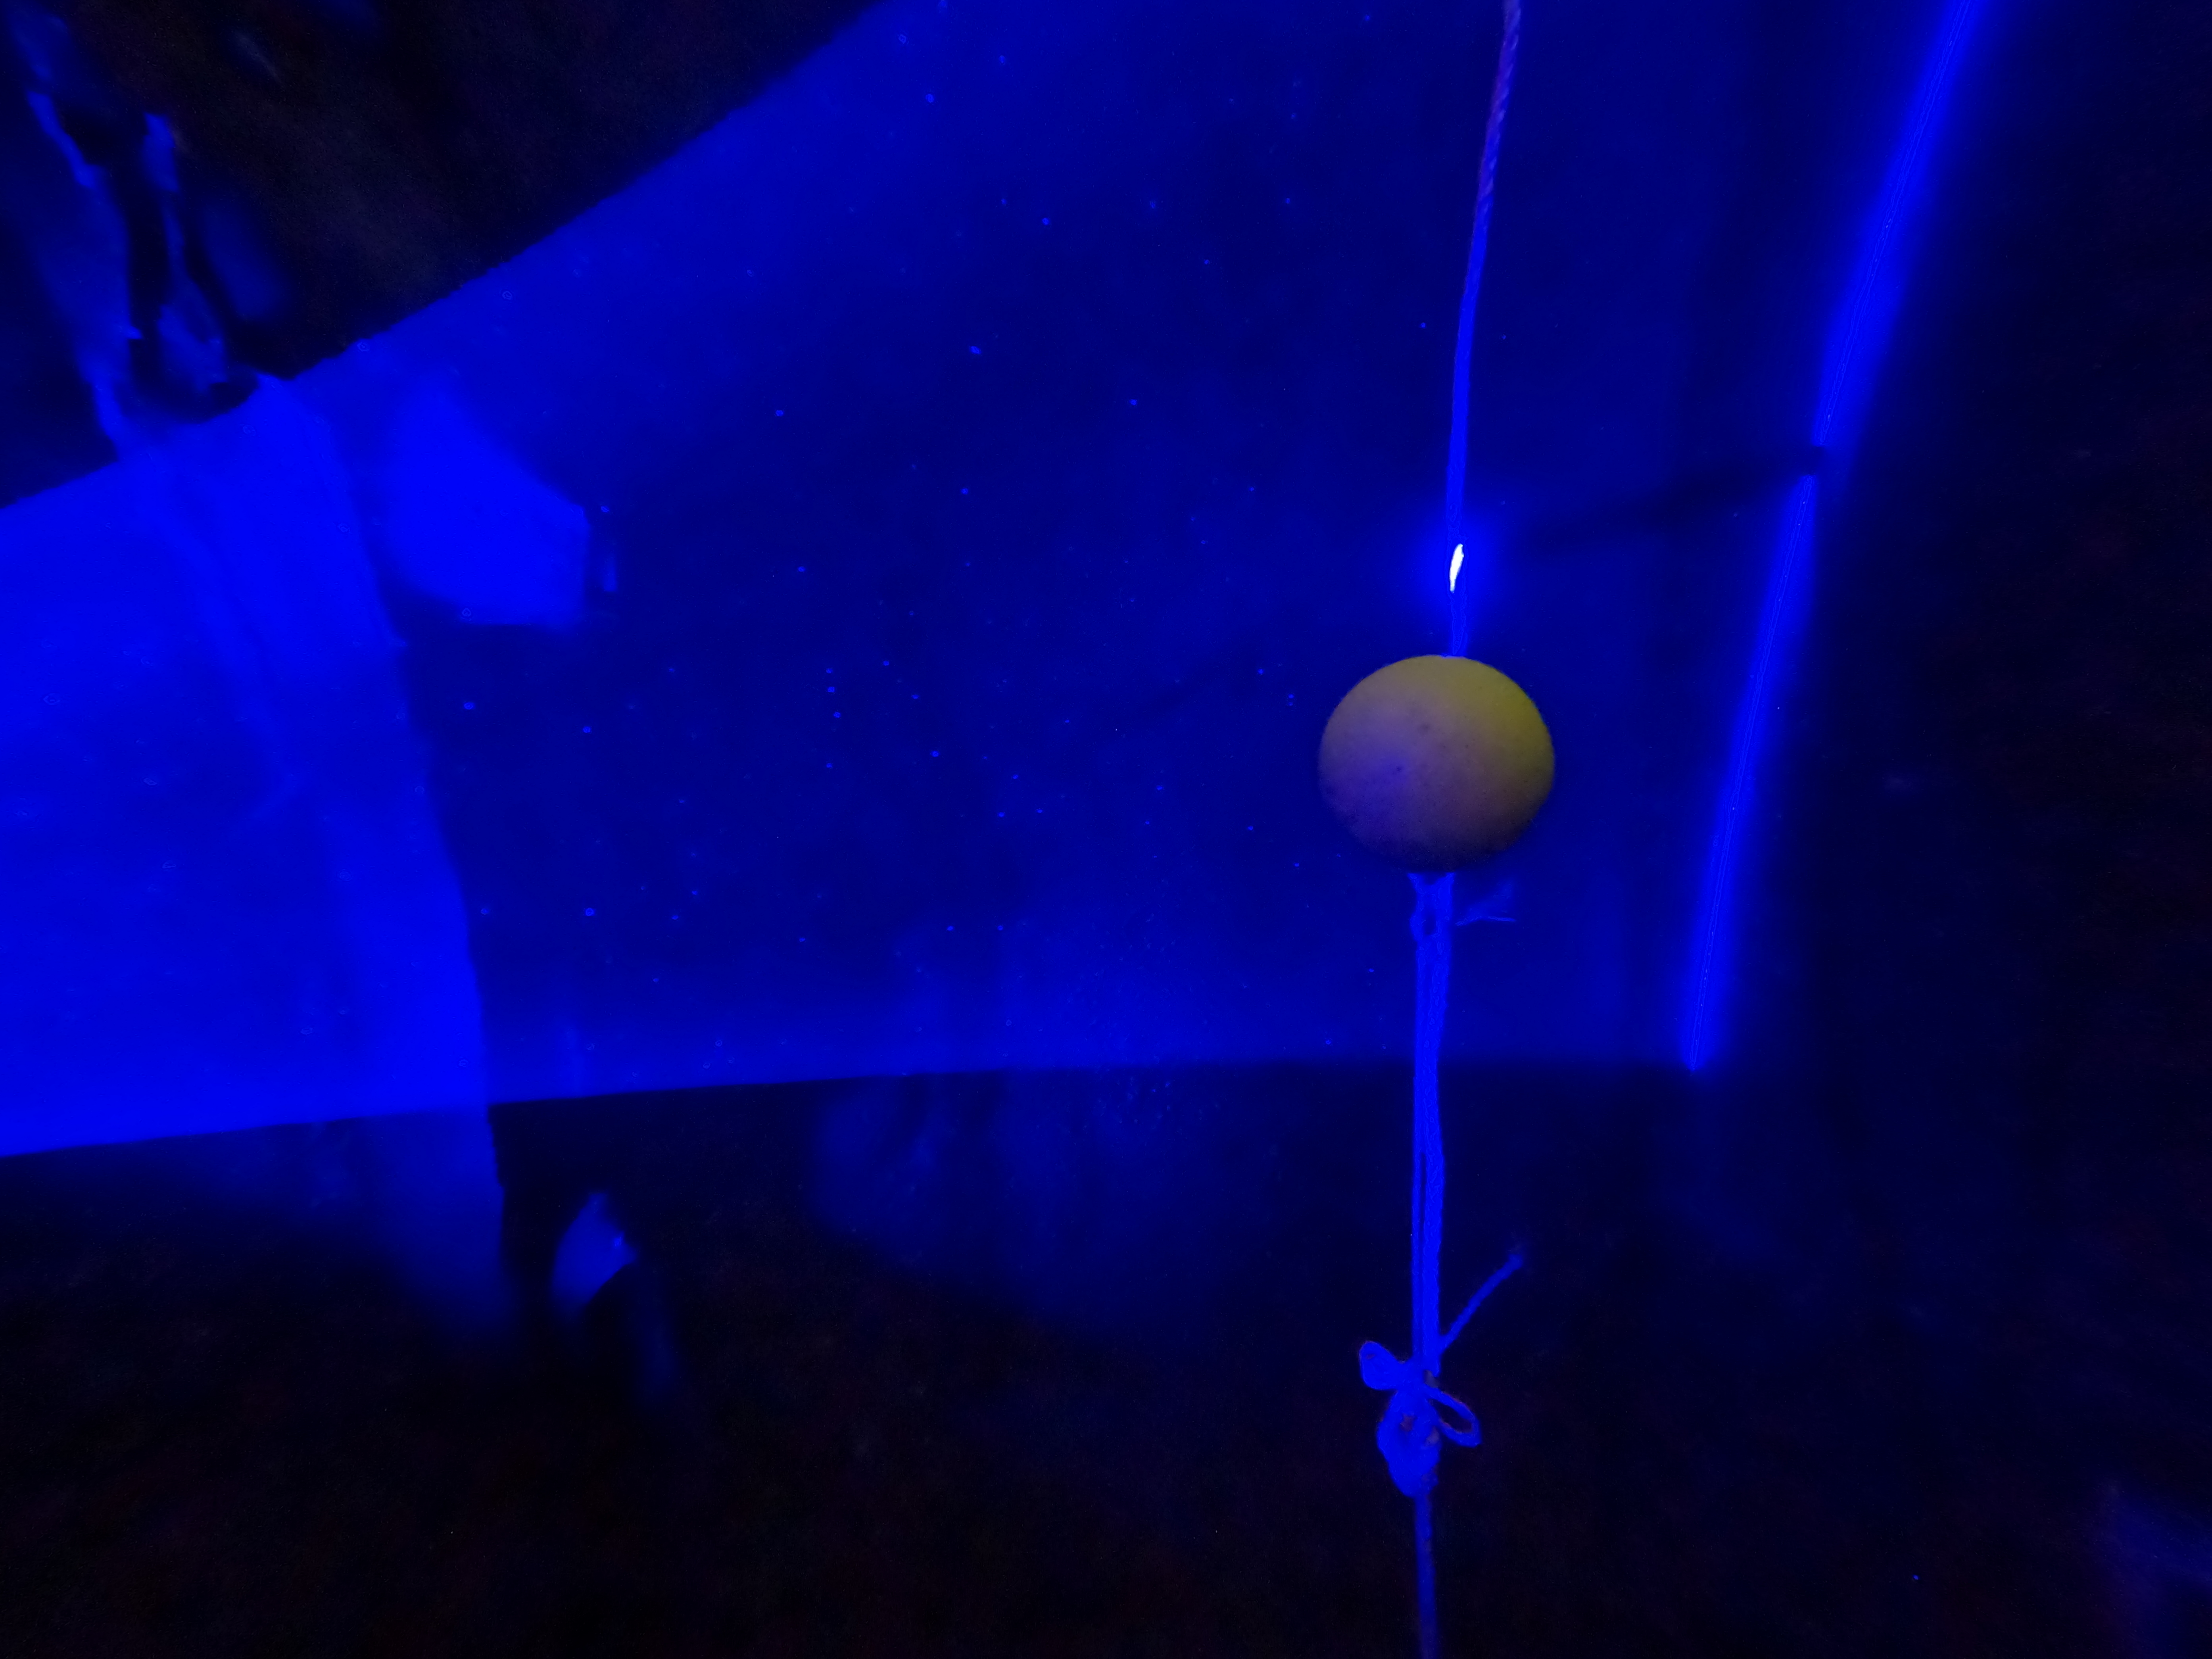

Supplement: Supplementary file 1239 [file G0032953.pdf › 7/G0032953.pdf]

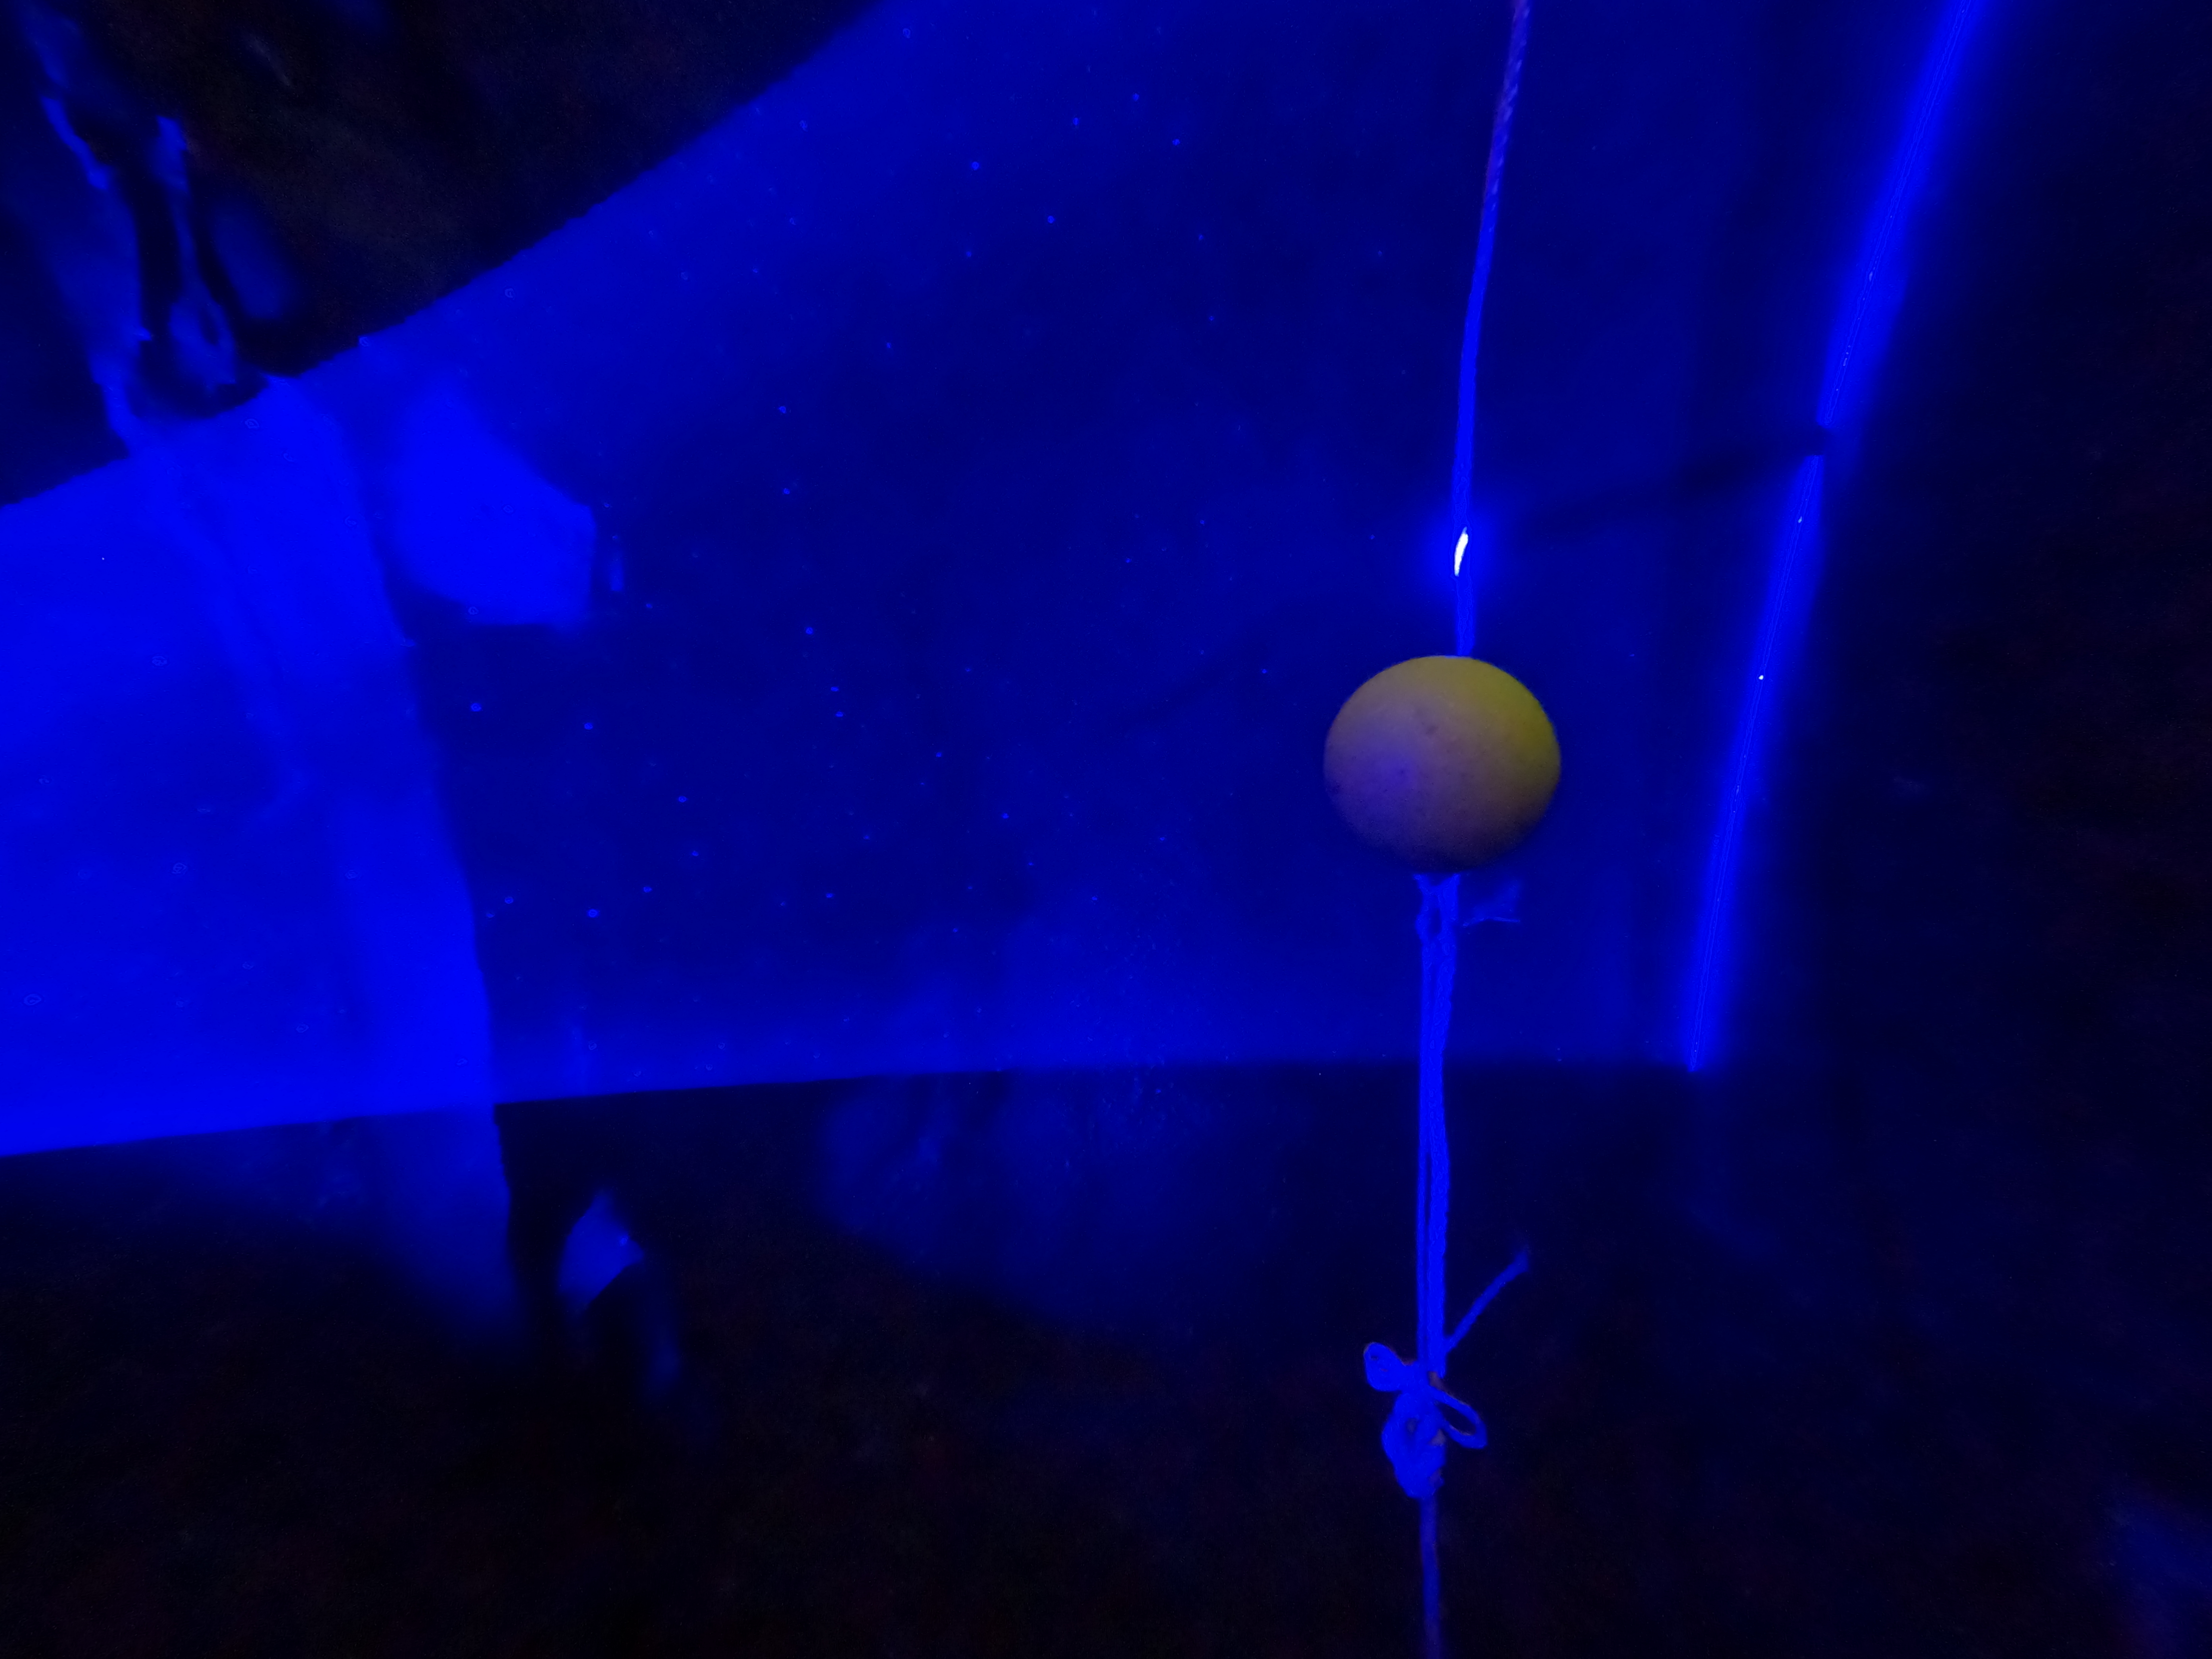

Supplement: Supplementary file 1240 [file G0032954.pdf › 7/G0032954.pdf]

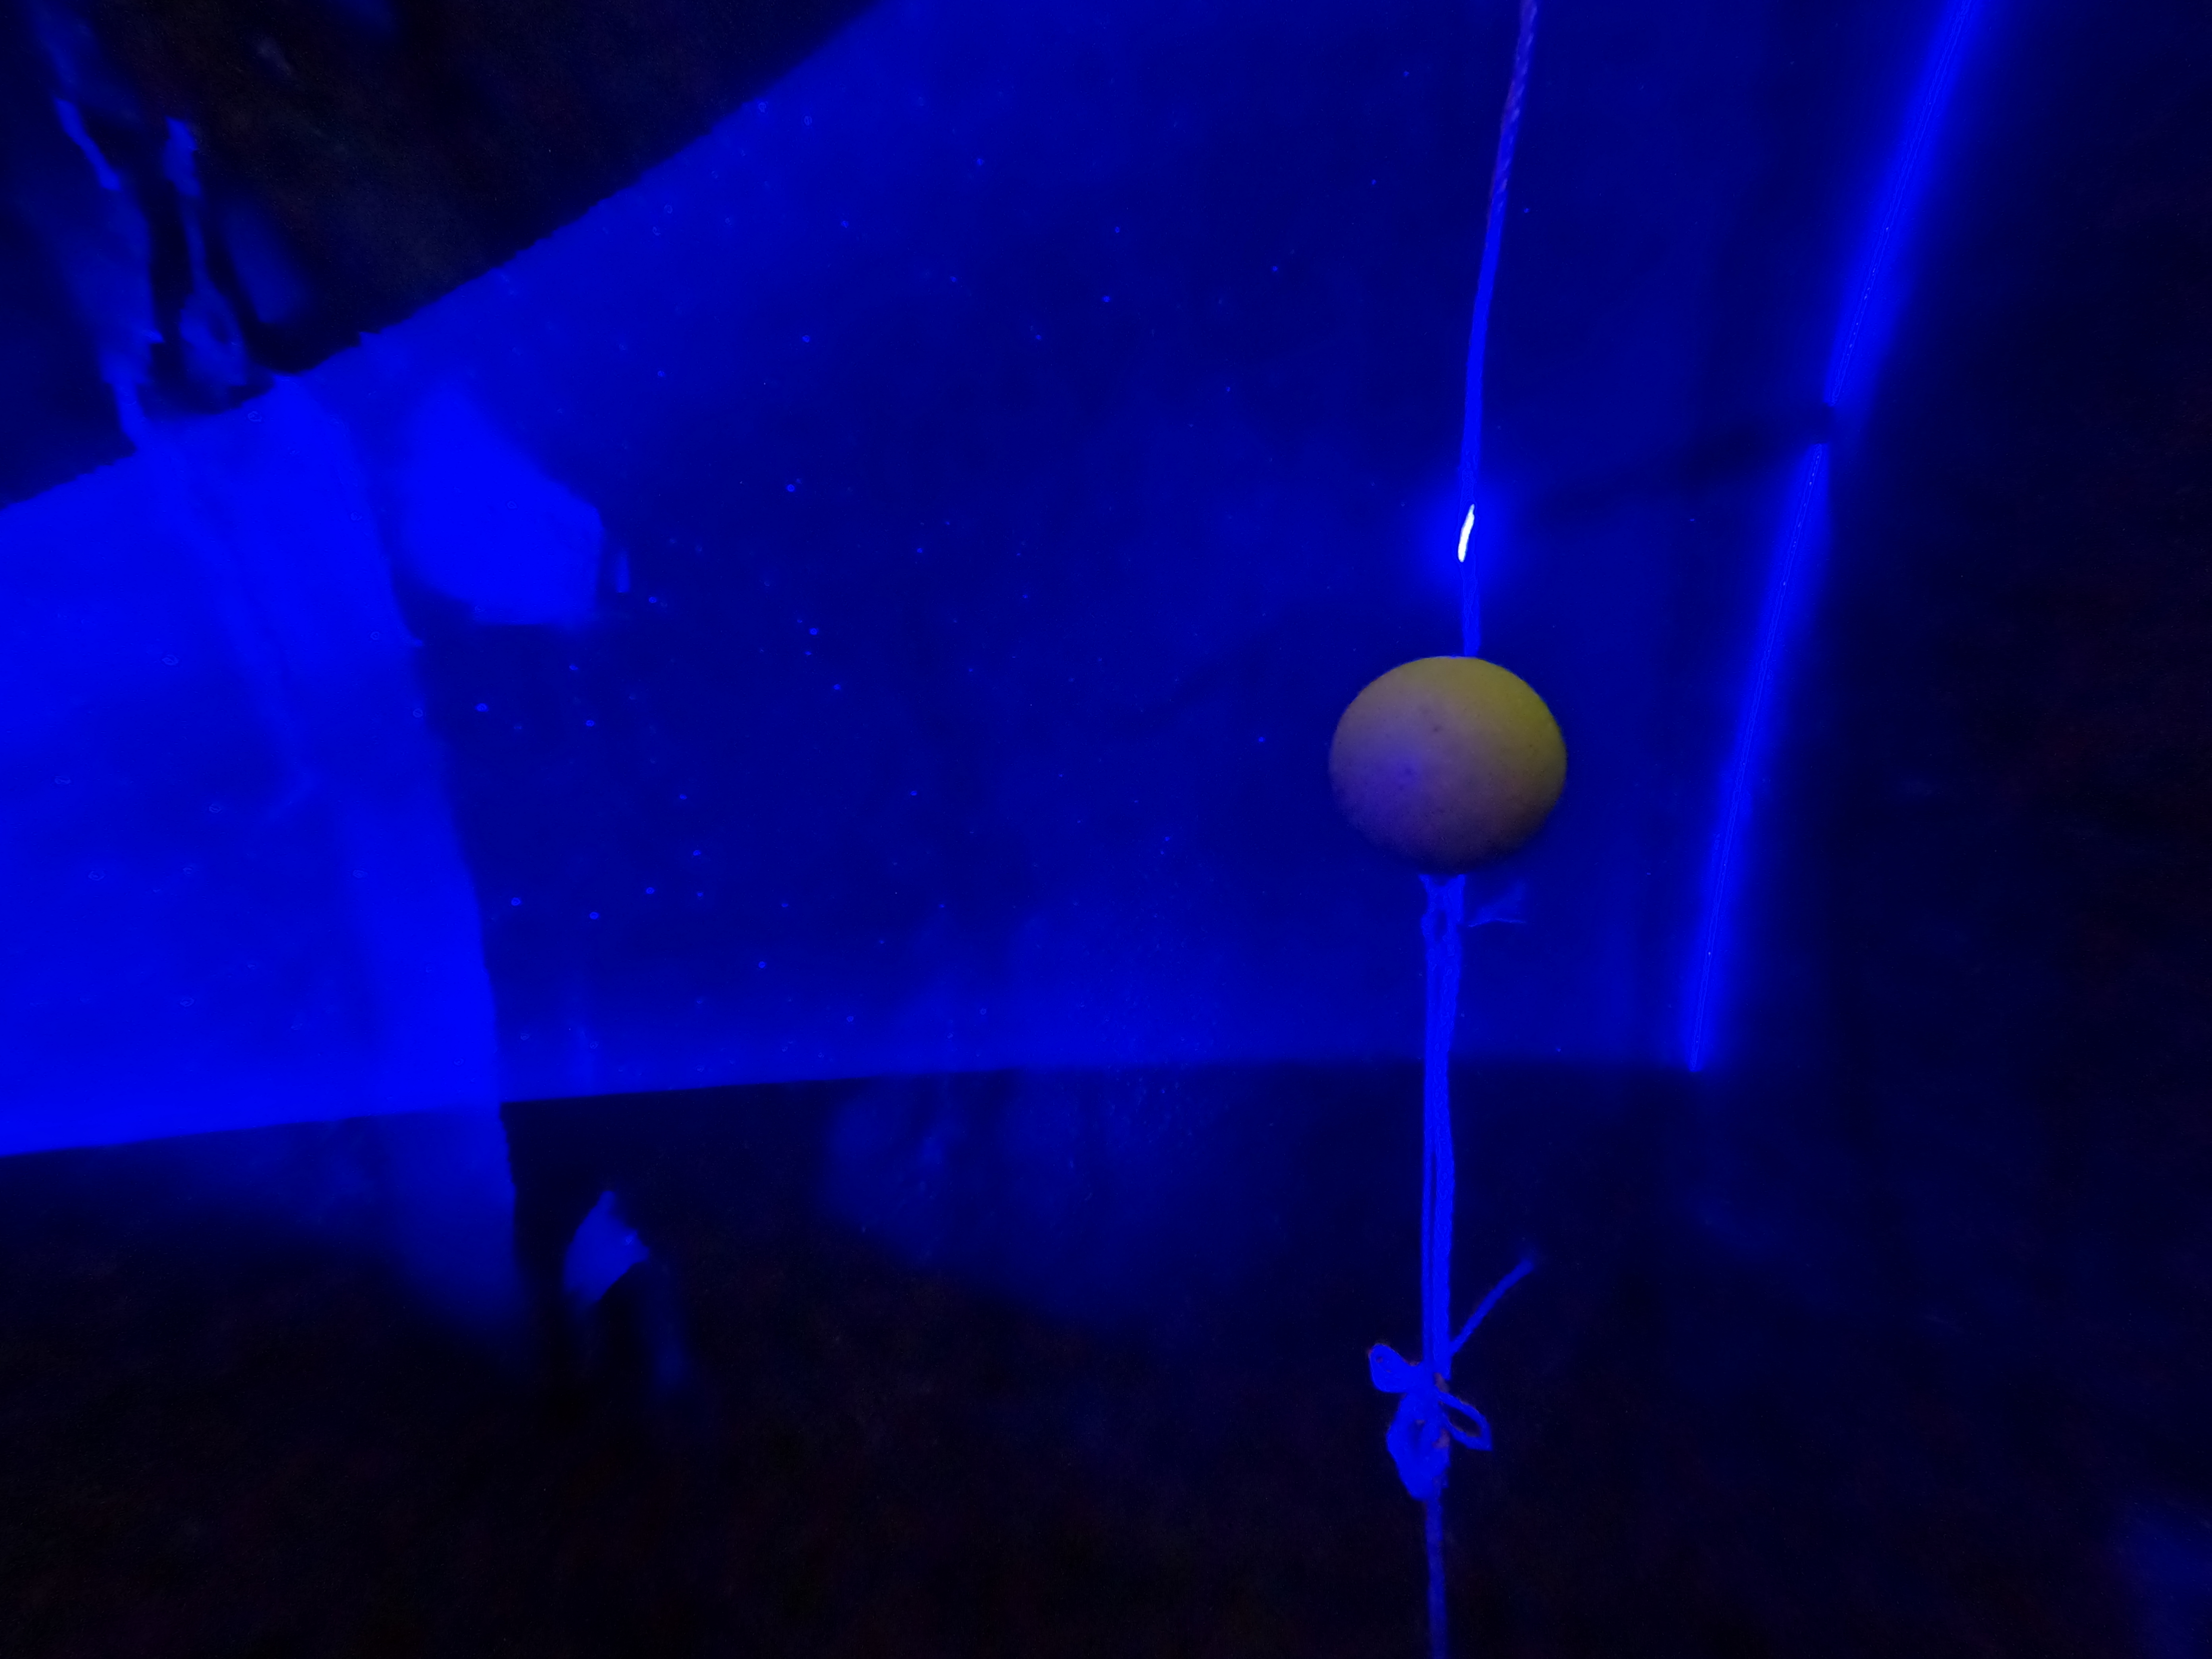

Supplement: Supplementary file 1241 [file G0032955.pdf › 7/G0032955.pdf]

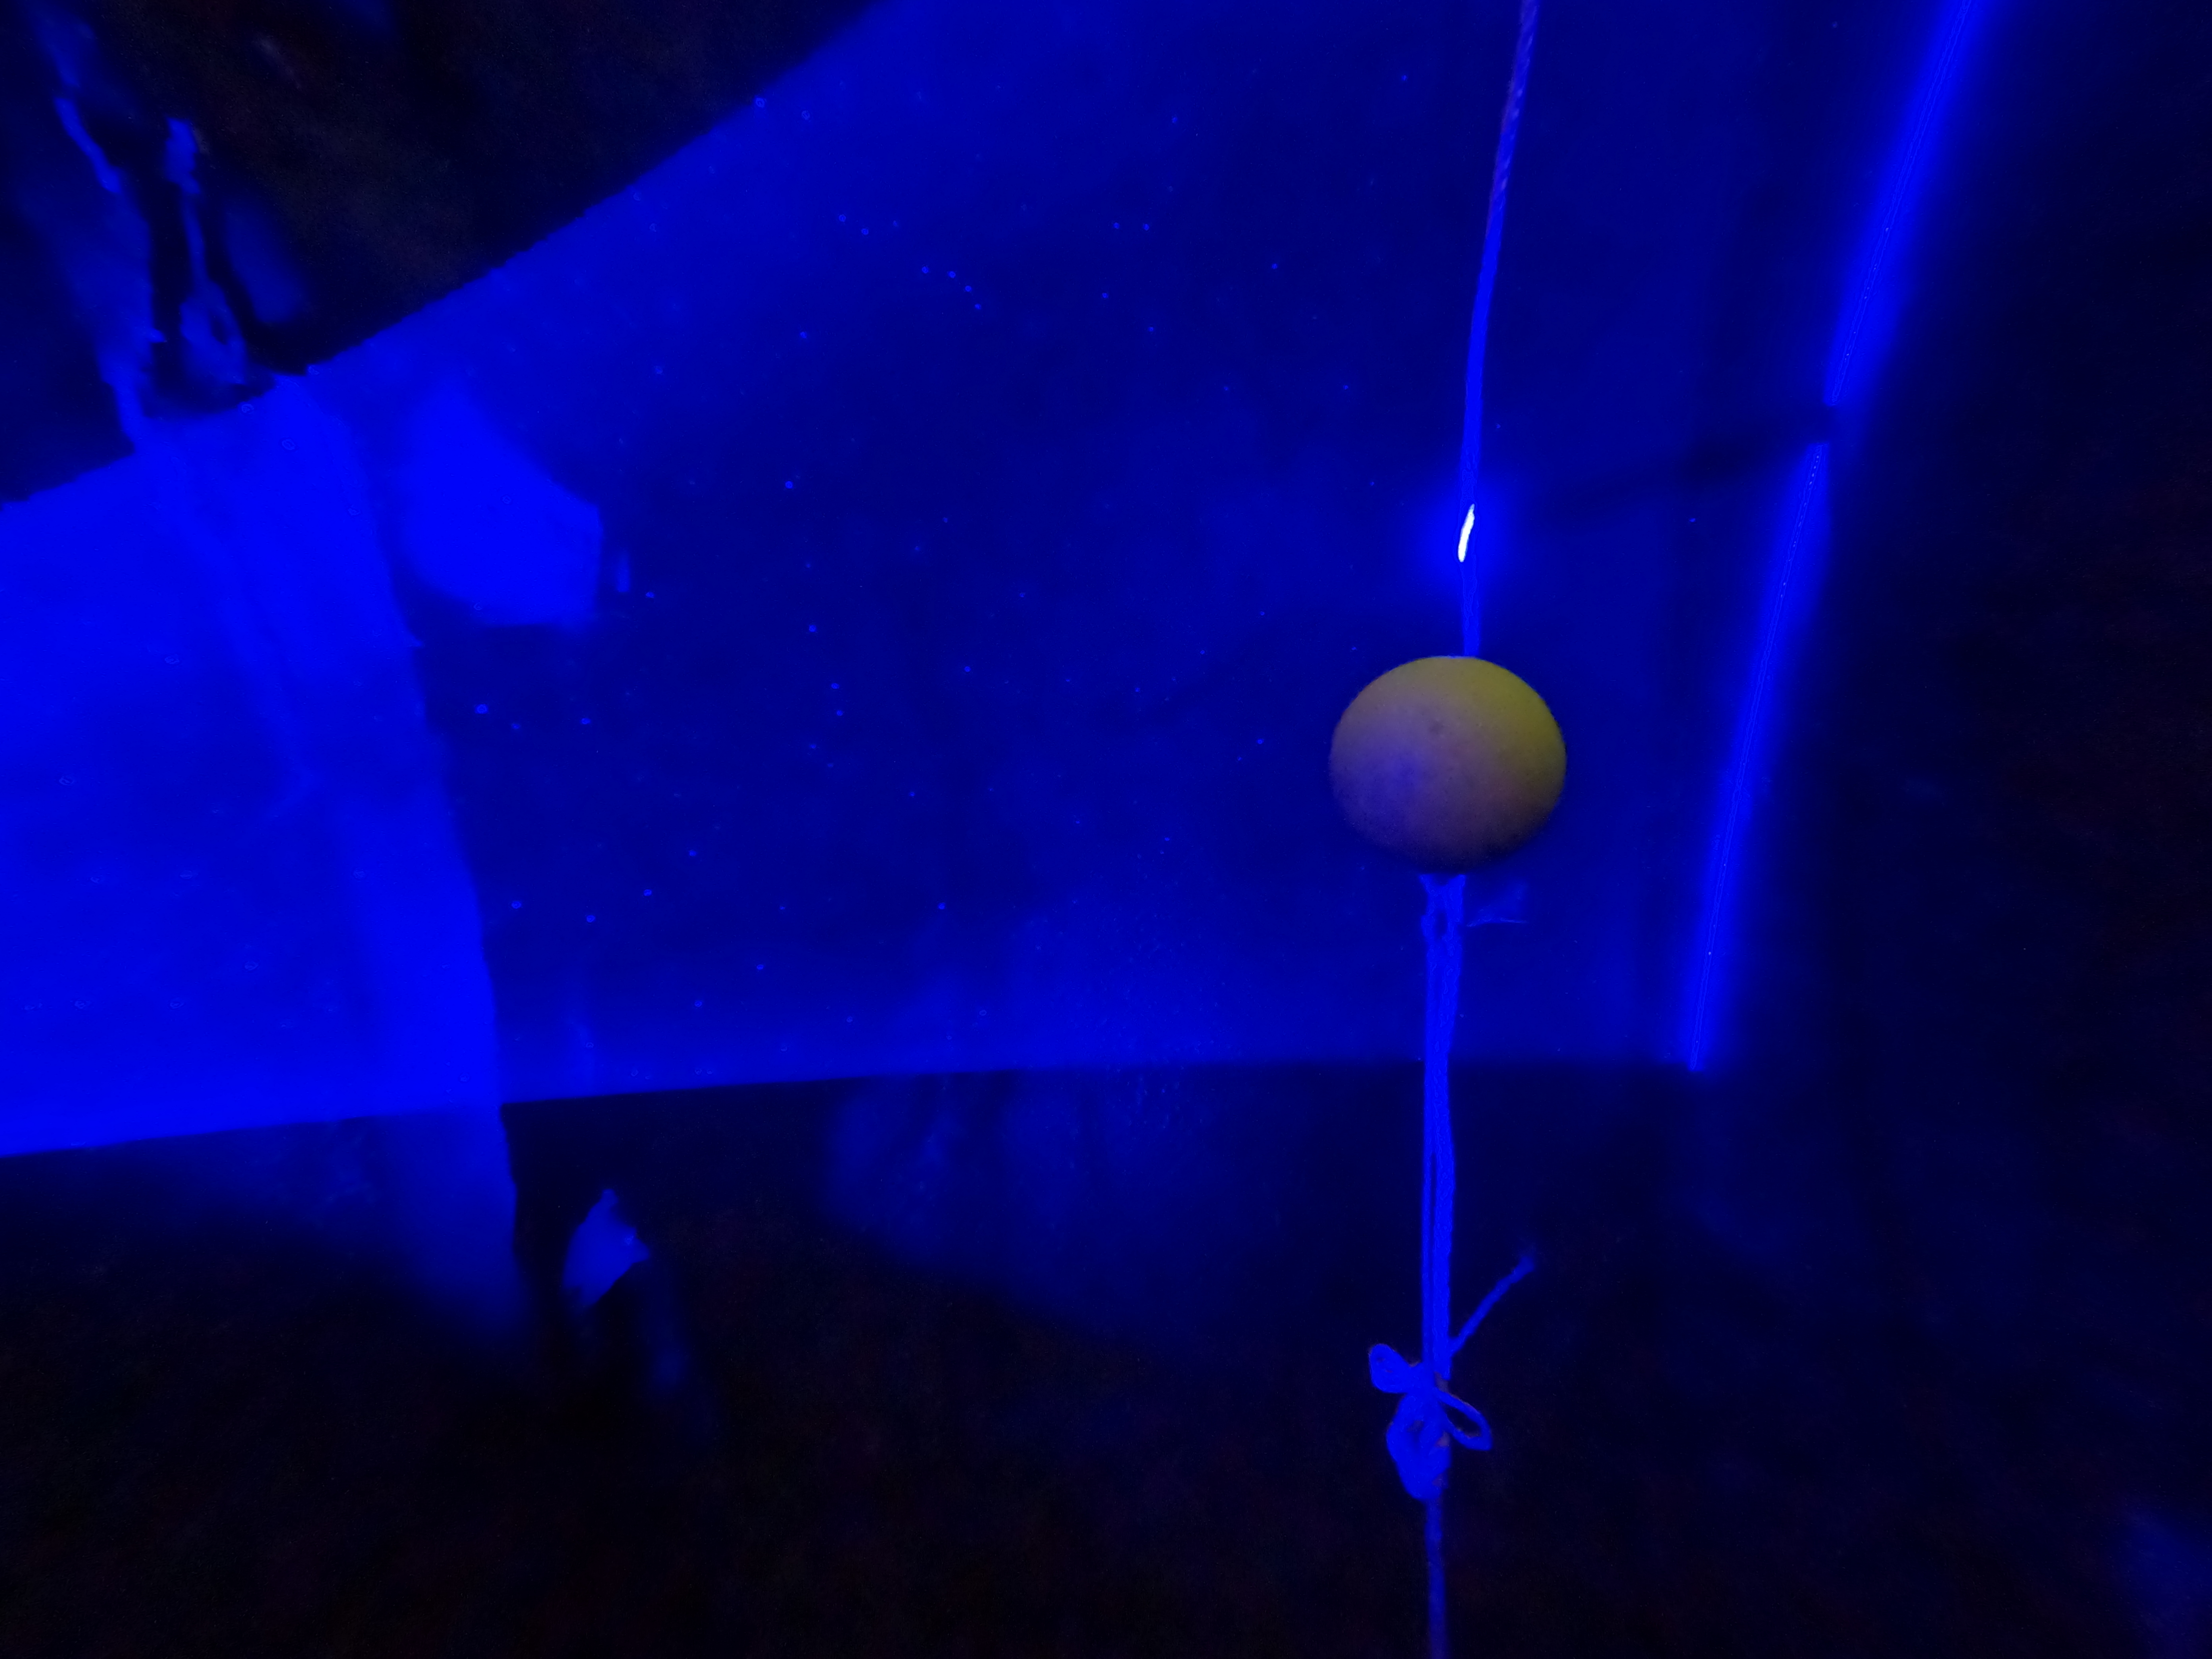

Supplement: Supplementary file 1242 [file G0032956.pdf › 7/G0032956.pdf]

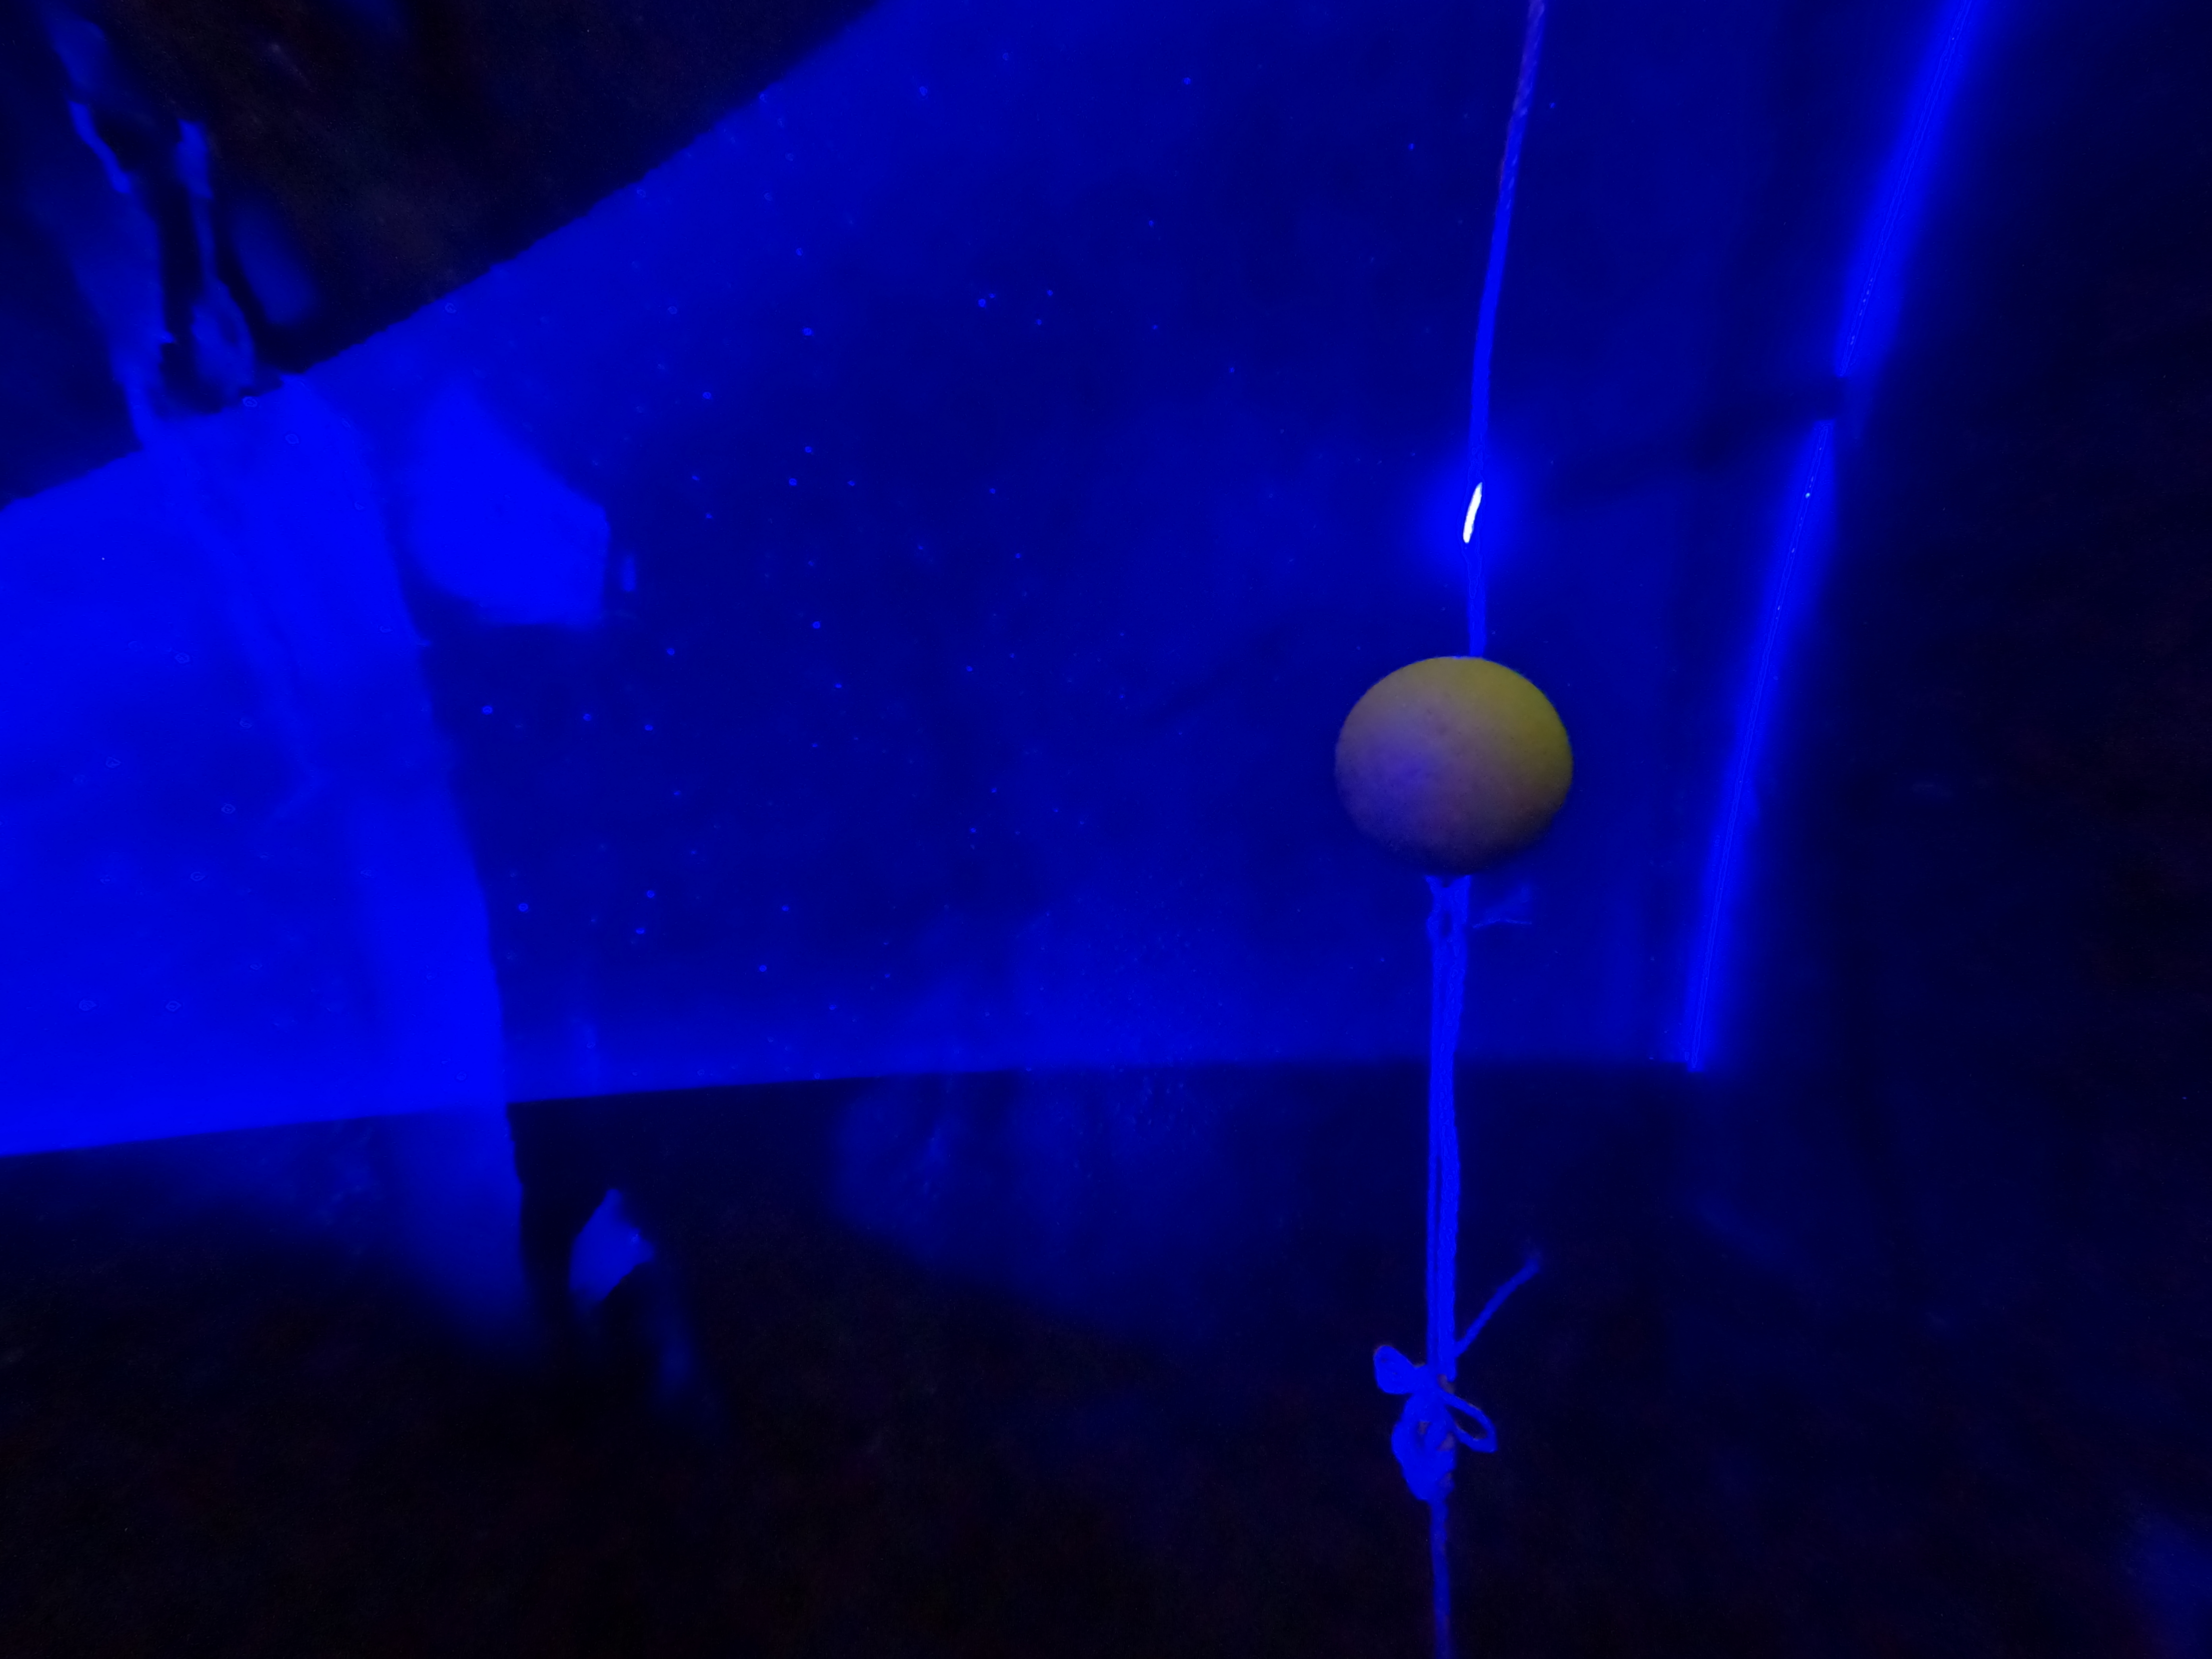

Supplement: Supplementary file 1243 [file G0032957.pdf › 7/G0032957.pdf]

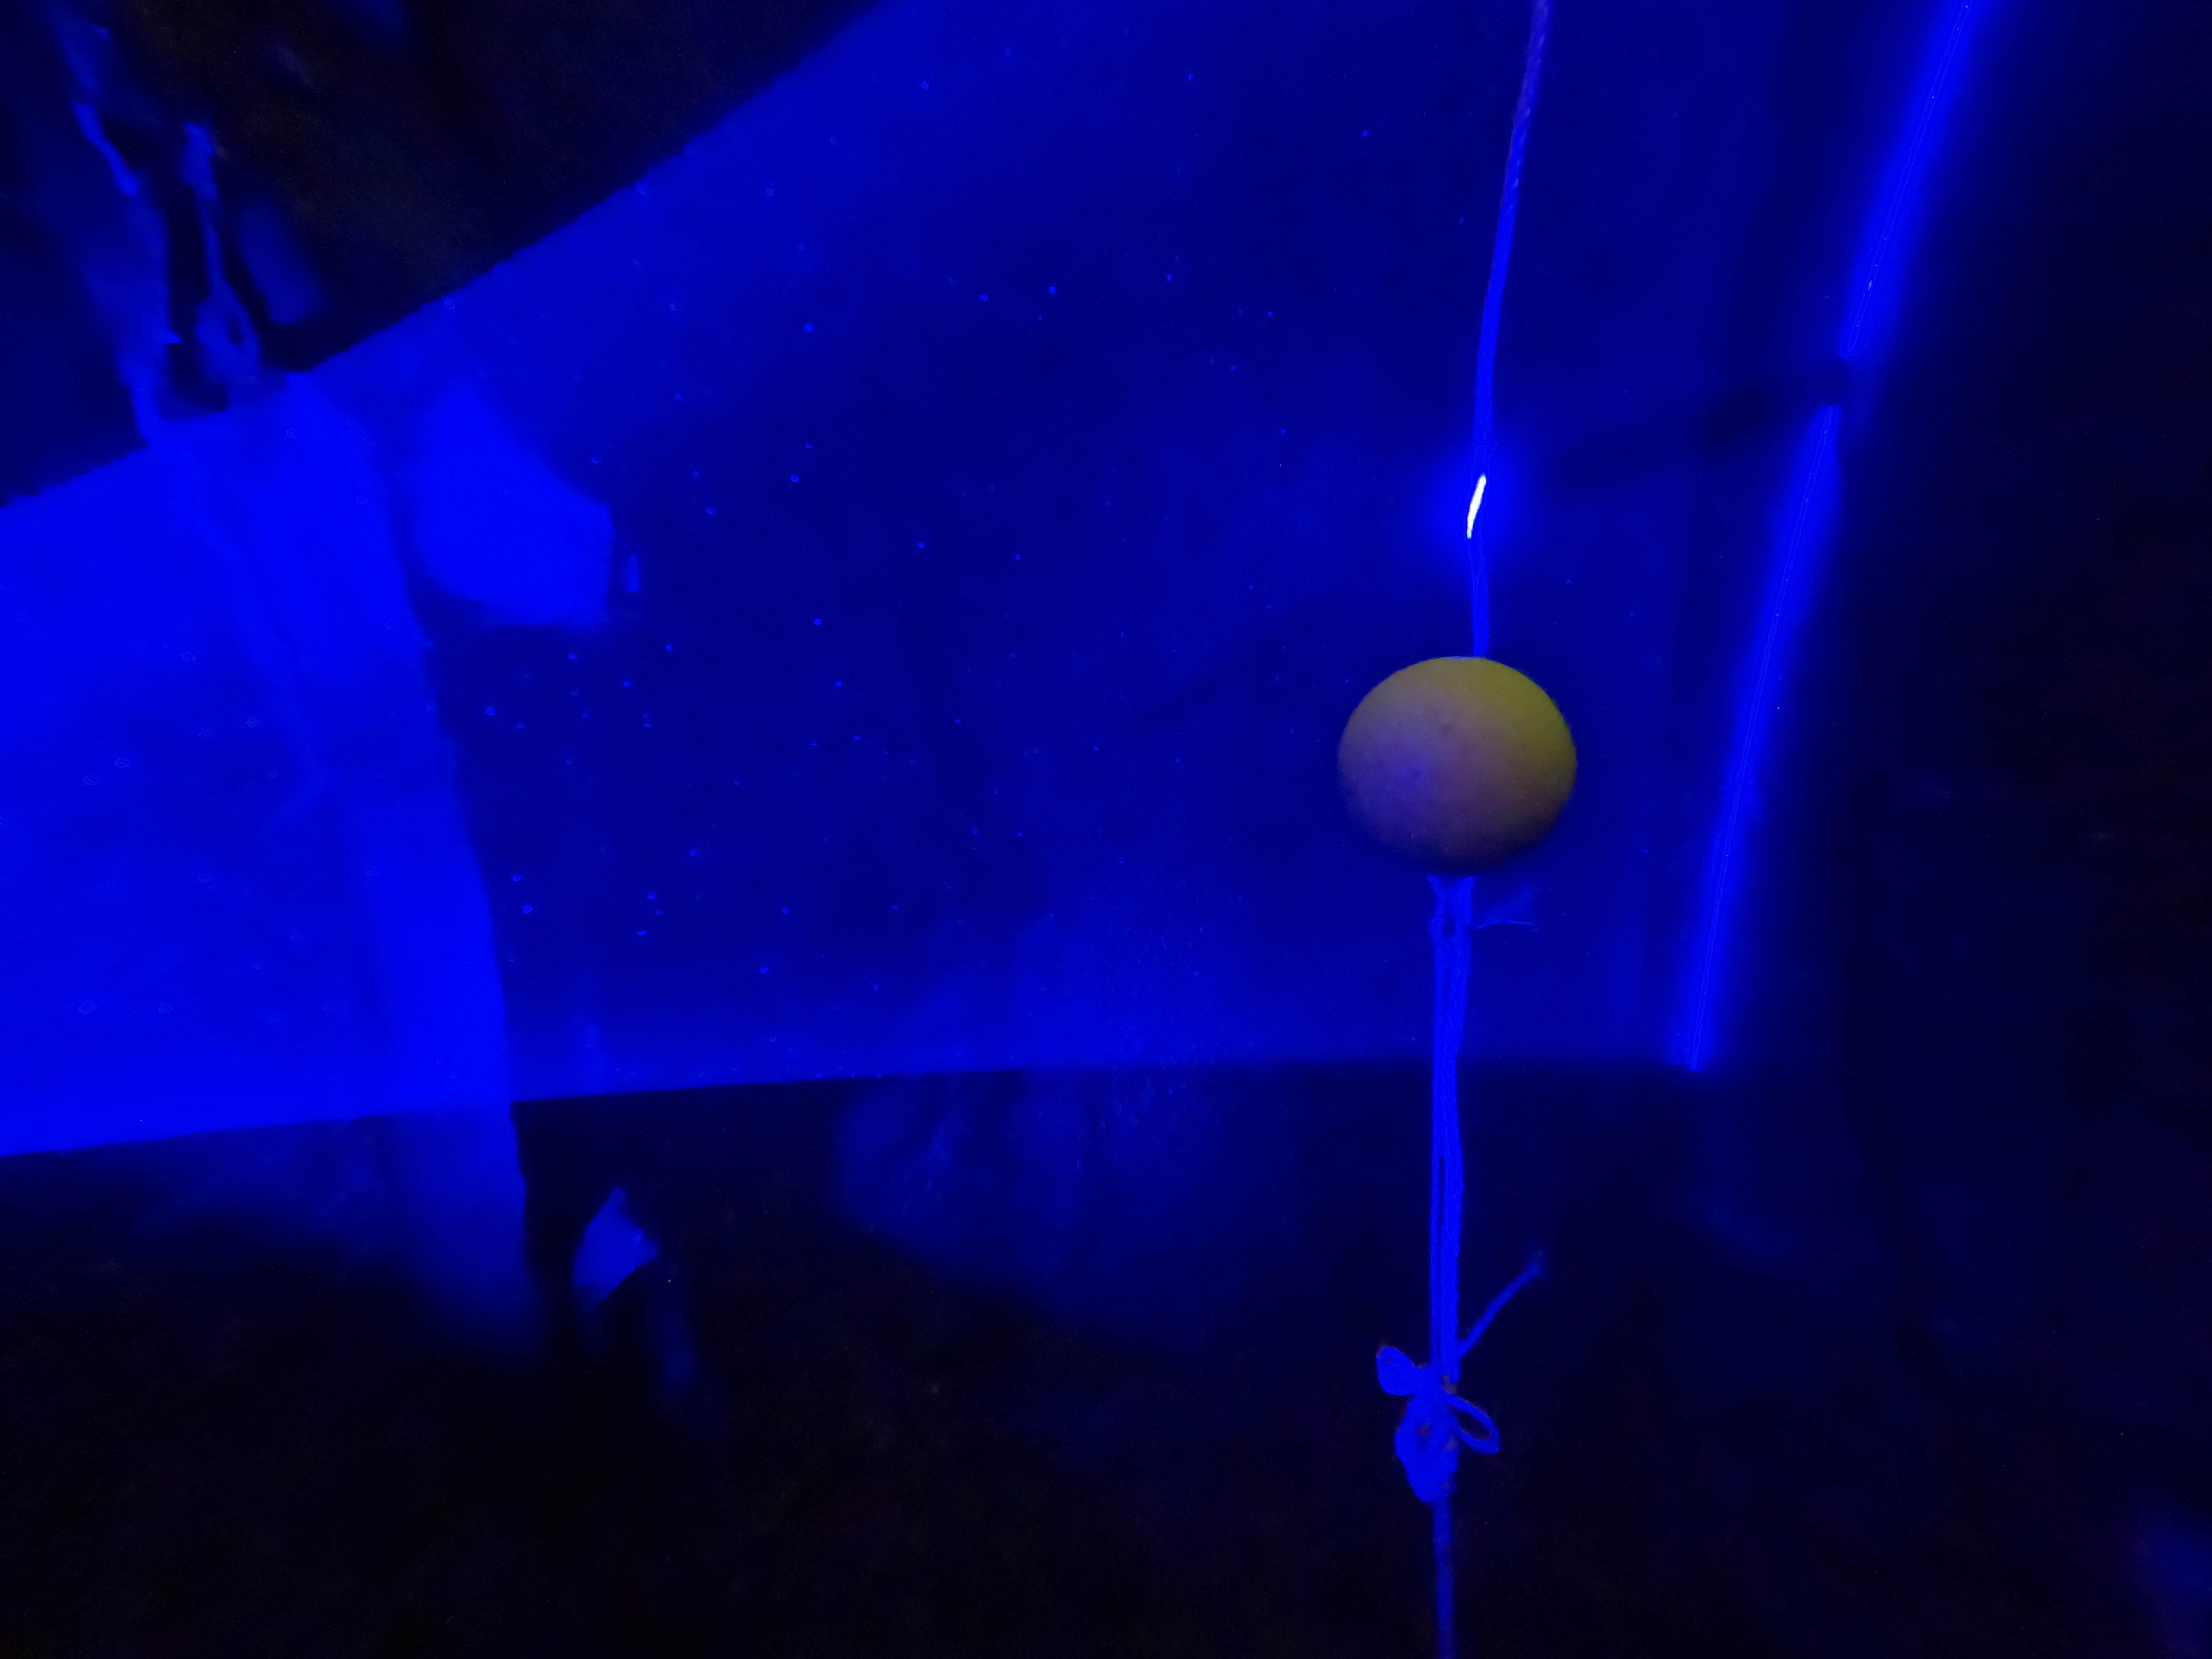

Supplement: Supplementary file 1244 [file G0032958.pdf › 7/G0032958.pdf]

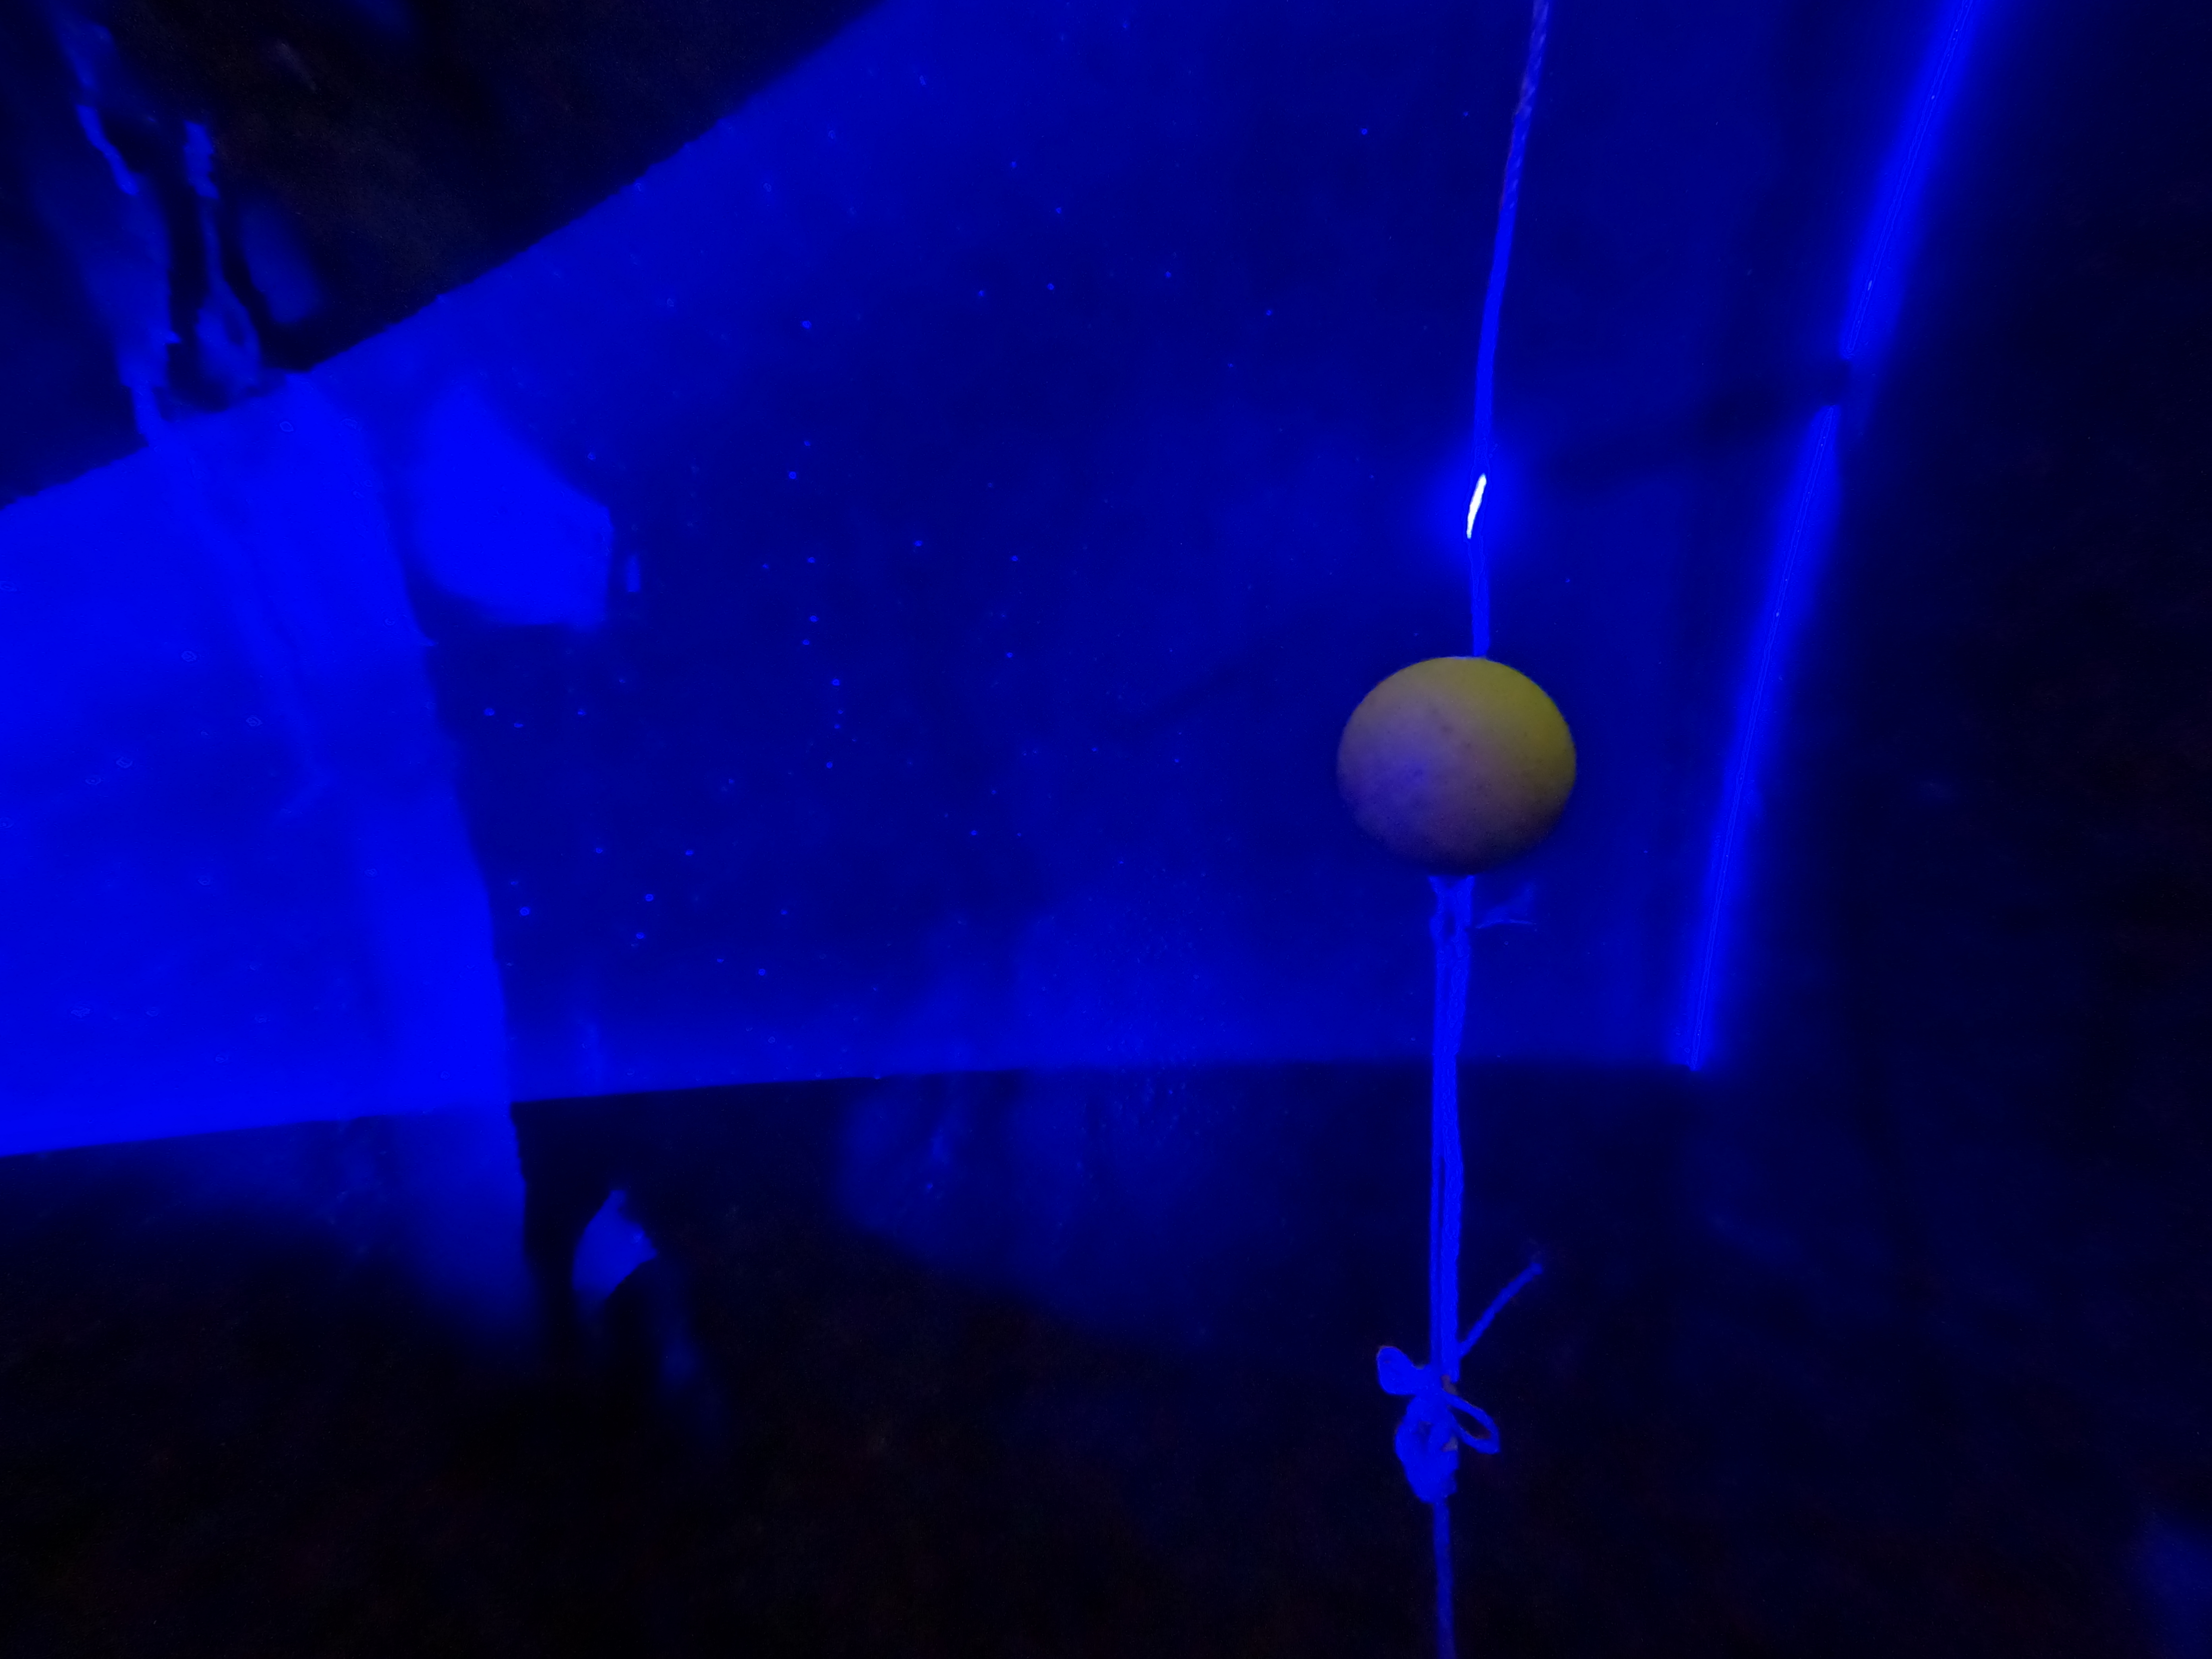

Supplement: Supplementary file 1245 [file G0032959.pdf › 7/G0032959.pdf]

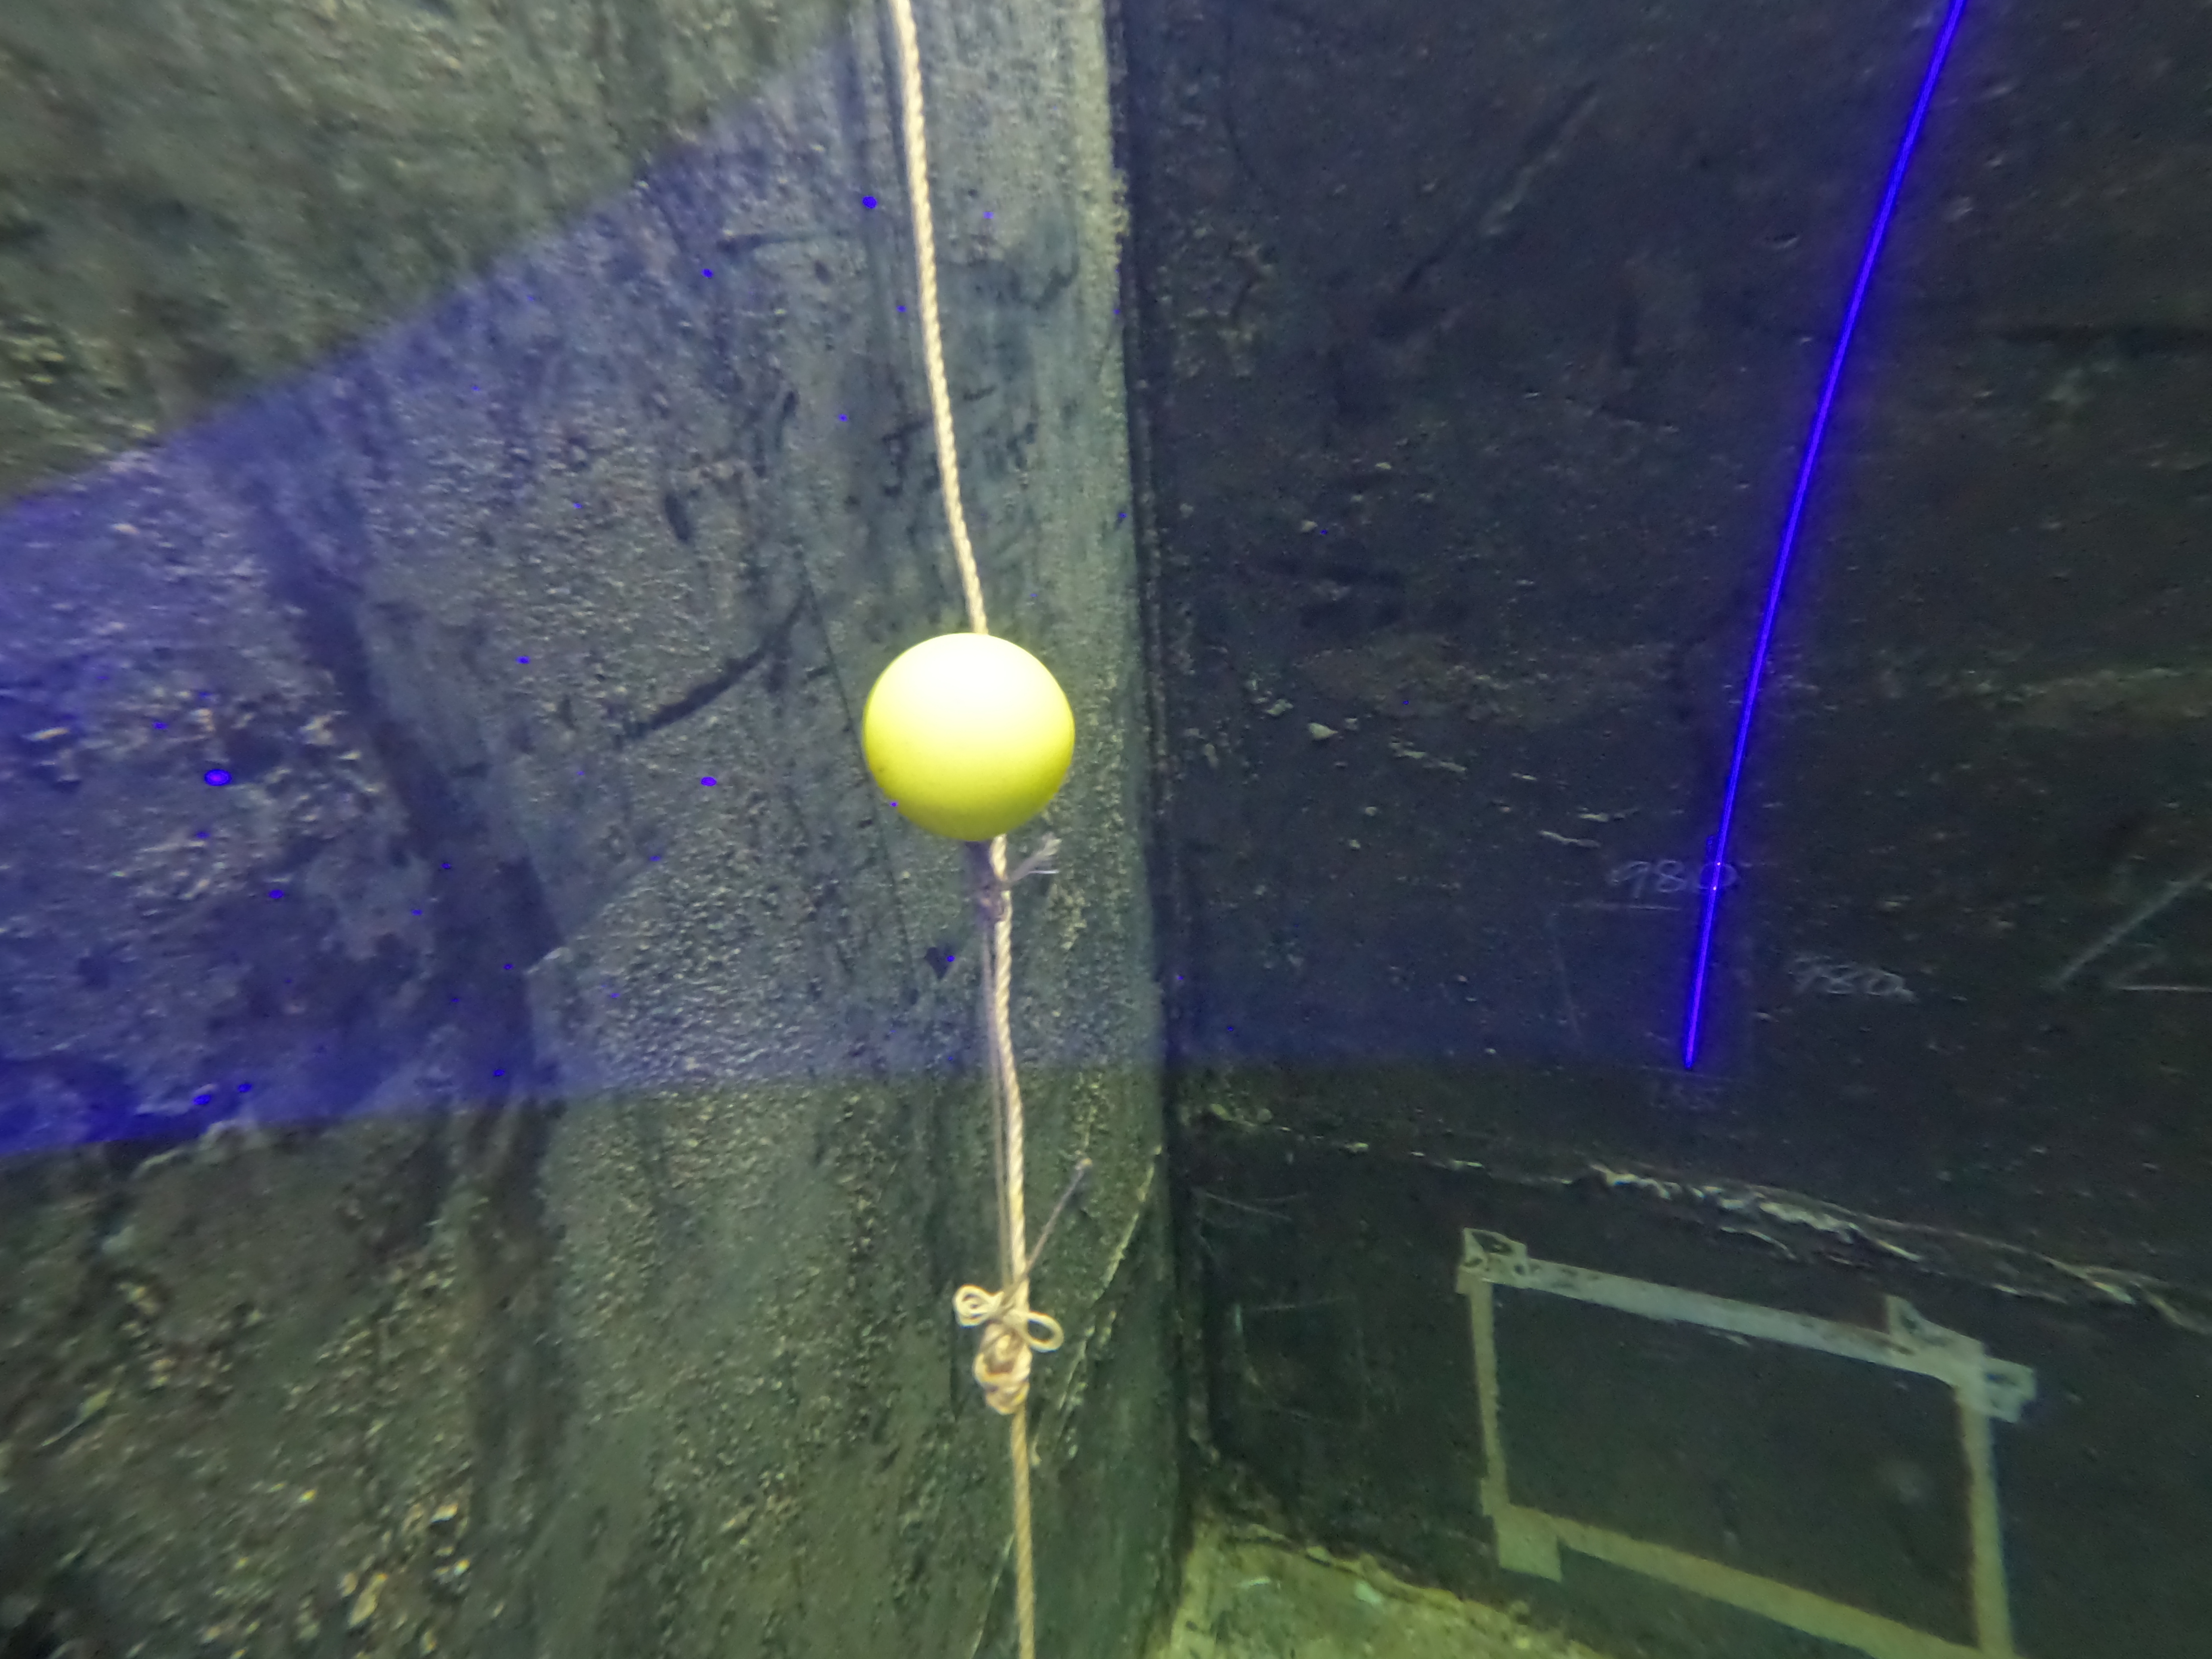

Supplement: Supplementary file 1246 [file G0032559.pdf › 6/G0032559.pdf]

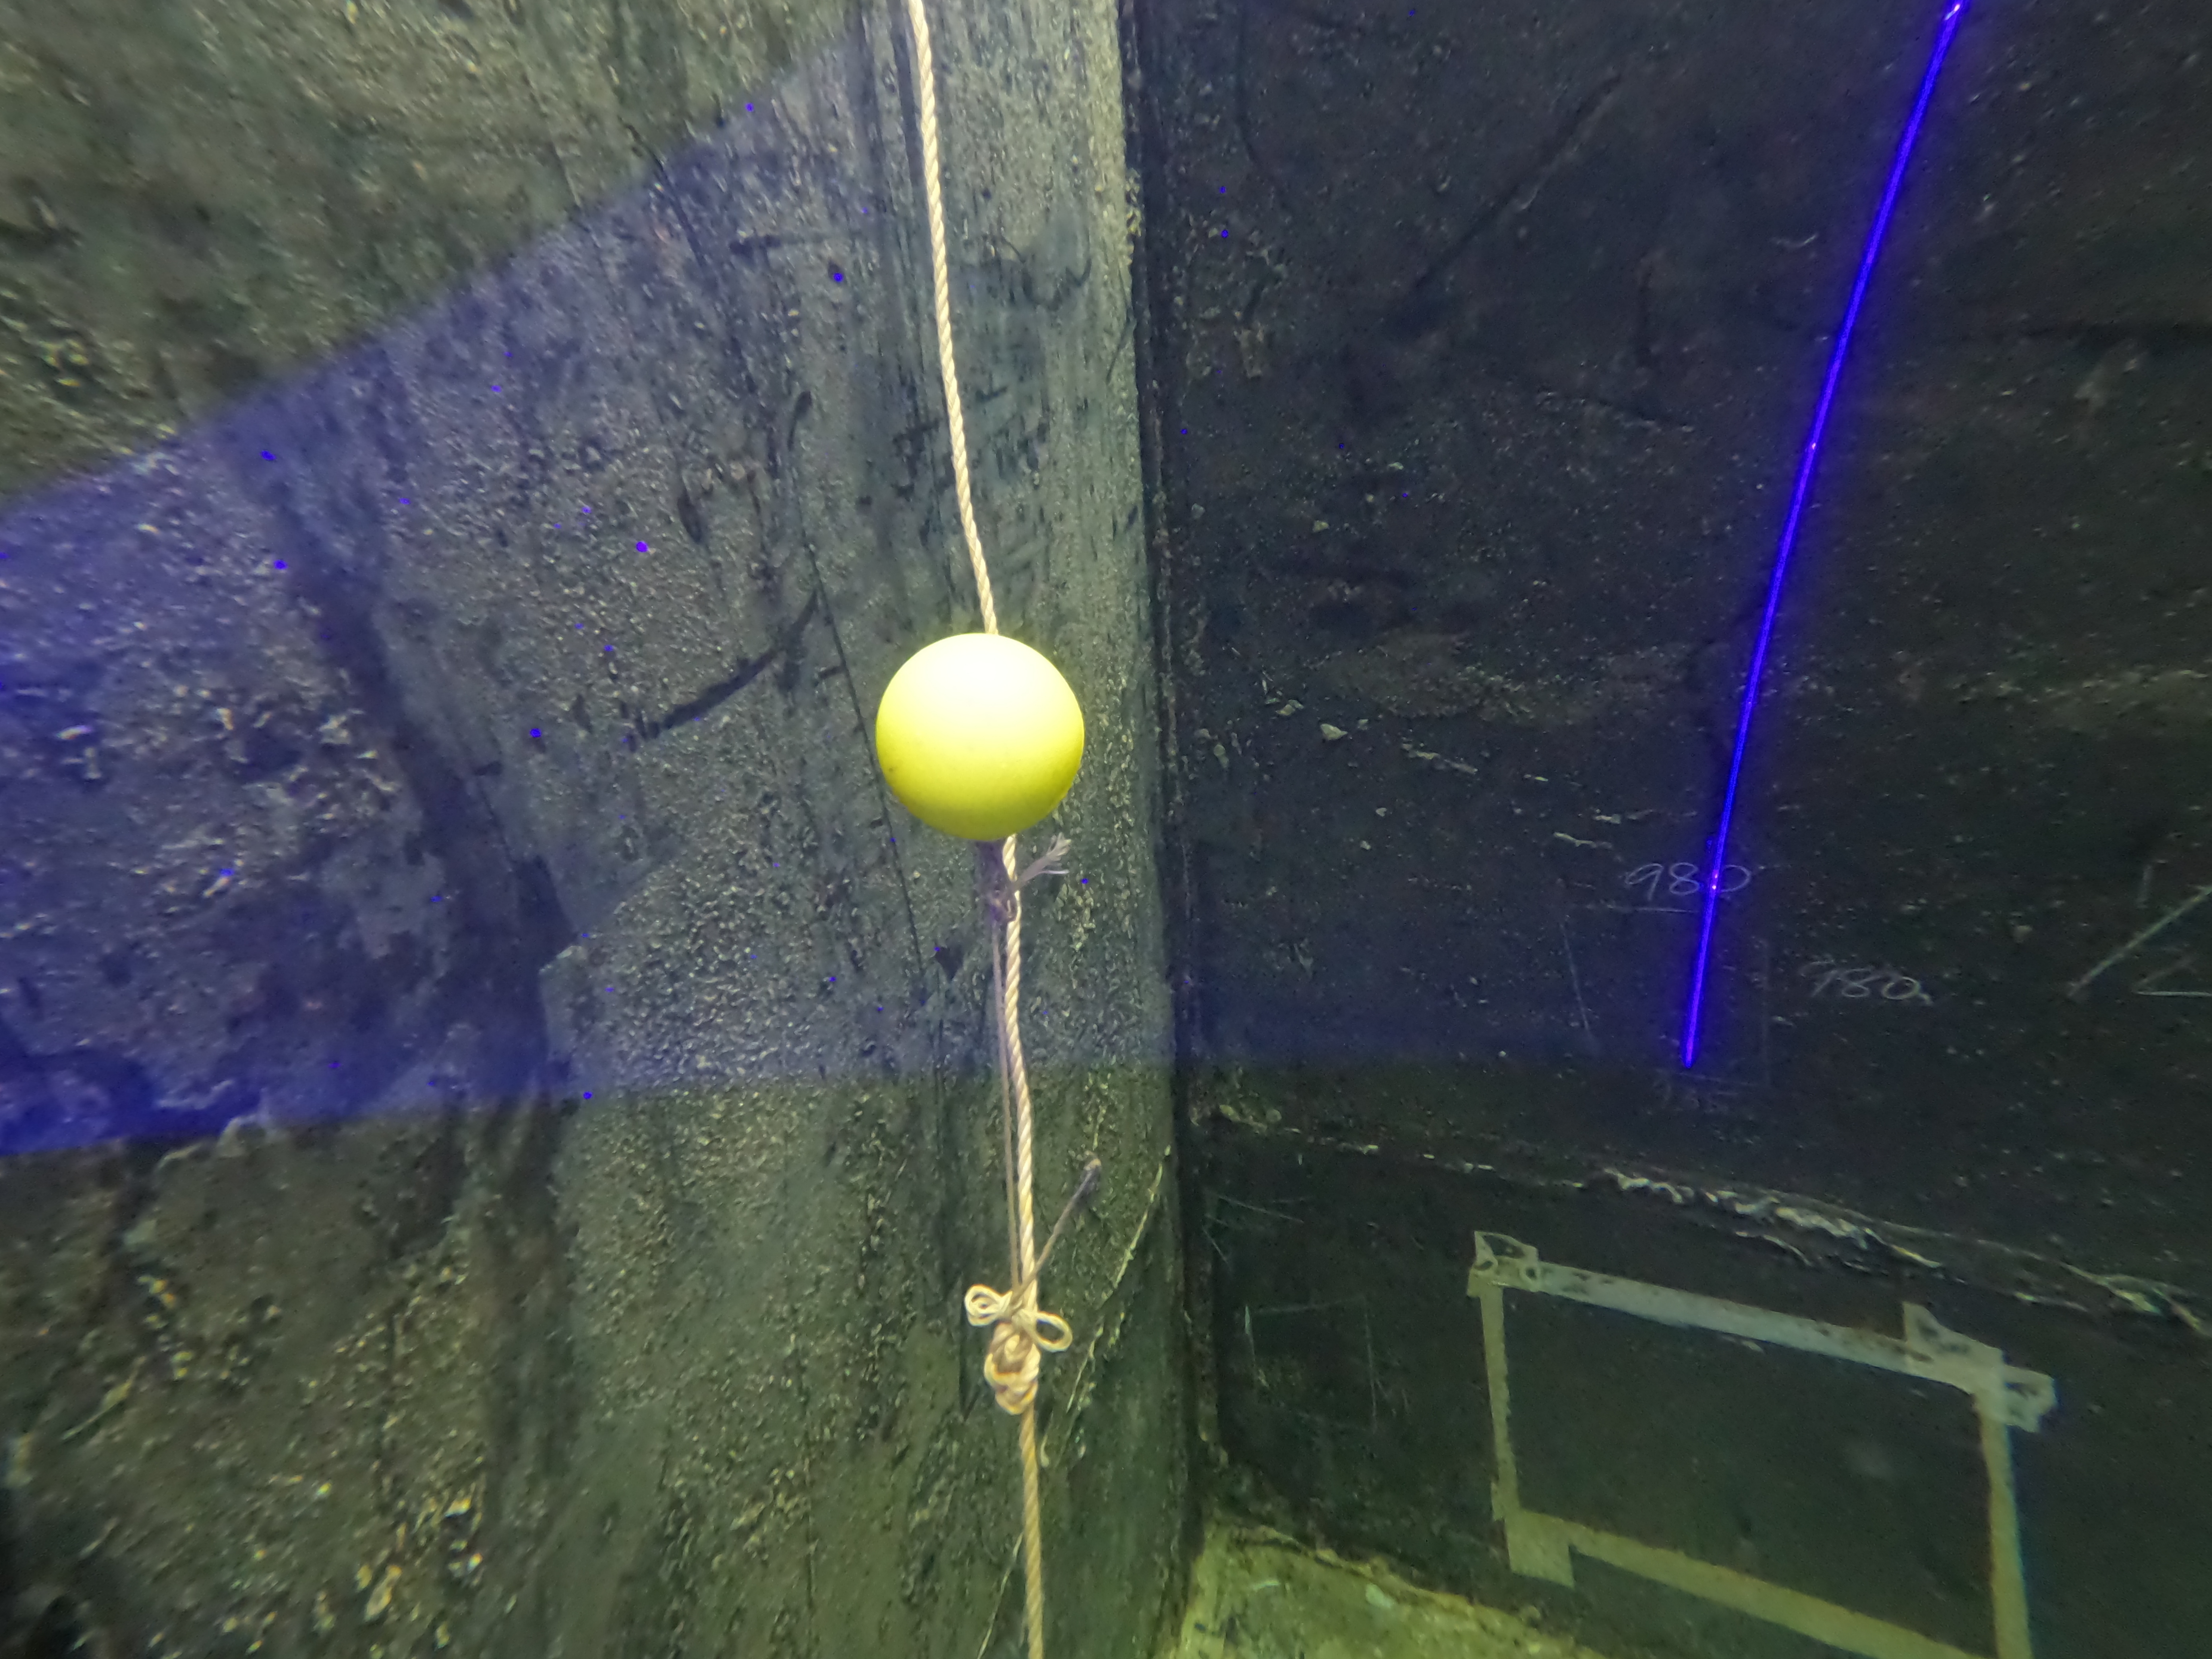

Supplement: Supplementary file 1247 [file G0032560.pdf › 6/G0032560.pdf]

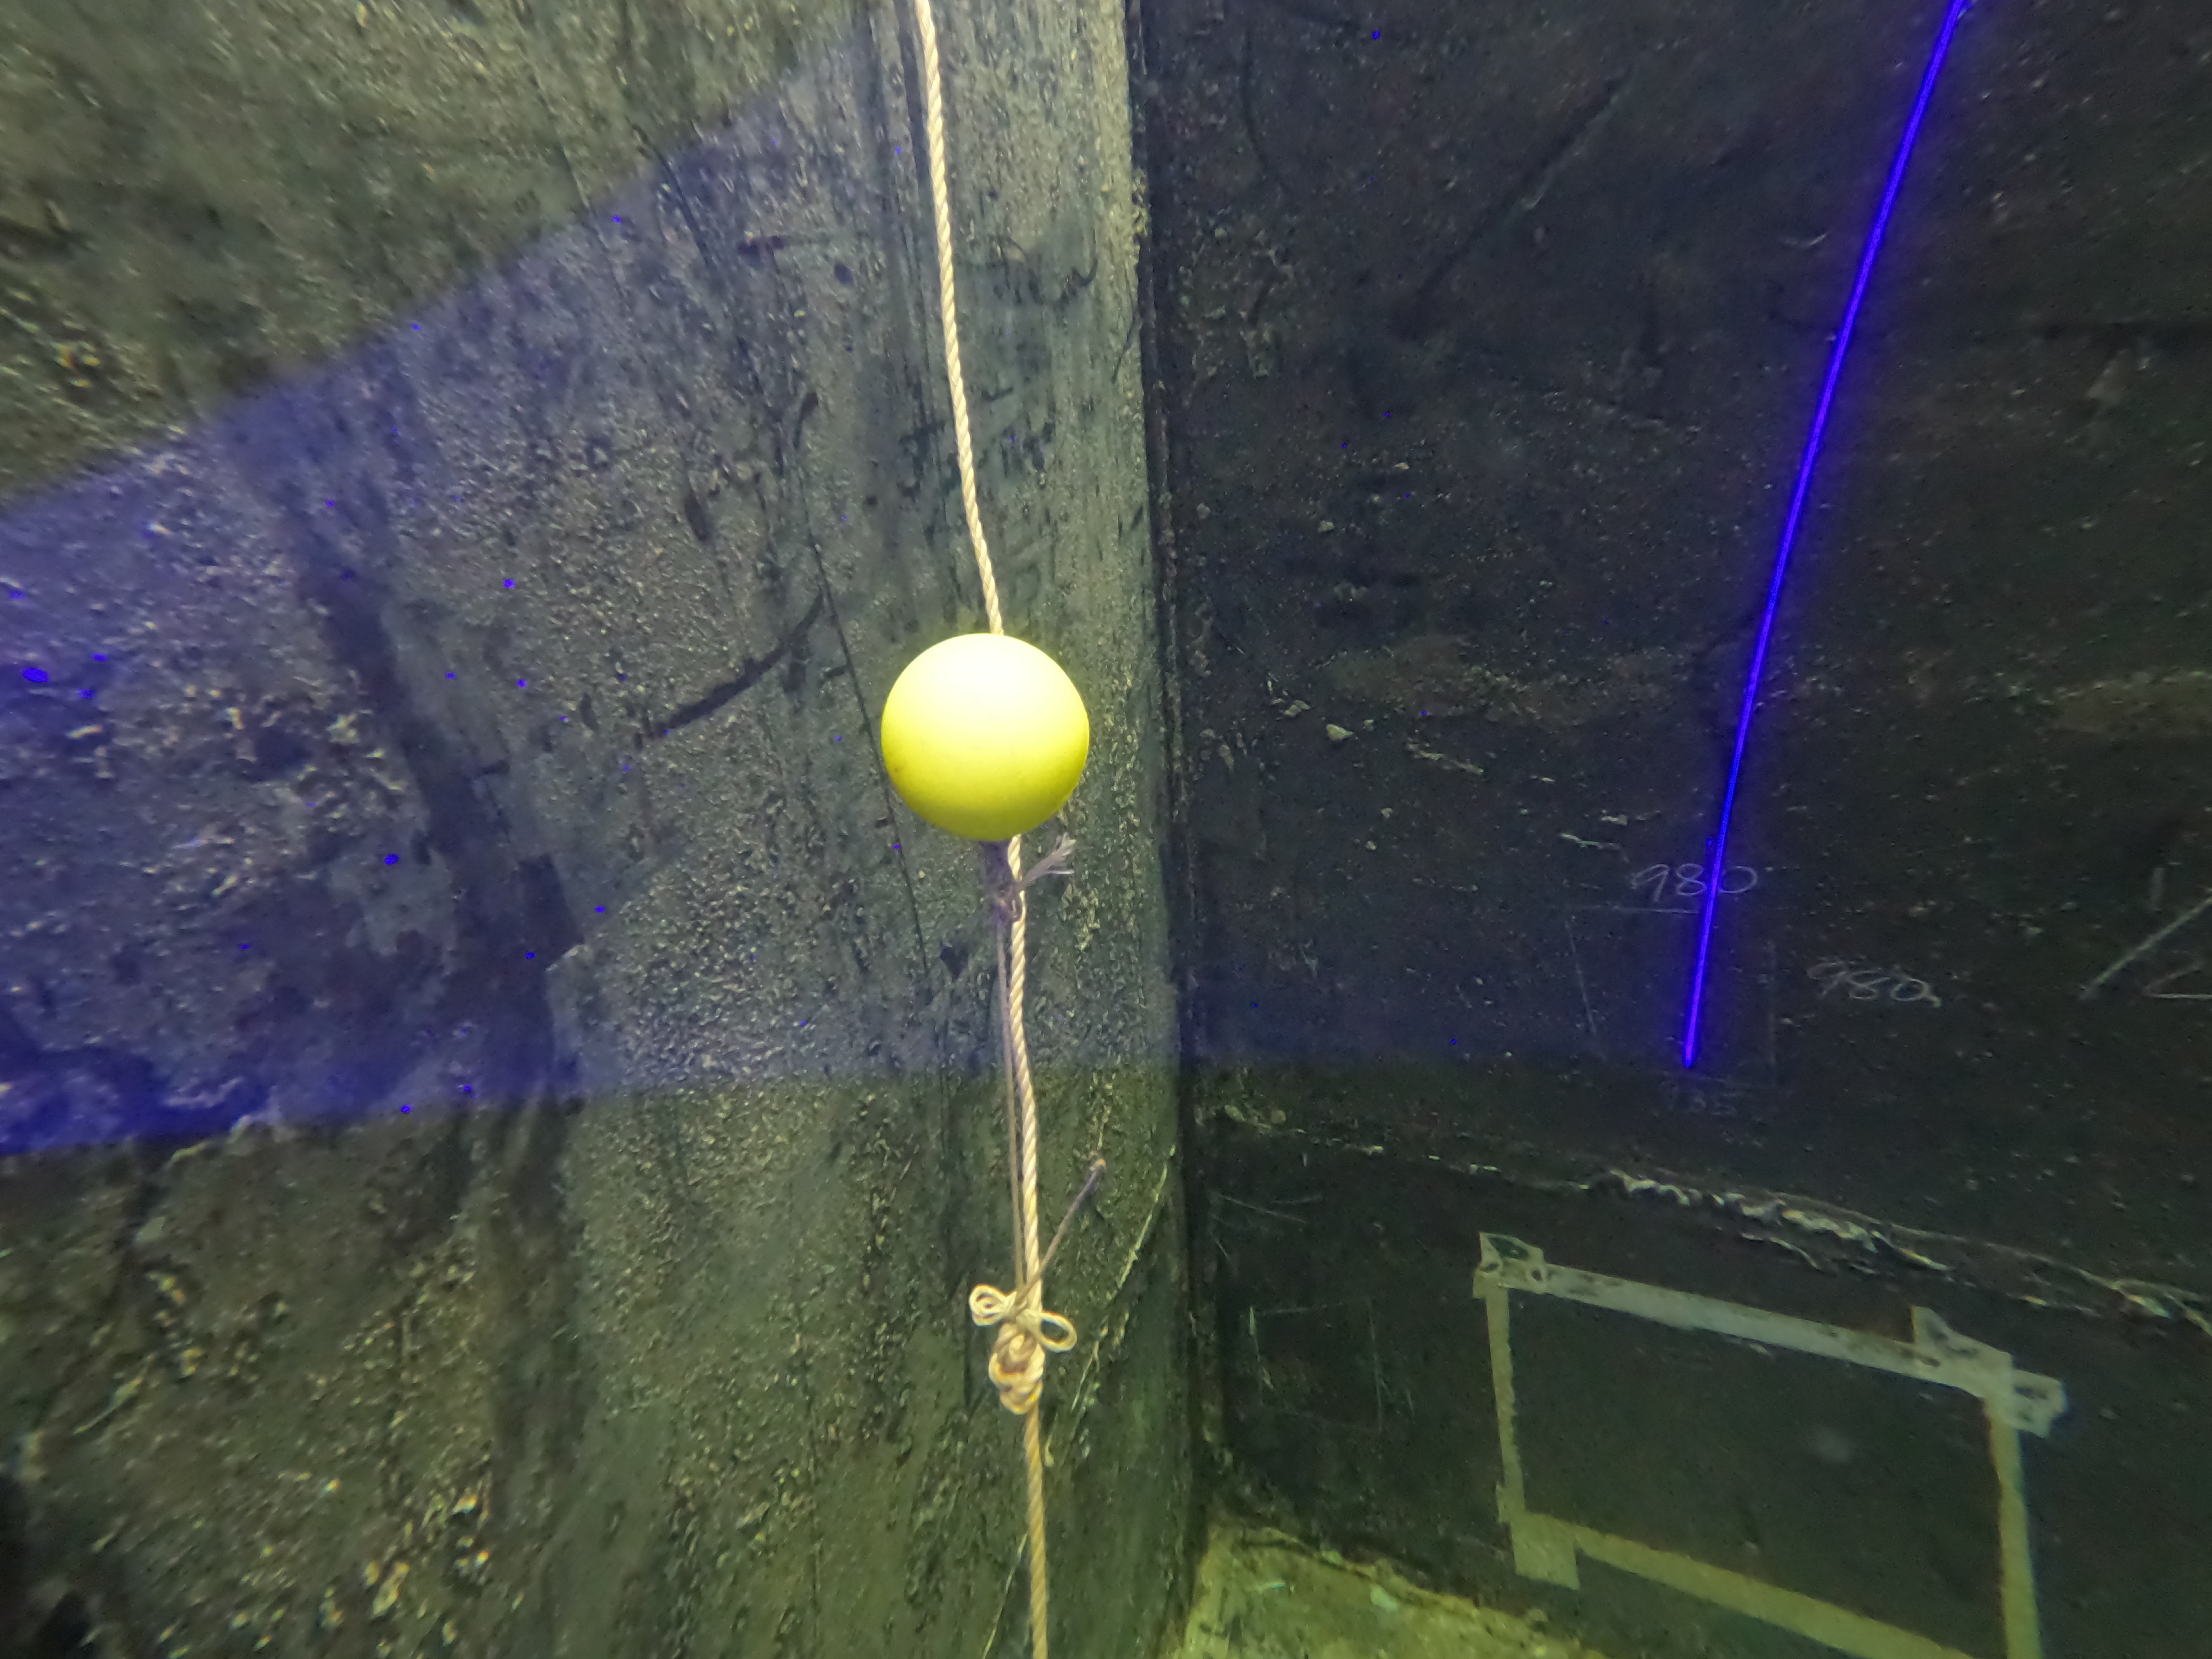

Supplement: Supplementary file 1248 [file G0032561.pdf › 6/G0032561.pdf]

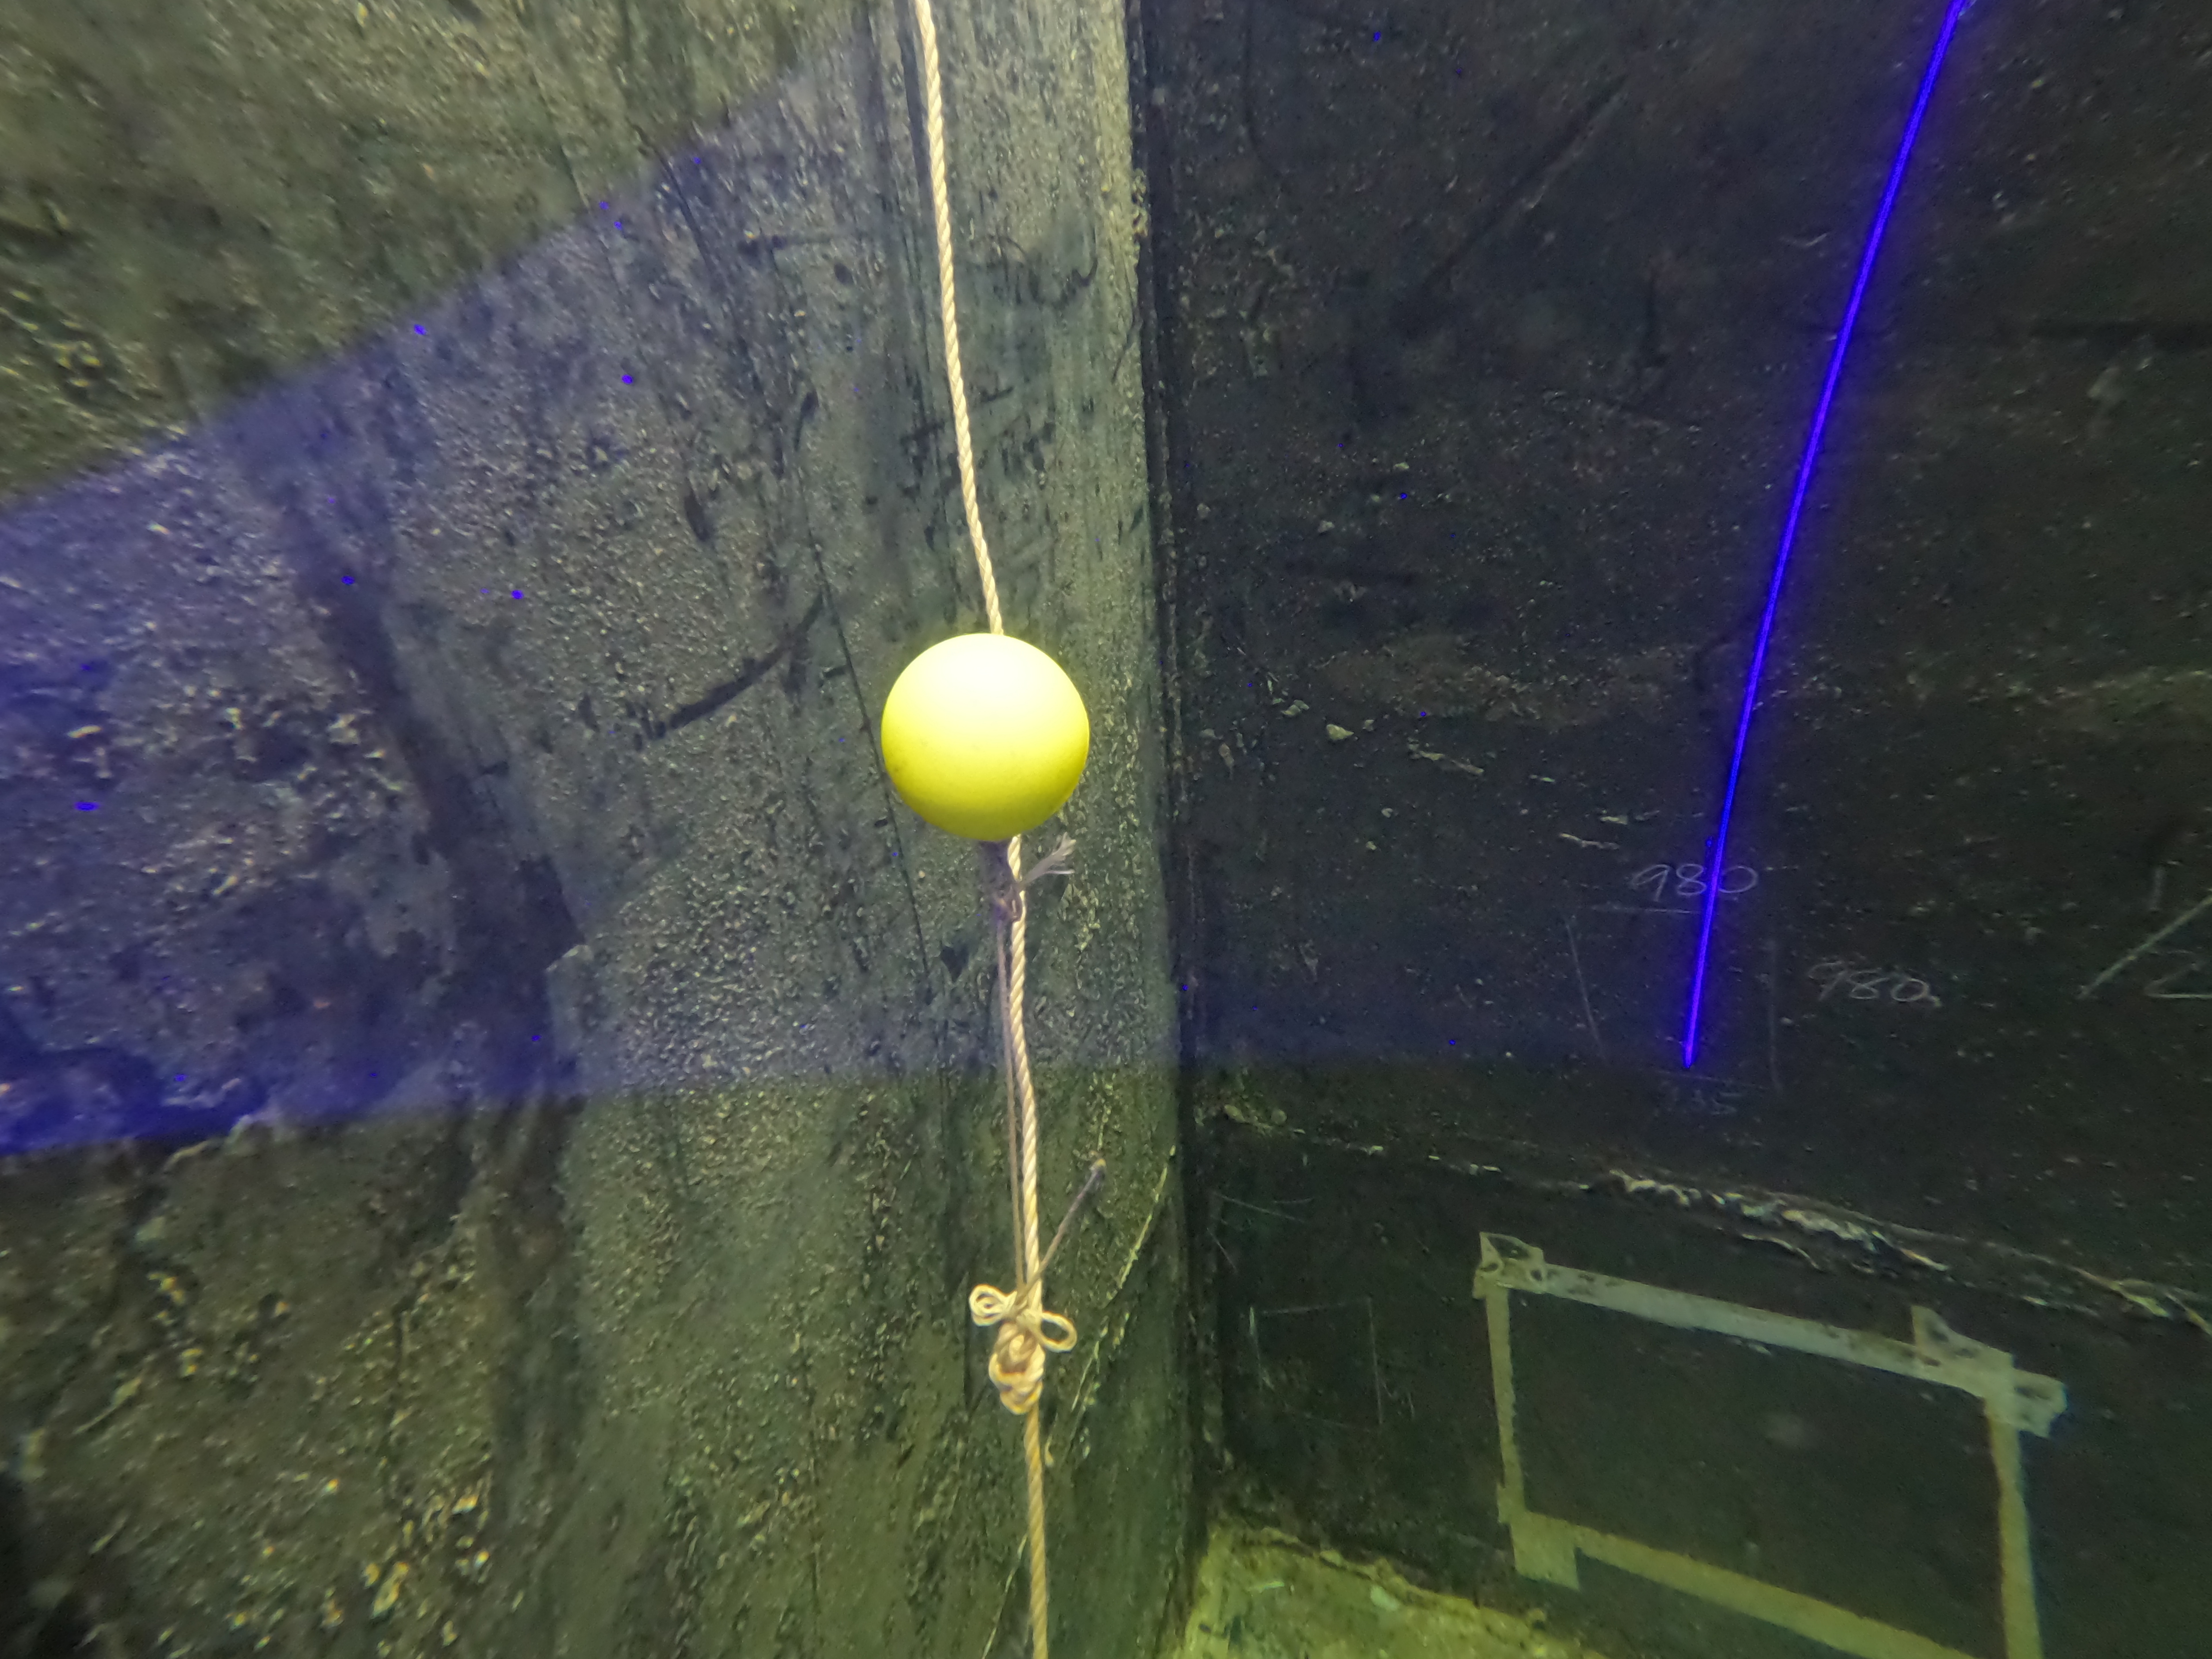

Supplement: Supplementary file 1249 [file G0032562.pdf › 6/G0032562.pdf]

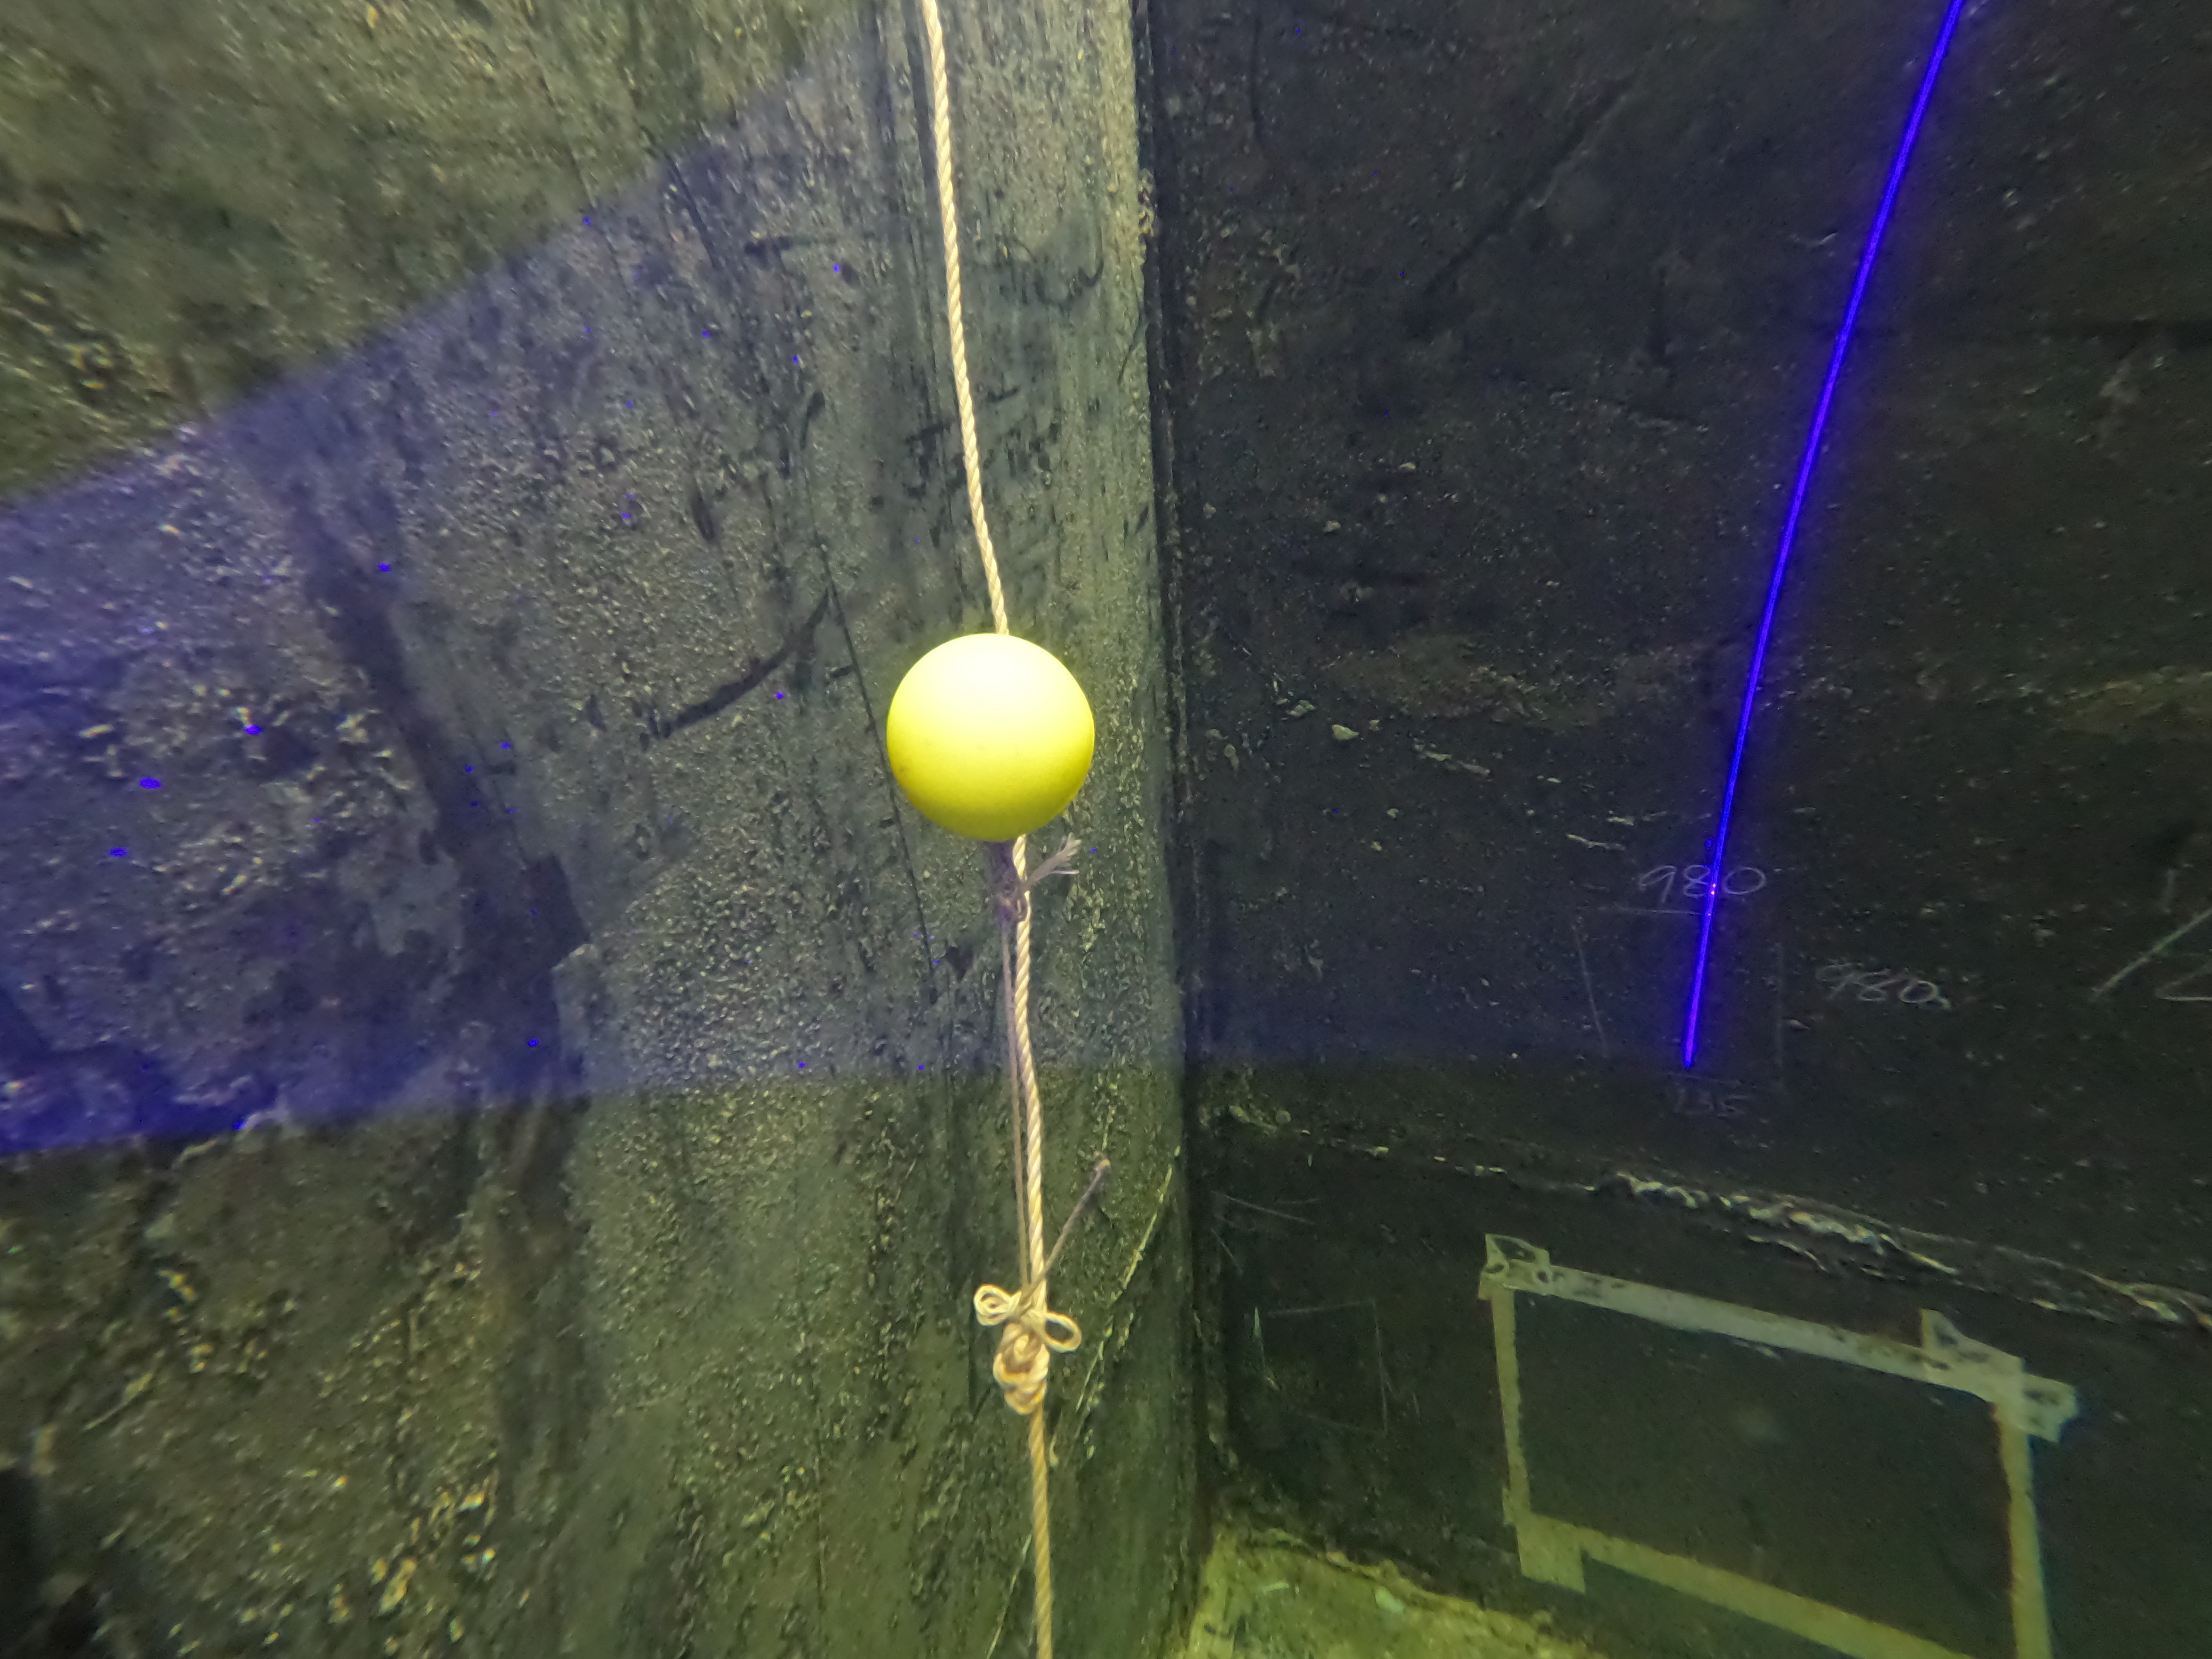

Supplement: Supplementary file 1250 [file G0032563.pdf › 6/G0032563.pdf]

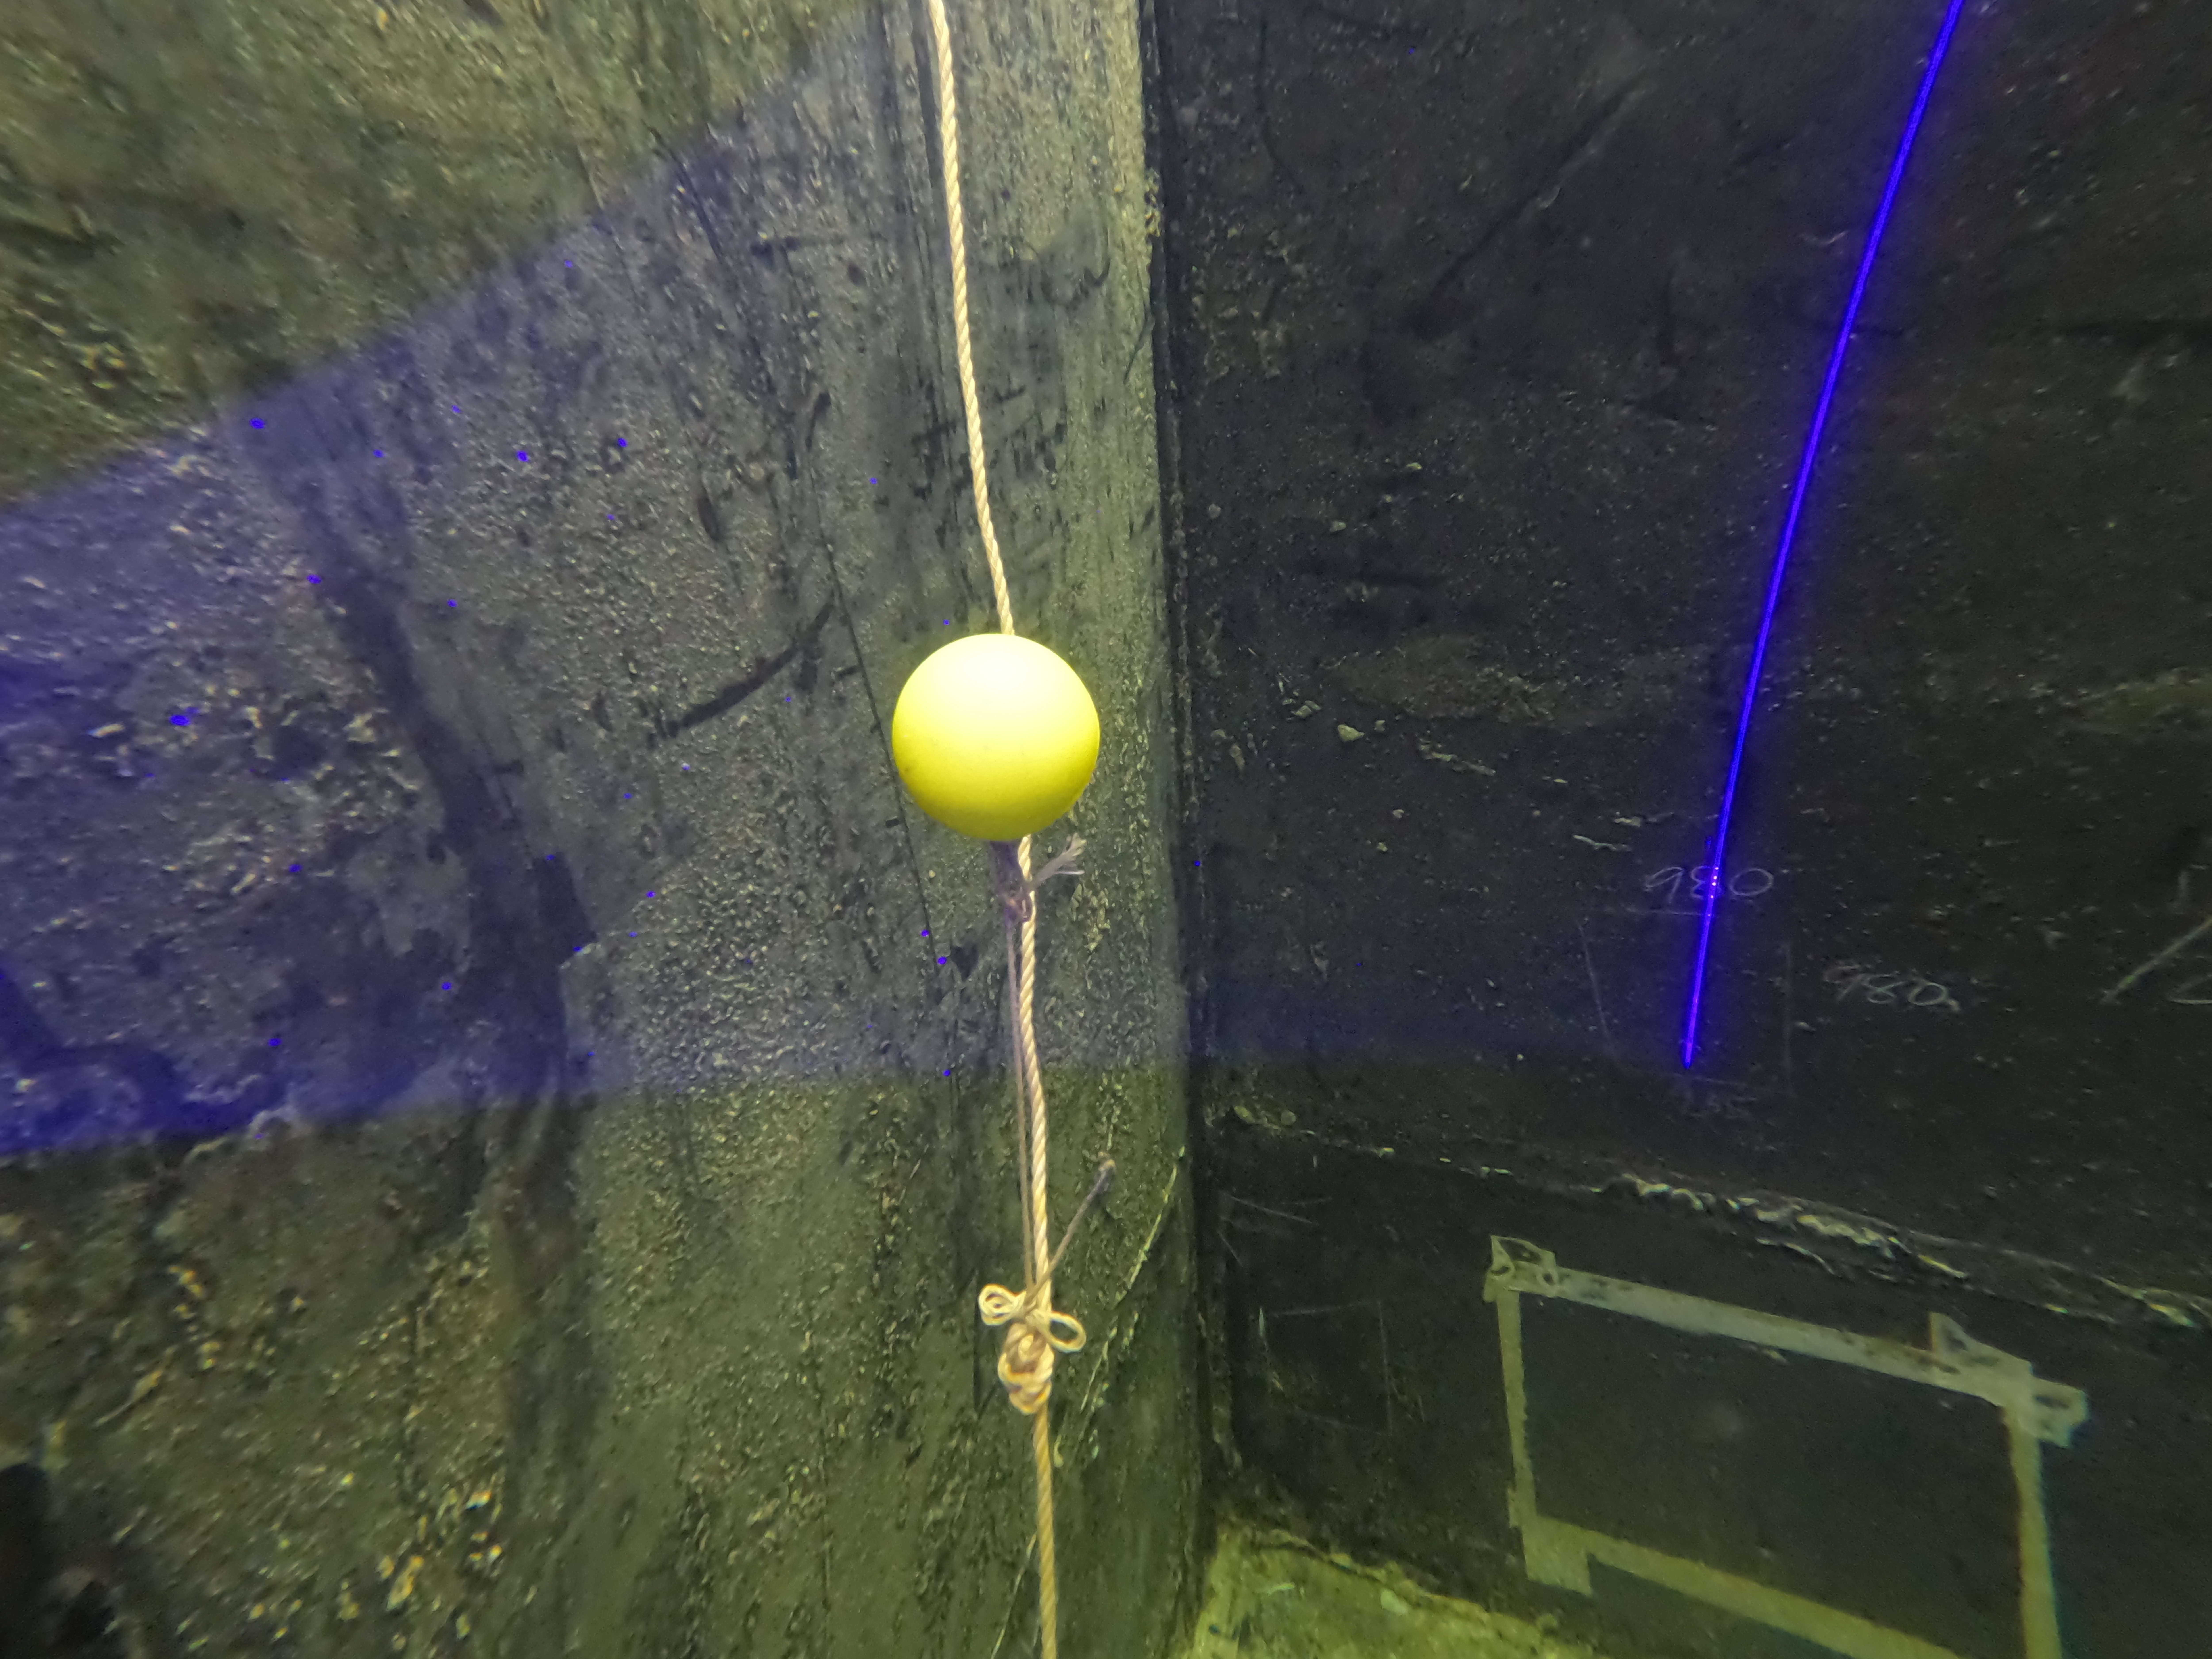

Supplement: Supplementary file 1251 [file G0032564.pdf › 6/G0032564.pdf]

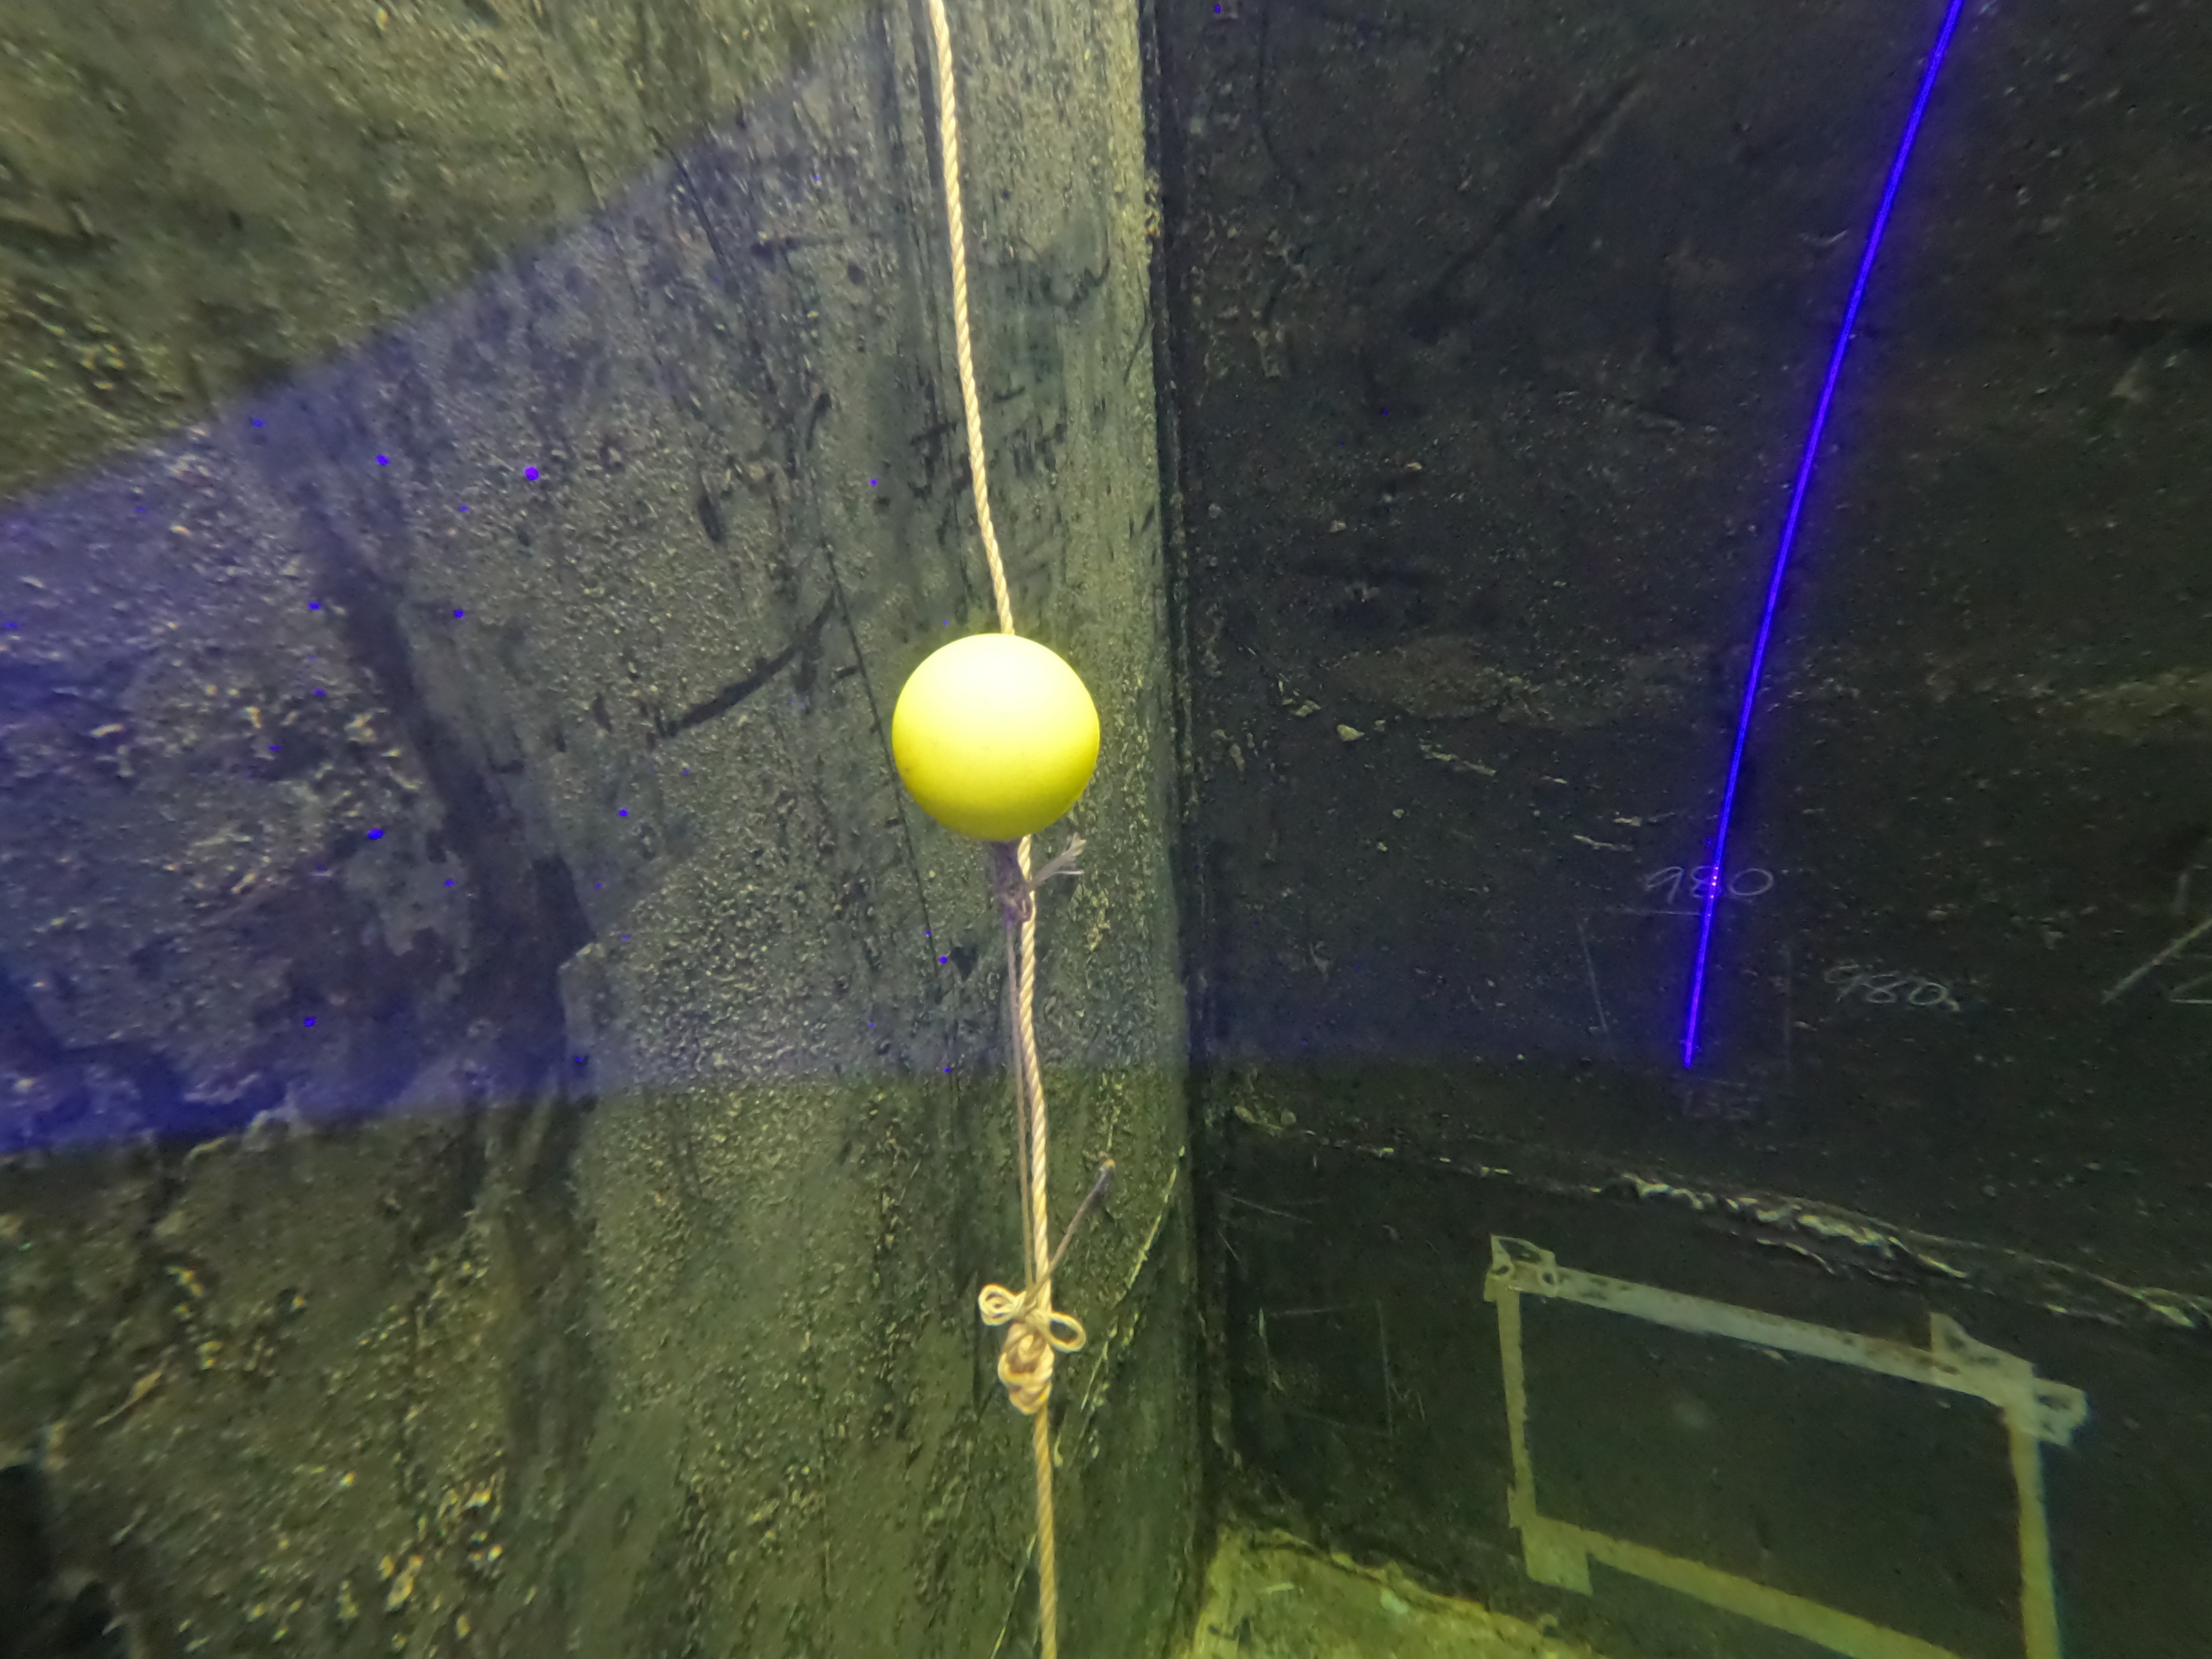

Supplement: Supplementary file 1252 [file G0032565.pdf › 6/G0032565.pdf]

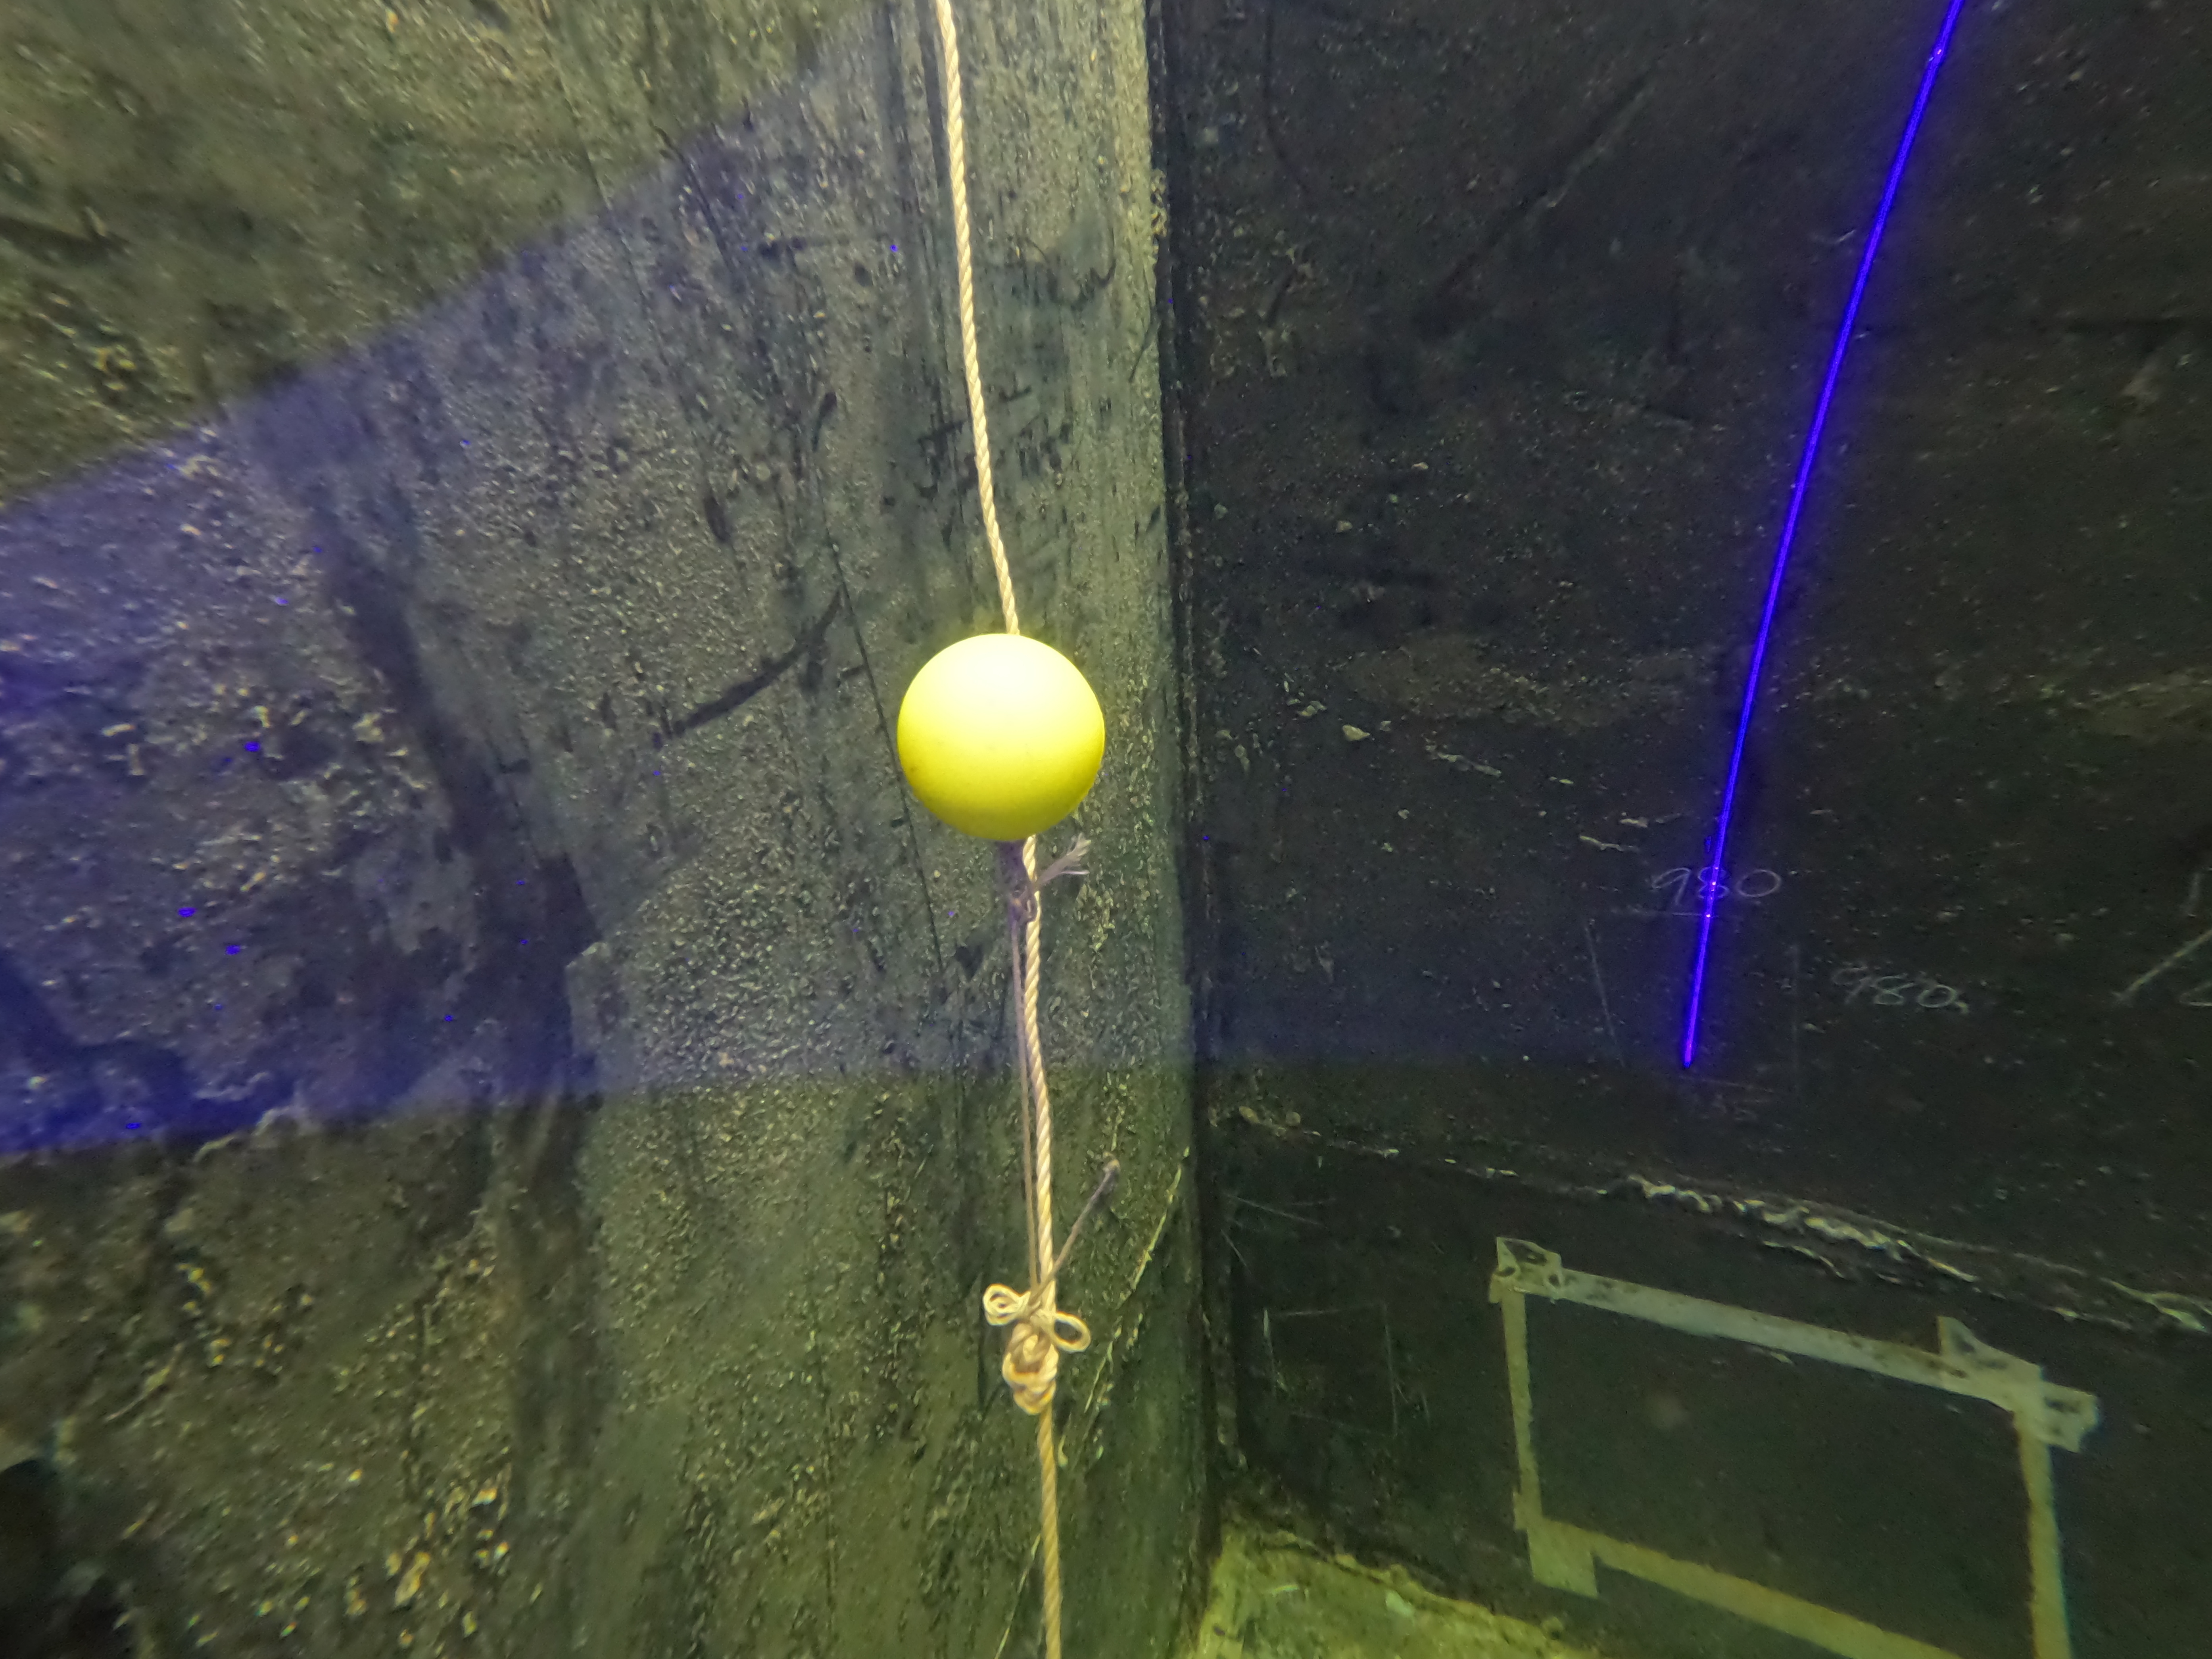

Supplement: Supplementary file 1253 [file G0032566.pdf › 6/G0032566.pdf]

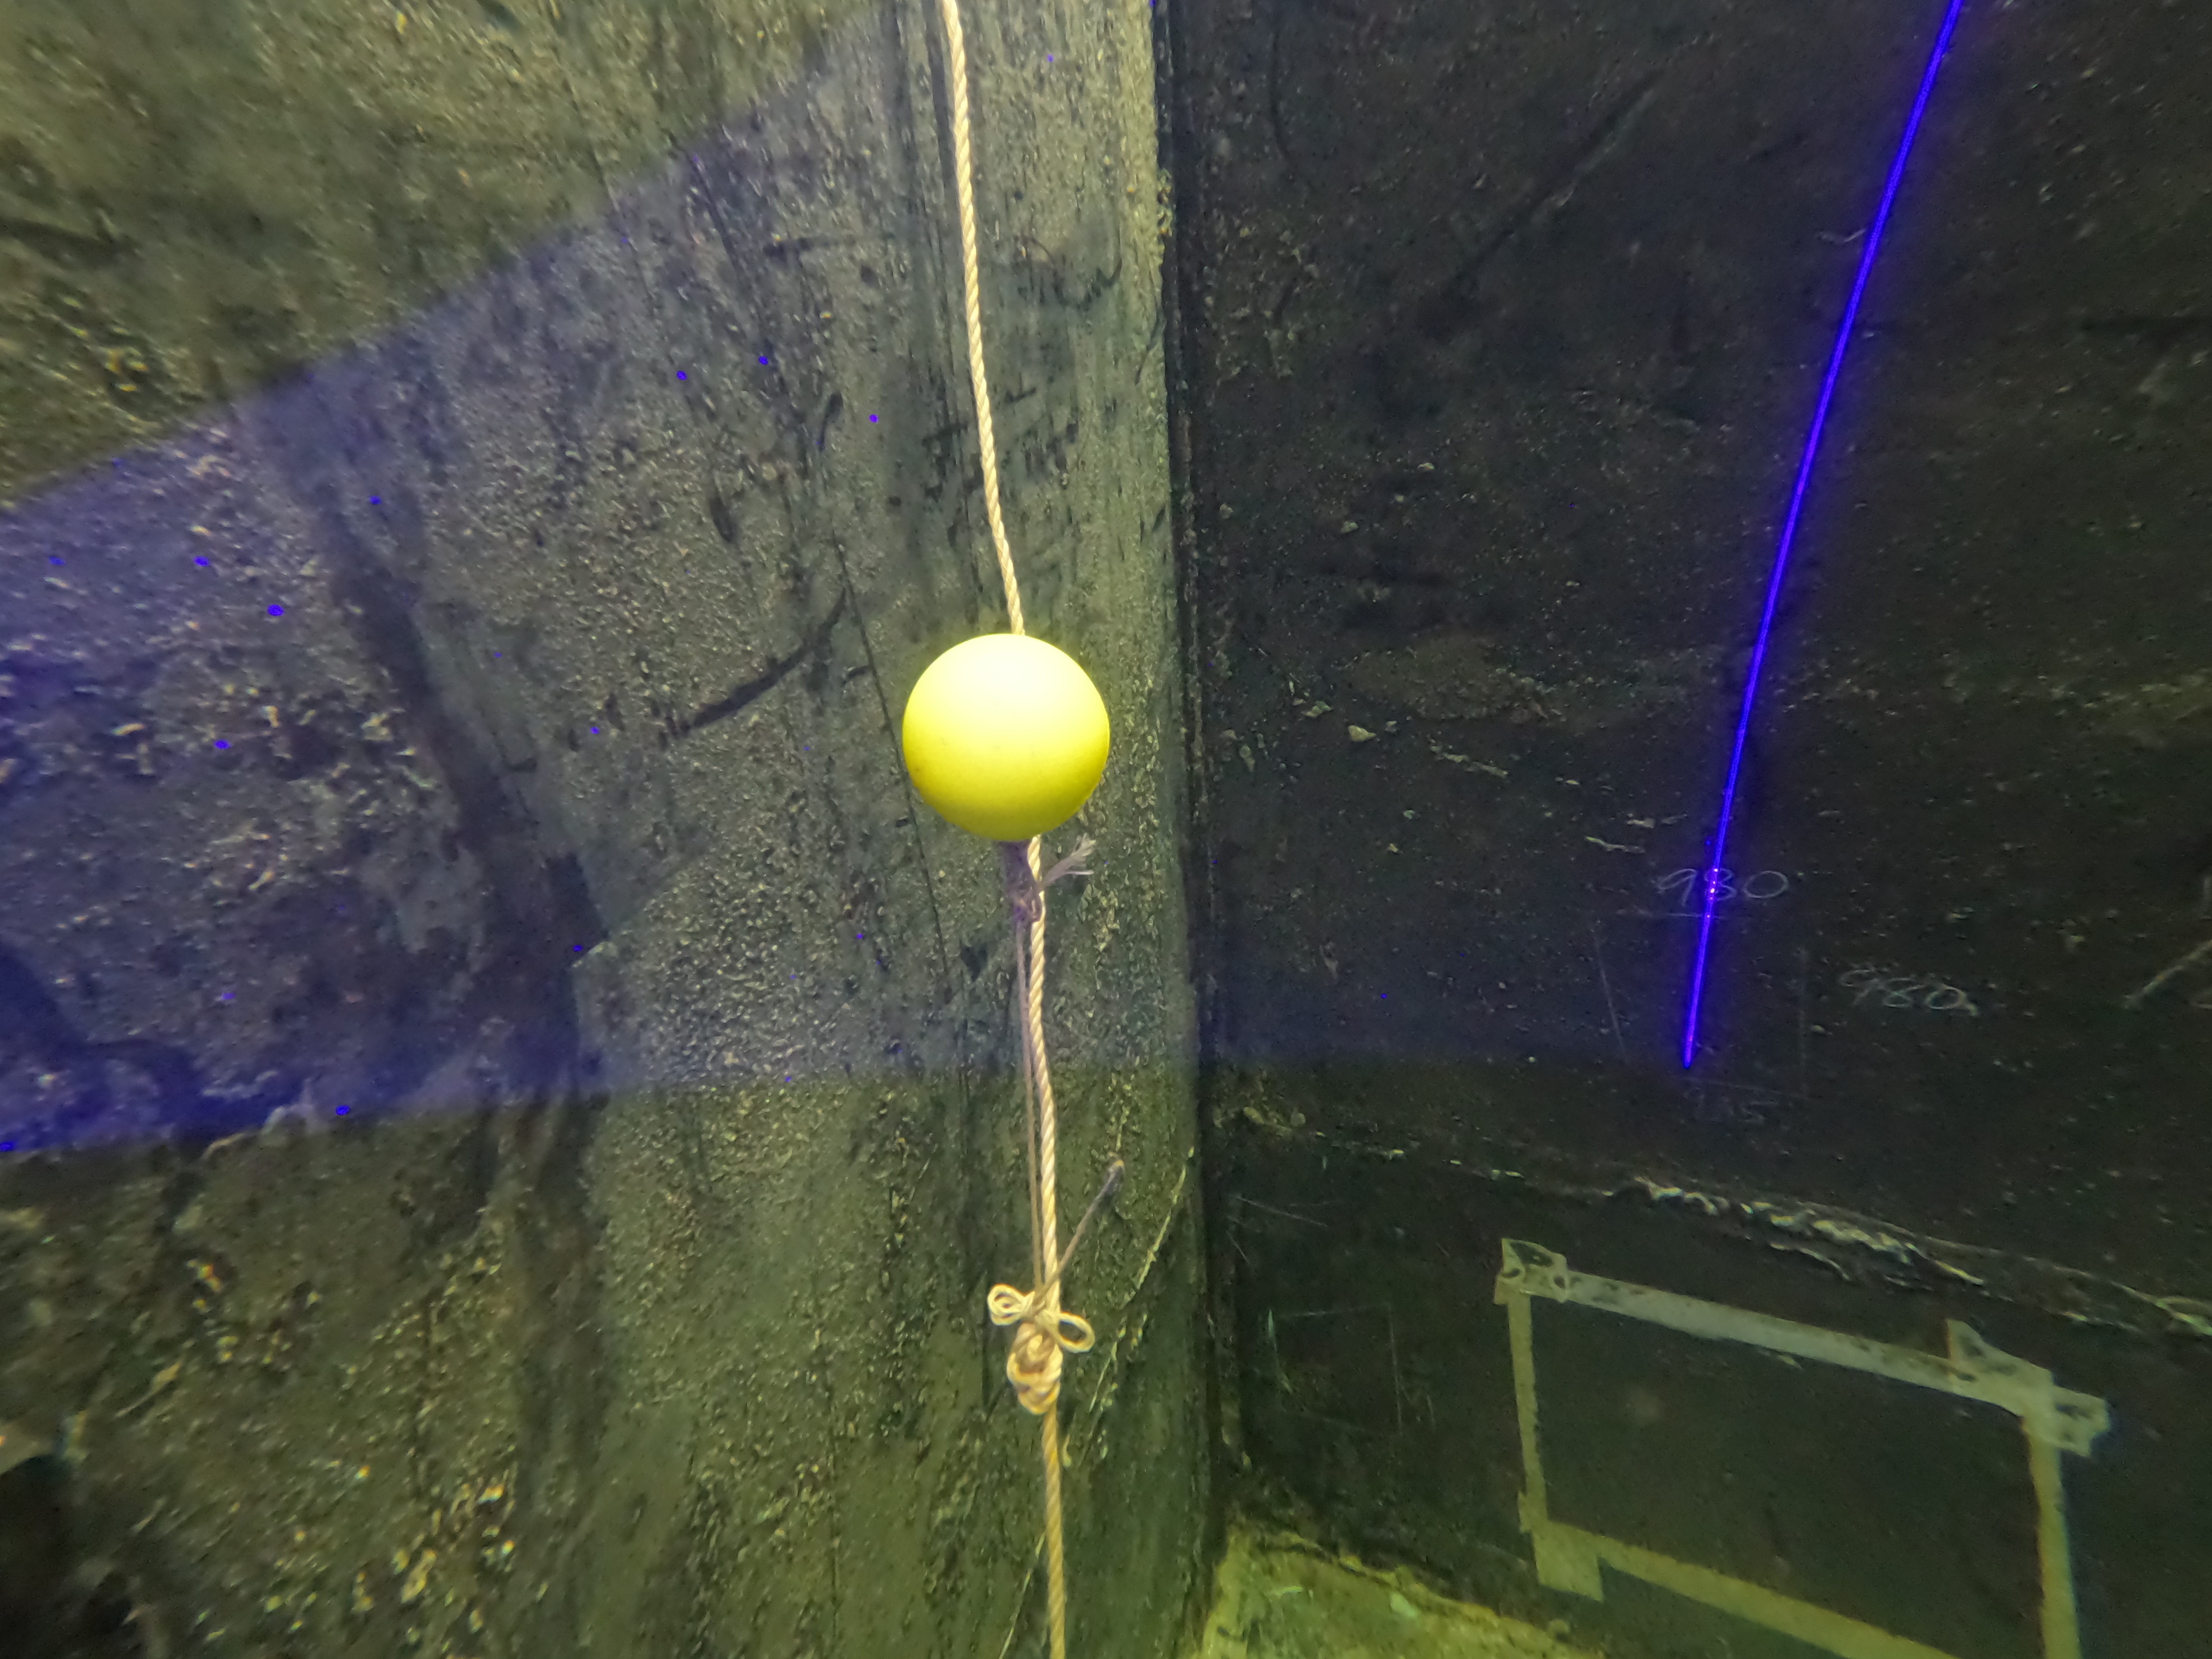

Supplement: Supplementary file 1254 [file G0032567.pdf › 6/G0032567.pdf]

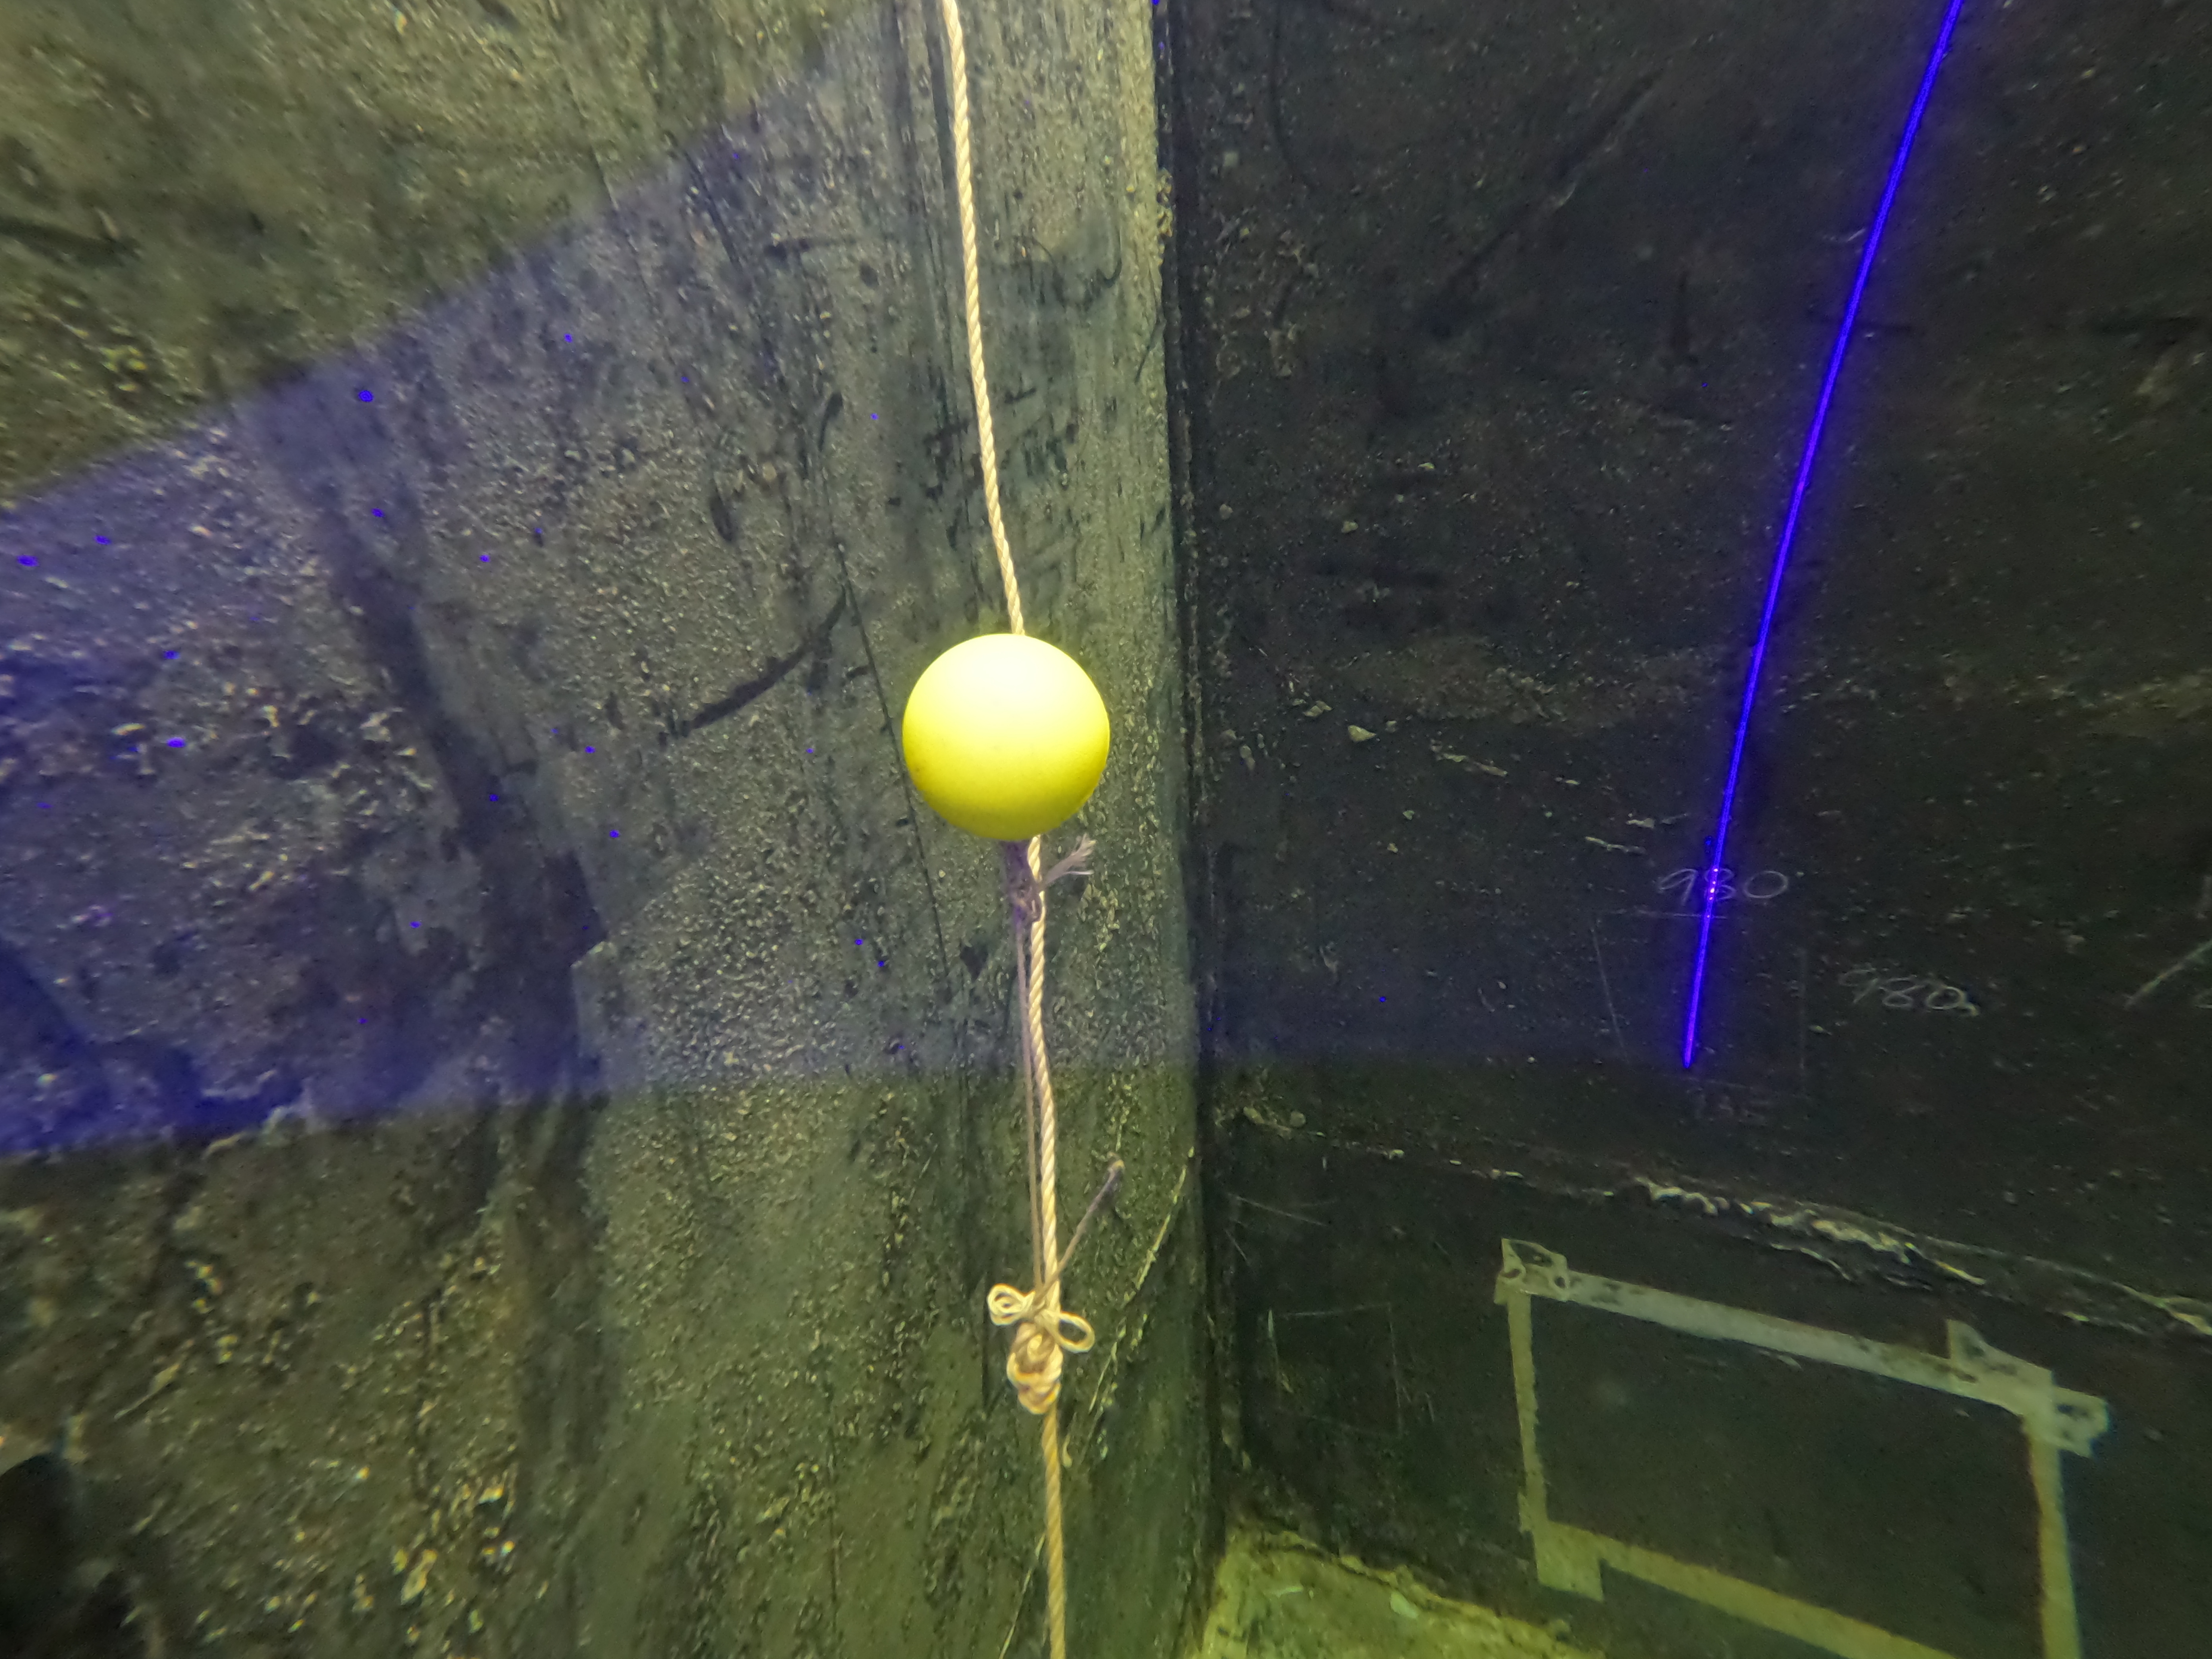

Supplement: Supplementary file 1255 [file G0032568.pdf › 6/G0032568.pdf]

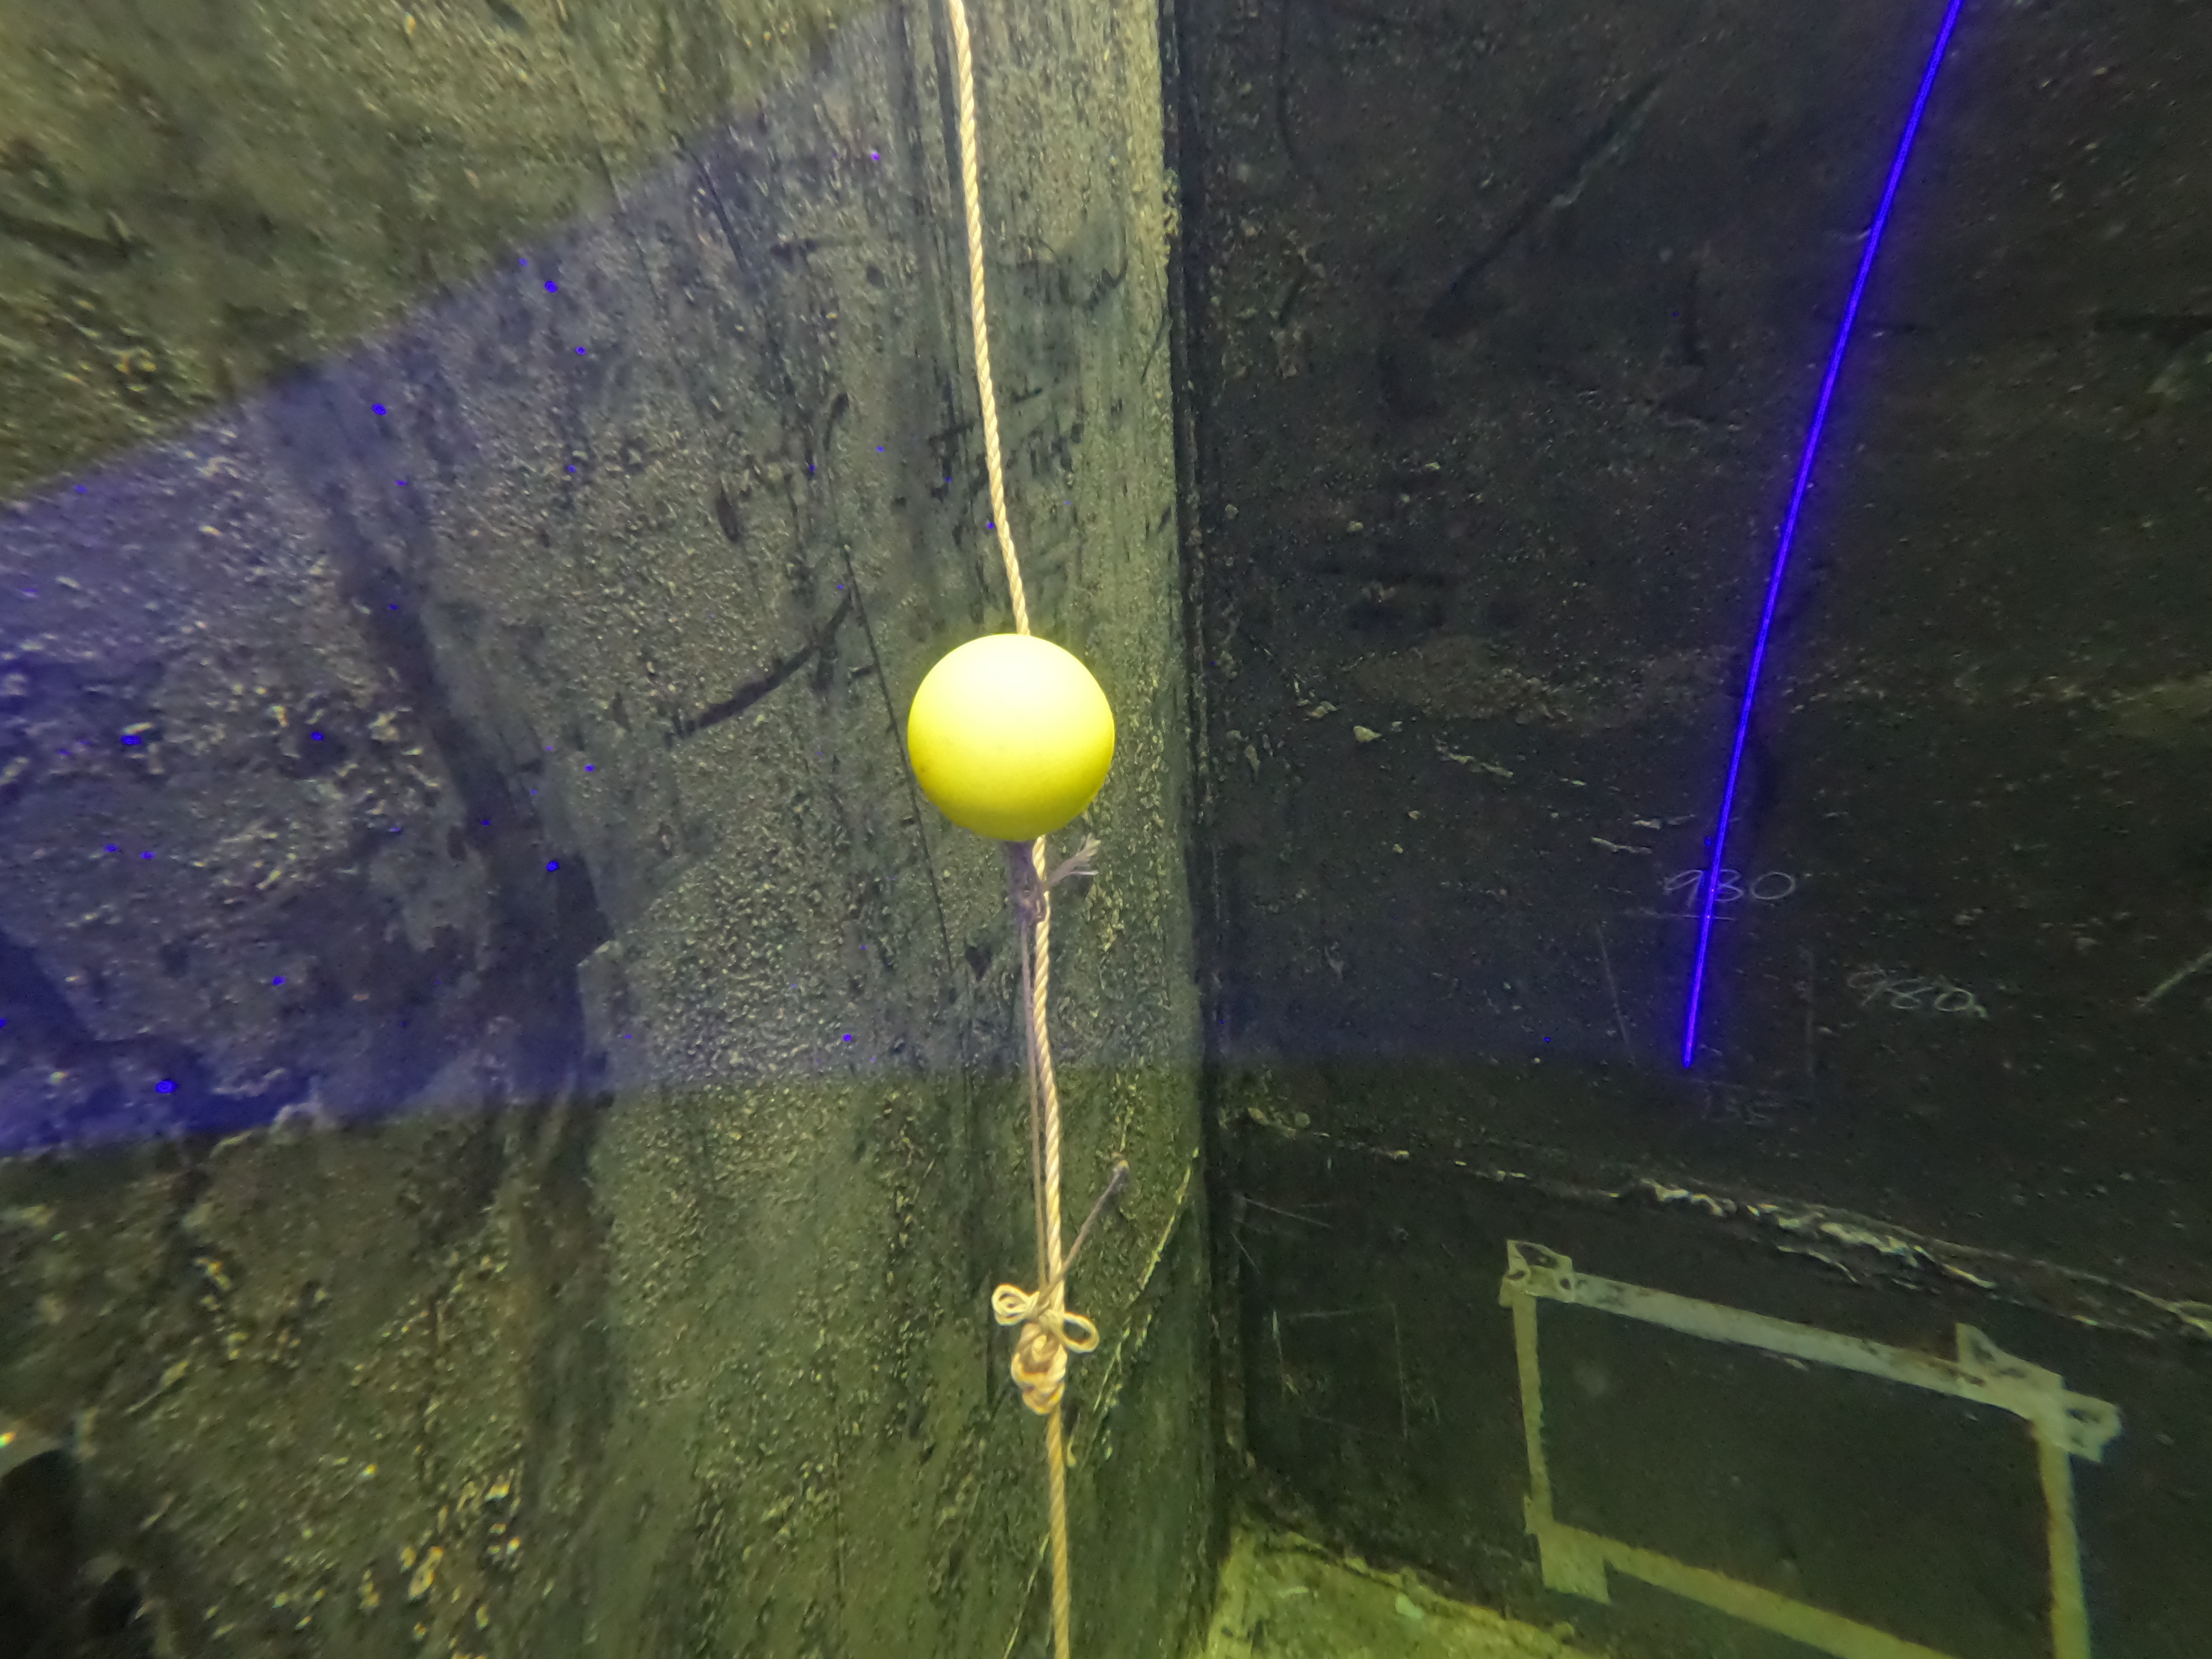

Supplement: Supplementary file 1256 [file G0032569.pdf › 6/G0032569.pdf]

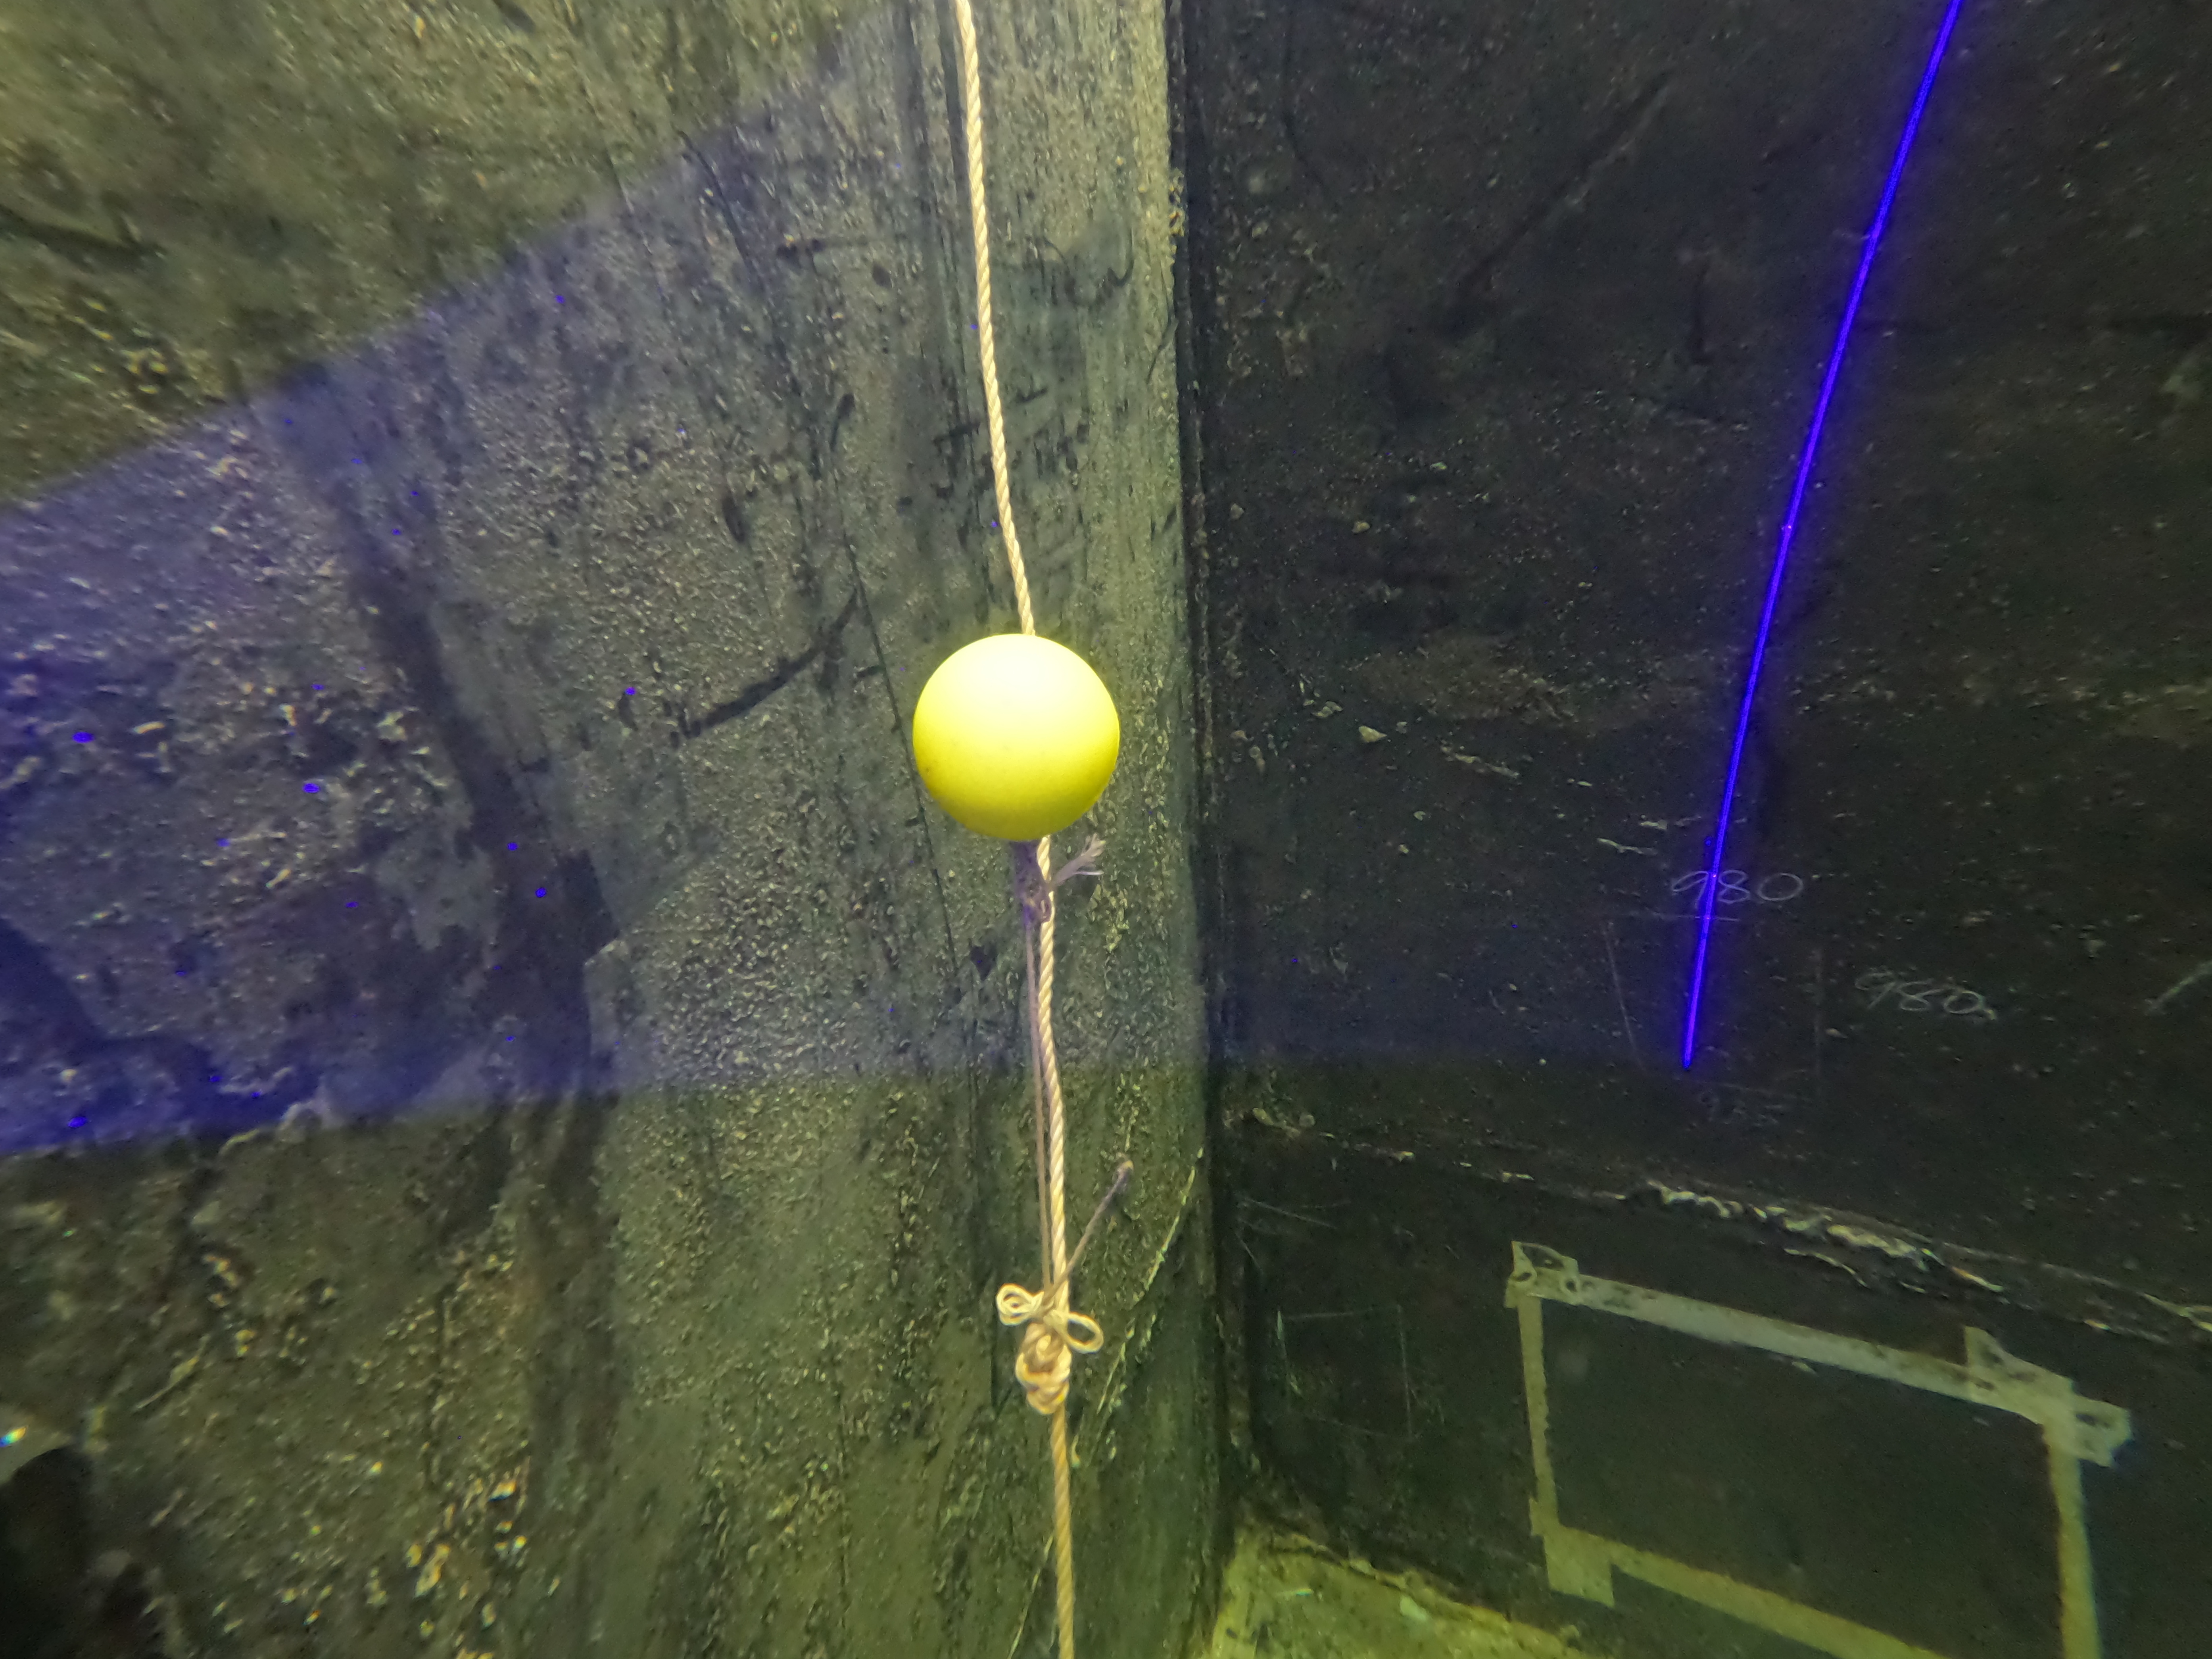

Supplement: Supplementary file 1257 [file G0032570.pdf › 6/G0032570.pdf]

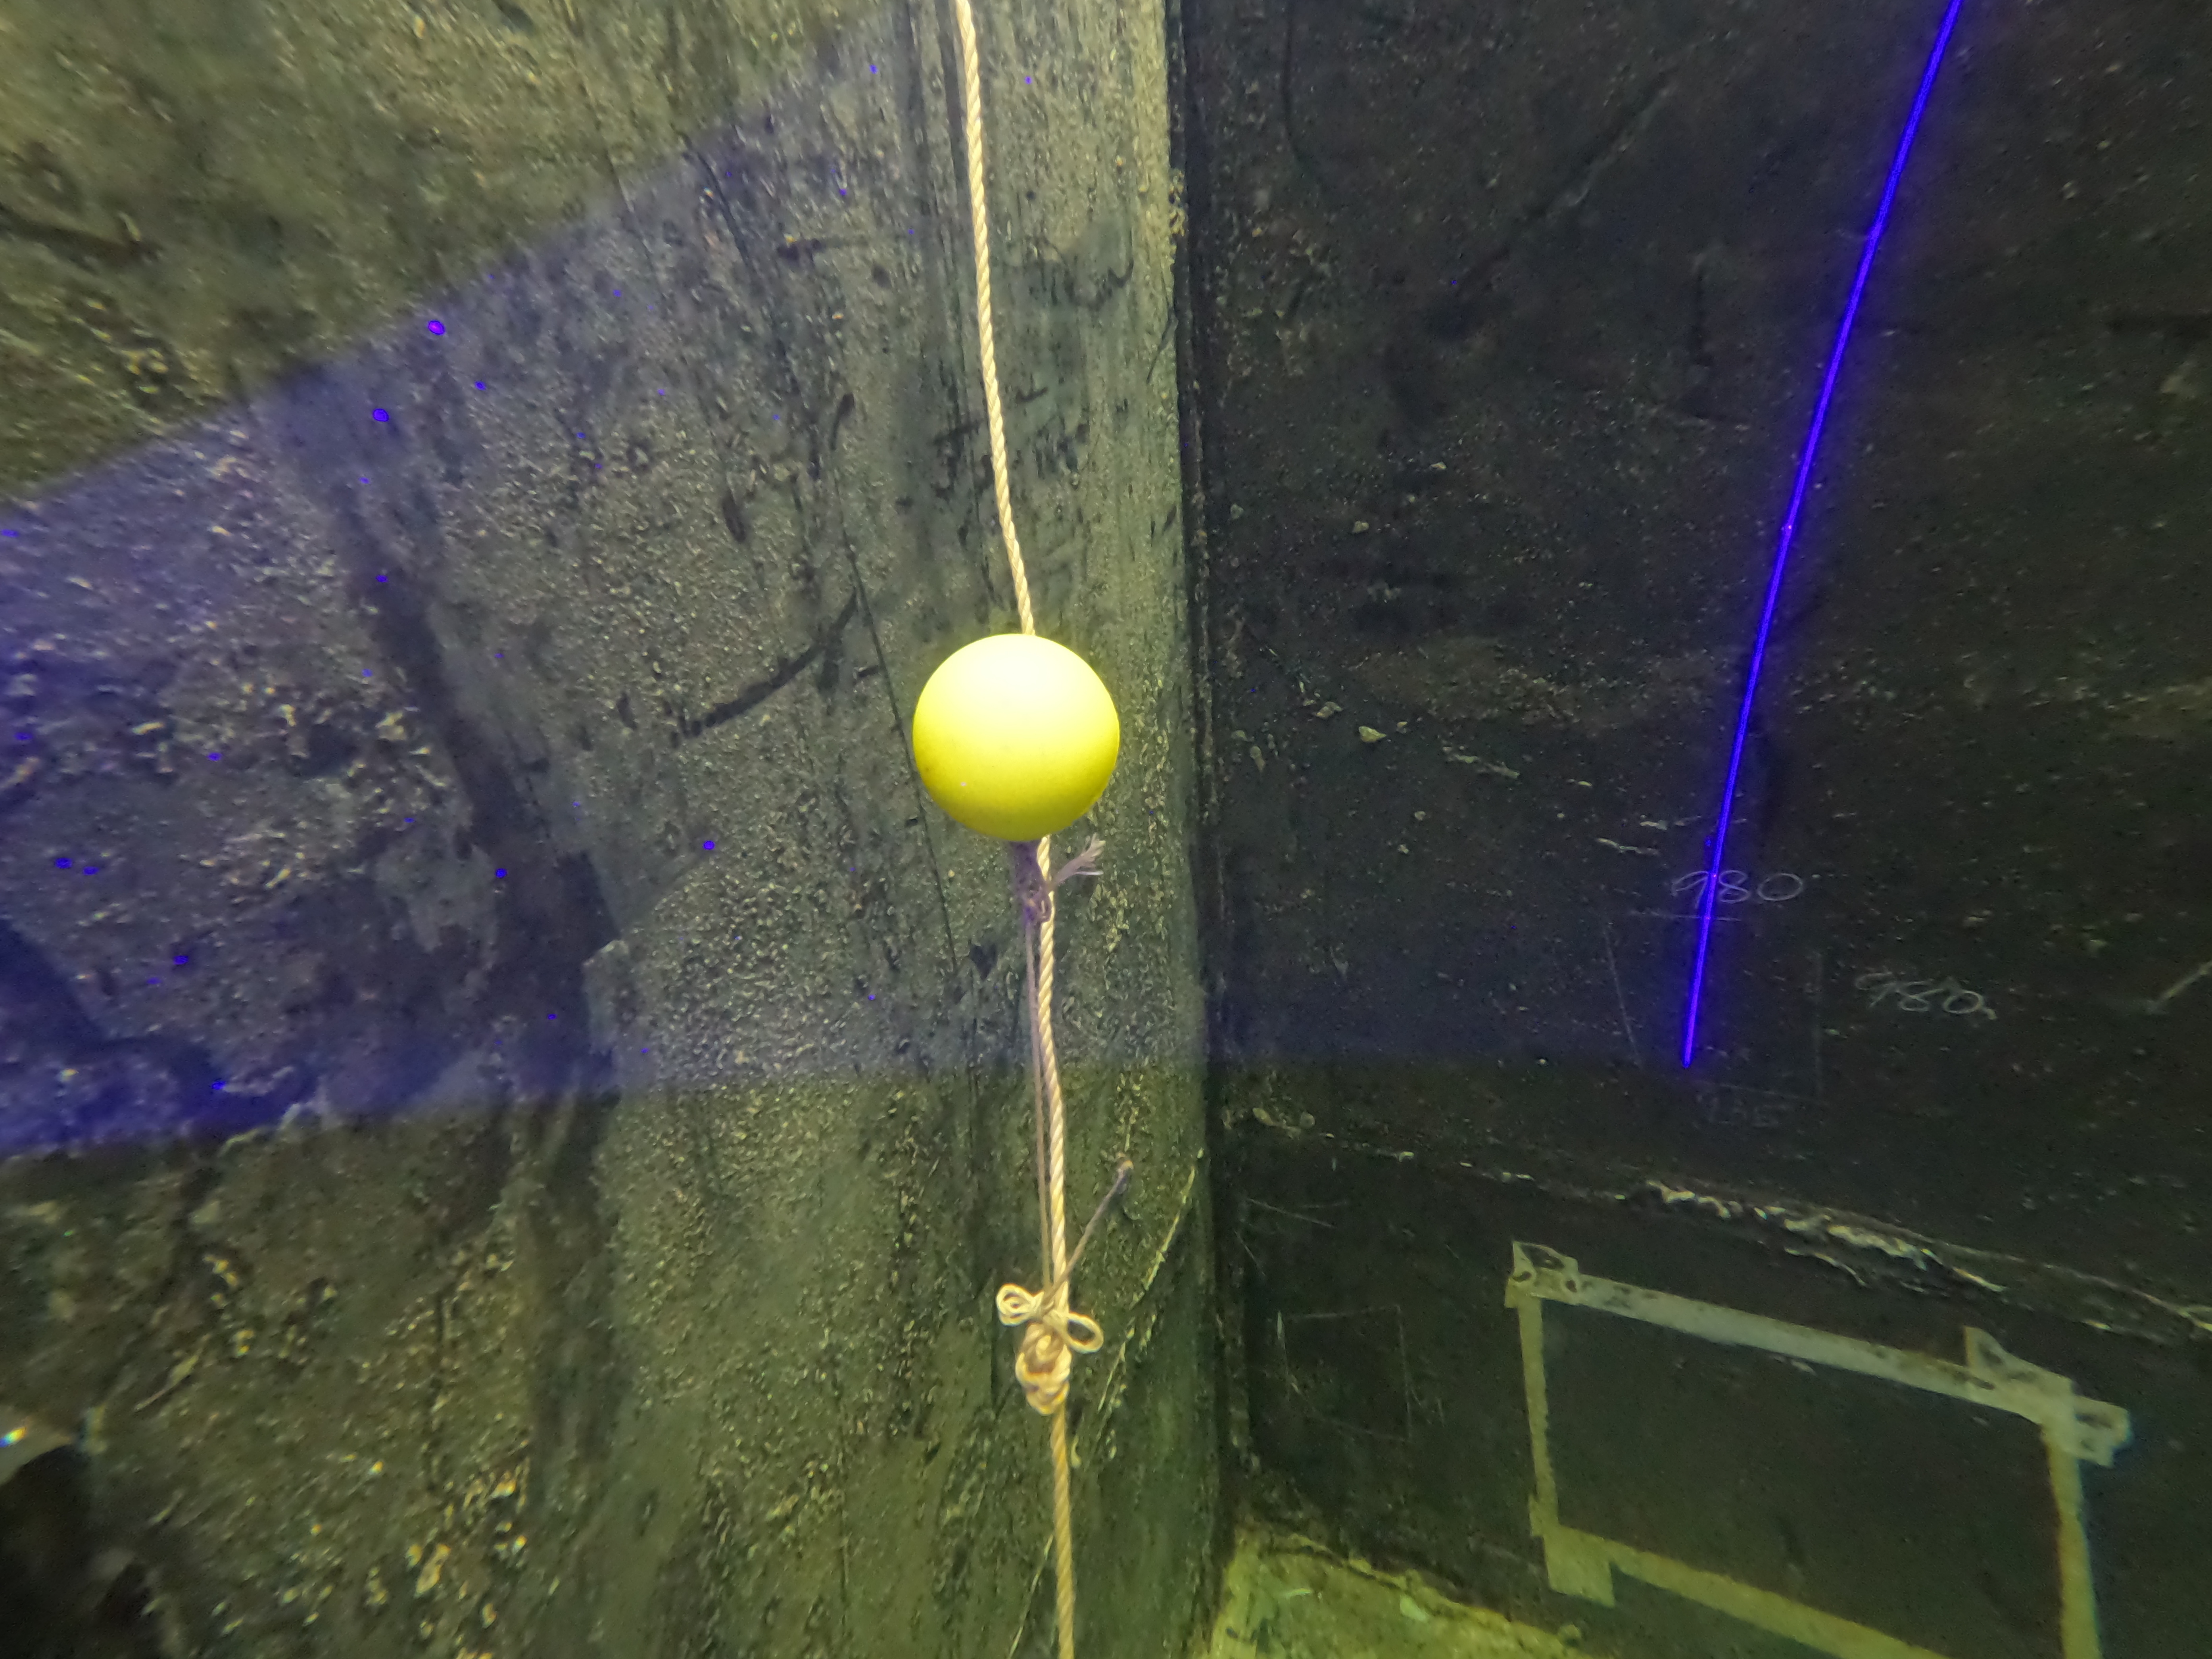

Supplement: Supplementary file 1258 [file G0032571.pdf › 6/G0032571.pdf]

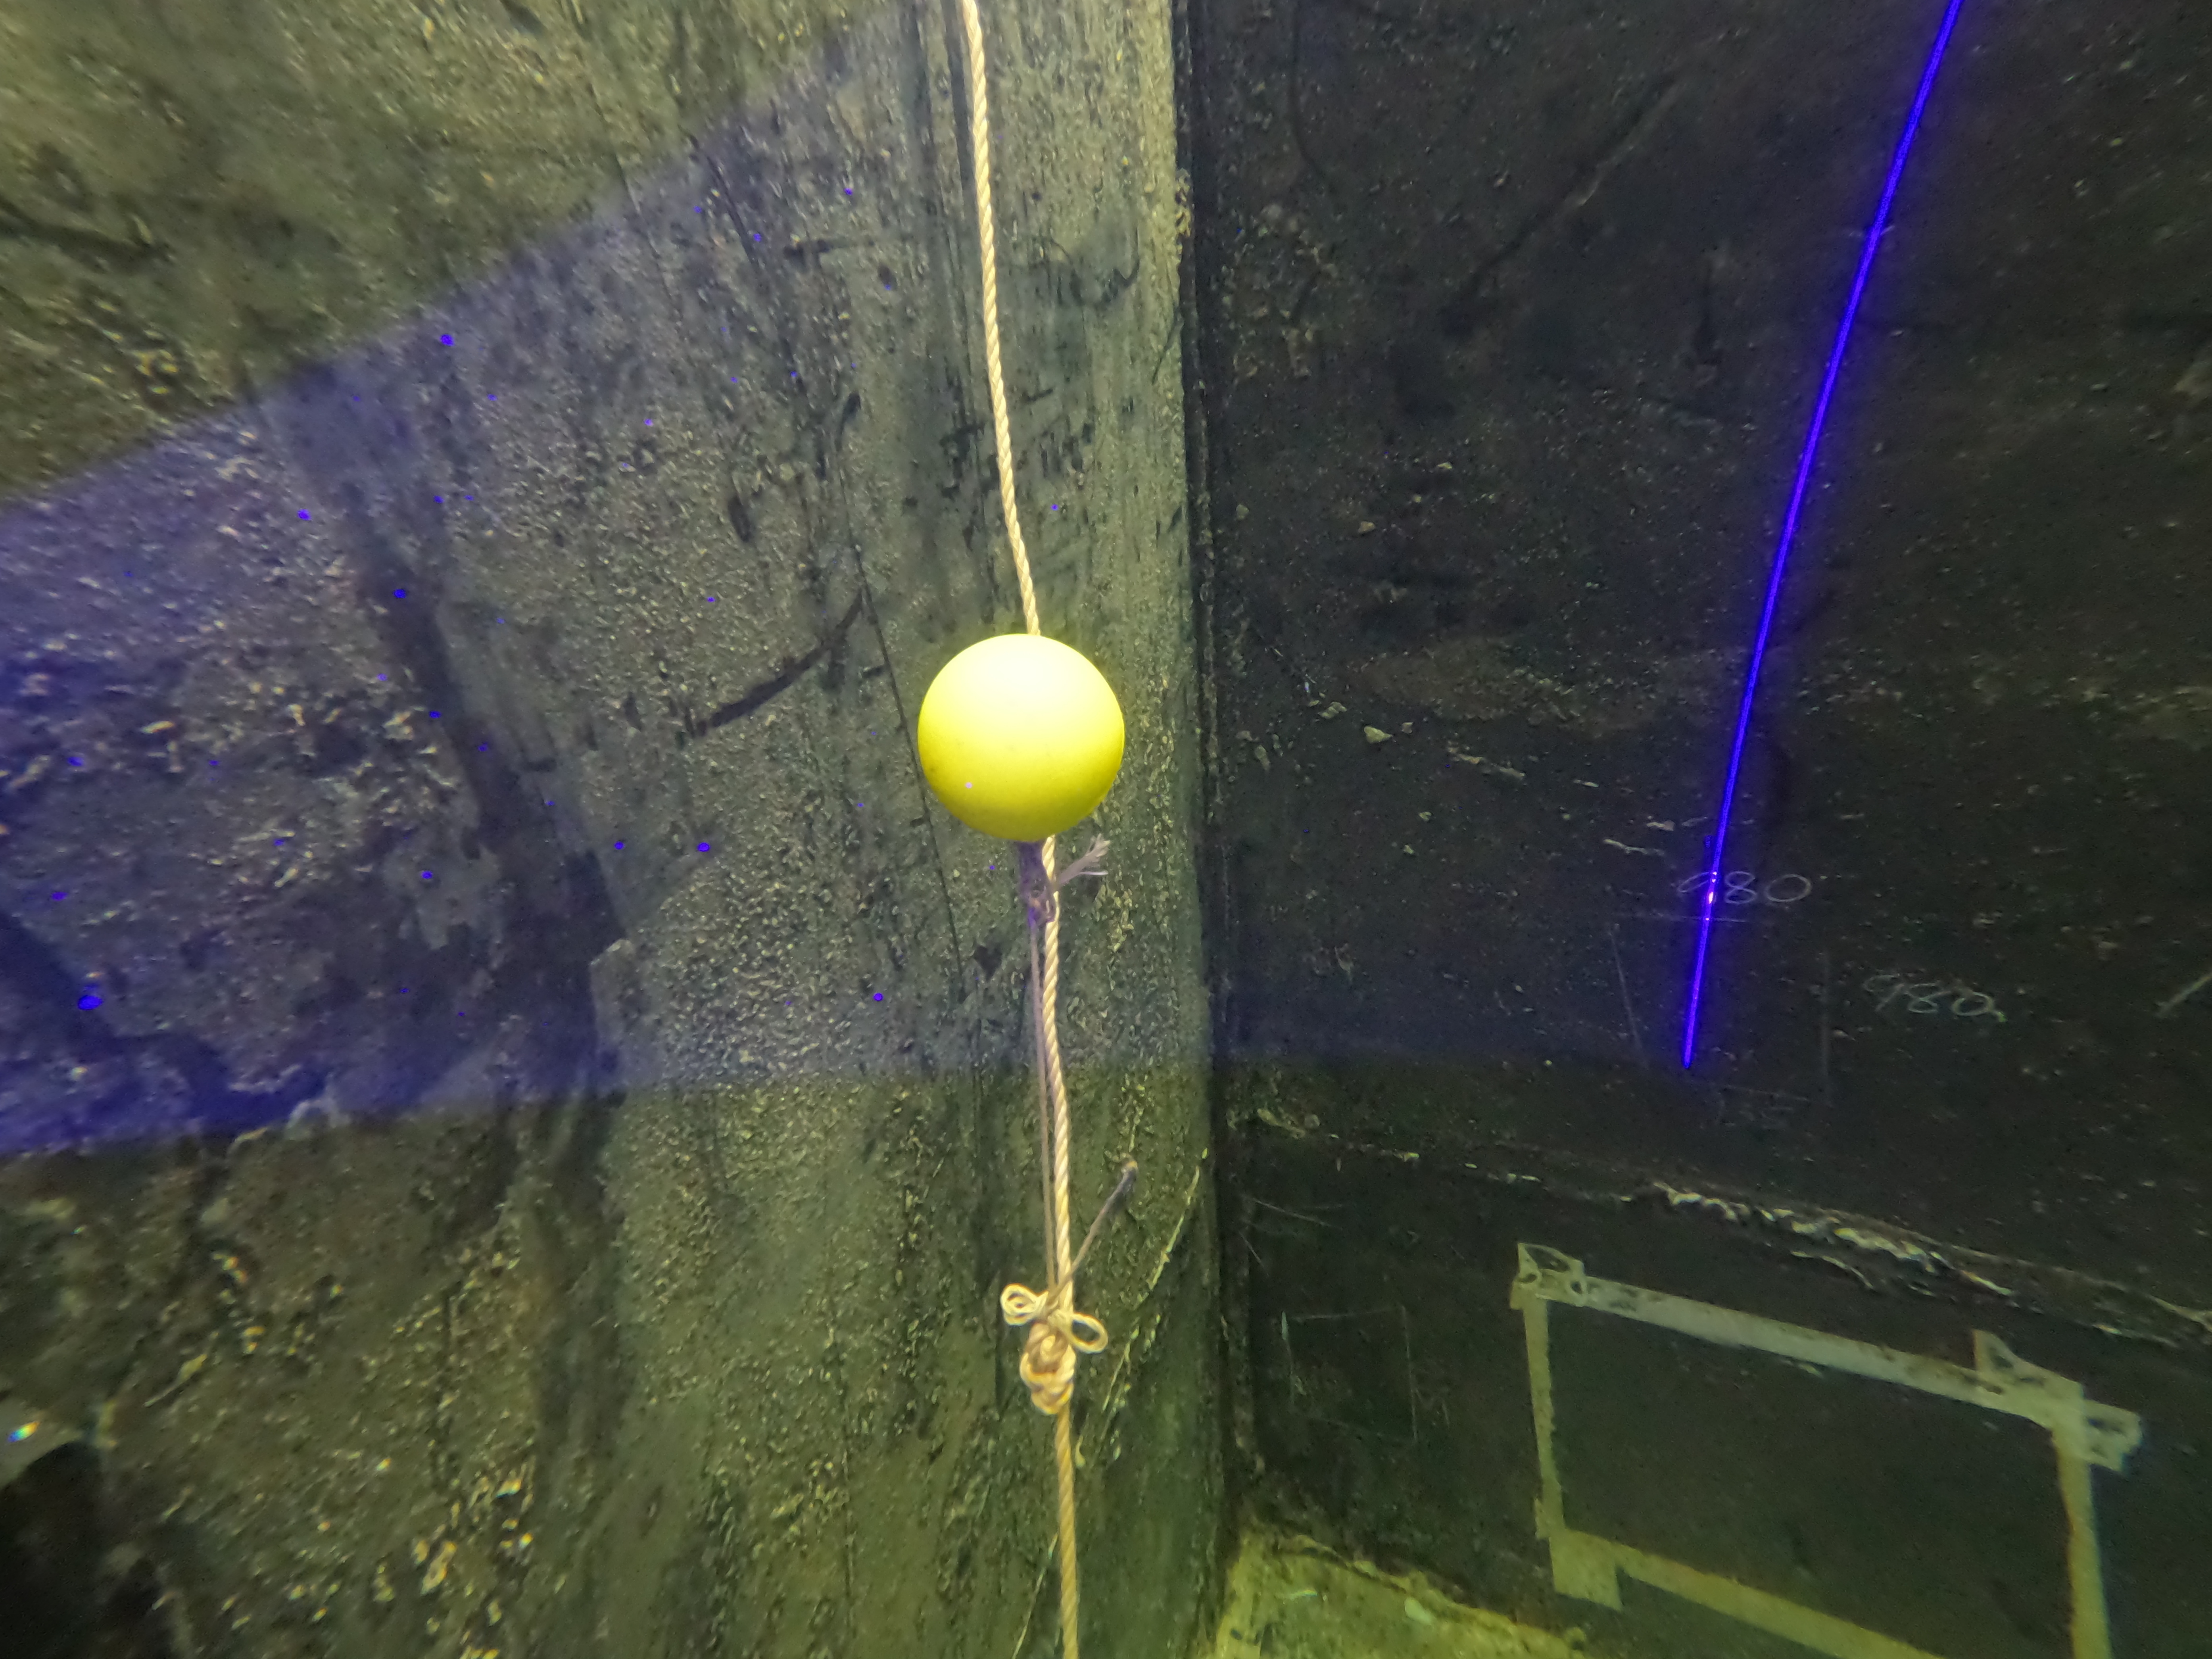

Supplement: Supplementary file 1259 [file G0032572.pdf › 6/G0032572.pdf]

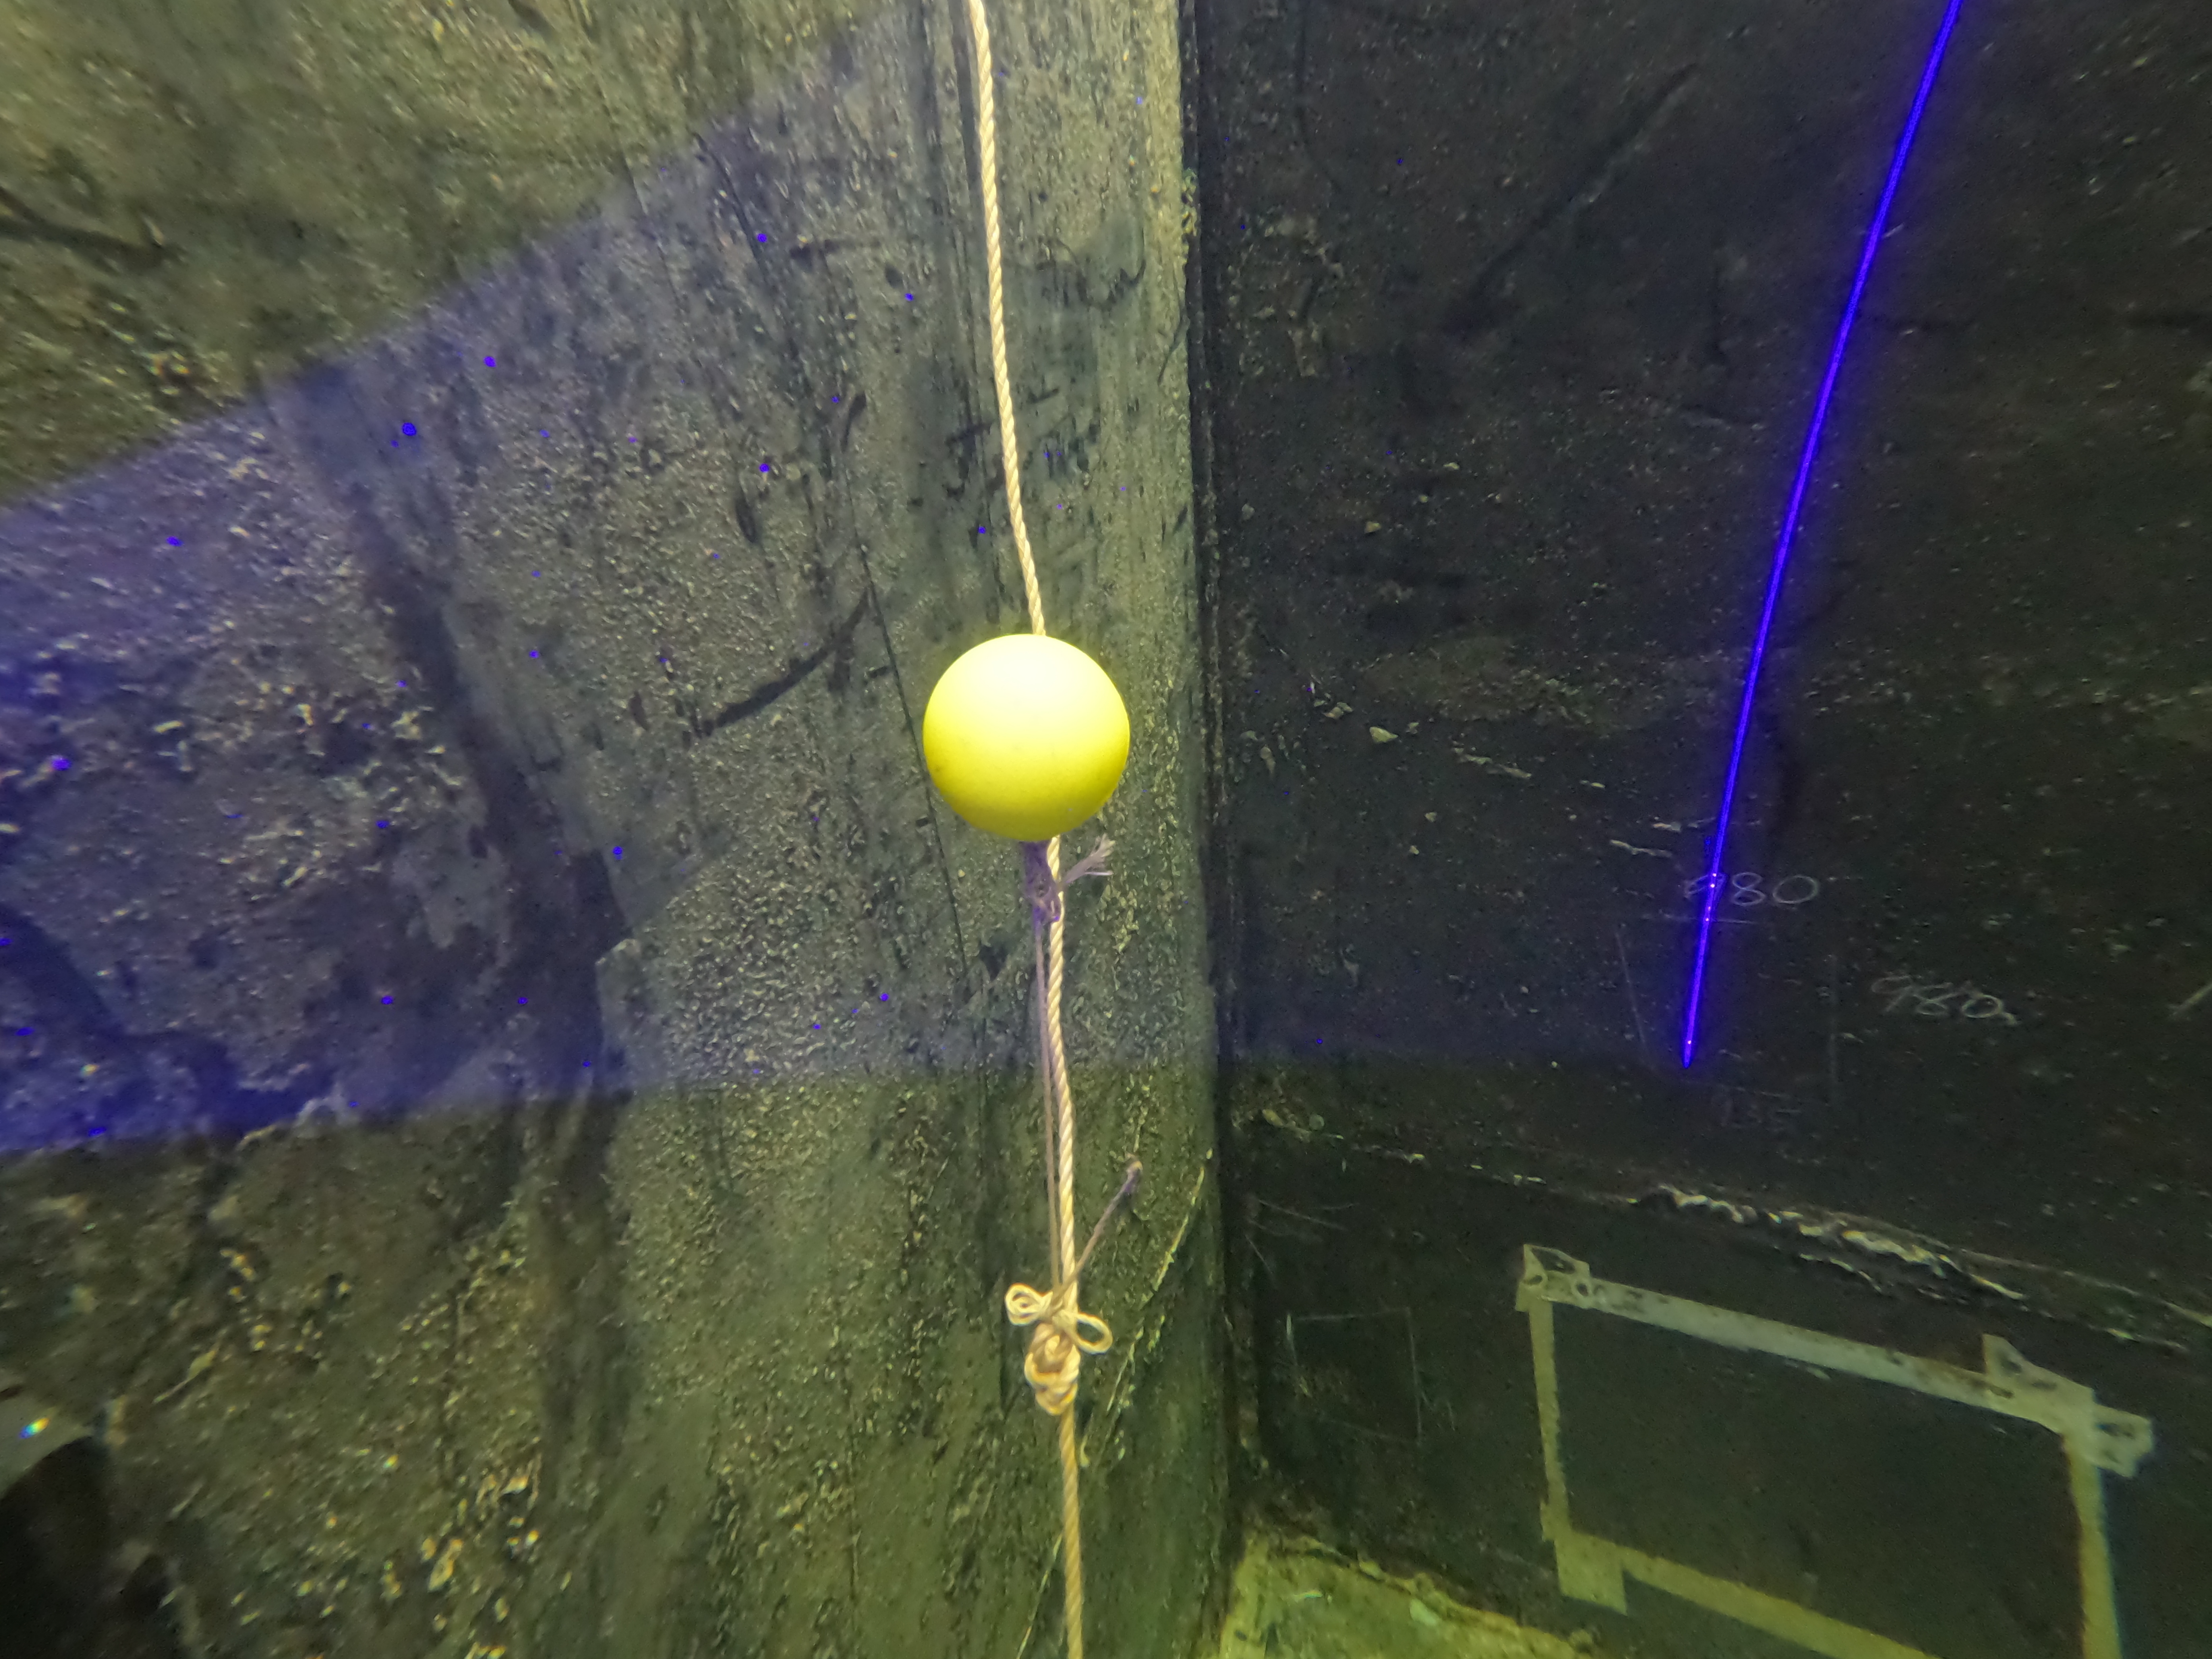

Supplement: Supplementary file 1260 [file G0032573.pdf › 6/G0032573.pdf]

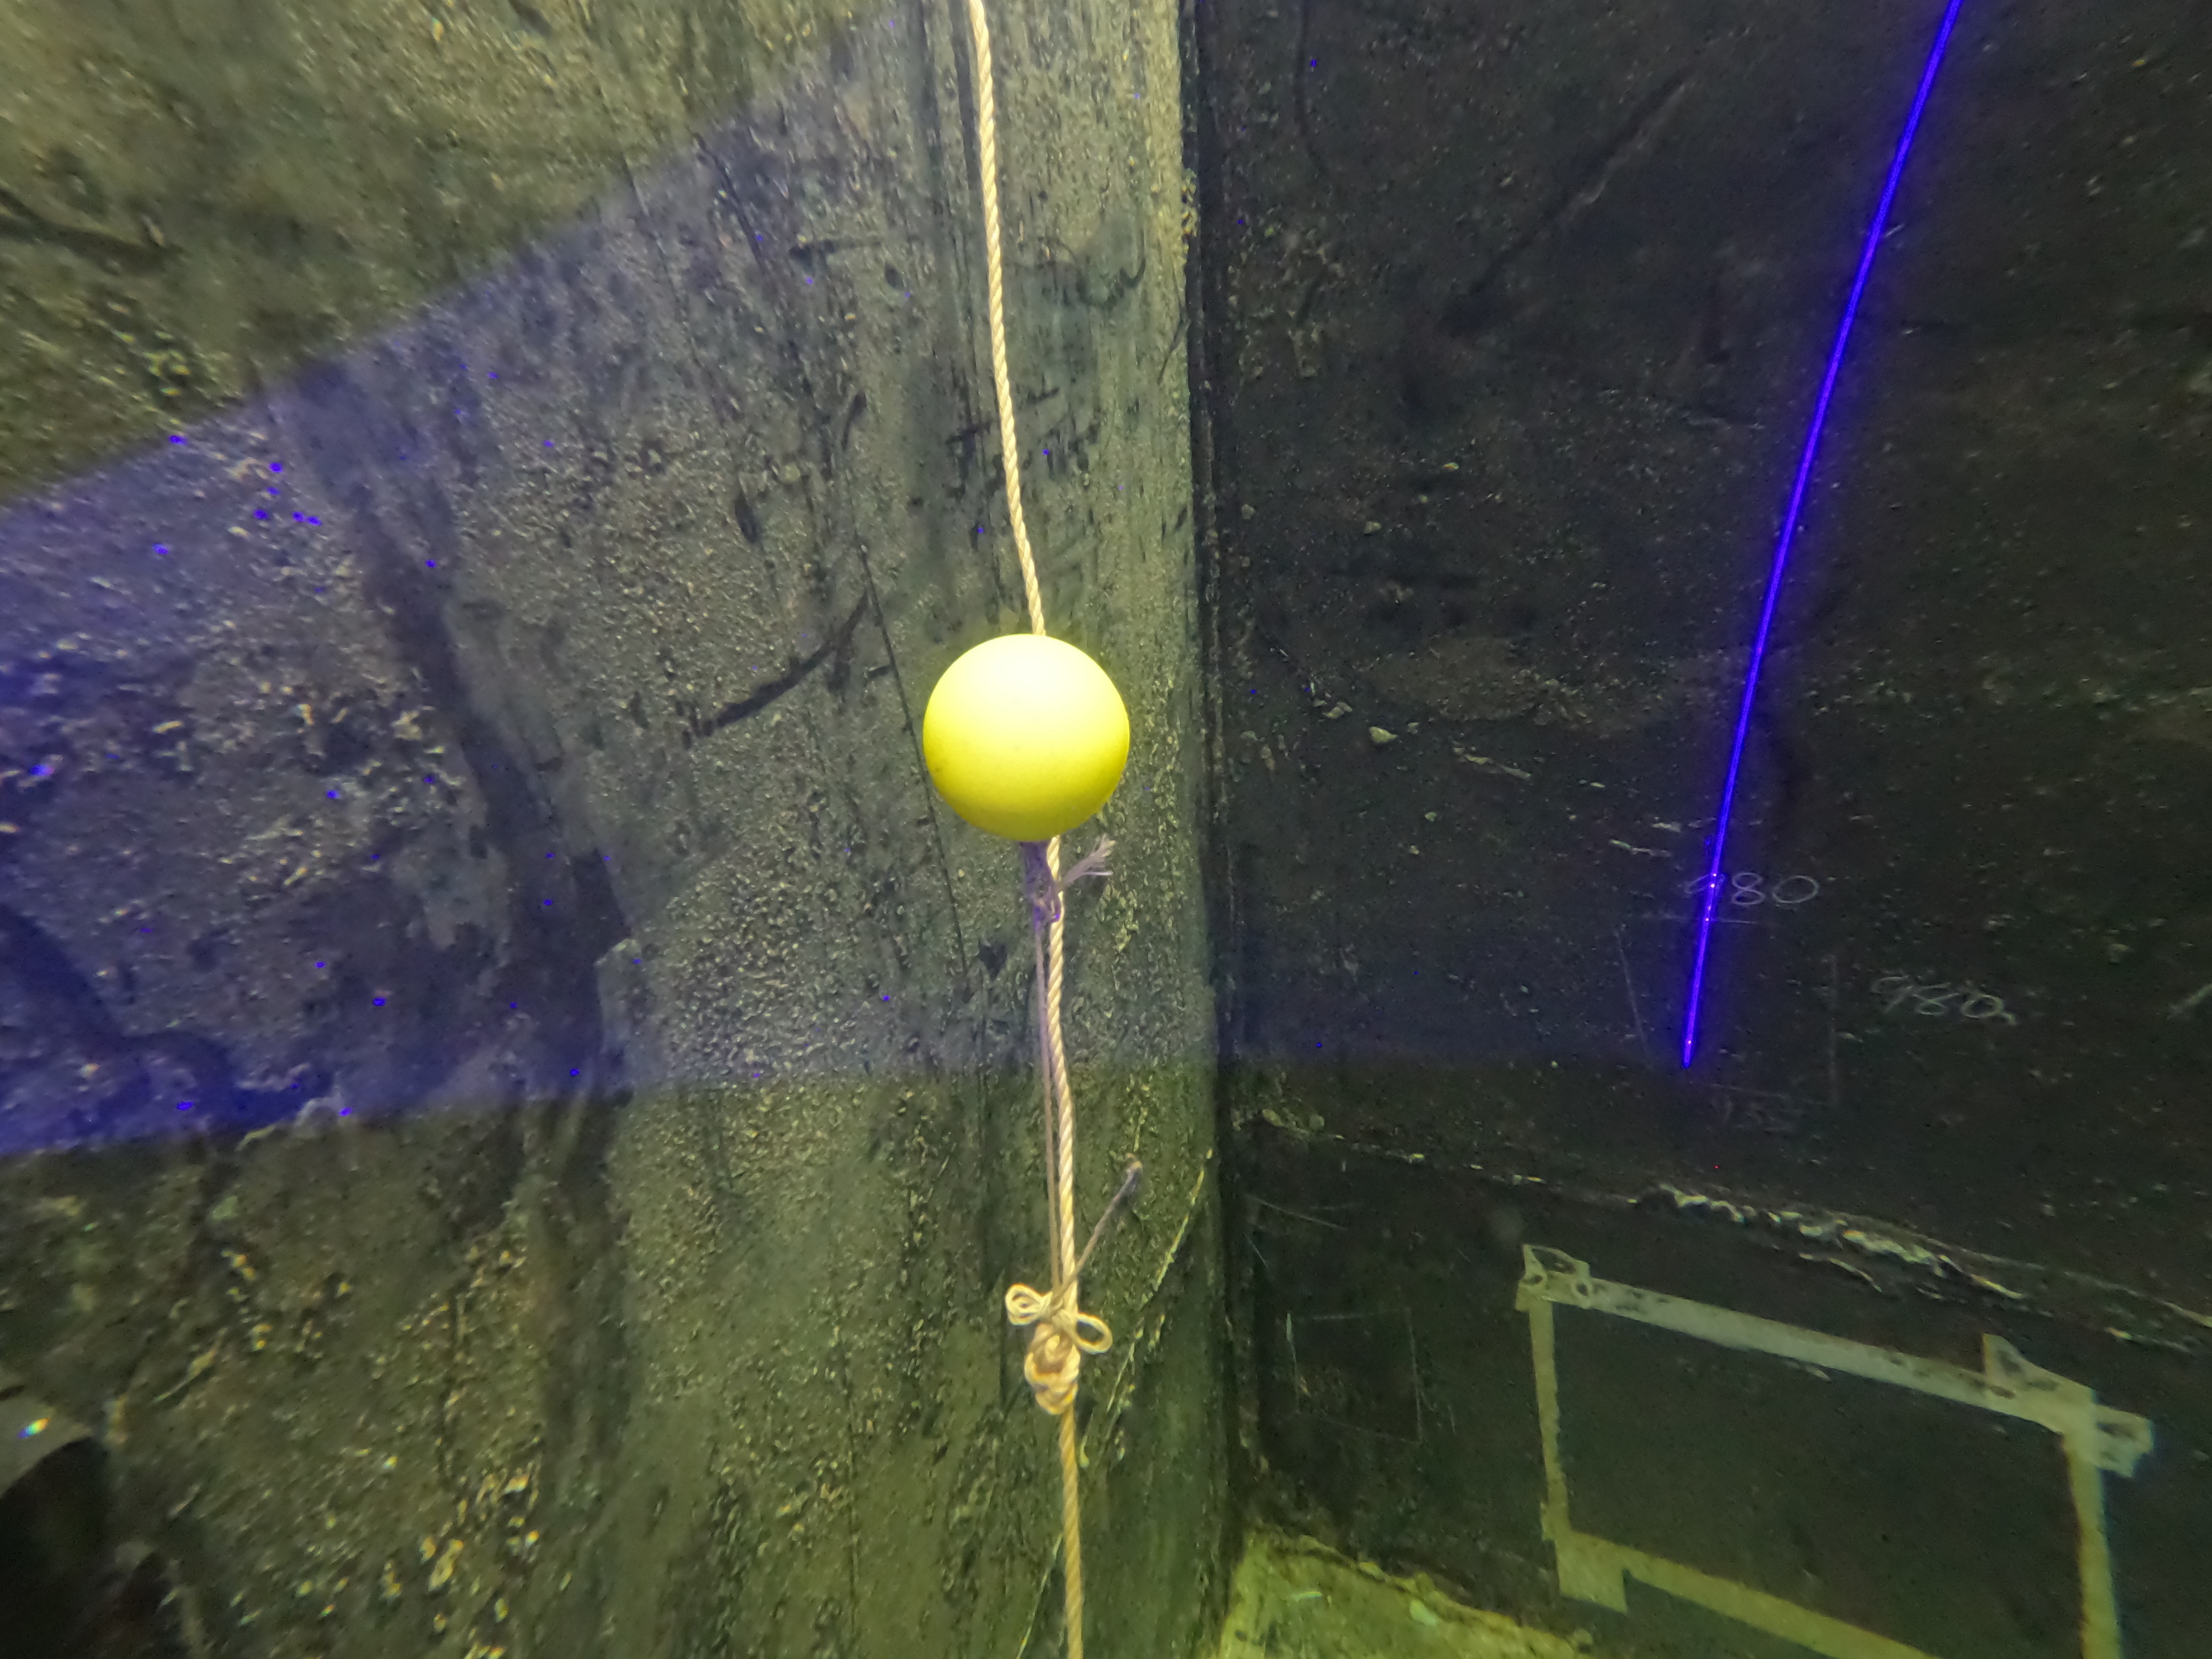

Supplement: Supplementary file 1261 [file G0032574.pdf › 6/G0032574.pdf]

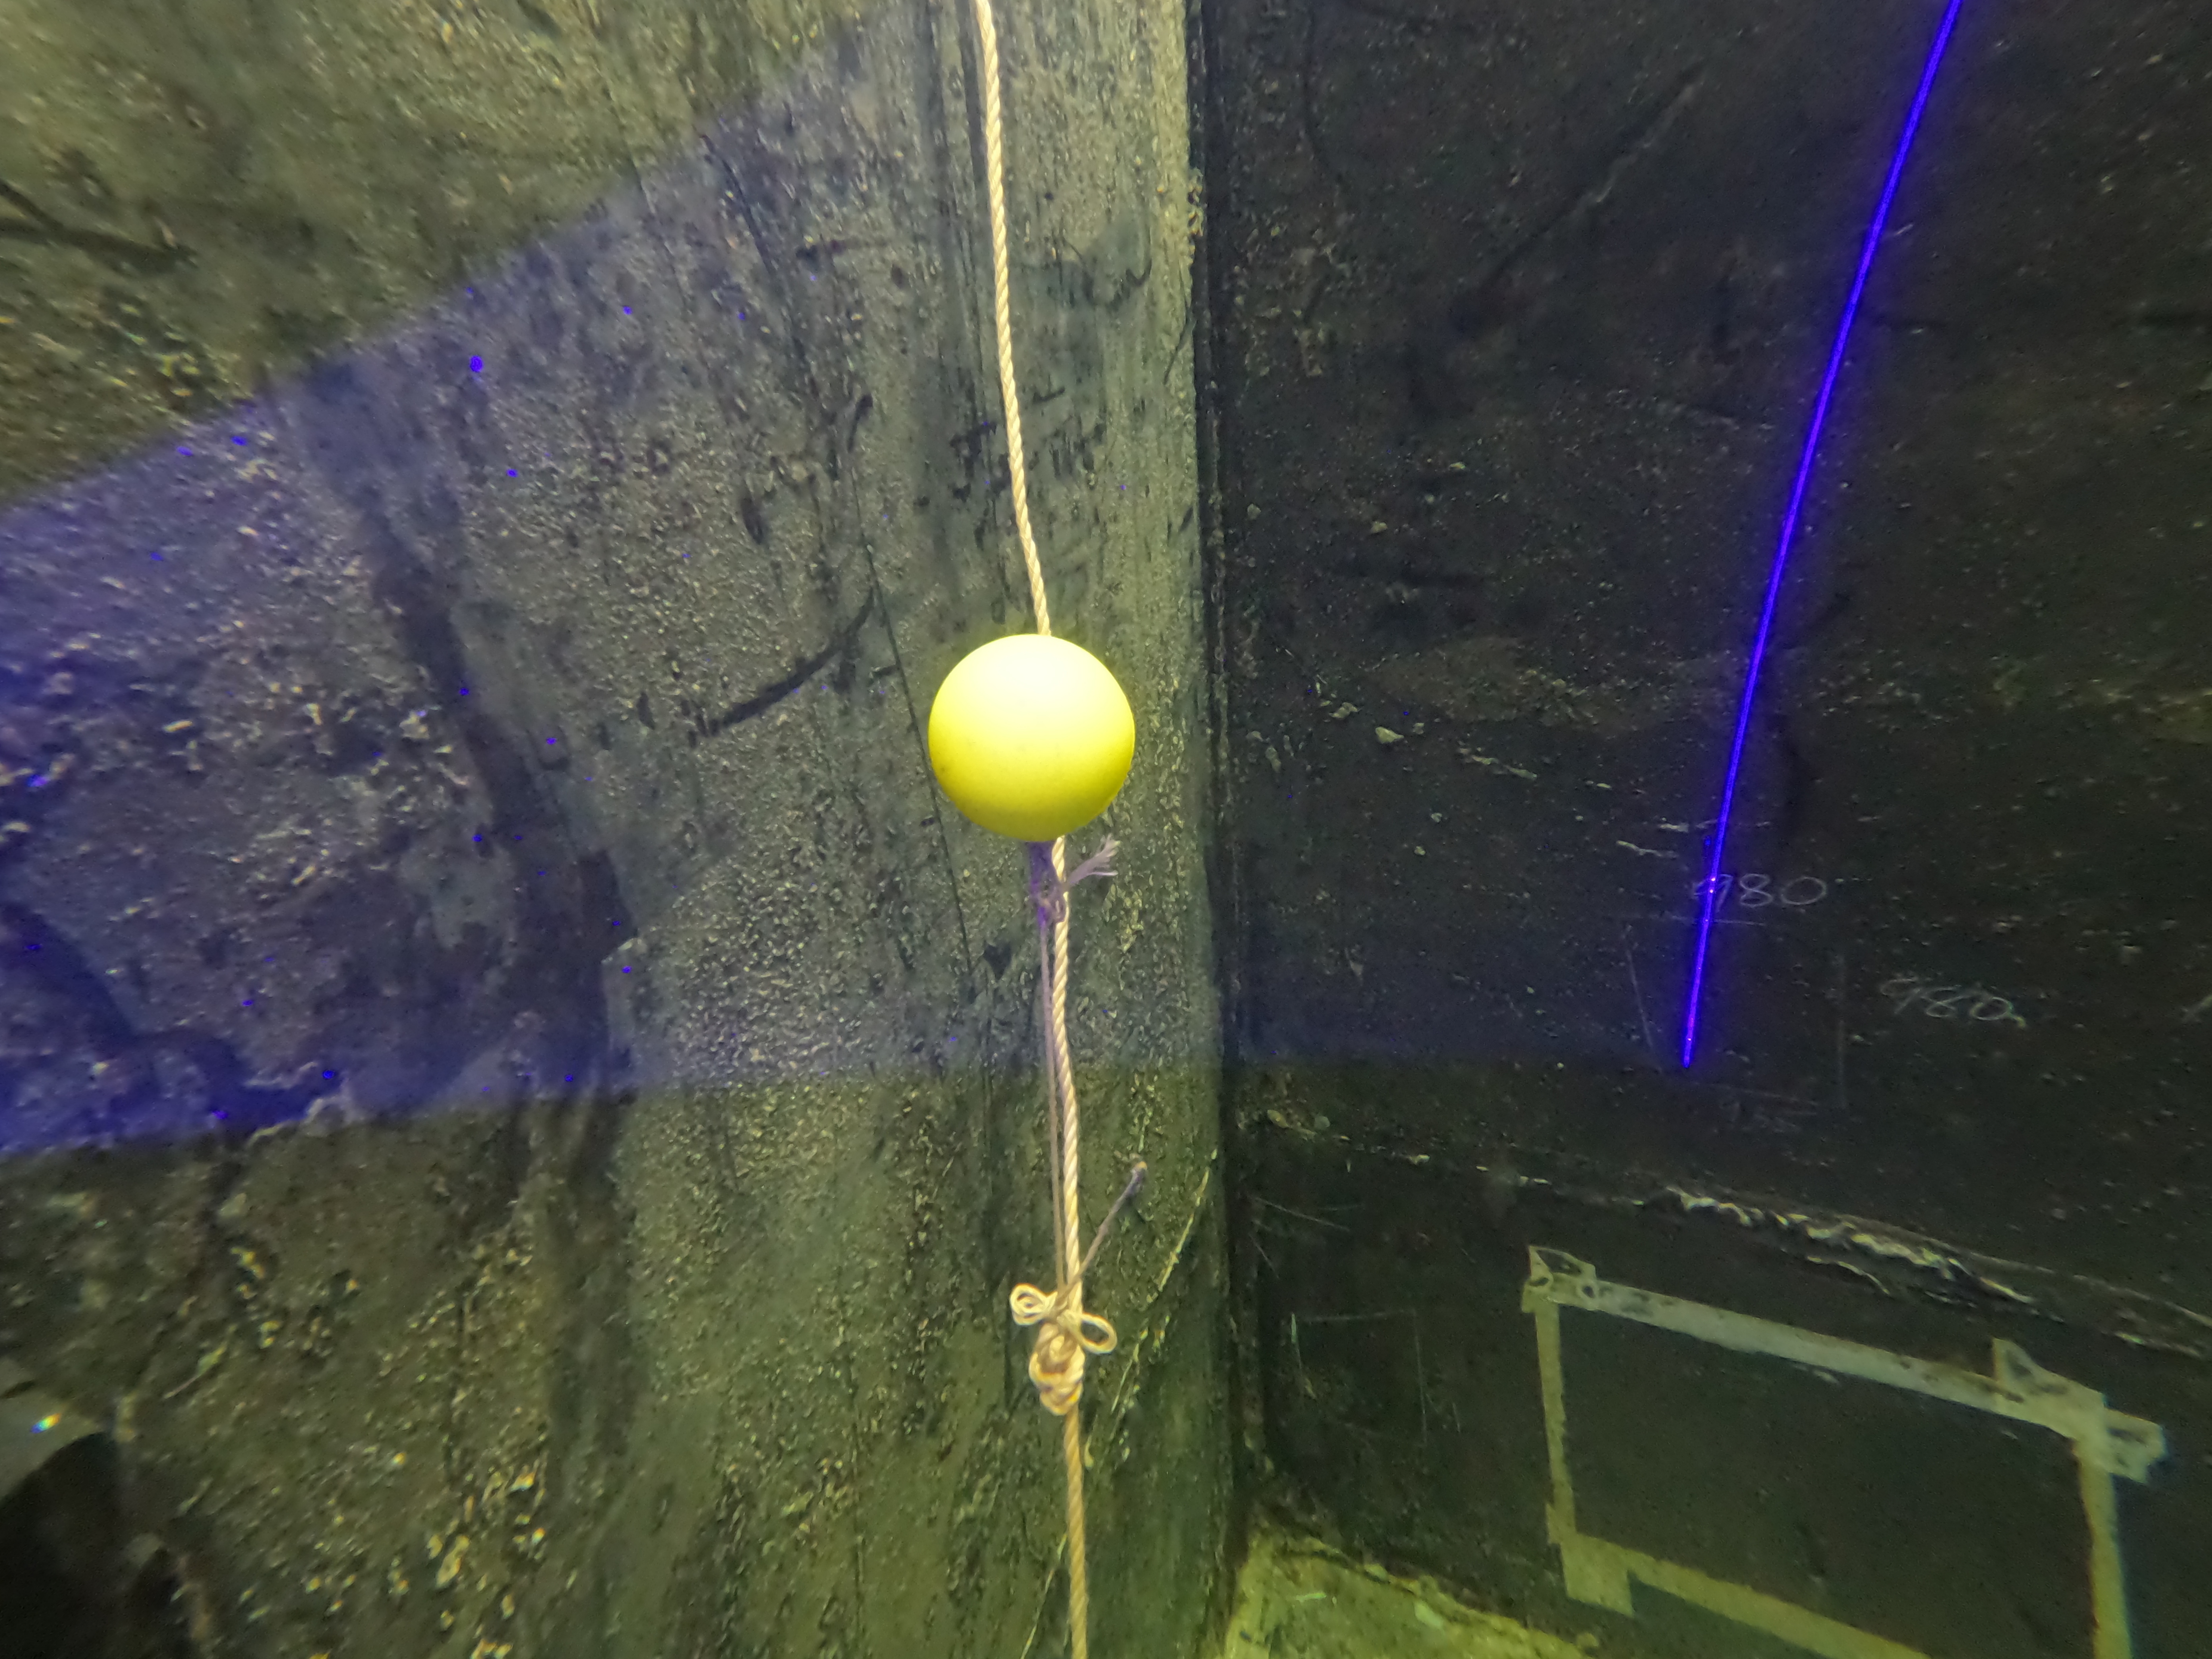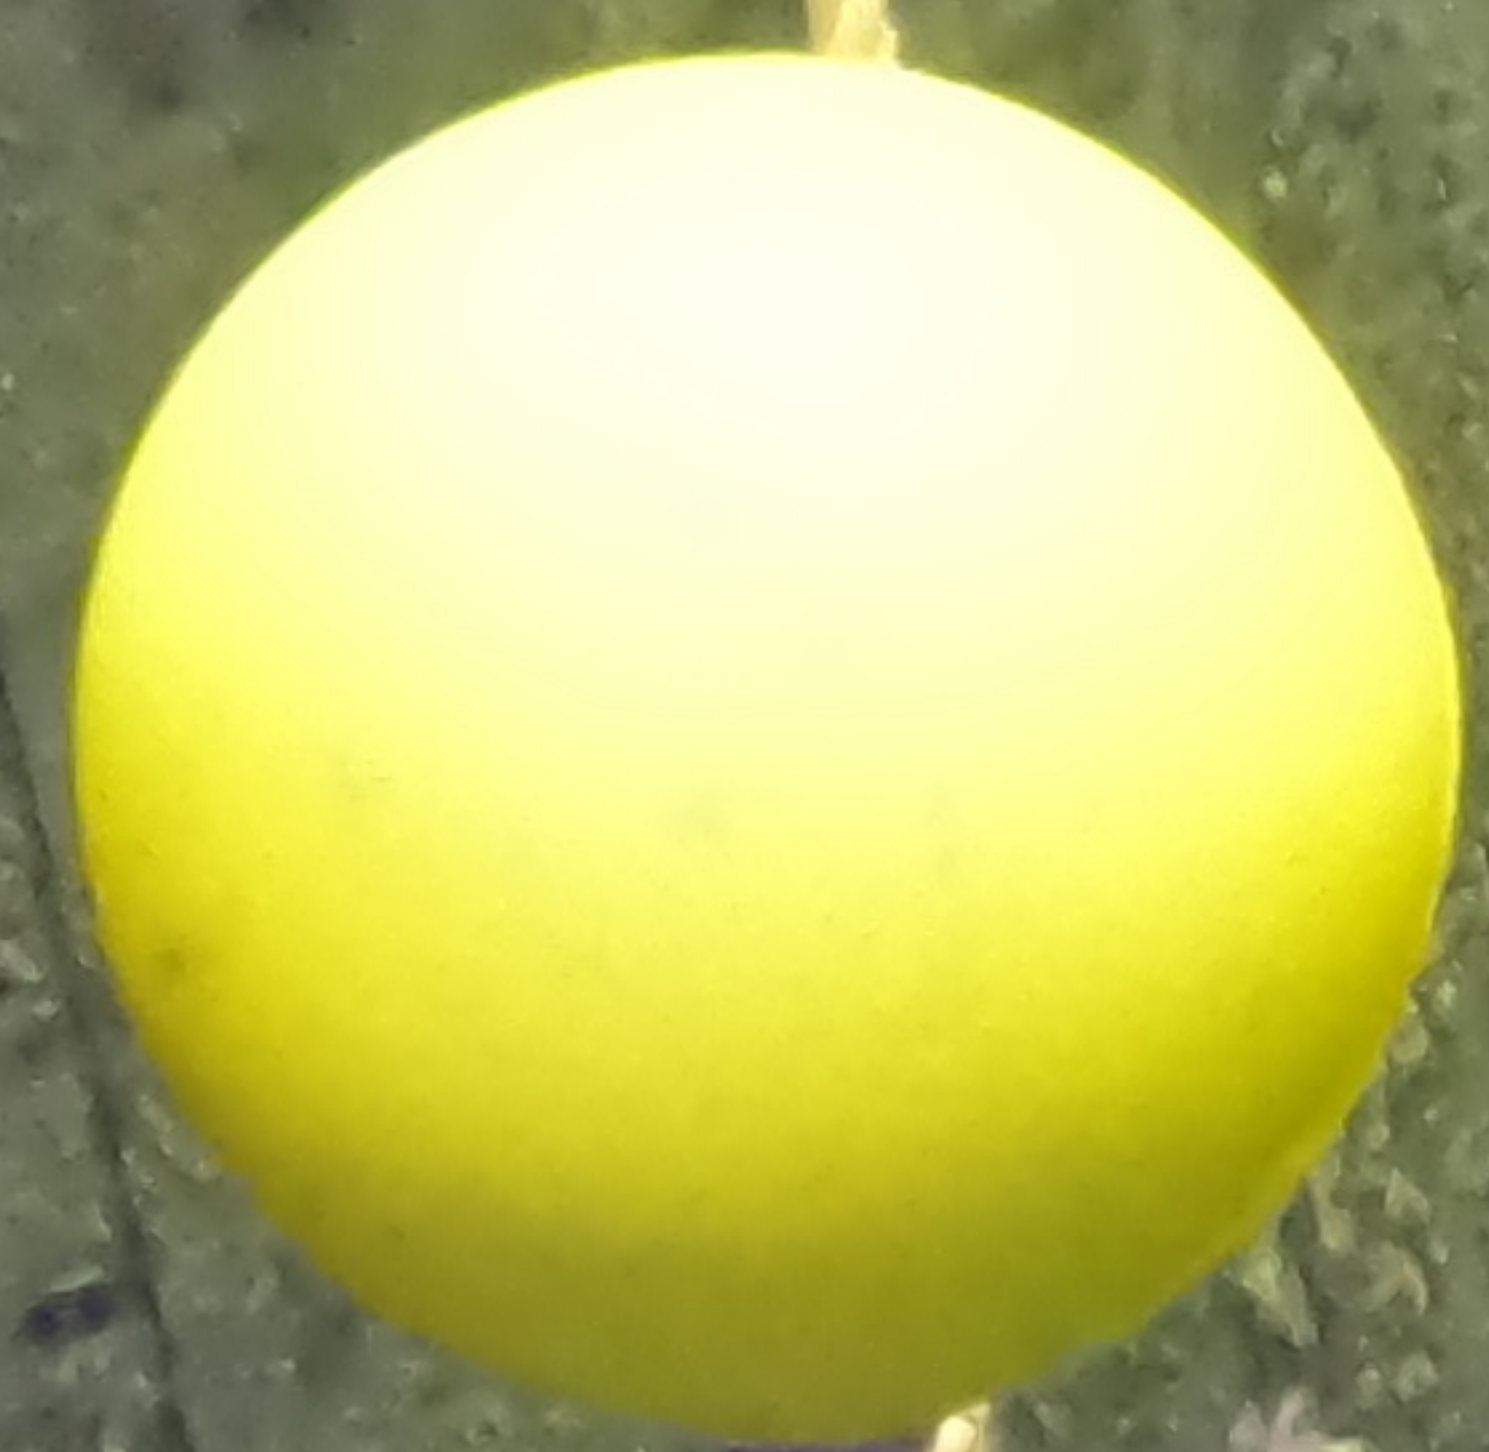

980

980

Supplement: Supplementary file 1262 [file G0032575.pdf › 6/G0032575.pdf]

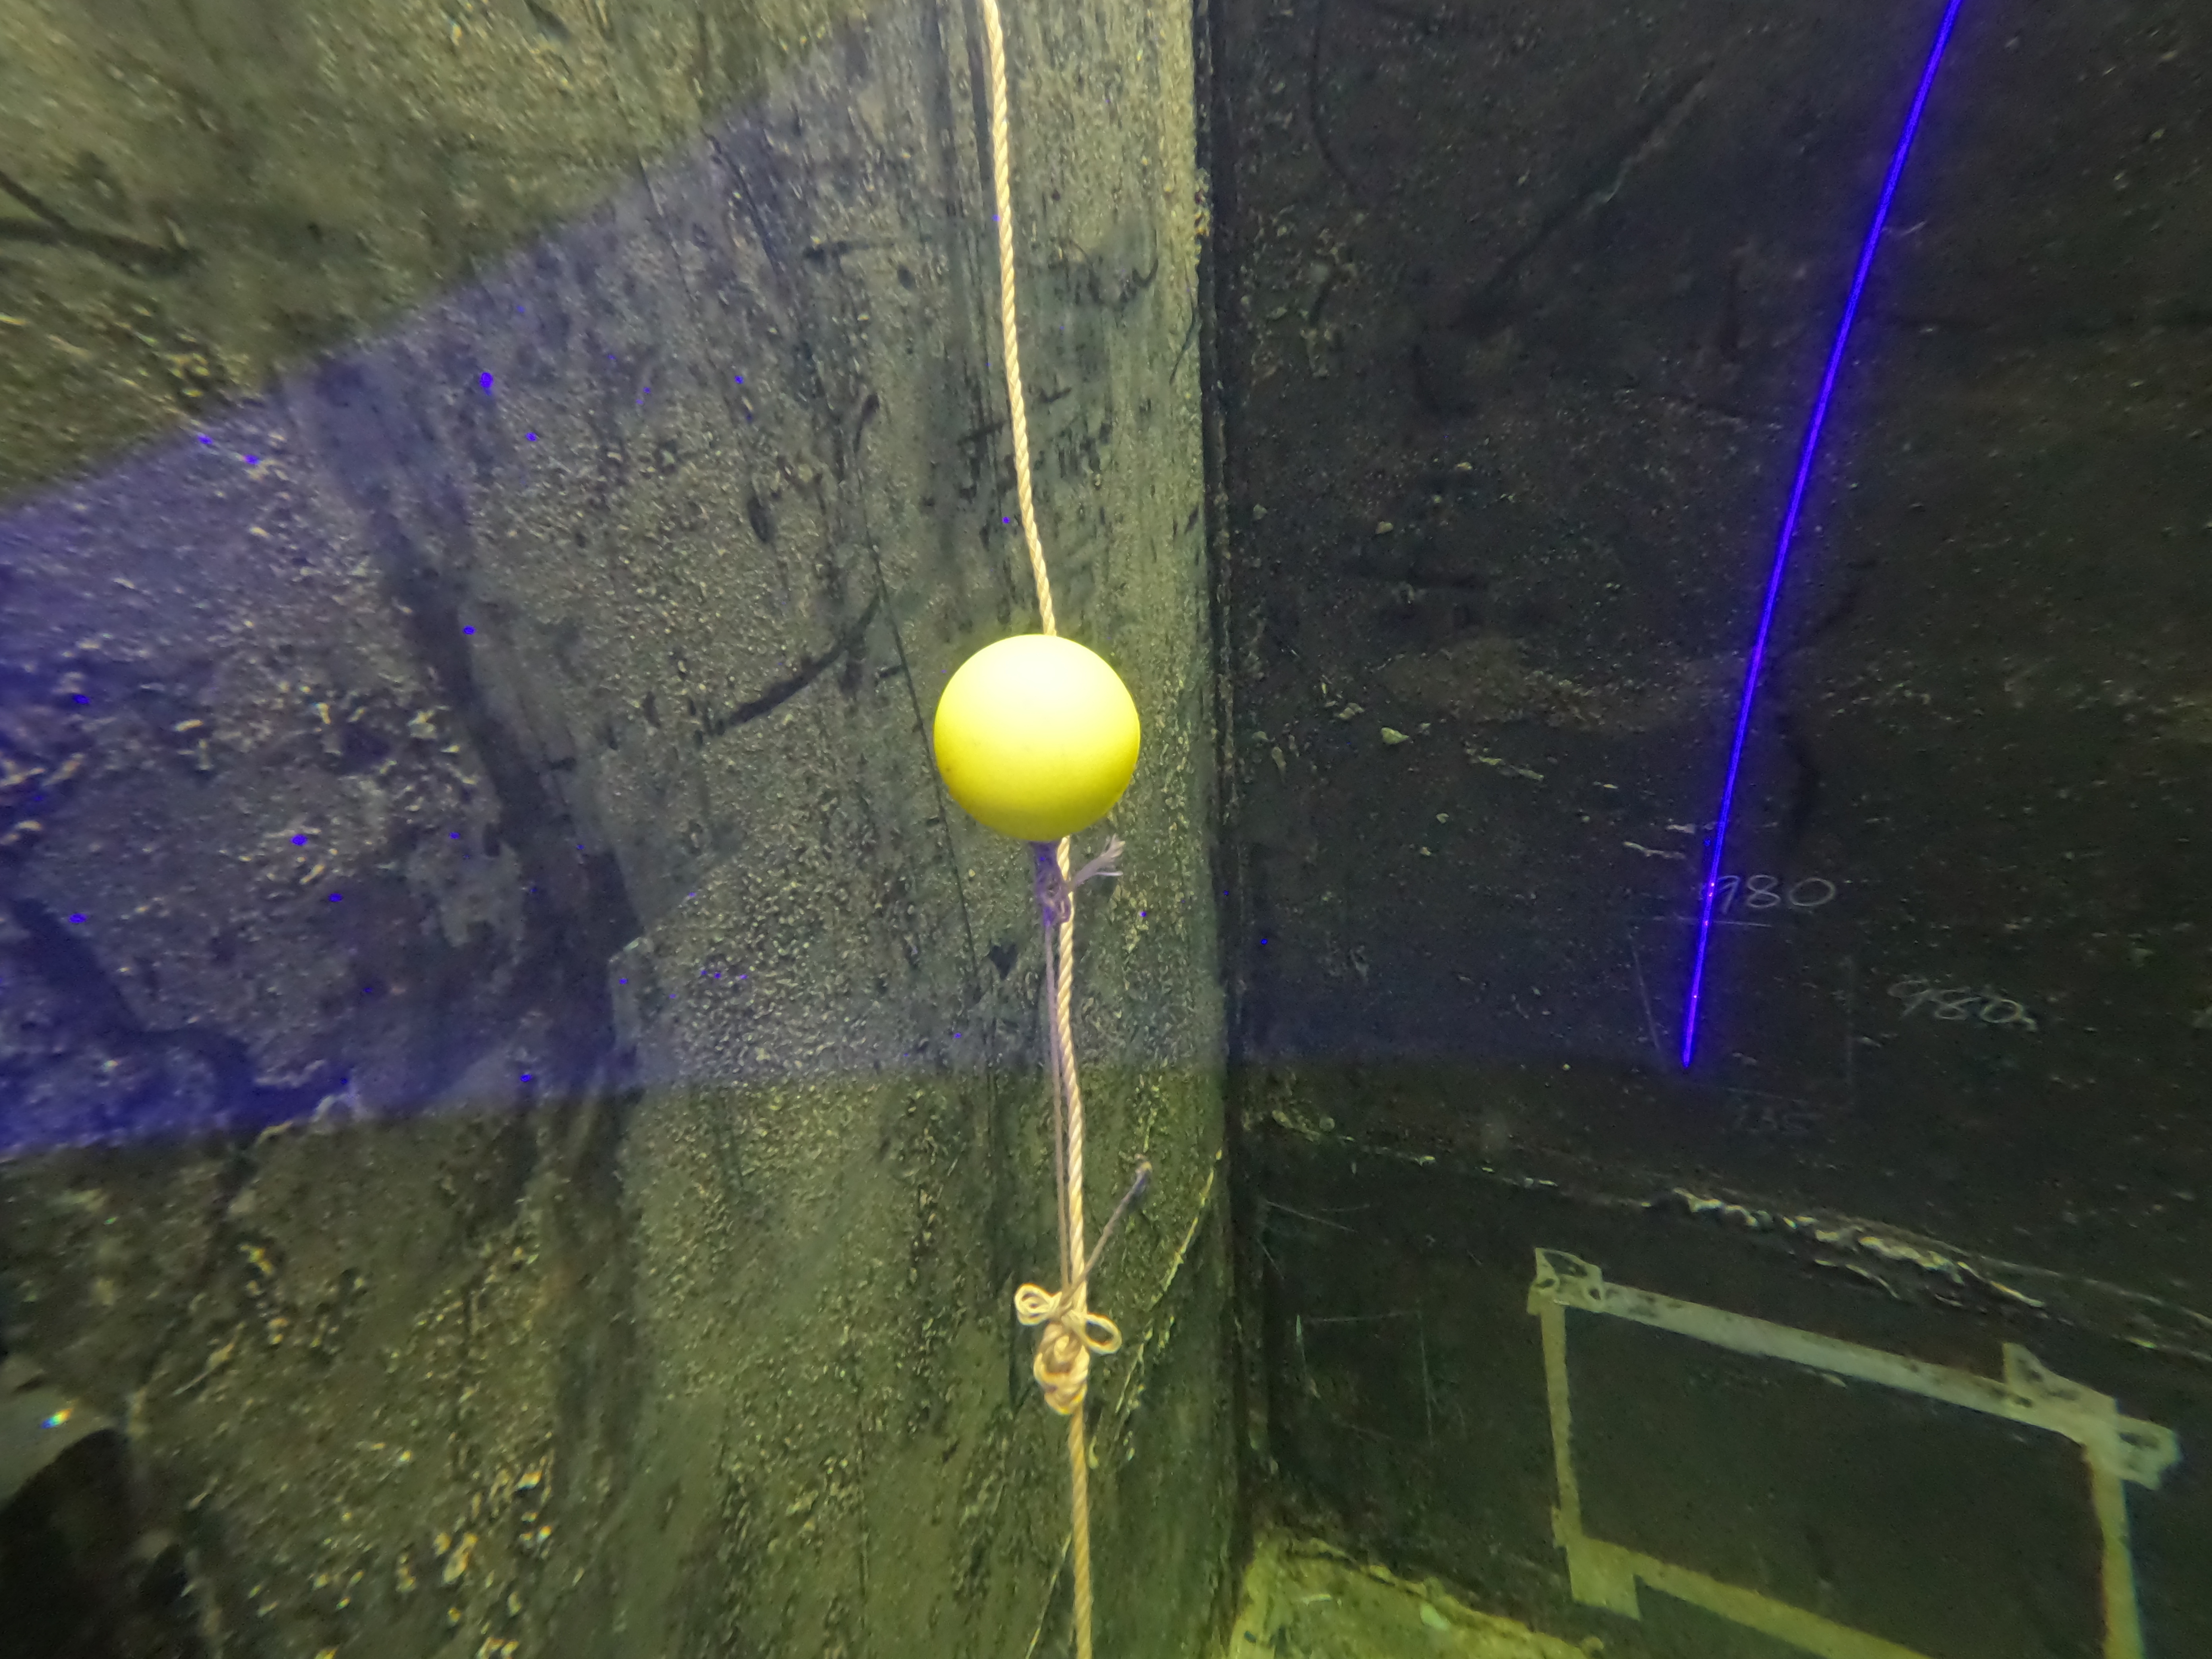

Supplement: Supplementary file 1263 [file G0032576.pdf › 6/G0032576.pdf]

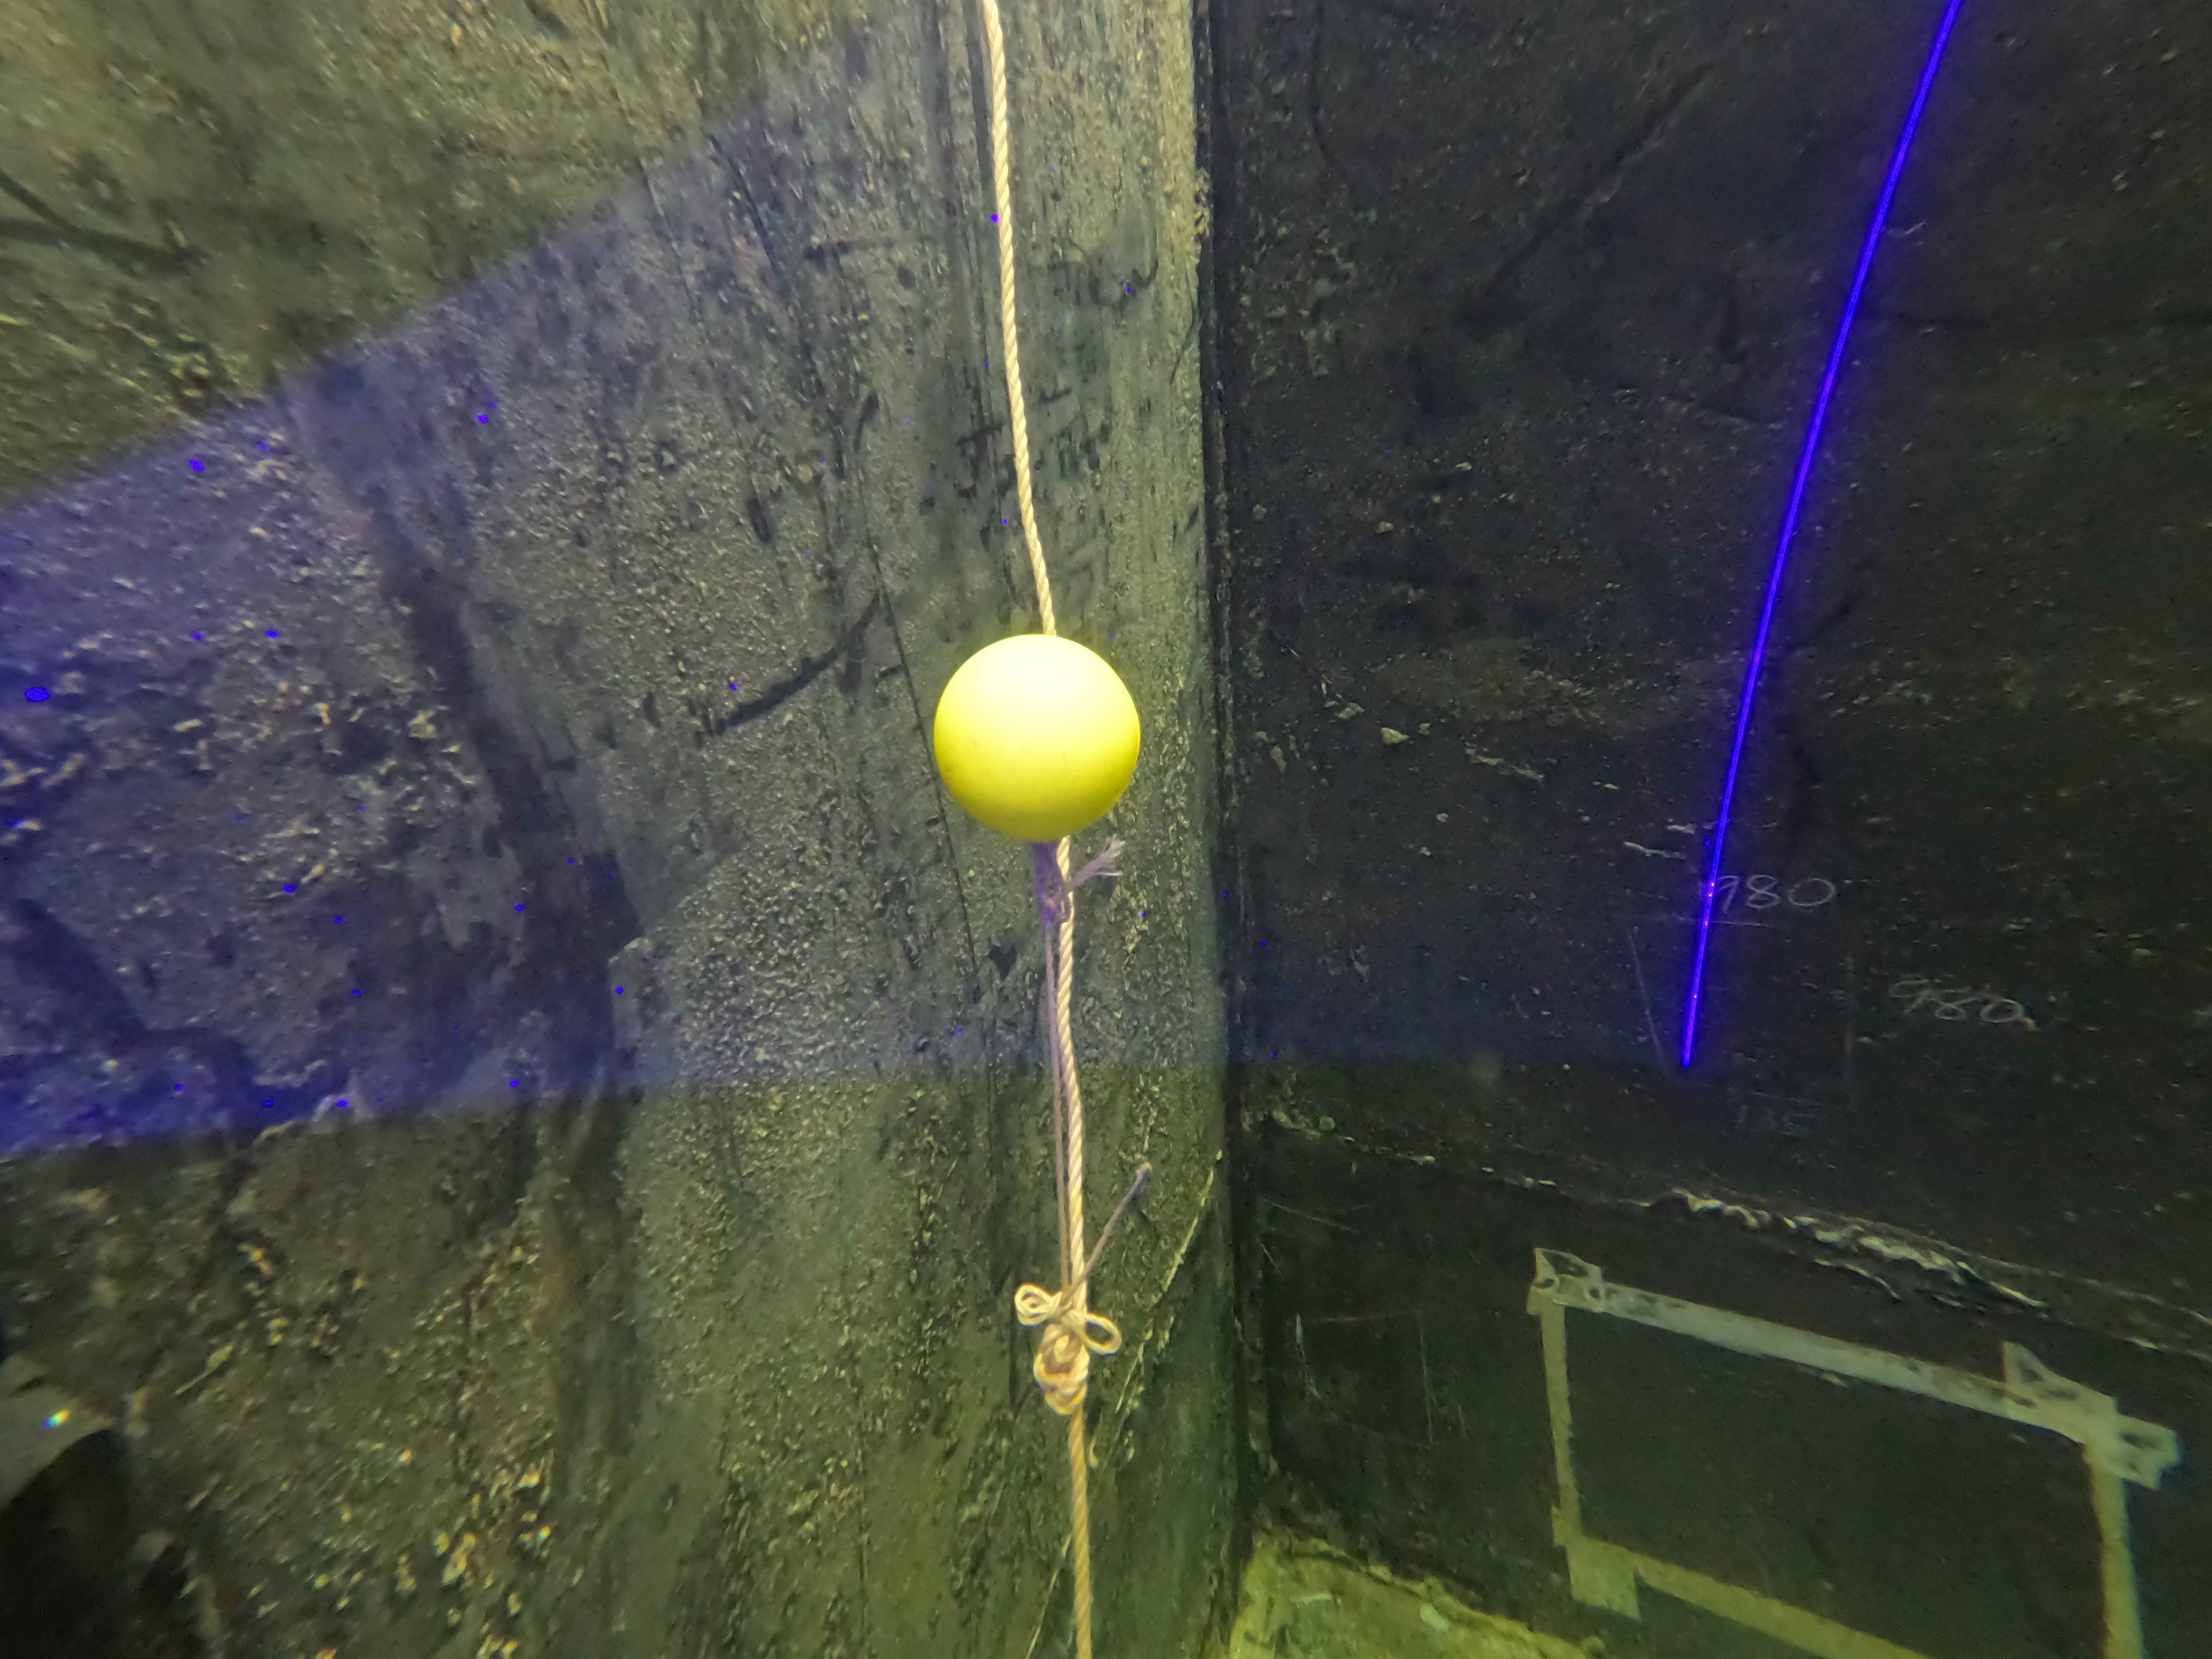

Supplement: Supplementary file 1264 [file G0032577.pdf › 6/G0032577.pdf]

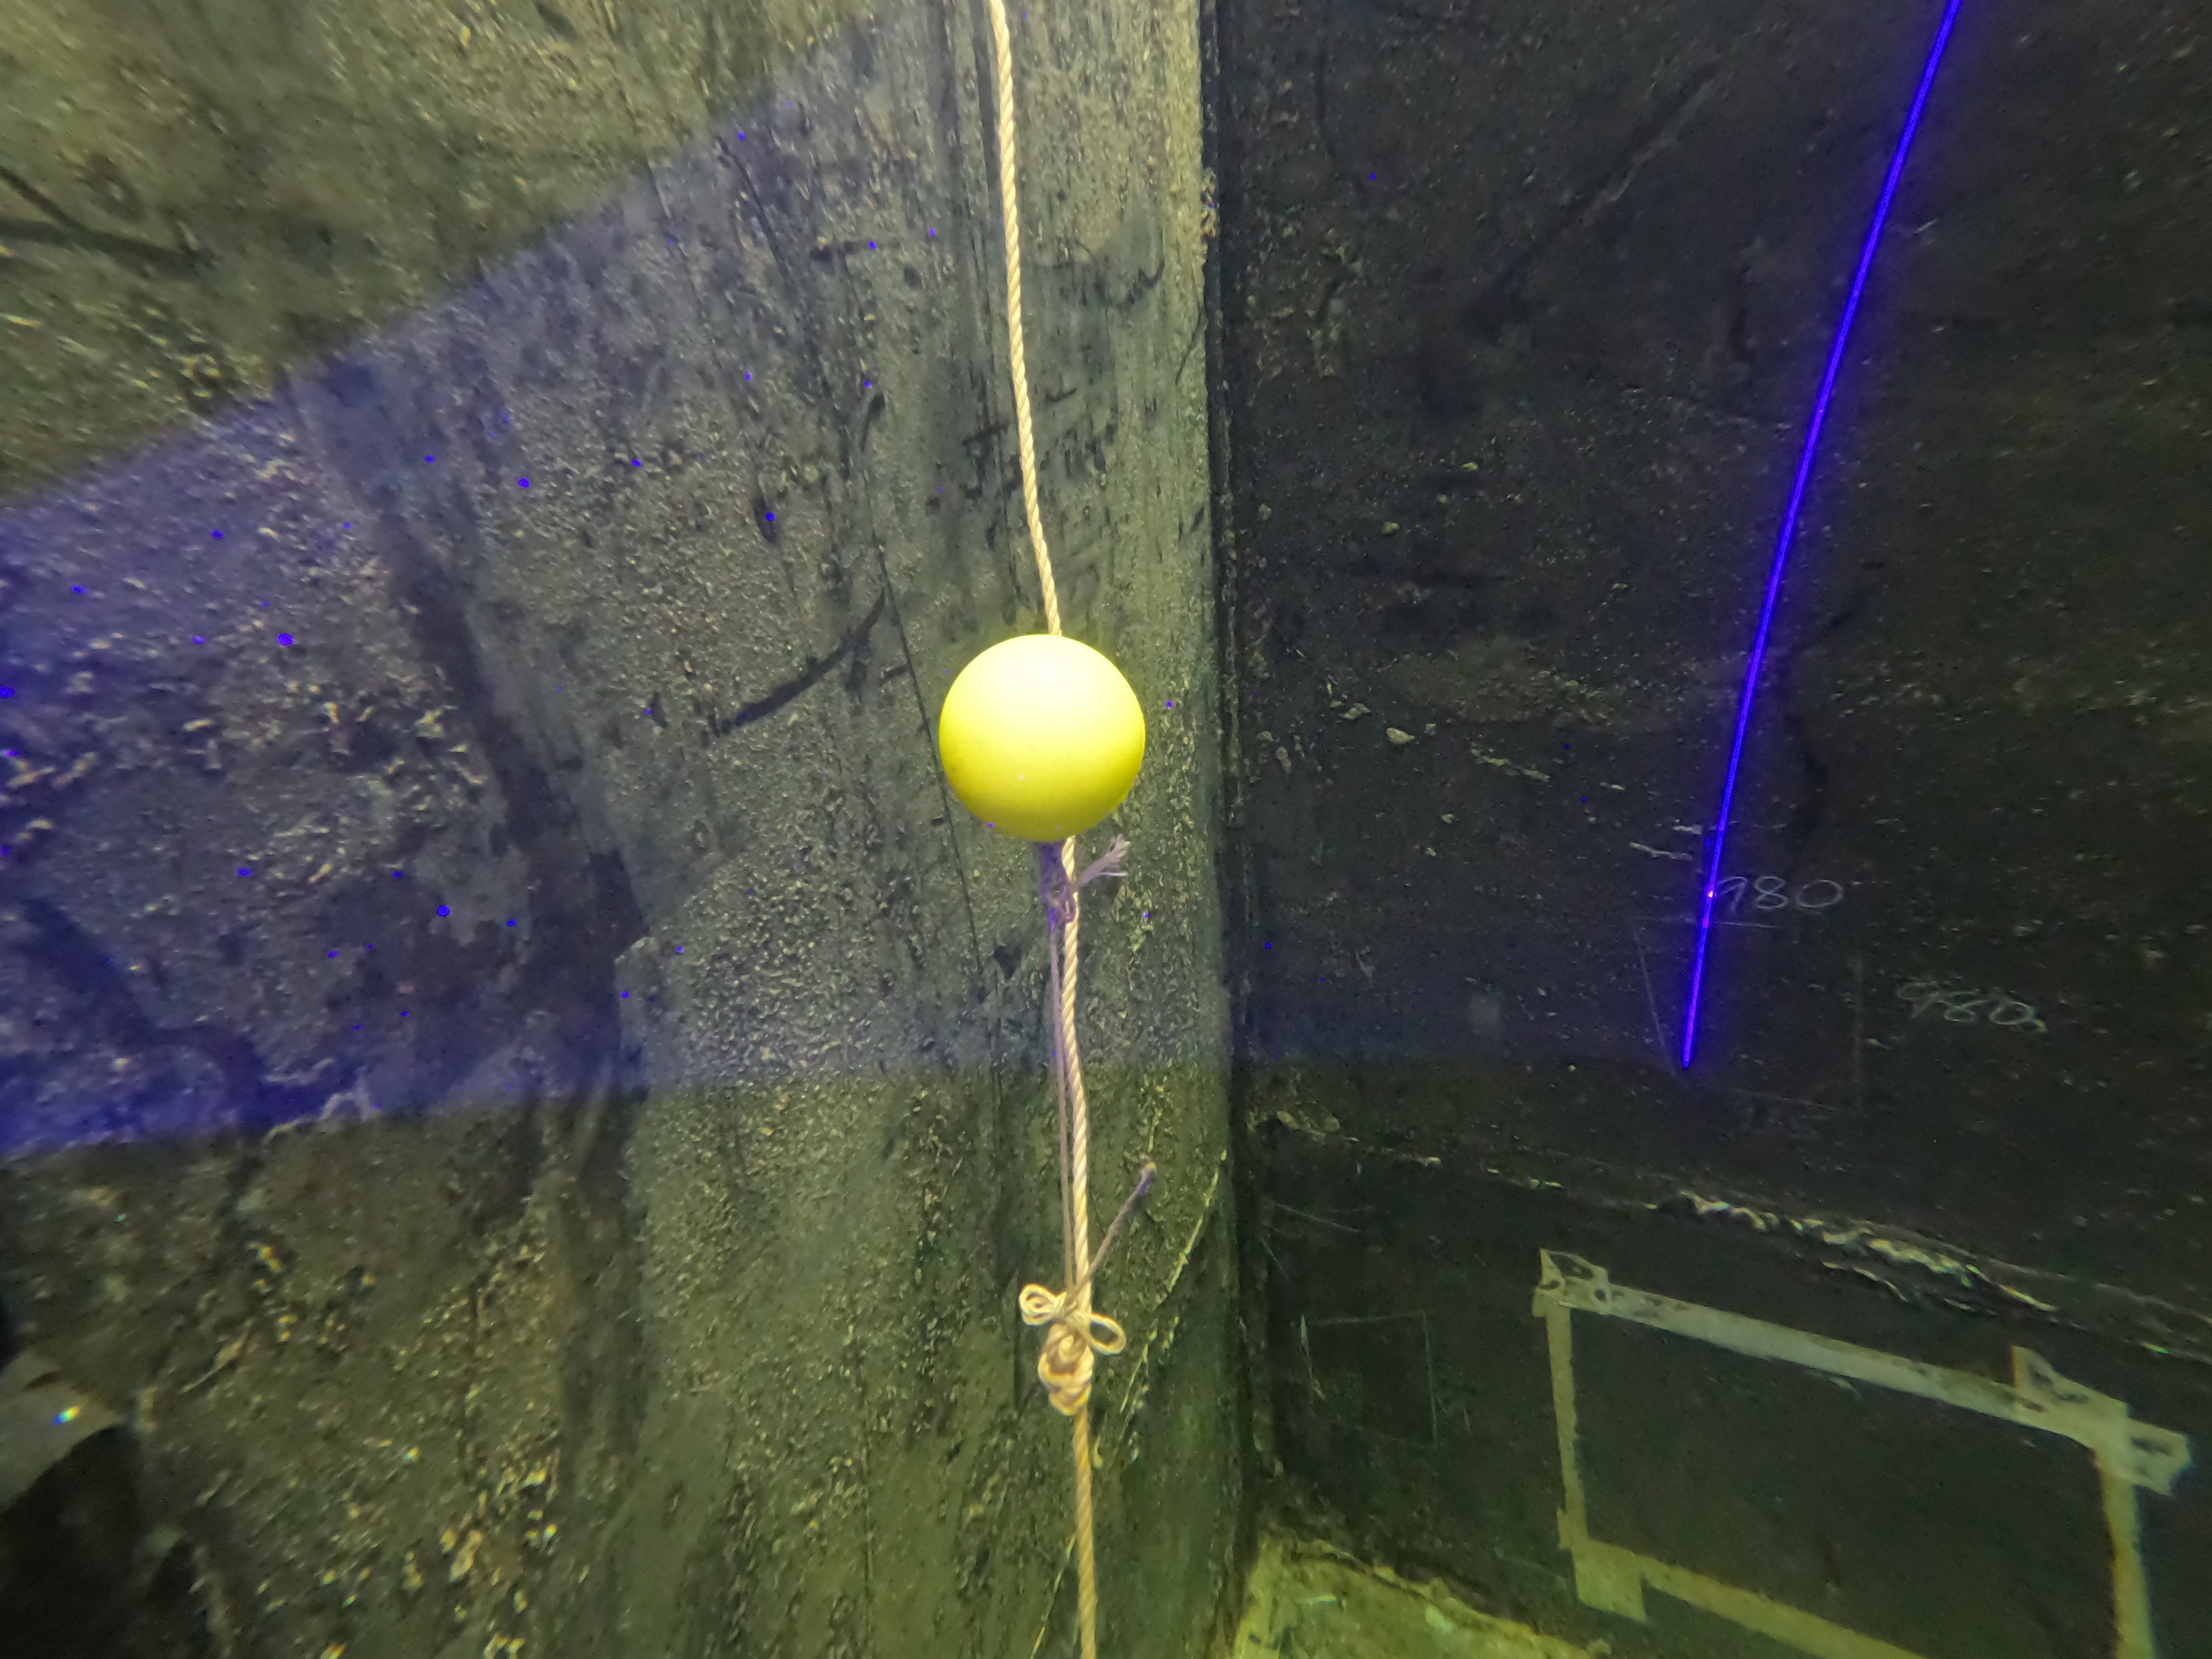

Supplement: Supplementary file 1265 [file G0032578.pdf › 6/G0032578.pdf]

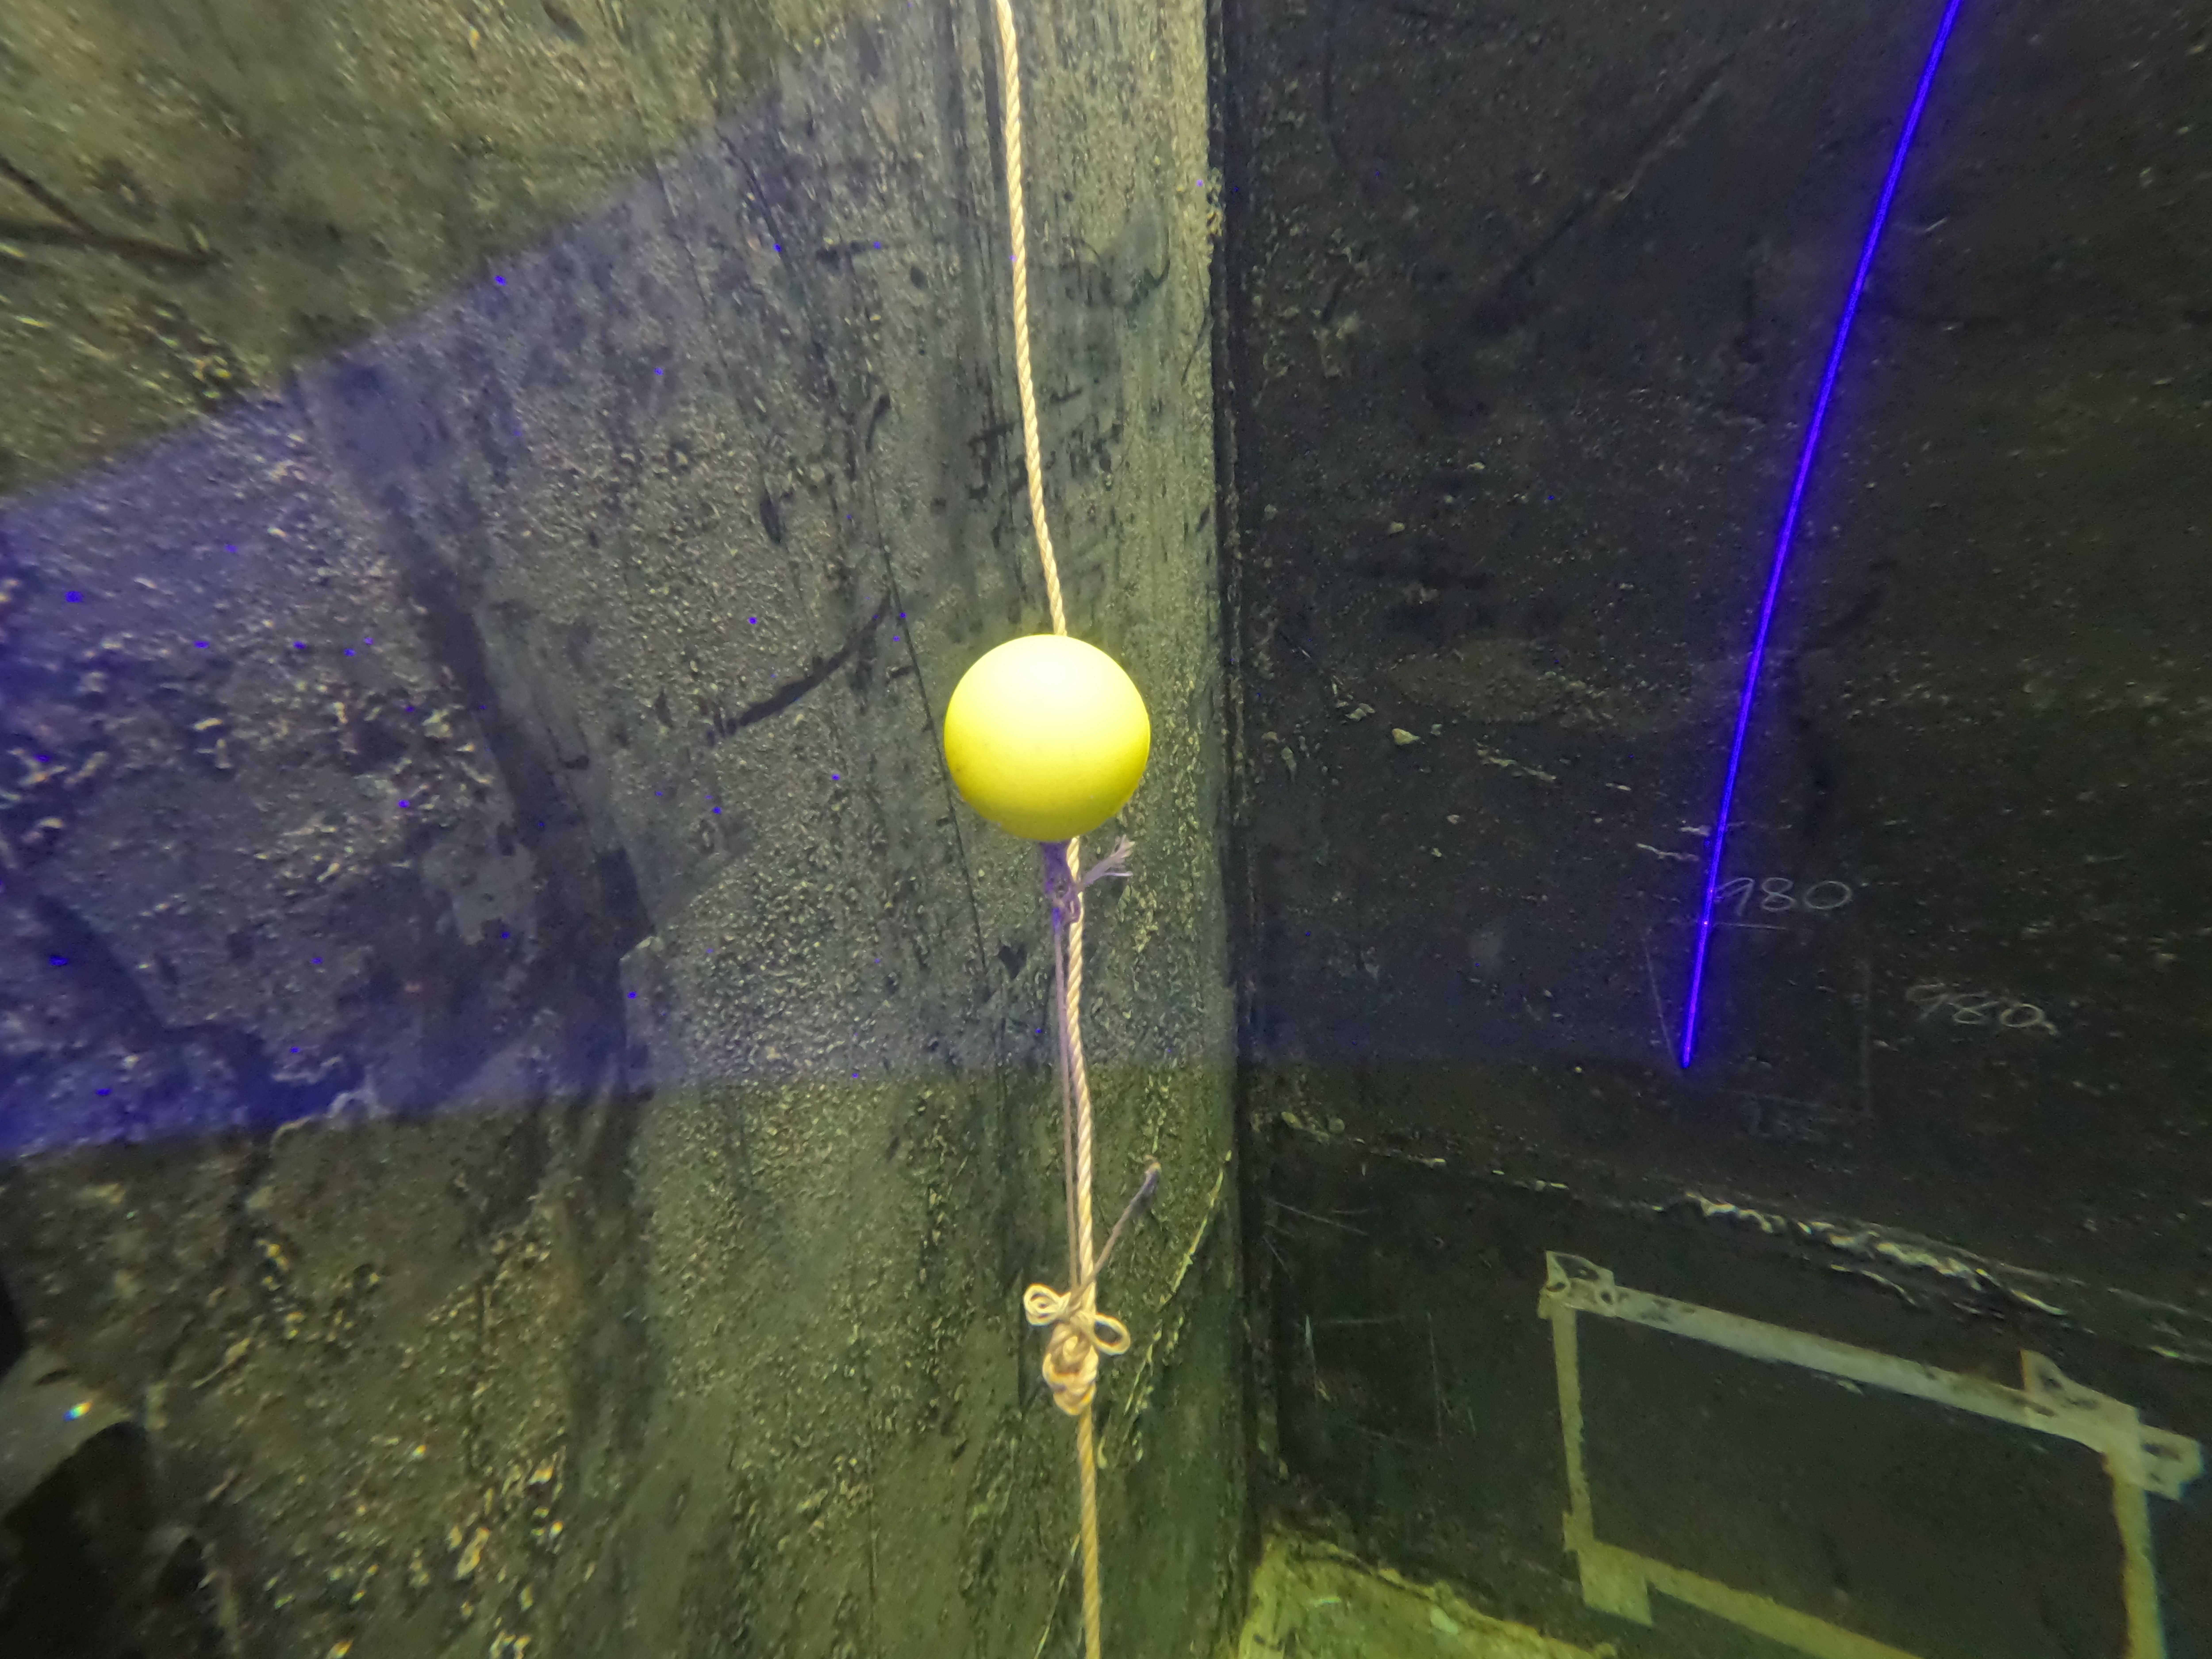

Supplement: Supplementary file 1266 [file G0032579.pdf › 6/G0032579.pdf]

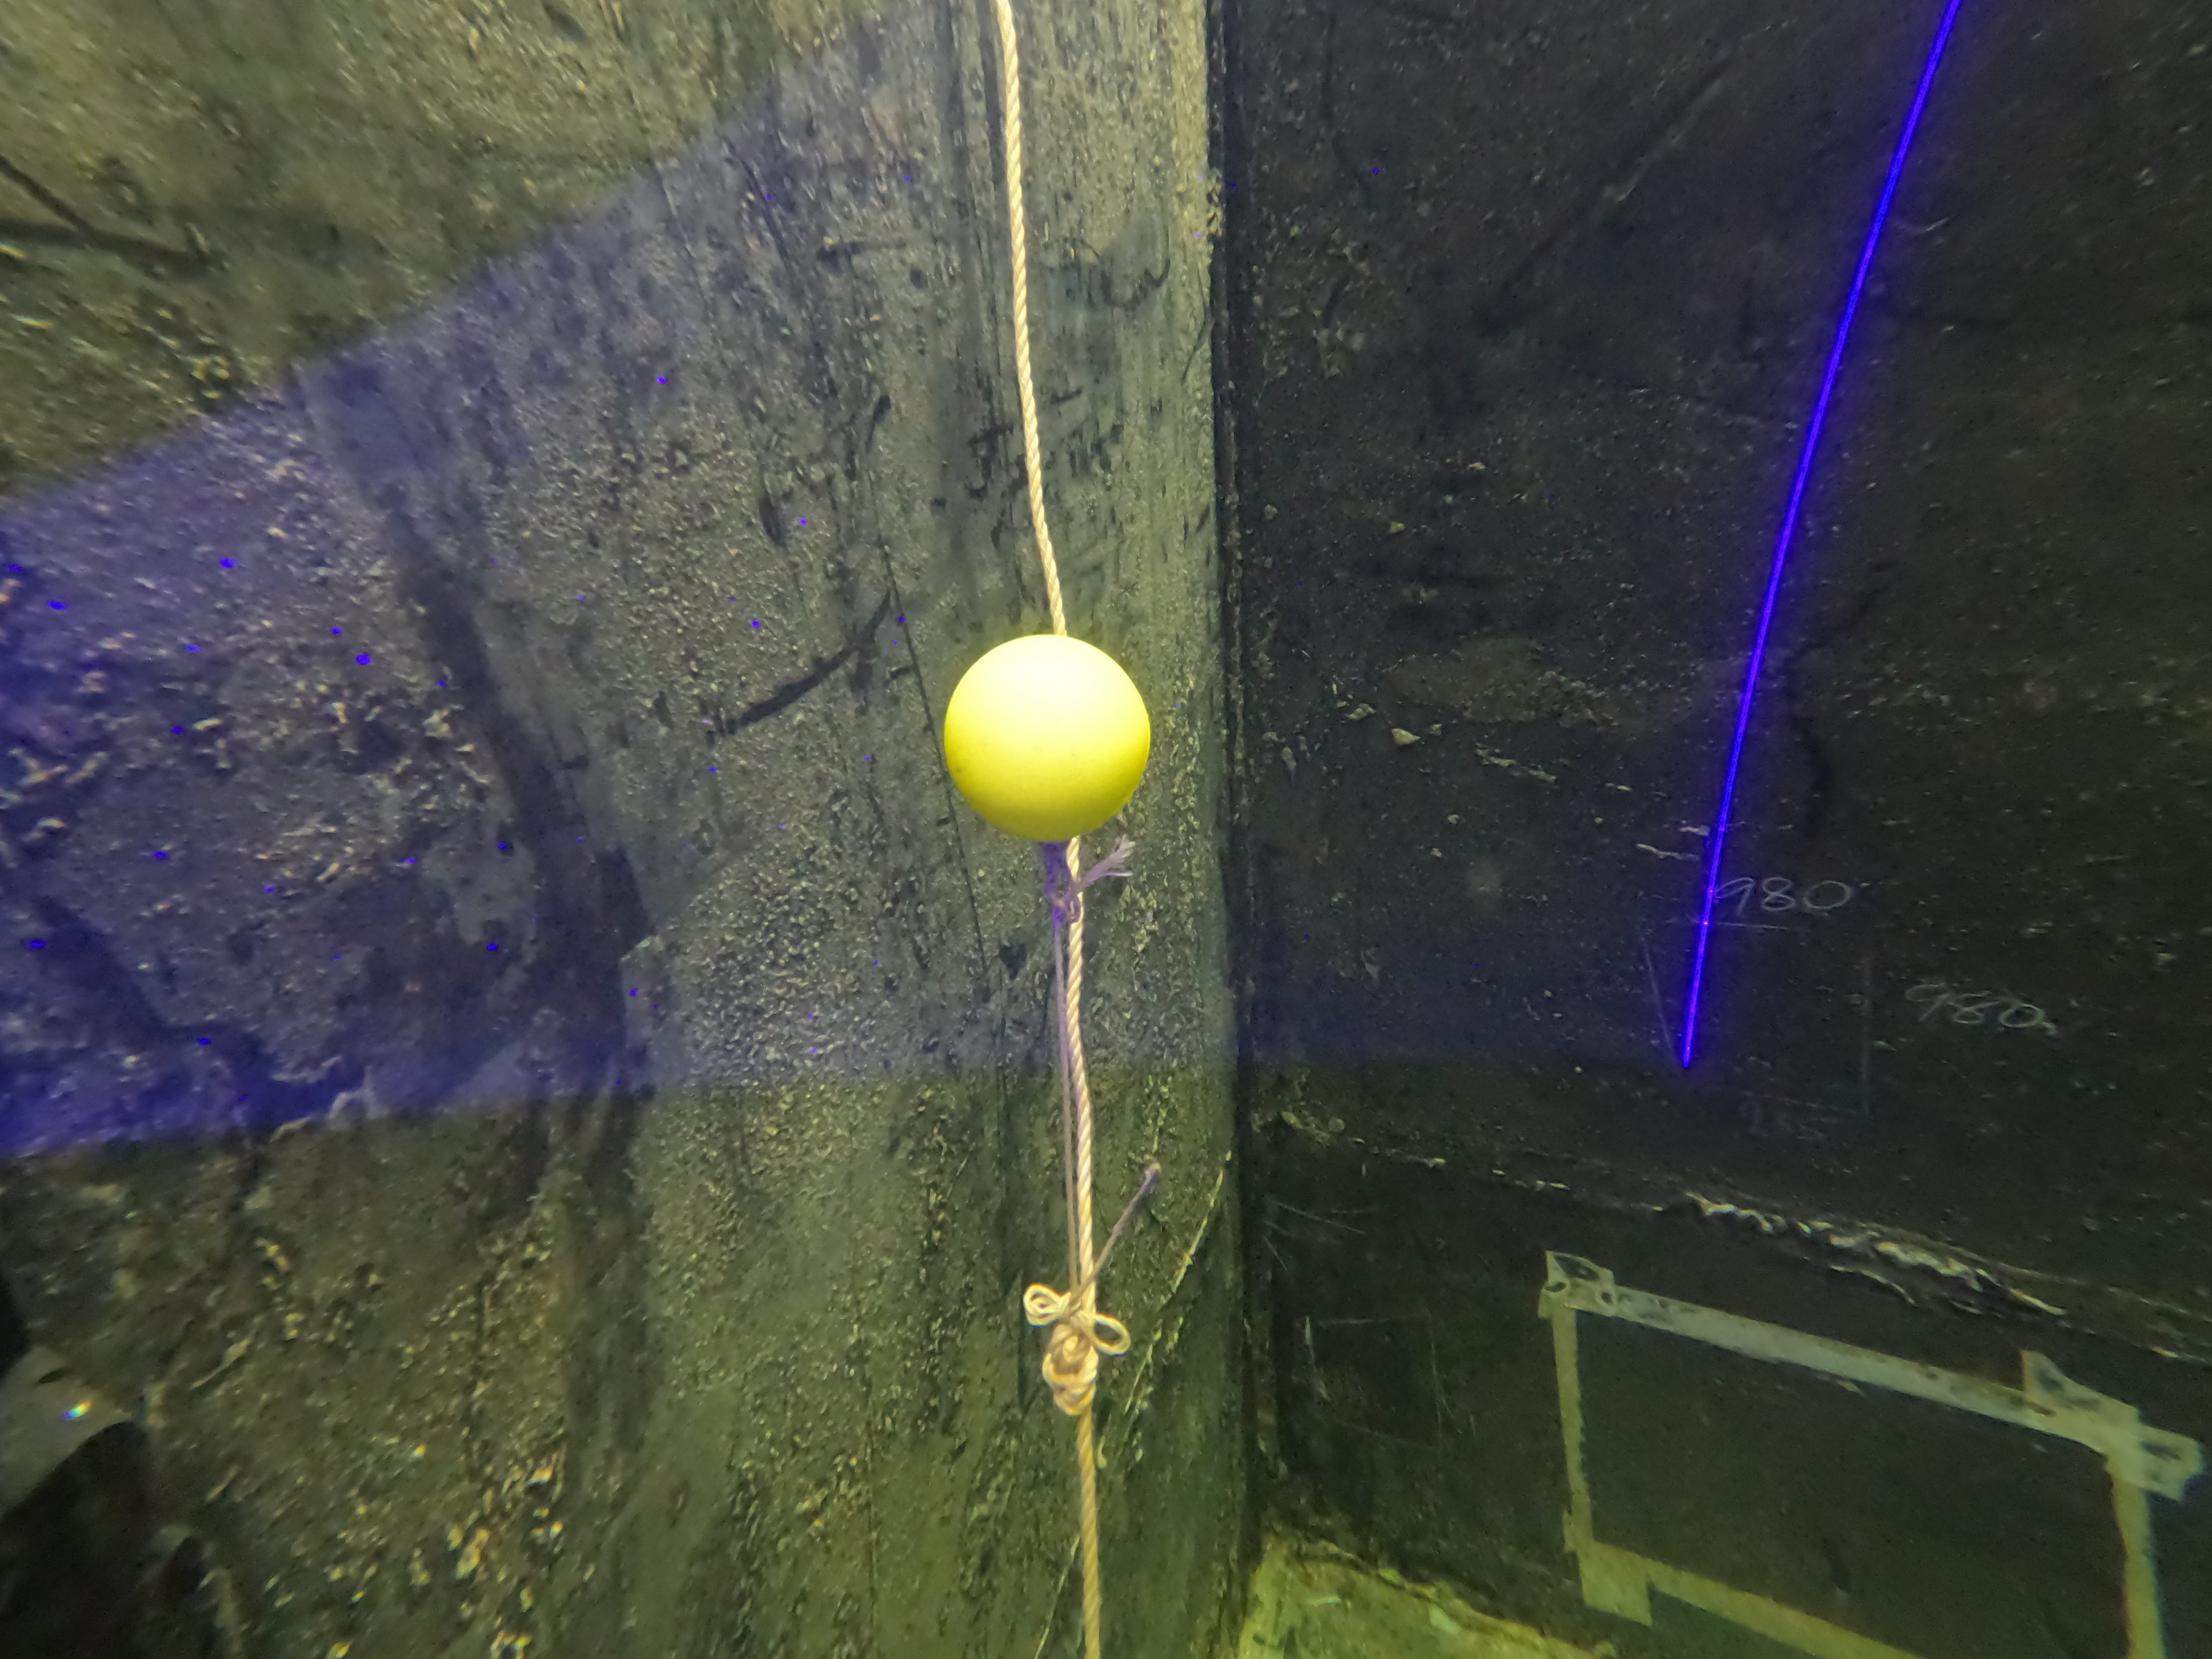

Supplement: Supplementary file 1267 [file G0032580.pdf › 6/G0032580.pdf]

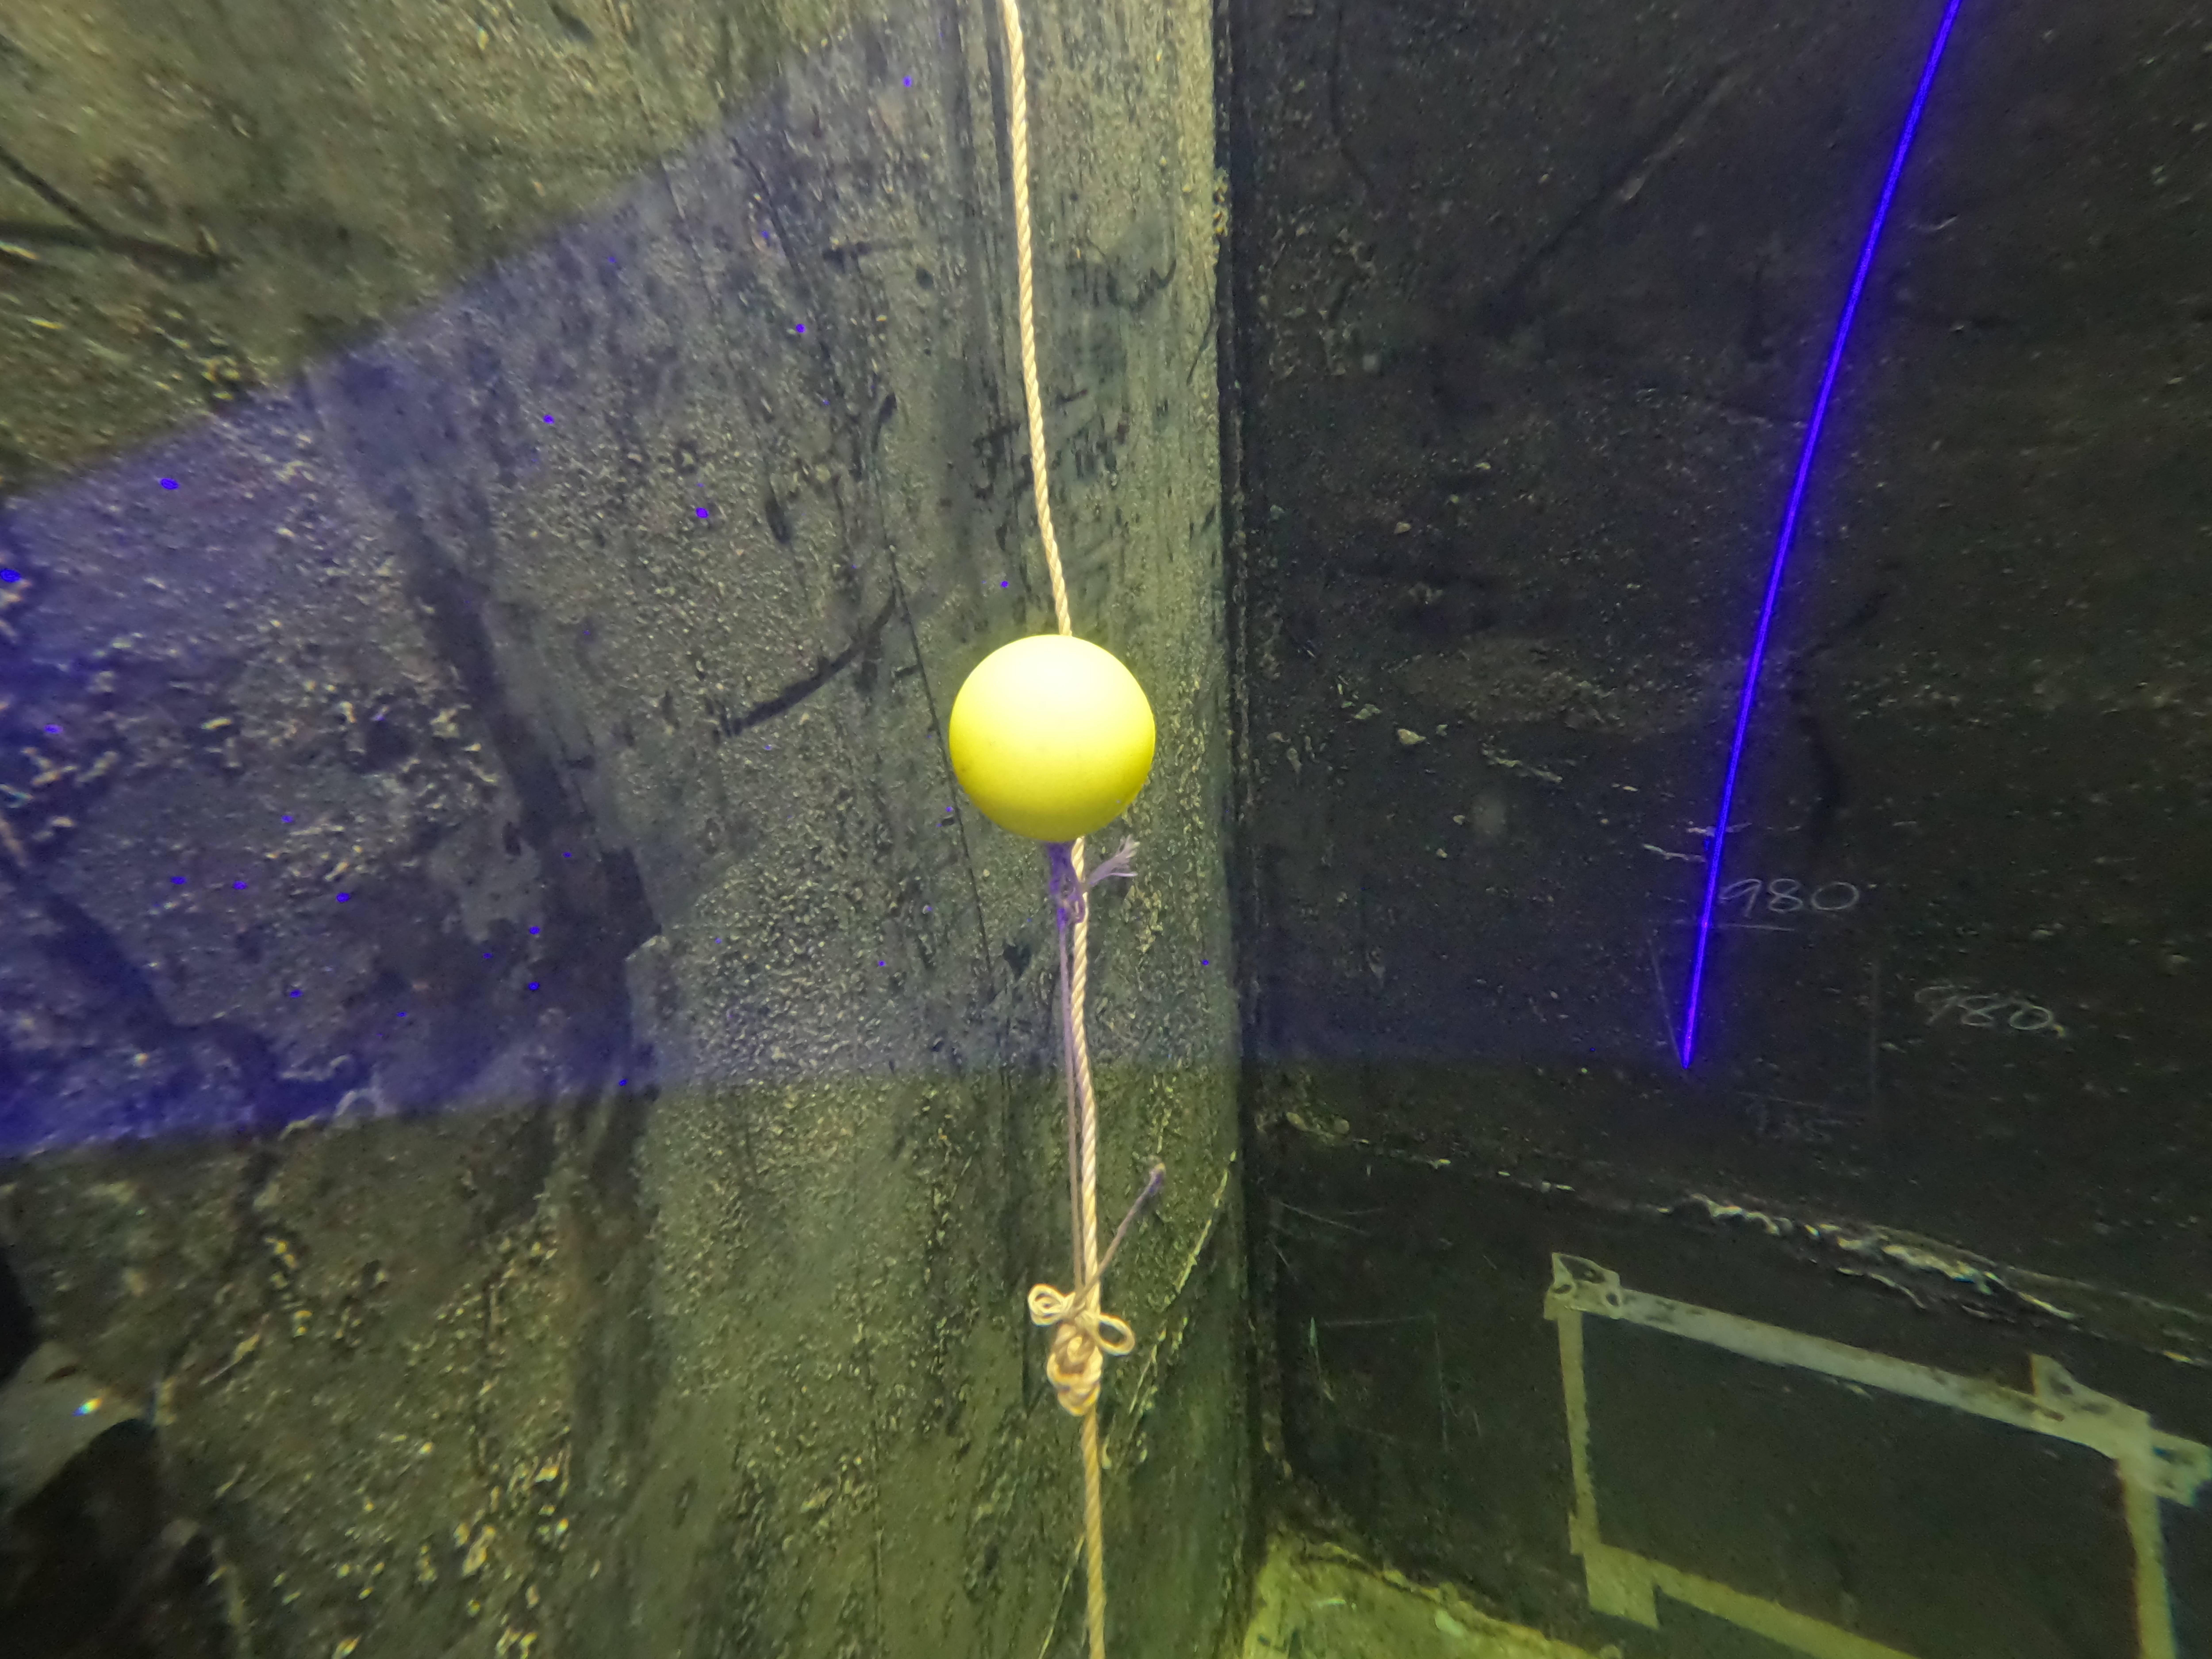

Supplement: Supplementary file 1268 [file G0032581.pdf › 6/G0032581.pdf]

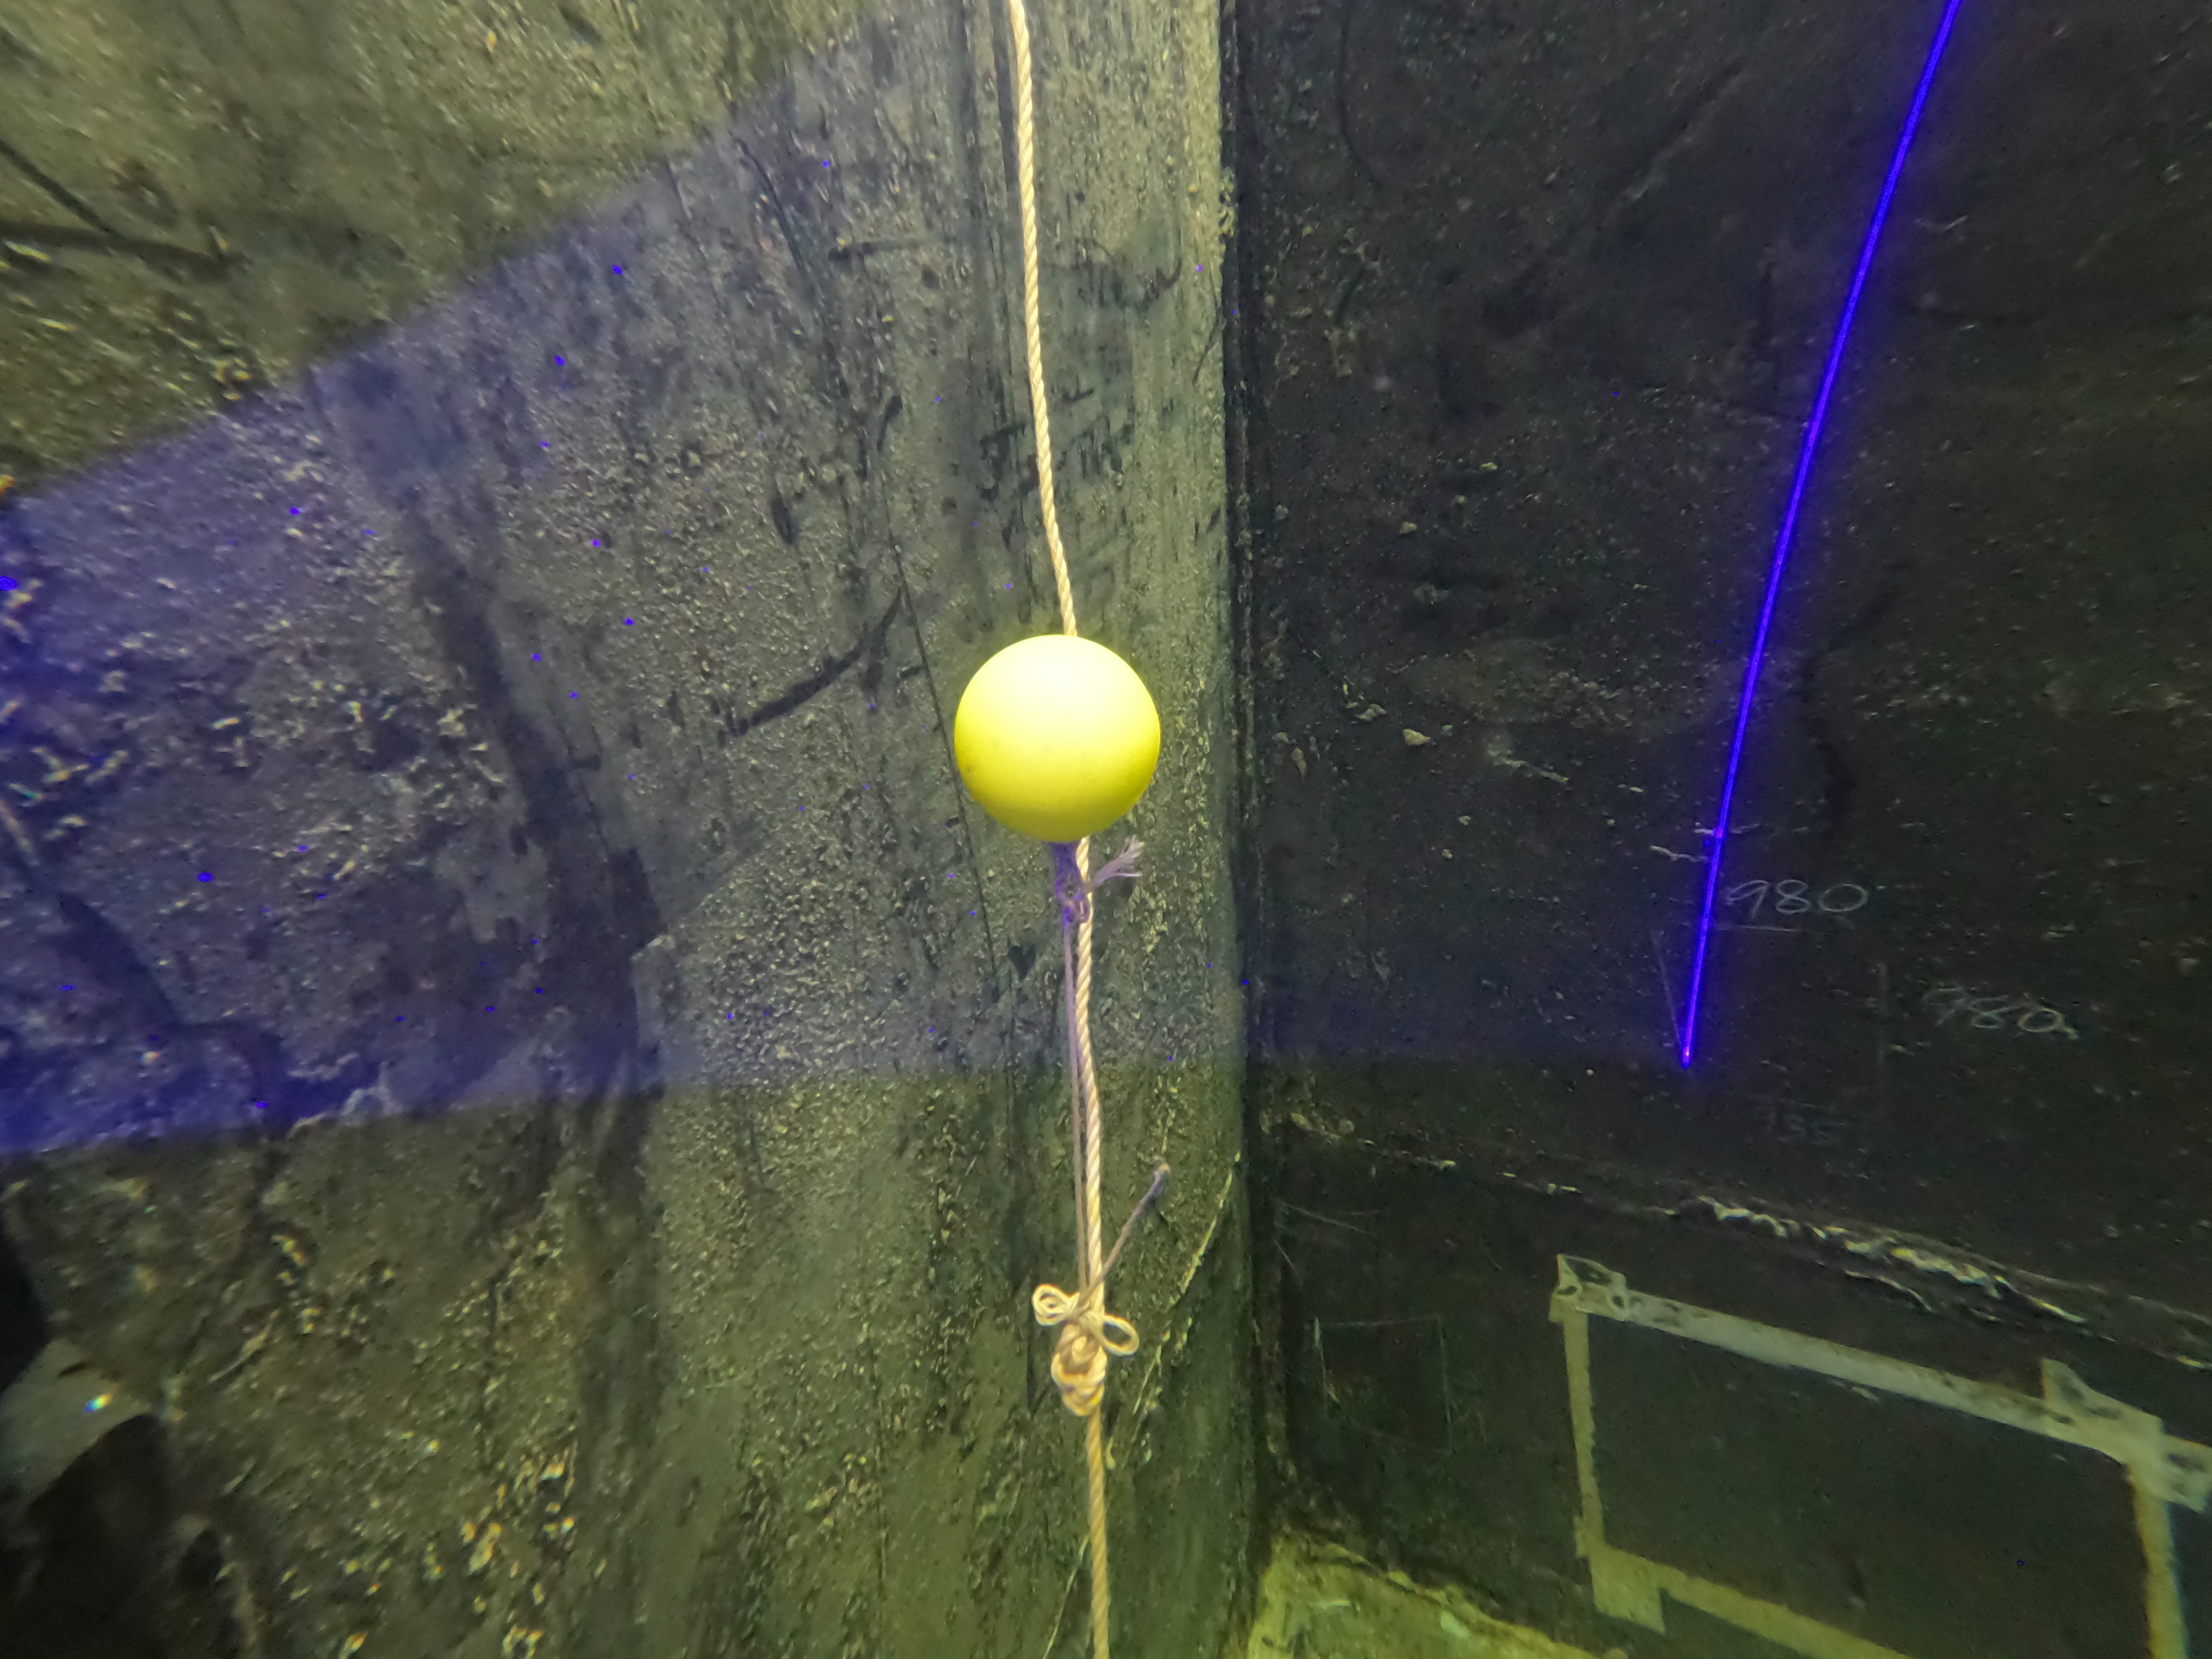

Supplement: Supplementary file 1269 [file G0032582.pdf › 6/G0032582.pdf]

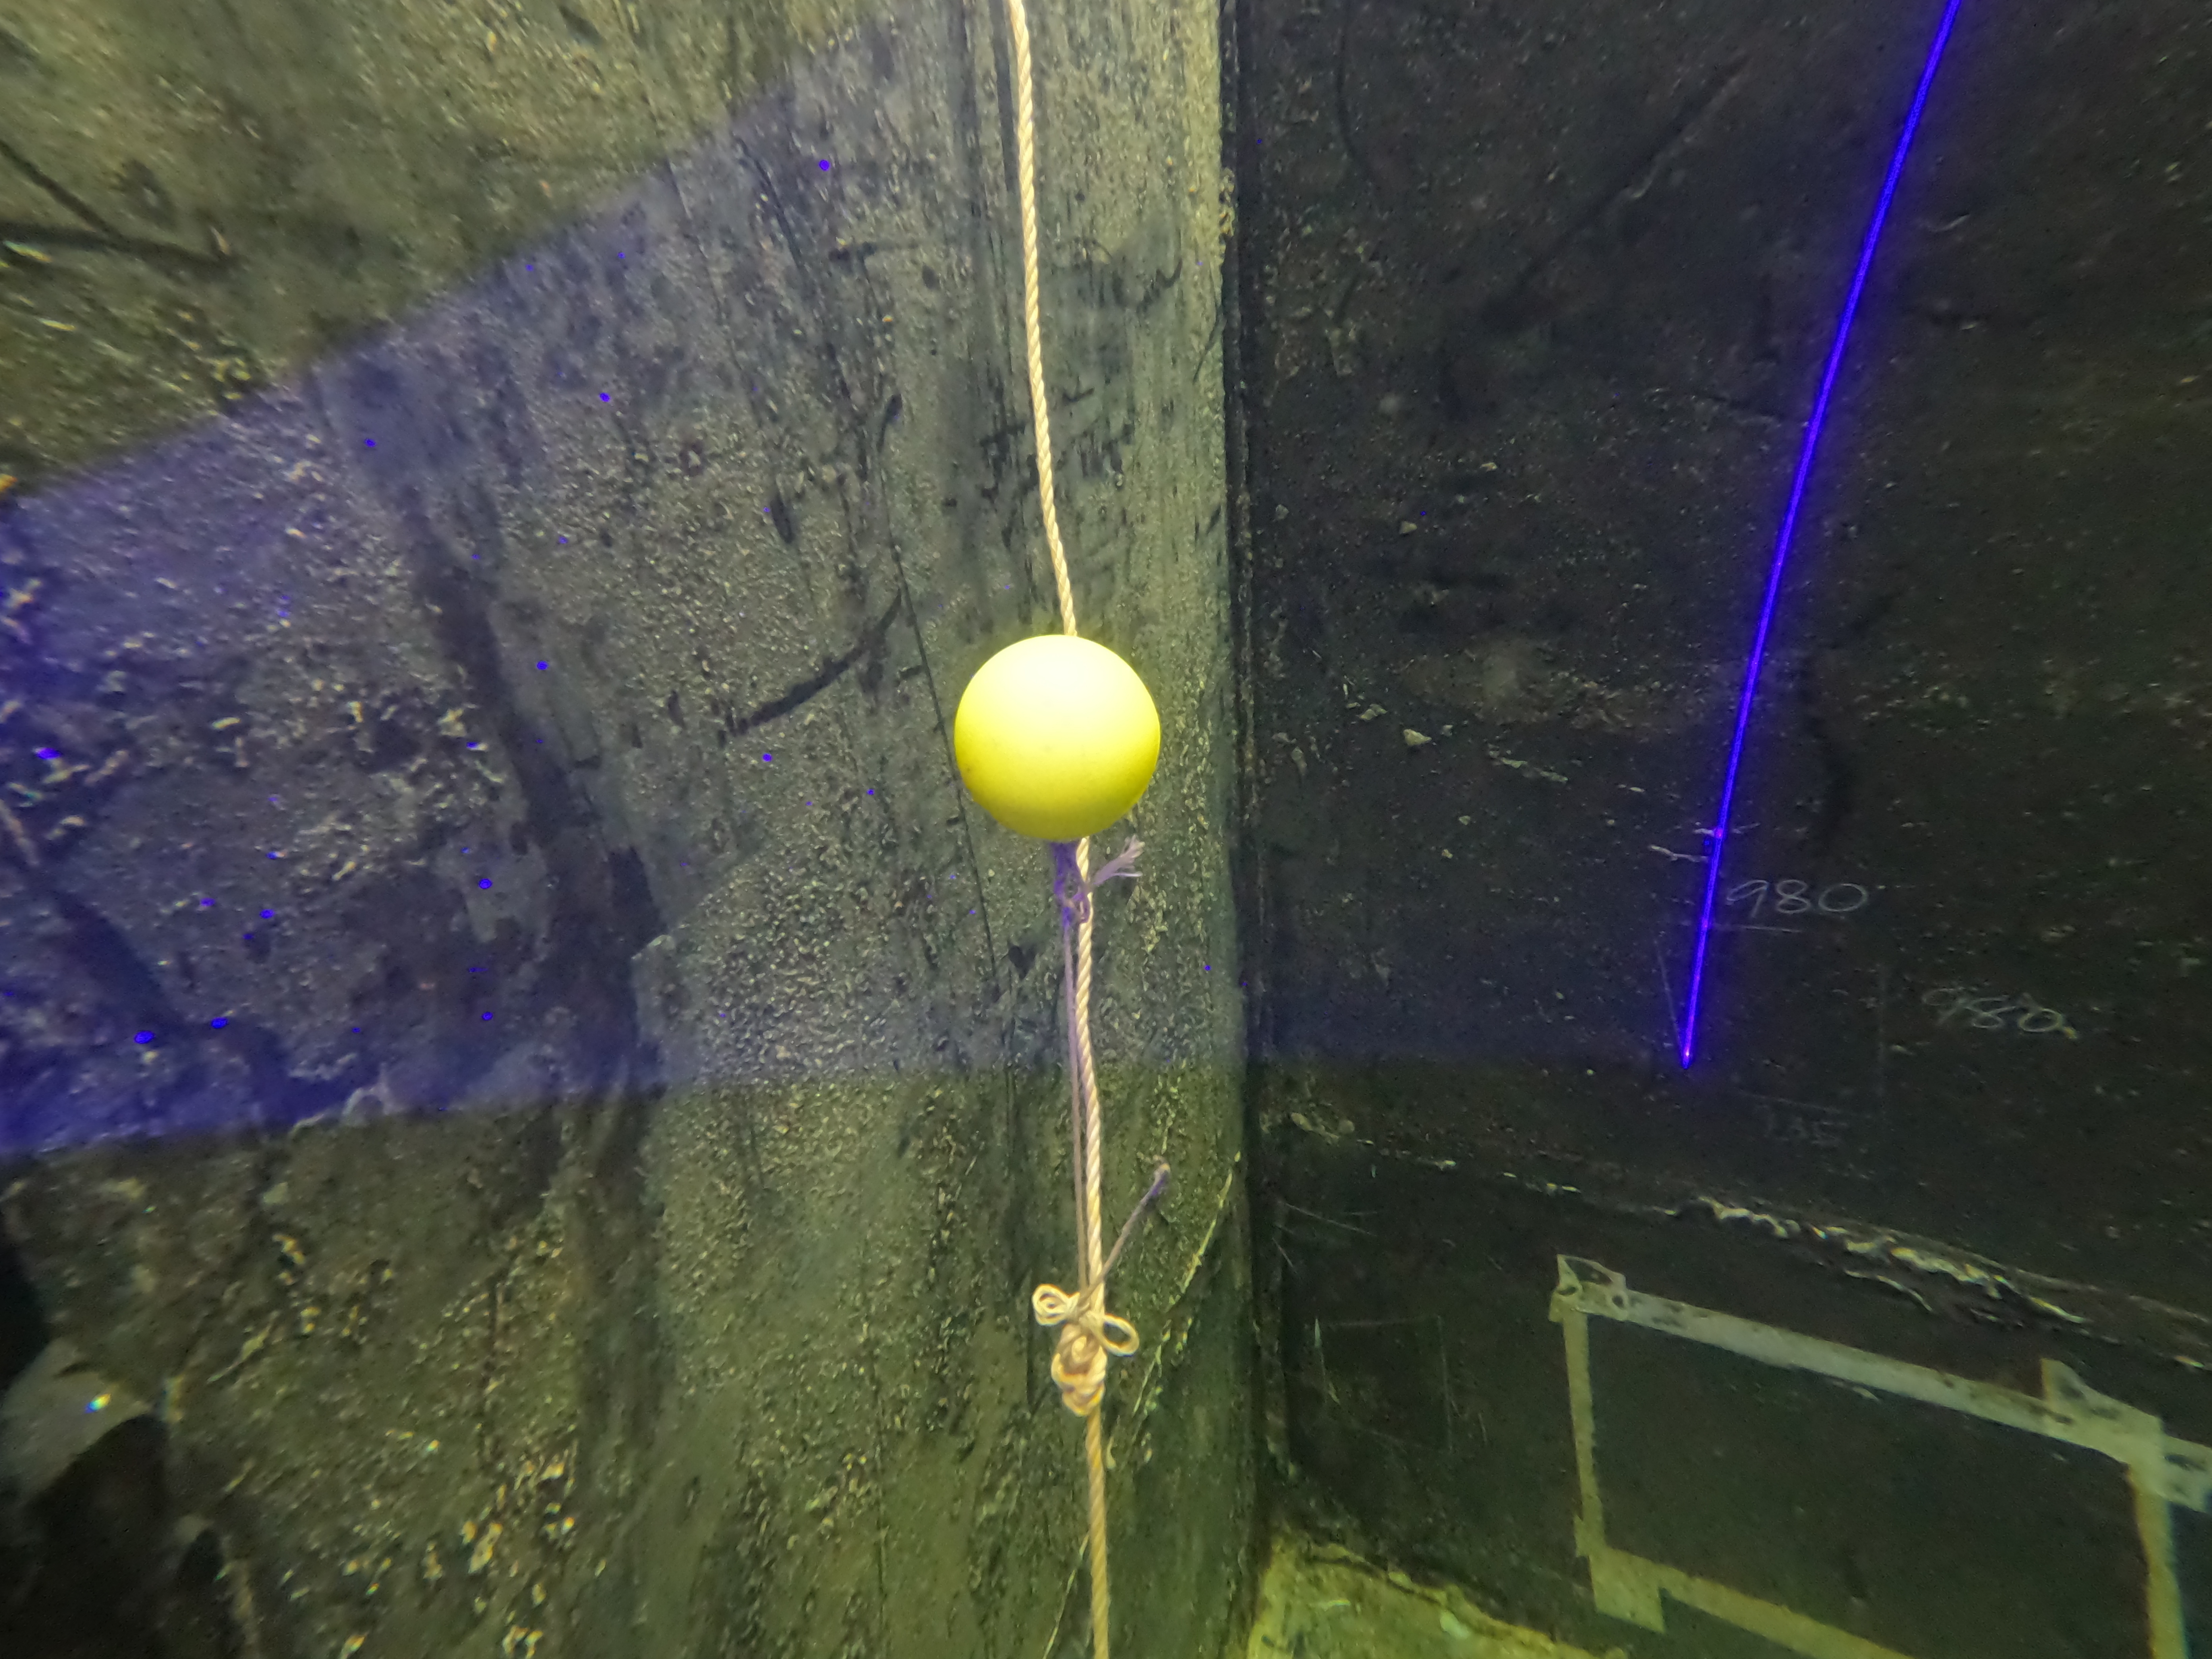

Supplement: Supplementary file 1270 [file G0032583.pdf › 6/G0032583.pdf]

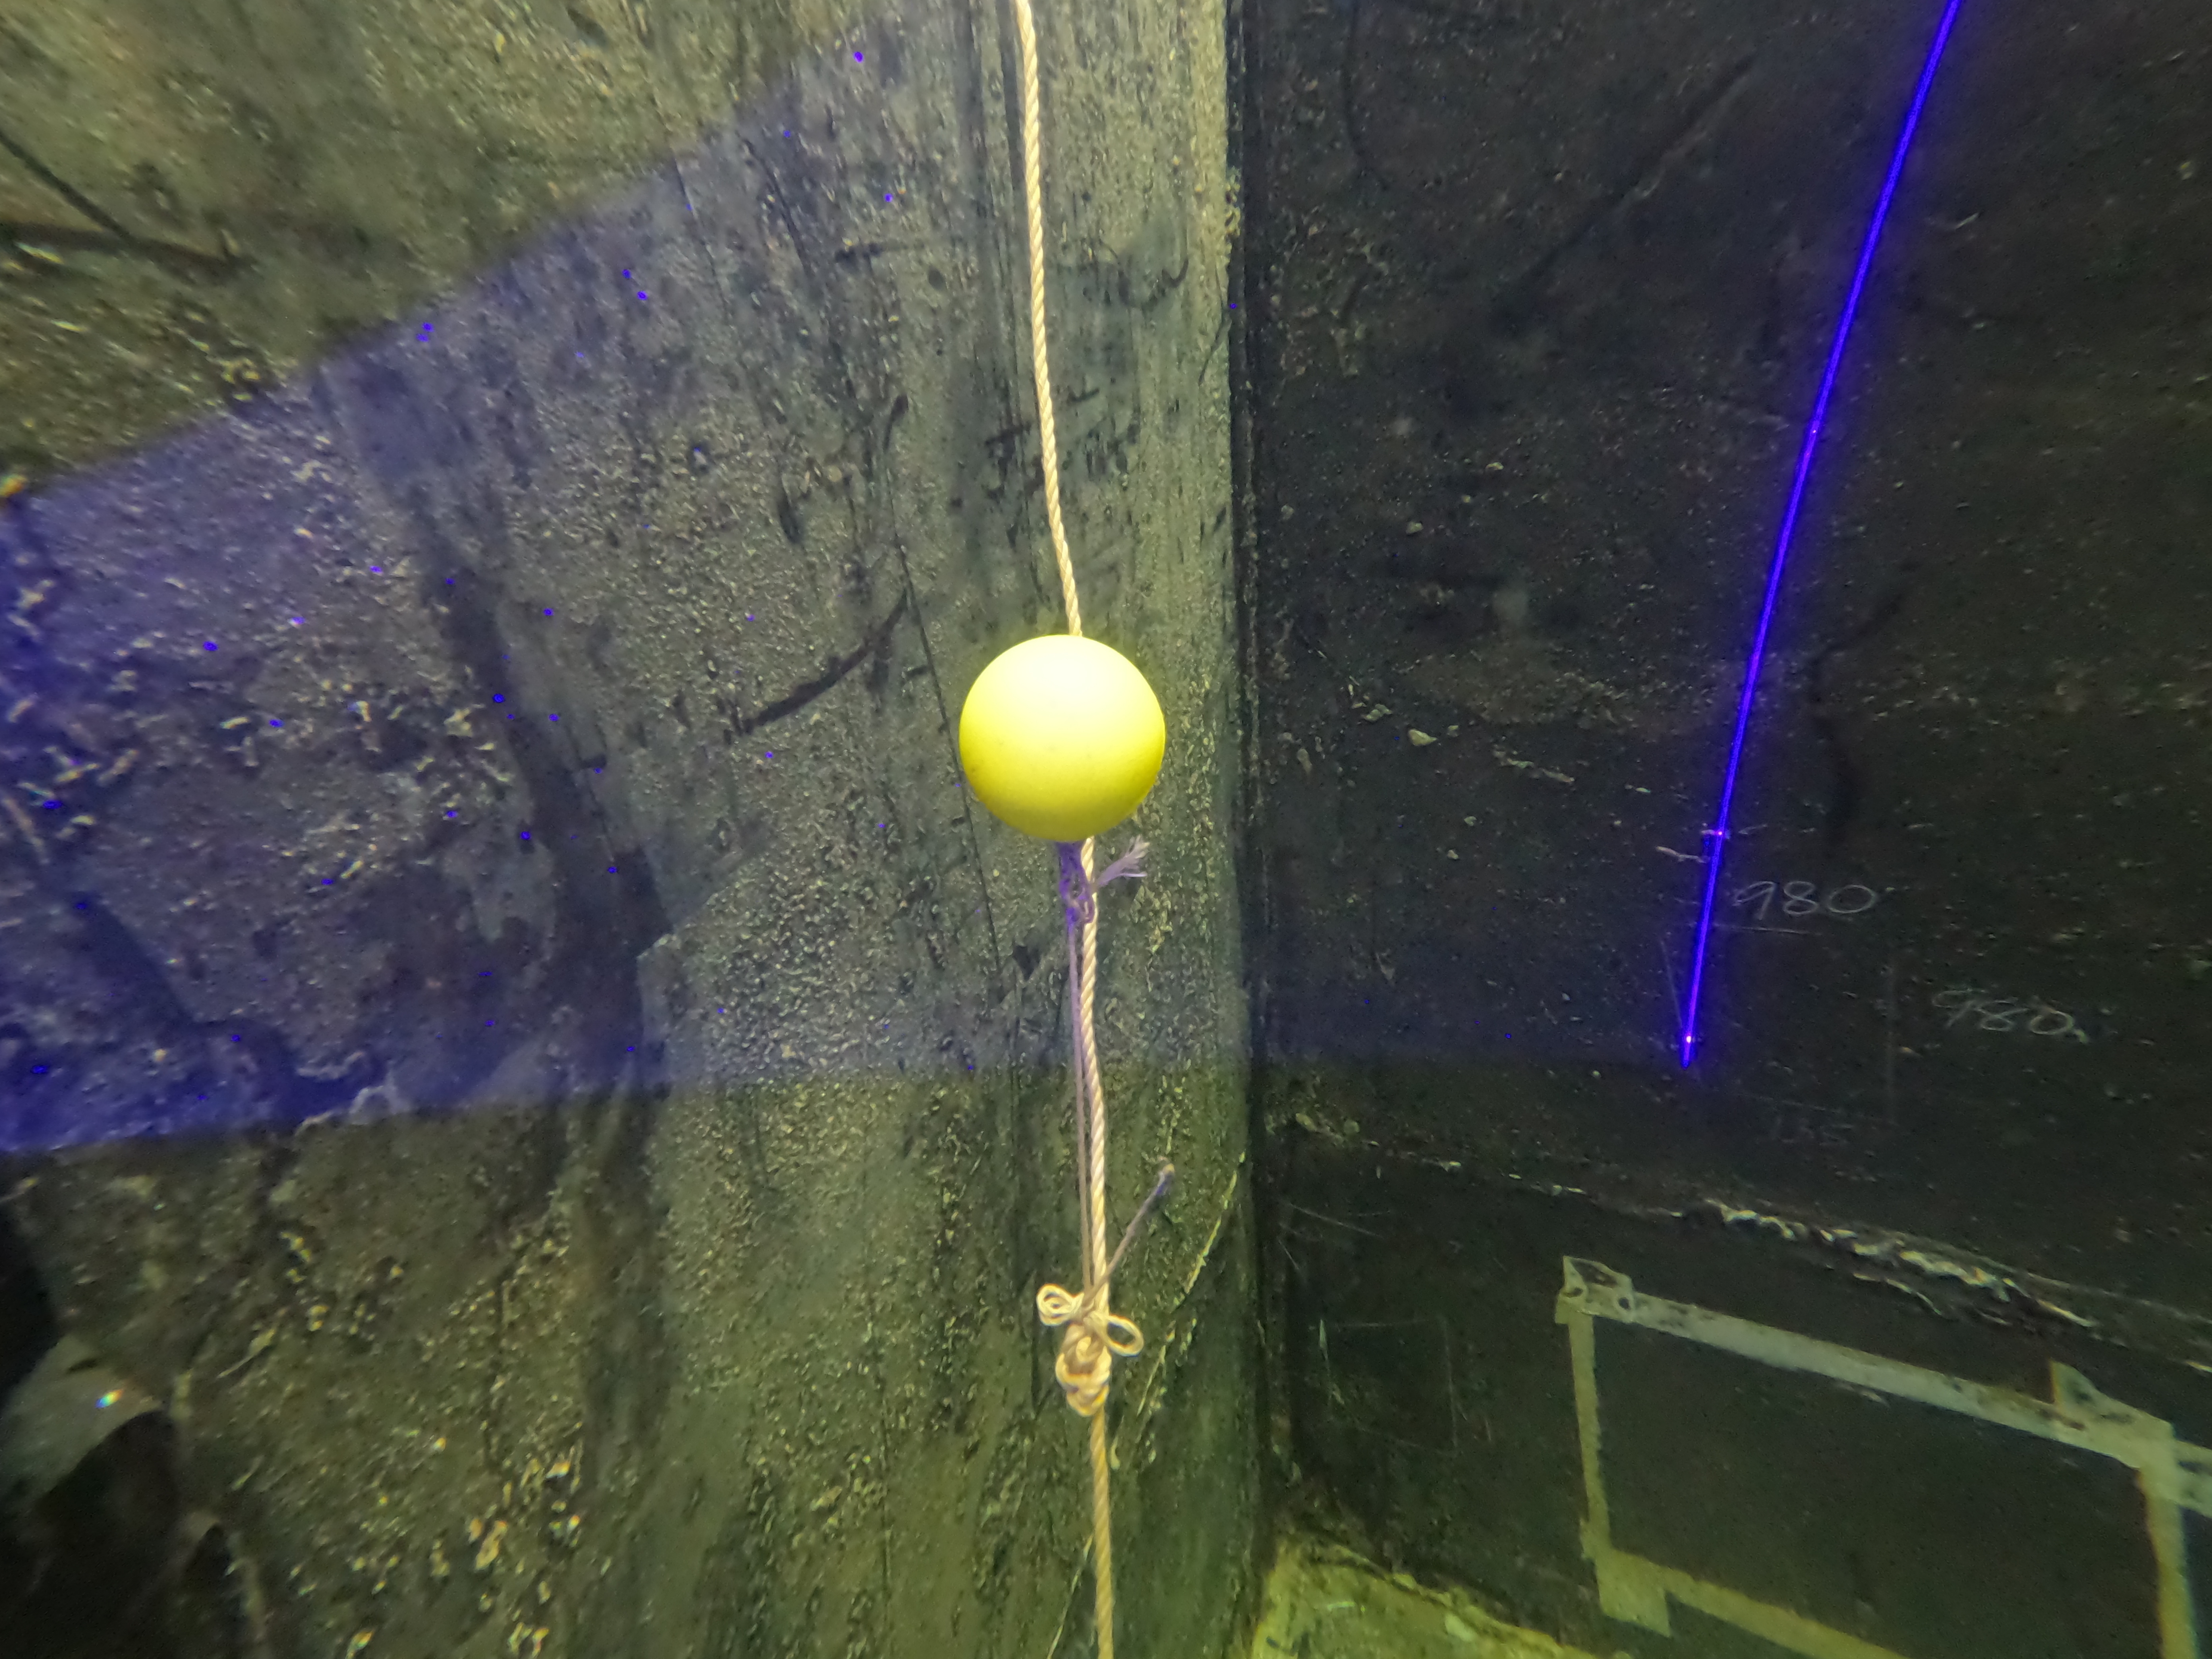

Supplement: Supplementary file 1271 [file G0032584.pdf › 6/G0032584.pdf]

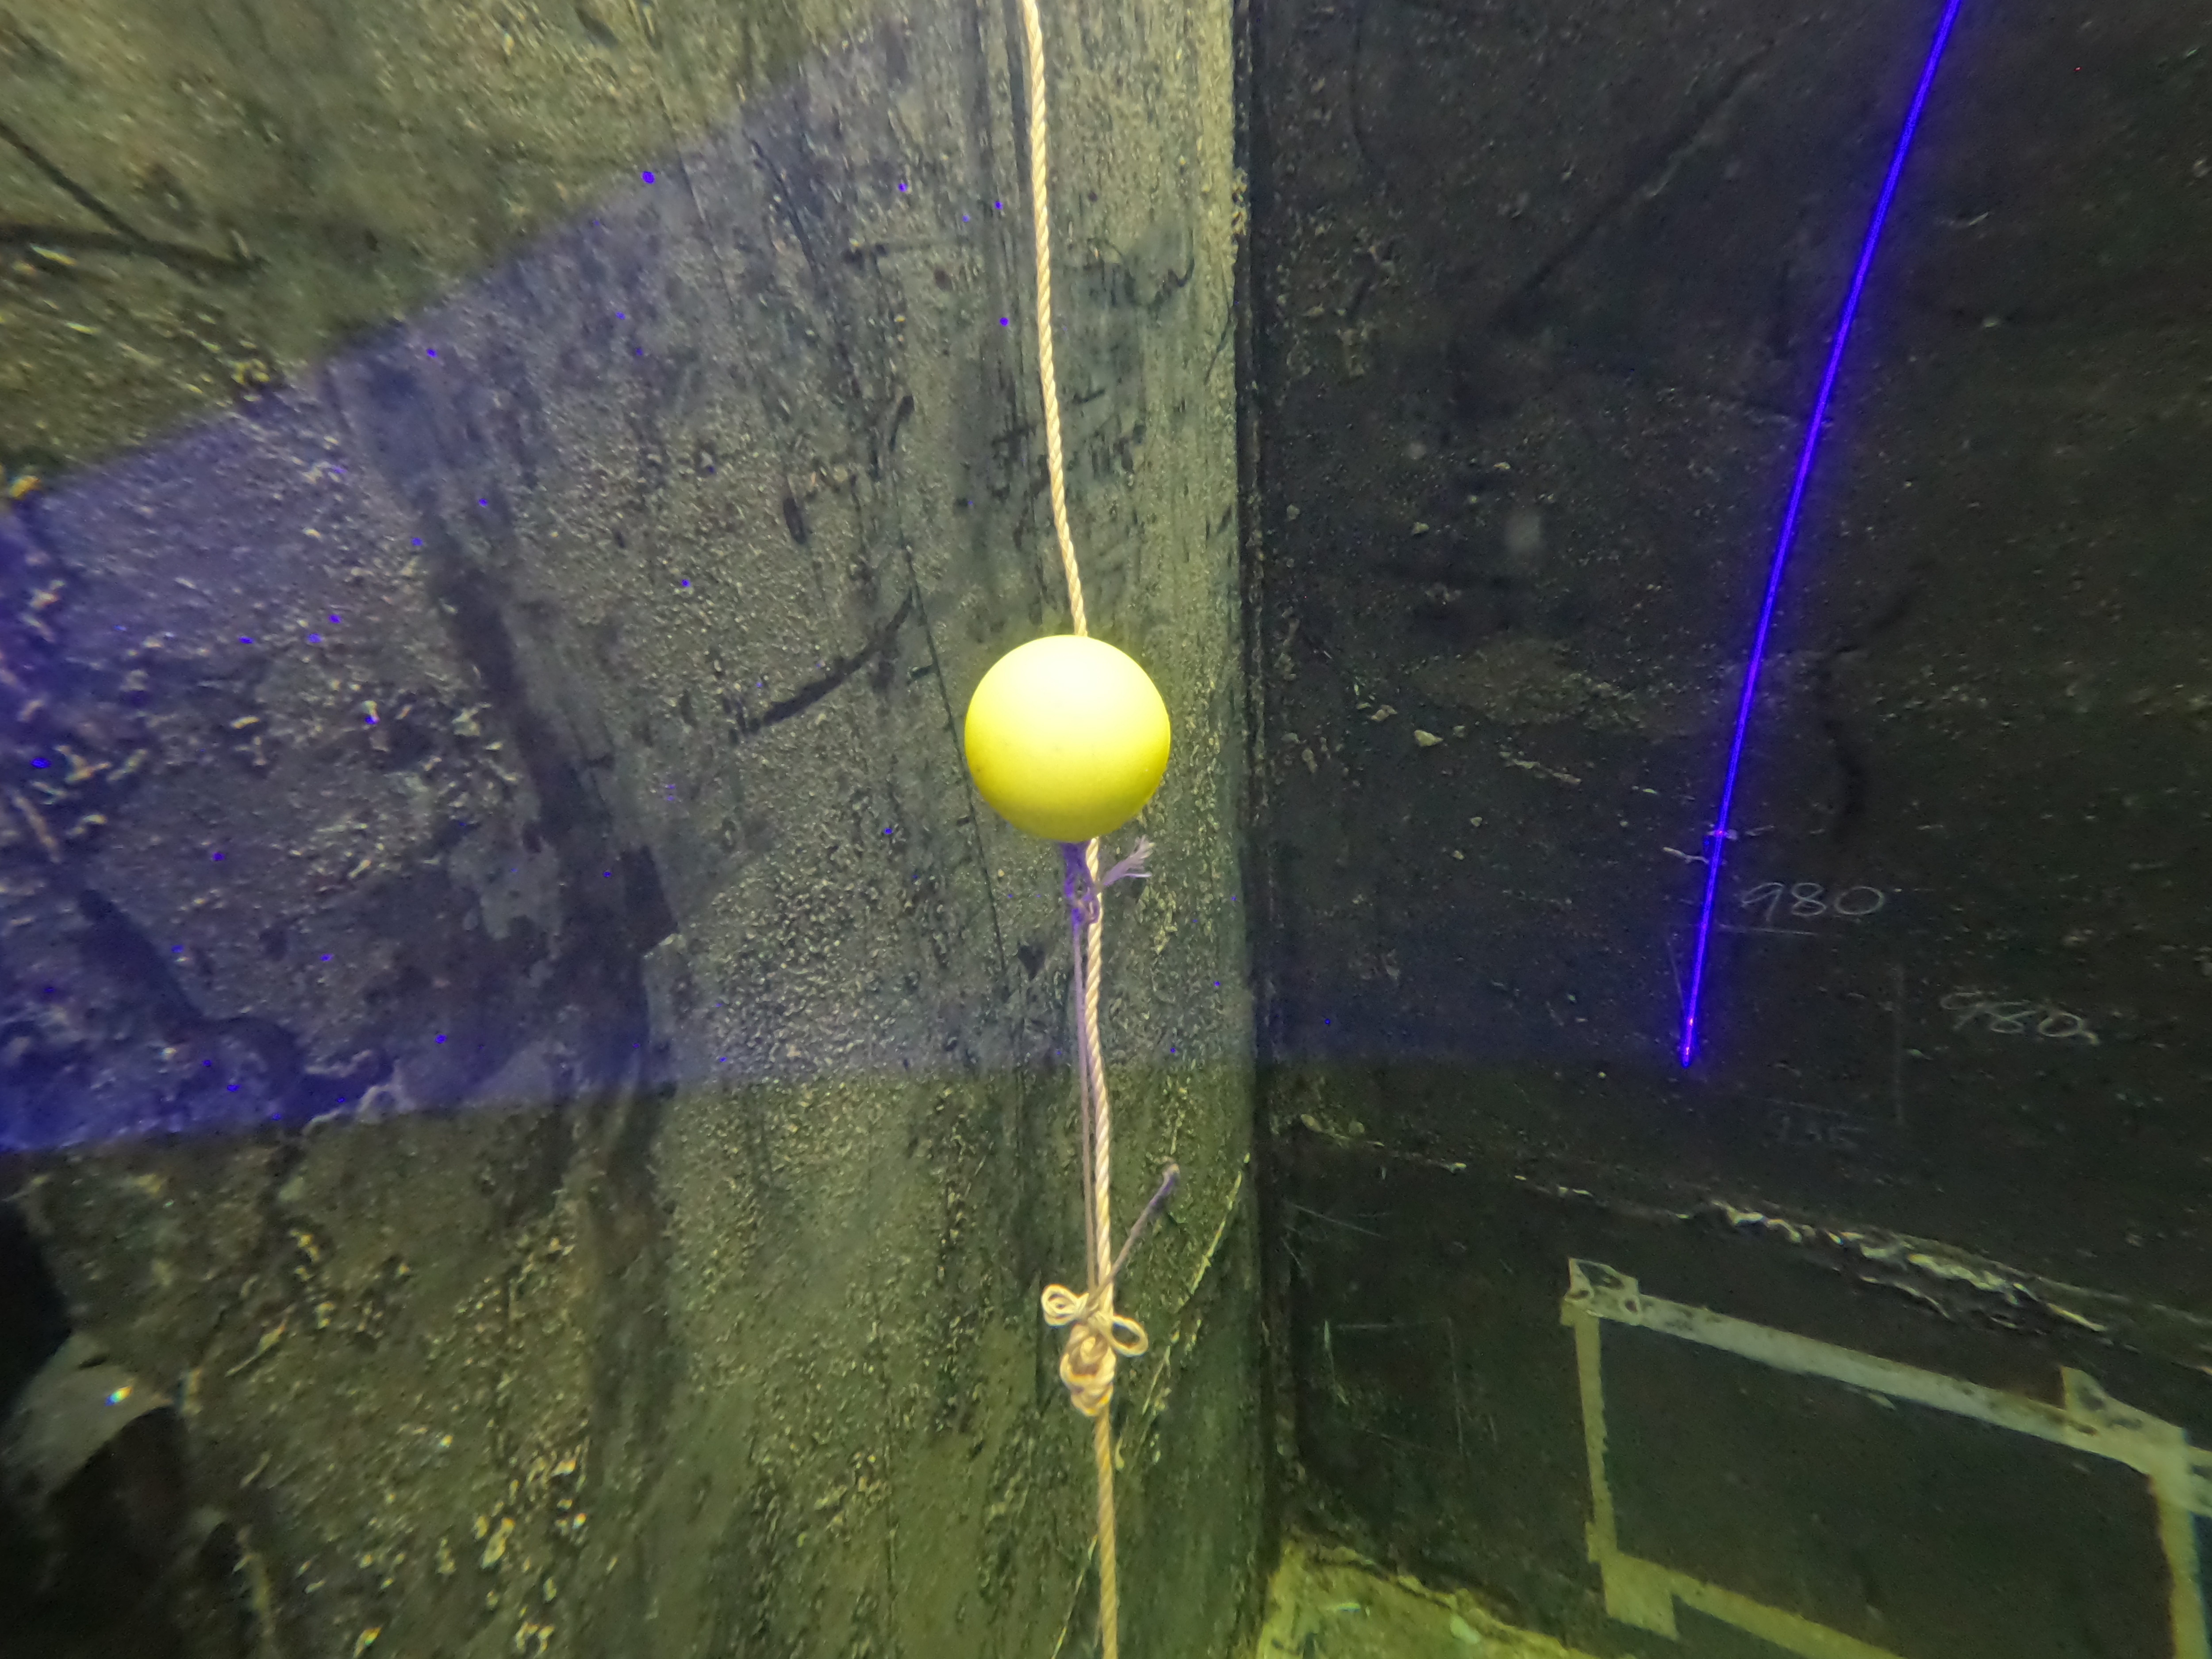

Supplement: Supplementary file 1272 [file G0032585.pdf › 6/G0032585.pdf]

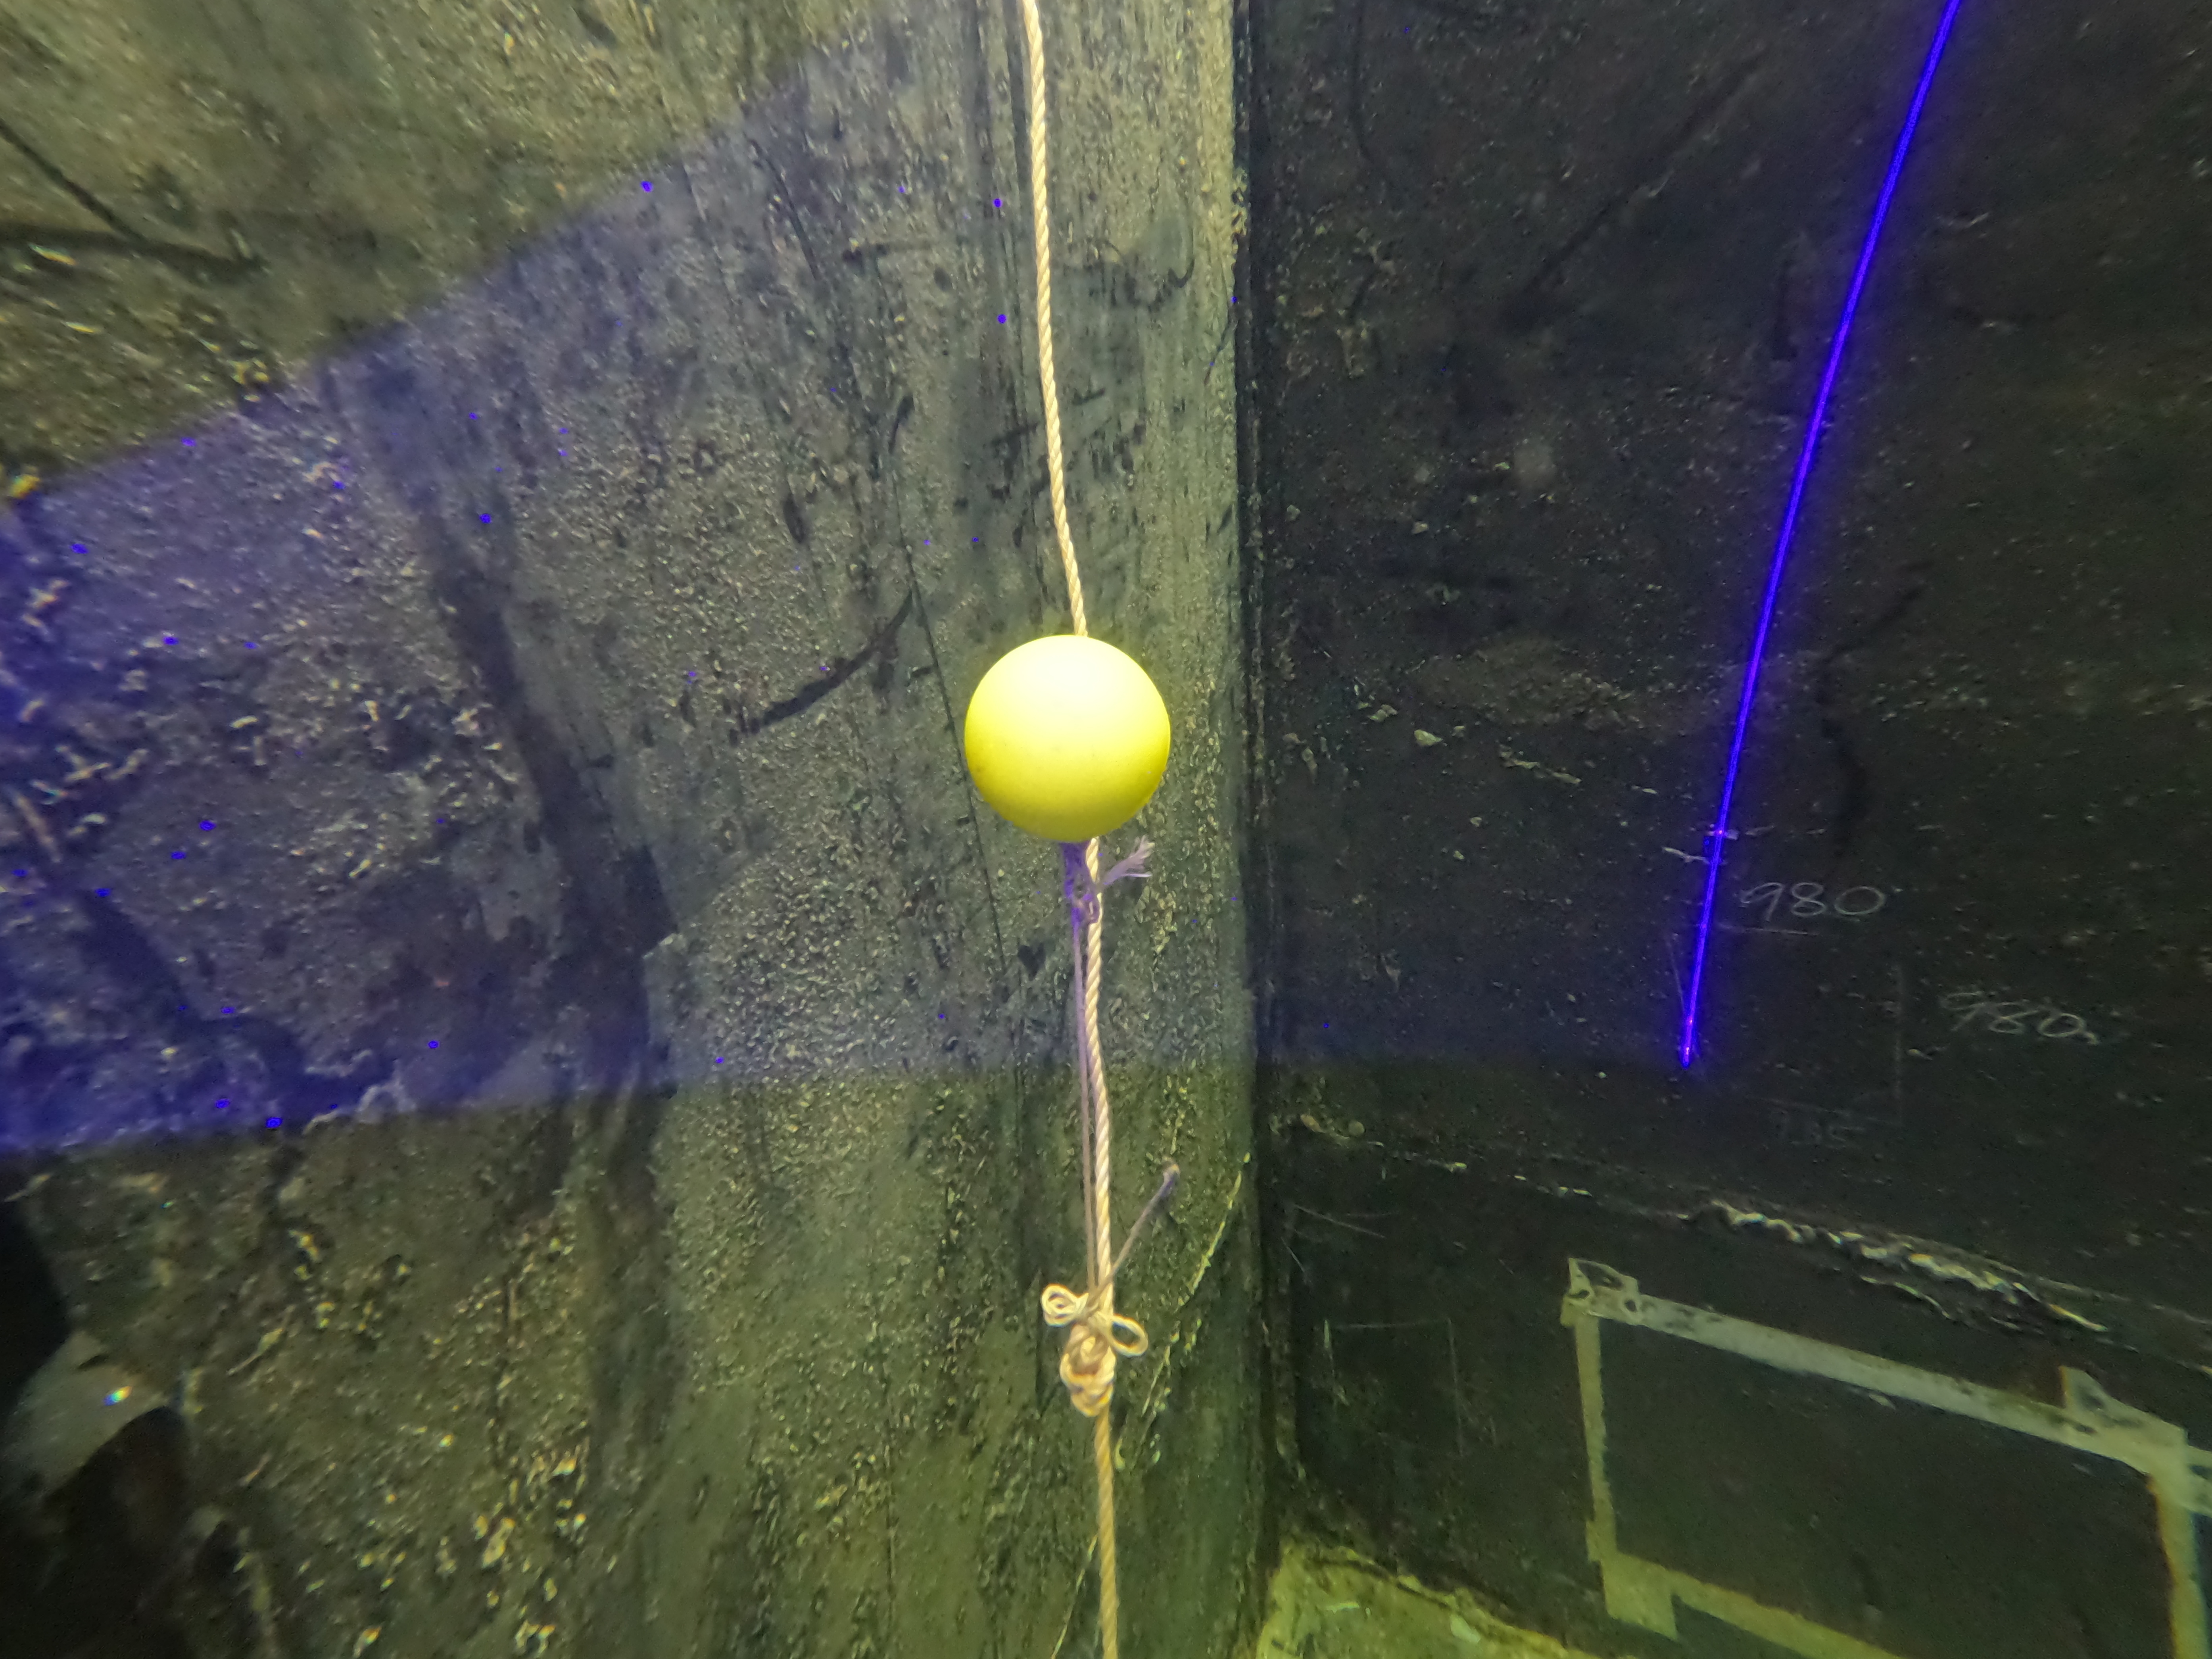

Supplement: Supplementary file 1273 [file G0032586.pdf › 6/G0032586.pdf]

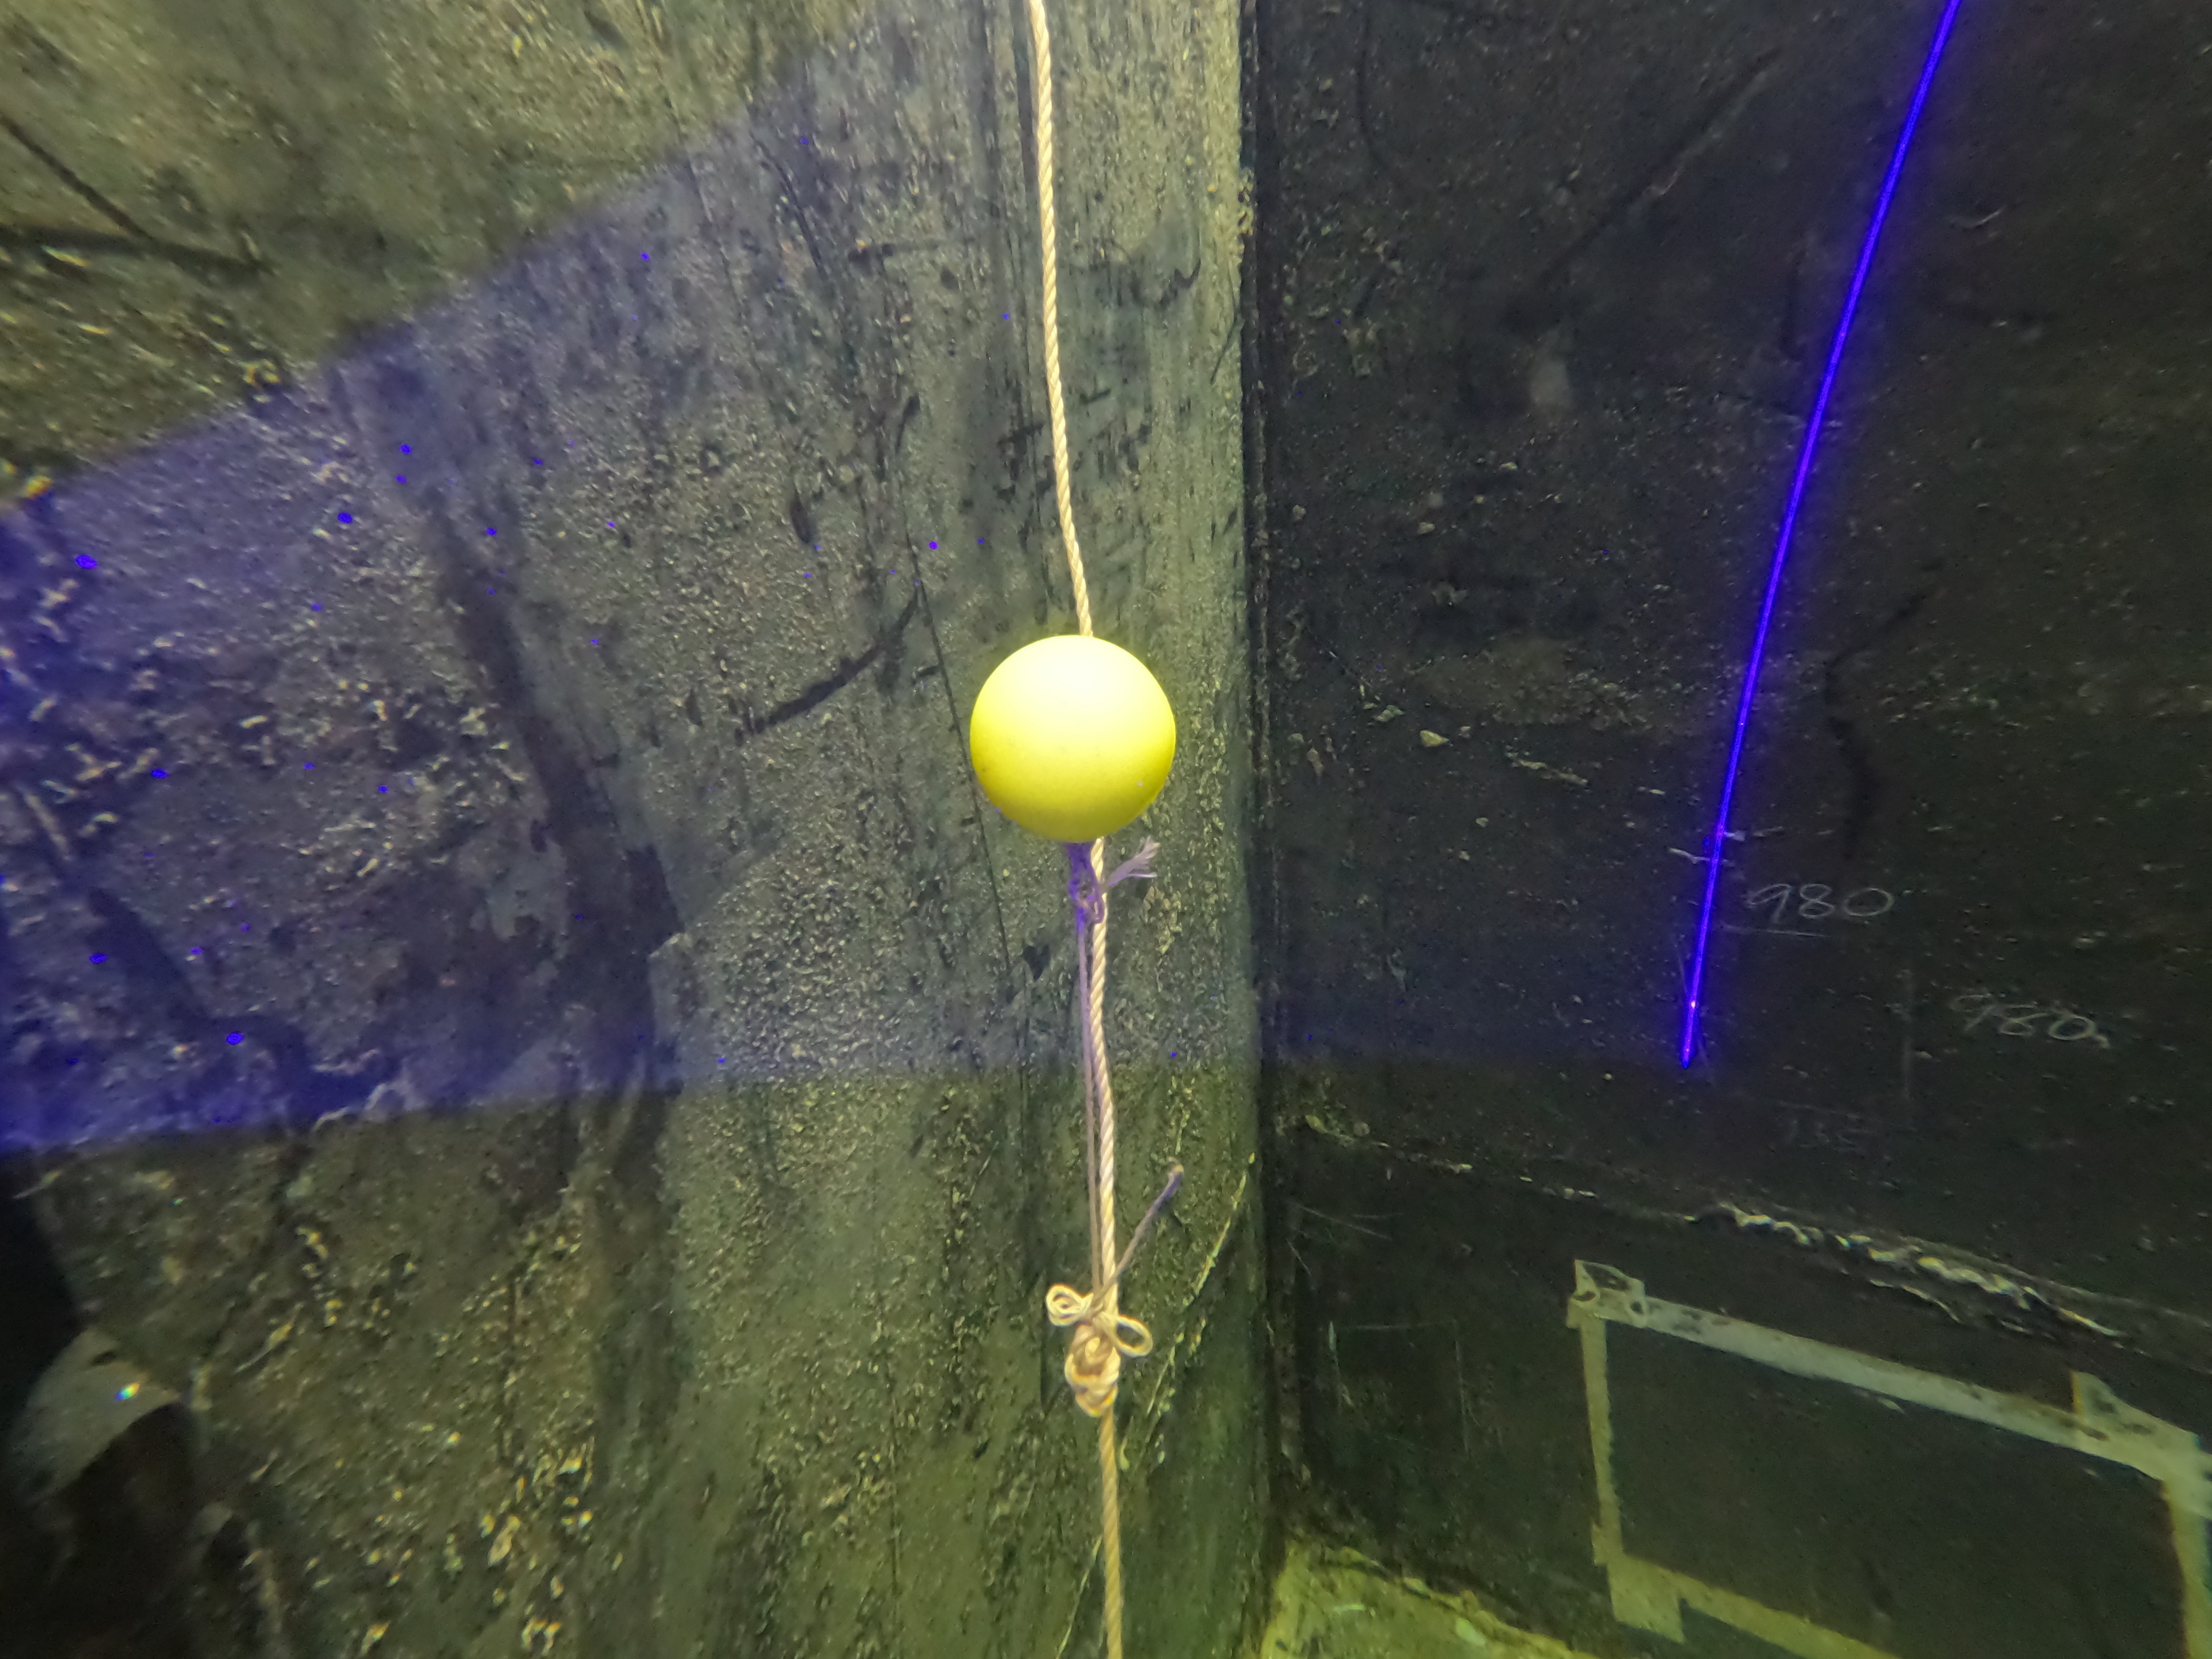

Supplement: Supplementary file 1274 [file G0032587.pdf › 6/G0032587.pdf]

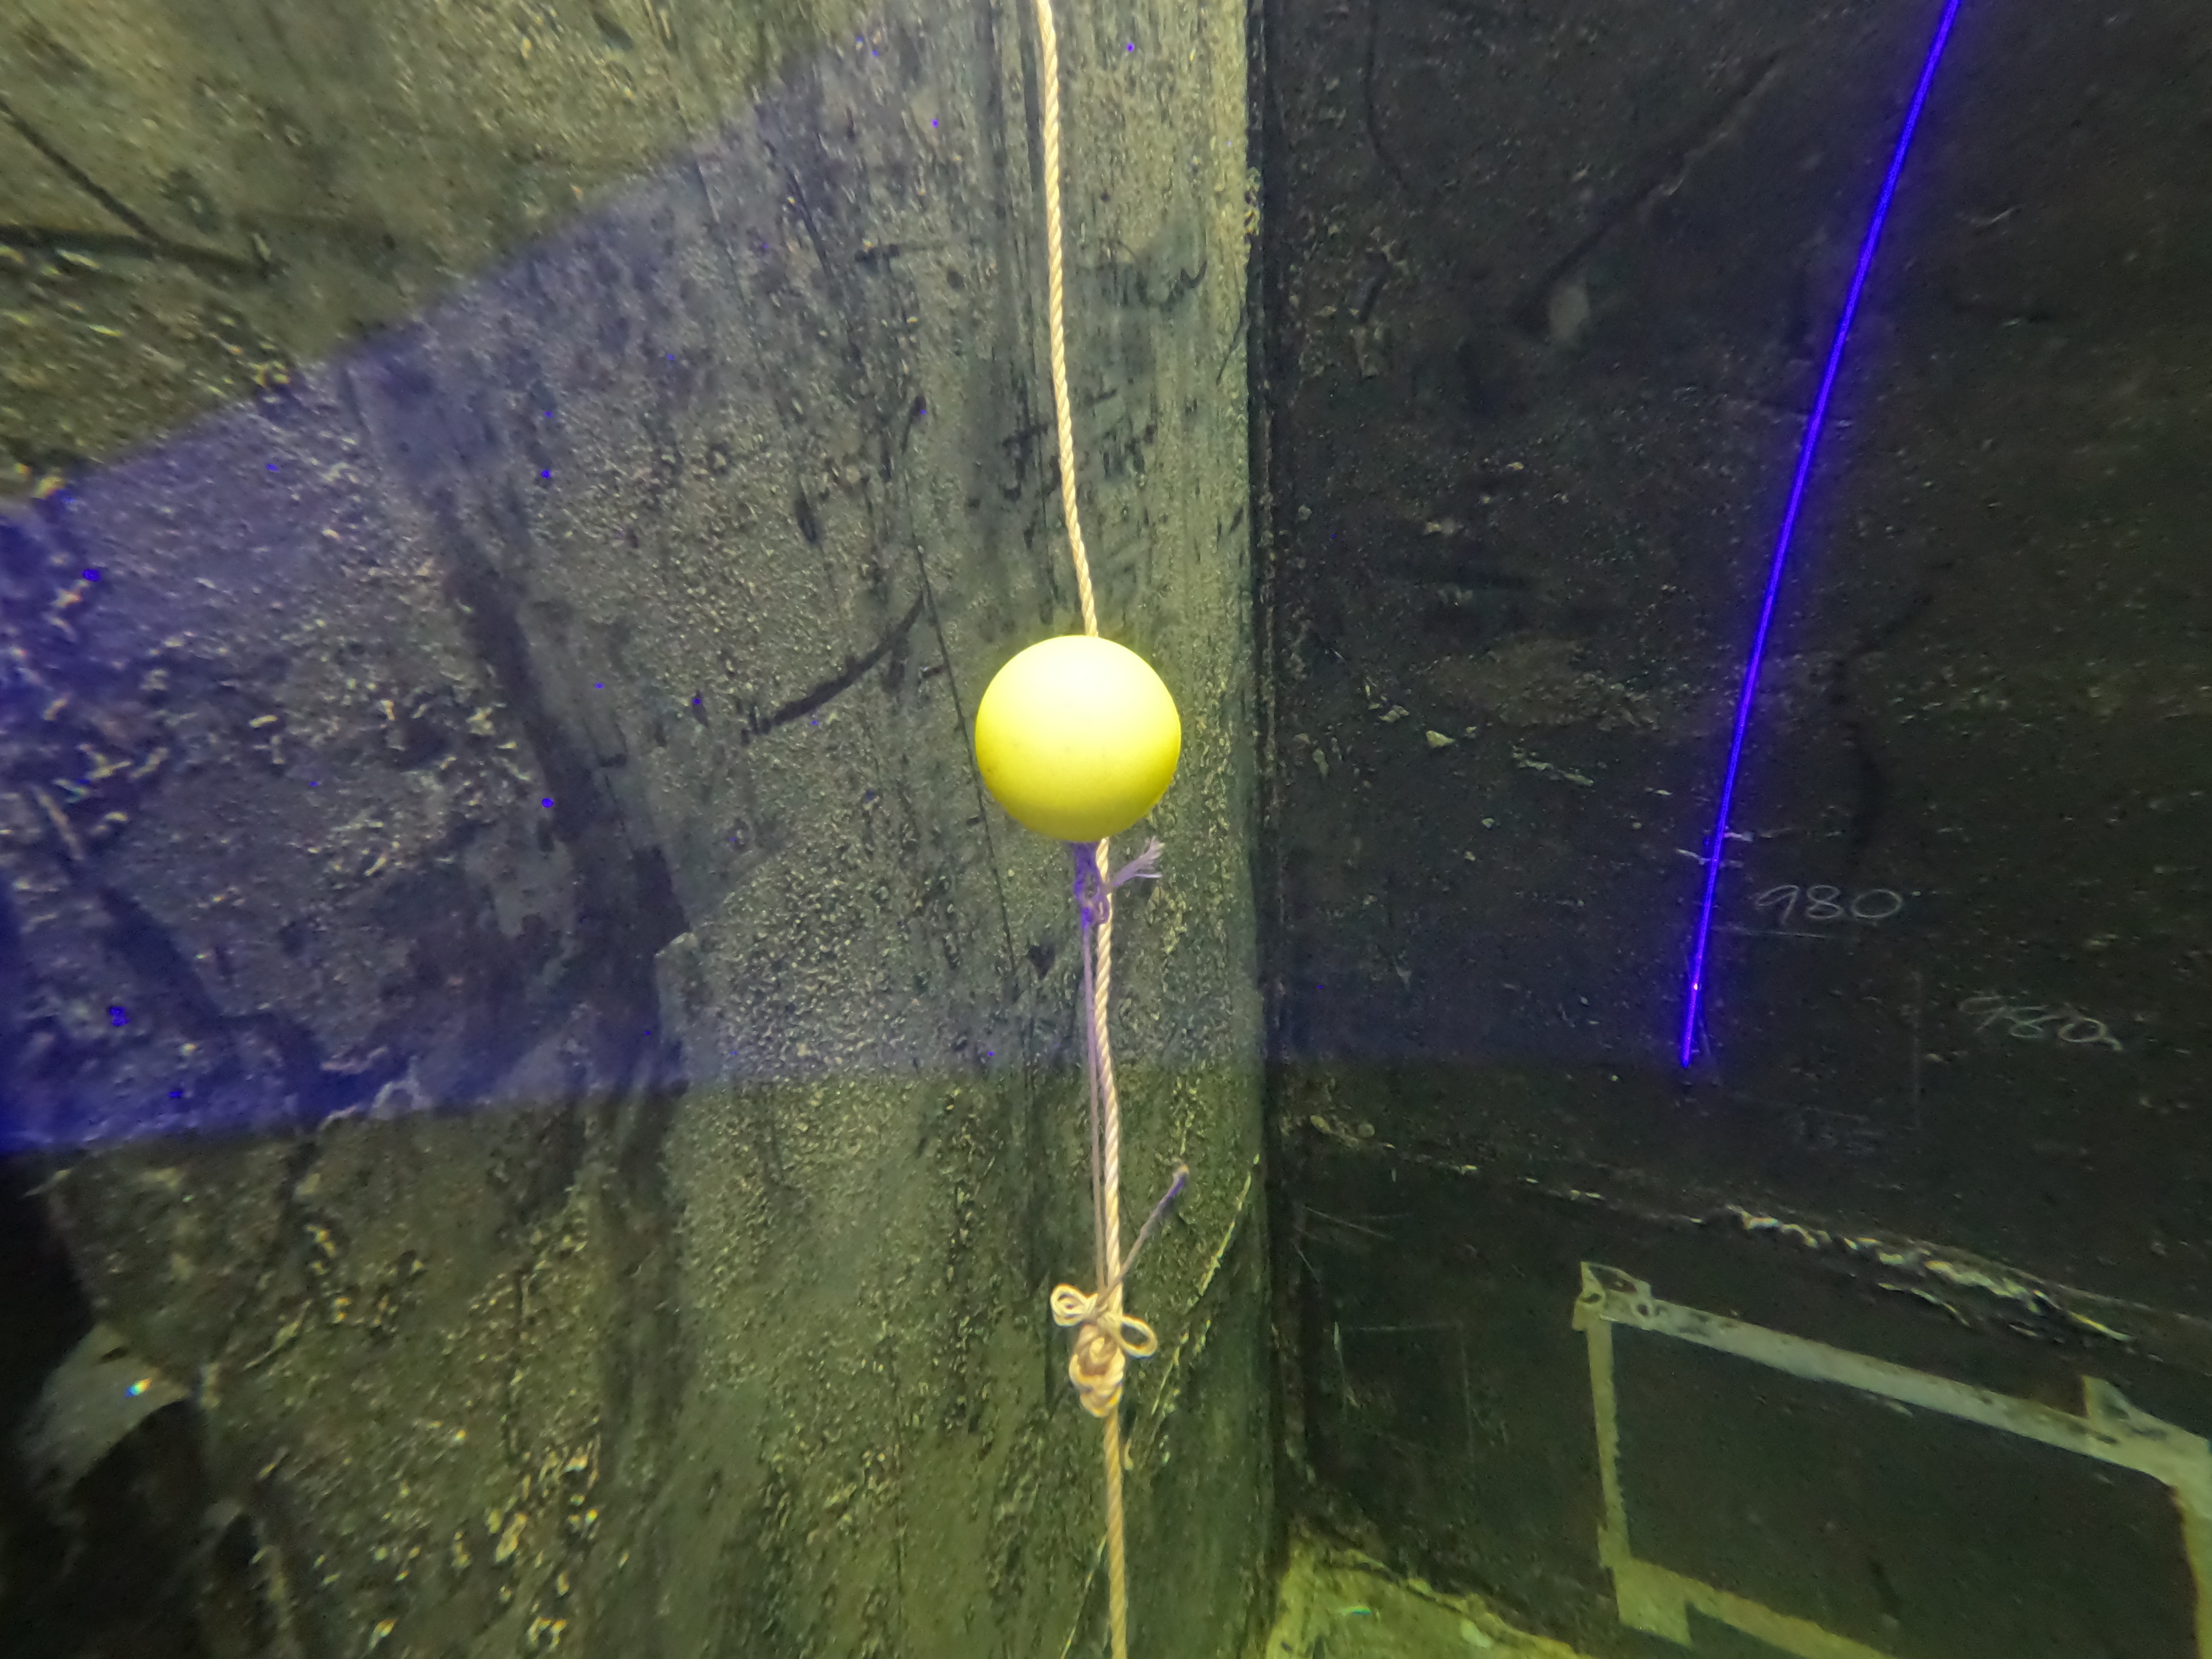

Supplement: Supplementary file 1275 [file G0032588.pdf › 6/G0032588.pdf]

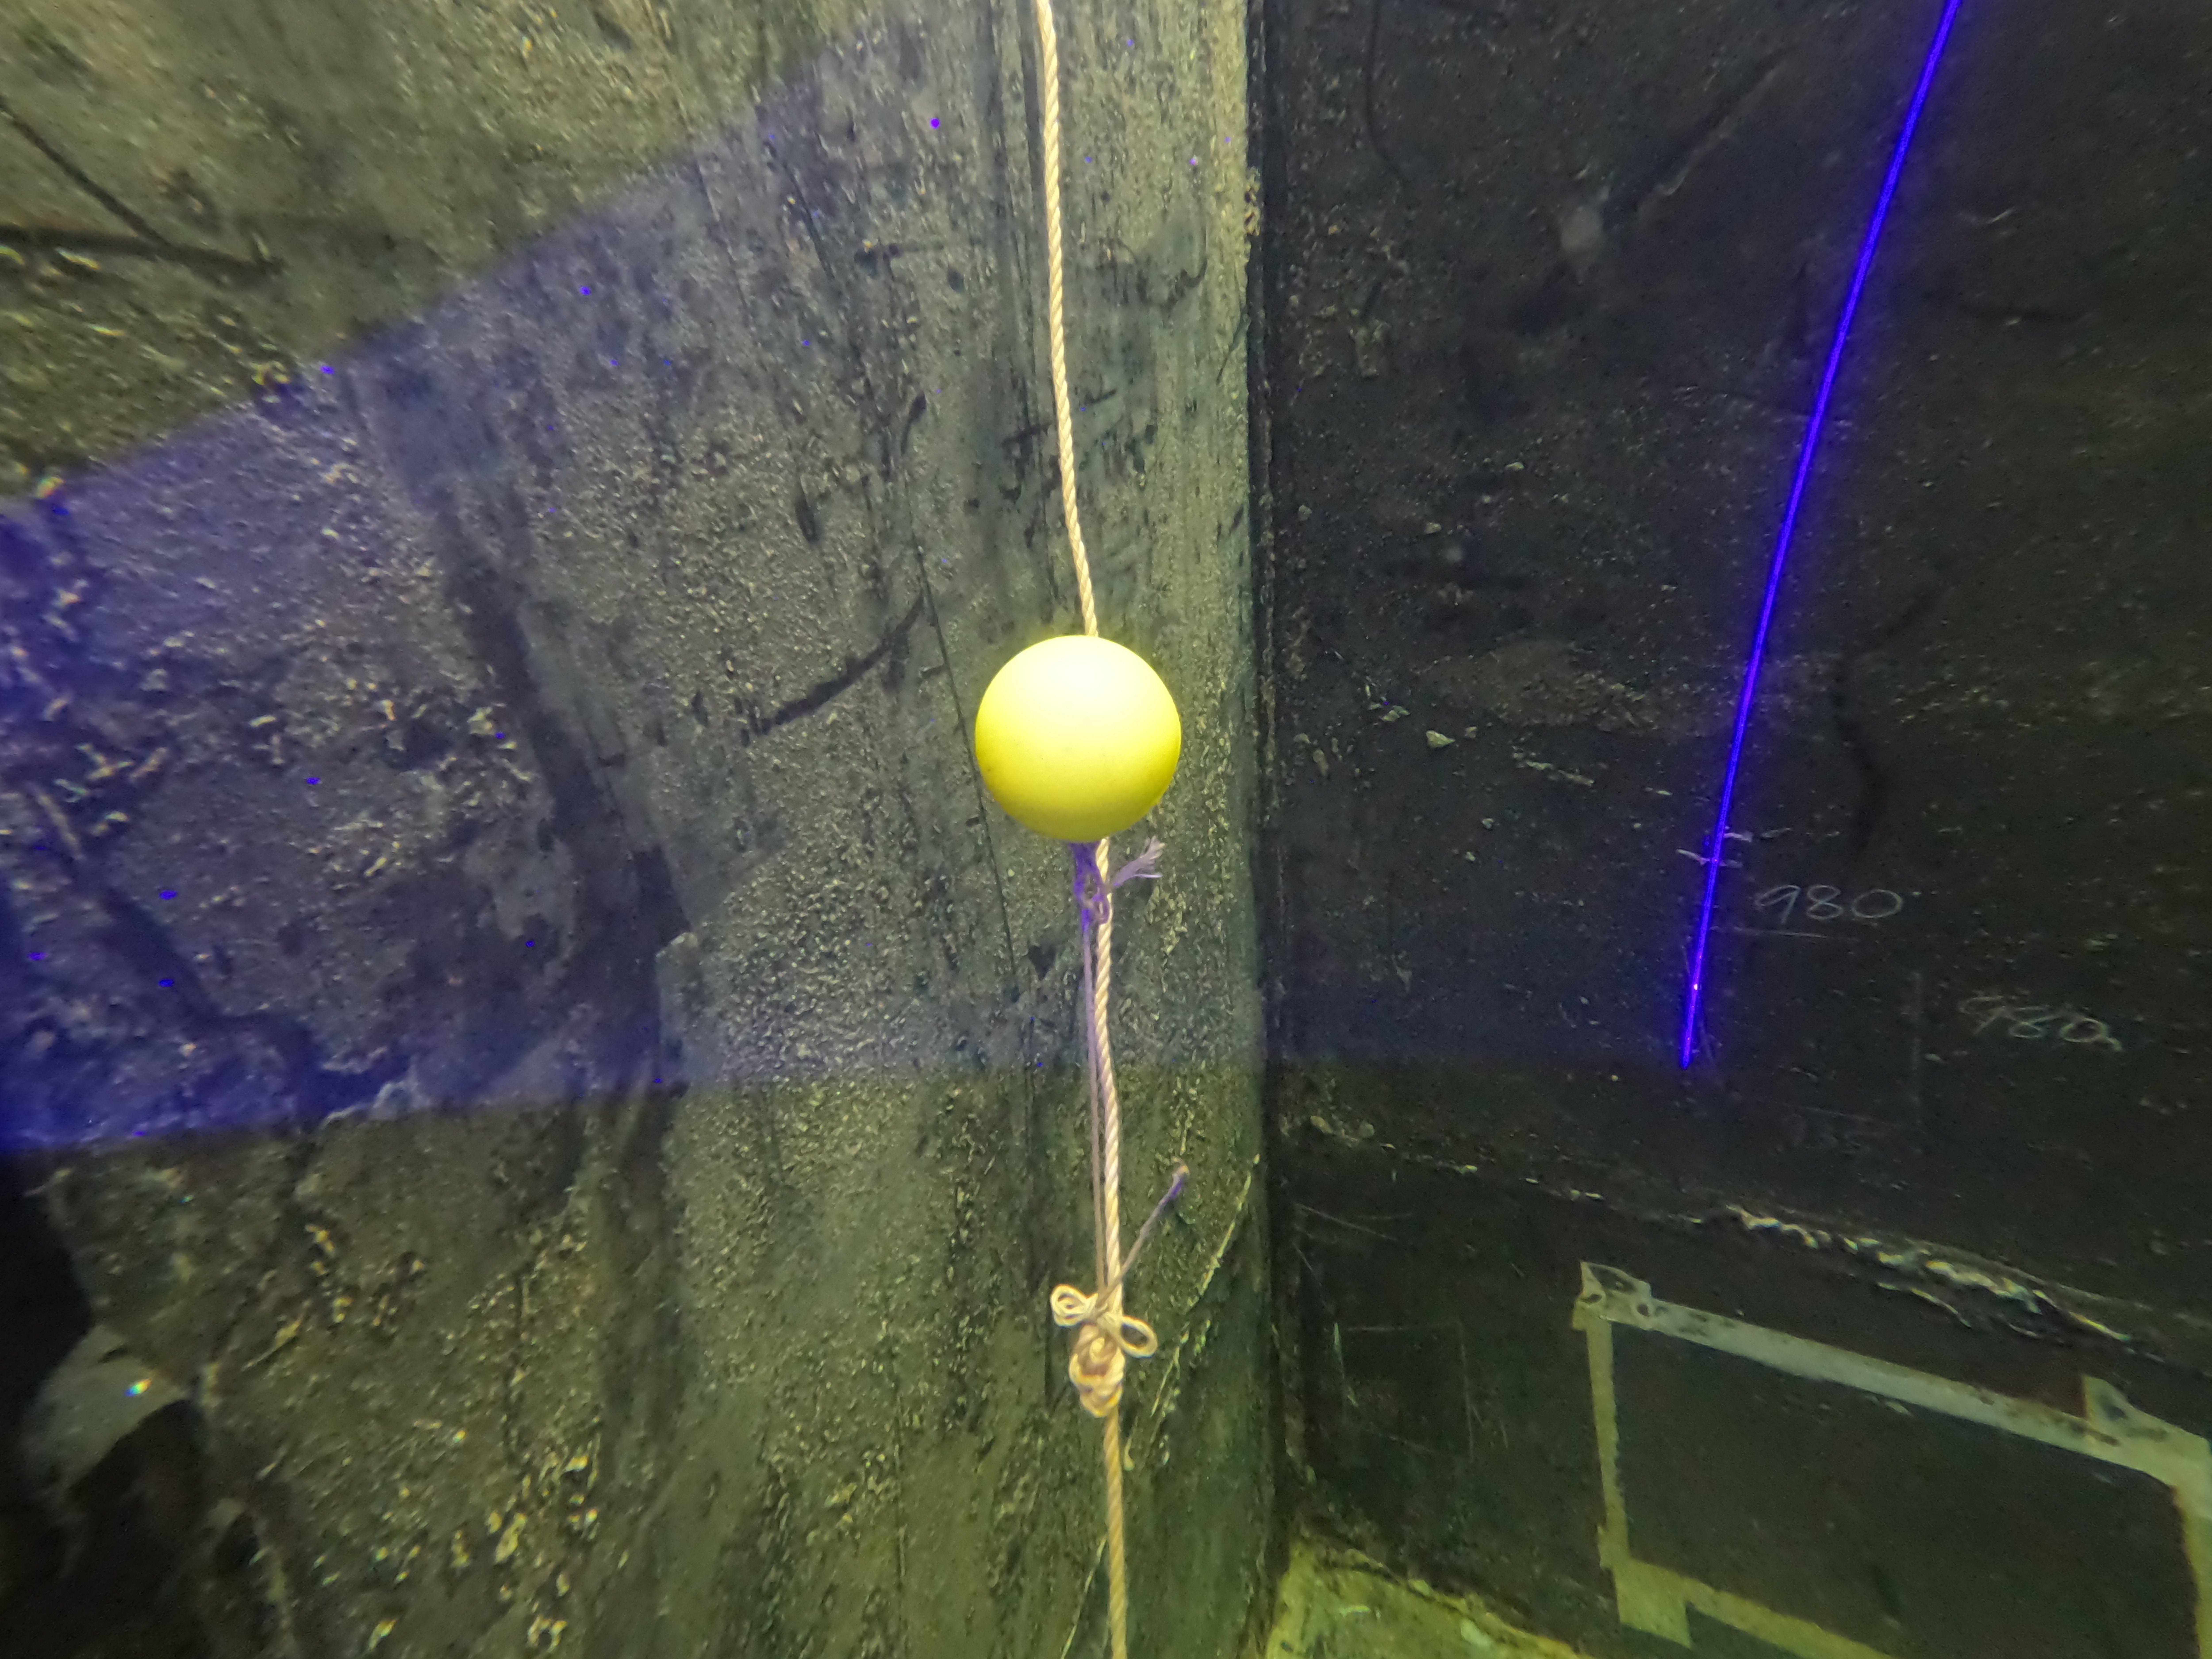

Supplement: Supplementary file 1276 [file G0032589.pdf › 6/G0032589.pdf]

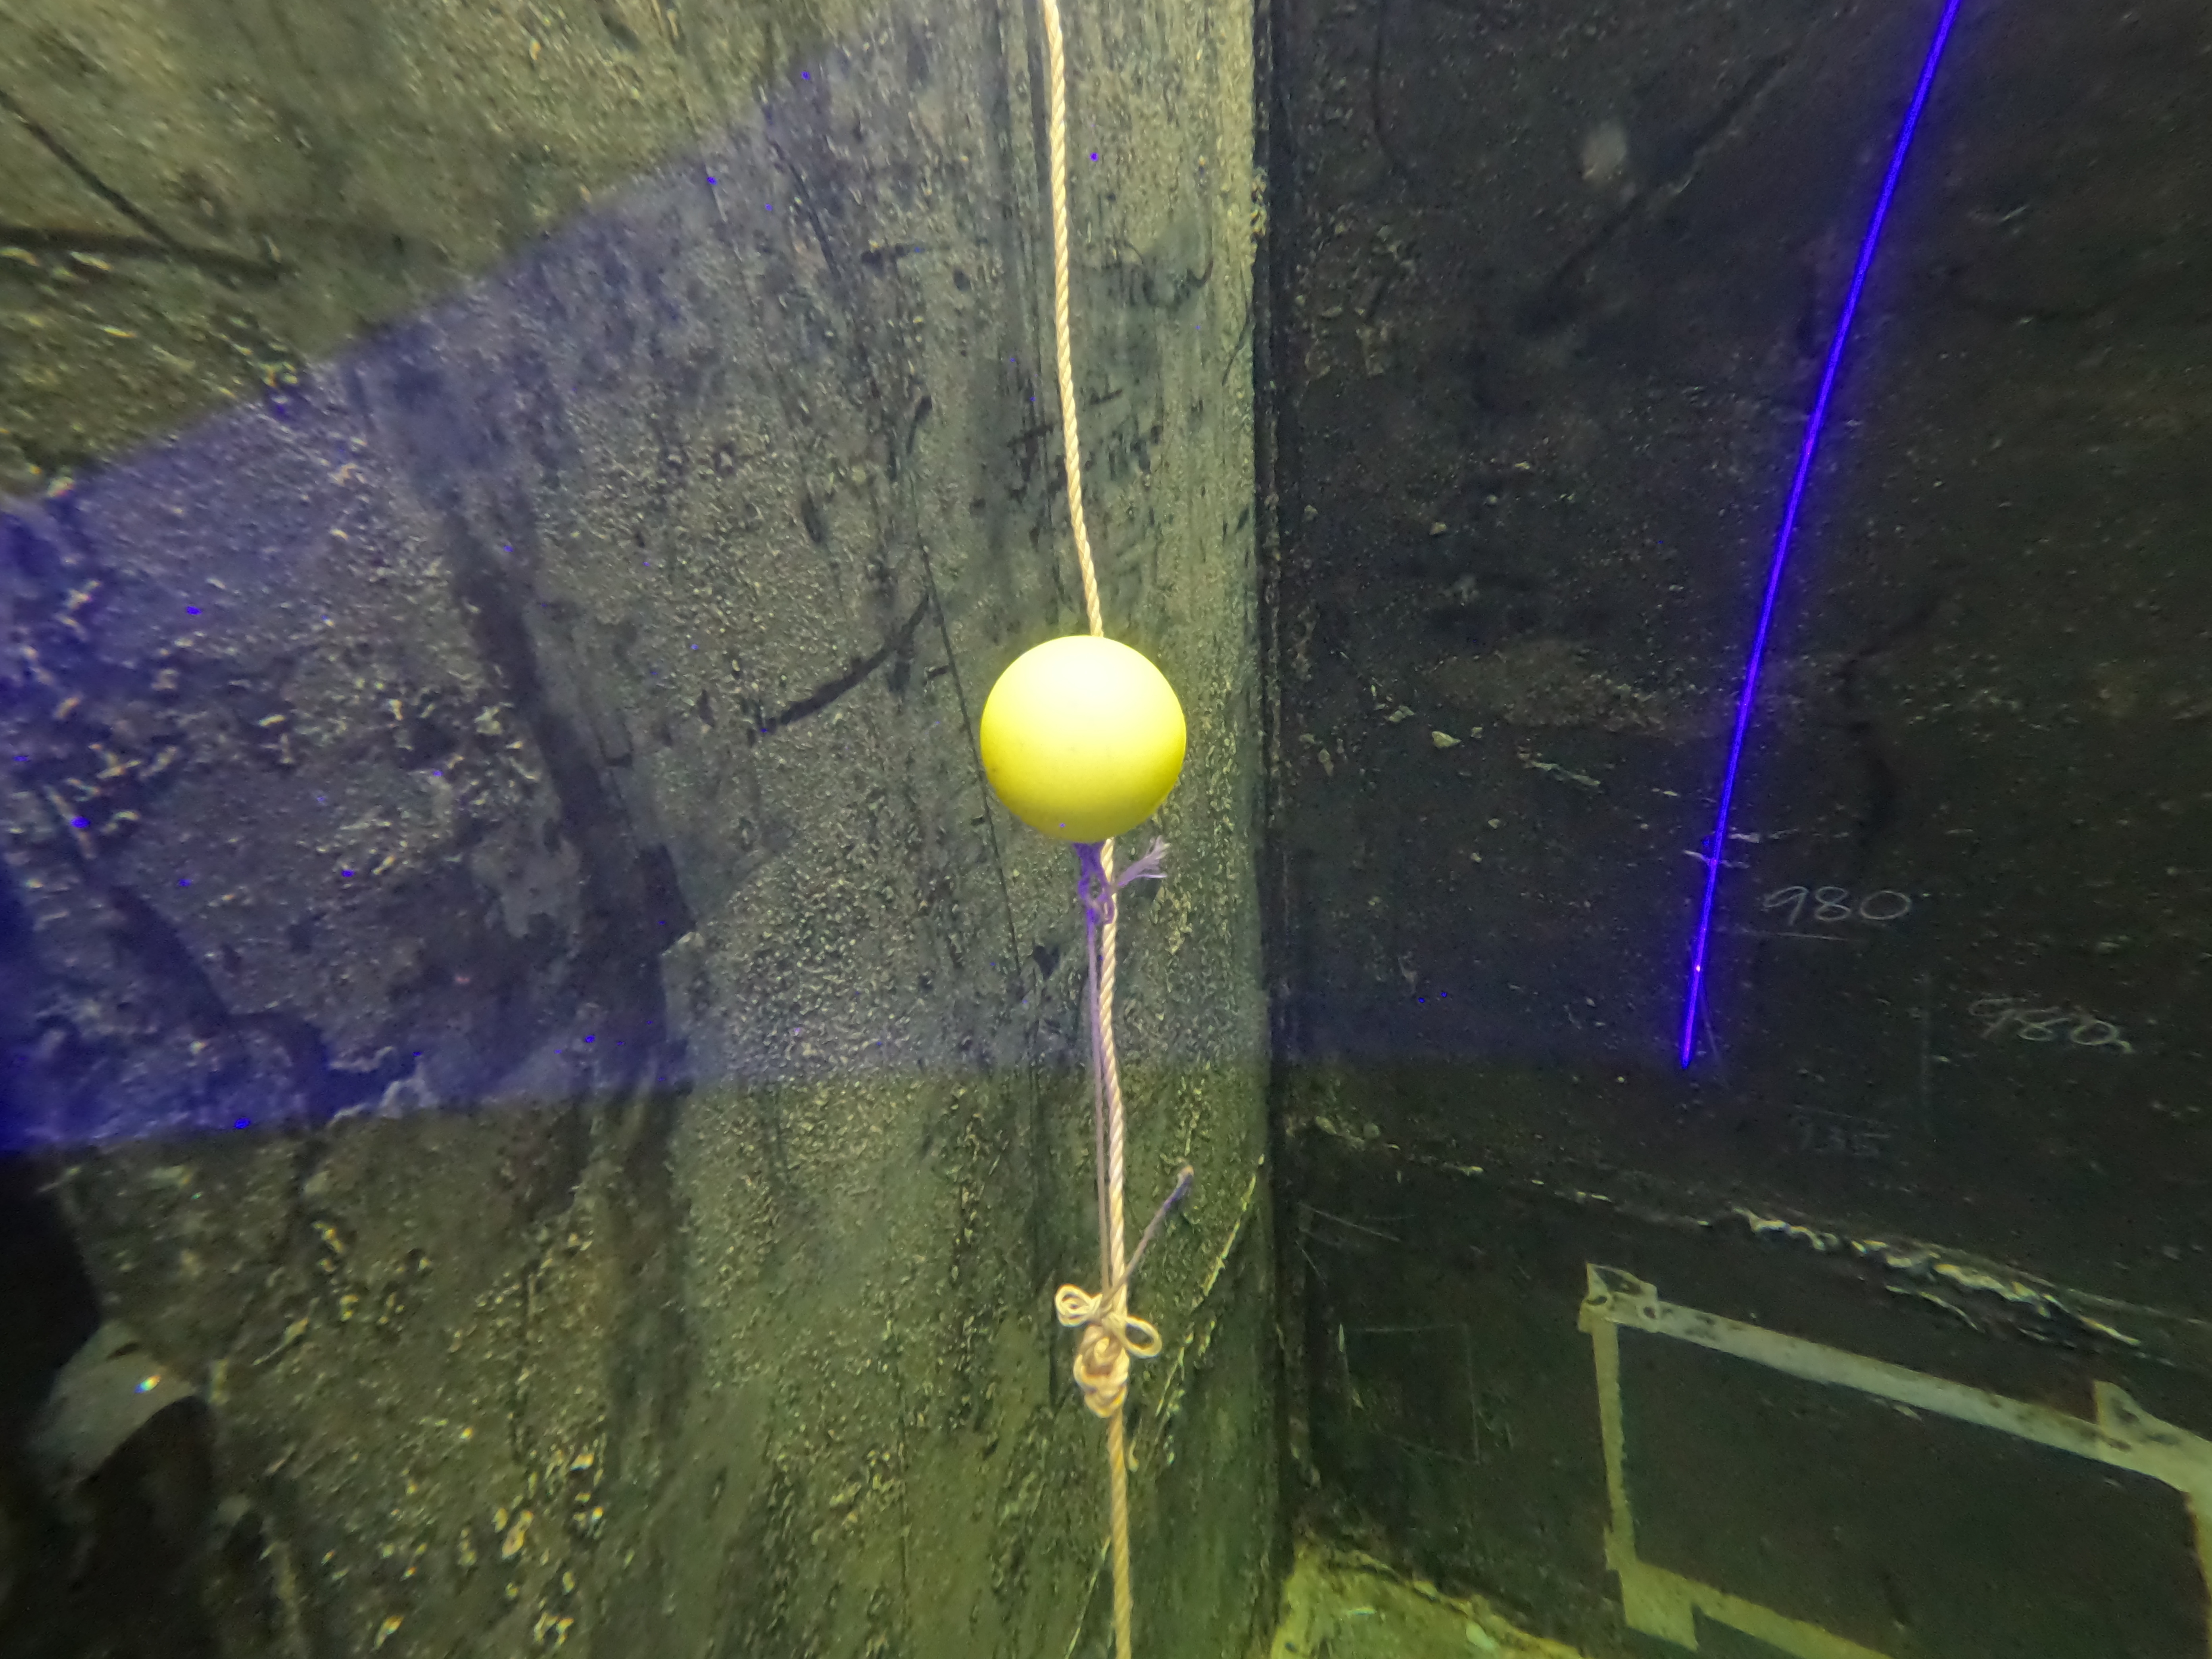

Supplement: Supplementary file 1277 [file G0032590.pdf › 6/G0032590.pdf]

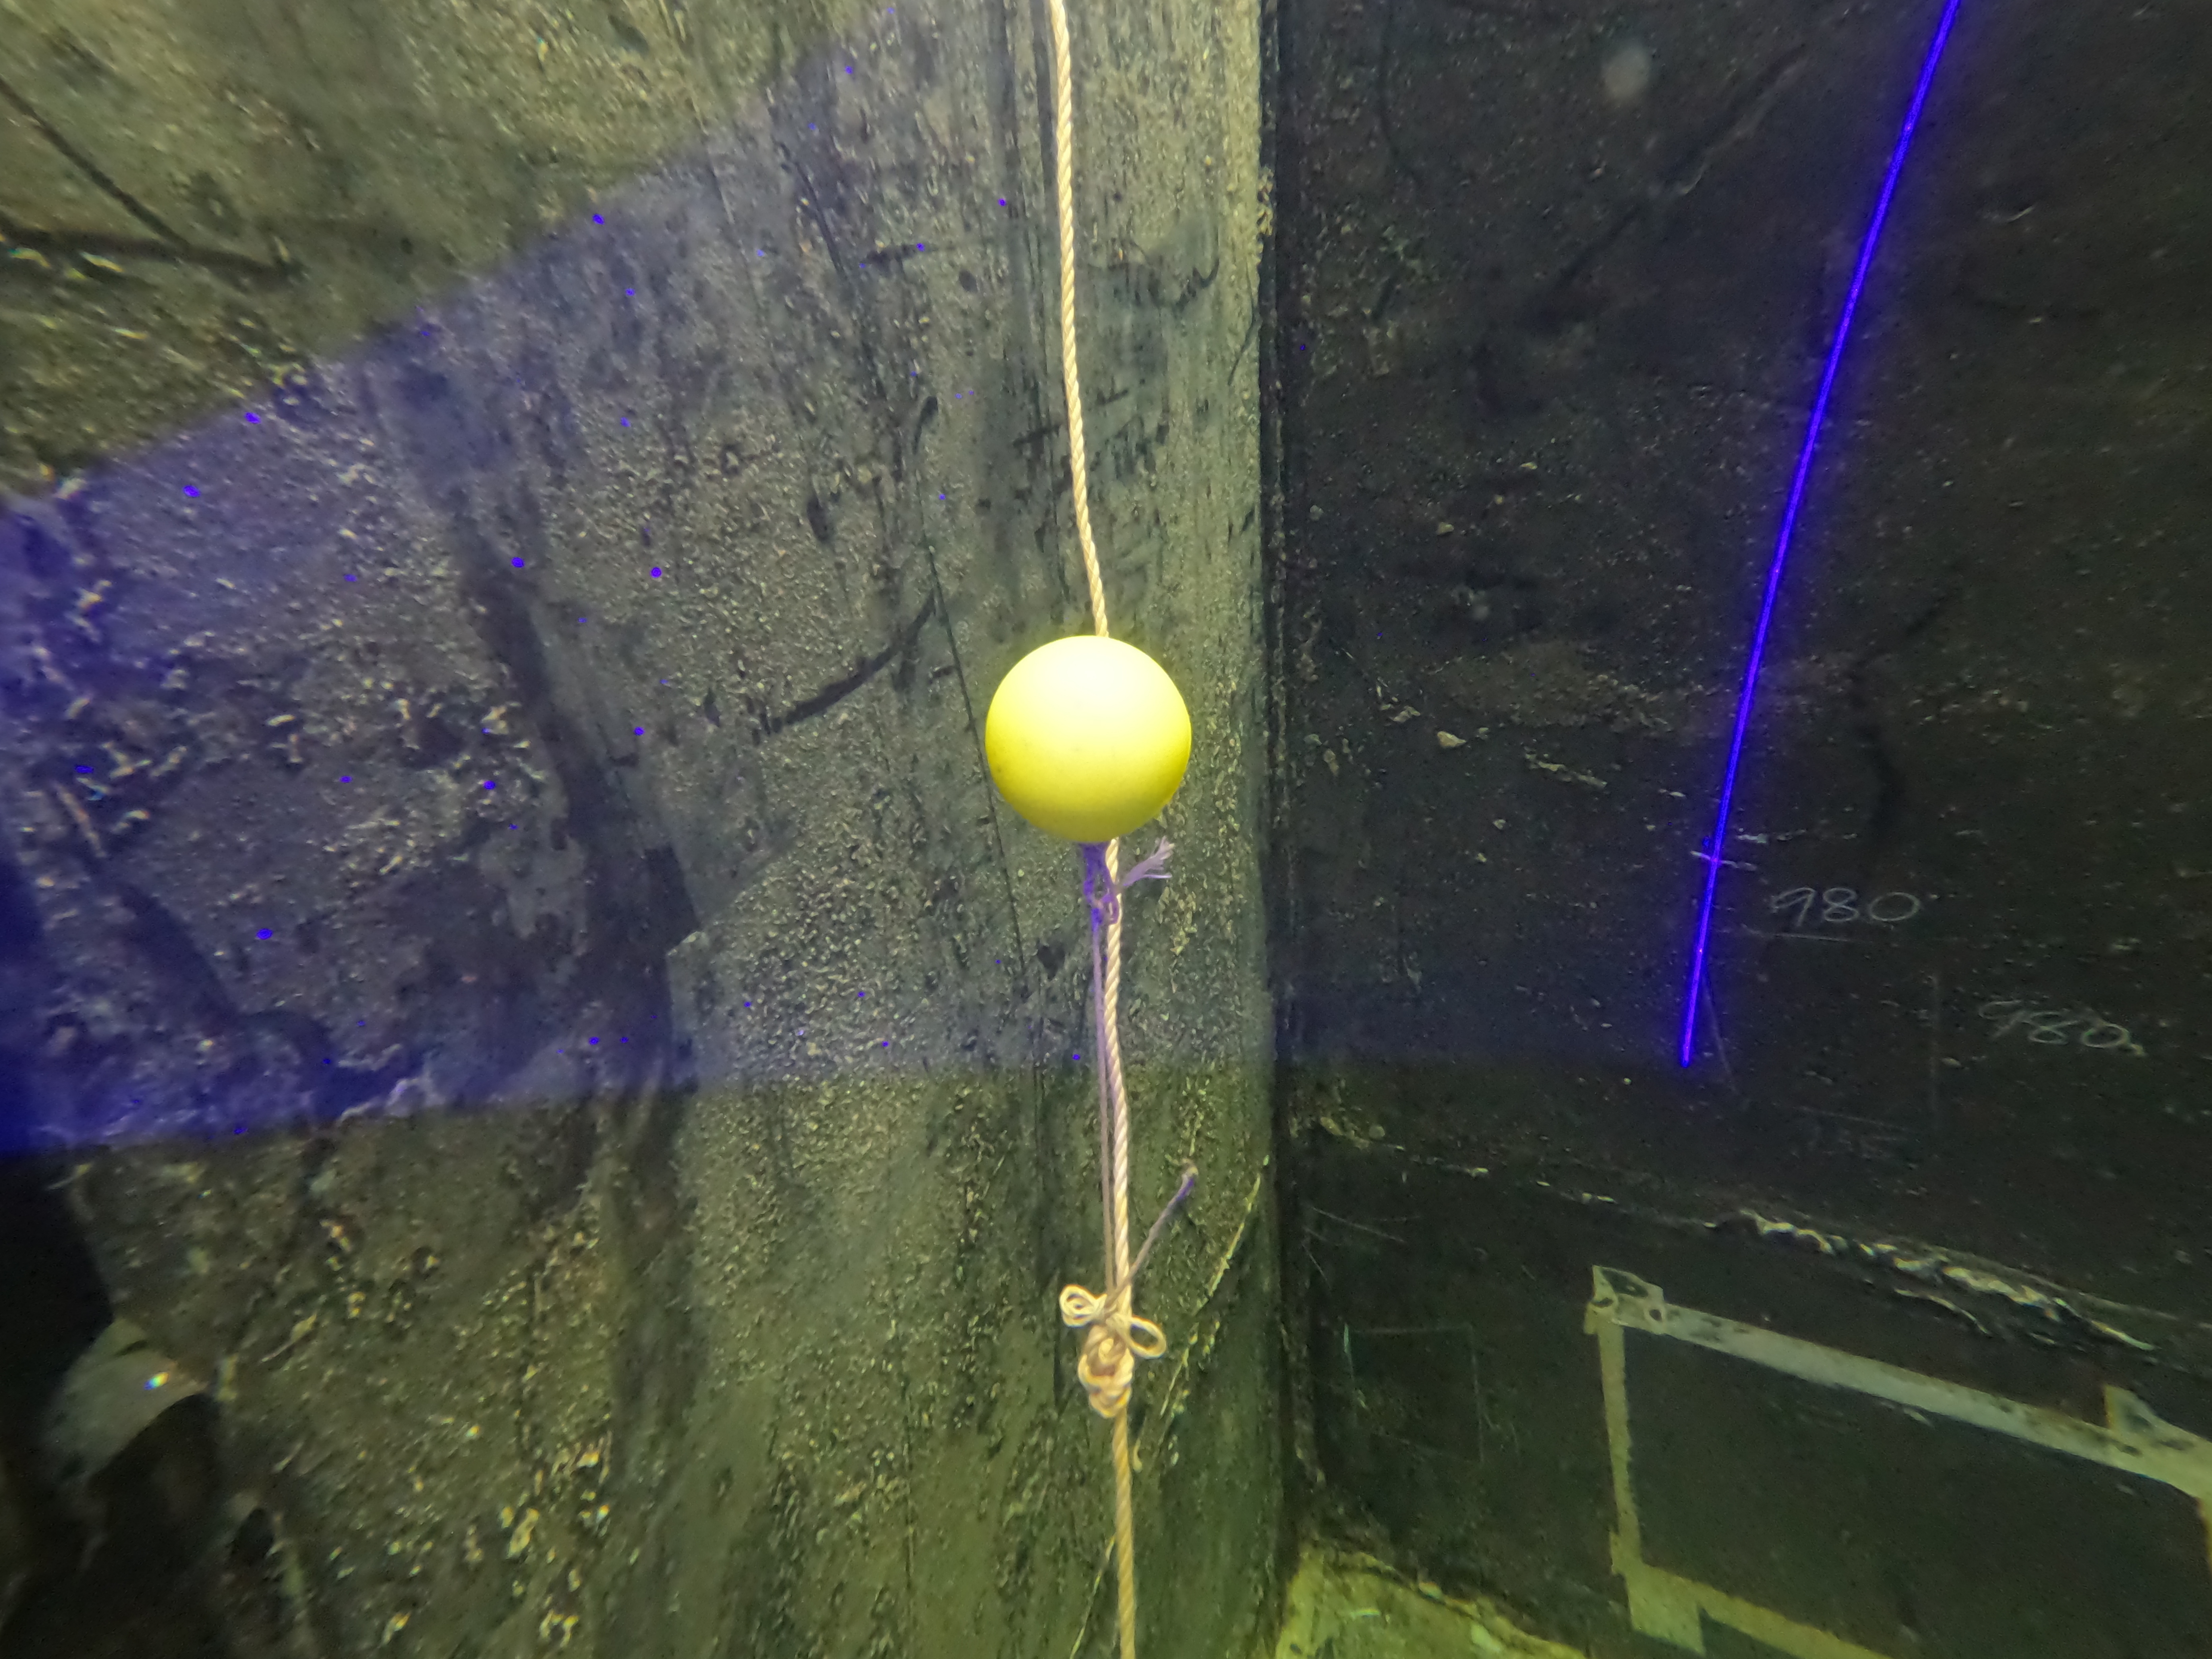

Supplement: Supplementary file 1278 [file G0032591.pdf › 6/G0032591.pdf]

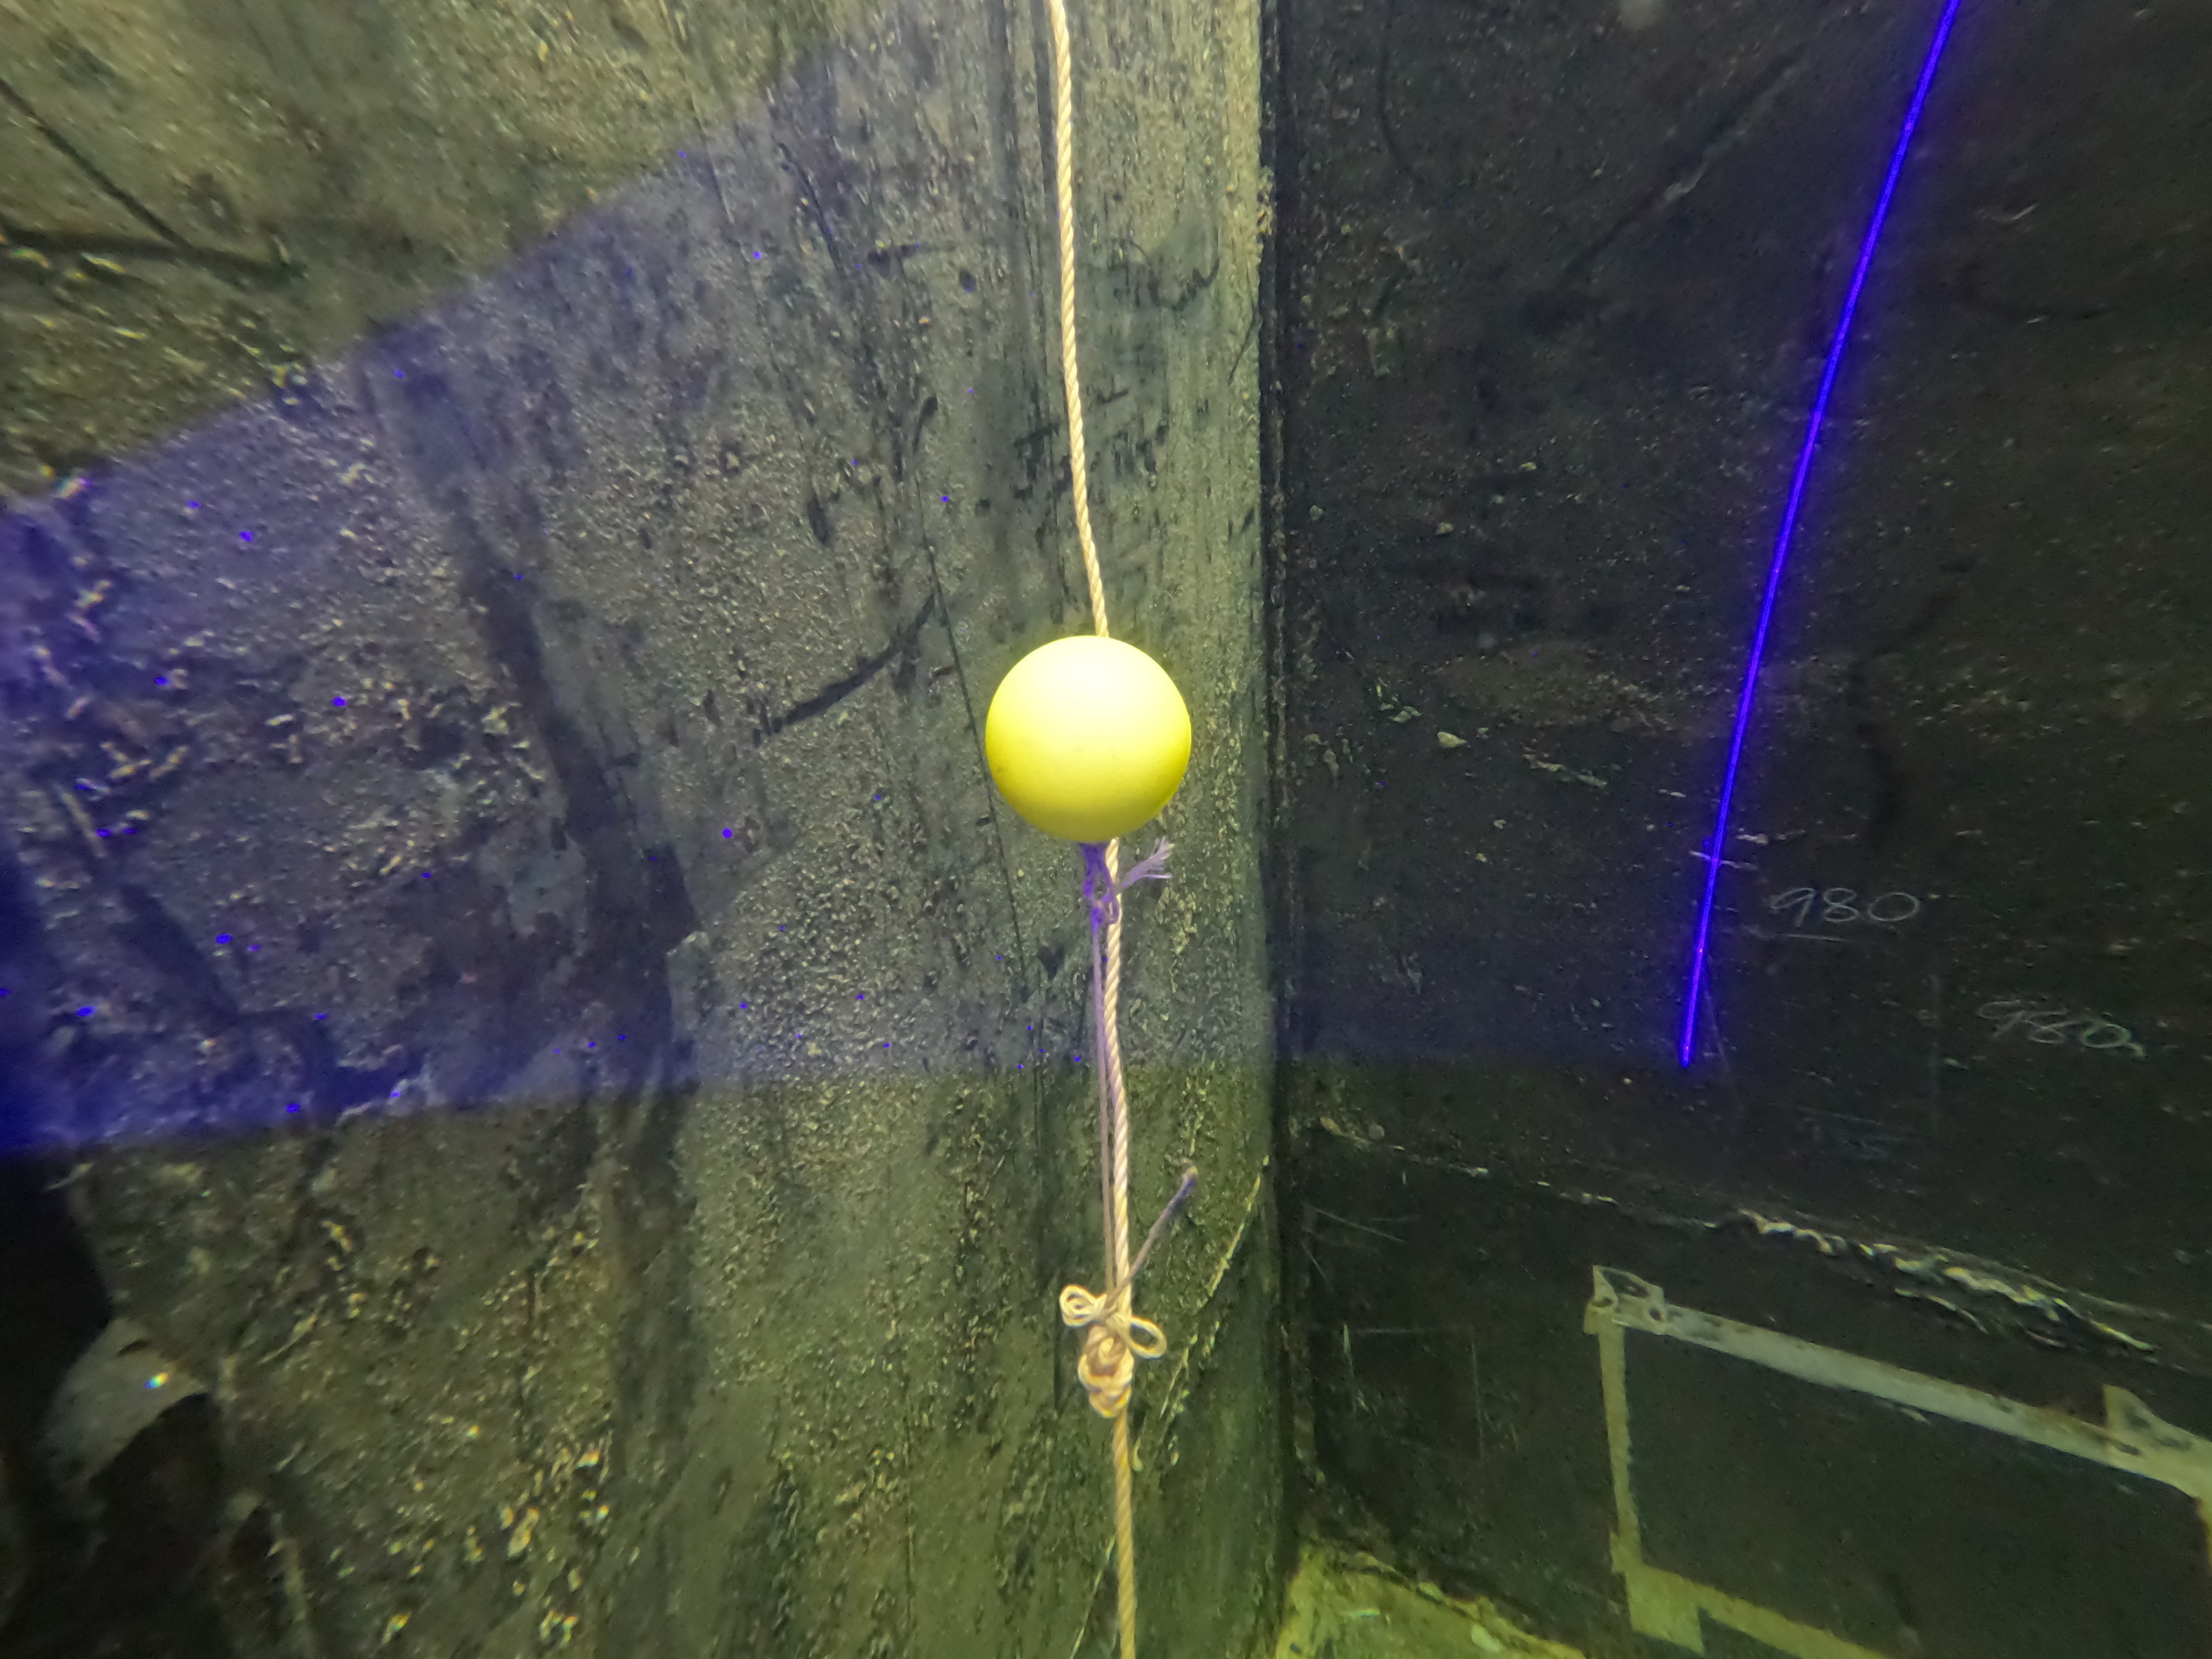

Supplement: Supplementary file 1279 [file G0032592.pdf › 6/G0032592.pdf]

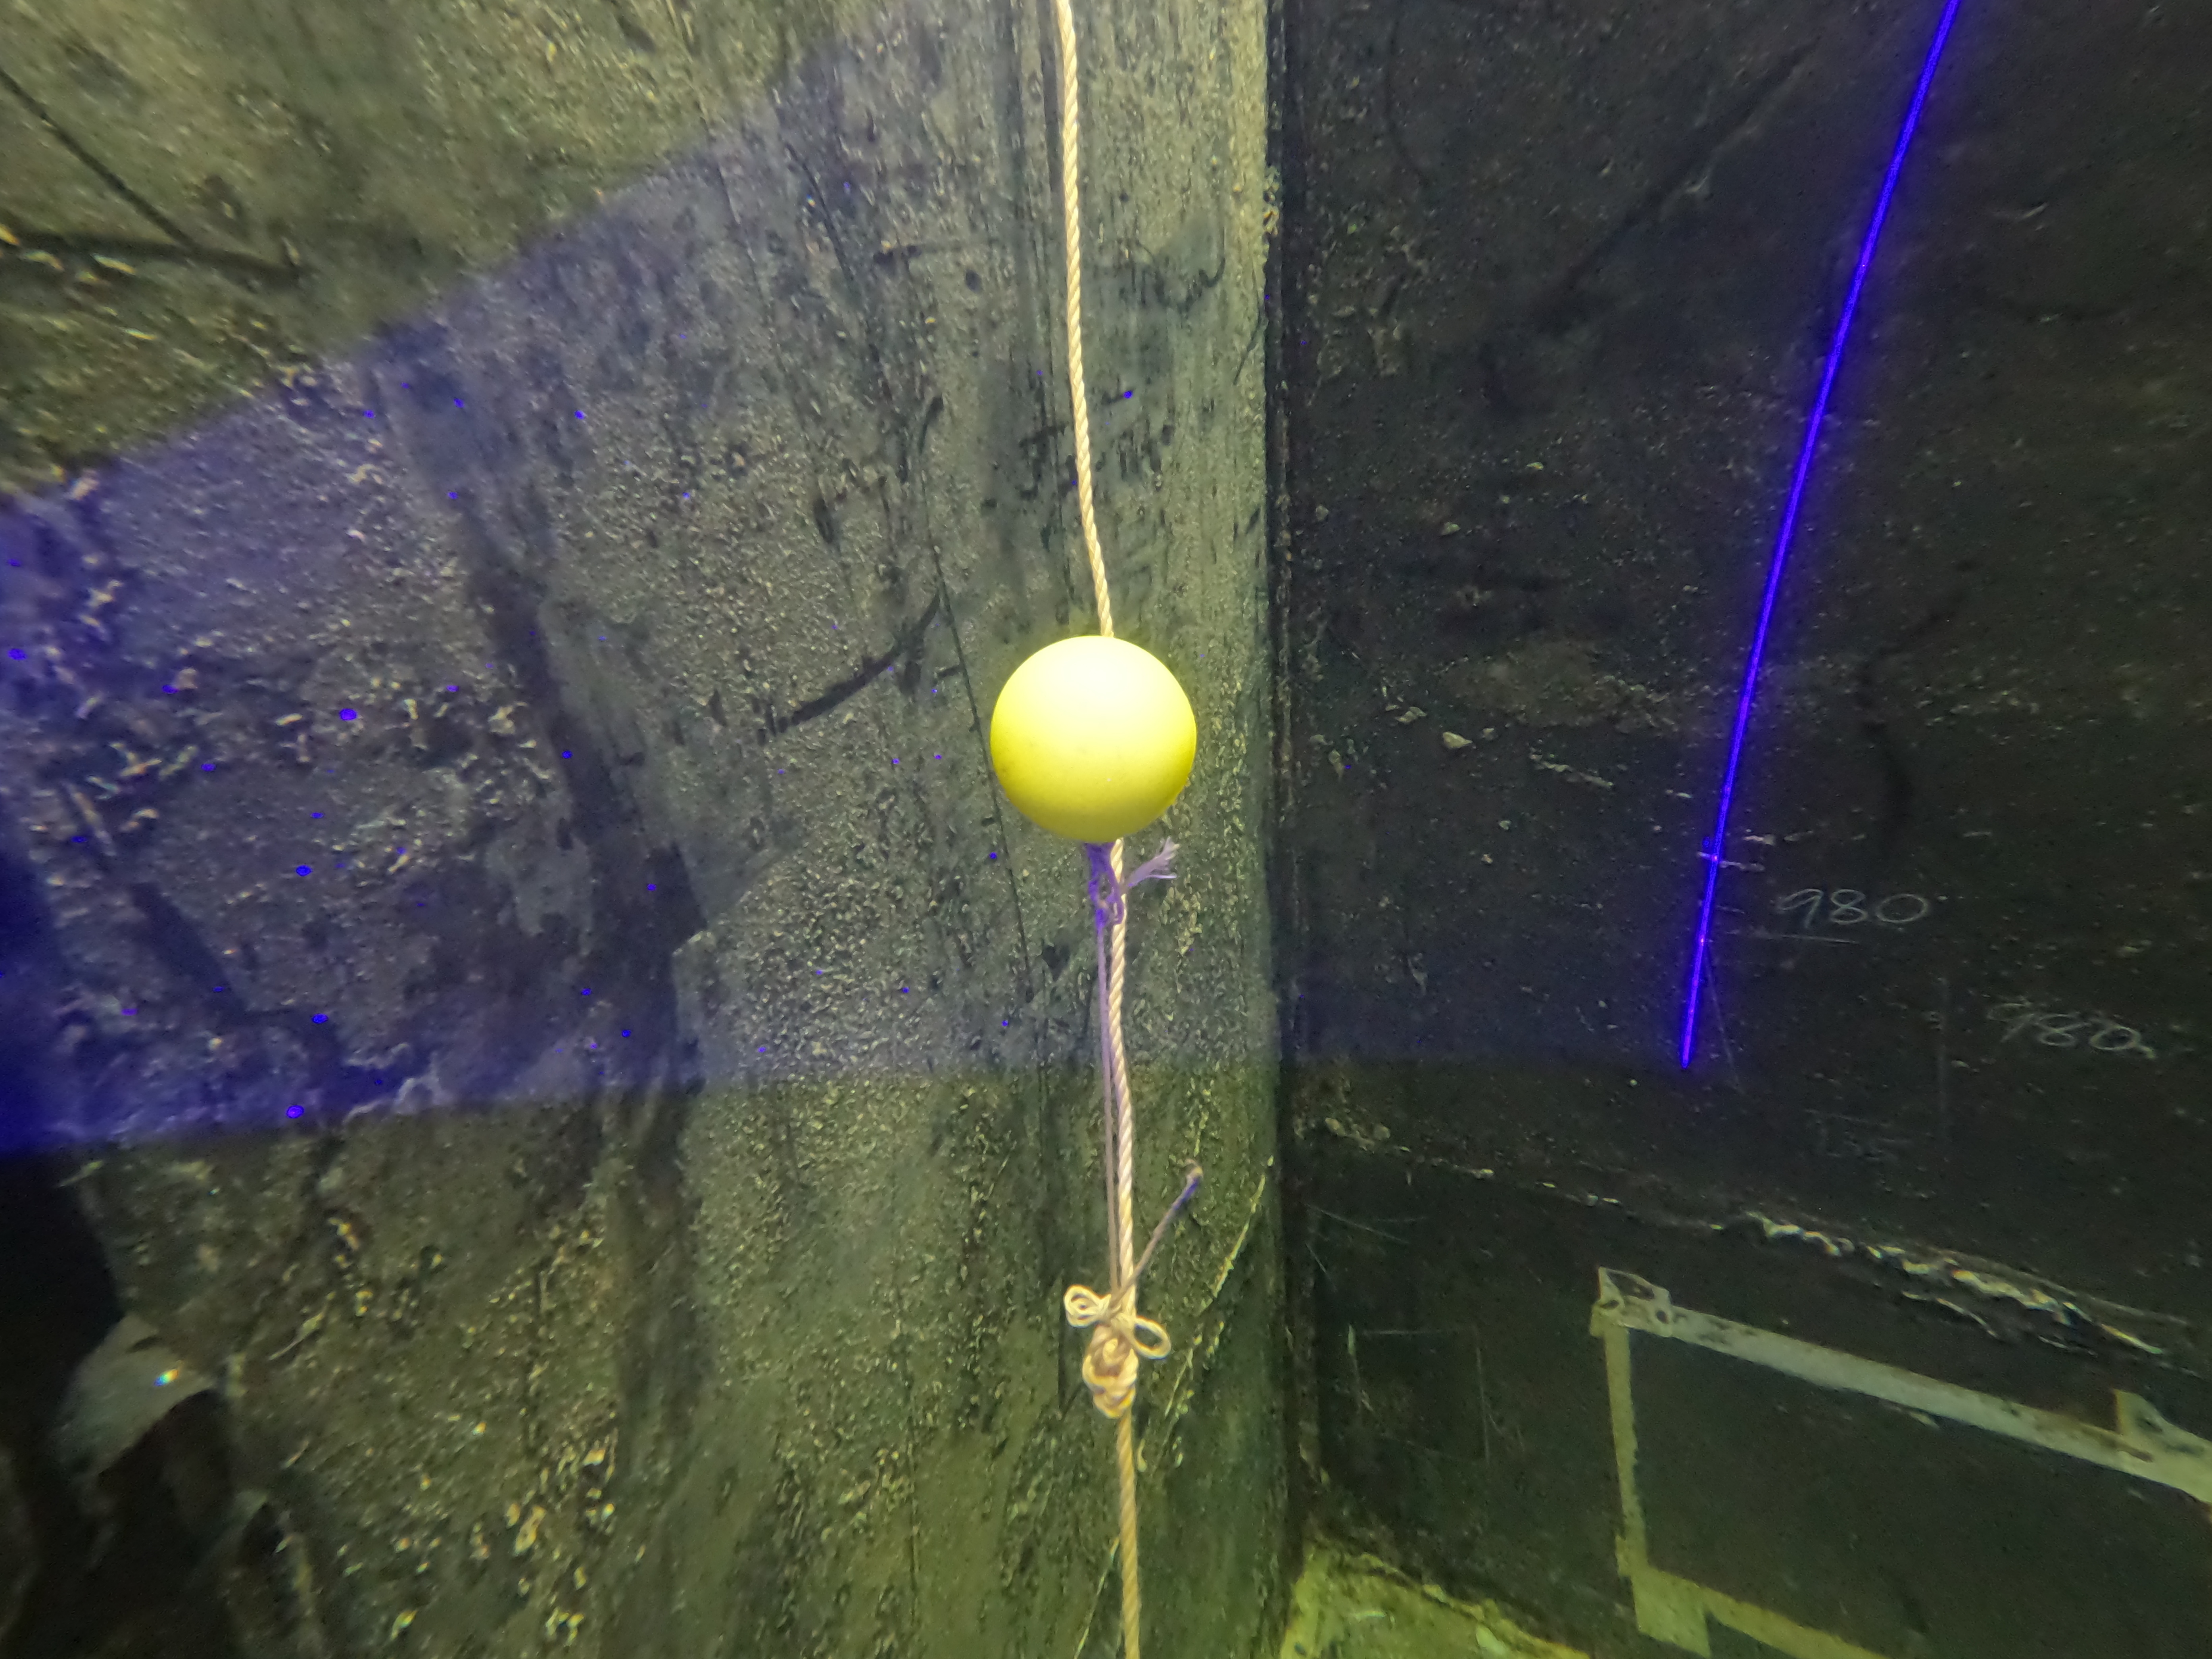

Supplement: Supplementary file 1280 [file G0032593.pdf › 6/G0032593.pdf]

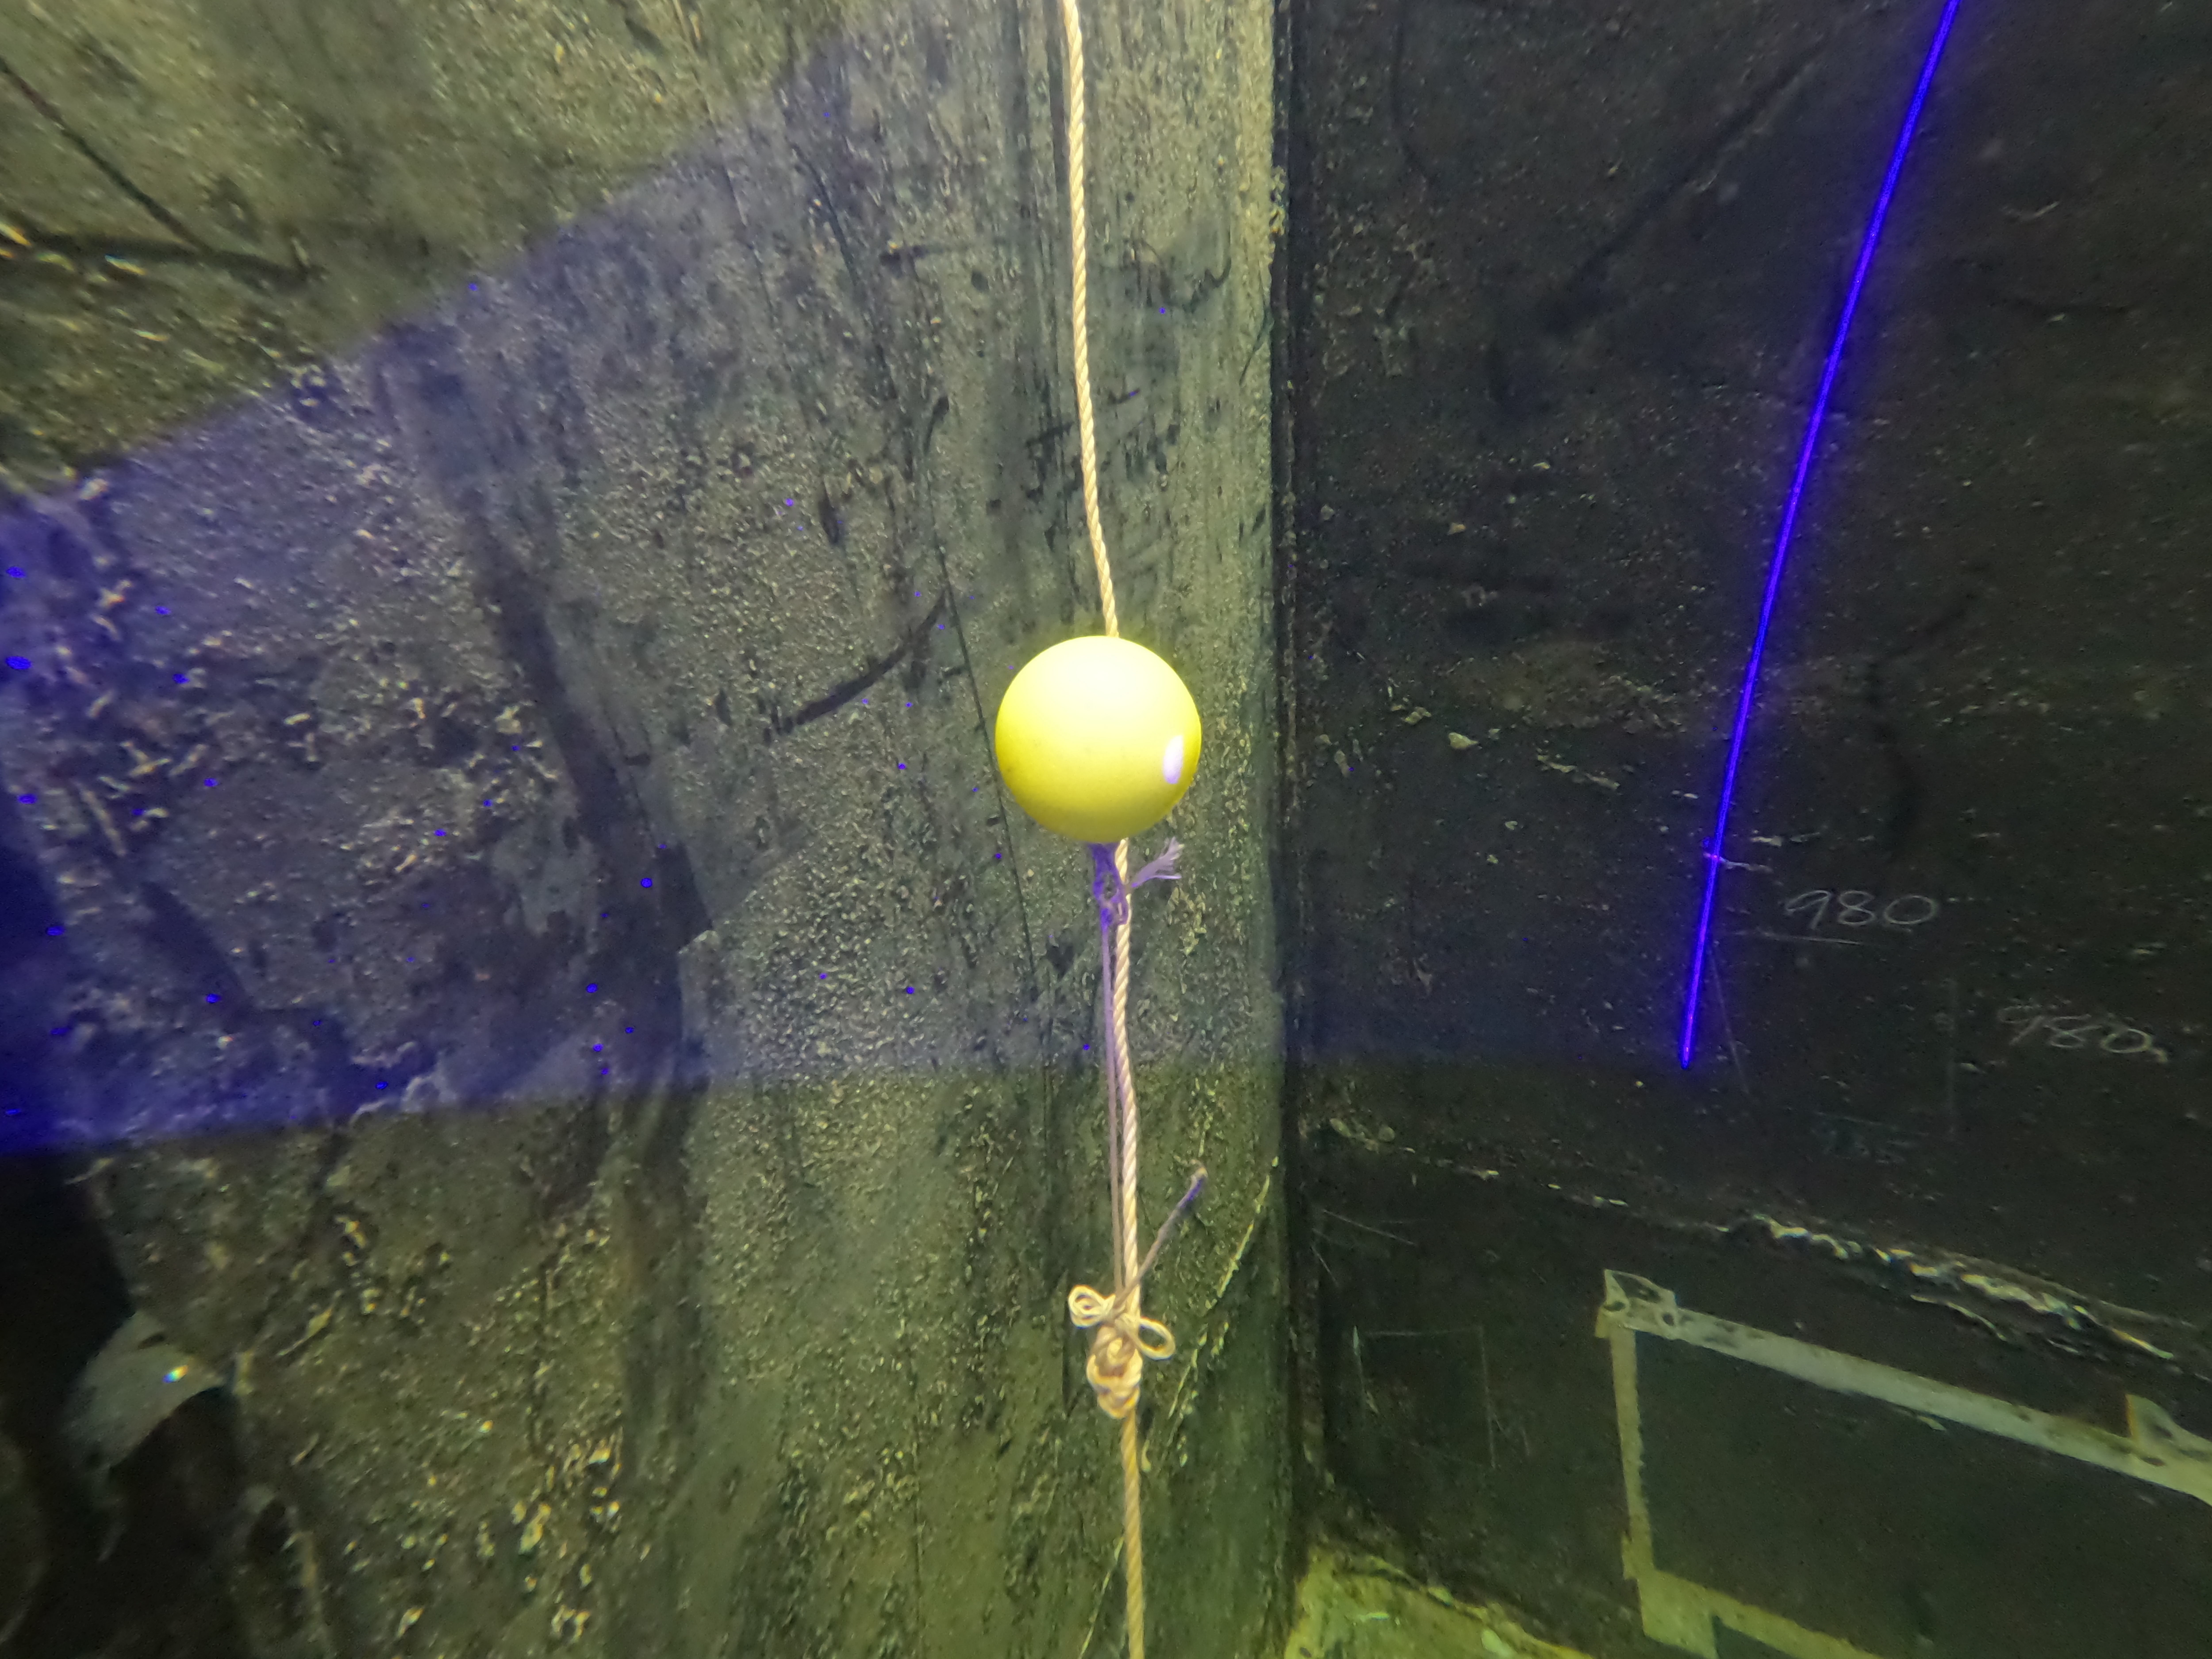

Supplement: Supplementary file 1281 [file G0032594.pdf › 6/G0032594.pdf]

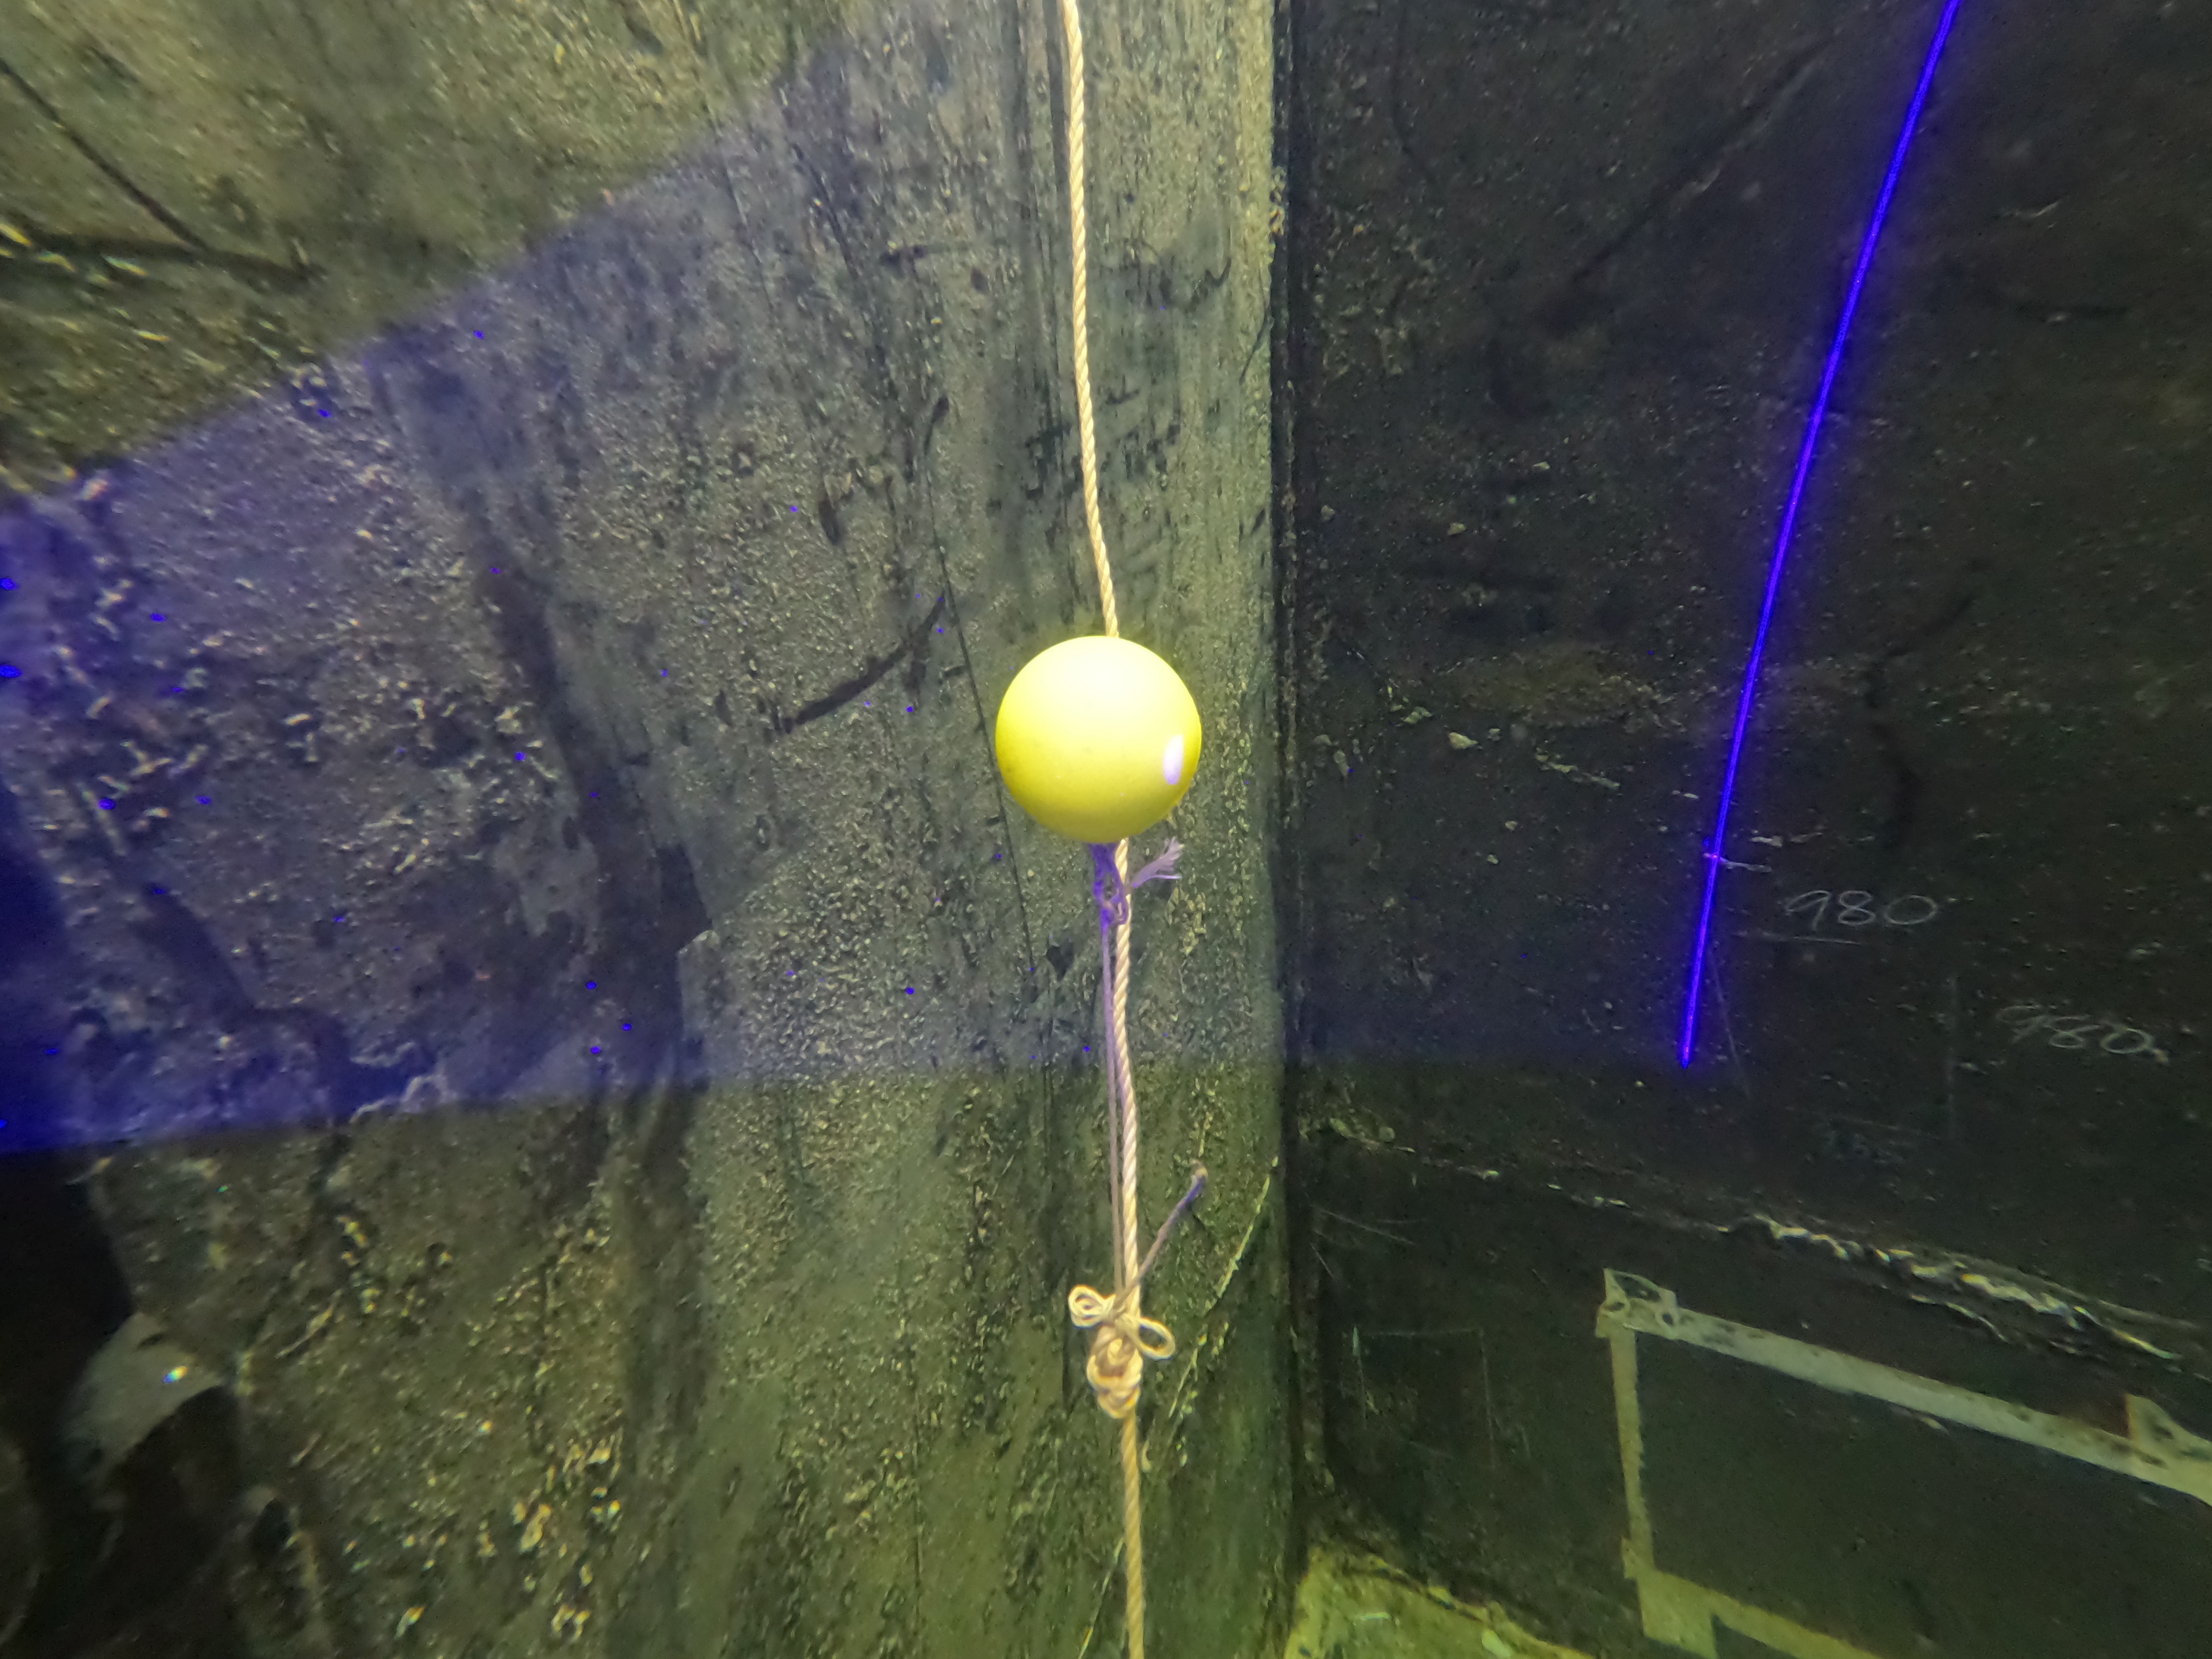

Supplement: Supplementary file 1282 [file G0032595.pdf › 6/G0032595.pdf]

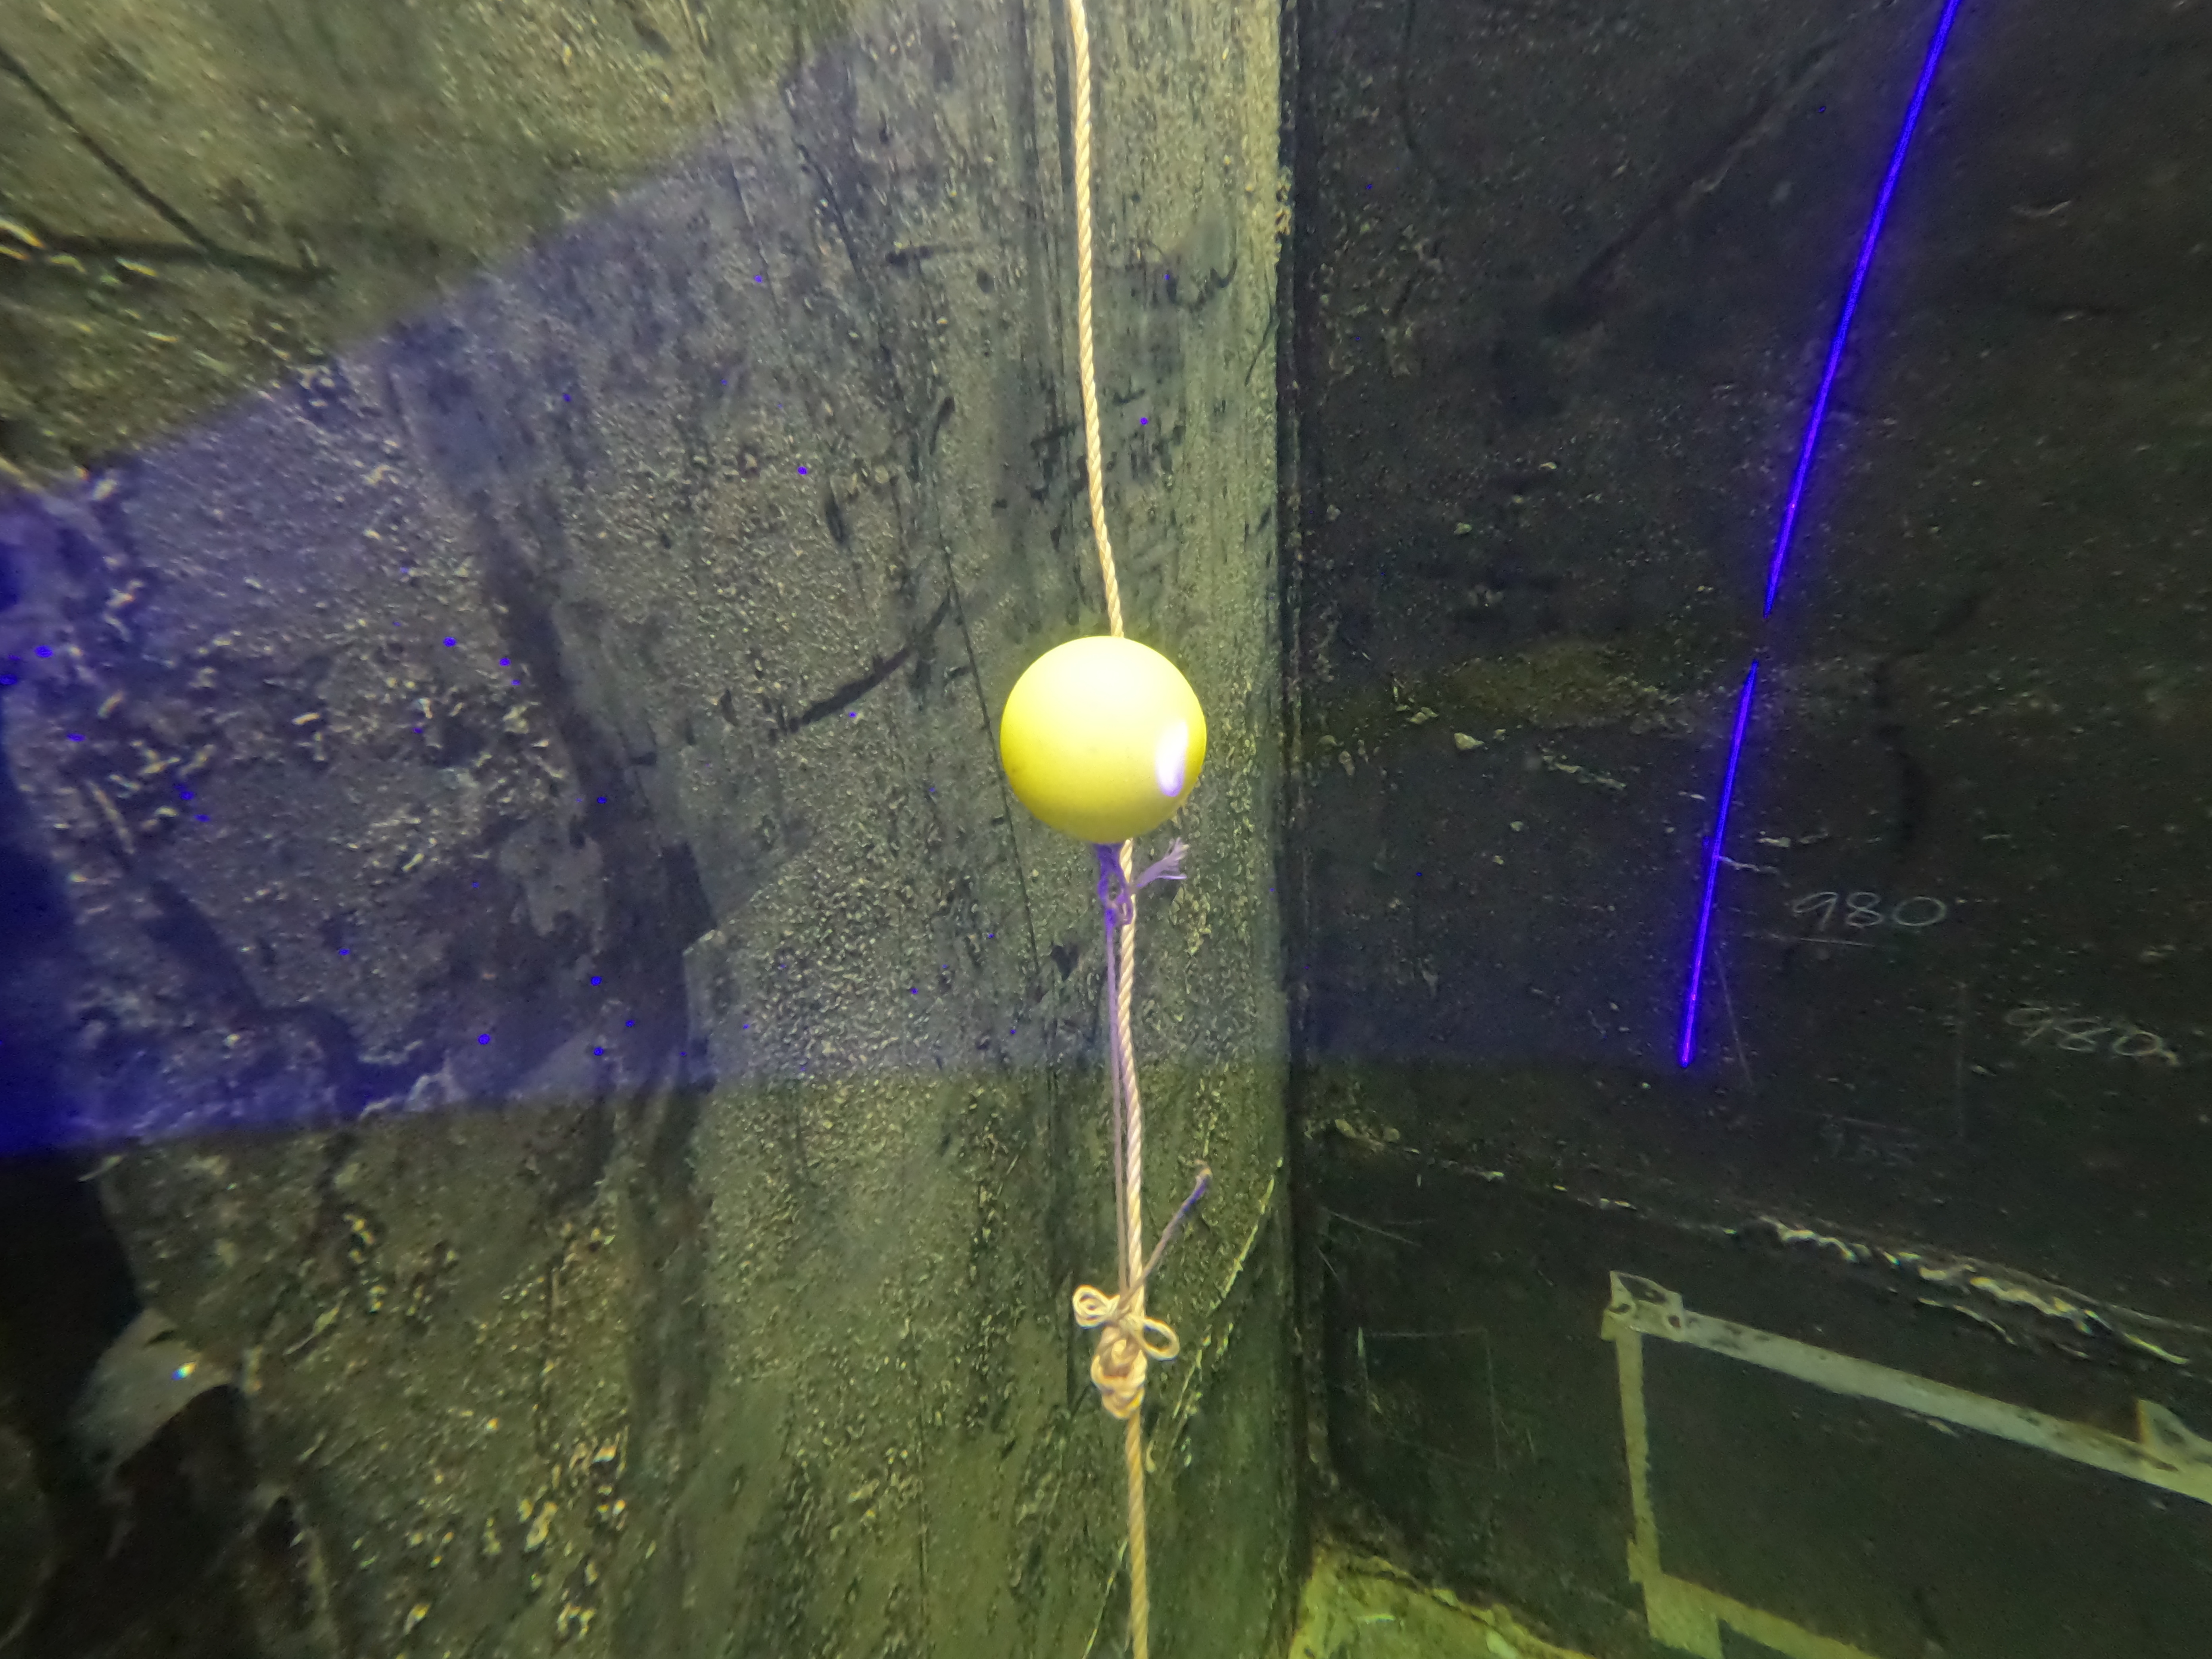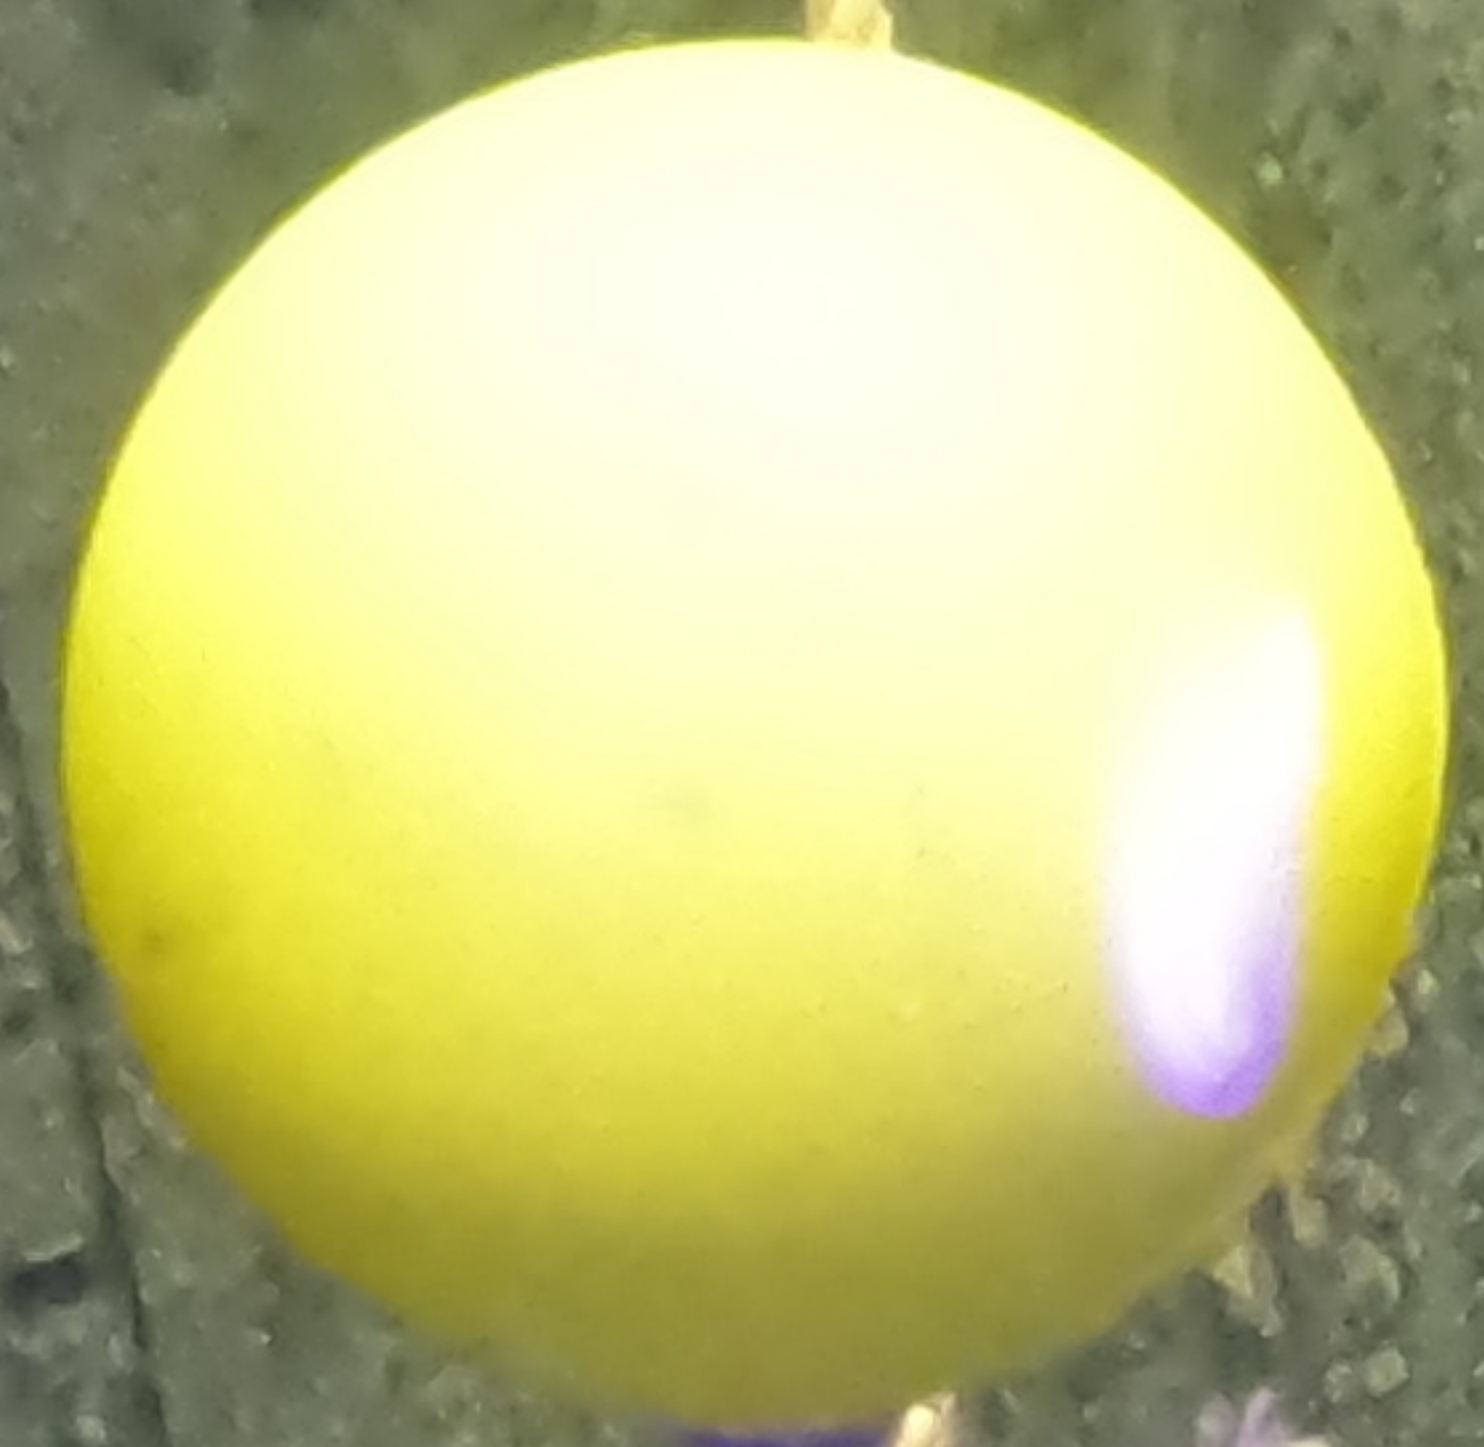

980

980

Supplement: Supplementary file 1283 [file G0032596.pdf › 6/G0032596.pdf]

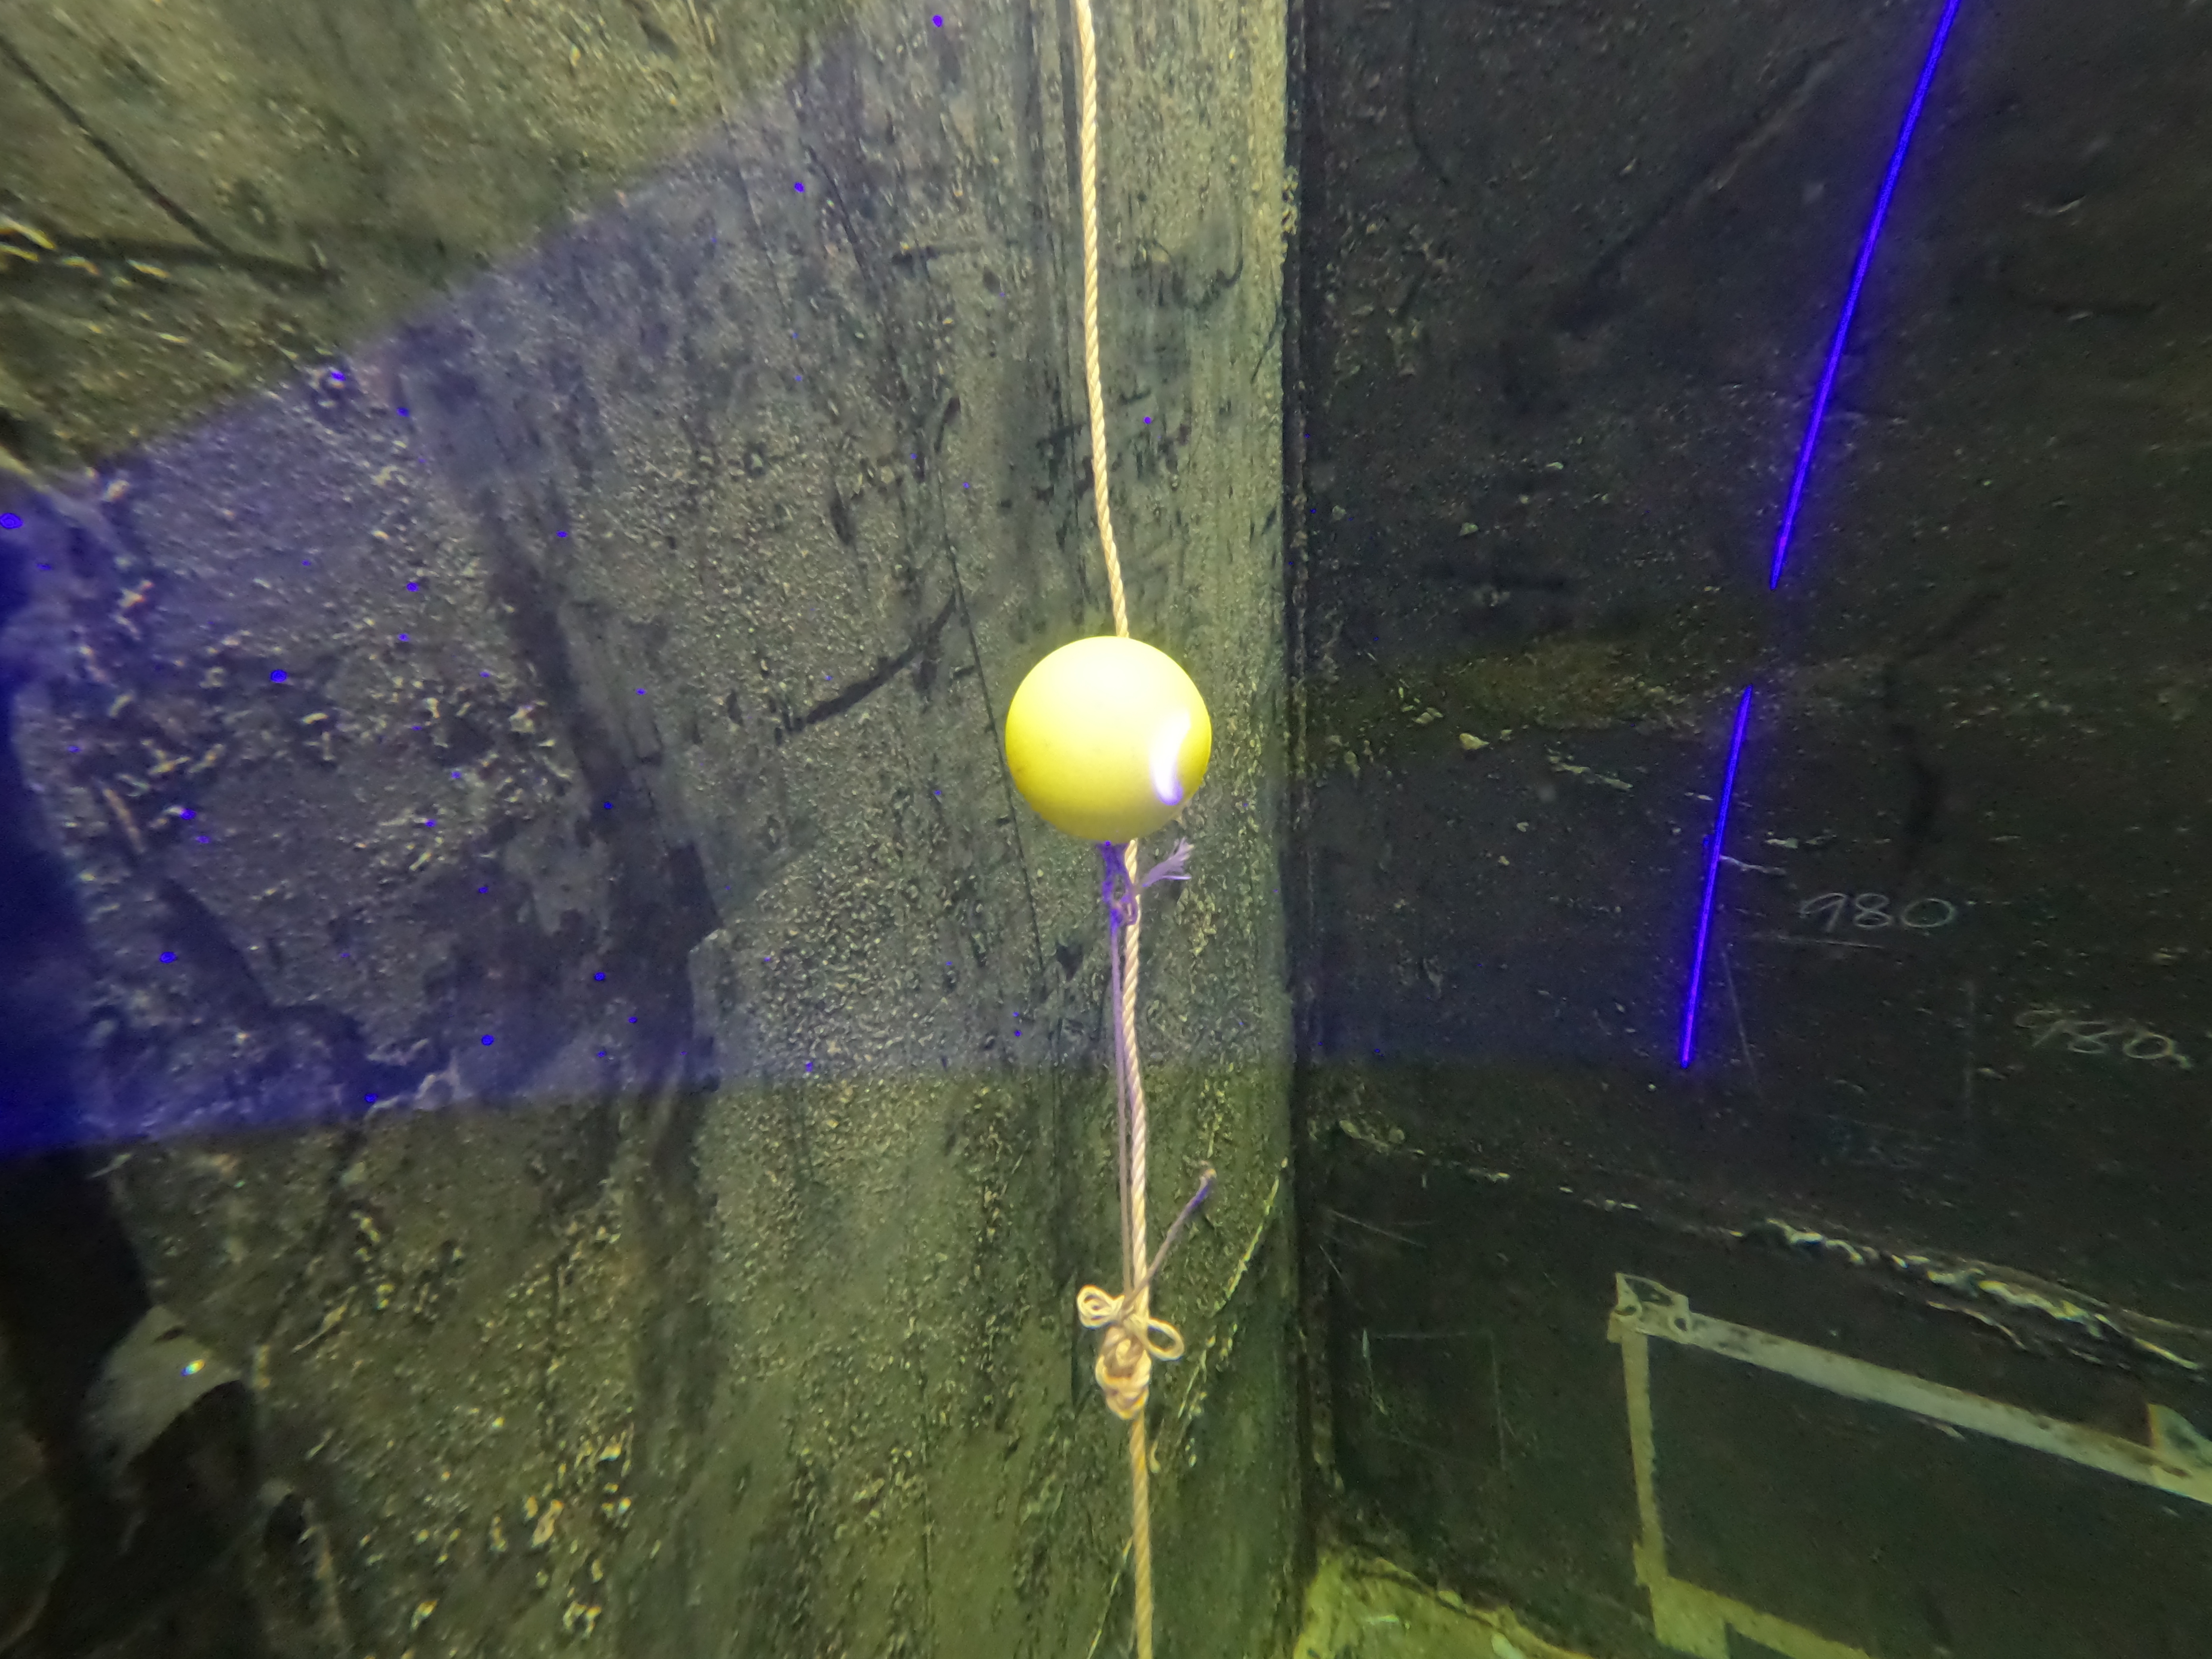

Supplement: Supplementary file 1284 [file G0032597.pdf › 6/G0032597.pdf]

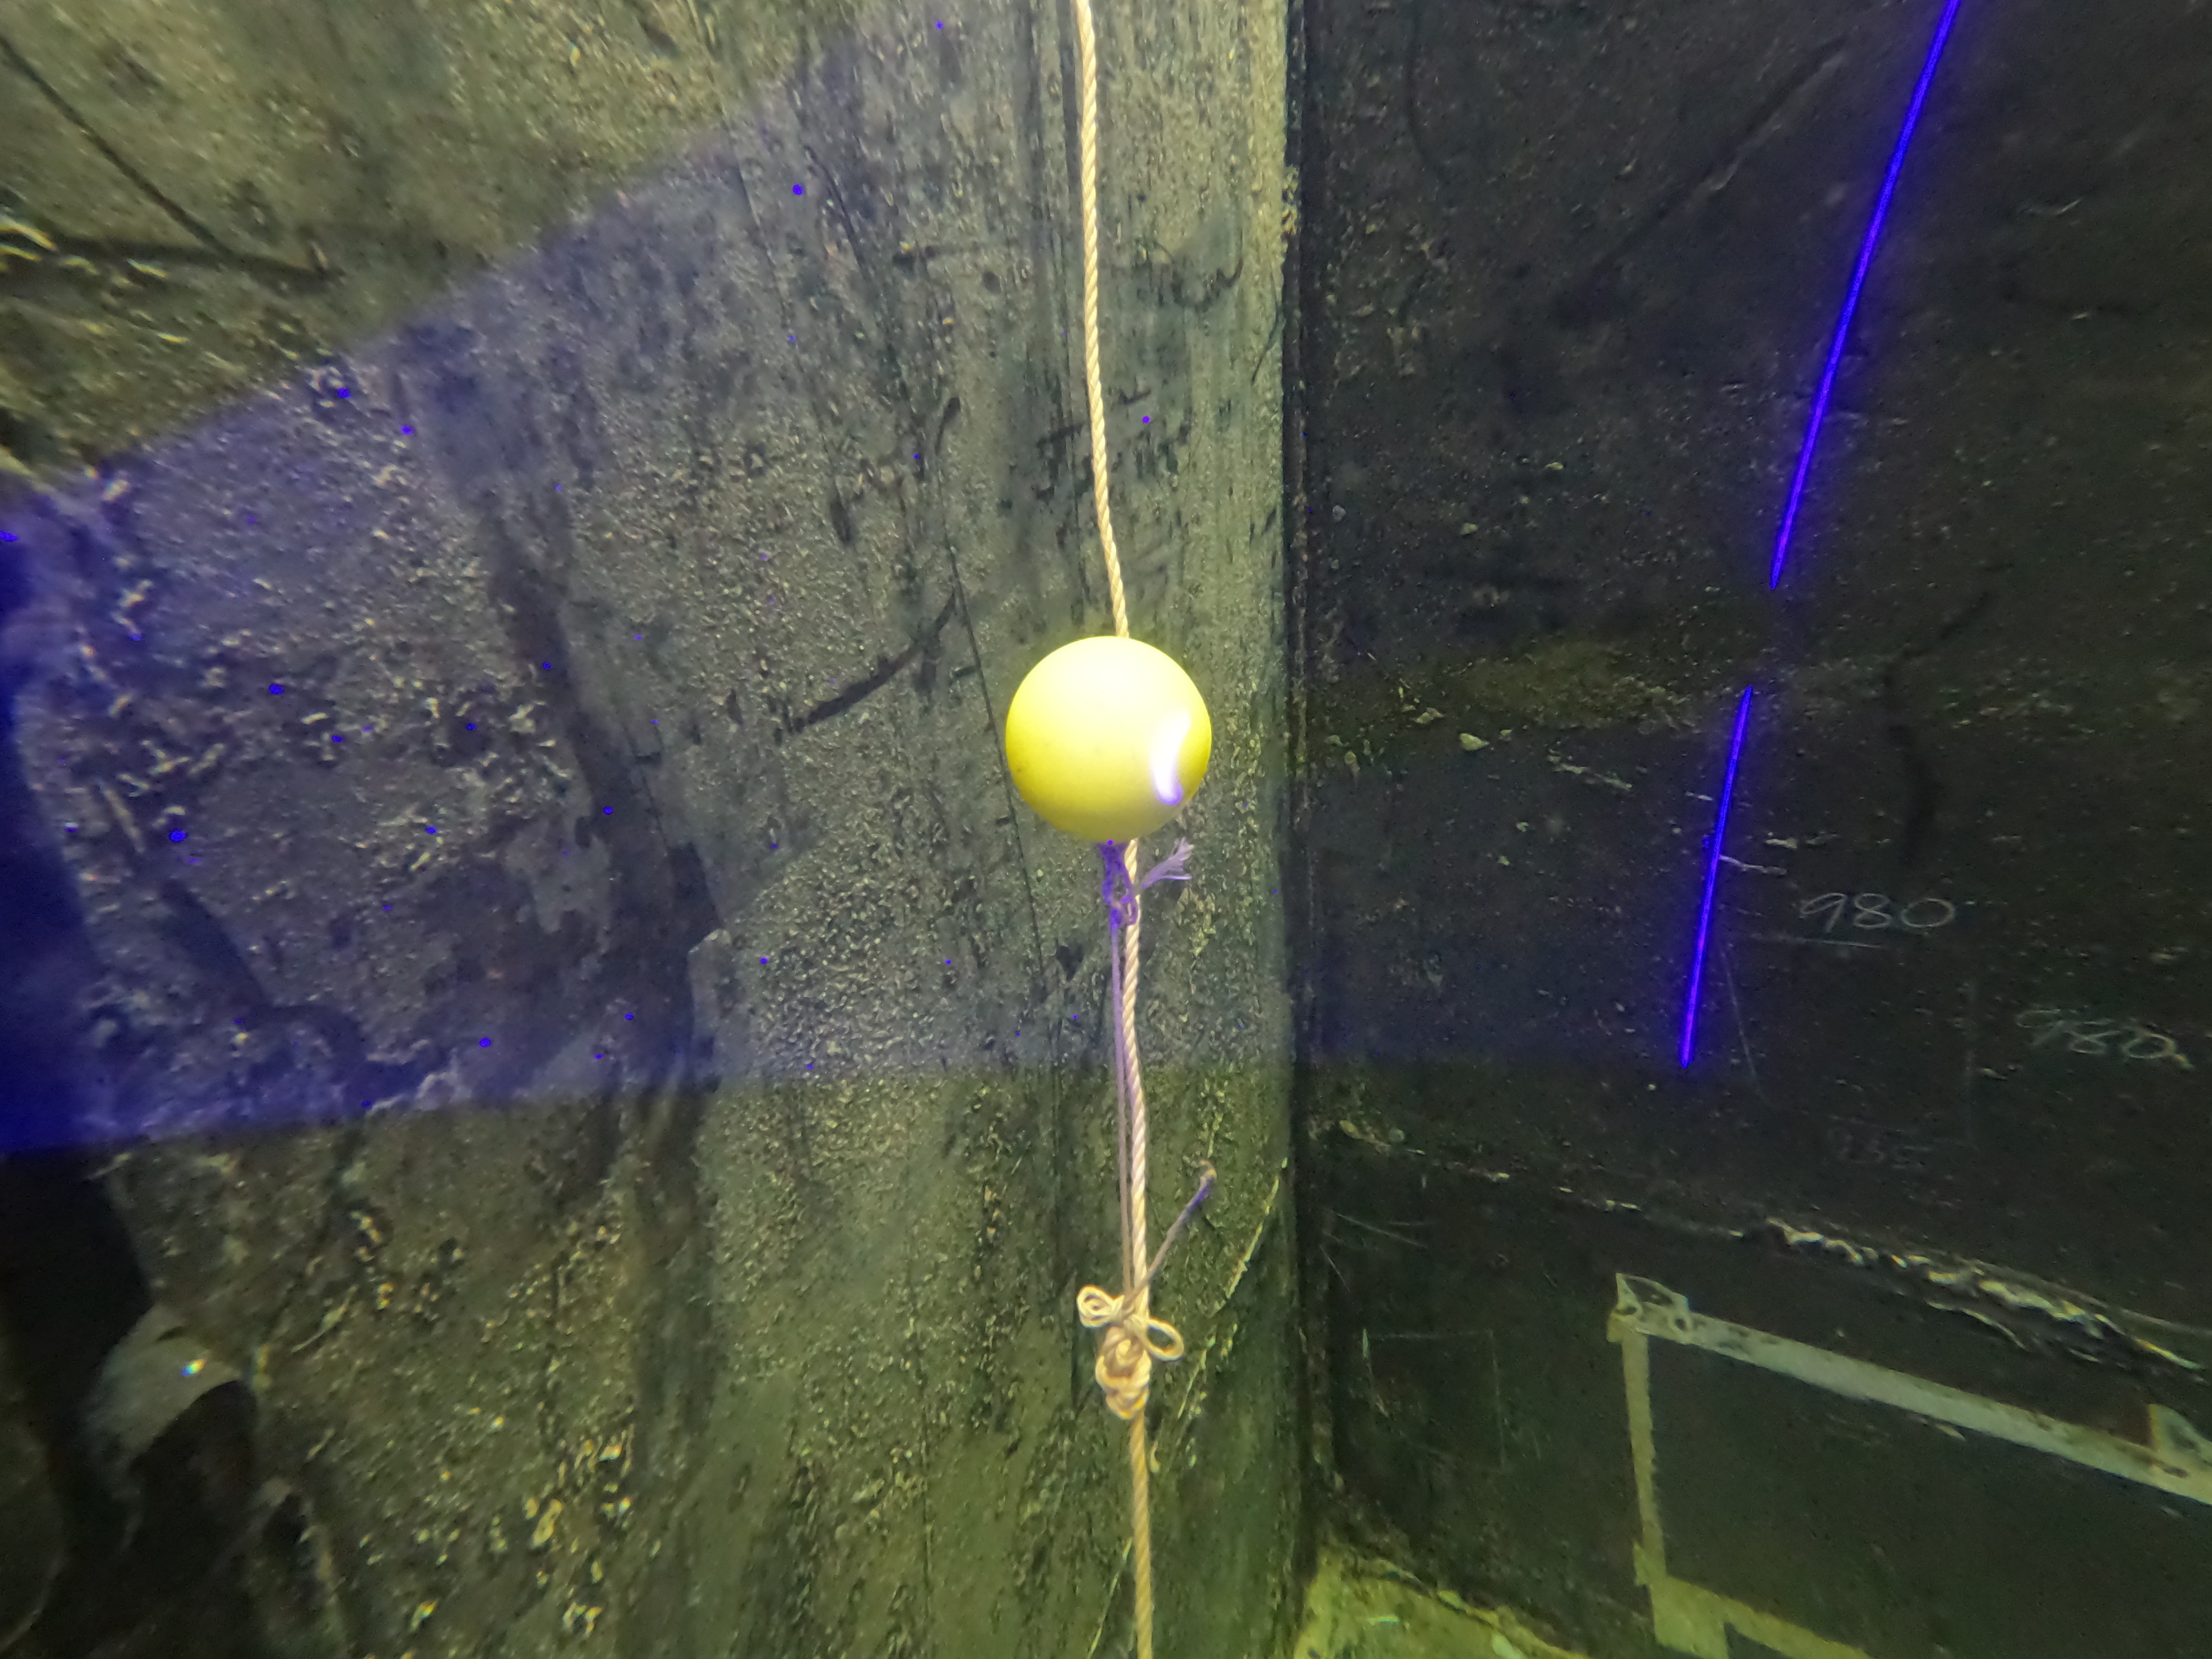

Supplement: Supplementary file 1285 [file G0032598.pdf › 6/G0032598.pdf]

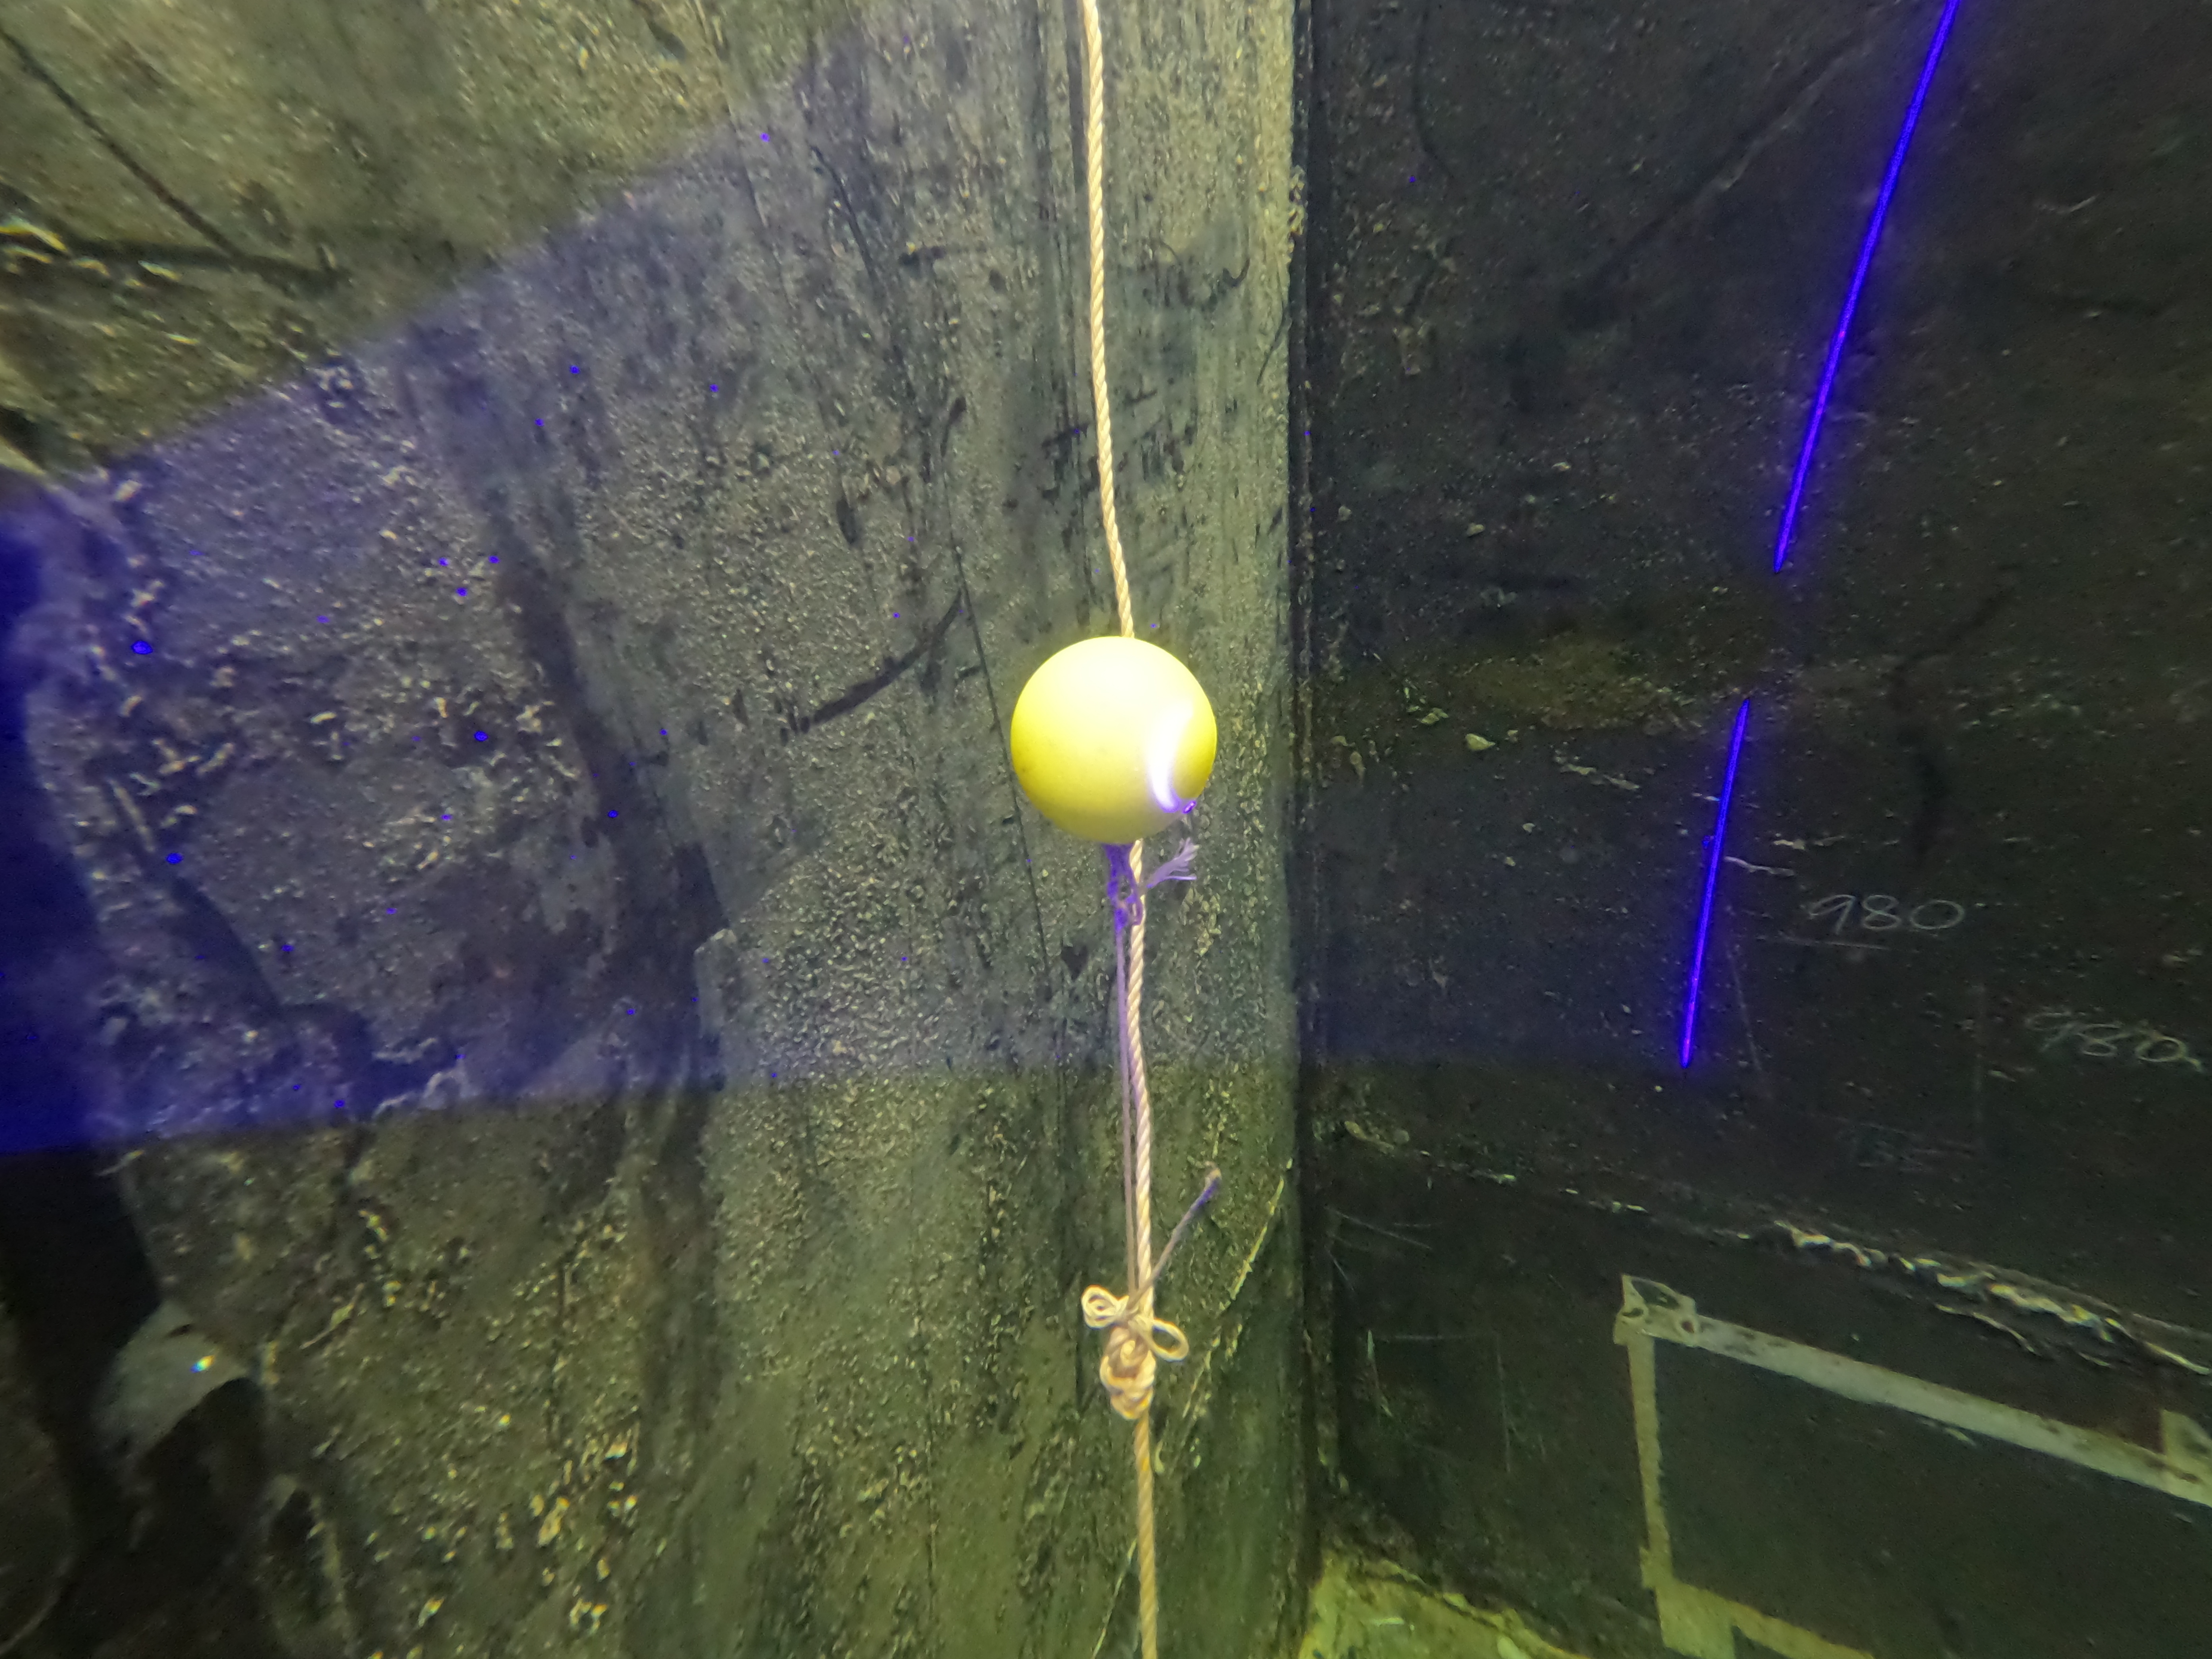

Supplement: Supplementary file 1286 [file G0032599.pdf › 6/G0032599.pdf]

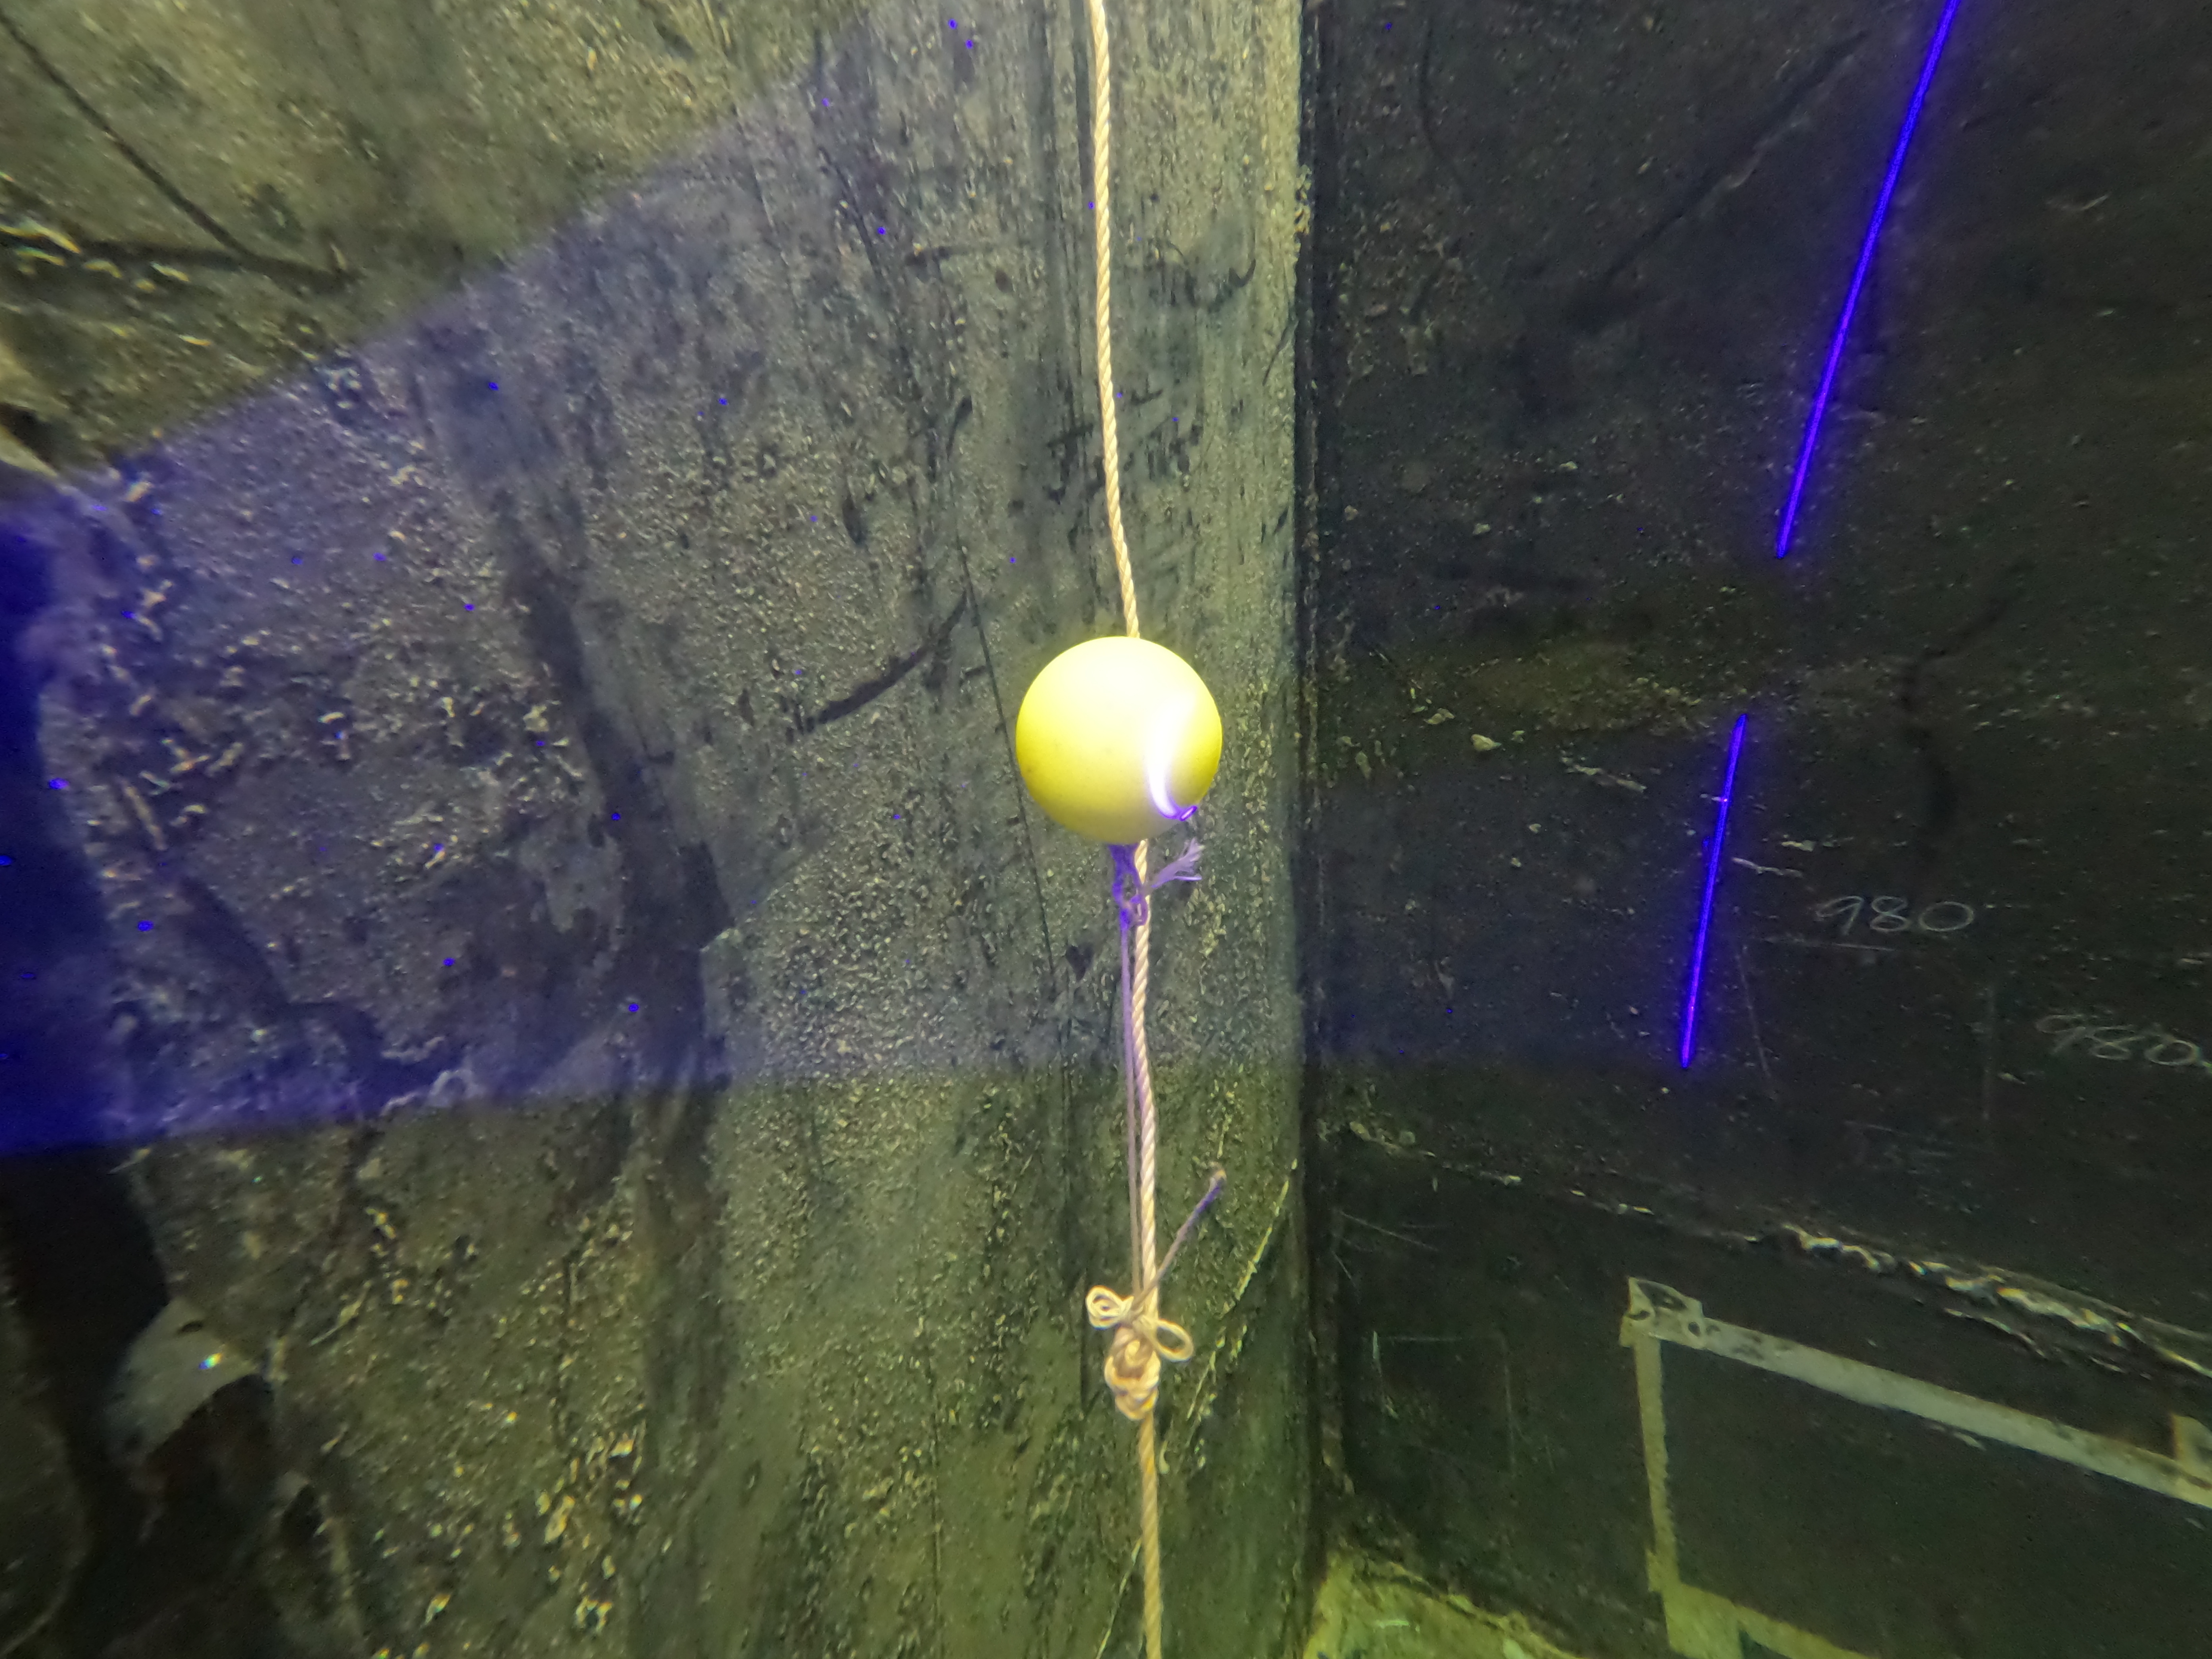

Supplement: Supplementary file 1287 [file G0032600.pdf › 6/G0032600.pdf]

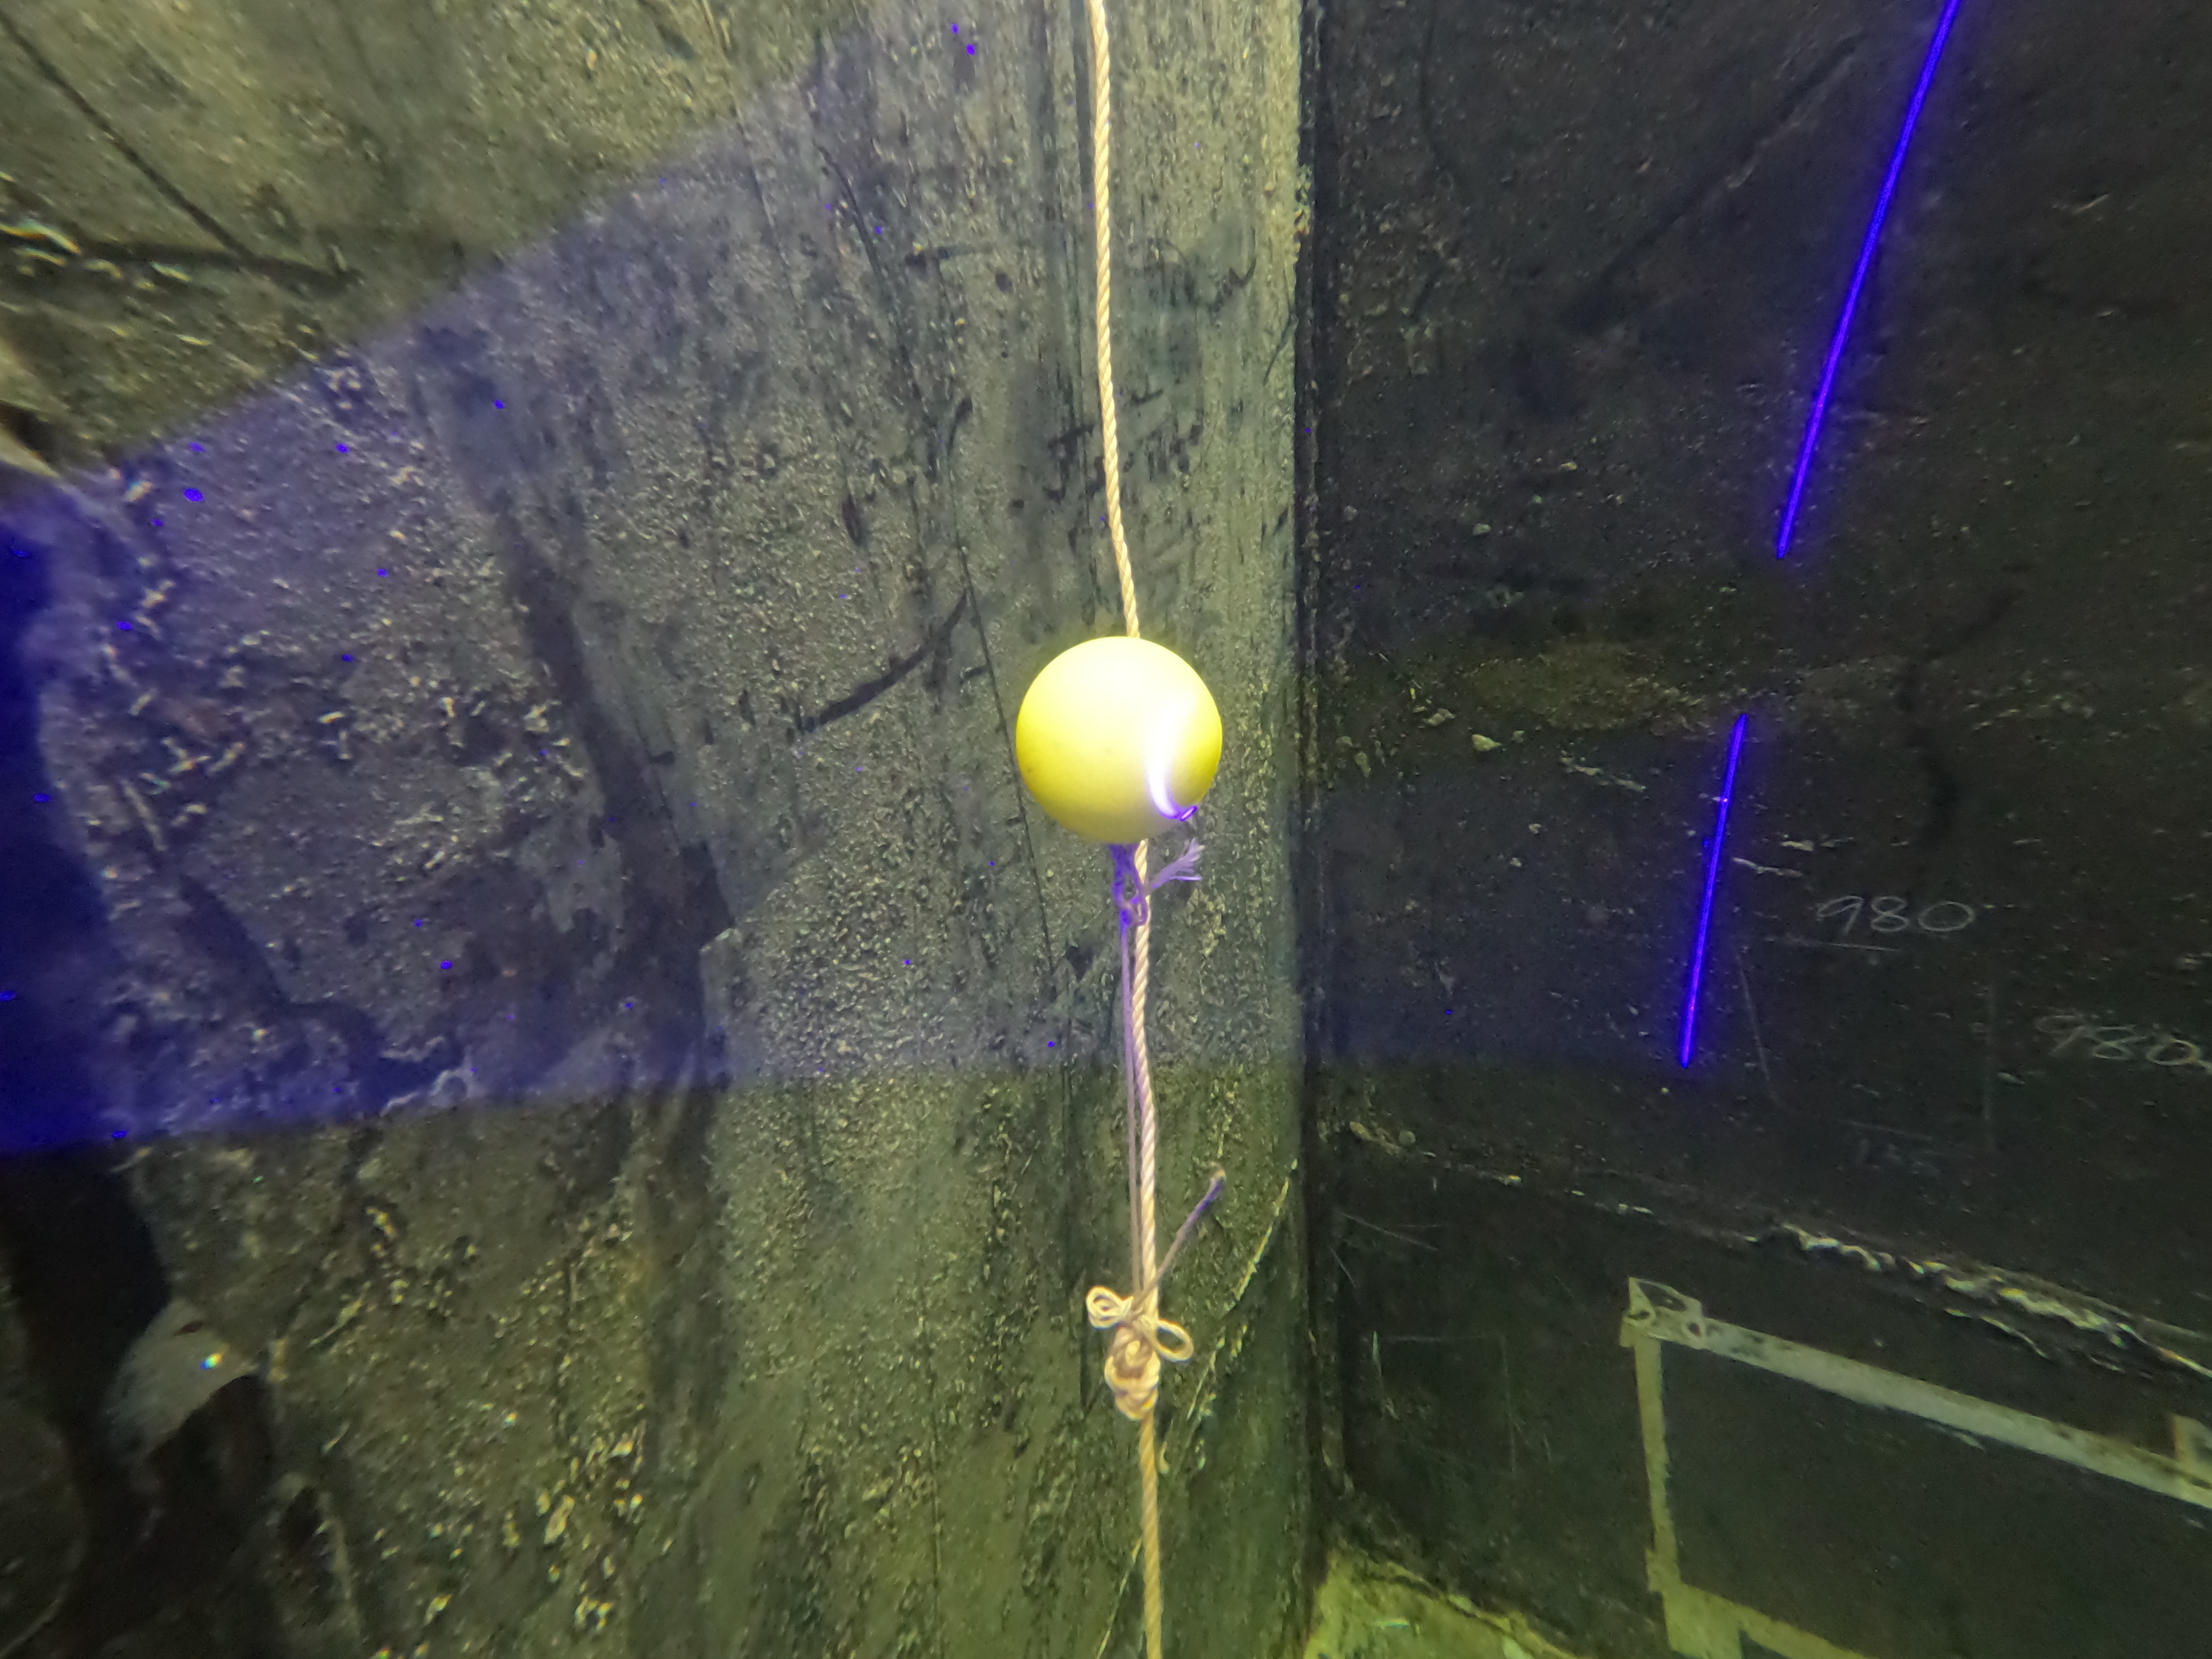

980

980

Supplement: Supplementary file 1288 [file G0032601.pdf › 6/G0032601.pdf]

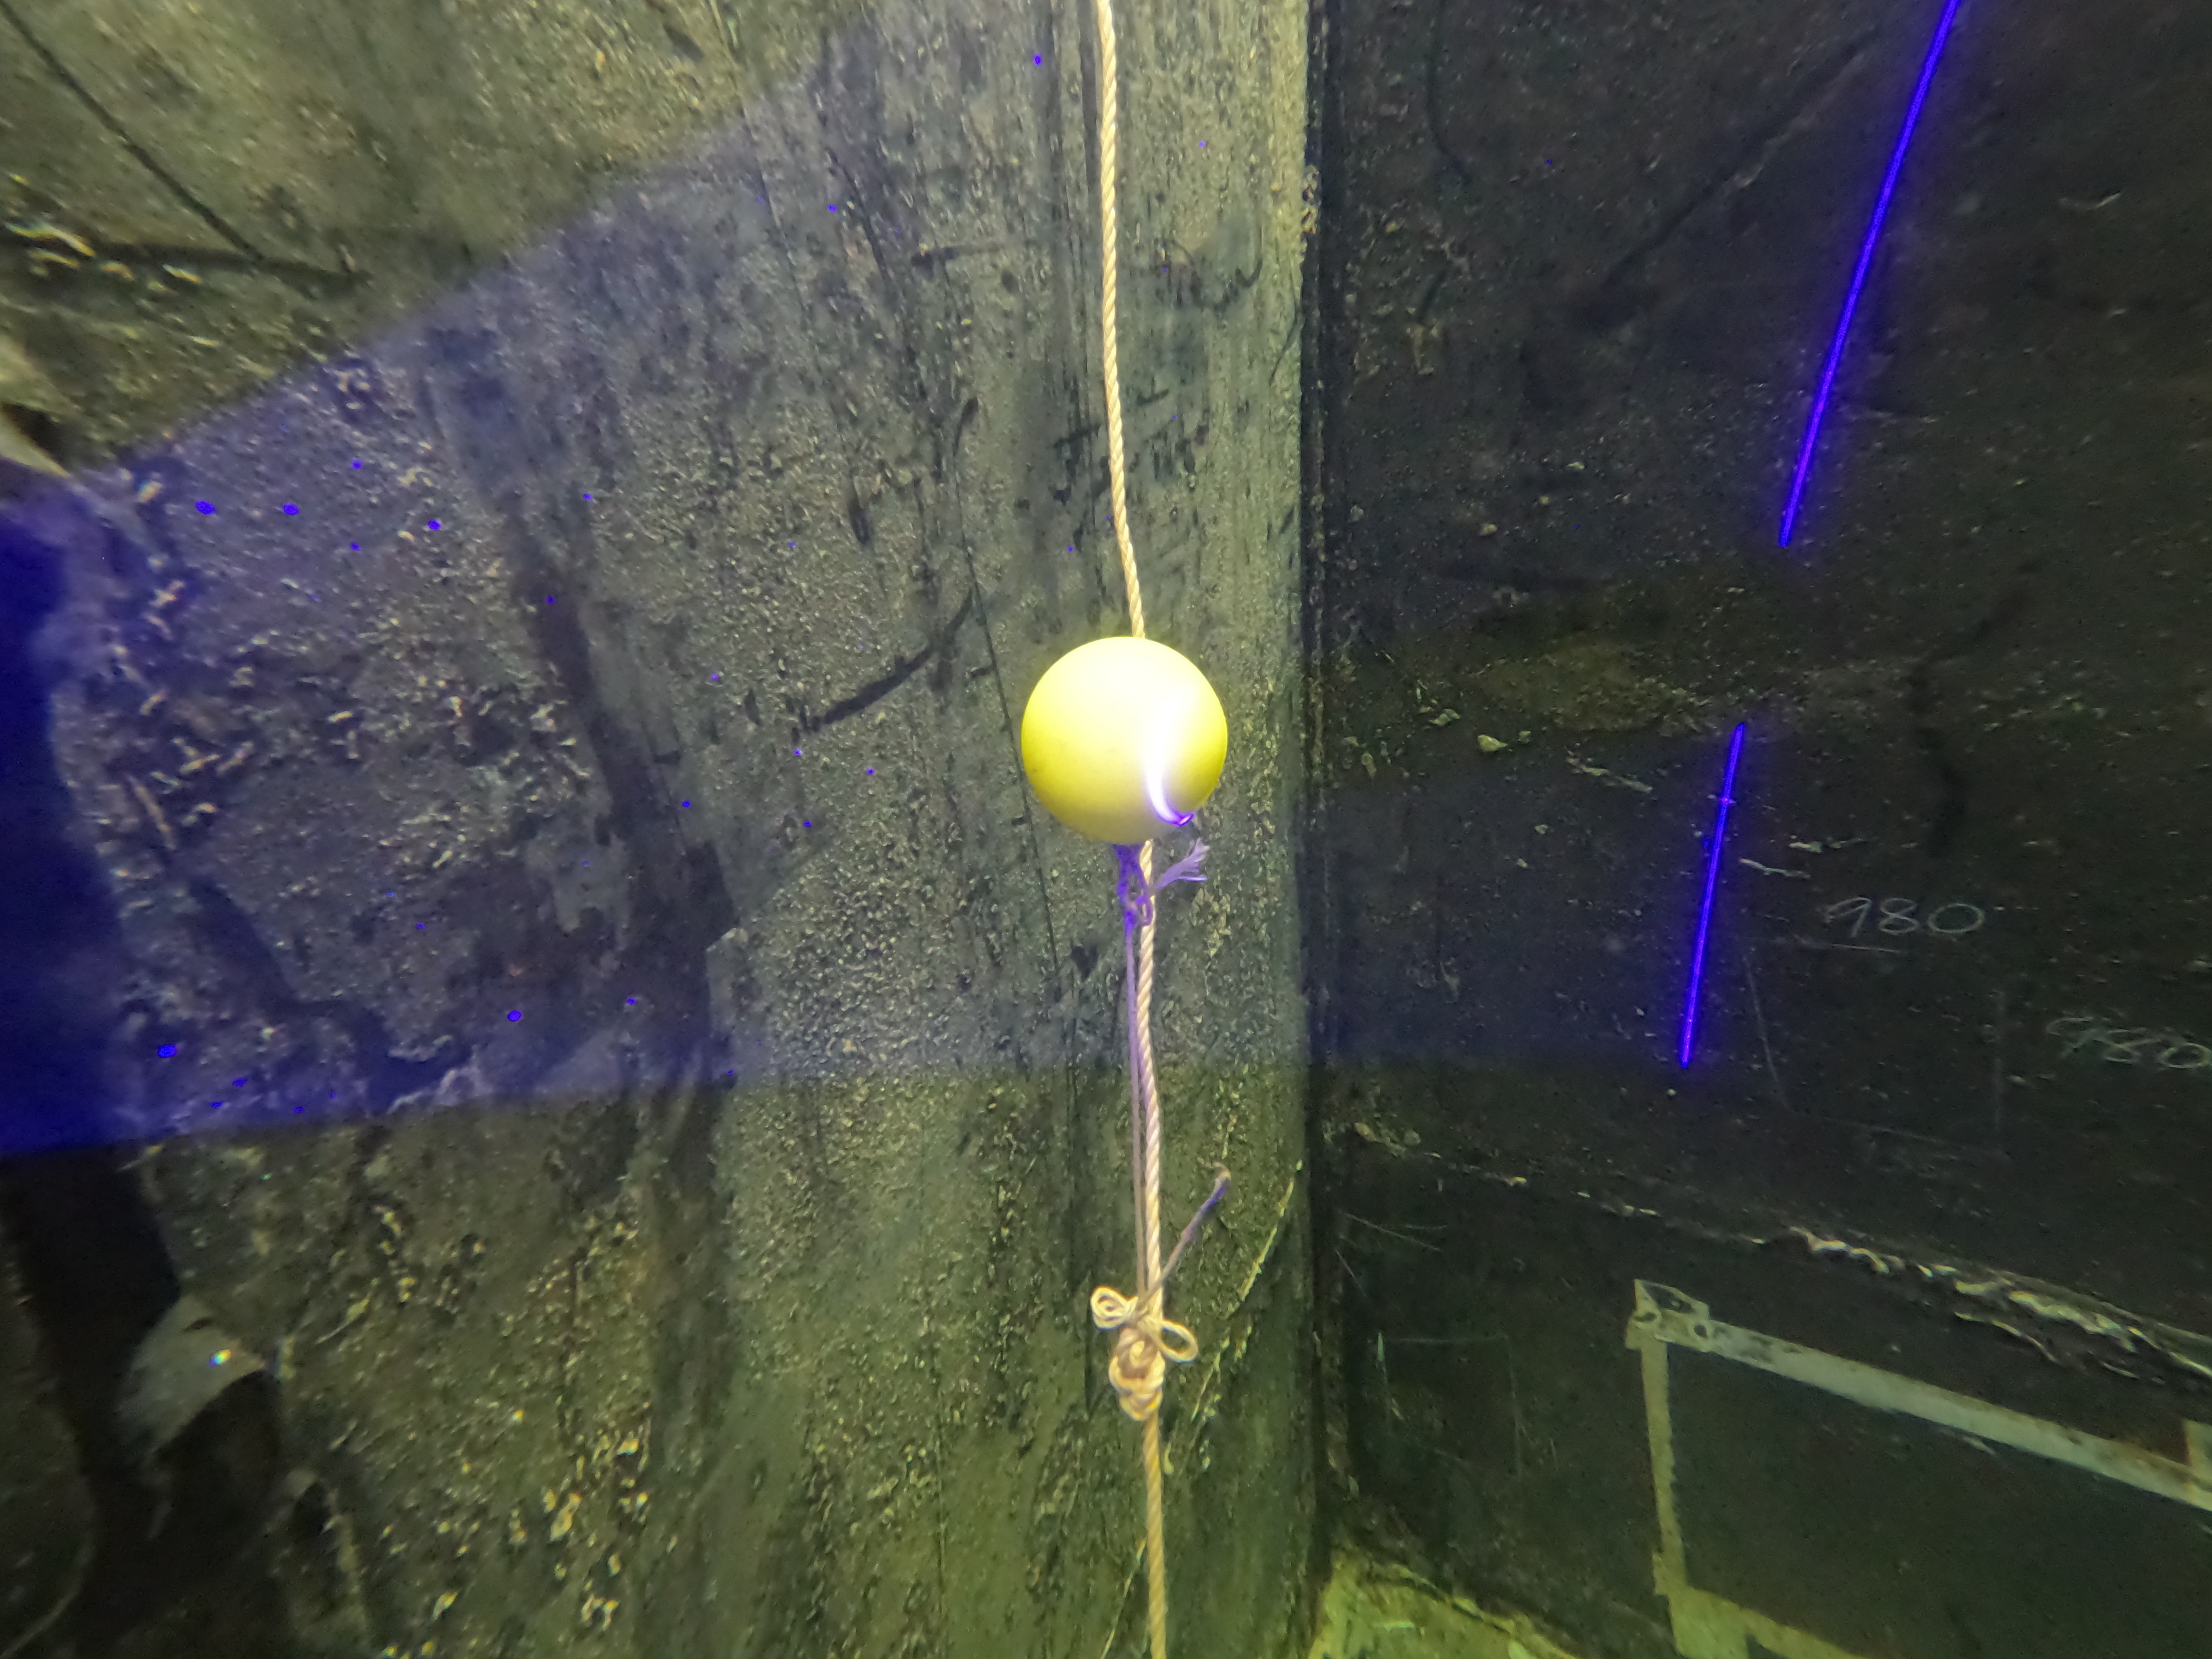

Supplement: Supplementary file 1289 [file G0032602.pdf › 6/G0032602.pdf]

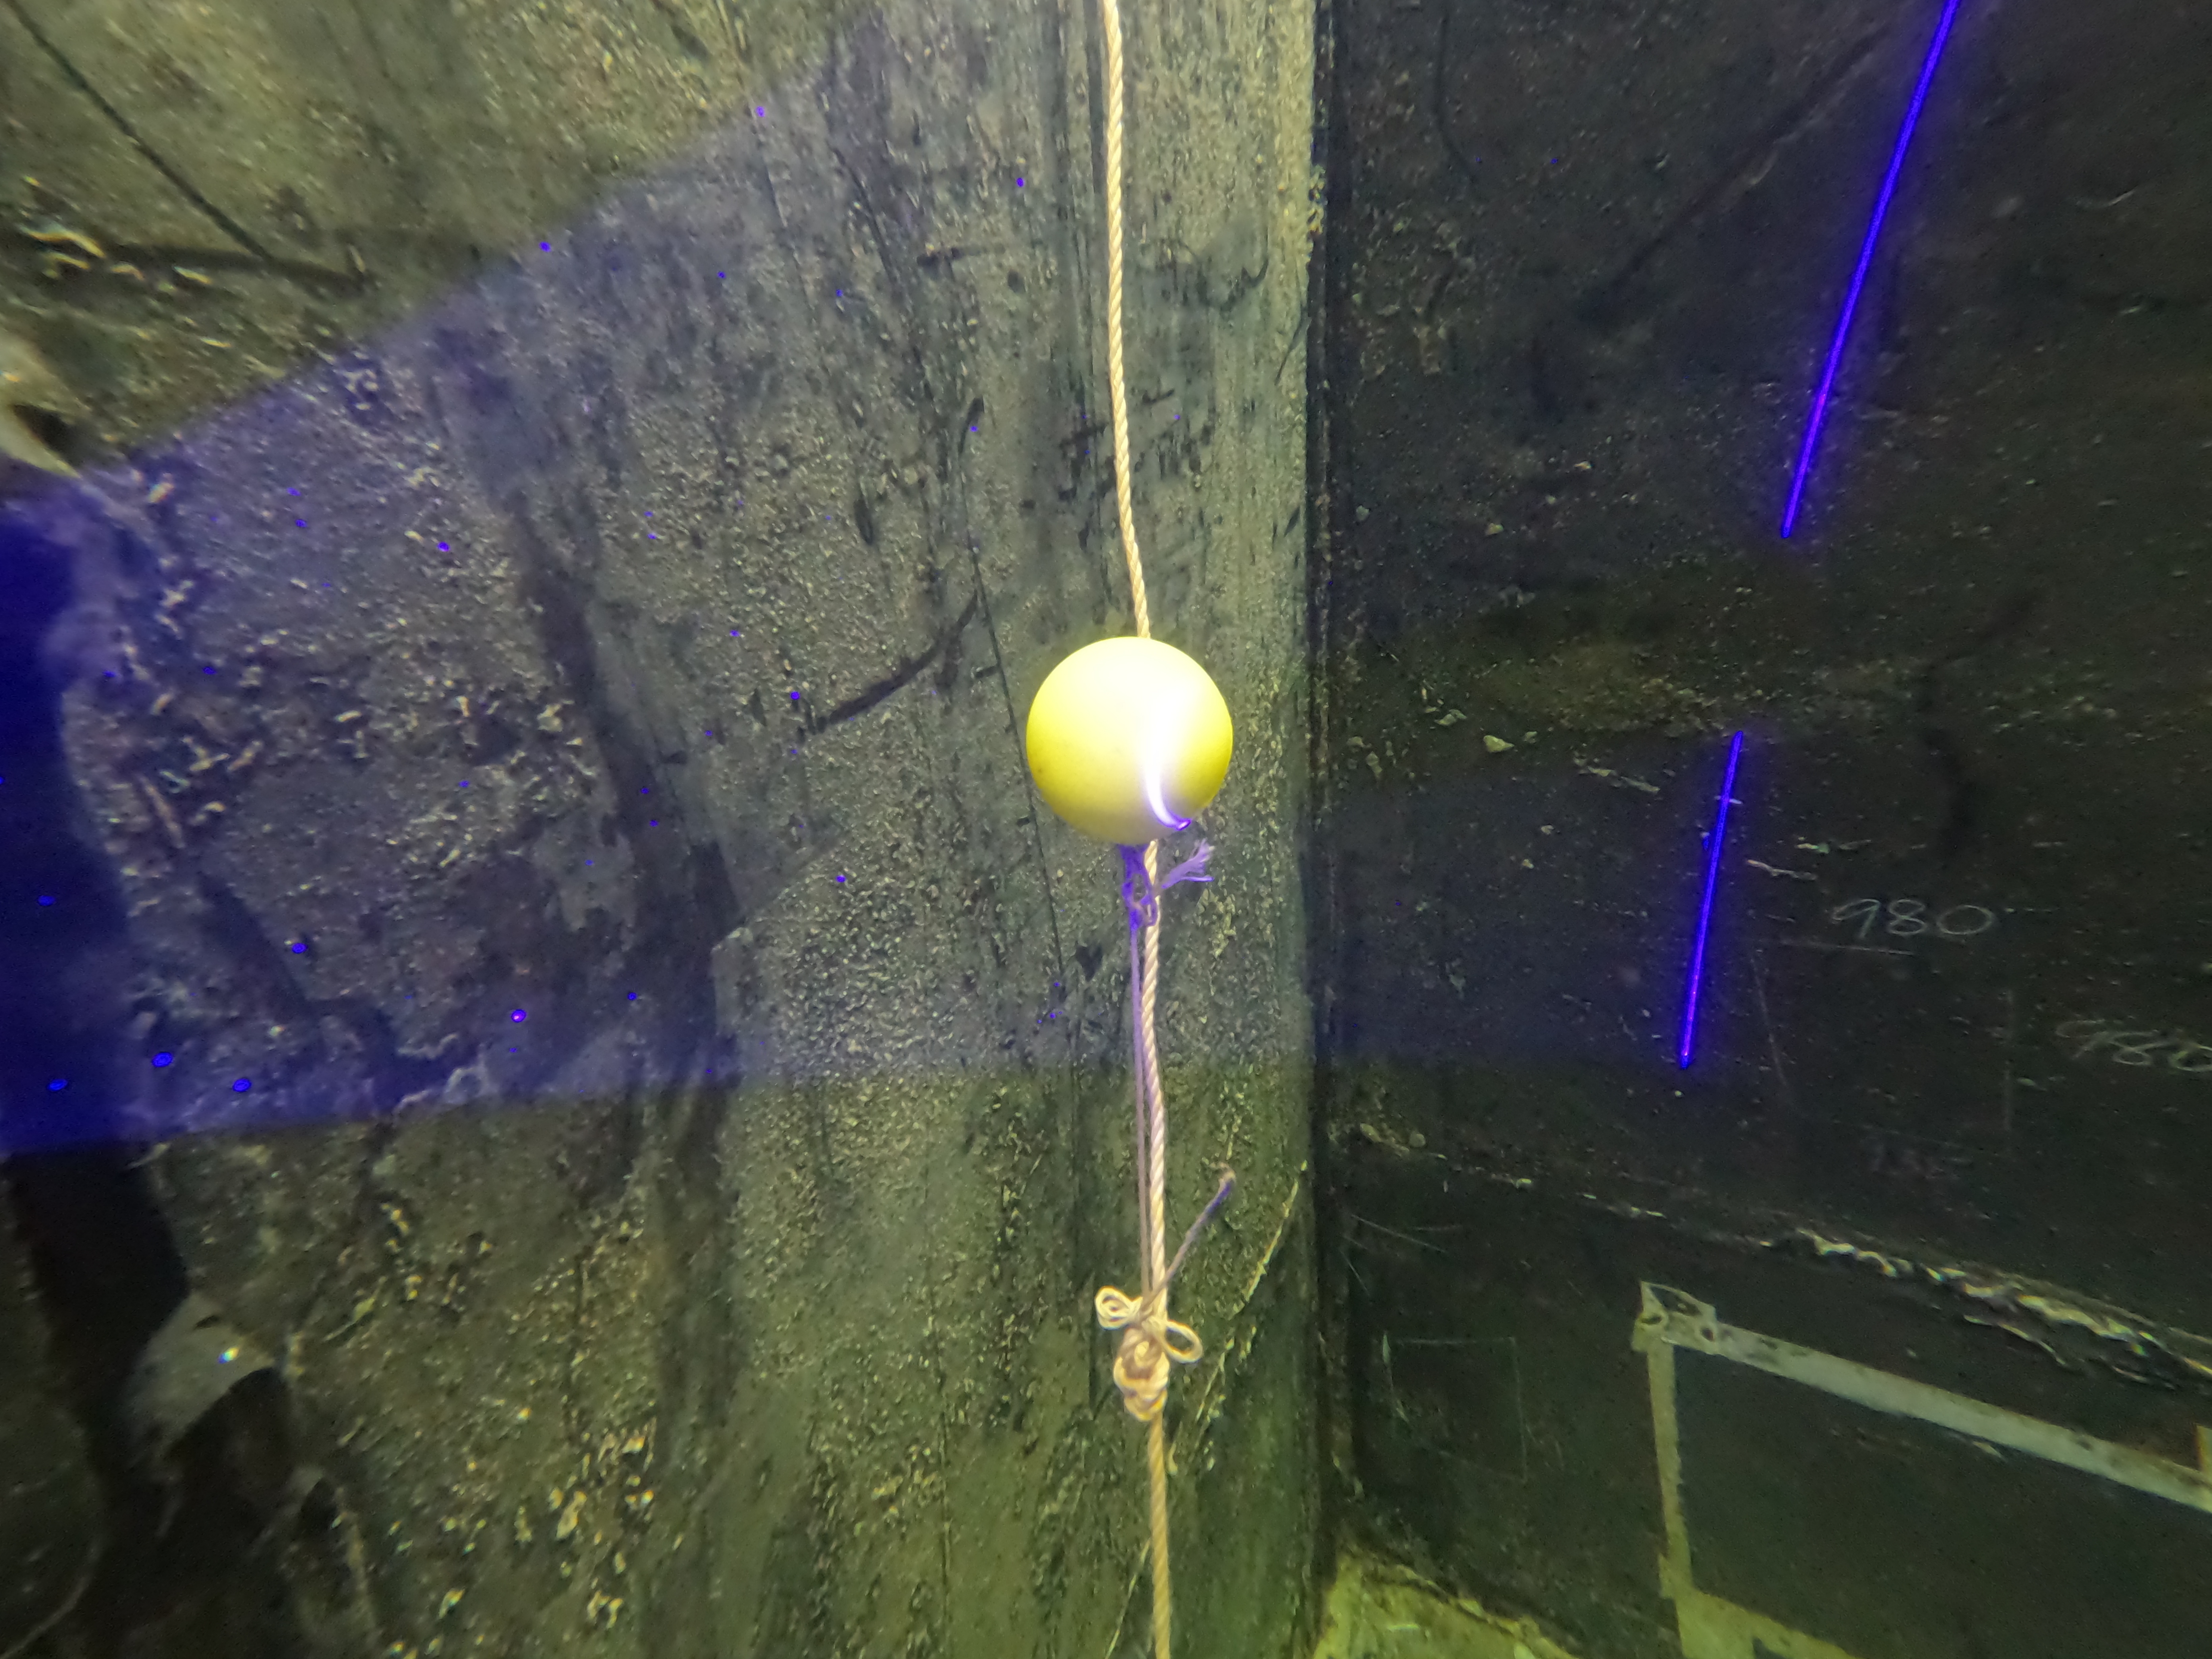

Supplement: Supplementary file 1290 [file G0032603.pdf › 6/G0032603.pdf]

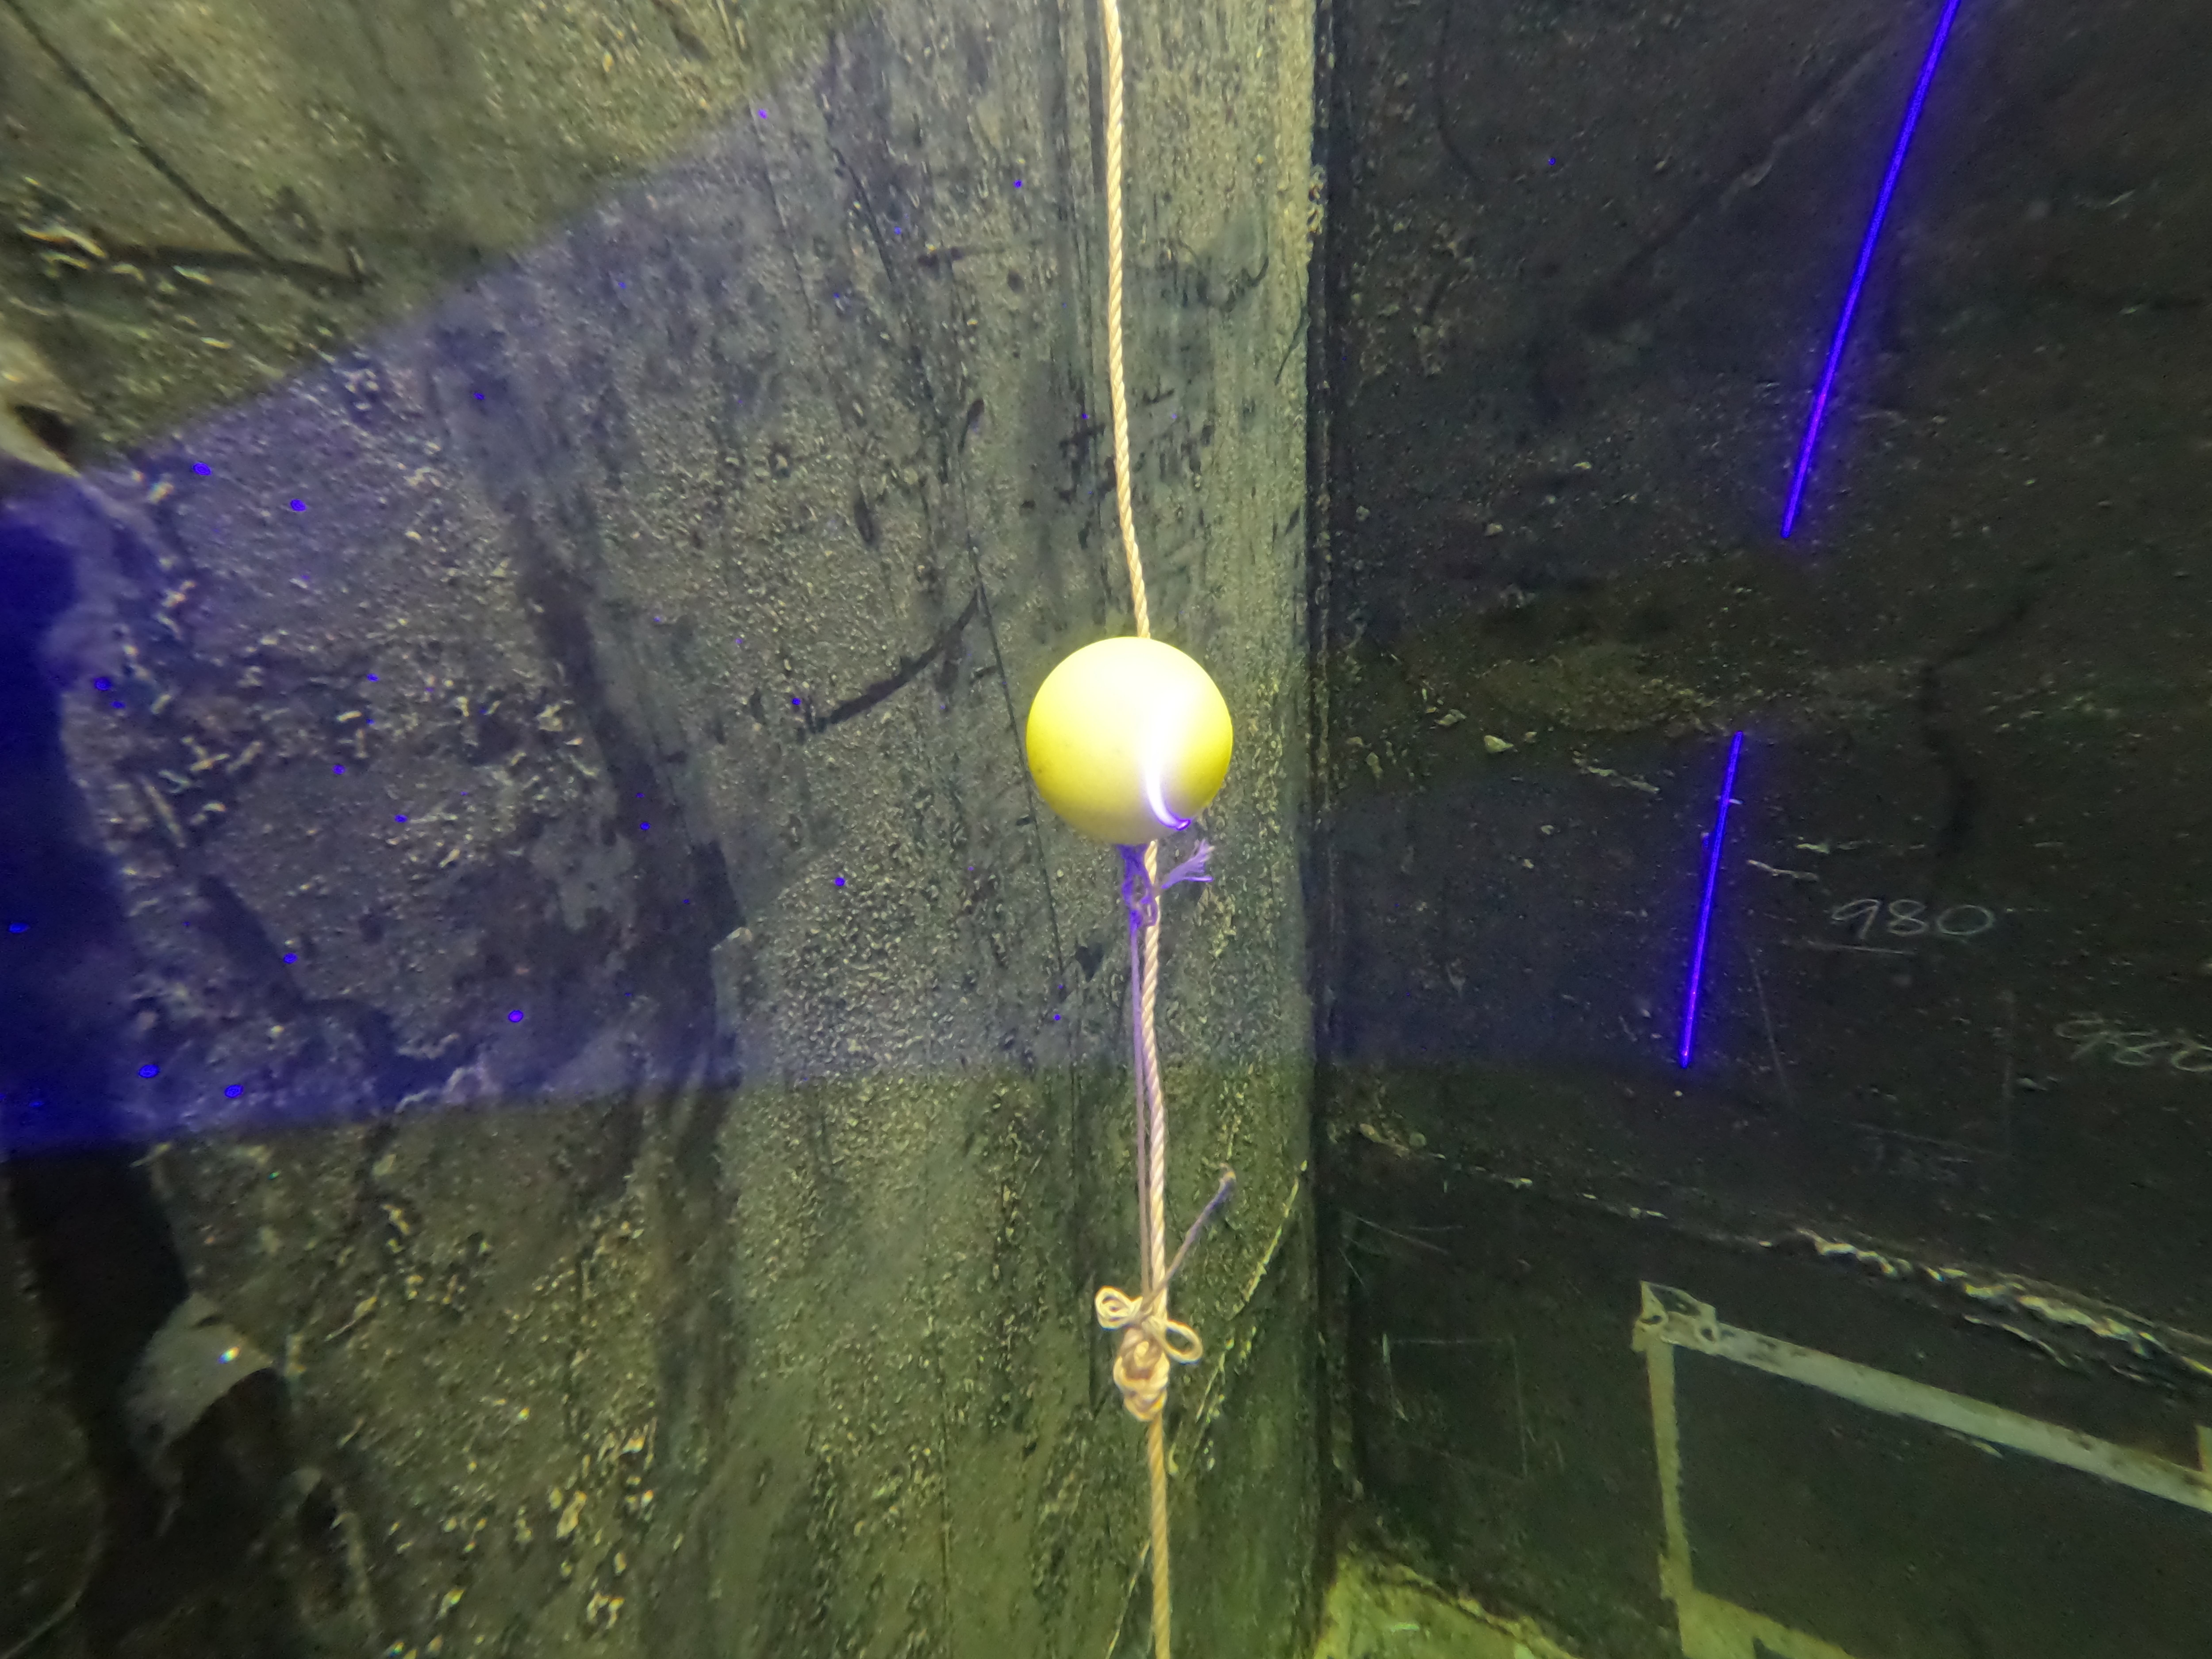

Supplement: Supplementary file 1291 [file G0032604.pdf › 6/G0032604.pdf]

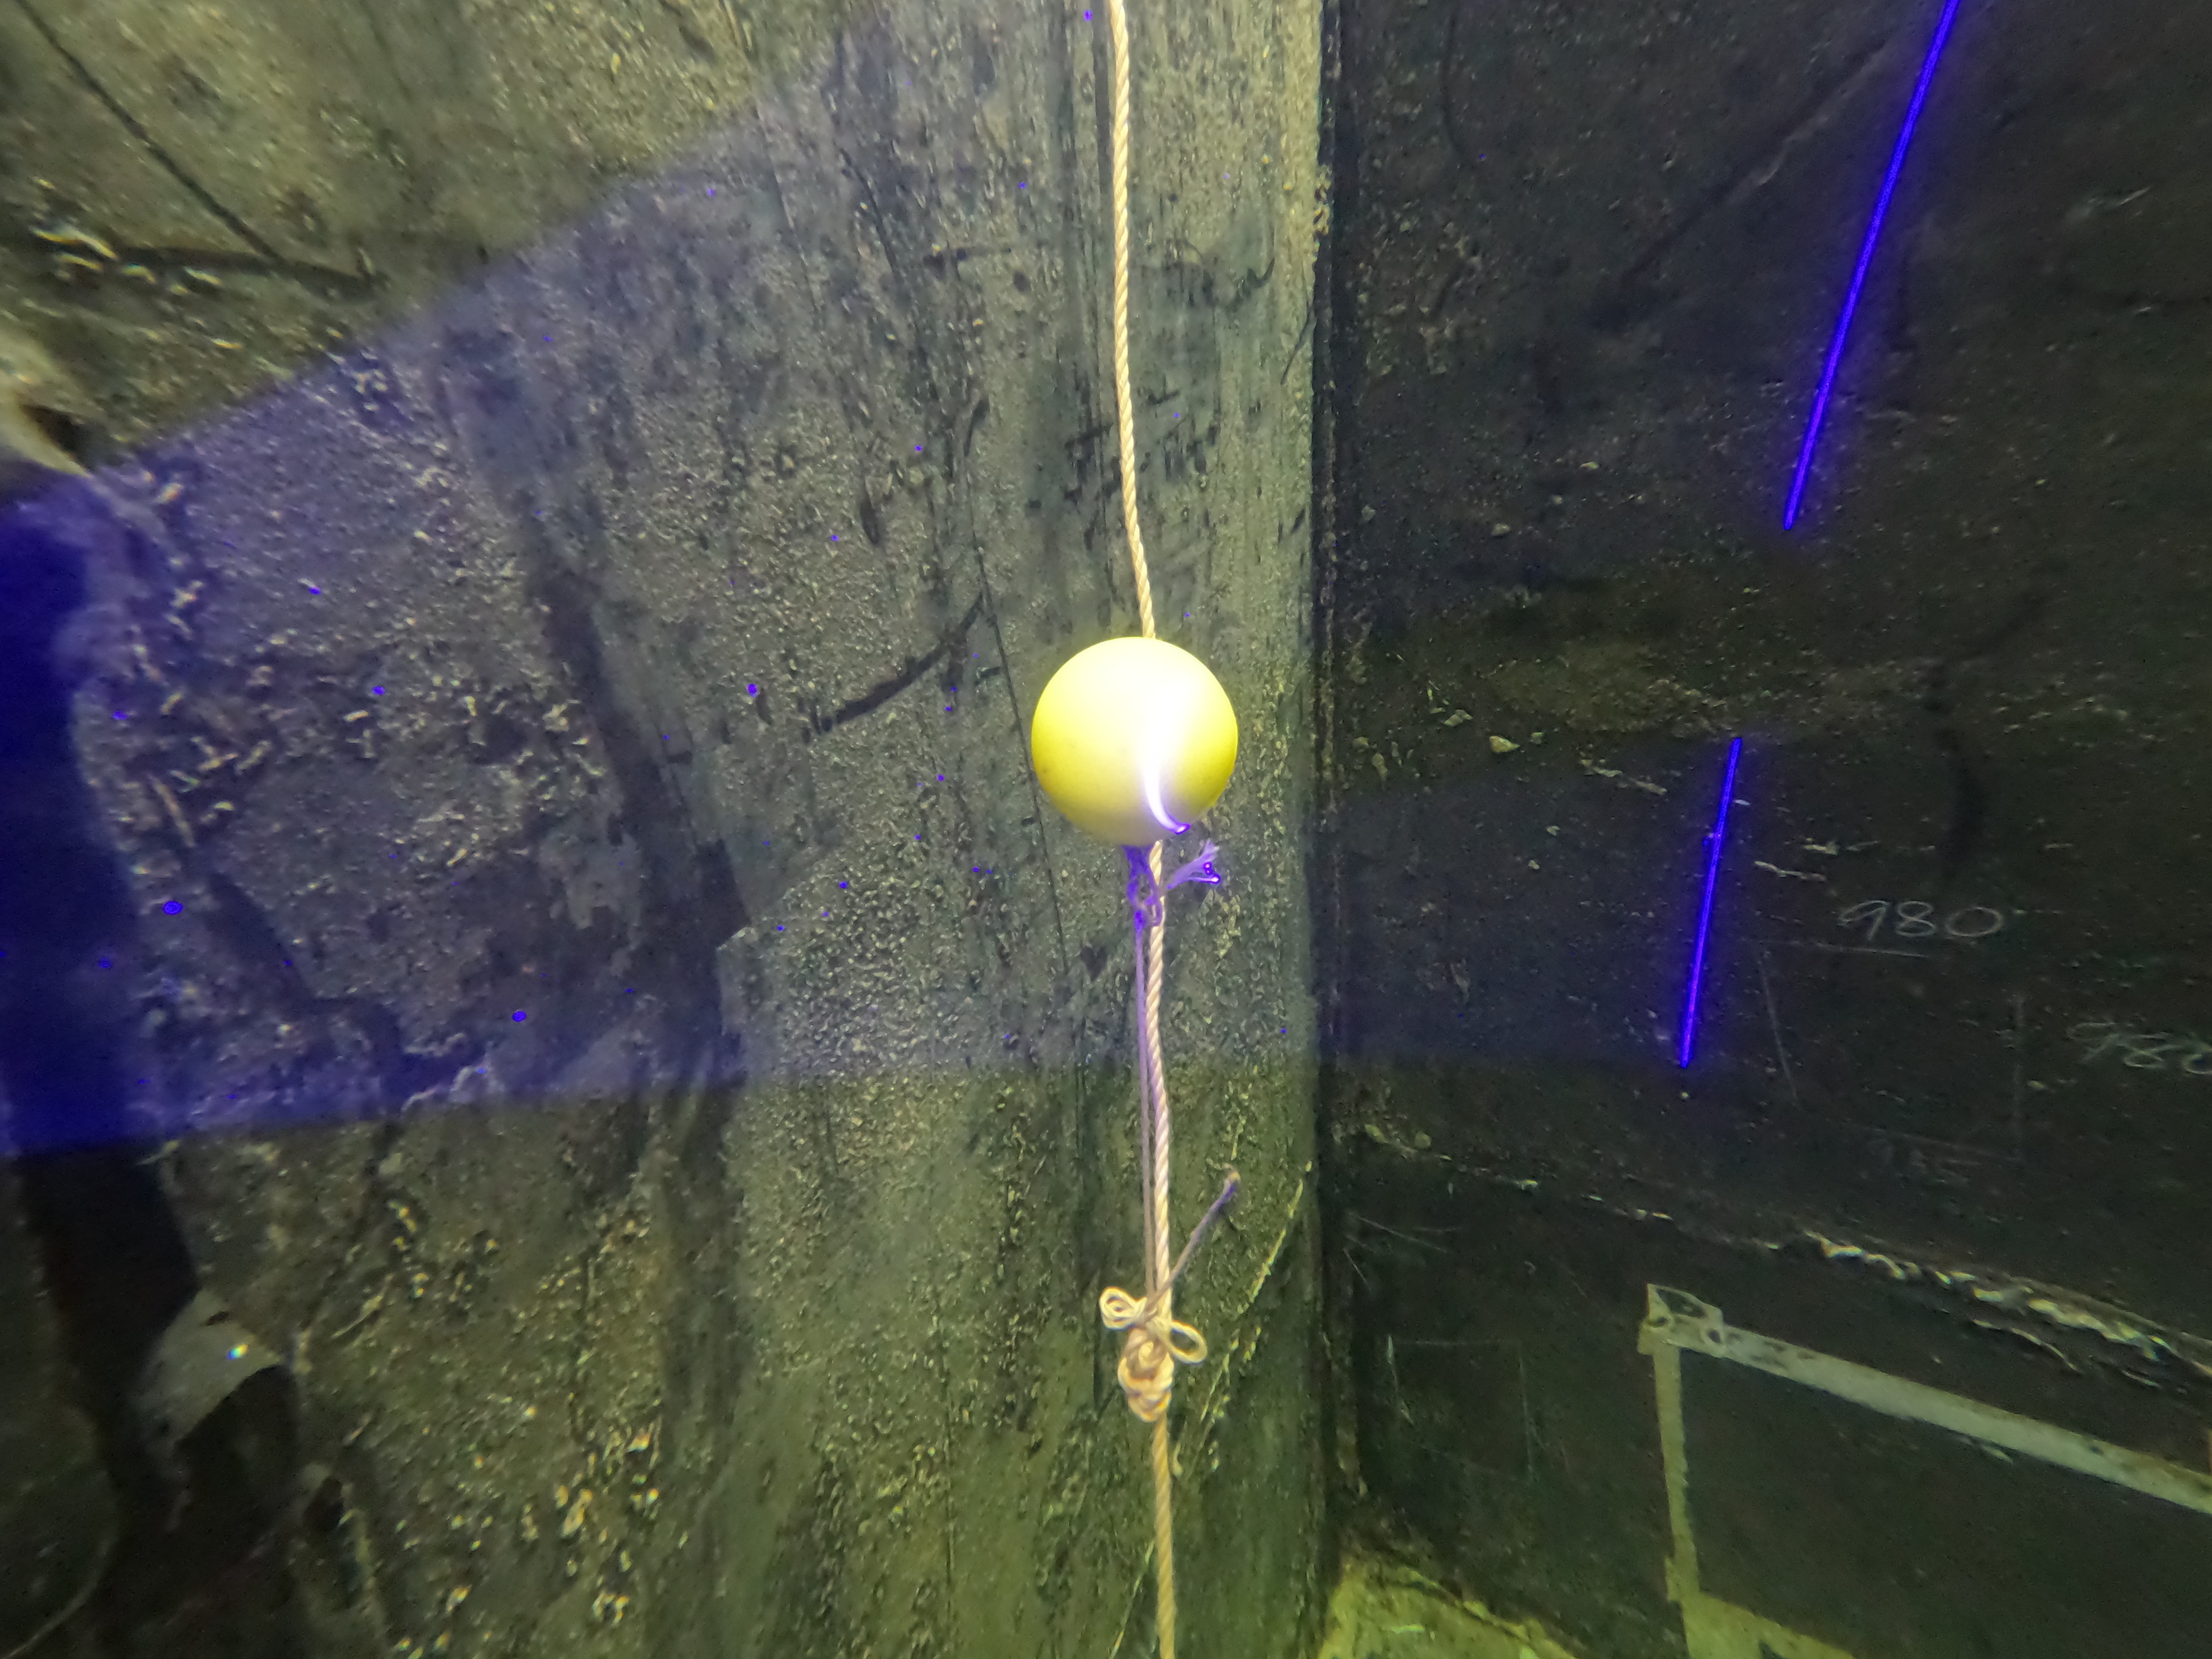

Supplement: Supplementary file 1292 [file G0032605.pdf › 6/G0032605.pdf]

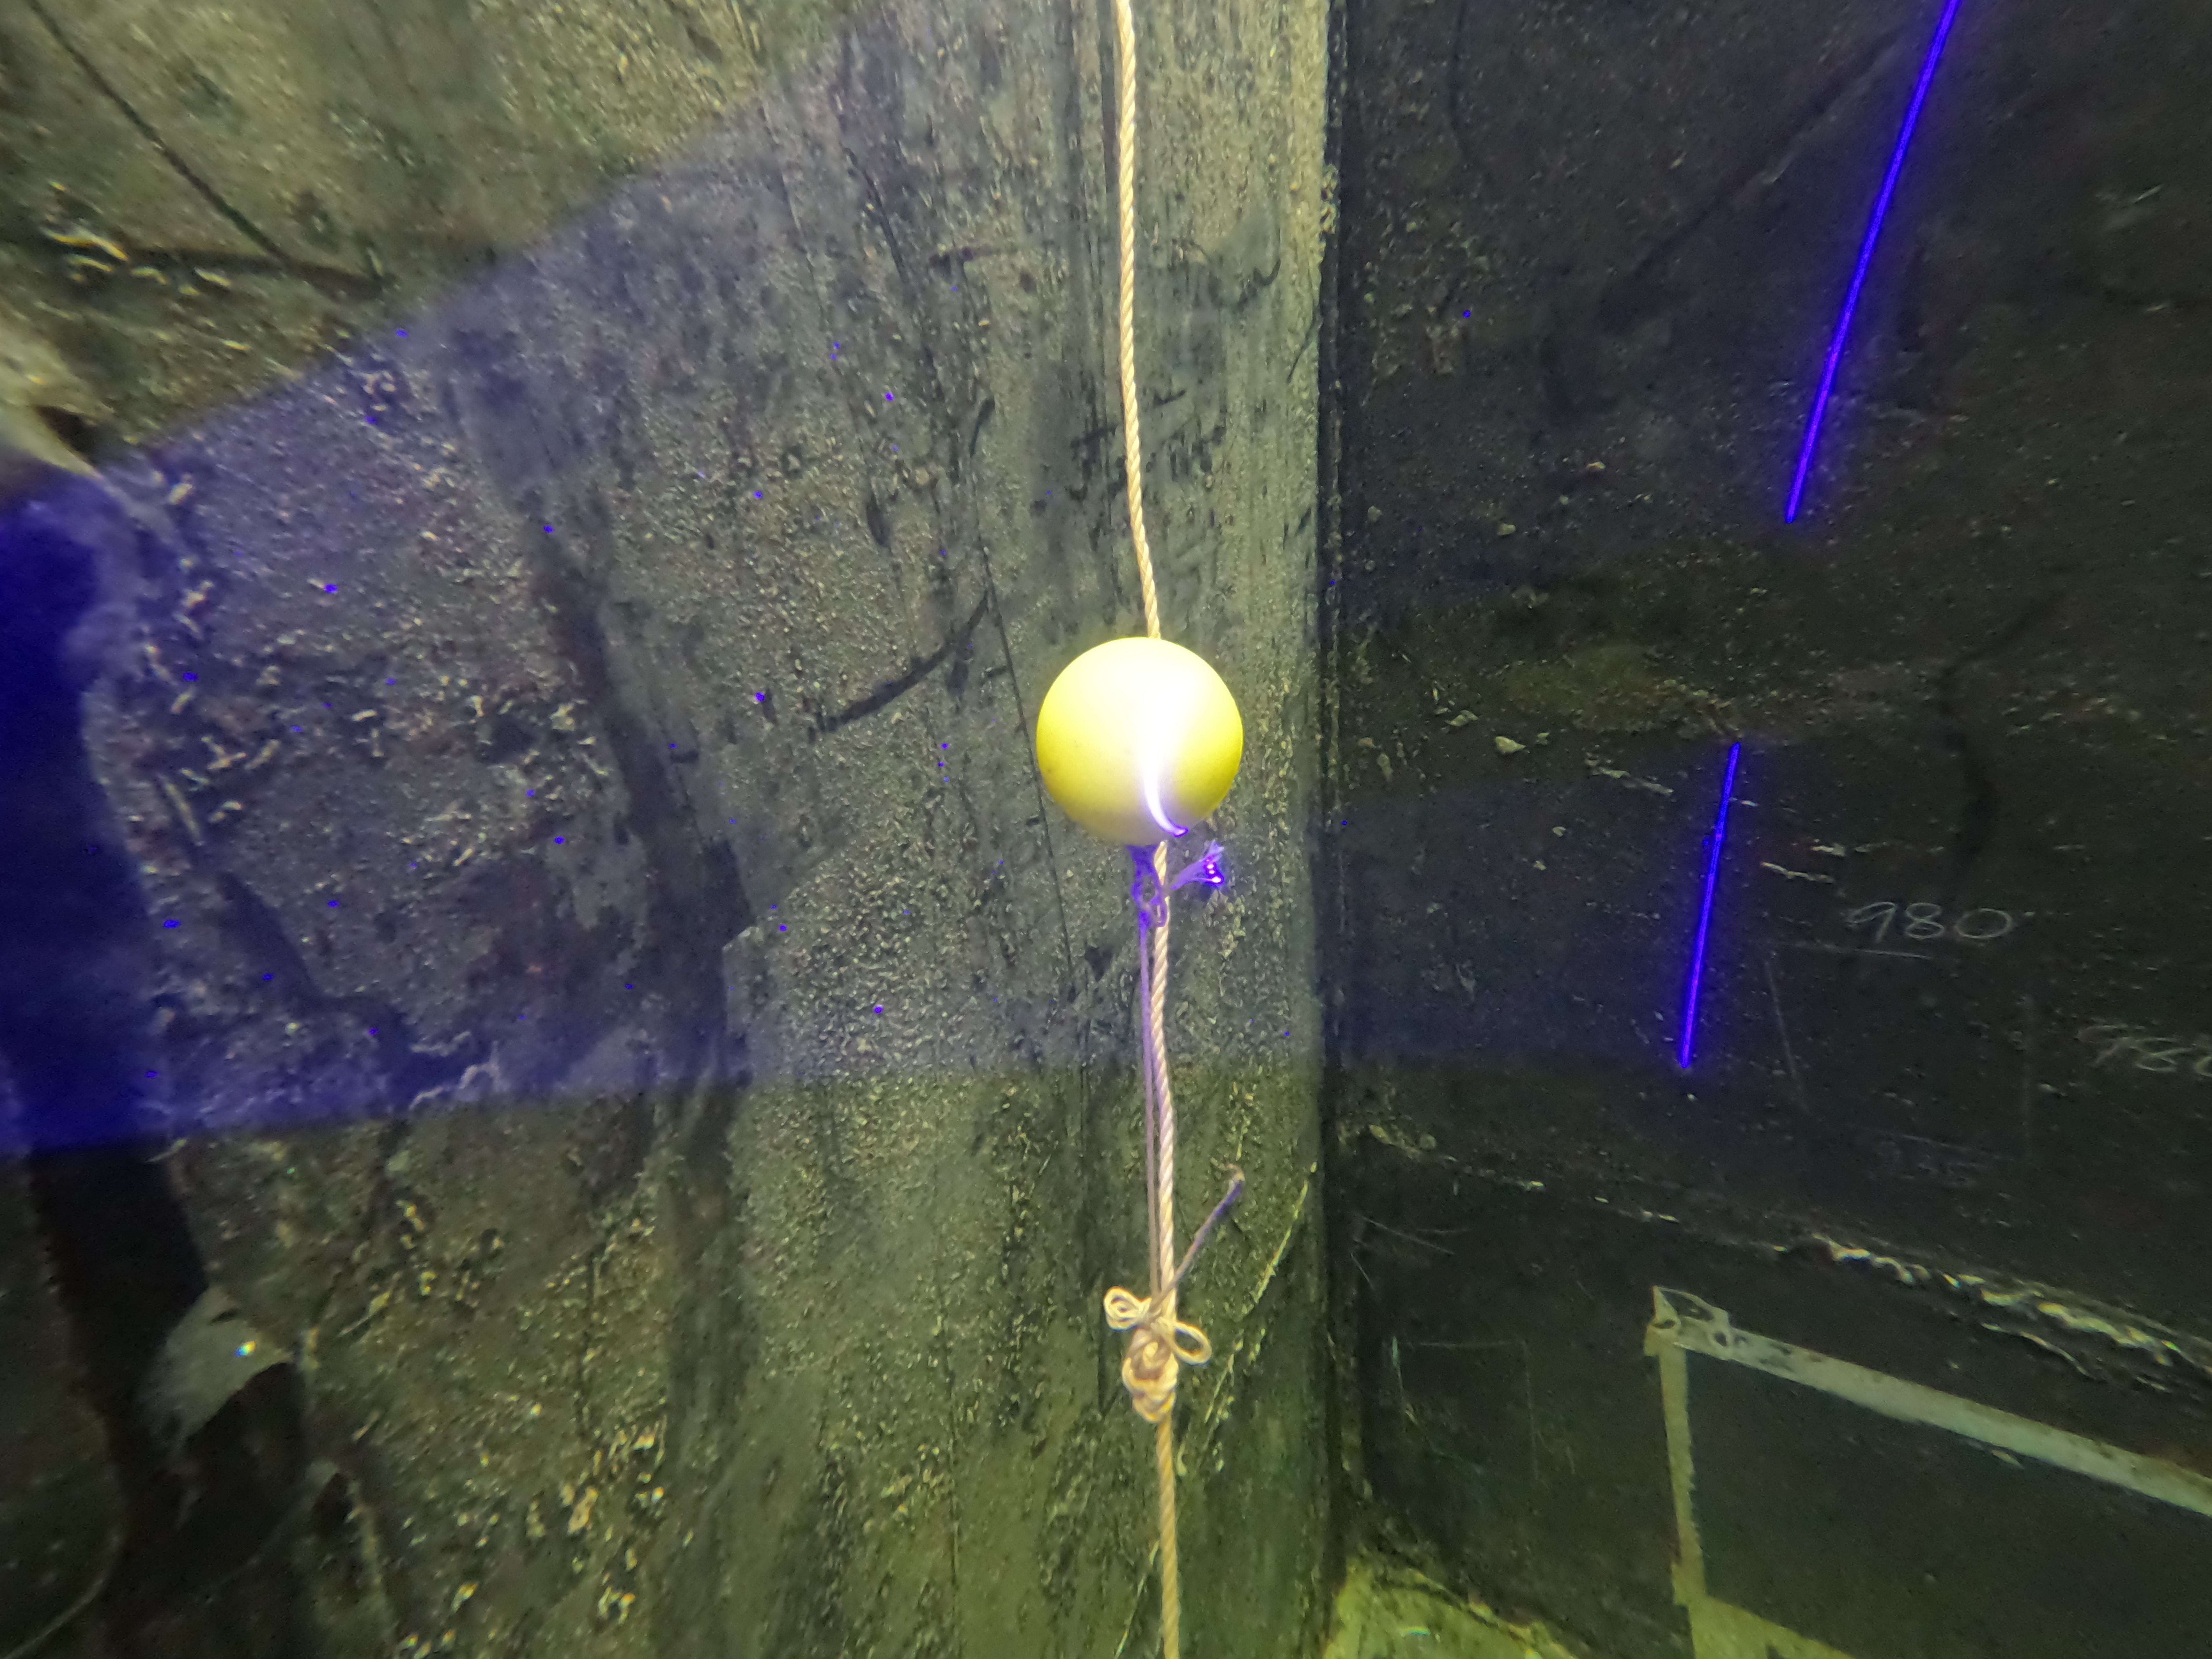

Supplement: Supplementary file 1293 [file G0032606.pdf › 6/G0032606.pdf]

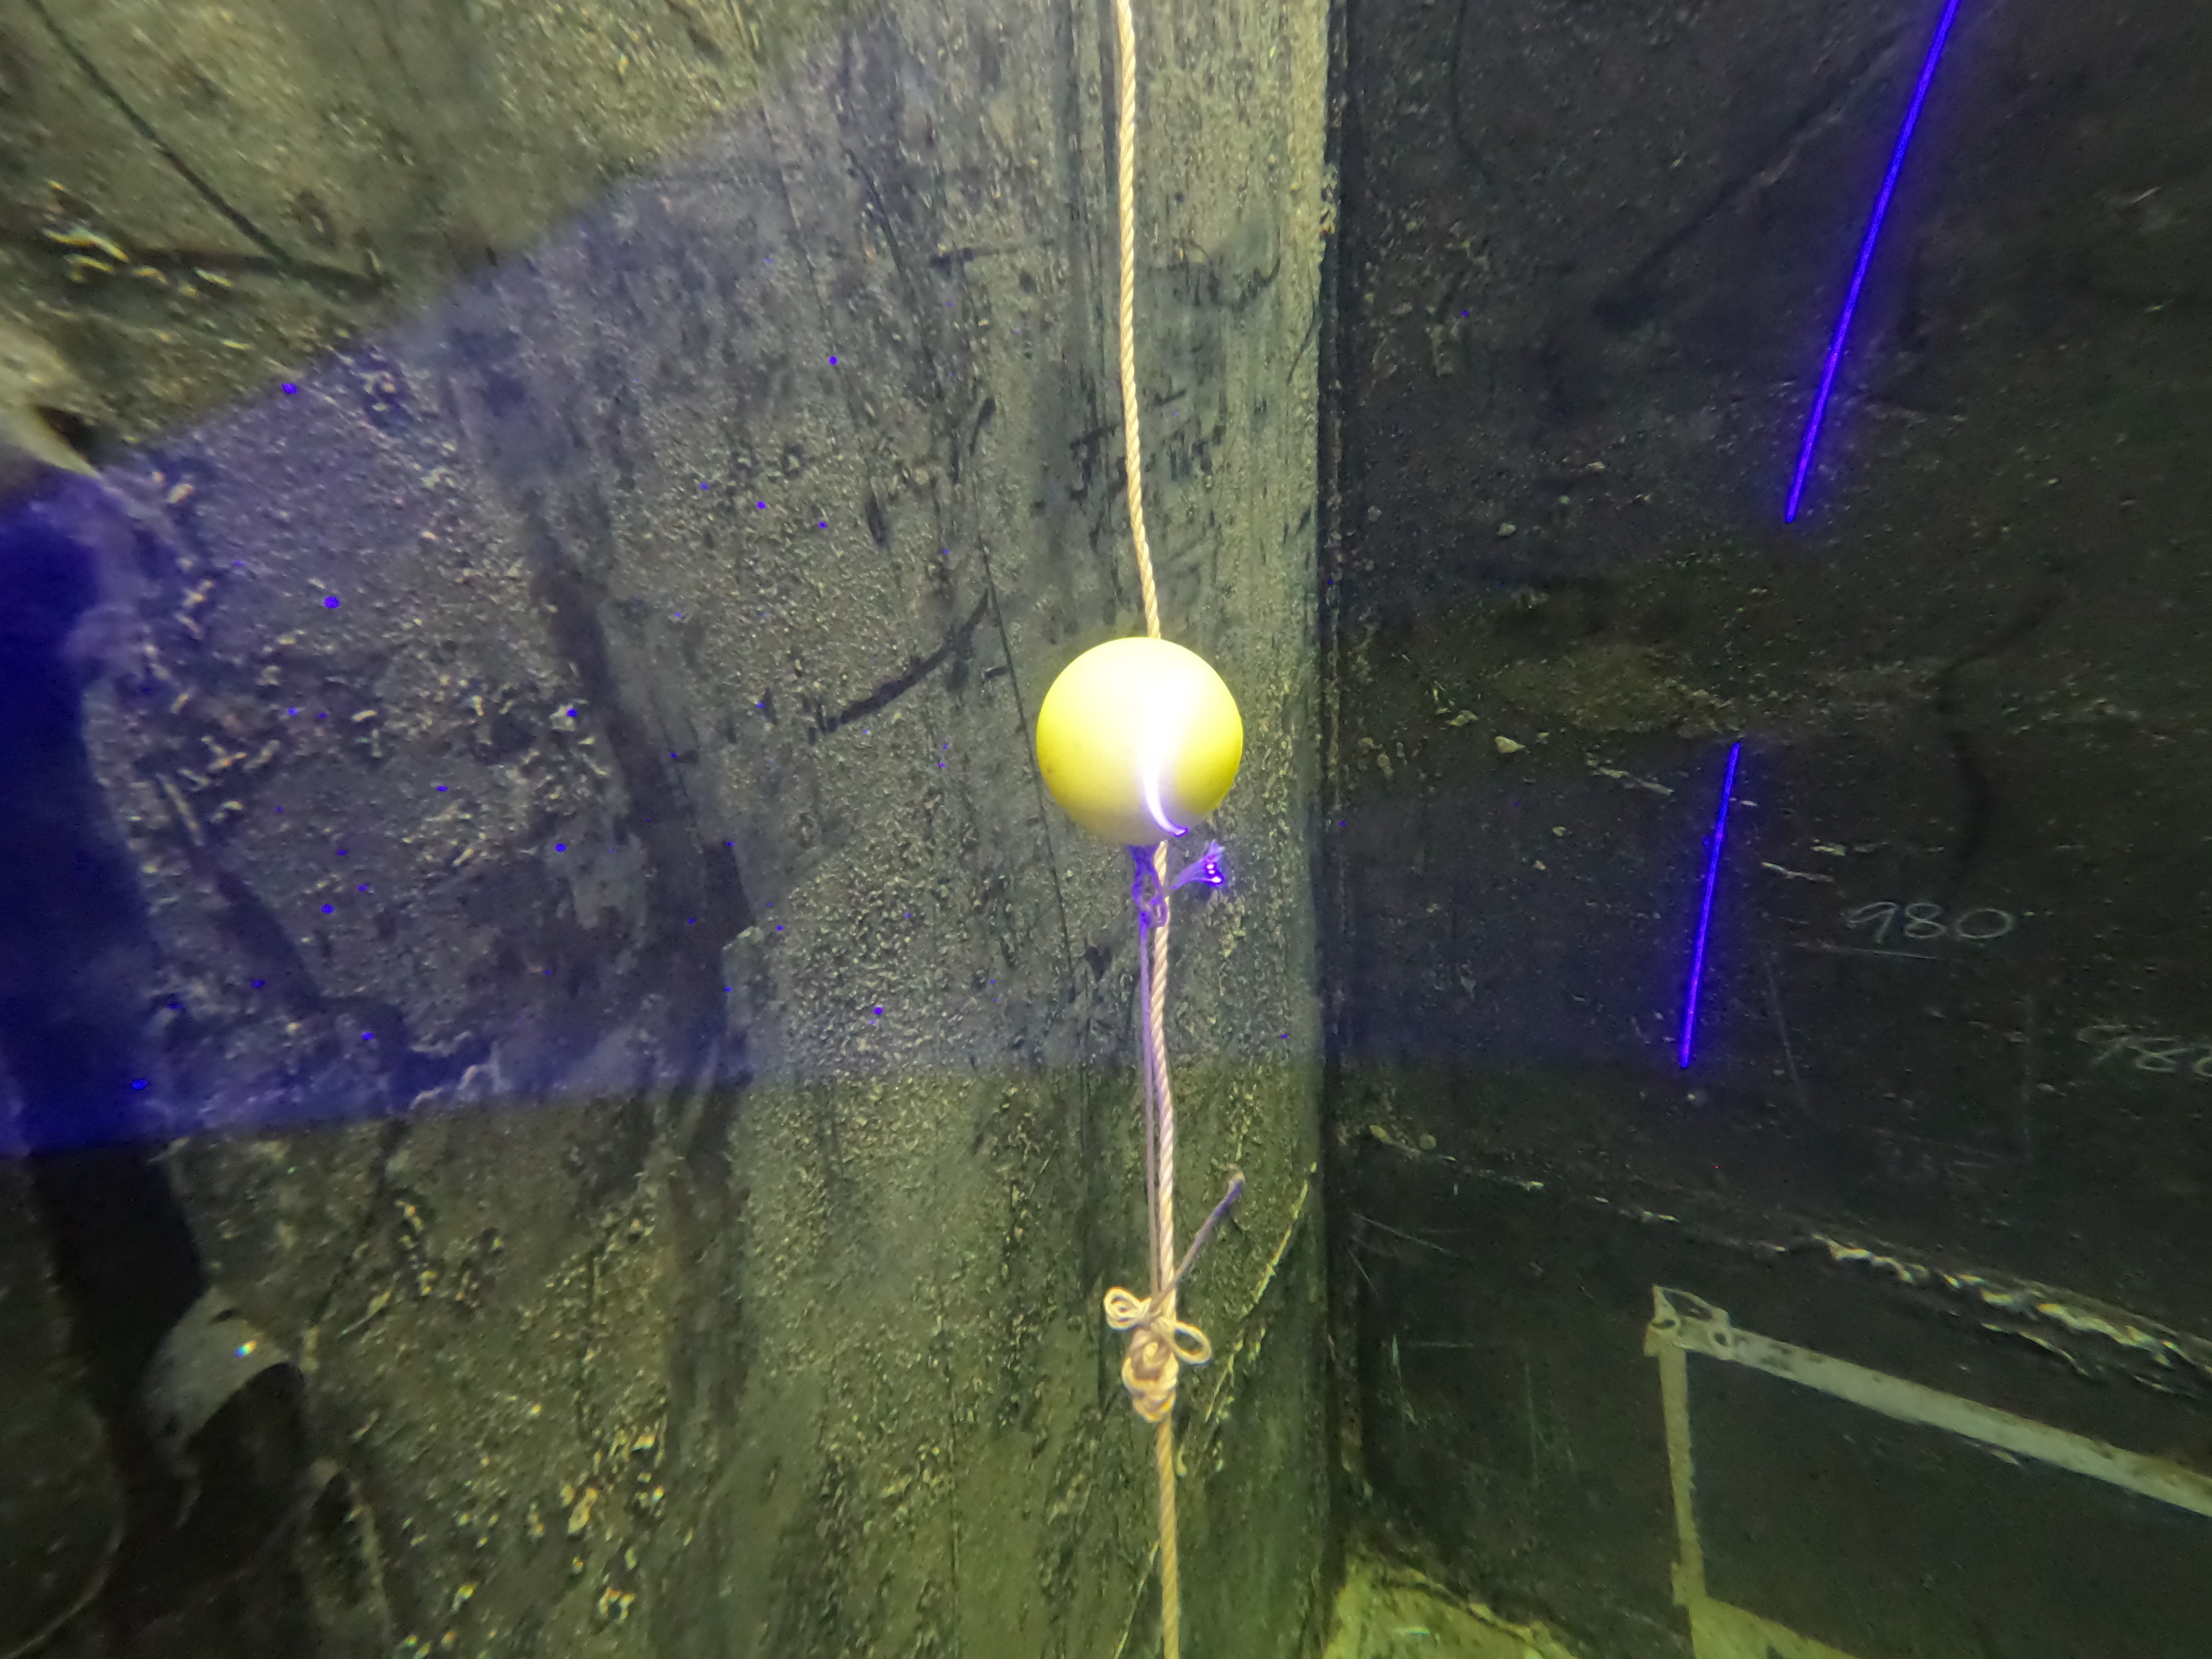

Supplement: Supplementary file 1294 [file G0032607.pdf › 6/G0032607.pdf]

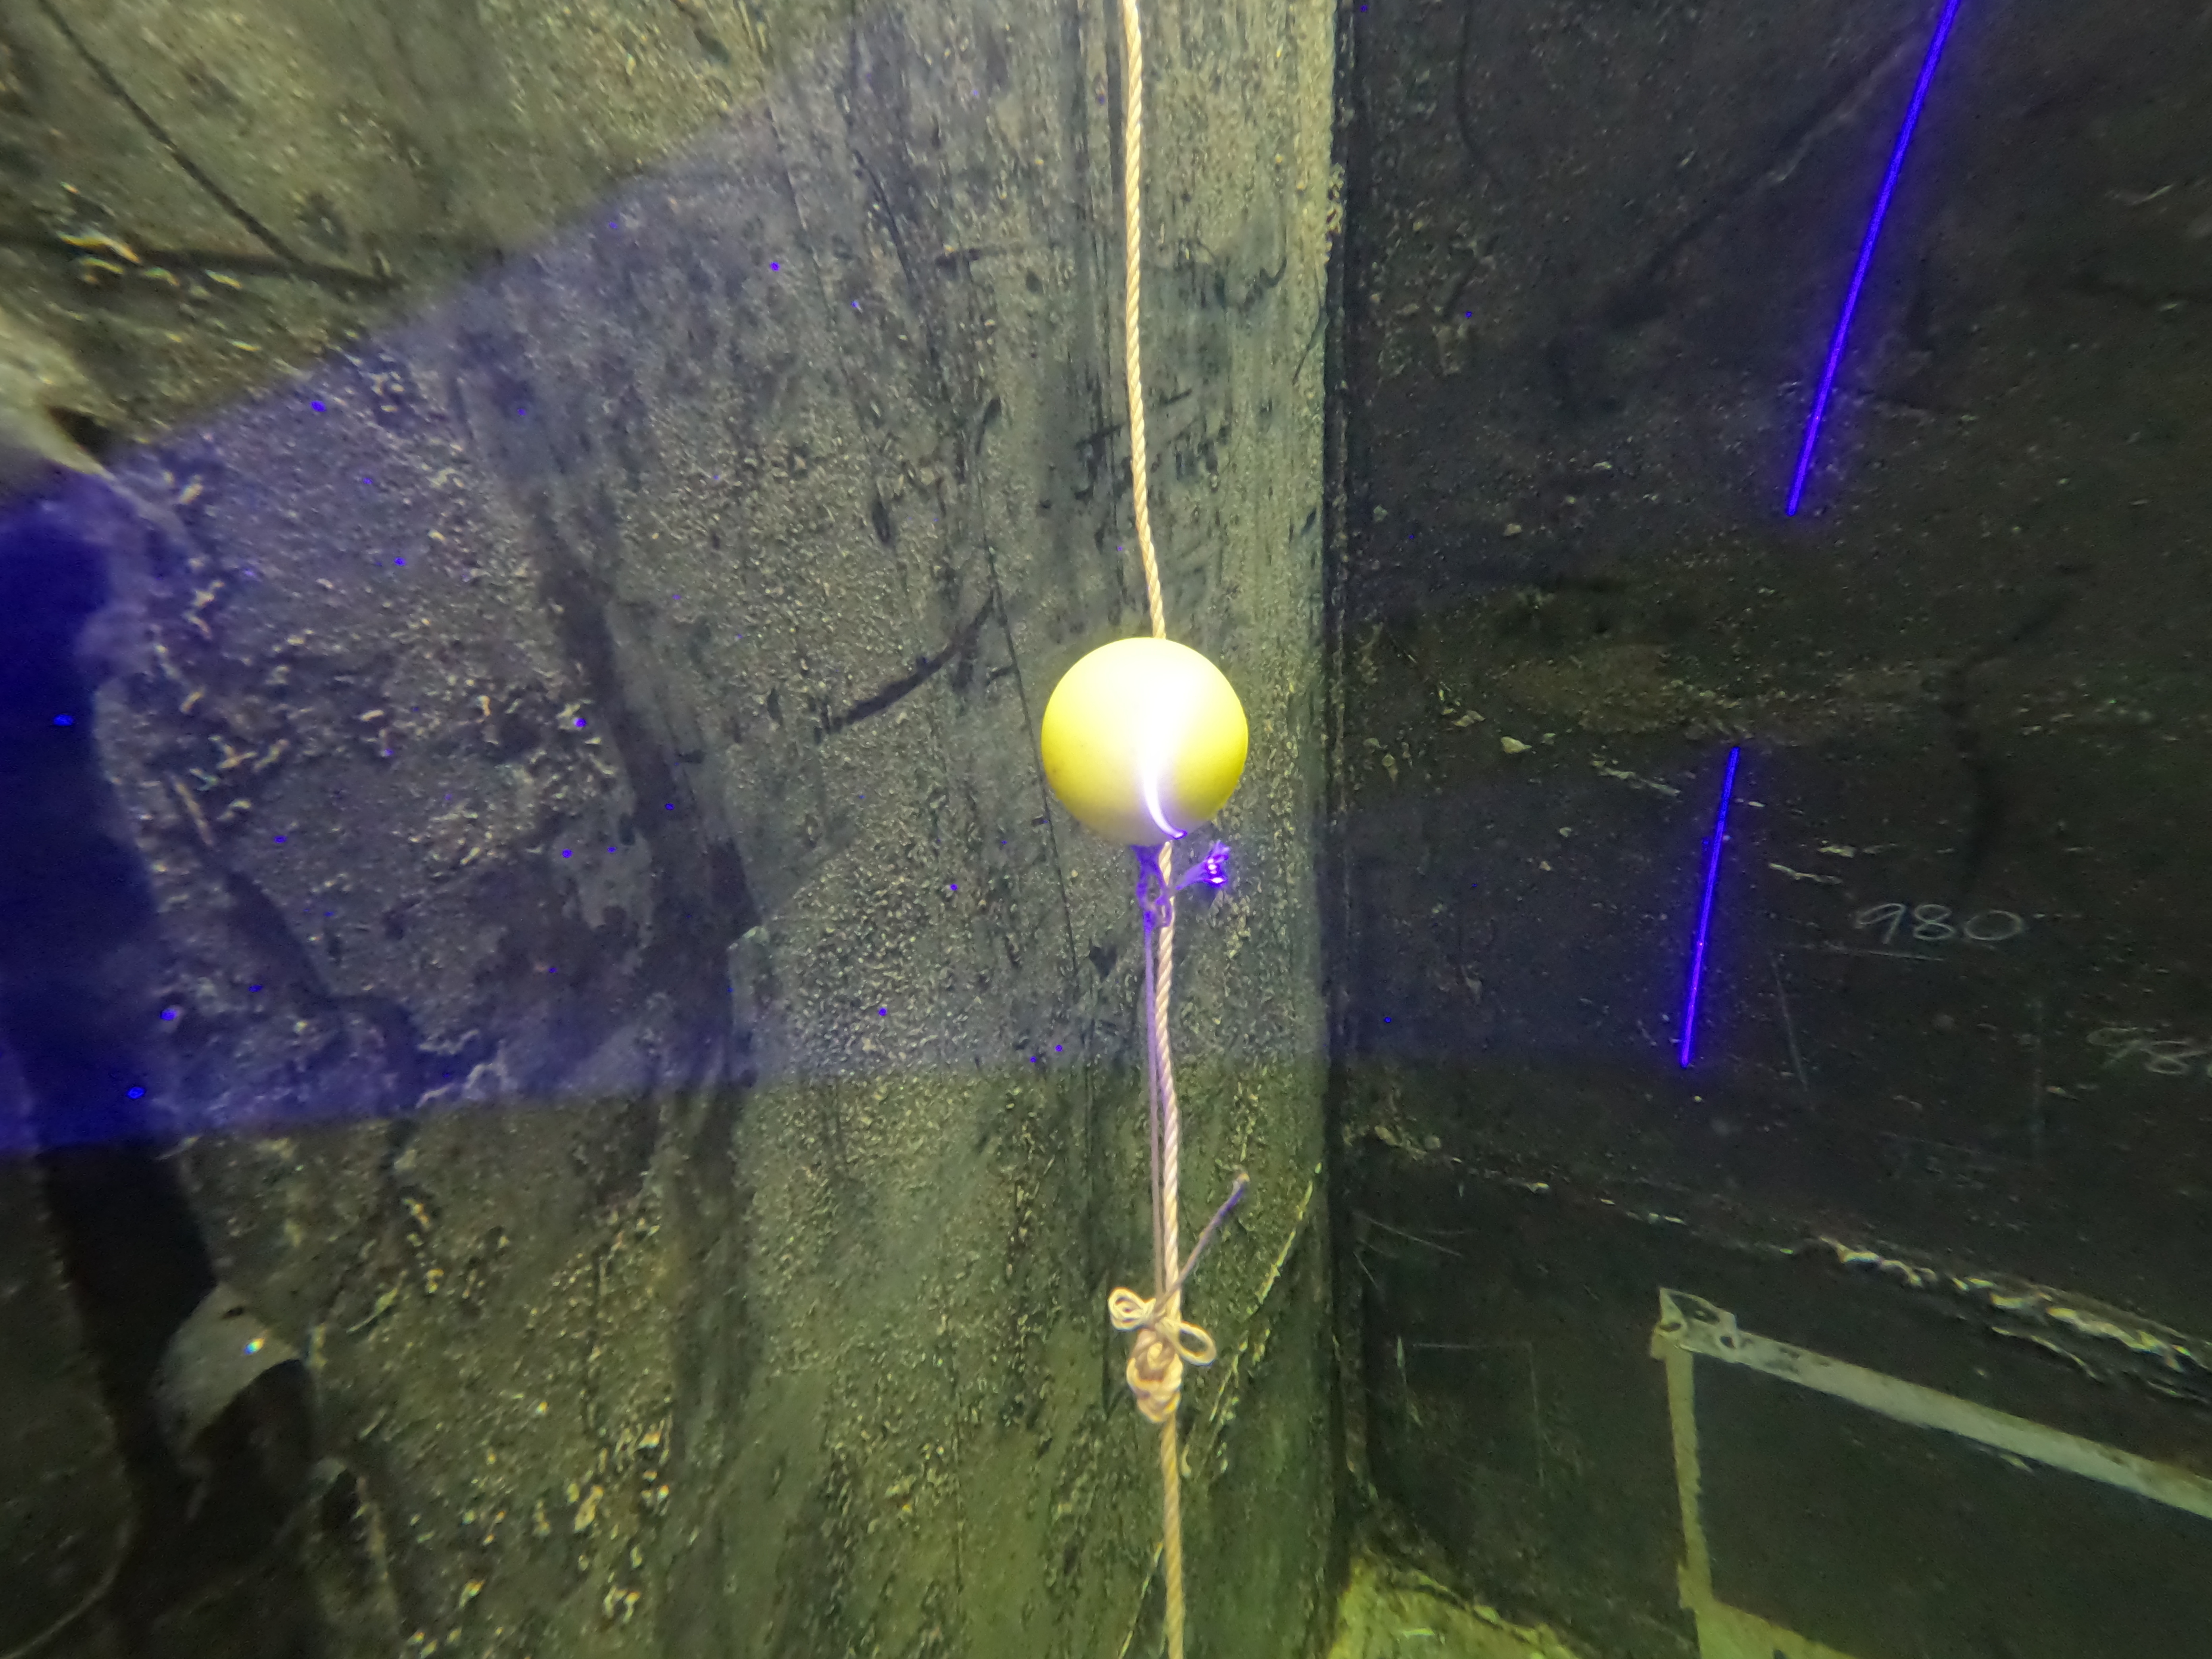

980

Supplement: Supplementary file 1295 [file G0032608.pdf › 6/G0032608.pdf]

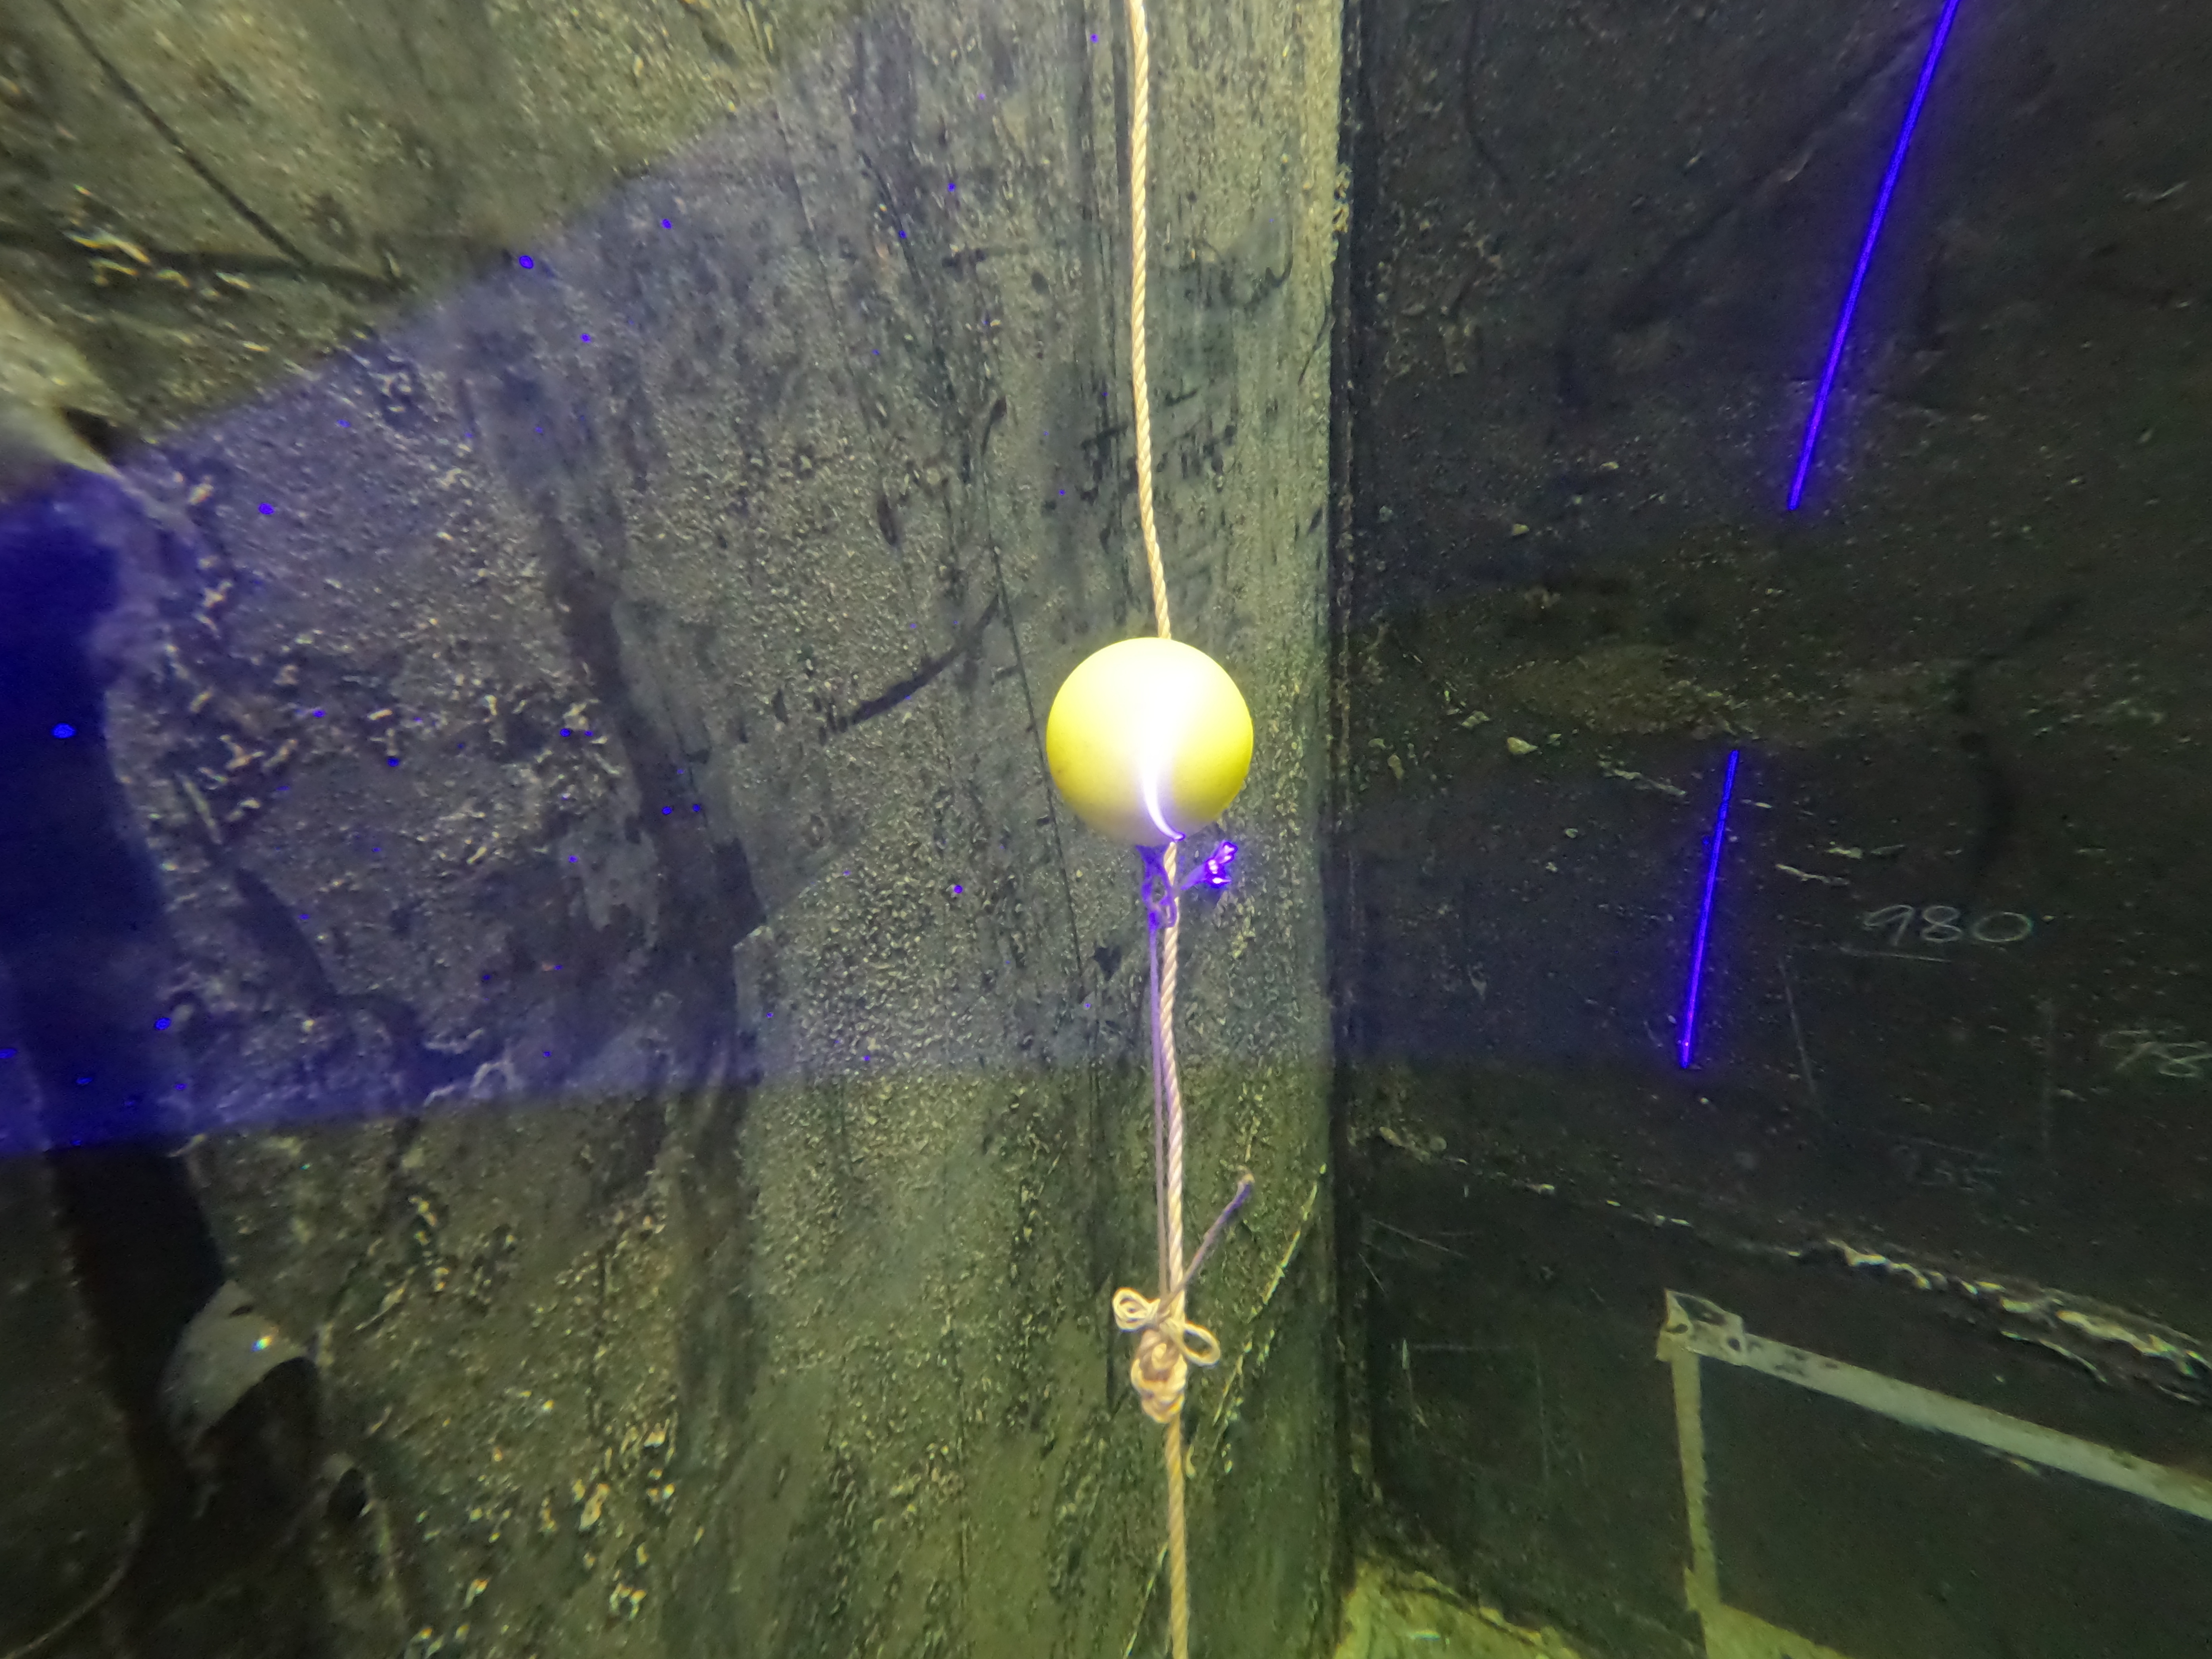

Supplement: Supplementary file 1296 [file G0032609.pdf › 6/G0032609.pdf]

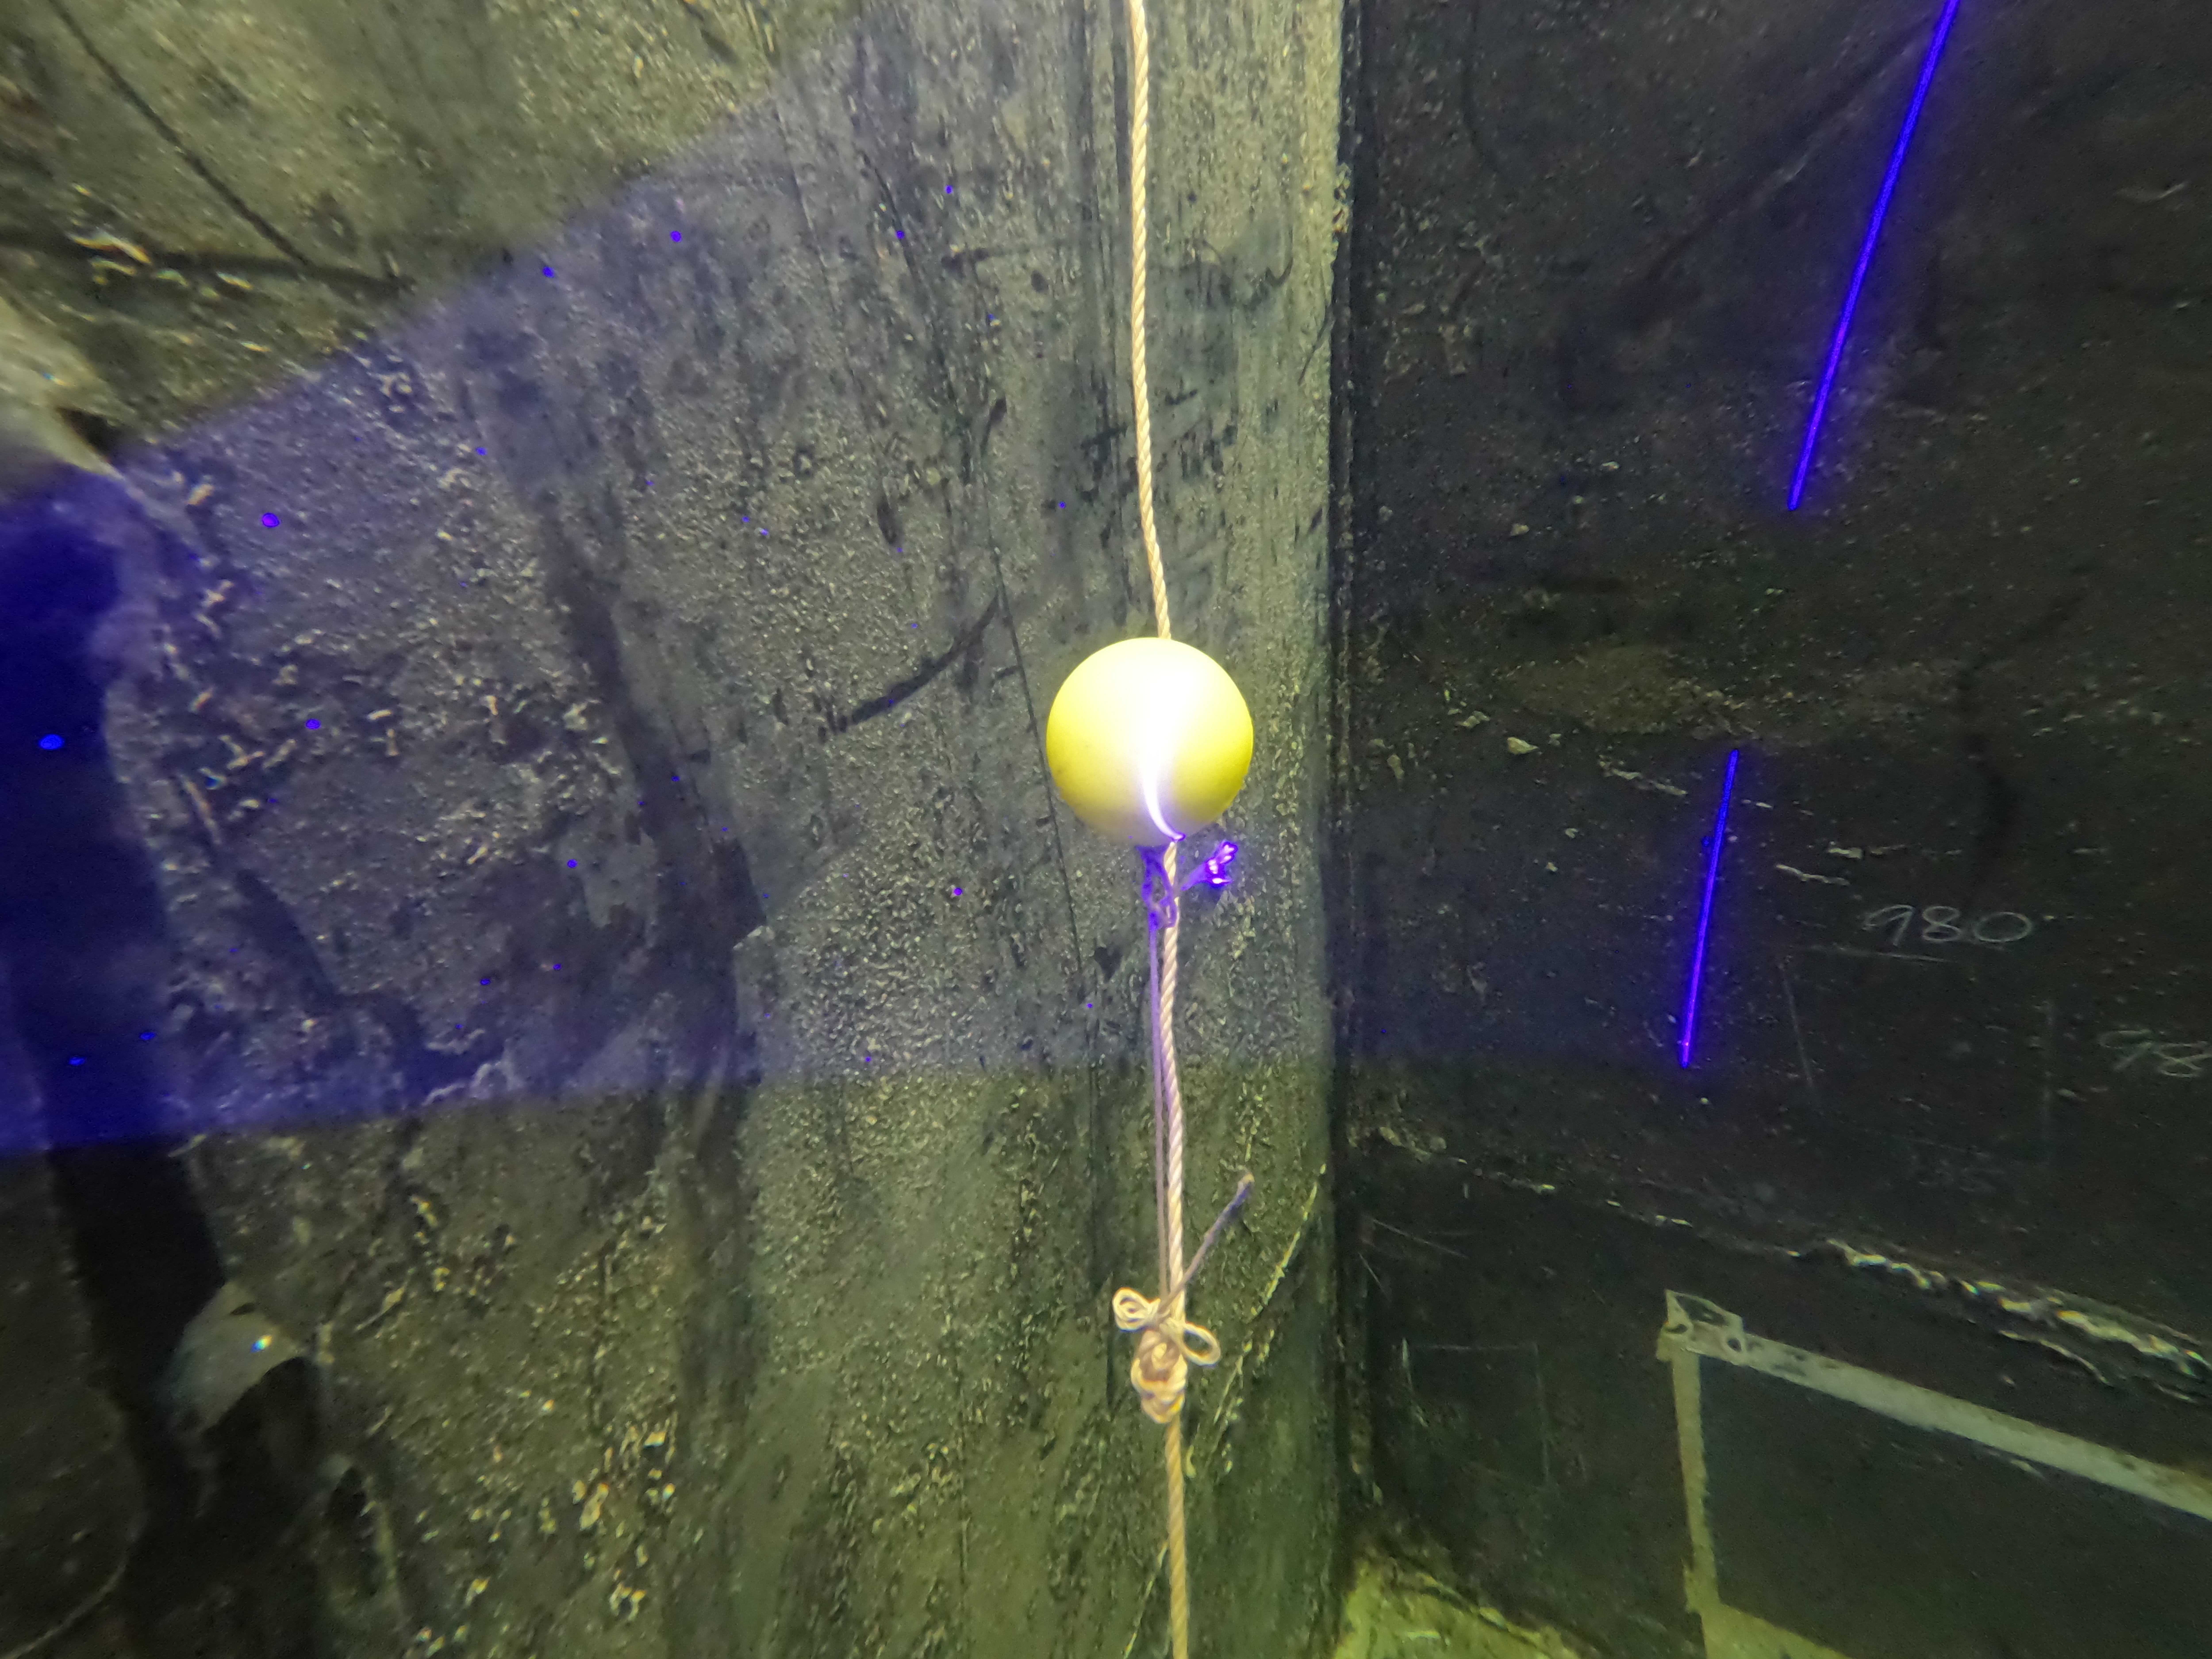

980

98

Supplement: Supplementary file 1297 [file G0032610.pdf › 6/G0032610.pdf]

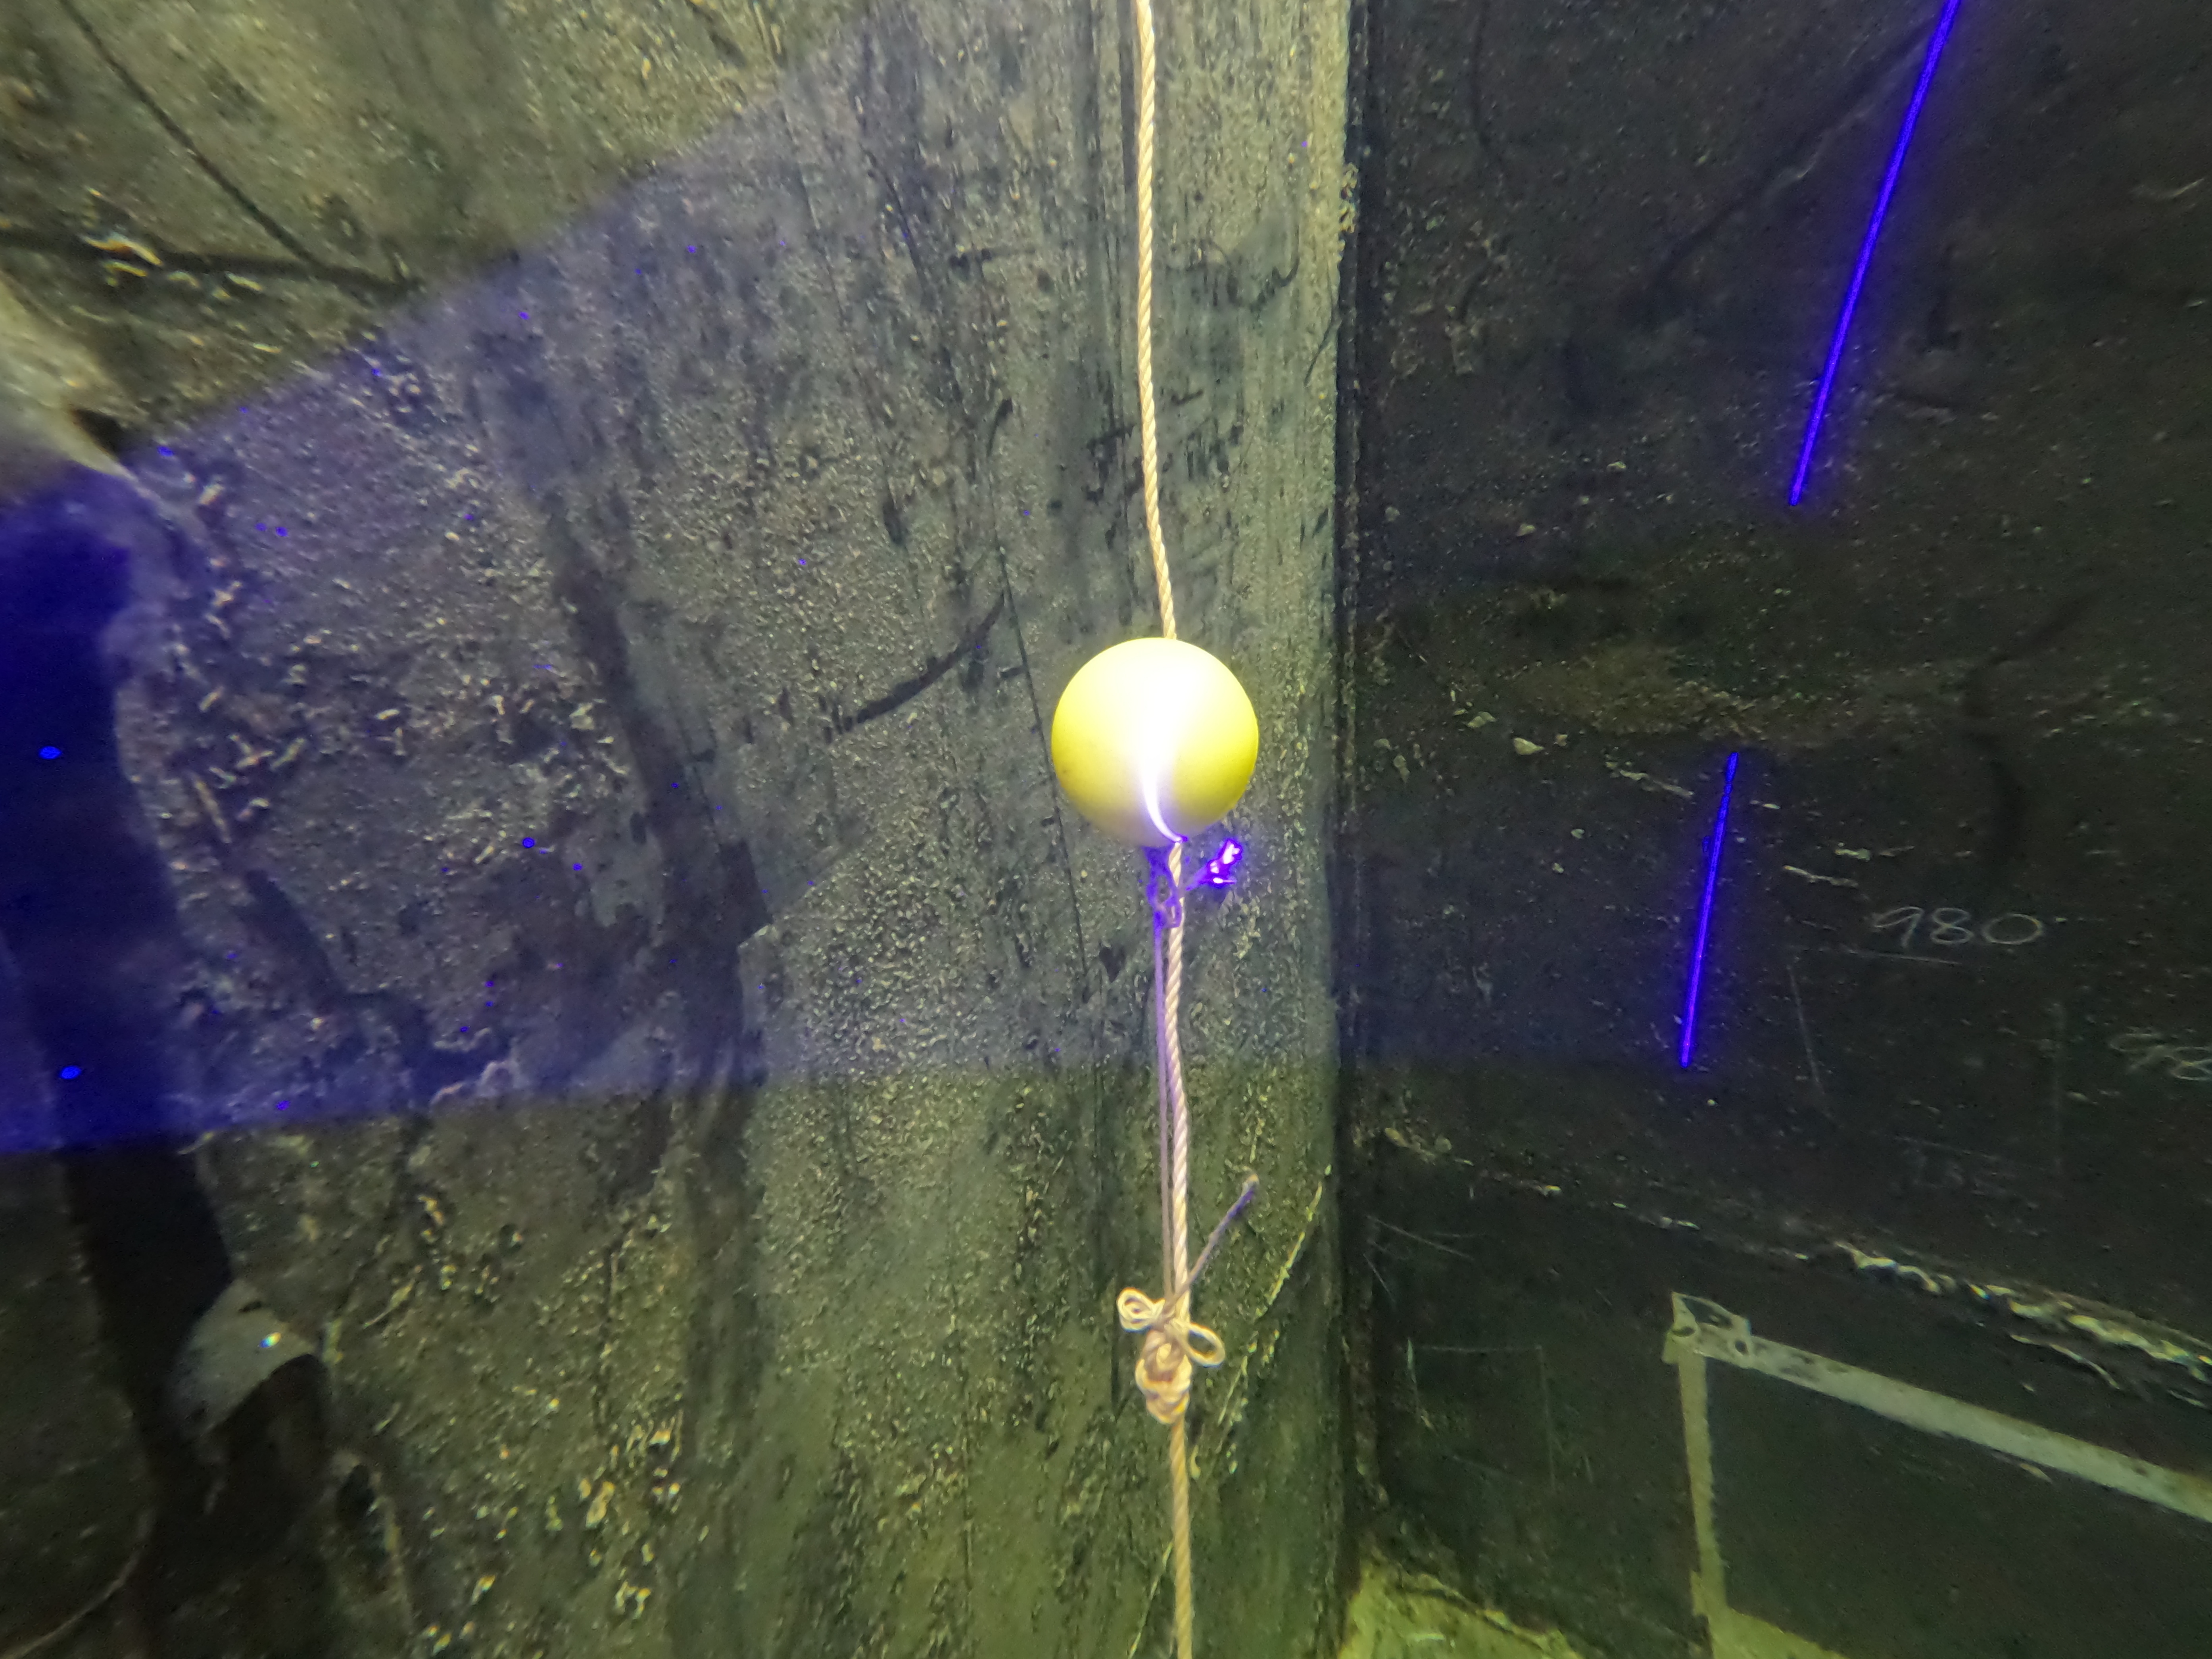

Supplement: Supplementary file 1298 [file G0032611.pdf › 6/G0032611.pdf]

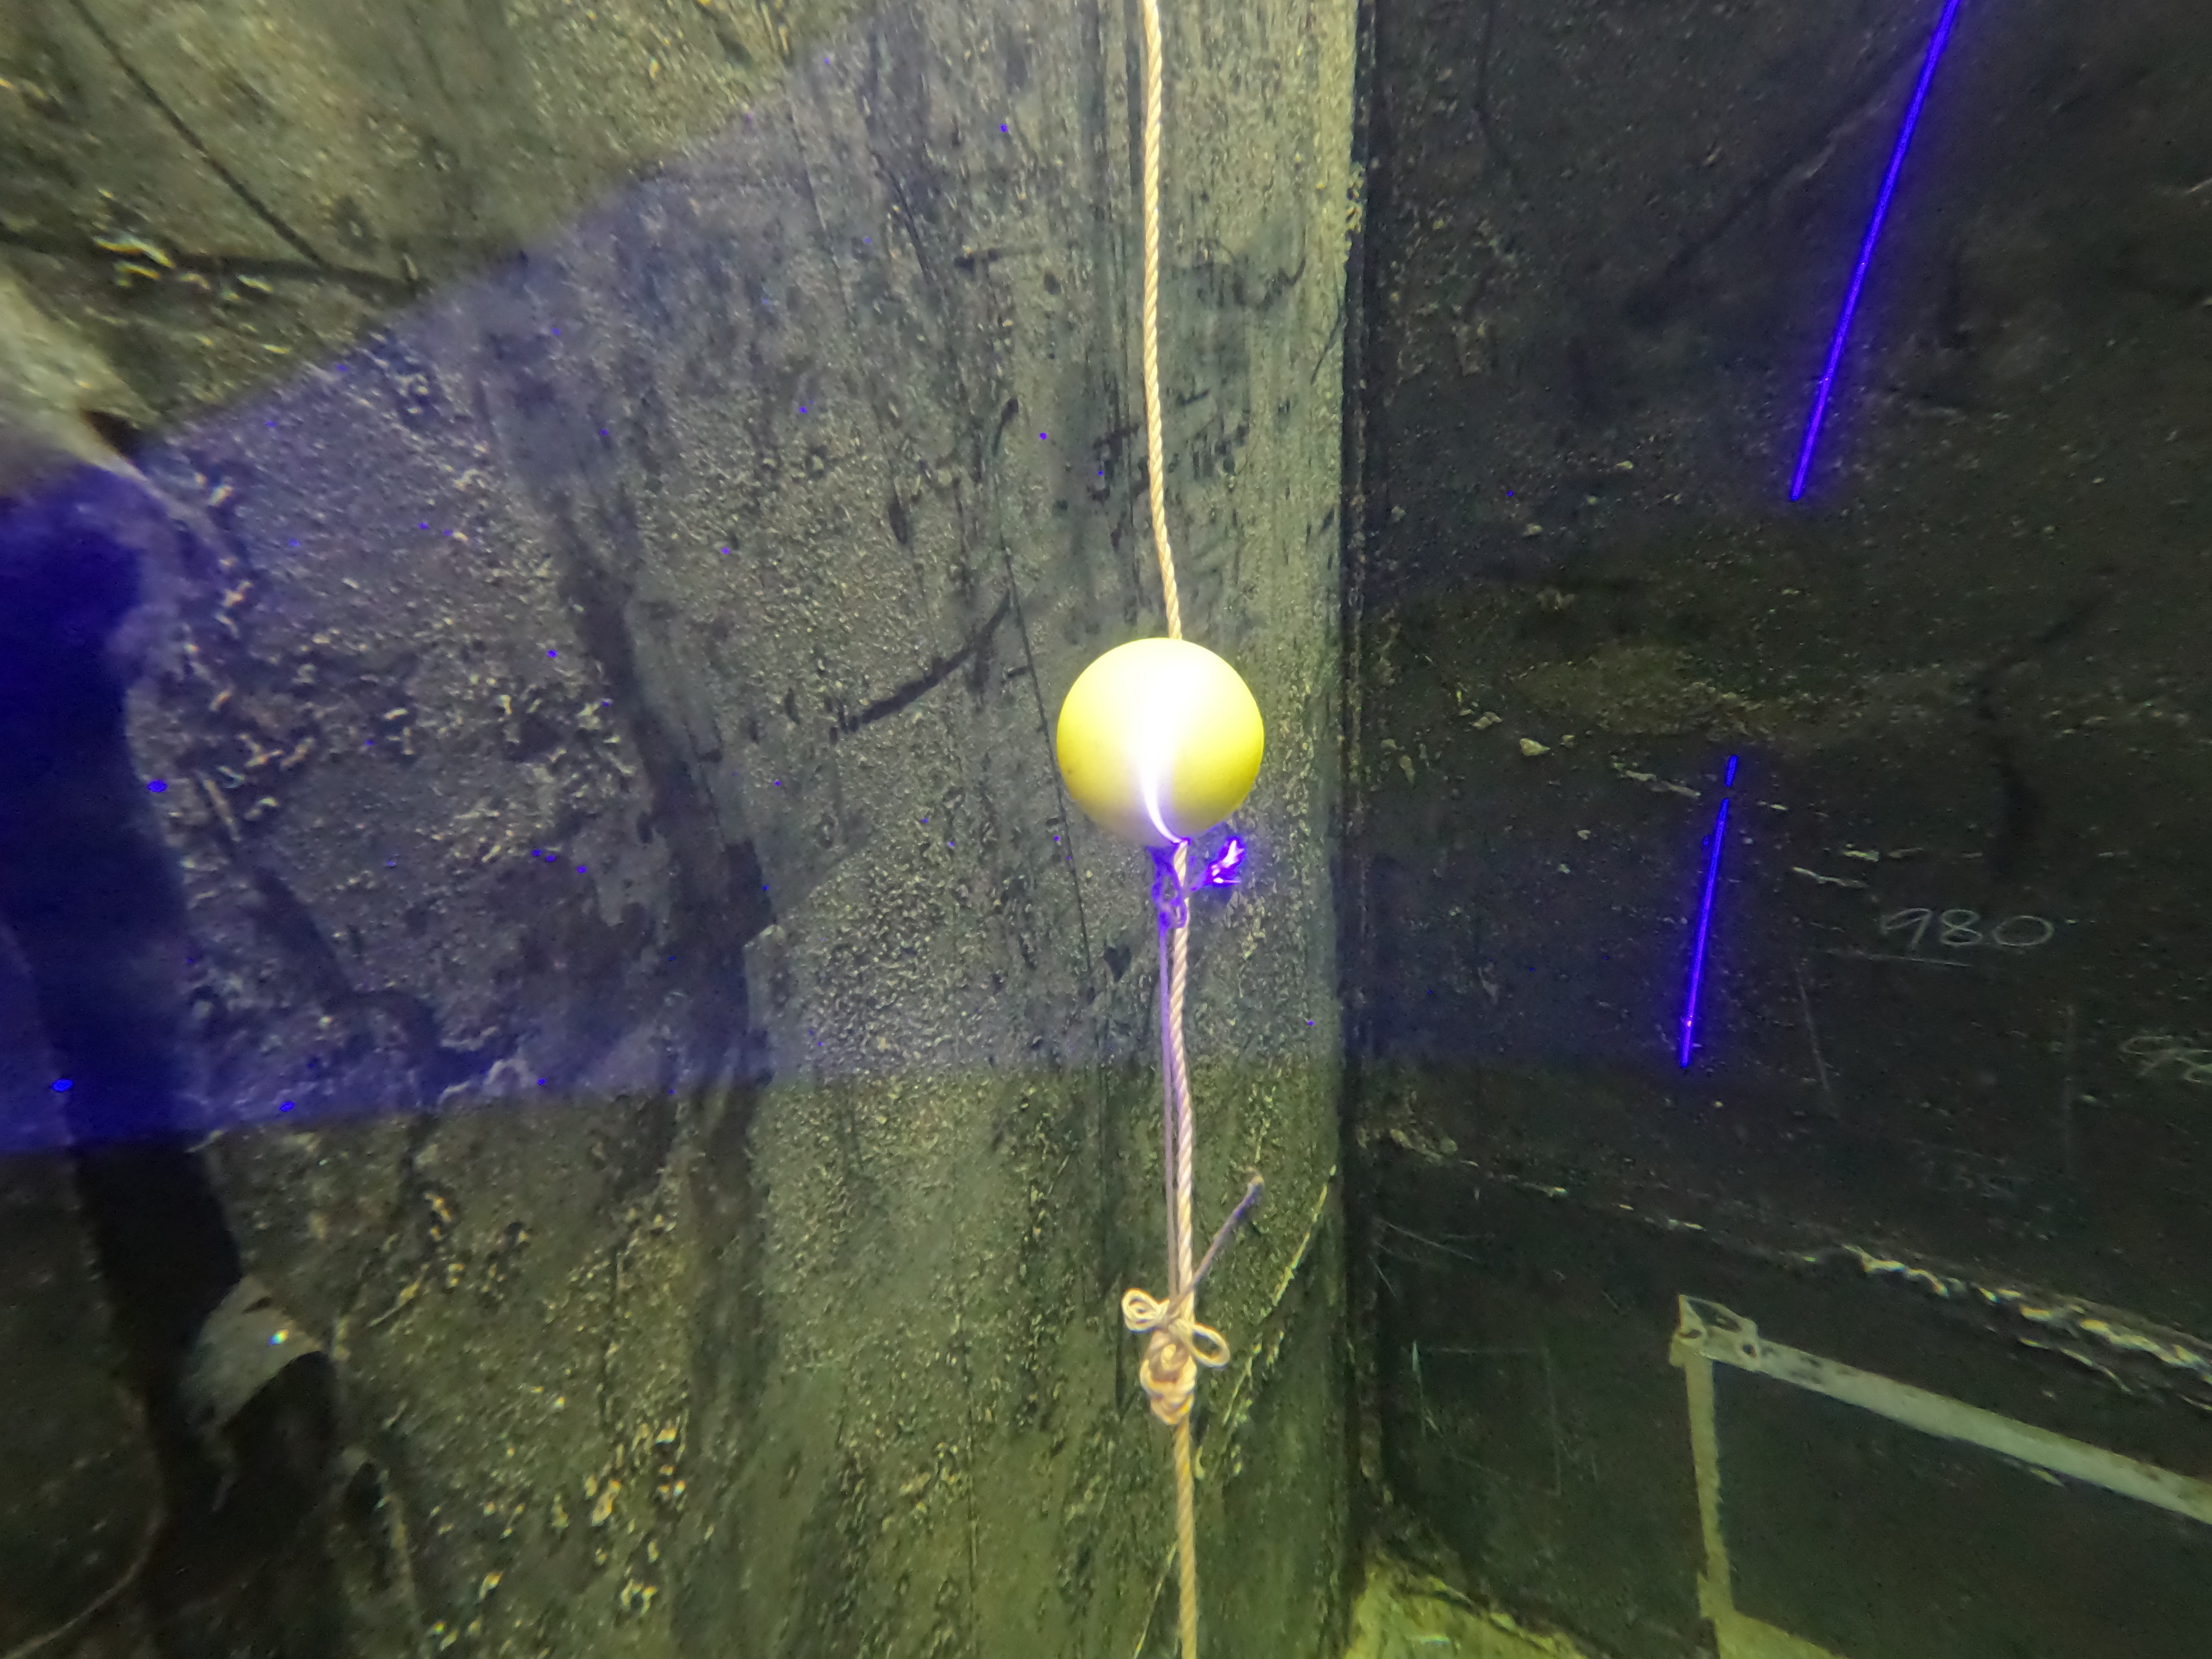

980

Supplement: Supplementary file 1299 [file G0032612.pdf › 6/G0032612.pdf]

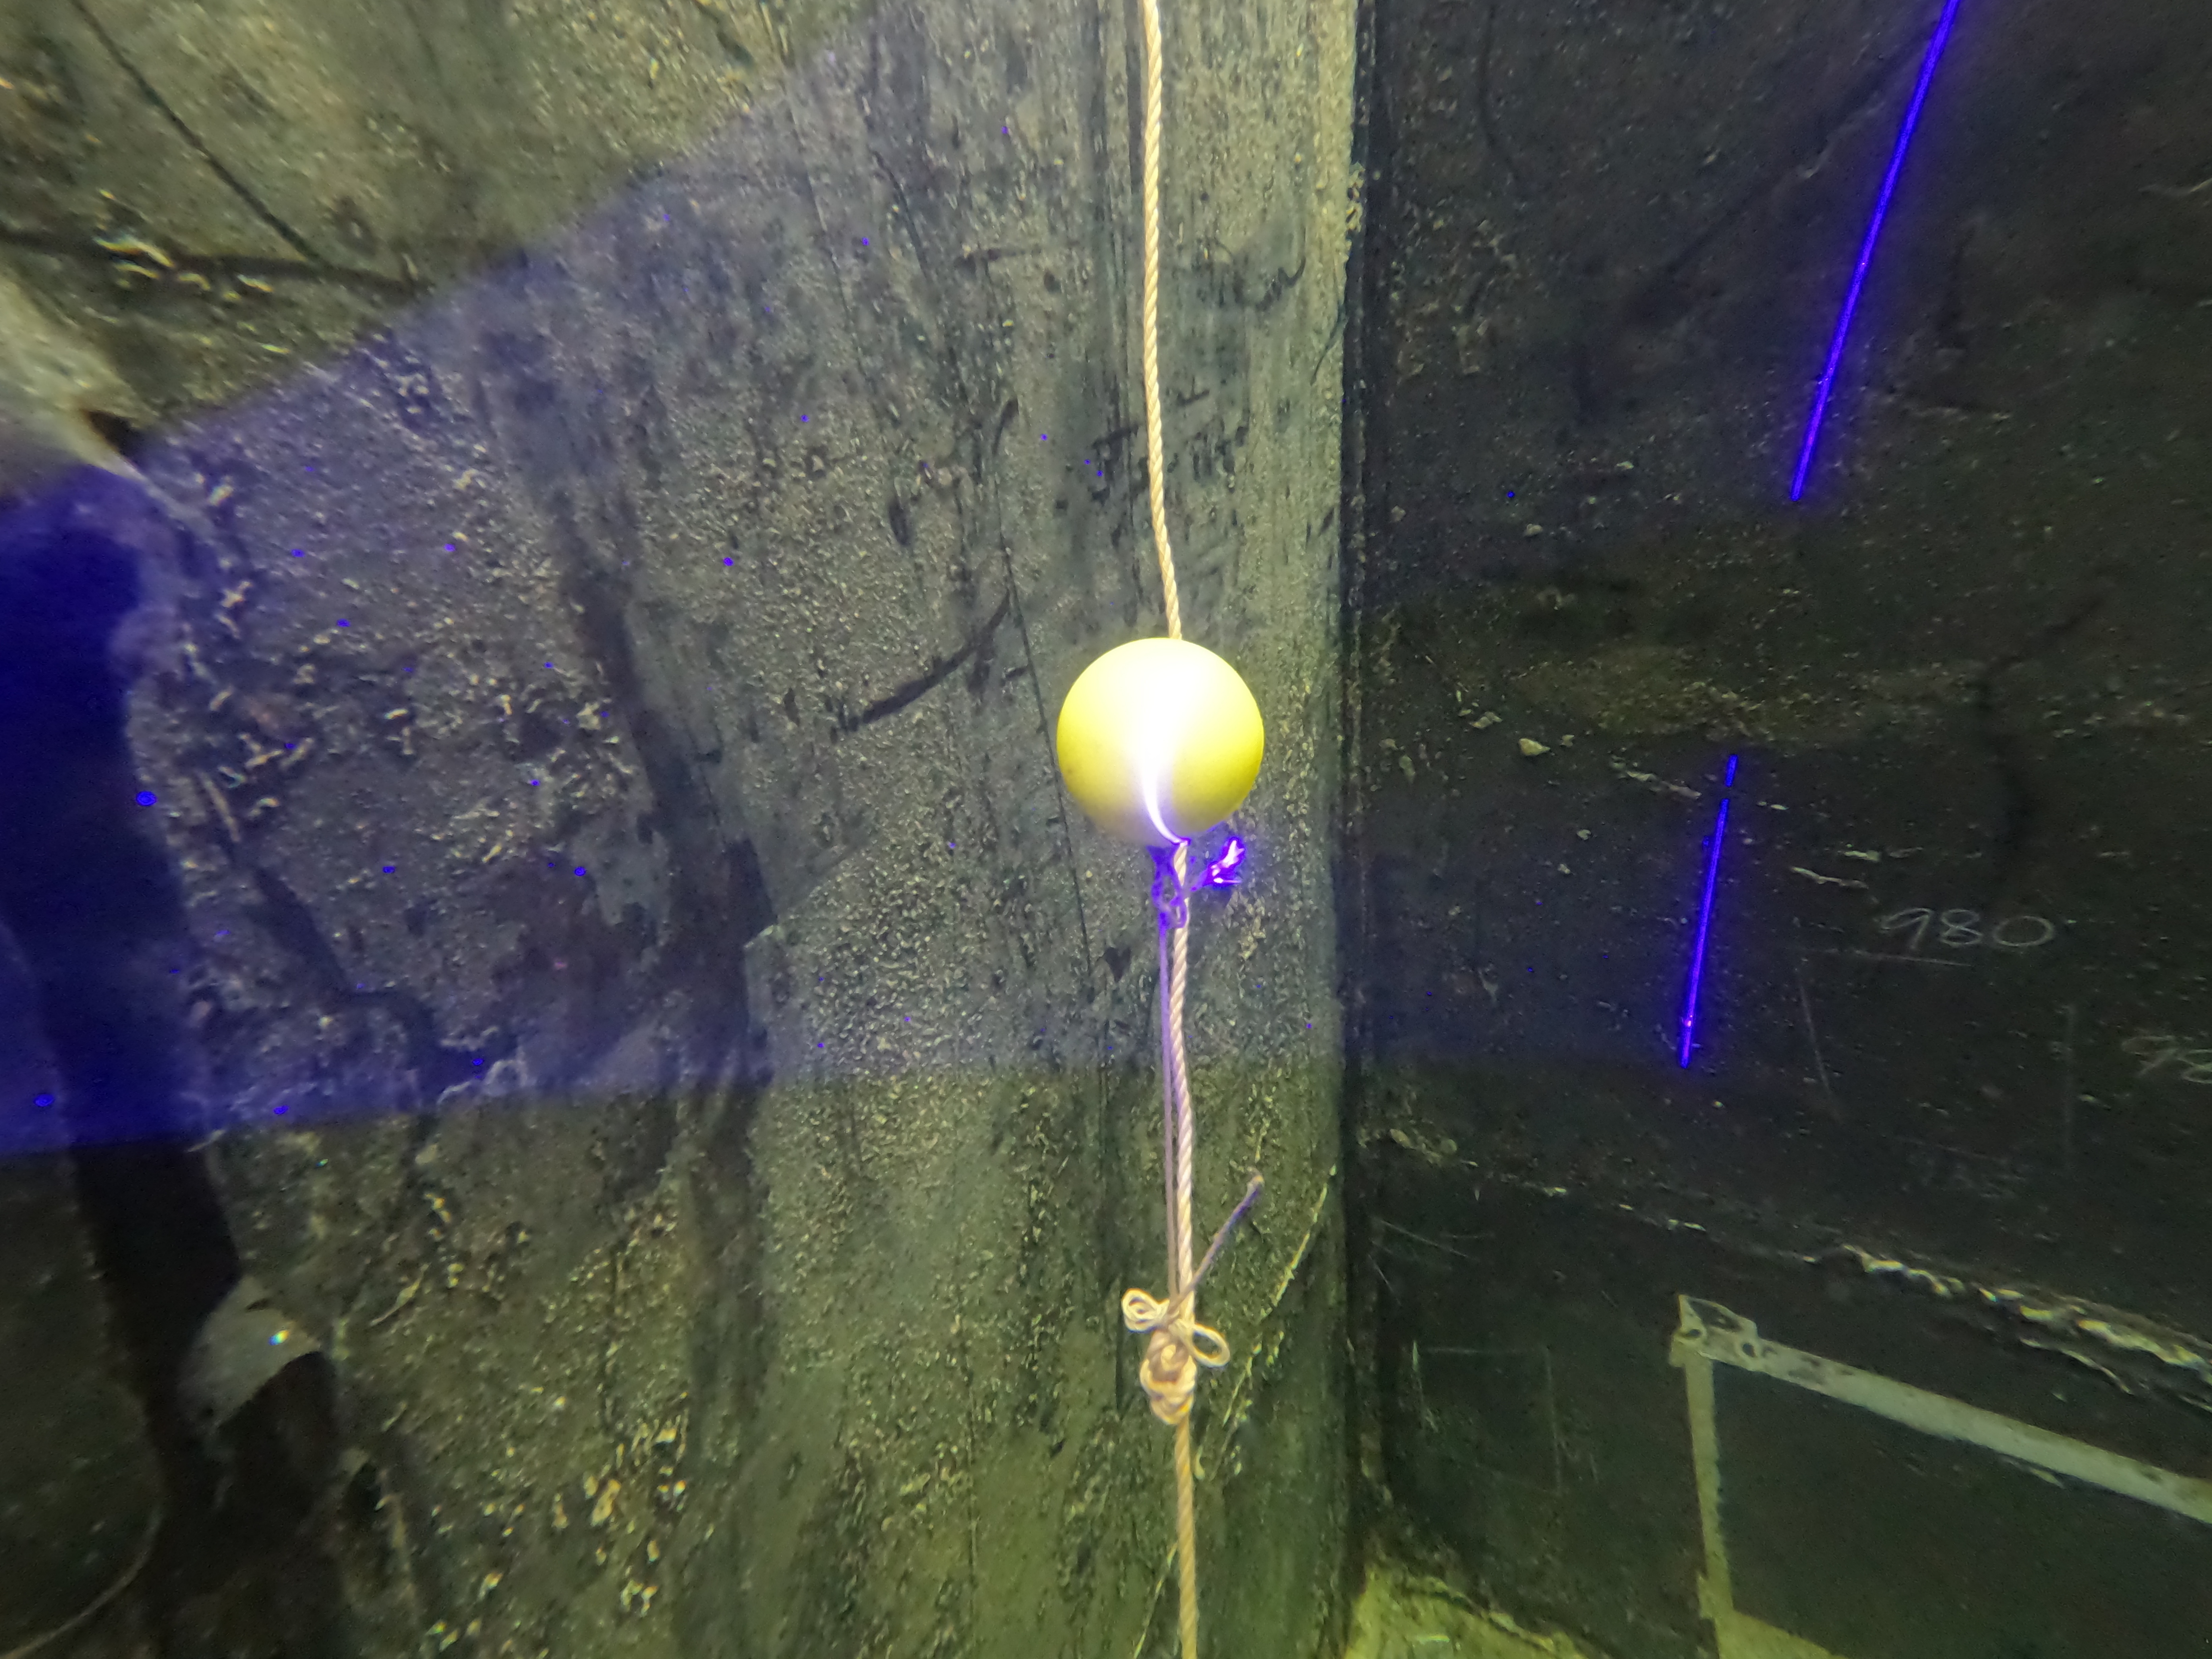

Supplement: Supplementary file 1300 [file G0032613.pdf › 6/G0032613.pdf]

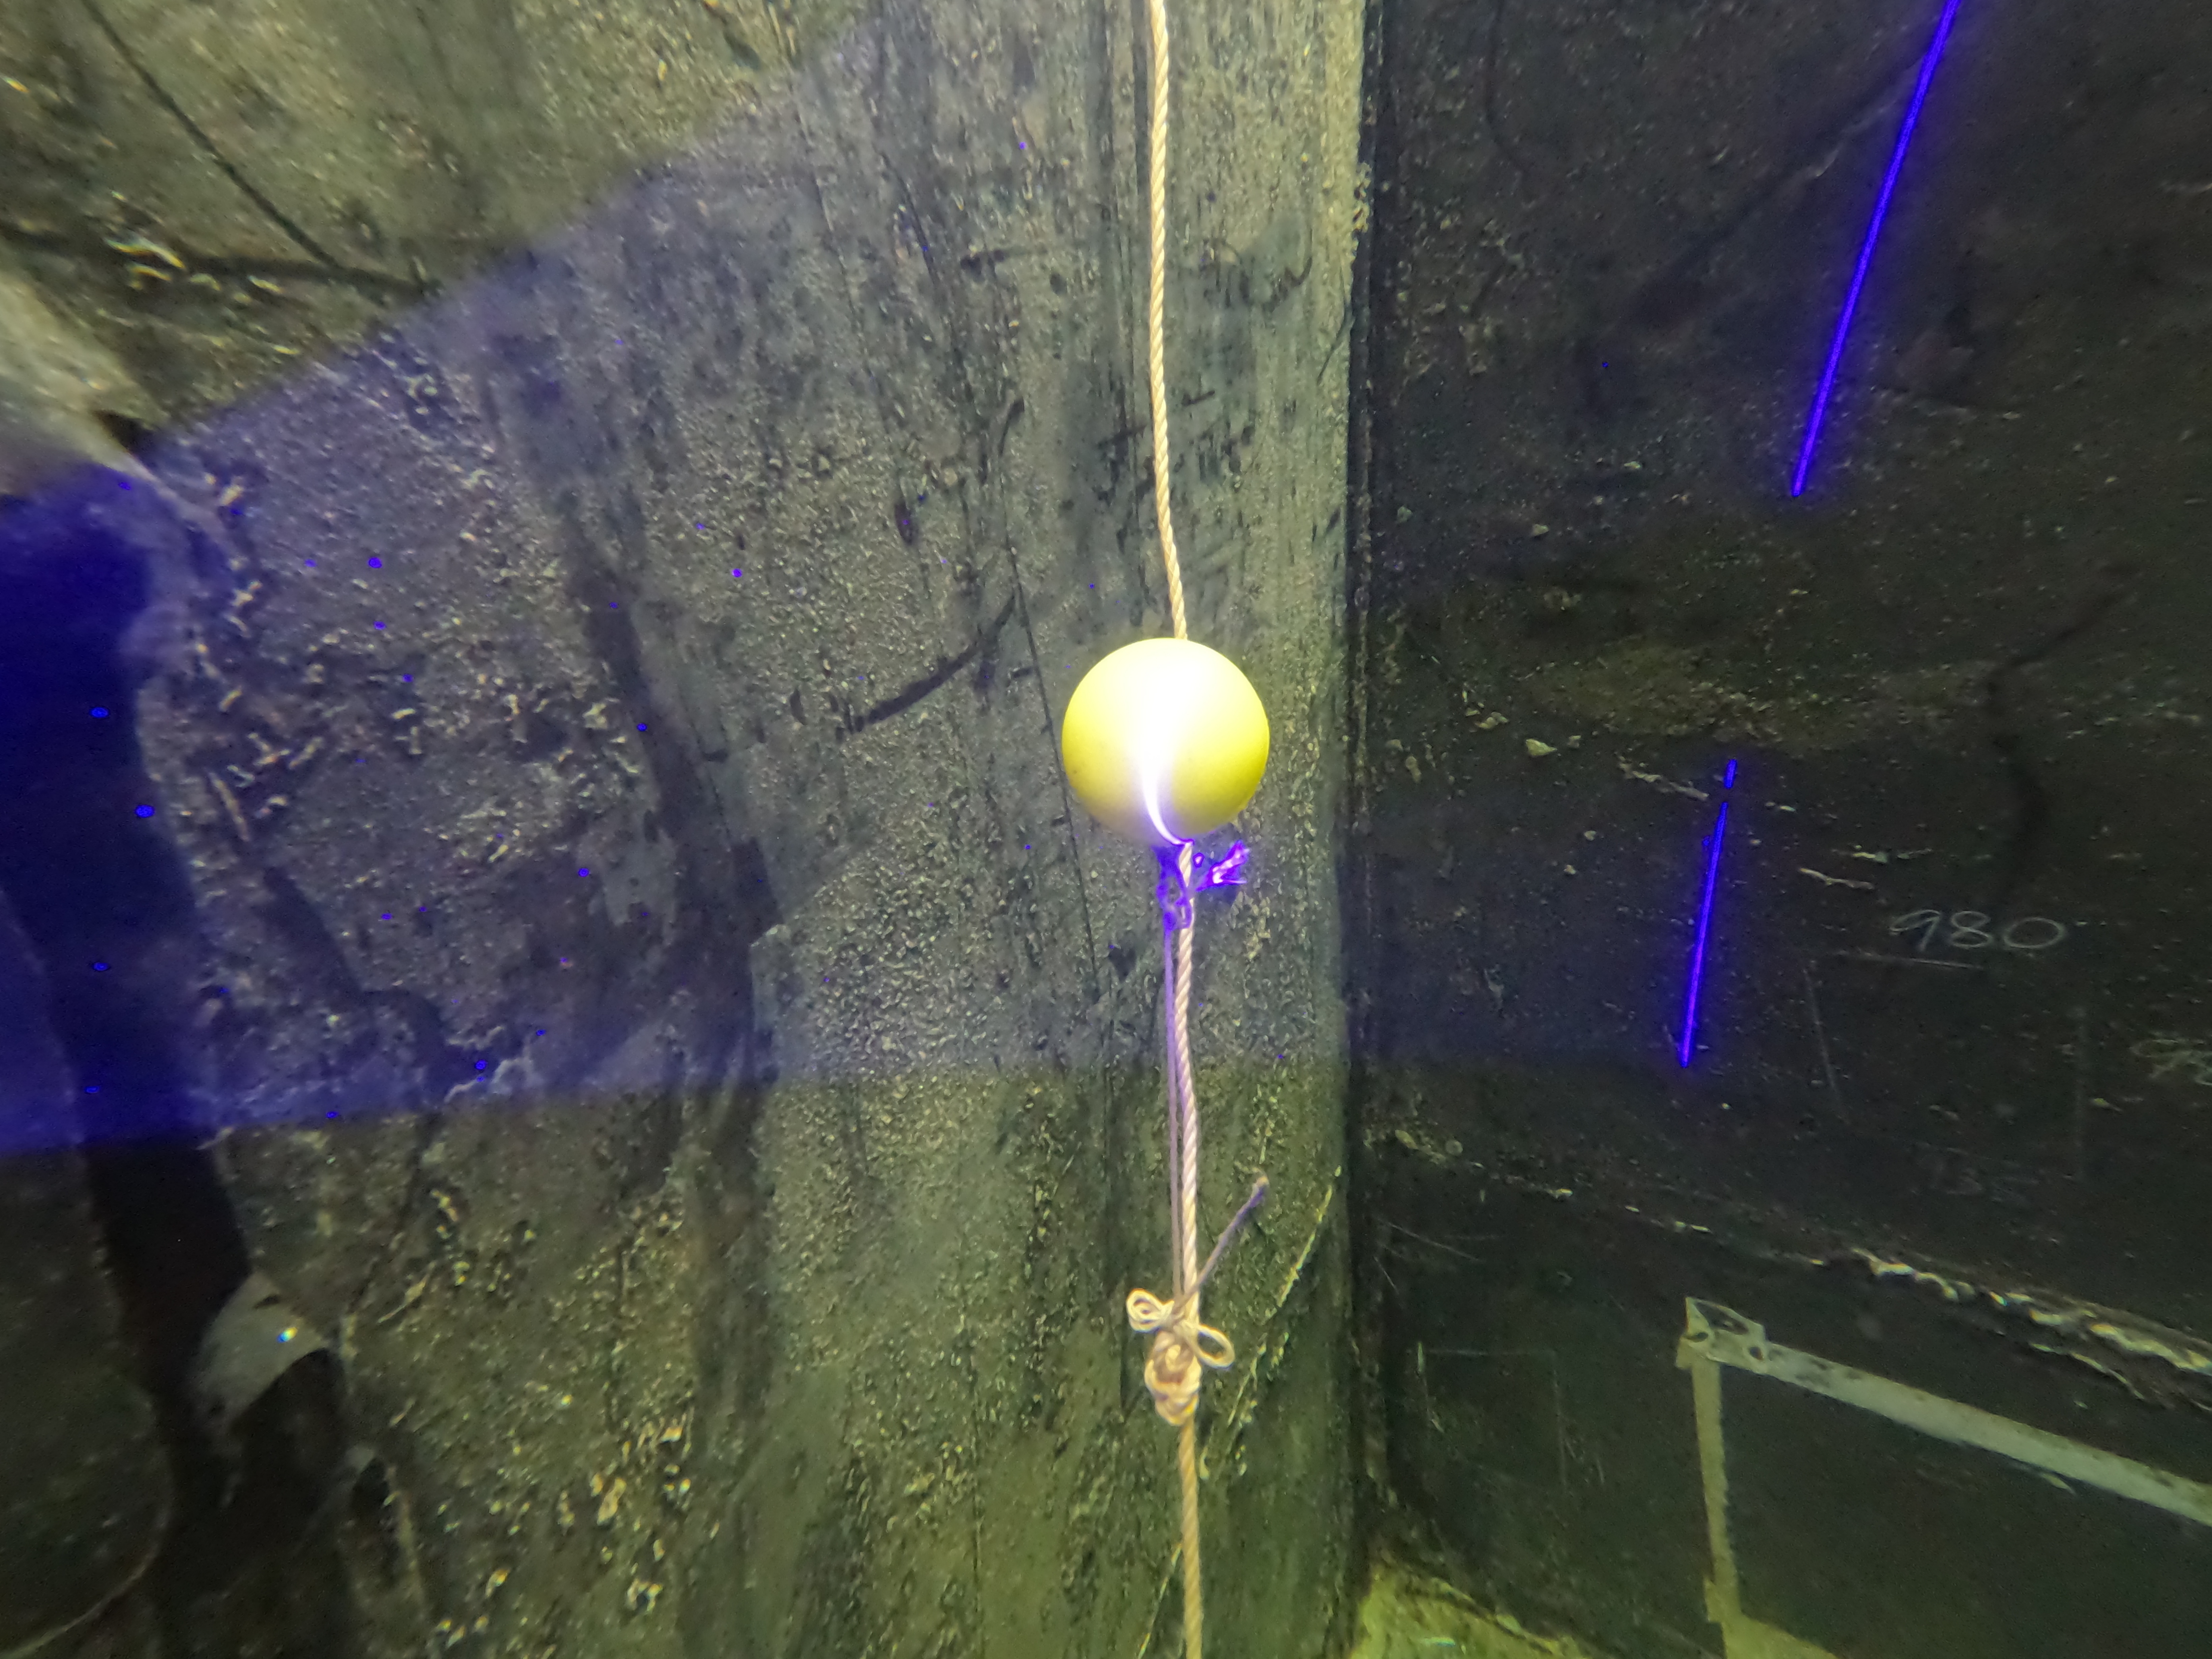

980

Supplement: Supplementary file 1301 [file G0032614.pdf › 6/G0032614.pdf]
