# Supplementary figures and images for: 3D reconstruction of shallow sea environment using direct system calibration and faint laser line extraction (part 14 of 35)
Source: Research Square preprint supplement (doi:10.21203/rs.3.rs-5262658/v1), 2024-12-02

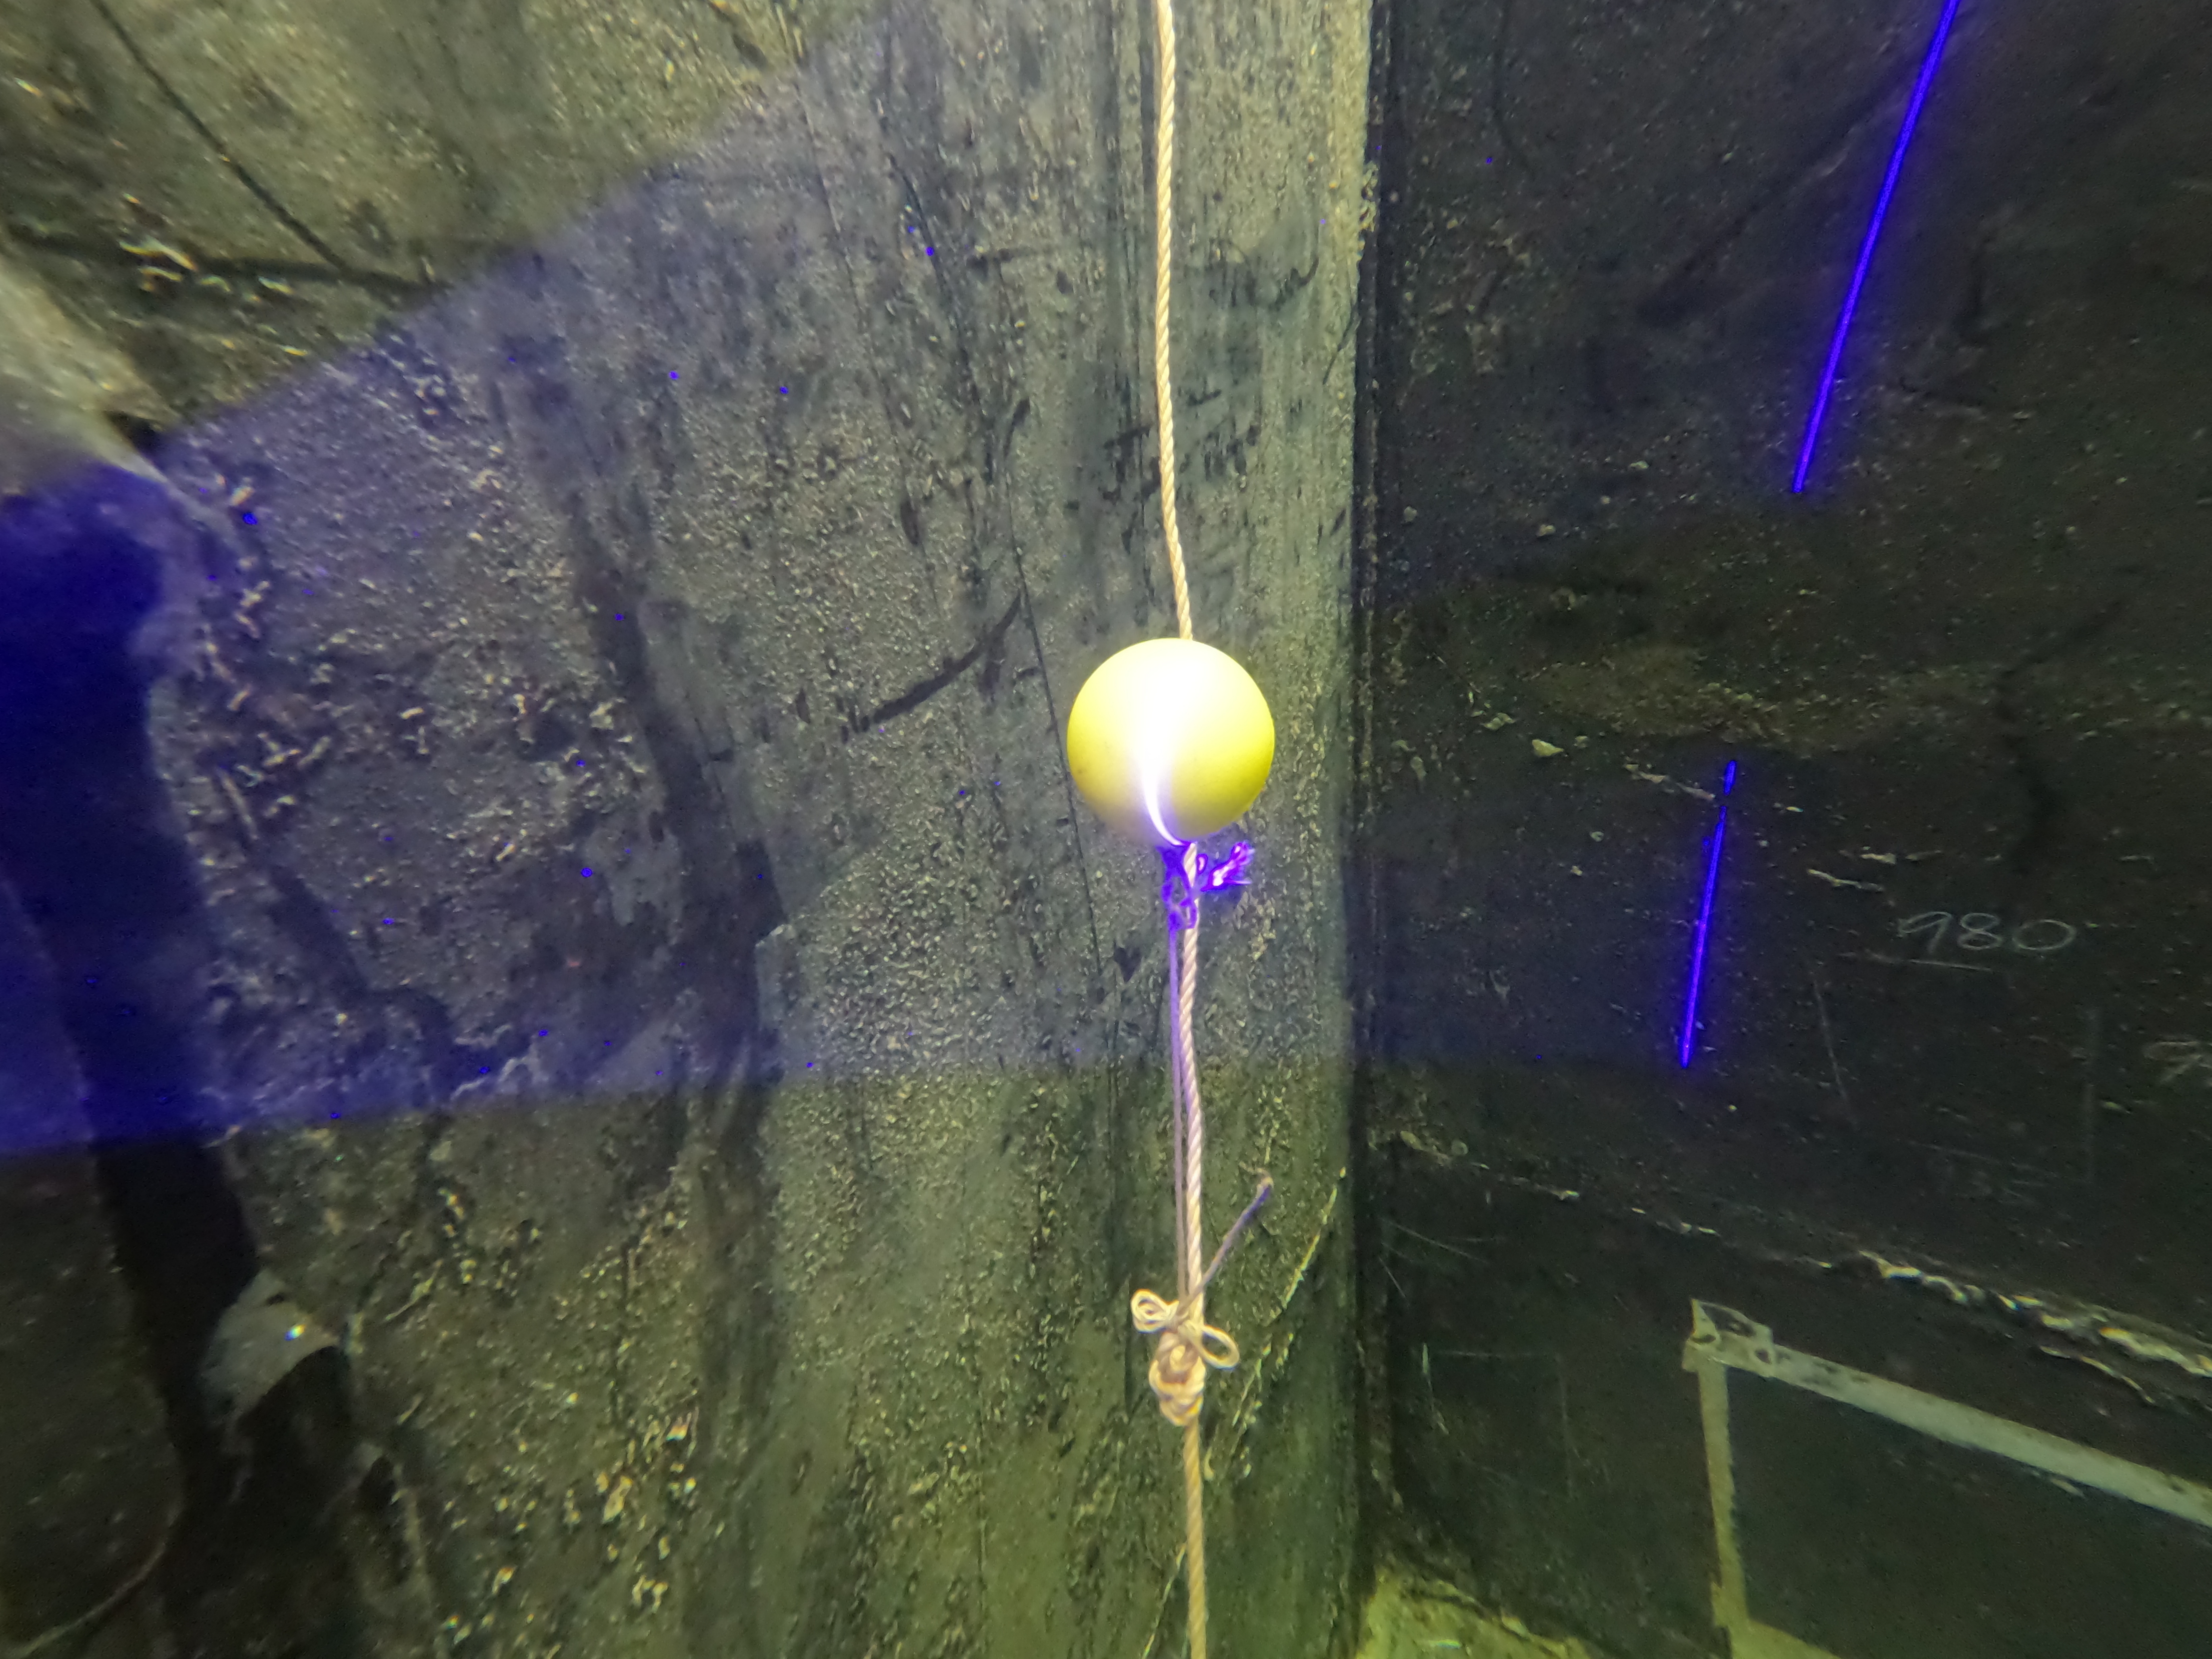

980

Supplement: Supplementary file 1302 [file G0032615.pdf › 6/G0032615.pdf]

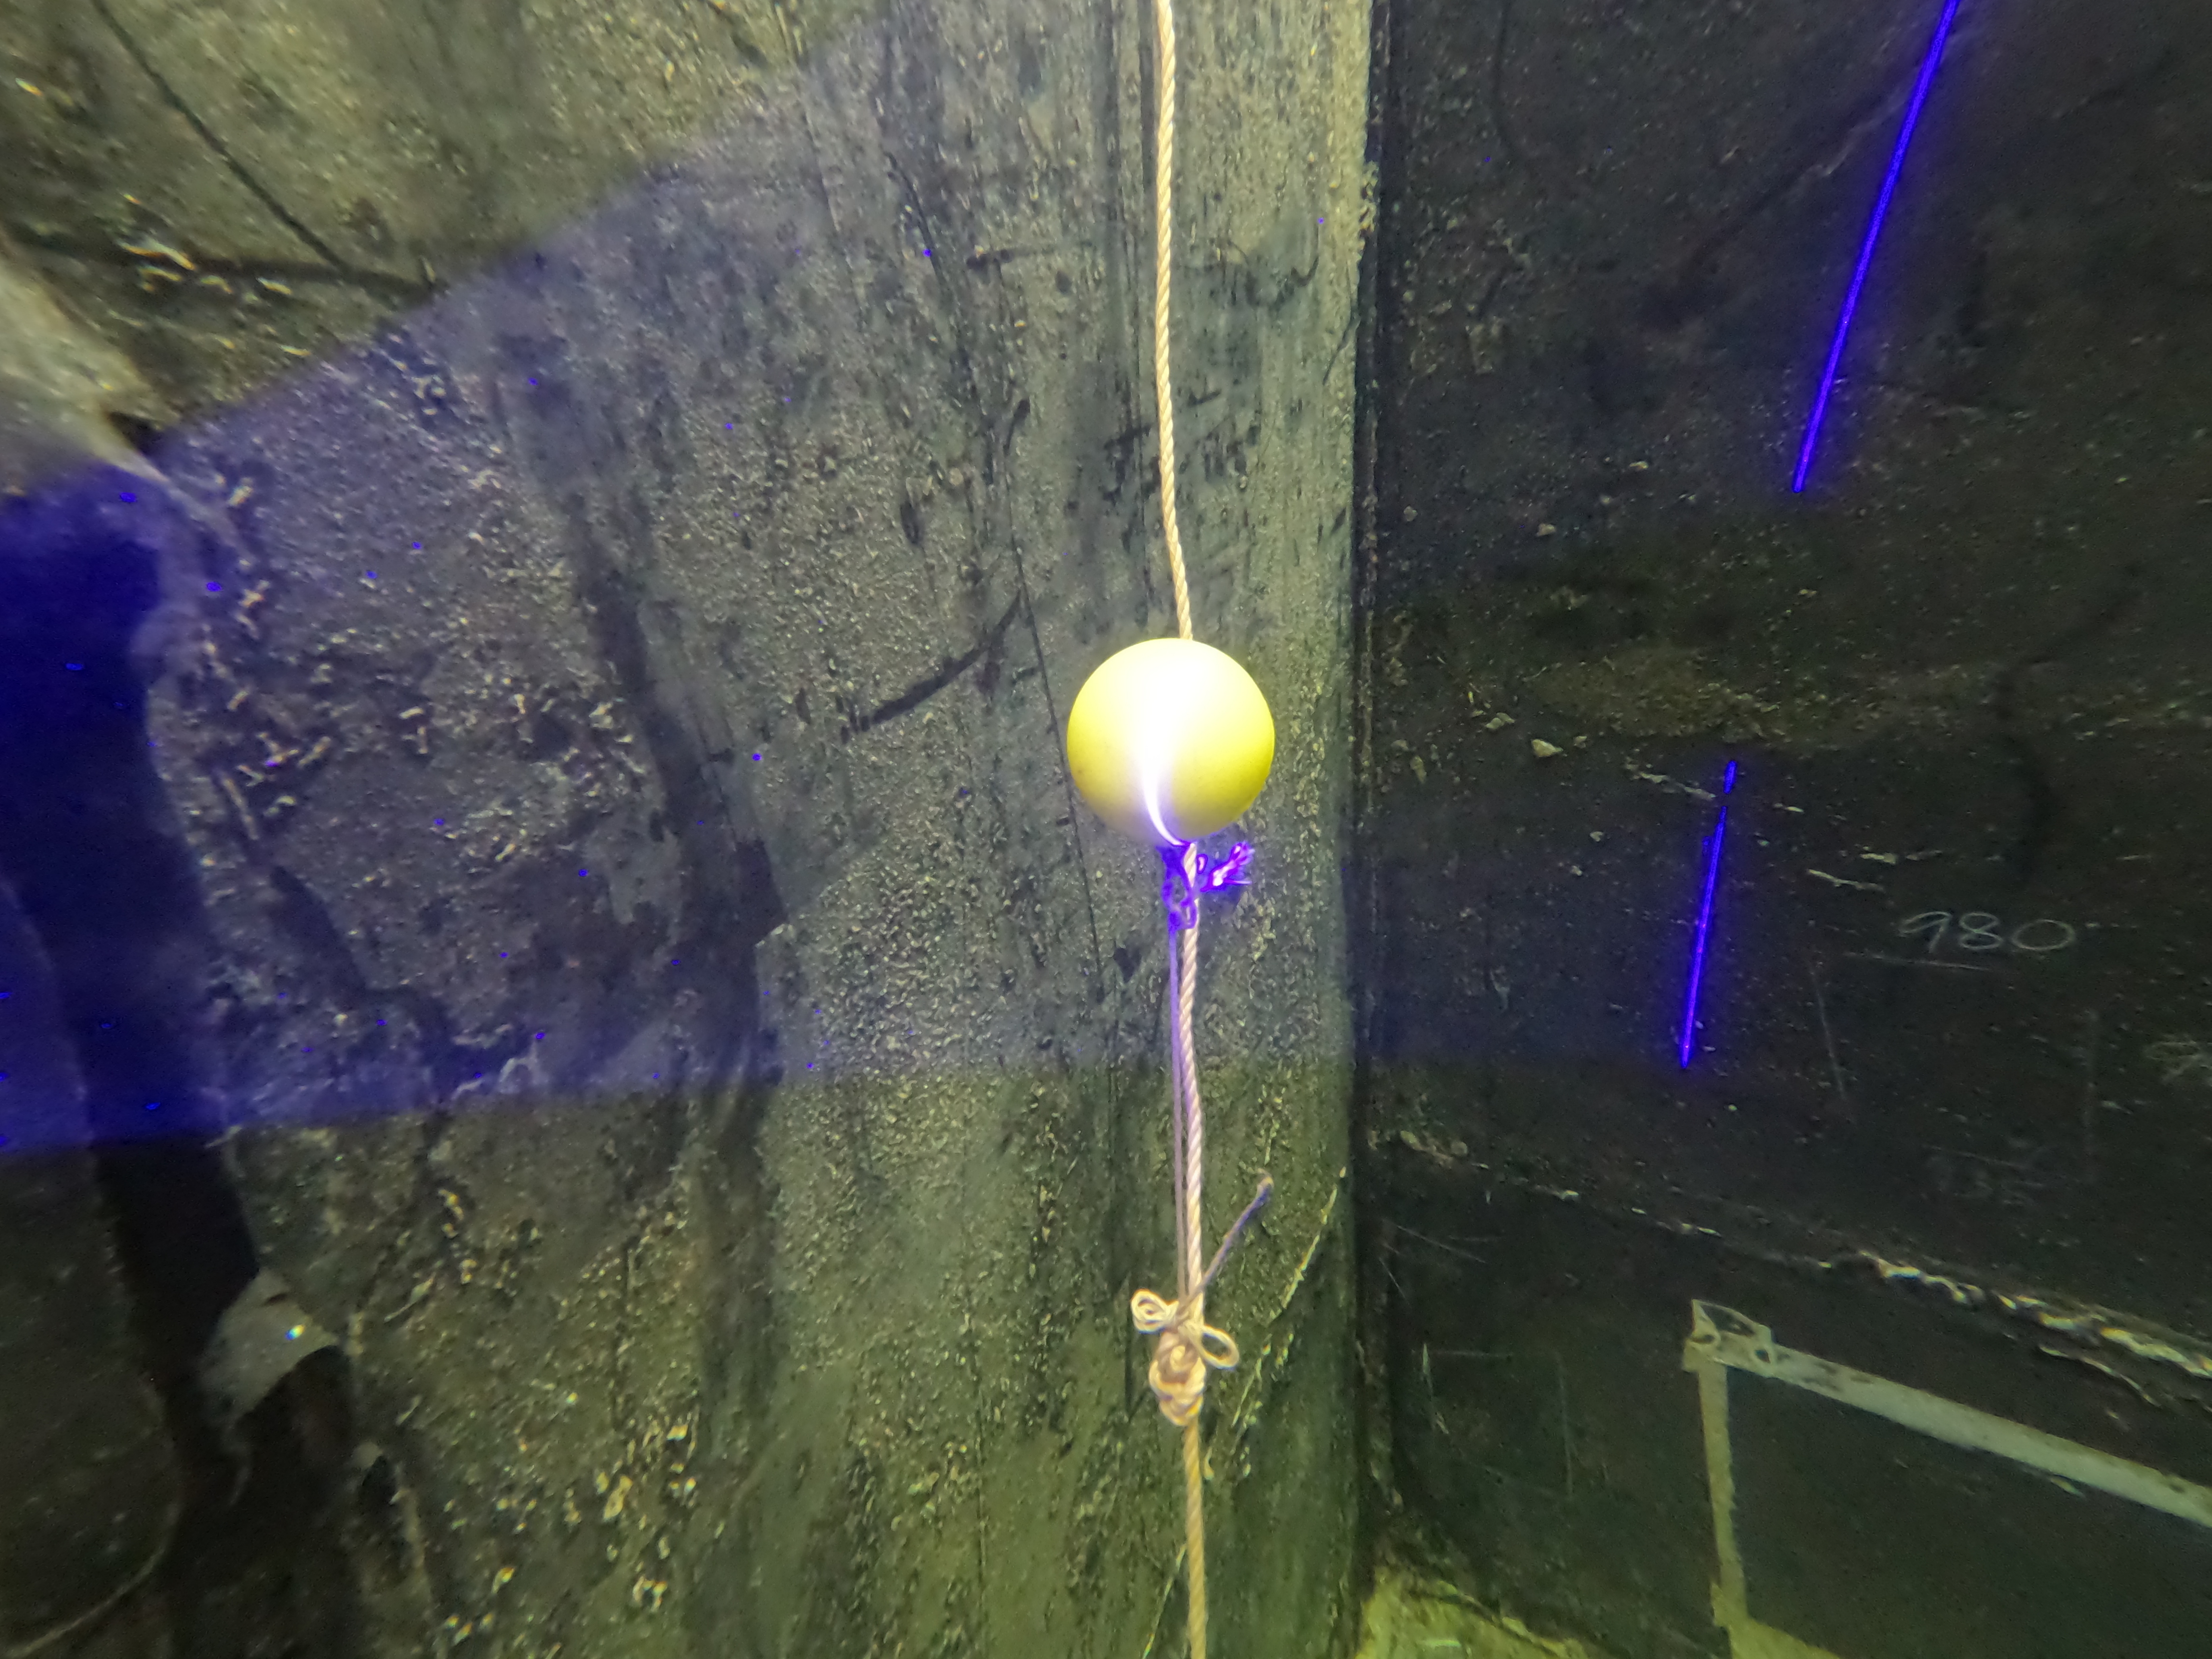

980

Supplement: Supplementary file 1303 [file G0032616.pdf › 6/G0032616.pdf]

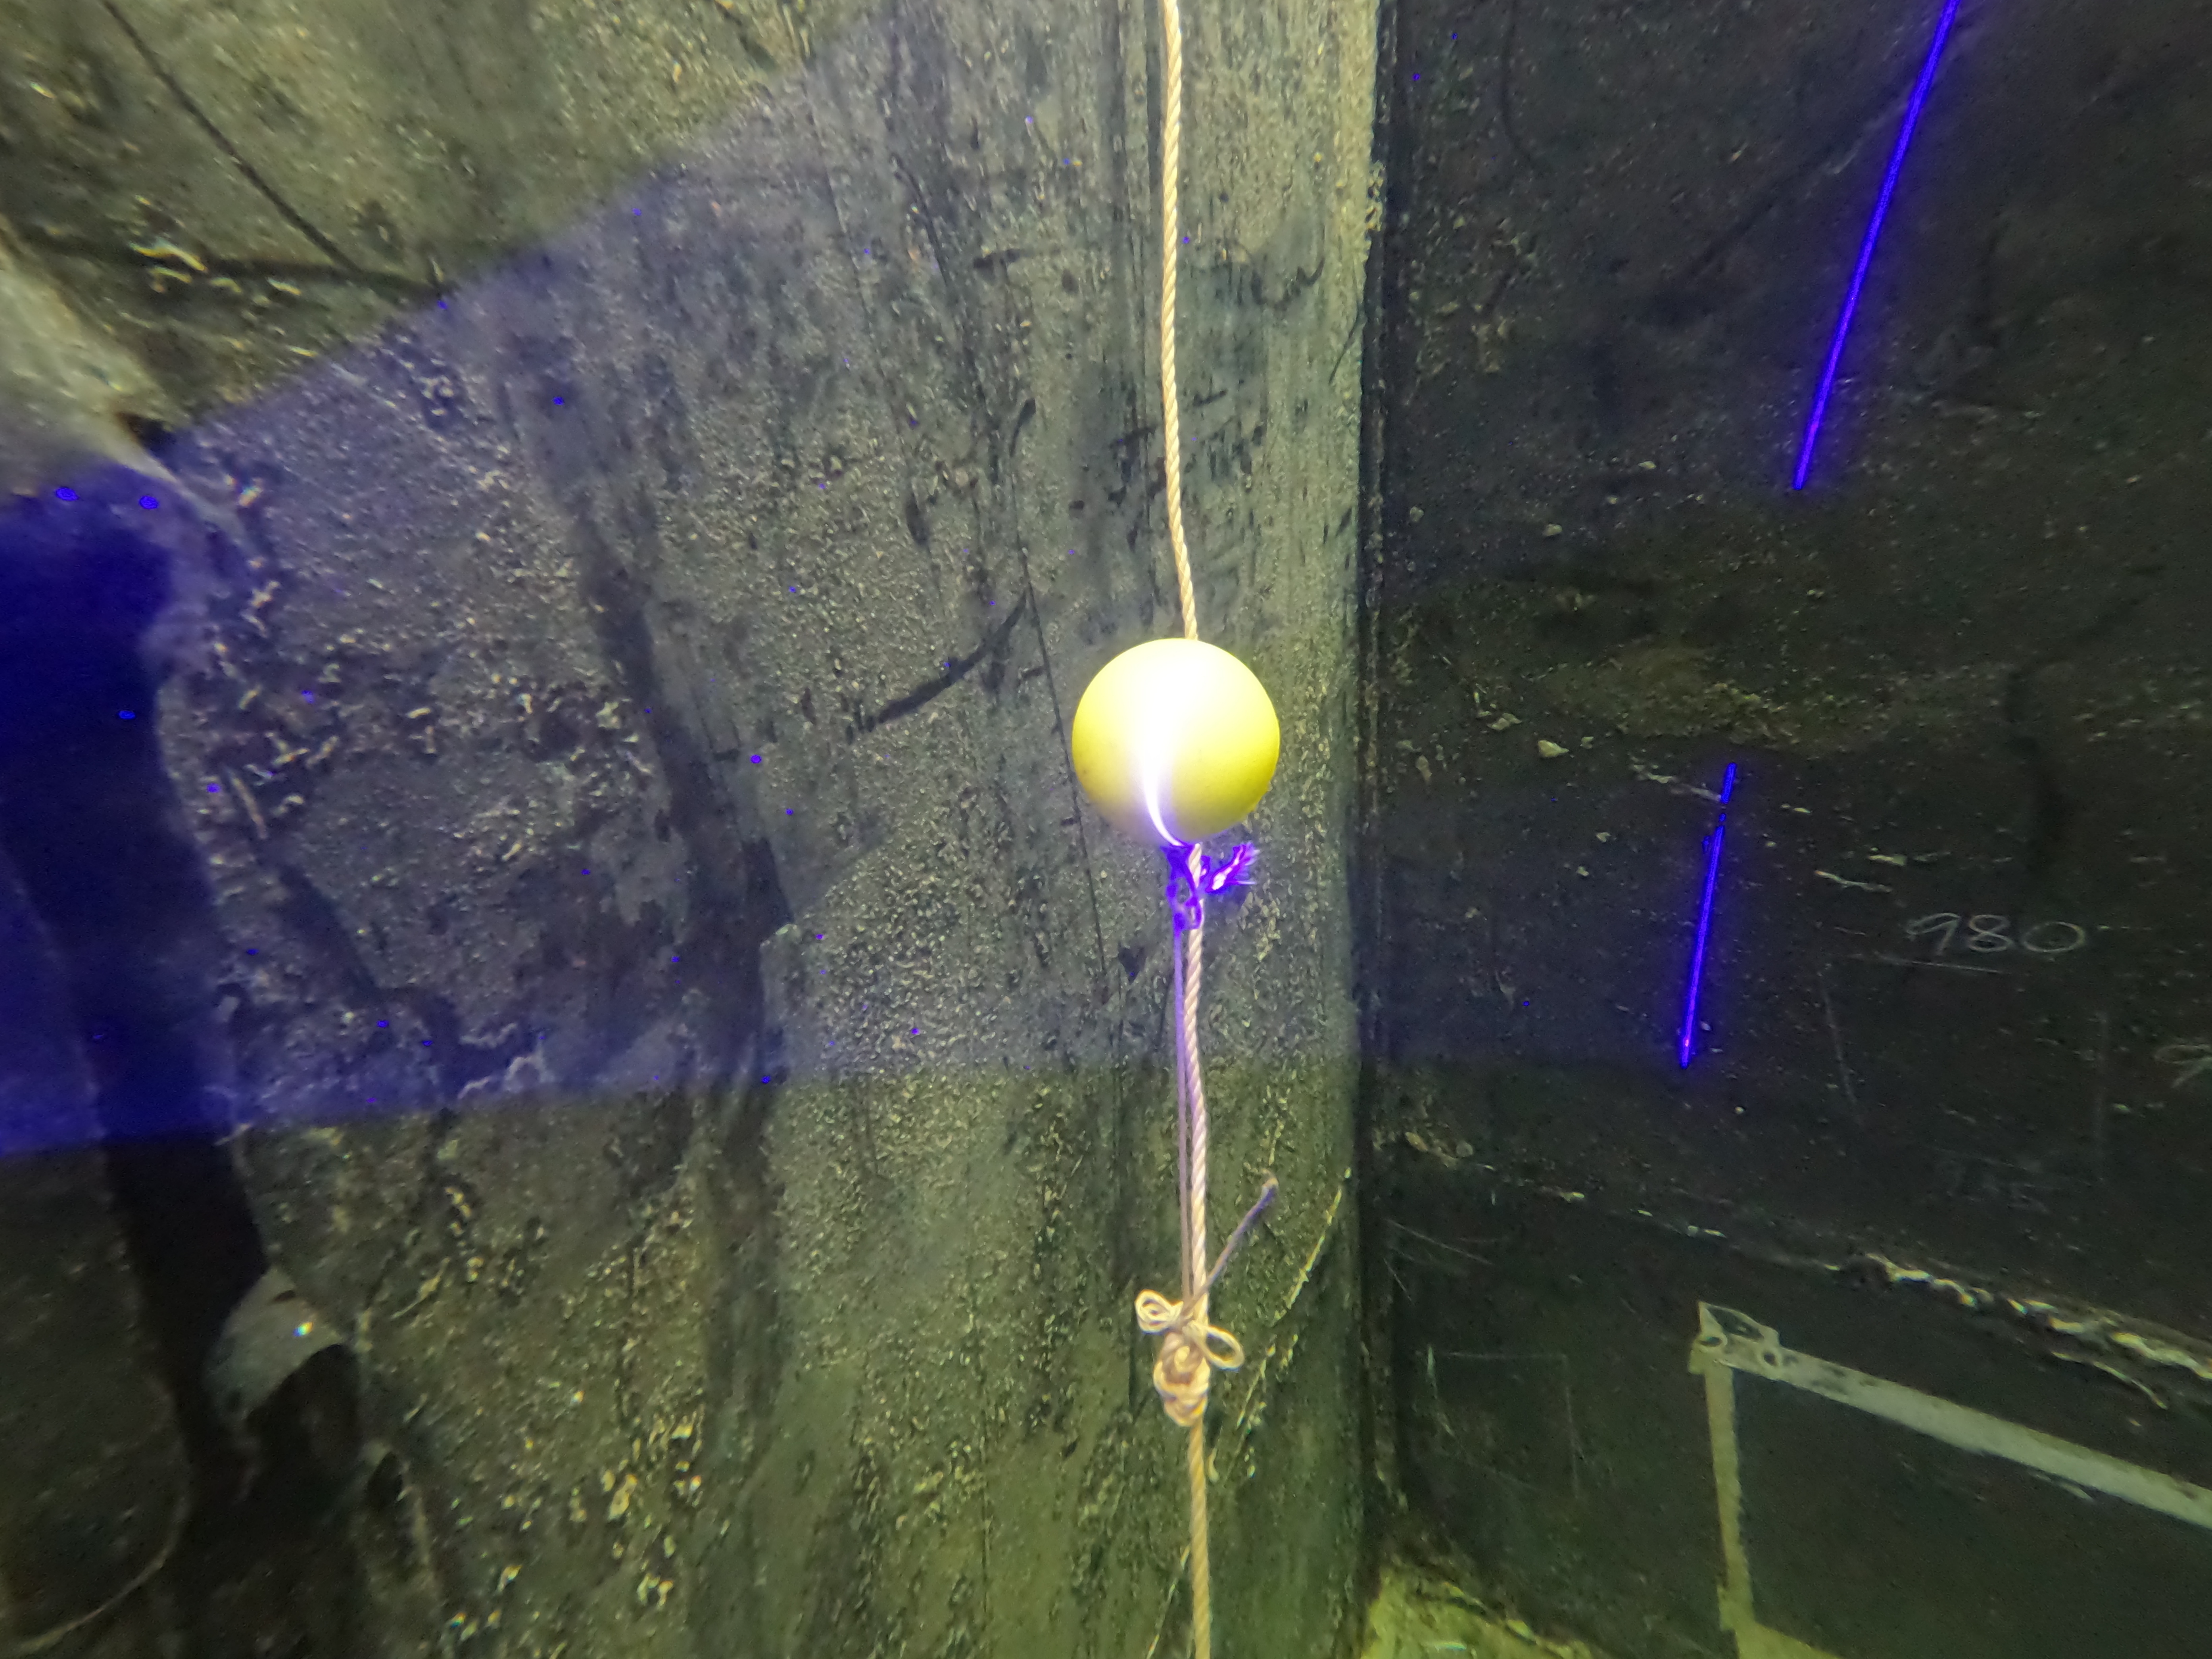

980

Supplement: Supplementary file 1304 [file G0032617.pdf › 6/G0032617.pdf]

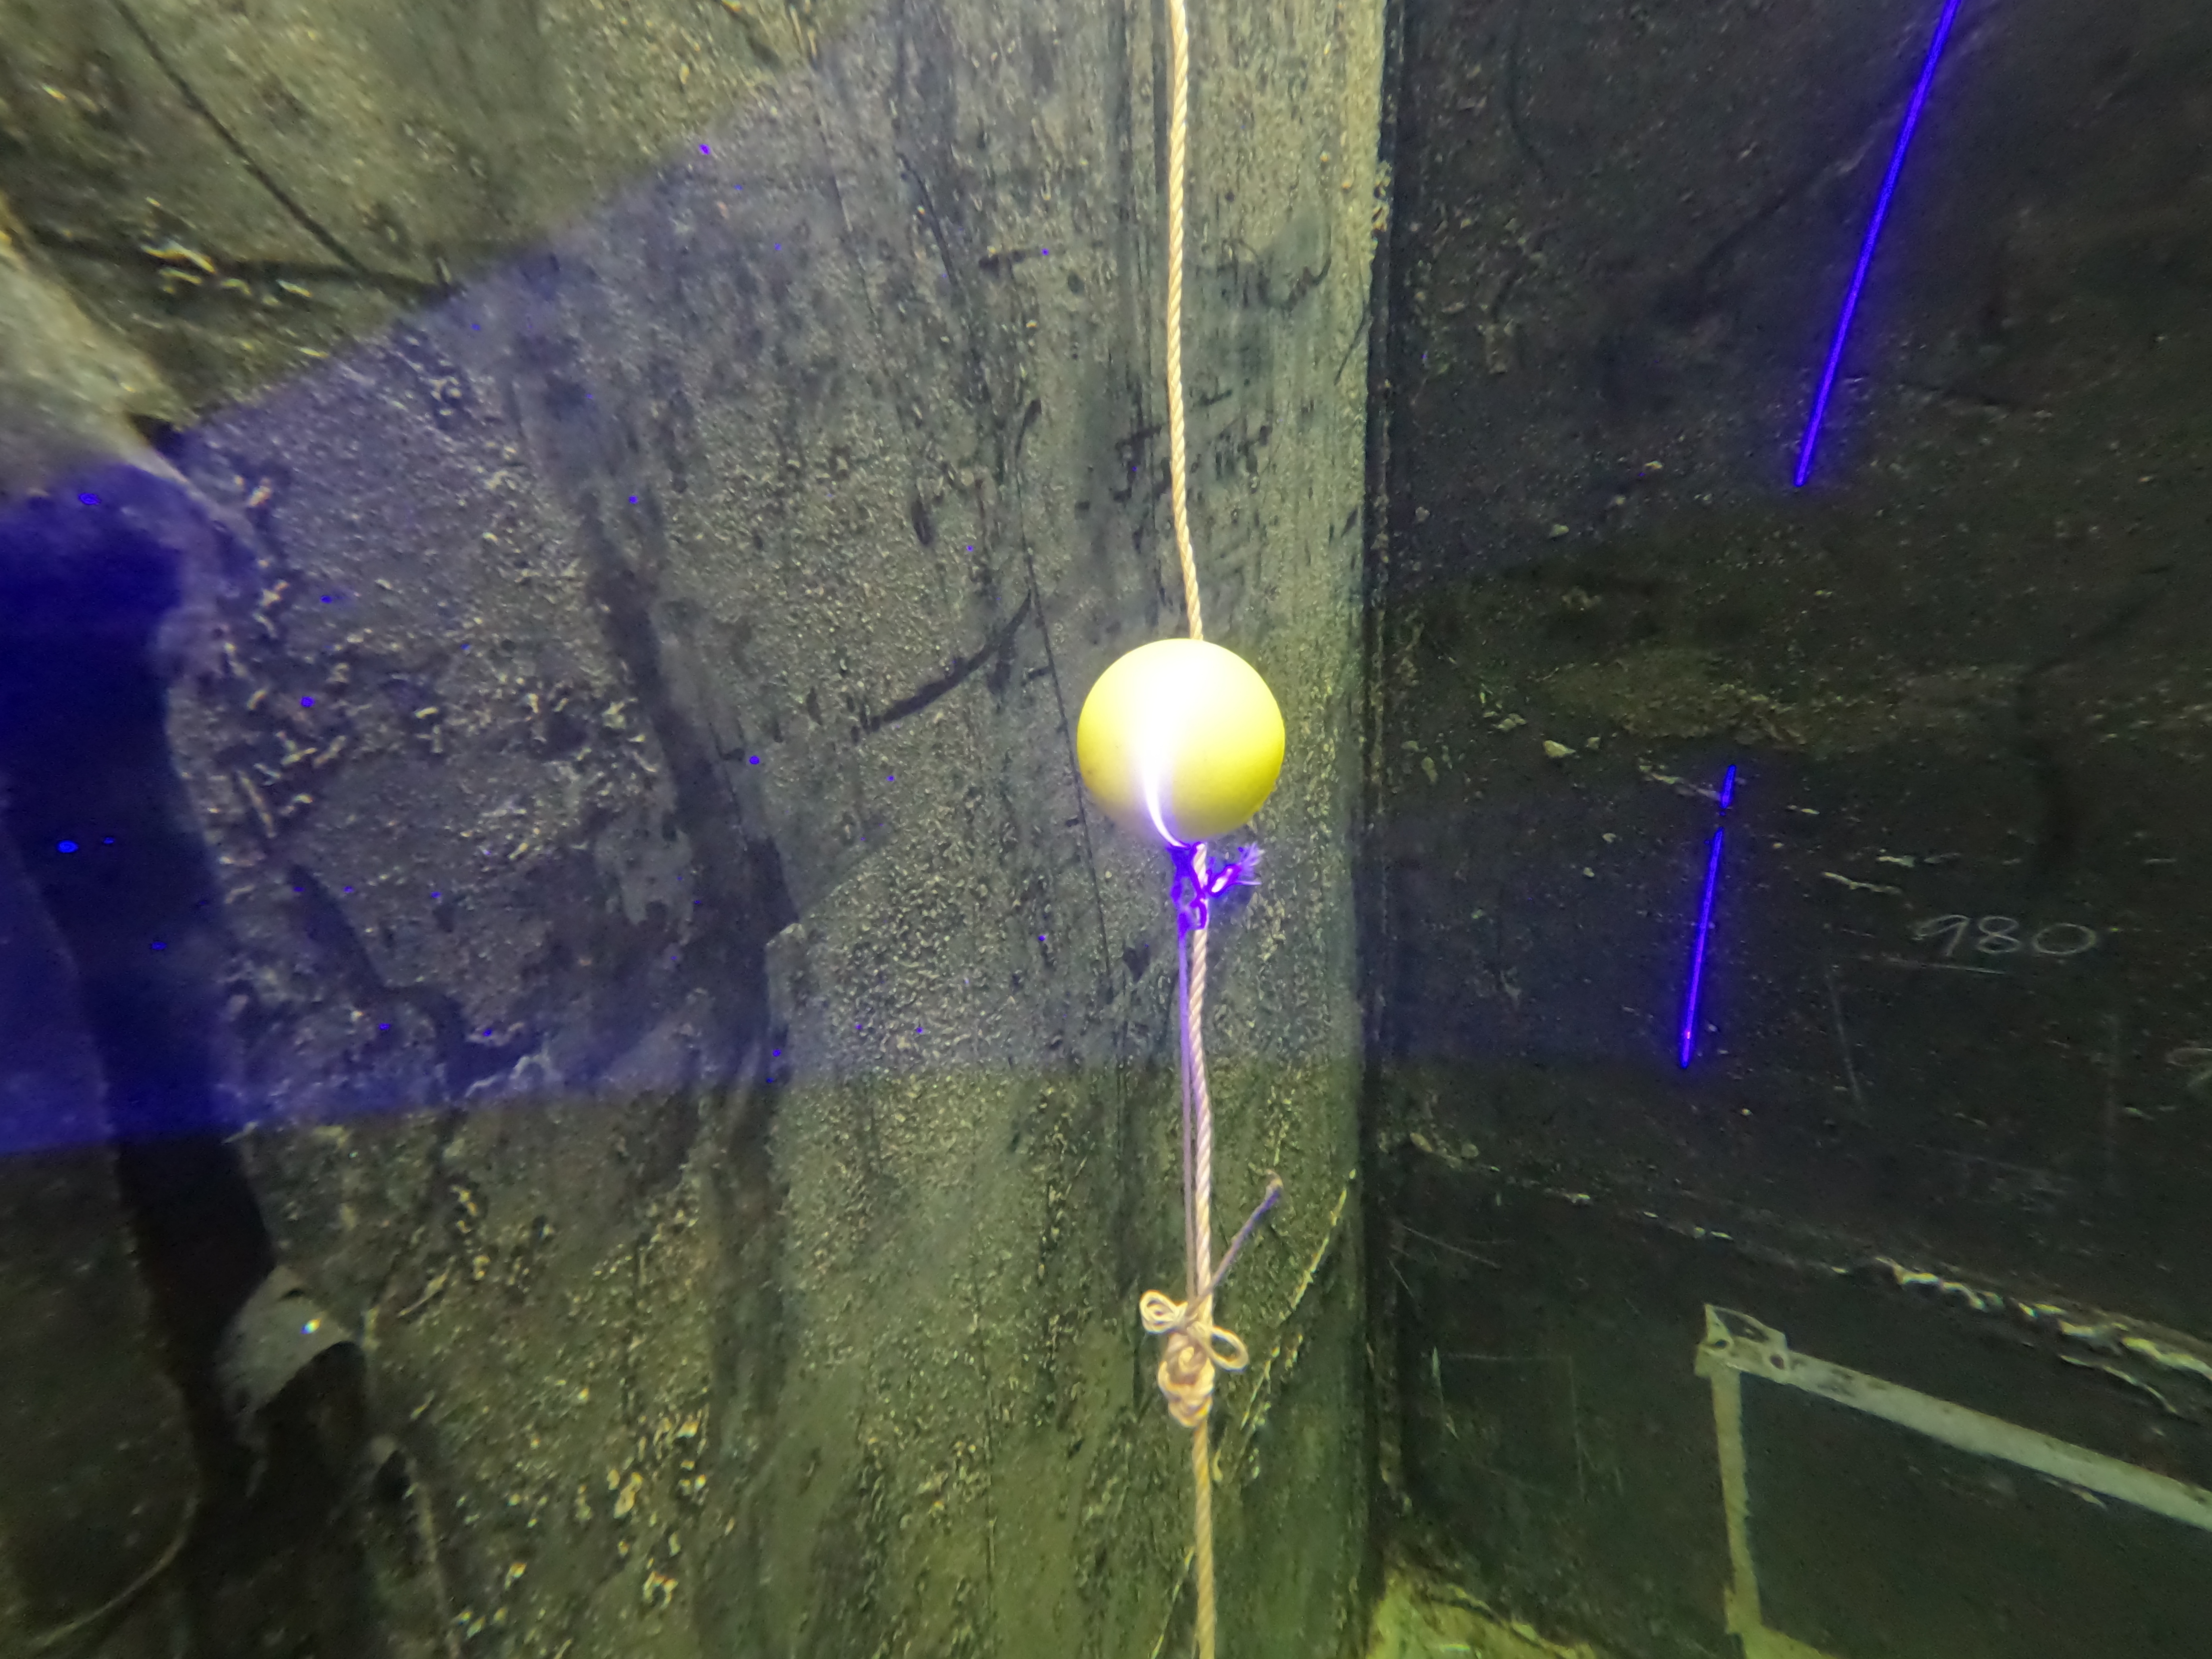

Supplement: Supplementary file 1305 [file G0032618.pdf › 6/G0032618.pdf]

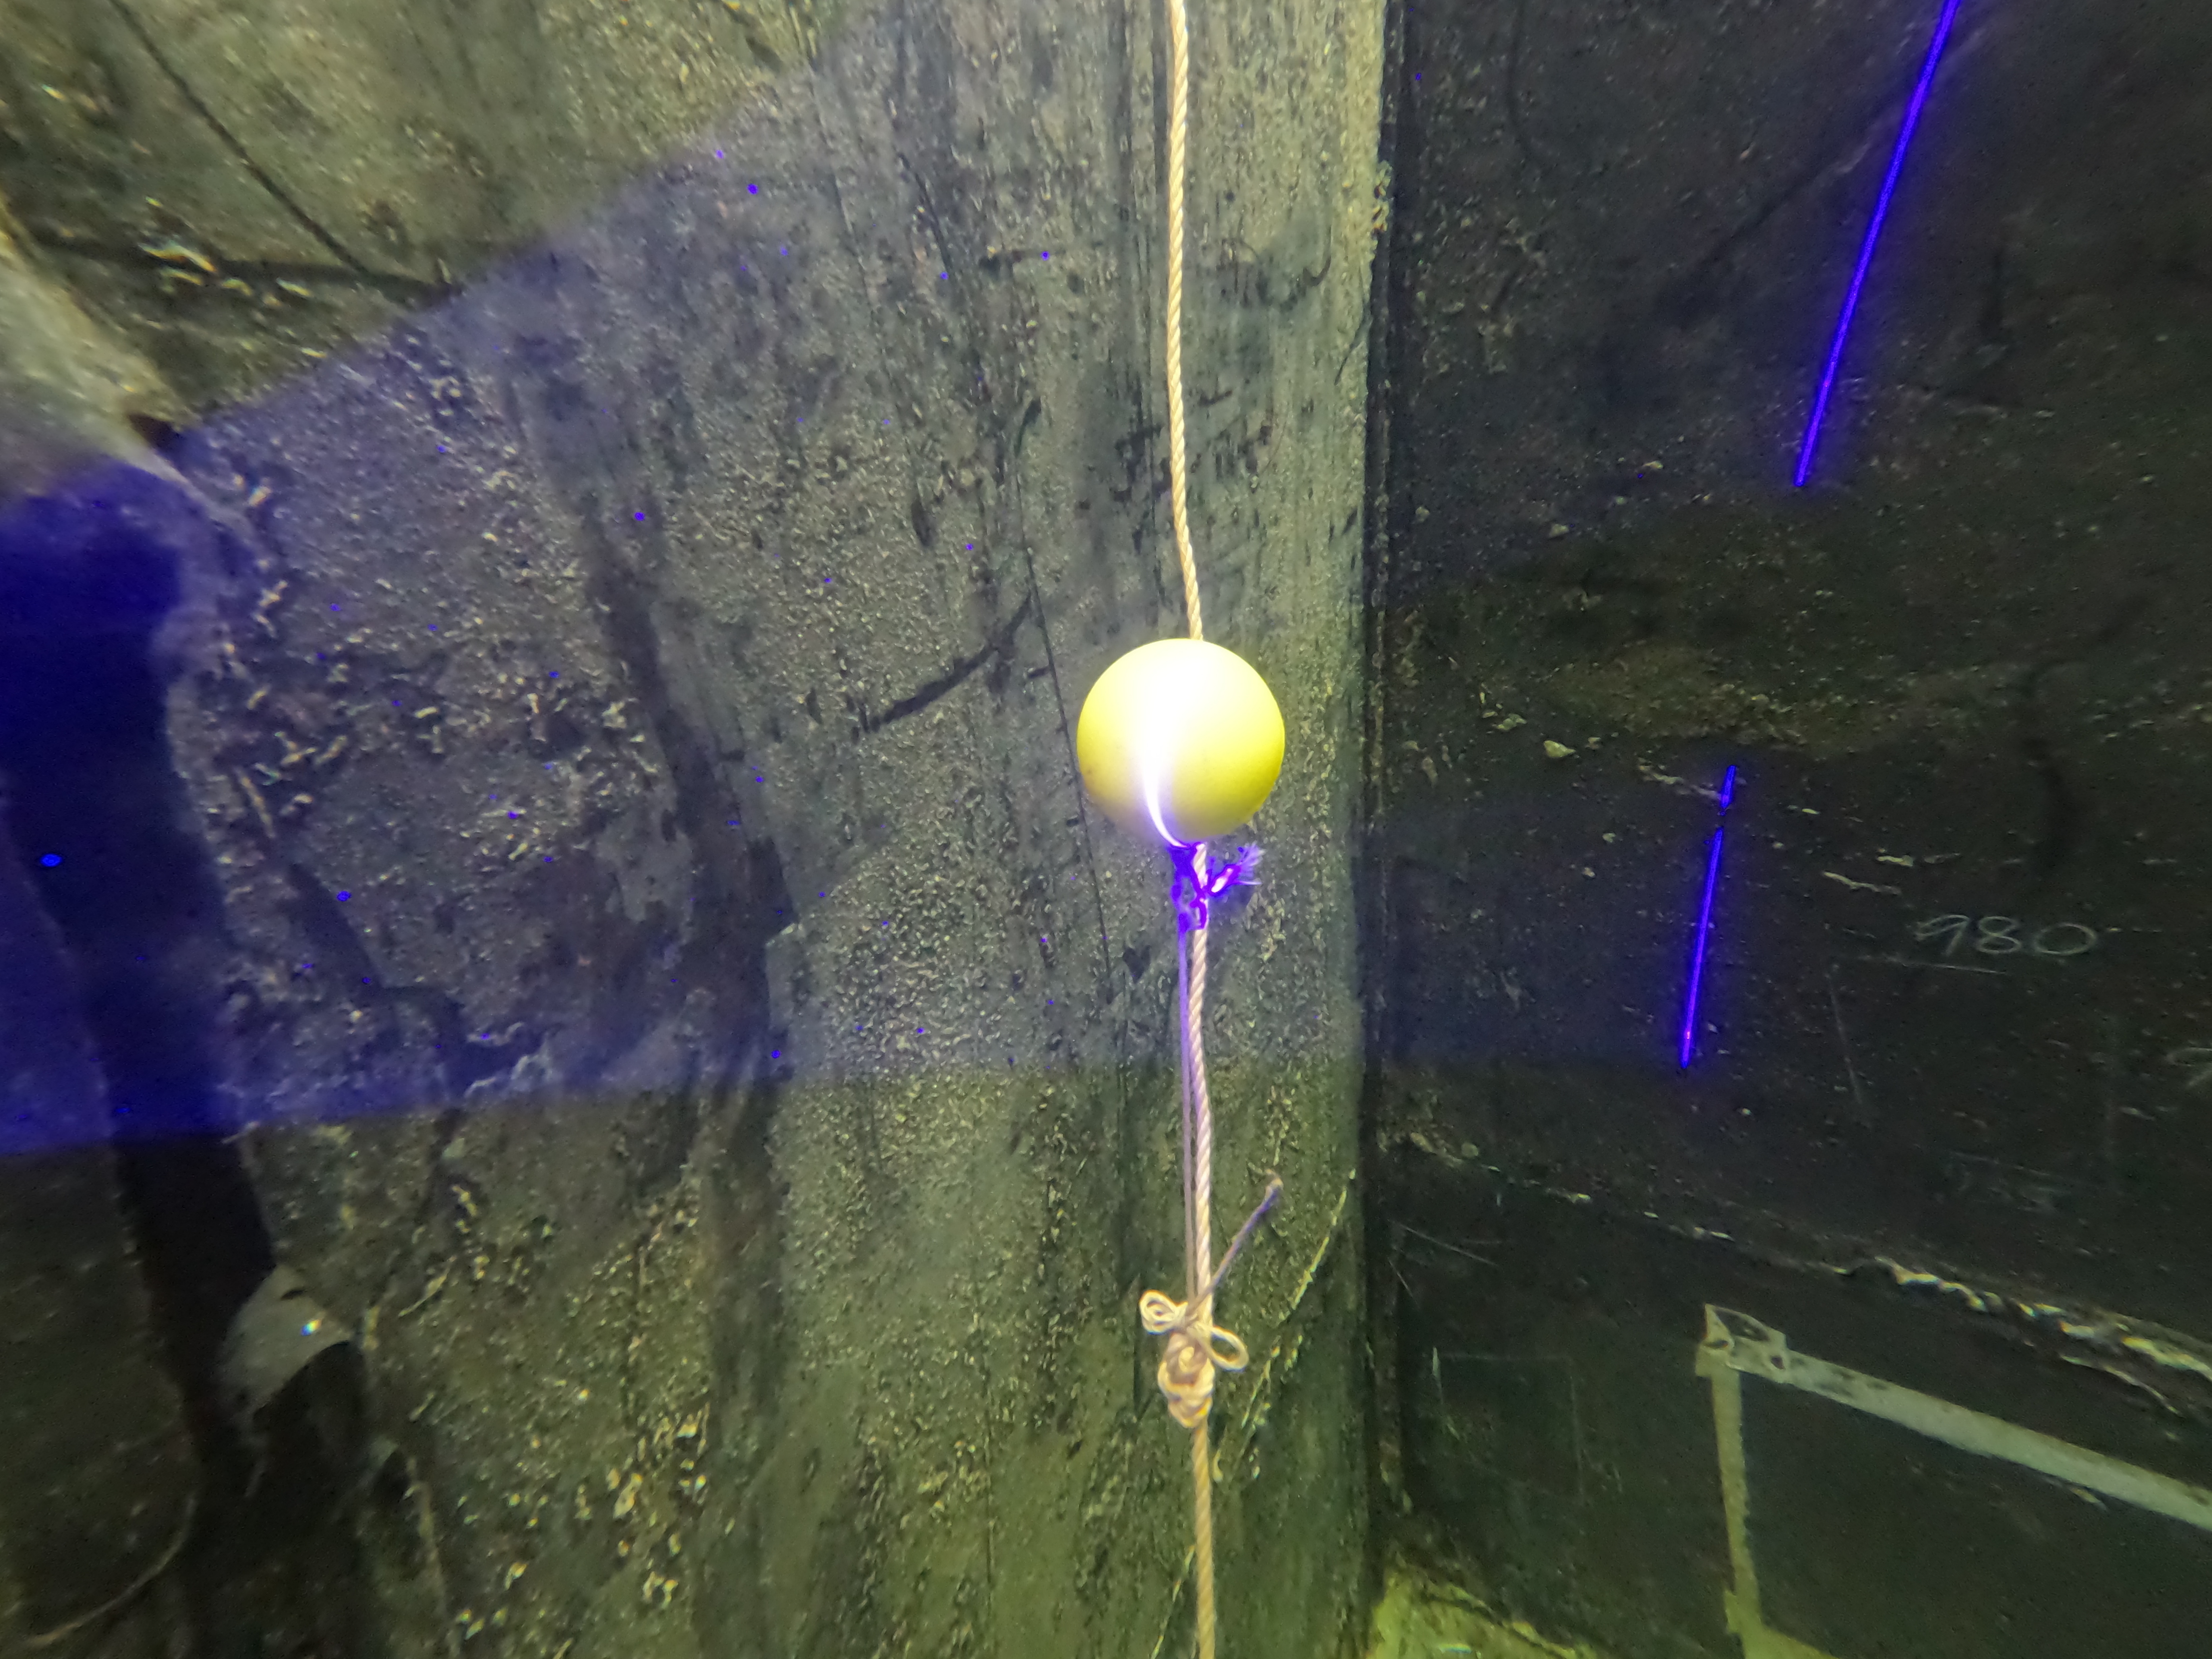

Supplement: Supplementary file 1306 [file G0032619.pdf › 6/G0032619.pdf]

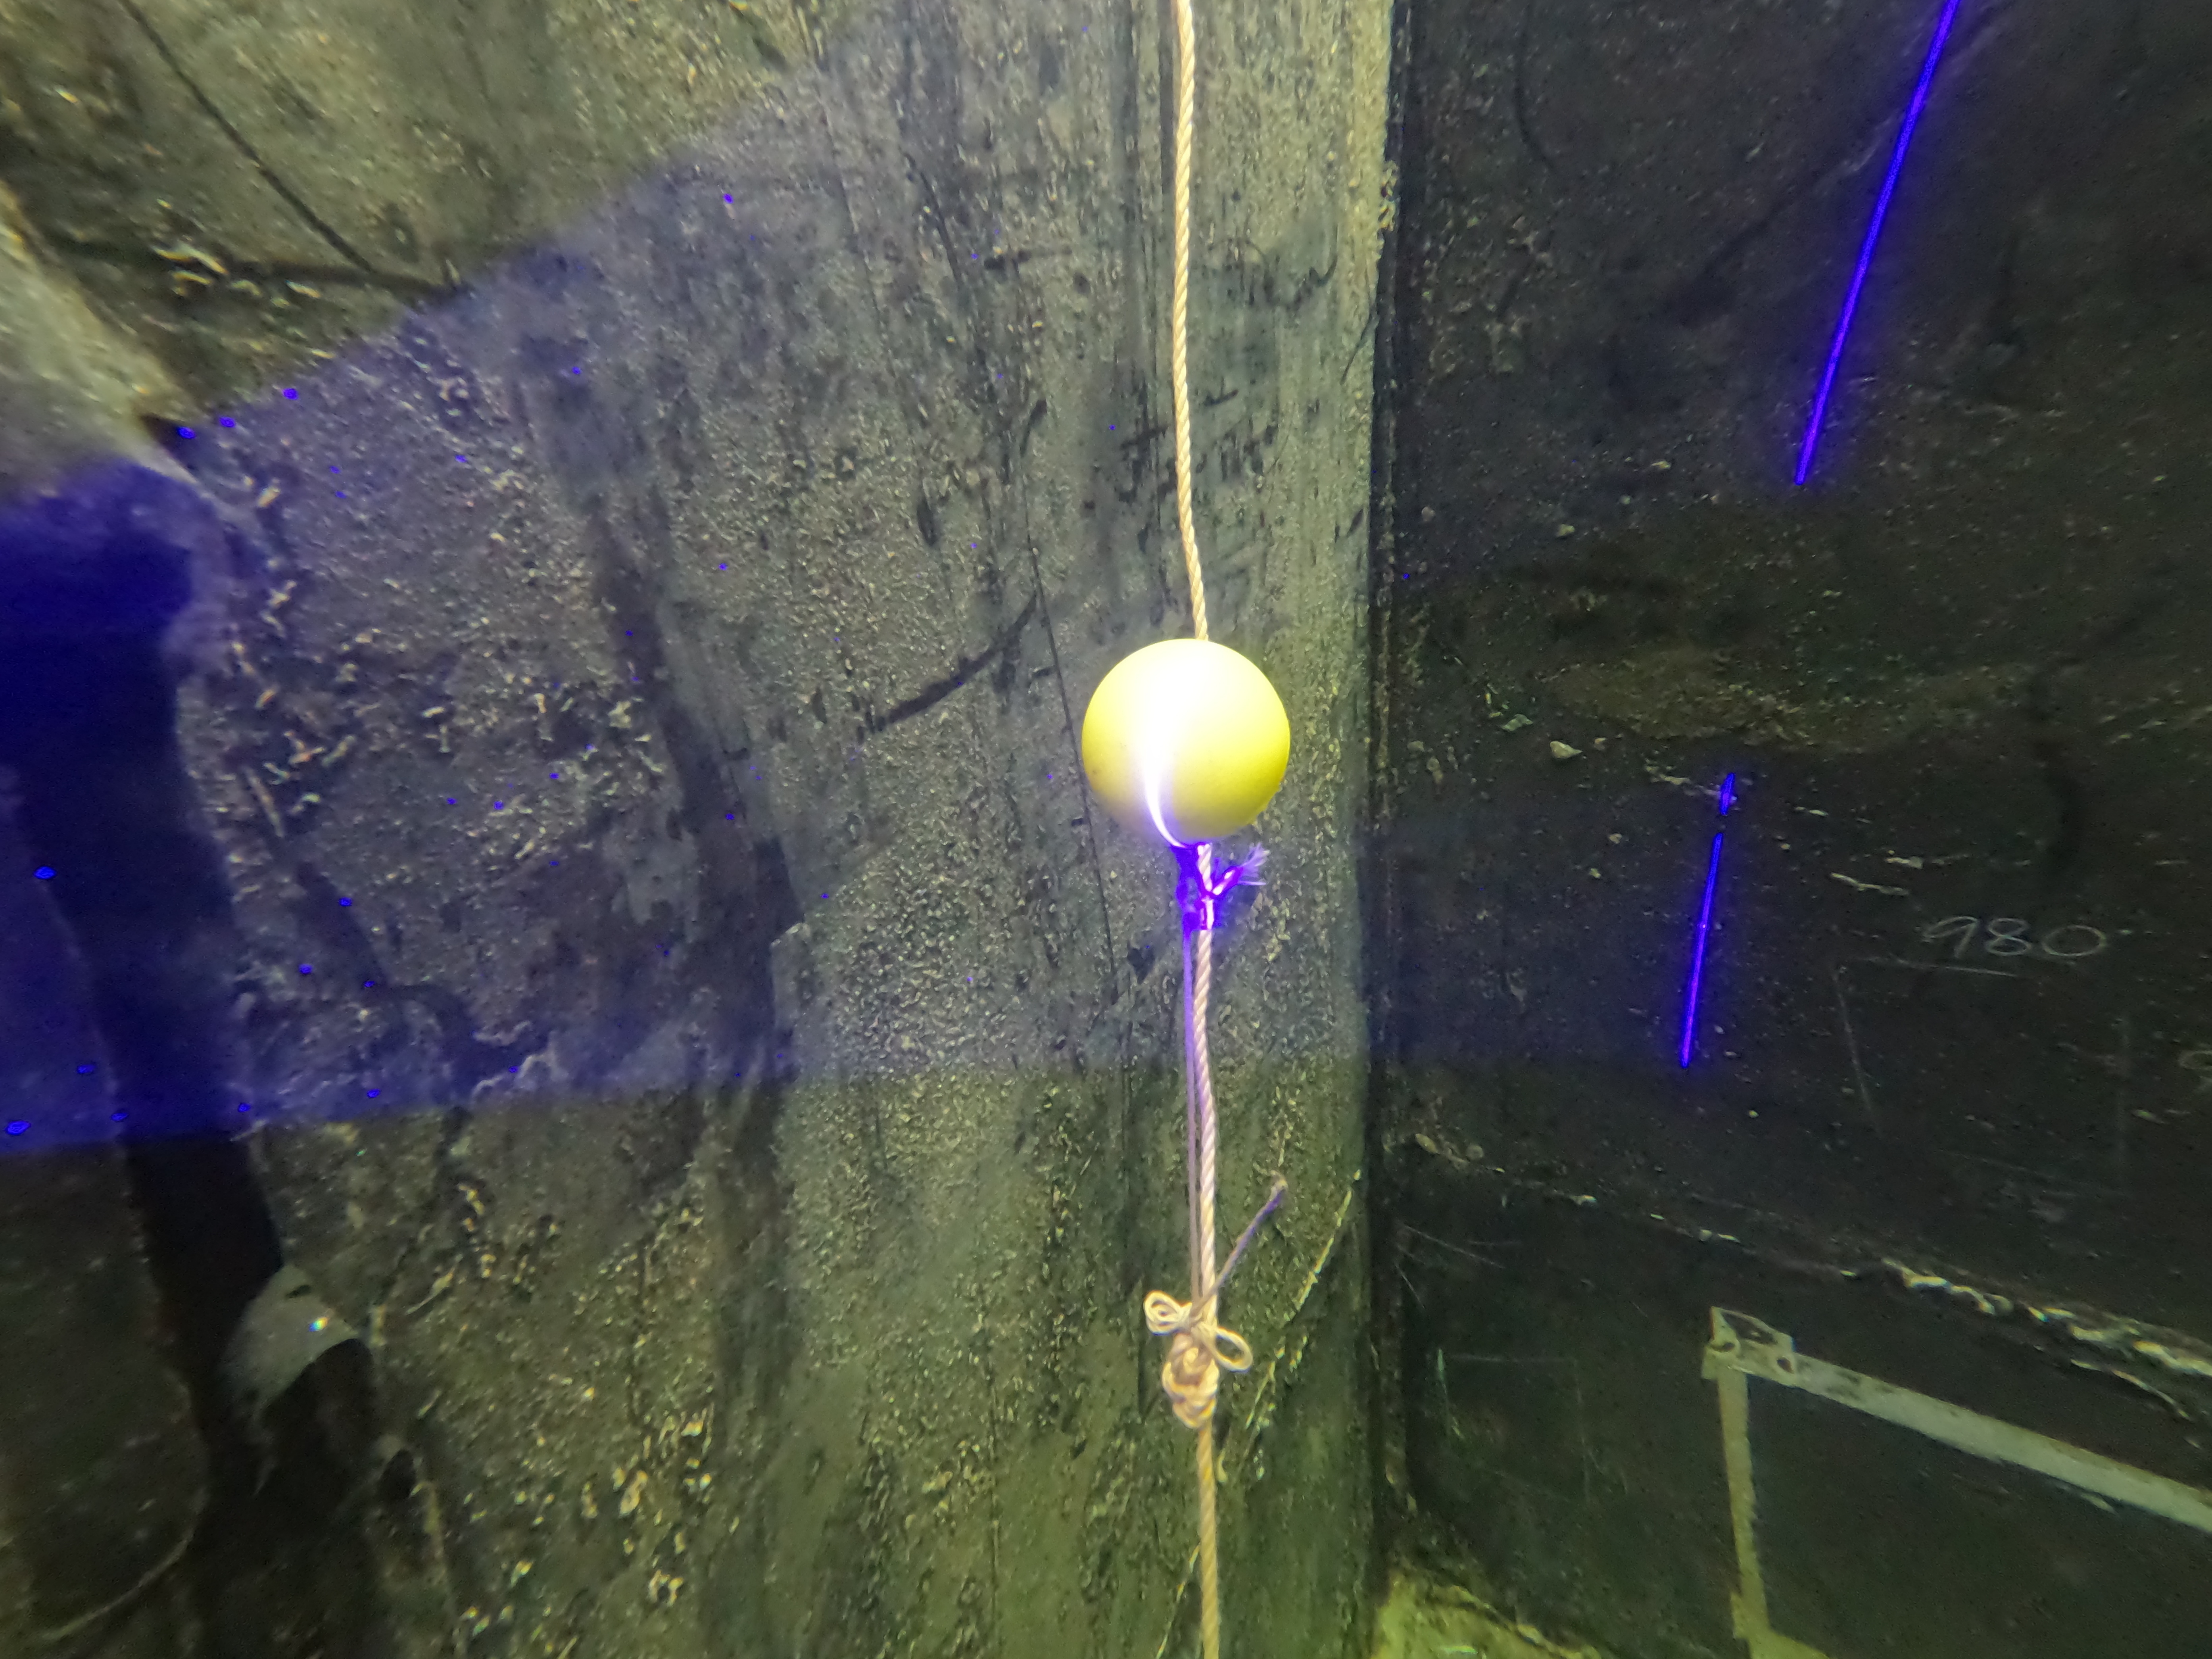

980

Supplement: Supplementary file 1307 [file G0032620.pdf › 6/G0032620.pdf]

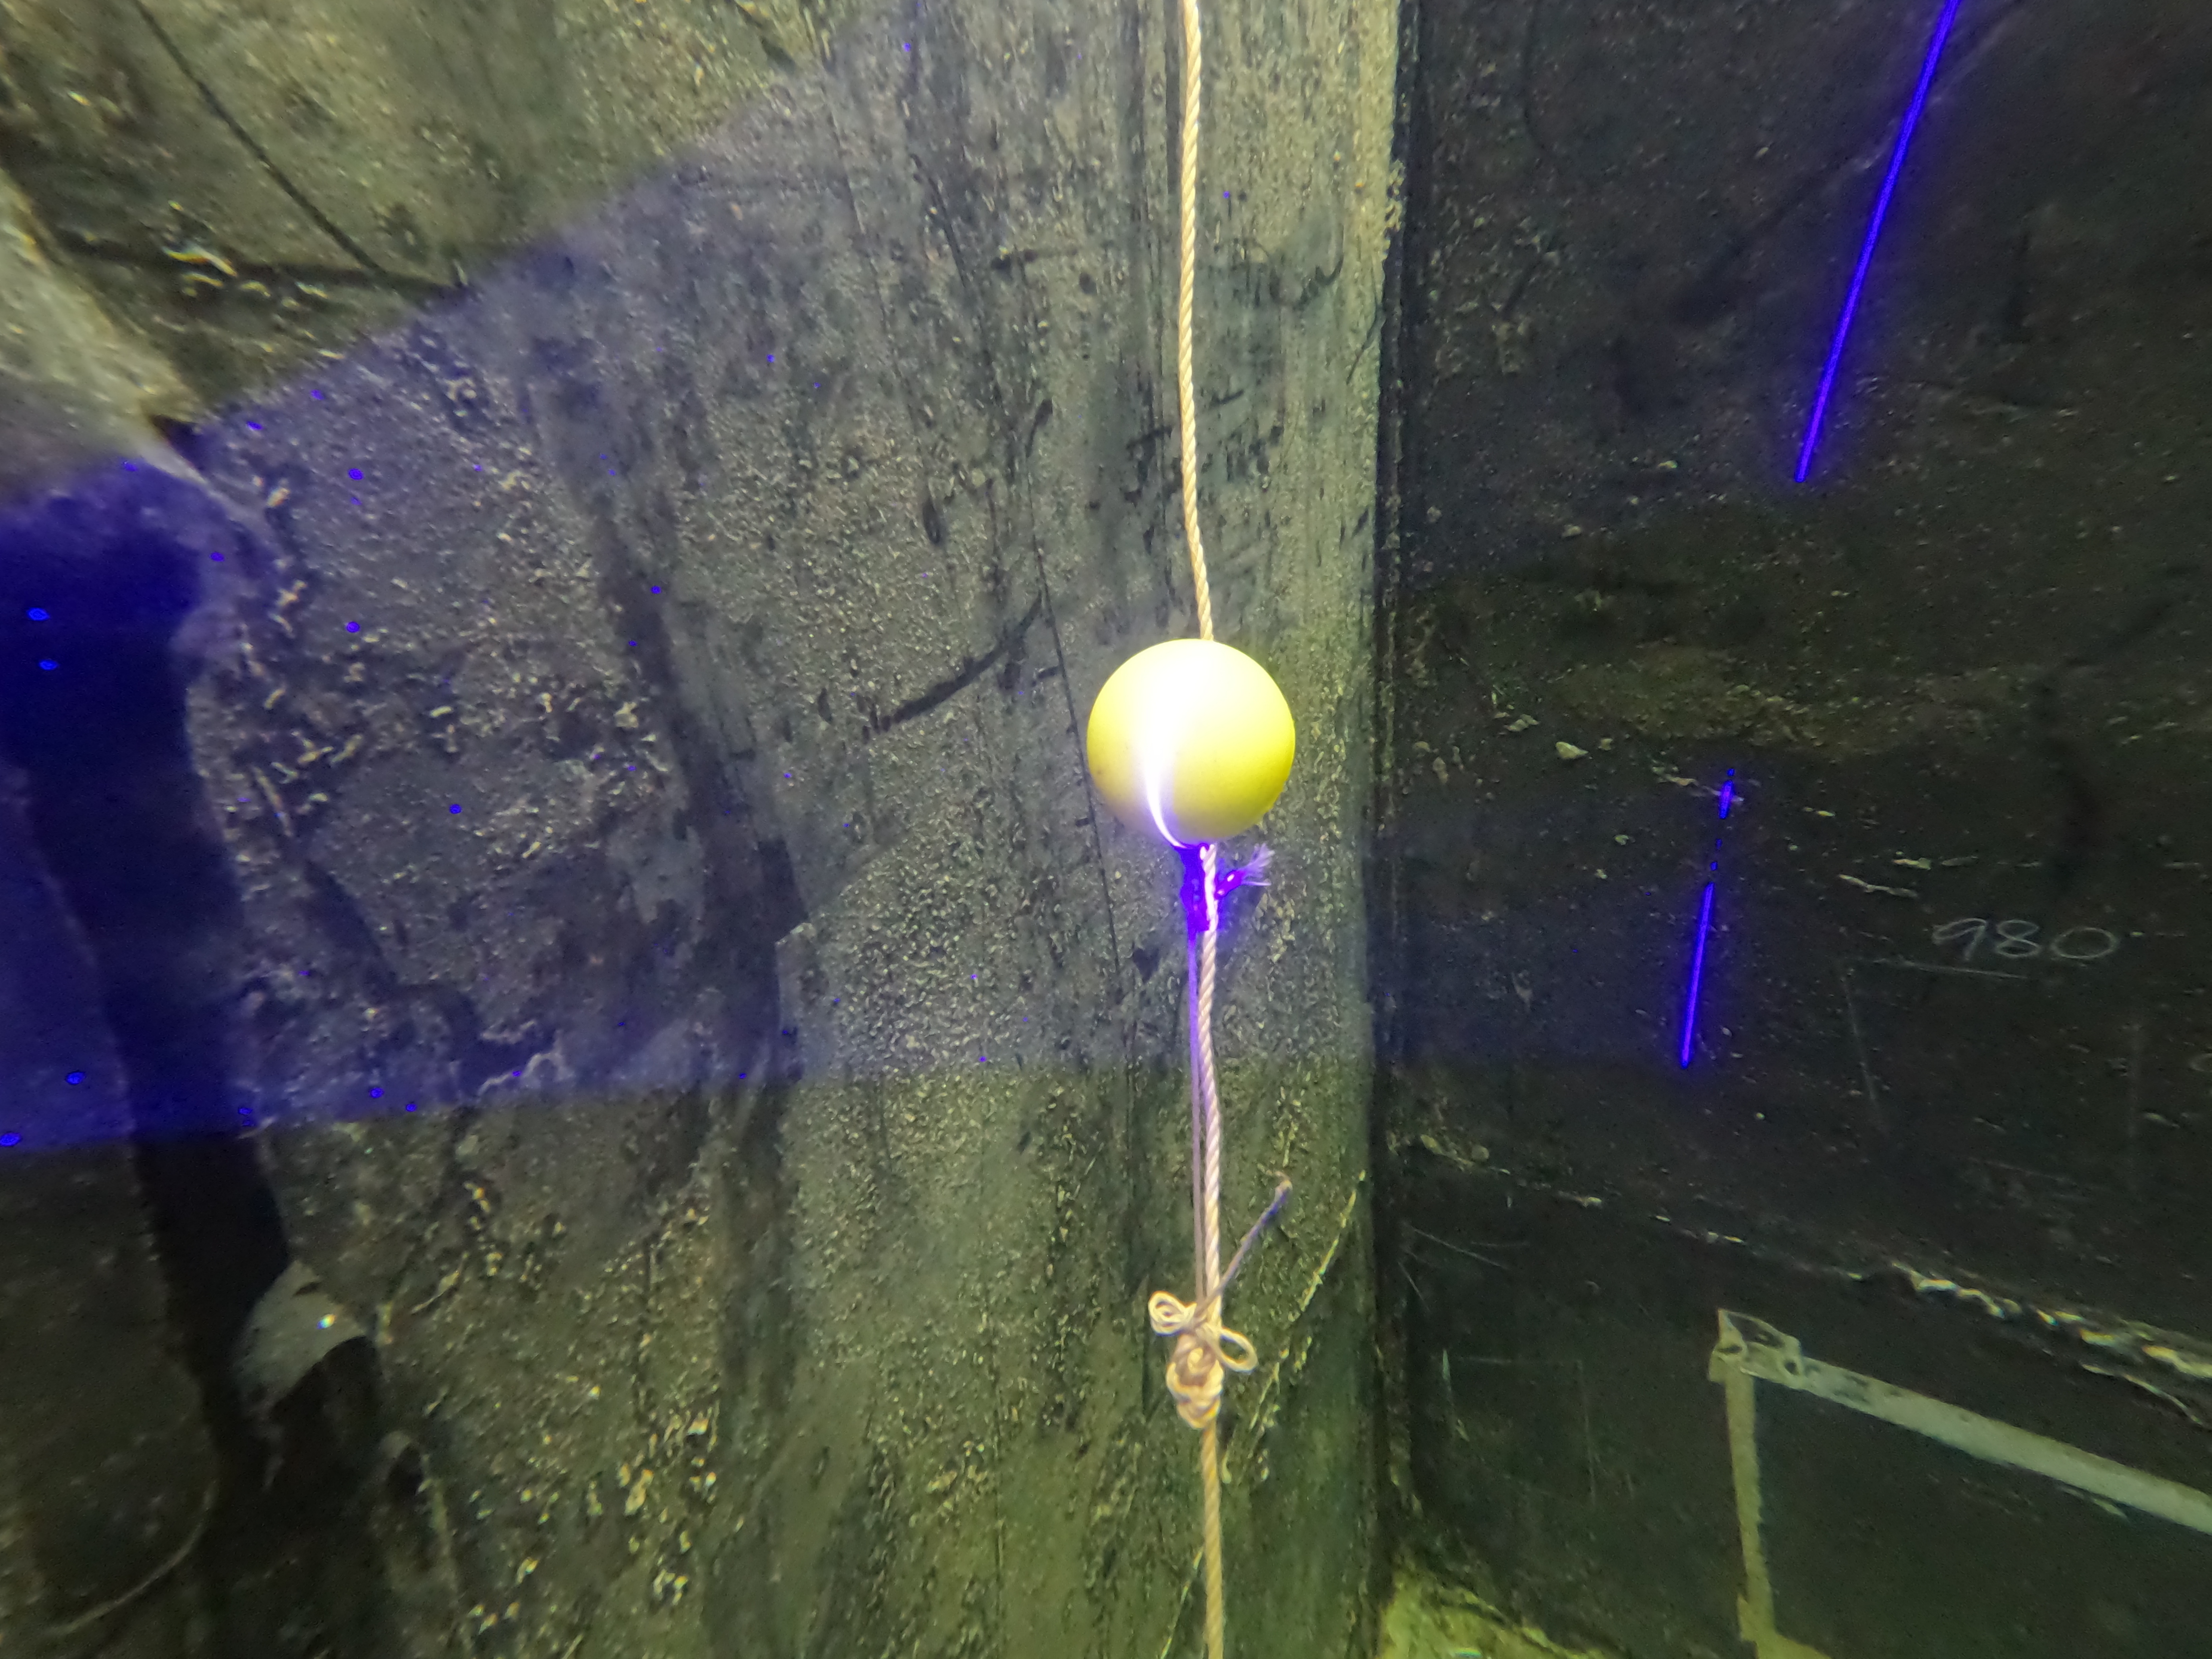

Supplement: Supplementary file 1308 [file G0032621.pdf › 6/G0032621.pdf]

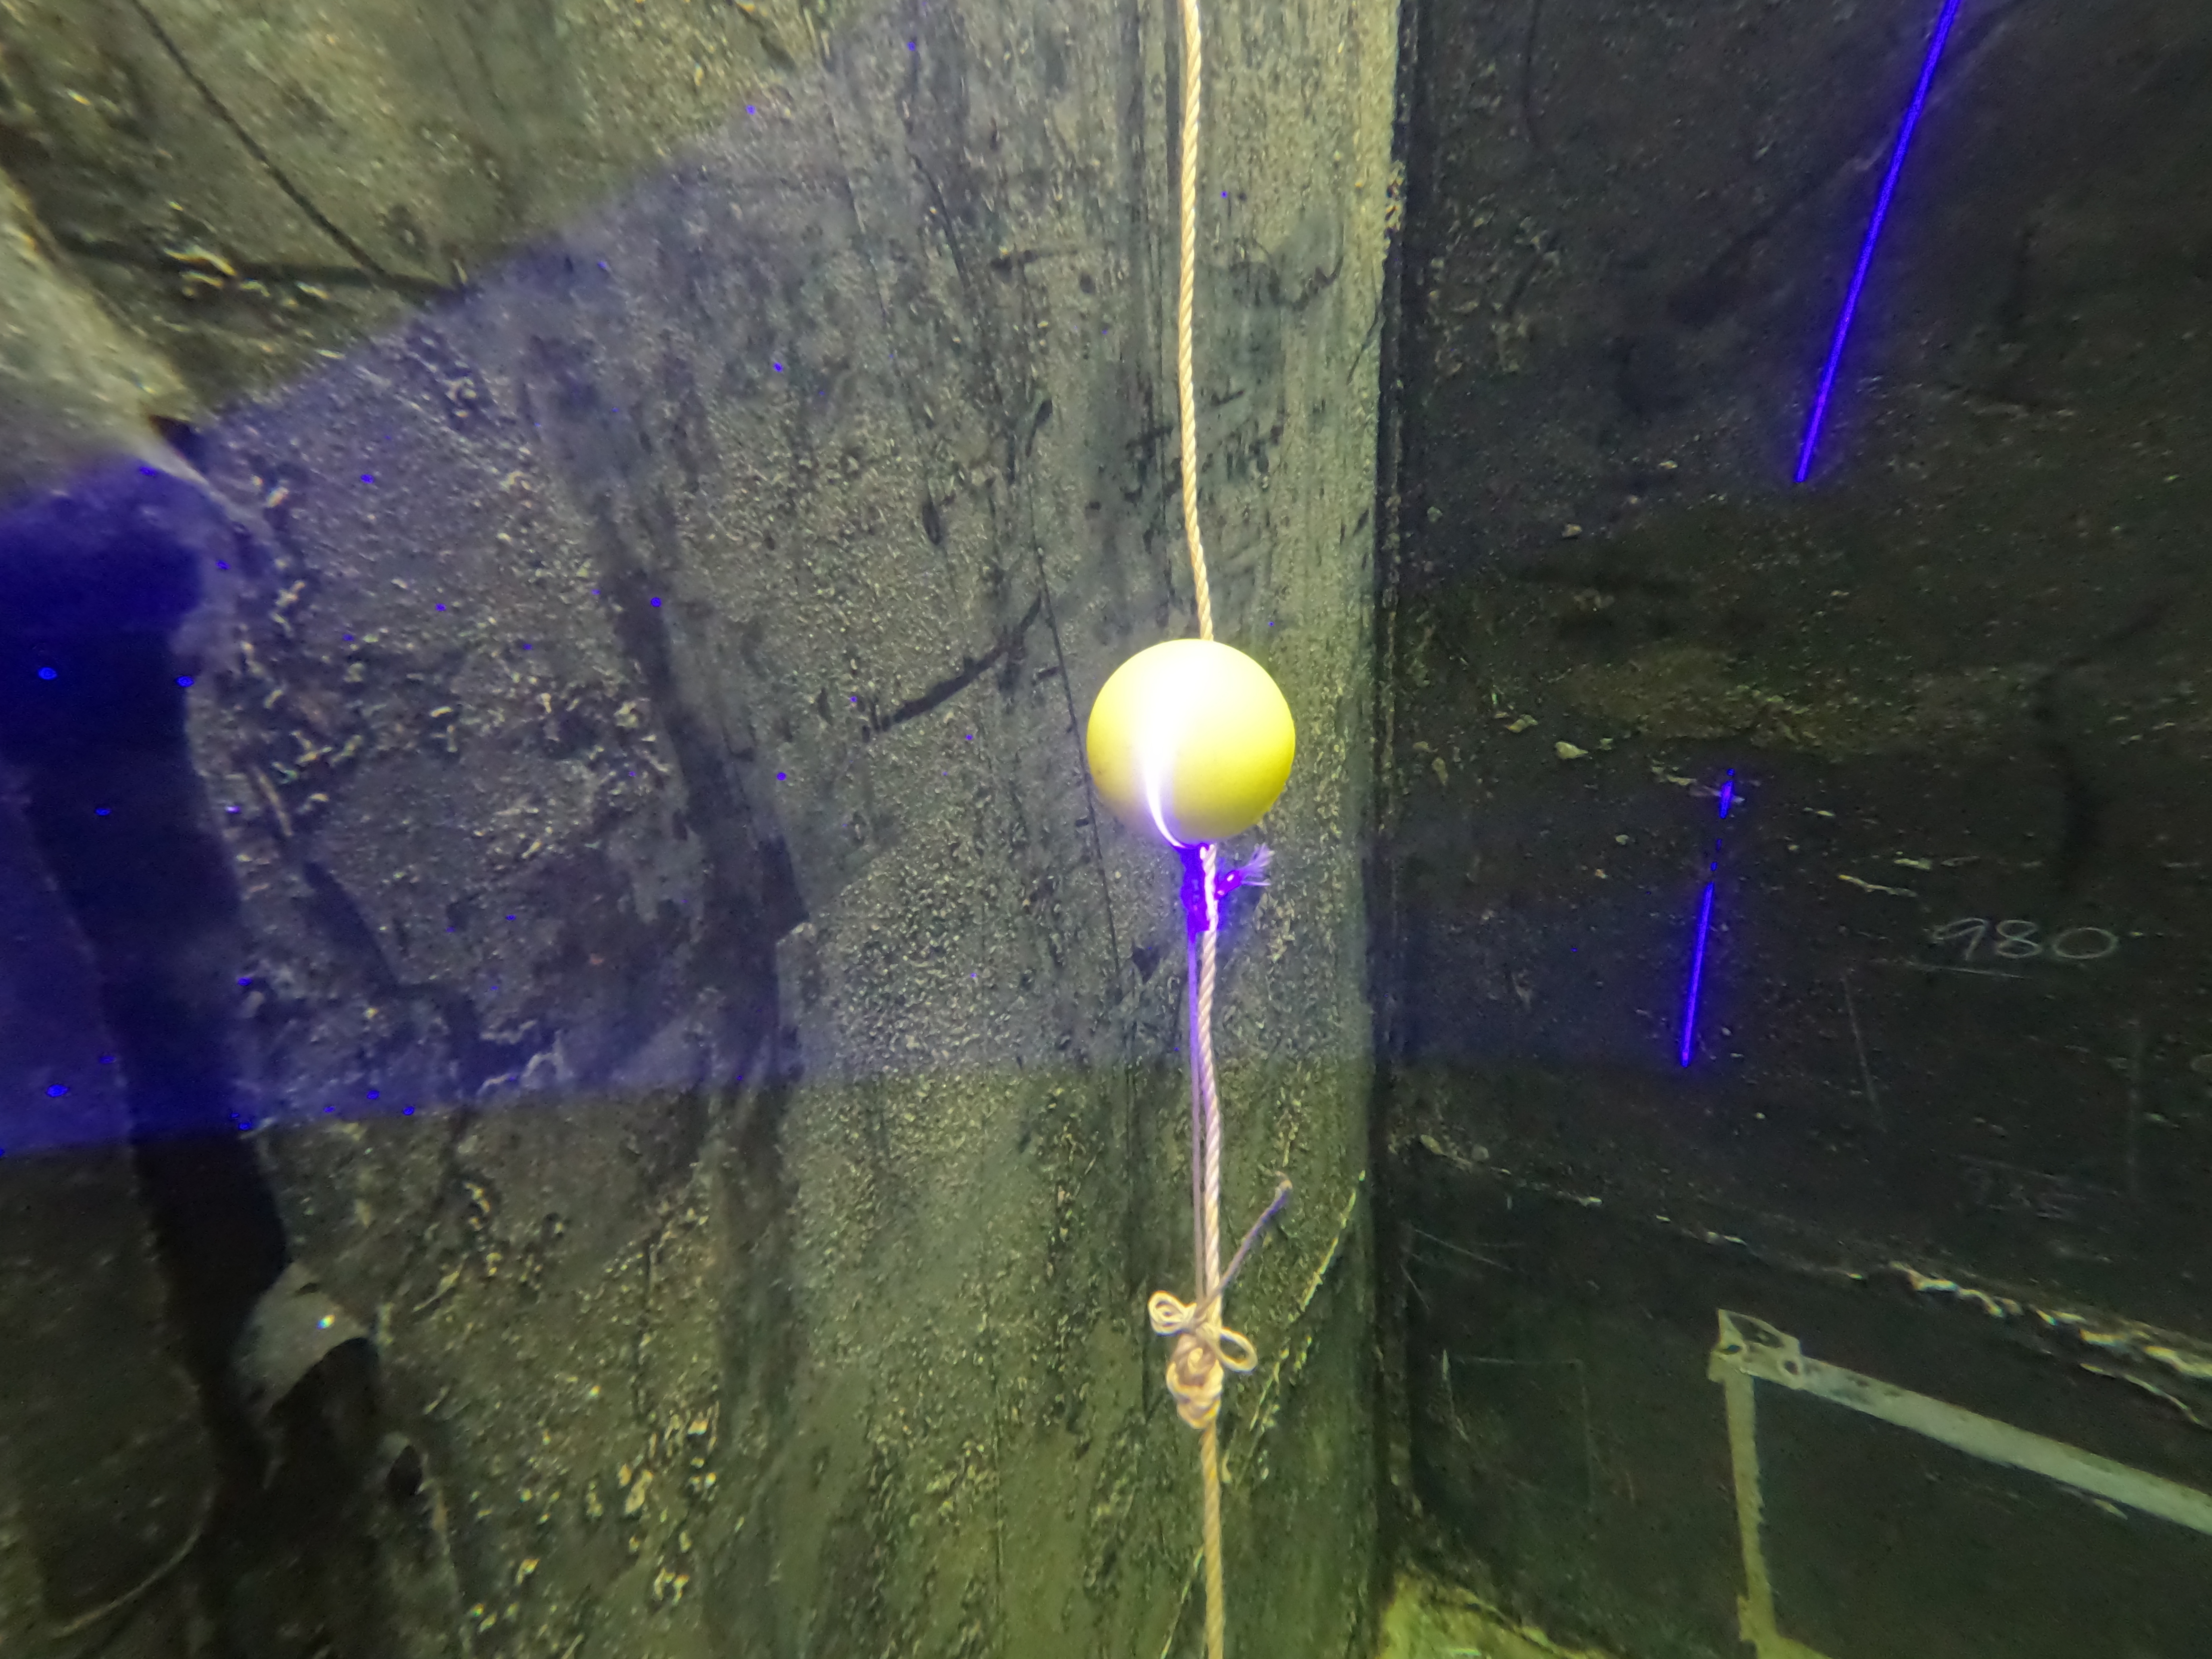

980

Supplement: Supplementary file 1309 [file G0032622.pdf › 6/G0032622.pdf]

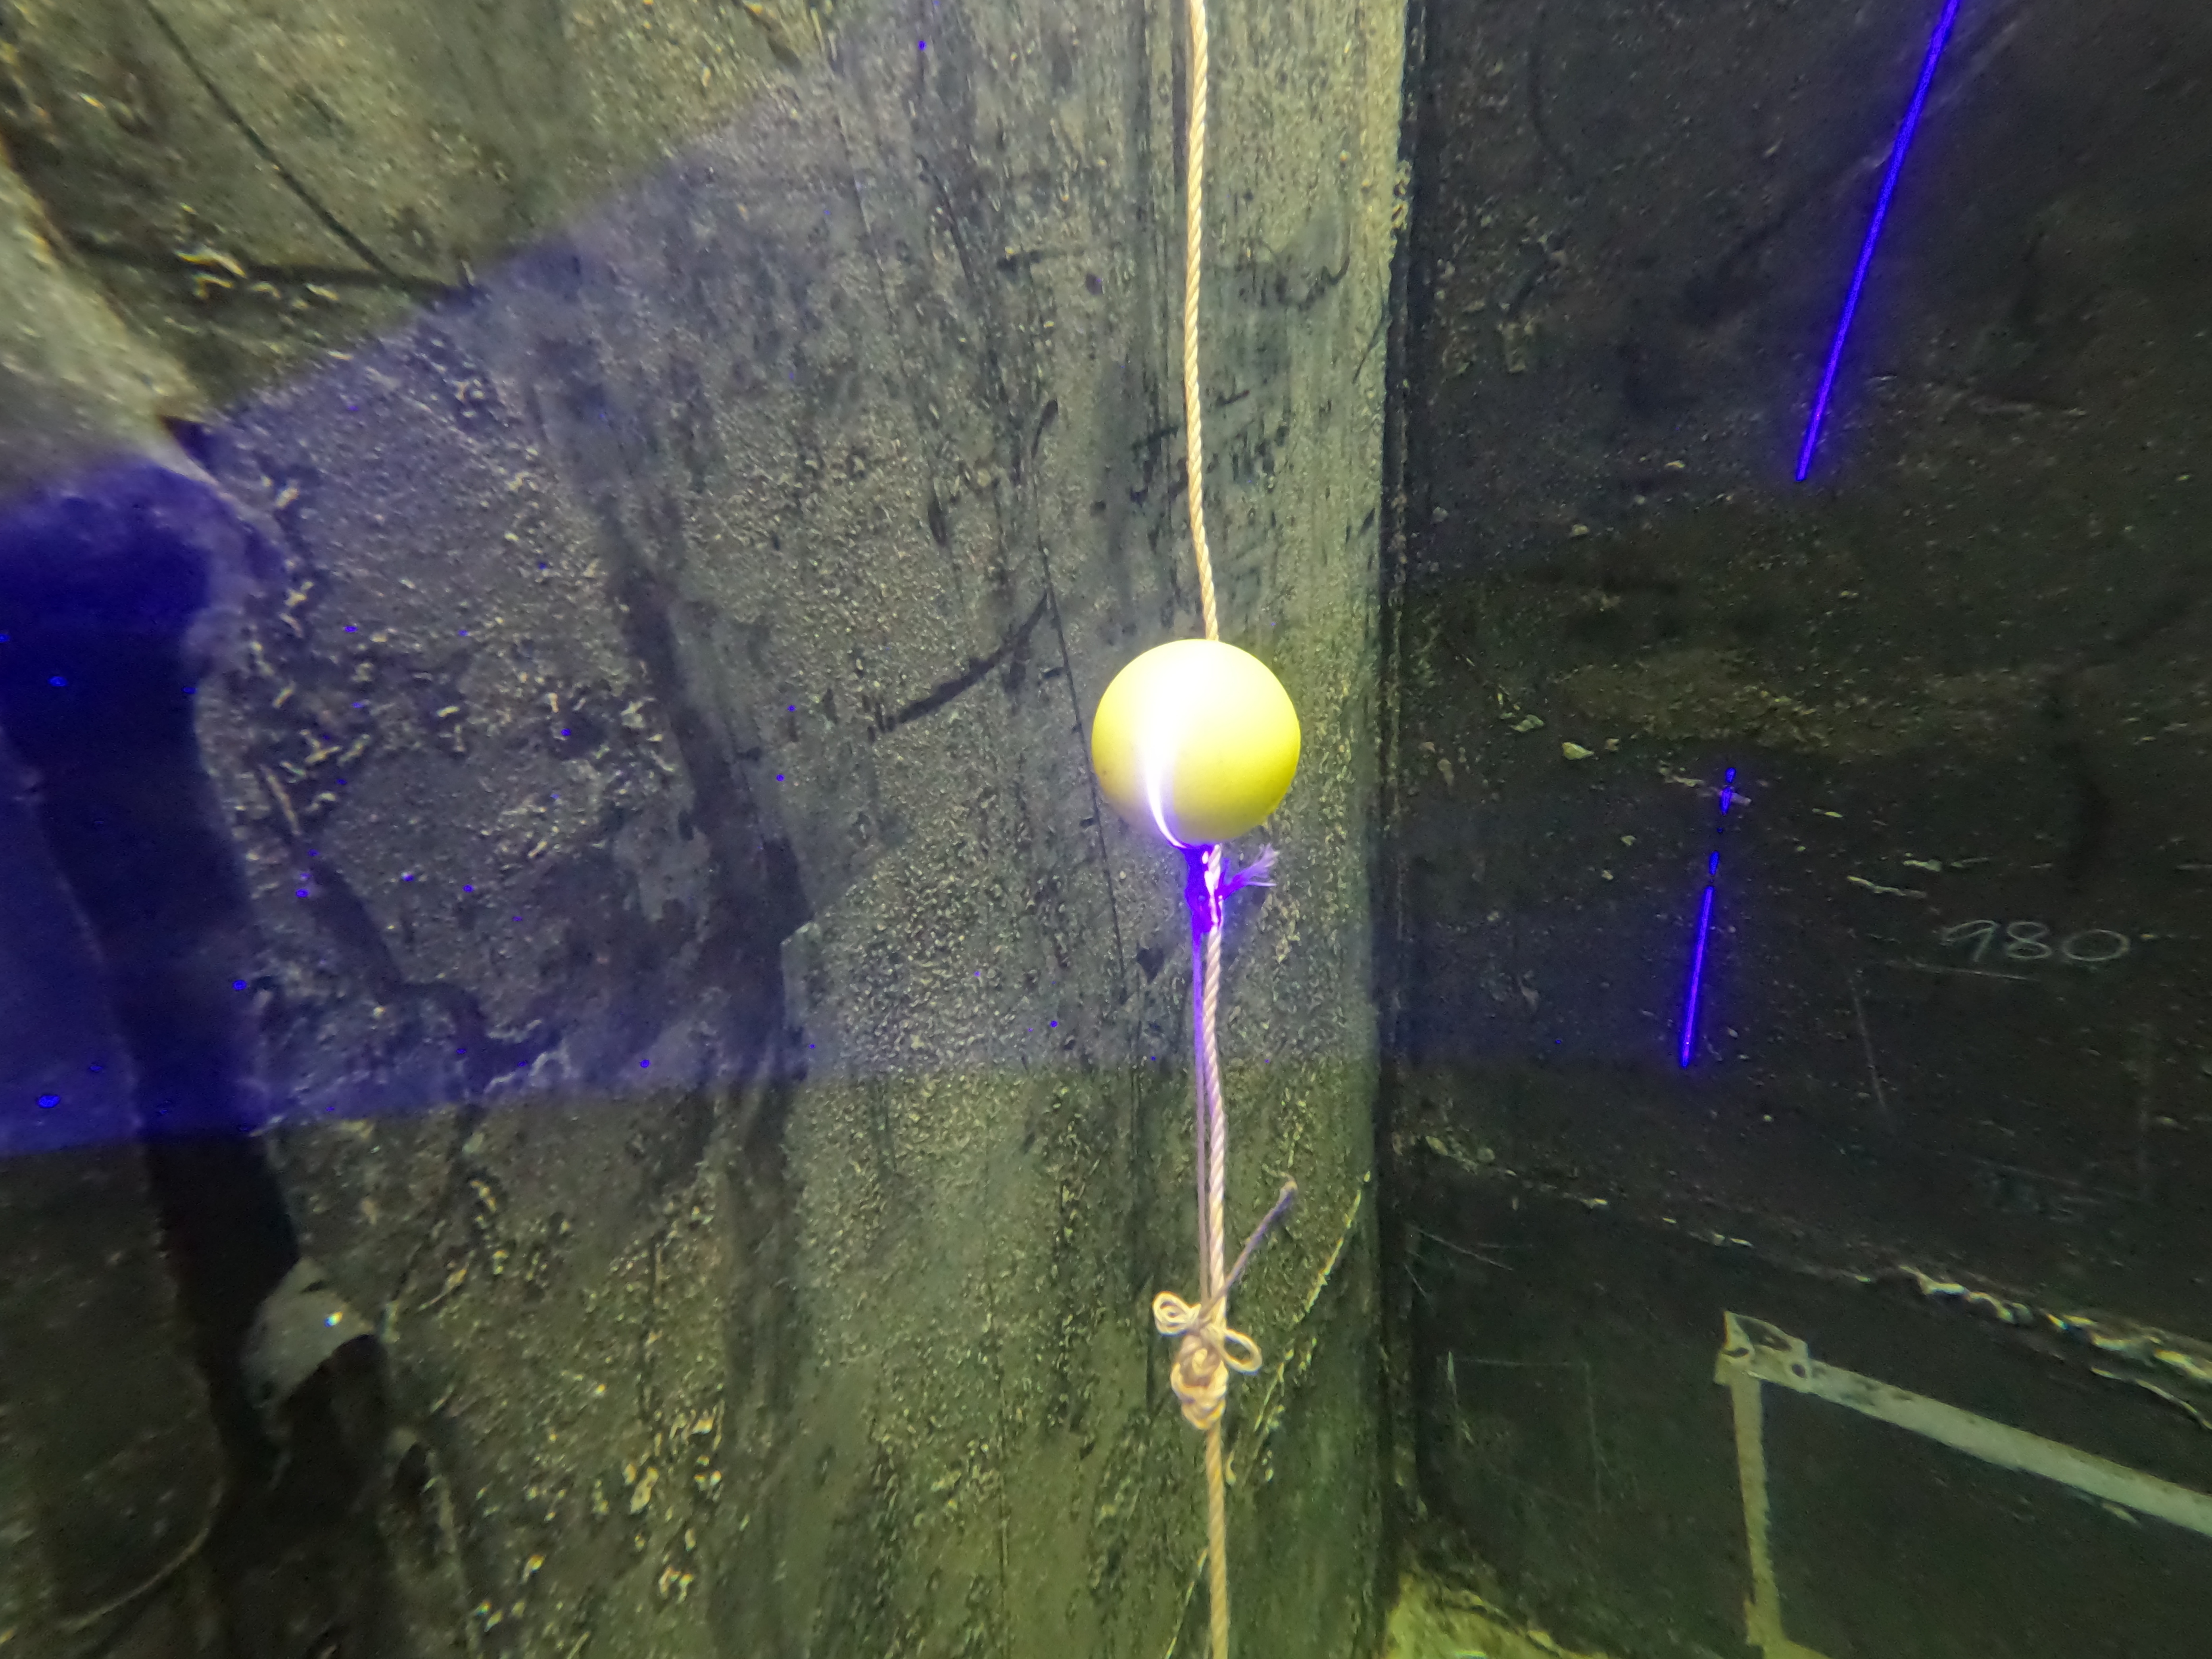

Supplement: Supplementary file 1310 [file G0032623.pdf › 6/G0032623.pdf]

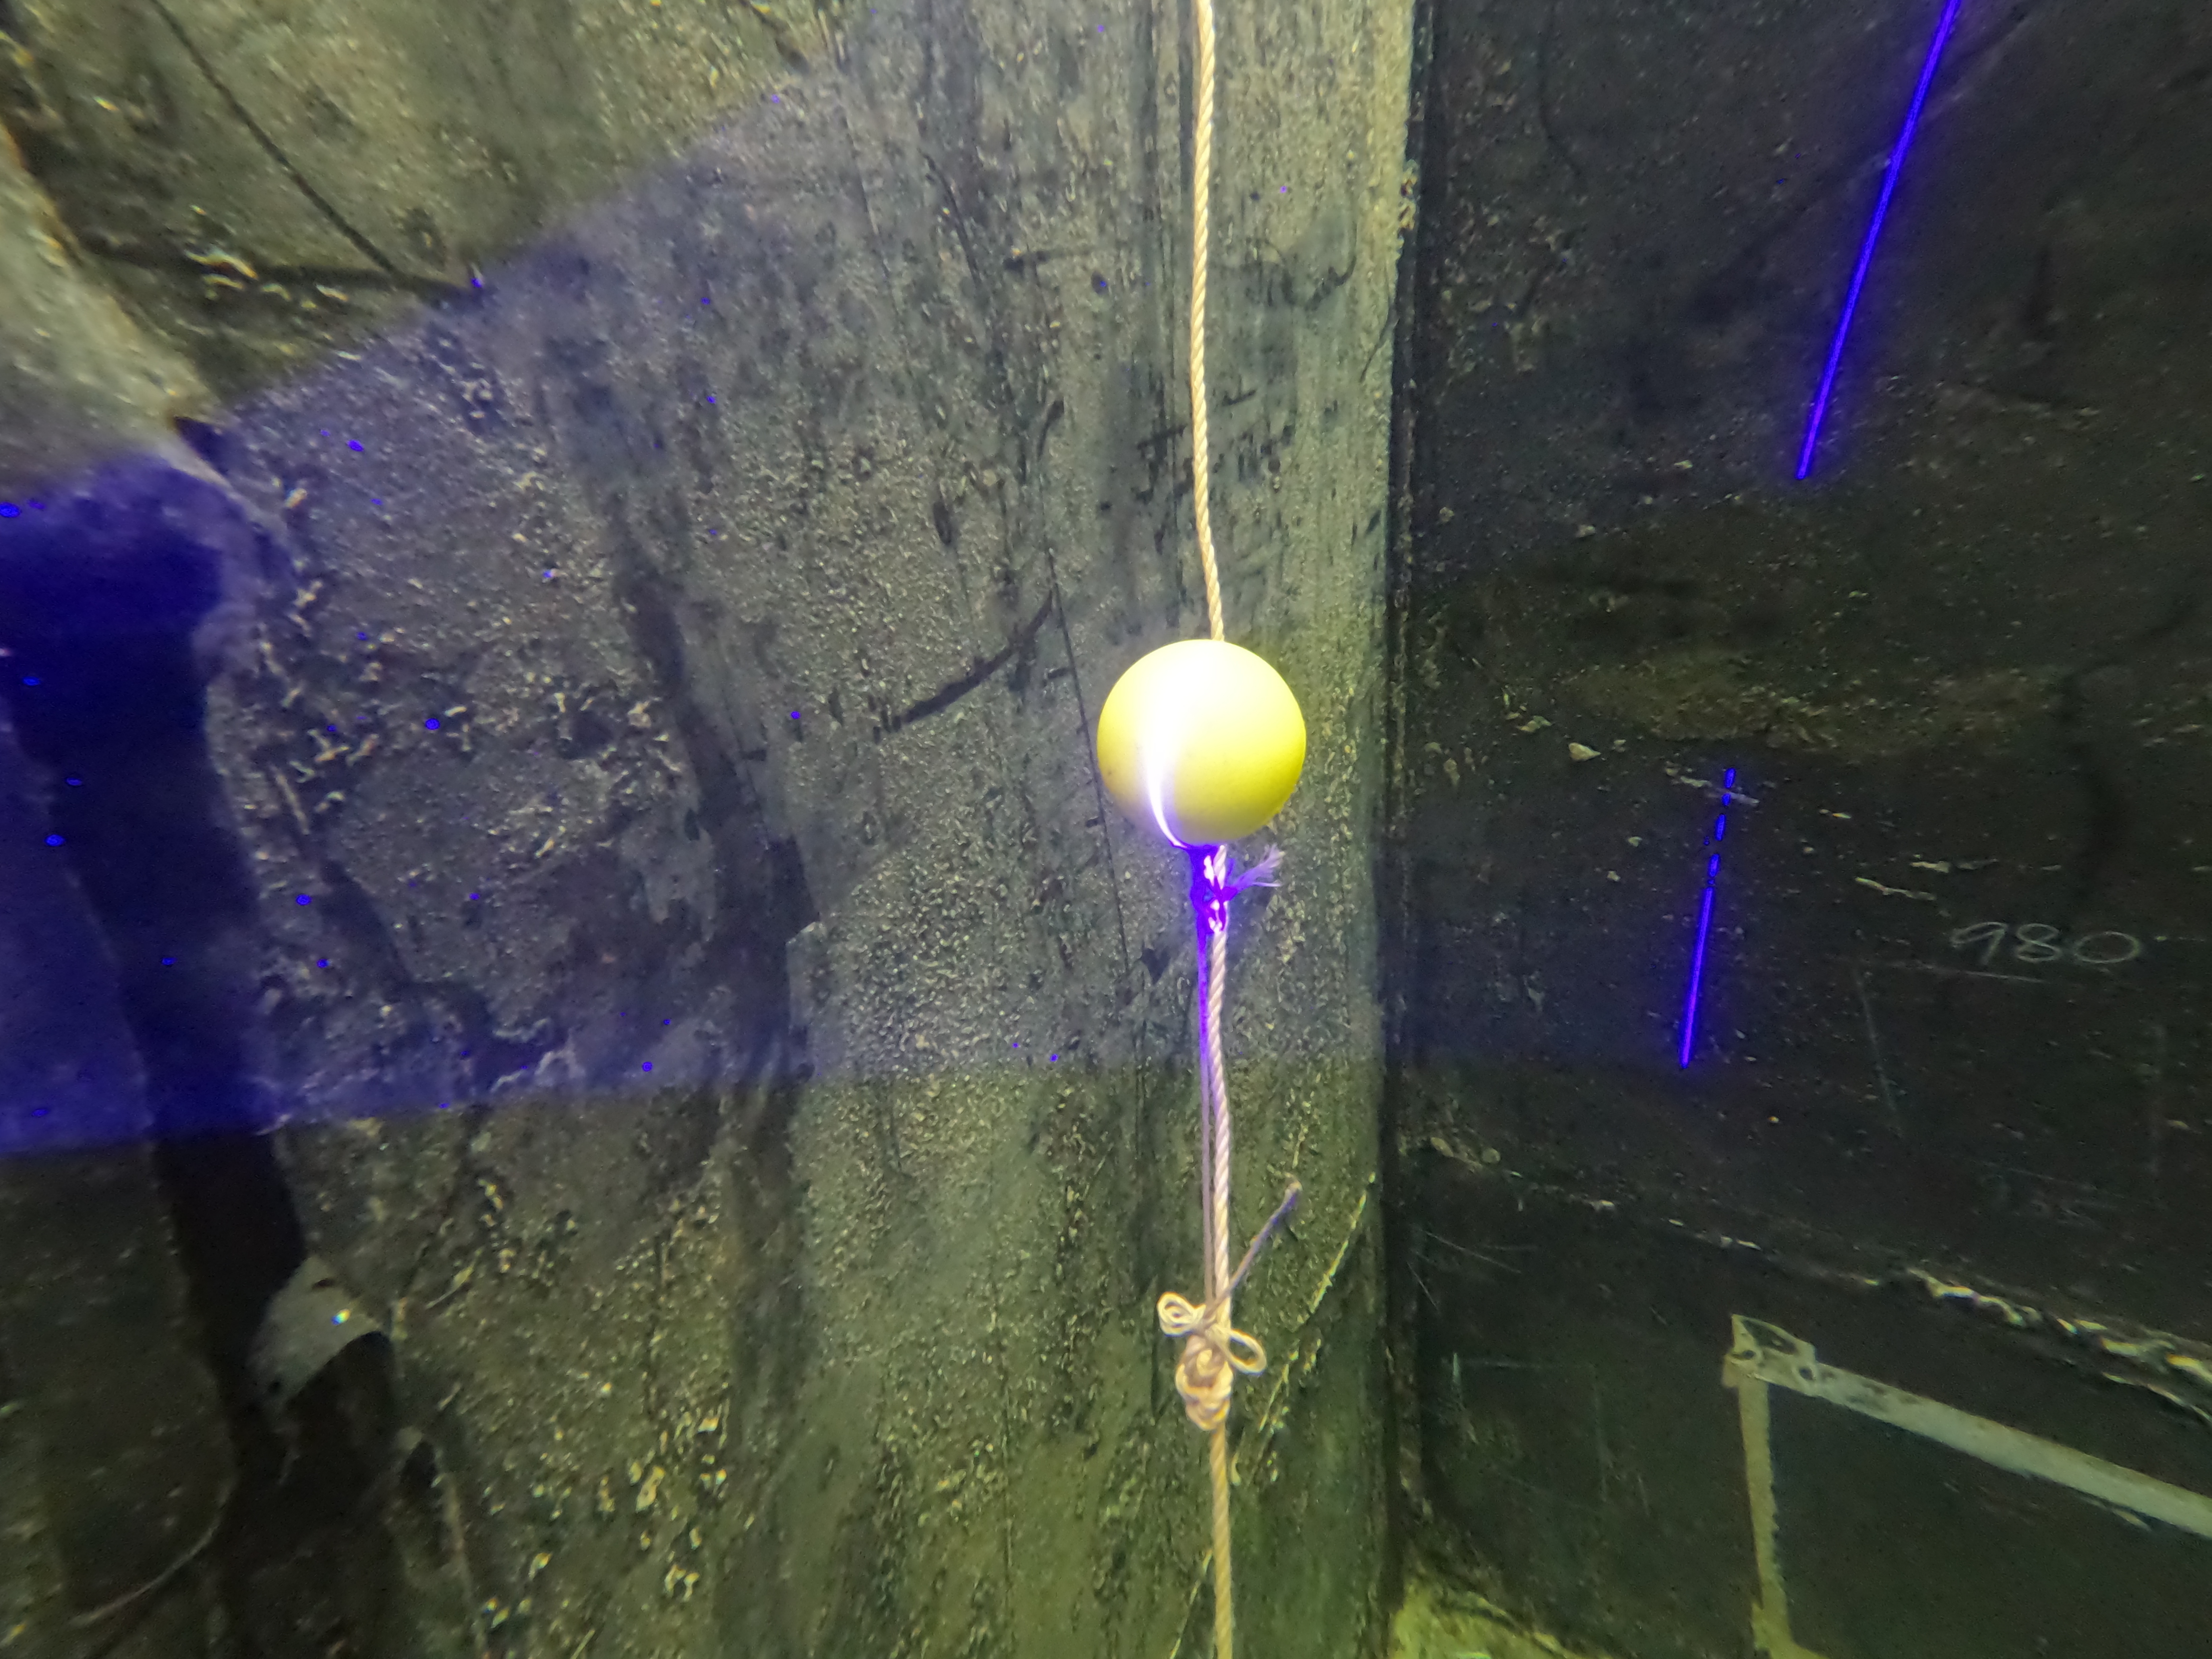

Supplement: Supplementary file 1311 [file G0032624.pdf › 6/G0032624.pdf]

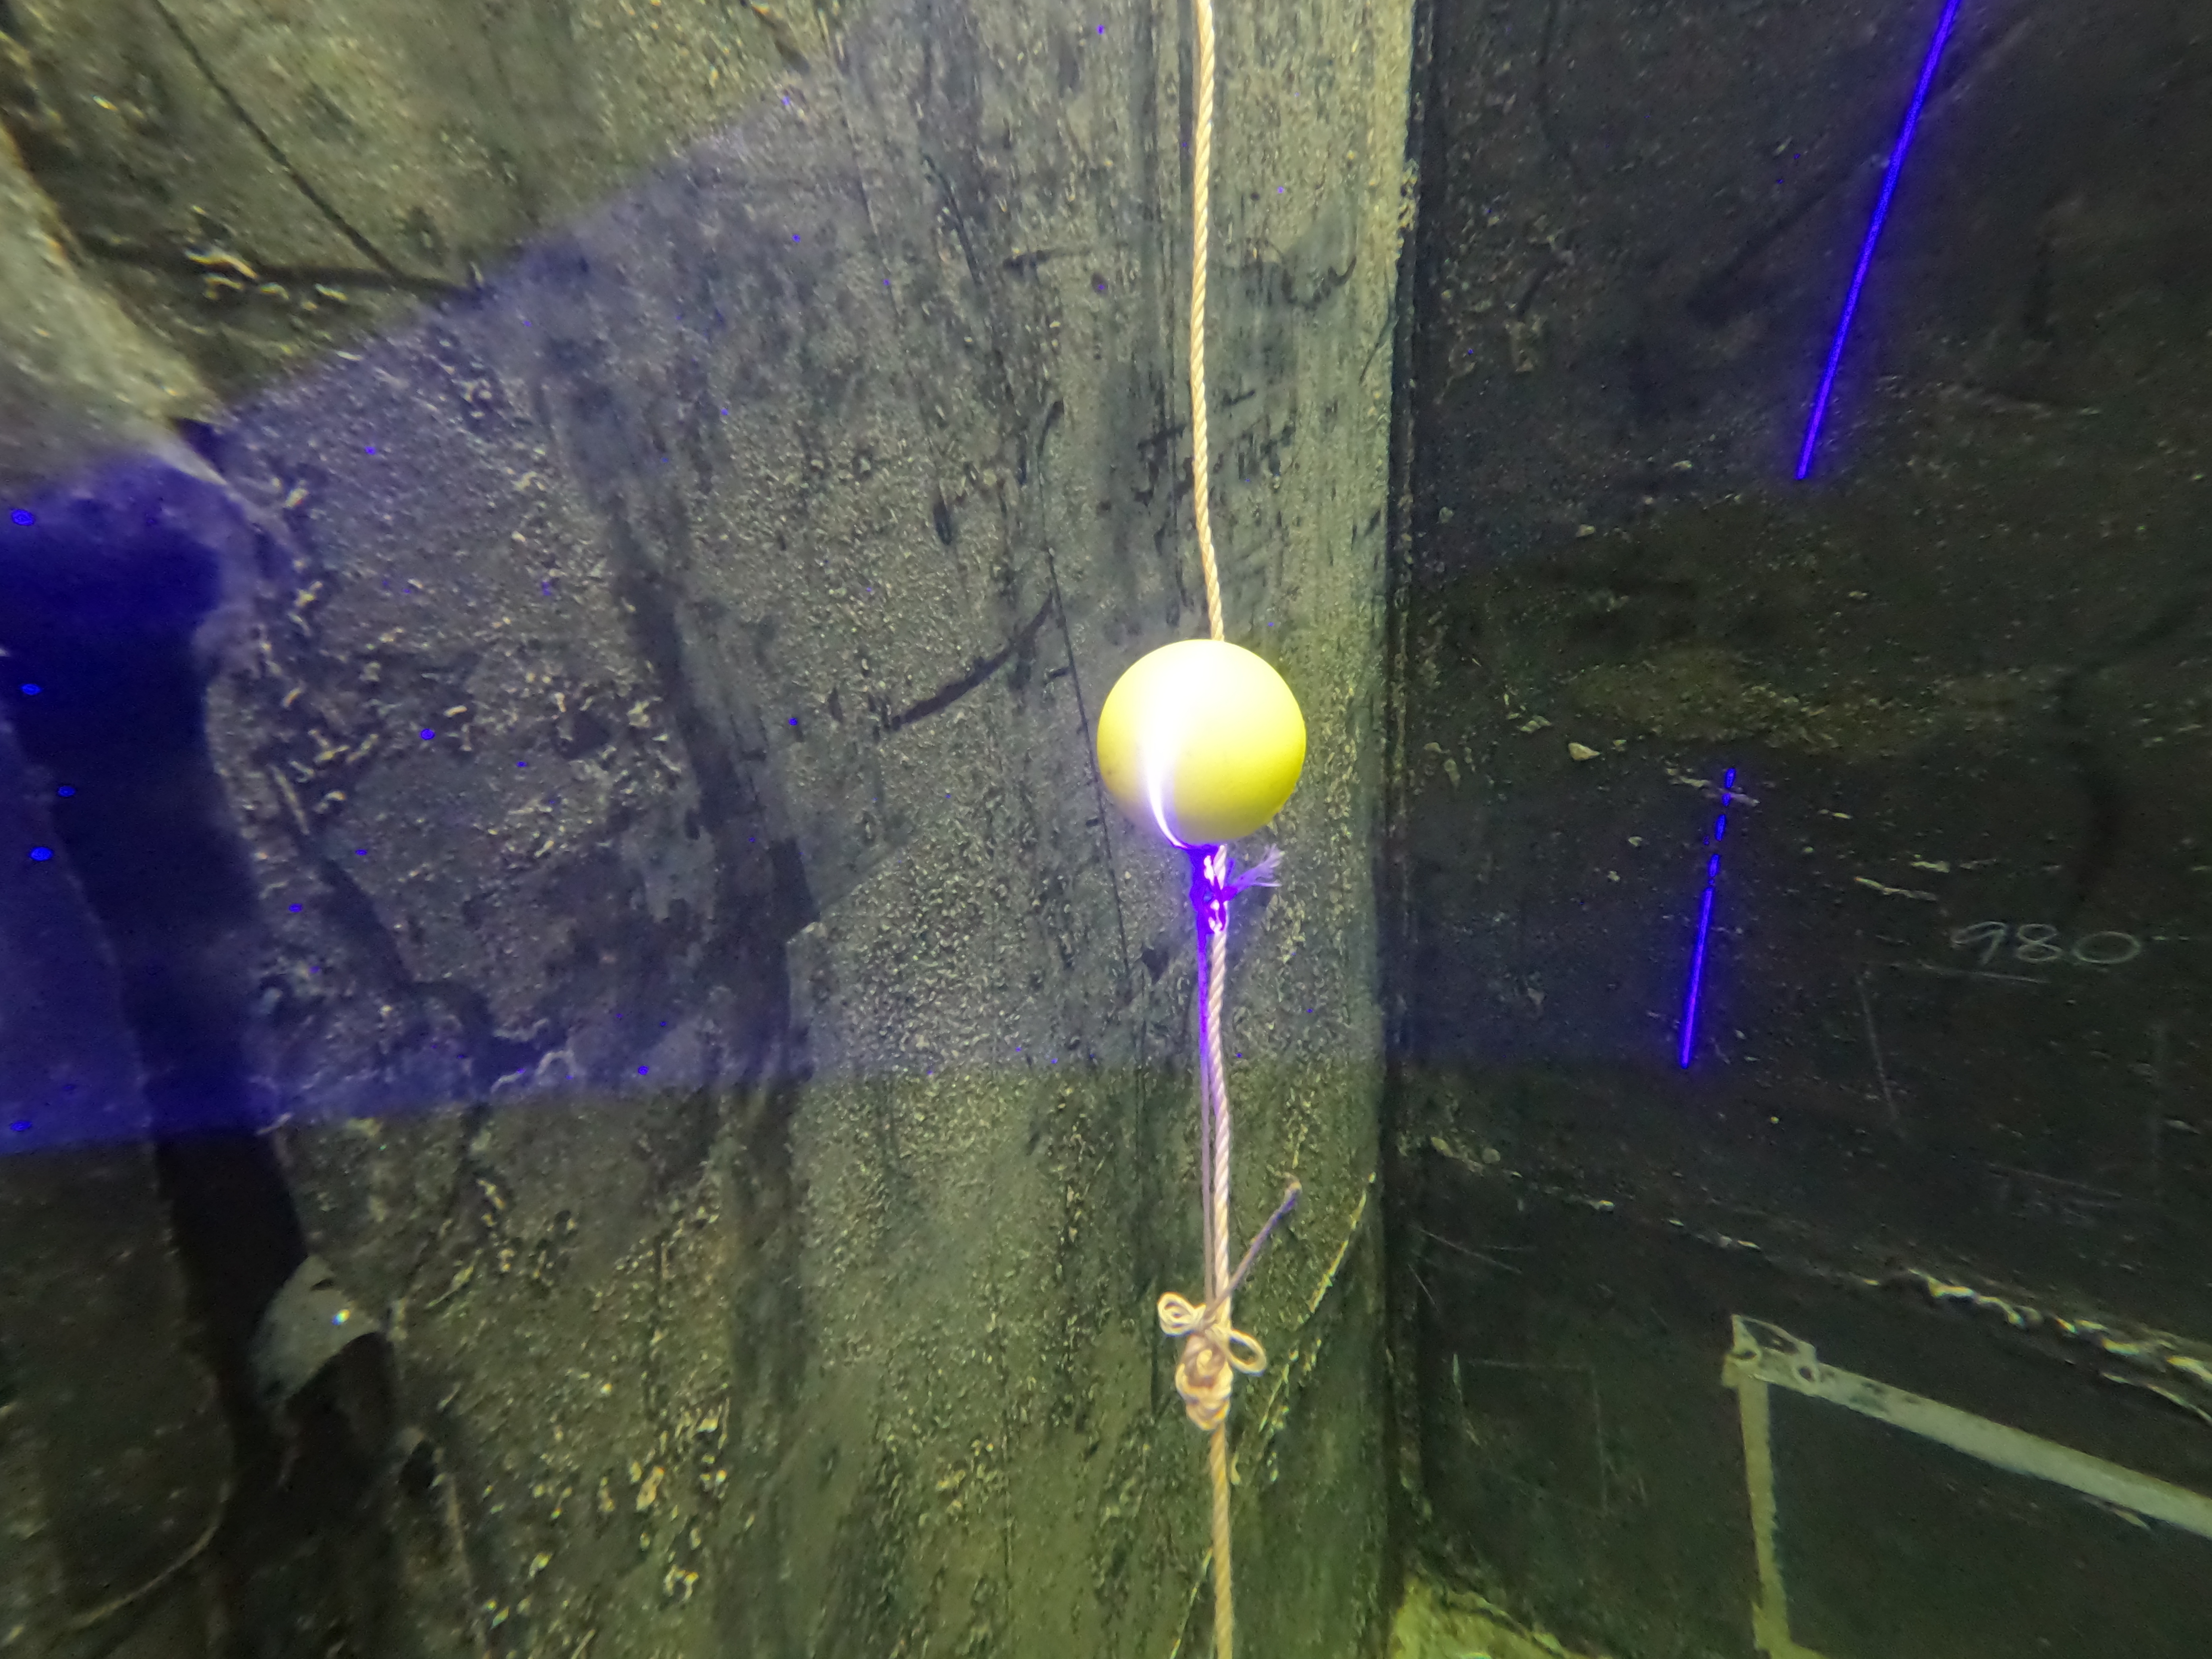

Supplement: Supplementary file 1312 [file G0032625.pdf › 6/G0032625.pdf]

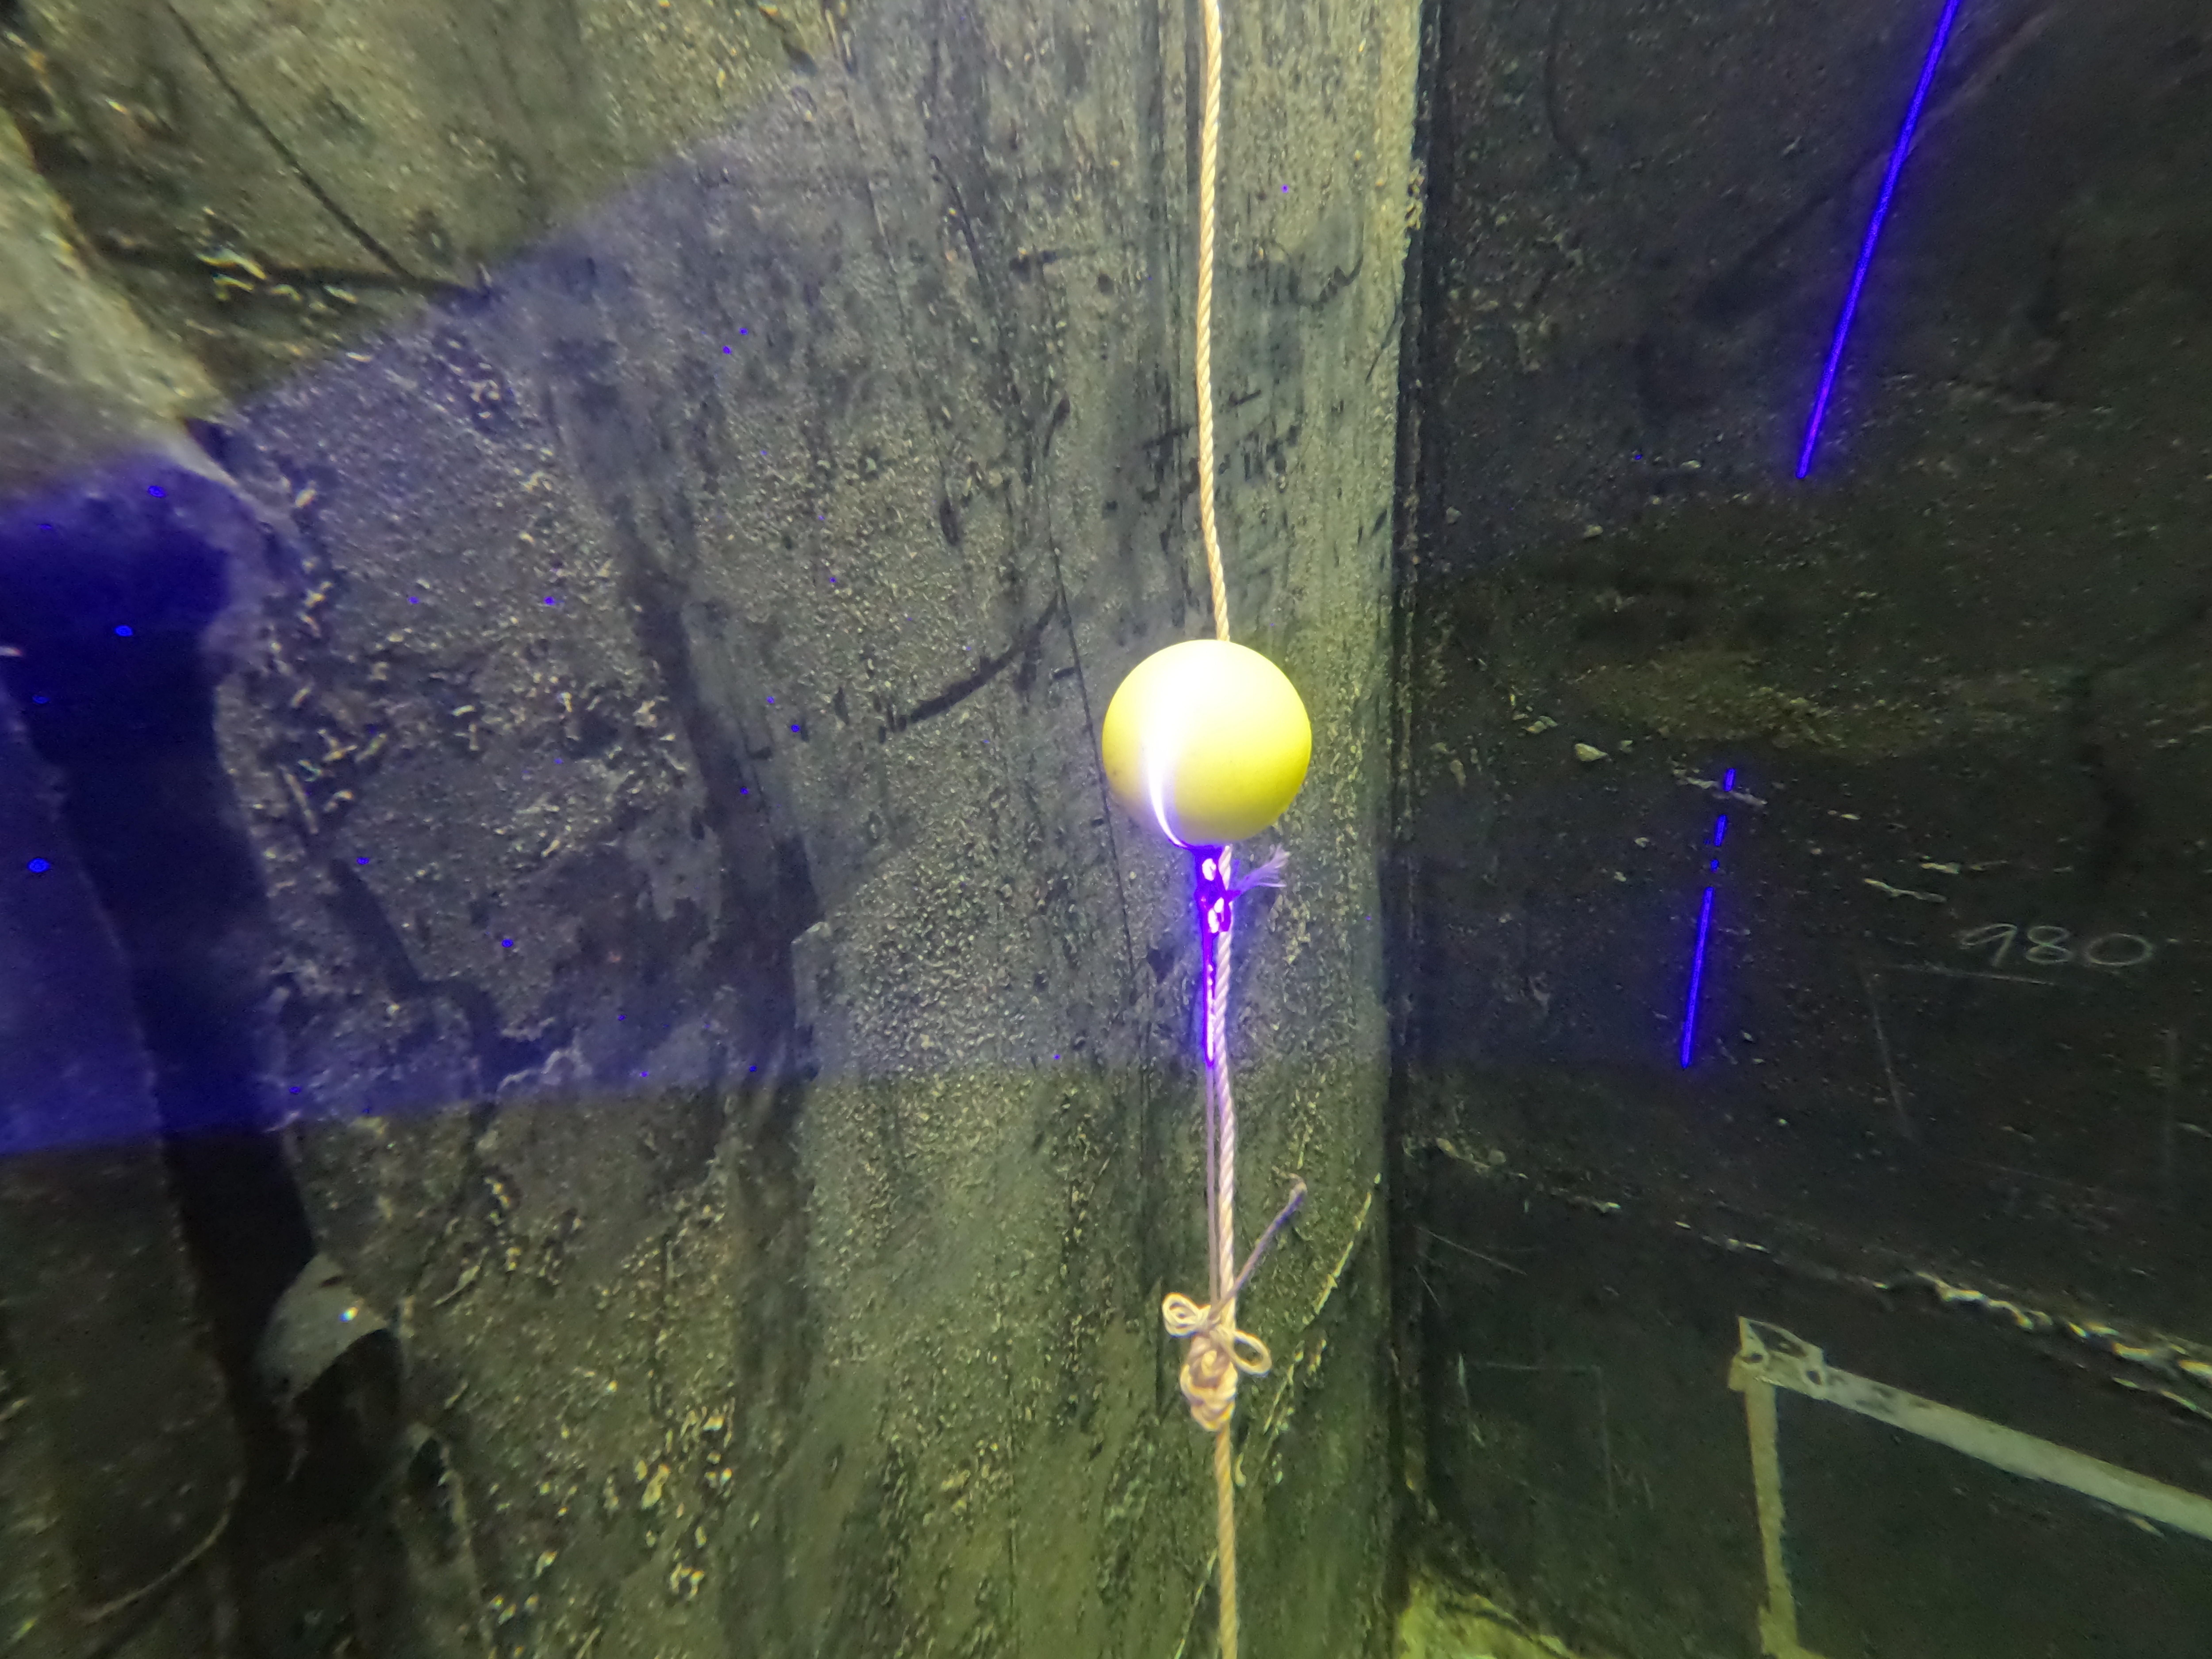

Supplement: Supplementary file 1313 [file G0032626.pdf › 6/G0032626.pdf]

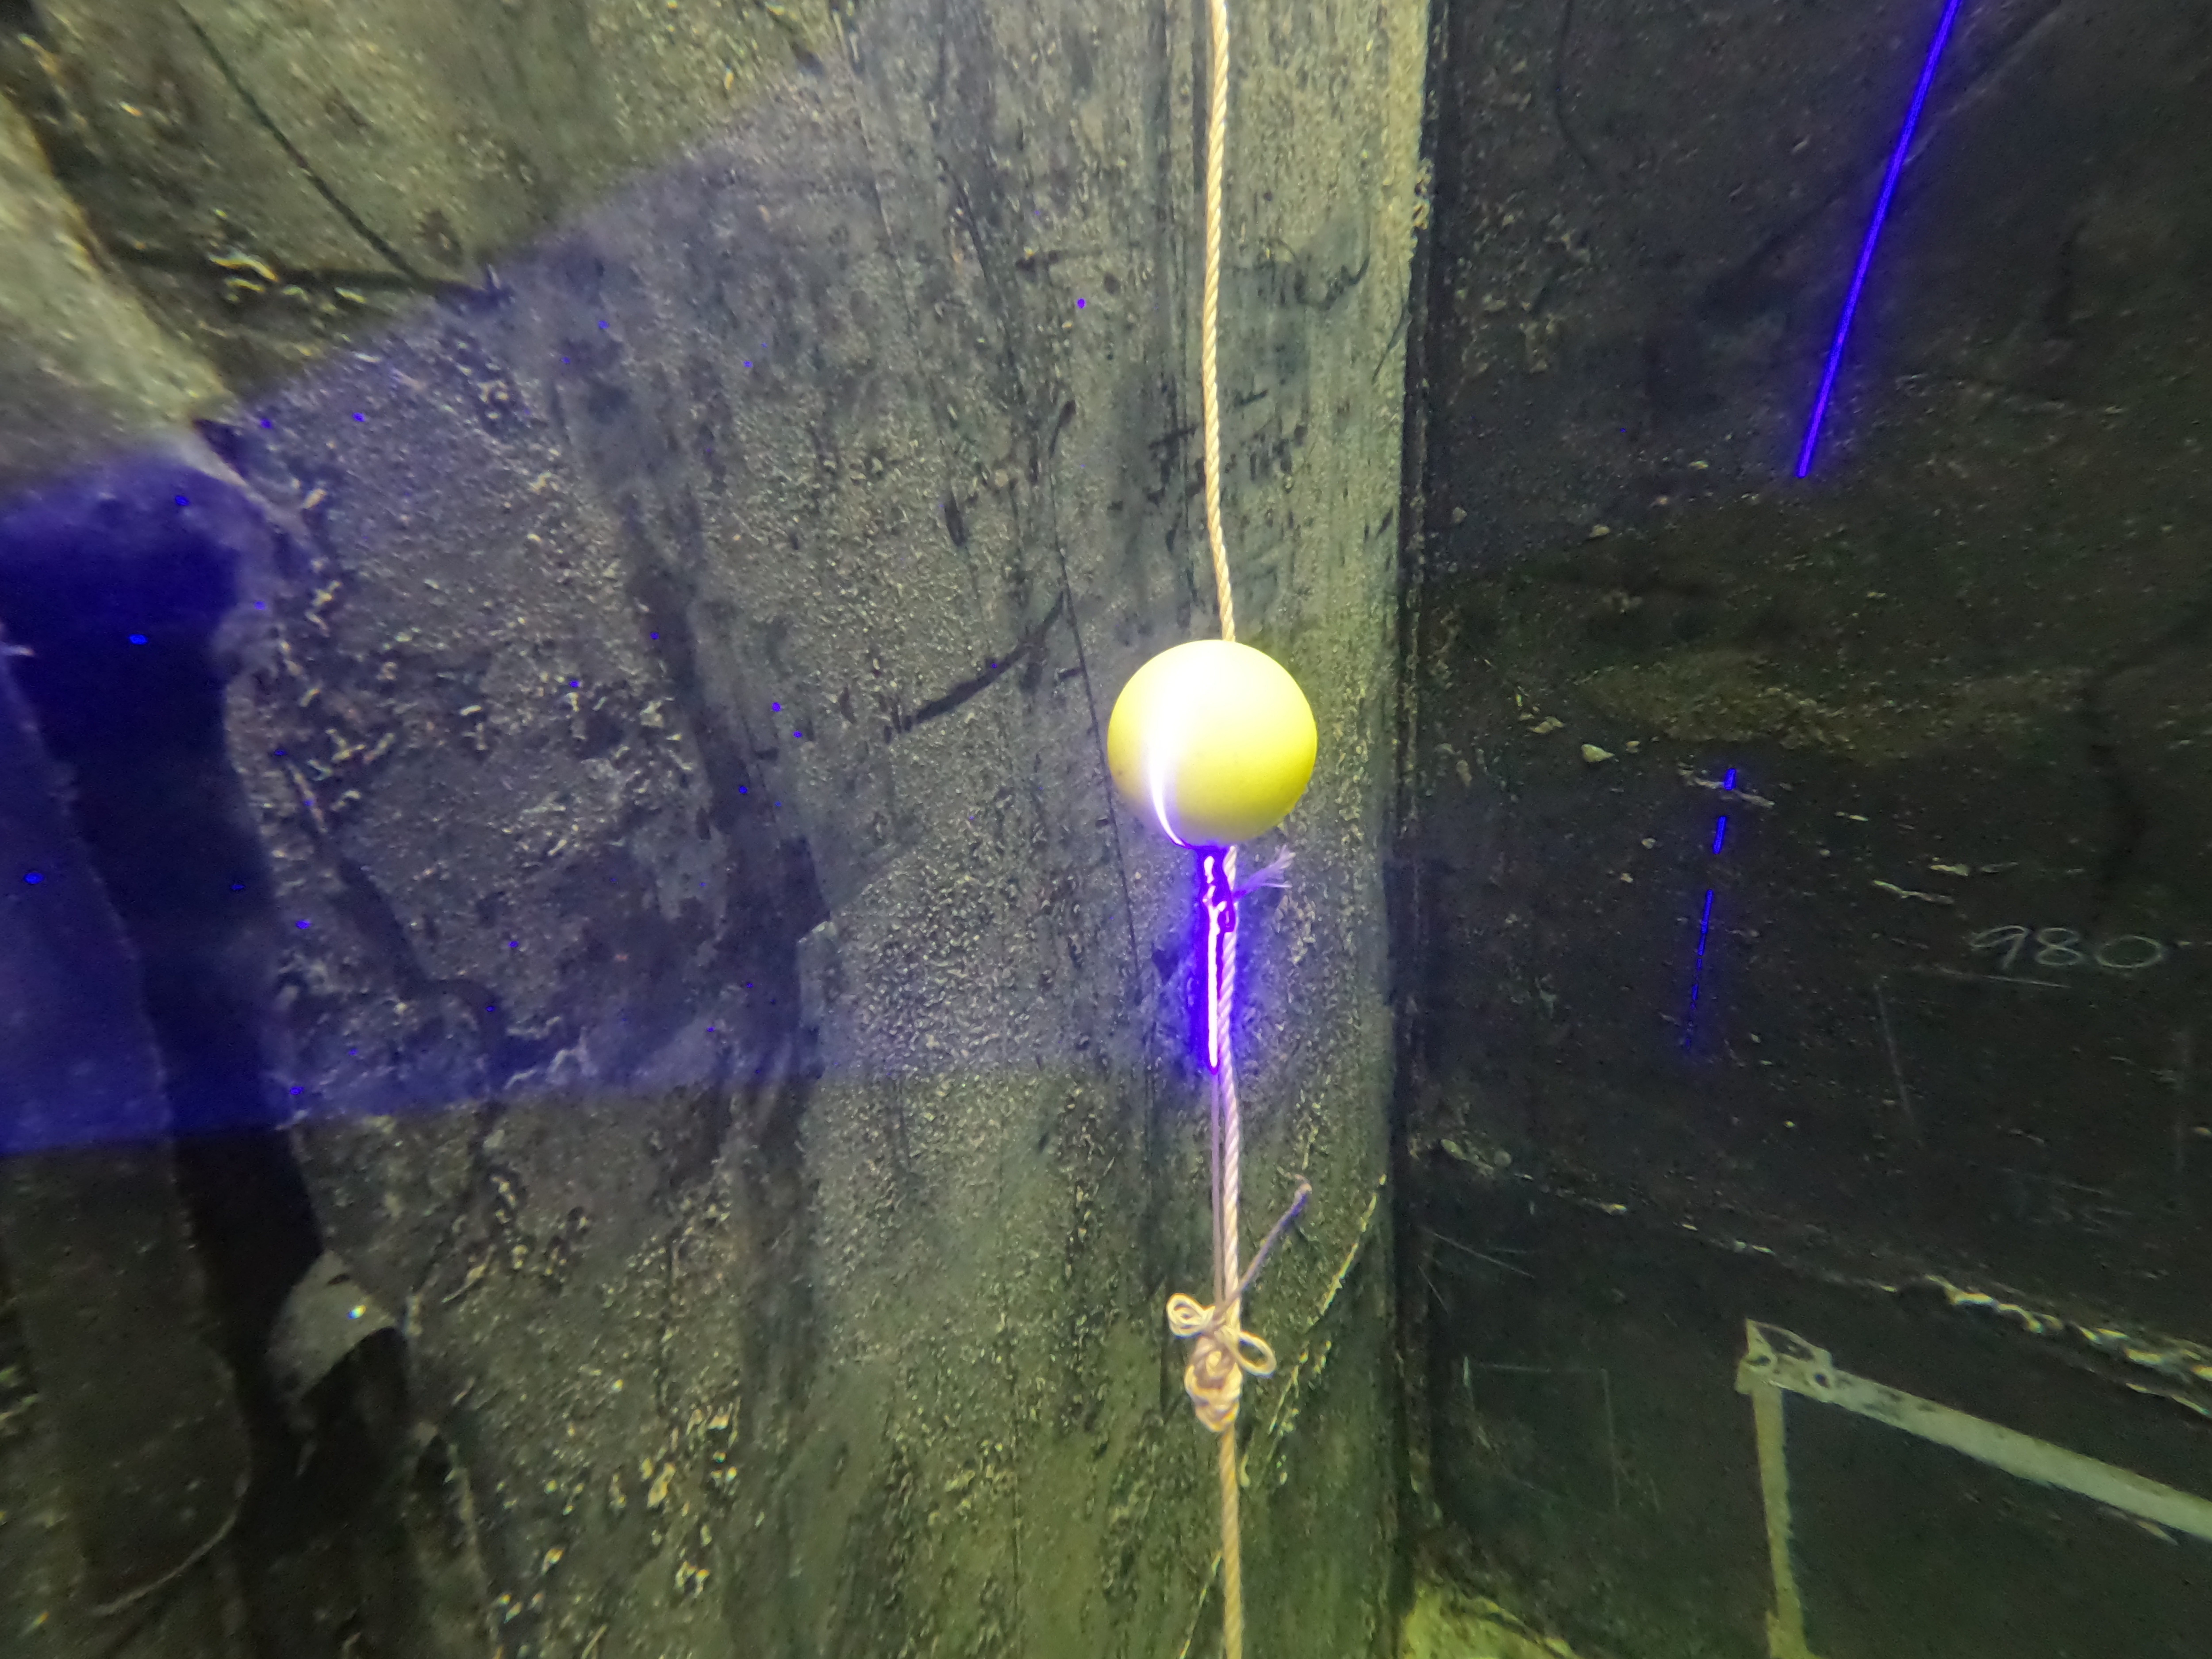

980

Supplement: Supplementary file 1314 [file G0032627.pdf › 6/G0032627.pdf]

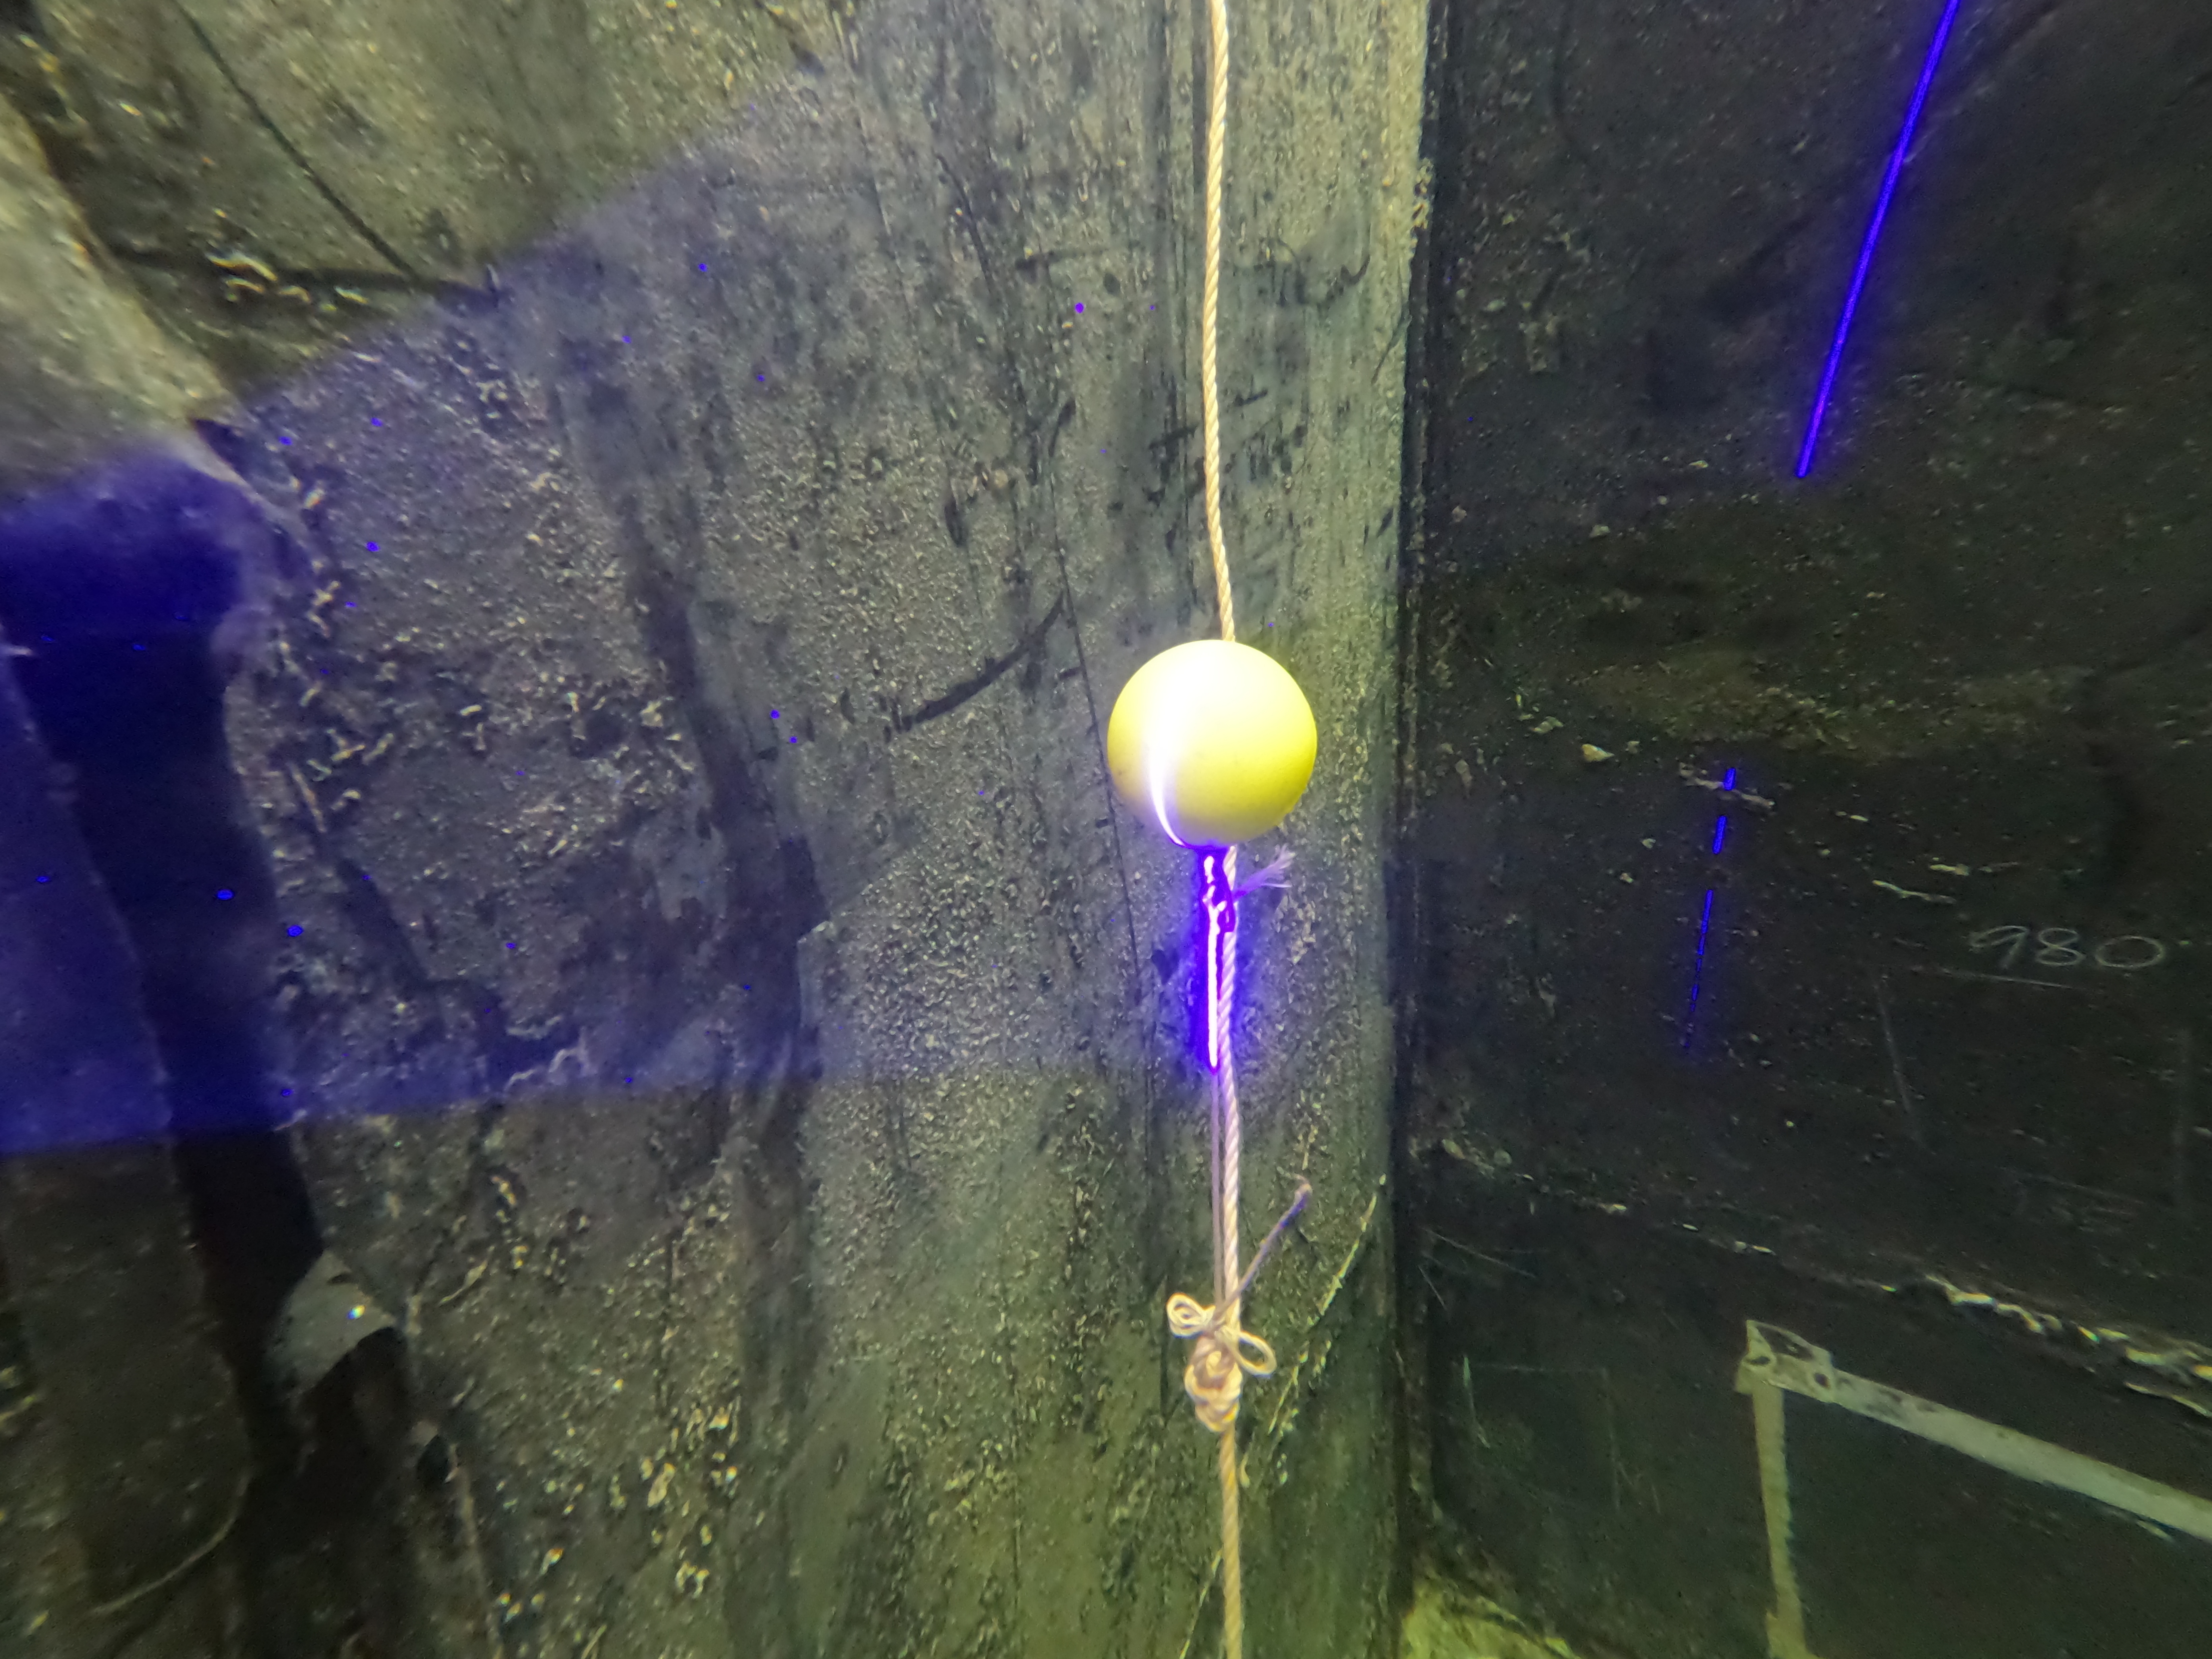

980

Supplement: Supplementary file 1315 [file G0032628.pdf › 6/G0032628.pdf]

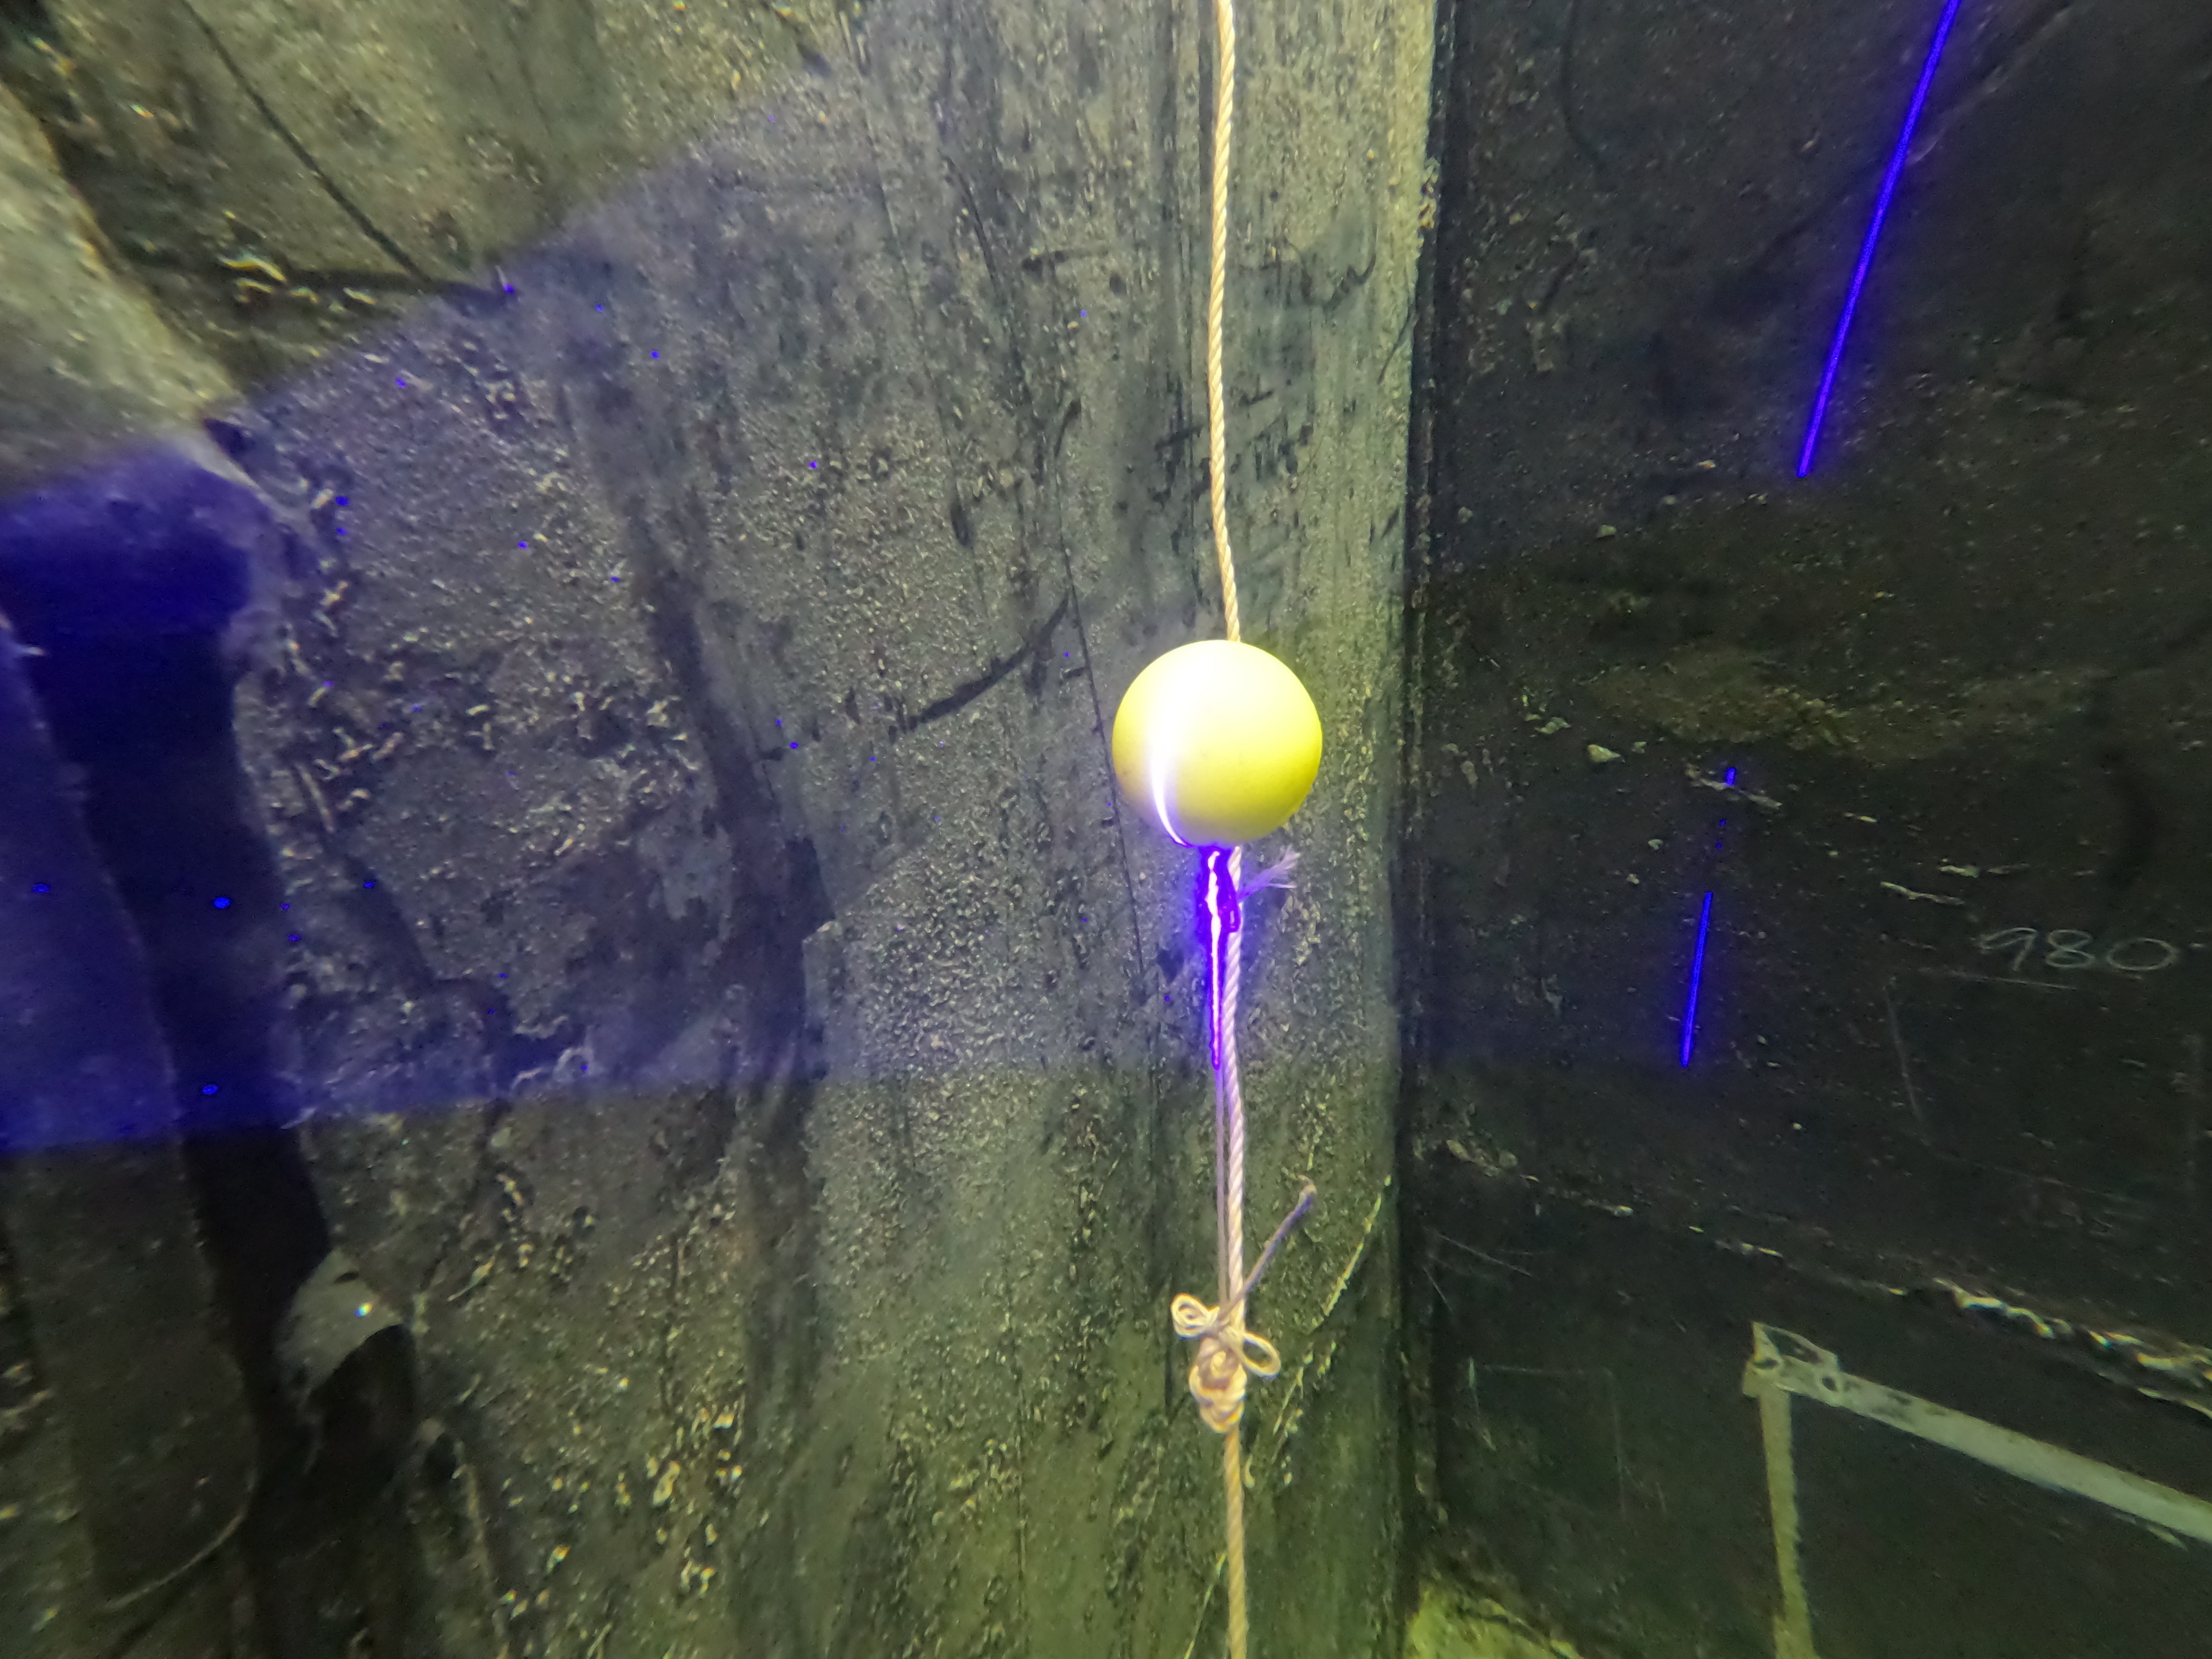

980

Supplement: Supplementary file 1316 [file G0032629.pdf › 6/G0032629.pdf]

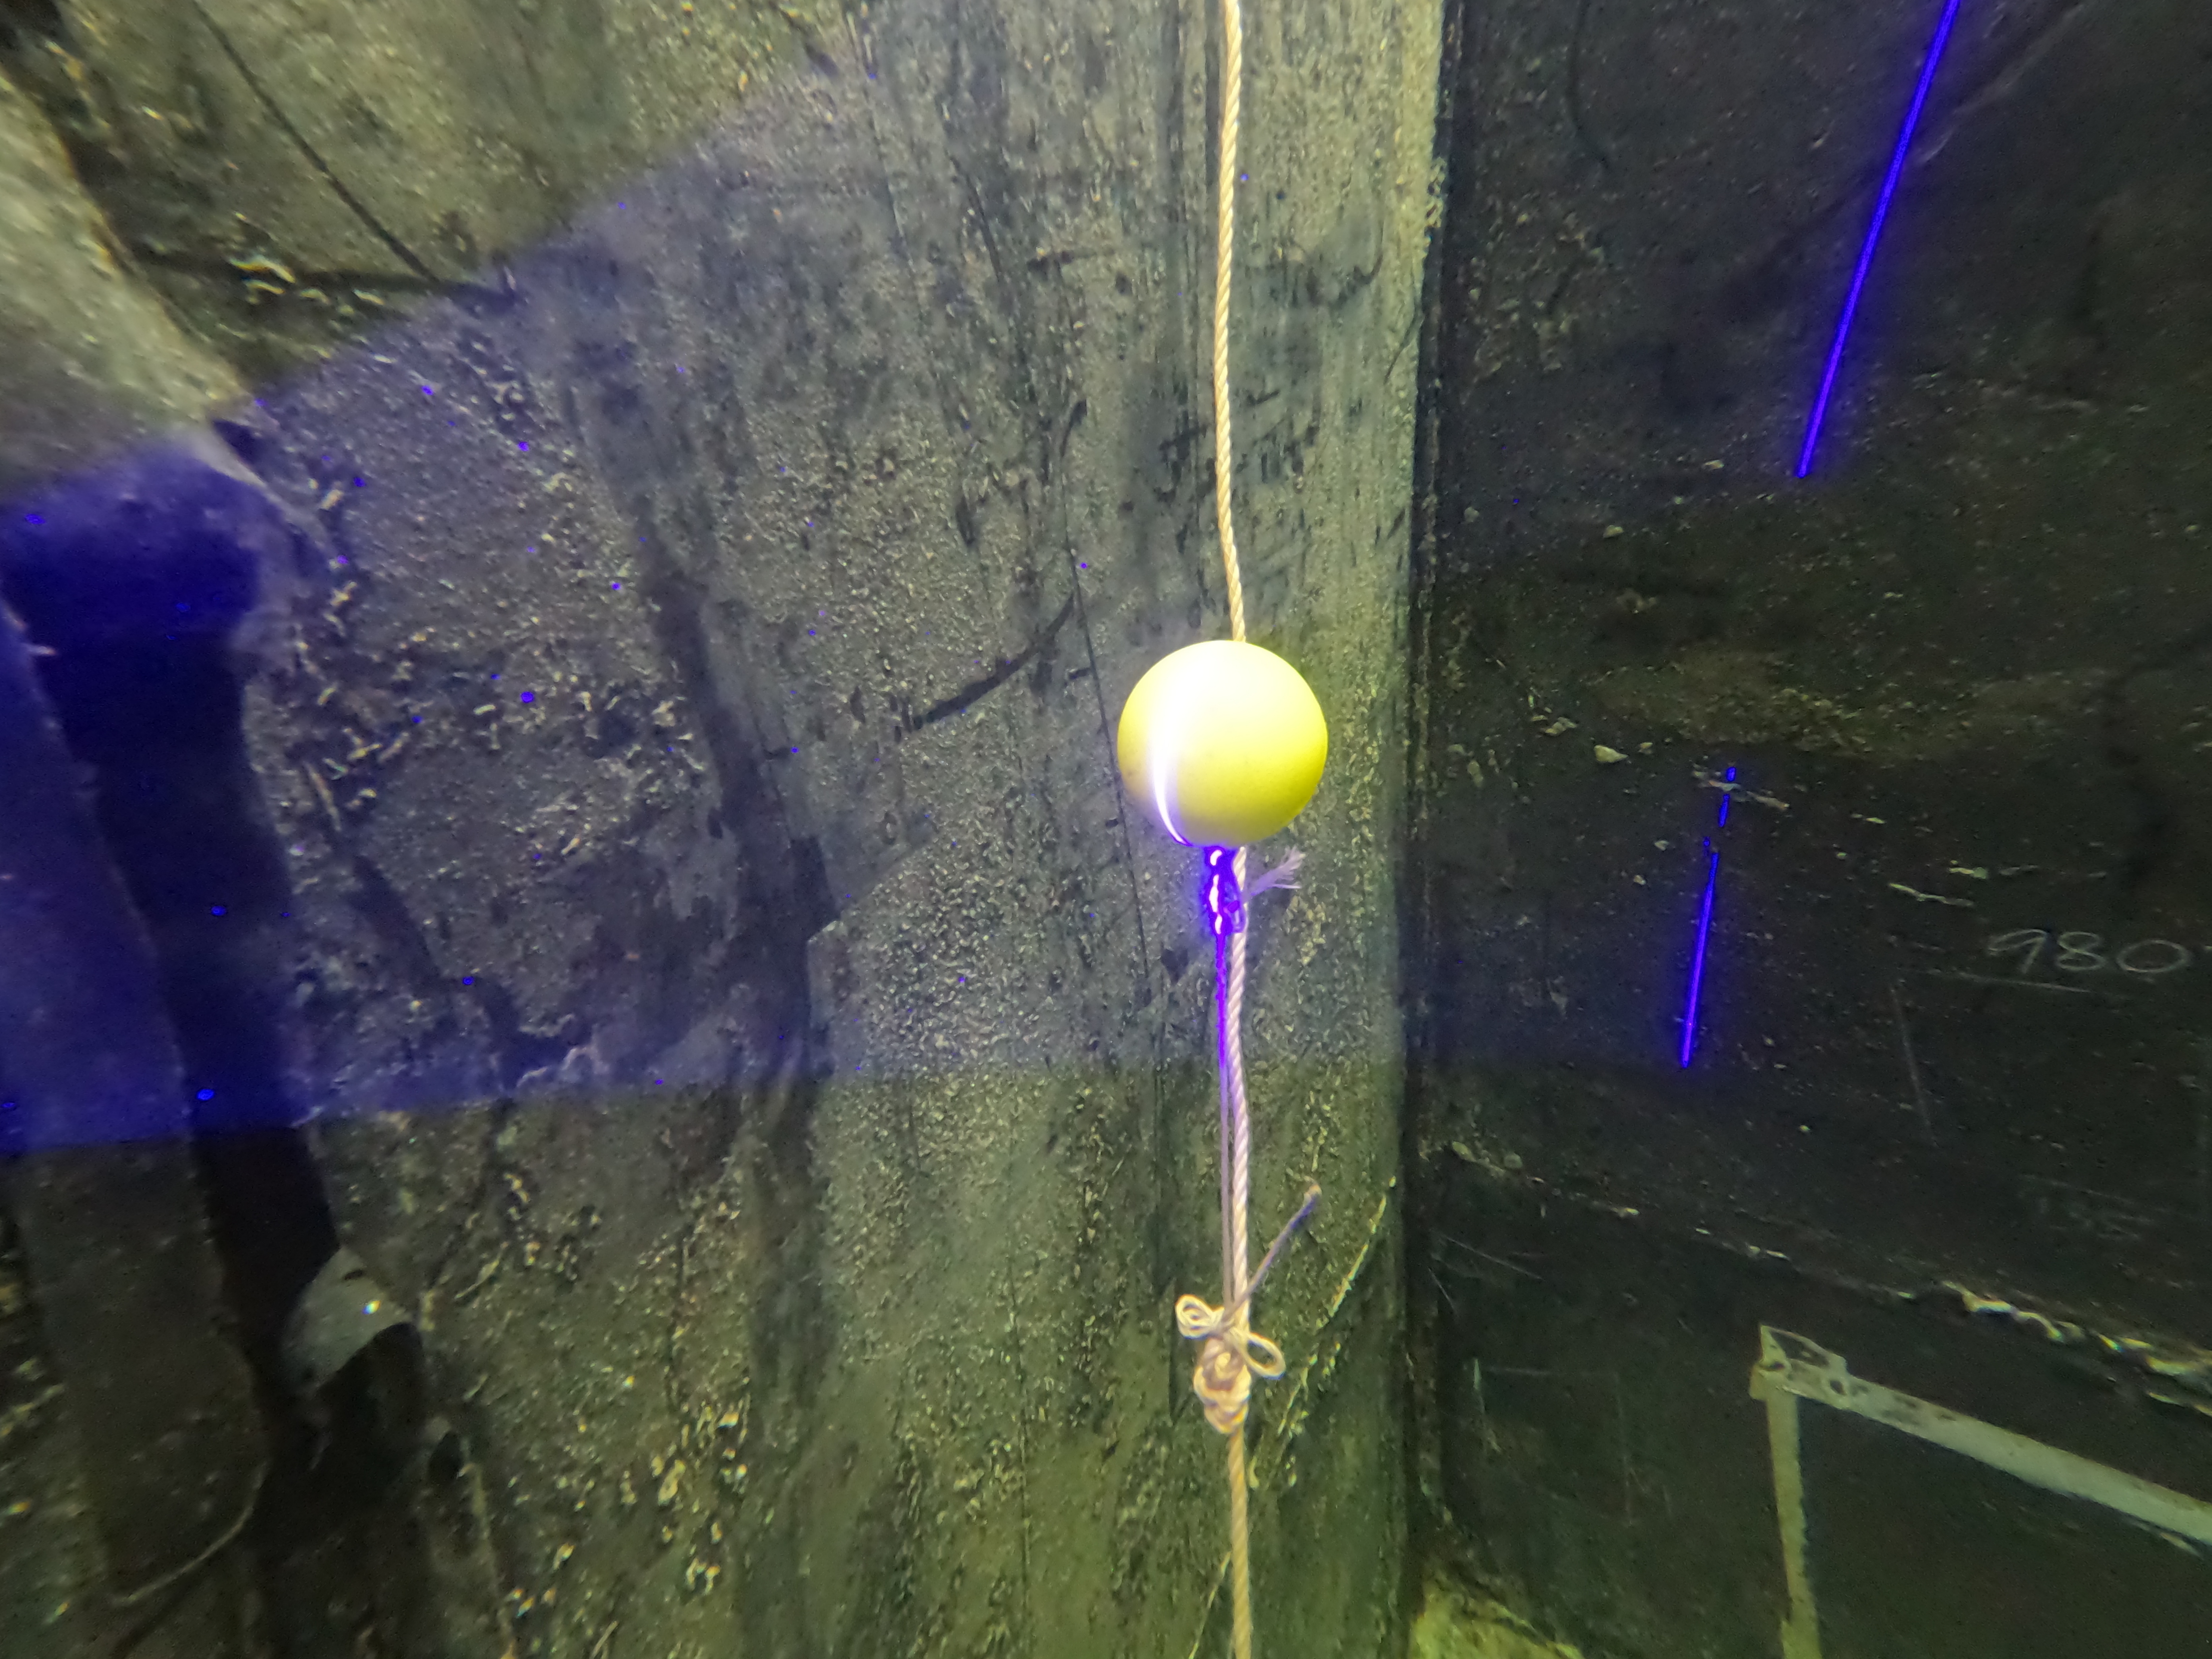

Supplement: Supplementary file 1317 [file G0032630.pdf › 6/G0032630.pdf]

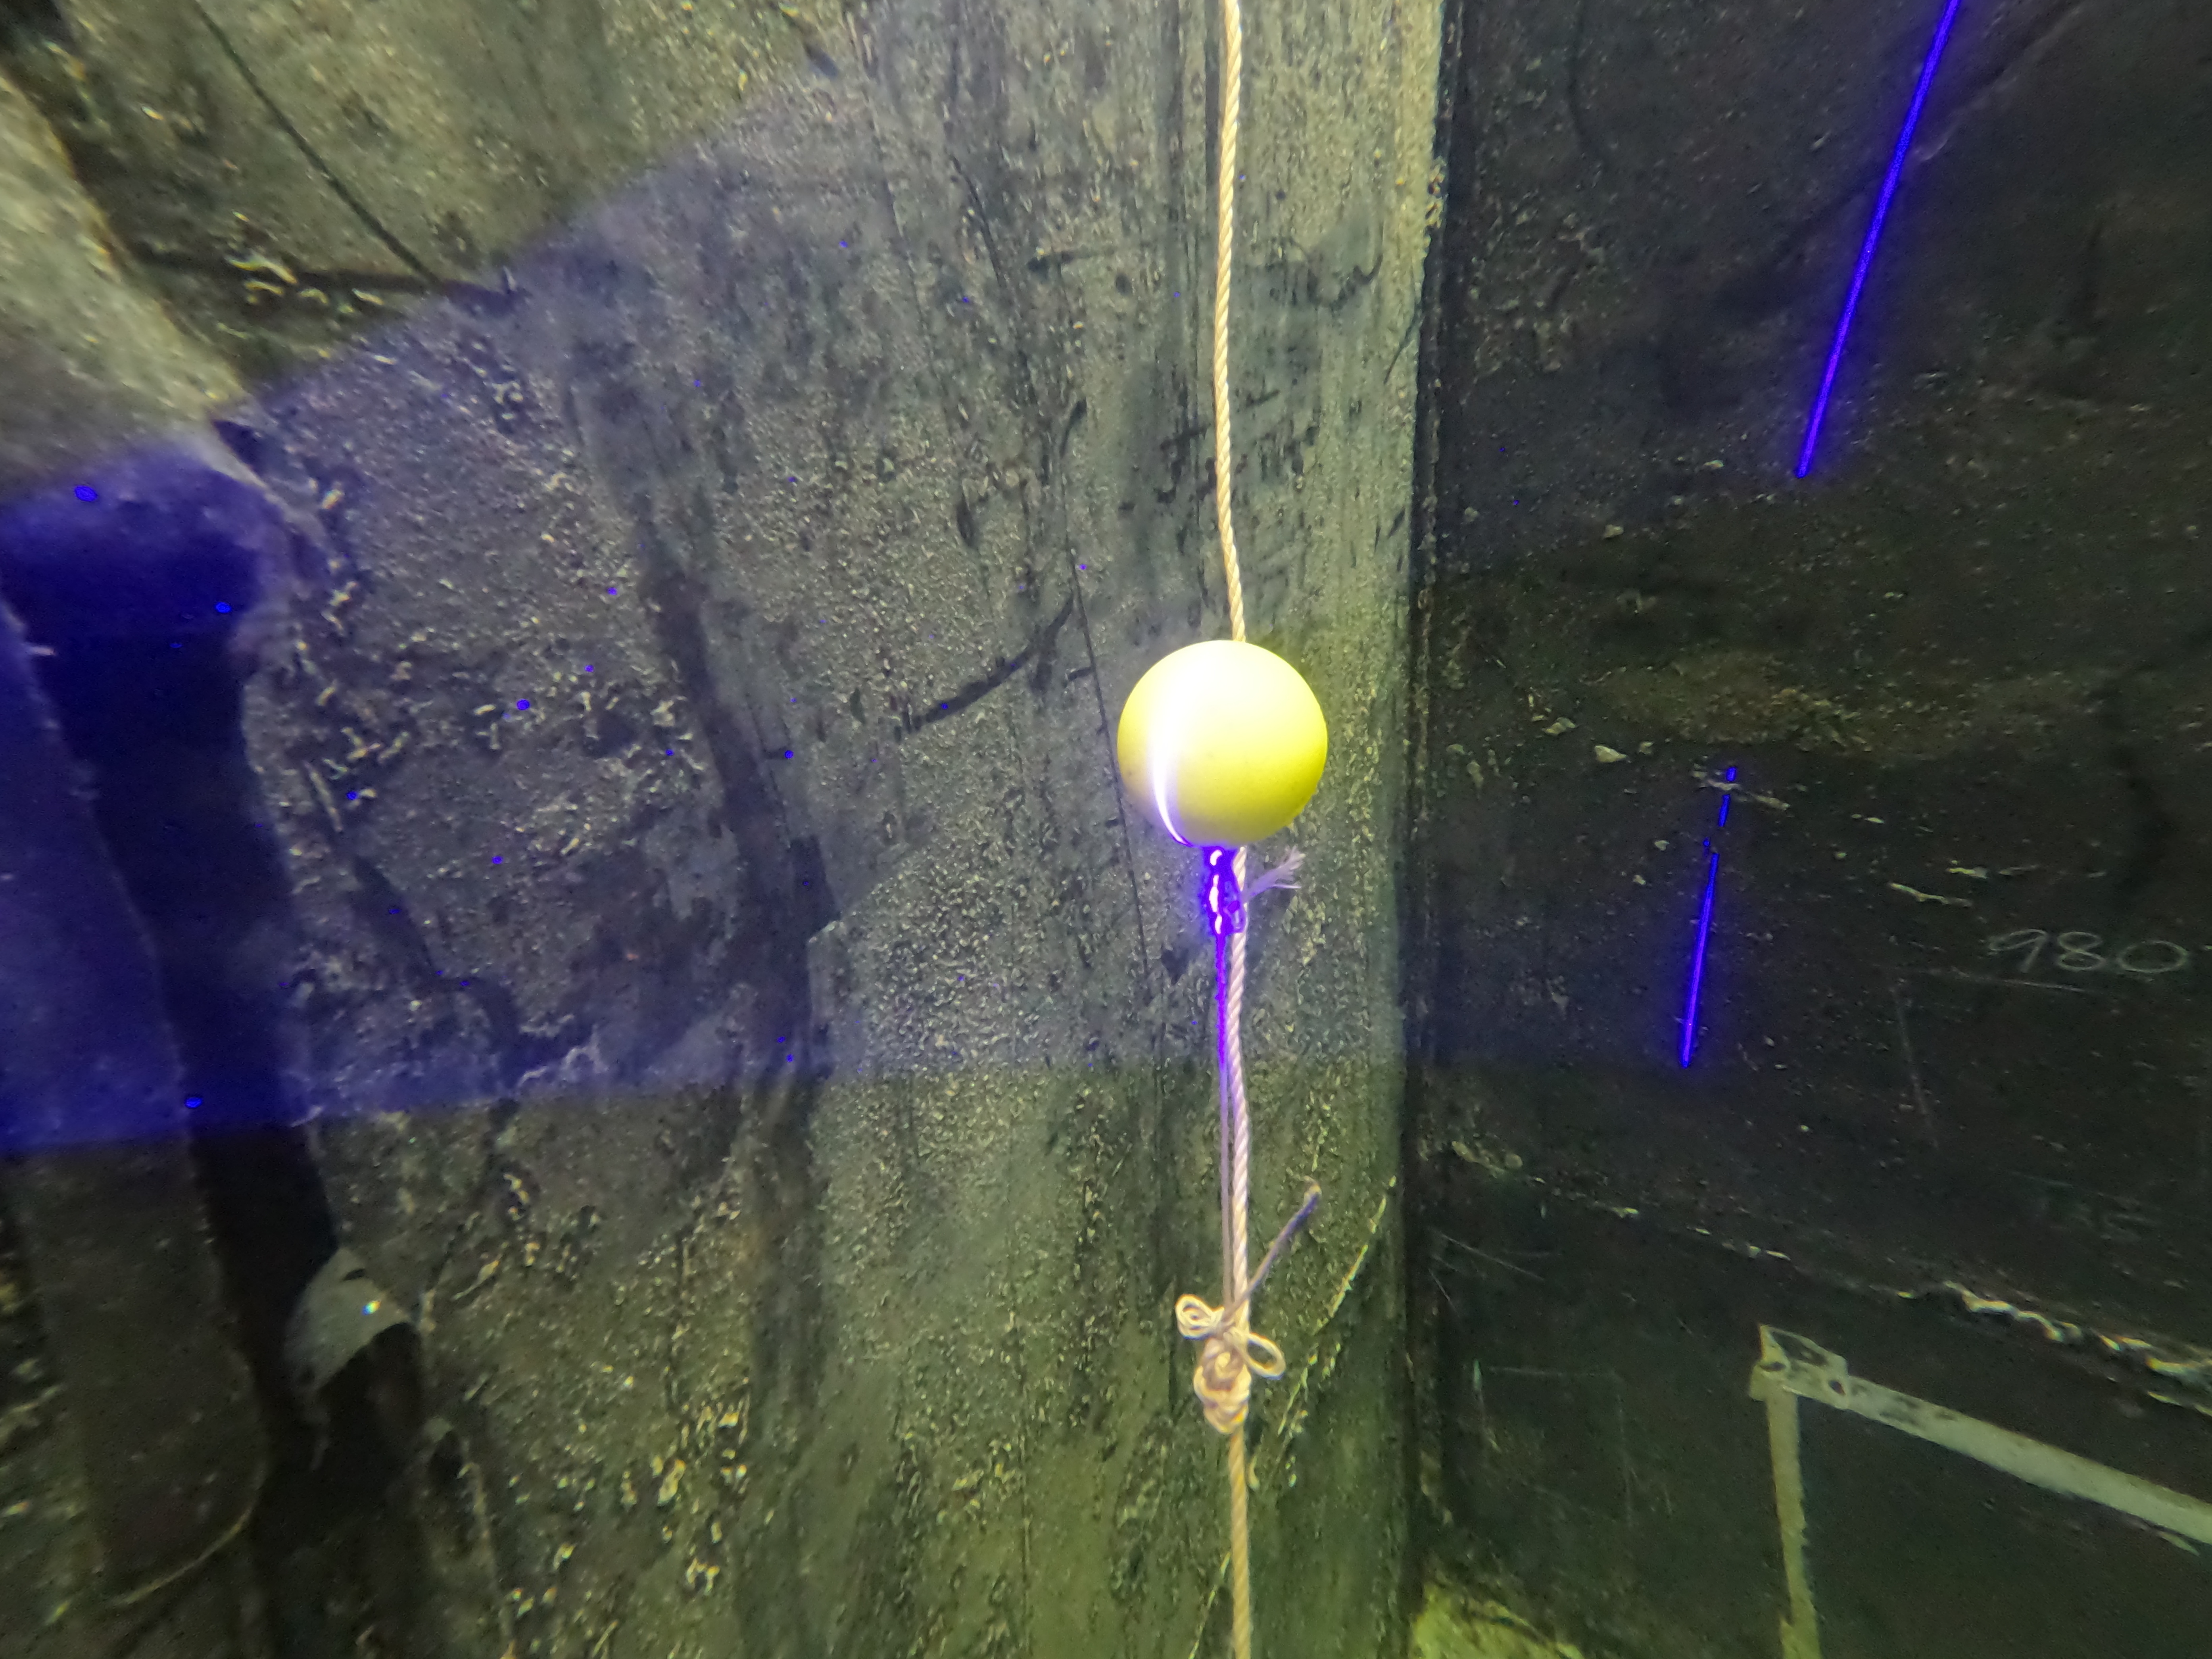

980

Supplement: Supplementary file 1318 [file G0032631.pdf › 6/G0032631.pdf]

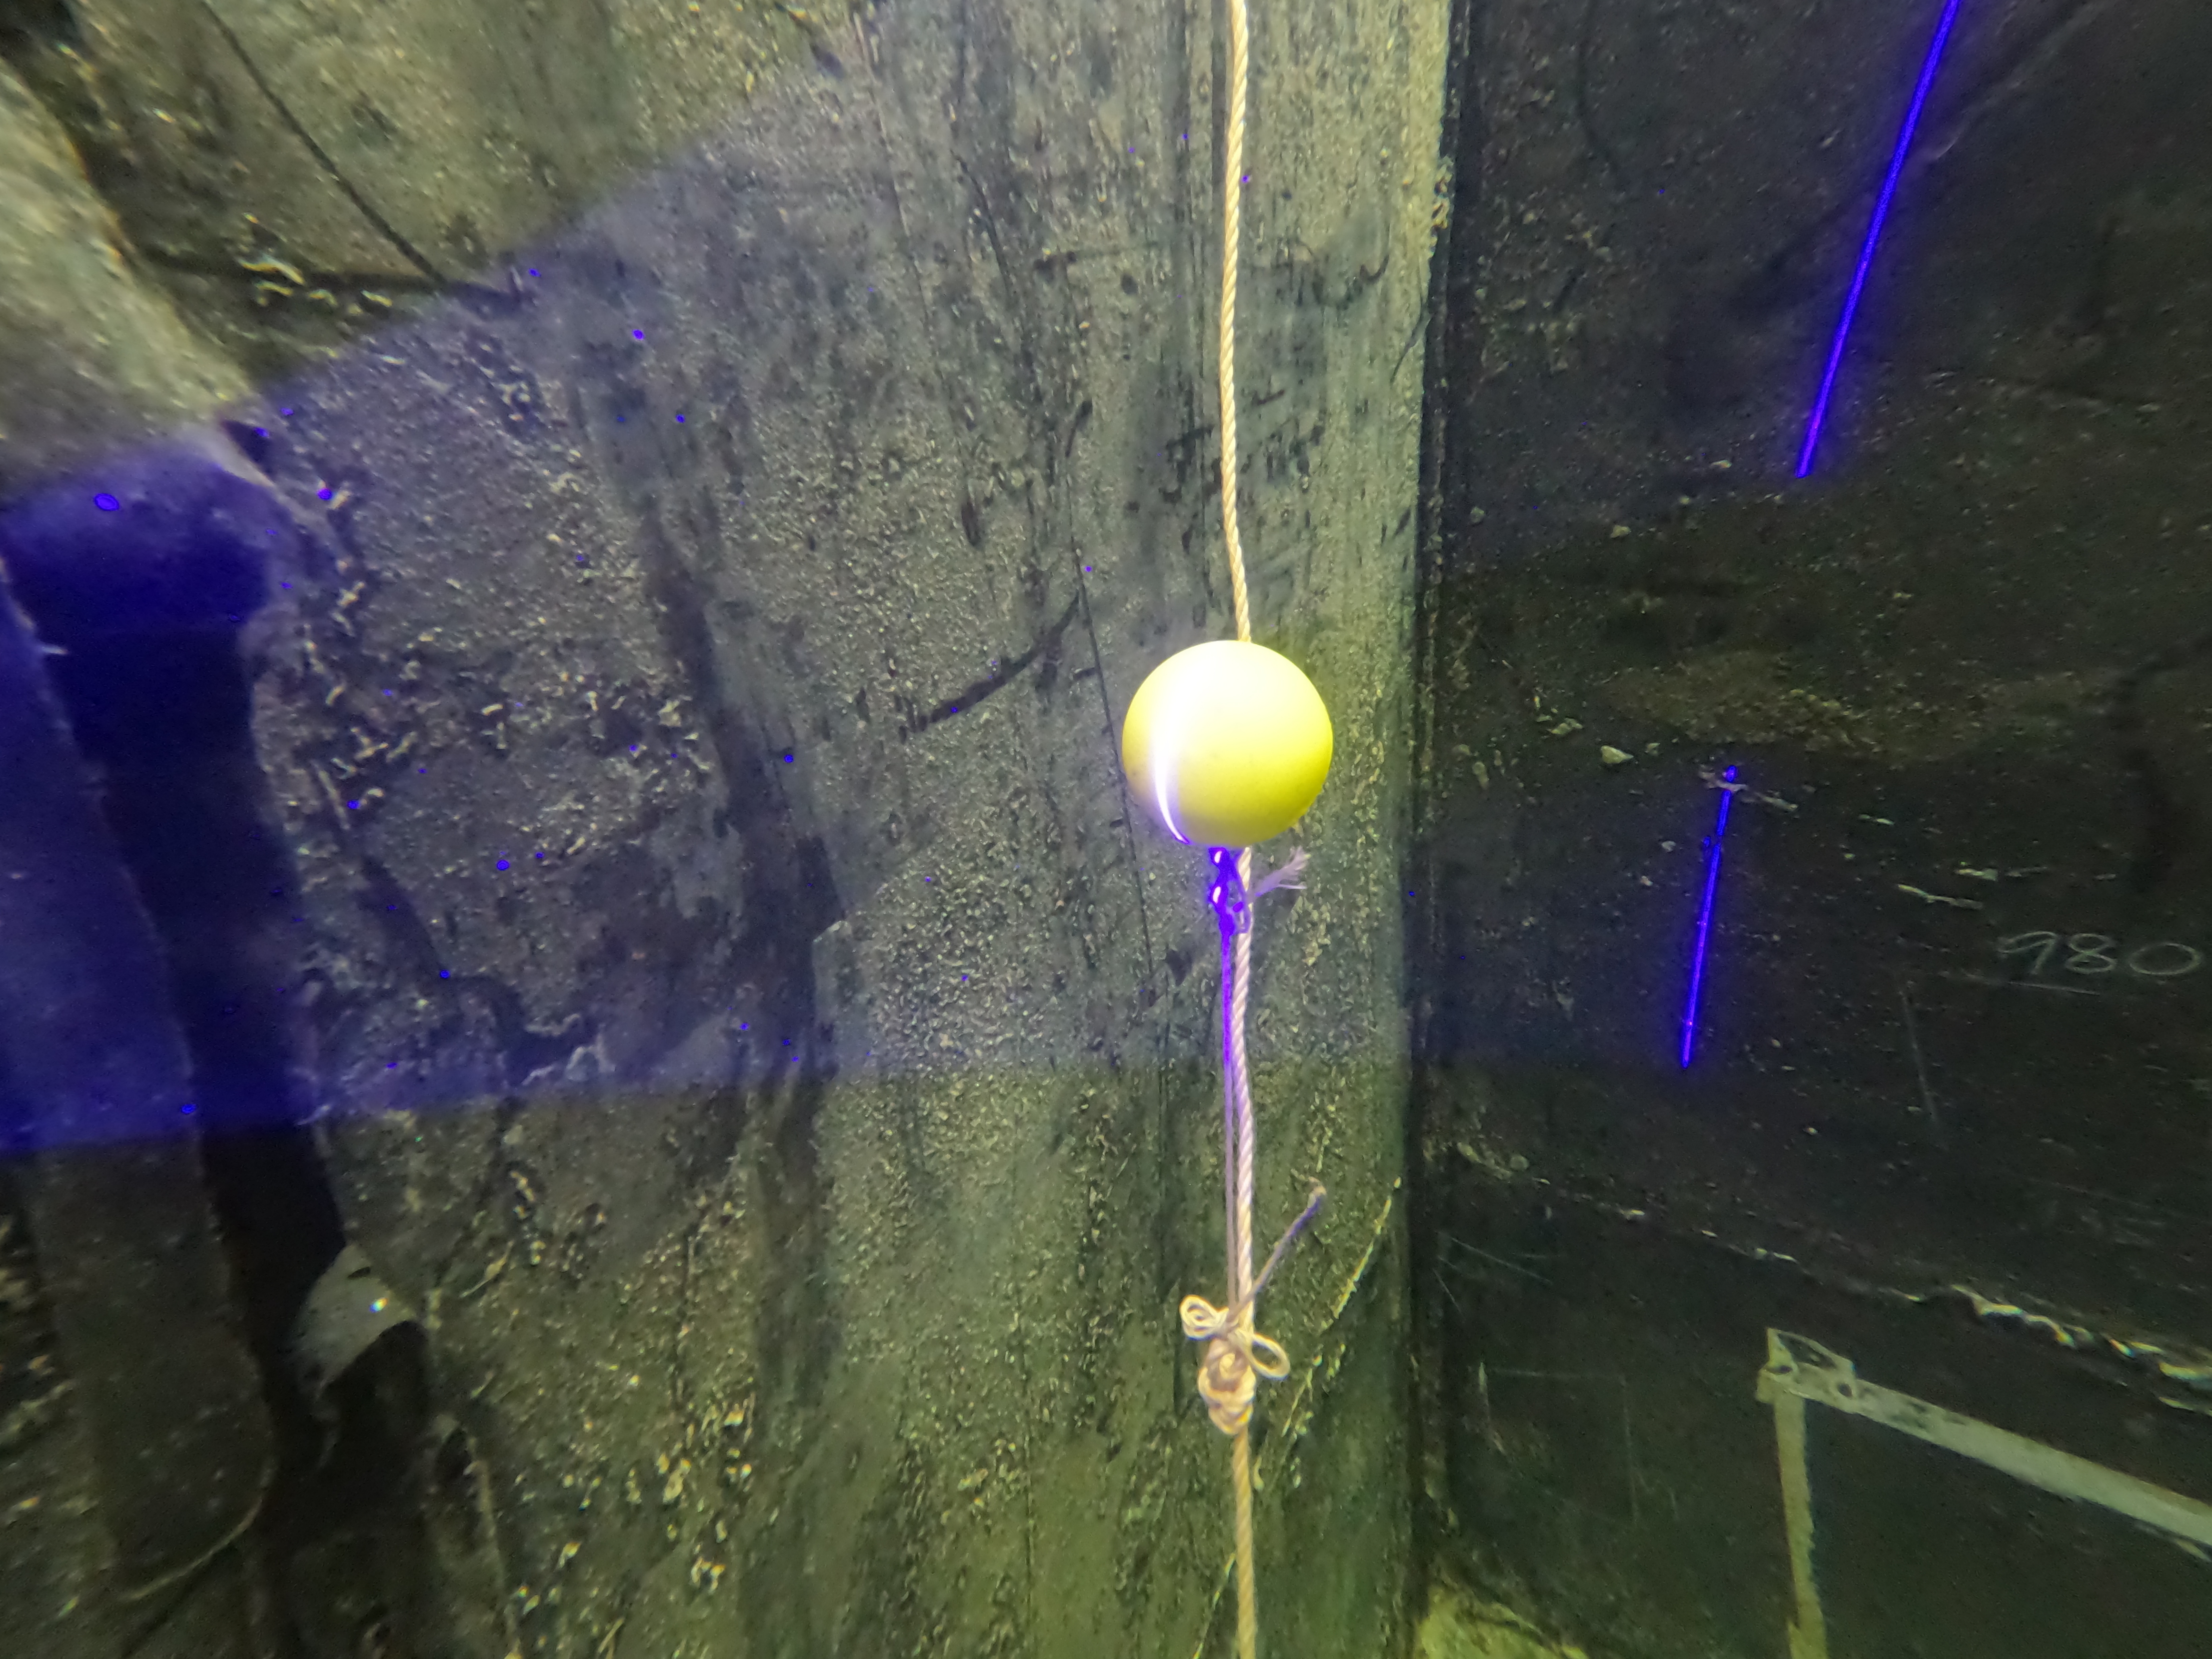

980

Supplement: Supplementary file 1319 [file G0032632.pdf › 6/G0032632.pdf]

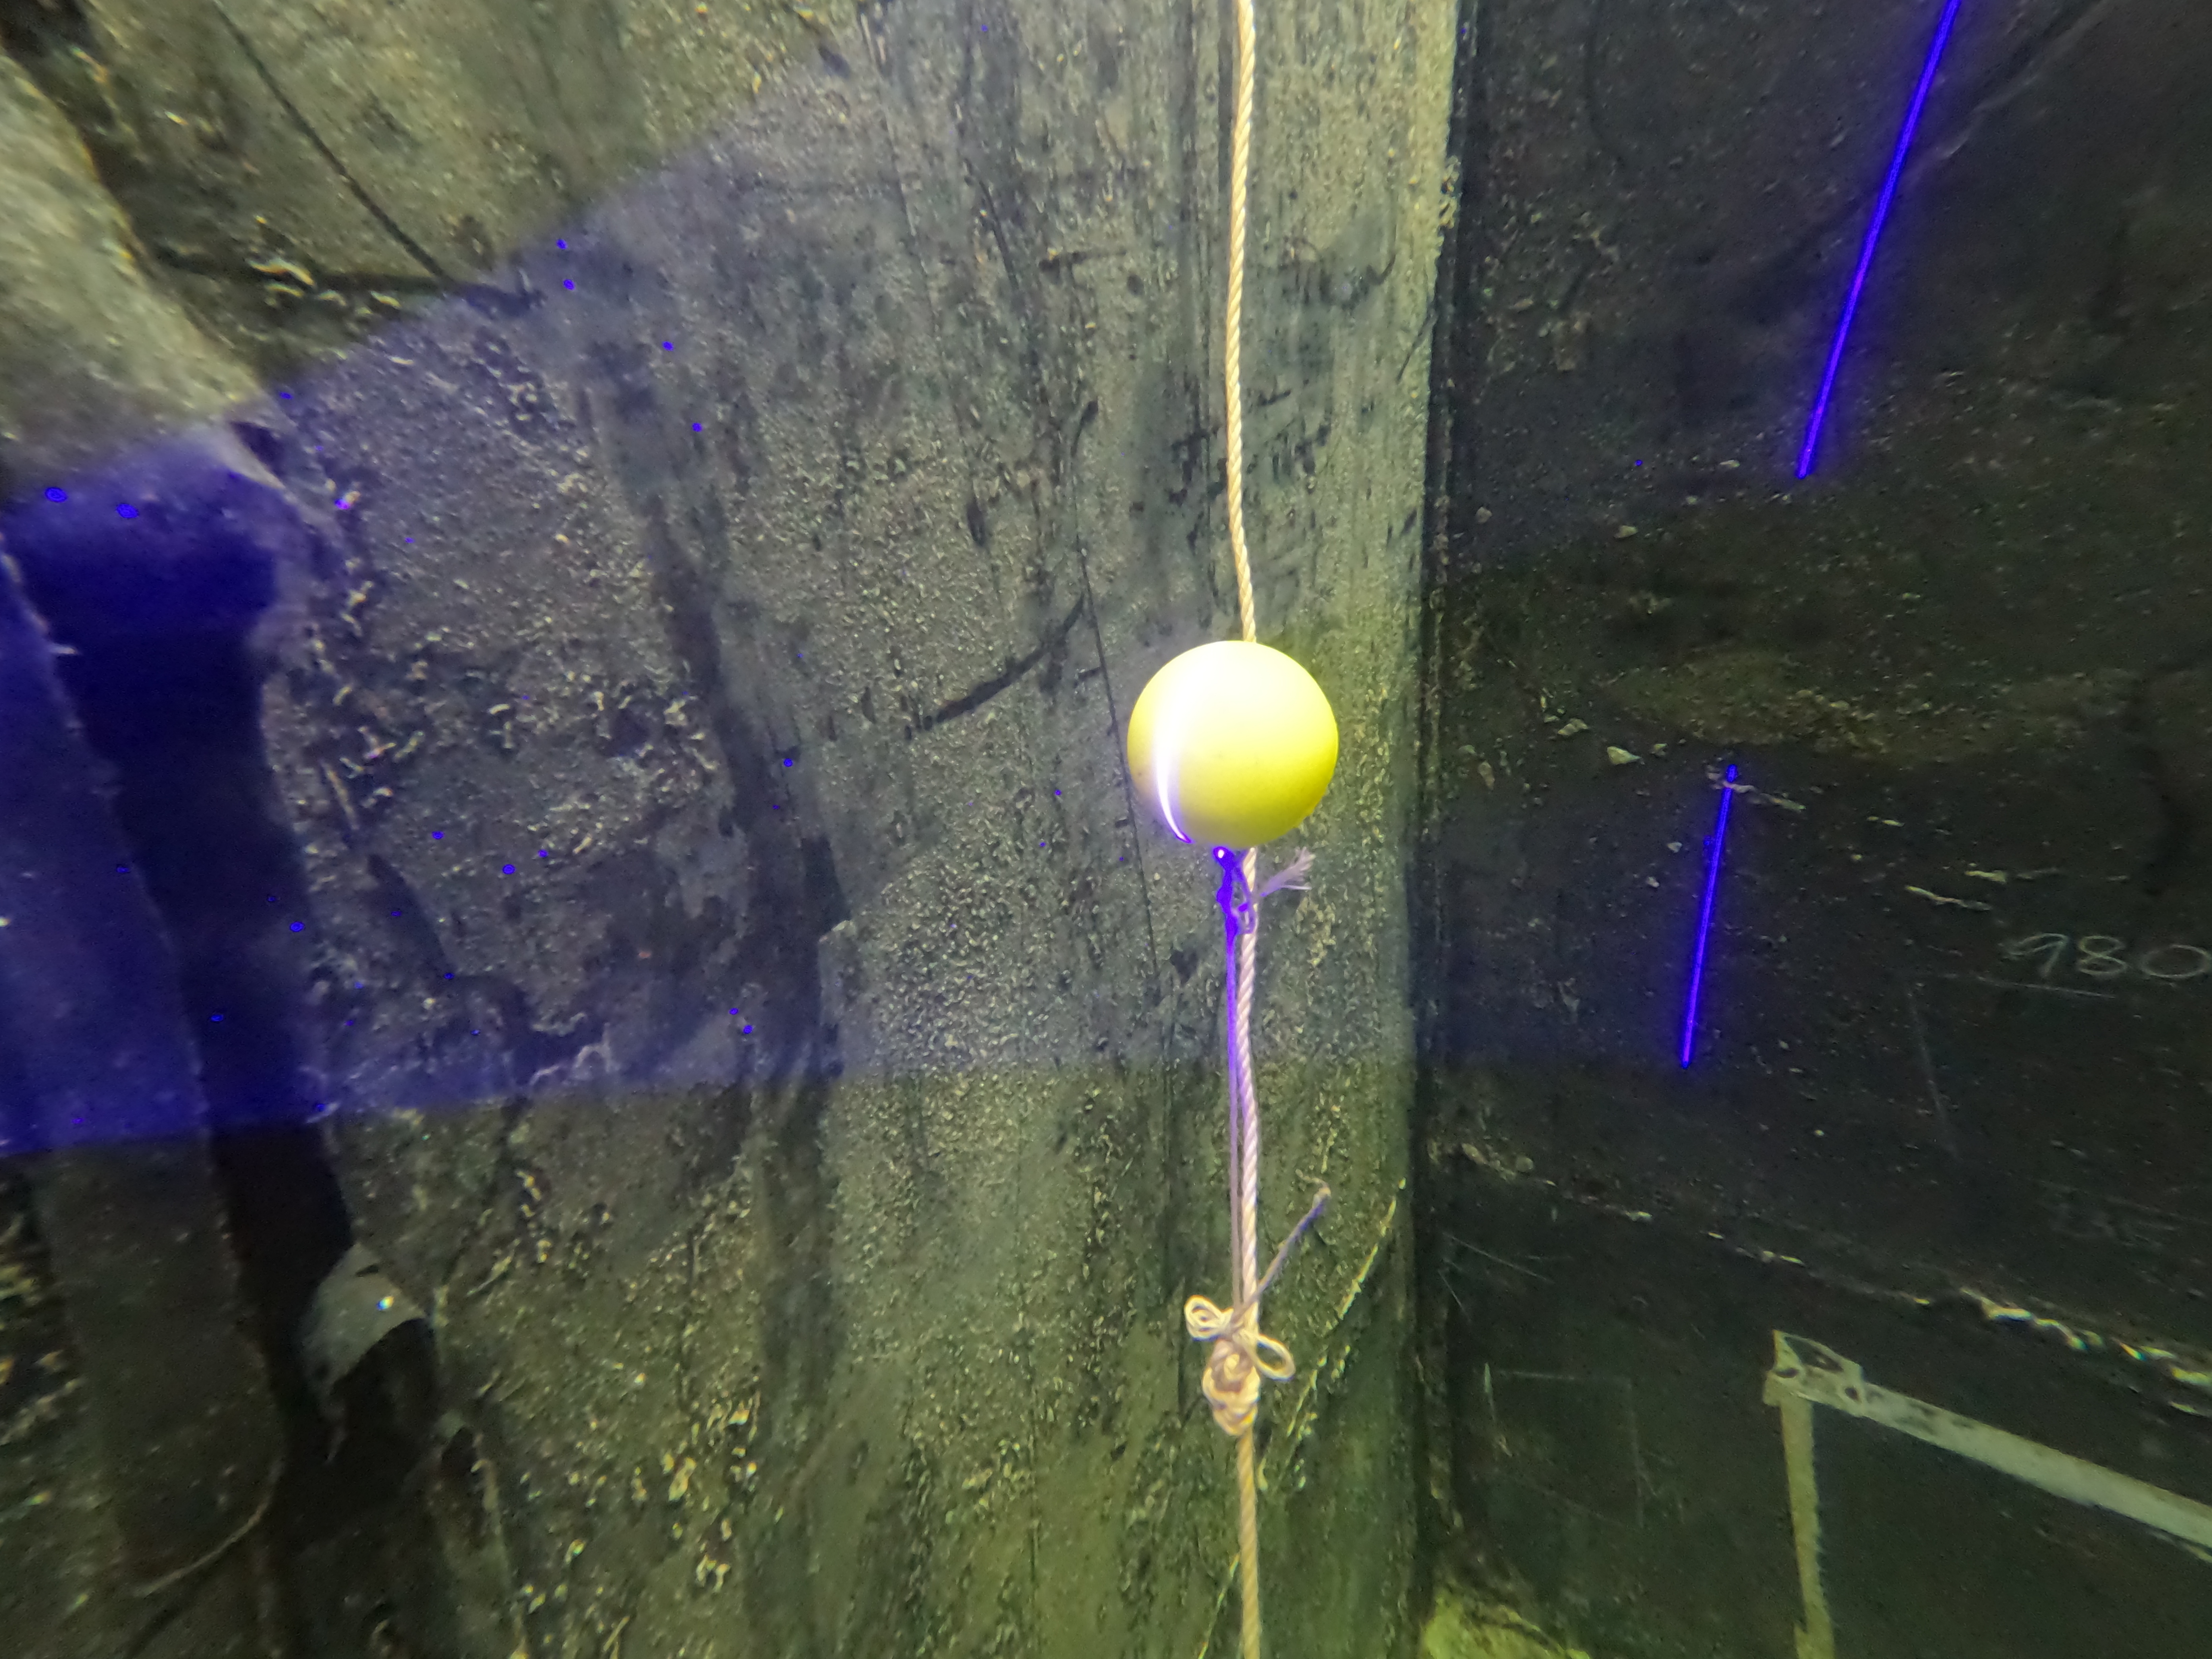

980

Supplement: Supplementary file 1320 [file G0032633.pdf › 6/G0032633.pdf]

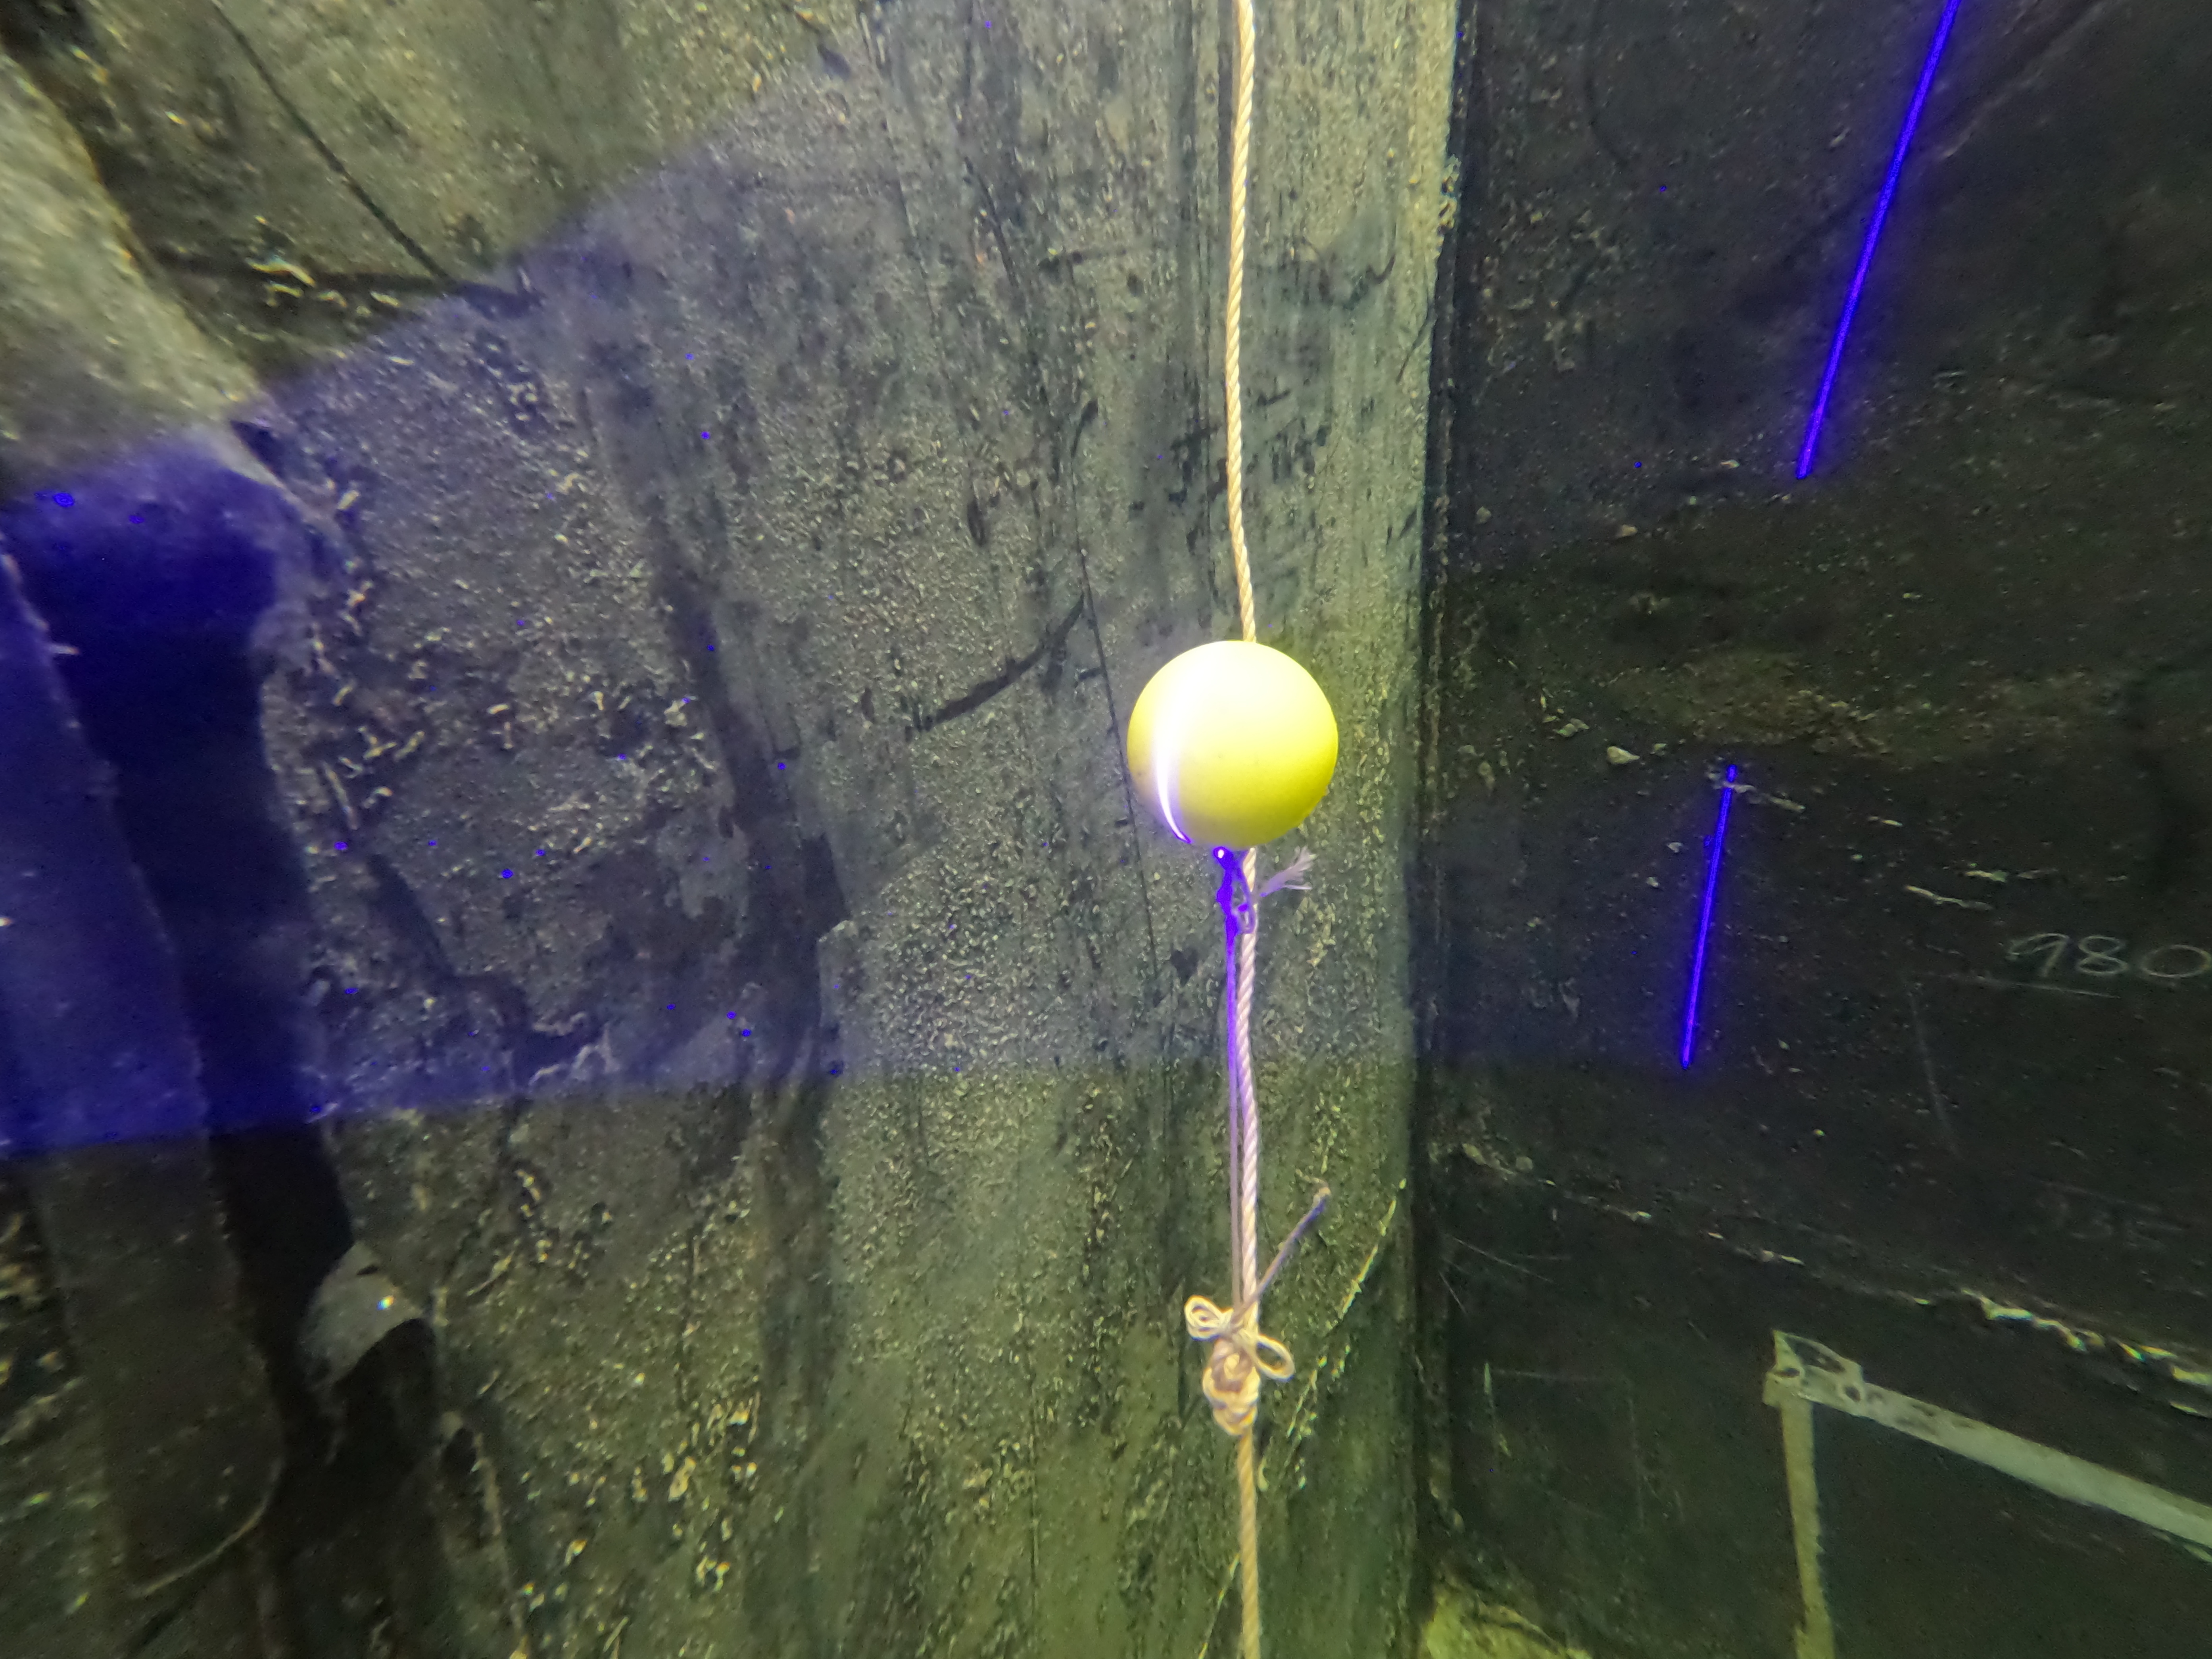

980

Supplement: Supplementary file 1321 [file G0032634.pdf › 6/G0032634.pdf]

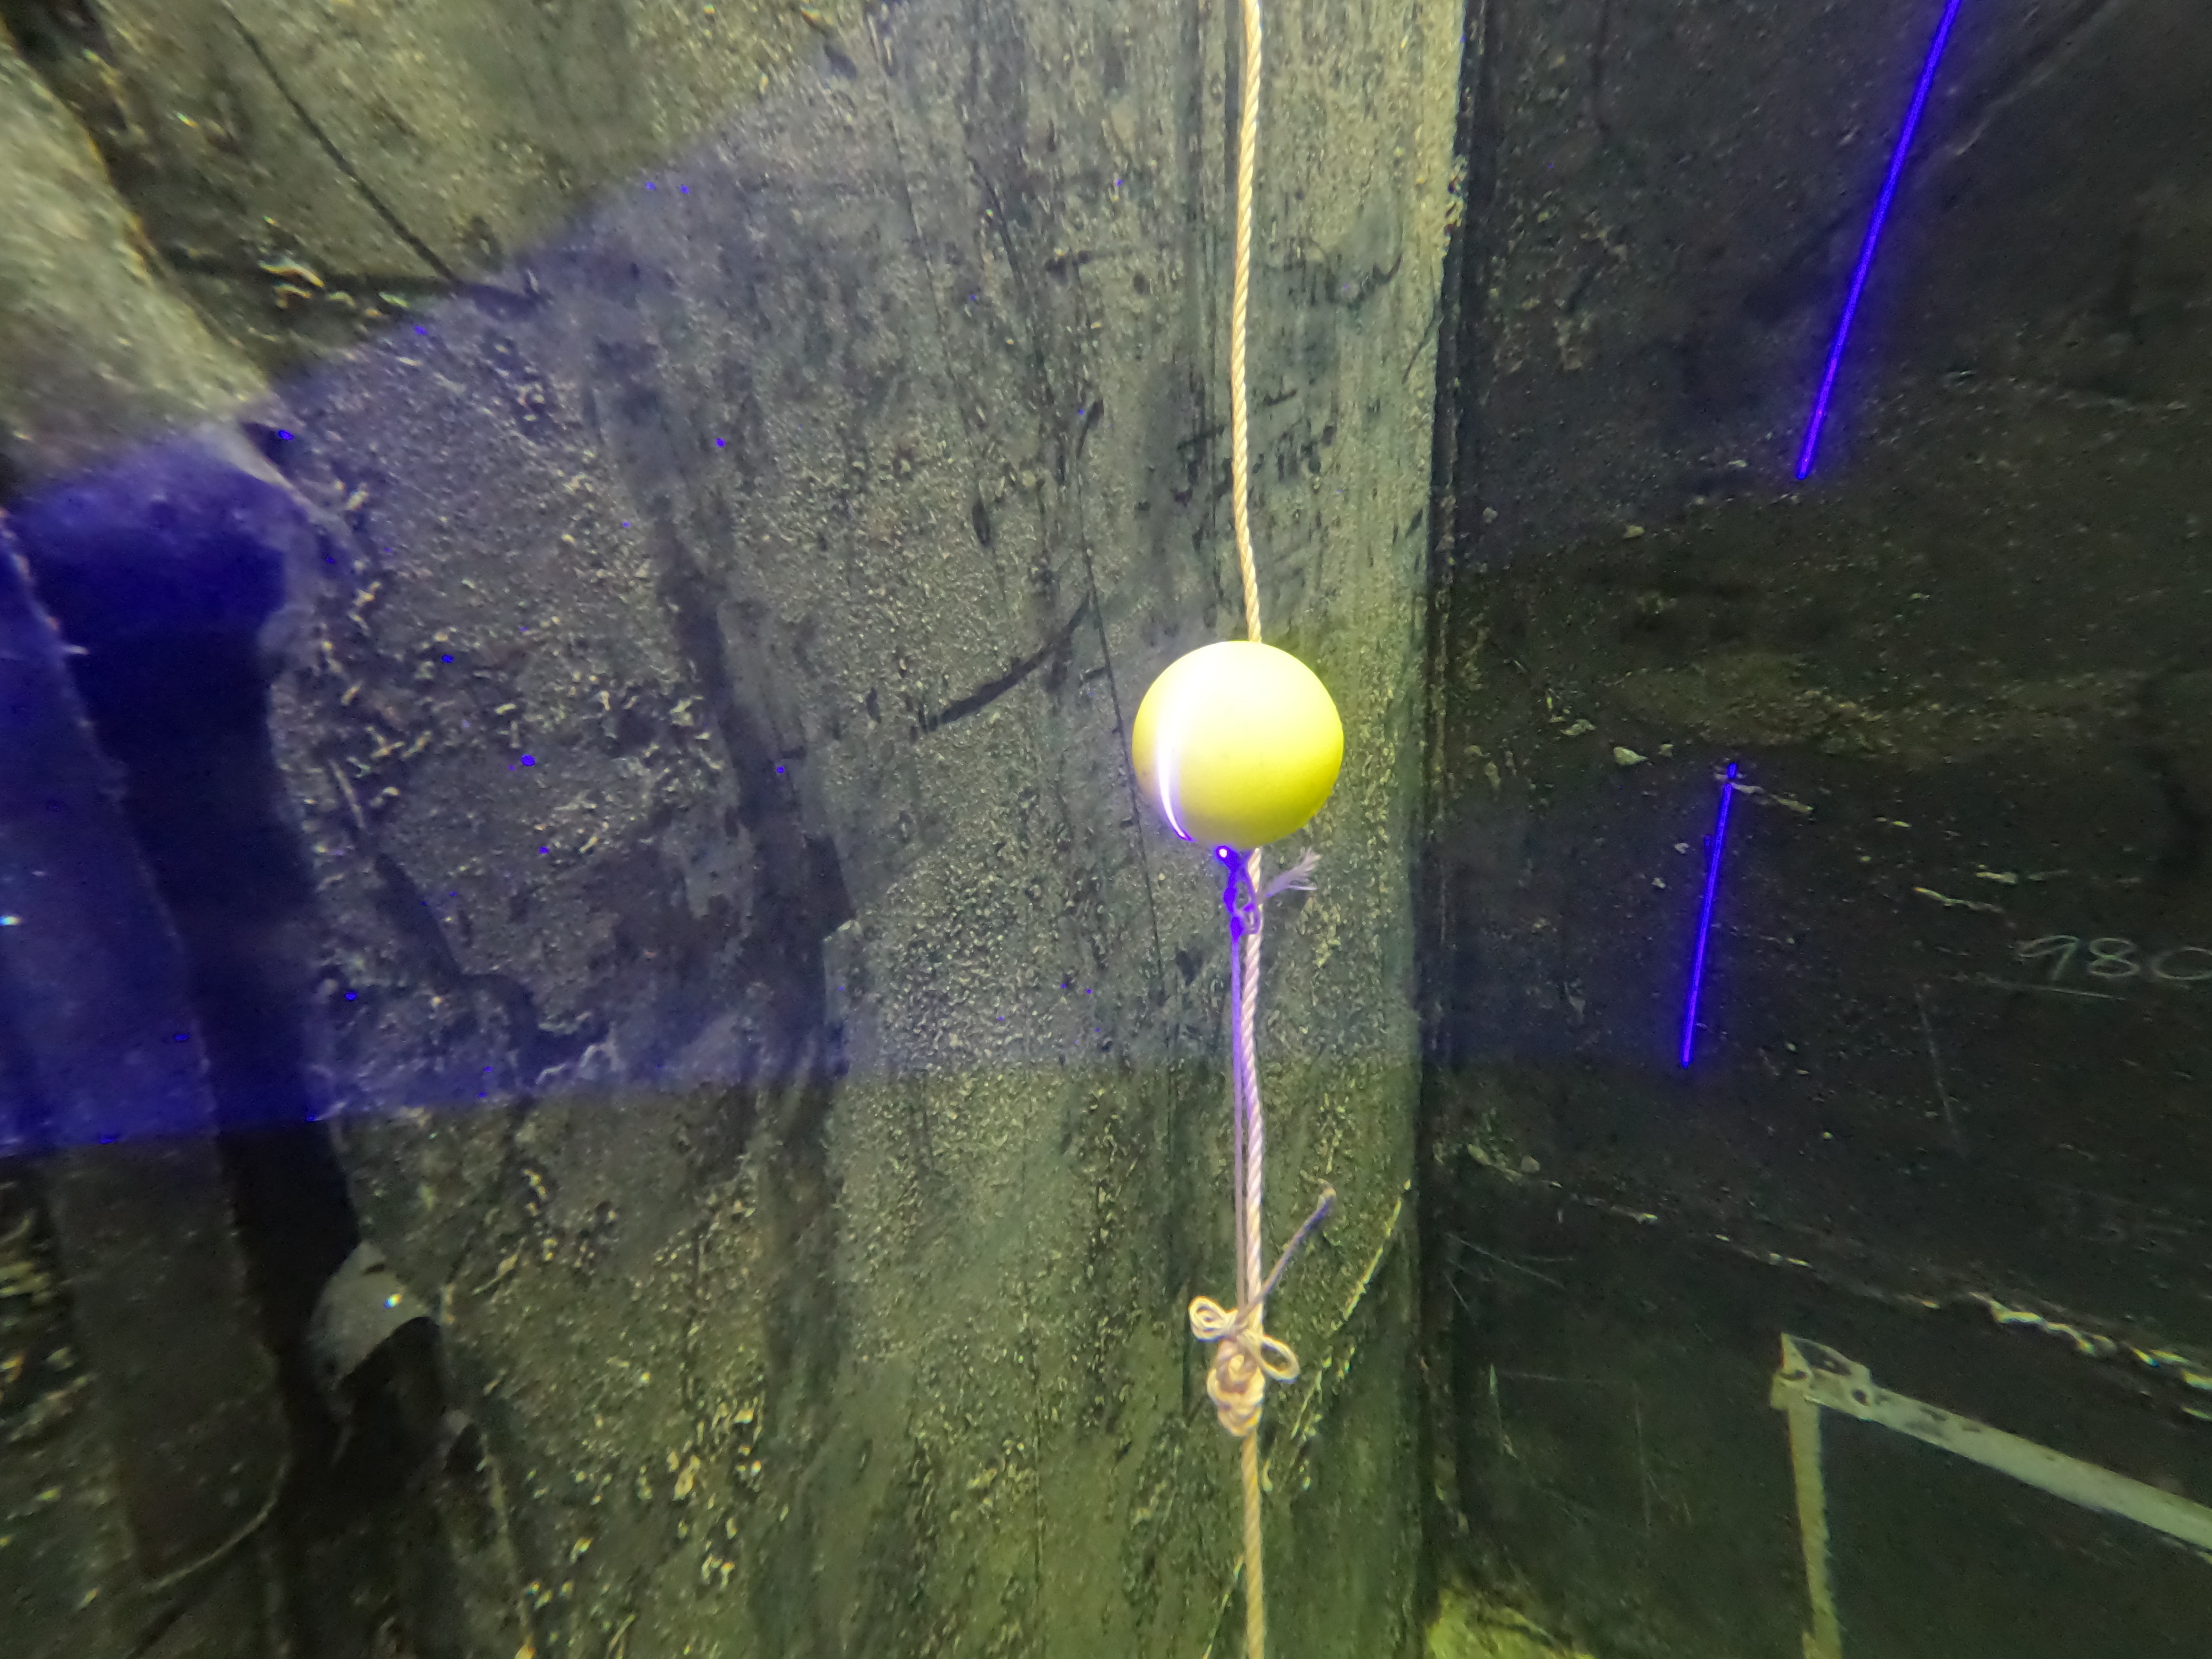

980

Supplement: Supplementary file 1322 [file G0032635.pdf › 6/G0032635.pdf]

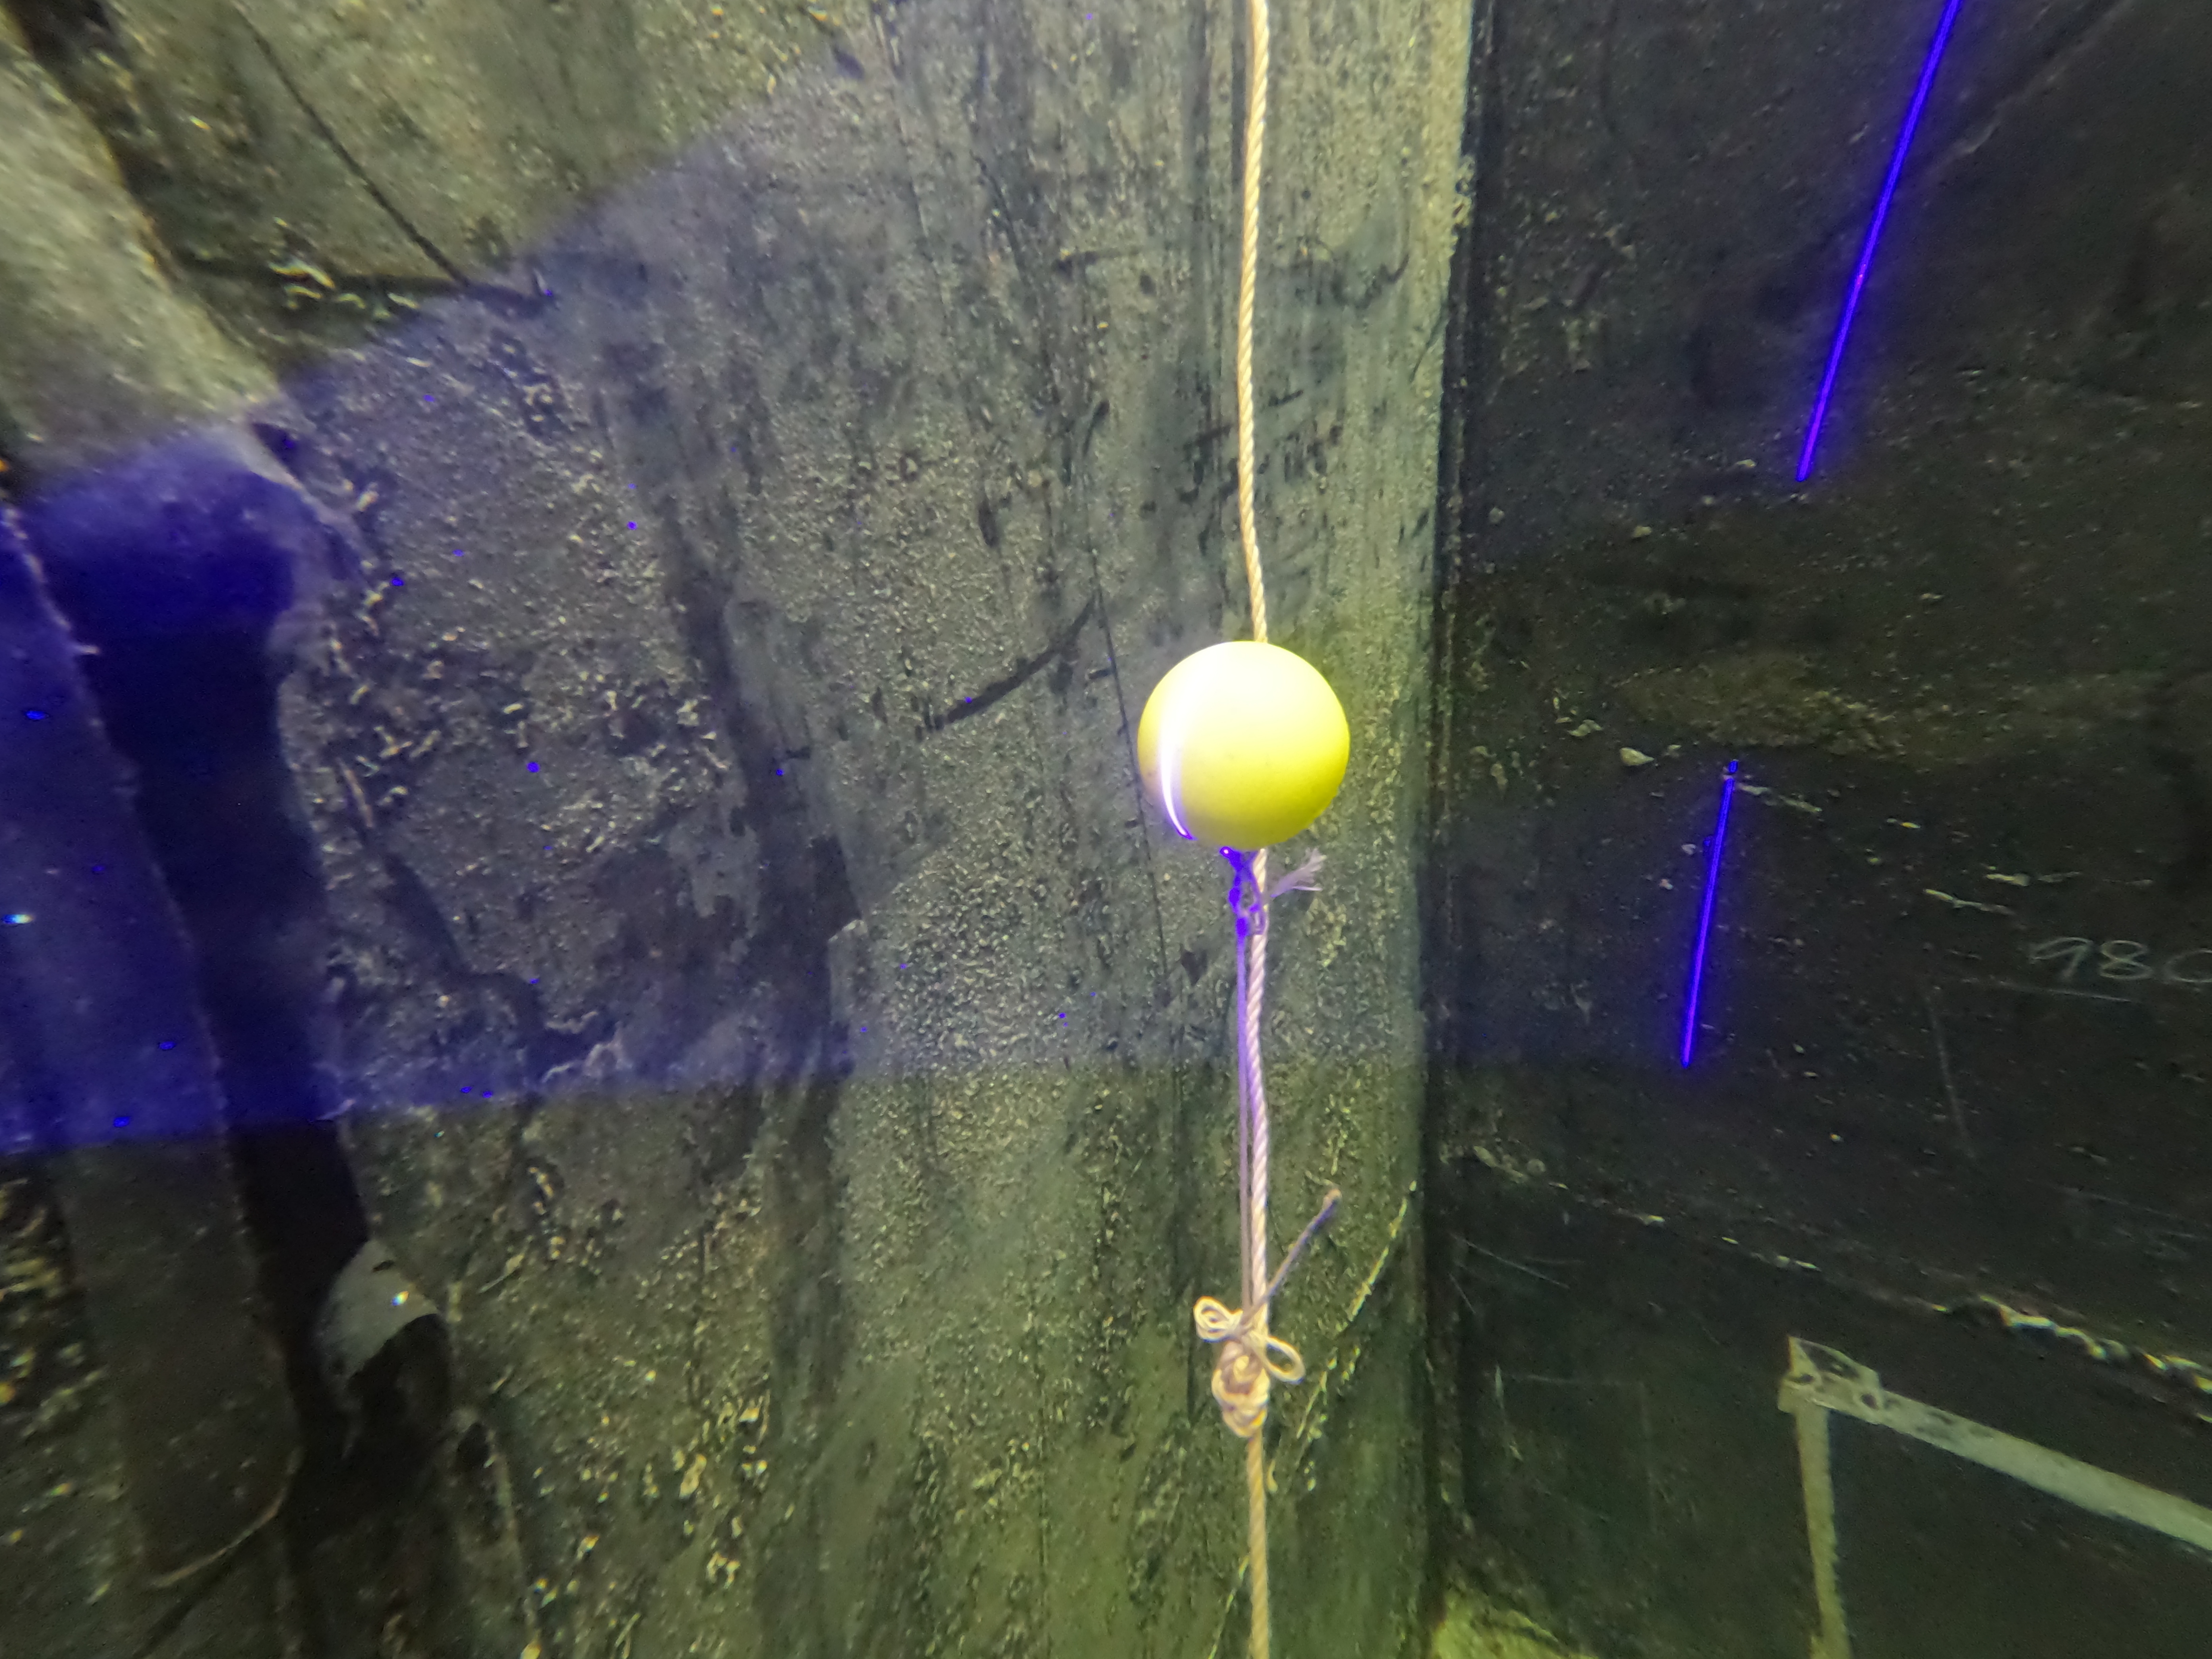

Supplement: Supplementary file 1323 [file G0032636.pdf › 6/G0032636.pdf]

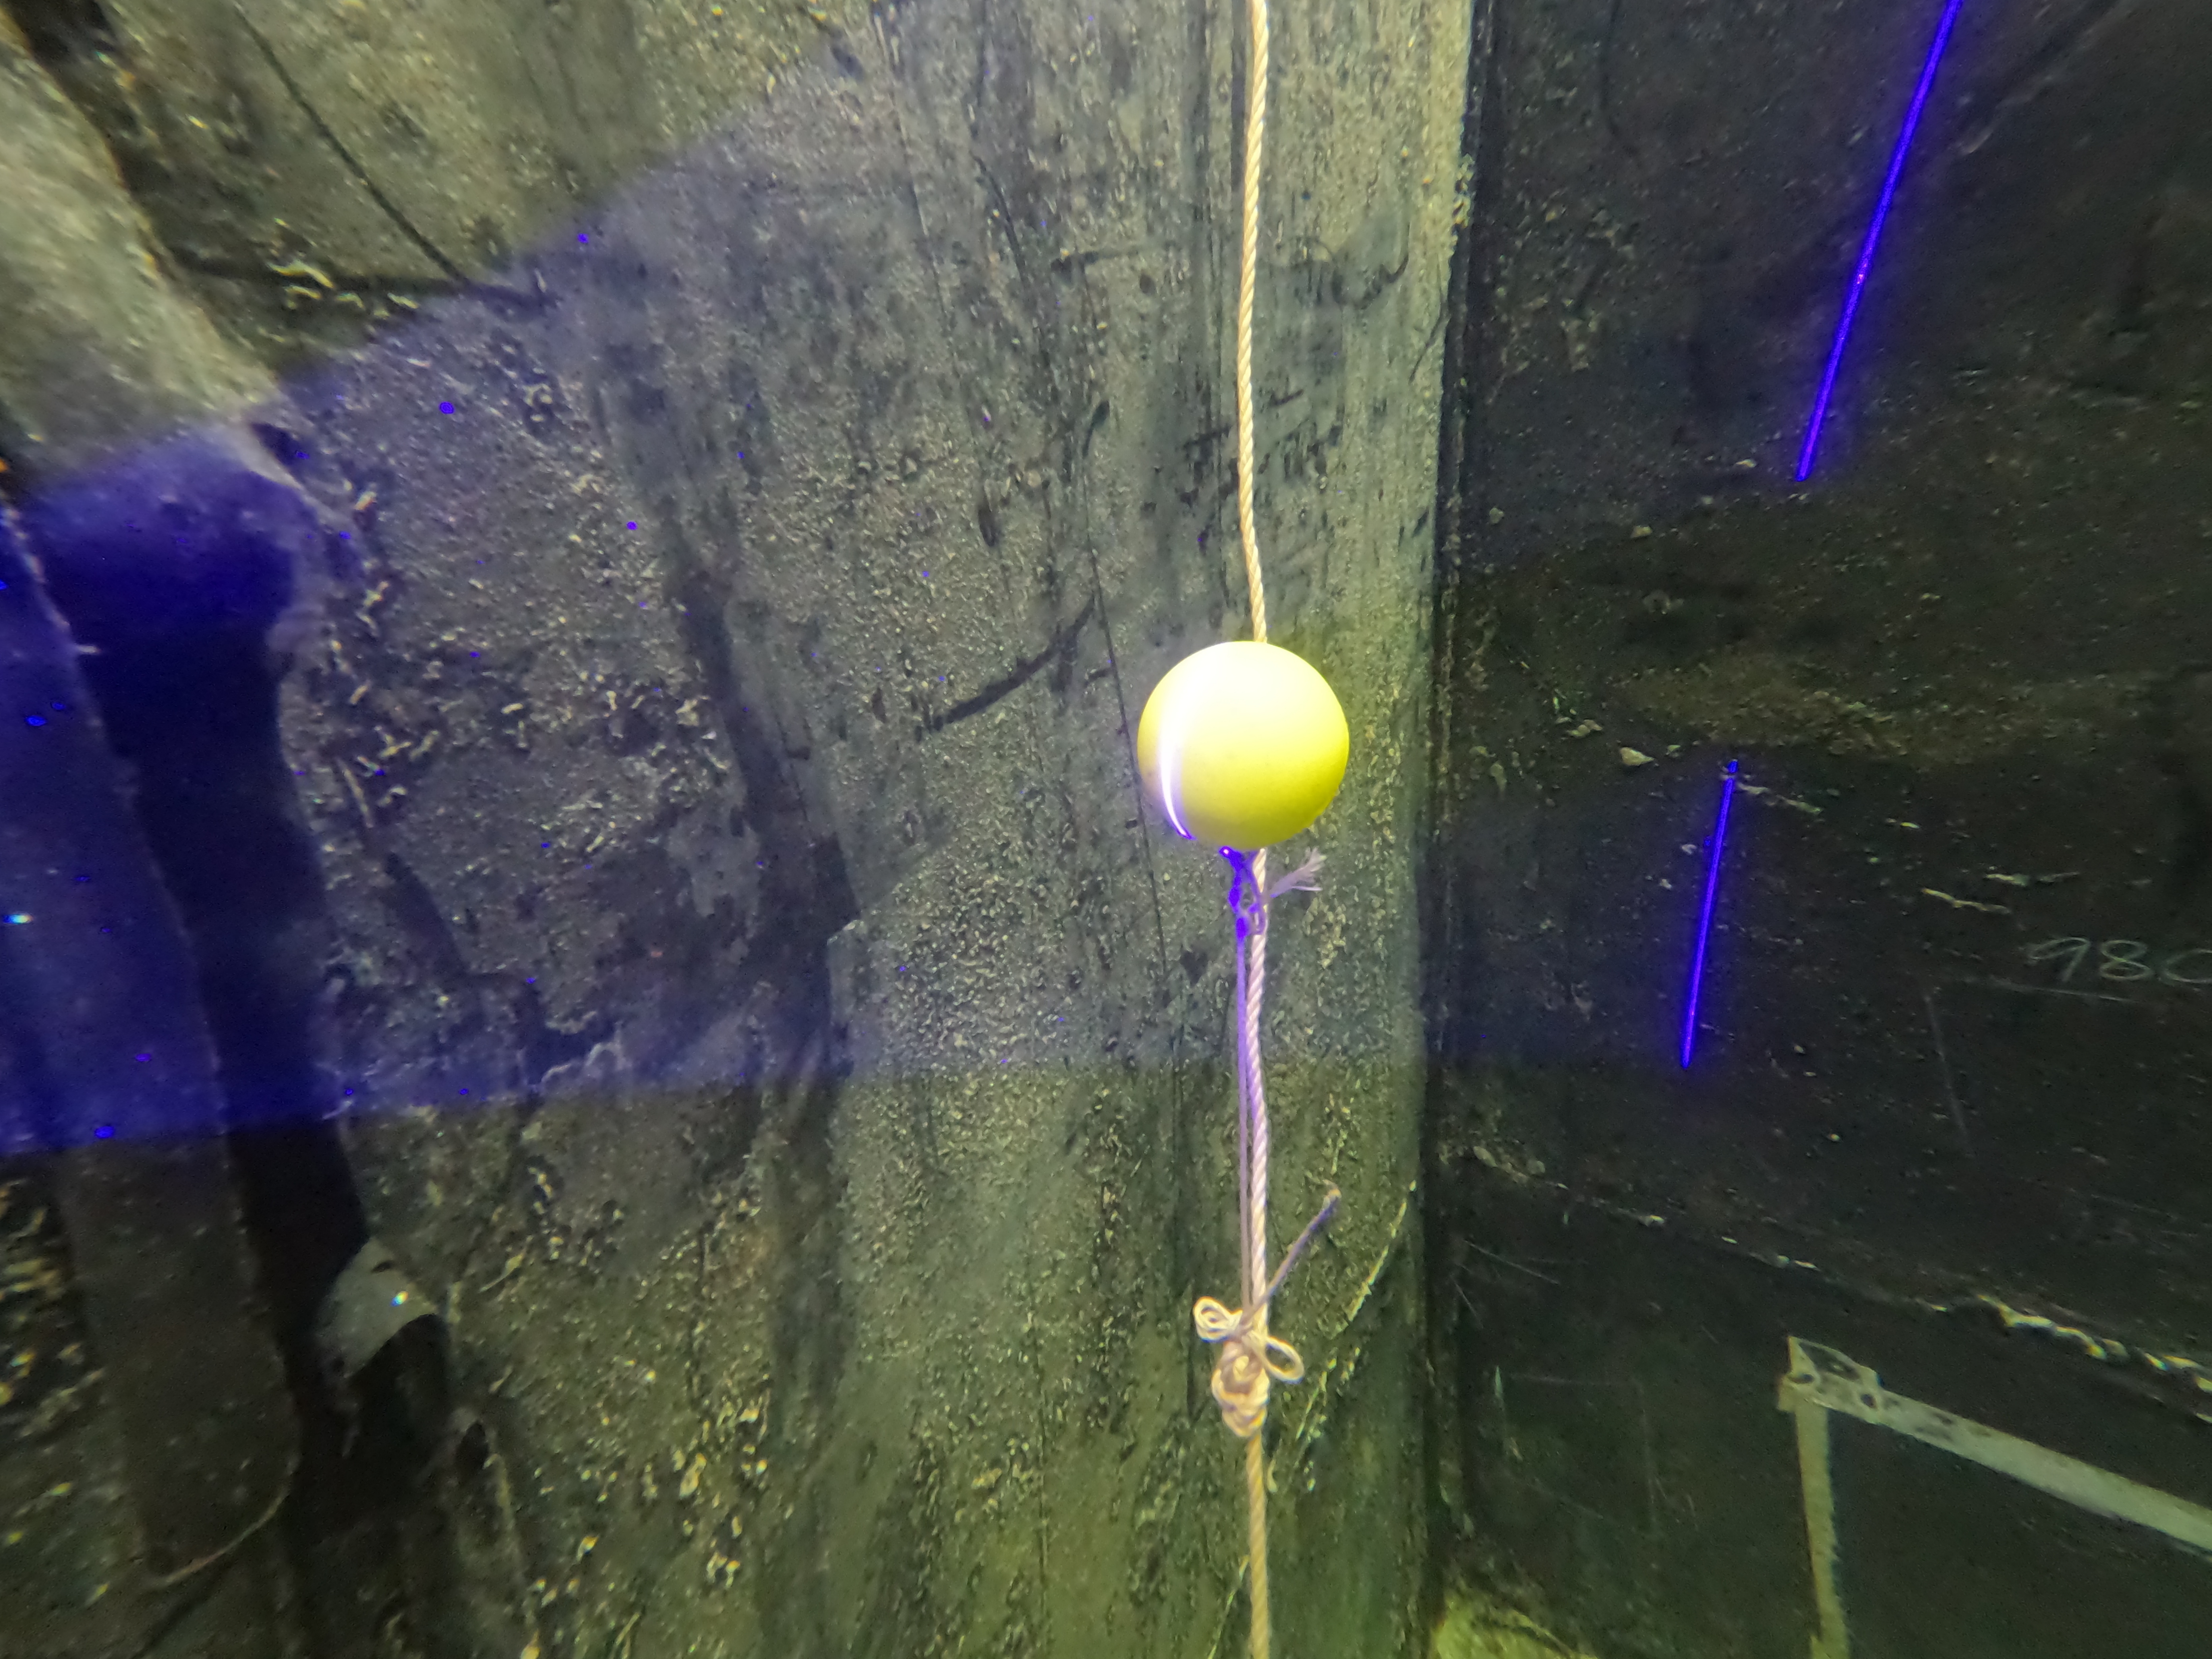

Supplement: Supplementary file 1324 [file G0032637.pdf › 6/G0032637.pdf]

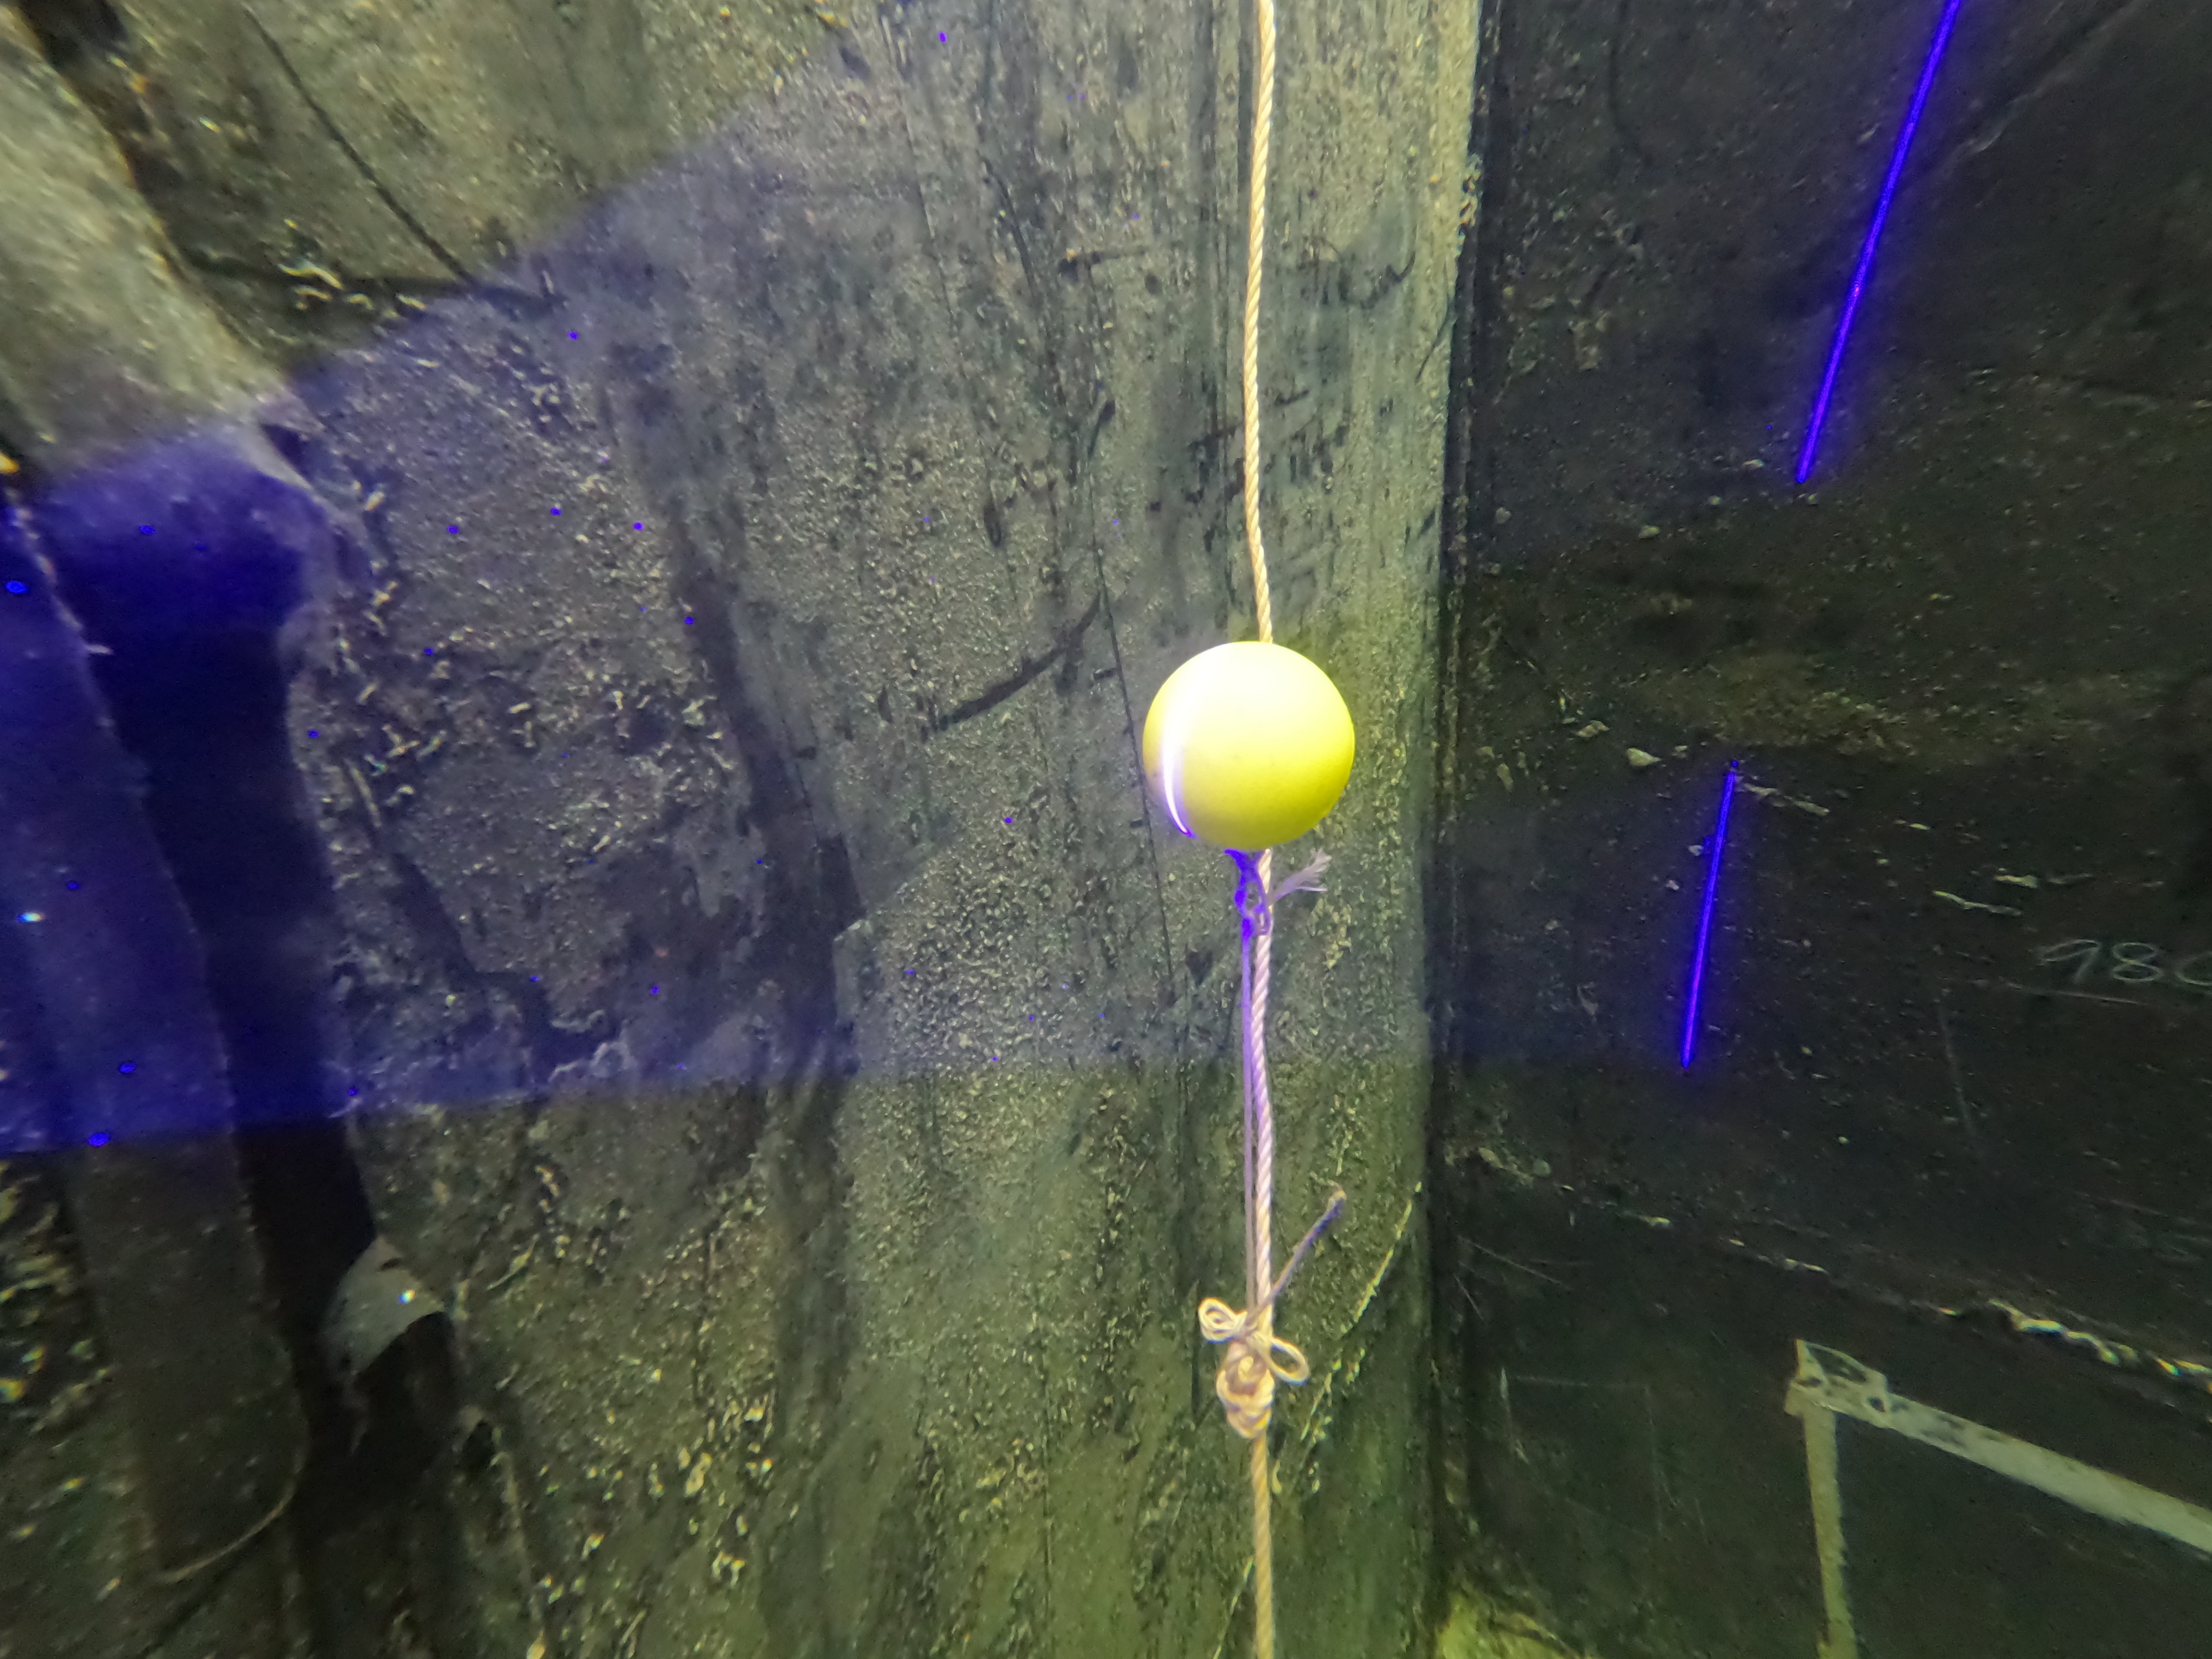

Supplement: Supplementary file 1325 [file G0032638.pdf › 6/G0032638.pdf]

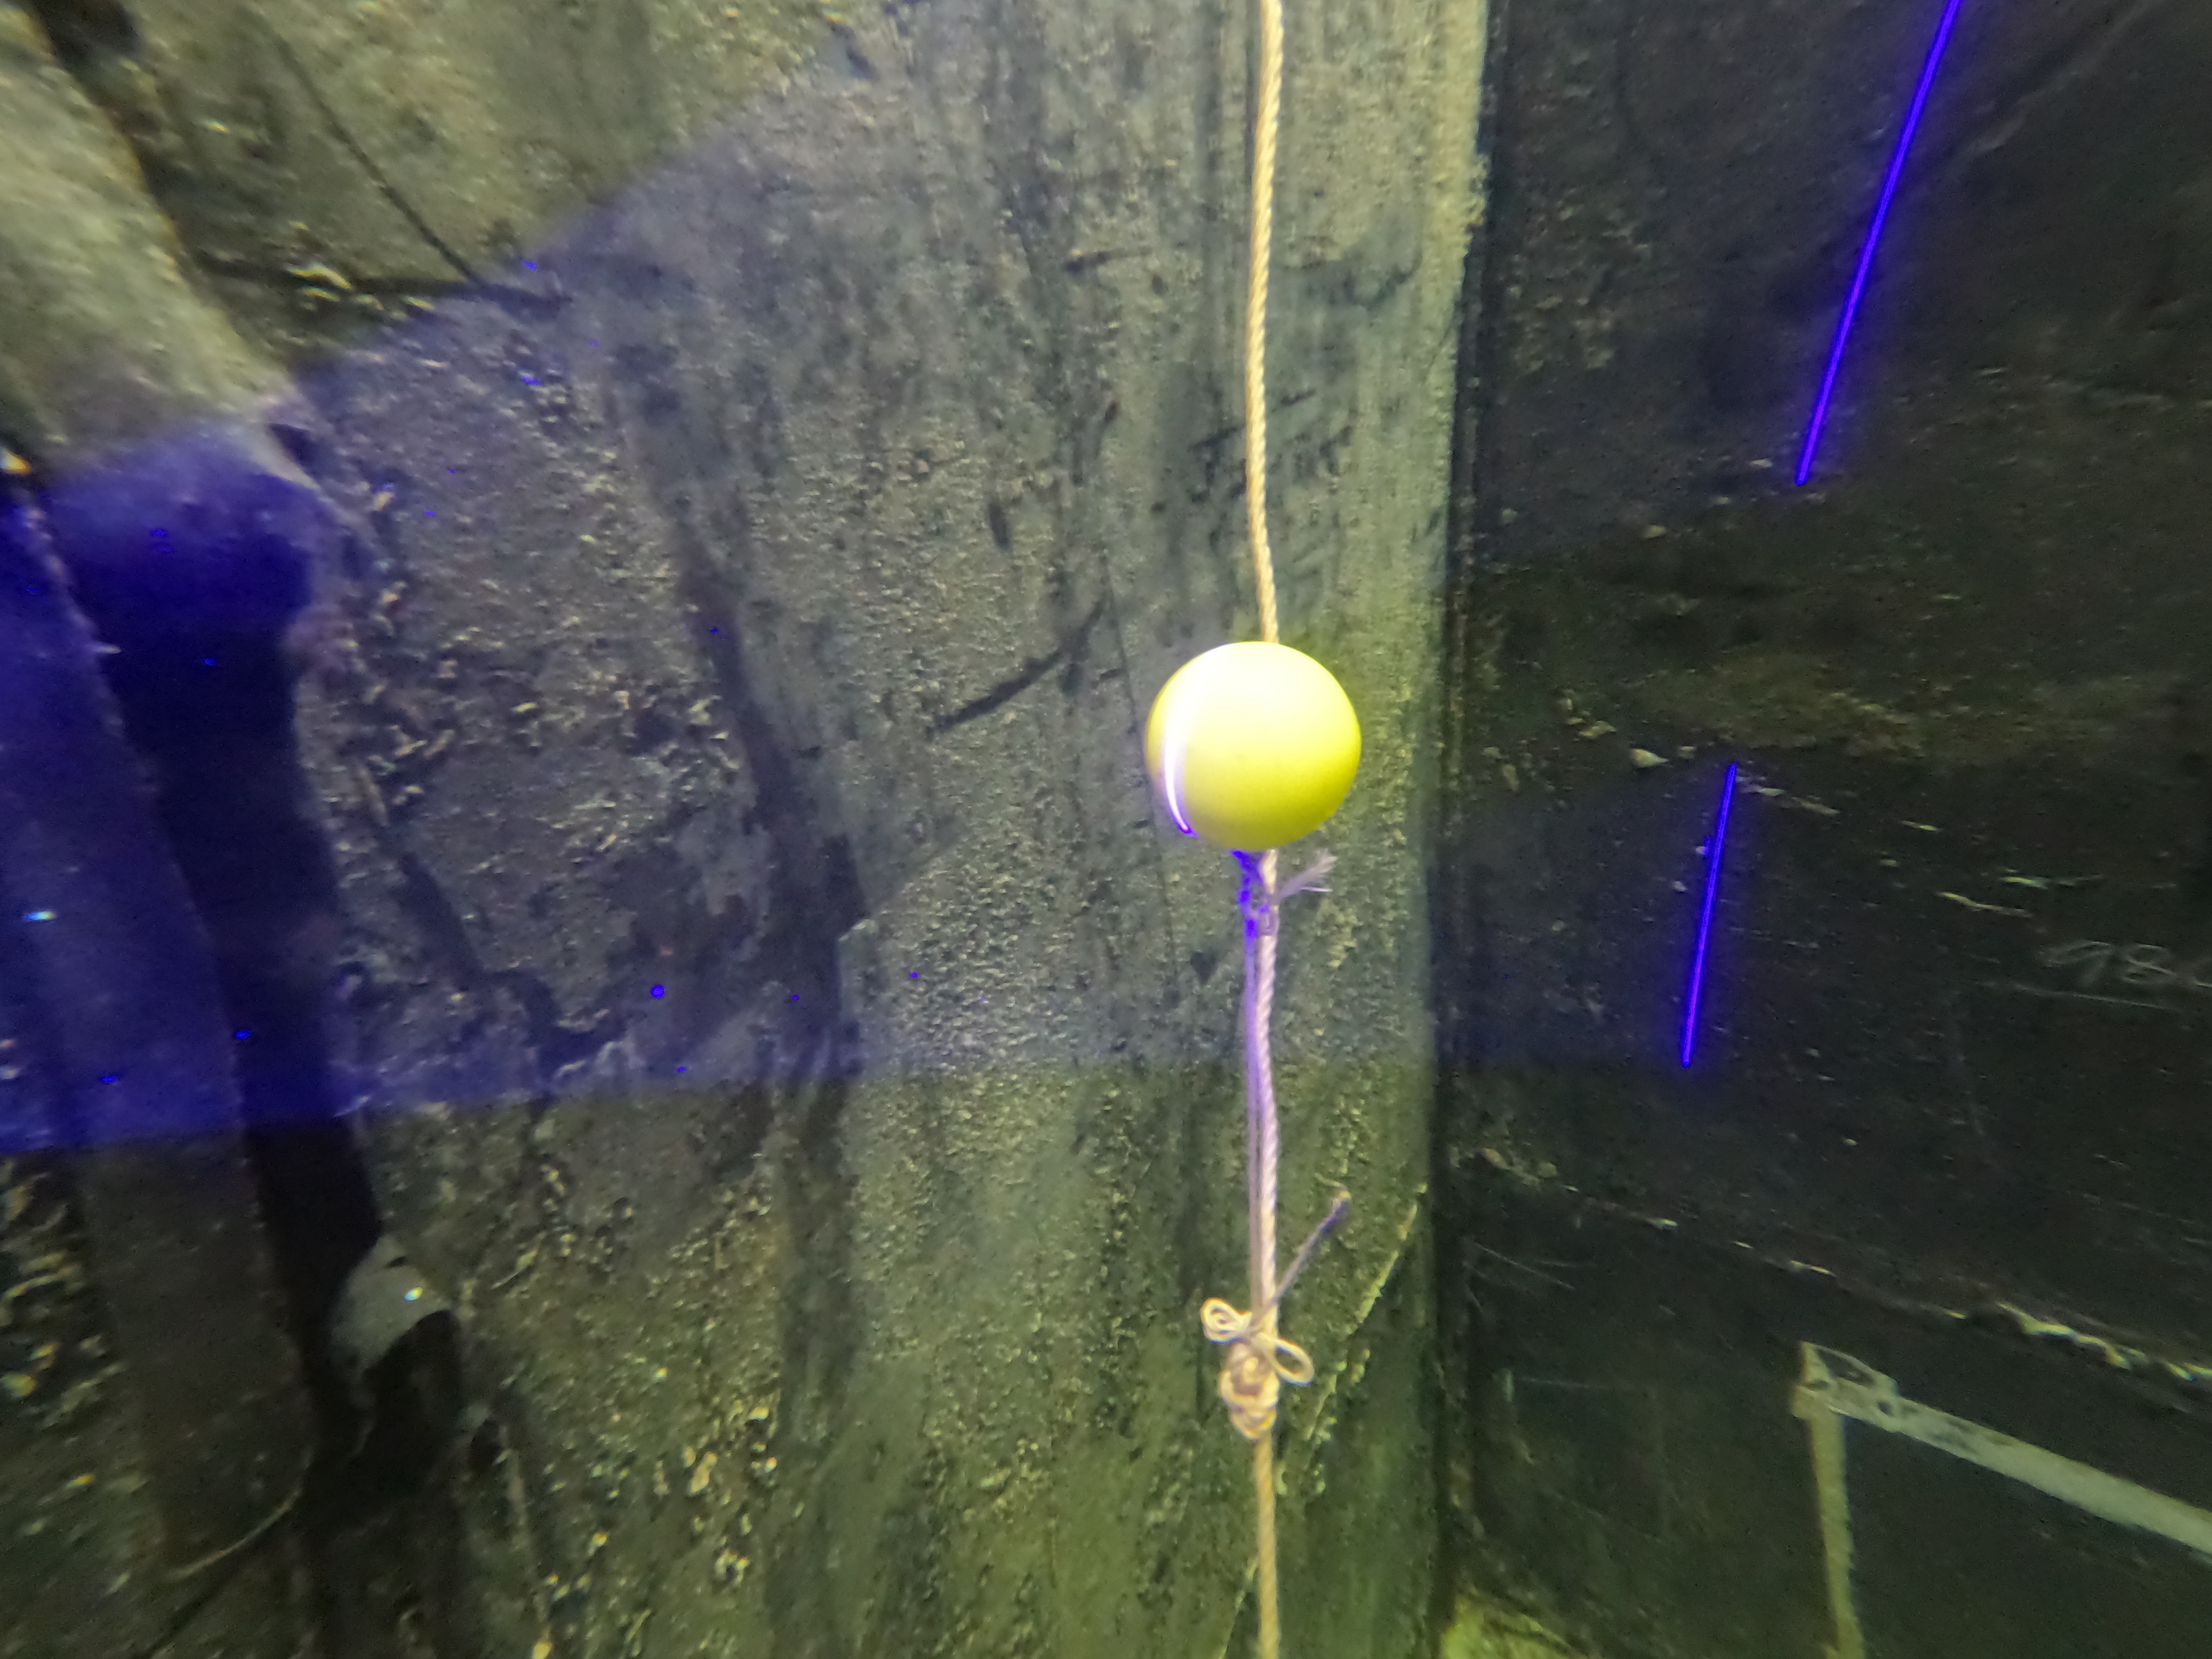

Supplement: Supplementary file 1326 [file G0032639.pdf › 6/G0032639.pdf]

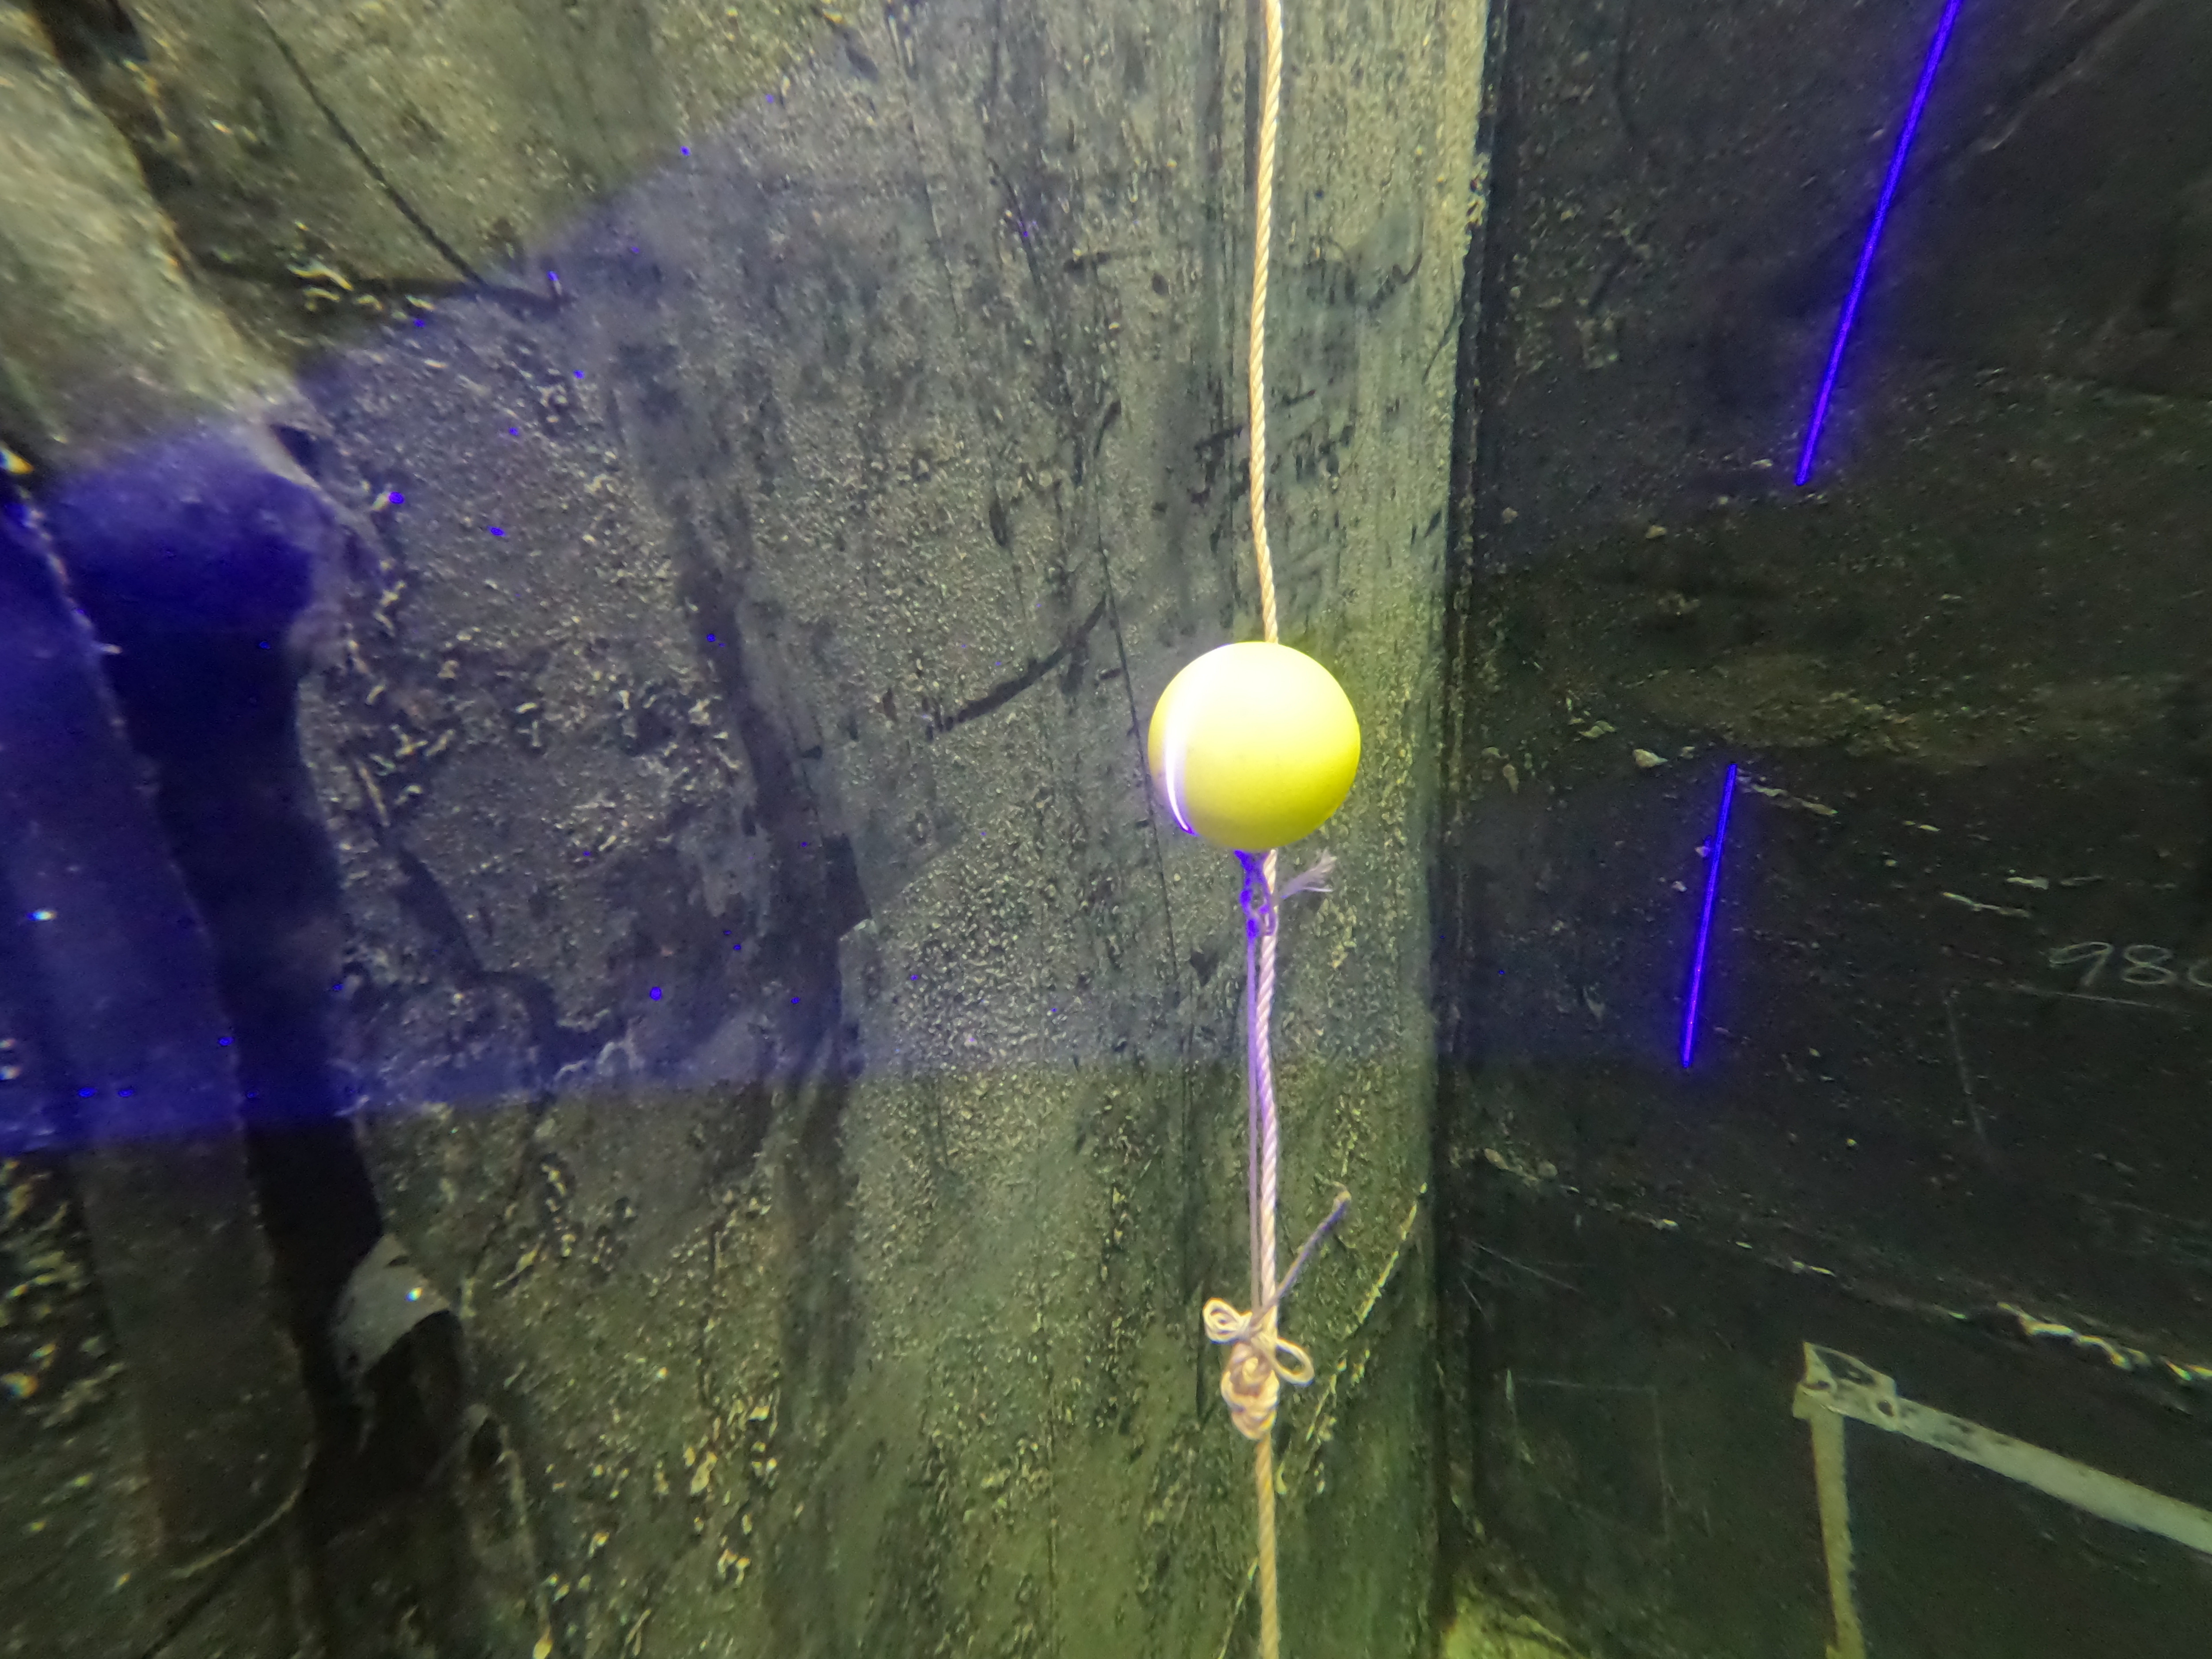

Supplement: Supplementary file 1327 [file G0032640.pdf › 6/G0032640.pdf]

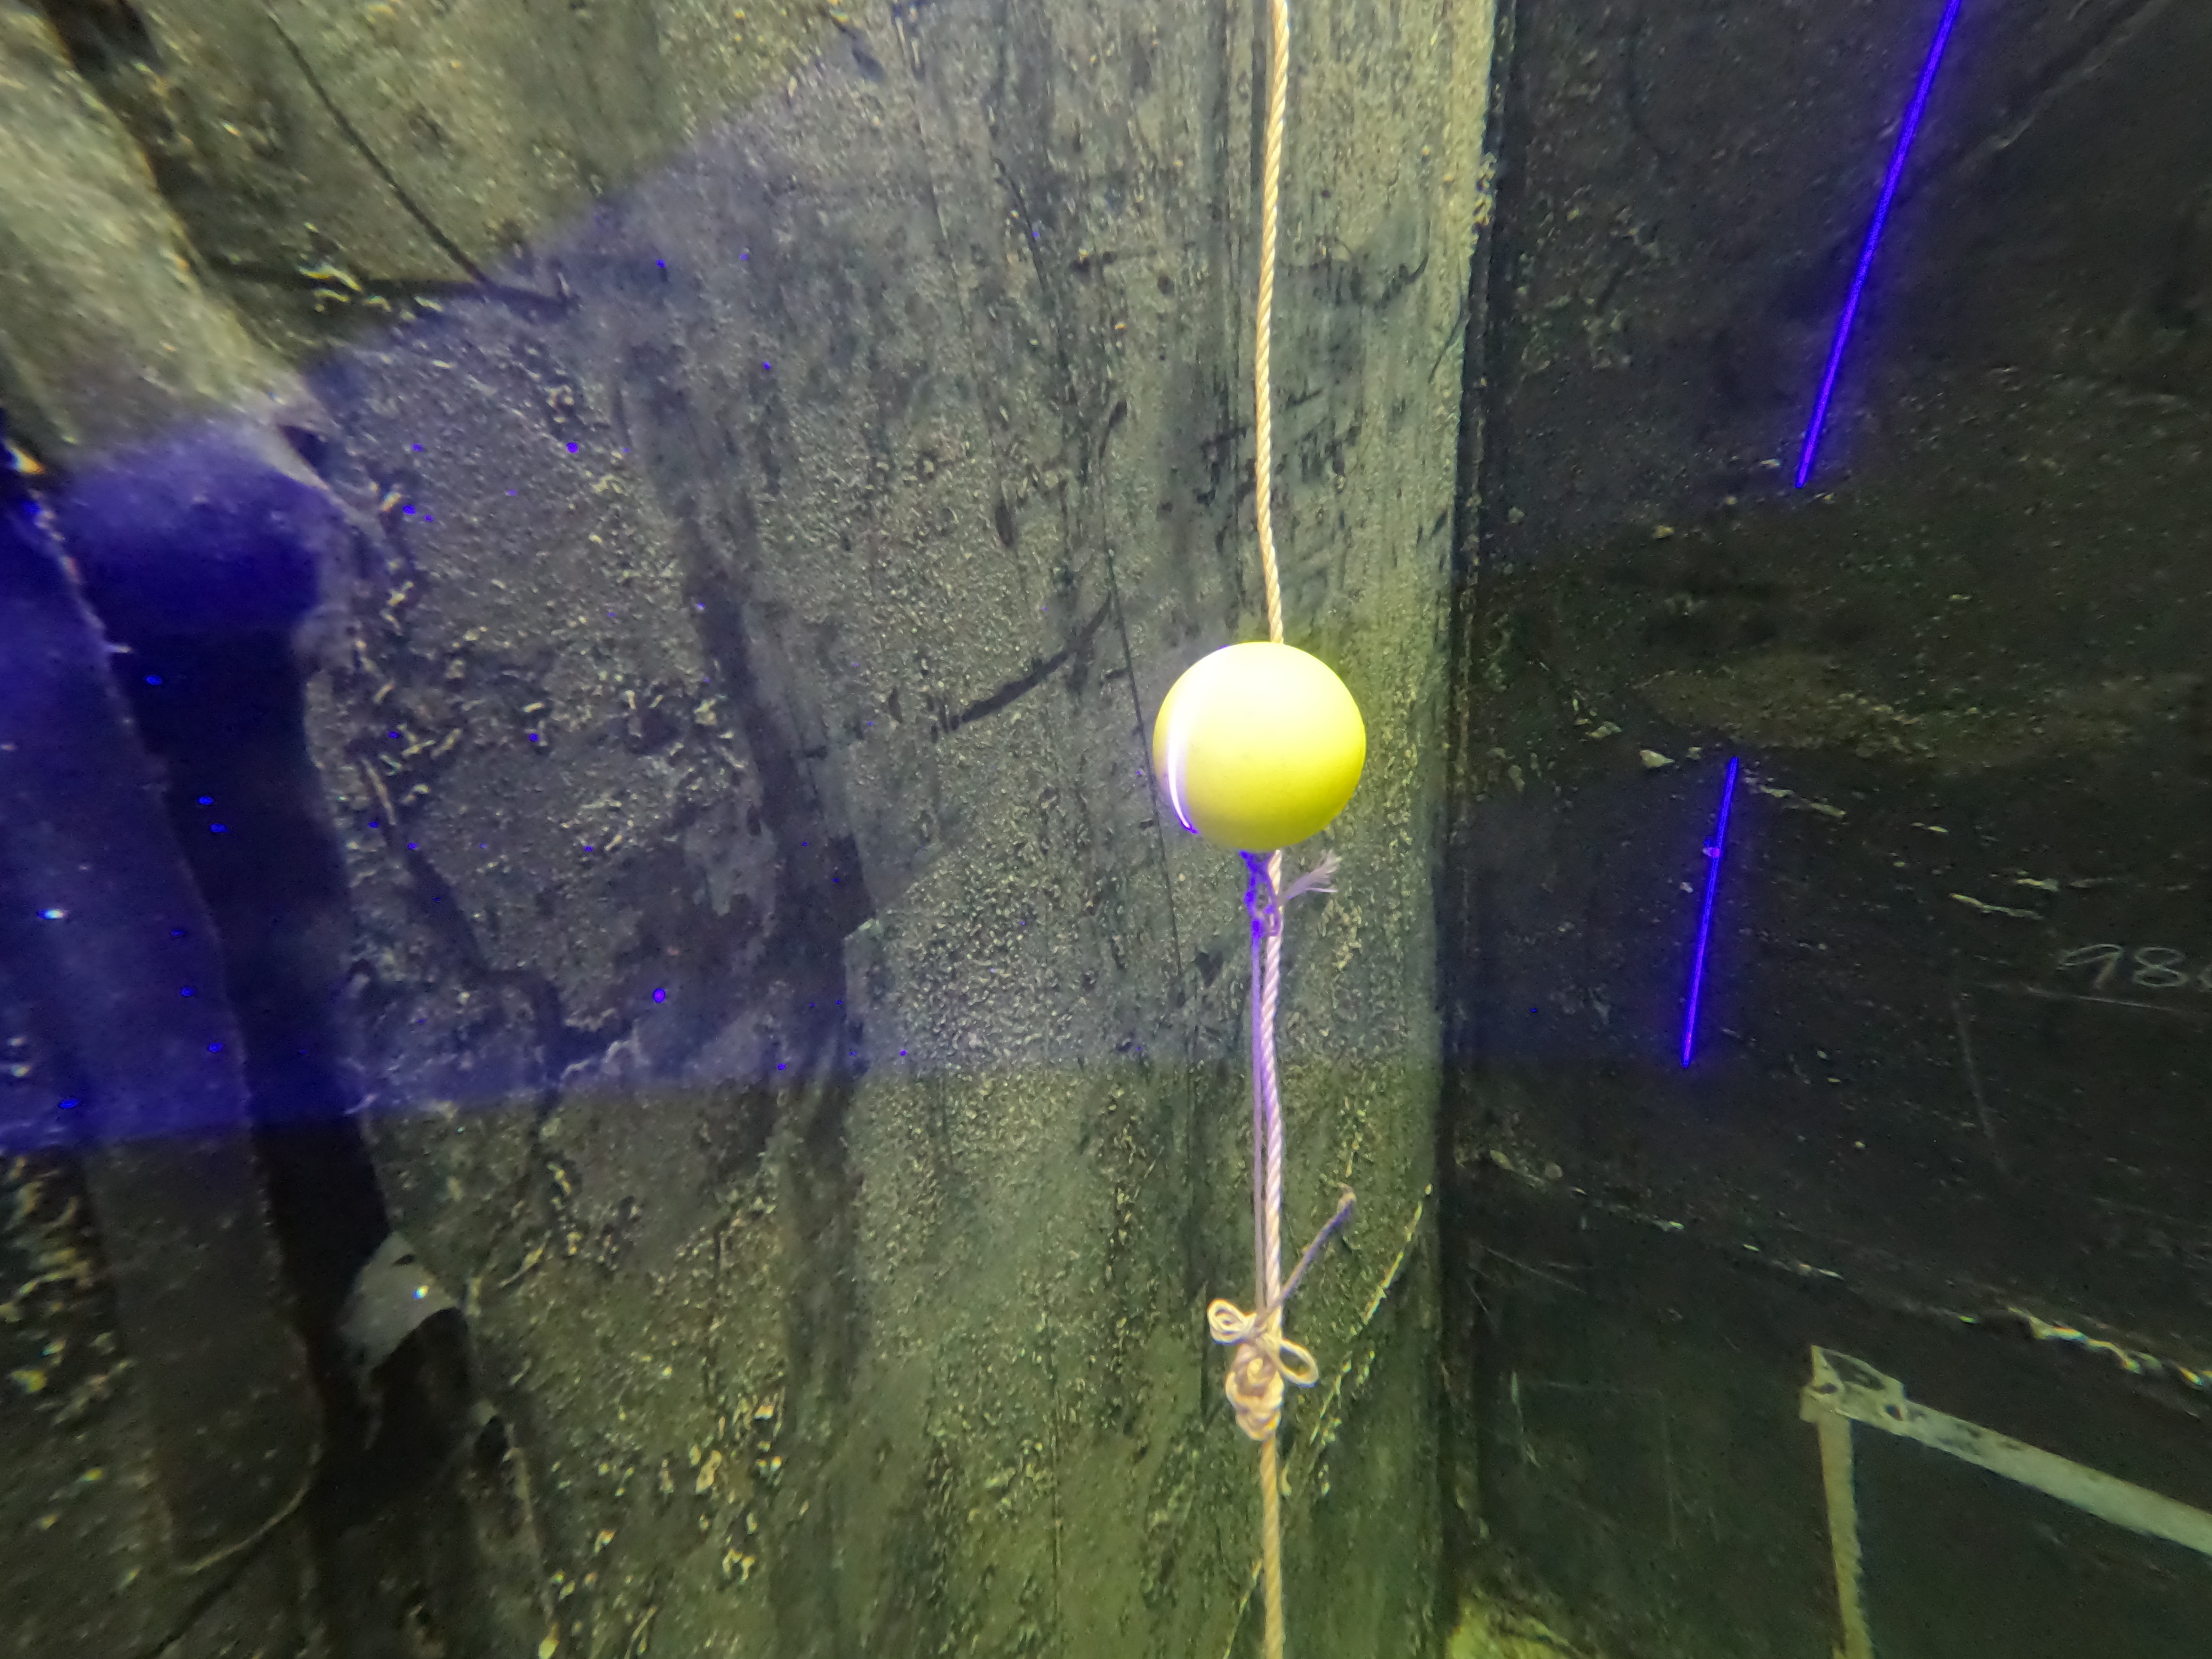

Supplement: Supplementary file 1328 [file G0032641.pdf › 6/G0032641.pdf]

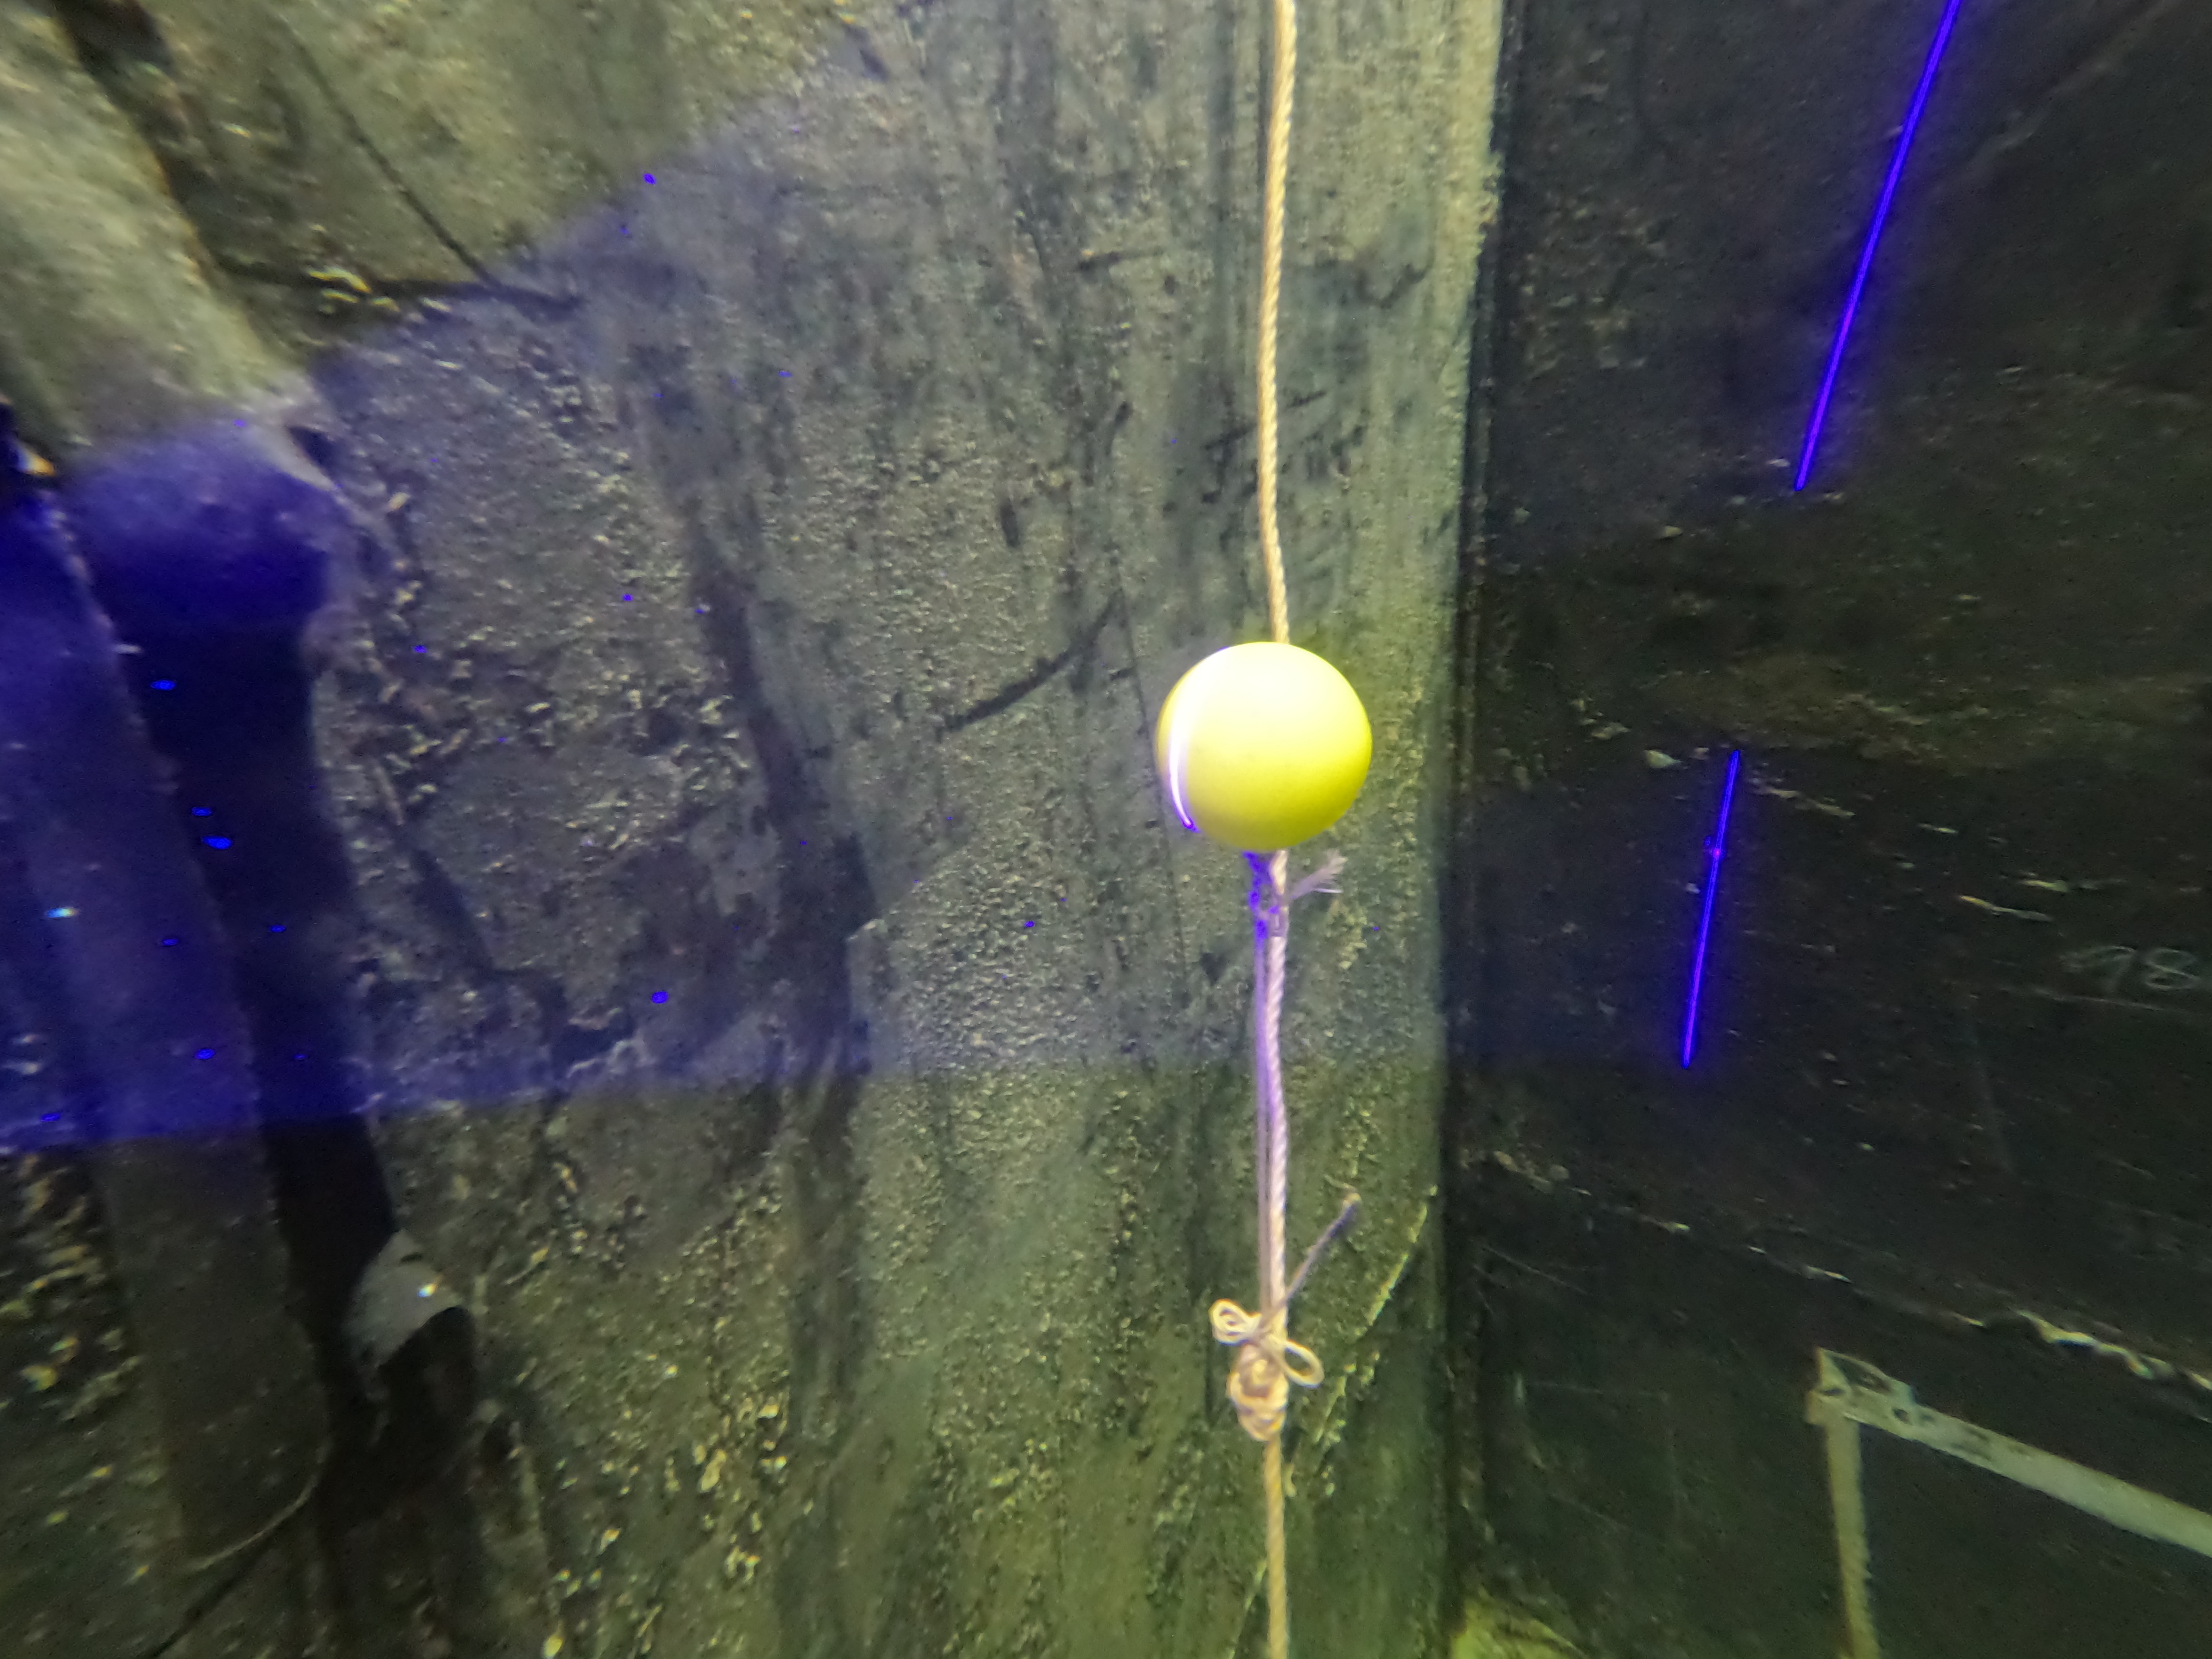

Supplement: Supplementary file 1329 [file G0032642.pdf › 6/G0032642.pdf]

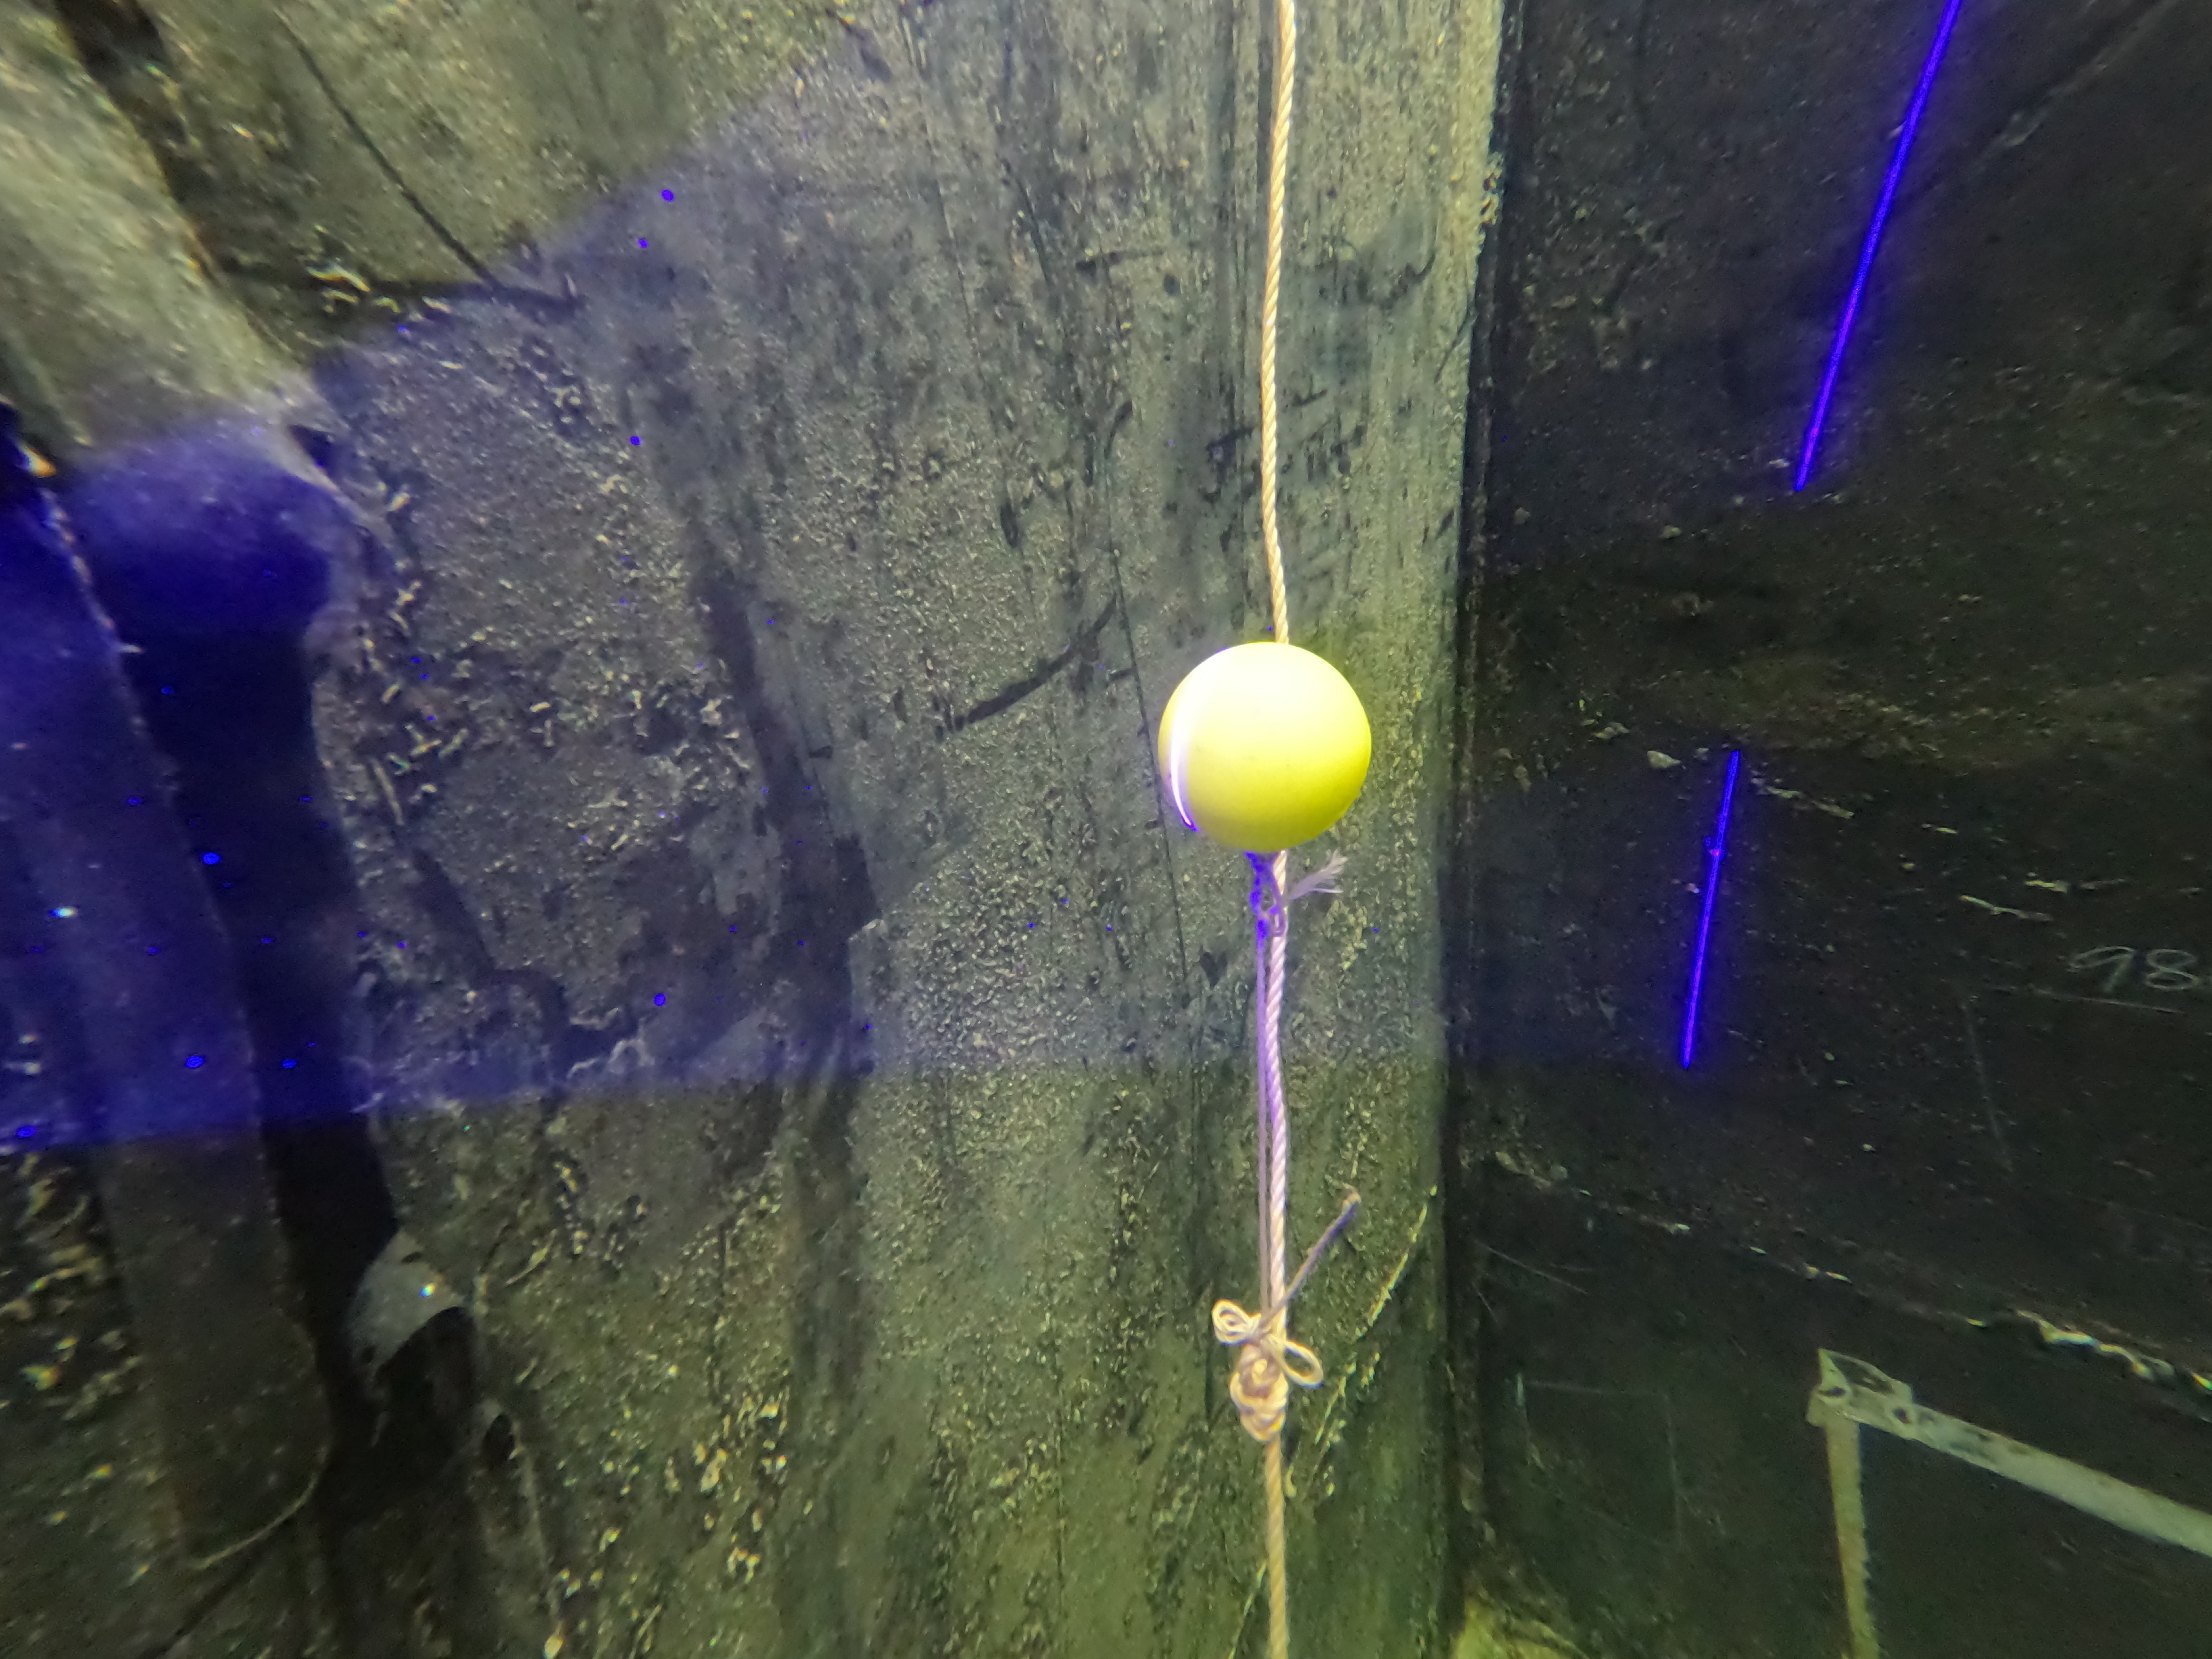

Supplement: Supplementary file 1330 [file G0032643.pdf › 6/G0032643.pdf]

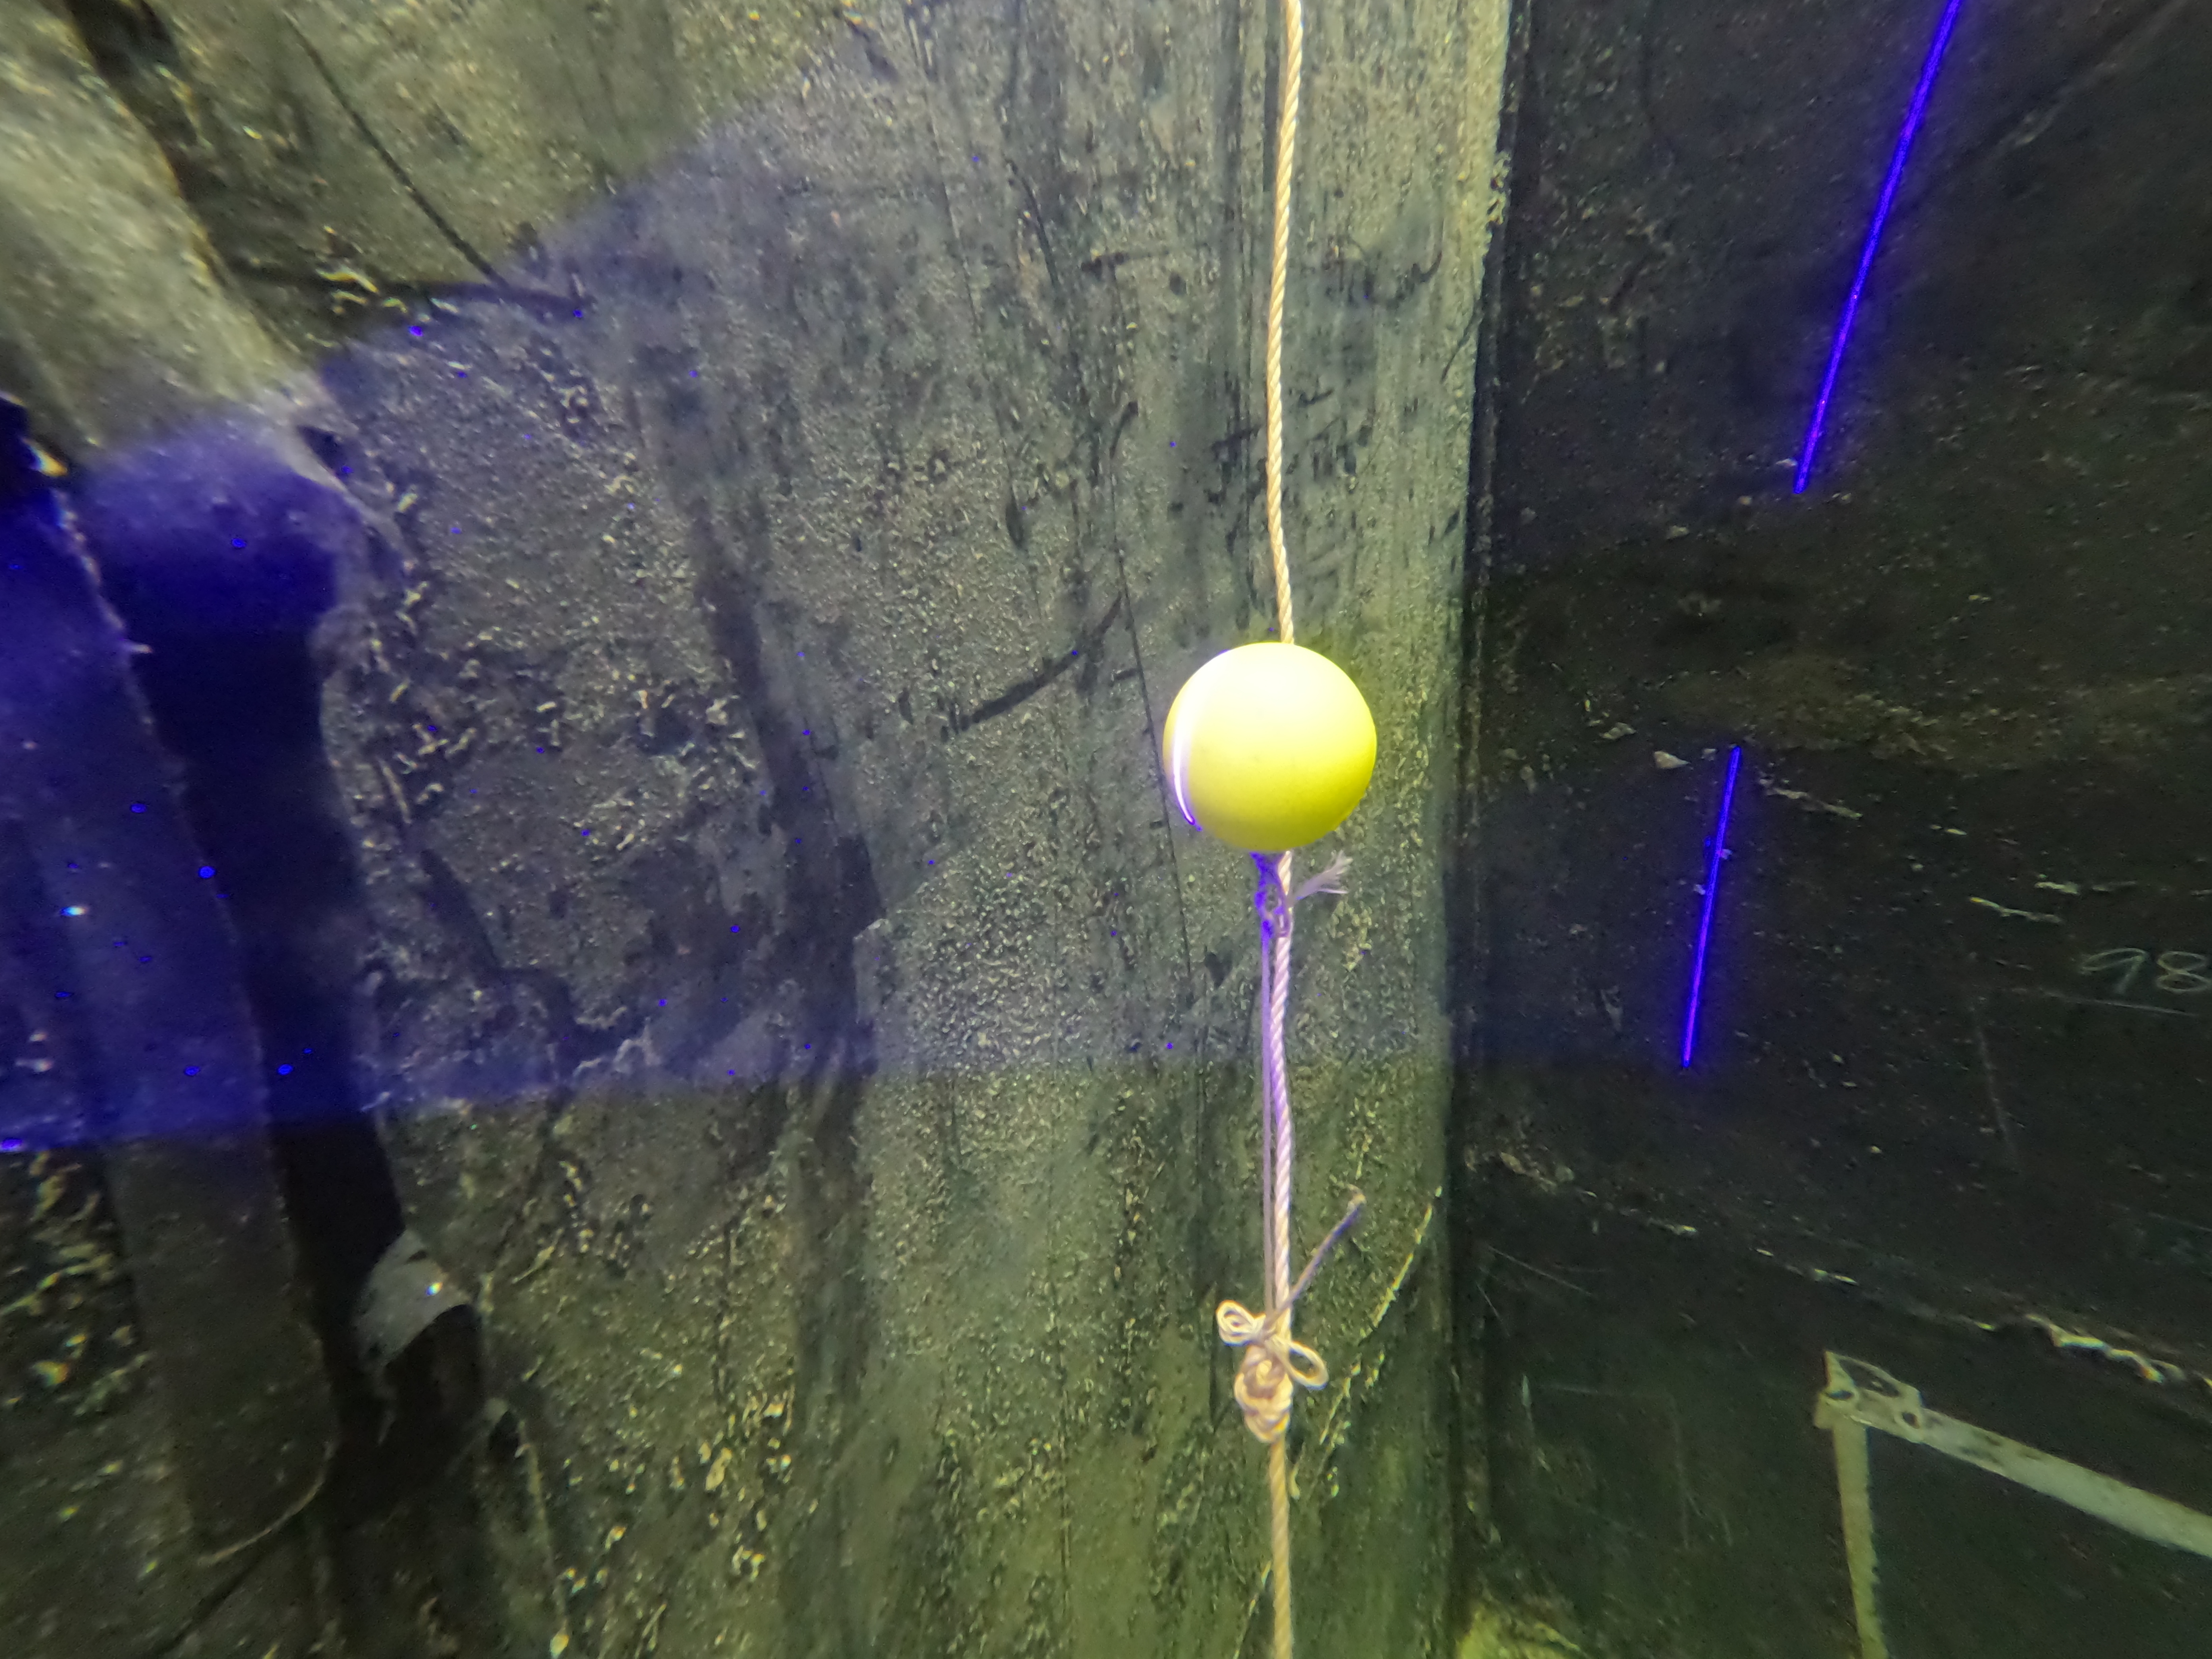

Supplement: Supplementary file 1331 [file G0032644.pdf › 6/G0032644.pdf]

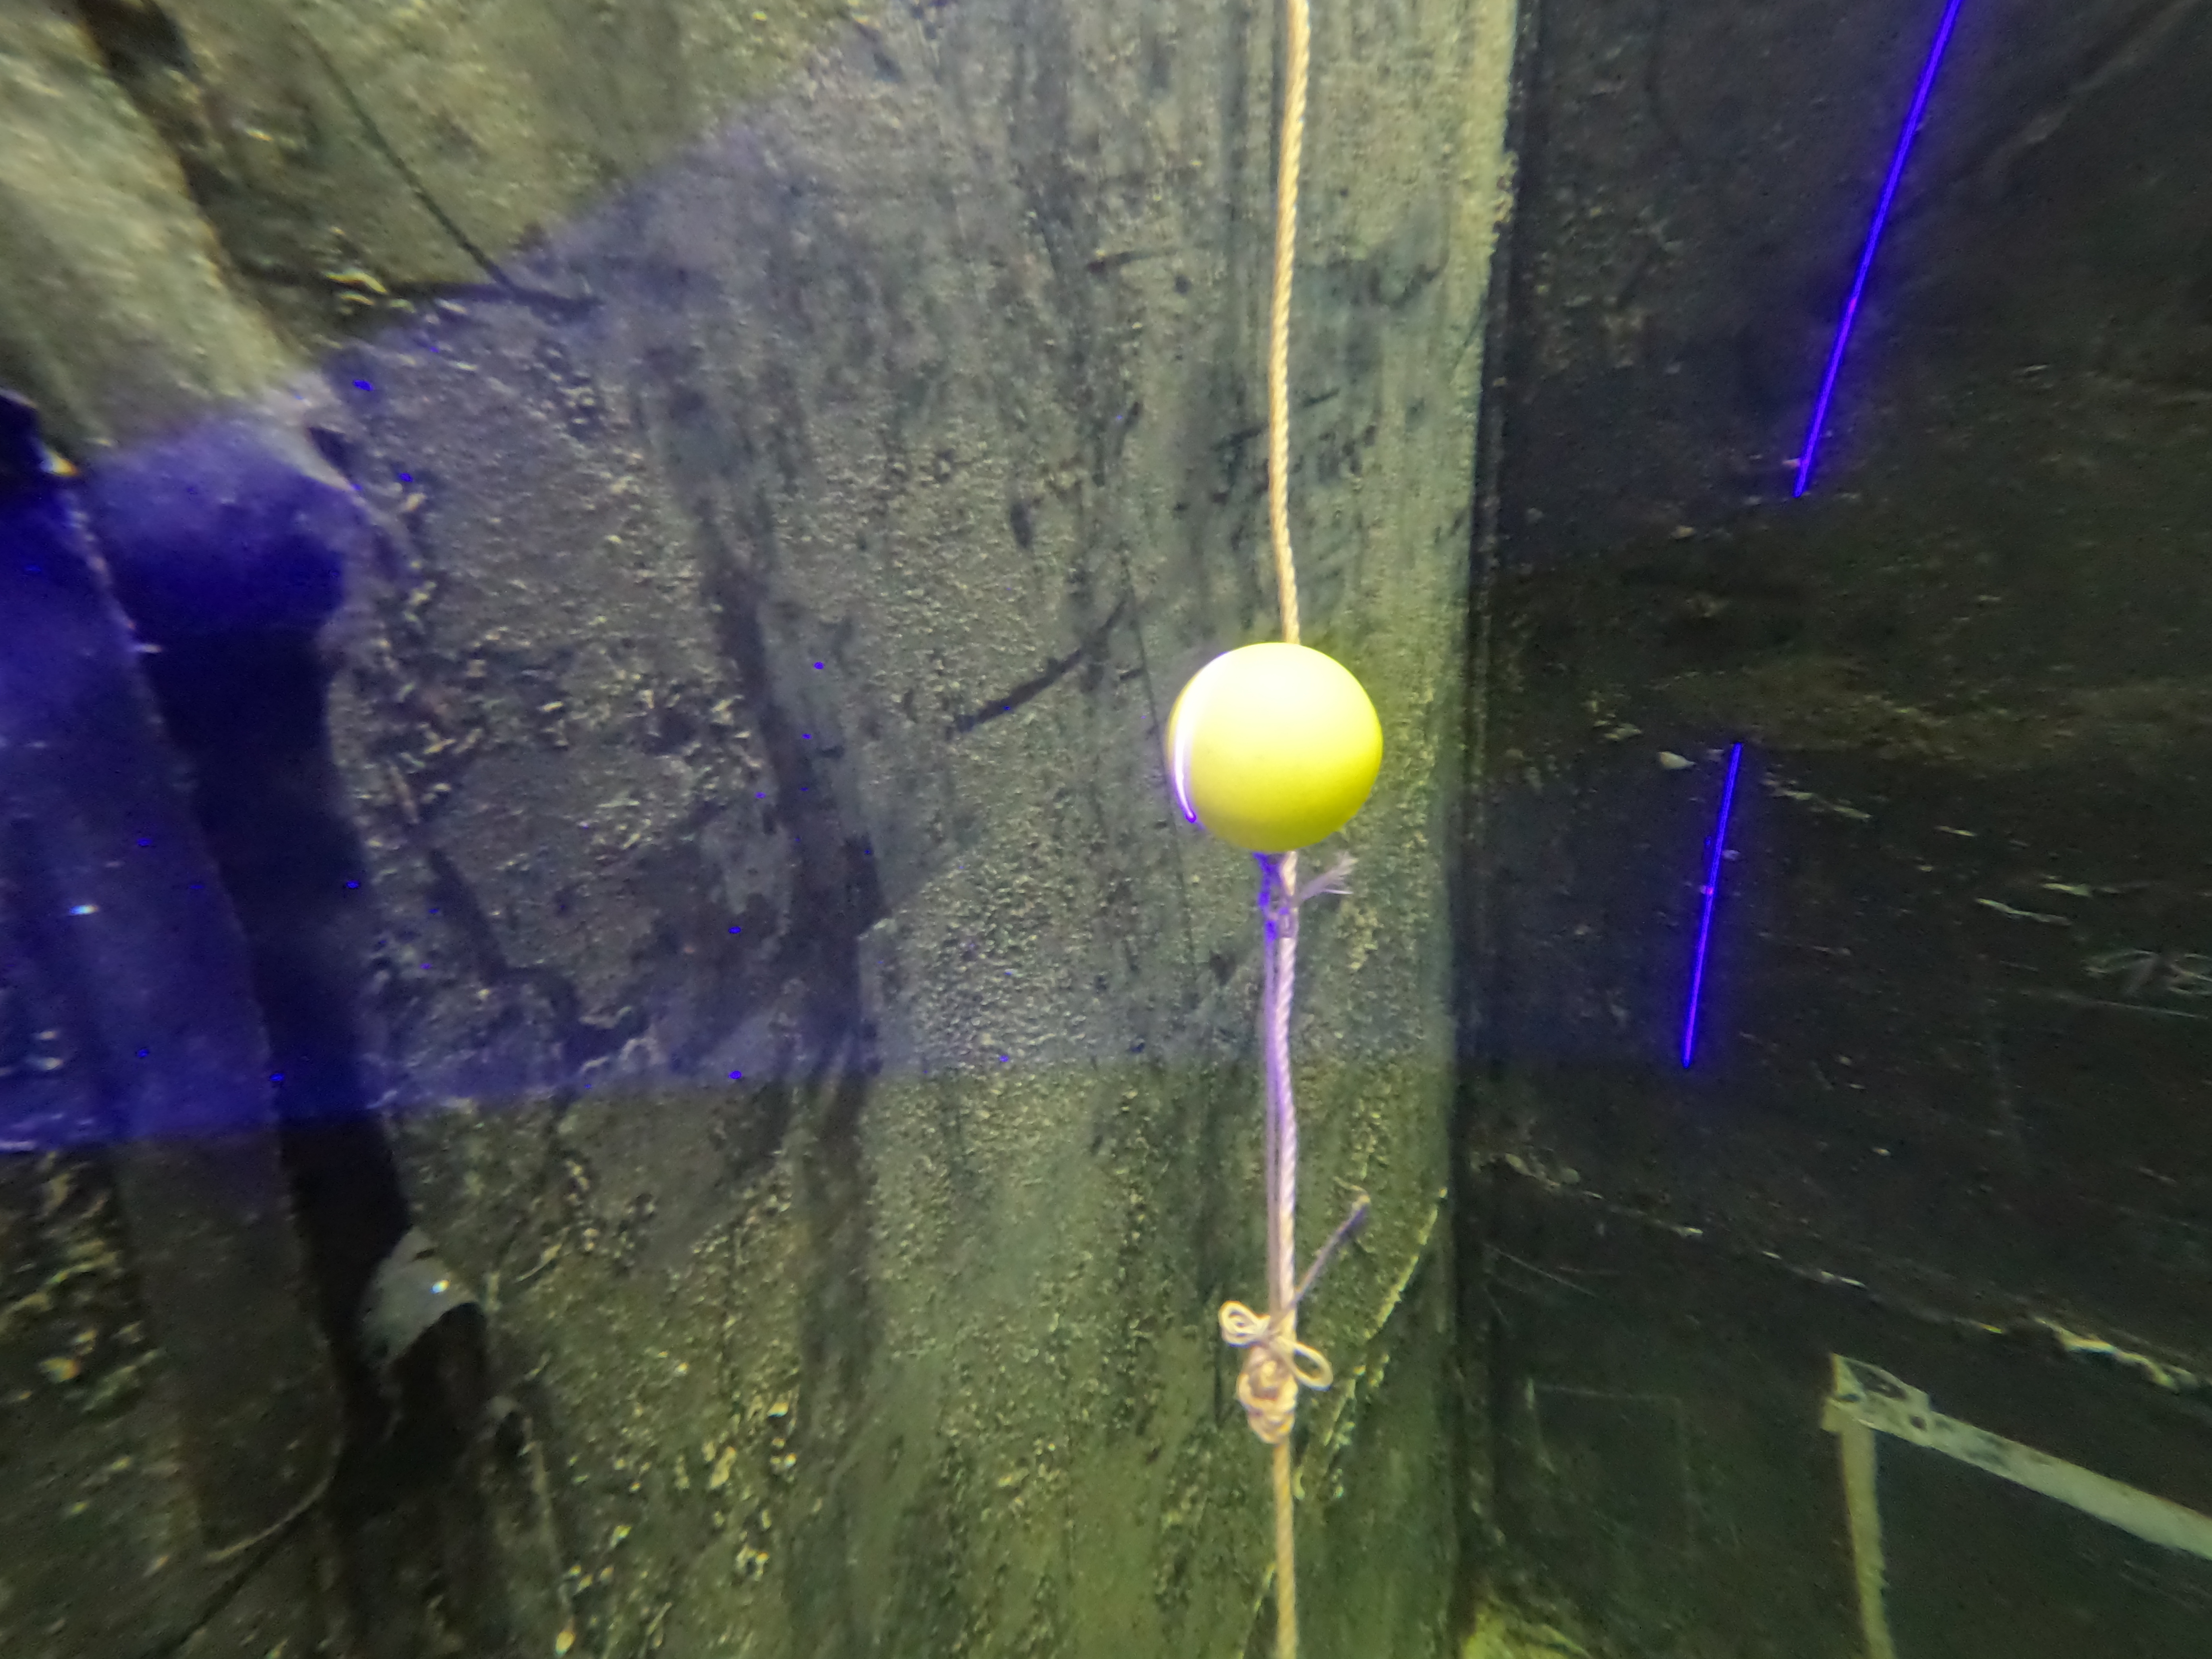

Supplement: Supplementary file 1332 [file G0032645.pdf › 6/G0032645.pdf]

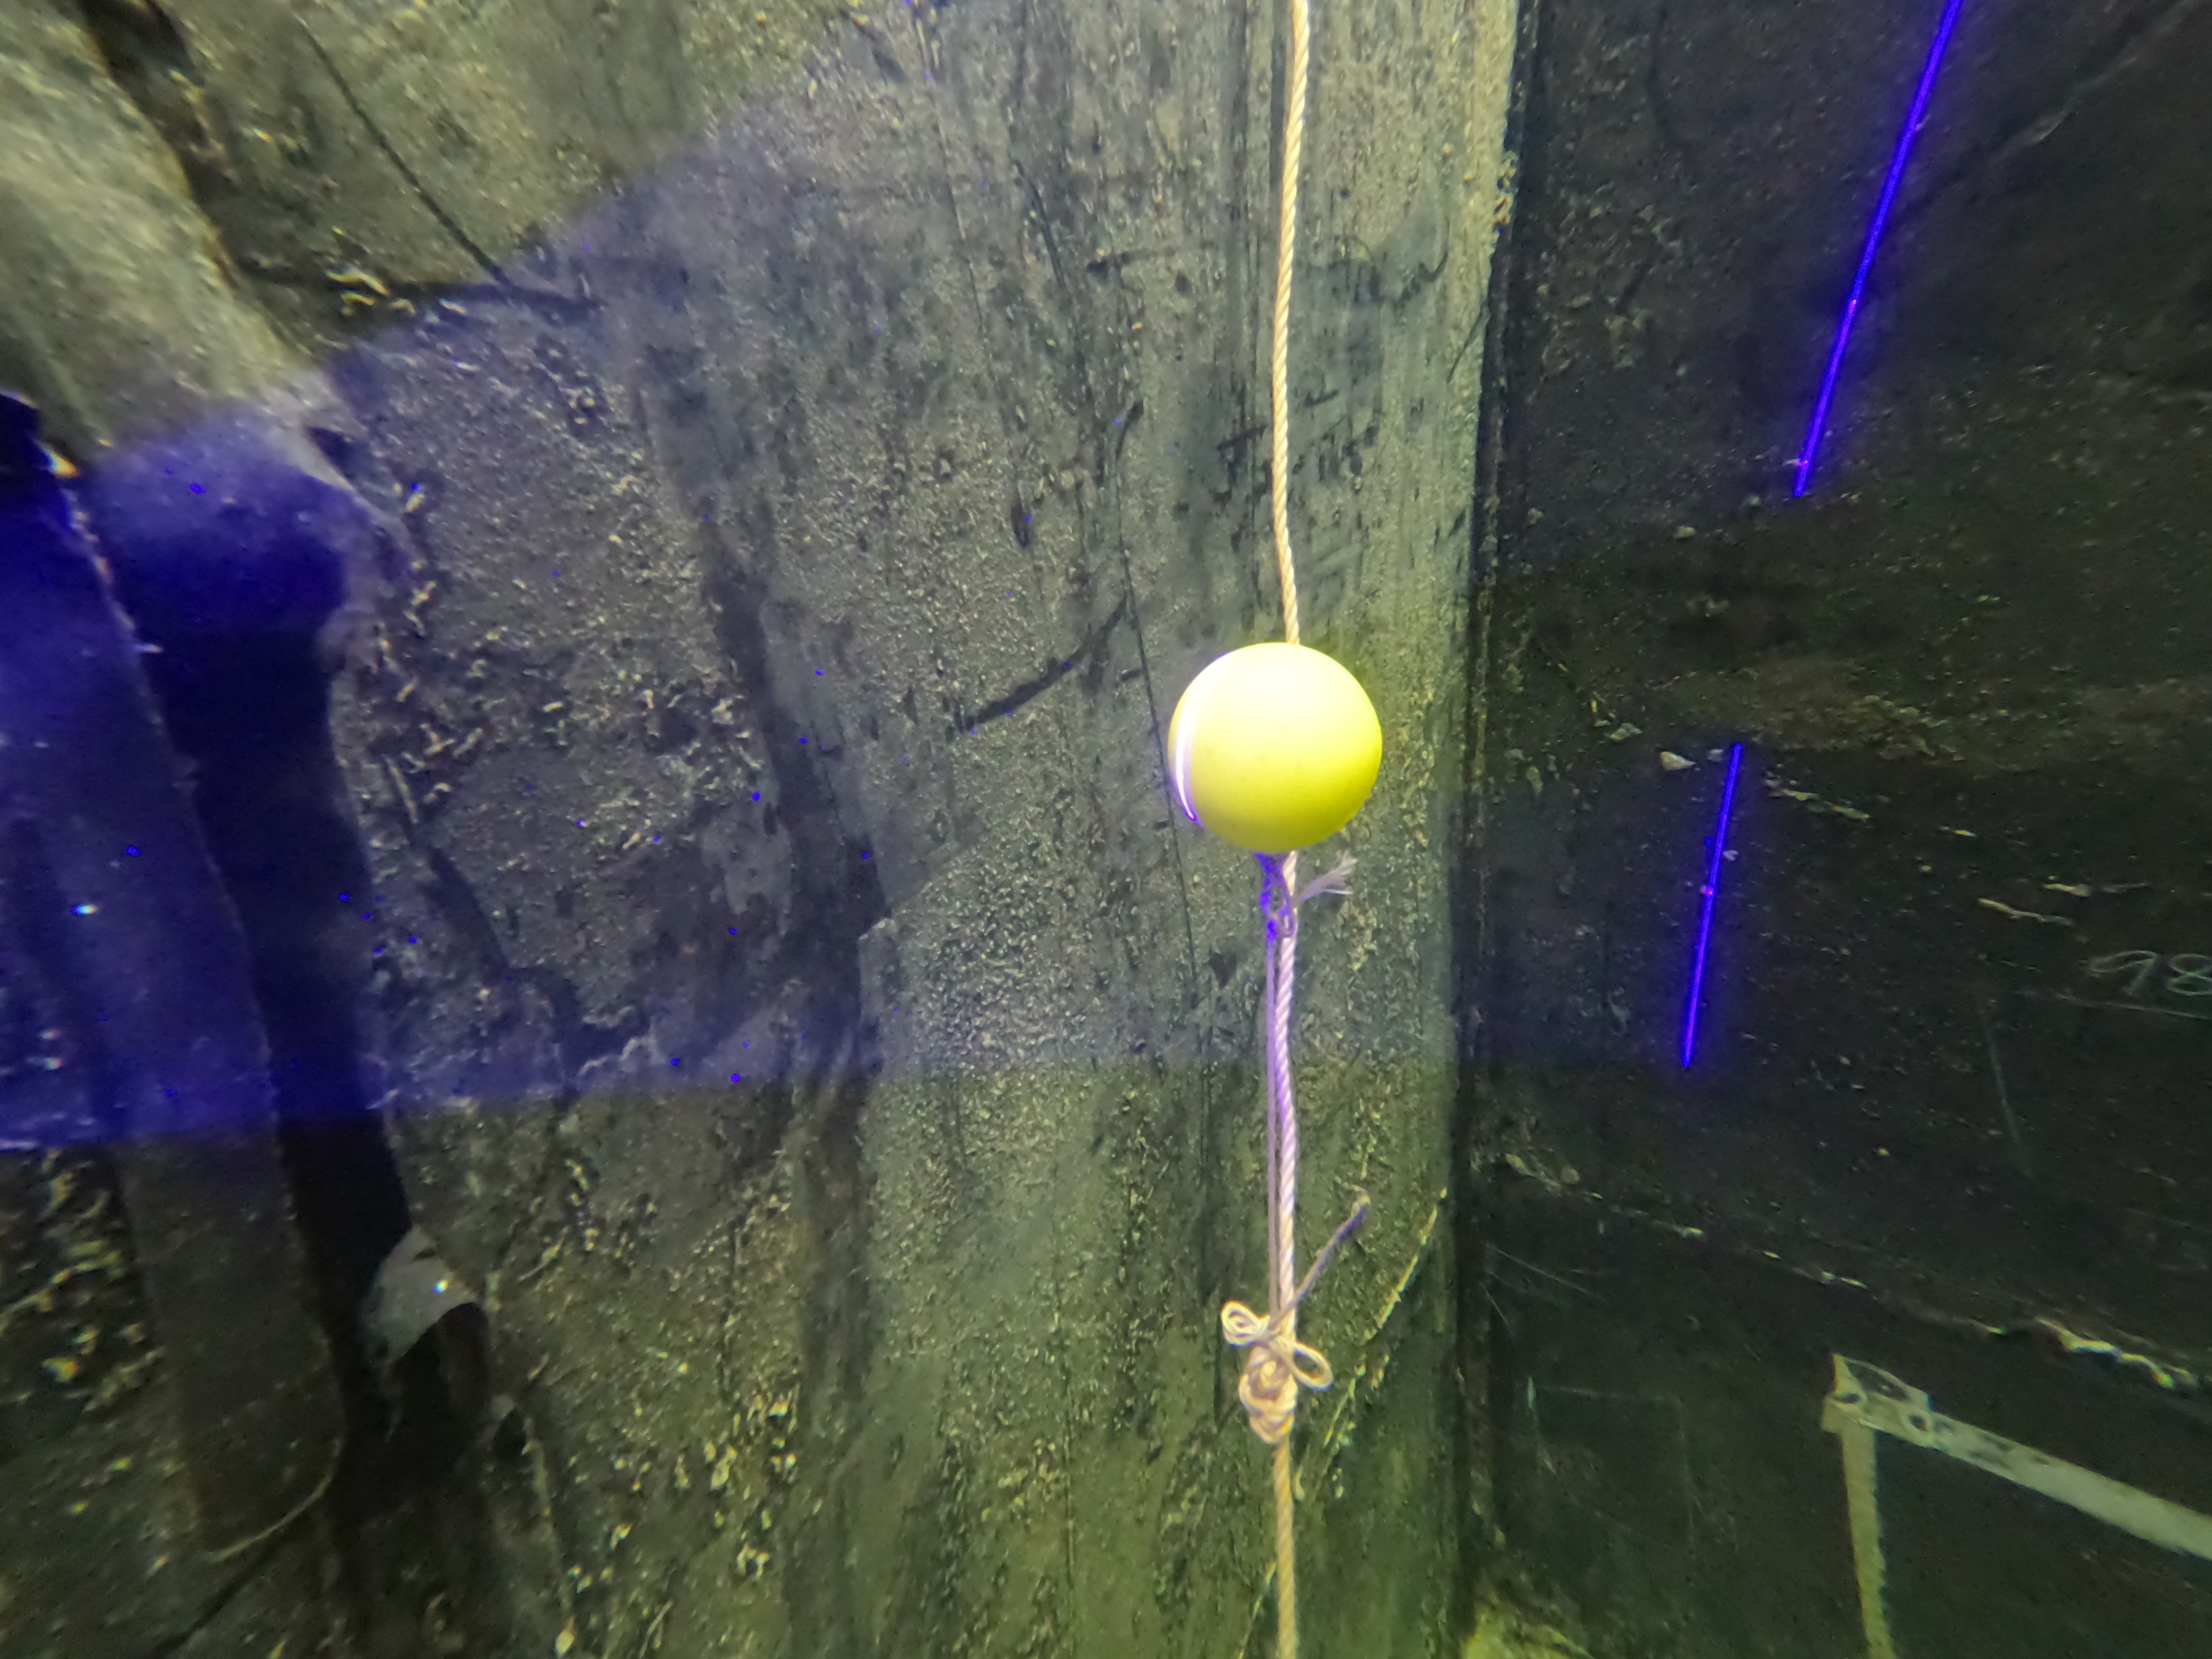

Supplement: Supplementary file 1333 [file G0032646.pdf › 6/G0032646.pdf]

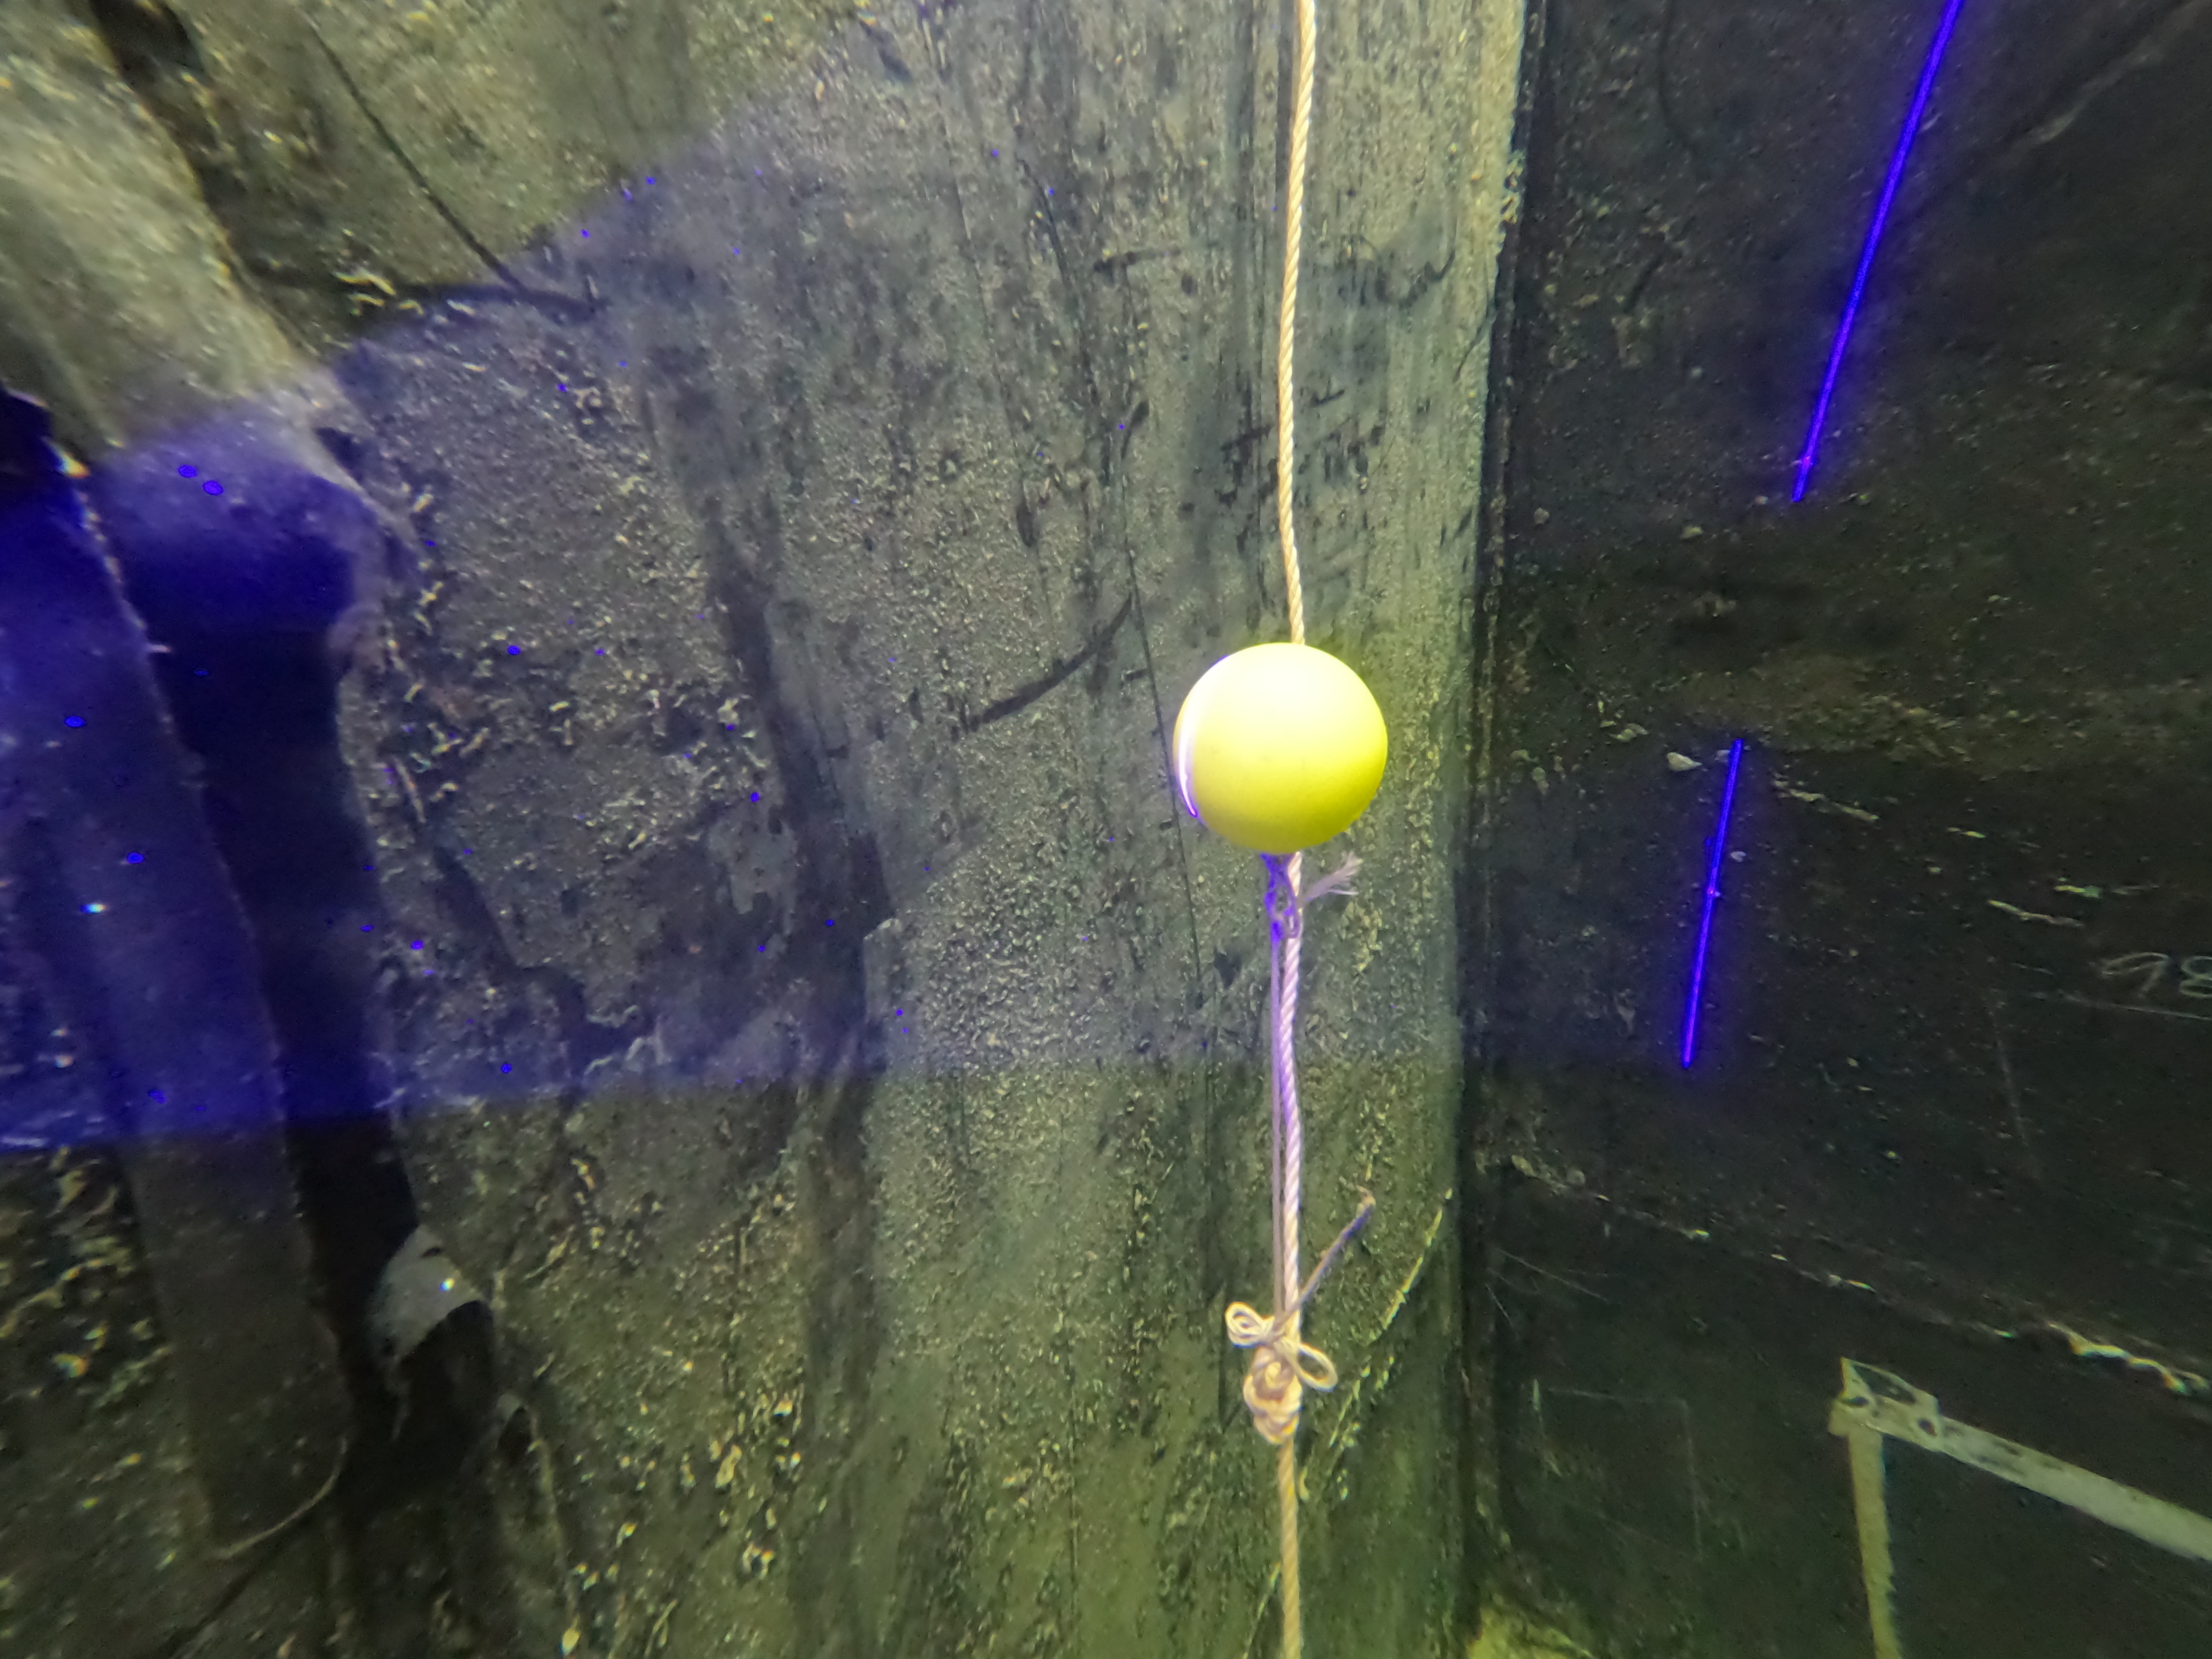

Supplement: Supplementary file 1334 [file G0032647.pdf › 6/G0032647.pdf]

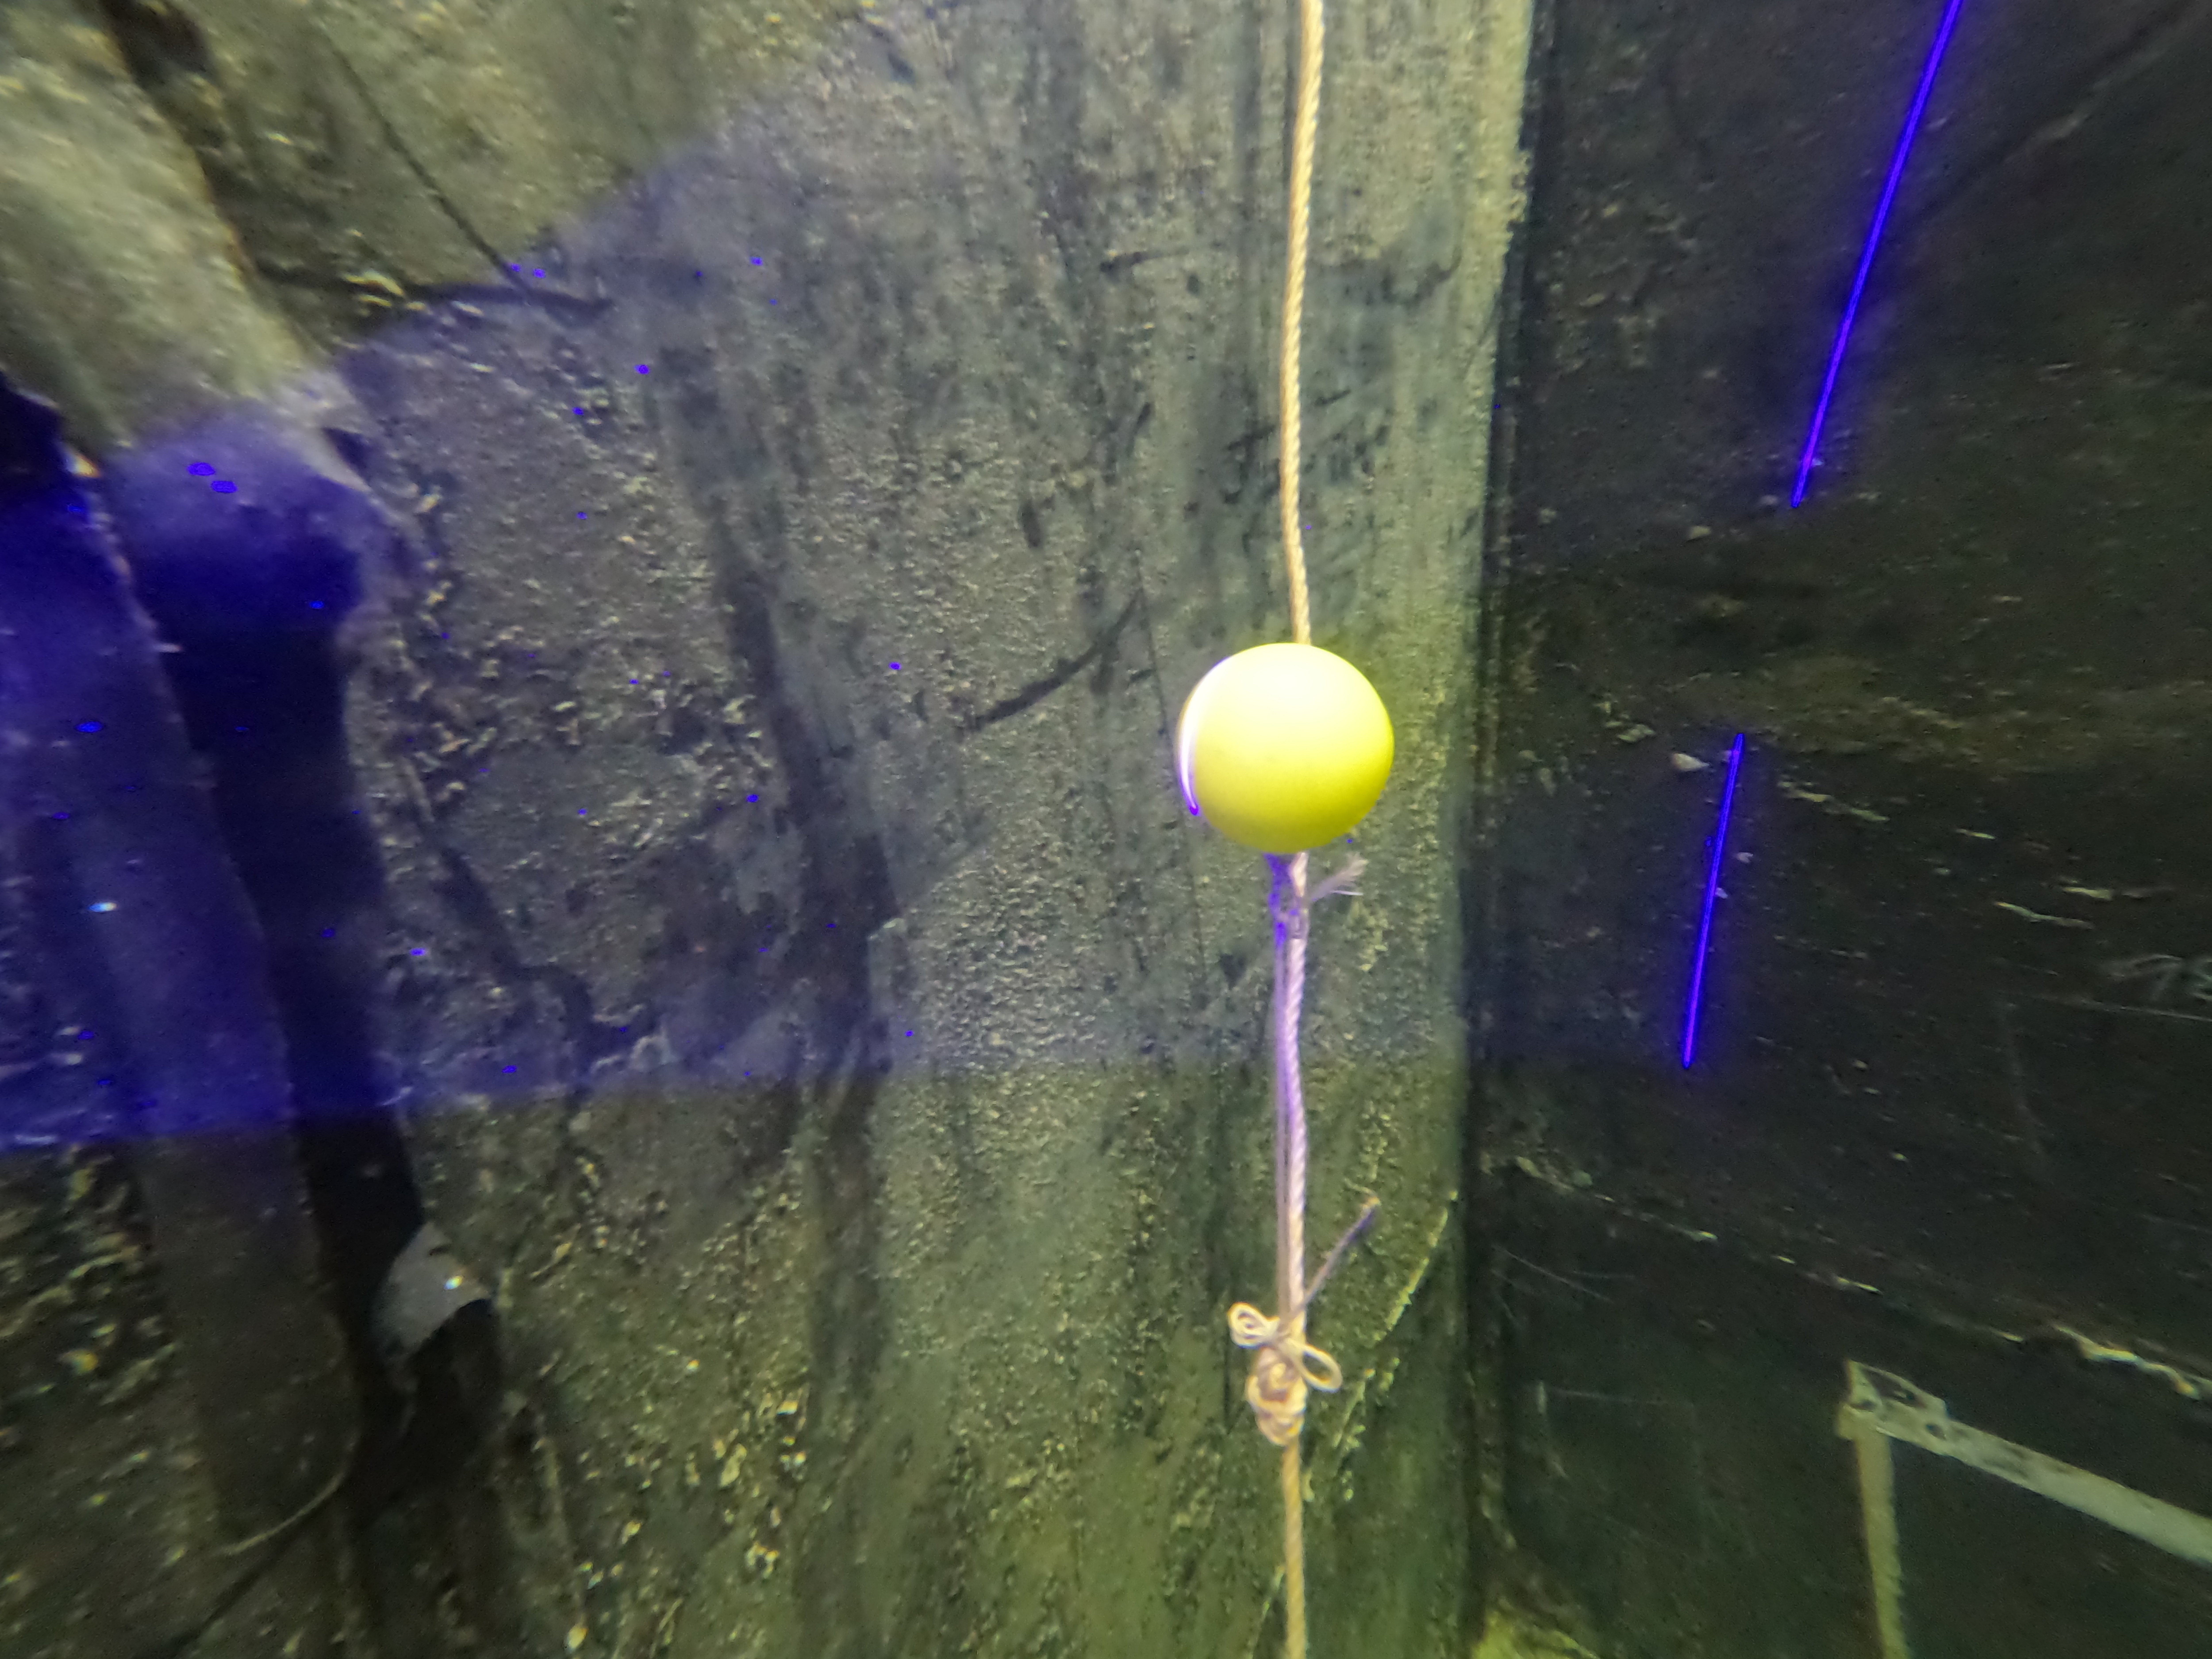

Supplement: Supplementary file 1335 [file G0032648.pdf › 6/G0032648.pdf]

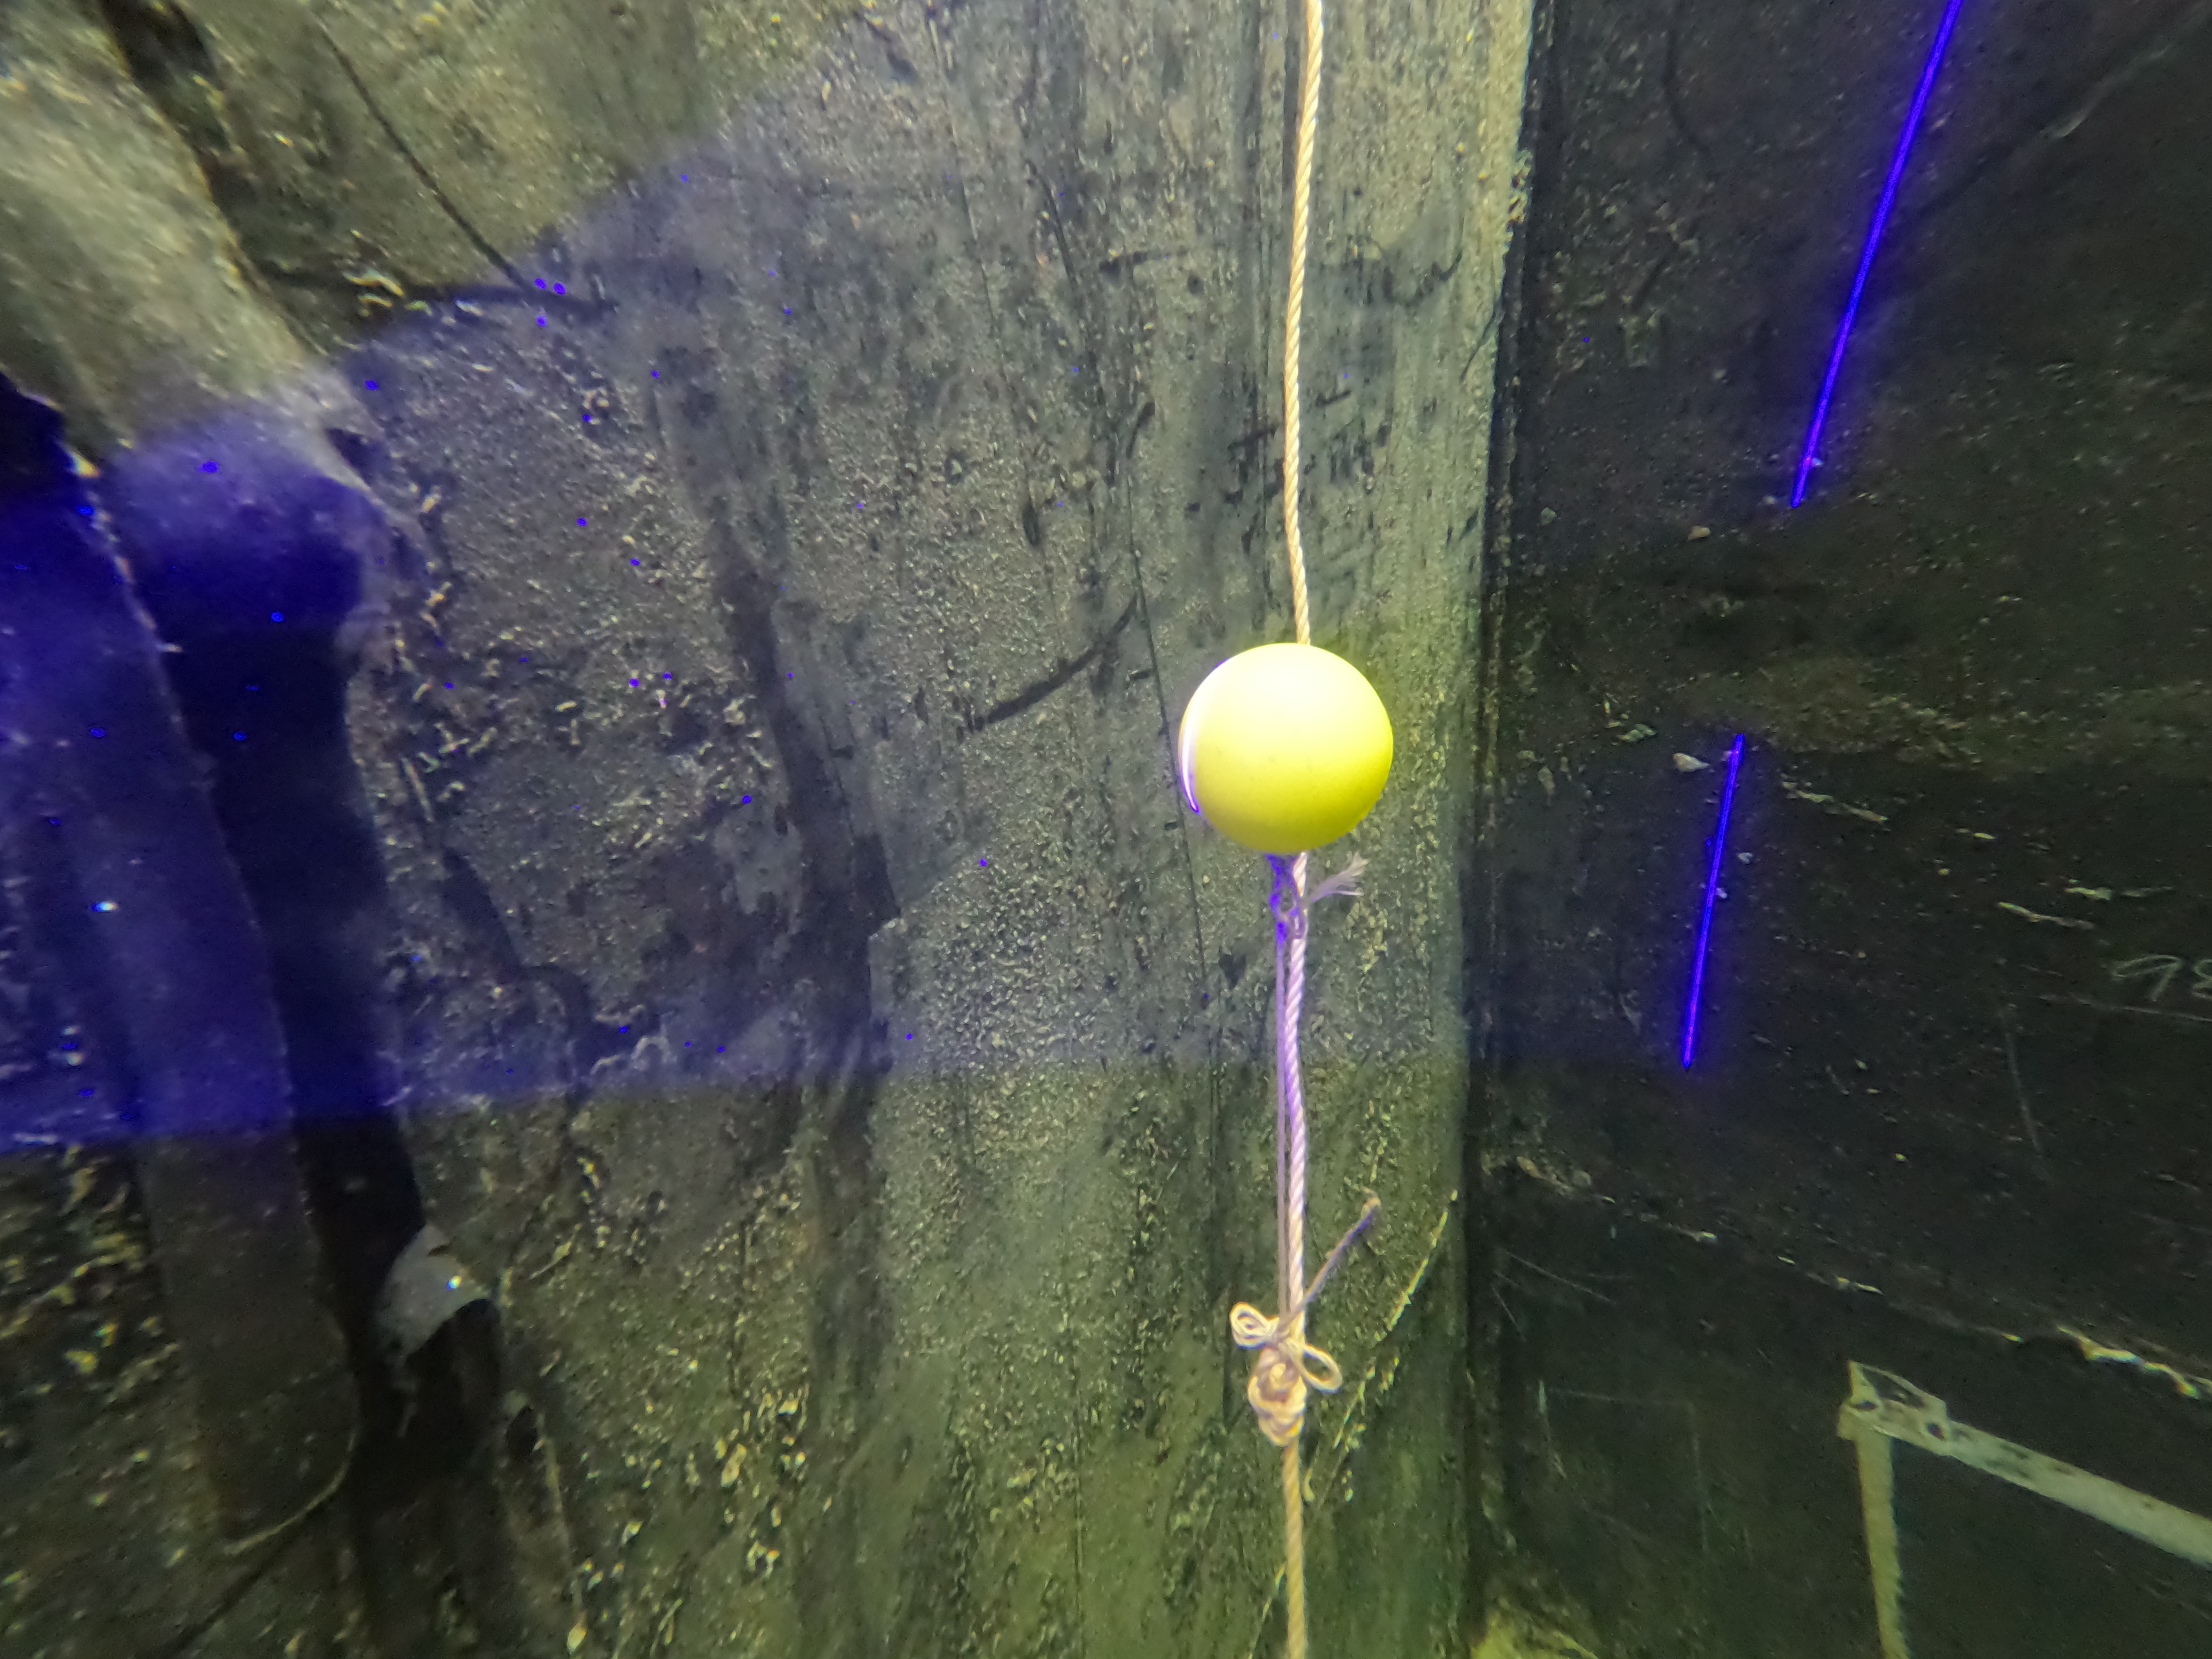

Supplement: Supplementary file 1336 [file G0032649.pdf › 6/G0032649.pdf]

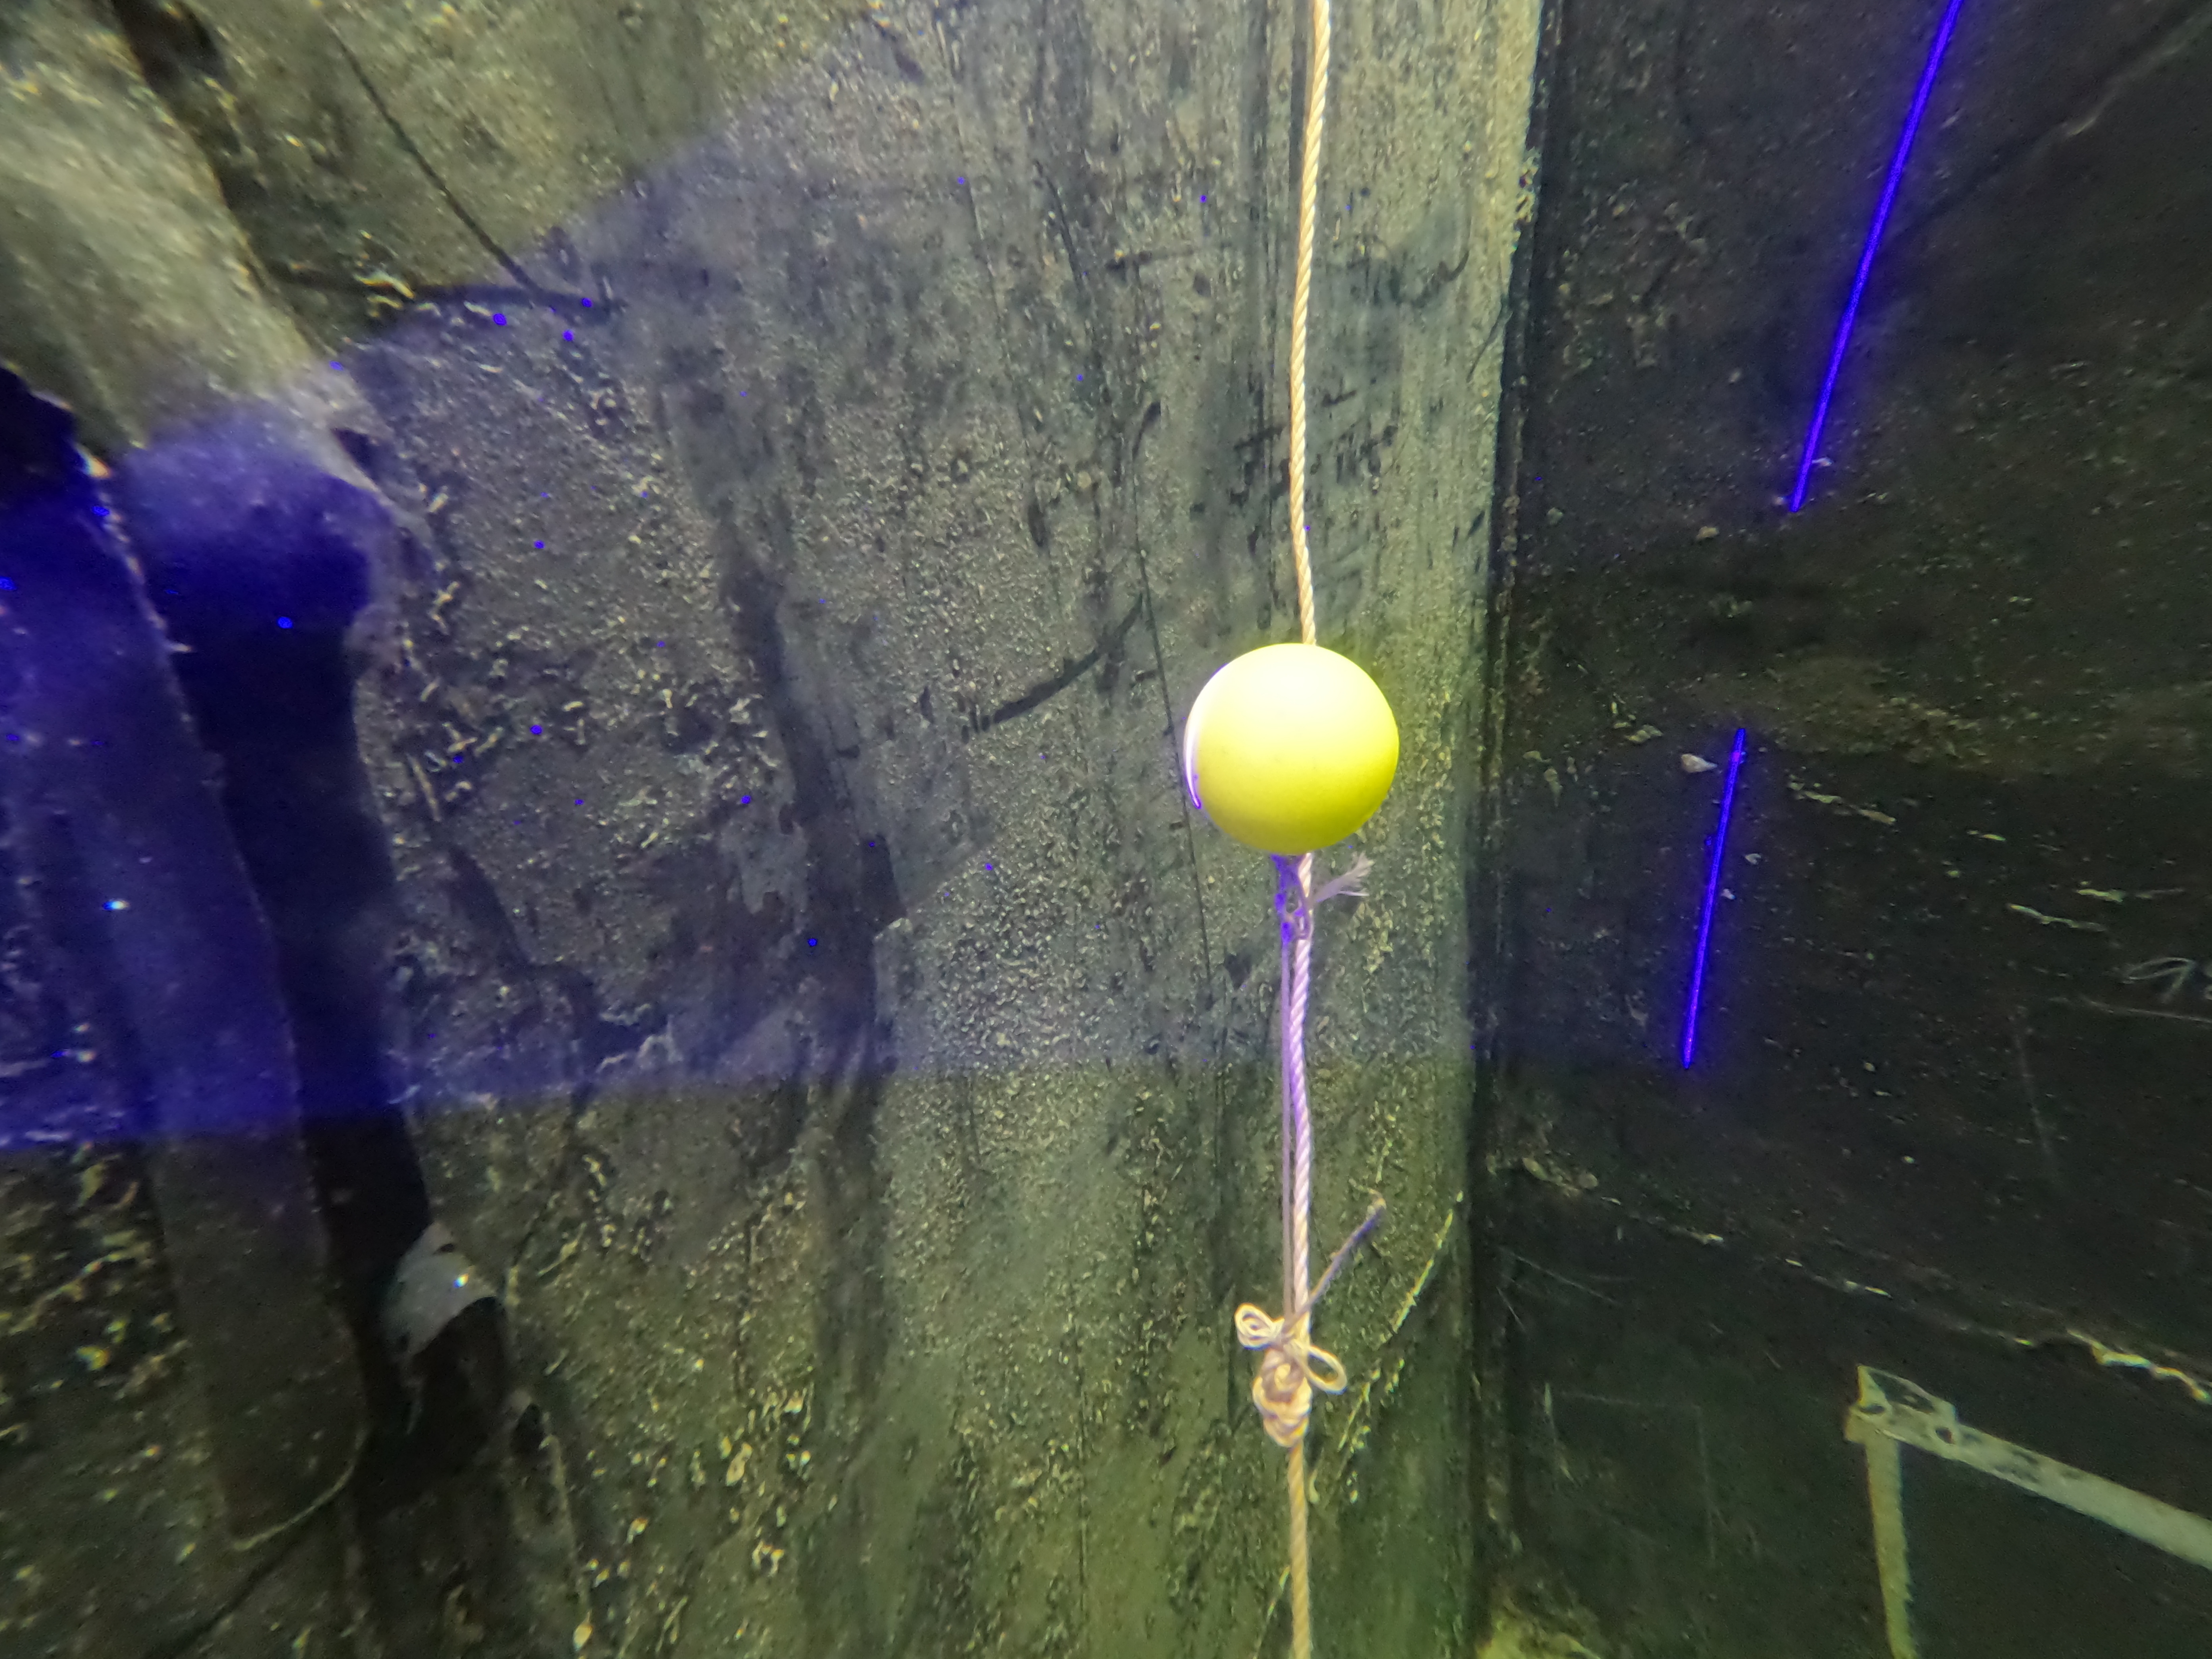

Supplement: Supplementary file 1337 [file G0032650.pdf › 6/G0032650.pdf]

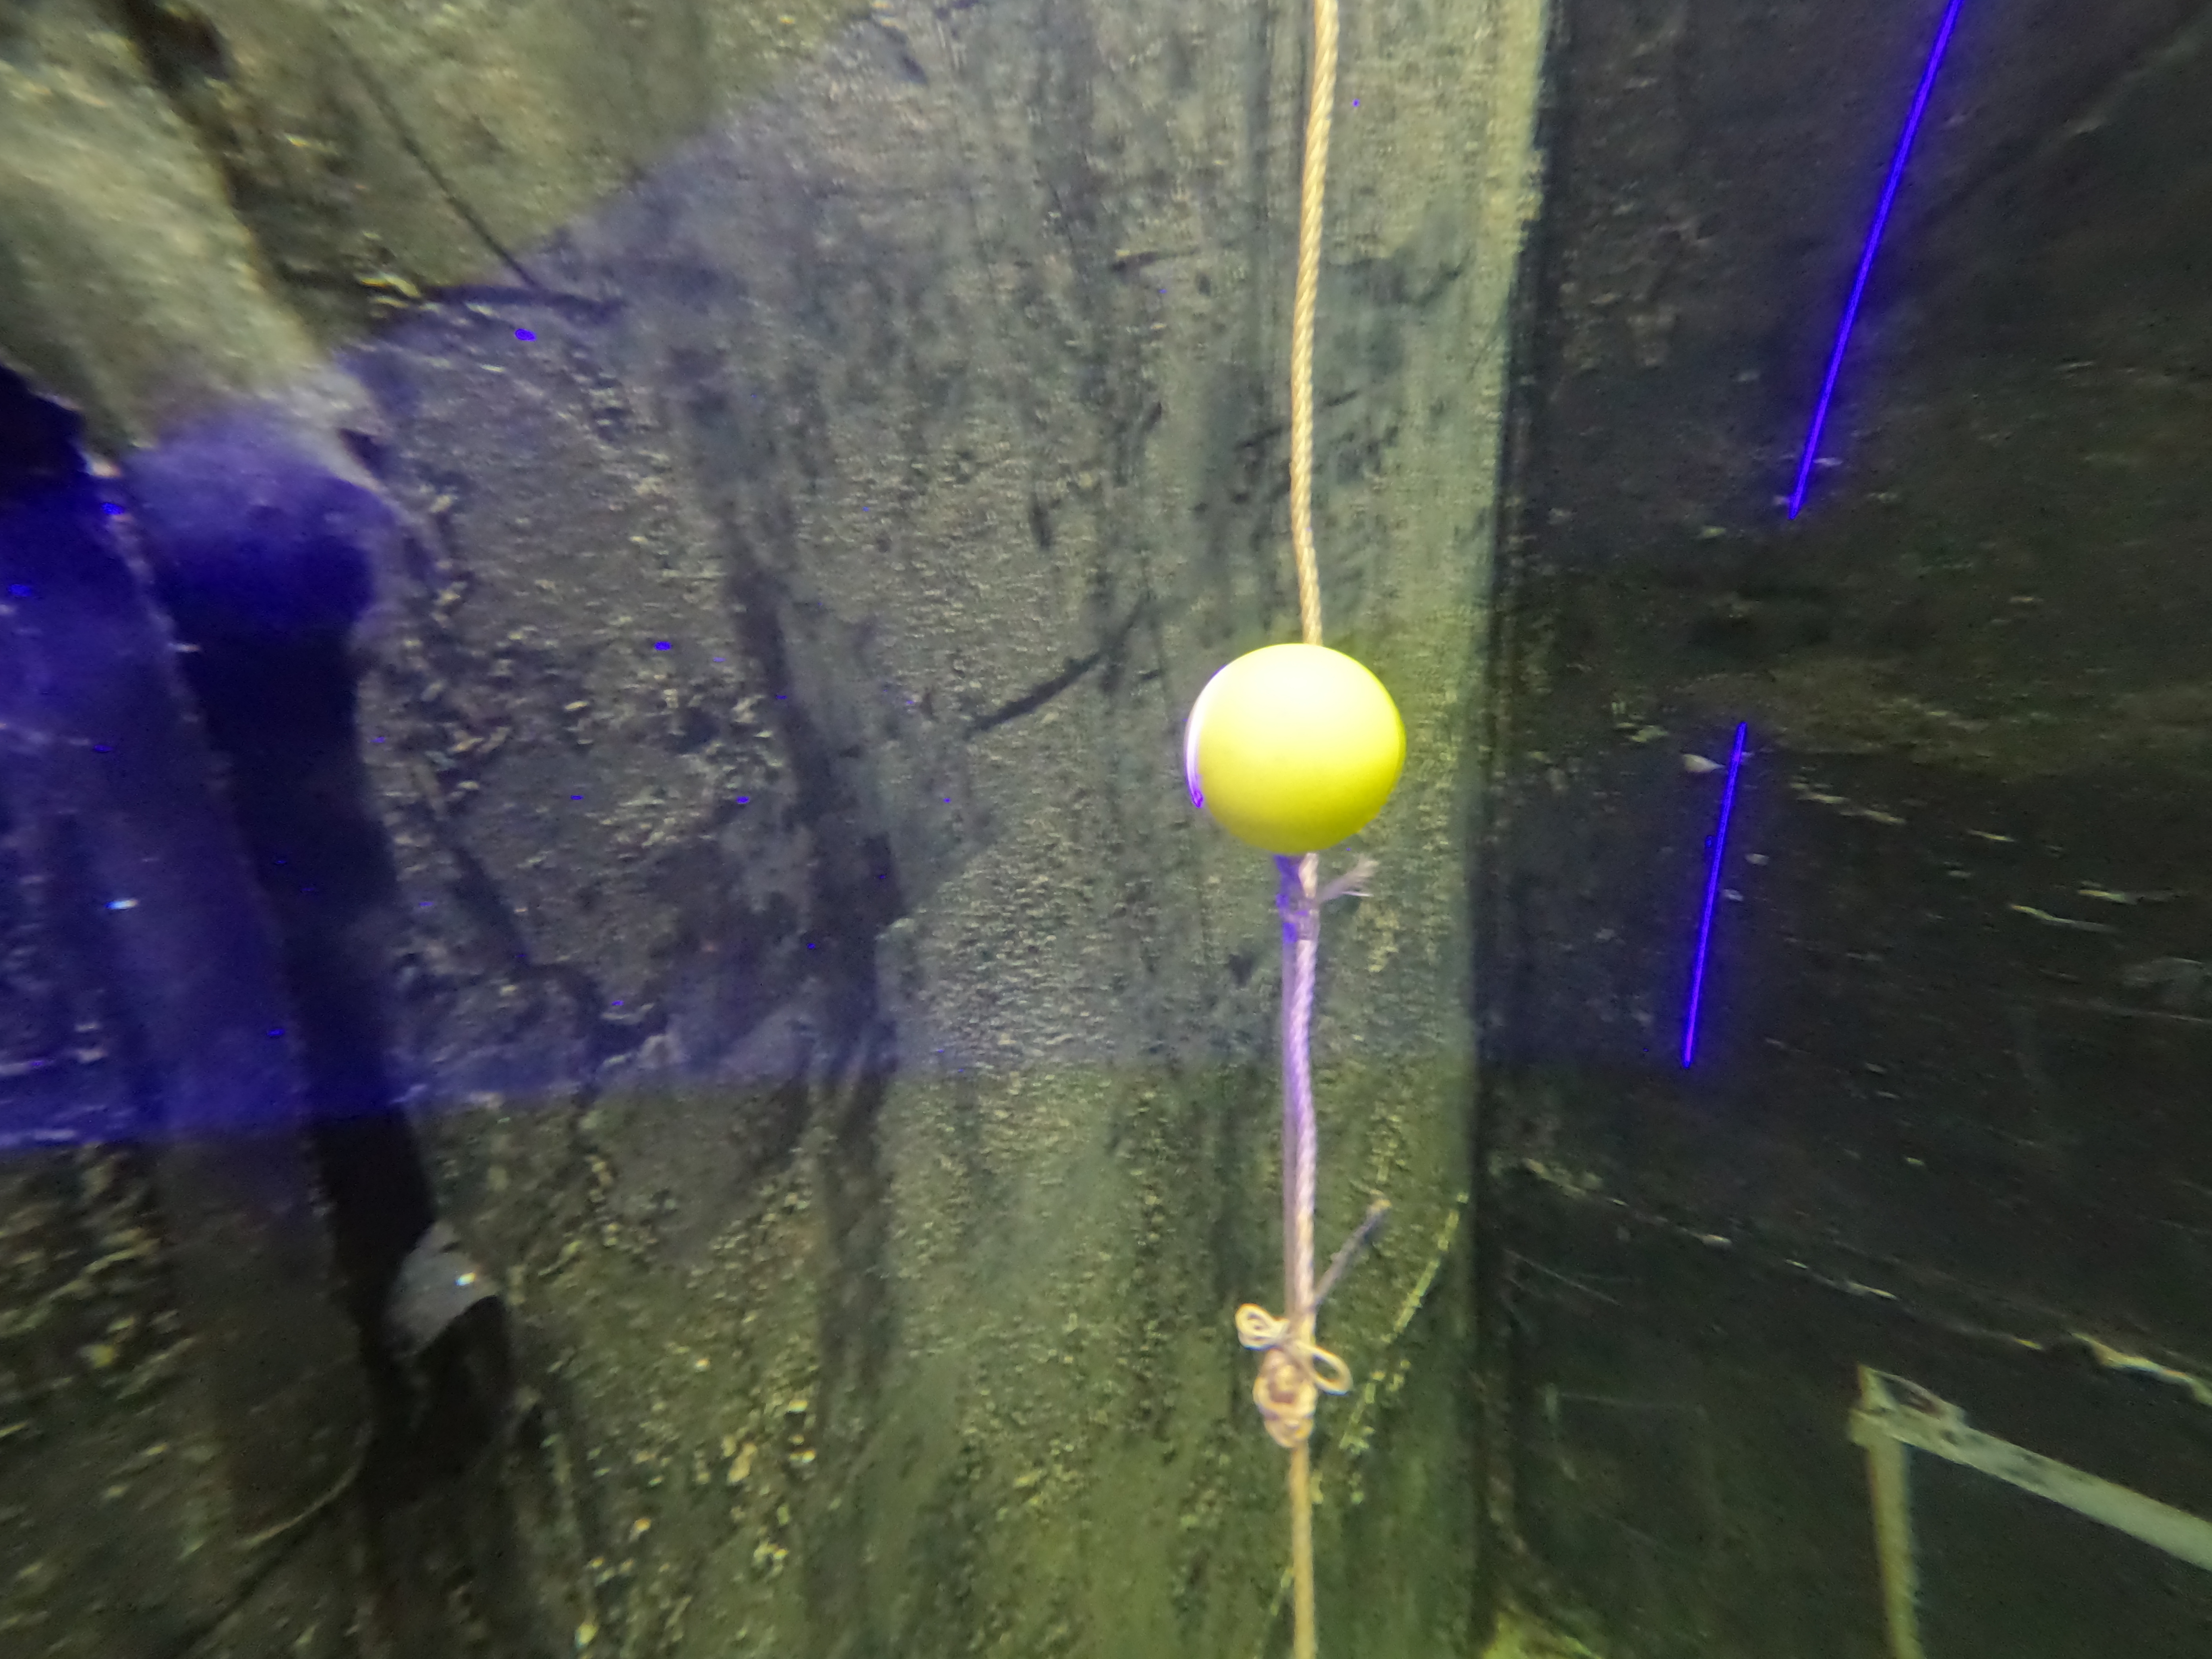

Supplement: Supplementary file 1338 [file G0032651.pdf › 6/G0032651.pdf]

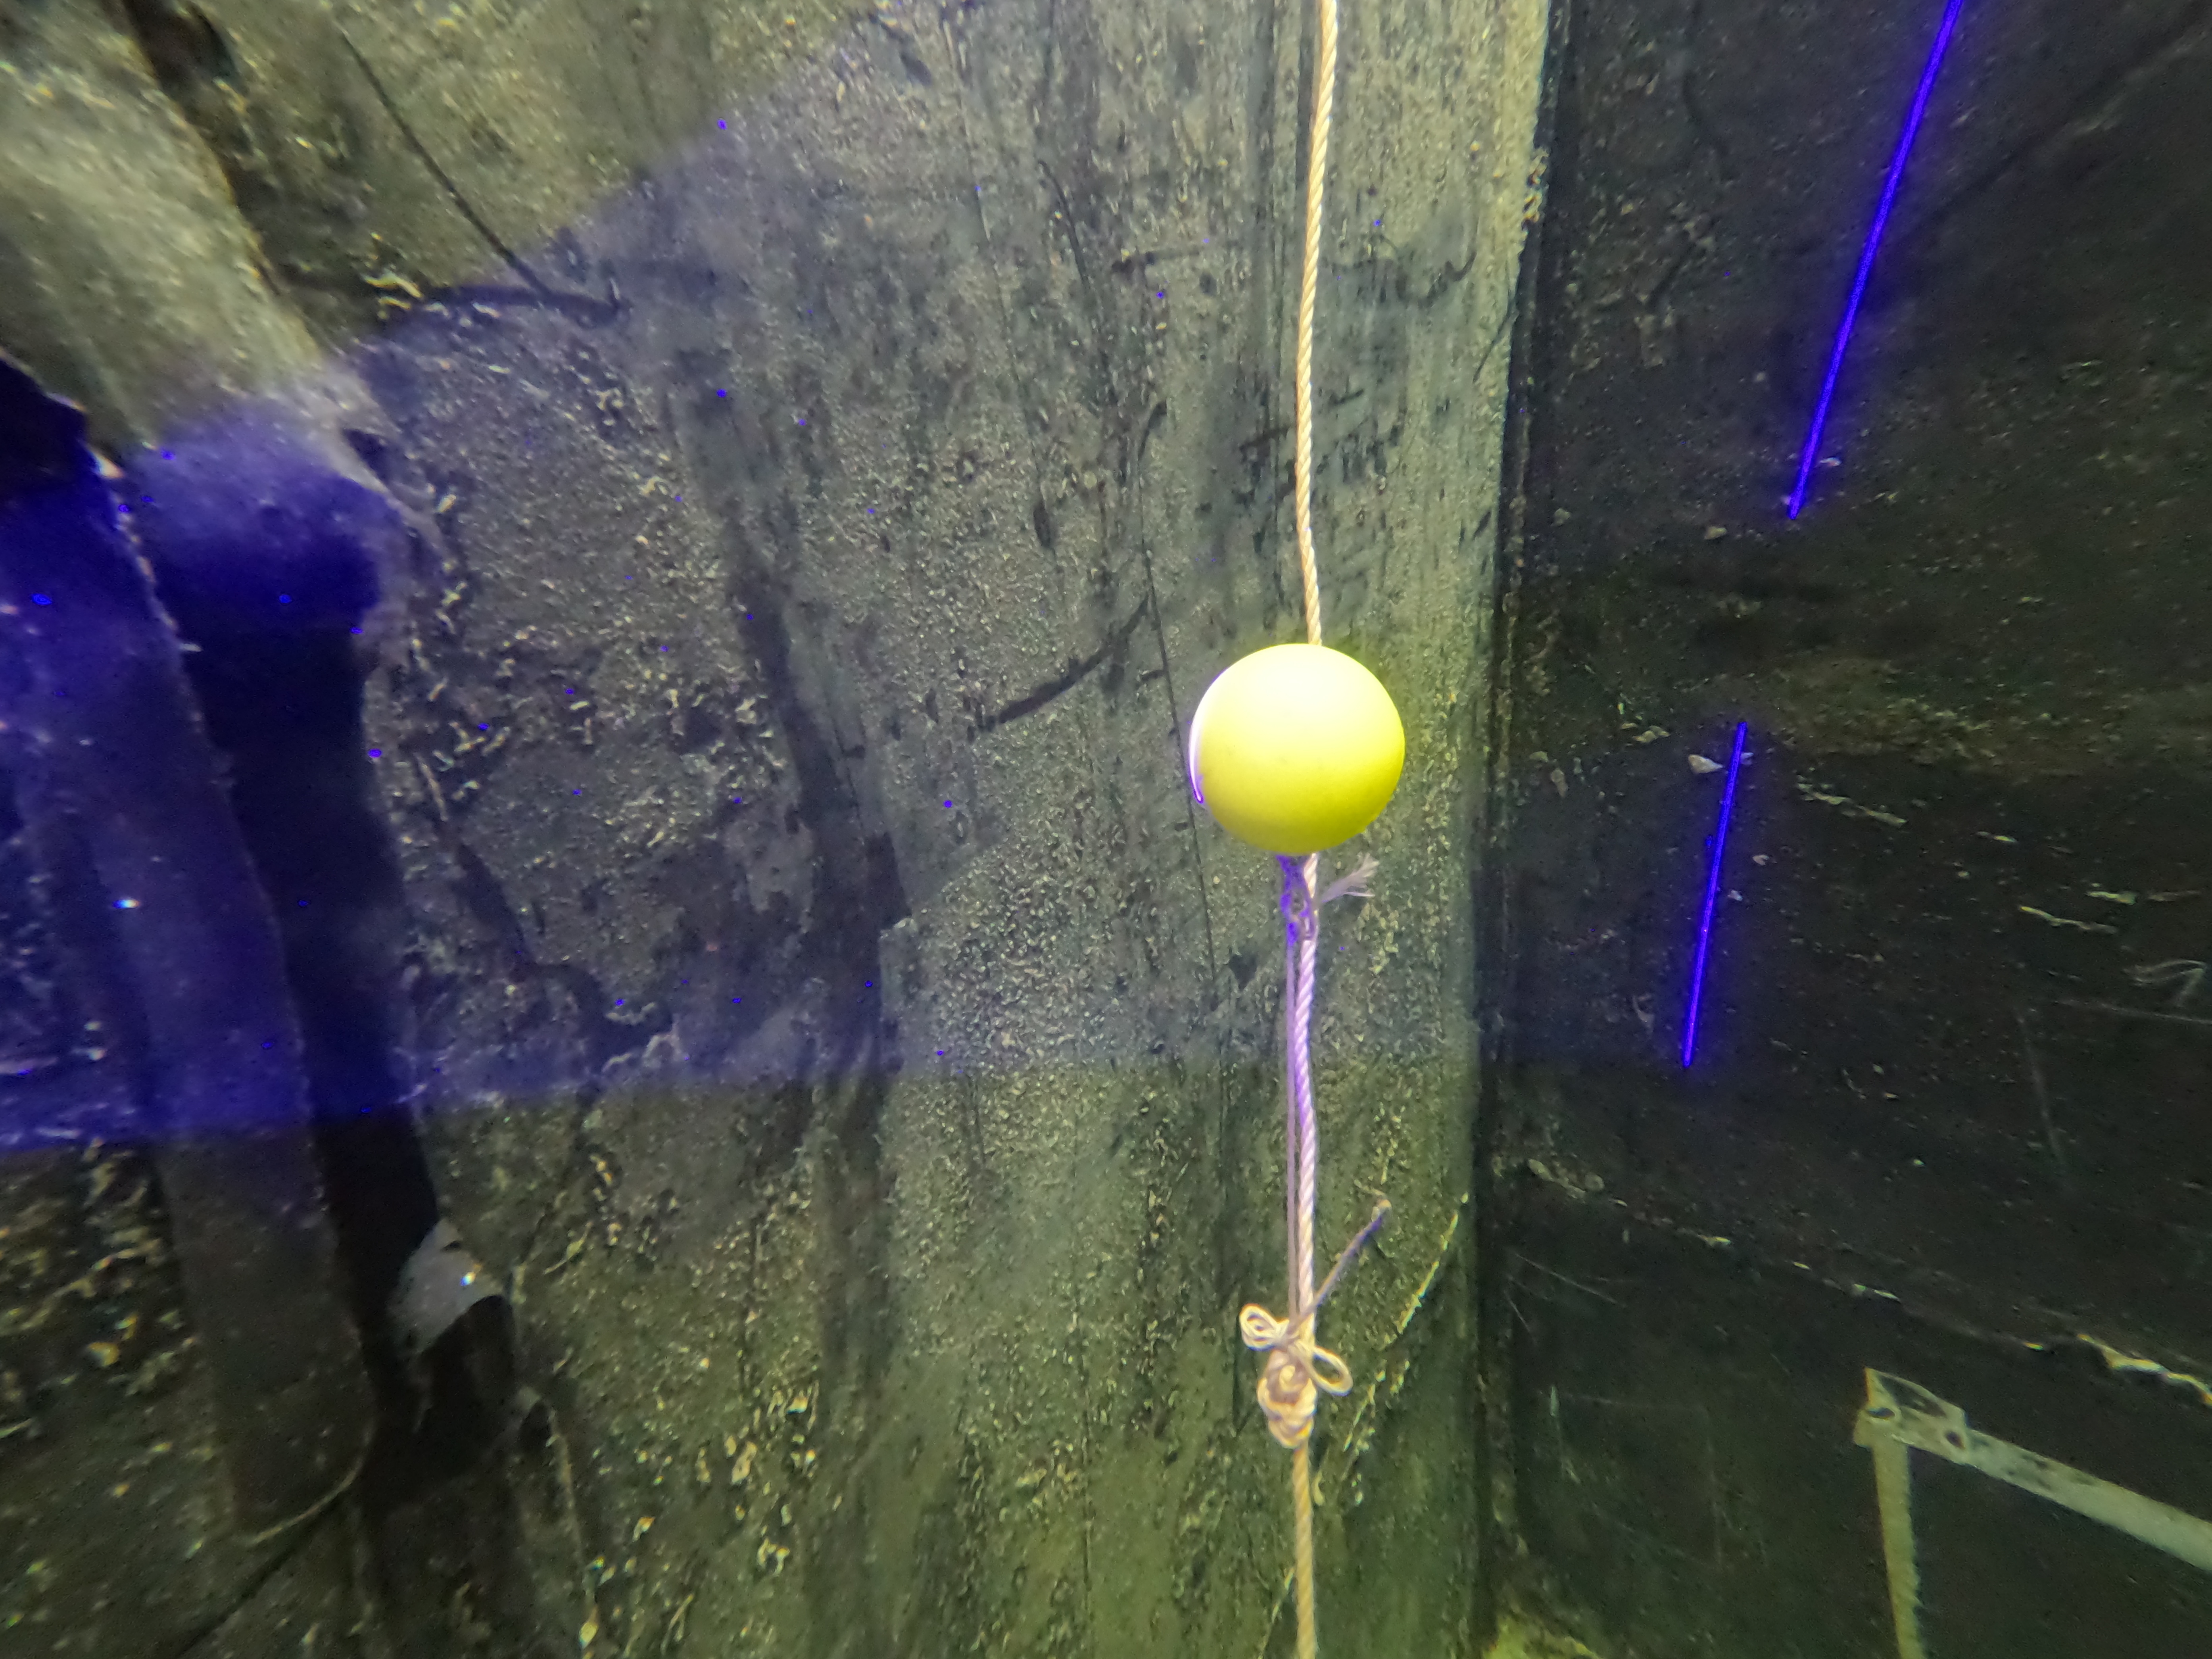

Supplement: Supplementary file 1339 [file G0032652.pdf › 6/G0032652.pdf]

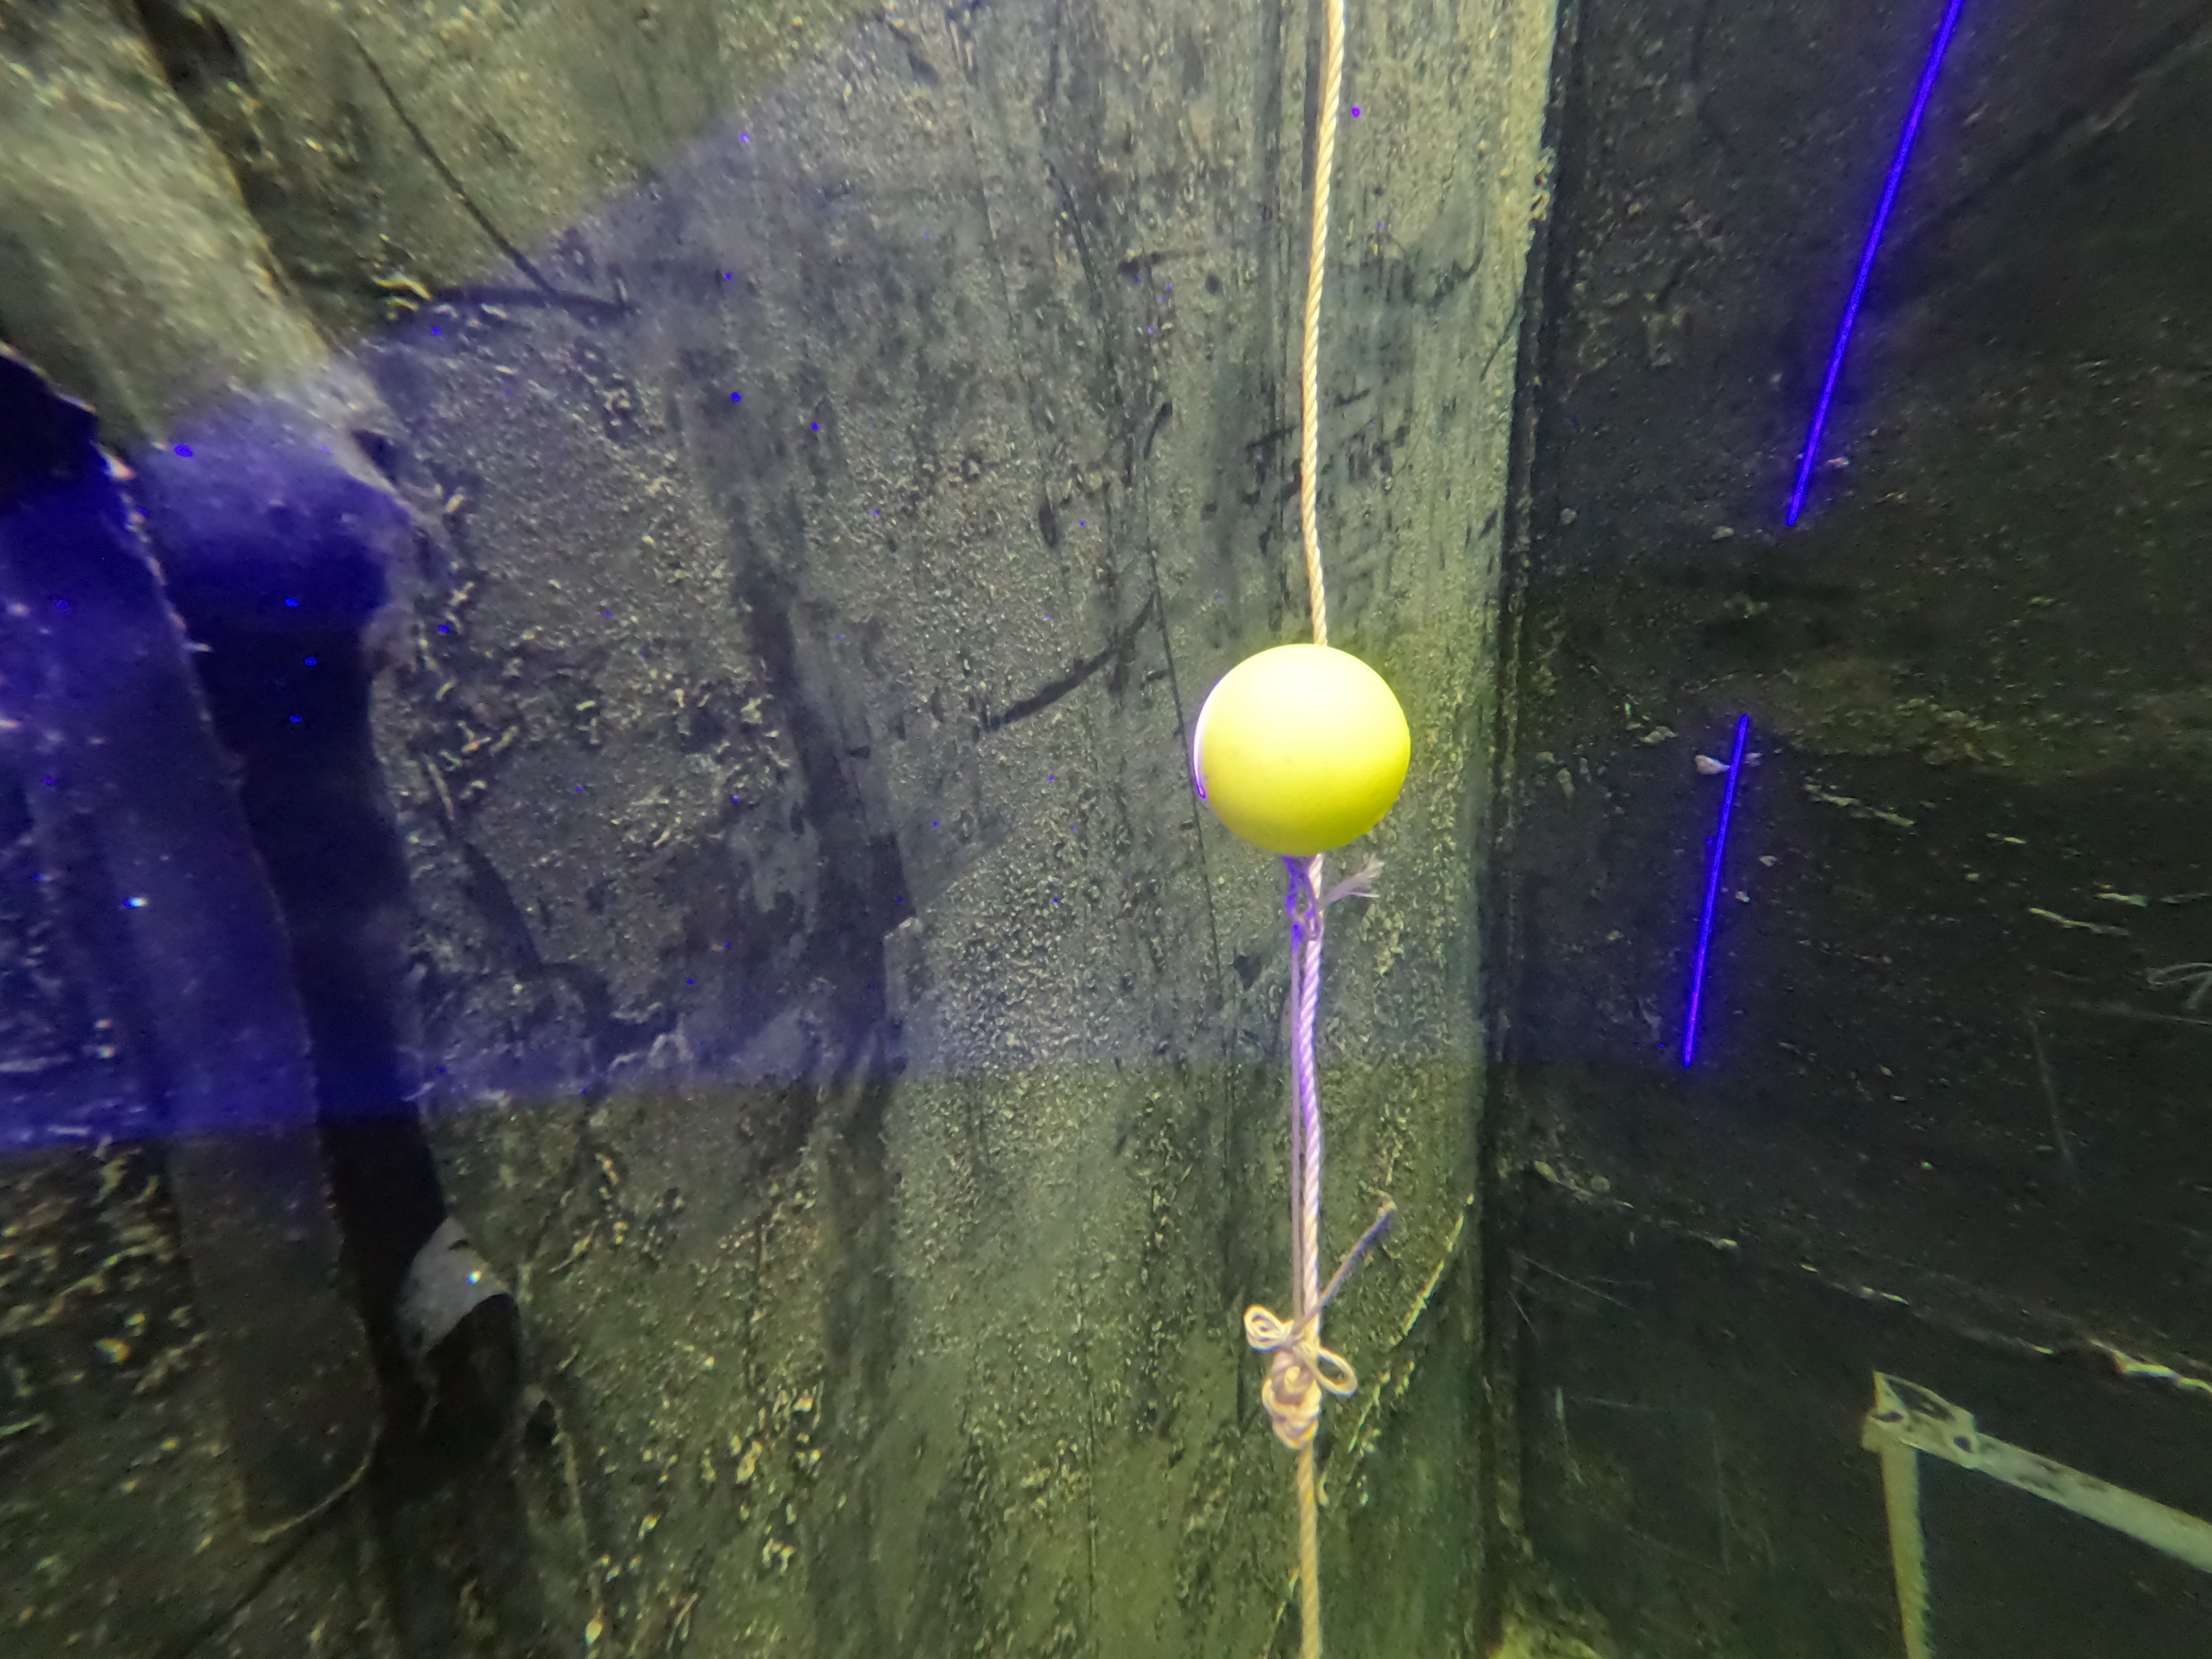

Supplement: Supplementary file 1340 [file G0032653.pdf › 6/G0032653.pdf]

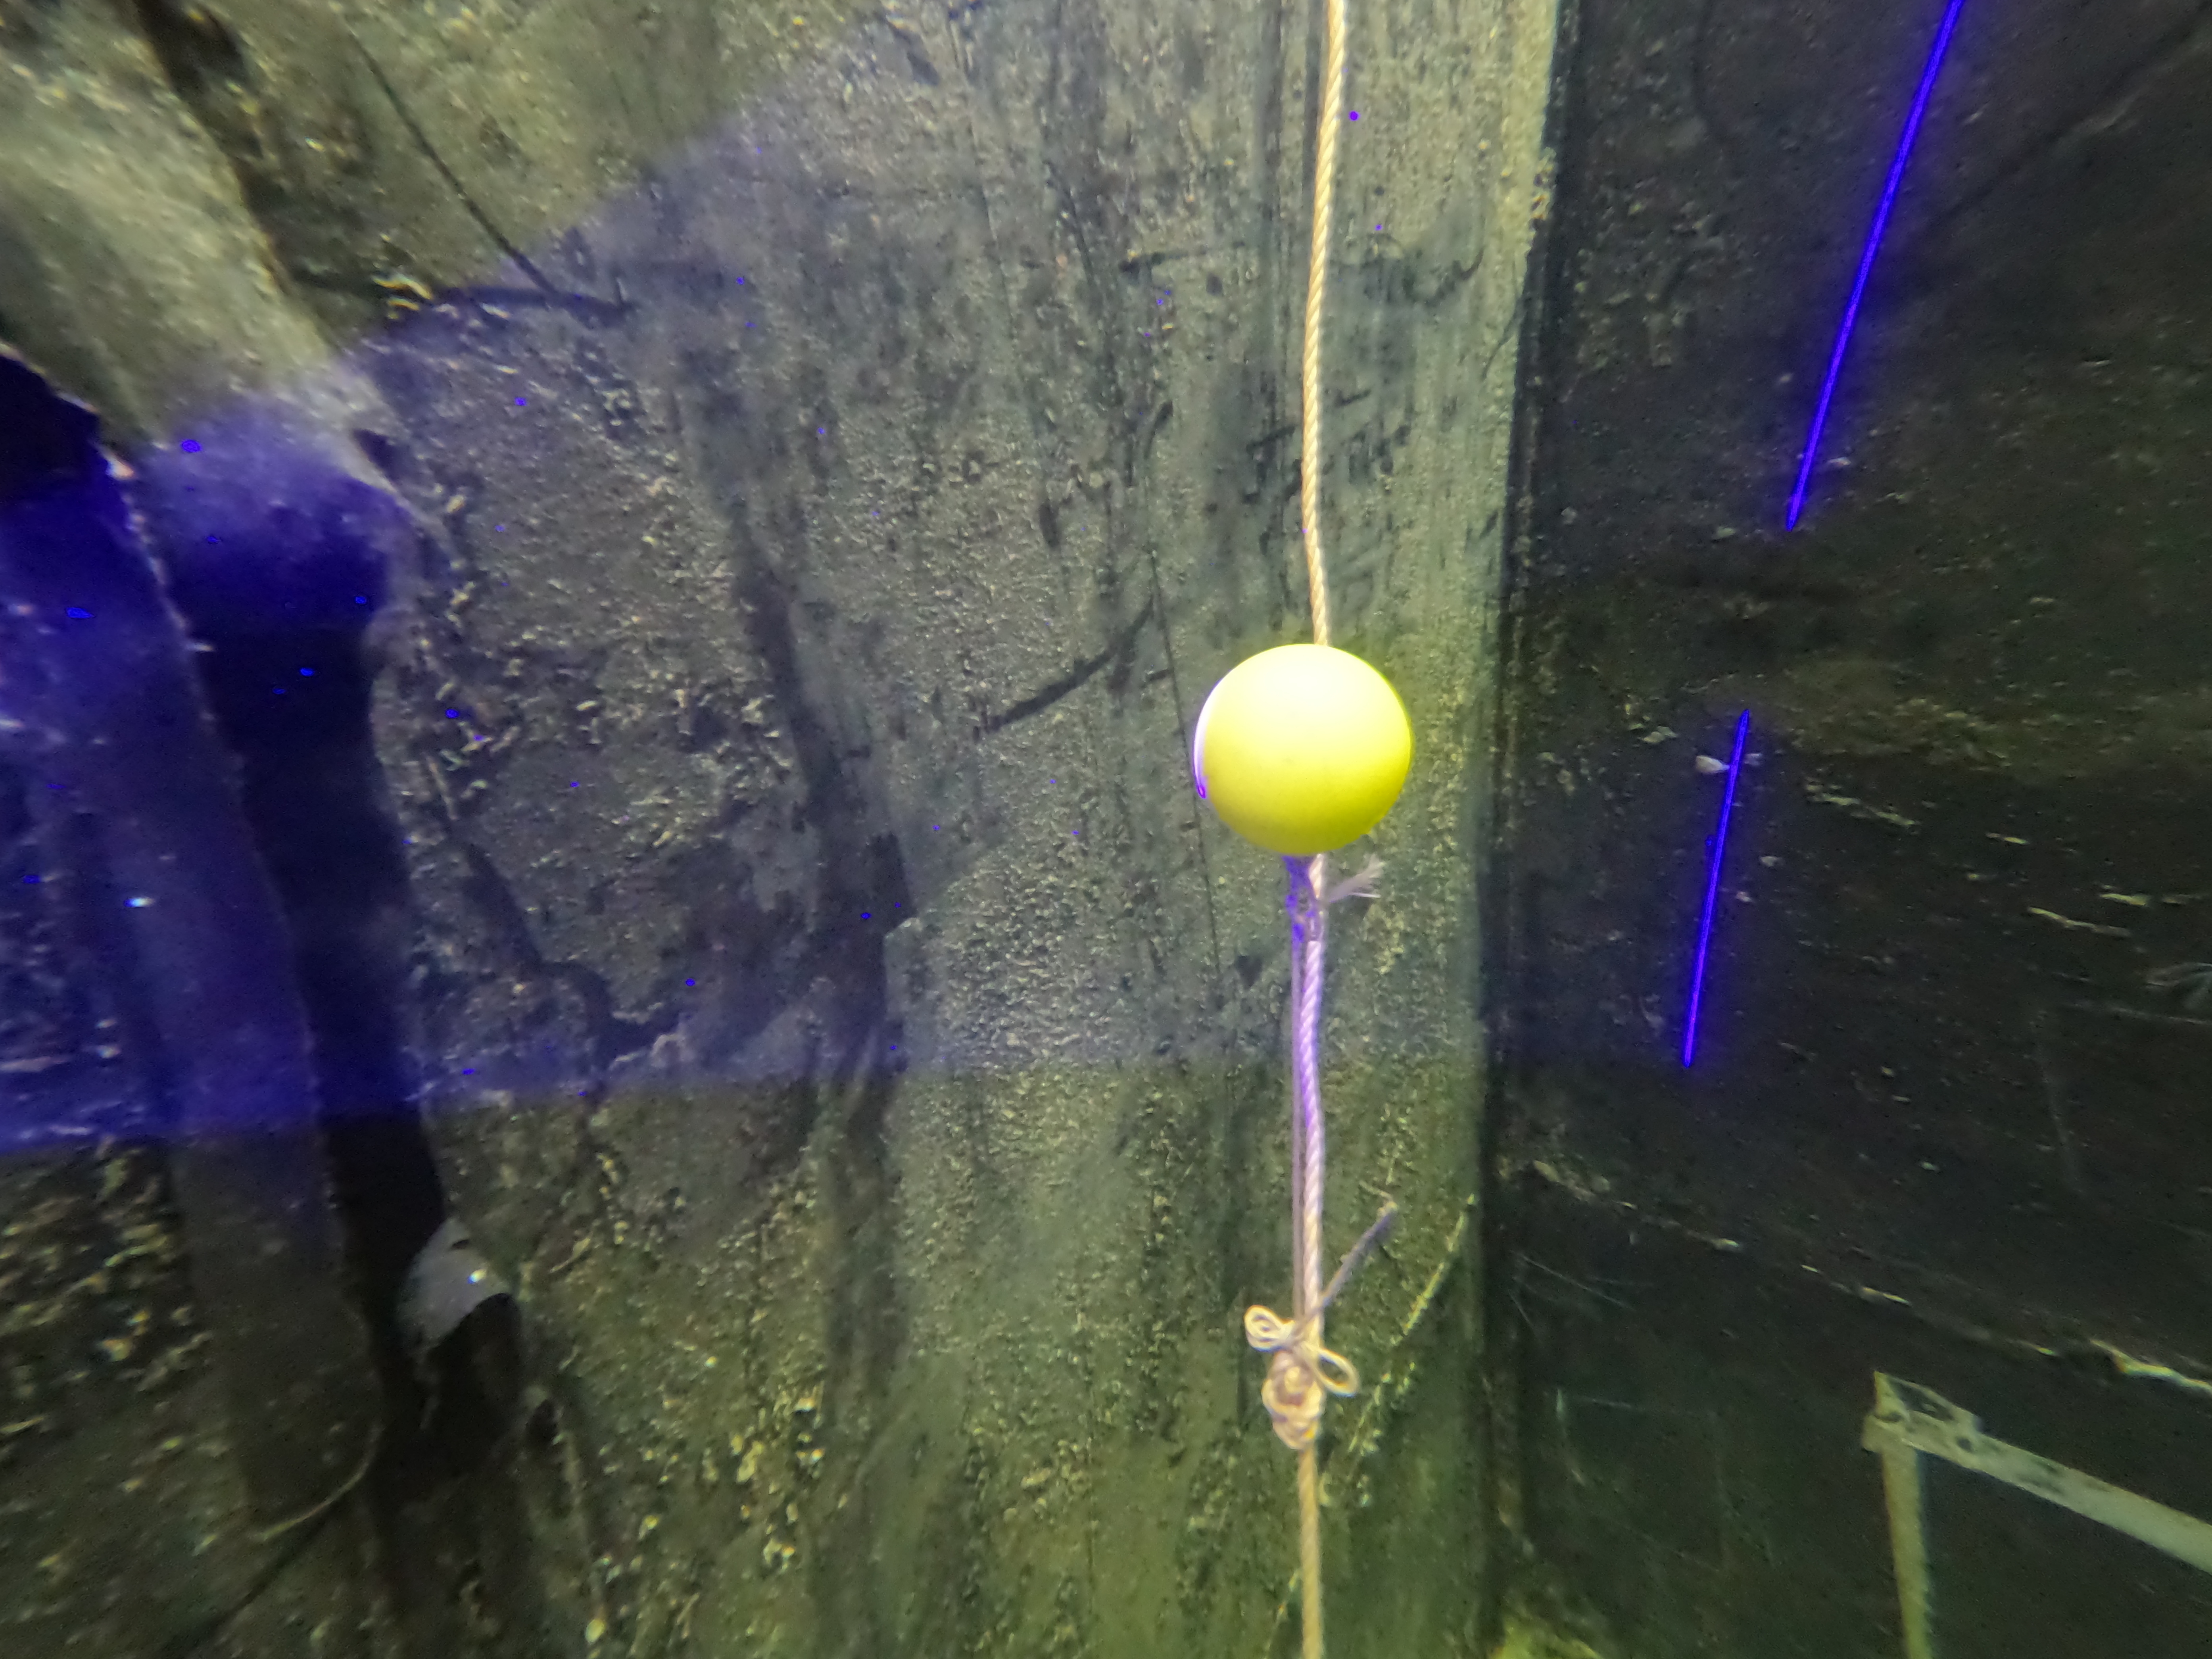

Supplement: Supplementary file 1341 [file G0032654.pdf › 6/G0032654.pdf]

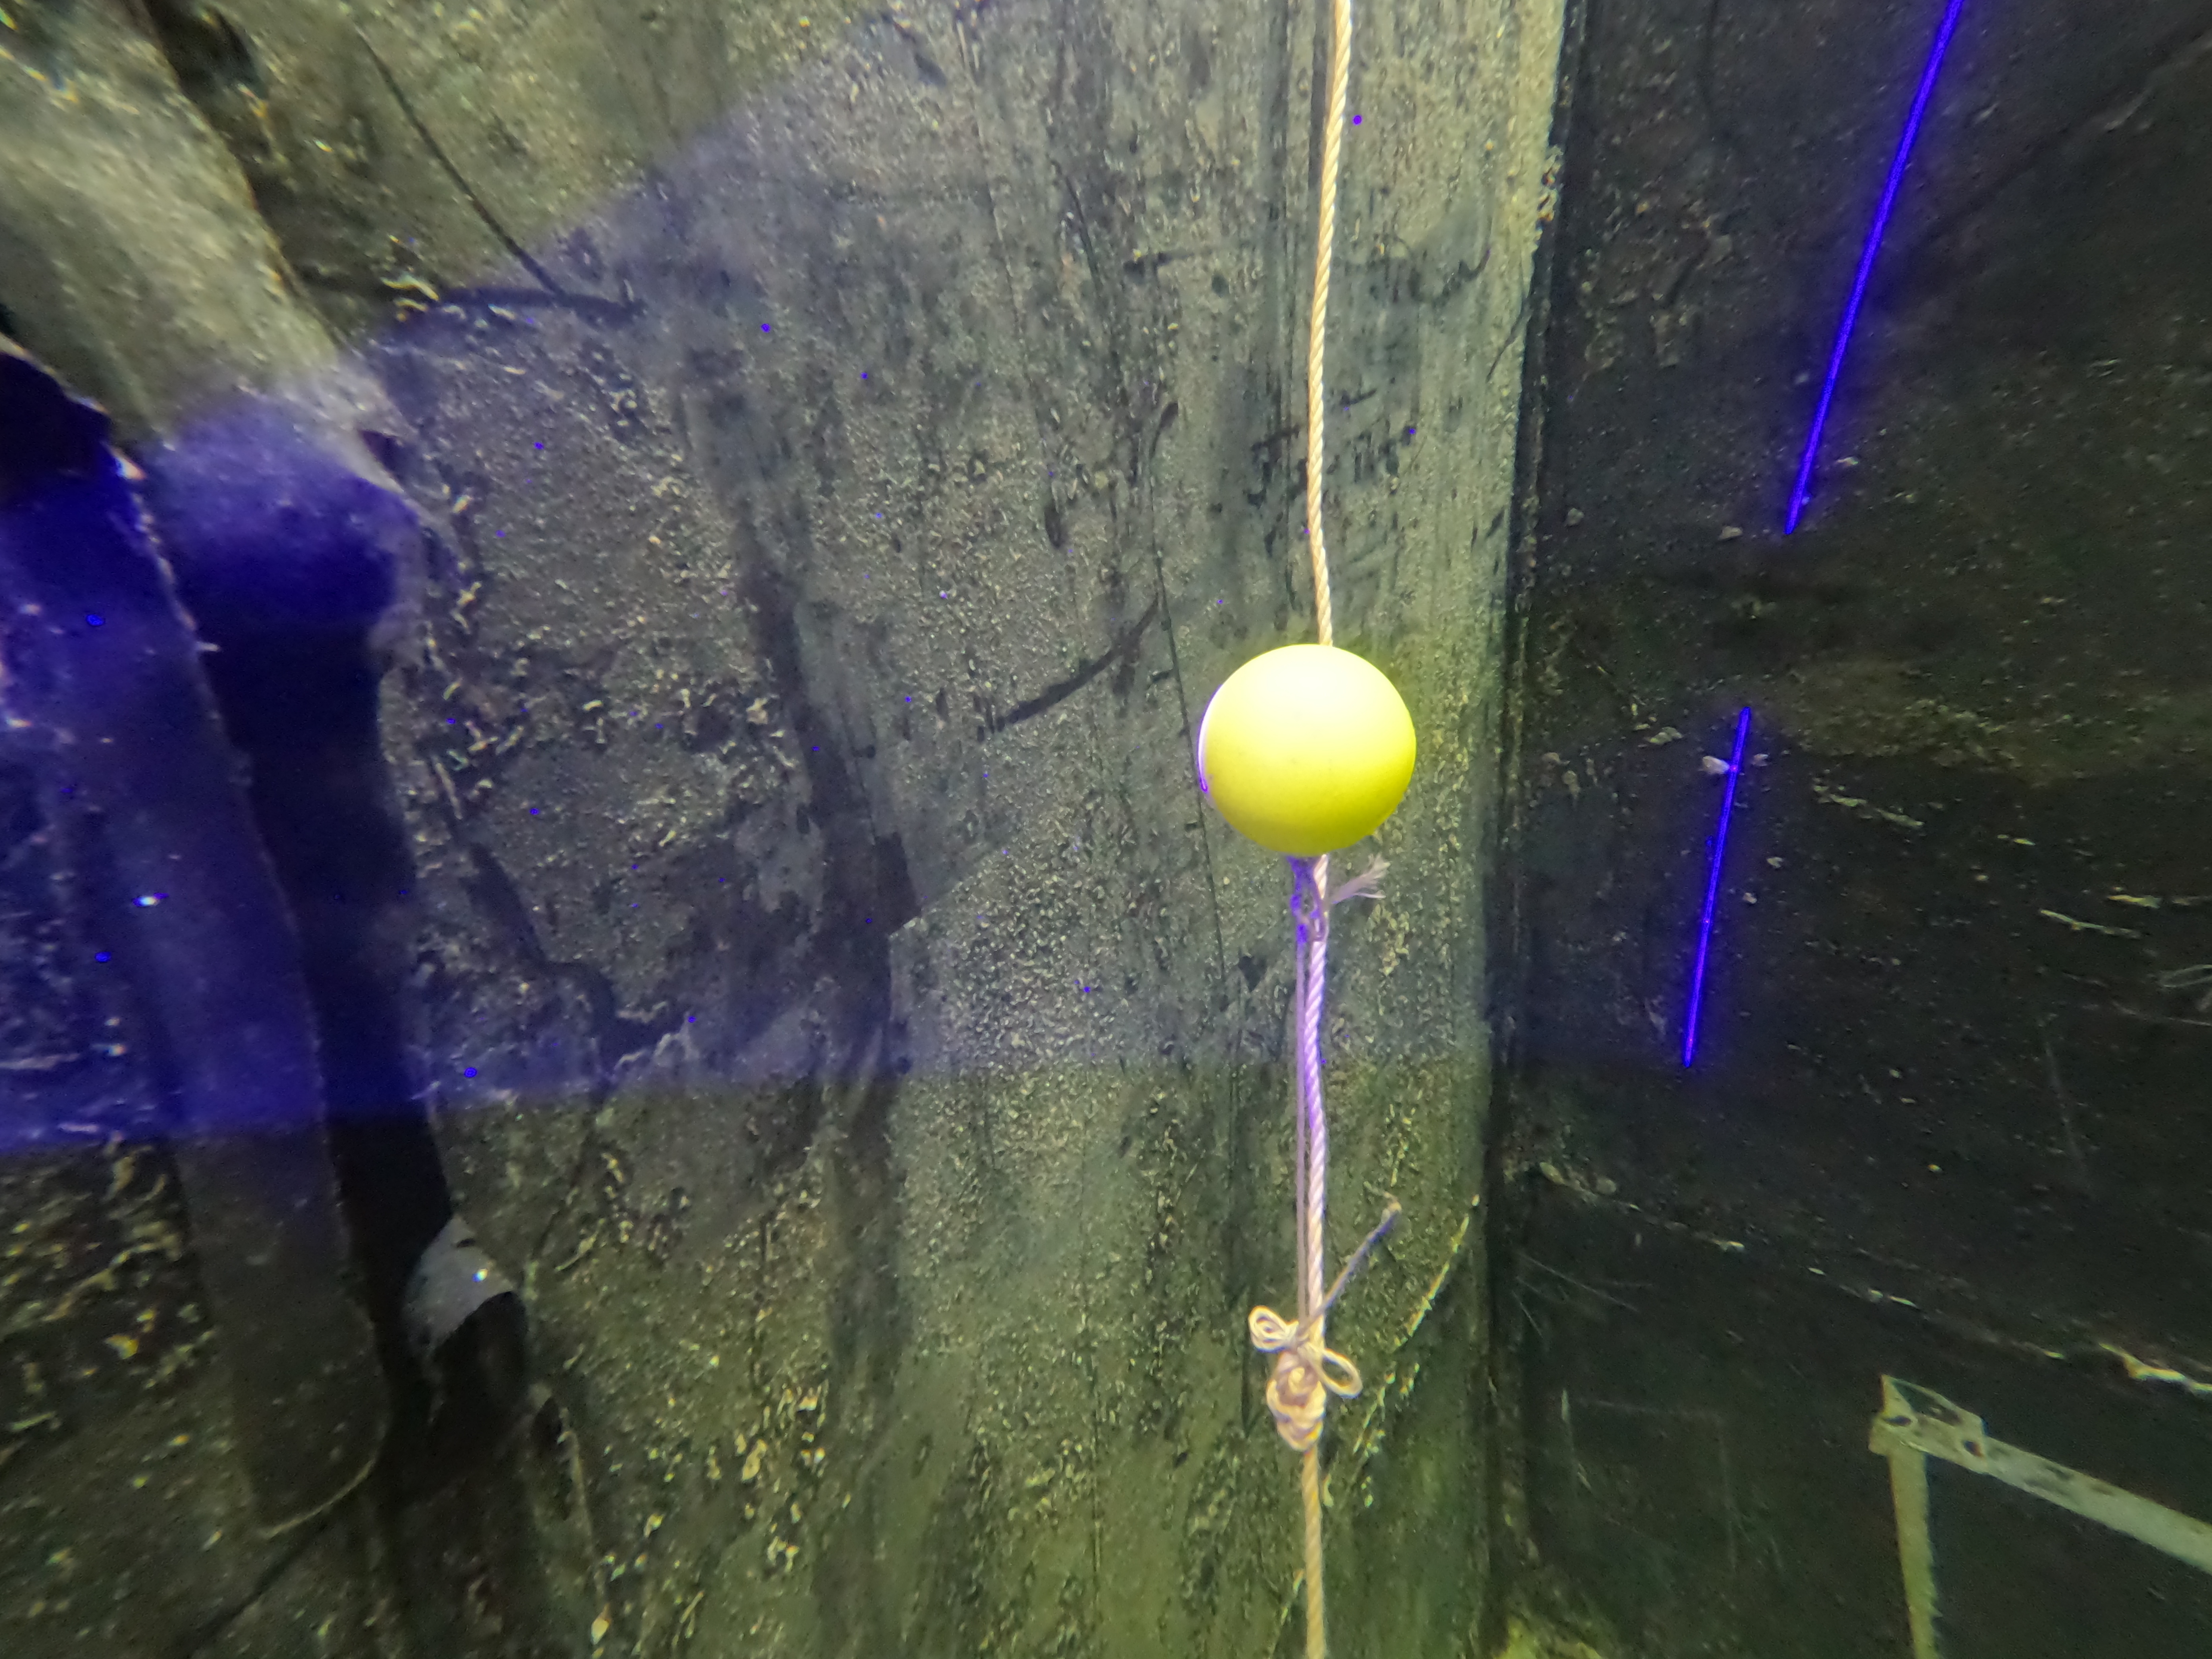

Supplement: Supplementary file 1342 [file G0032655.pdf › 6/G0032655.pdf]

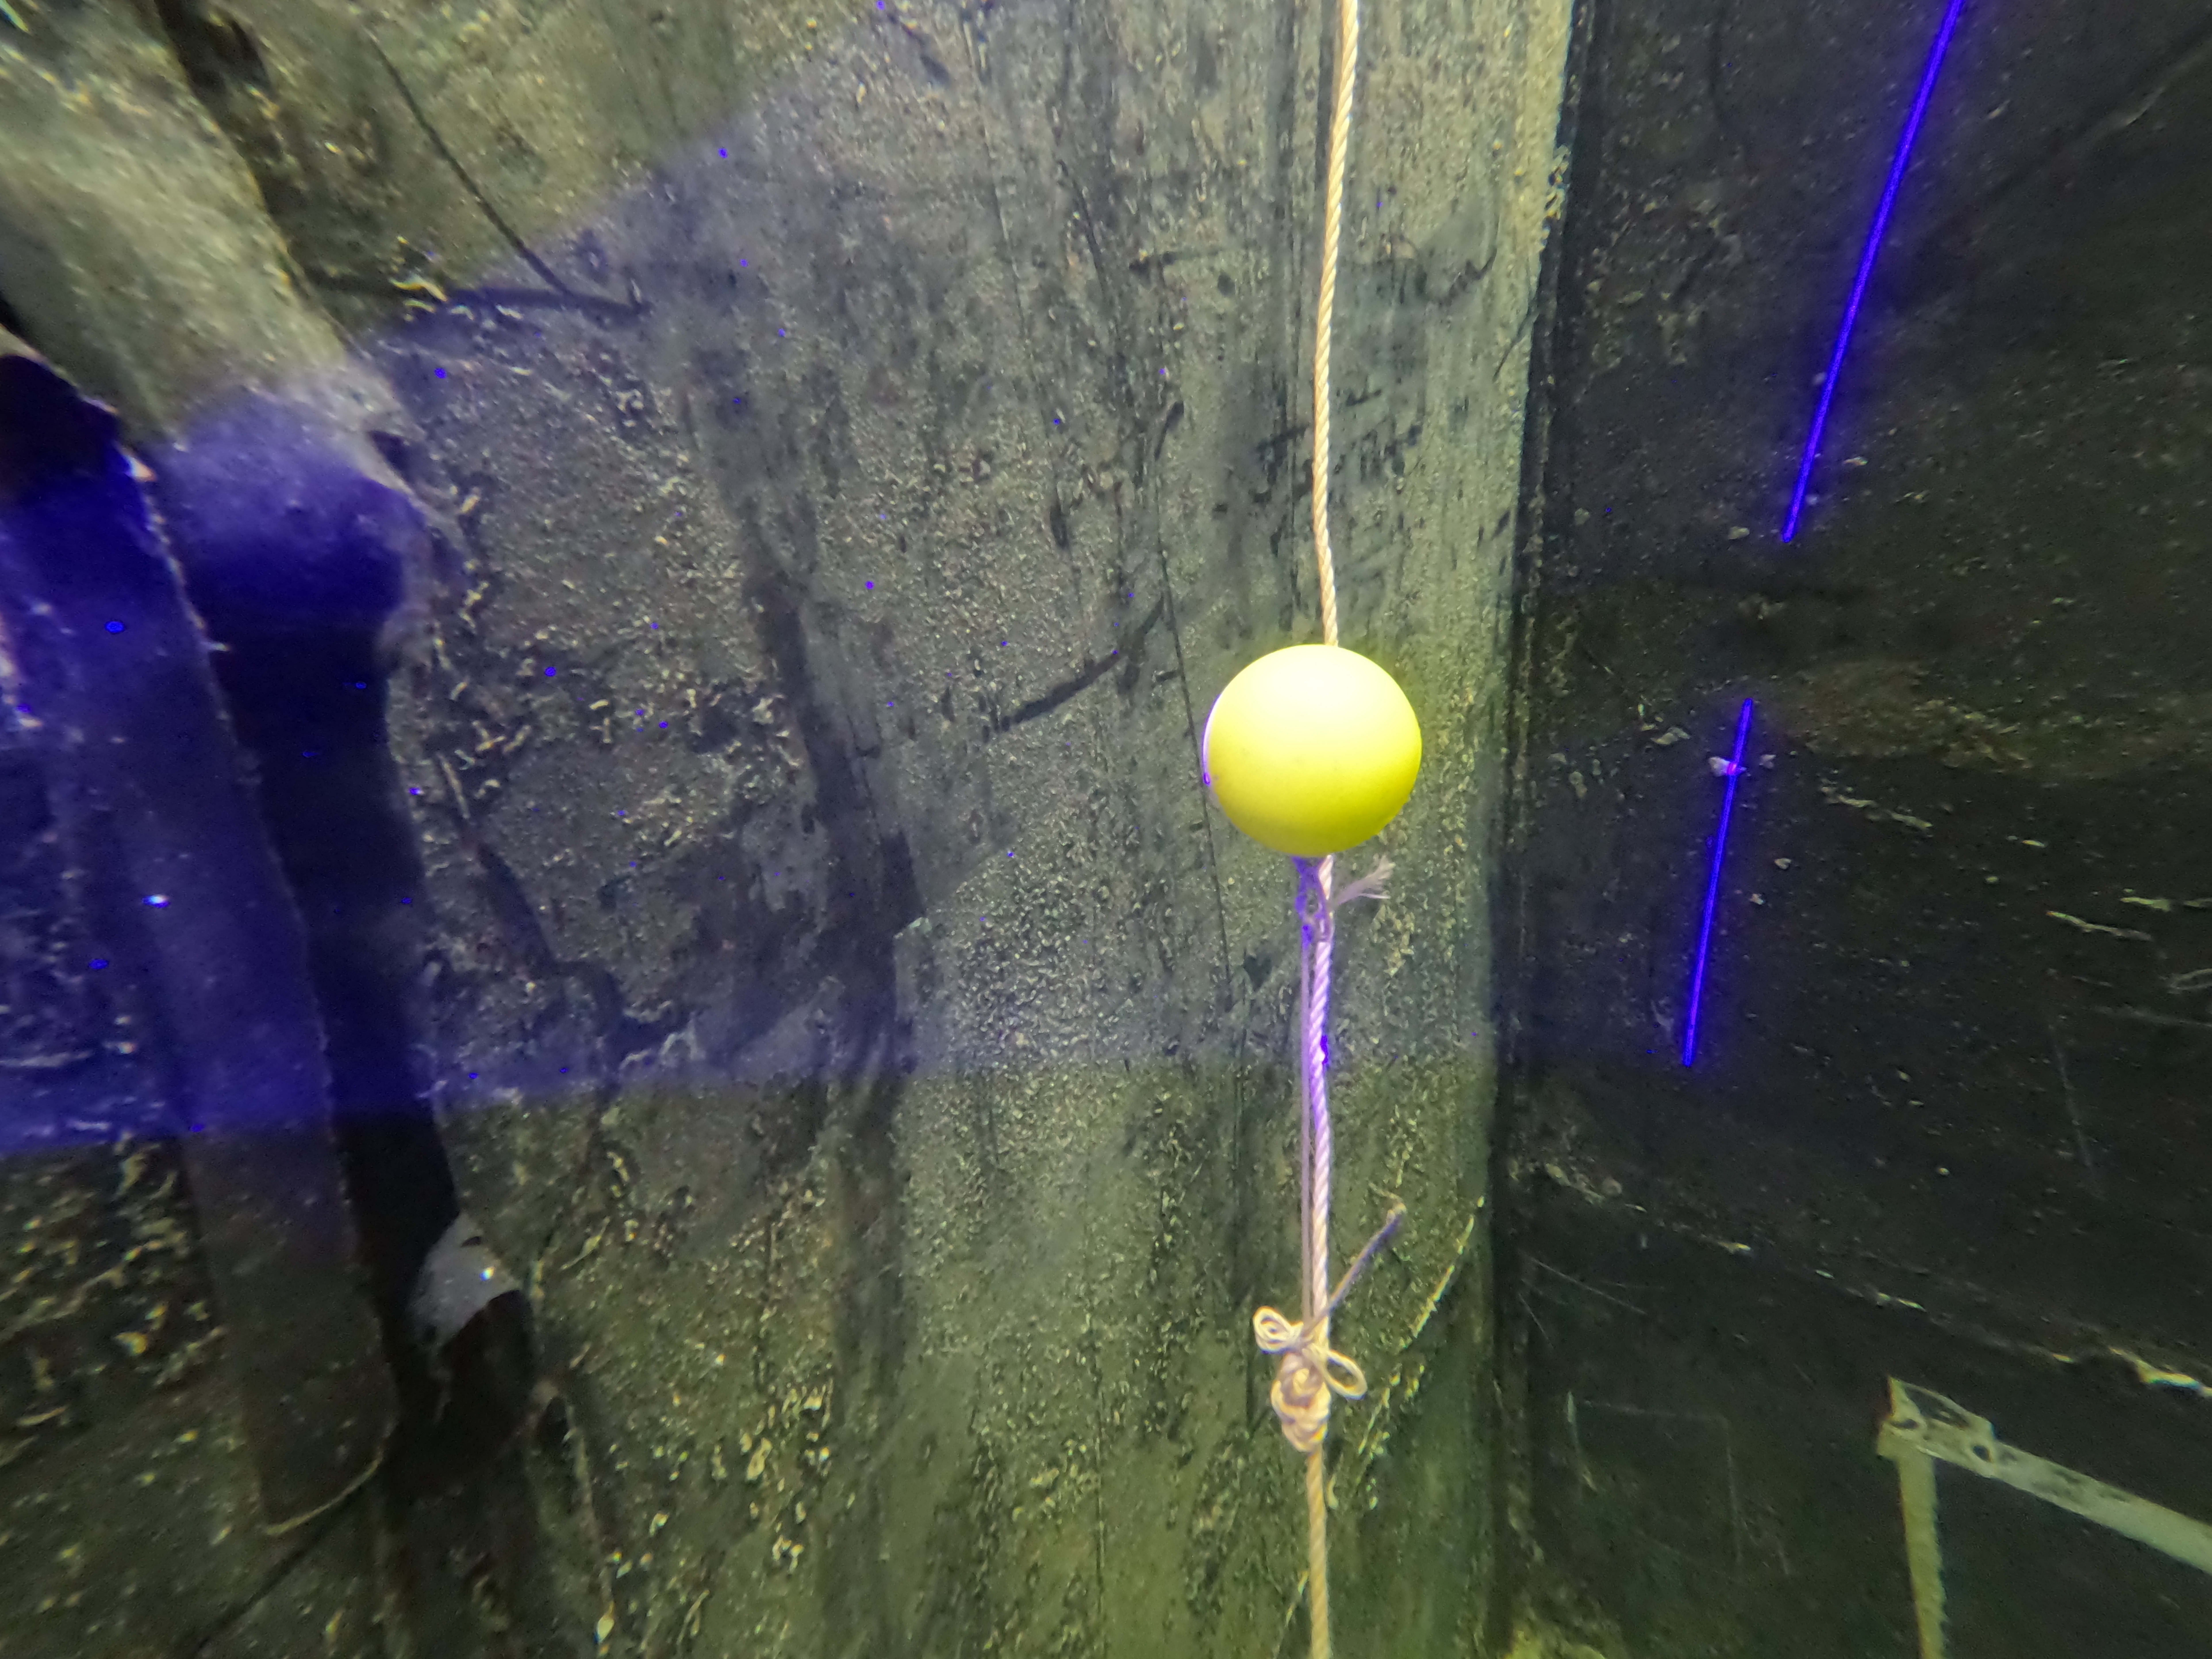

Supplement: Supplementary file 1343 [file G0032656.pdf › 6/G0032656.pdf]

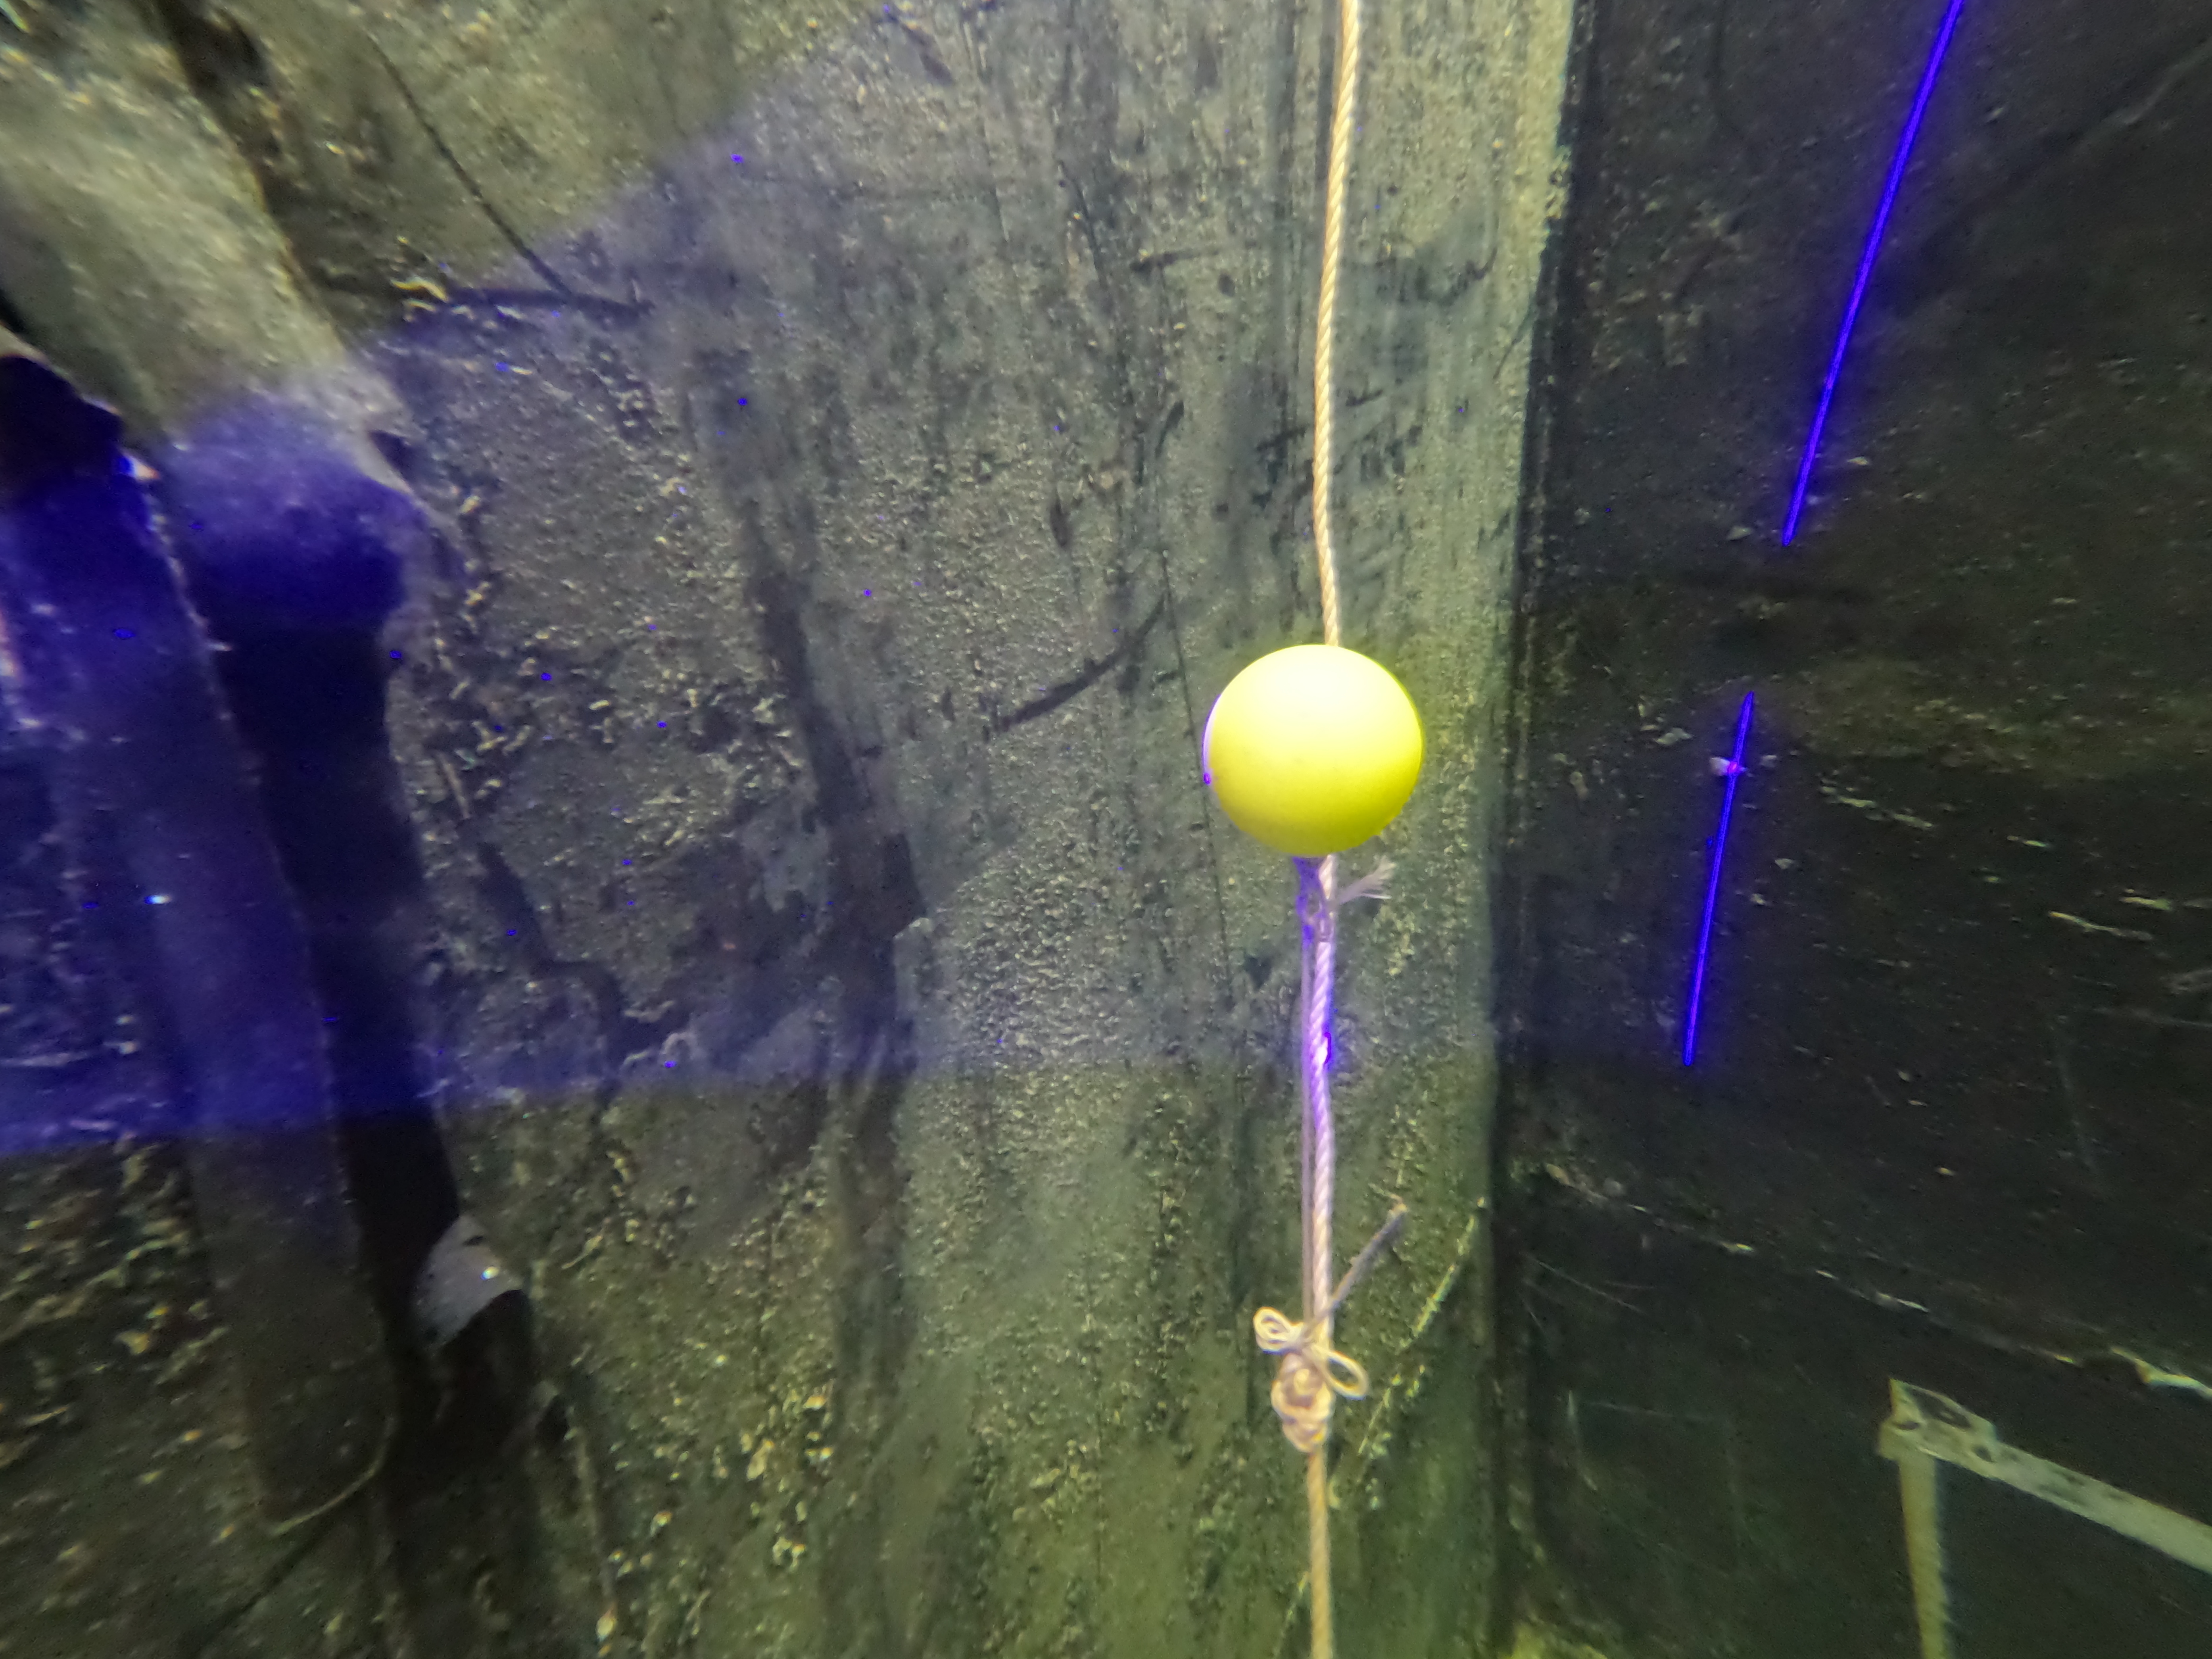

Supplement: Supplementary file 1344 [file G0032657.pdf › 6/G0032657.pdf]

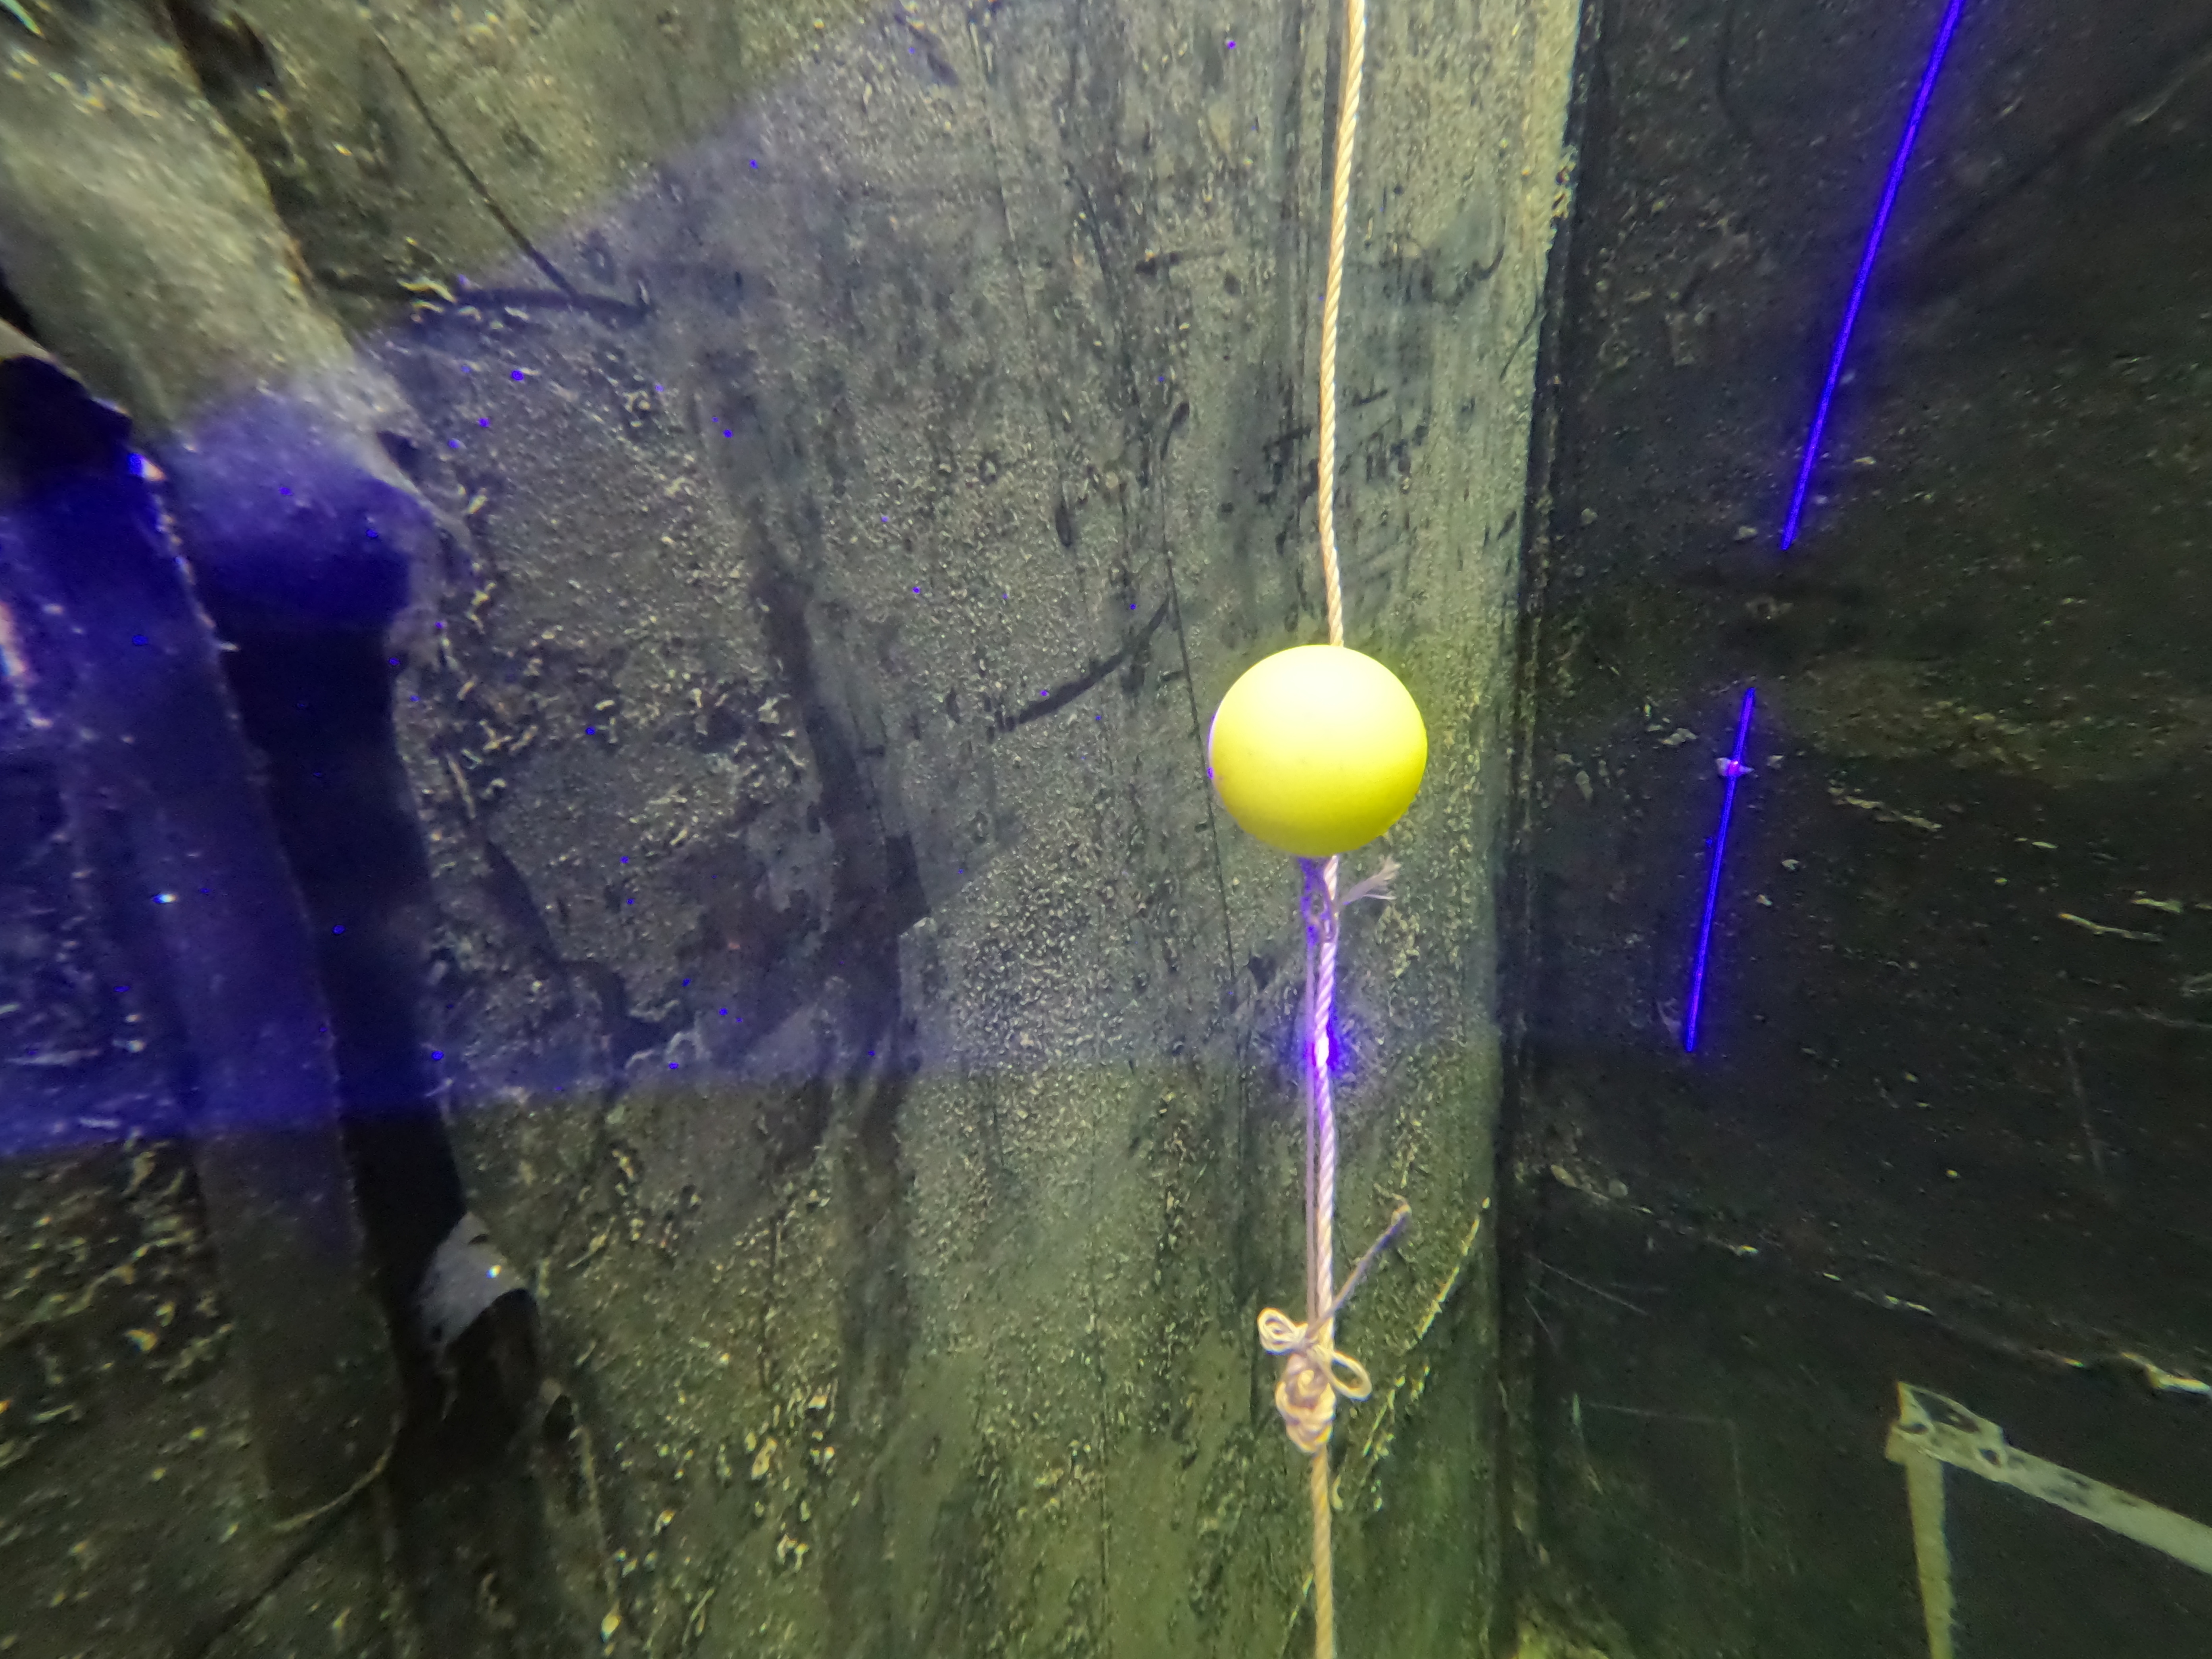

Supplement: Supplementary file 1345 [file G0032658.pdf › 6/G0032658.pdf]

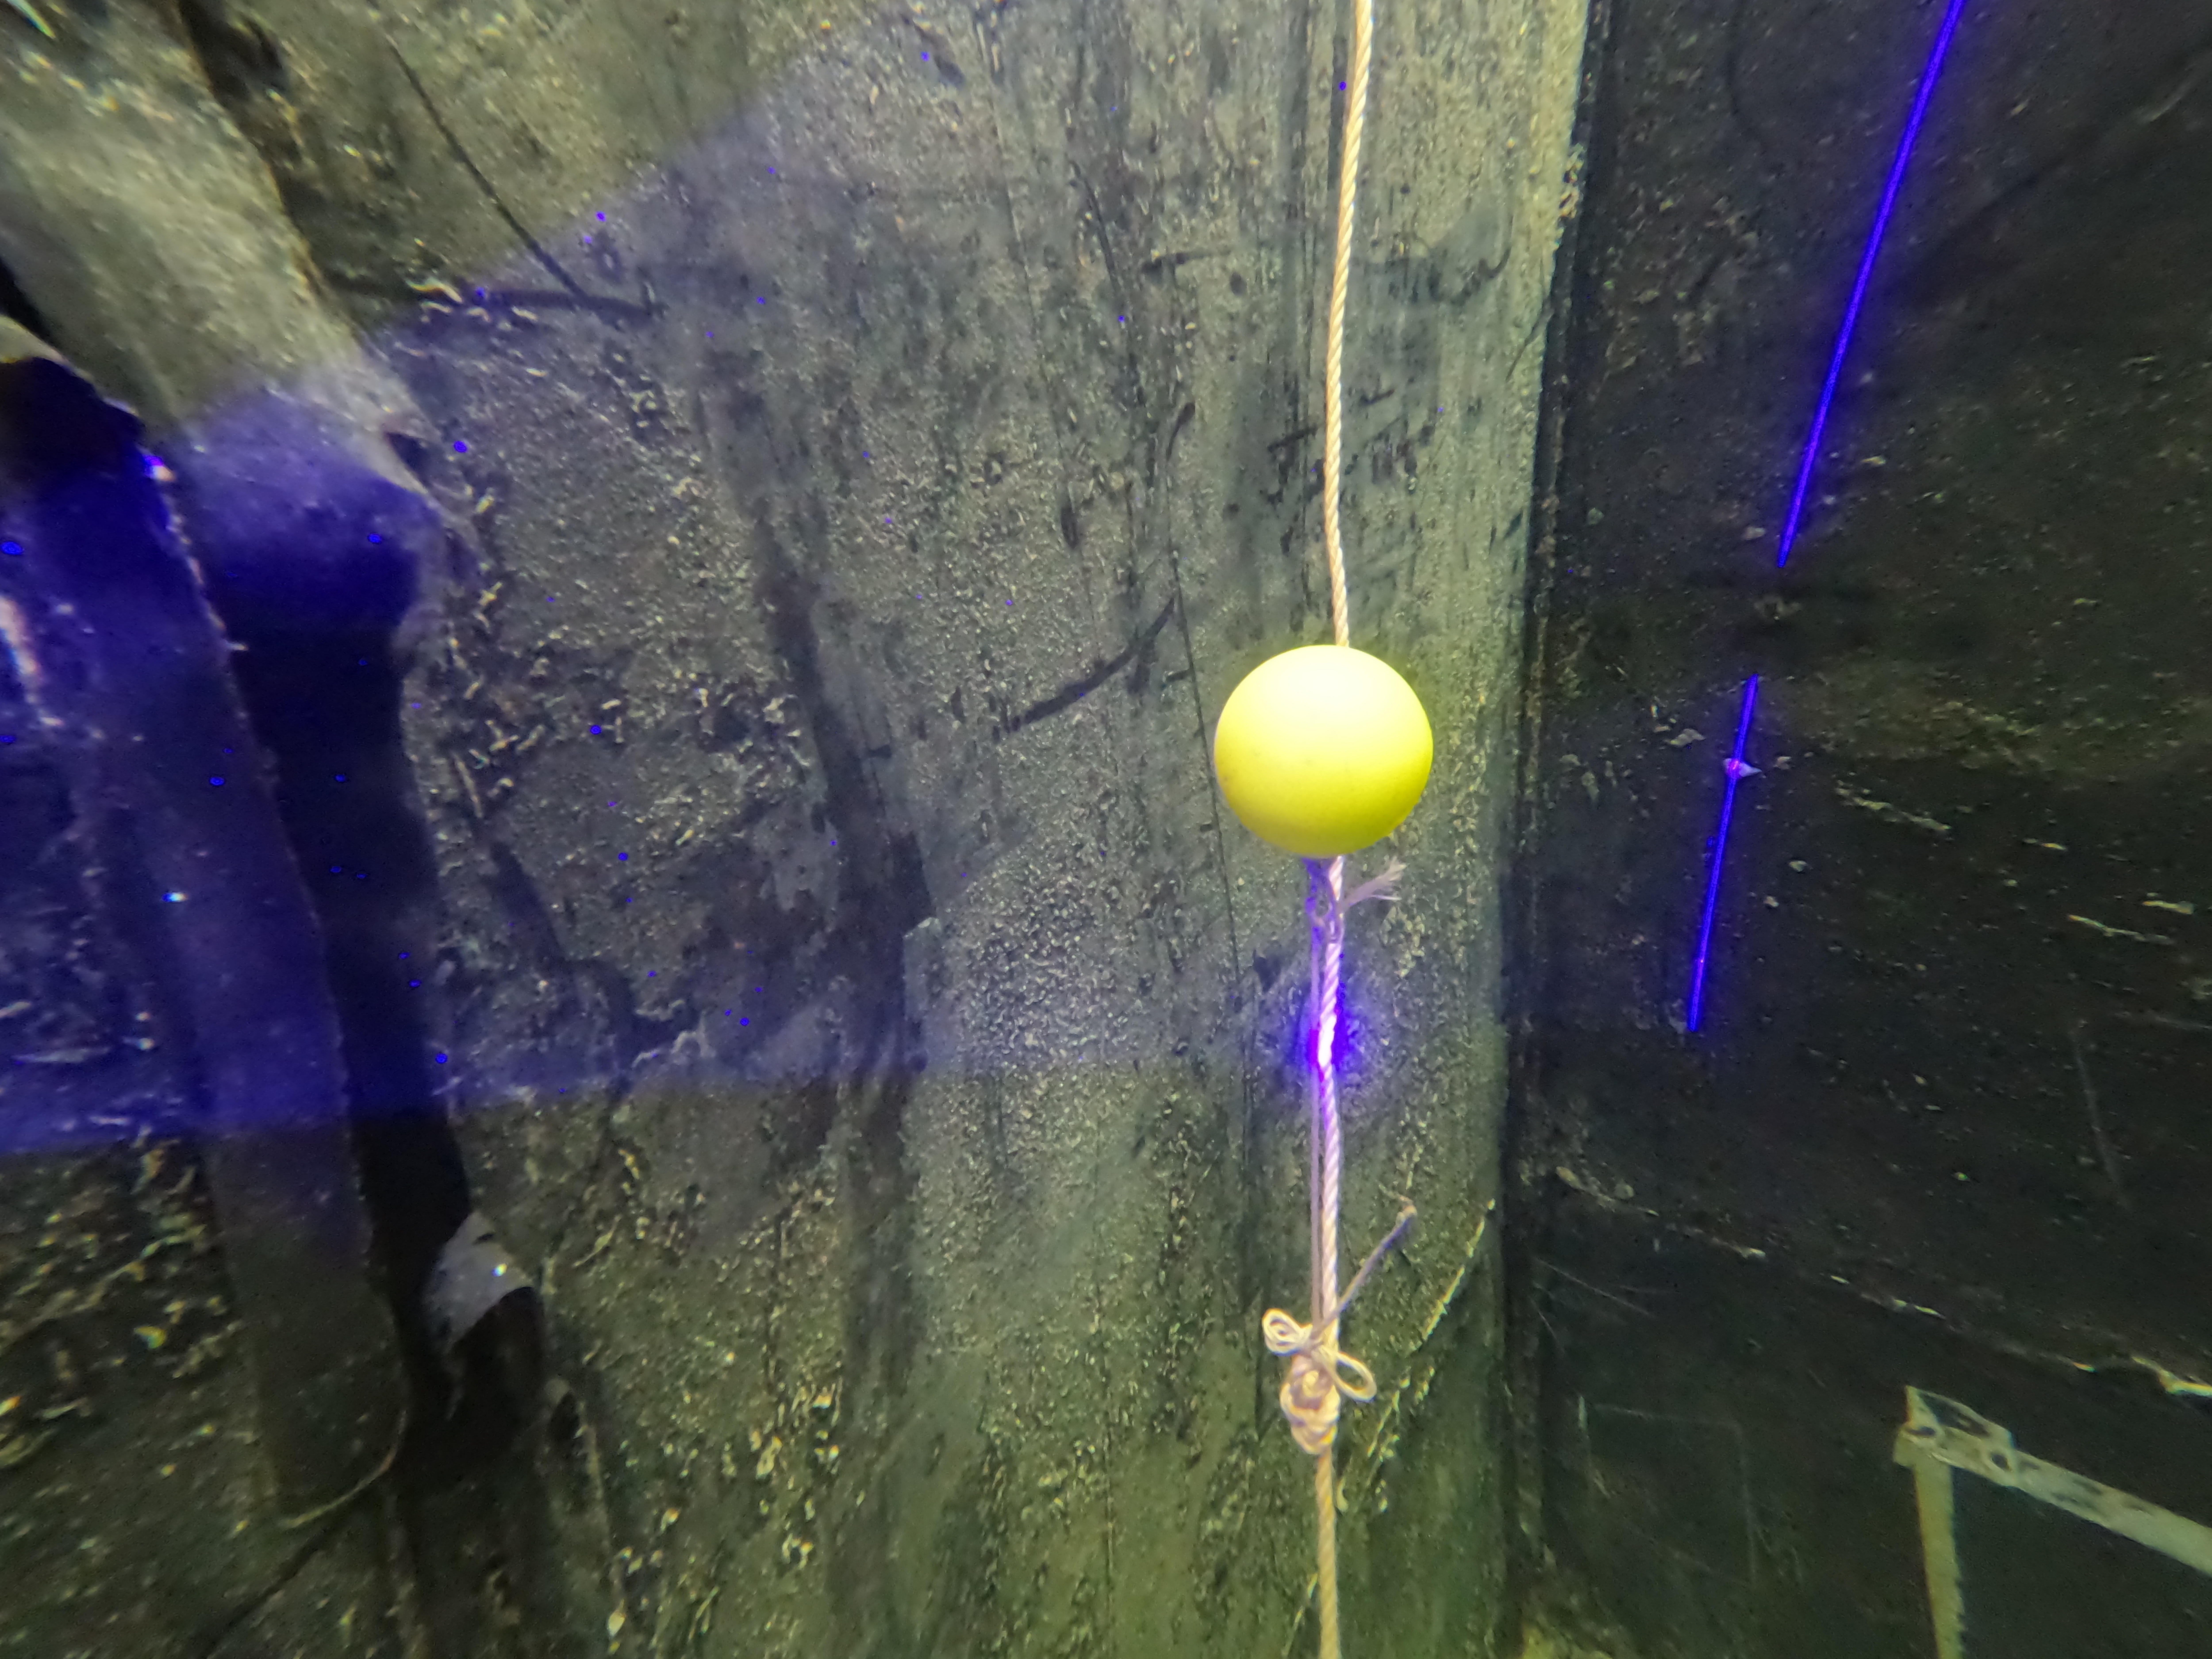

Supplement: Supplementary file 1346 [file G0032659.pdf › 6/G0032659.pdf]

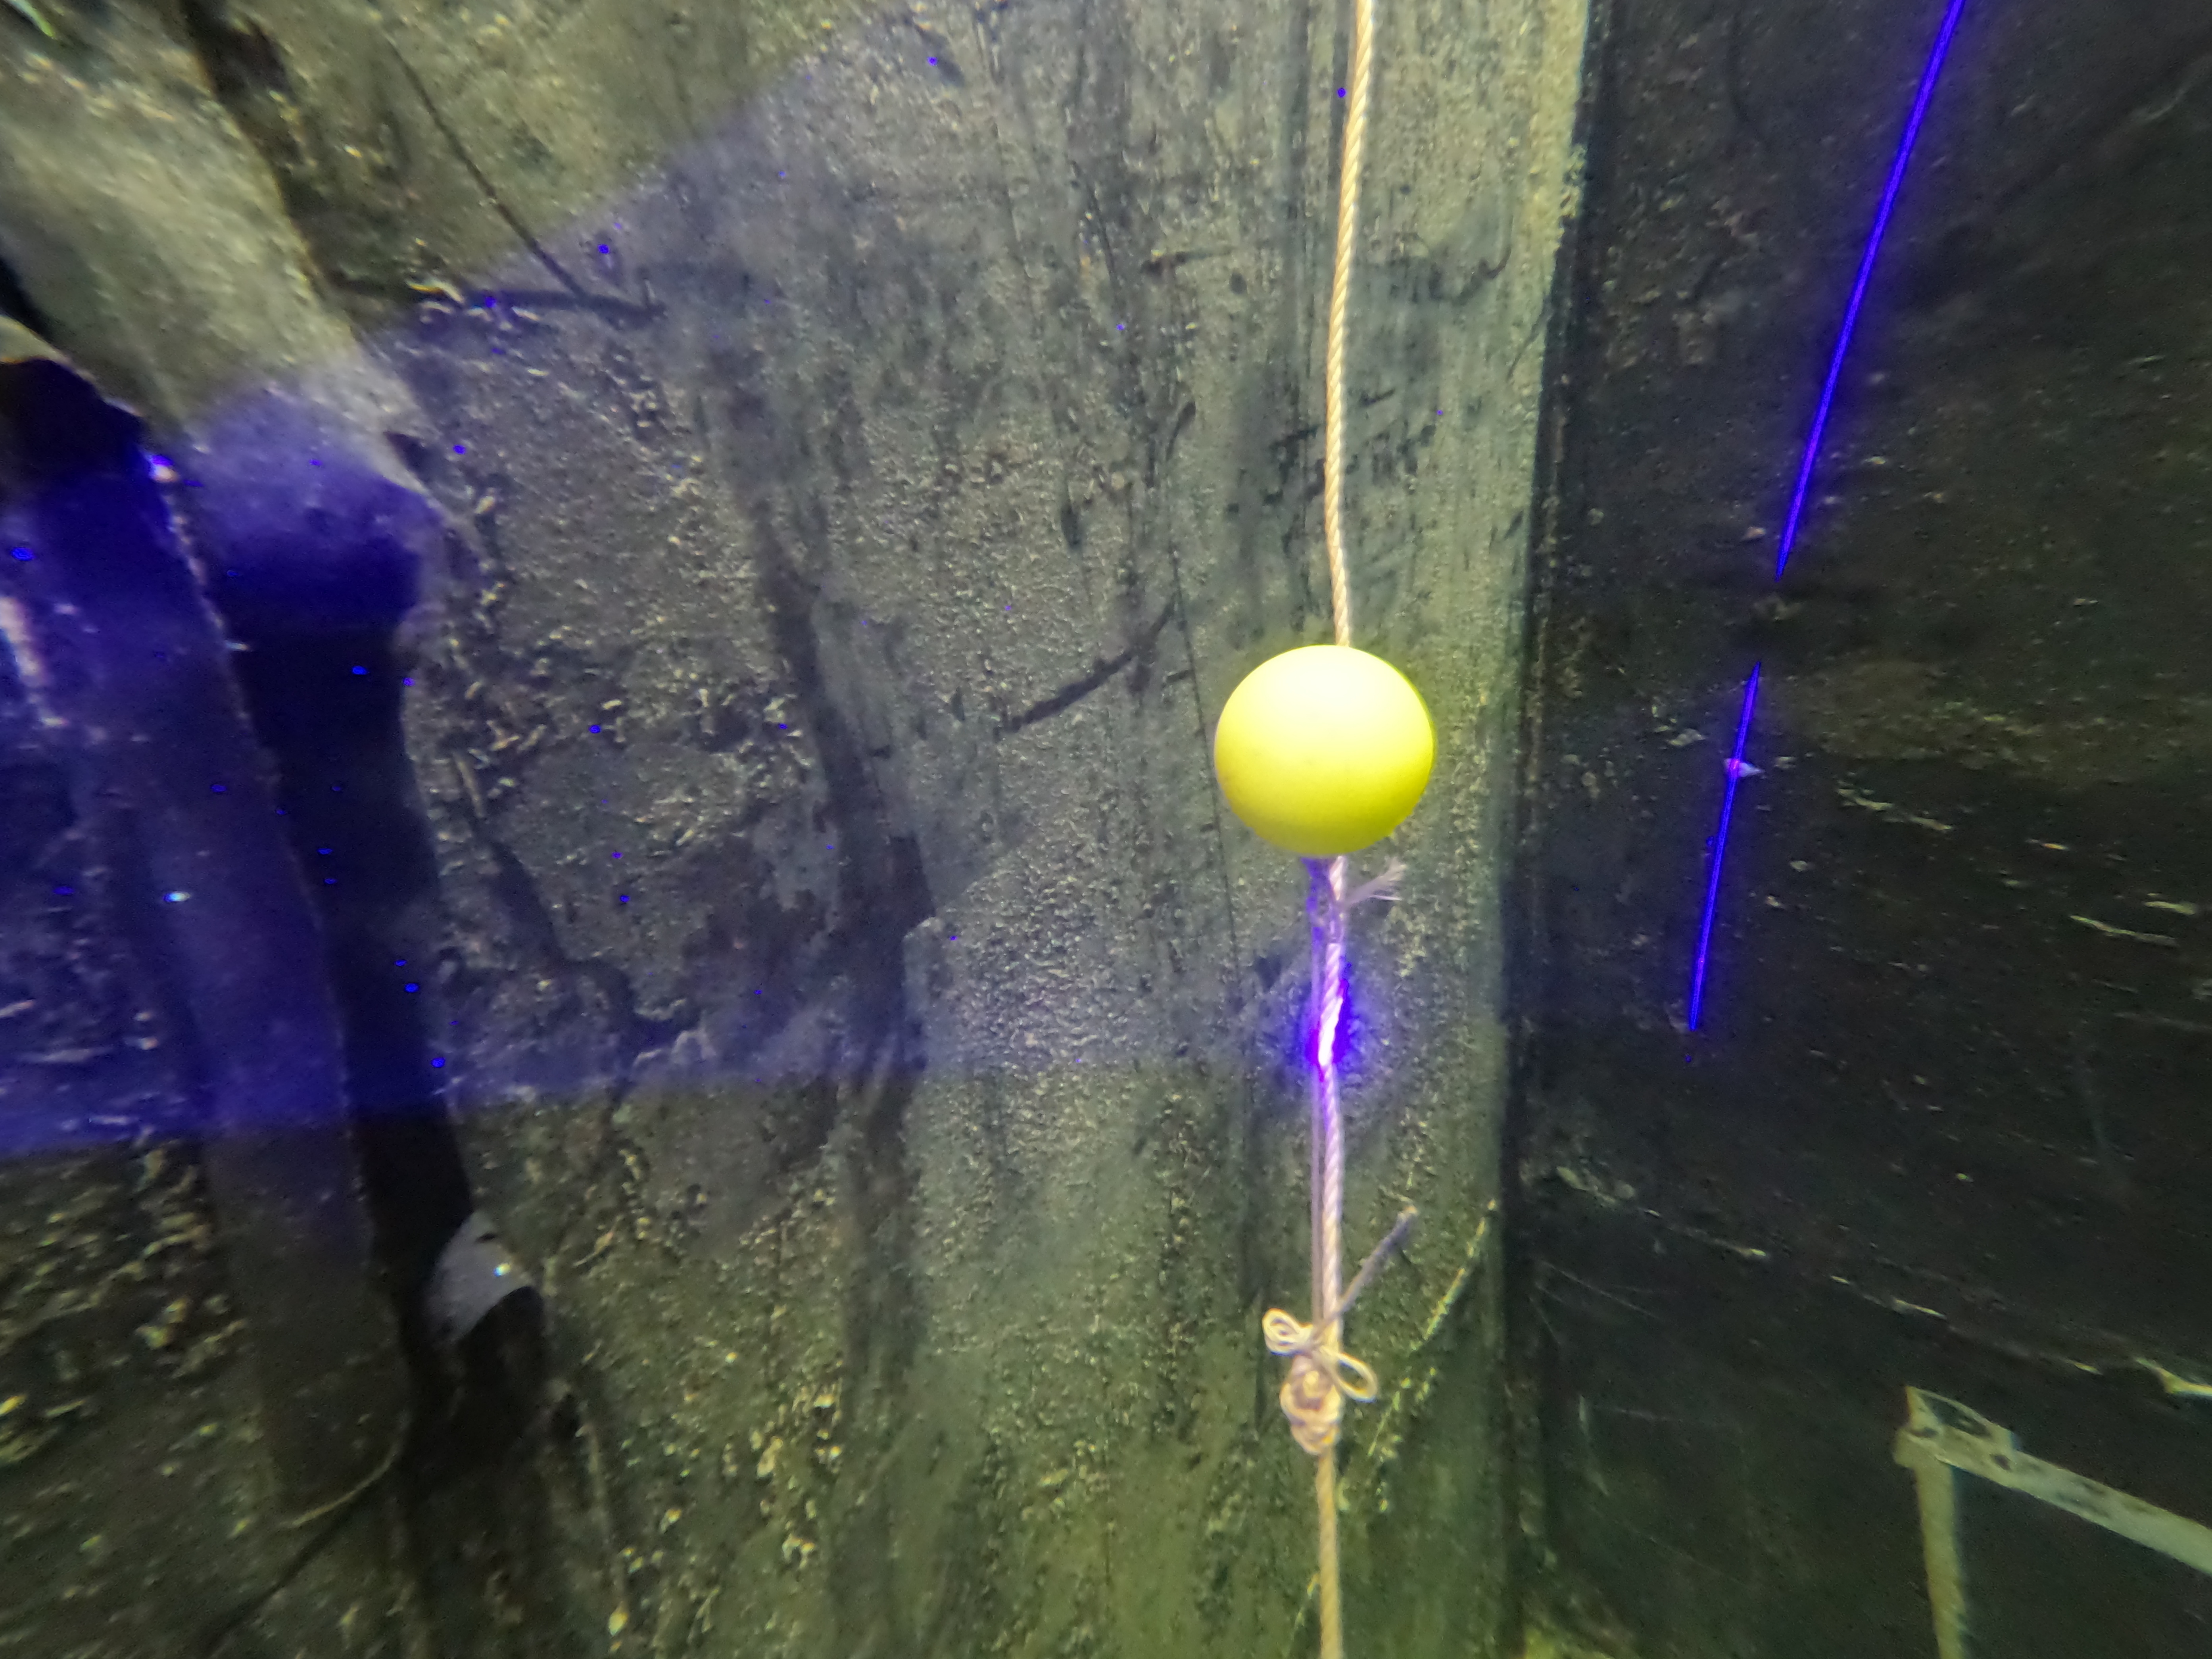

Supplement: Supplementary file 1347 [file G0032660.pdf › 6/G0032660.pdf]

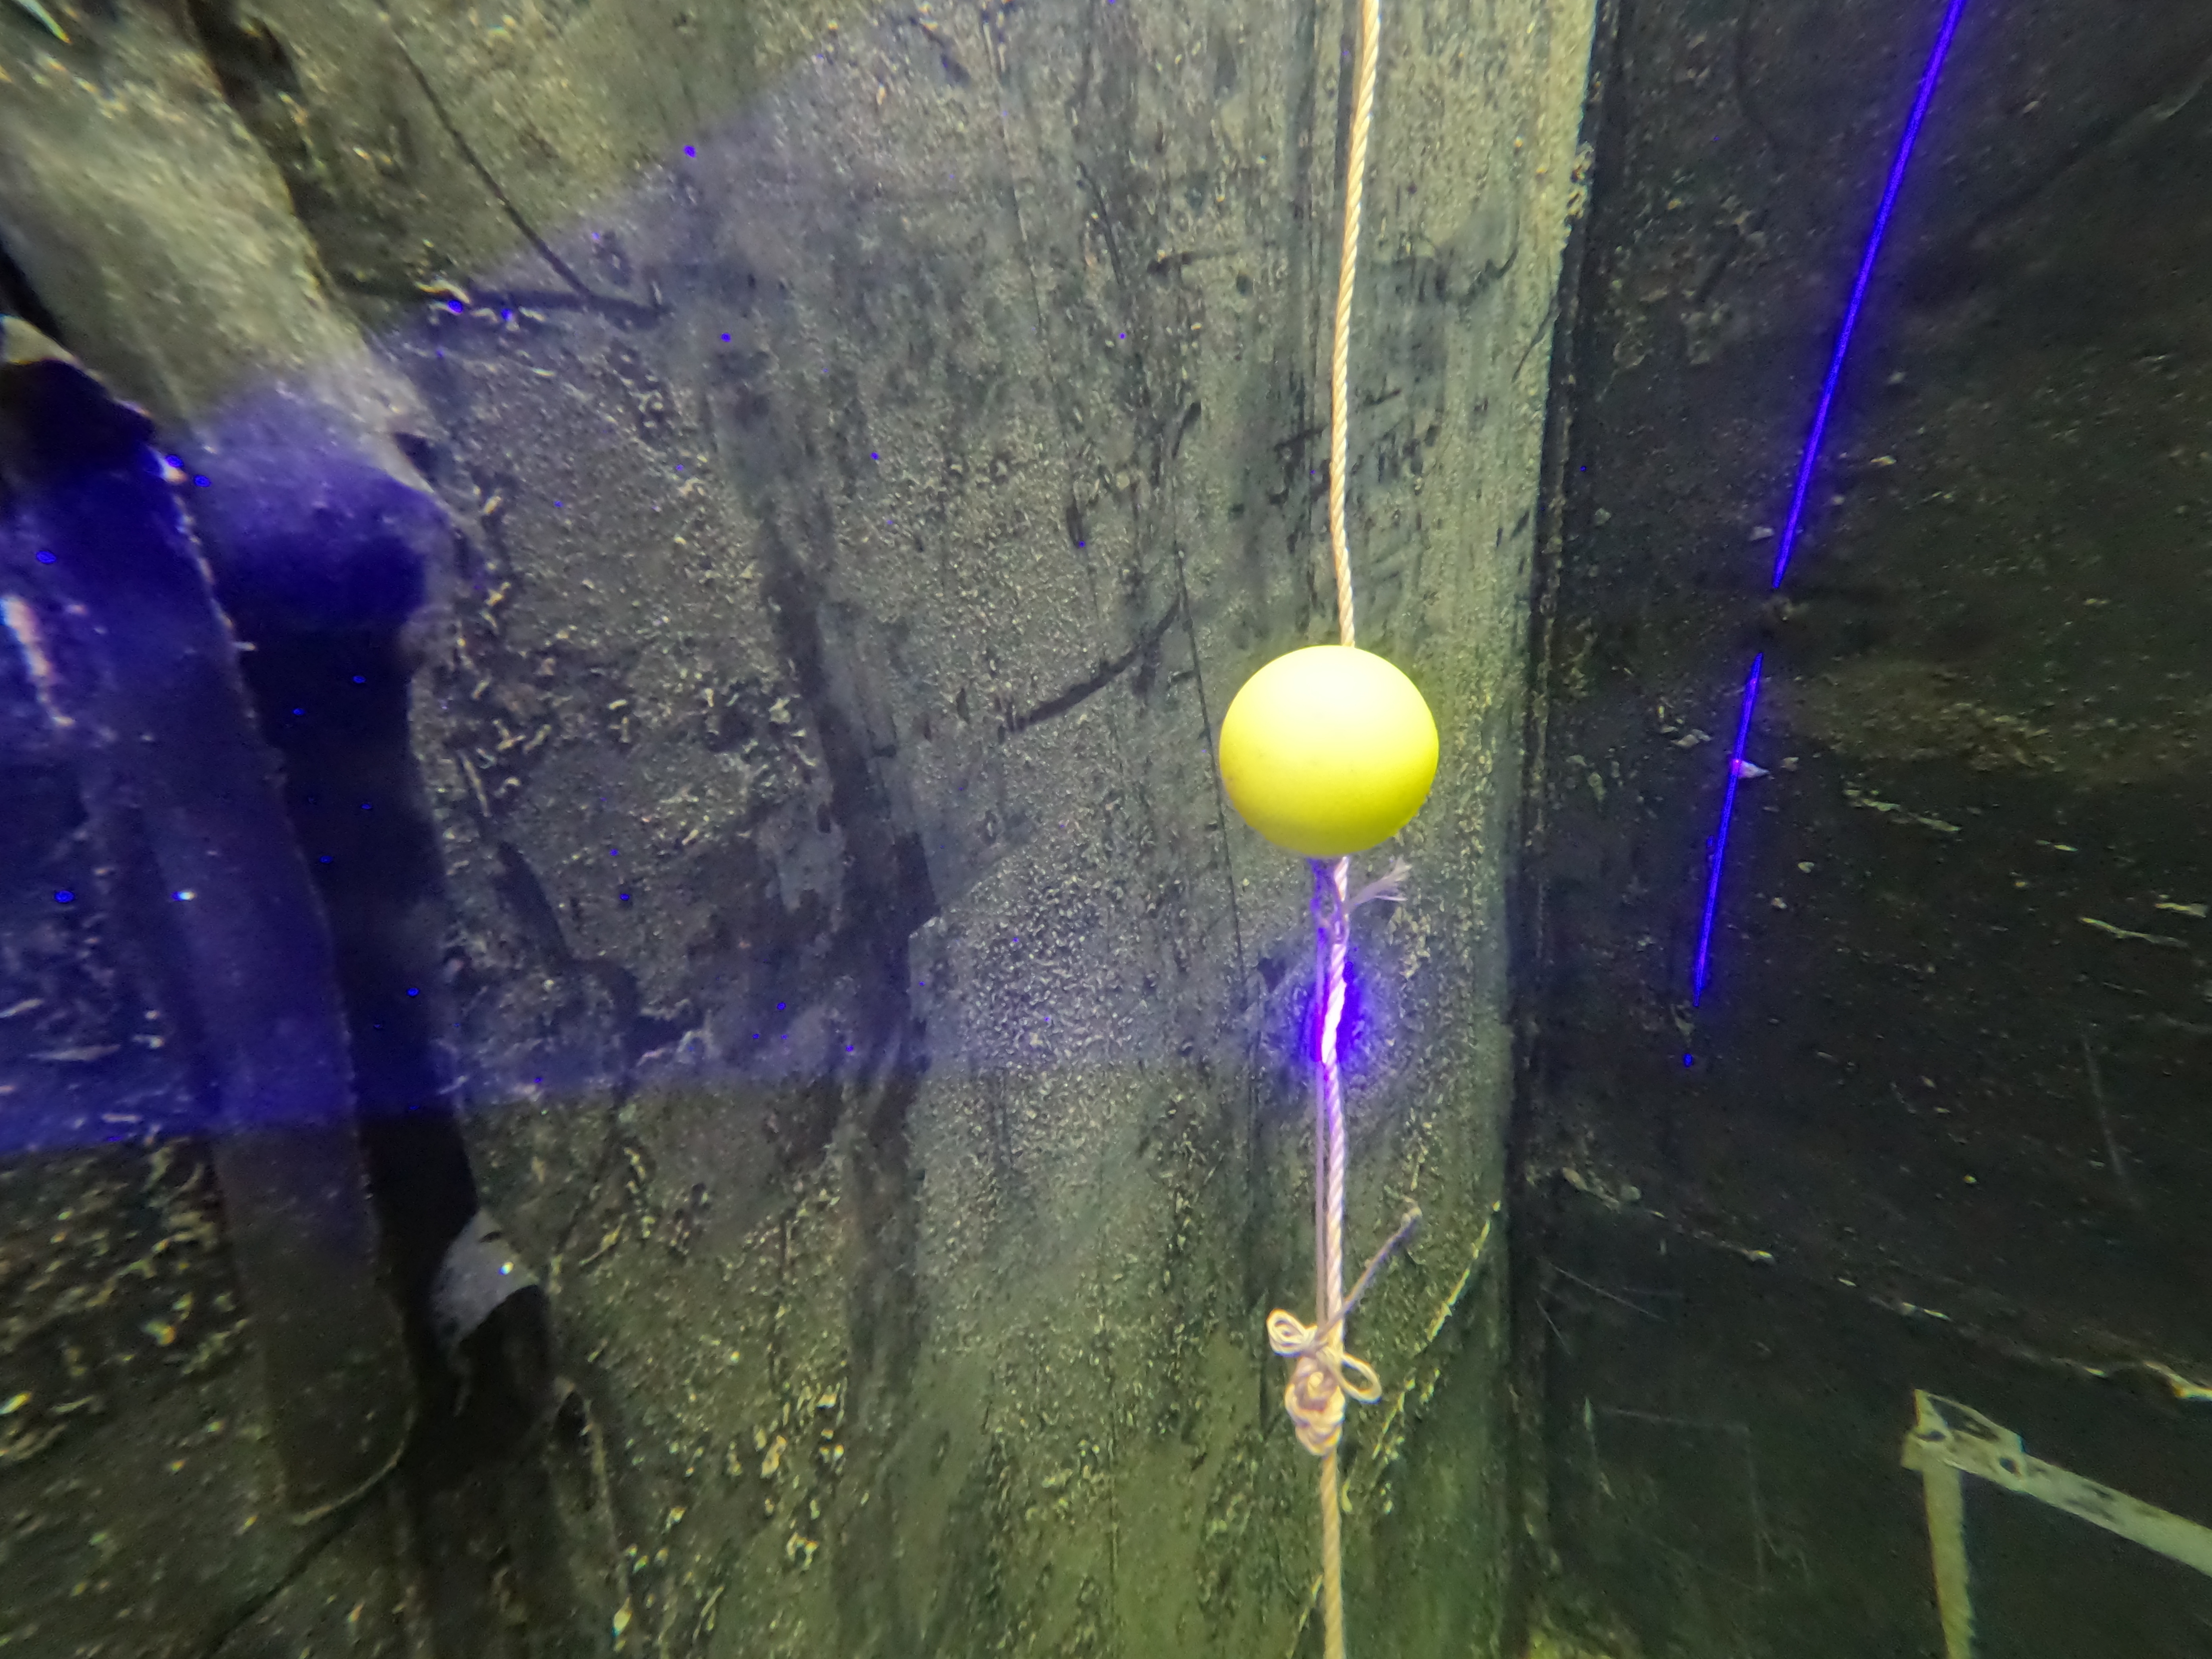

Supplement: Supplementary file 1348 [file G0032661.pdf › 6/G0032661.pdf]

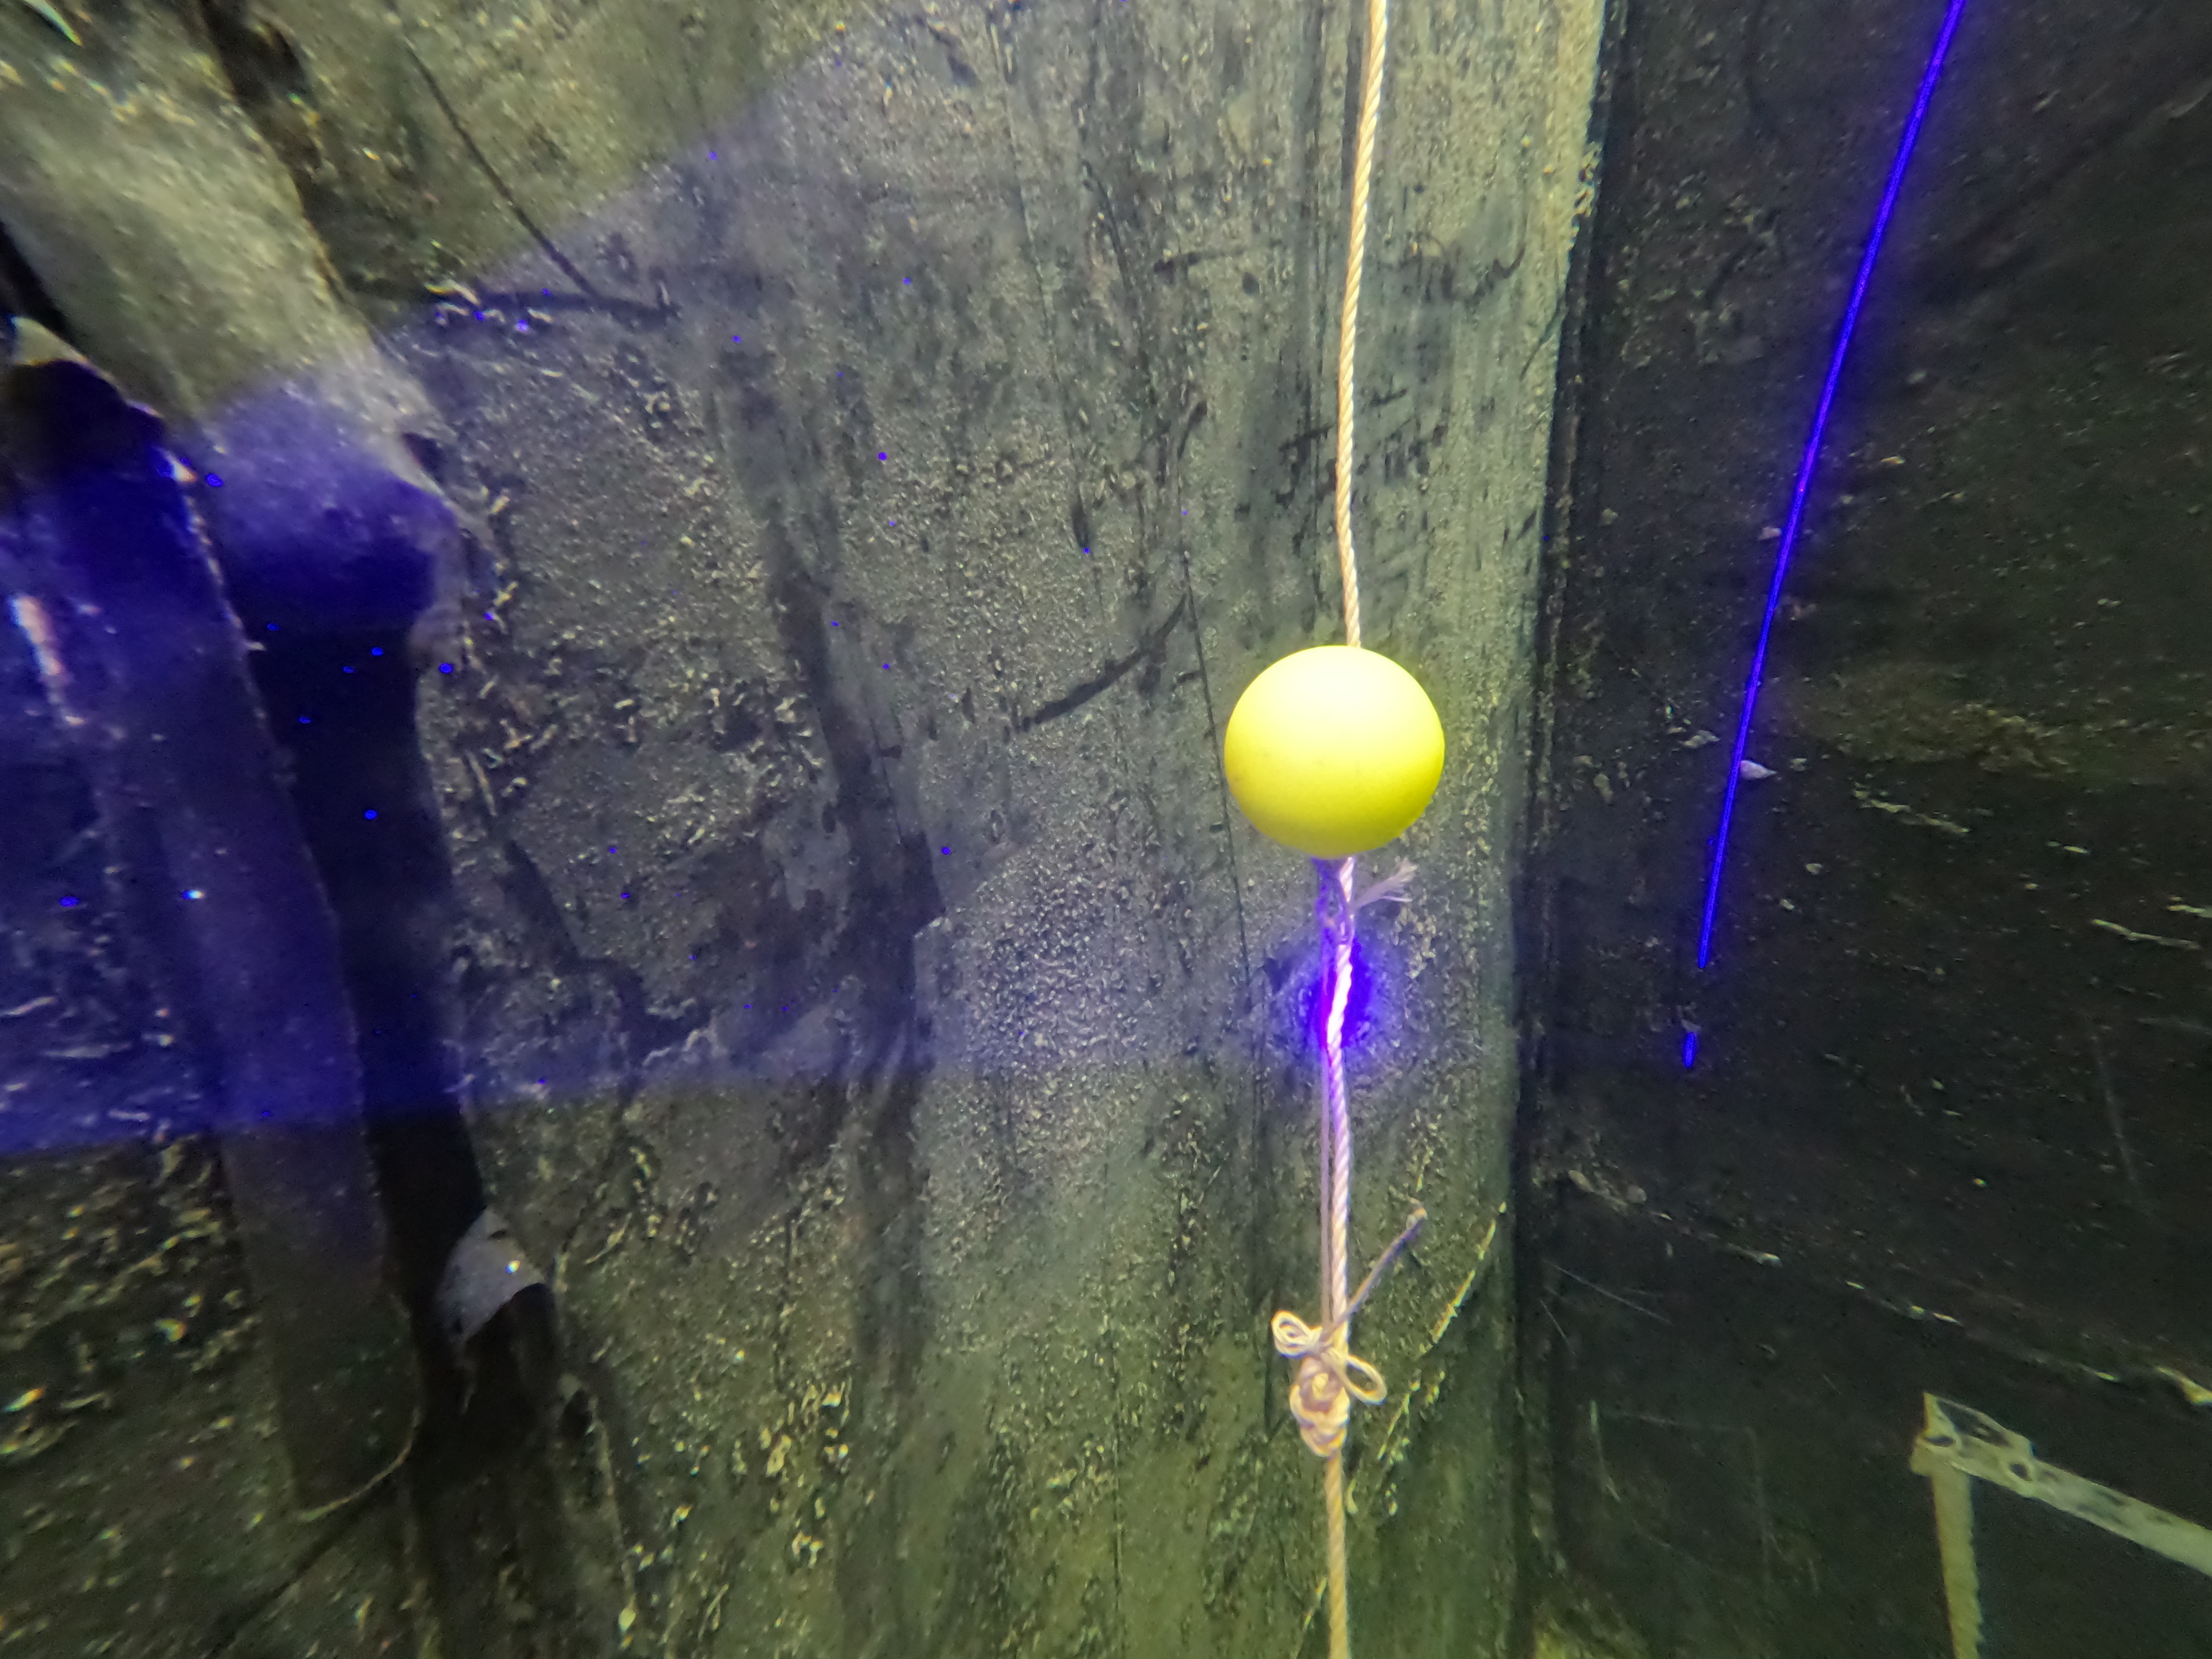

Supplement: Supplementary file 1349 [file G0032662.pdf › 6/G0032662.pdf]

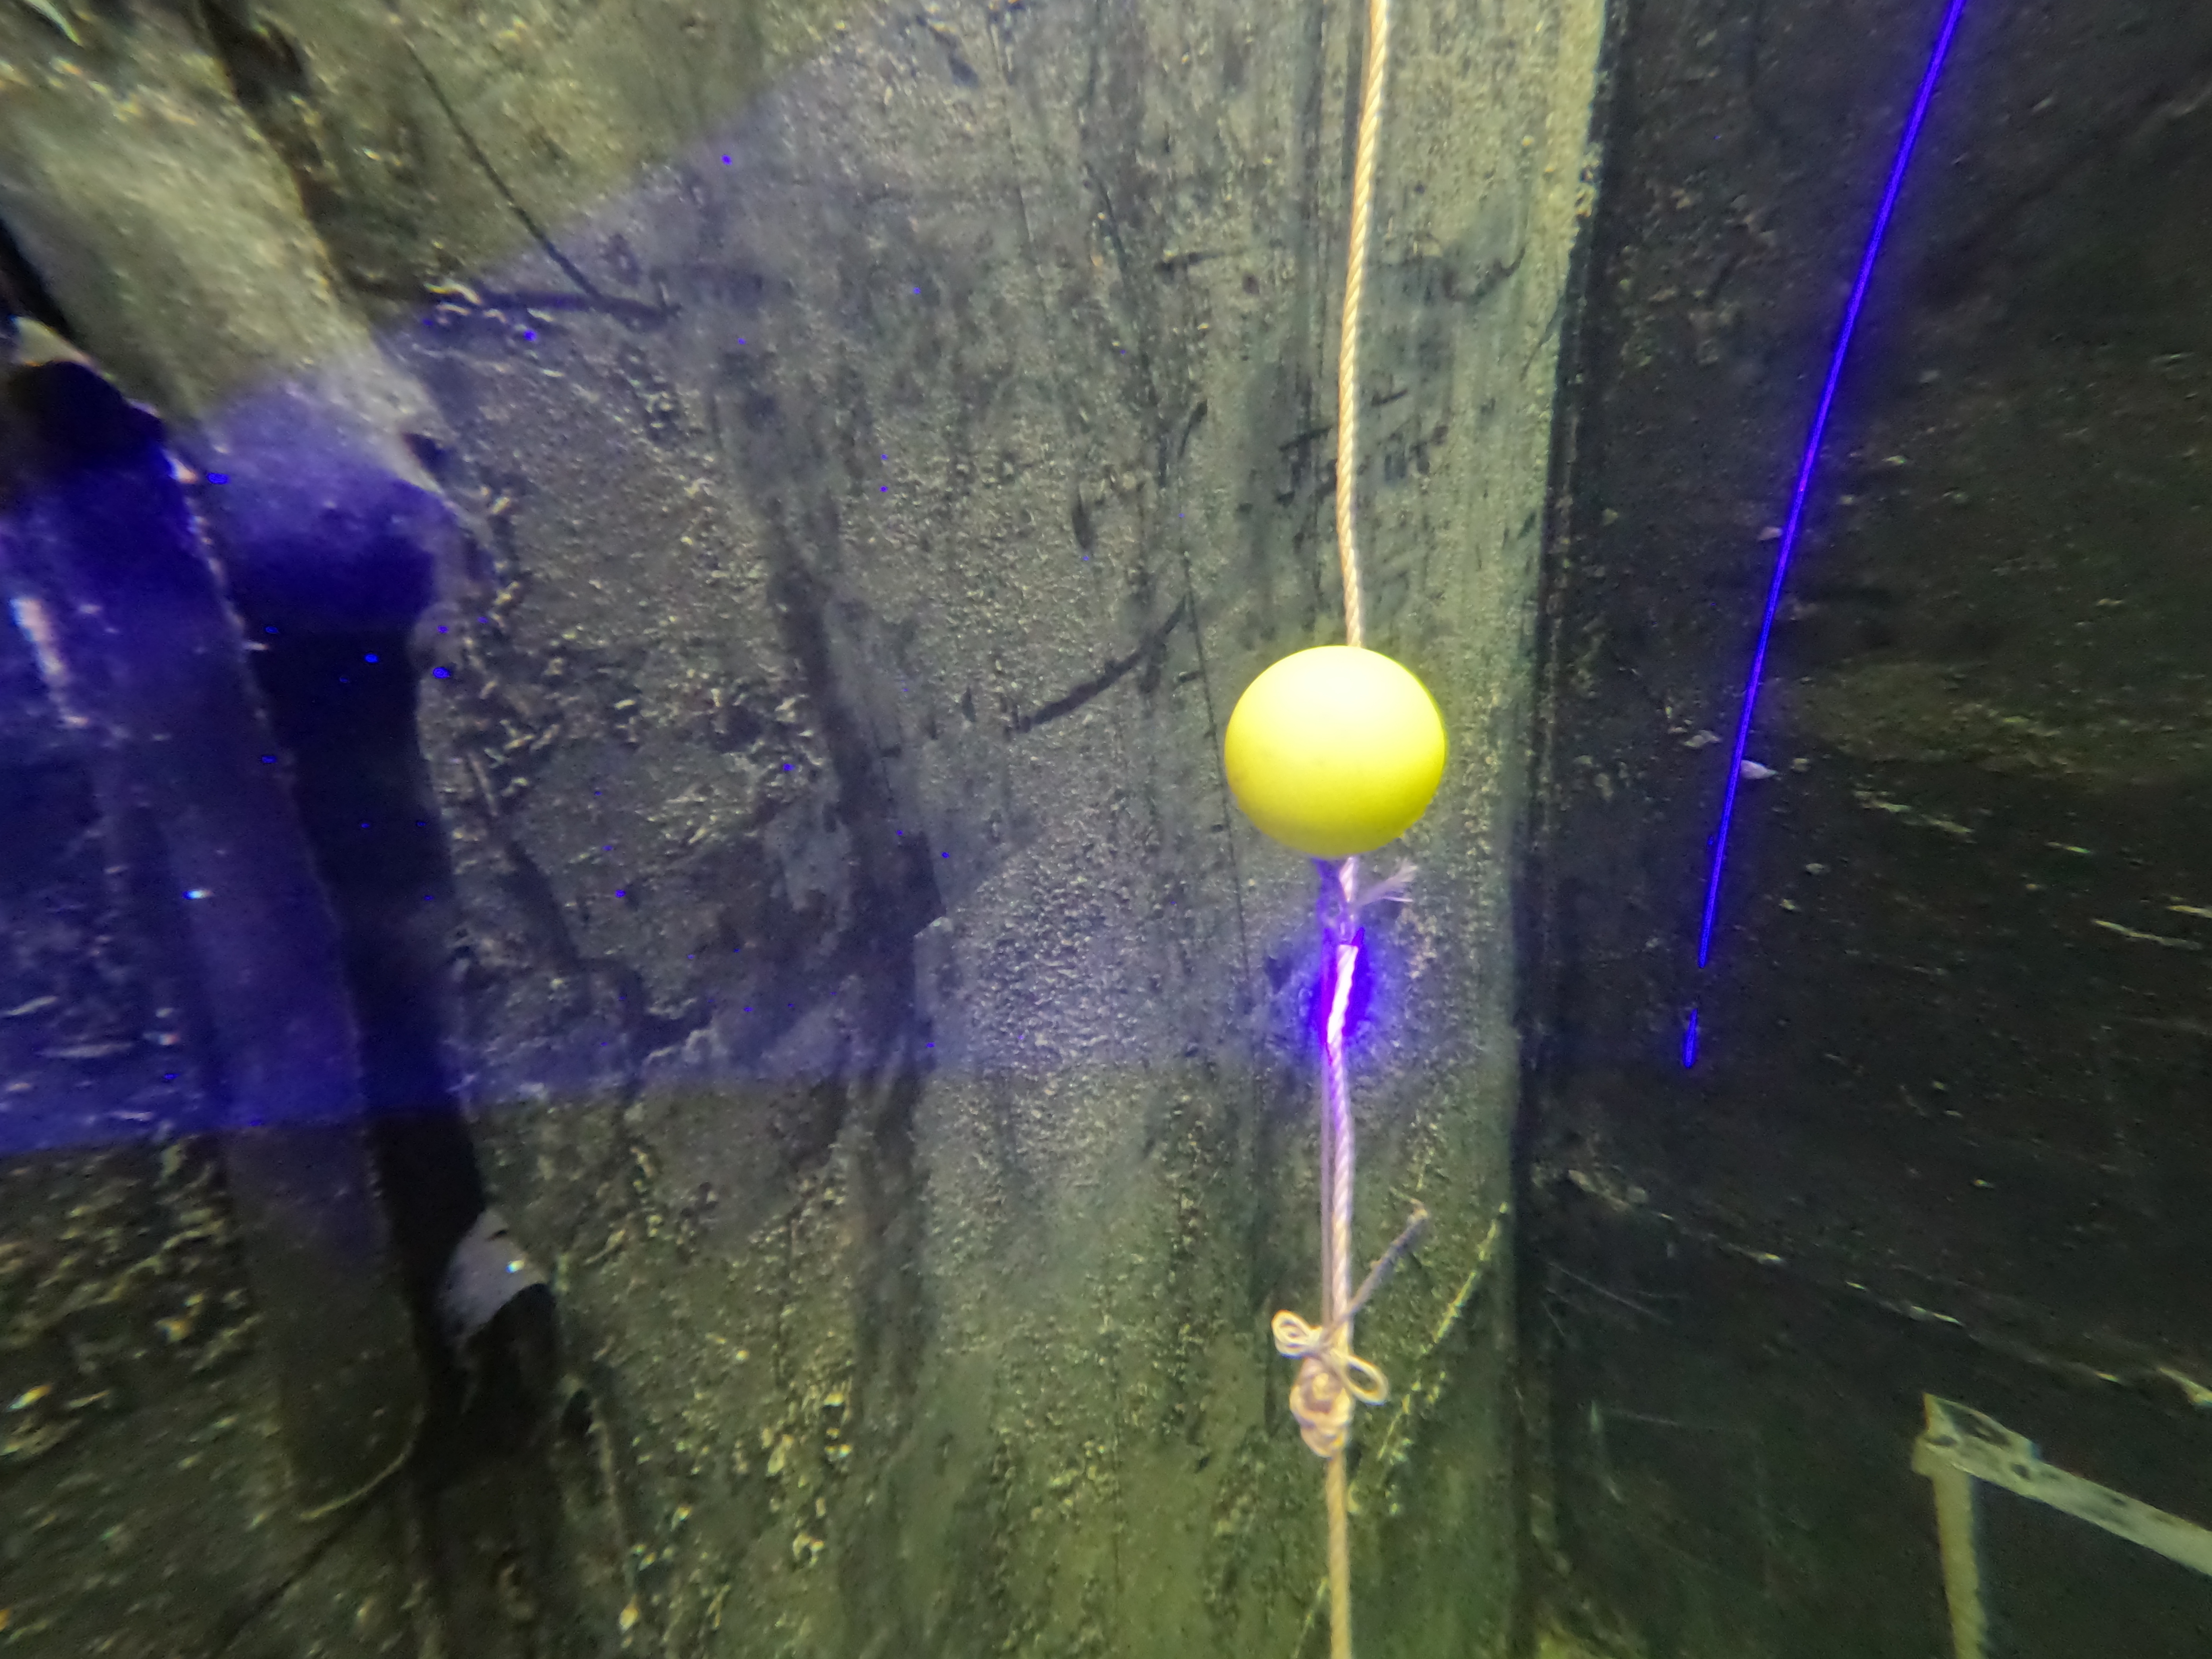

Supplement: Supplementary file 1350 [file G0032663.pdf › 6/G0032663.pdf]

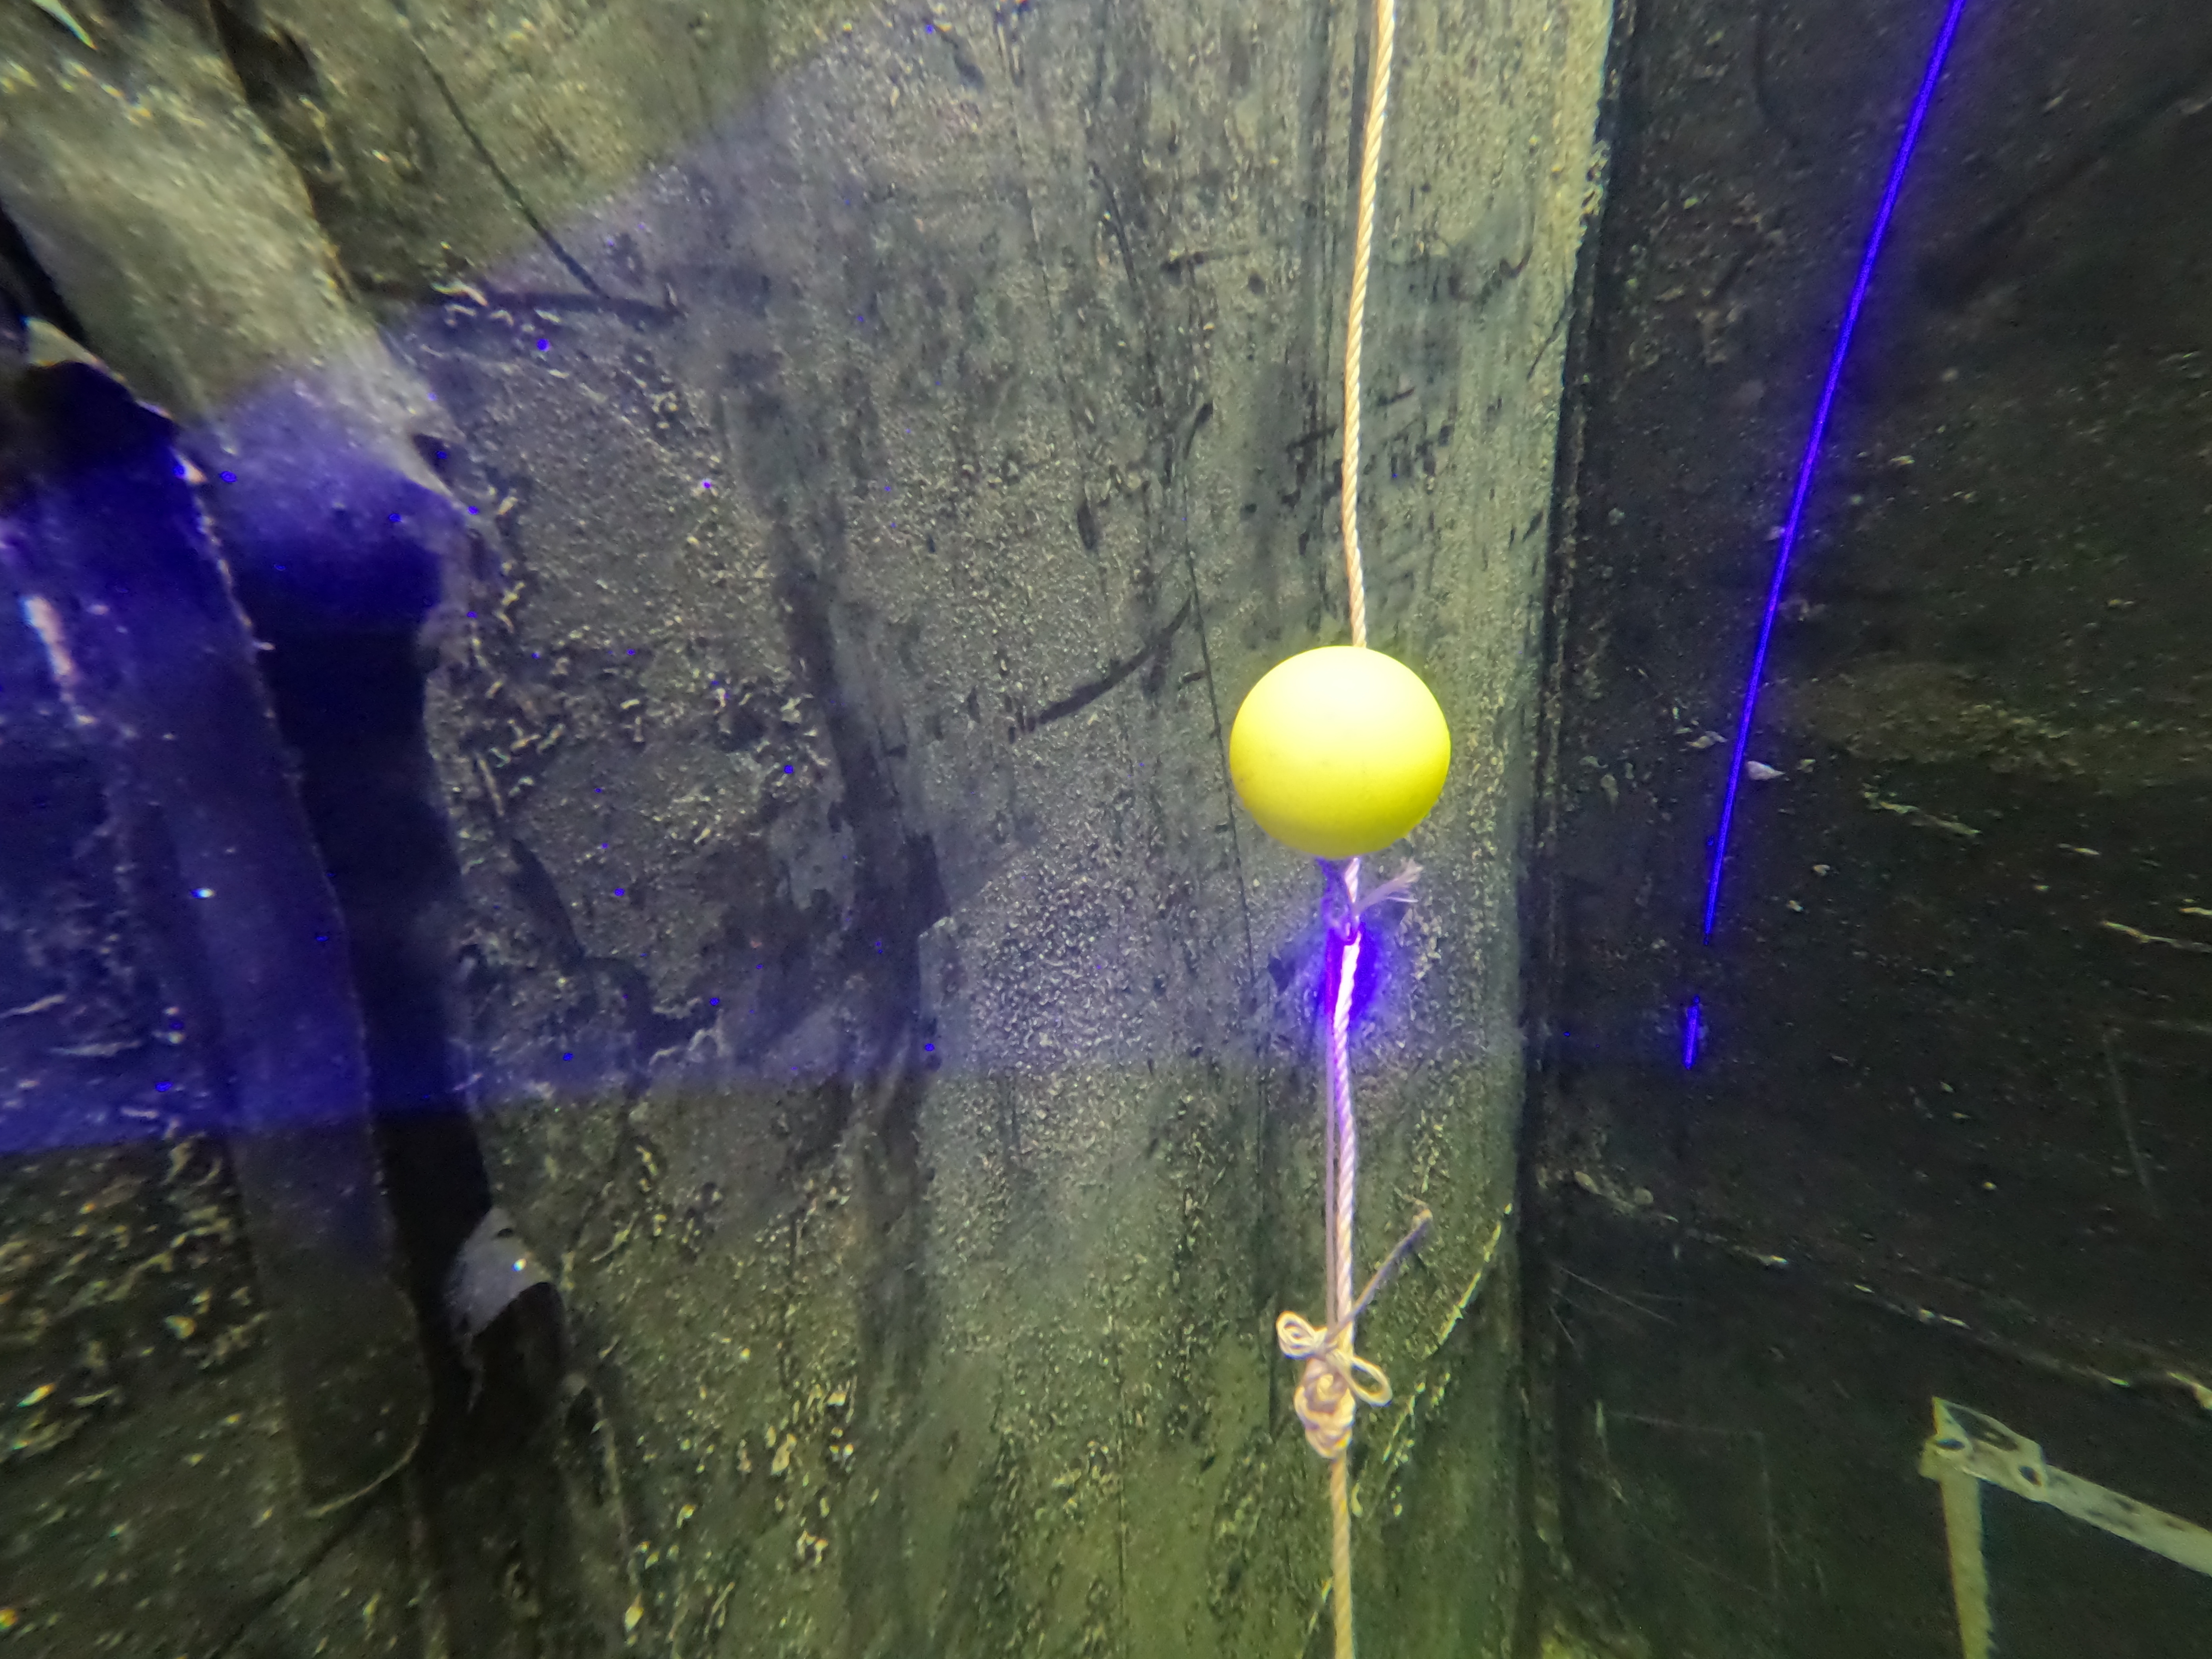

Supplement: Supplementary file 1351 [file G0032664.pdf › 6/G0032664.pdf]

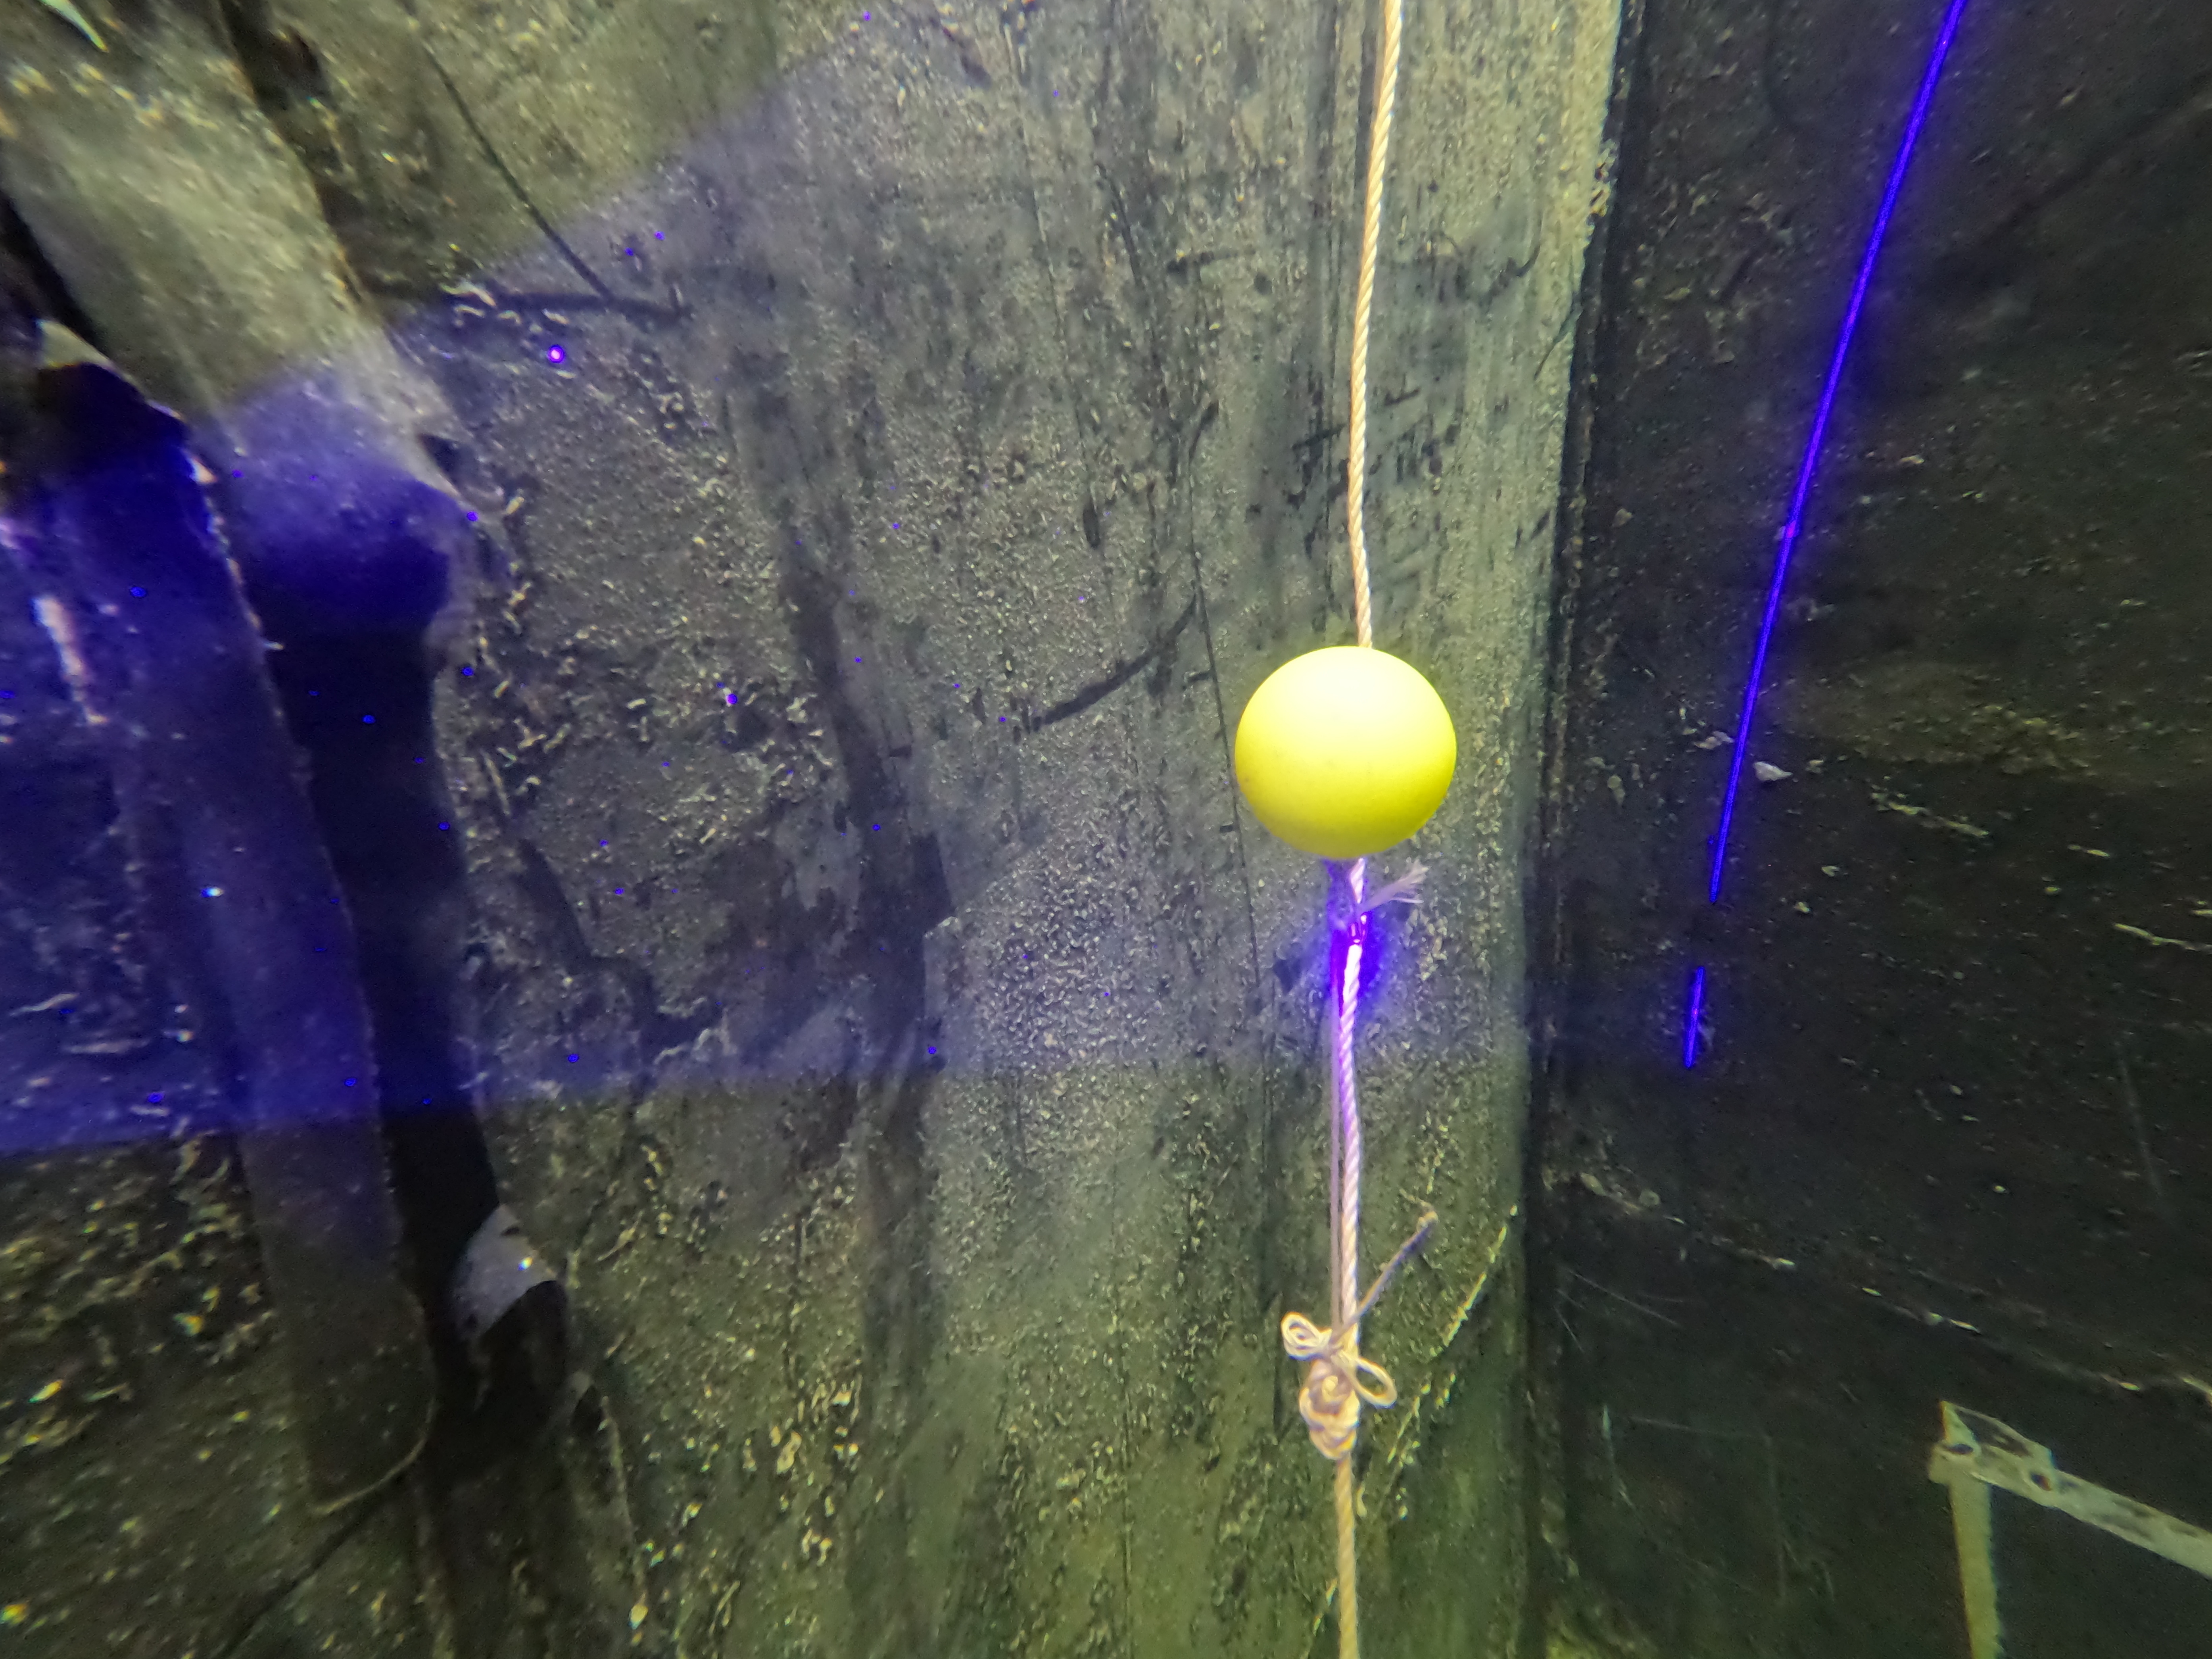

Supplement: Supplementary file 1352 [file G0032665.pdf › 6/G0032665.pdf]

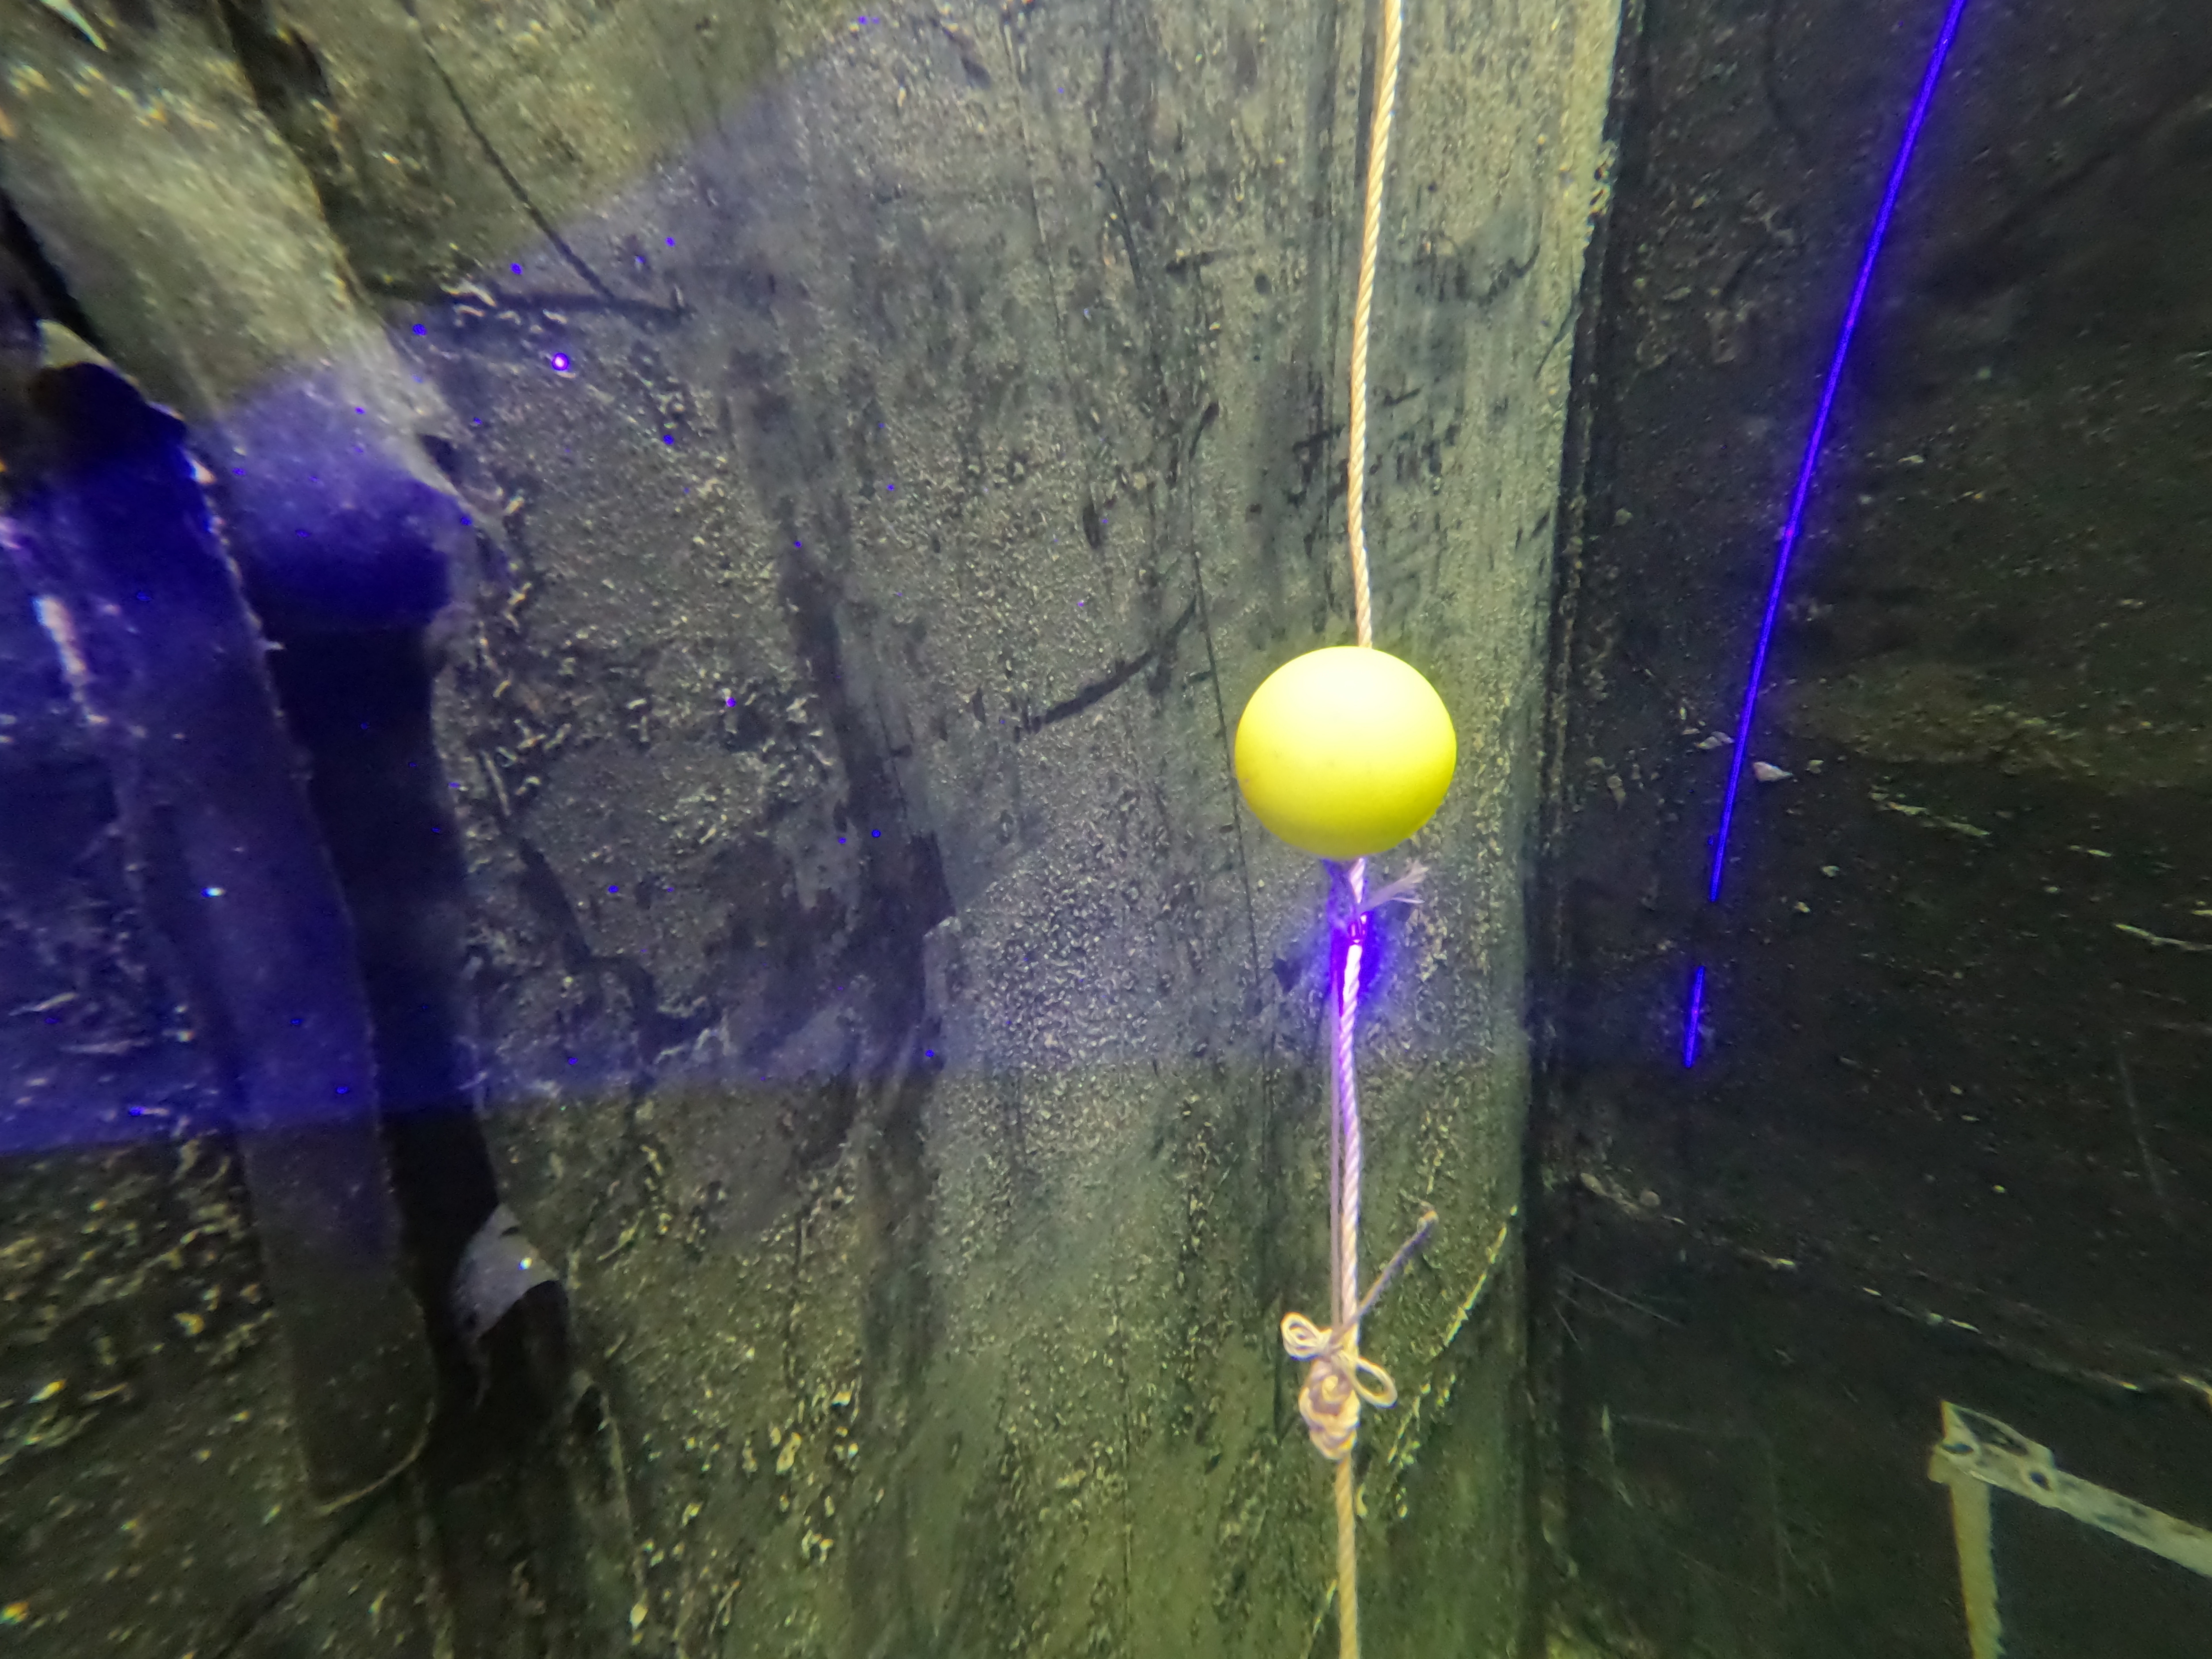

Supplement: Supplementary file 1353 [file G0032666.pdf › 6/G0032666.pdf]

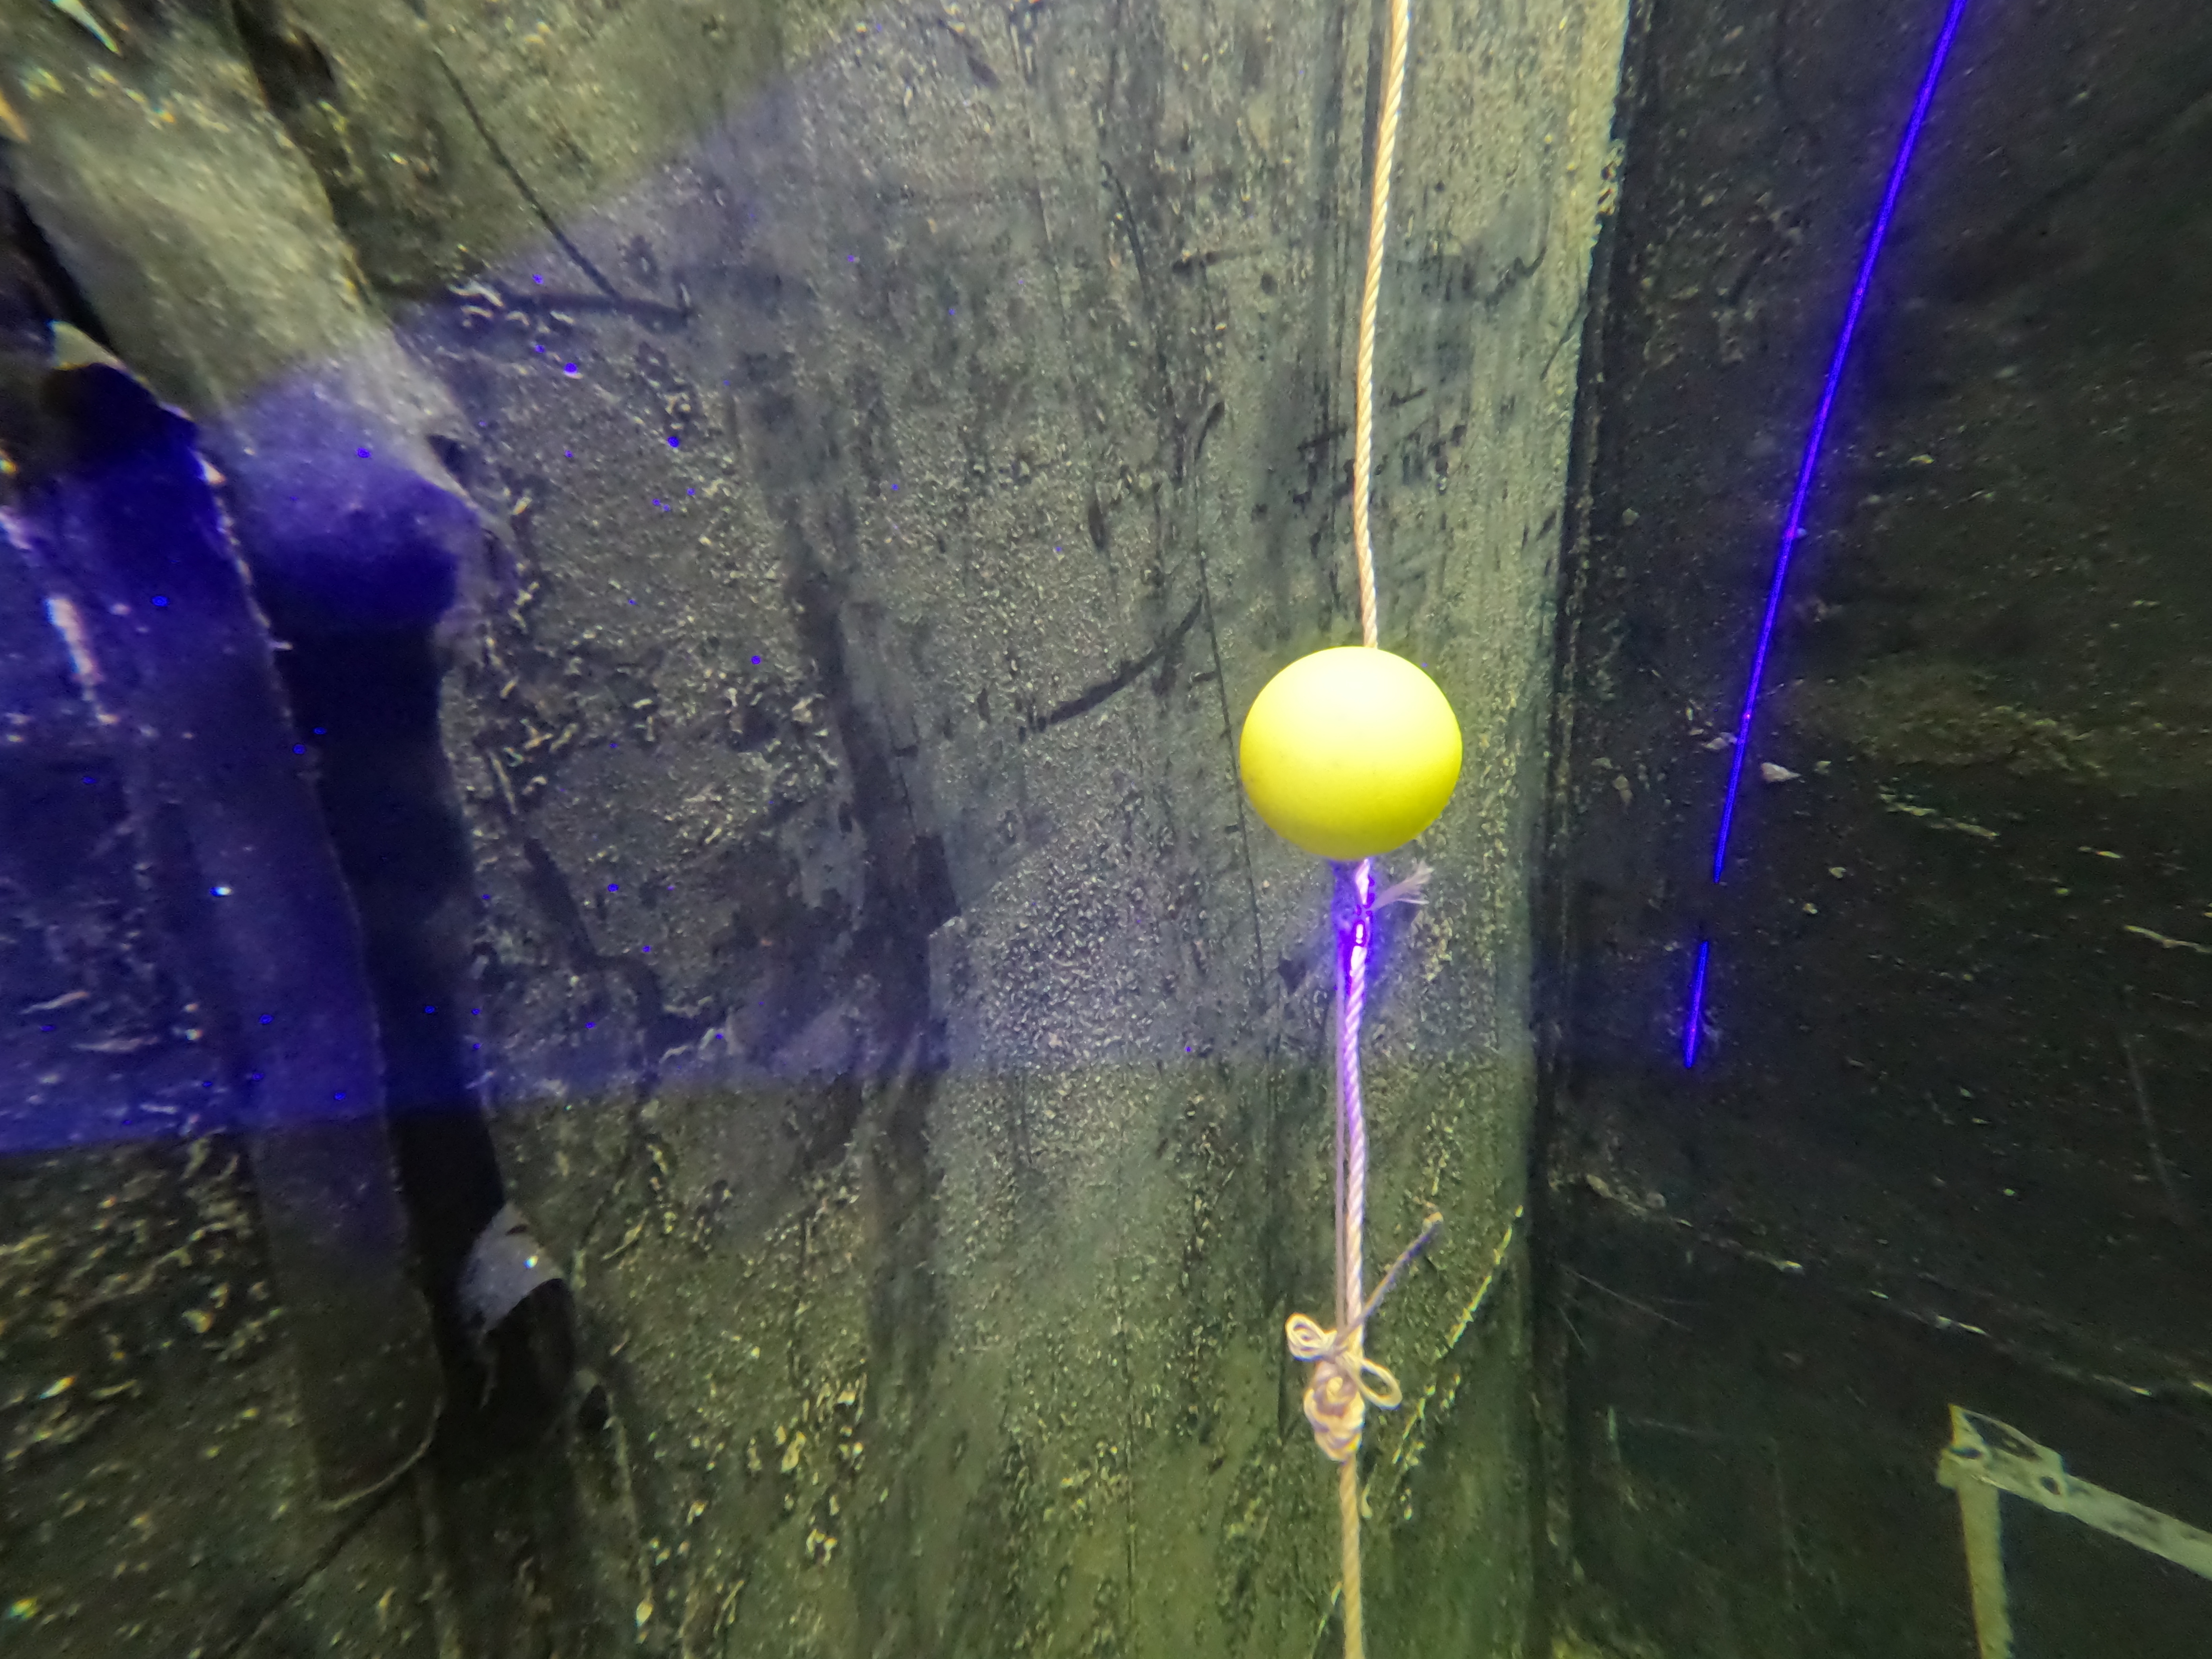

Supplement: Supplementary file 1354 [file G0032667.pdf › 6/G0032667.pdf]

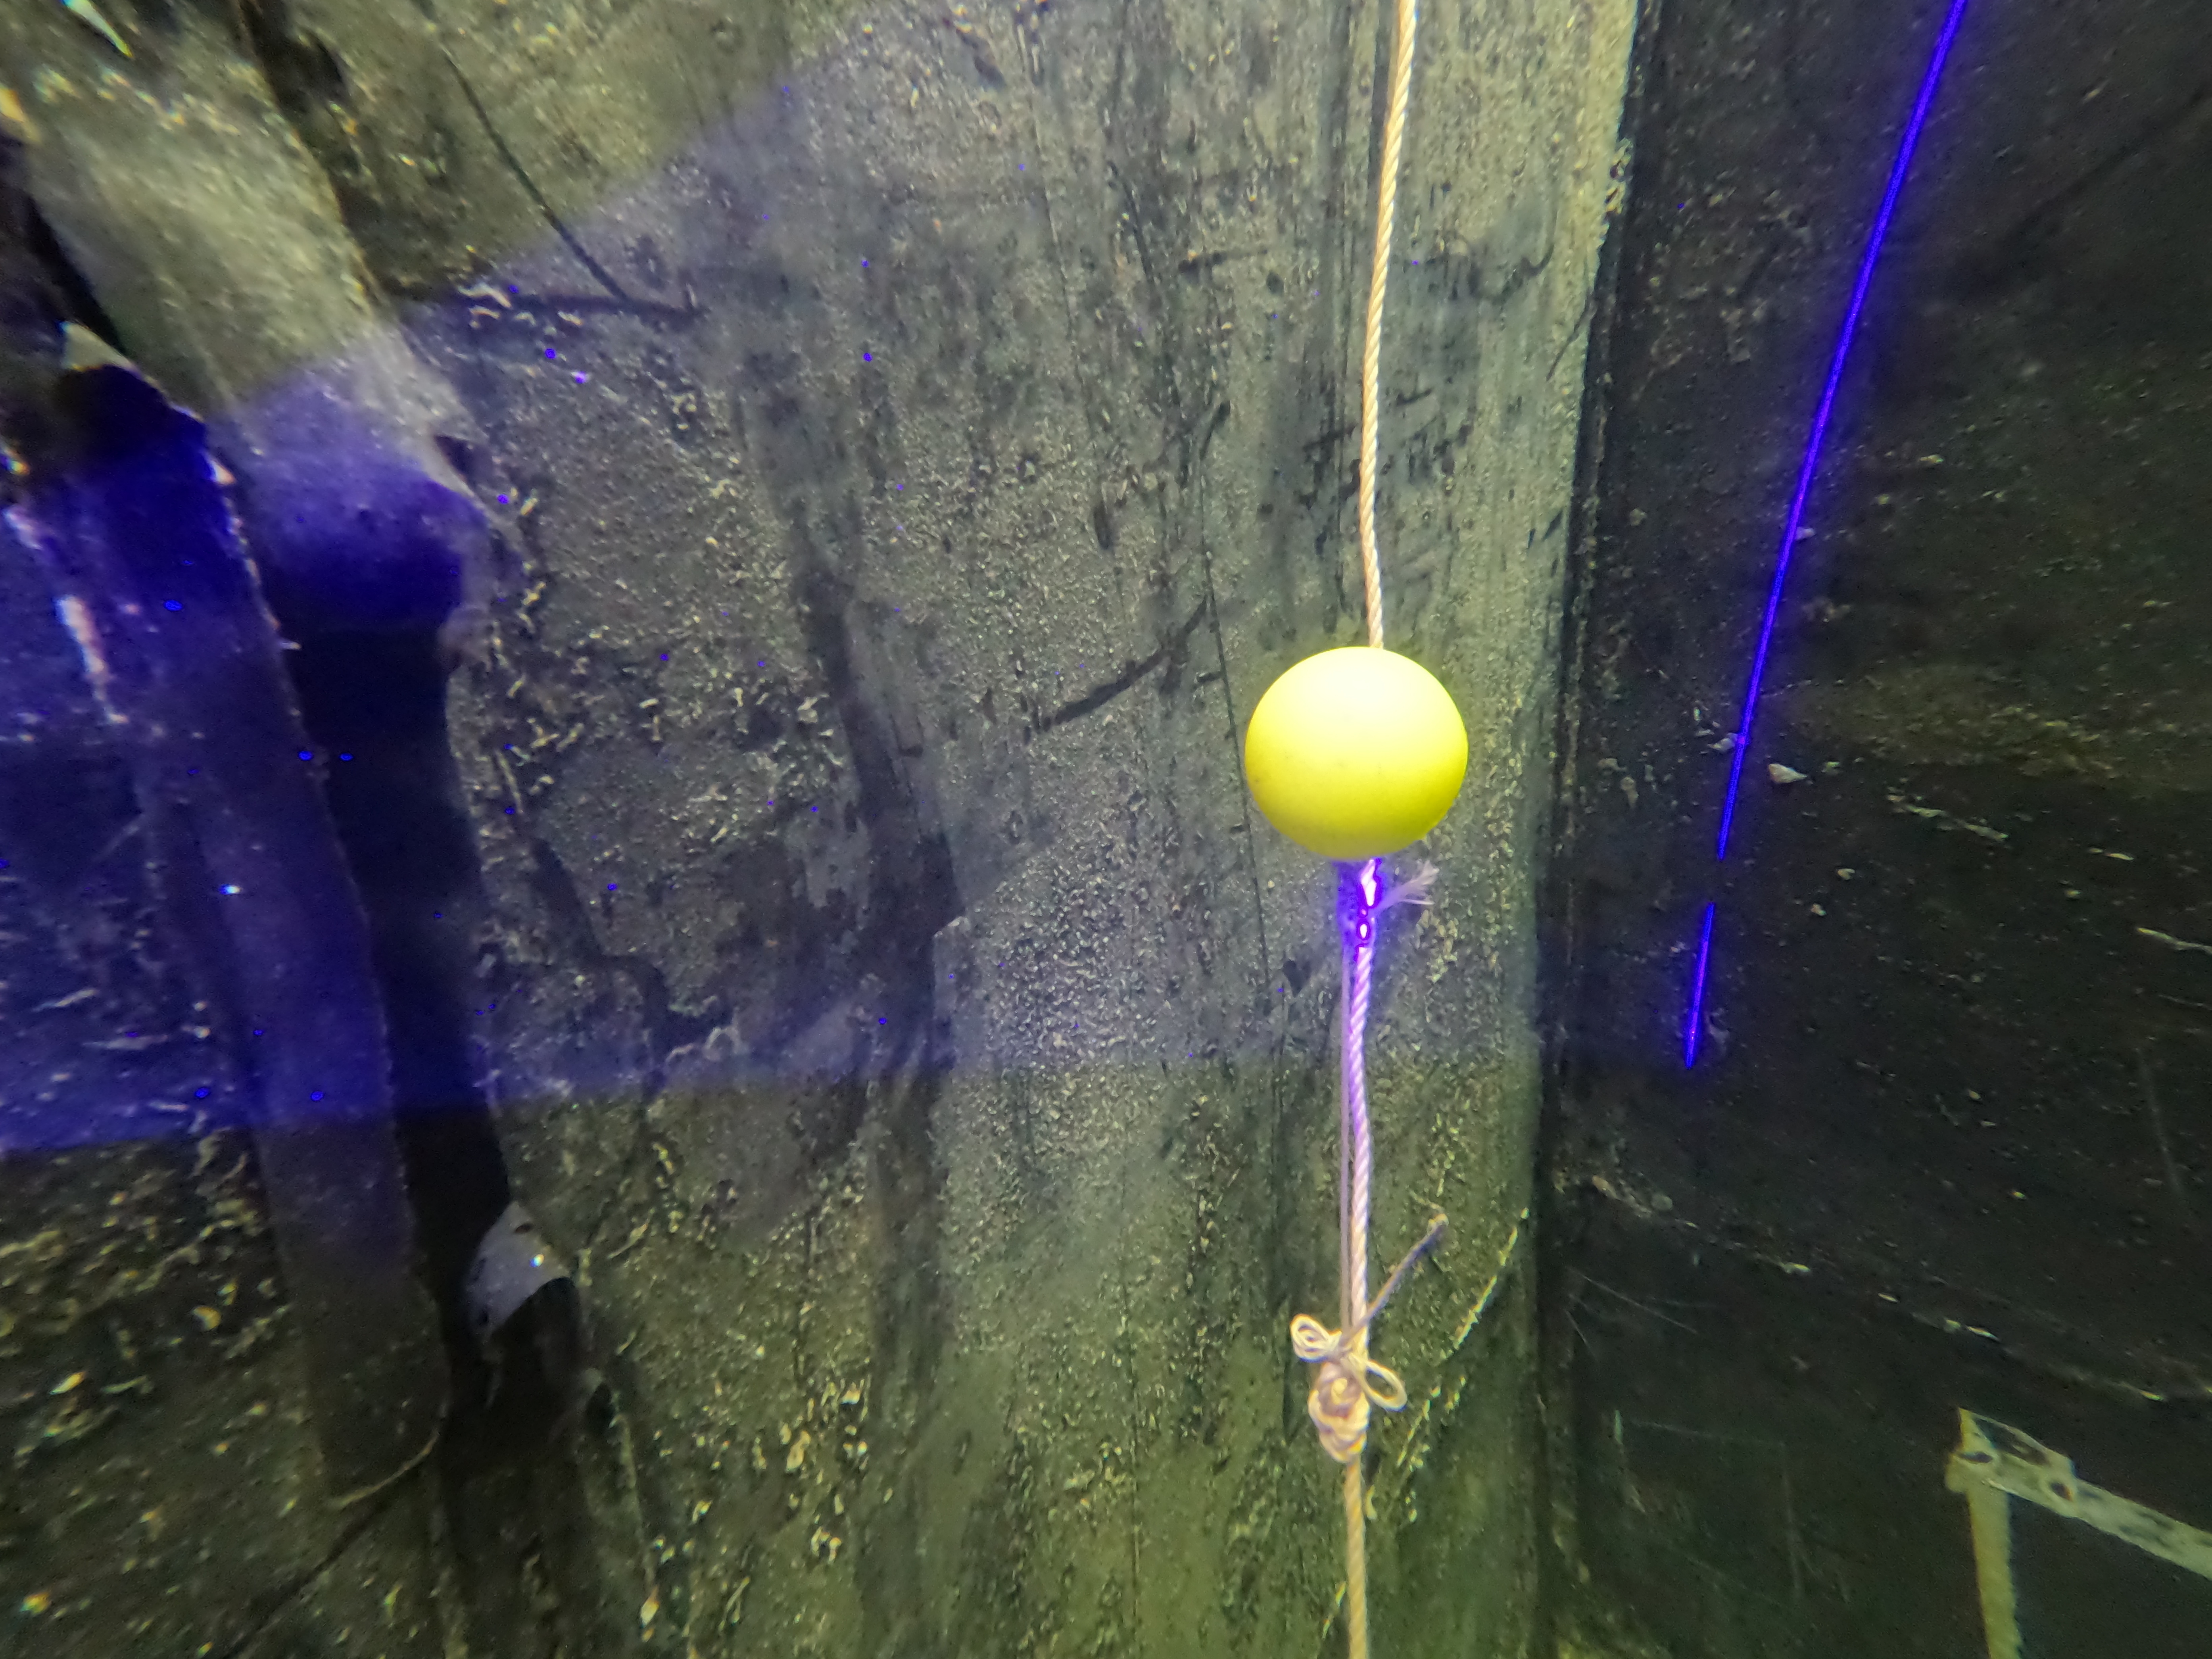

Supplement: Supplementary file 1355 [file G0032668.pdf › 6/G0032668.pdf]

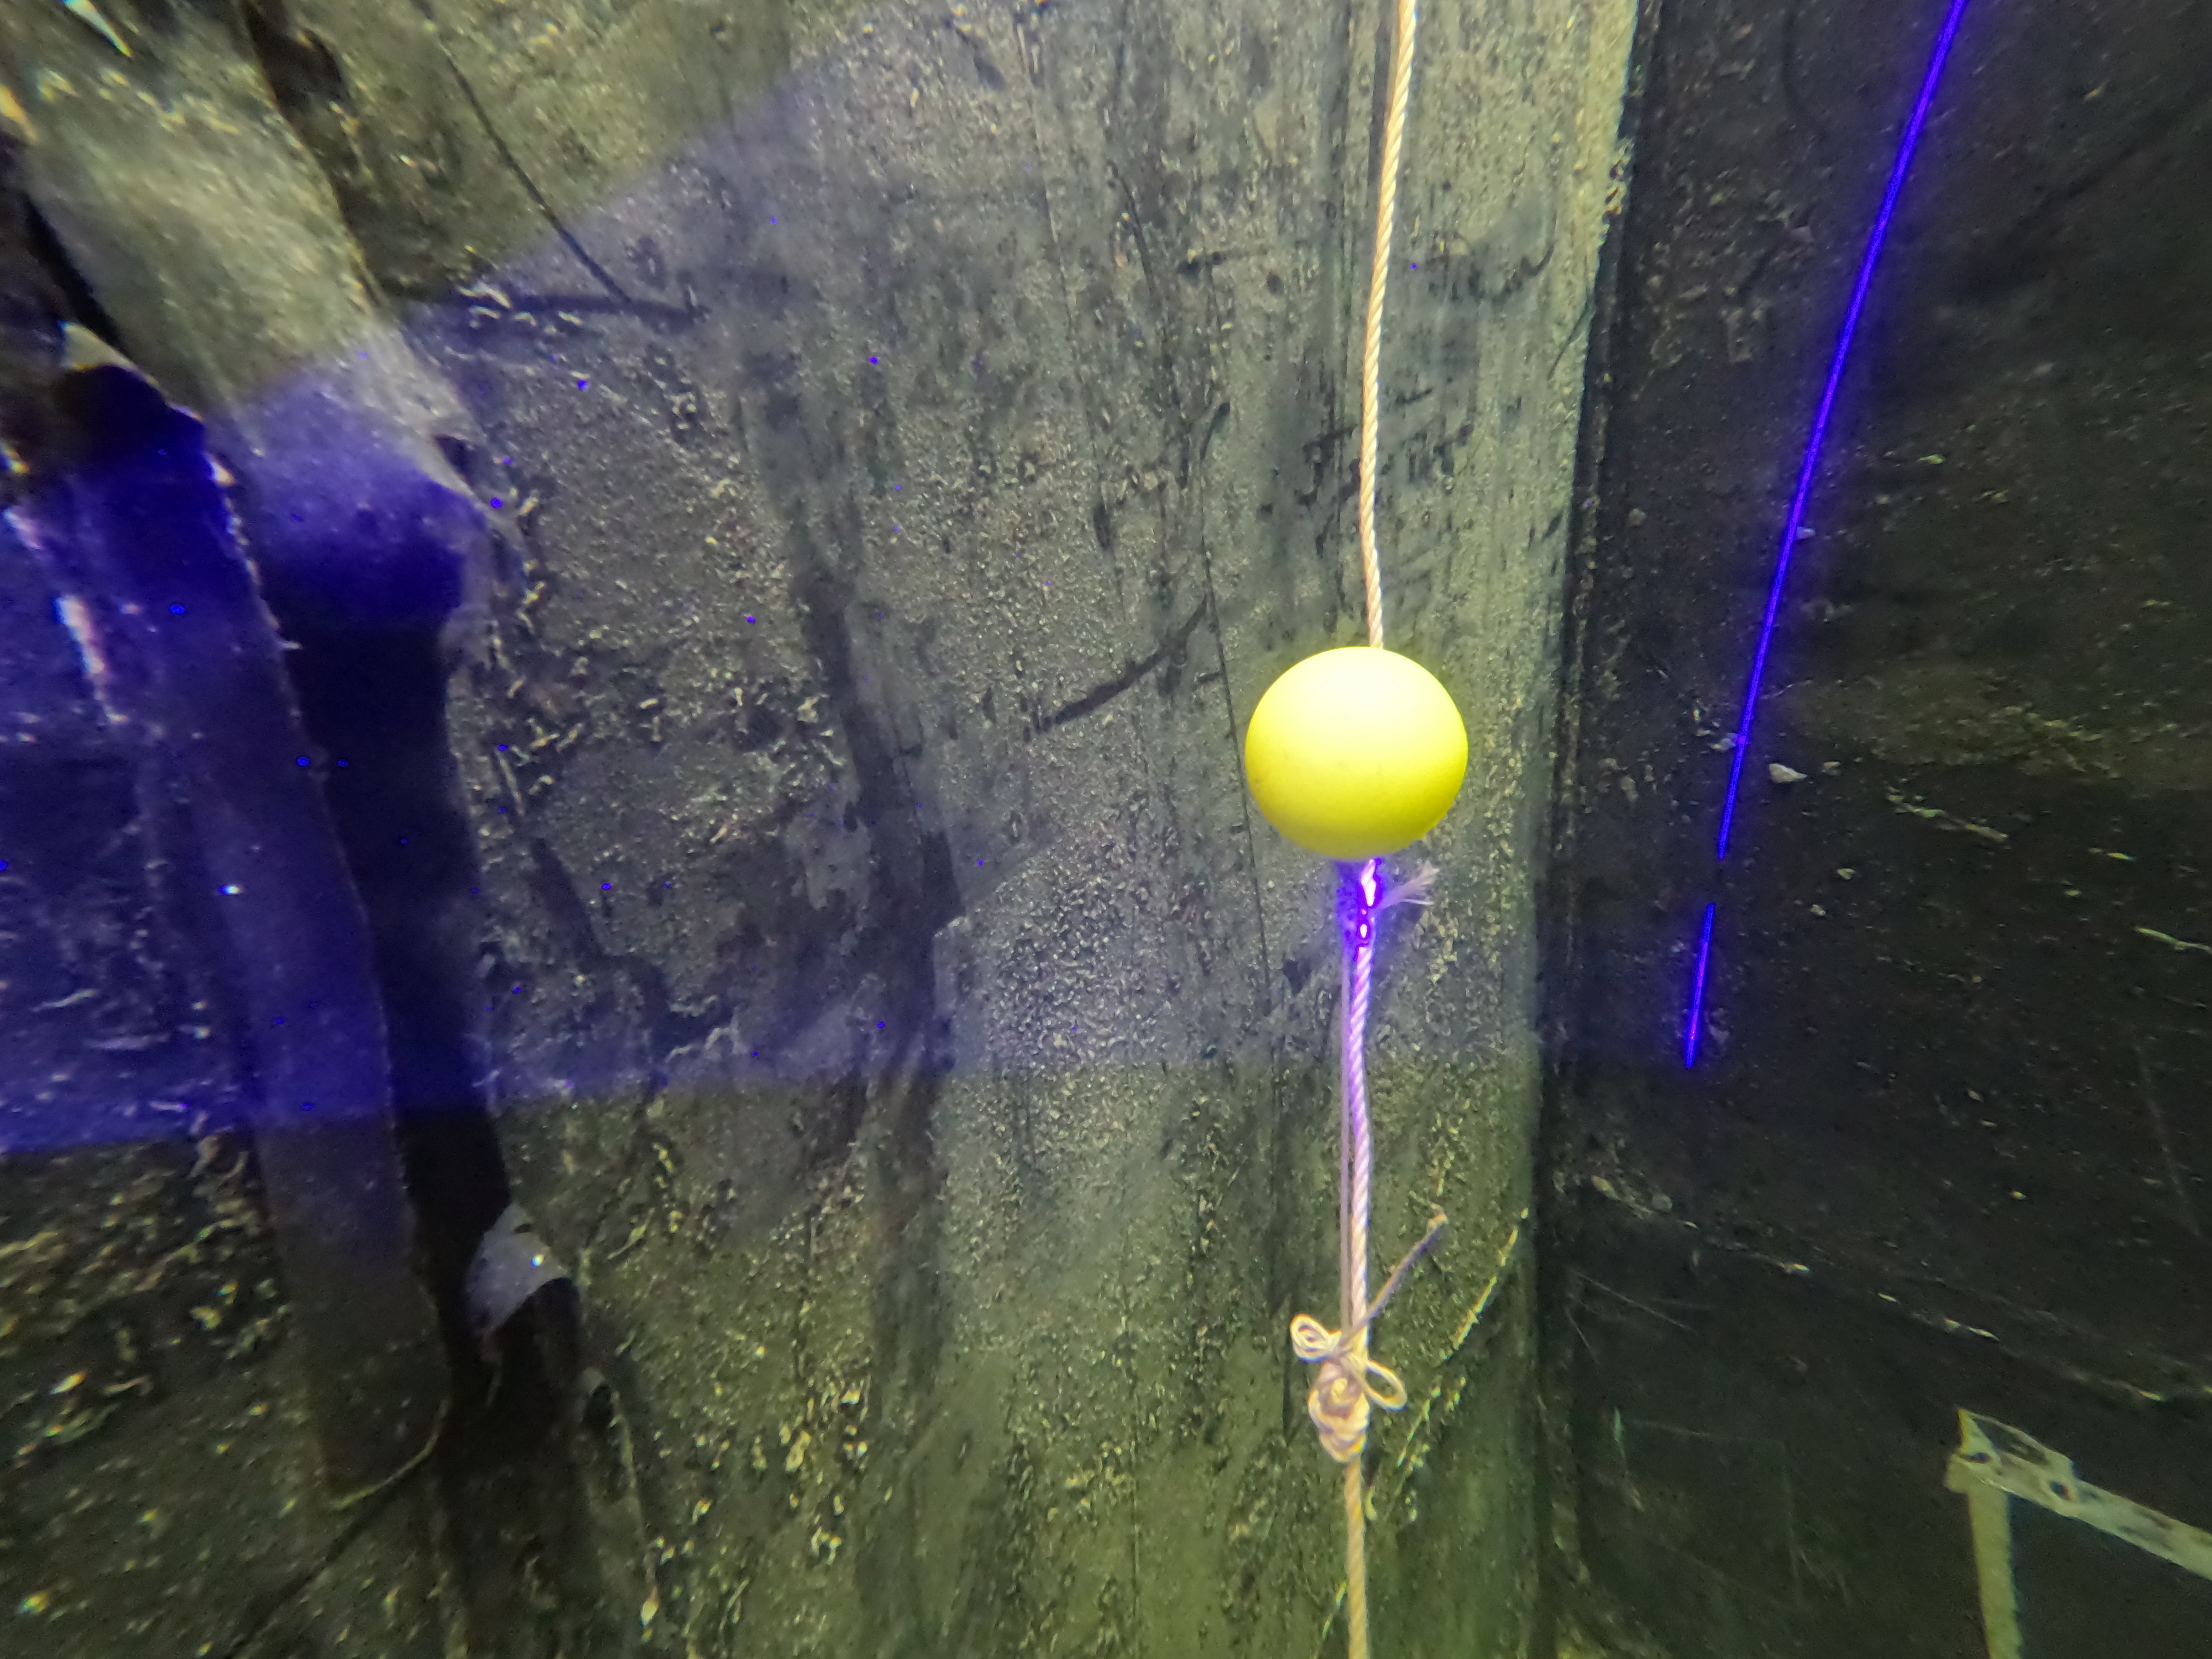

Supplement: Supplementary file 1356 [file G0032669.pdf › 6/G0032669.pdf]

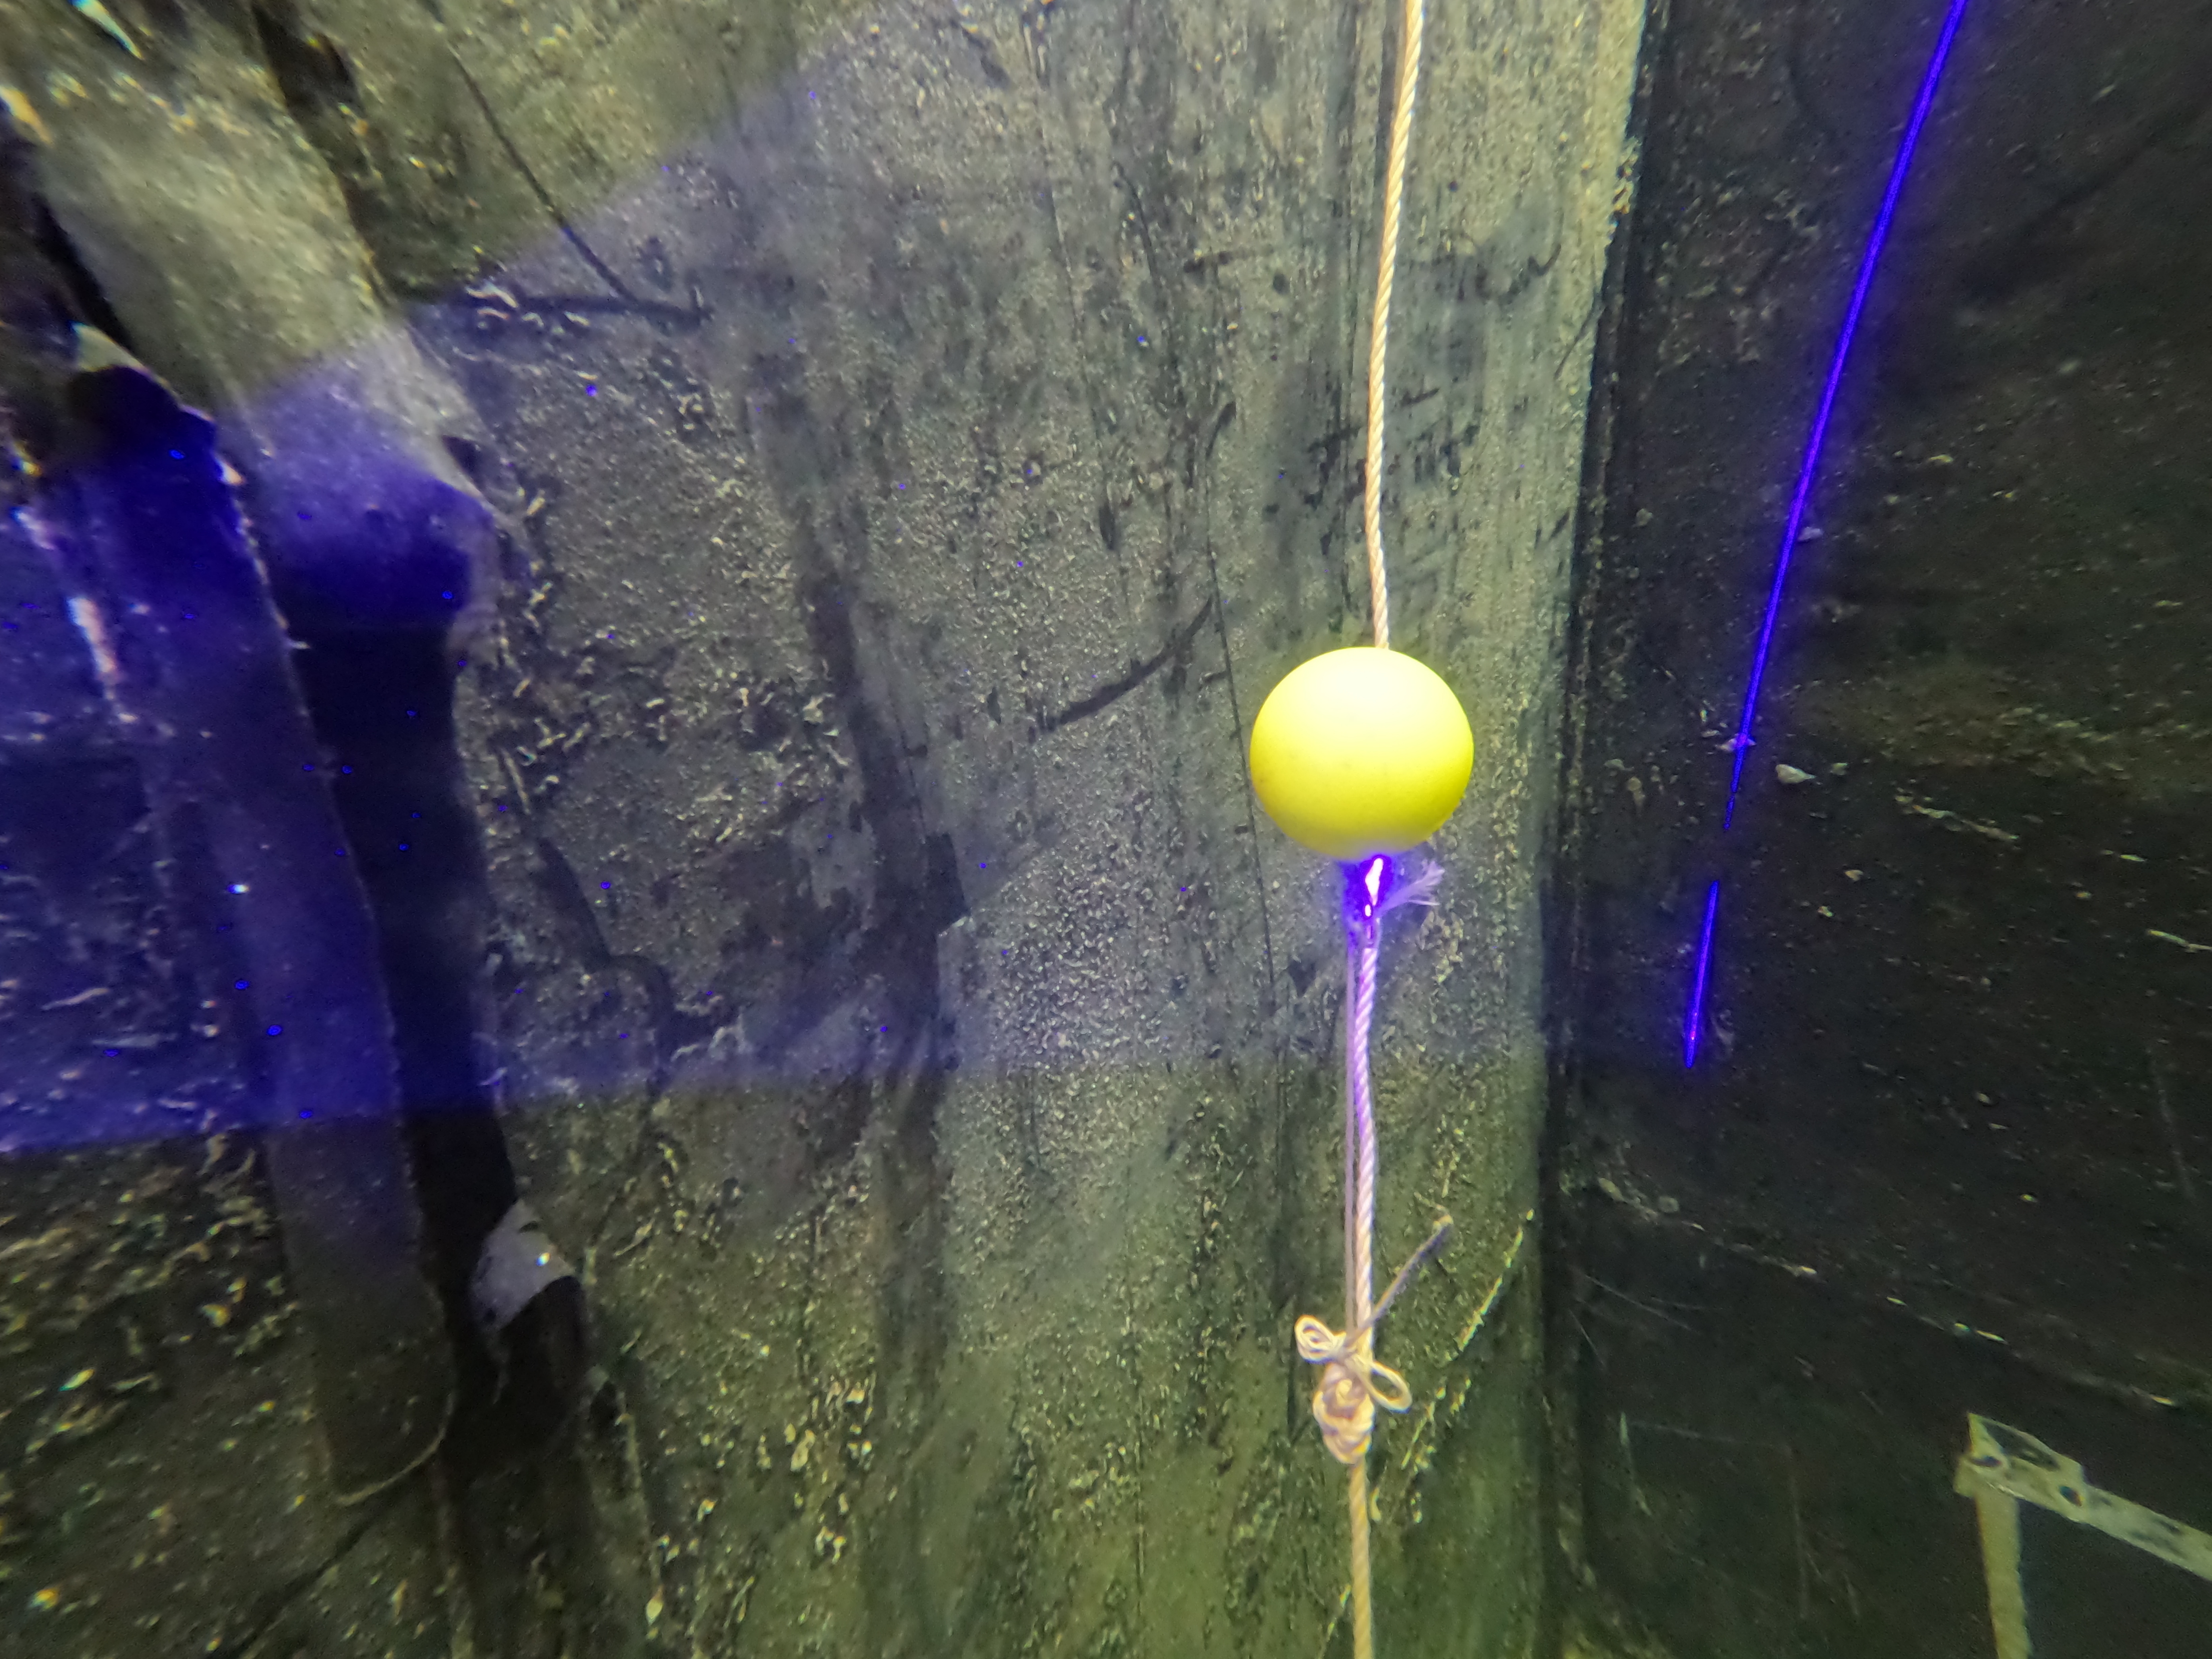

Supplement: Supplementary file 1357 [file G0032670.pdf › 6/G0032670.pdf]

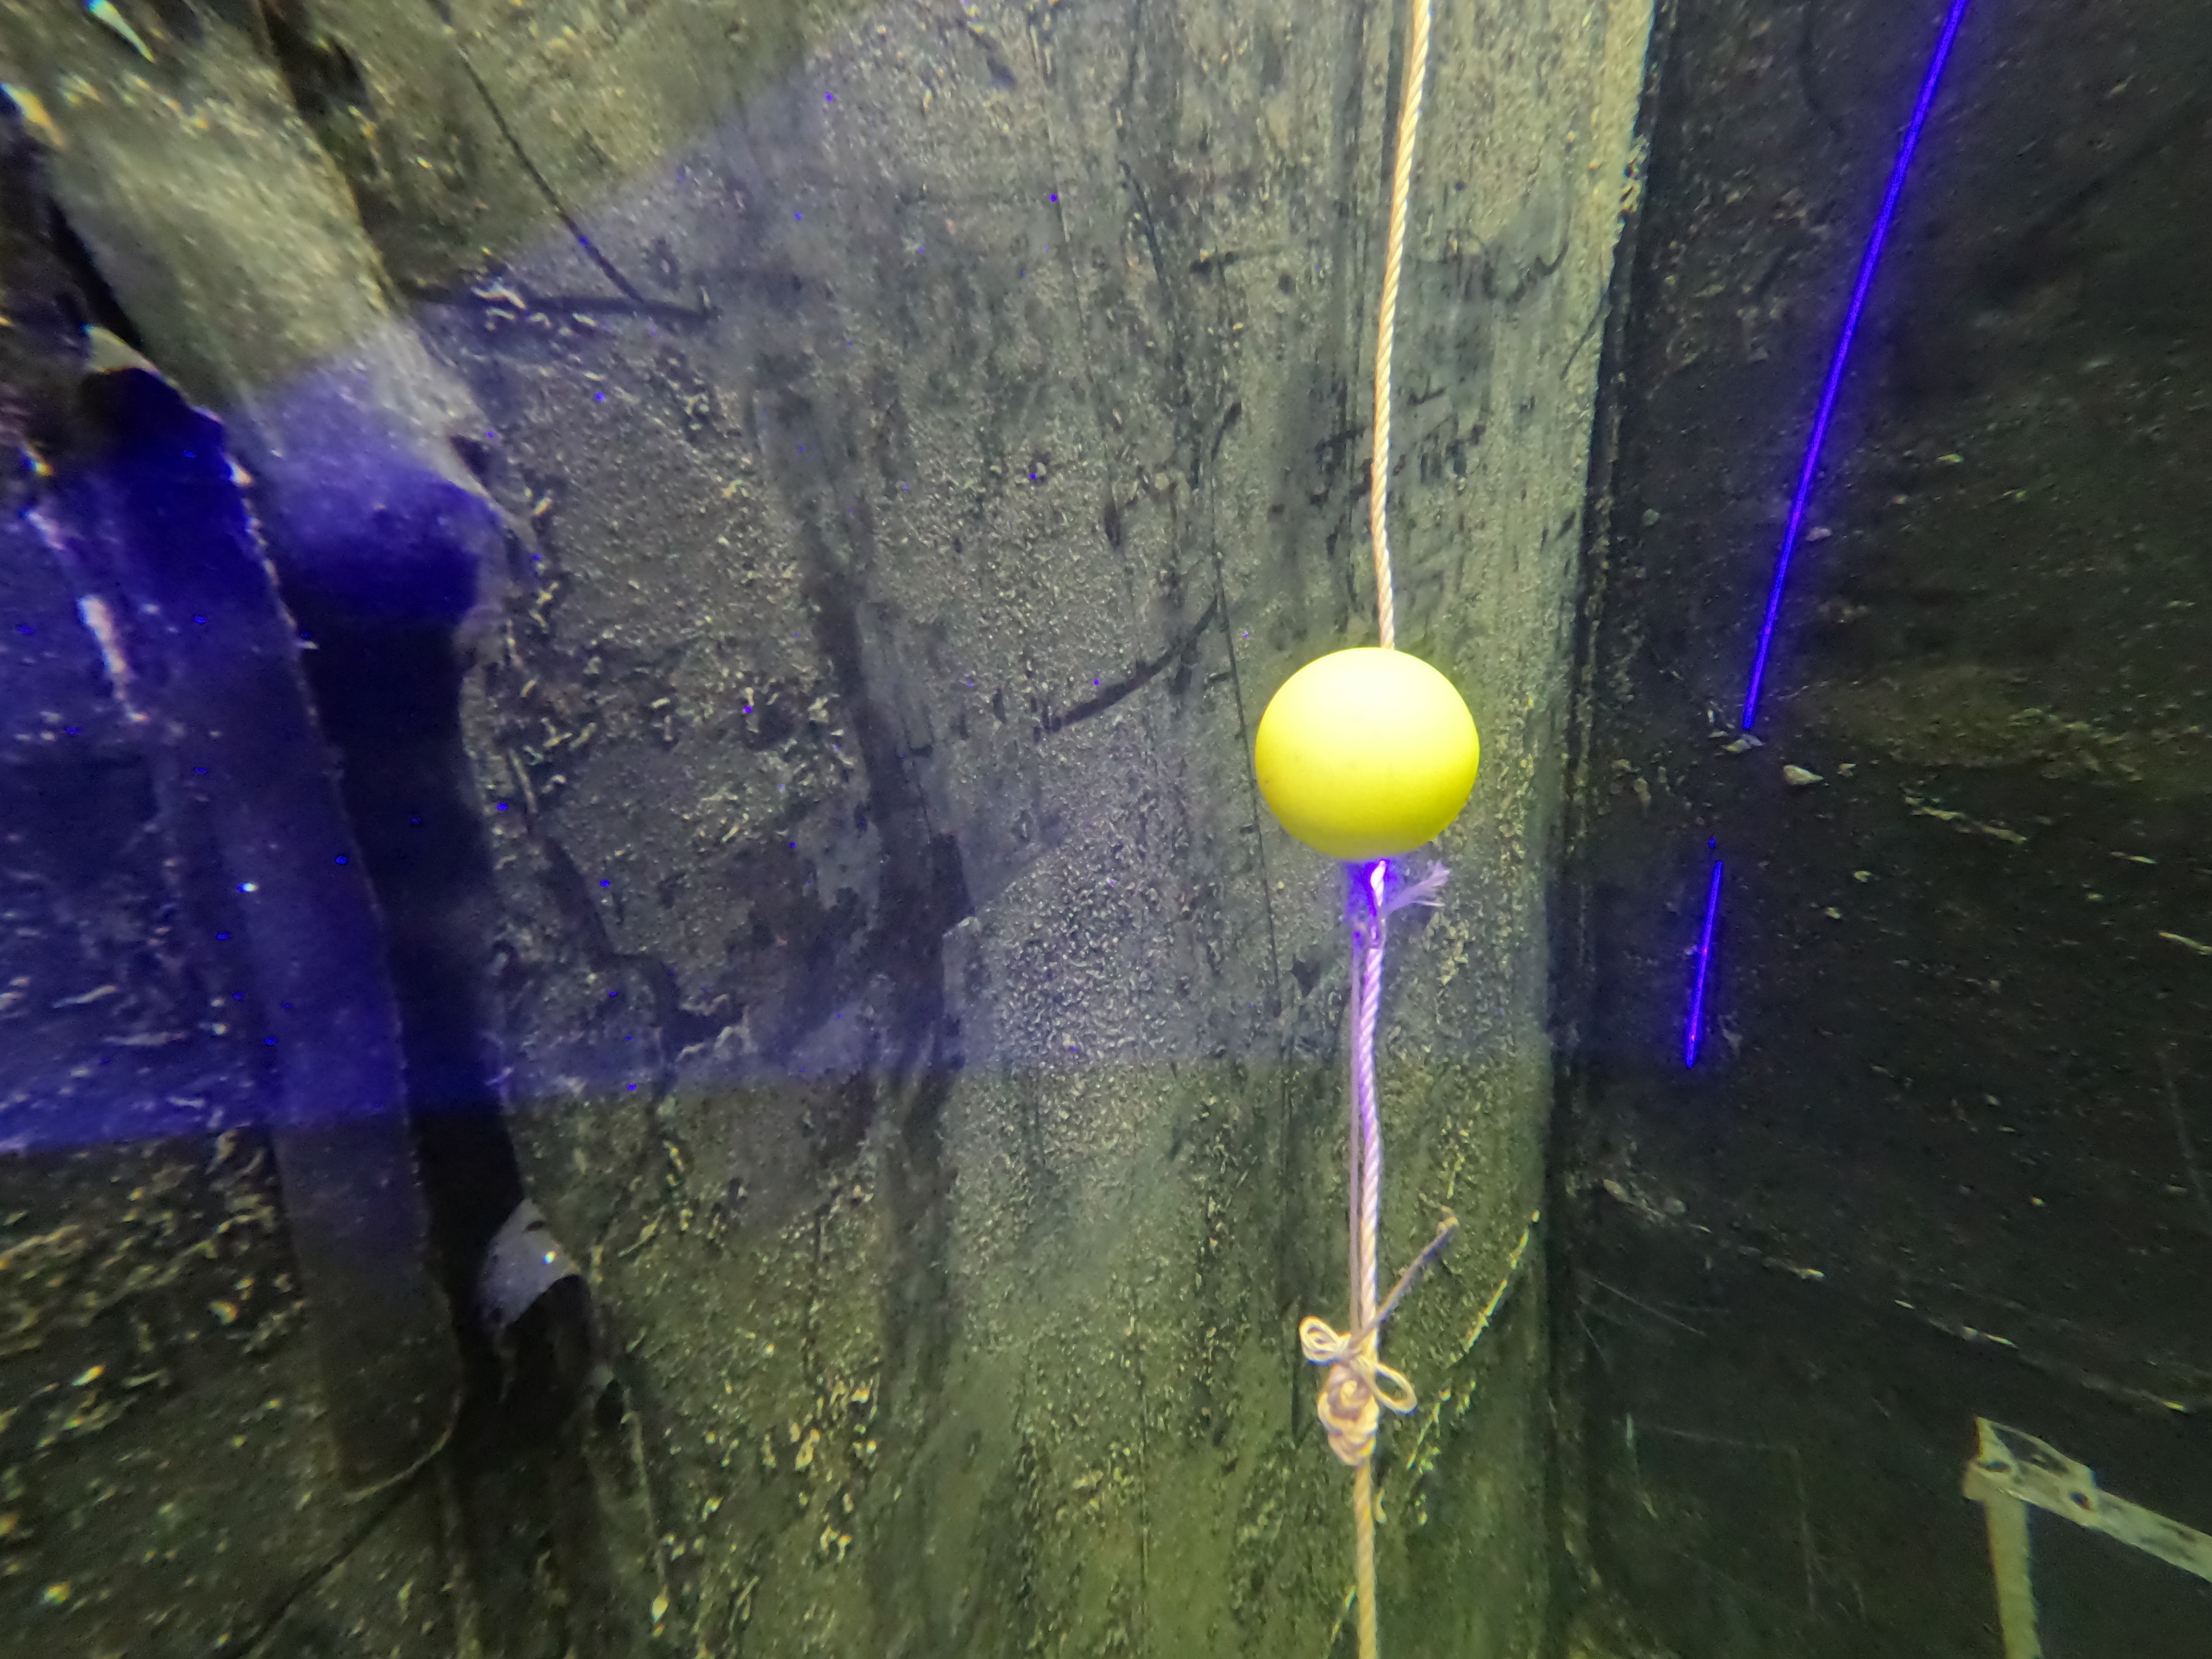

Supplement: Supplementary file 1358 [file G0032671.pdf › 6/G0032671.pdf]

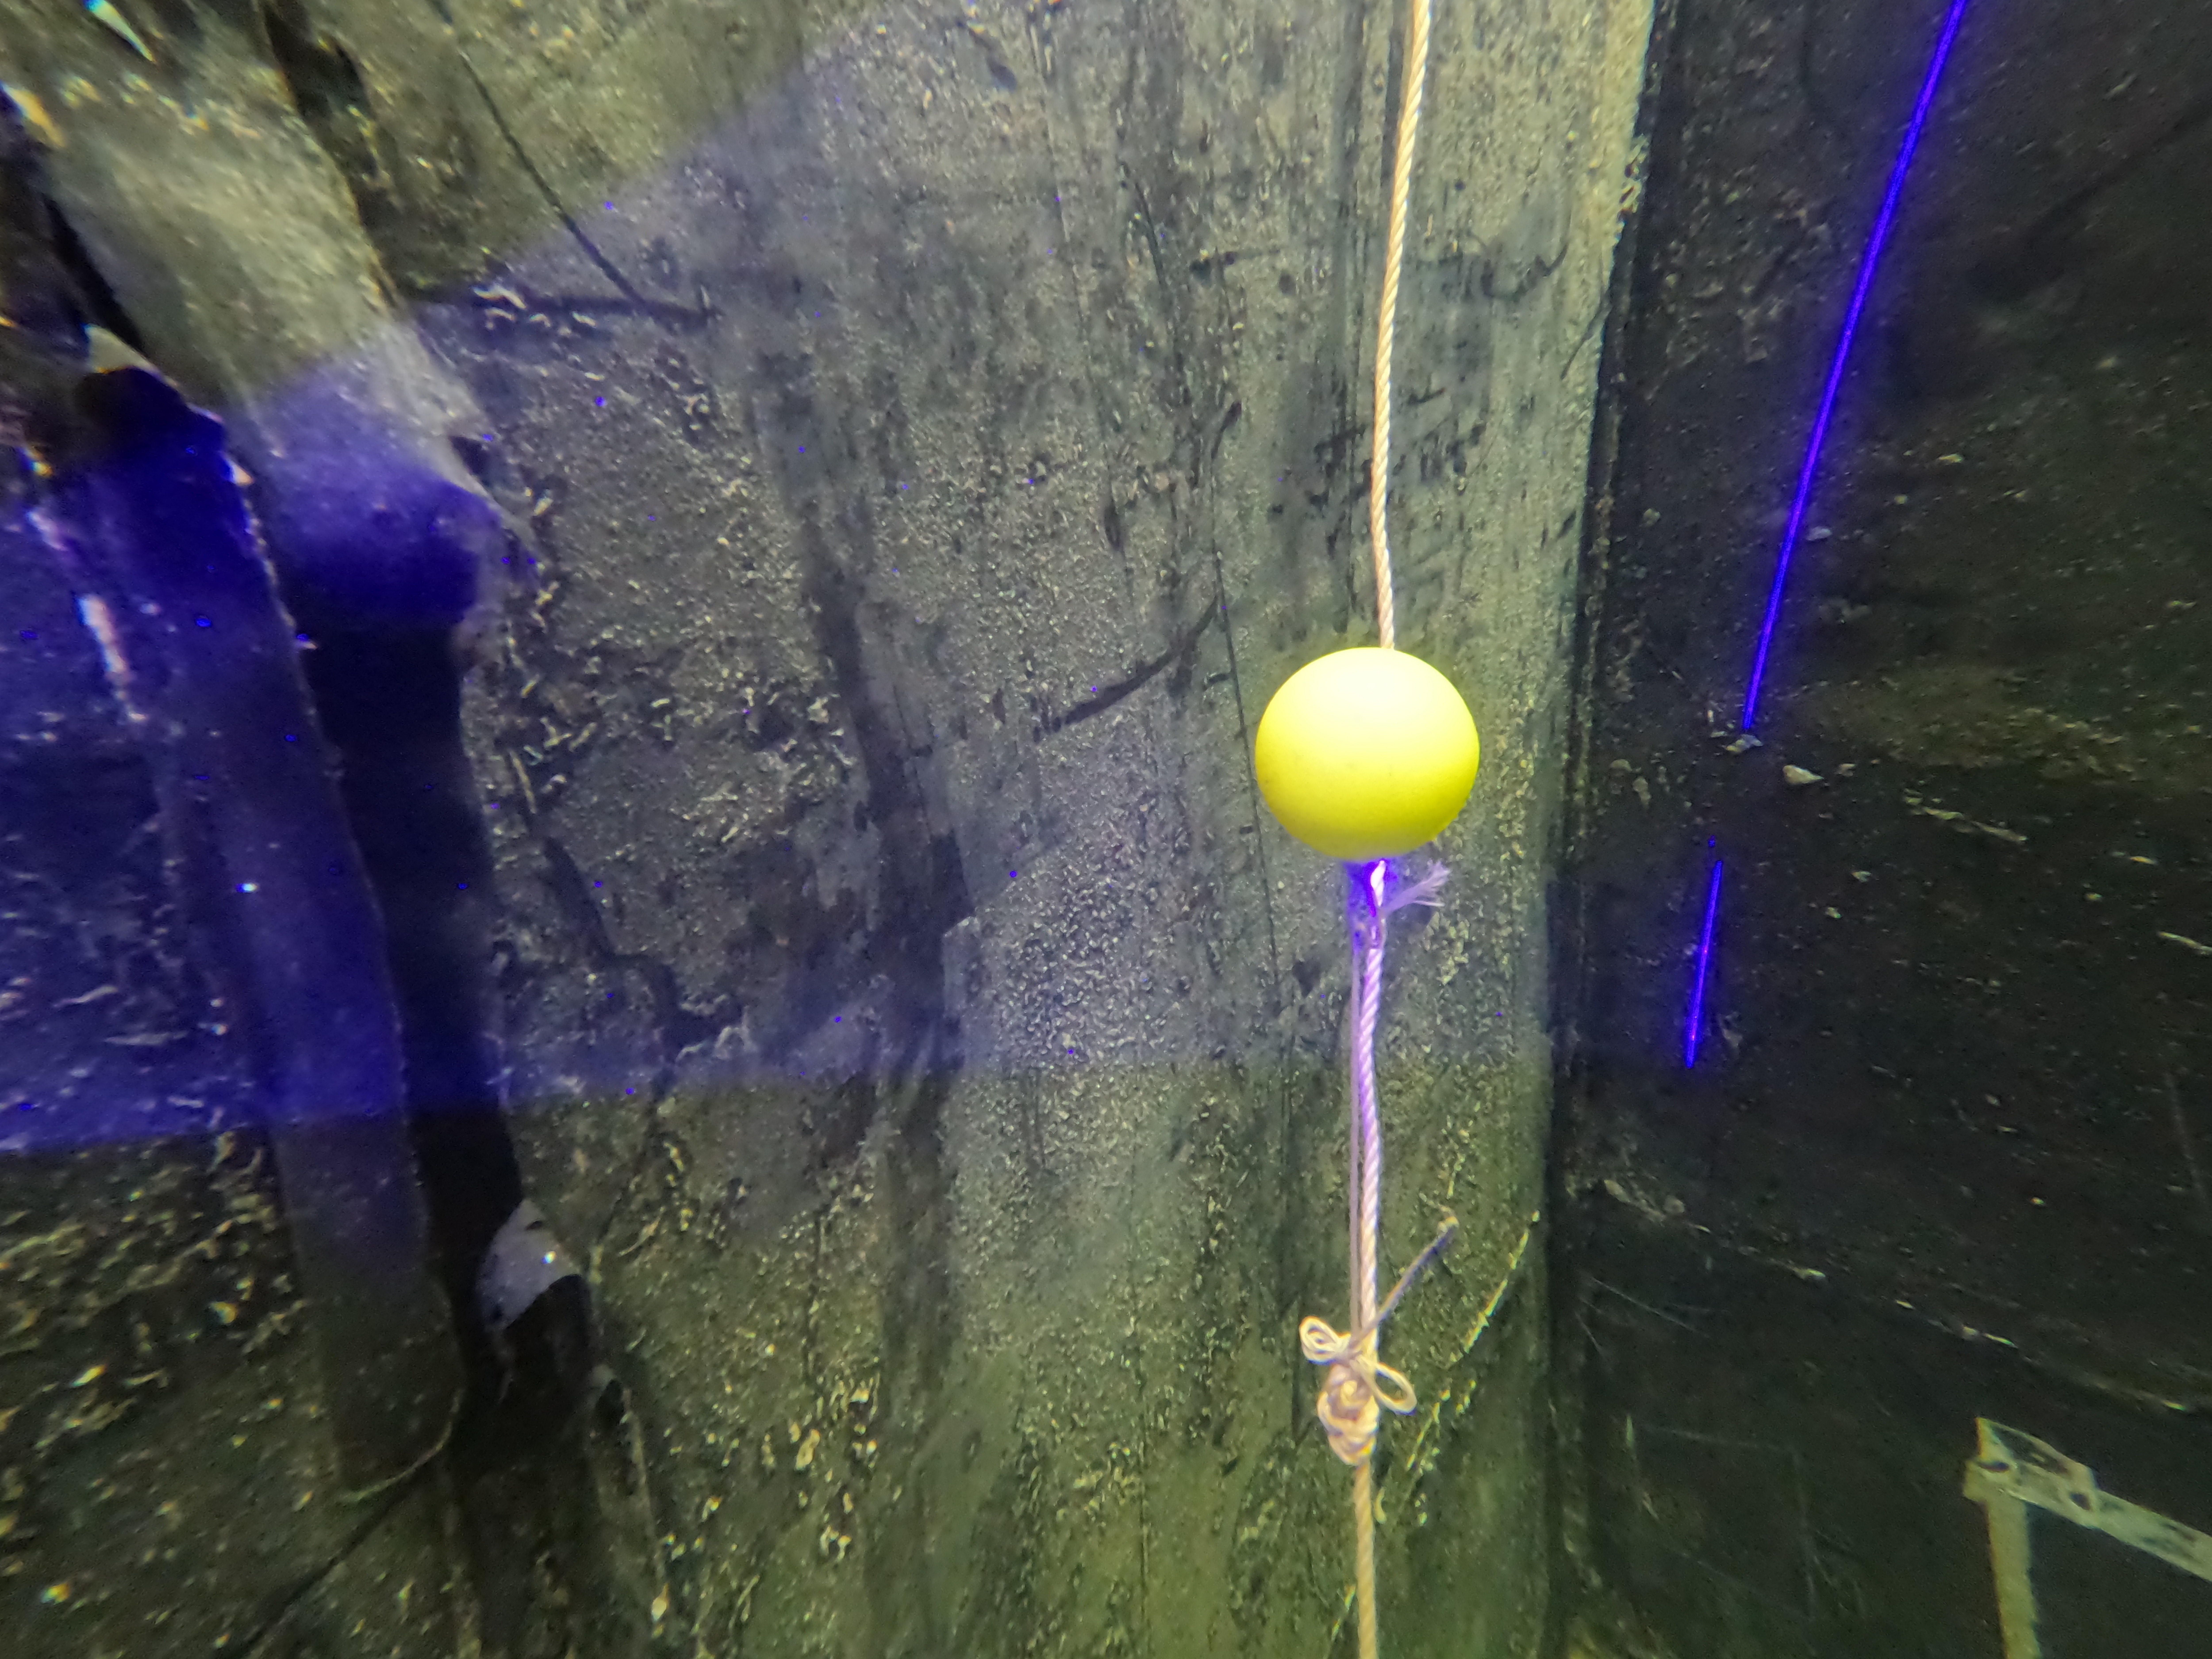

Supplement: Supplementary file 1359 [file G0032672.pdf › 6/G0032672.pdf]

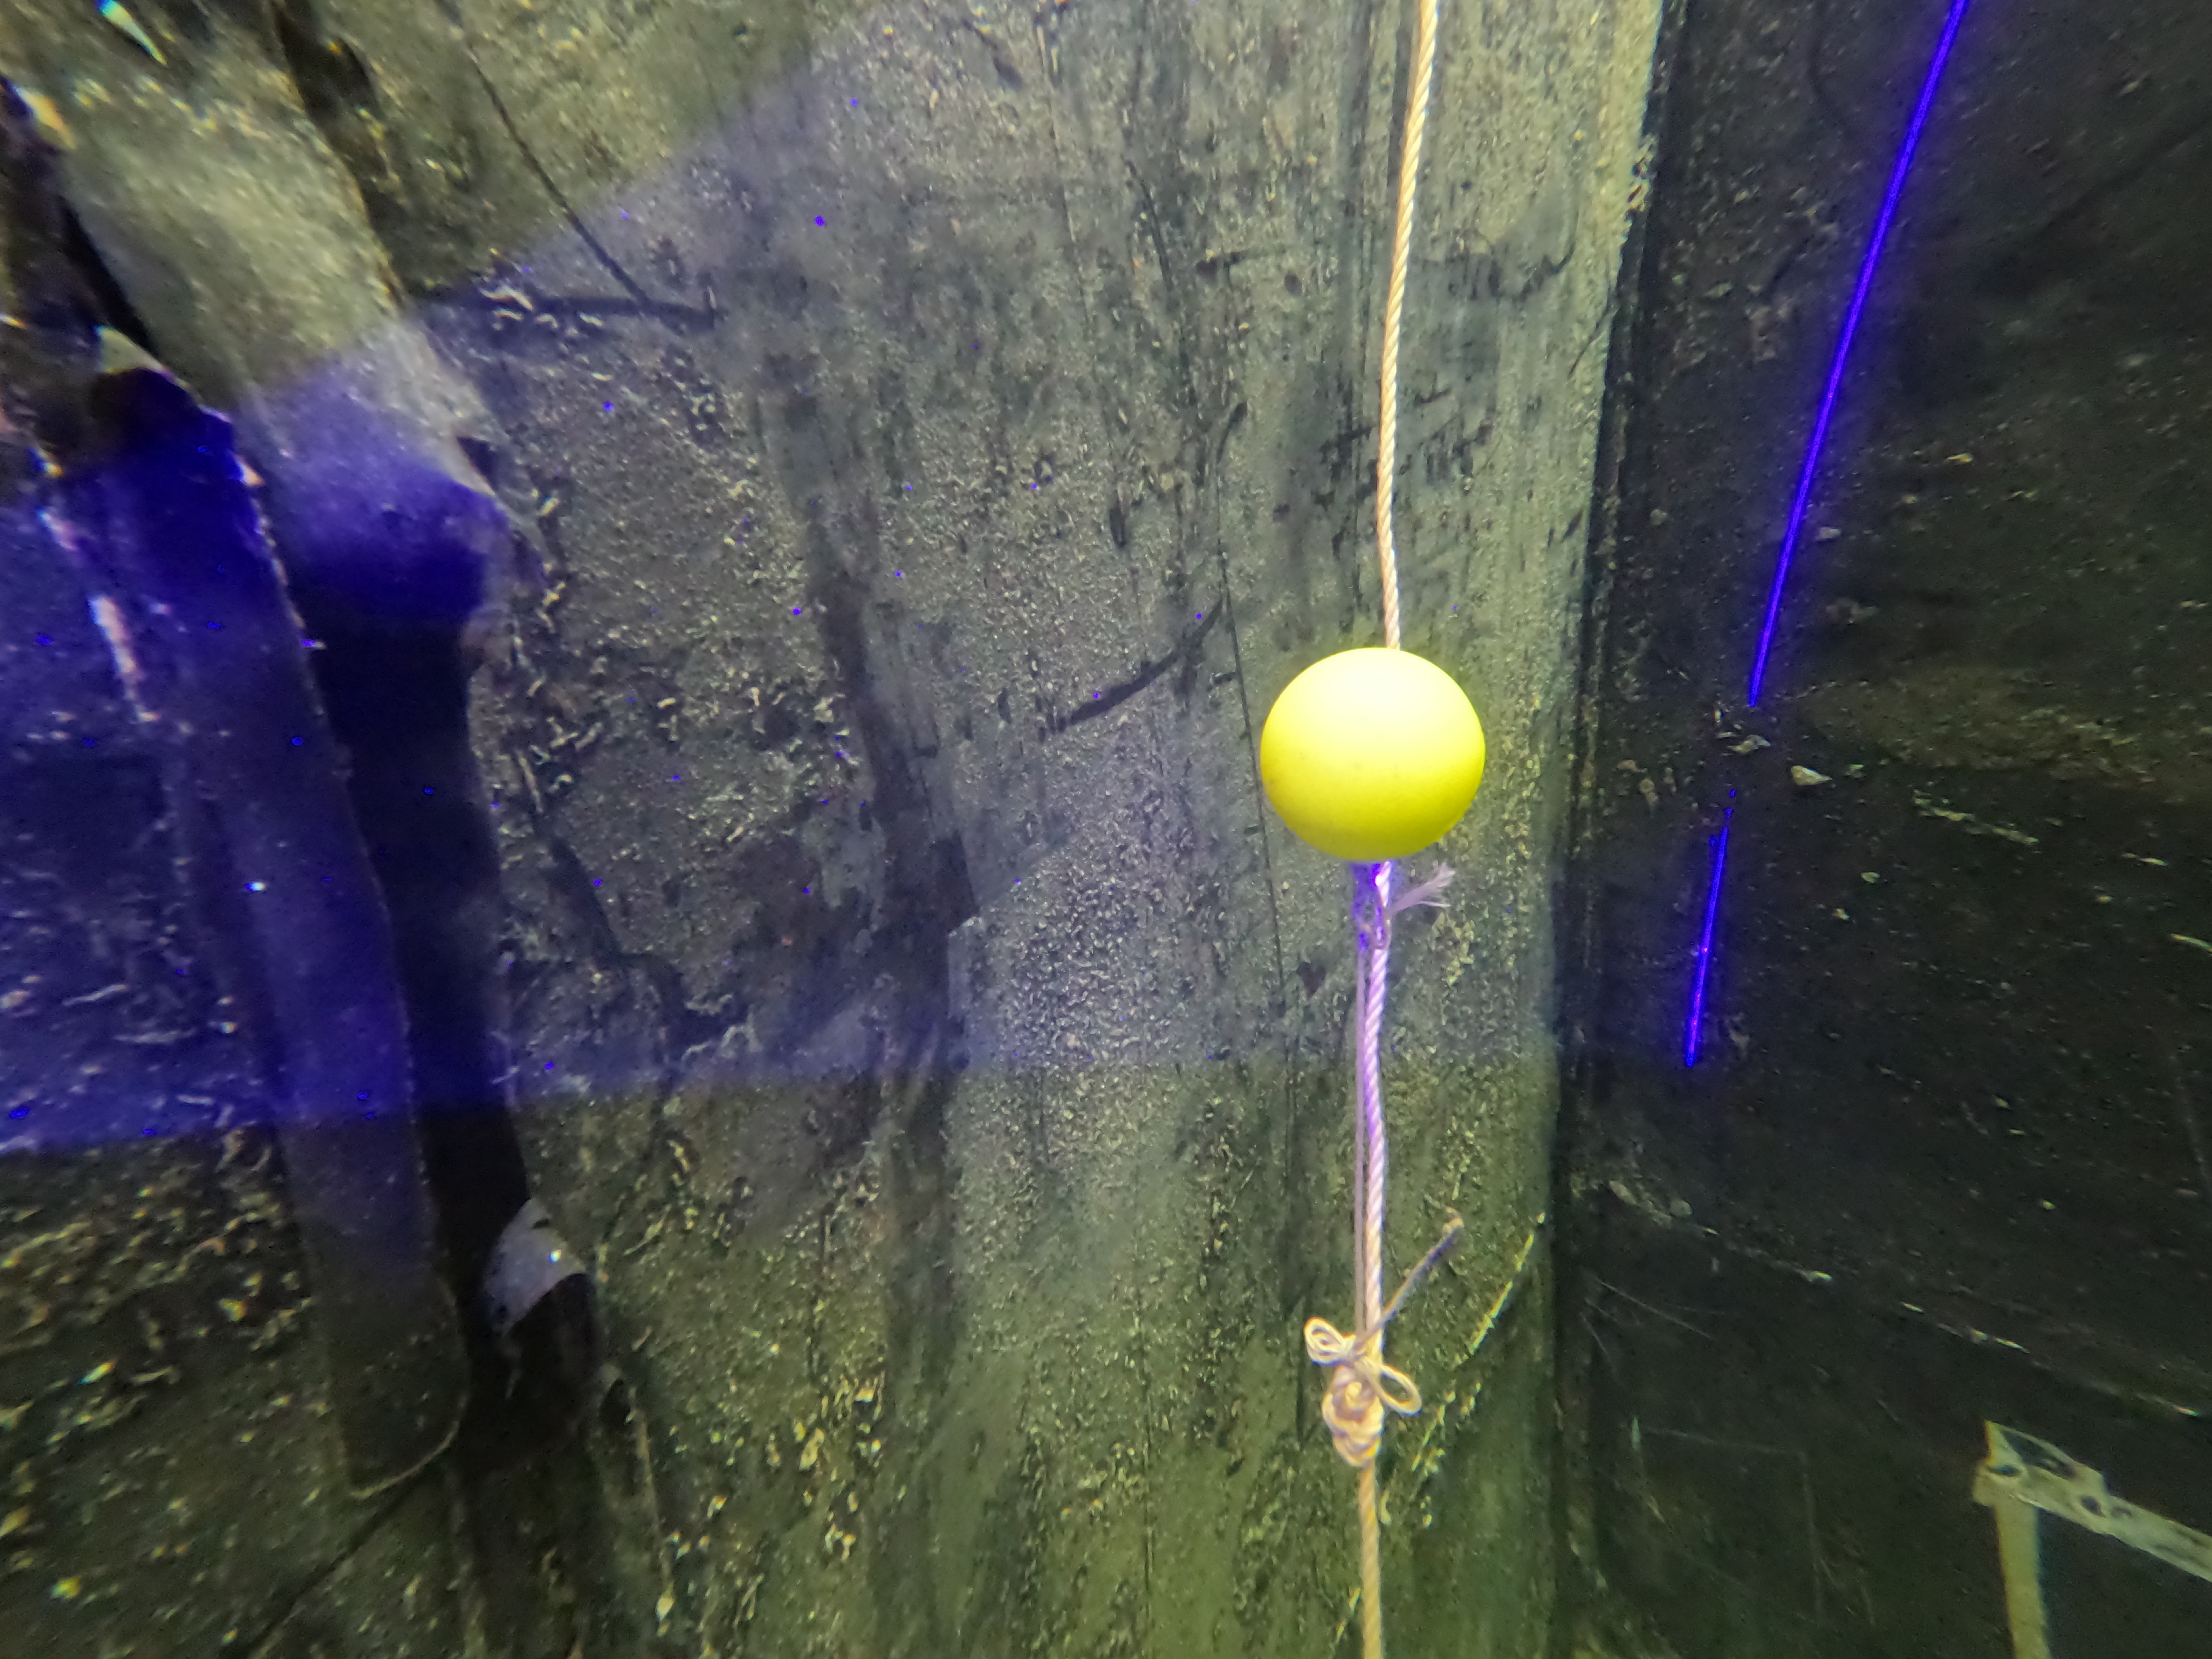

Supplement: Supplementary file 1360 [file G0032673.pdf › 6/G0032673.pdf]

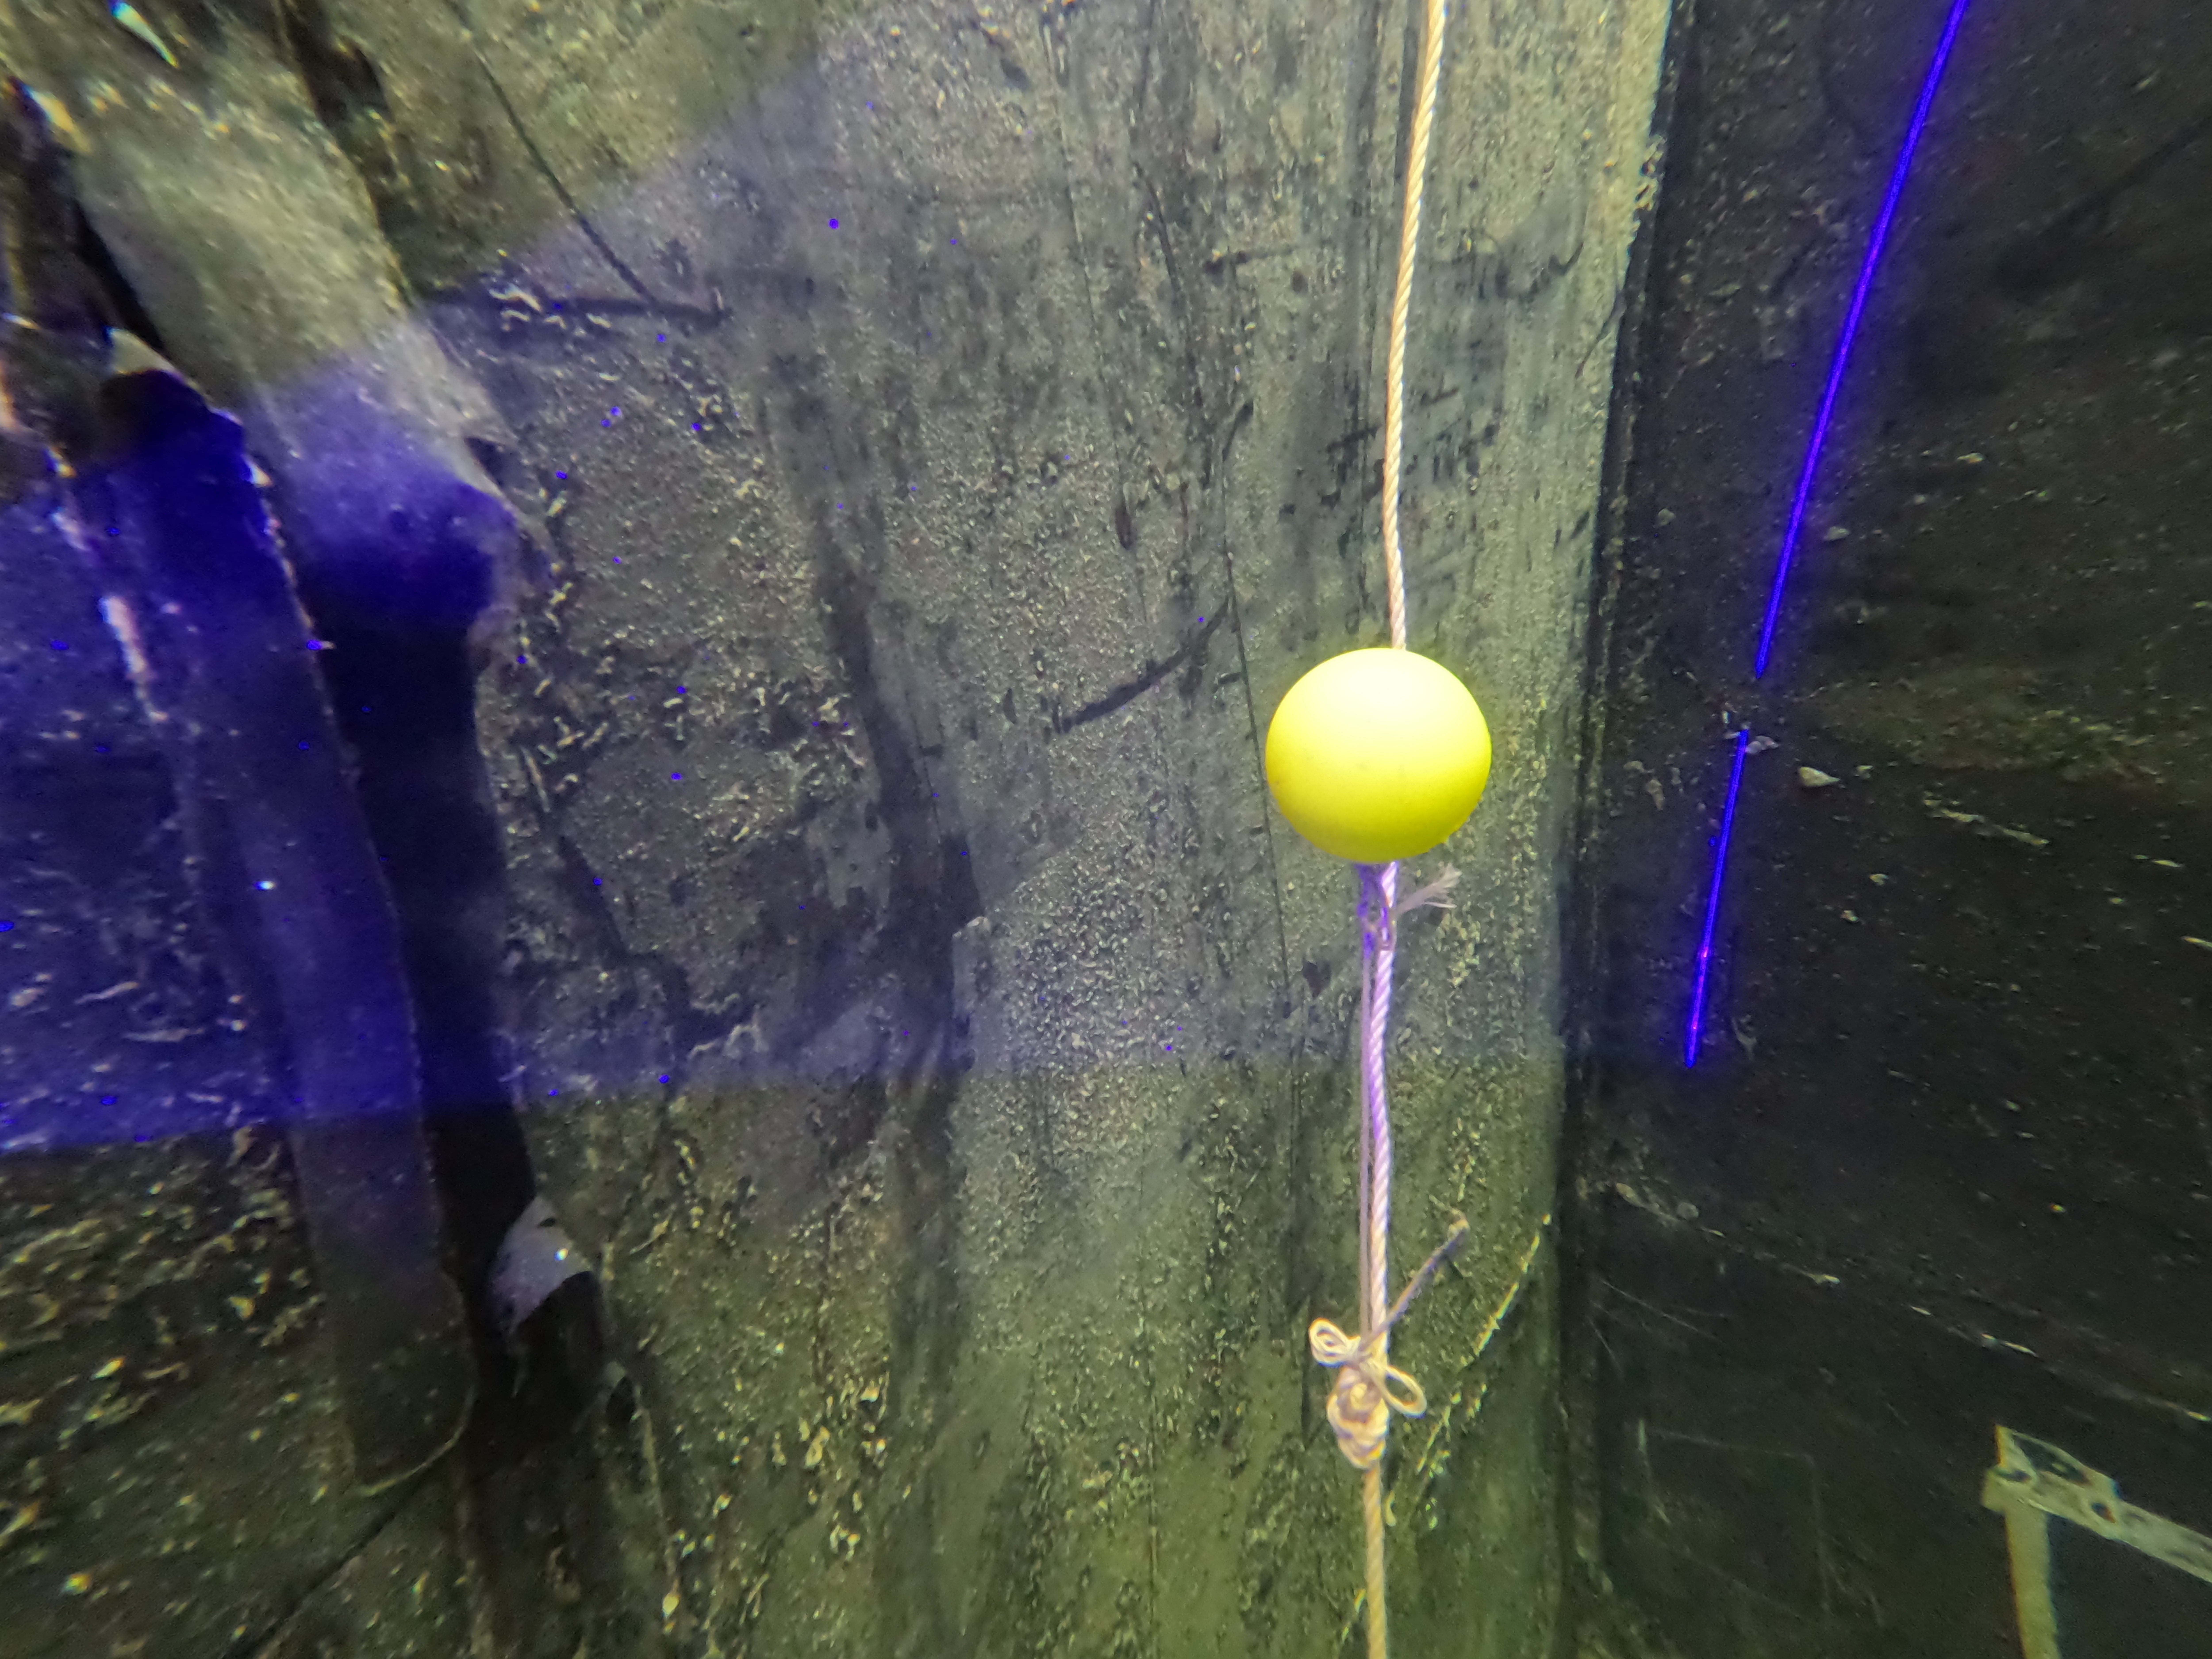

Supplement: Supplementary file 1361 [file G0032674.pdf › 6/G0032674.pdf]

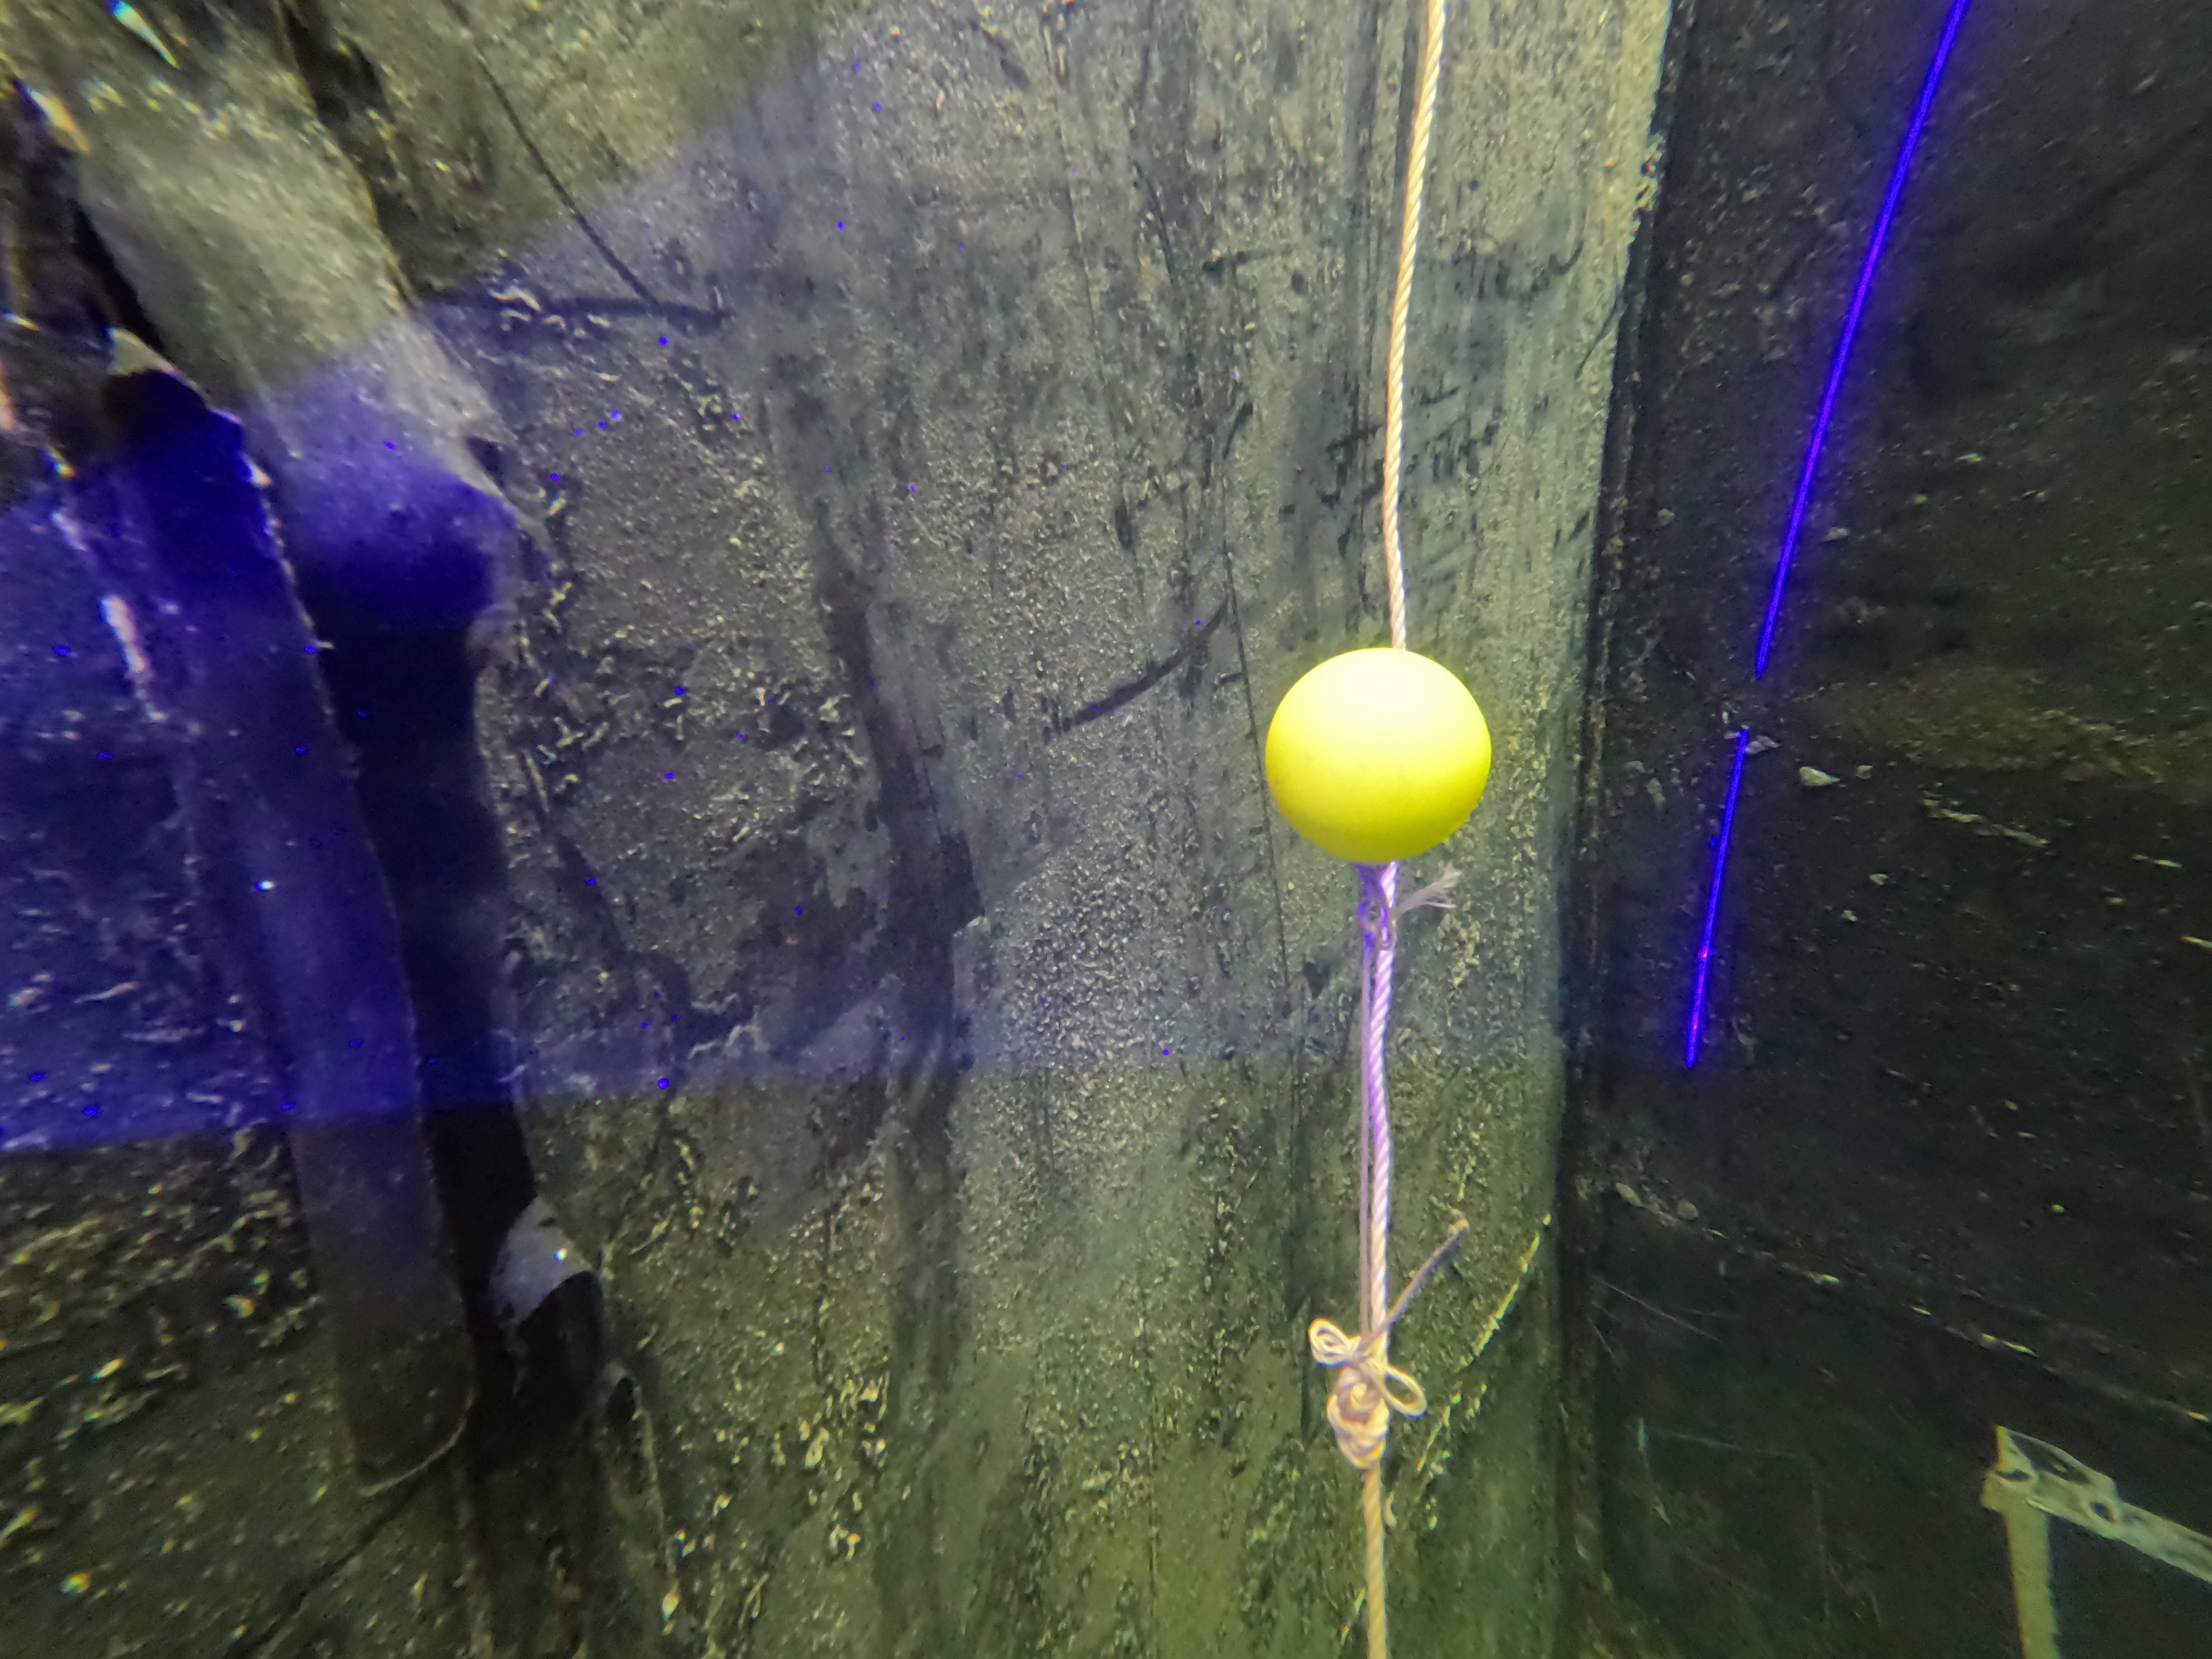

Supplement: Supplementary file 1362 [file G0032675.pdf › 6/G0032675.pdf]

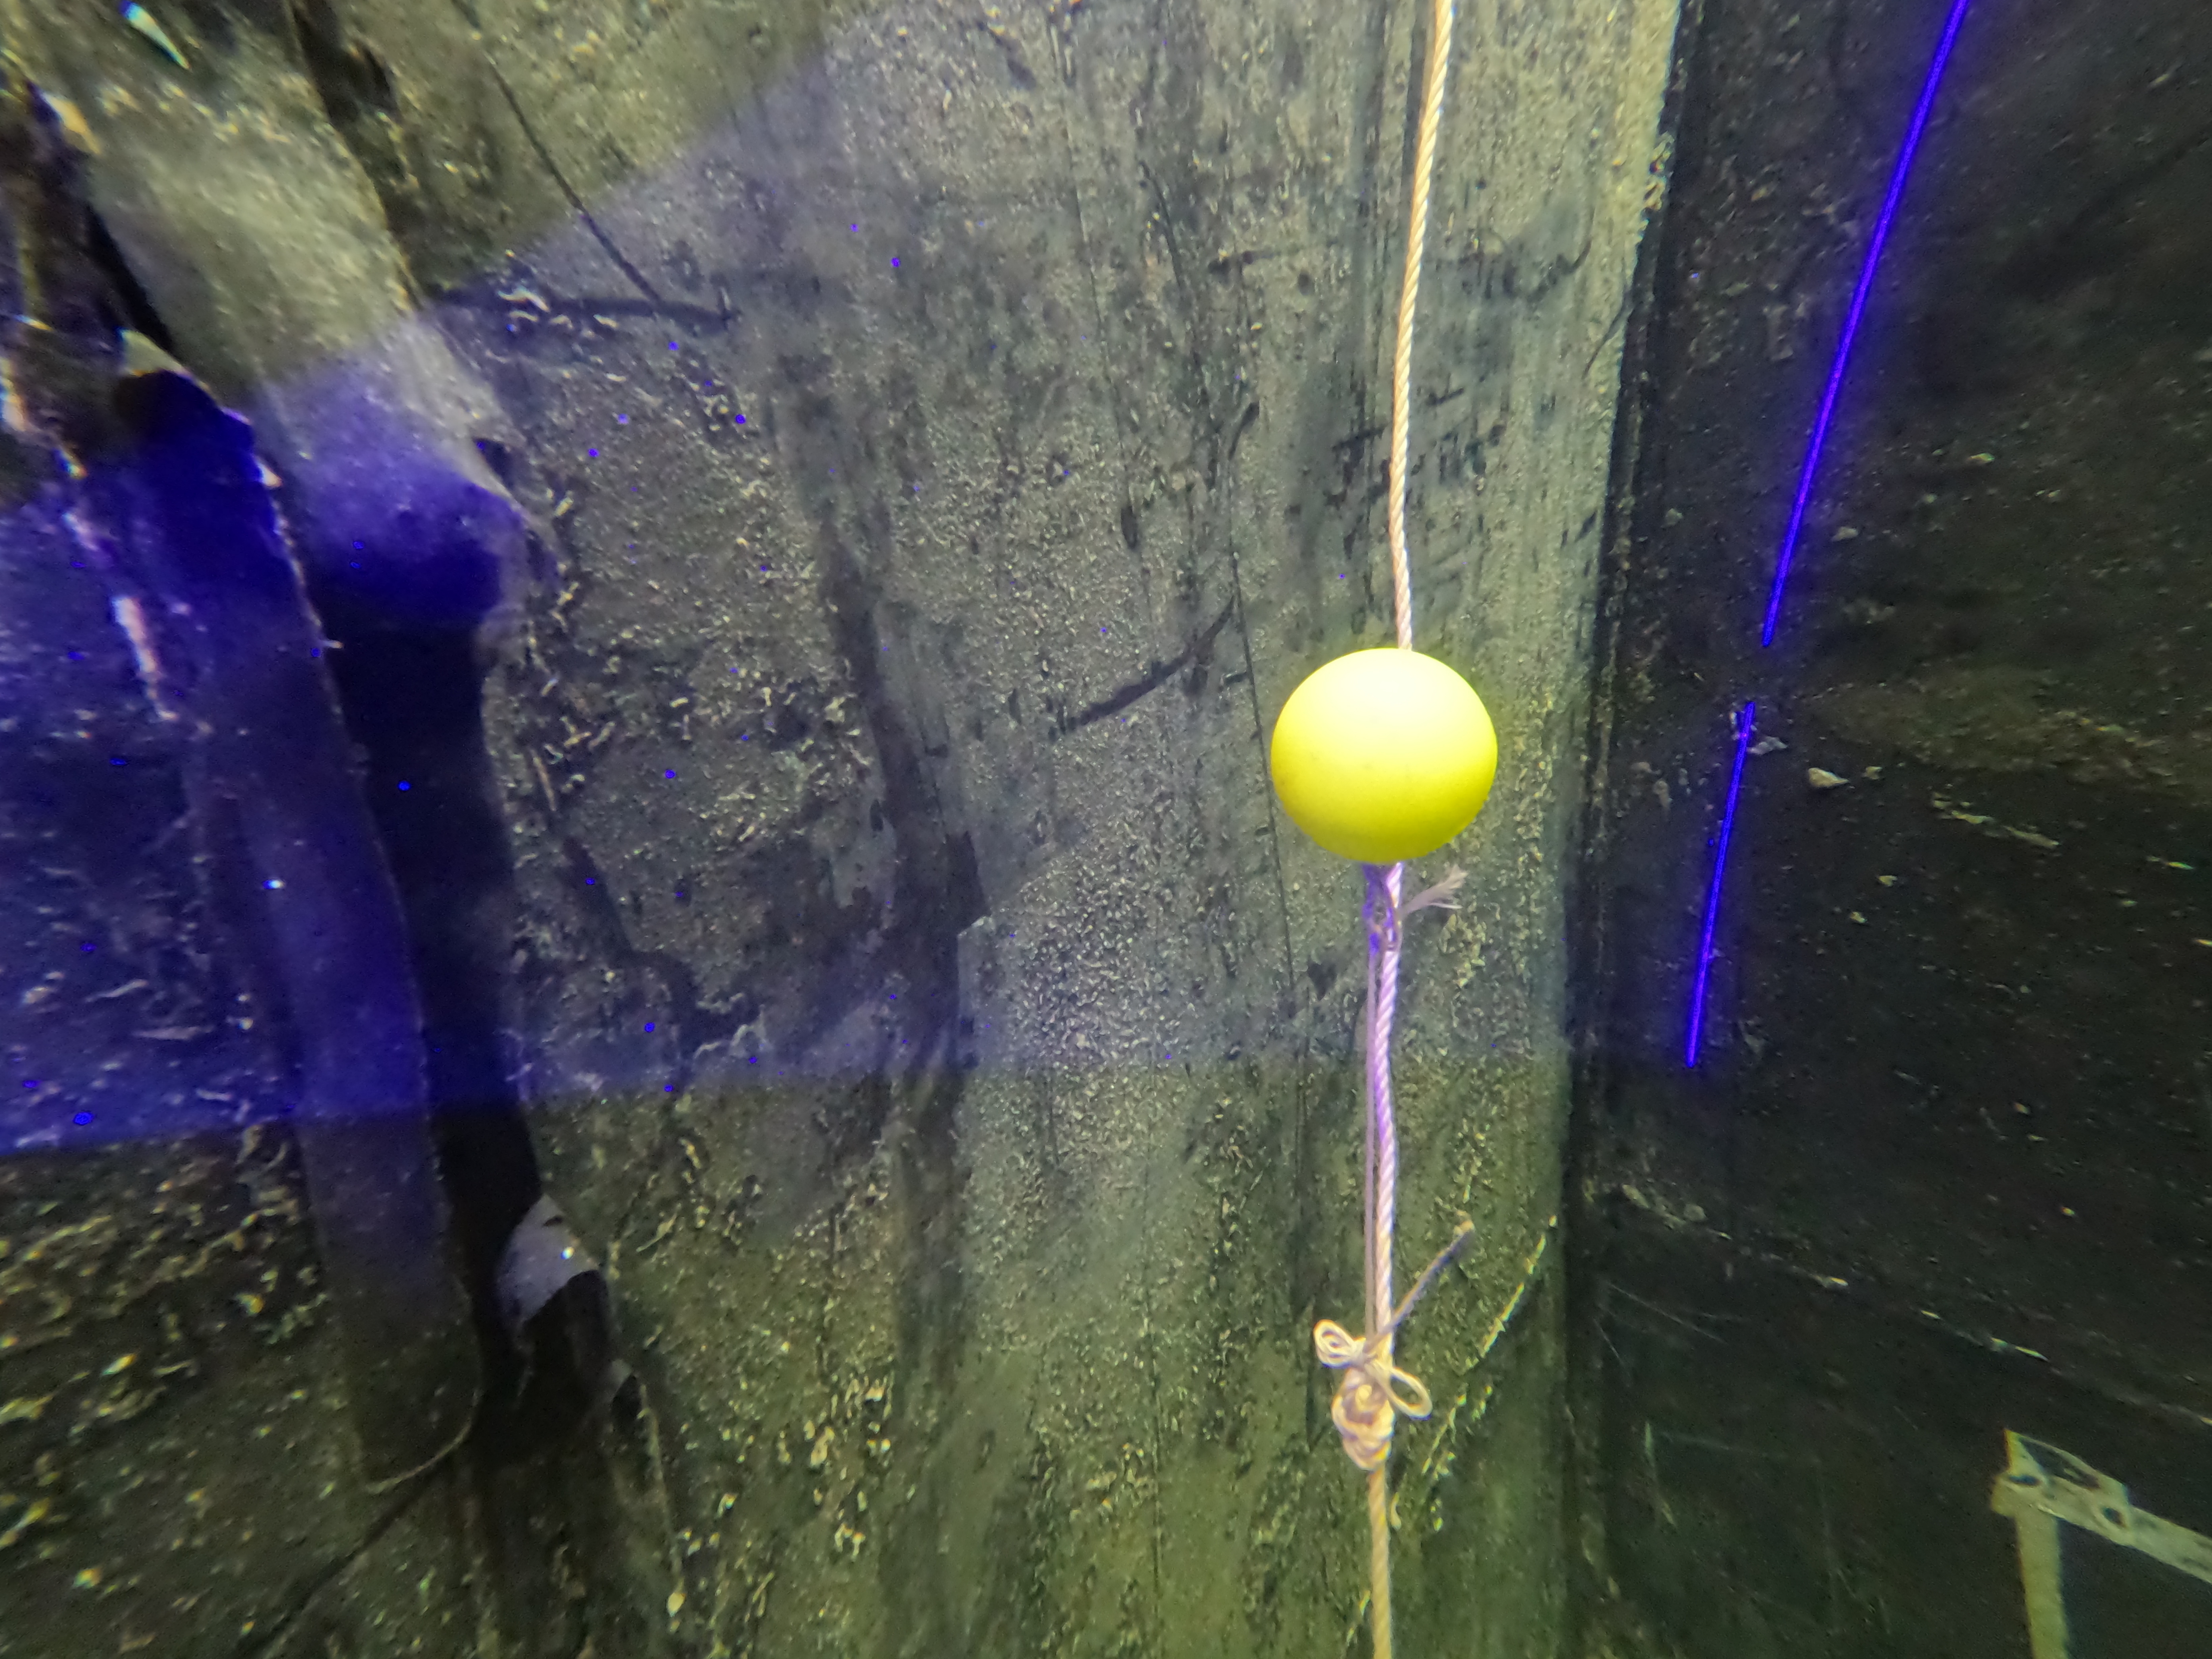

Supplement: Supplementary file 1363 [file G0032676.pdf › 6/G0032676.pdf]

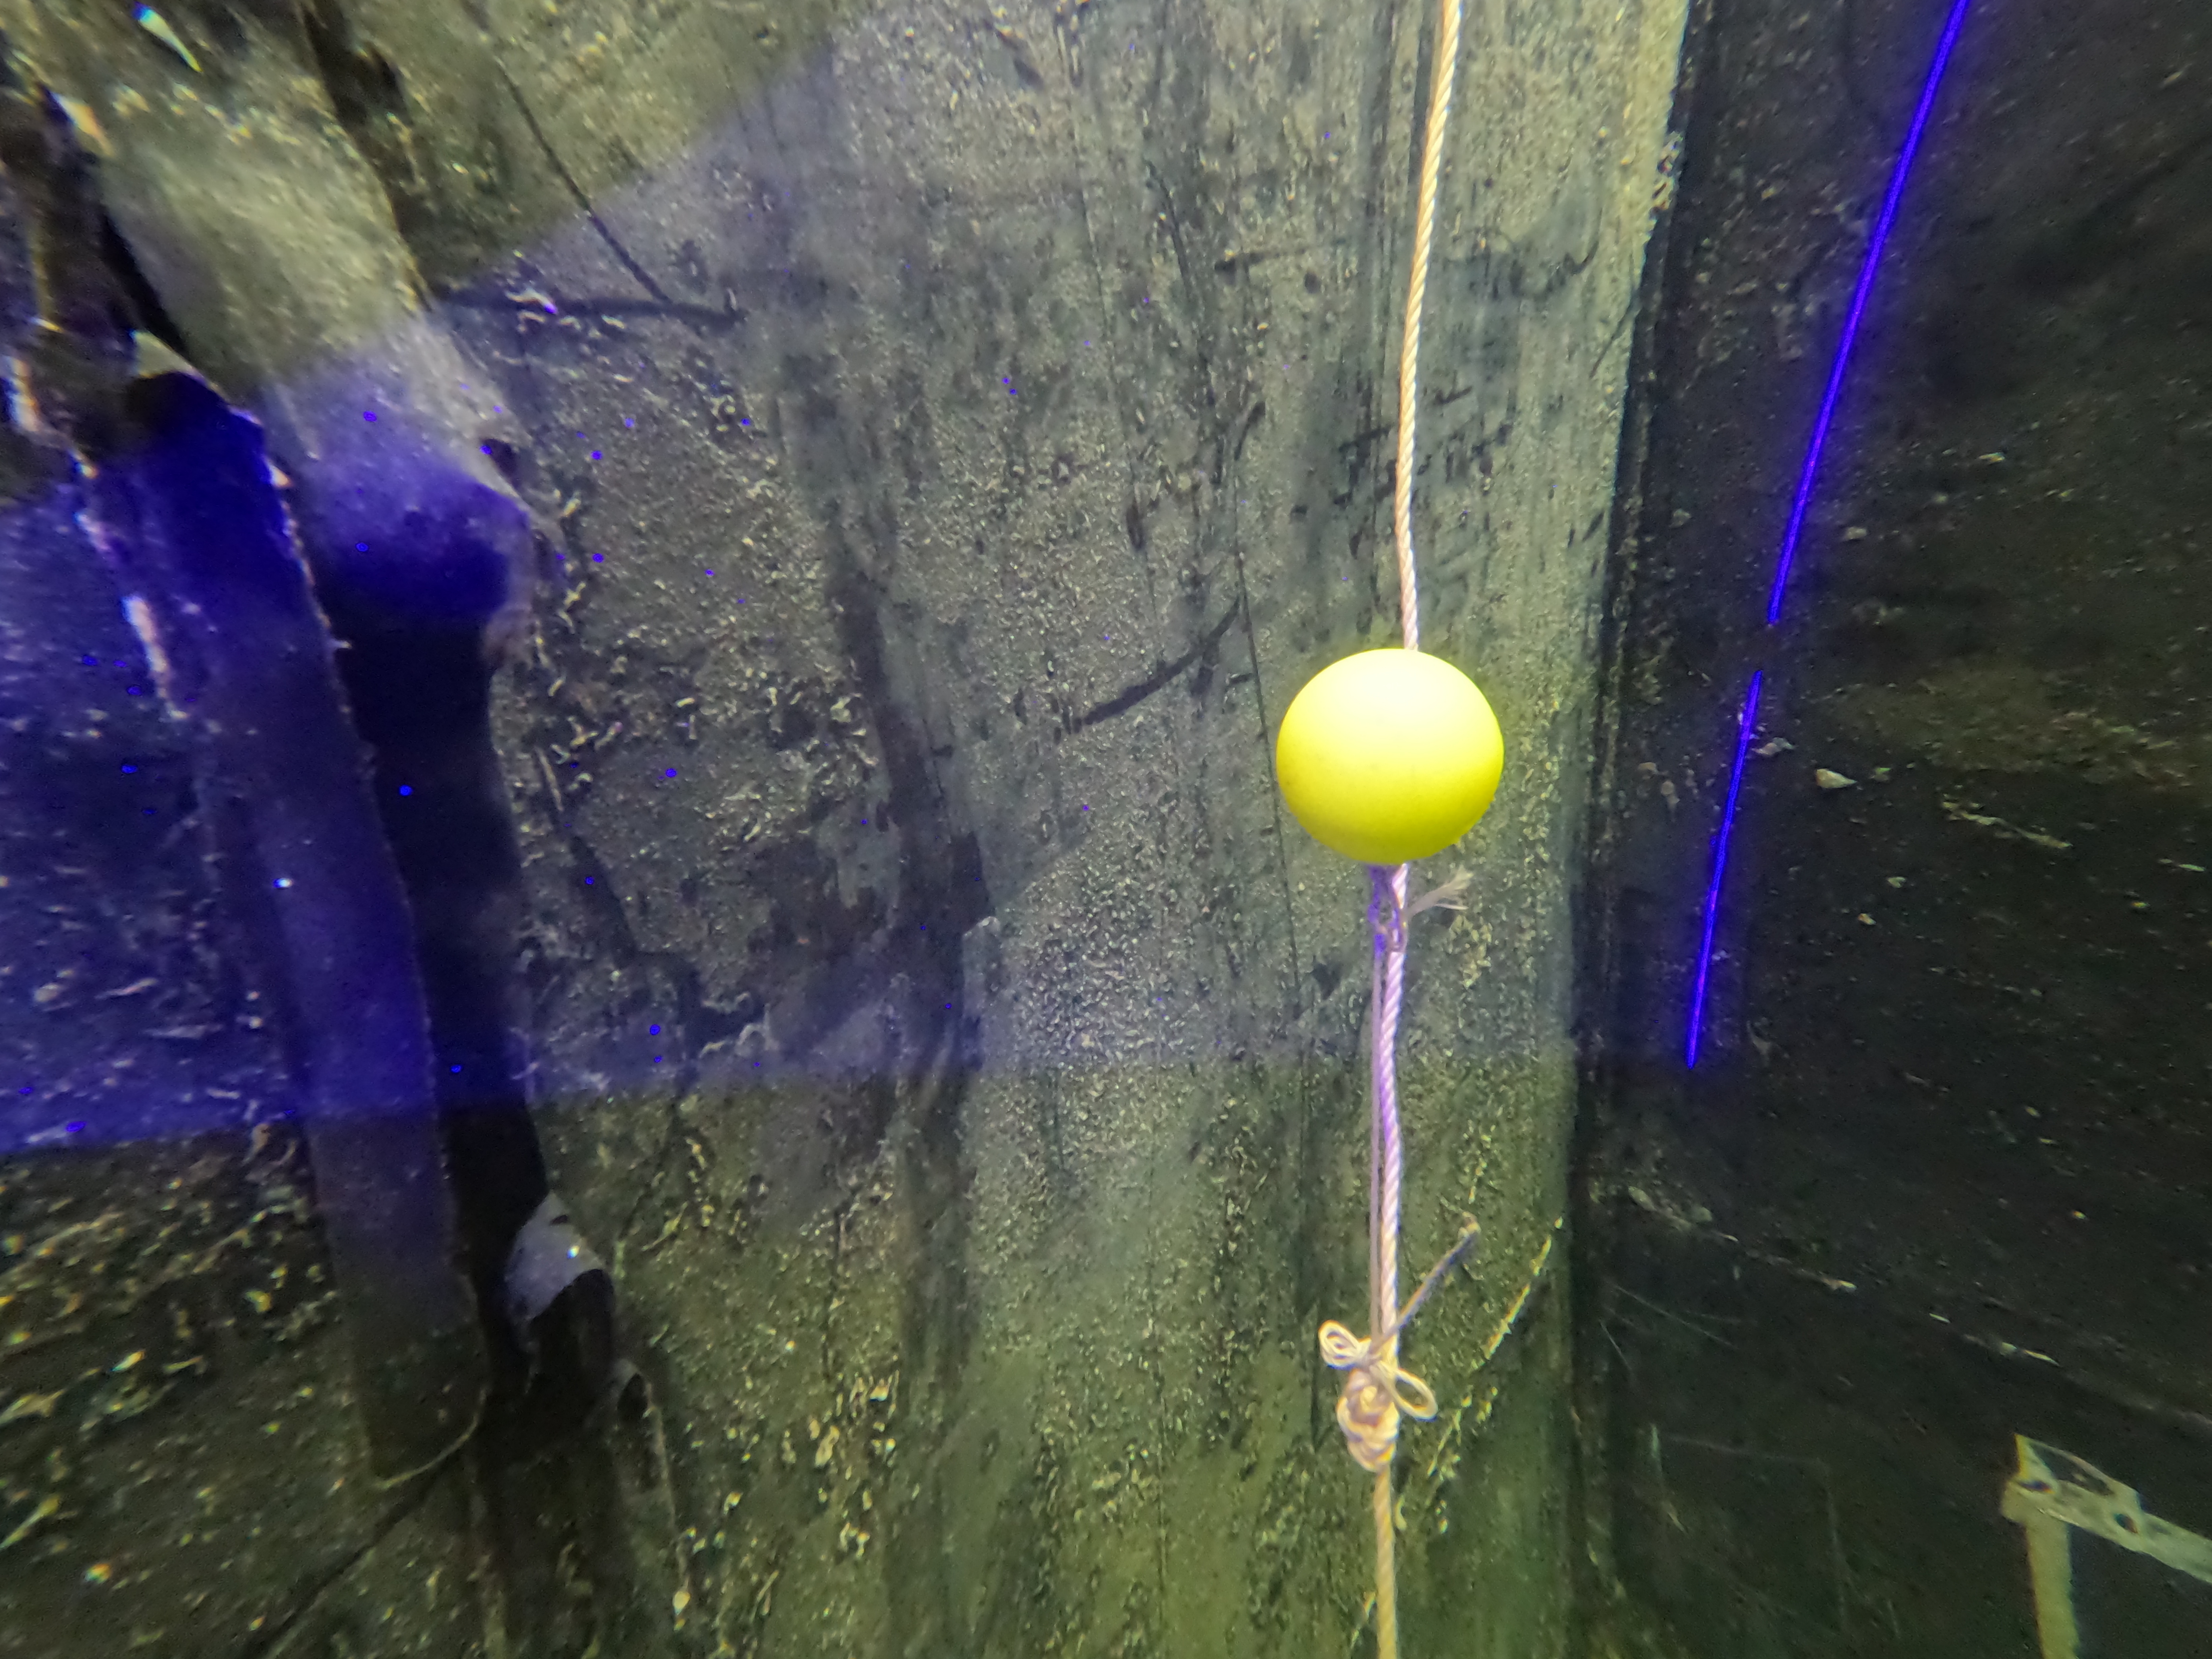

Supplement: Supplementary file 1364 [file G0032677.pdf › 6/G0032677.pdf]

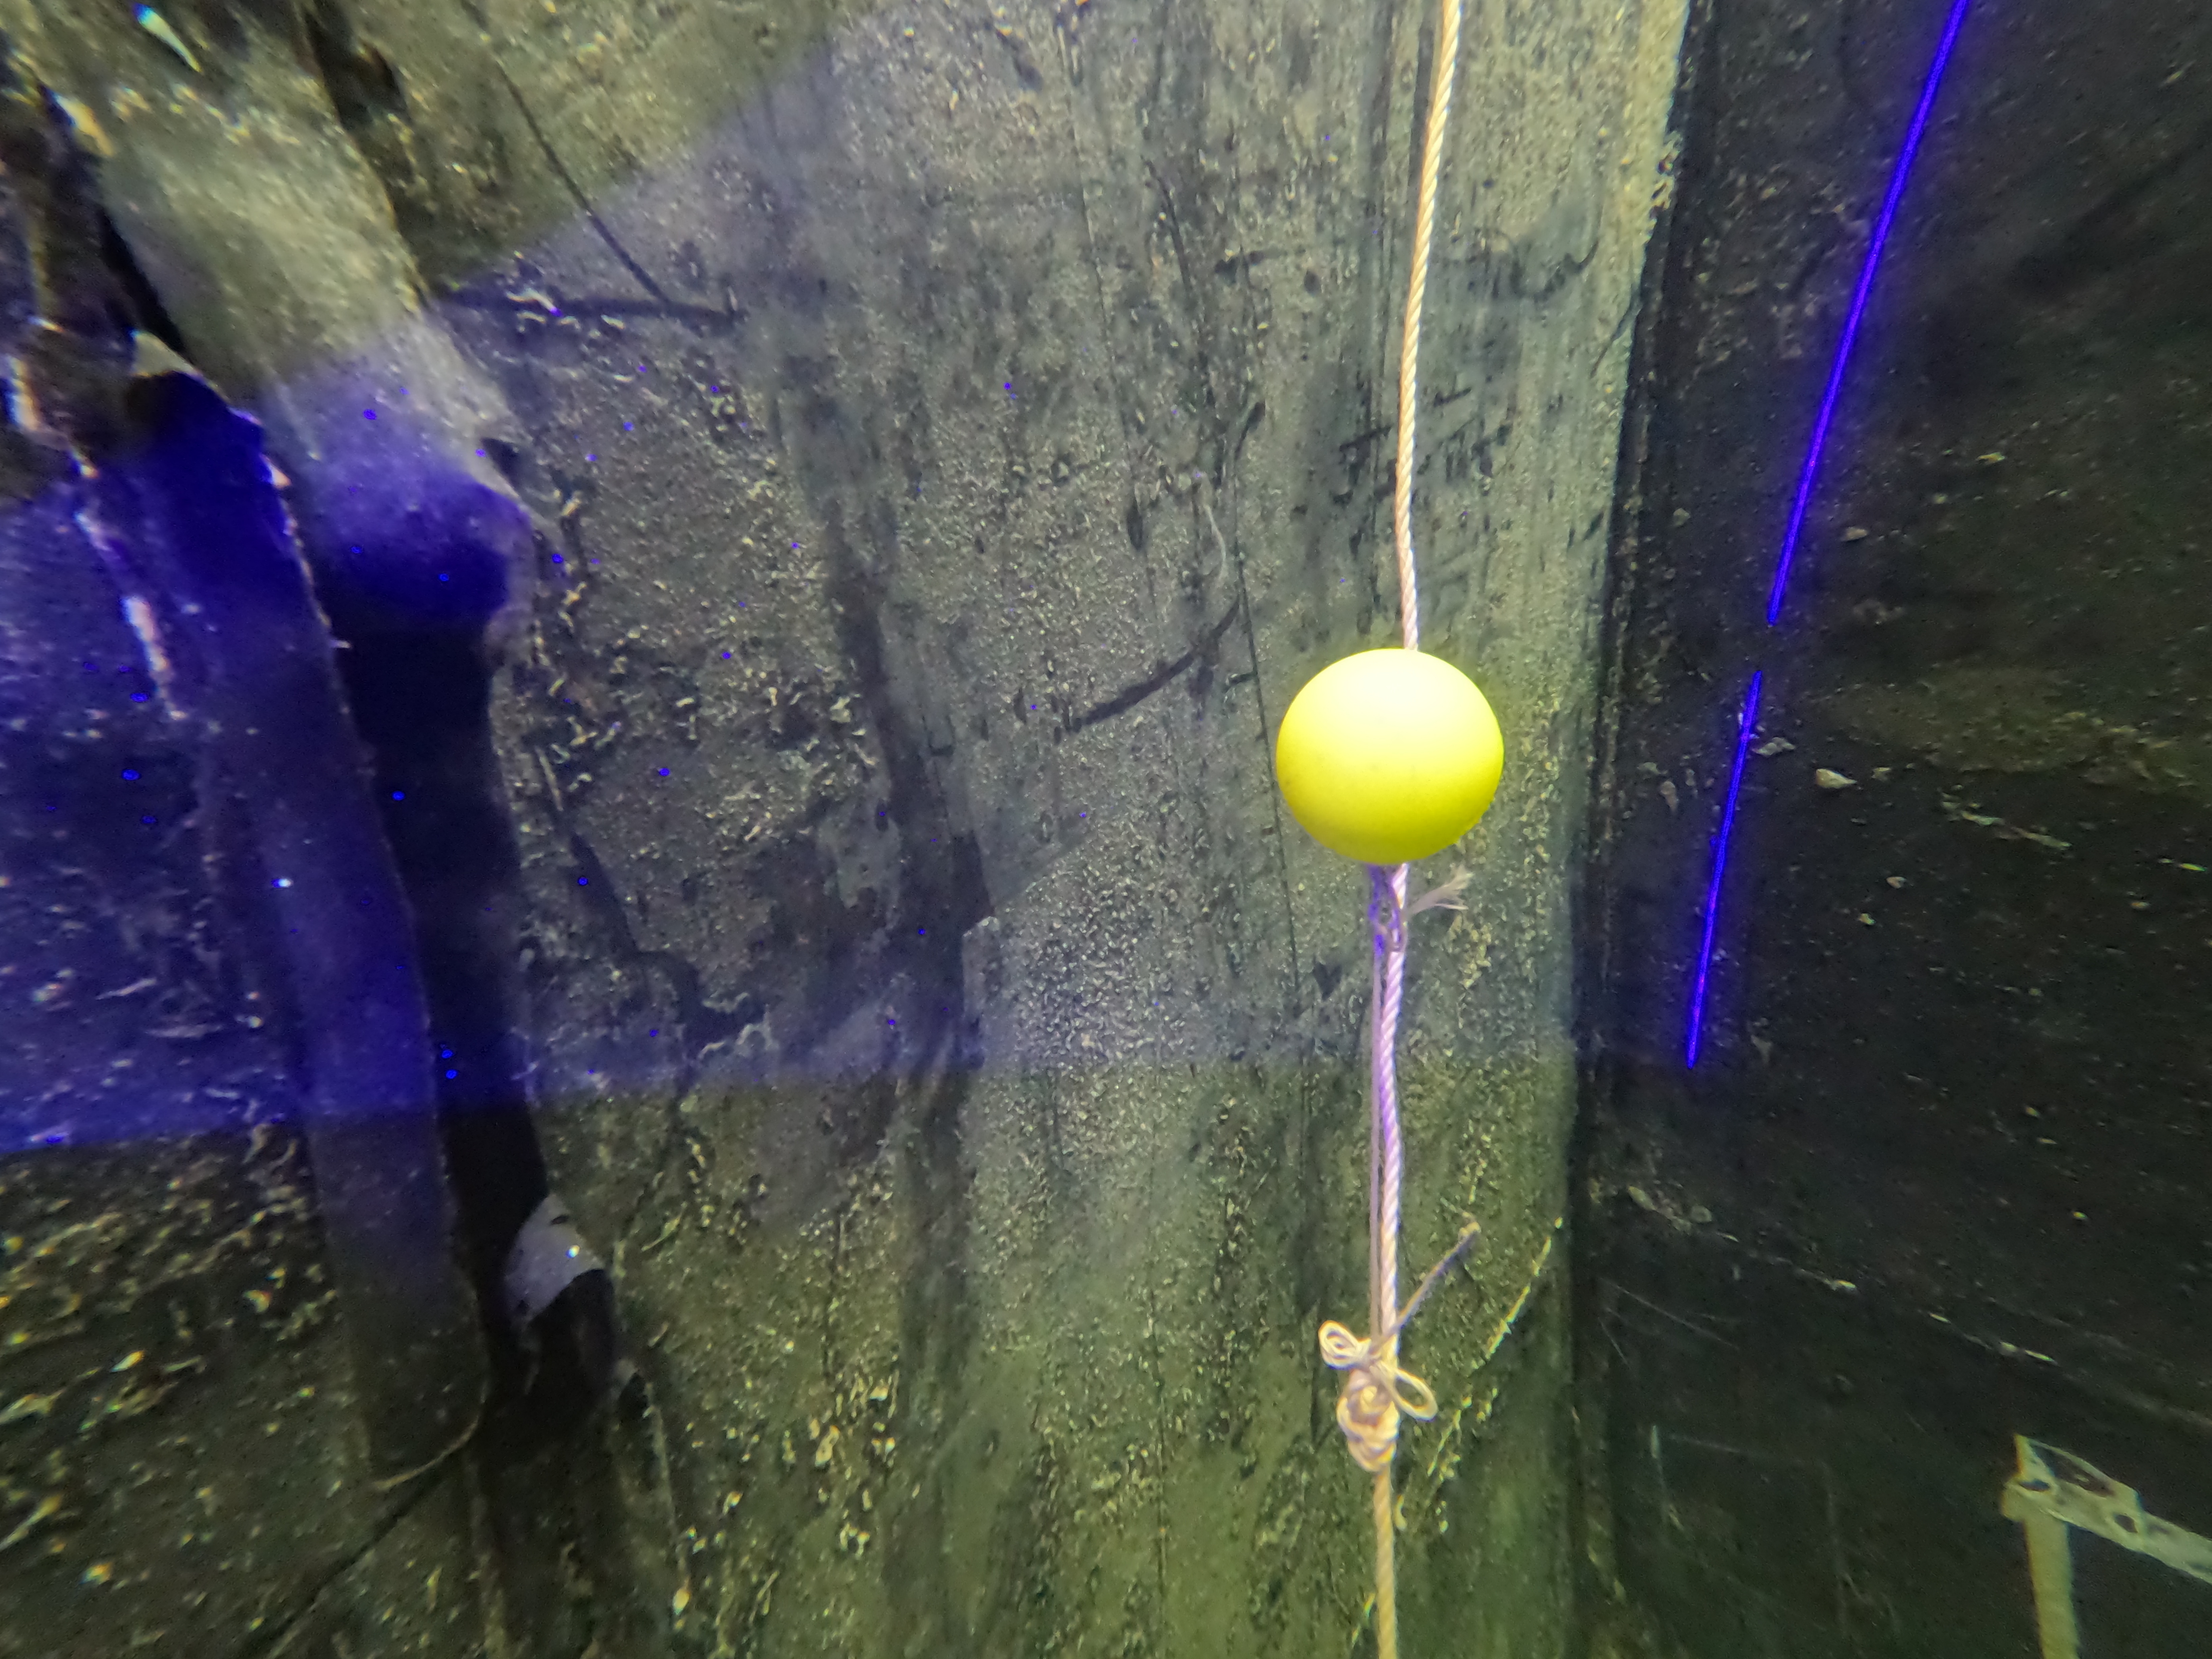

Supplement: Supplementary file 1365 [file G0032678.pdf › 6/G0032678.pdf]

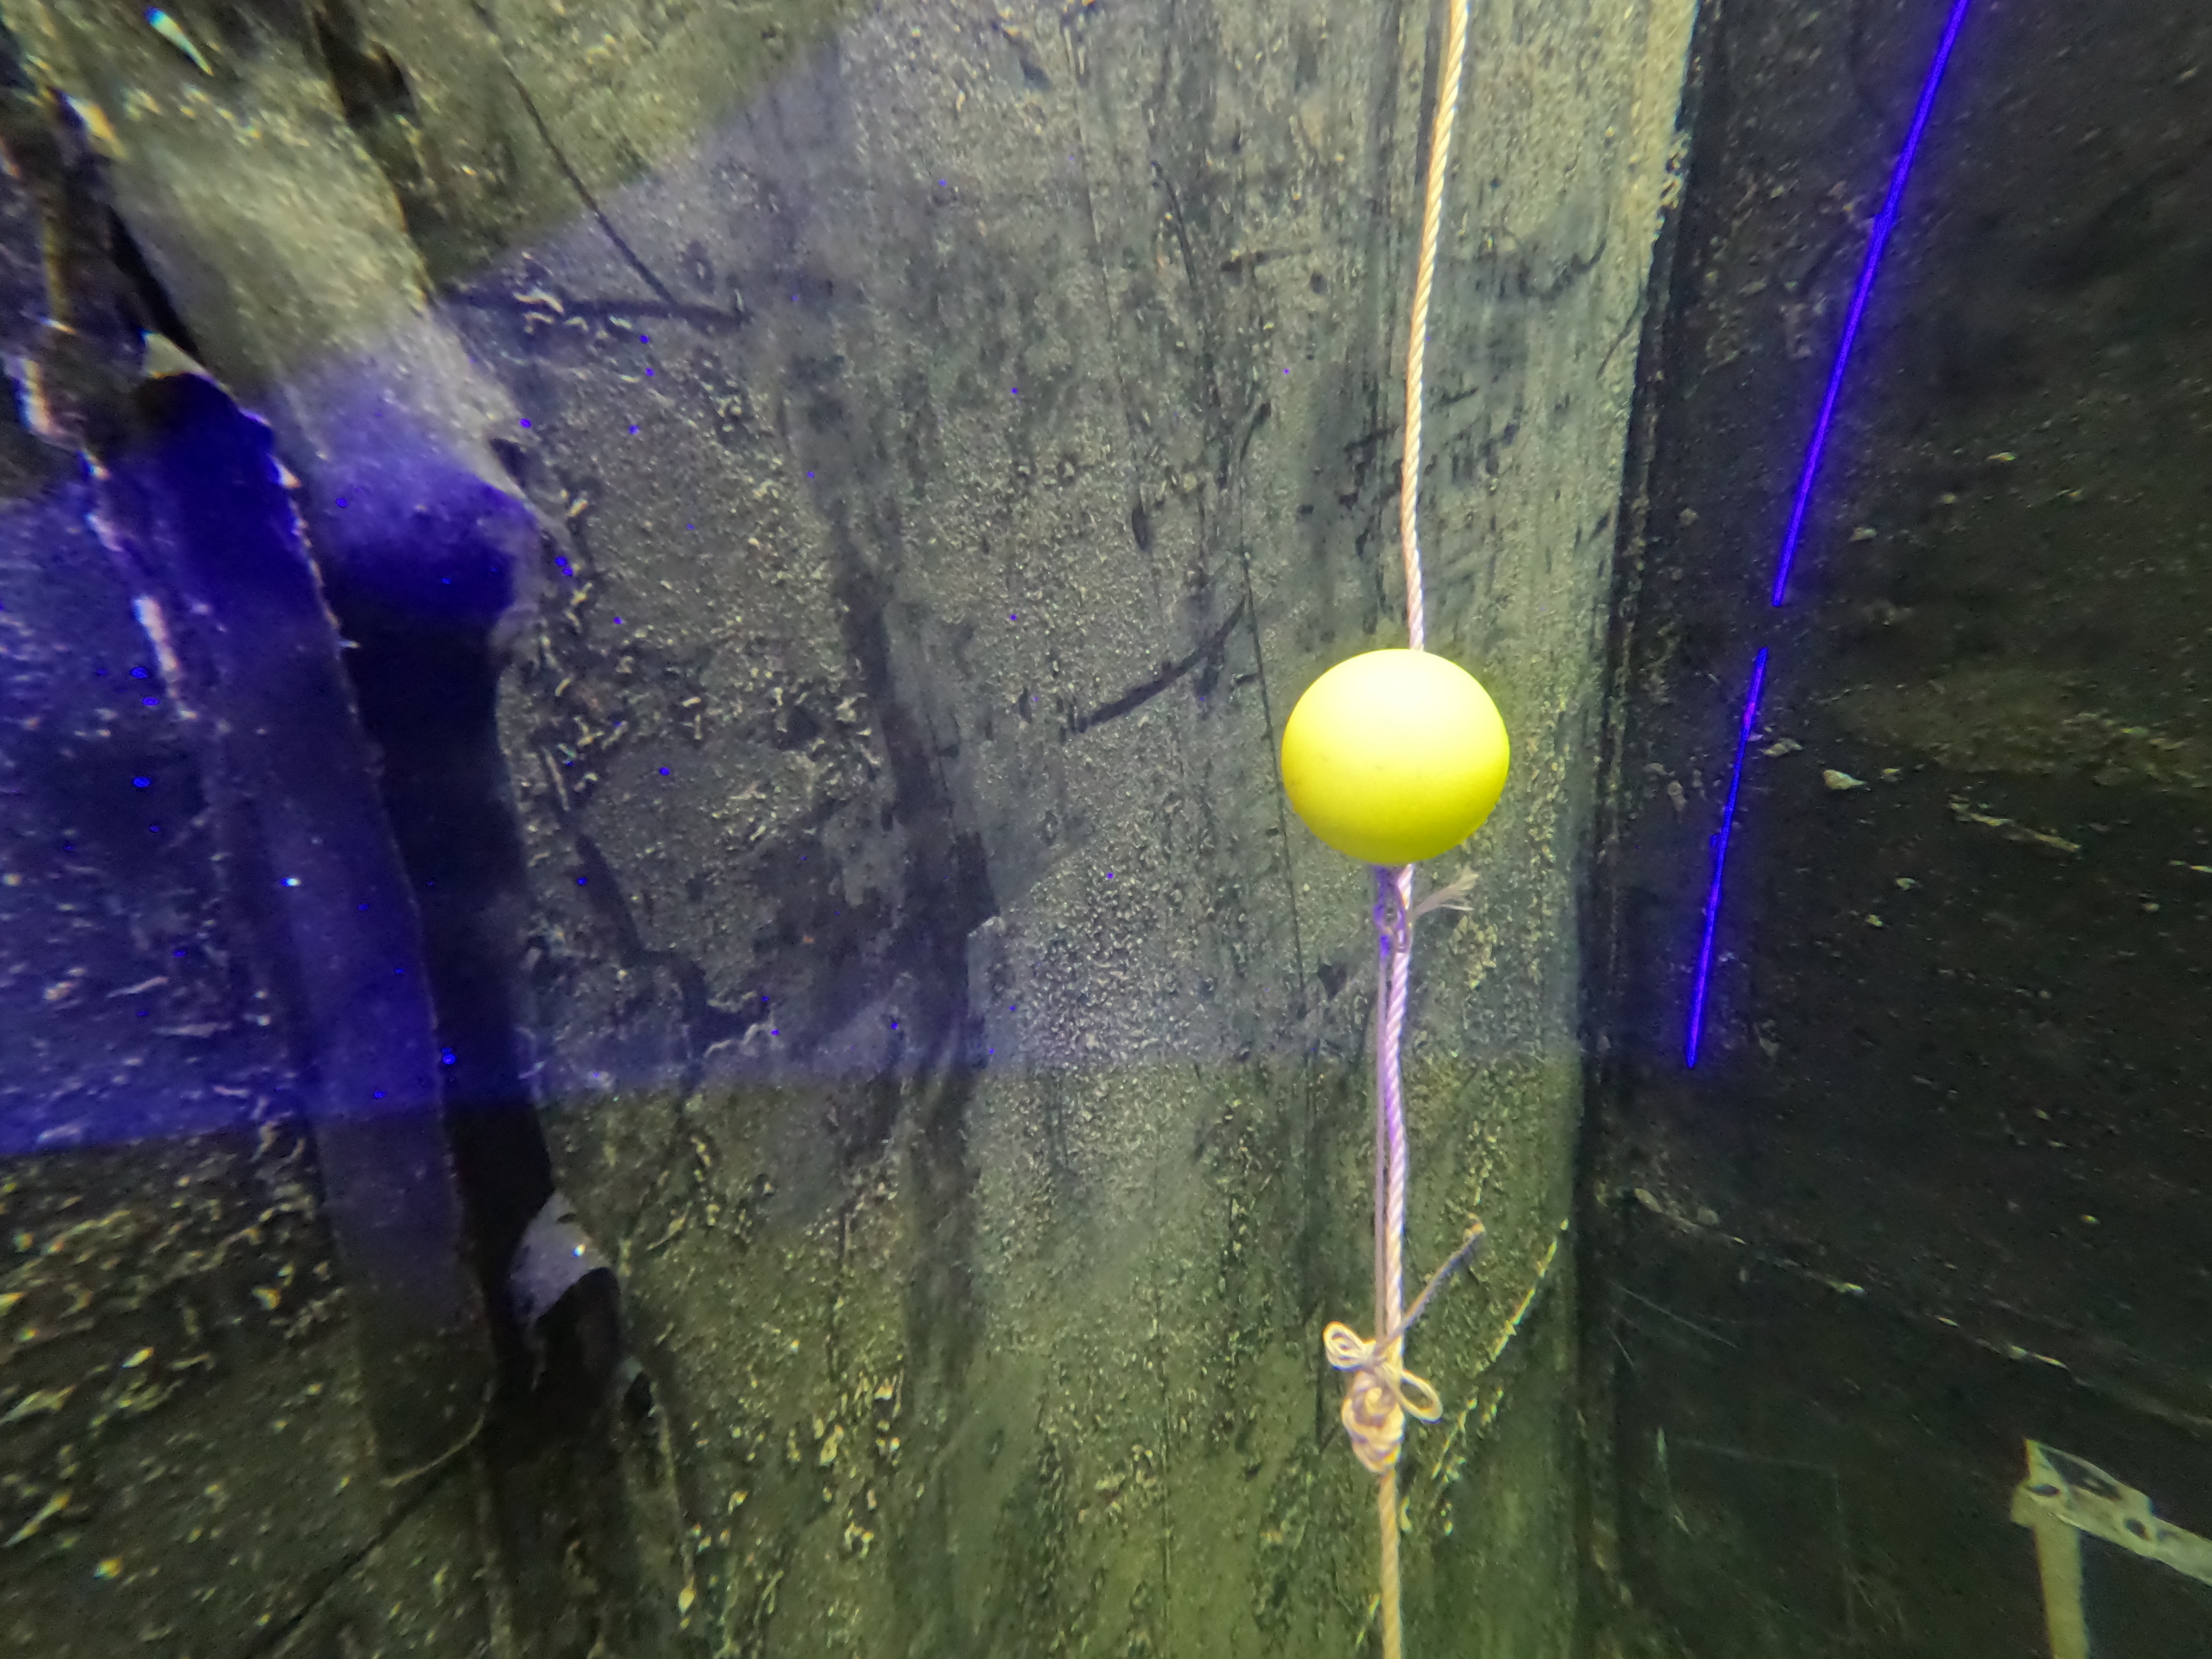

Supplement: Supplementary file 1366 [file G0032679.pdf › 6/G0032679.pdf]

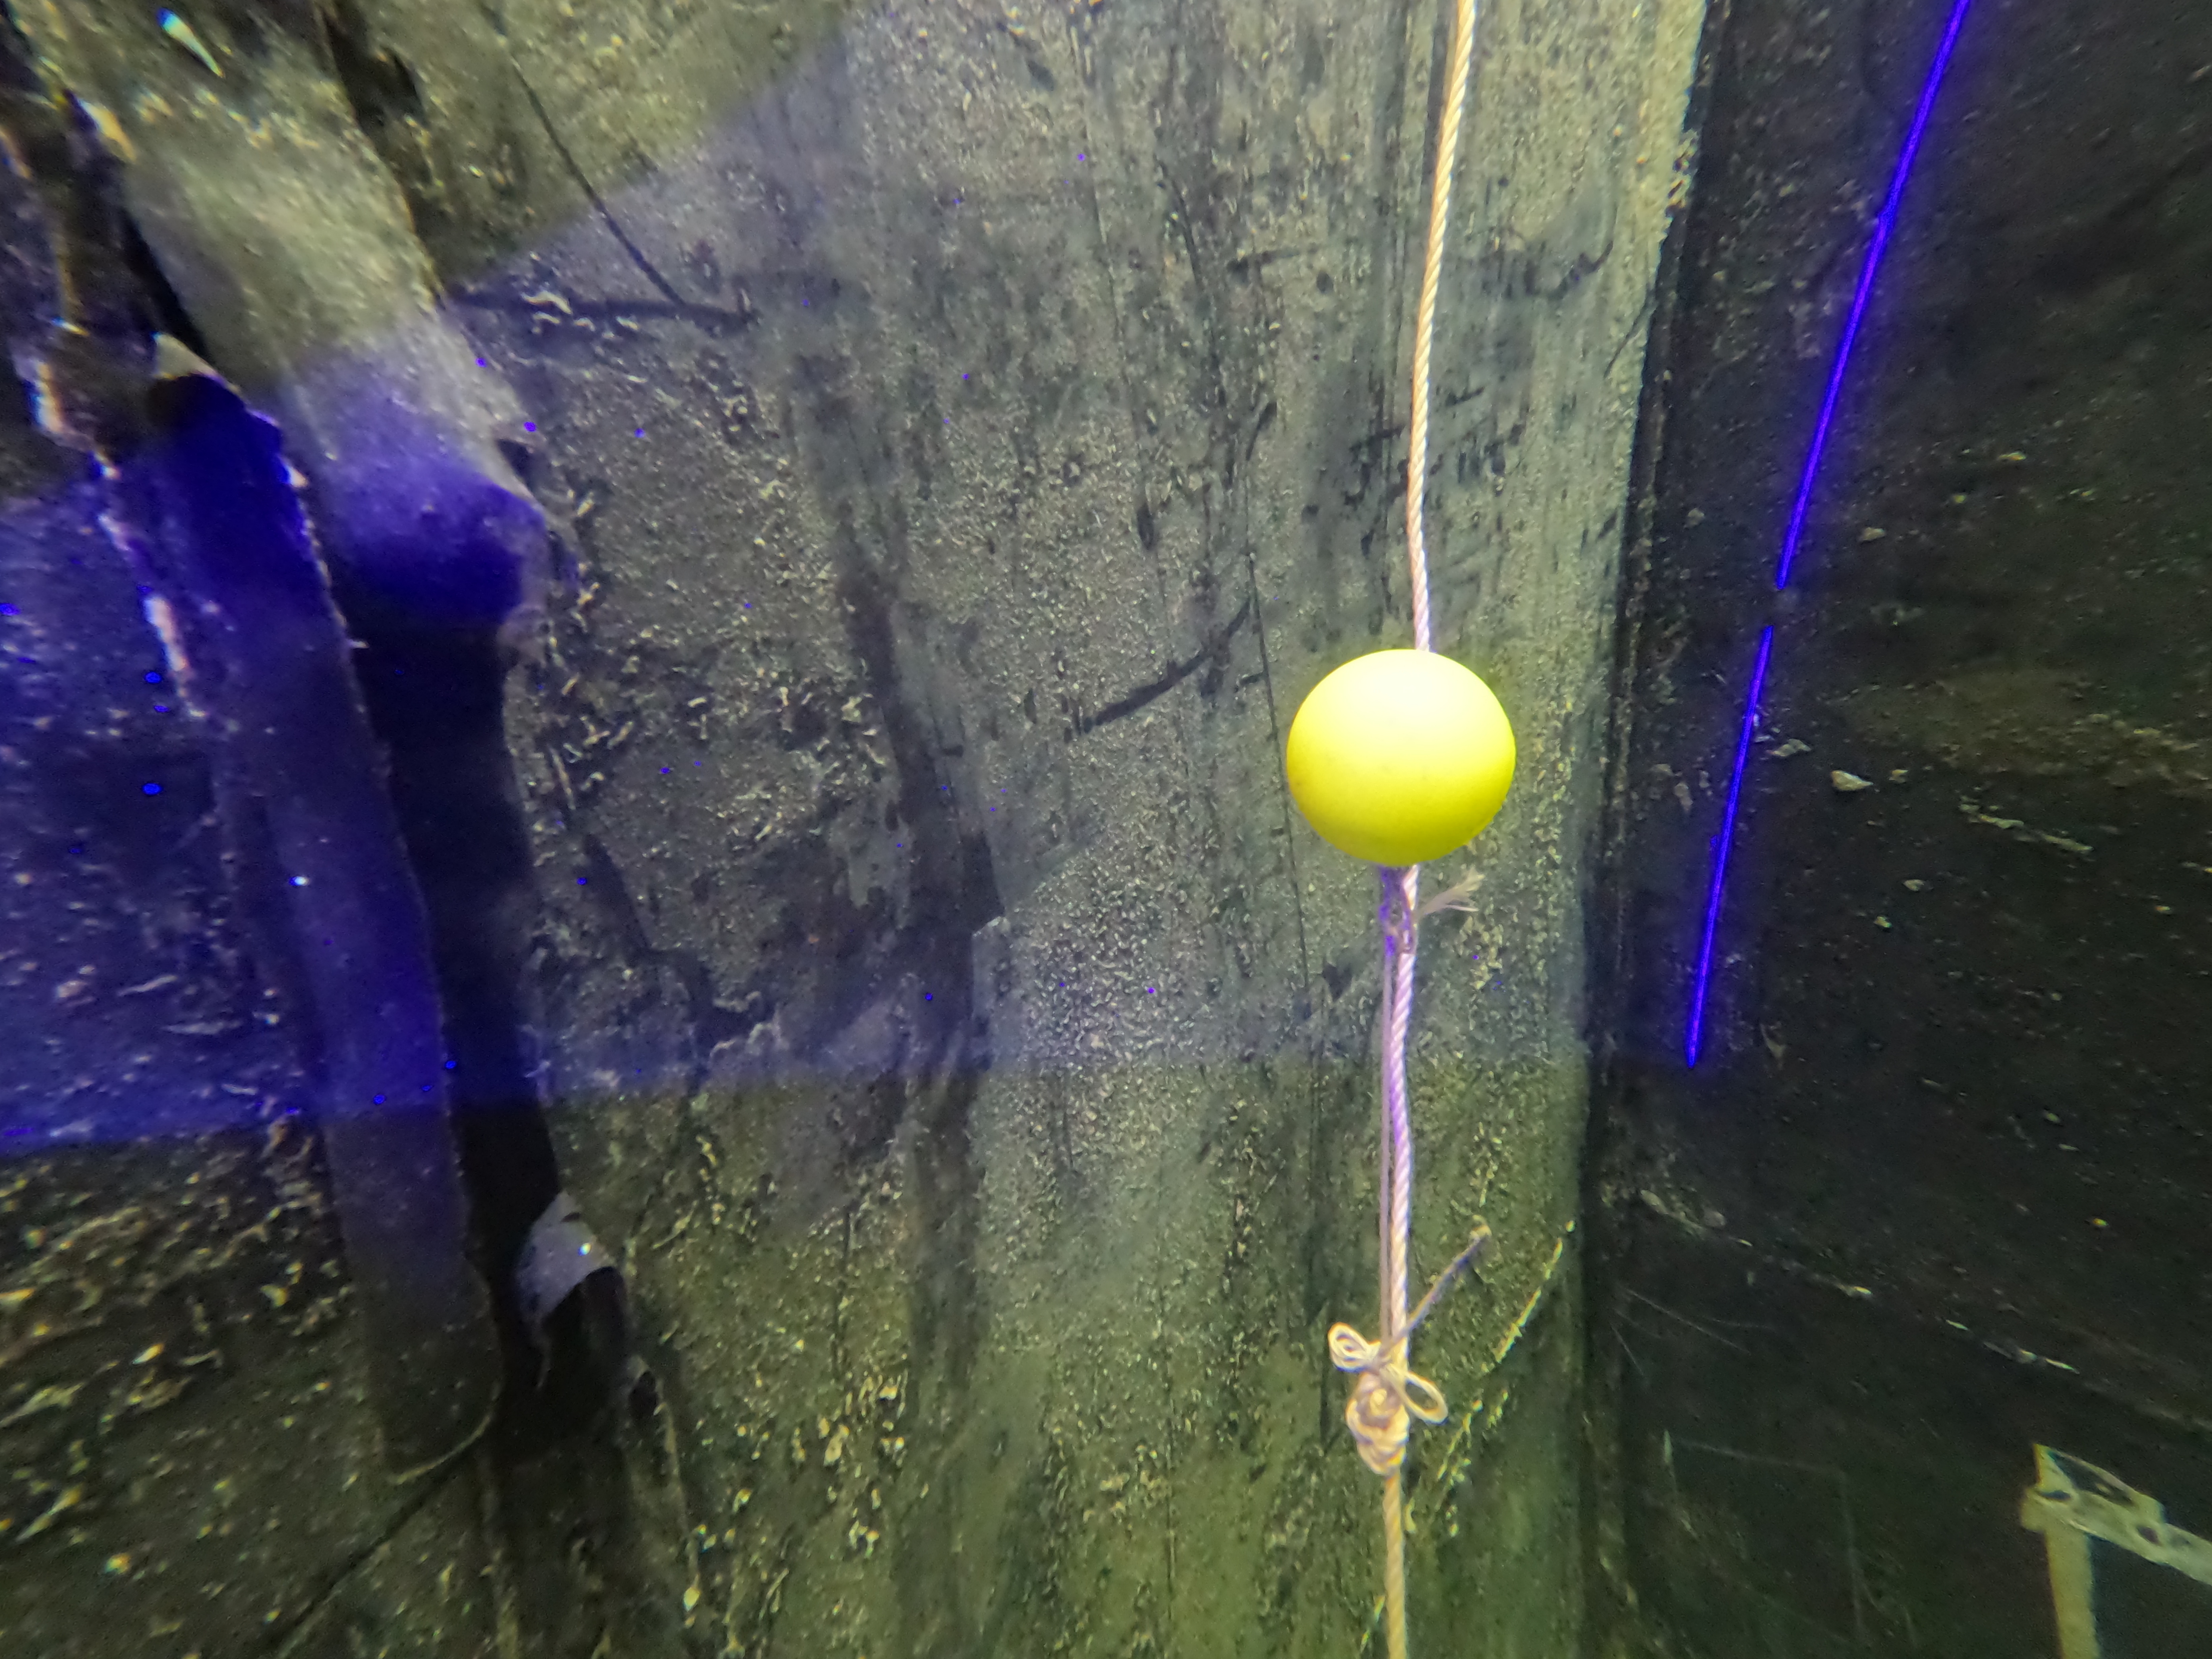

Supplement: Supplementary file 1367 [file G0032680.pdf › 6/G0032680.pdf]

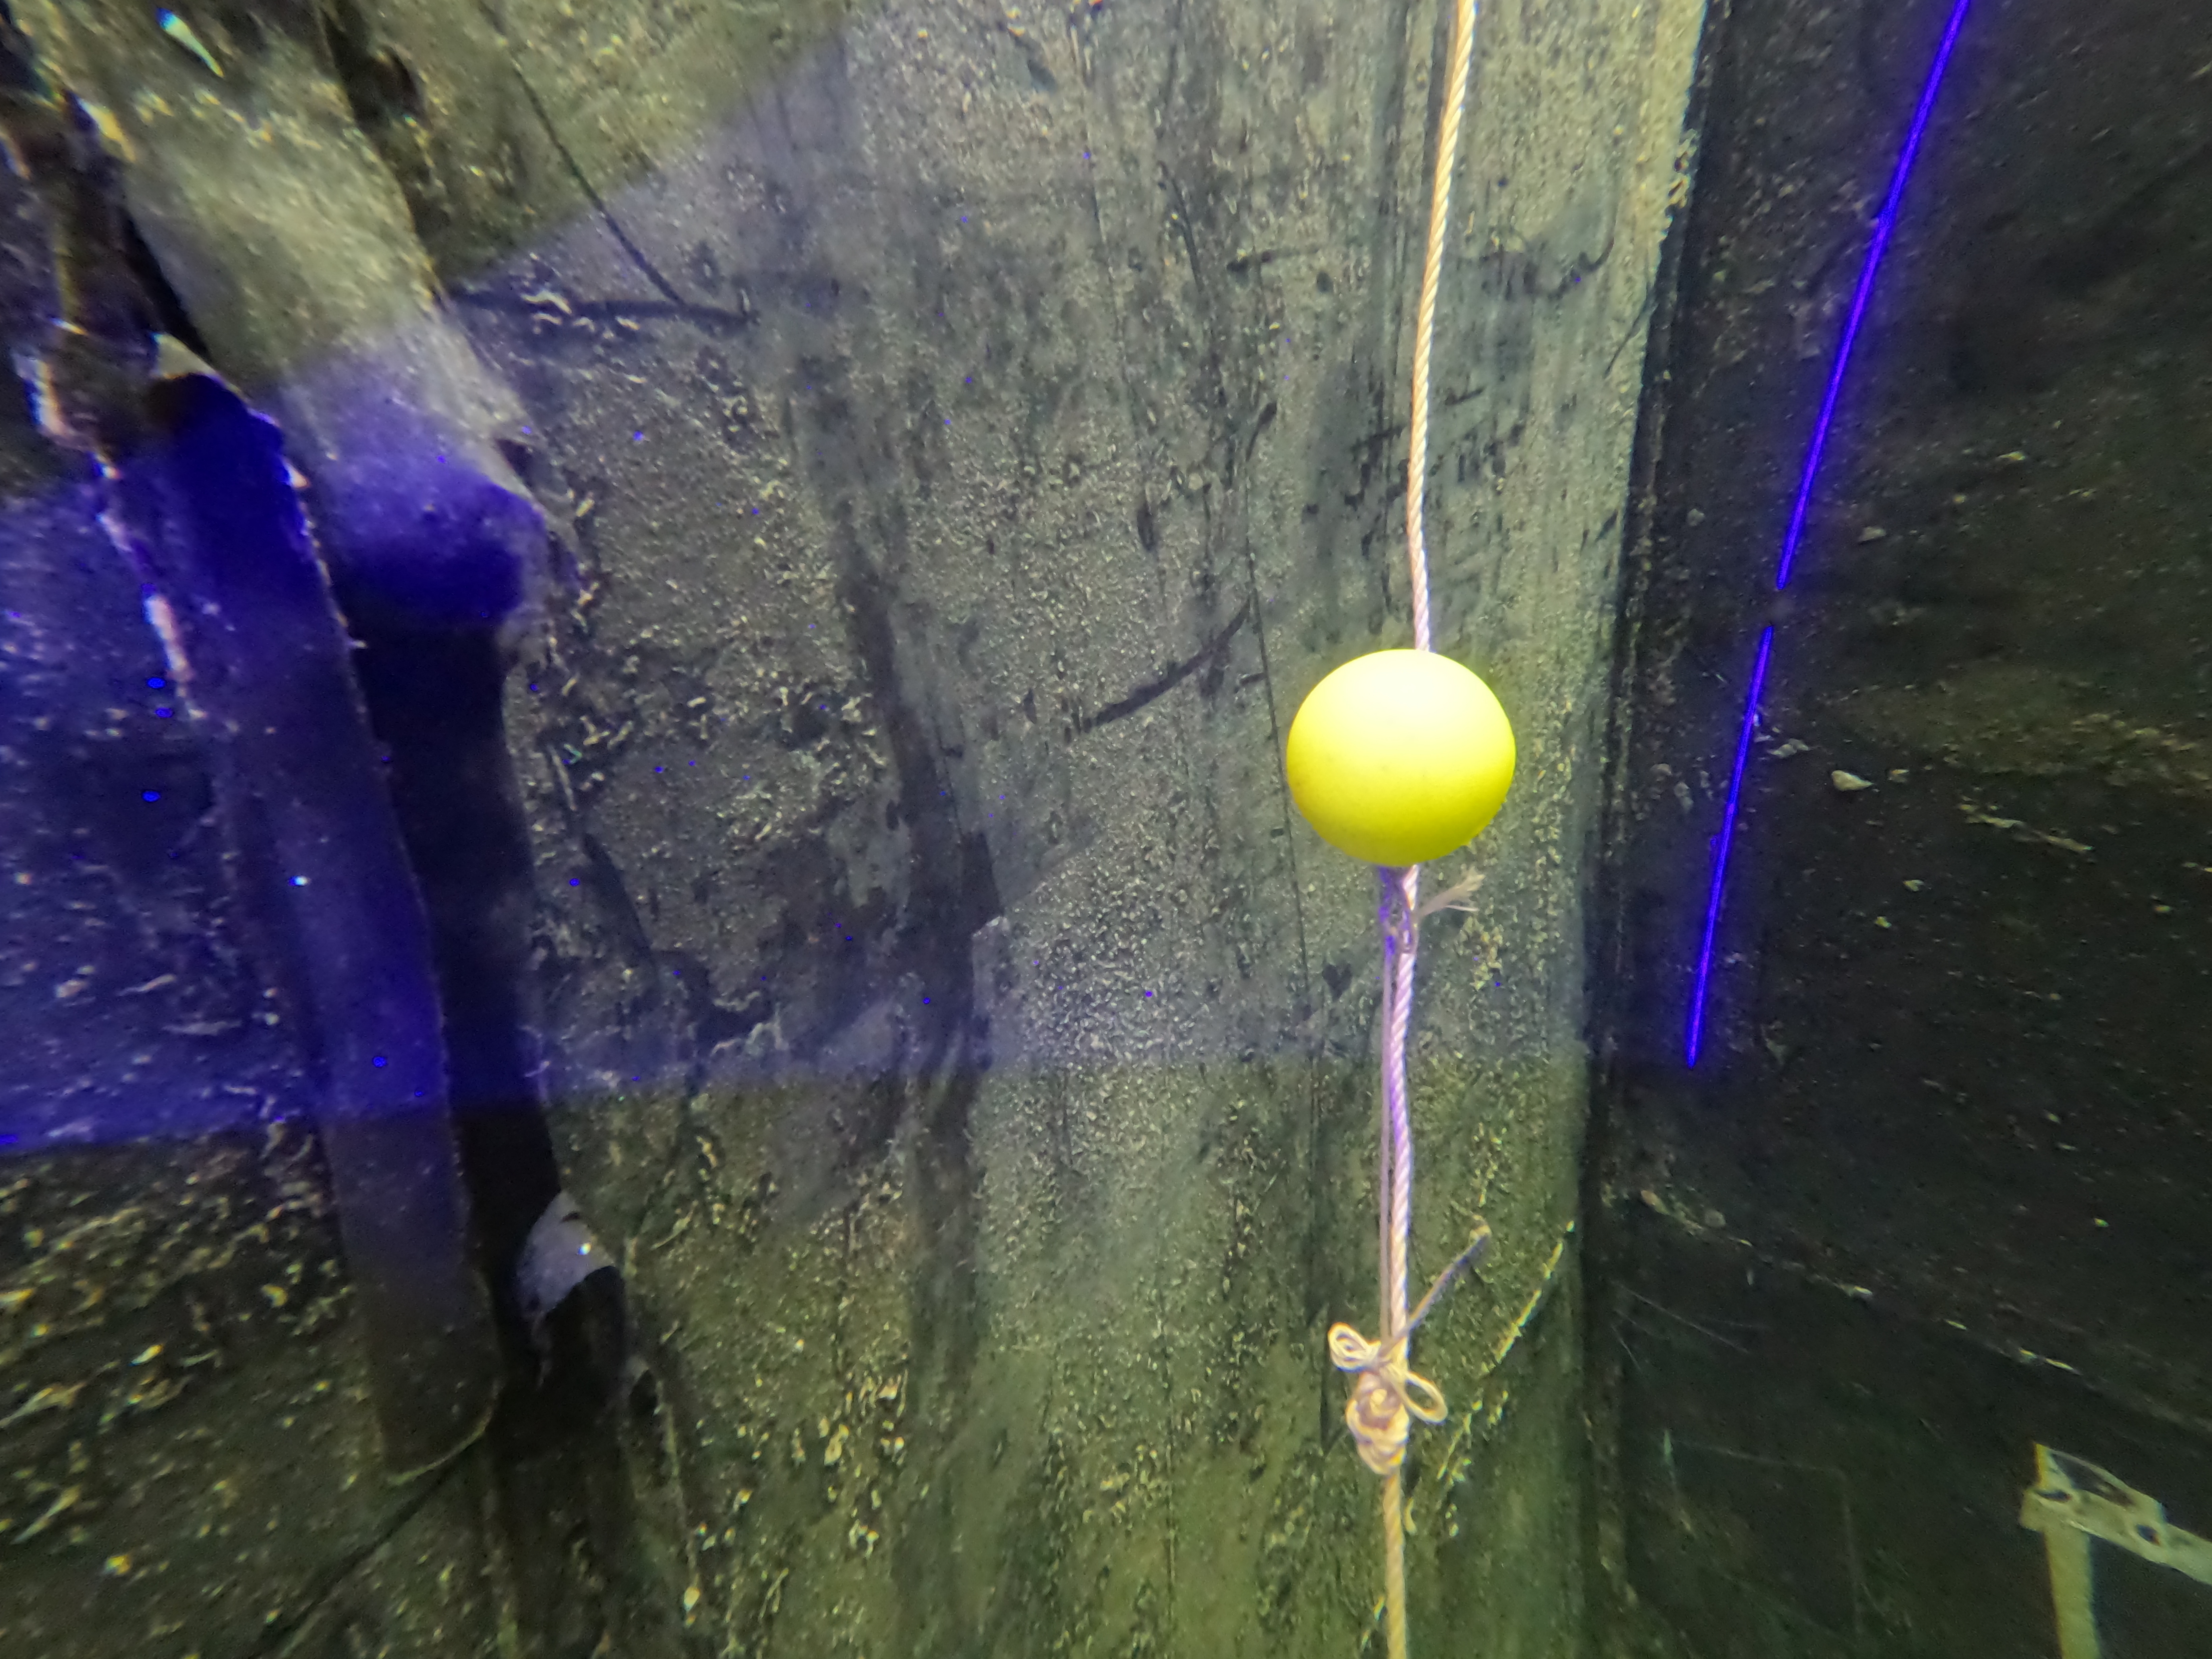

Supplement: Supplementary file 1368 [file G0032681.pdf › 6/G0032681.pdf]

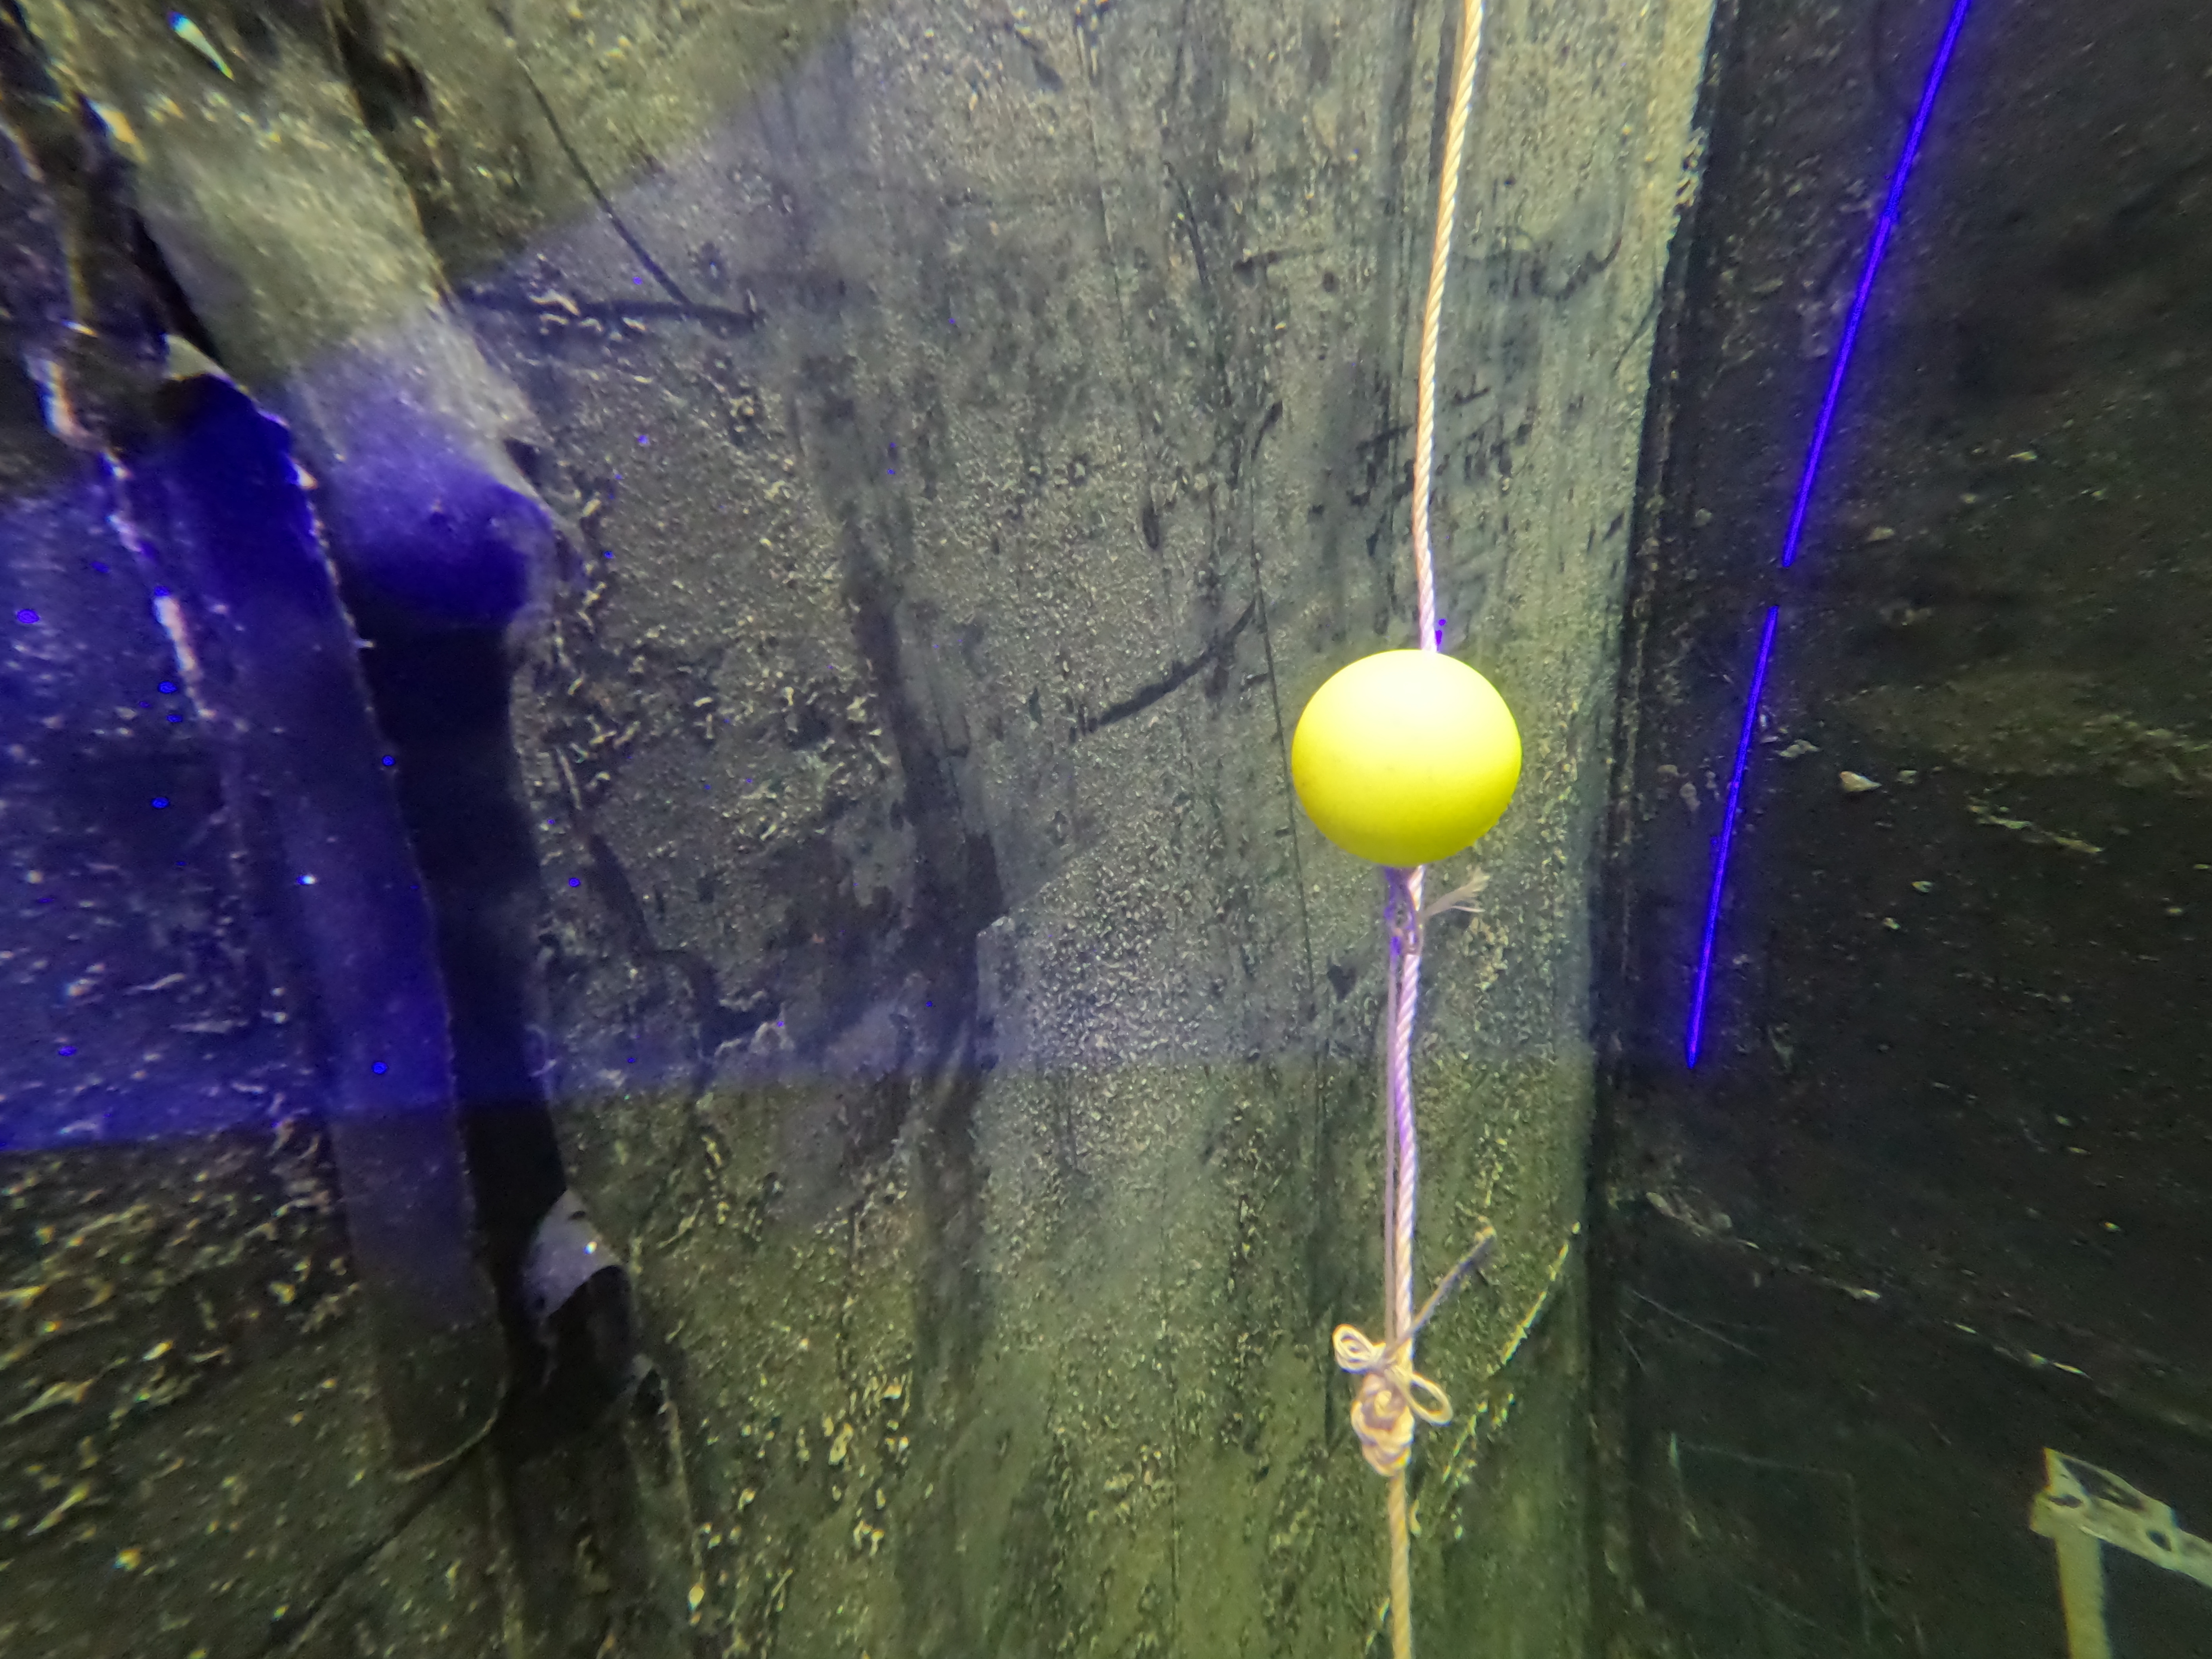

Supplement: Supplementary file 1369 [file G0032682.pdf › 6/G0032682.pdf]

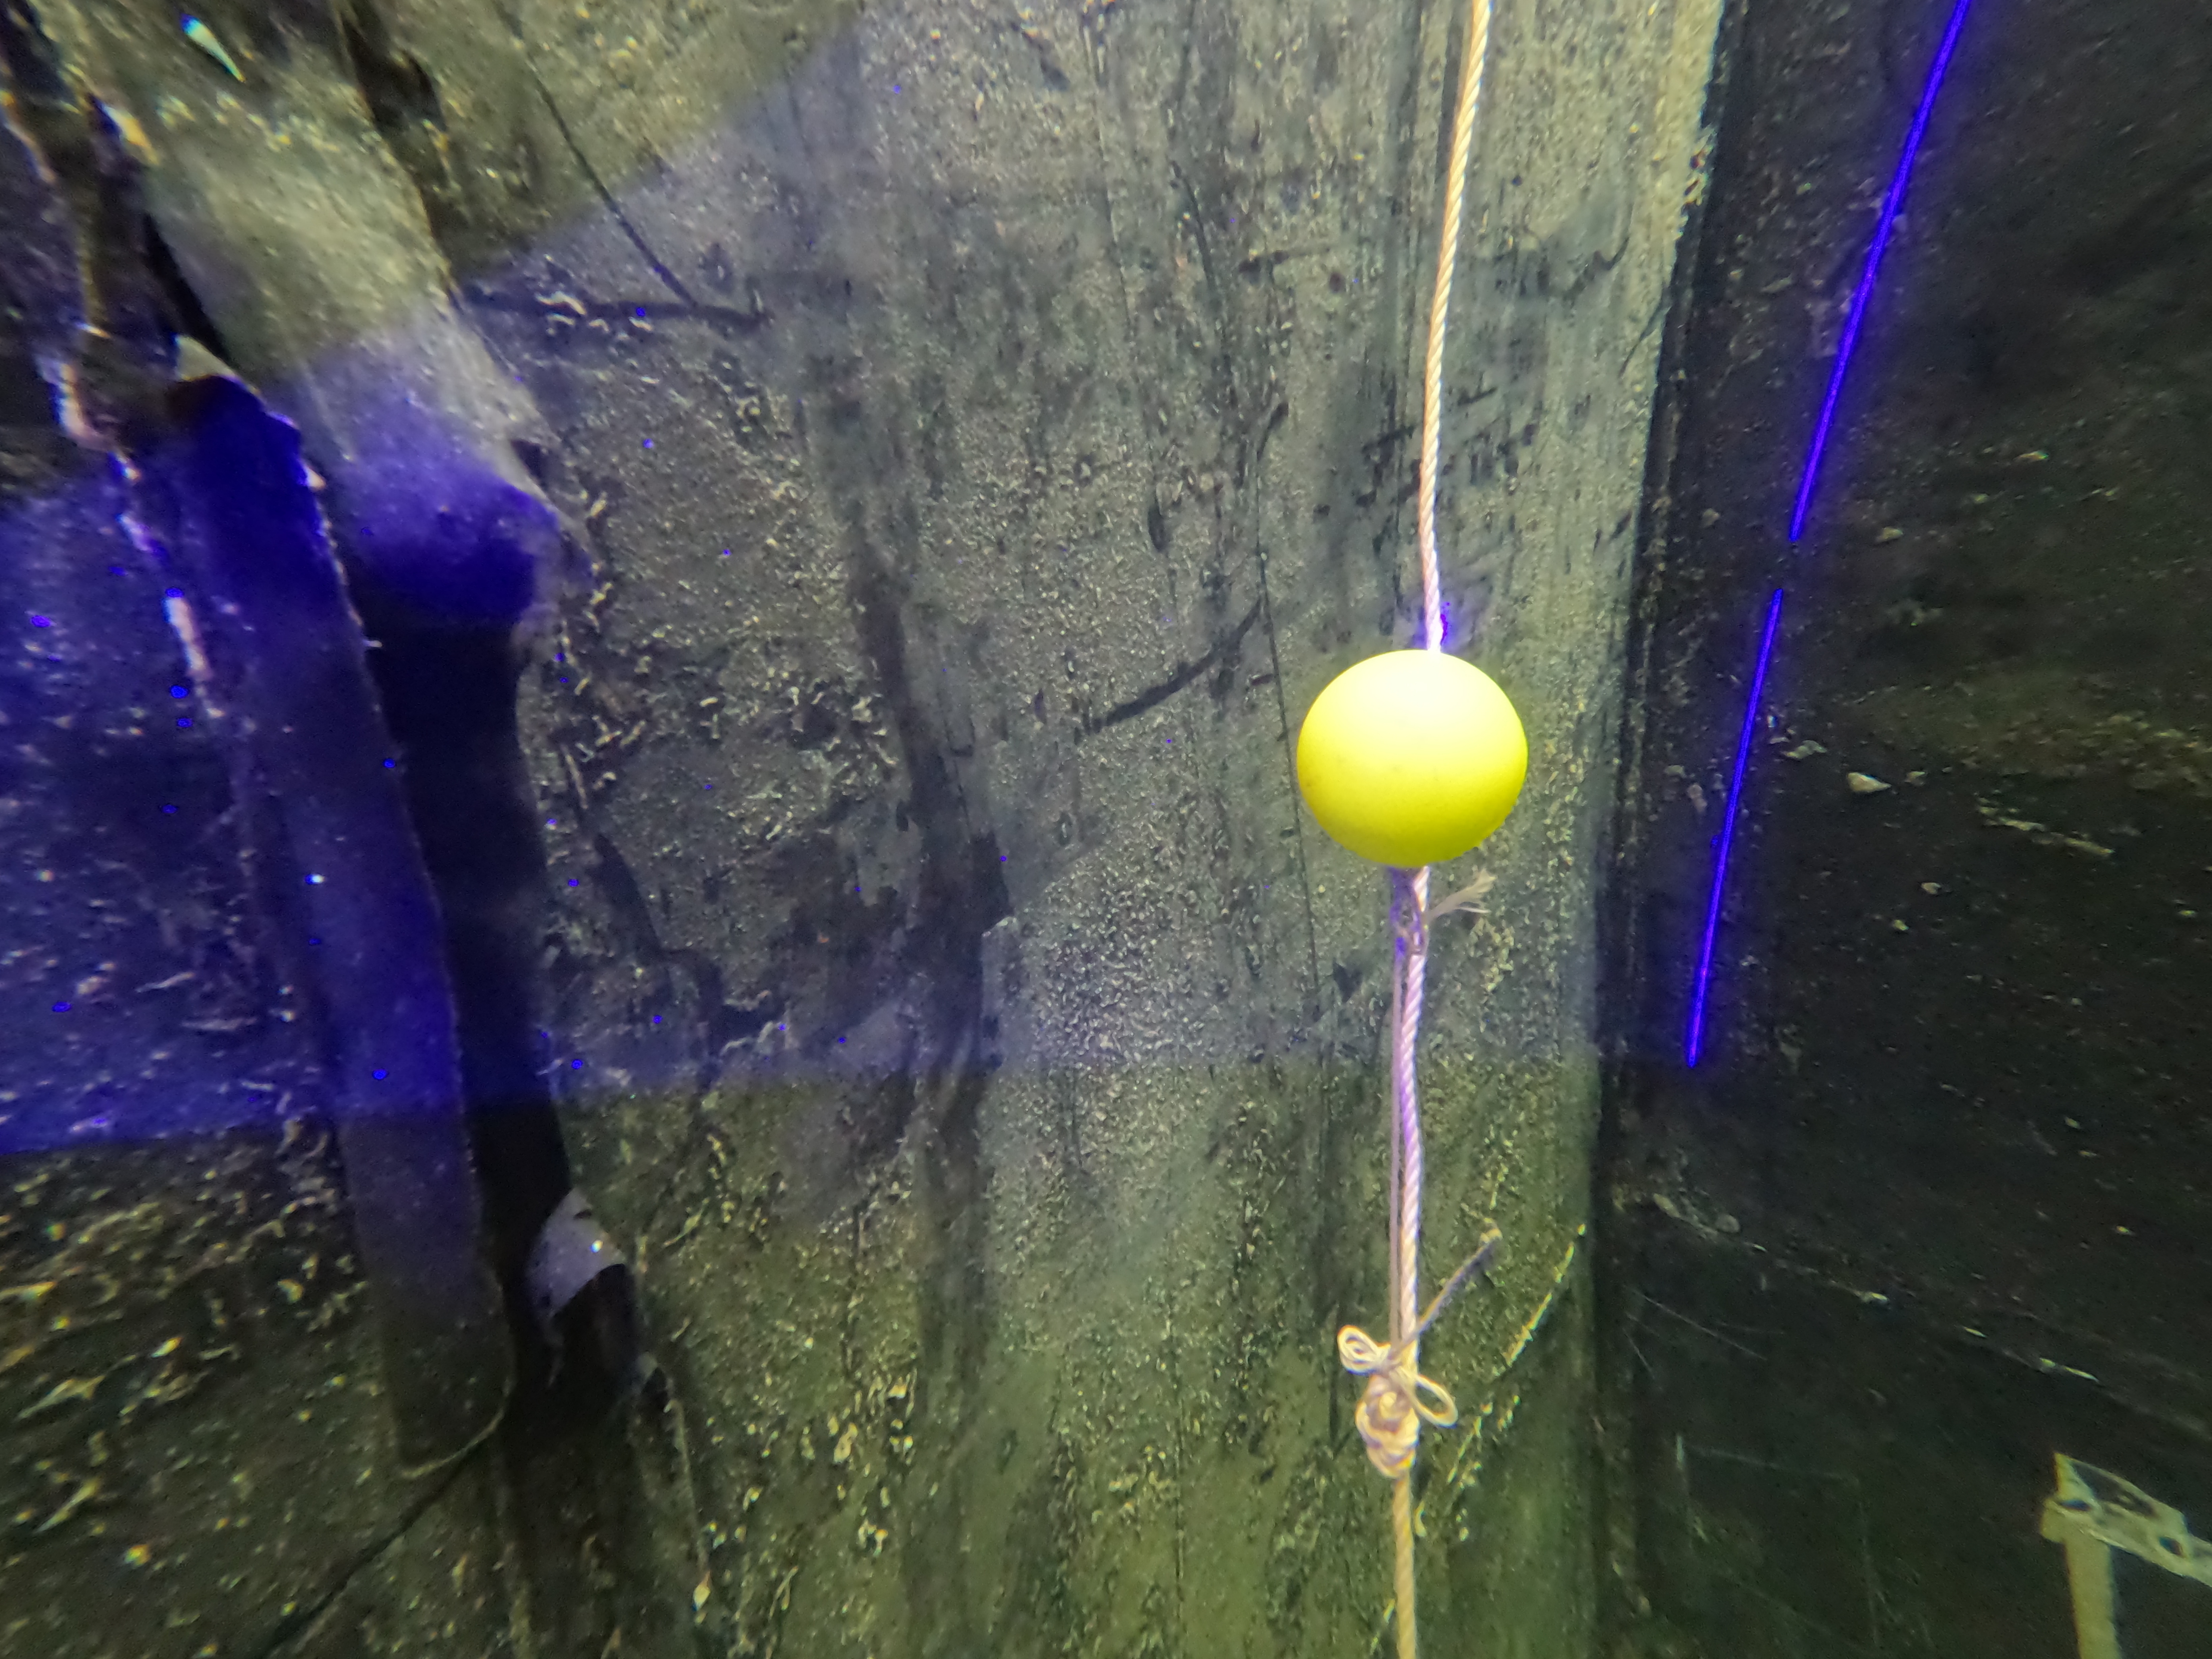

Supplement: Supplementary file 1370 [file G0032683.pdf › 6/G0032683.pdf]

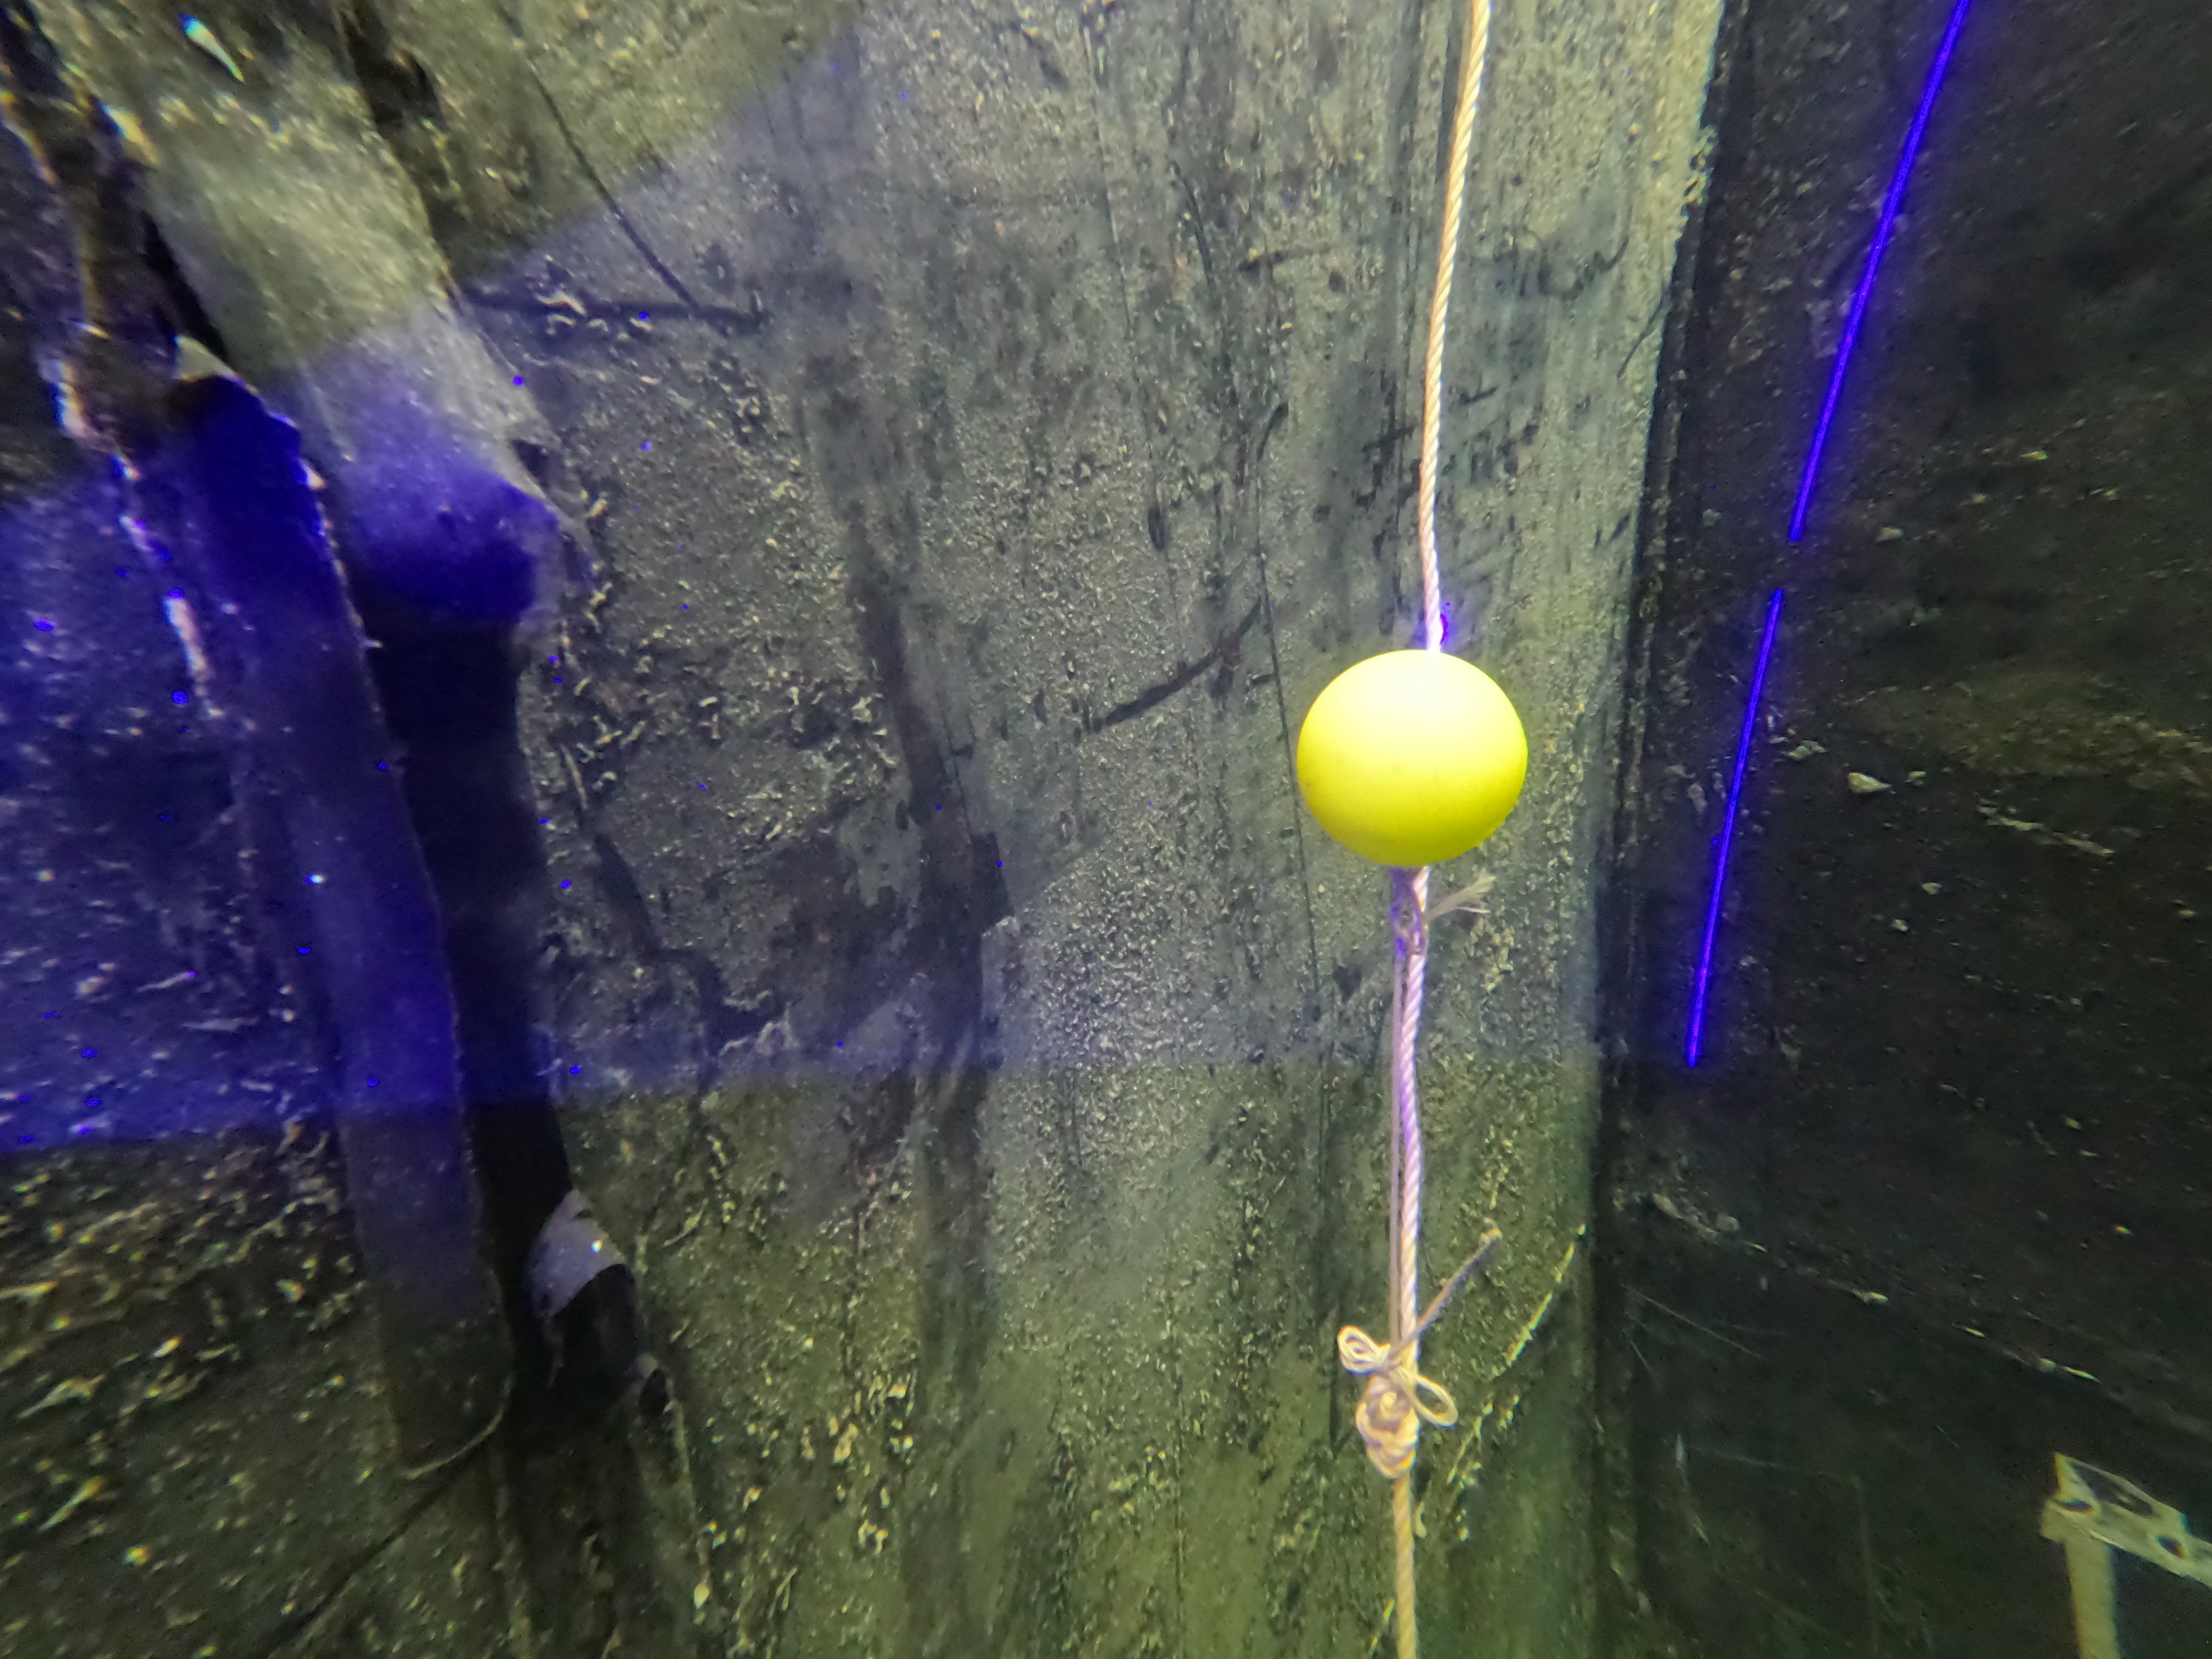

Supplement: Supplementary file 1371 [file G0032684.pdf › 6/G0032684.pdf]

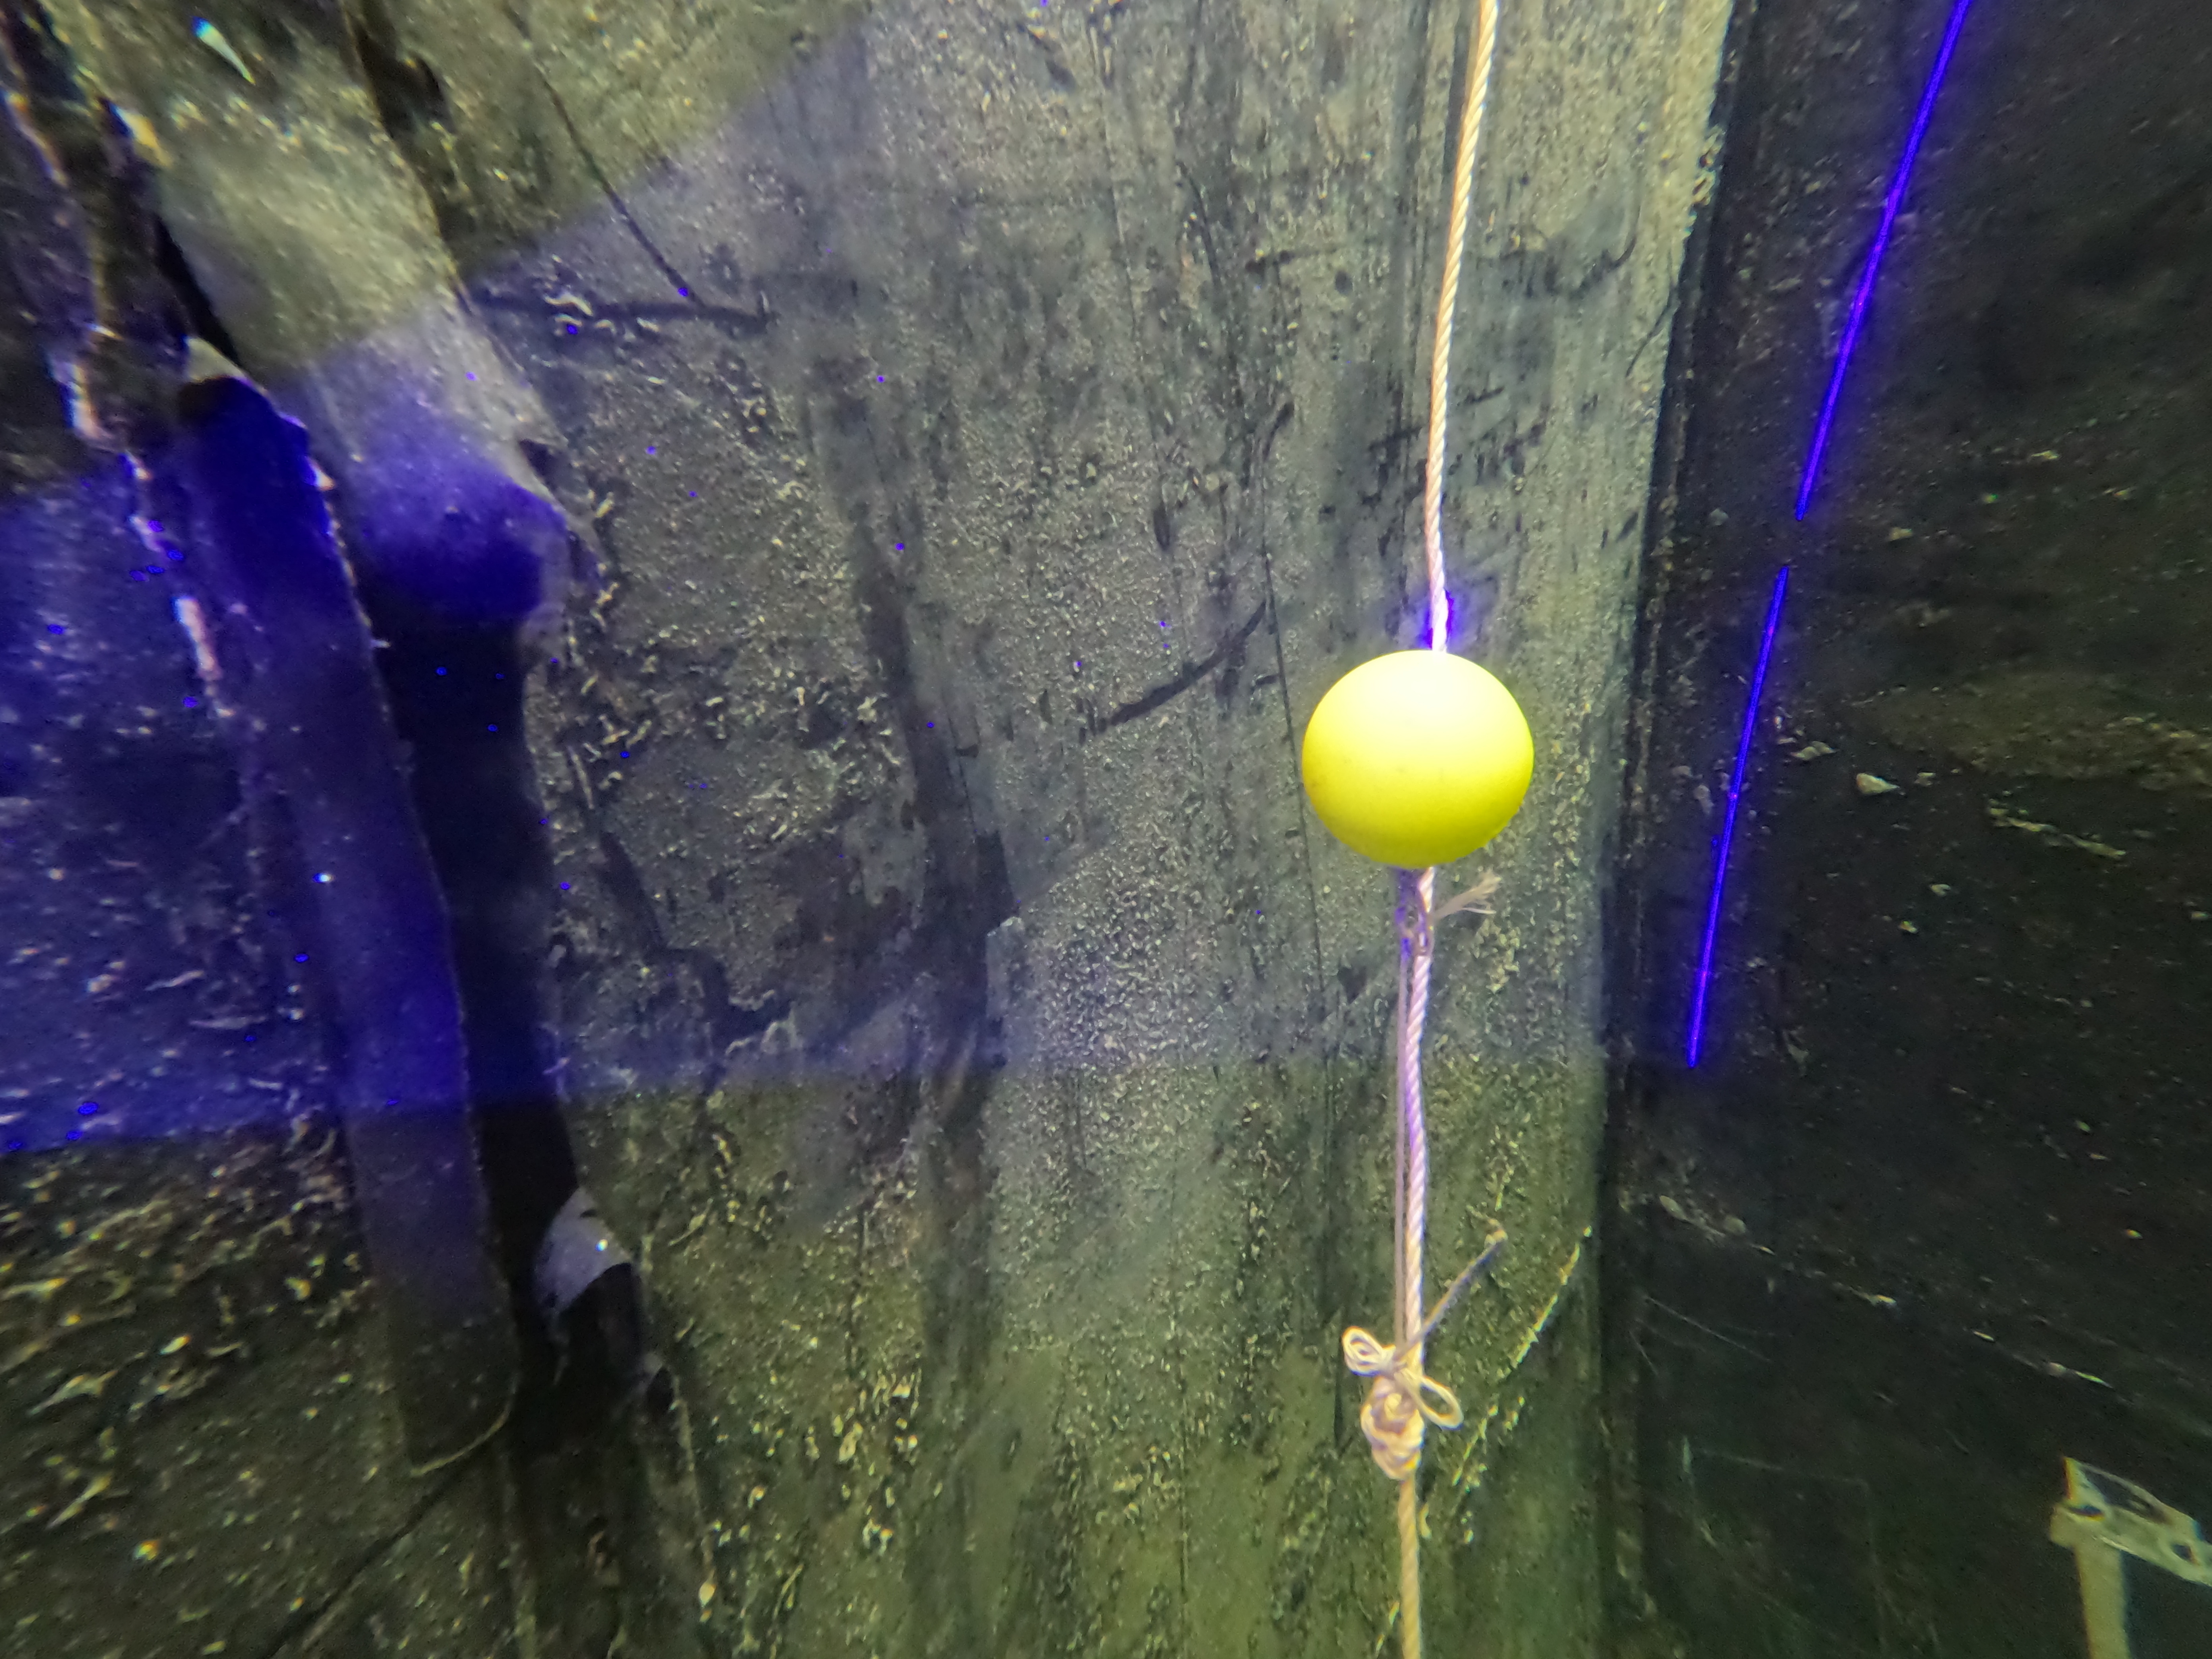

Supplement: Supplementary file 1372 [file G0032685.pdf › 6/G0032685.pdf]

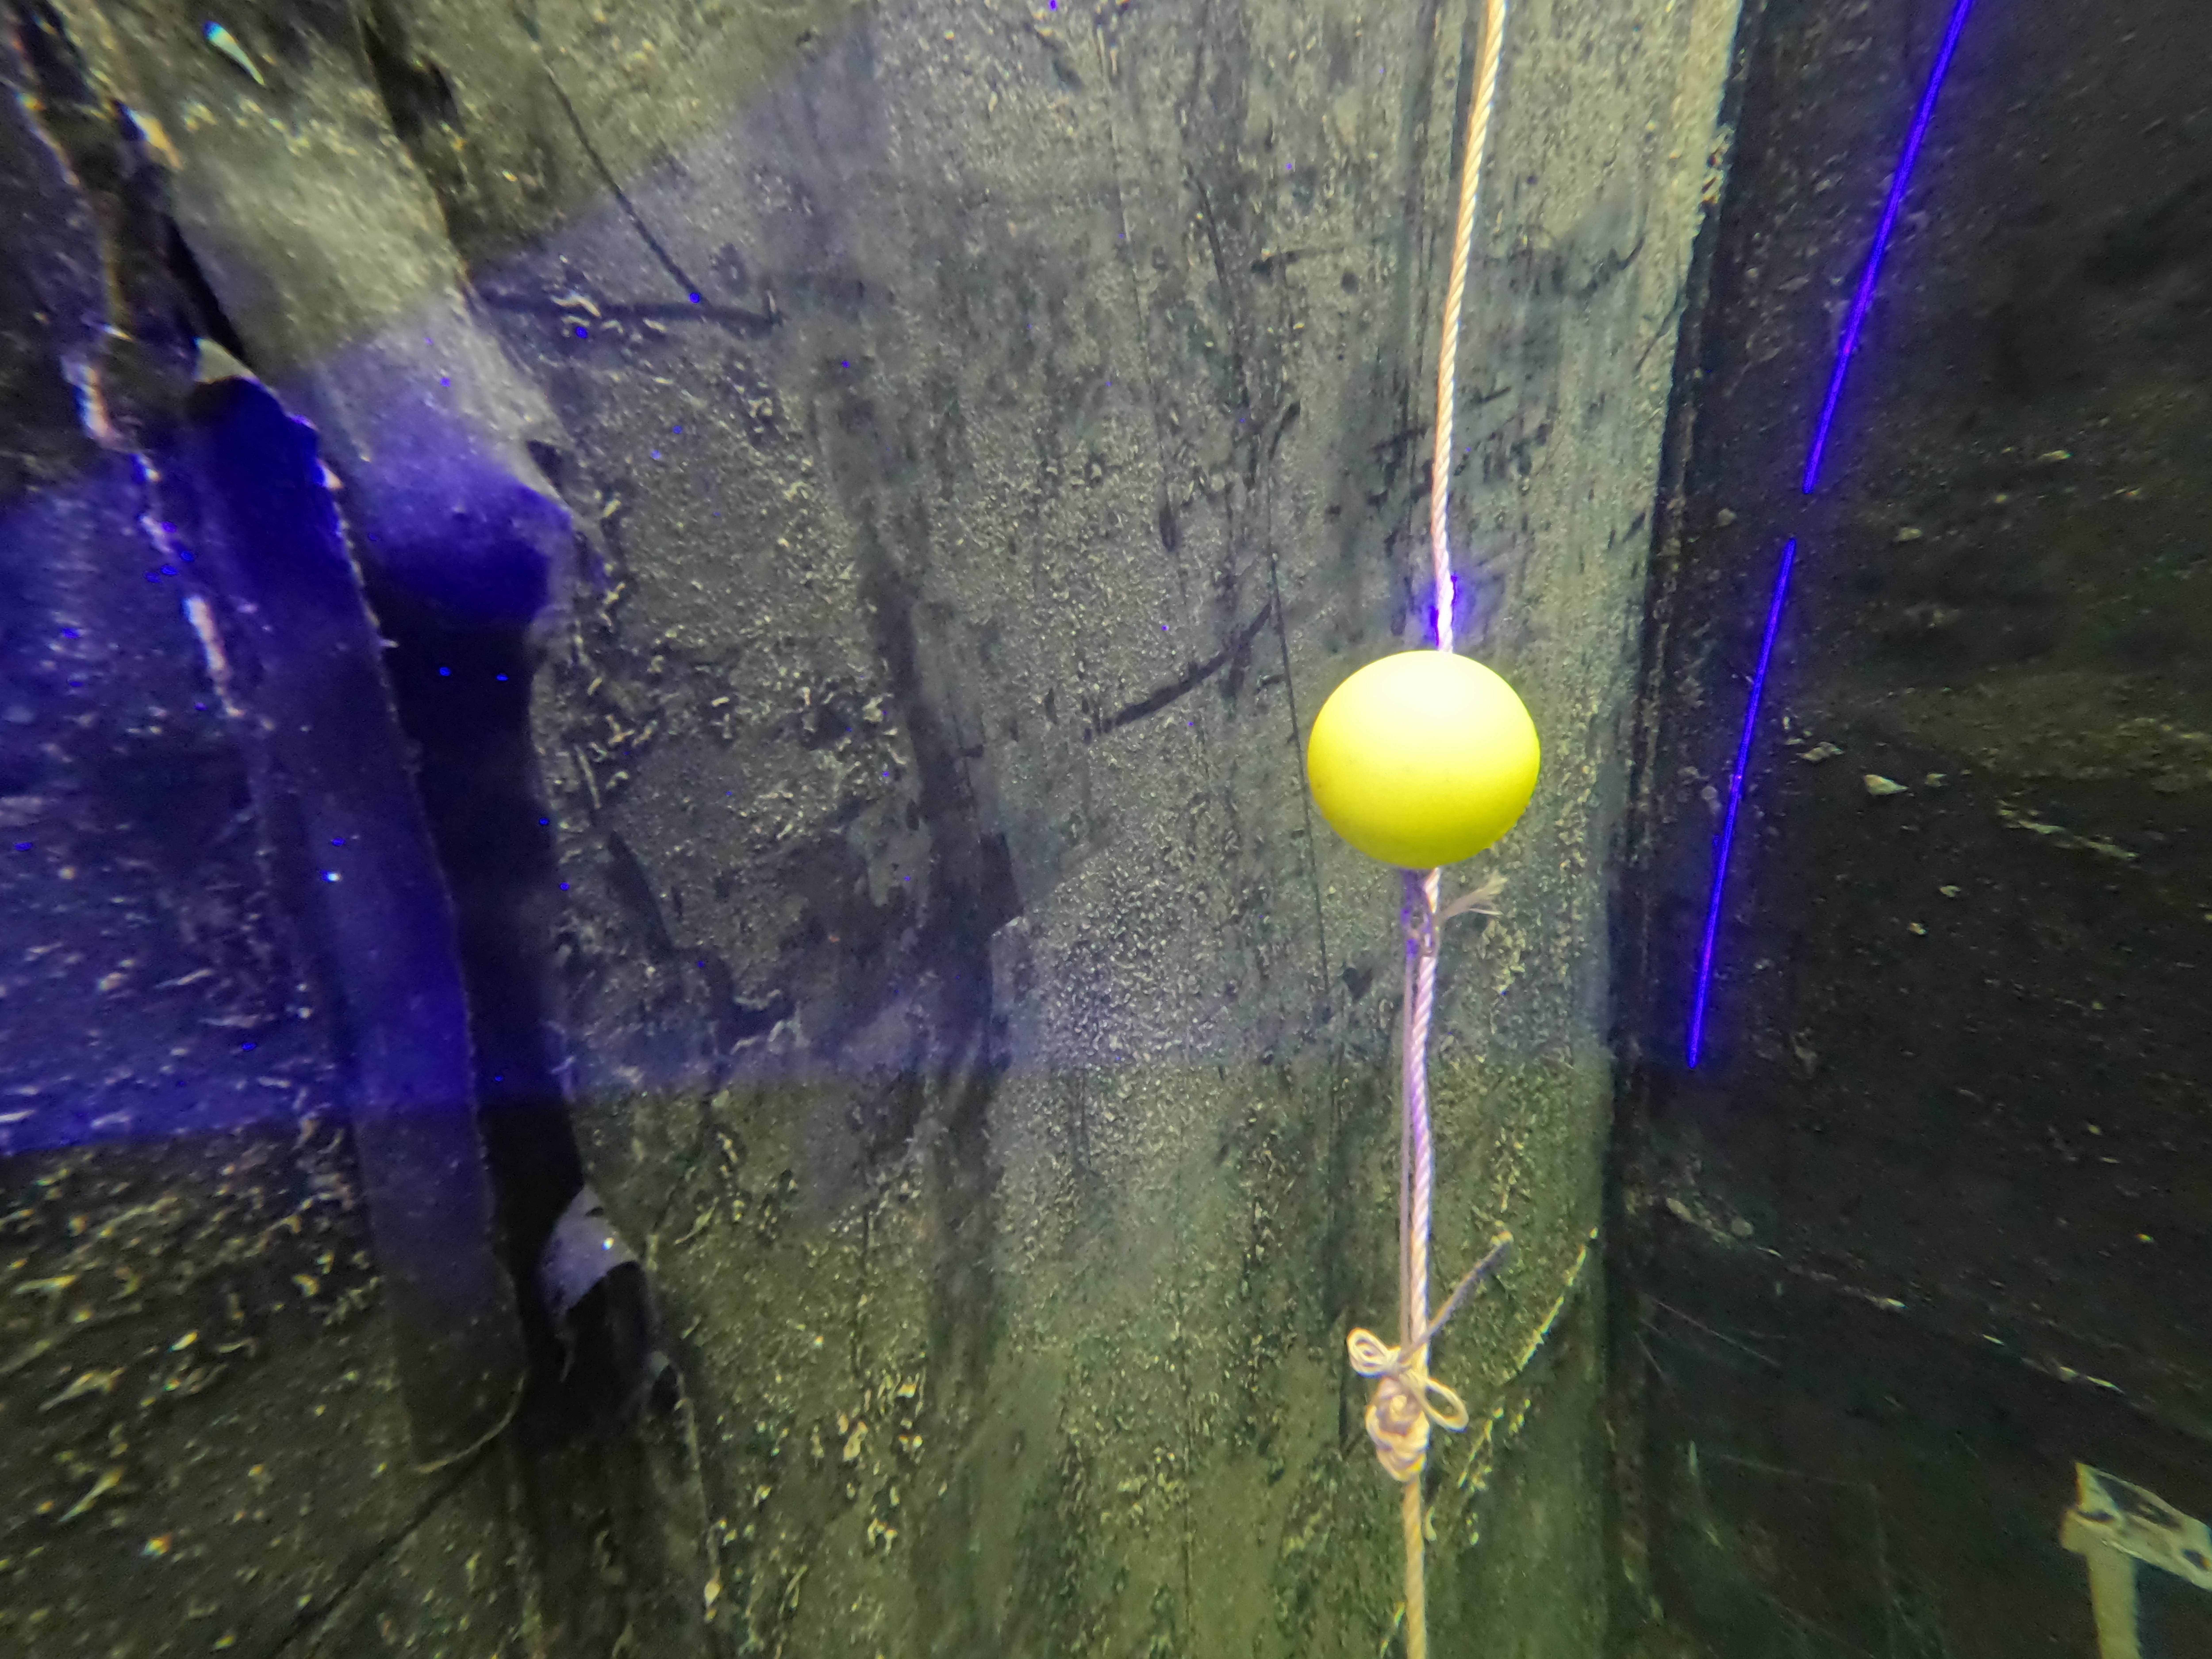

Supplement: Supplementary file 1373 [file G0032686.pdf › 6/G0032686.pdf]

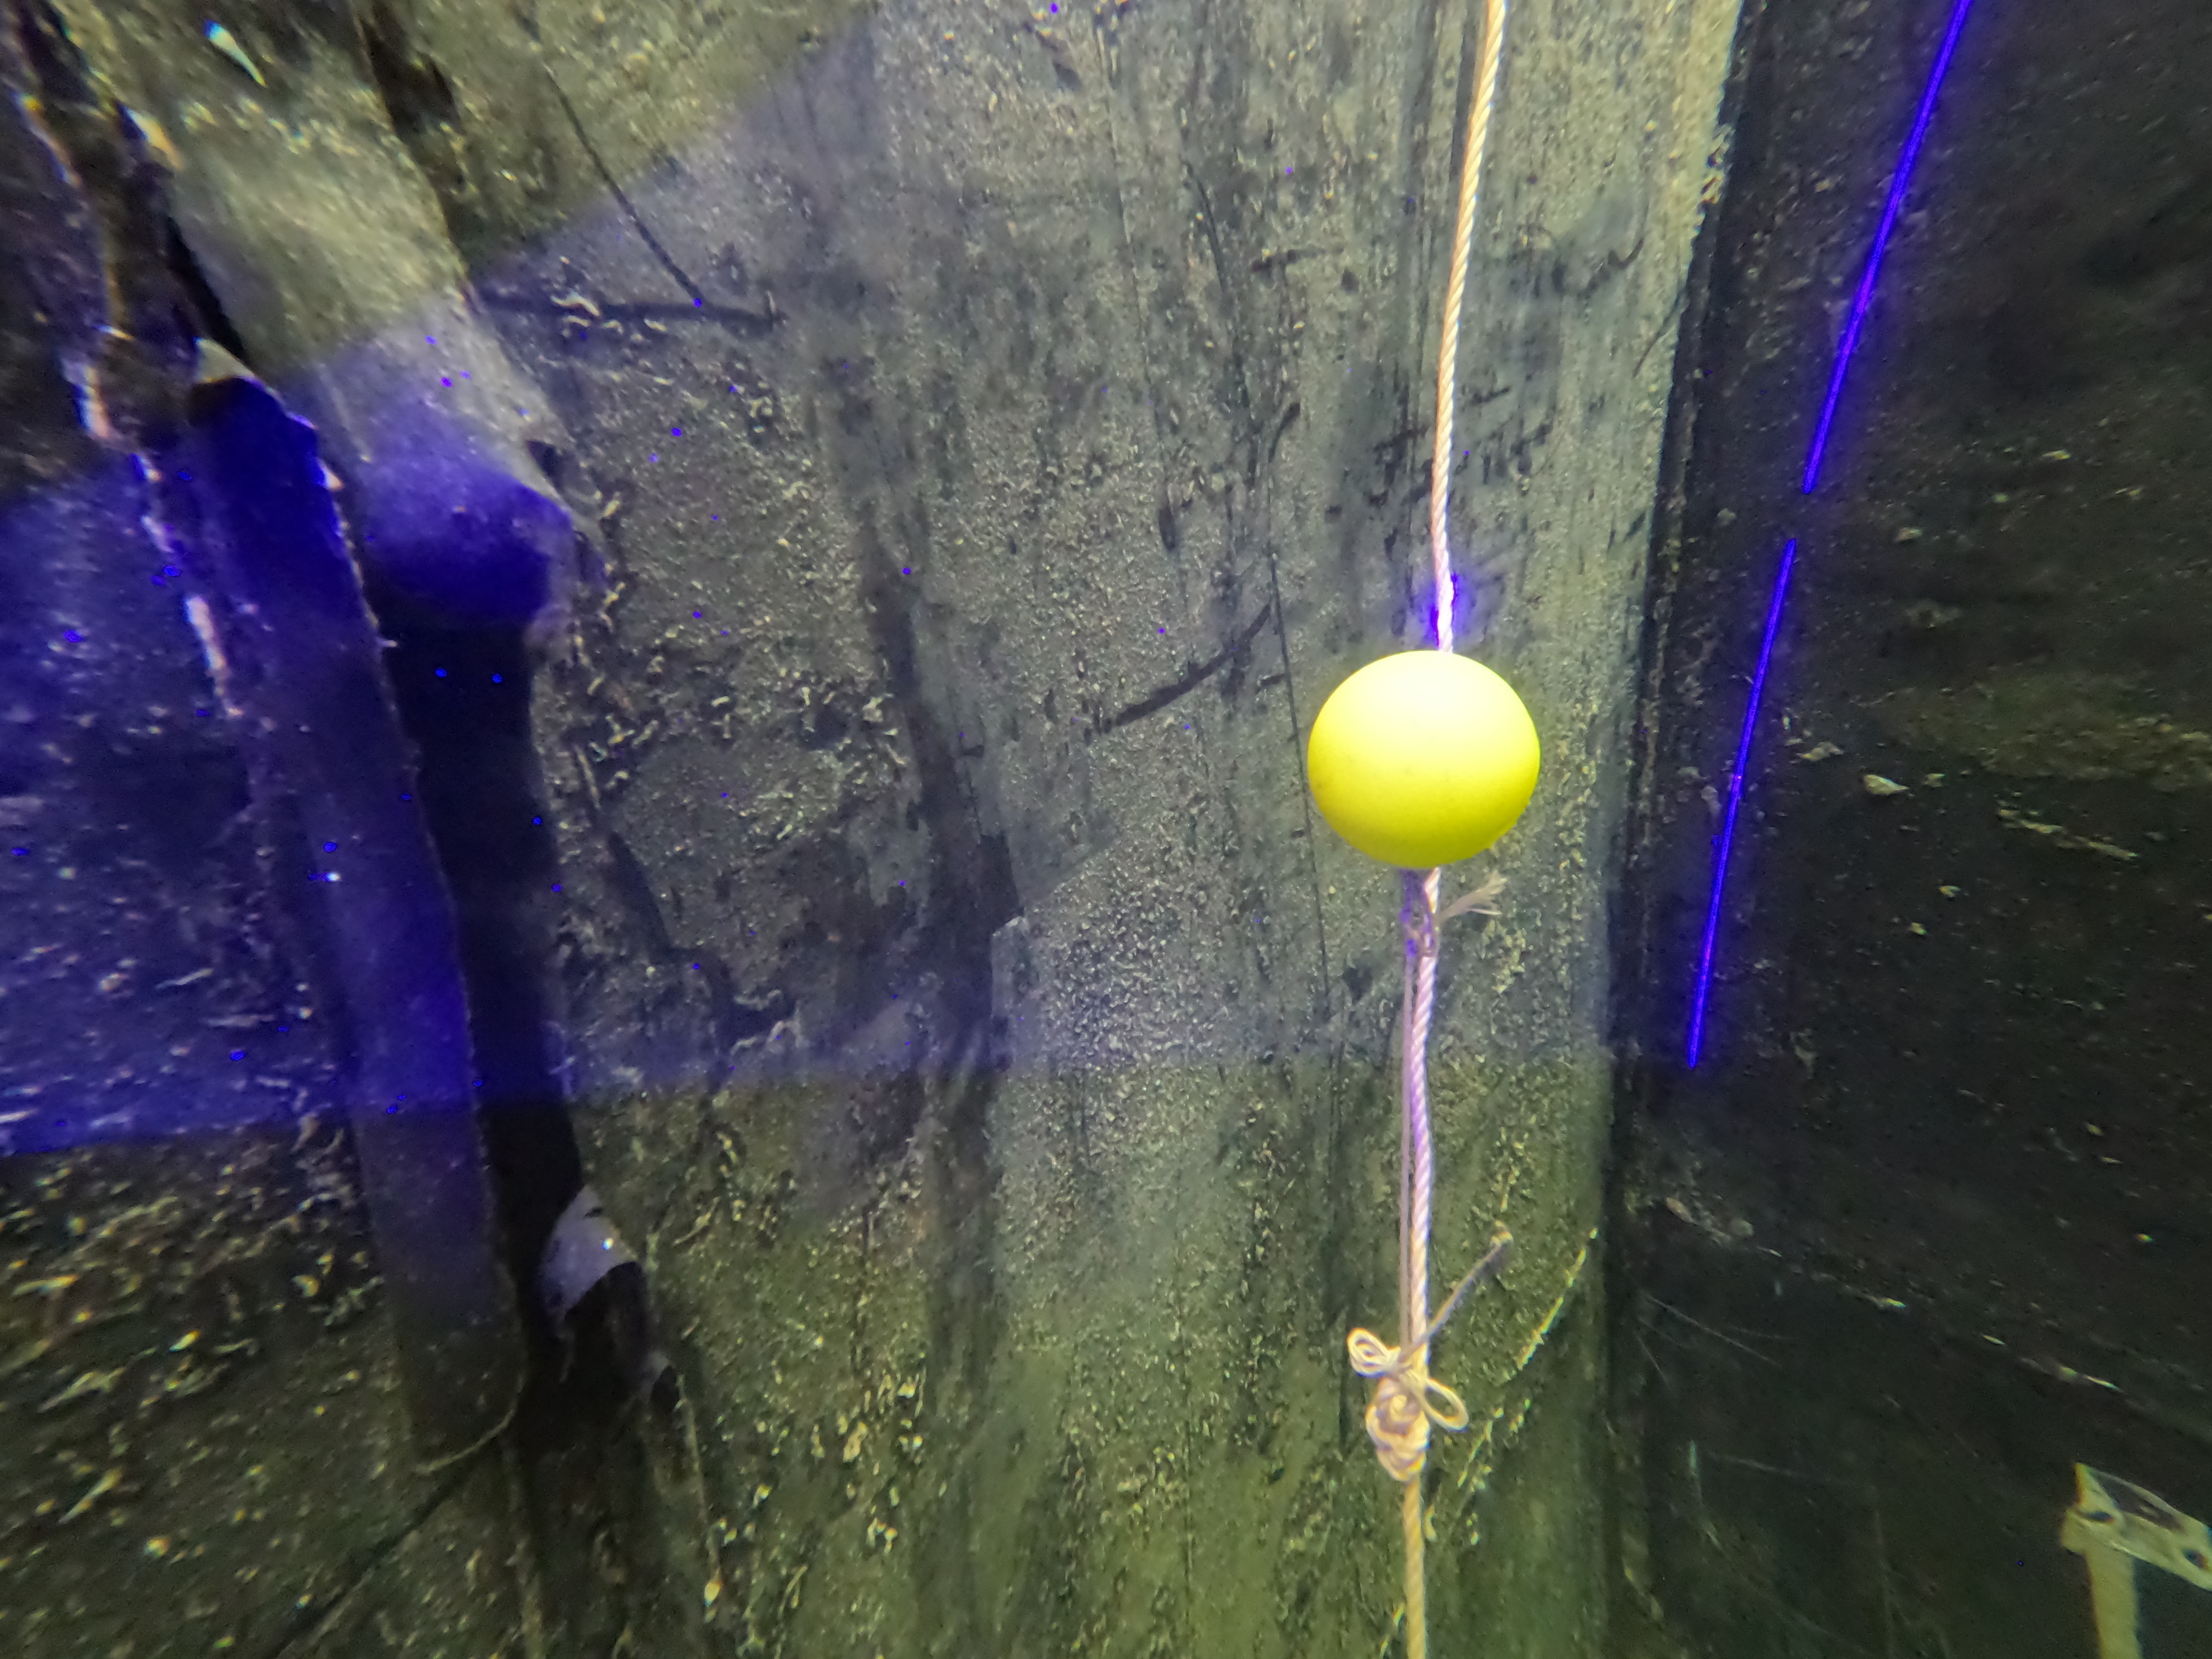

Supplement: Supplementary file 1374 [file G0032687.pdf › 6/G0032687.pdf]

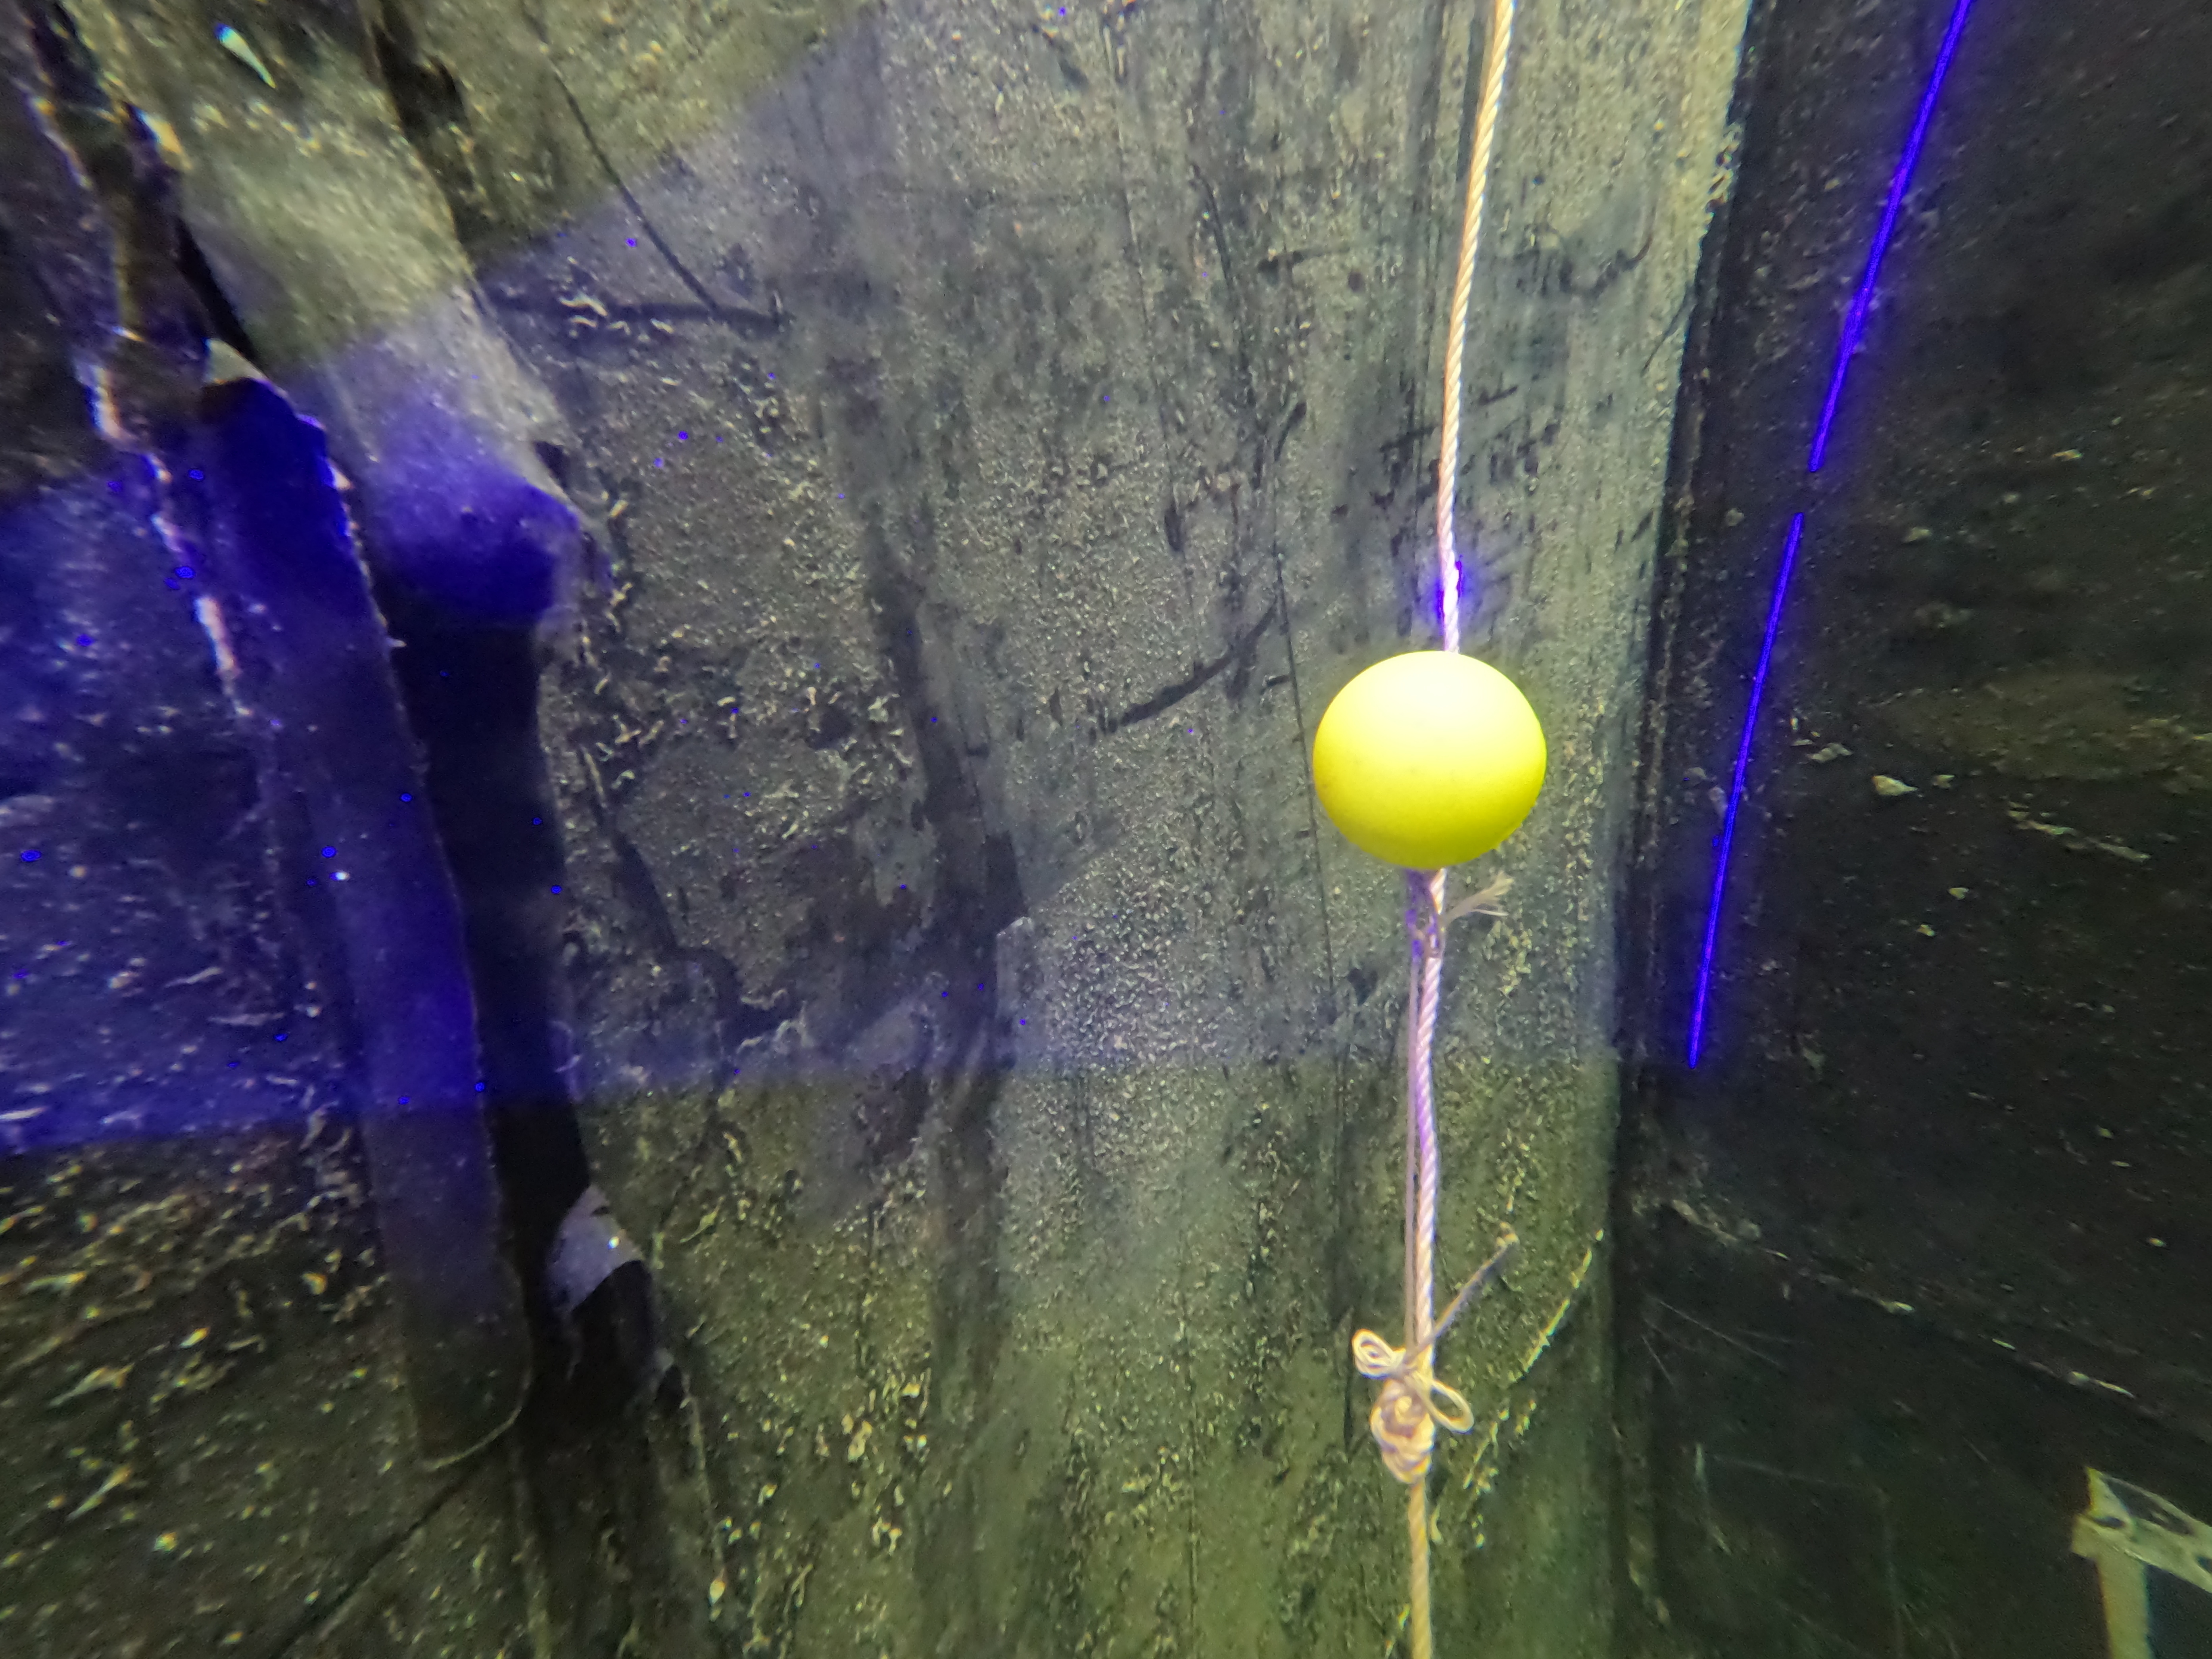

Supplement: Supplementary file 1375 [file G0032688.pdf › 6/G0032688.pdf]

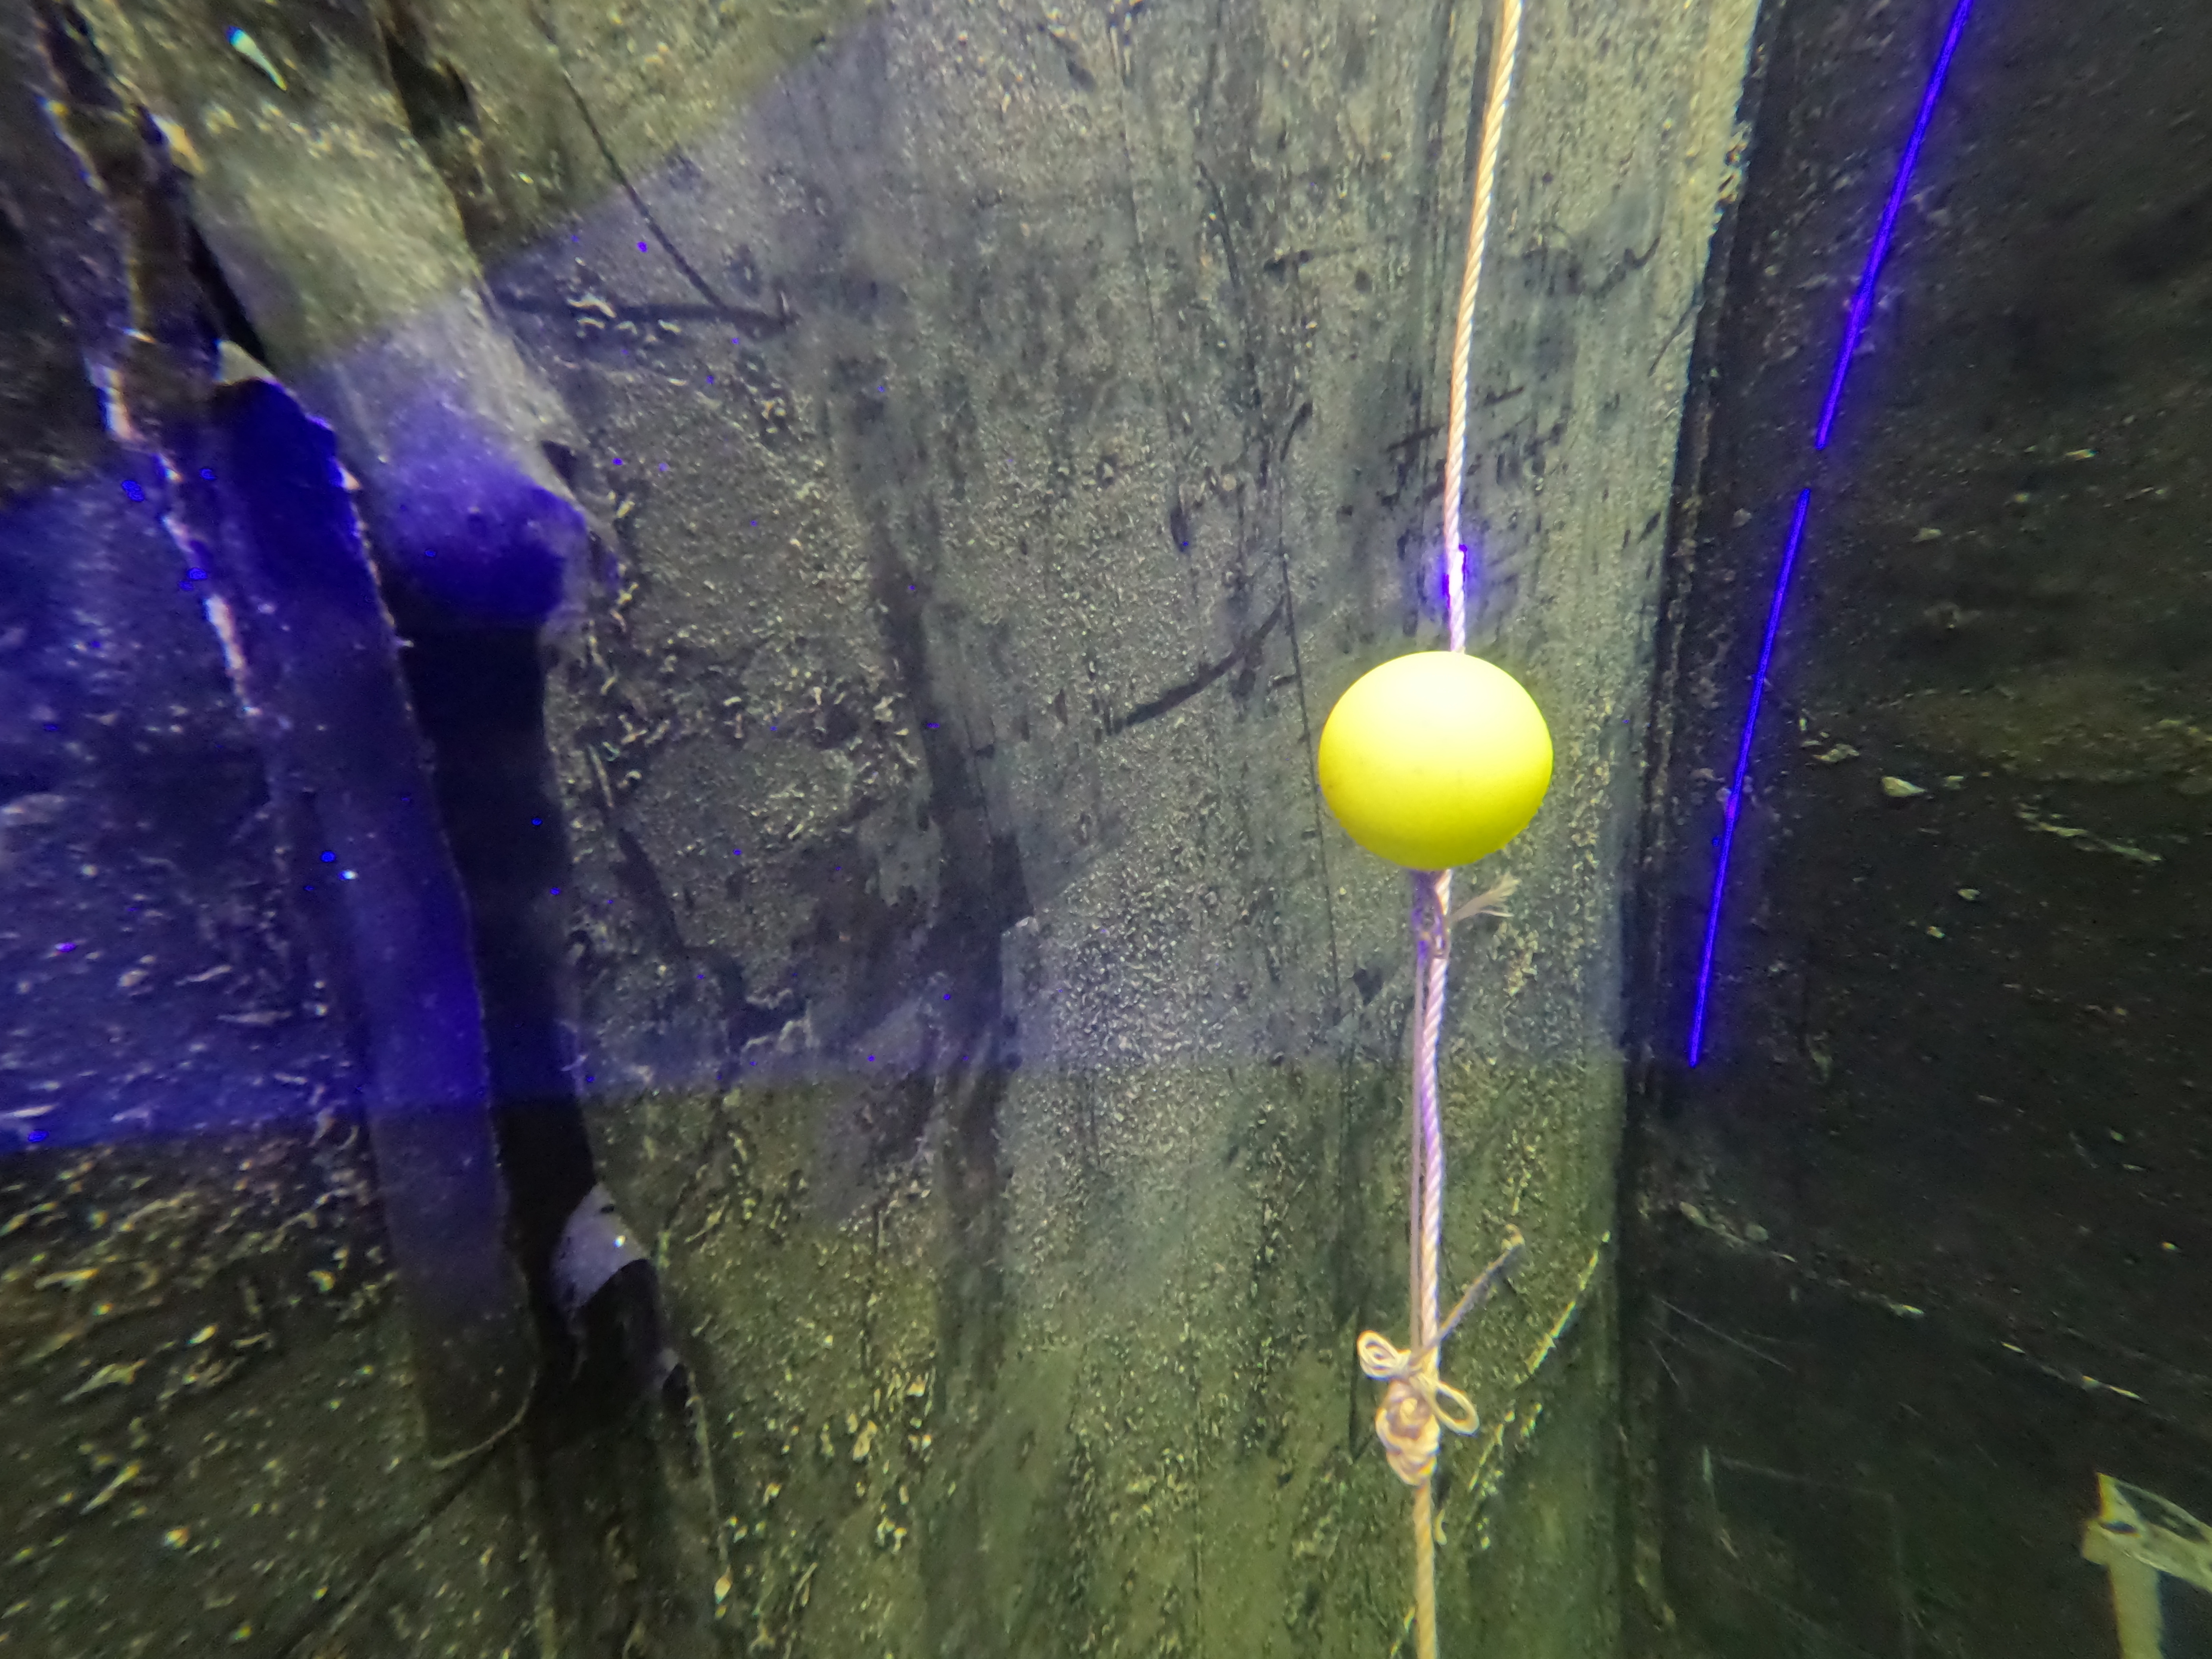

Supplement: Supplementary file 1376 [file G0032689.pdf › 6/G0032689.pdf]

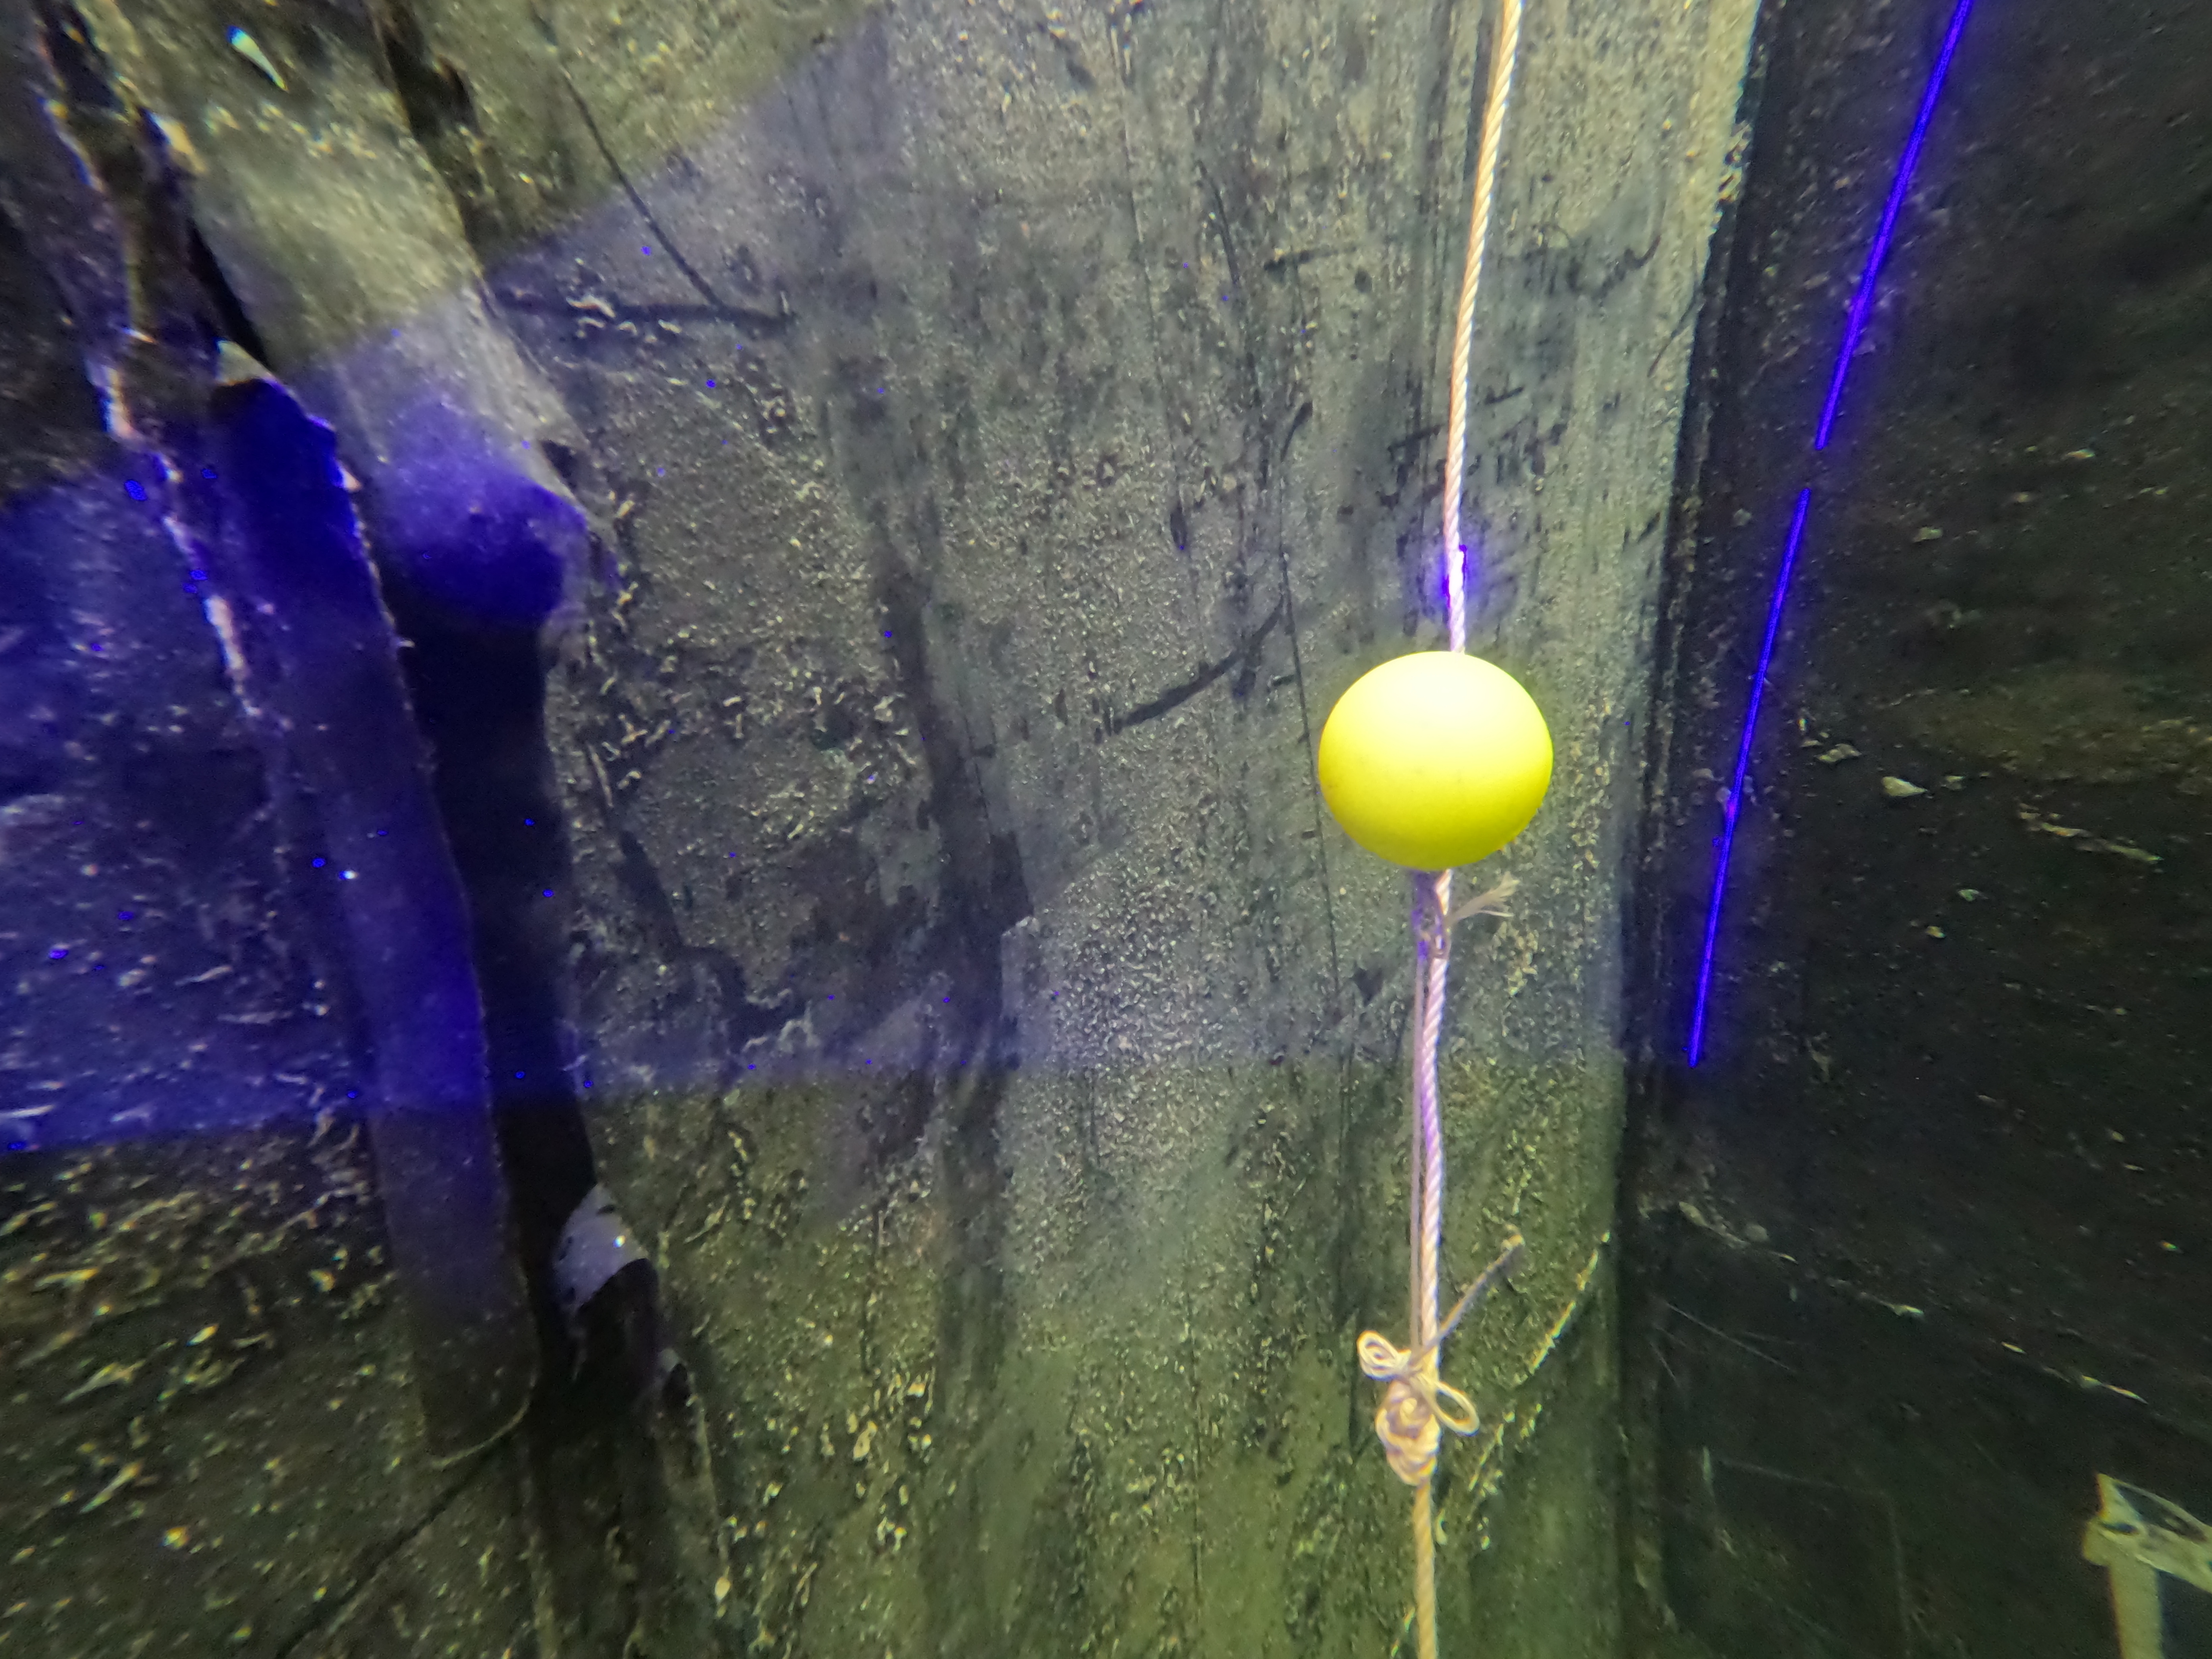

Supplement: Supplementary file 1377 [file G0032690.pdf › 6/G0032690.pdf]

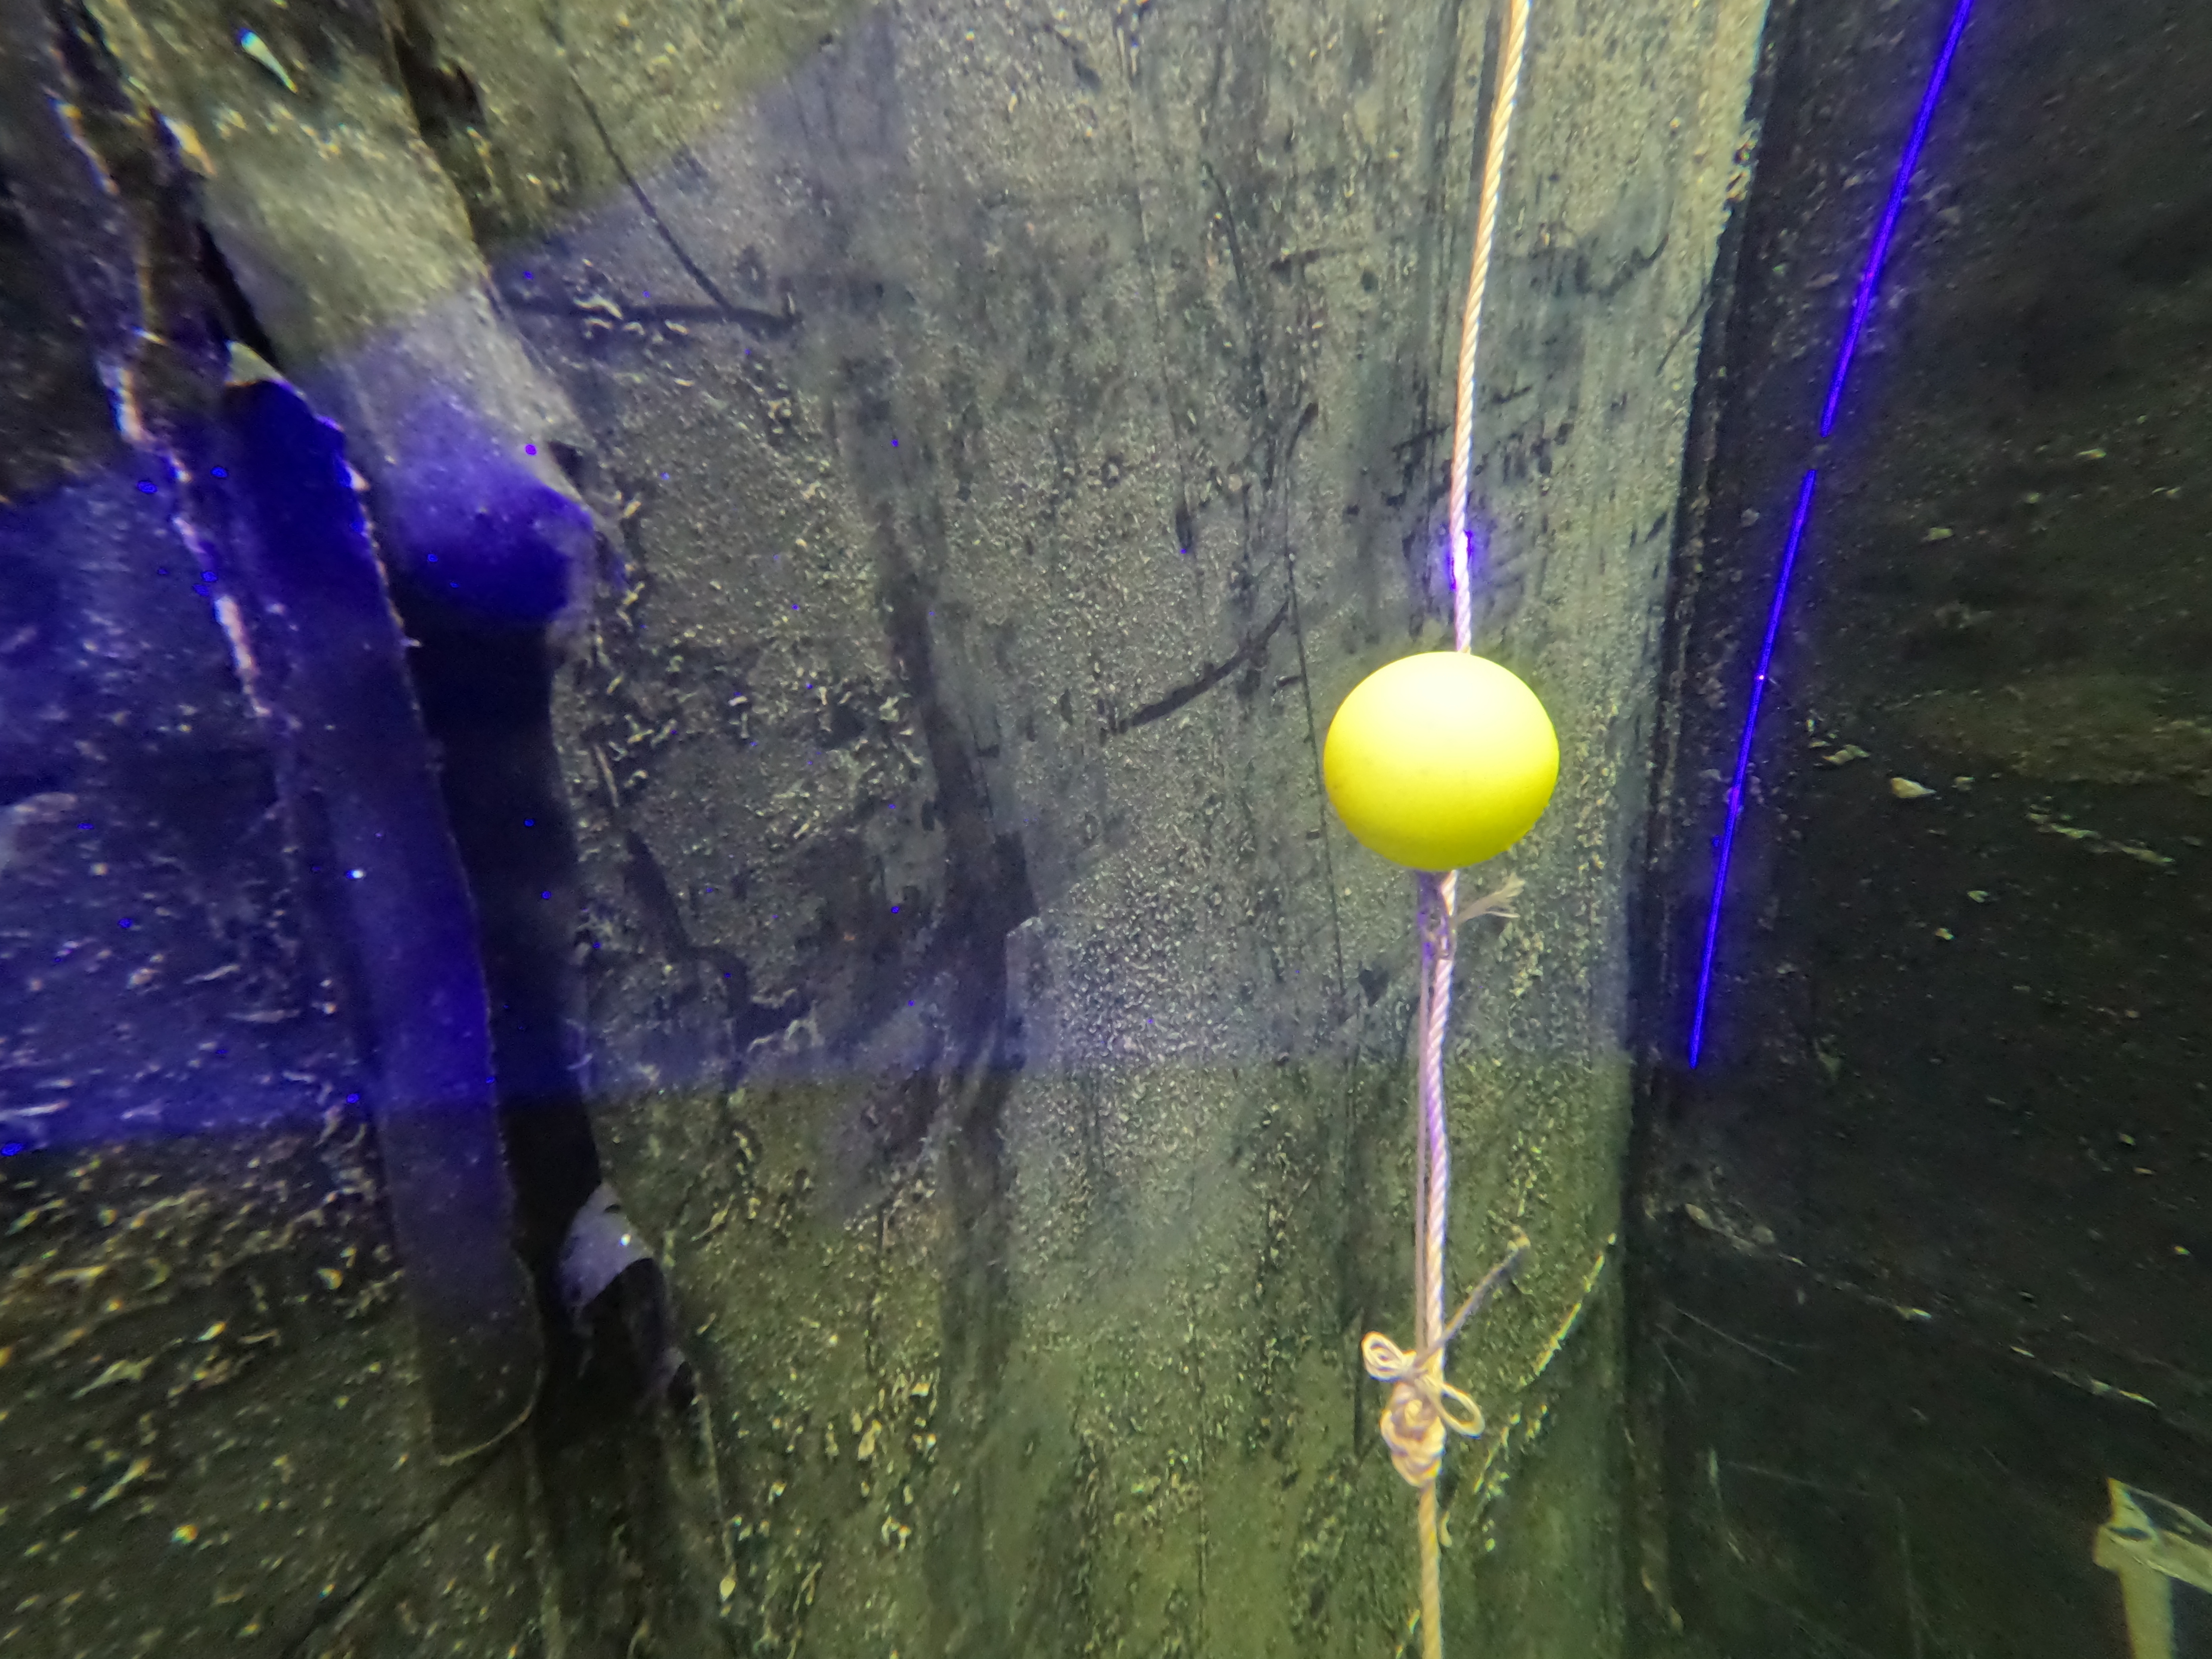

Supplement: Supplementary file 1378 [file G0032691.pdf › 6/G0032691.pdf]

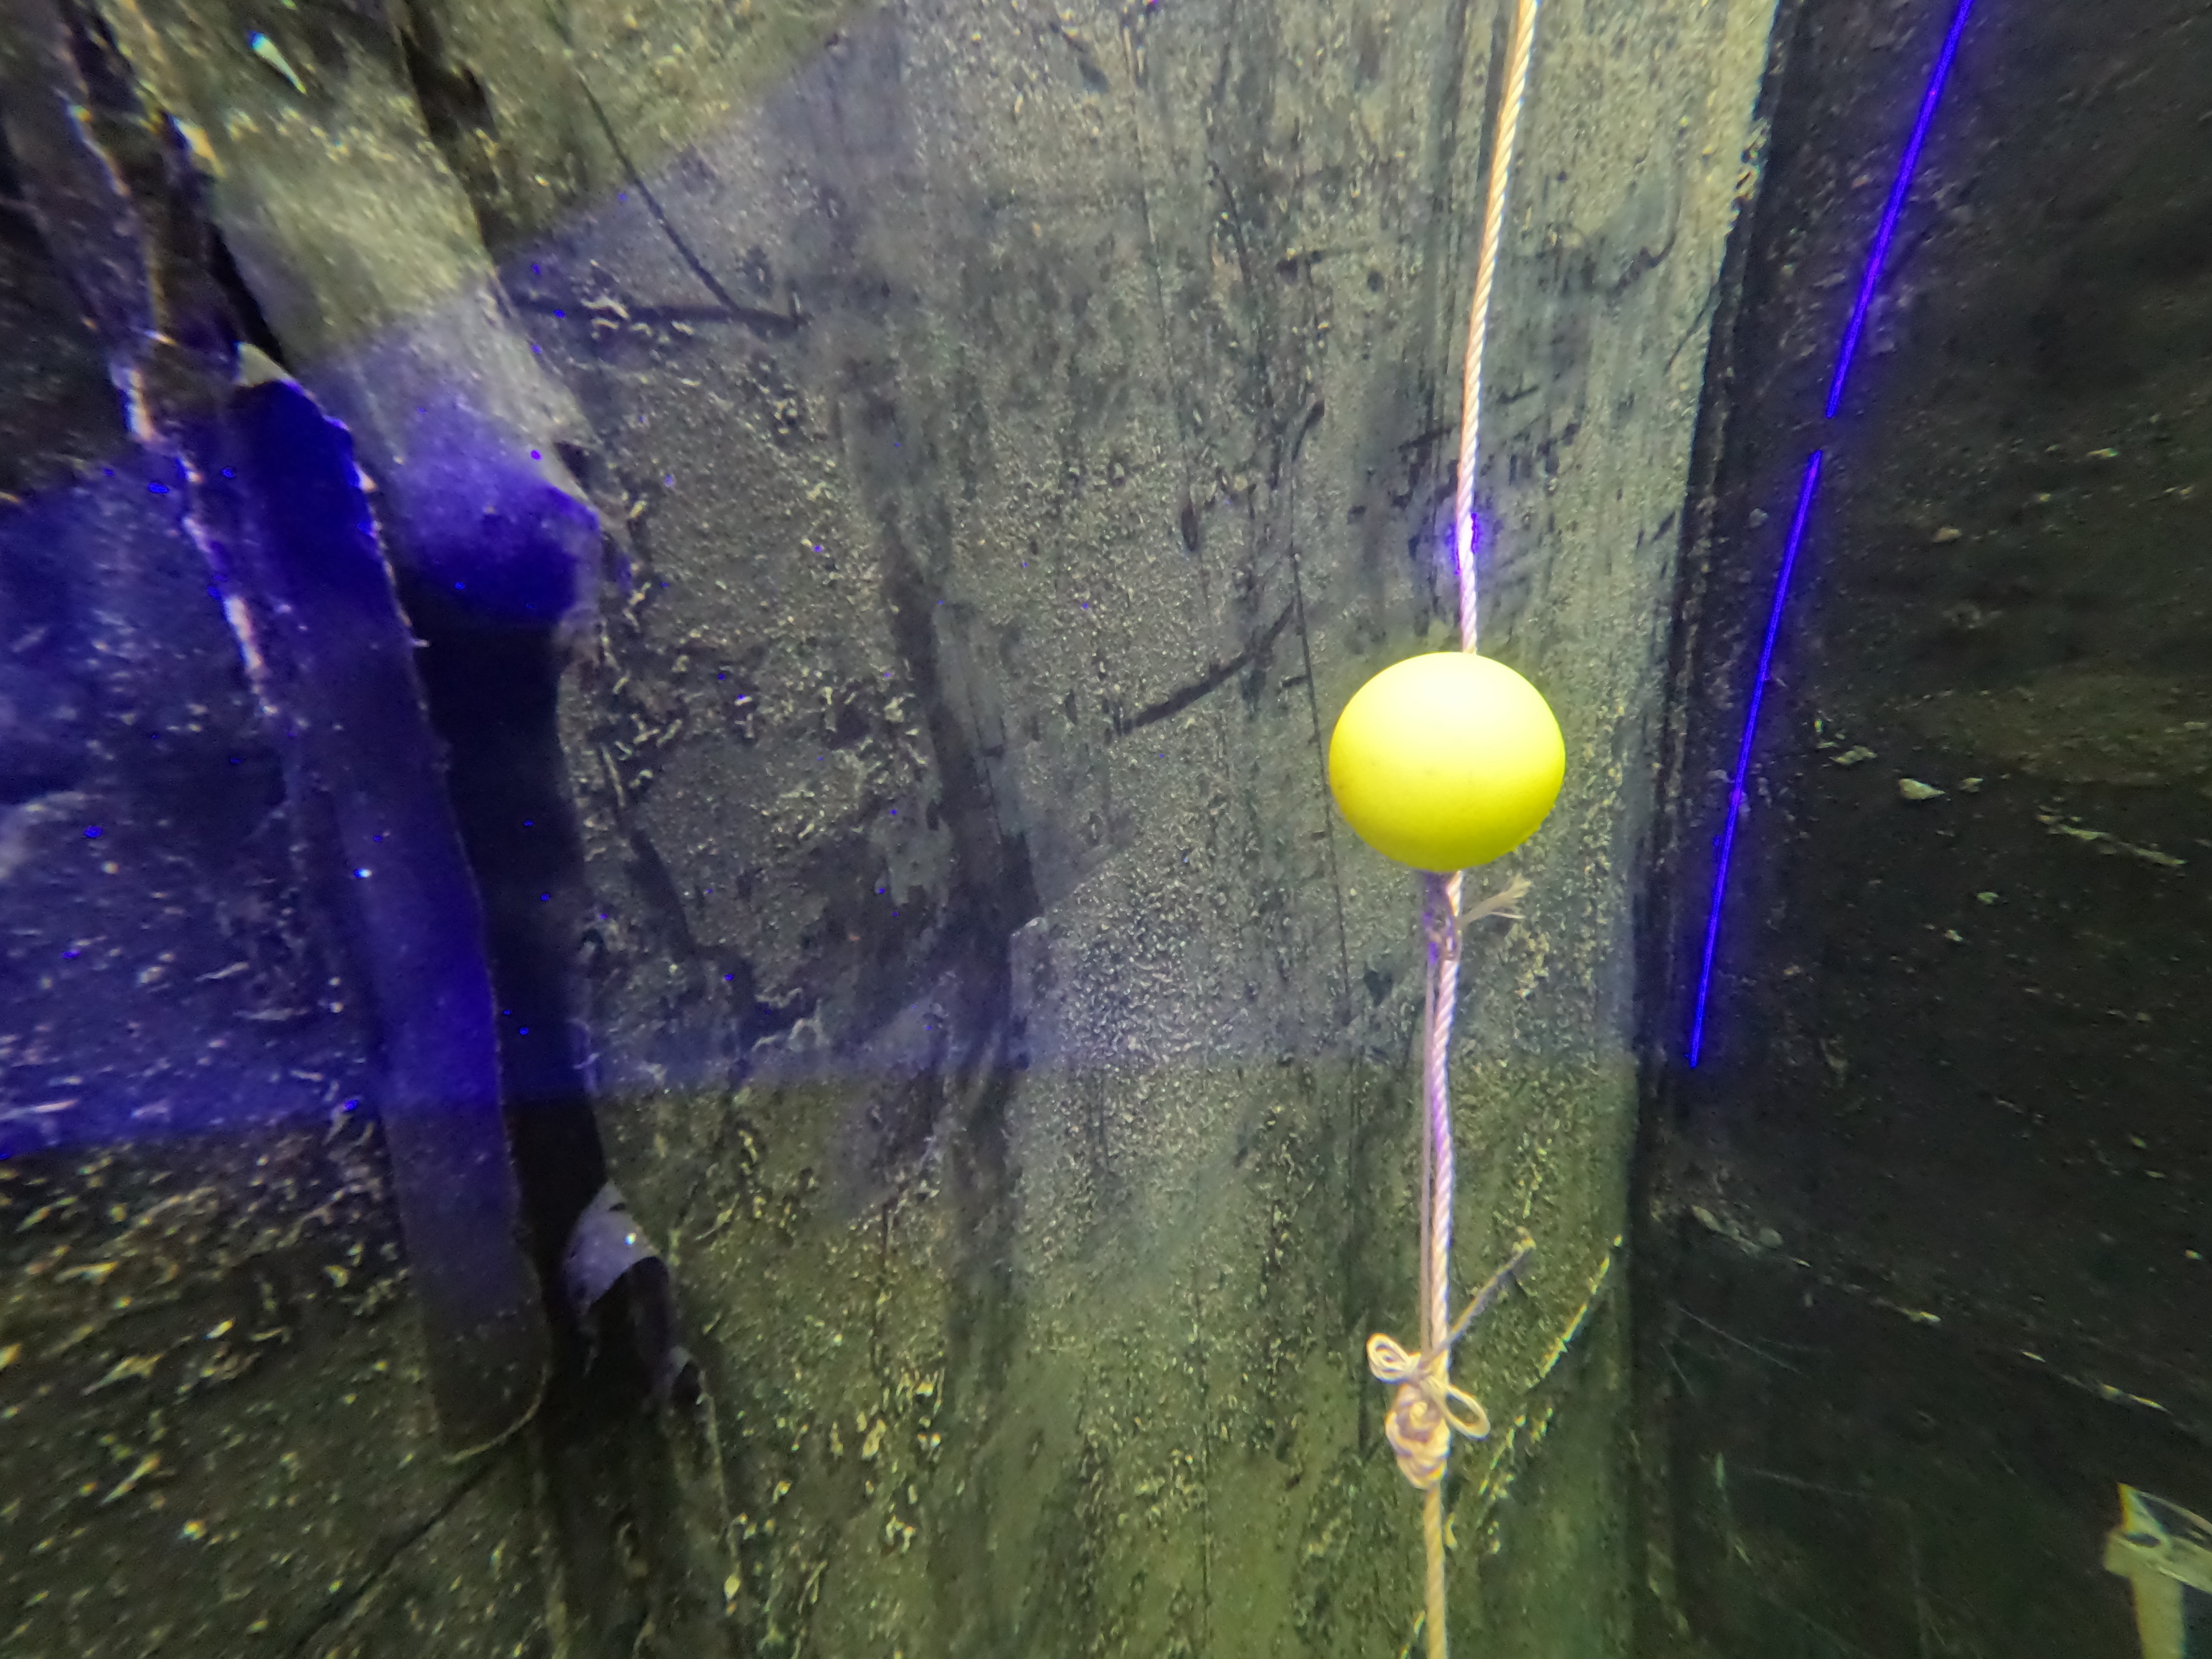

Supplement: Supplementary file 1379 [file G0032692.pdf › 6/G0032692.pdf]

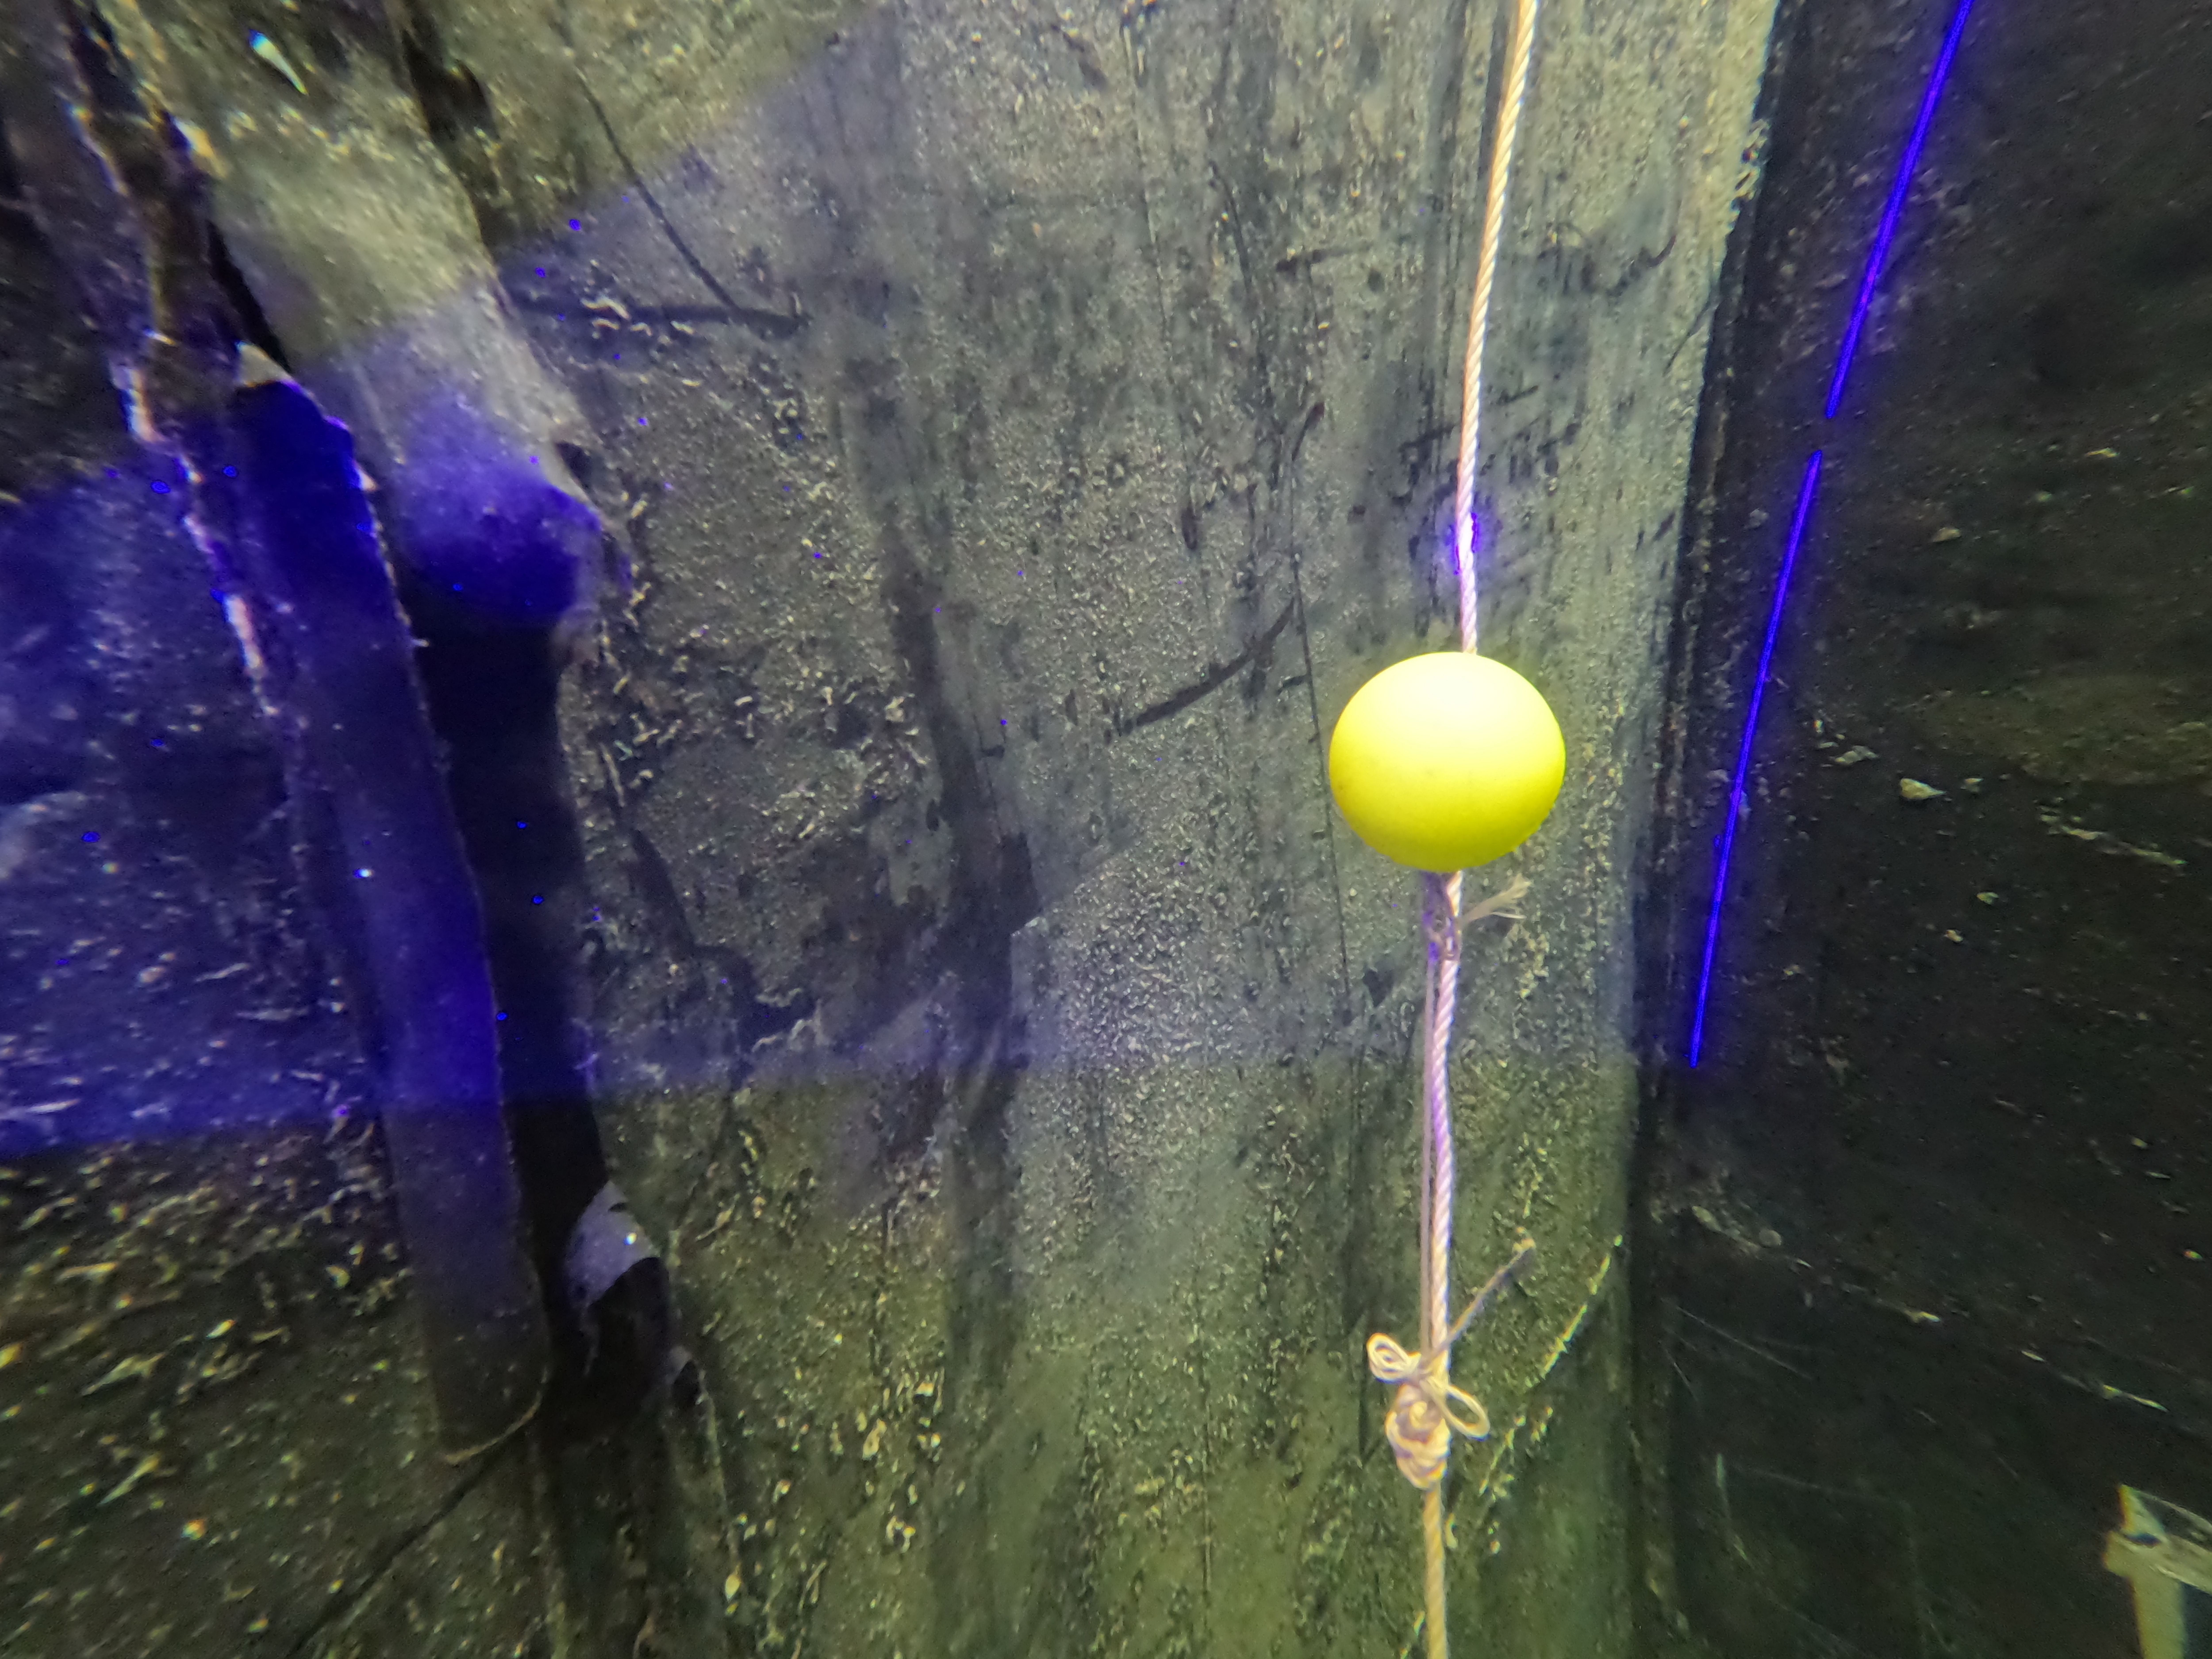

Supplement: Supplementary file 1380 [file G0032693.pdf › 6/G0032693.pdf]

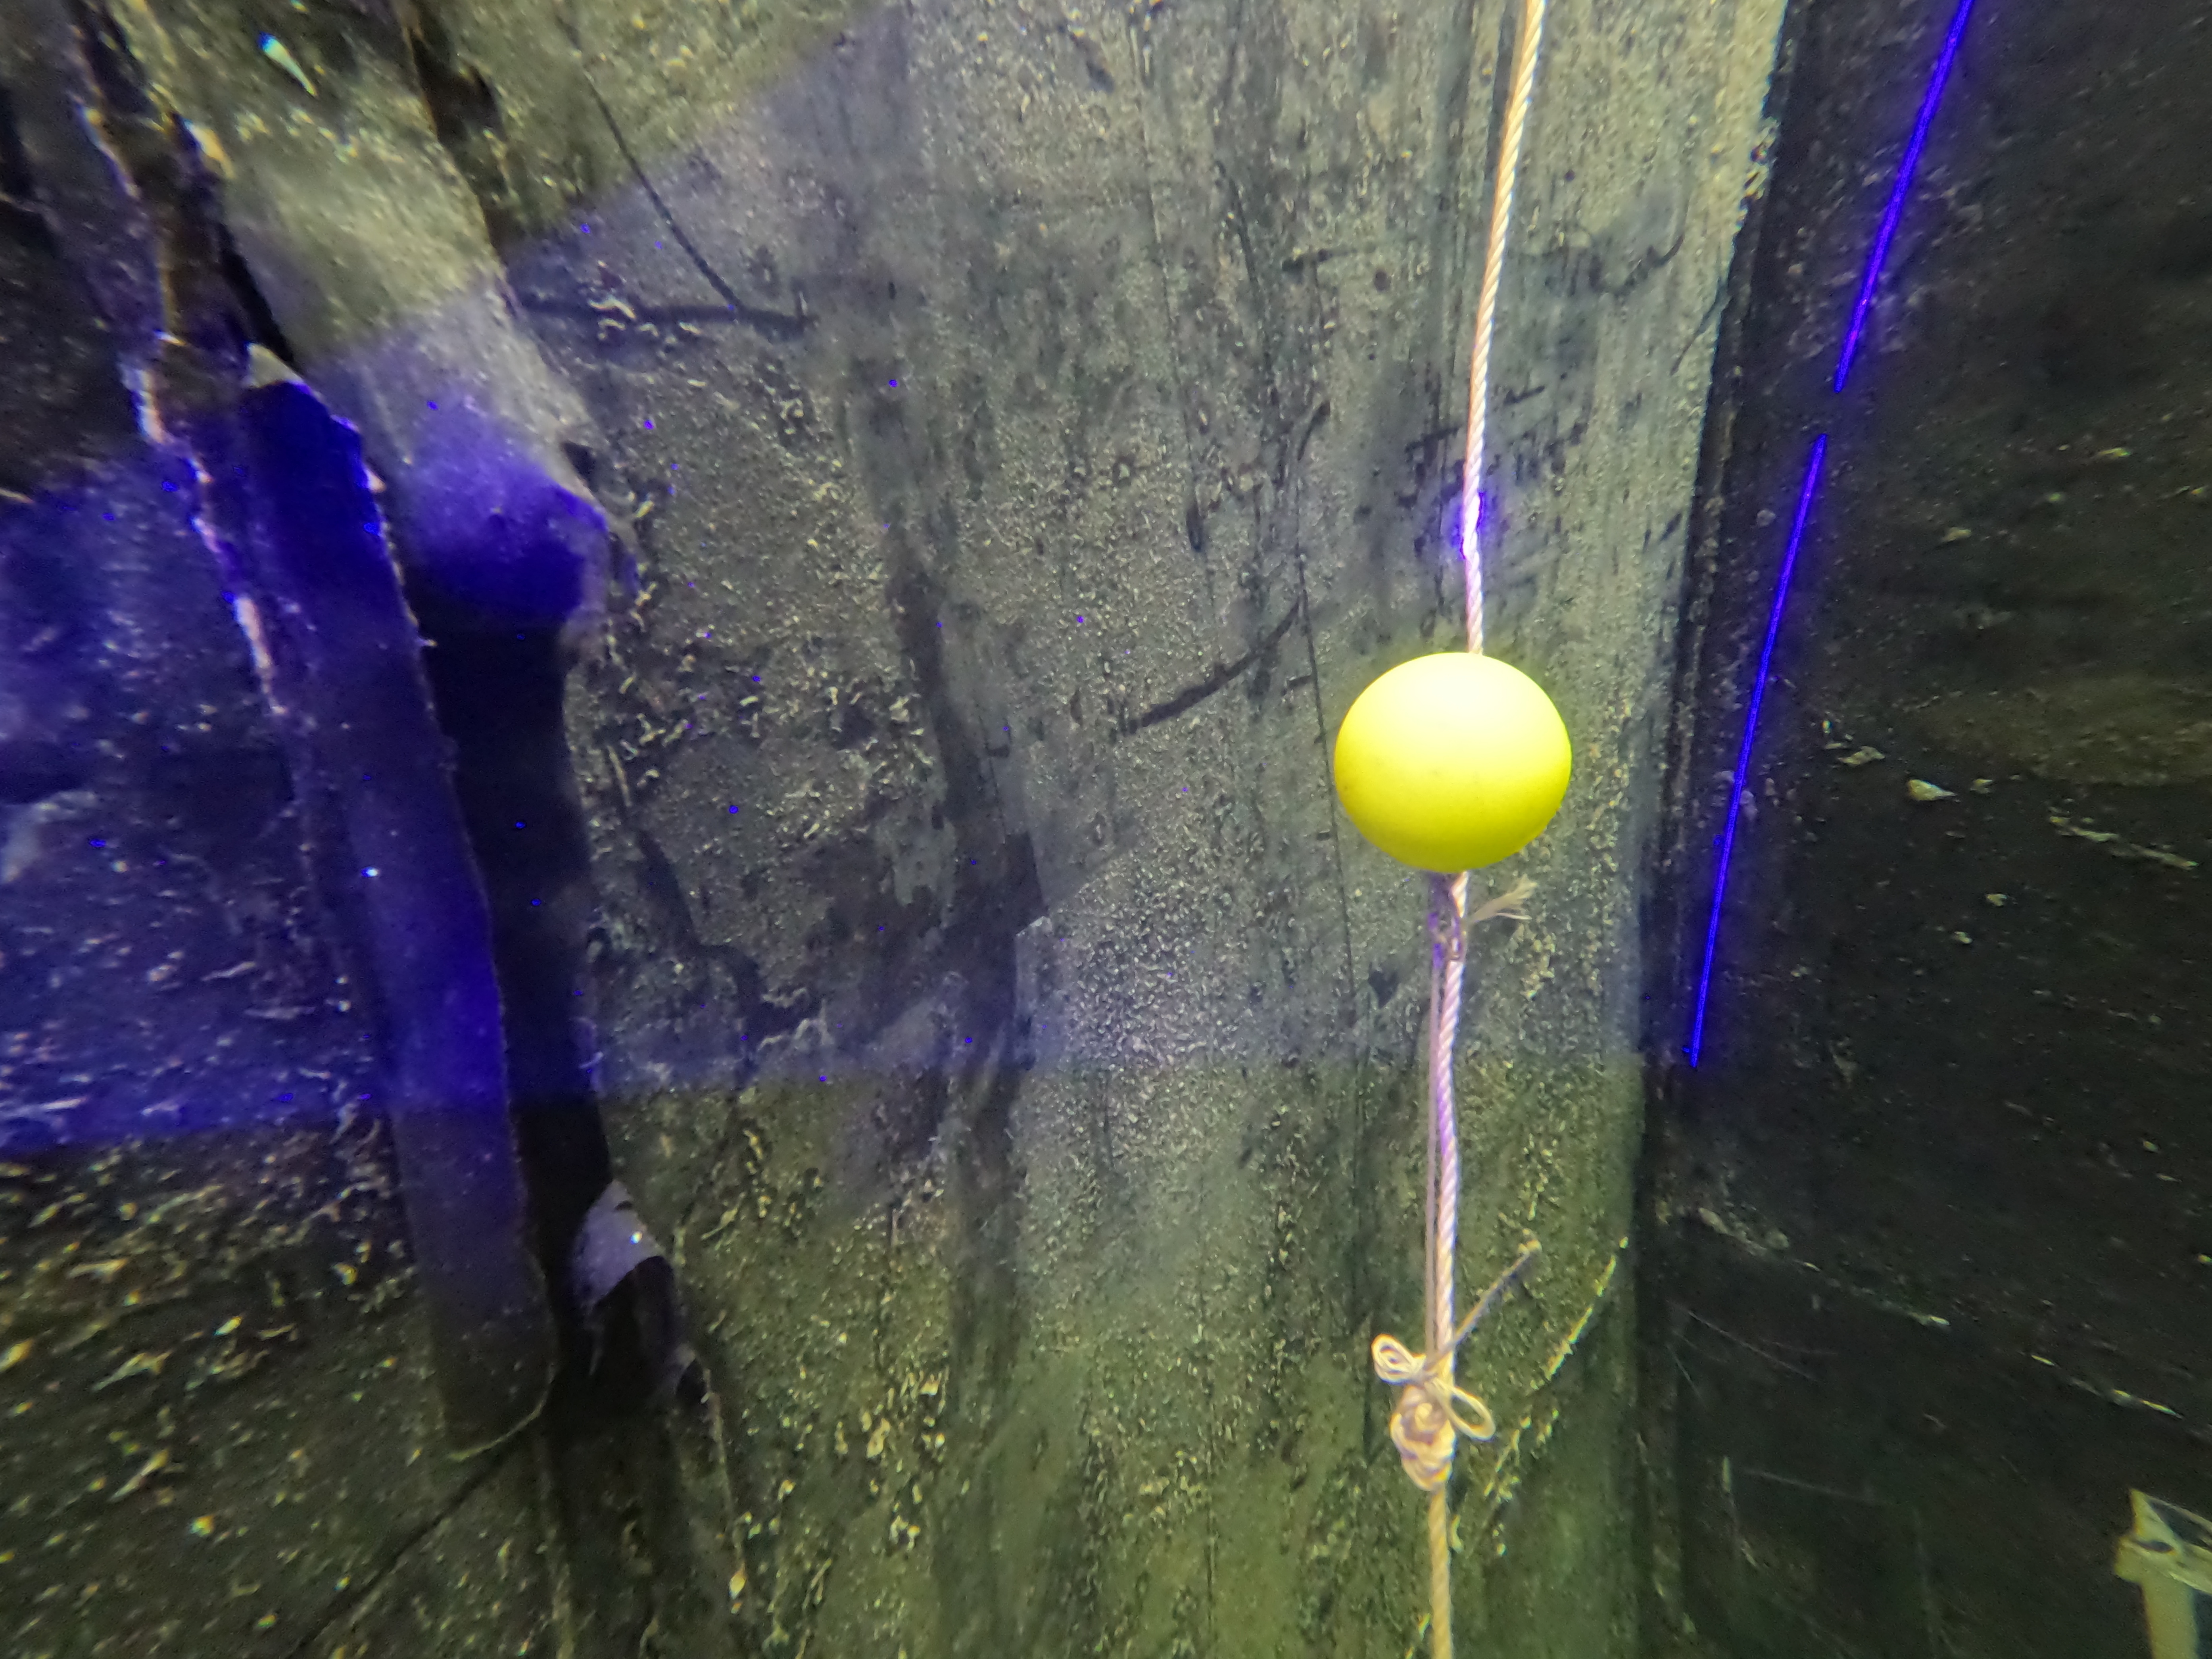

Supplement: Supplementary file 1381 [file G0032694.pdf › 6/G0032694.pdf]

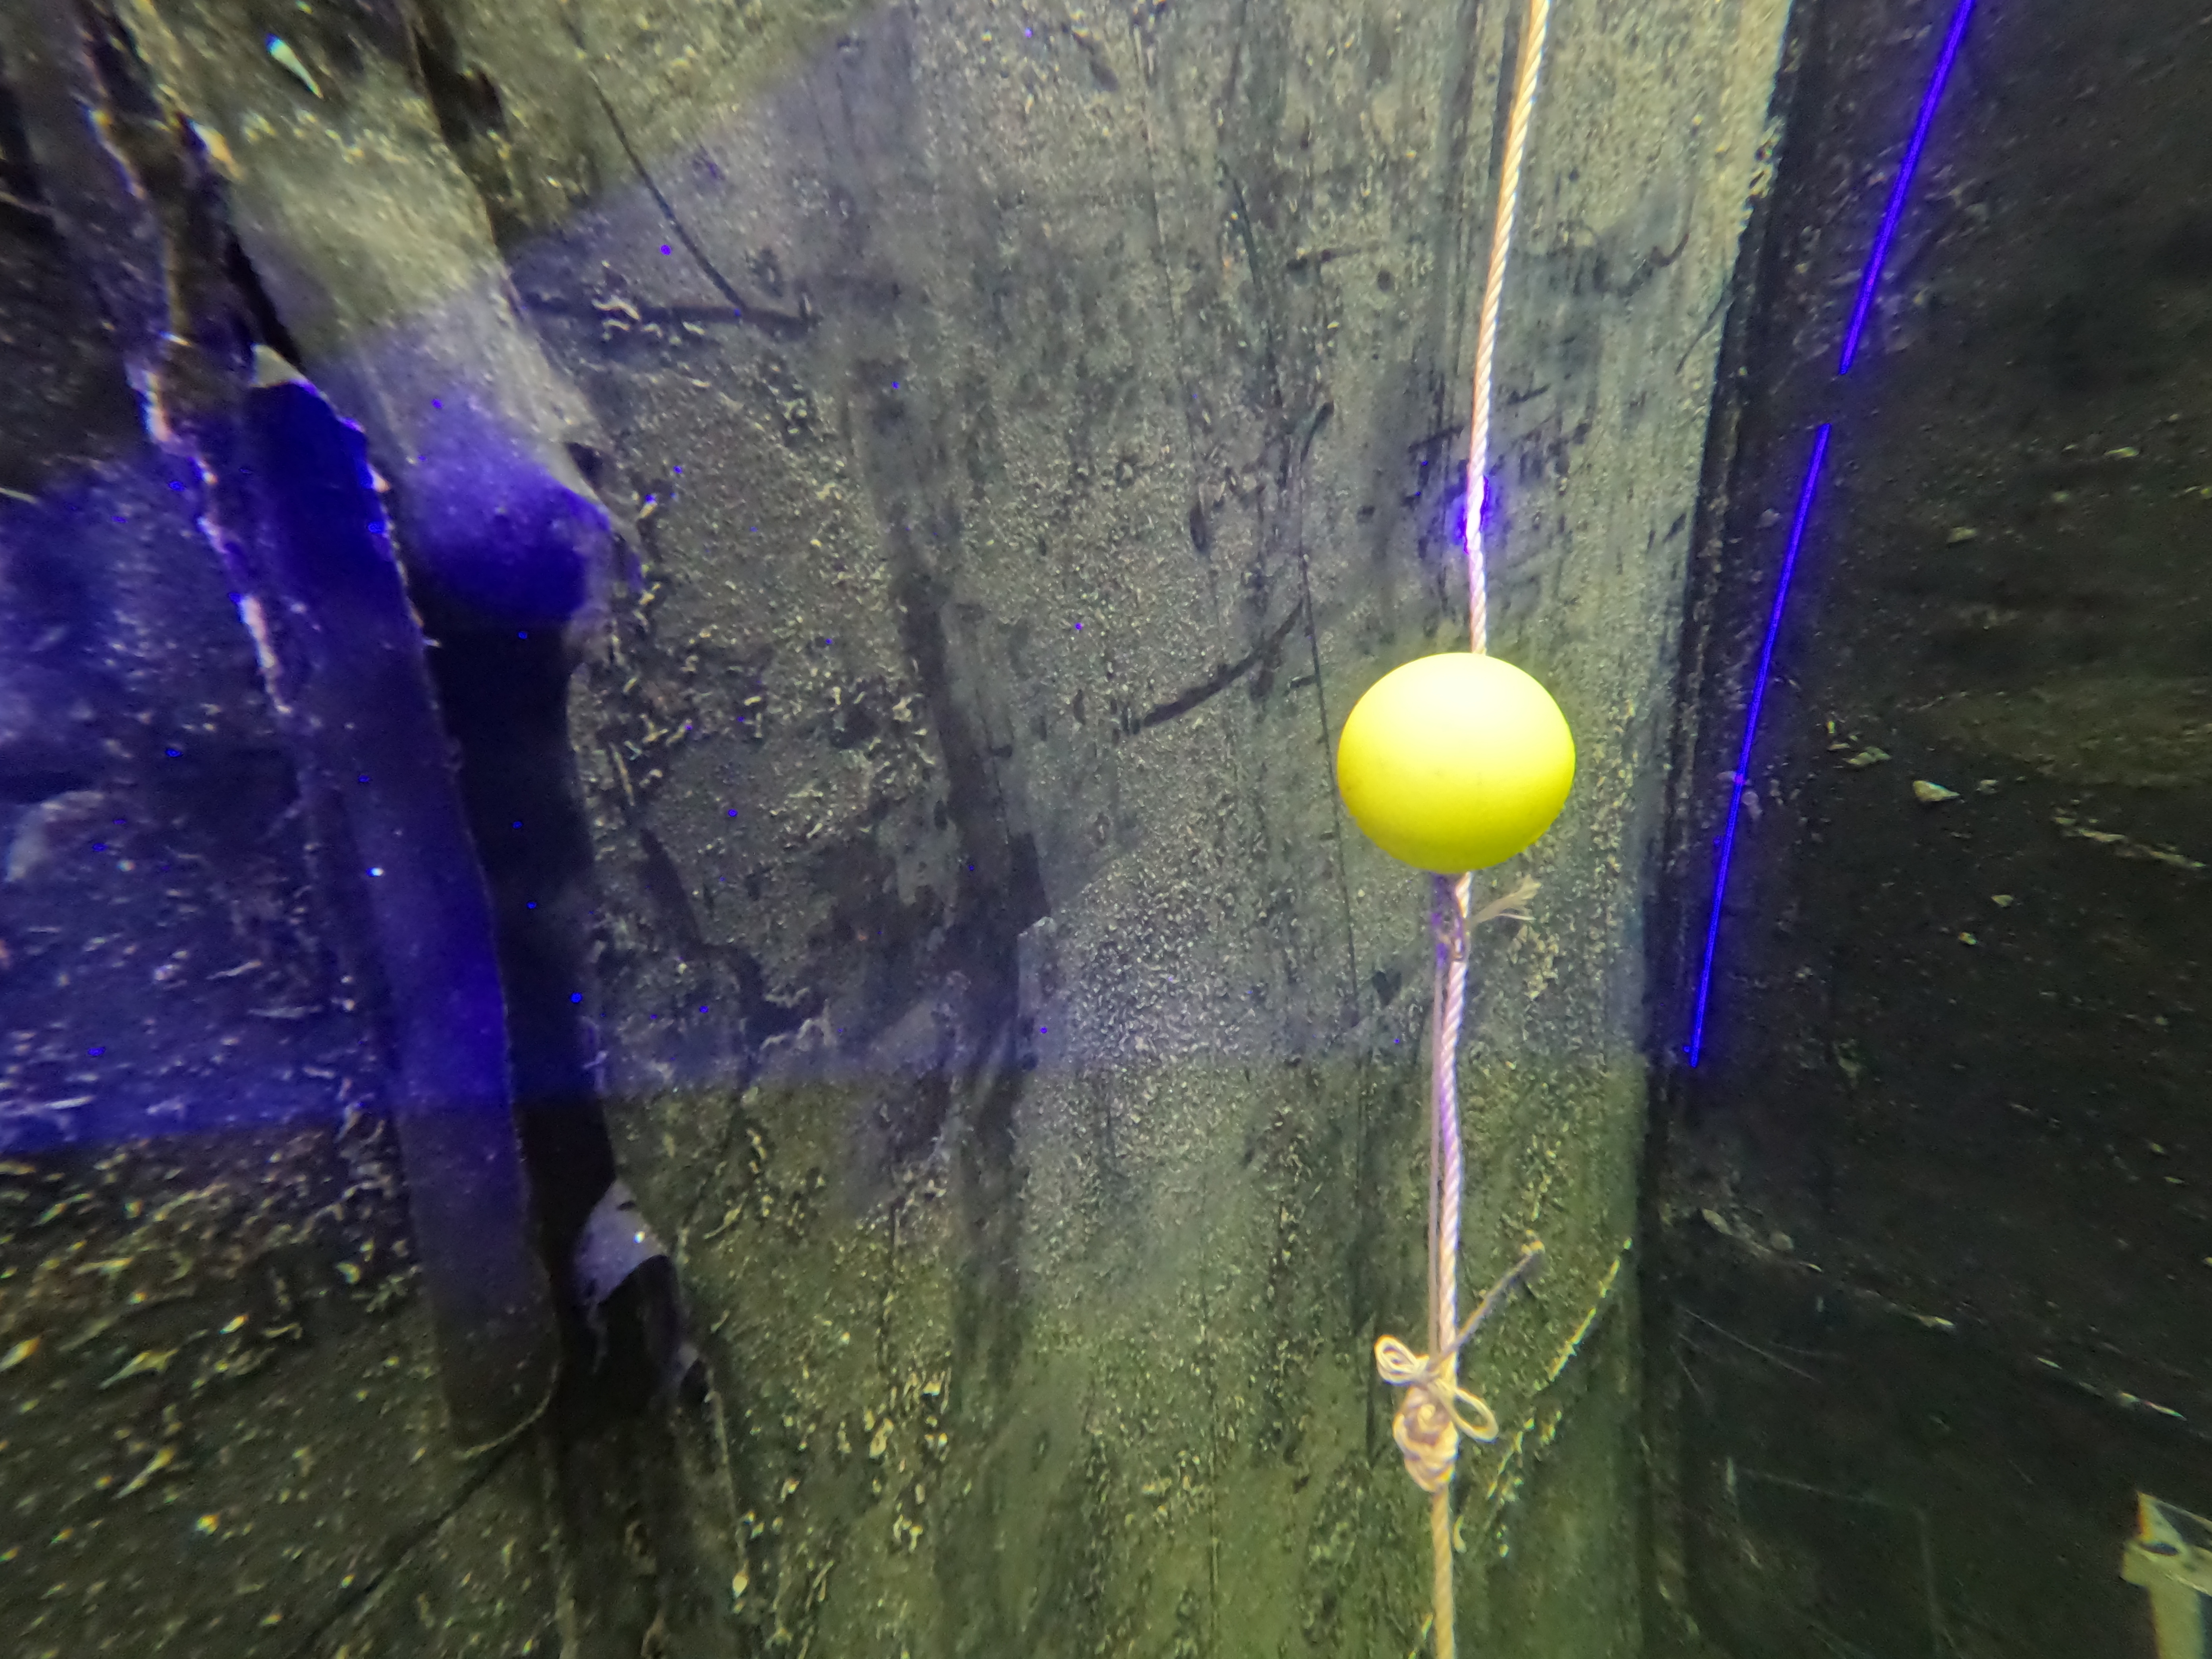

Supplement: Supplementary file 1382 [file G0032695.pdf › 6/G0032695.pdf]

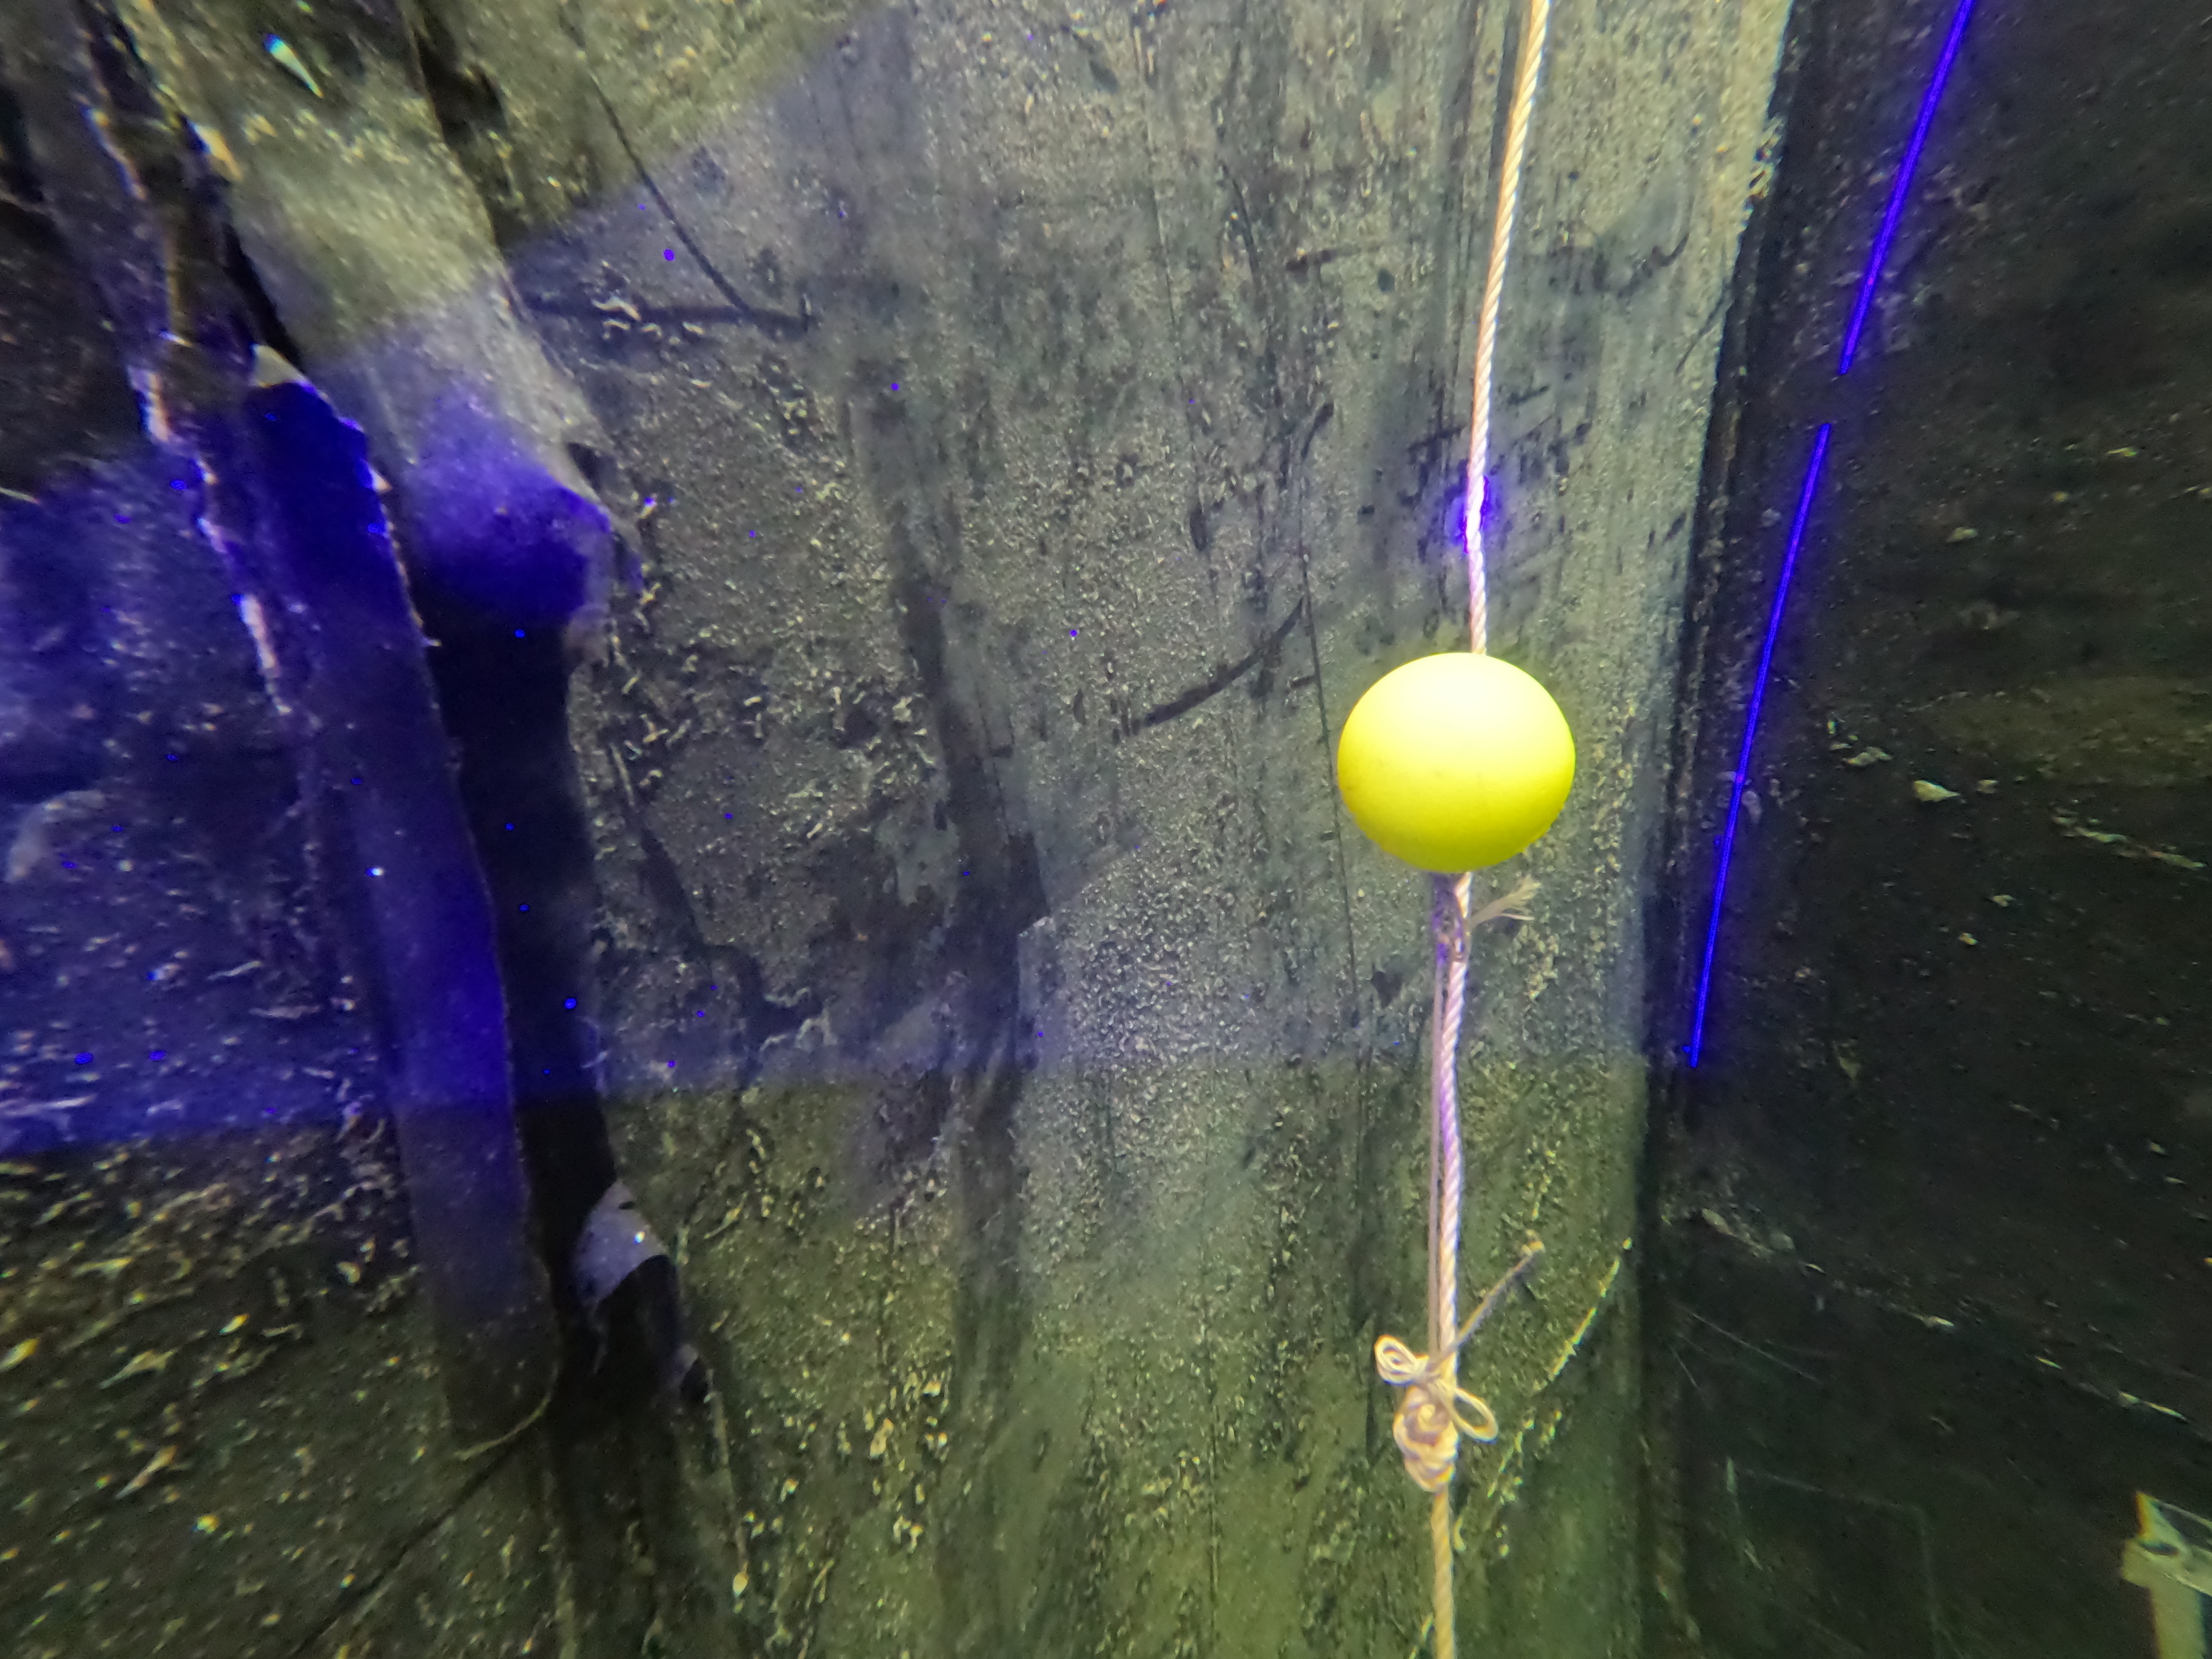

Supplement: Supplementary file 1383 [file G0032696.pdf › 6/G0032696.pdf]

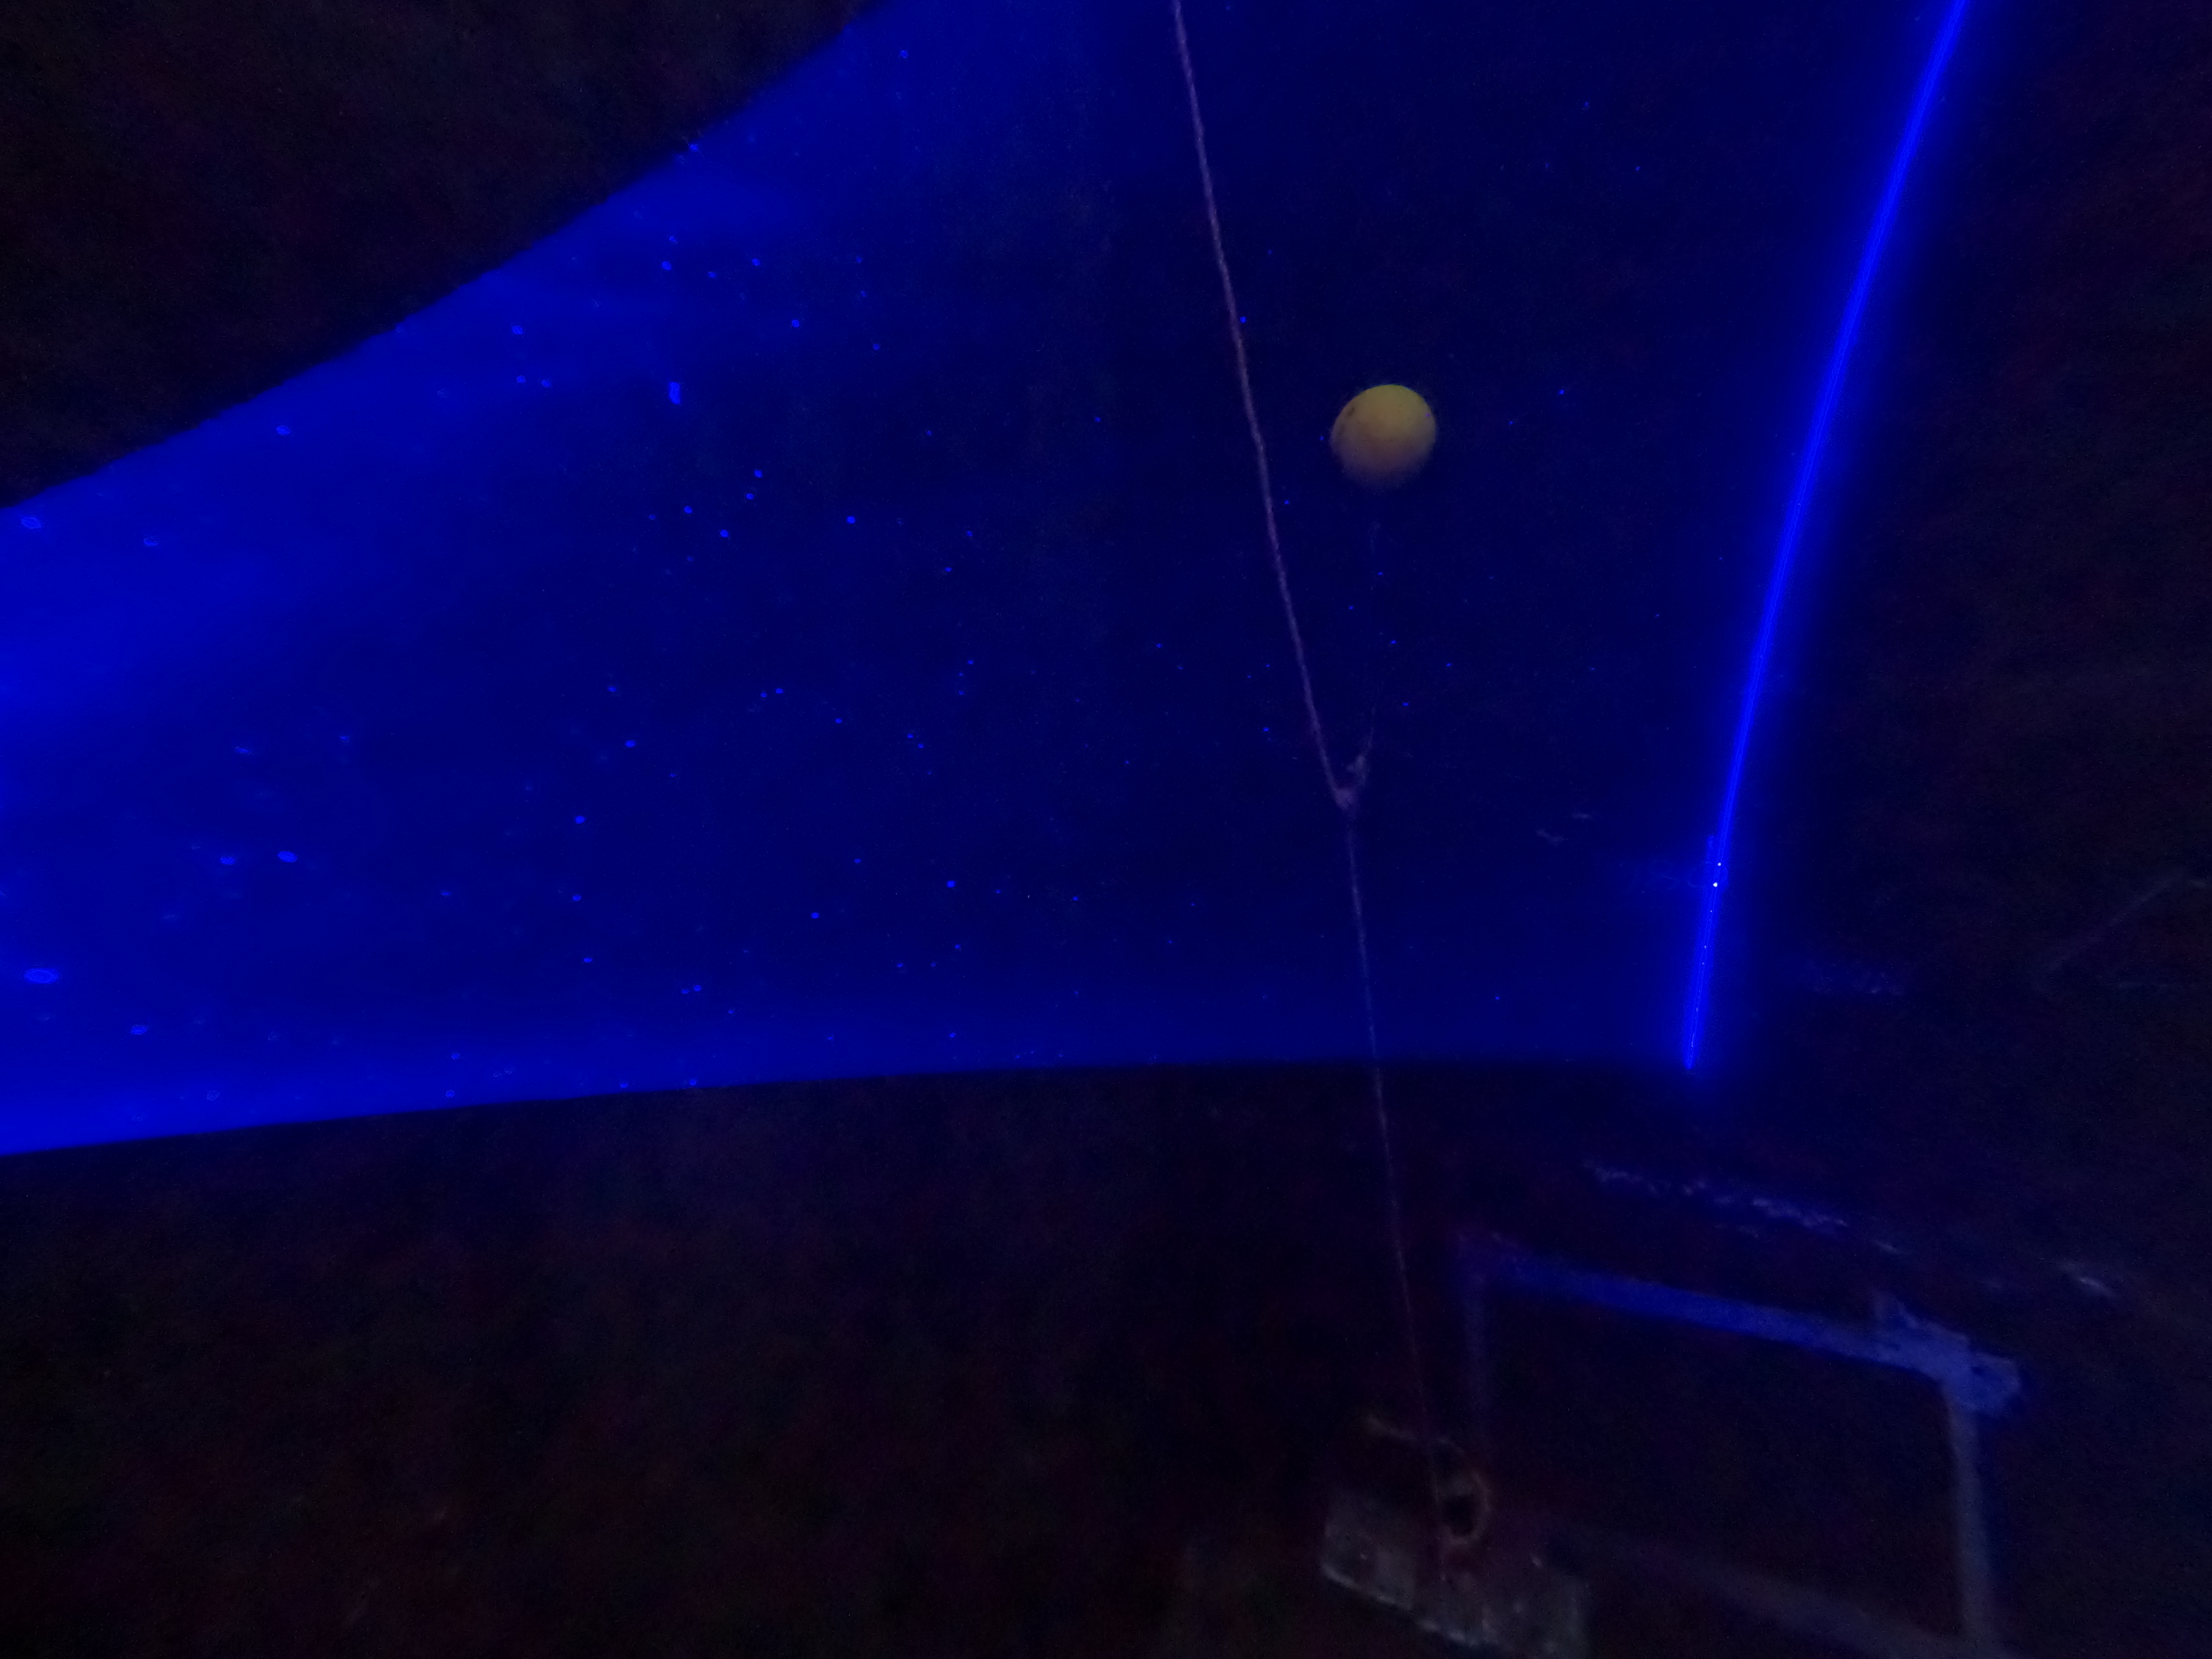

Supplement: Supplementary file 1385 [file G0032084.pdf › 11/G0032084.pdf]

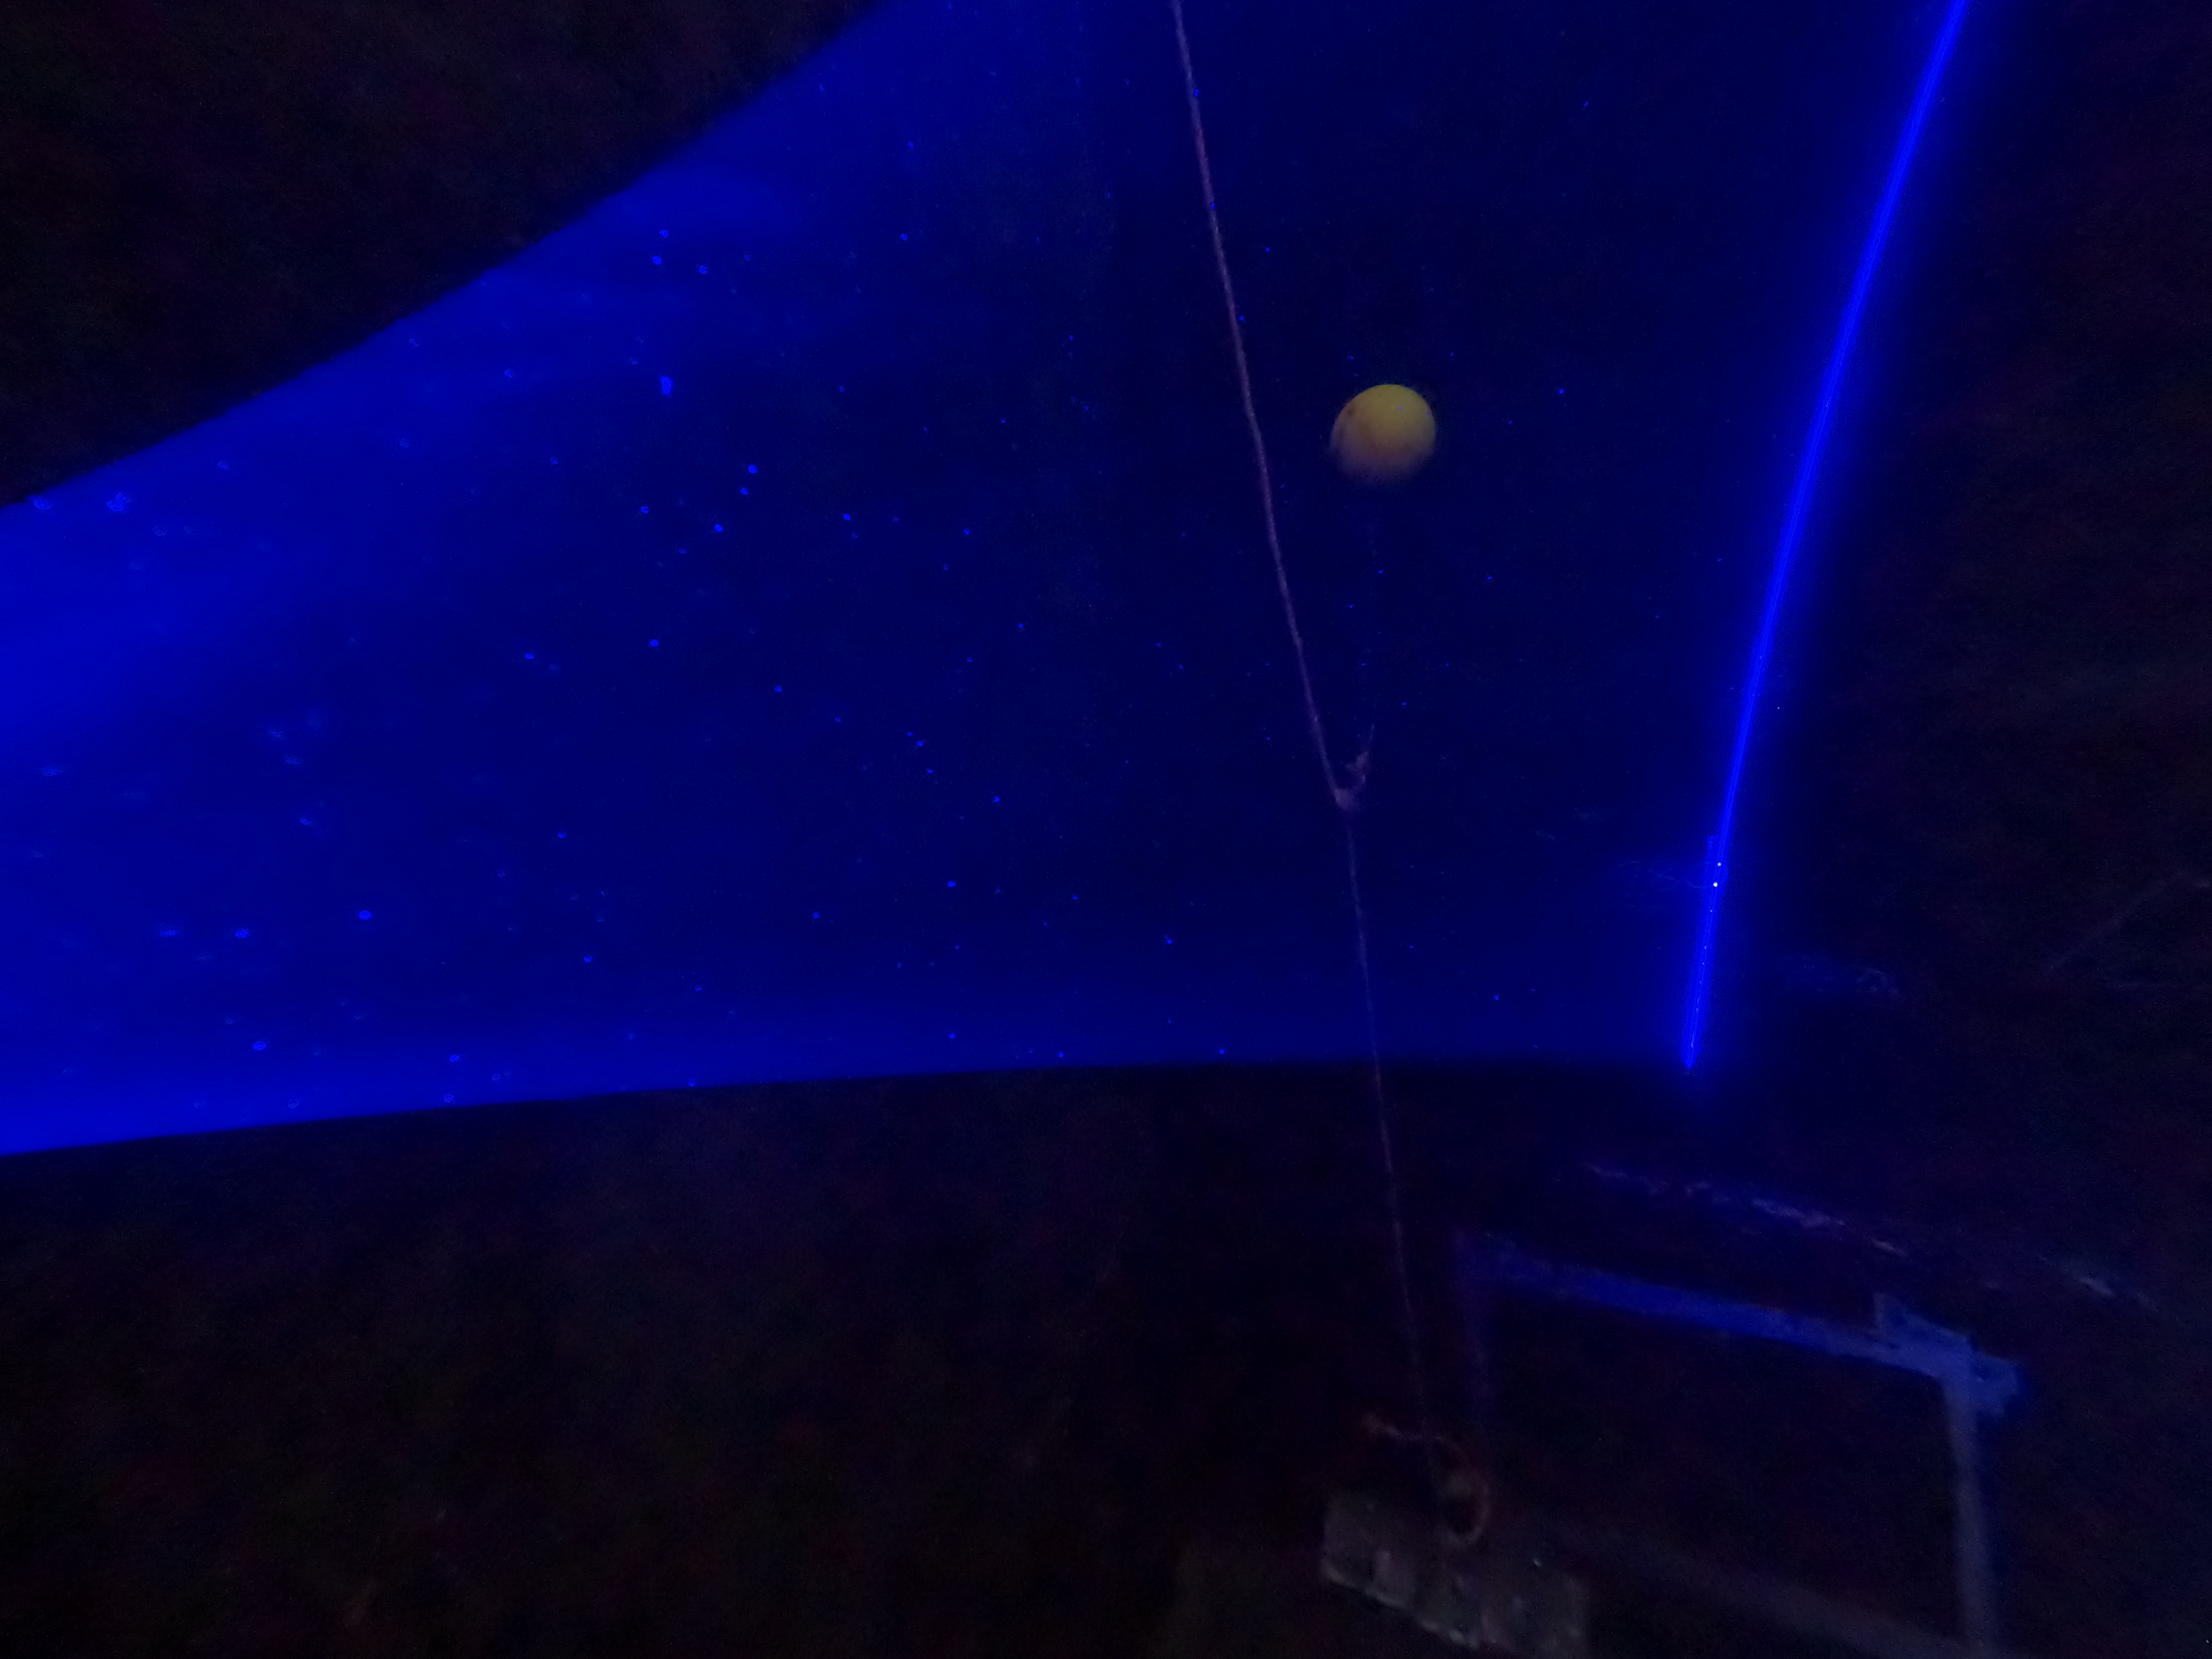

Supplement: Supplementary file 1386 [file G0032085.pdf › 11/G0032085.pdf]

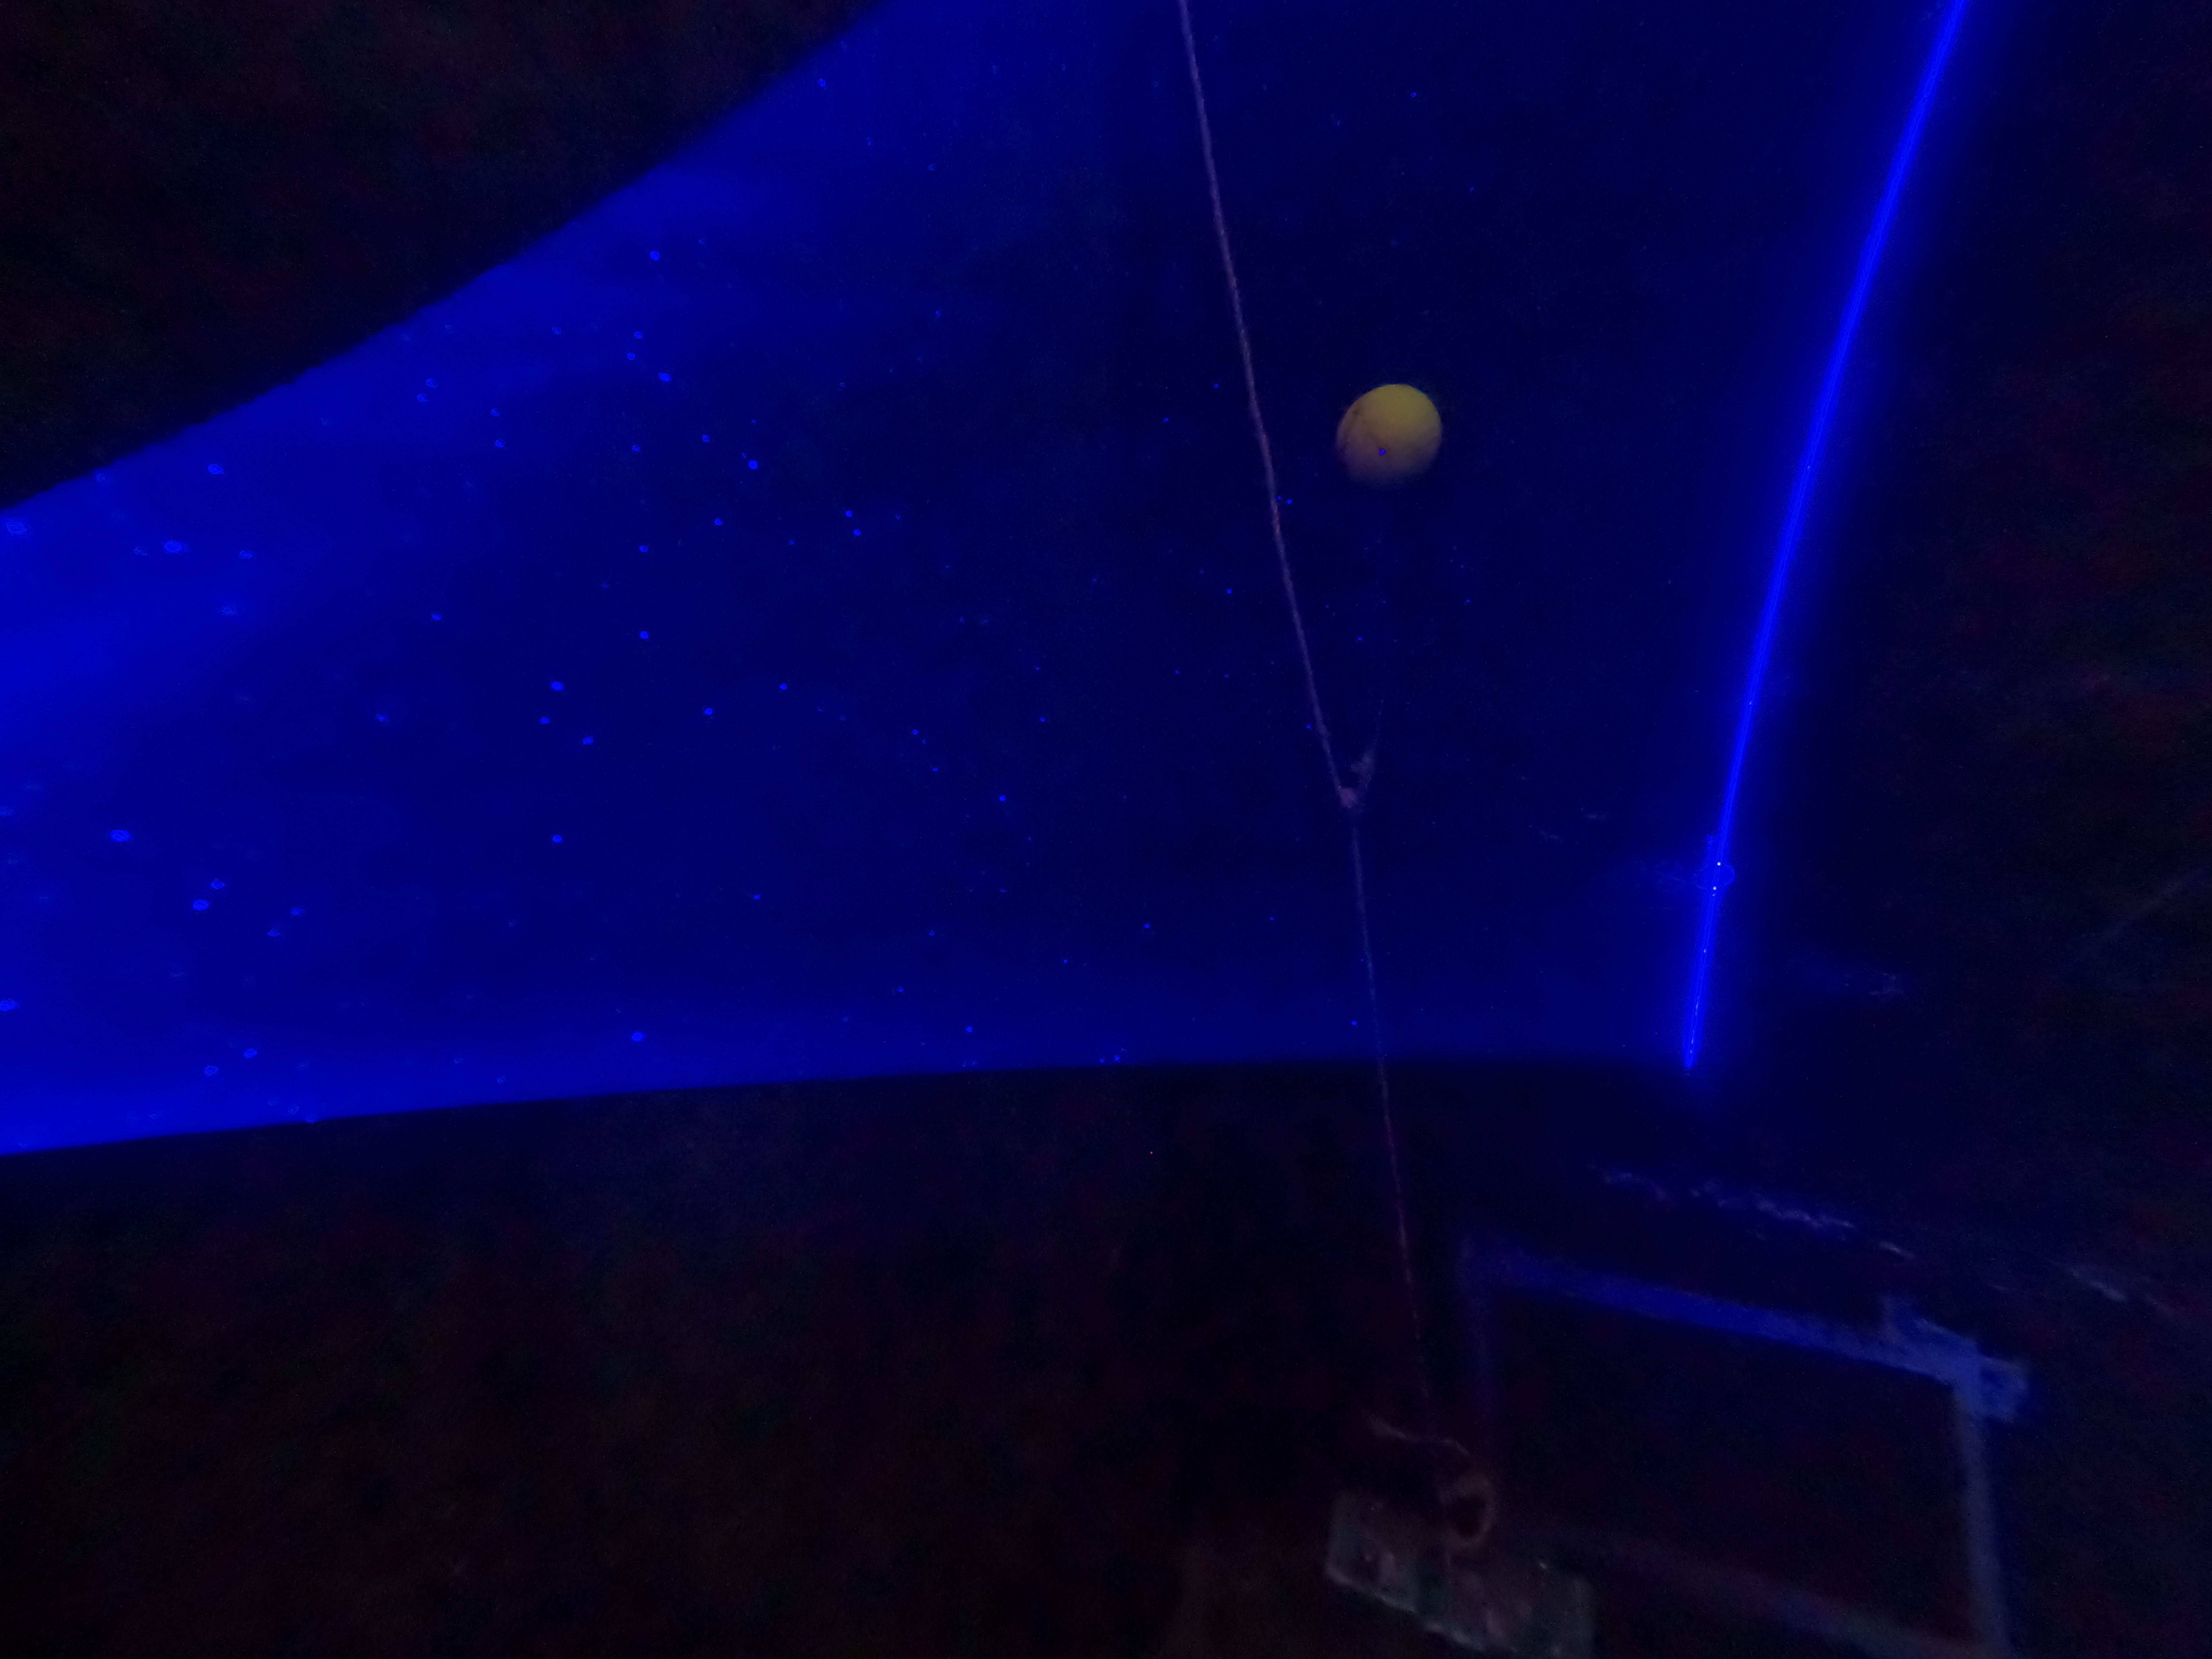

Supplement: Supplementary file 1387 [file G0032086.pdf › 11/G0032086.pdf]

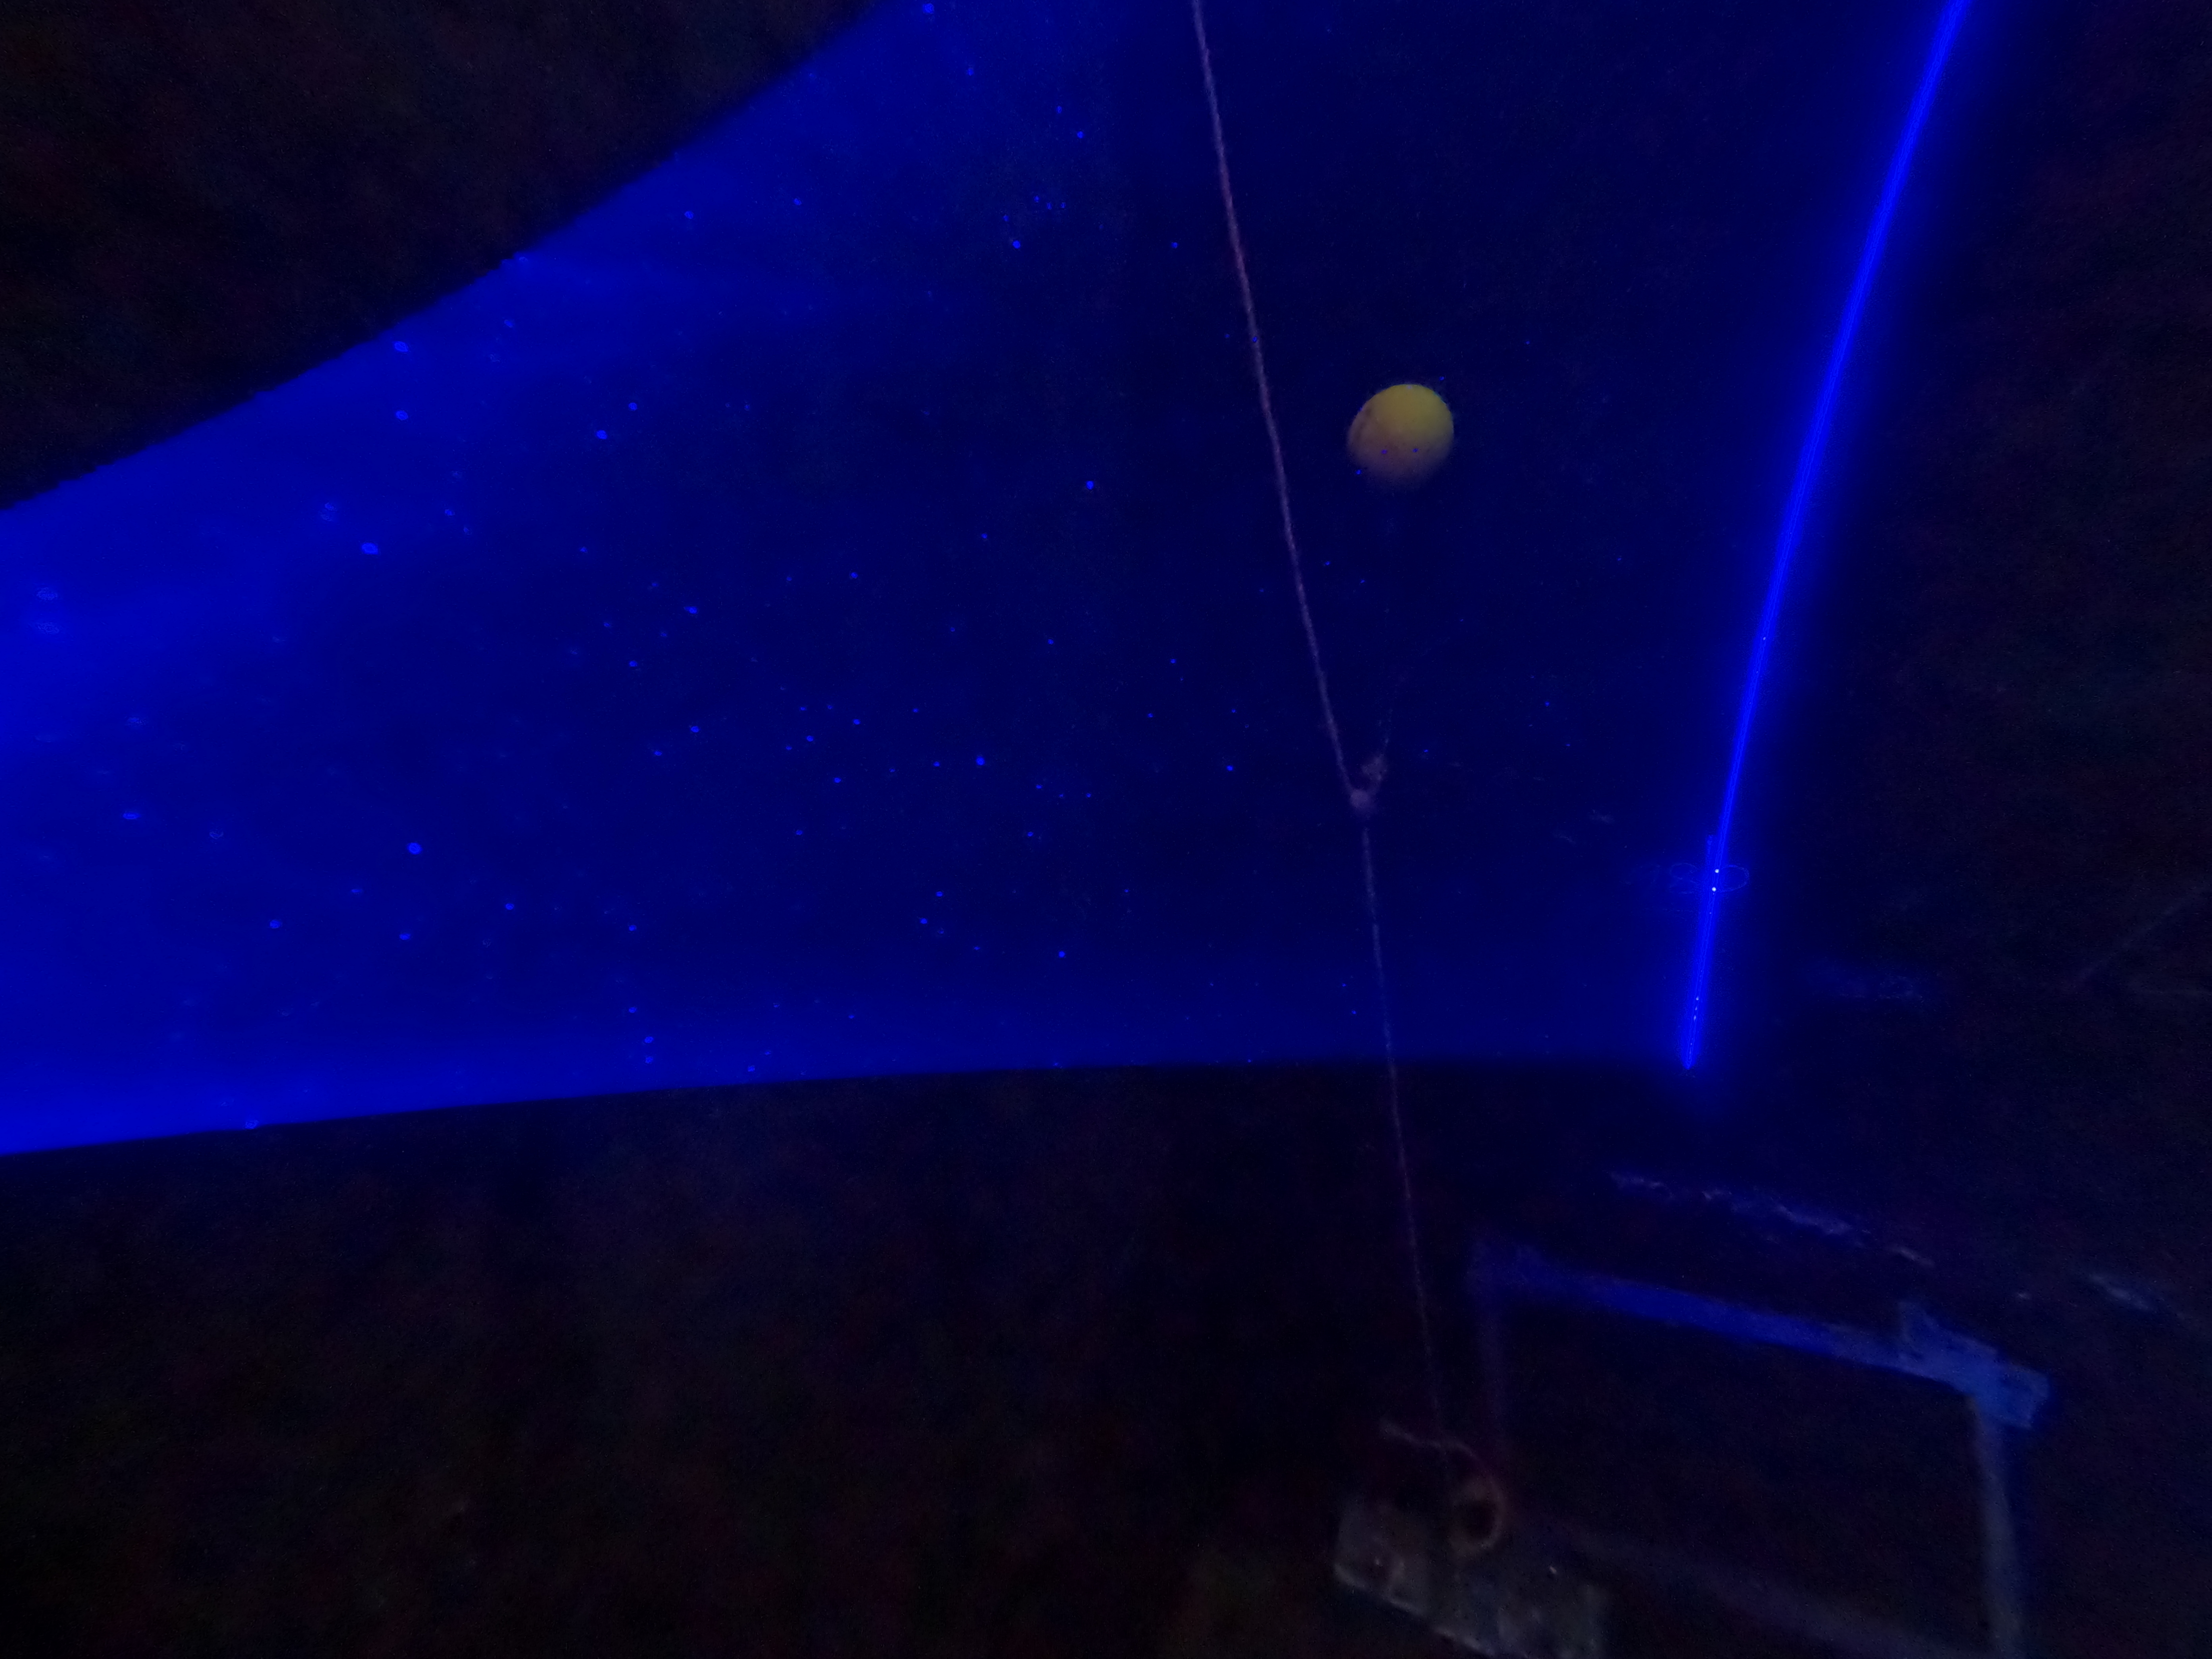

Supplement: Supplementary file 1390 [file G0032089.pdf › 11/G0032089.pdf]

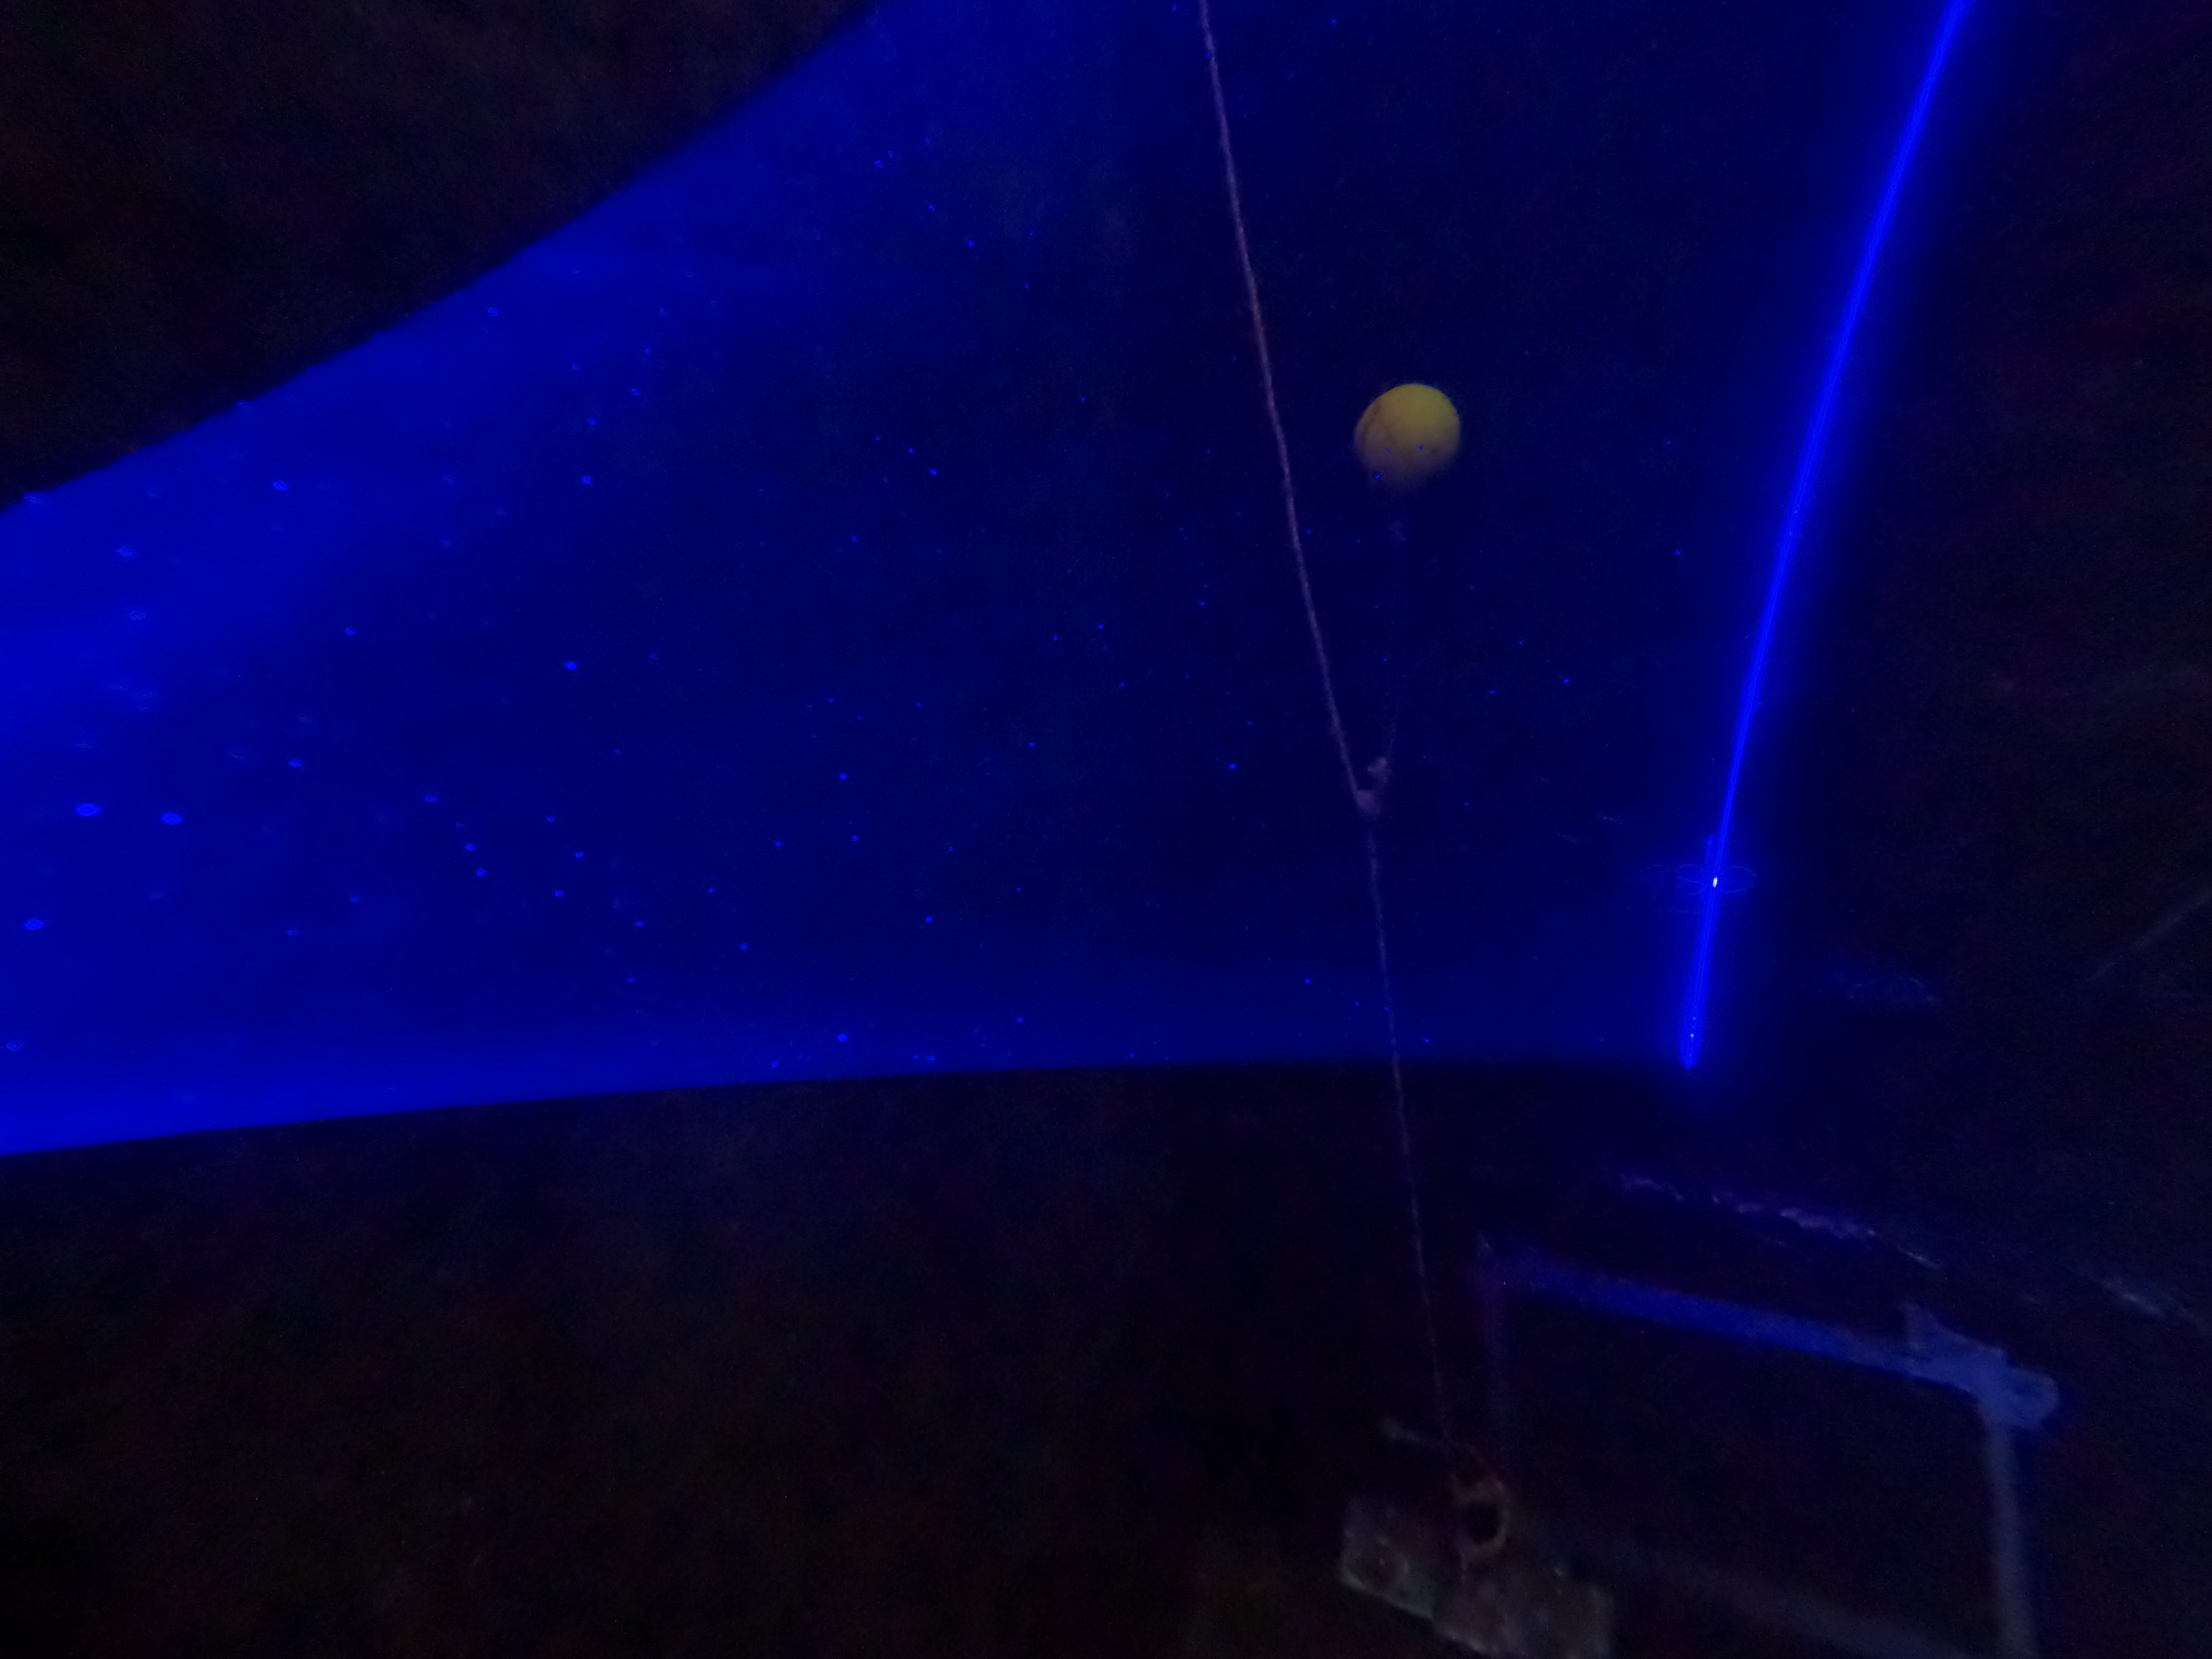

Supplement: Supplementary file 1392 [file G0032091.pdf › 11/G0032091.pdf]

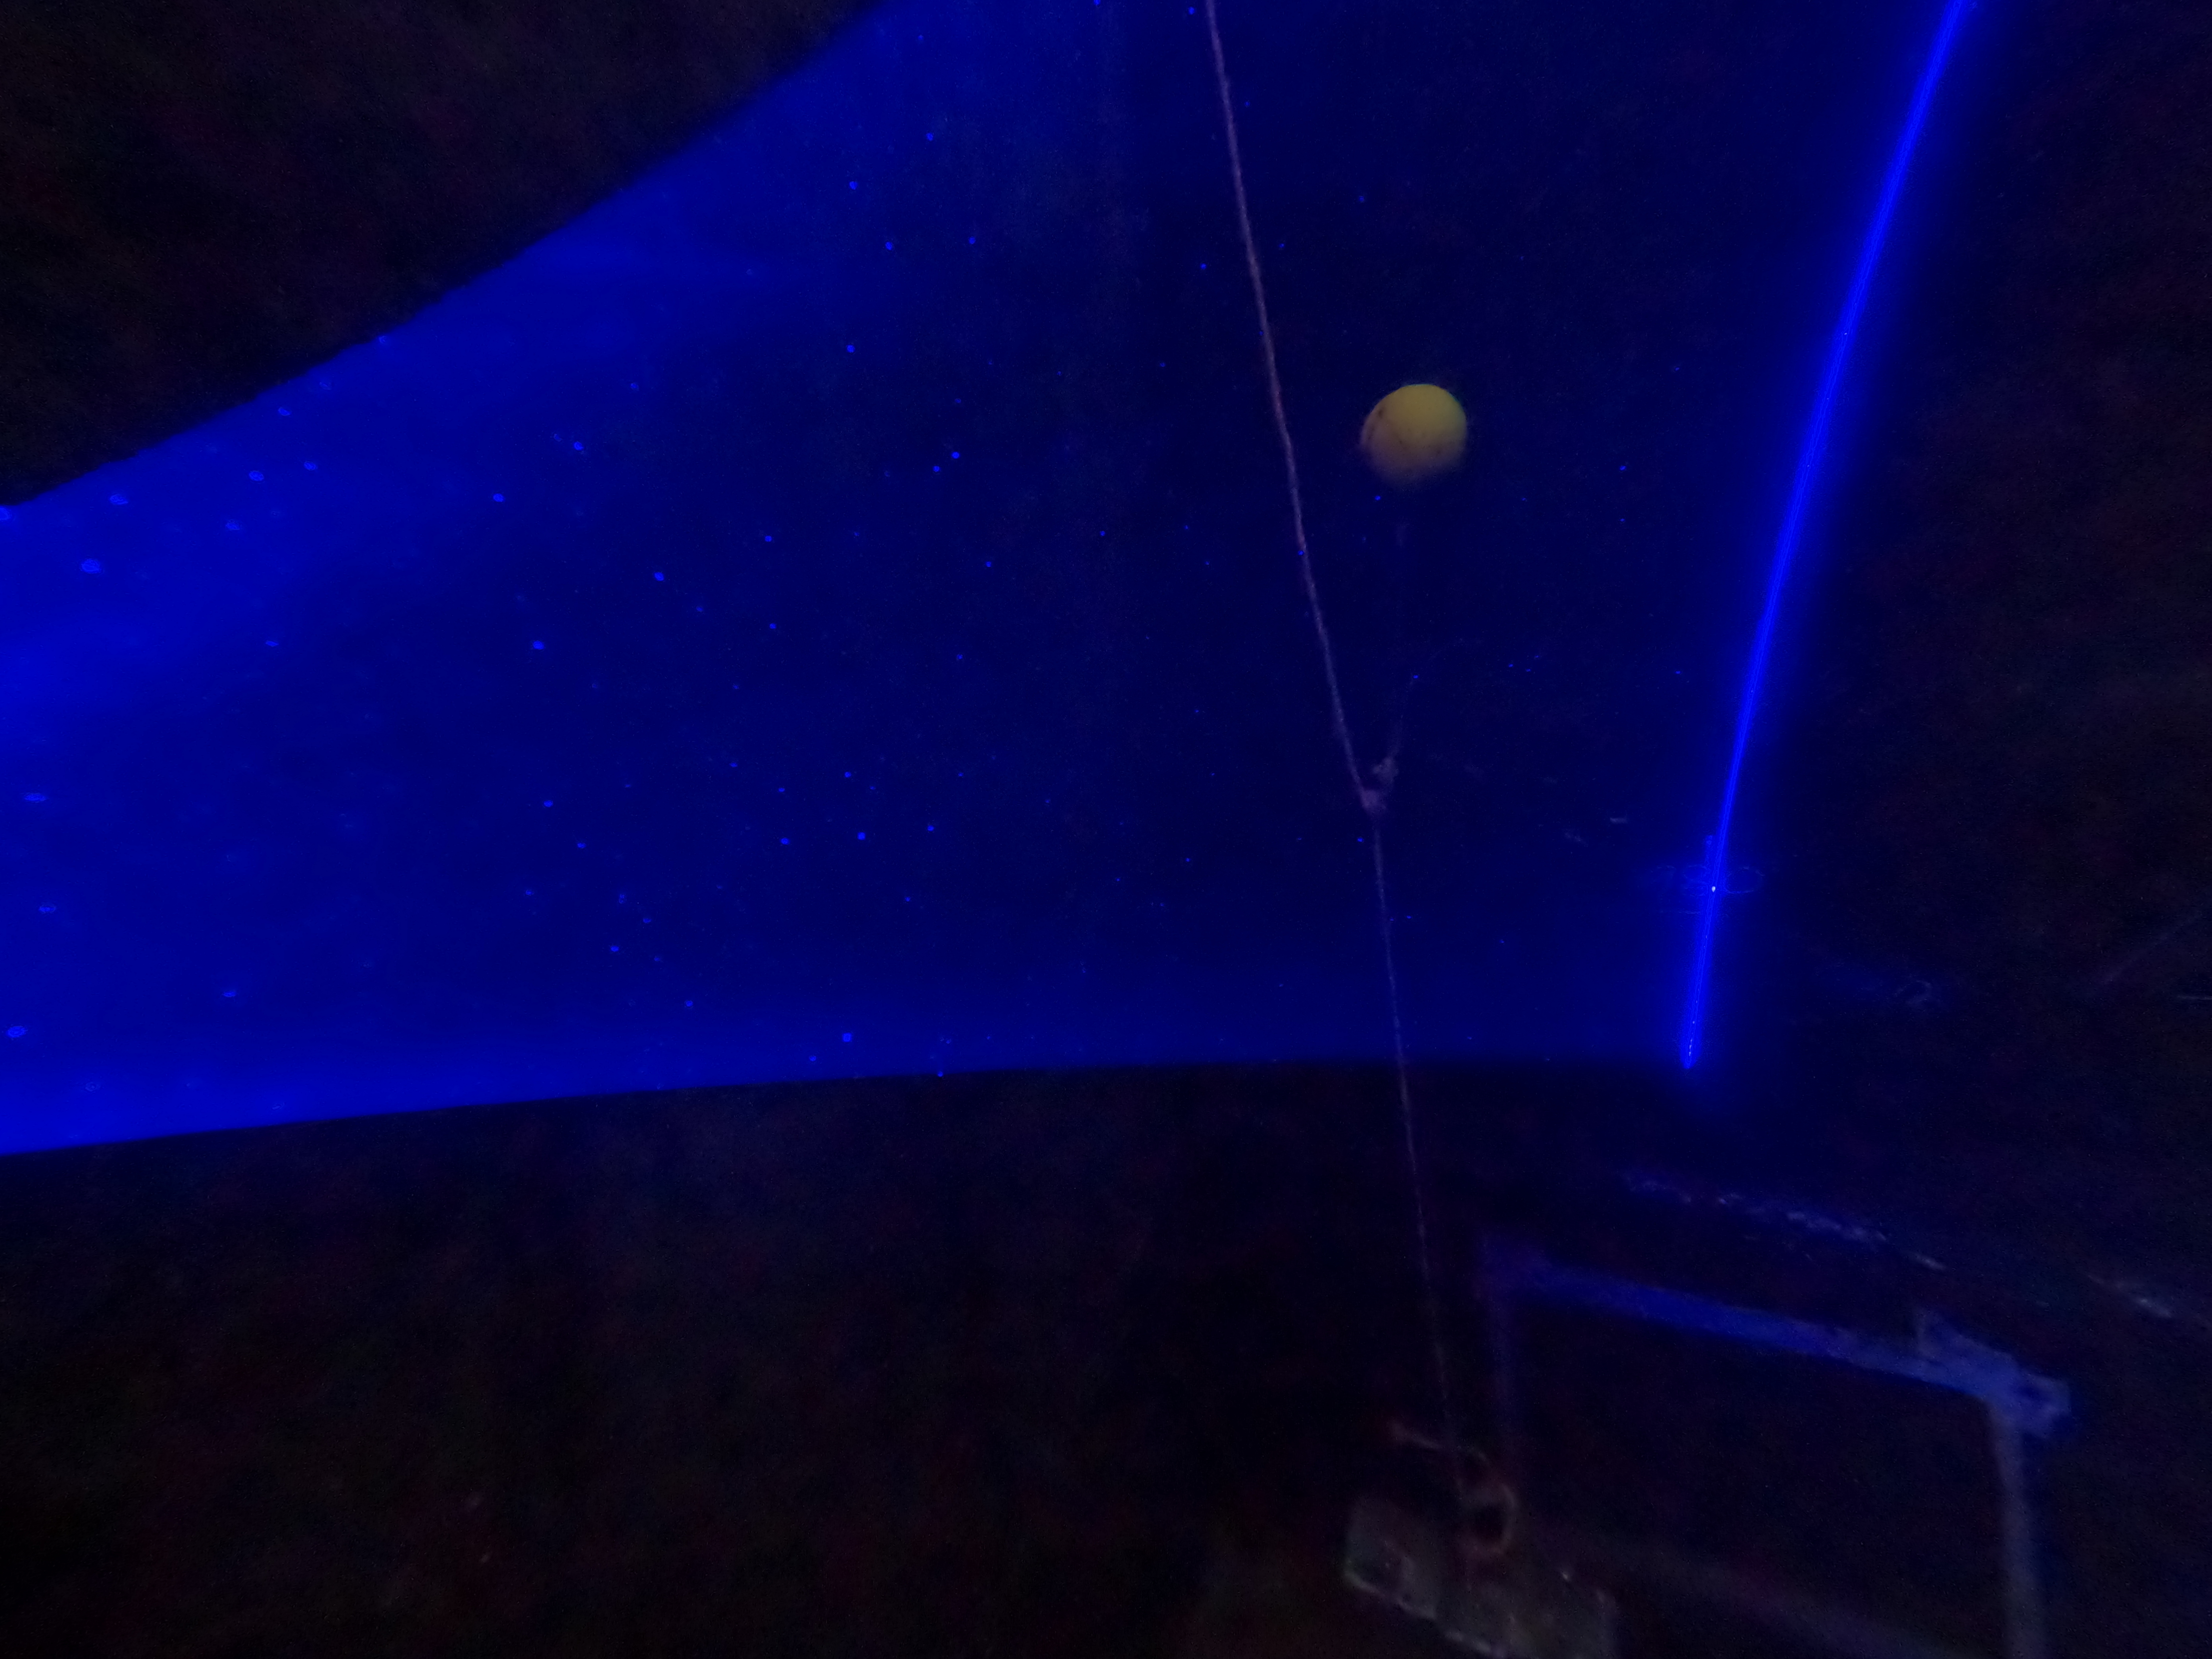

Supplement: Supplementary file 1393 [file G0032092.pdf › 11/G0032092.pdf]

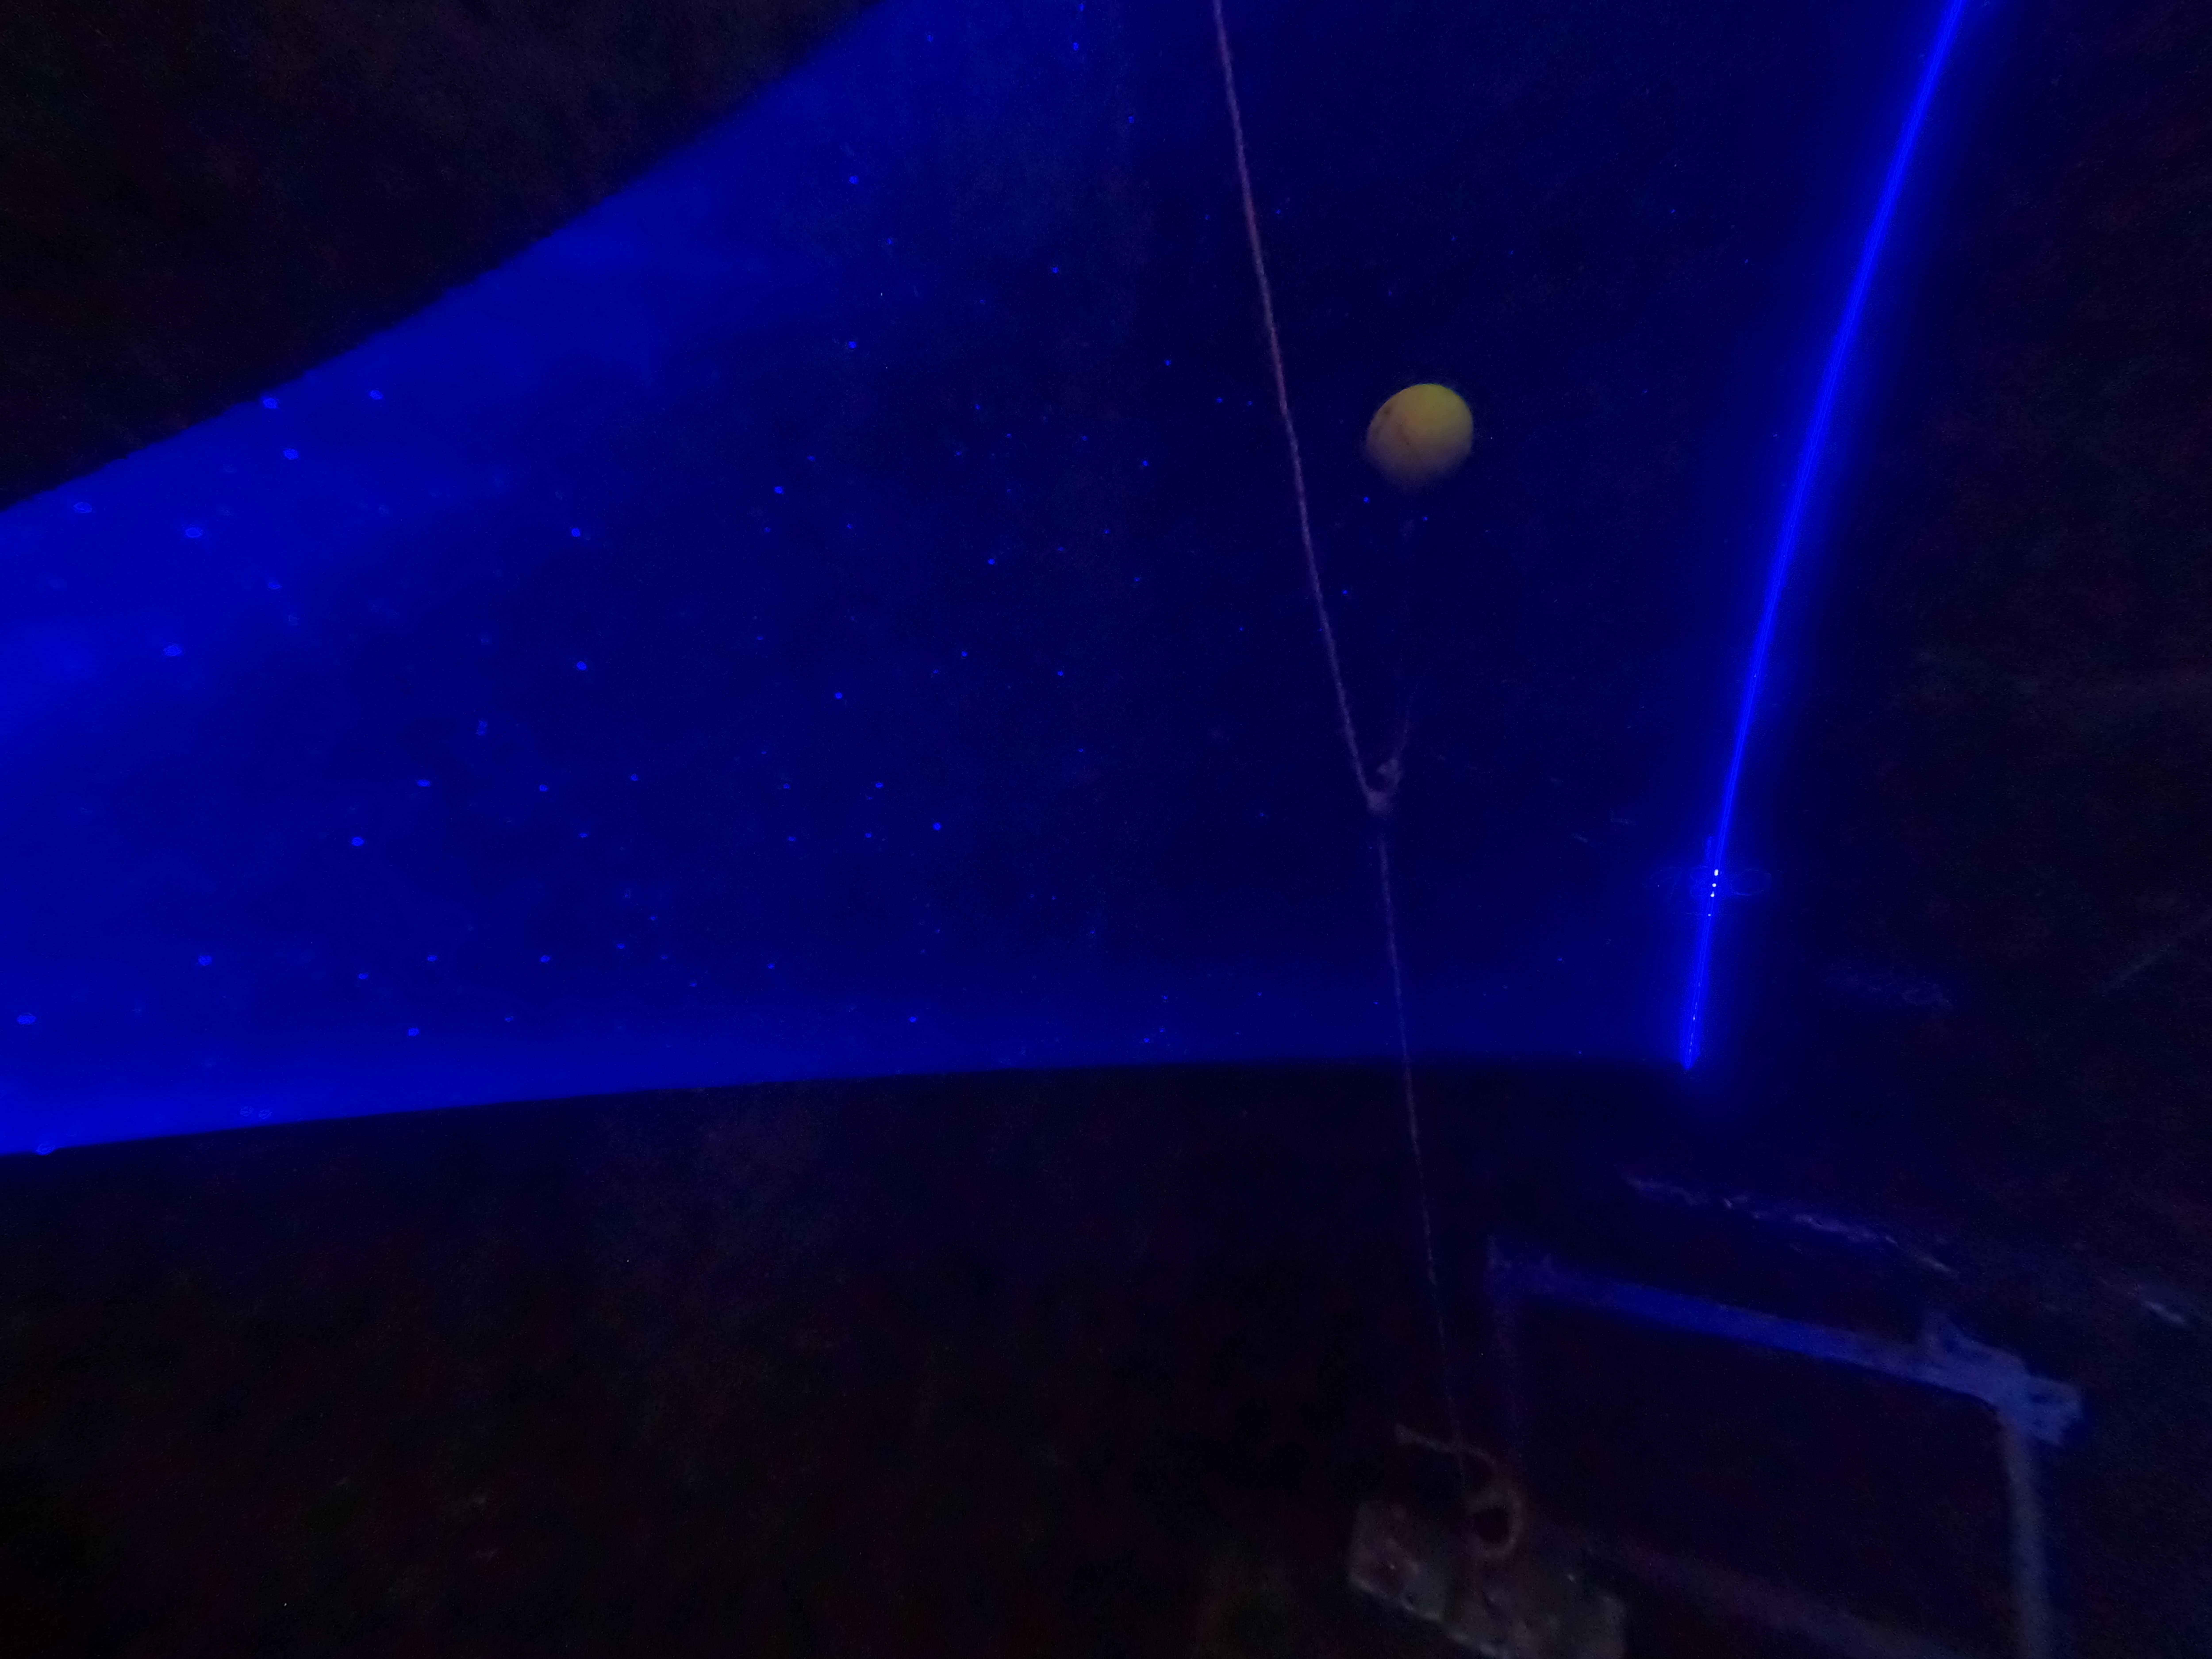

Supplement: Supplementary file 1394 [file G0032093.pdf › 11/G0032093.pdf]

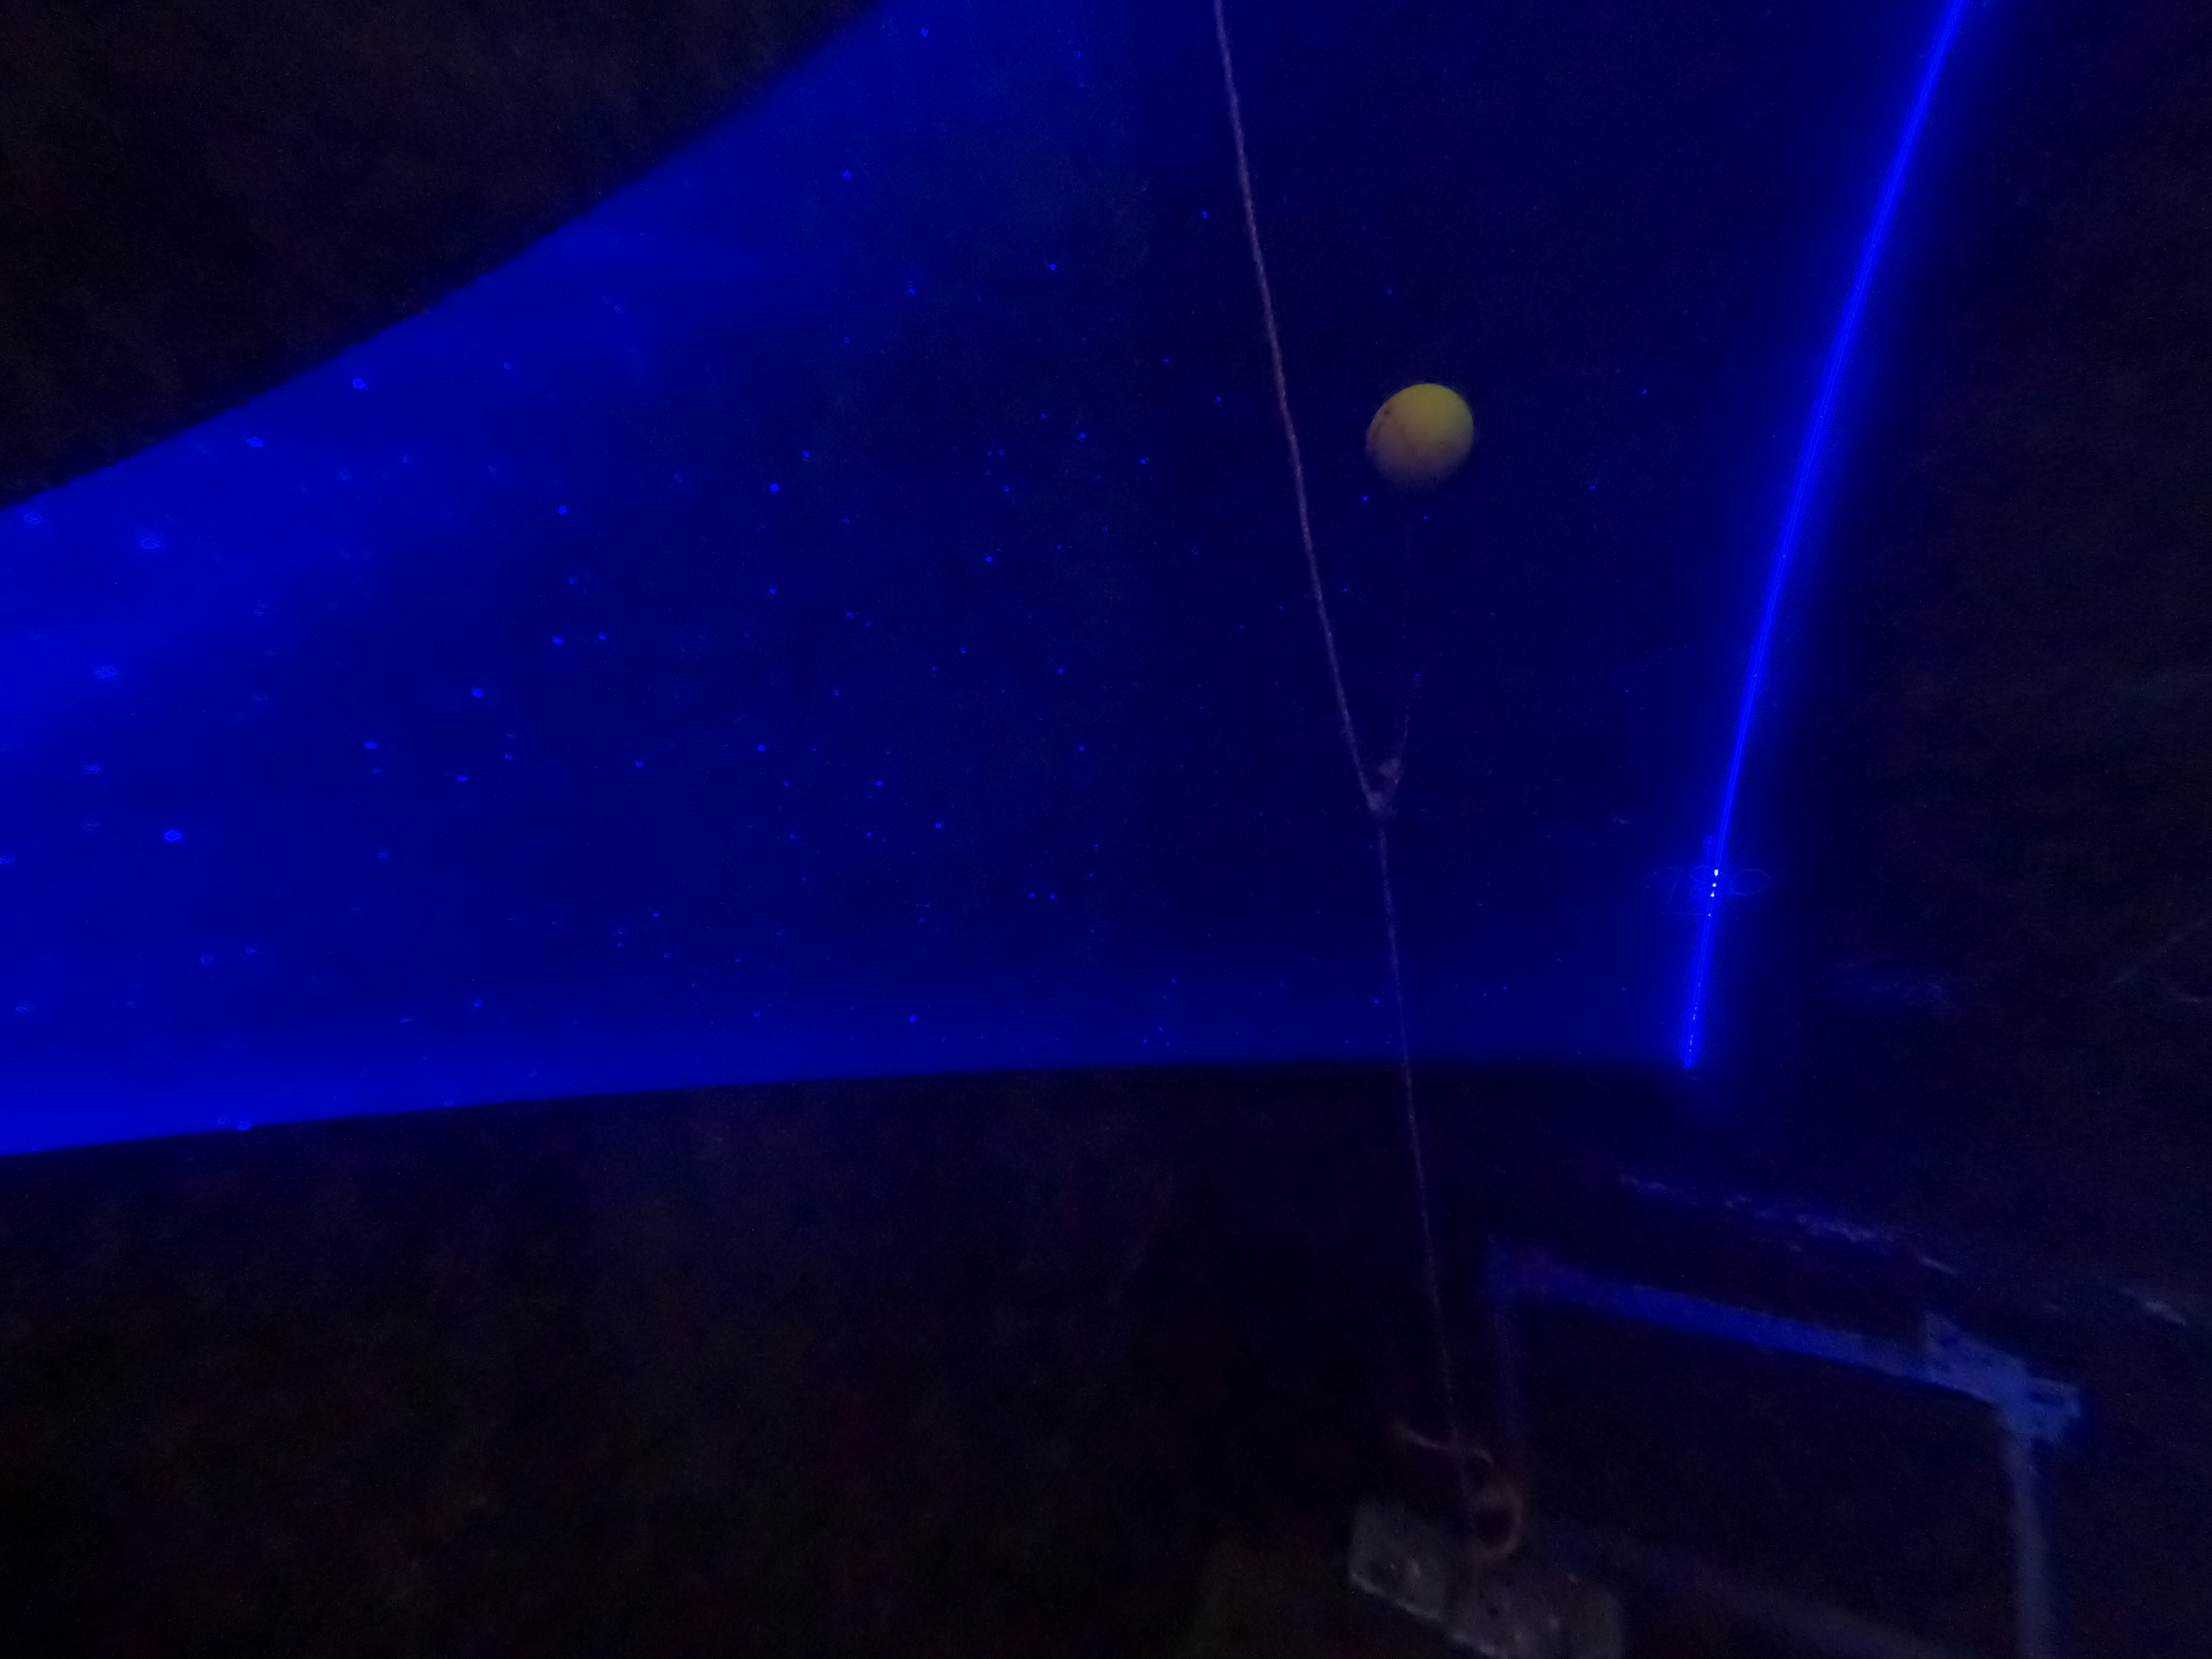

Supplement: Supplementary file 1395 [file G0032094.pdf › 11/G0032094.pdf]

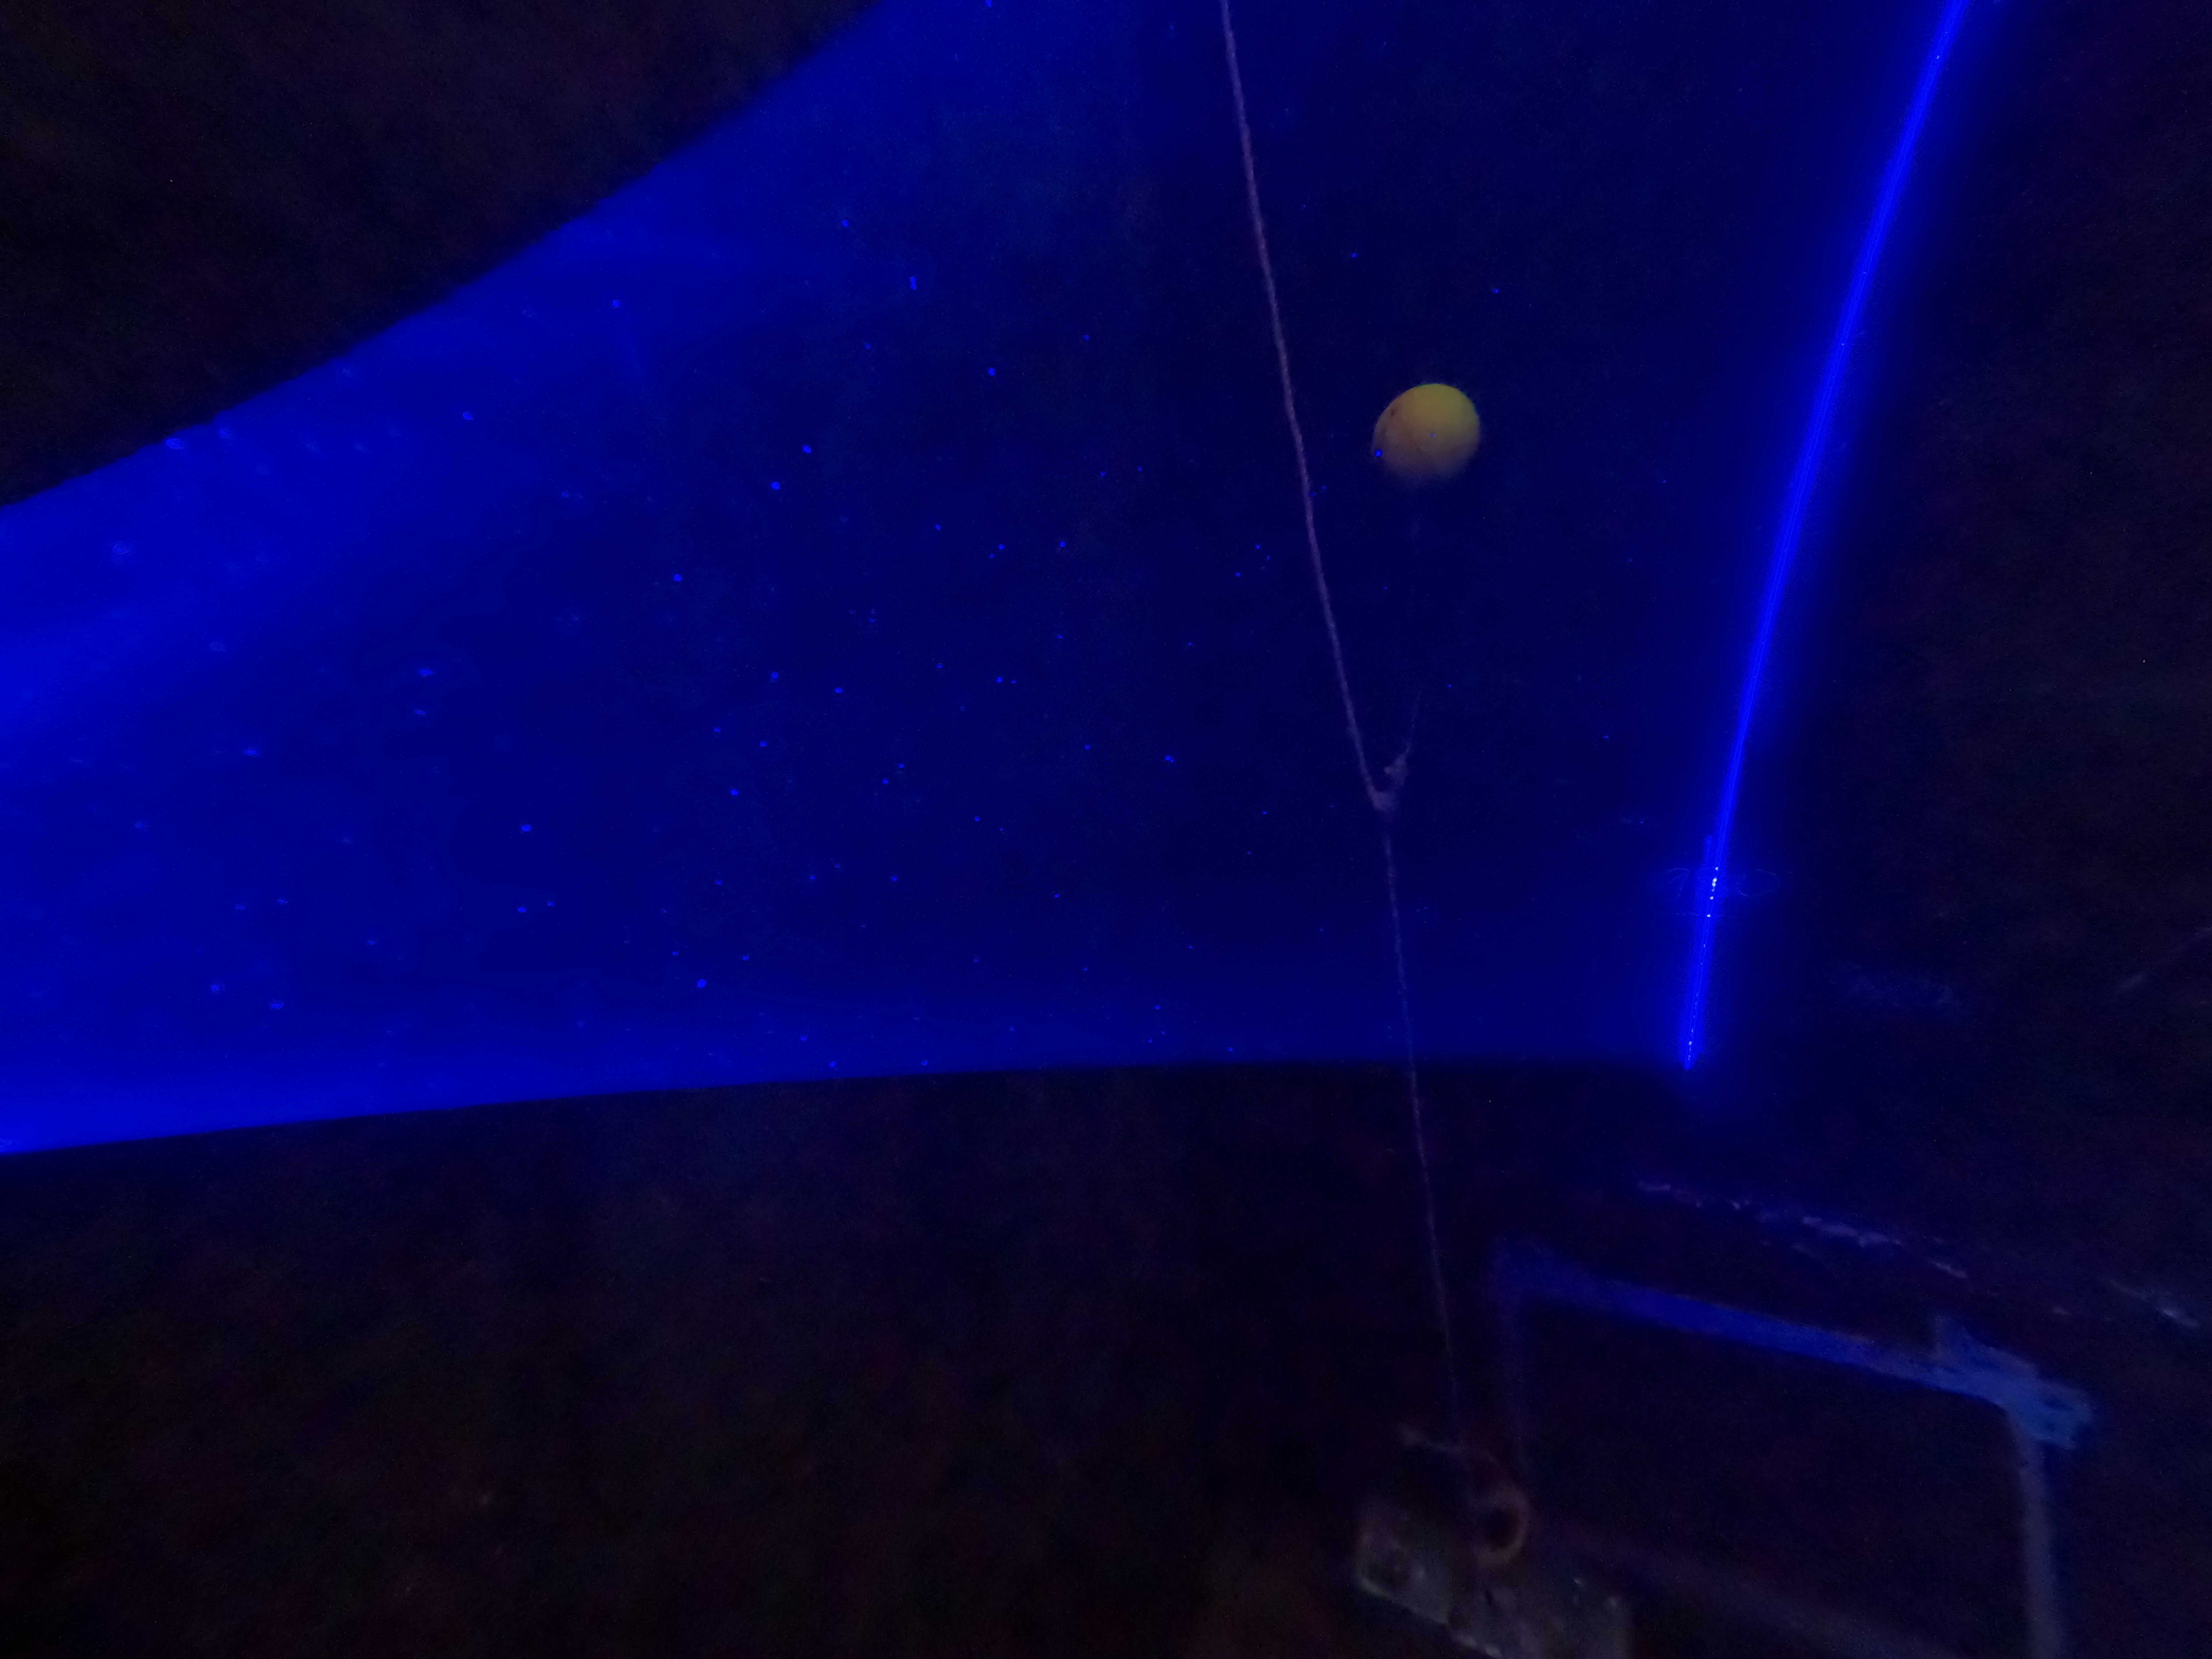

Supplement: Supplementary file 1396 [file G0032095.pdf › 11/G0032095.pdf]

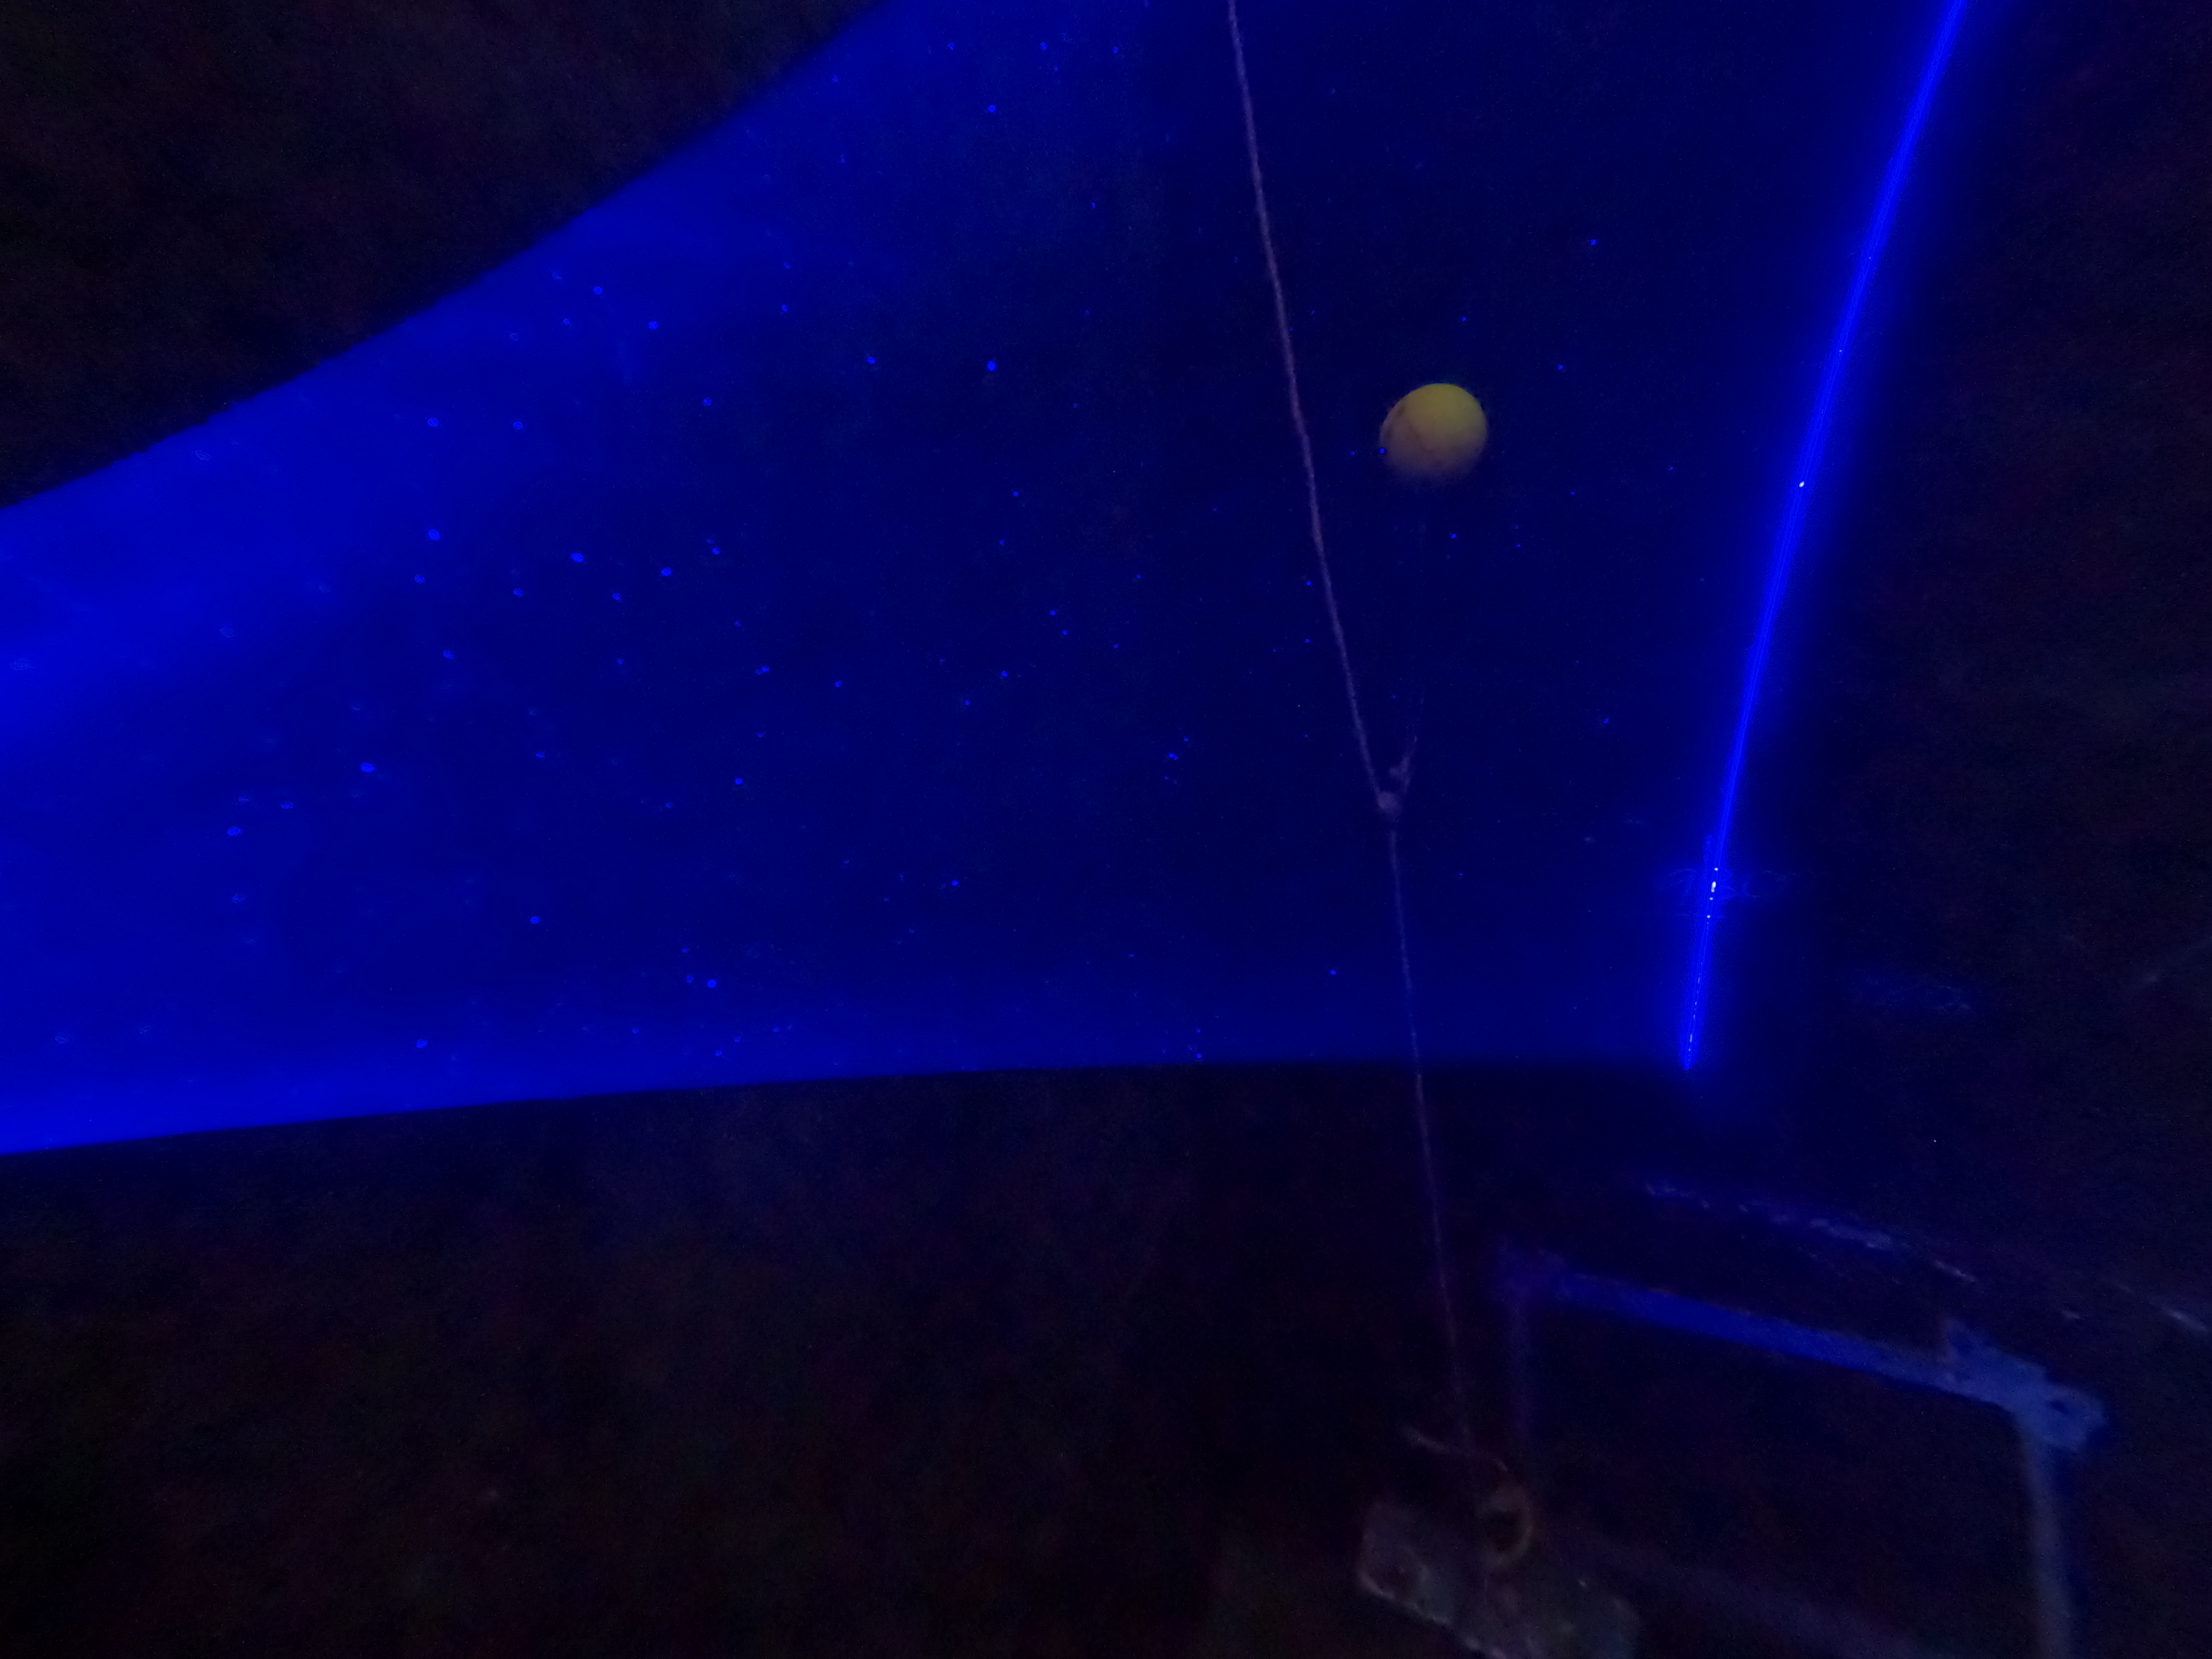

Supplement: Supplementary file 1398 [file G0032097.pdf › 11/G0032097.pdf]

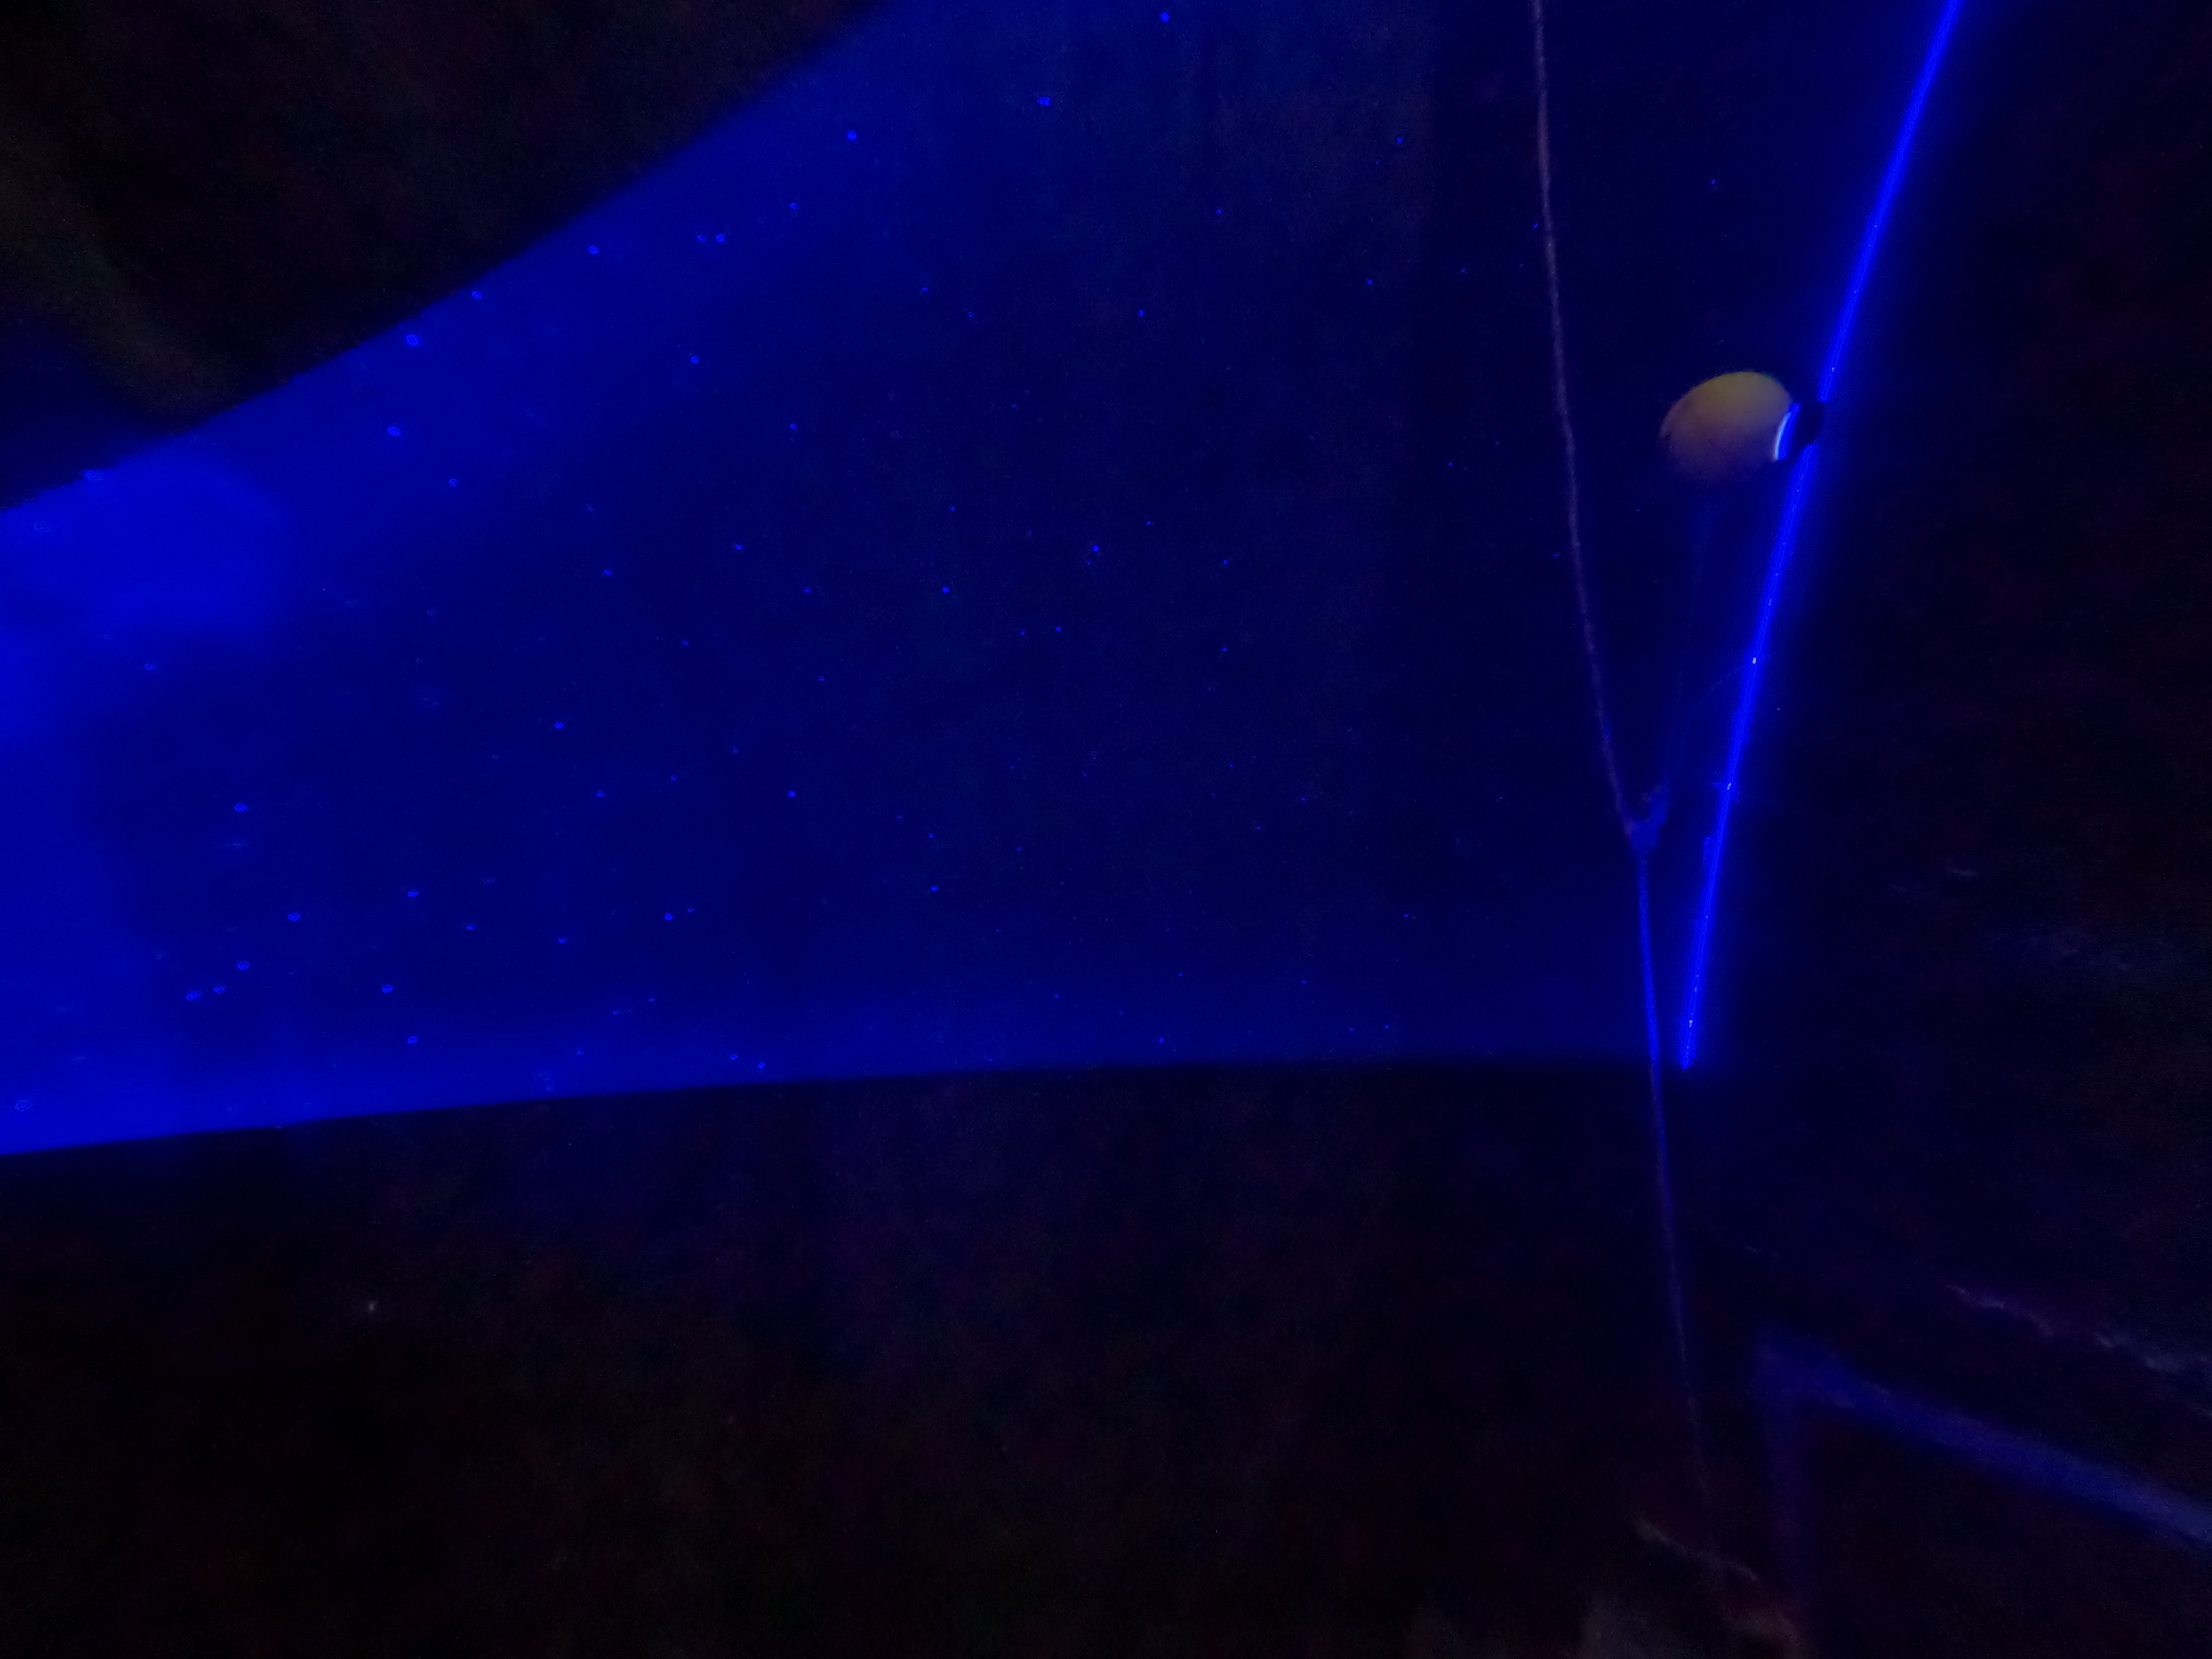

Supplement: Supplementary file 1461 [file G0032160.pdf › 11/G0032160.pdf]

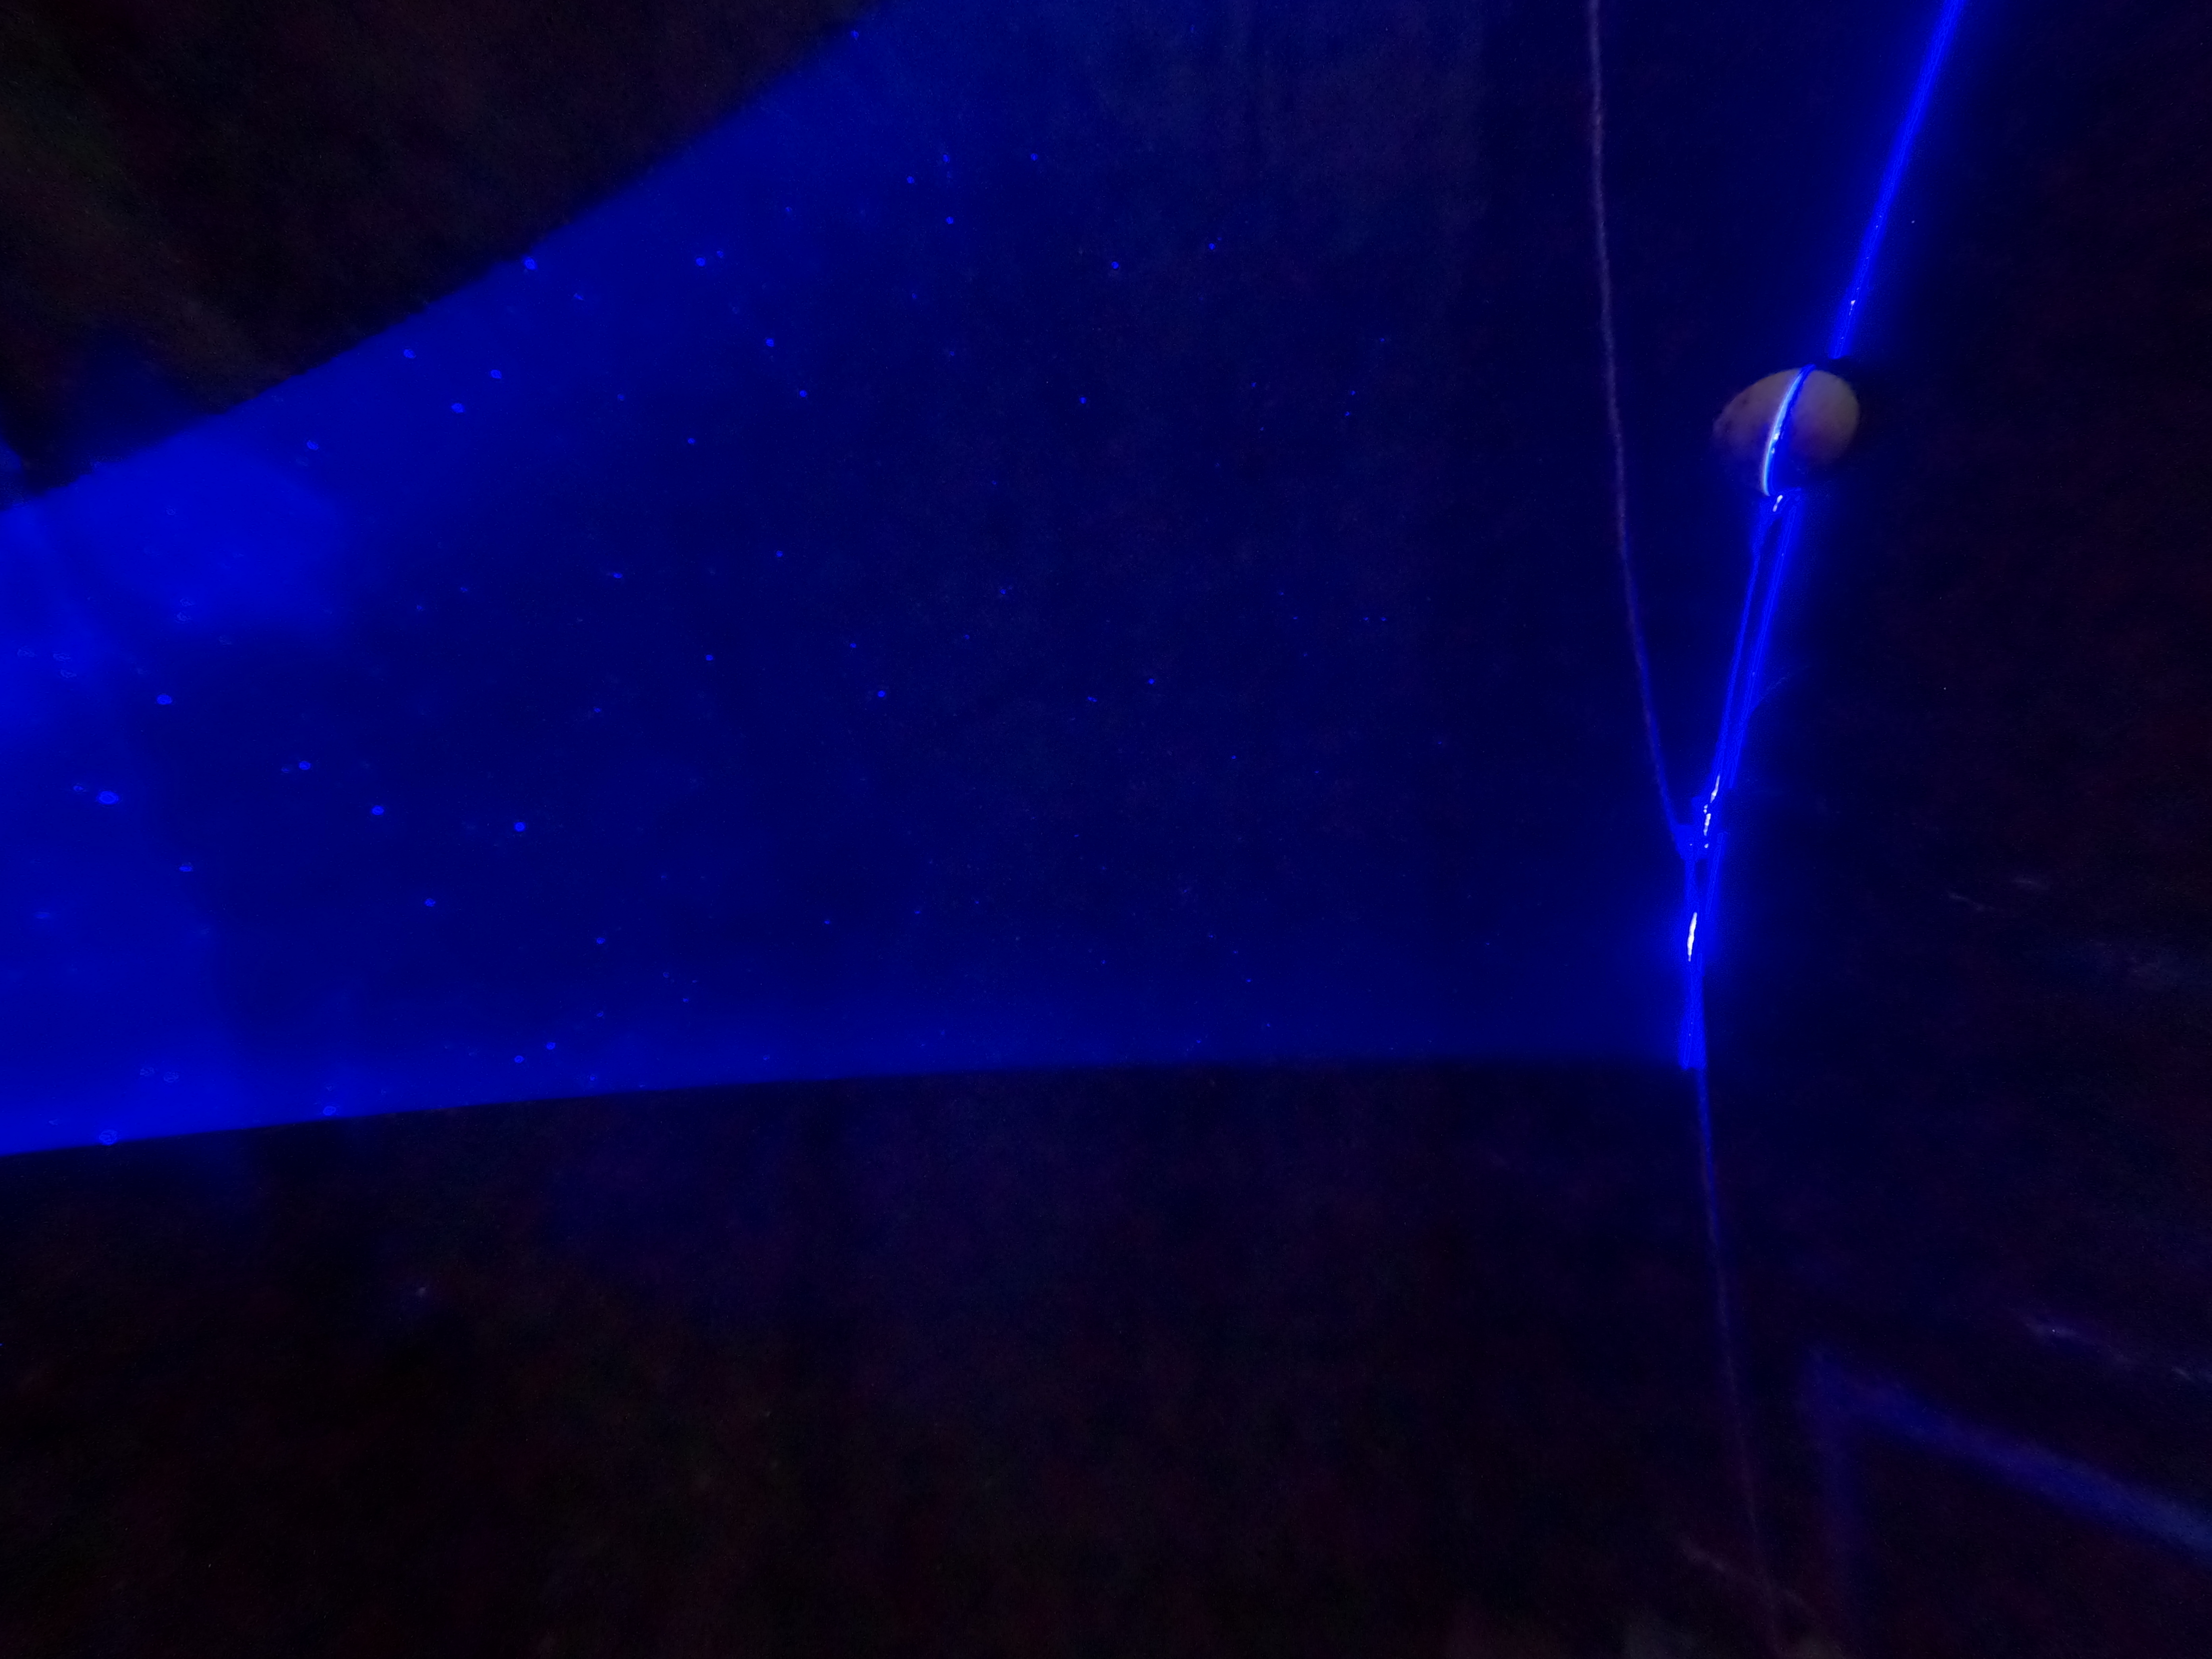

Supplement: Supplementary file 1471 [file G0032170.pdf › 11/G0032170.pdf]

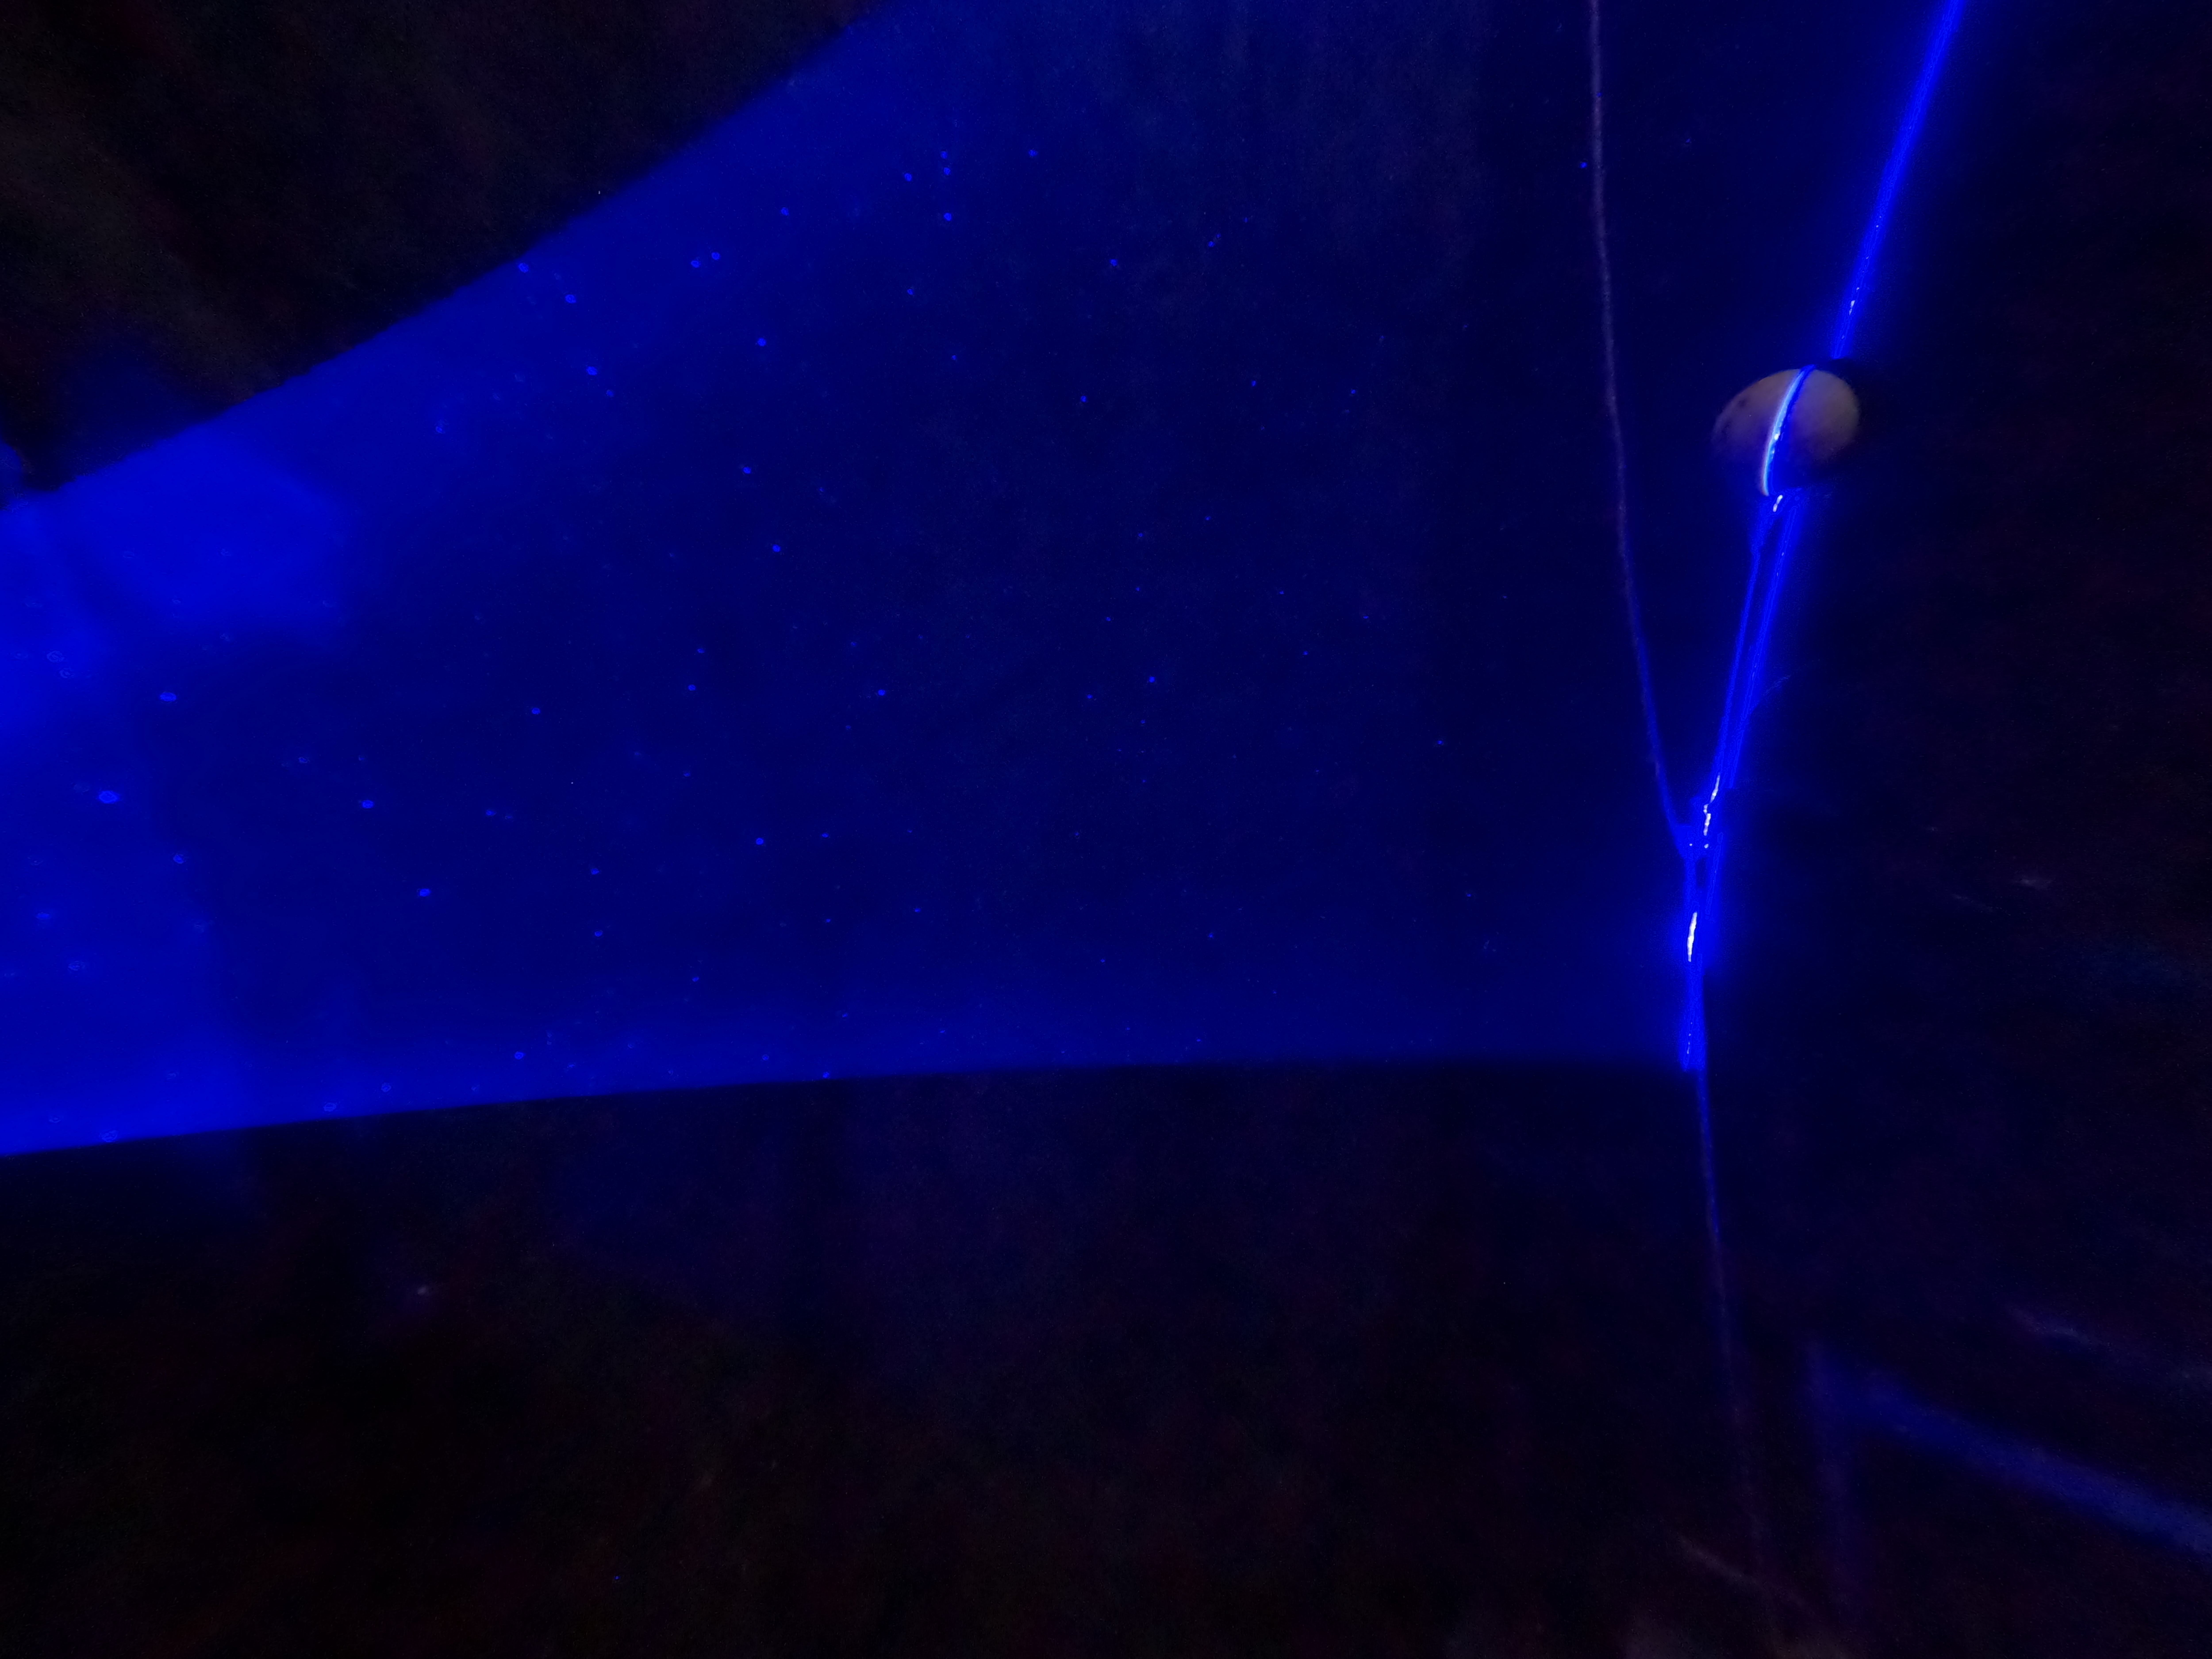

Supplement: Supplementary file 1472 [file G0032171.pdf › 11/G0032171.pdf]

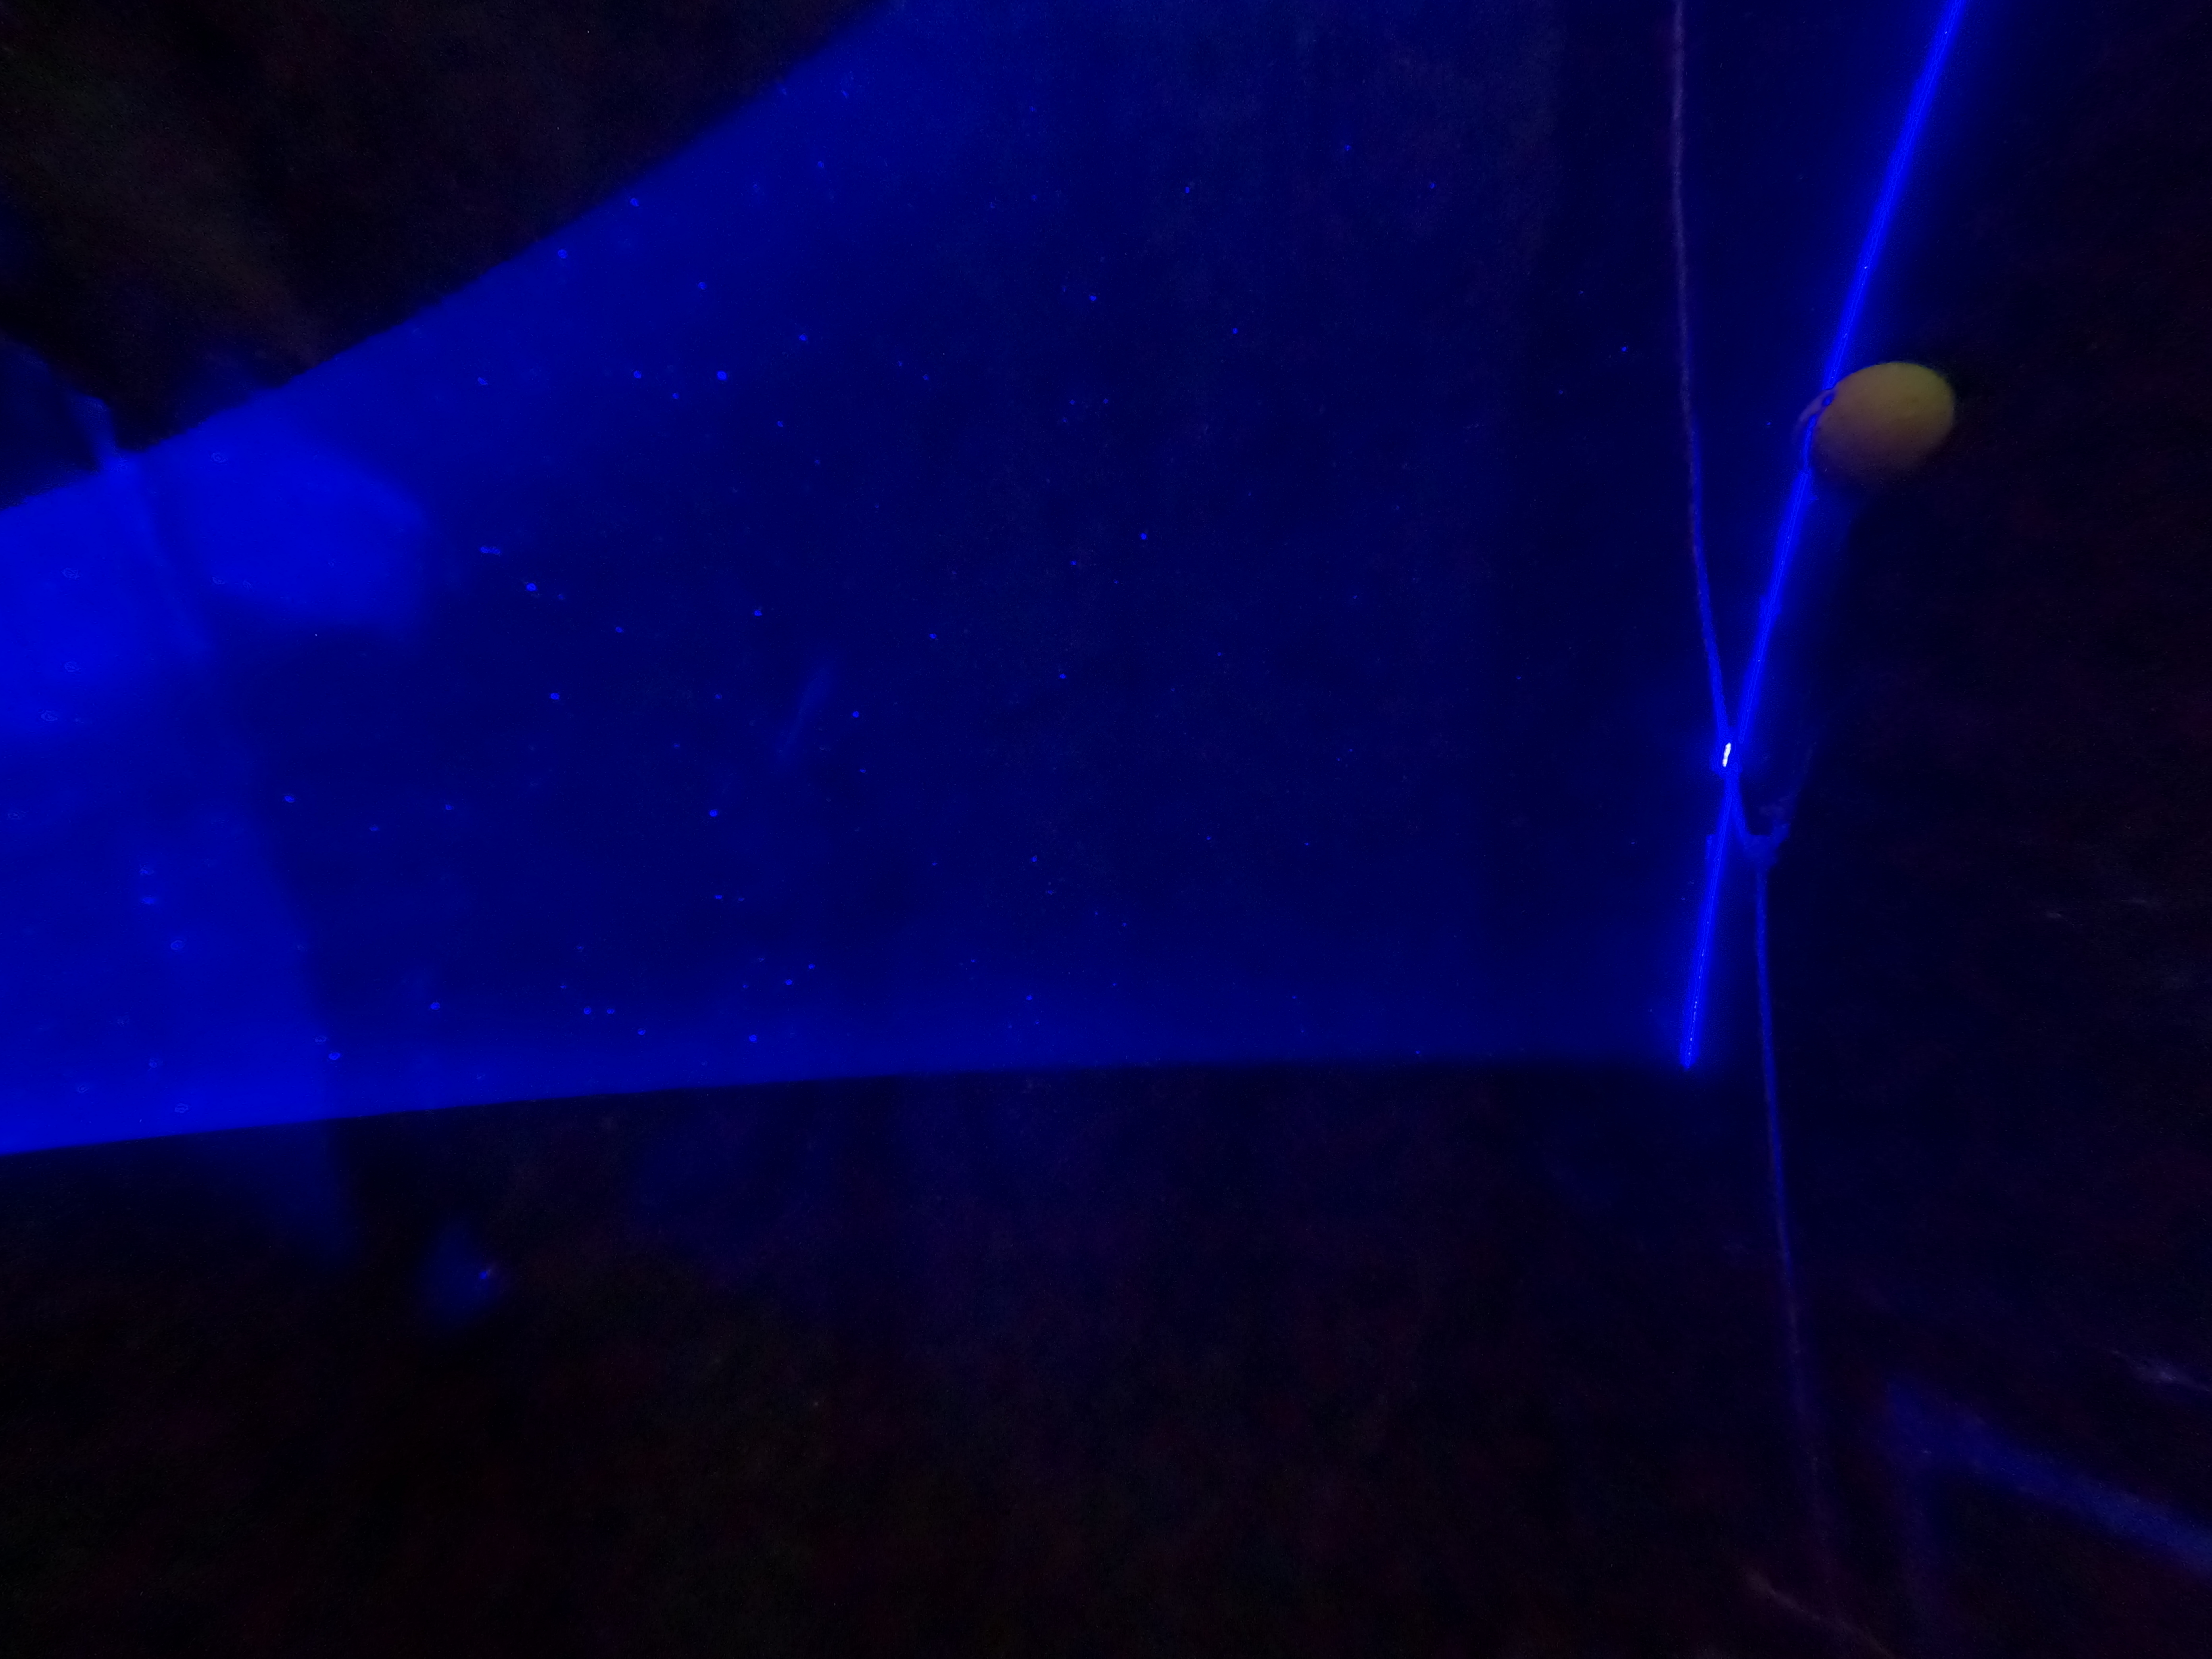

Supplement: Supplementary file 1486 [file G0032185.pdf › 11/G0032185.pdf]

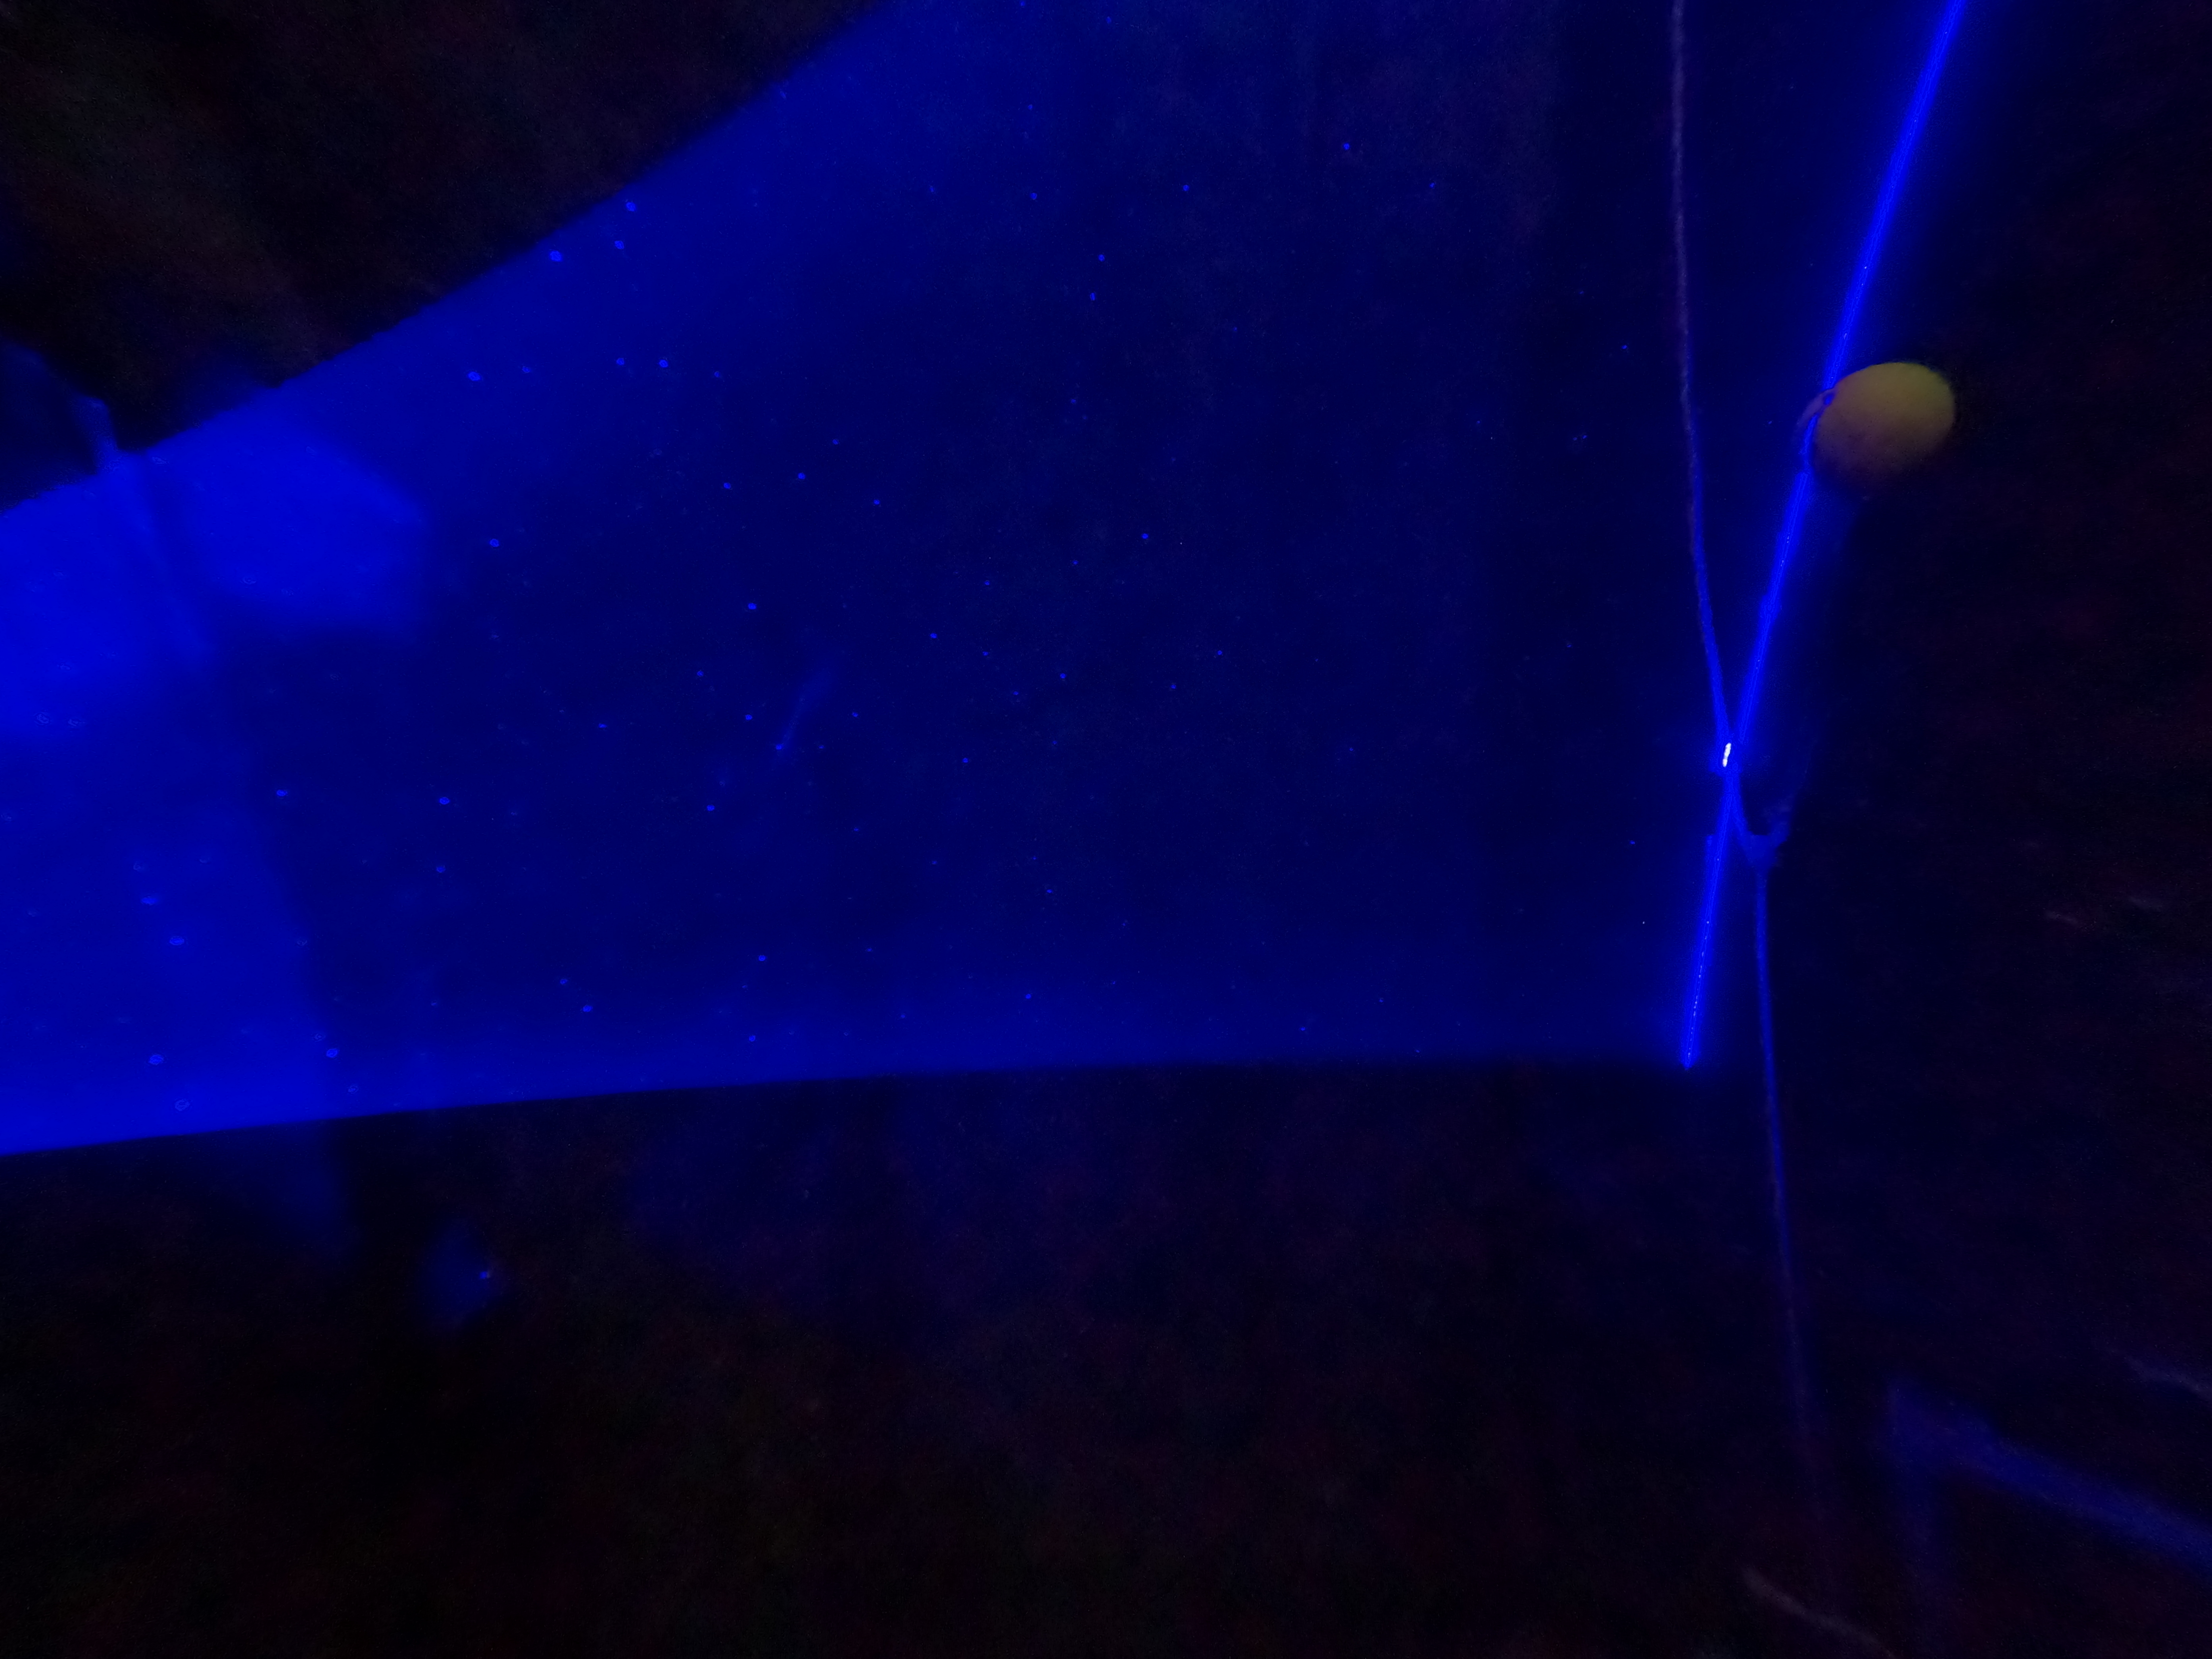

Supplement: Supplementary file 1487 [file G0032186.pdf › 11/G0032186.pdf]

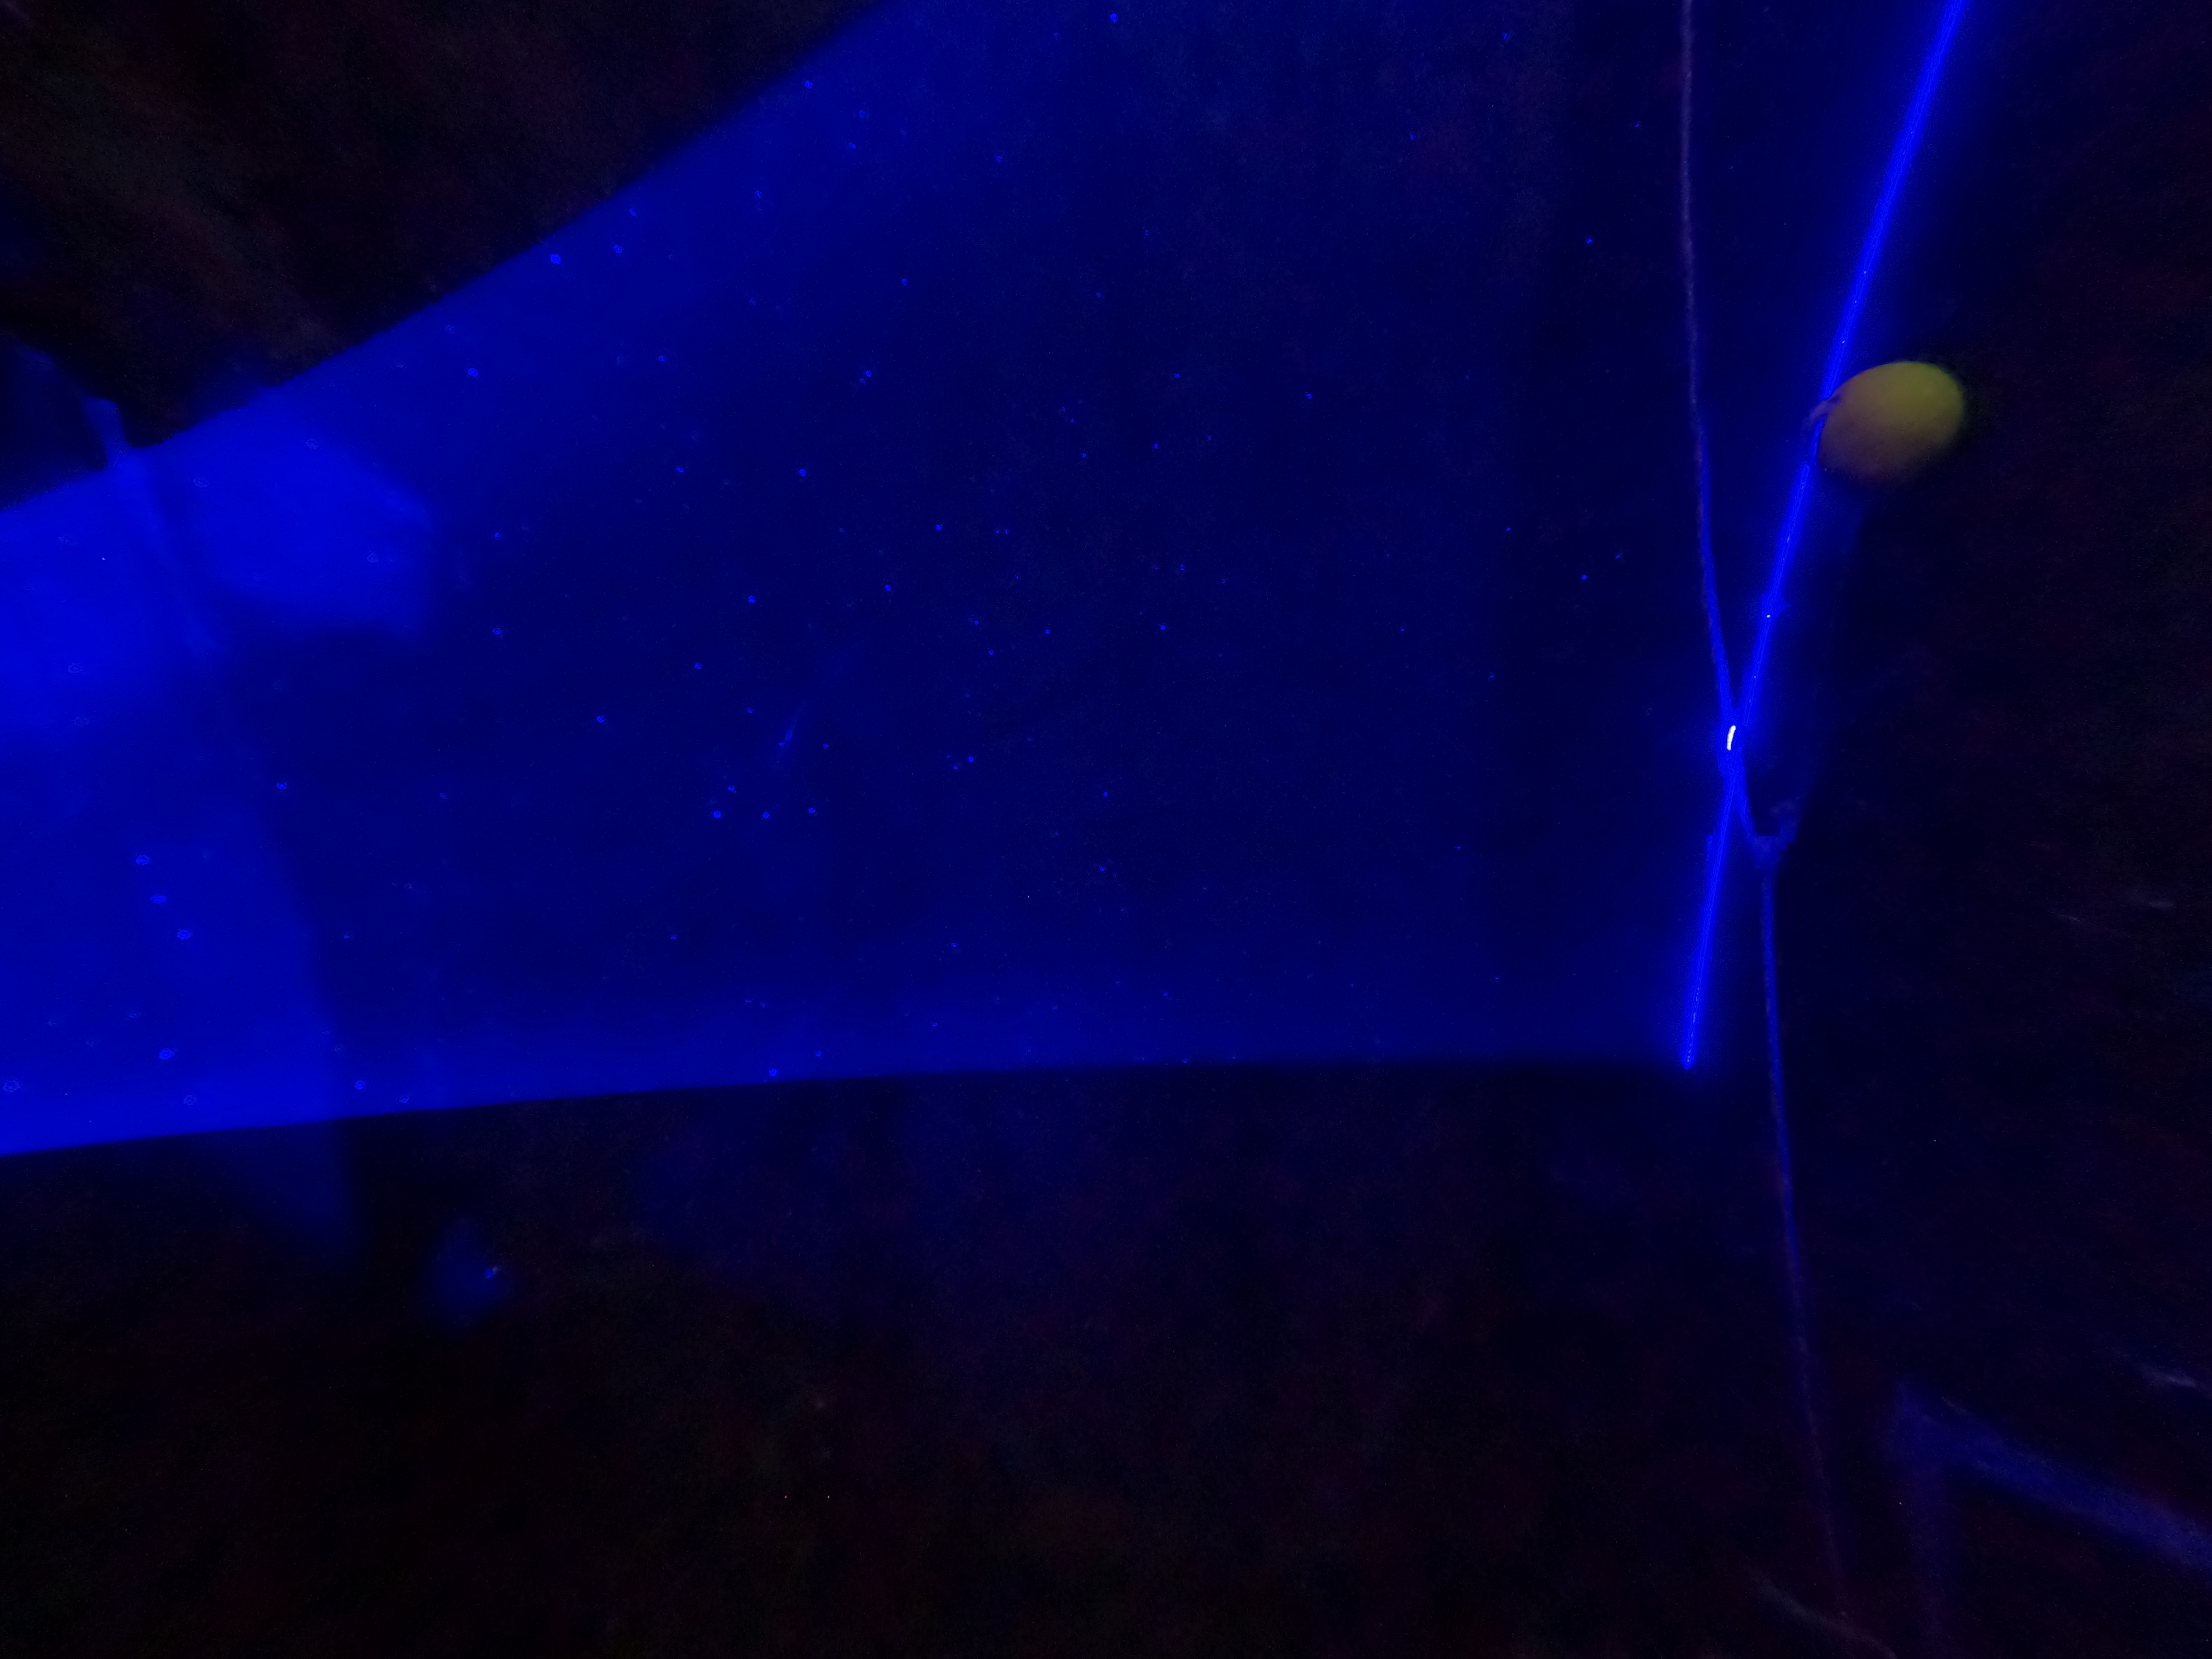

Supplement: Supplementary file 1488 [file G0032187.pdf › 11/G0032187.pdf]

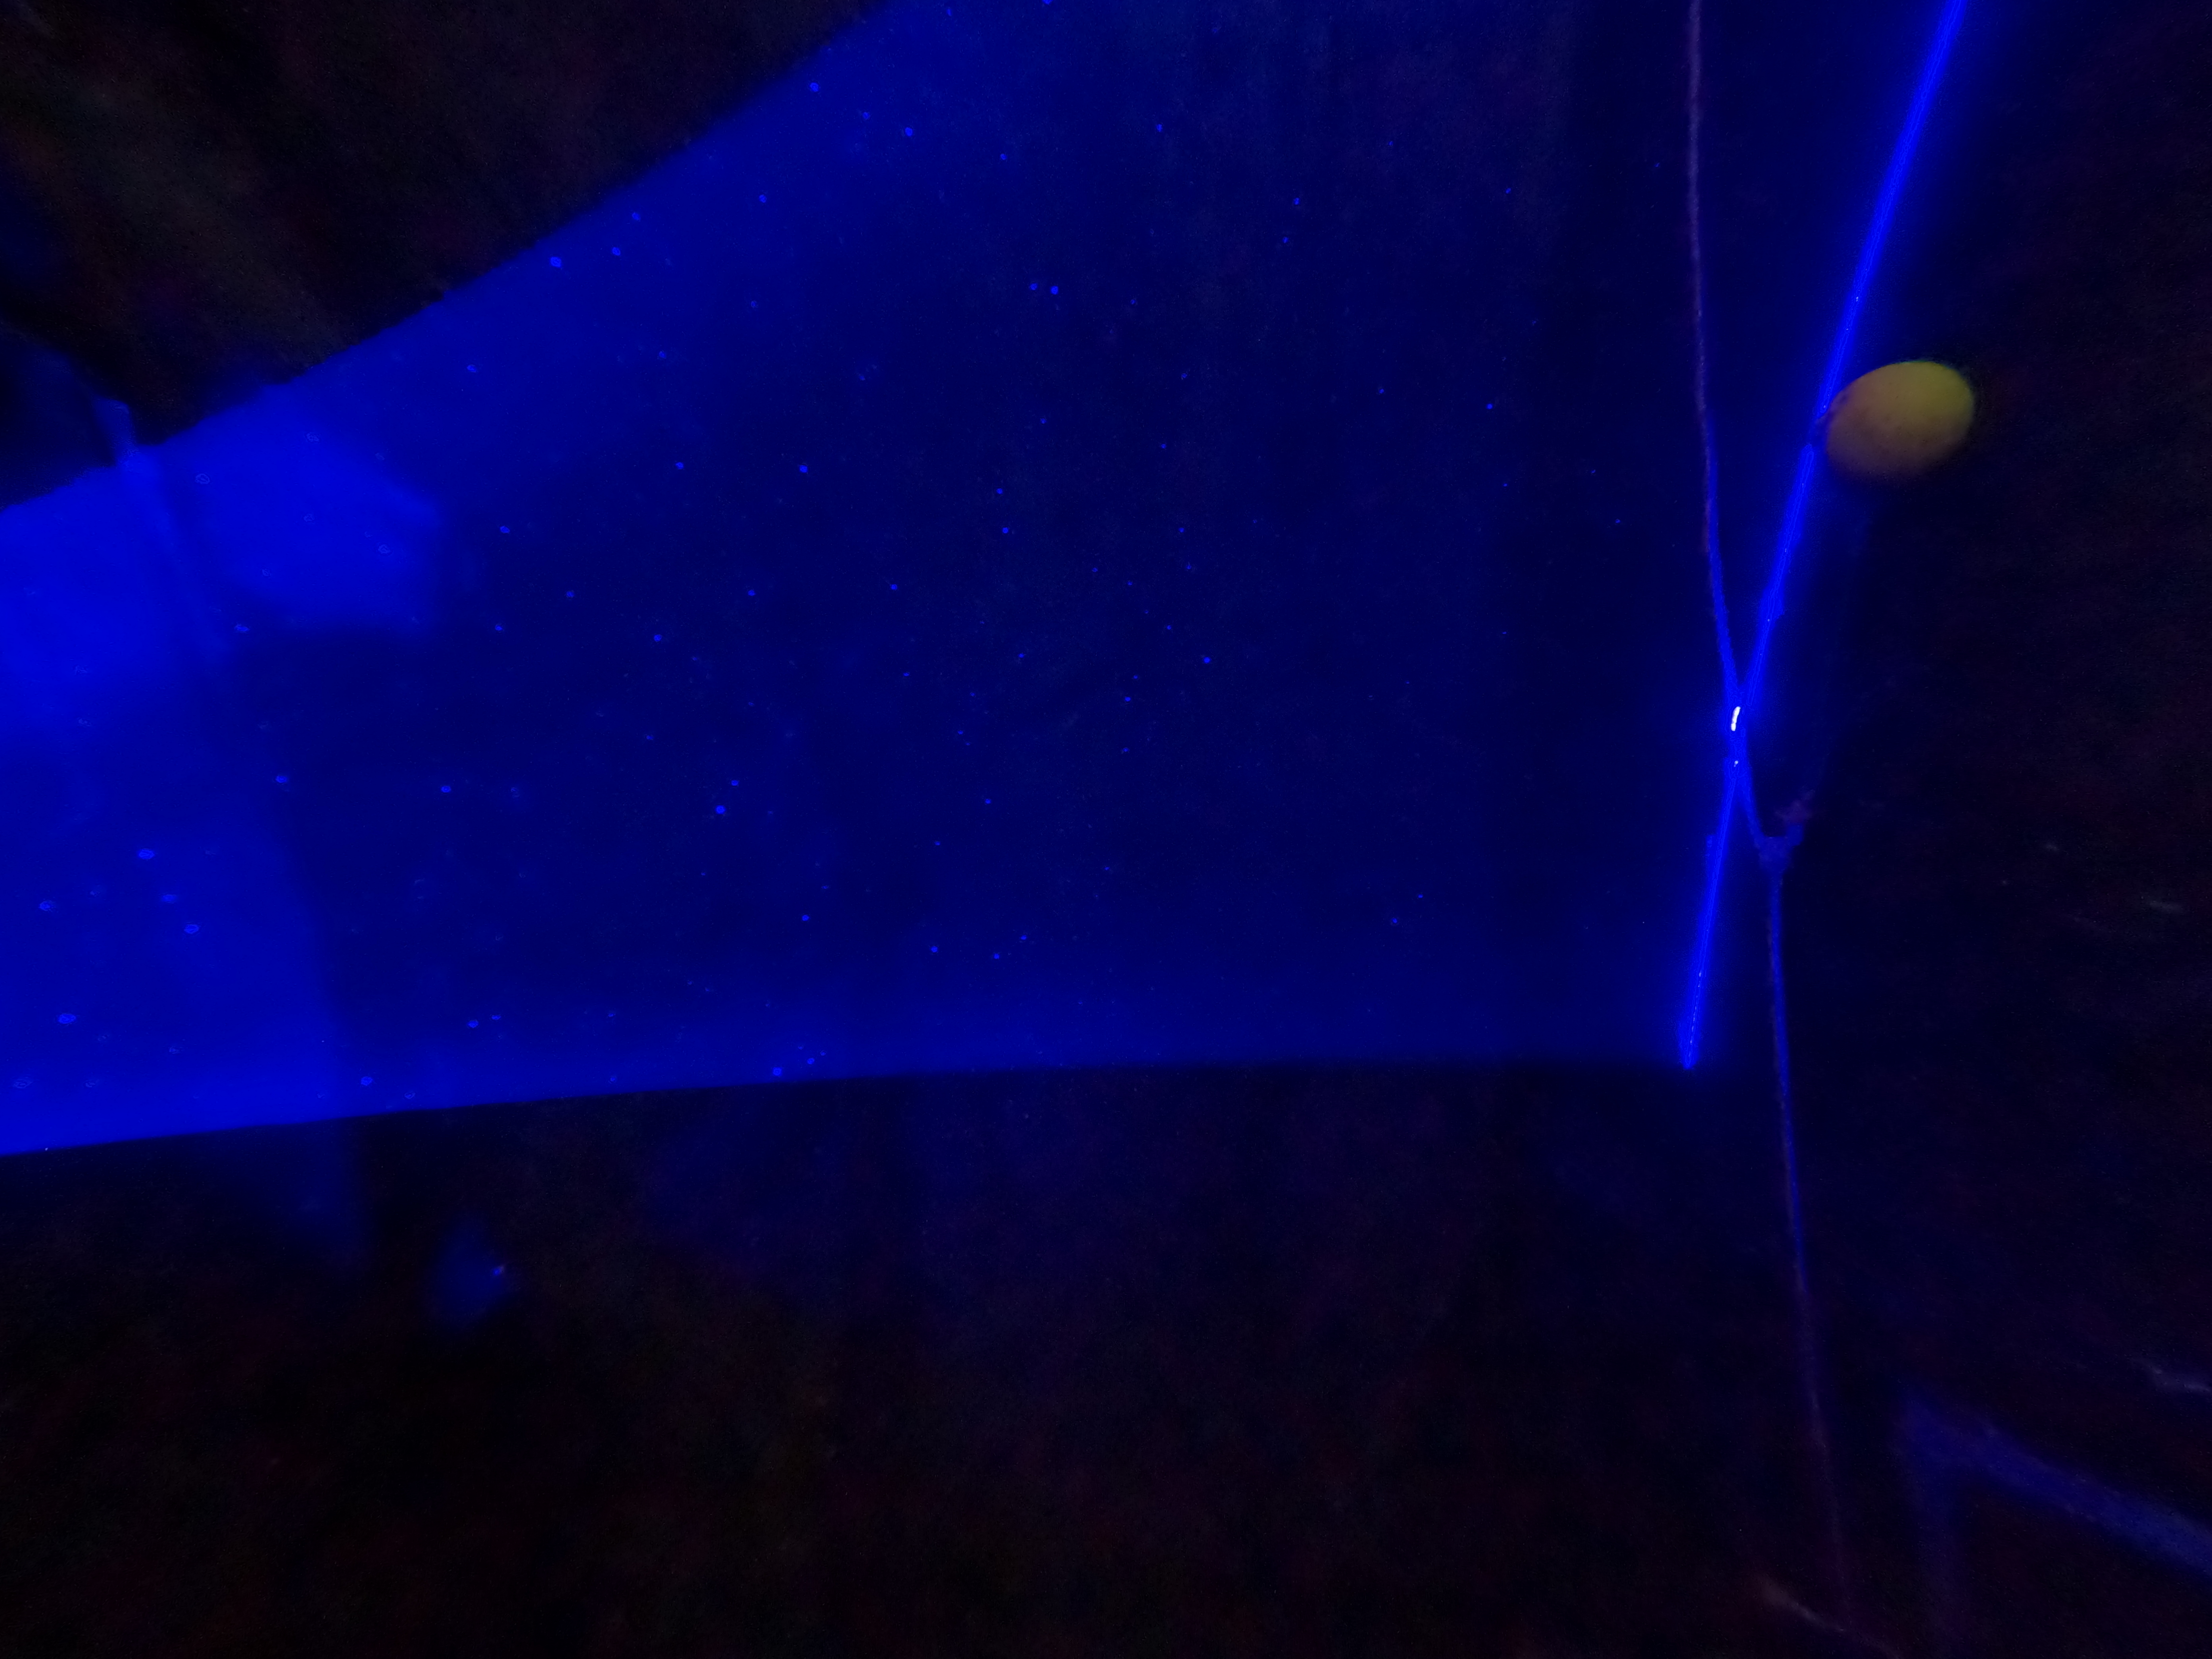

Supplement: Supplementary file 1489 [file G0032188.pdf › 11/G0032188.pdf]

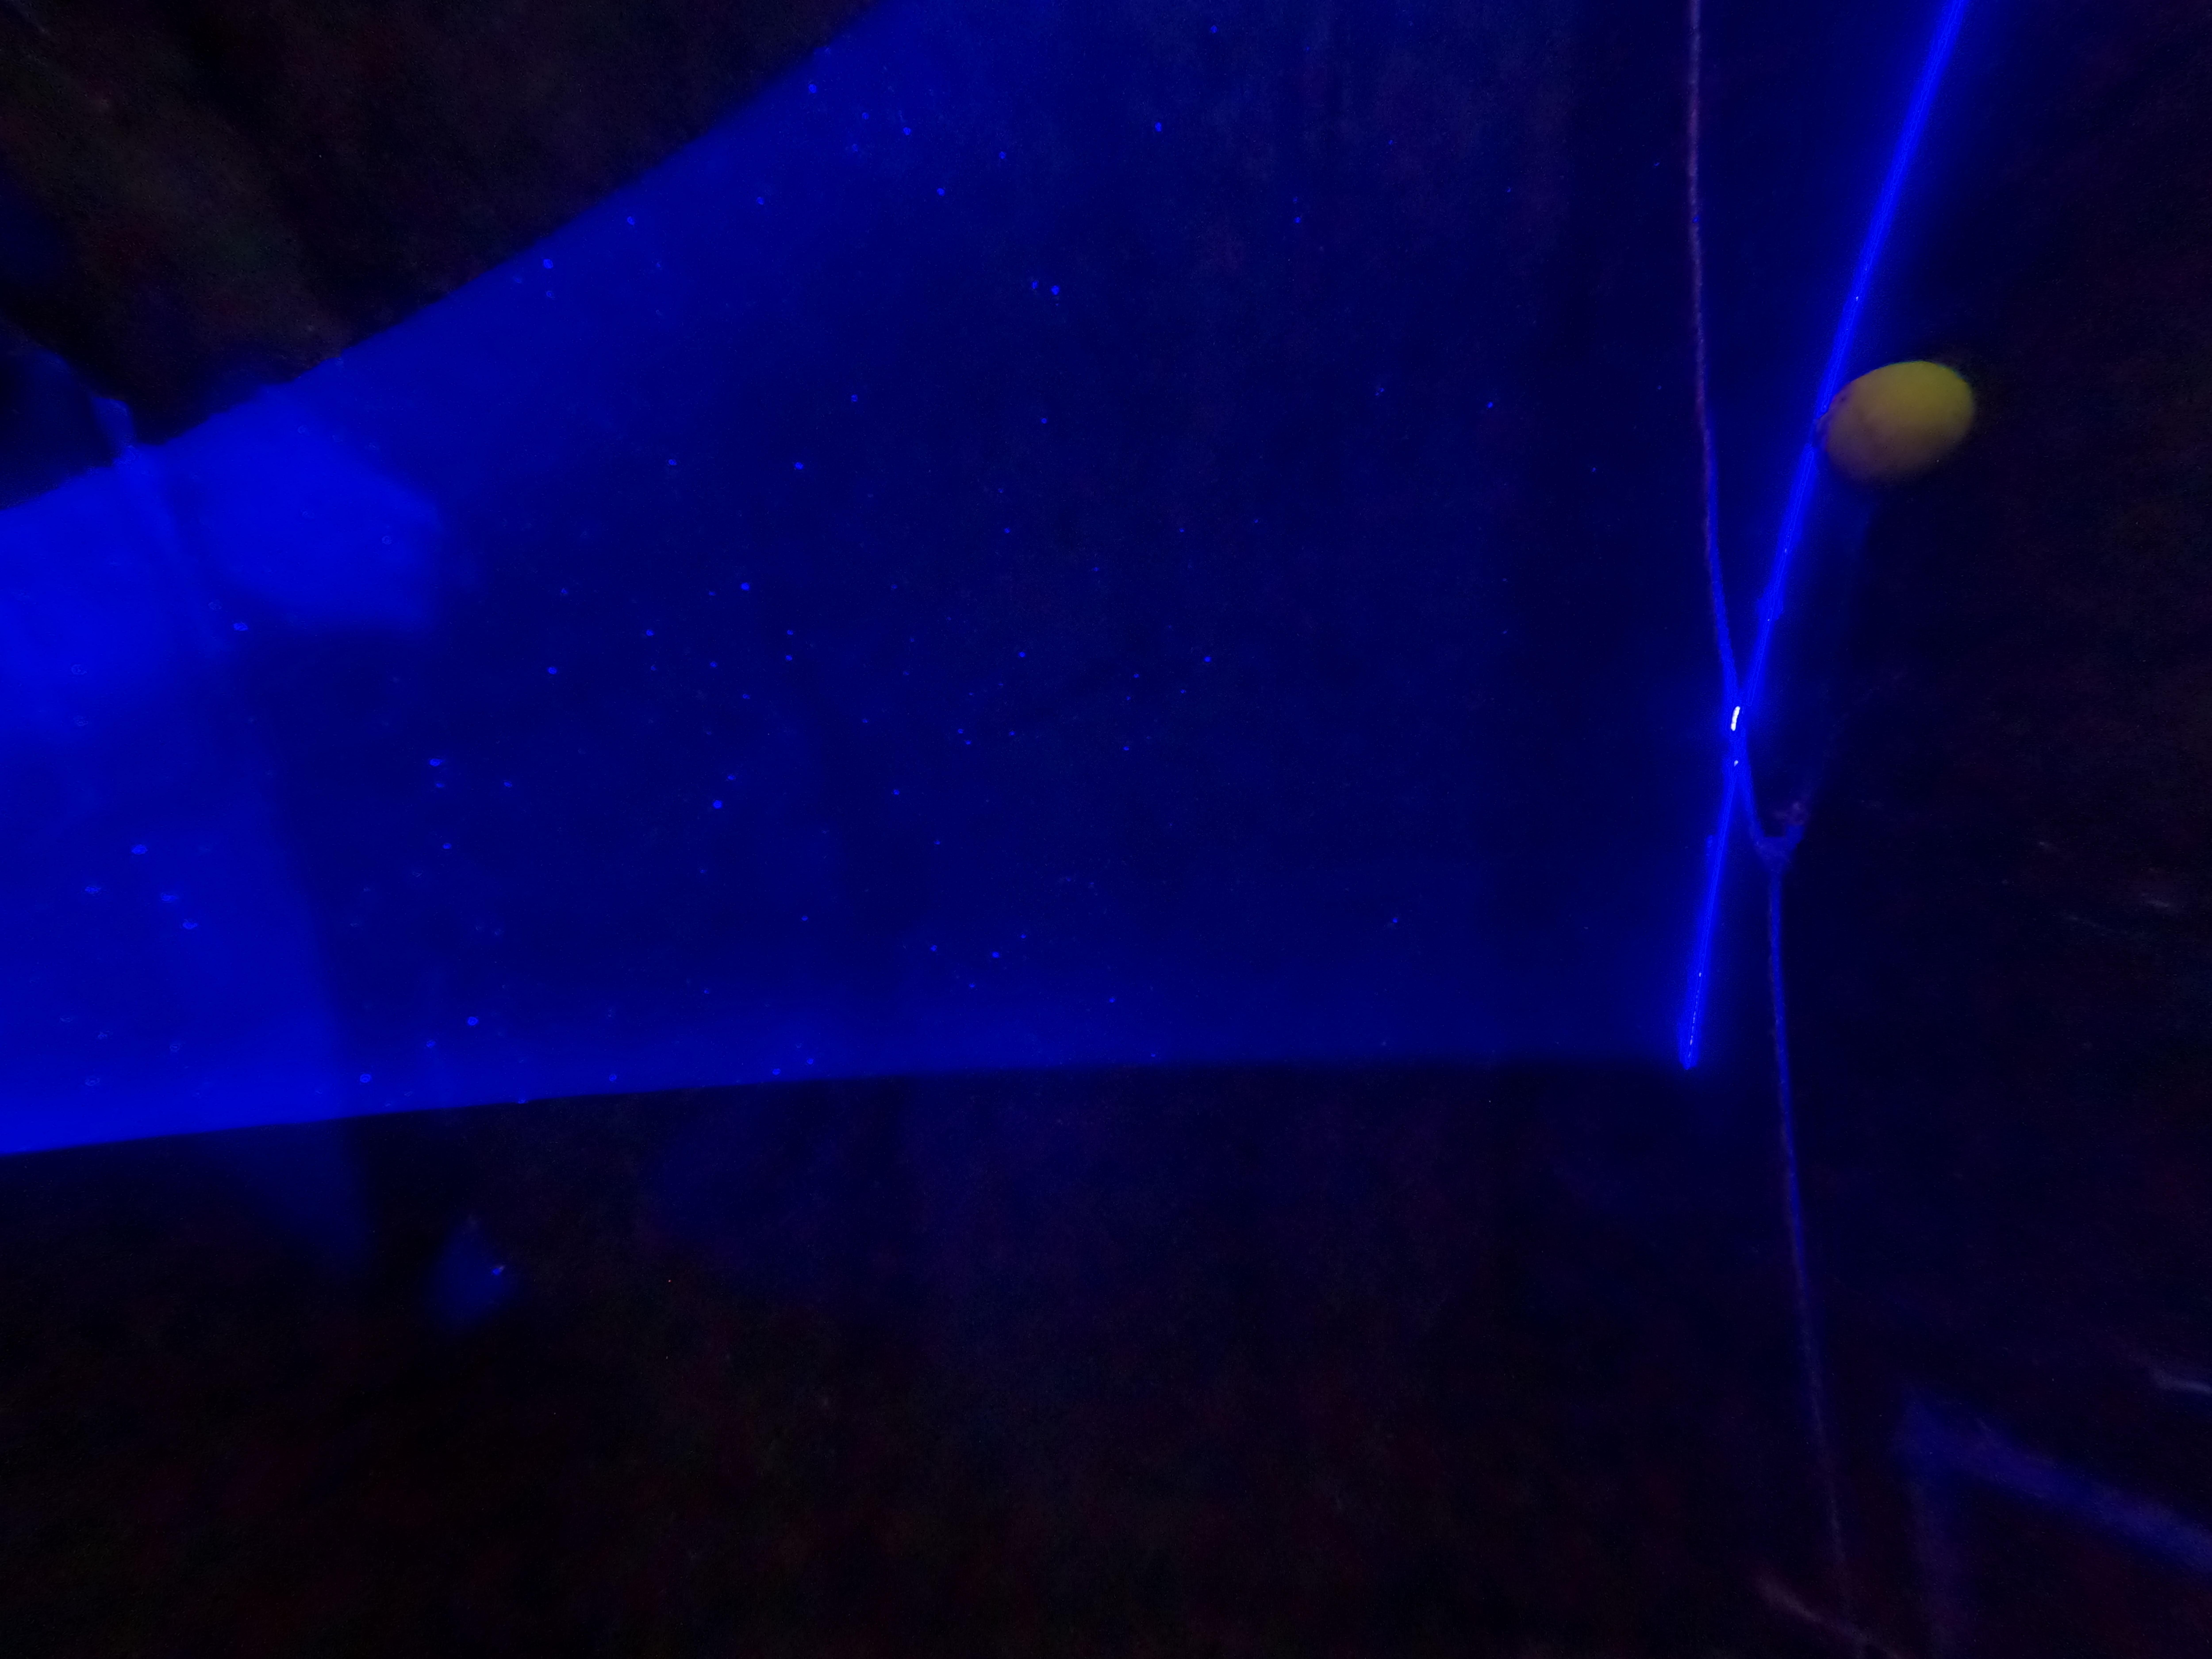

Supplement: Supplementary file 1490 [file G0032189.pdf › 11/G0032189.pdf]
