# Supplementary figures and images for: 3D reconstruction of shallow sea environment using direct system calibration and faint laser line extraction (part 15 of 35)
Source: Research Square preprint supplement (doi:10.21203/rs.3.rs-5262658/v1), 2024-12-02

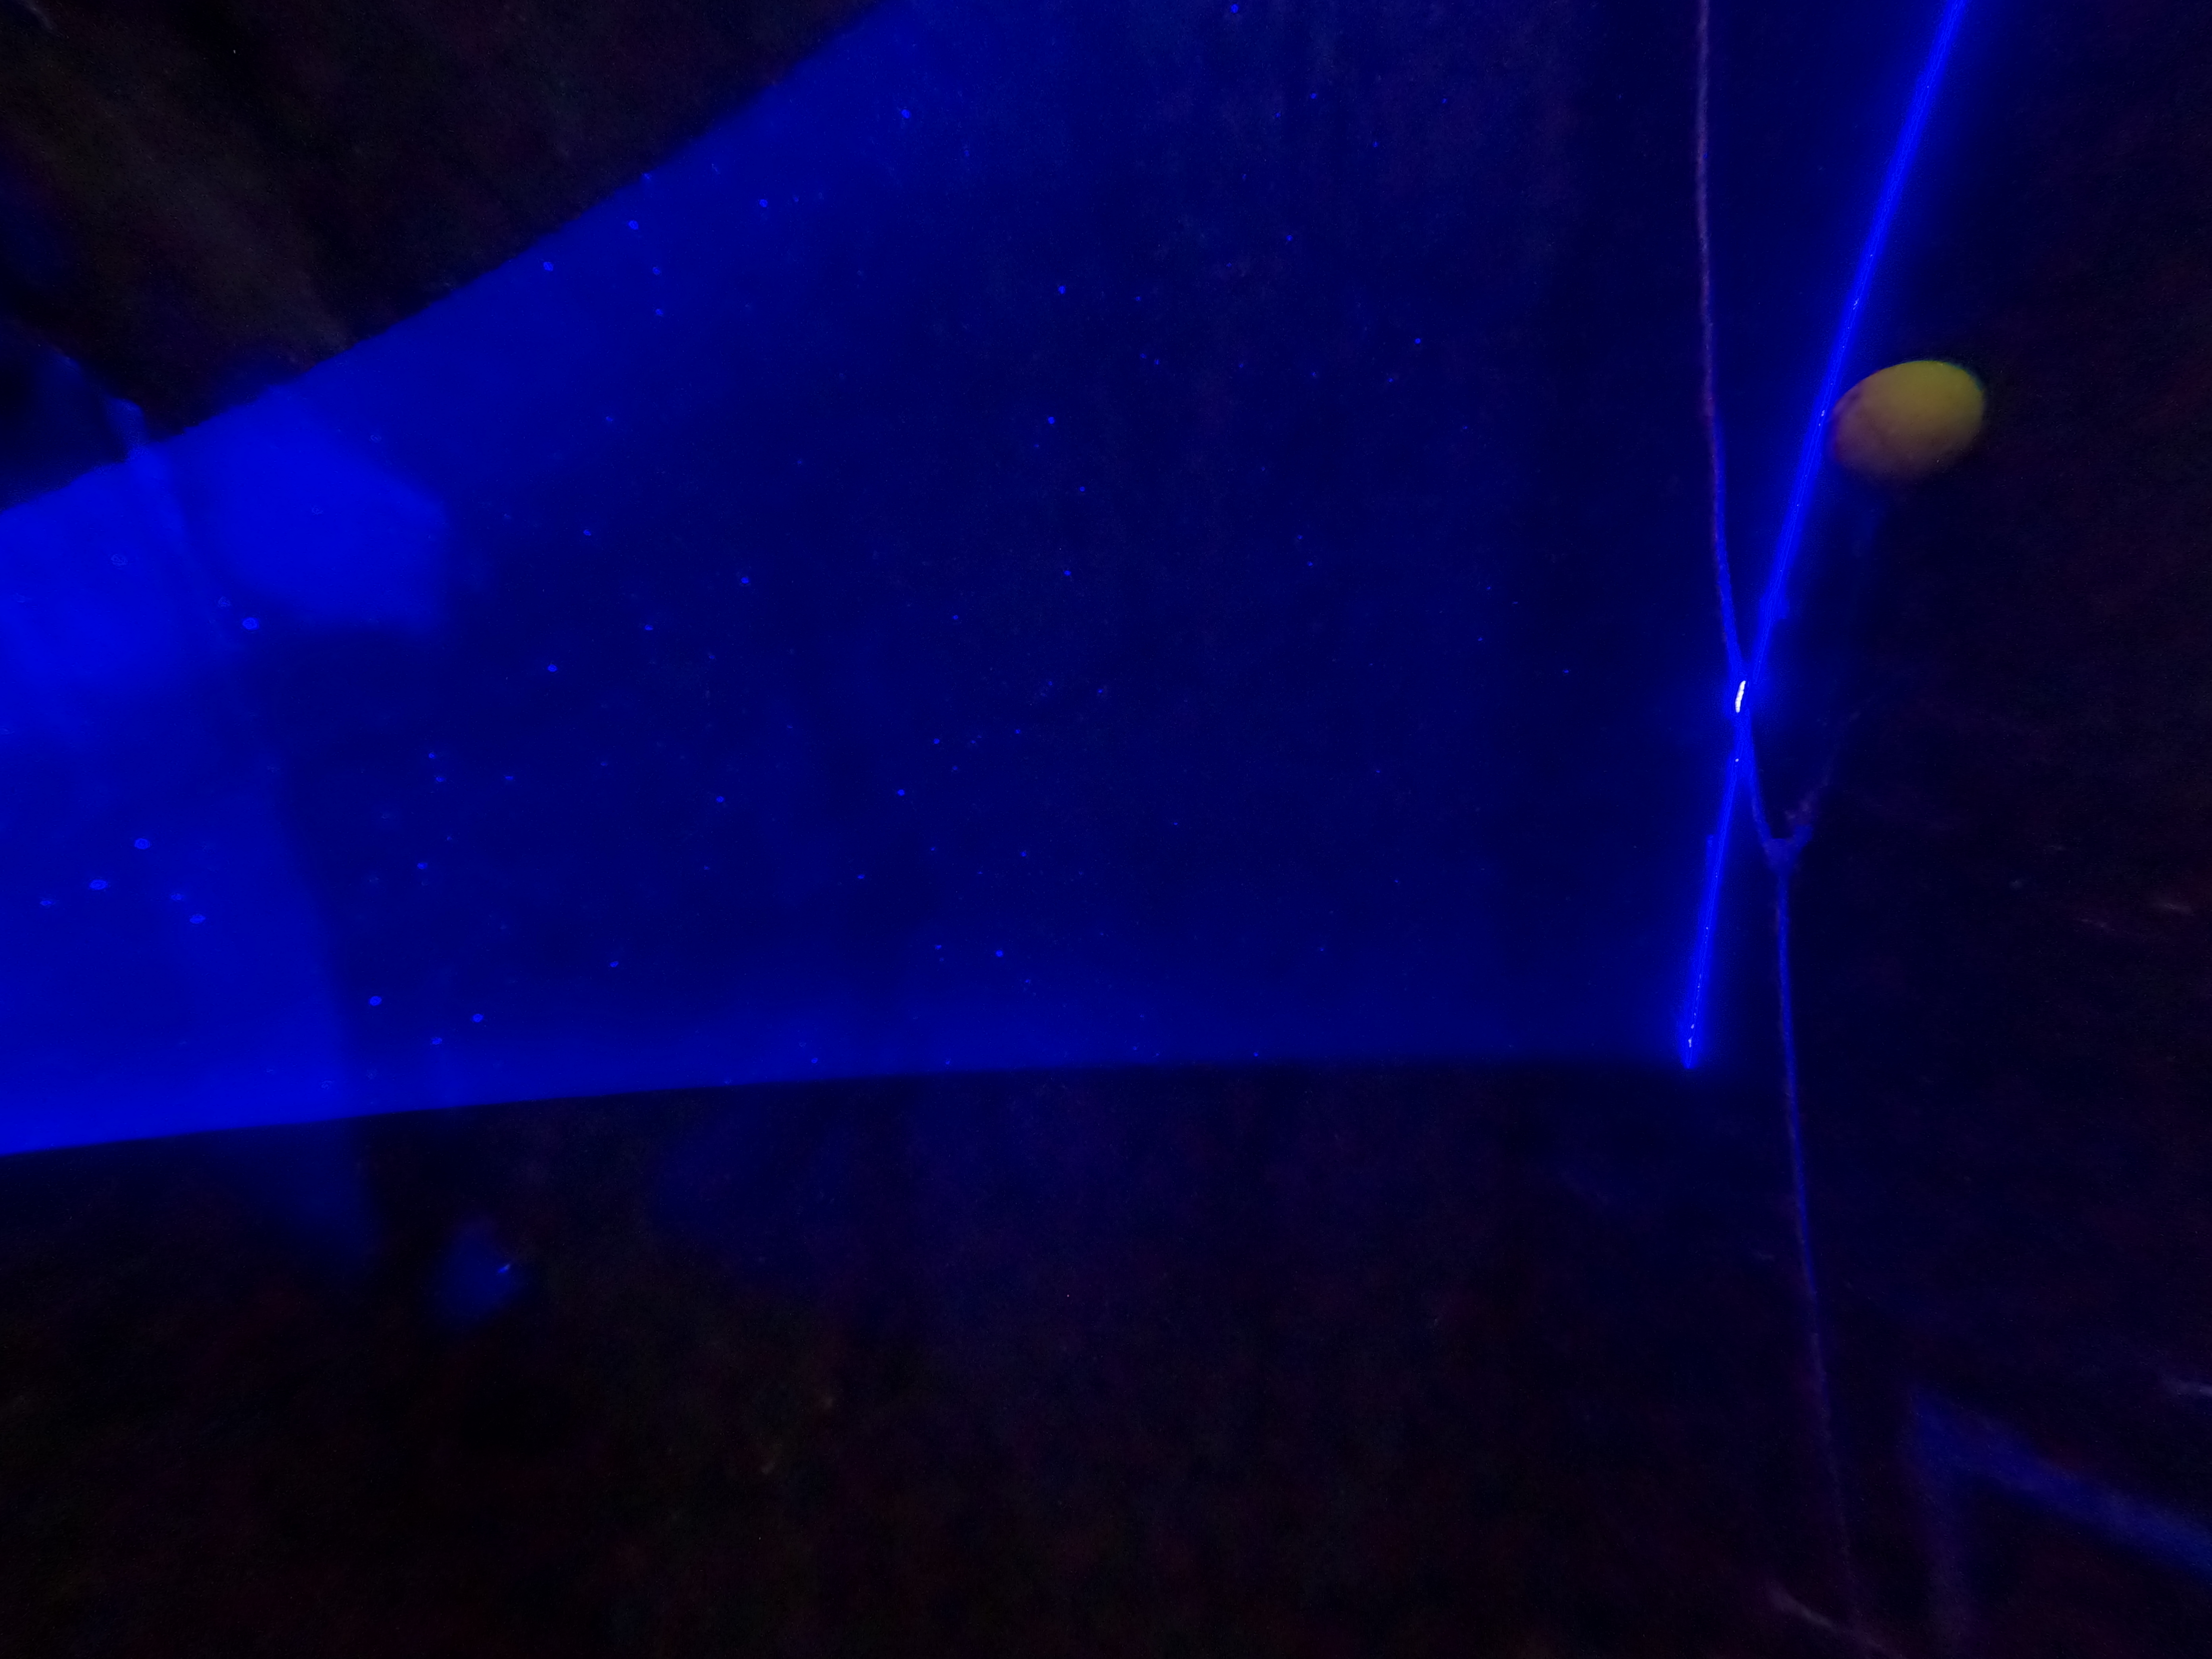

Supplement: Supplementary file 1491 [file G0032190.pdf › 11/G0032190.pdf]

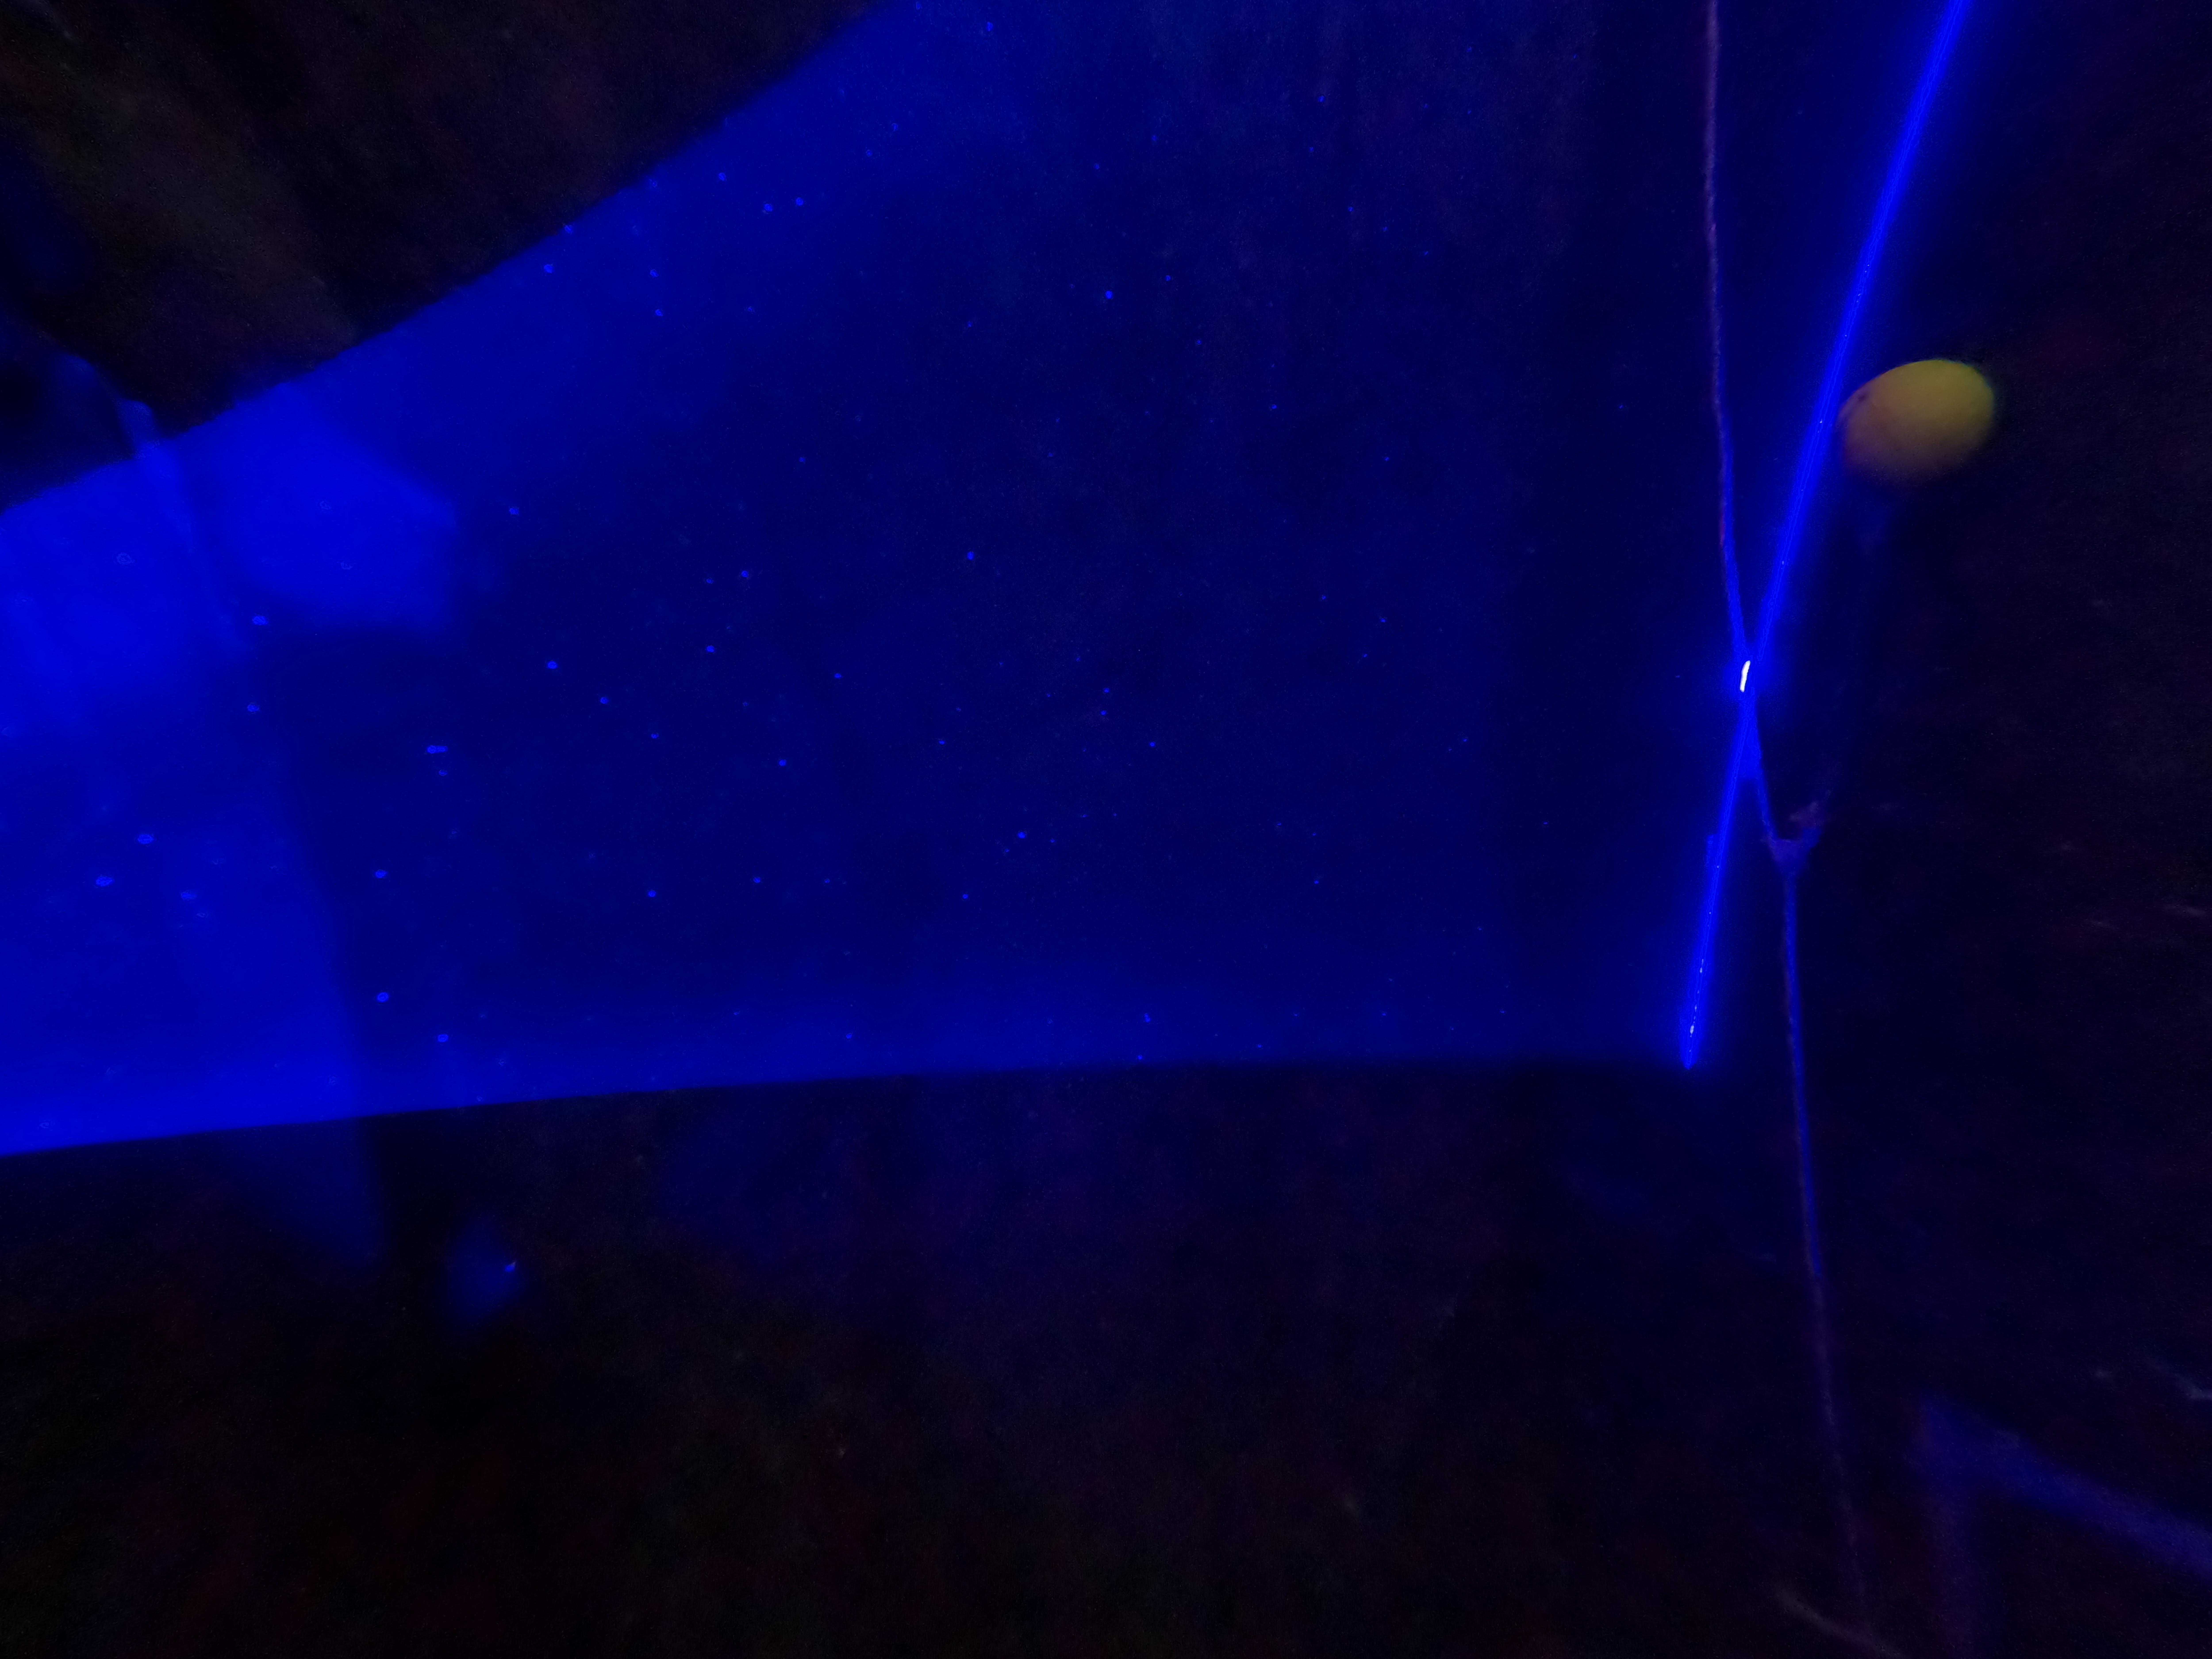

Supplement: Supplementary file 1492 [file G0032191.pdf › 11/G0032191.pdf]

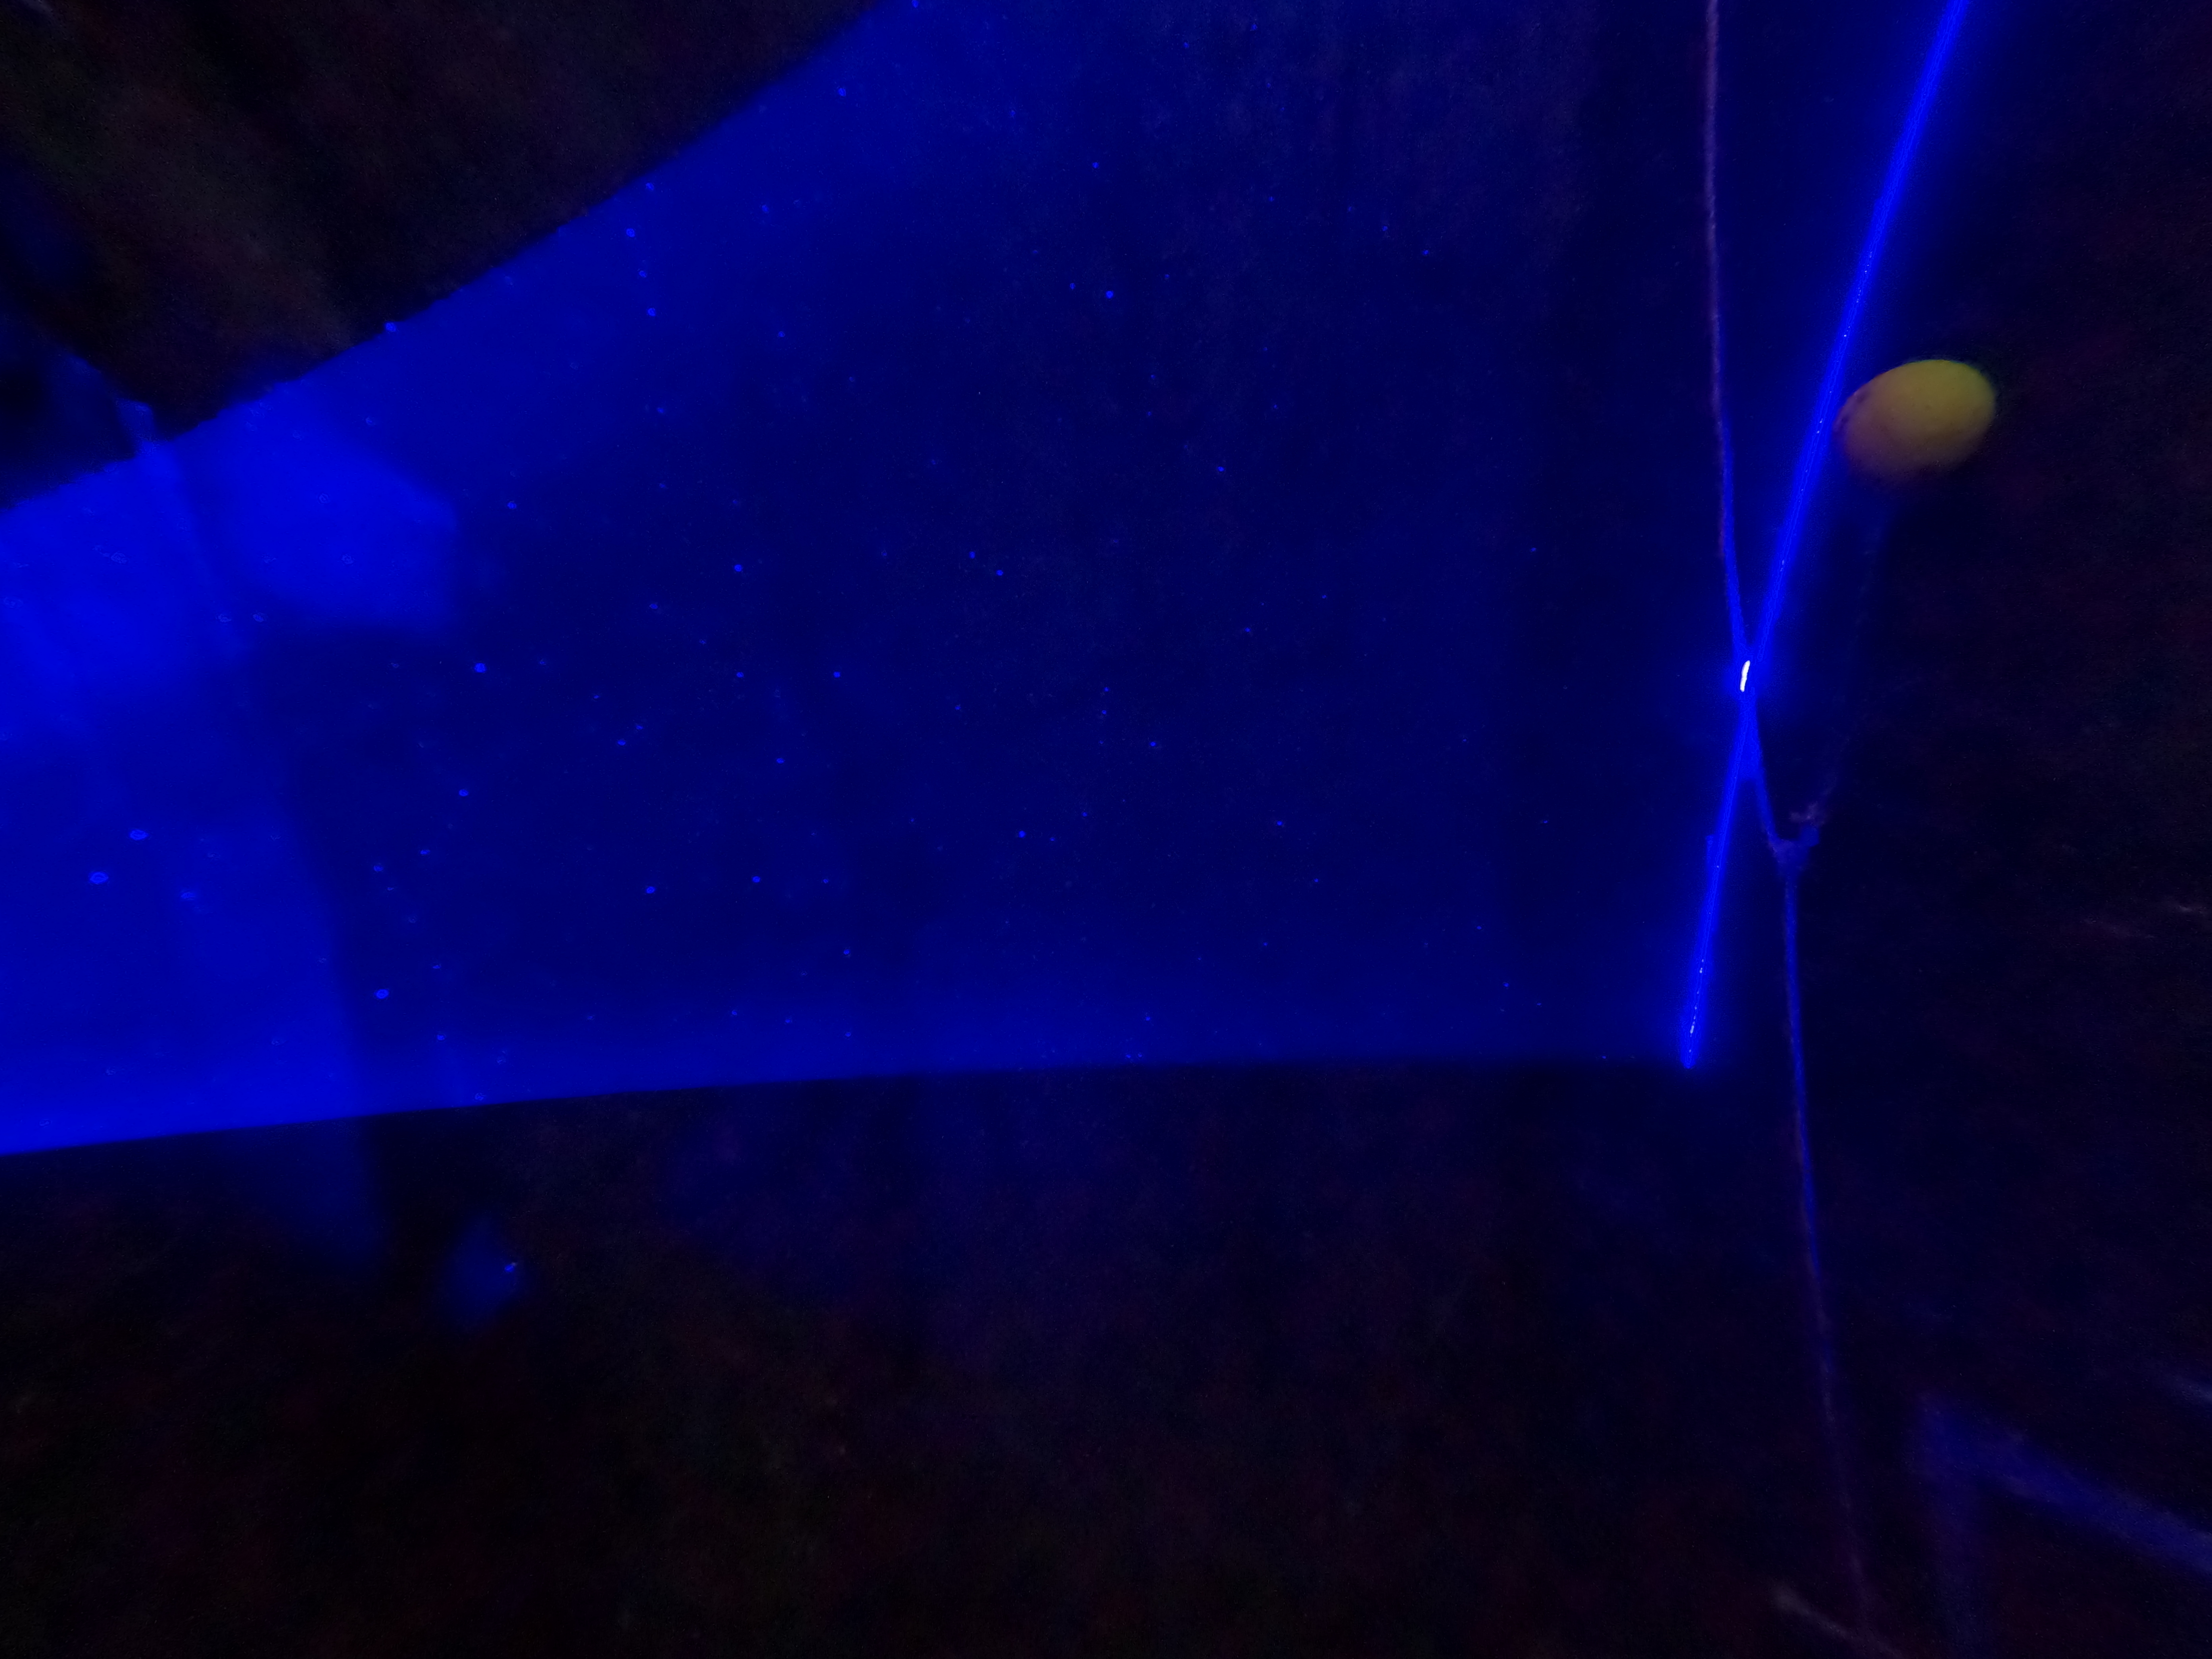

Supplement: Supplementary file 1493 [file G0032192.pdf › 11/G0032192.pdf]

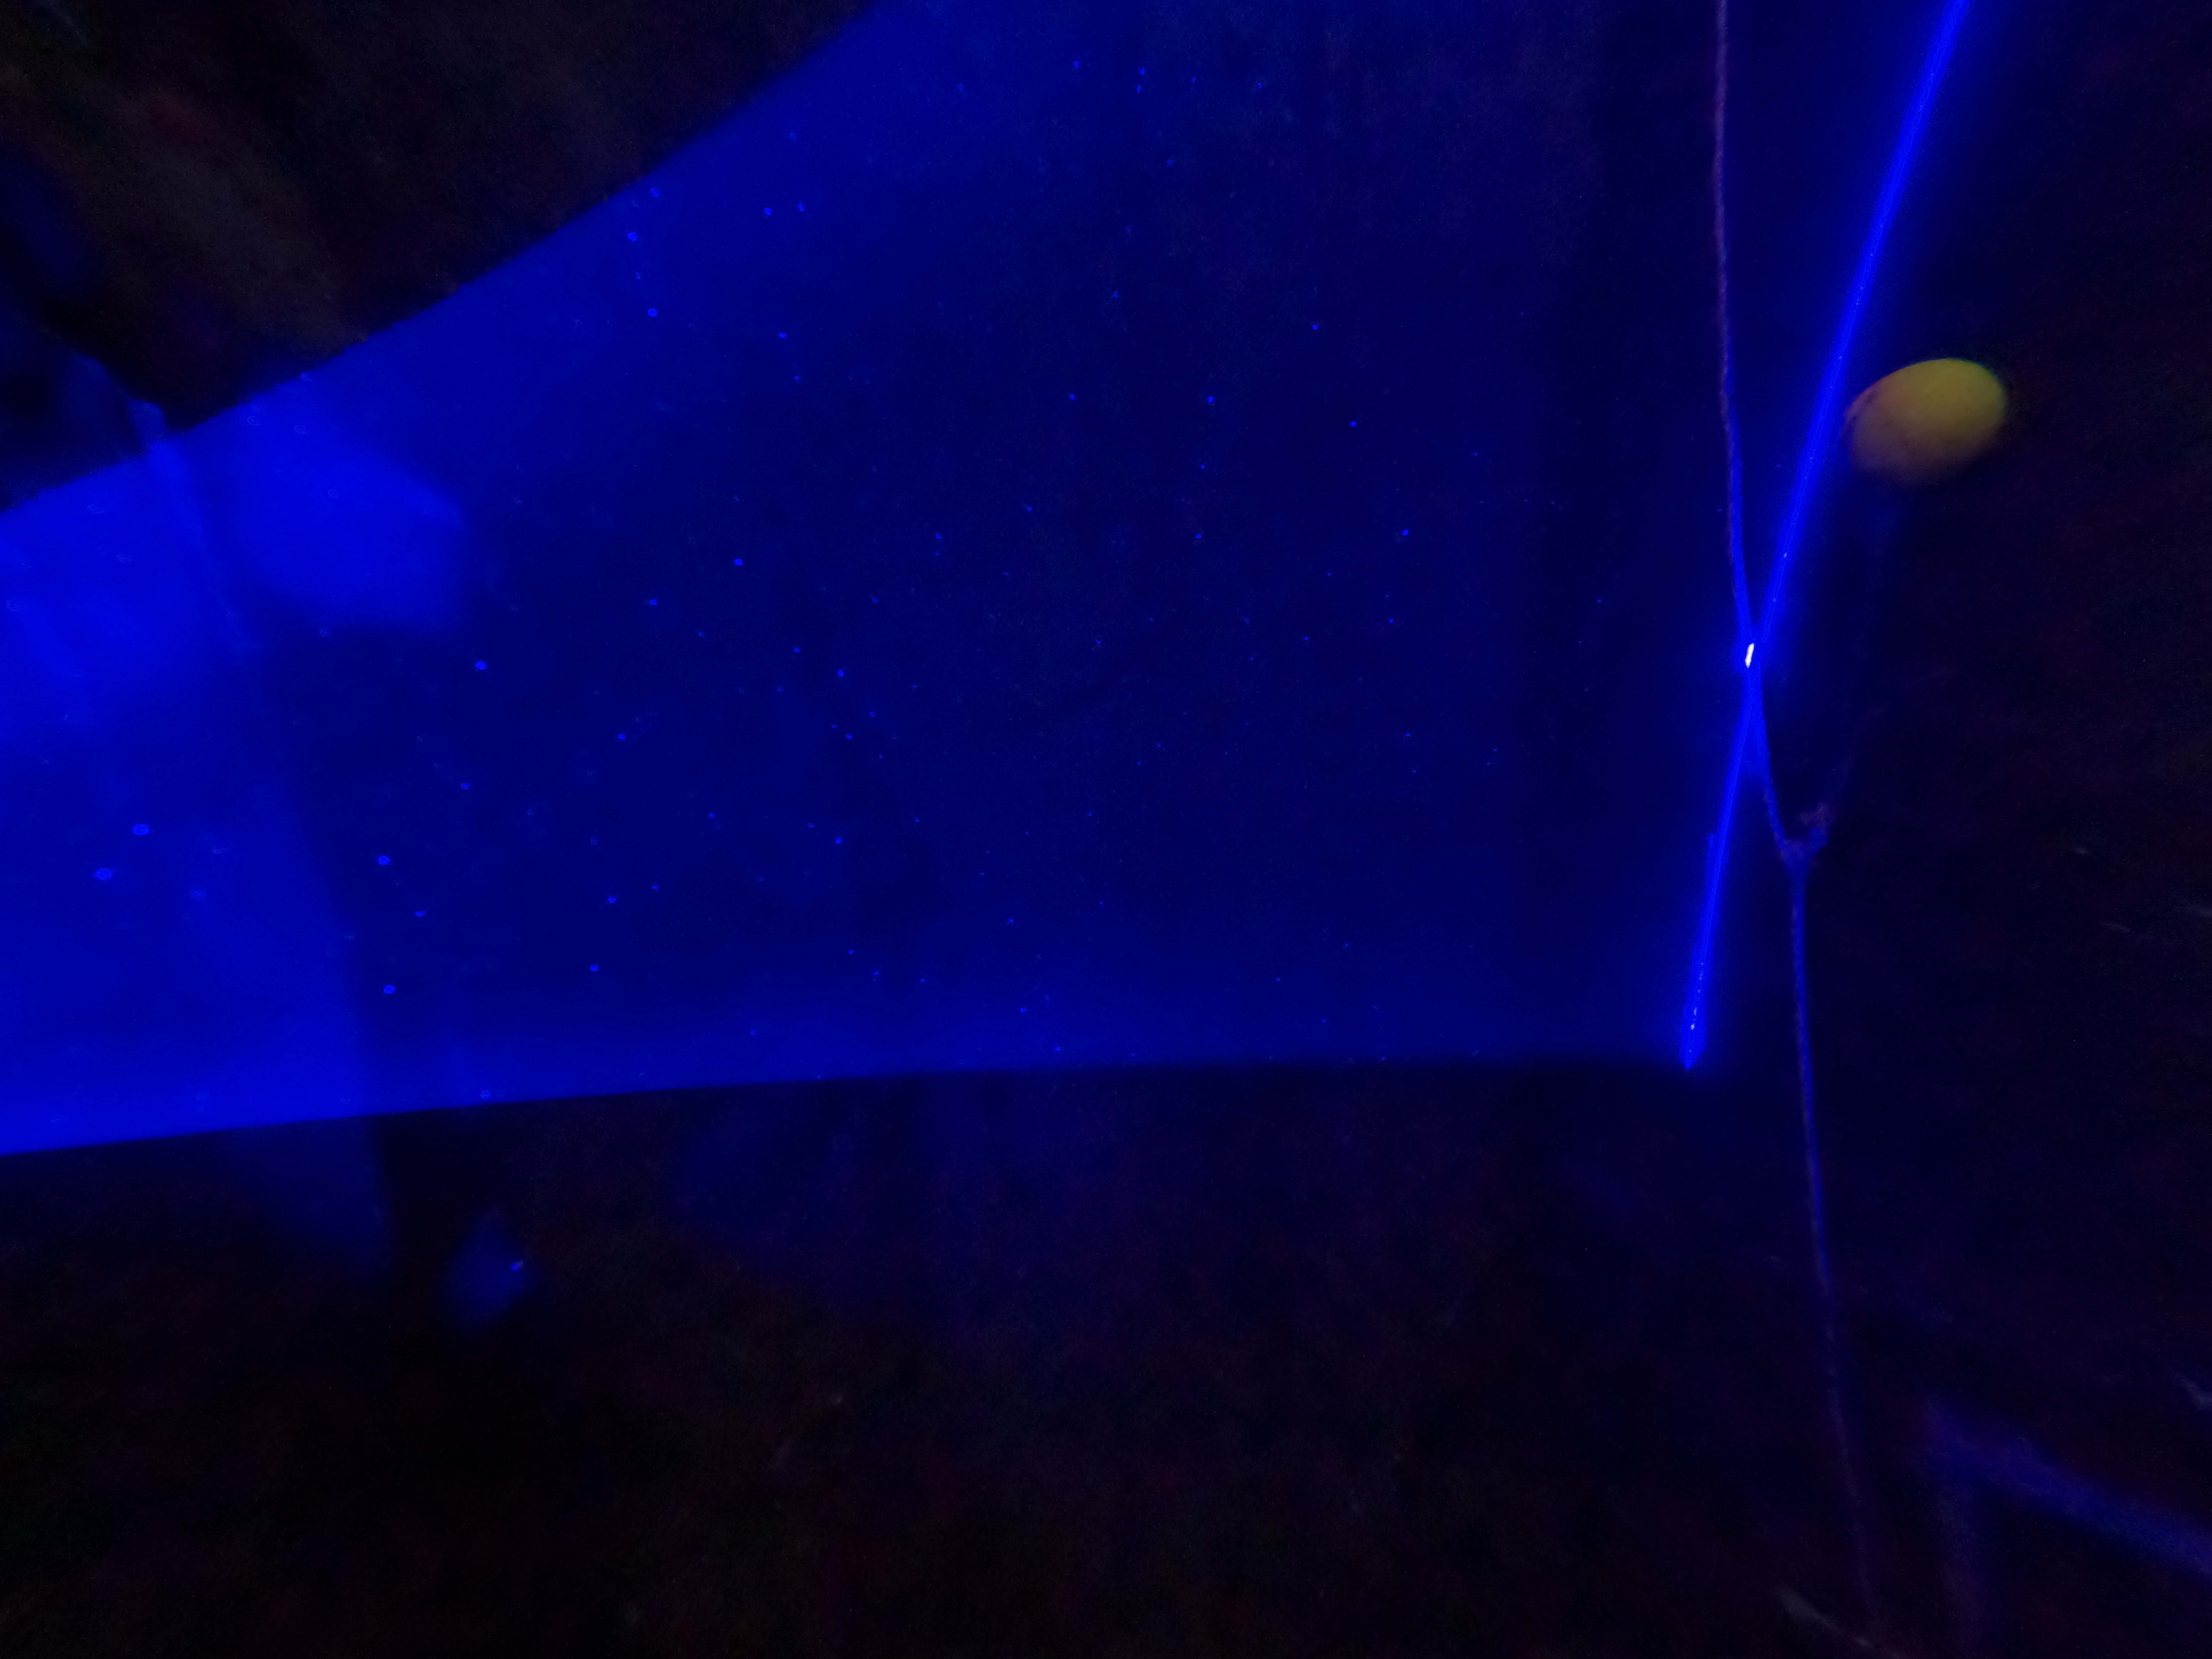

Supplement: Supplementary file 1494 [file G0032193.pdf › 11/G0032193.pdf]

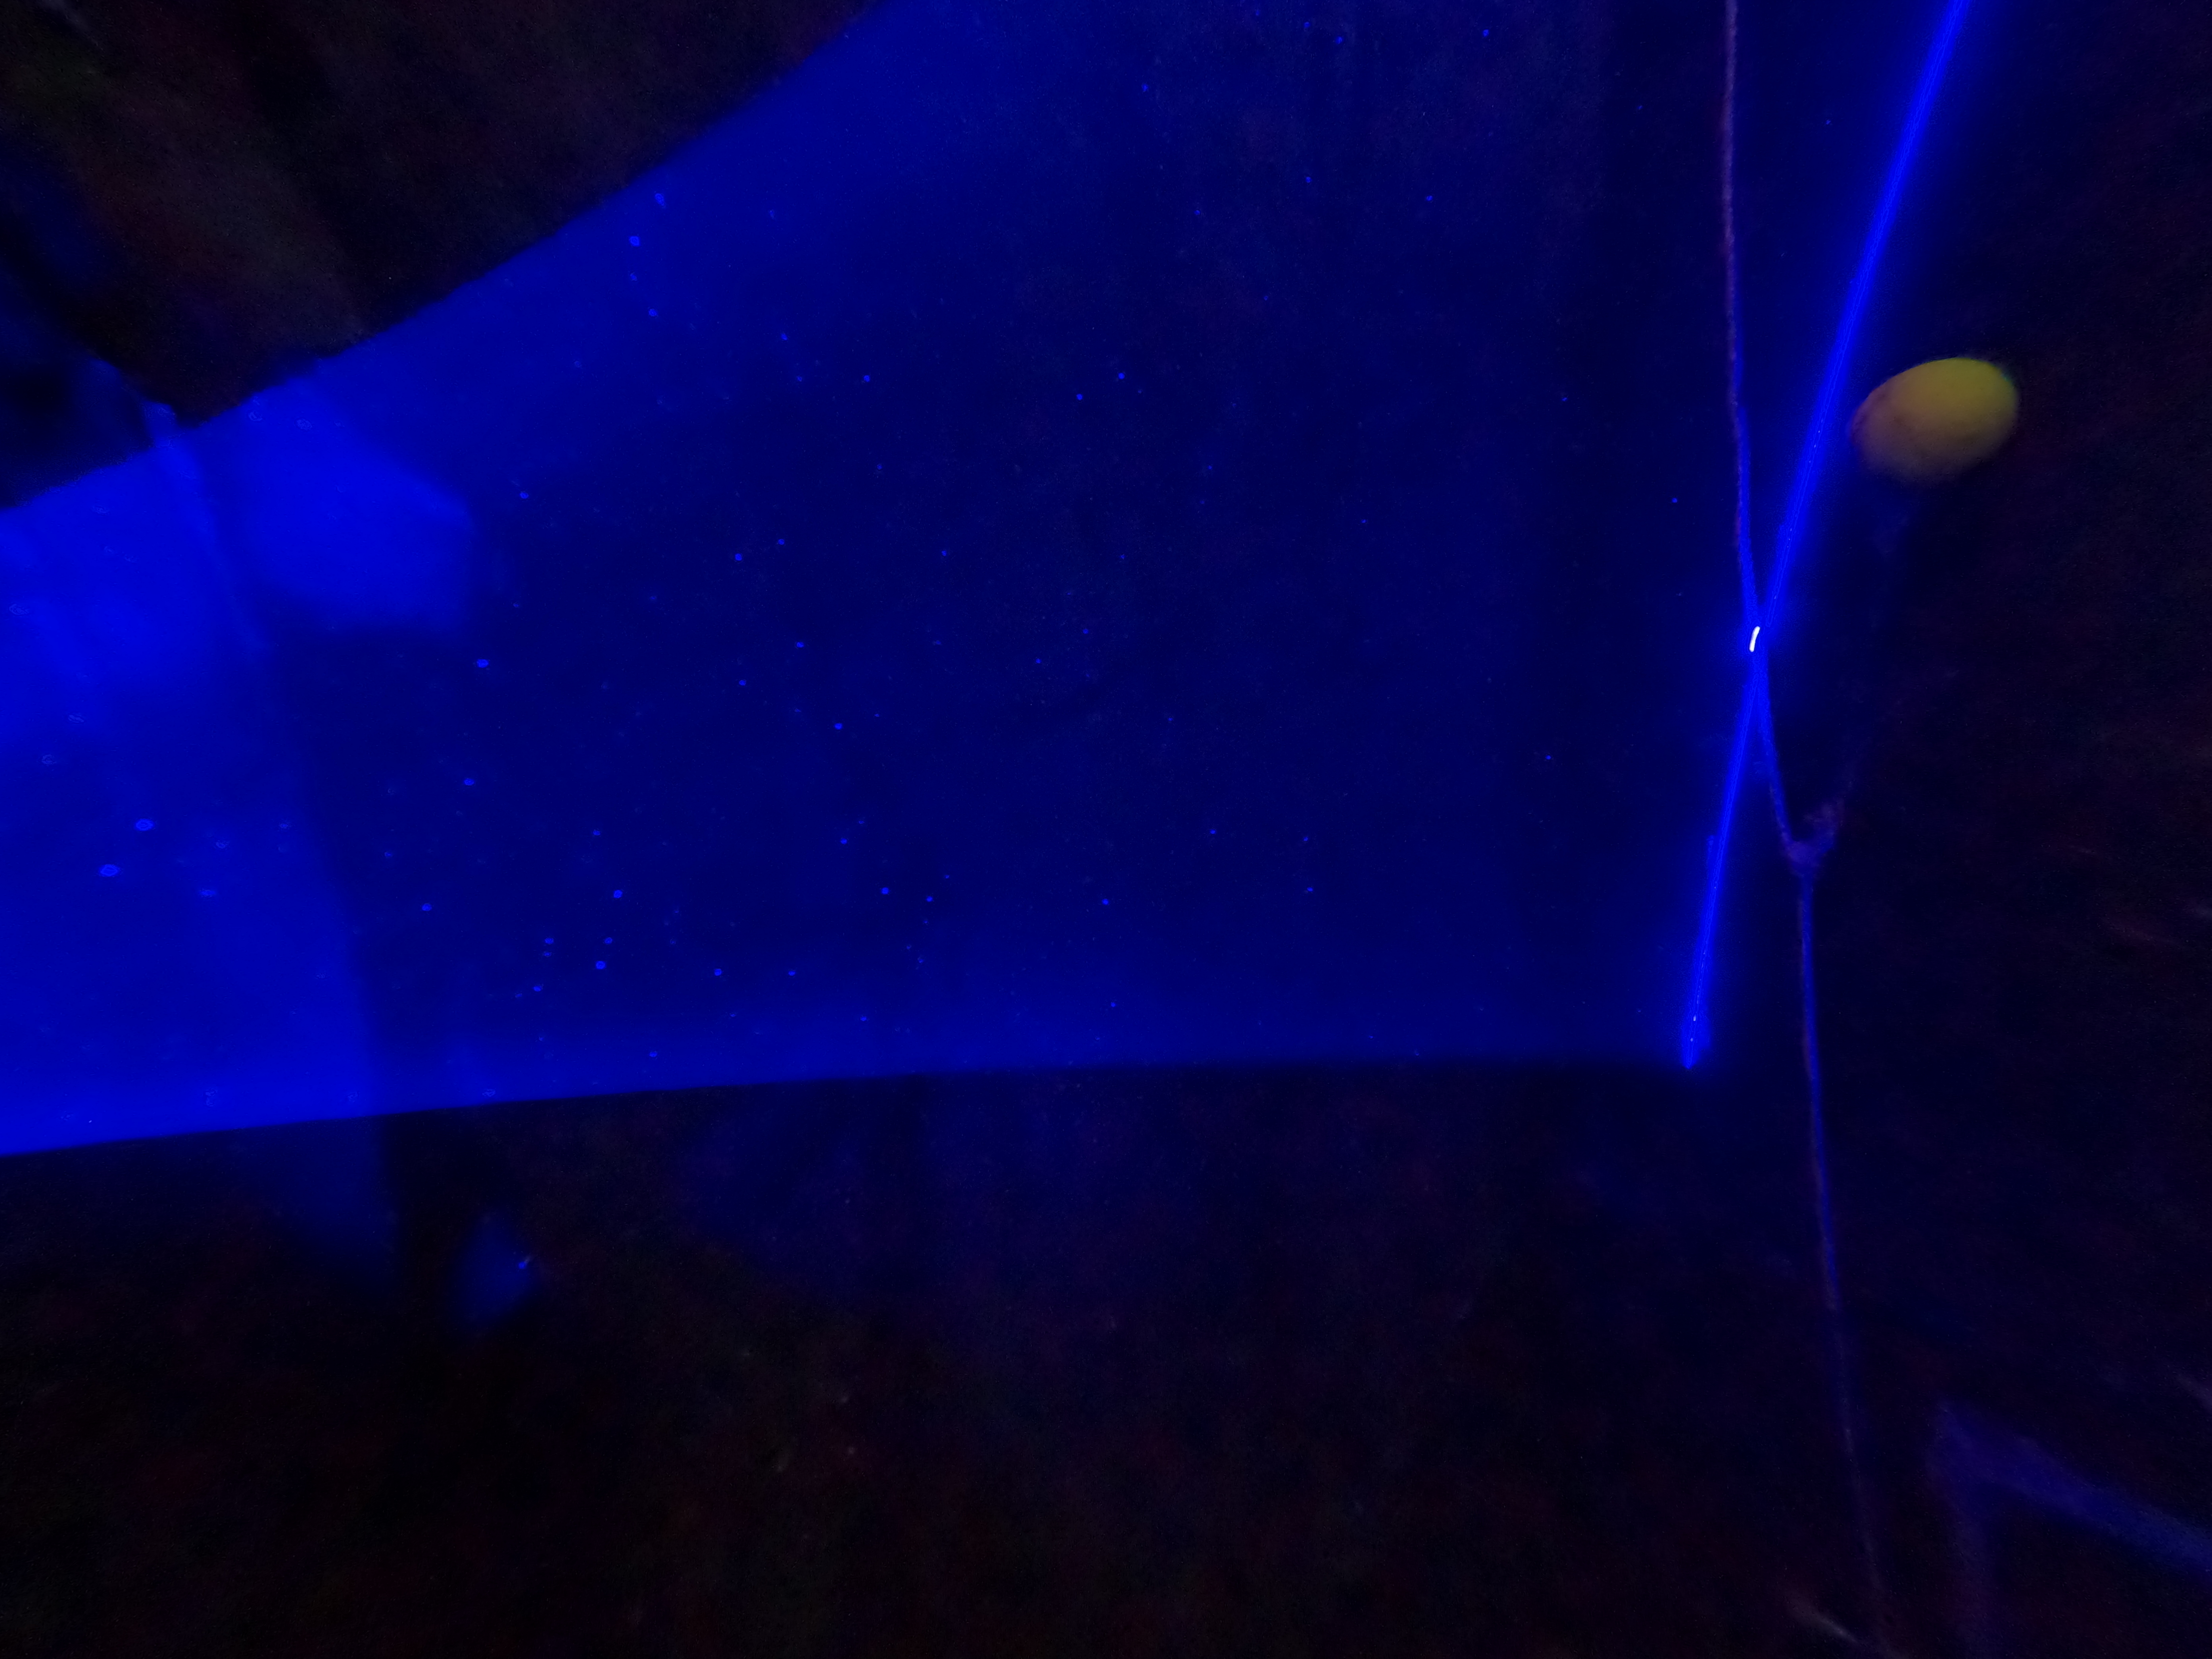

Supplement: Supplementary file 1495 [file G0032194.pdf › 11/G0032194.pdf]

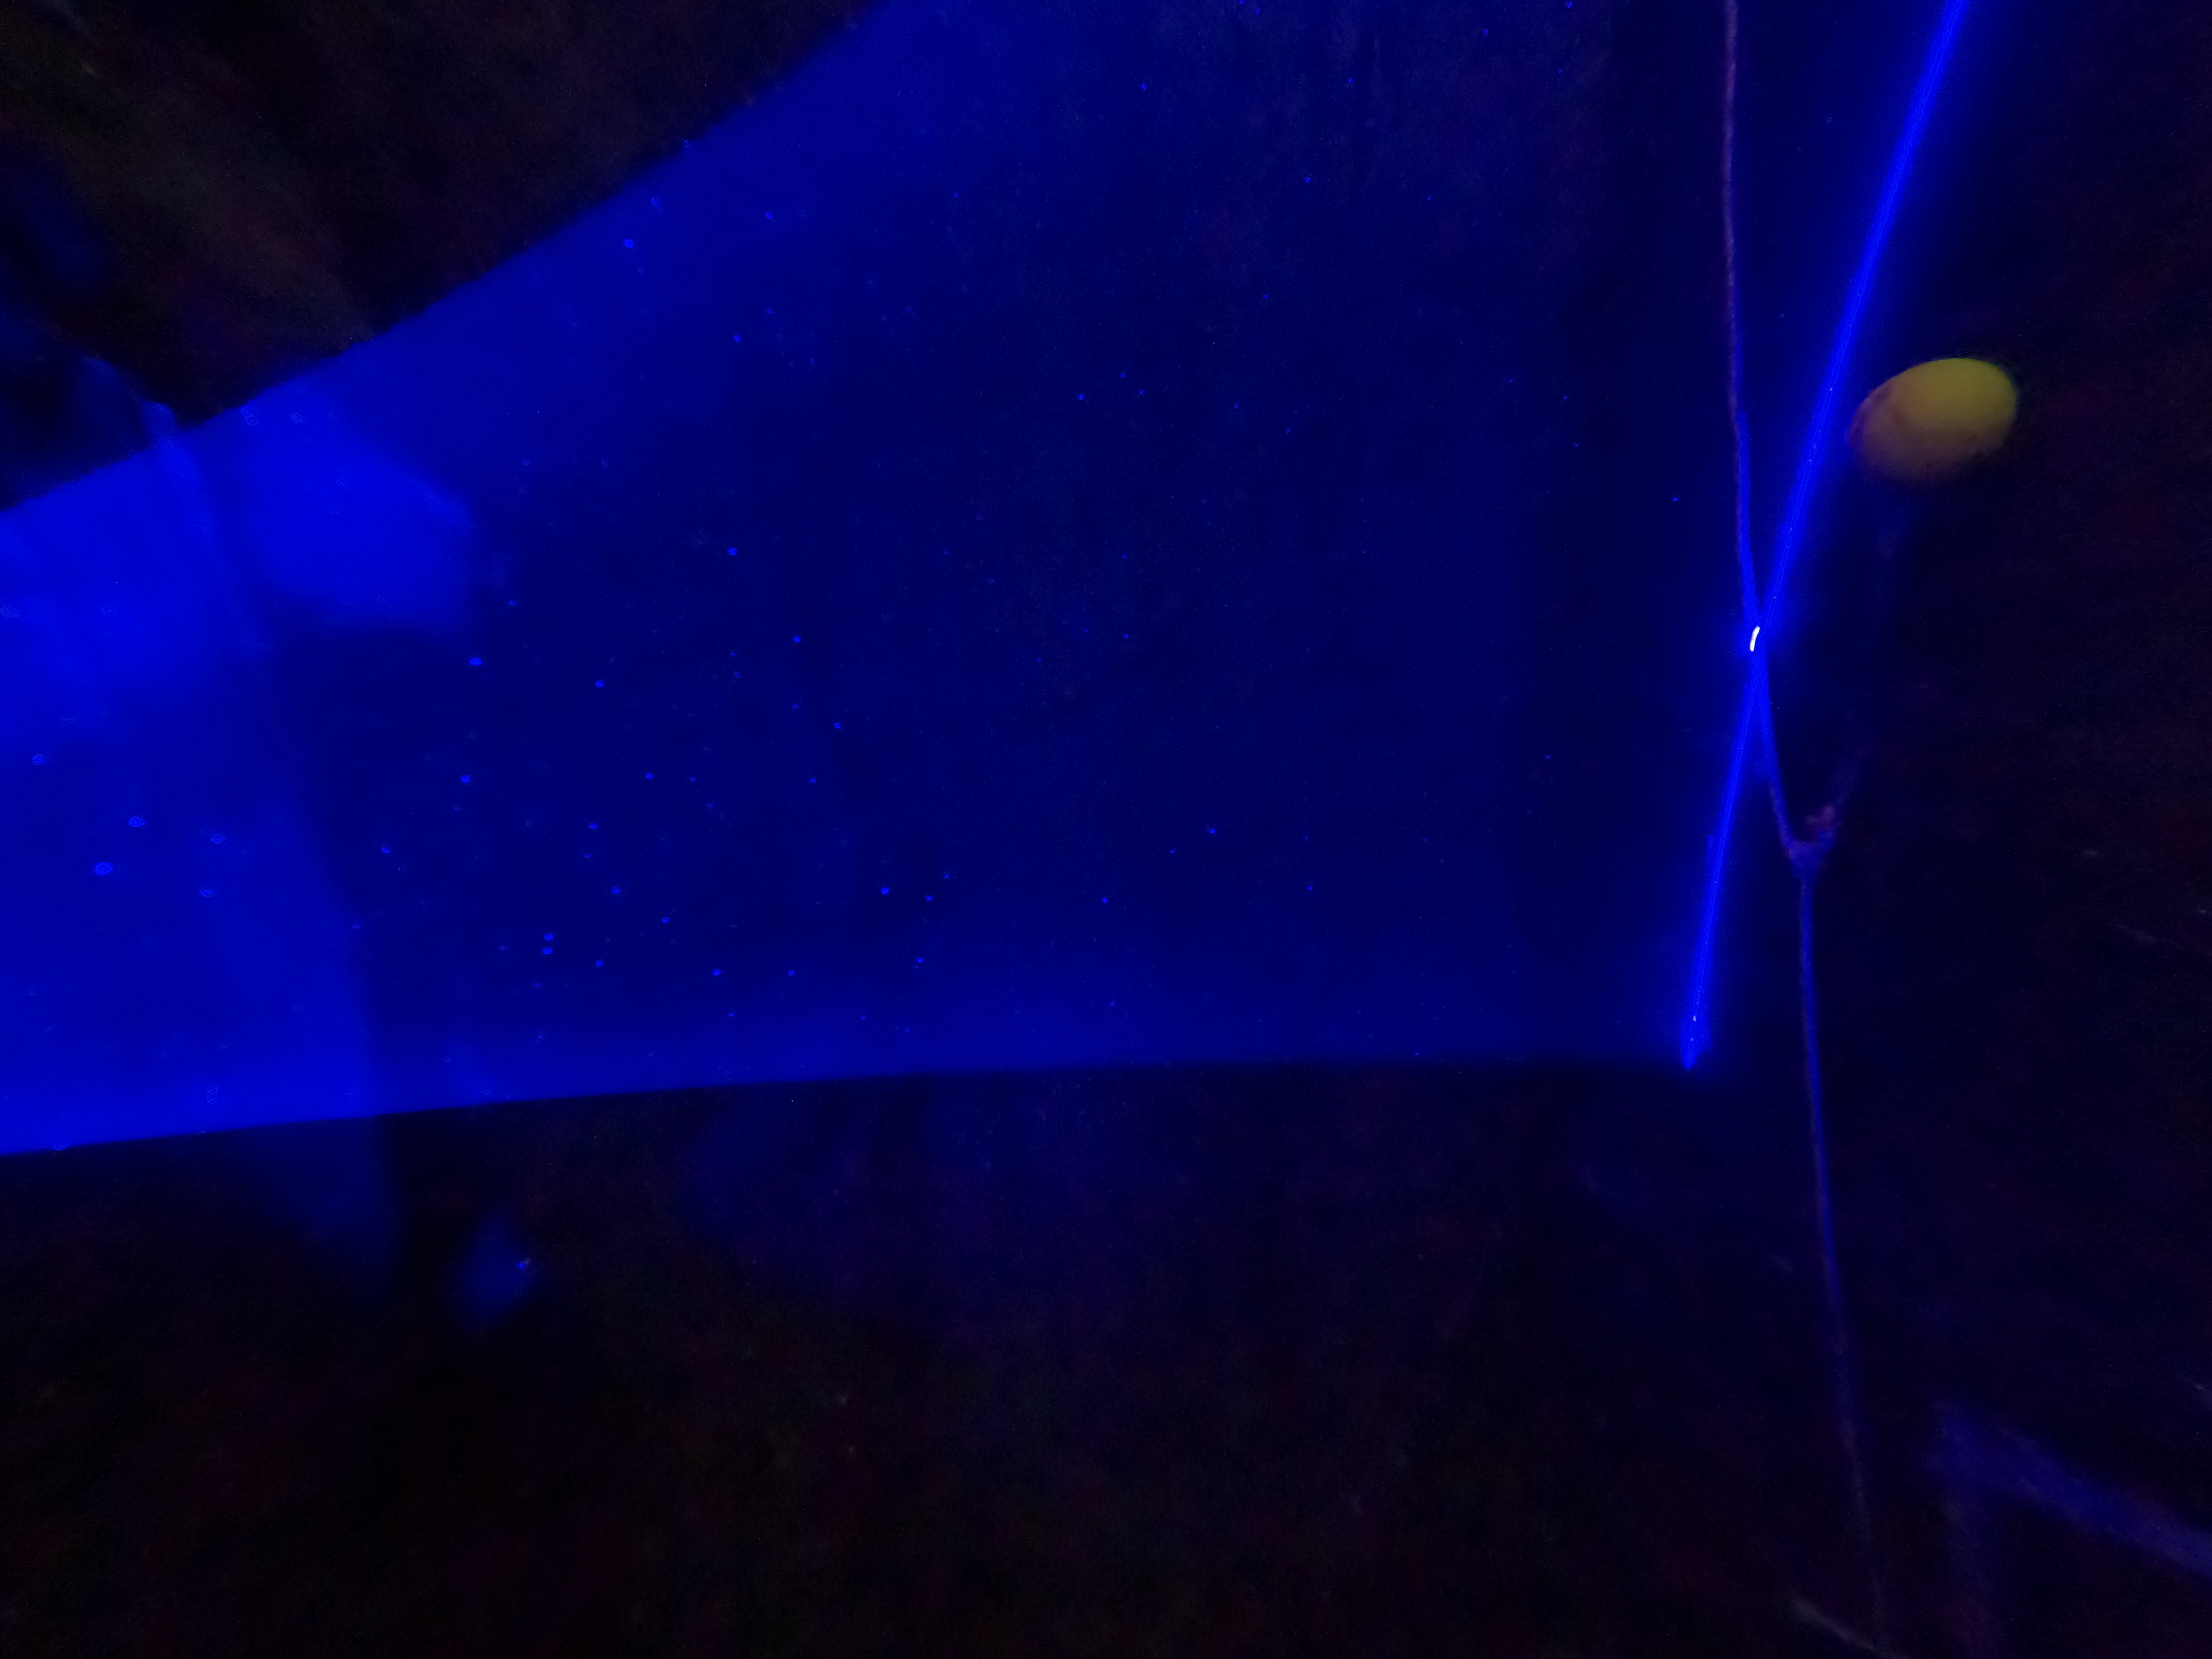

Supplement: Supplementary file 1496 [file G0032195.pdf › 11/G0032195.pdf]

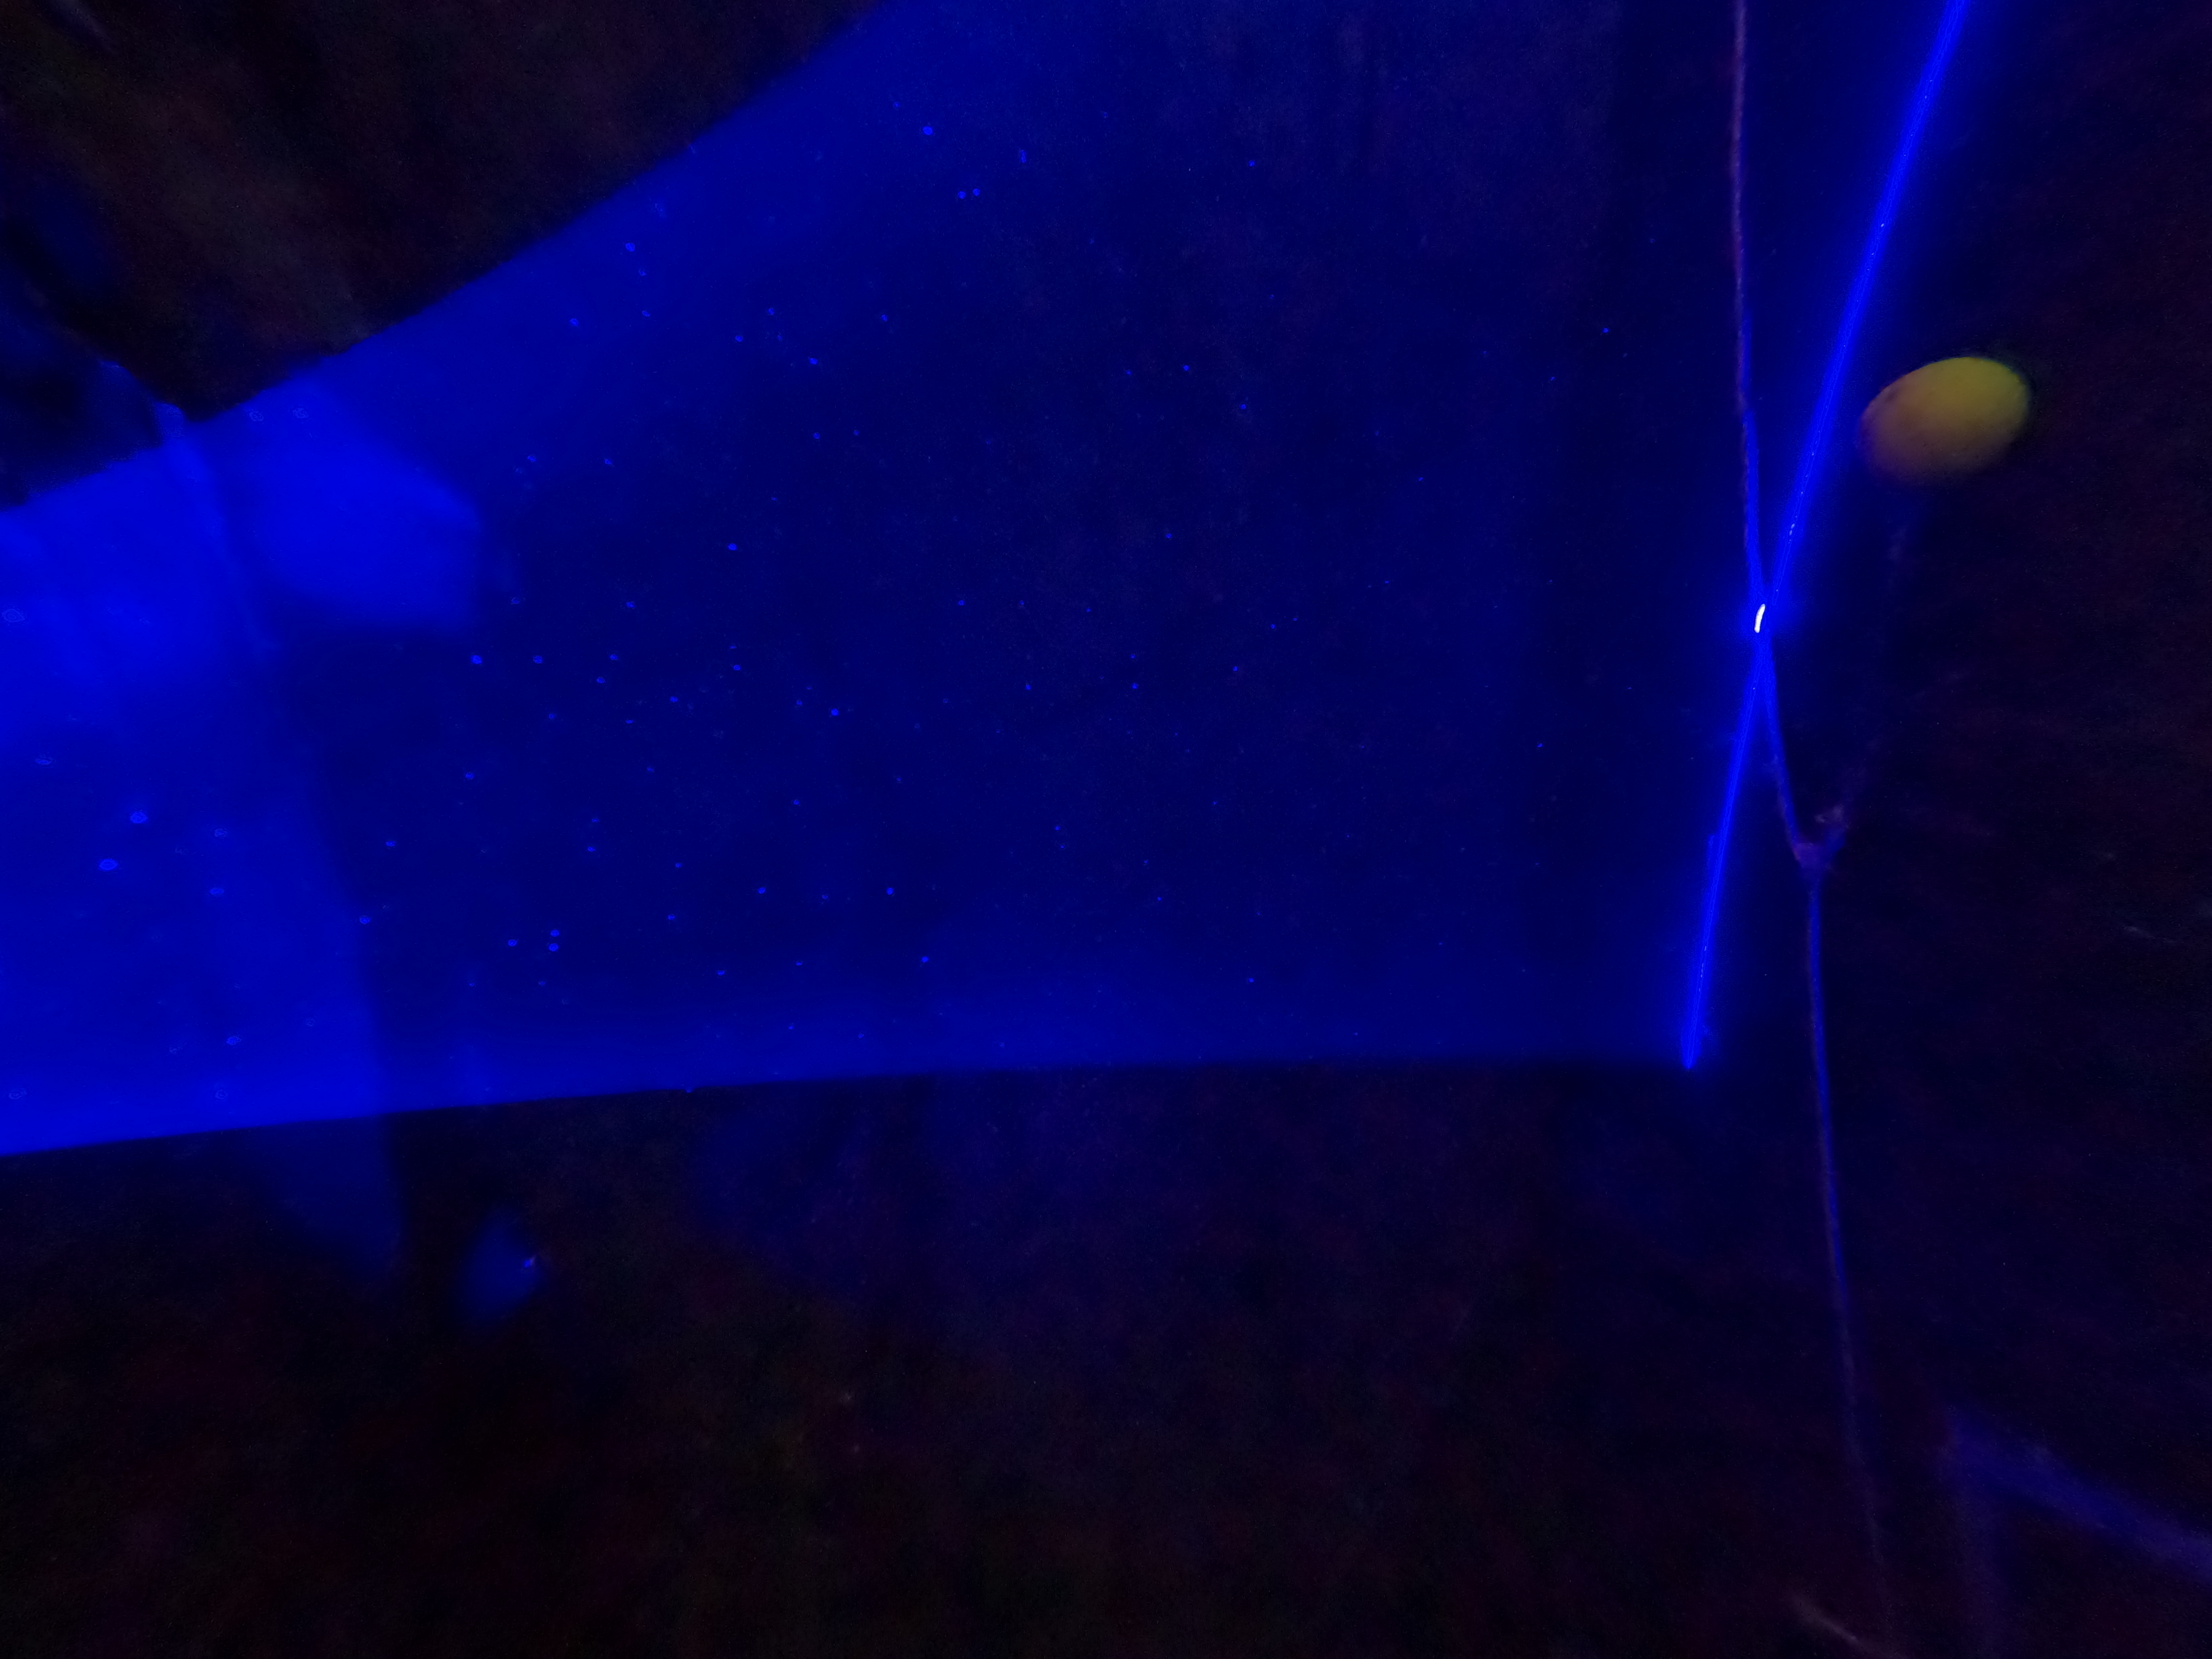

Supplement: Supplementary file 1497 [file G0032196.pdf › 11/G0032196.pdf]

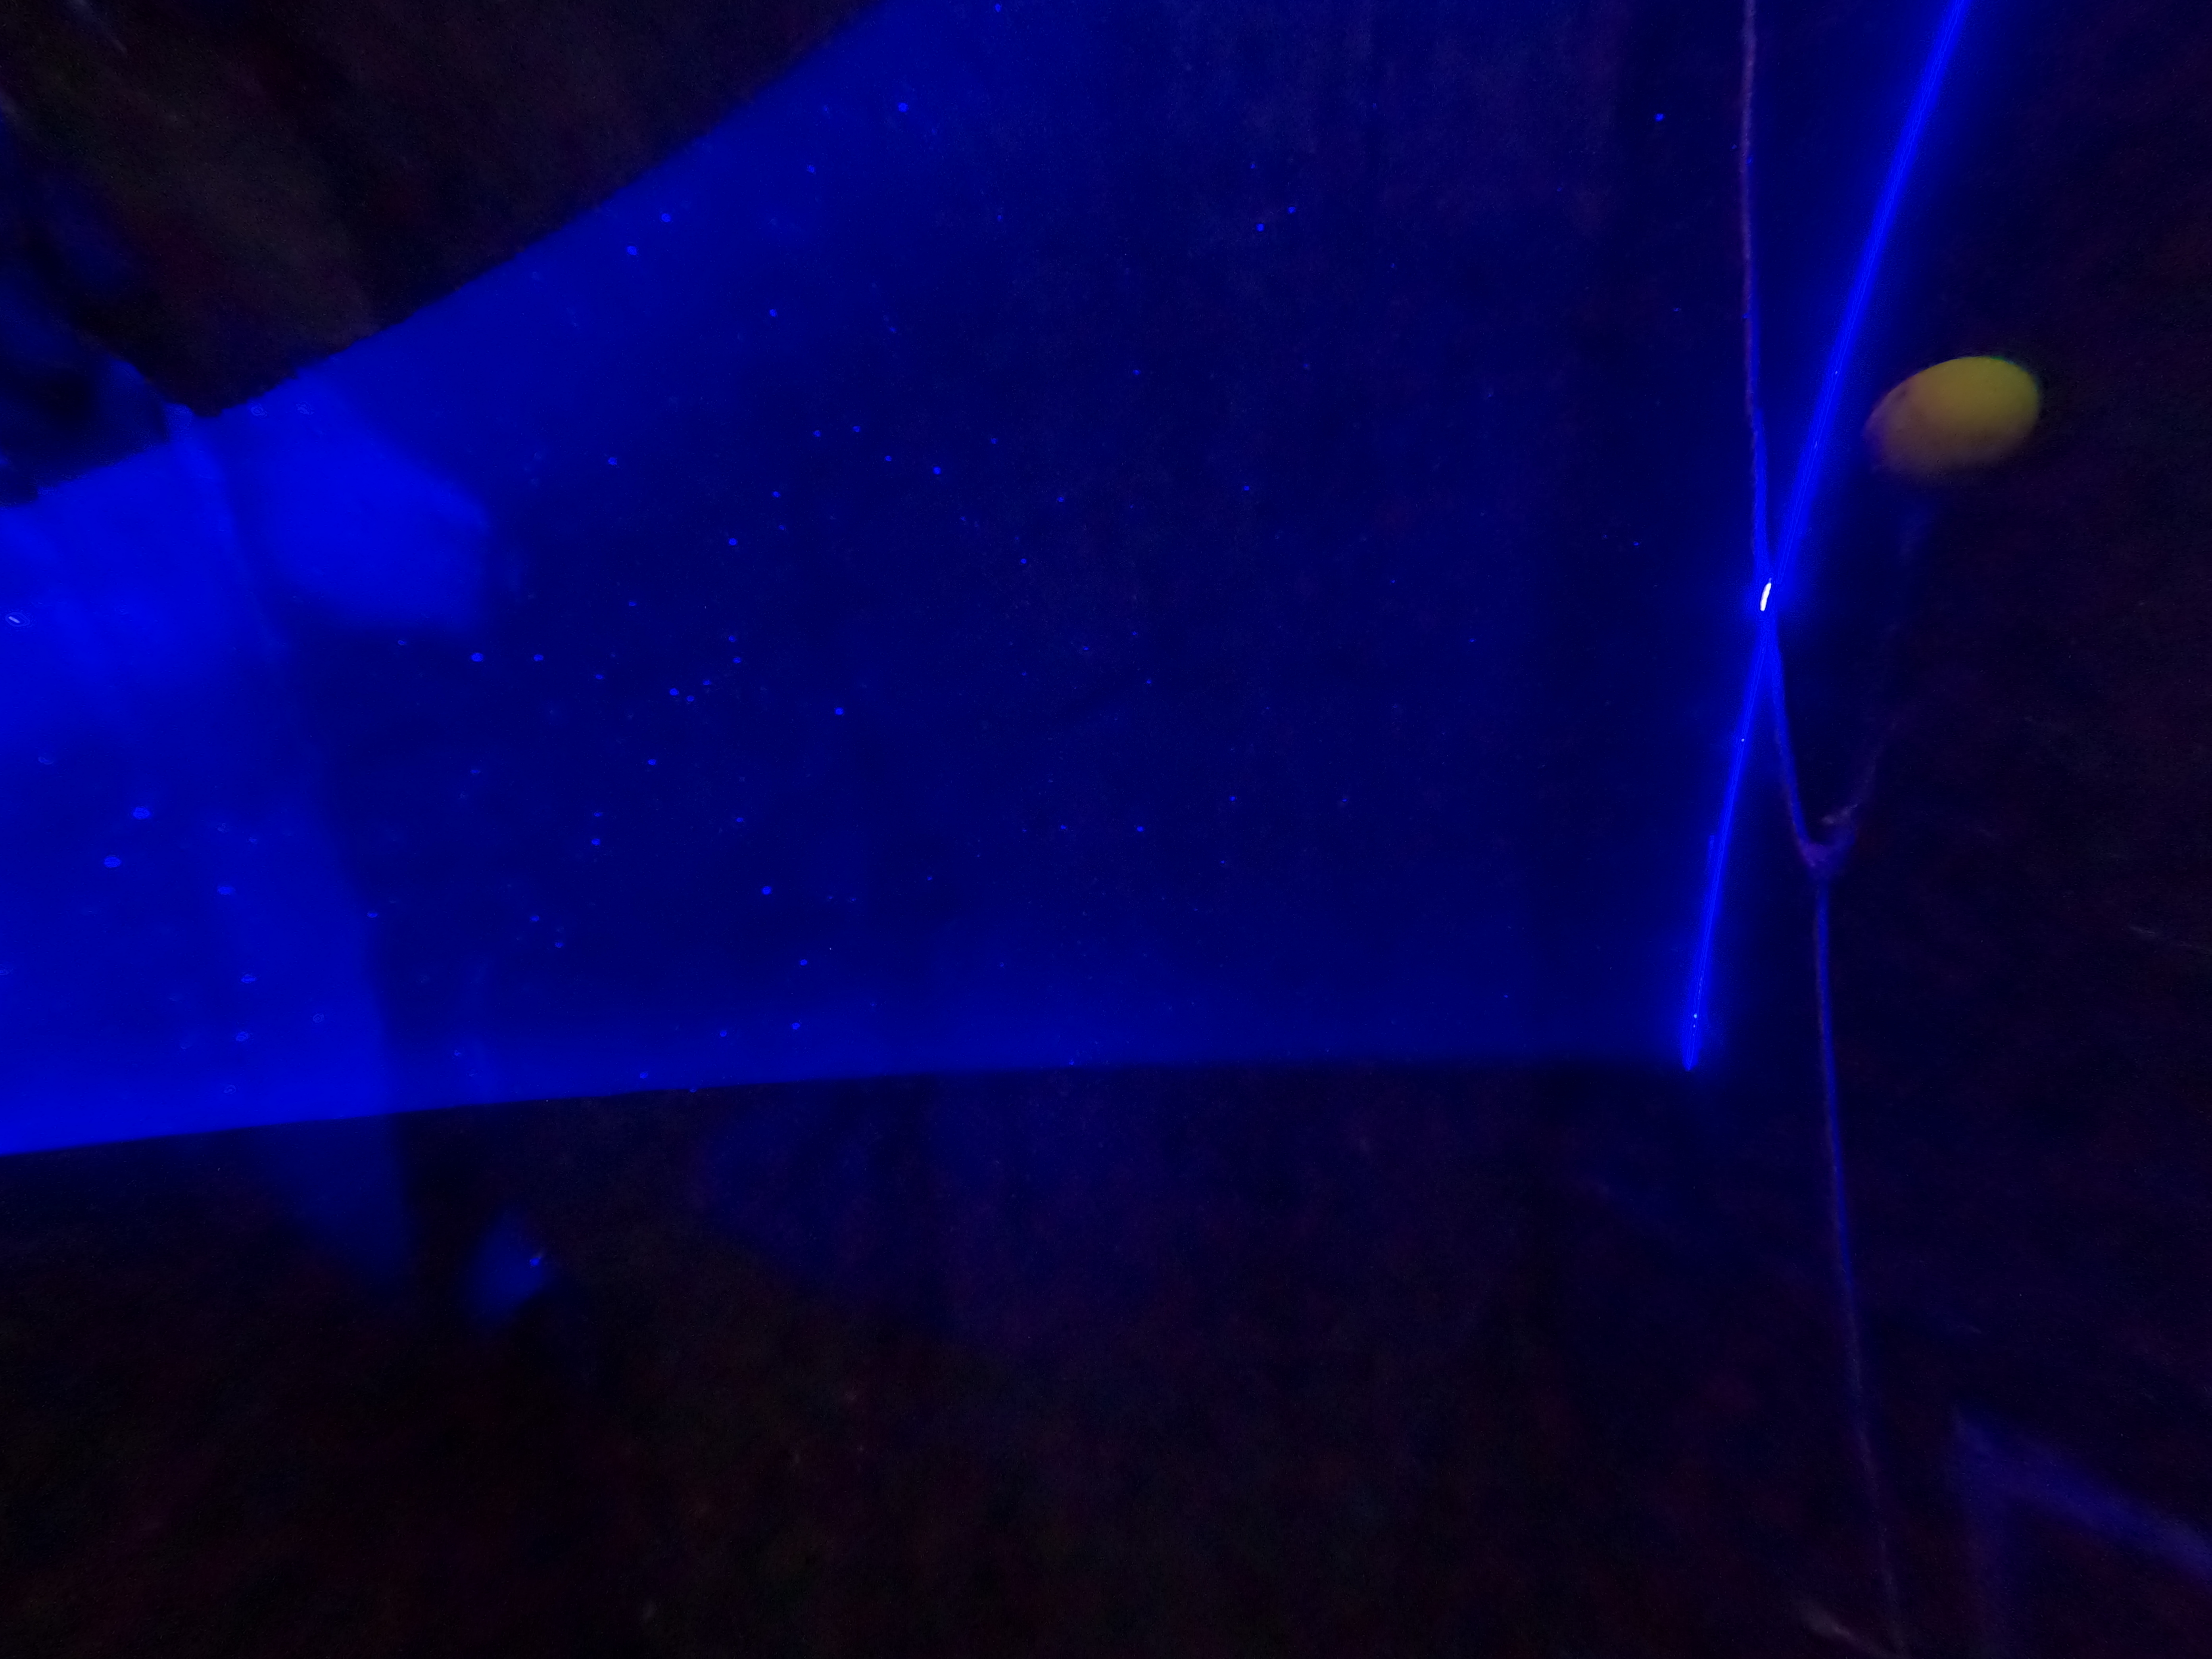

Supplement: Supplementary file 1498 [file G0032197.pdf › 11/G0032197.pdf]

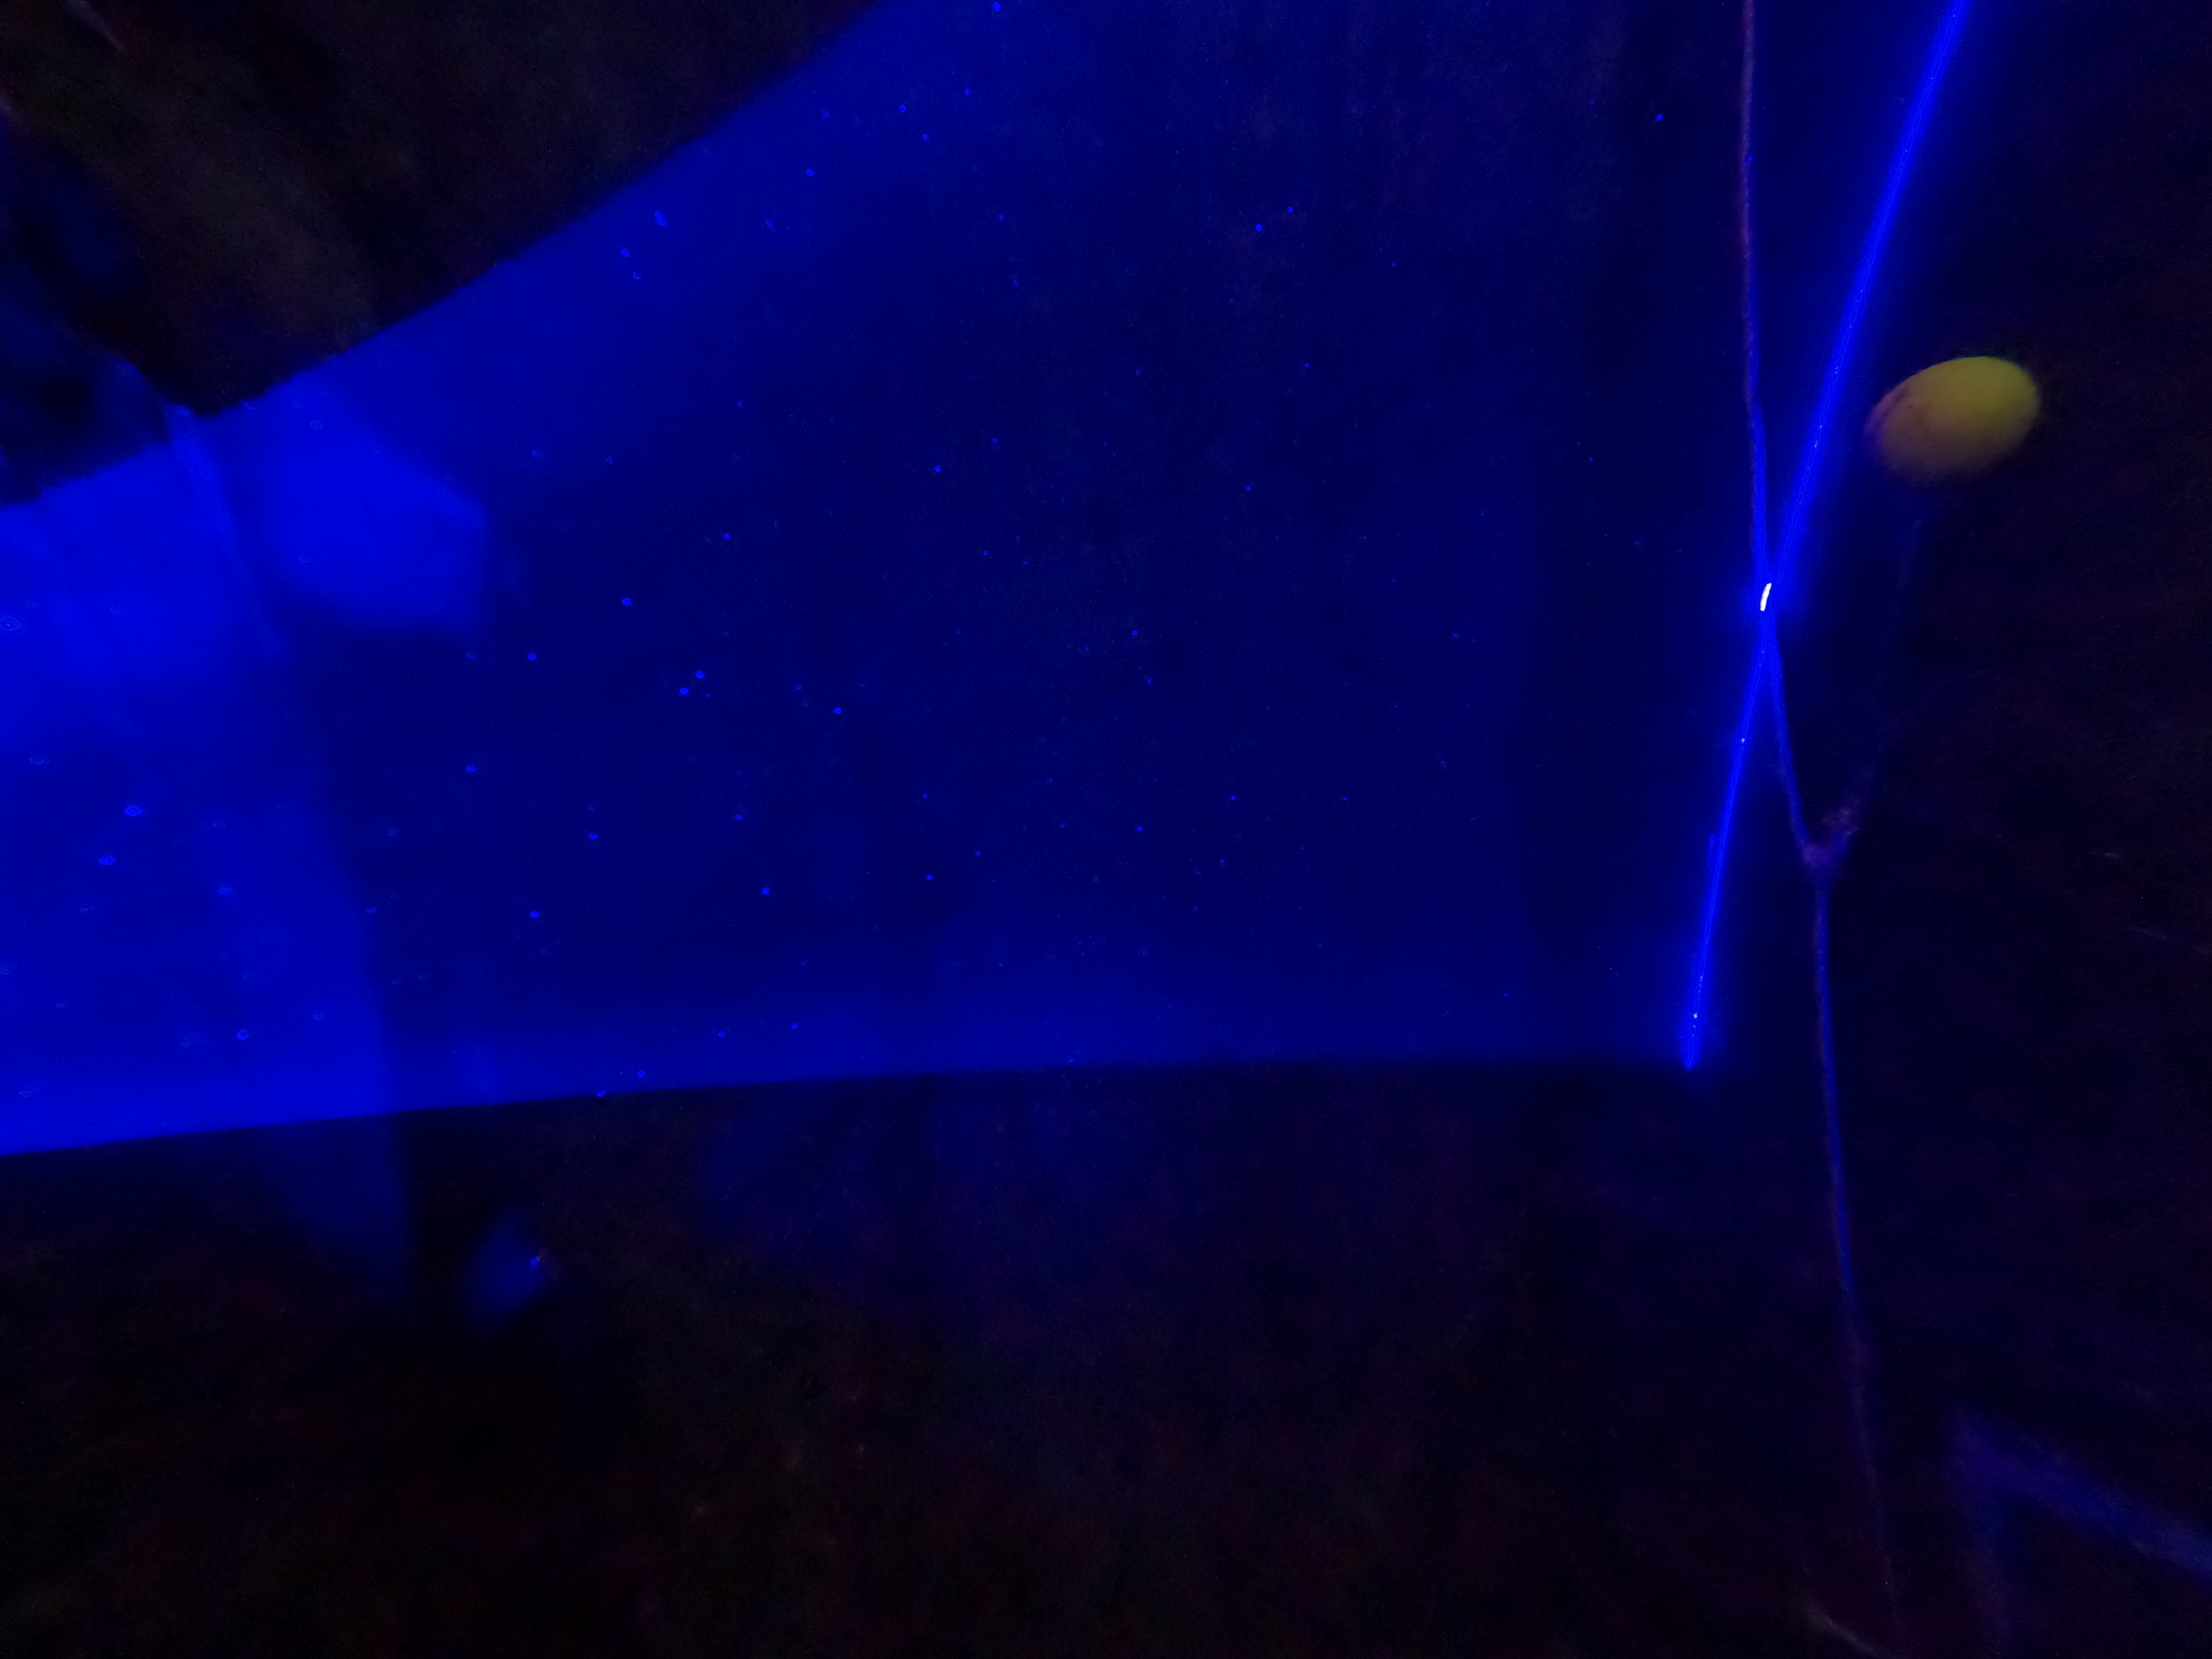

Supplement: Supplementary file 1499 [file G0032198.pdf › 11/G0032198.pdf]

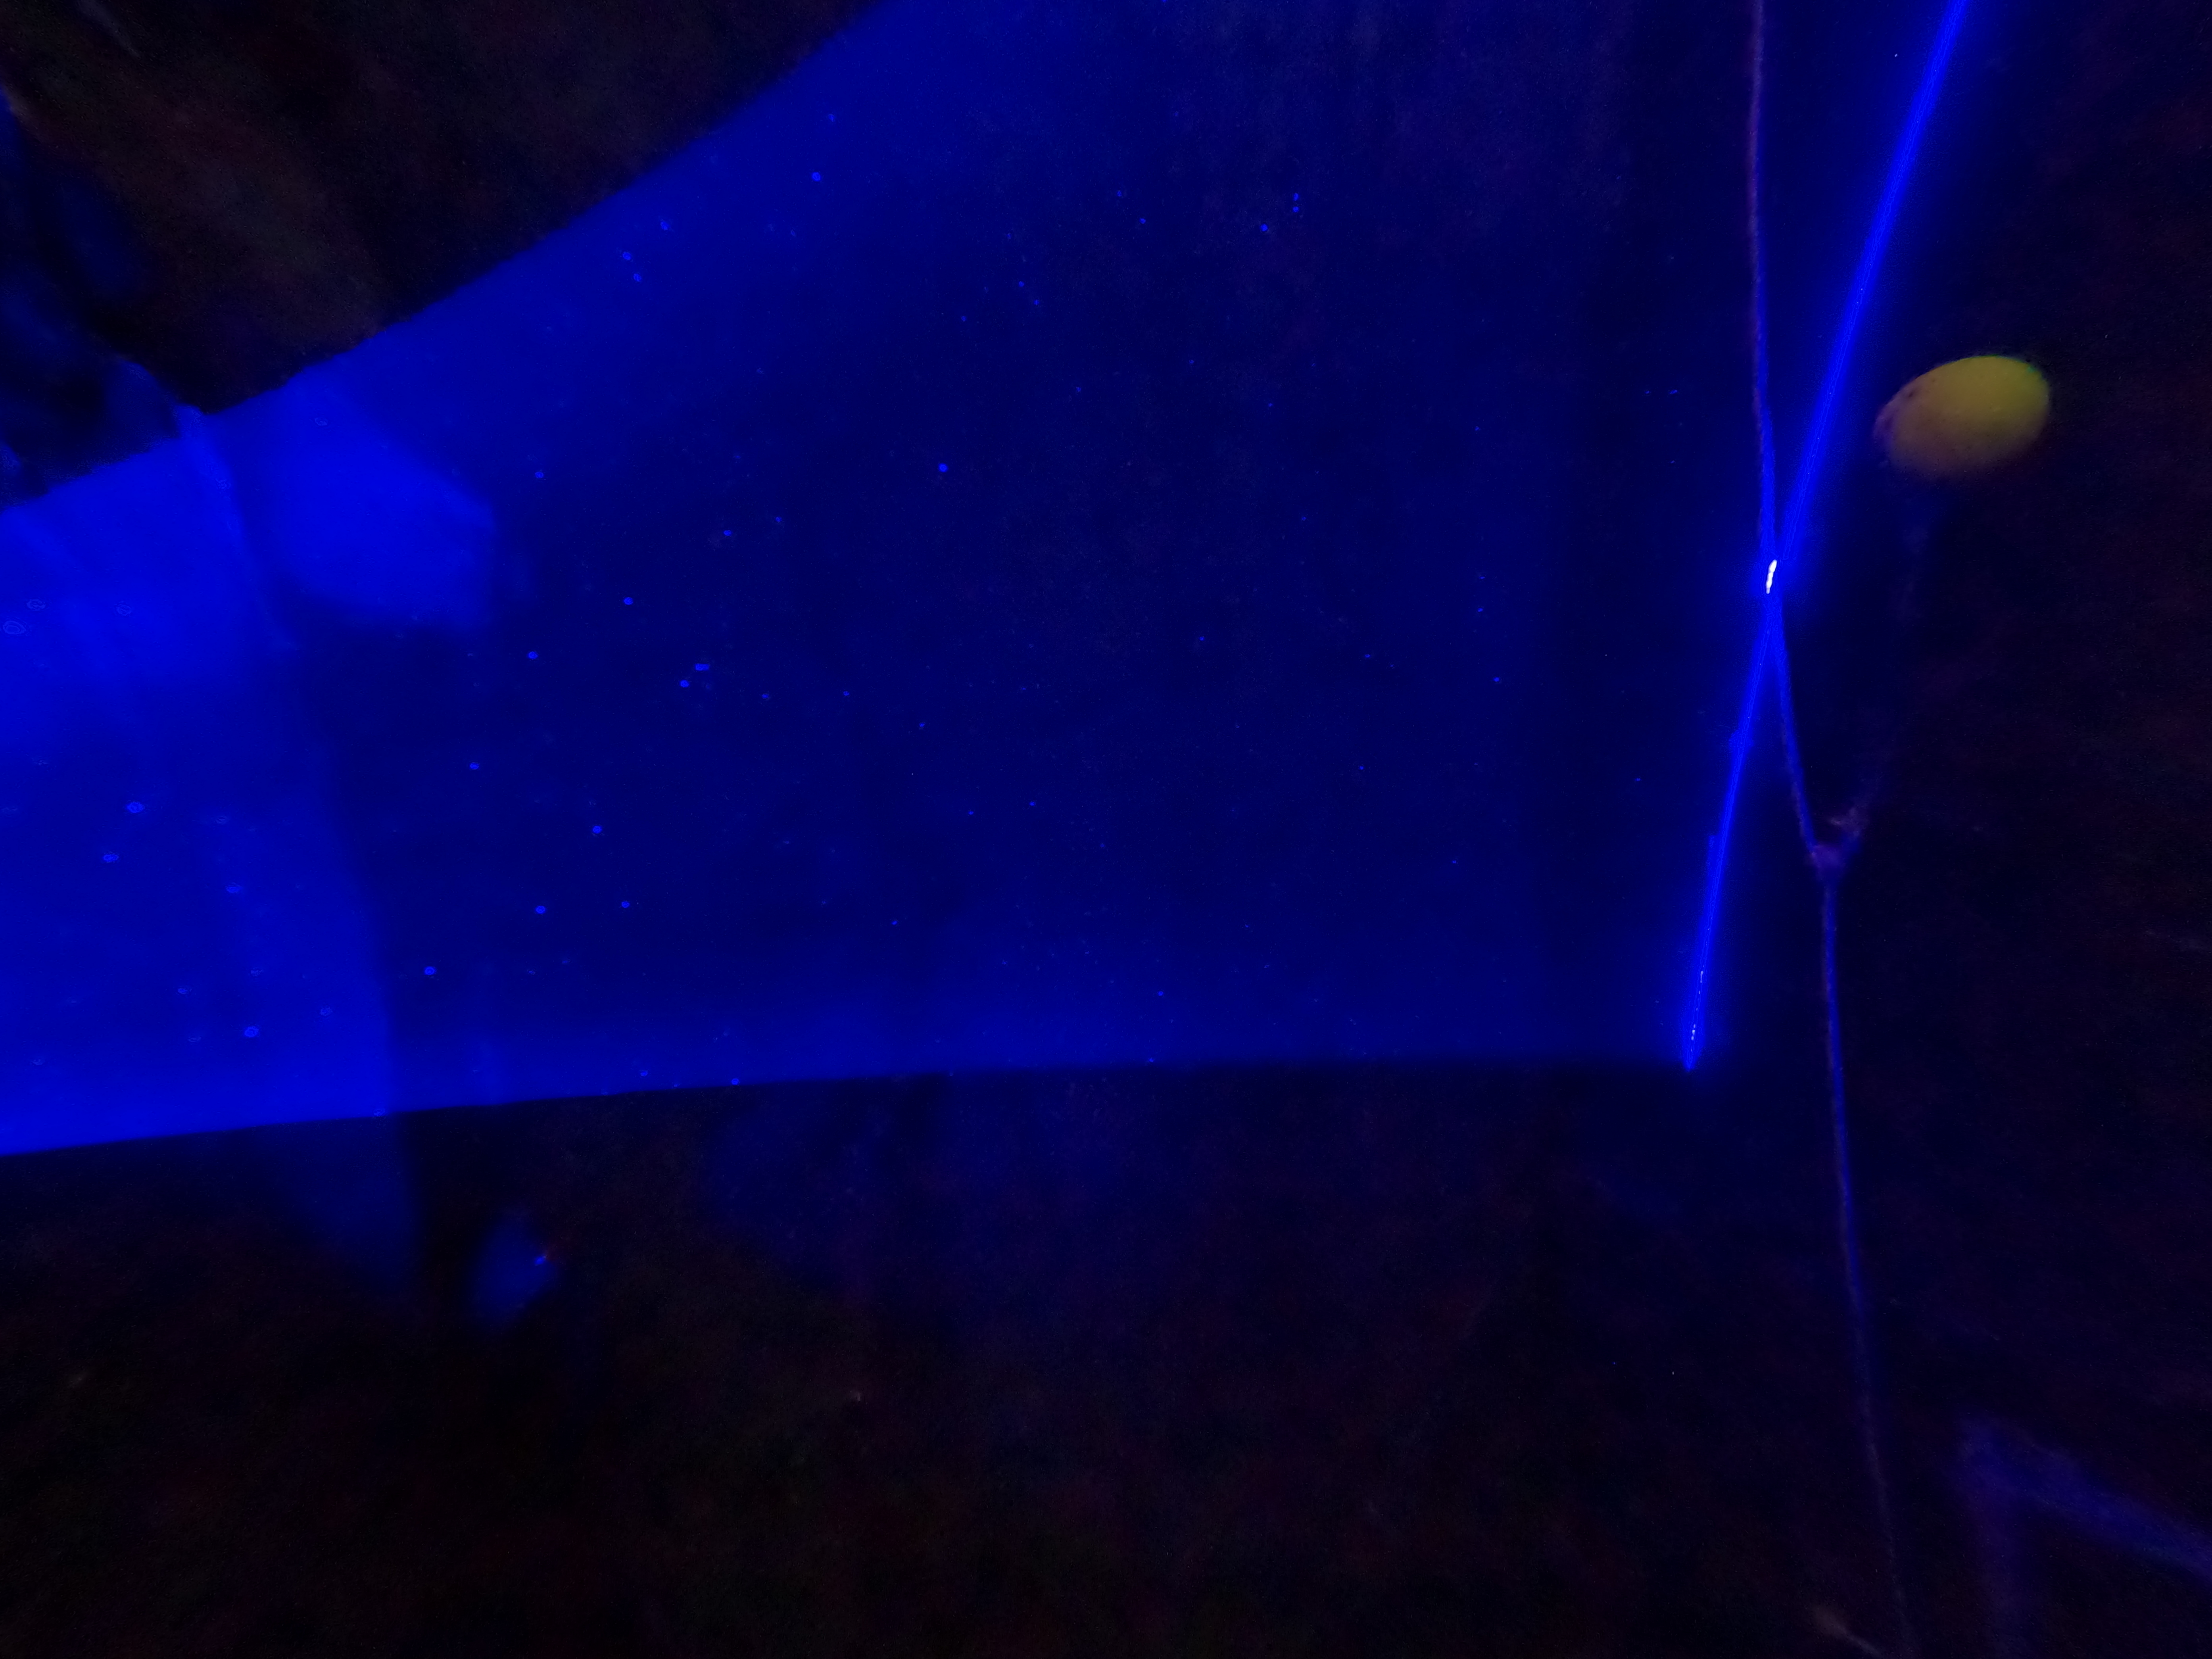

Supplement: Supplementary file 1500 [file G0032199.pdf › 11/G0032199.pdf]

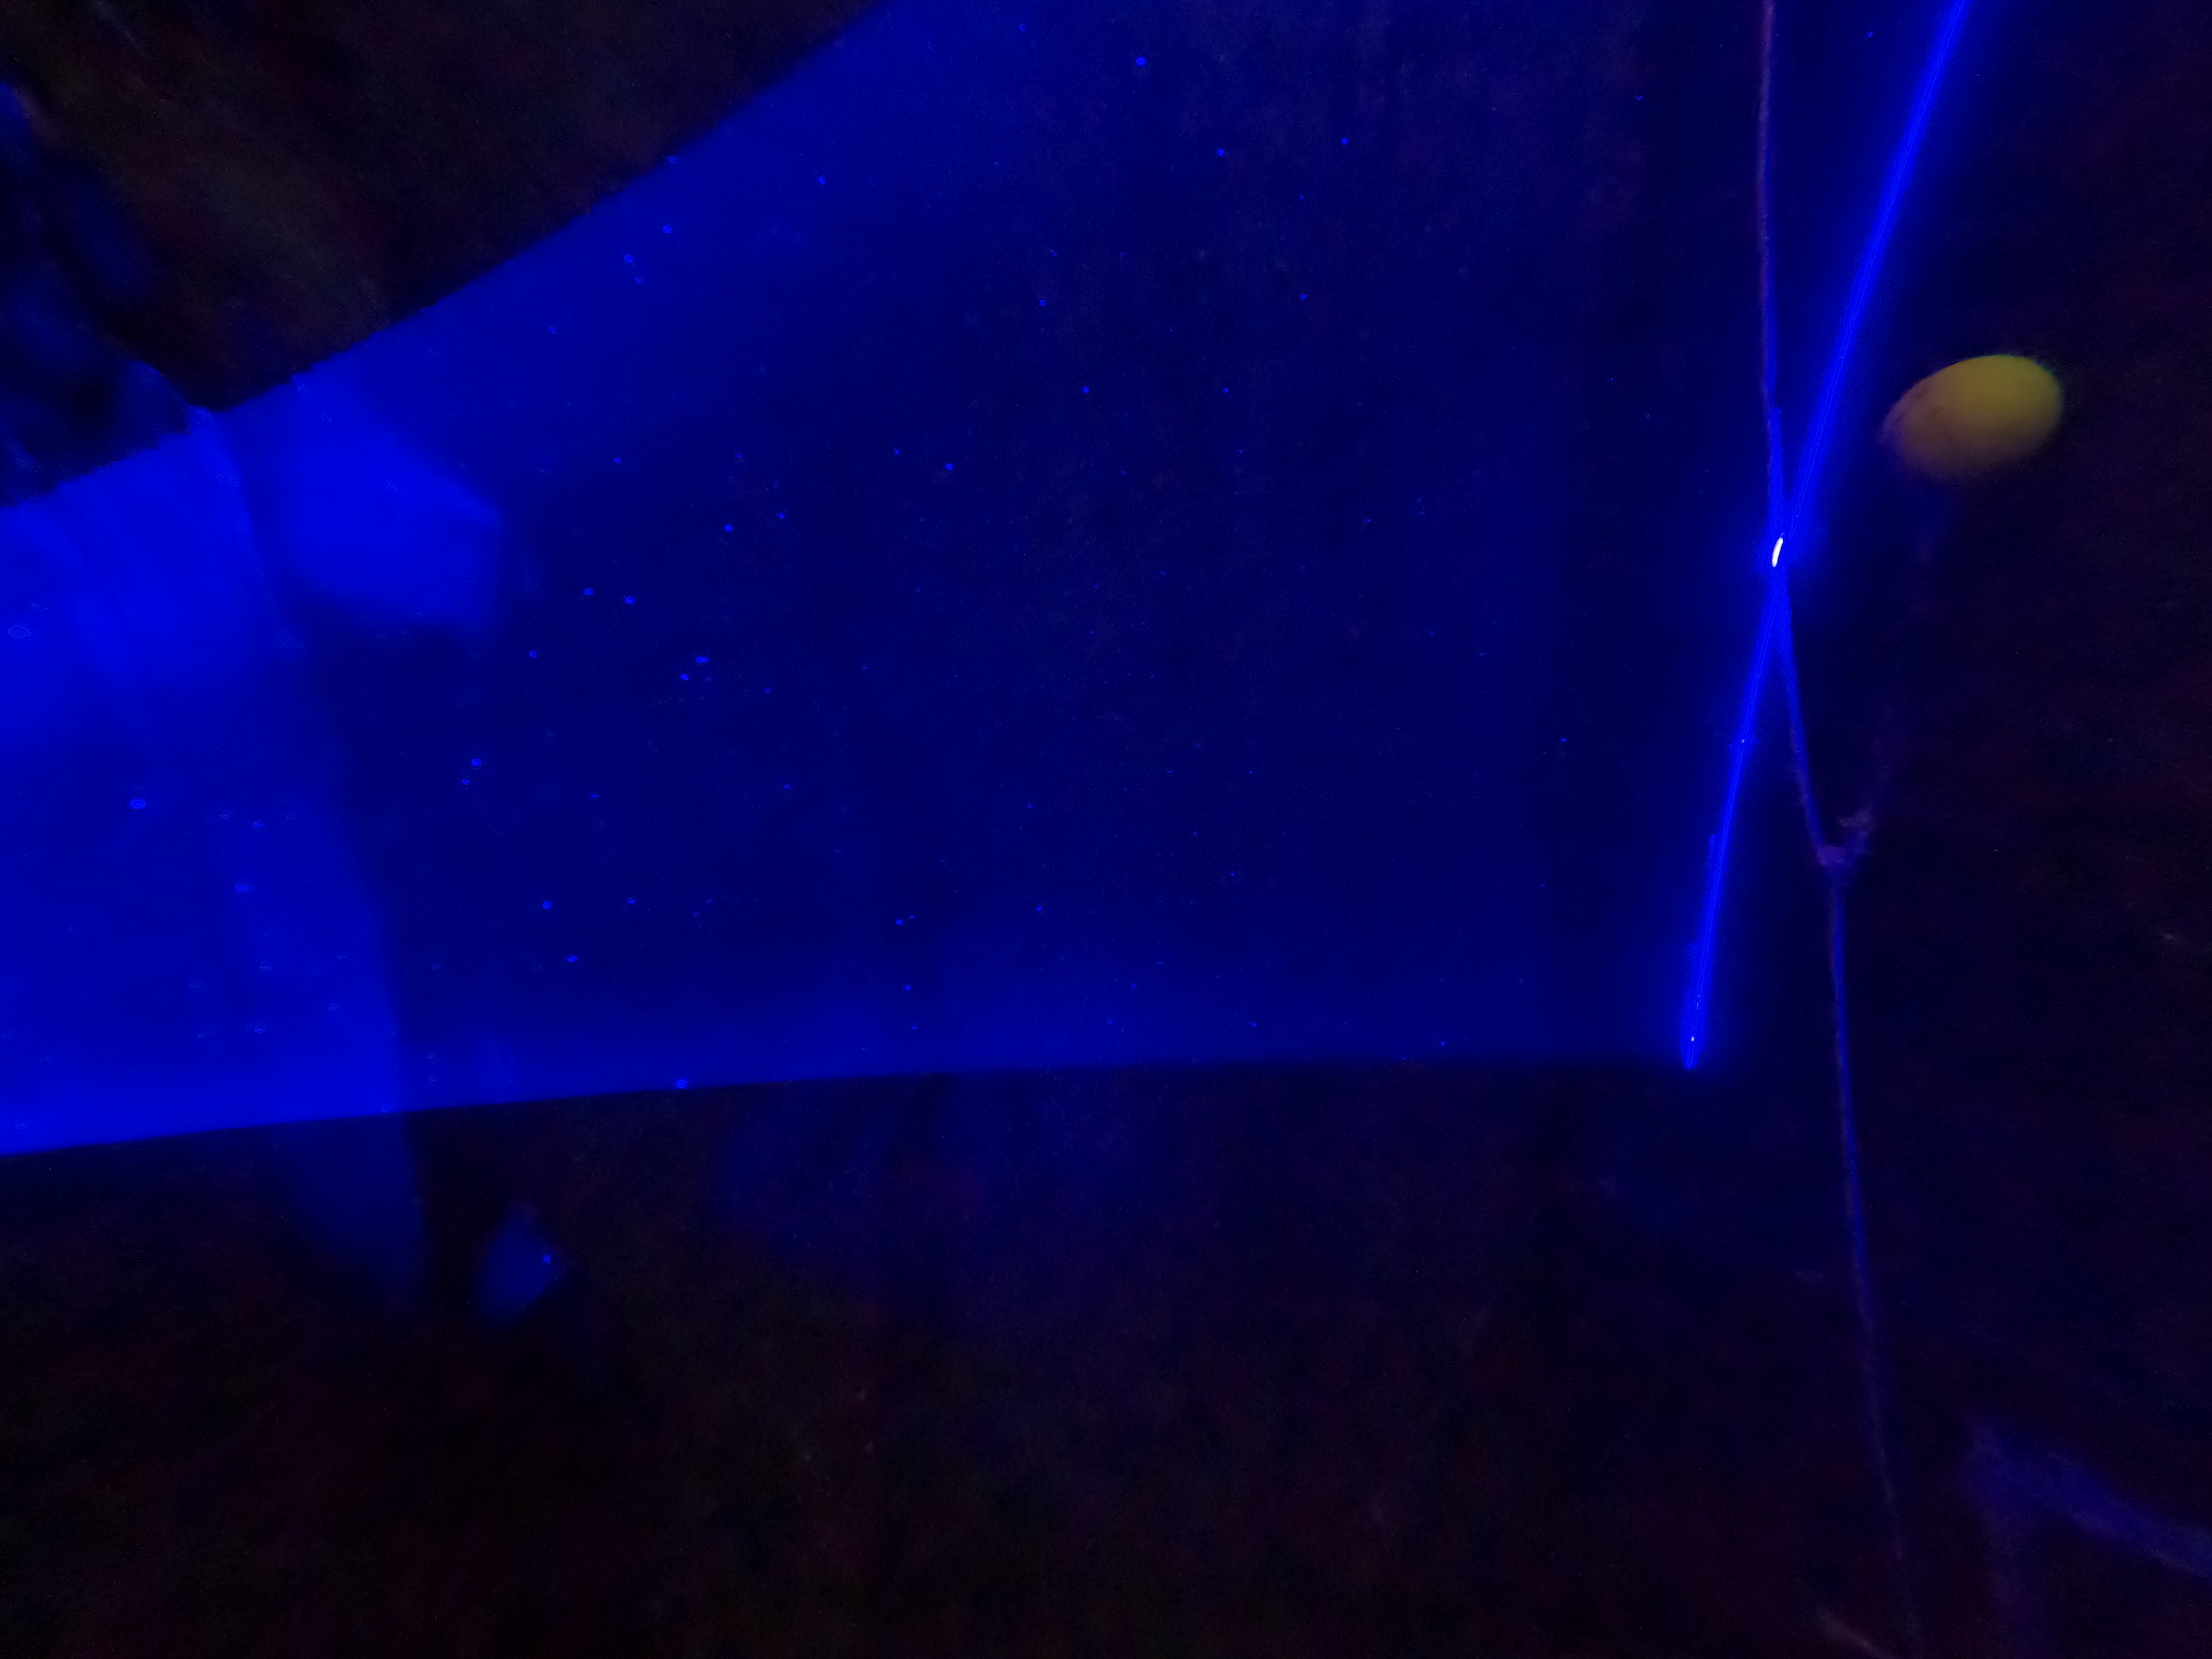

Supplement: Supplementary file 1501 [file G0032200.pdf › 11/G0032200.pdf]

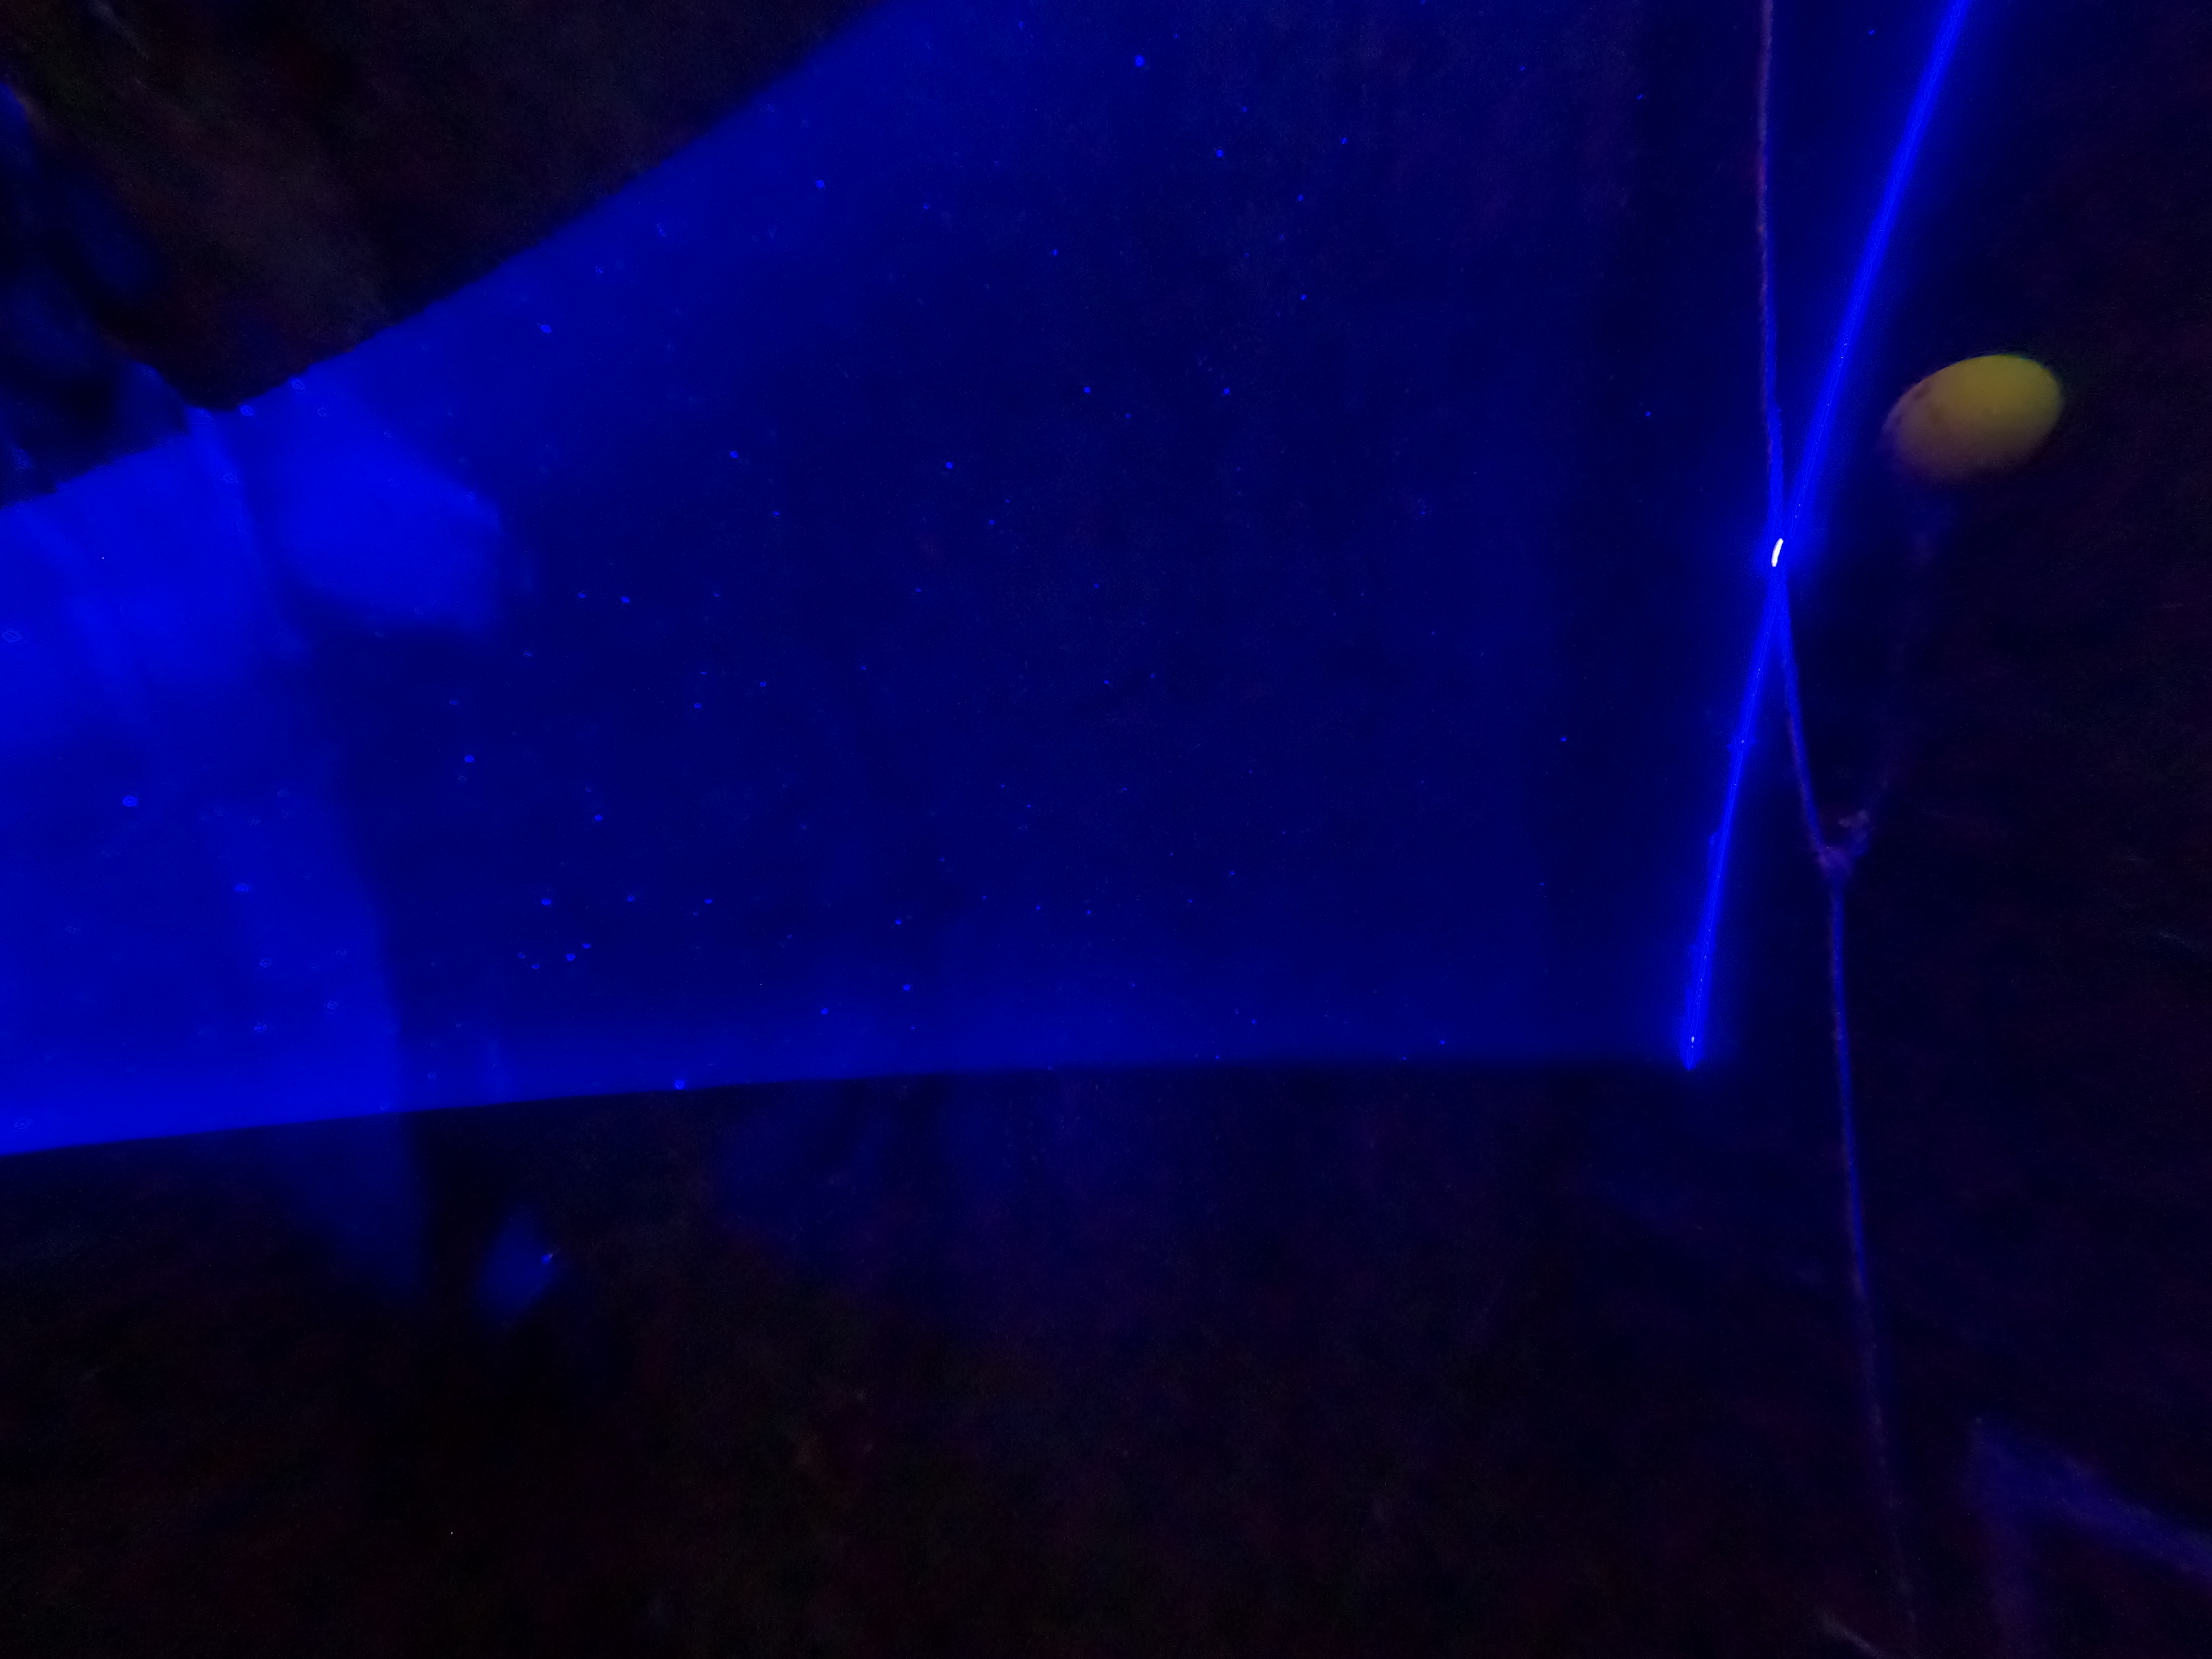

Supplement: Supplementary file 1502 [file G0032201.pdf › 11/G0032201.pdf]

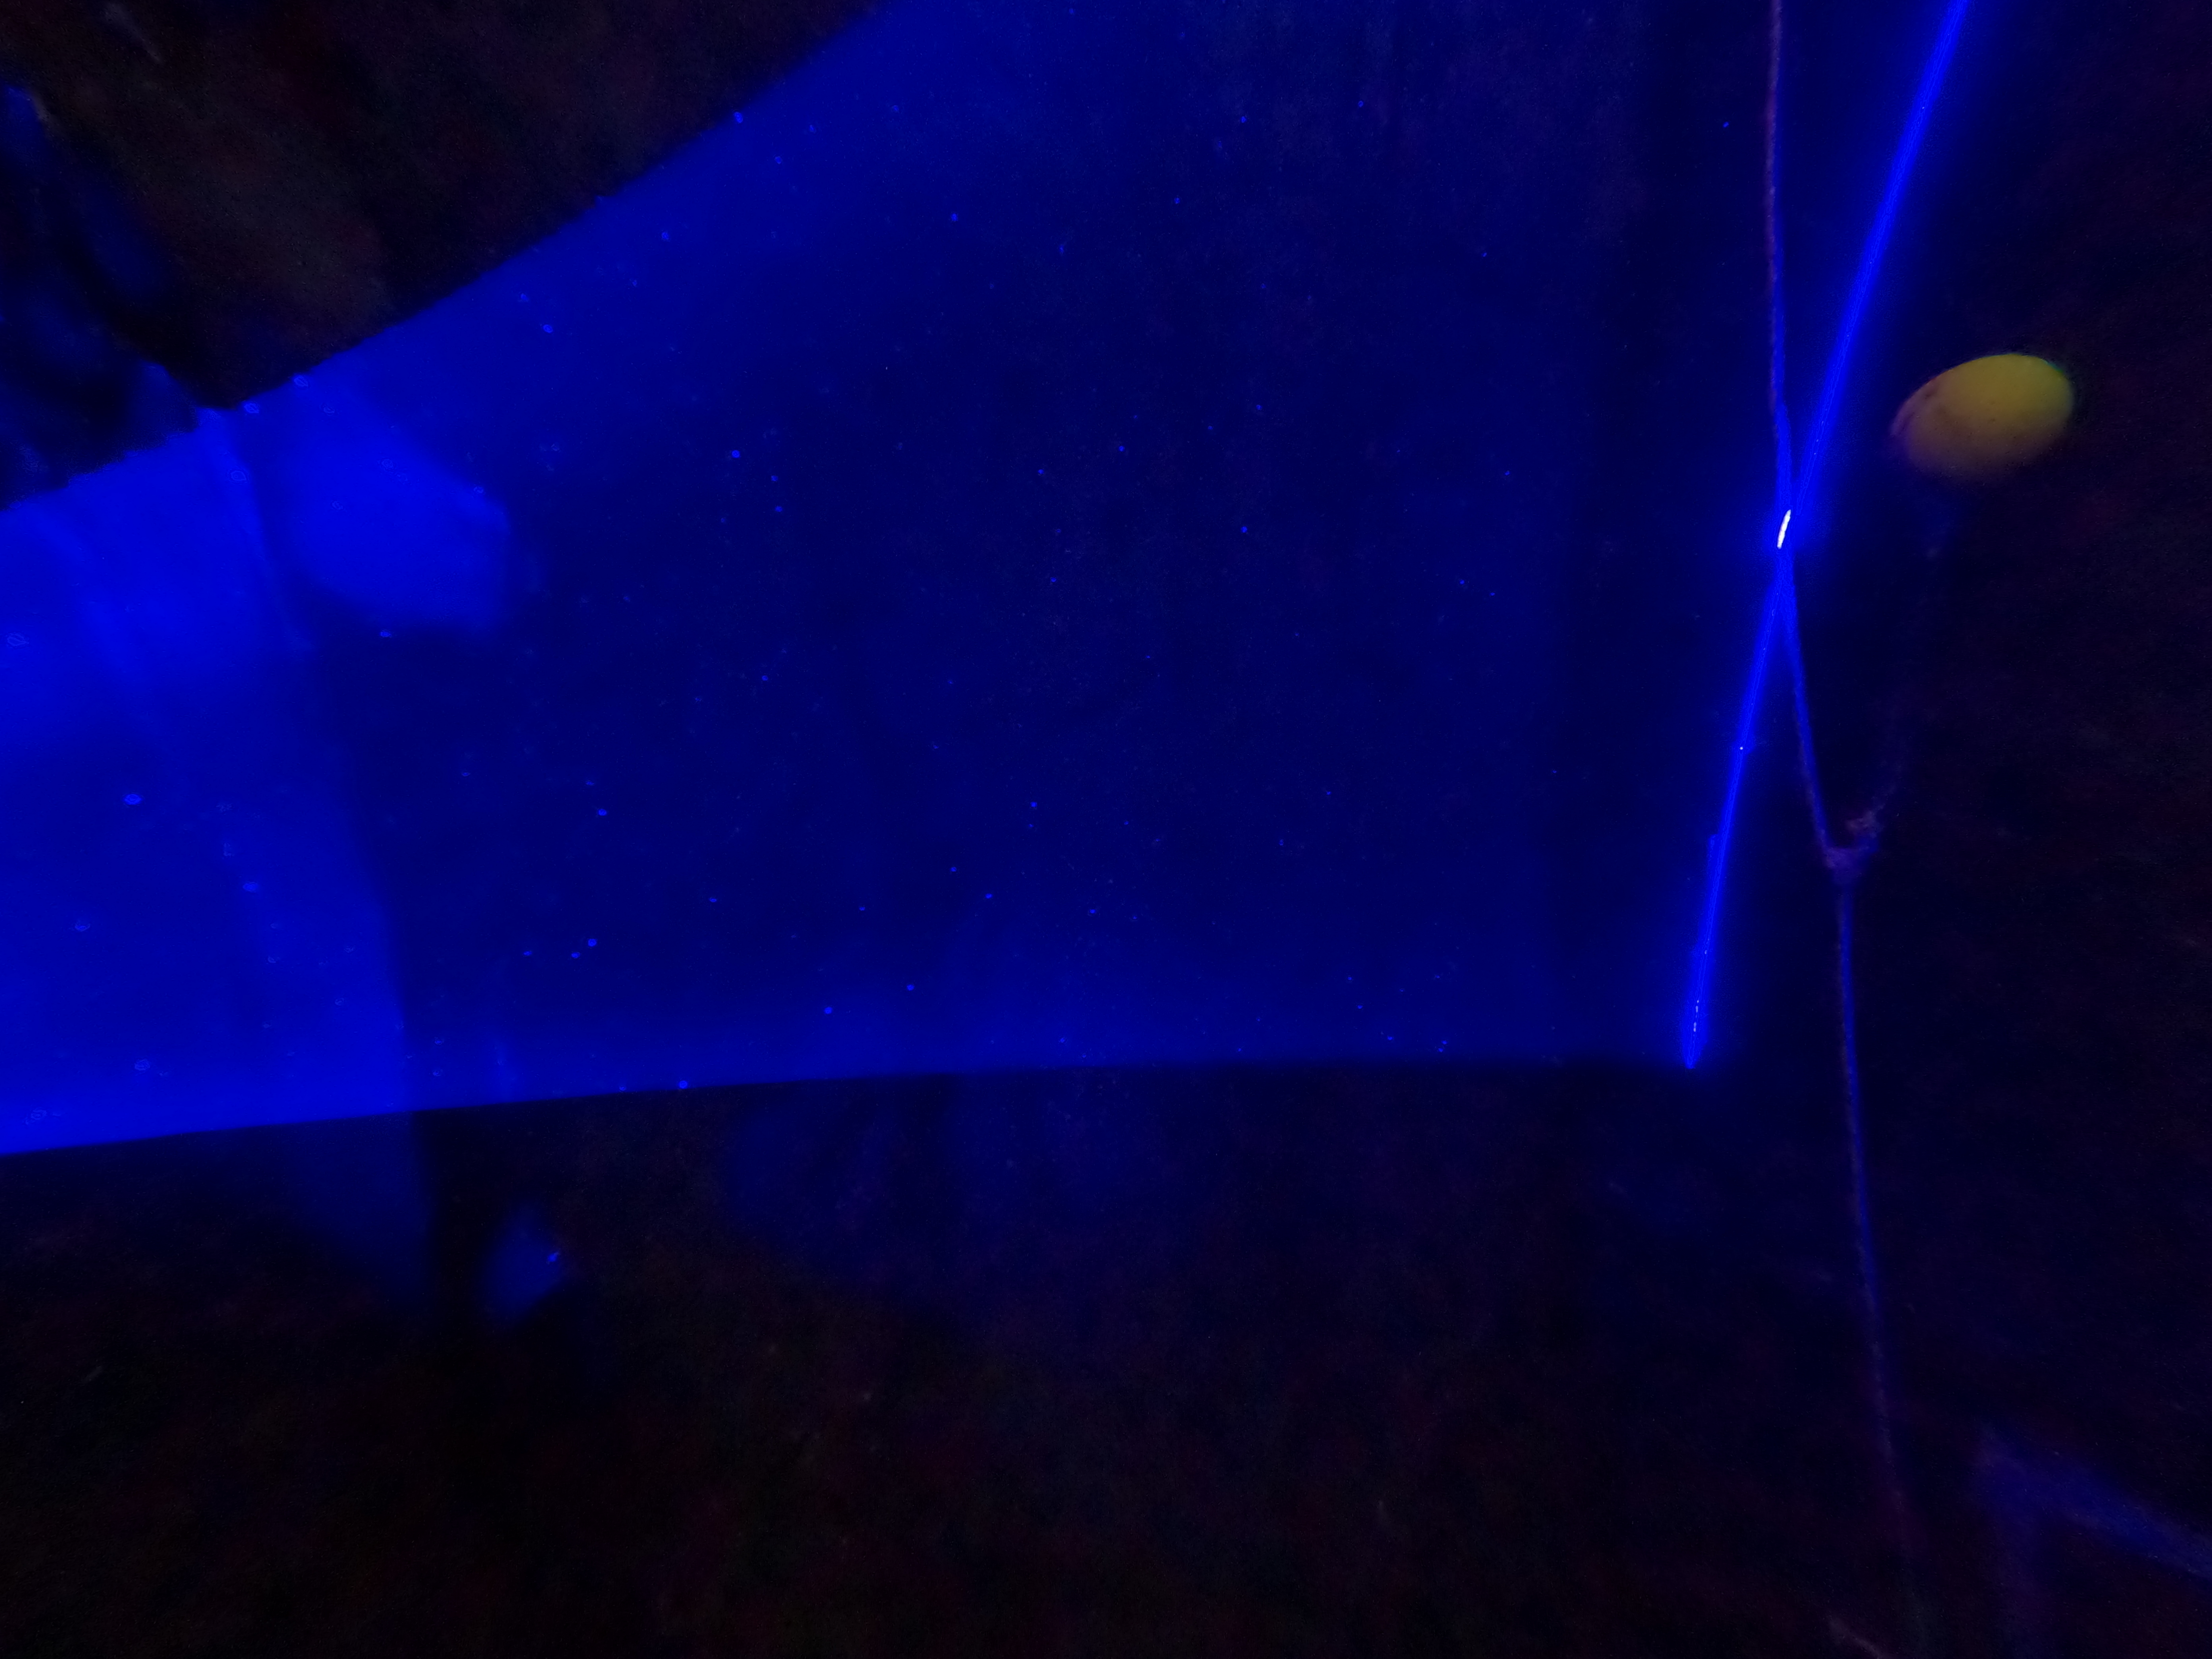

Supplement: Supplementary file 1503 [file G0032202.pdf › 11/G0032202.pdf]

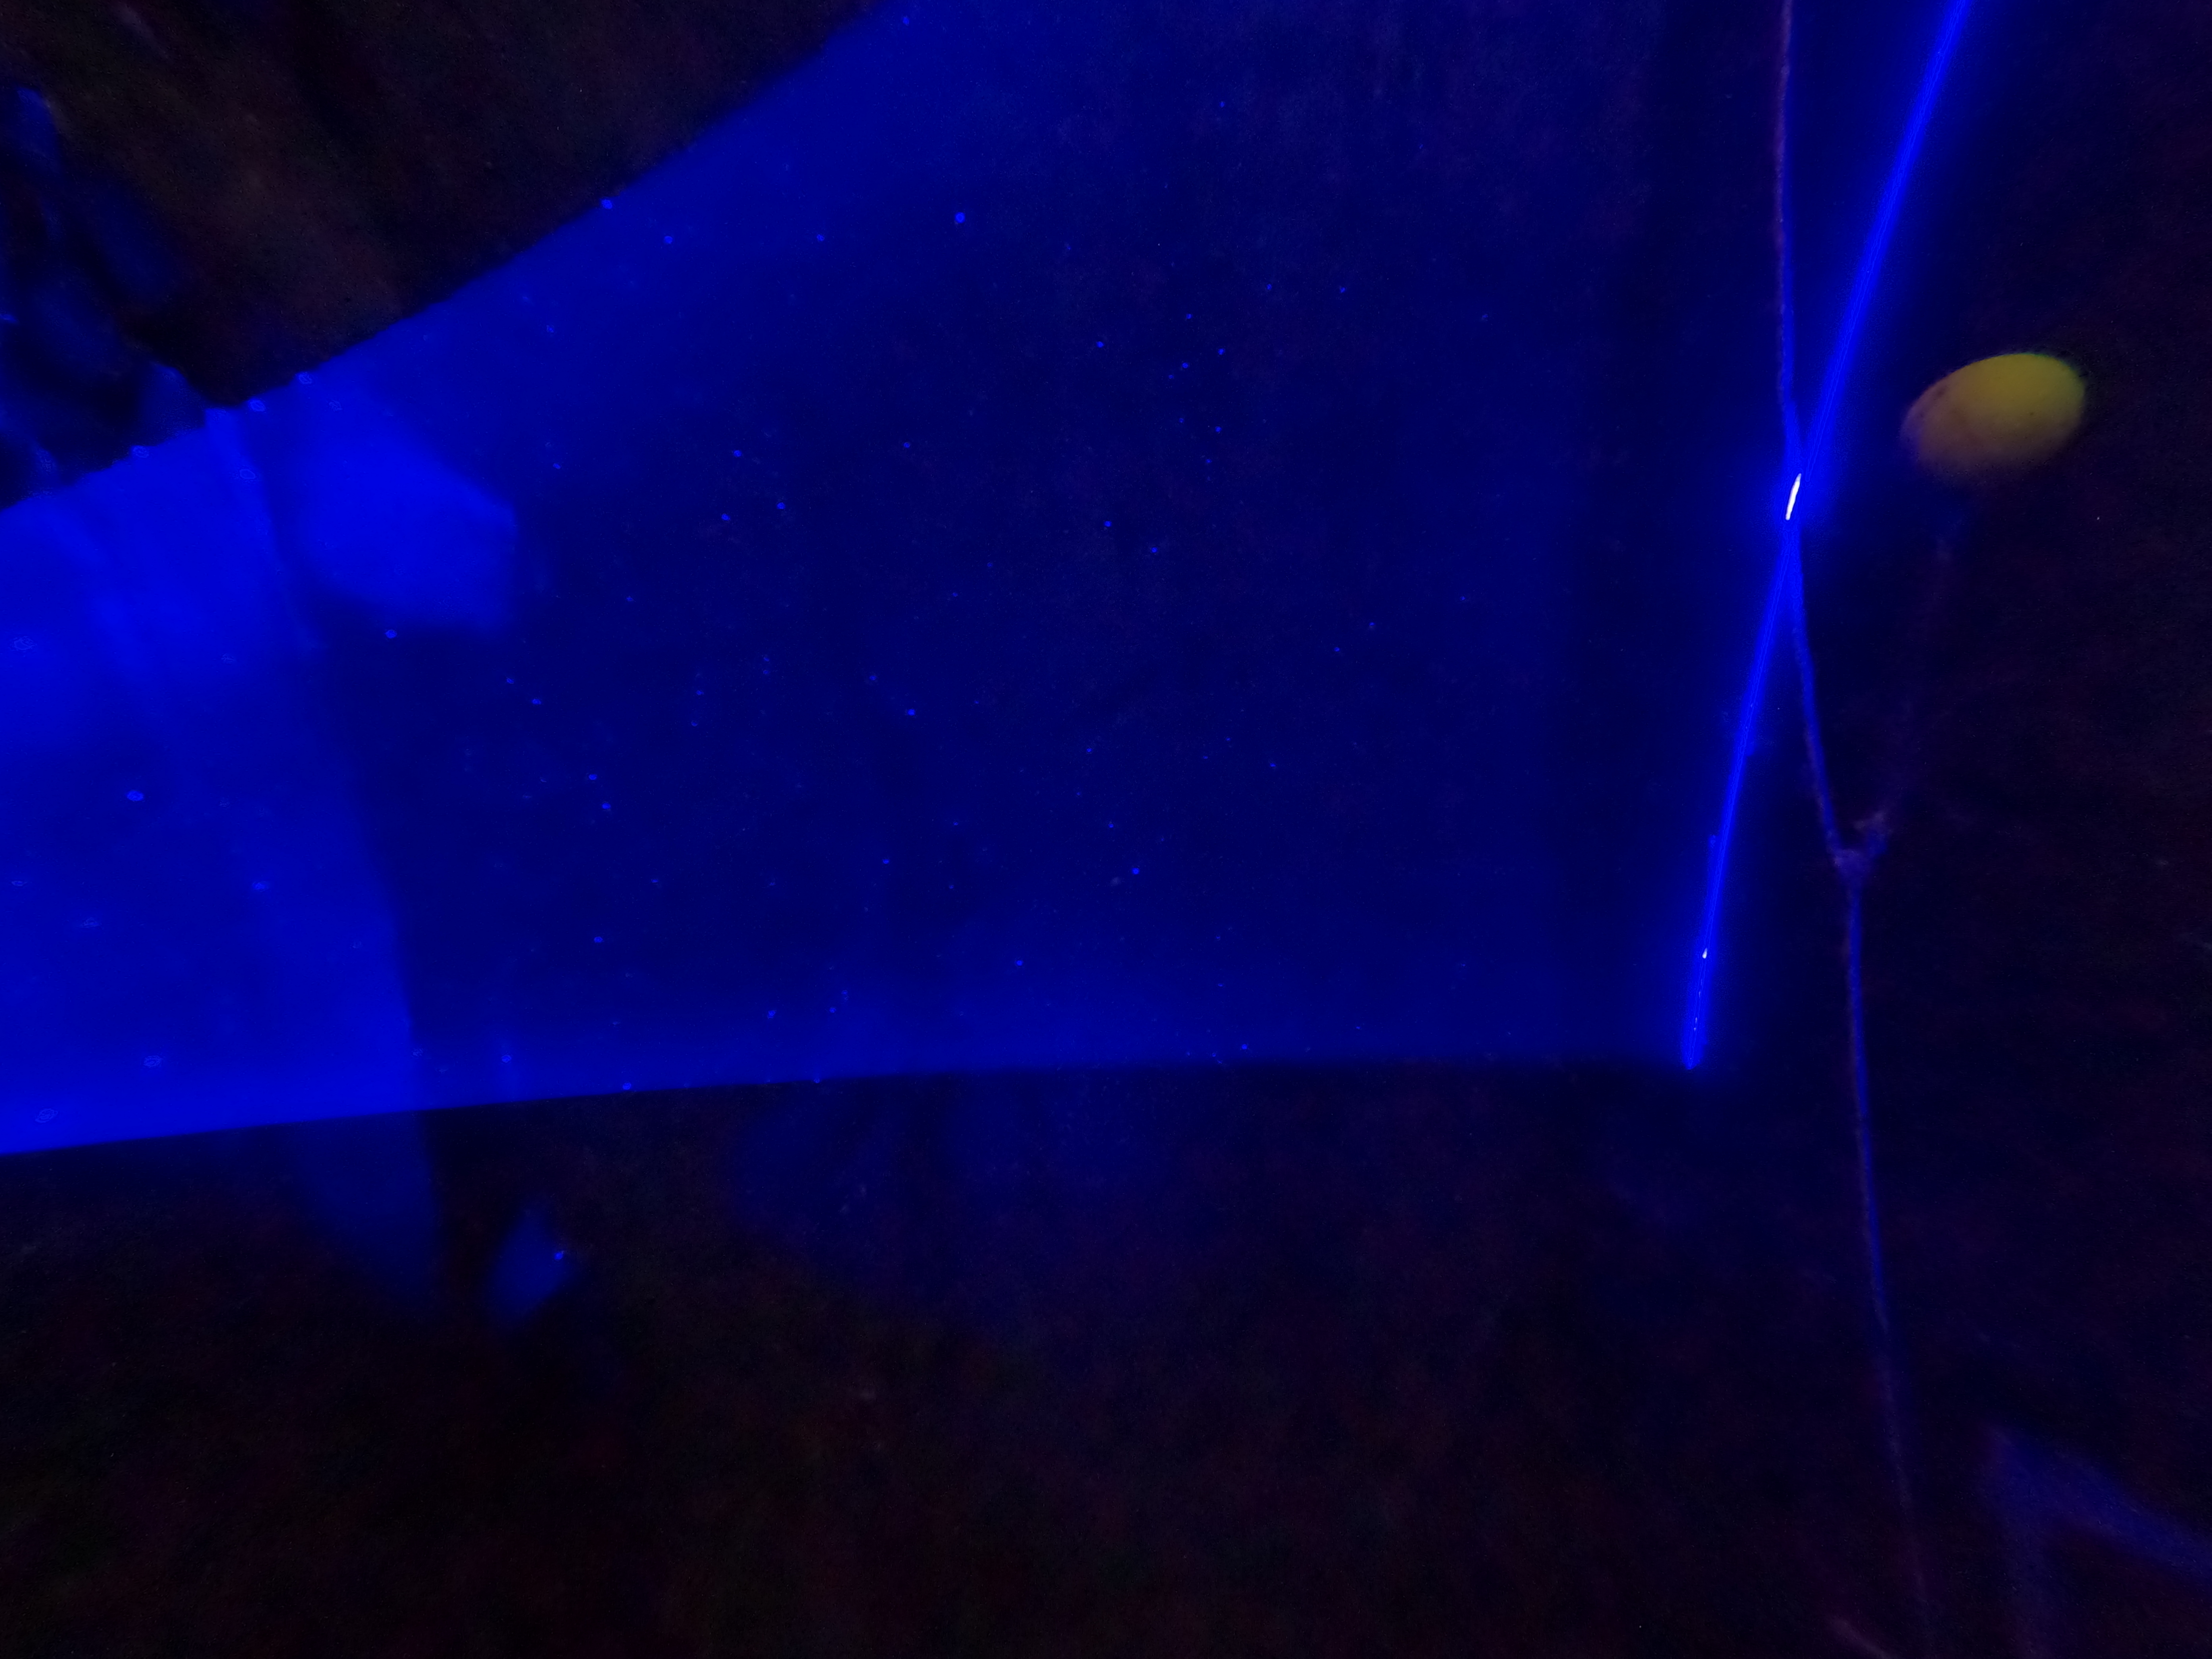

Supplement: Supplementary file 1504 [file G0032203.pdf › 11/G0032203.pdf]

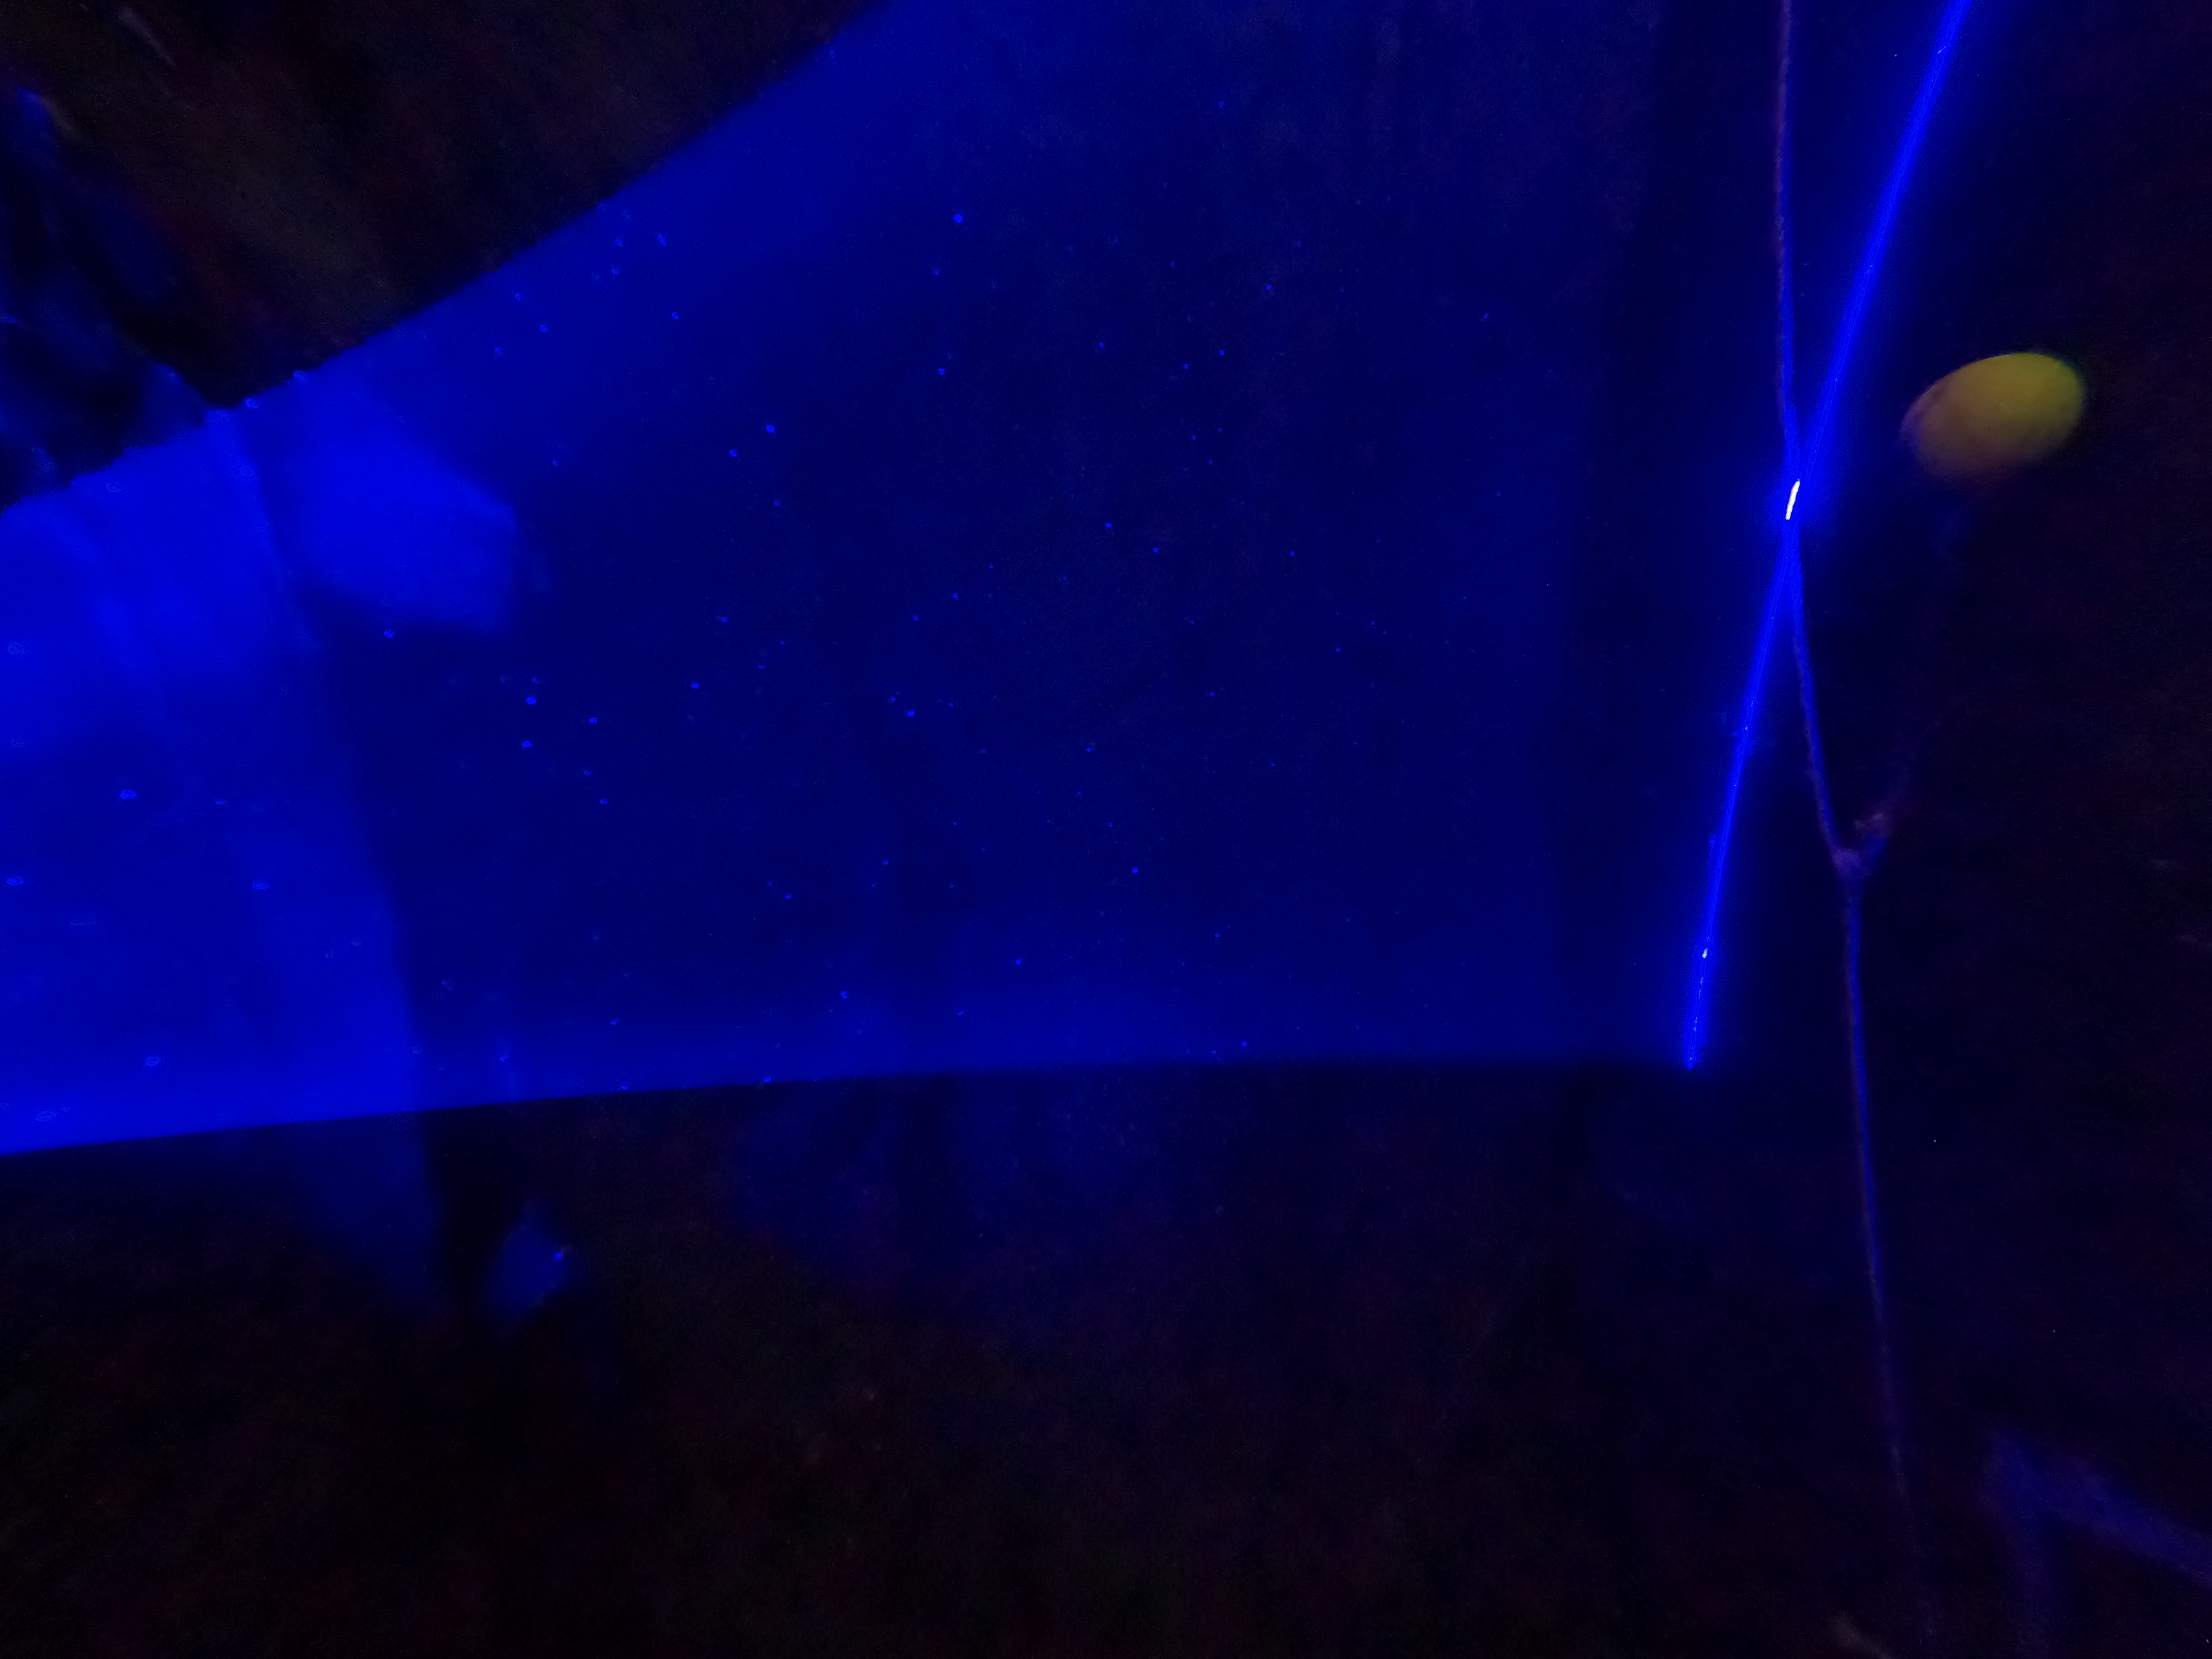

Supplement: Supplementary file 1505 [file G0032204.pdf › 11/G0032204.pdf]

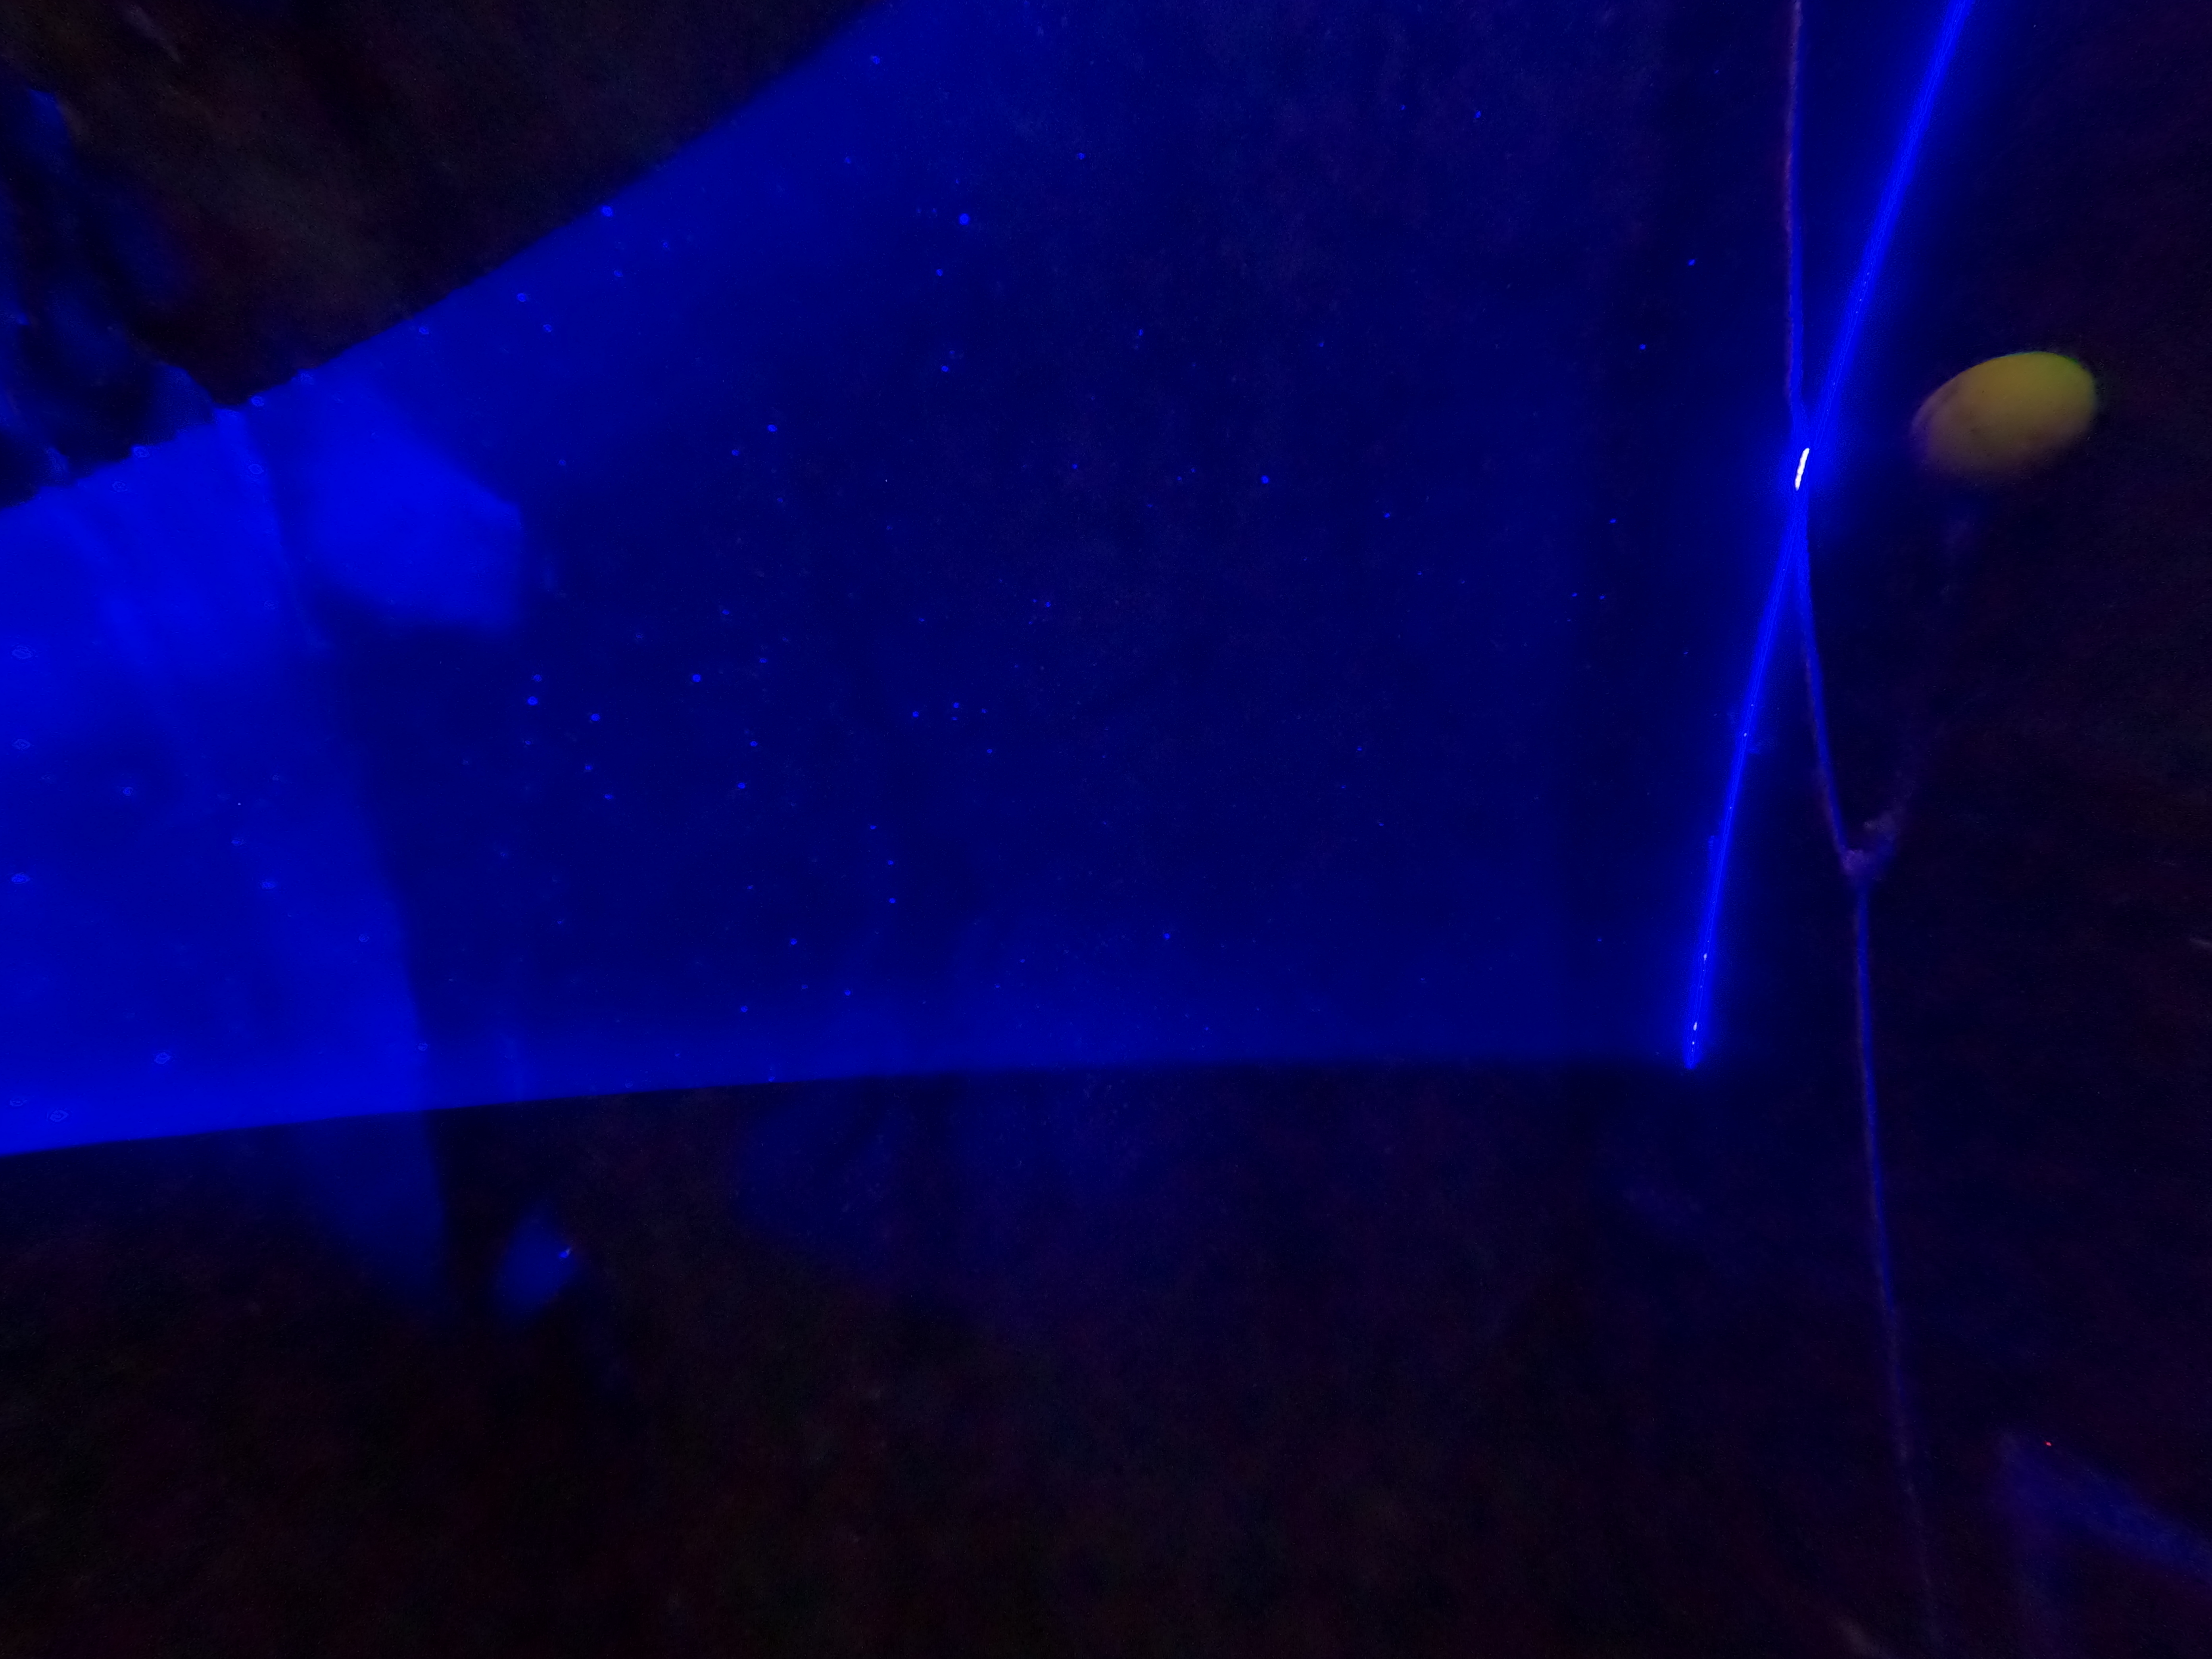

Supplement: Supplementary file 1506 [file G0032205.pdf › 11/G0032205.pdf]

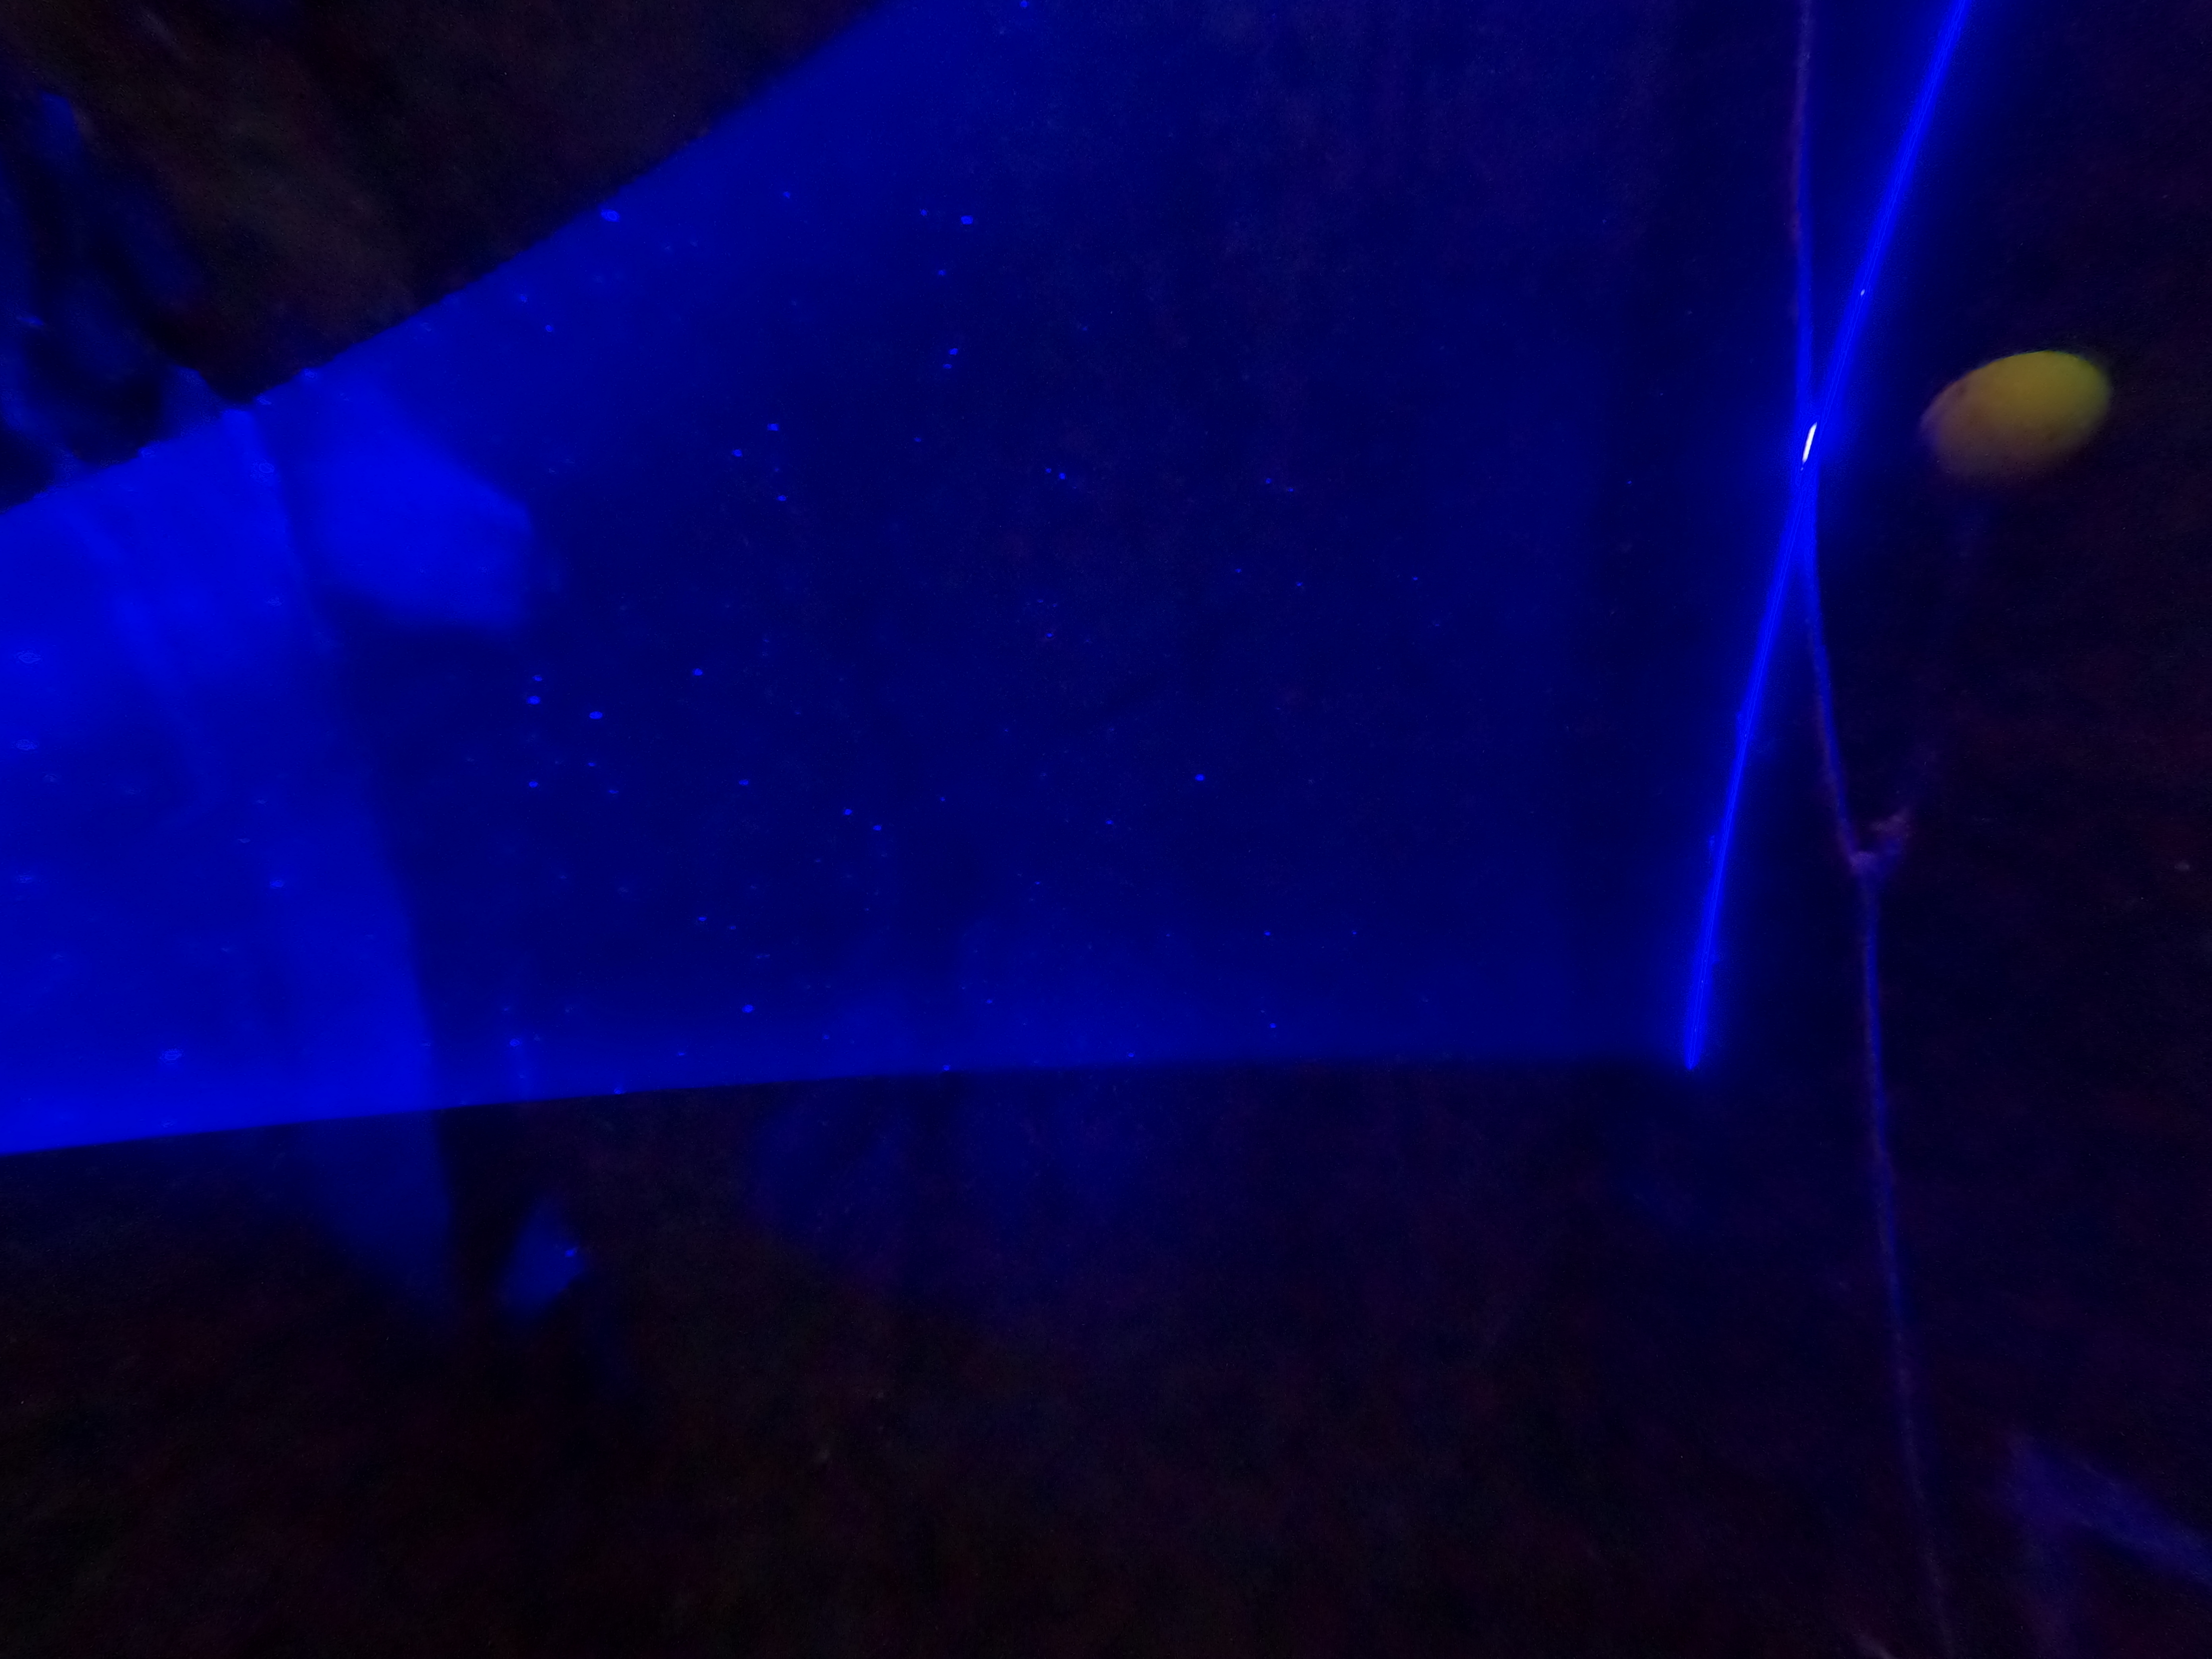

Supplement: Supplementary file 1507 [file G0032206.pdf › 11/G0032206.pdf]

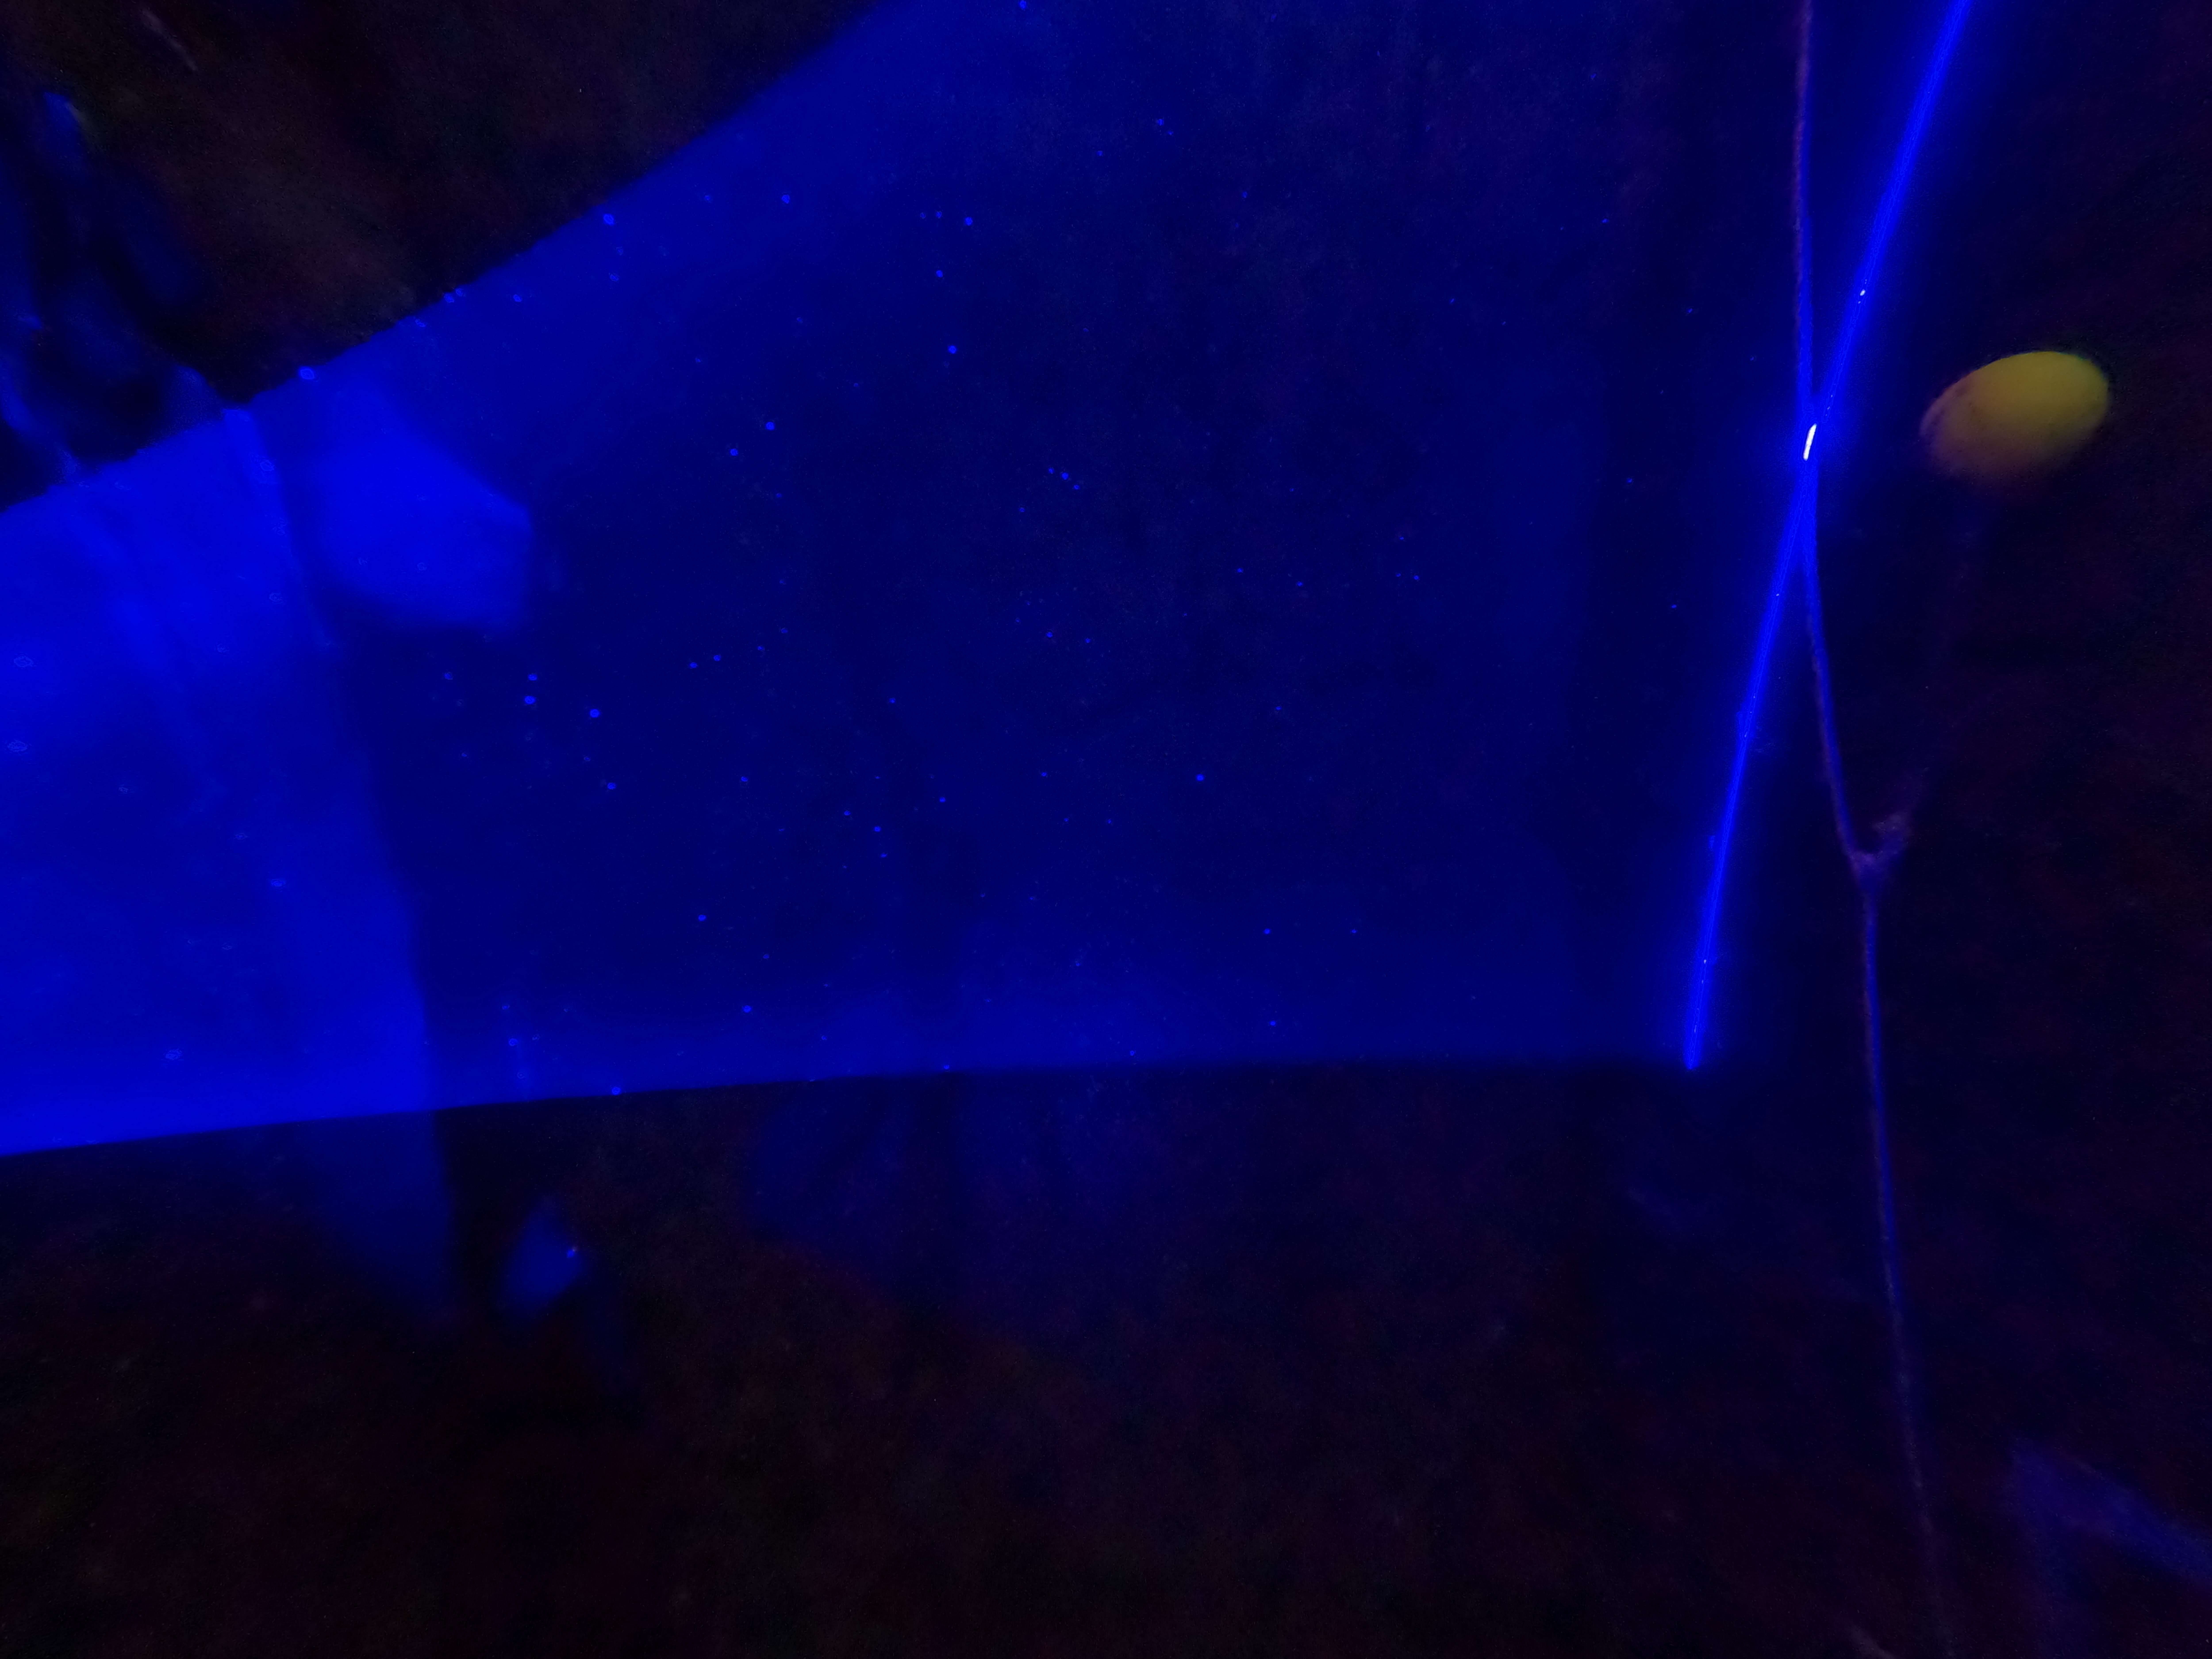

Supplement: Supplementary file 1508 [file G0032207.pdf › 11/G0032207.pdf]

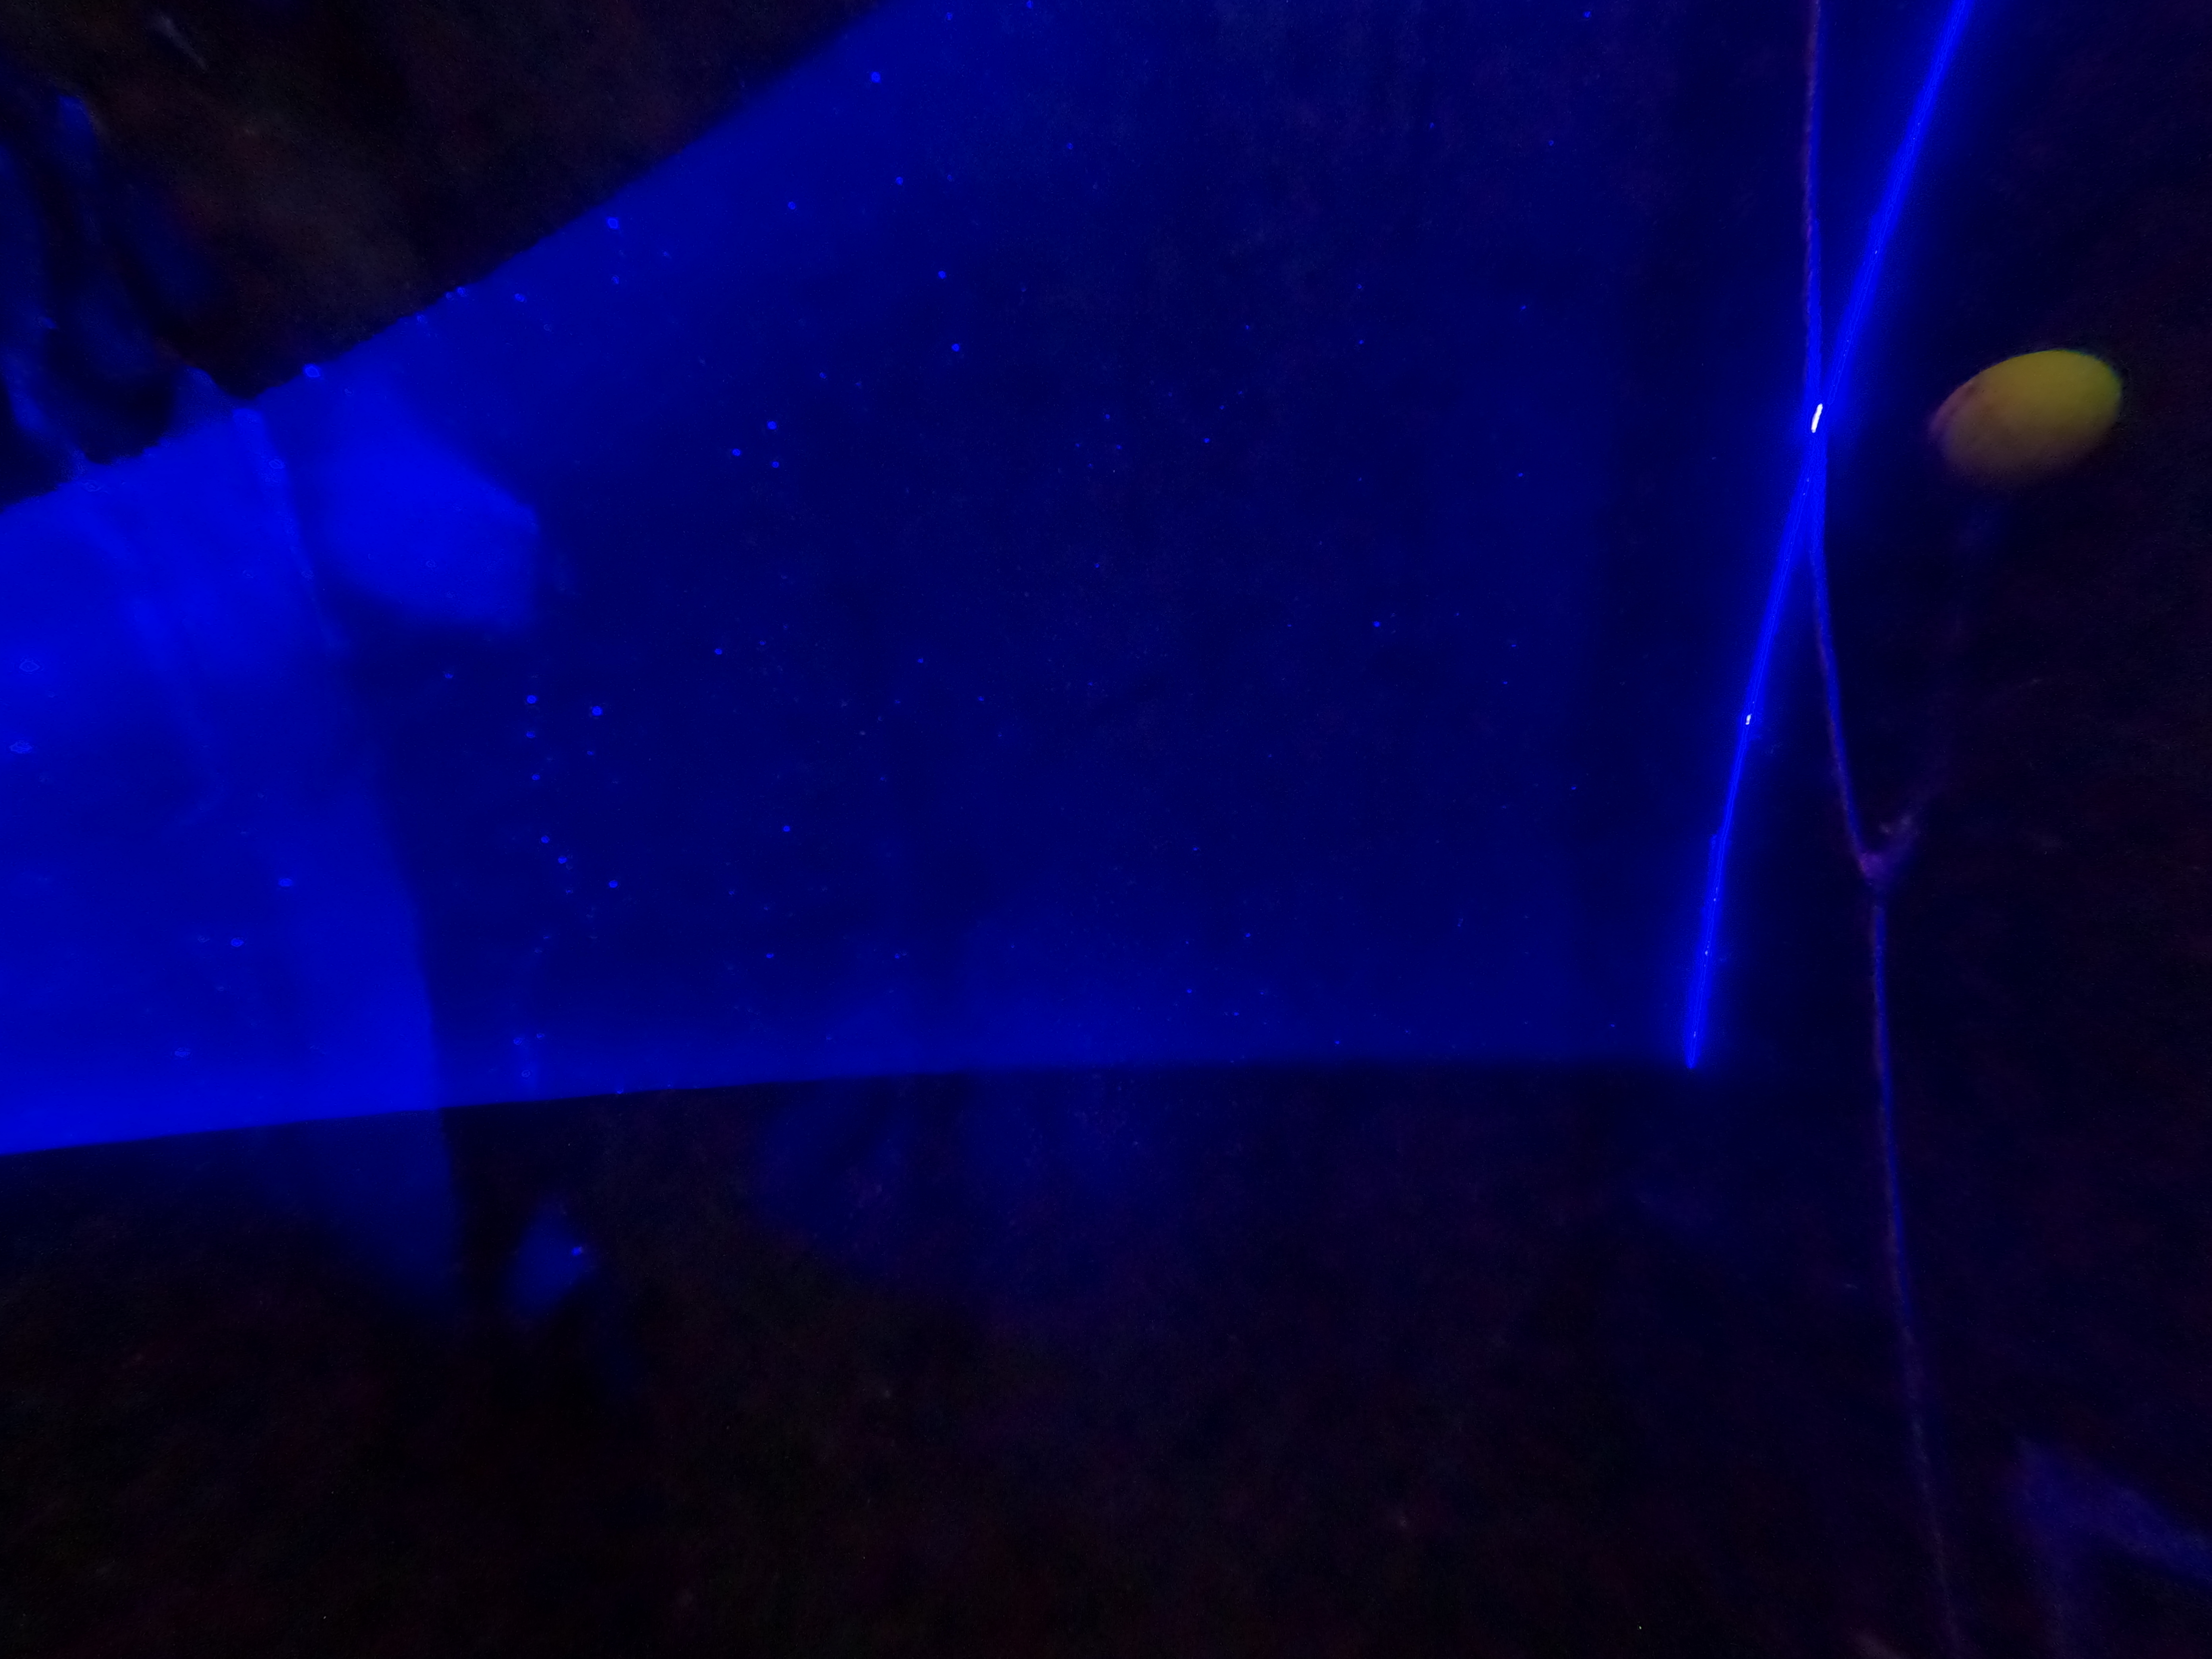

Supplement: Supplementary file 1509 [file G0032208.pdf › 11/G0032208.pdf]

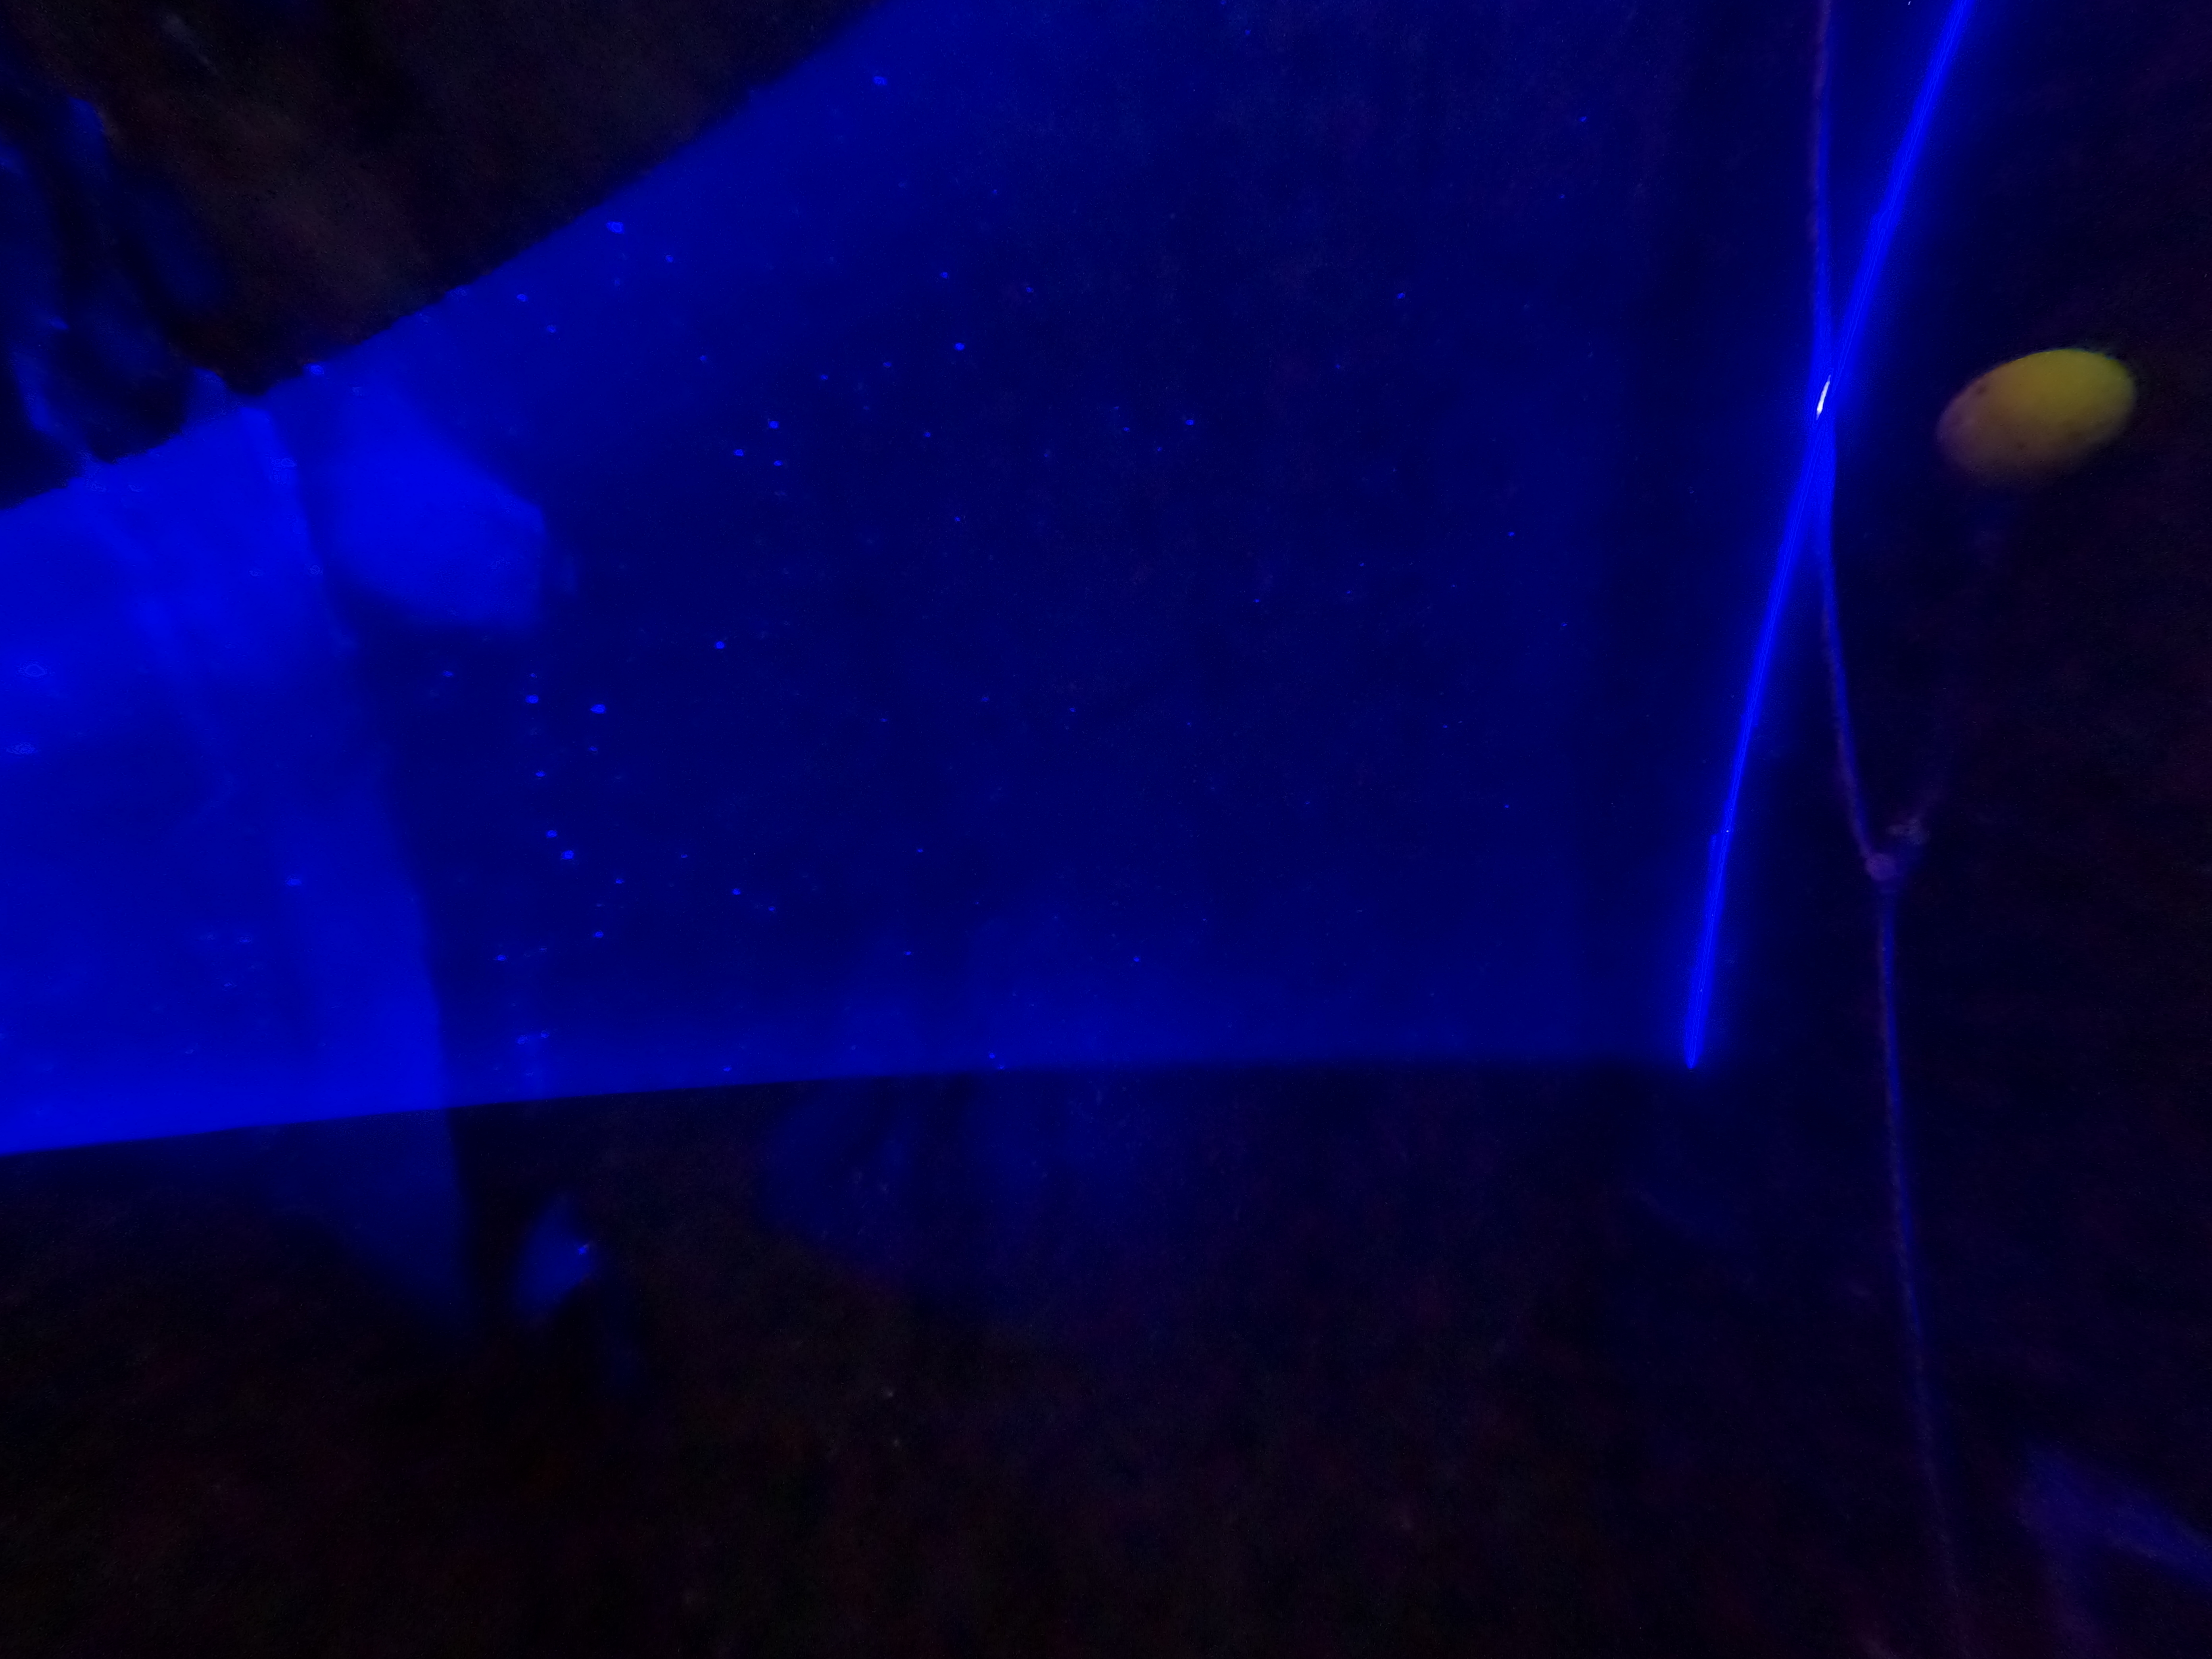

Supplement: Supplementary file 1510 [file G0032209.pdf › 11/G0032209.pdf]

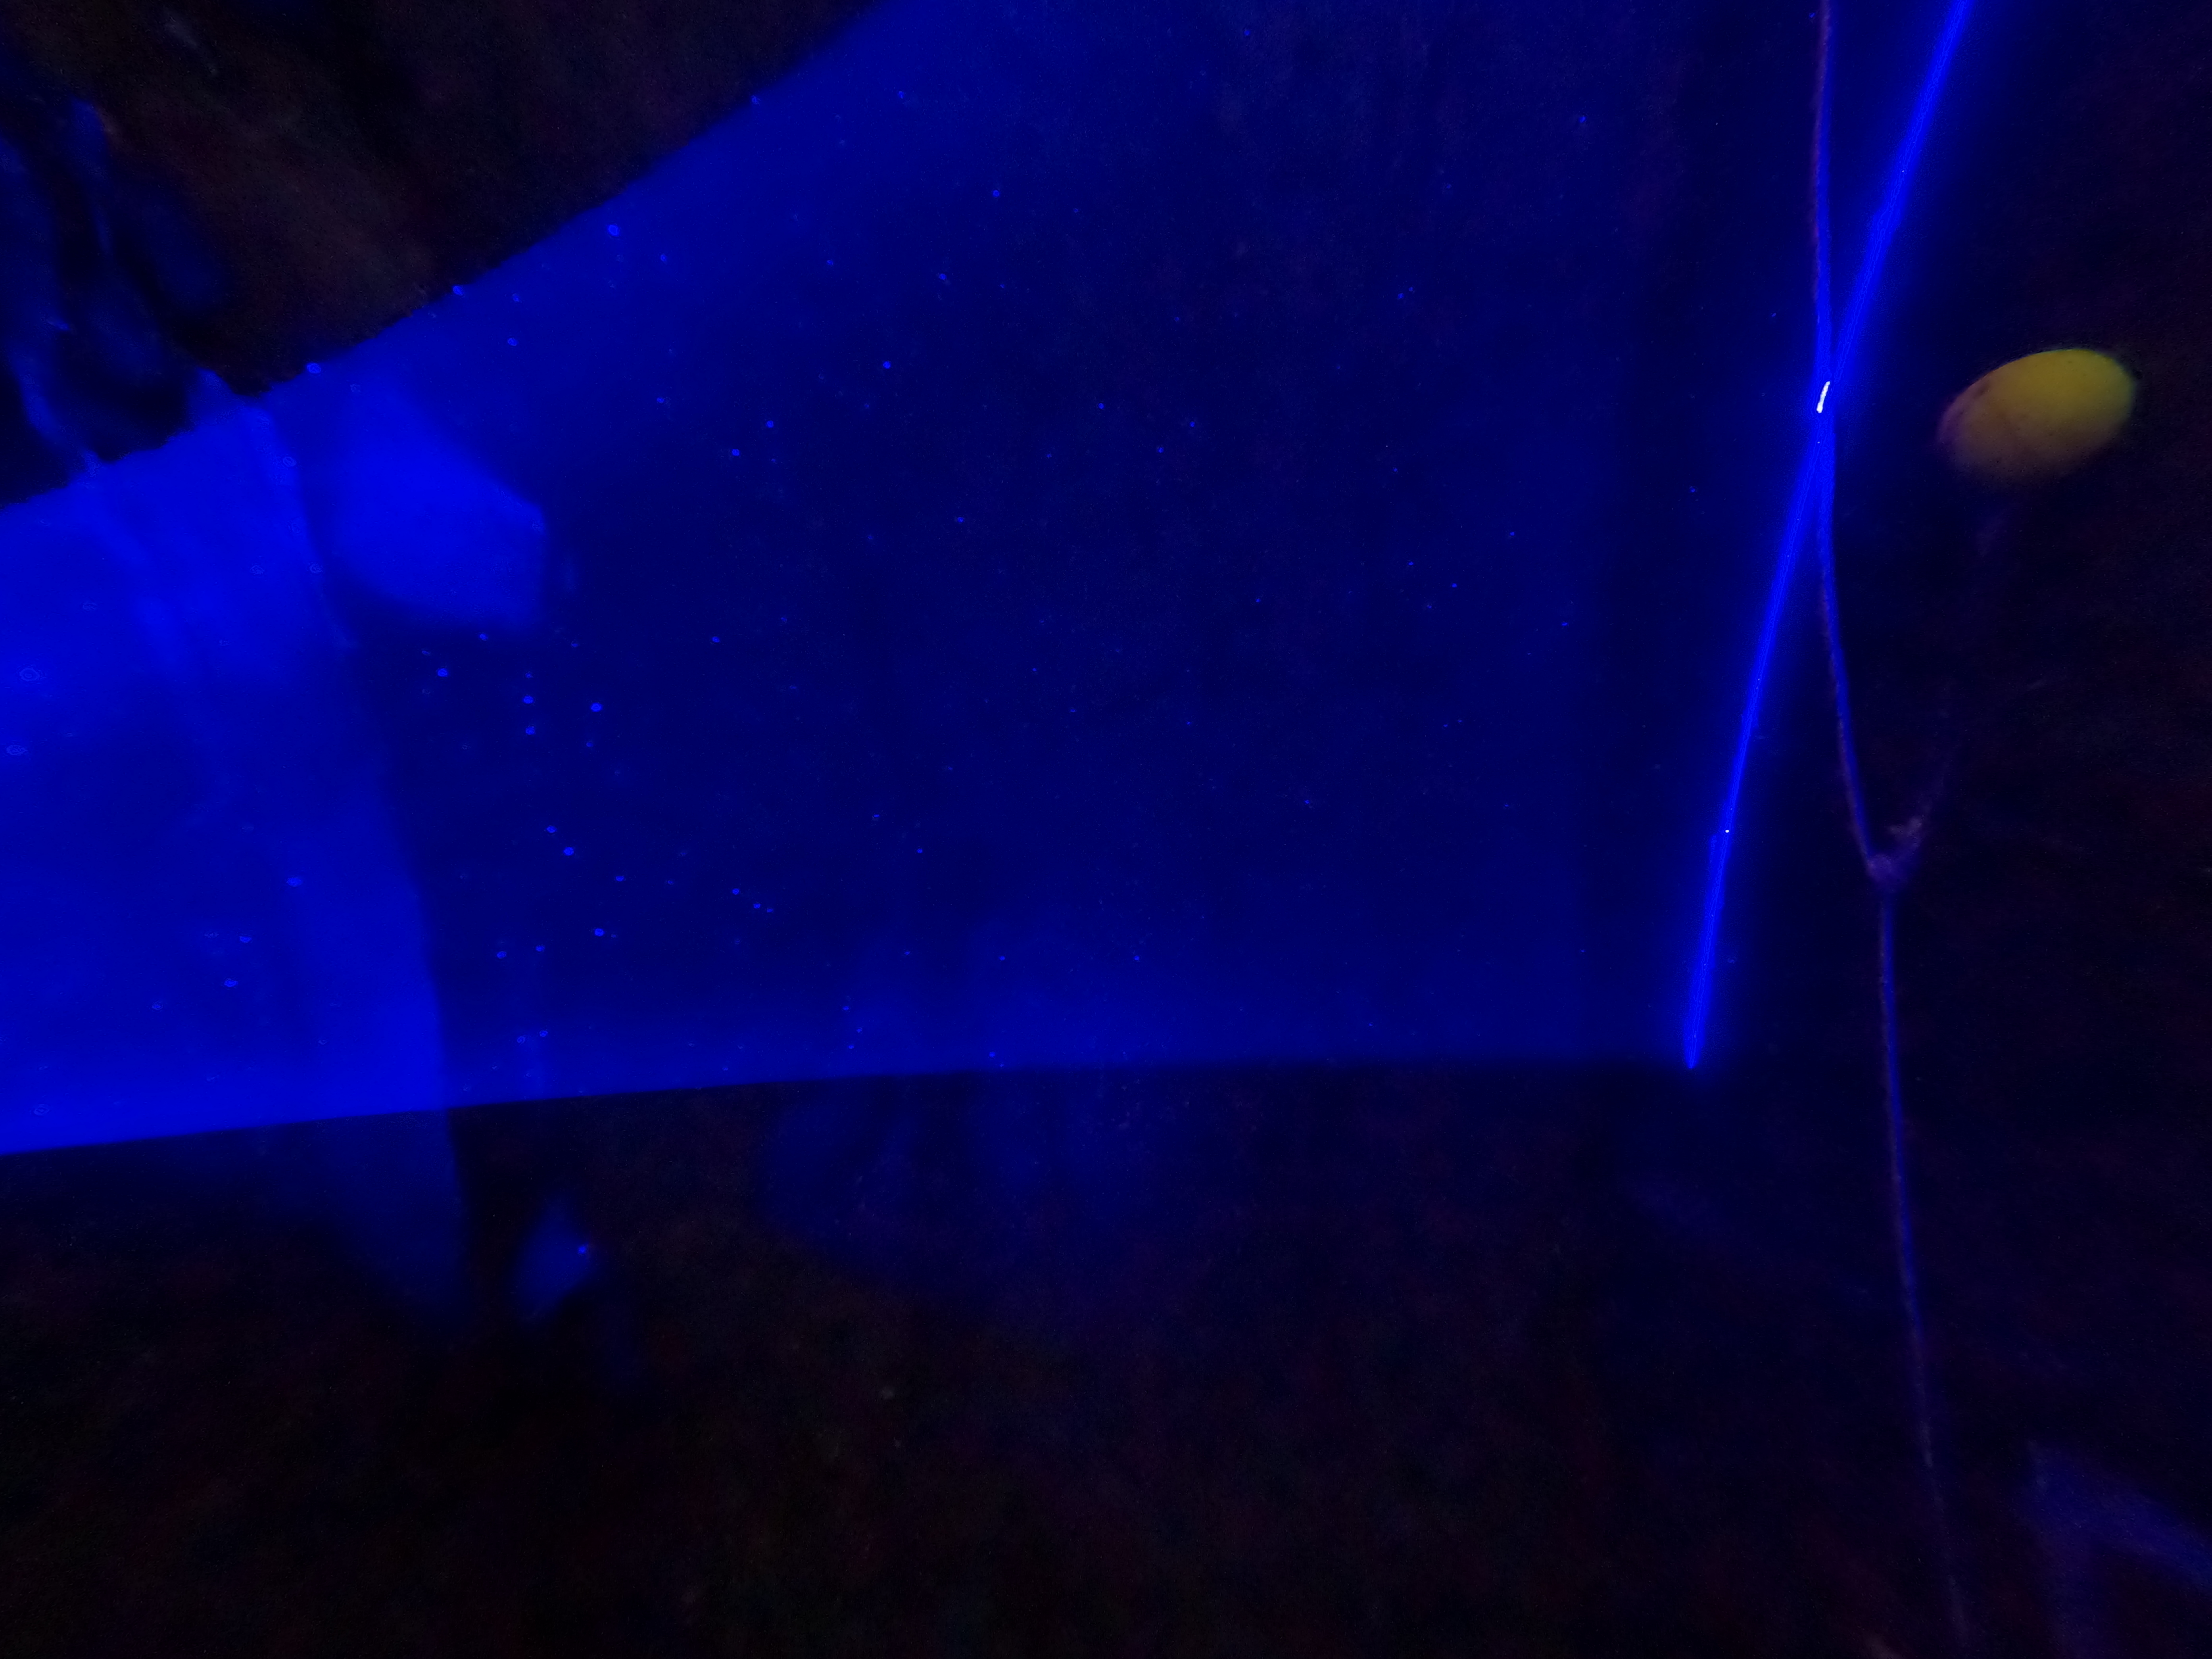

Supplement: Supplementary file 1511 [file G0032210.pdf › 11/G0032210.pdf]

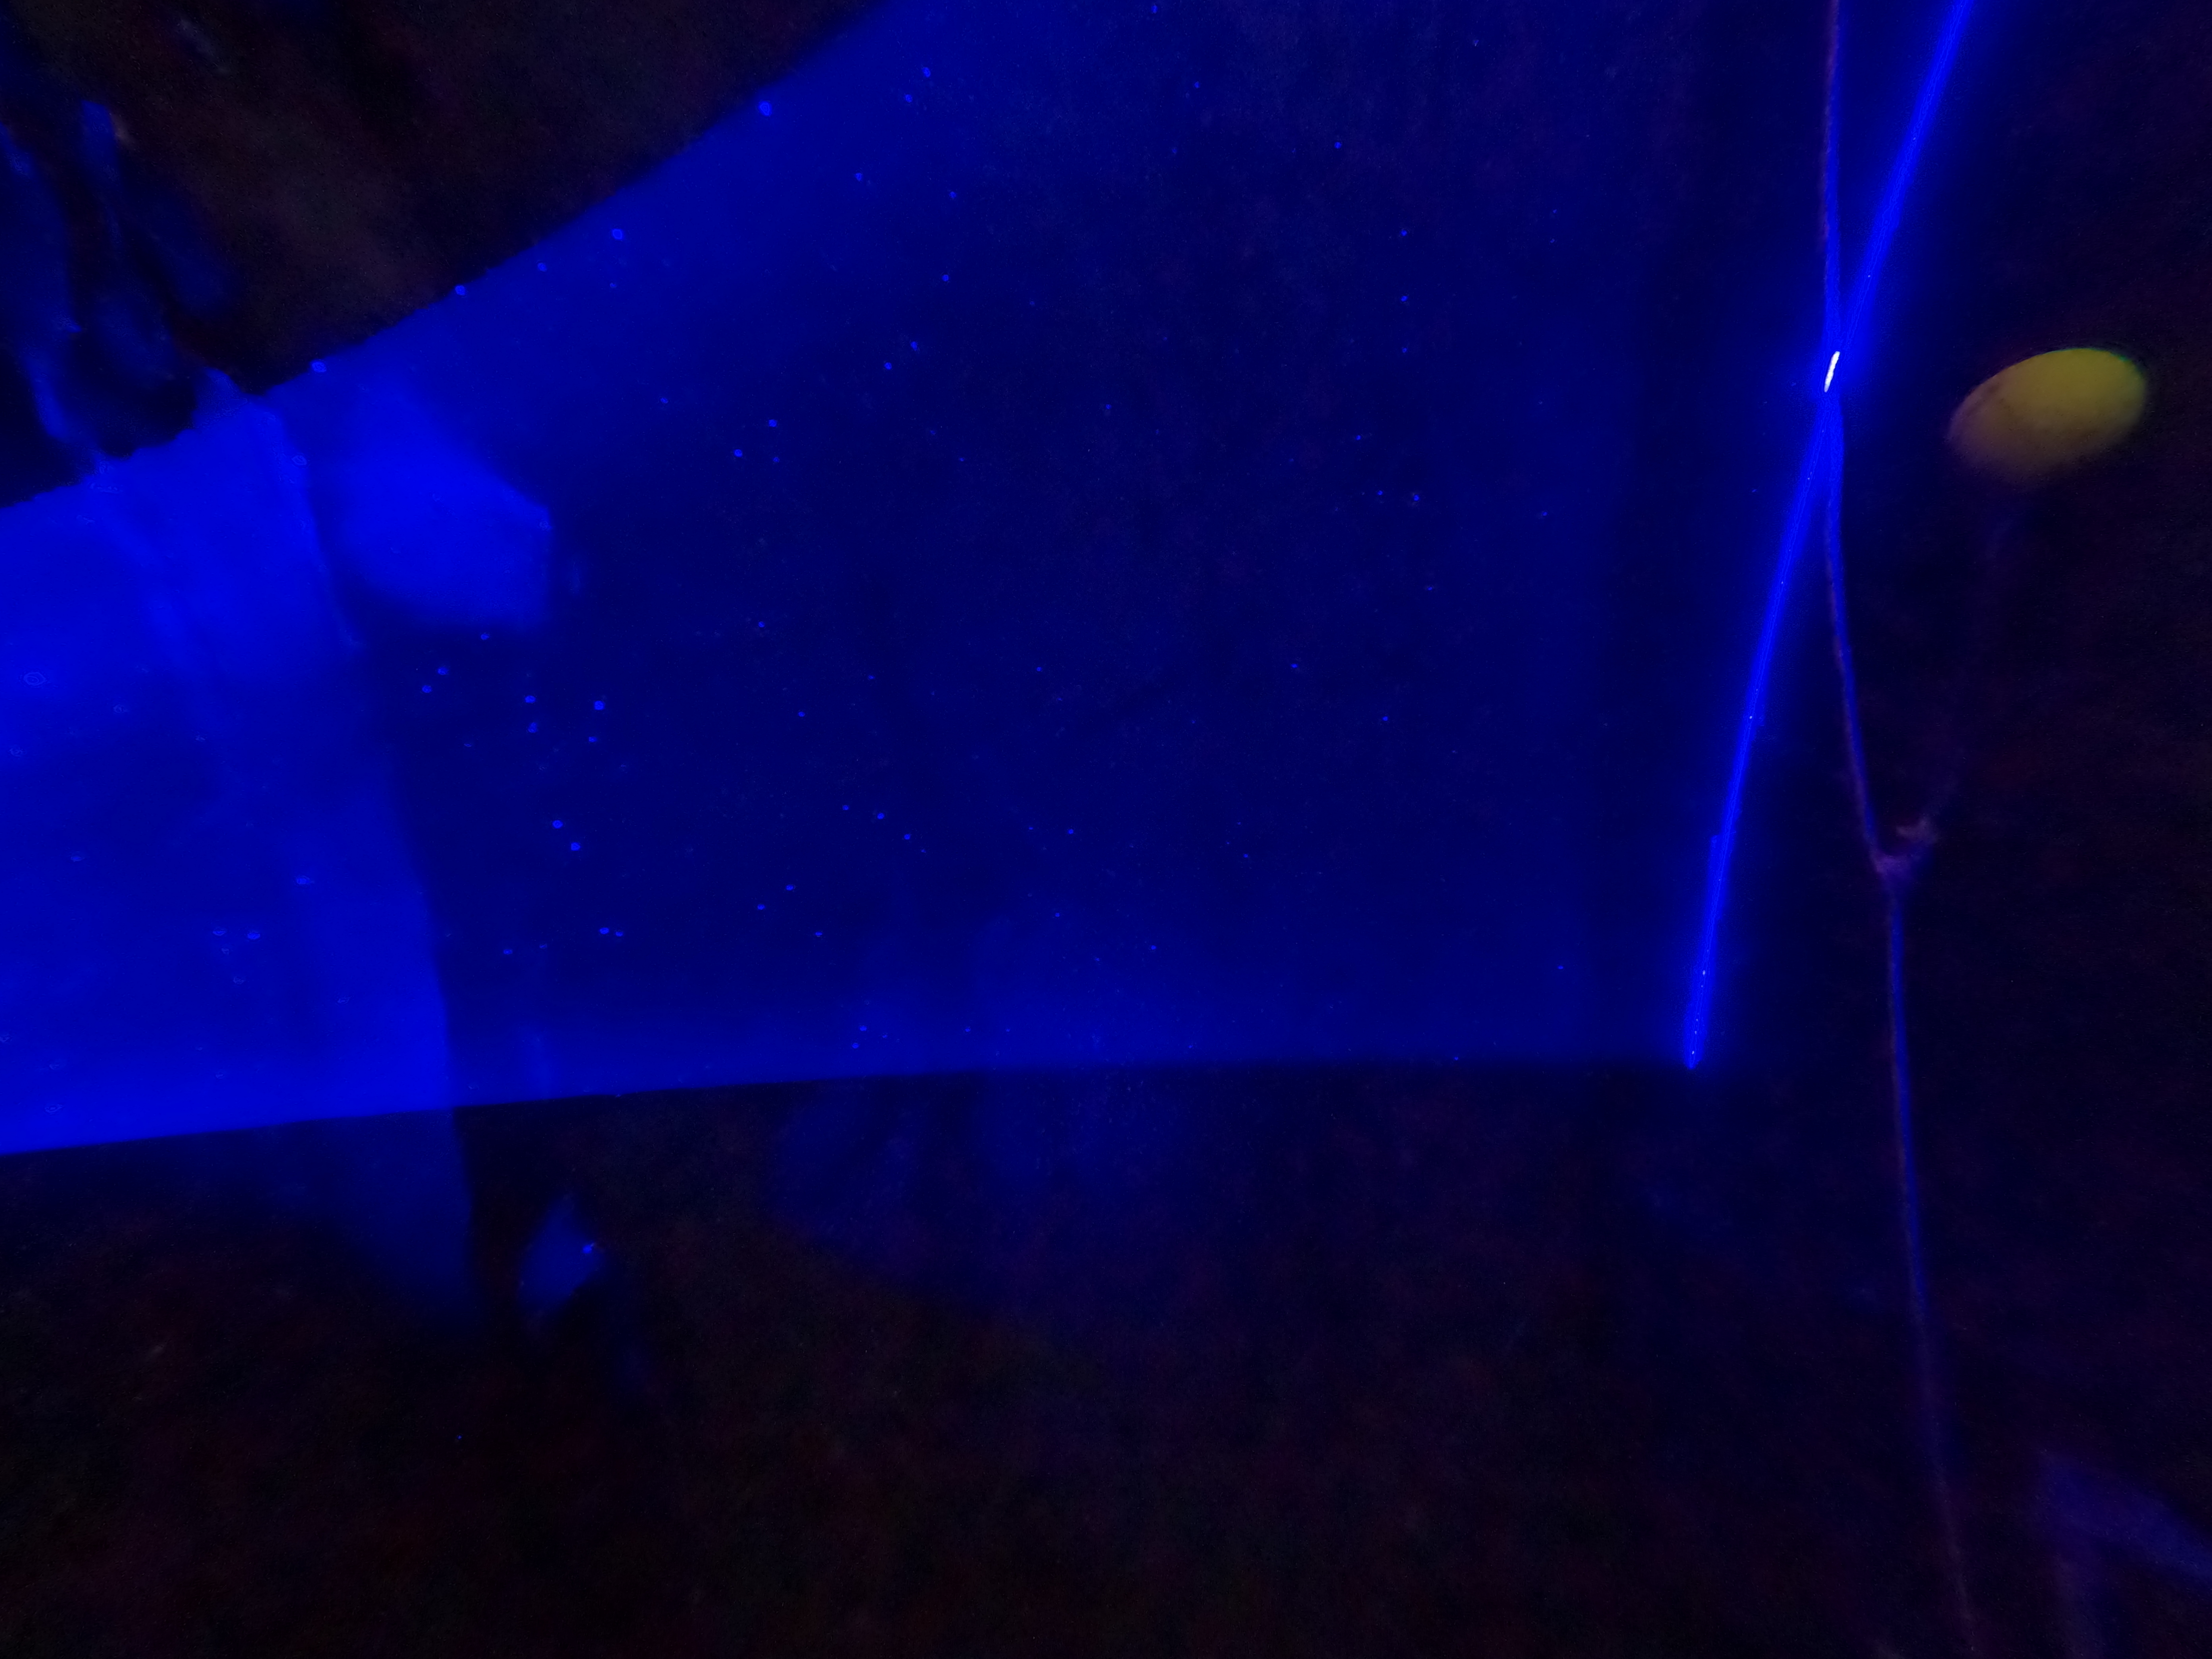

Supplement: Supplementary file 1512 [file G0032211.pdf › 11/G0032211.pdf]

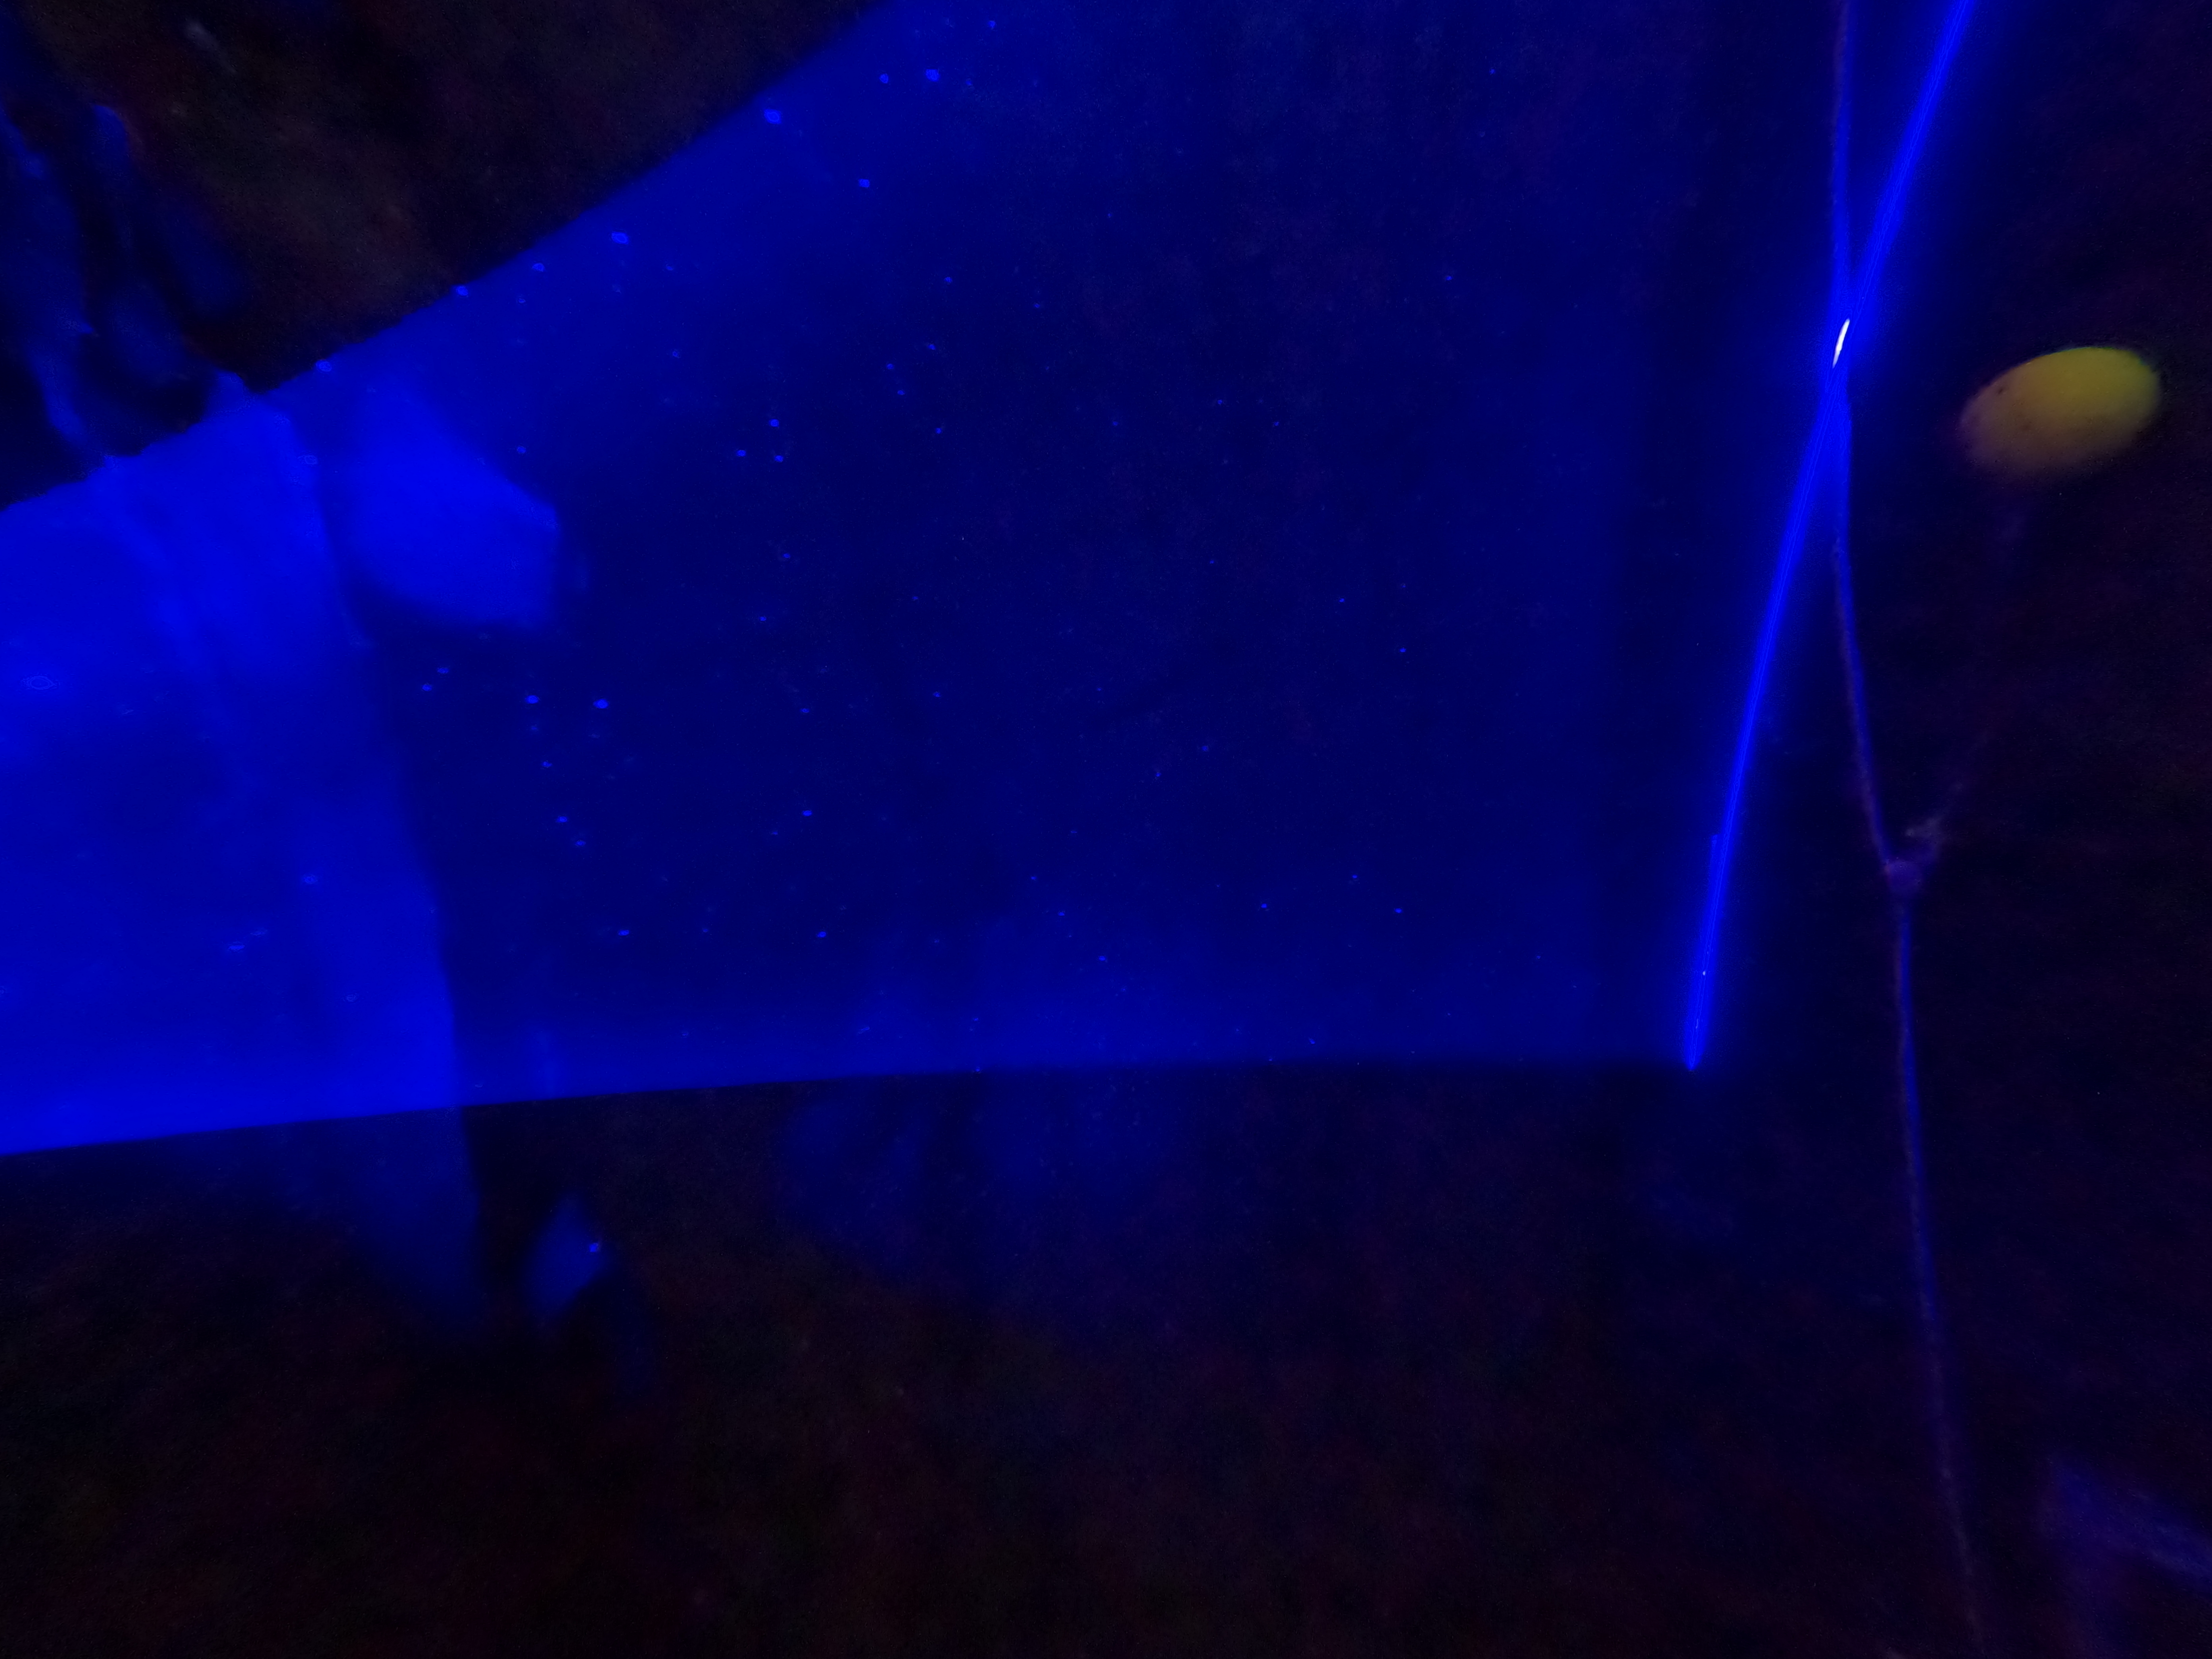

Supplement: Supplementary file 1513 [file G0032212.pdf › 11/G0032212.pdf]

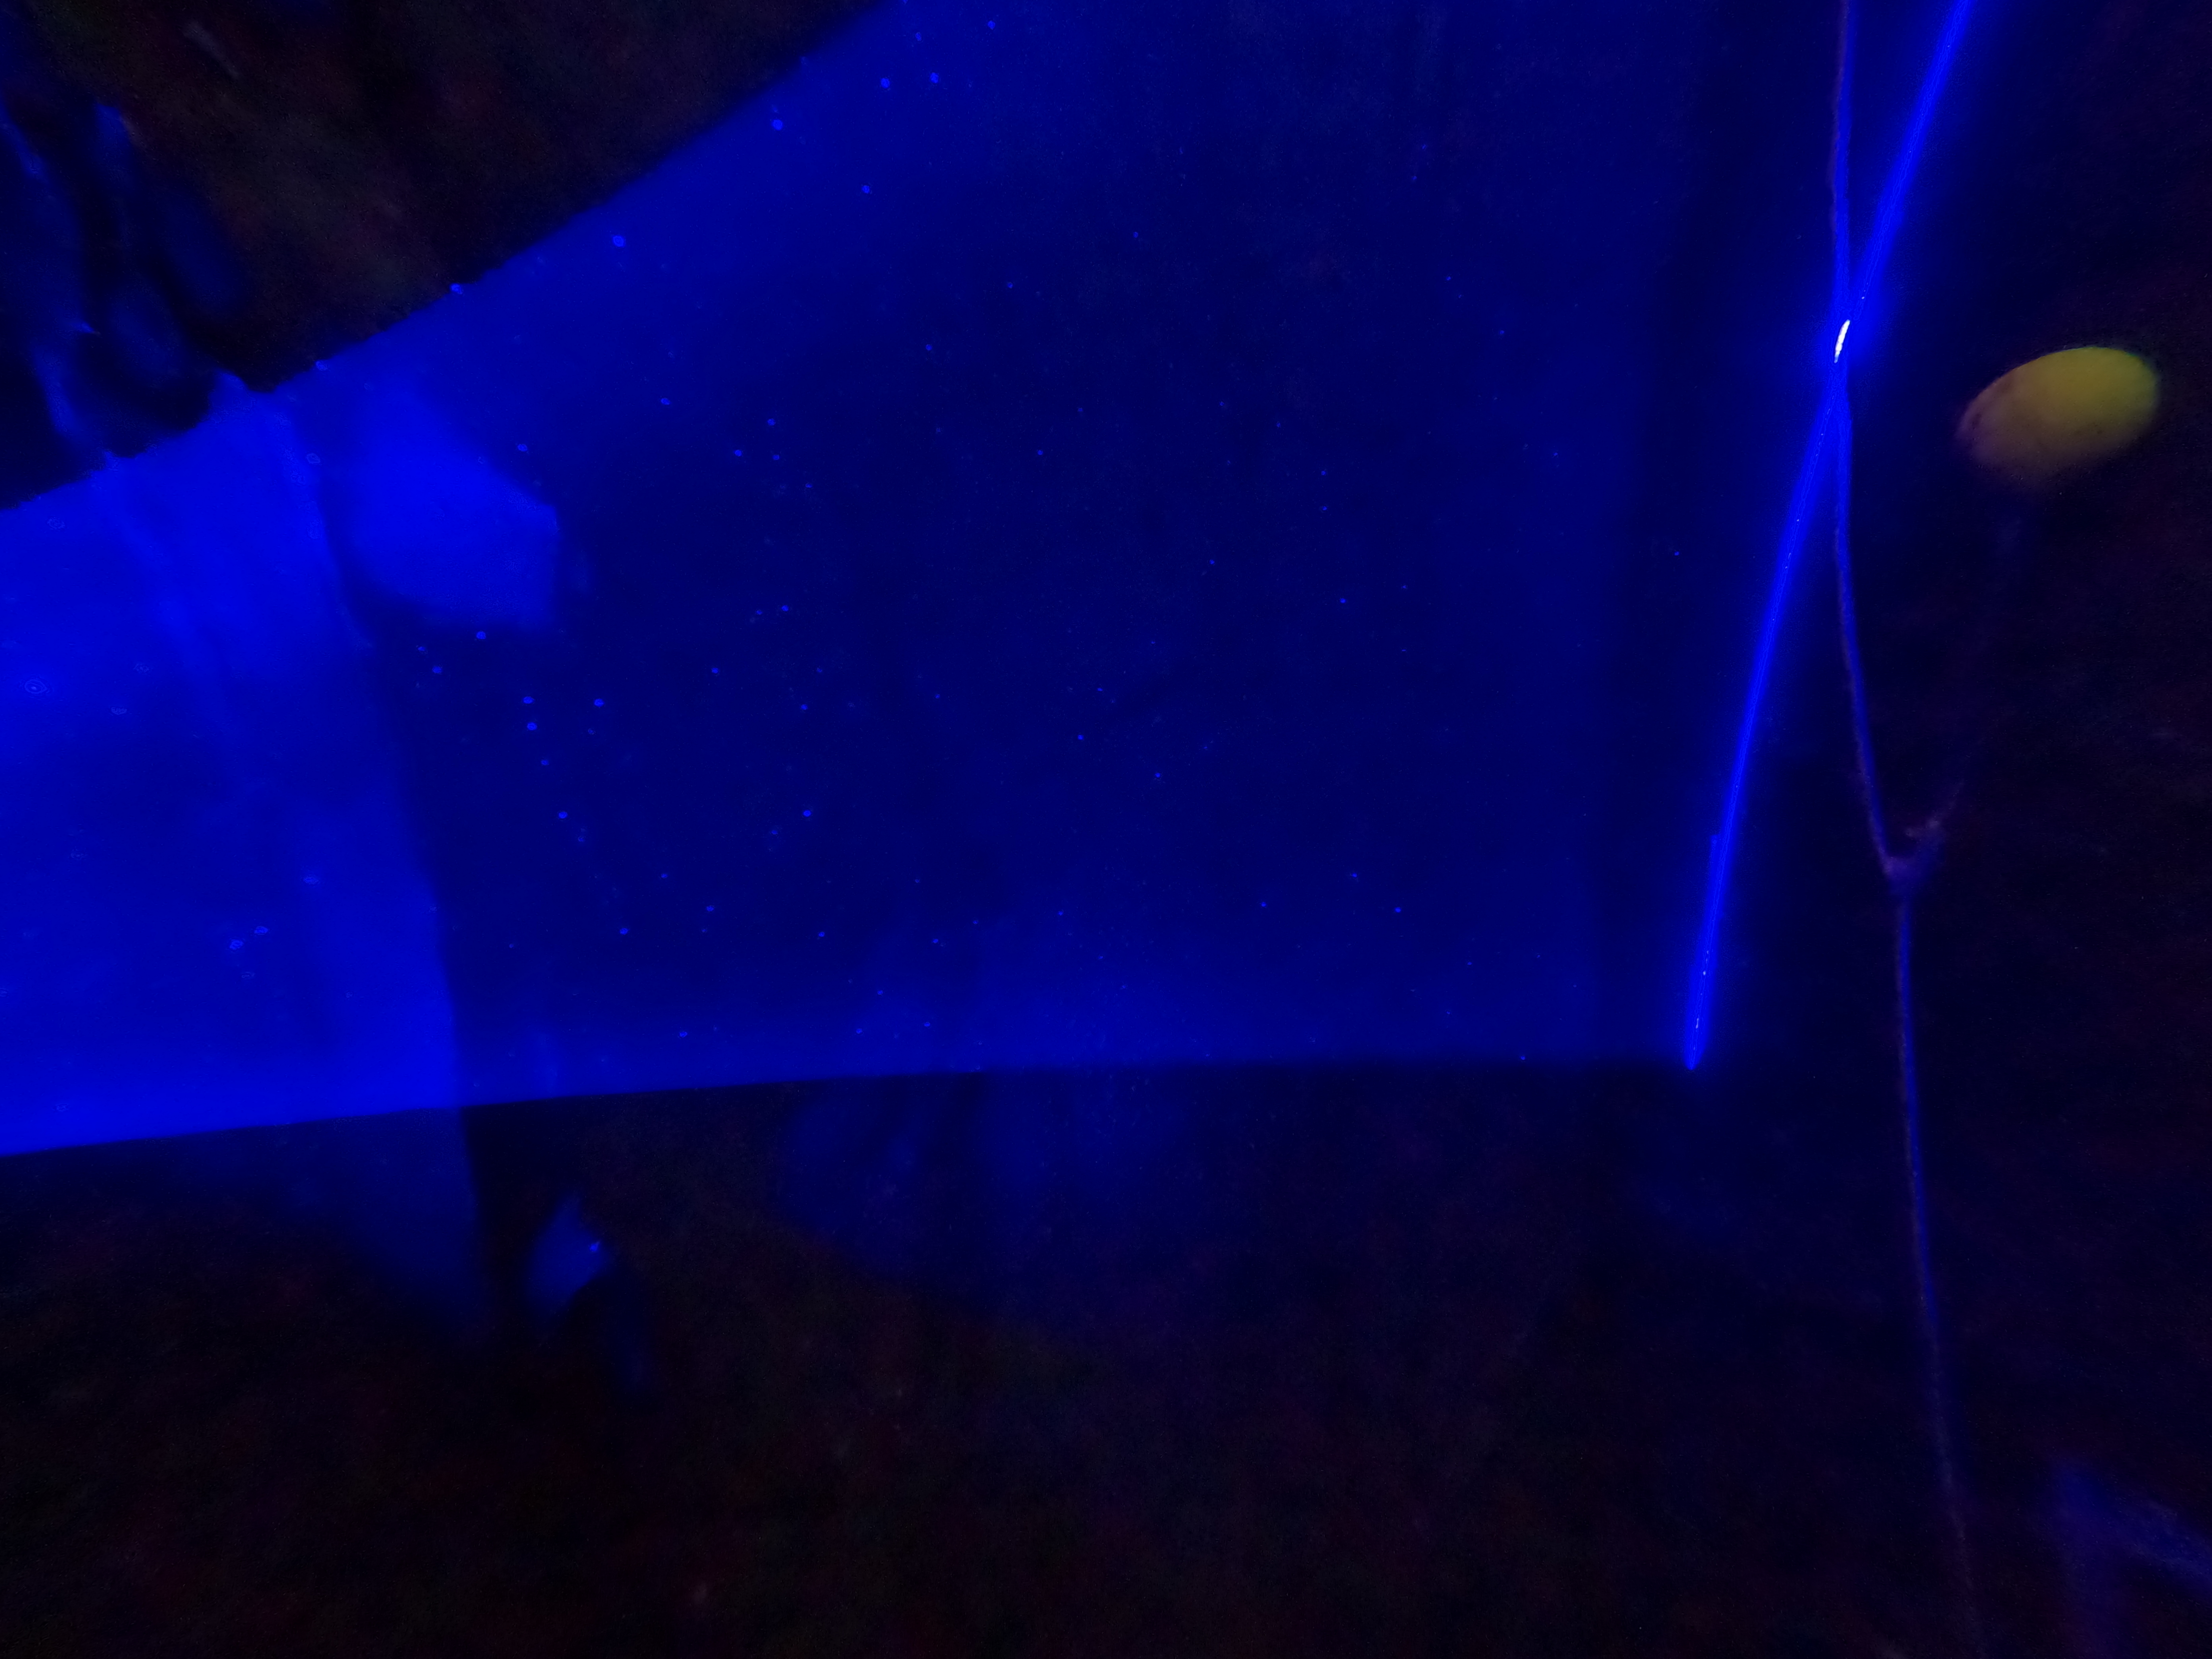

Supplement: Supplementary file 1514 [file G0032213.pdf › 11/G0032213.pdf]

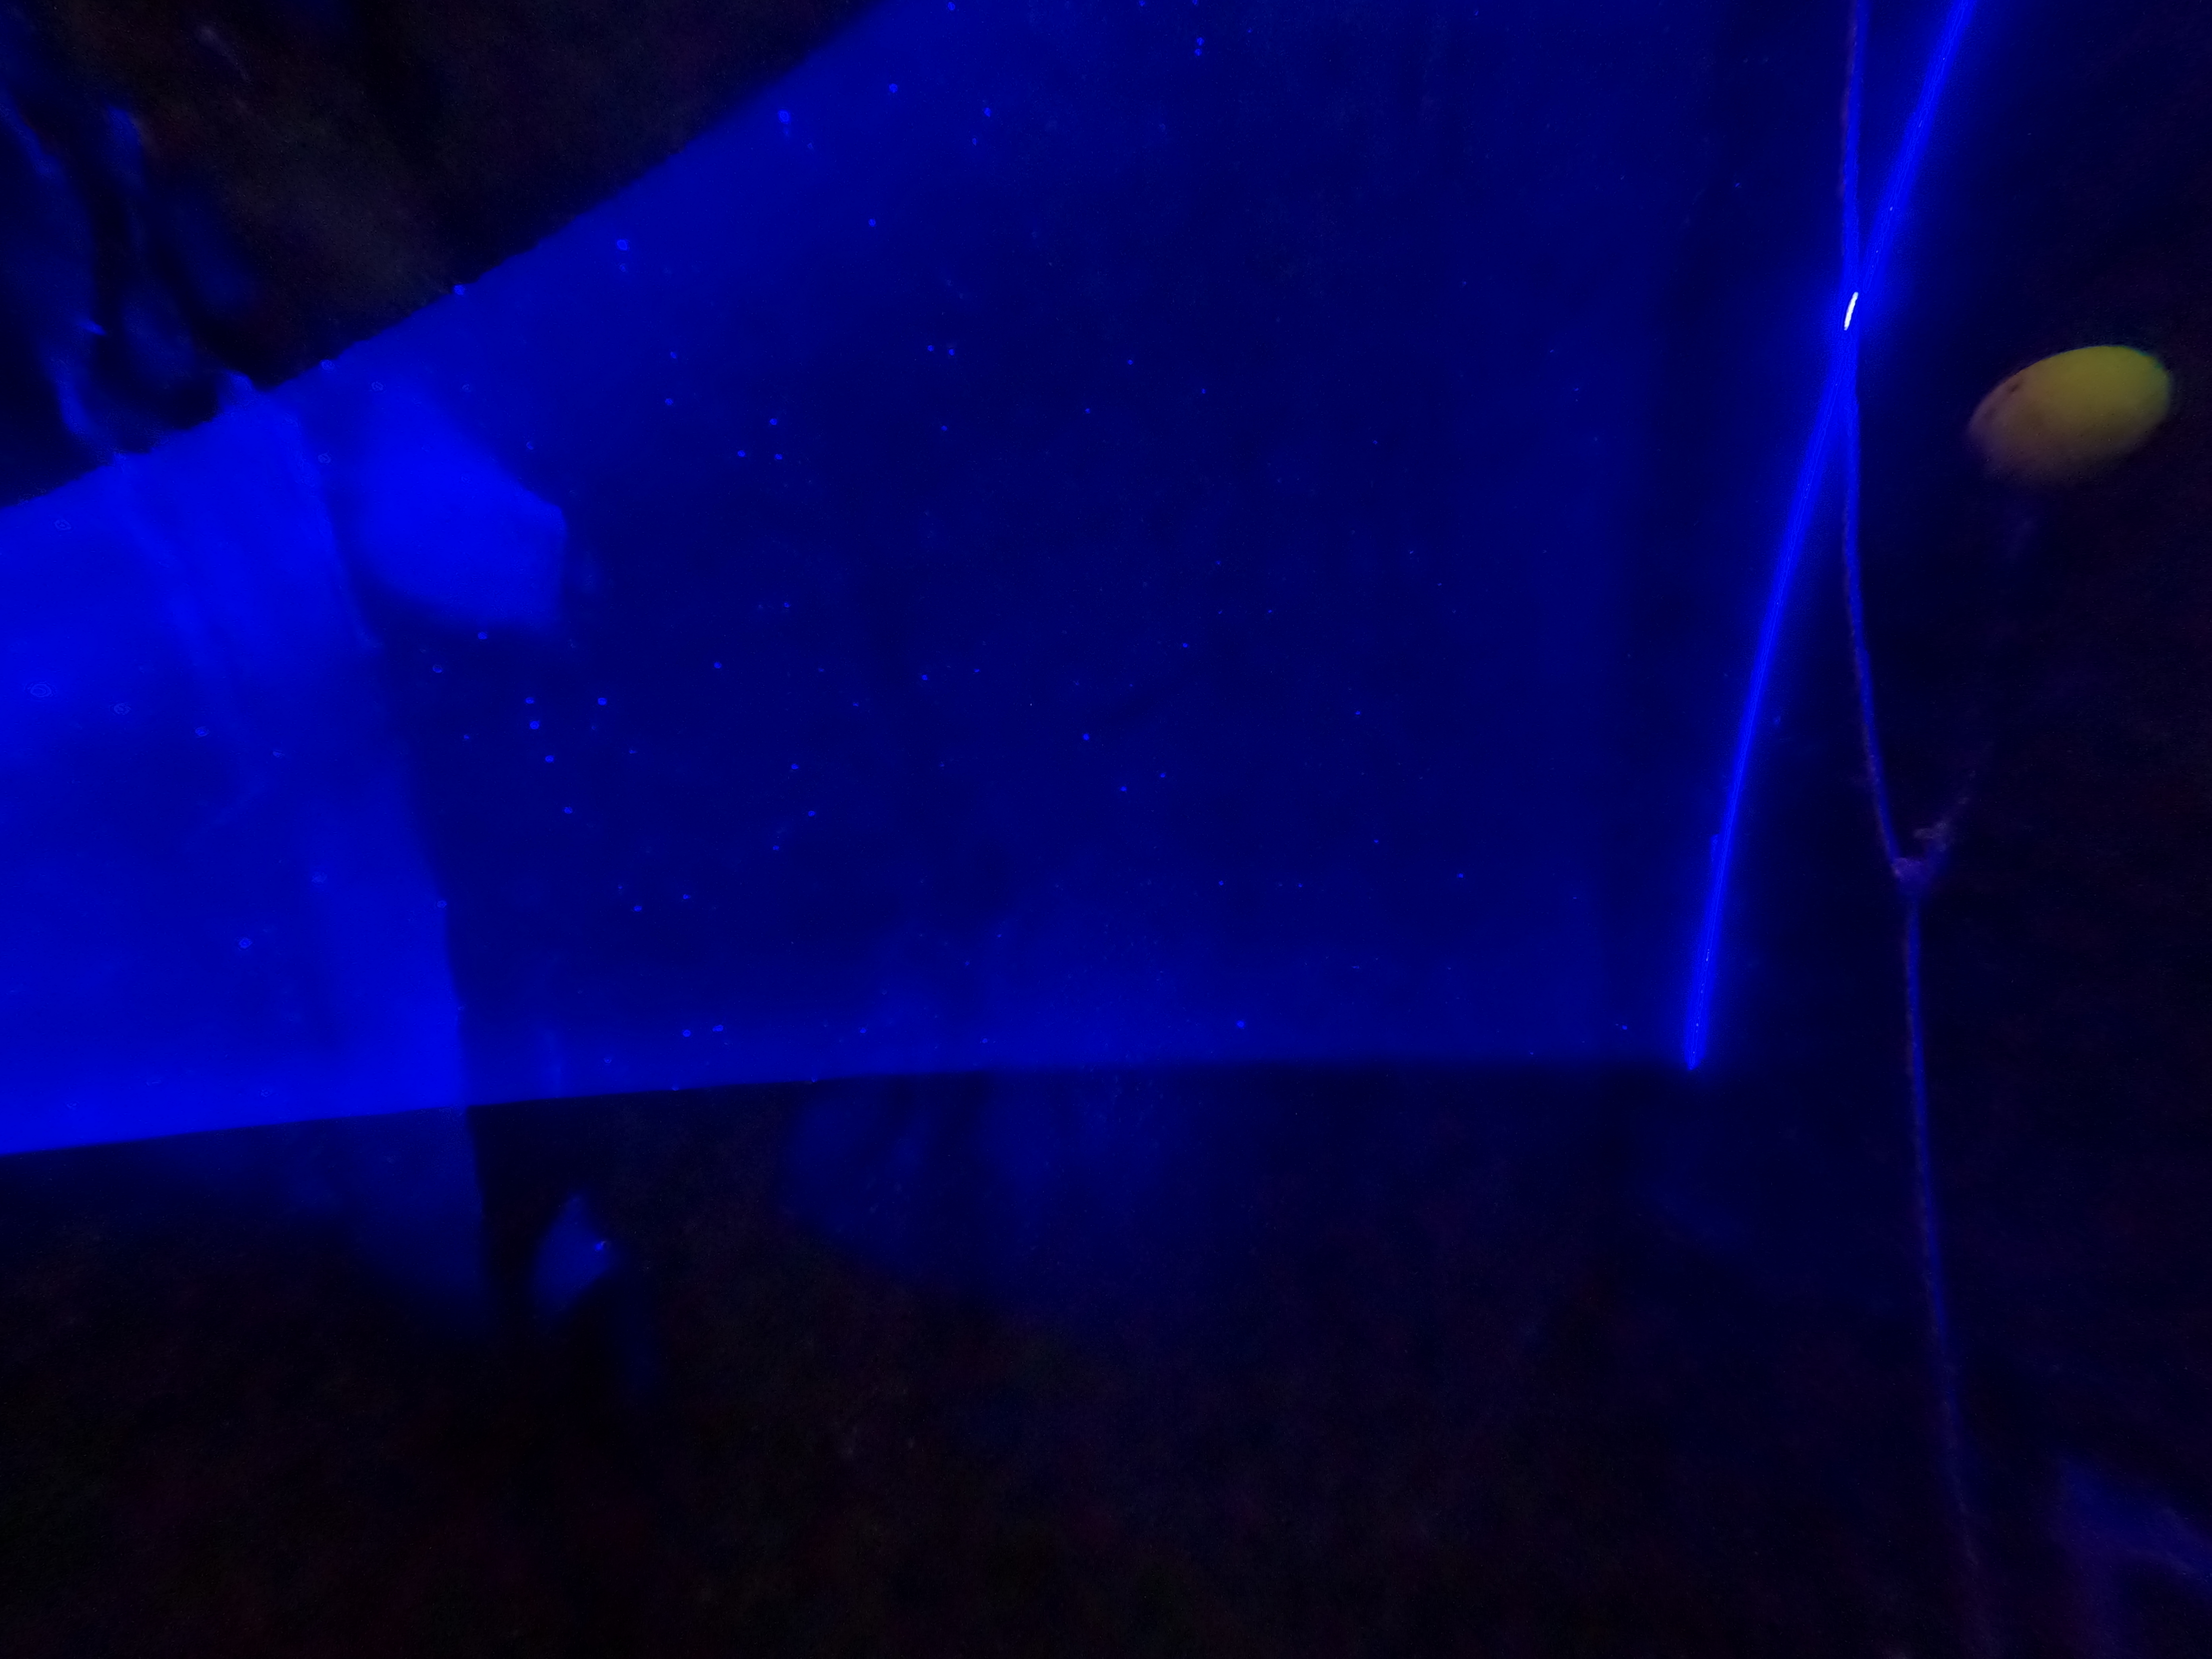

Supplement: Supplementary file 1515 [file G0032214.pdf › 11/G0032214.pdf]

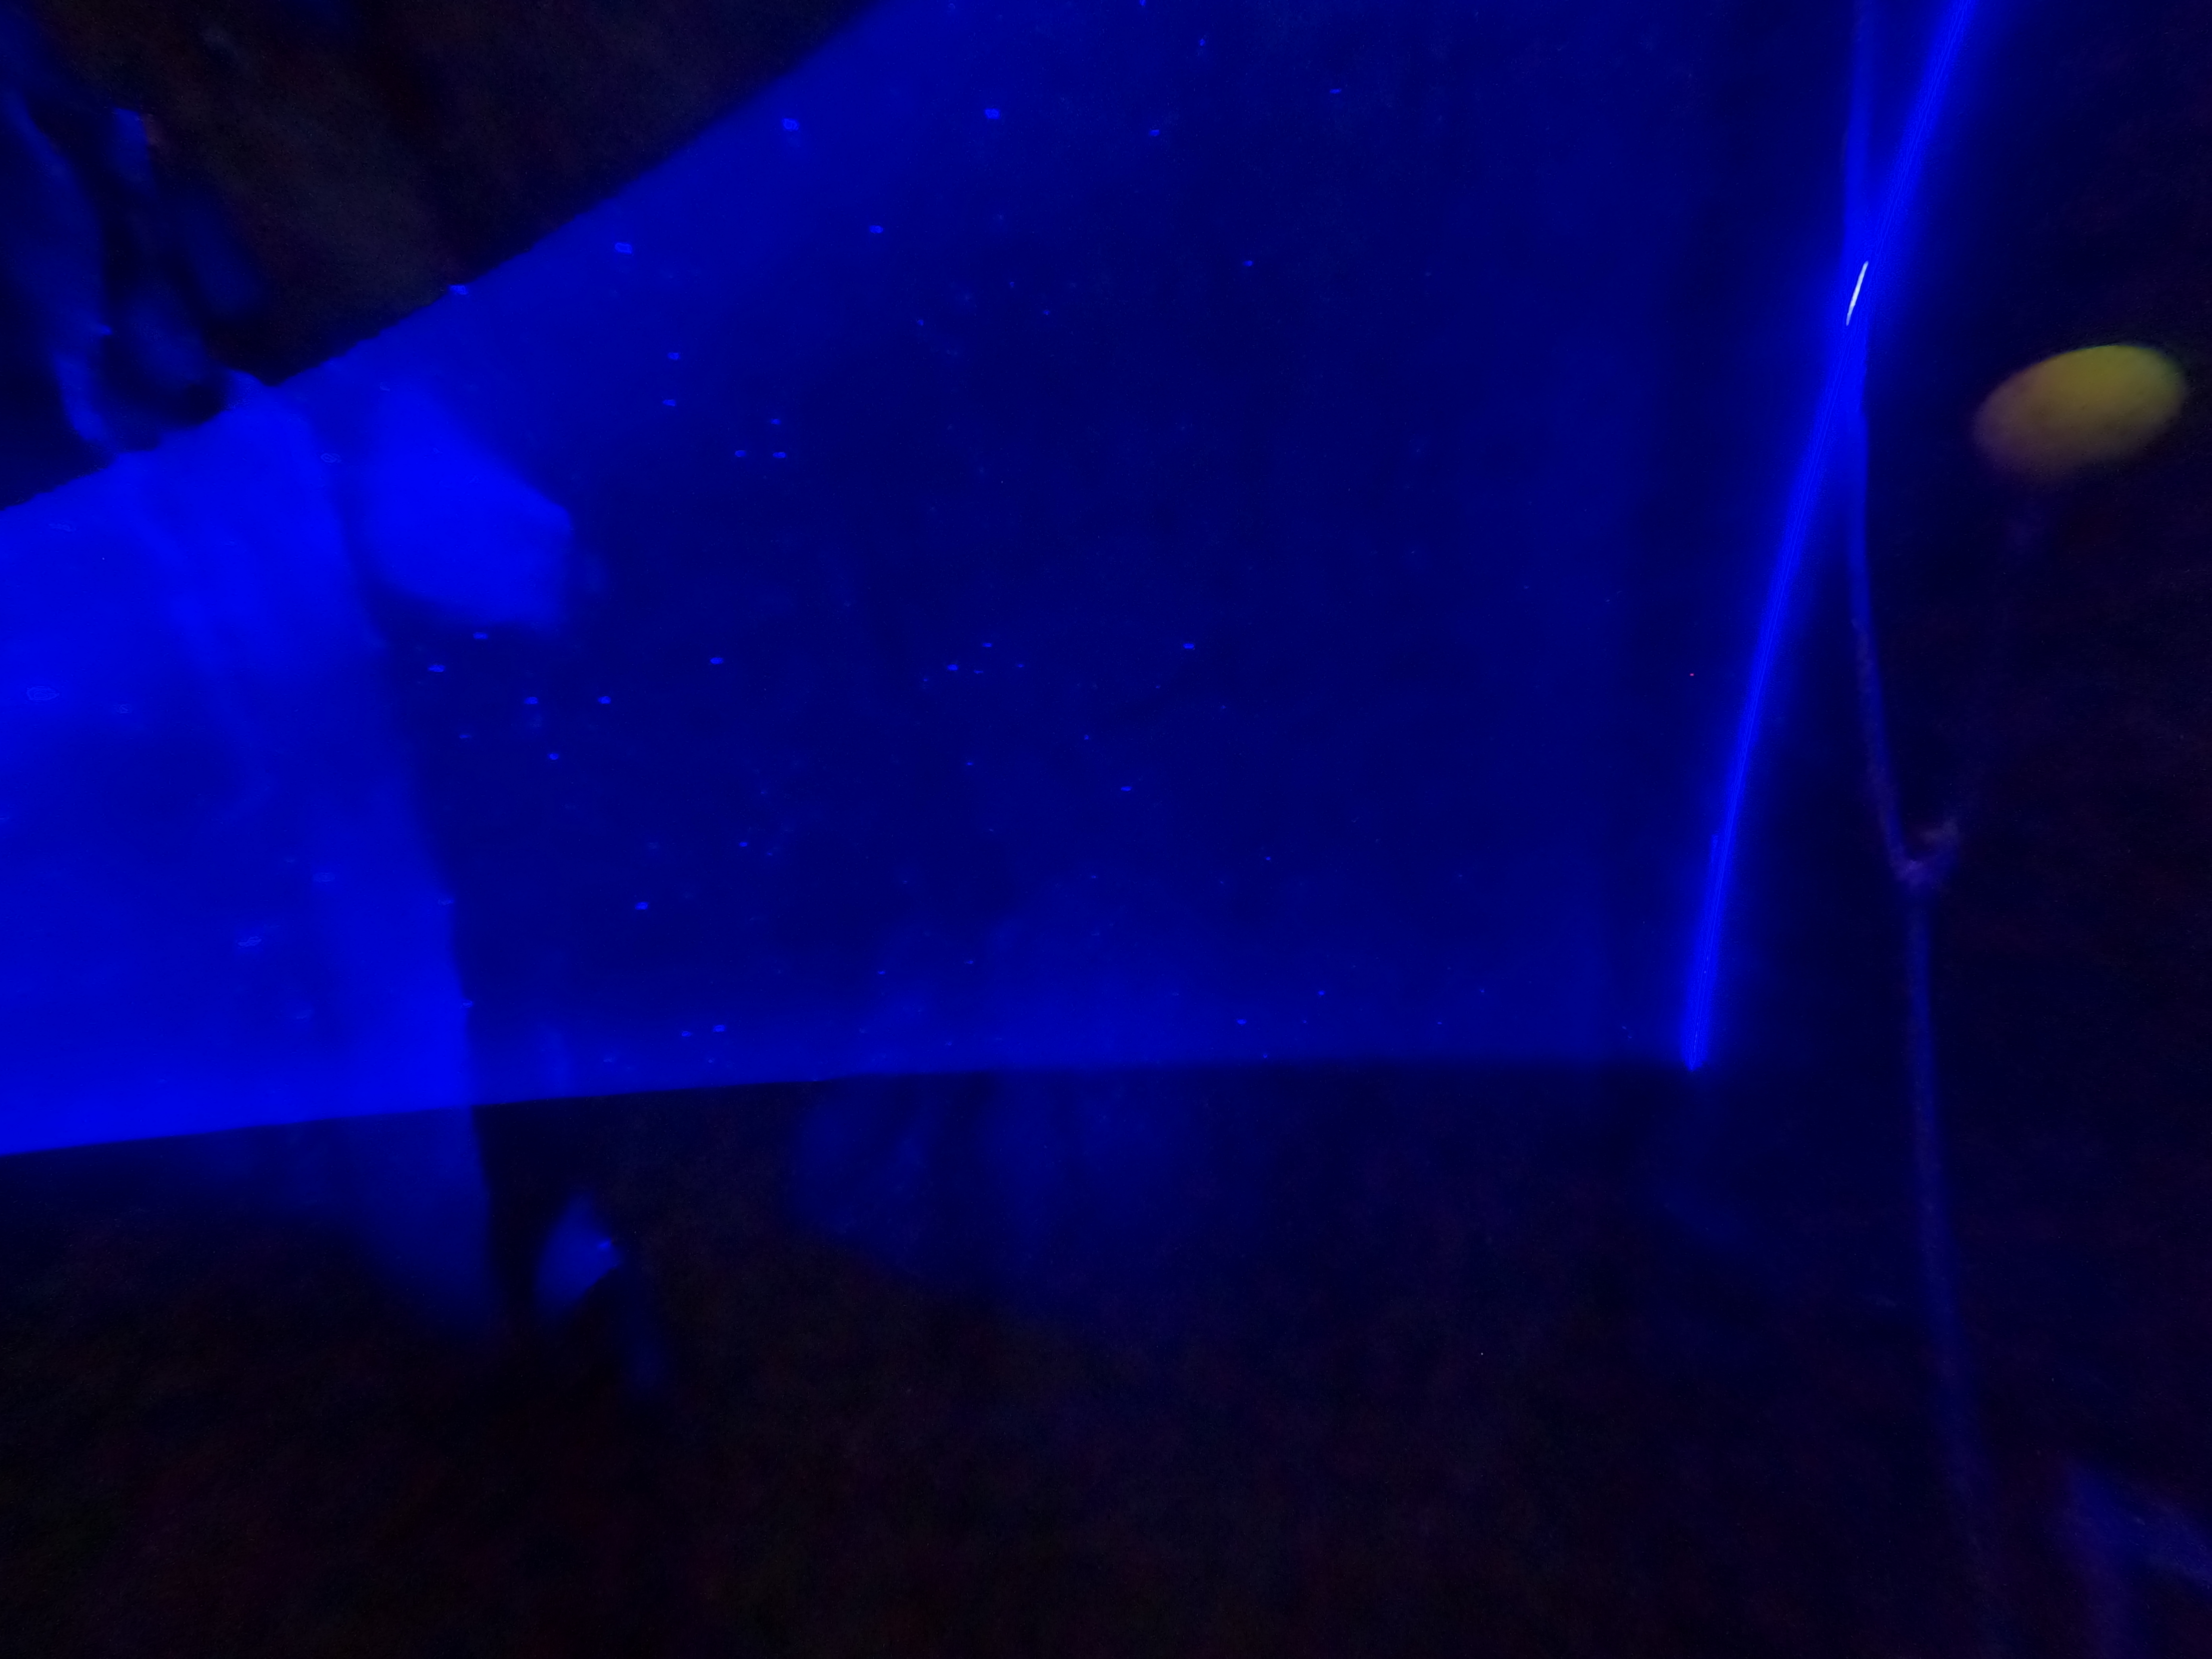

Supplement: Supplementary file 1516 [file G0032215.pdf › 11/G0032215.pdf]

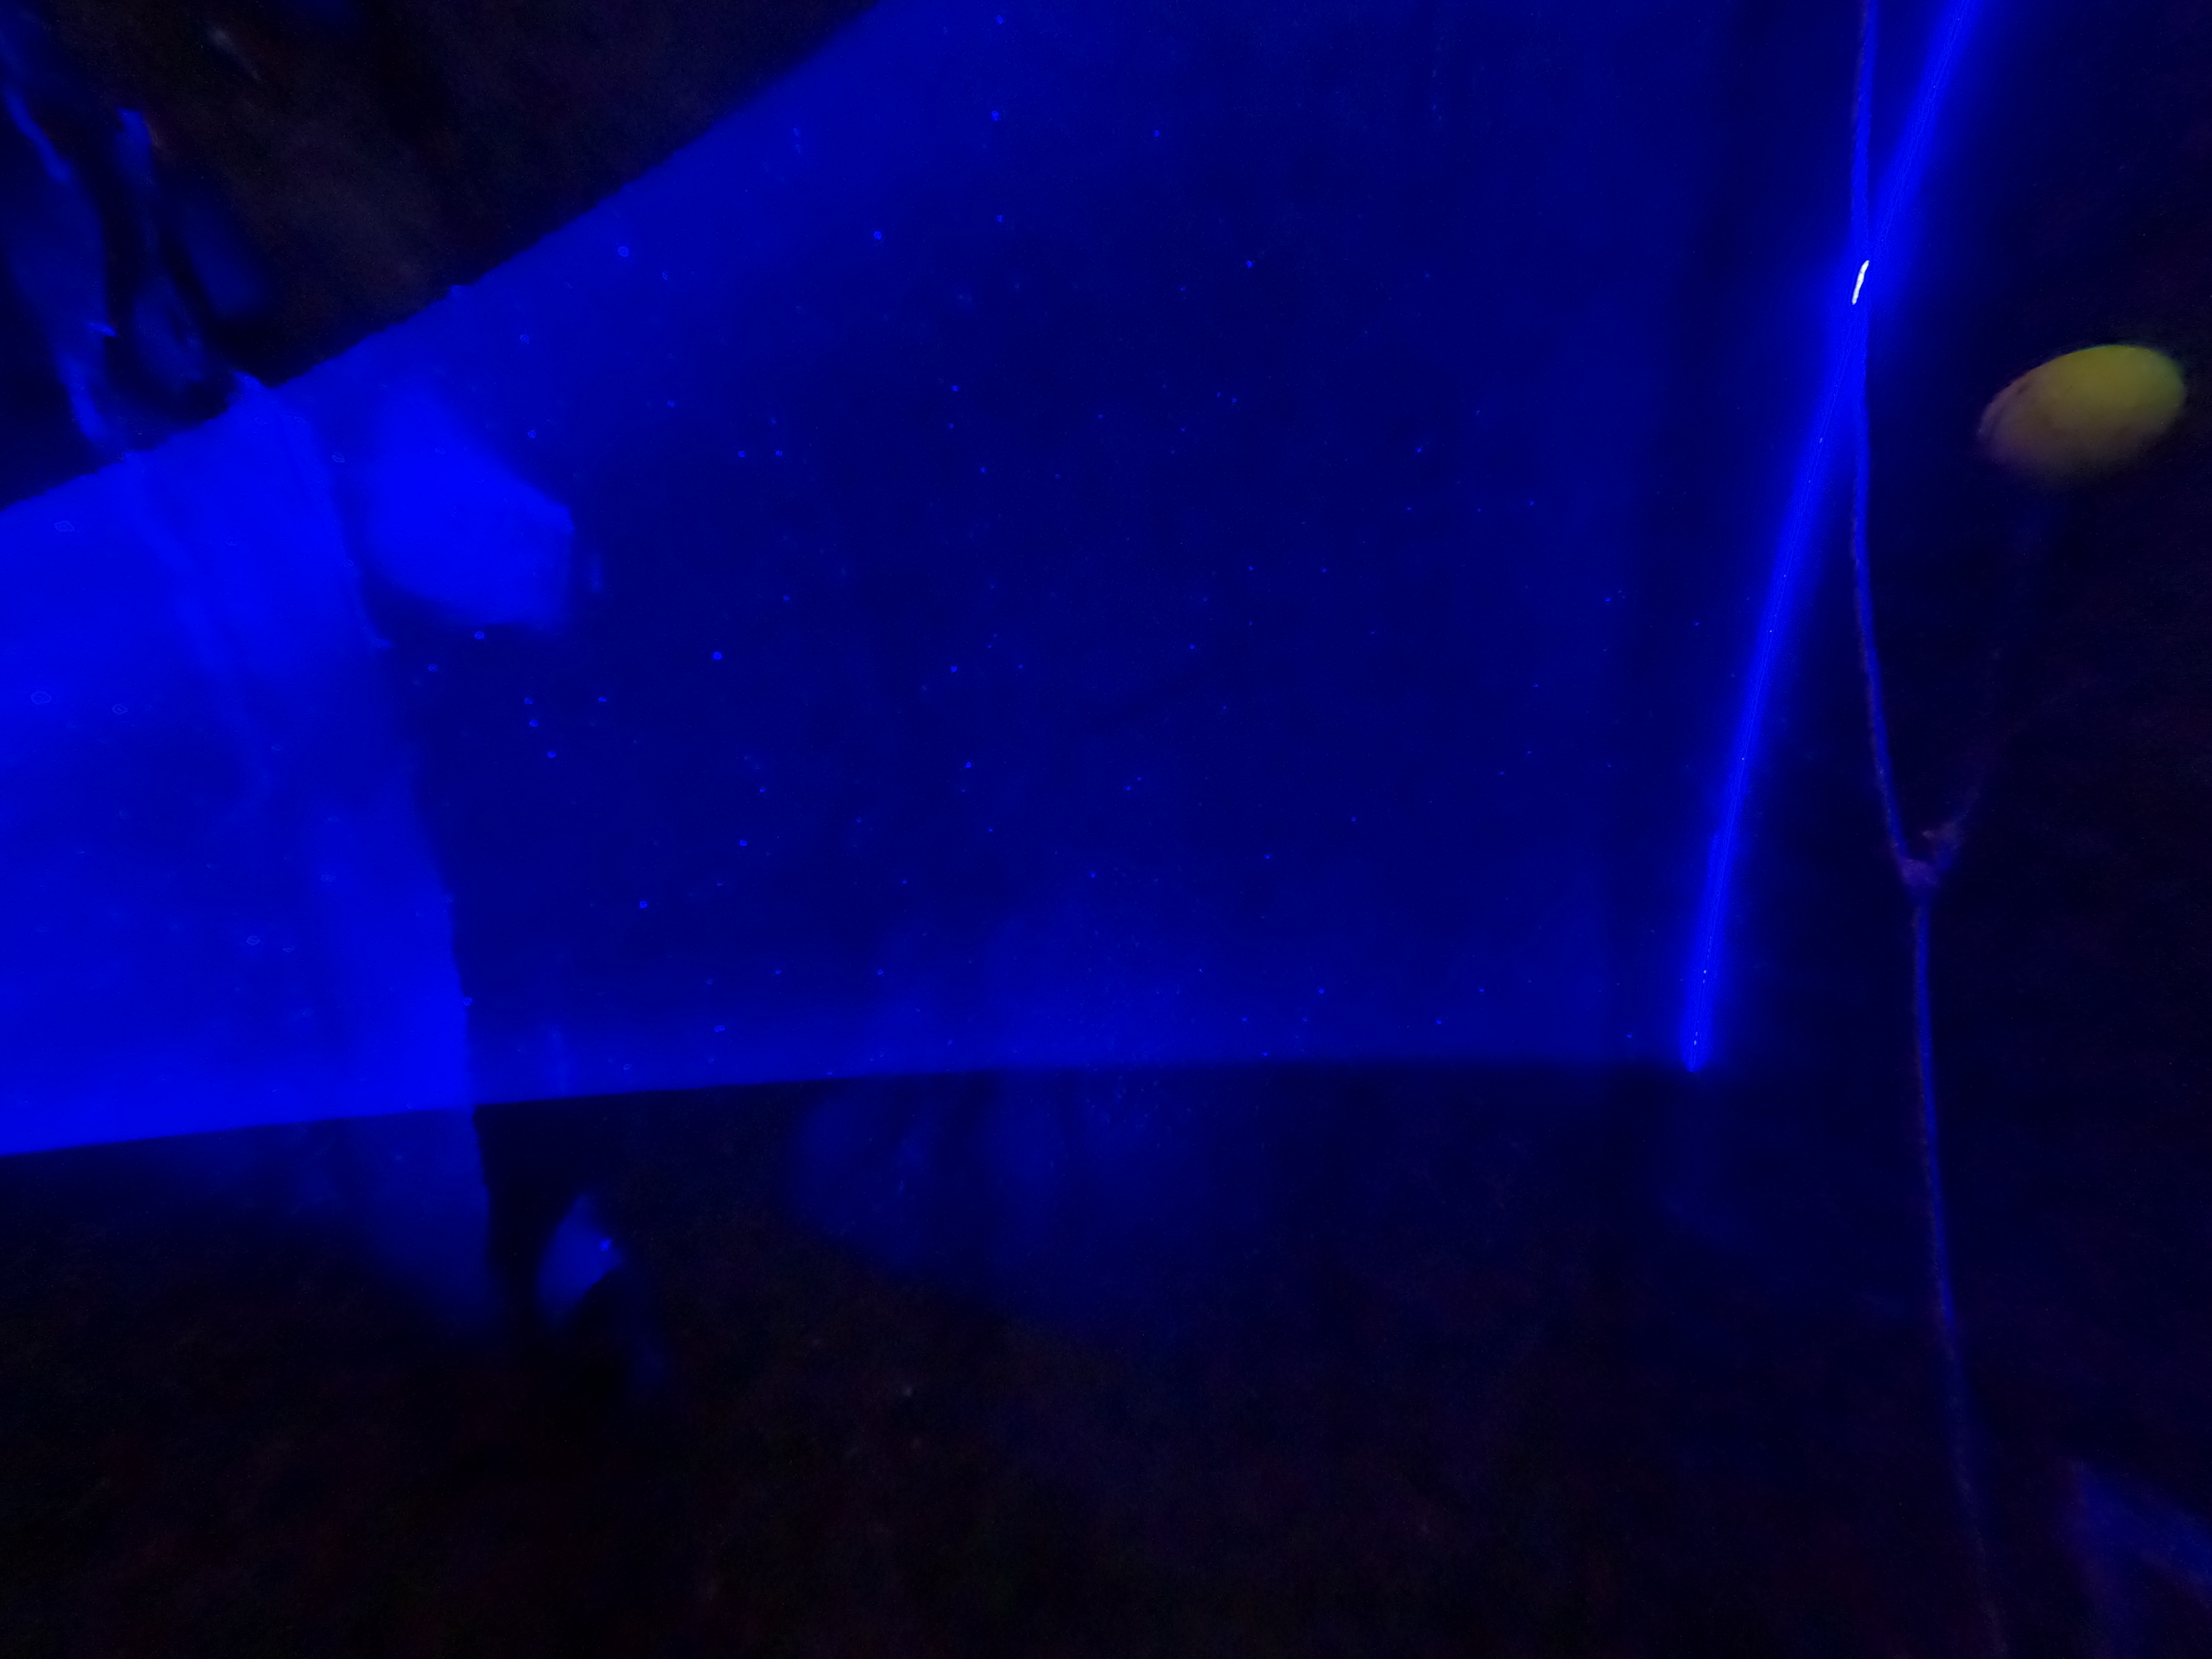

Supplement: Supplementary file 1517 [file G0032216.pdf › 11/G0032216.pdf]

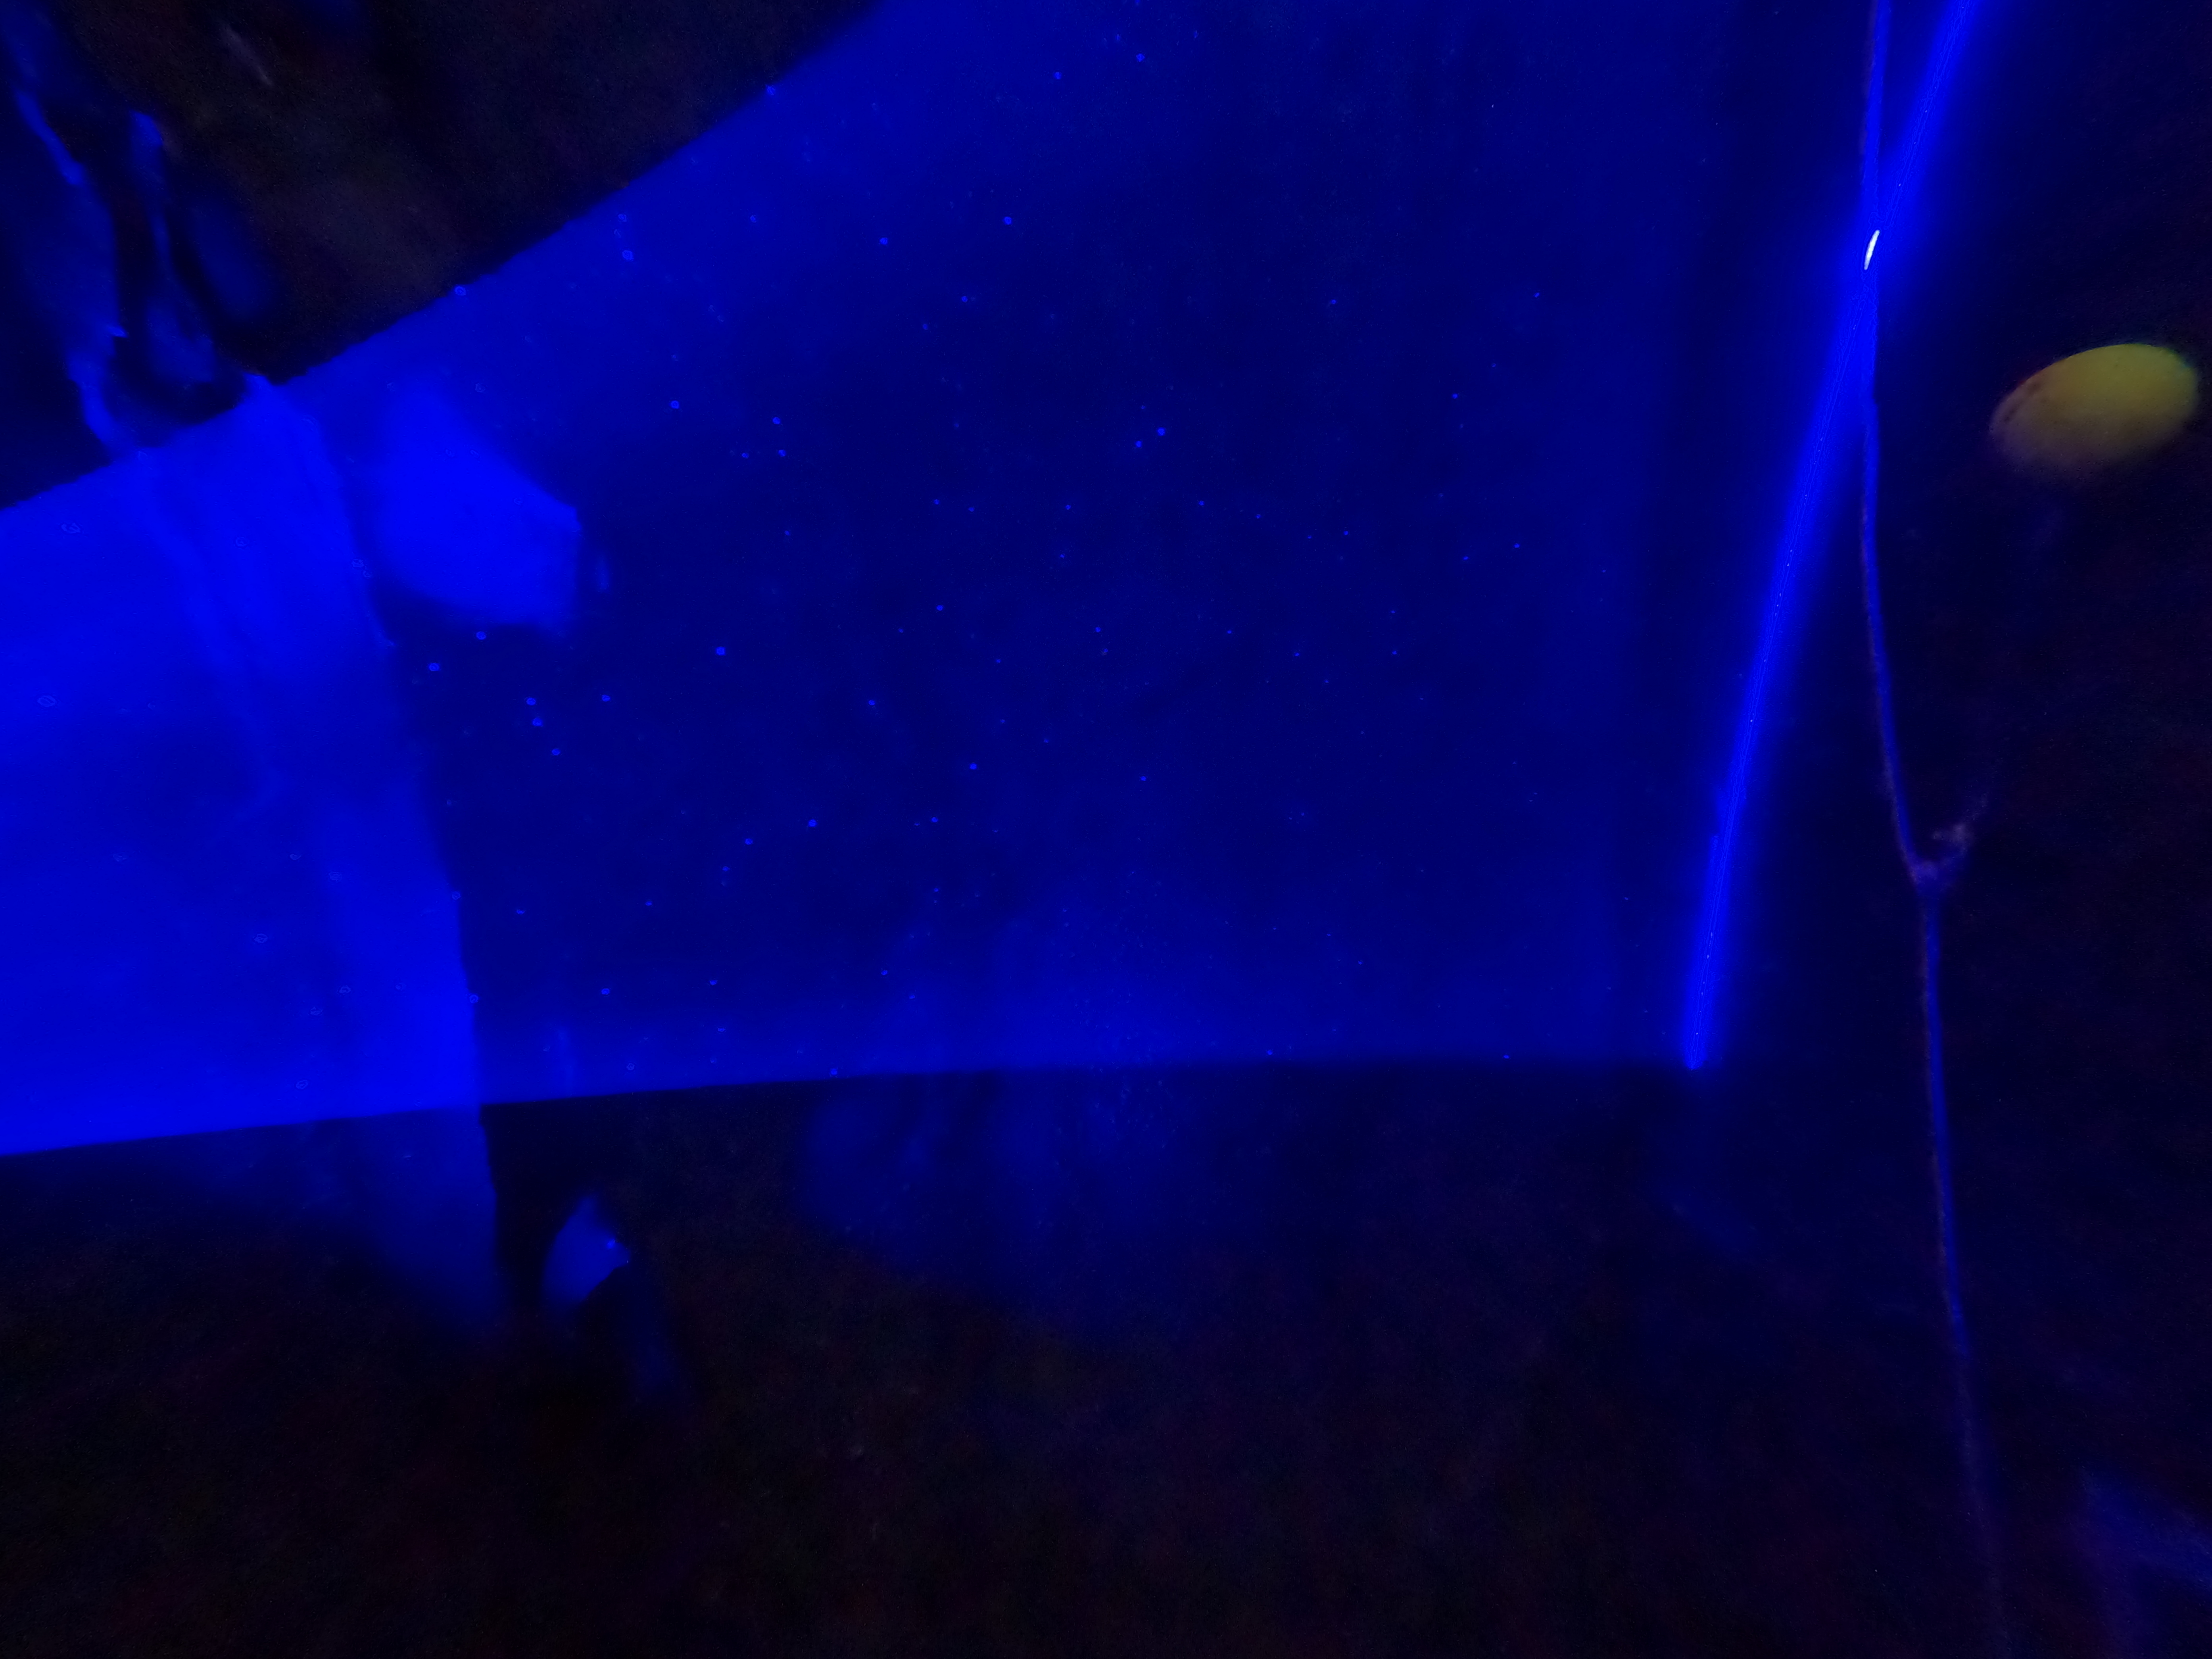

Supplement: Supplementary file 1518 [file G0032217.pdf › 11/G0032217.pdf]

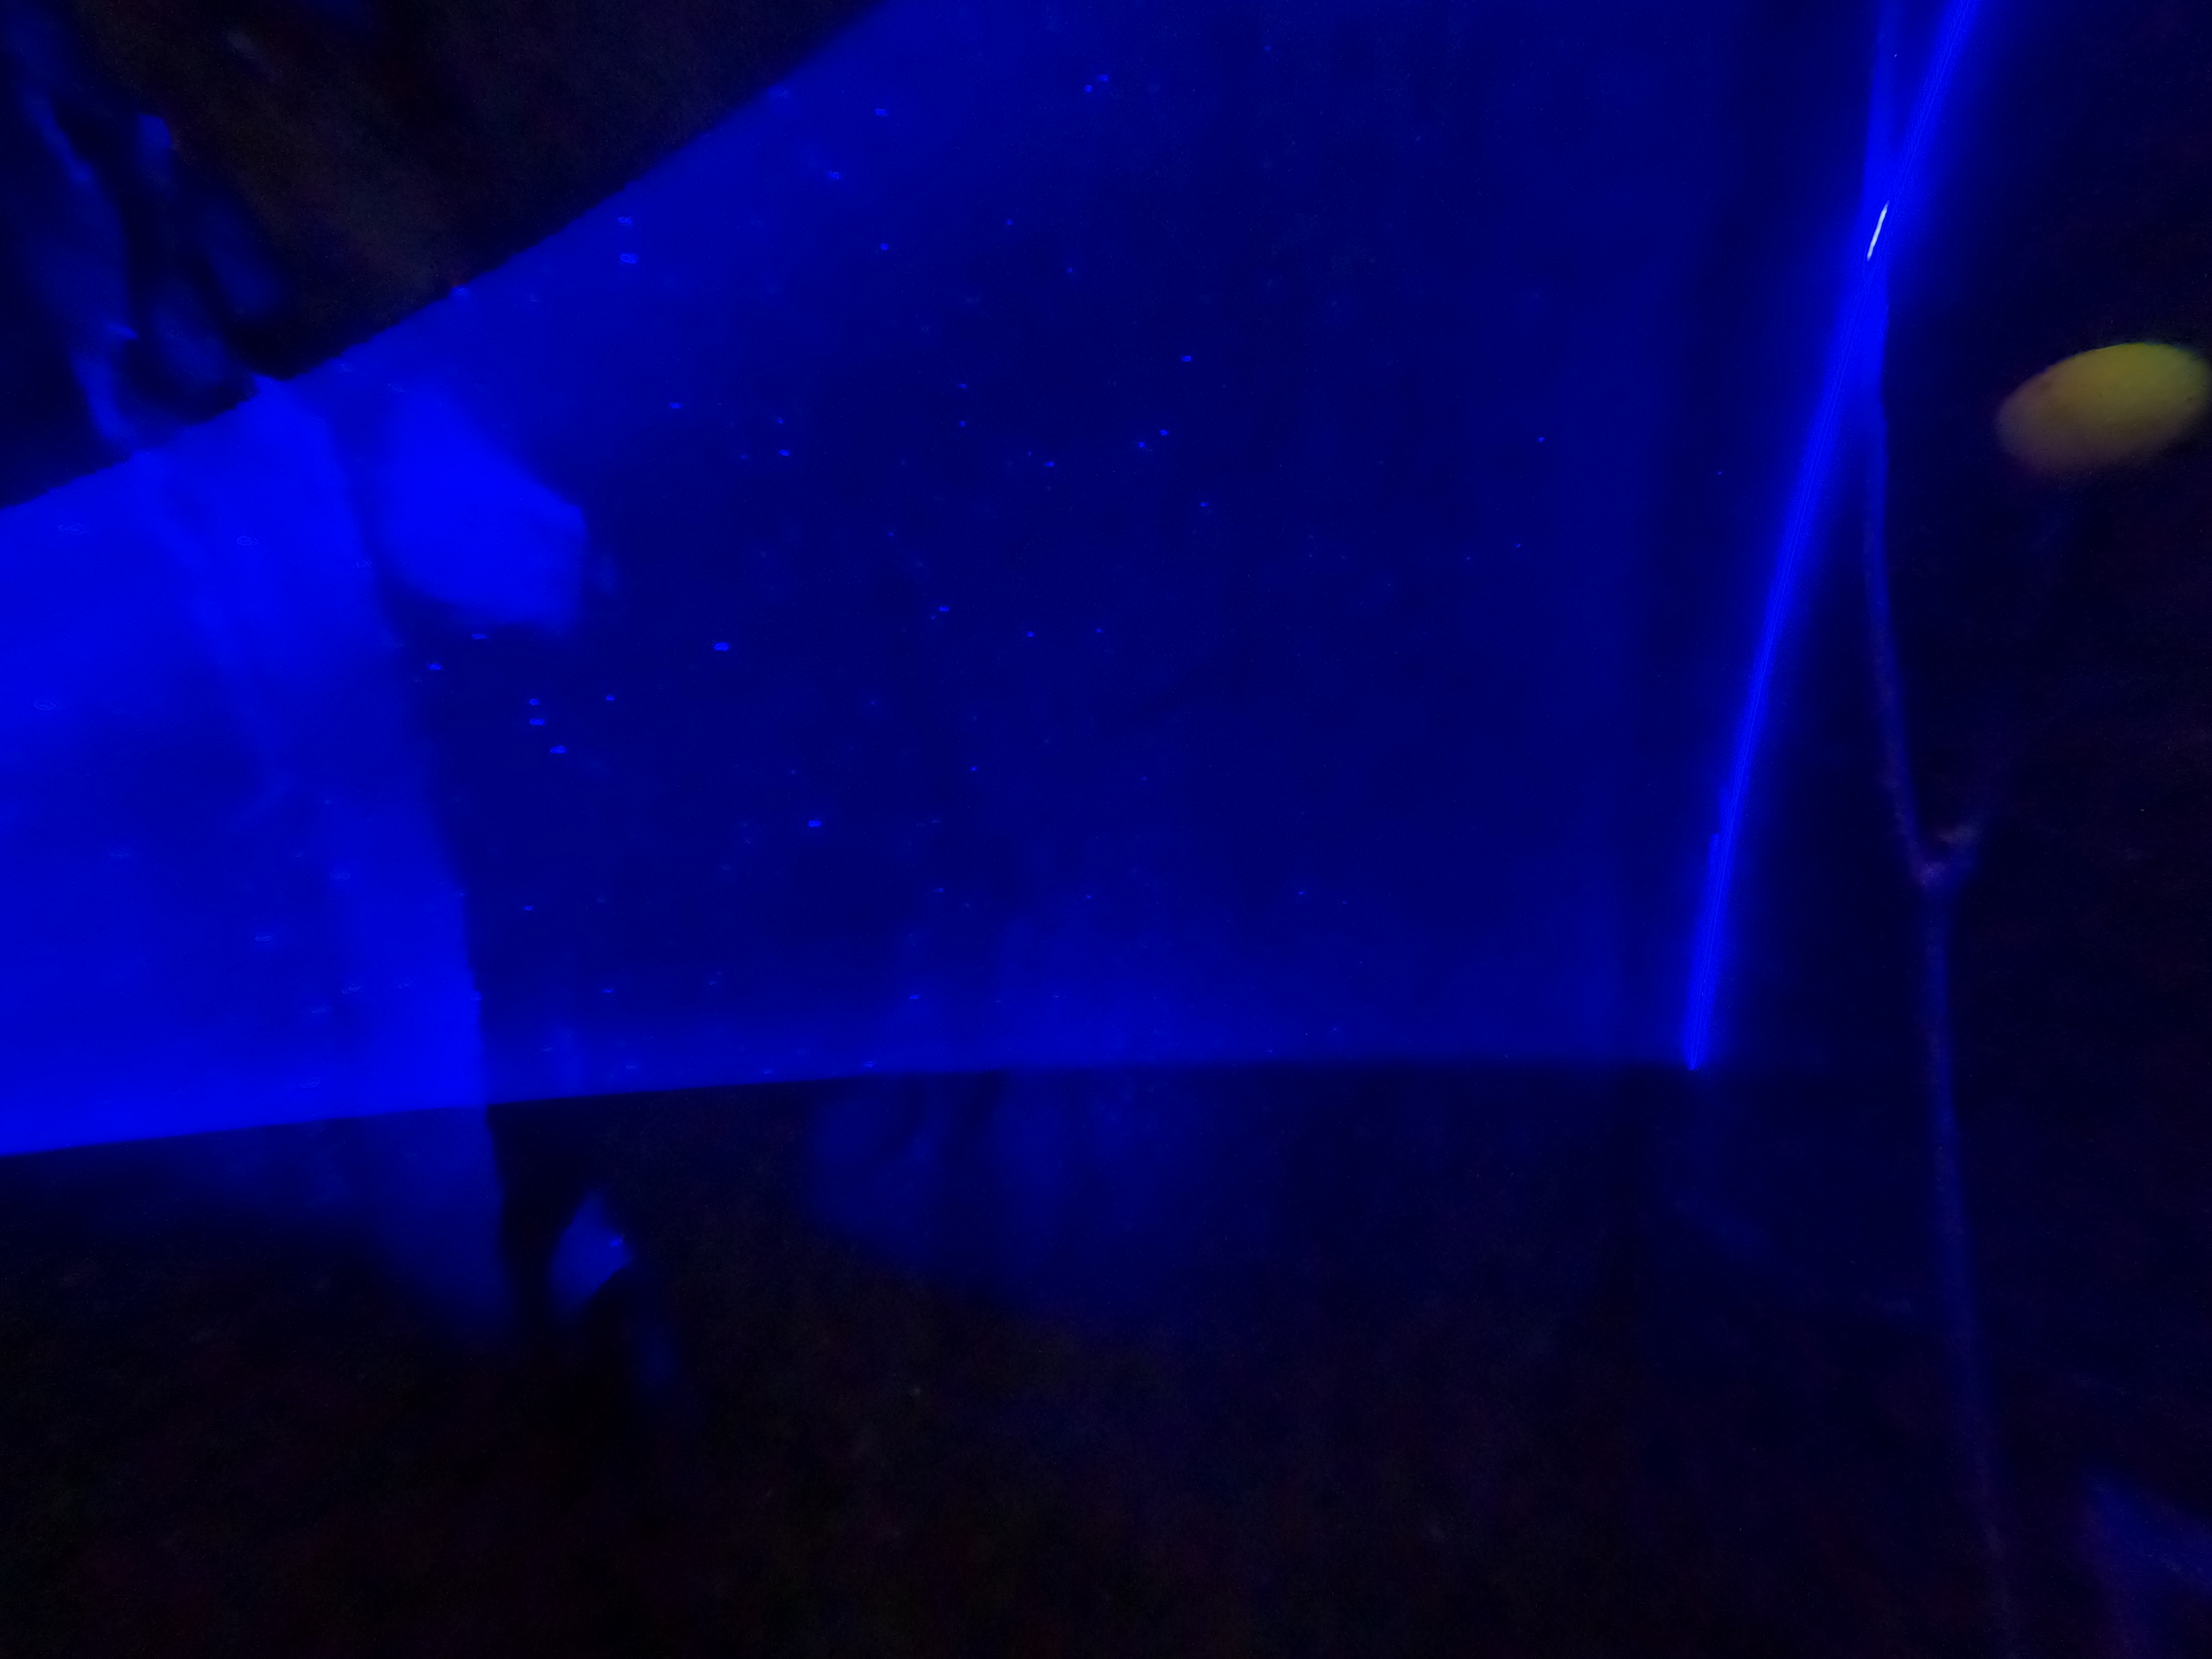

Supplement: Supplementary file 1519 [file G0032218.pdf › 11/G0032218.pdf]

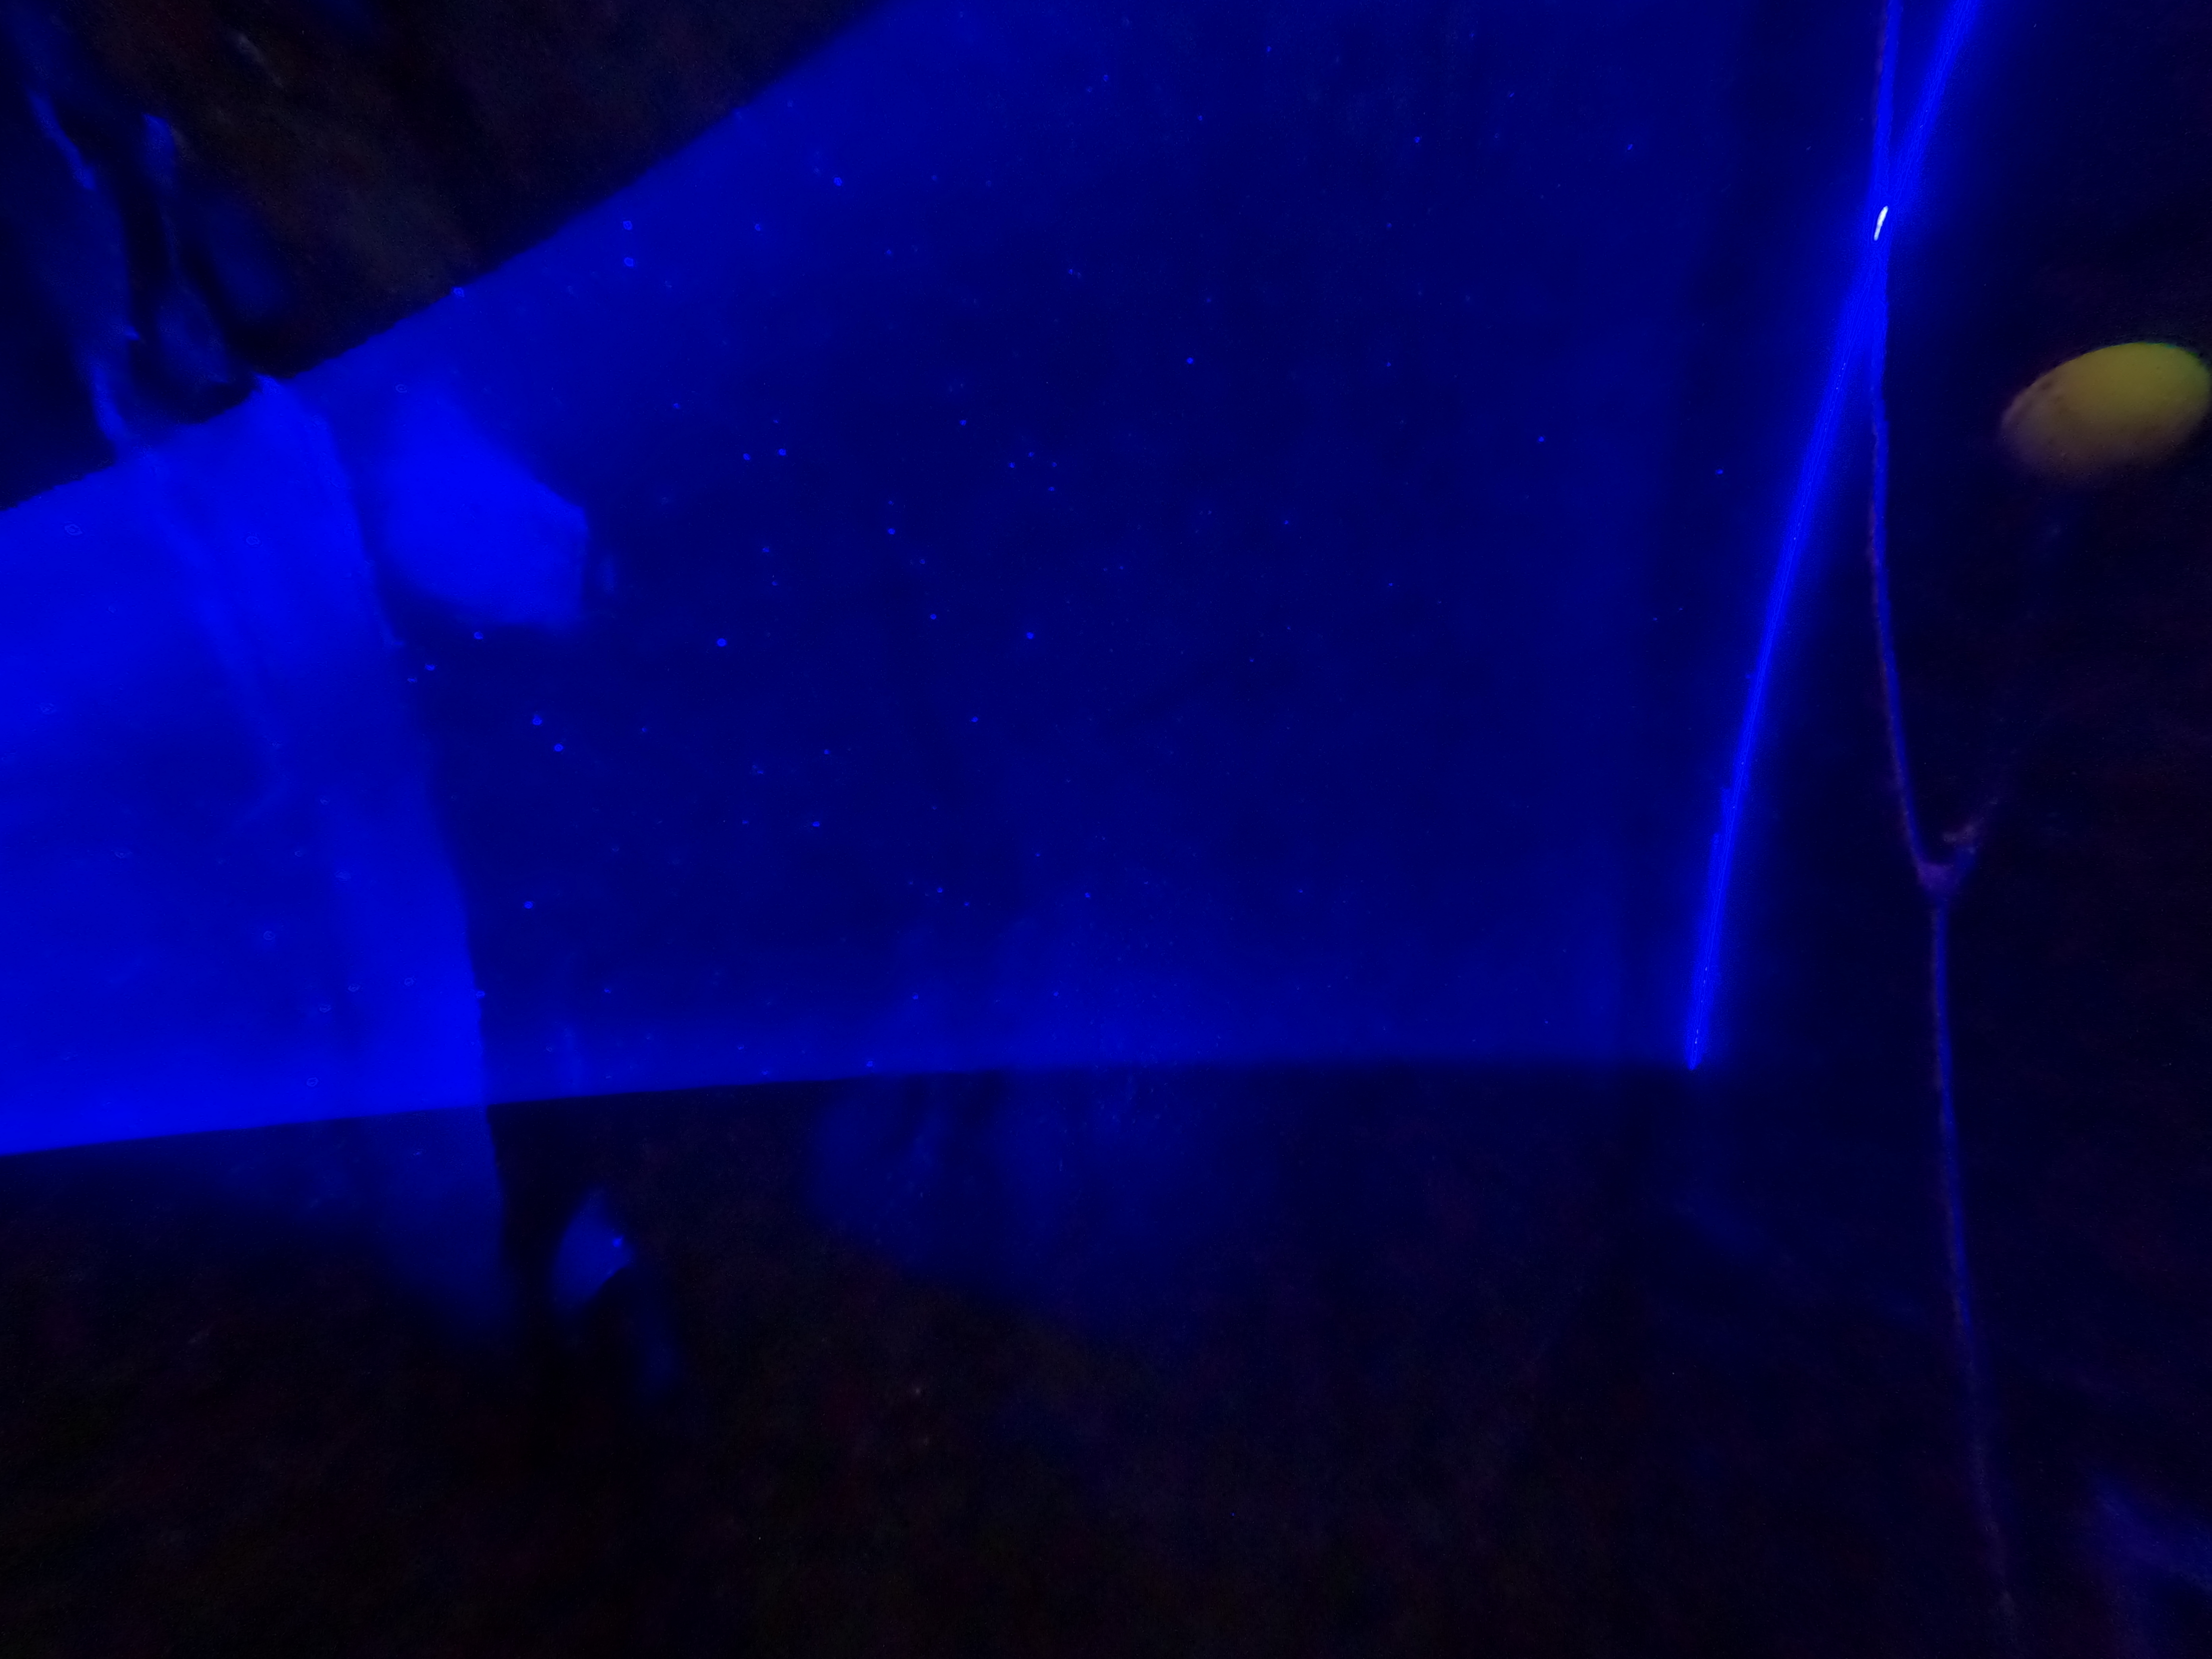

Supplement: Supplementary file 1520 [file G0032219.pdf › 11/G0032219.pdf]

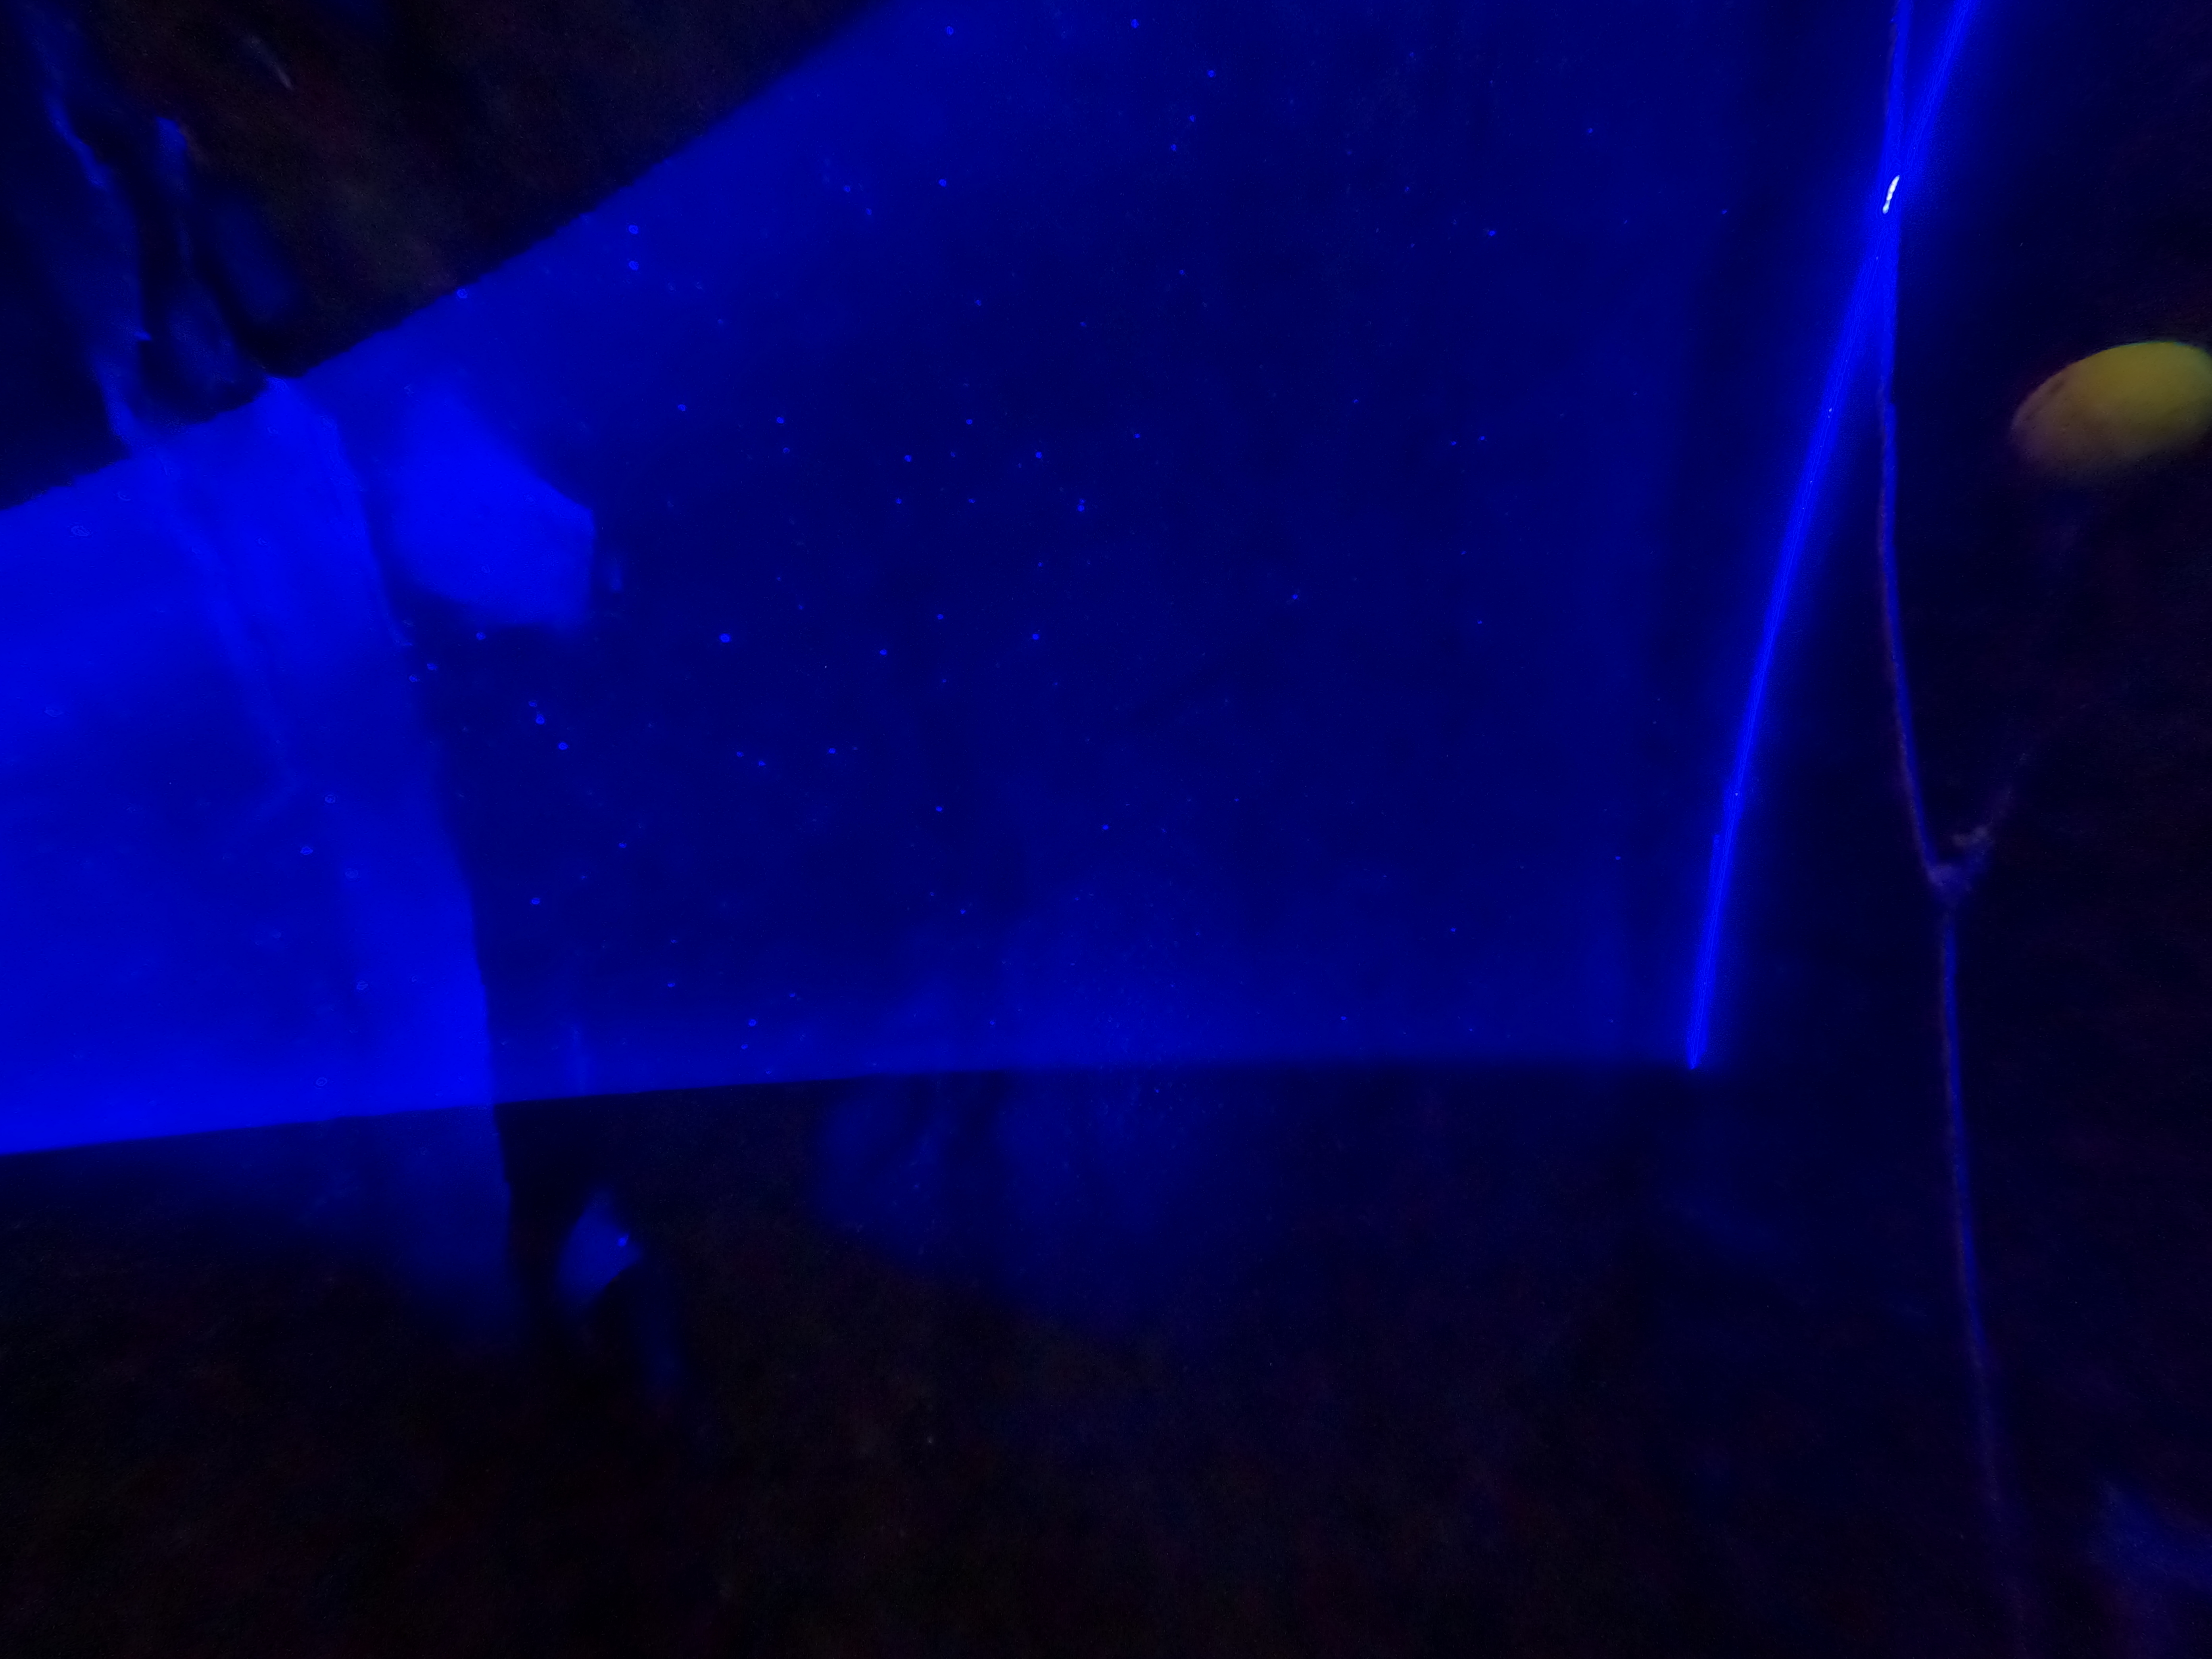

Supplement: Supplementary file 1521 [file G0032220.pdf › 11/G0032220.pdf]

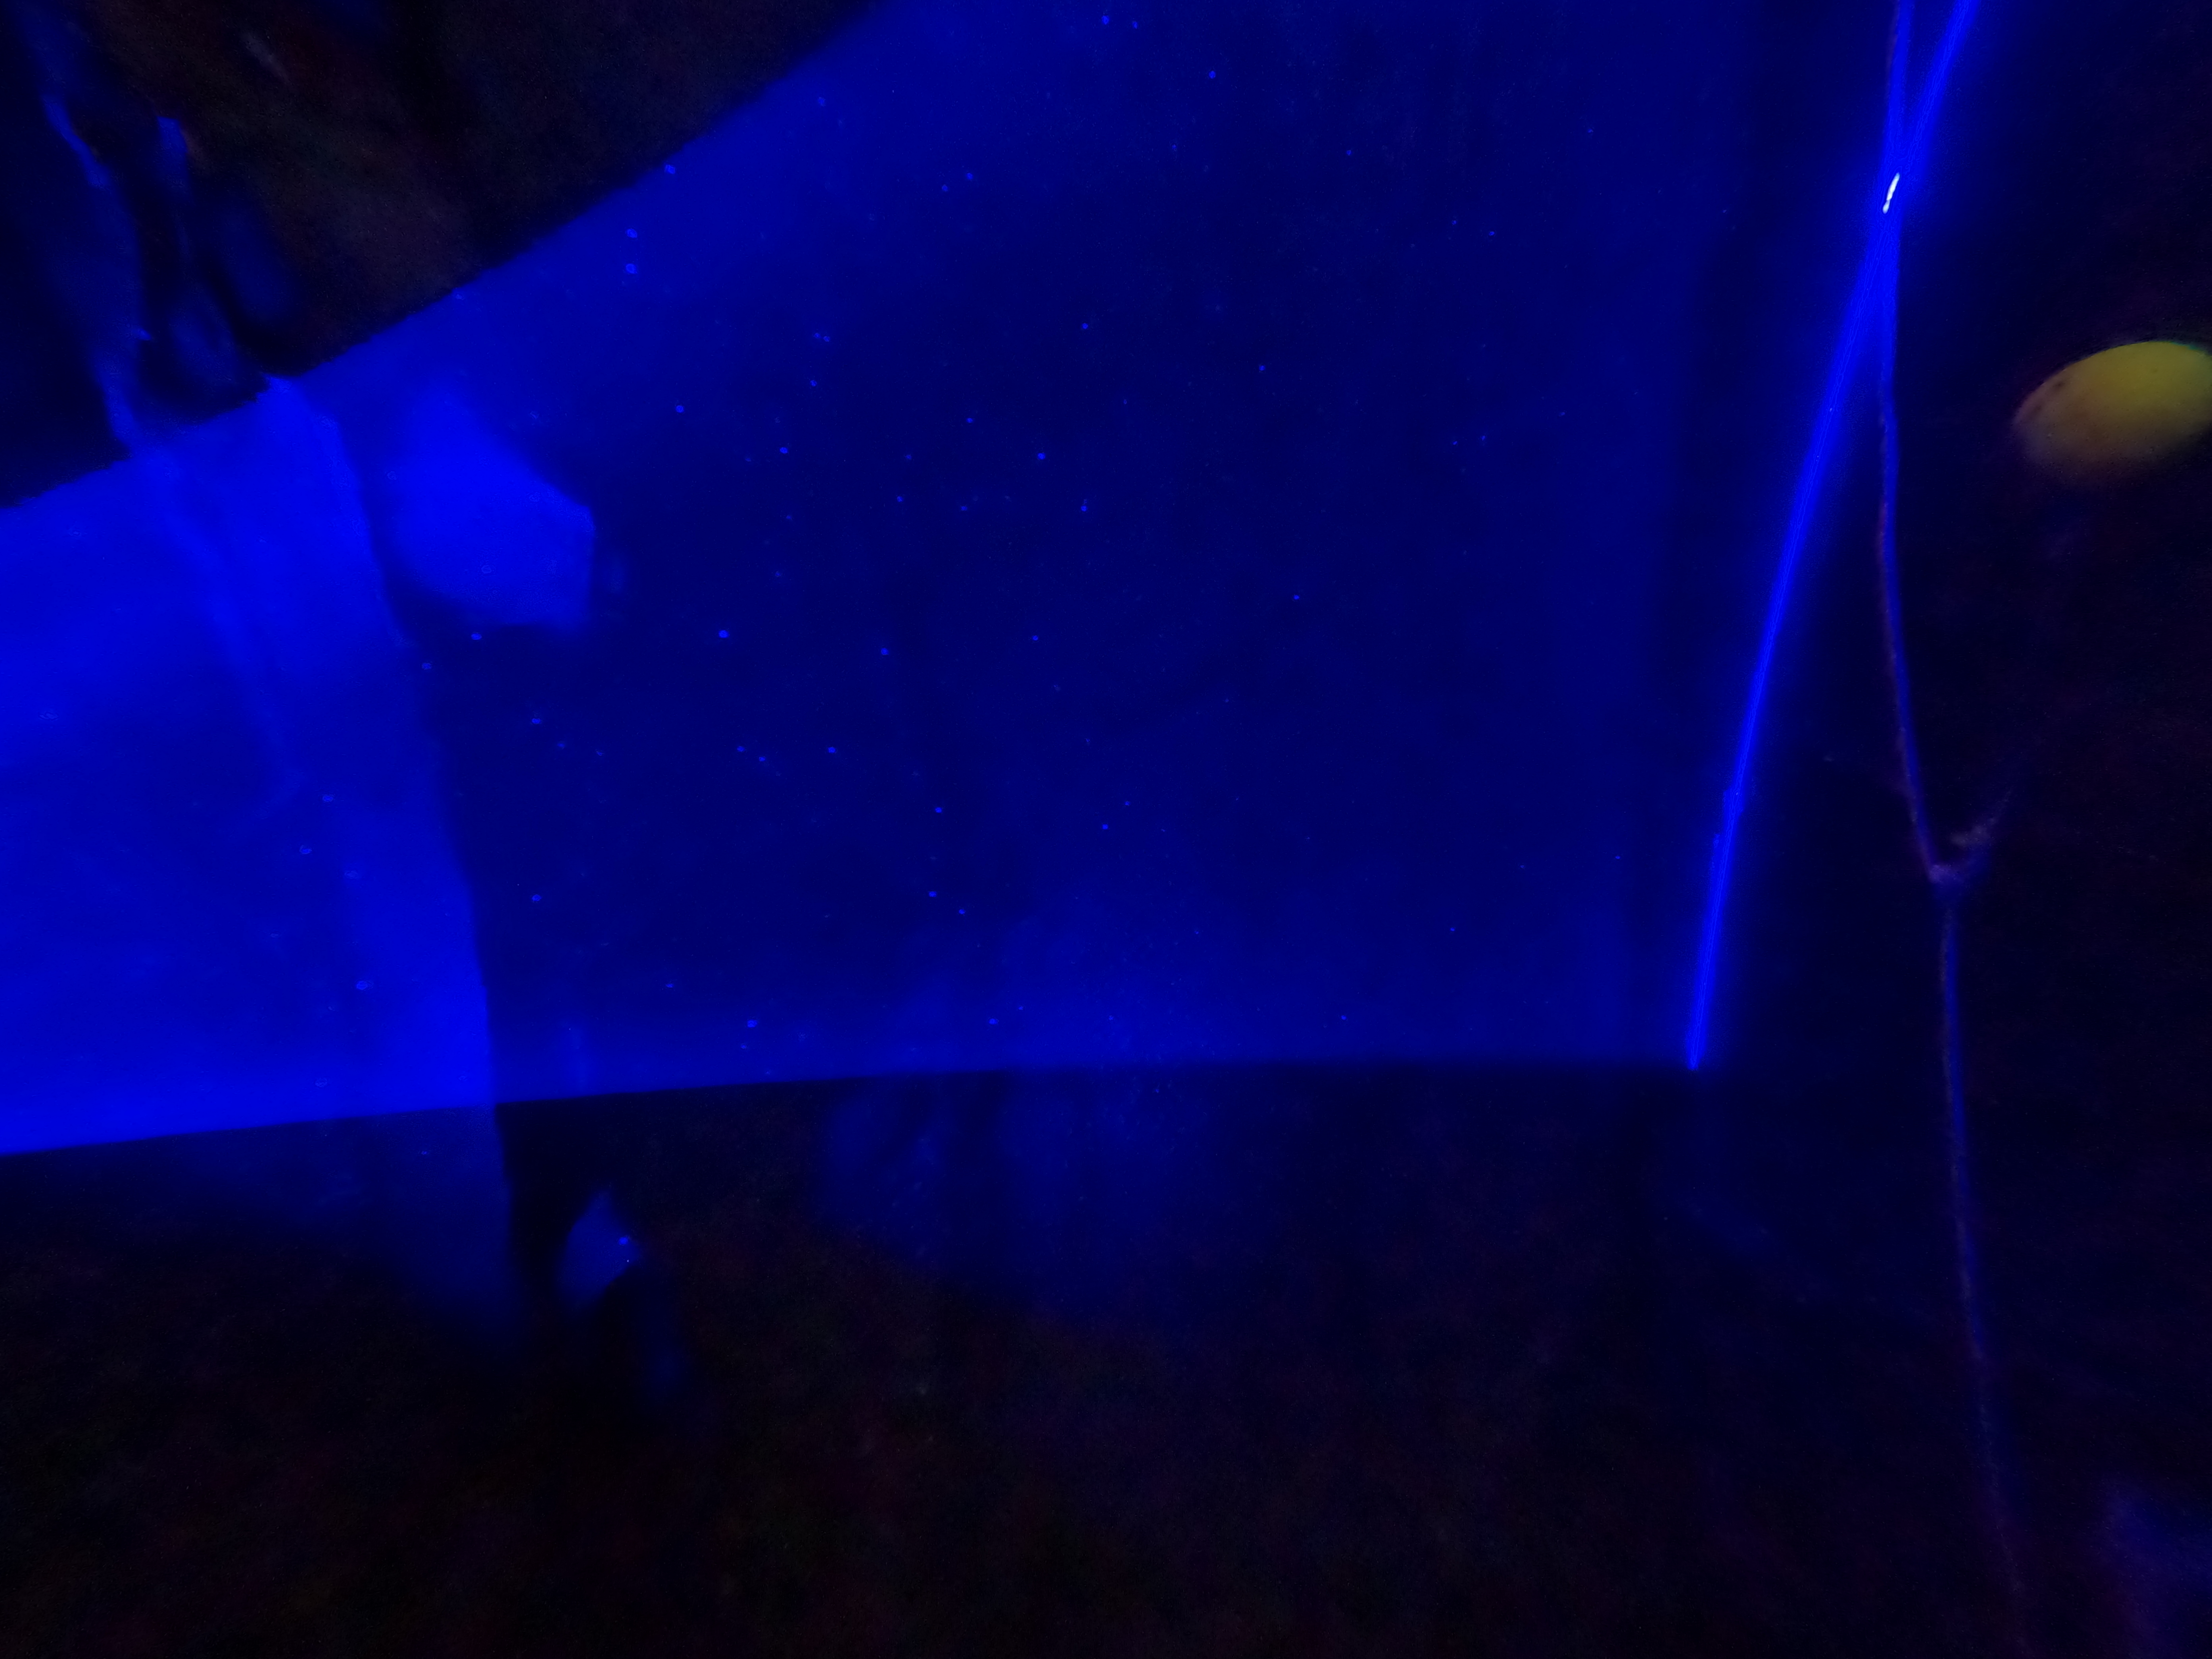

Supplement: Supplementary file 1522 [file G0032221.pdf › 11/G0032221.pdf]

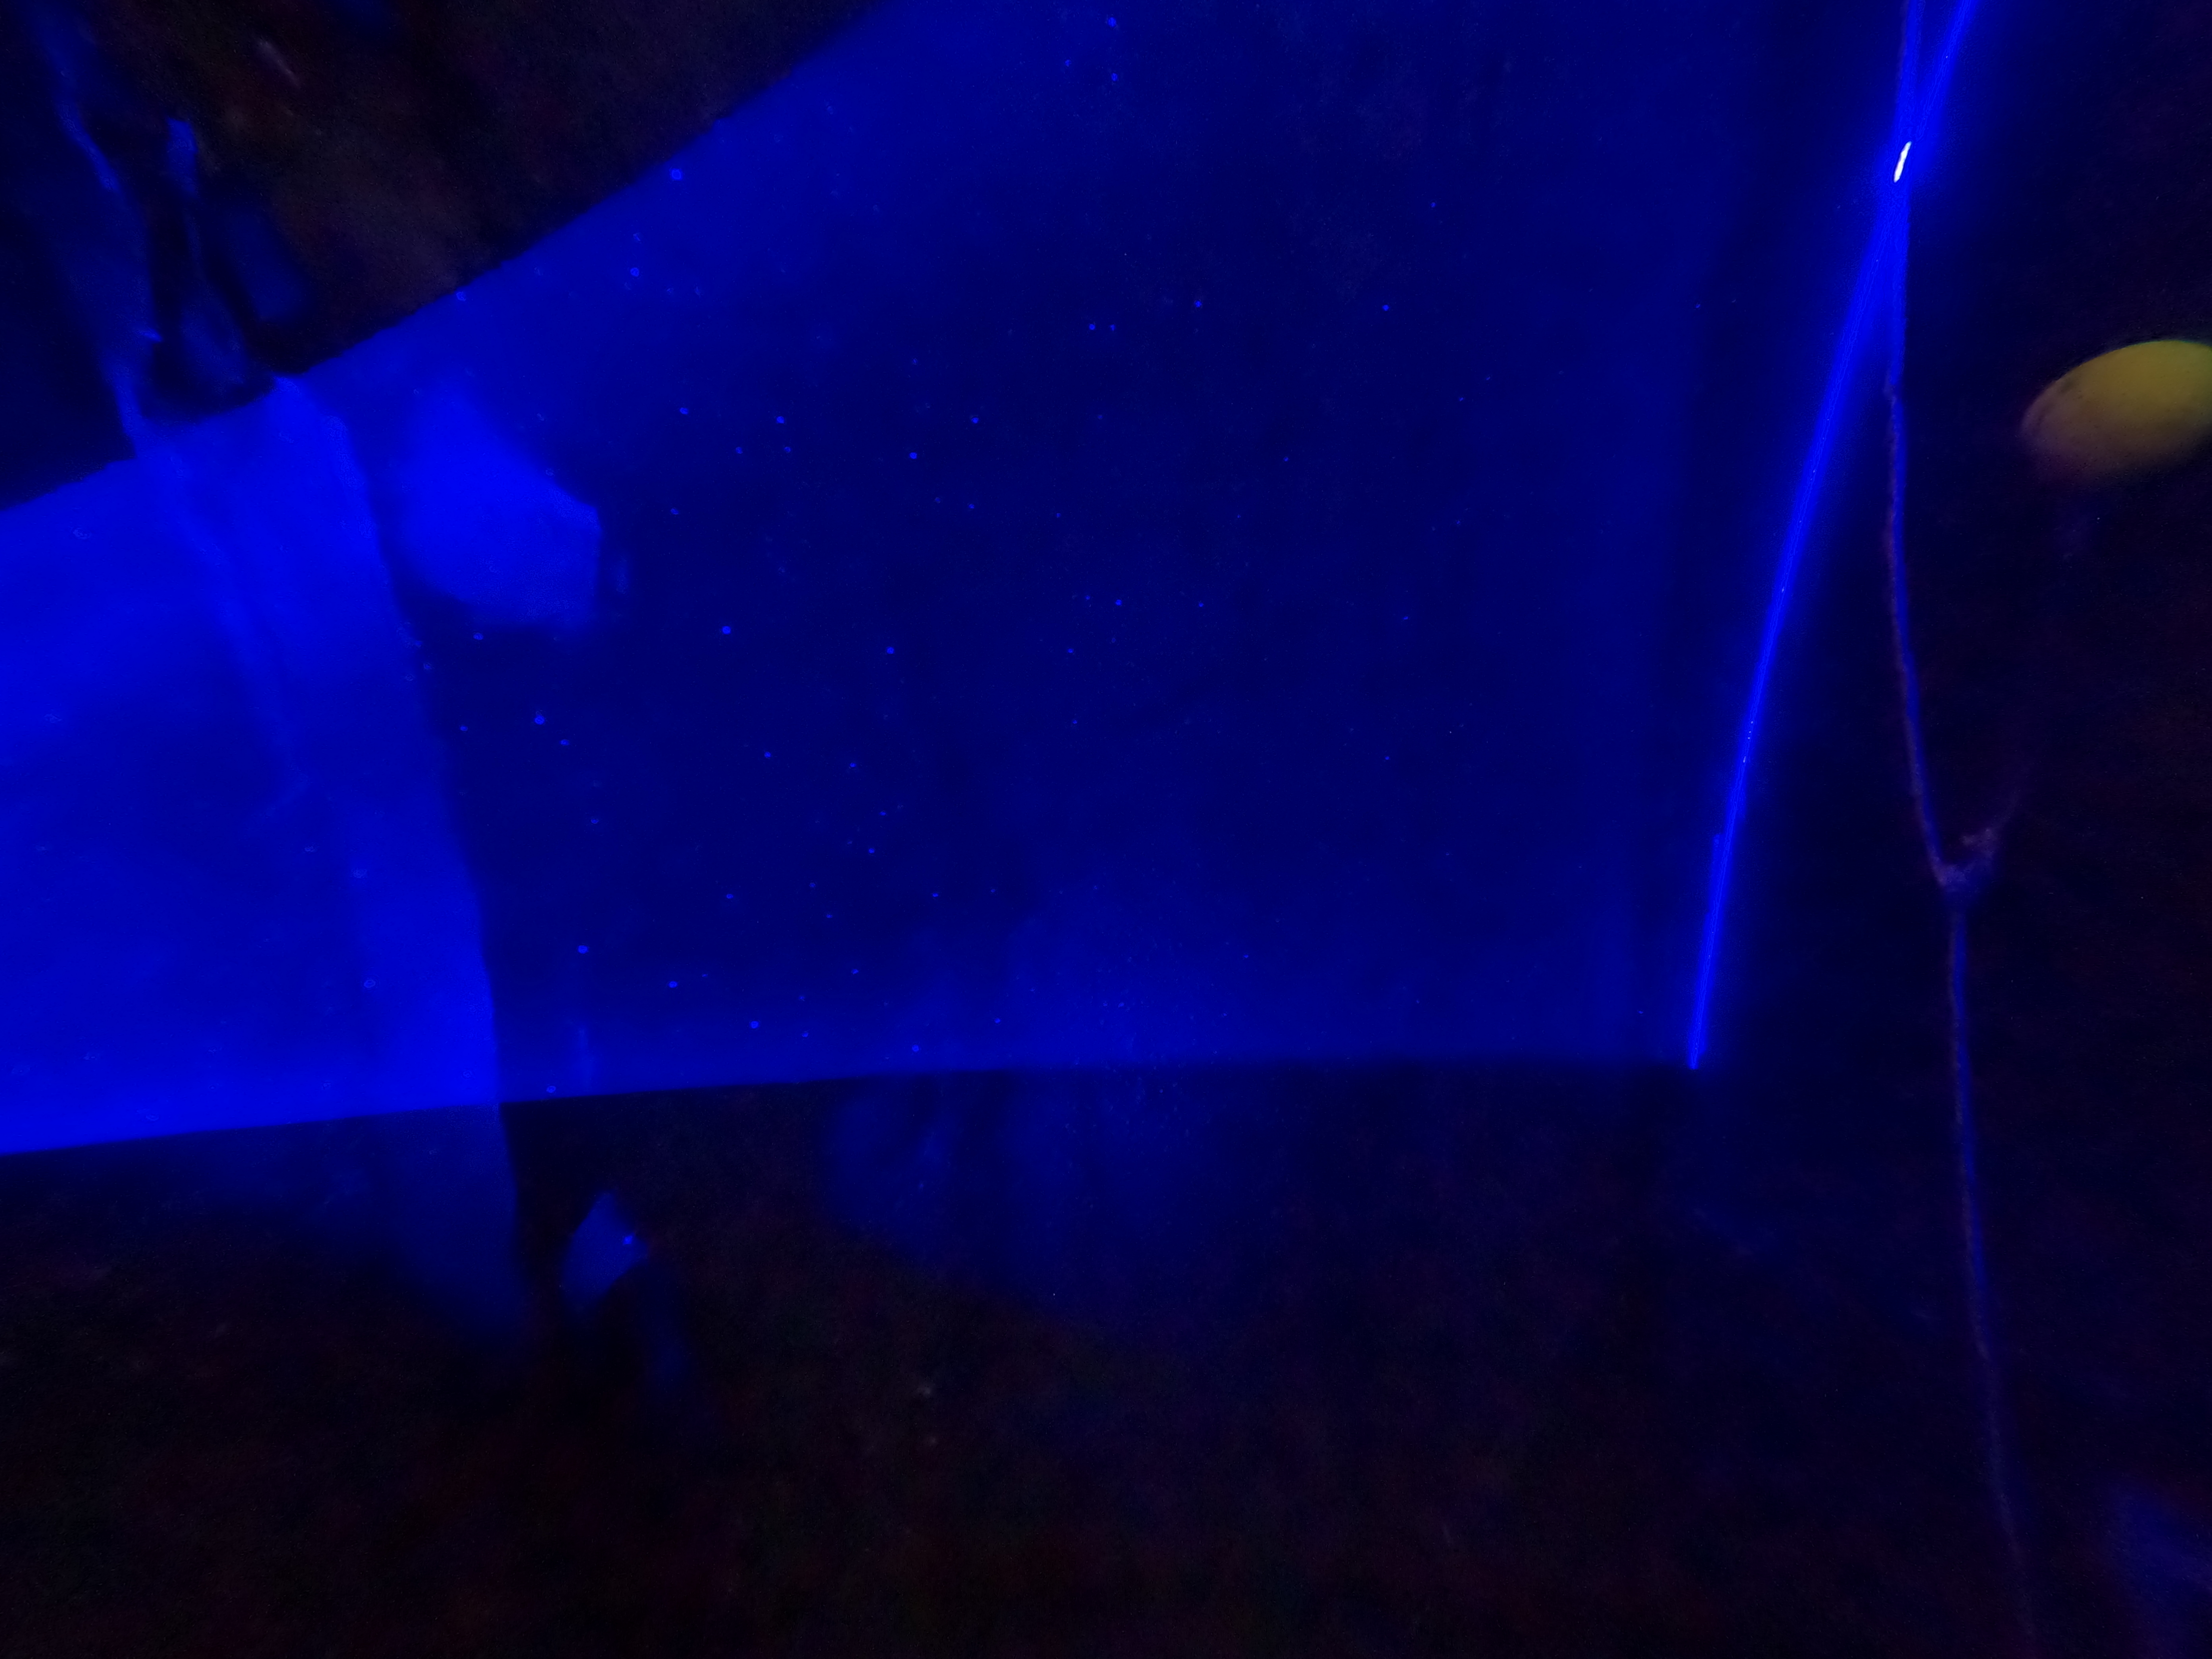

Supplement: Supplementary file 1523 [file G0032222.pdf › 11/G0032222.pdf]

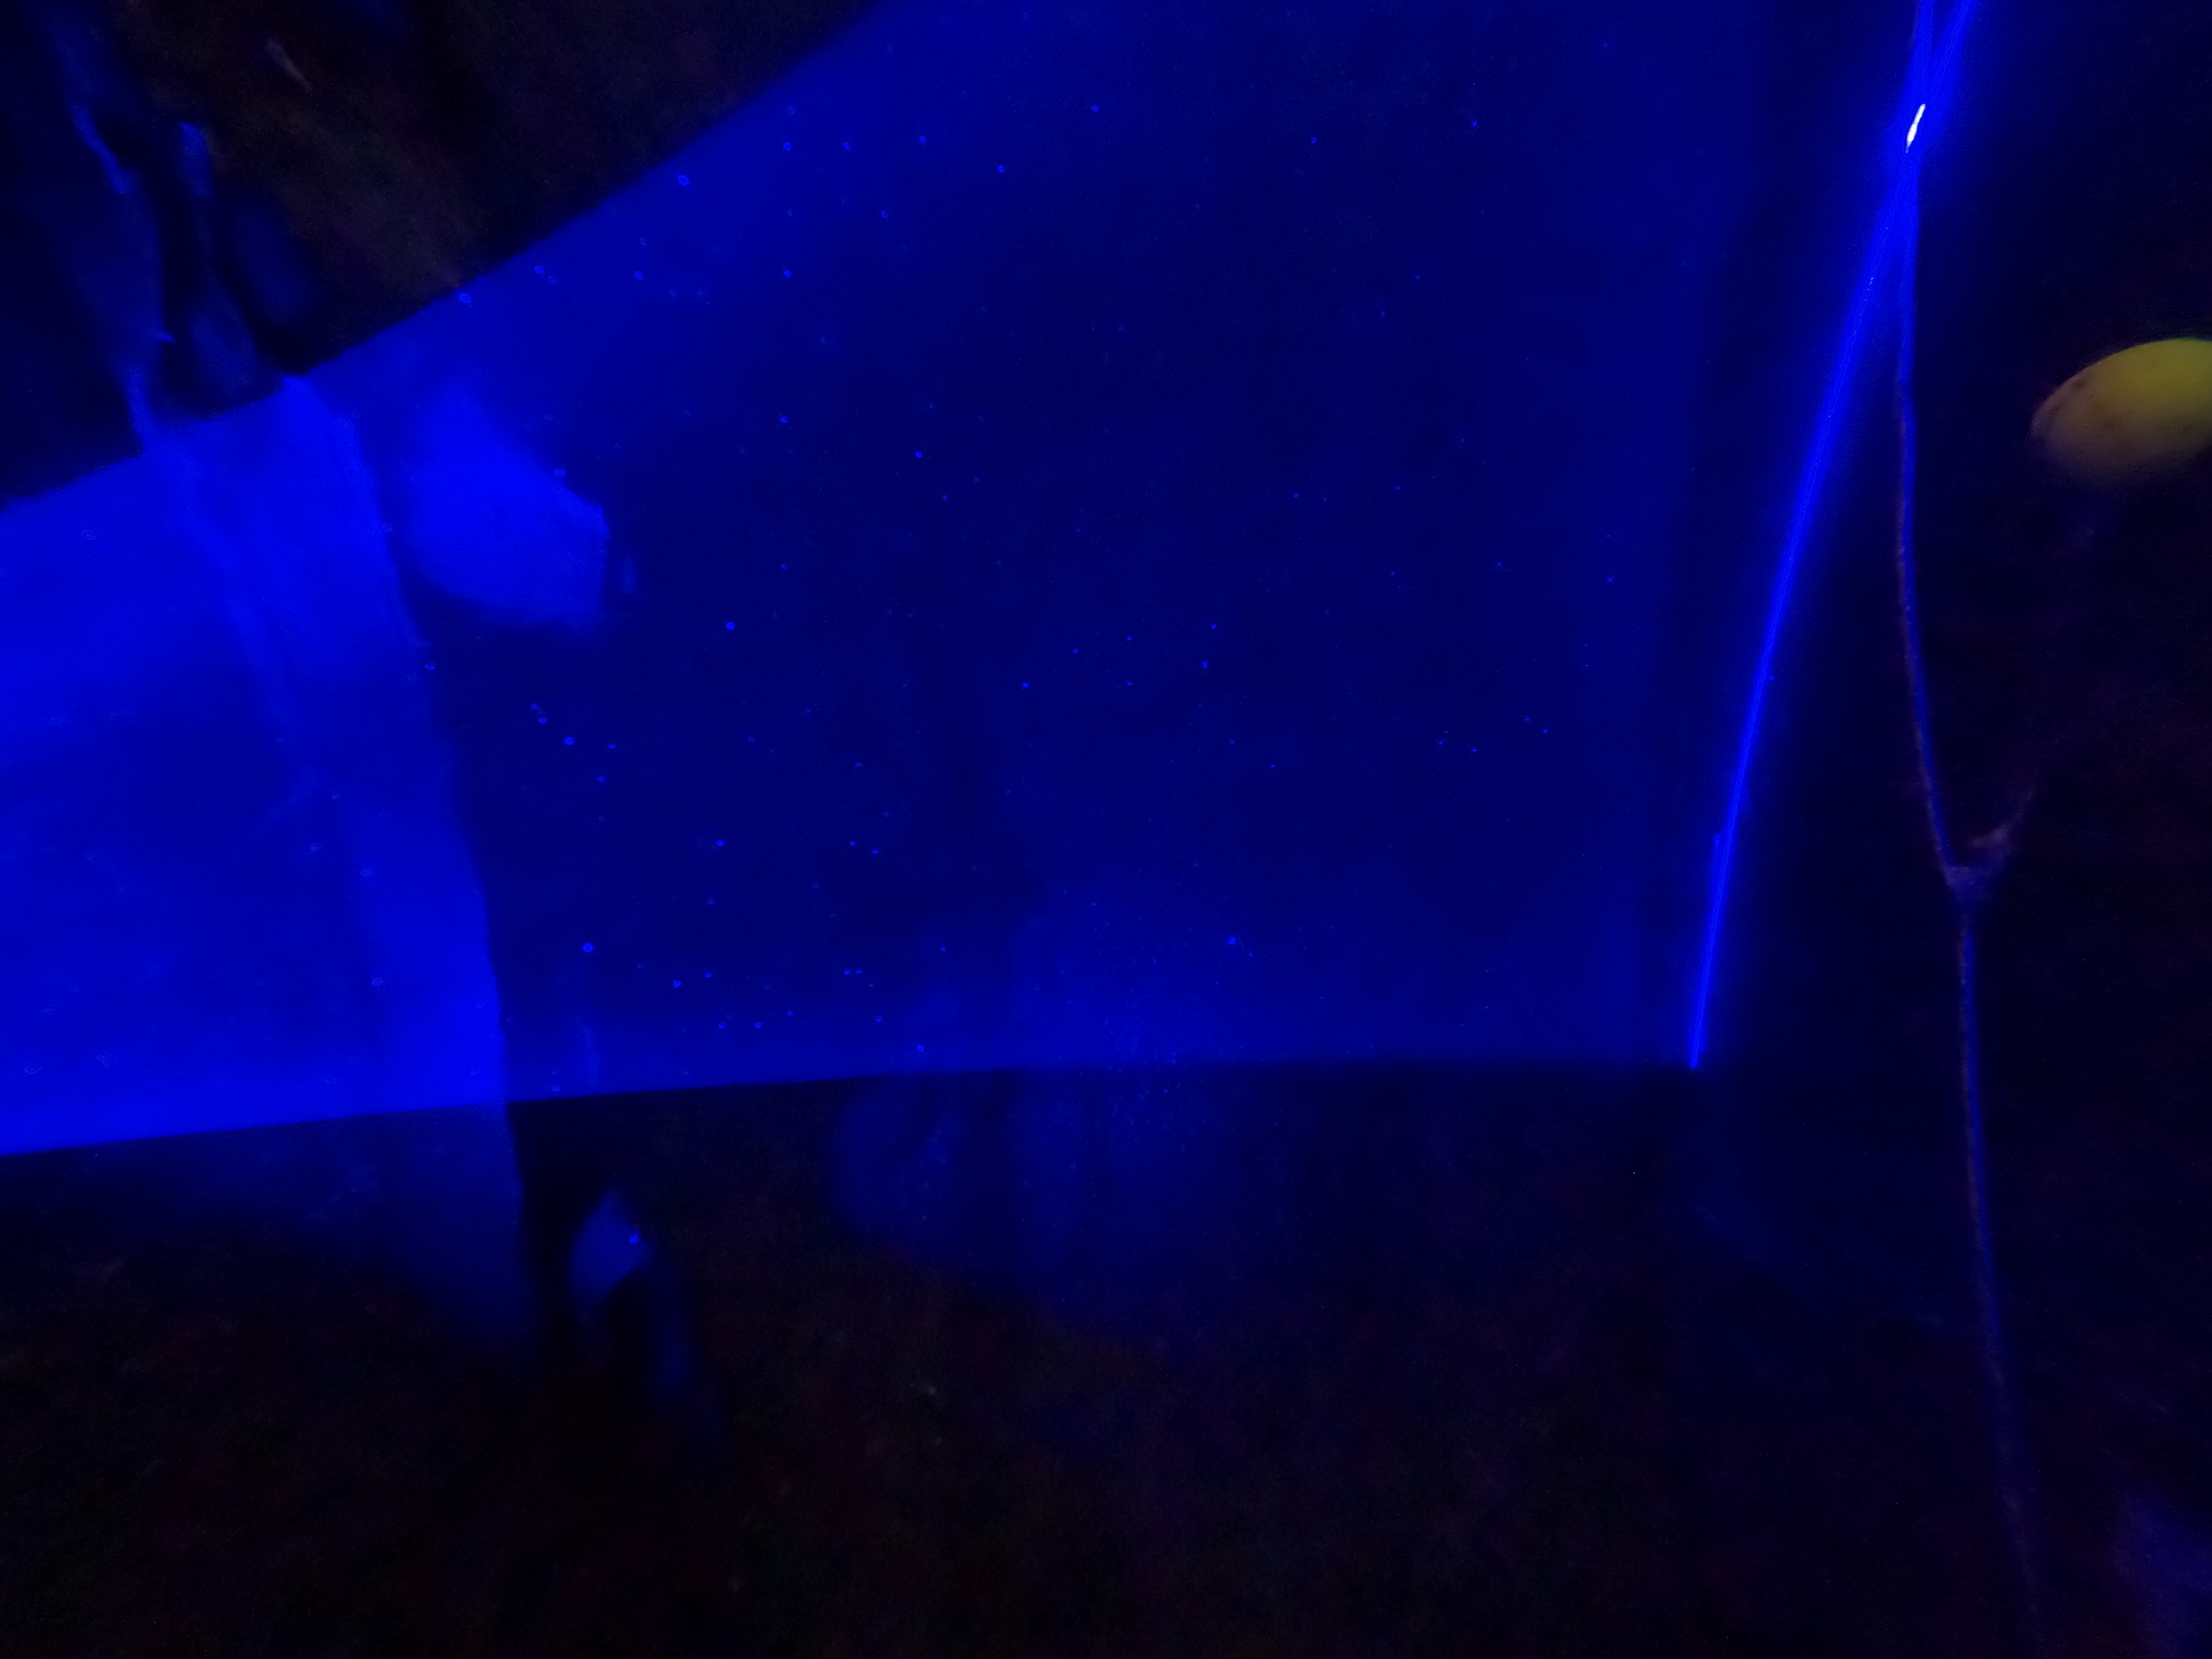

Supplement: Supplementary file 1524 [file G0032223.pdf › 11/G0032223.pdf]

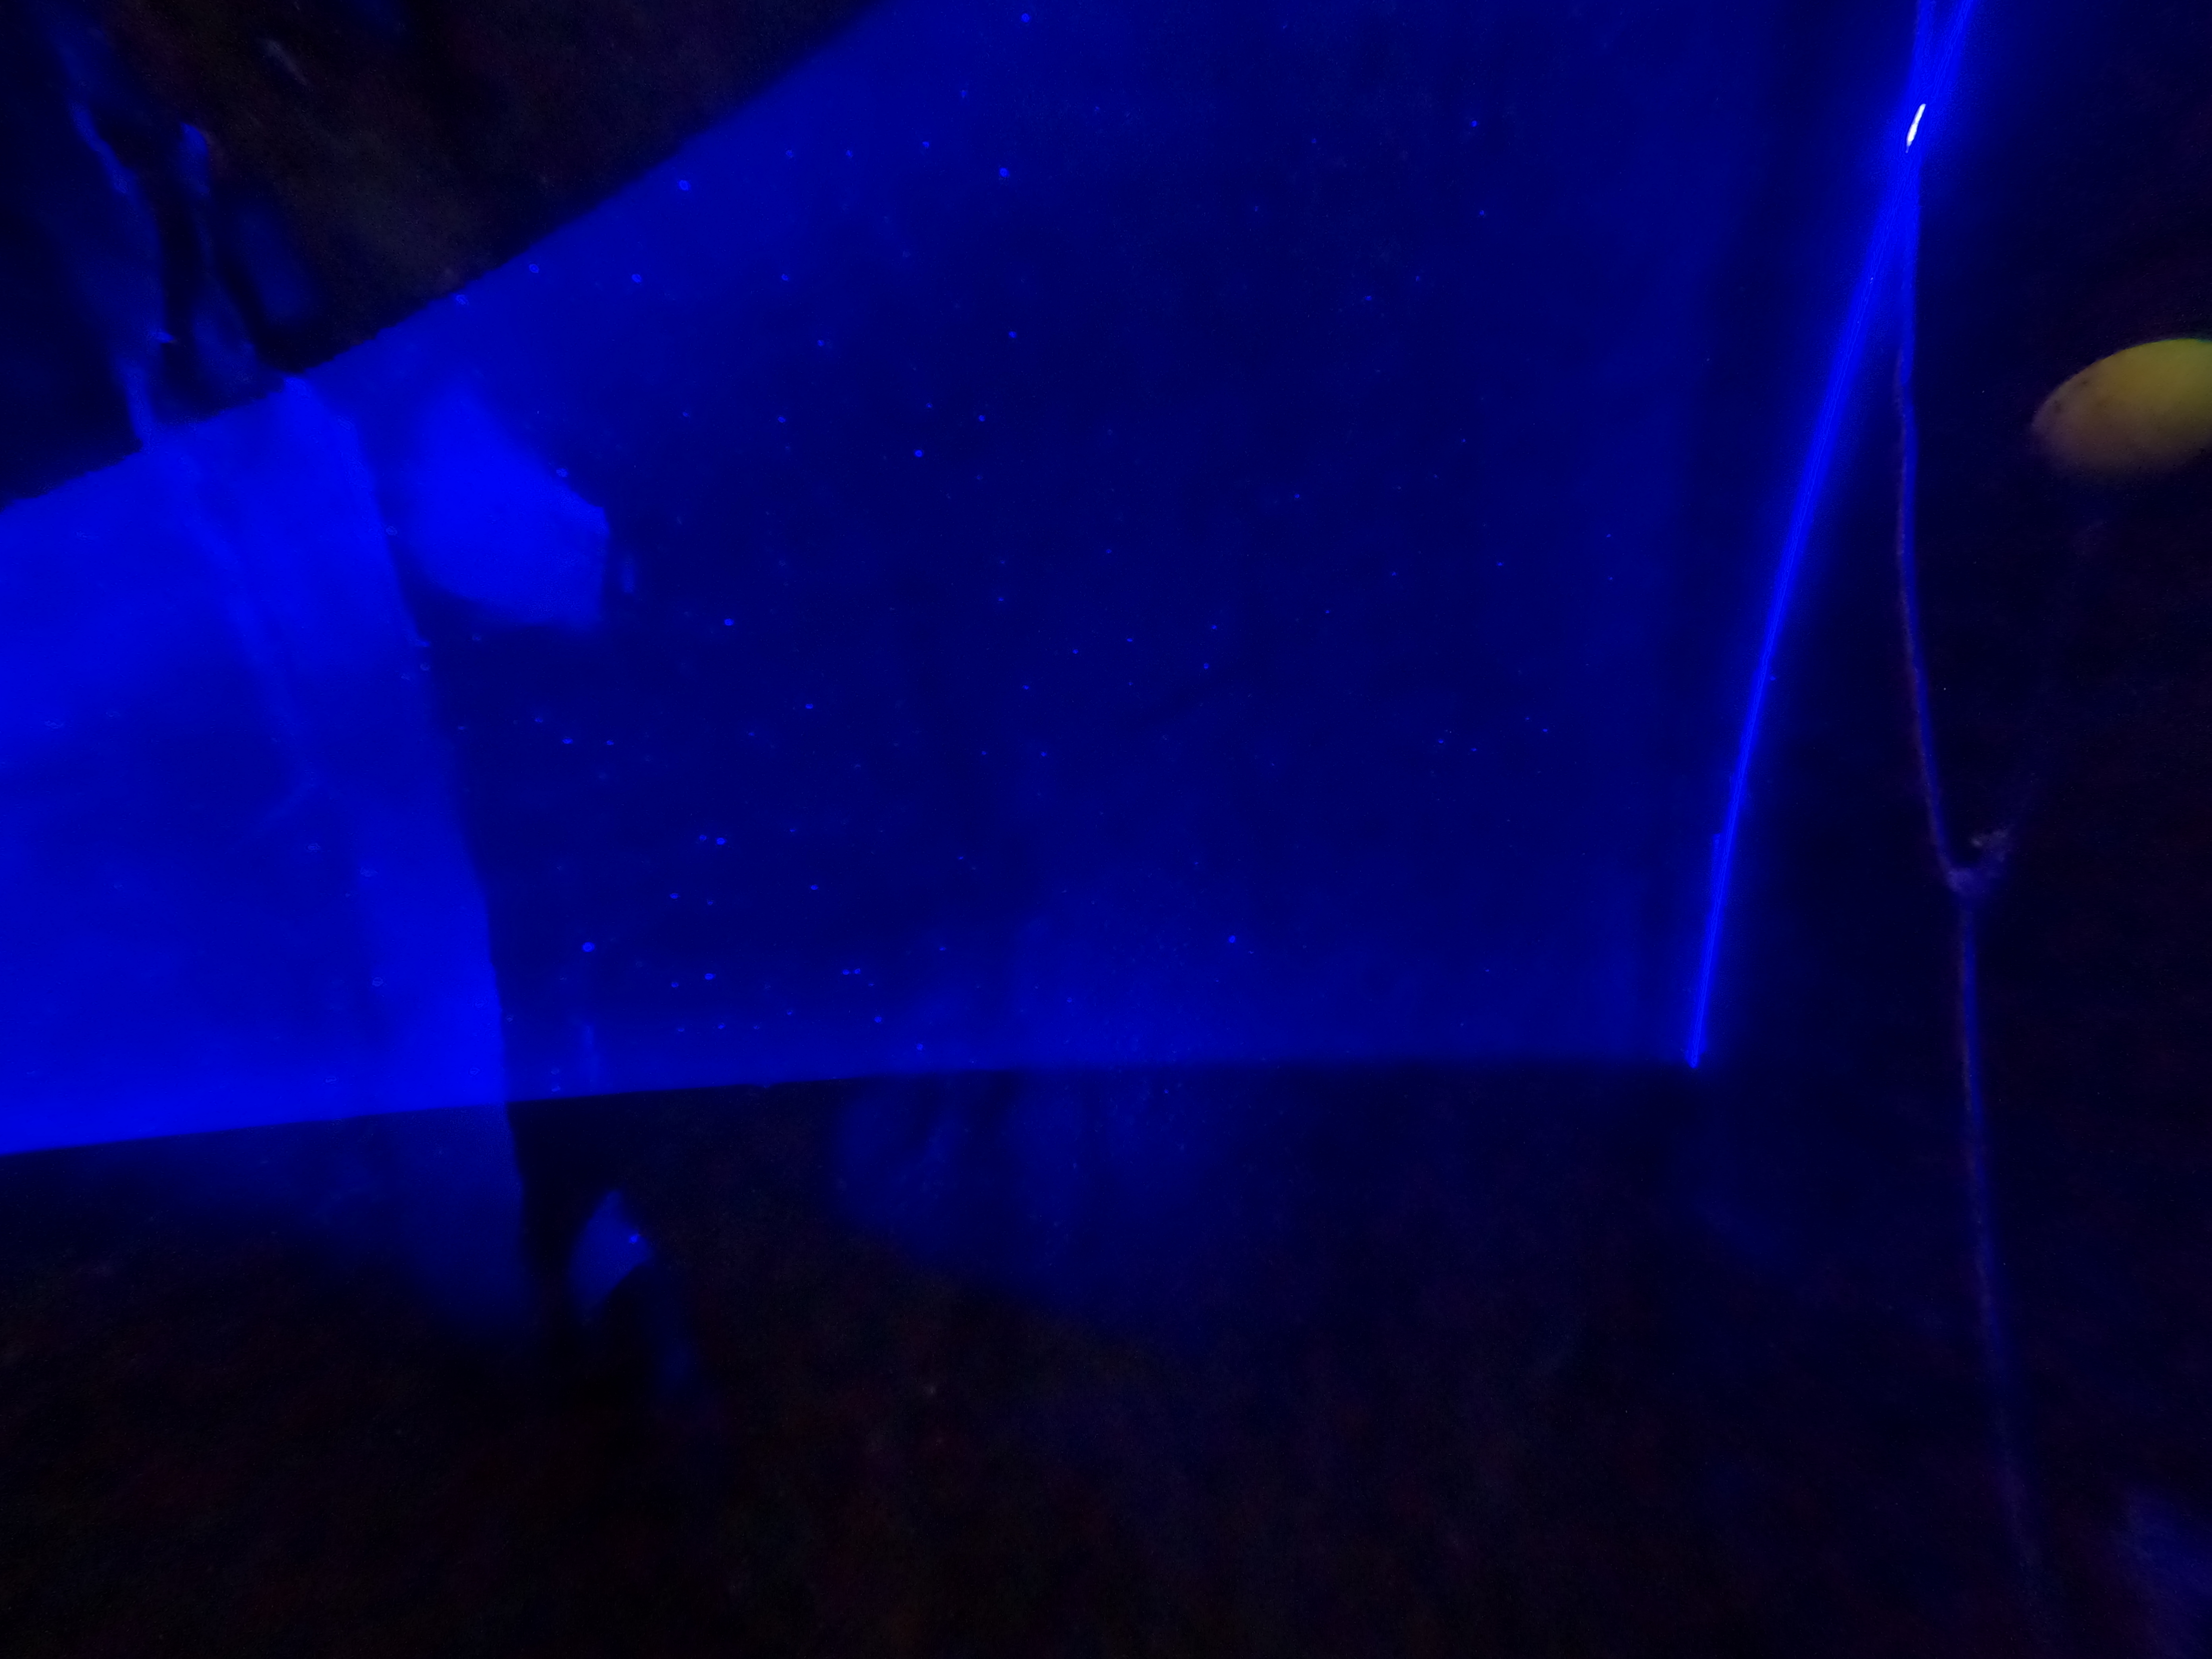

Supplement: Supplementary file 1525 [file G0032224.pdf › 11/G0032224.pdf]

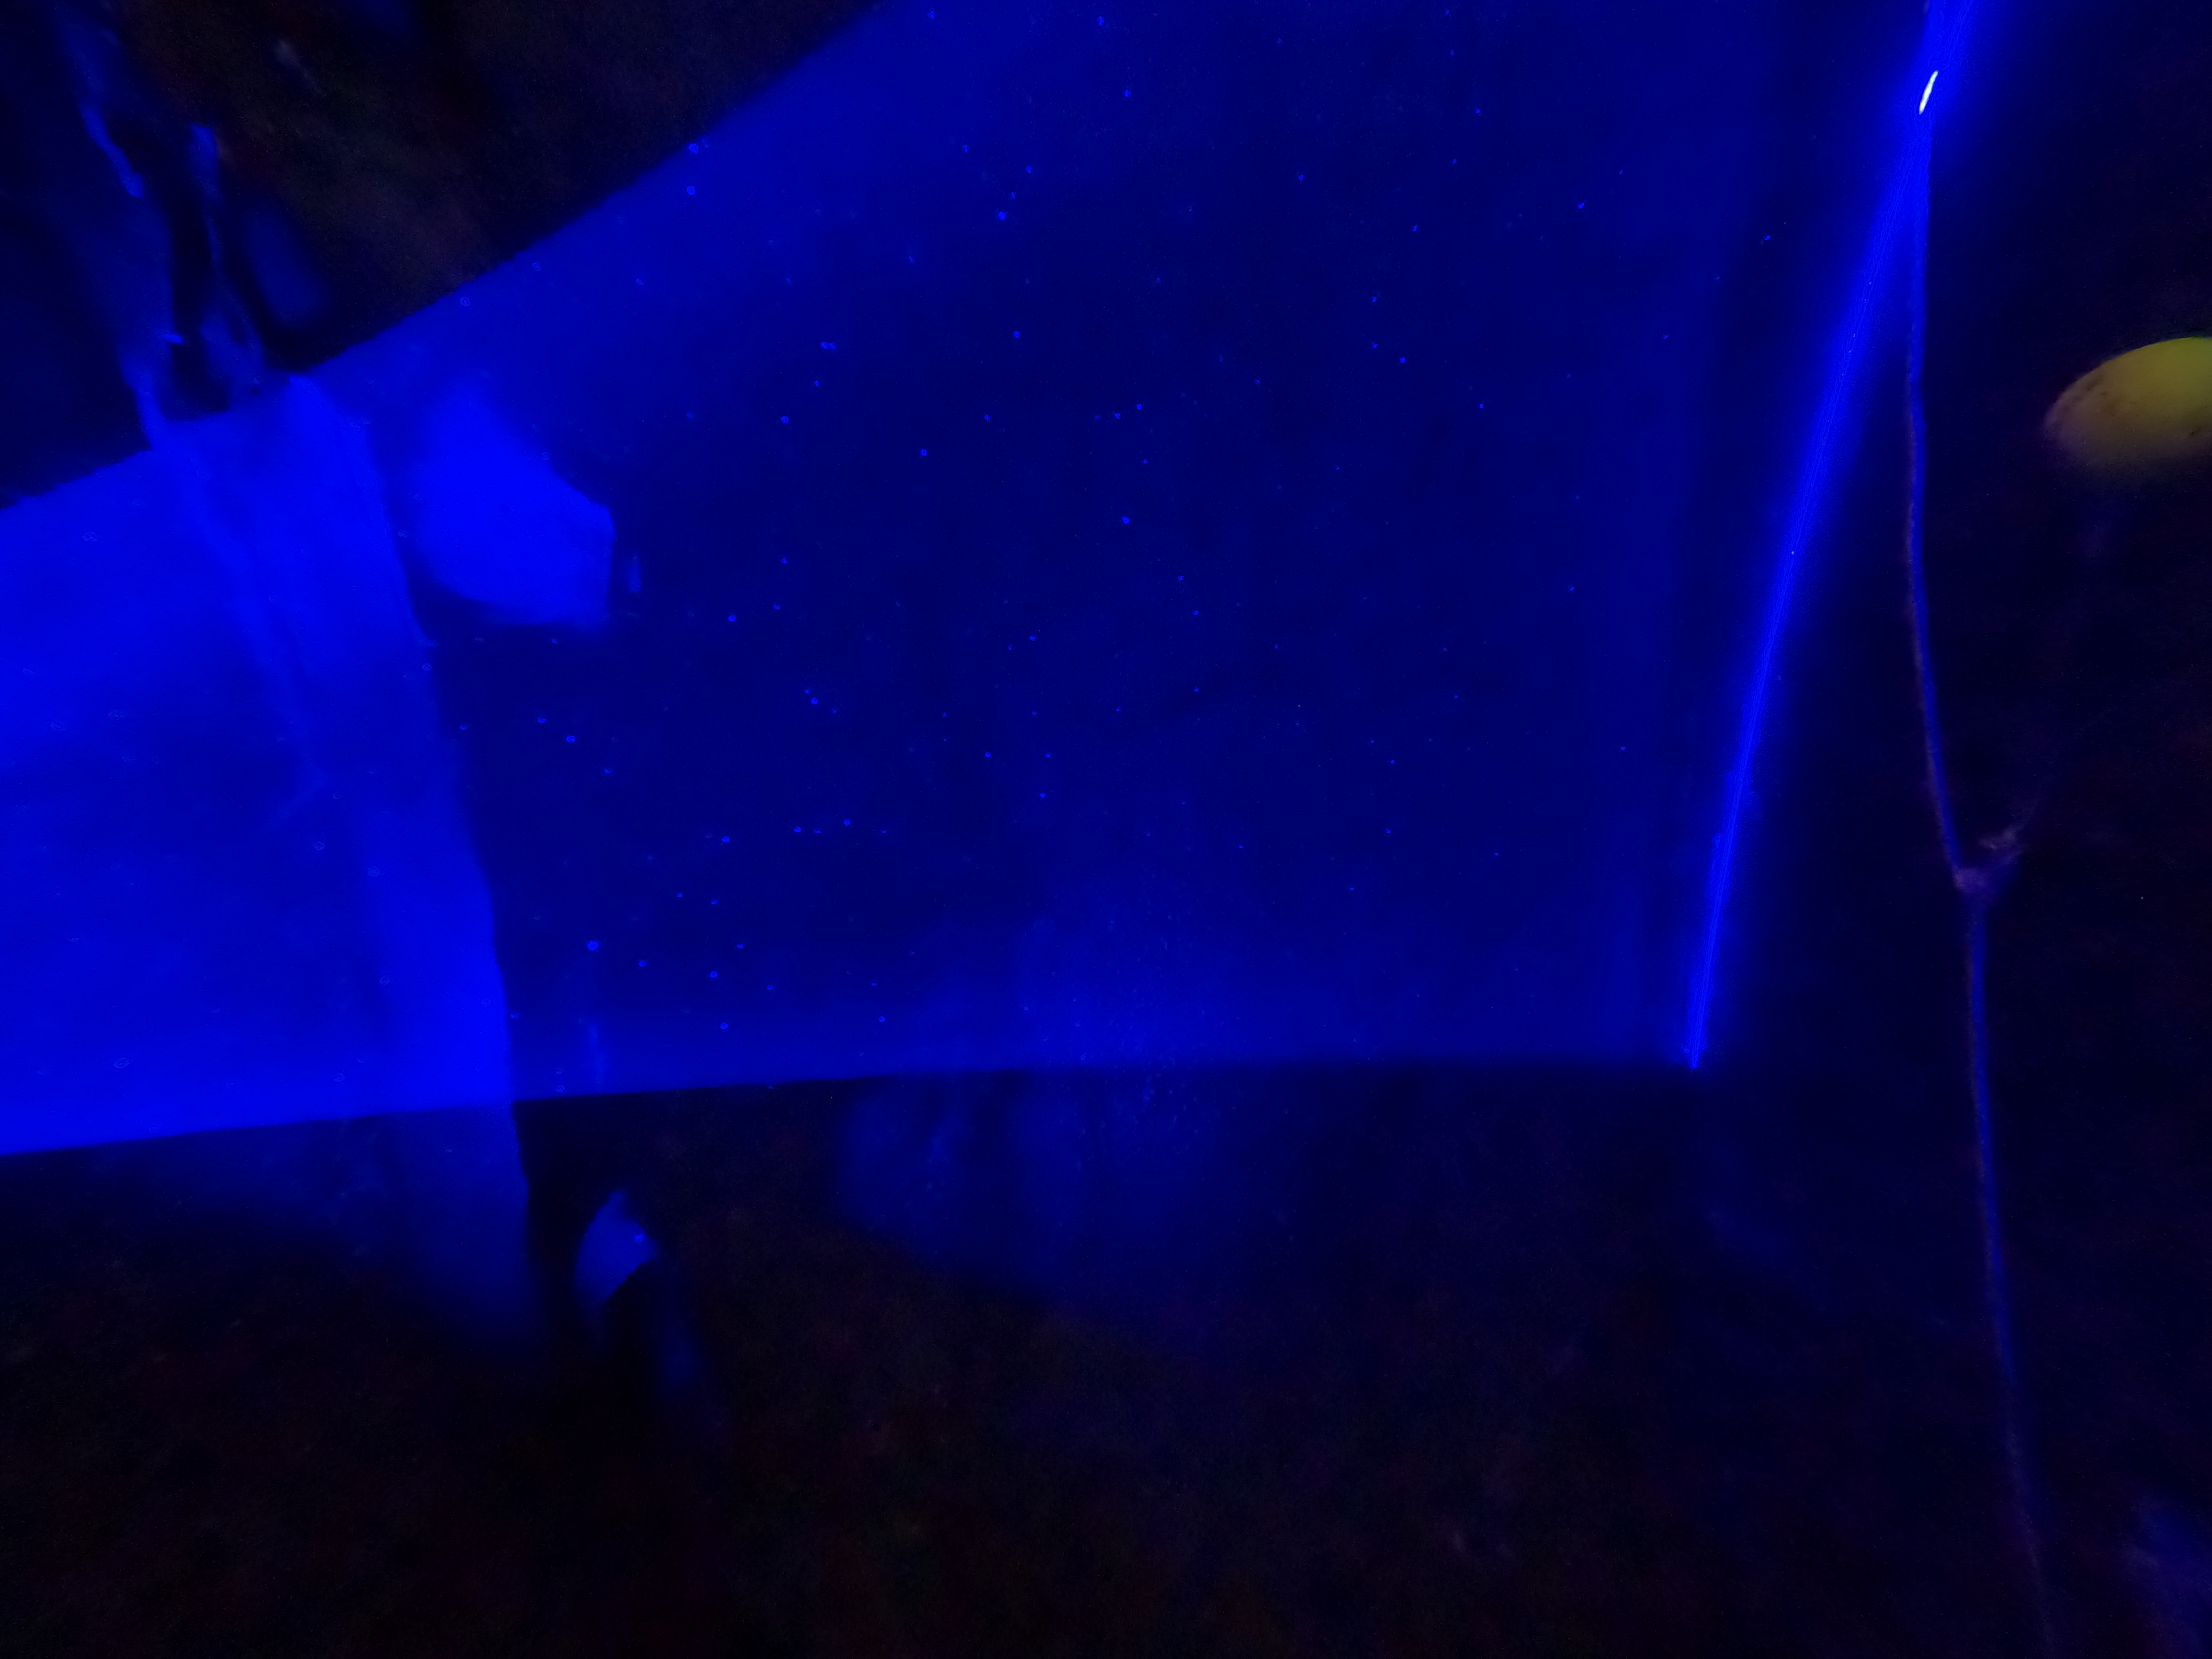

Supplement: Supplementary file 1526 [file G0032225.pdf › 11/G0032225.pdf]

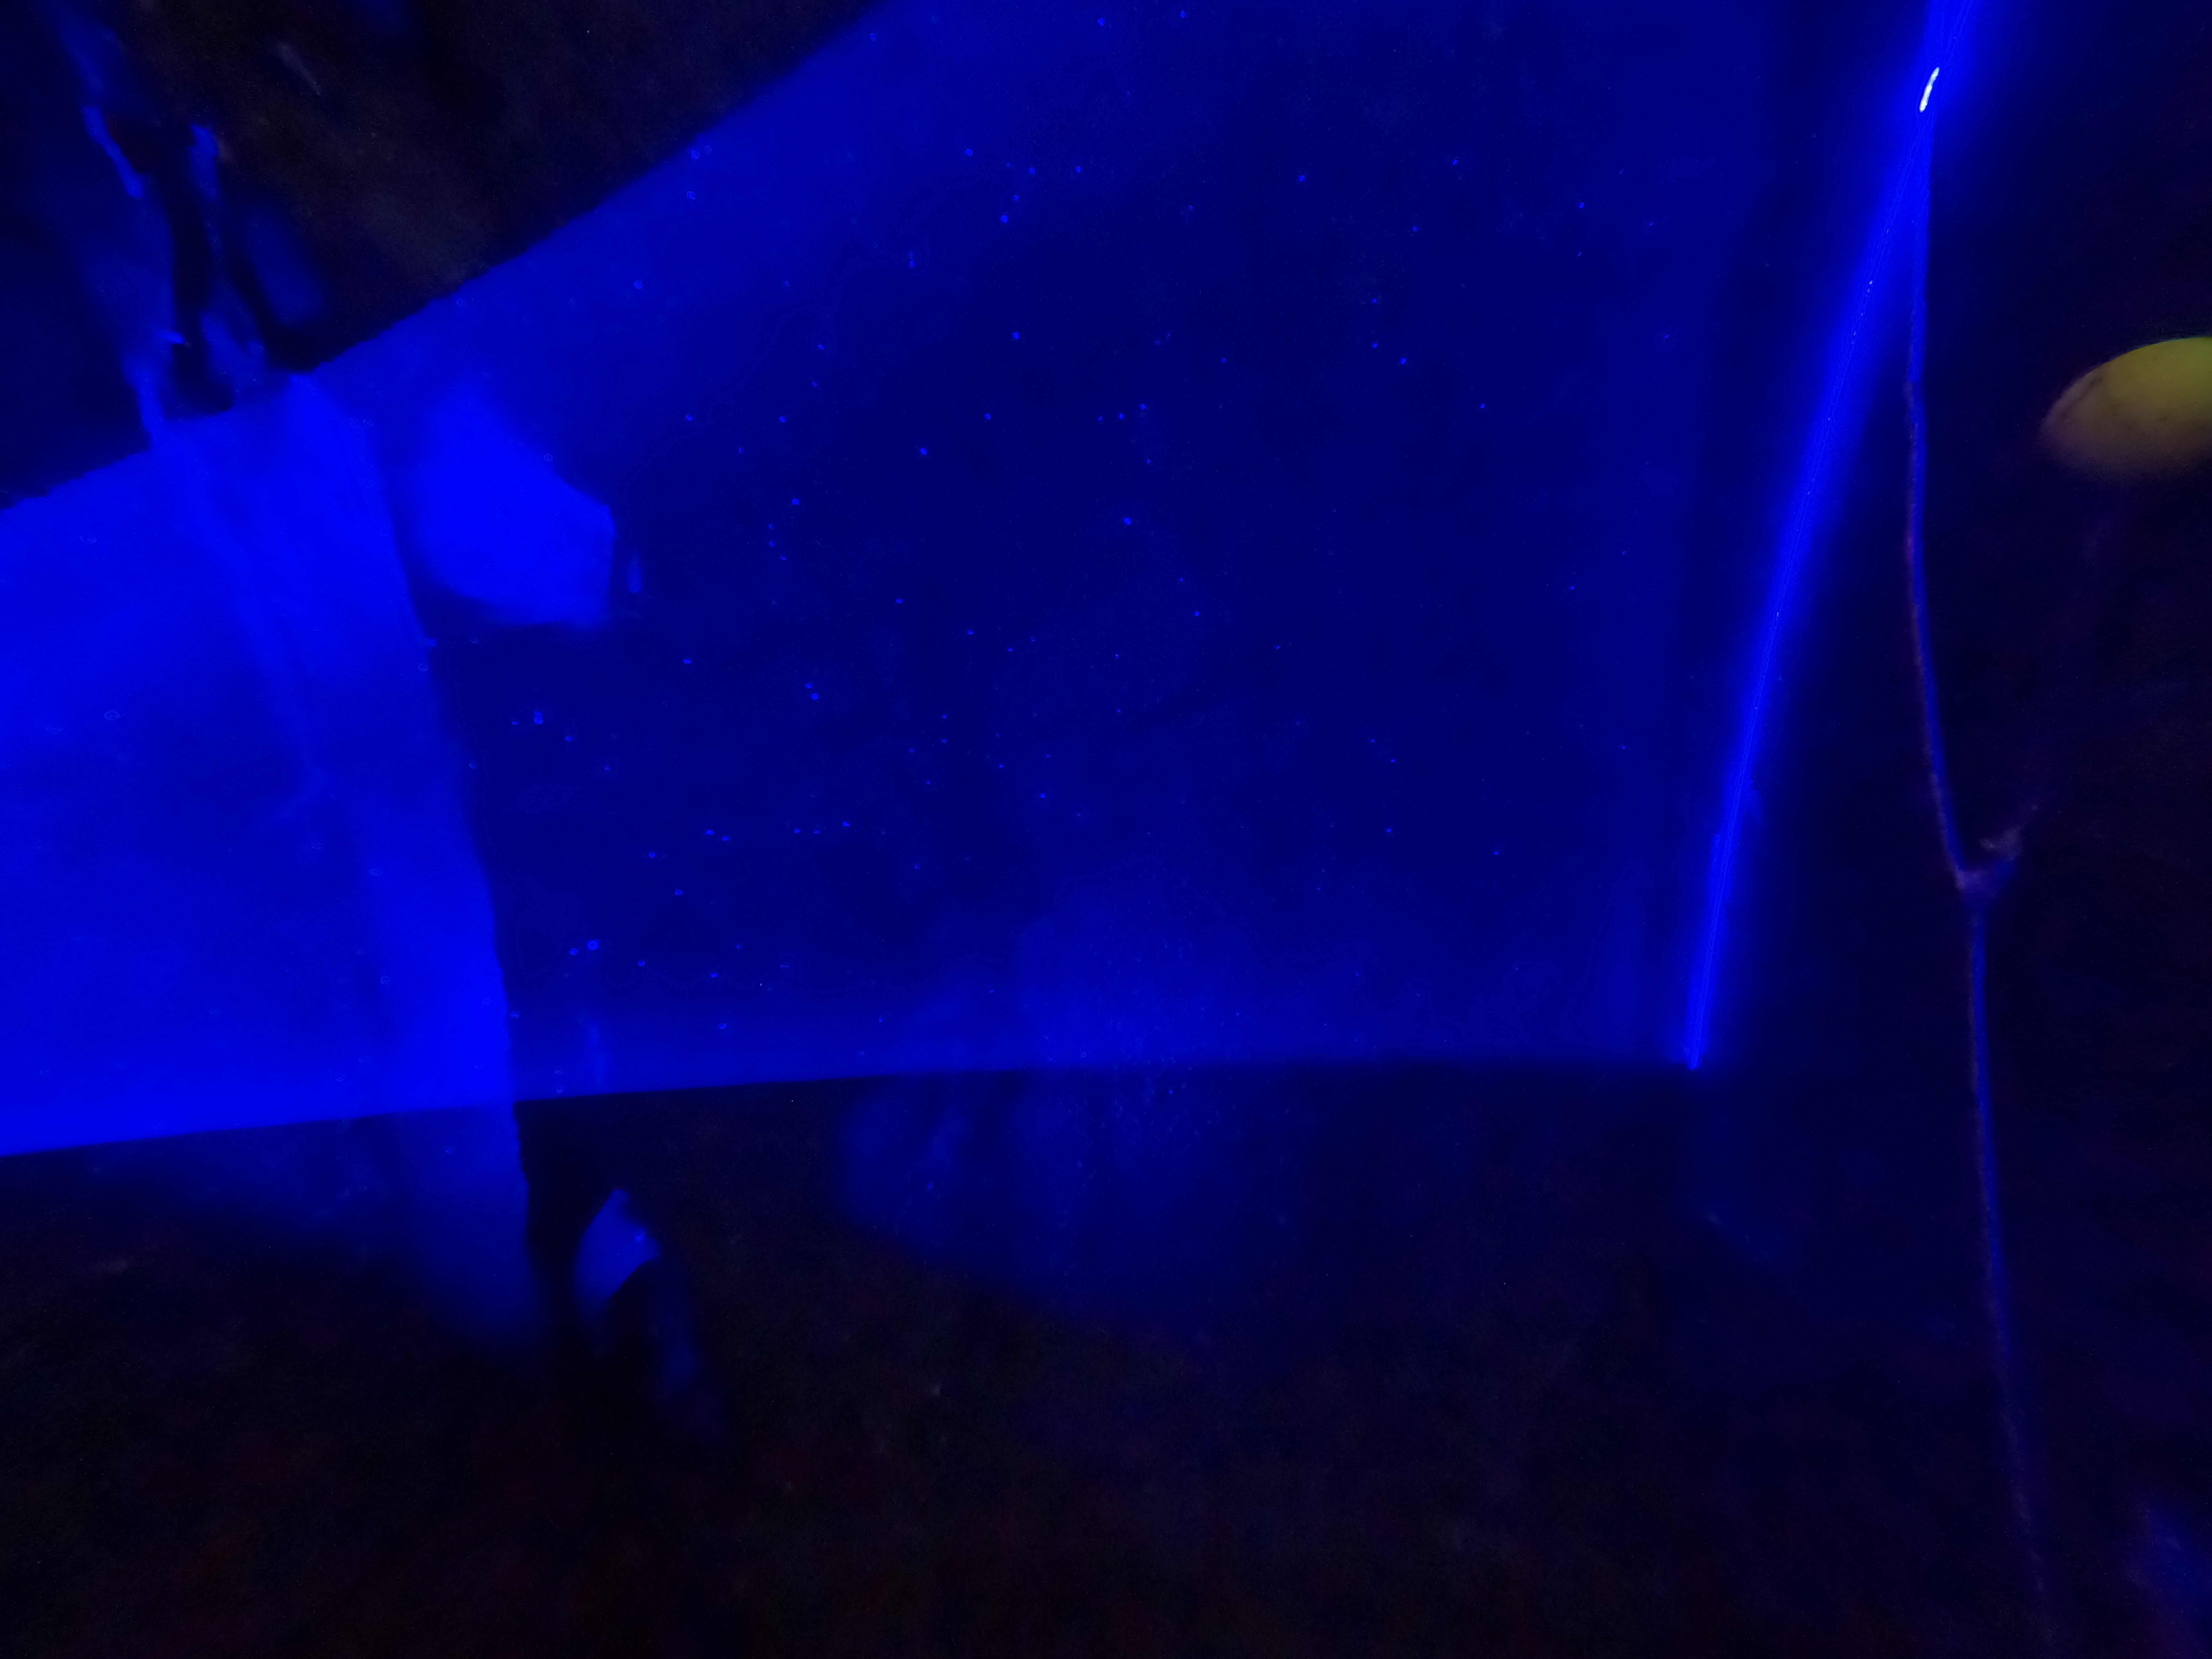

Supplement: Supplementary file 1527 [file G0032226.pdf › 11/G0032226.pdf]

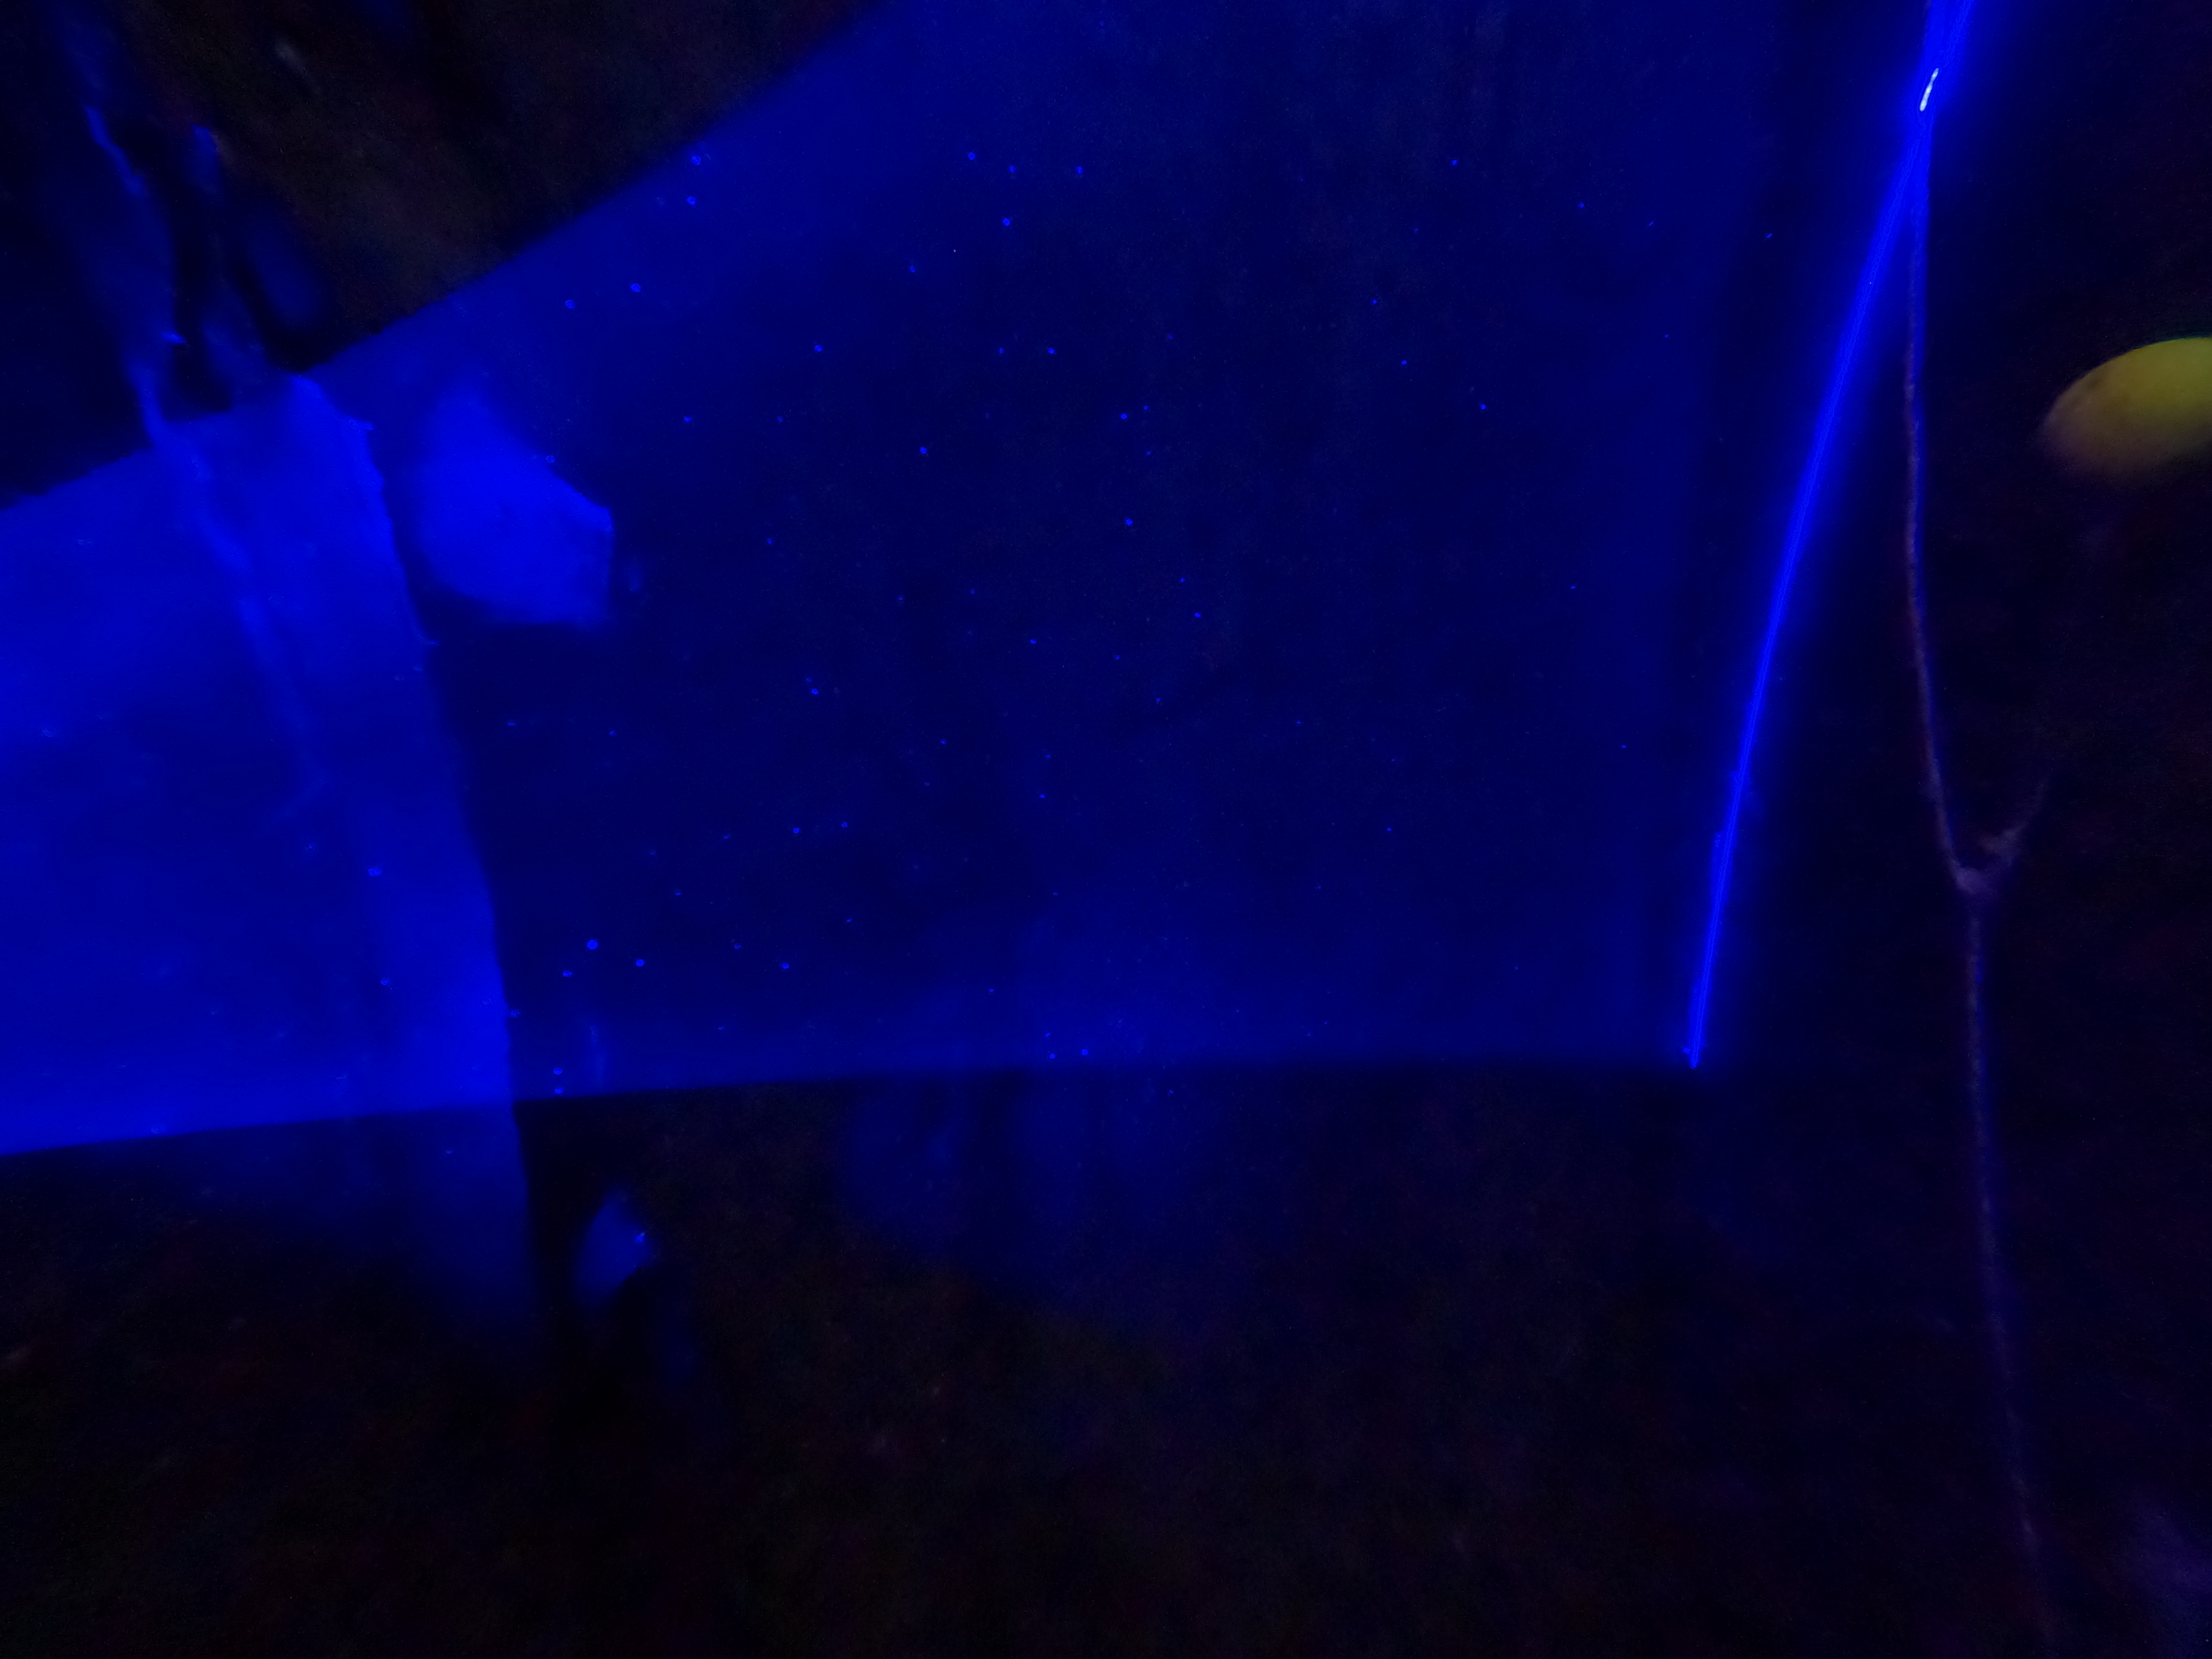

Supplement: Supplementary file 1528 [file G0032227.pdf › 11/G0032227.pdf]

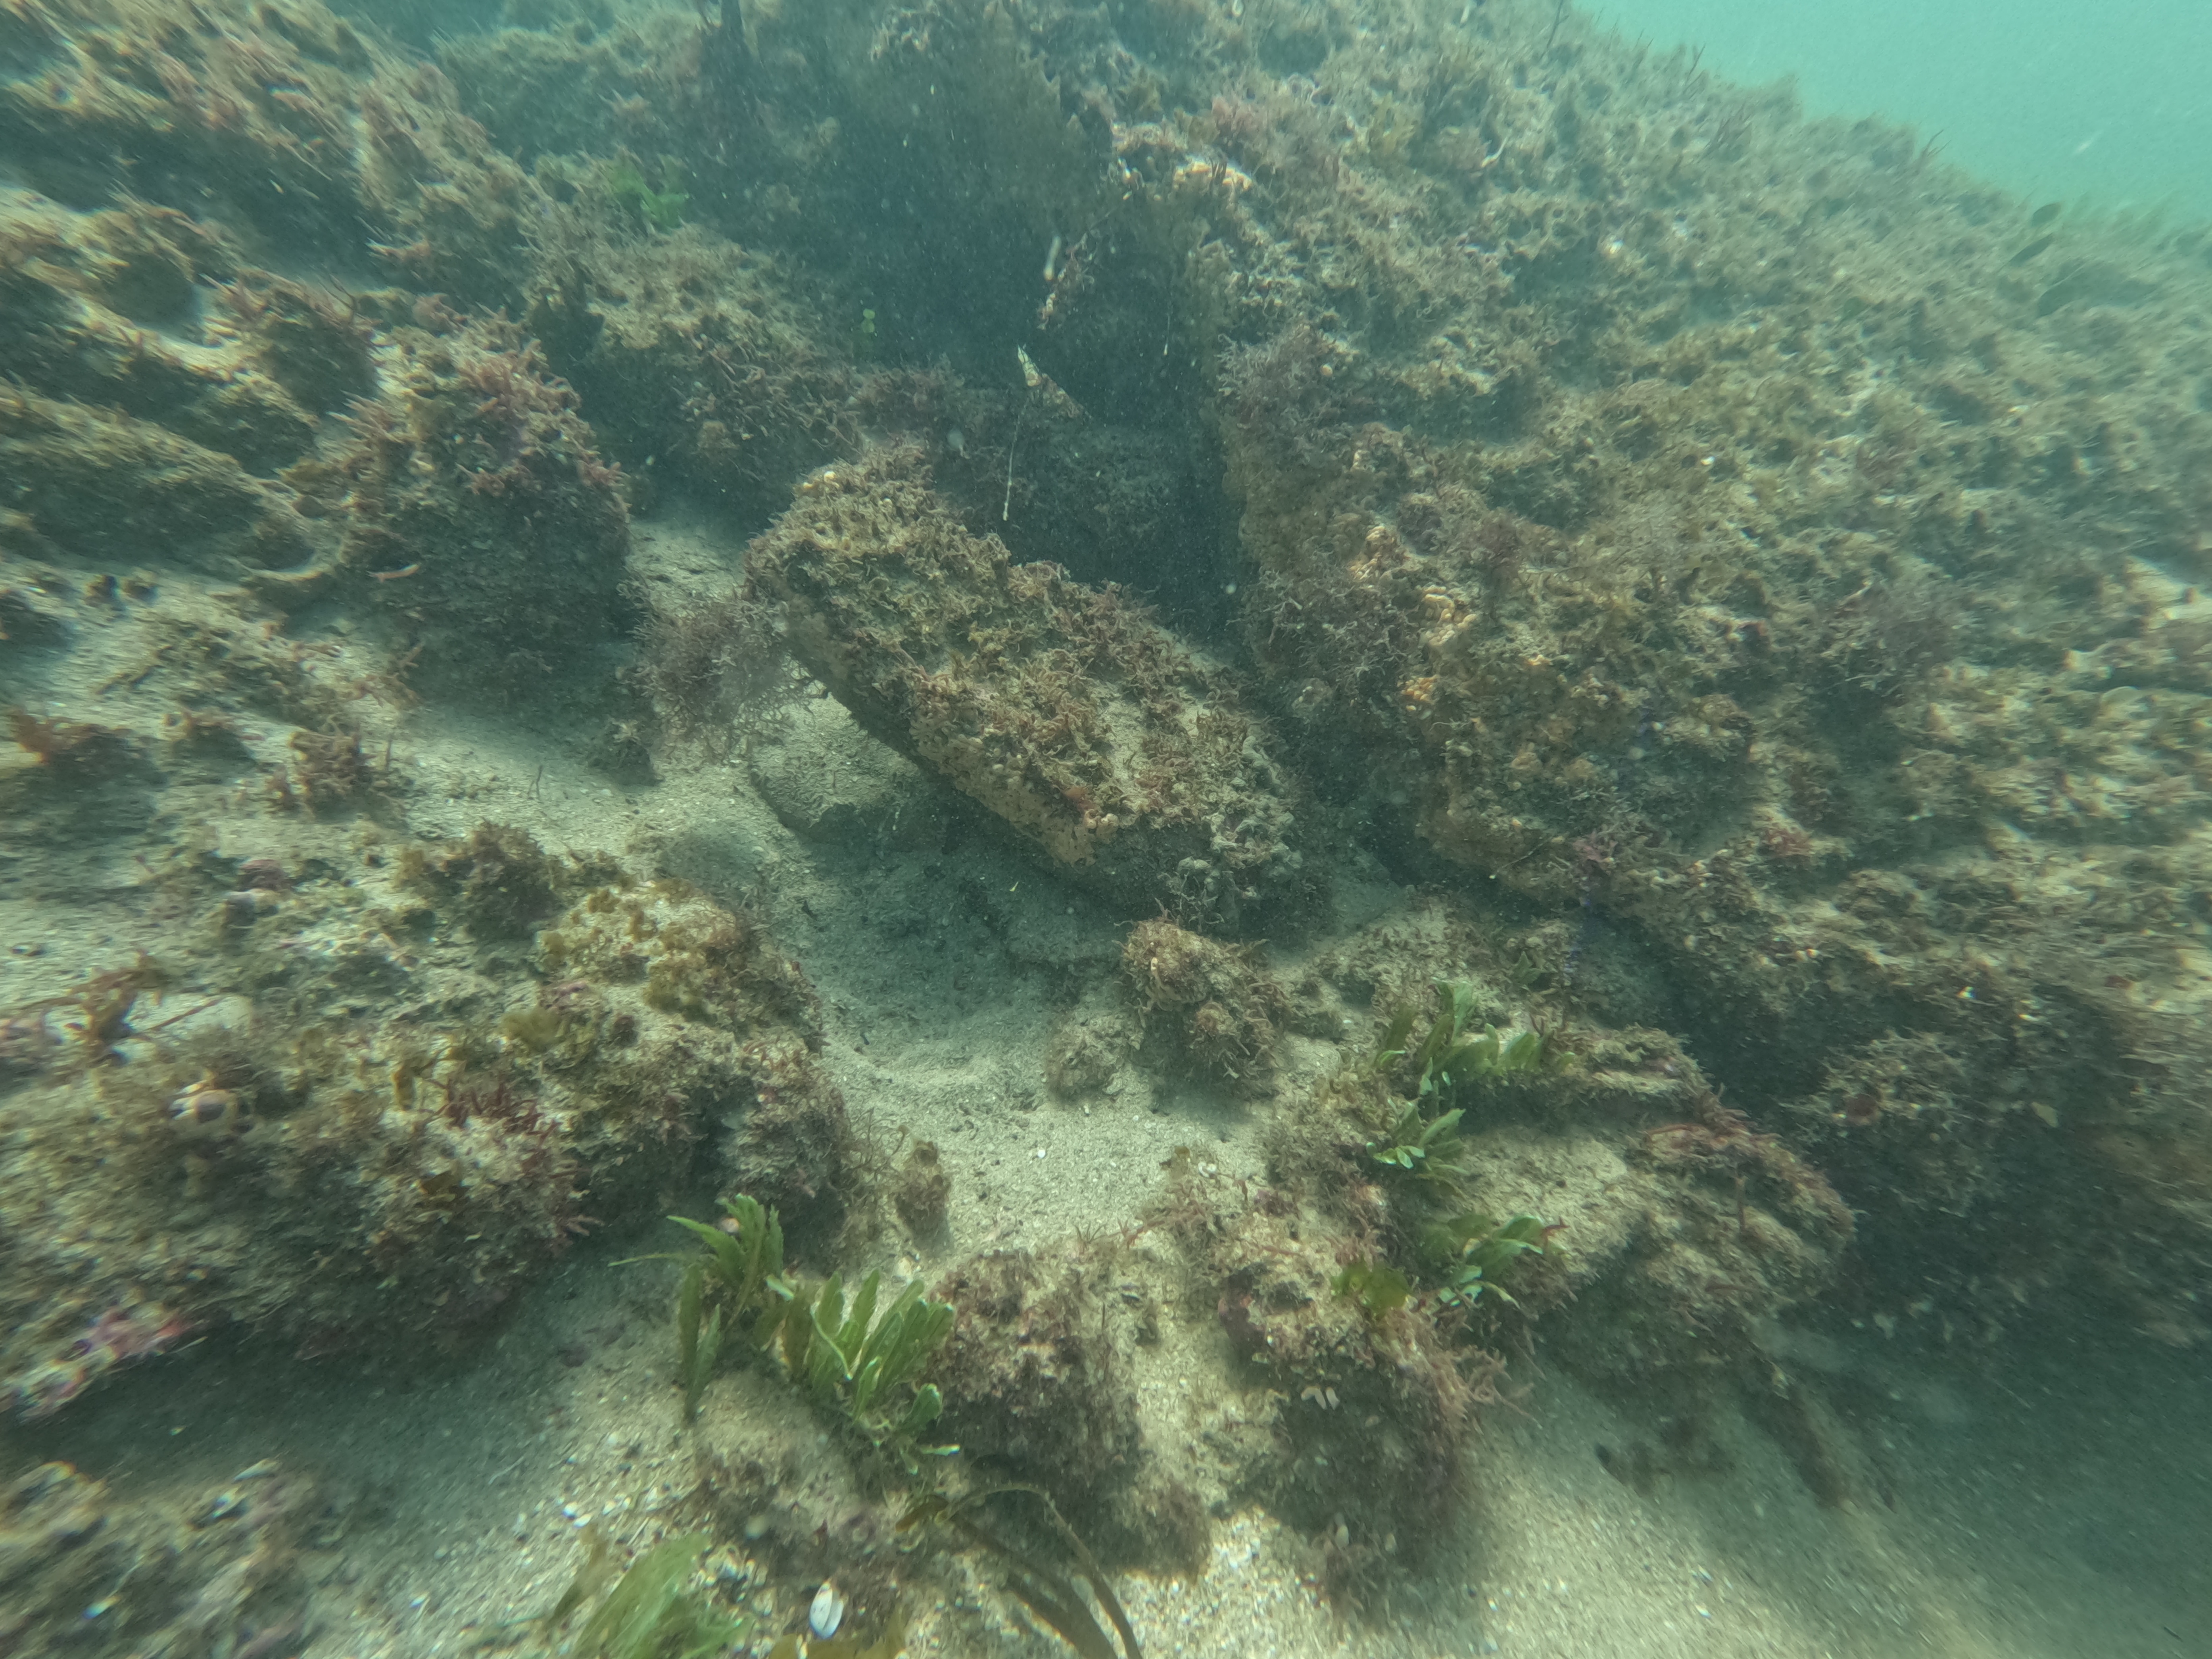

Supplement: Supplementary file 1529 [file G0027855.pdf › Ocean1/G0027855.pdf]

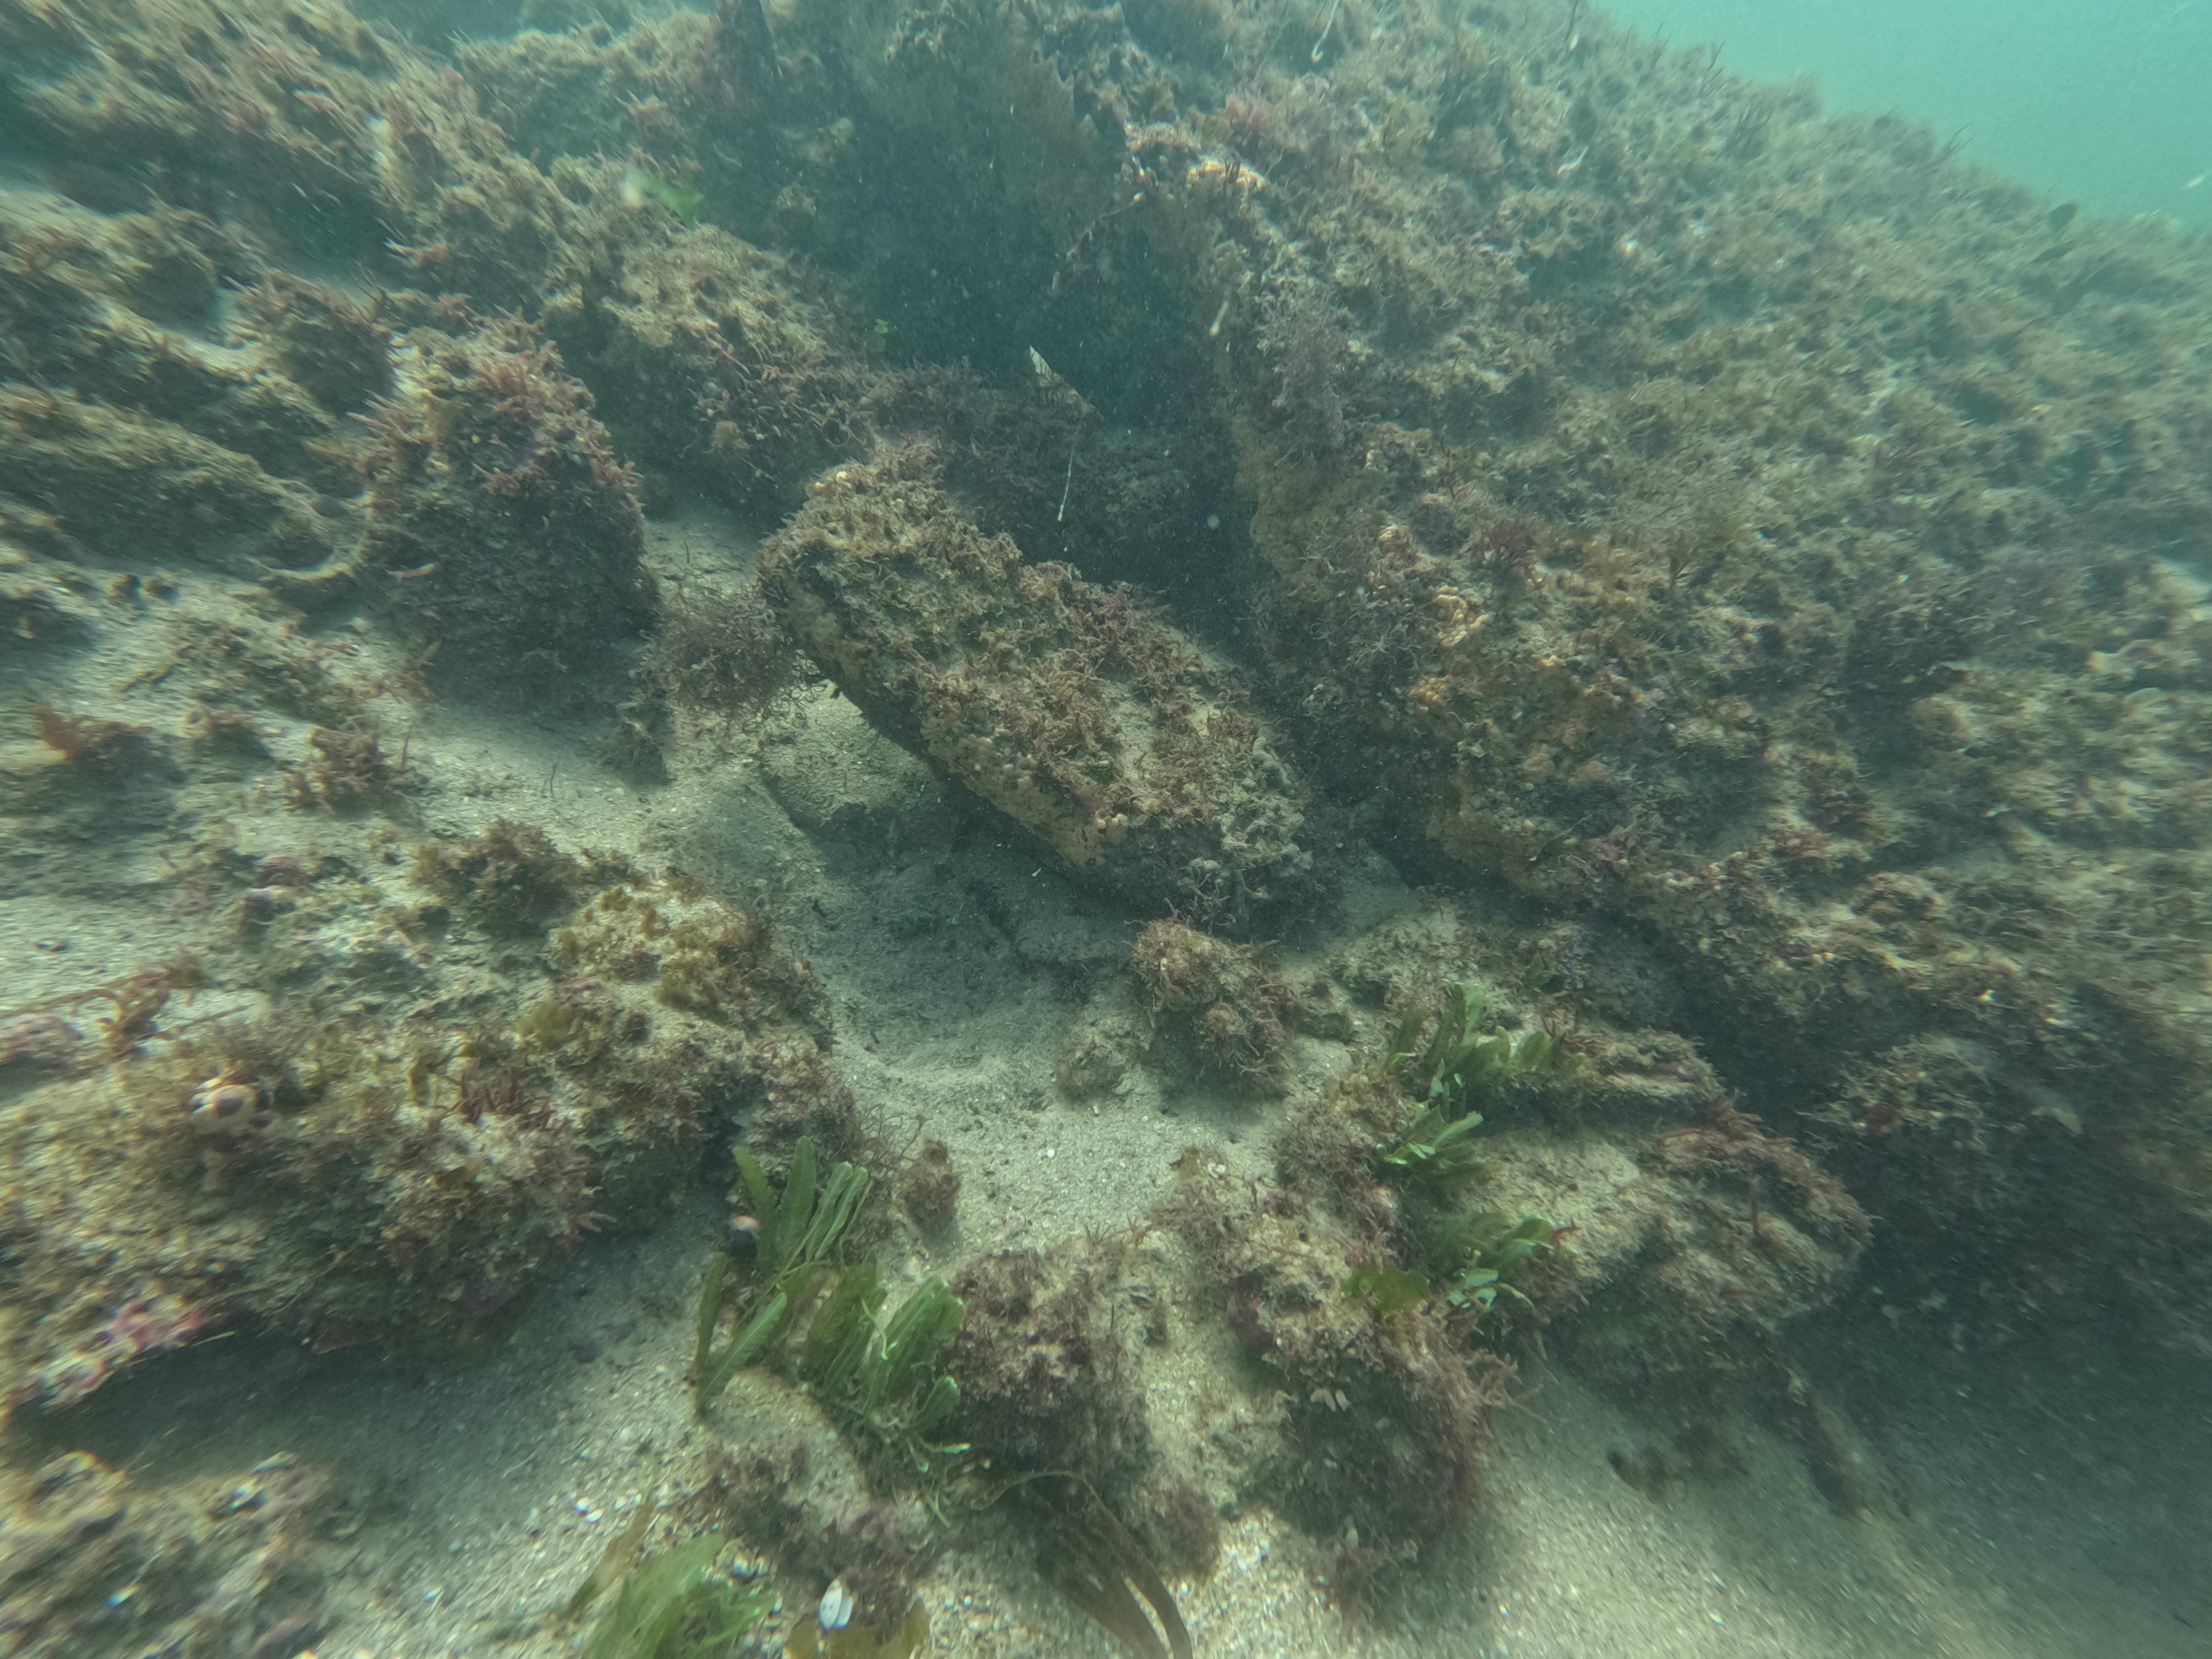

Supplement: Supplementary file 1530 [file G0027856.pdf › Ocean1/G0027856.pdf]

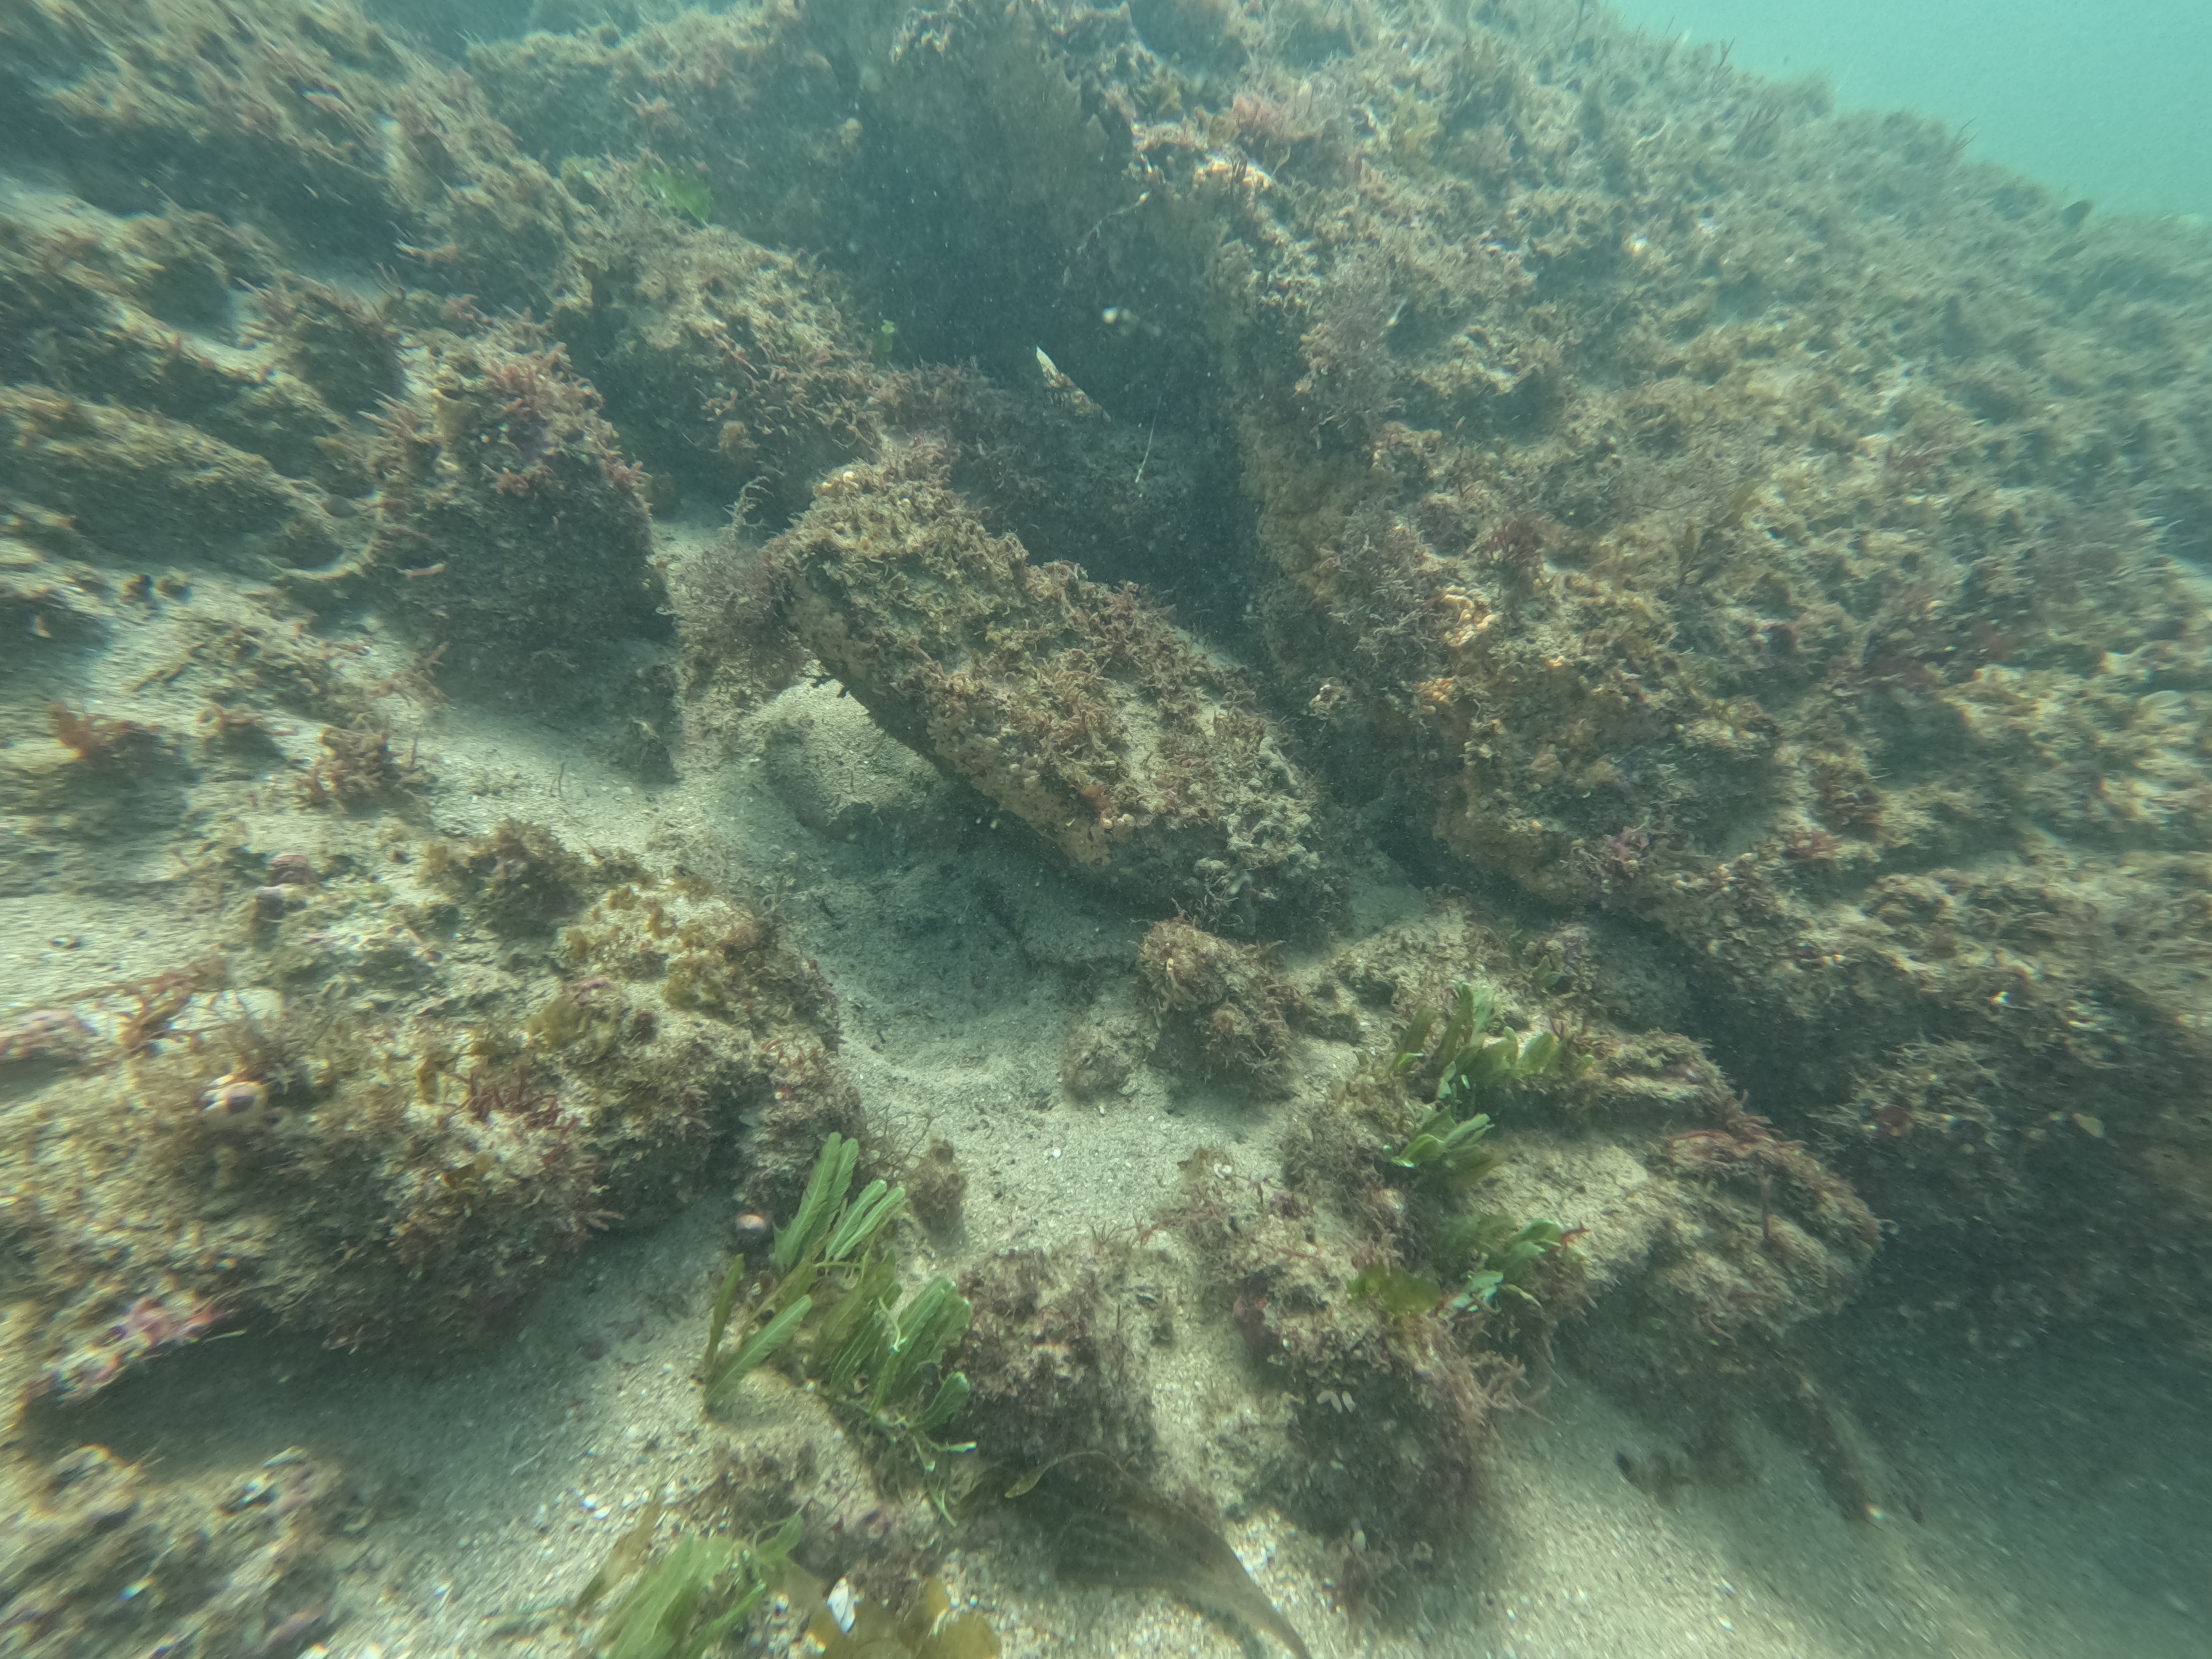

Supplement: Supplementary file 1531 [file G0027857.pdf › Ocean1/G0027857.pdf]

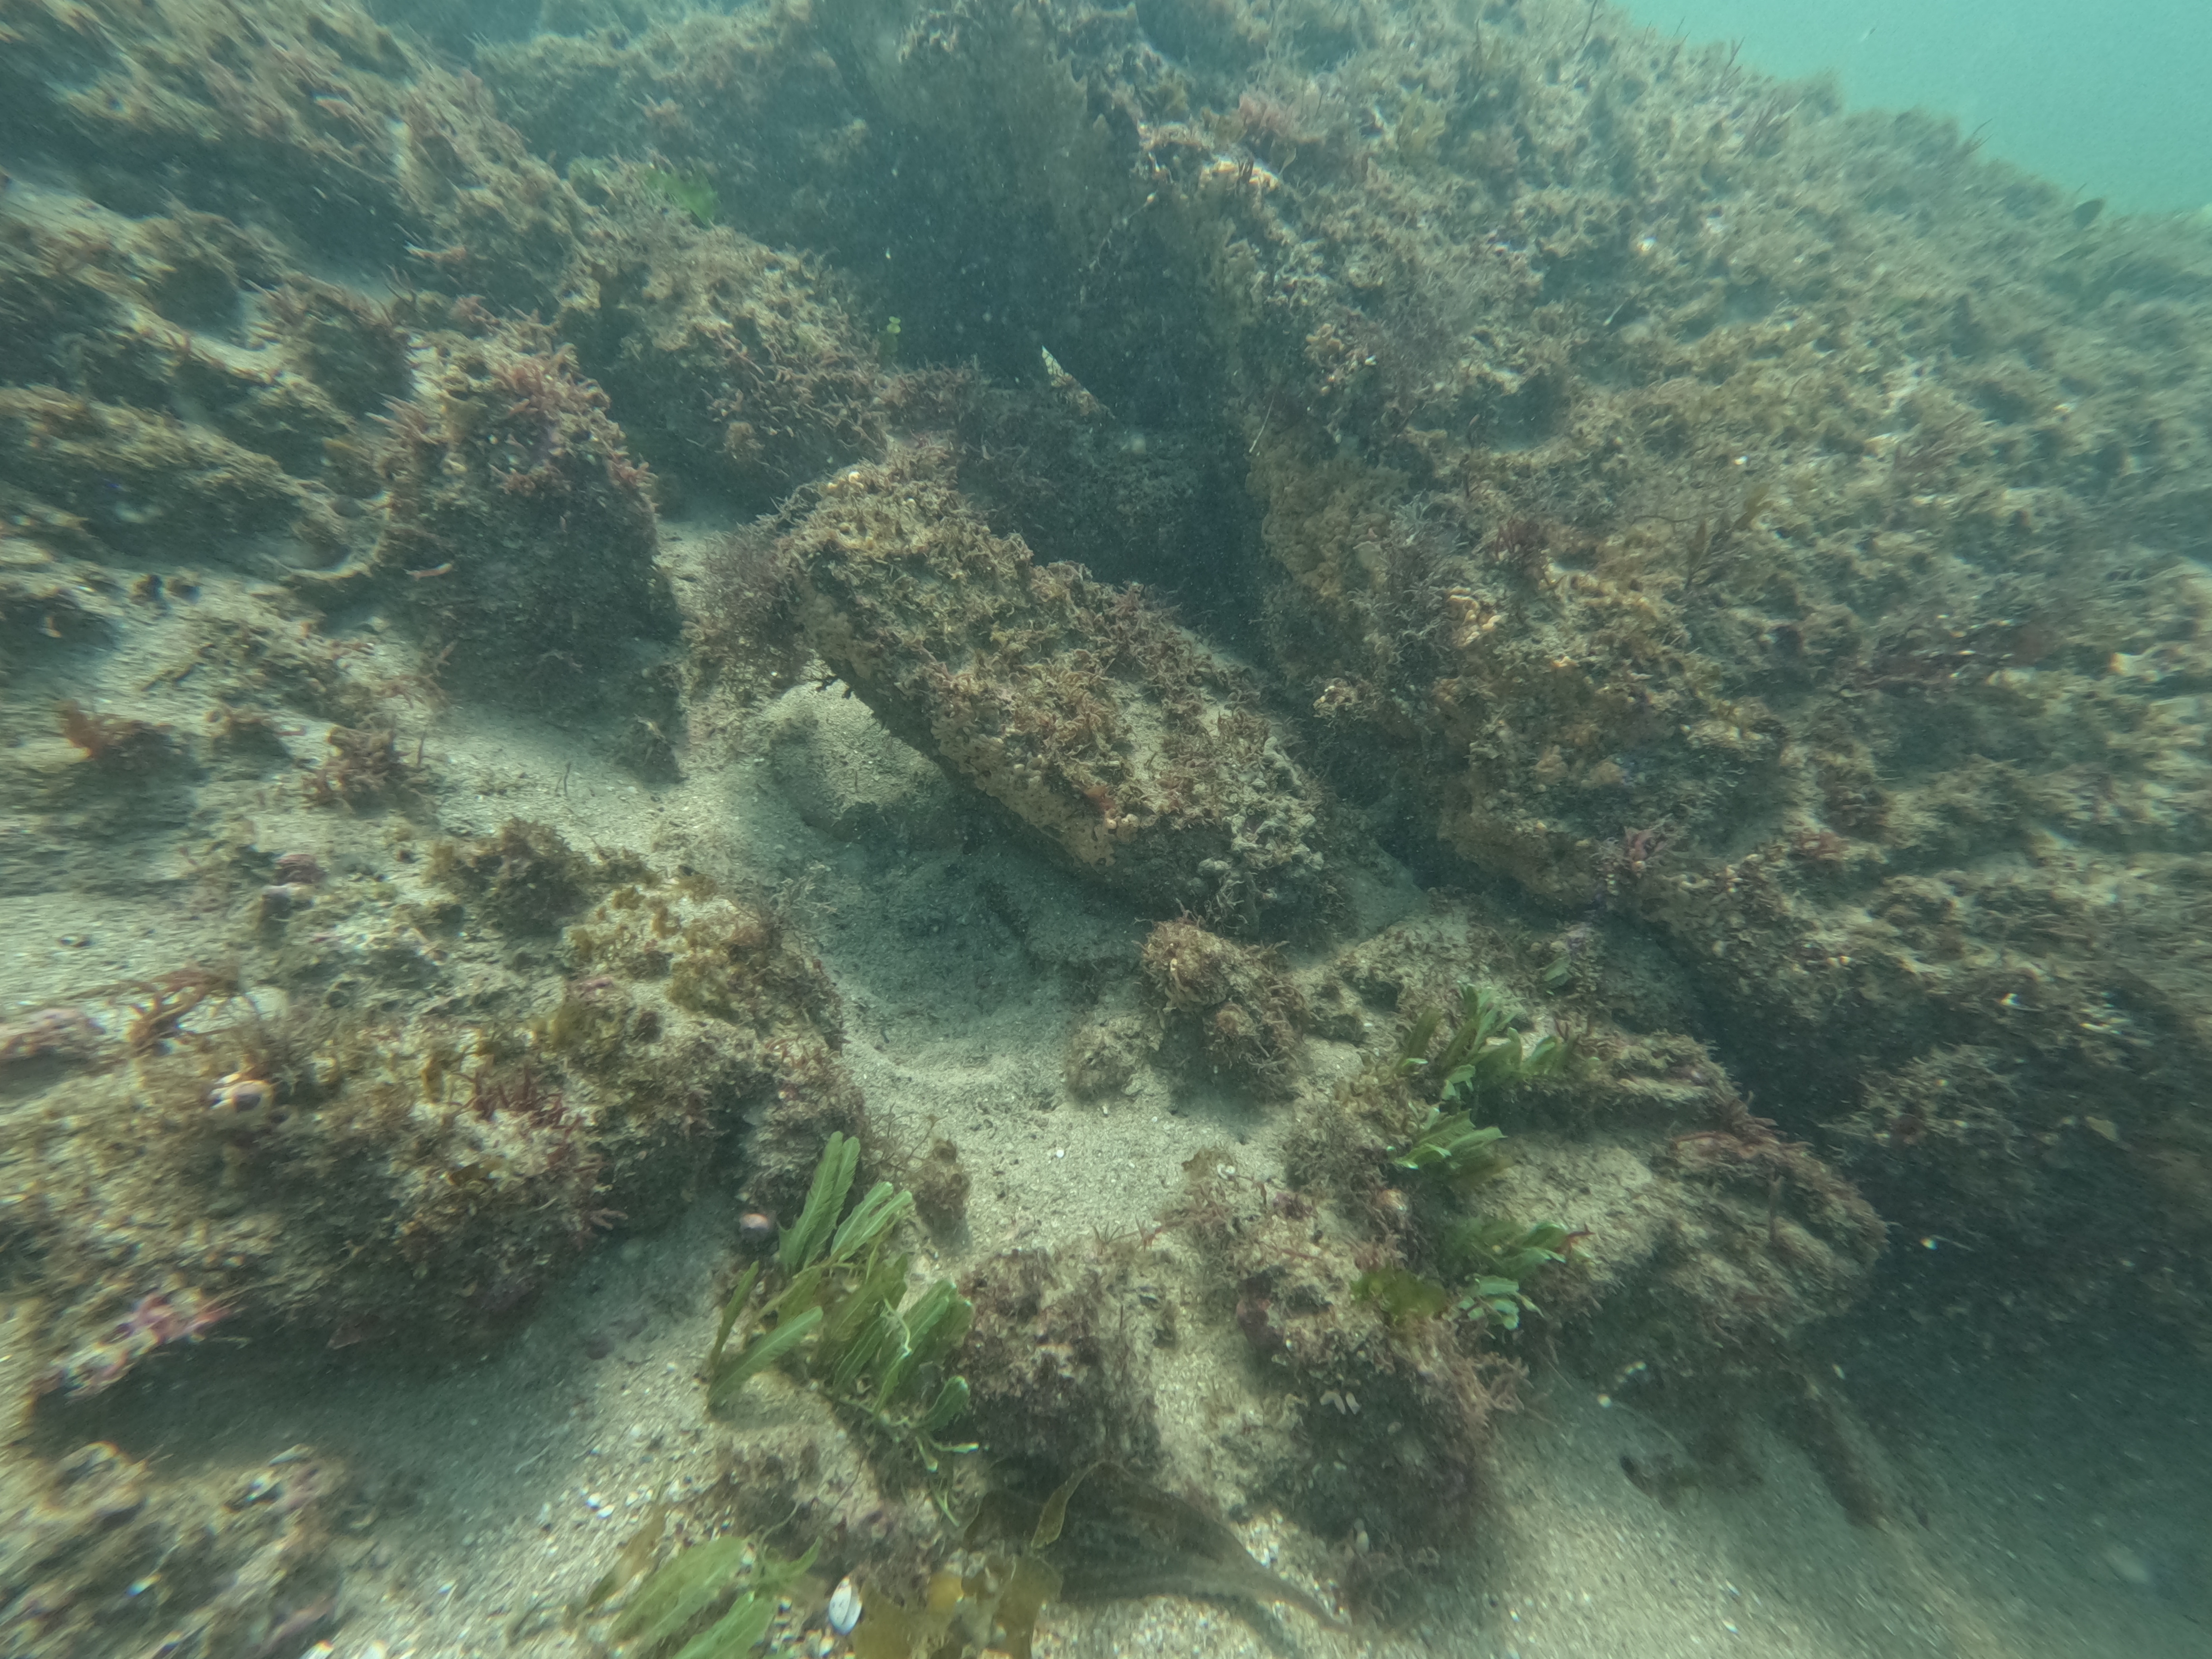

Supplement: Supplementary file 1532 [file G0027858.pdf › Ocean1/G0027858.pdf]

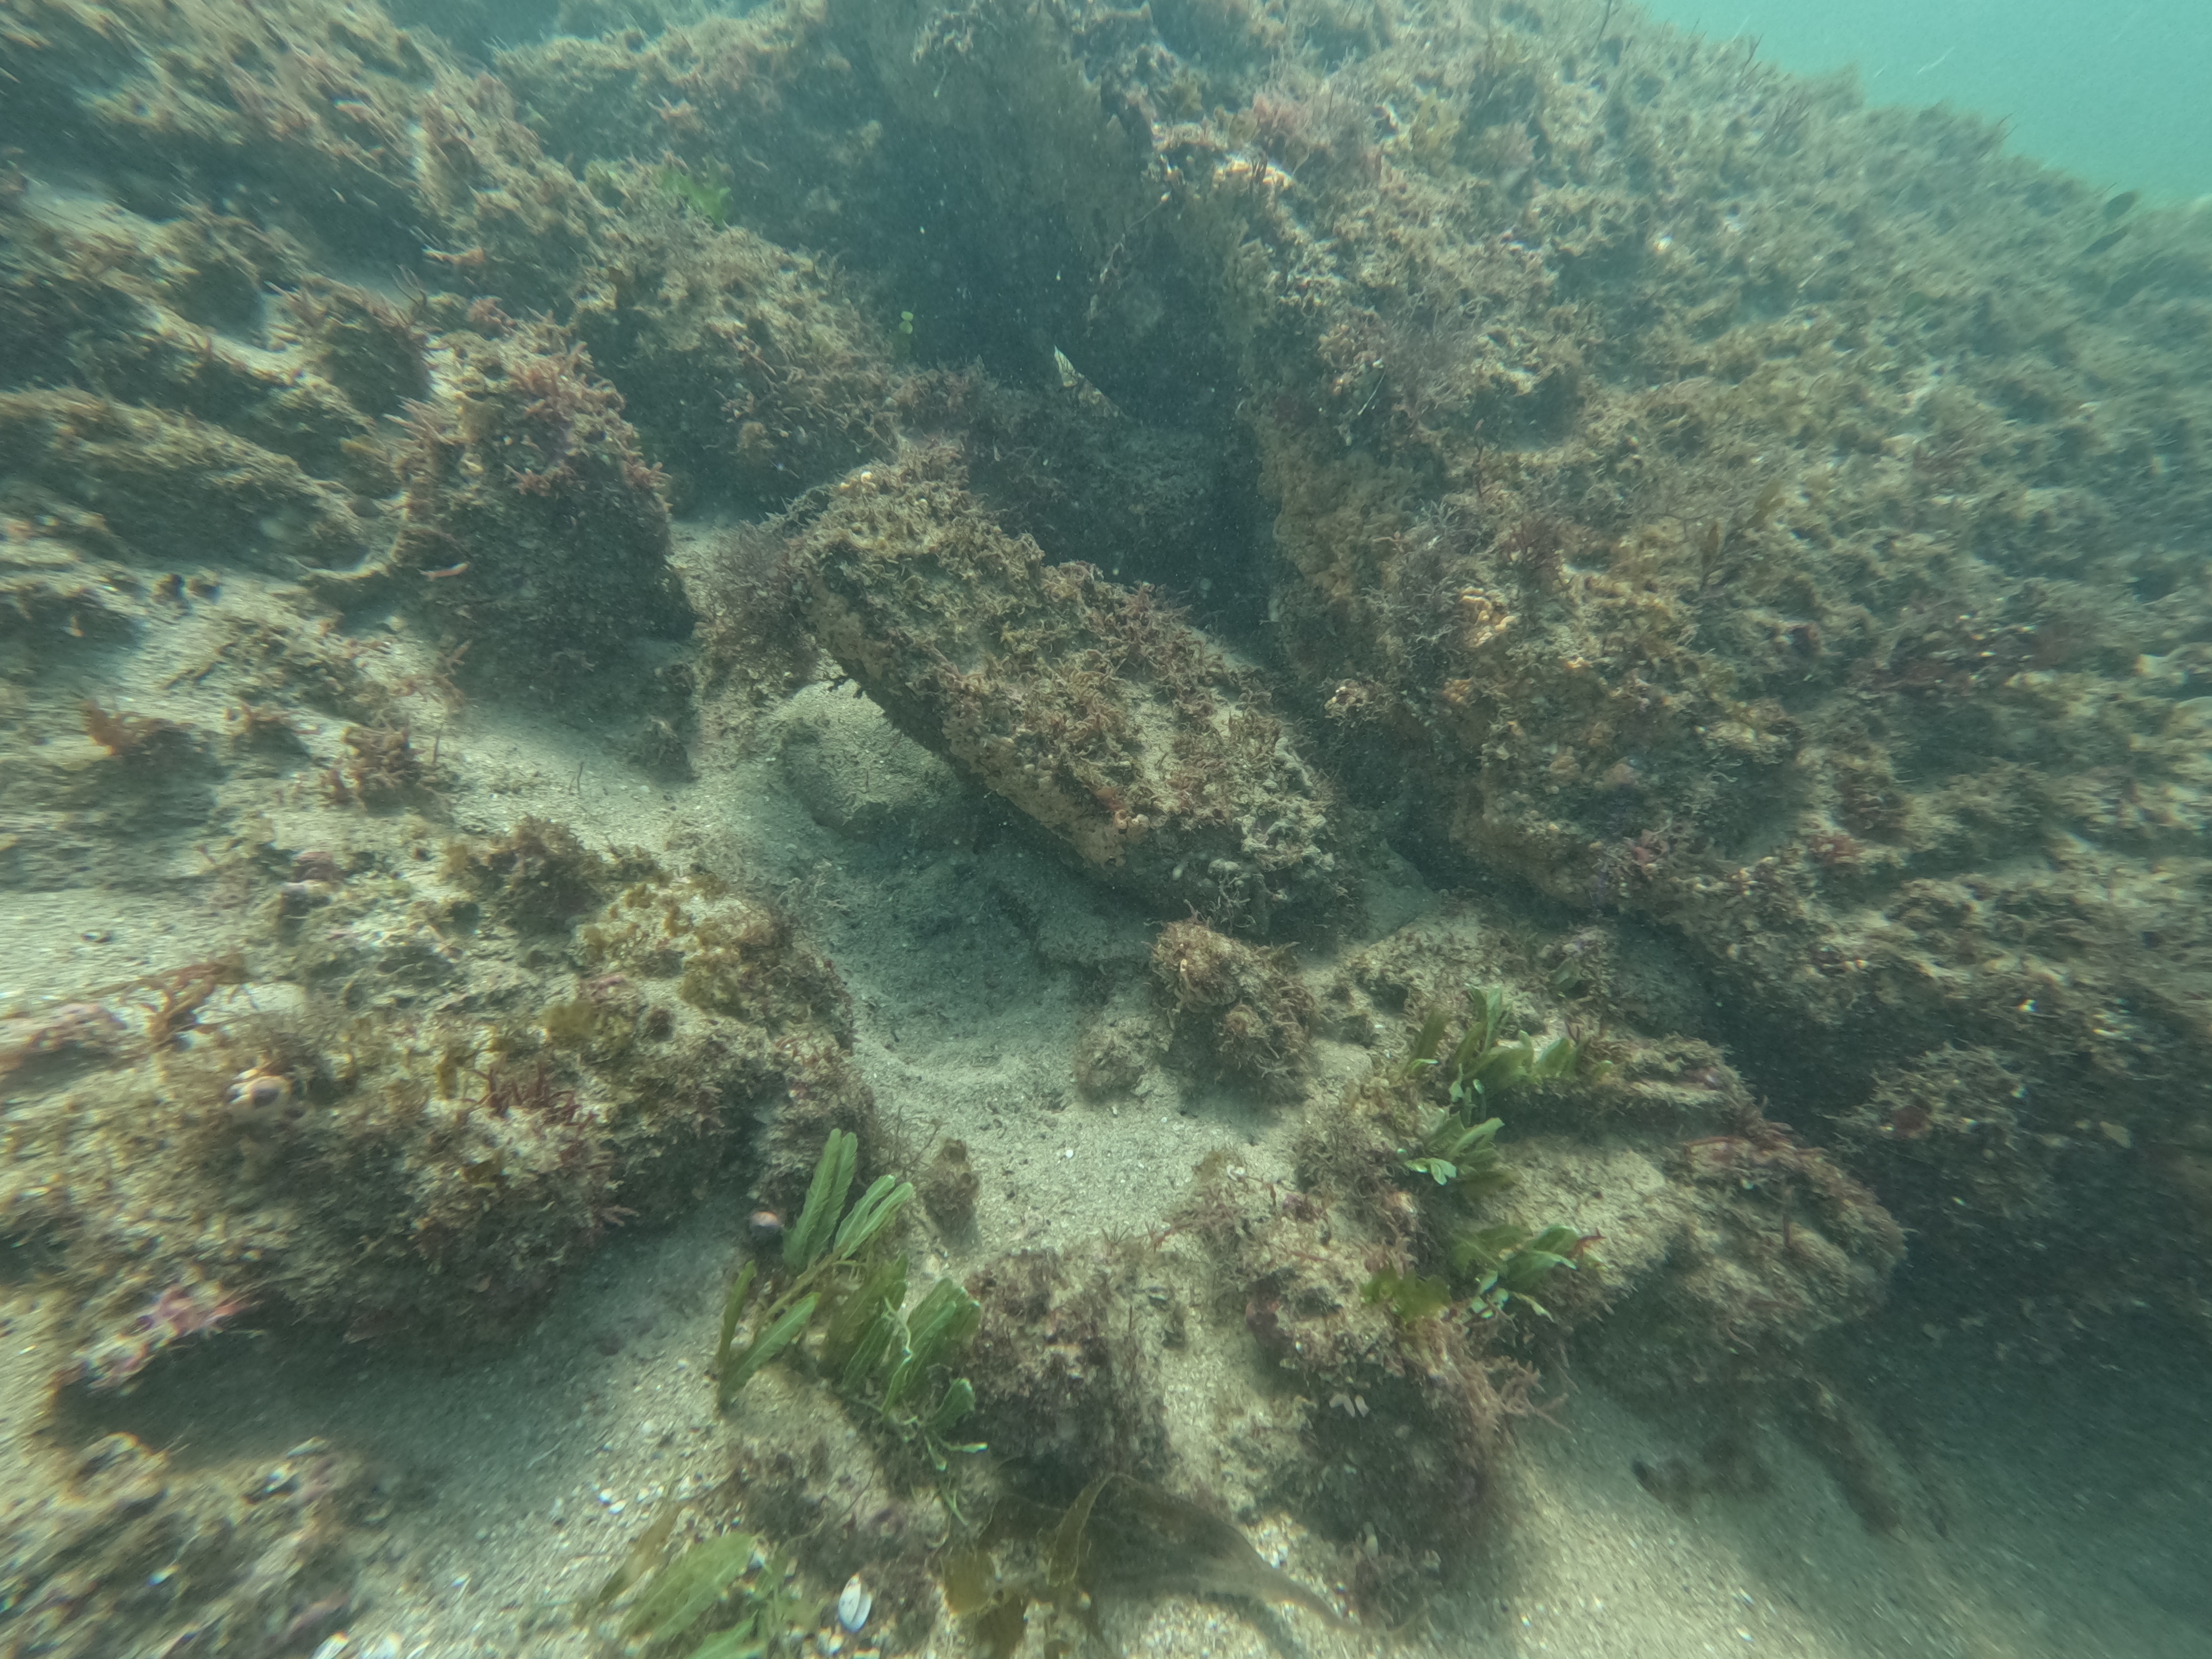

Supplement: Supplementary file 1533 [file G0027859.pdf › Ocean1/G0027859.pdf]

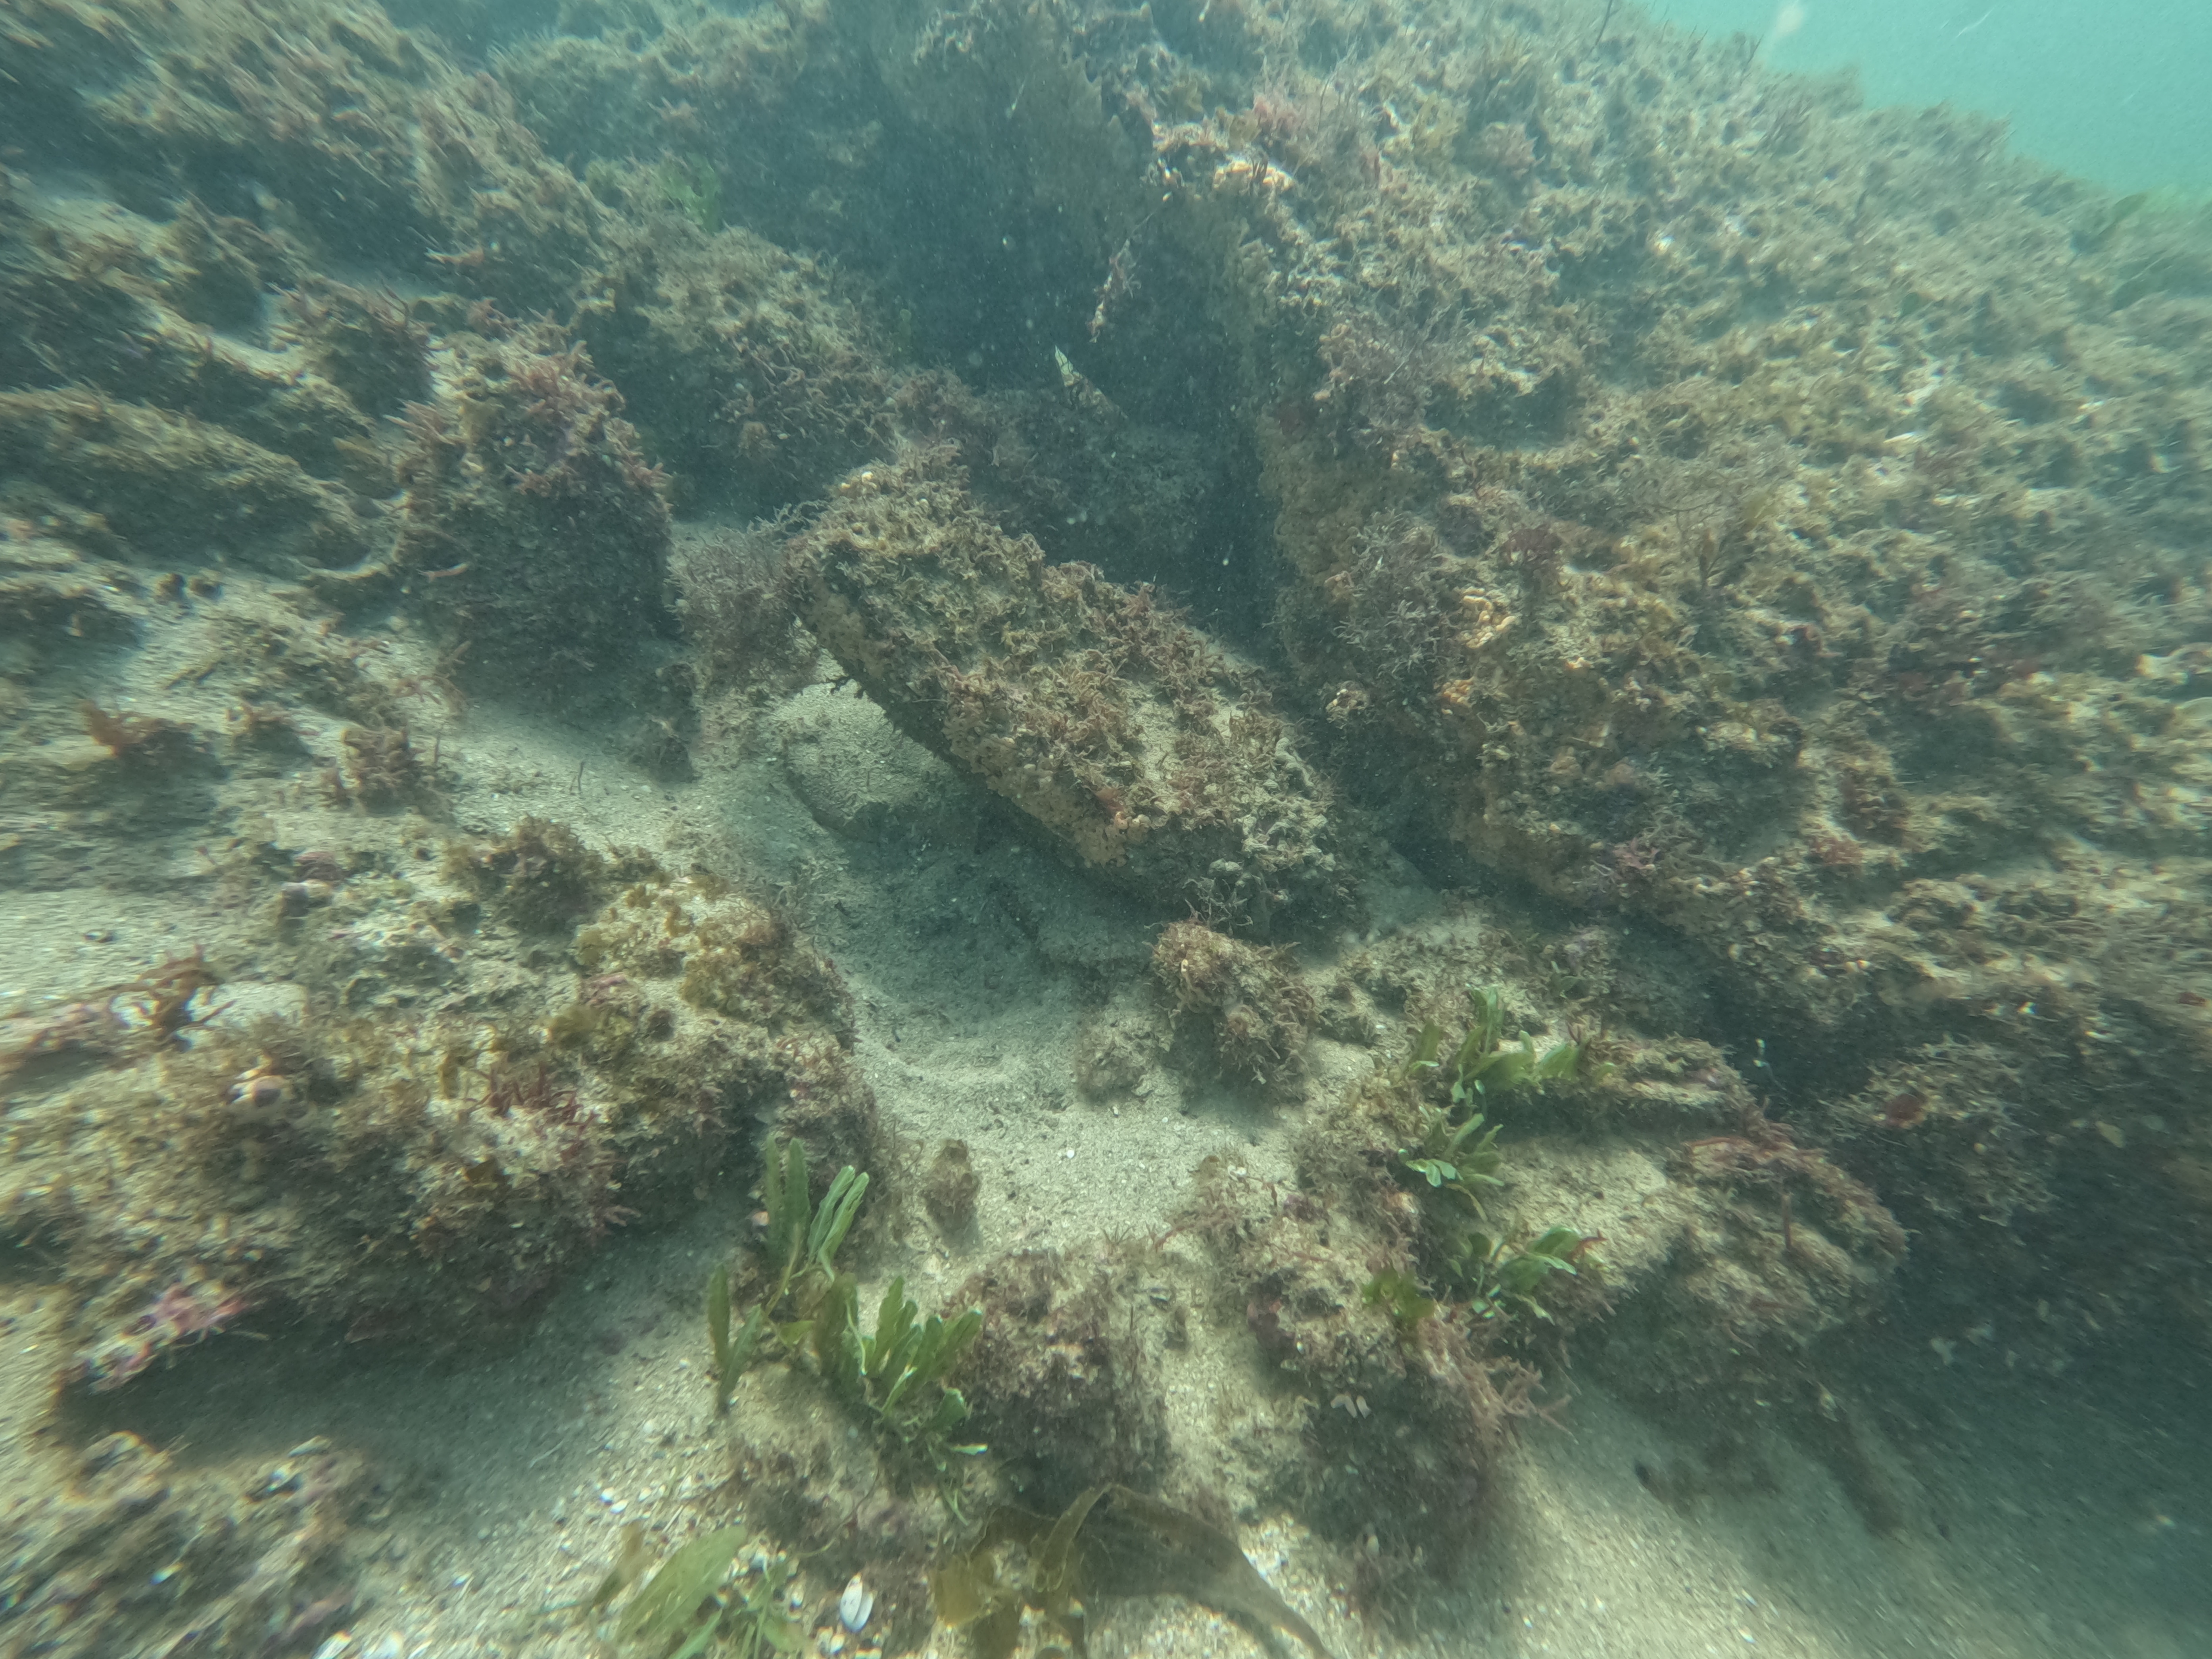

Supplement: Supplementary file 1534 [file G0027860.pdf › Ocean1/G0027860.pdf]

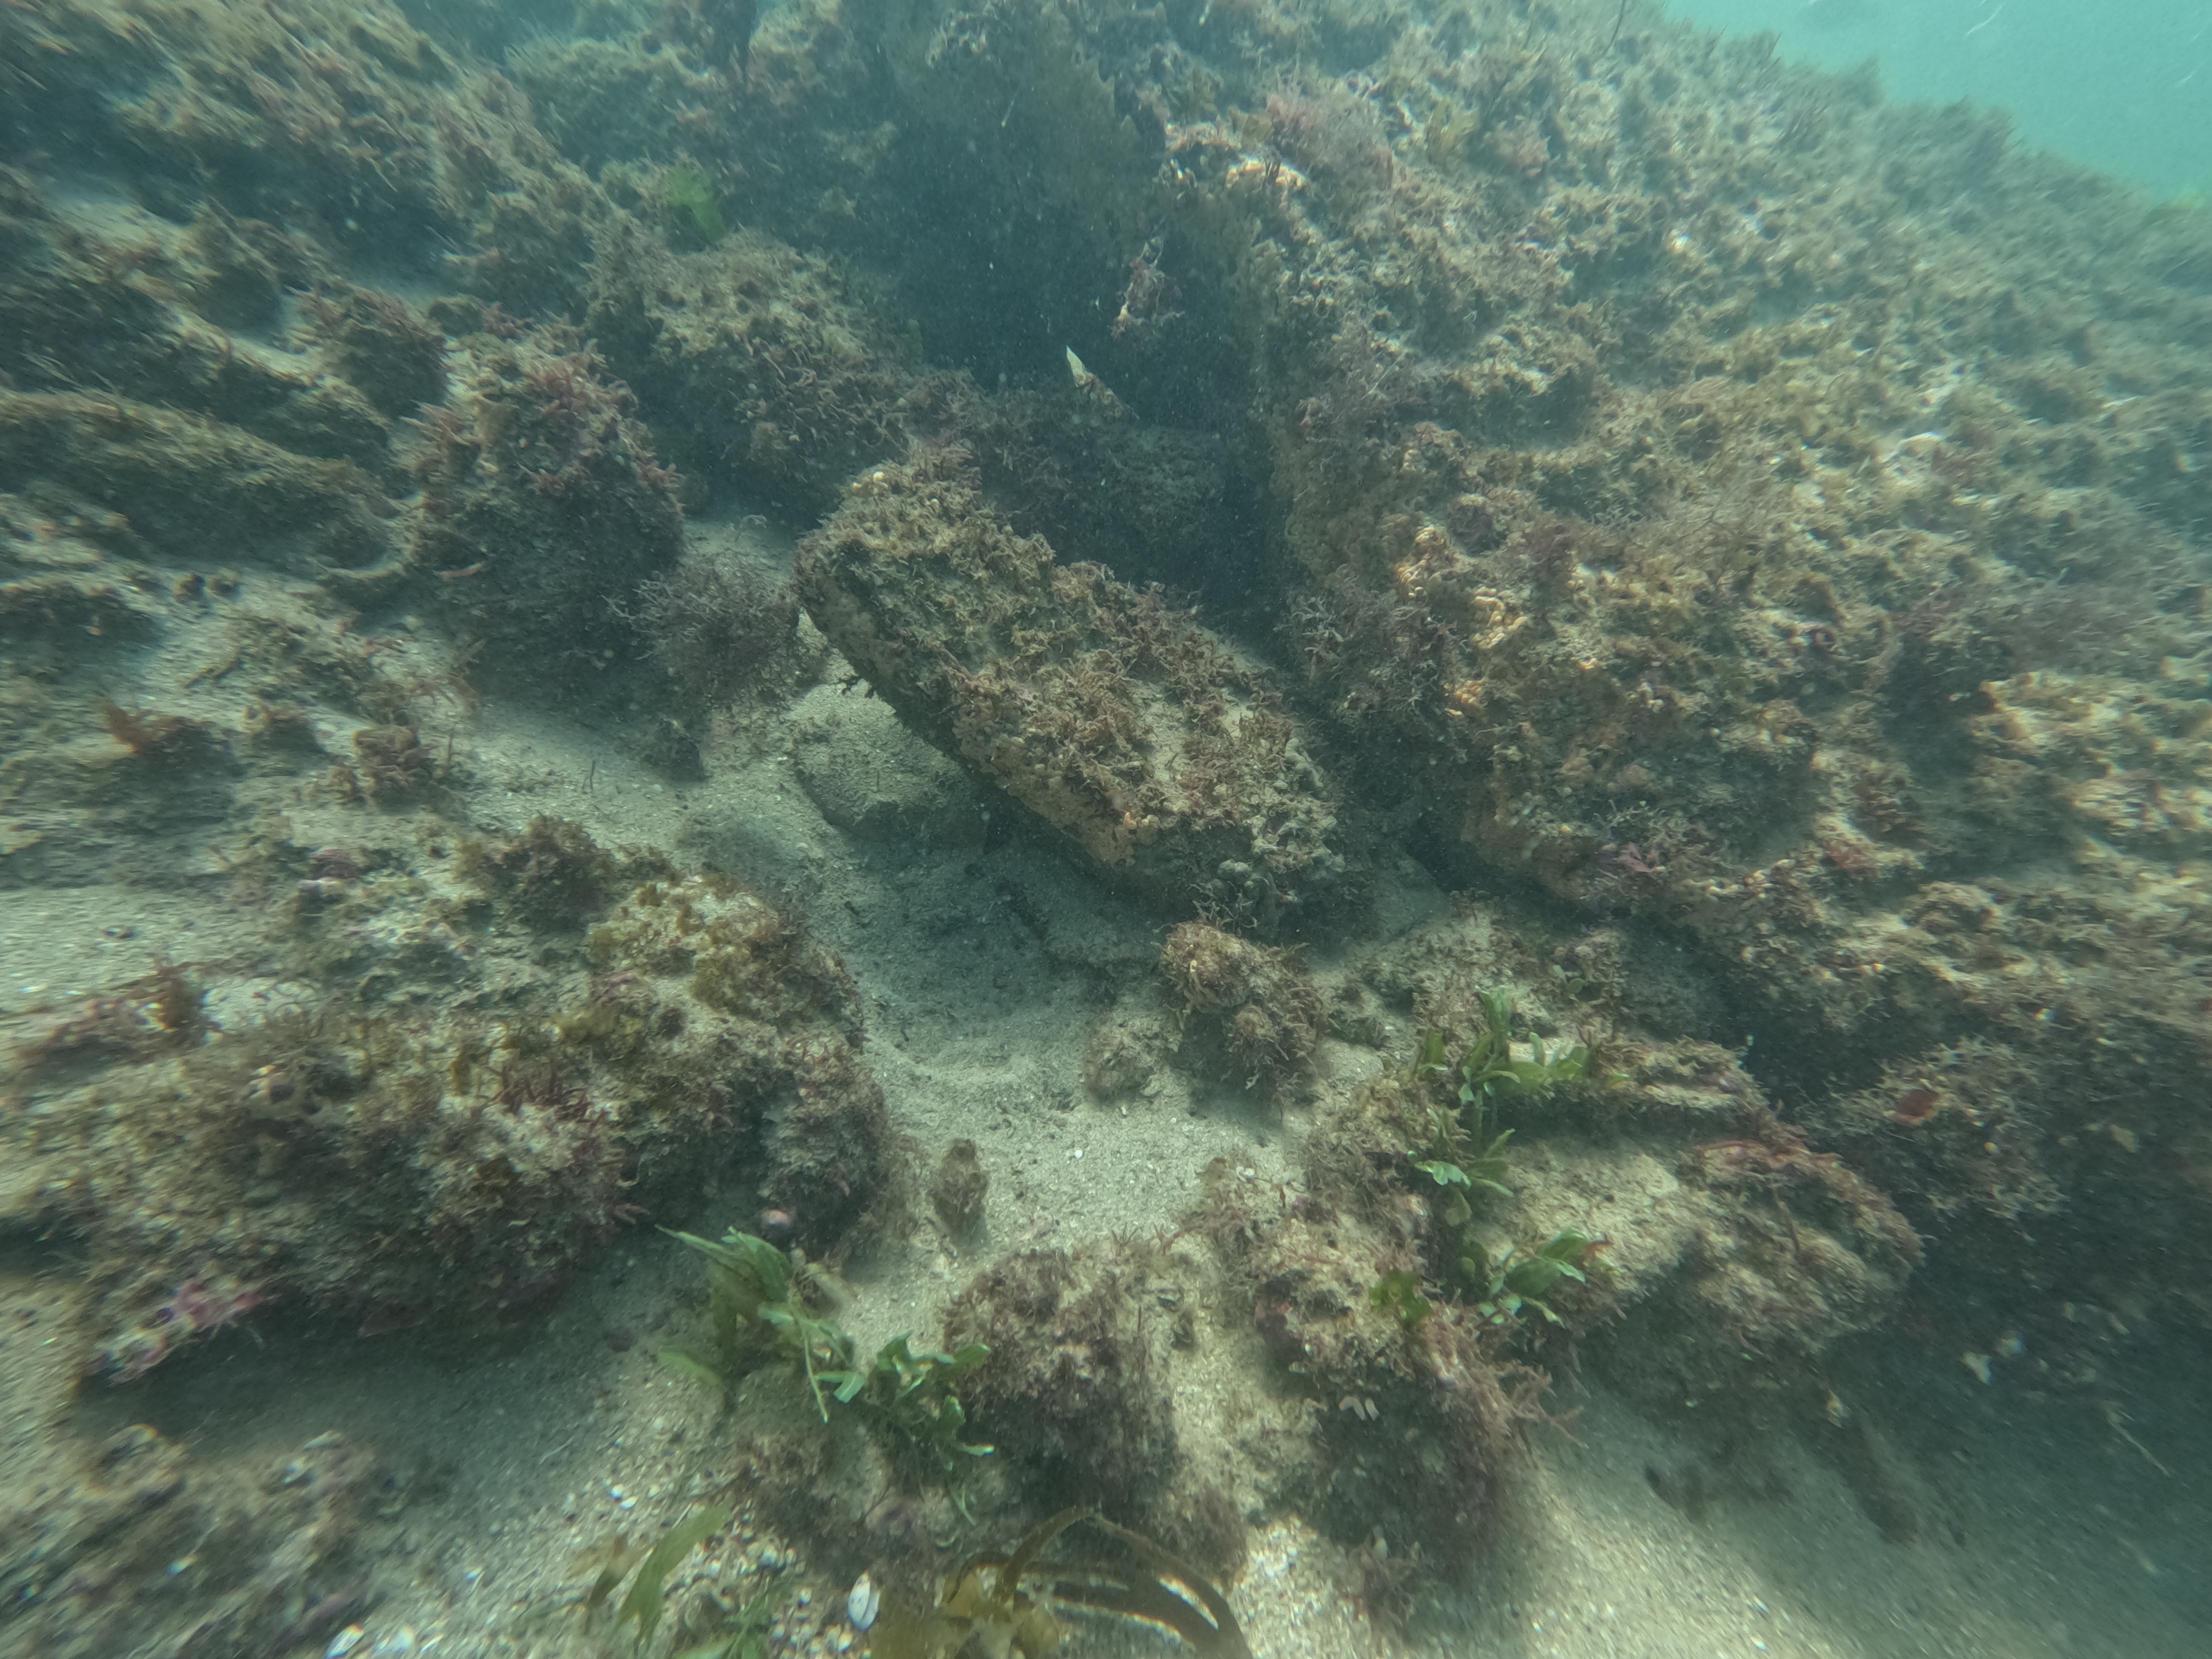

Supplement: Supplementary file 1535 [file G0027861.pdf › Ocean1/G0027861.pdf]

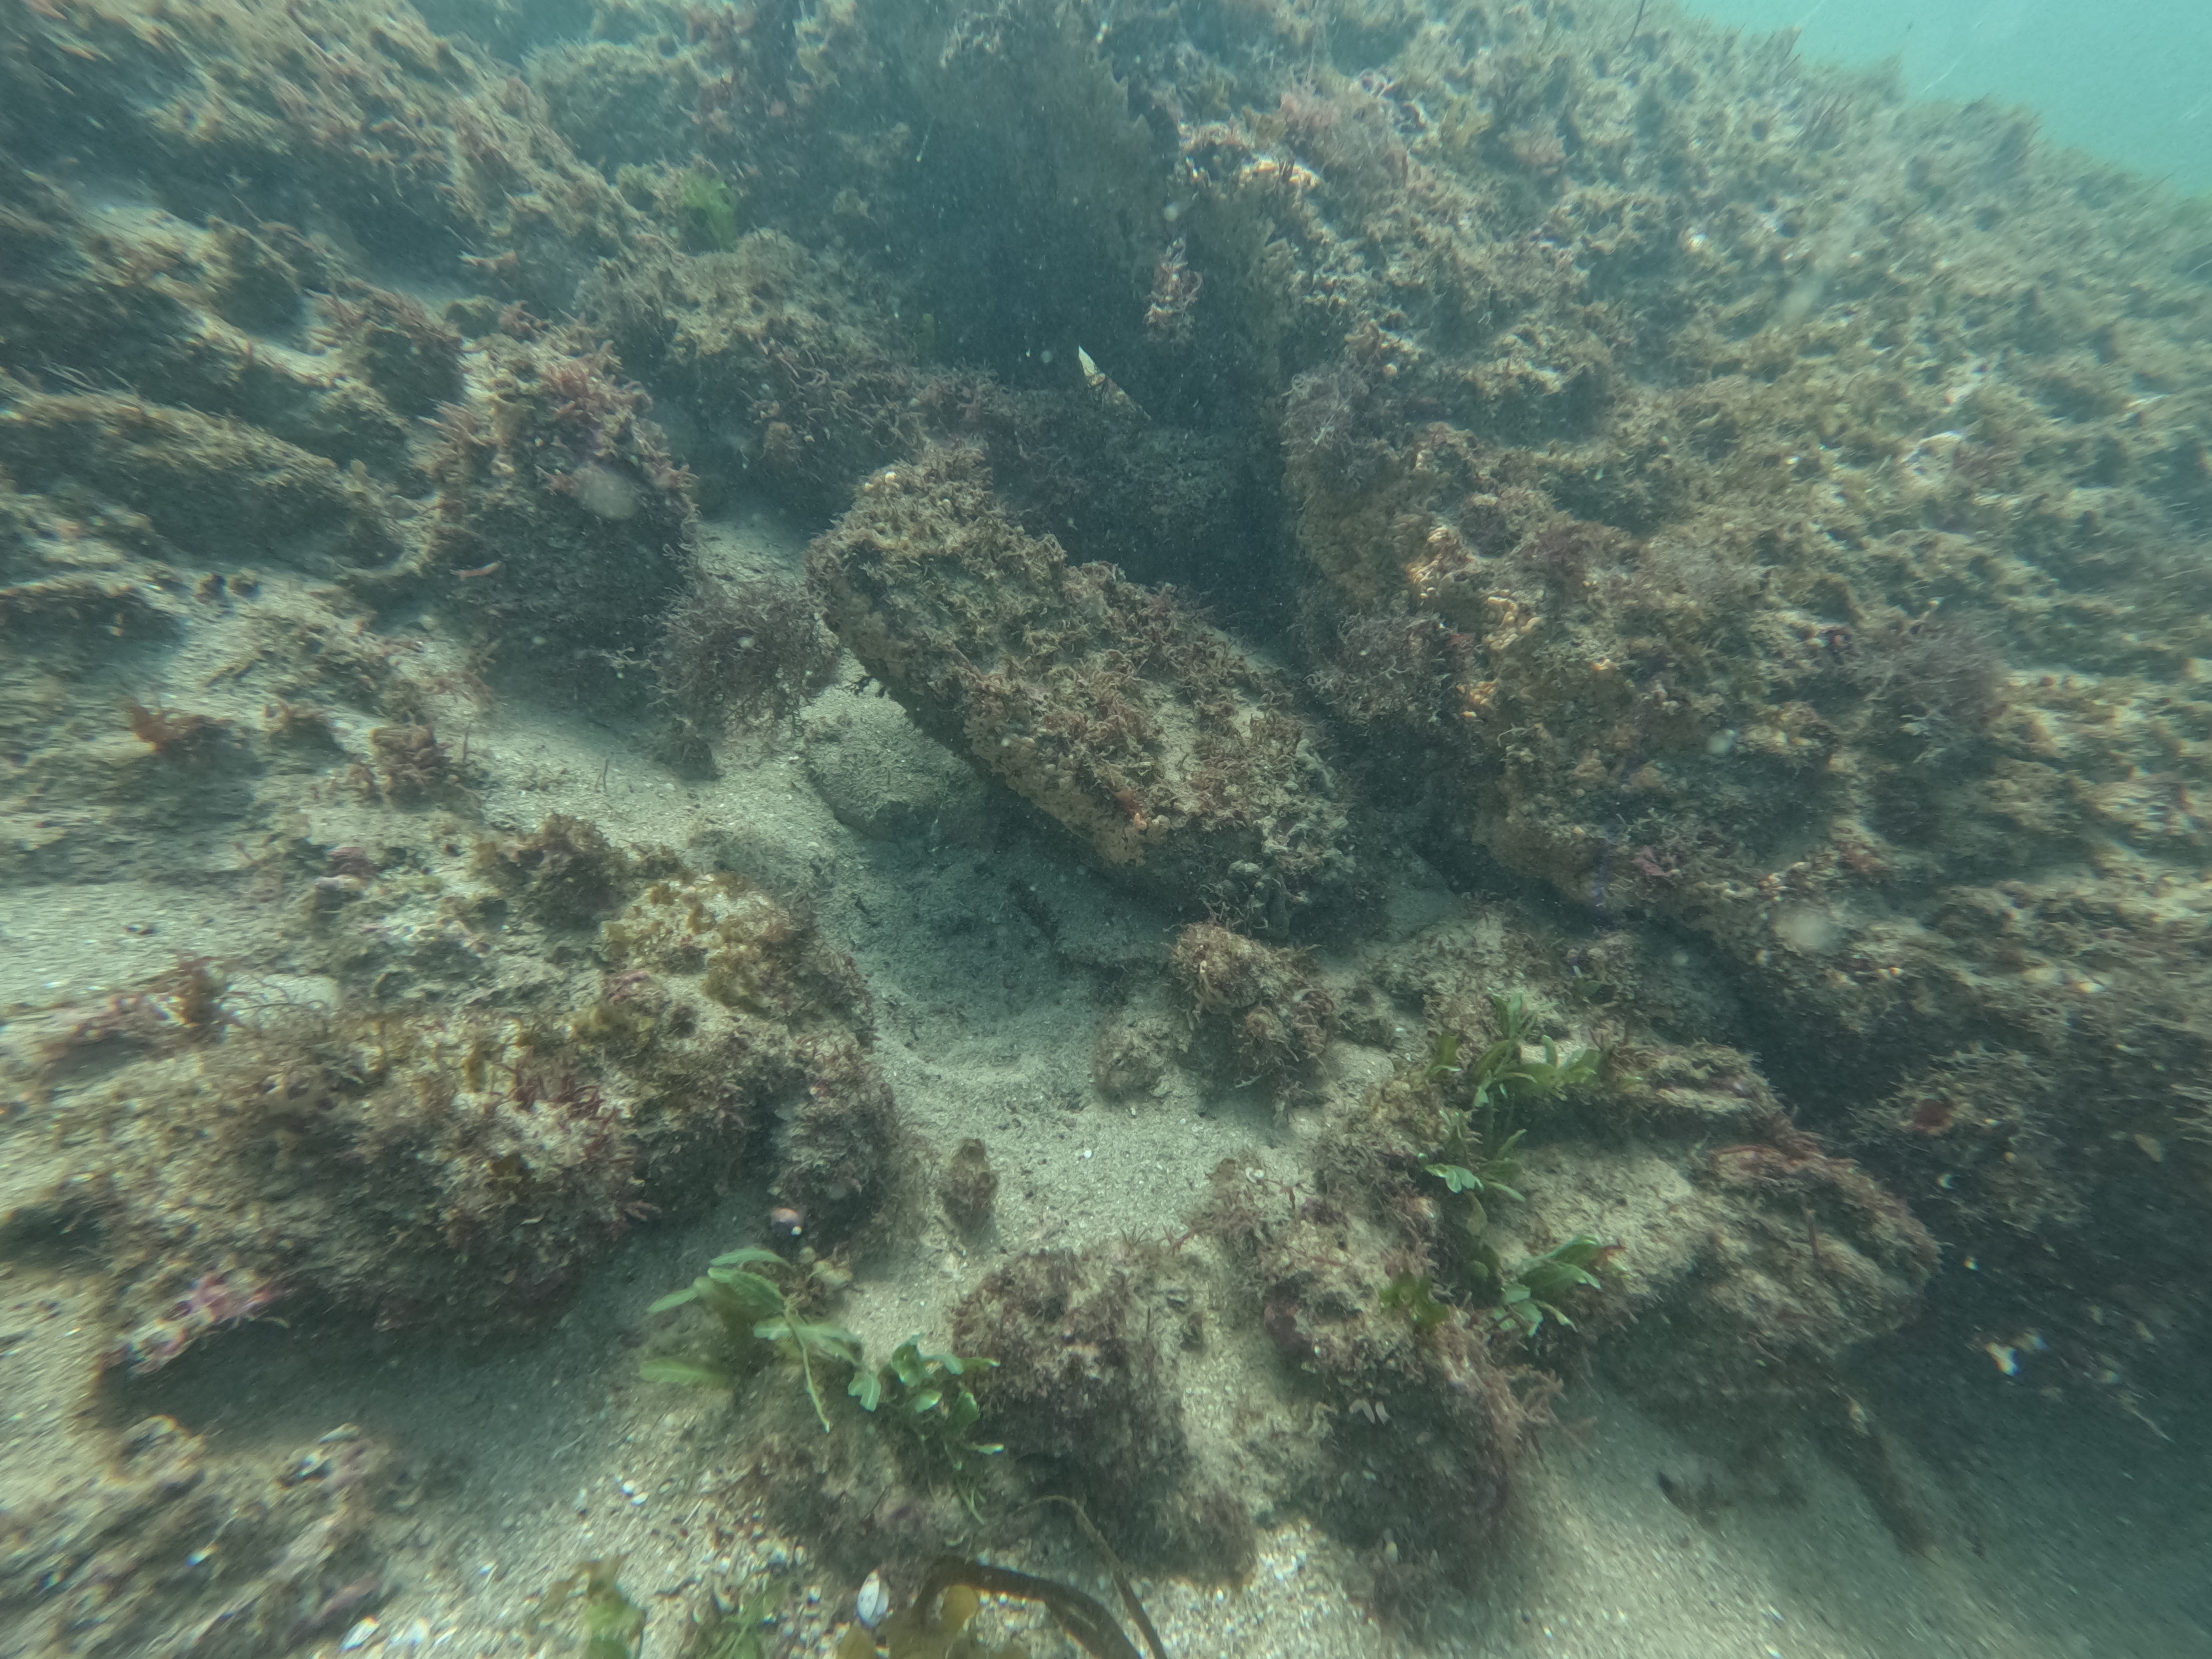

Supplement: Supplementary file 1536 [file G0027862.pdf › Ocean1/G0027862.pdf]

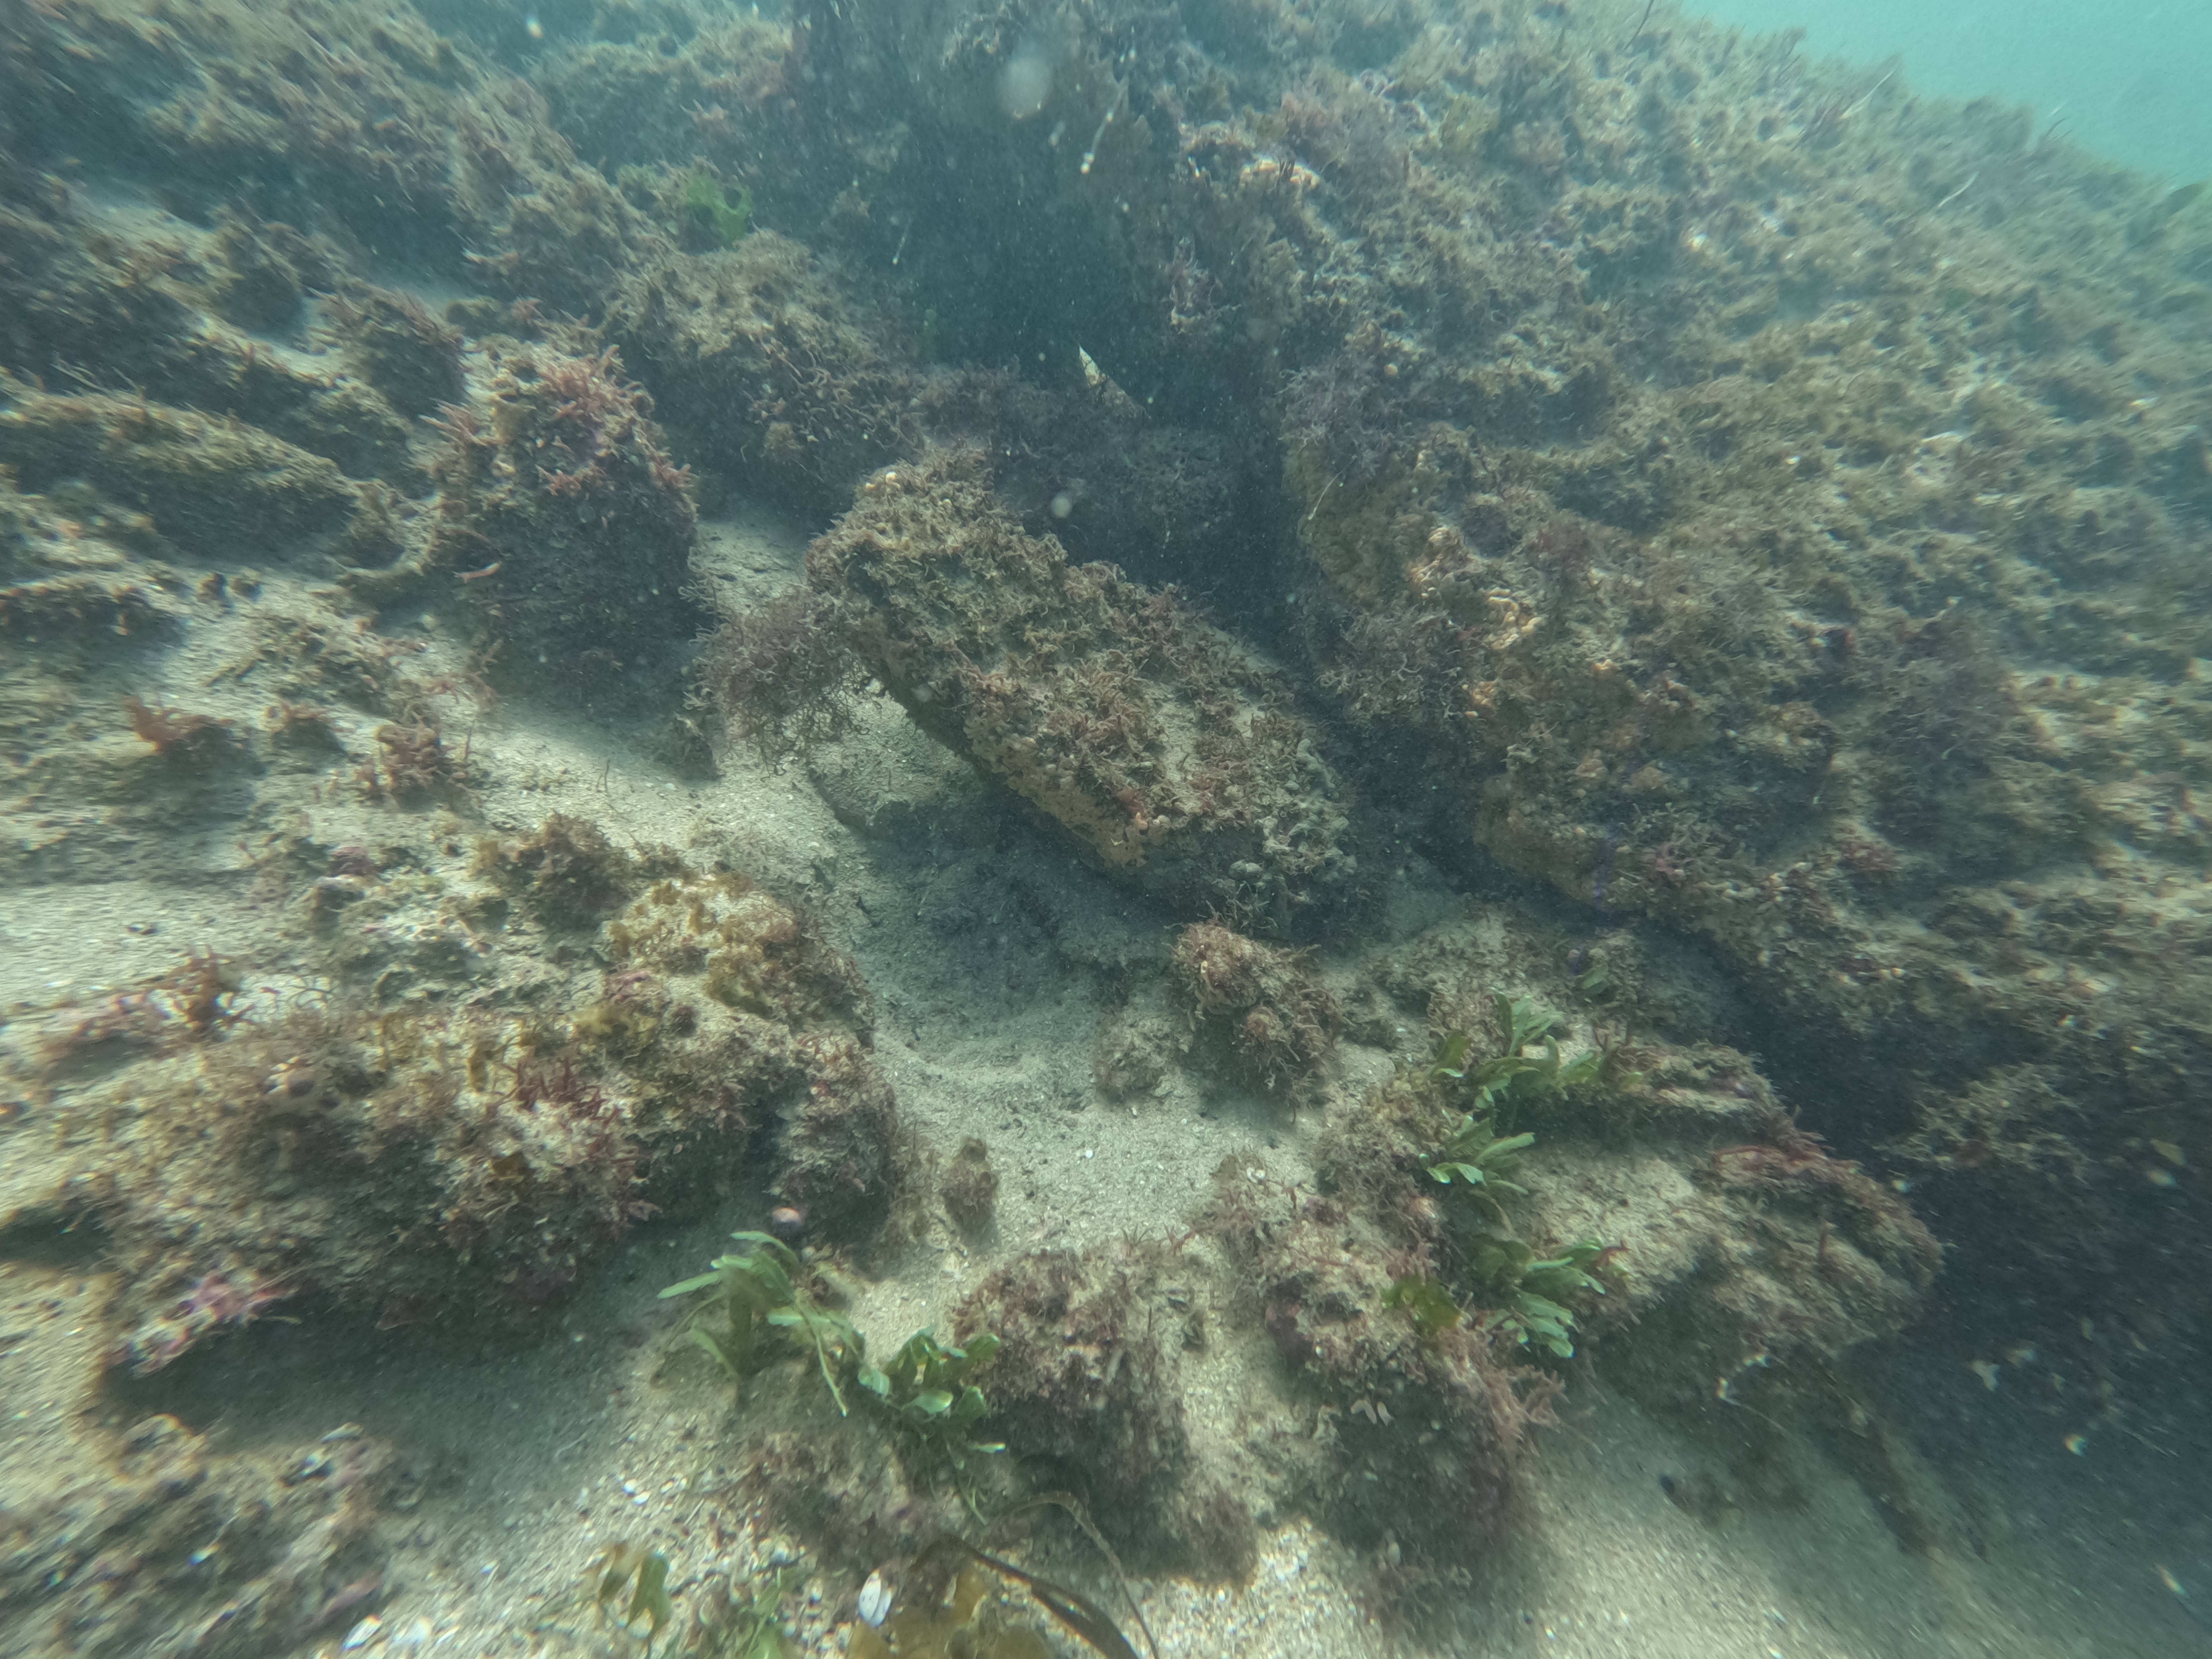

Supplement: Supplementary file 1537 [file G0027863.pdf › Ocean1/G0027863.pdf]

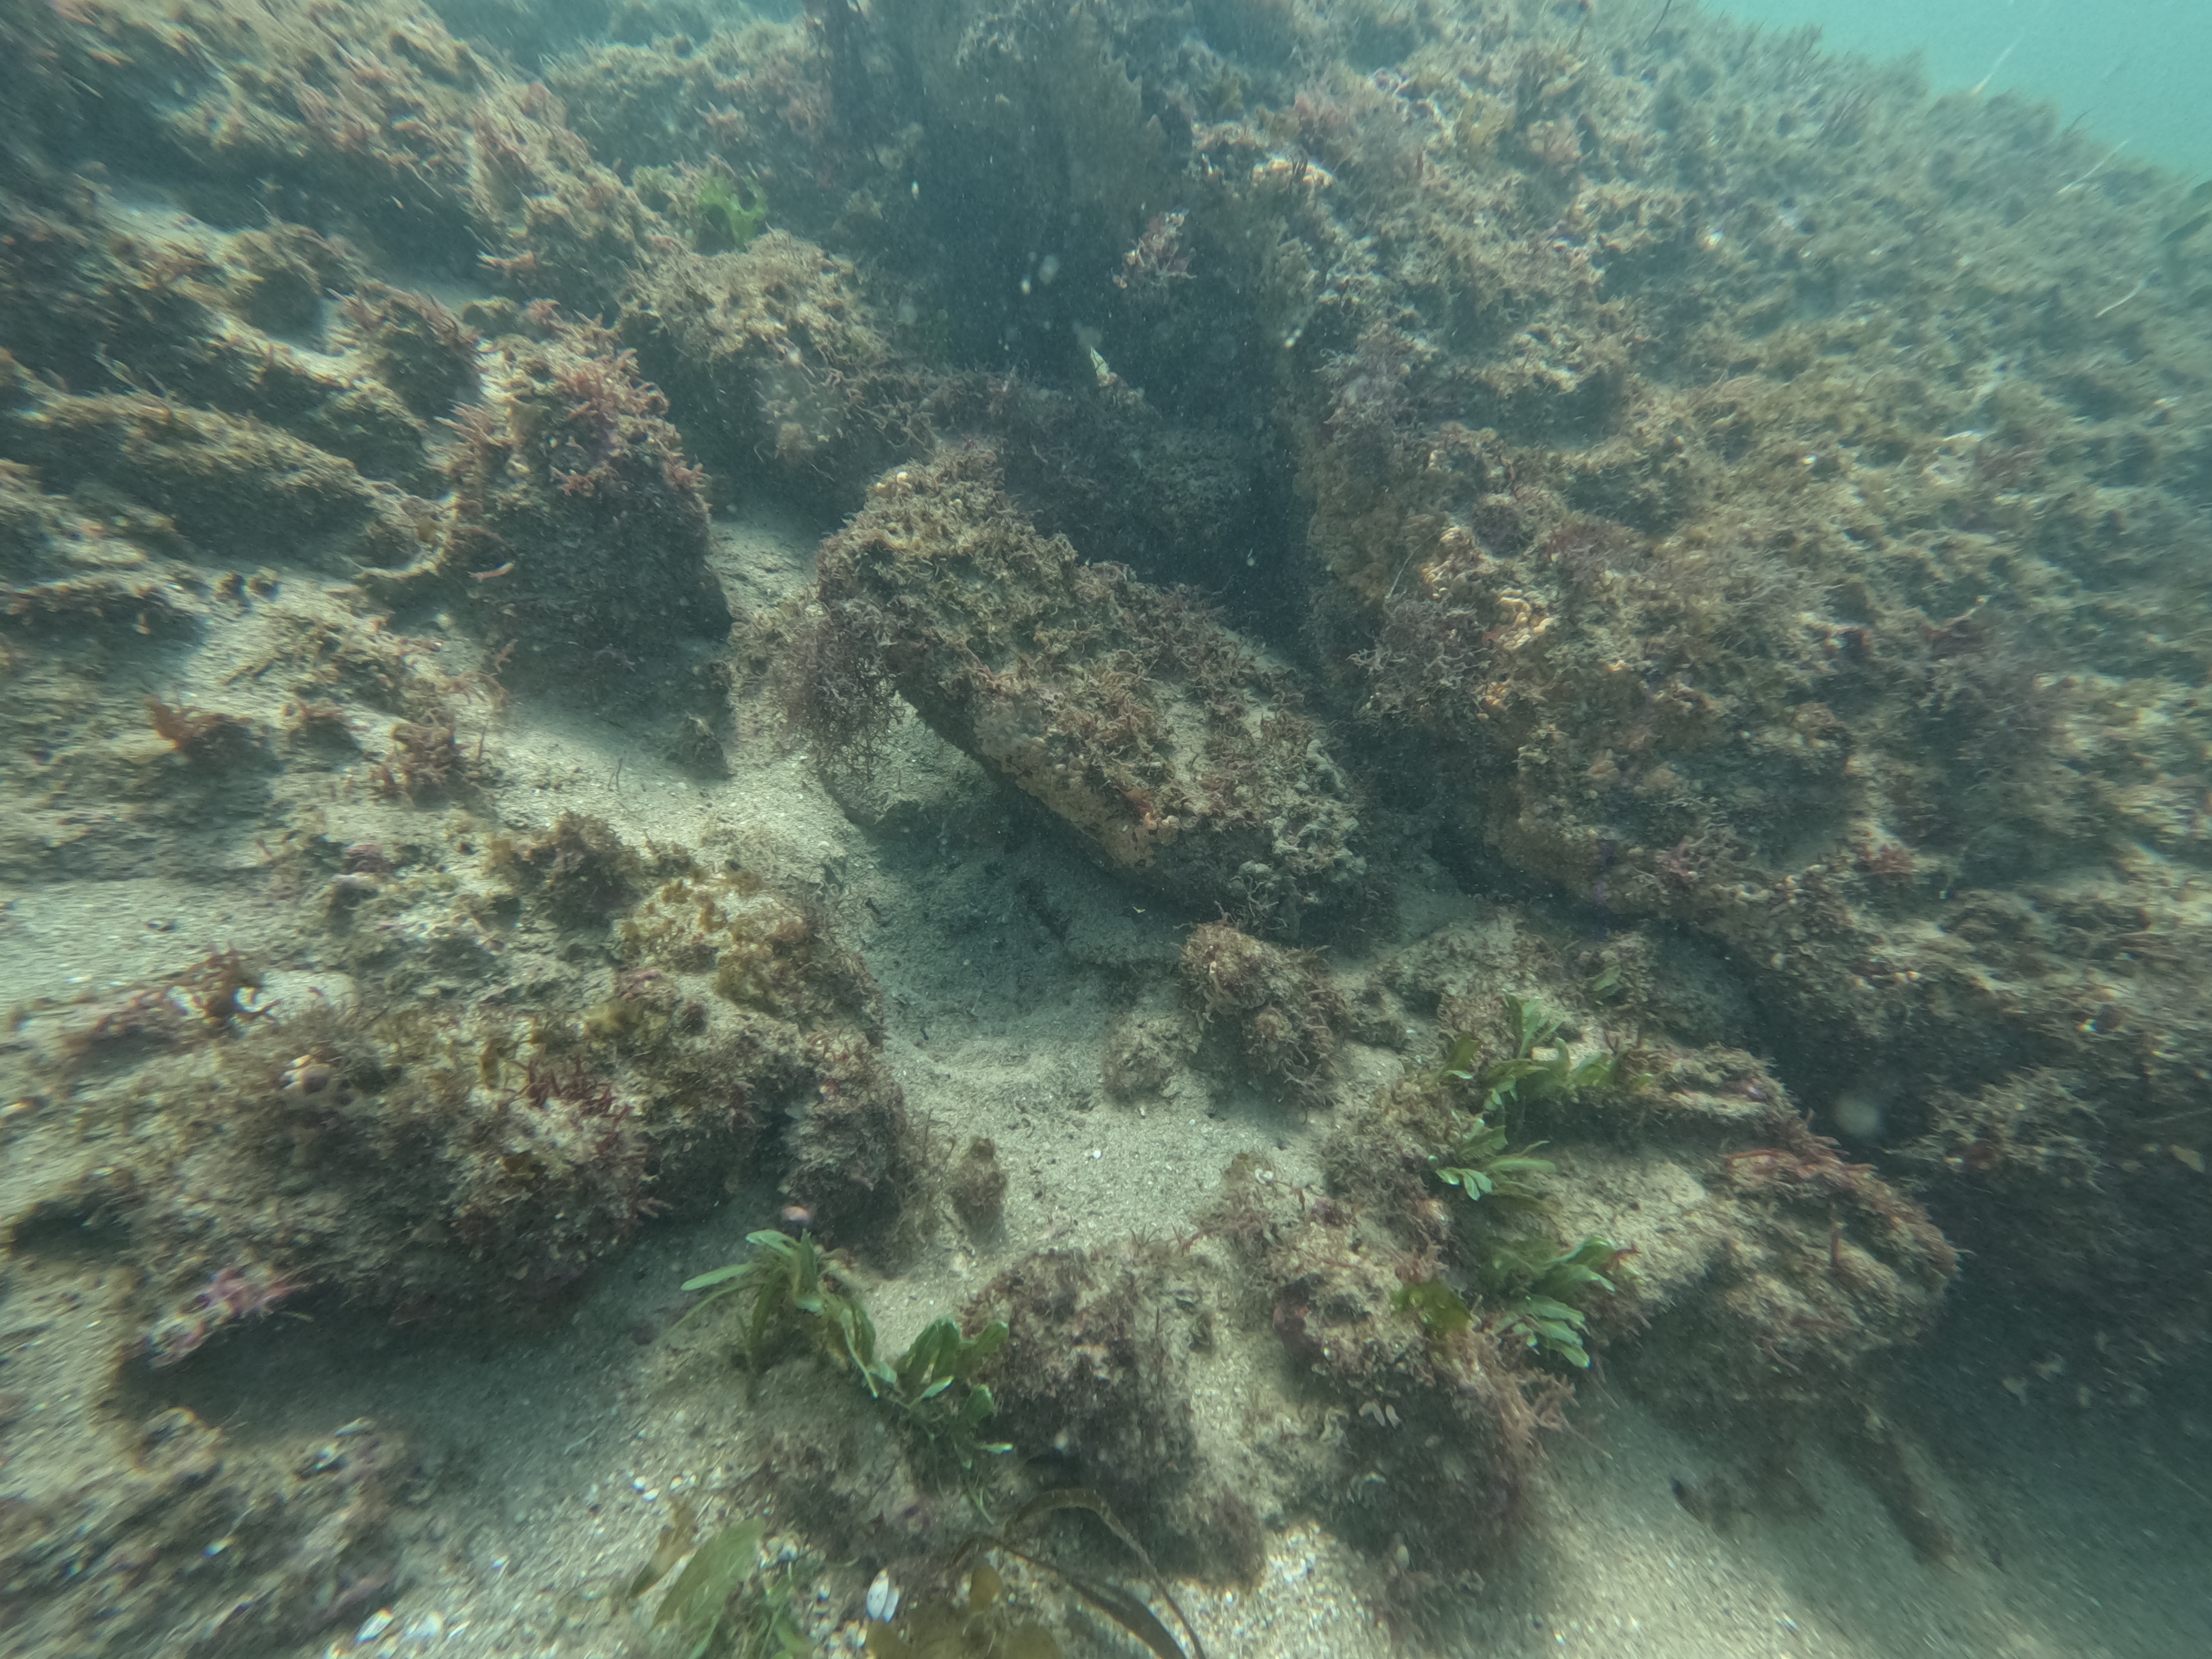

Supplement: Supplementary file 1538 [file G0027864.pdf › Ocean1/G0027864.pdf]

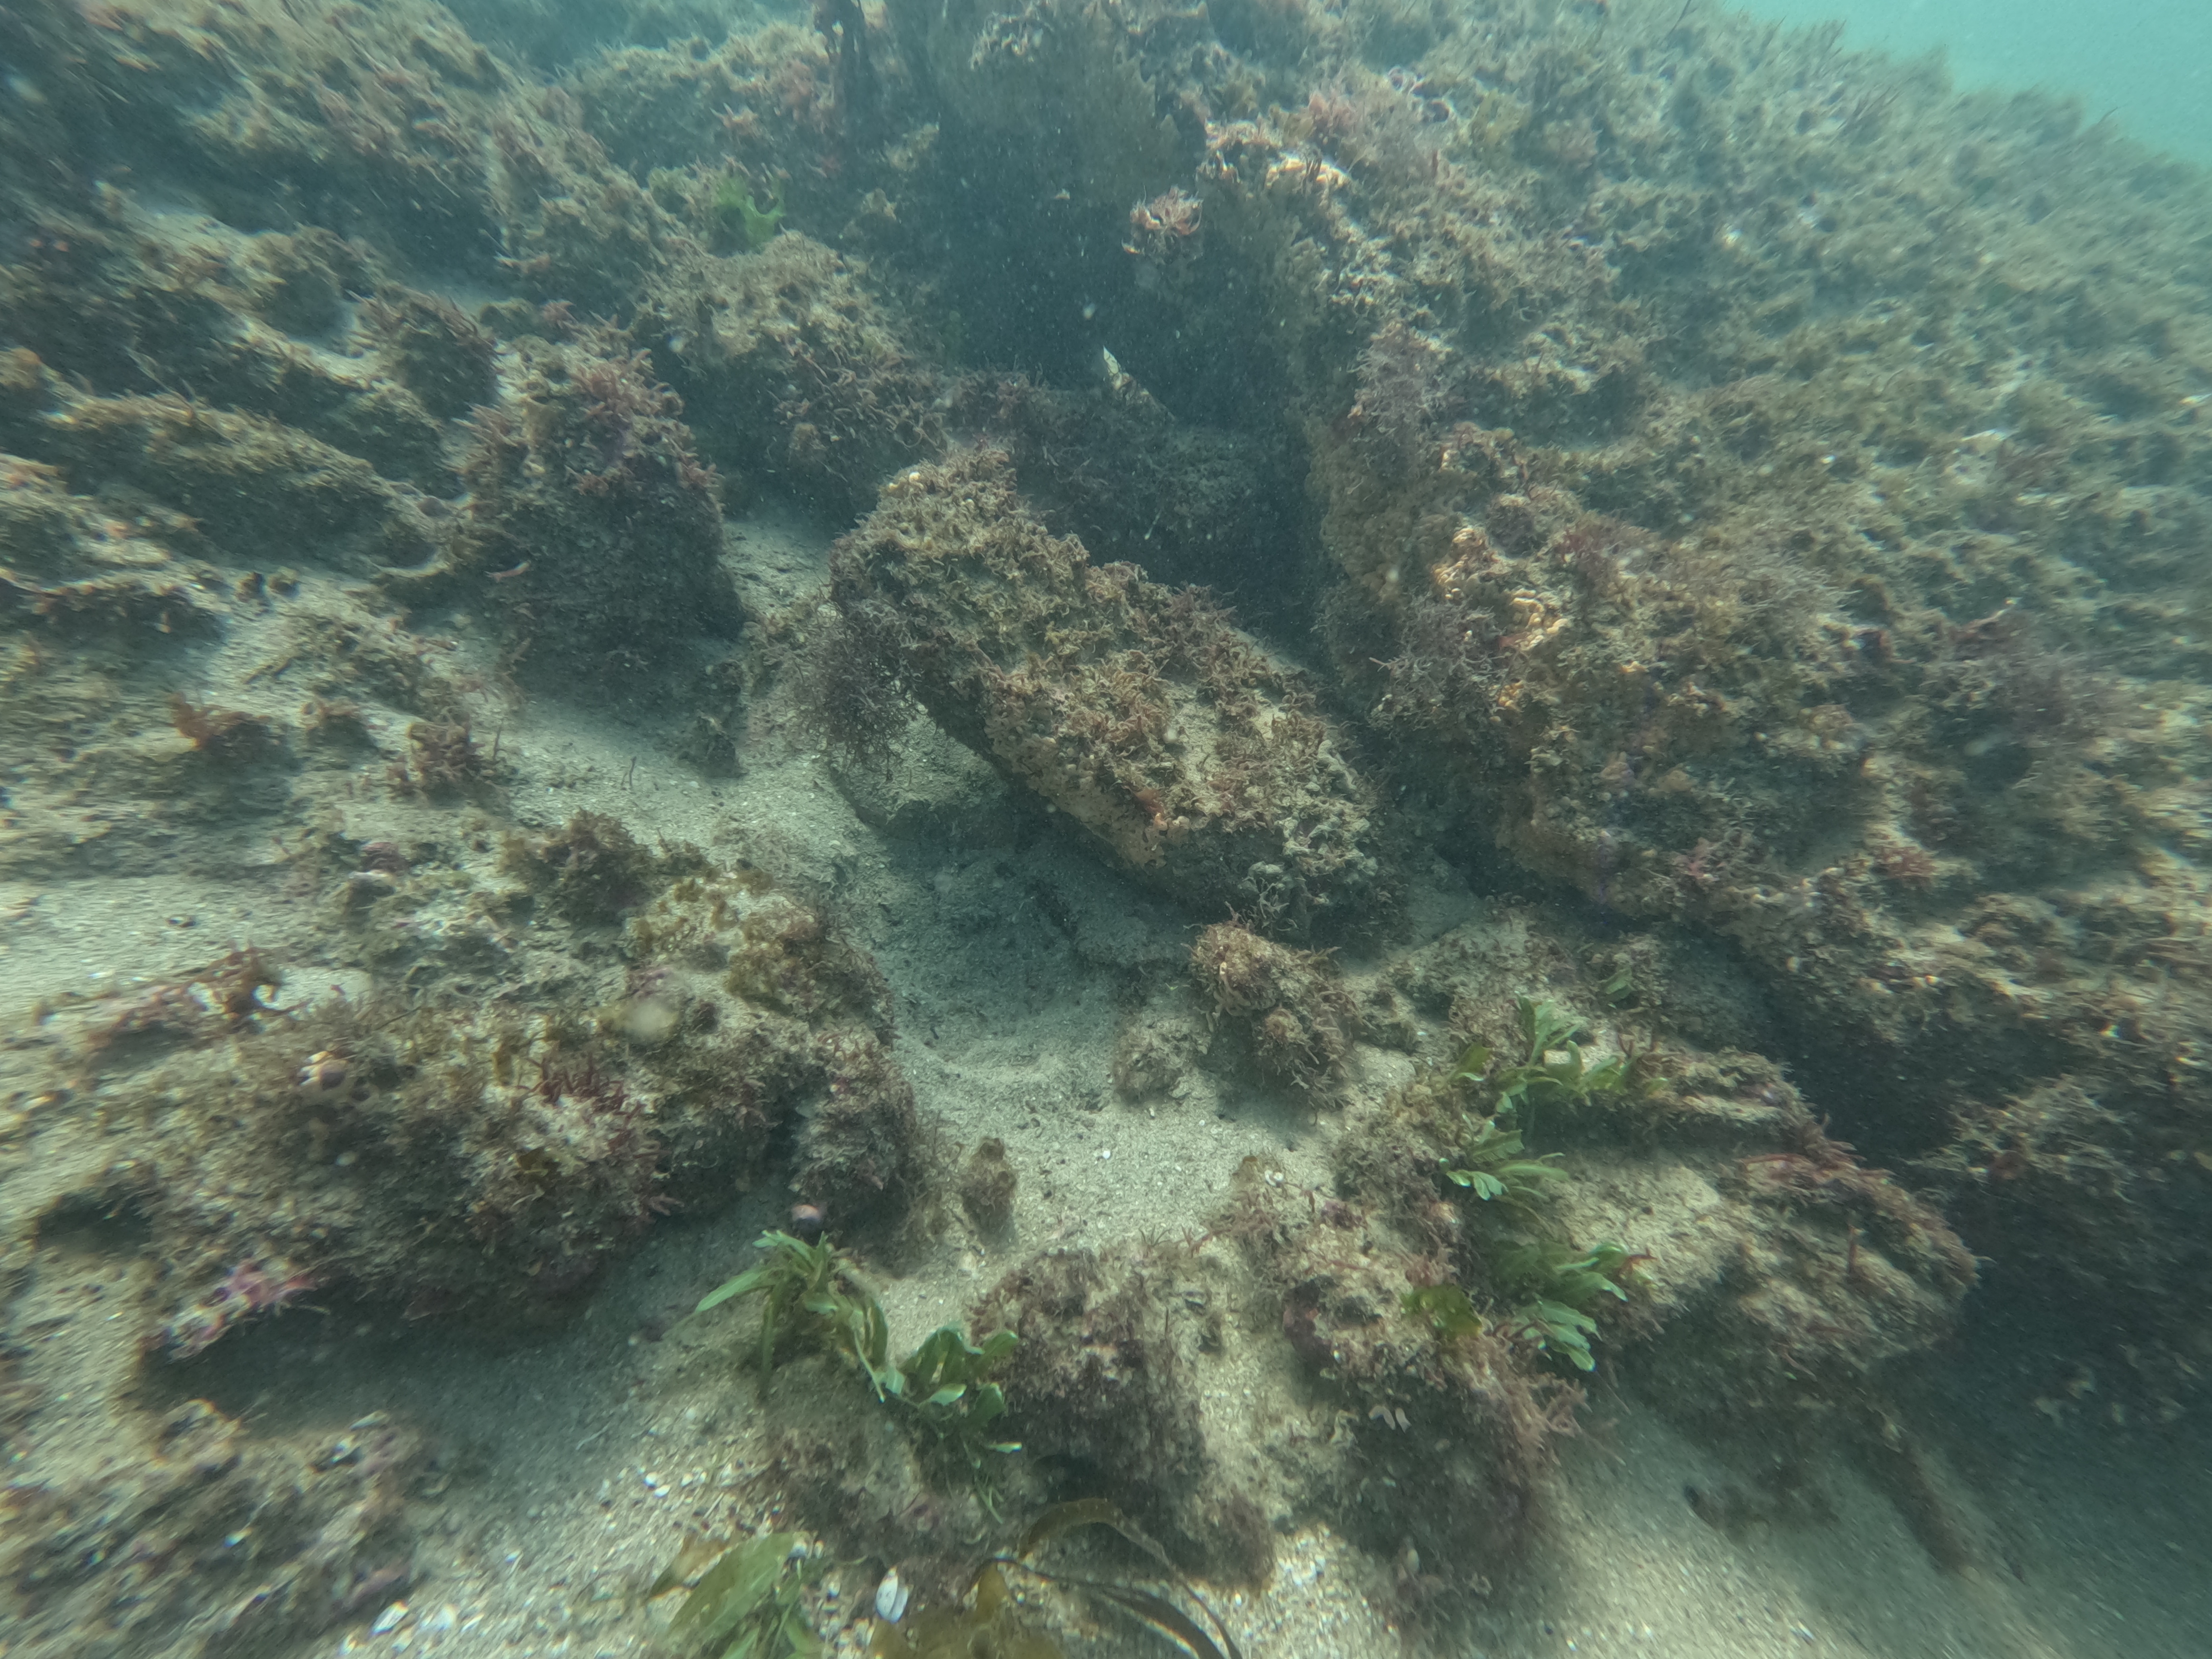

Supplement: Supplementary file 1539 [file G0027865.pdf › Ocean1/G0027865.pdf]

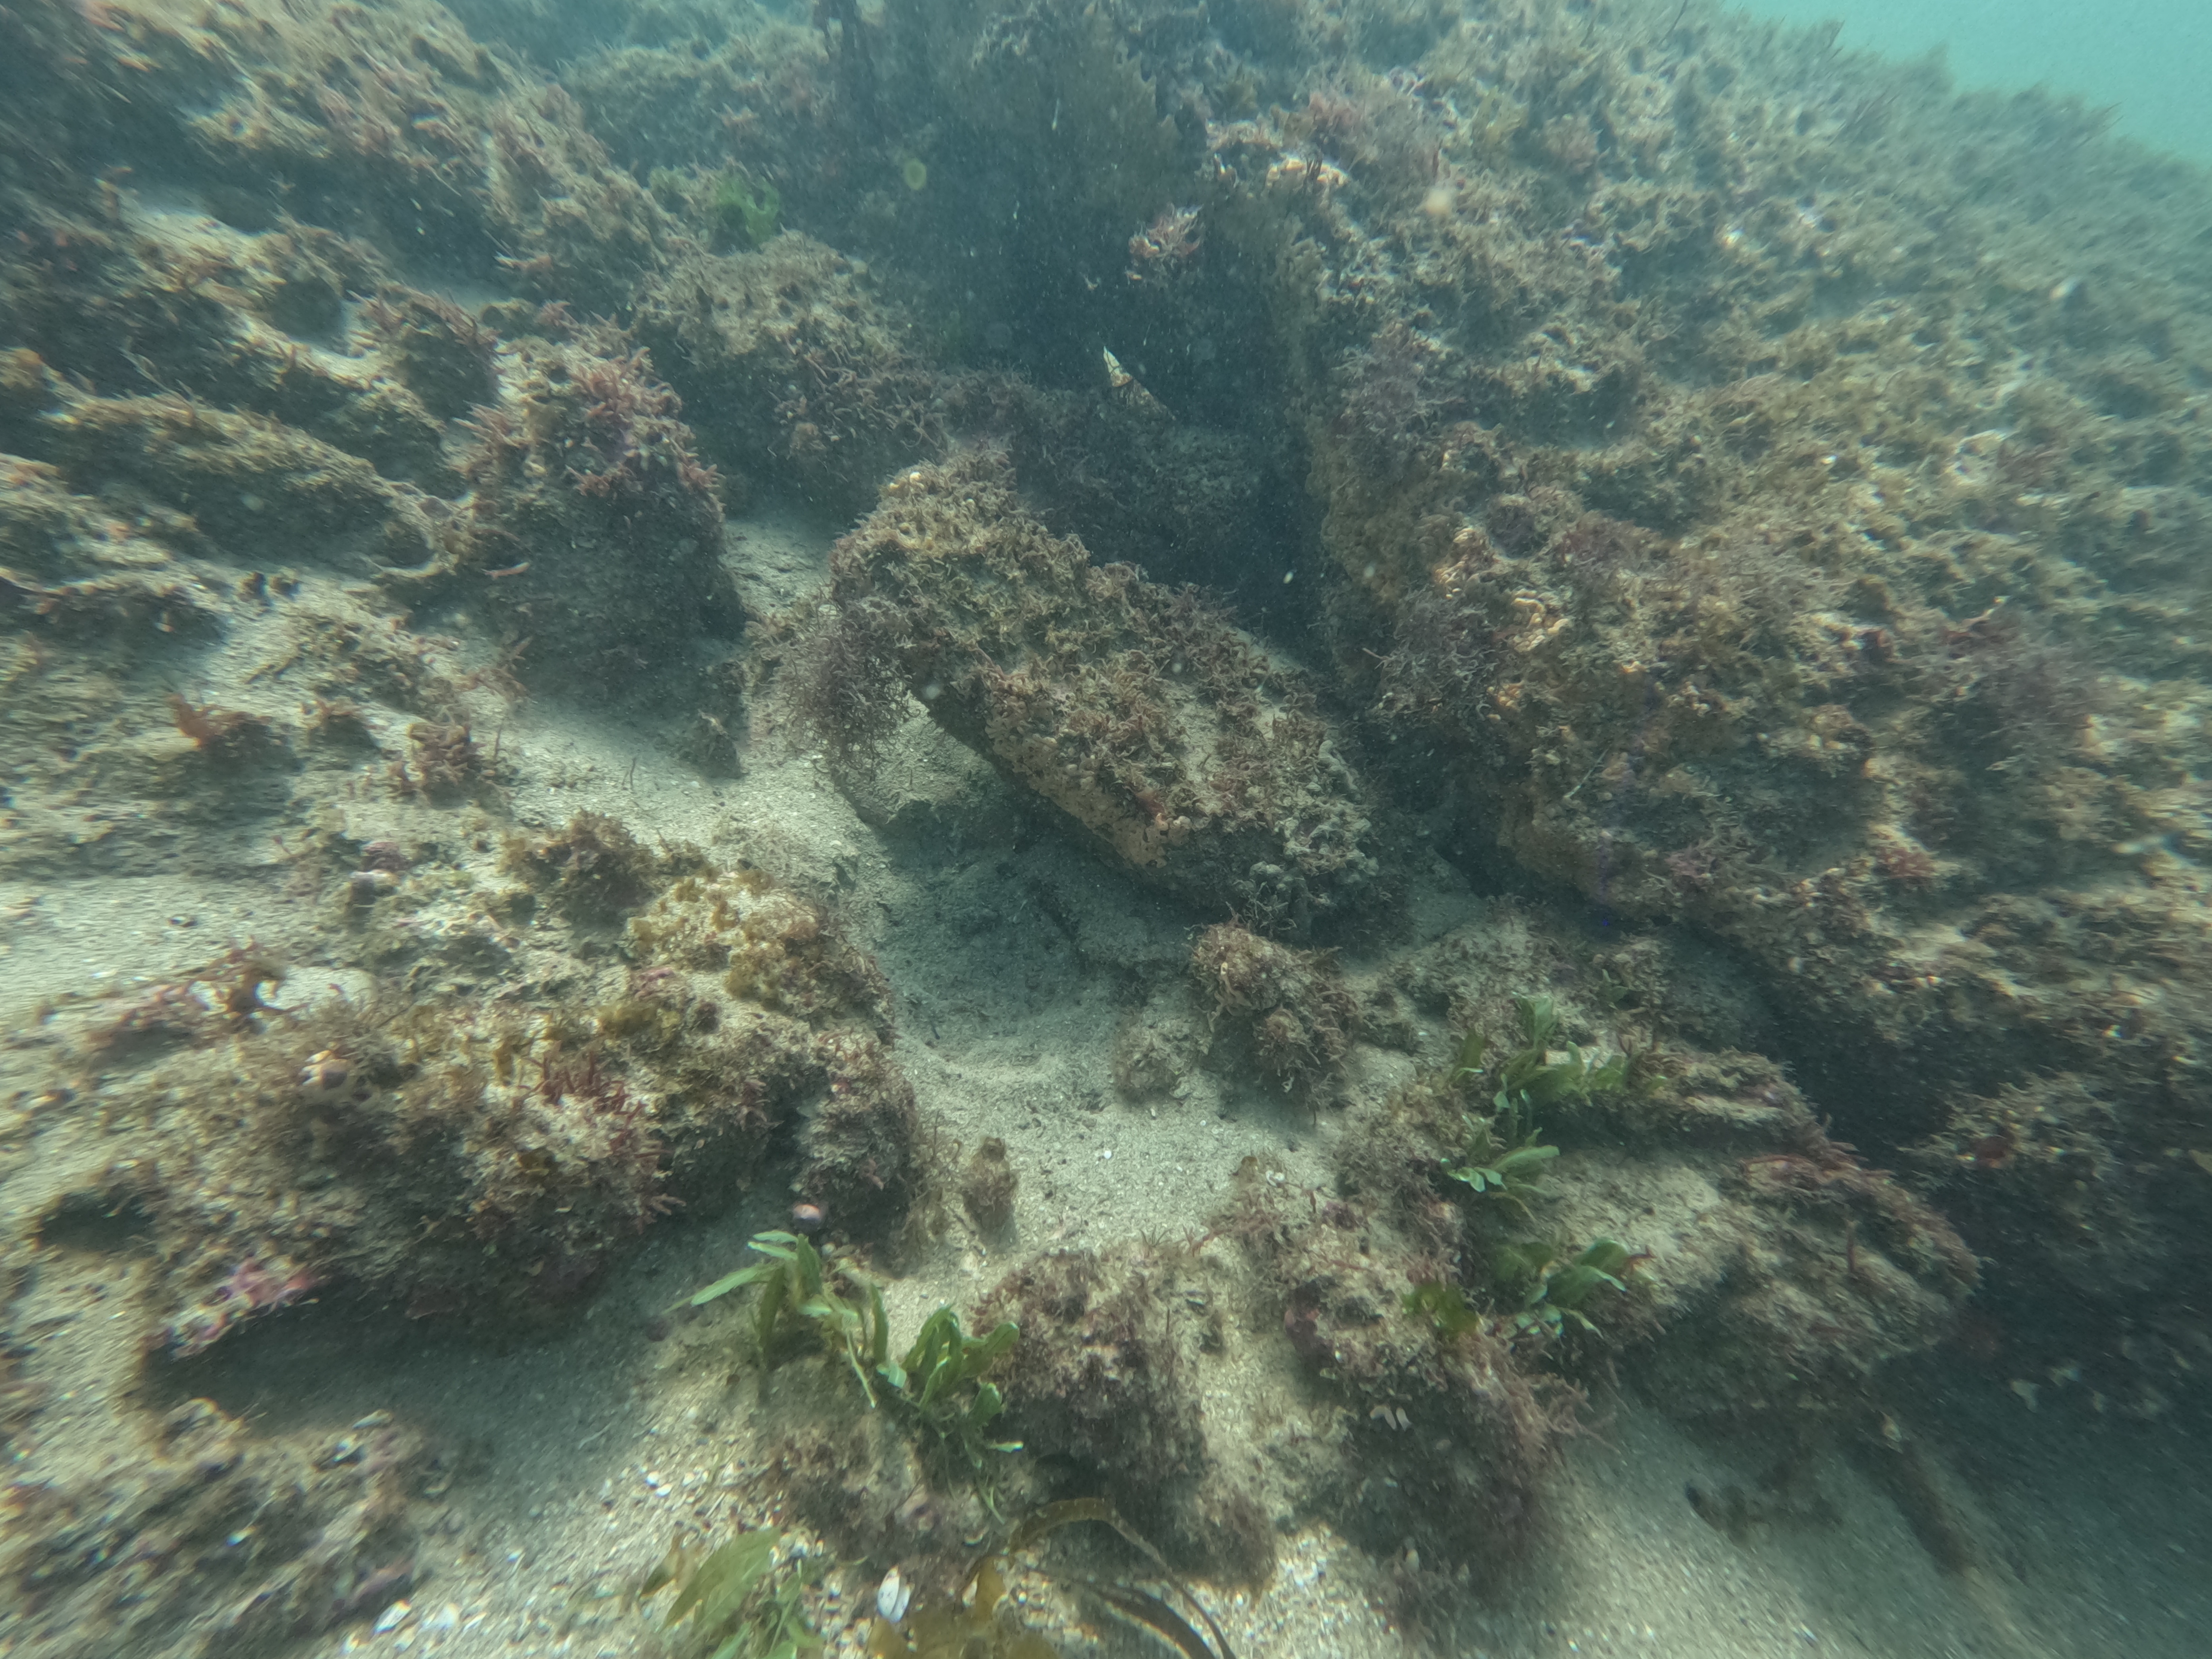

Supplement: Supplementary file 1540 [file G0027866.pdf › Ocean1/G0027866.pdf]

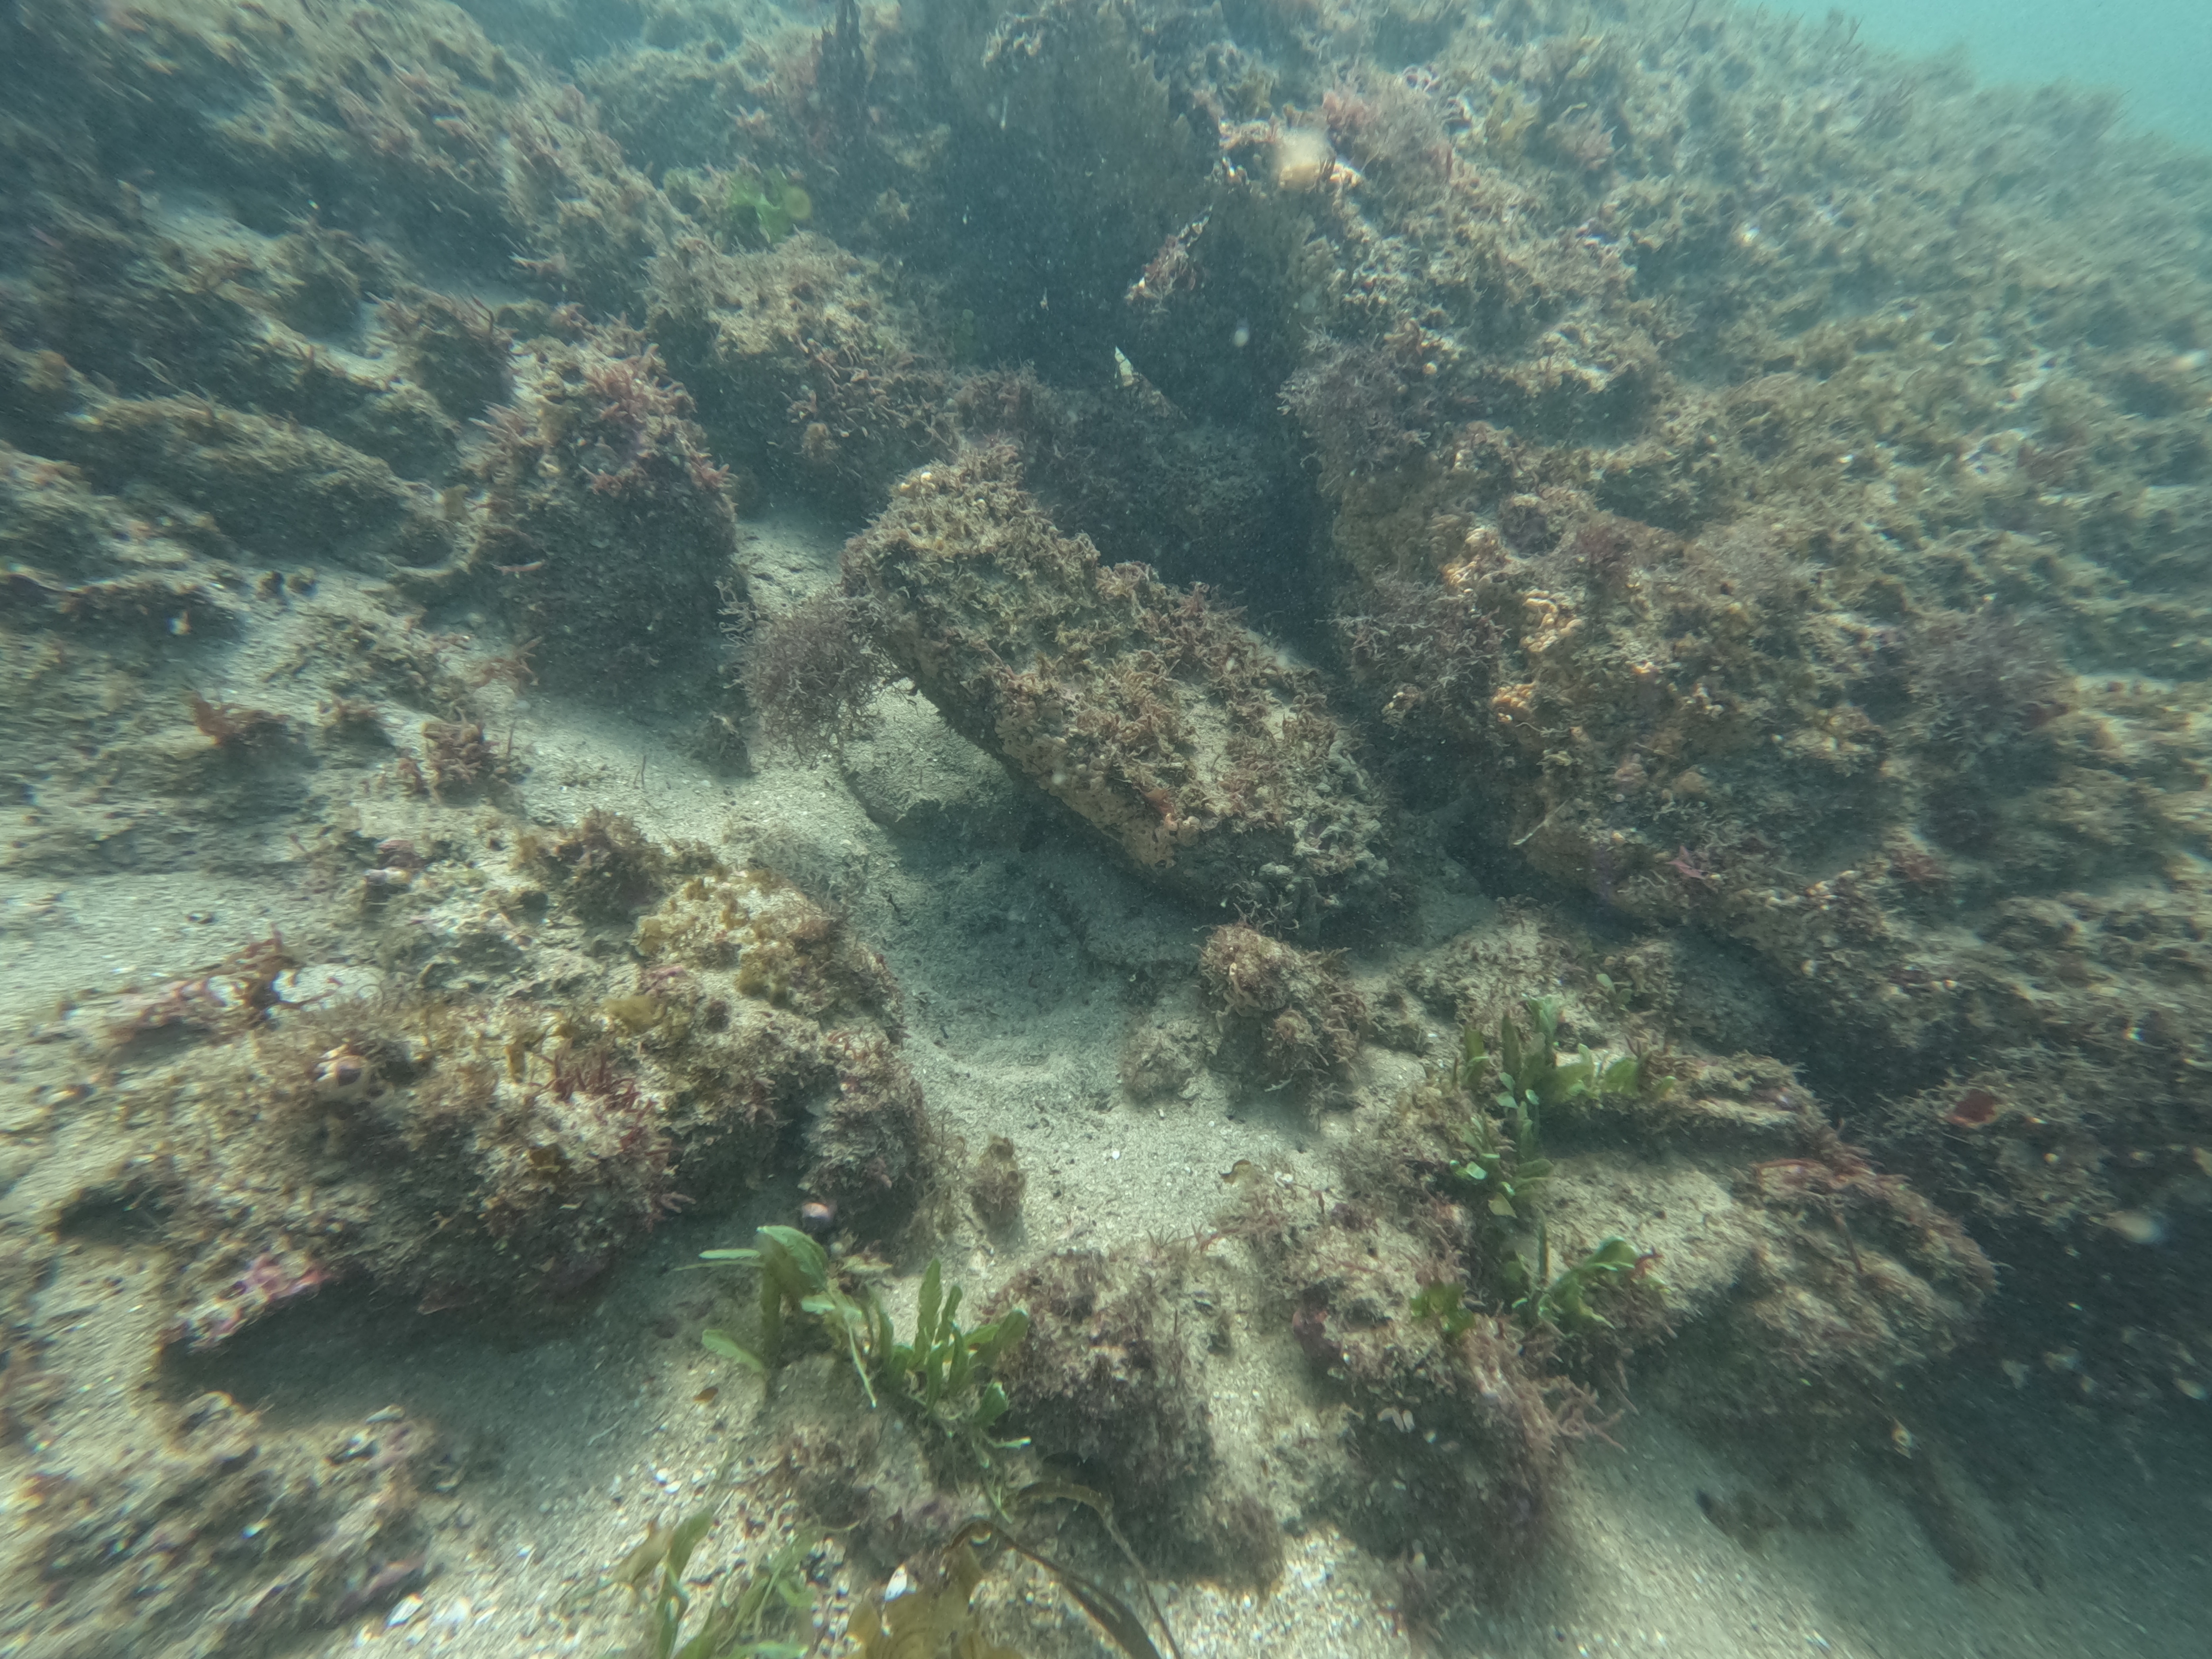

Supplement: Supplementary file 1541 [file G0027867.pdf › Ocean1/G0027867.pdf]

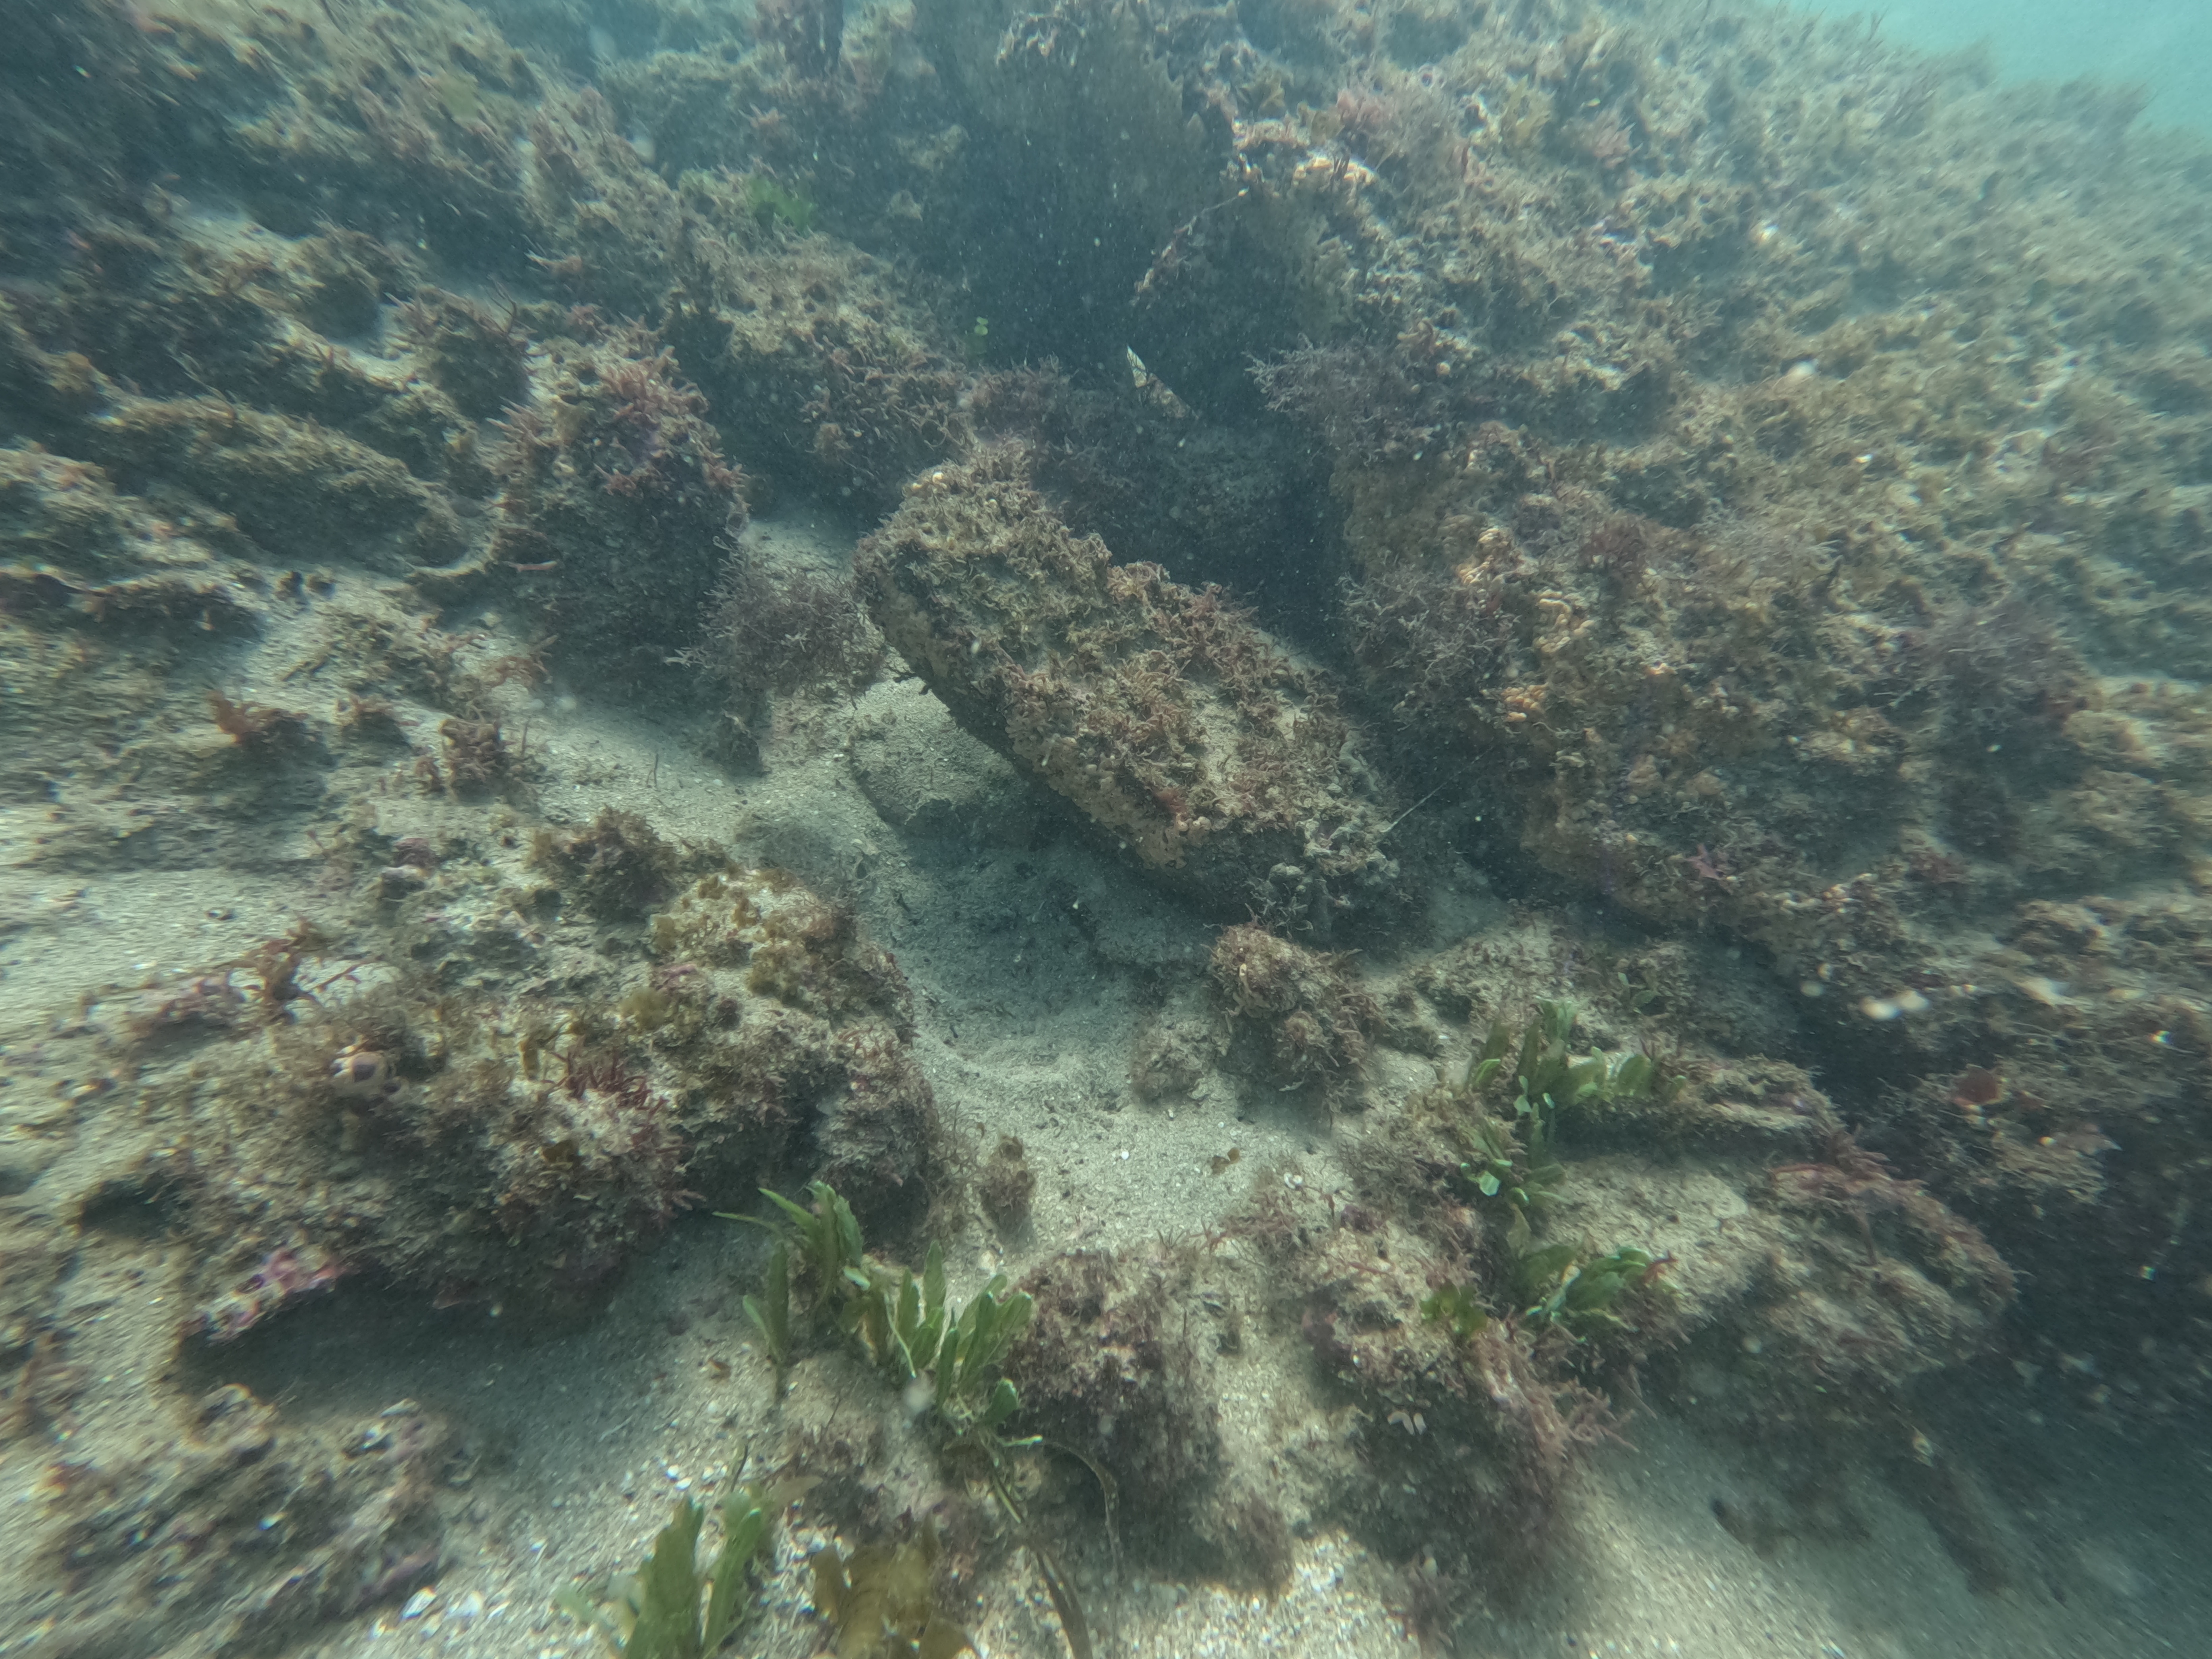

Supplement: Supplementary file 1542 [file G0027868.pdf › Ocean1/G0027868.pdf]

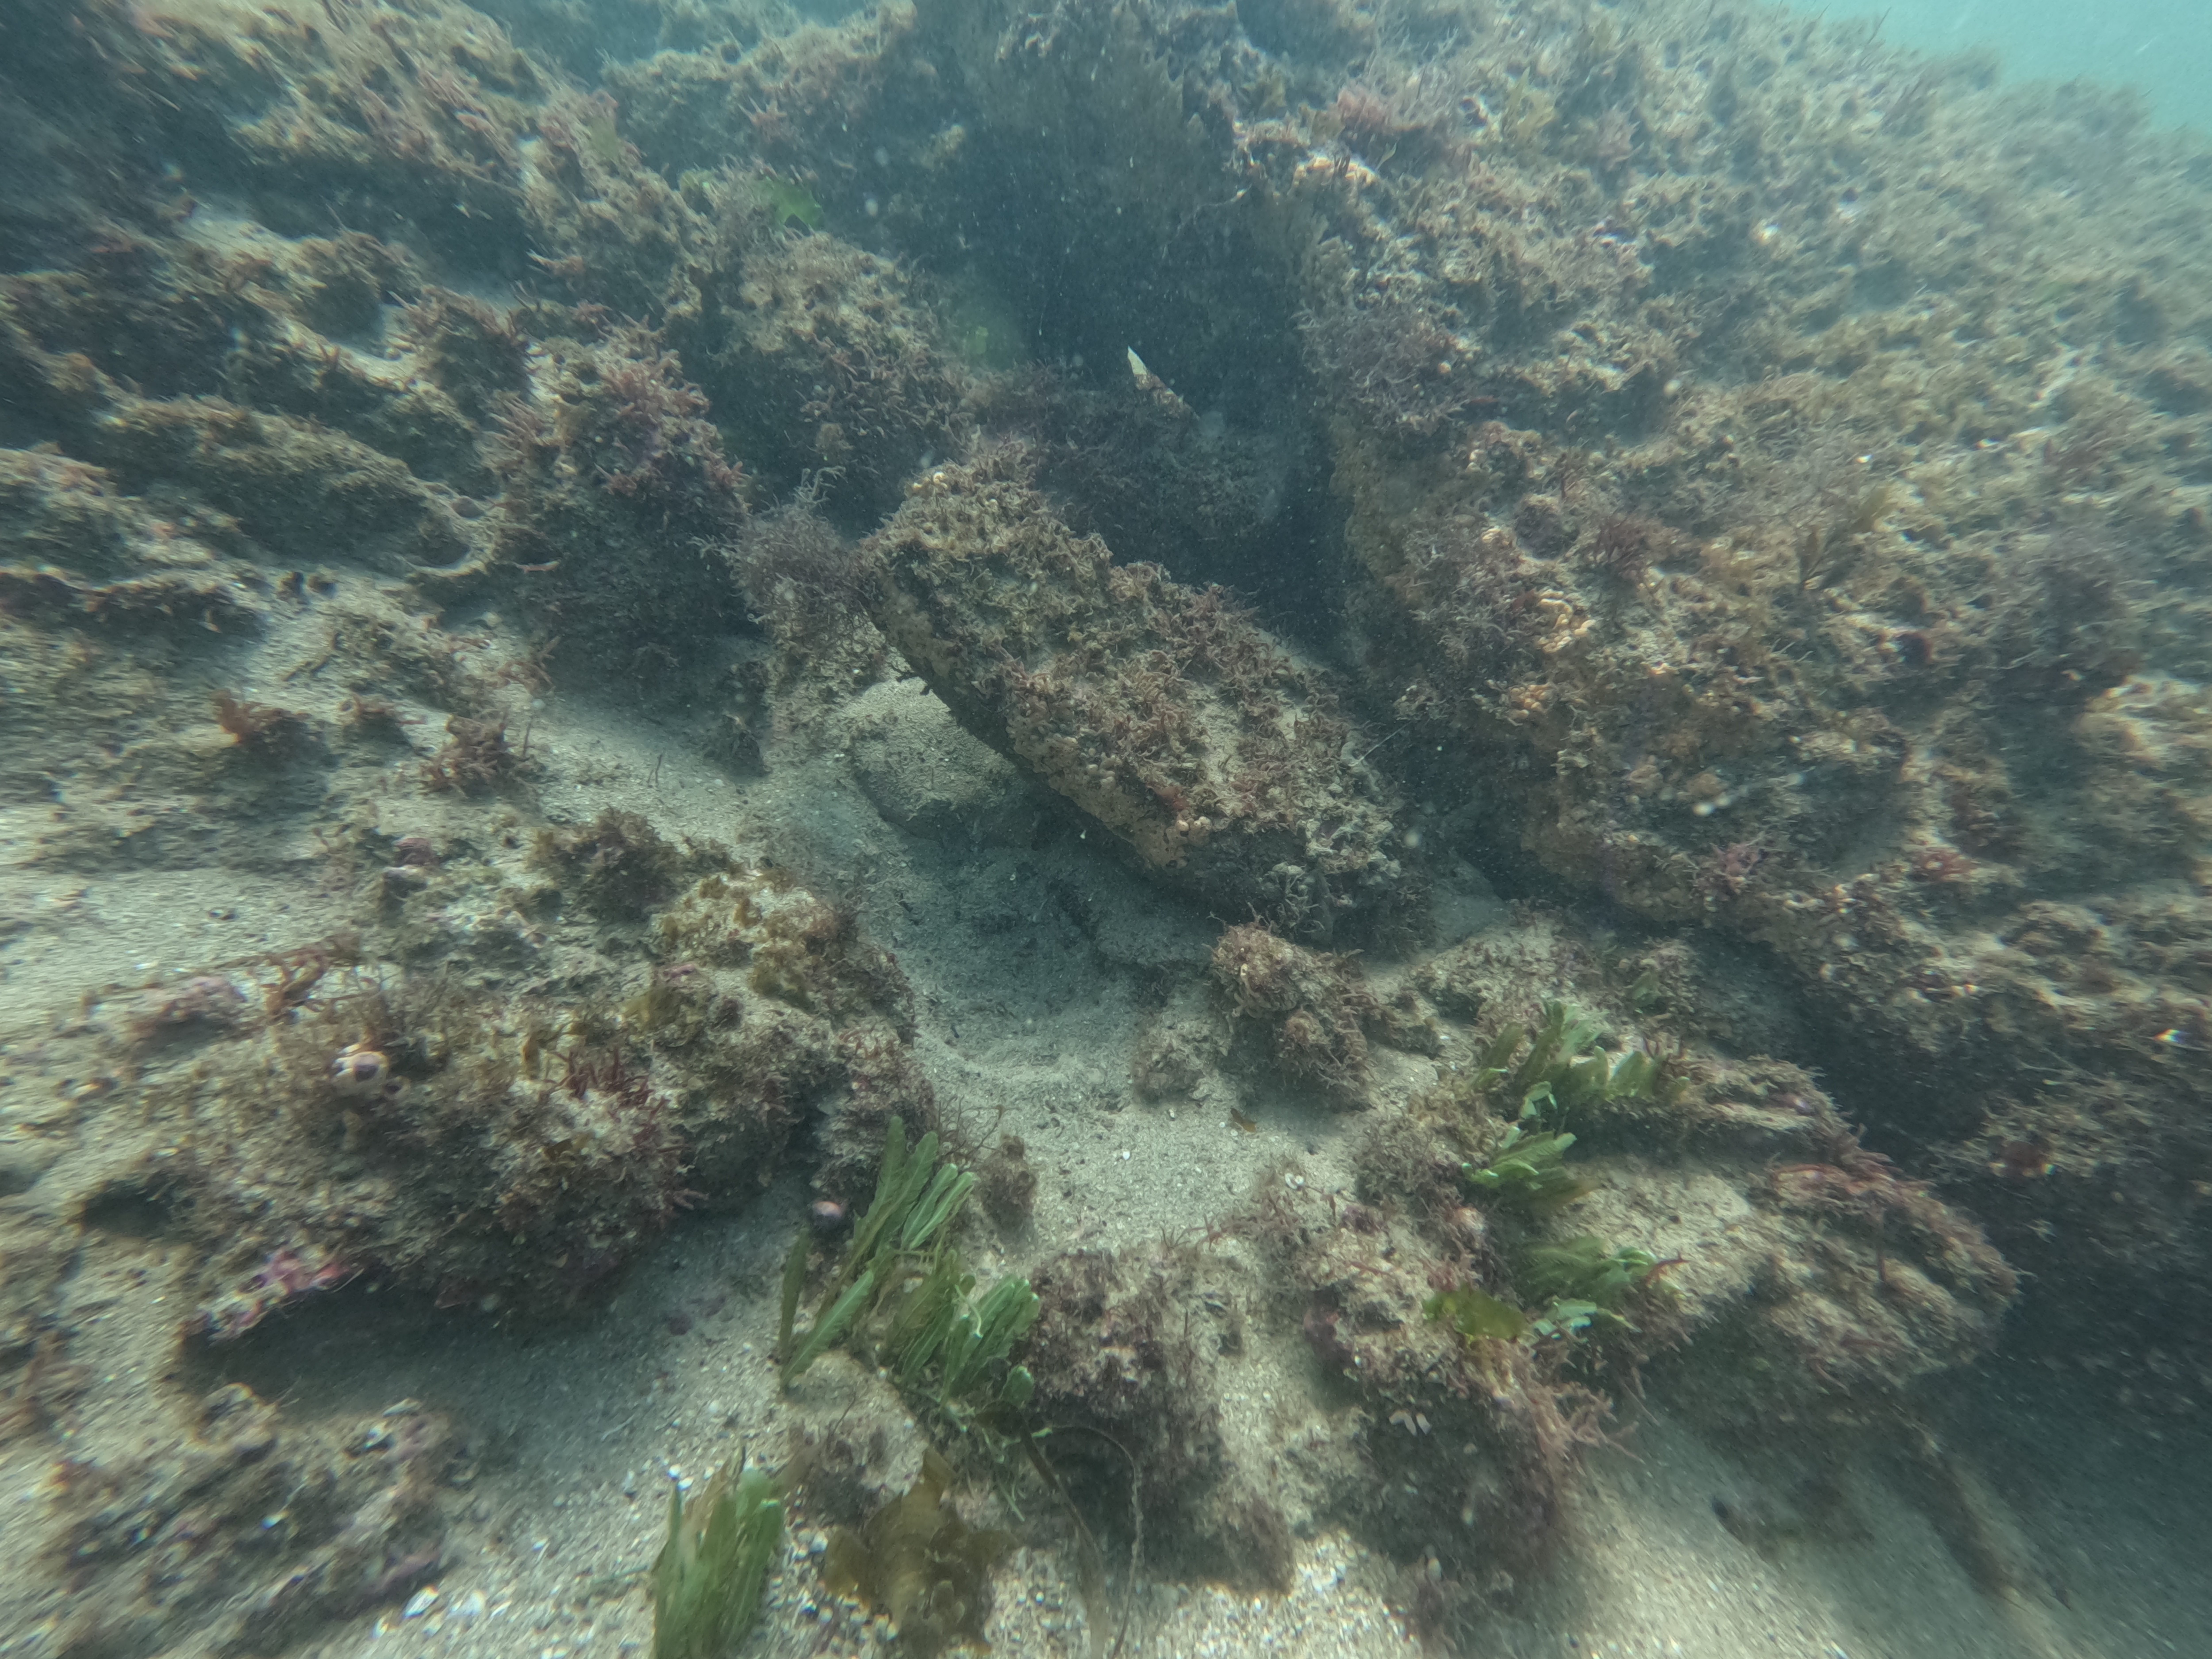

Supplement: Supplementary file 1543 [file G0027869.pdf › Ocean1/G0027869.pdf]

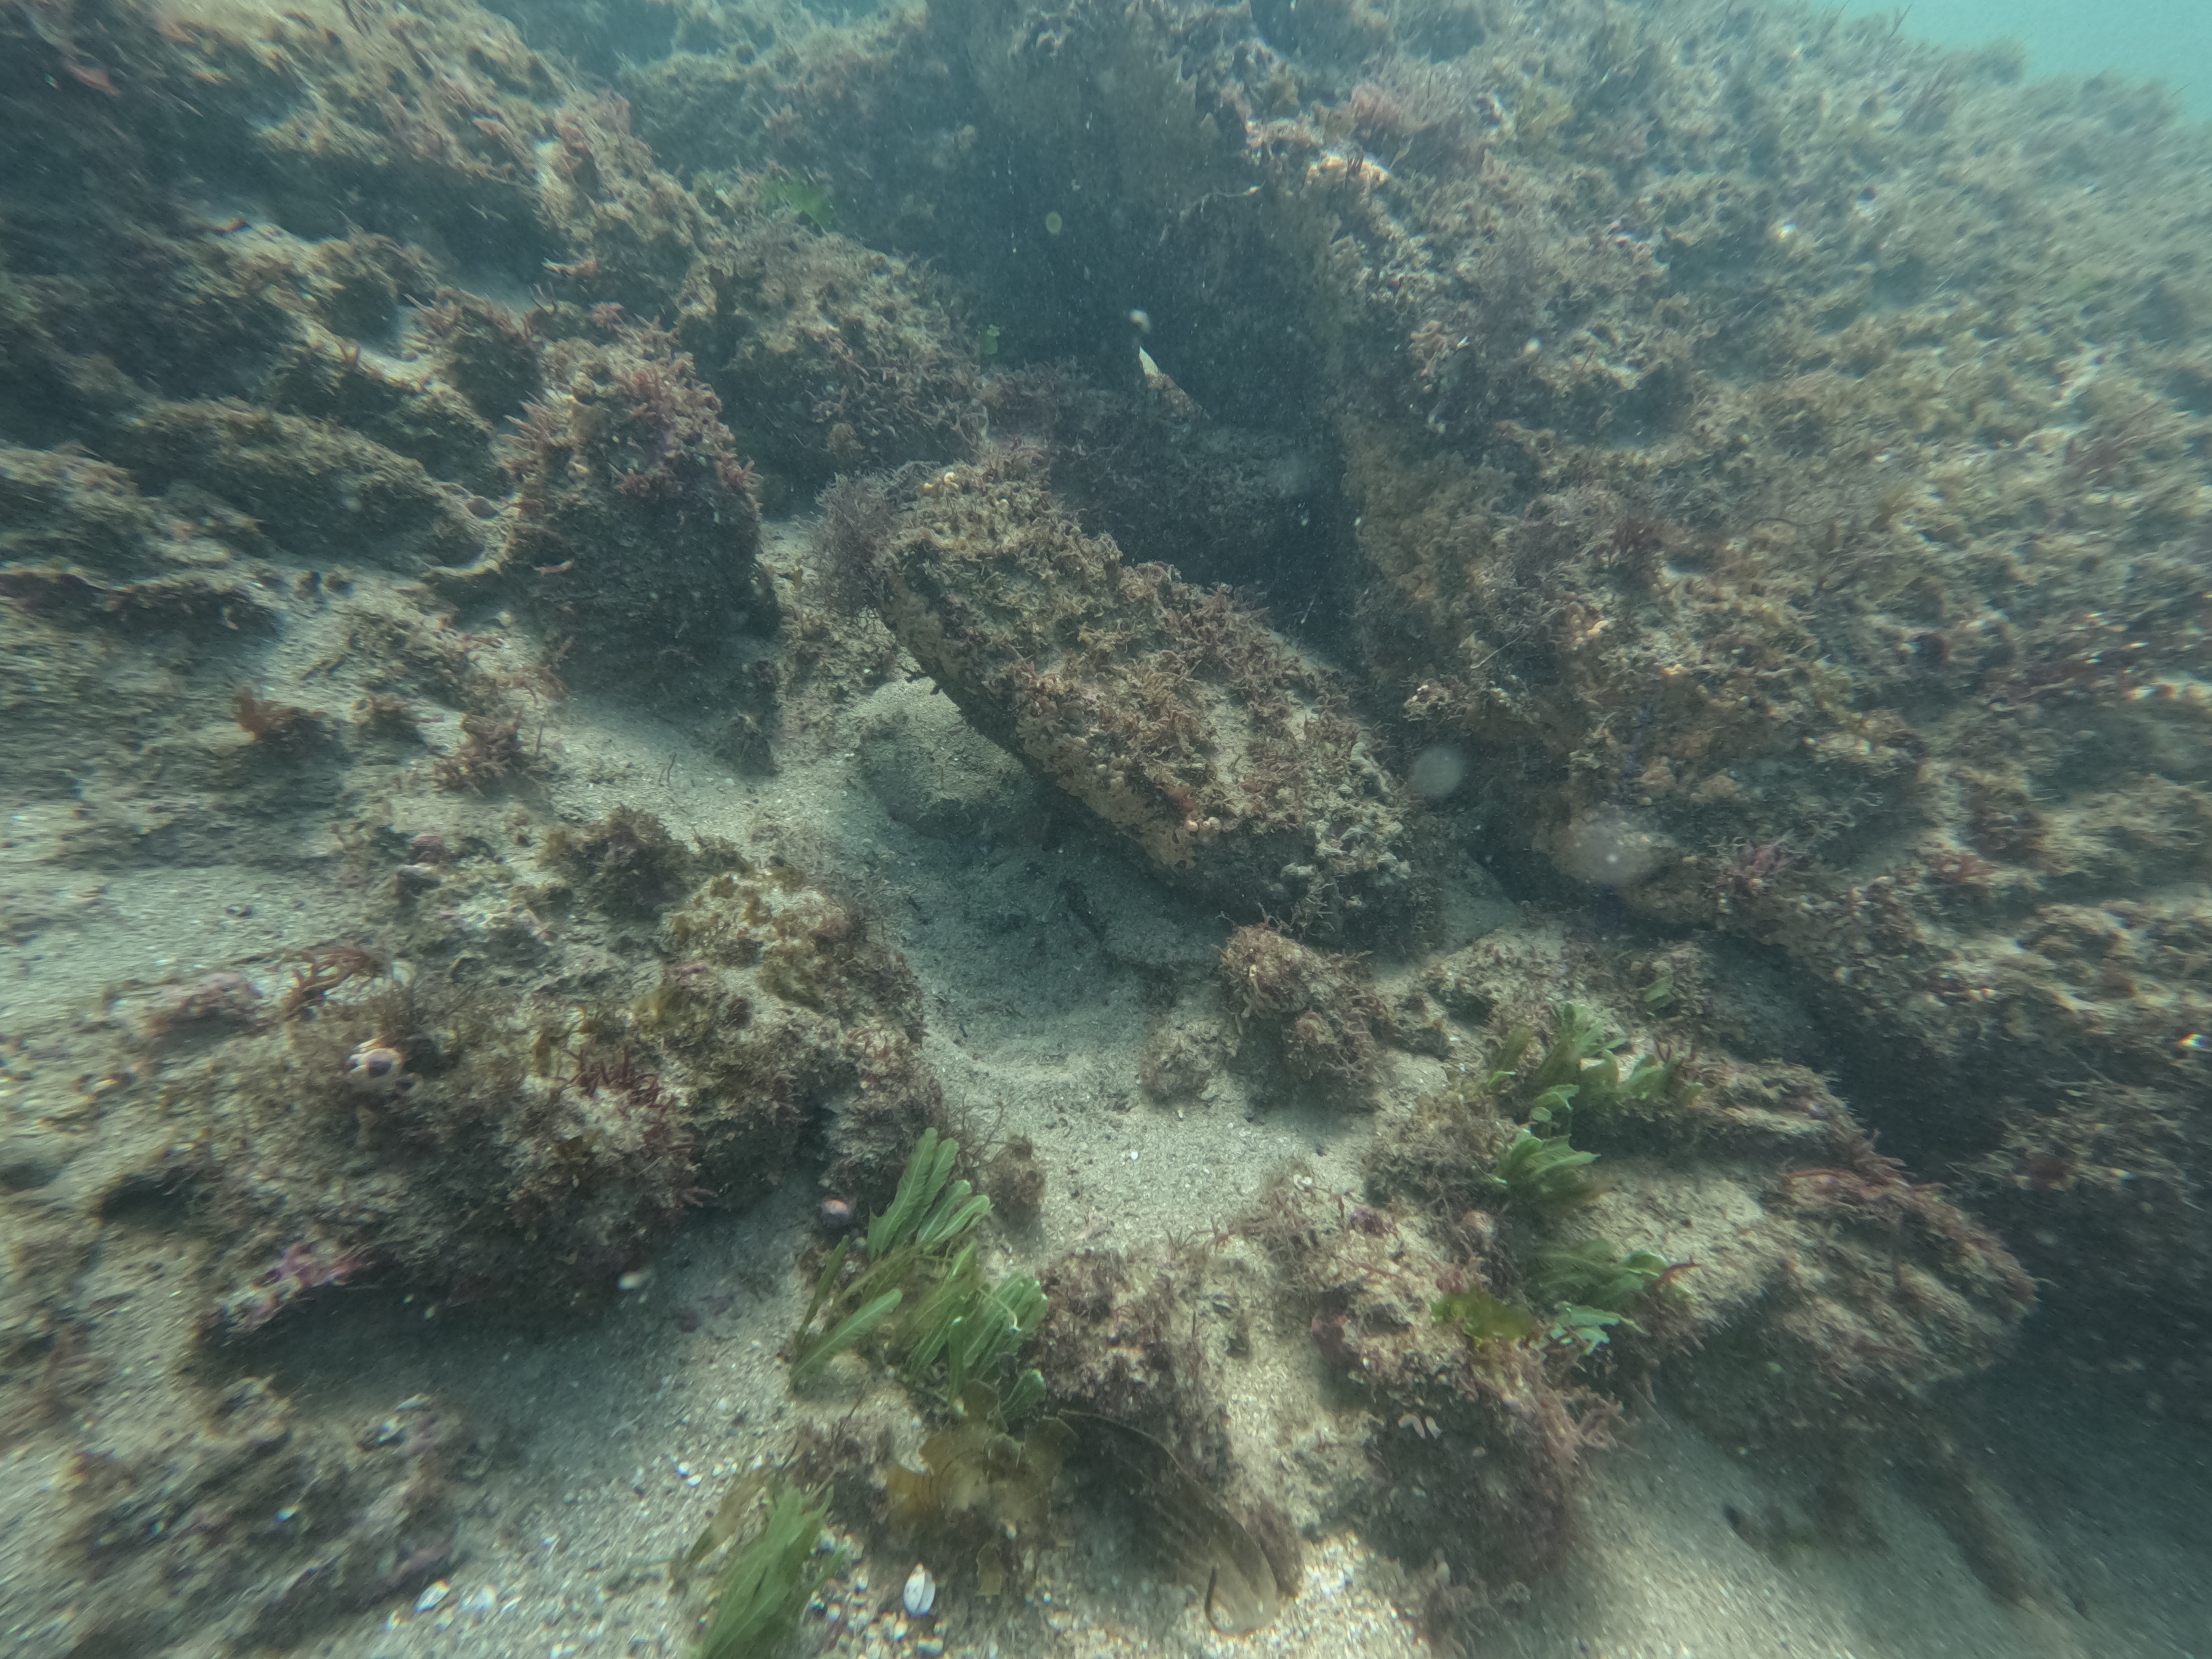

Supplement: Supplementary file 1544 [file G0027870.pdf › Ocean1/G0027870.pdf]

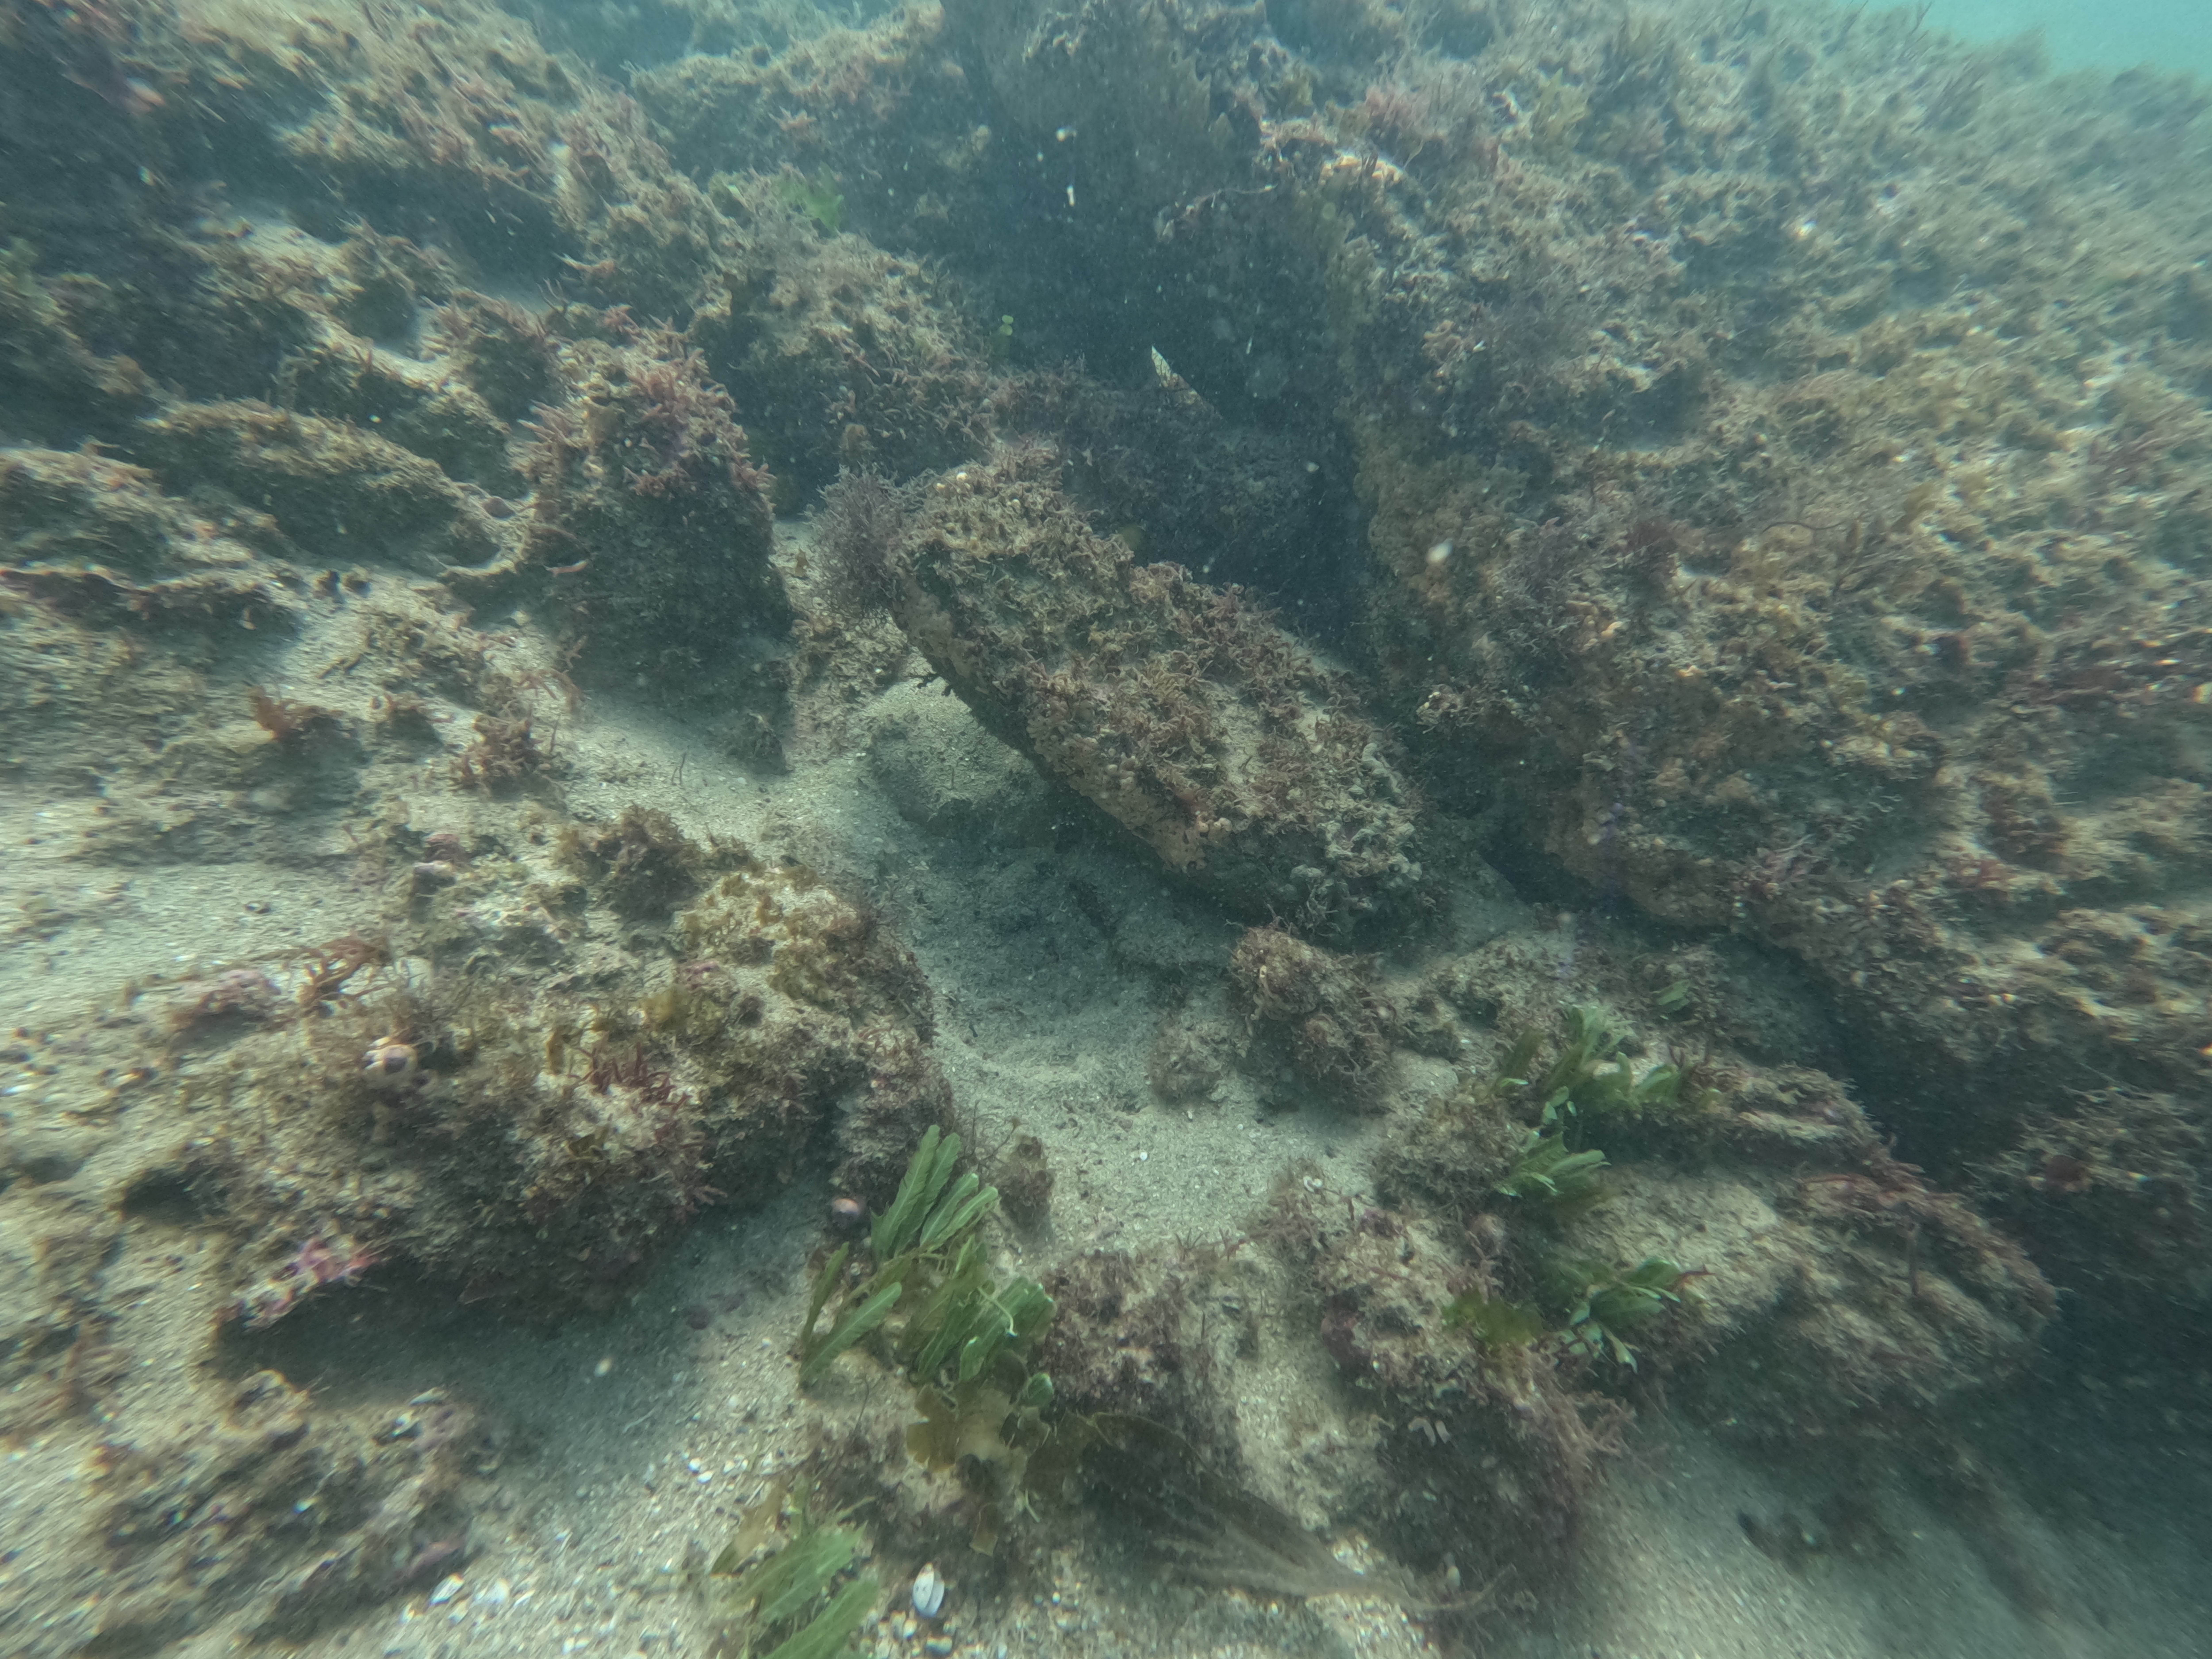

Supplement: Supplementary file 1545 [file G0027871.pdf › Ocean1/G0027871.pdf]

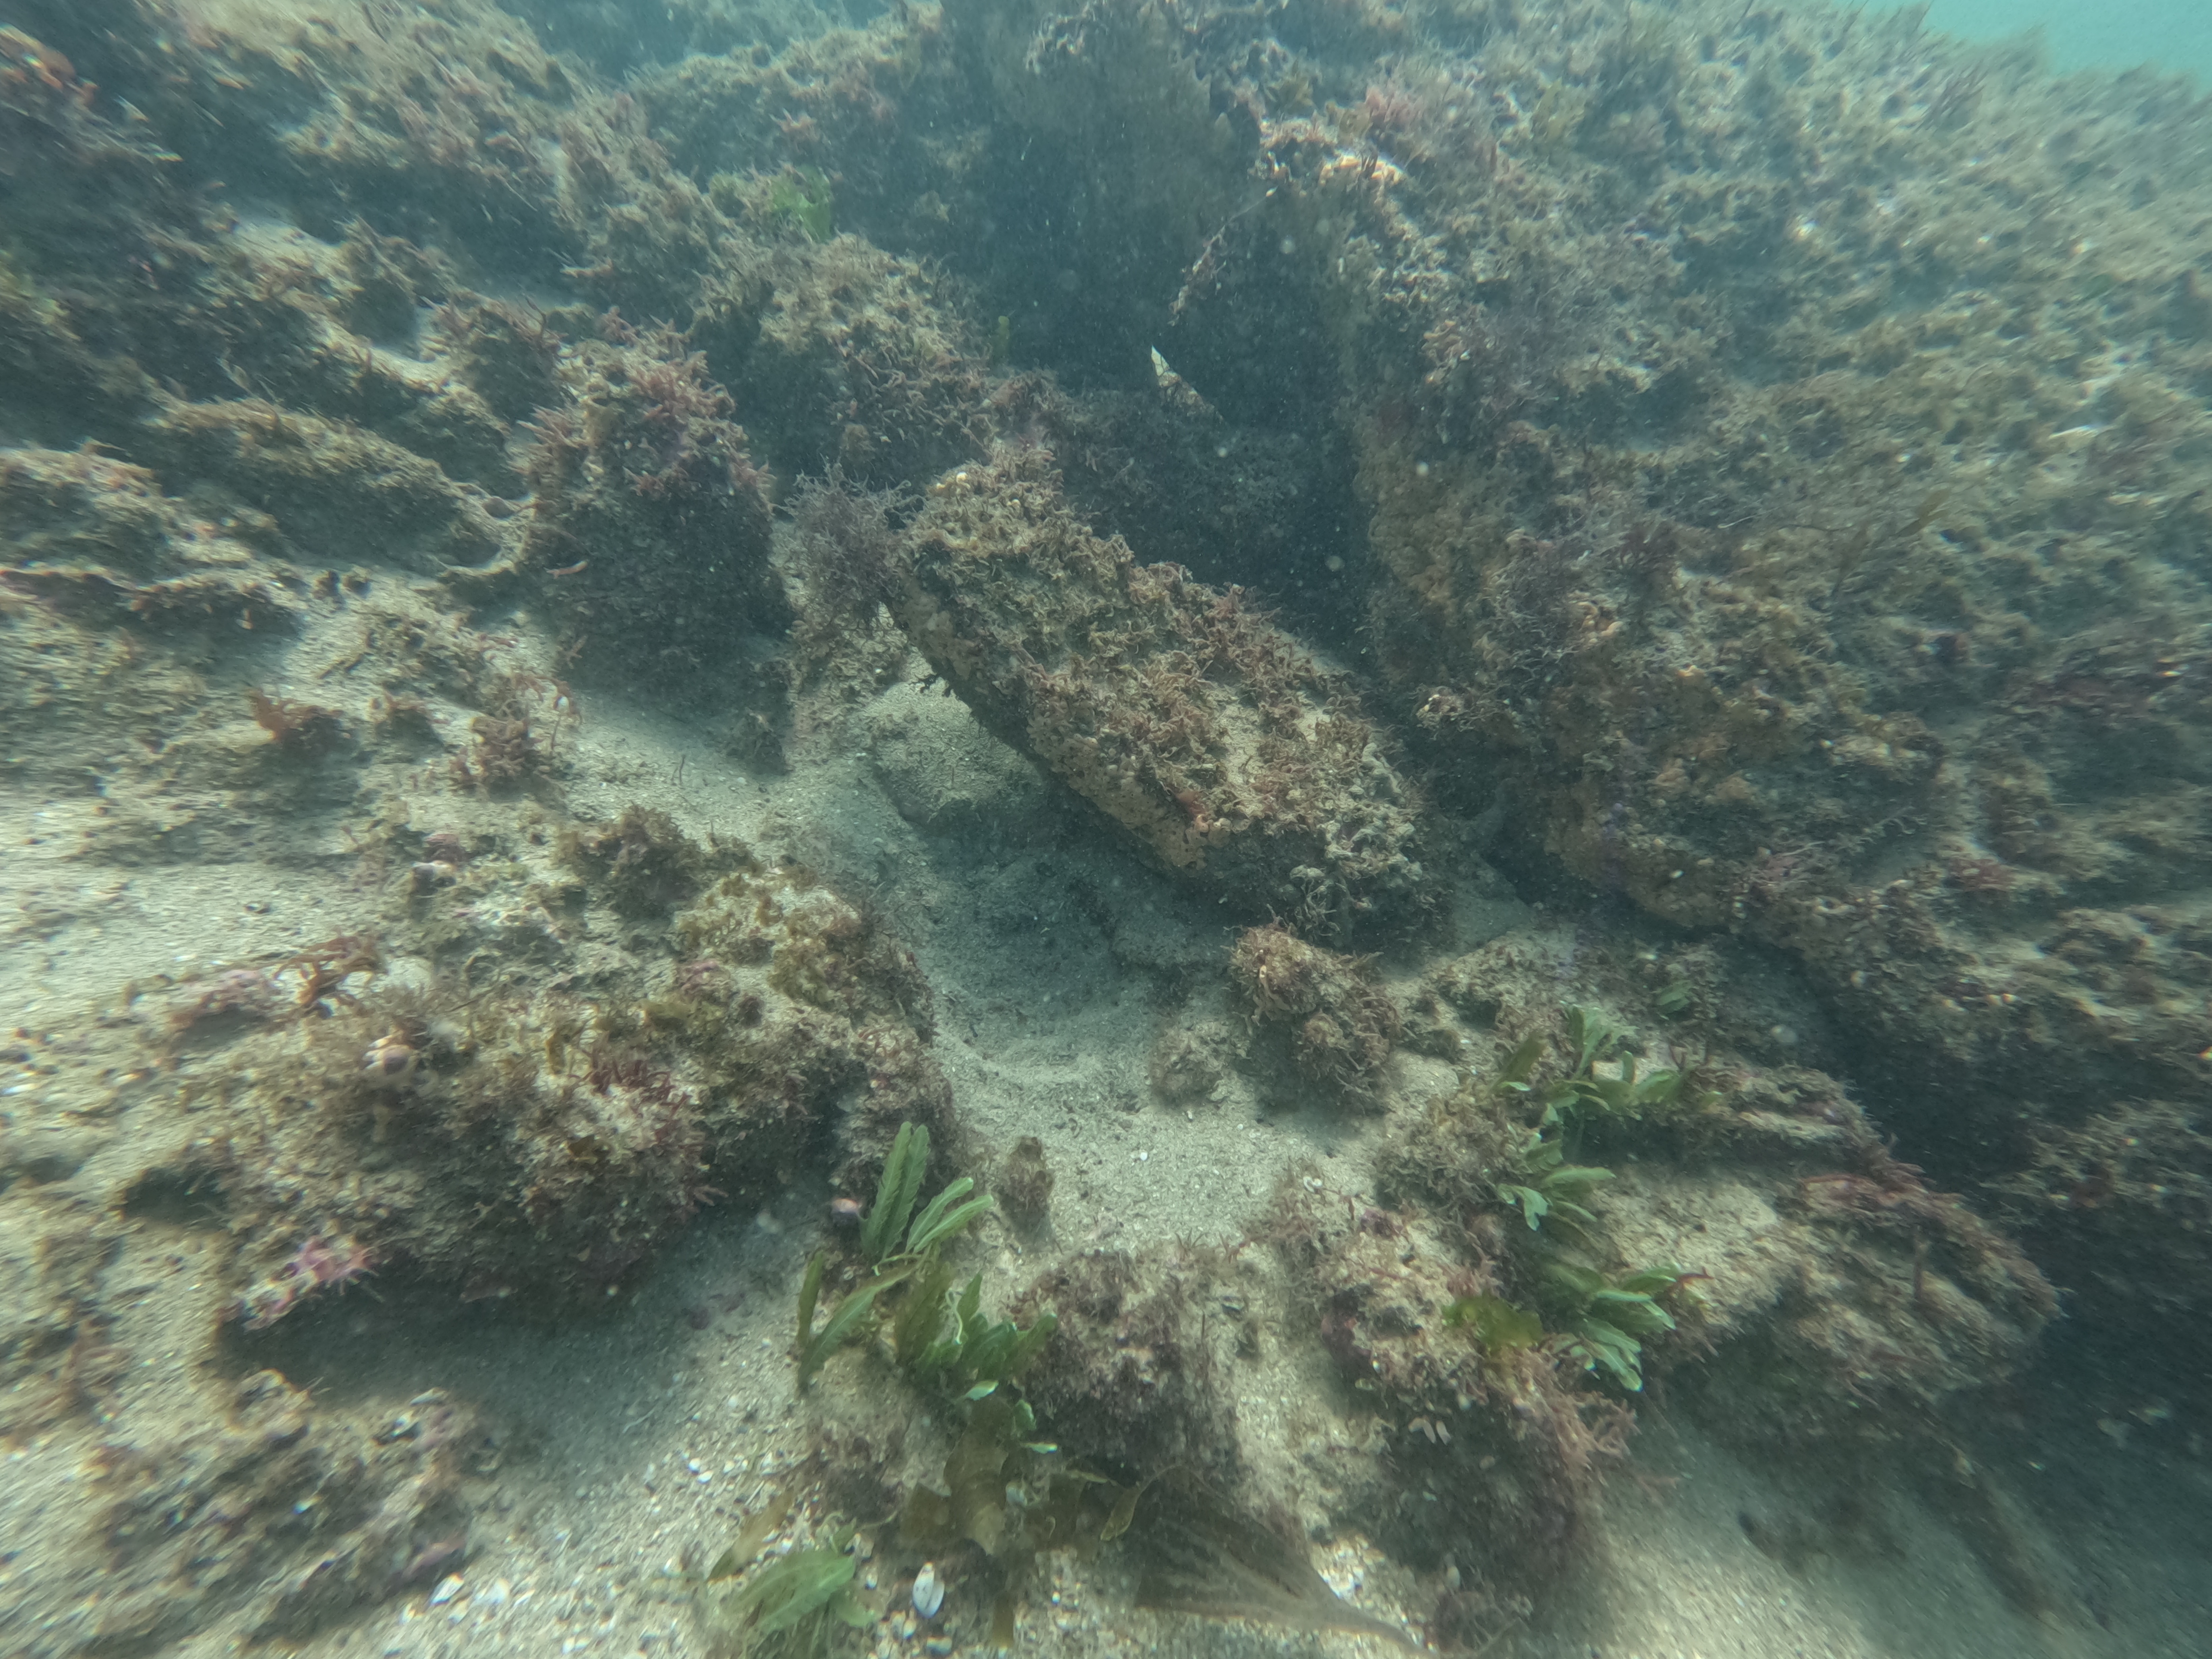

Supplement: Supplementary file 1546 [file G0027872.pdf › Ocean1/G0027872.pdf]

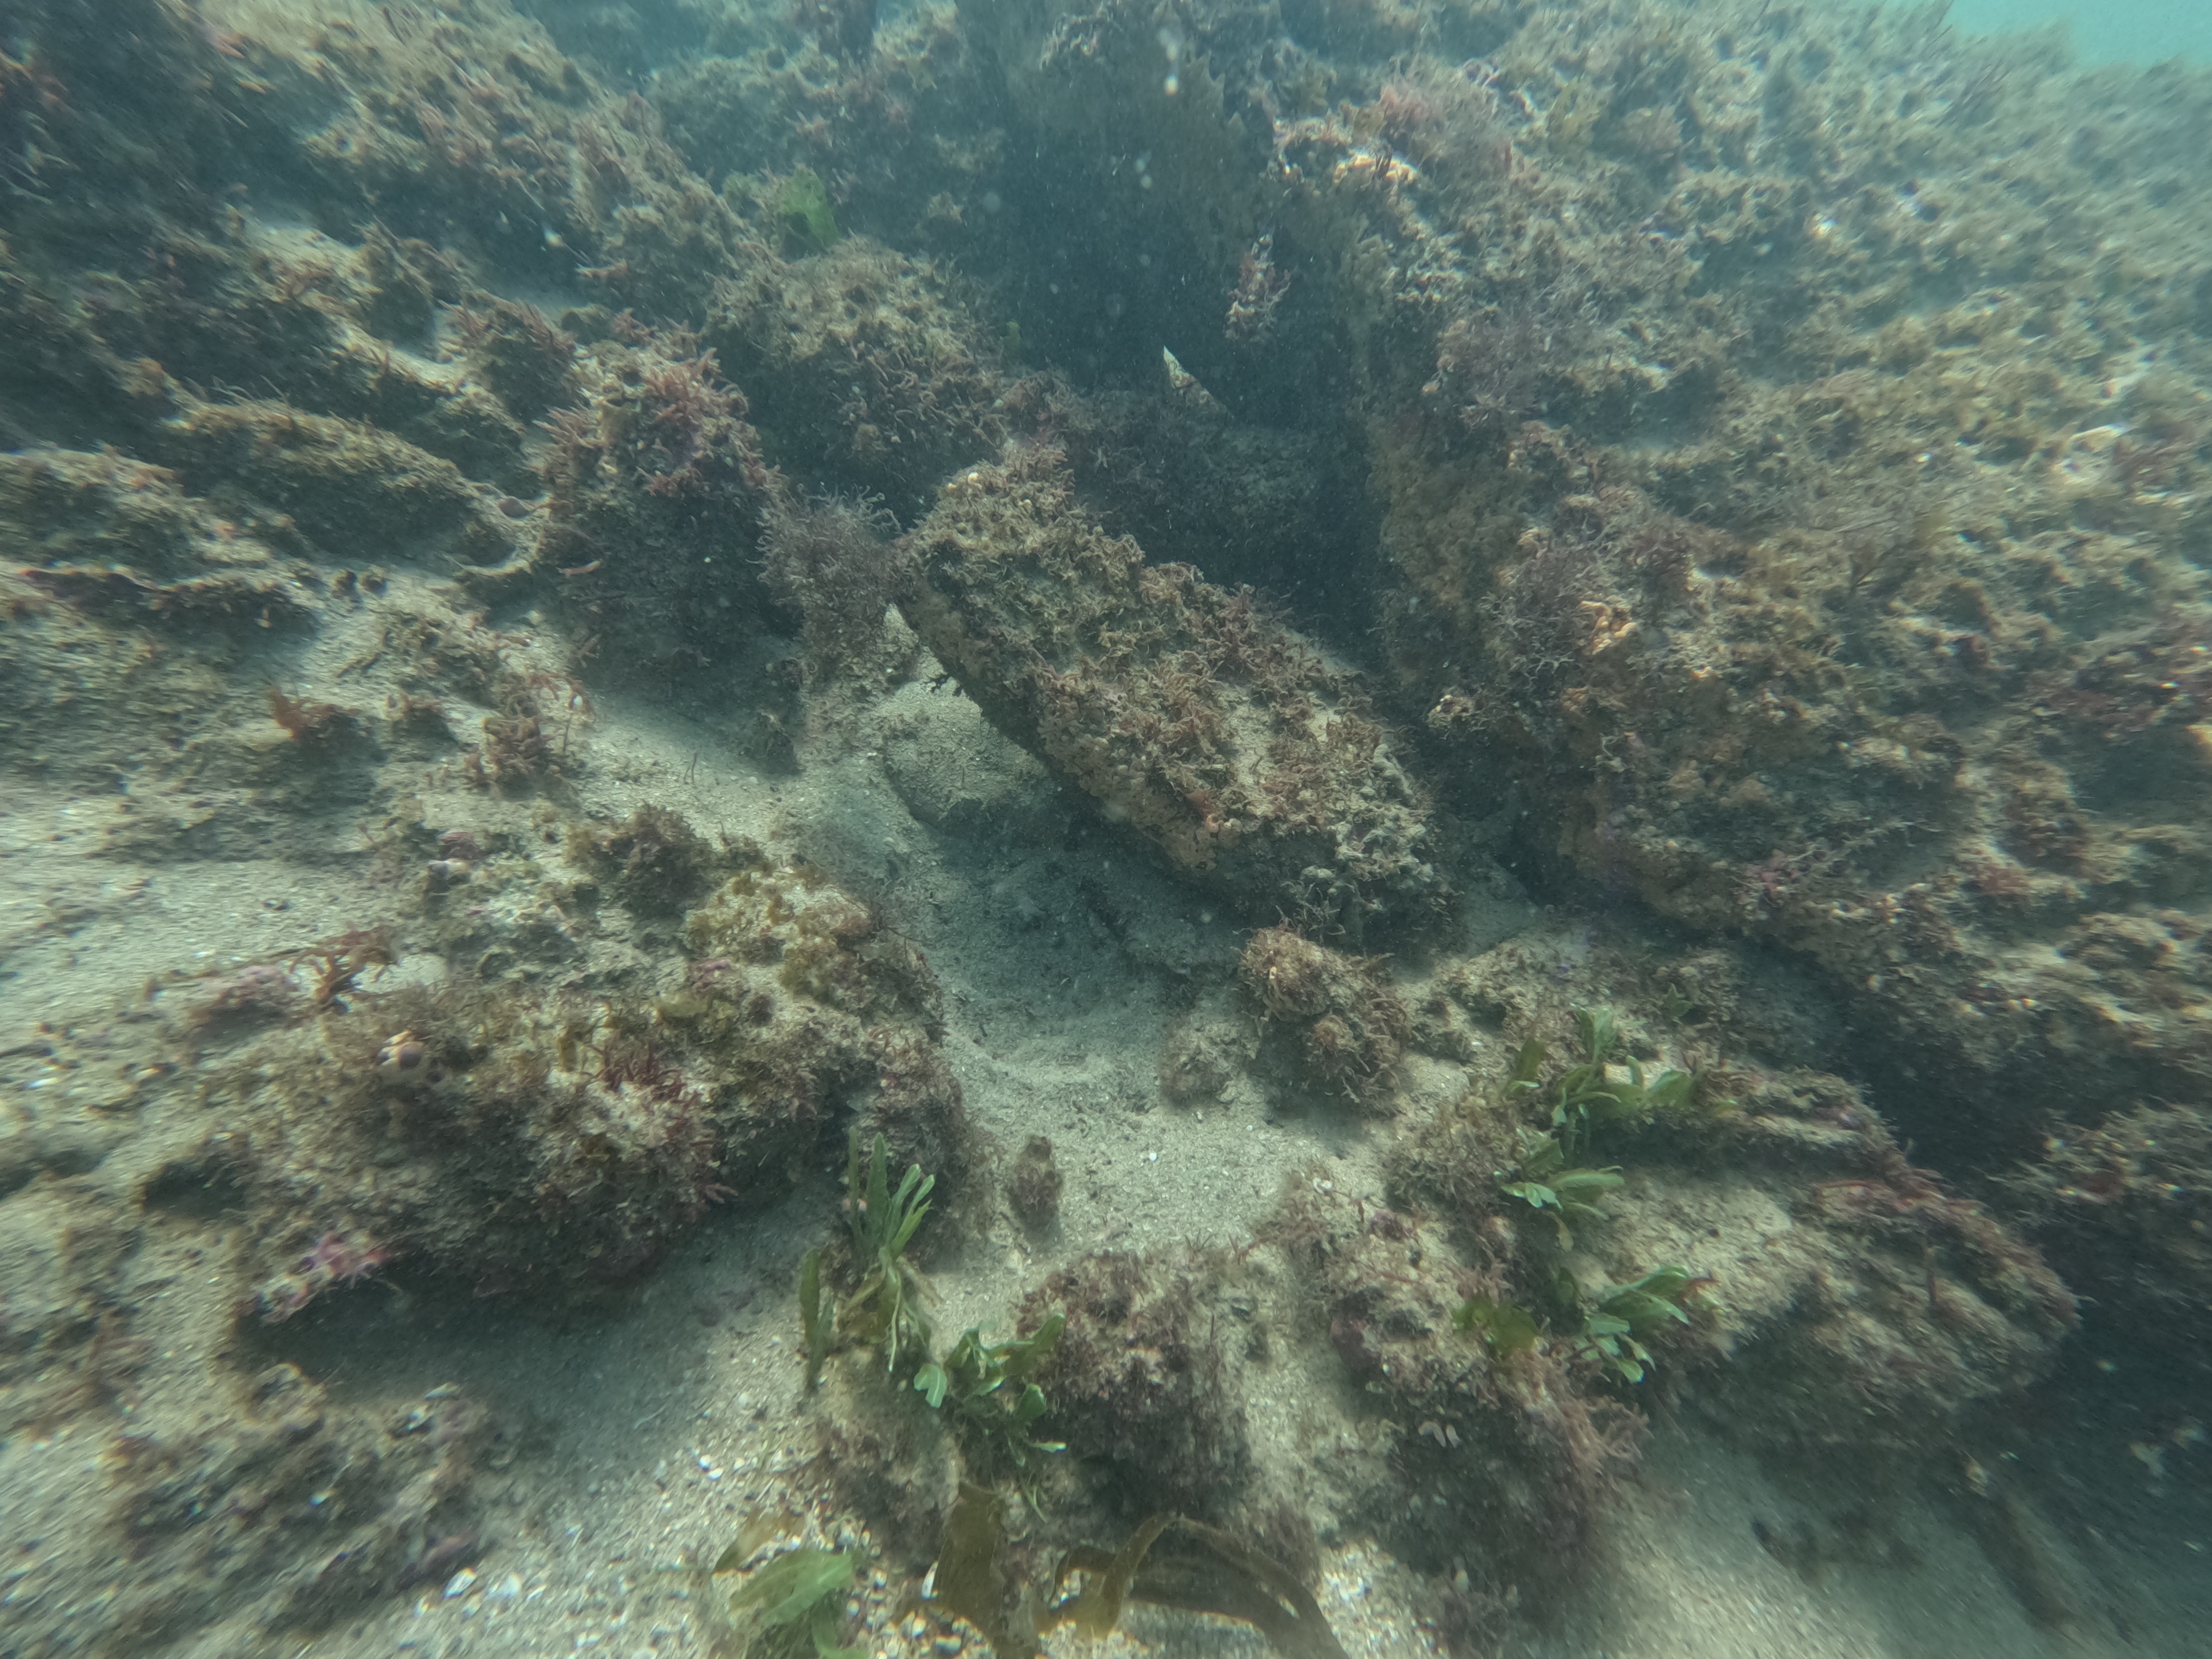

Supplement: Supplementary file 1547 [file G0027873.pdf › Ocean1/G0027873.pdf]

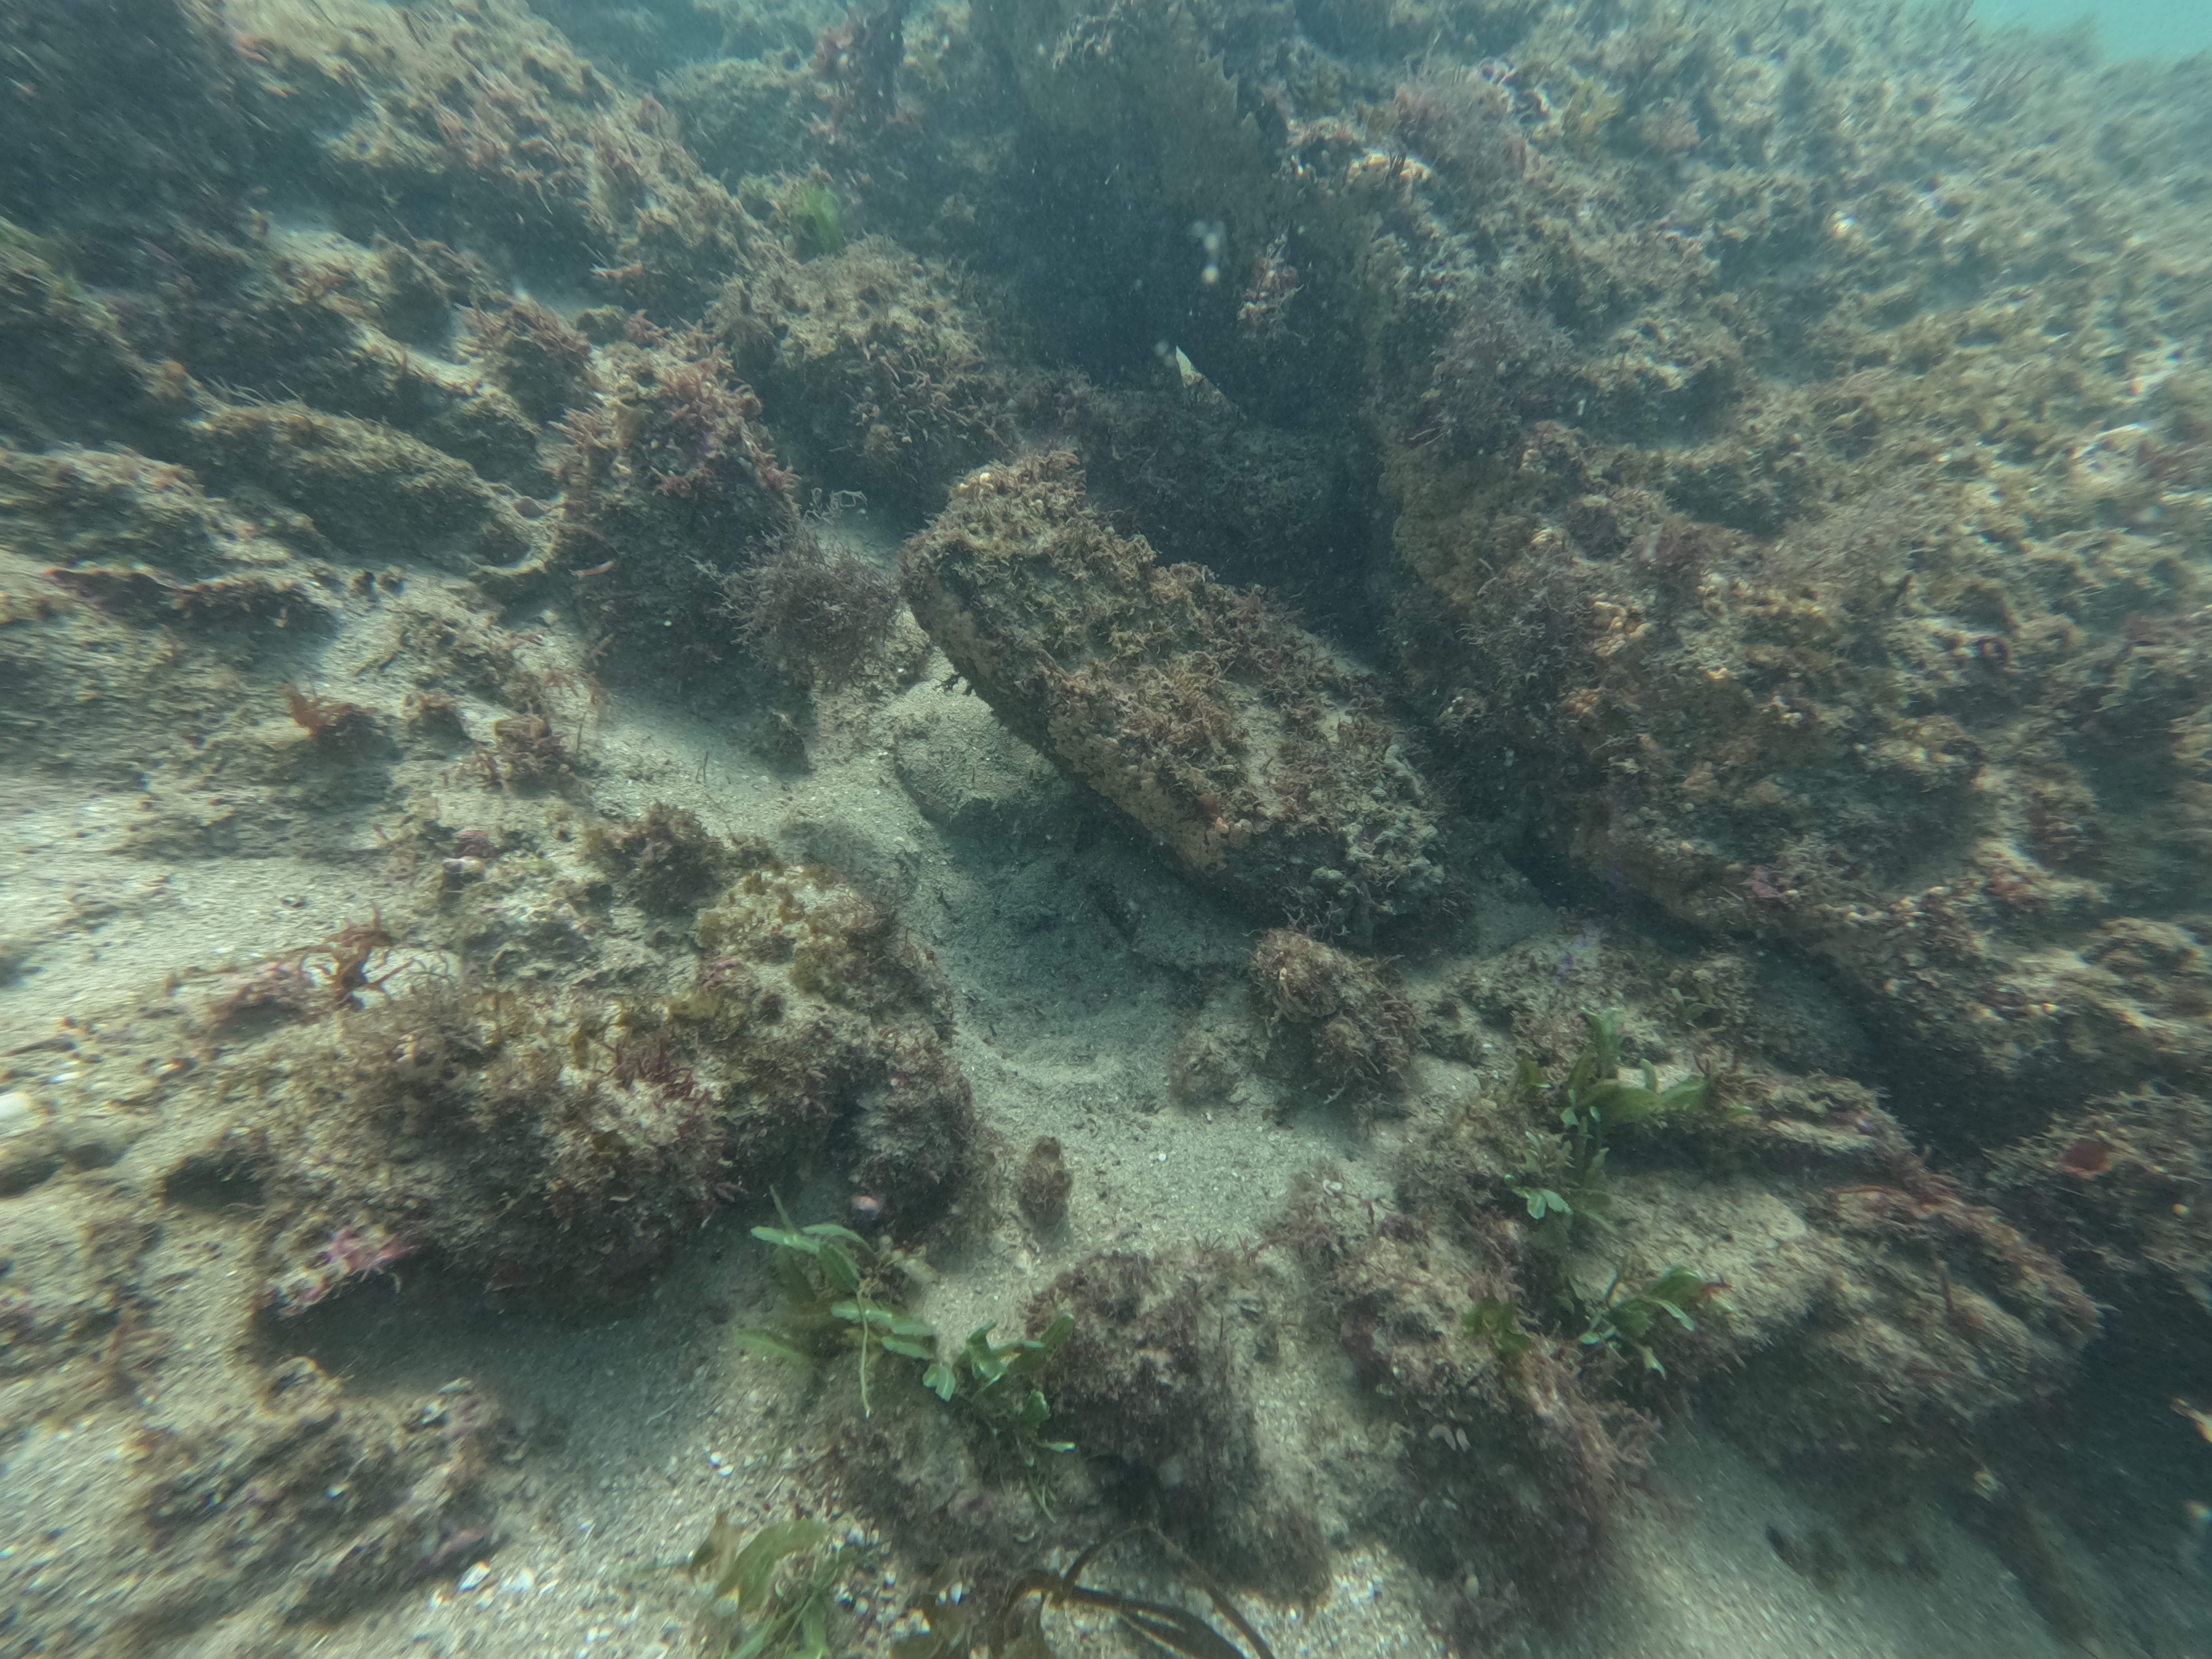

Supplement: Supplementary file 1548 [file G0027874.pdf › Ocean1/G0027874.pdf]

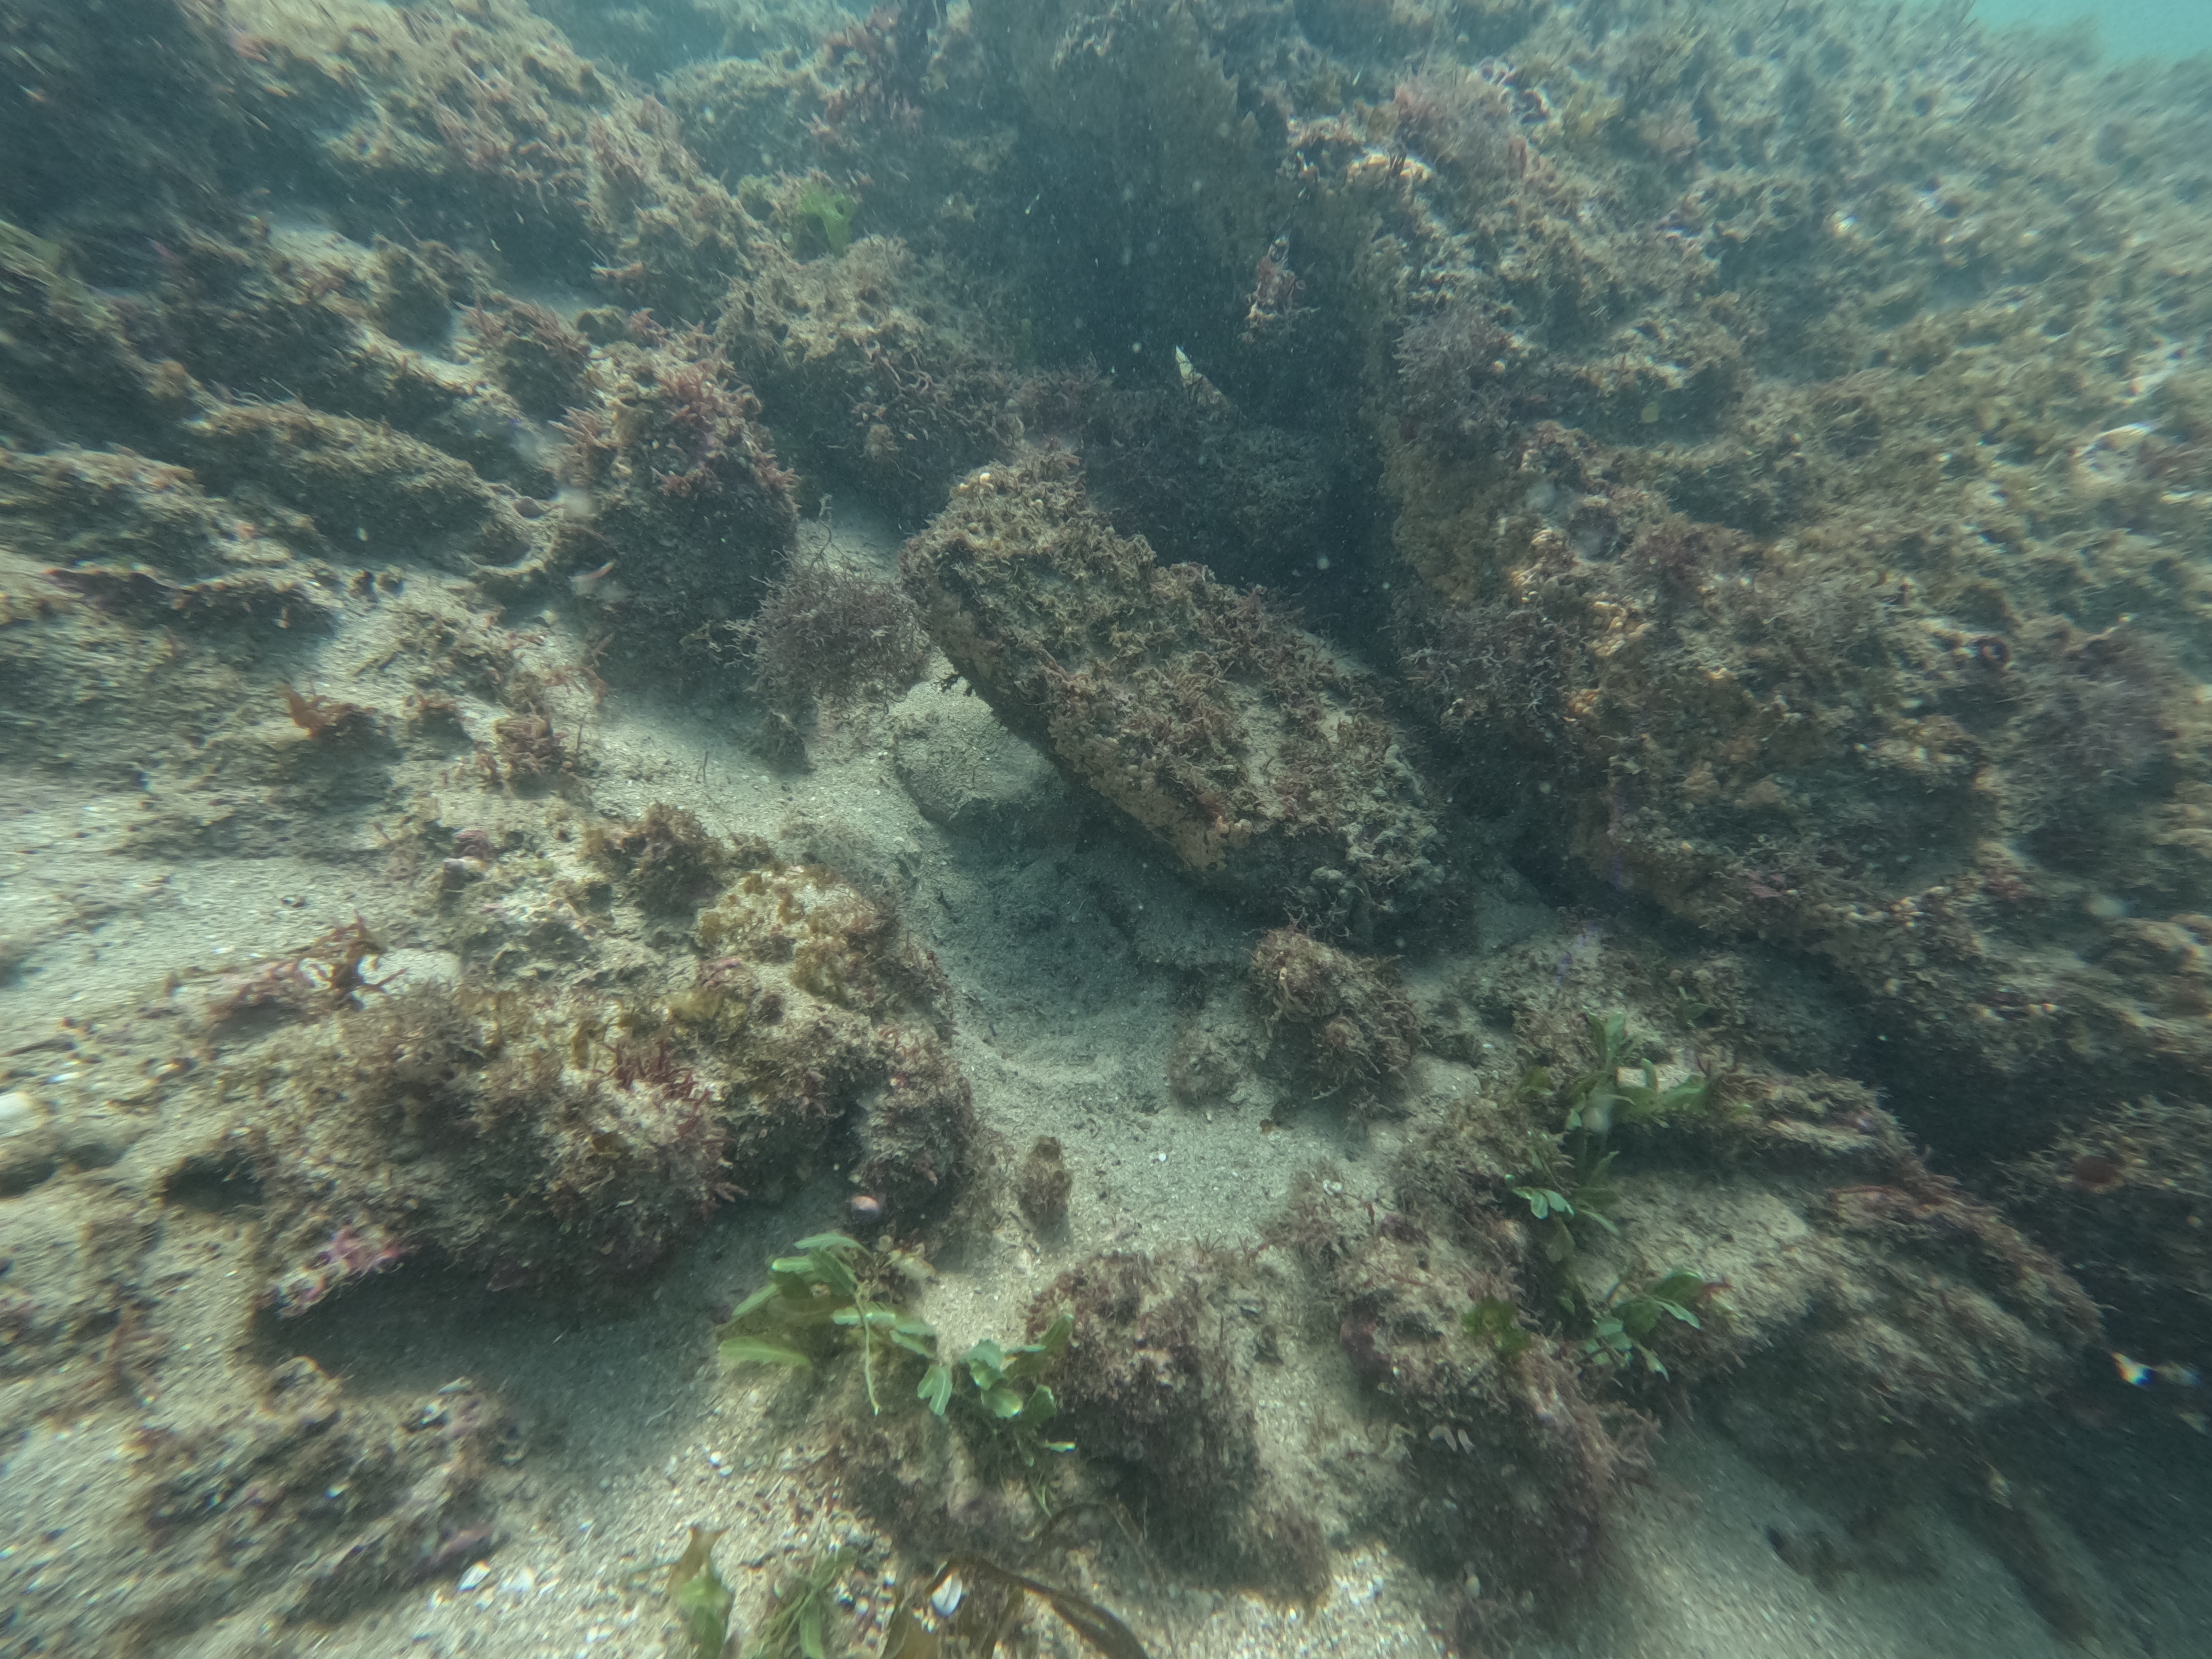

Supplement: Supplementary file 1549 [file G0027875.pdf › Ocean1/G0027875.pdf]

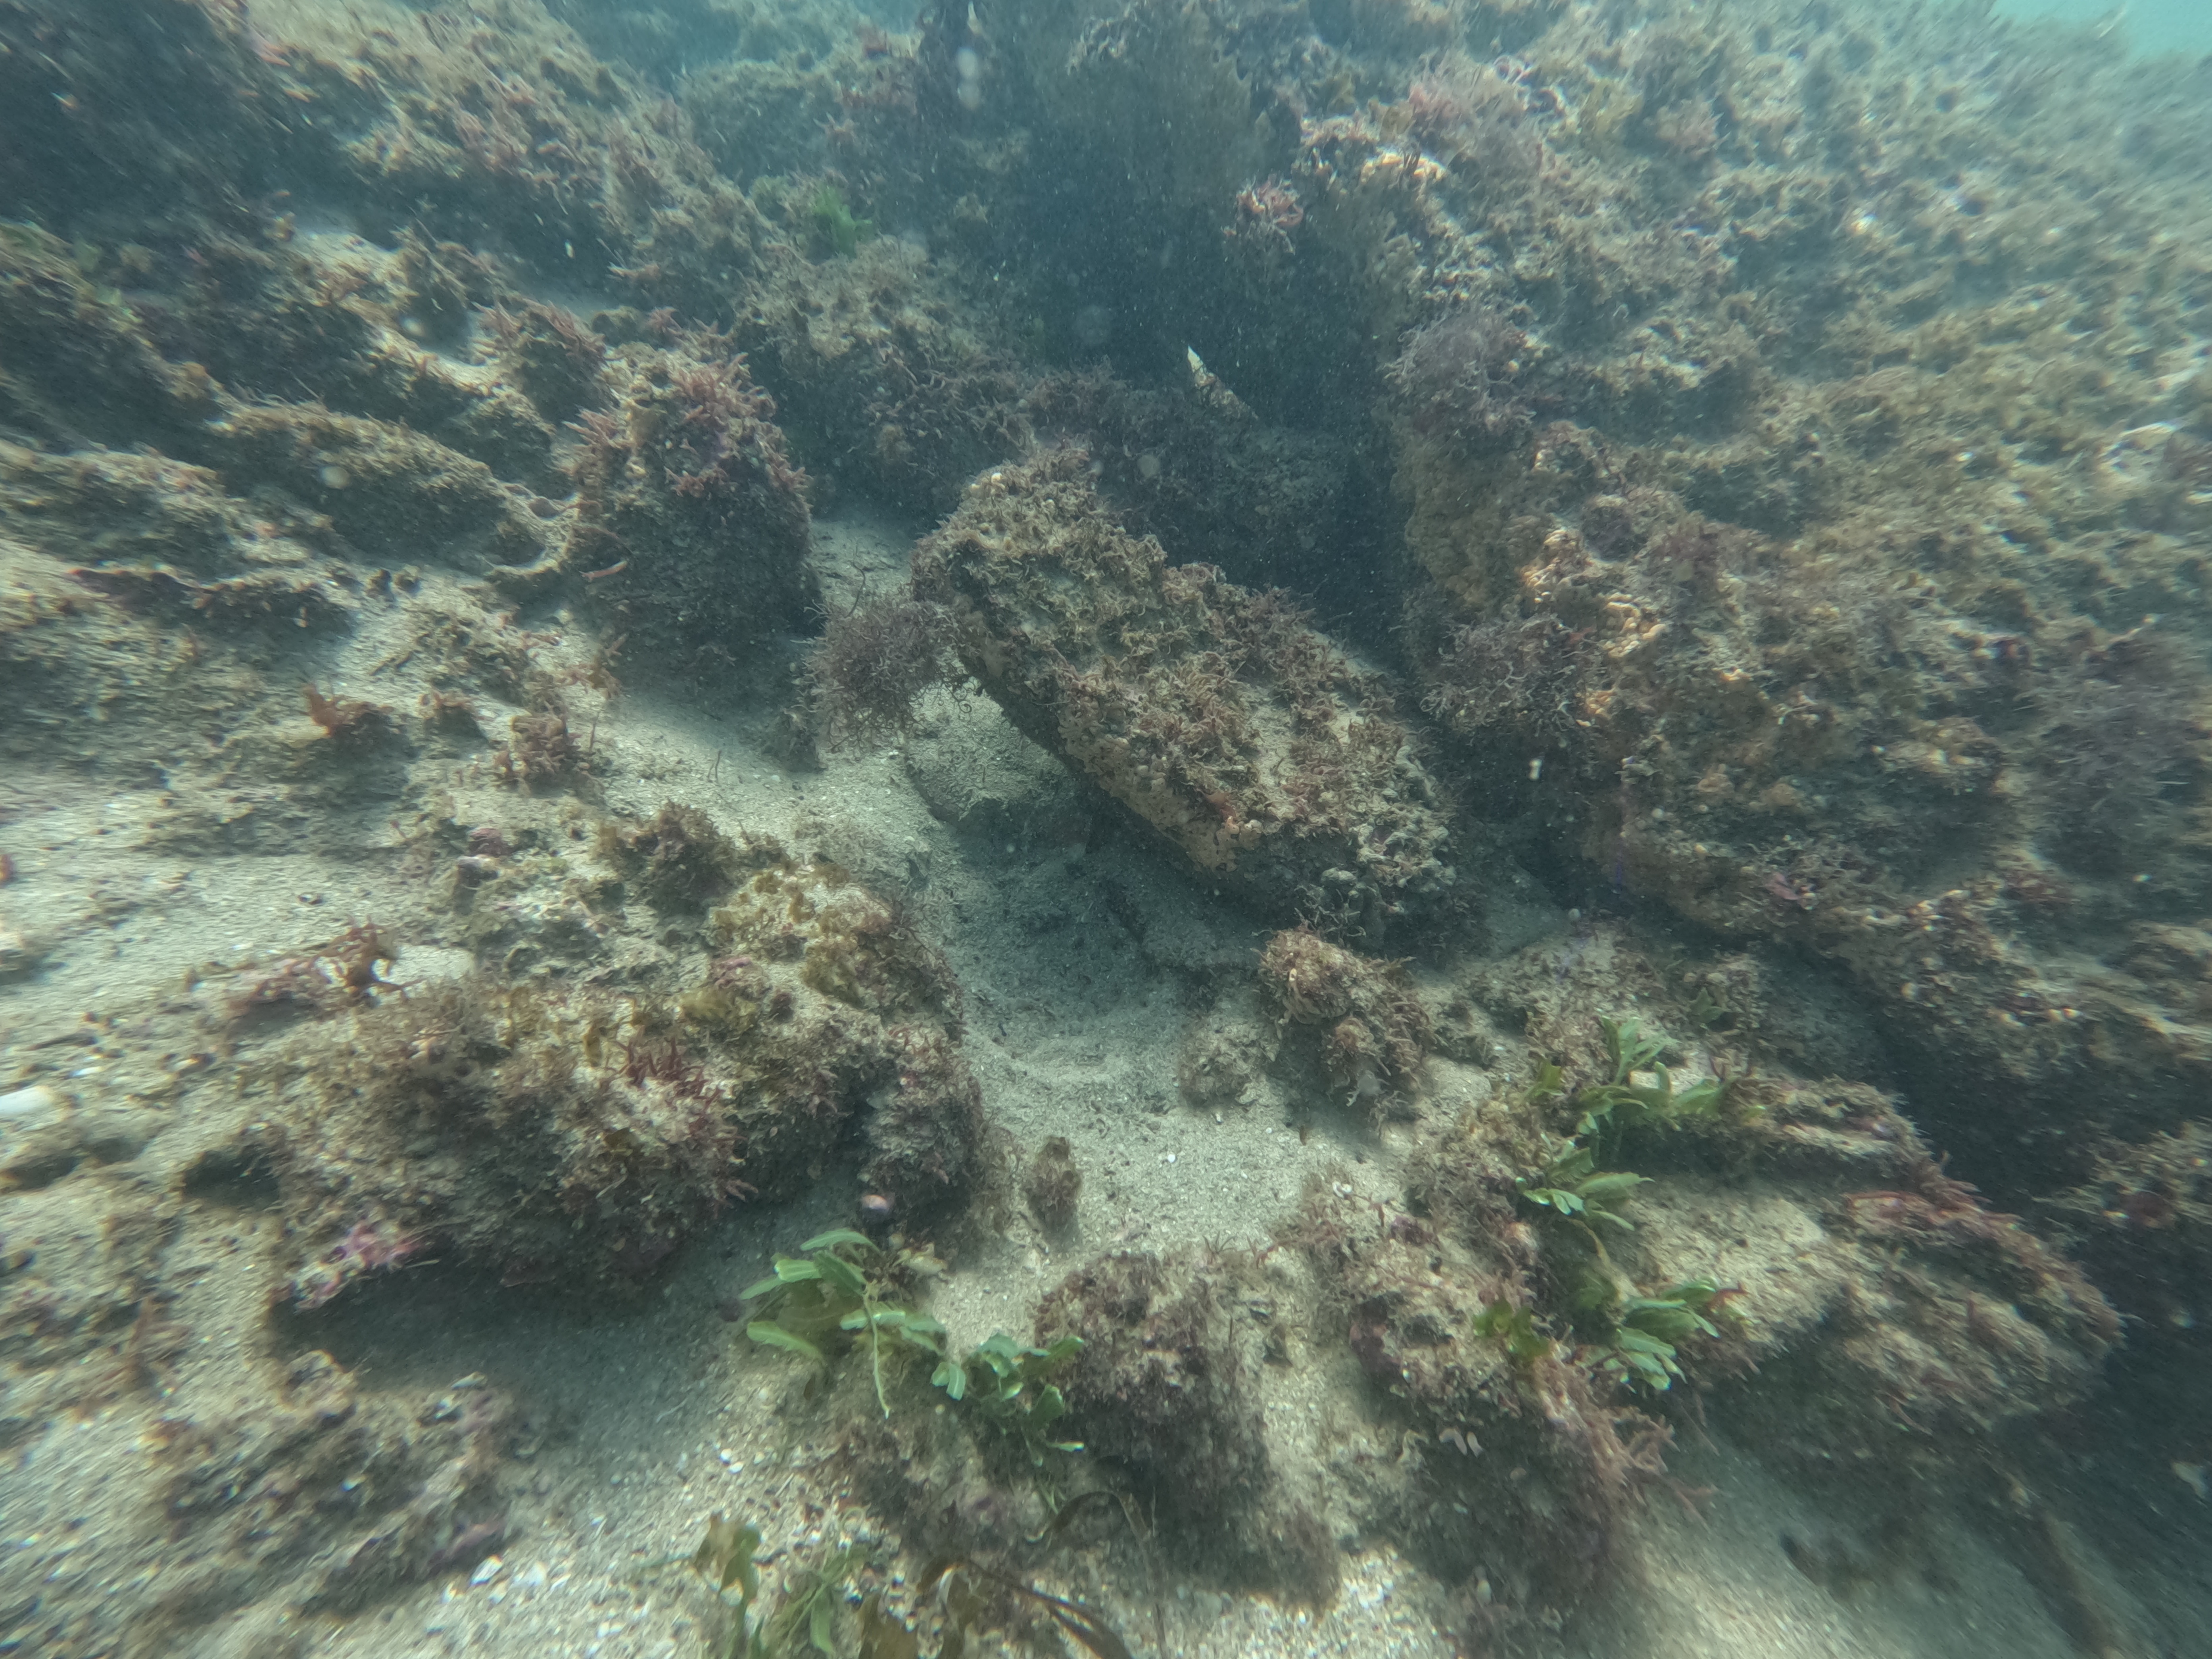

Supplement: Supplementary file 1550 [file G0027876.pdf › Ocean1/G0027876.pdf]

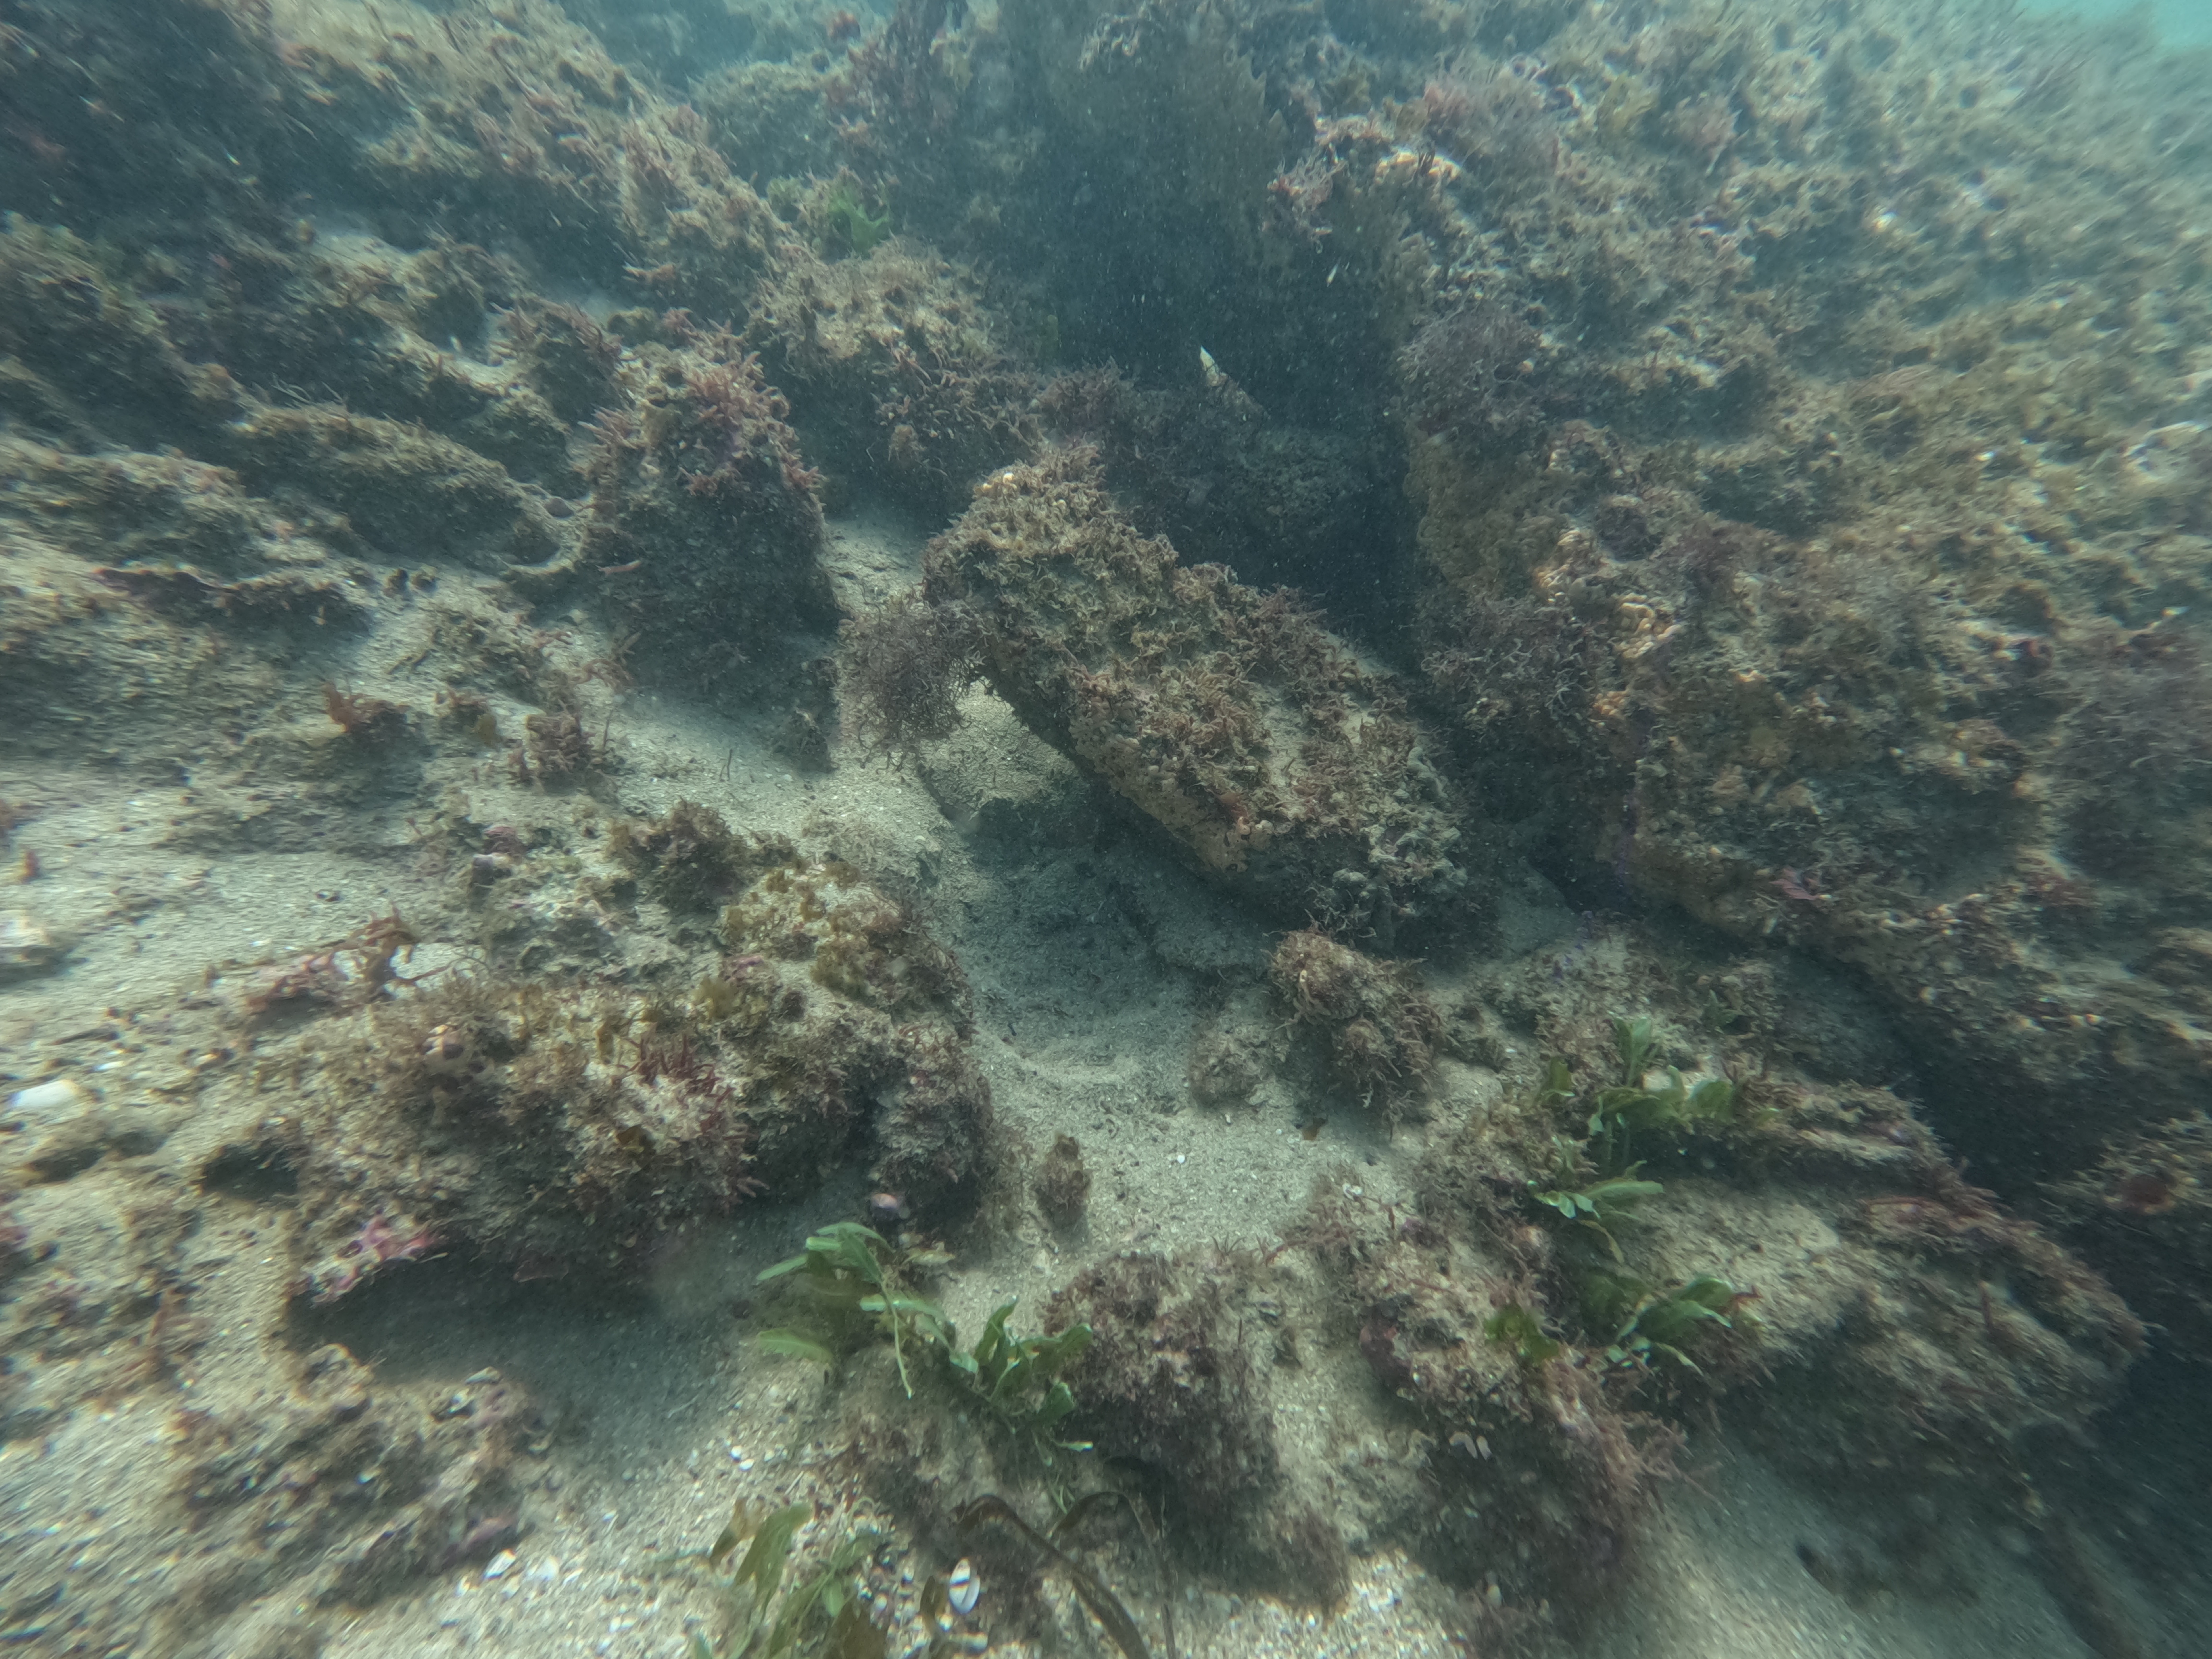

Supplement: Supplementary file 1551 [file G0027877.pdf › Ocean1/G0027877.pdf]

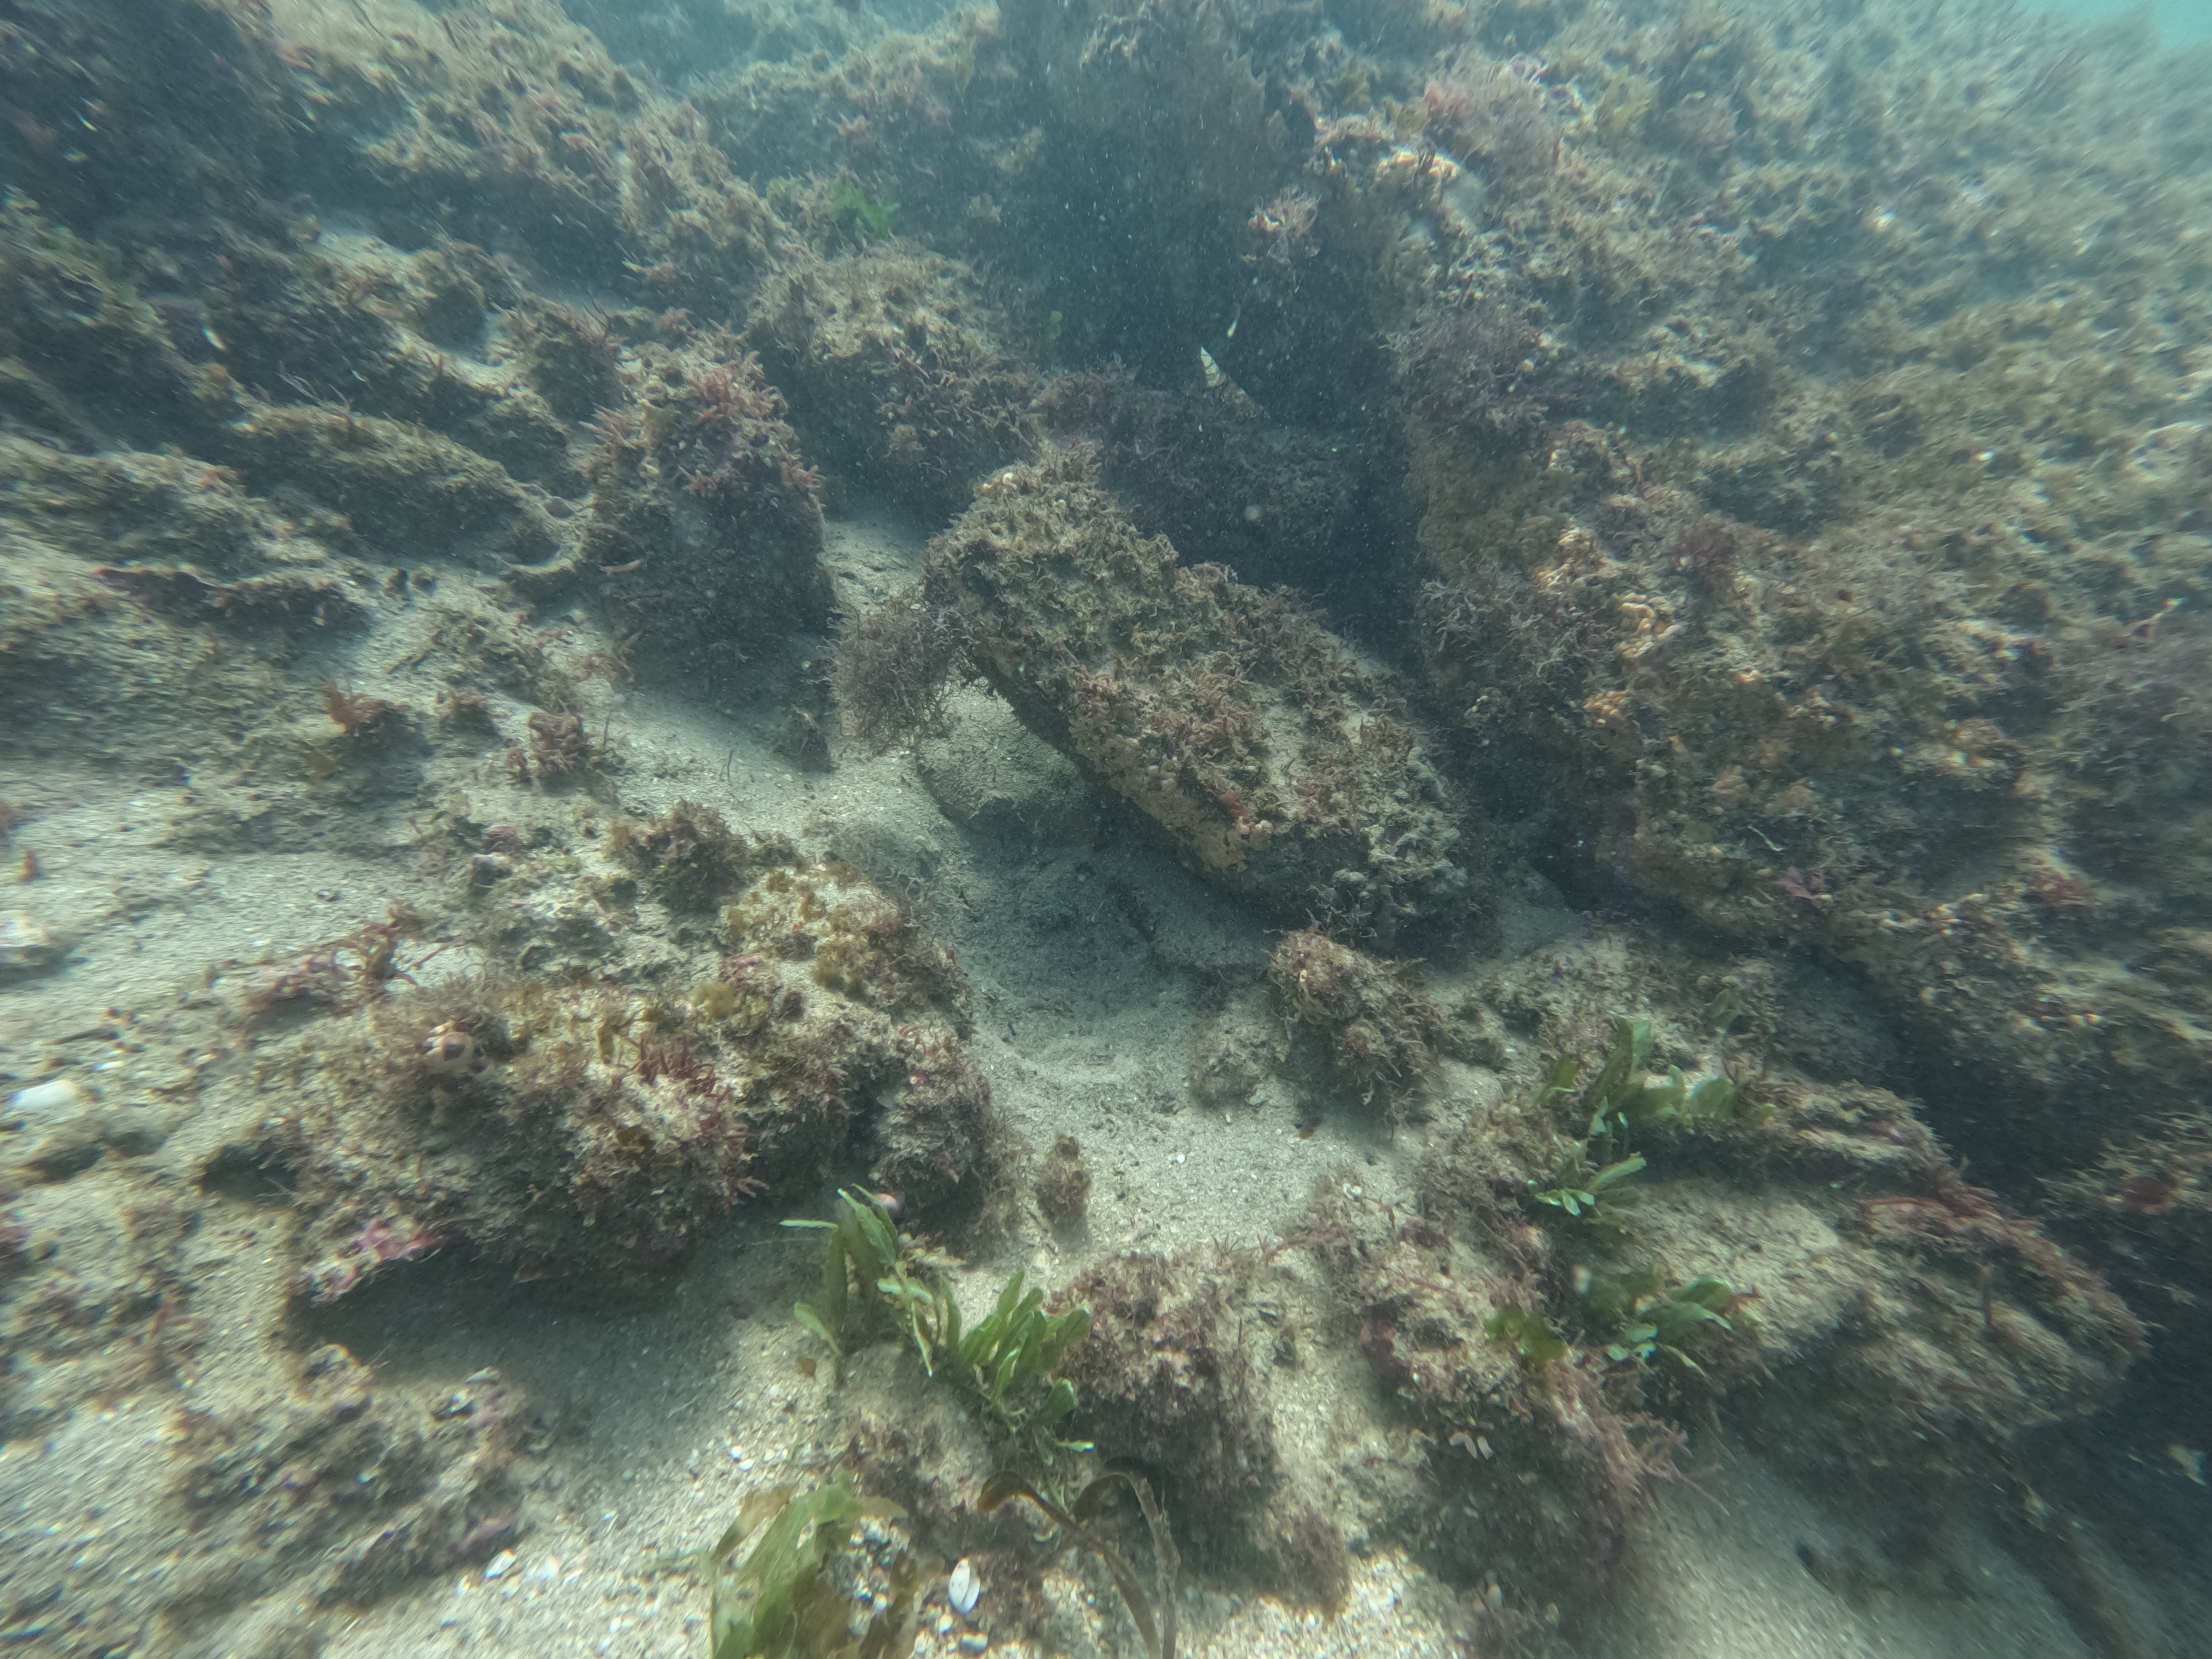

Supplement: Supplementary file 1552 [file G0027878.pdf › Ocean1/G0027878.pdf]

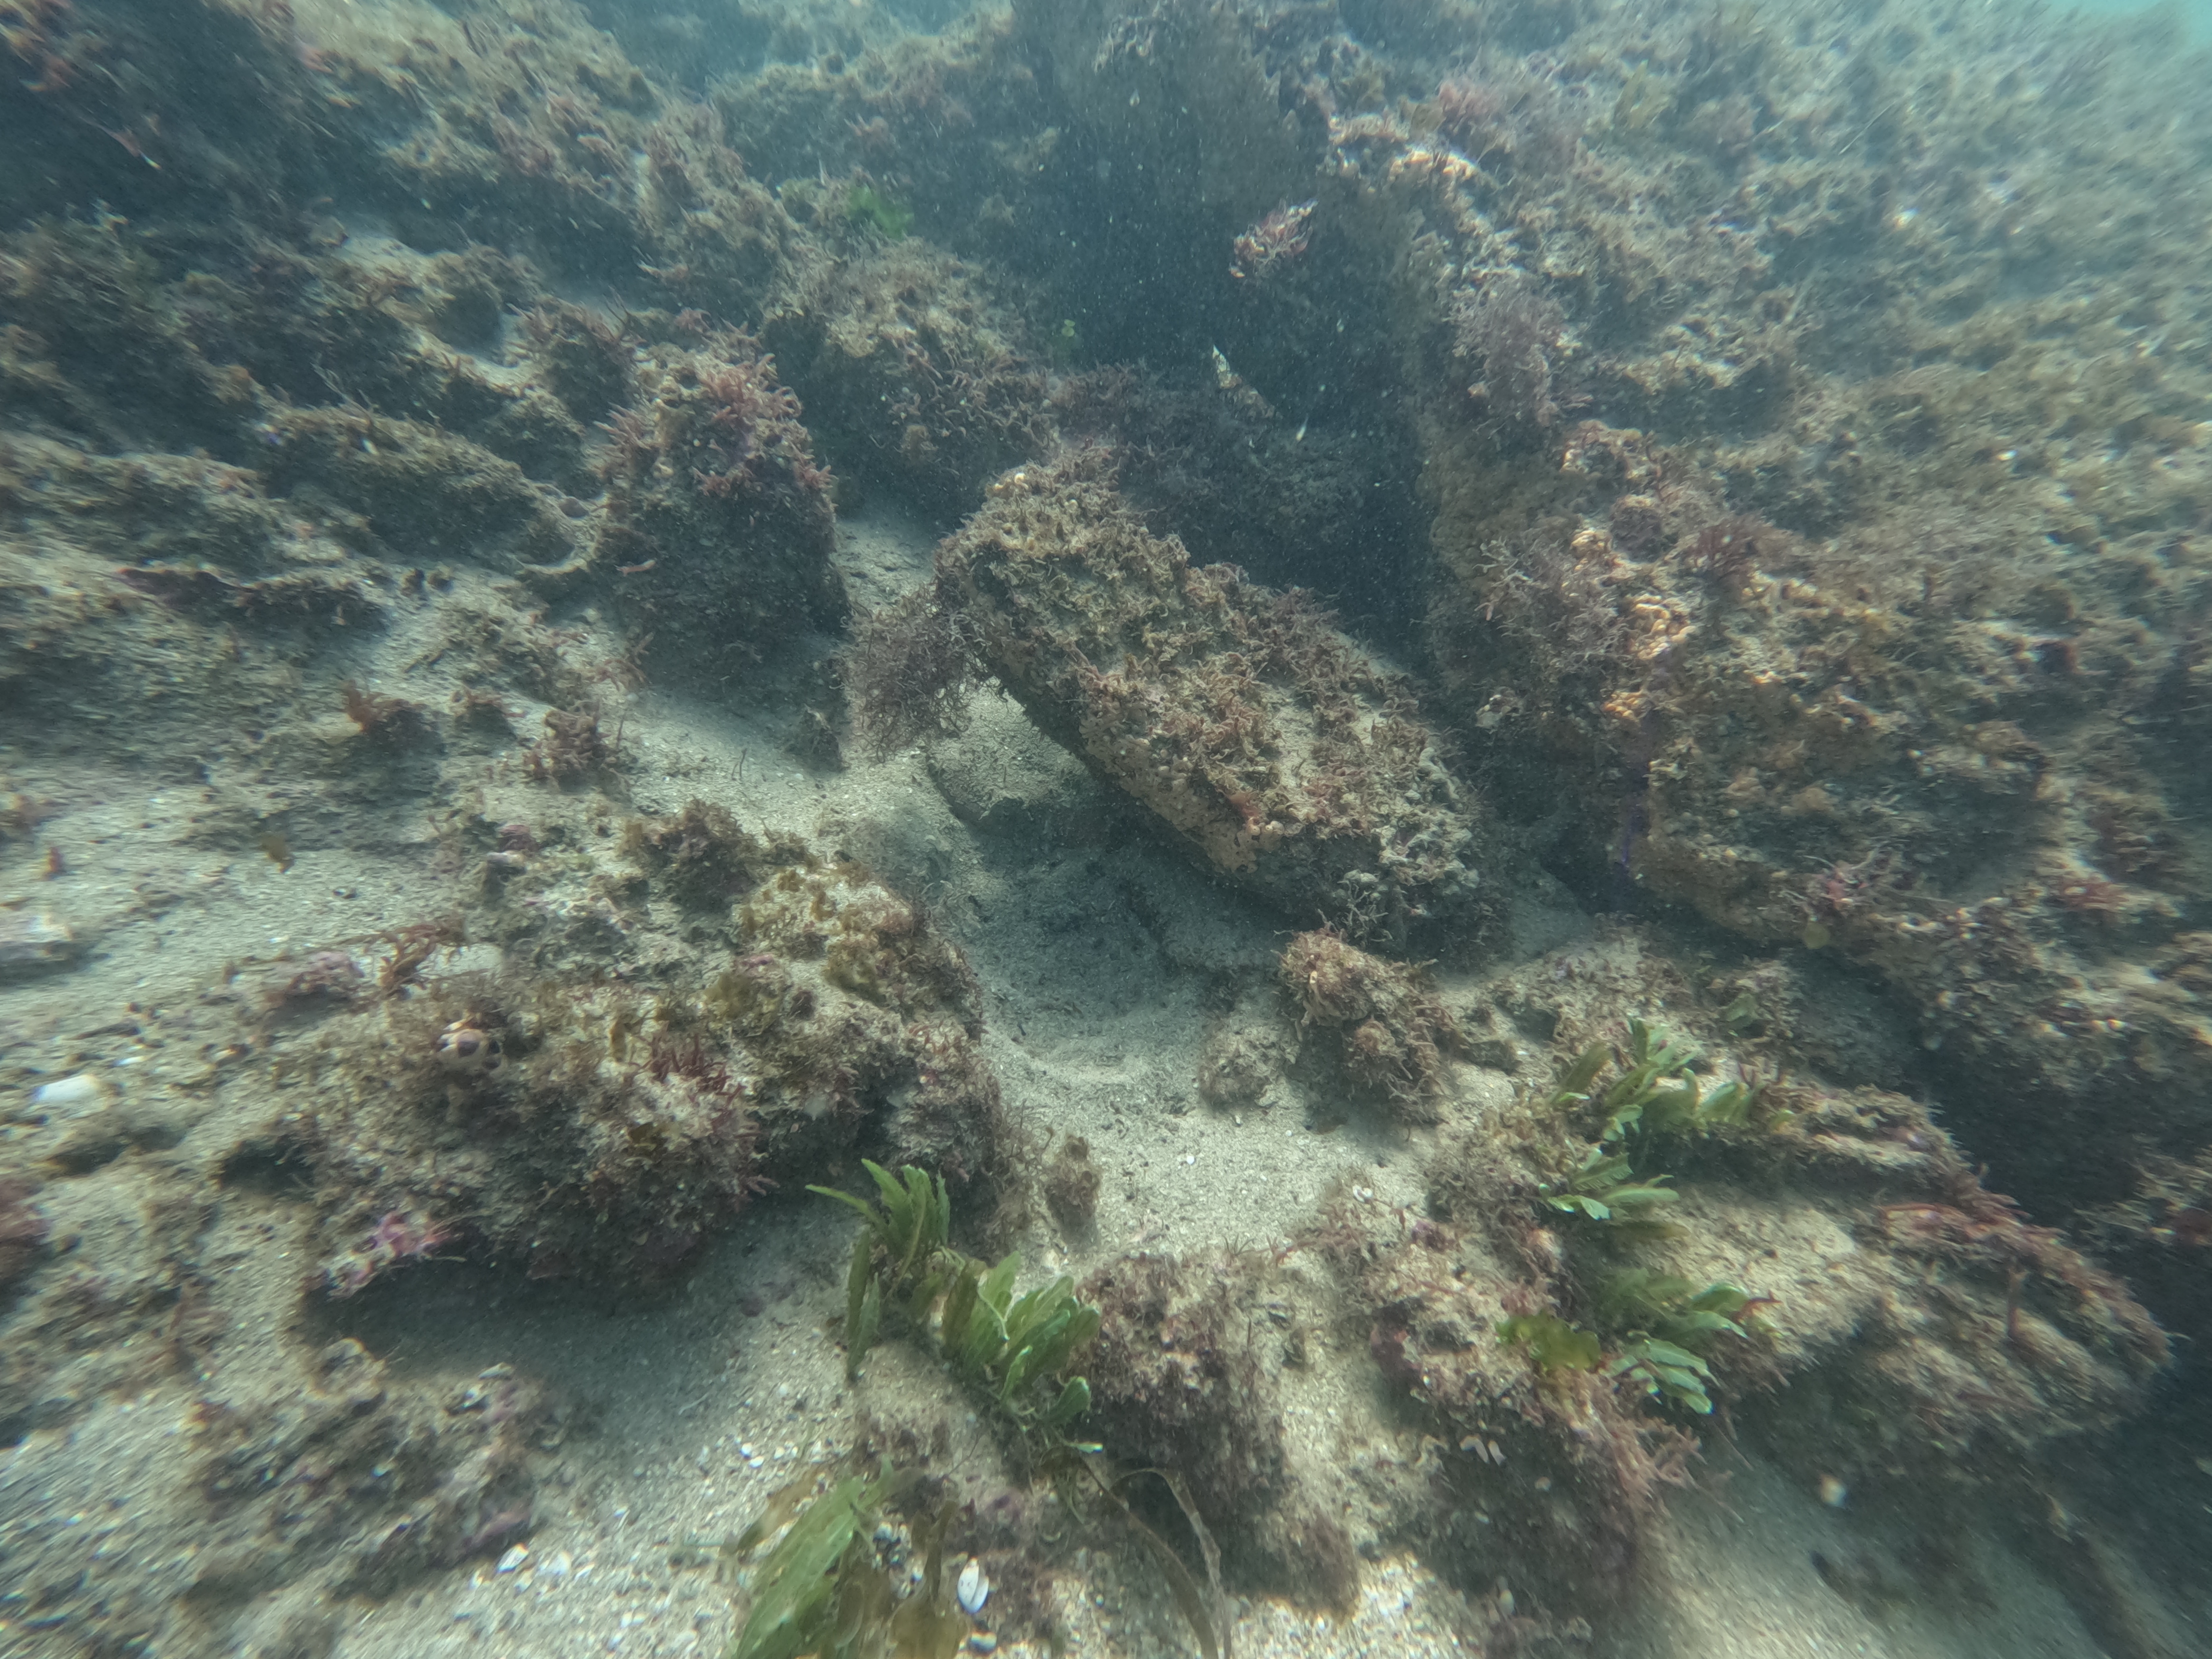

Supplement: Supplementary file 1553 [file G0027879.pdf › Ocean1/G0027879.pdf]

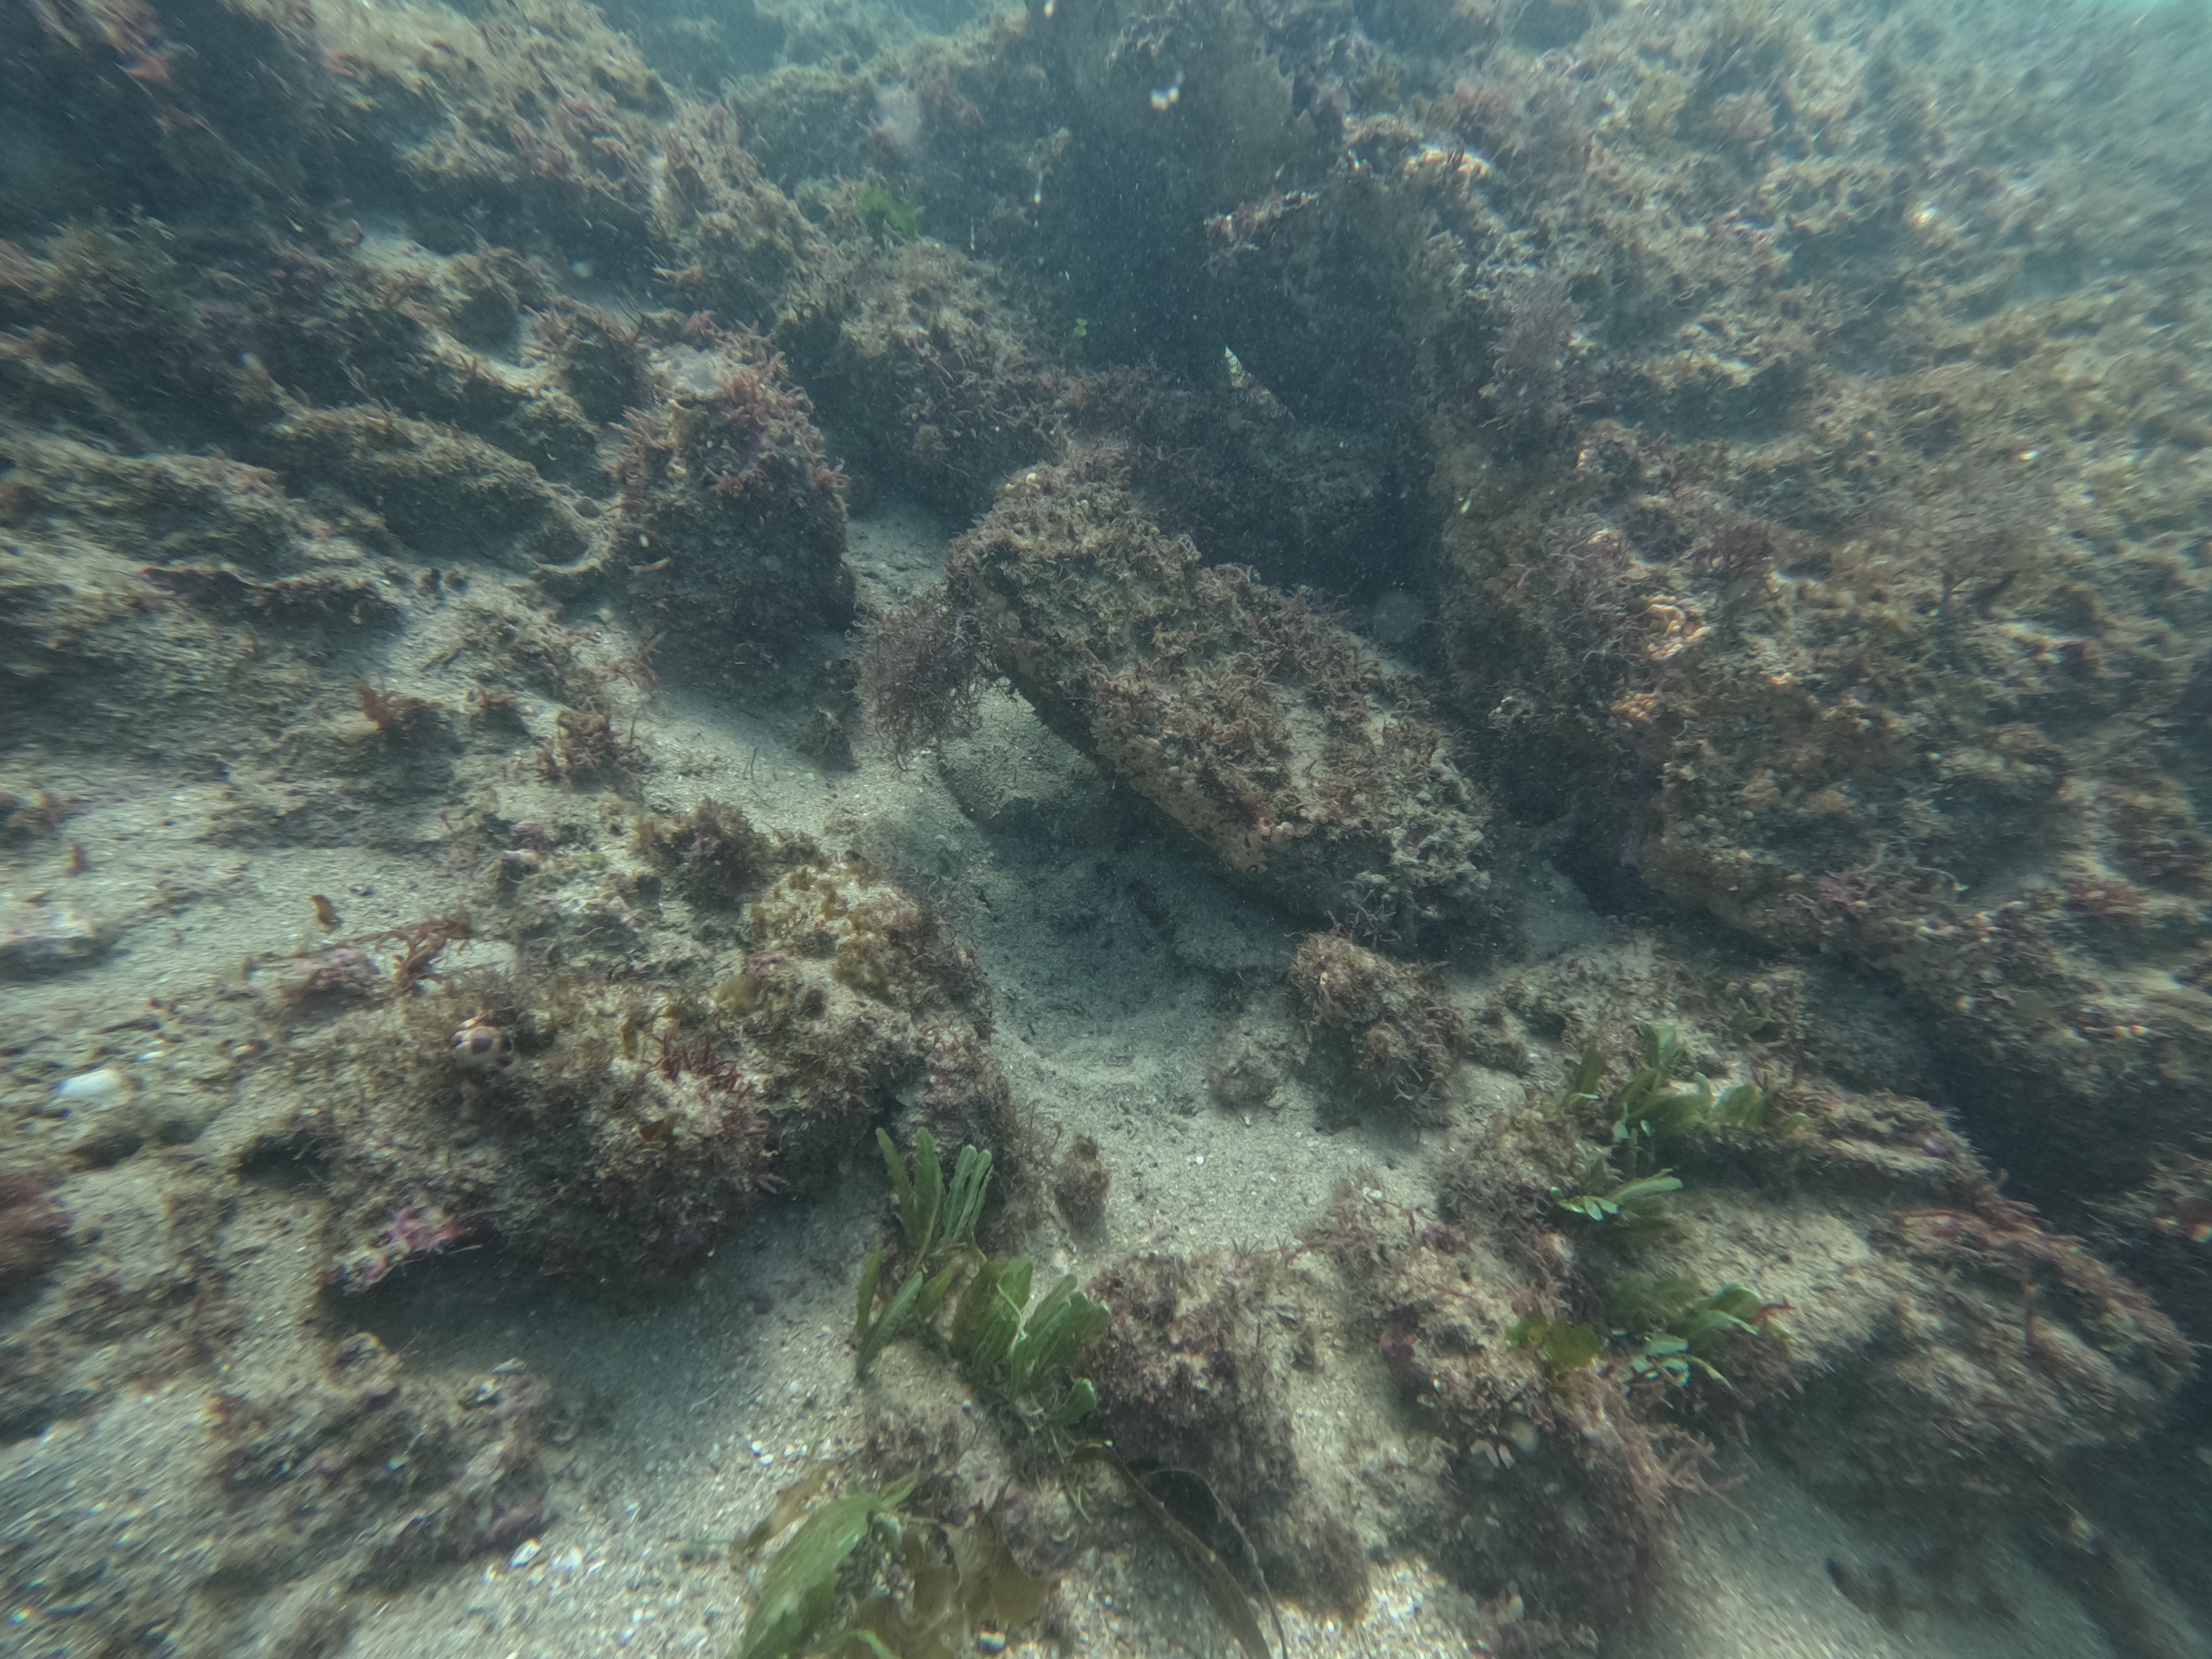

Supplement: Supplementary file 1554 [file G0027880.pdf › Ocean1/G0027880.pdf]

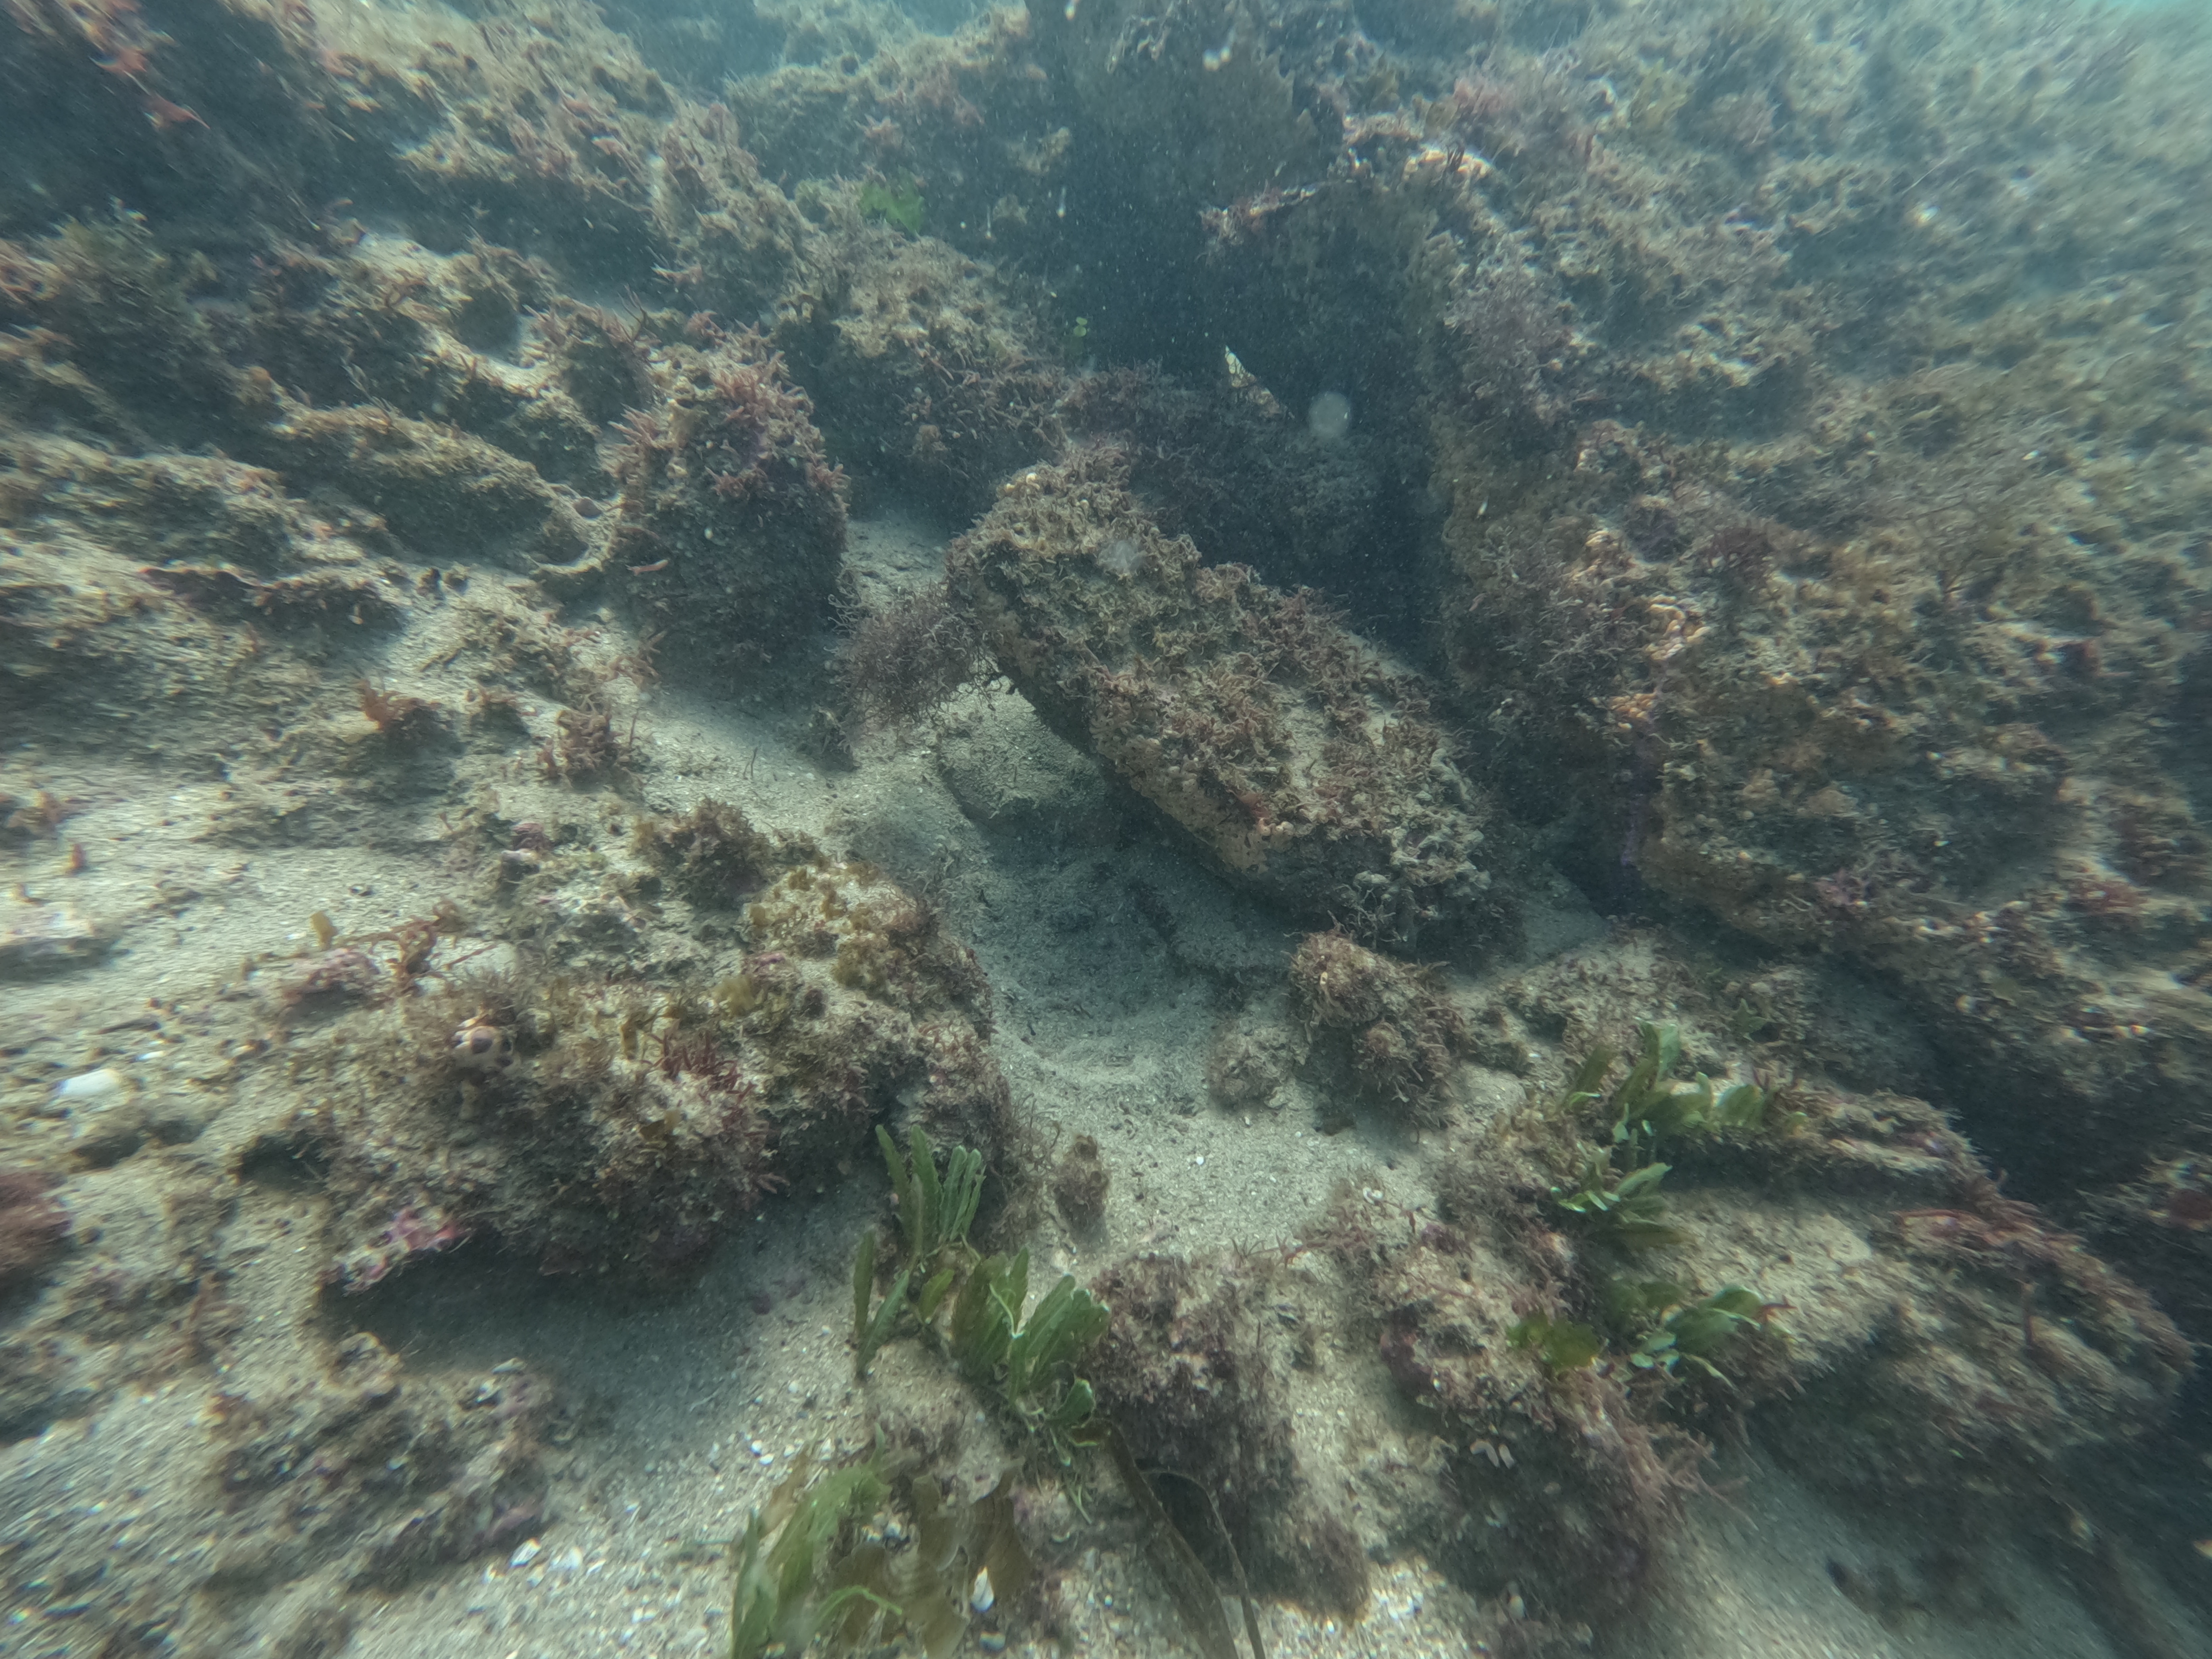

Supplement: Supplementary file 1555 [file G0027881.pdf › Ocean1/G0027881.pdf]

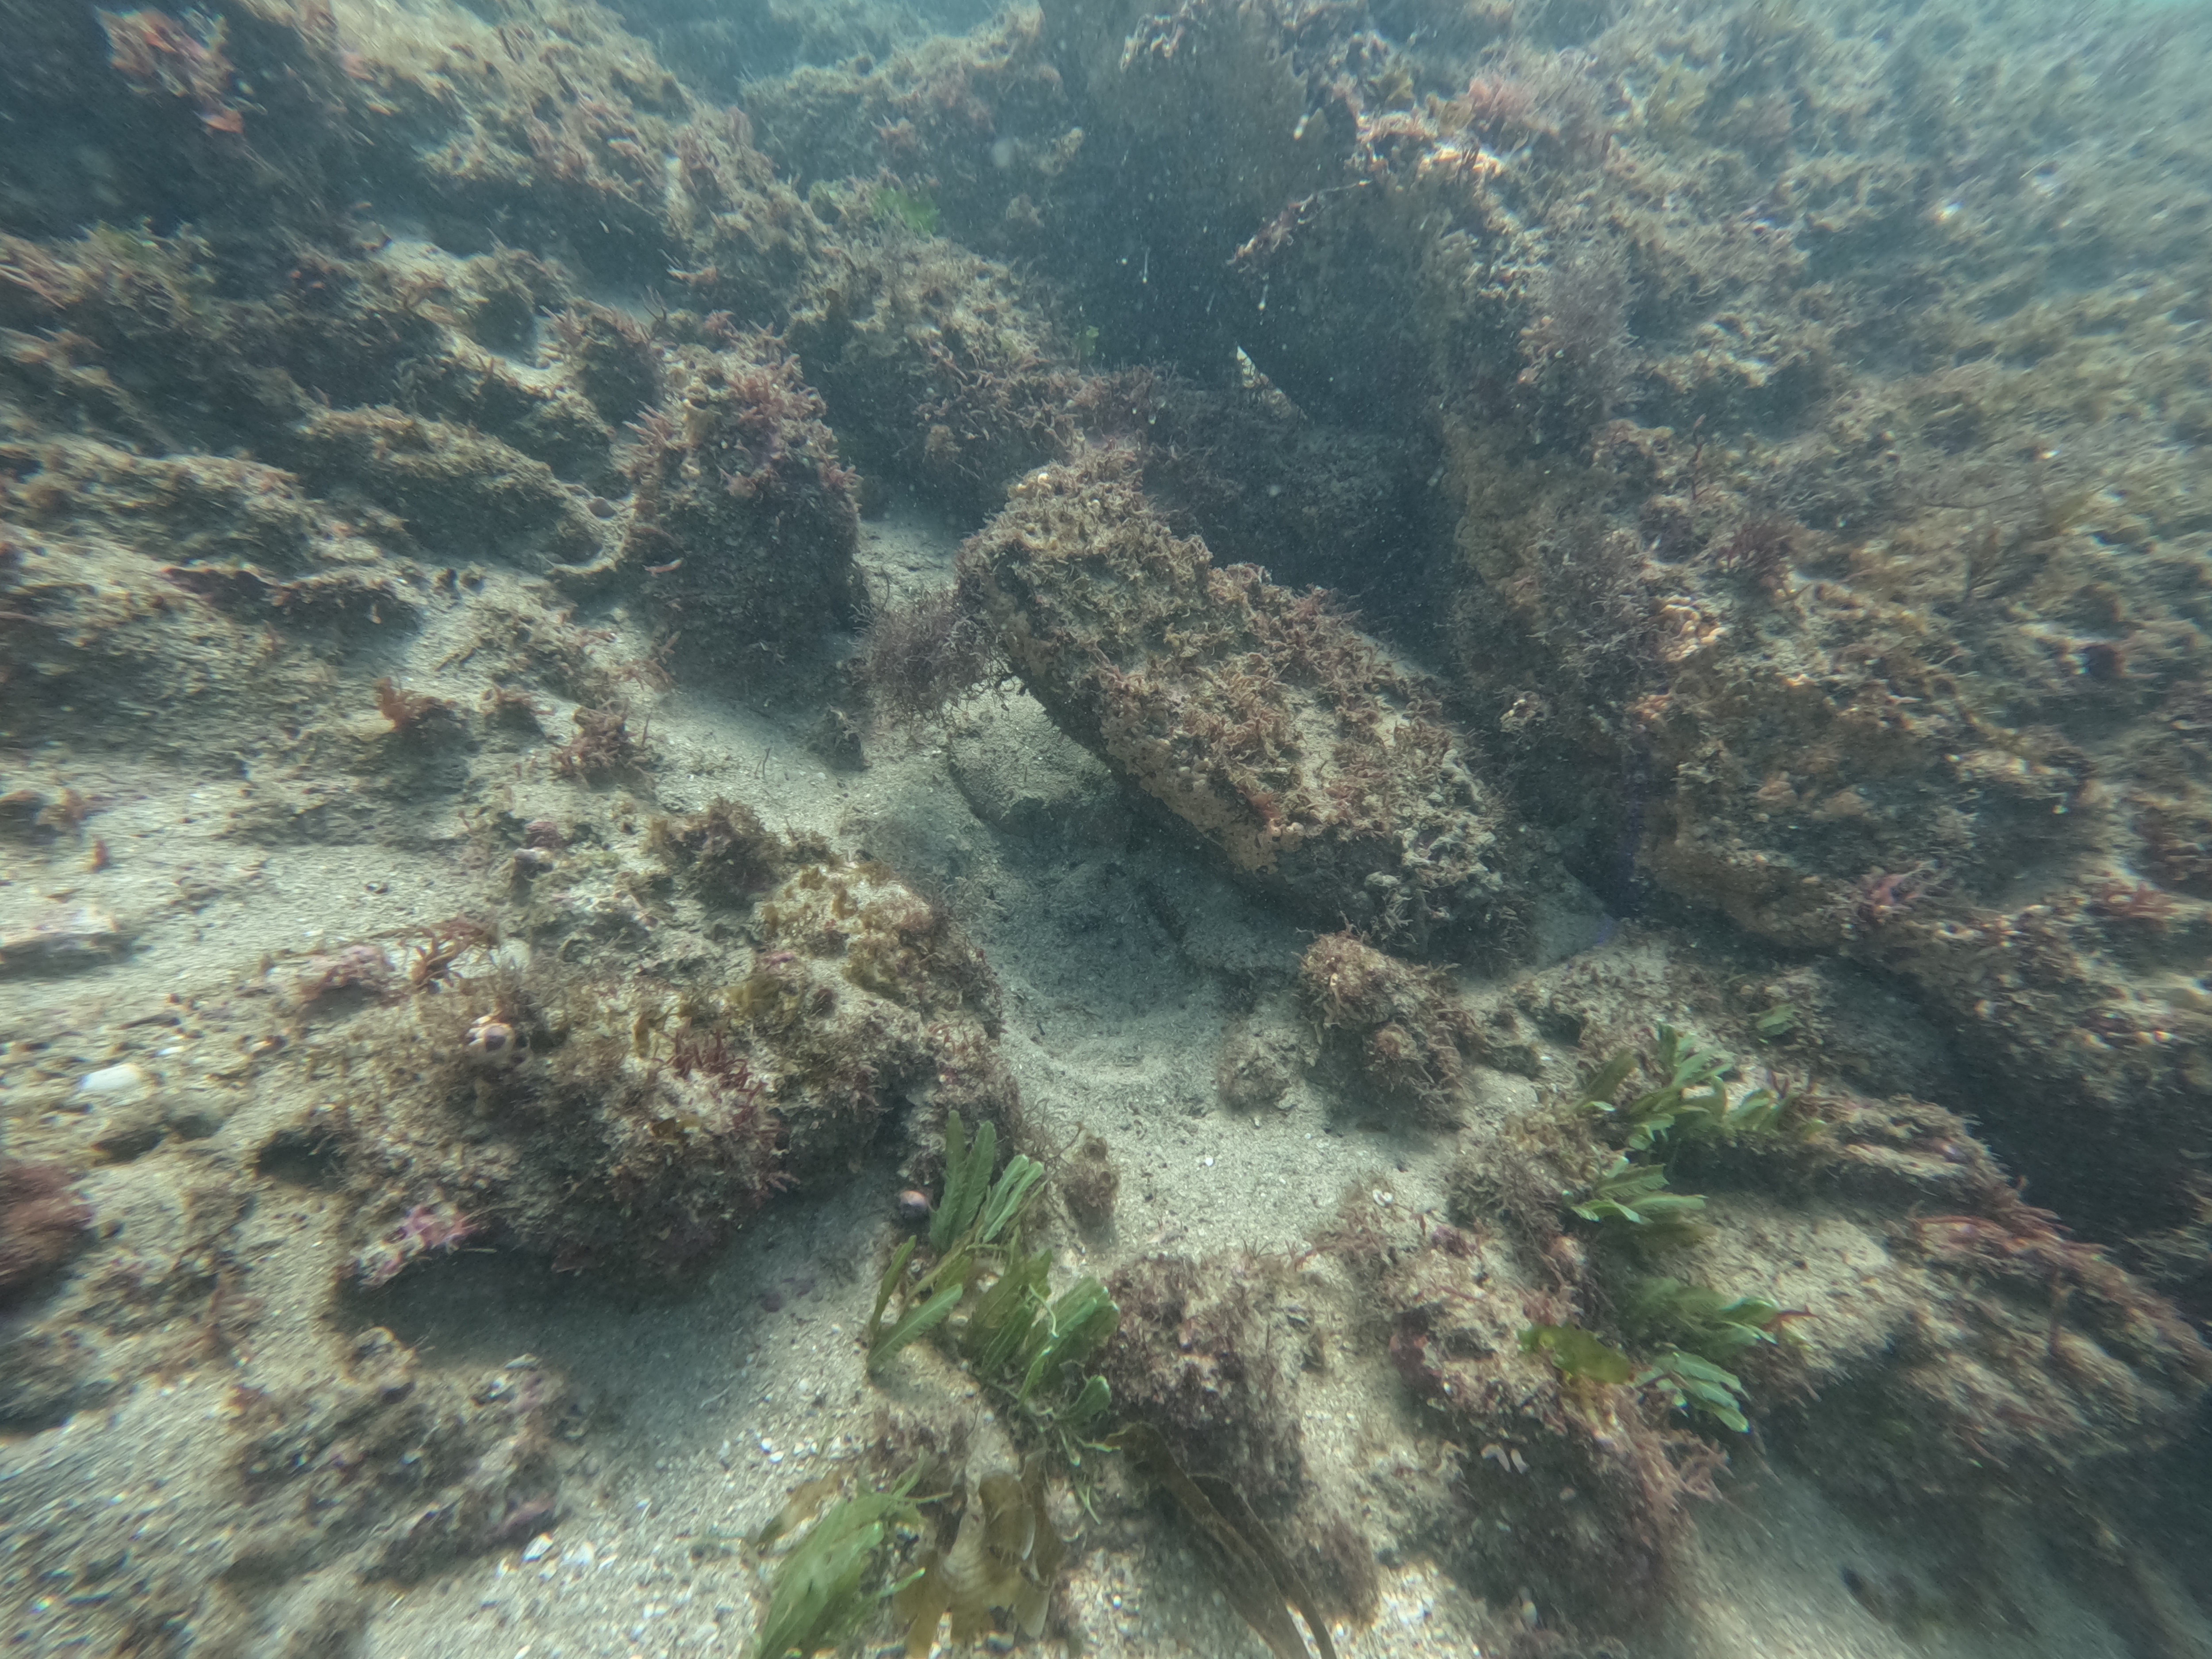

Supplement: Supplementary file 1556 [file G0027882.pdf › Ocean1/G0027882.pdf]

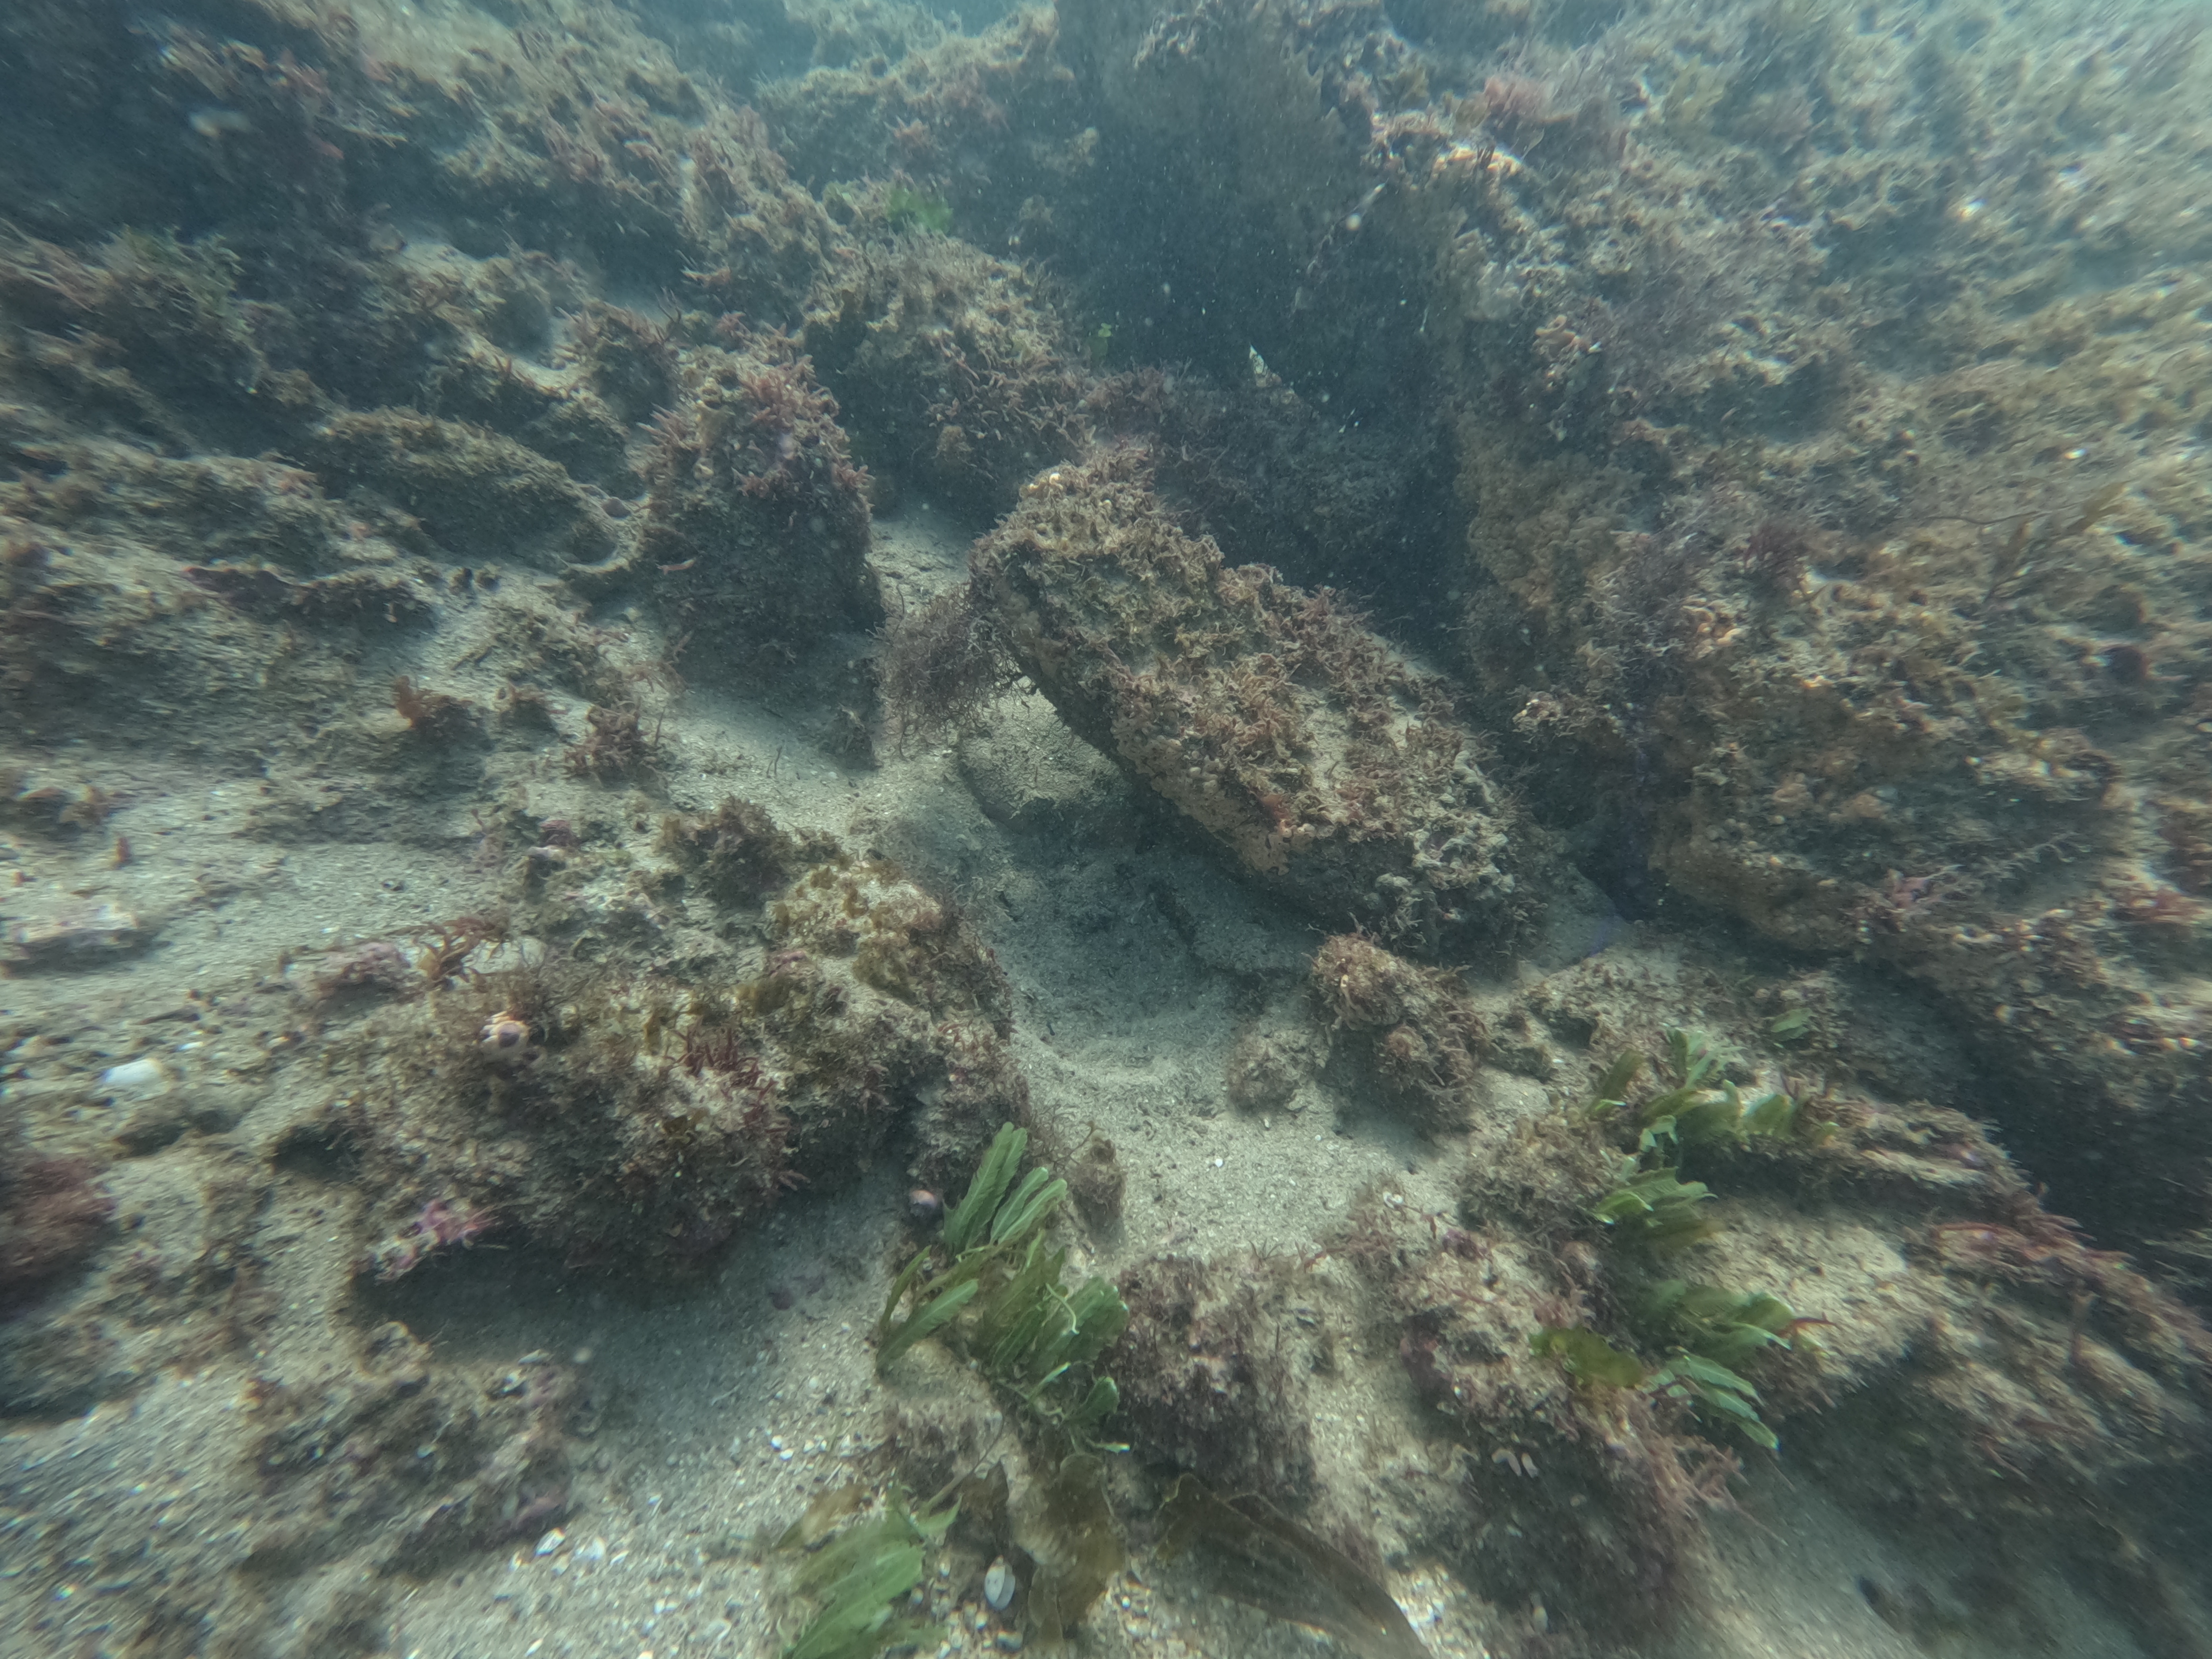

Supplement: Supplementary file 1557 [file G0027883.pdf › Ocean1/G0027883.pdf]

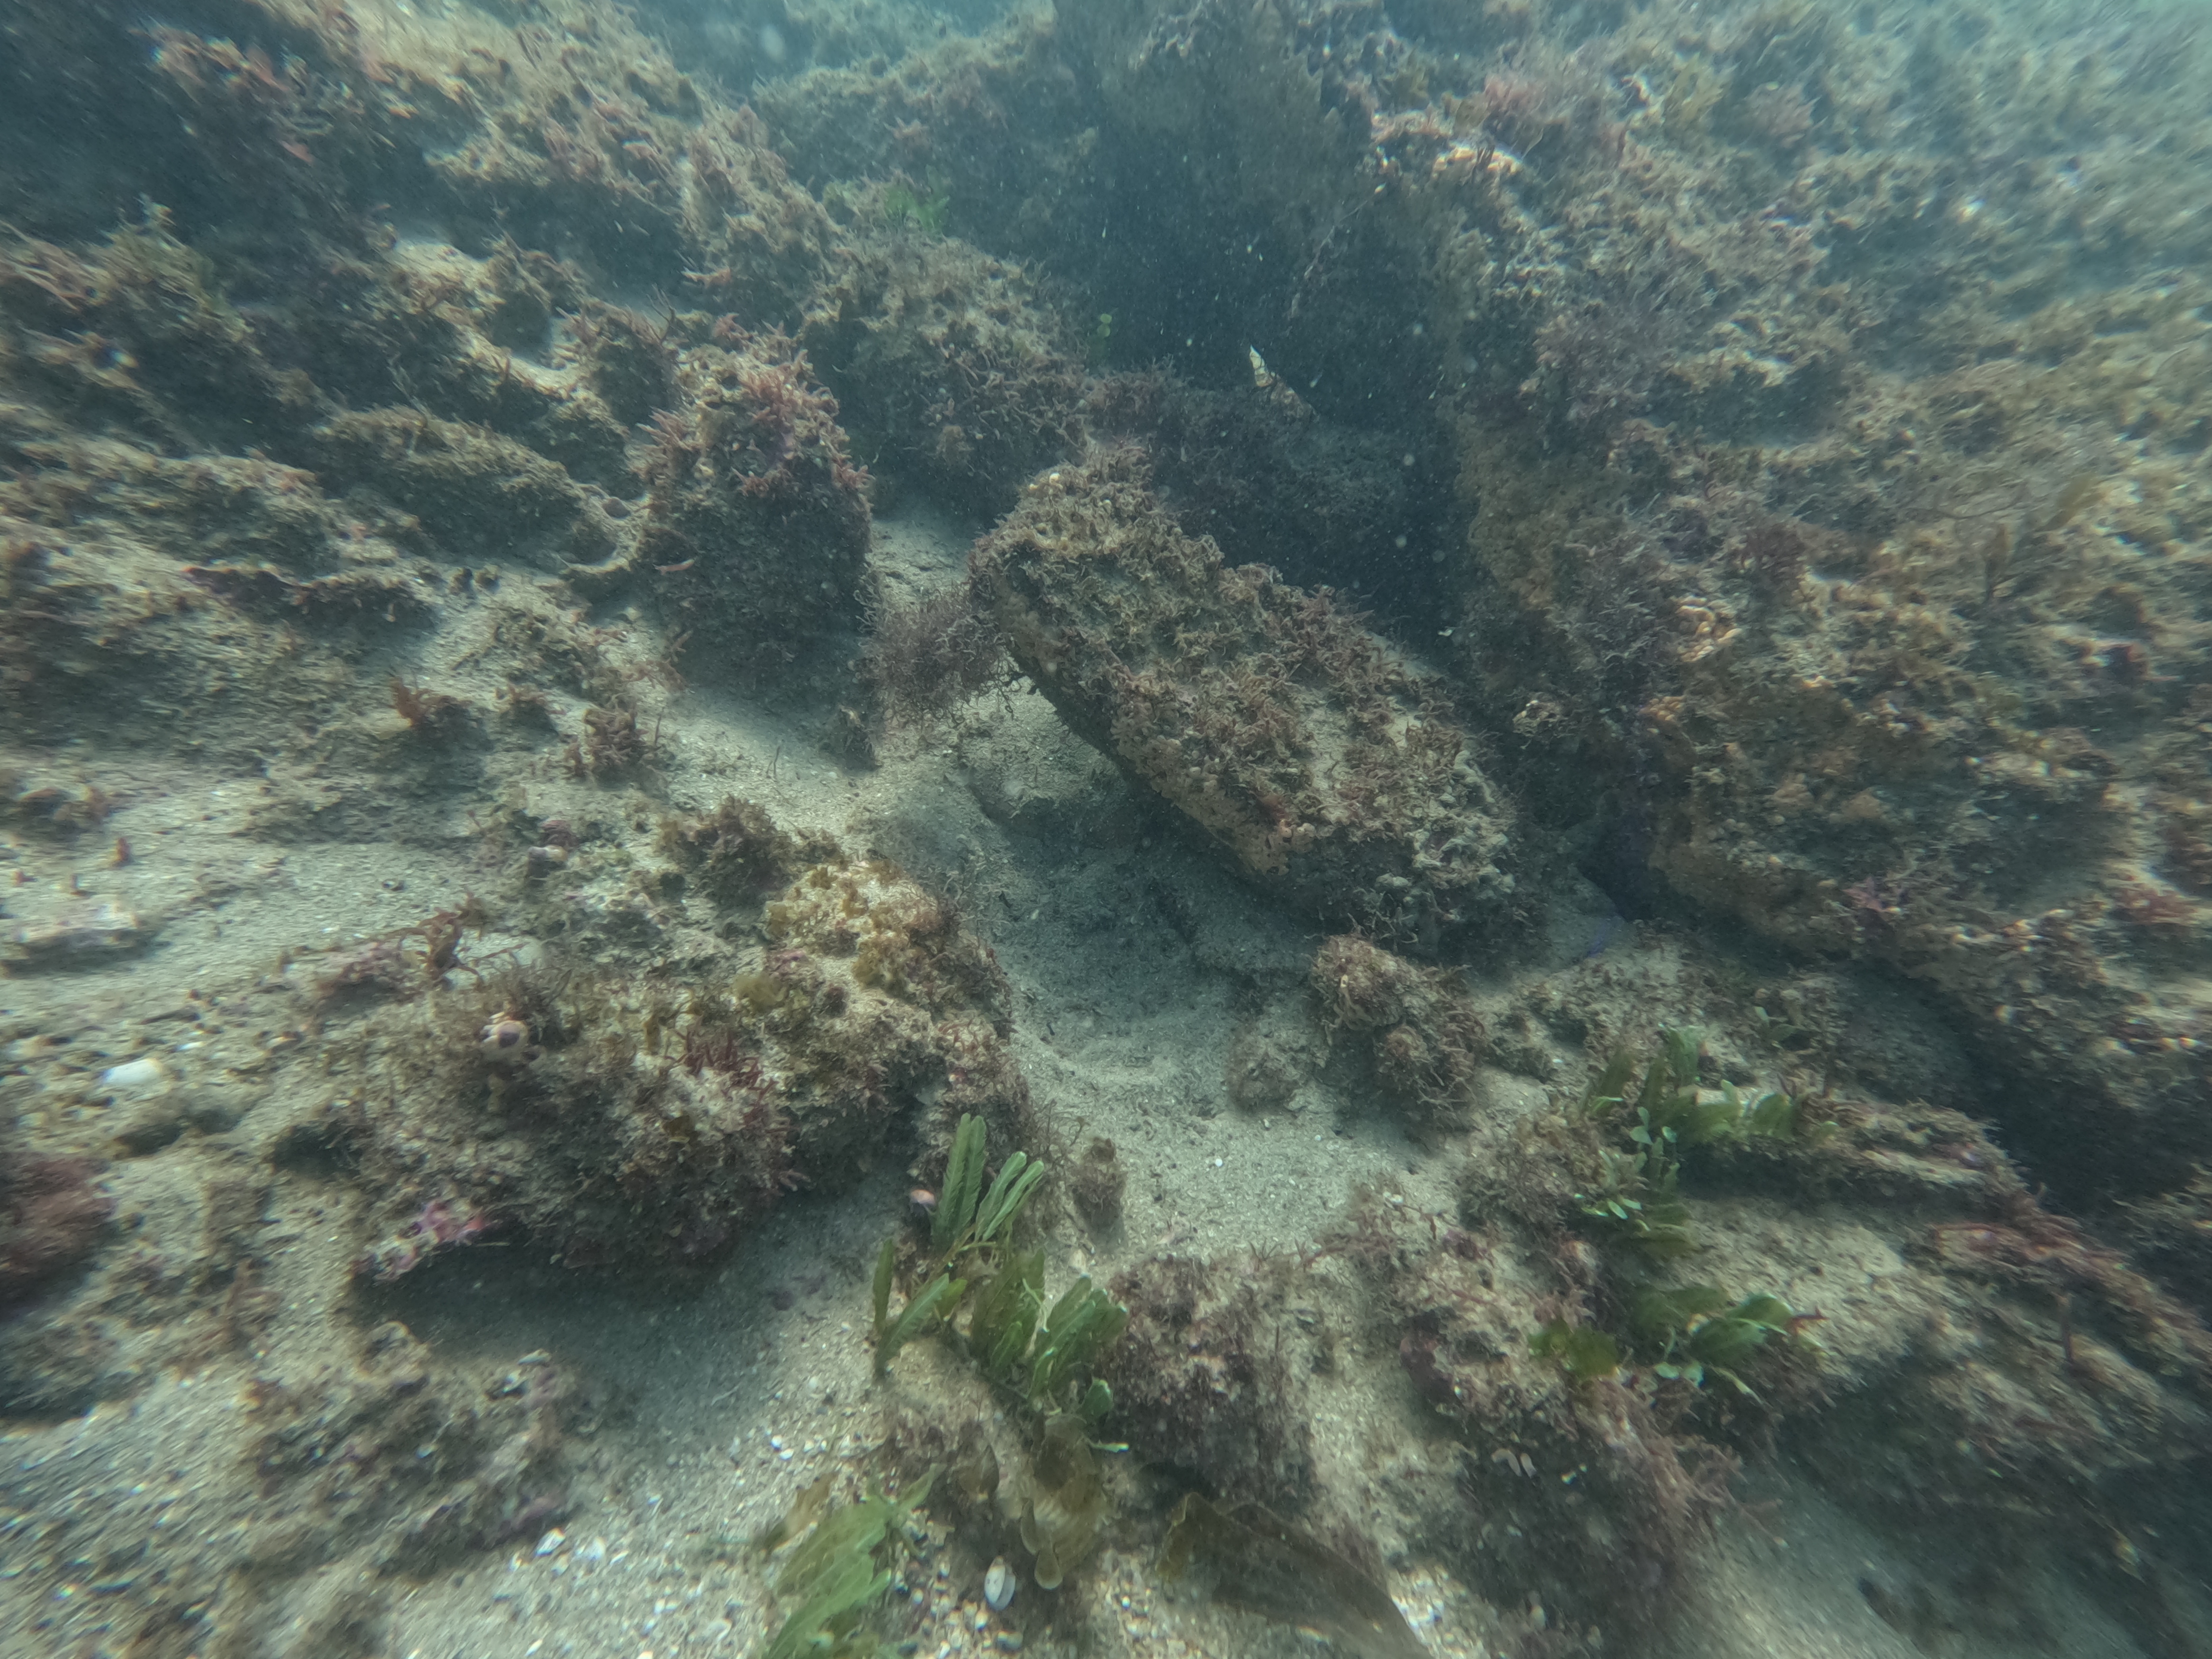

Supplement: Supplementary file 1558 [file G0027884.pdf › Ocean1/G0027884.pdf]

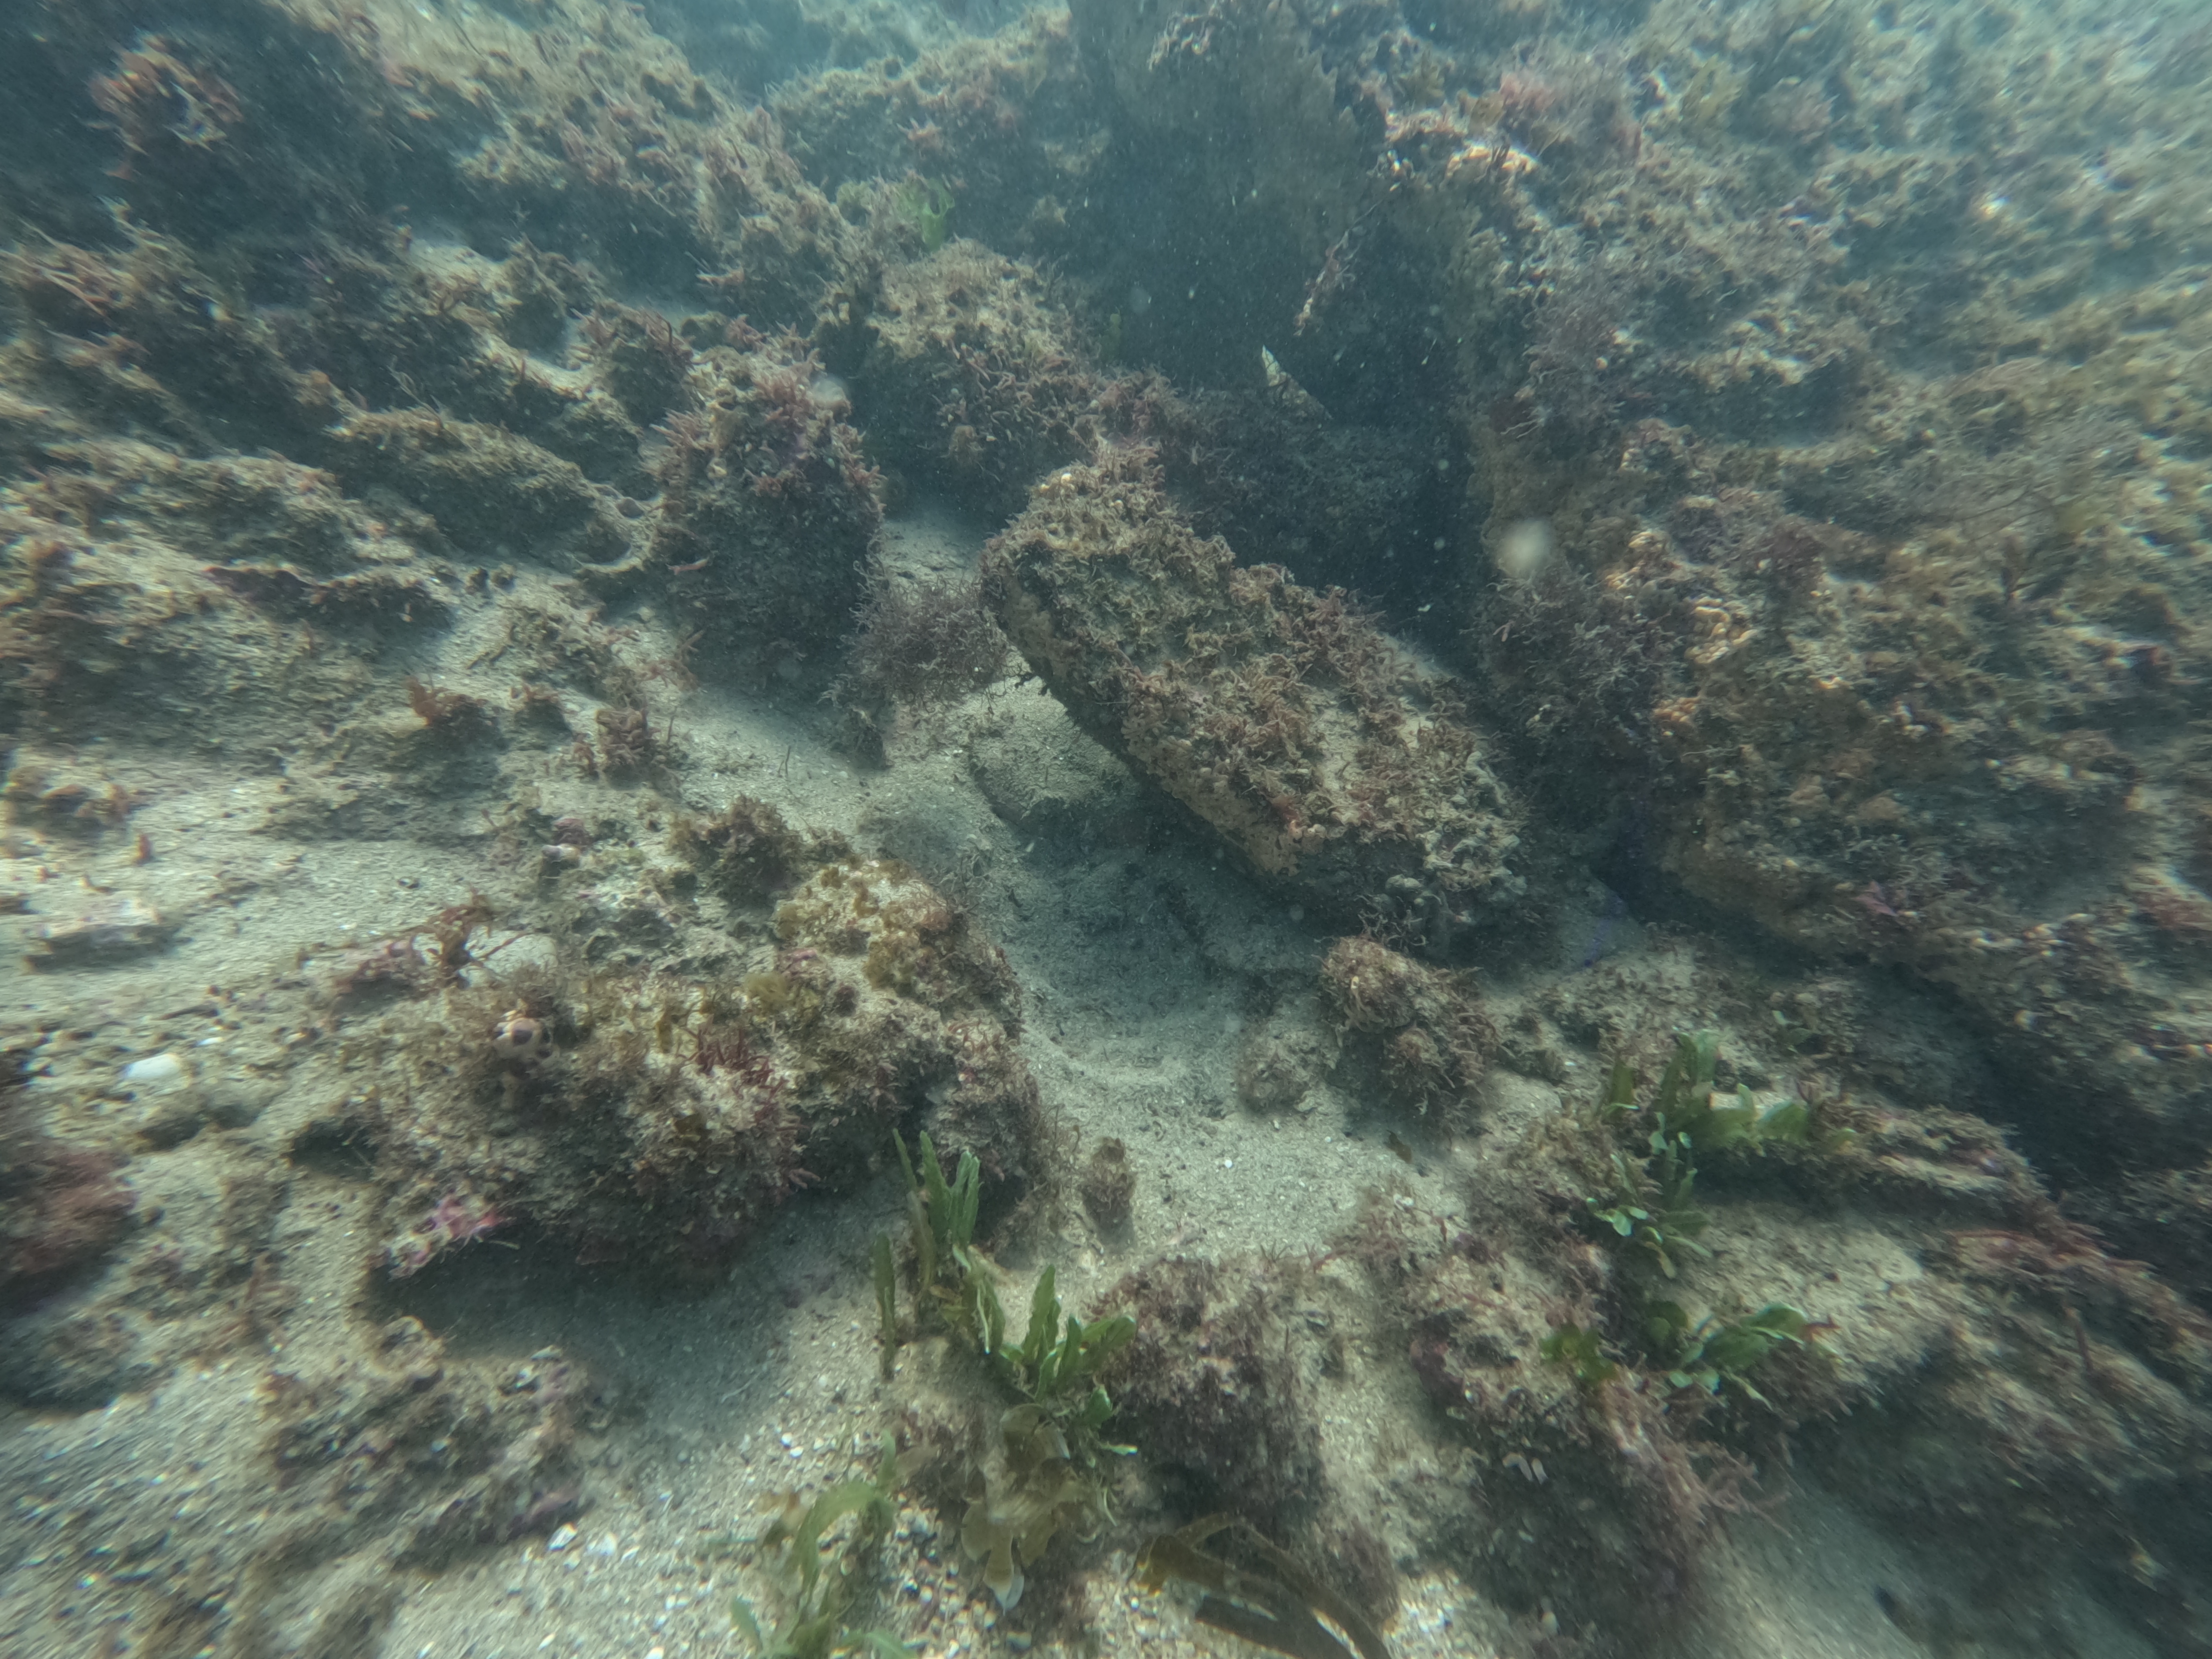

Supplement: Supplementary file 1559 [file G0027885.pdf › Ocean1/G0027885.pdf]

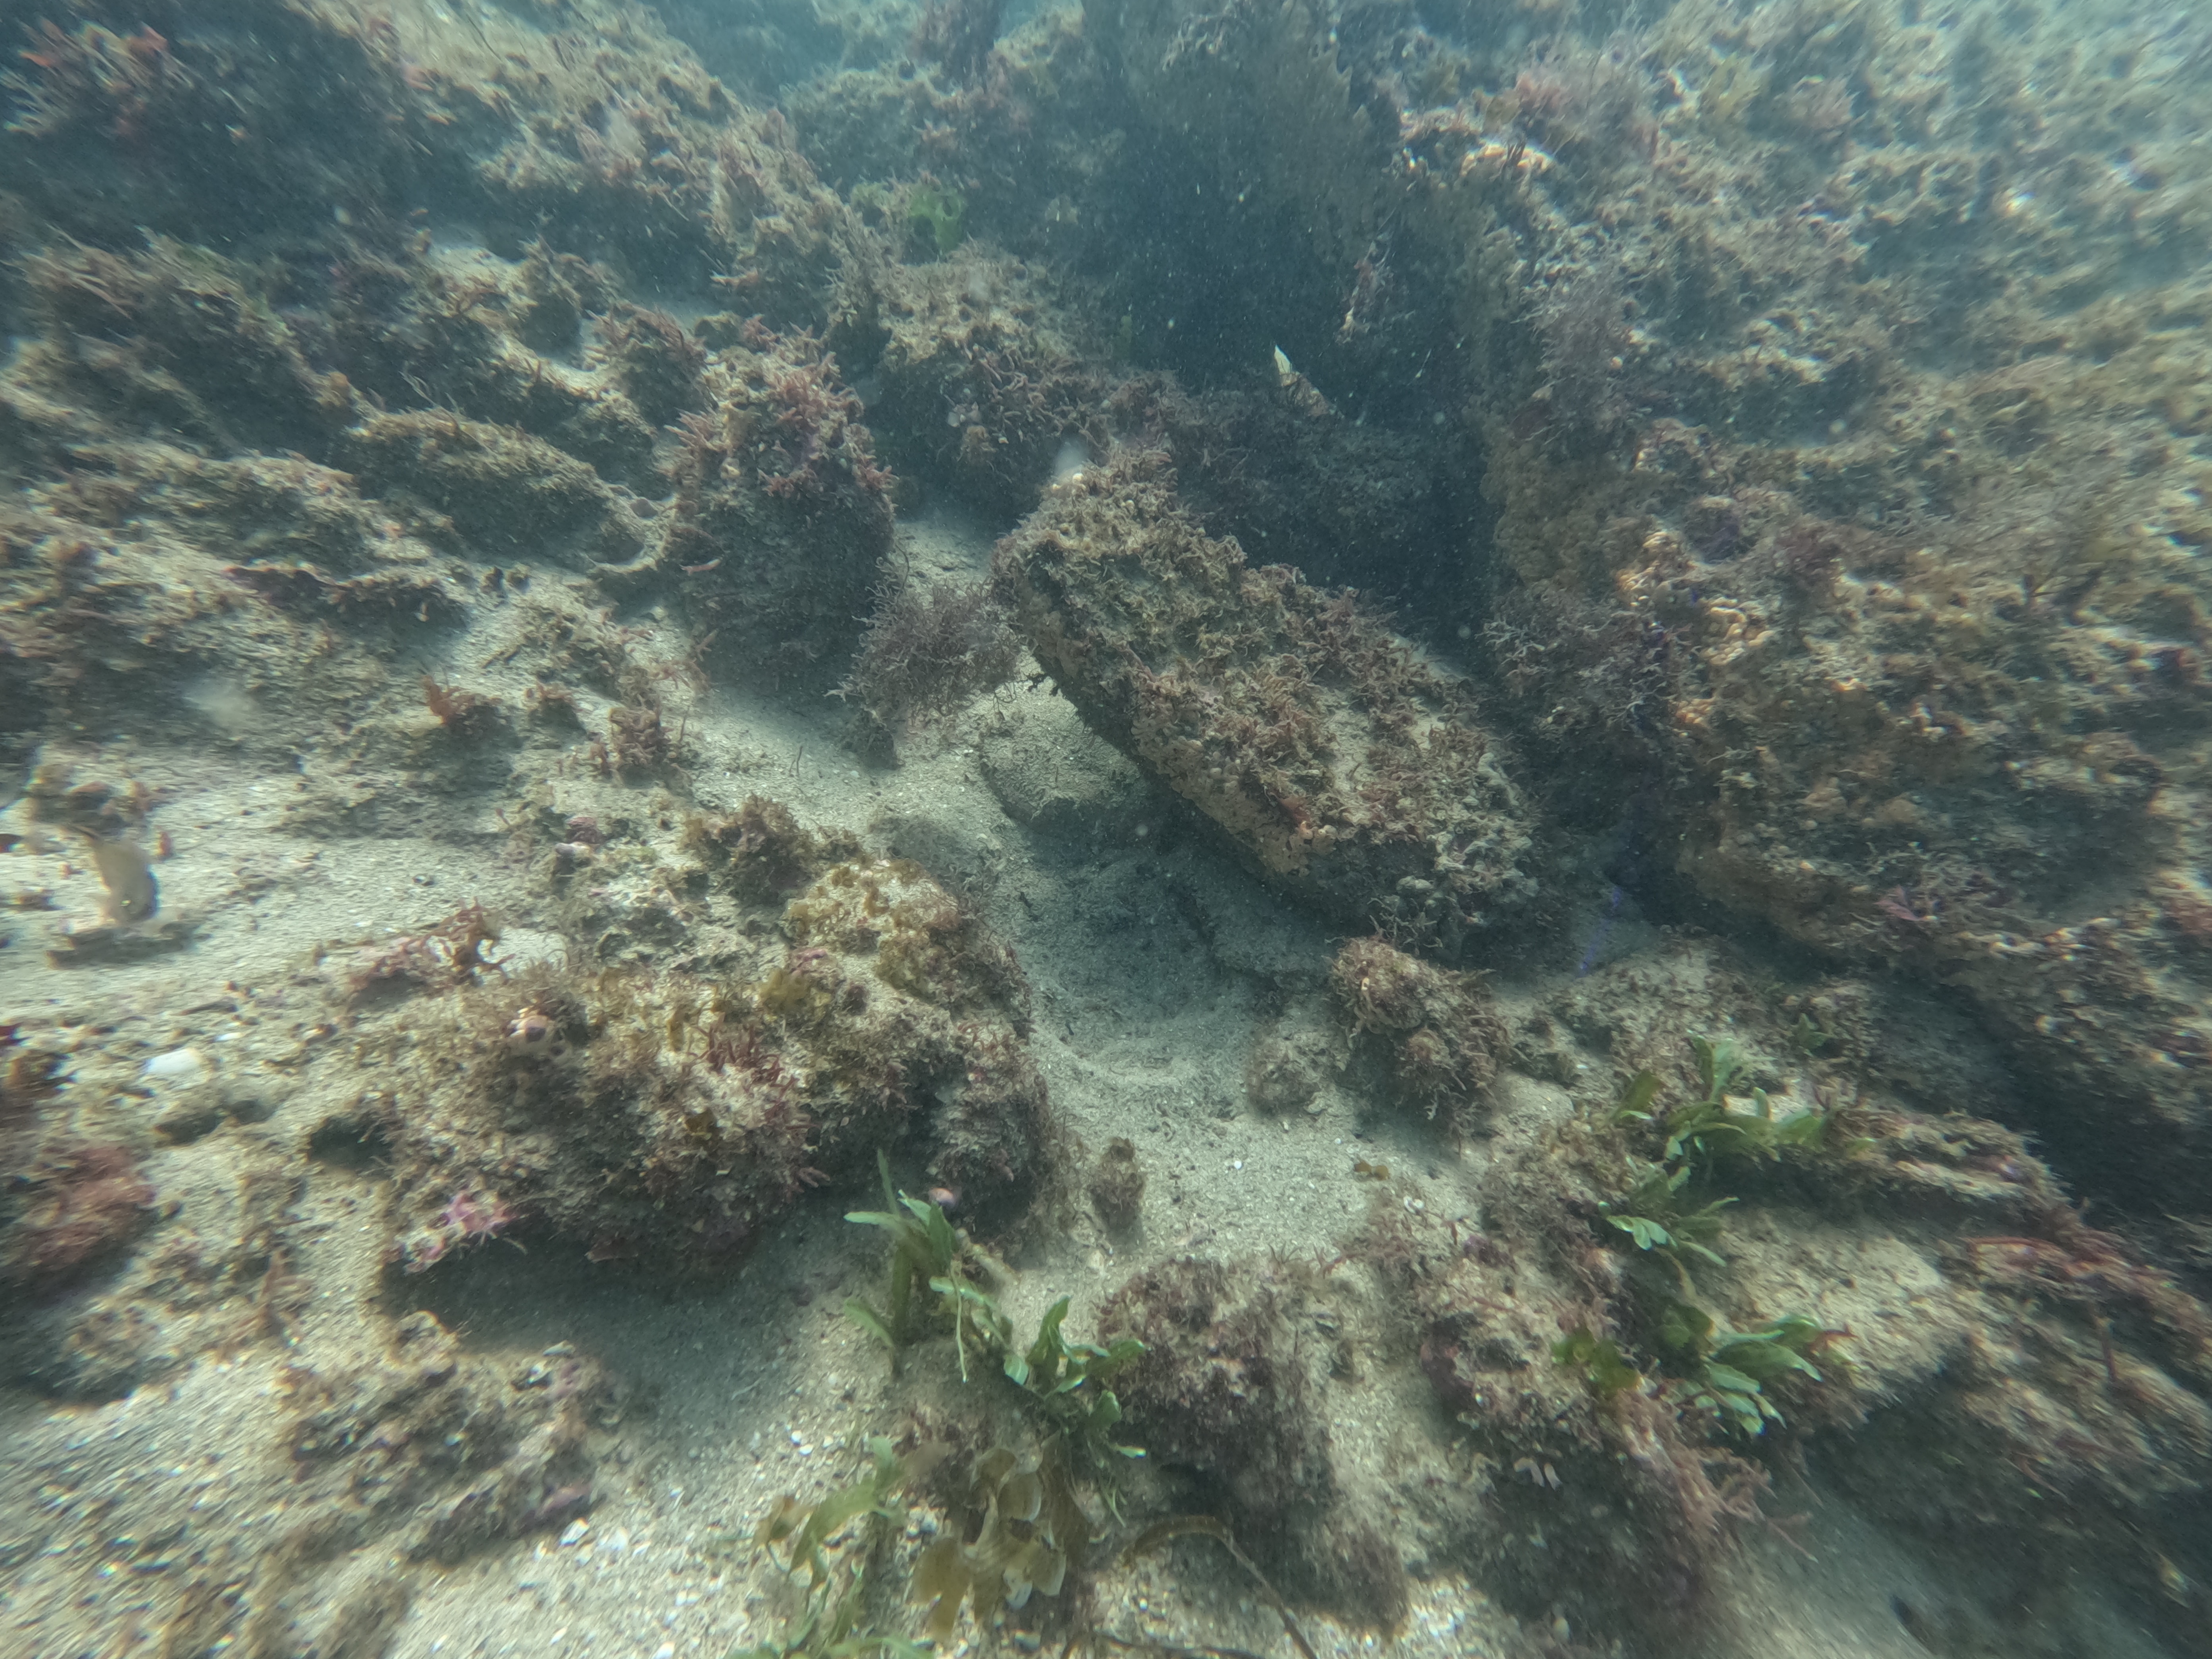

Supplement: Supplementary file 1560 [file G0027886.pdf › Ocean1/G0027886.pdf]

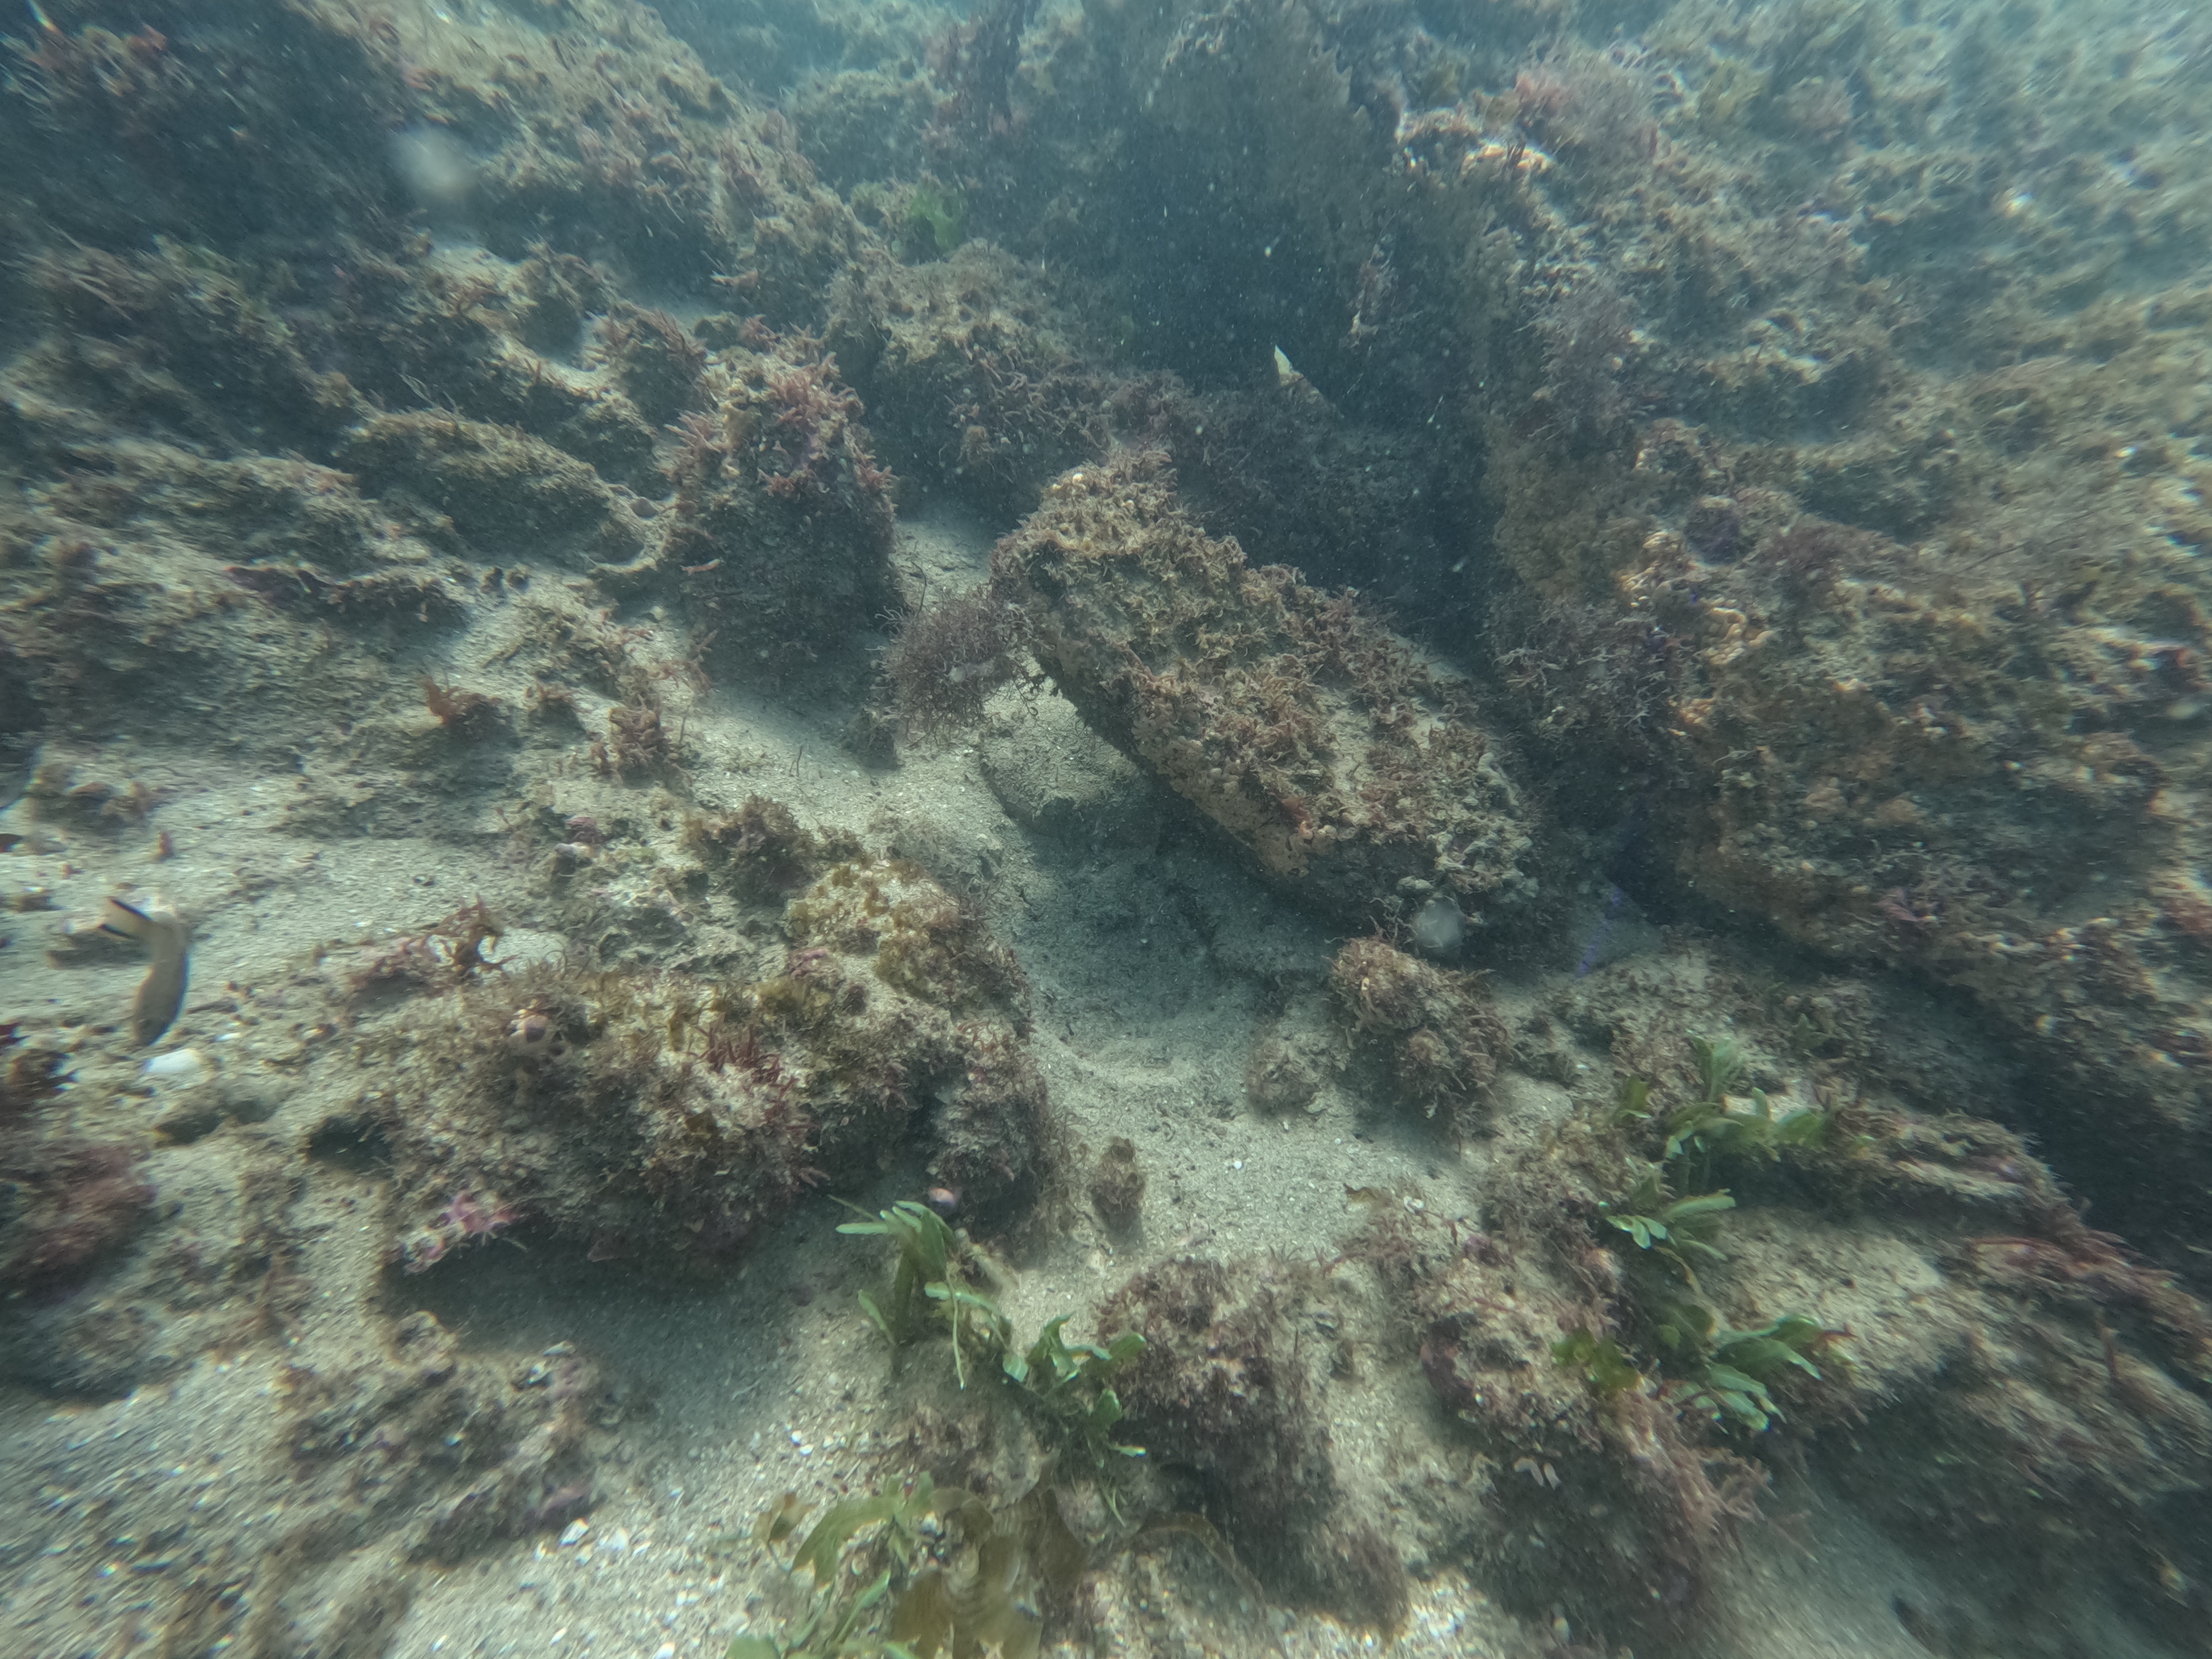

Supplement: Supplementary file 1561 [file G0027887.pdf › Ocean1/G0027887.pdf]

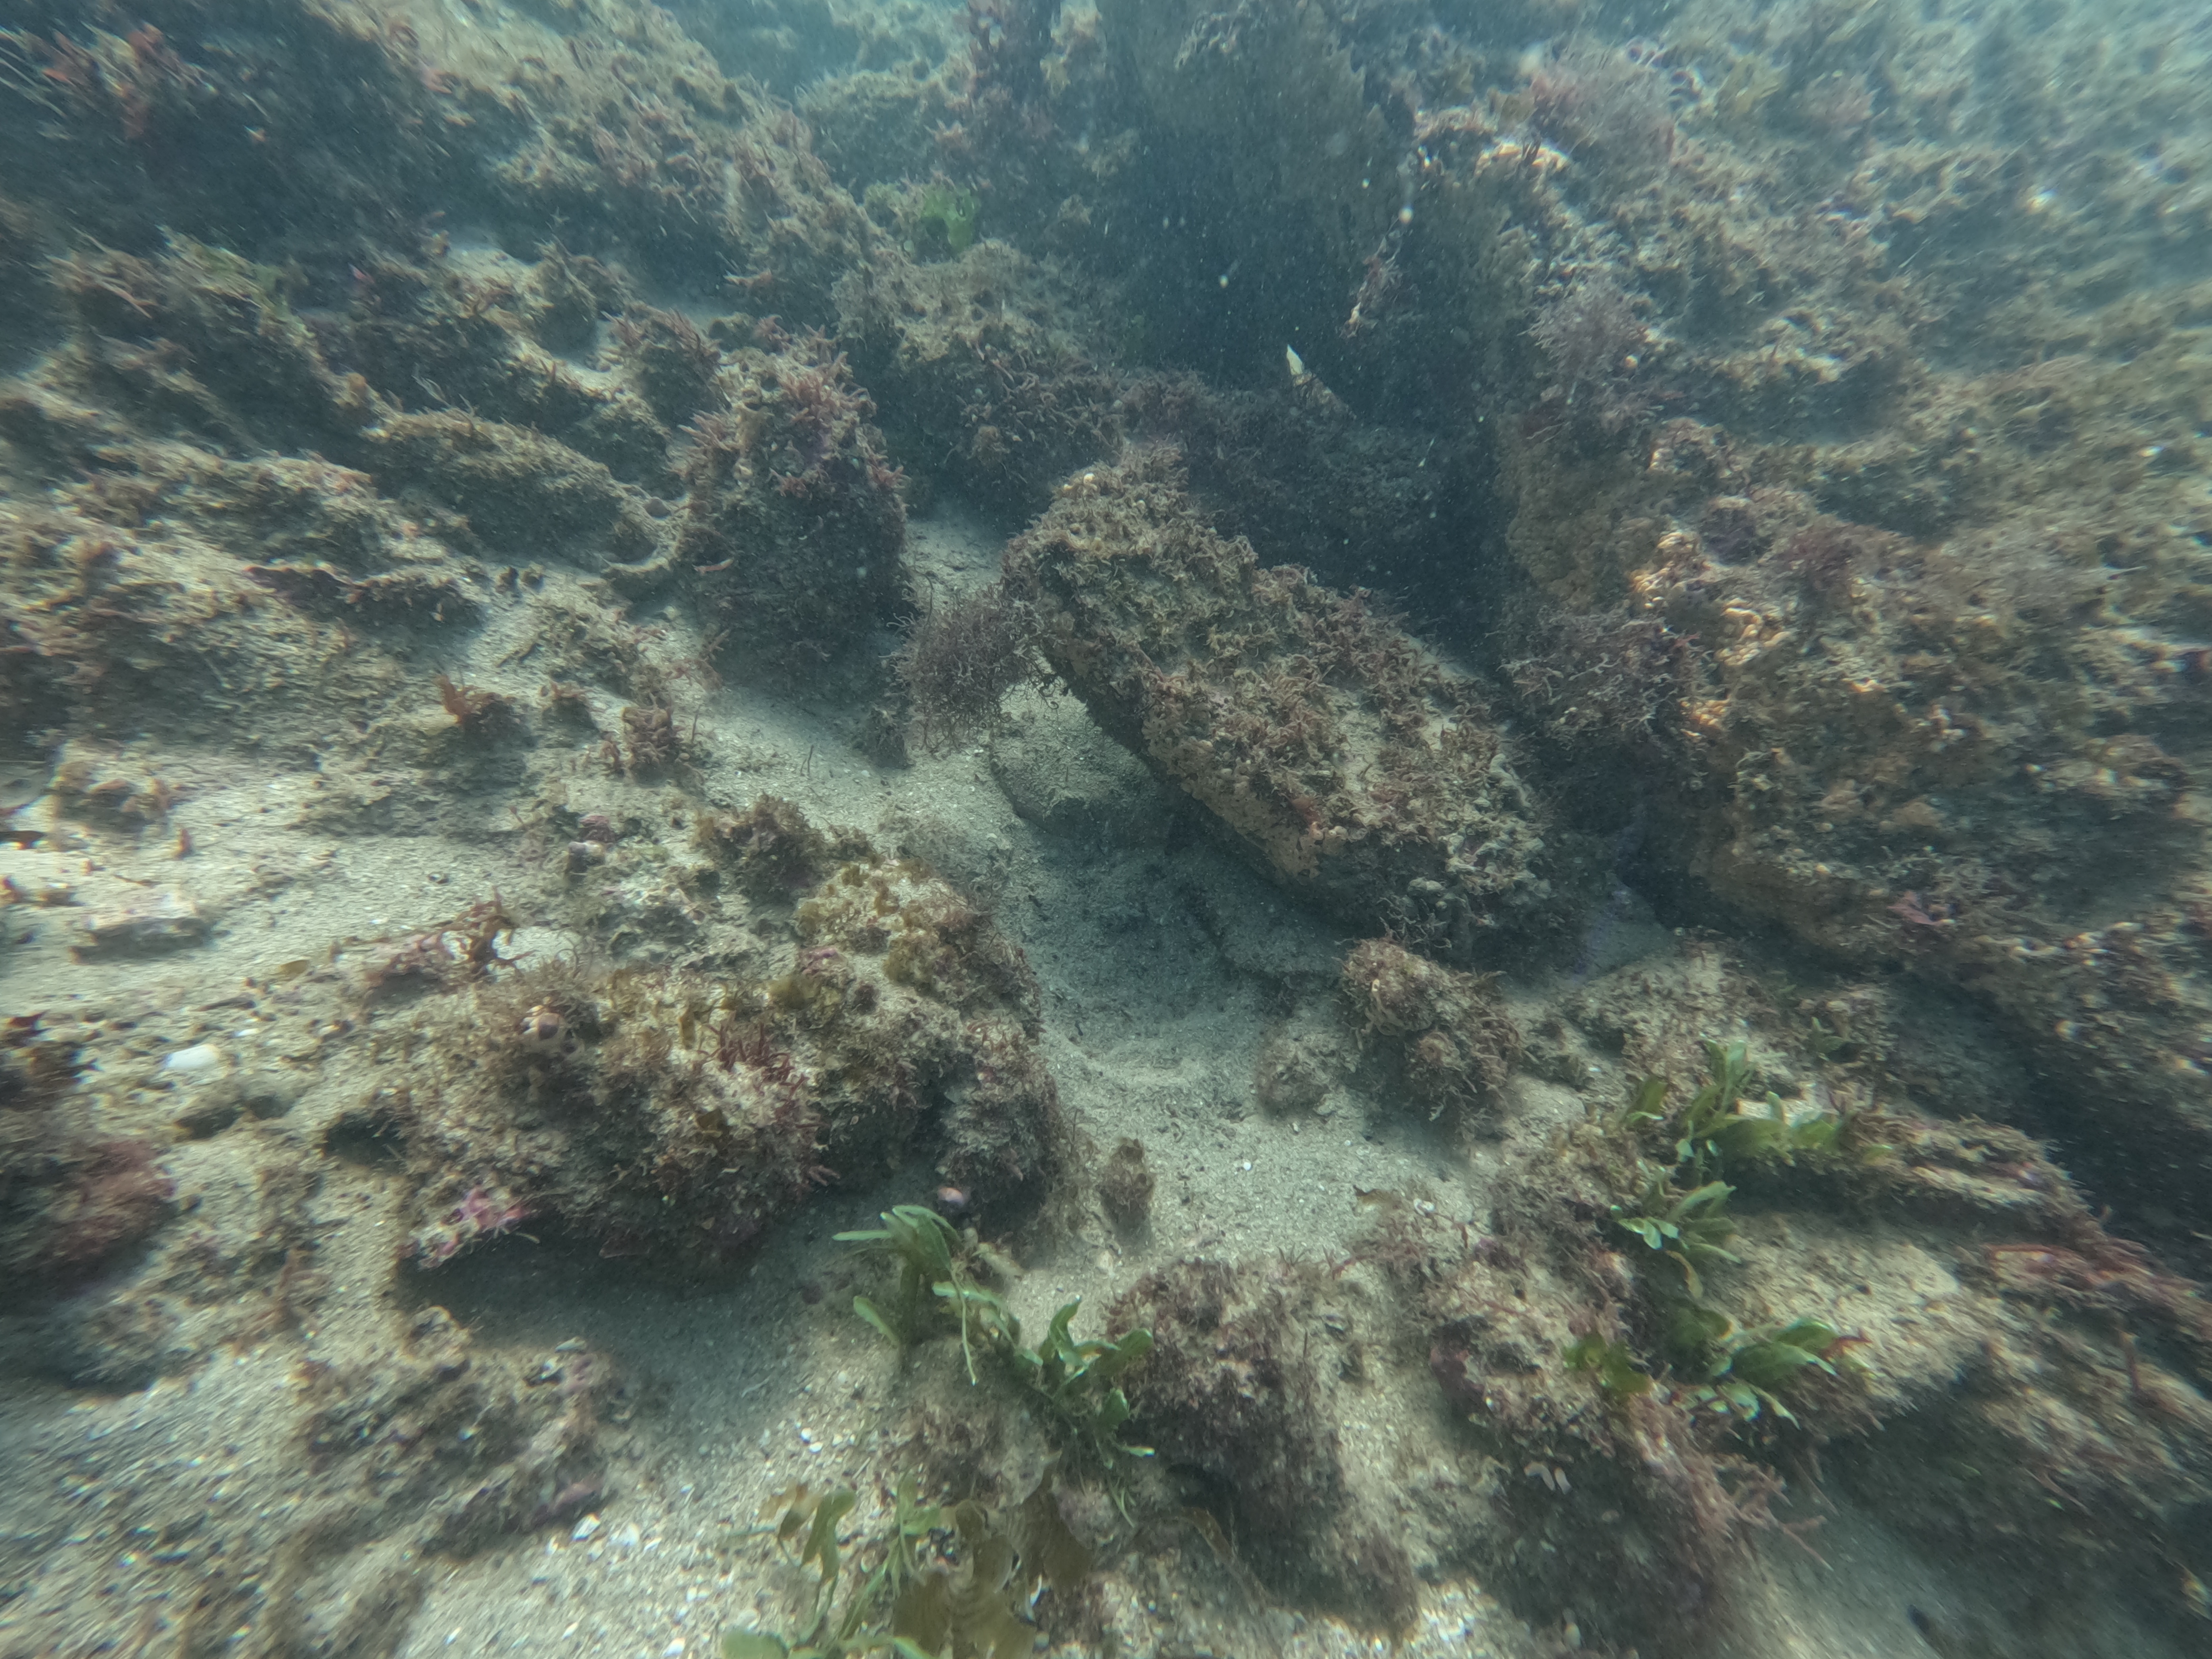

Supplement: Supplementary file 1562 [file G0027888.pdf › Ocean1/G0027888.pdf]

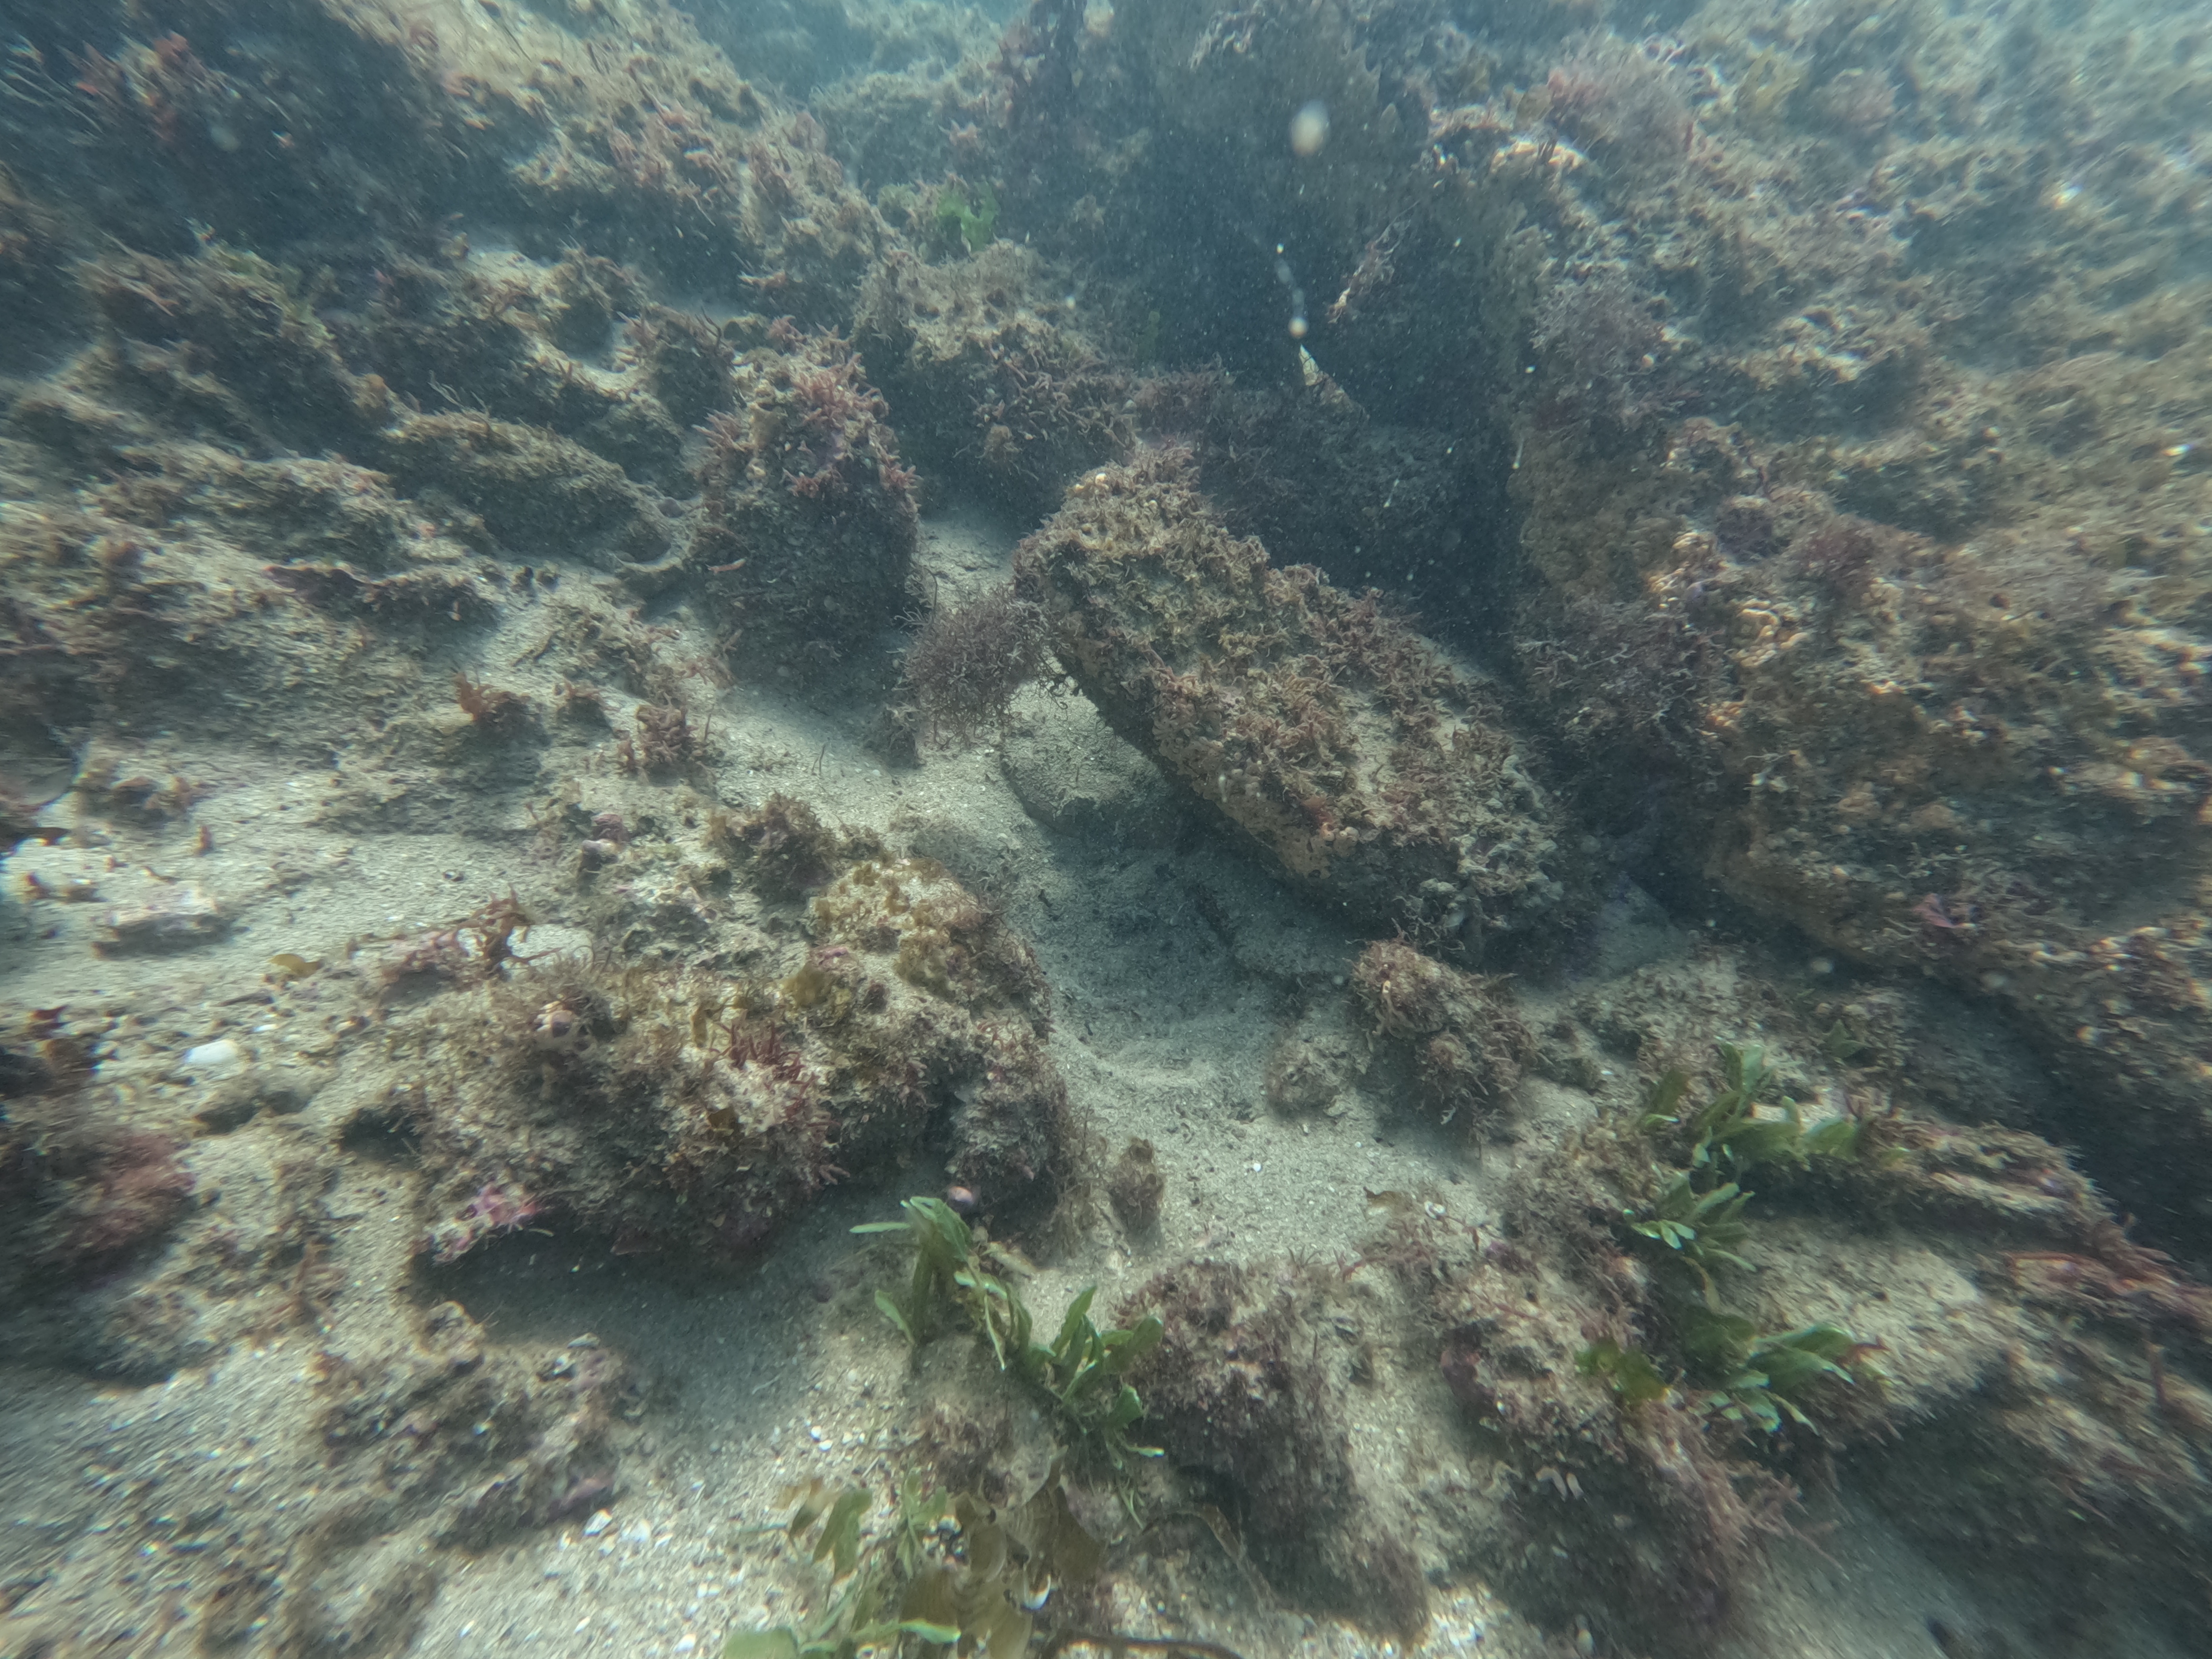

Supplement: Supplementary file 1563 [file G0027889.pdf › Ocean1/G0027889.pdf]

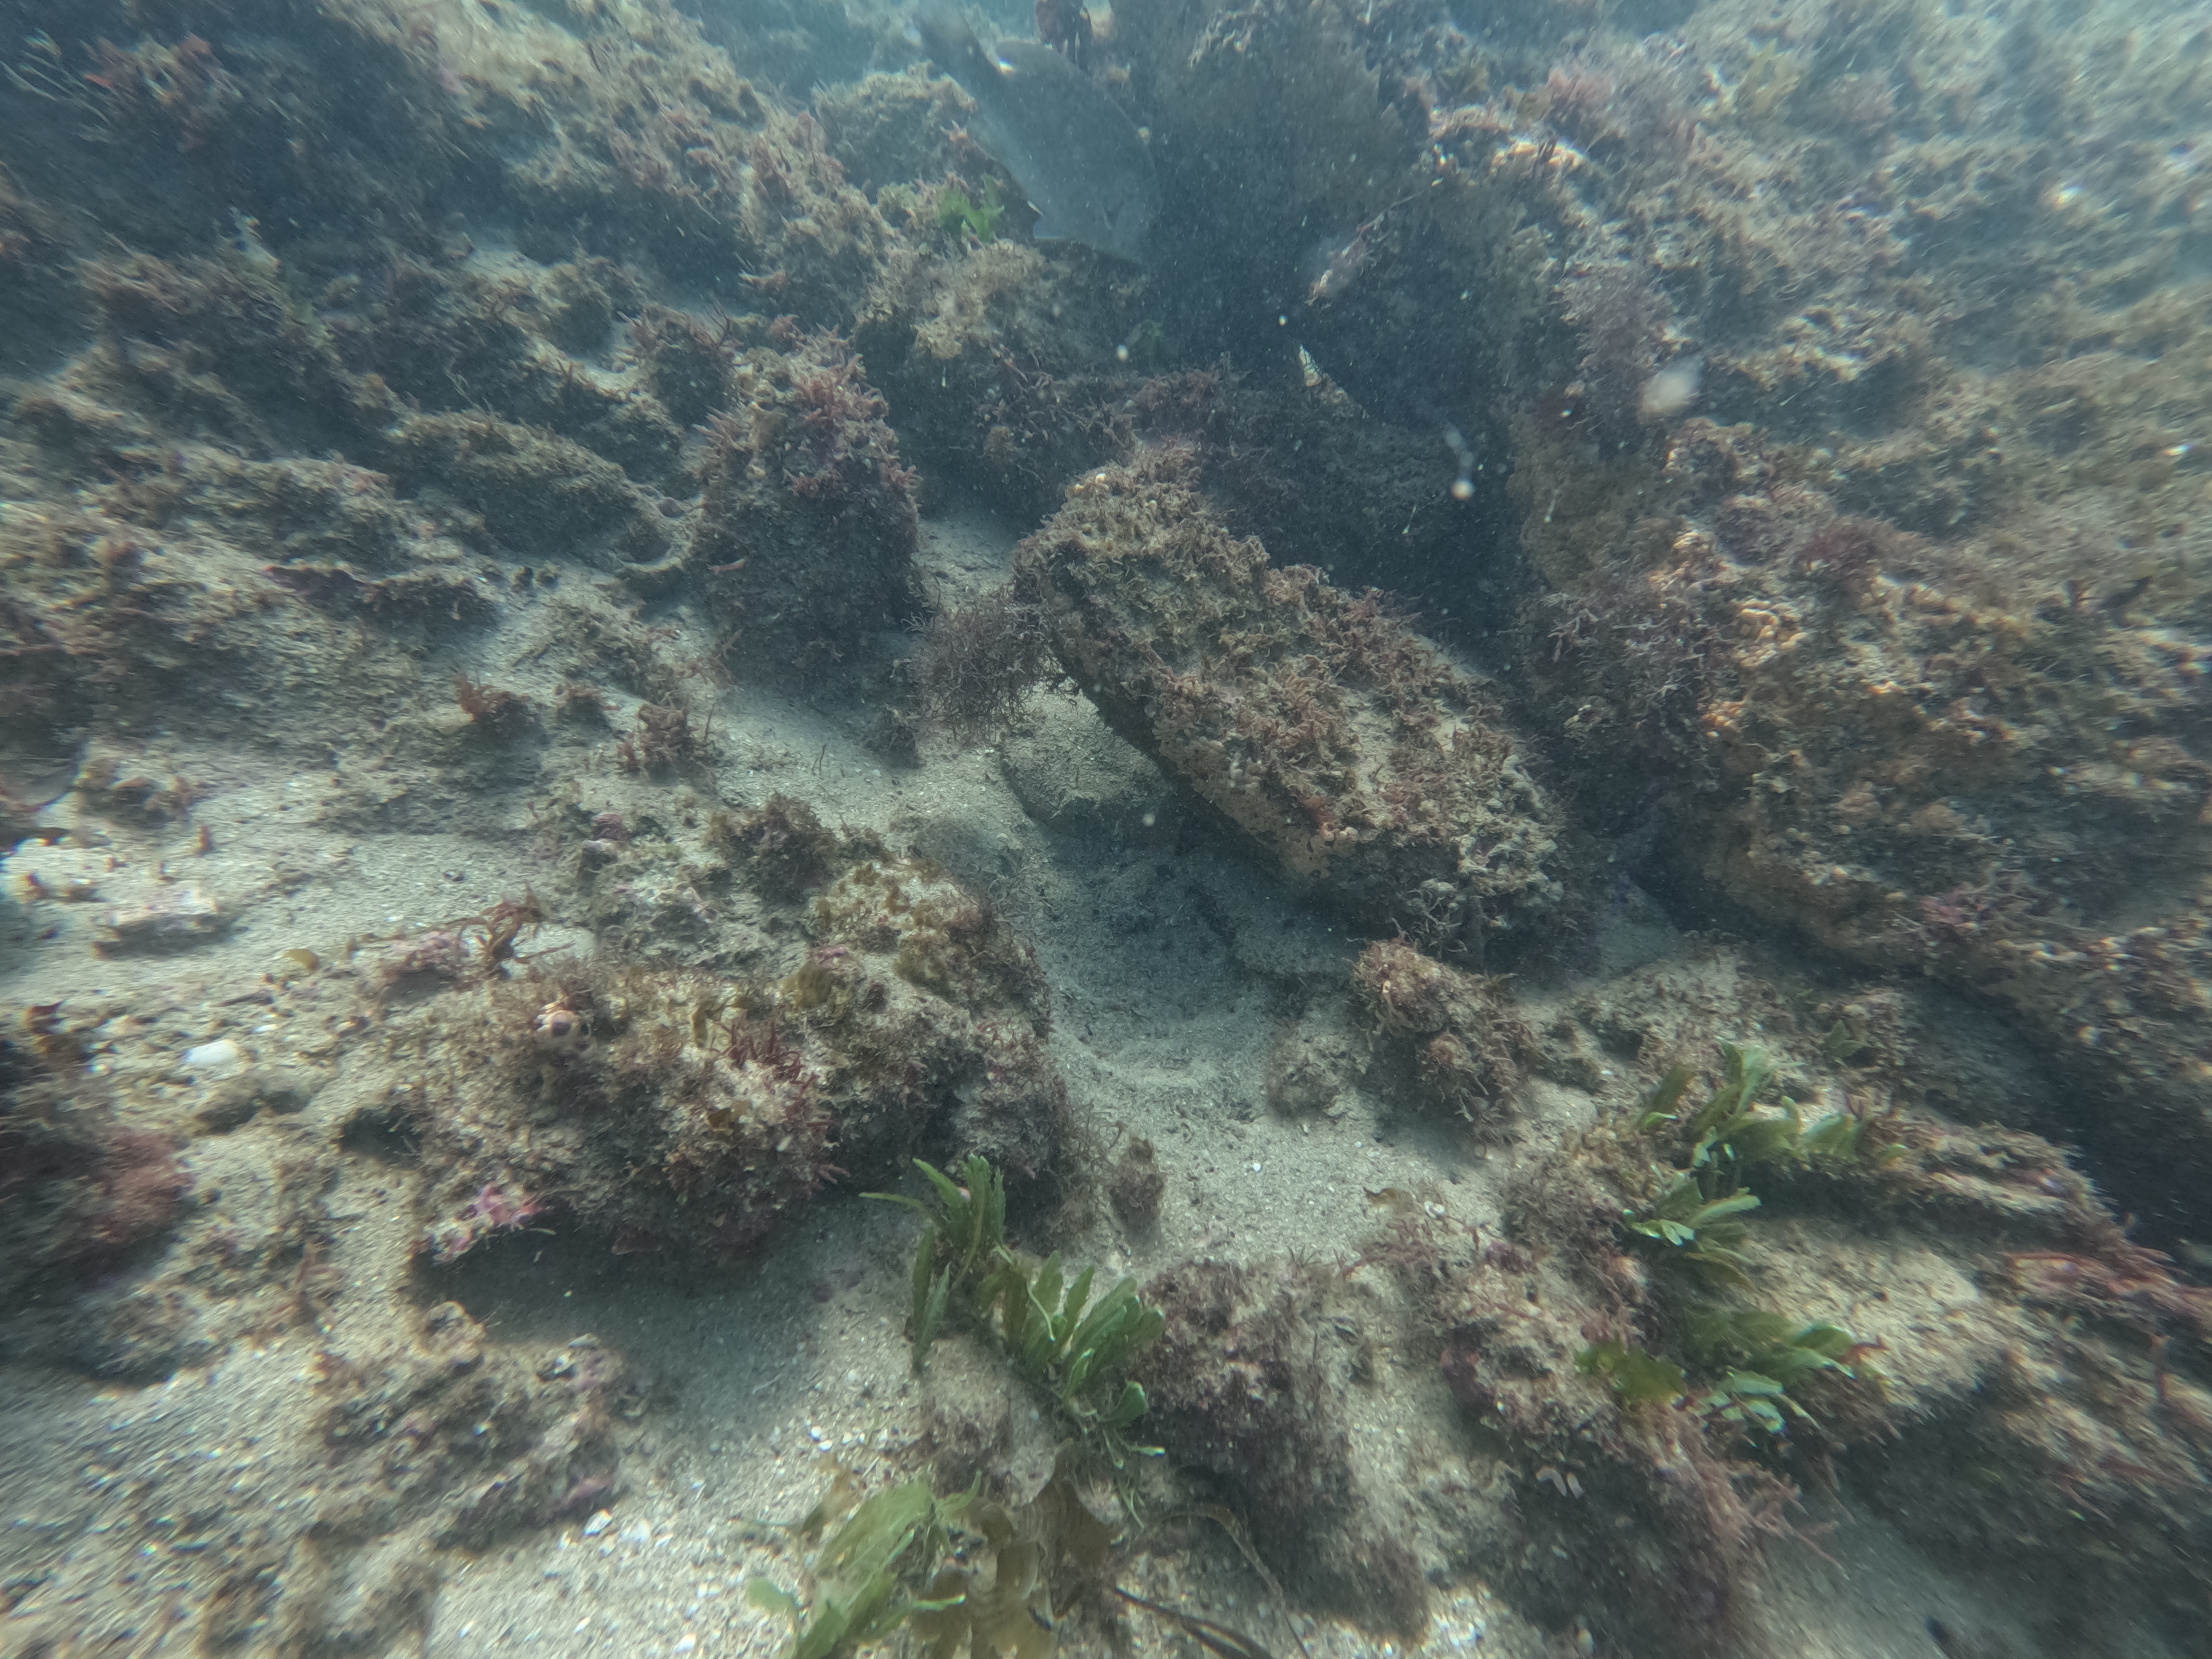

Supplement: Supplementary file 1564 [file G0027890.pdf › Ocean1/G0027890.pdf]

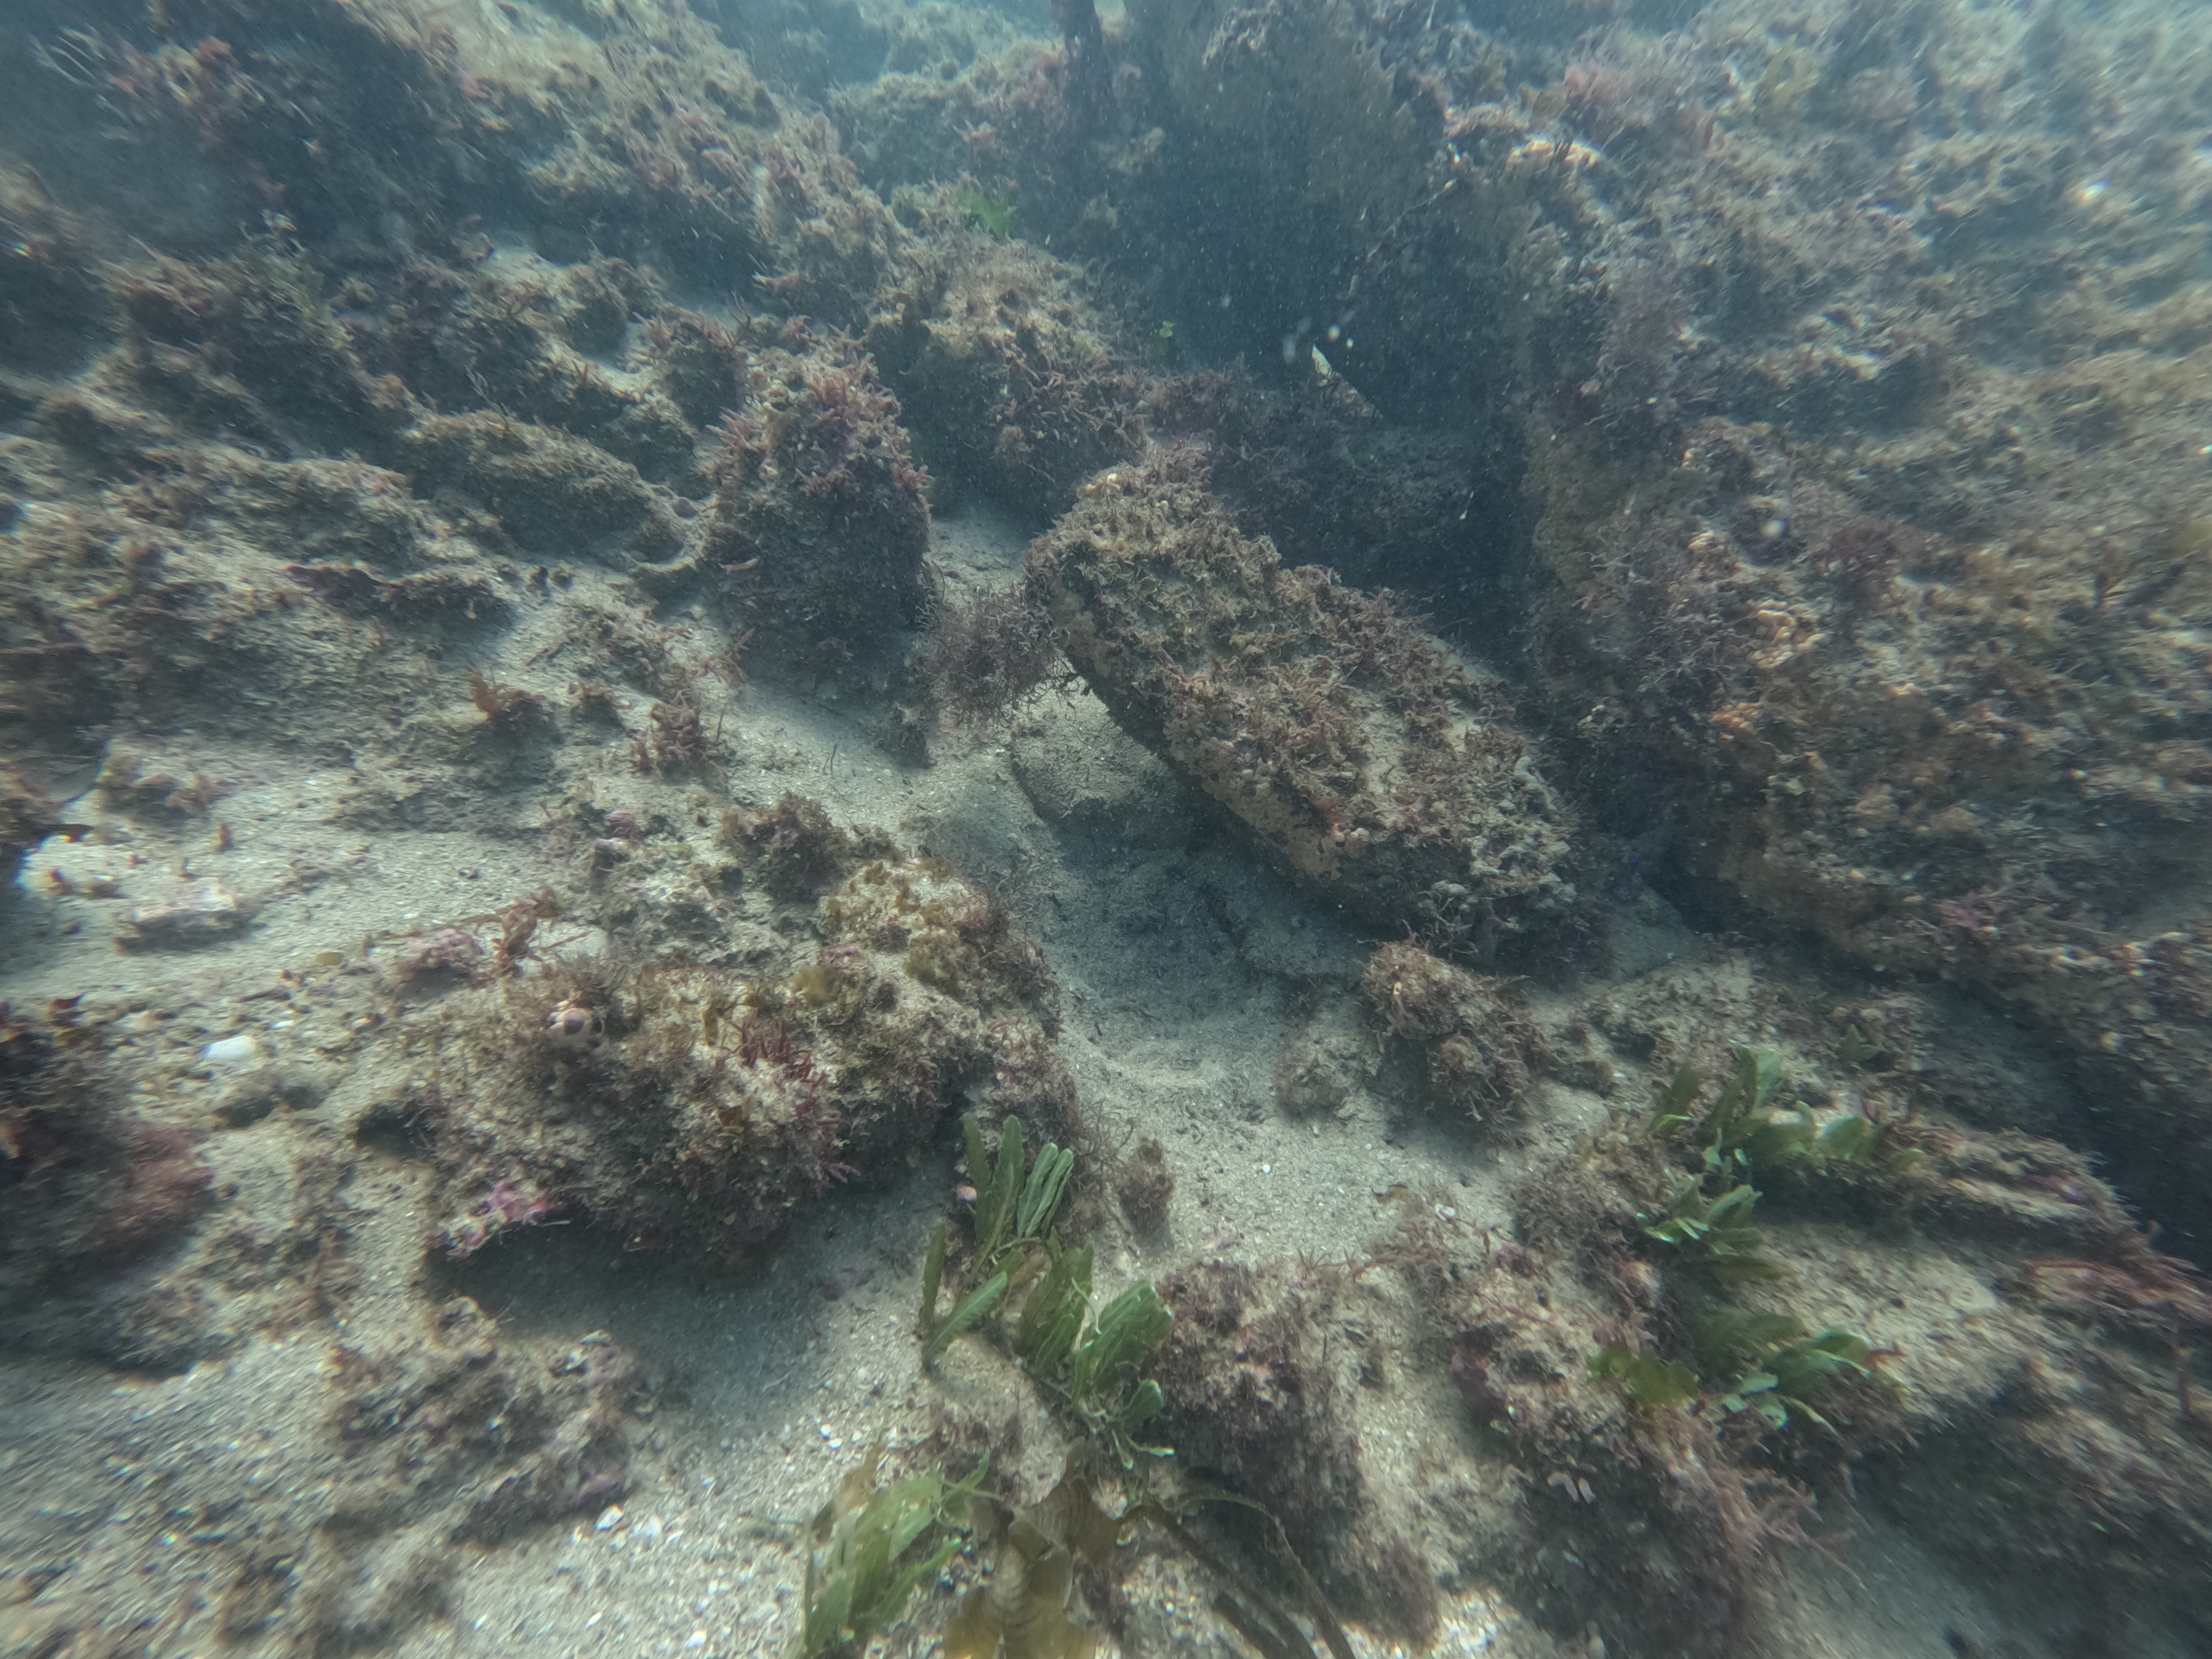

Supplement: Supplementary file 1565 [file G0027891.pdf › Ocean1/G0027891.pdf]

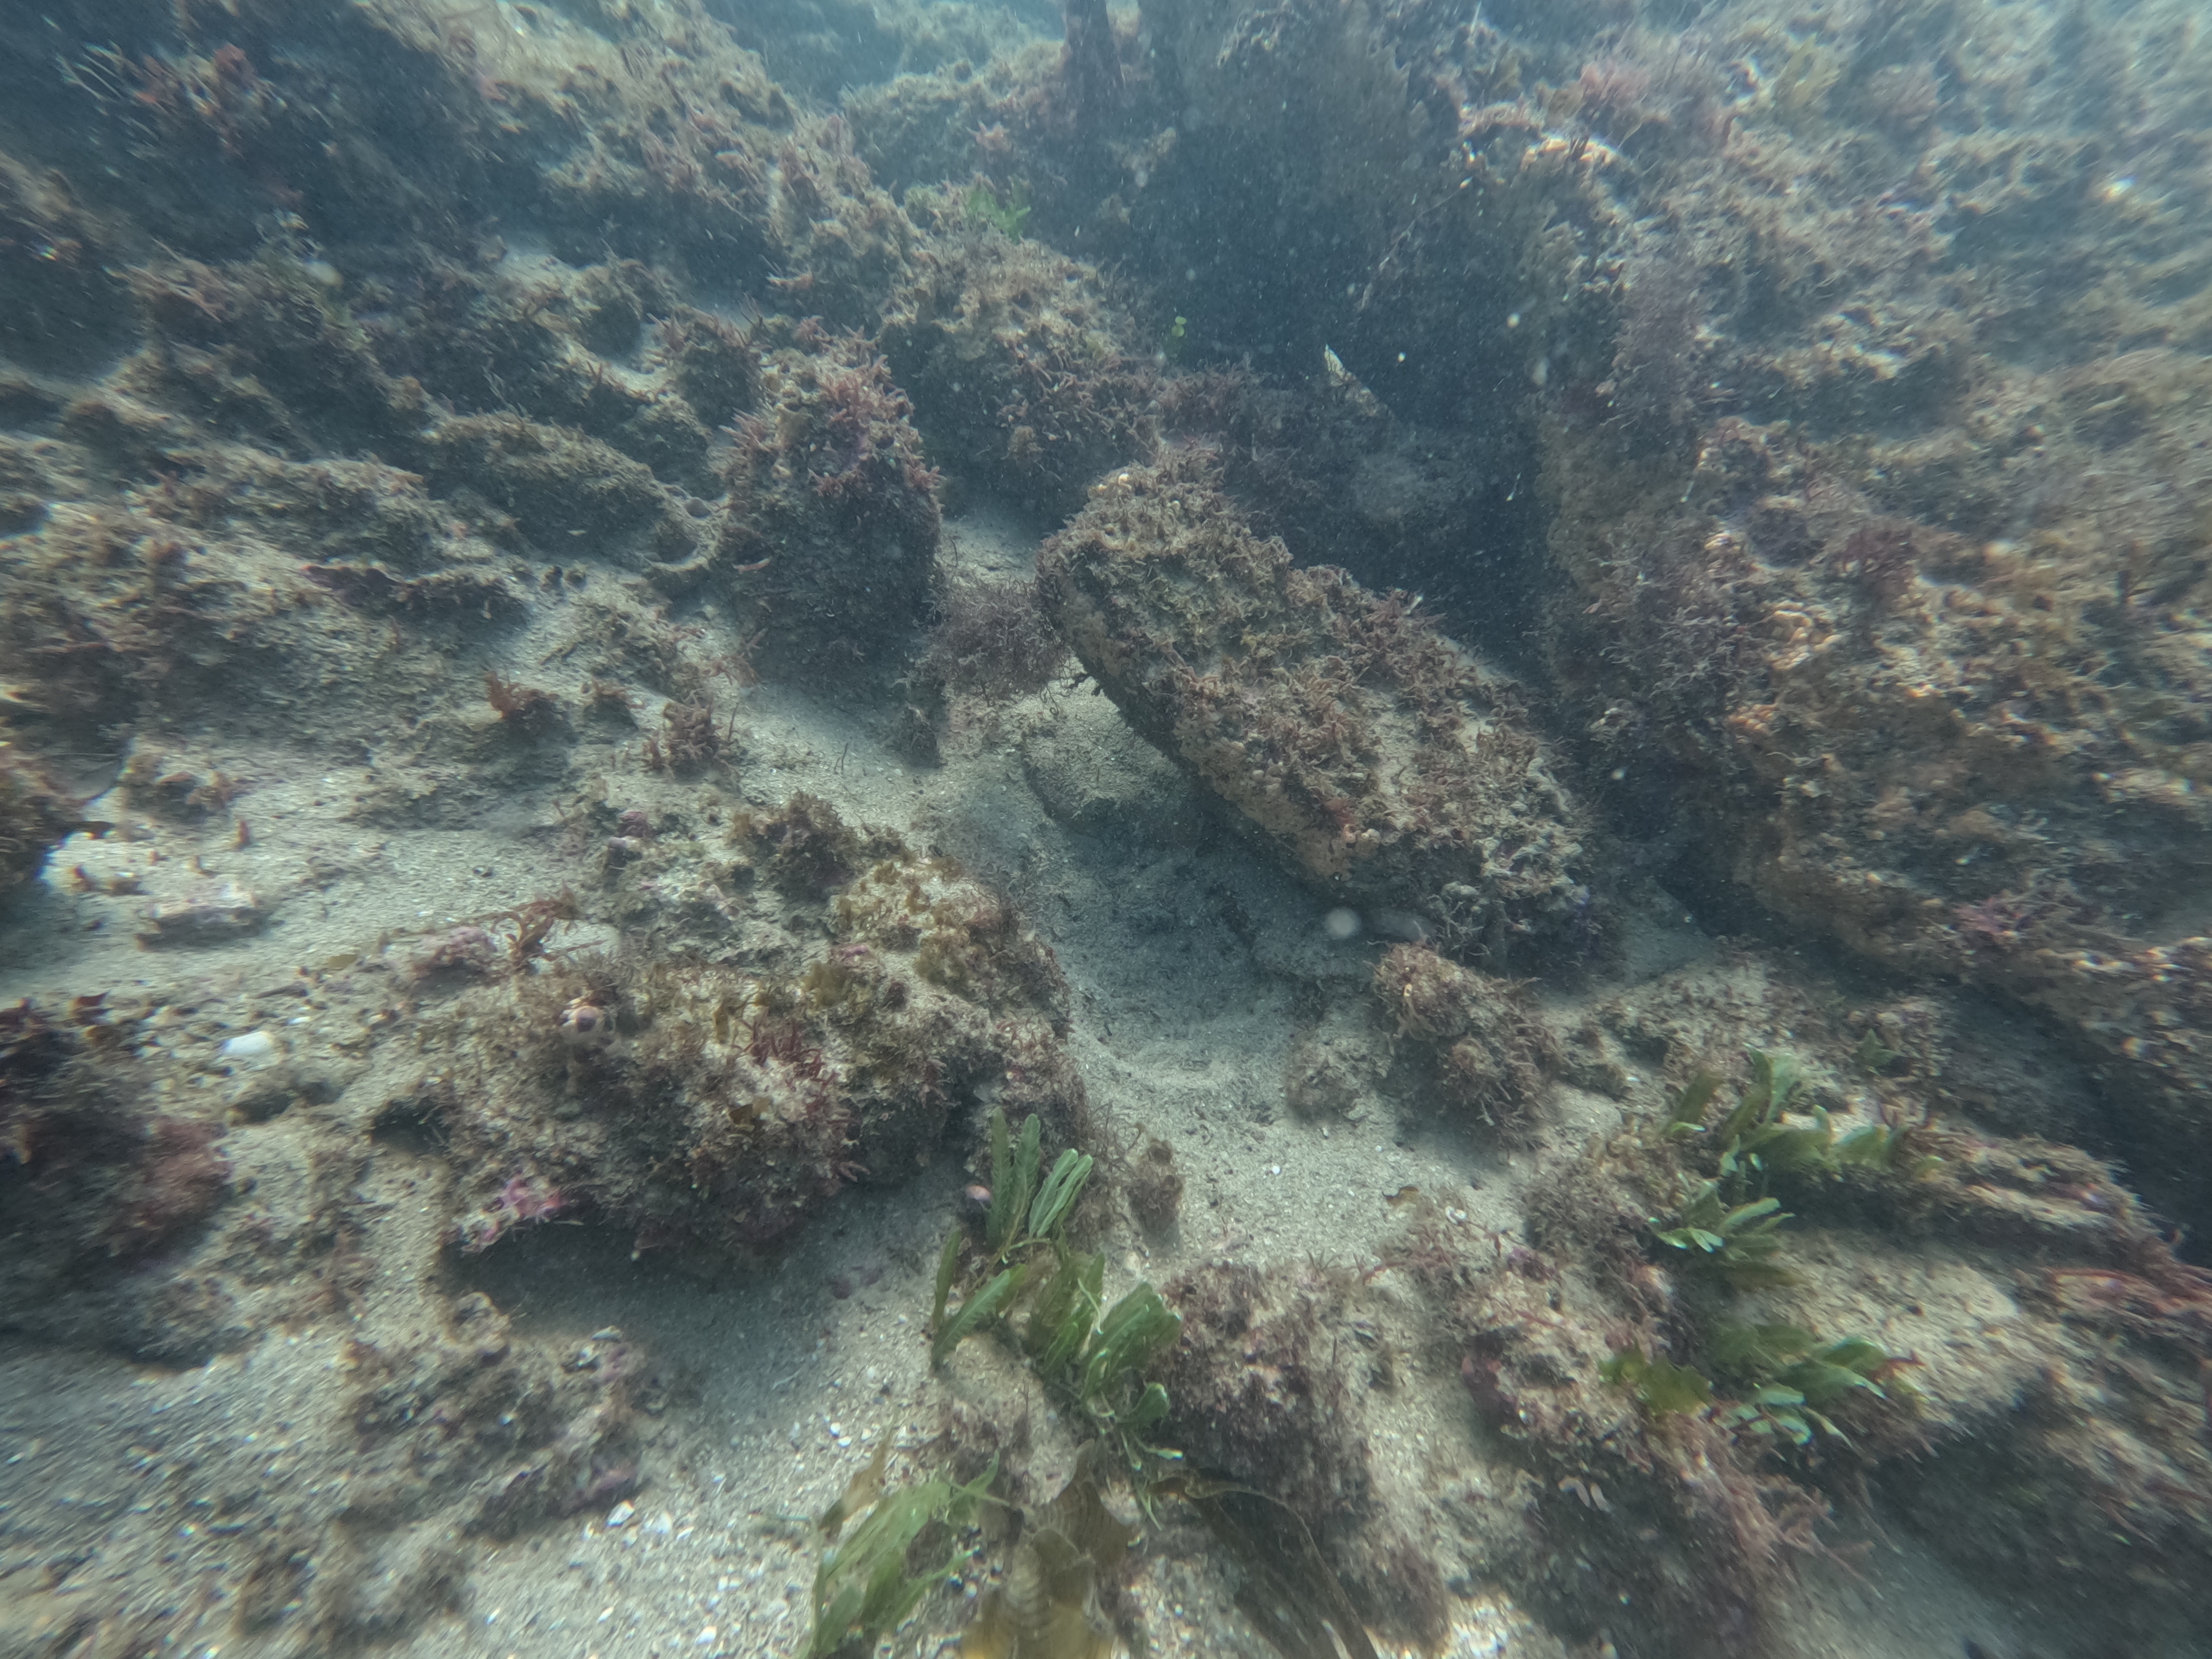

Supplement: Supplementary file 1566 [file G0027892.pdf › Ocean1/G0027892.pdf]

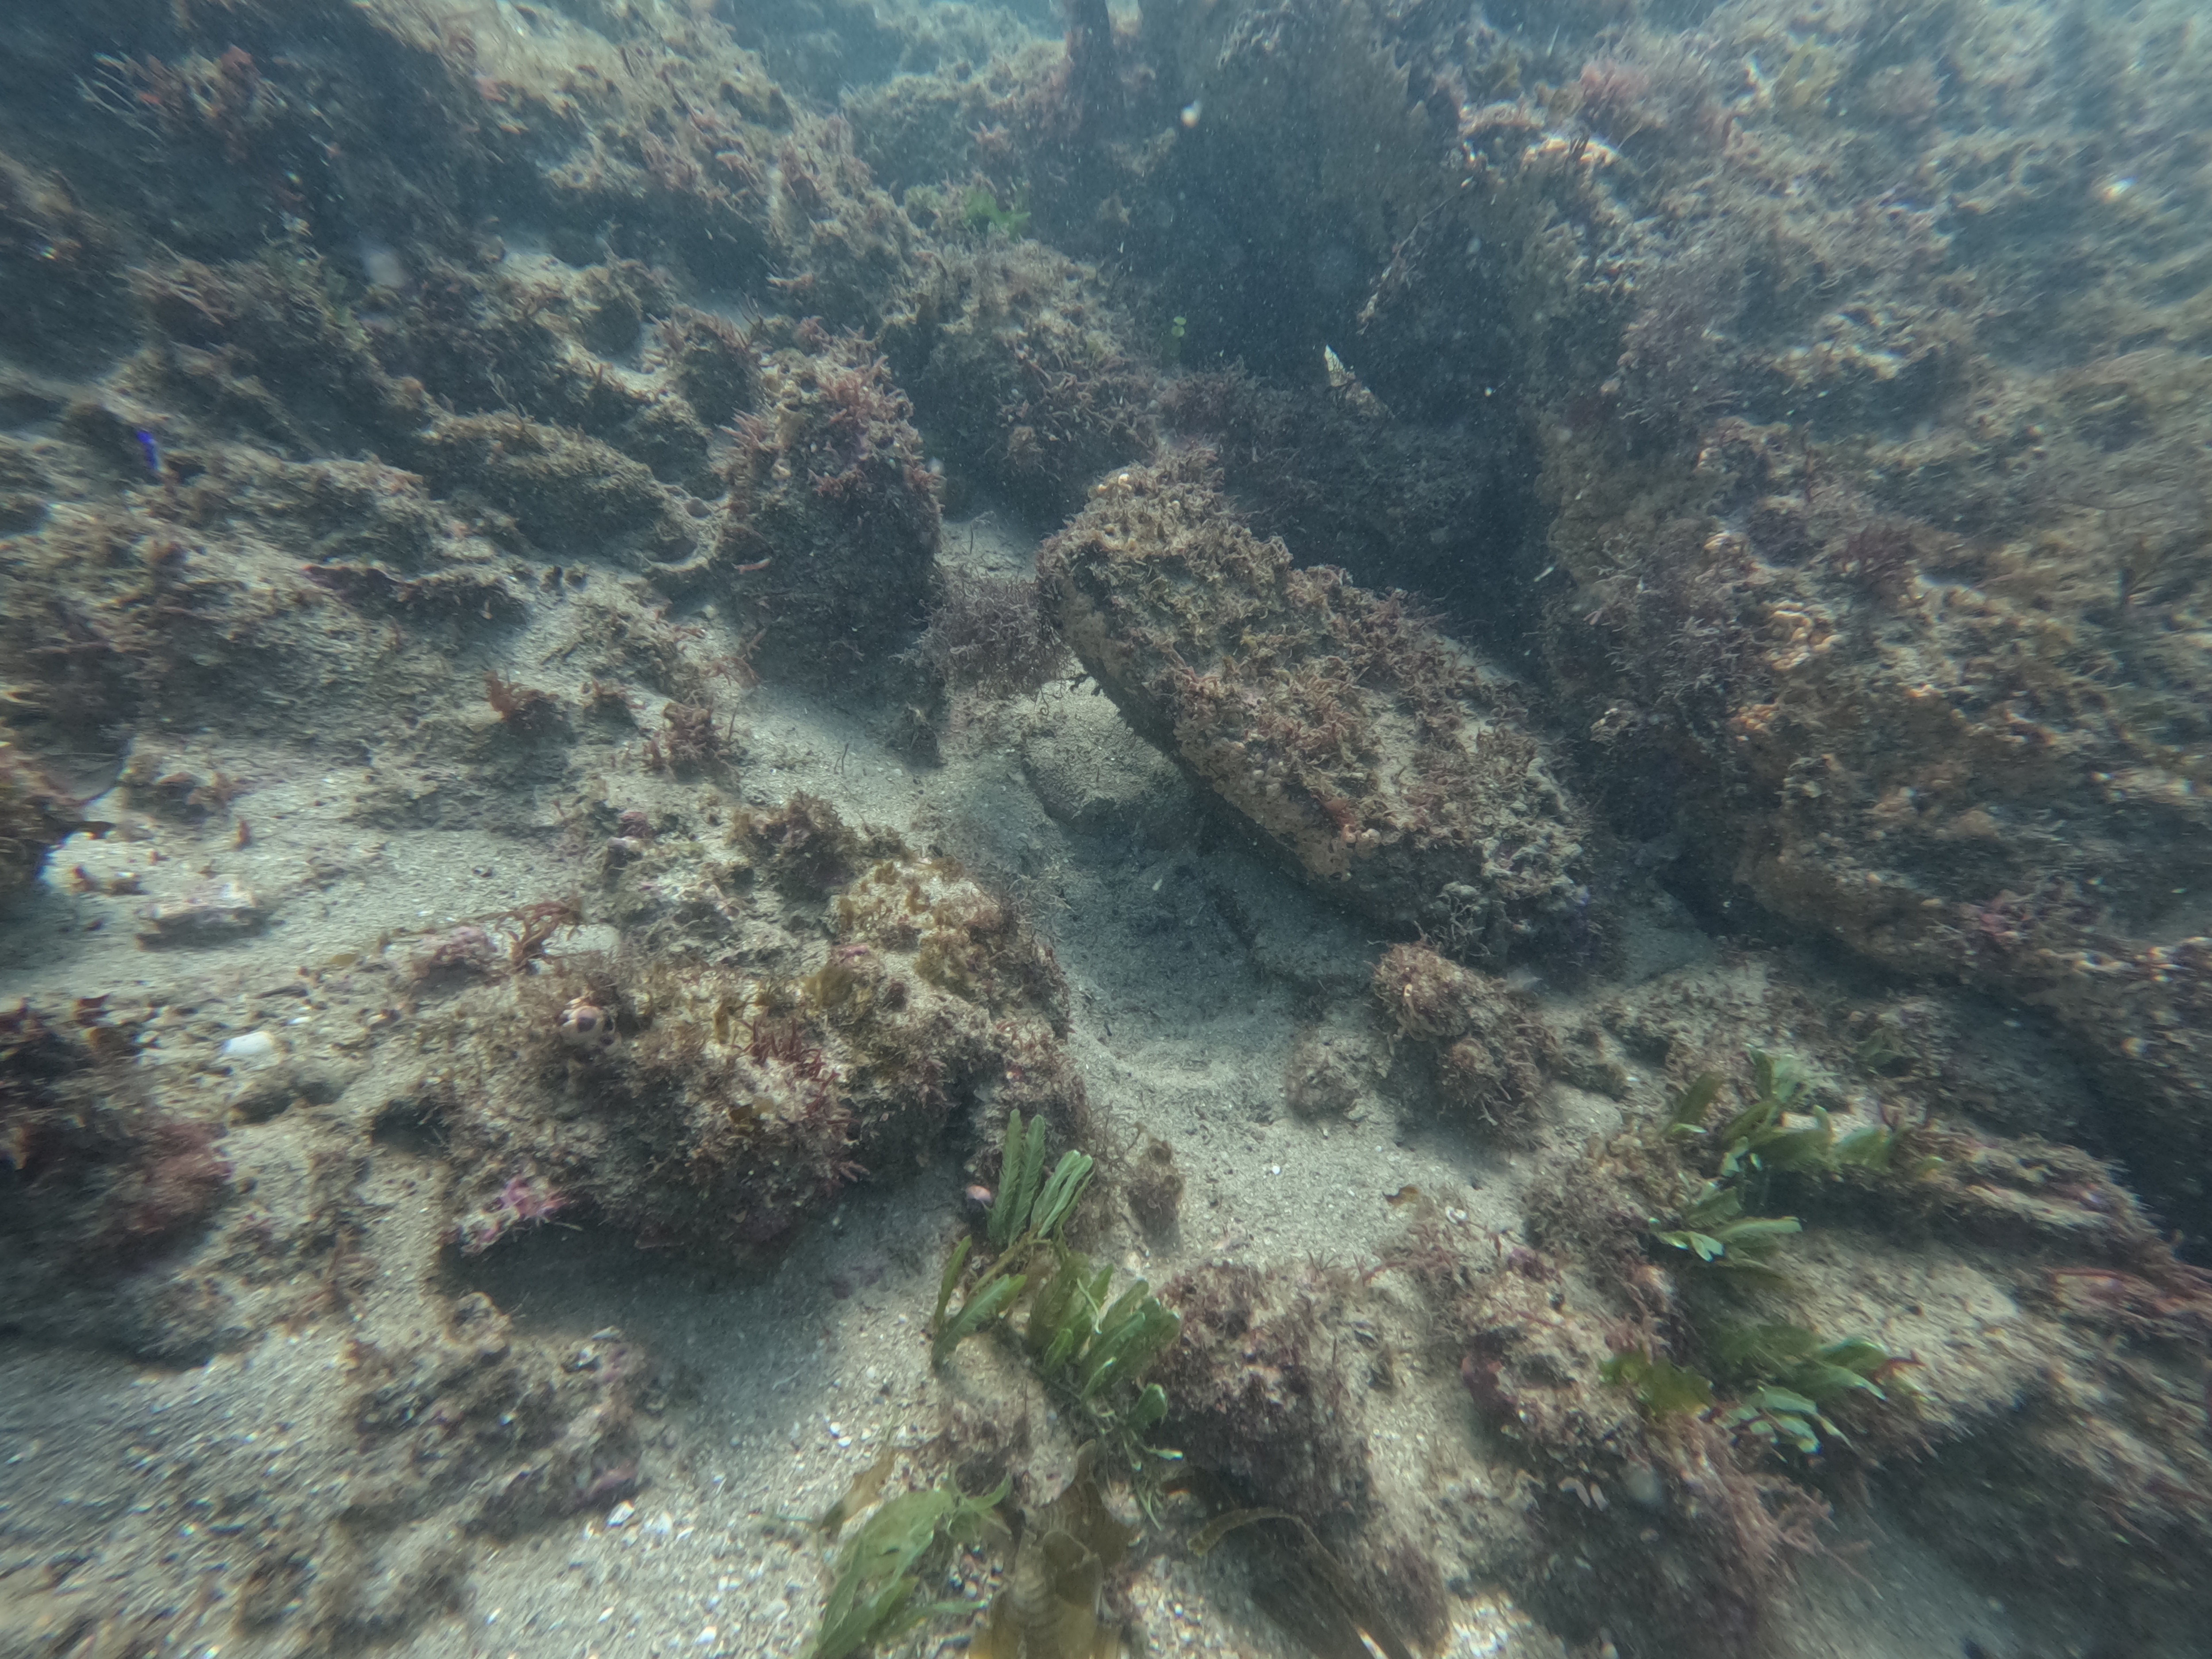

Supplement: Supplementary file 1567 [file G0027893.pdf › Ocean1/G0027893.pdf]

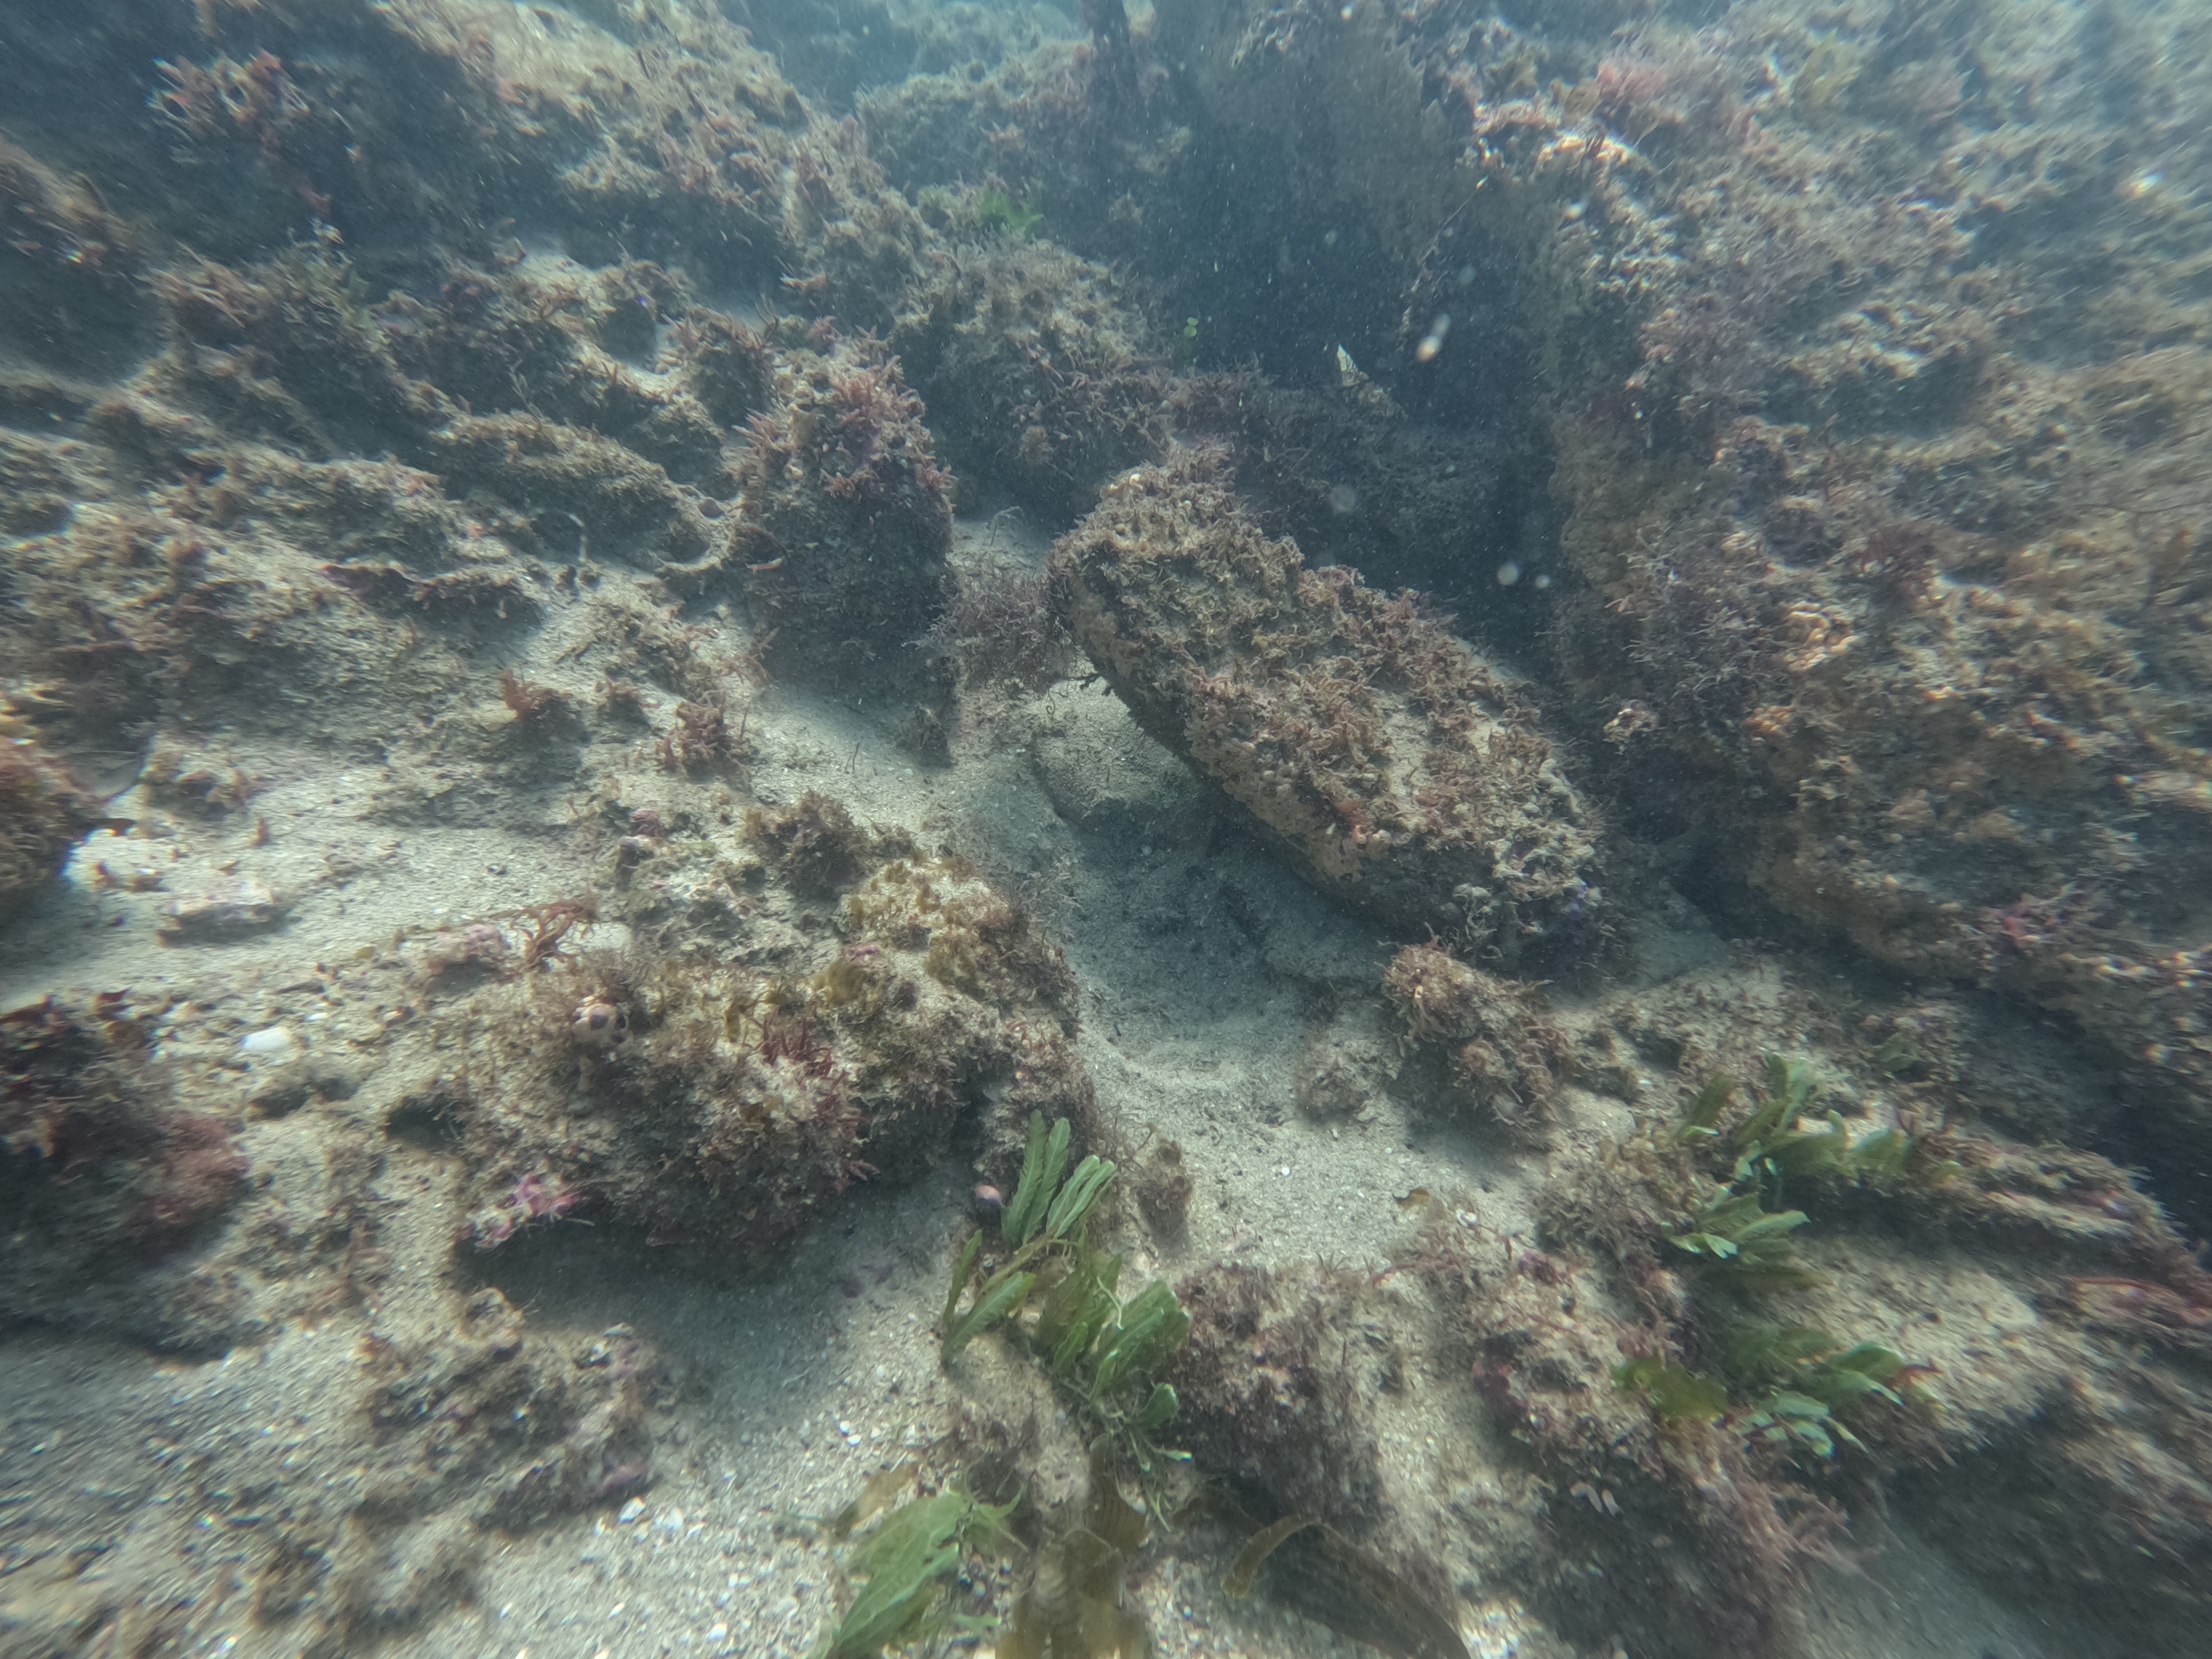

Supplement: Supplementary file 1568 [file G0027894.pdf › Ocean1/G0027894.pdf]

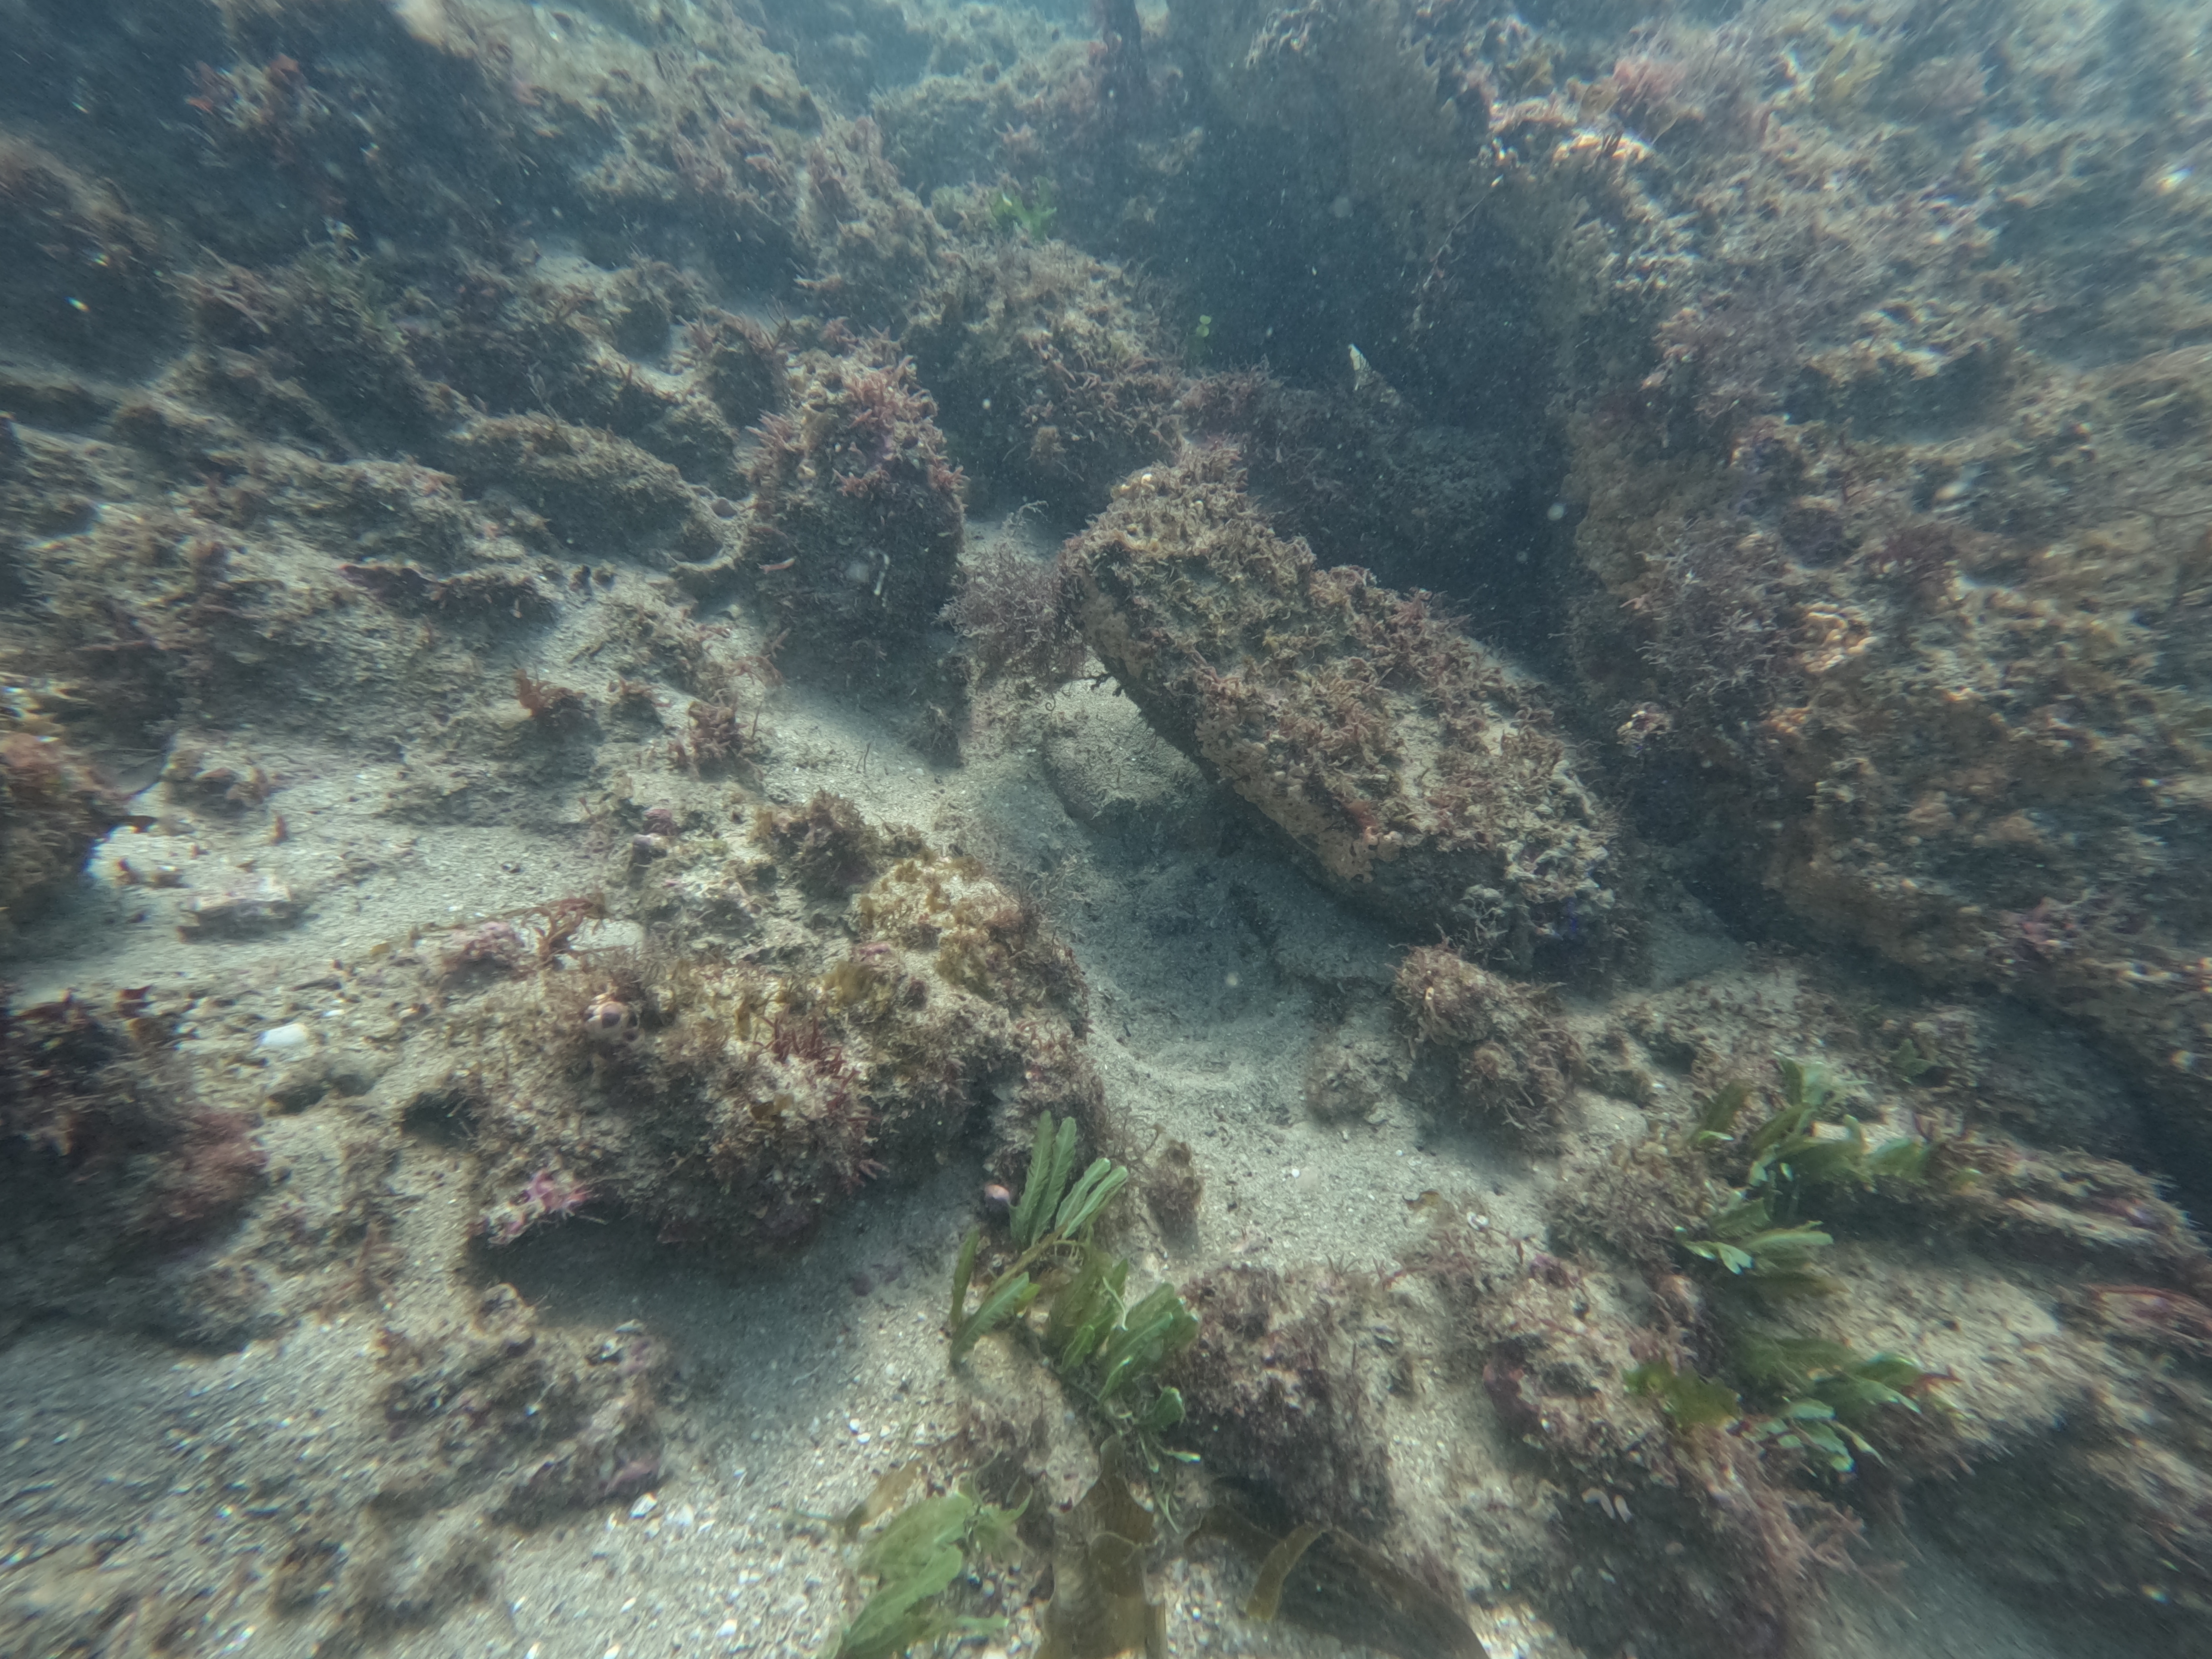

Supplement: Supplementary file 1569 [file G0027895.pdf › Ocean1/G0027895.pdf]

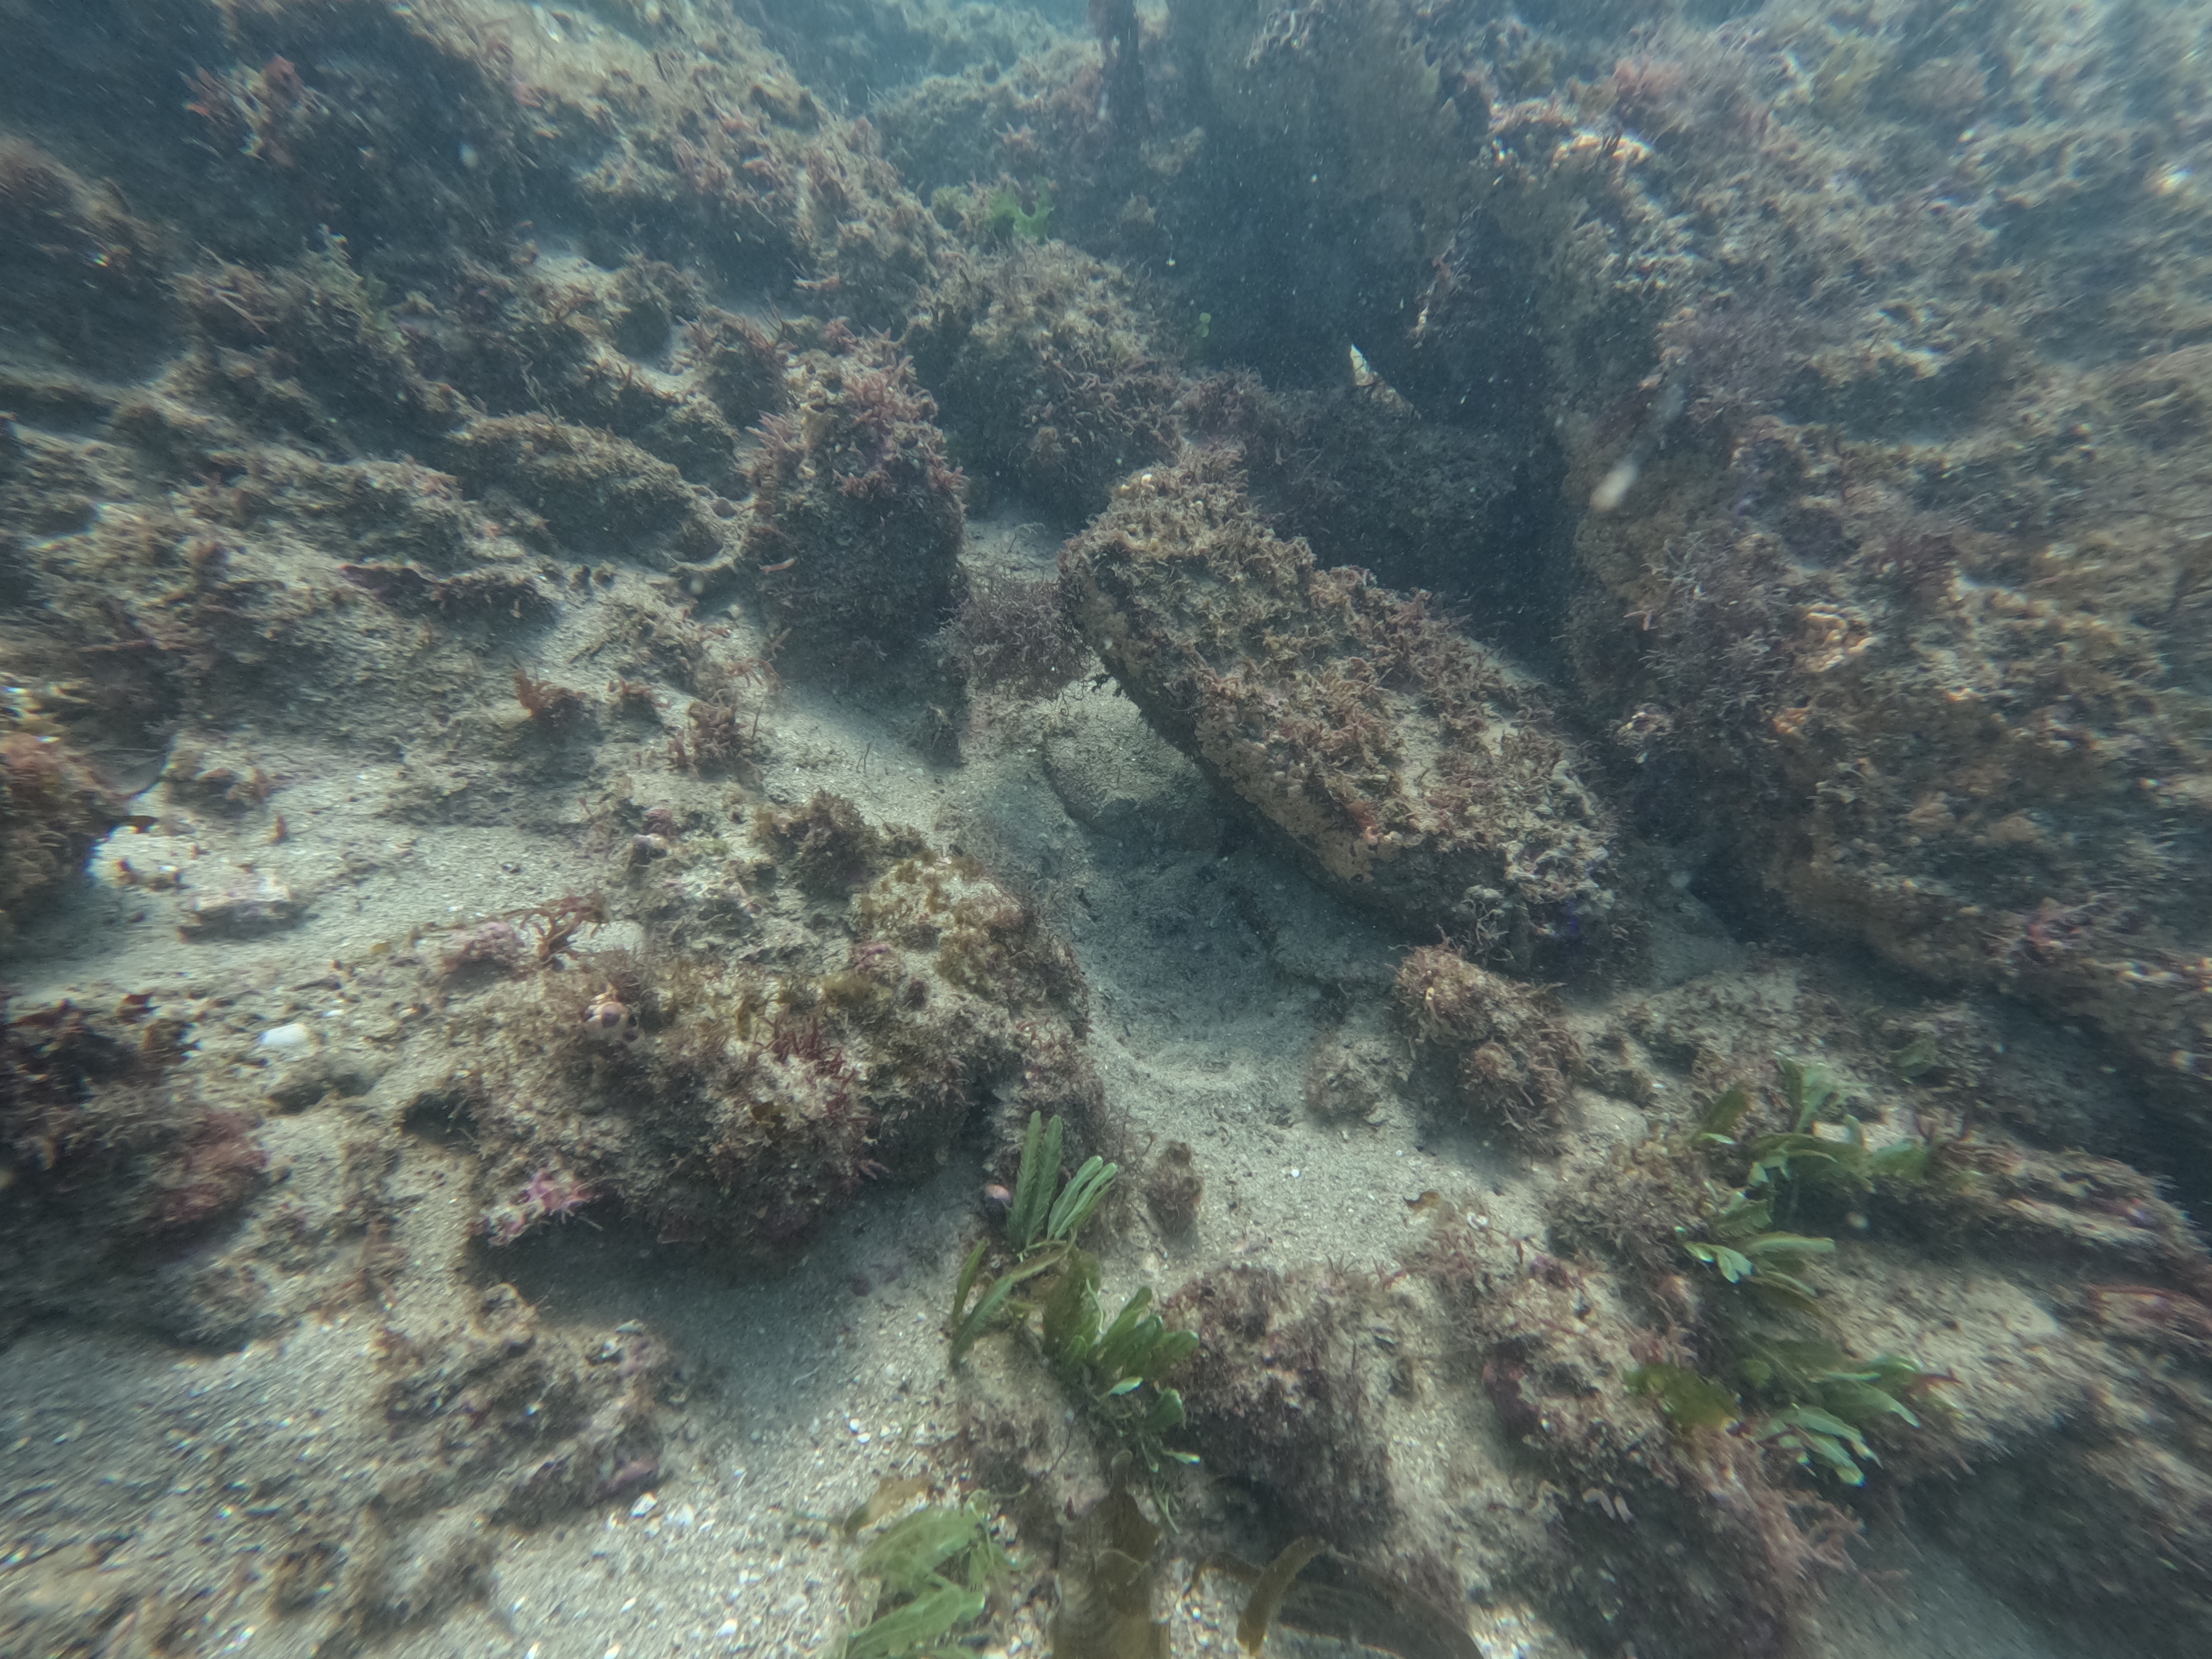

Supplement: Supplementary file 1570 [file G0027896.pdf › Ocean1/G0027896.pdf]

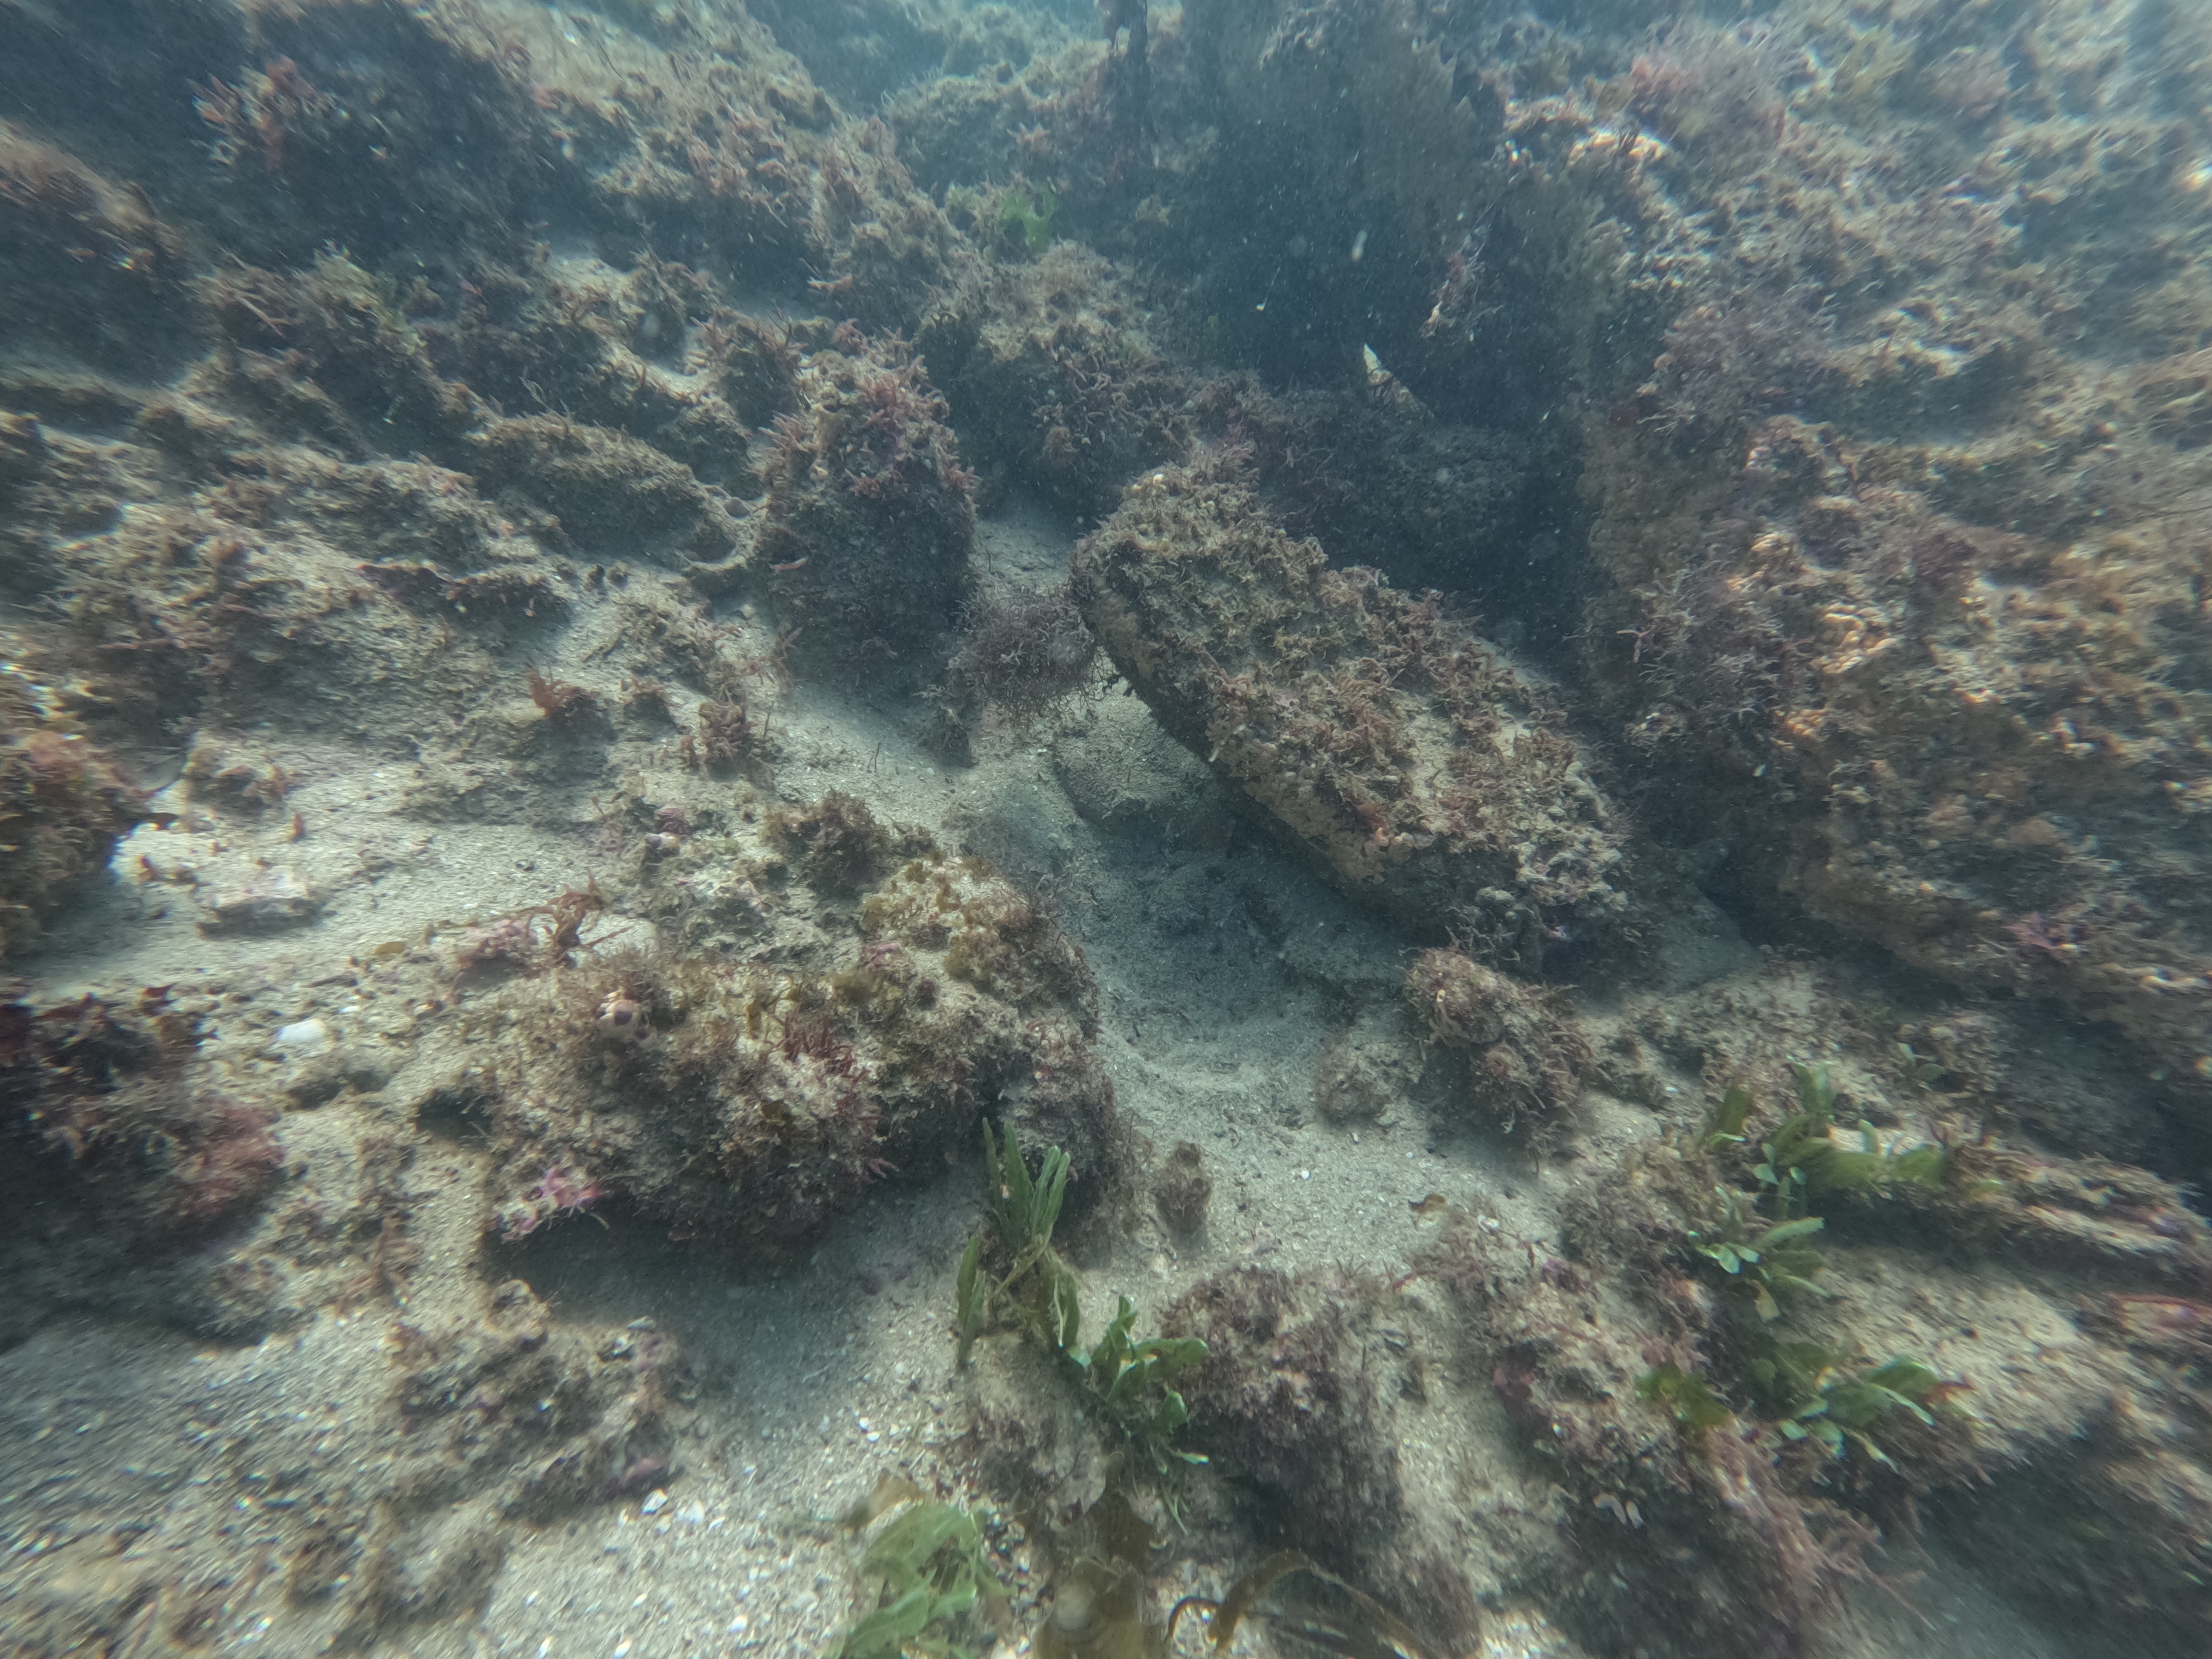

Supplement: Supplementary file 1571 [file G0027897.pdf › Ocean1/G0027897.pdf]

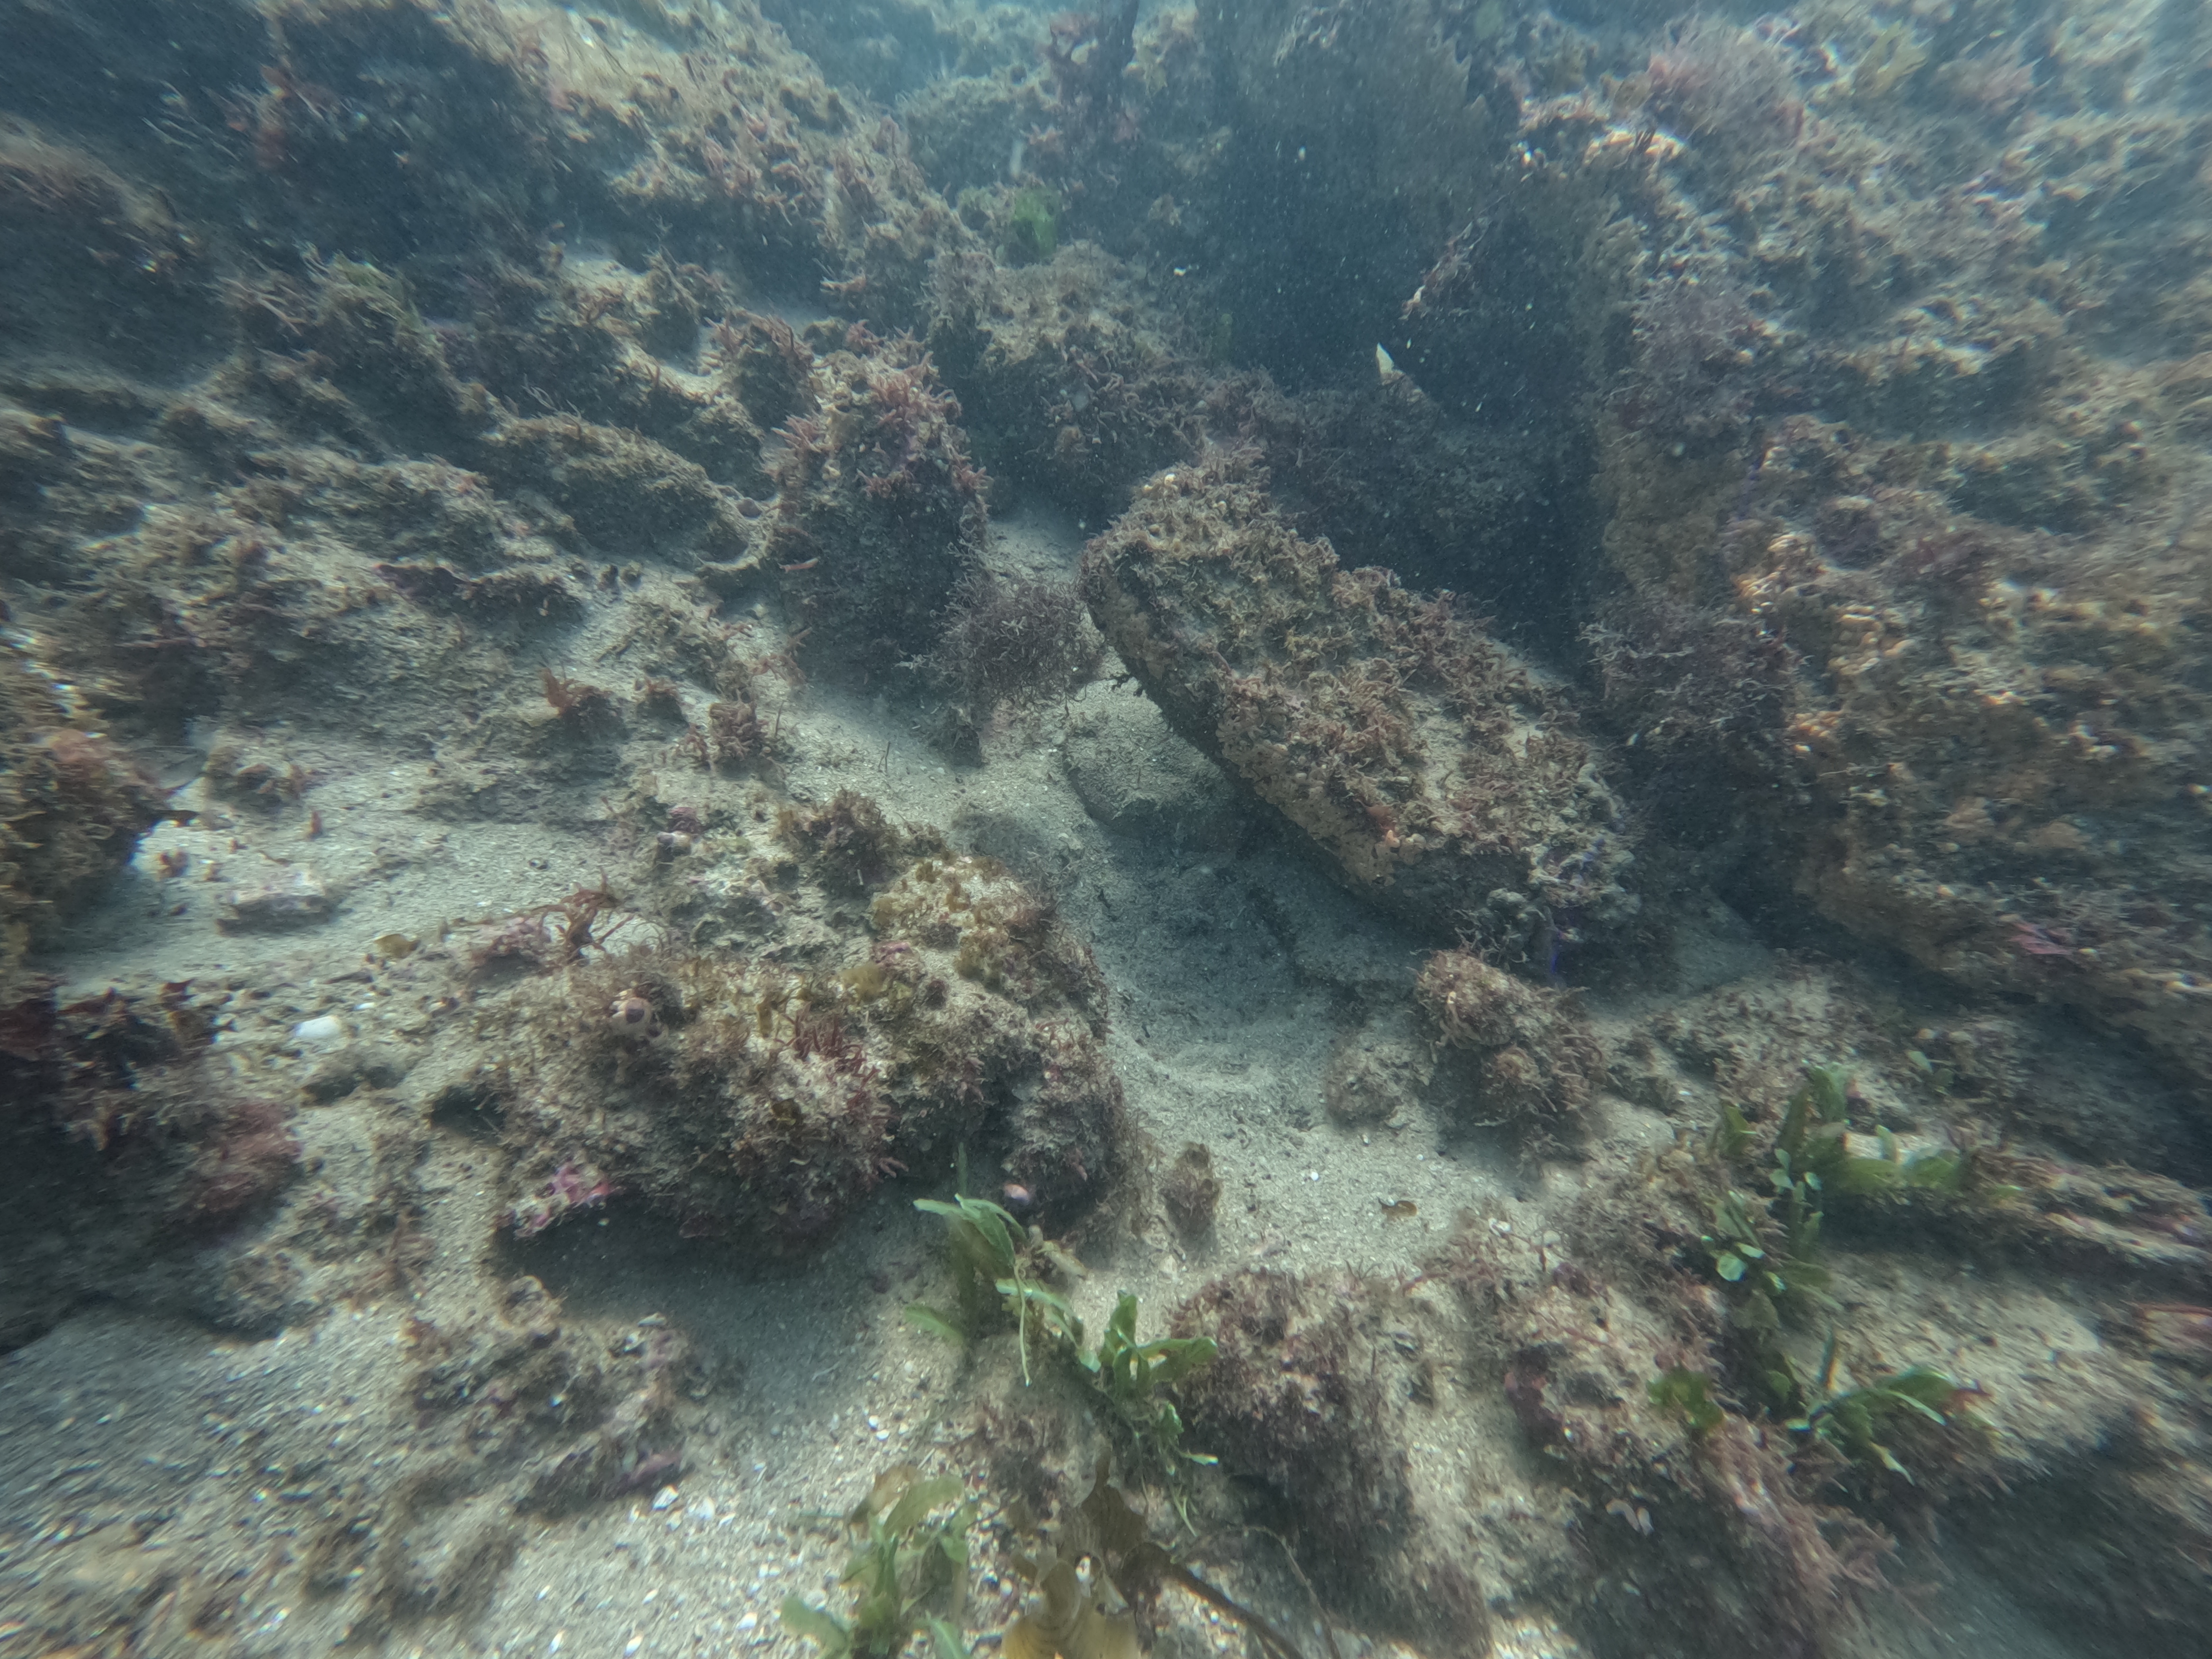

Supplement: Supplementary file 1572 [file G0027898.pdf › Ocean1/G0027898.pdf]

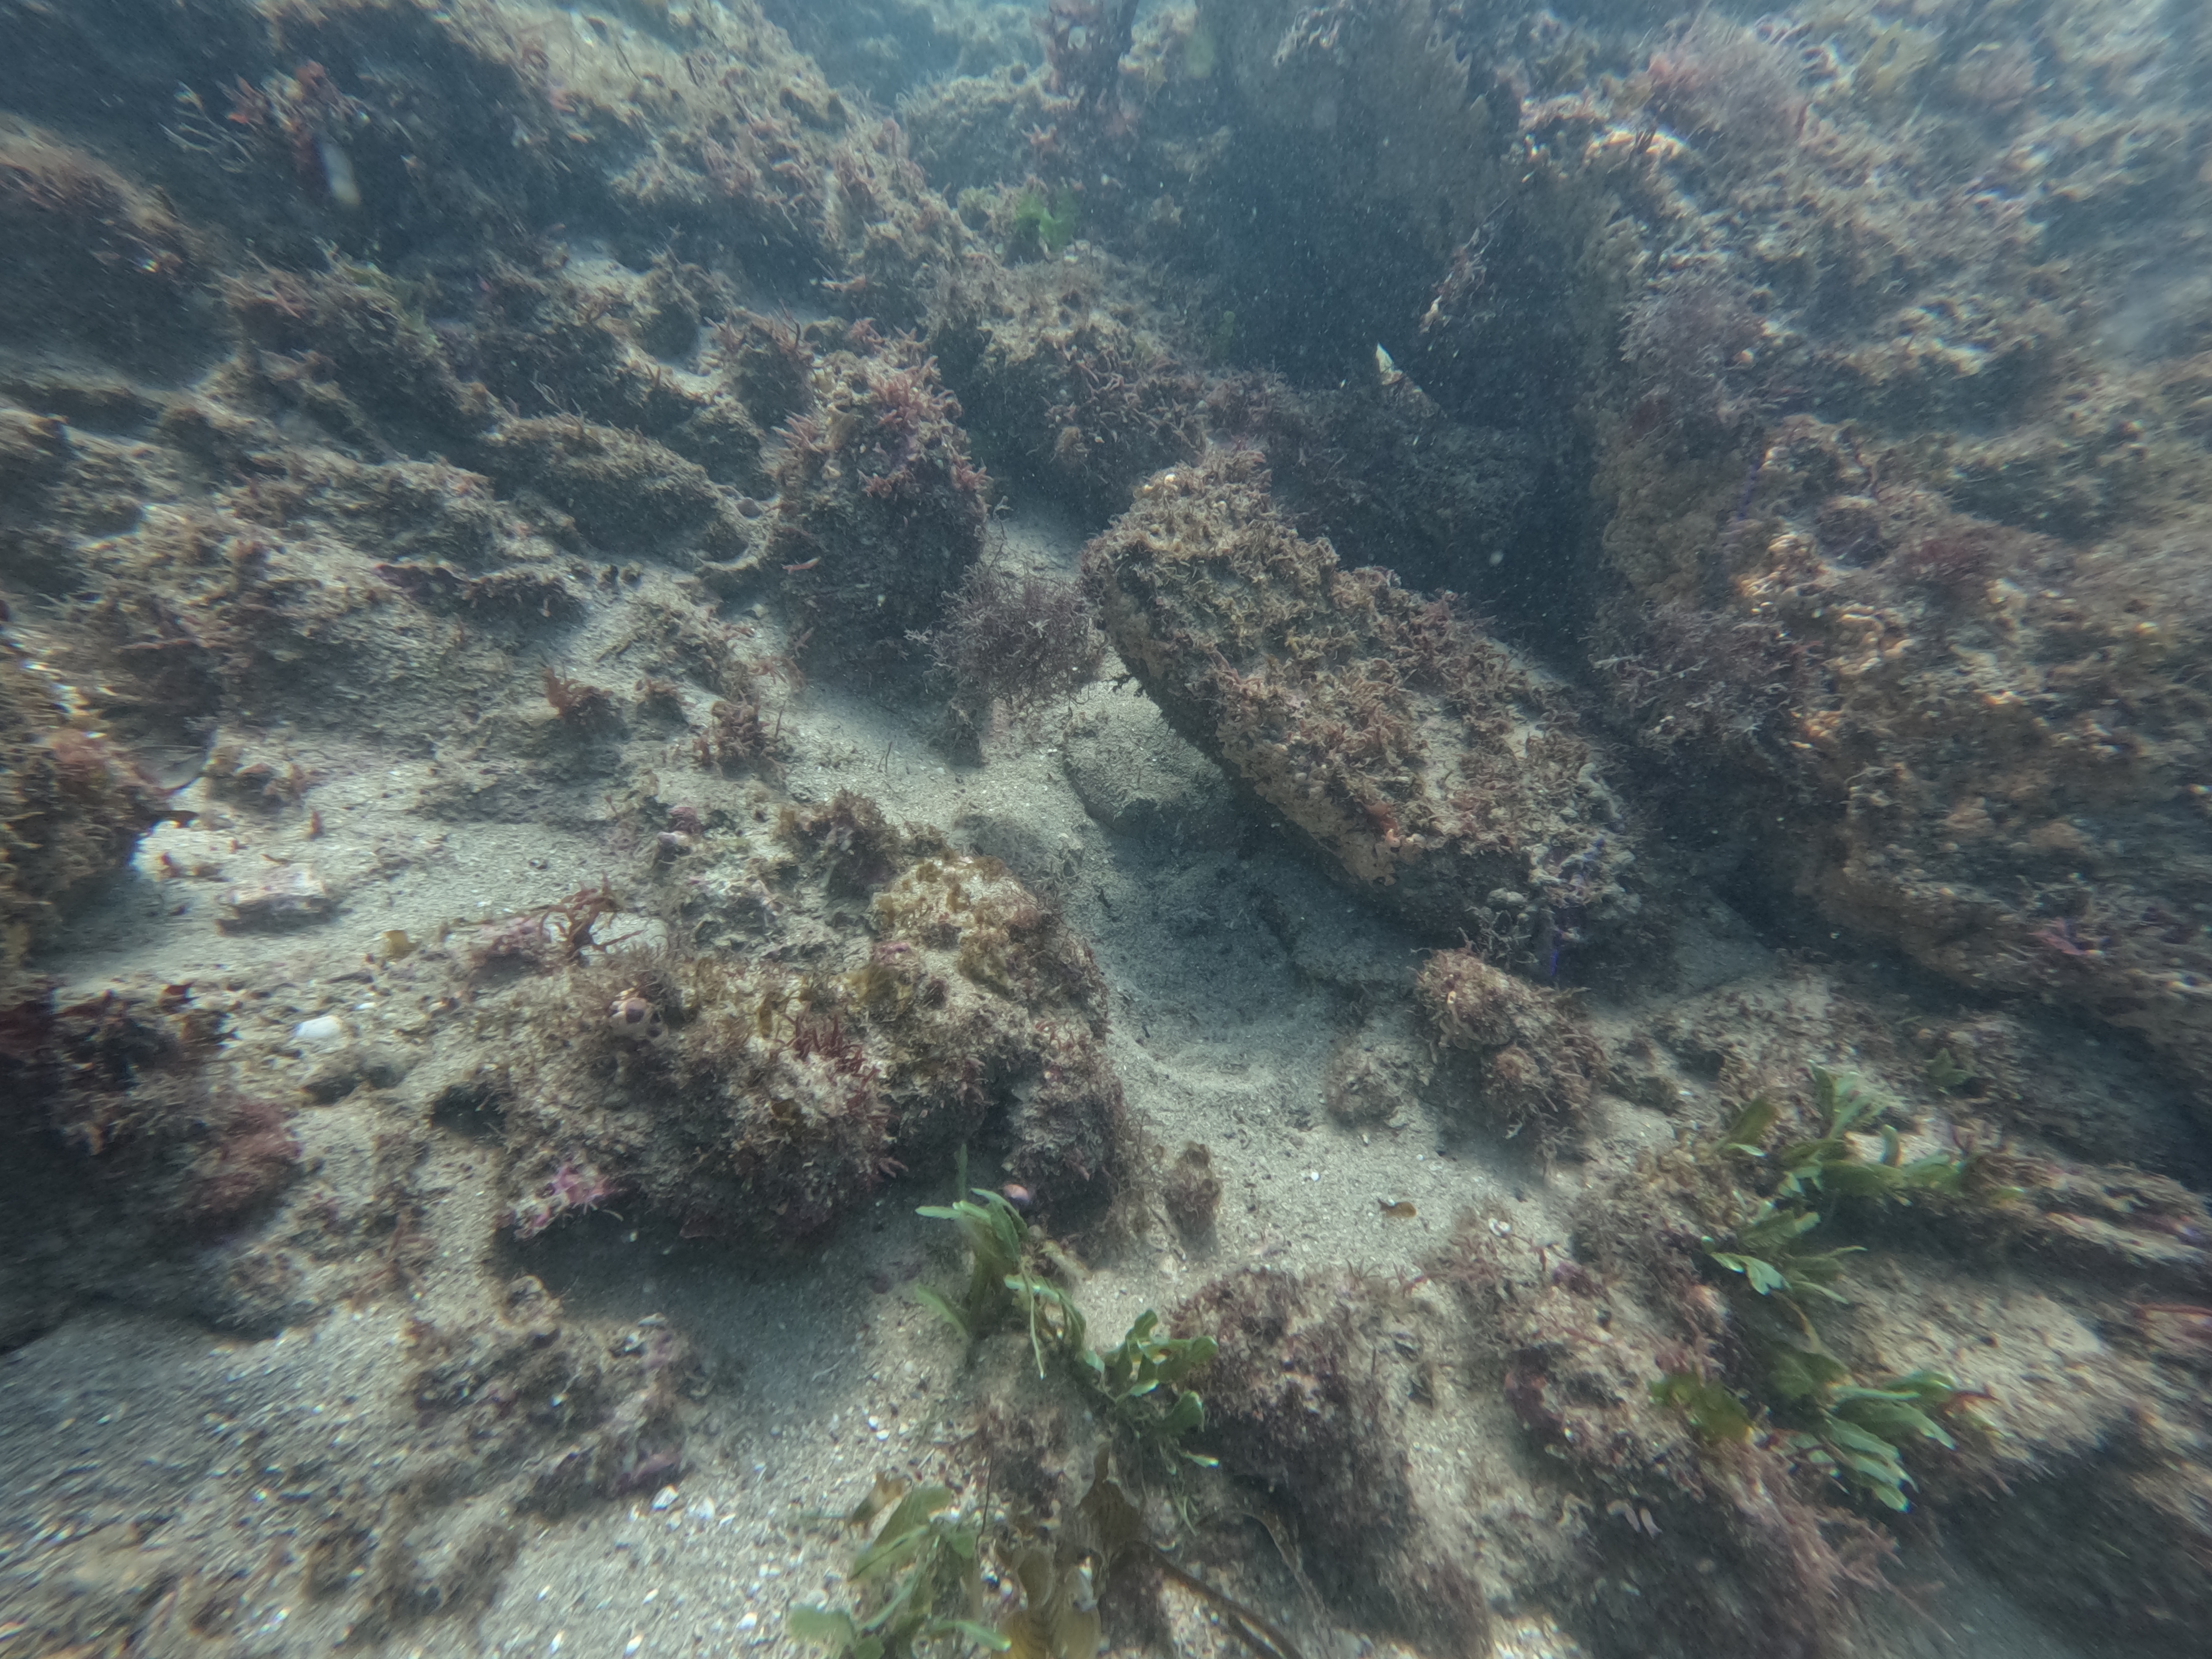

Supplement: Supplementary file 1573 [file G0027899.pdf › Ocean1/G0027899.pdf]

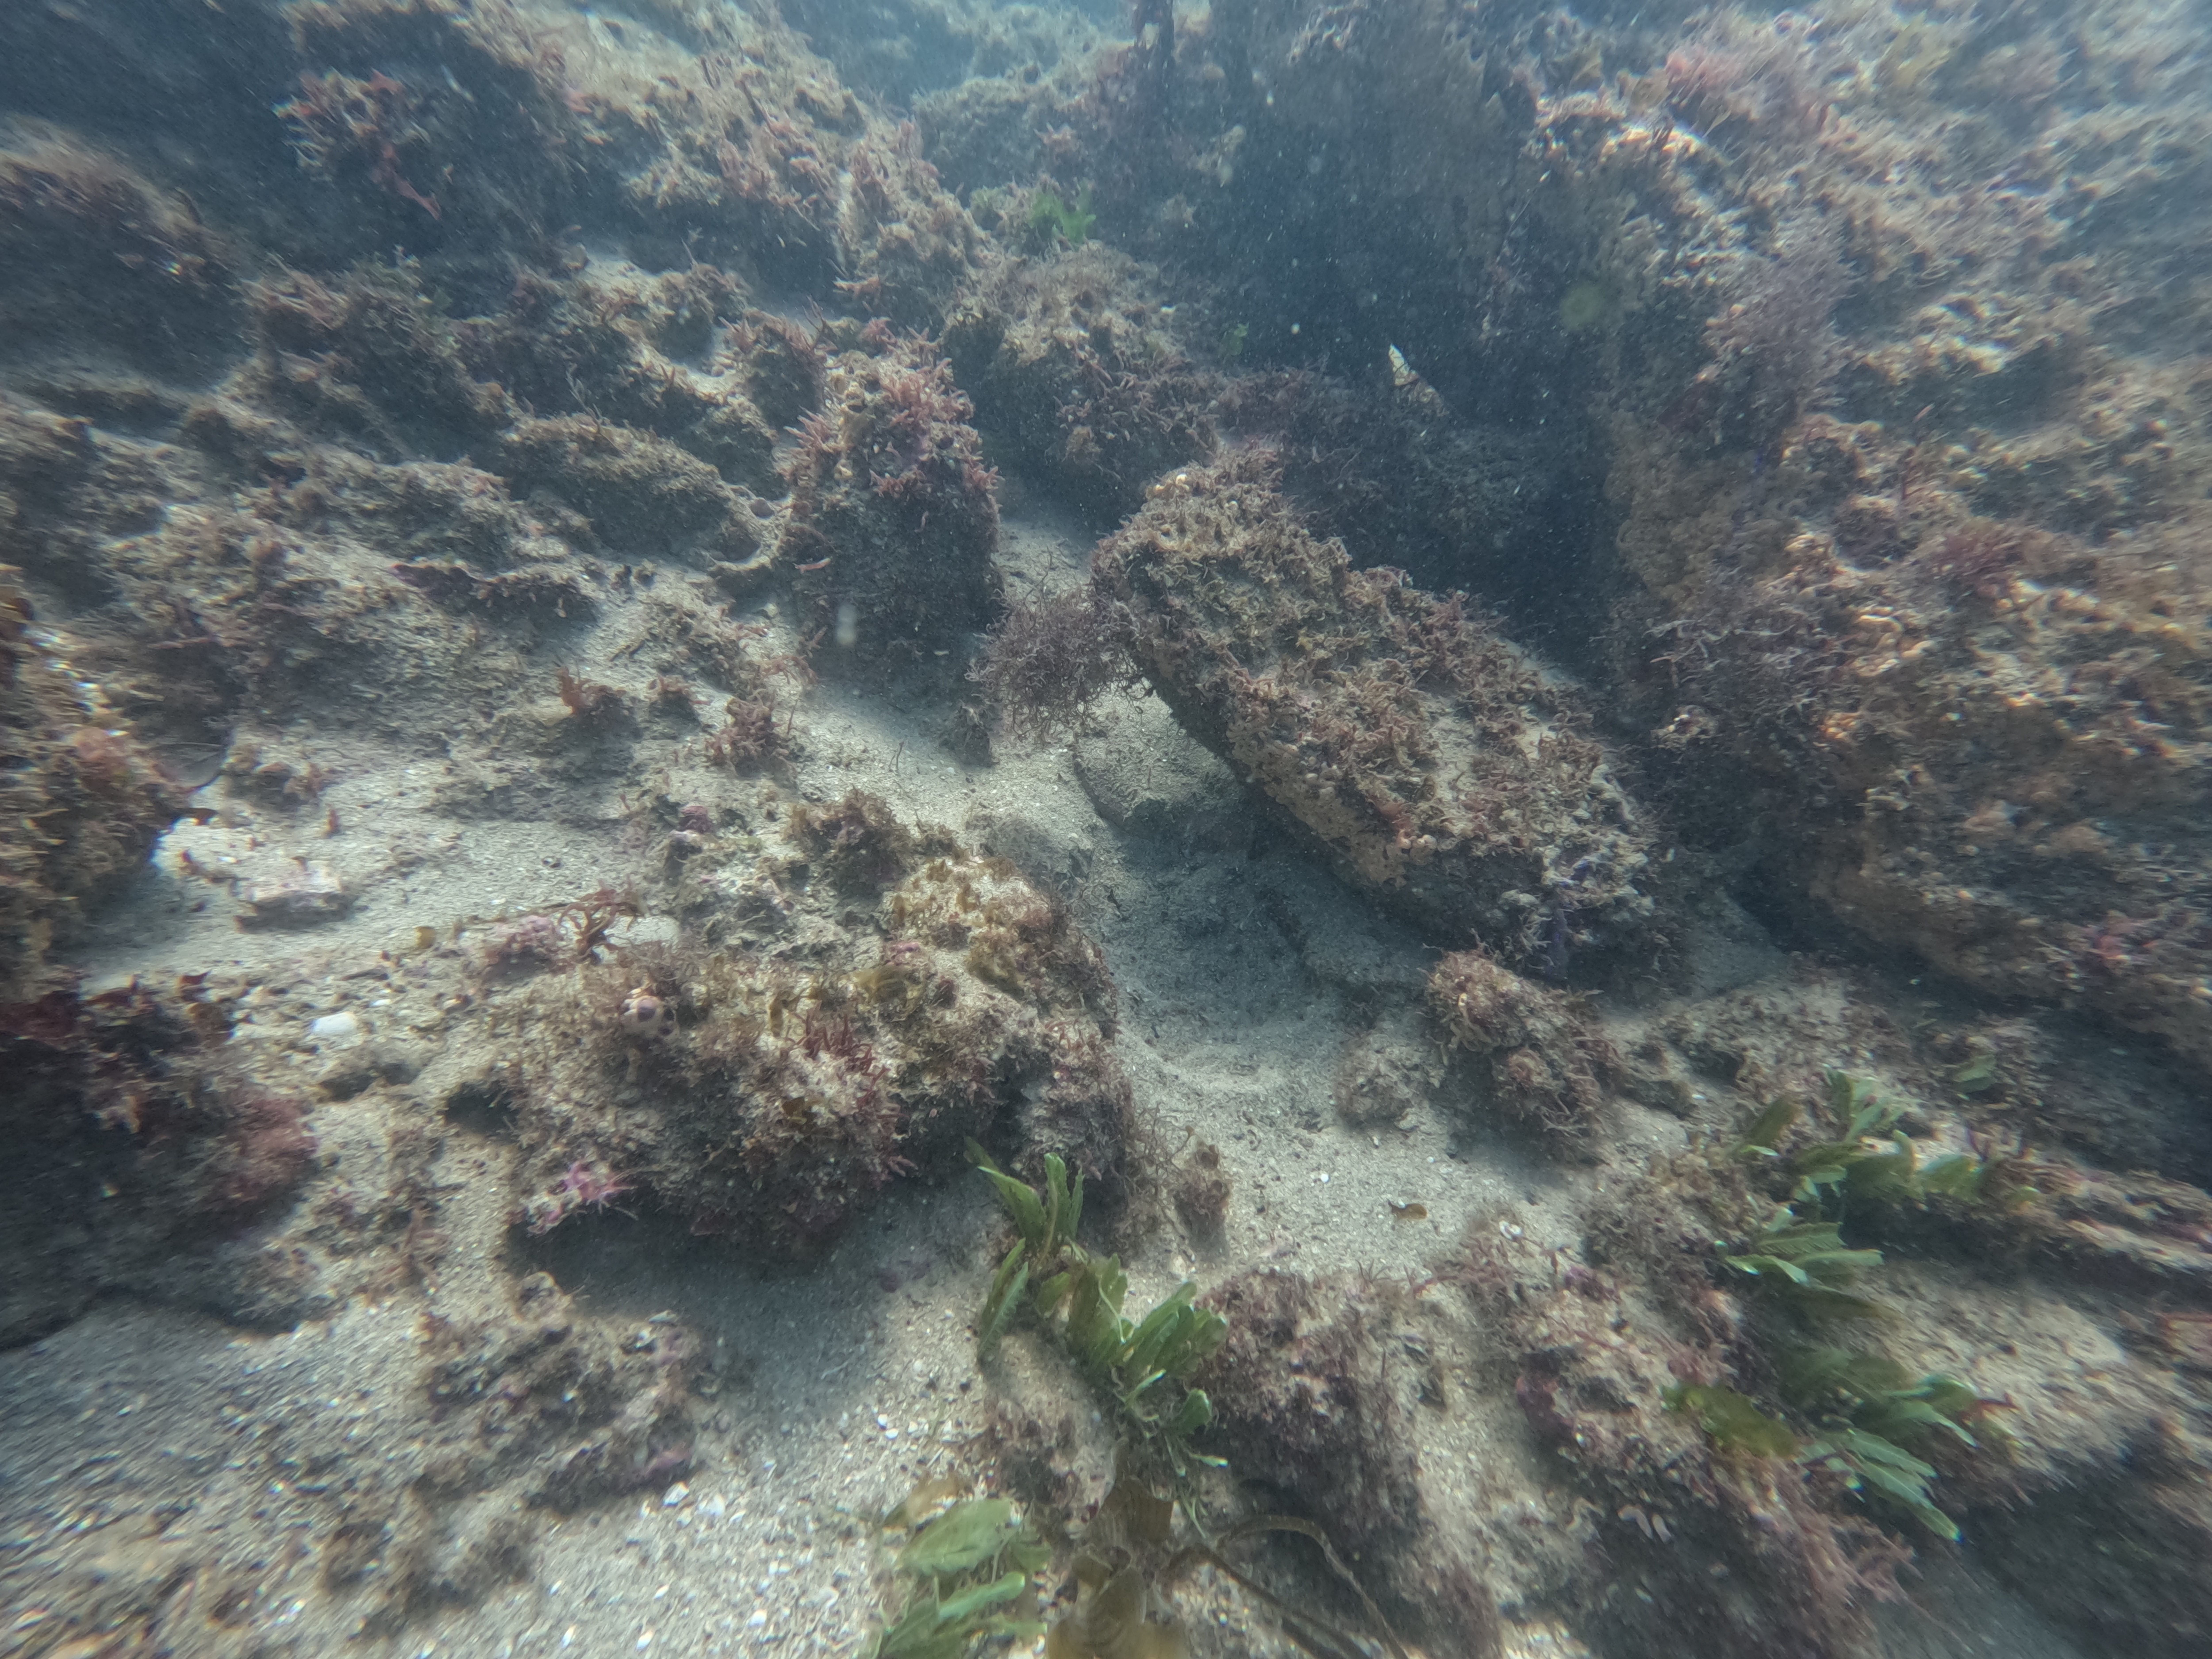

Supplement: Supplementary file 1574 [file G0027900.pdf › Ocean1/G0027900.pdf]

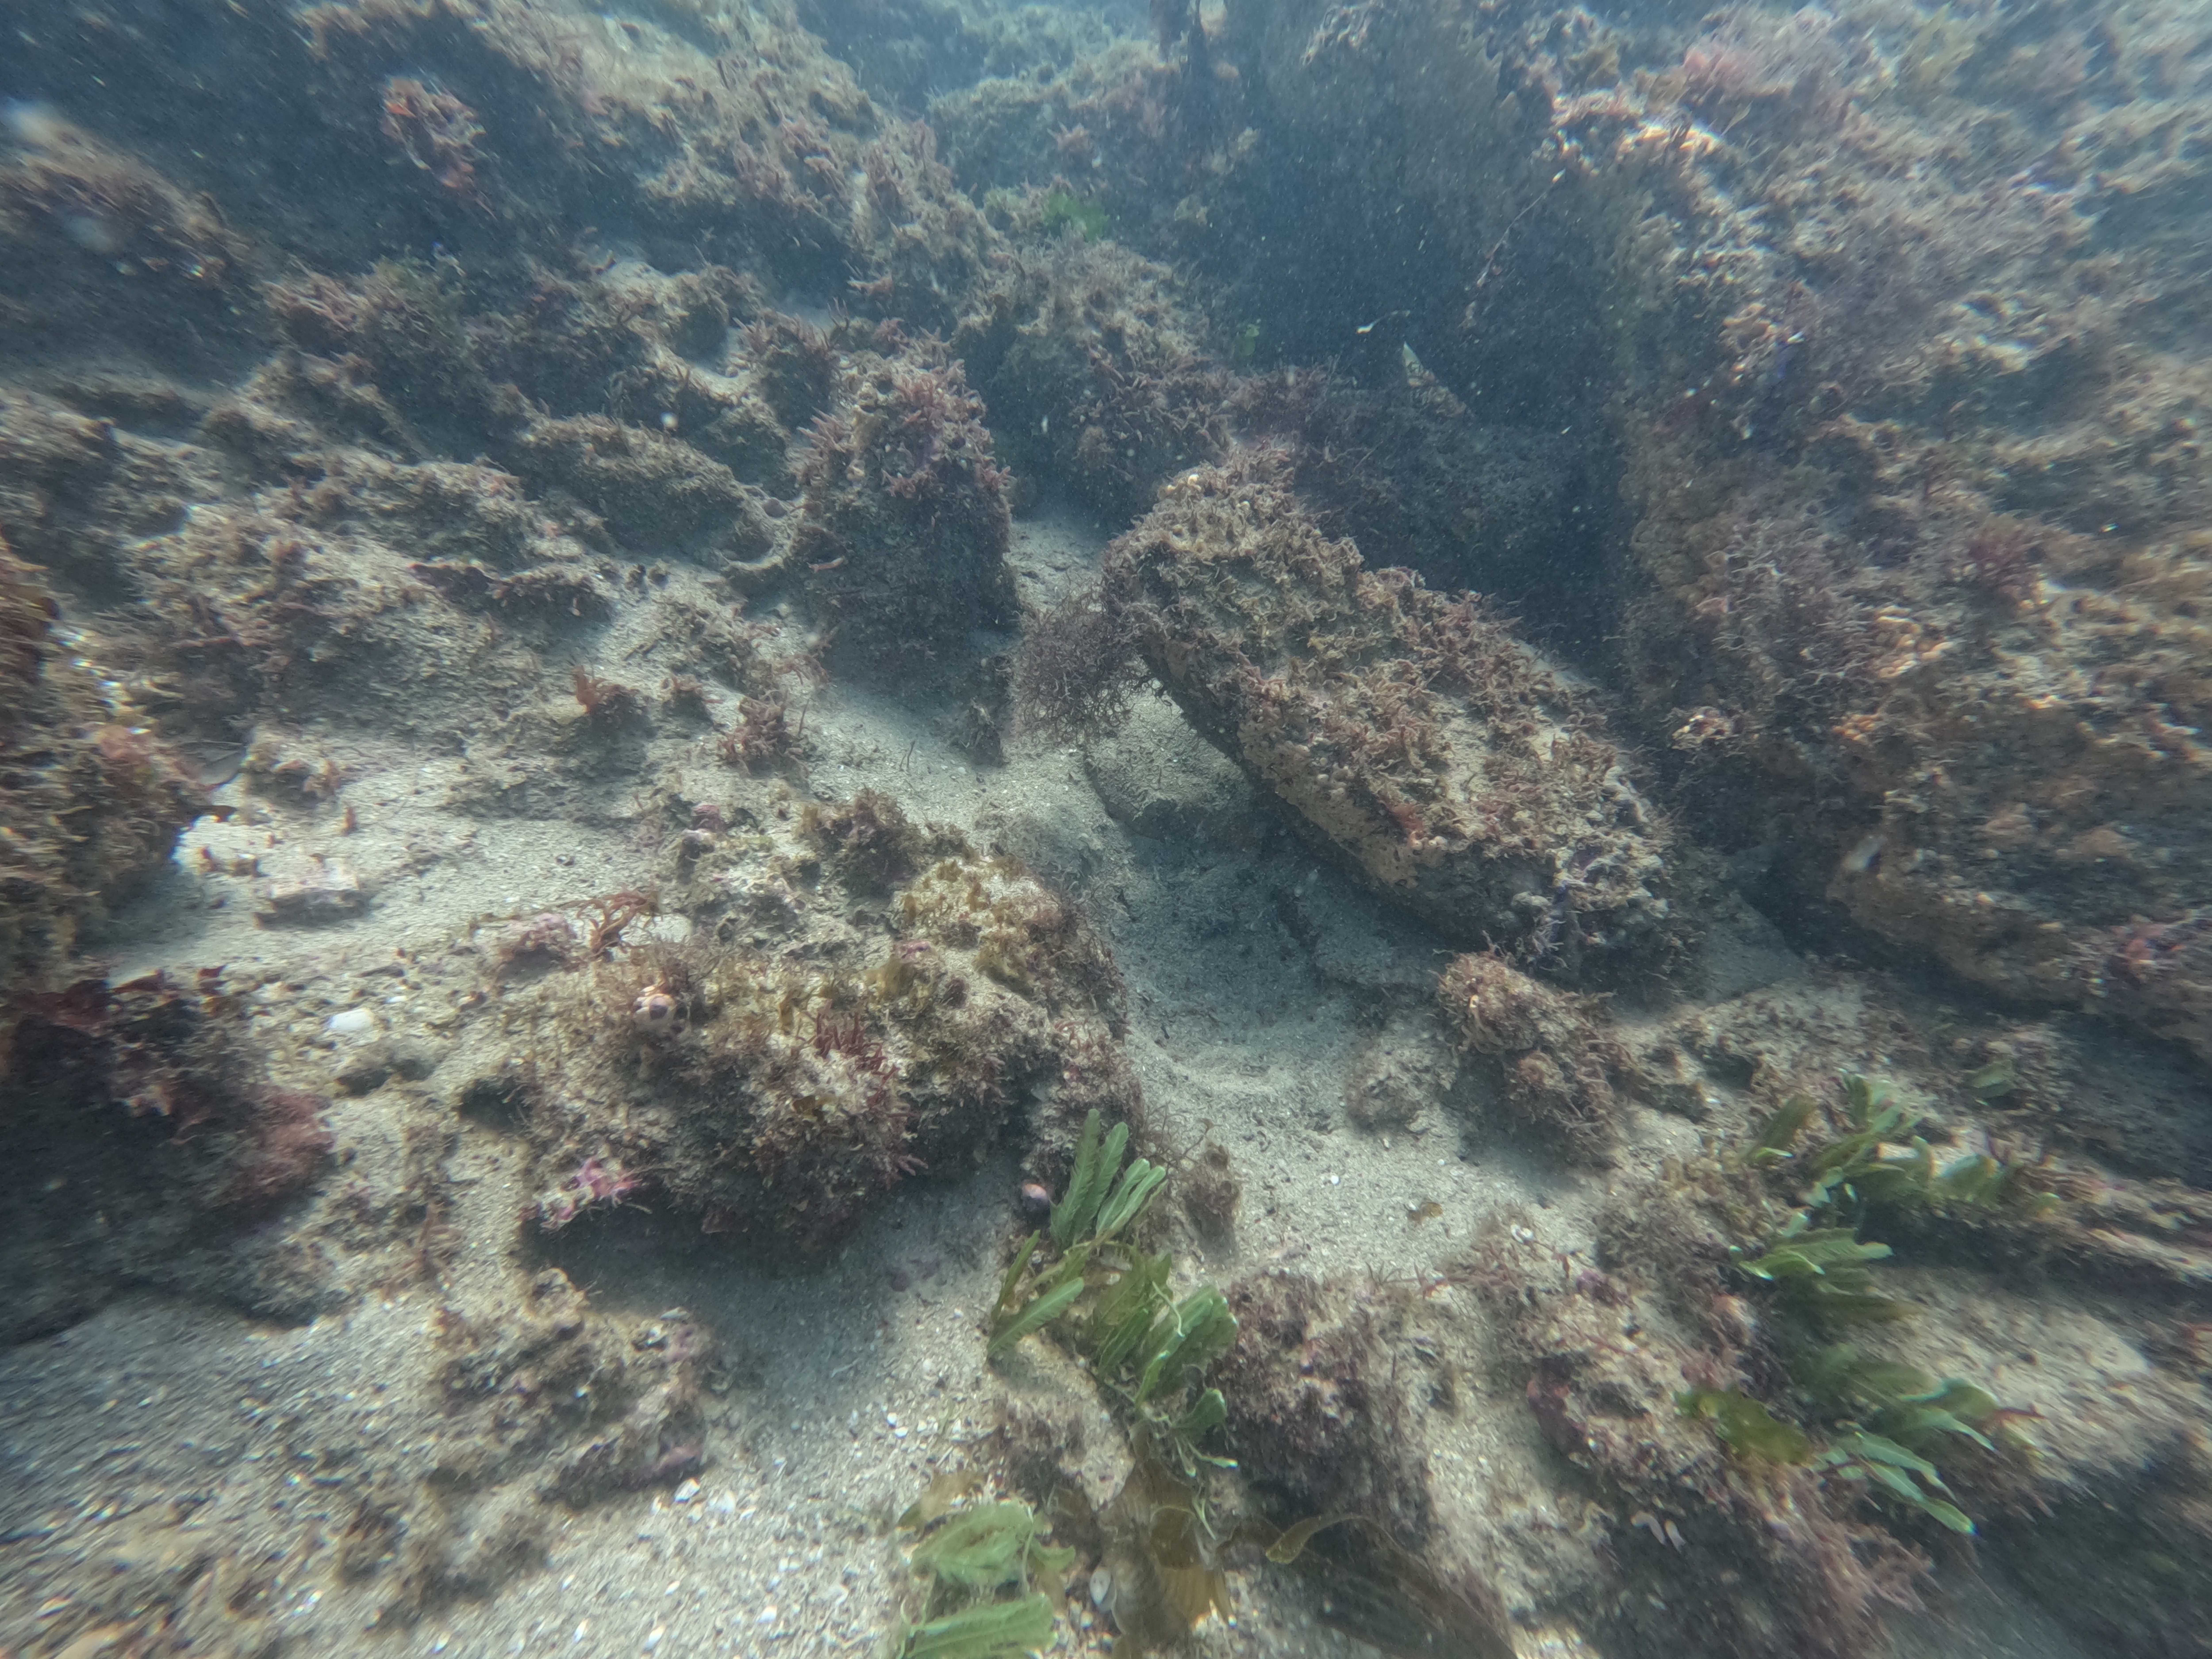

Supplement: Supplementary file 1575 [file G0027901.pdf › Ocean1/G0027901.pdf]

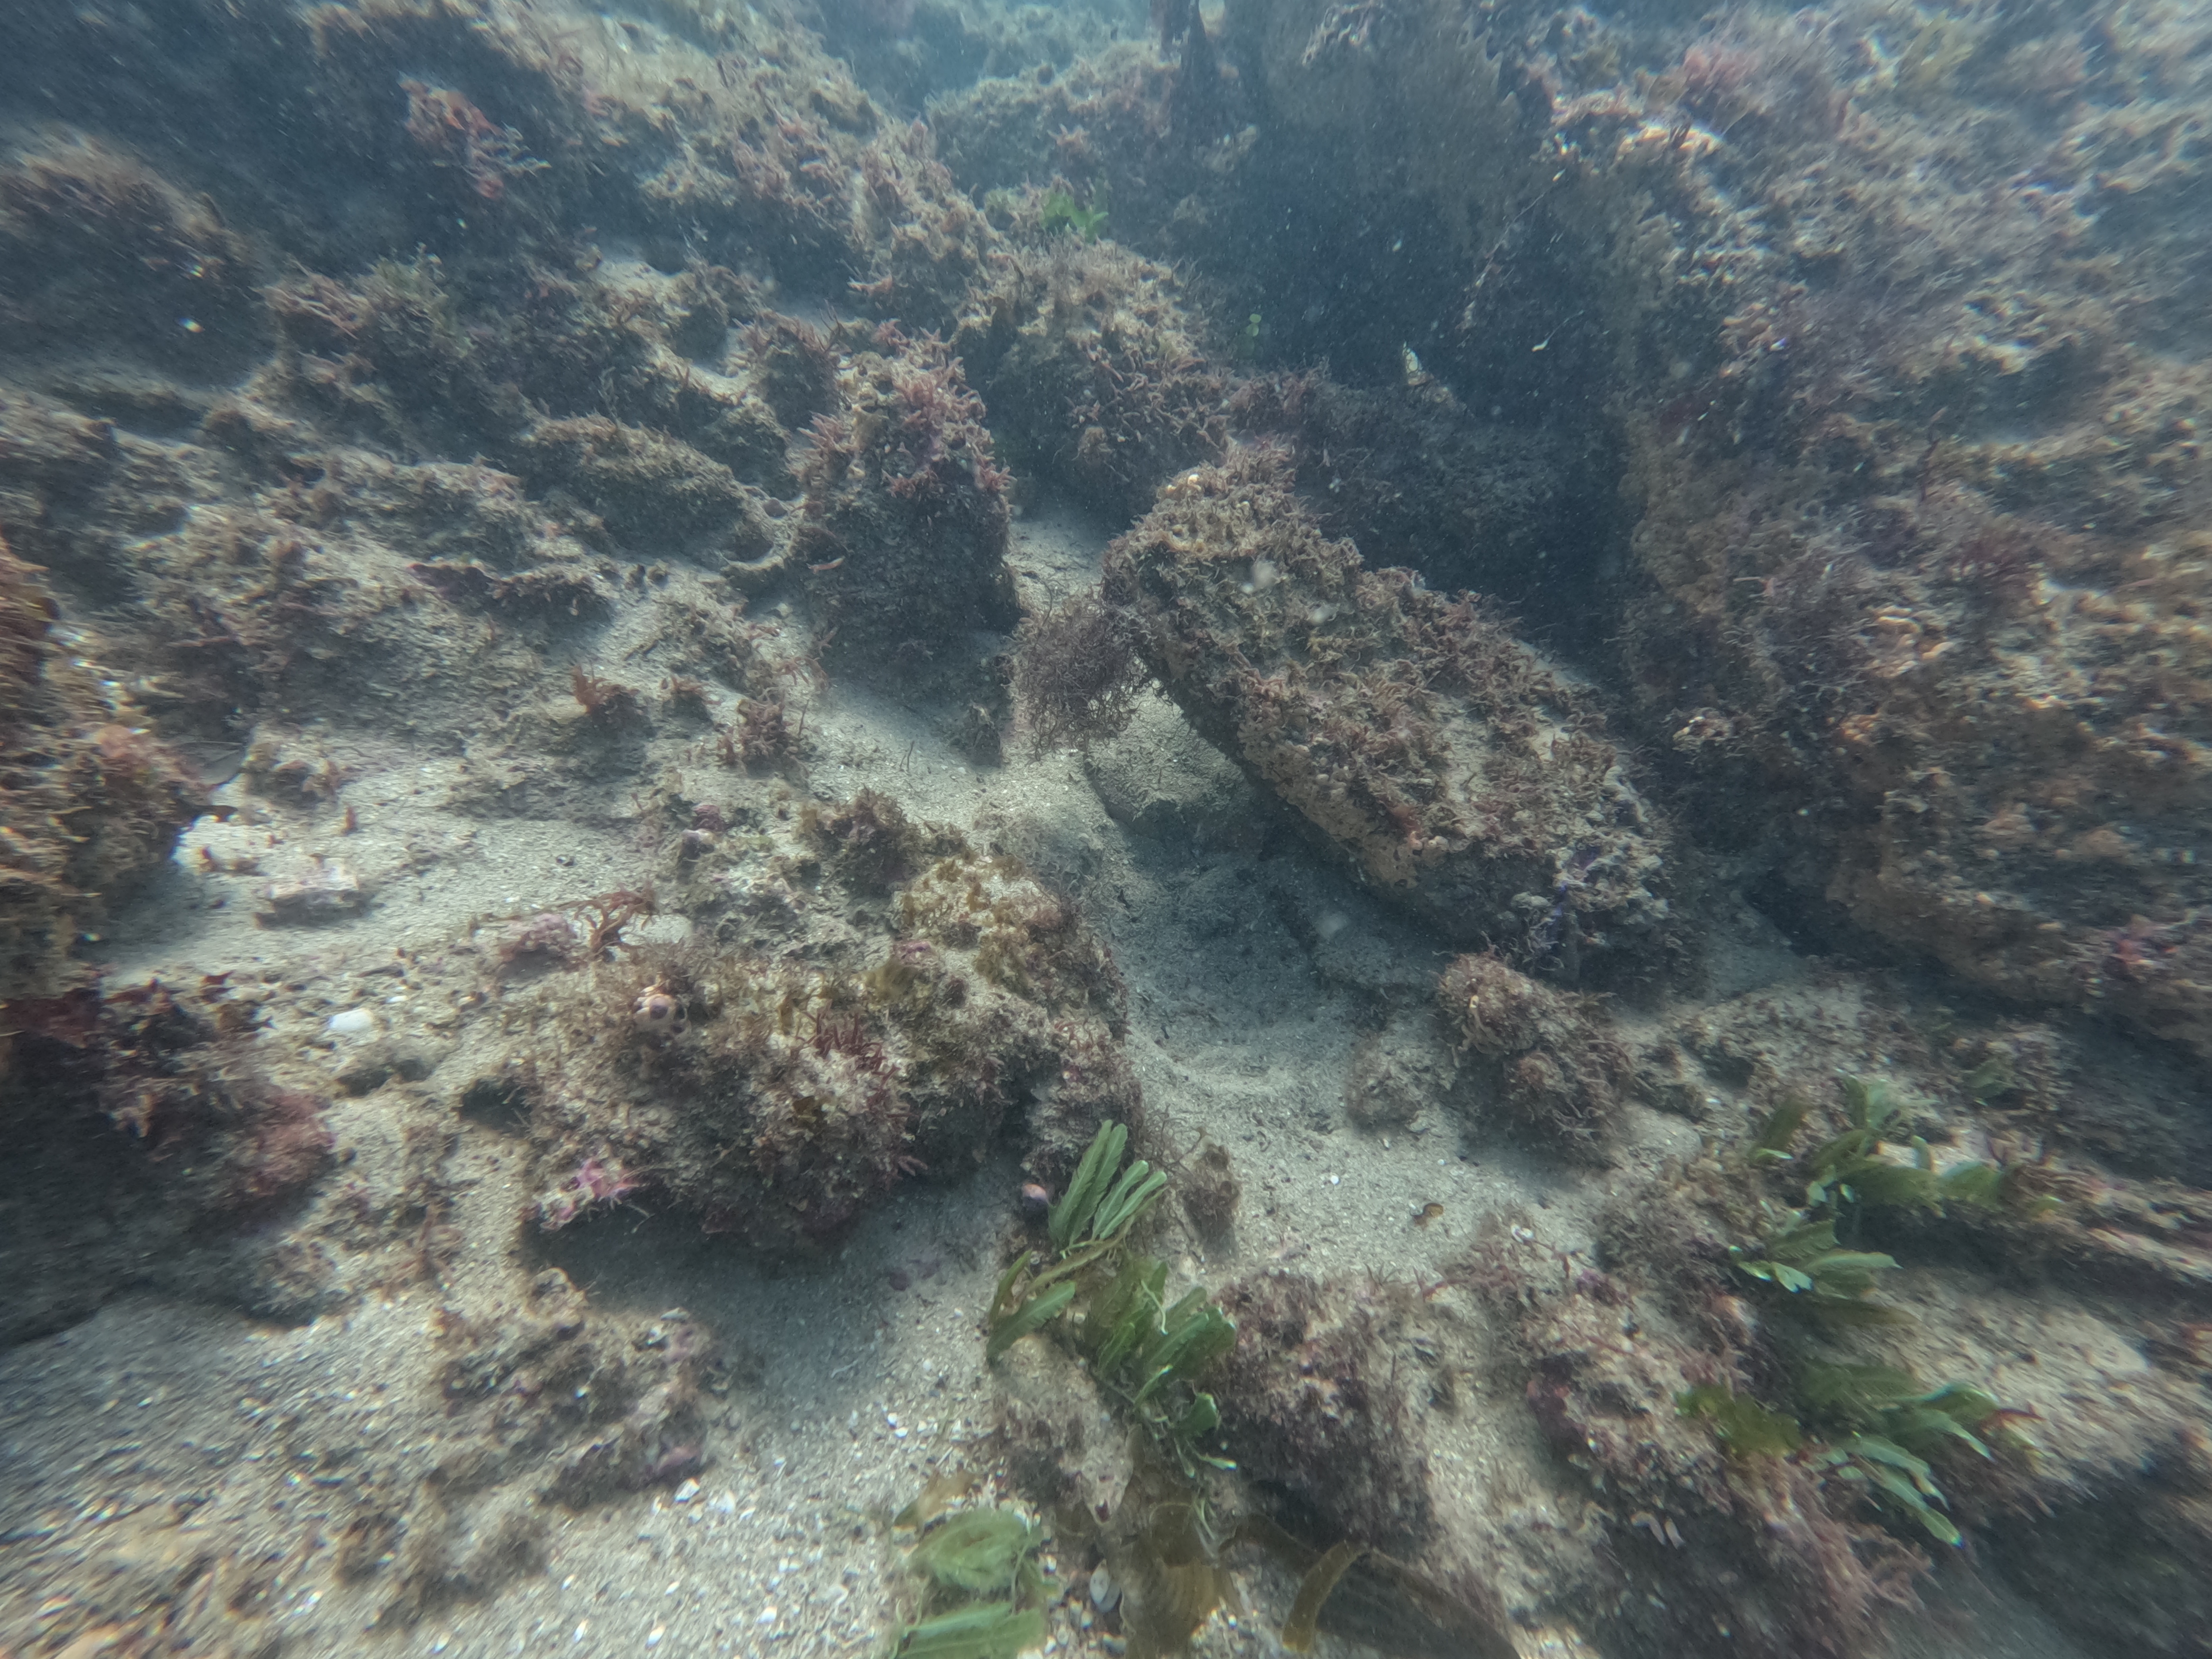

Supplement: Supplementary file 1576 [file G0027902.pdf › Ocean1/G0027902.pdf]

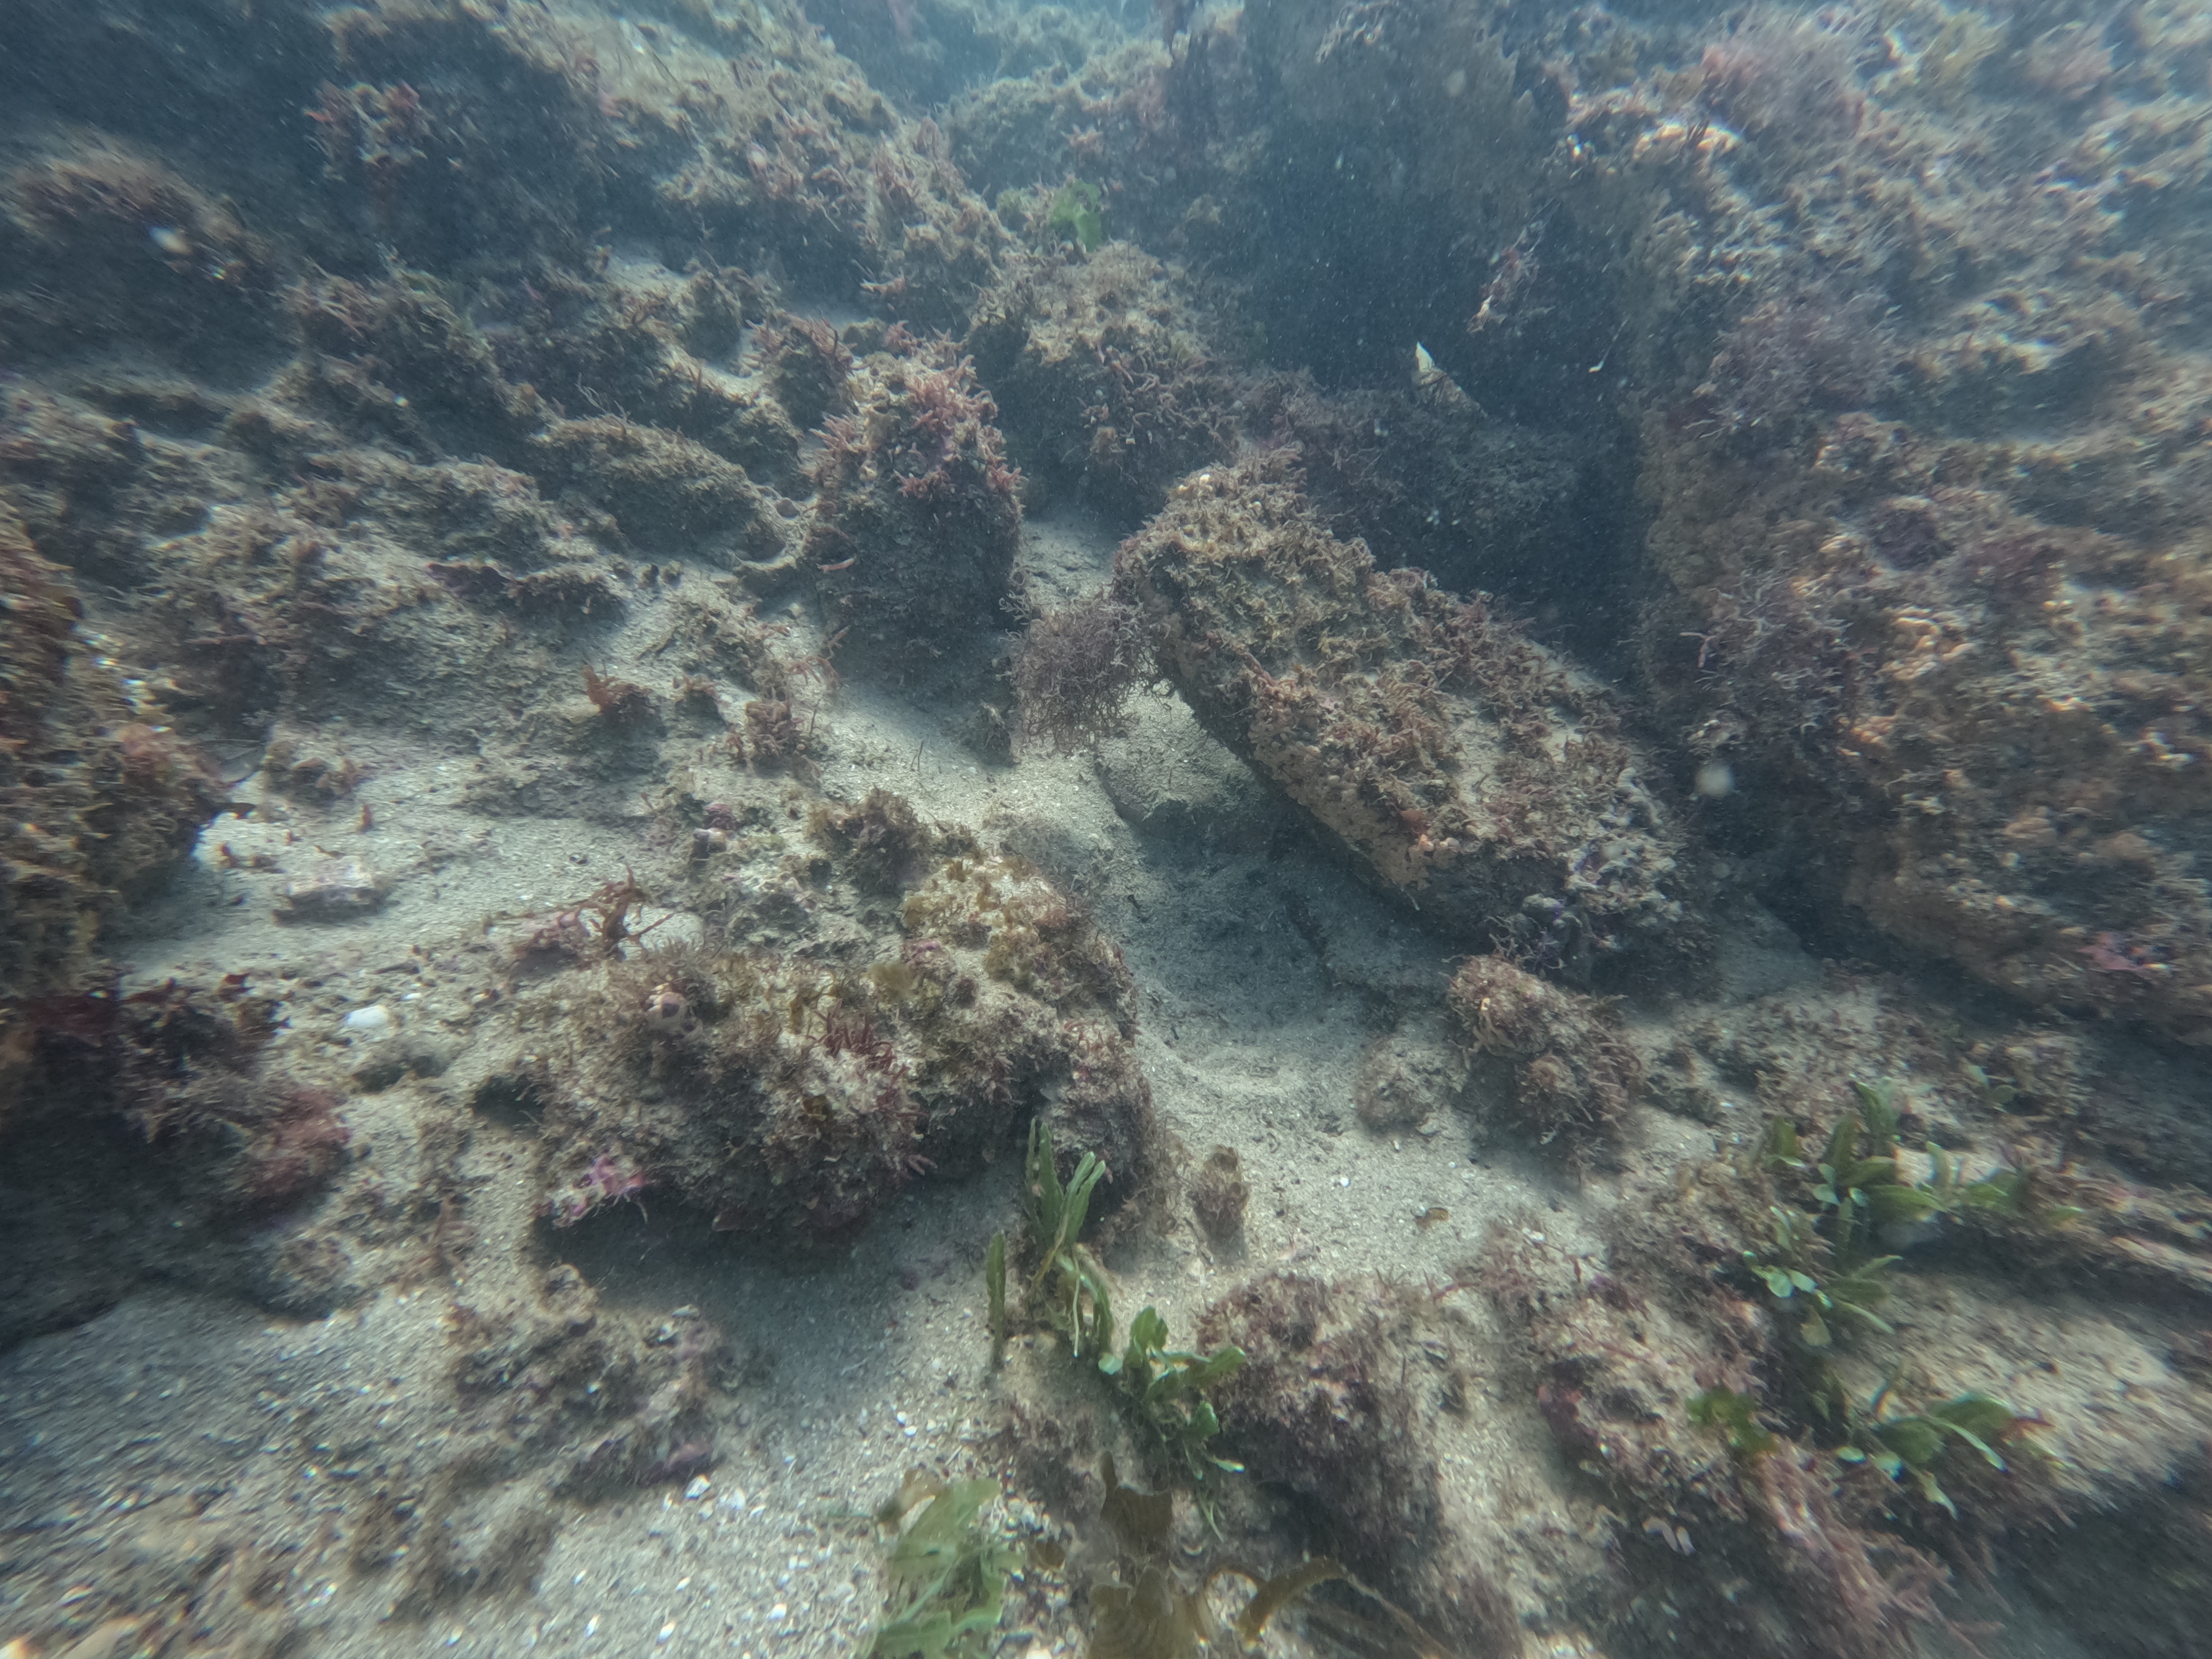

Supplement: Supplementary file 1577 [file G0027903.pdf › Ocean1/G0027903.pdf]

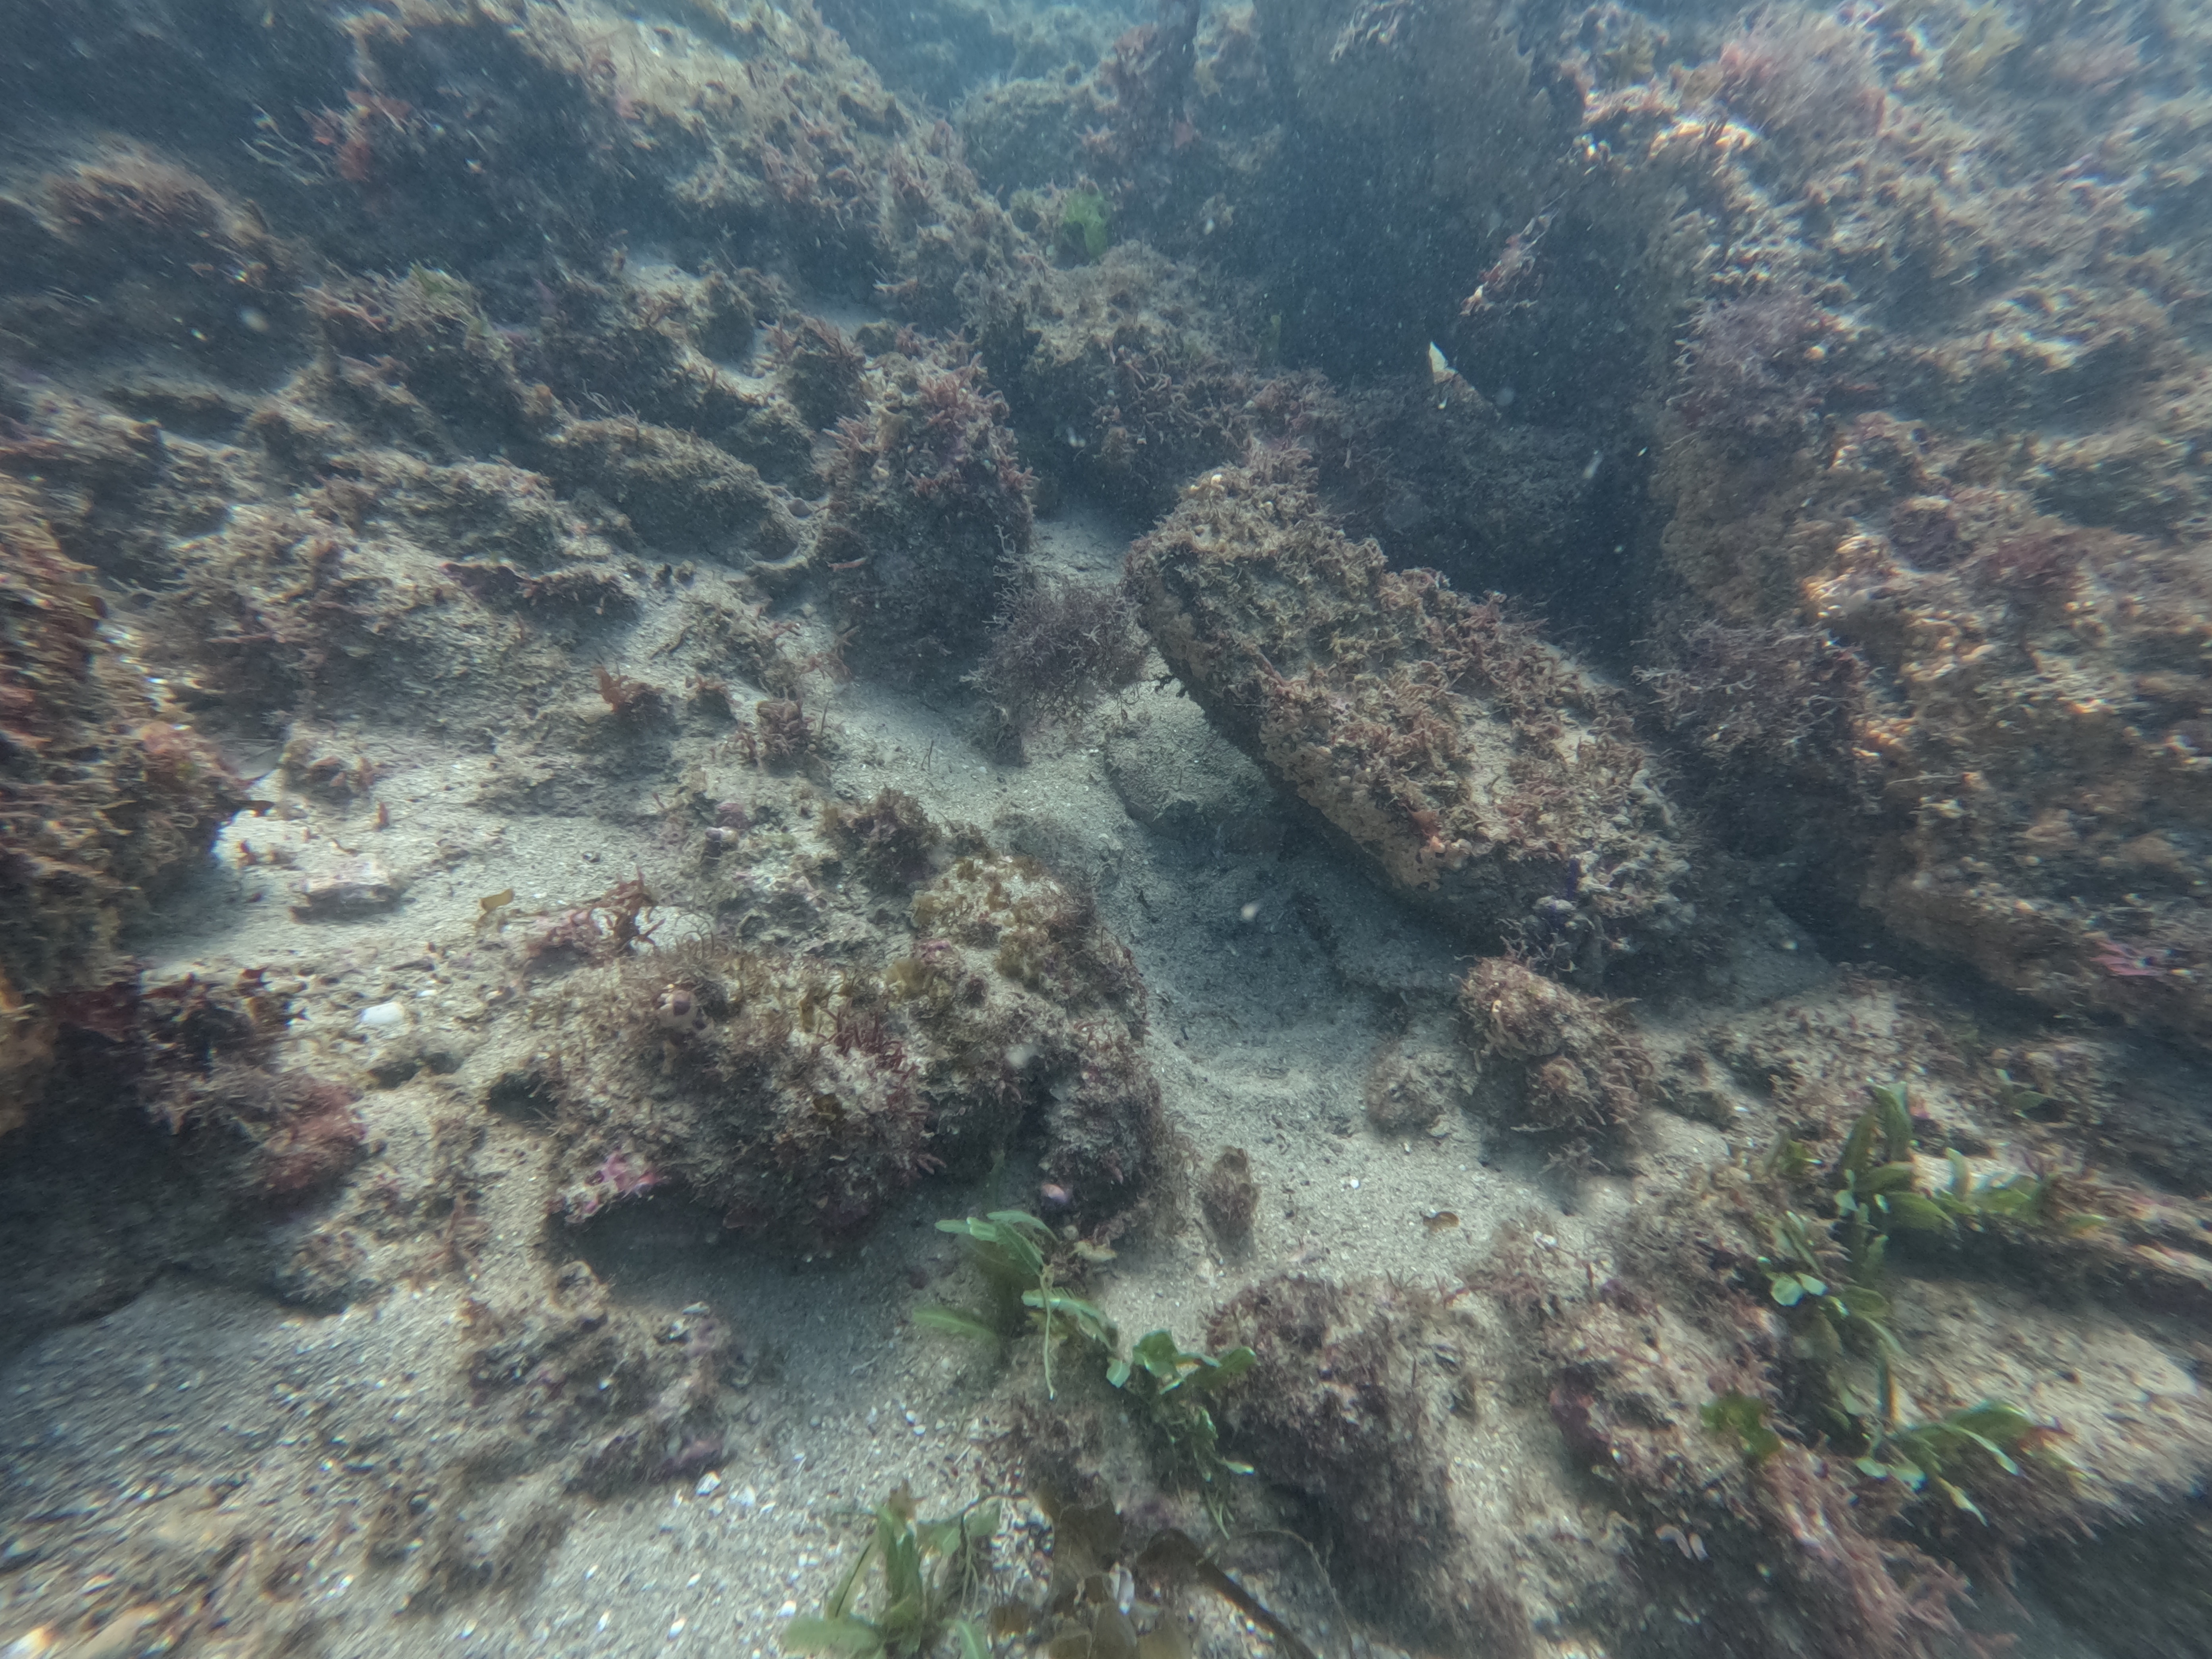

Supplement: Supplementary file 1578 [file G0027904.pdf › Ocean1/G0027904.pdf]

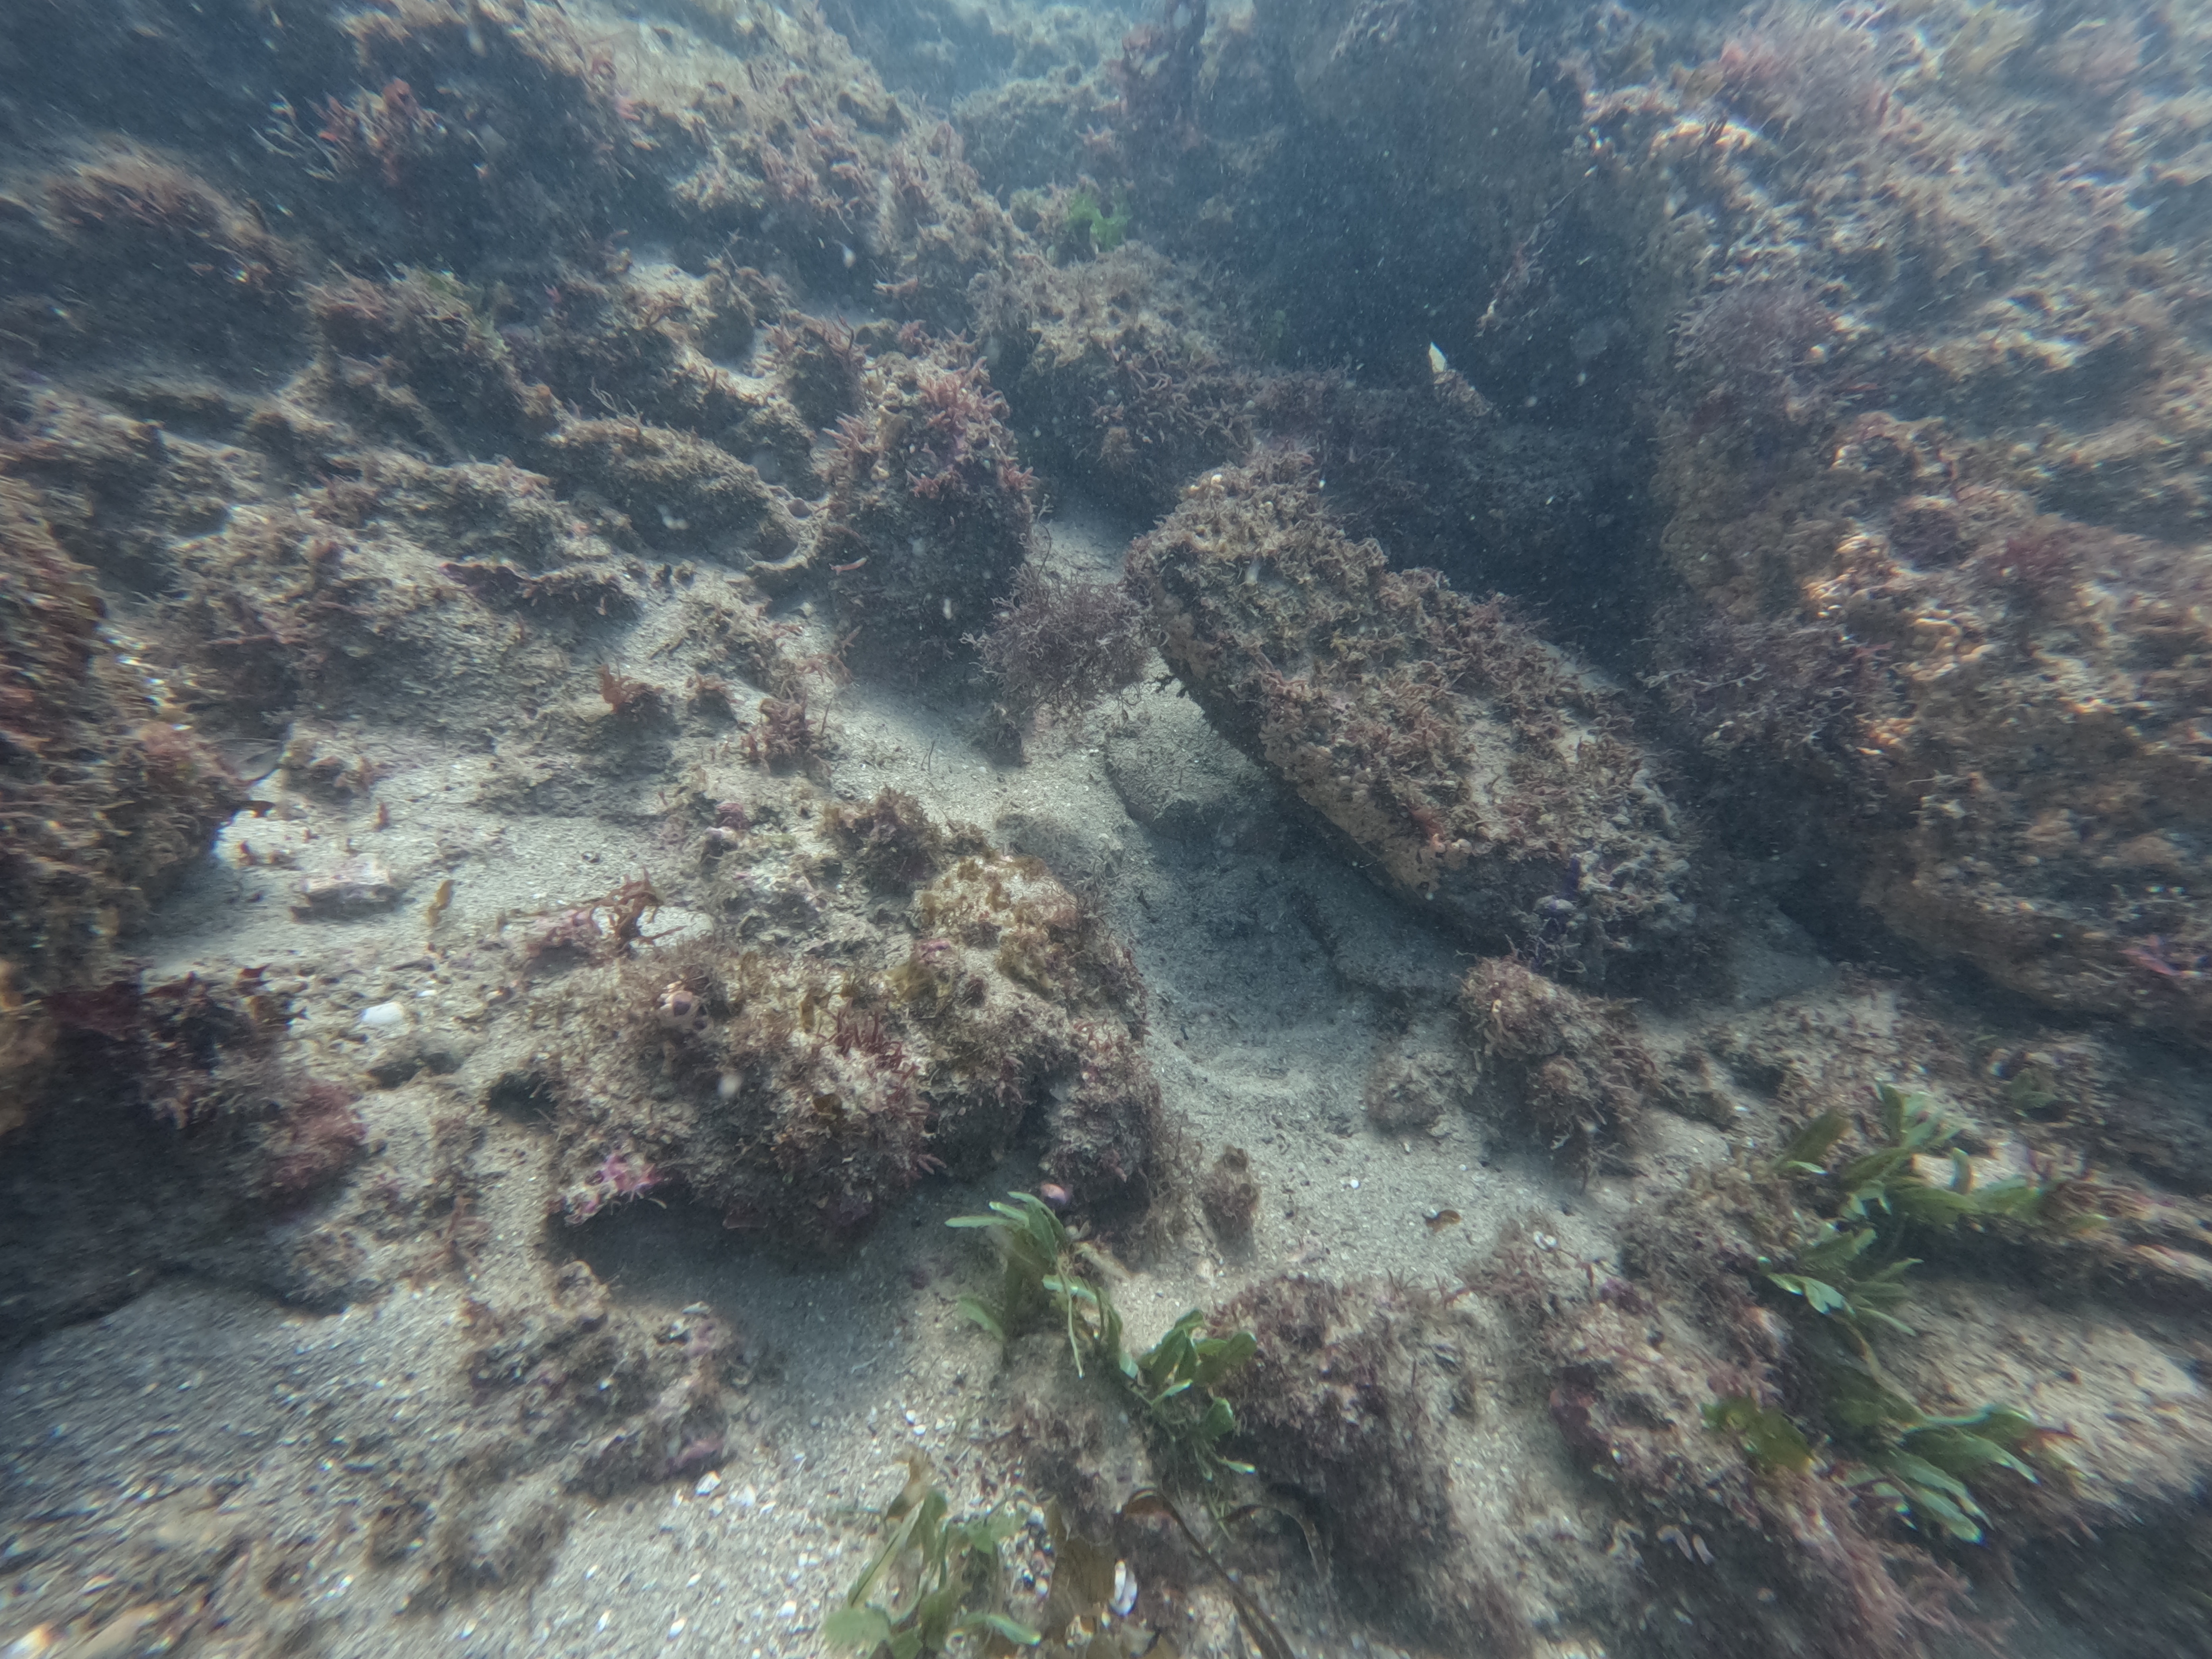

Supplement: Supplementary file 1579 [file G0027905.pdf › Ocean1/G0027905.pdf]

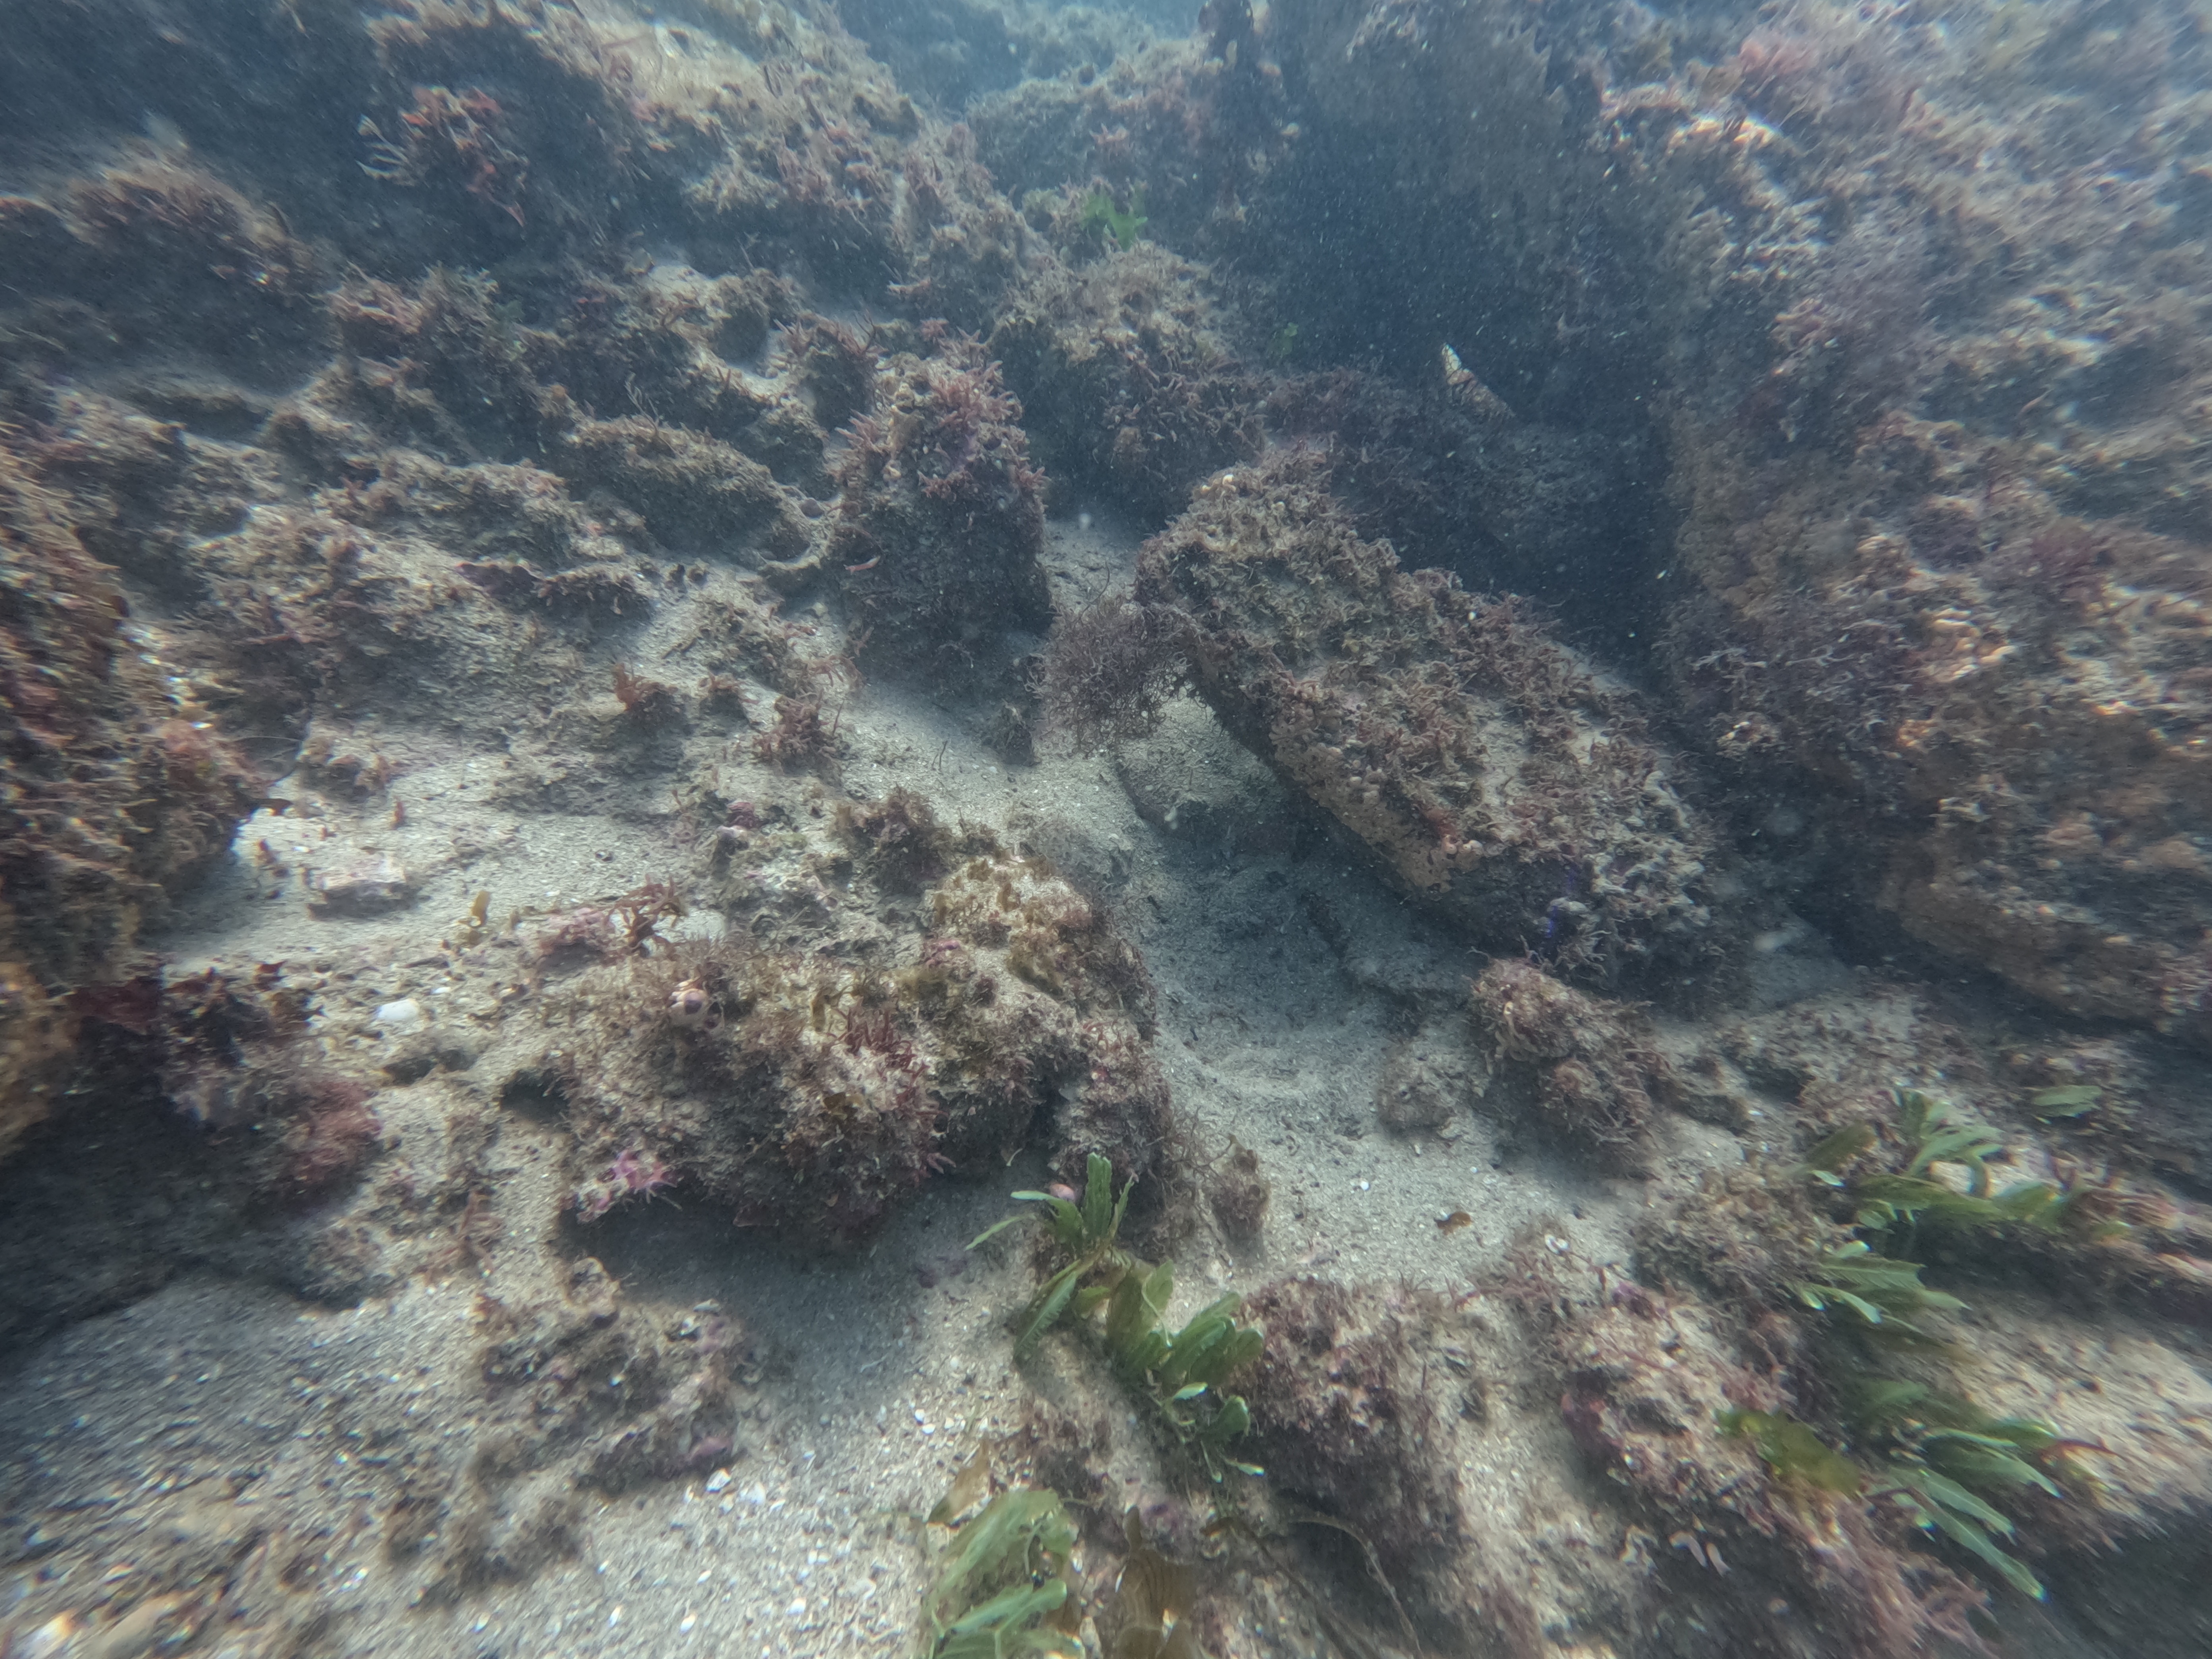

Supplement: Supplementary file 1580 [file G0027906.pdf › Ocean1/G0027906.pdf]

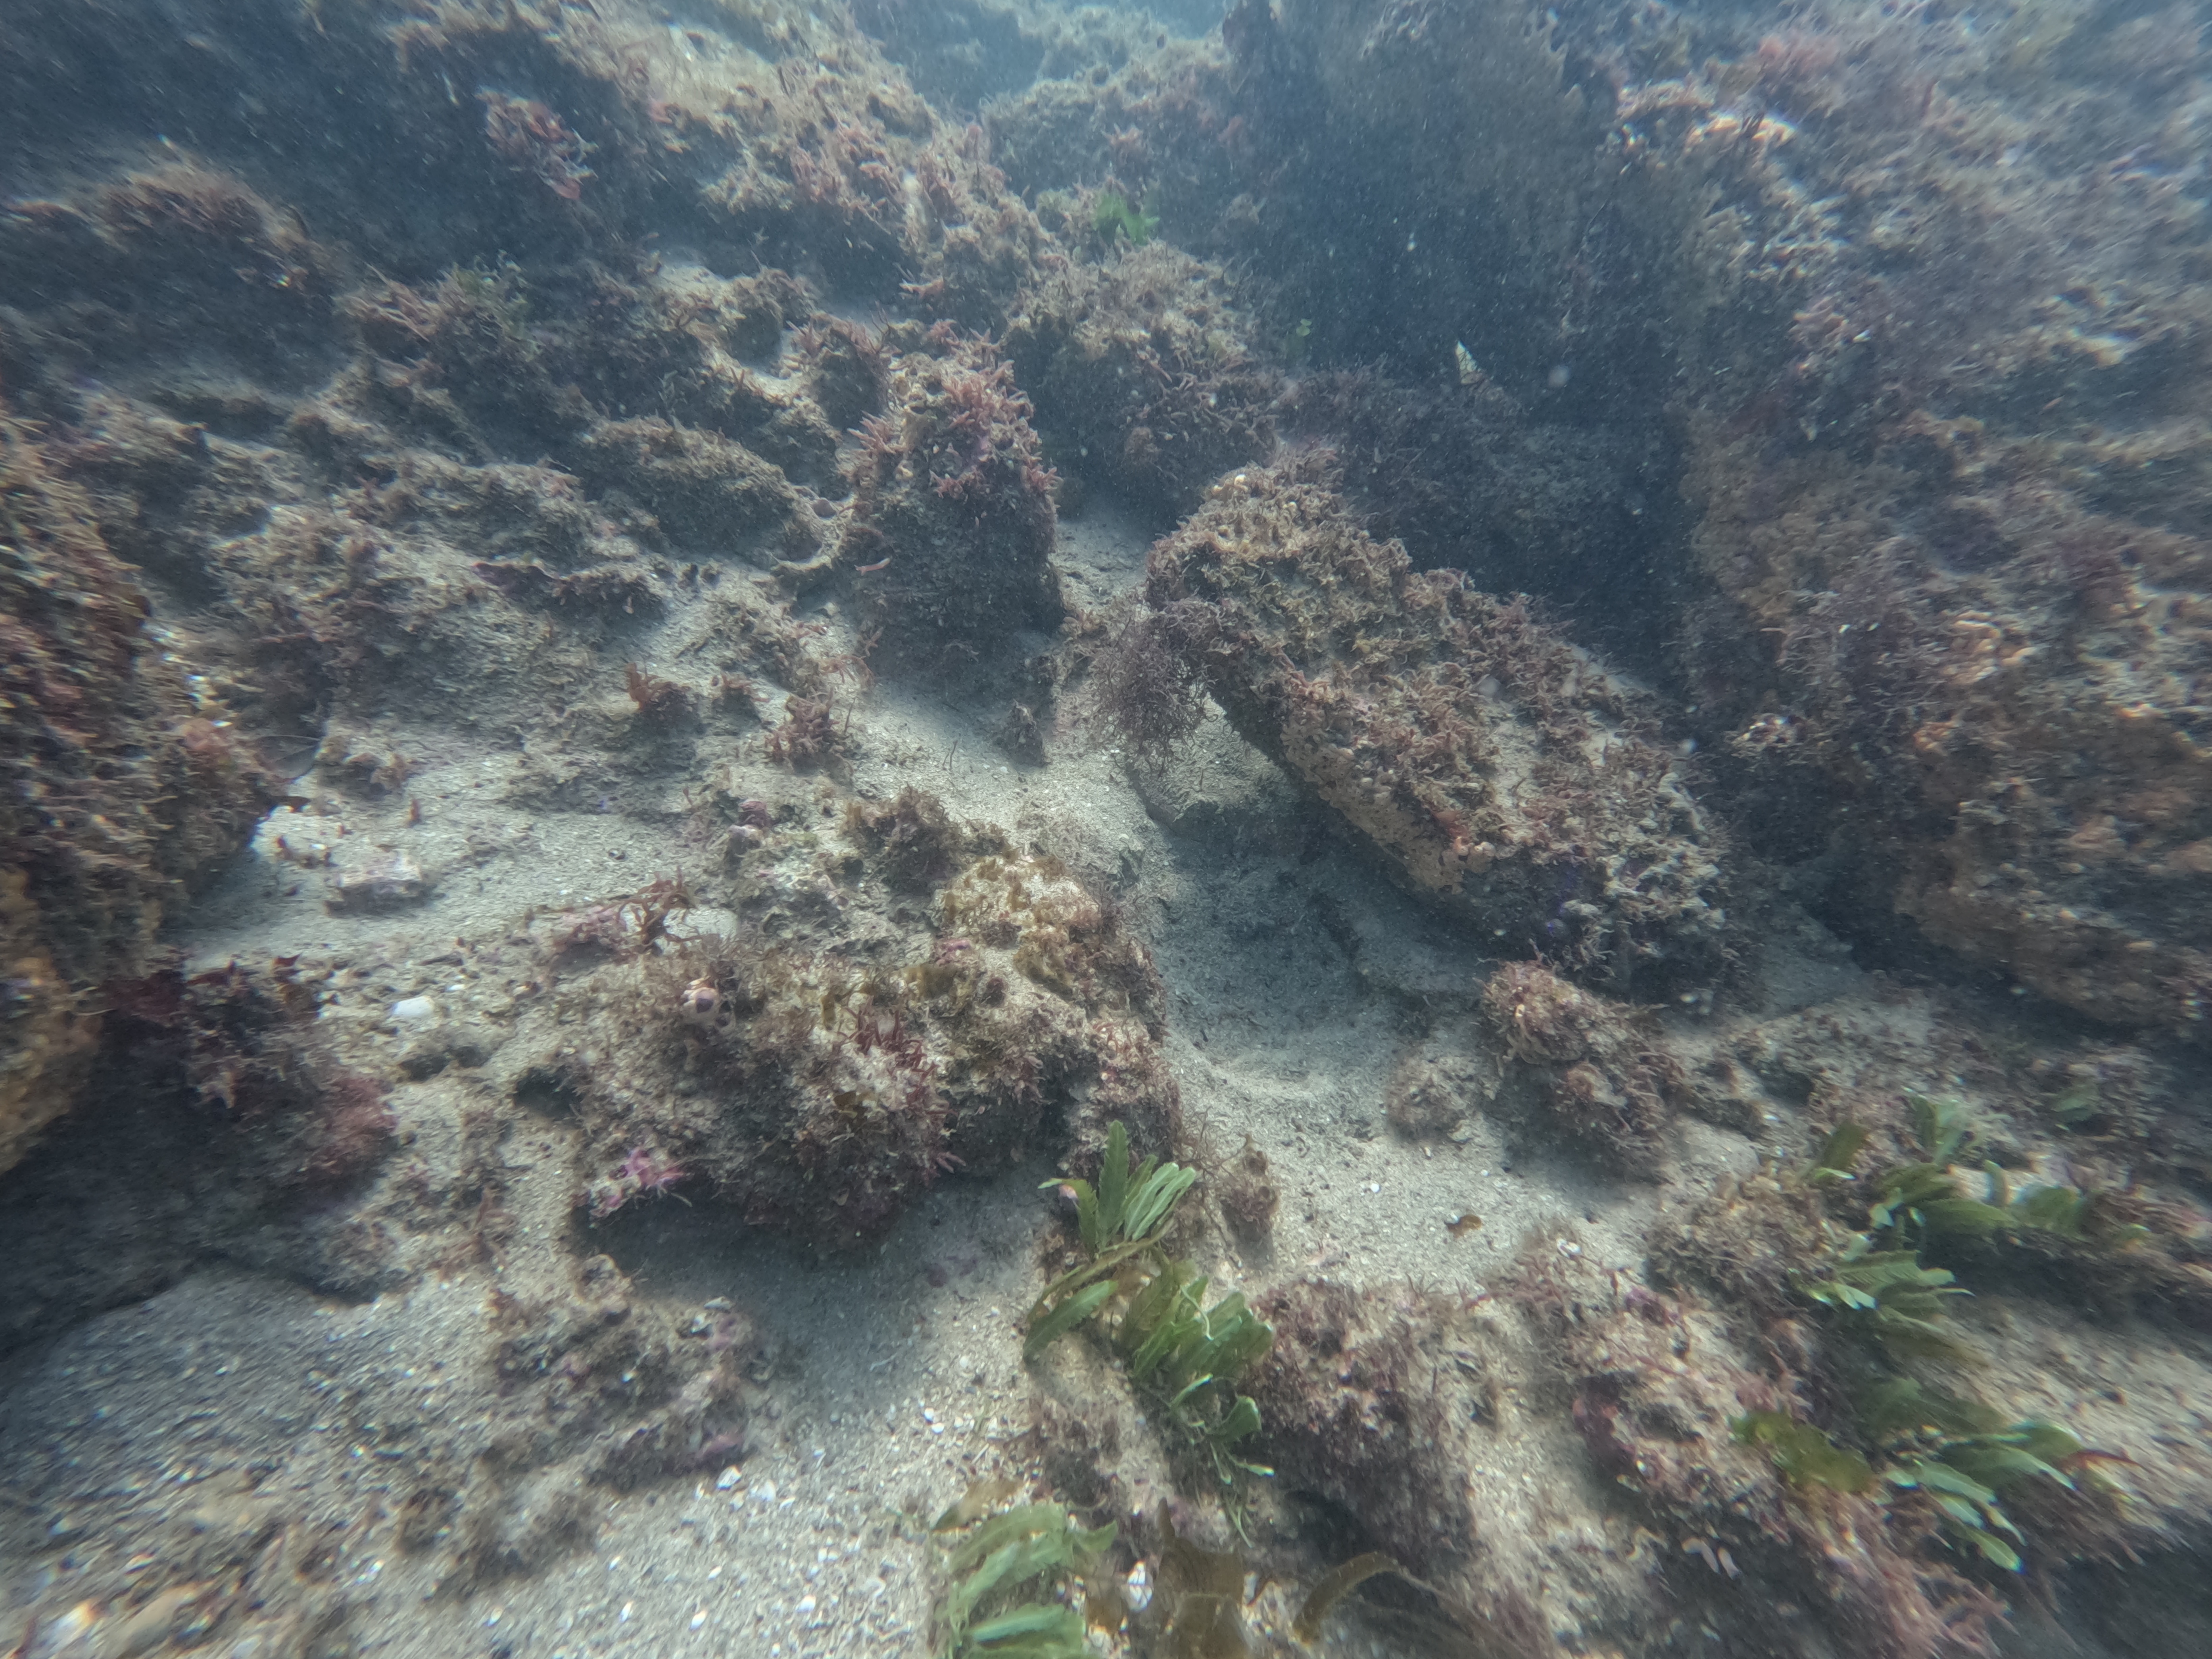

Supplement: Supplementary file 1581 [file G0027907.pdf › Ocean1/G0027907.pdf]

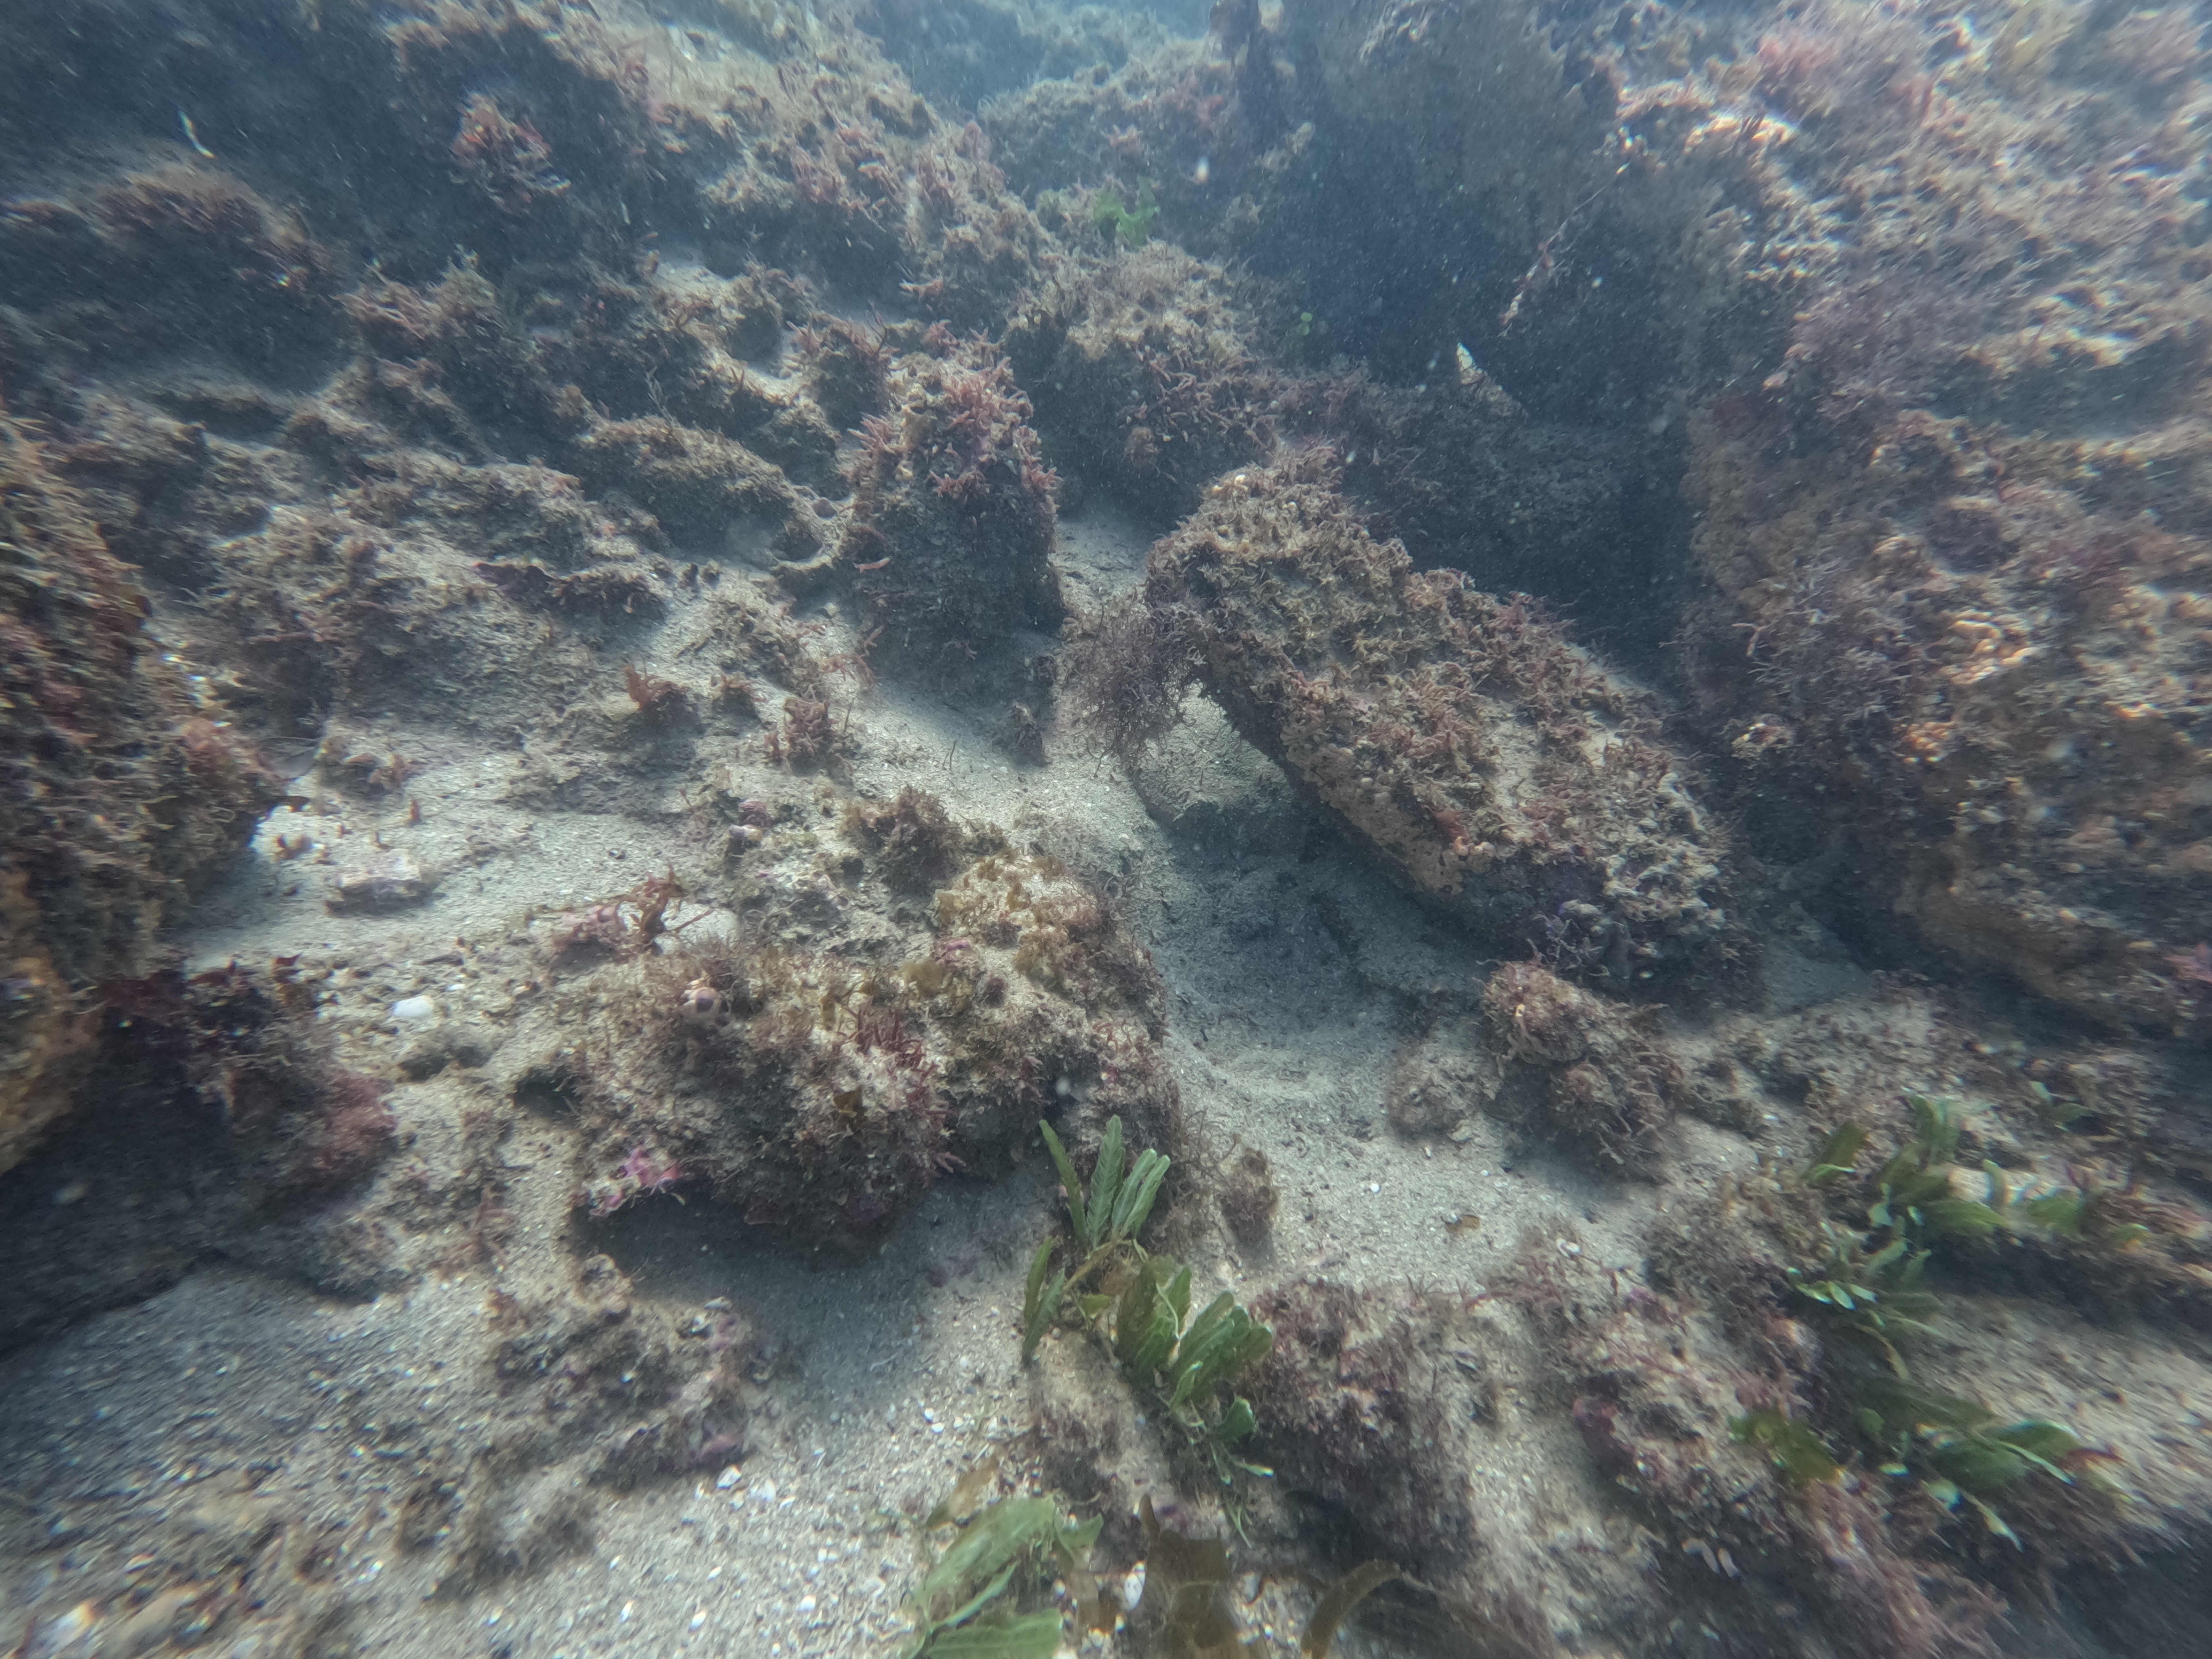

Supplement: Supplementary file 1582 [file G0027908.pdf › Ocean1/G0027908.pdf]

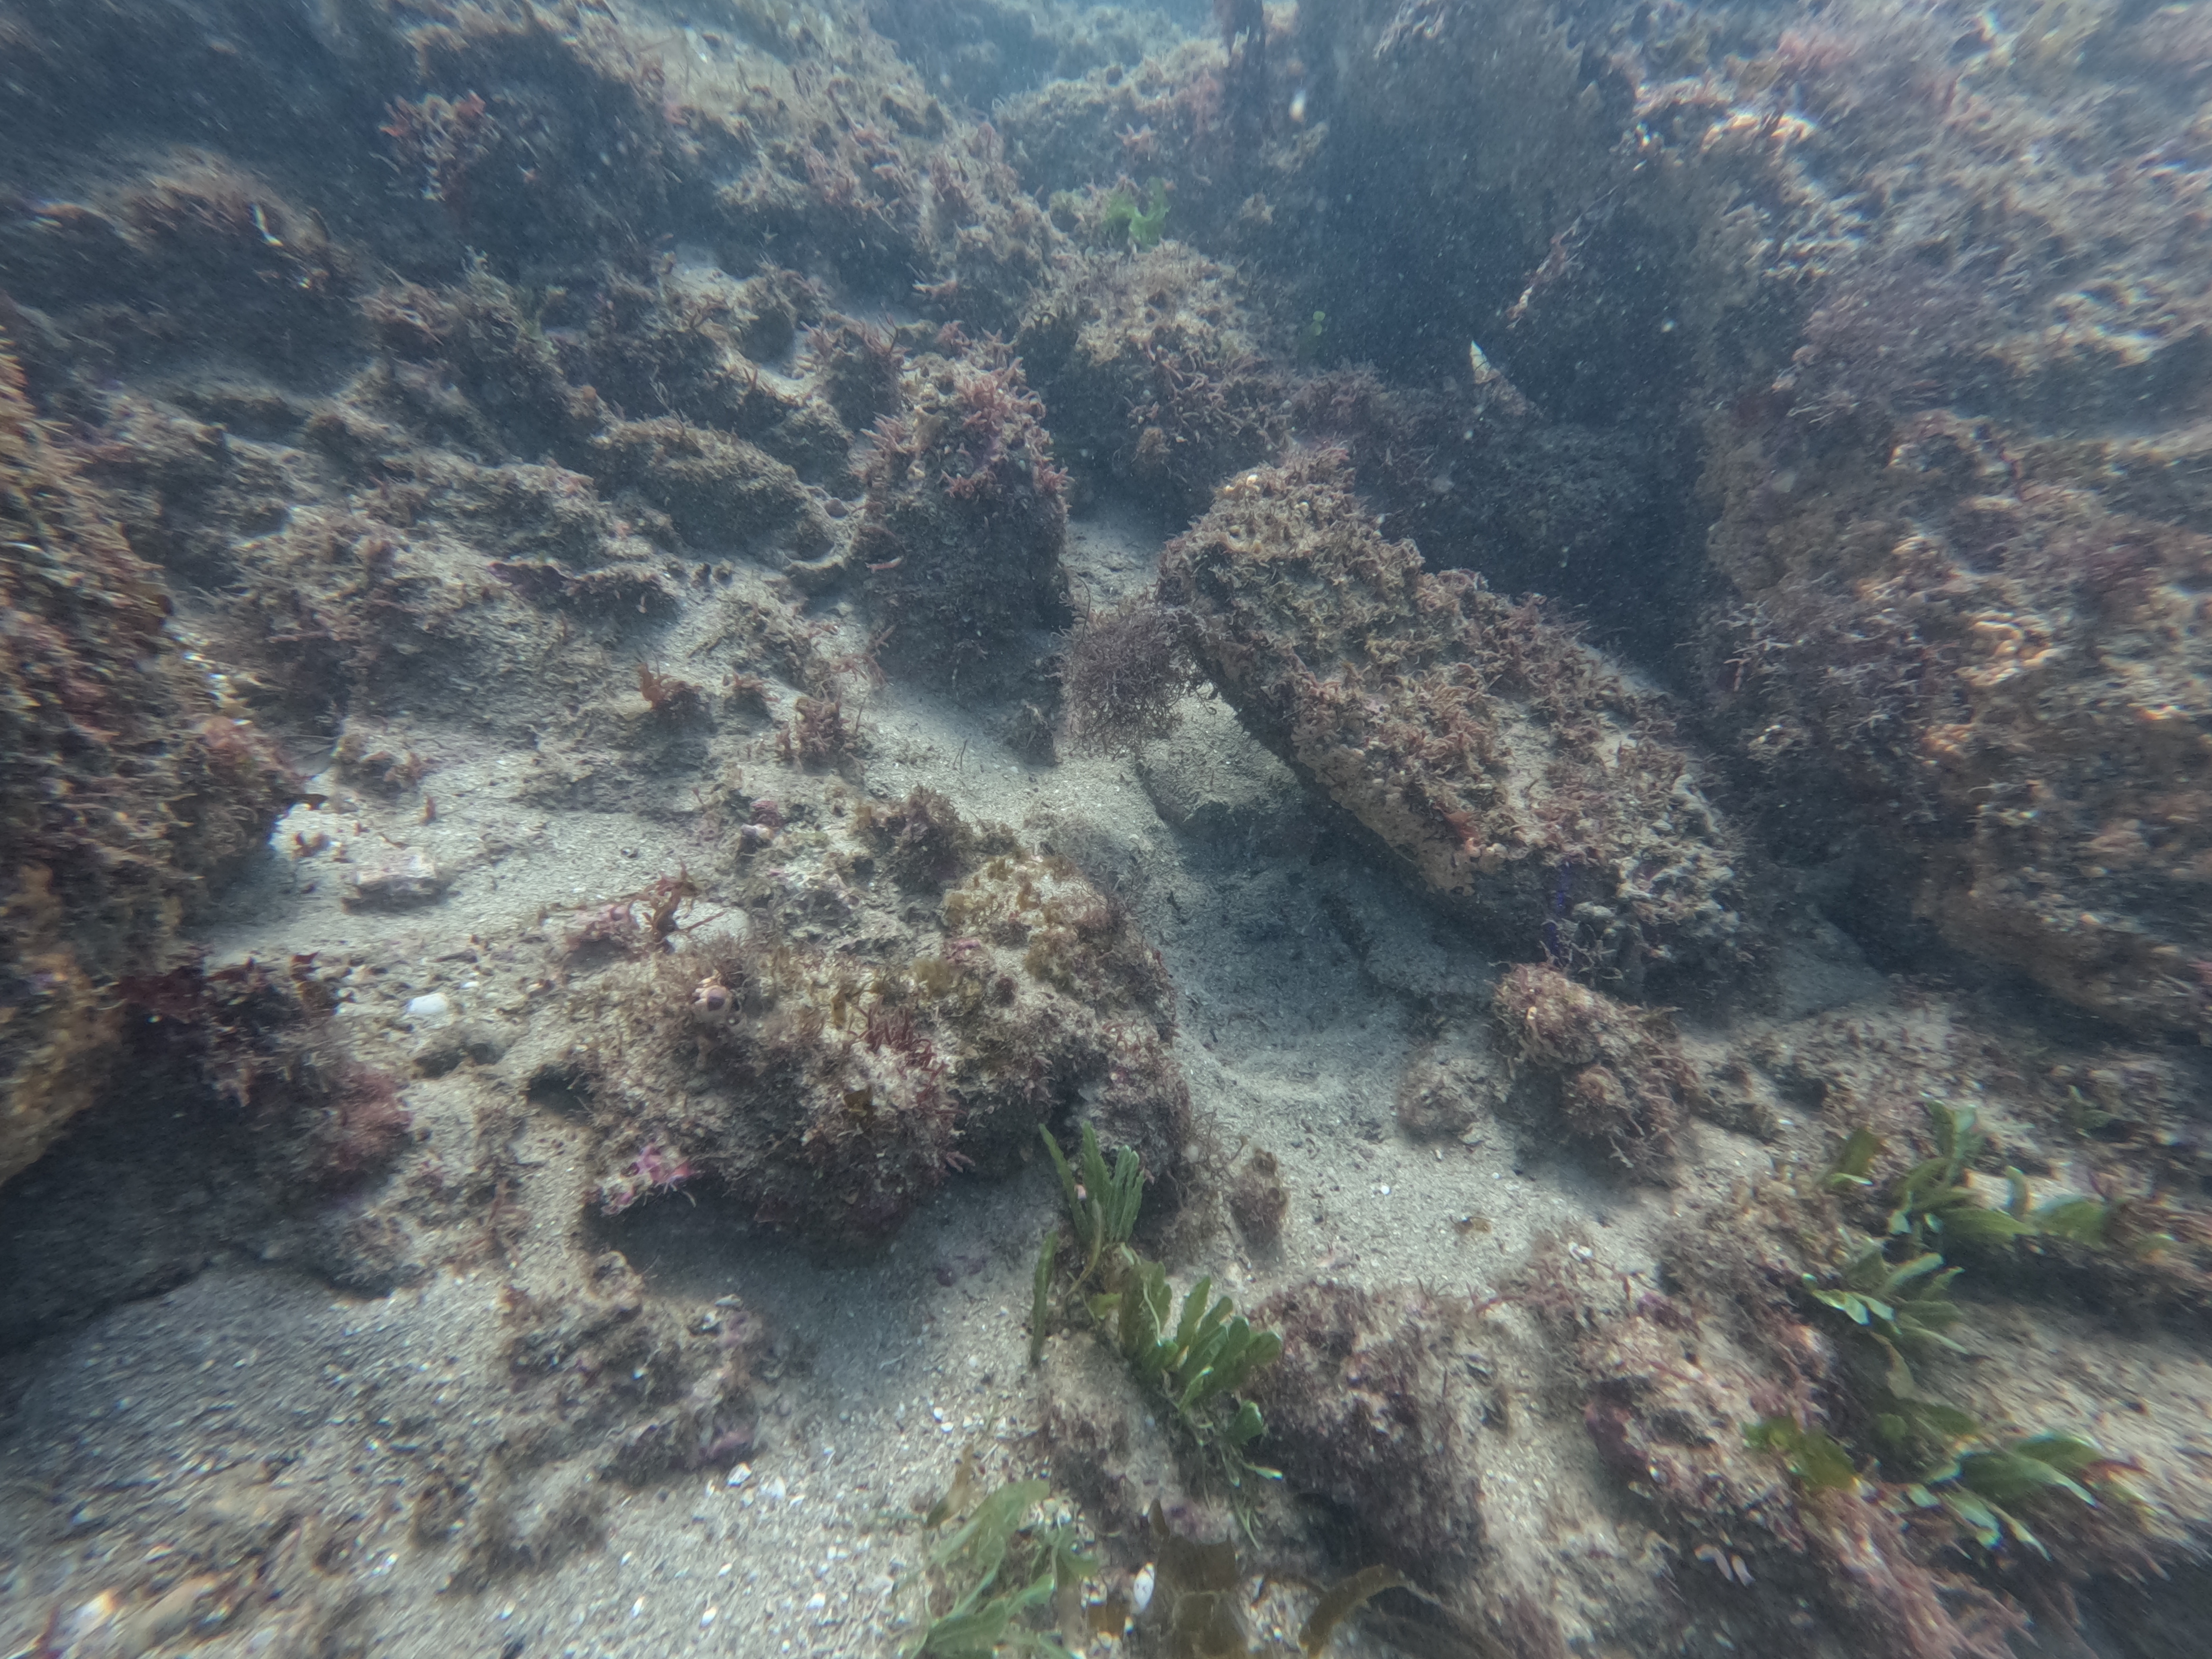

Supplement: Supplementary file 1583 [file G0027909.pdf › Ocean1/G0027909.pdf]

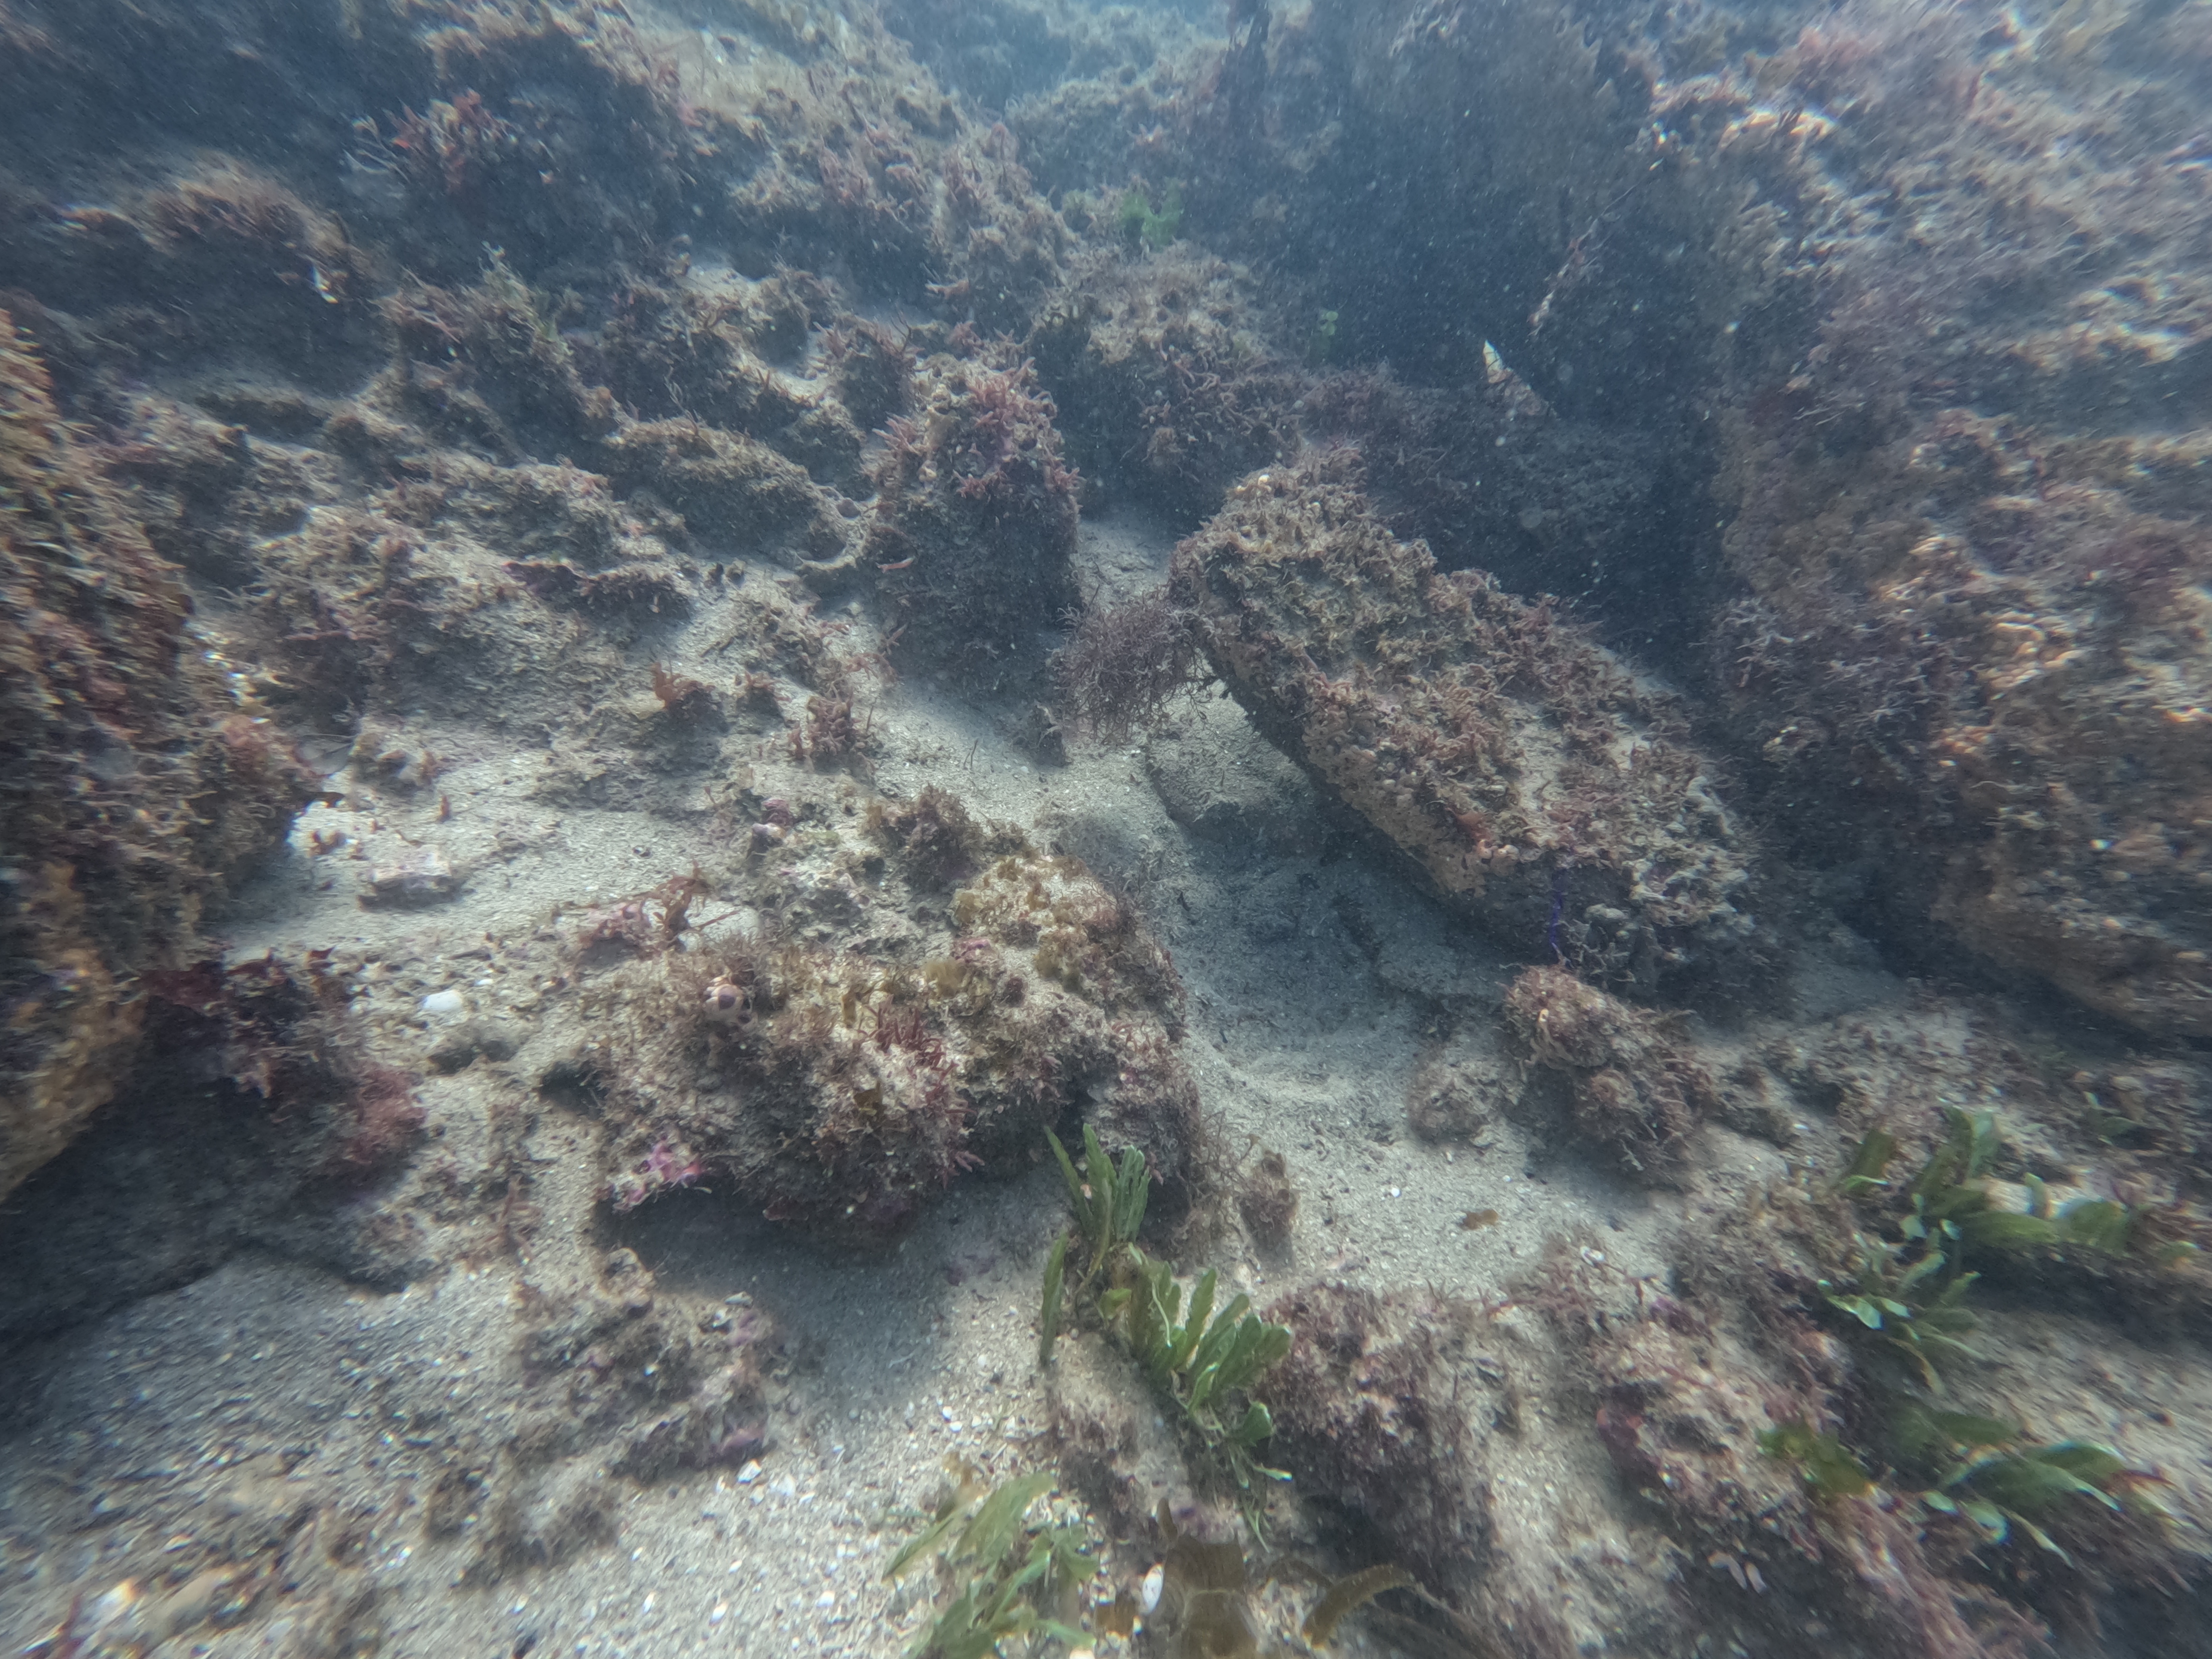

Supplement: Supplementary file 1584 [file G0027910.pdf › Ocean1/G0027910.pdf]

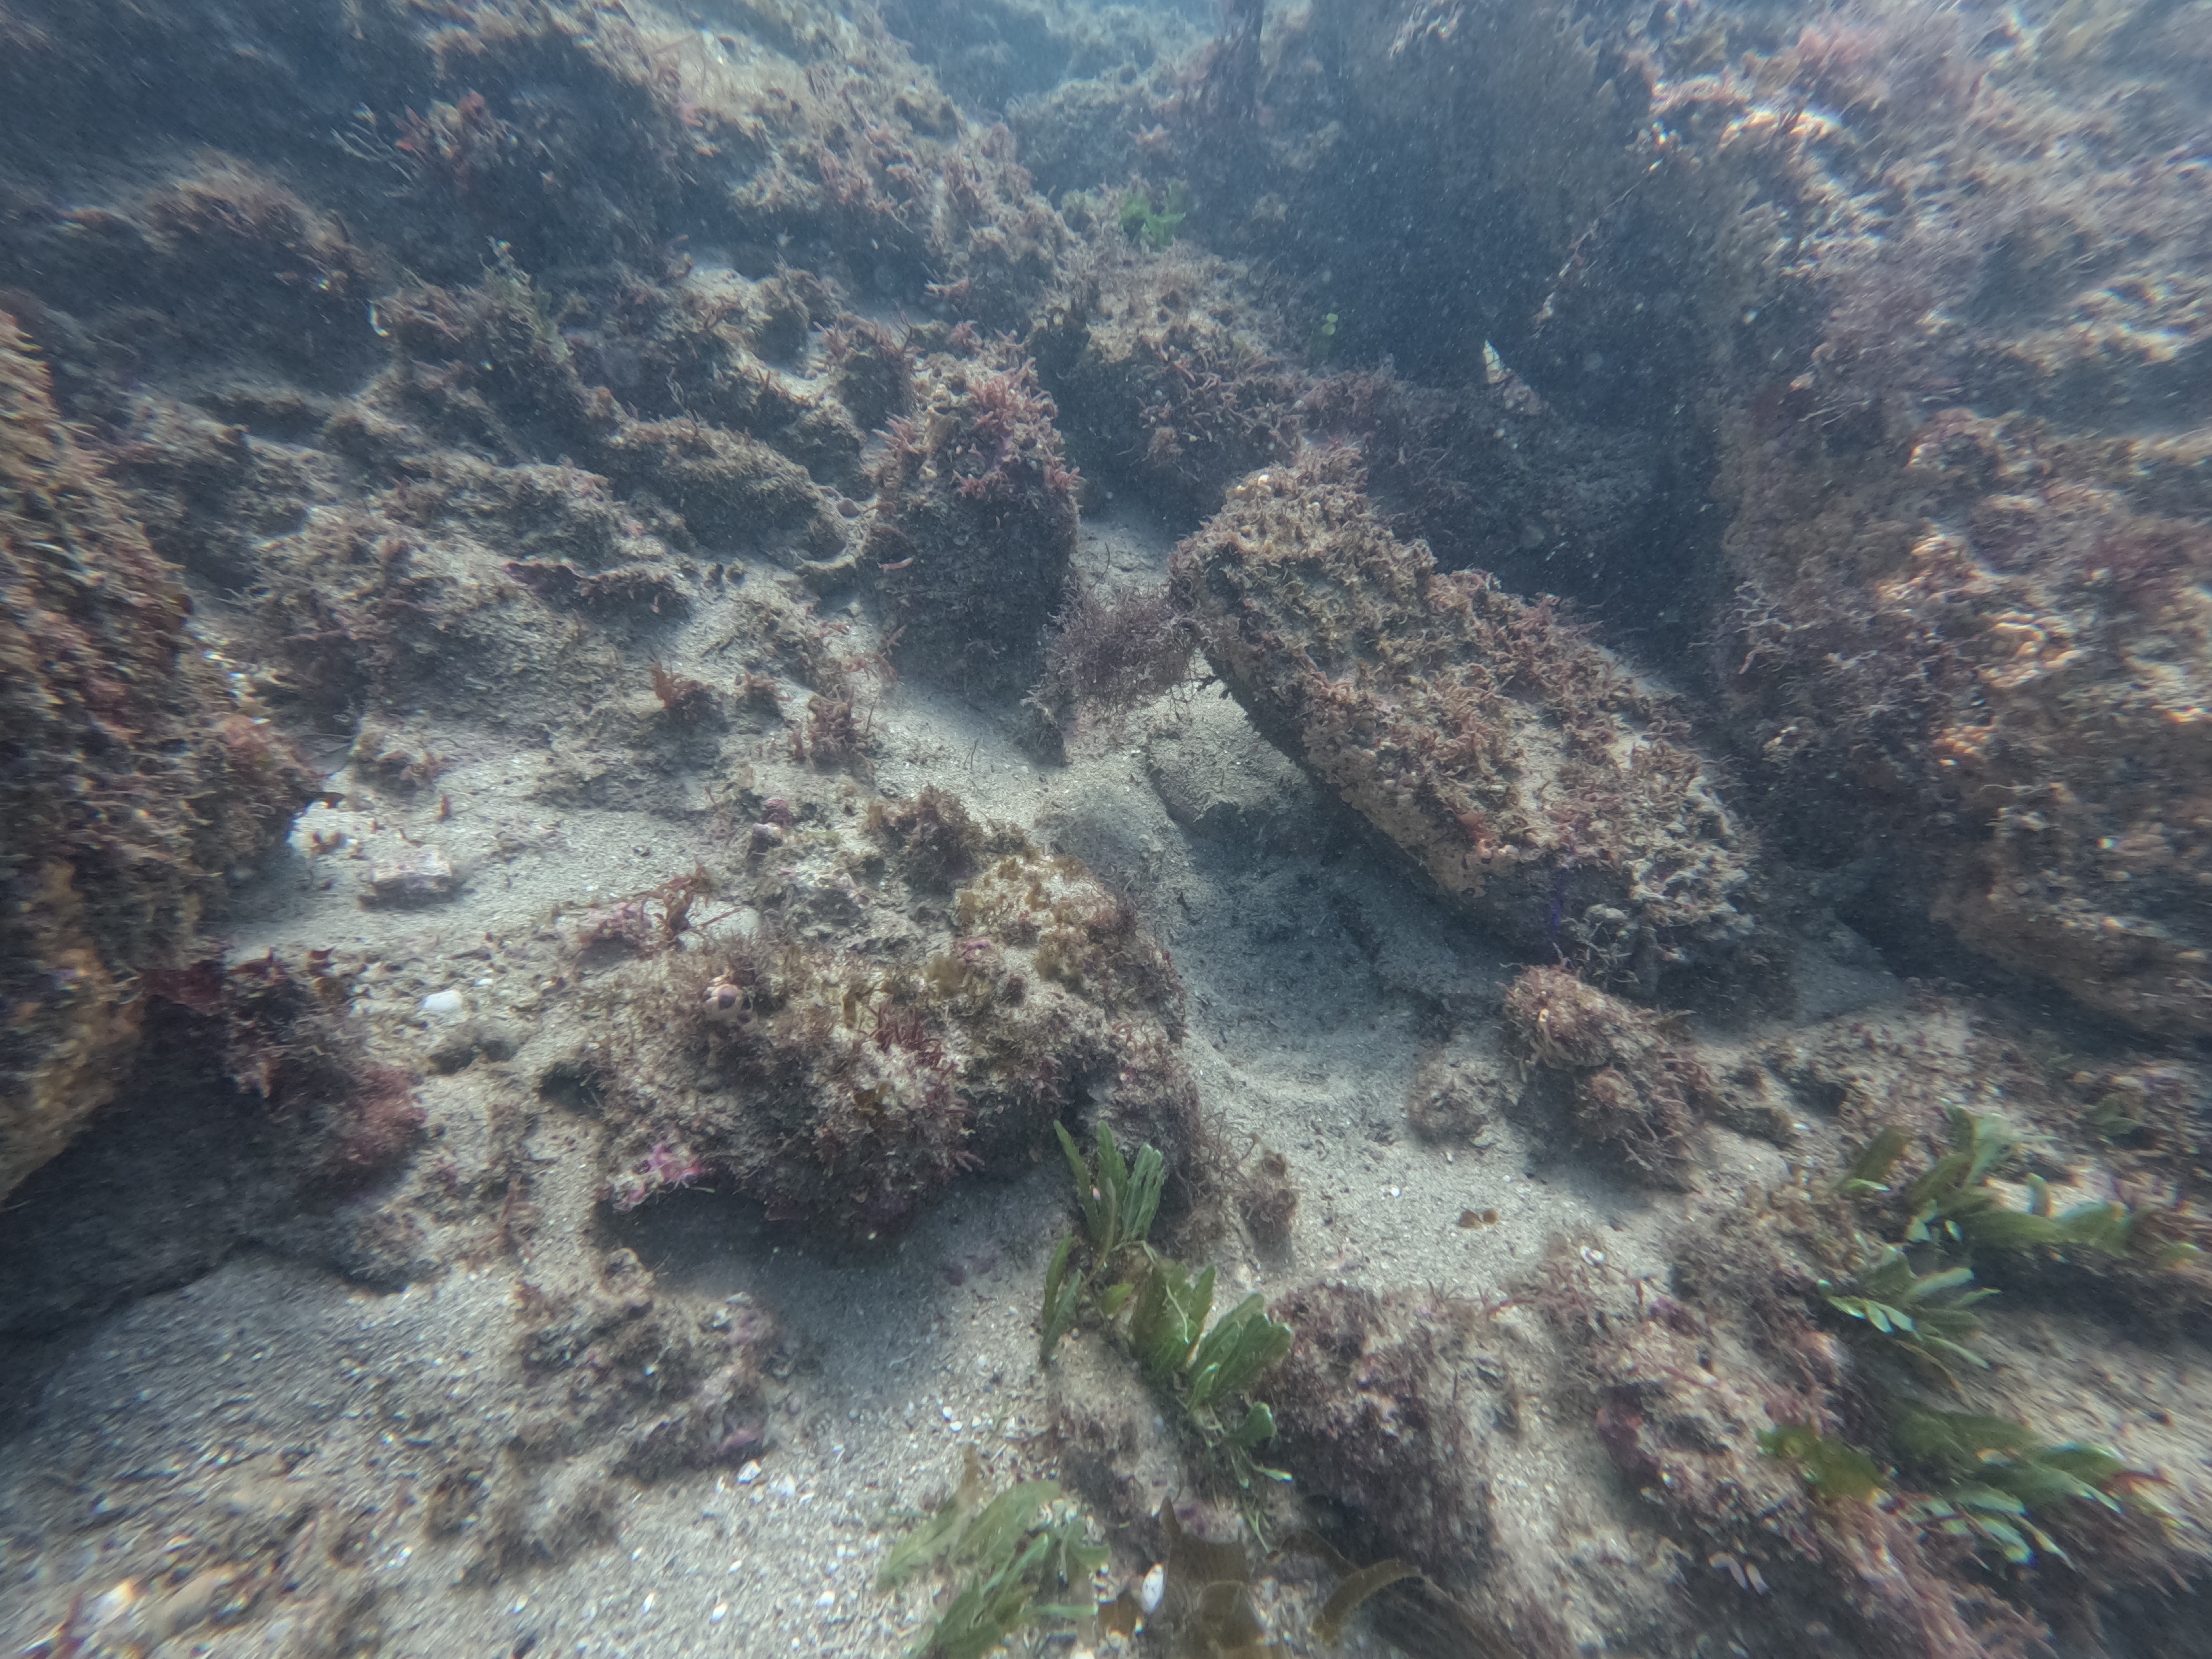

Supplement: Supplementary file 1585 [file G0027911.pdf › Ocean1/G0027911.pdf]

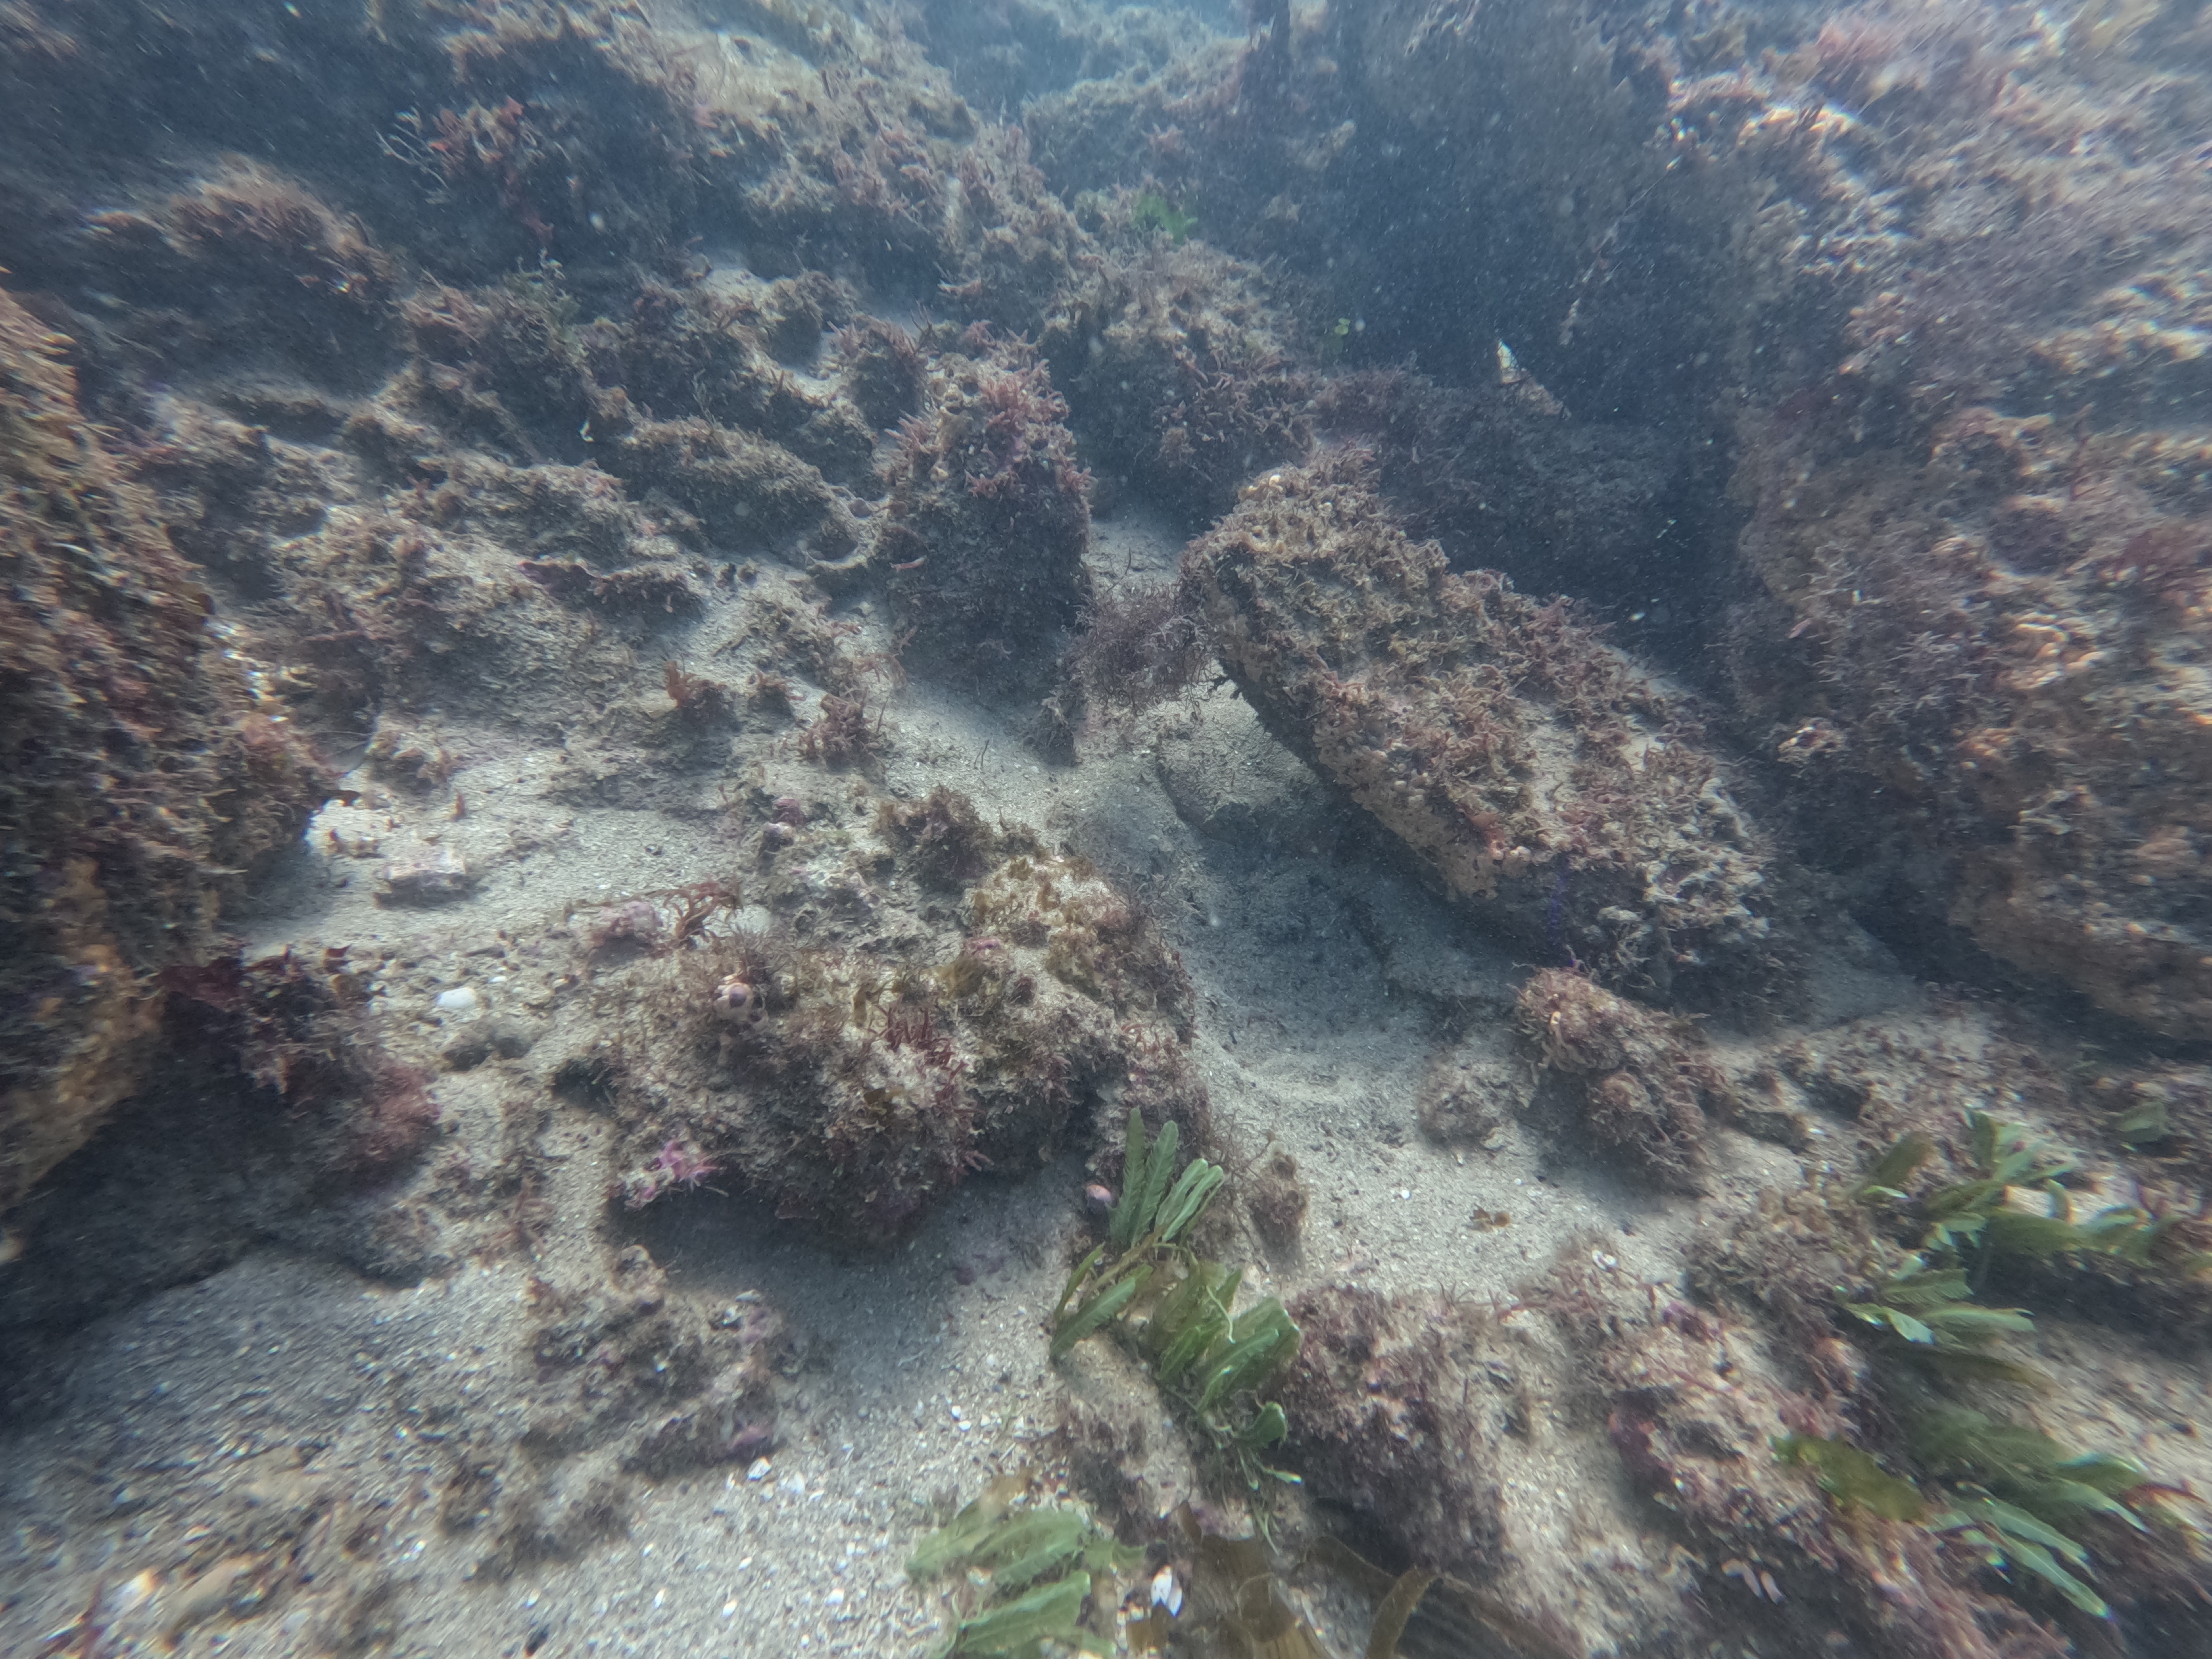

Supplement: Supplementary file 1586 [file G0027912.pdf › Ocean1/G0027912.pdf]

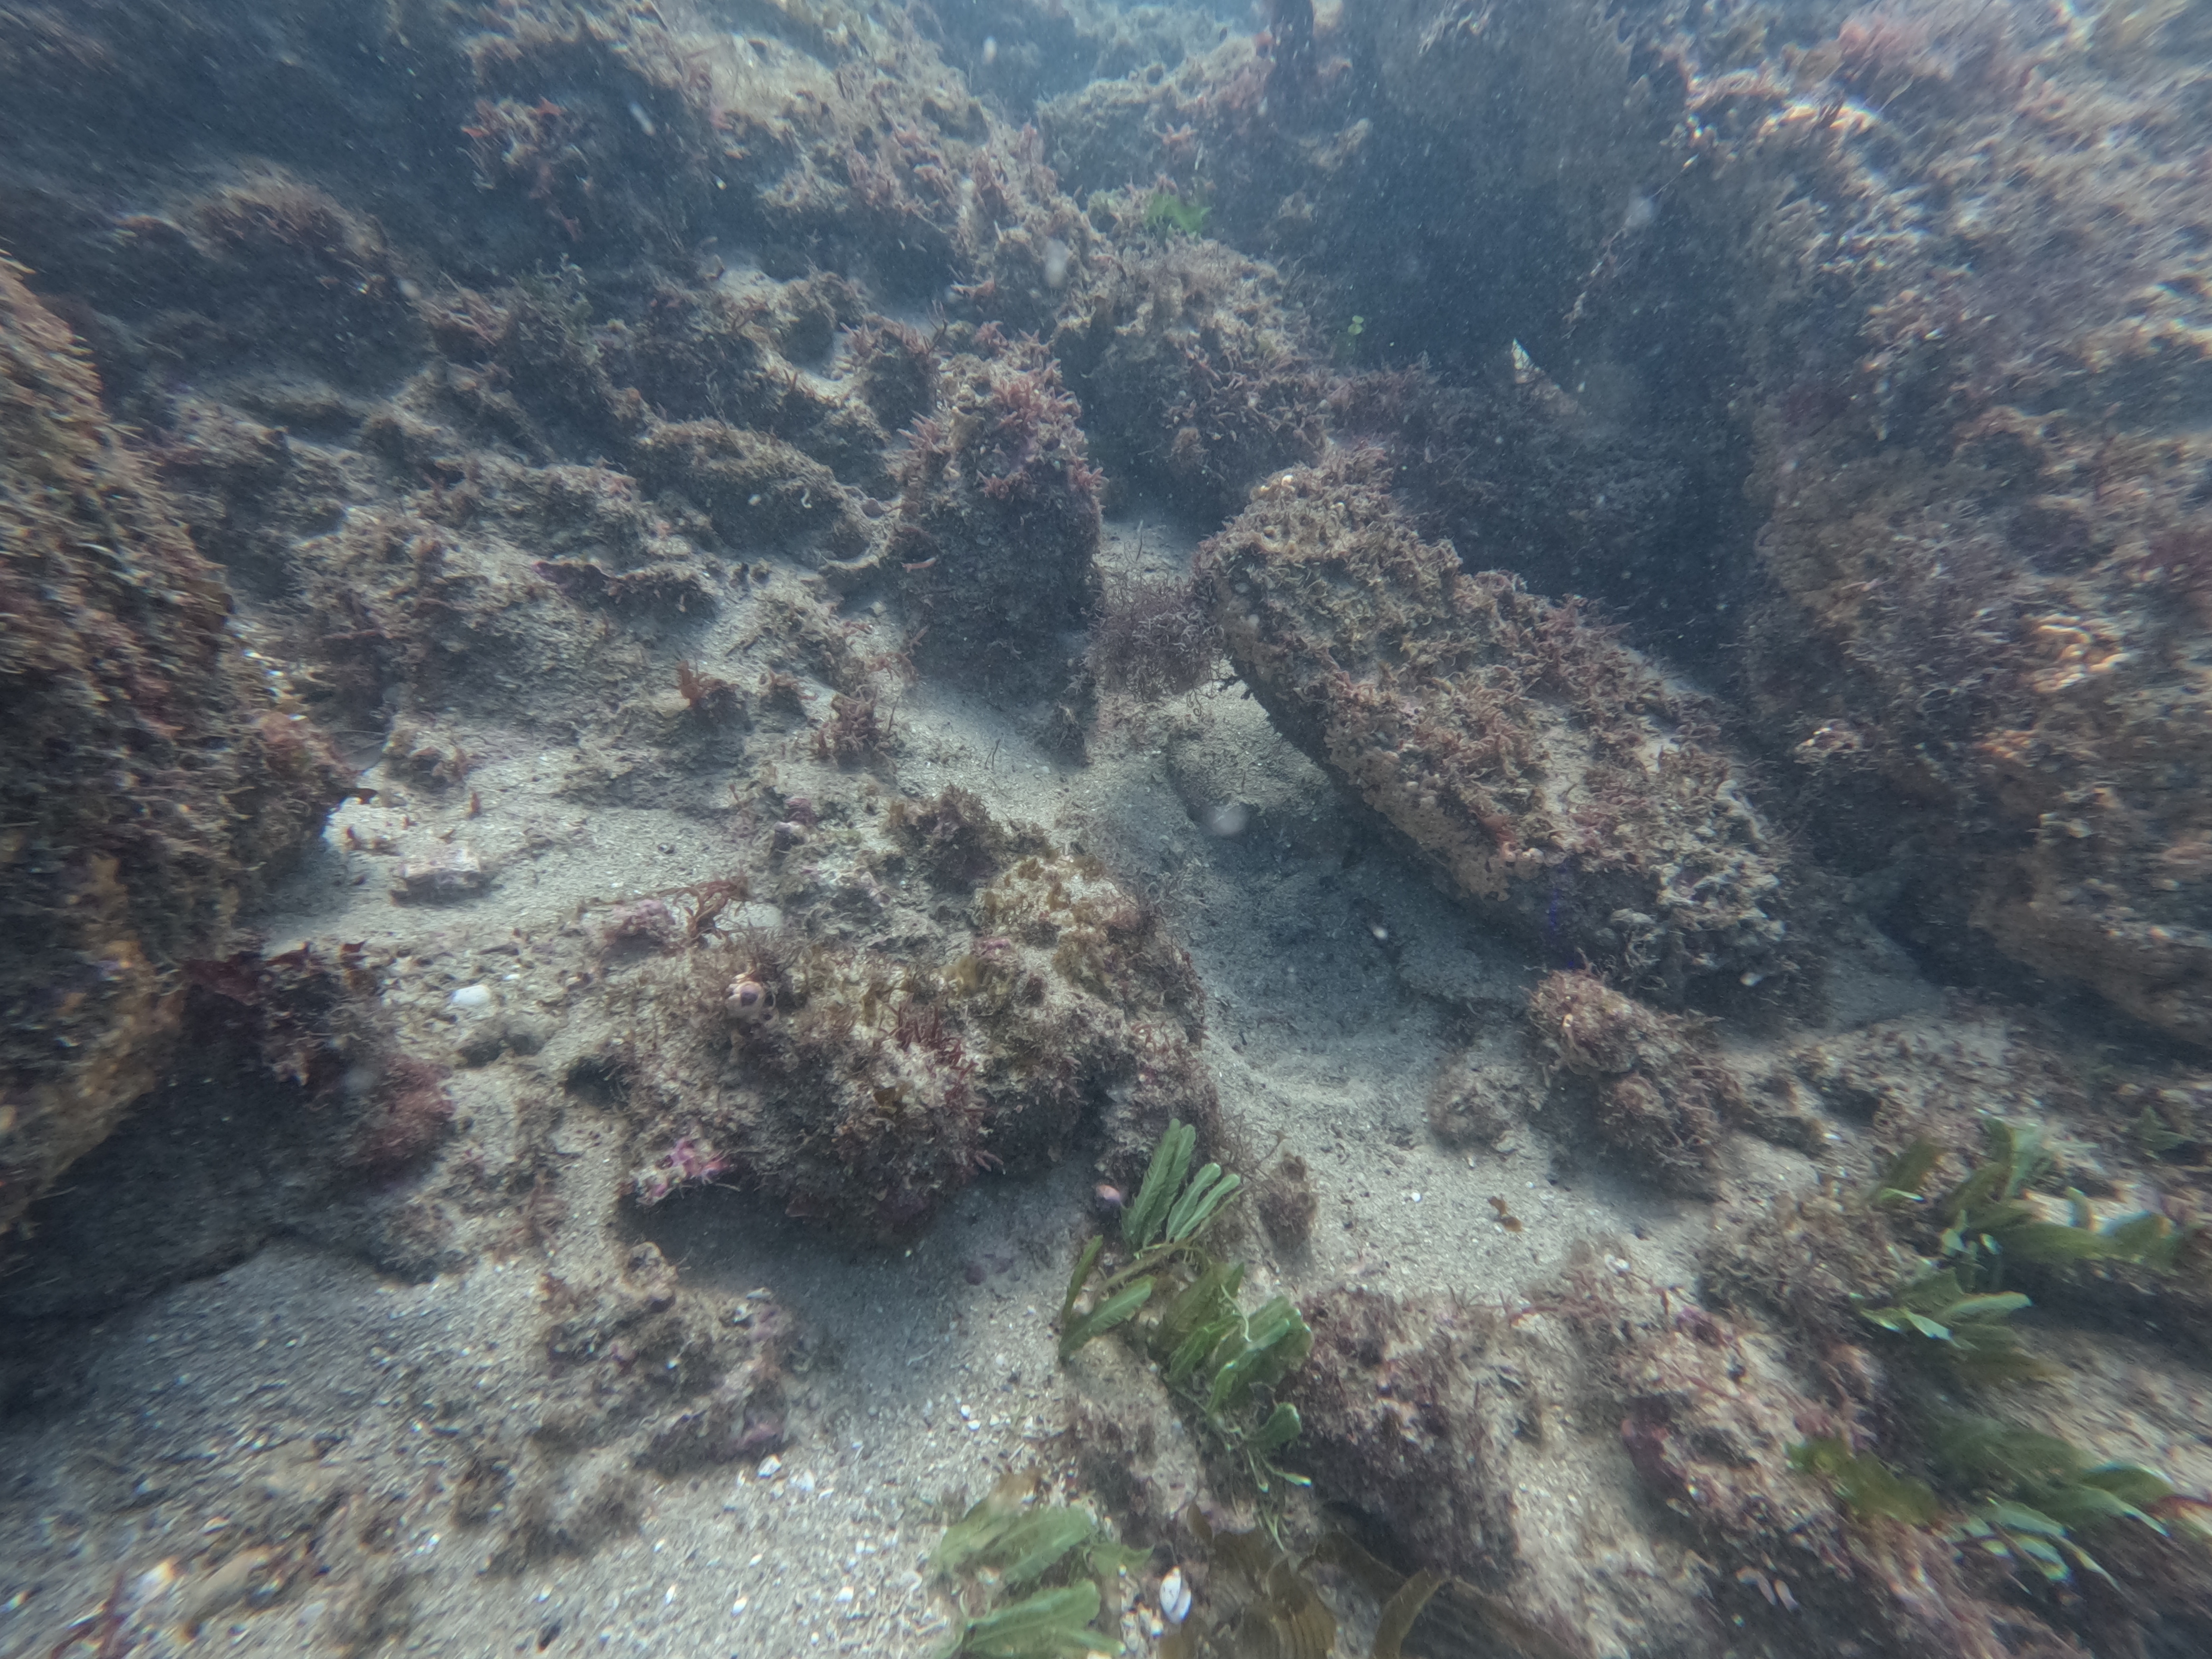

Supplement: Supplementary file 1587 [file G0027913.pdf › Ocean1/G0027913.pdf]

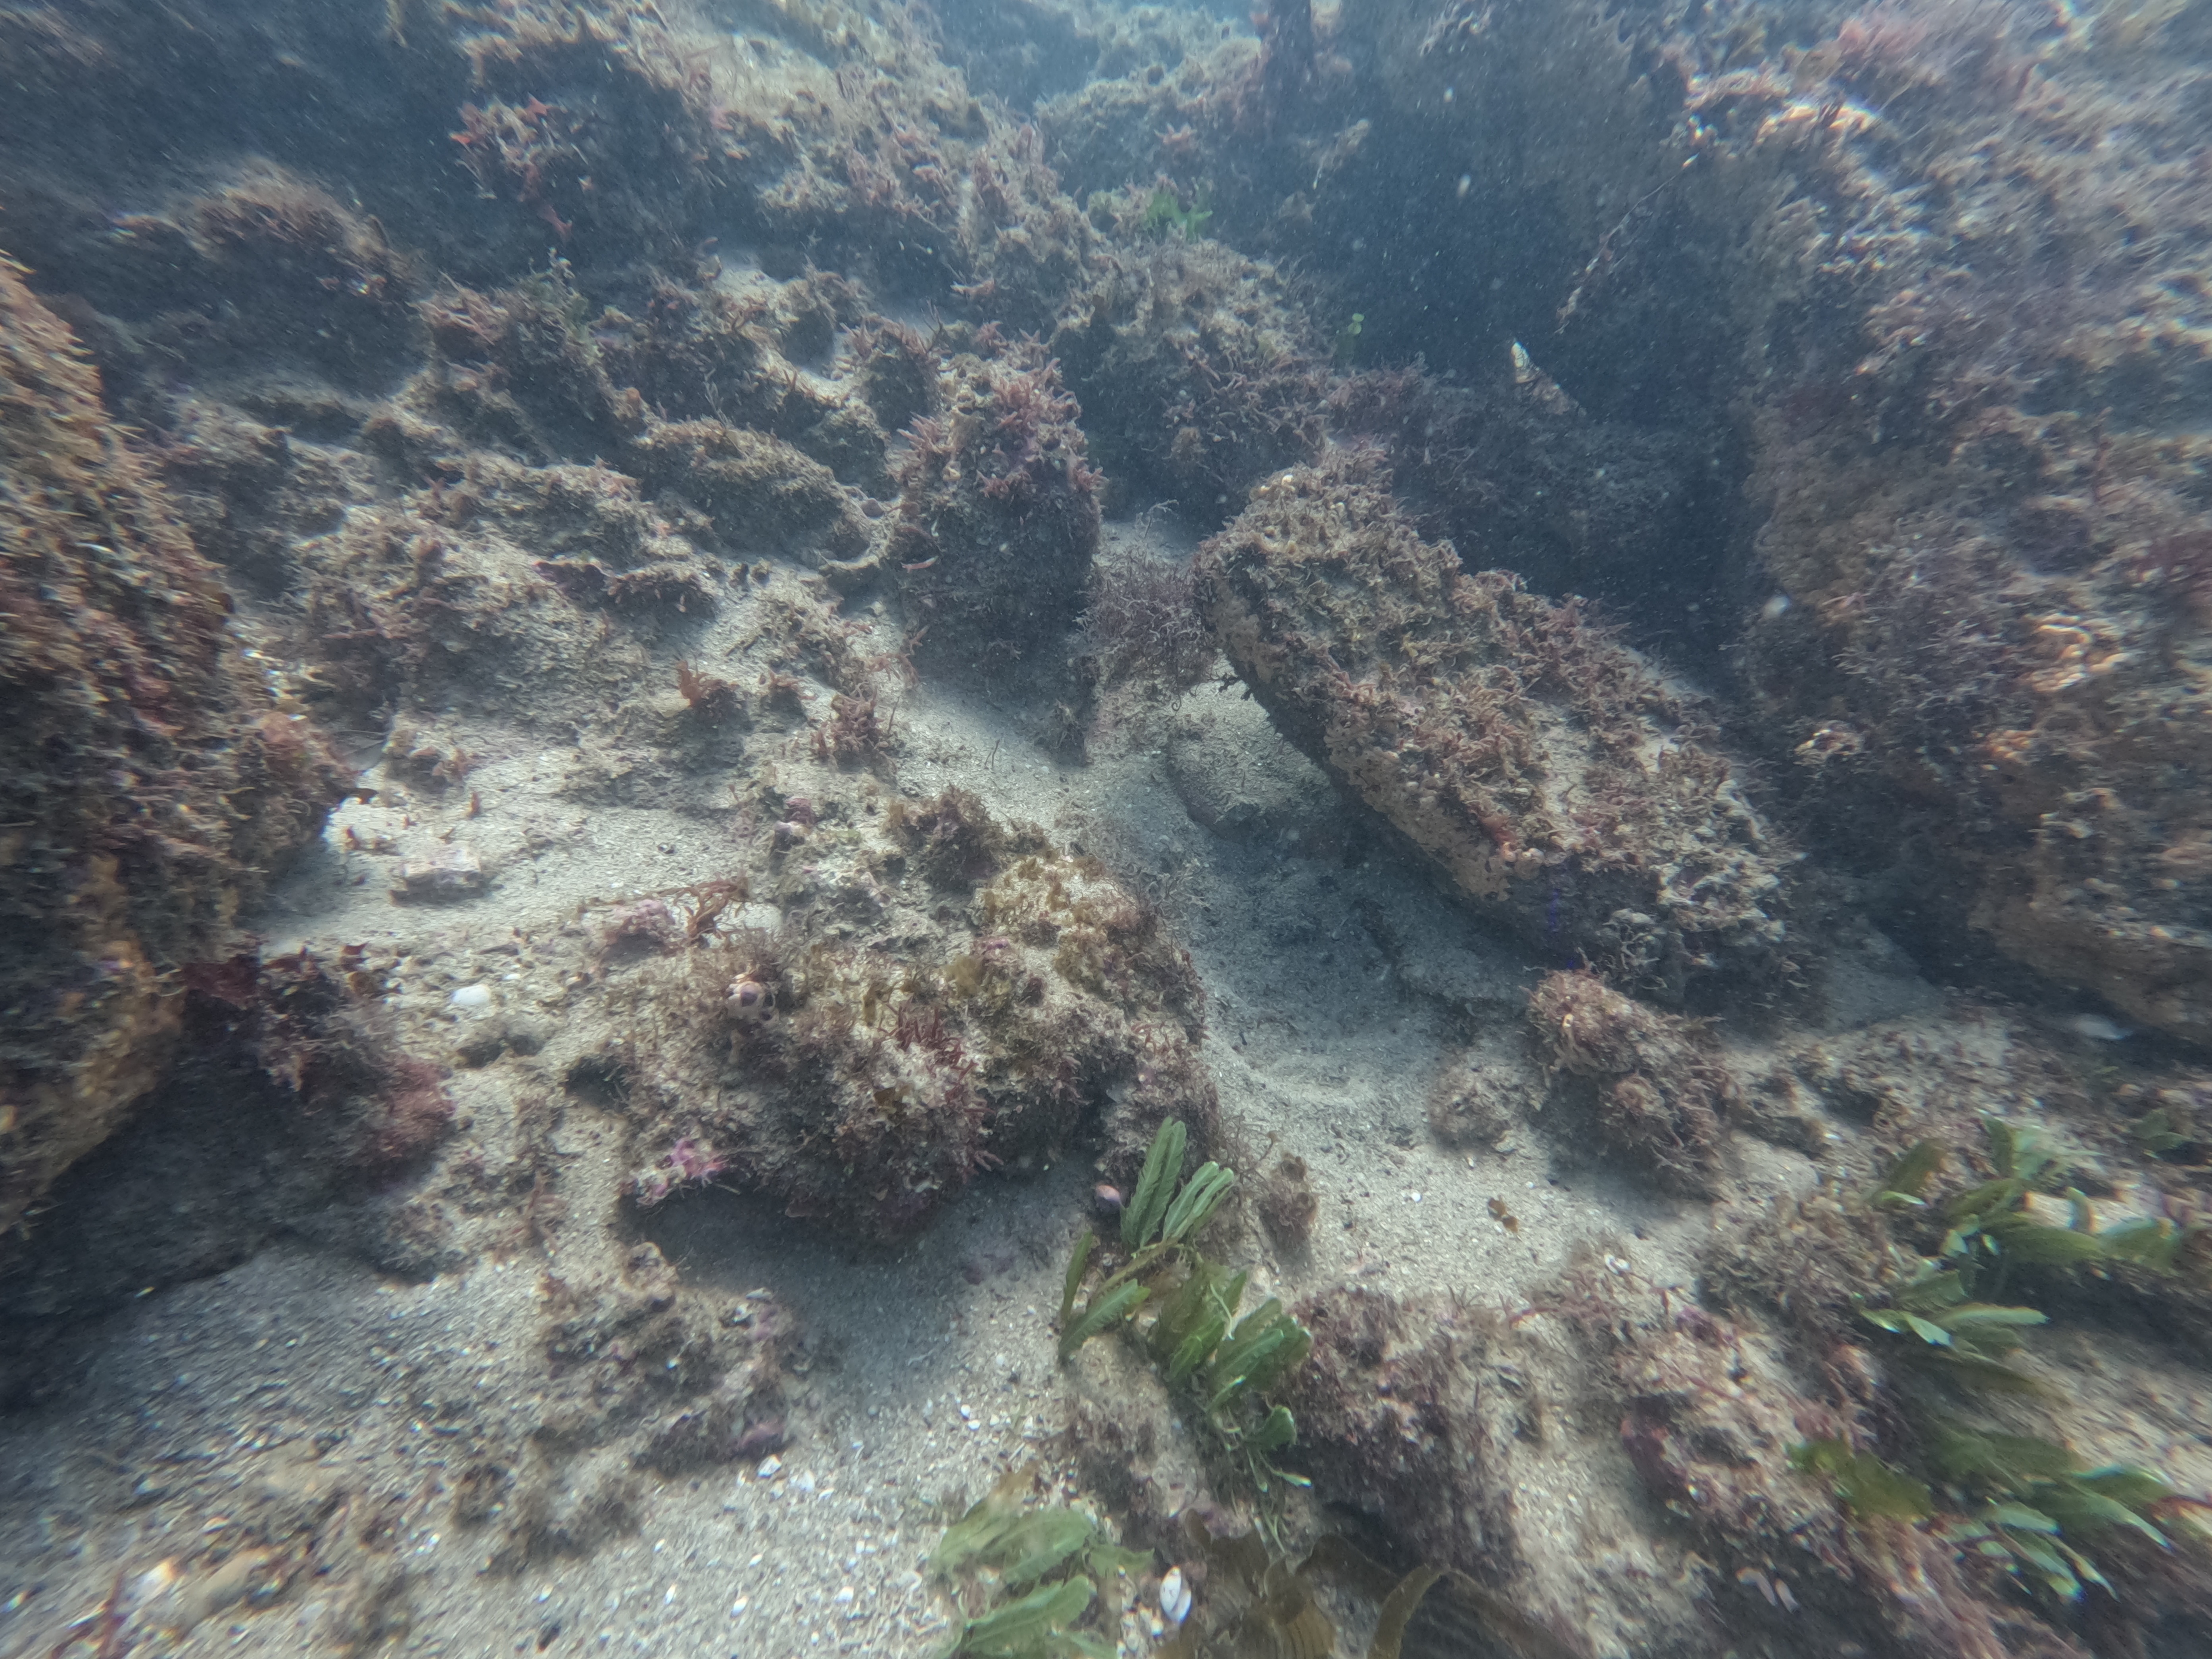

Supplement: Supplementary file 1588 [file G0027914.pdf › Ocean1/G0027914.pdf]

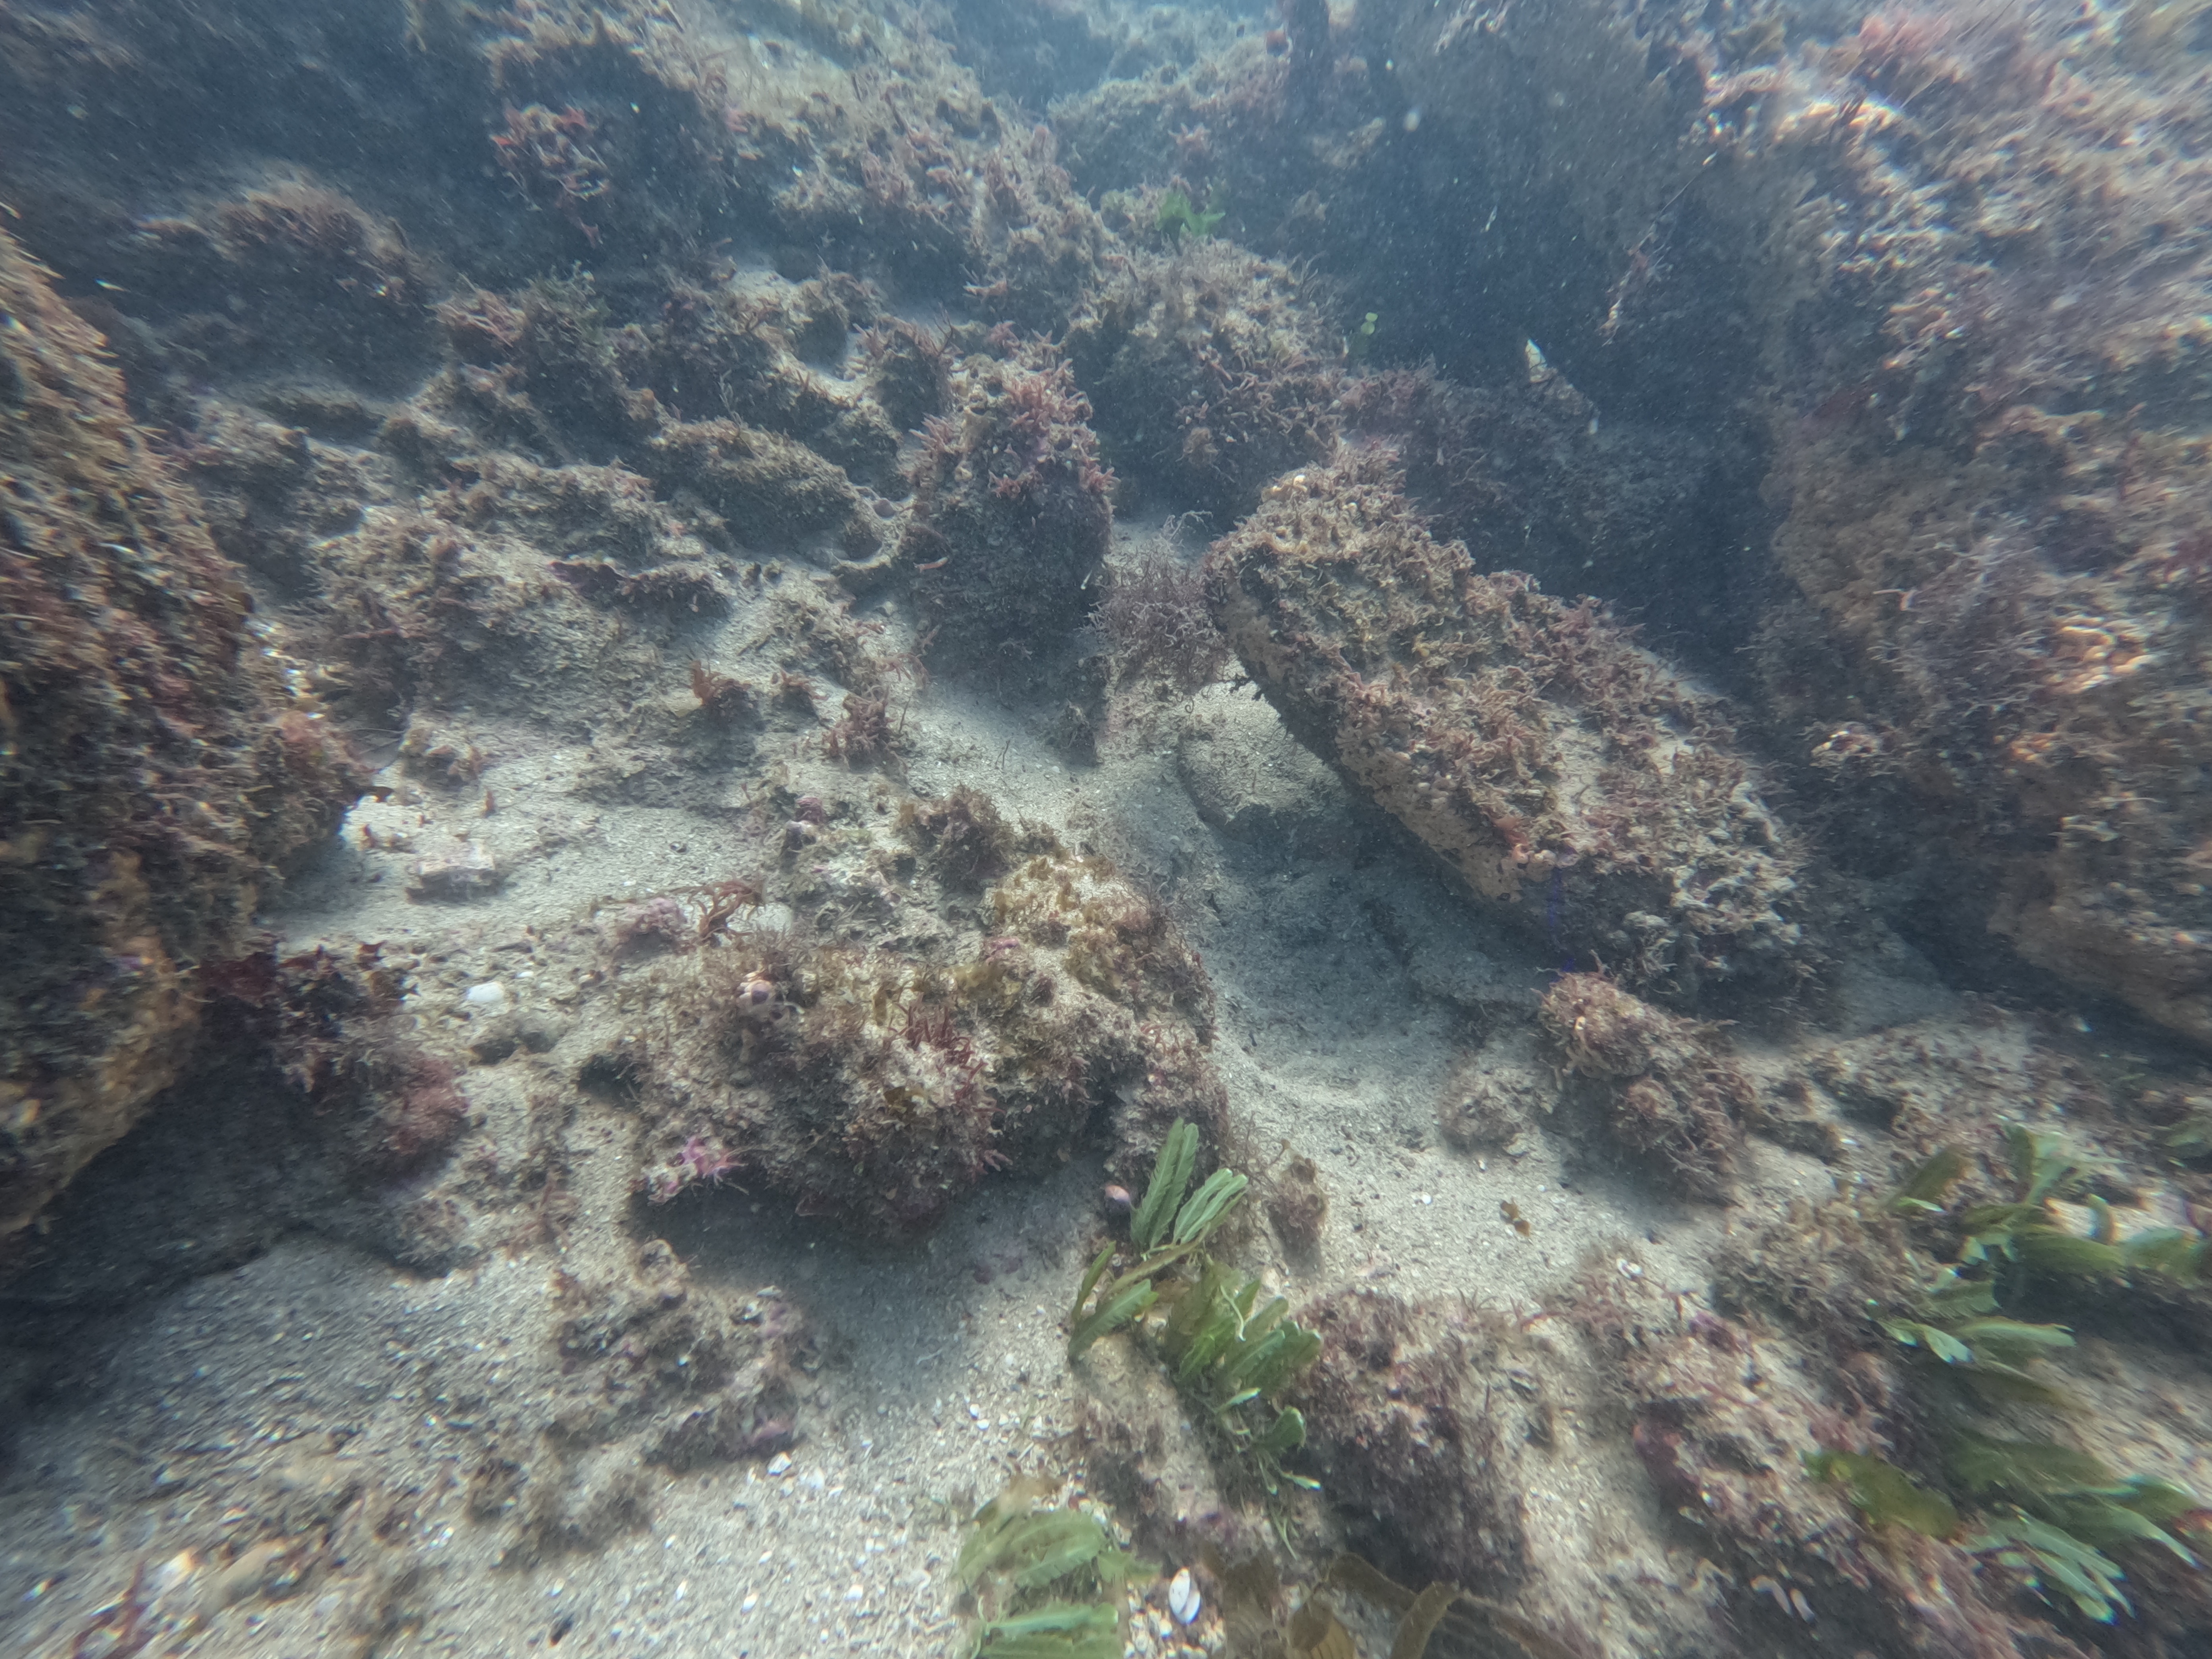

Supplement: Supplementary file 1589 [file G0027915.pdf › Ocean1/G0027915.pdf]

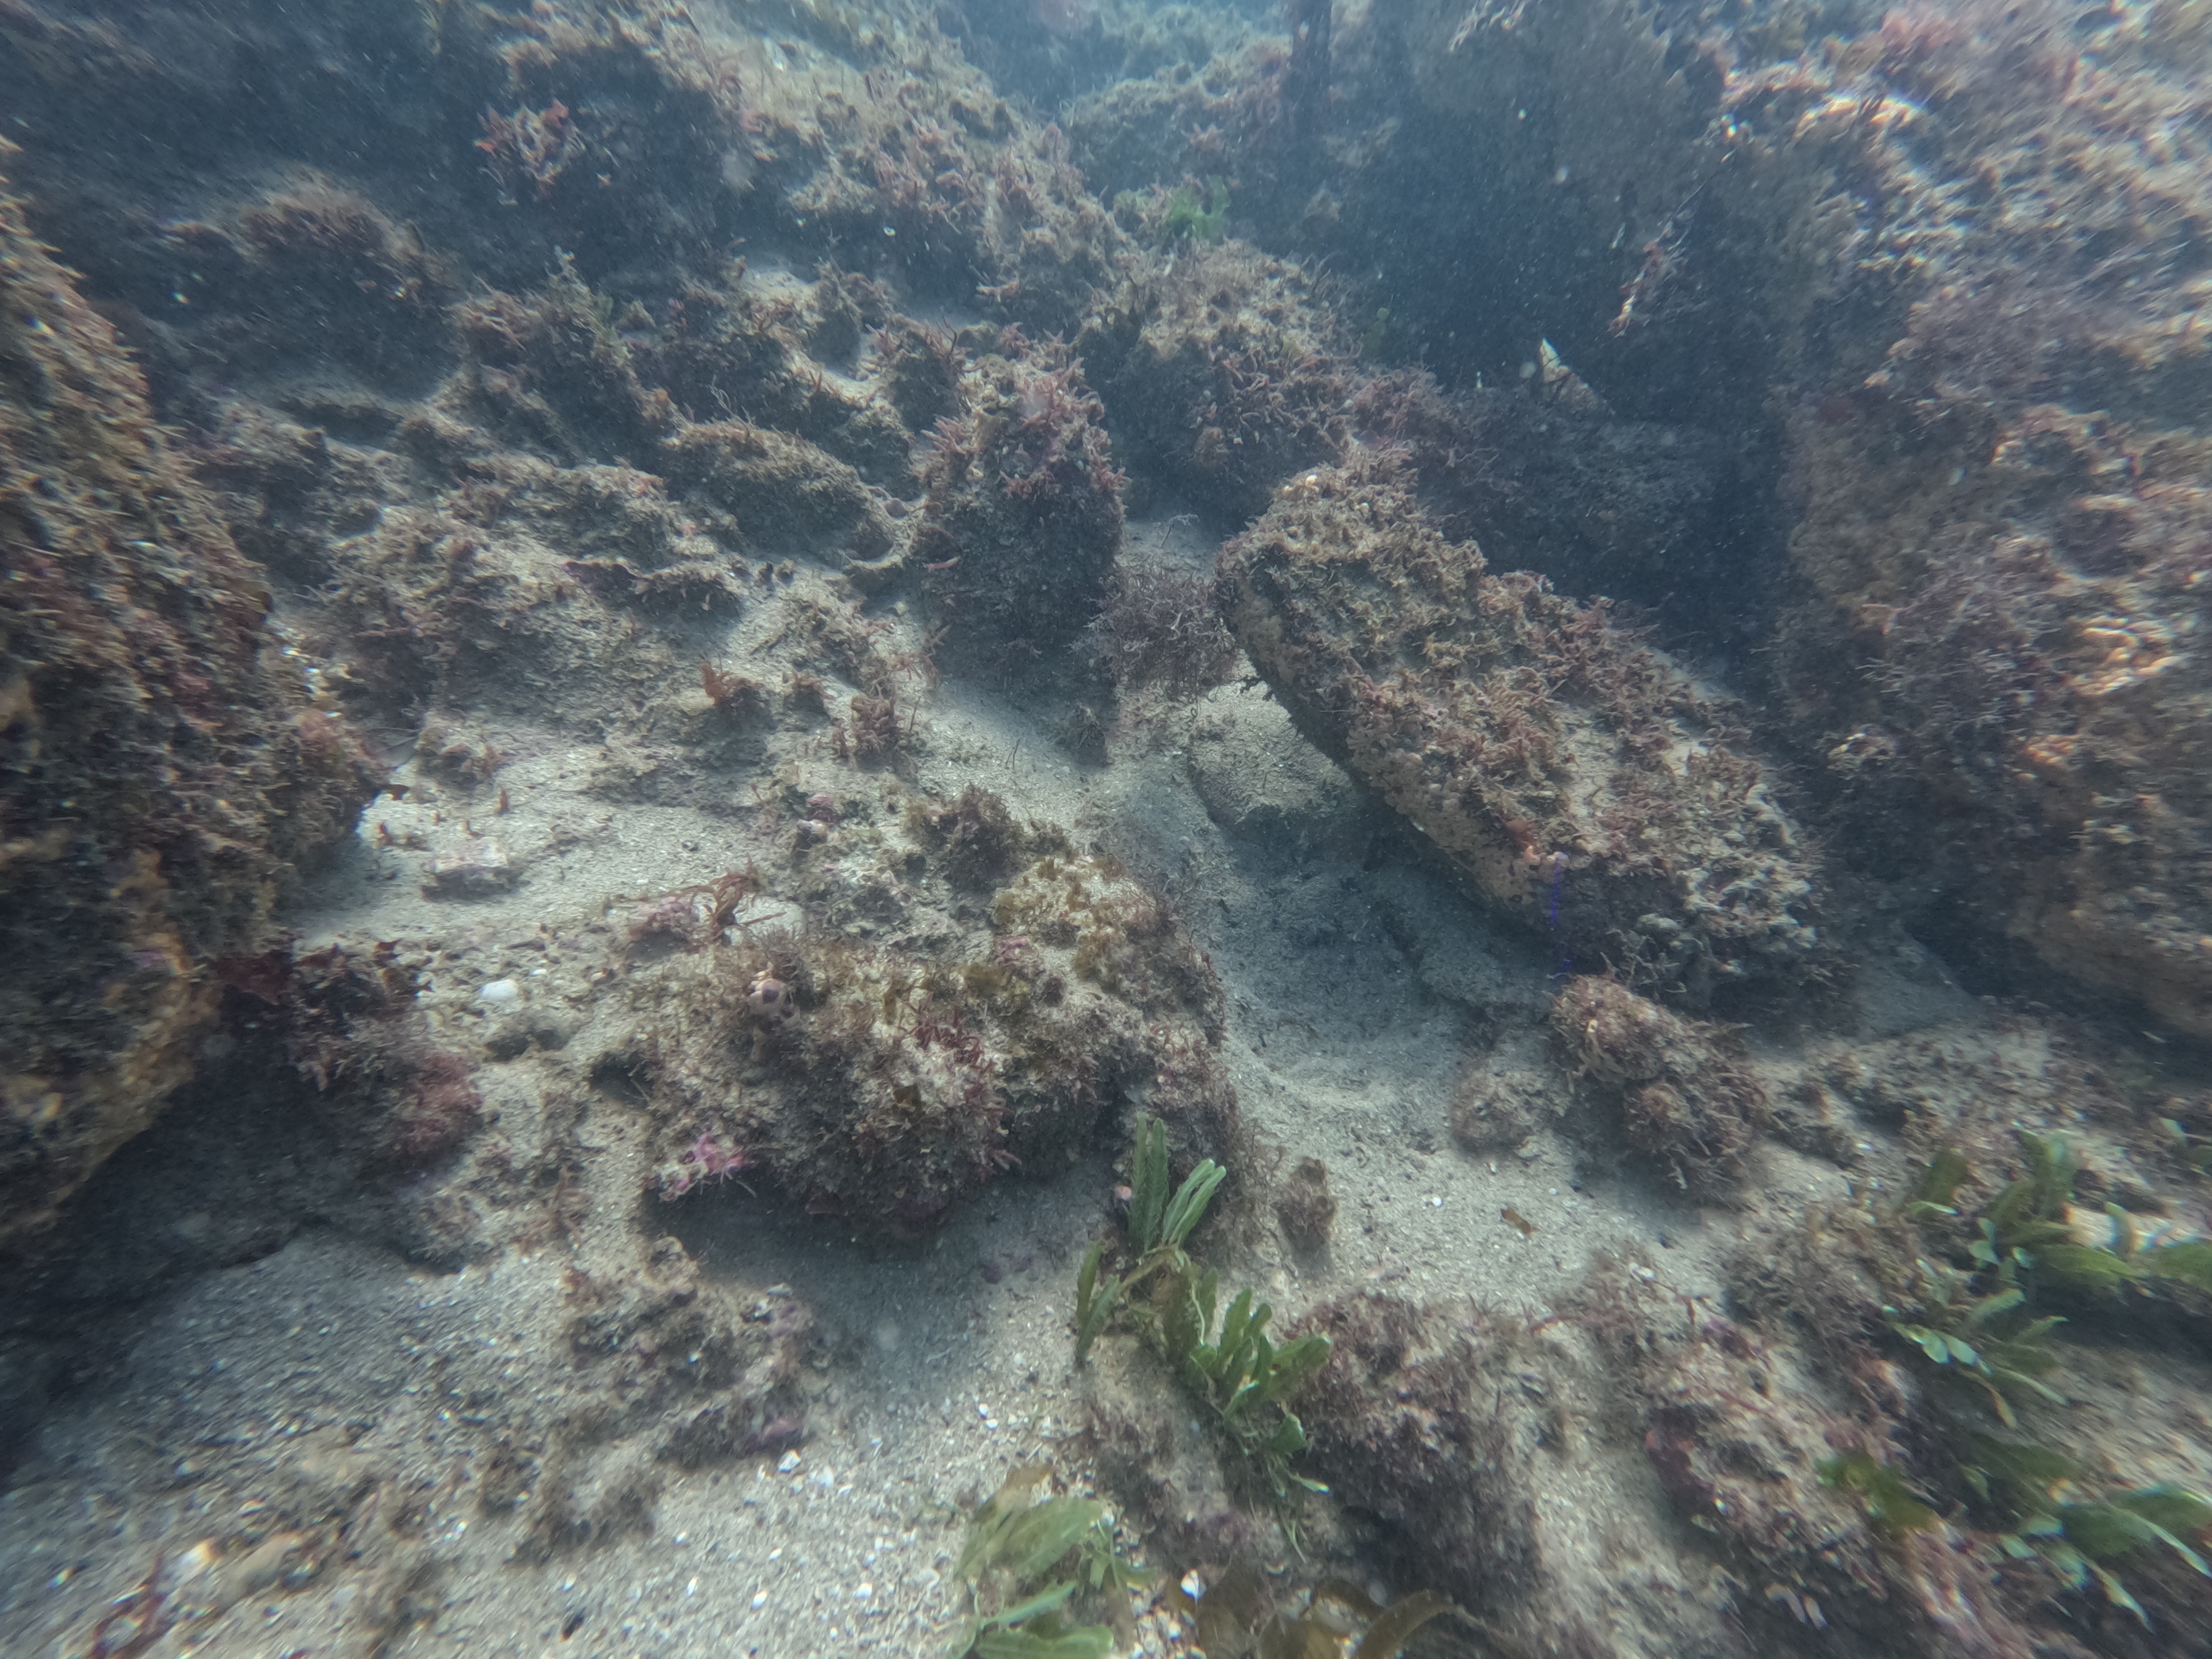

Supplement: Supplementary file 1590 [file G0027916.pdf › Ocean1/G0027916.pdf]
