# Supplementary figures and images for: 3D reconstruction of shallow sea environment using direct system calibration and faint laser line extraction (part 16 of 35)
Source: Research Square preprint supplement (doi:10.21203/rs.3.rs-5262658/v1), 2024-12-02

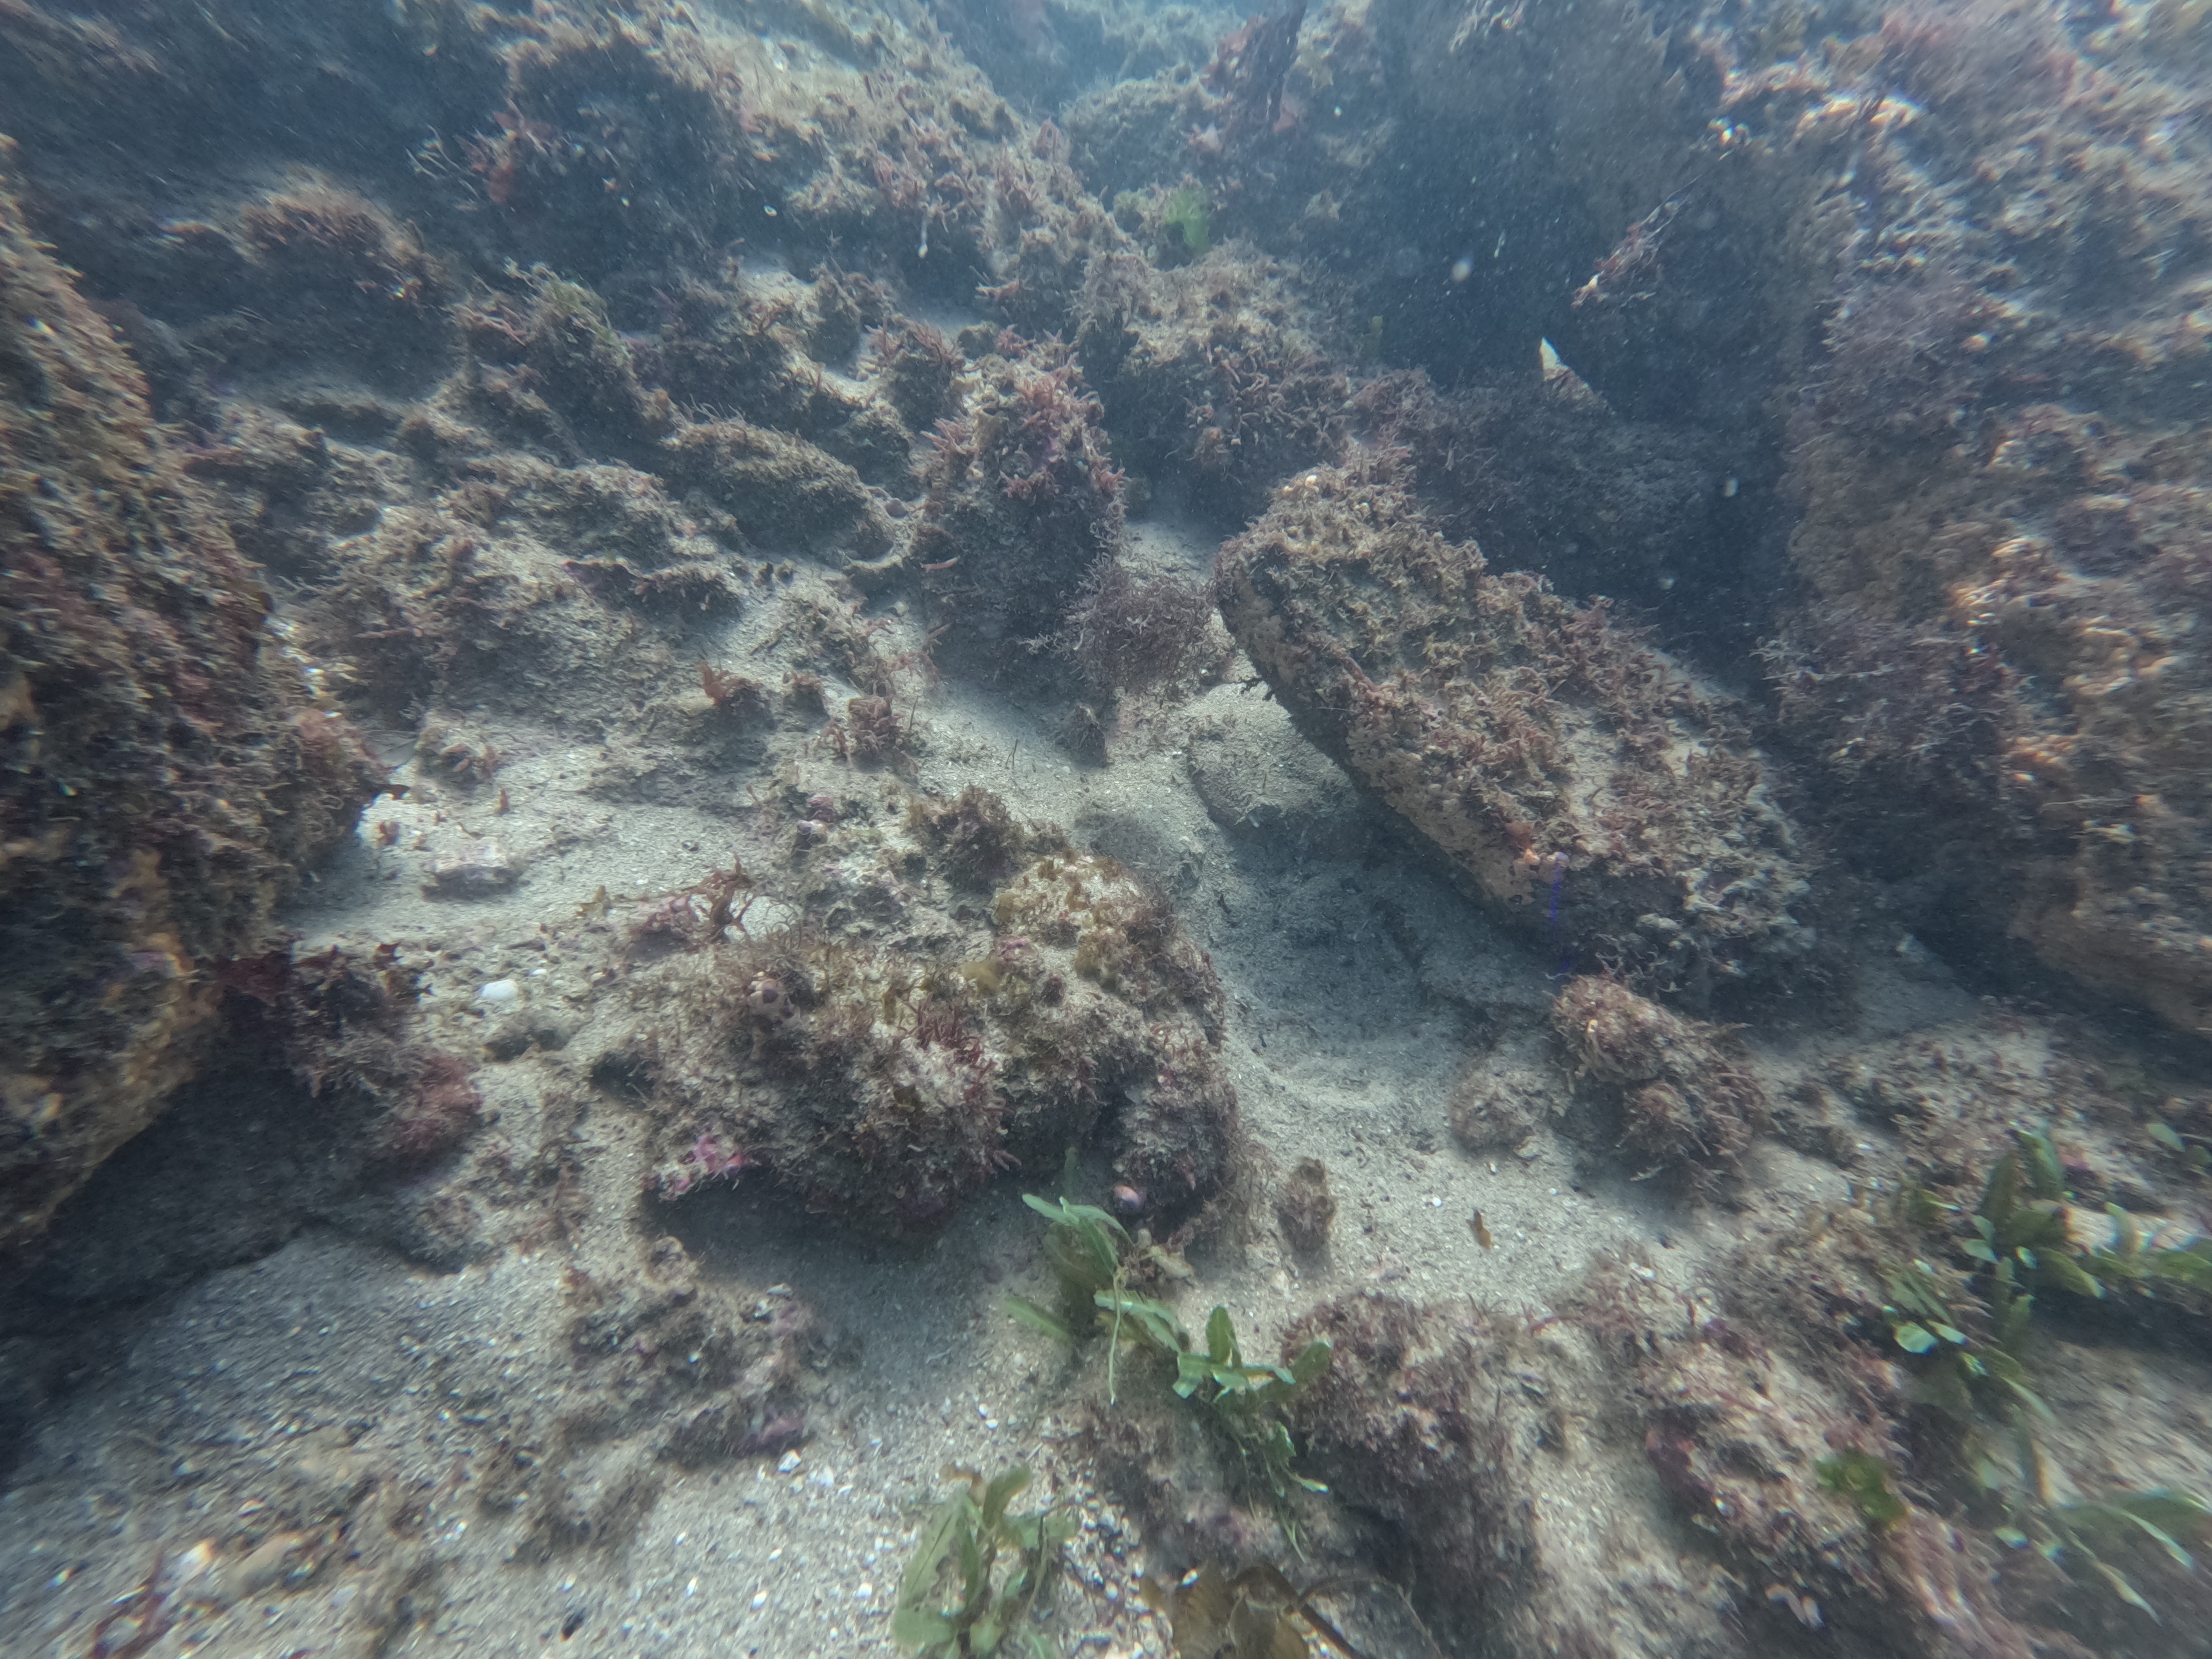

Supplement: Supplementary file 1591 [file G0027917.pdf › Ocean1/G0027917.pdf]

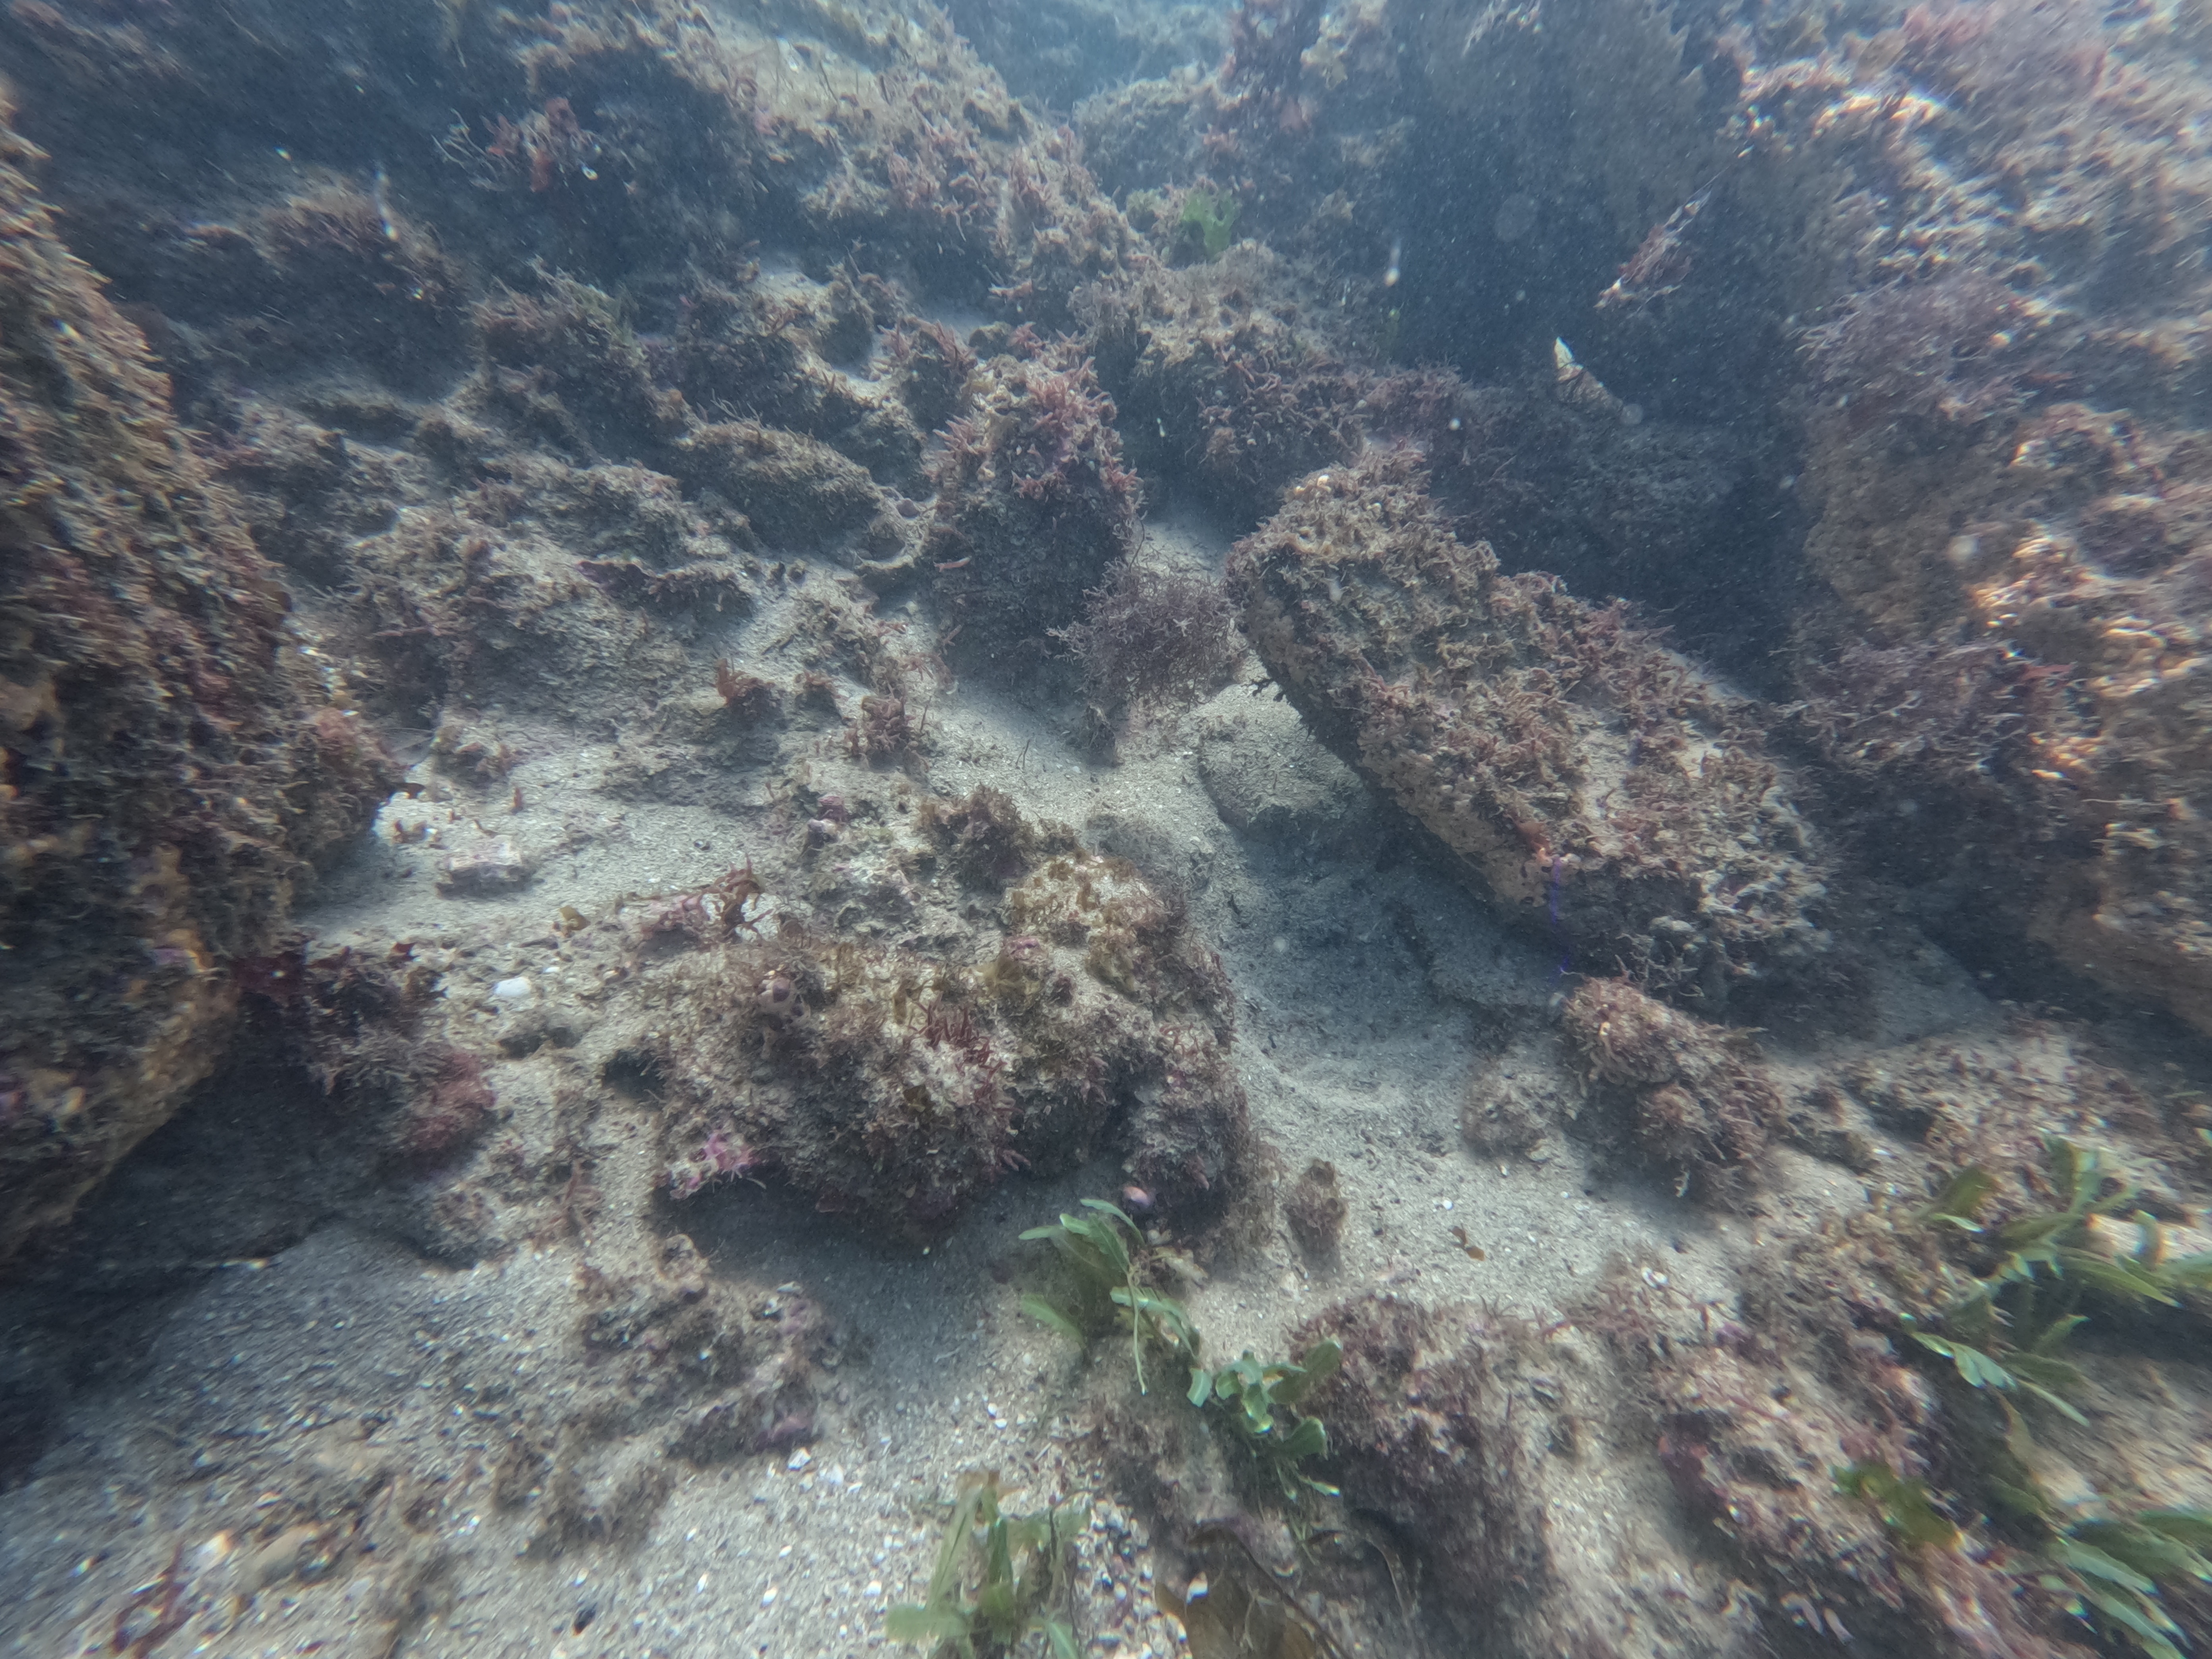

Supplement: Supplementary file 1592 [file G0027918.pdf › Ocean1/G0027918.pdf]

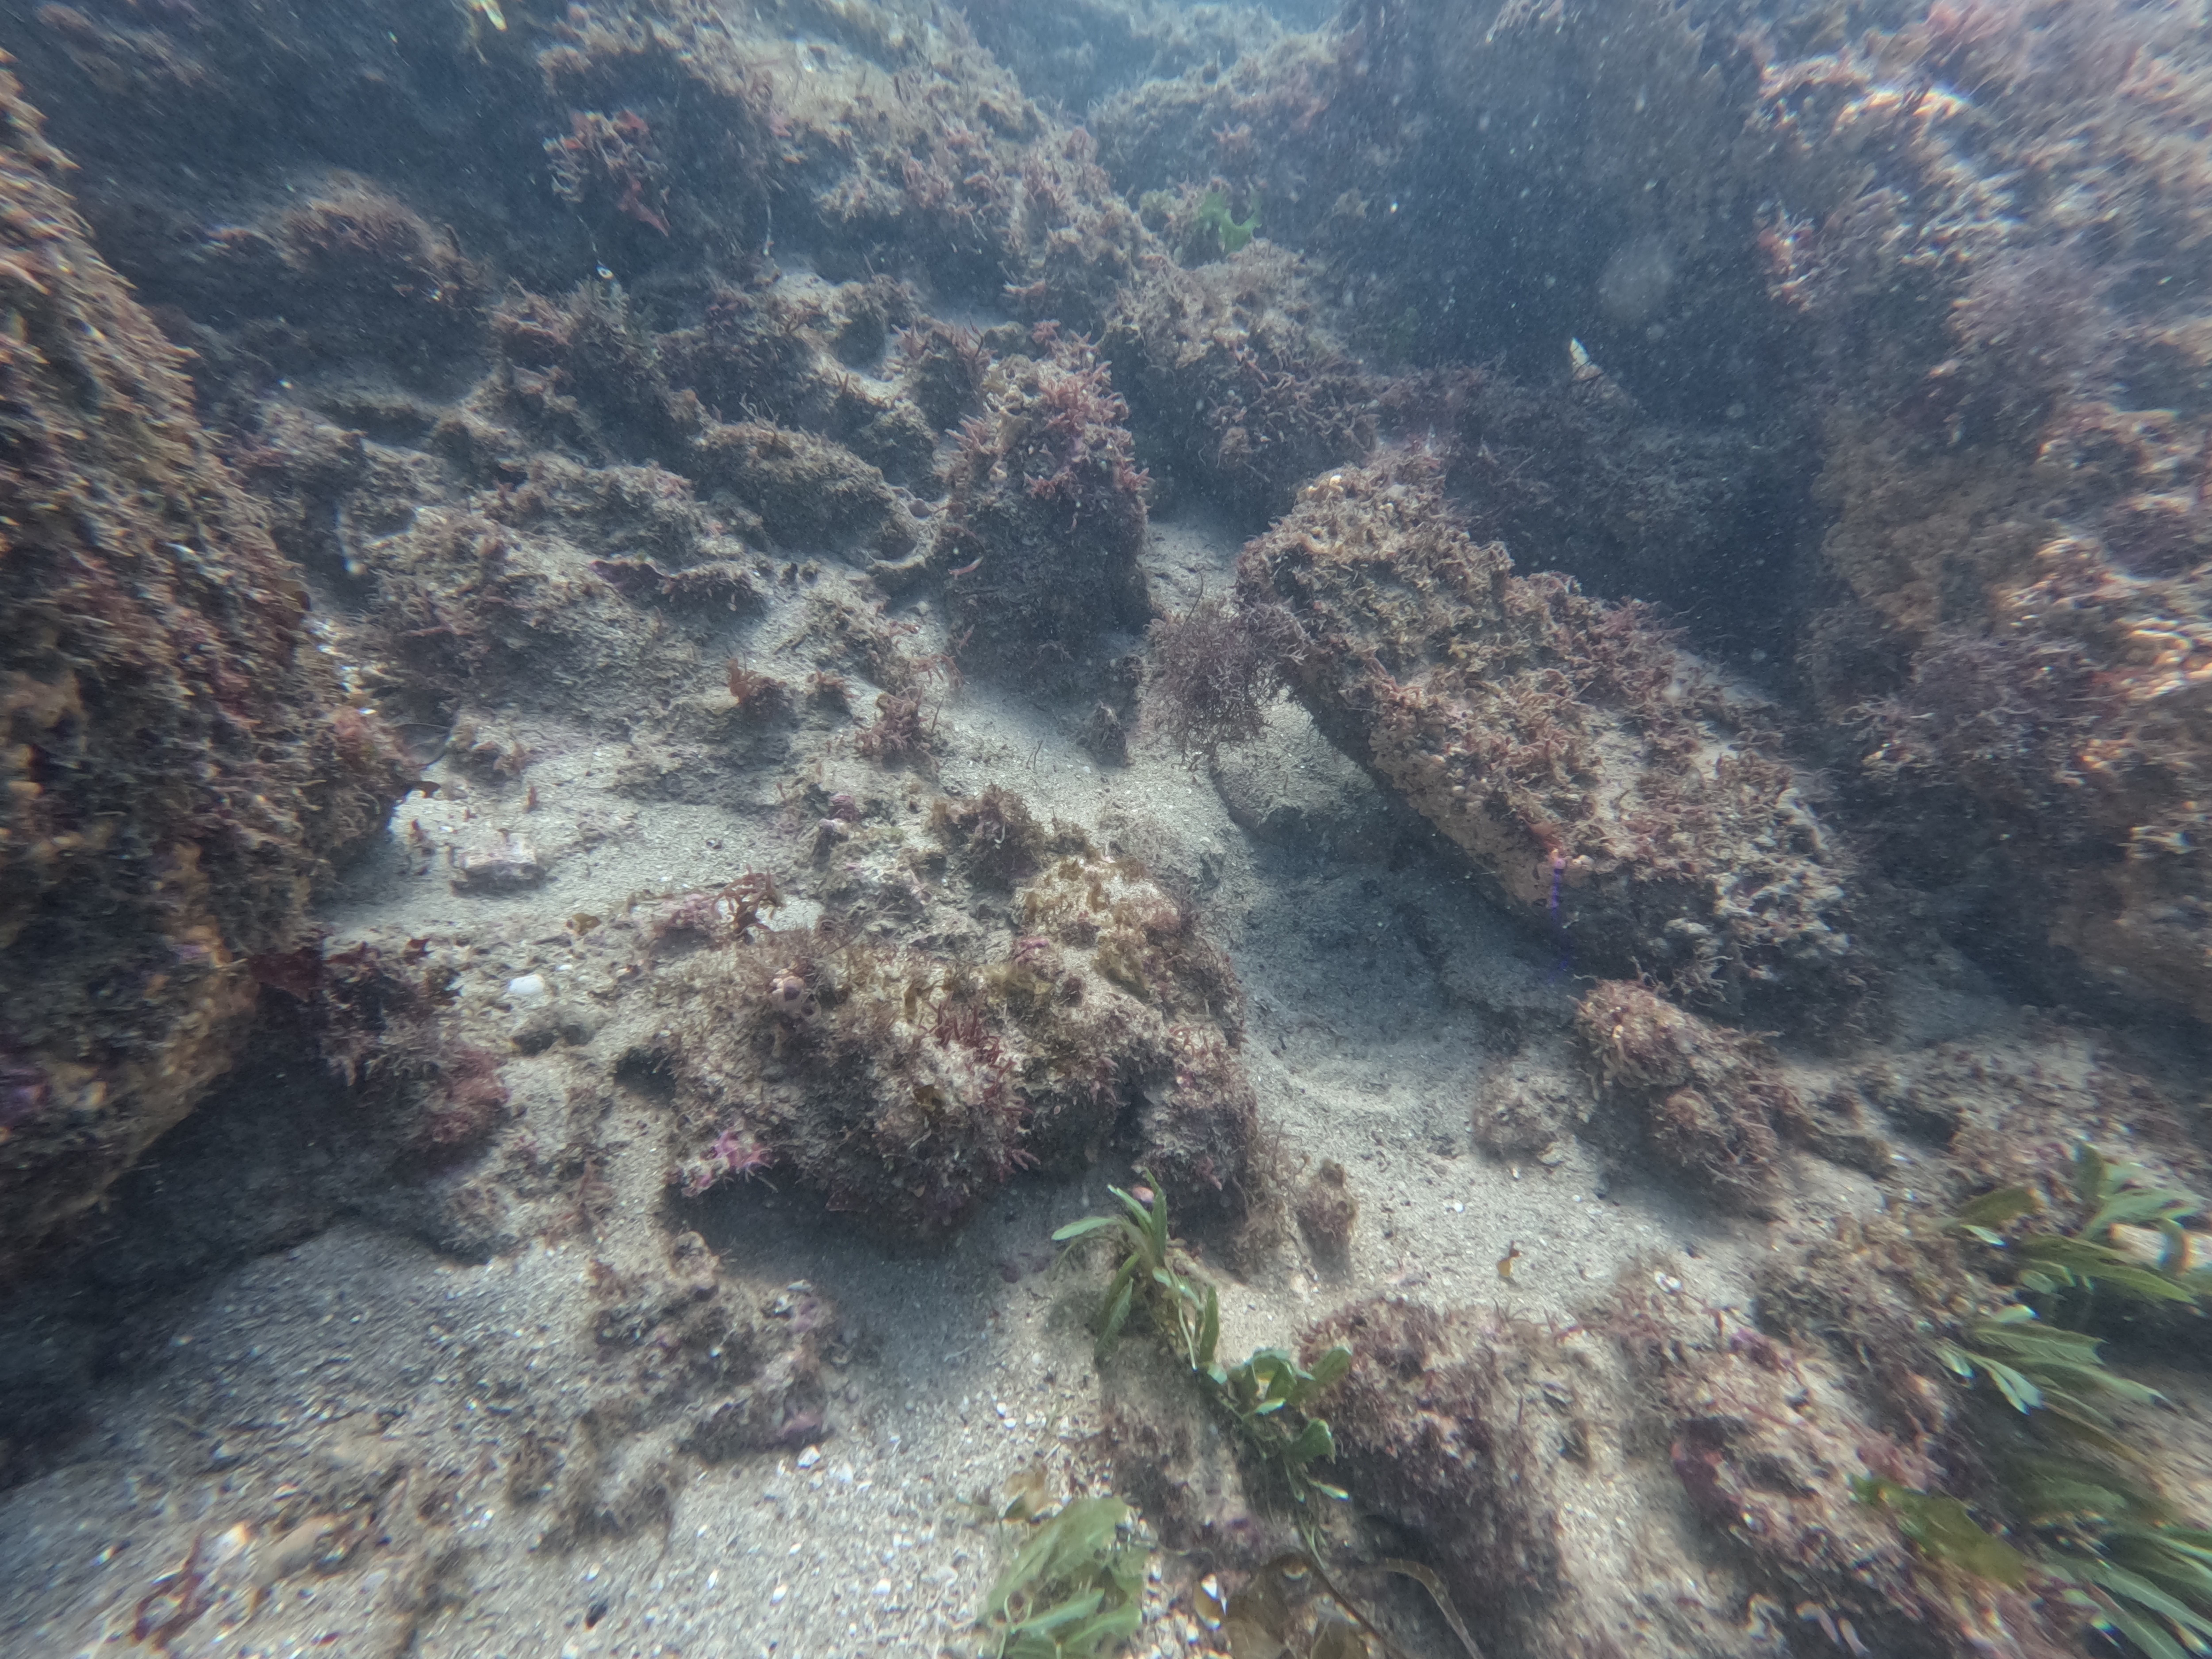

Supplement: Supplementary file 1593 [file G0027919.pdf › Ocean1/G0027919.pdf]

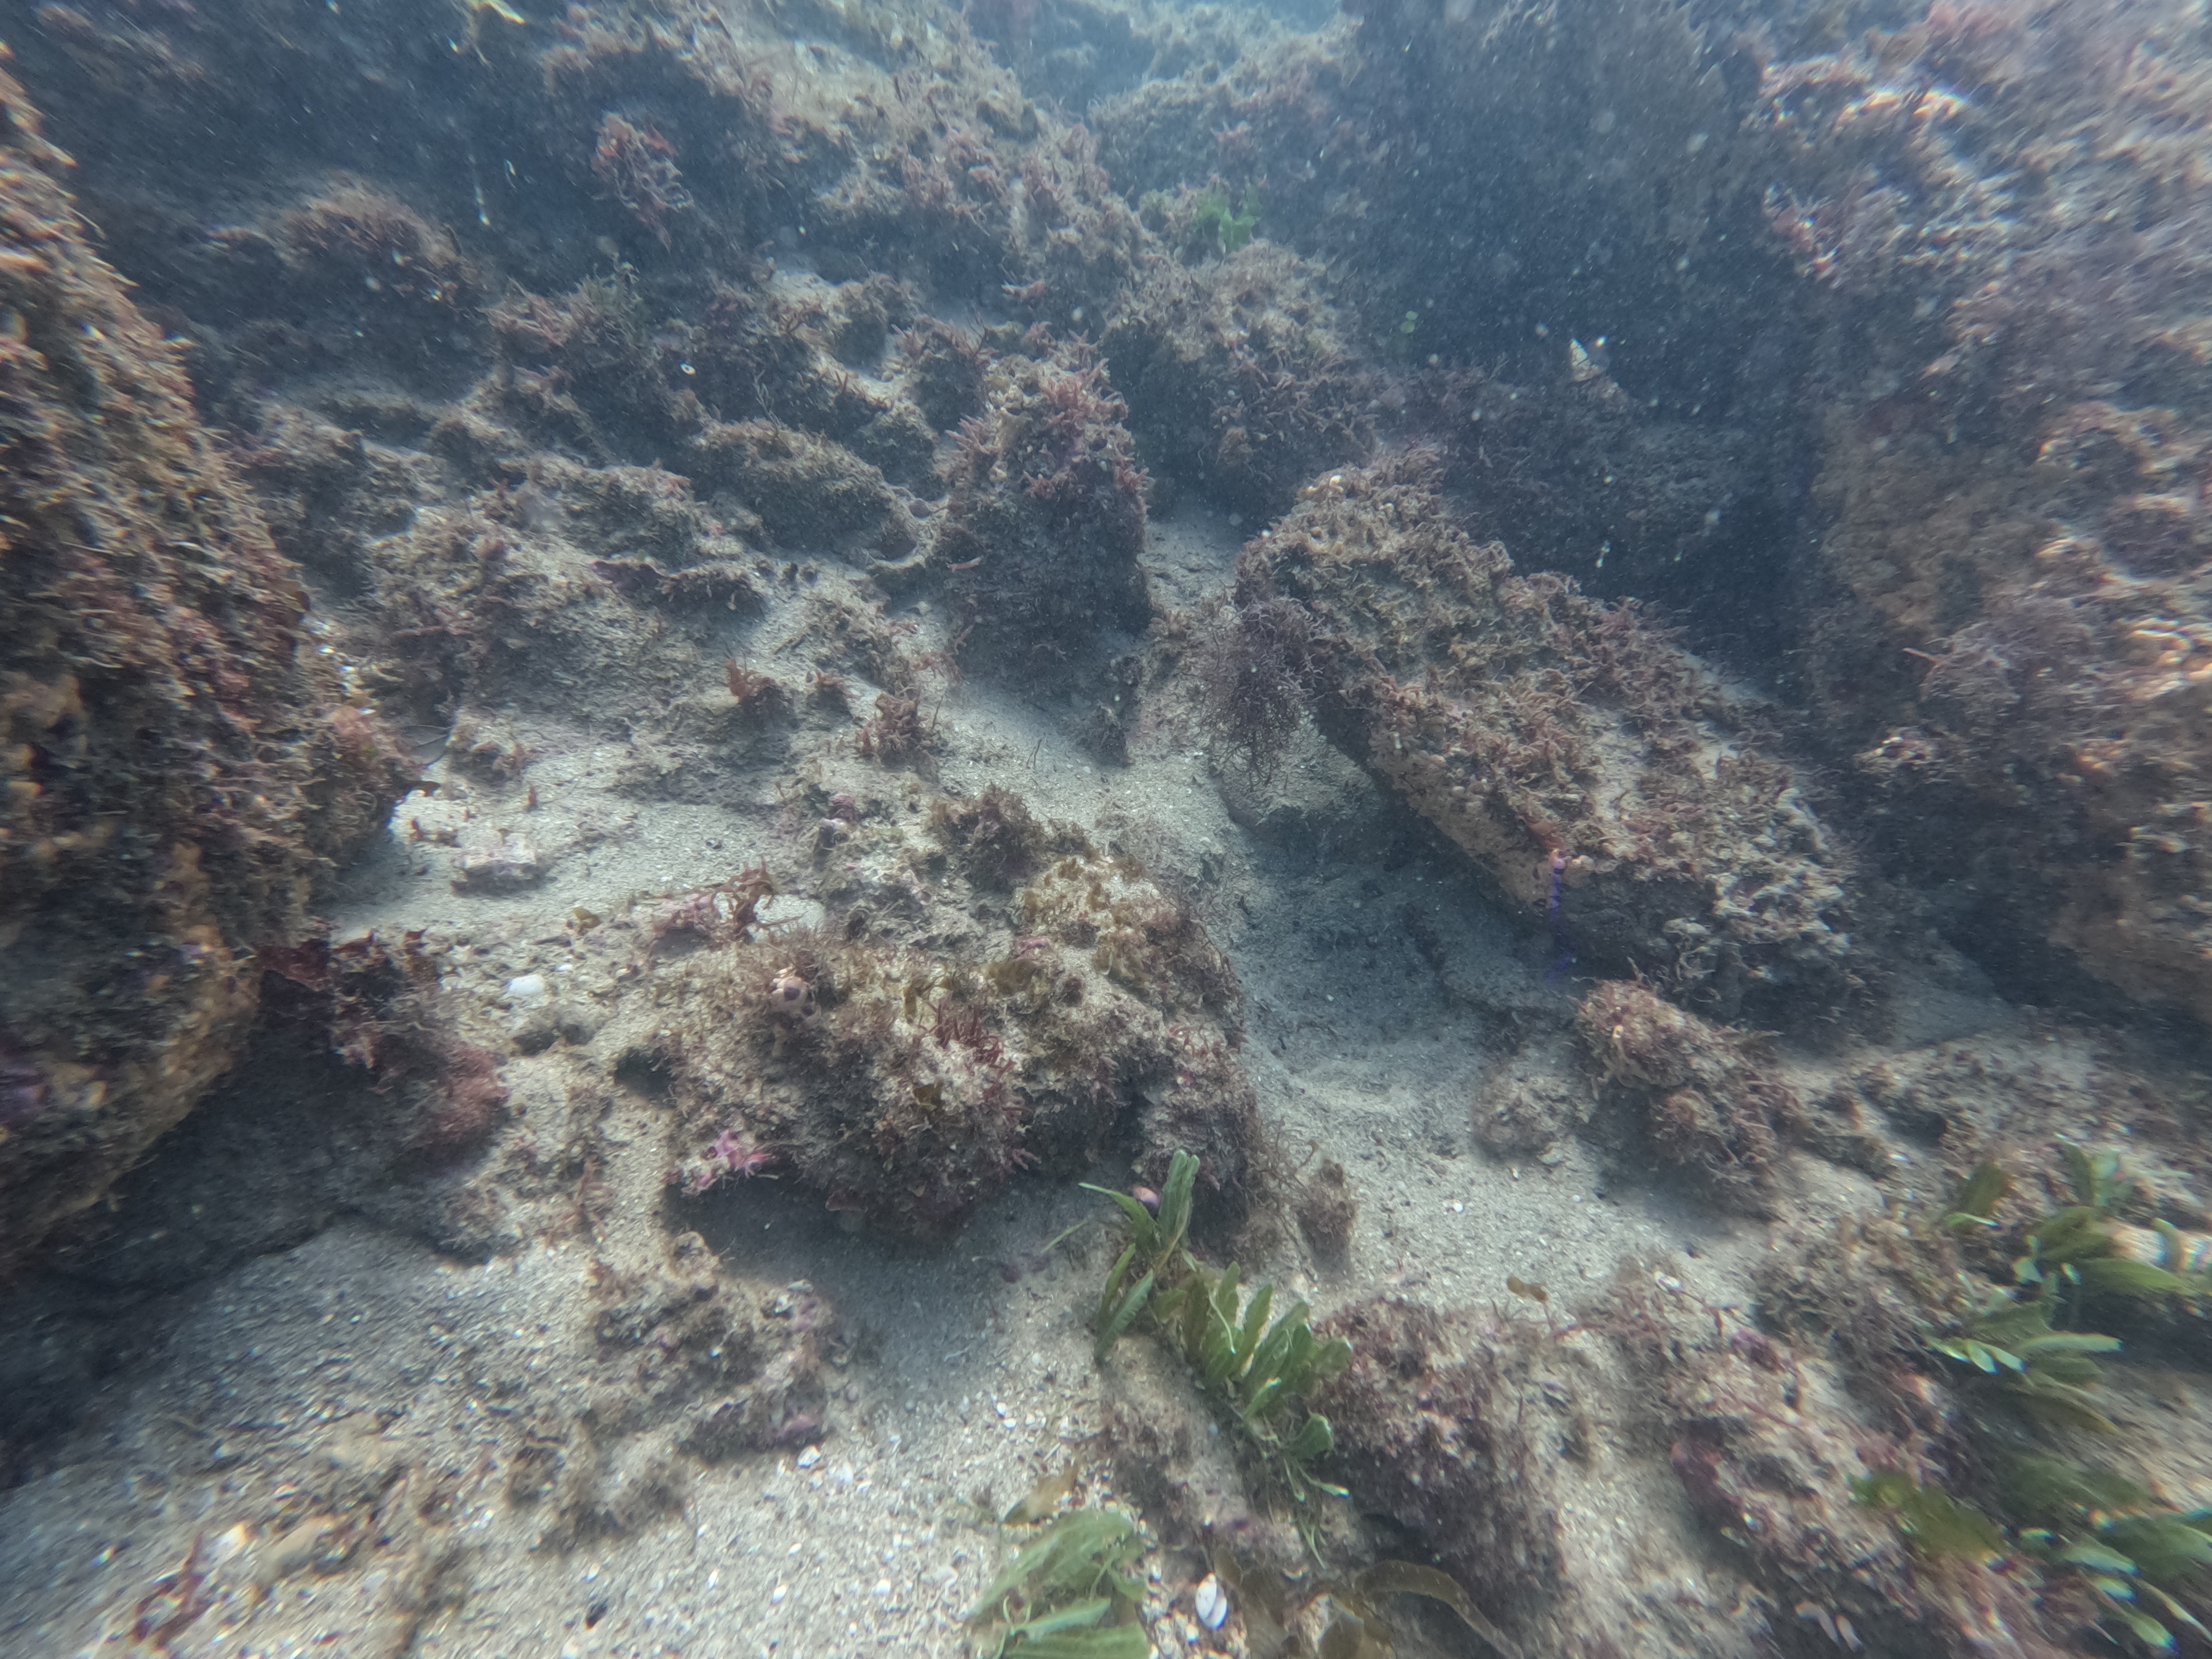

Supplement: Supplementary file 1594 [file G0027920.pdf › Ocean1/G0027920.pdf]

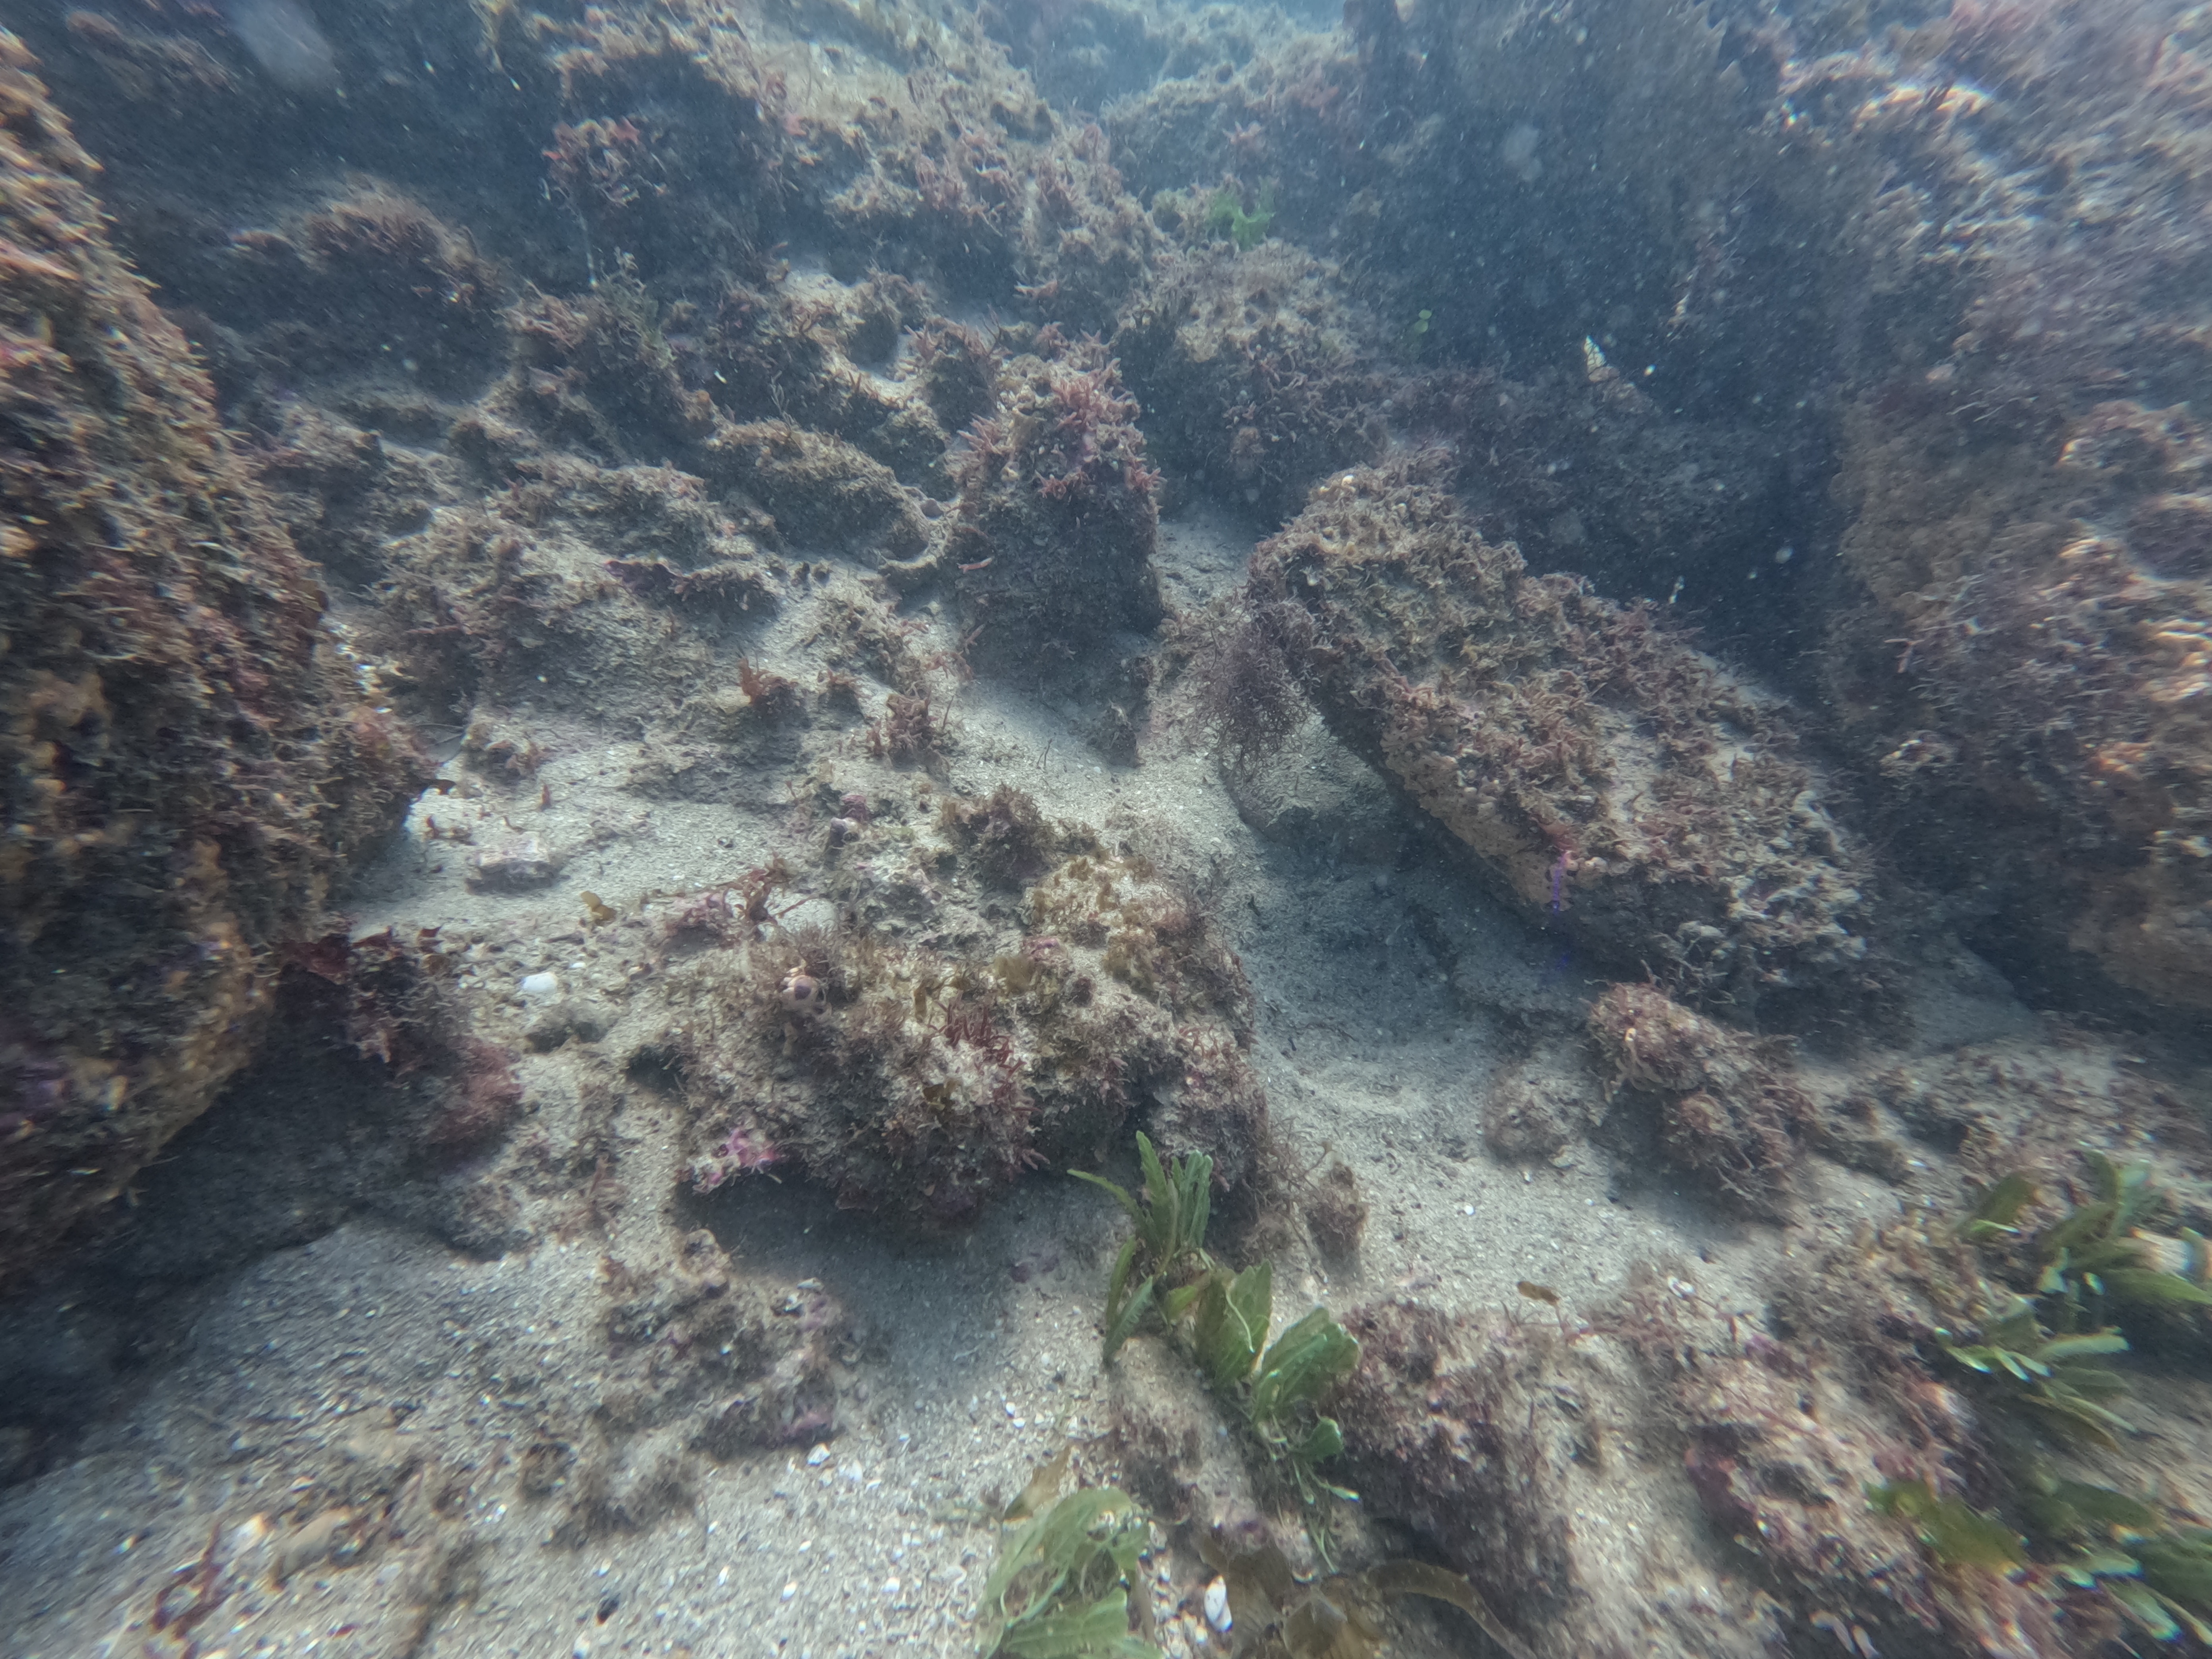

Supplement: Supplementary file 1595 [file G0027921.pdf › Ocean1/G0027921.pdf]

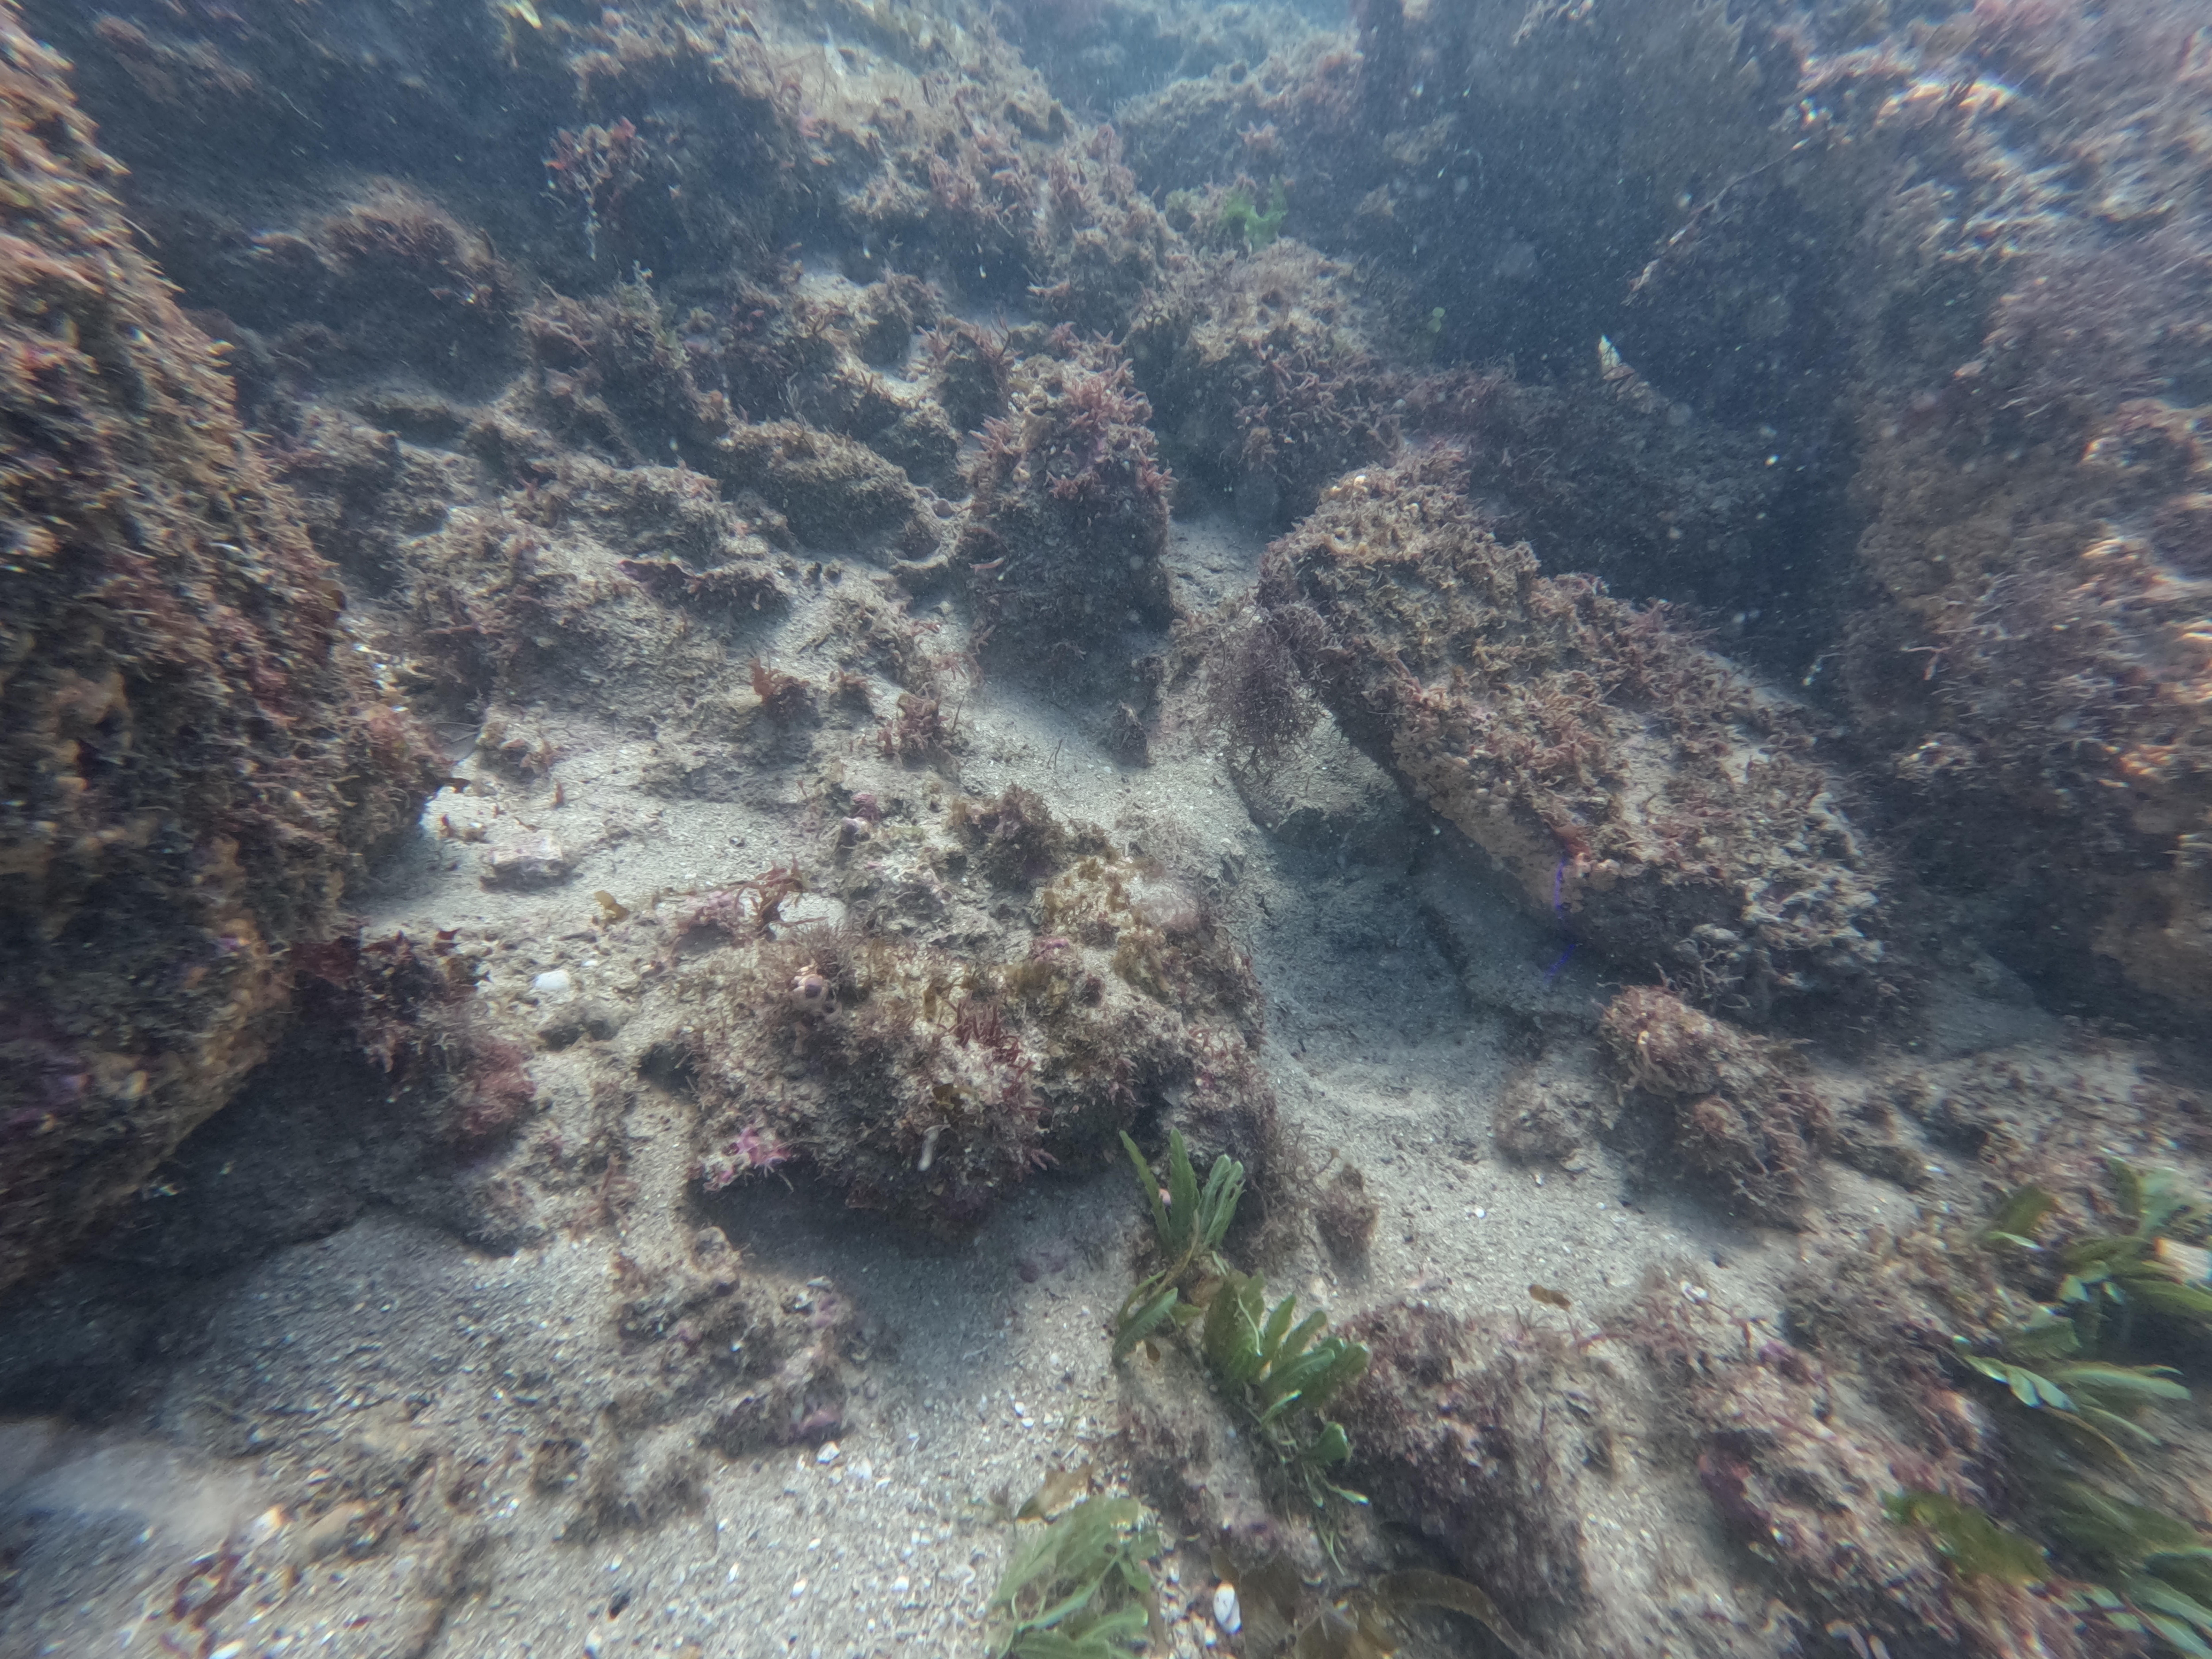

Supplement: Supplementary file 1596 [file G0027922.pdf › Ocean1/G0027922.pdf]

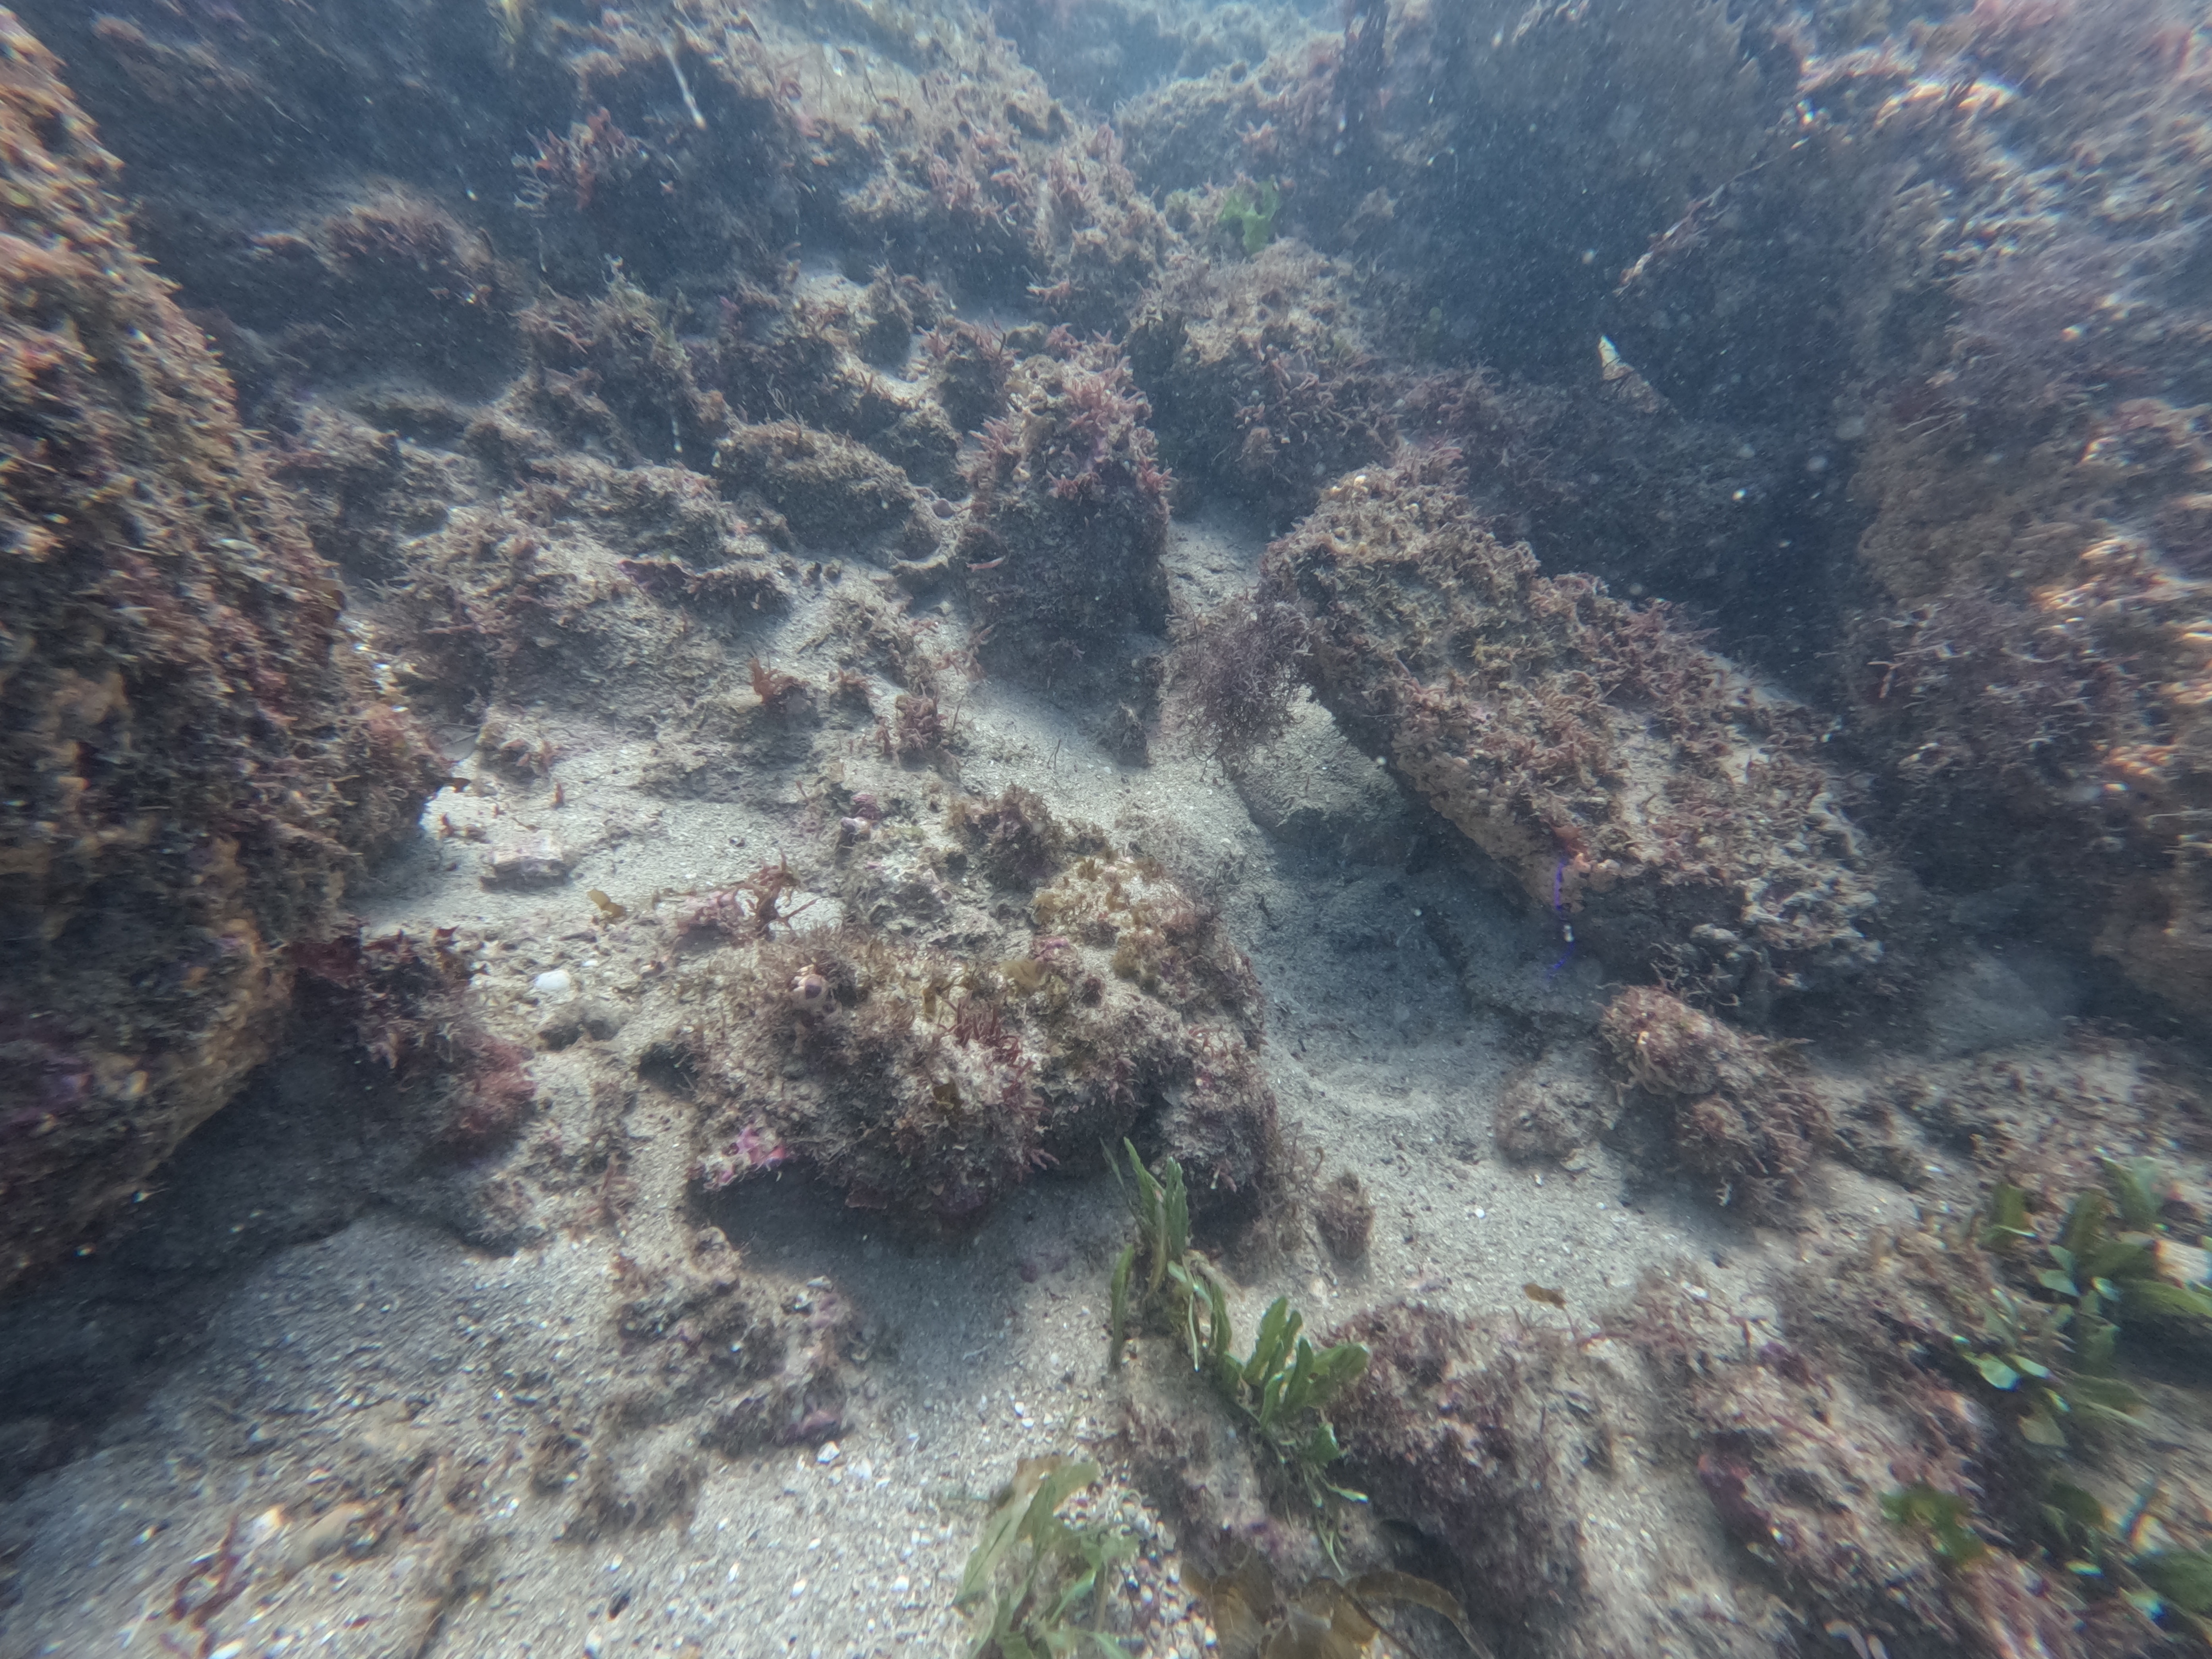

Supplement: Supplementary file 1597 [file G0027923.pdf › Ocean1/G0027923.pdf]

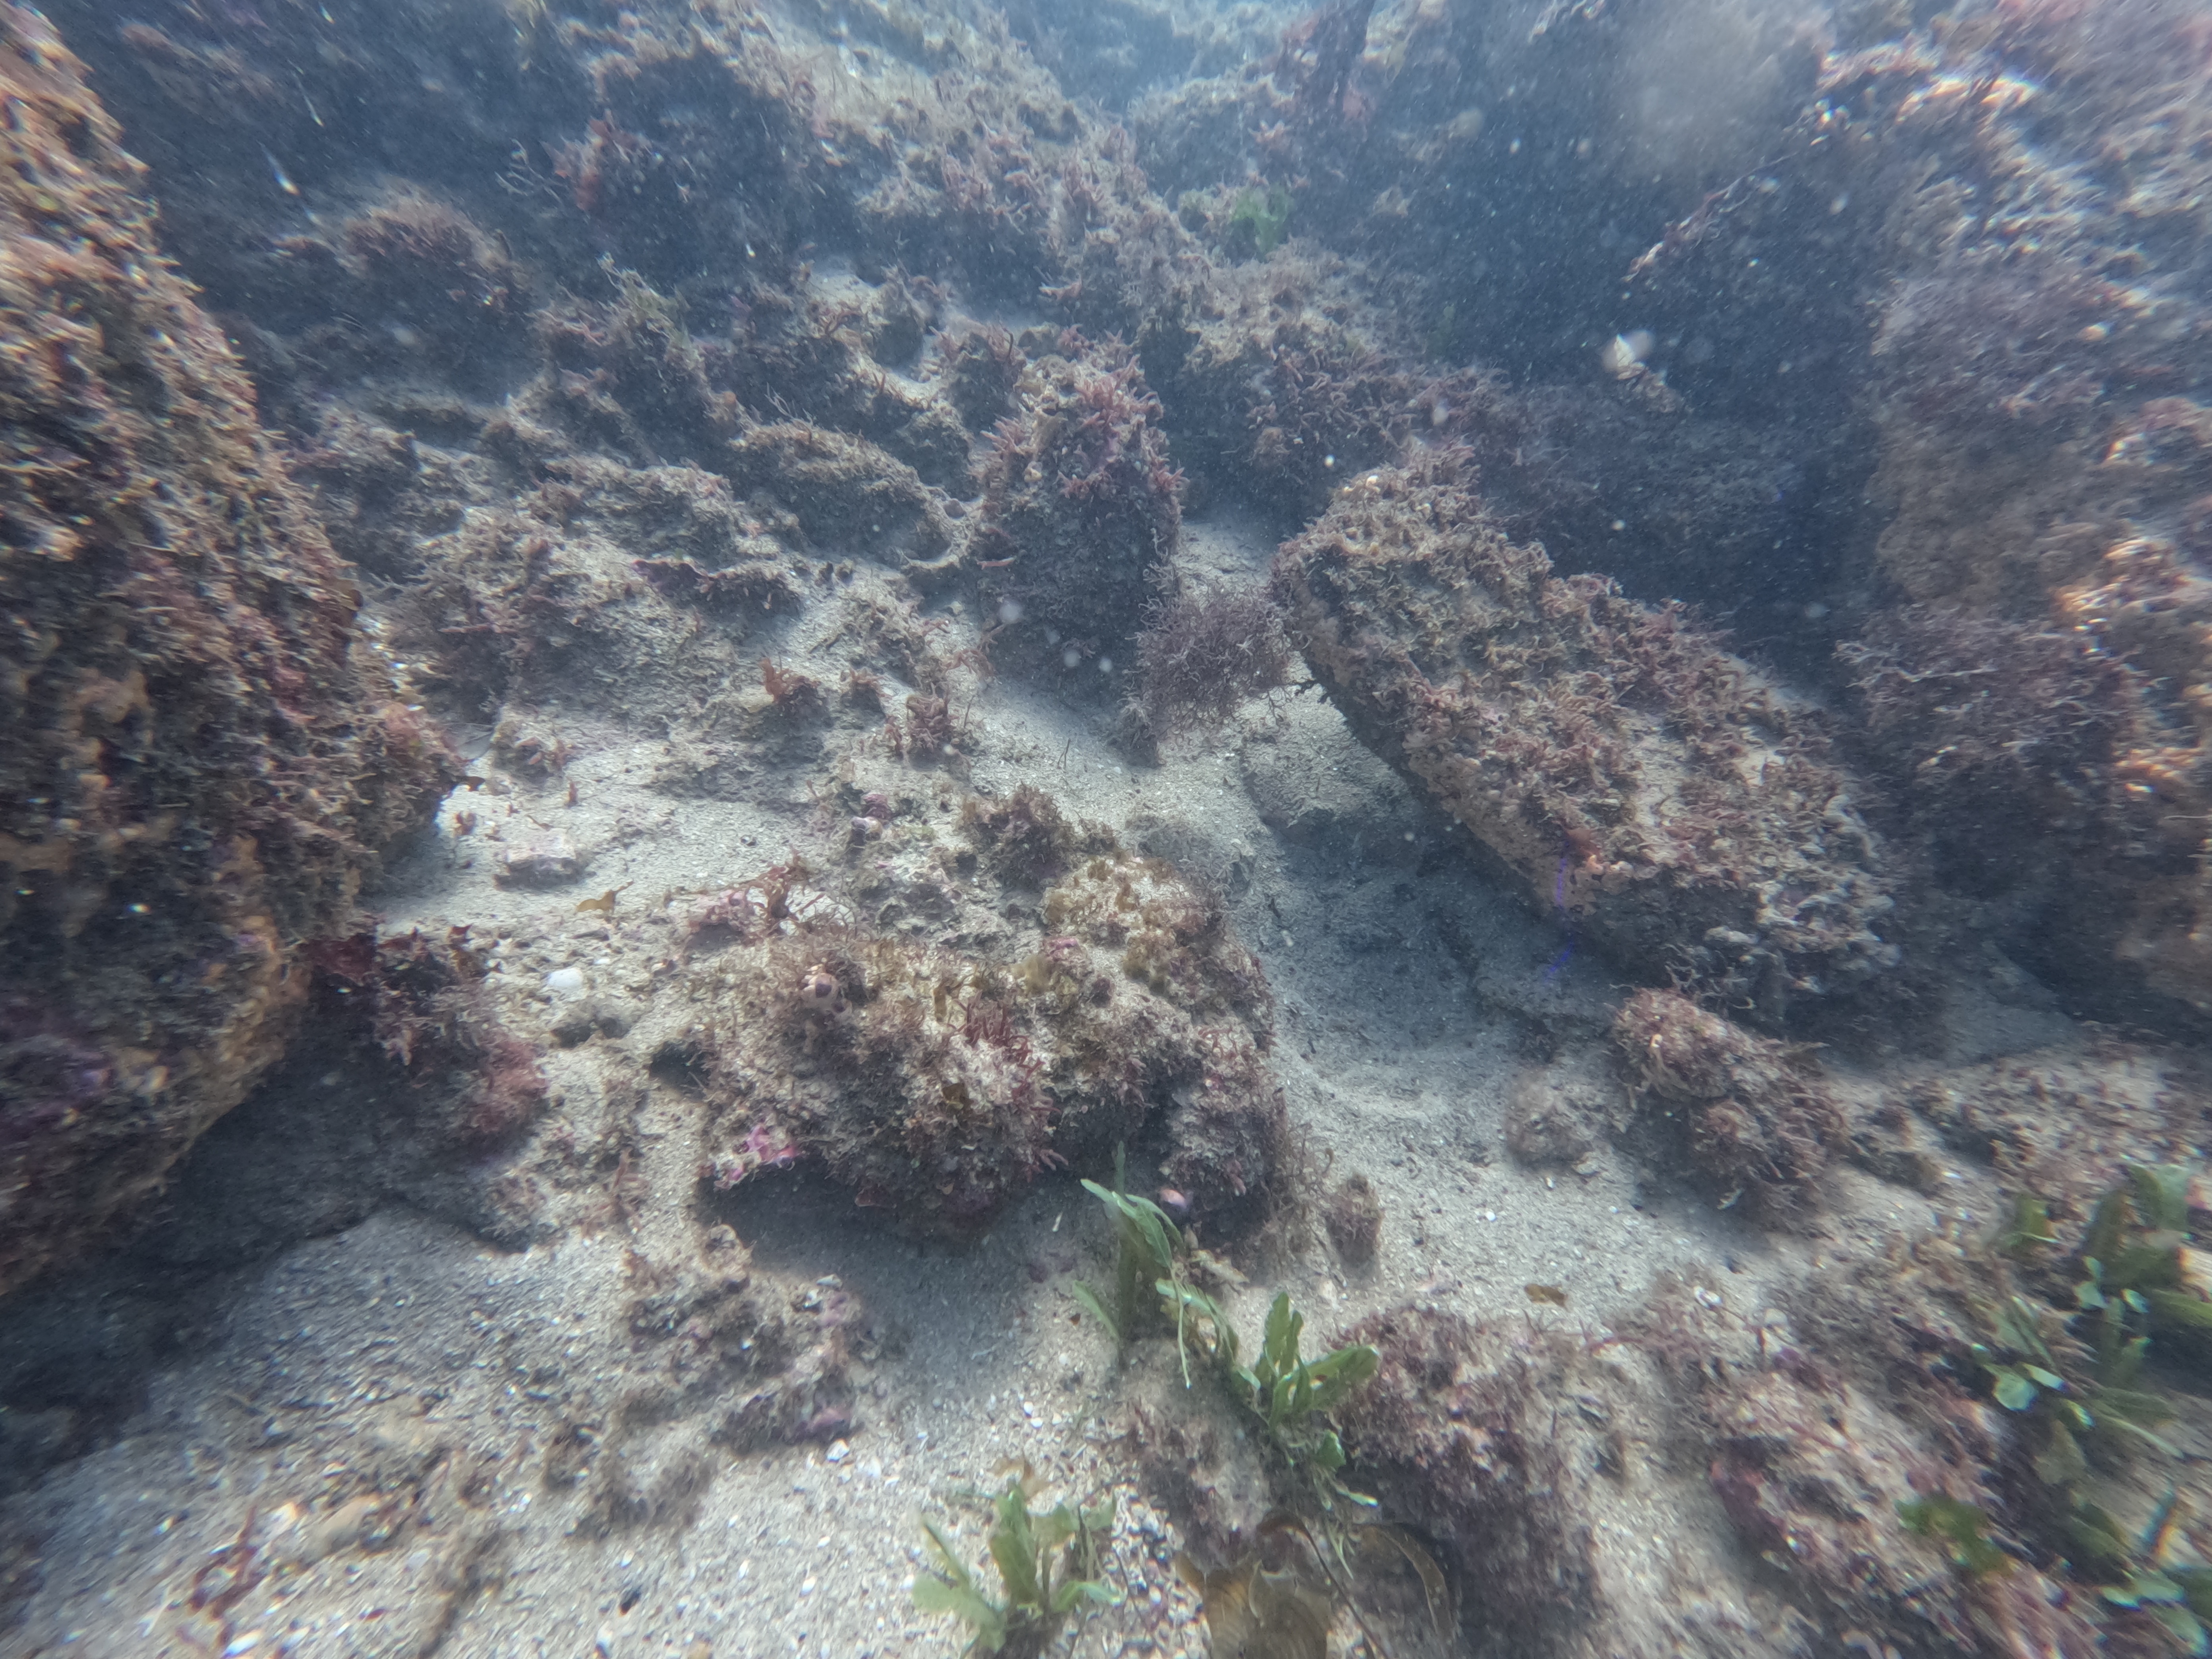

Supplement: Supplementary file 1598 [file G0027924.pdf › Ocean1/G0027924.pdf]

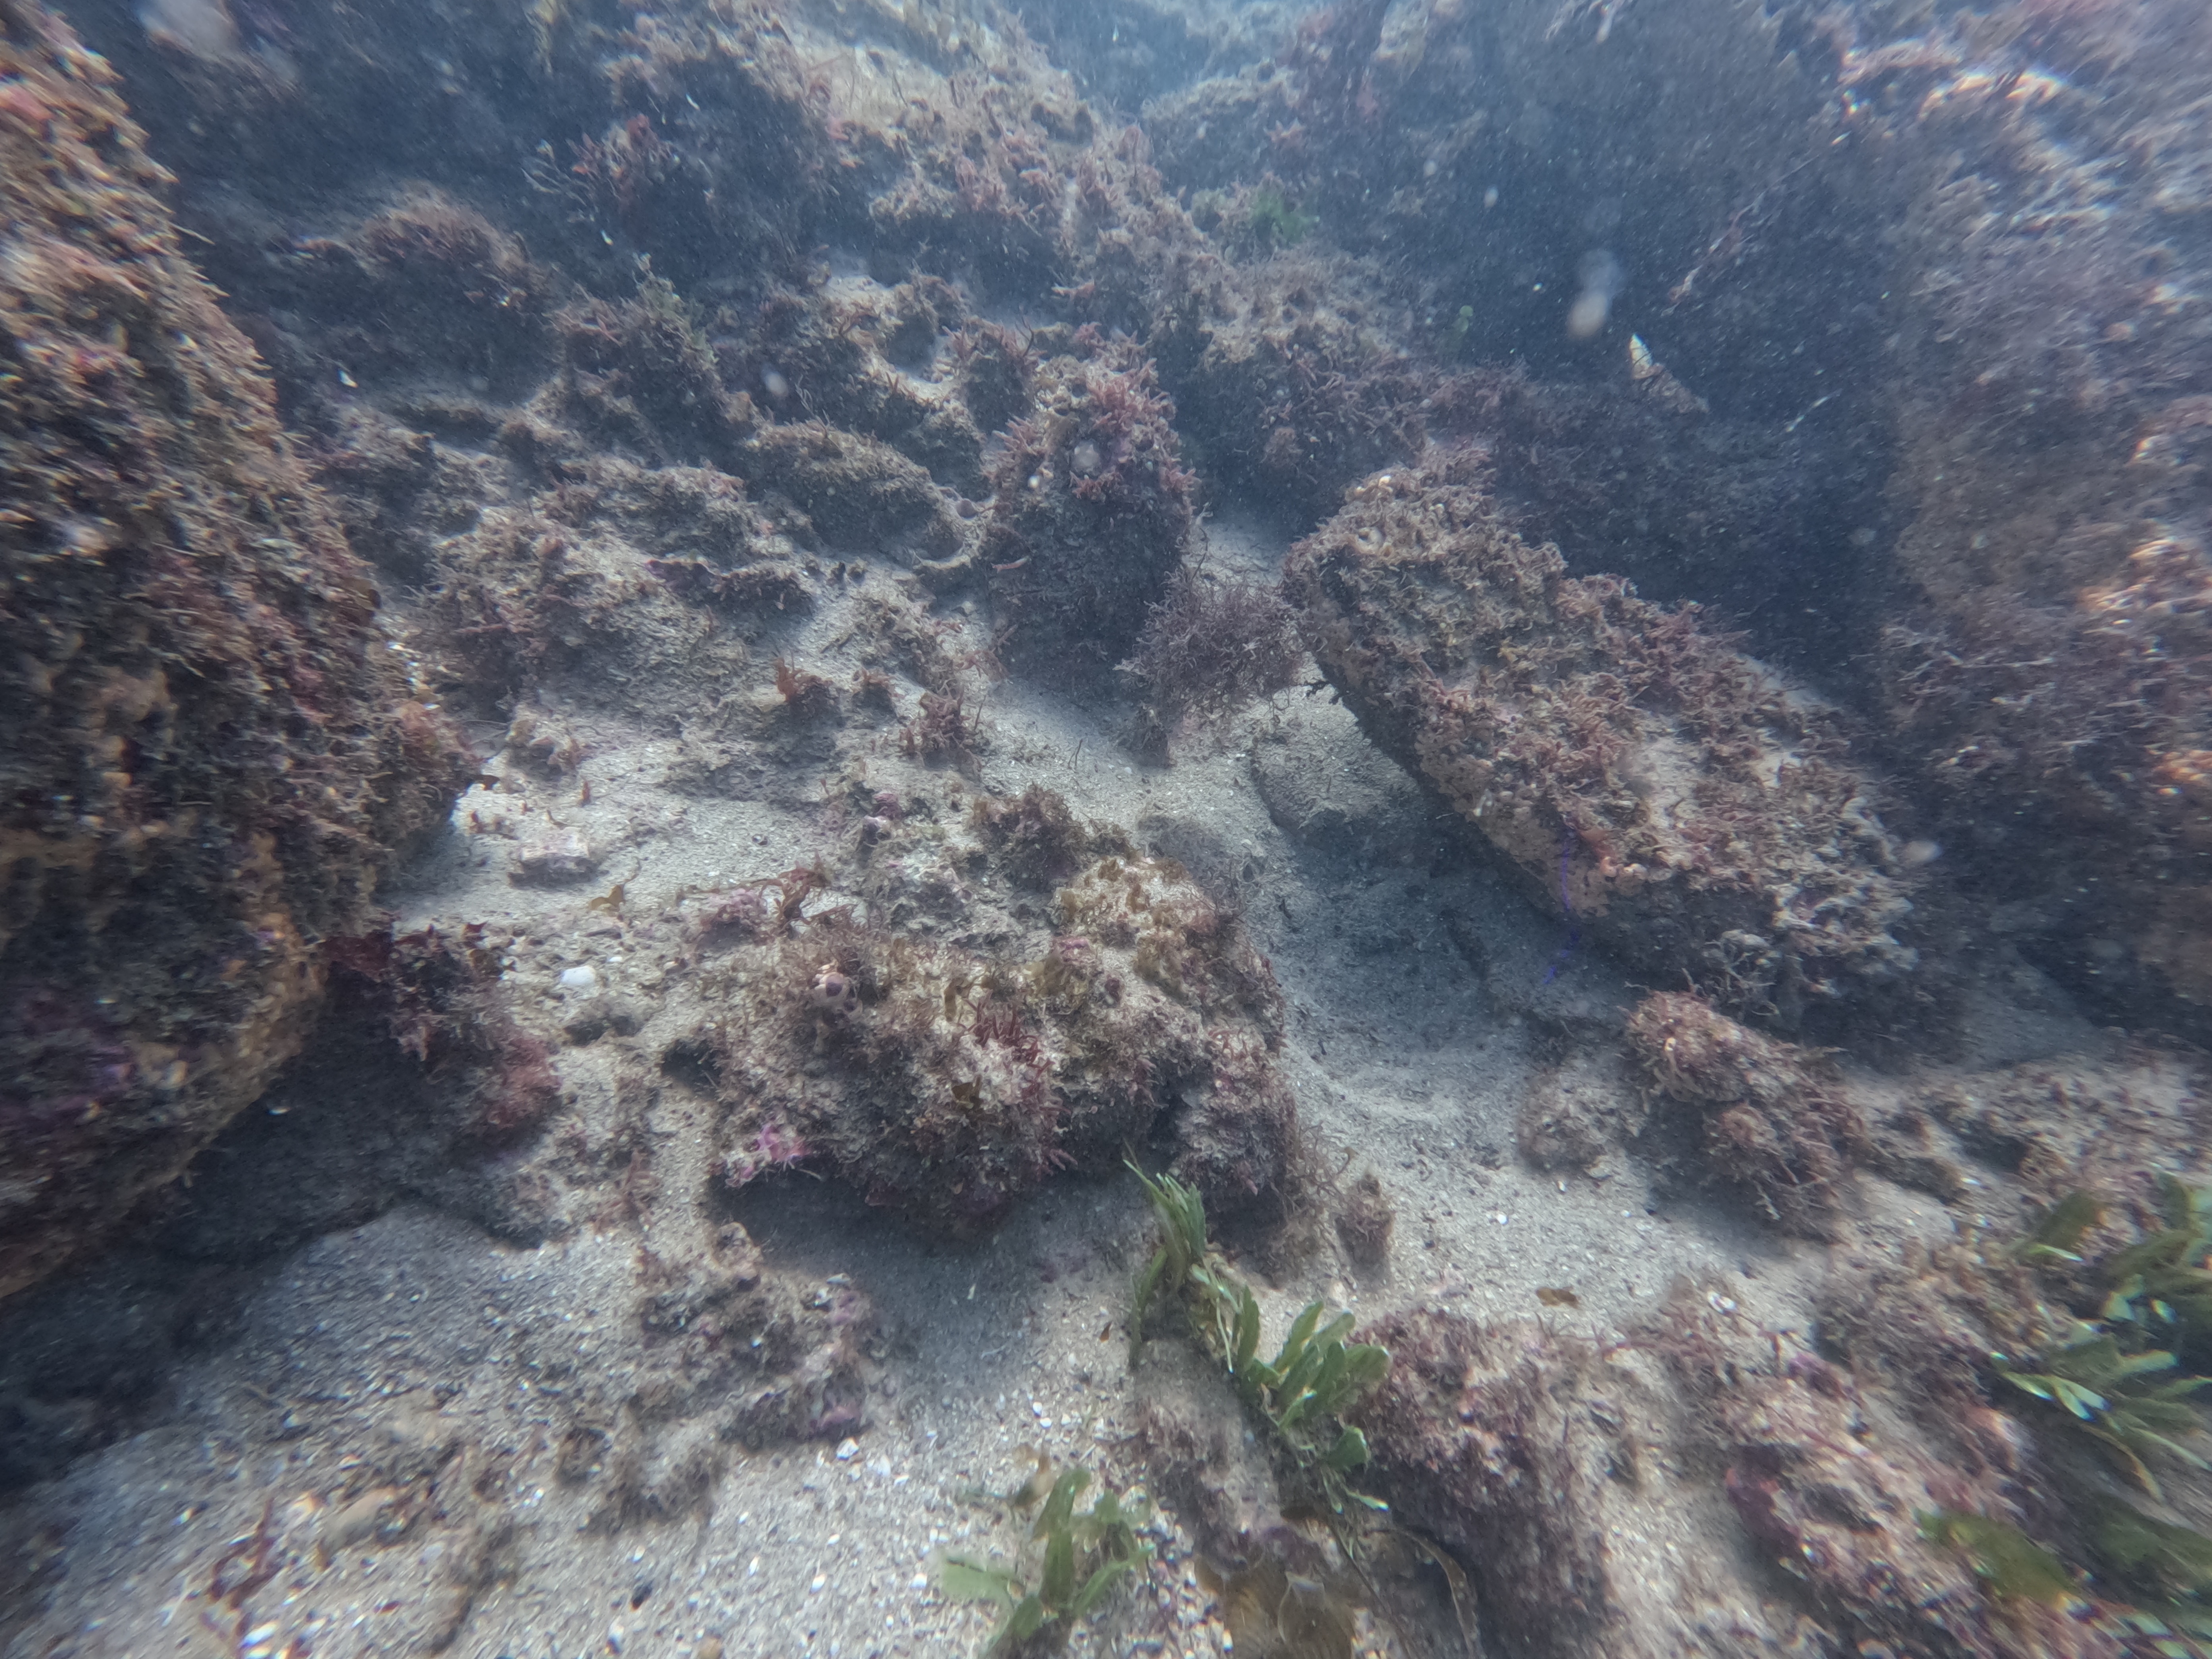

Supplement: Supplementary file 1599 [file G0027925.pdf › Ocean1/G0027925.pdf]

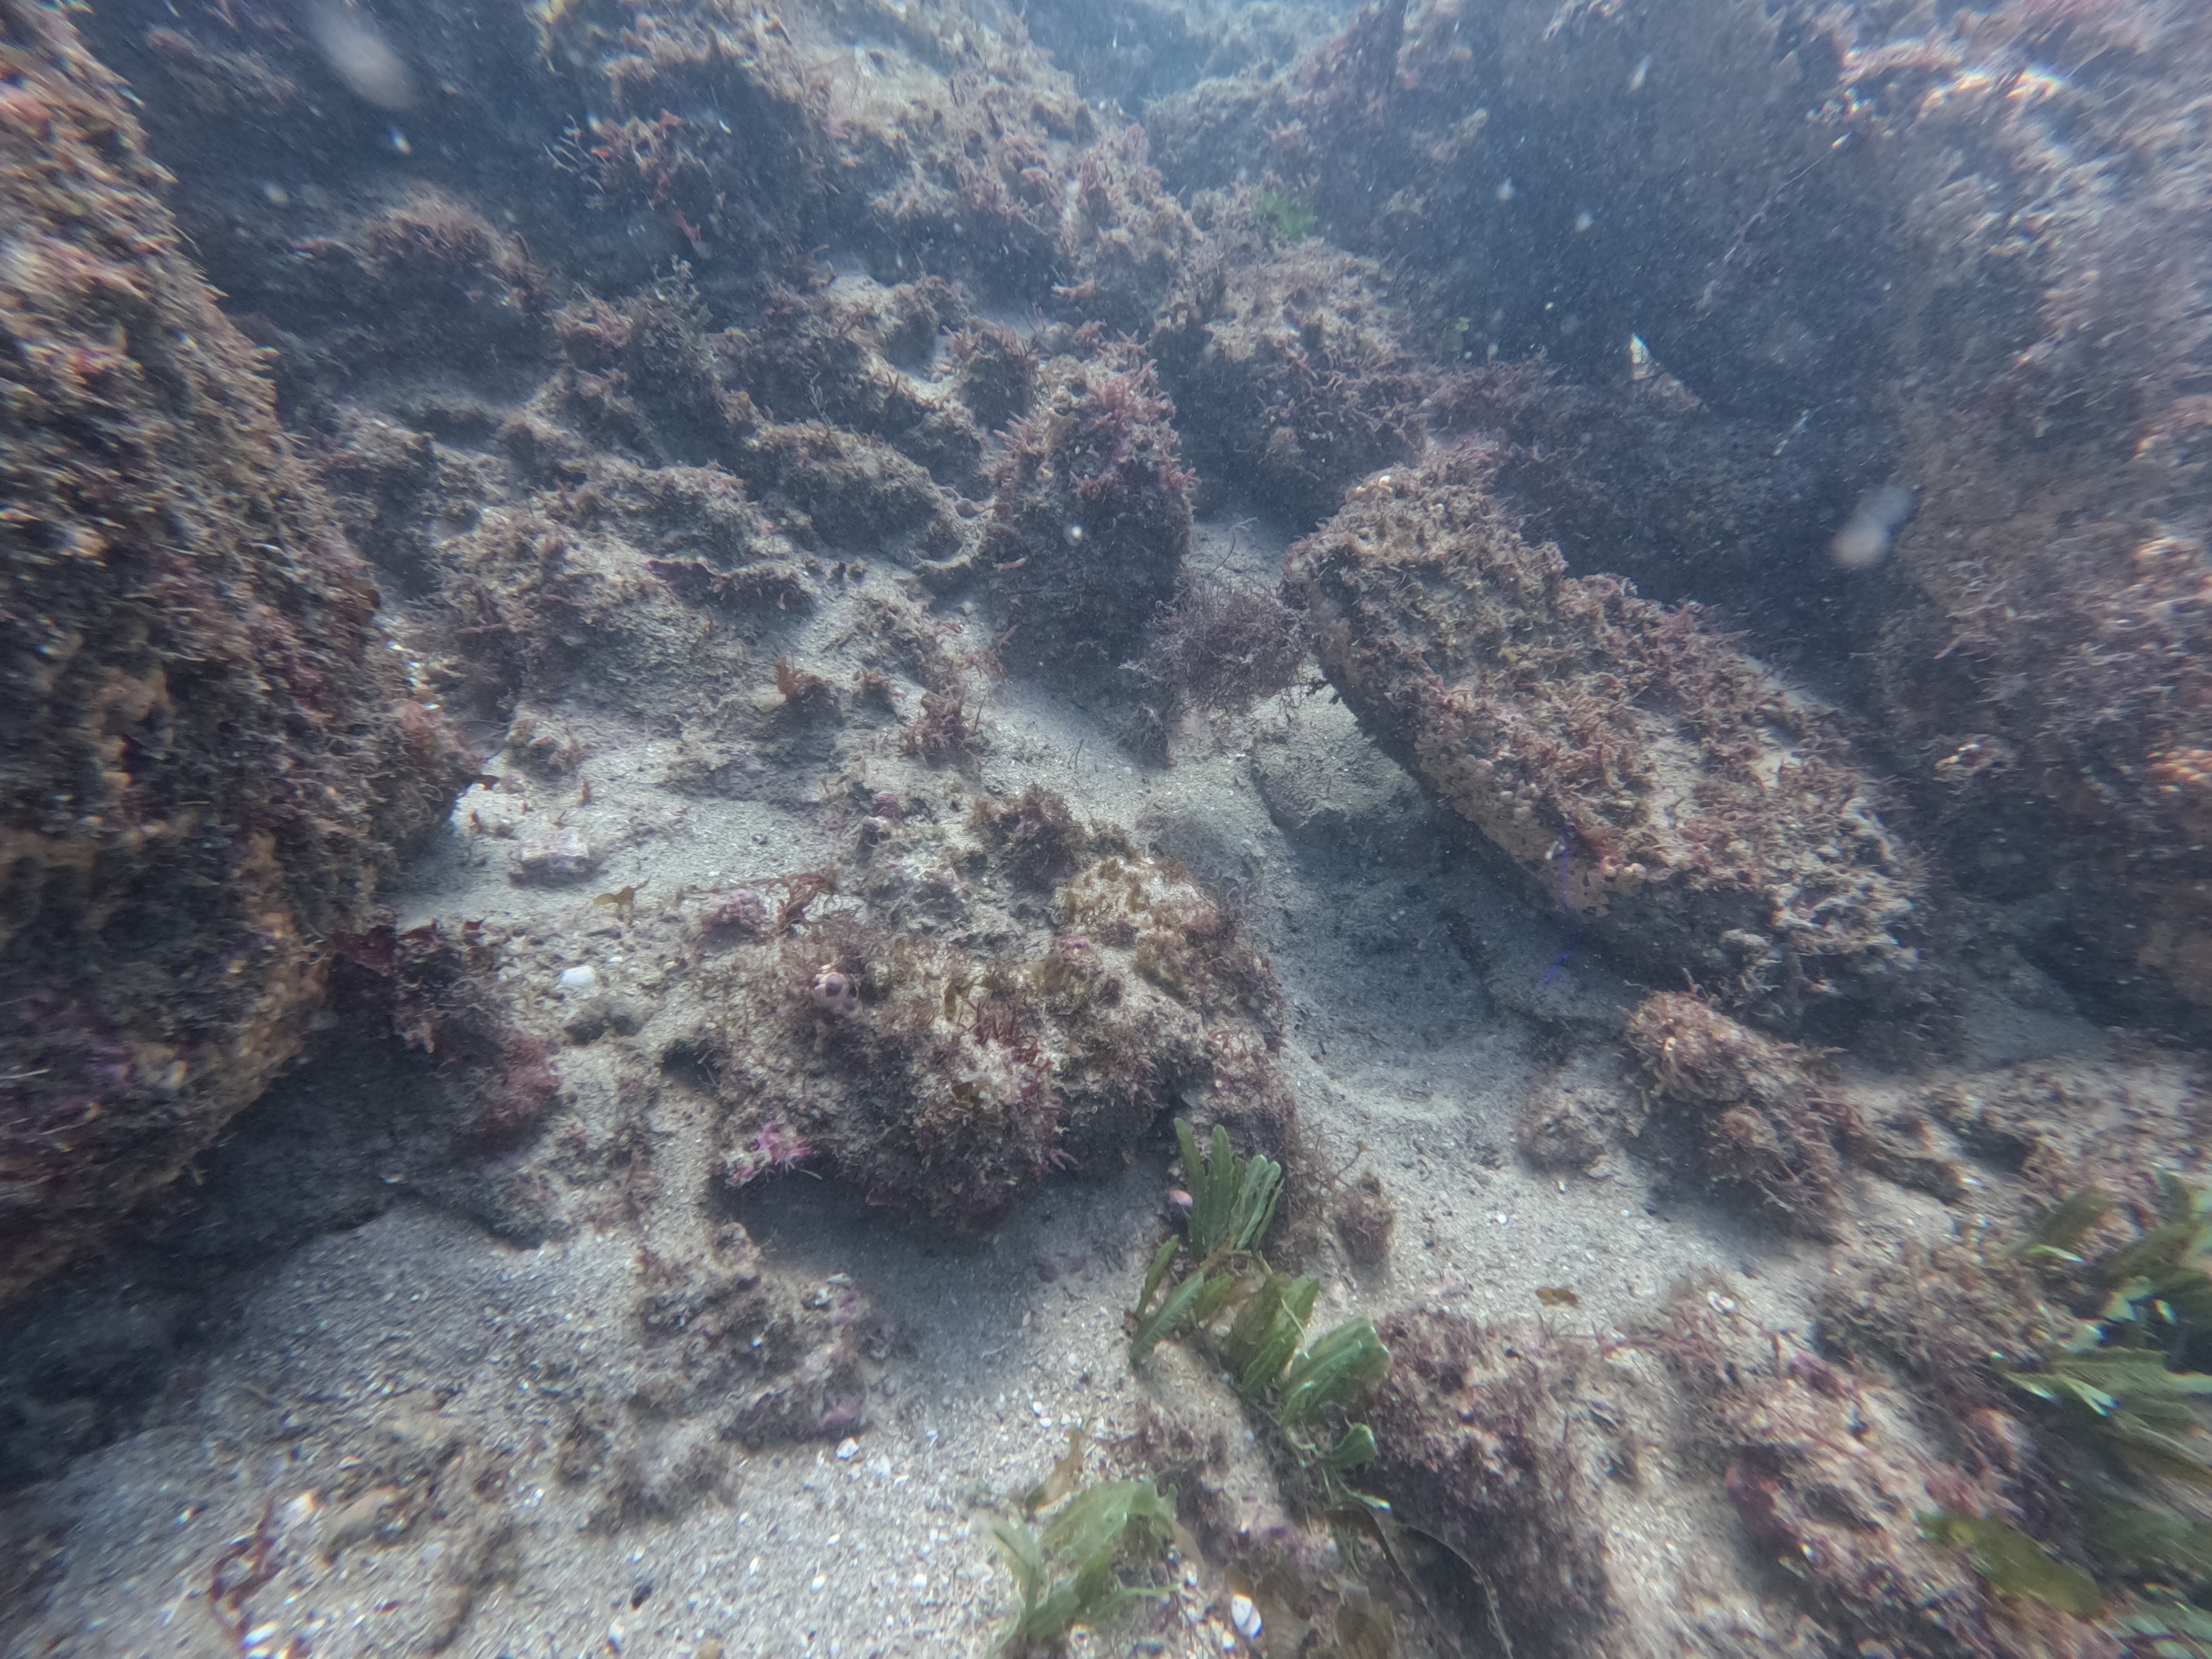

Supplement: Supplementary file 1600 [file G0027926.pdf › Ocean1/G0027926.pdf]

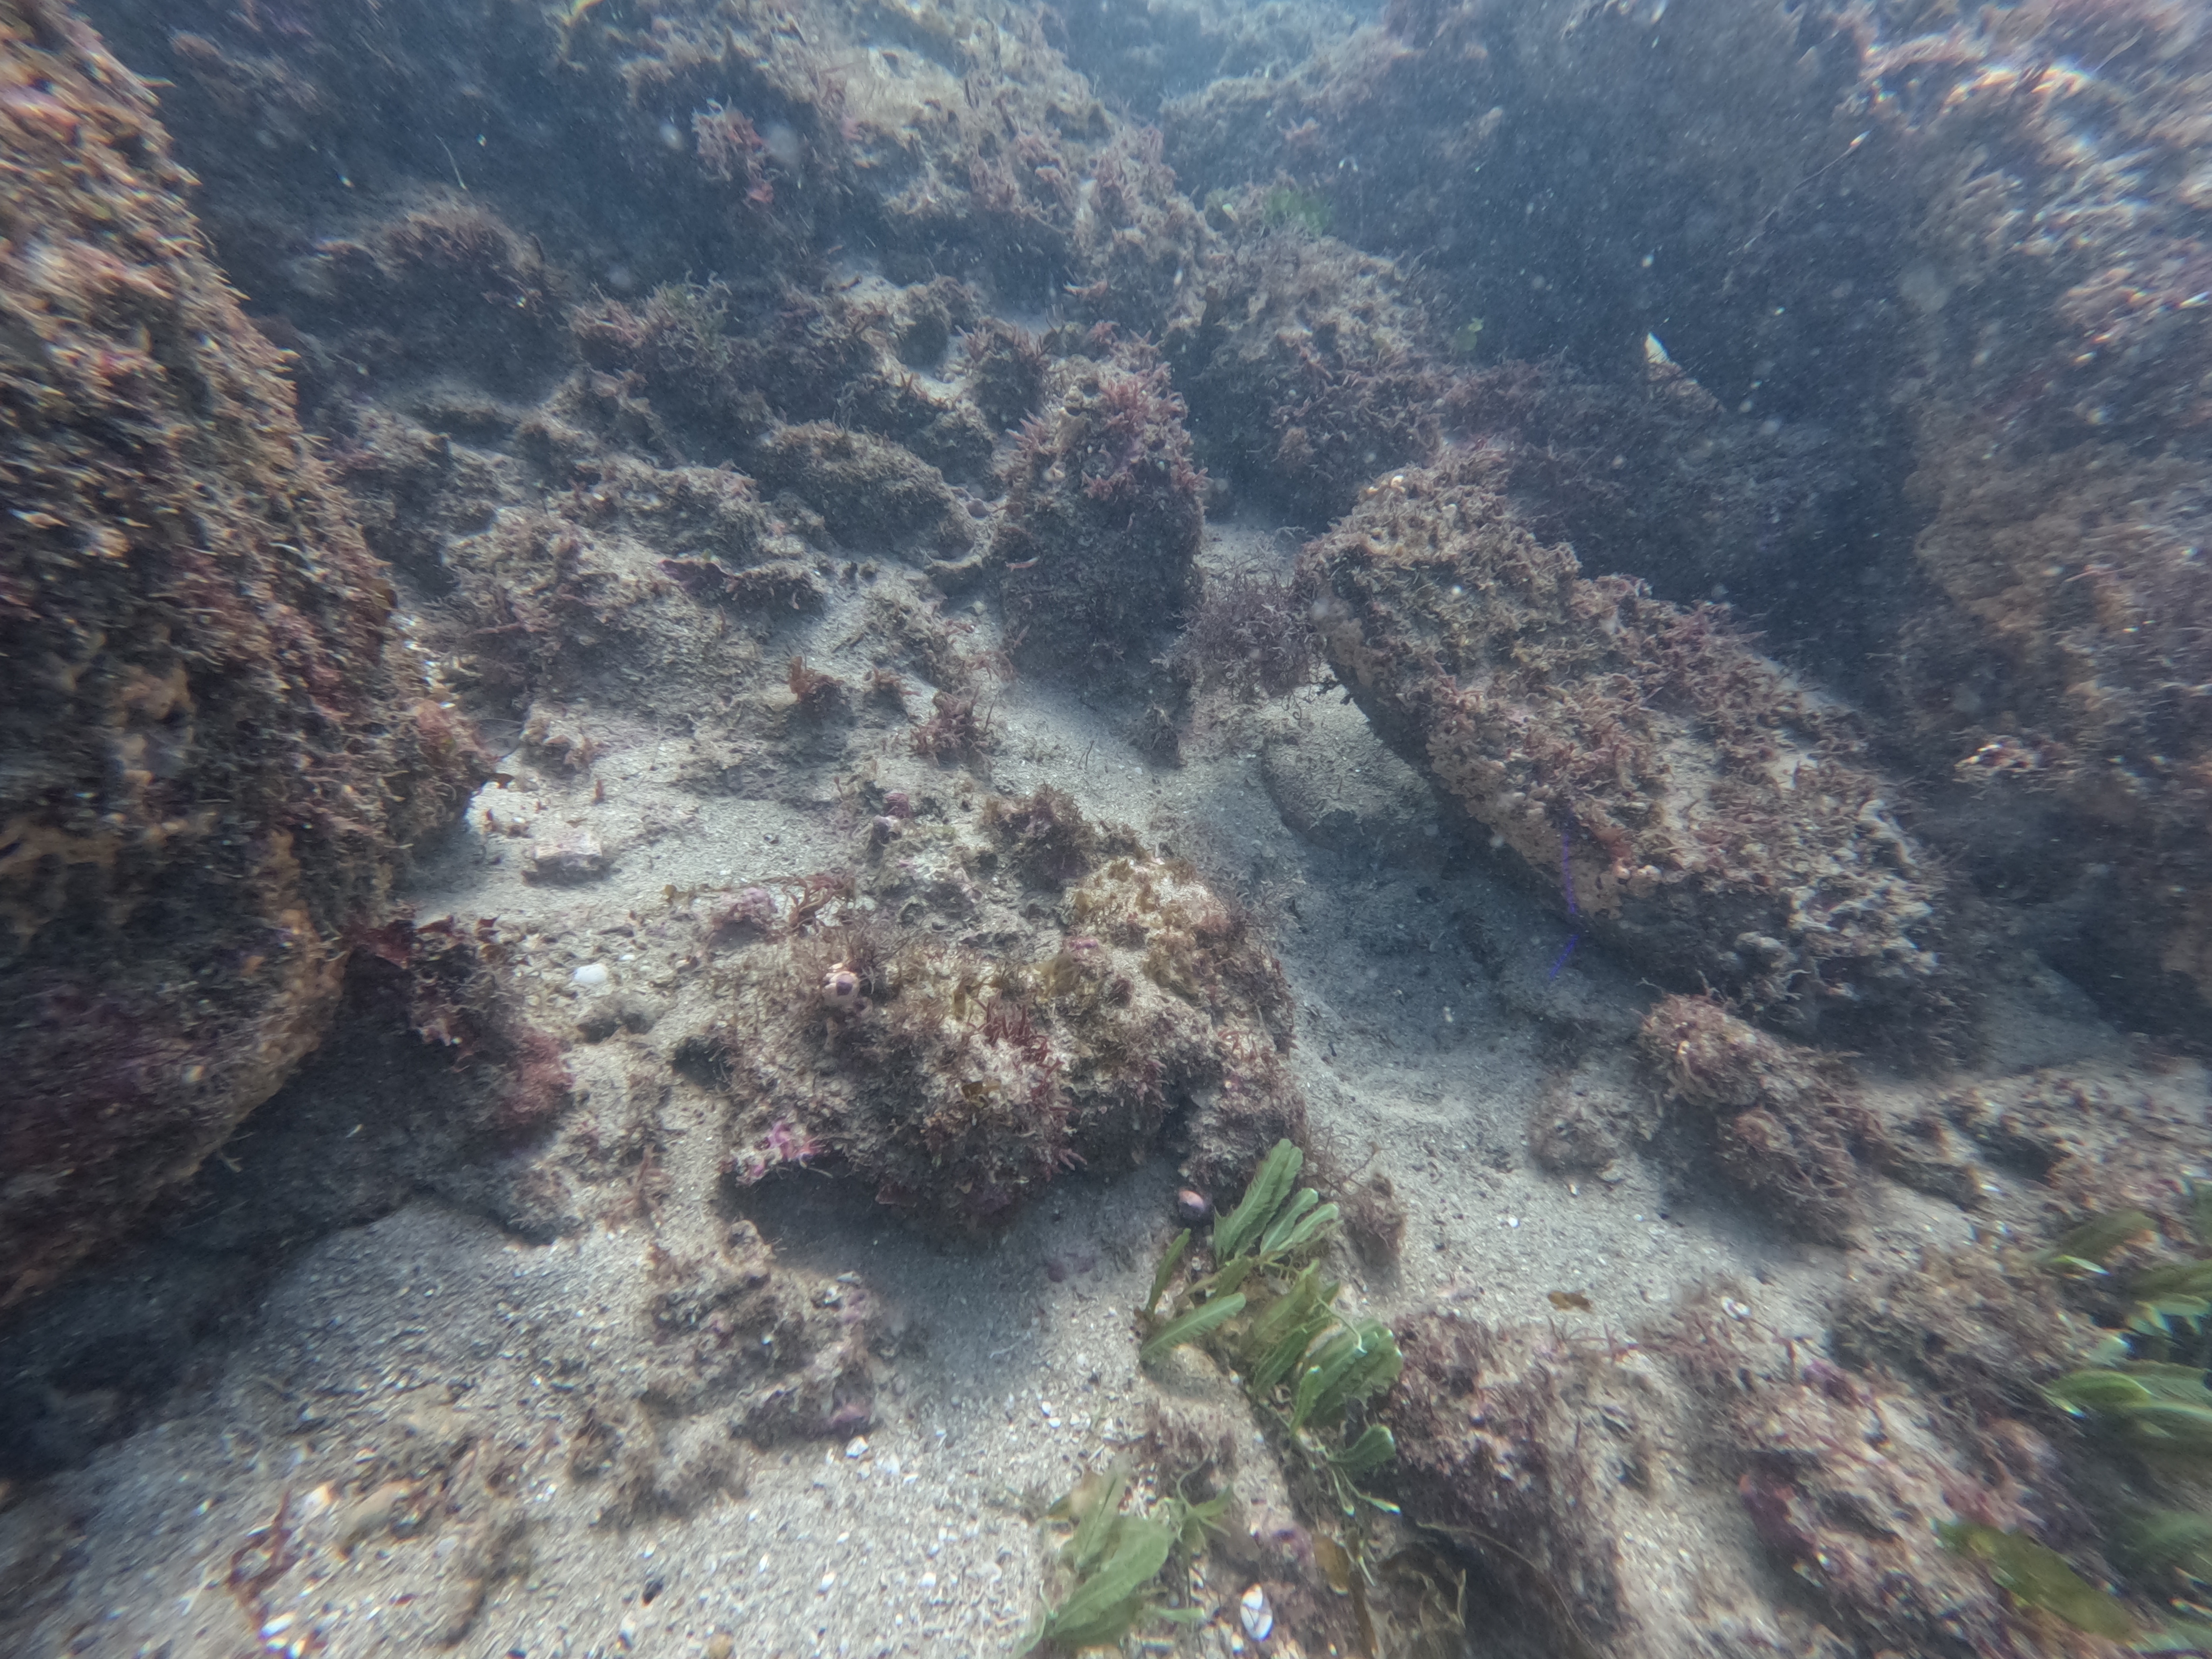

Supplement: Supplementary file 1601 [file G0027927.pdf › Ocean1/G0027927.pdf]

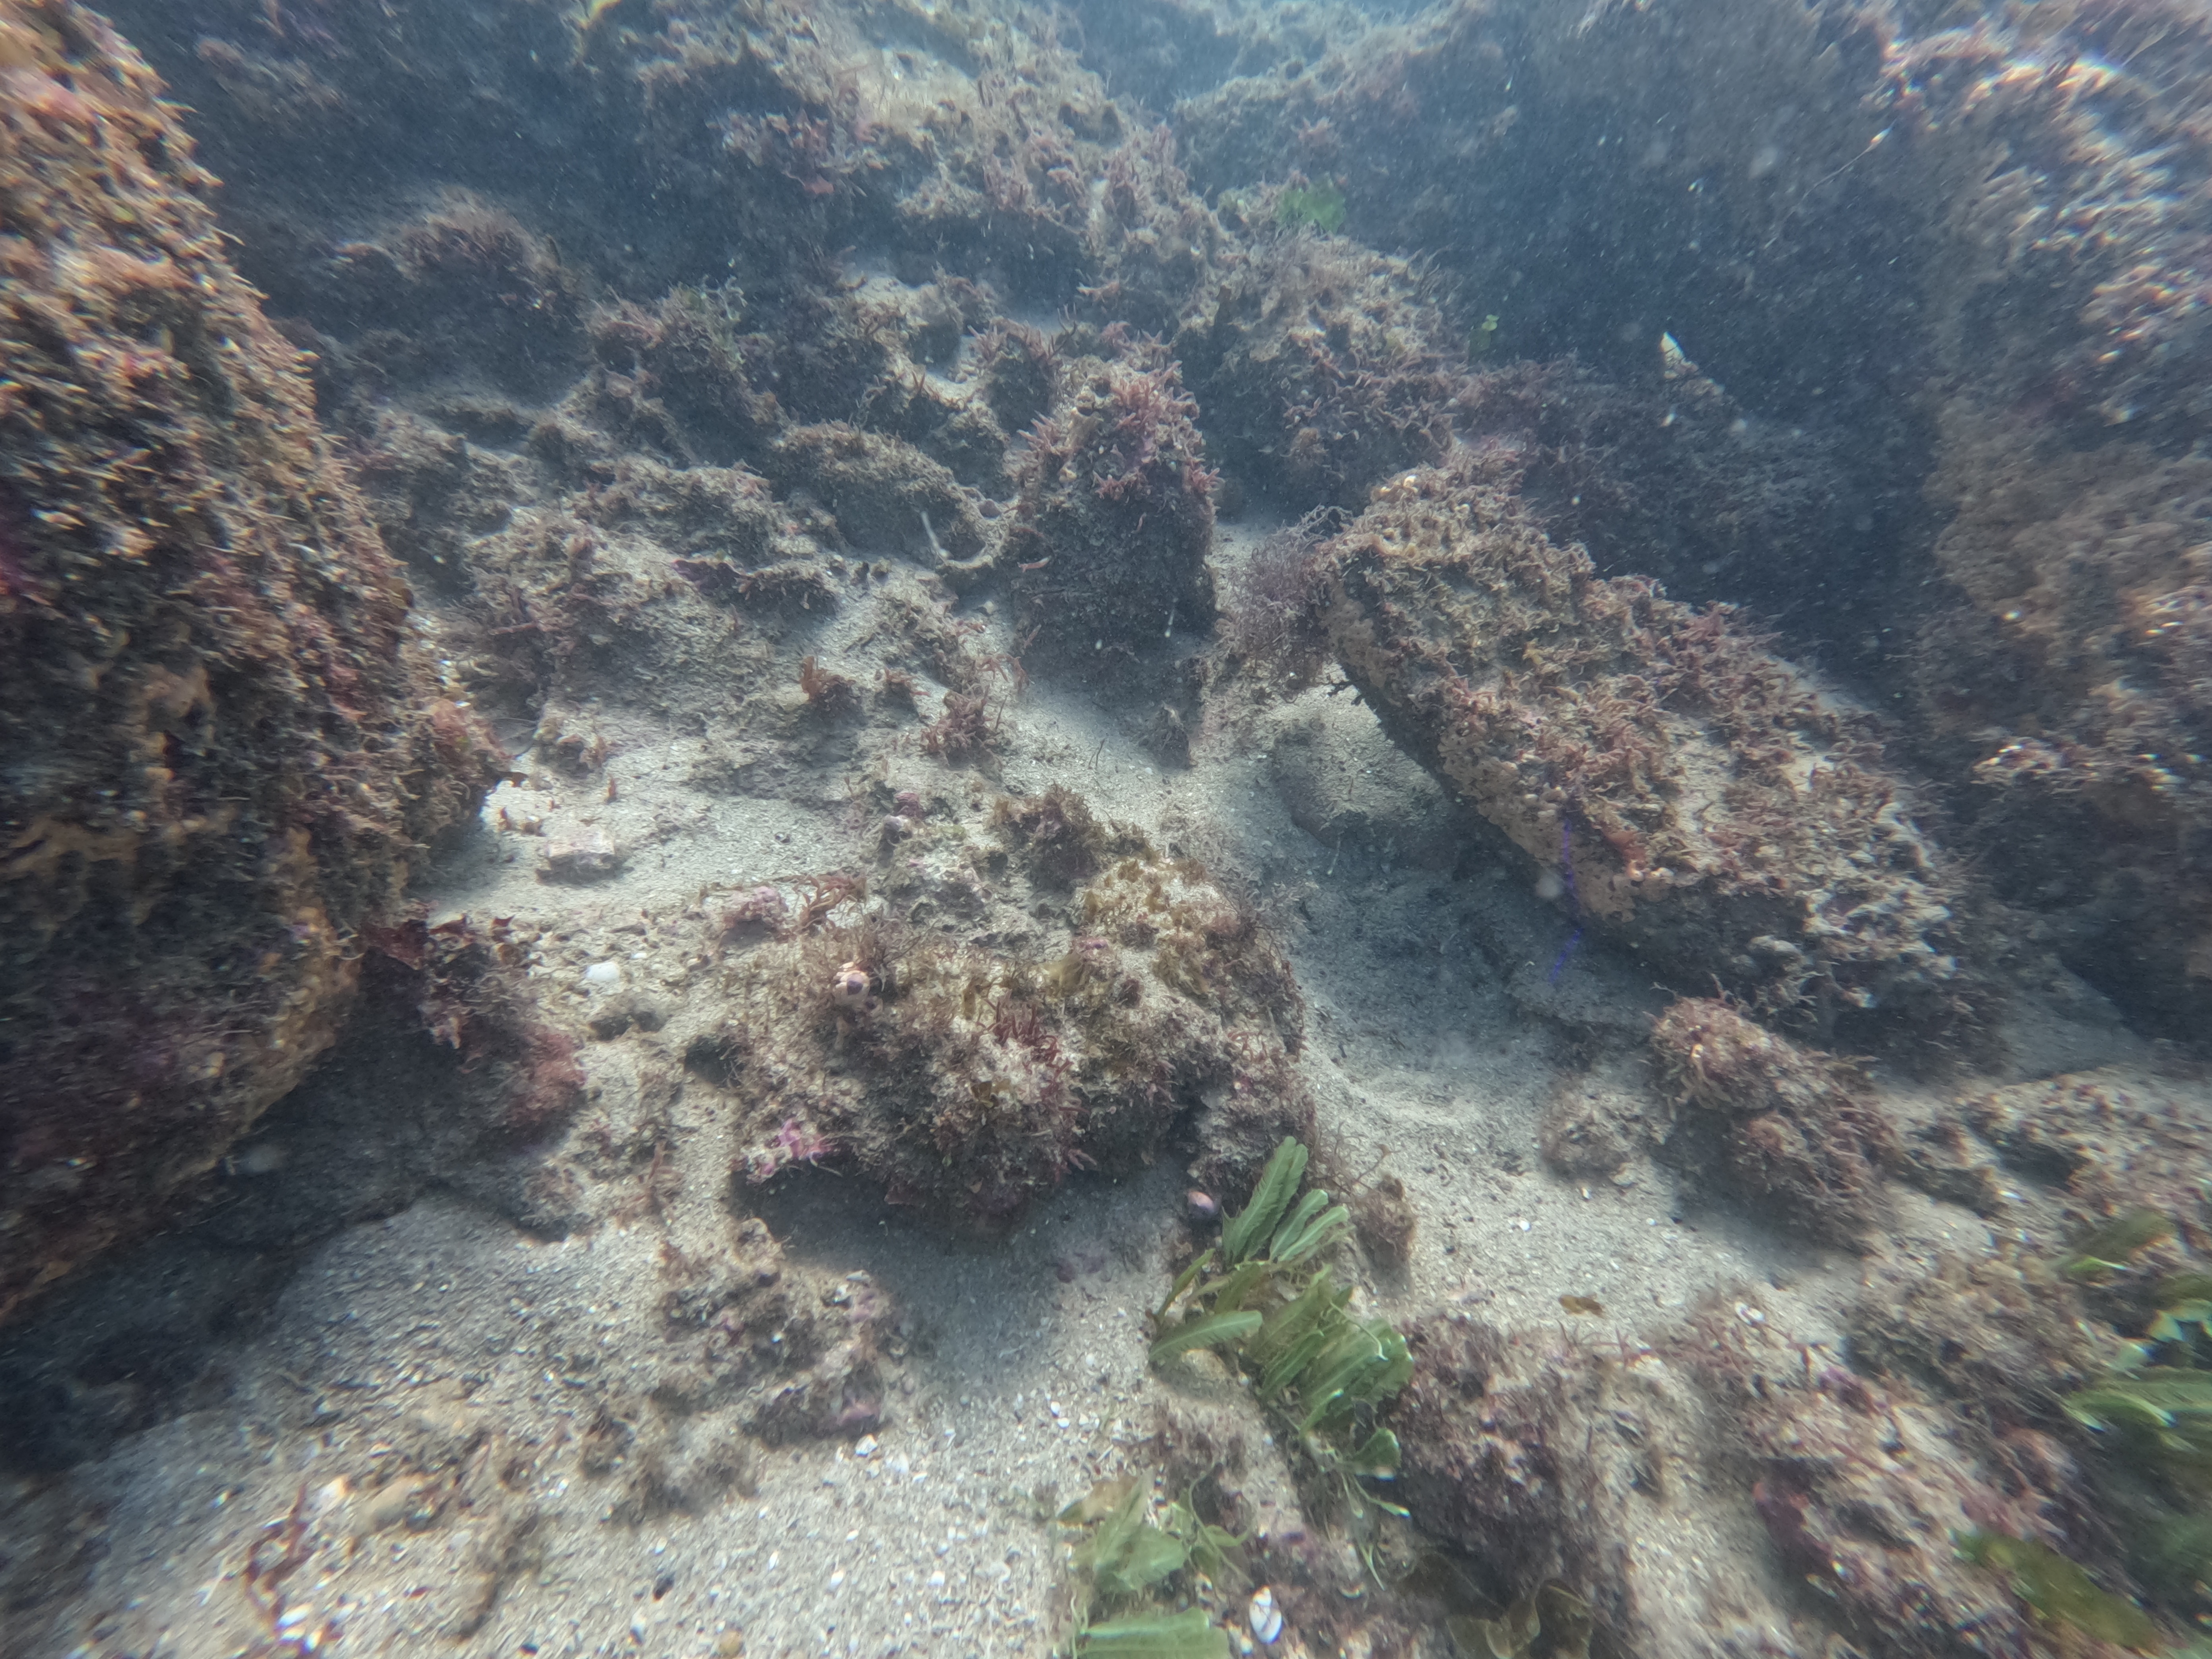

Supplement: Supplementary file 1602 [file G0027928.pdf › Ocean1/G0027928.pdf]

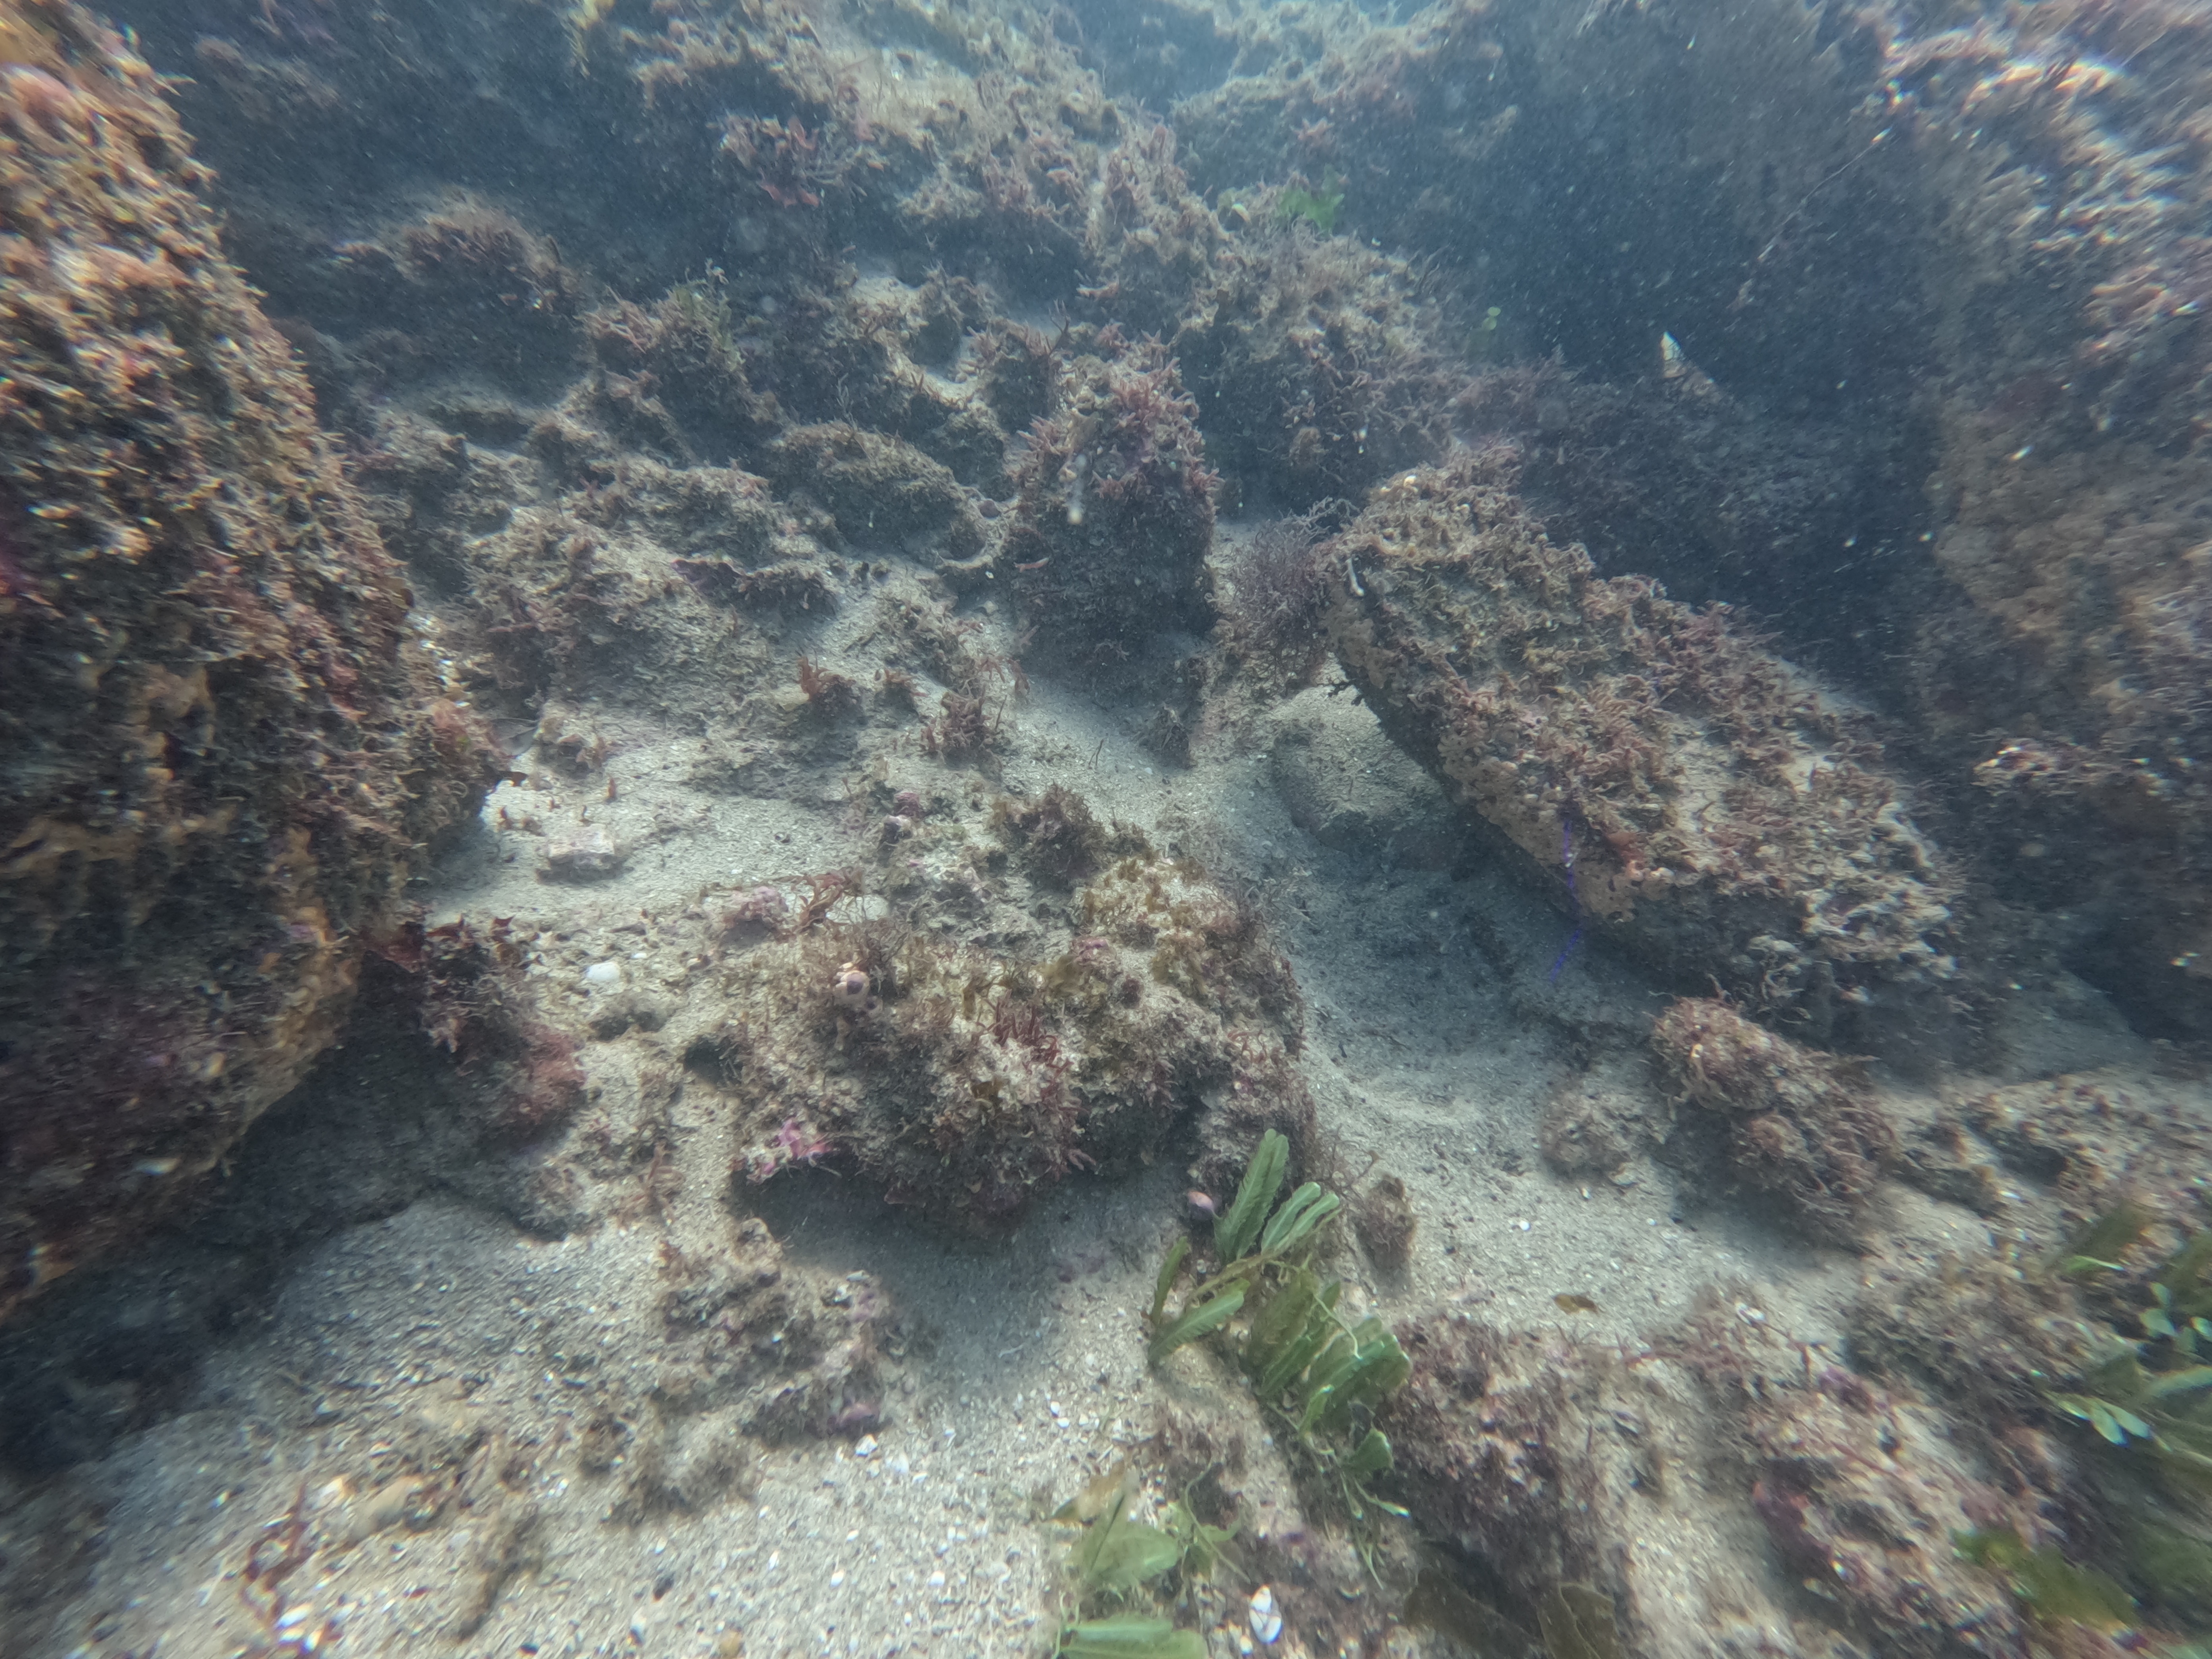

Supplement: Supplementary file 1603 [file G0027929.pdf › Ocean1/G0027929.pdf]

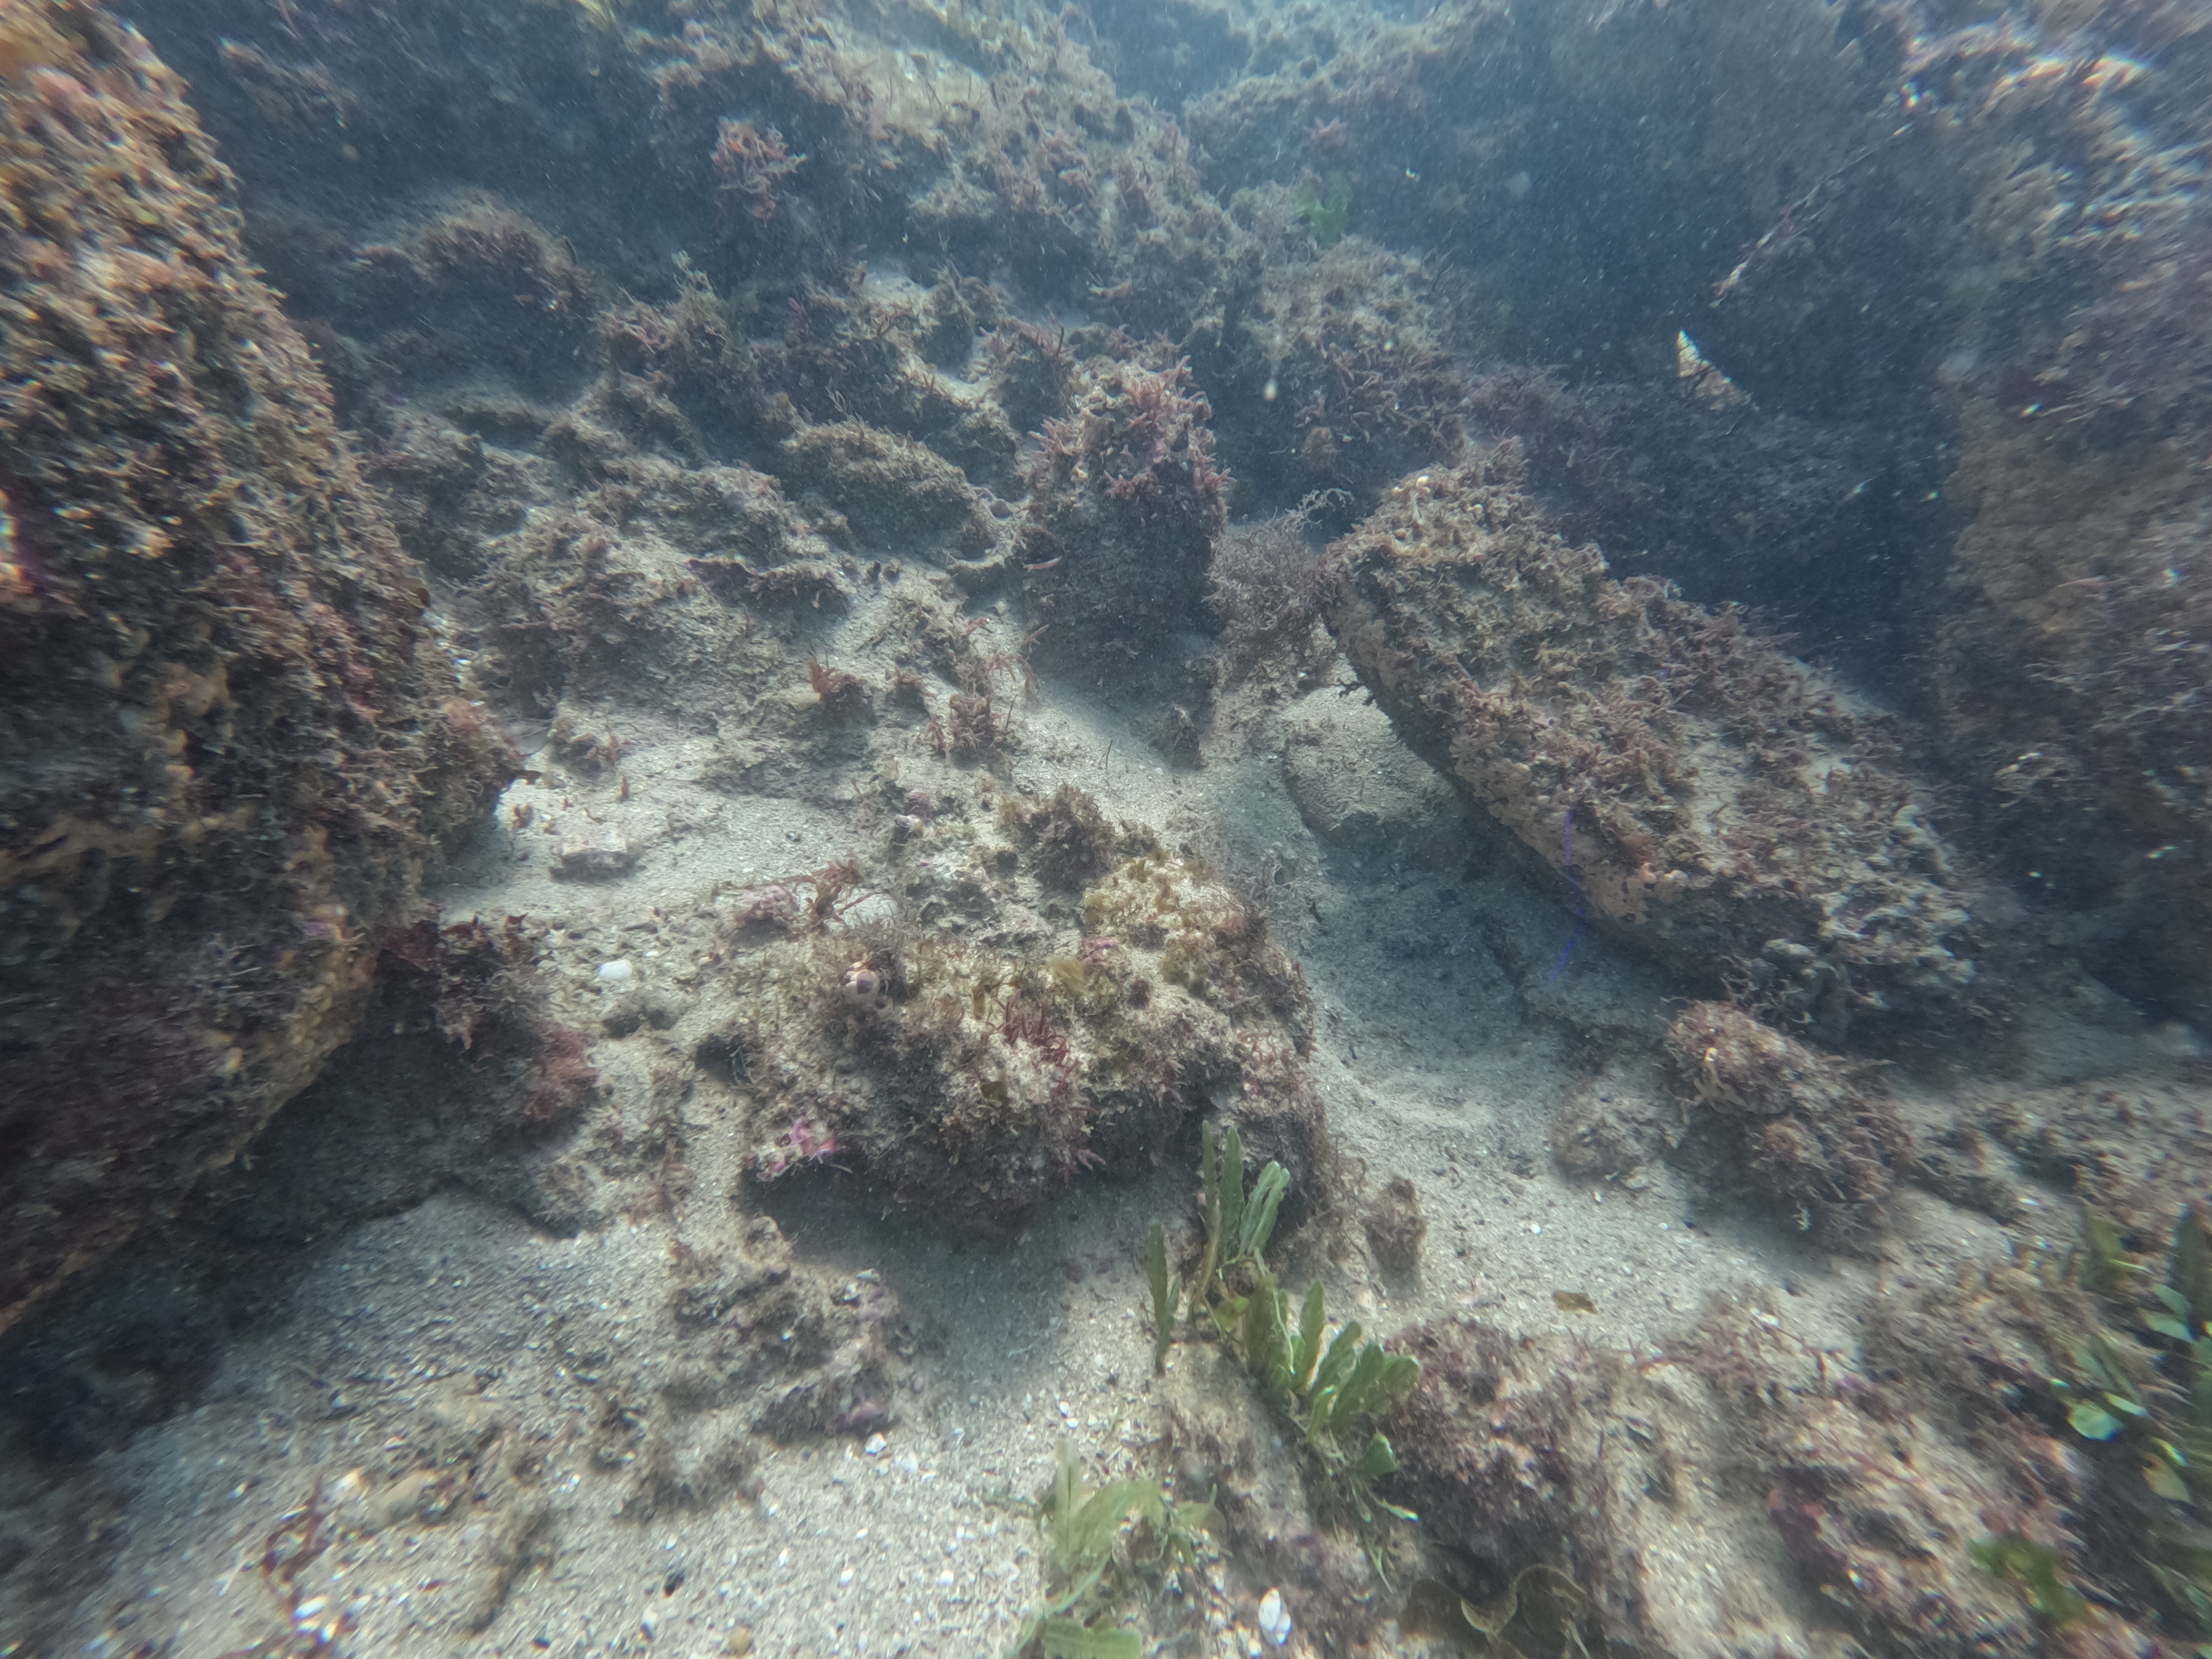

Supplement: Supplementary file 1604 [file G0027930.pdf › Ocean1/G0027930.pdf]

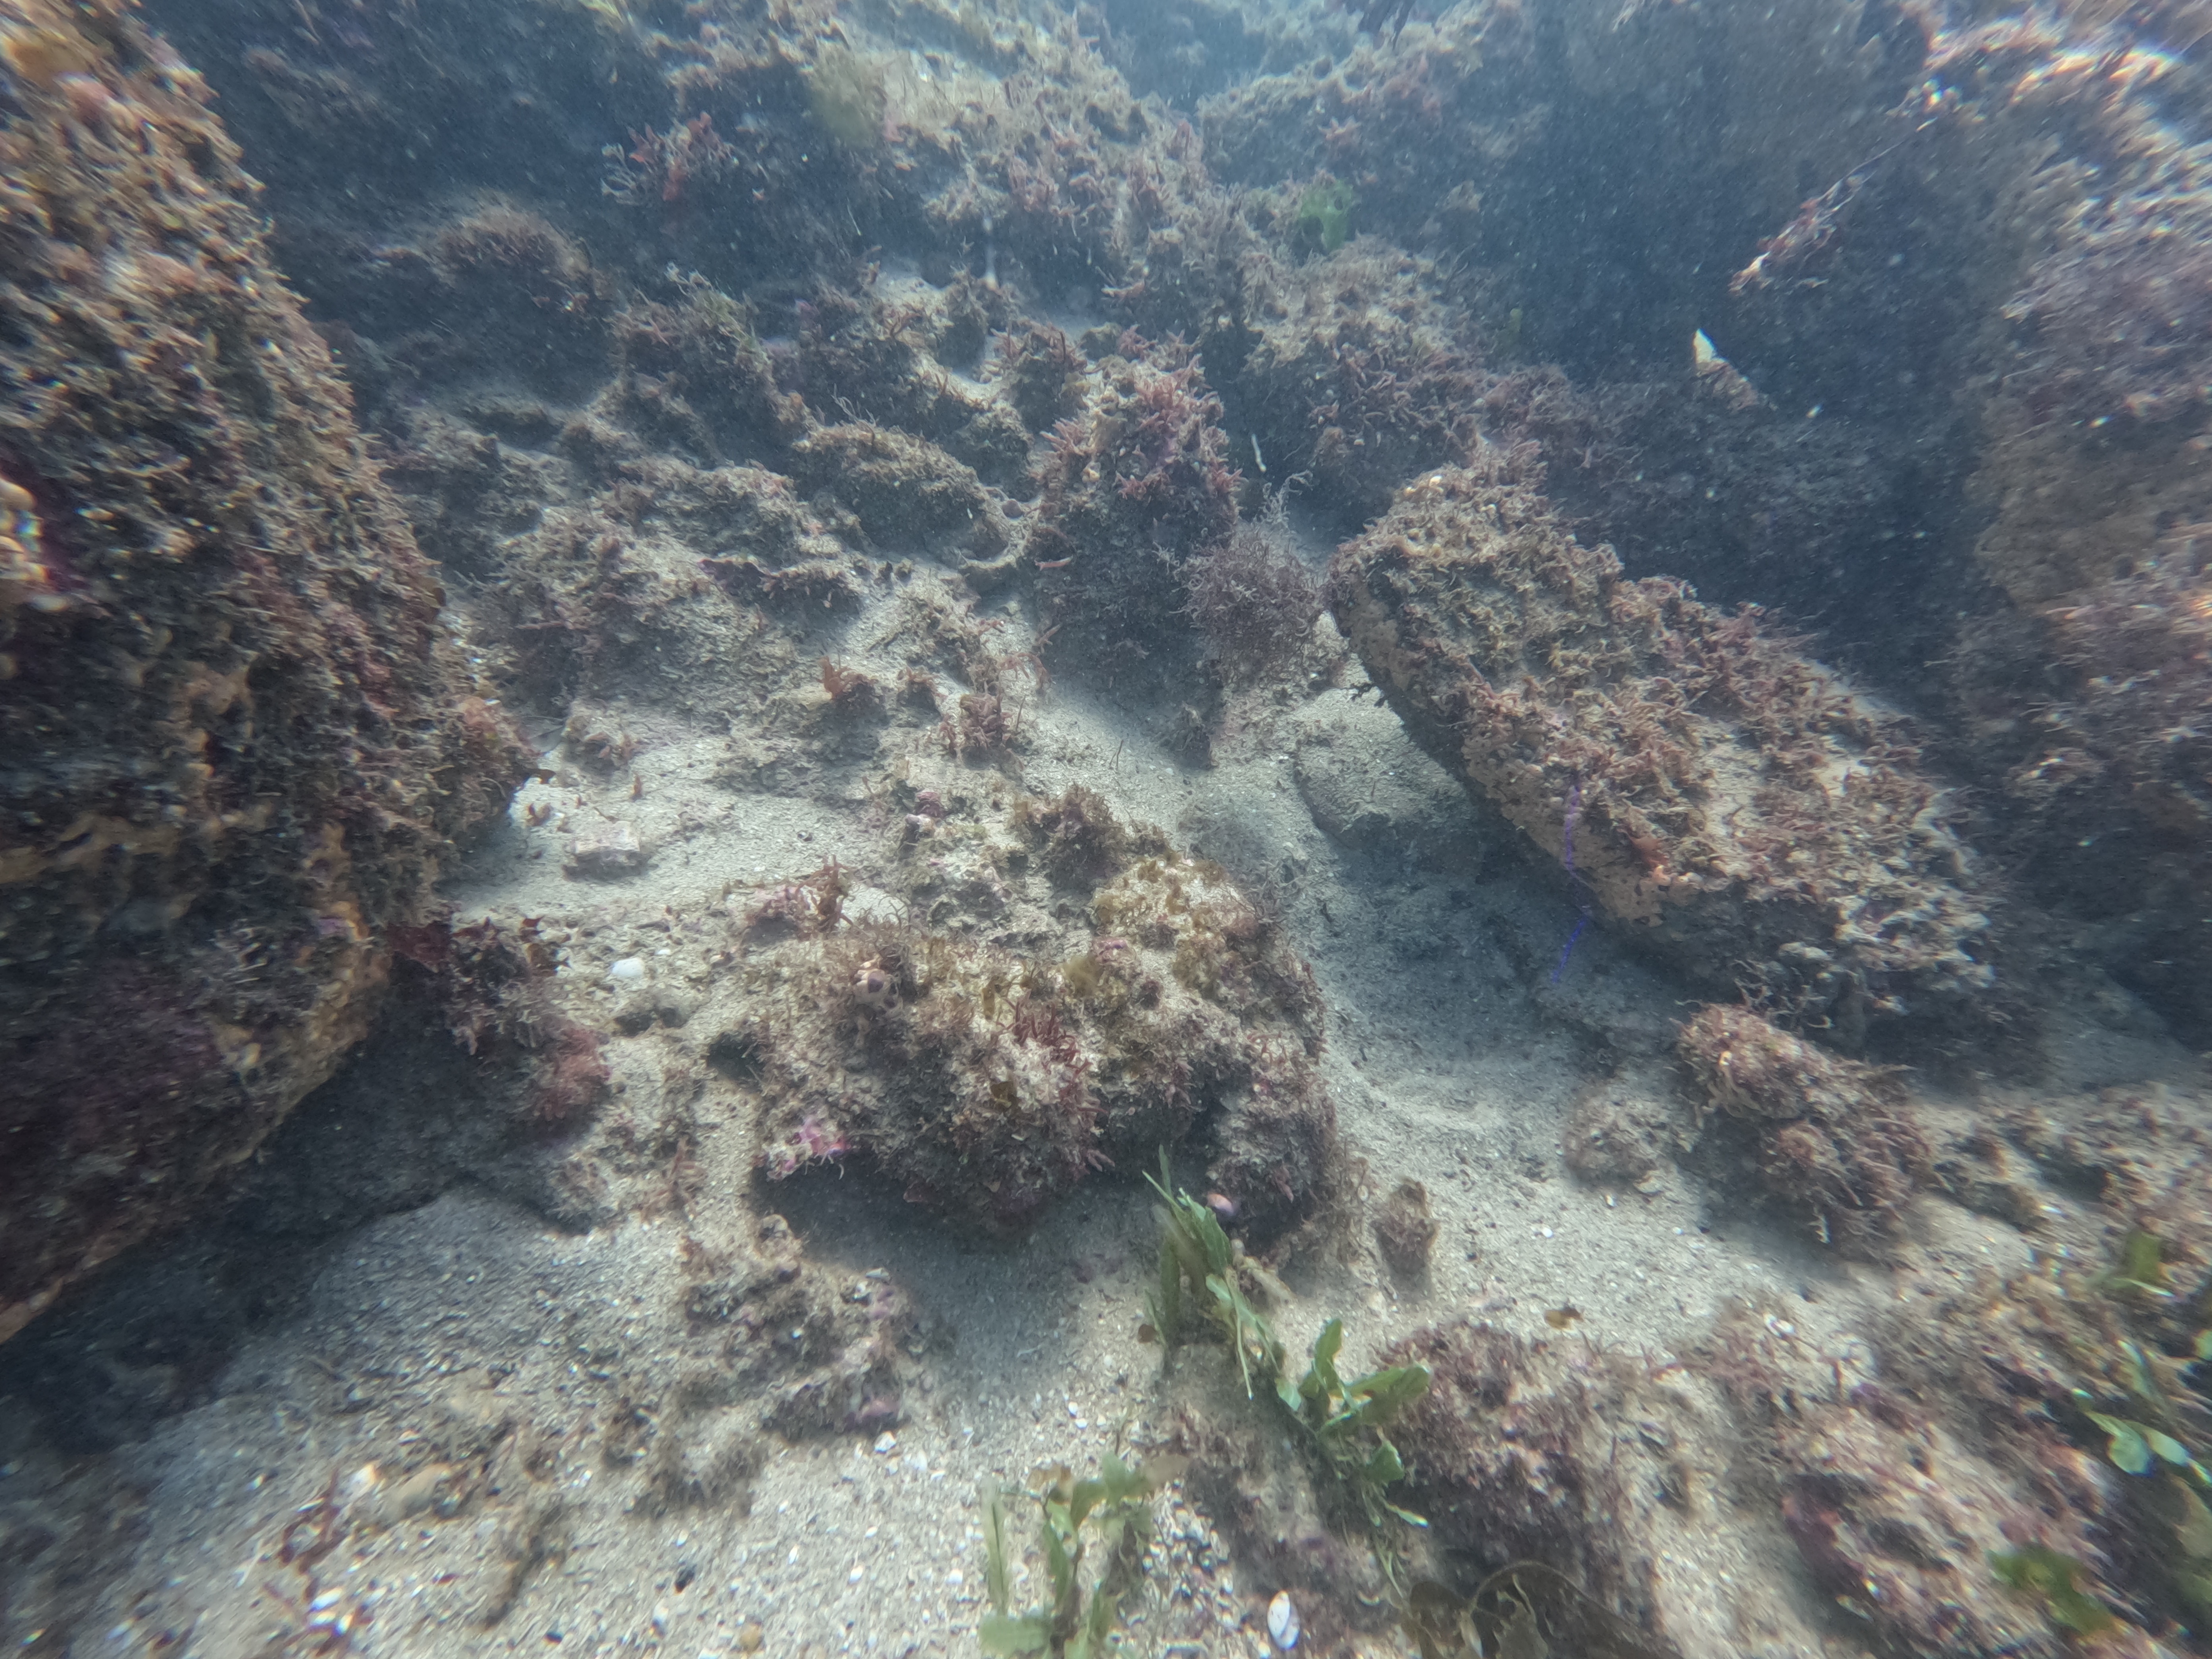

Supplement: Supplementary file 1605 [file G0027931.pdf › Ocean1/G0027931.pdf]

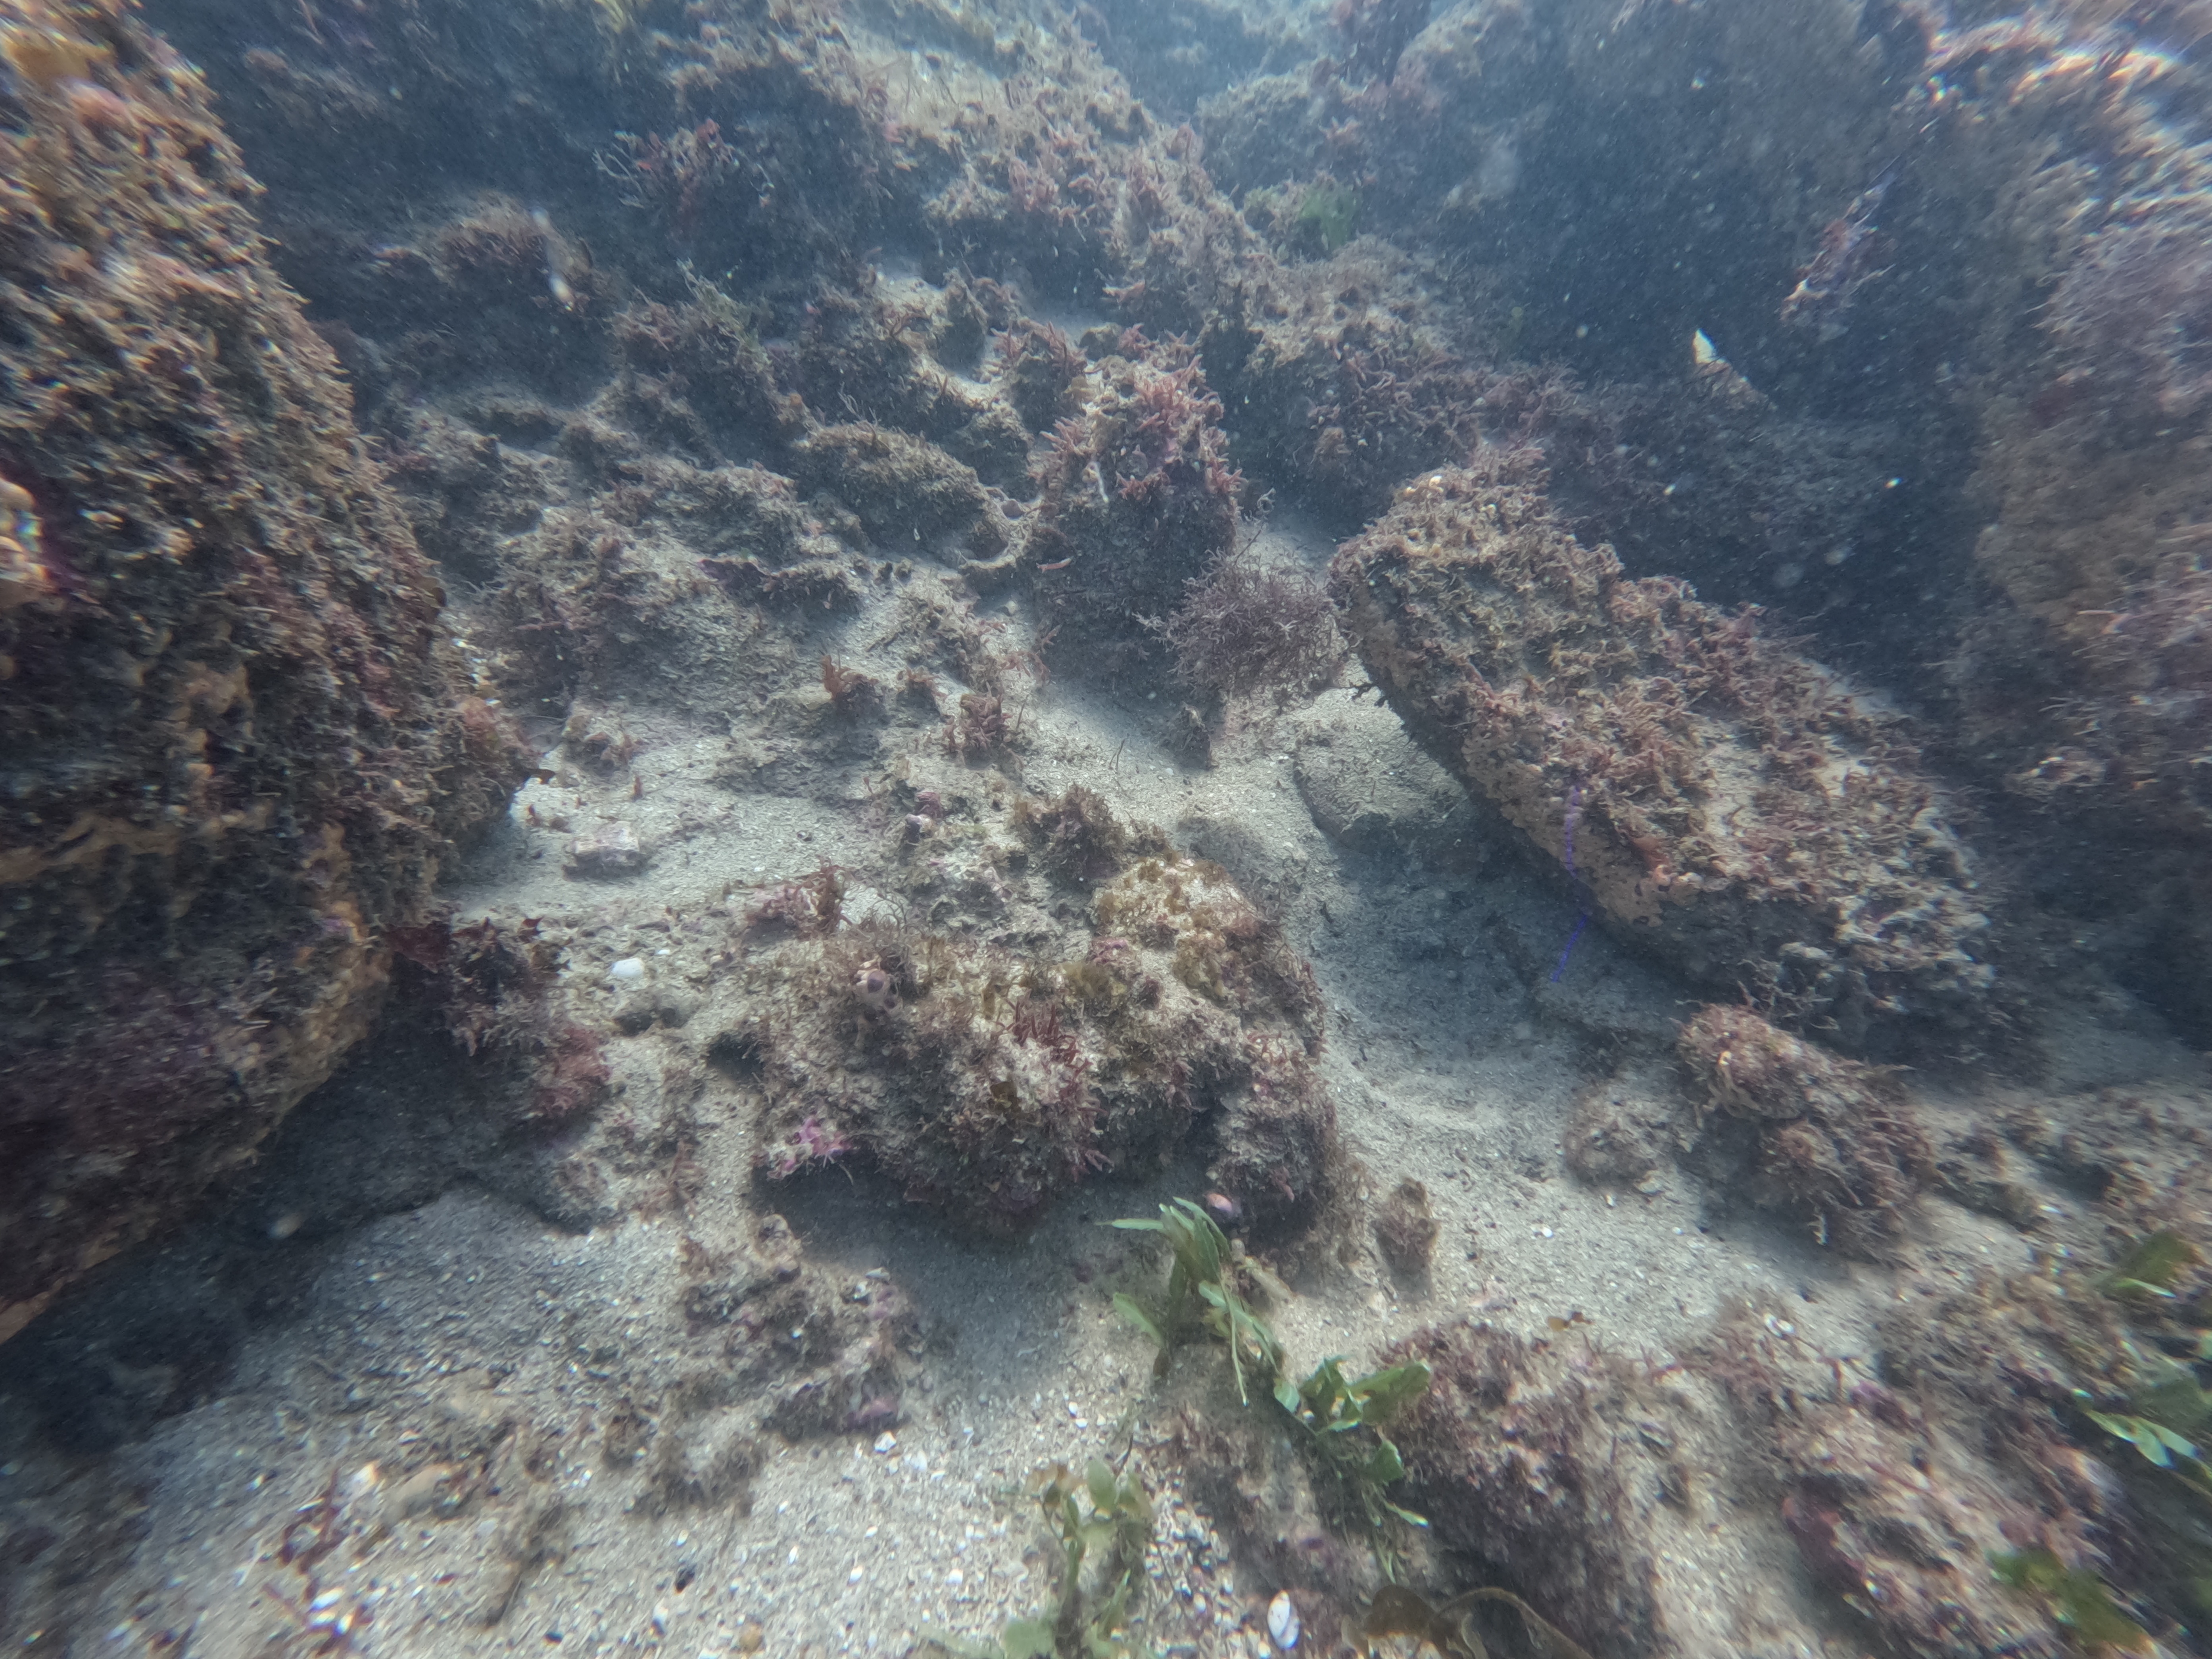

Supplement: Supplementary file 1606 [file G0027932.pdf › Ocean1/G0027932.pdf]

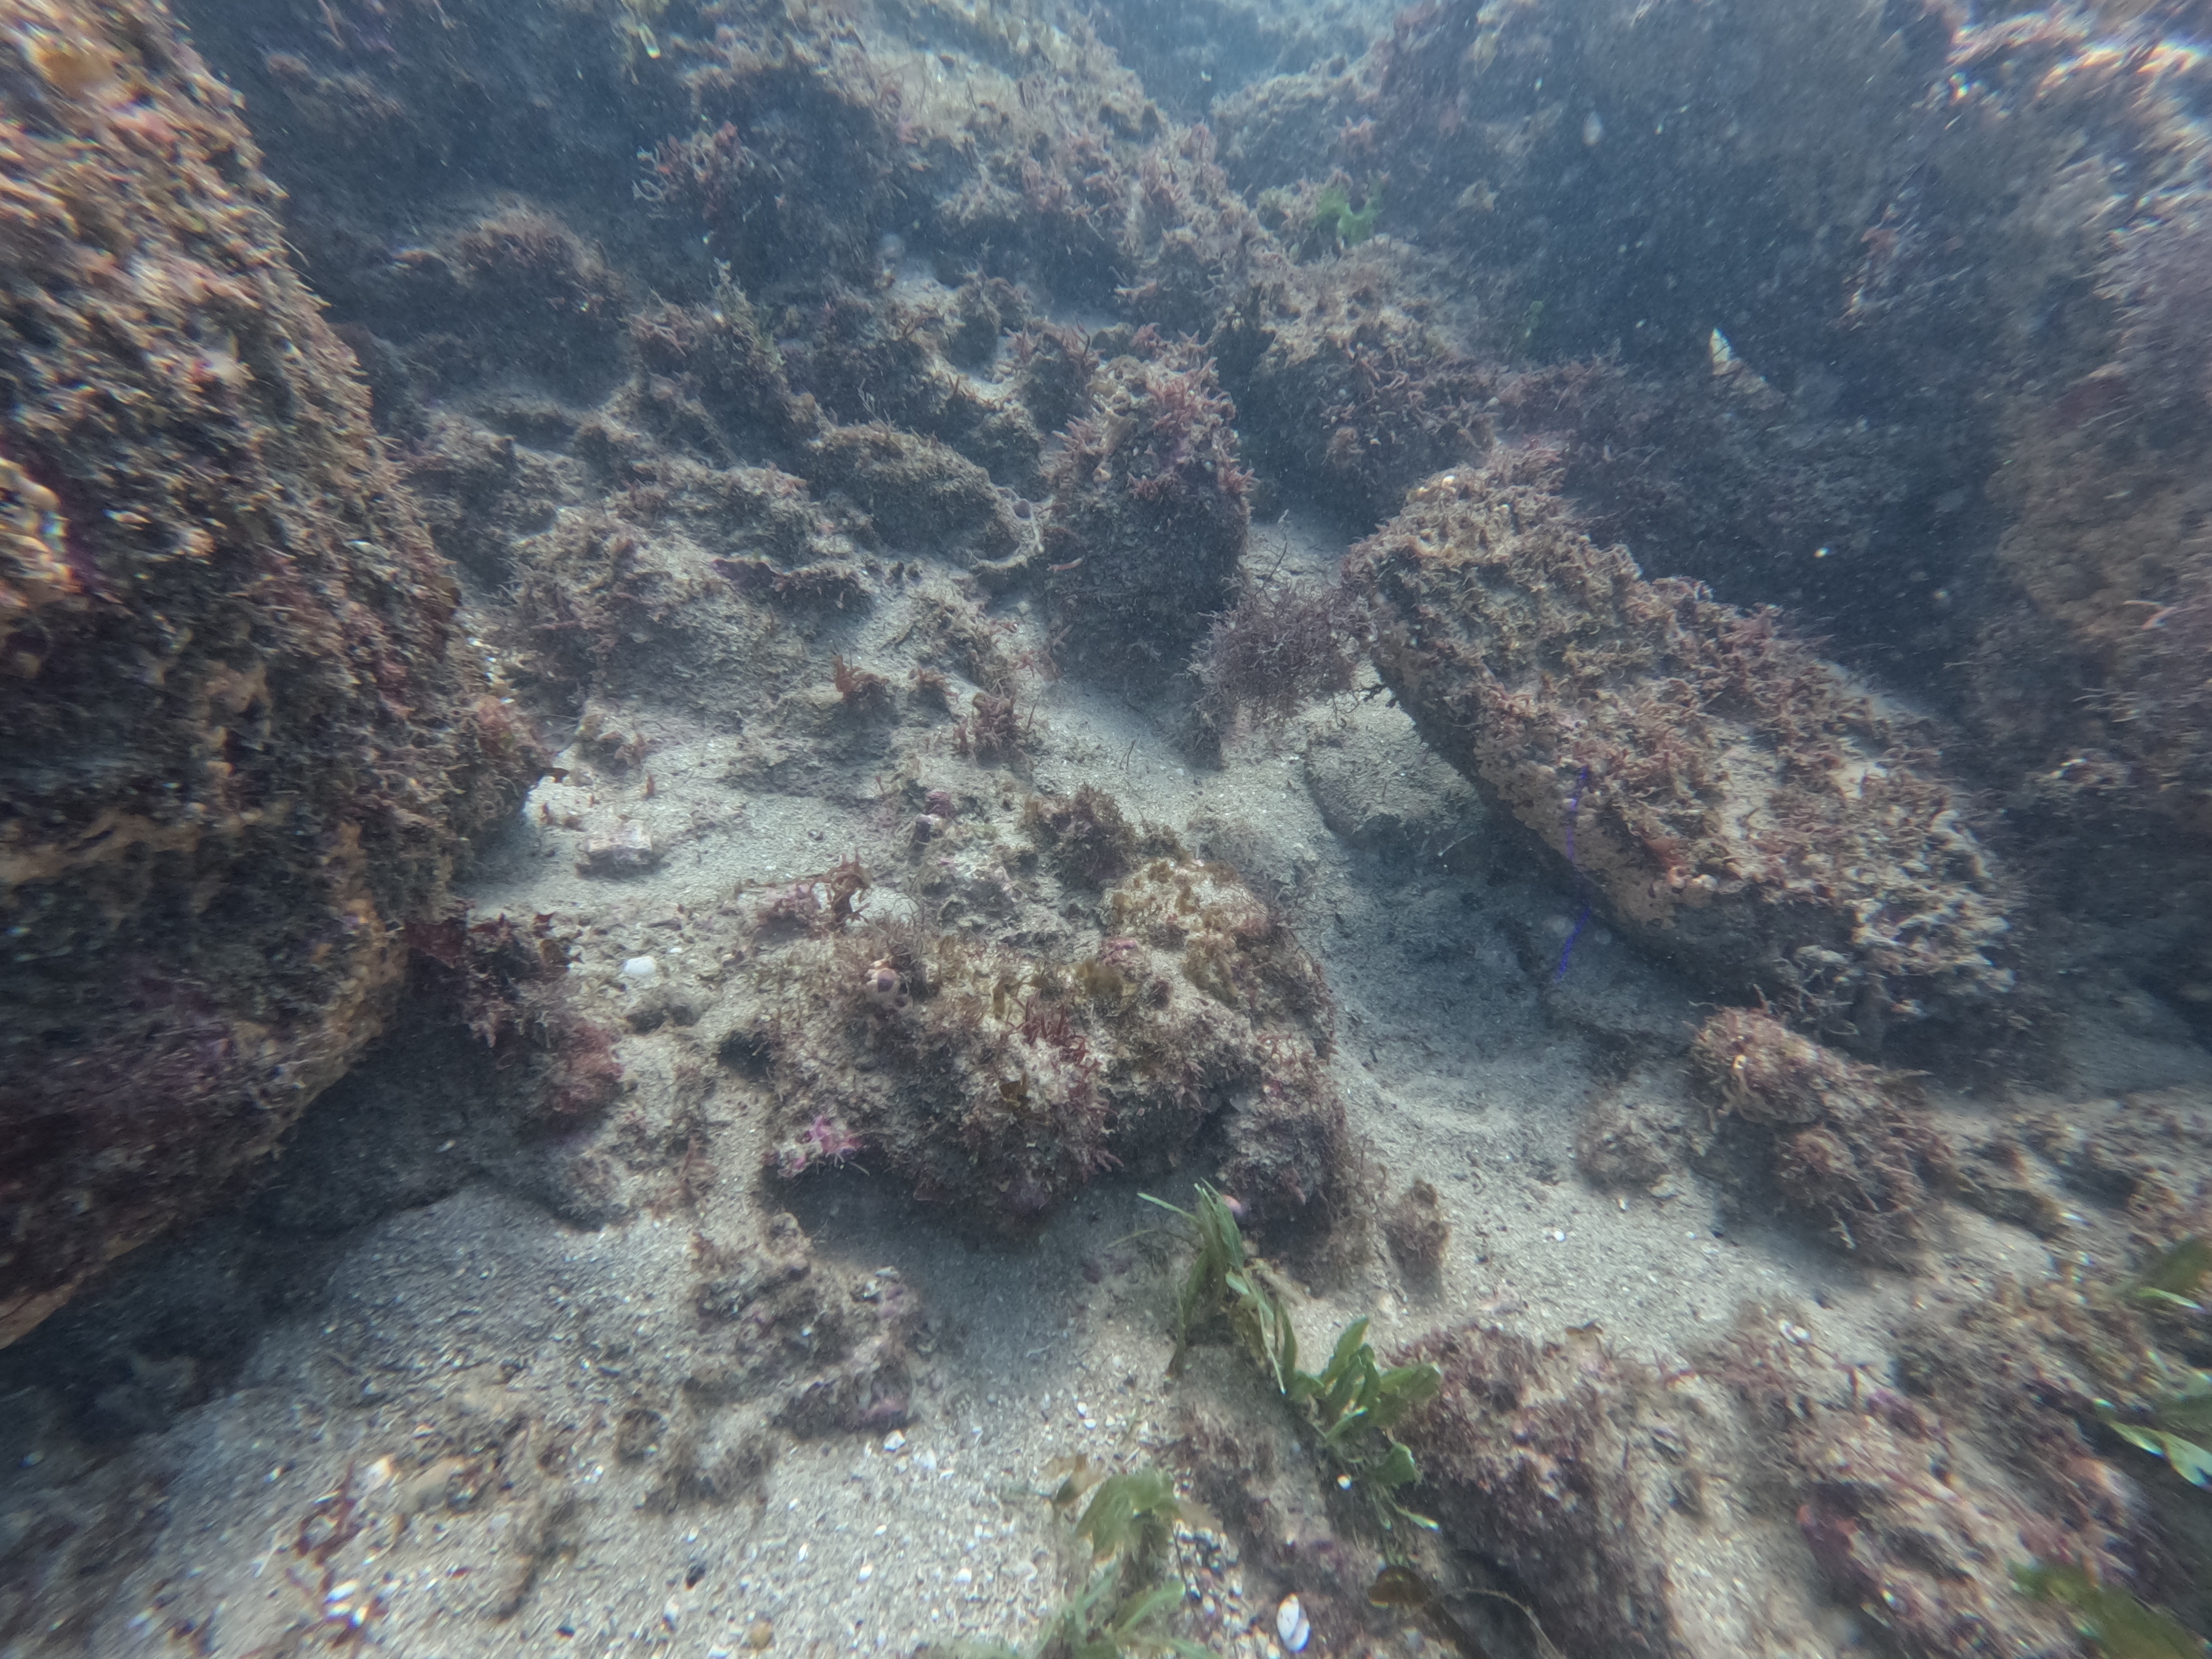

Supplement: Supplementary file 1607 [file G0027933.pdf › Ocean1/G0027933.pdf]

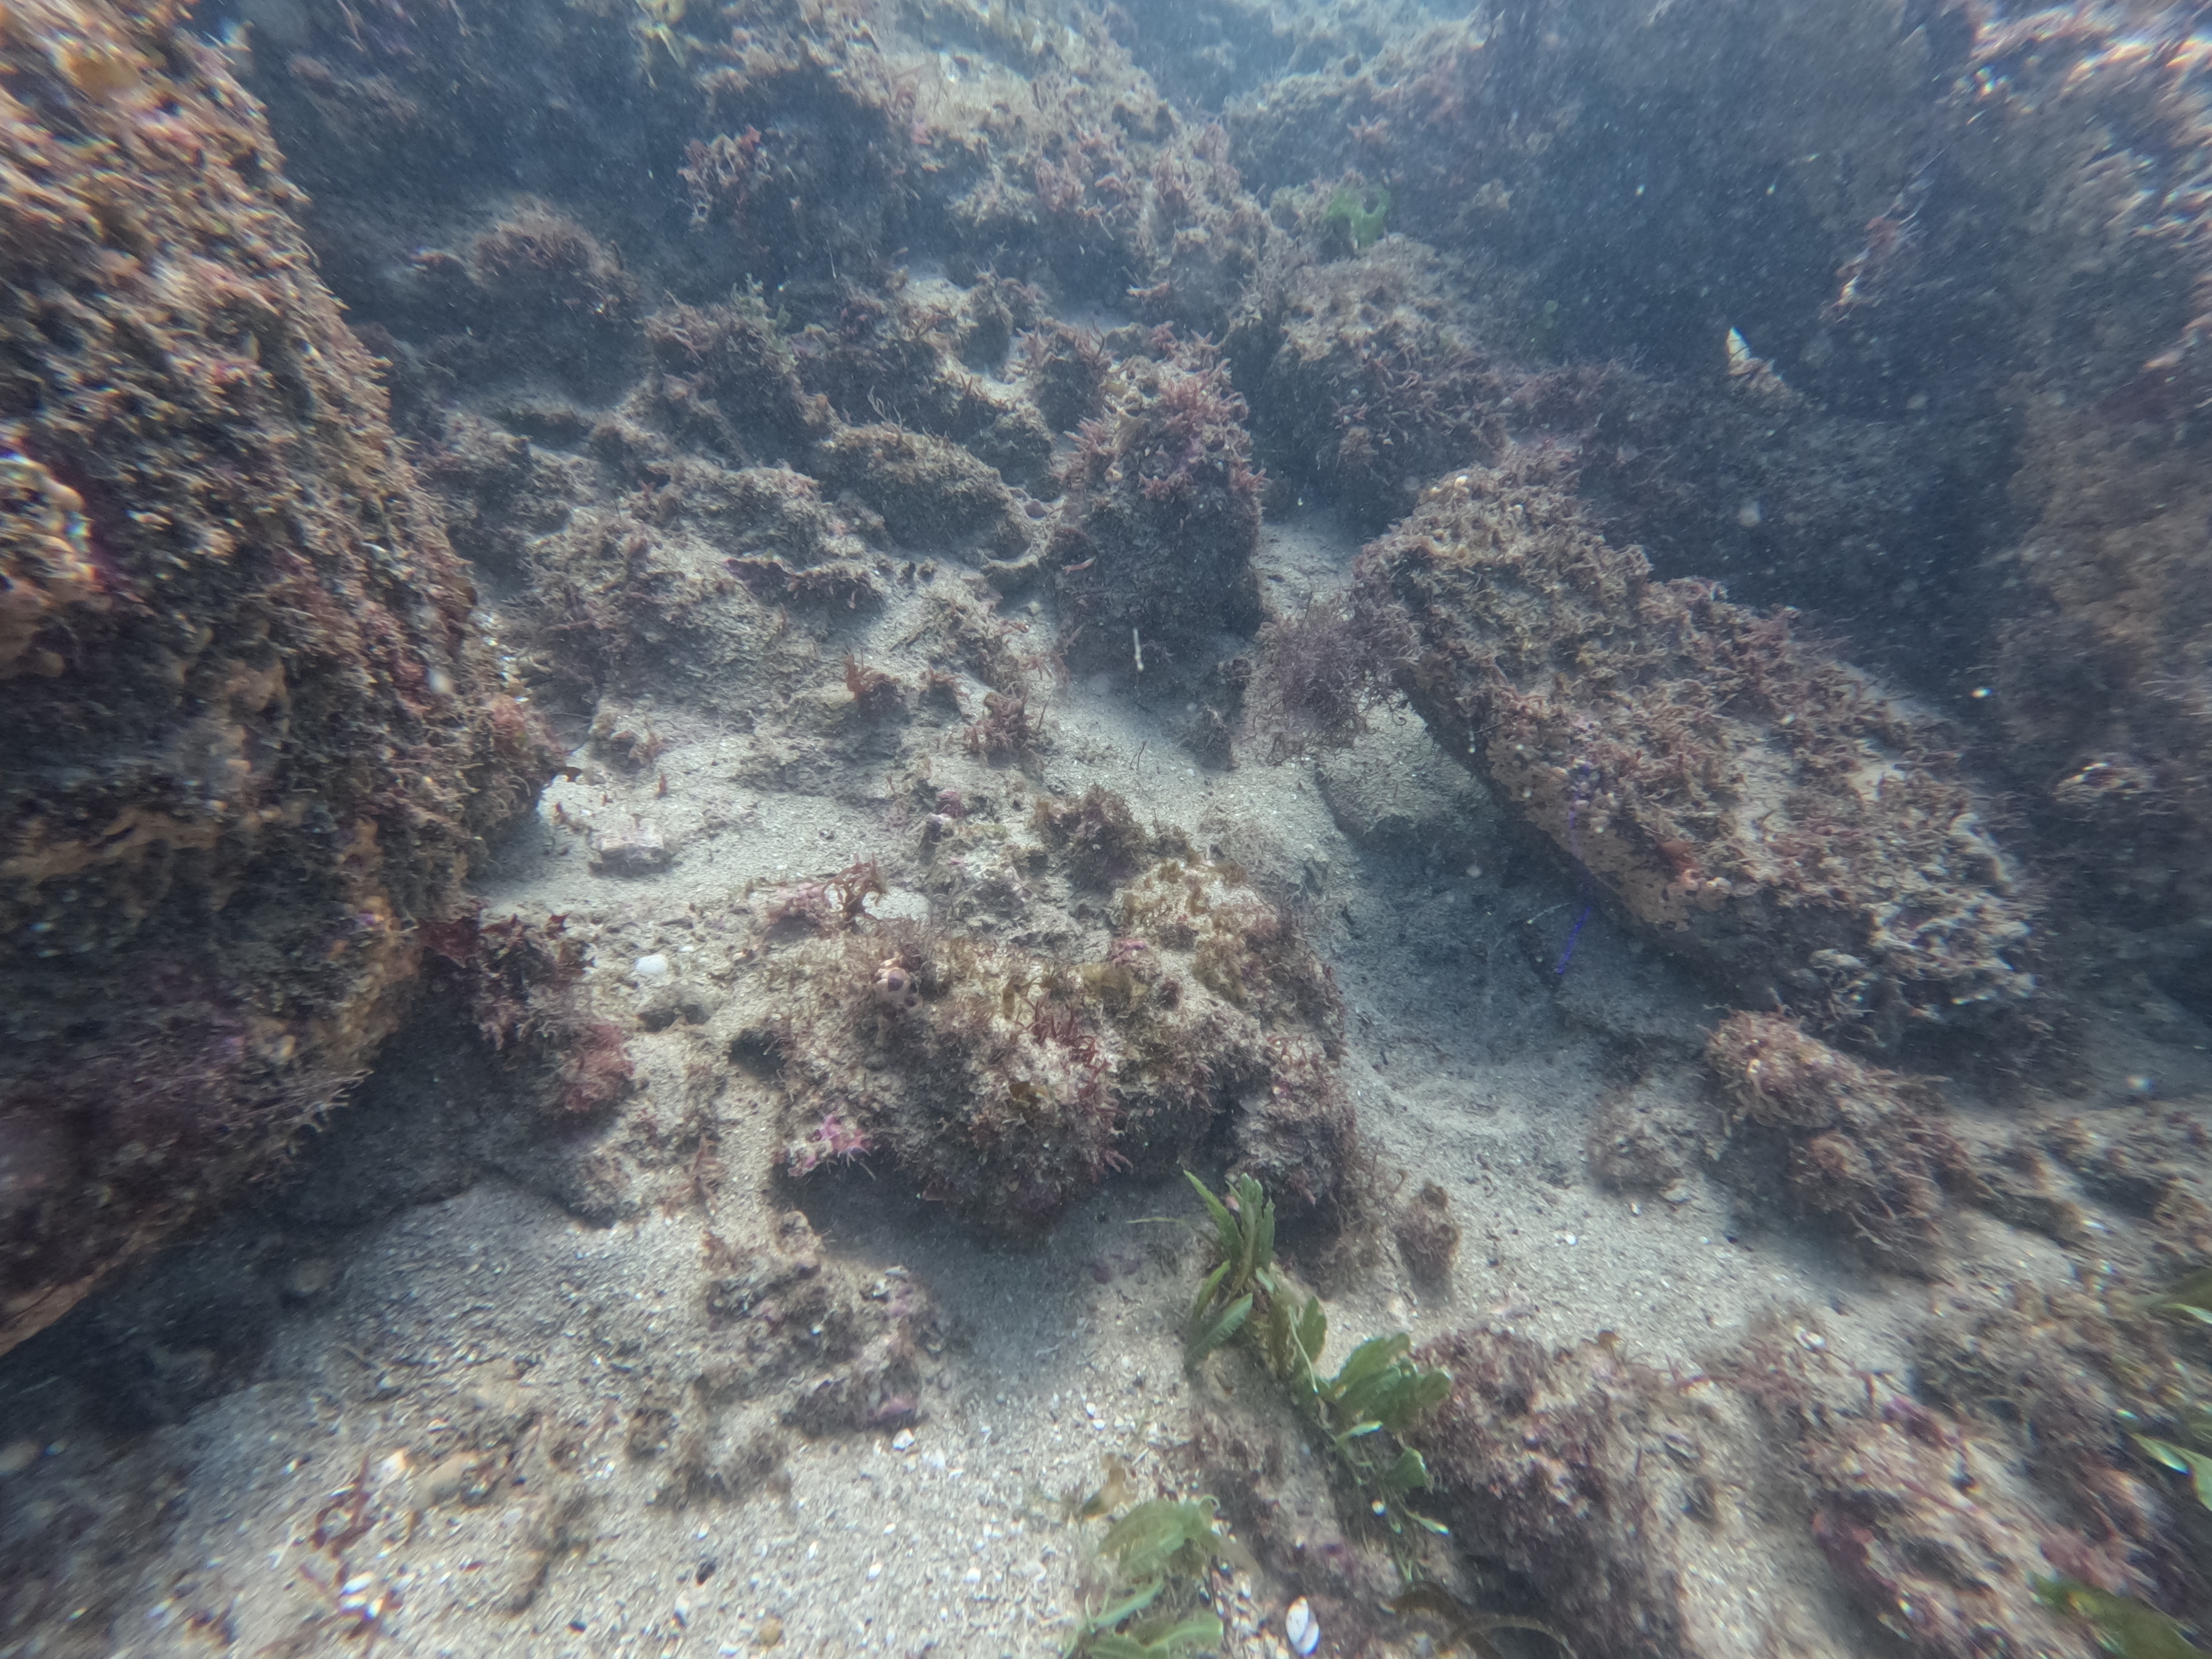

Supplement: Supplementary file 1608 [file G0027934.pdf › Ocean1/G0027934.pdf]

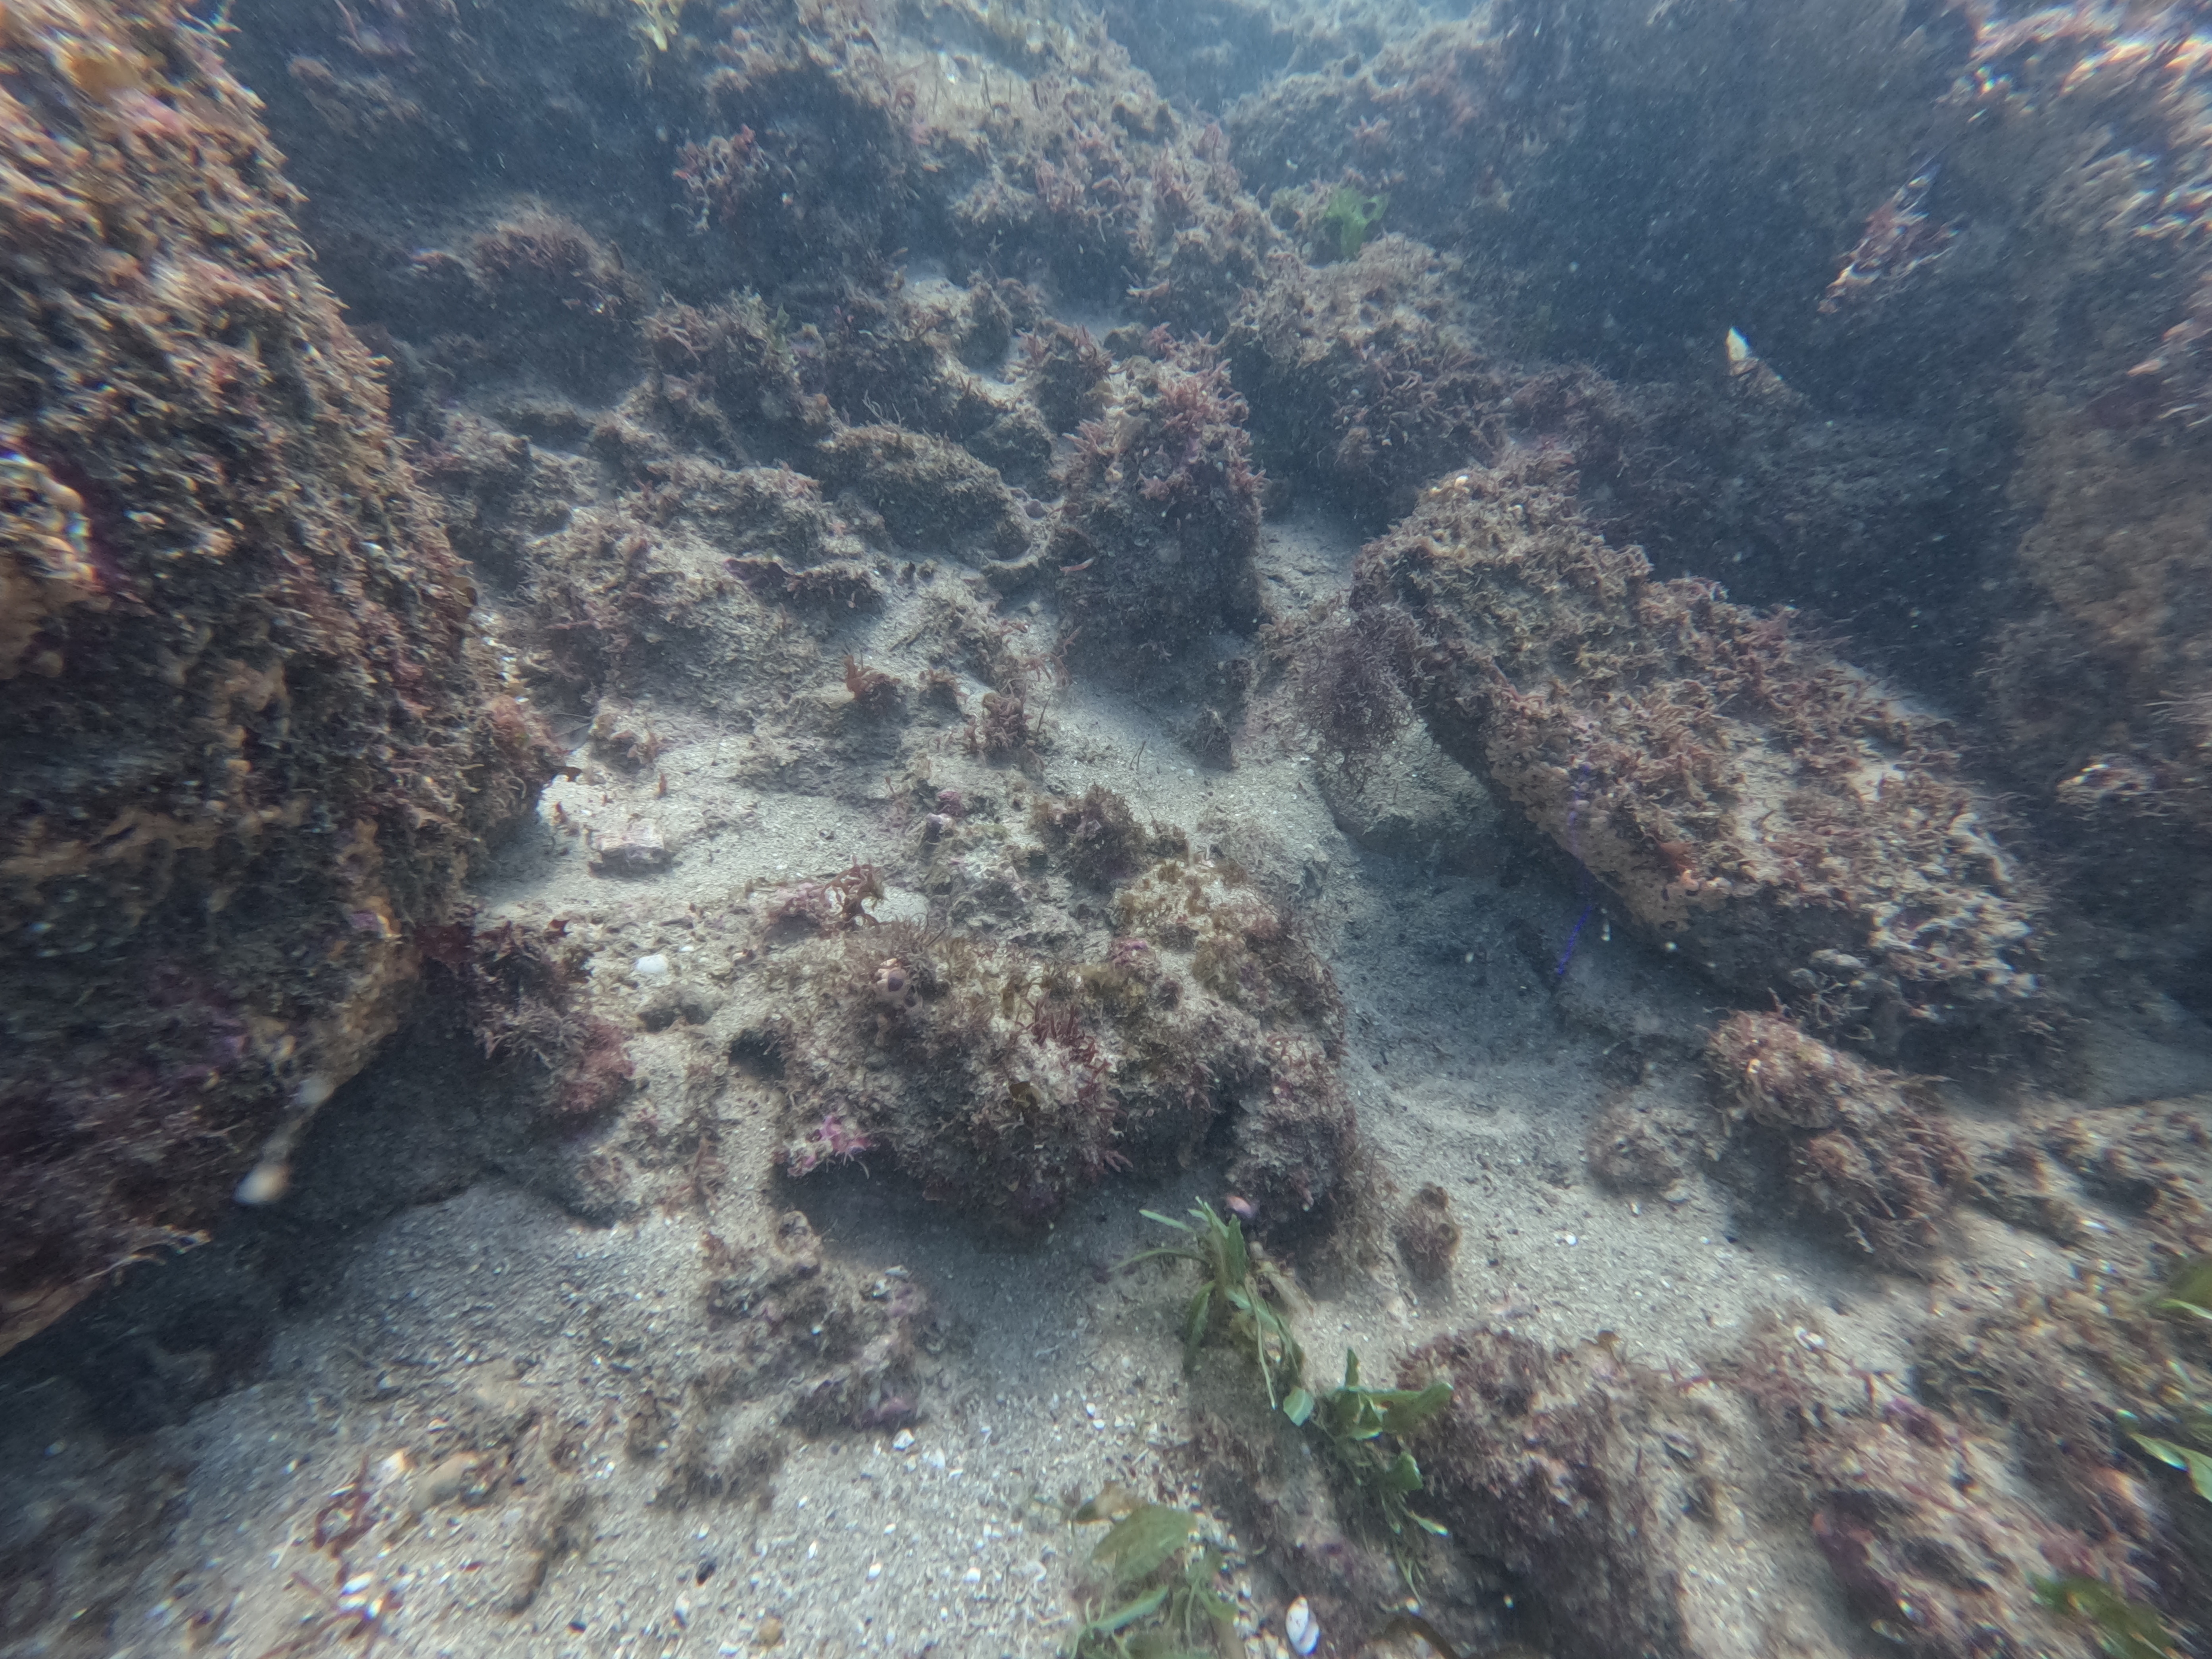

Supplement: Supplementary file 1609 [file G0027935.pdf › Ocean1/G0027935.pdf]

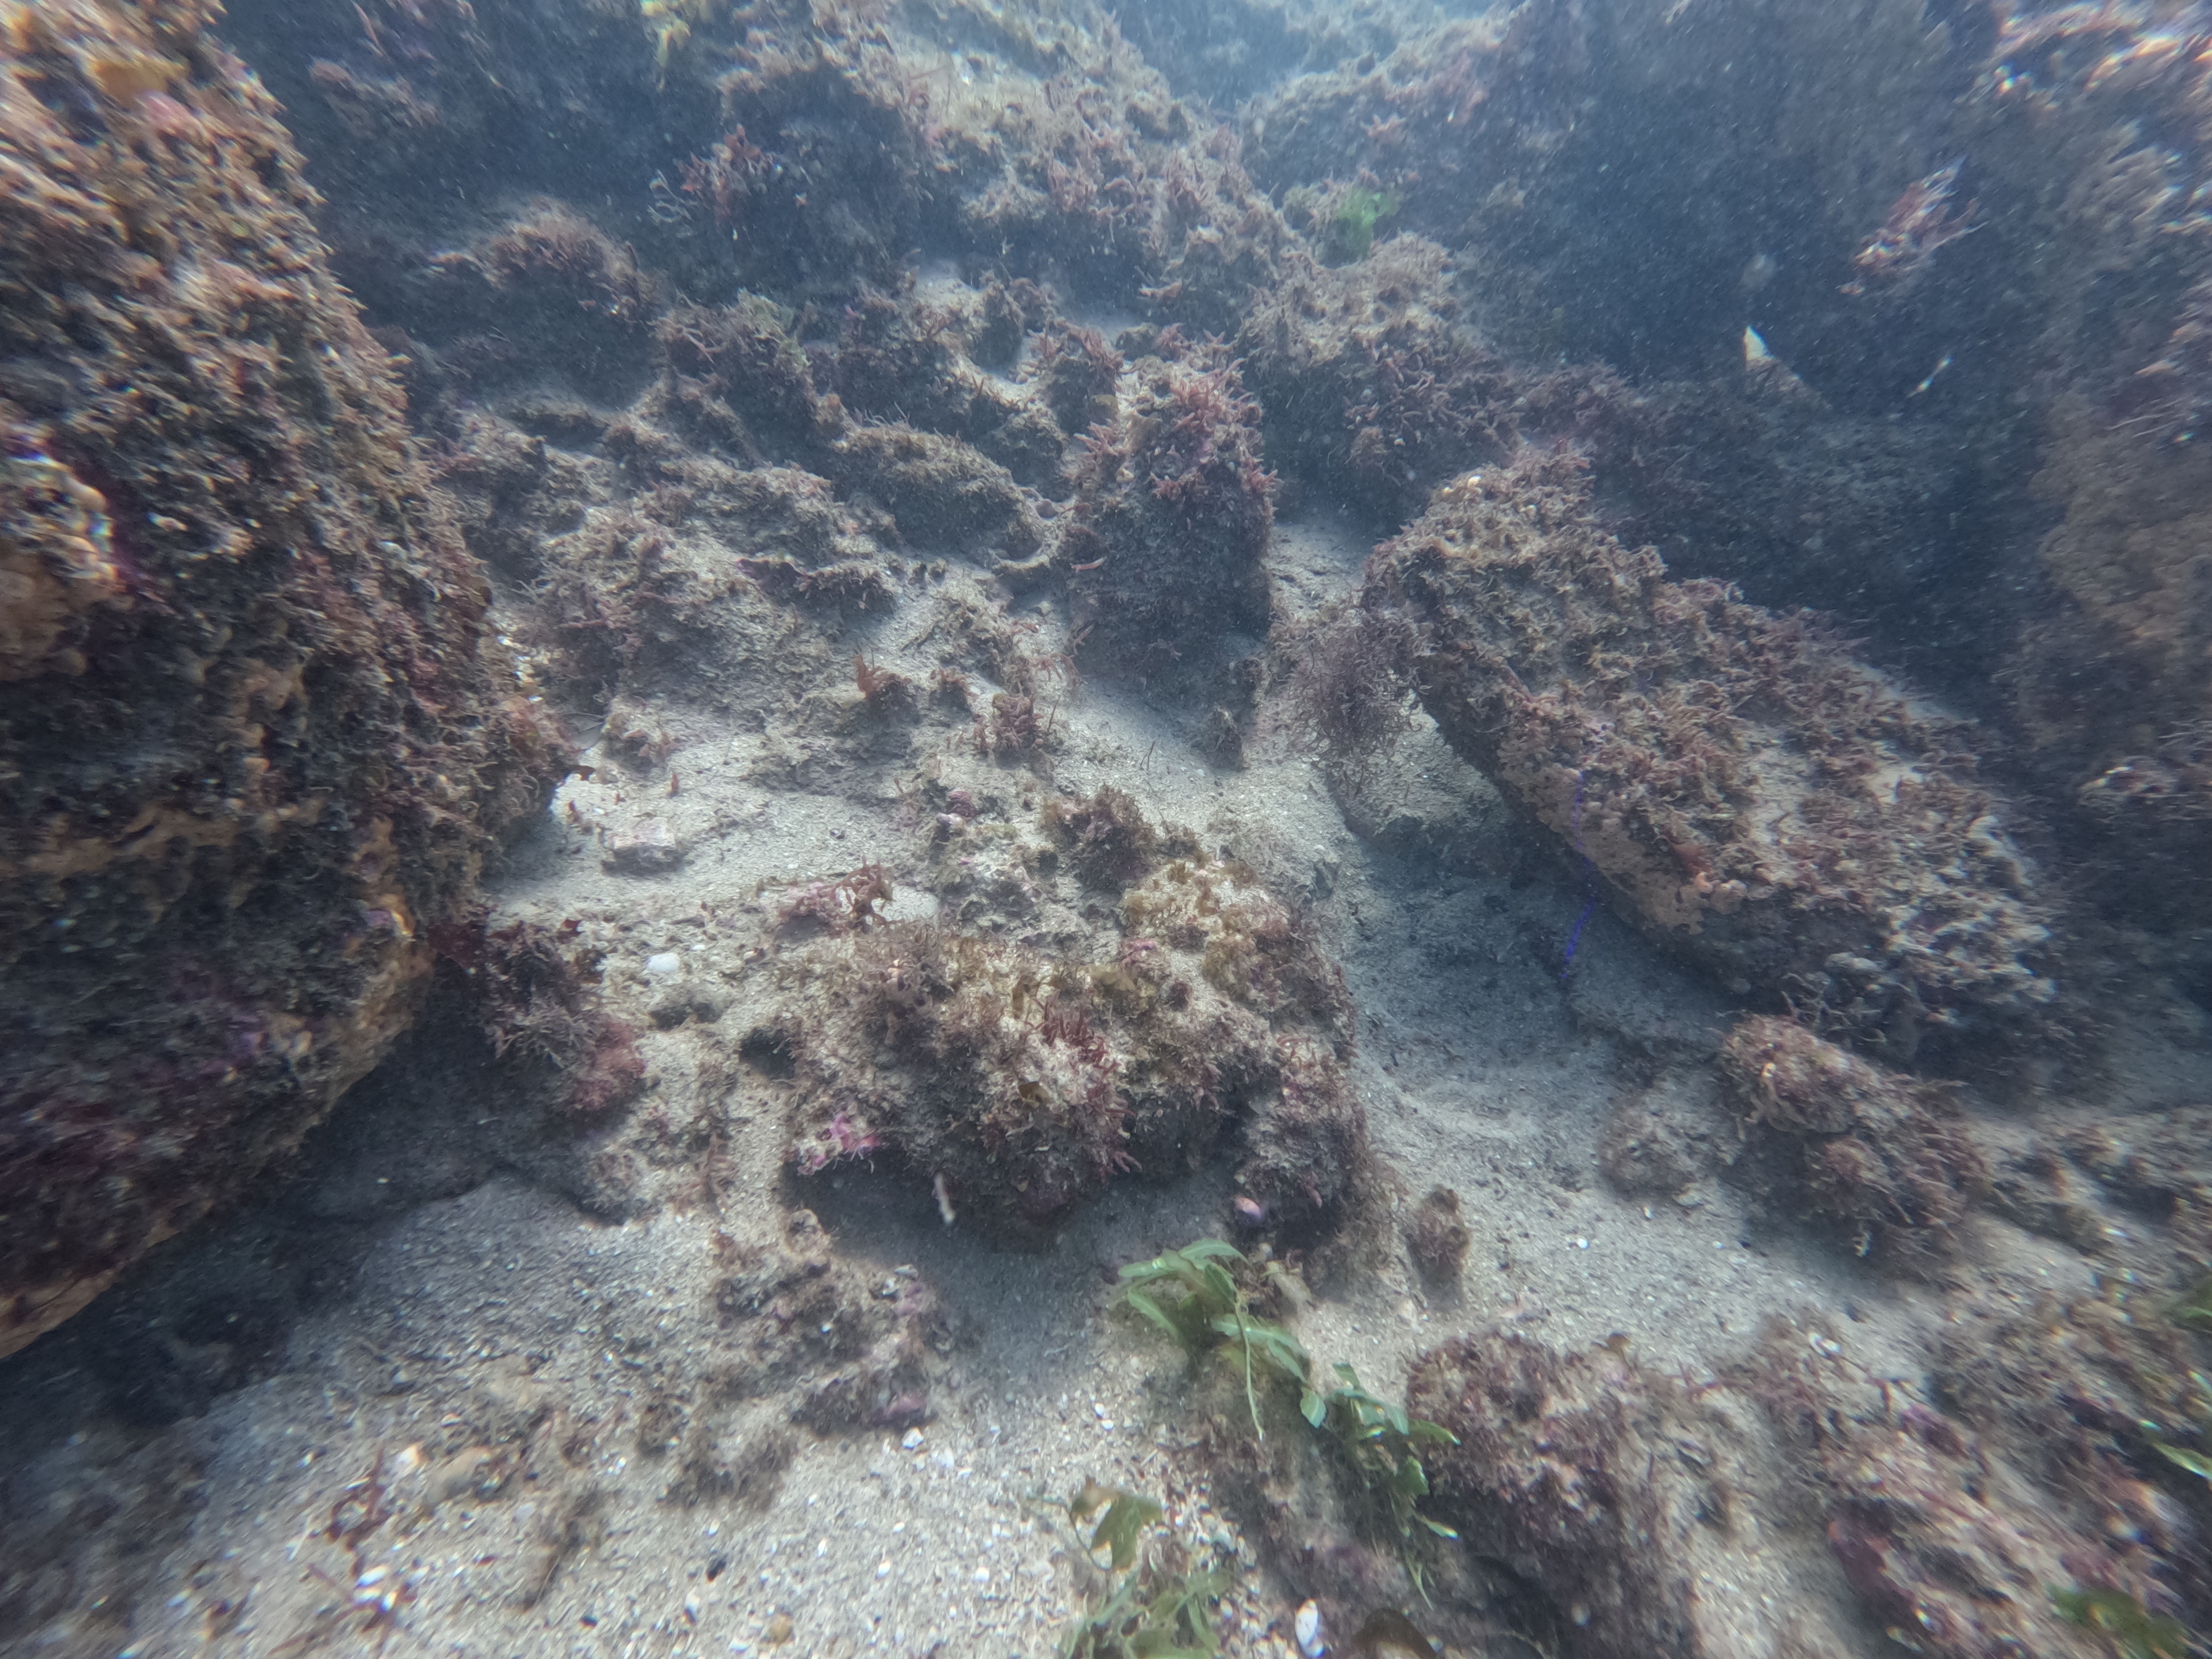

Supplement: Supplementary file 1610 [file G0027936.pdf › Ocean1/G0027936.pdf]

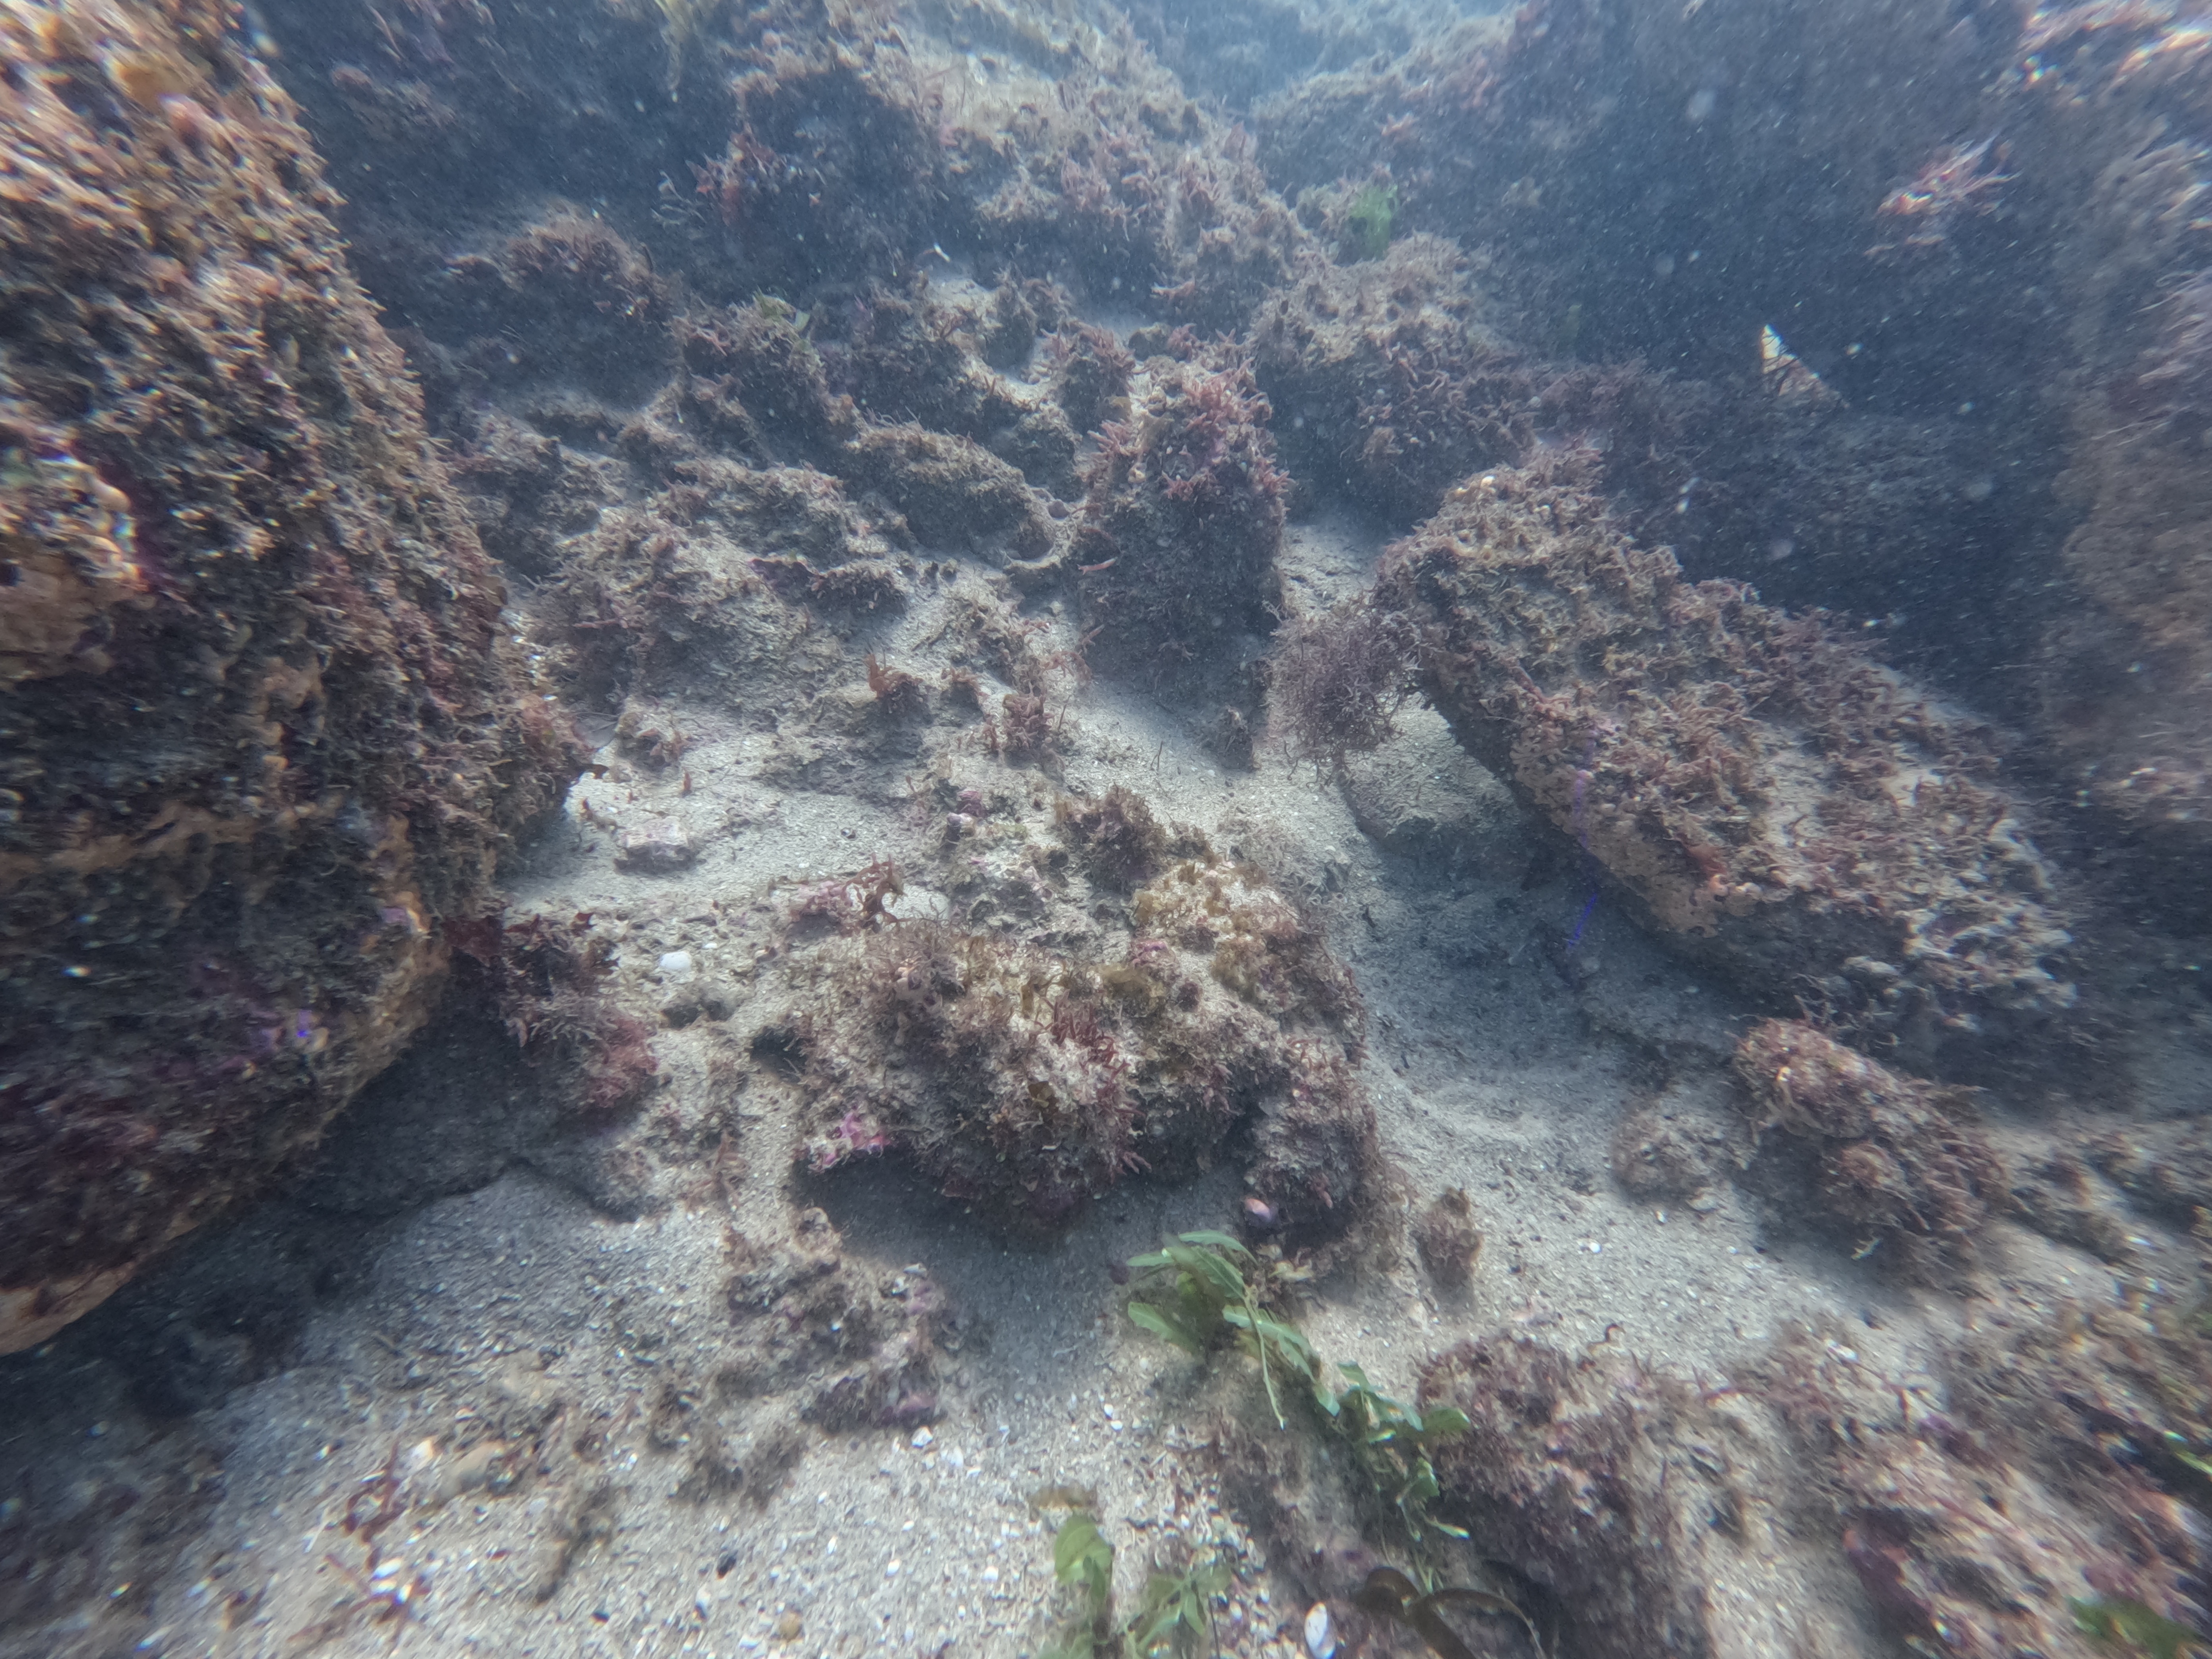

Supplement: Supplementary file 1611 [file G0027937.pdf › Ocean1/G0027937.pdf]

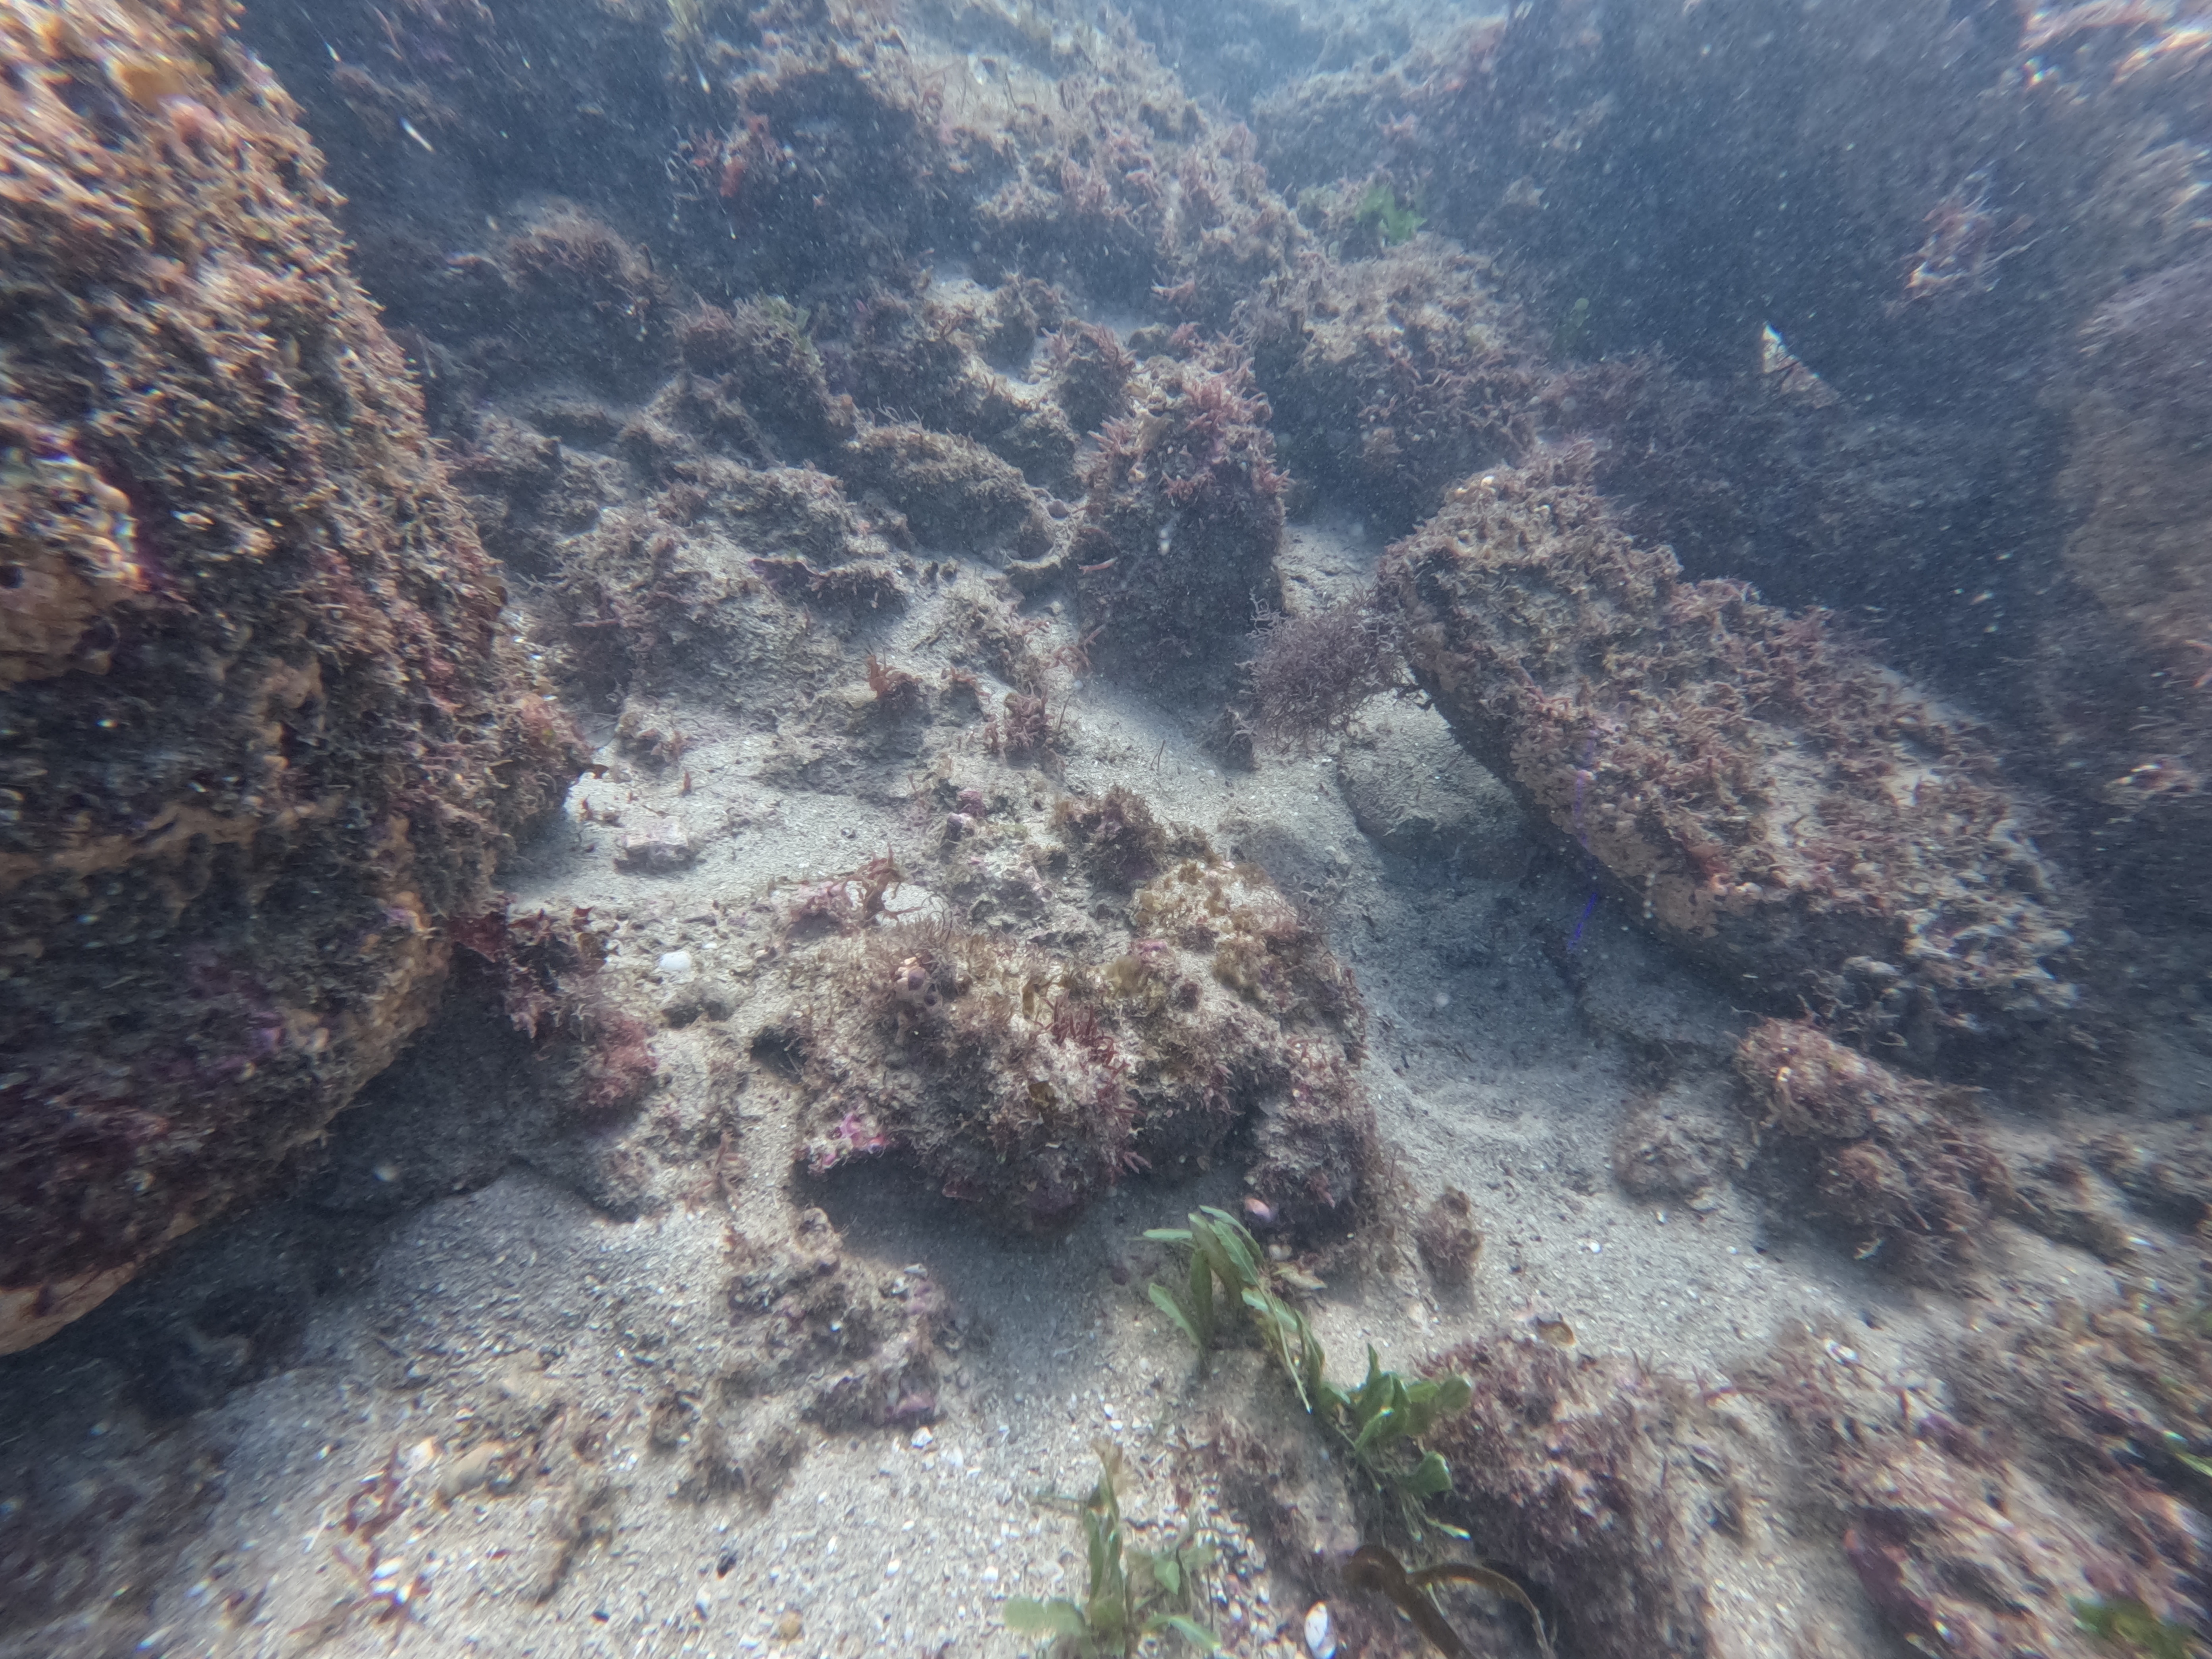

Supplement: Supplementary file 1612 [file G0027938.pdf › Ocean1/G0027938.pdf]

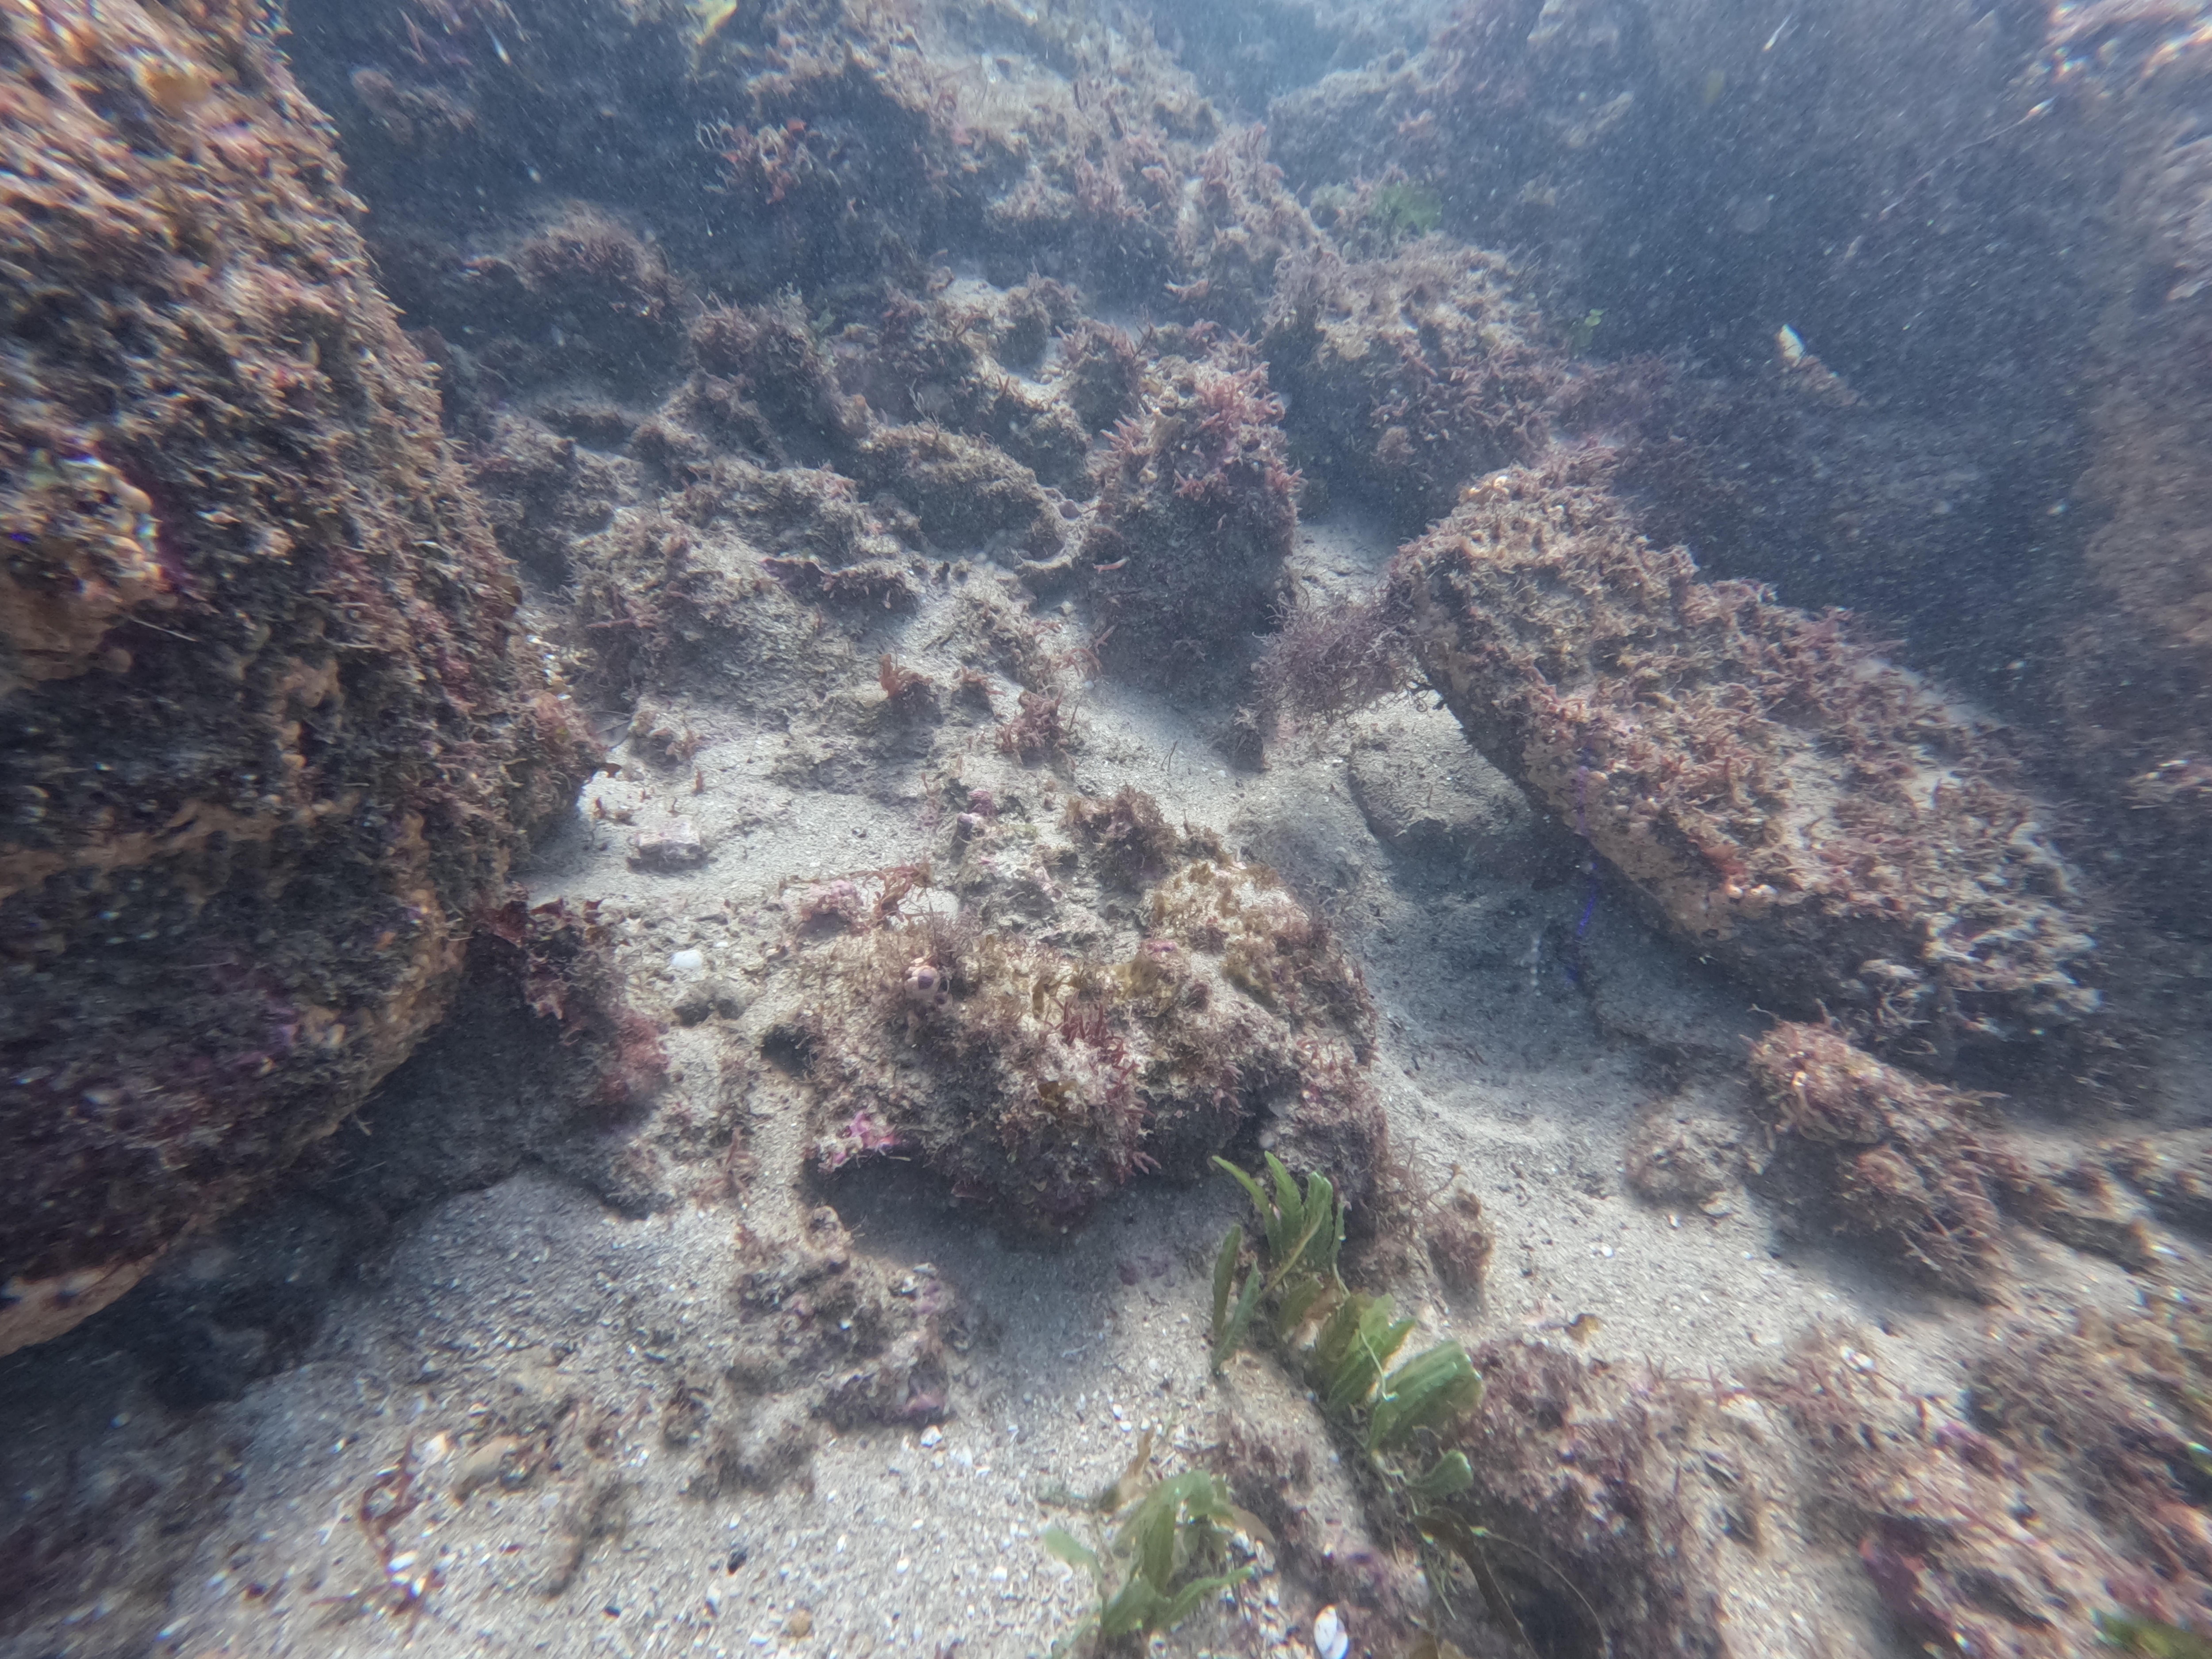

Supplement: Supplementary file 1613 [file G0027939.pdf › Ocean1/G0027939.pdf]

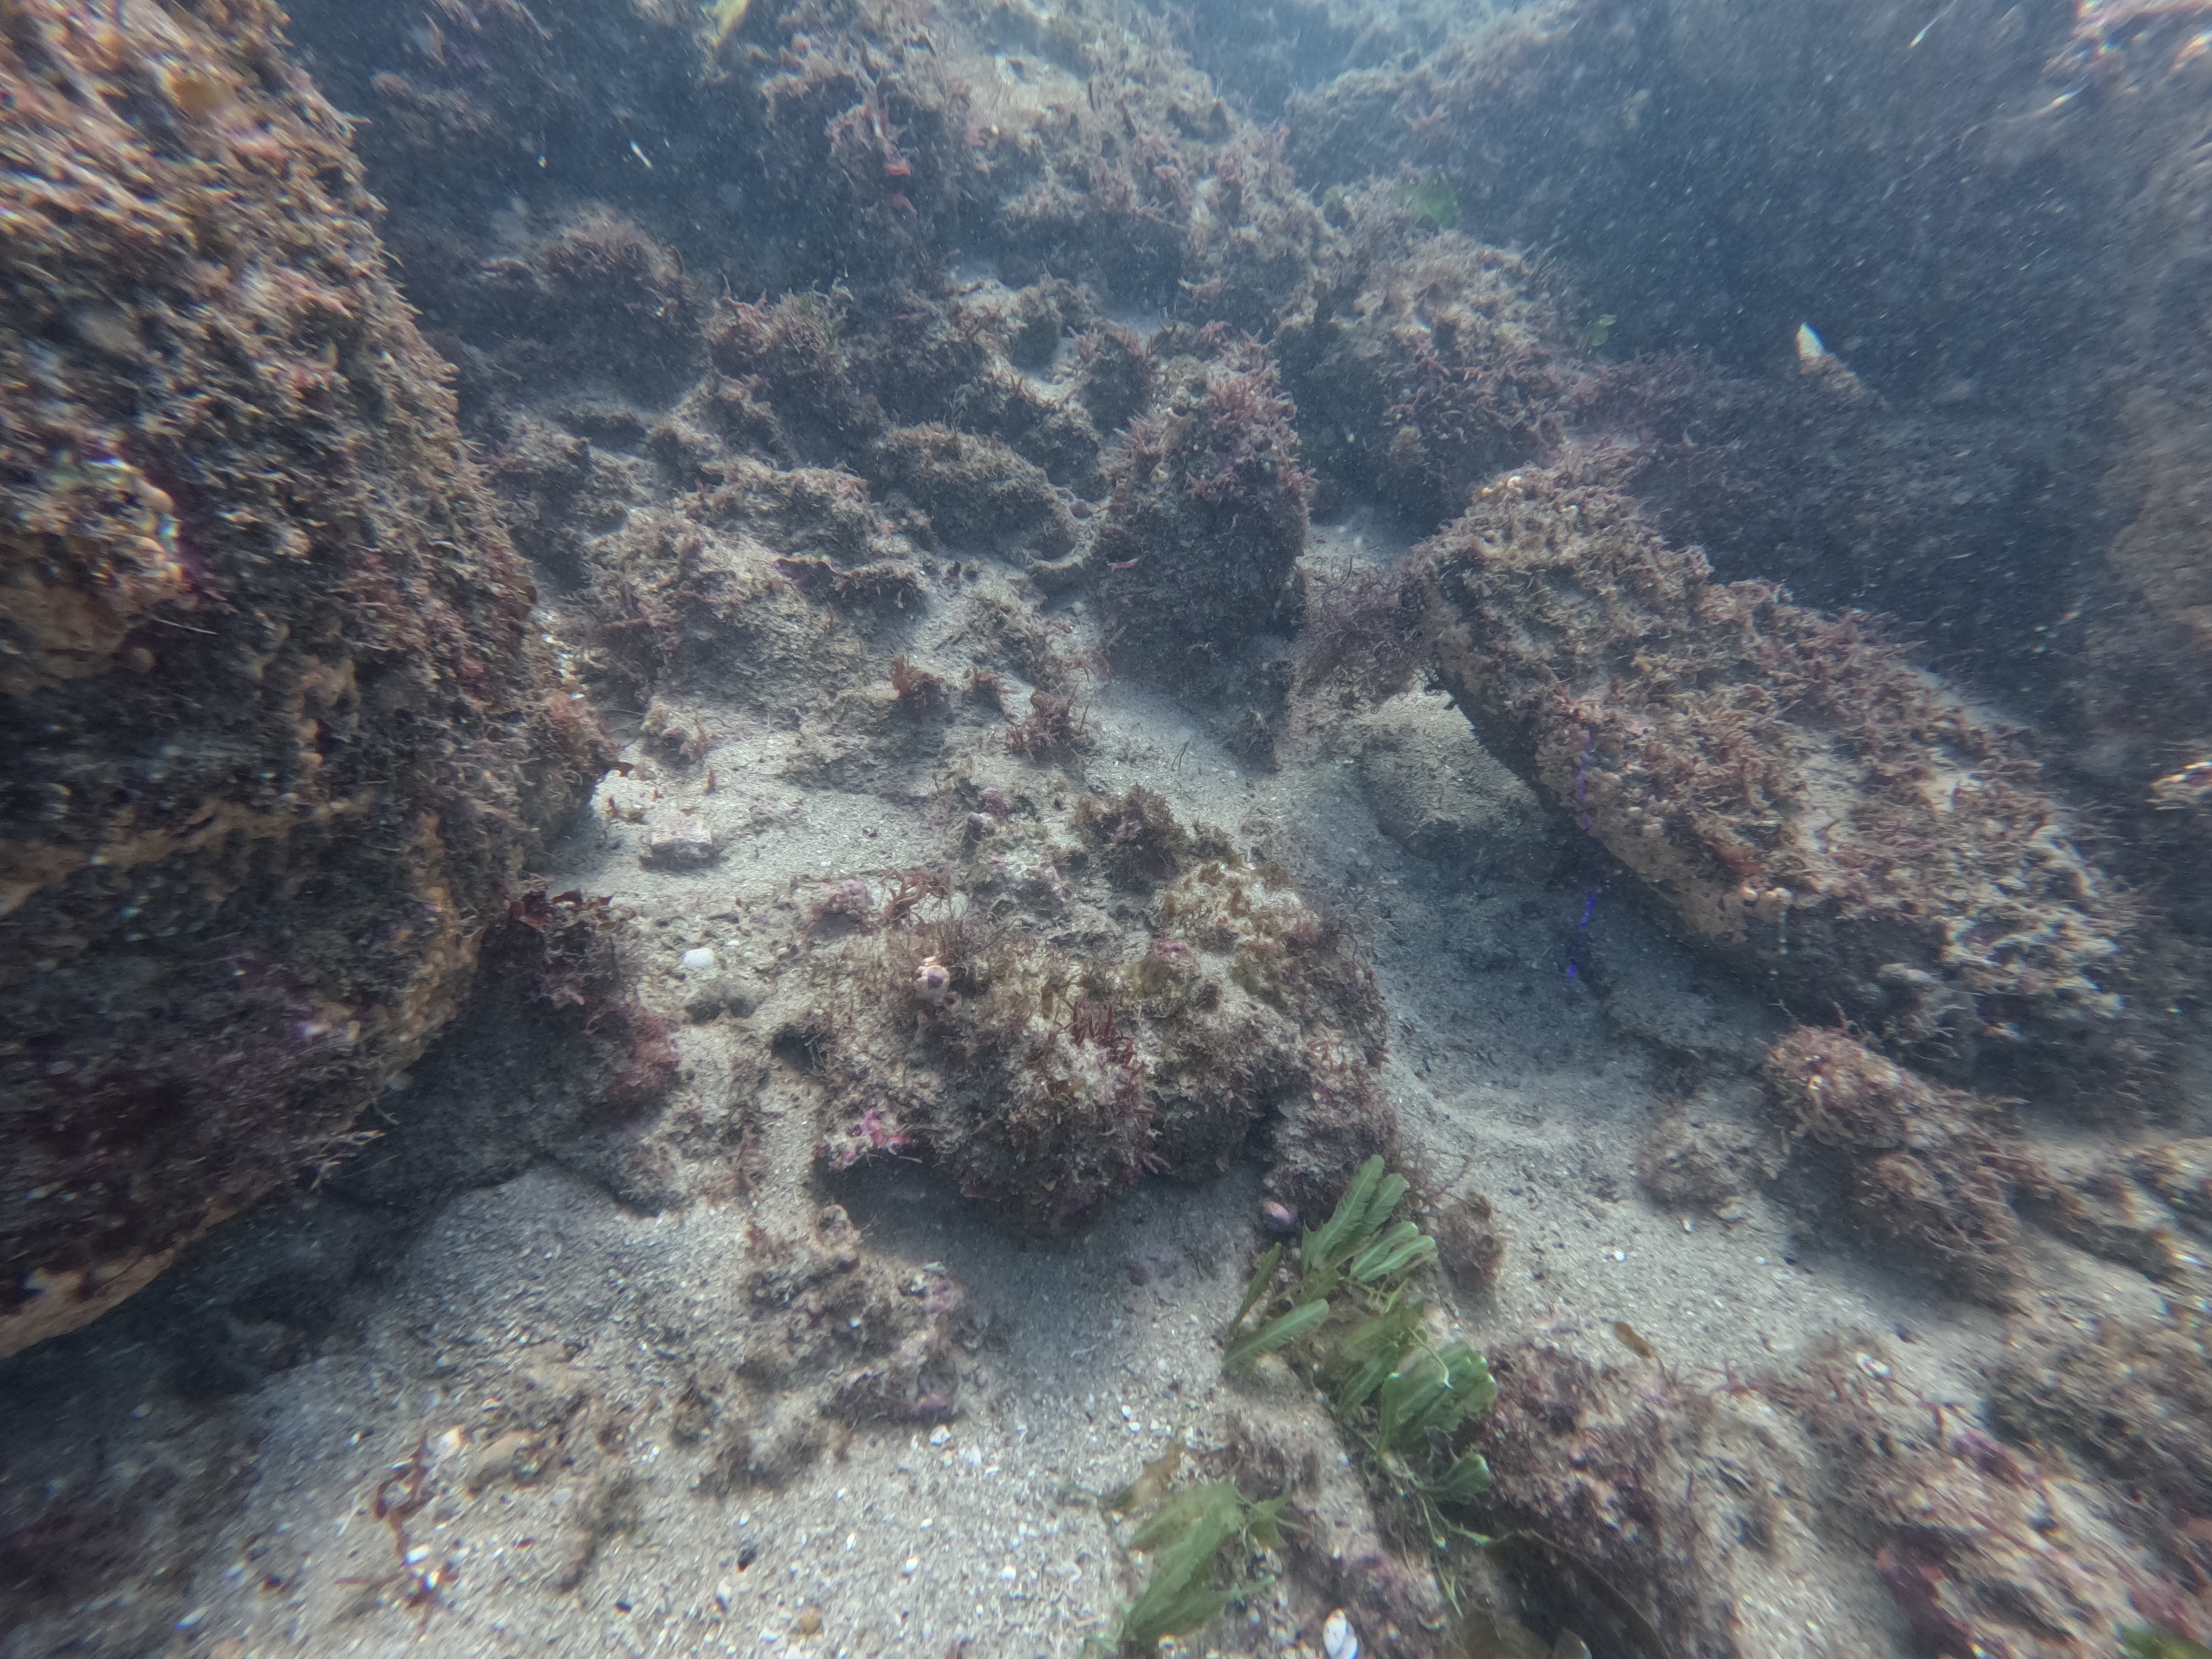

Supplement: Supplementary file 1614 [file G0027940.pdf › Ocean1/G0027940.pdf]

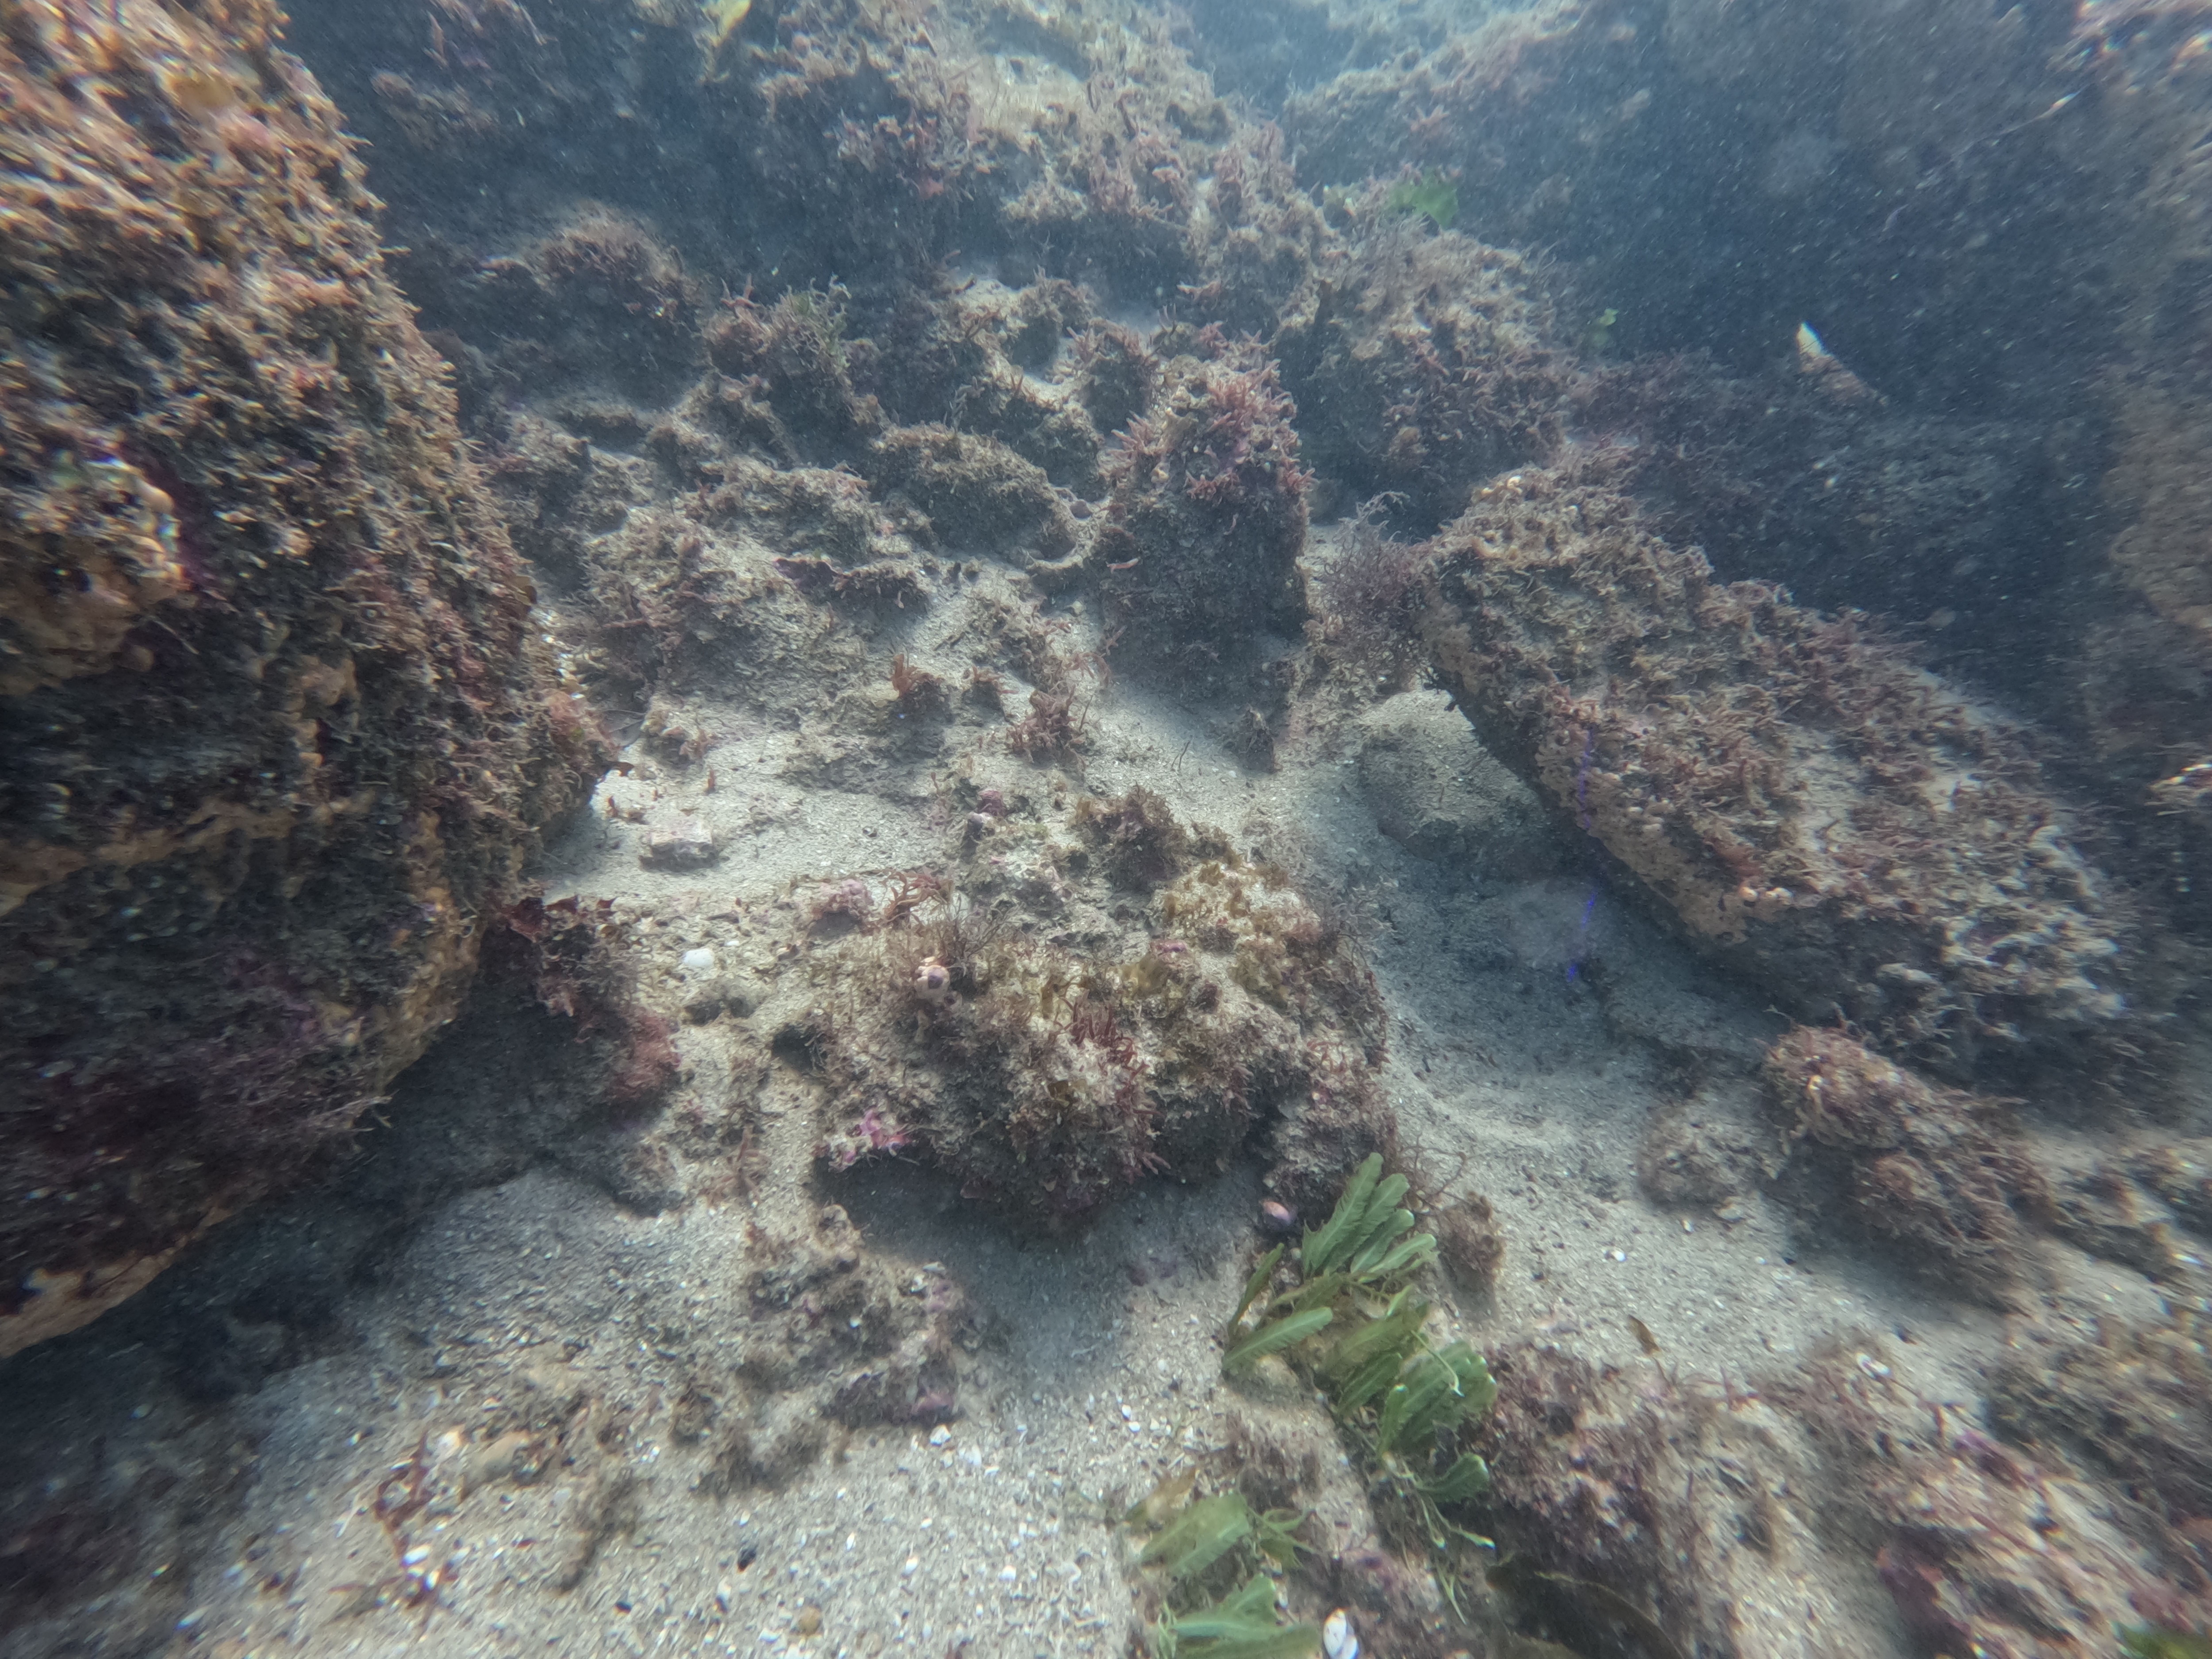

Supplement: Supplementary file 1615 [file G0027941.pdf › Ocean1/G0027941.pdf]

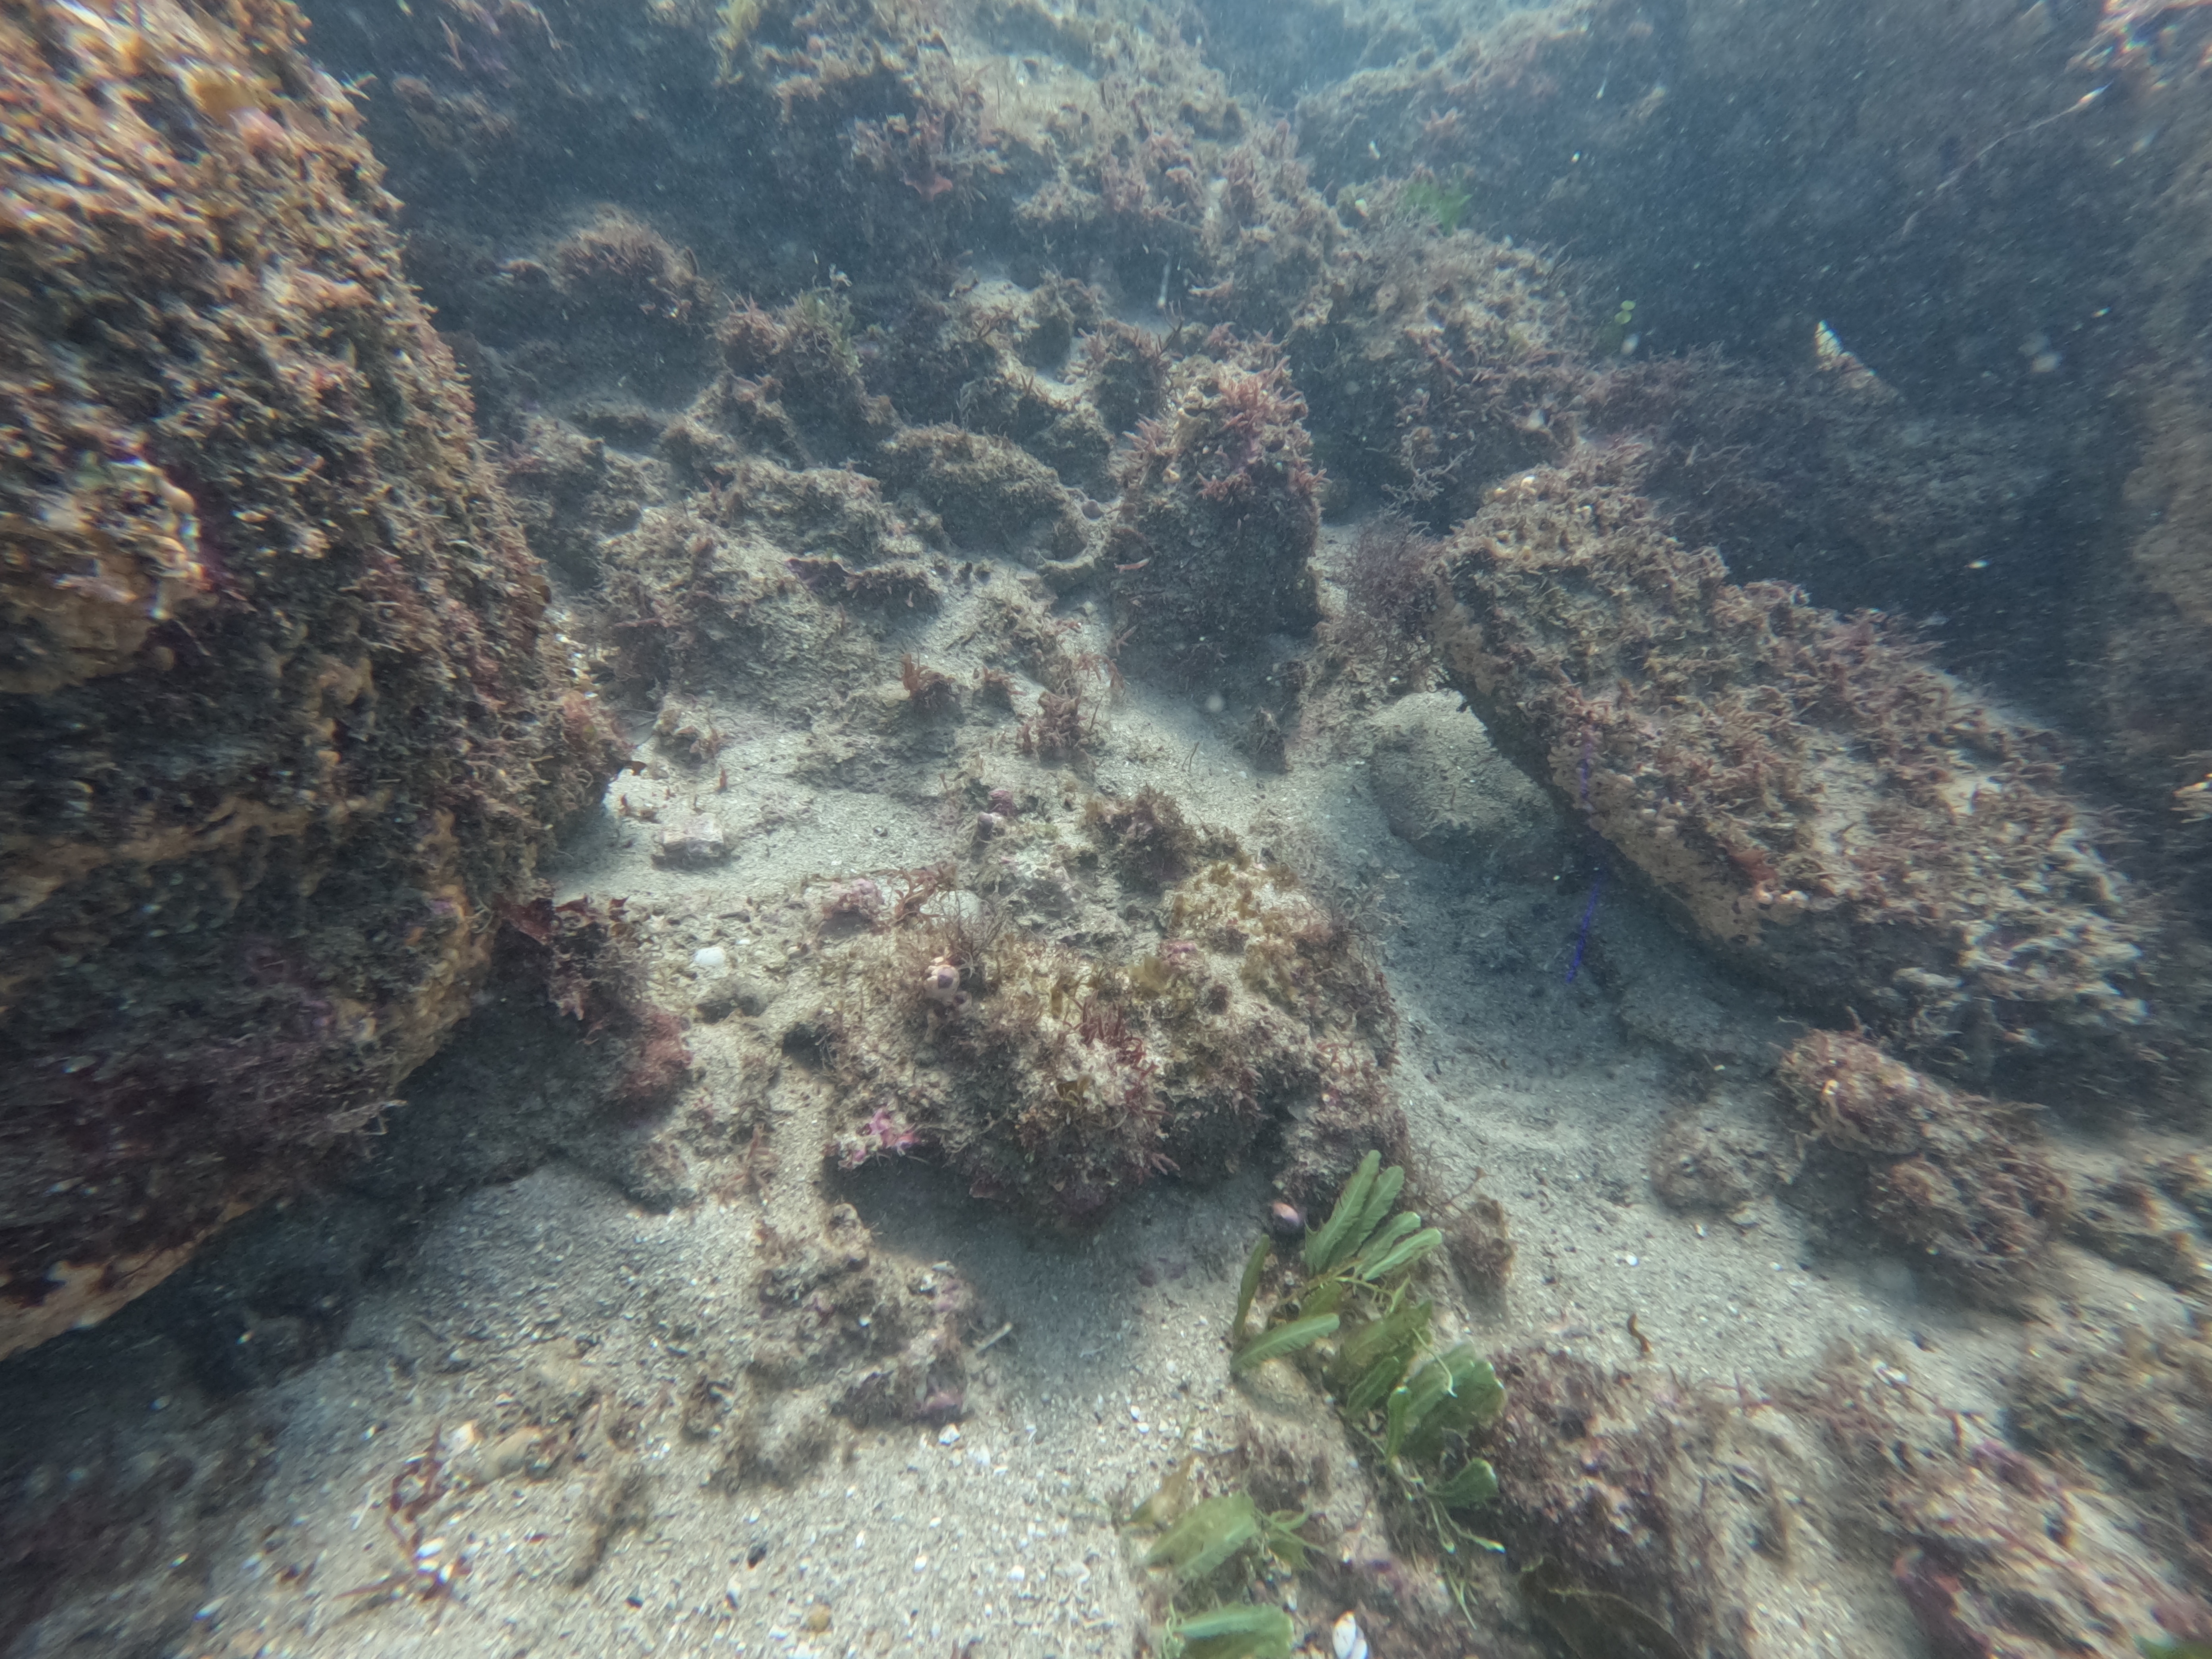

Supplement: Supplementary file 1616 [file G0027942.pdf › Ocean1/G0027942.pdf]

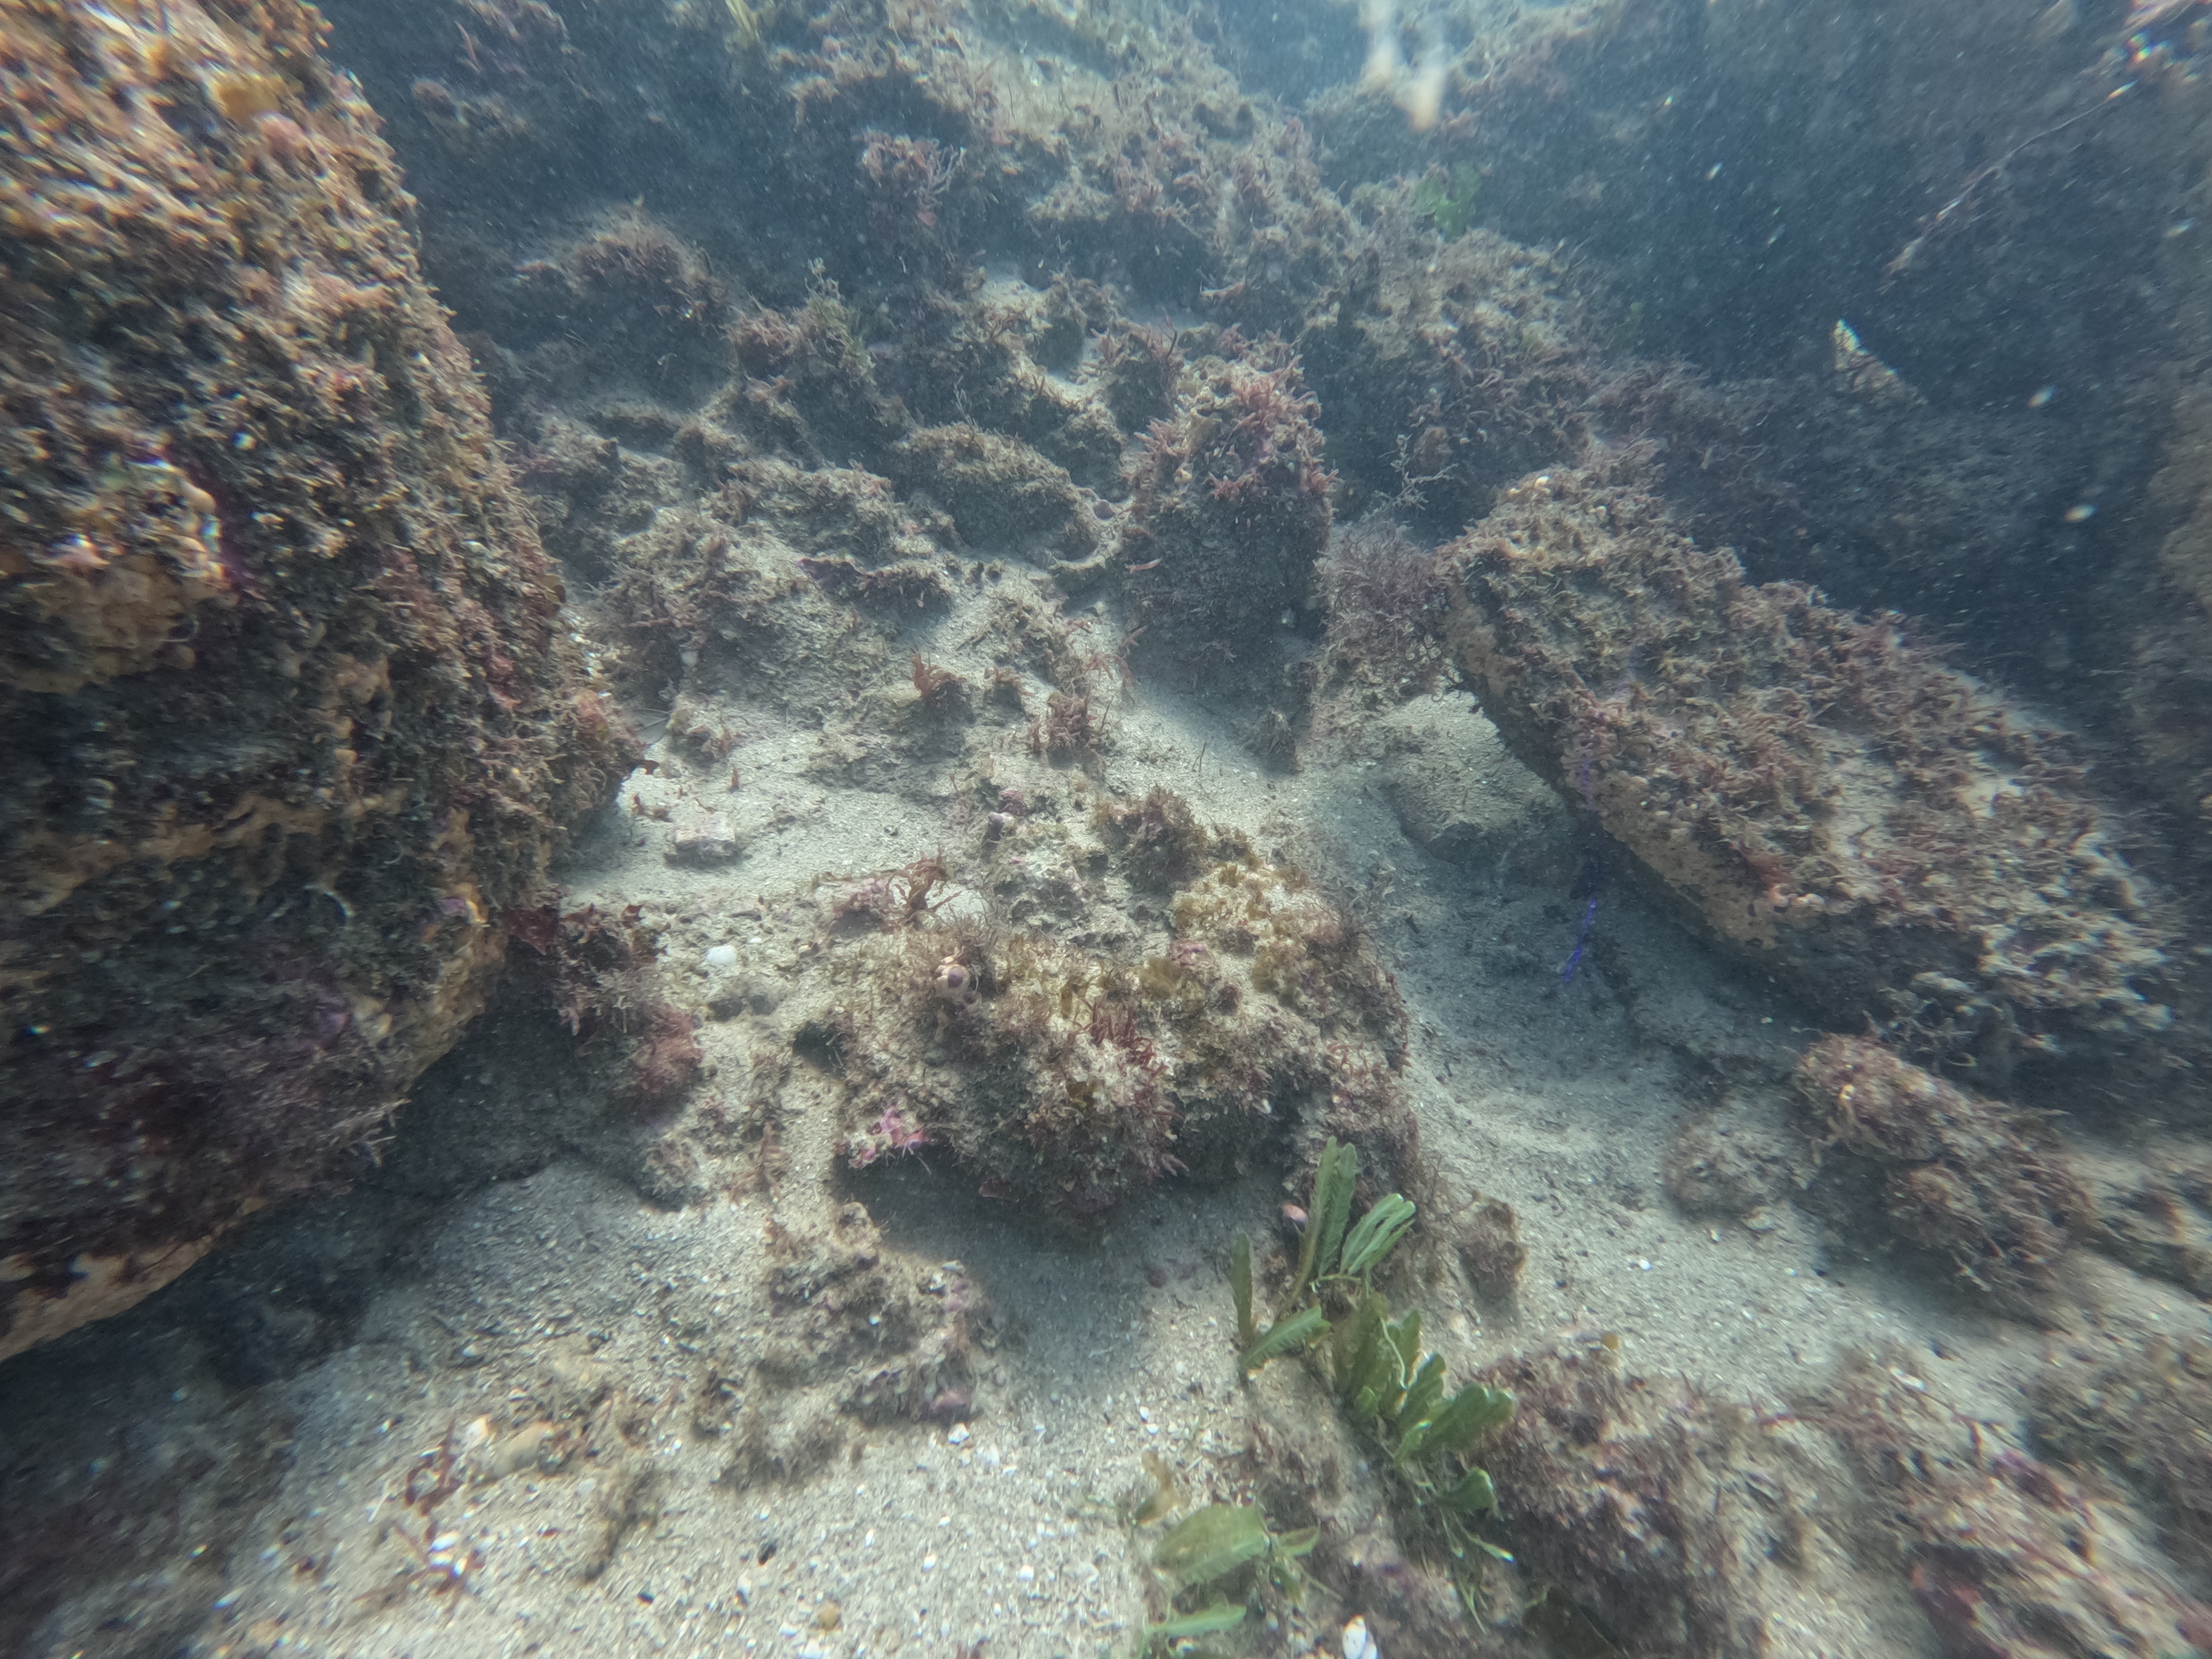

Supplement: Supplementary file 1617 [file G0027943.pdf › Ocean1/G0027943.pdf]

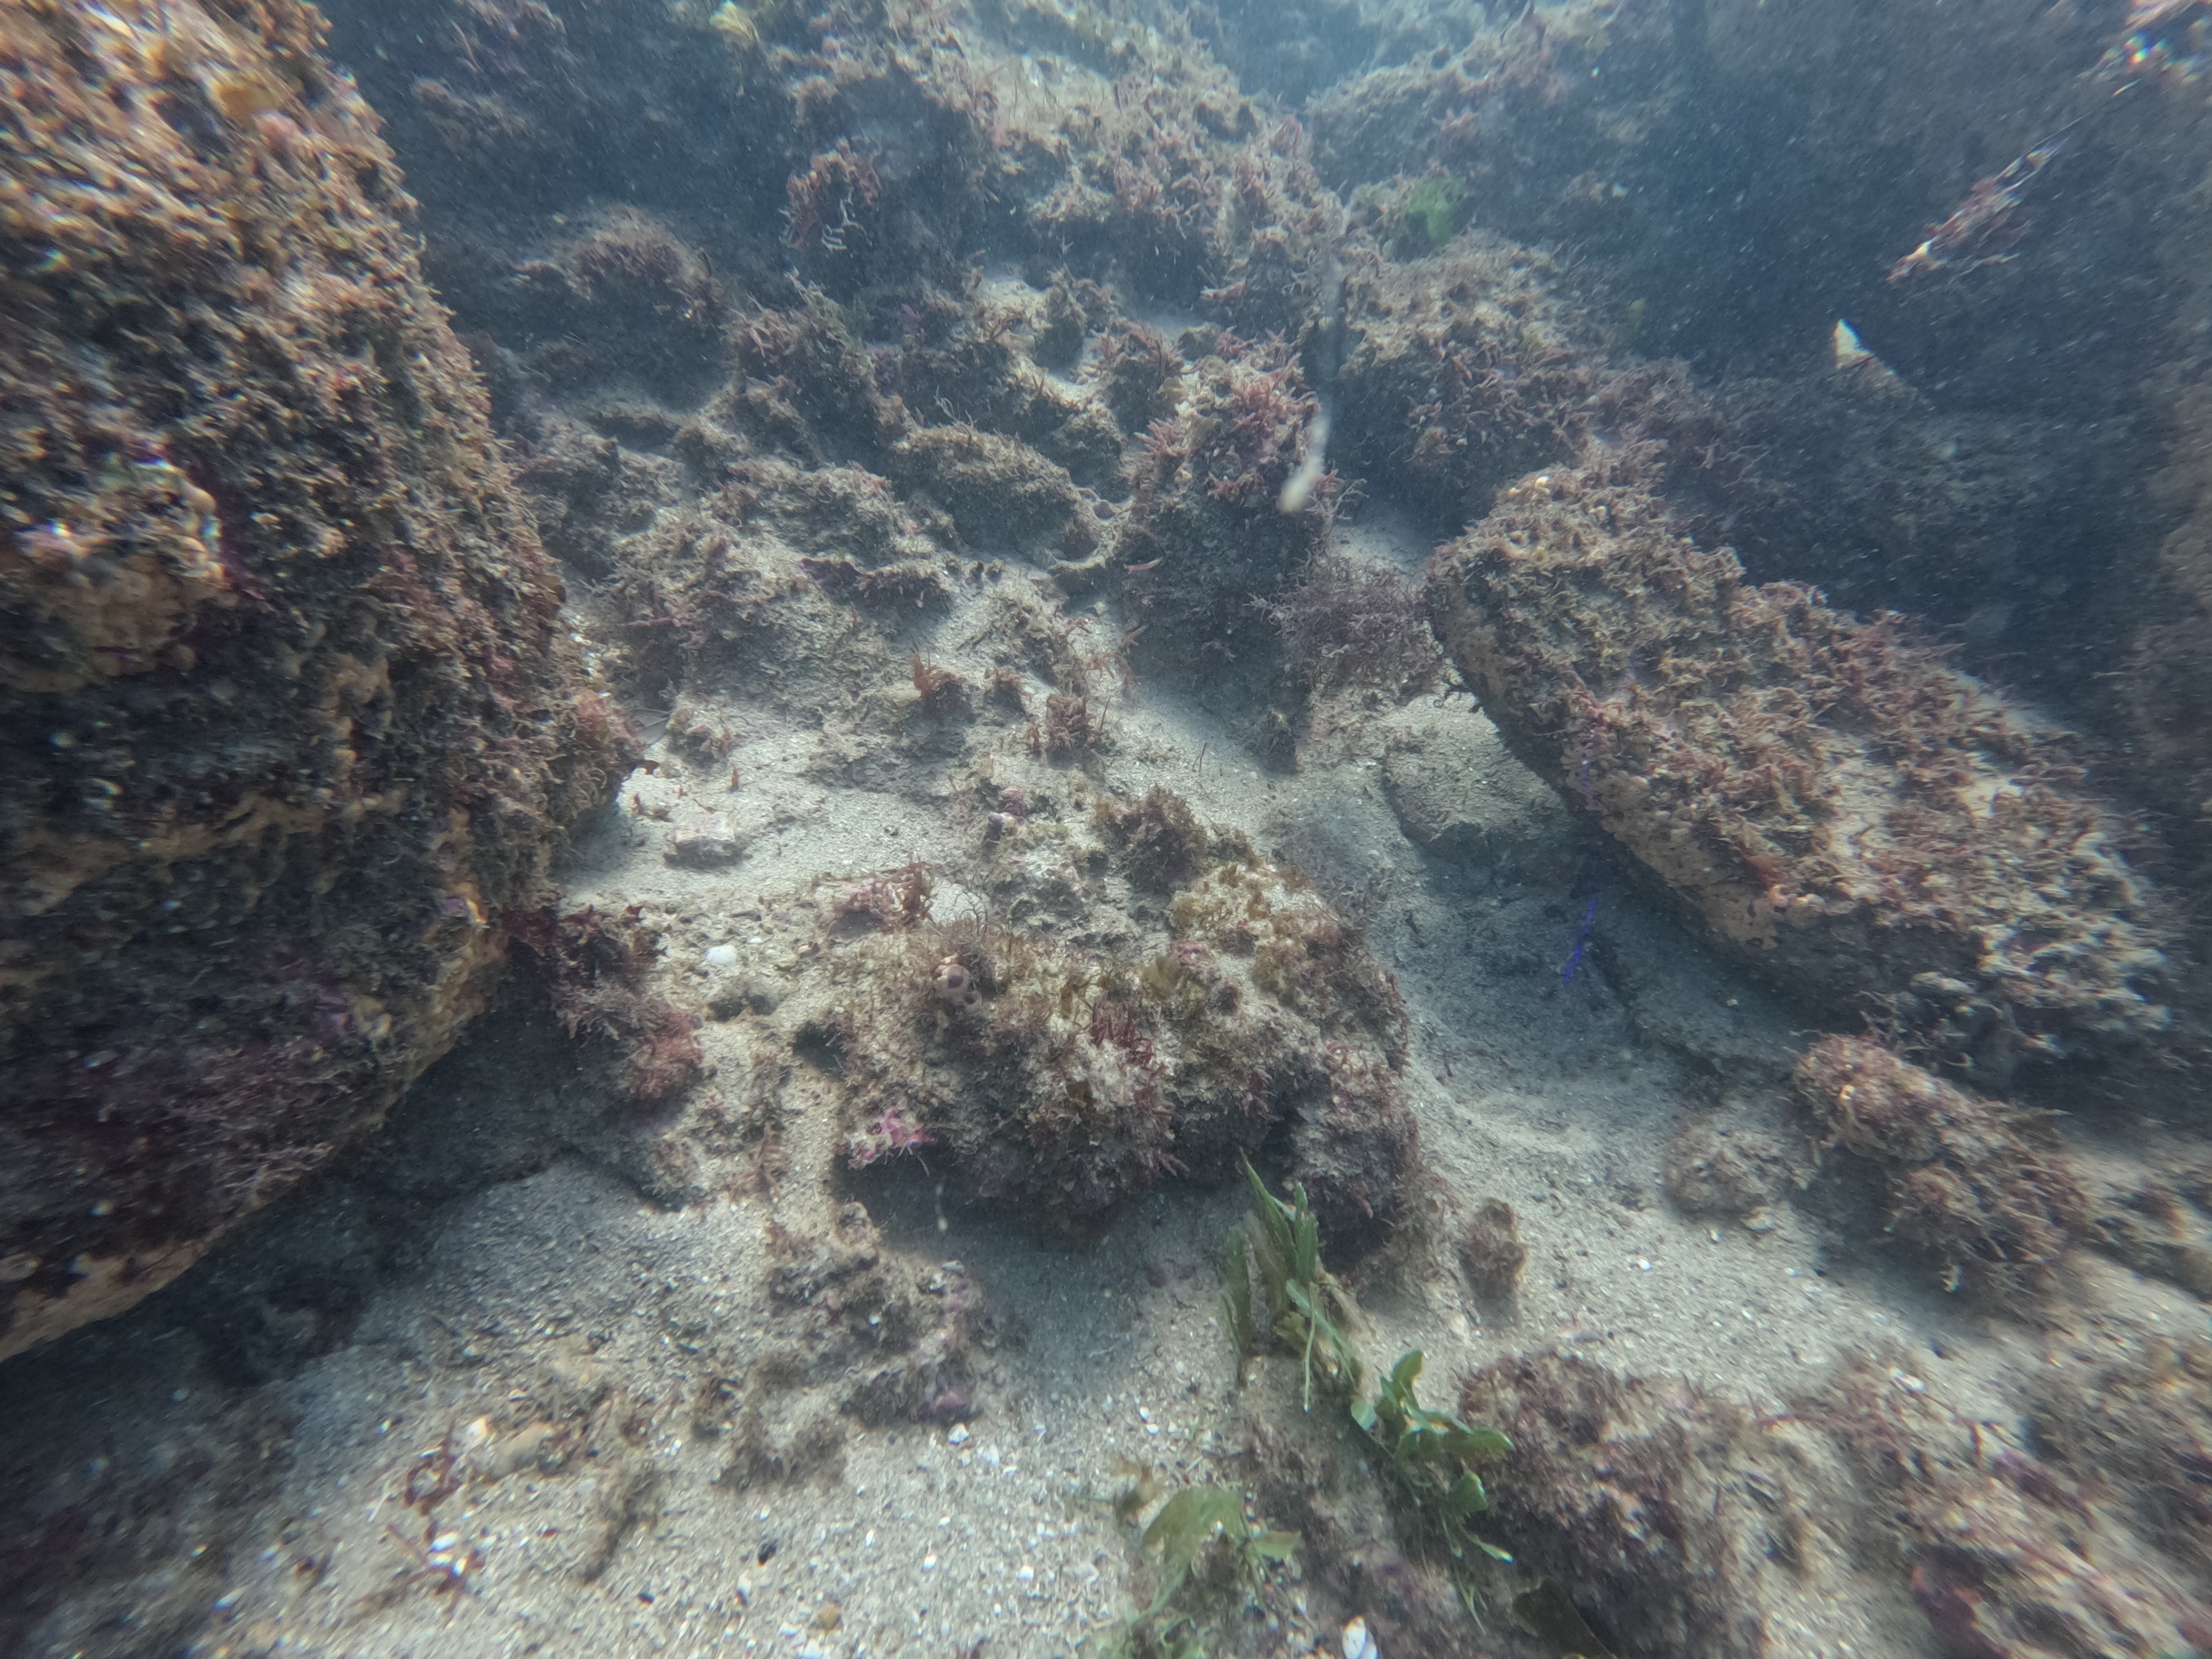

Supplement: Supplementary file 1618 [file G0027944.pdf › Ocean1/G0027944.pdf]

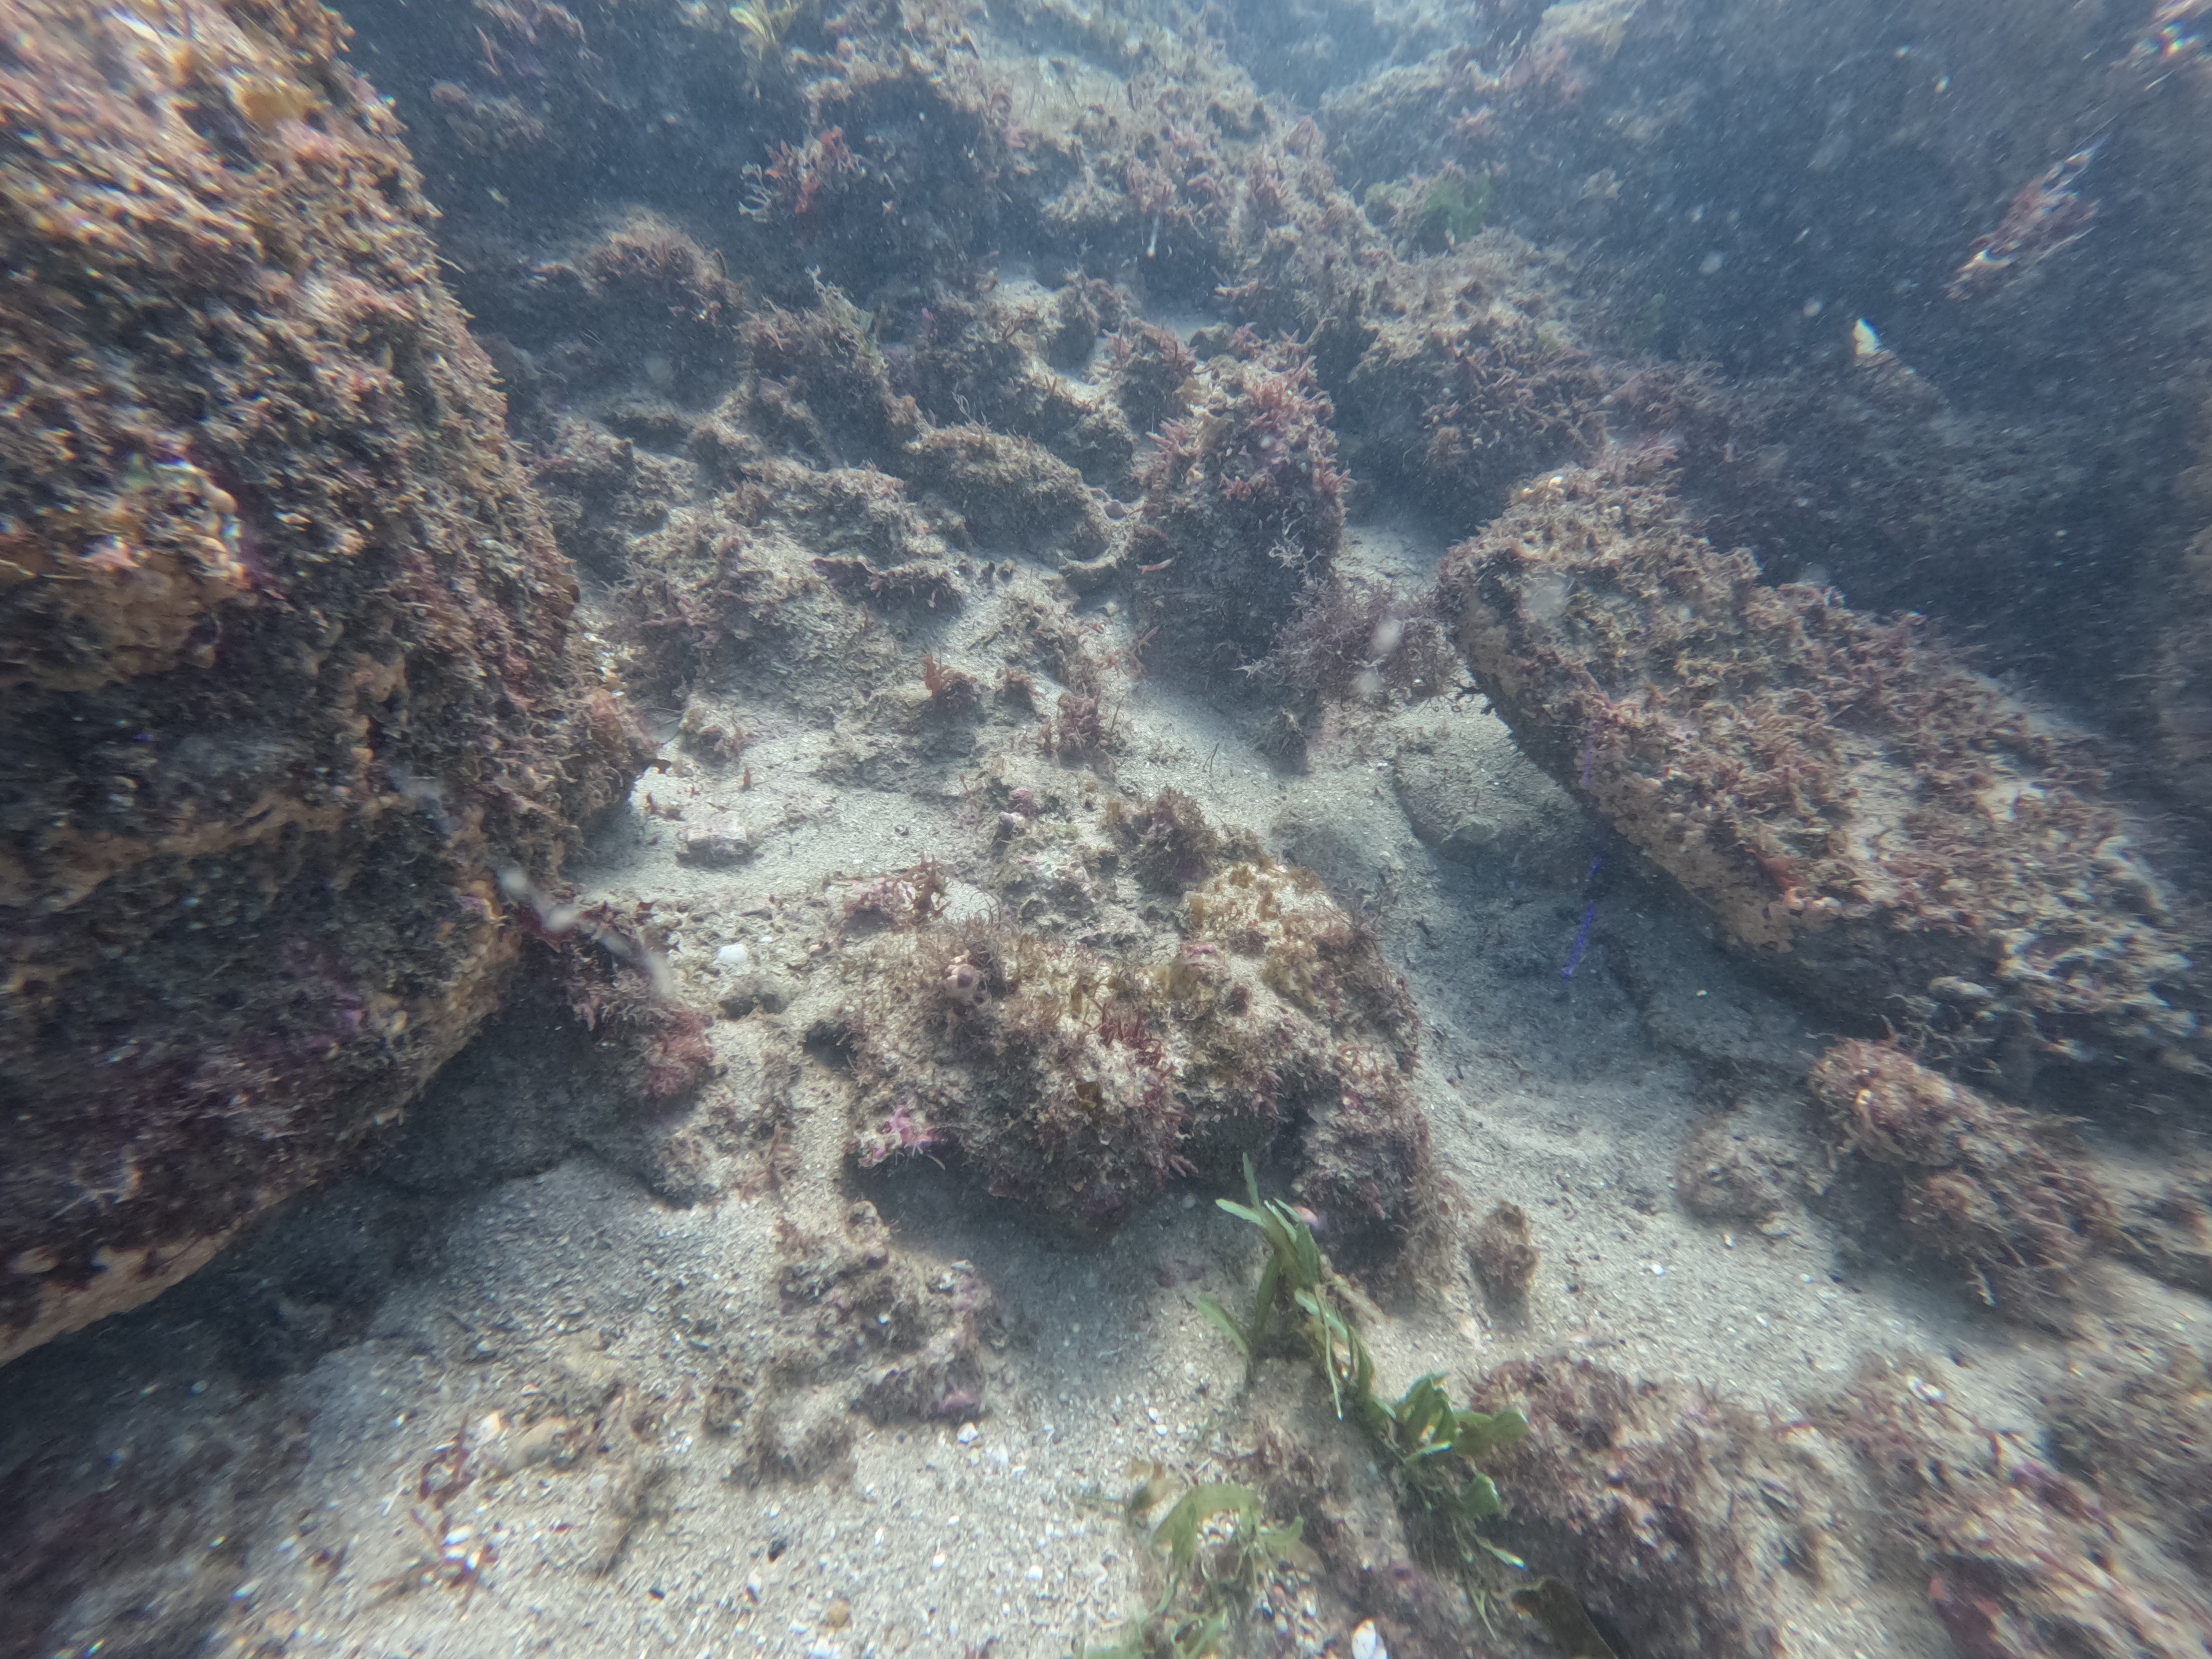

Supplement: Supplementary file 1619 [file G0027945.pdf › Ocean1/G0027945.pdf]

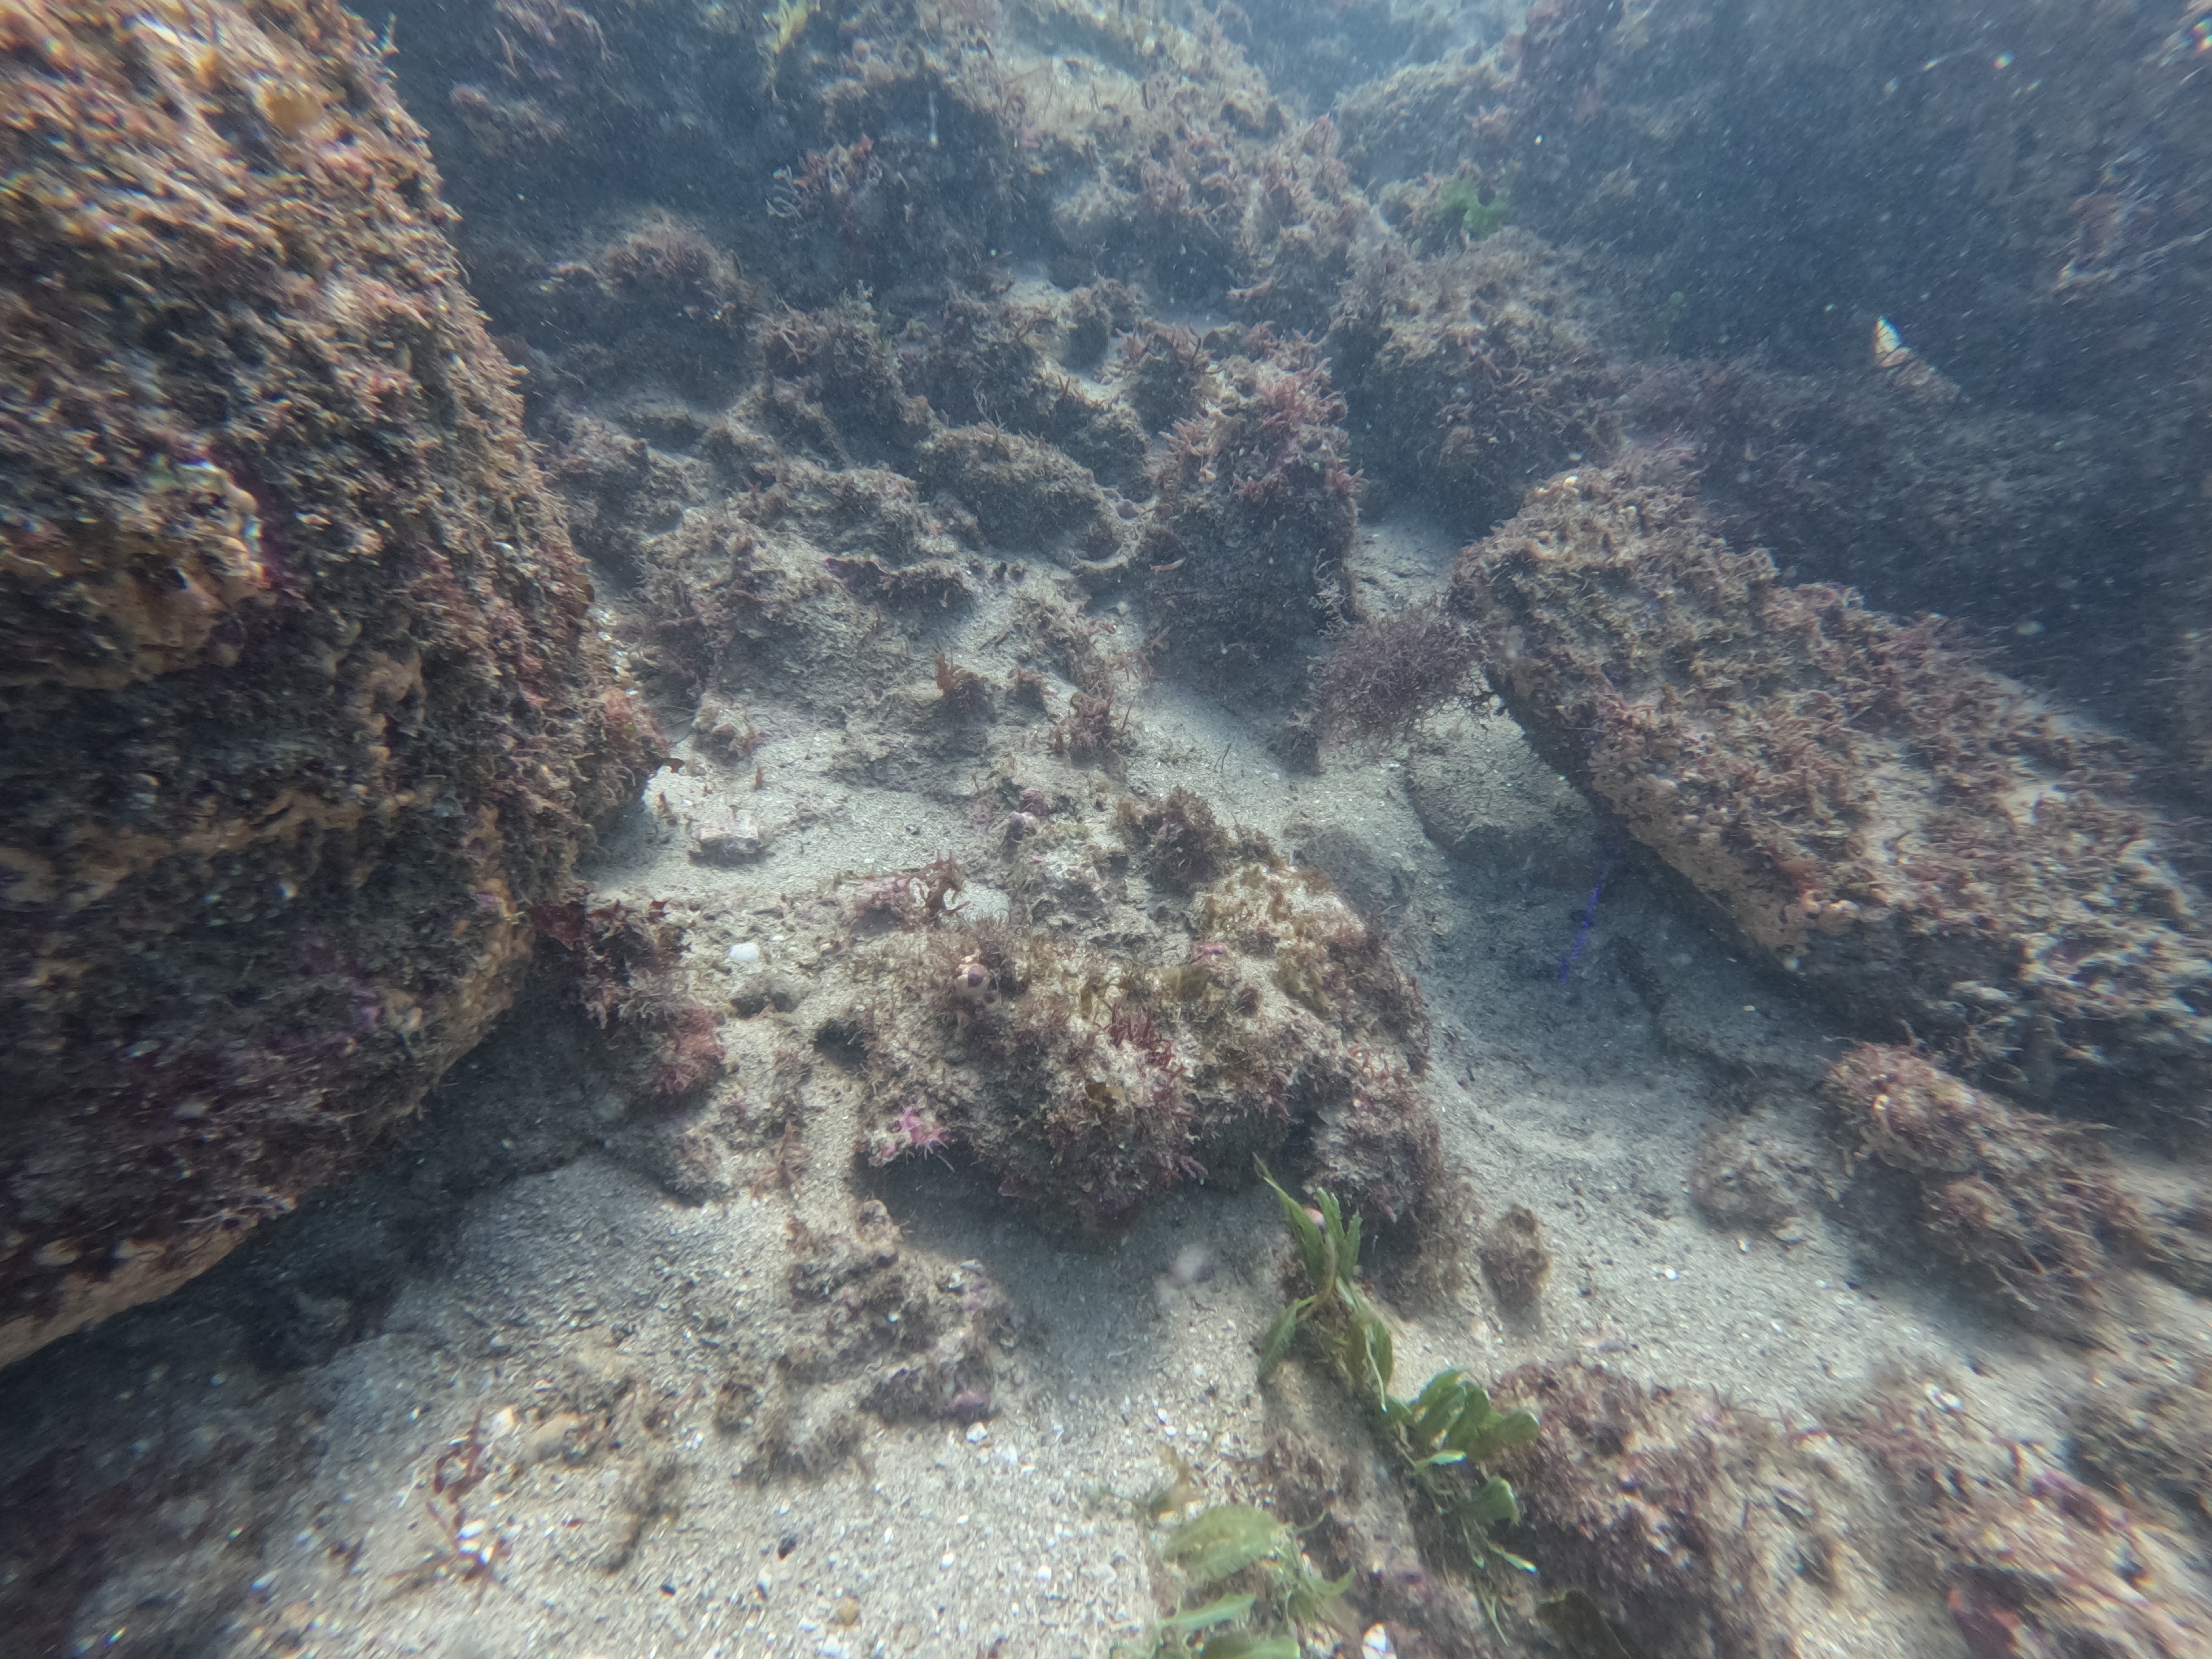

Supplement: Supplementary file 1620 [file G0027946.pdf › Ocean1/G0027946.pdf]

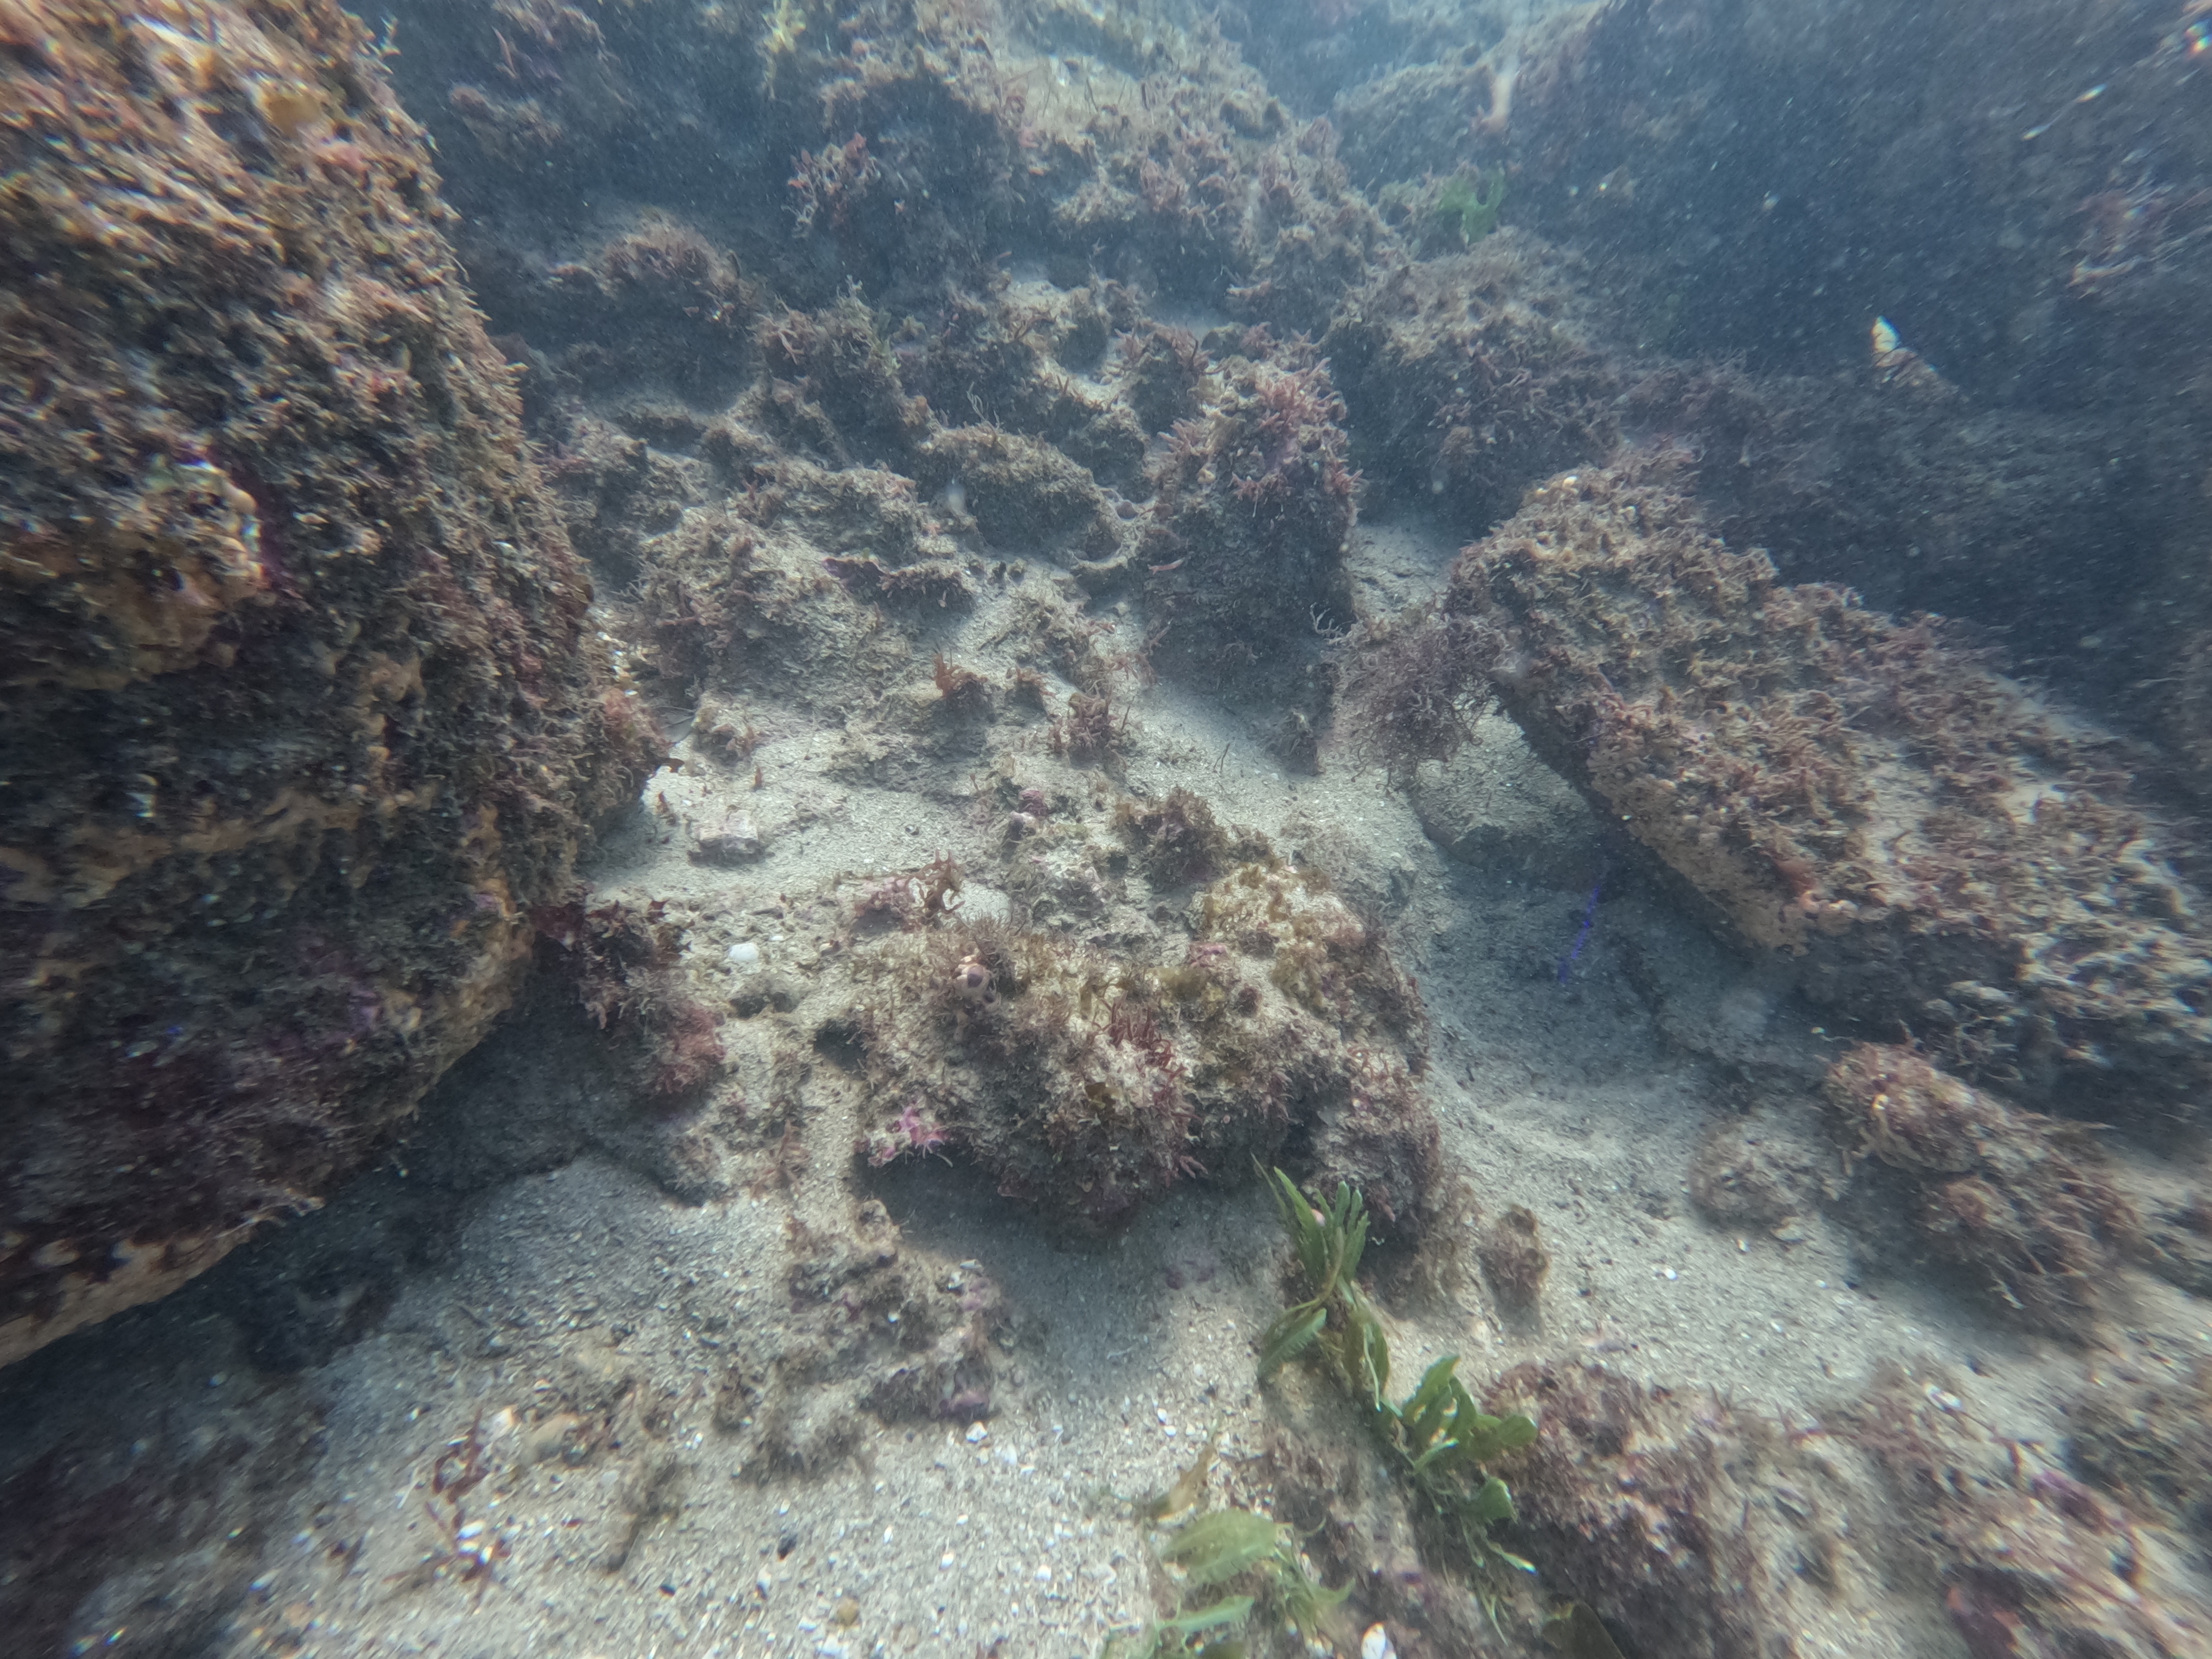

Supplement: Supplementary file 1621 [file G0027947.pdf › Ocean1/G0027947.pdf]

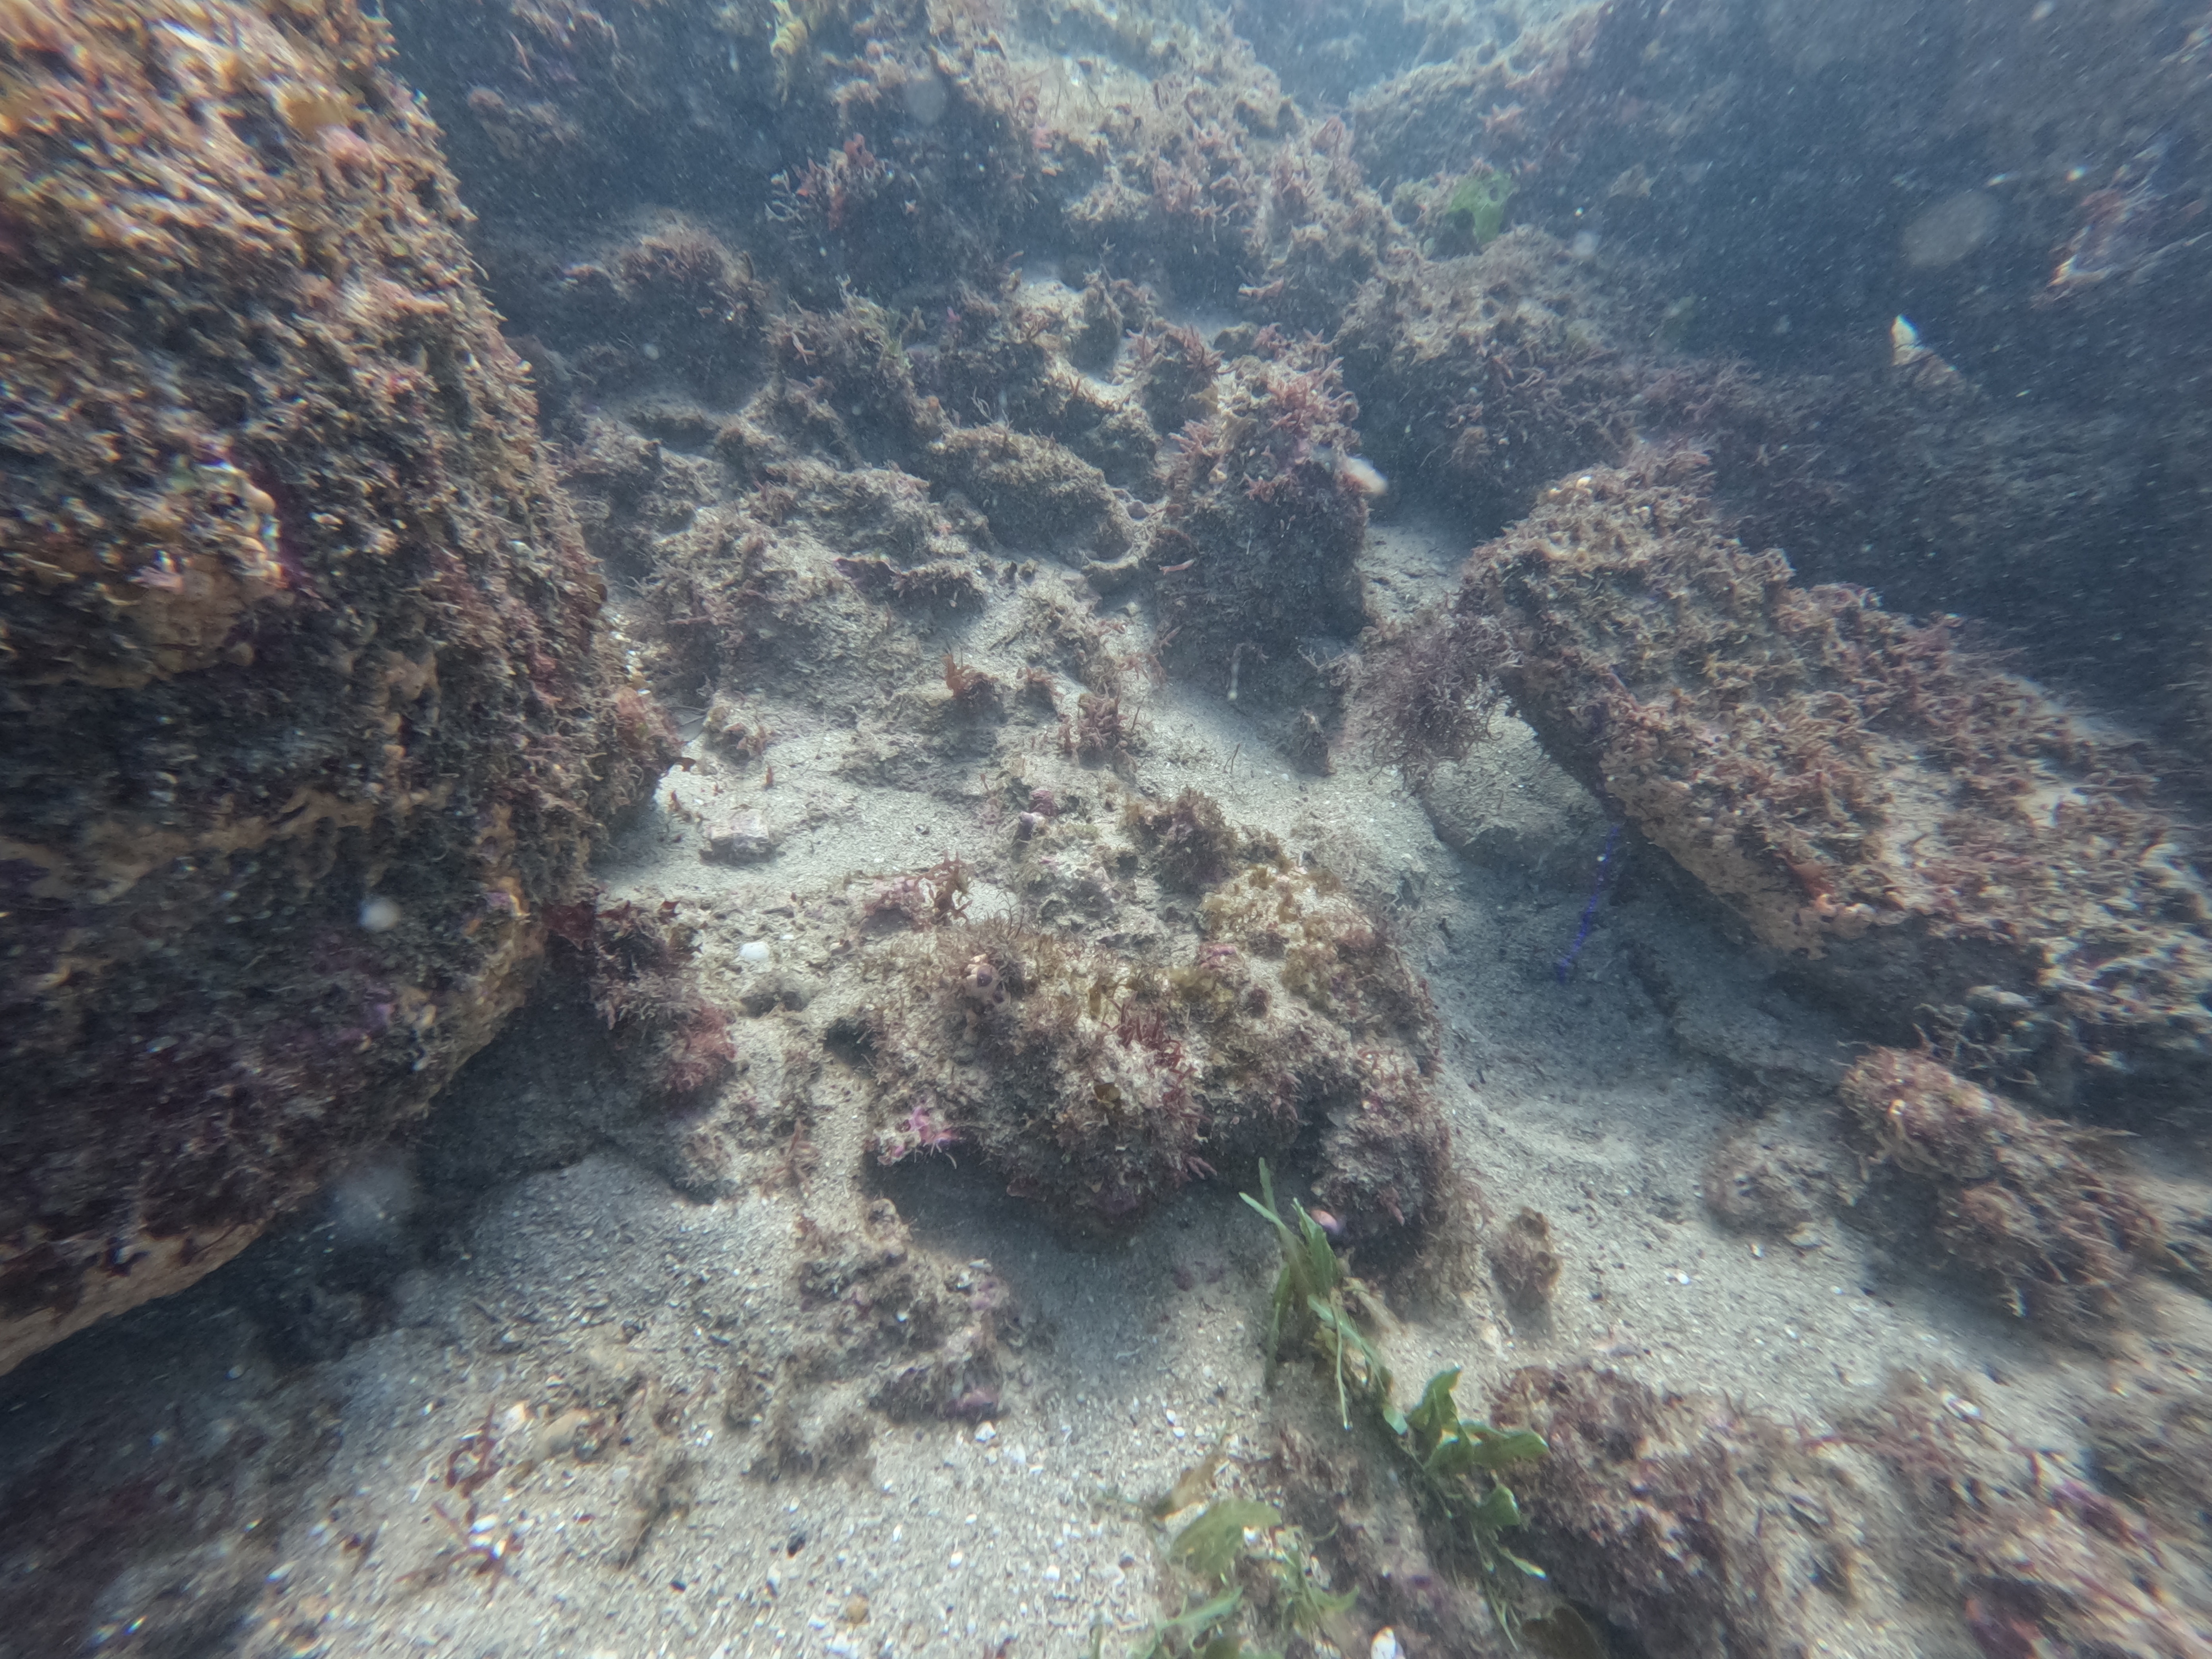

Supplement: Supplementary file 1622 [file G0027948.pdf › Ocean1/G0027948.pdf]

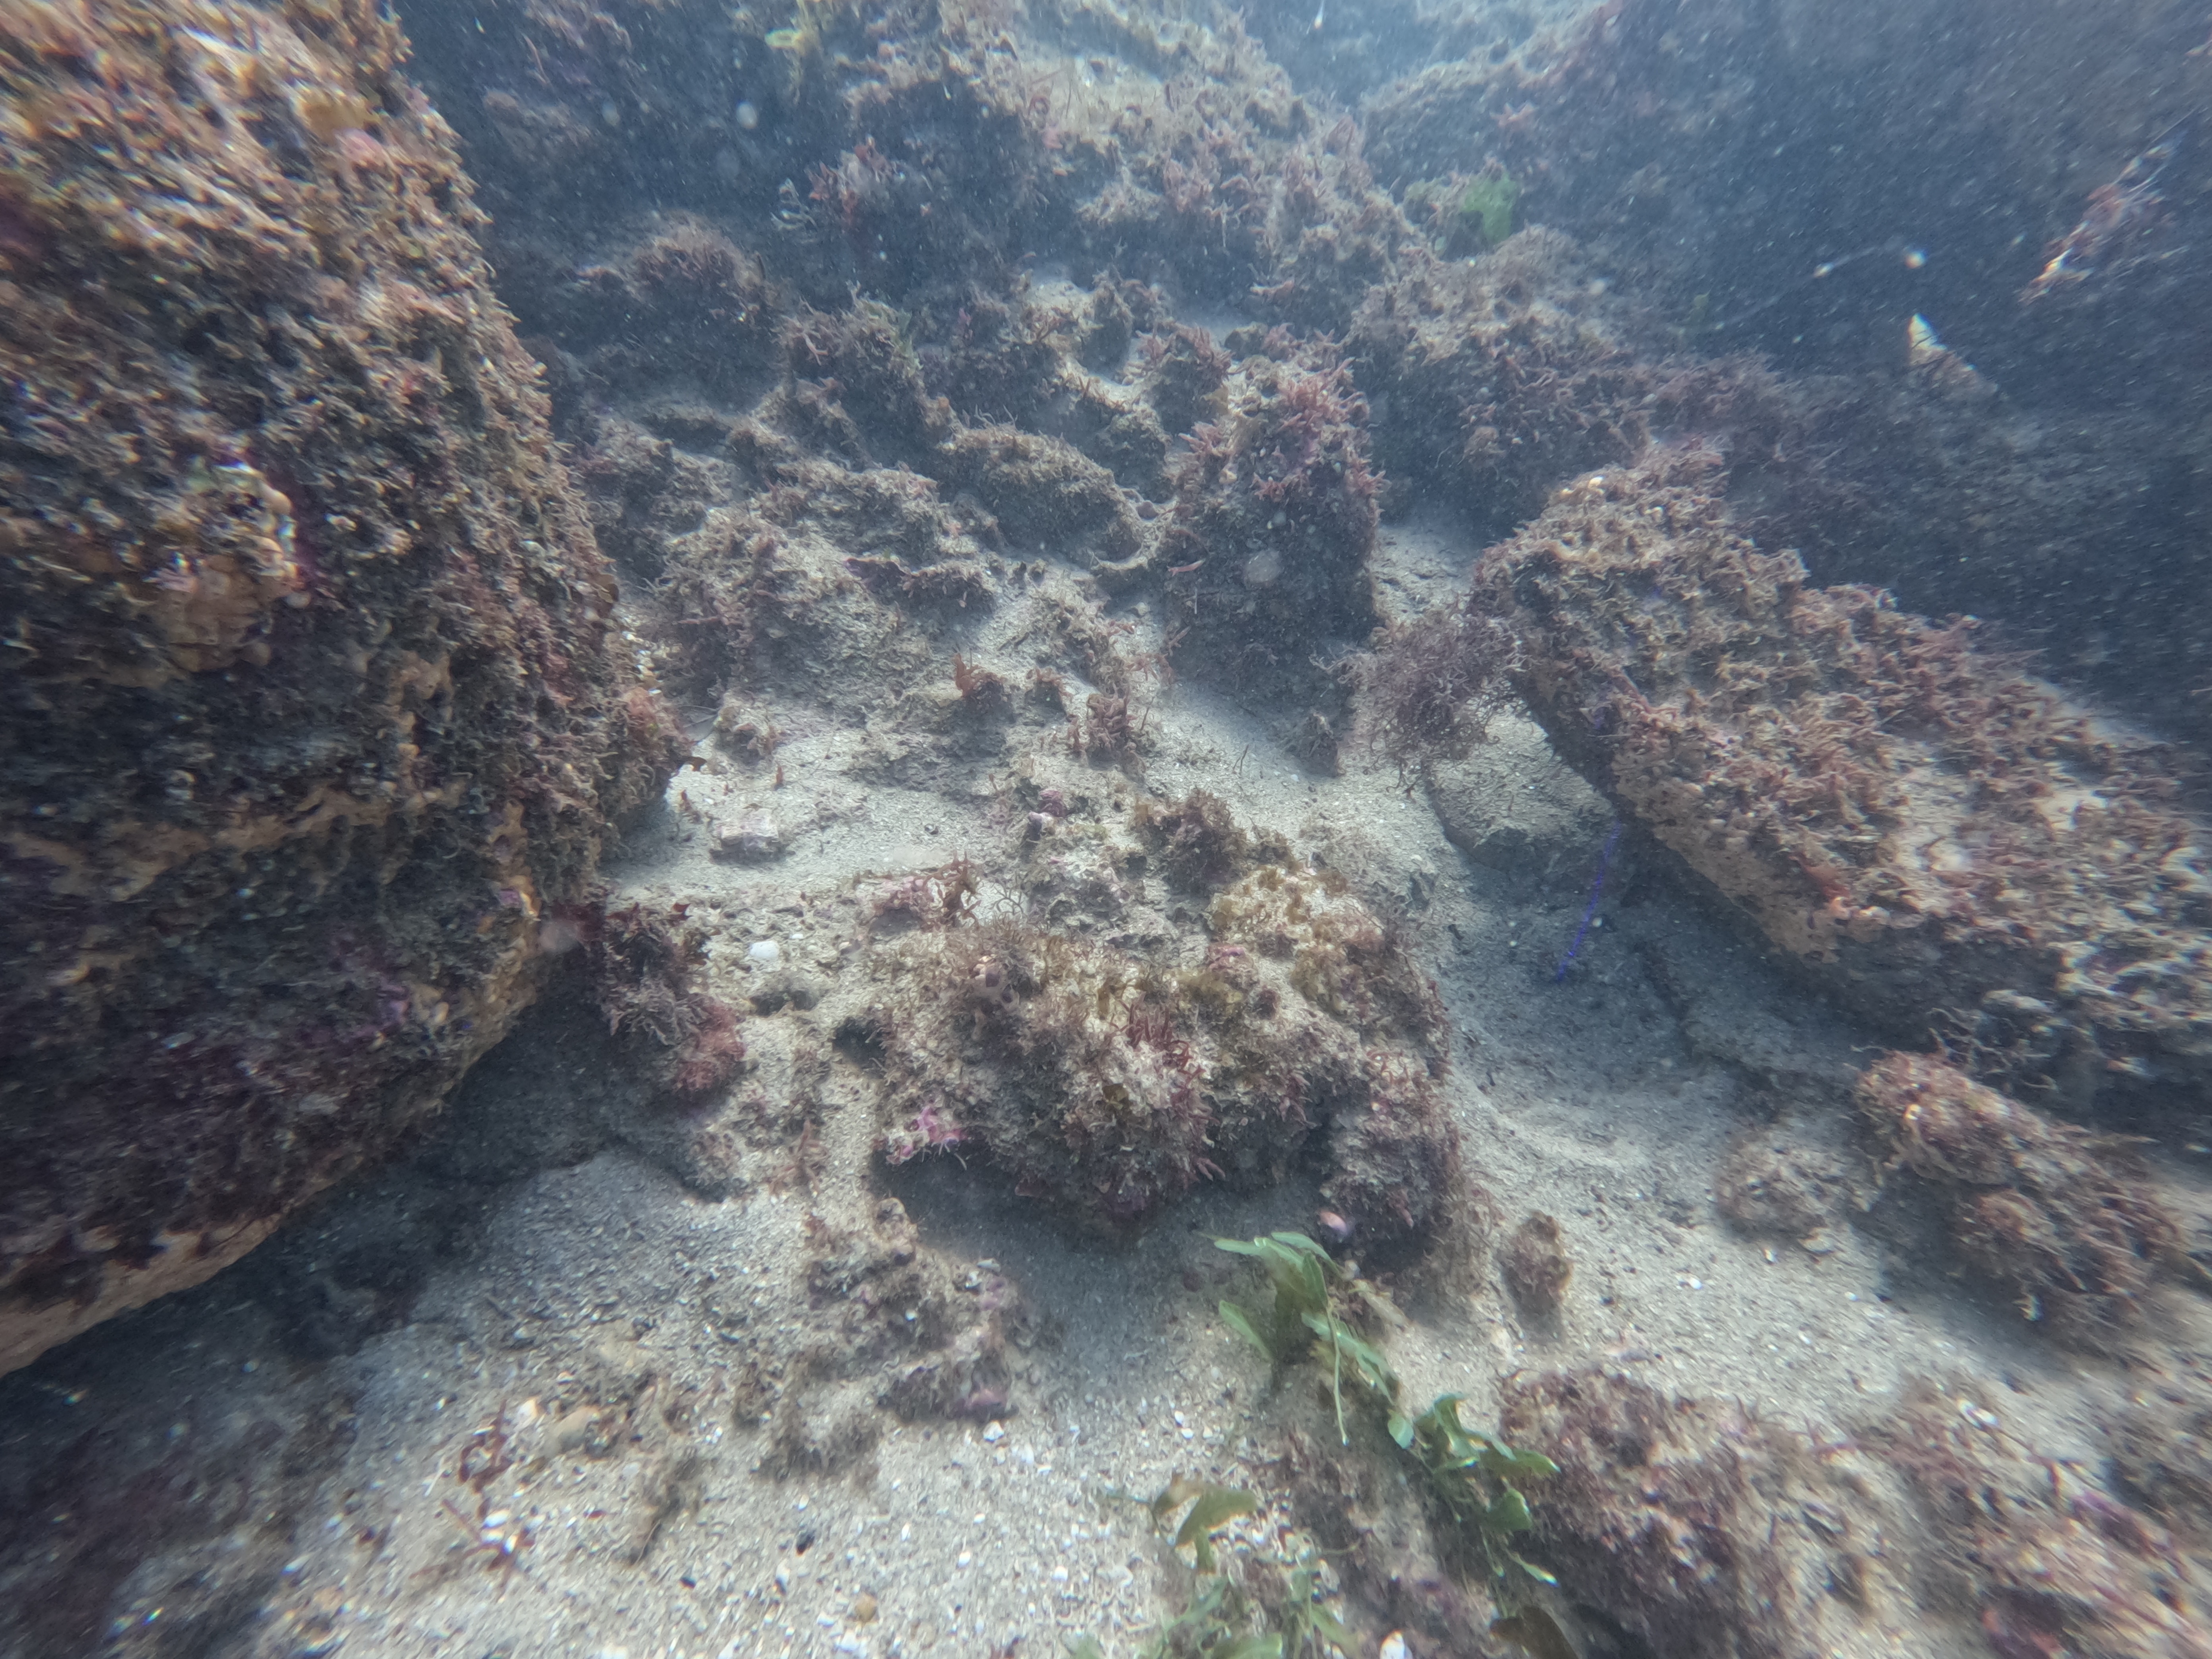

Supplement: Supplementary file 1623 [file G0027949.pdf › Ocean1/G0027949.pdf]

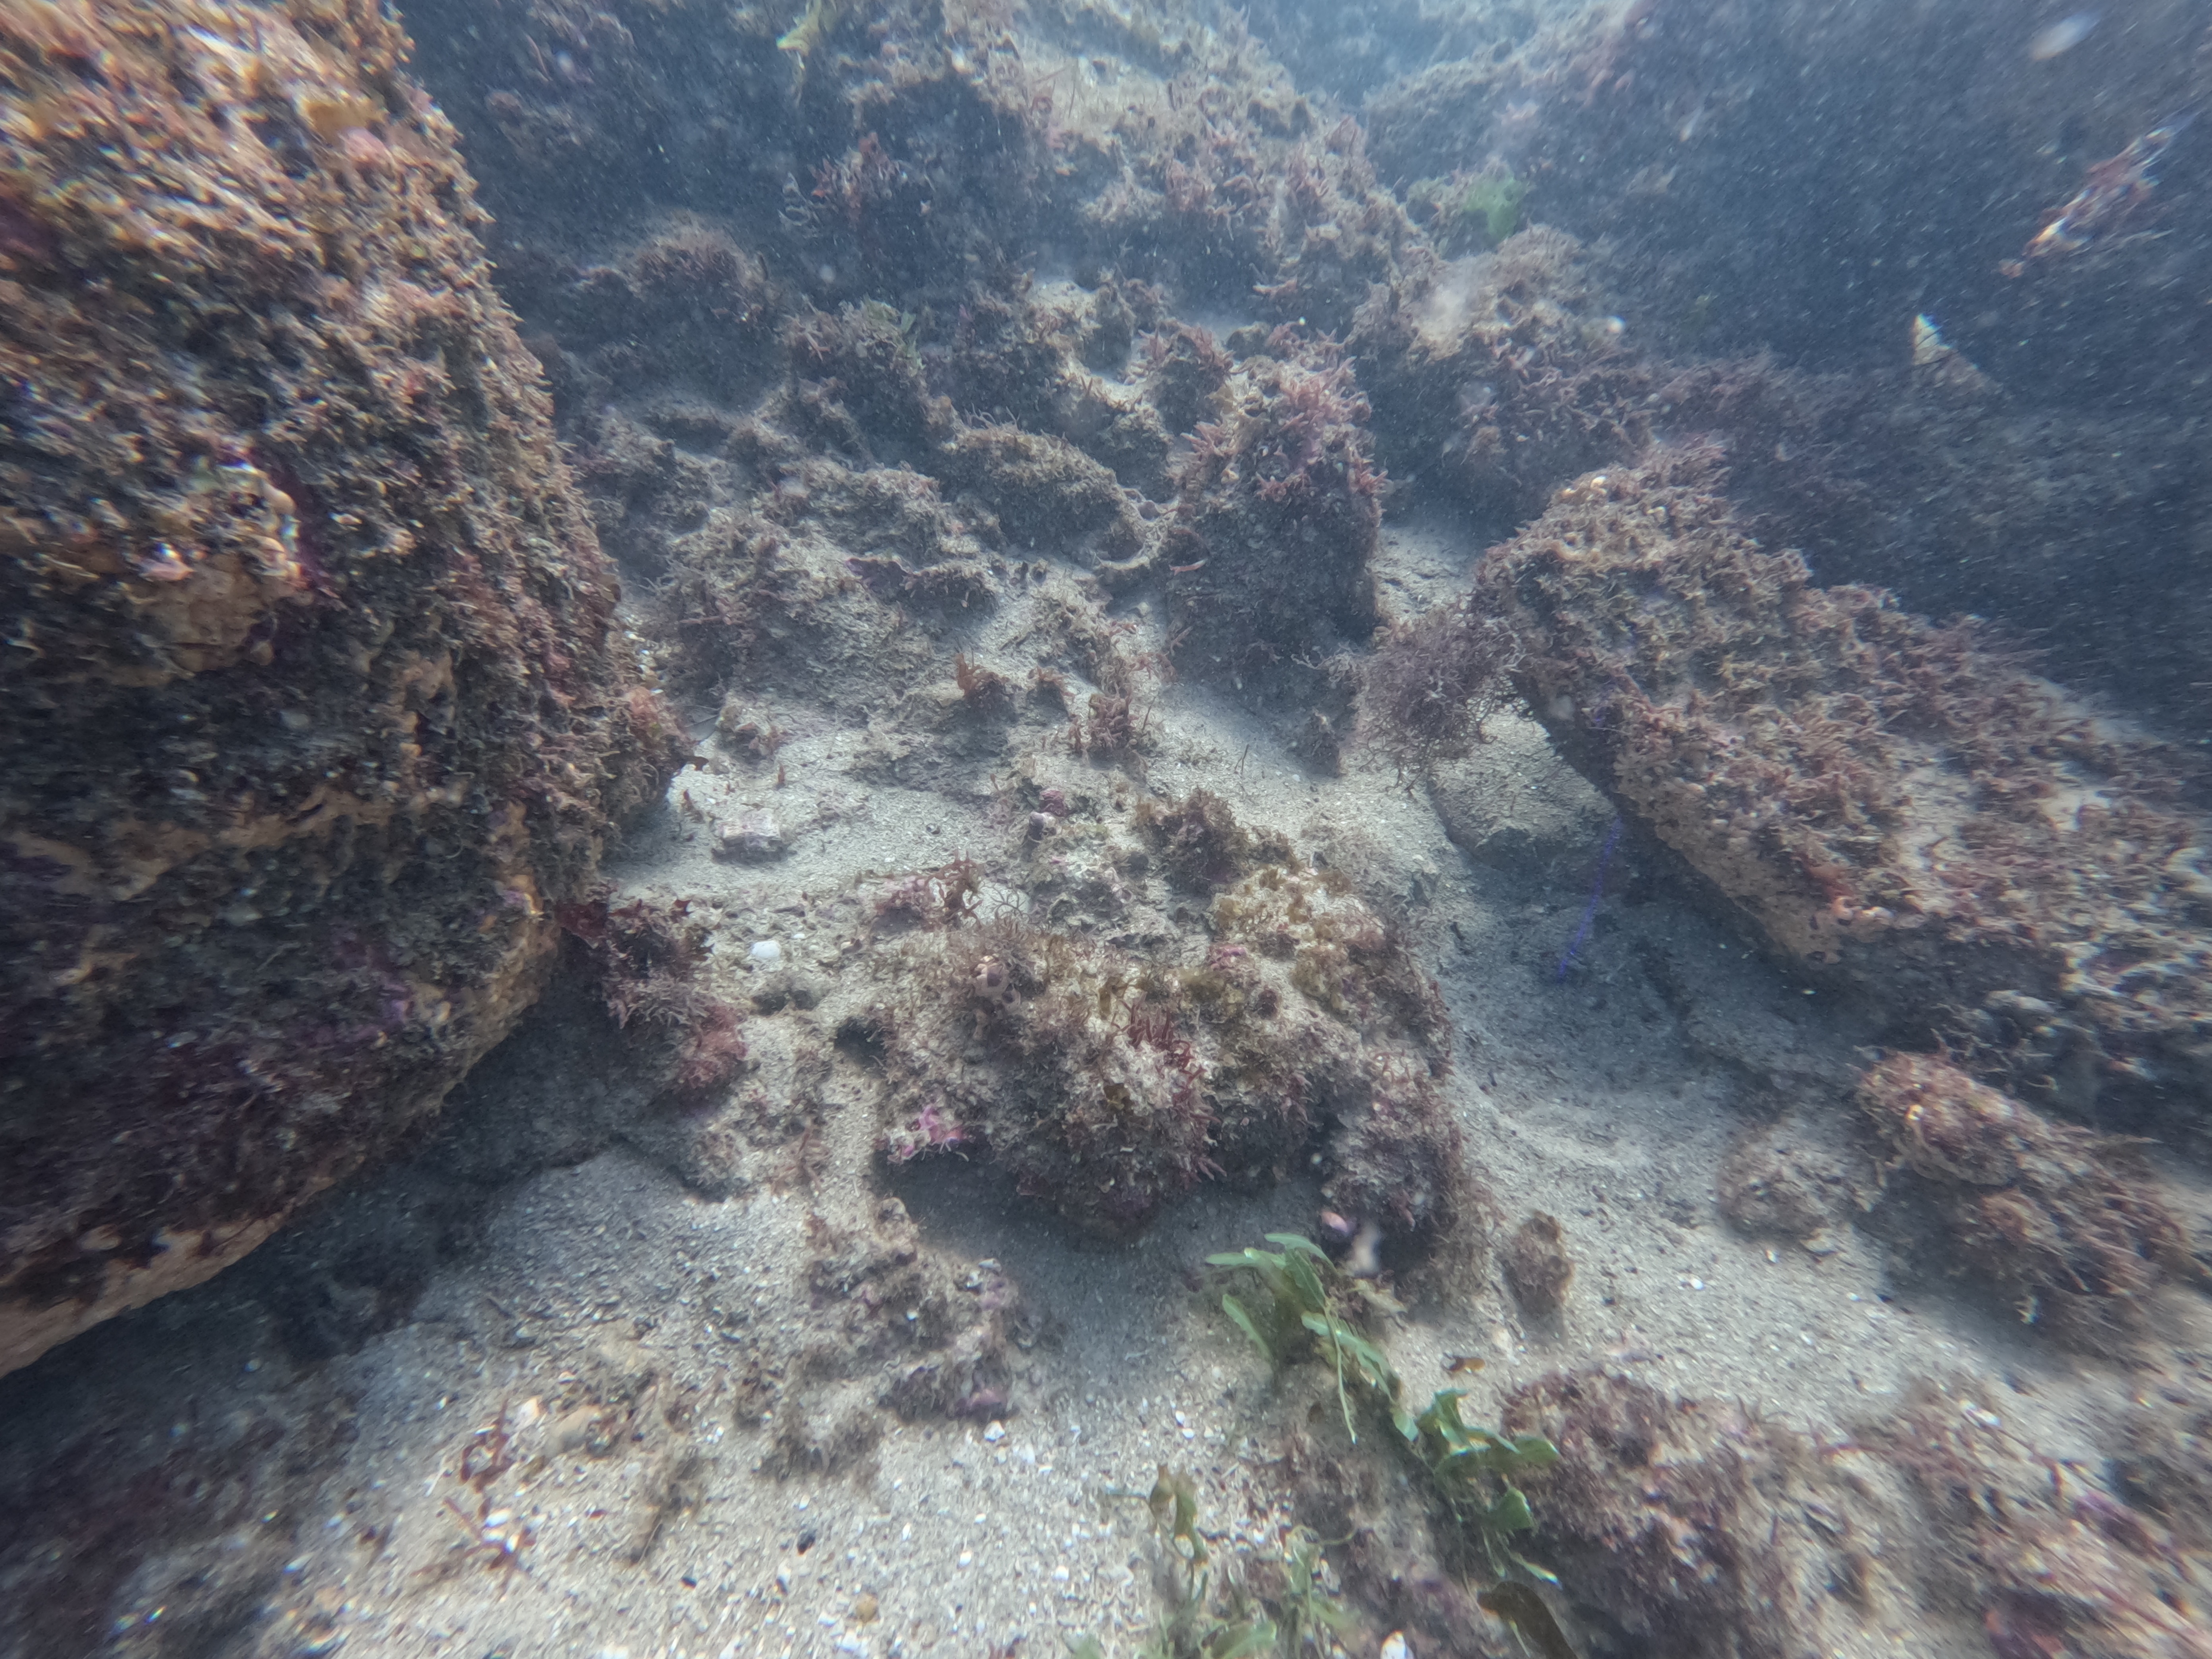

Supplement: Supplementary file 1624 [file G0027950.pdf › Ocean1/G0027950.pdf]

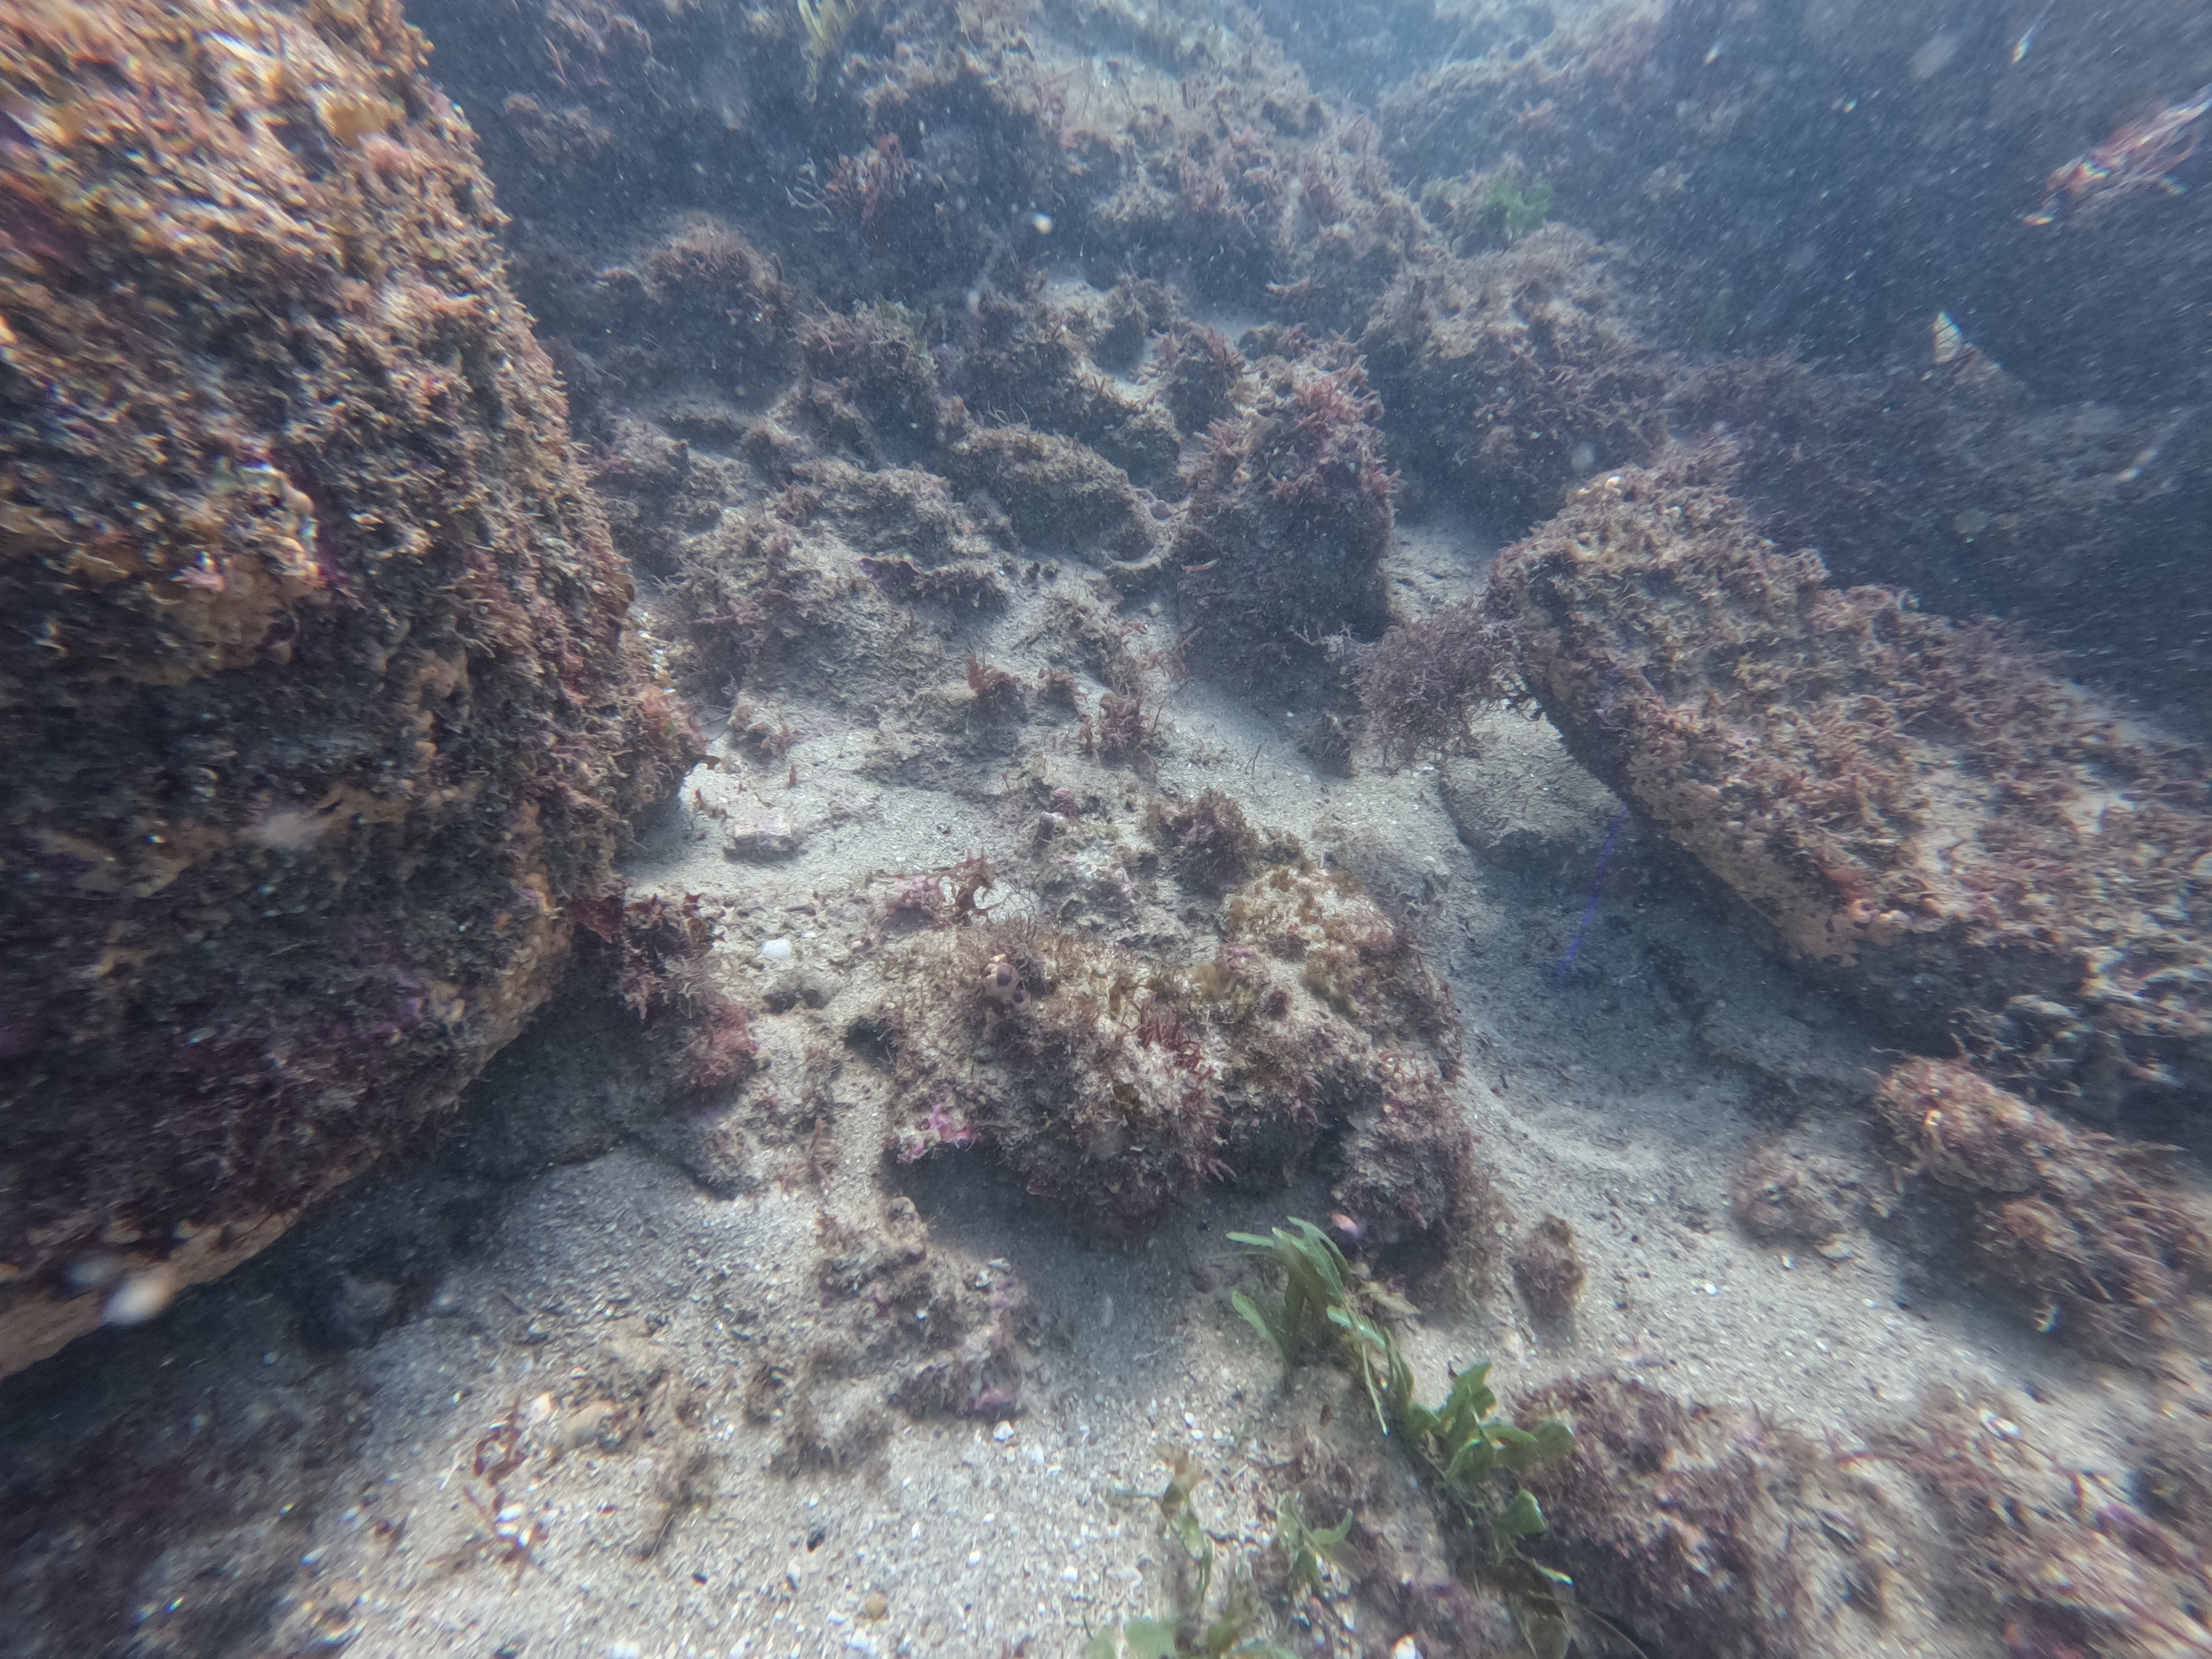

Supplement: Supplementary file 1625 [file G0027951.pdf › Ocean1/G0027951.pdf]

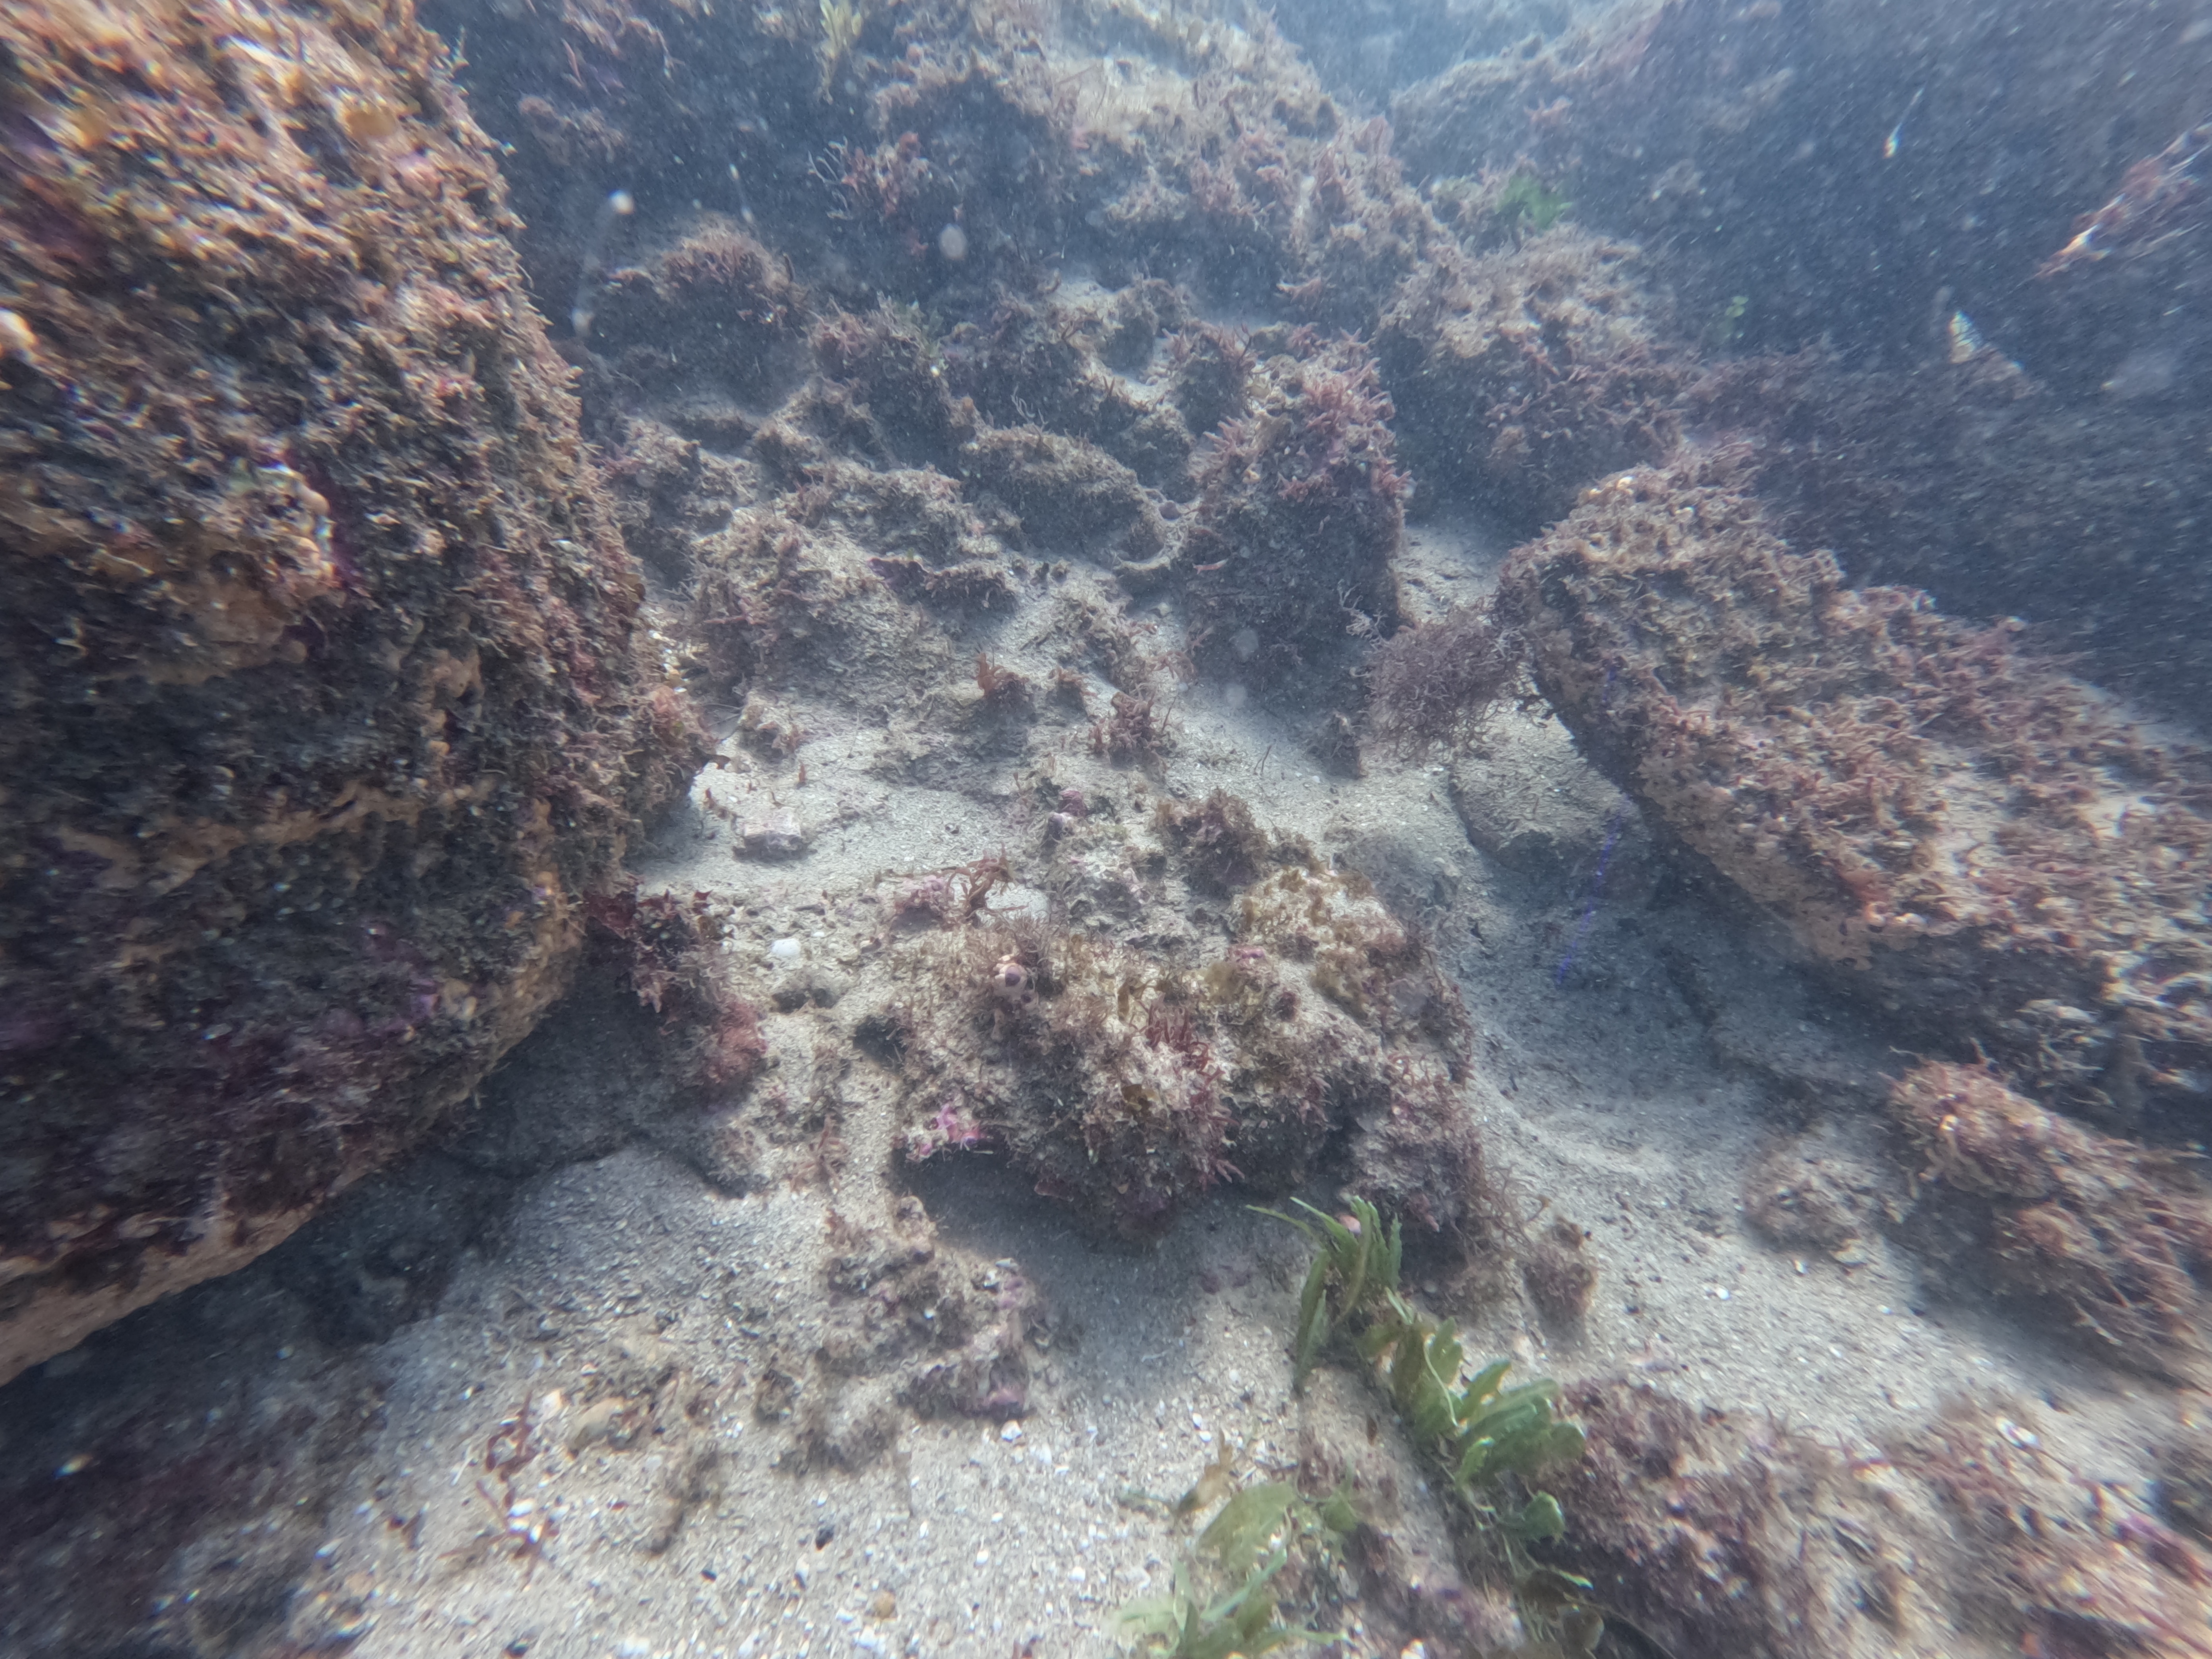

Supplement: Supplementary file 1626 [file G0027952.pdf › Ocean1/G0027952.pdf]

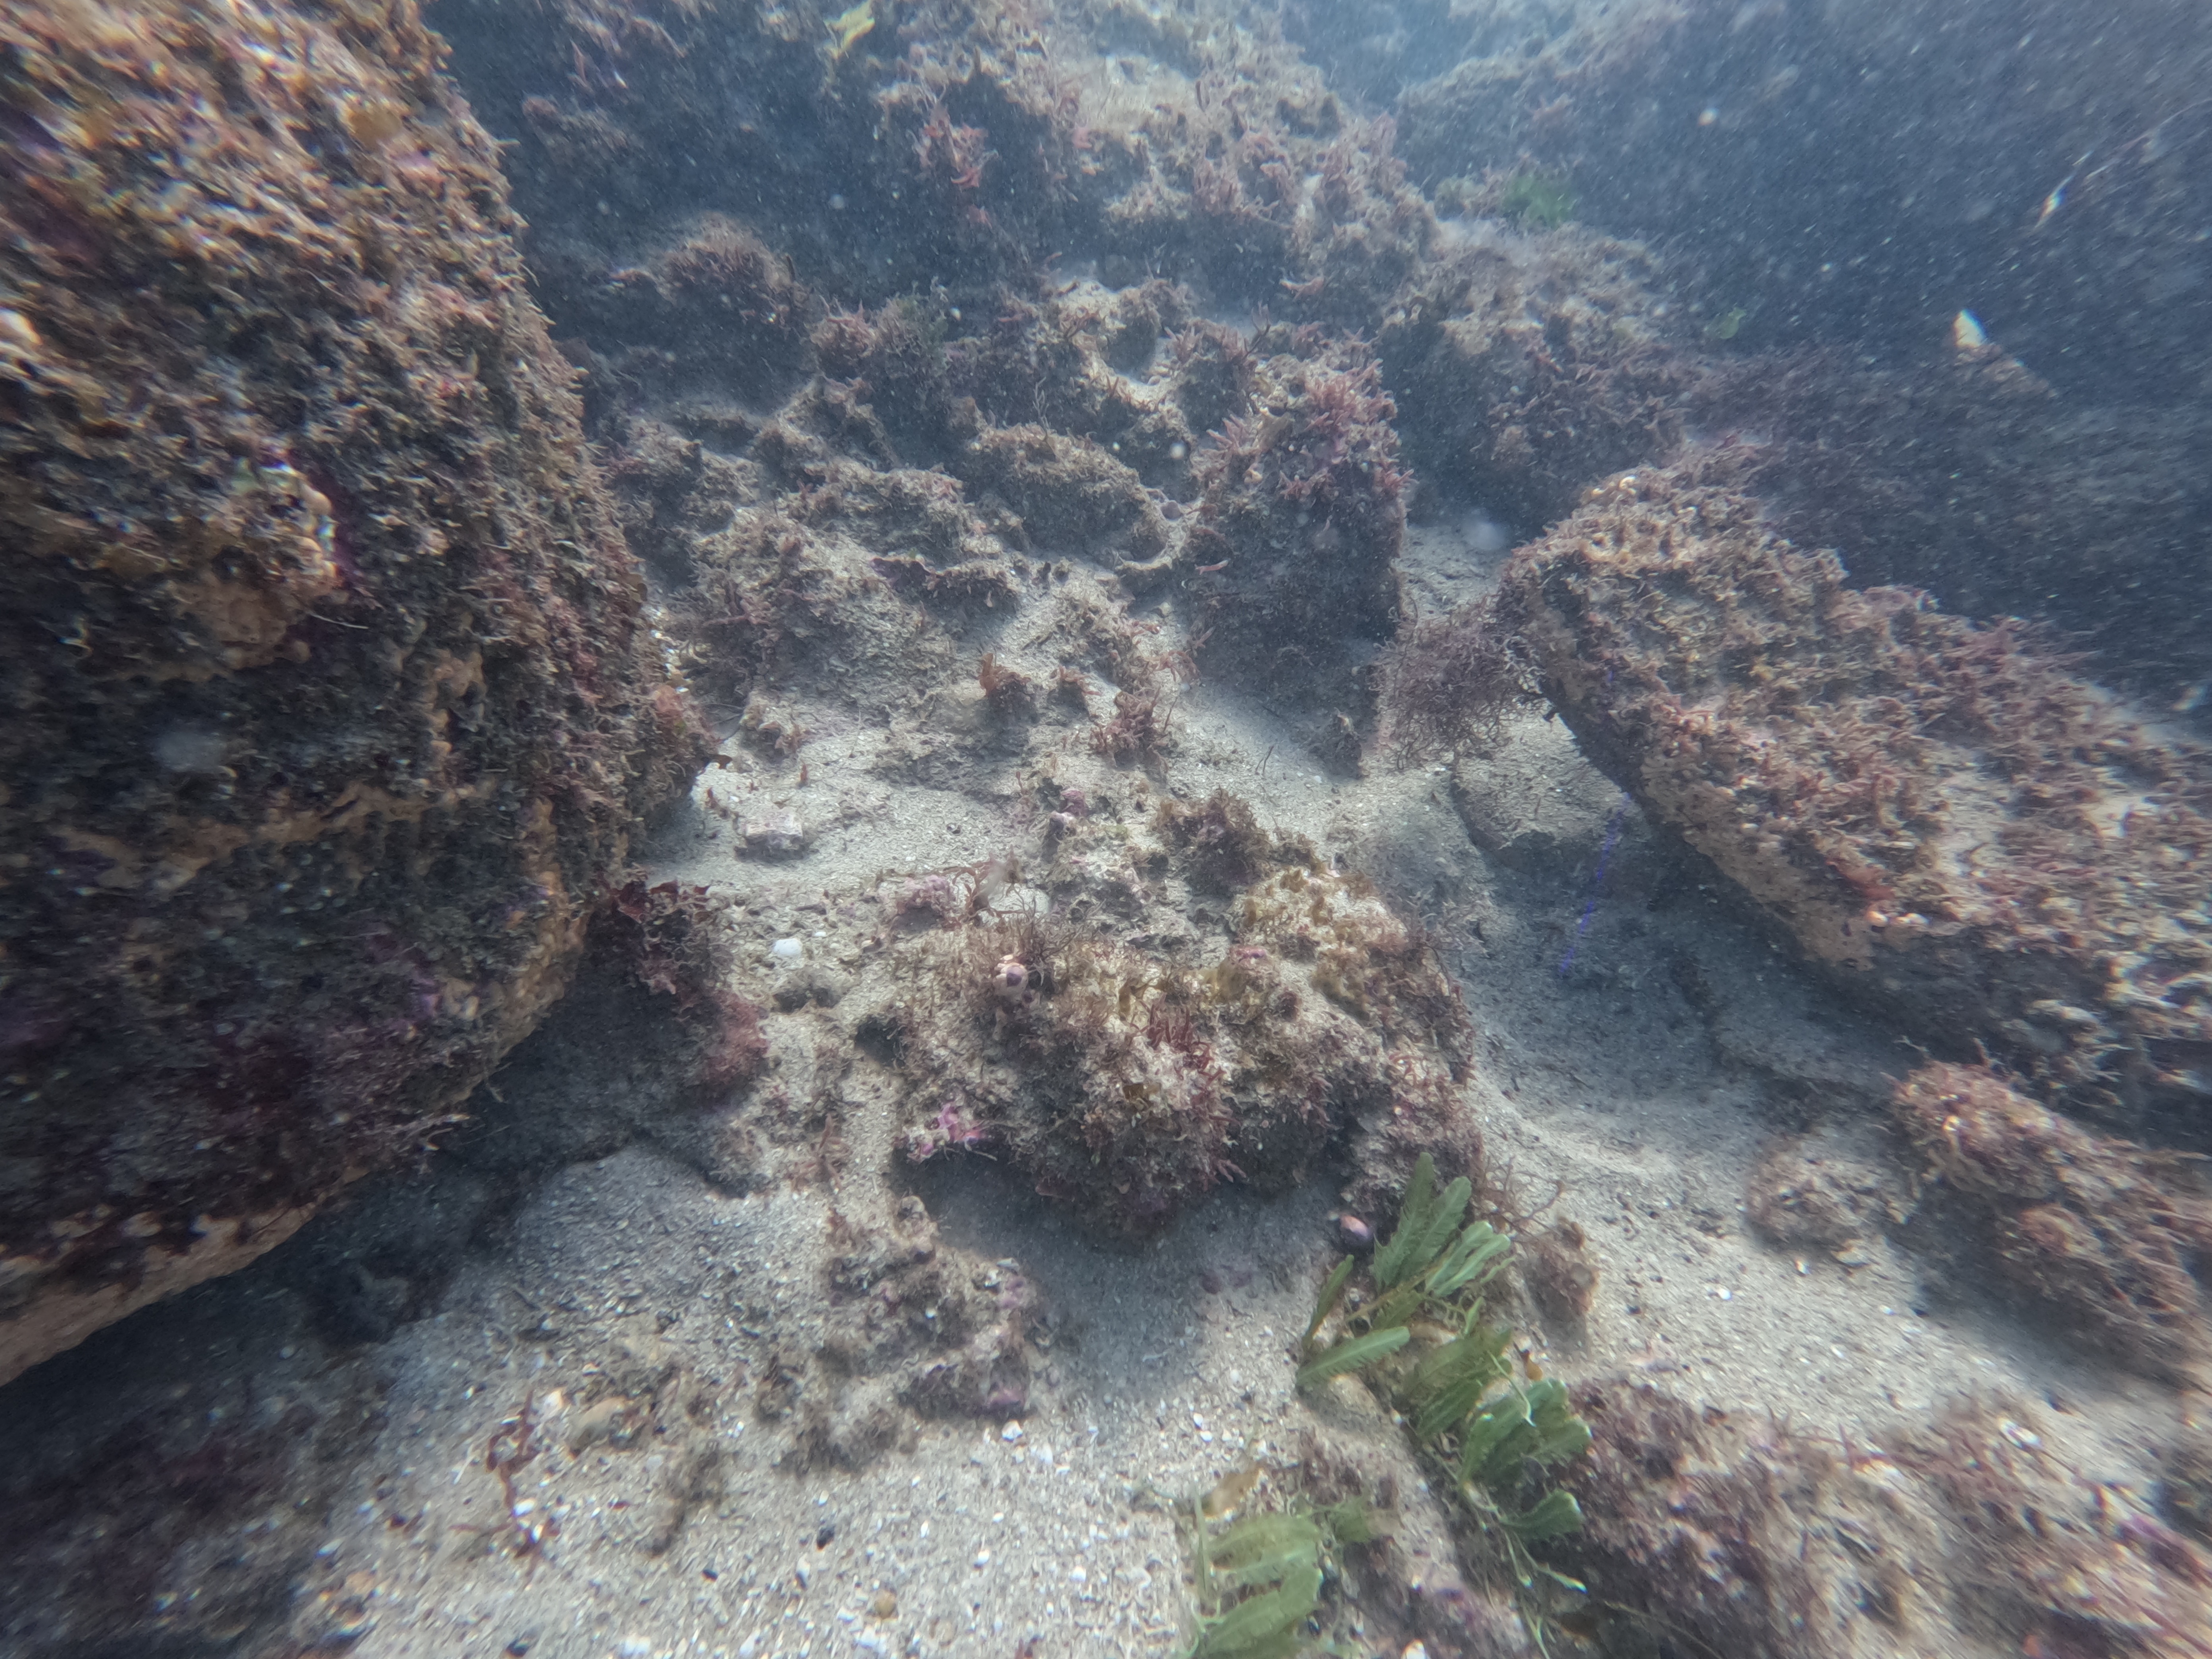

Supplement: Supplementary file 1627 [file G0027953.pdf › Ocean1/G0027953.pdf]

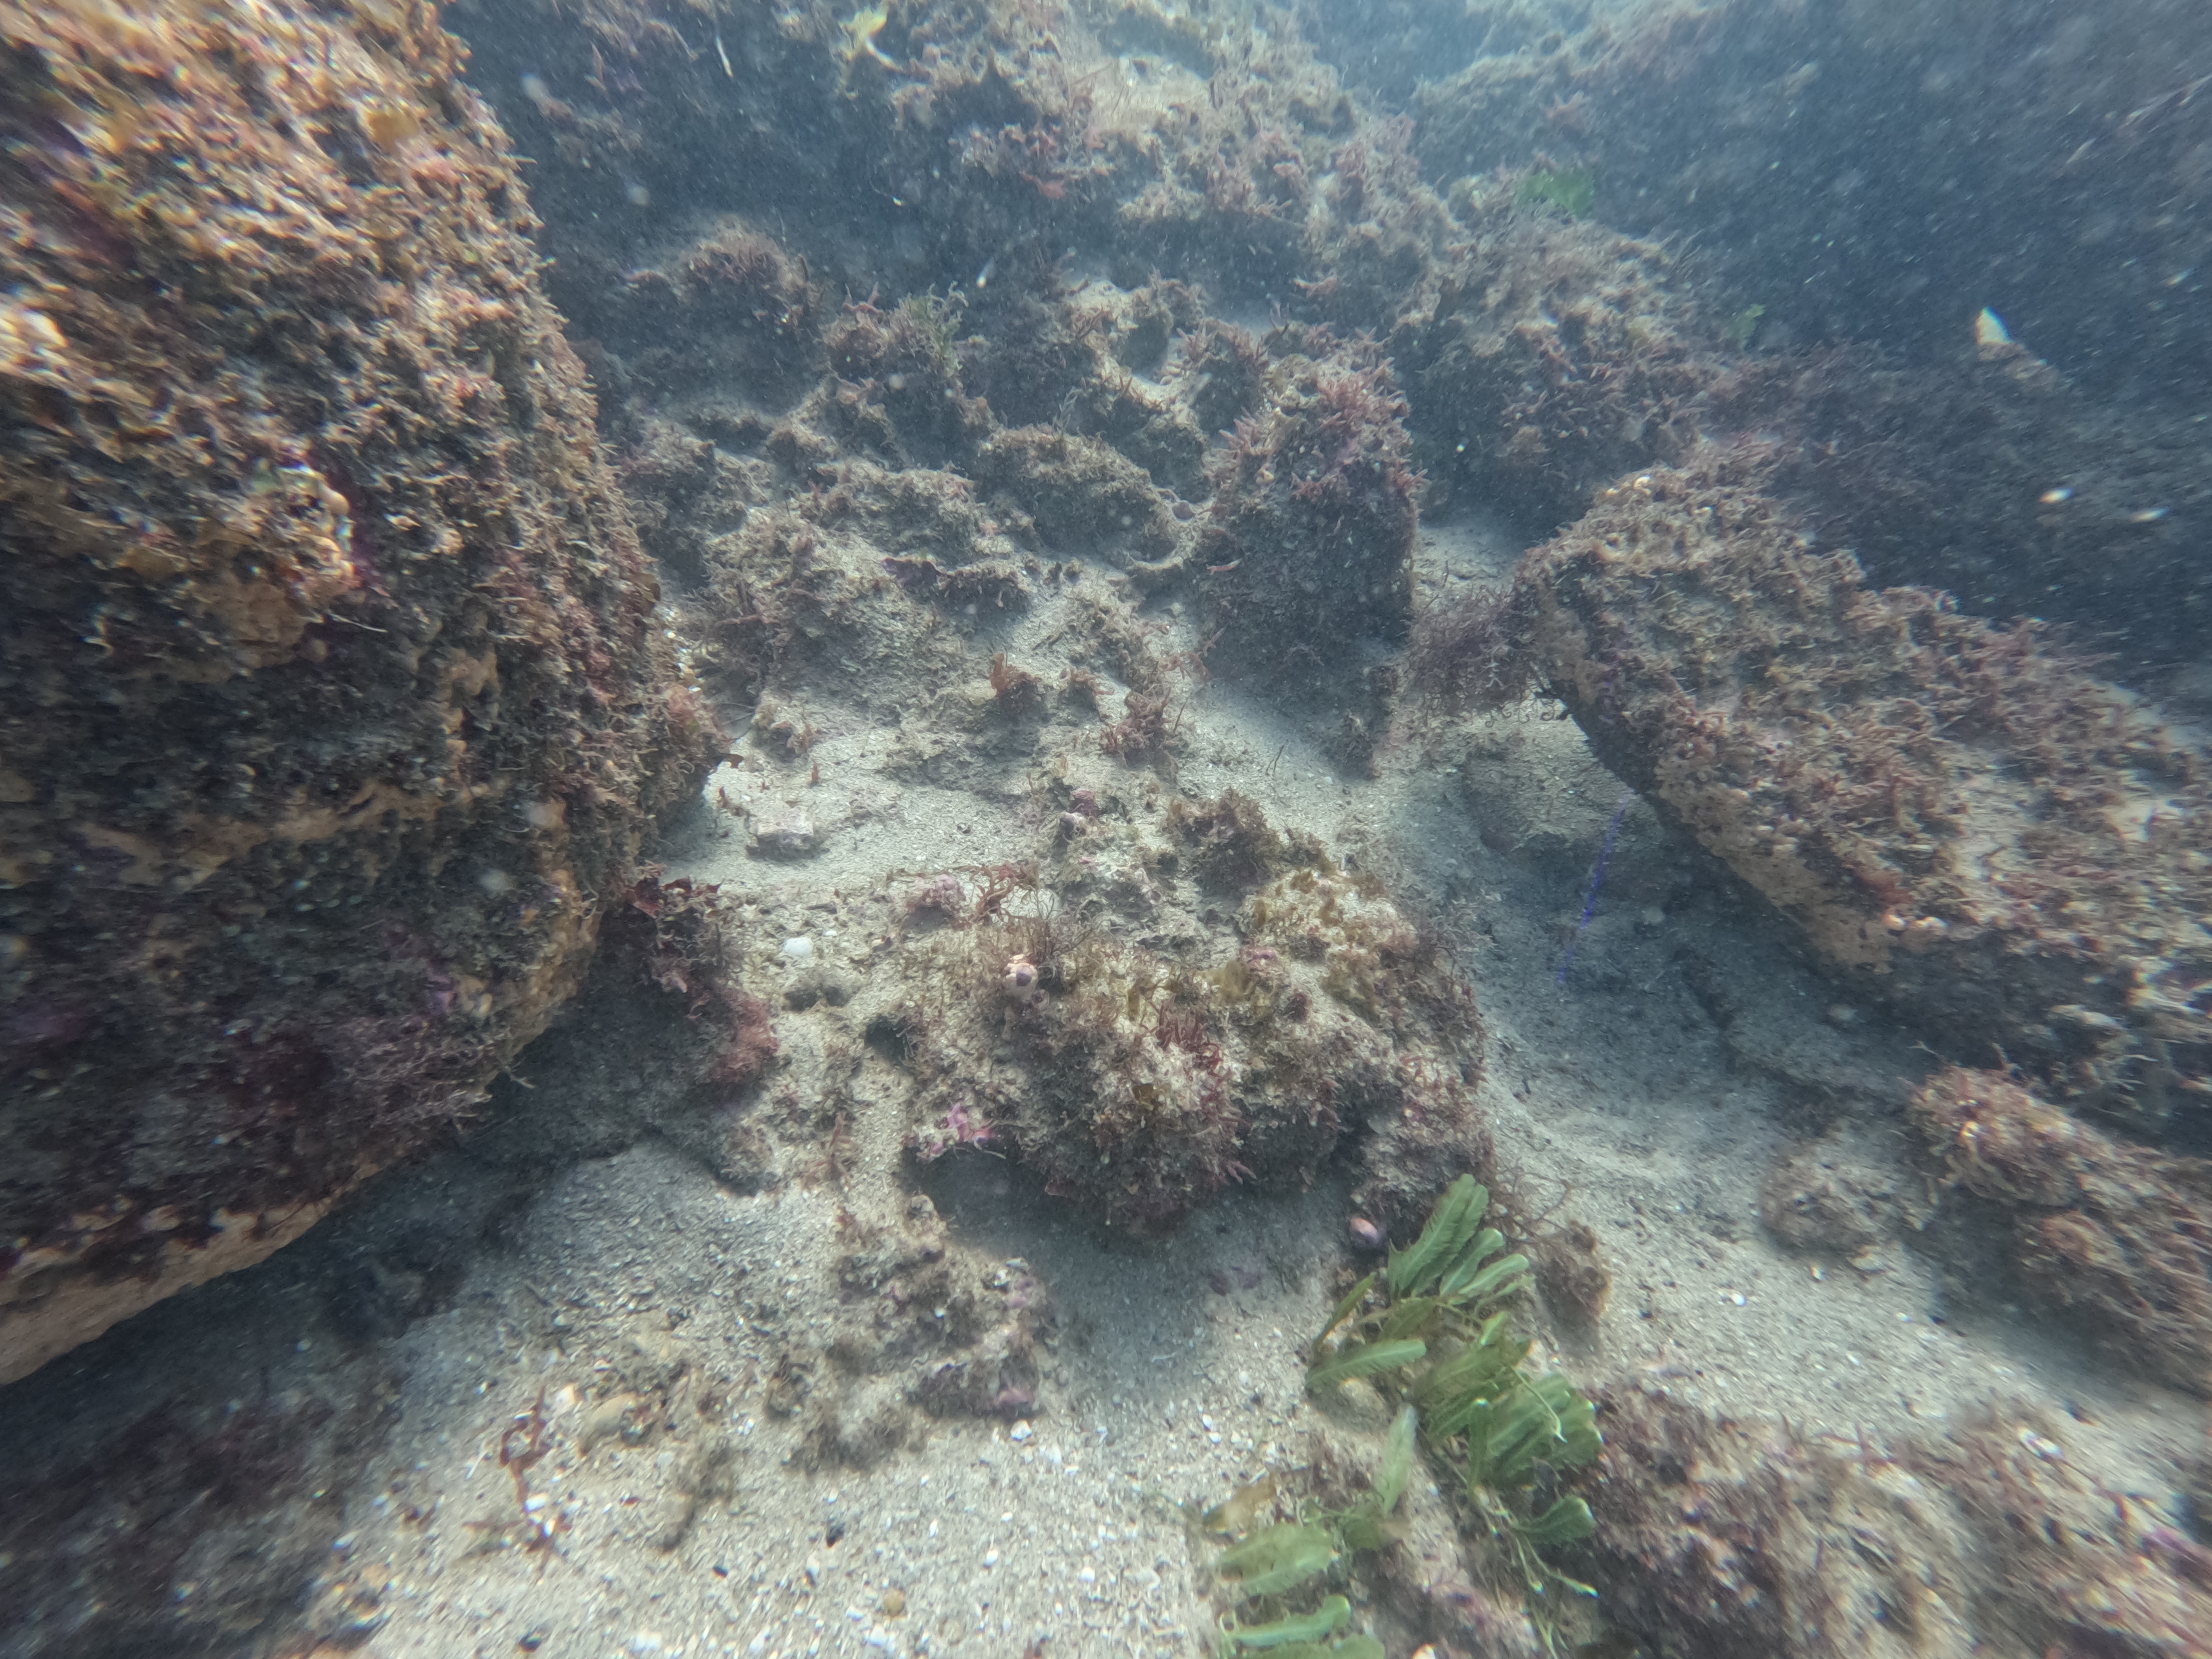

Supplement: Supplementary file 1628 [file G0027954.pdf › Ocean1/G0027954.pdf]

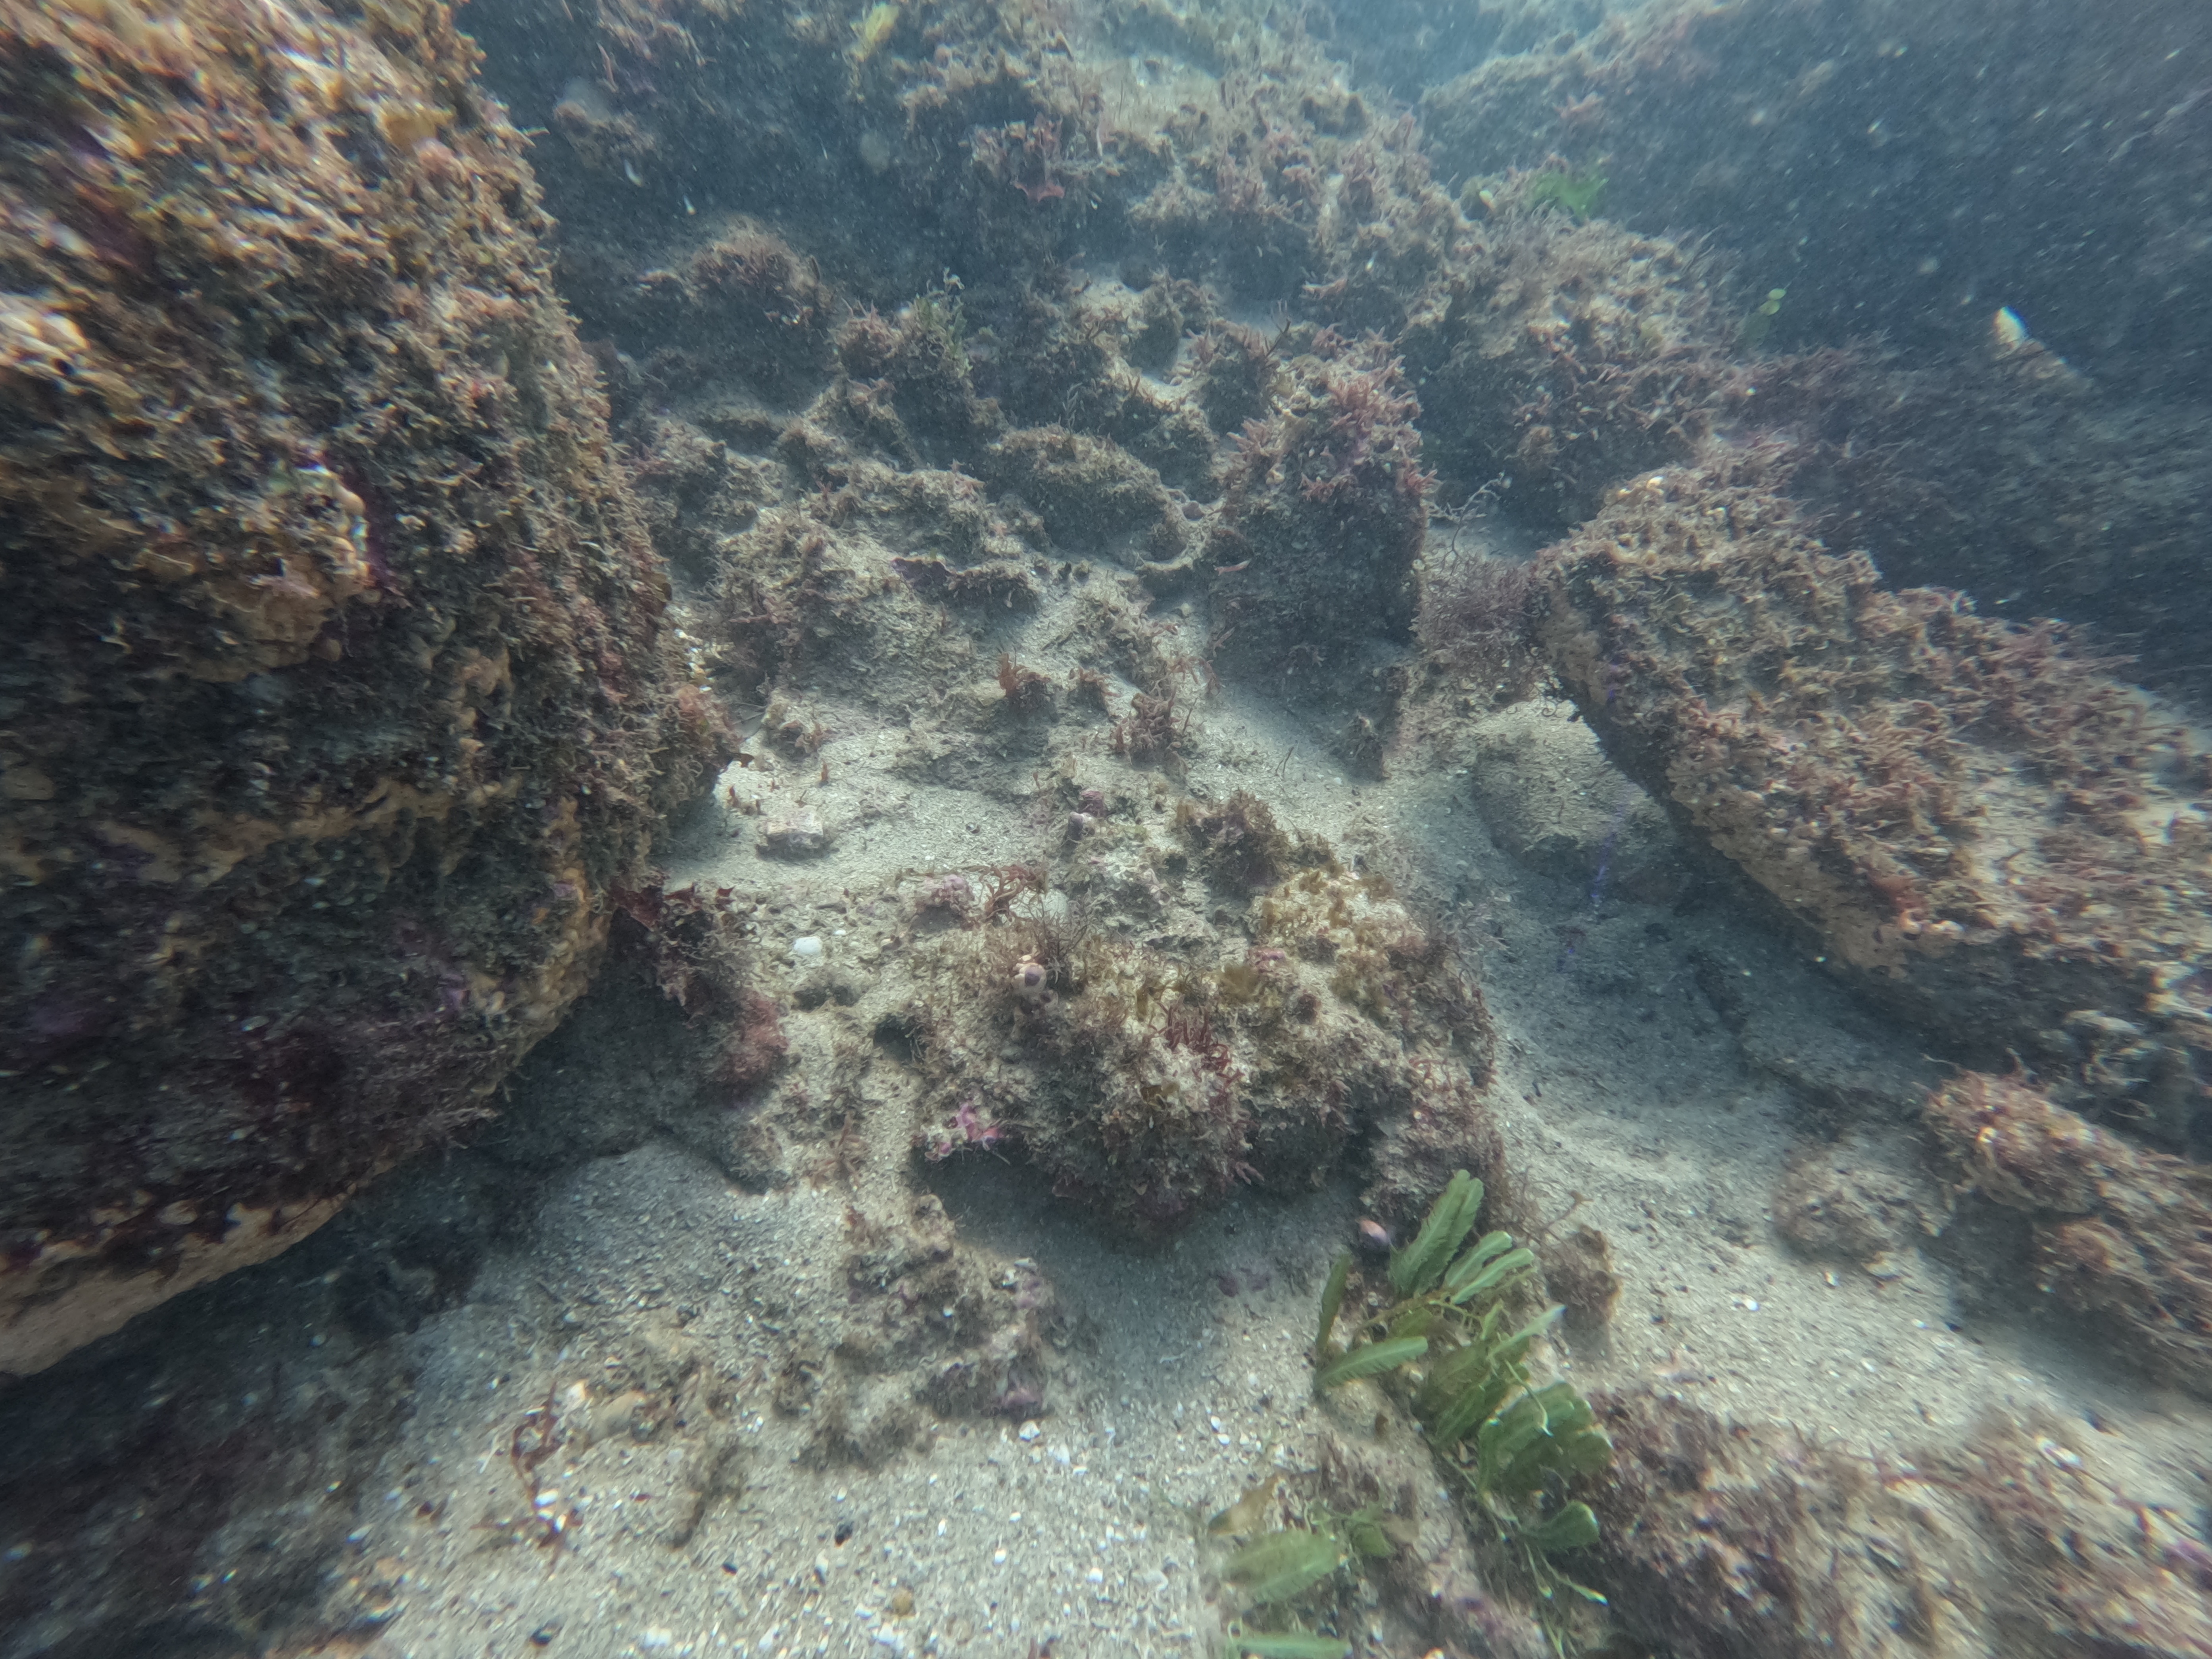

Supplement: Supplementary file 1629 [file G0027955.pdf › Ocean1/G0027955.pdf]

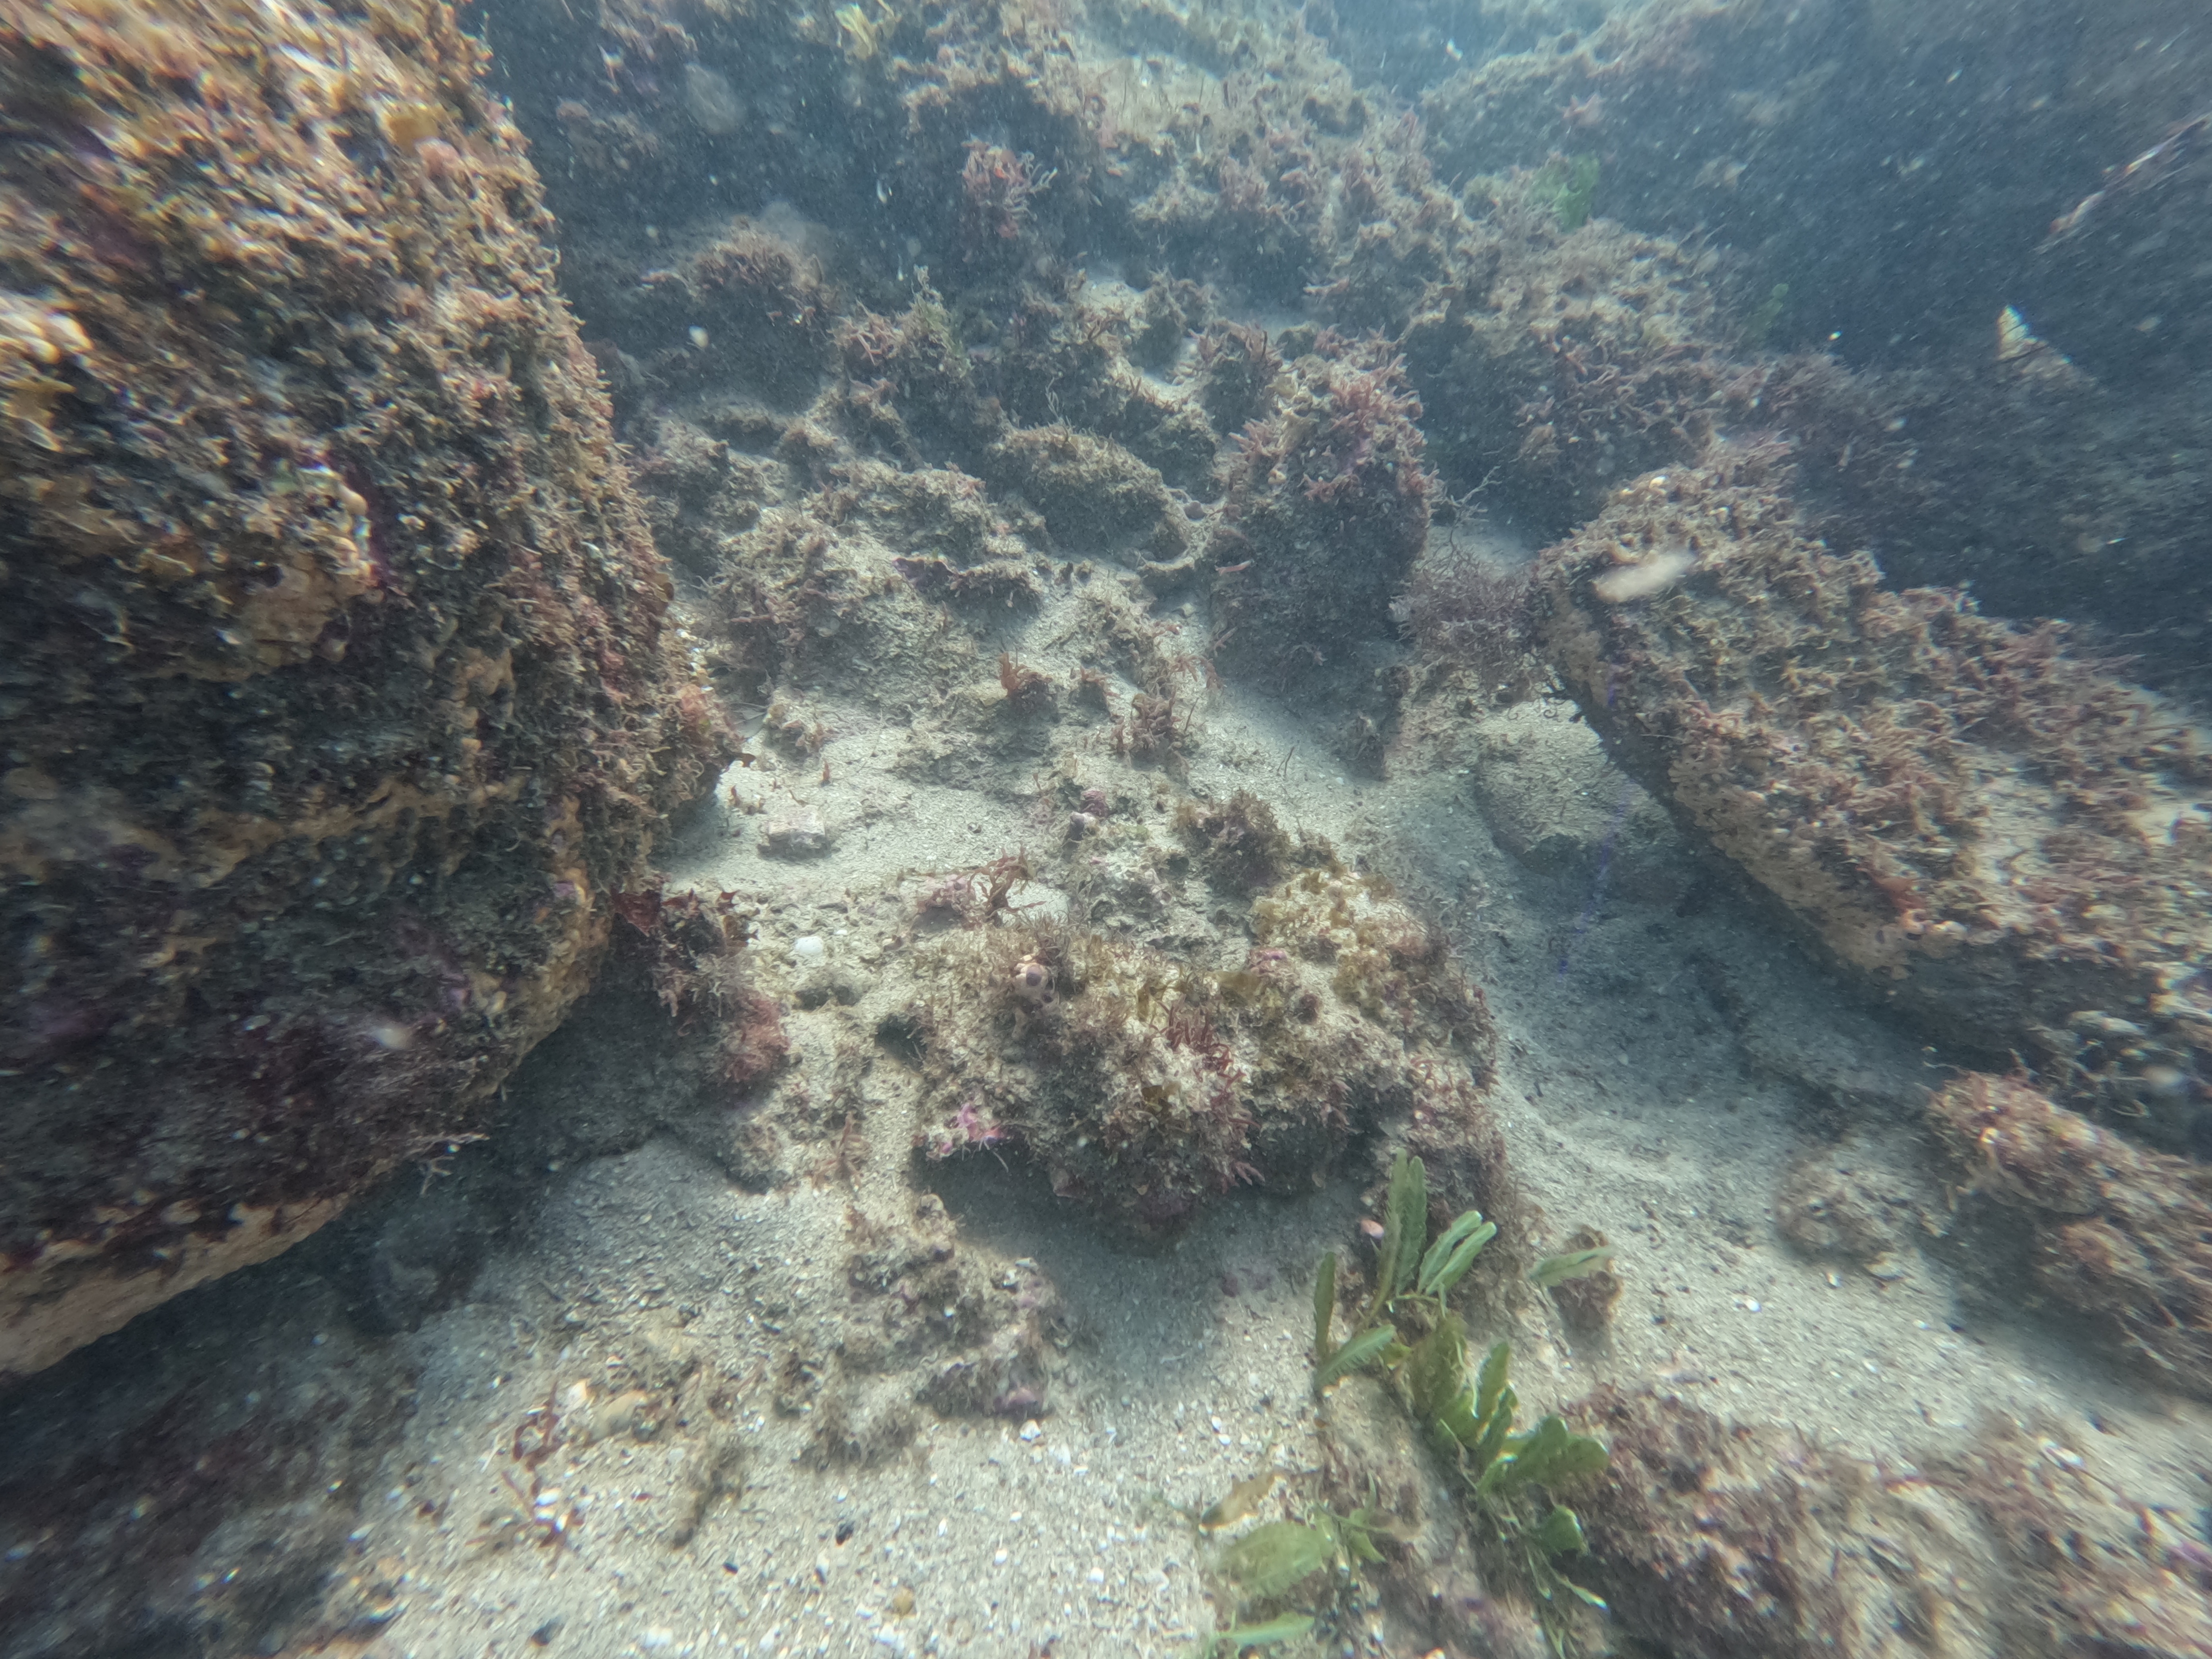

Supplement: Supplementary file 1630 [file G0027956.pdf › Ocean1/G0027956.pdf]

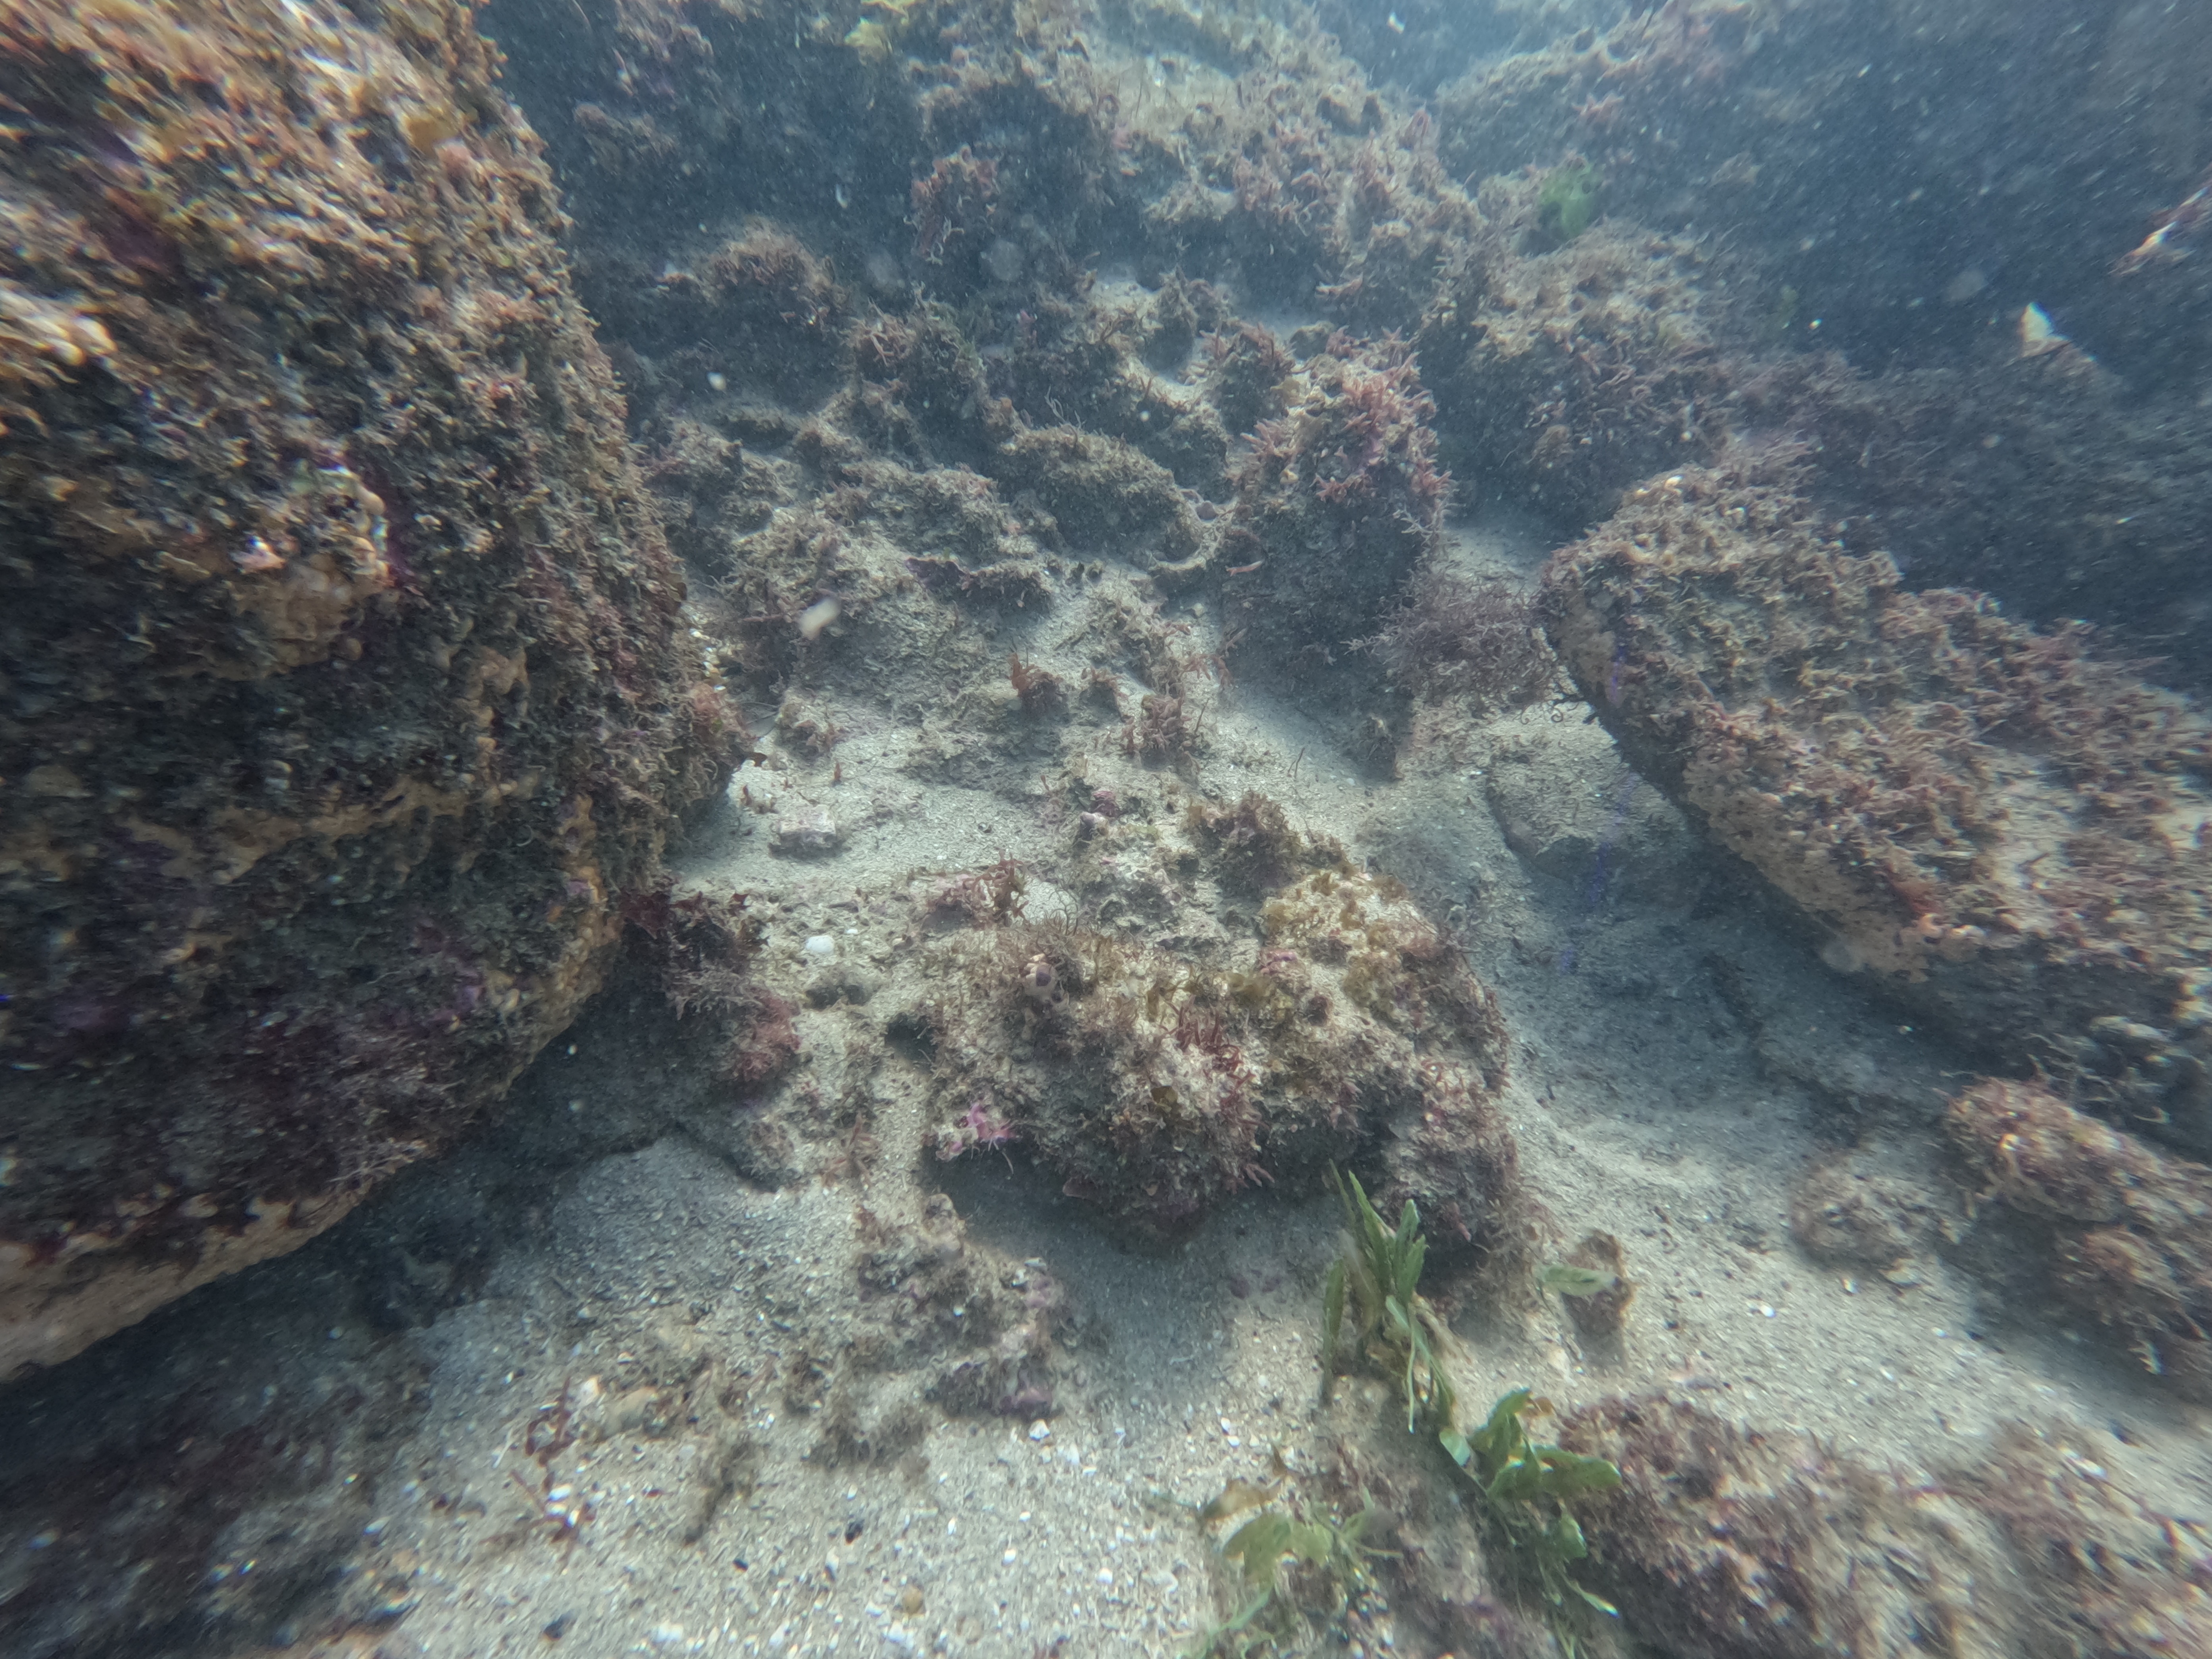

Supplement: Supplementary file 1631 [file G0027957.pdf › Ocean1/G0027957.pdf]

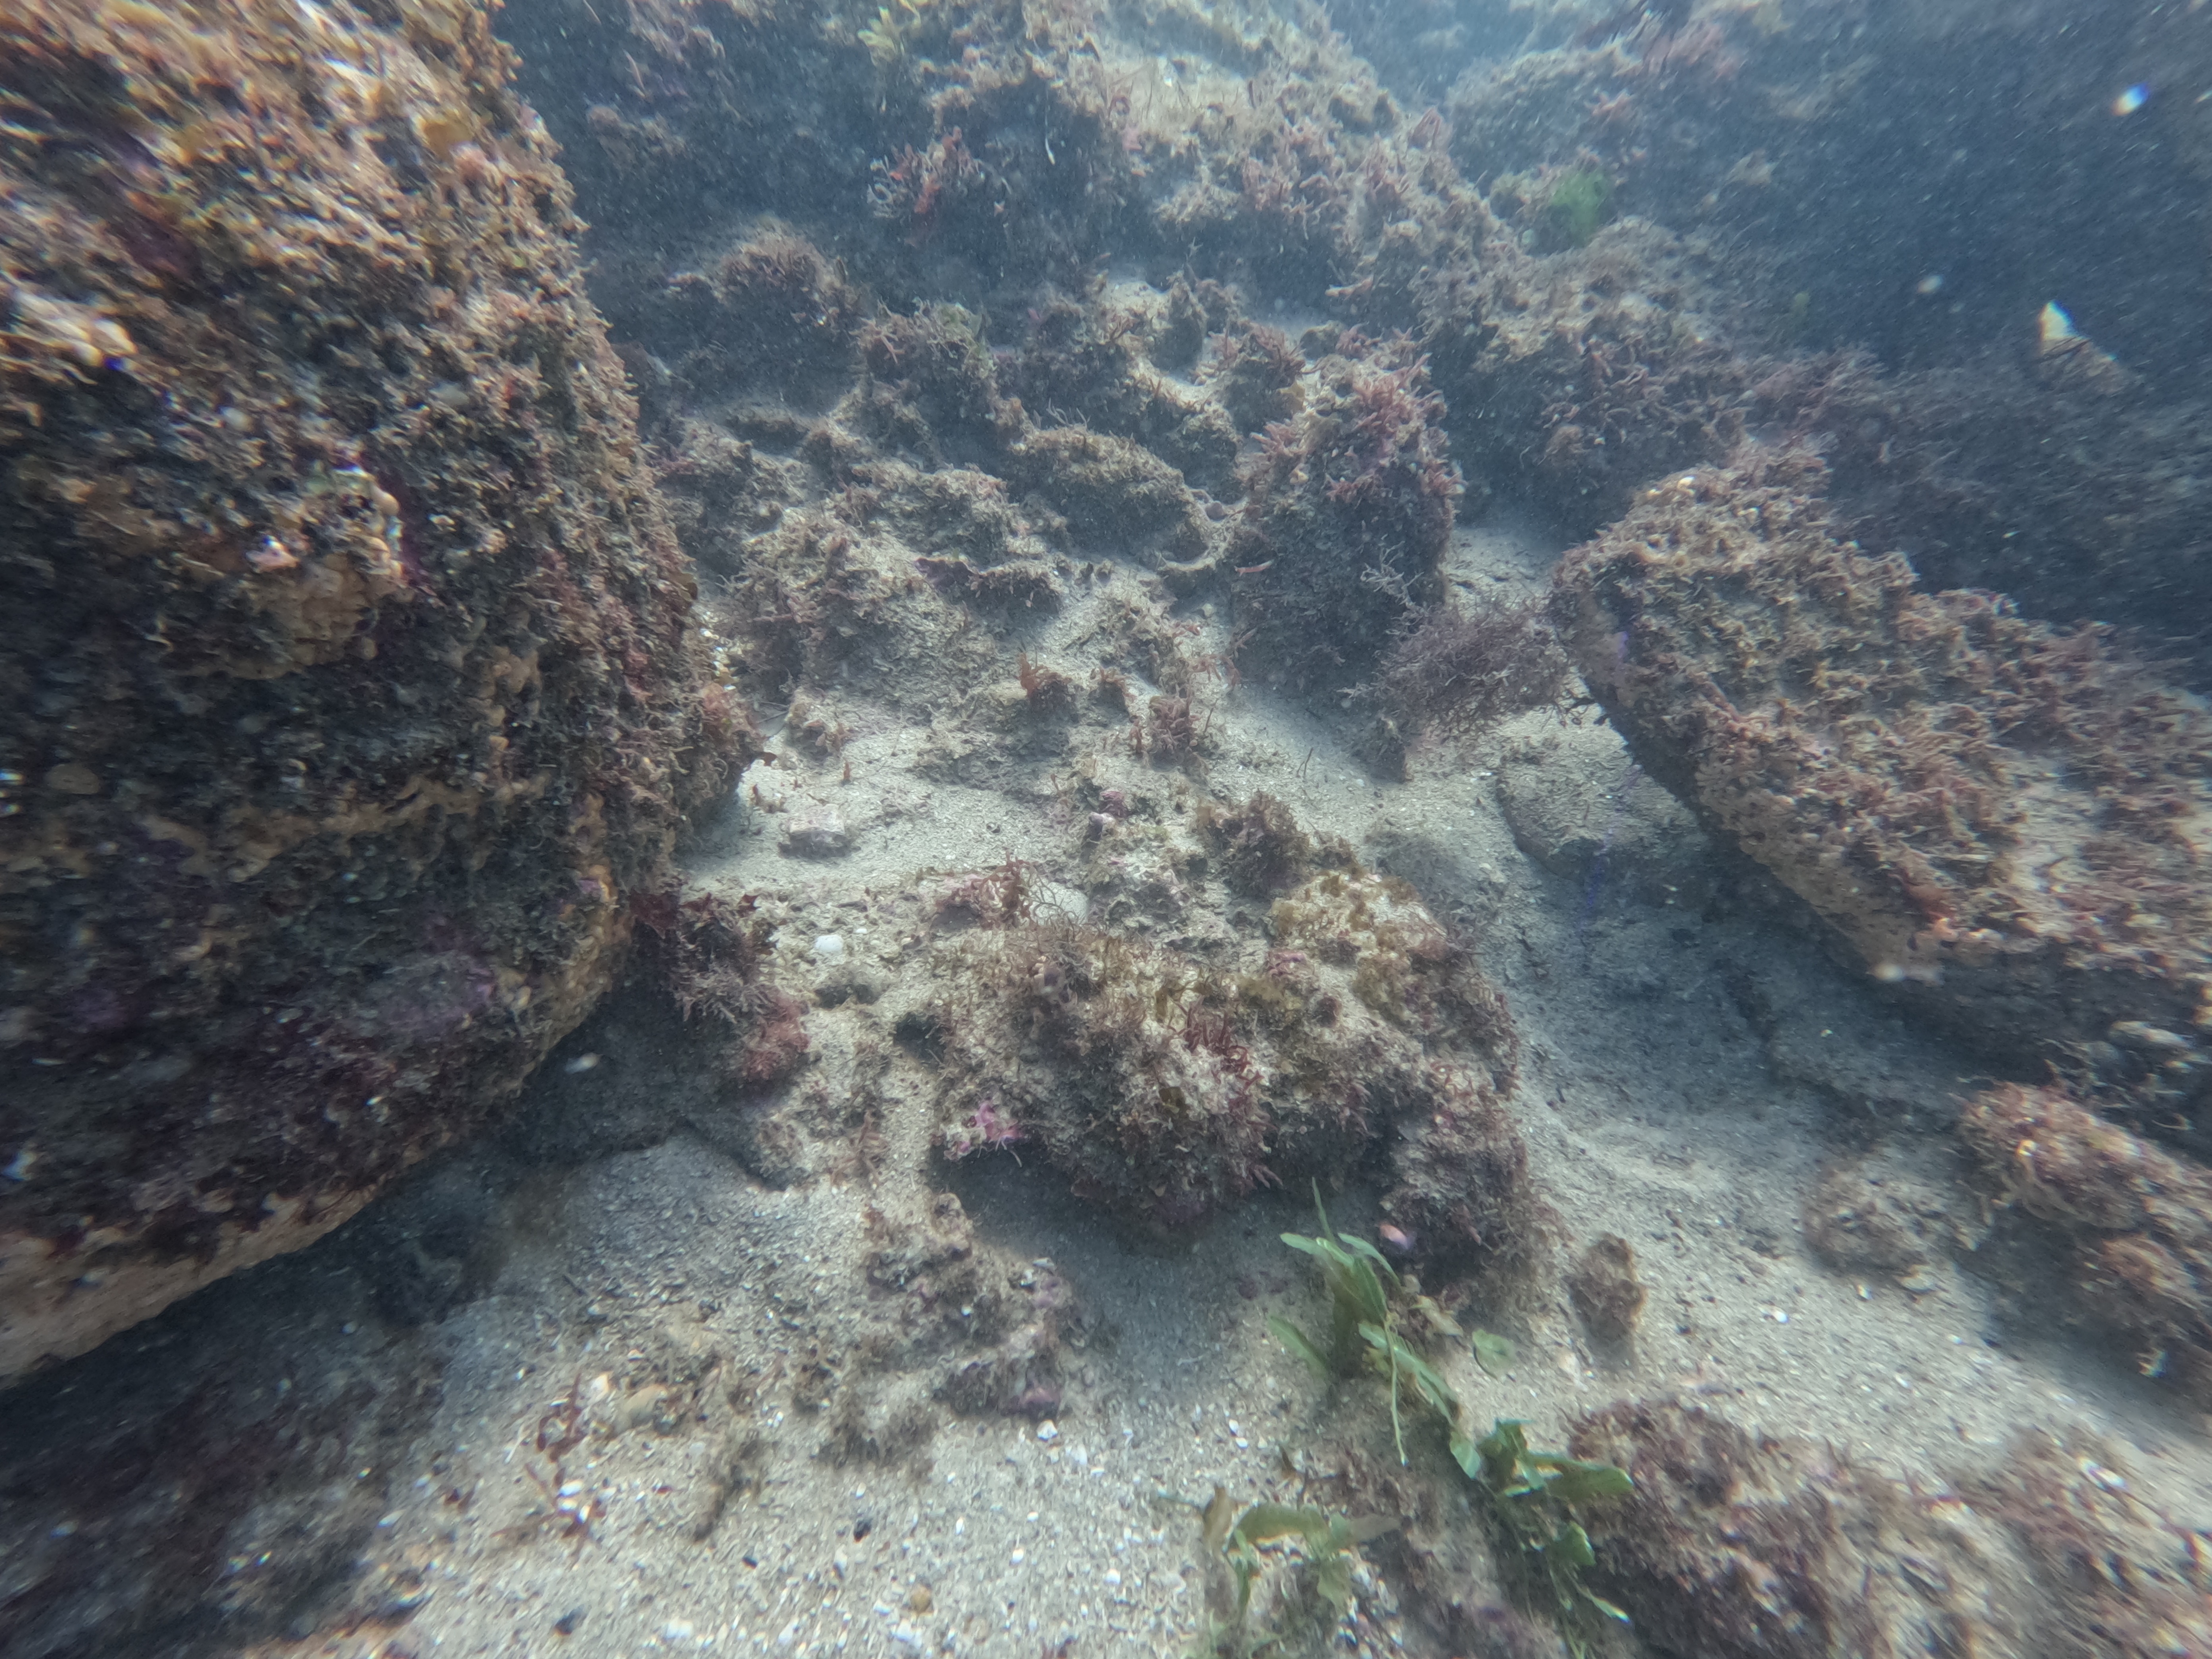

Supplement: Supplementary file 1632 [file G0027958.pdf › Ocean1/G0027958.pdf]

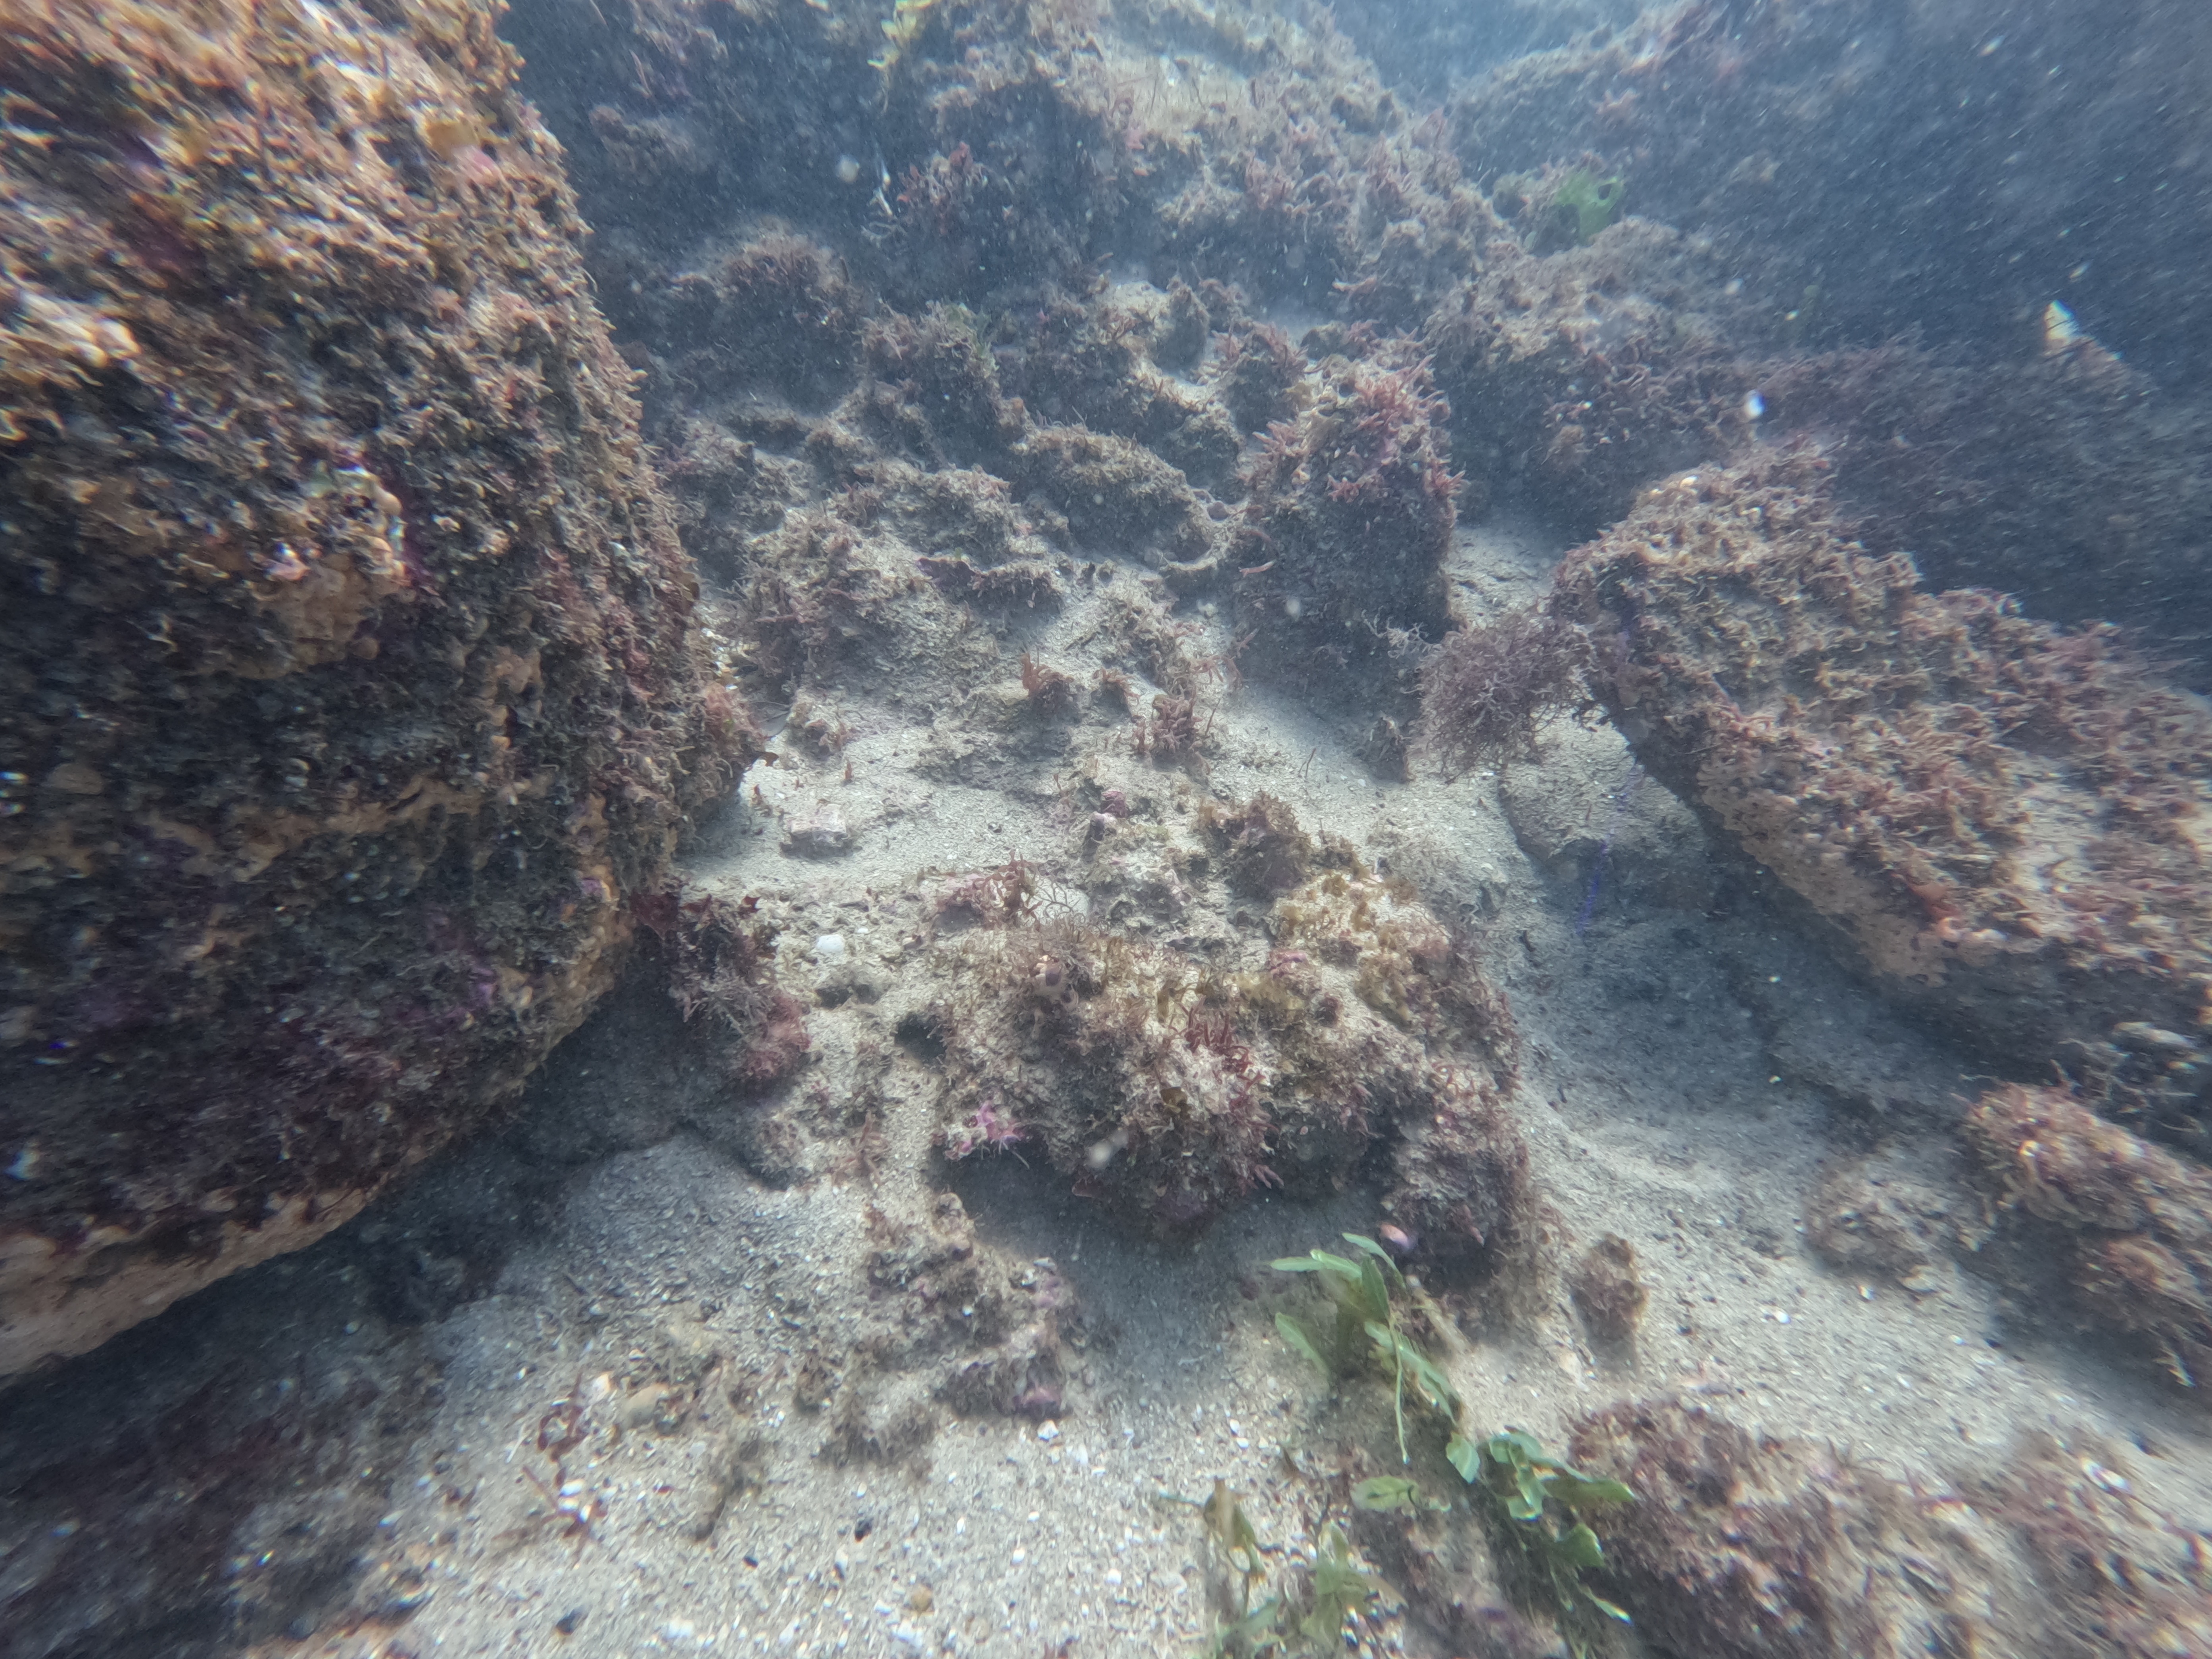

Supplement: Supplementary file 1633 [file G0027959.pdf › Ocean1/G0027959.pdf]

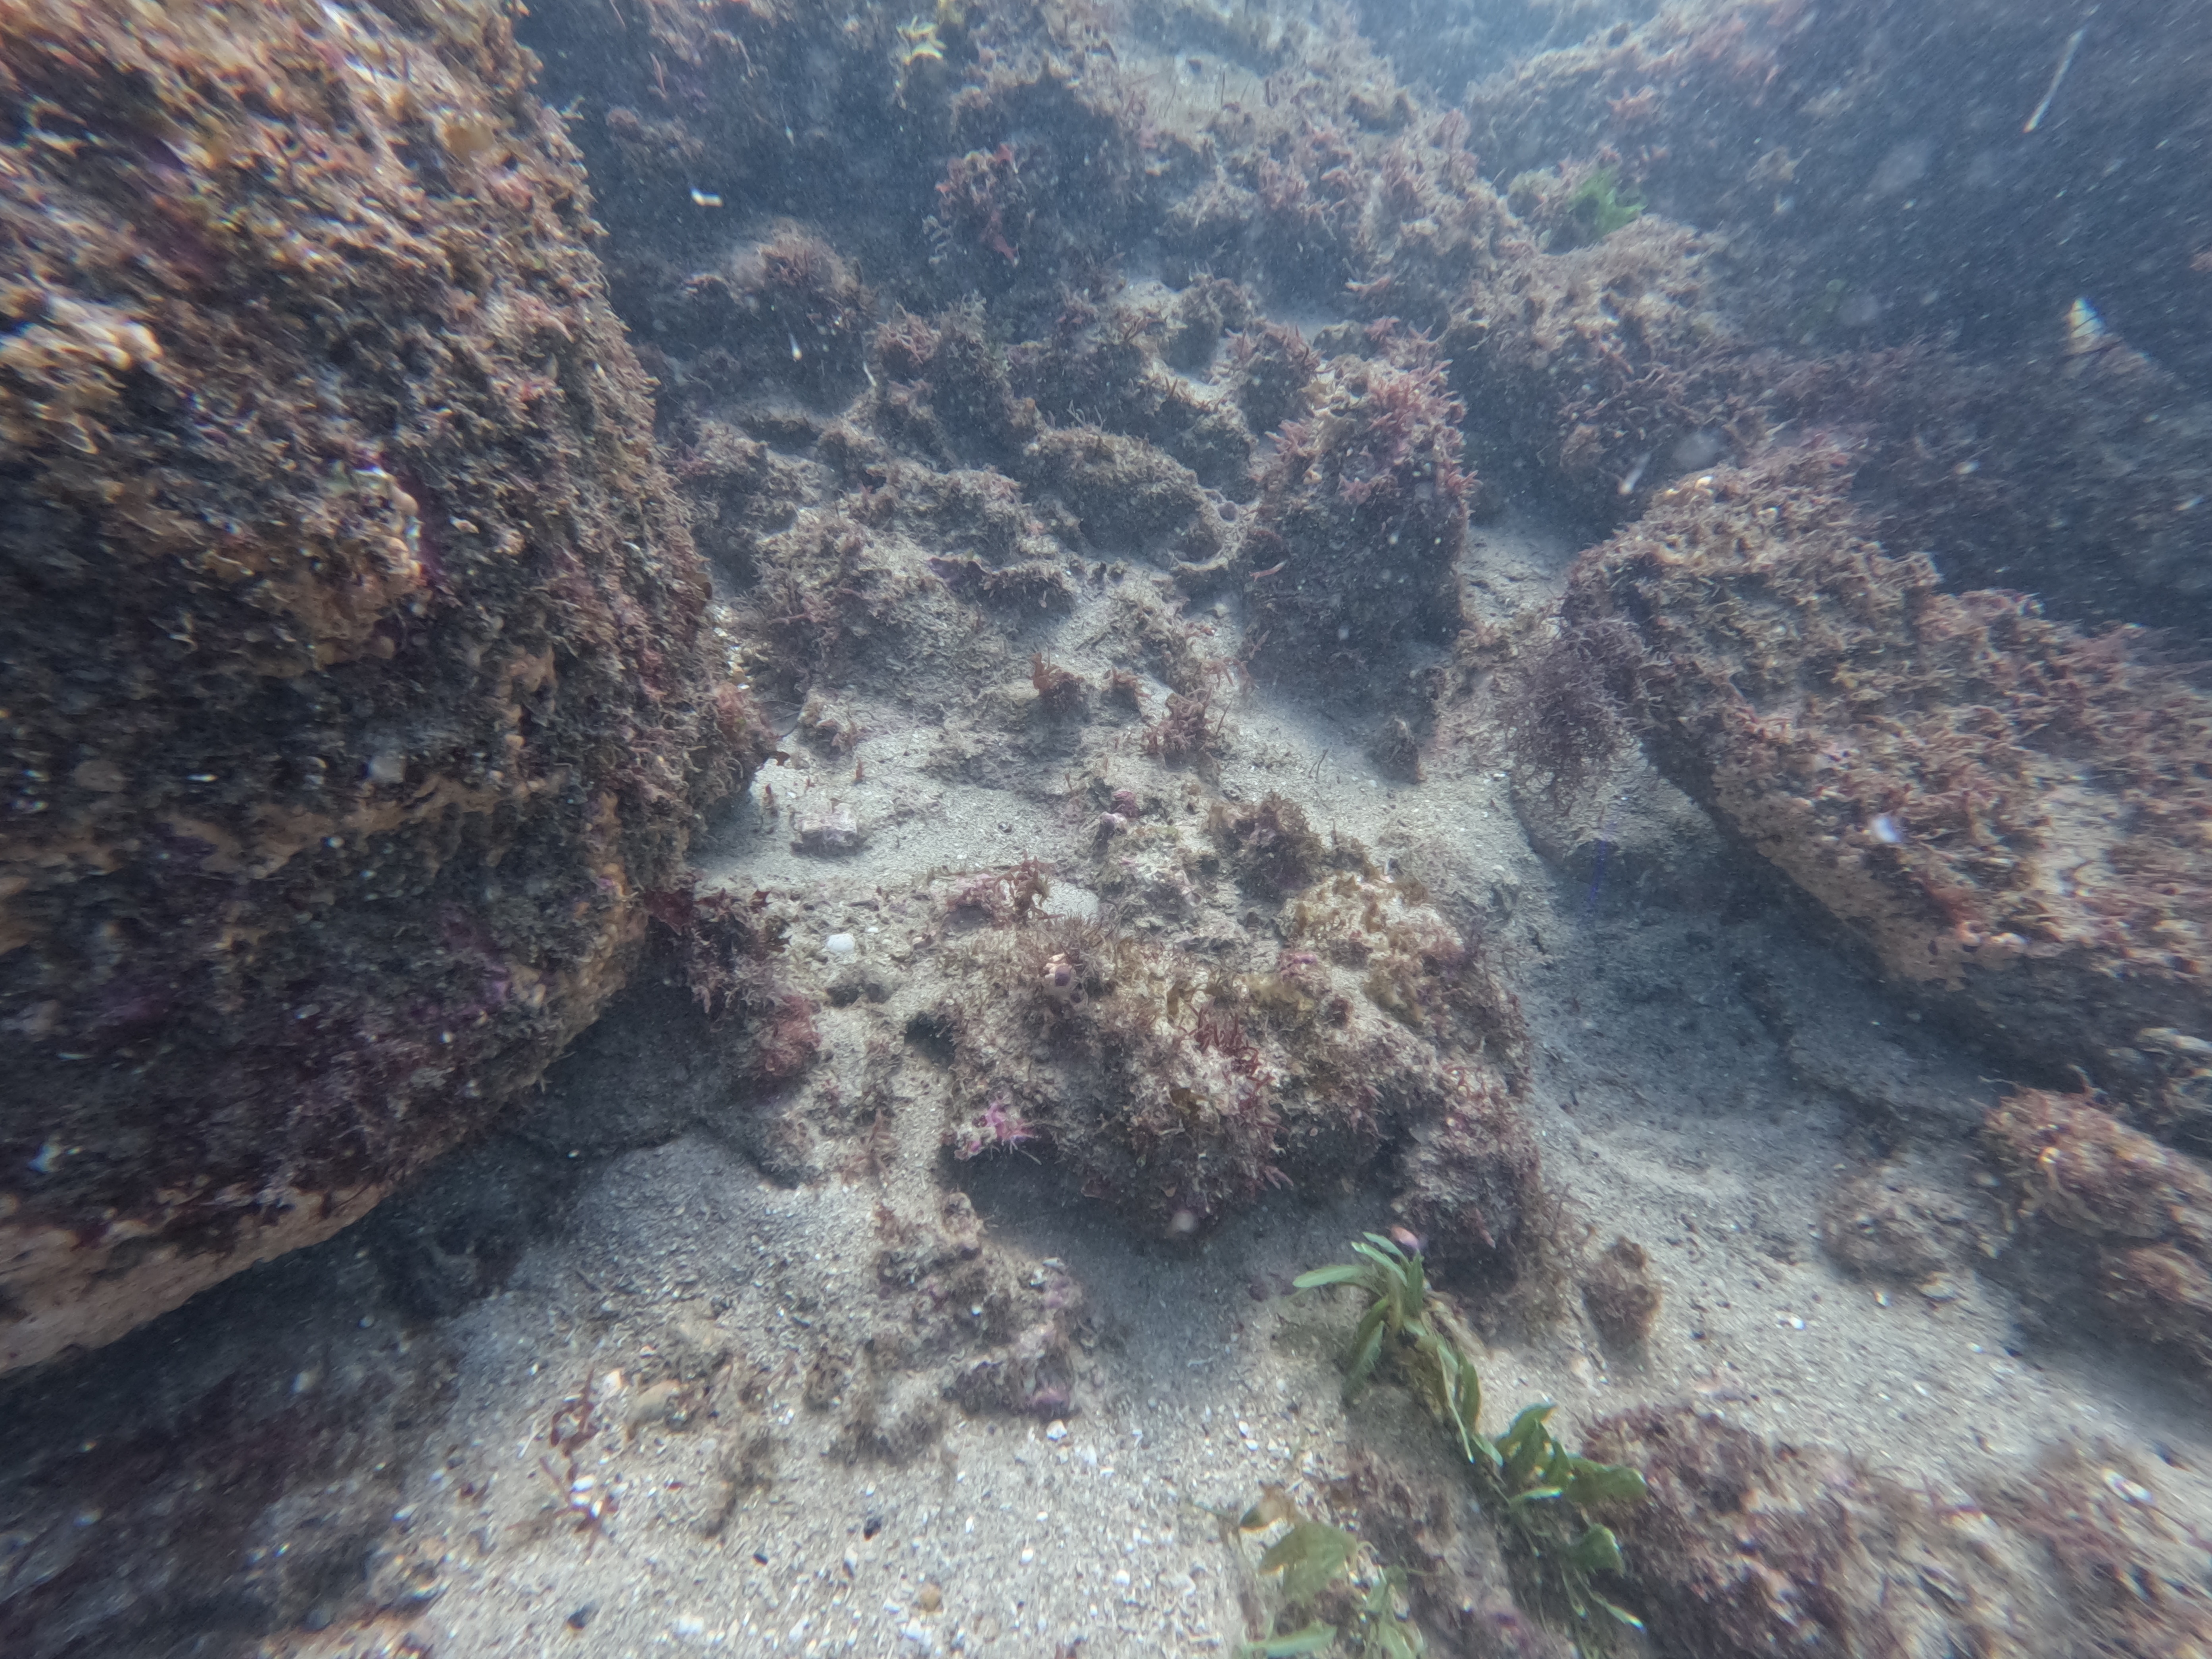

Supplement: Supplementary file 1634 [file G0027960.pdf › Ocean1/G0027960.pdf]

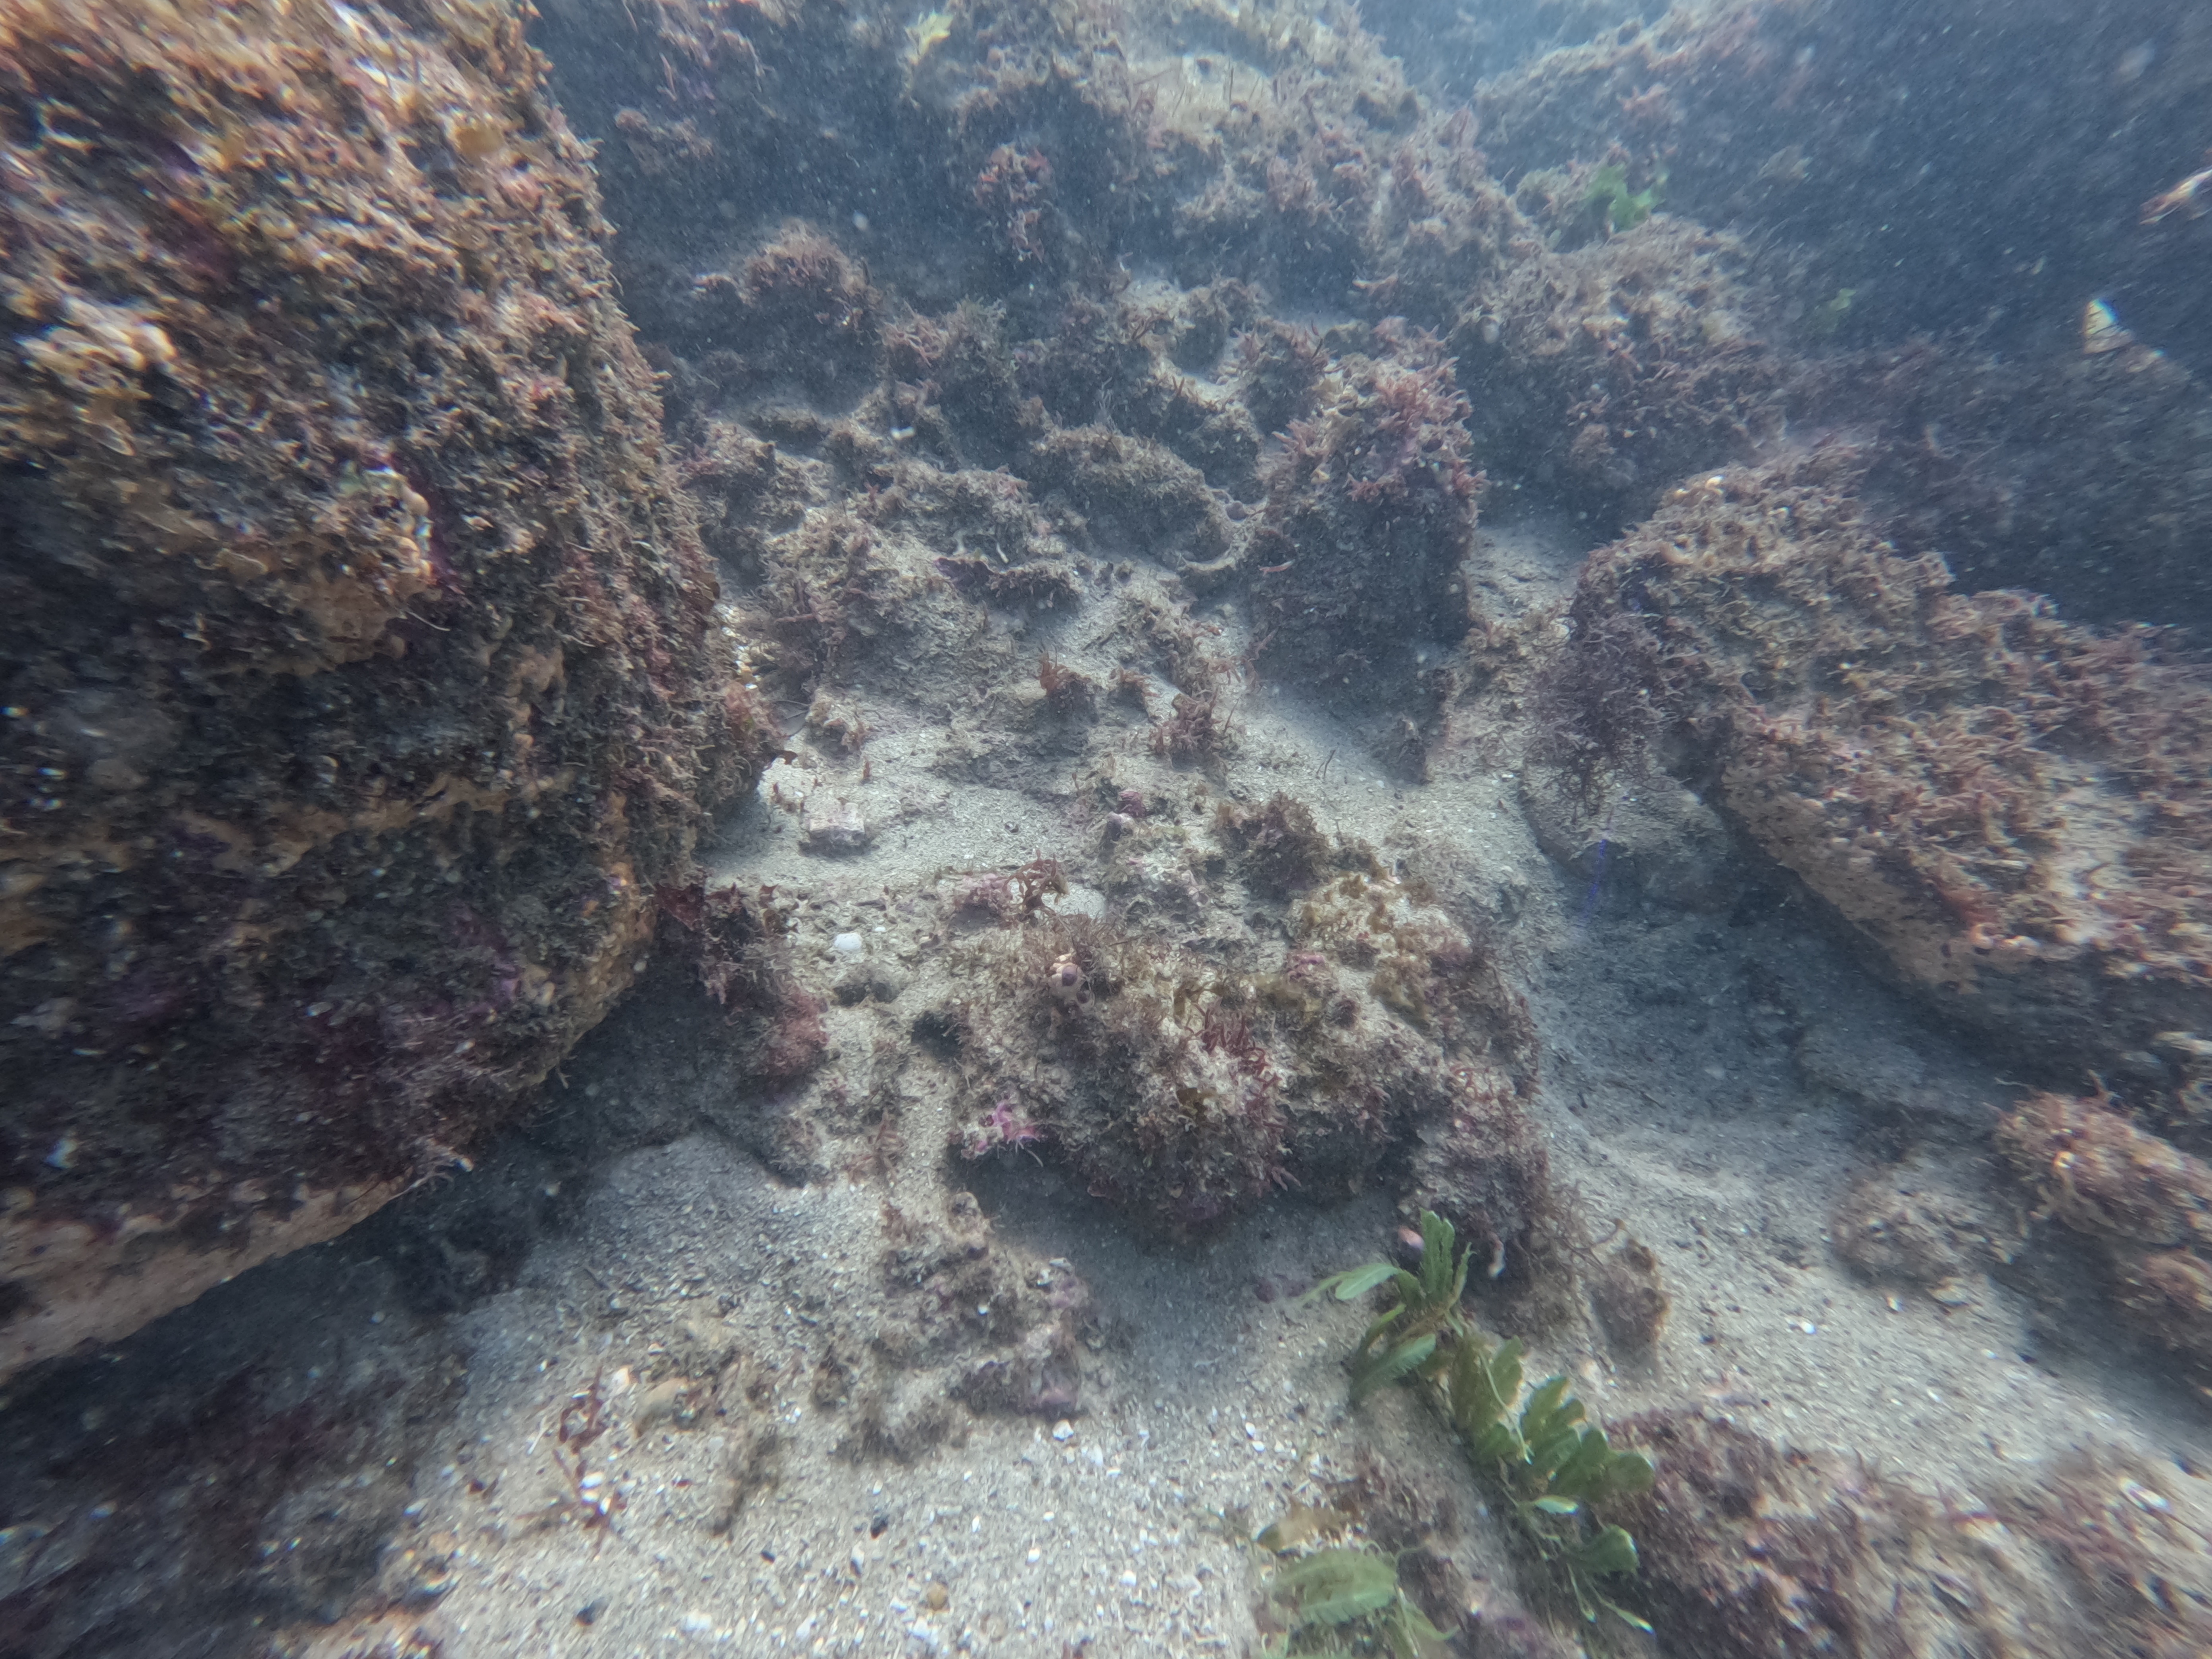

Supplement: Supplementary file 1635 [file G0027961.pdf › Ocean1/G0027961.pdf]

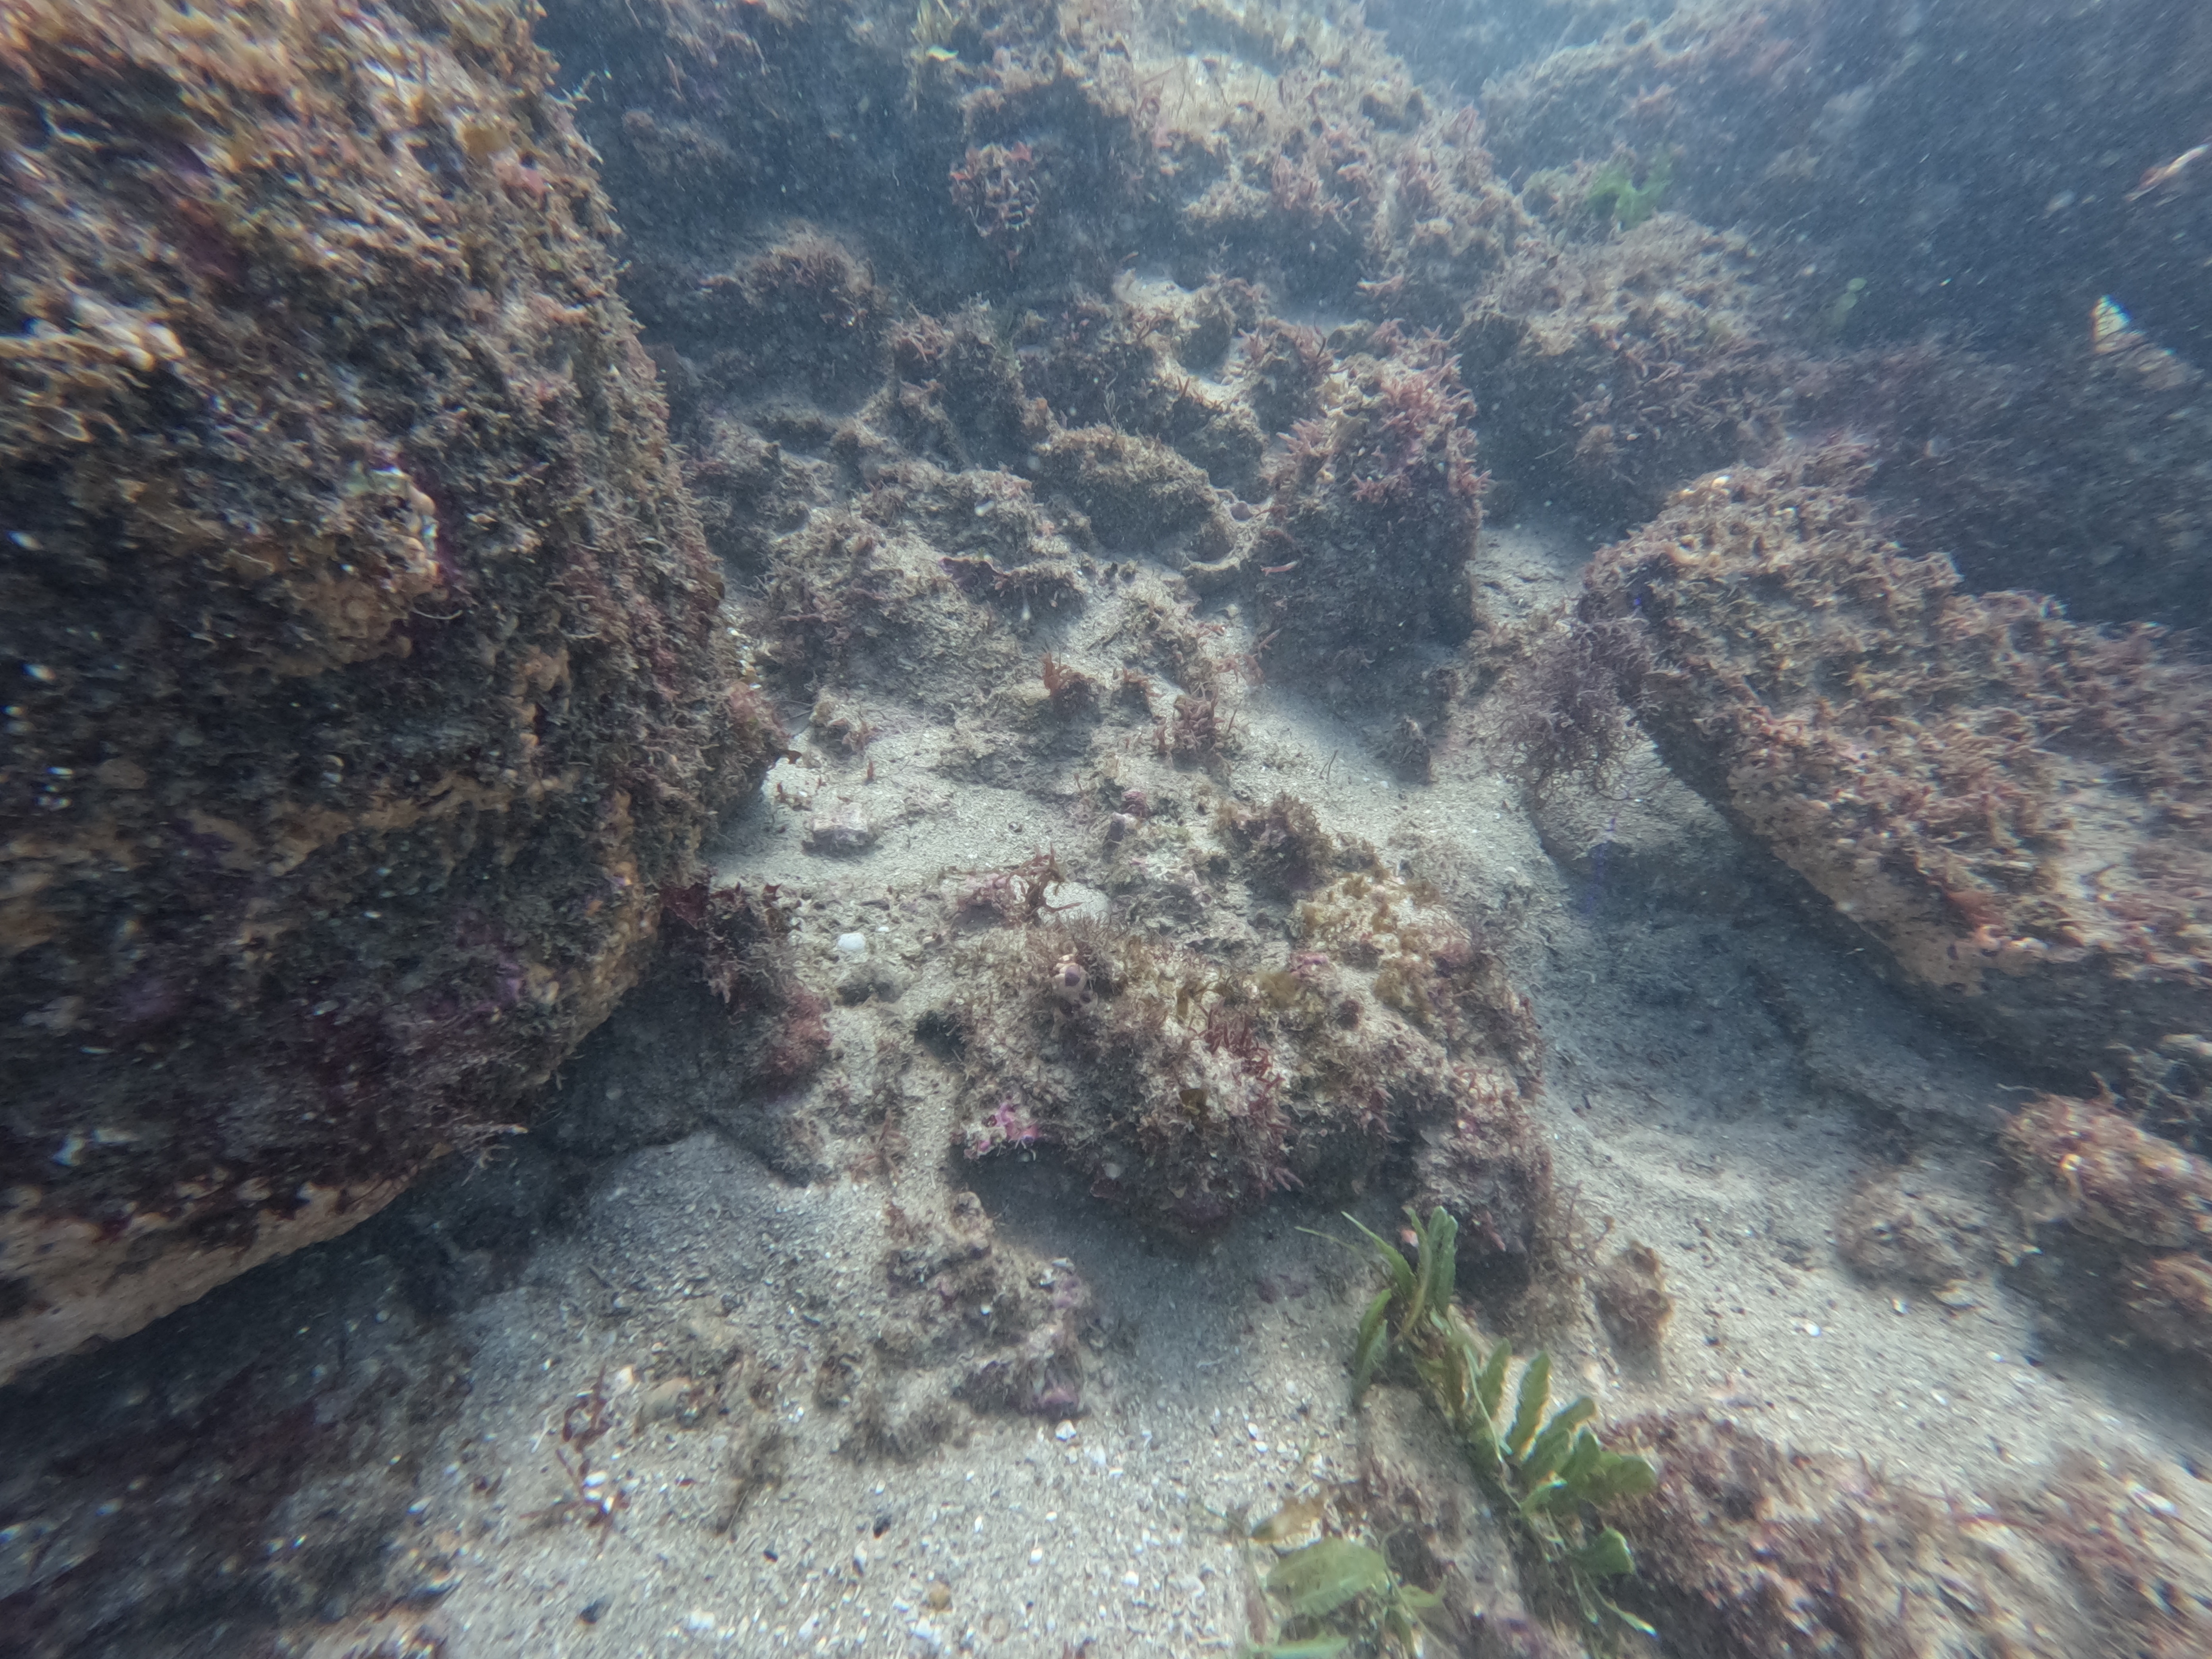

Supplement: Supplementary file 1636 [file G0027962.pdf › Ocean1/G0027962.pdf]

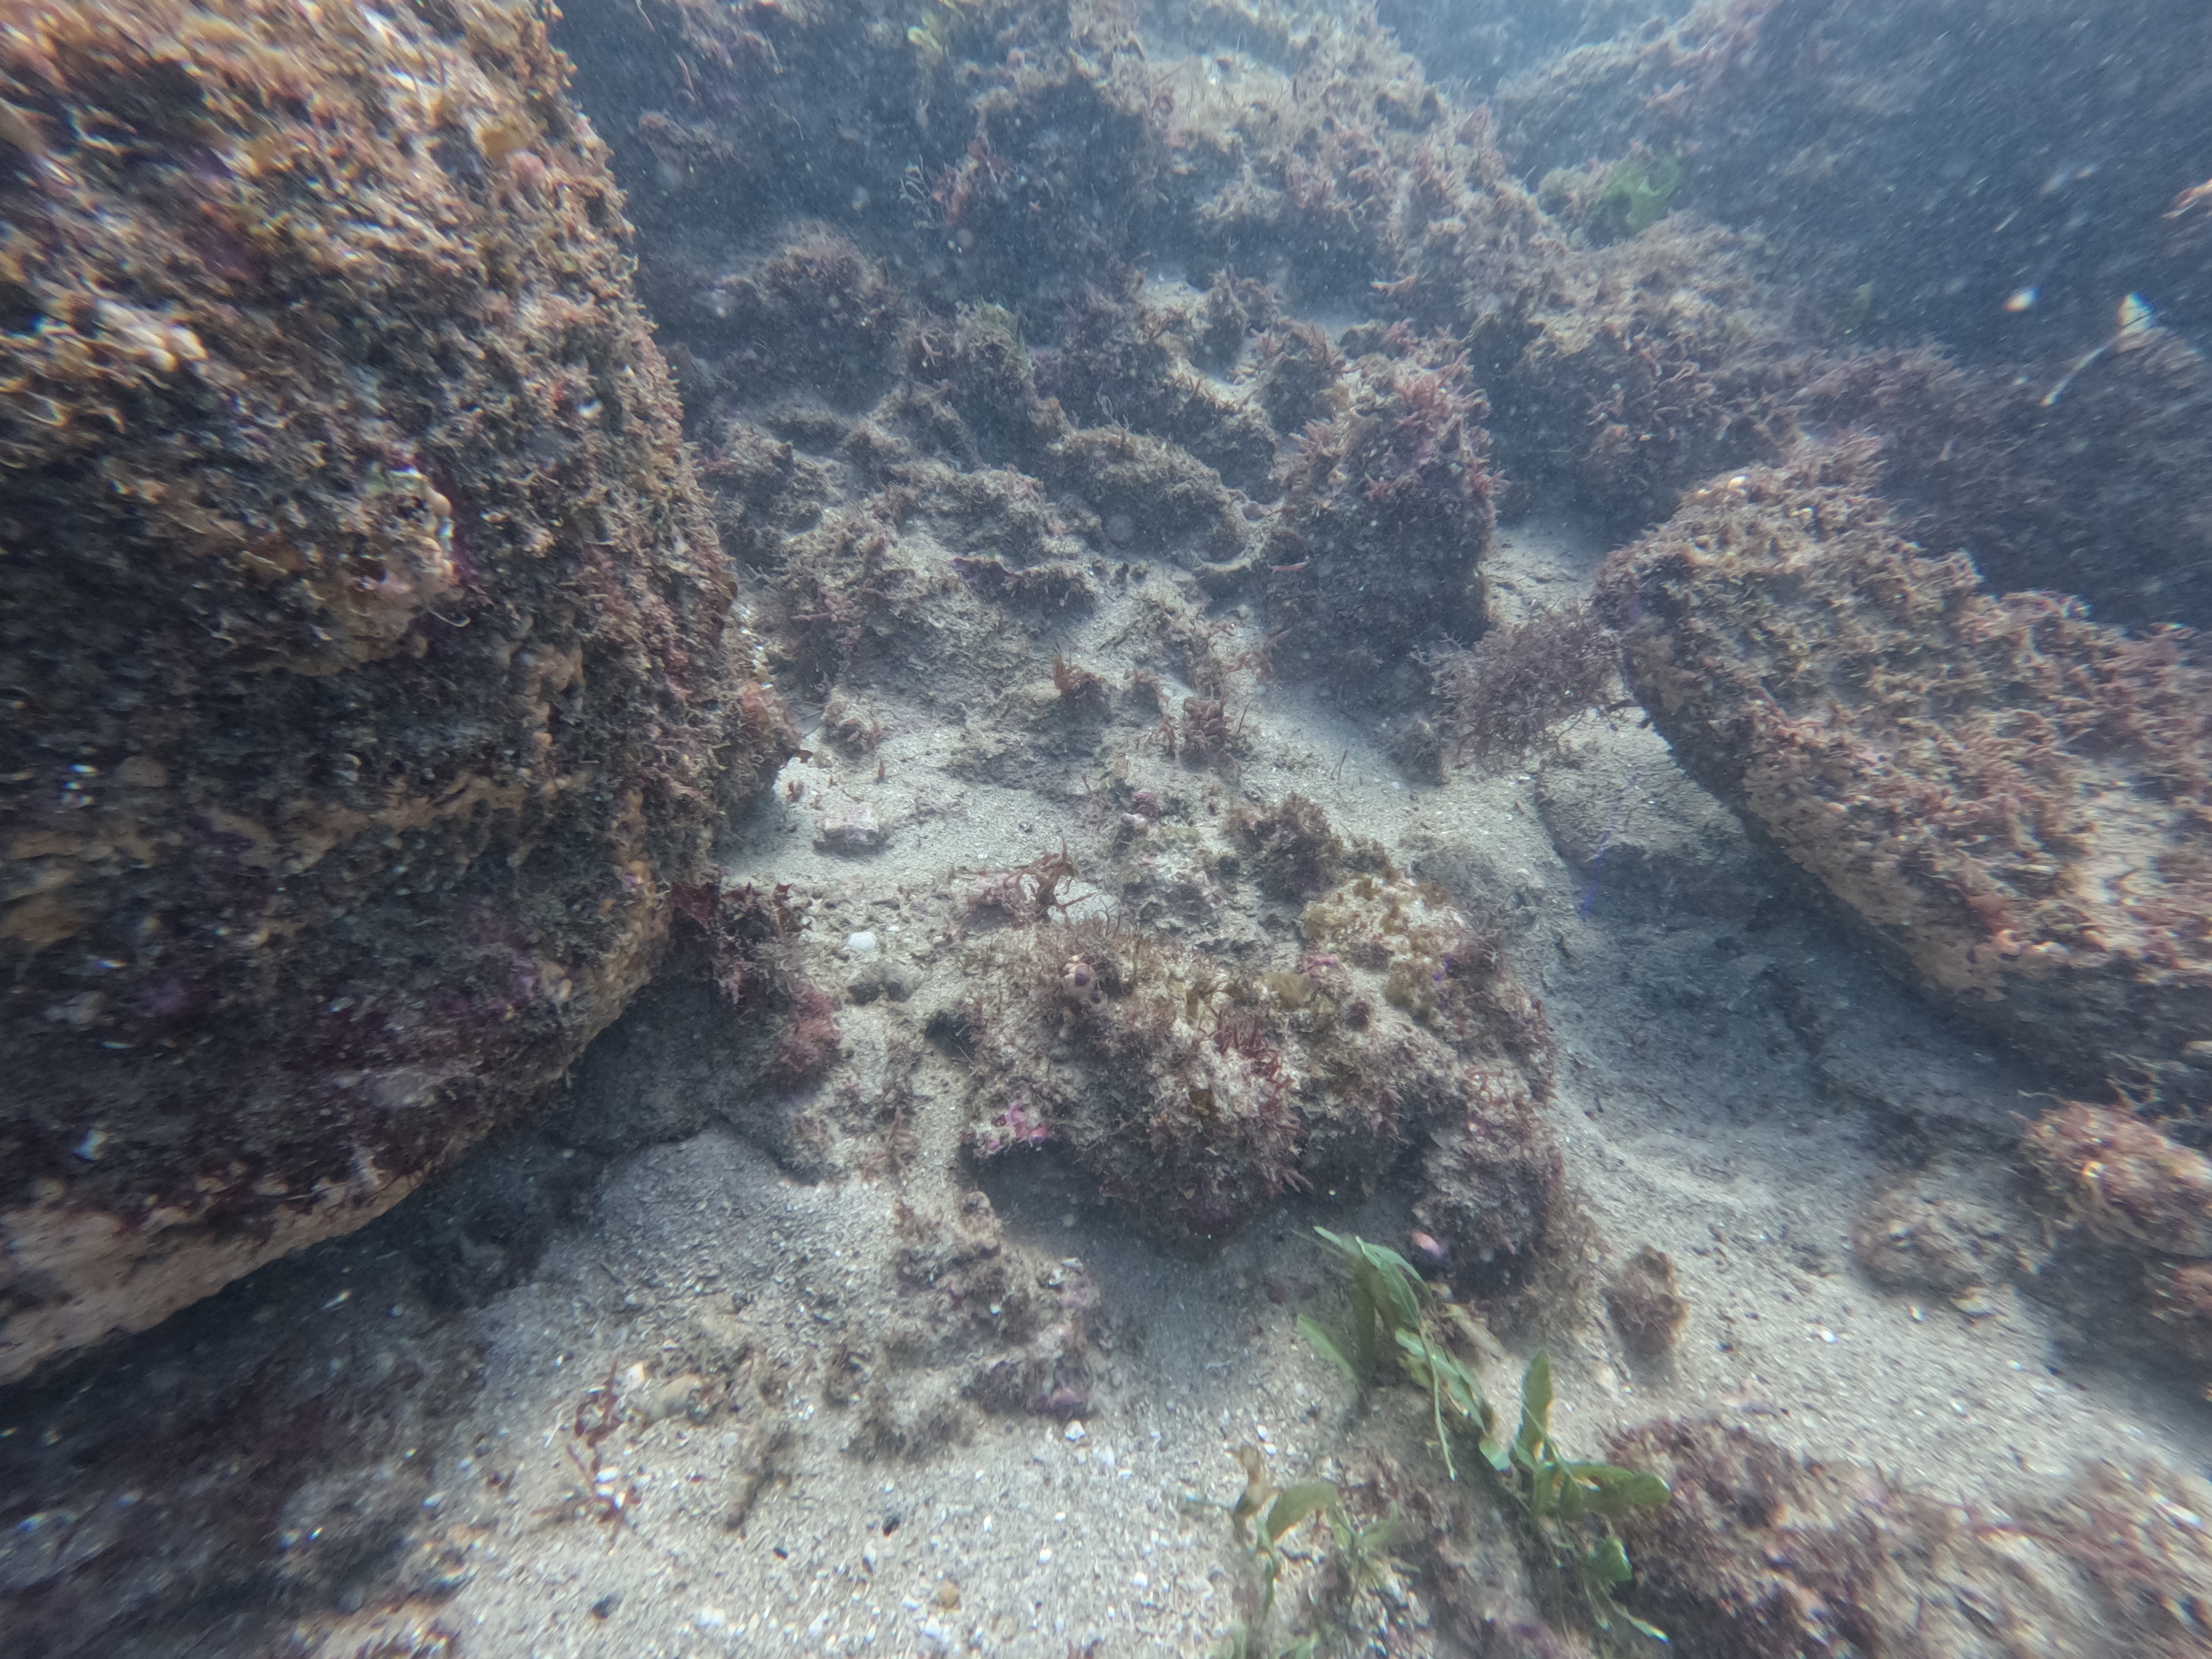

Supplement: Supplementary file 1637 [file G0027963.pdf › Ocean1/G0027963.pdf]

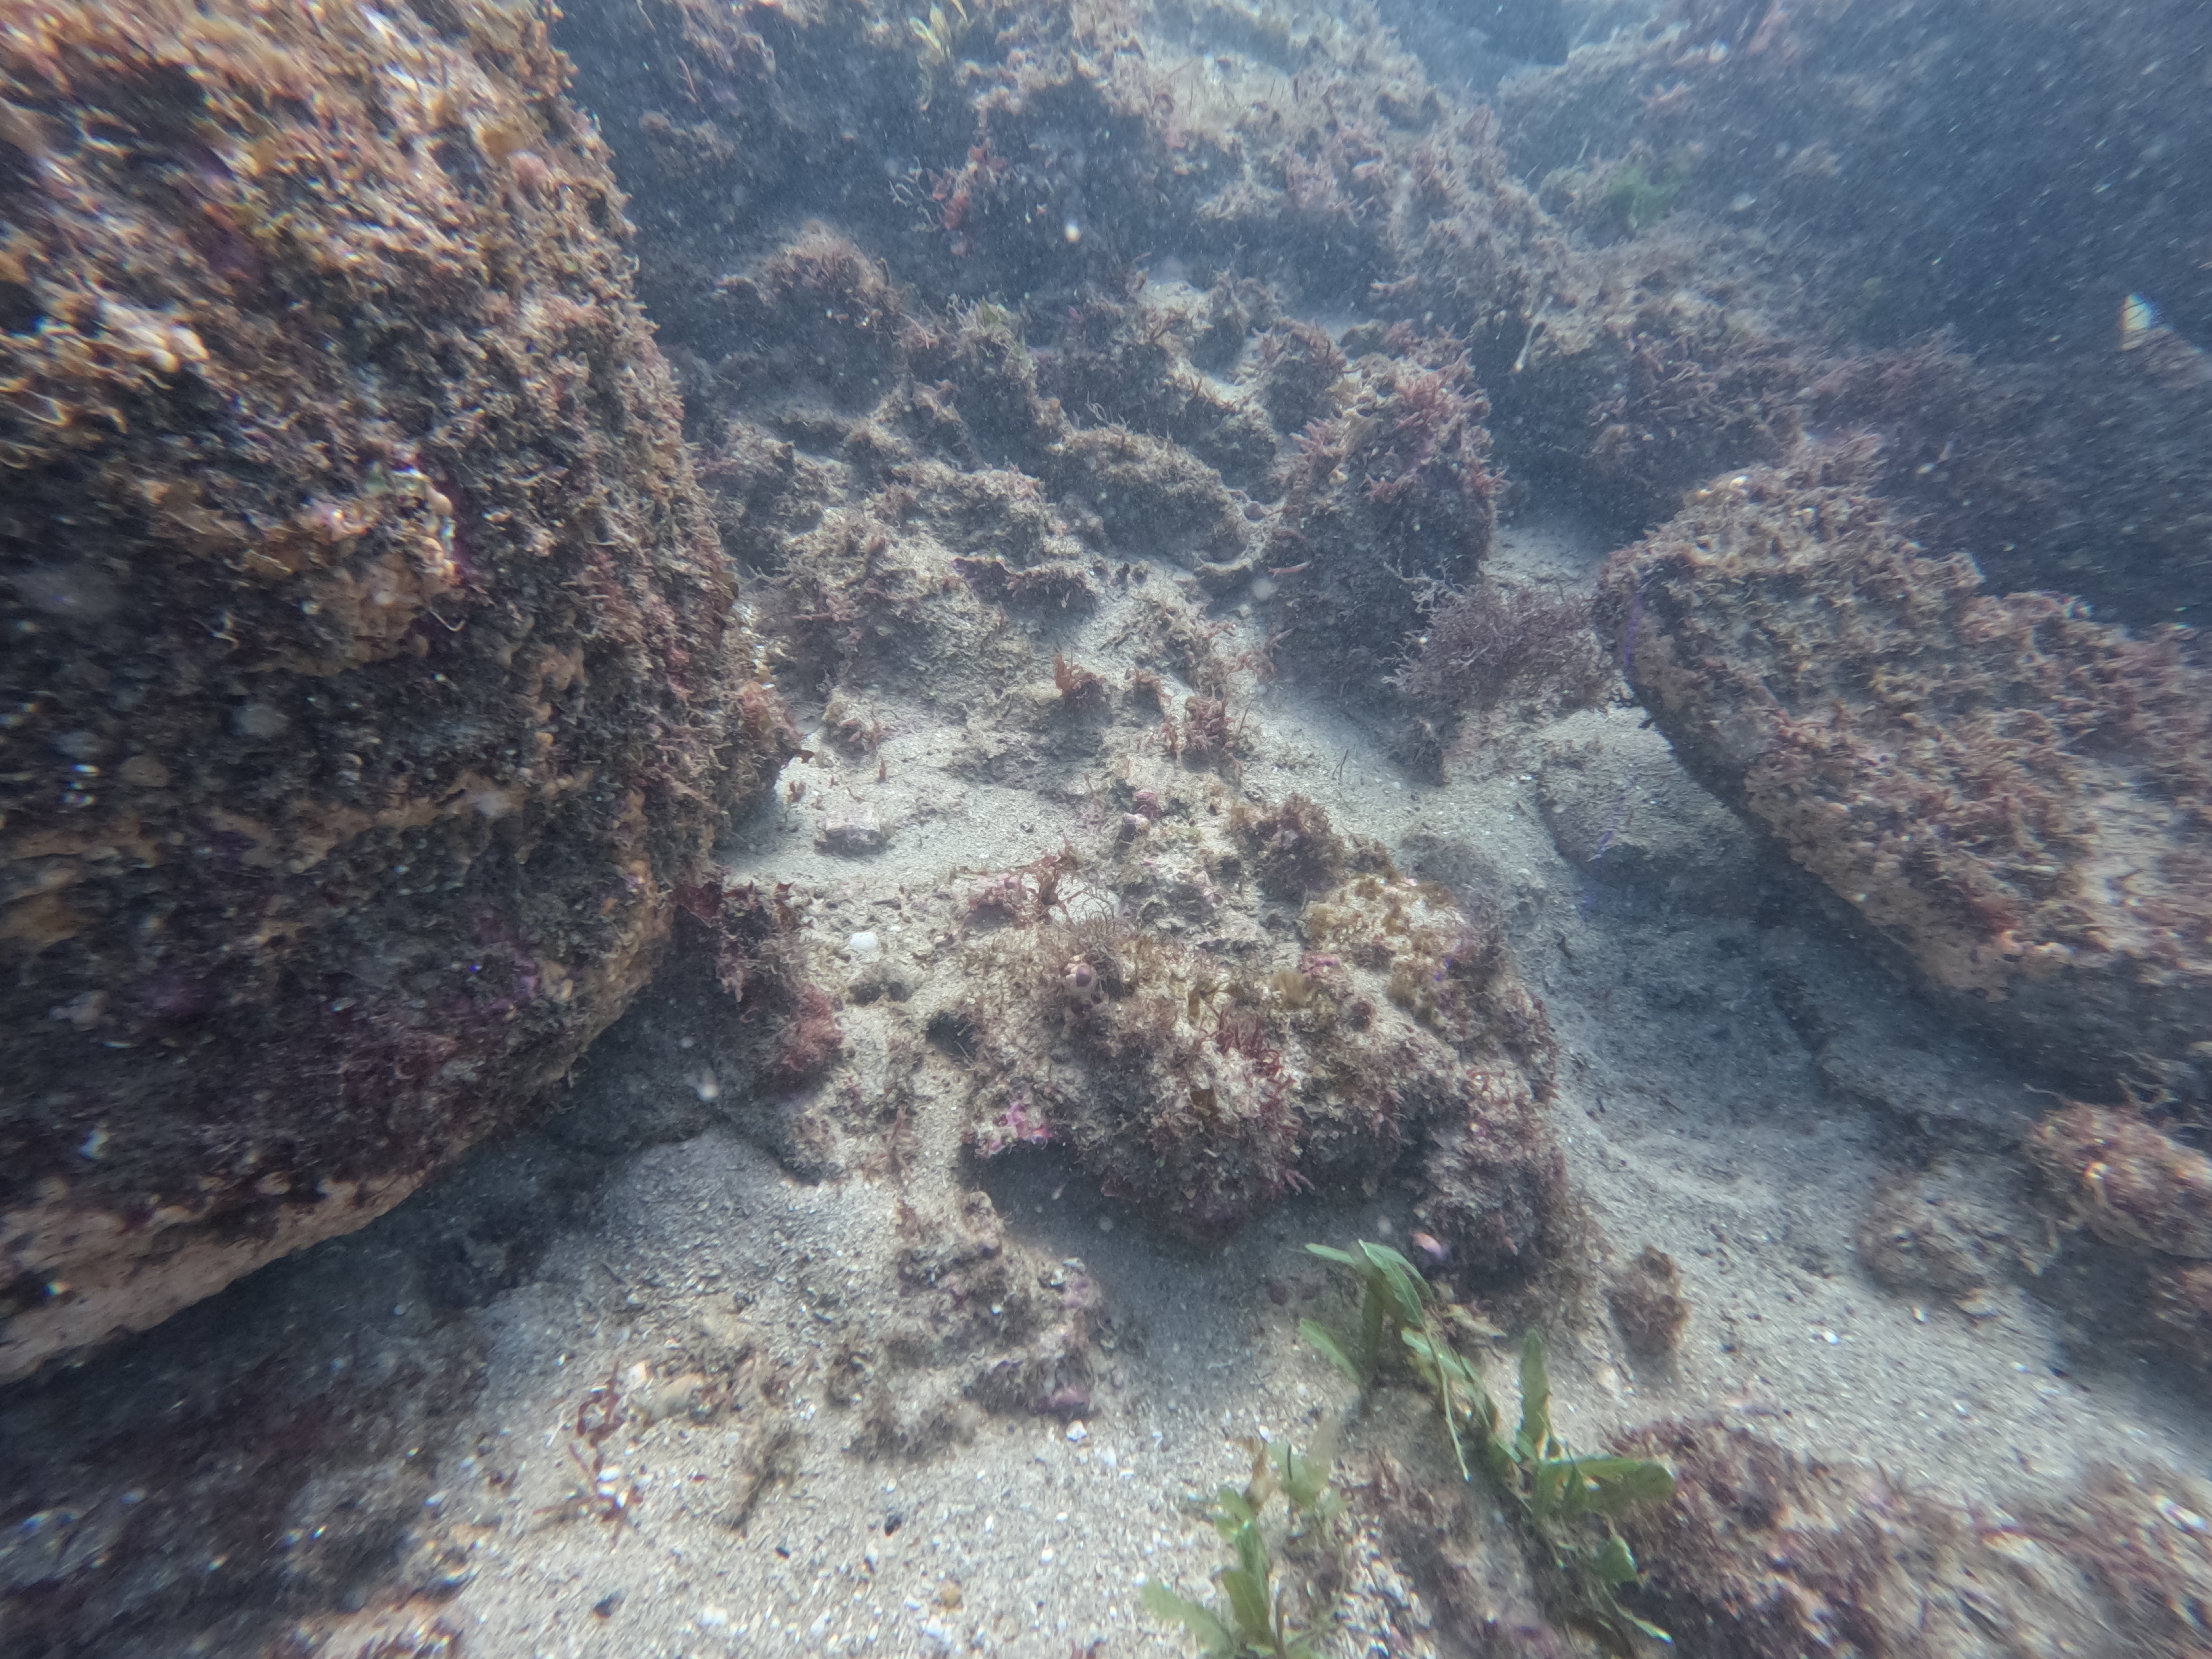

Supplement: Supplementary file 1638 [file G0027964.pdf › Ocean1/G0027964.pdf]

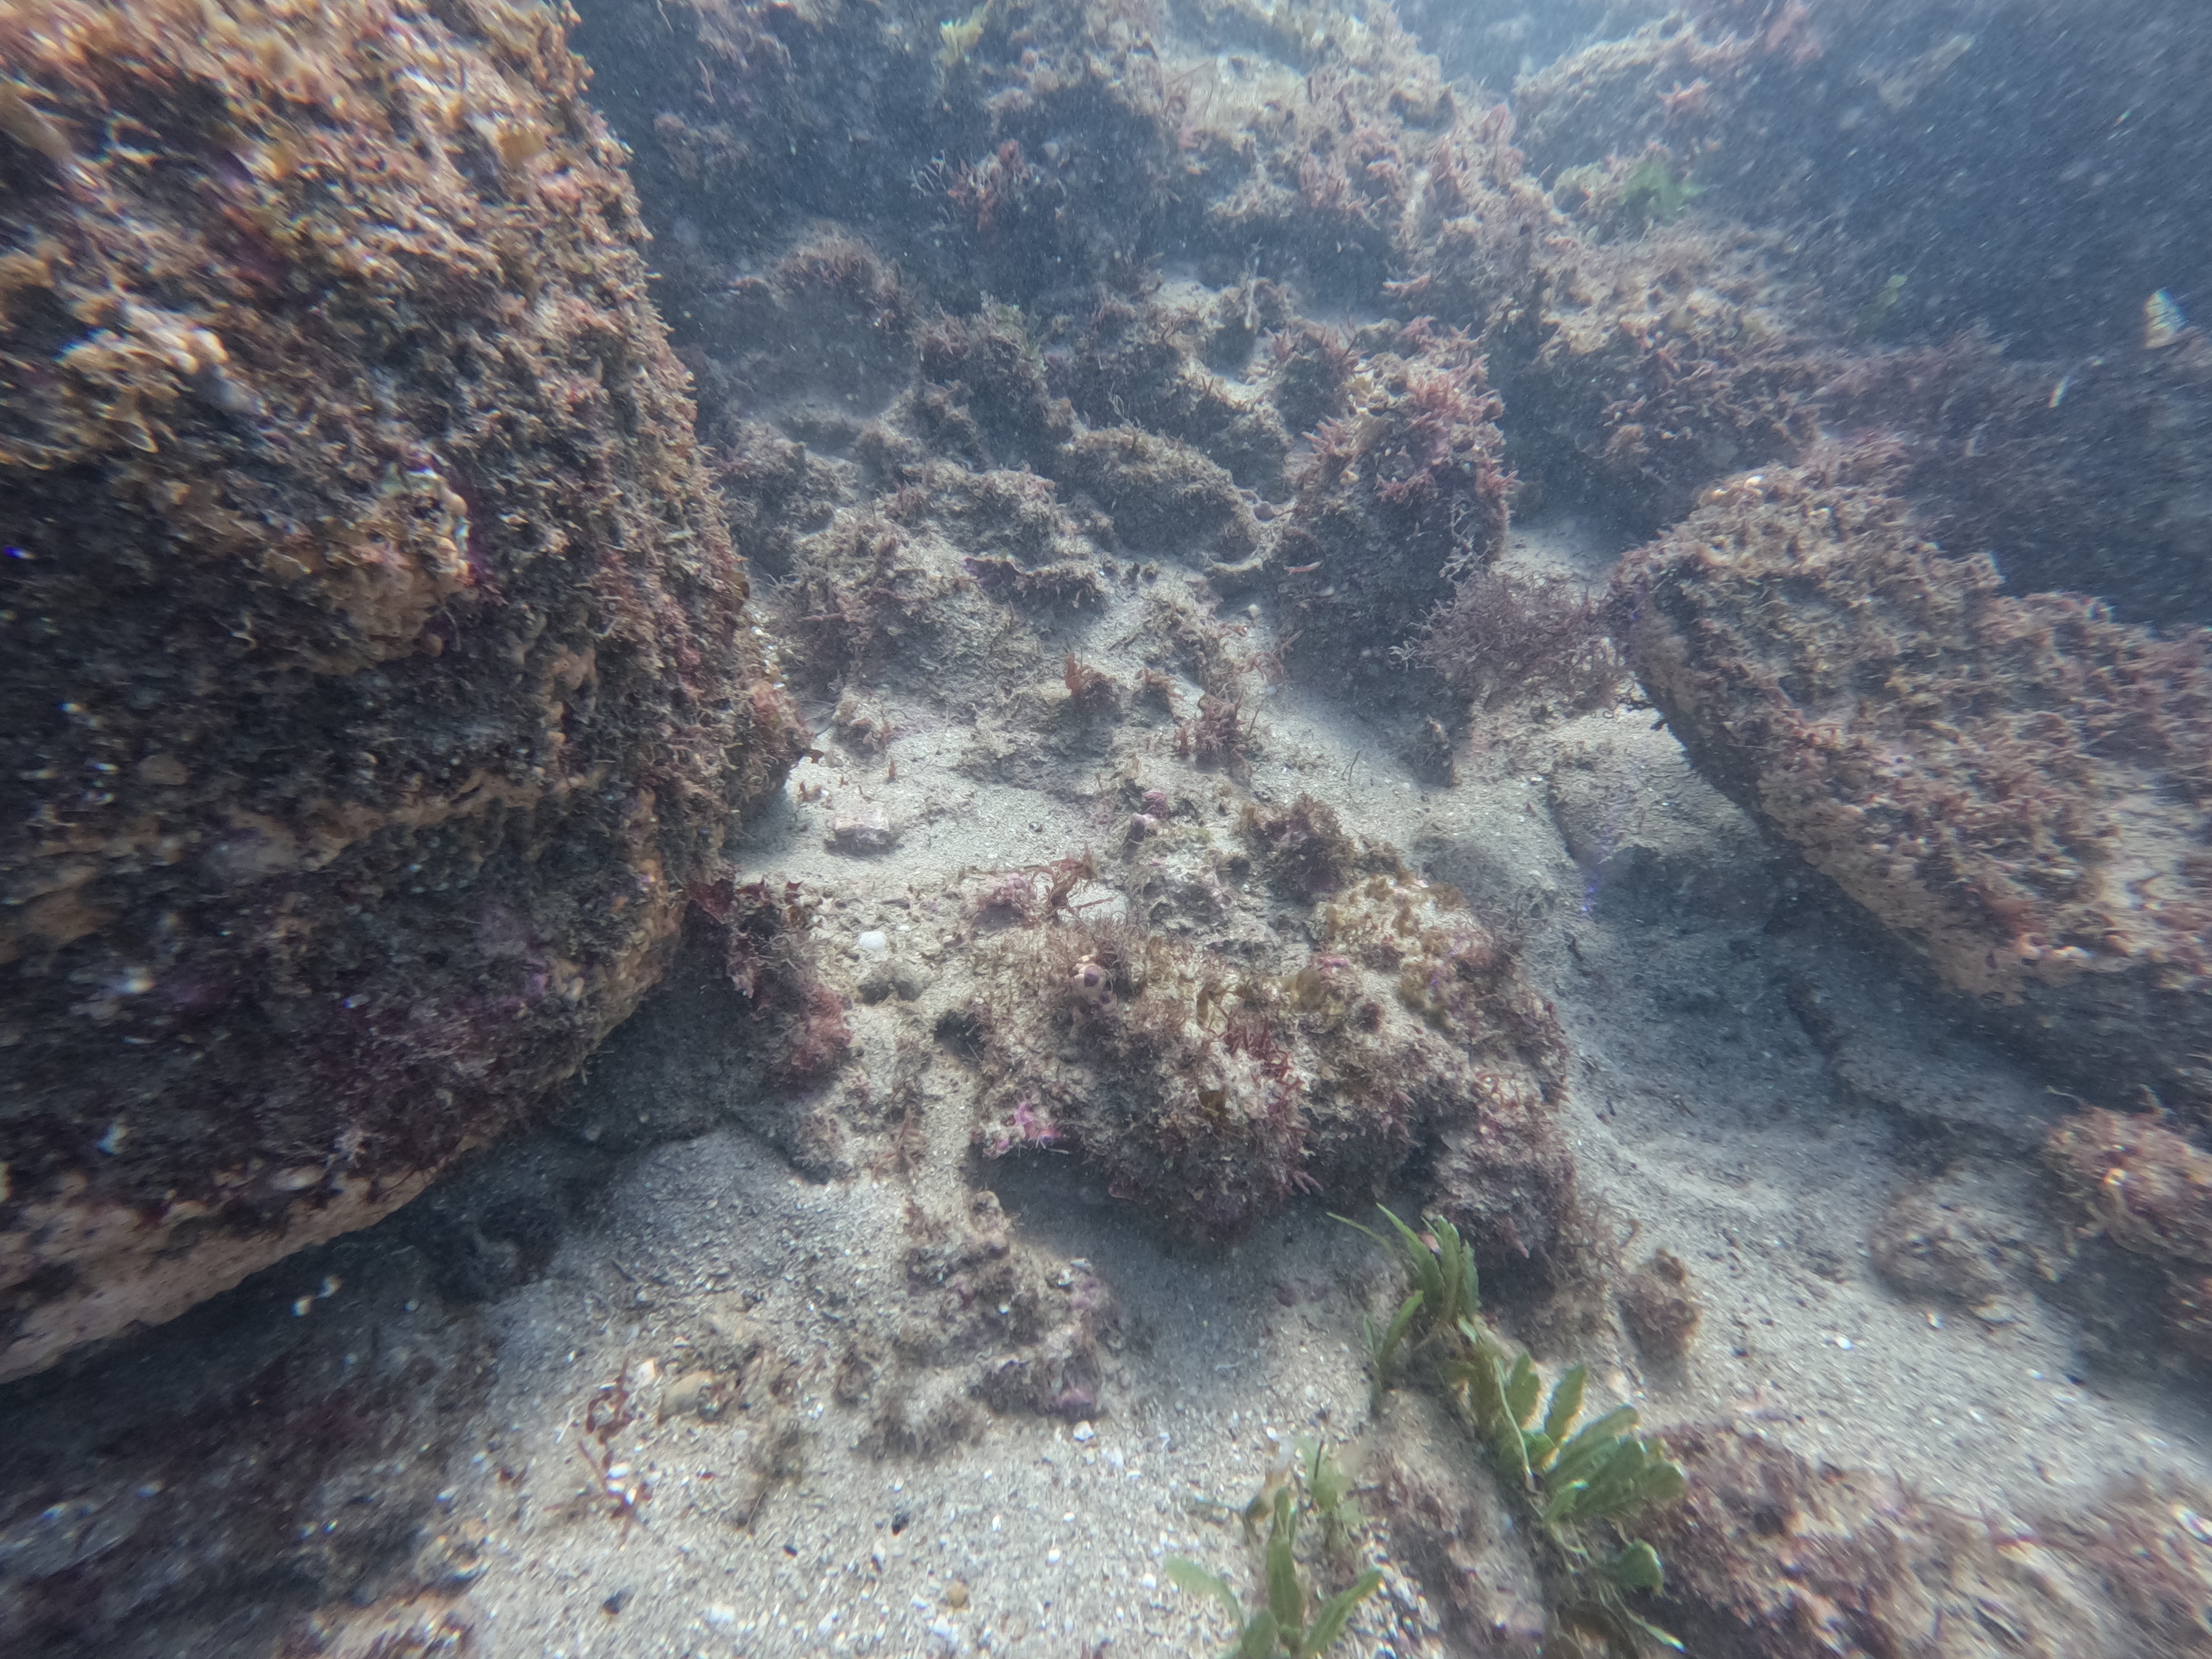

Supplement: Supplementary file 1639 [file G0027965.pdf › Ocean1/G0027965.pdf]

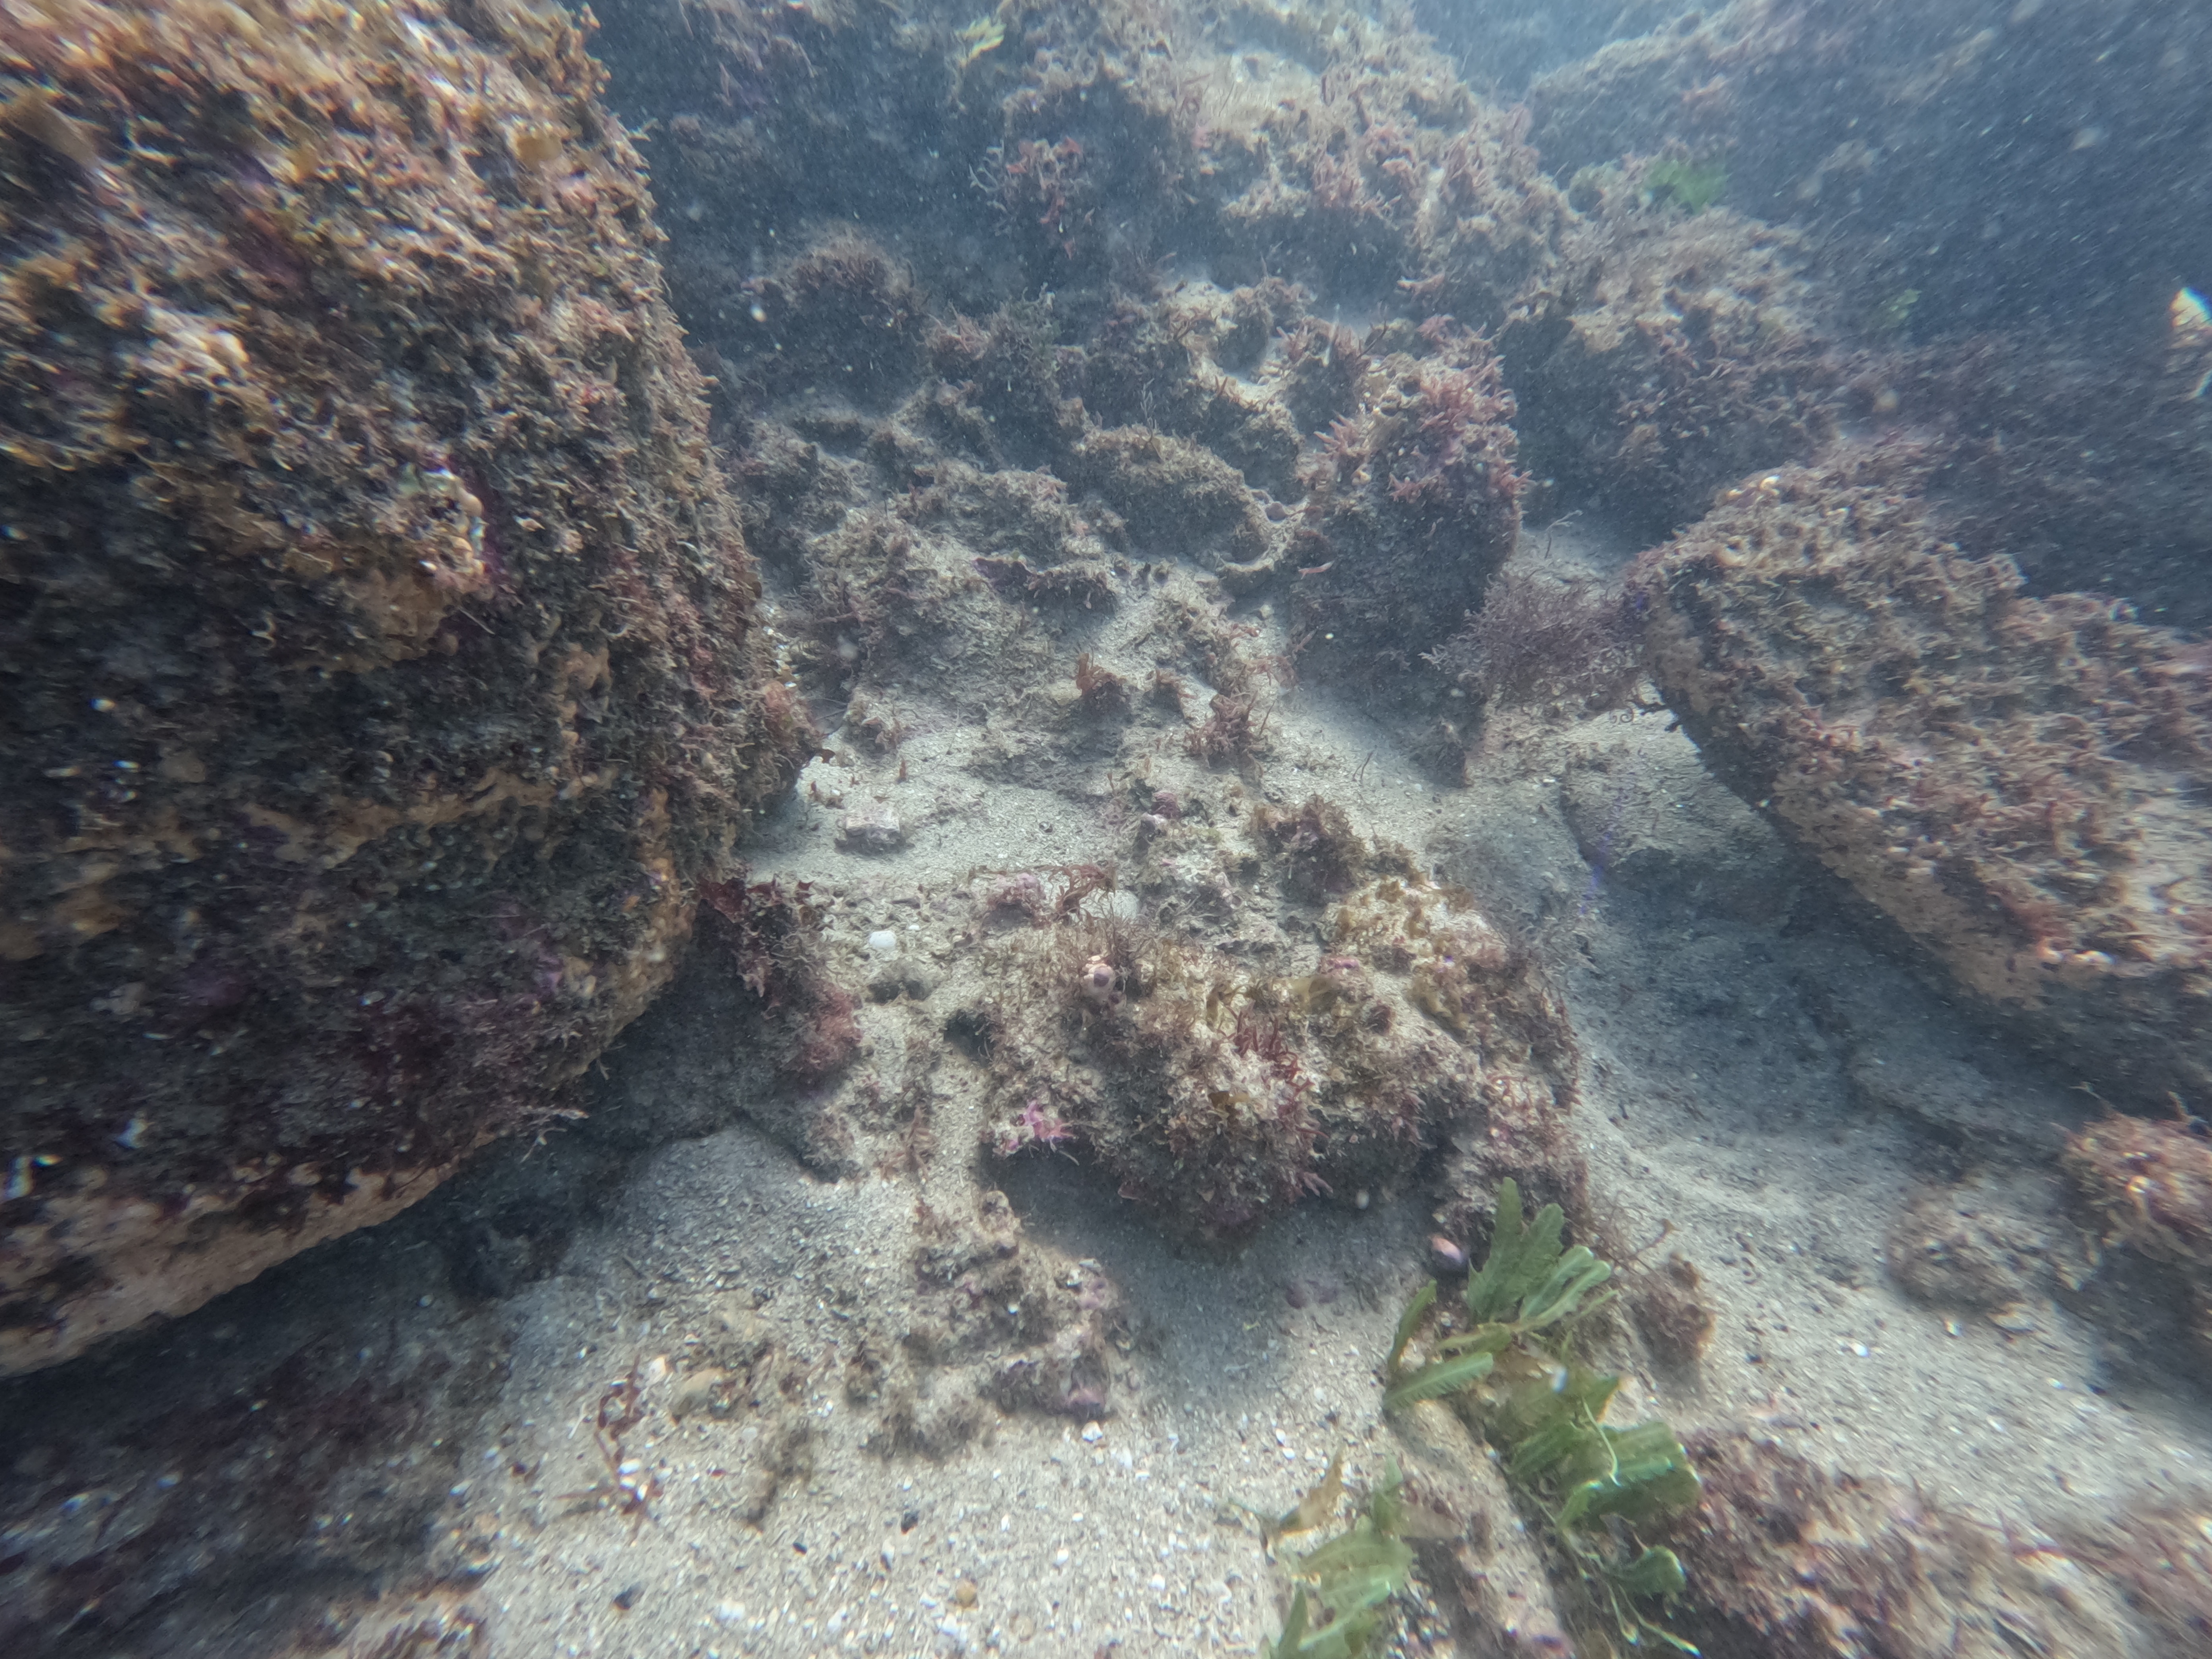

Supplement: Supplementary file 1640 [file G0027966.pdf › Ocean1/G0027966.pdf]

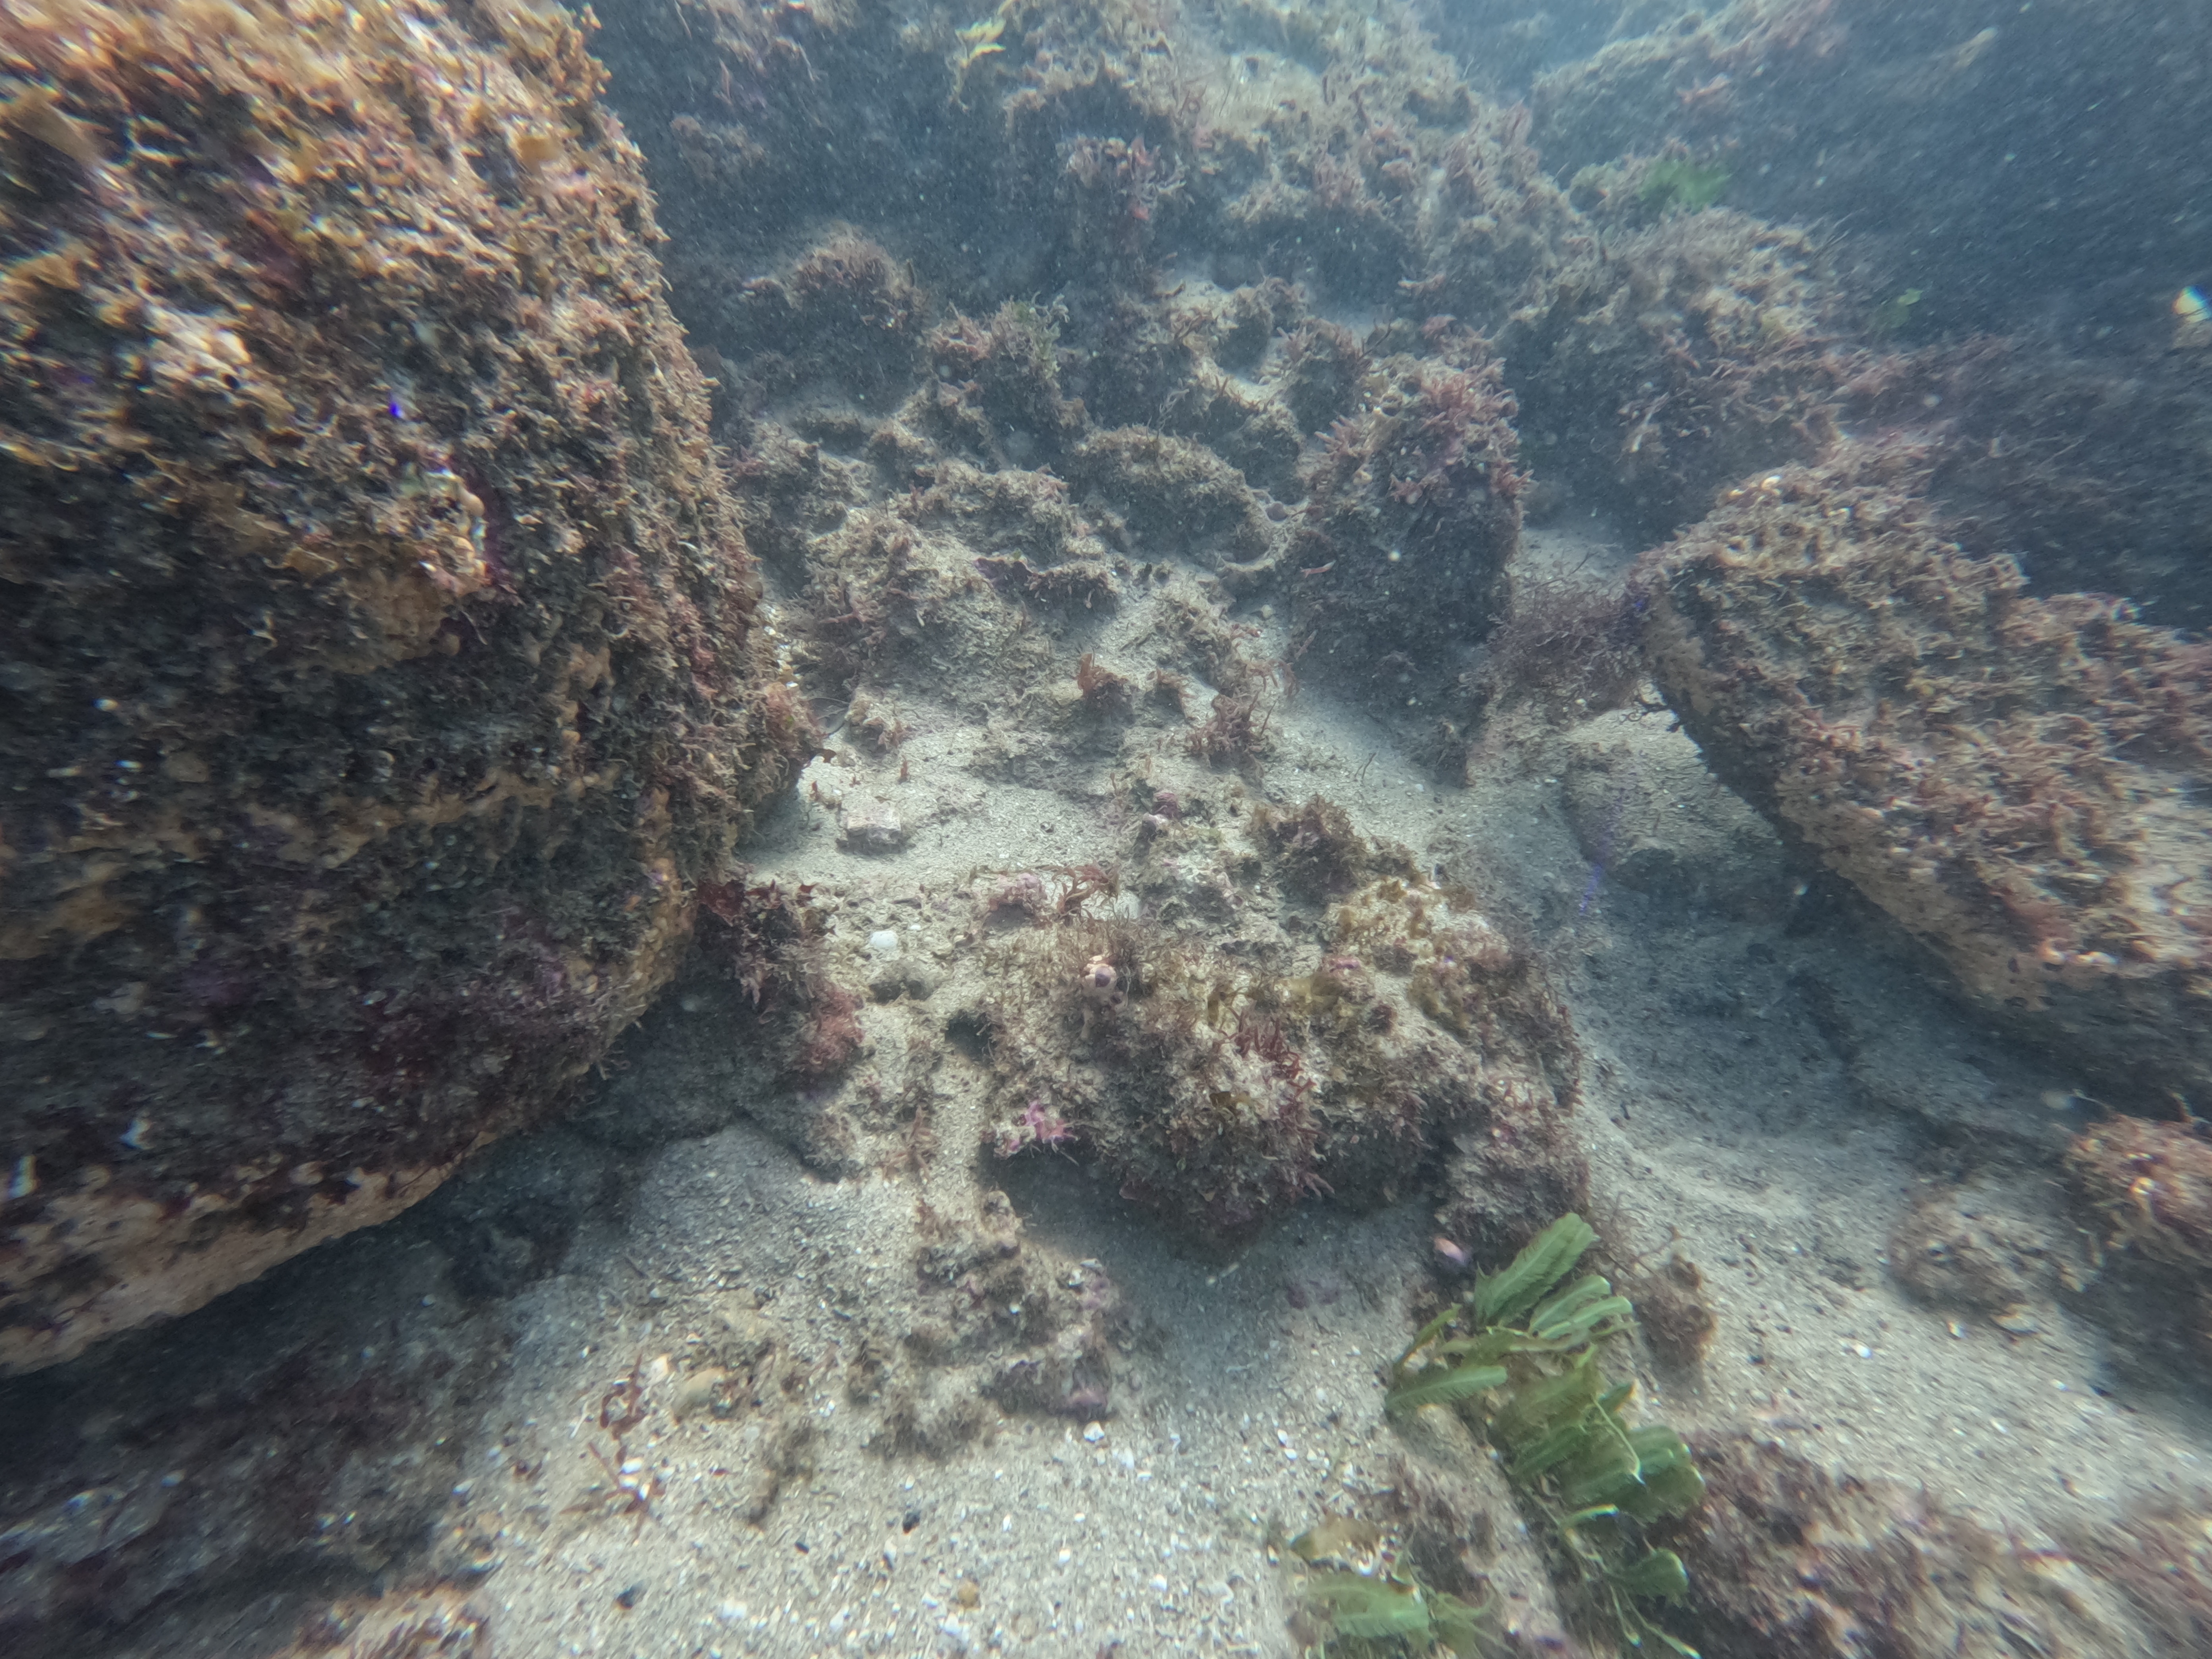

Supplement: Supplementary file 1641 [file G0027967.pdf › Ocean1/G0027967.pdf]

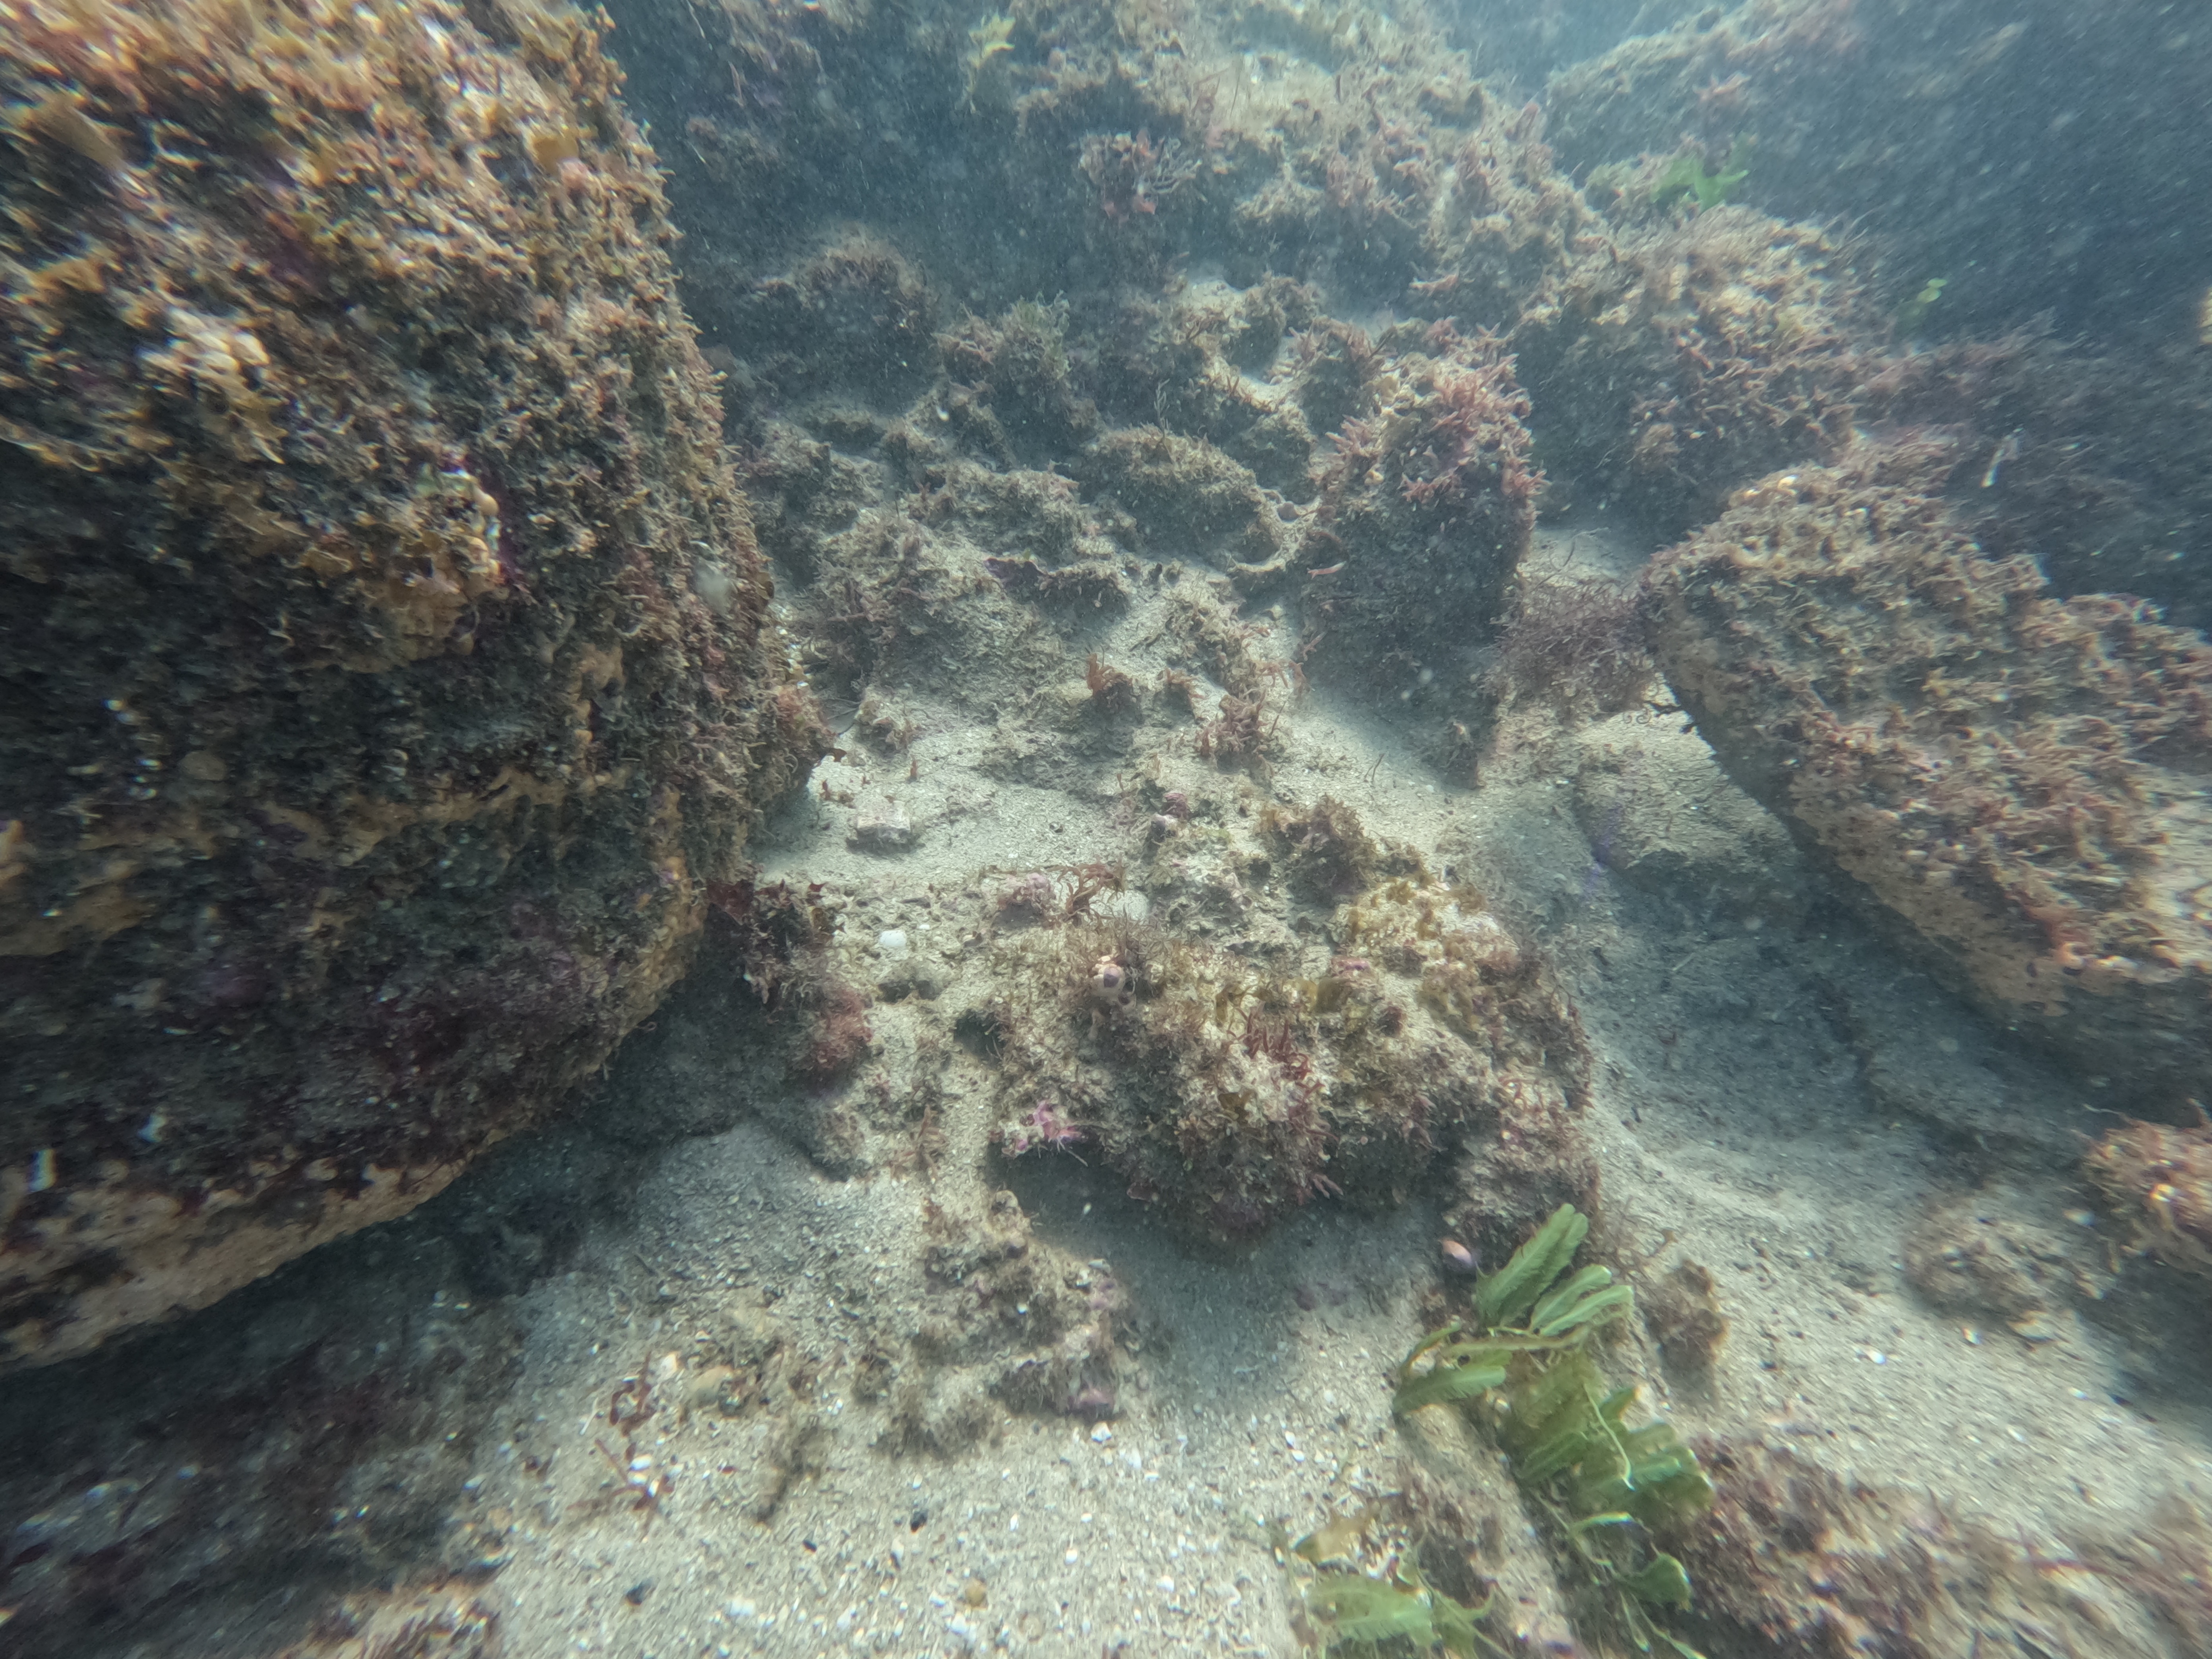

Supplement: Supplementary file 1642 [file G0027968.pdf › Ocean1/G0027968.pdf]

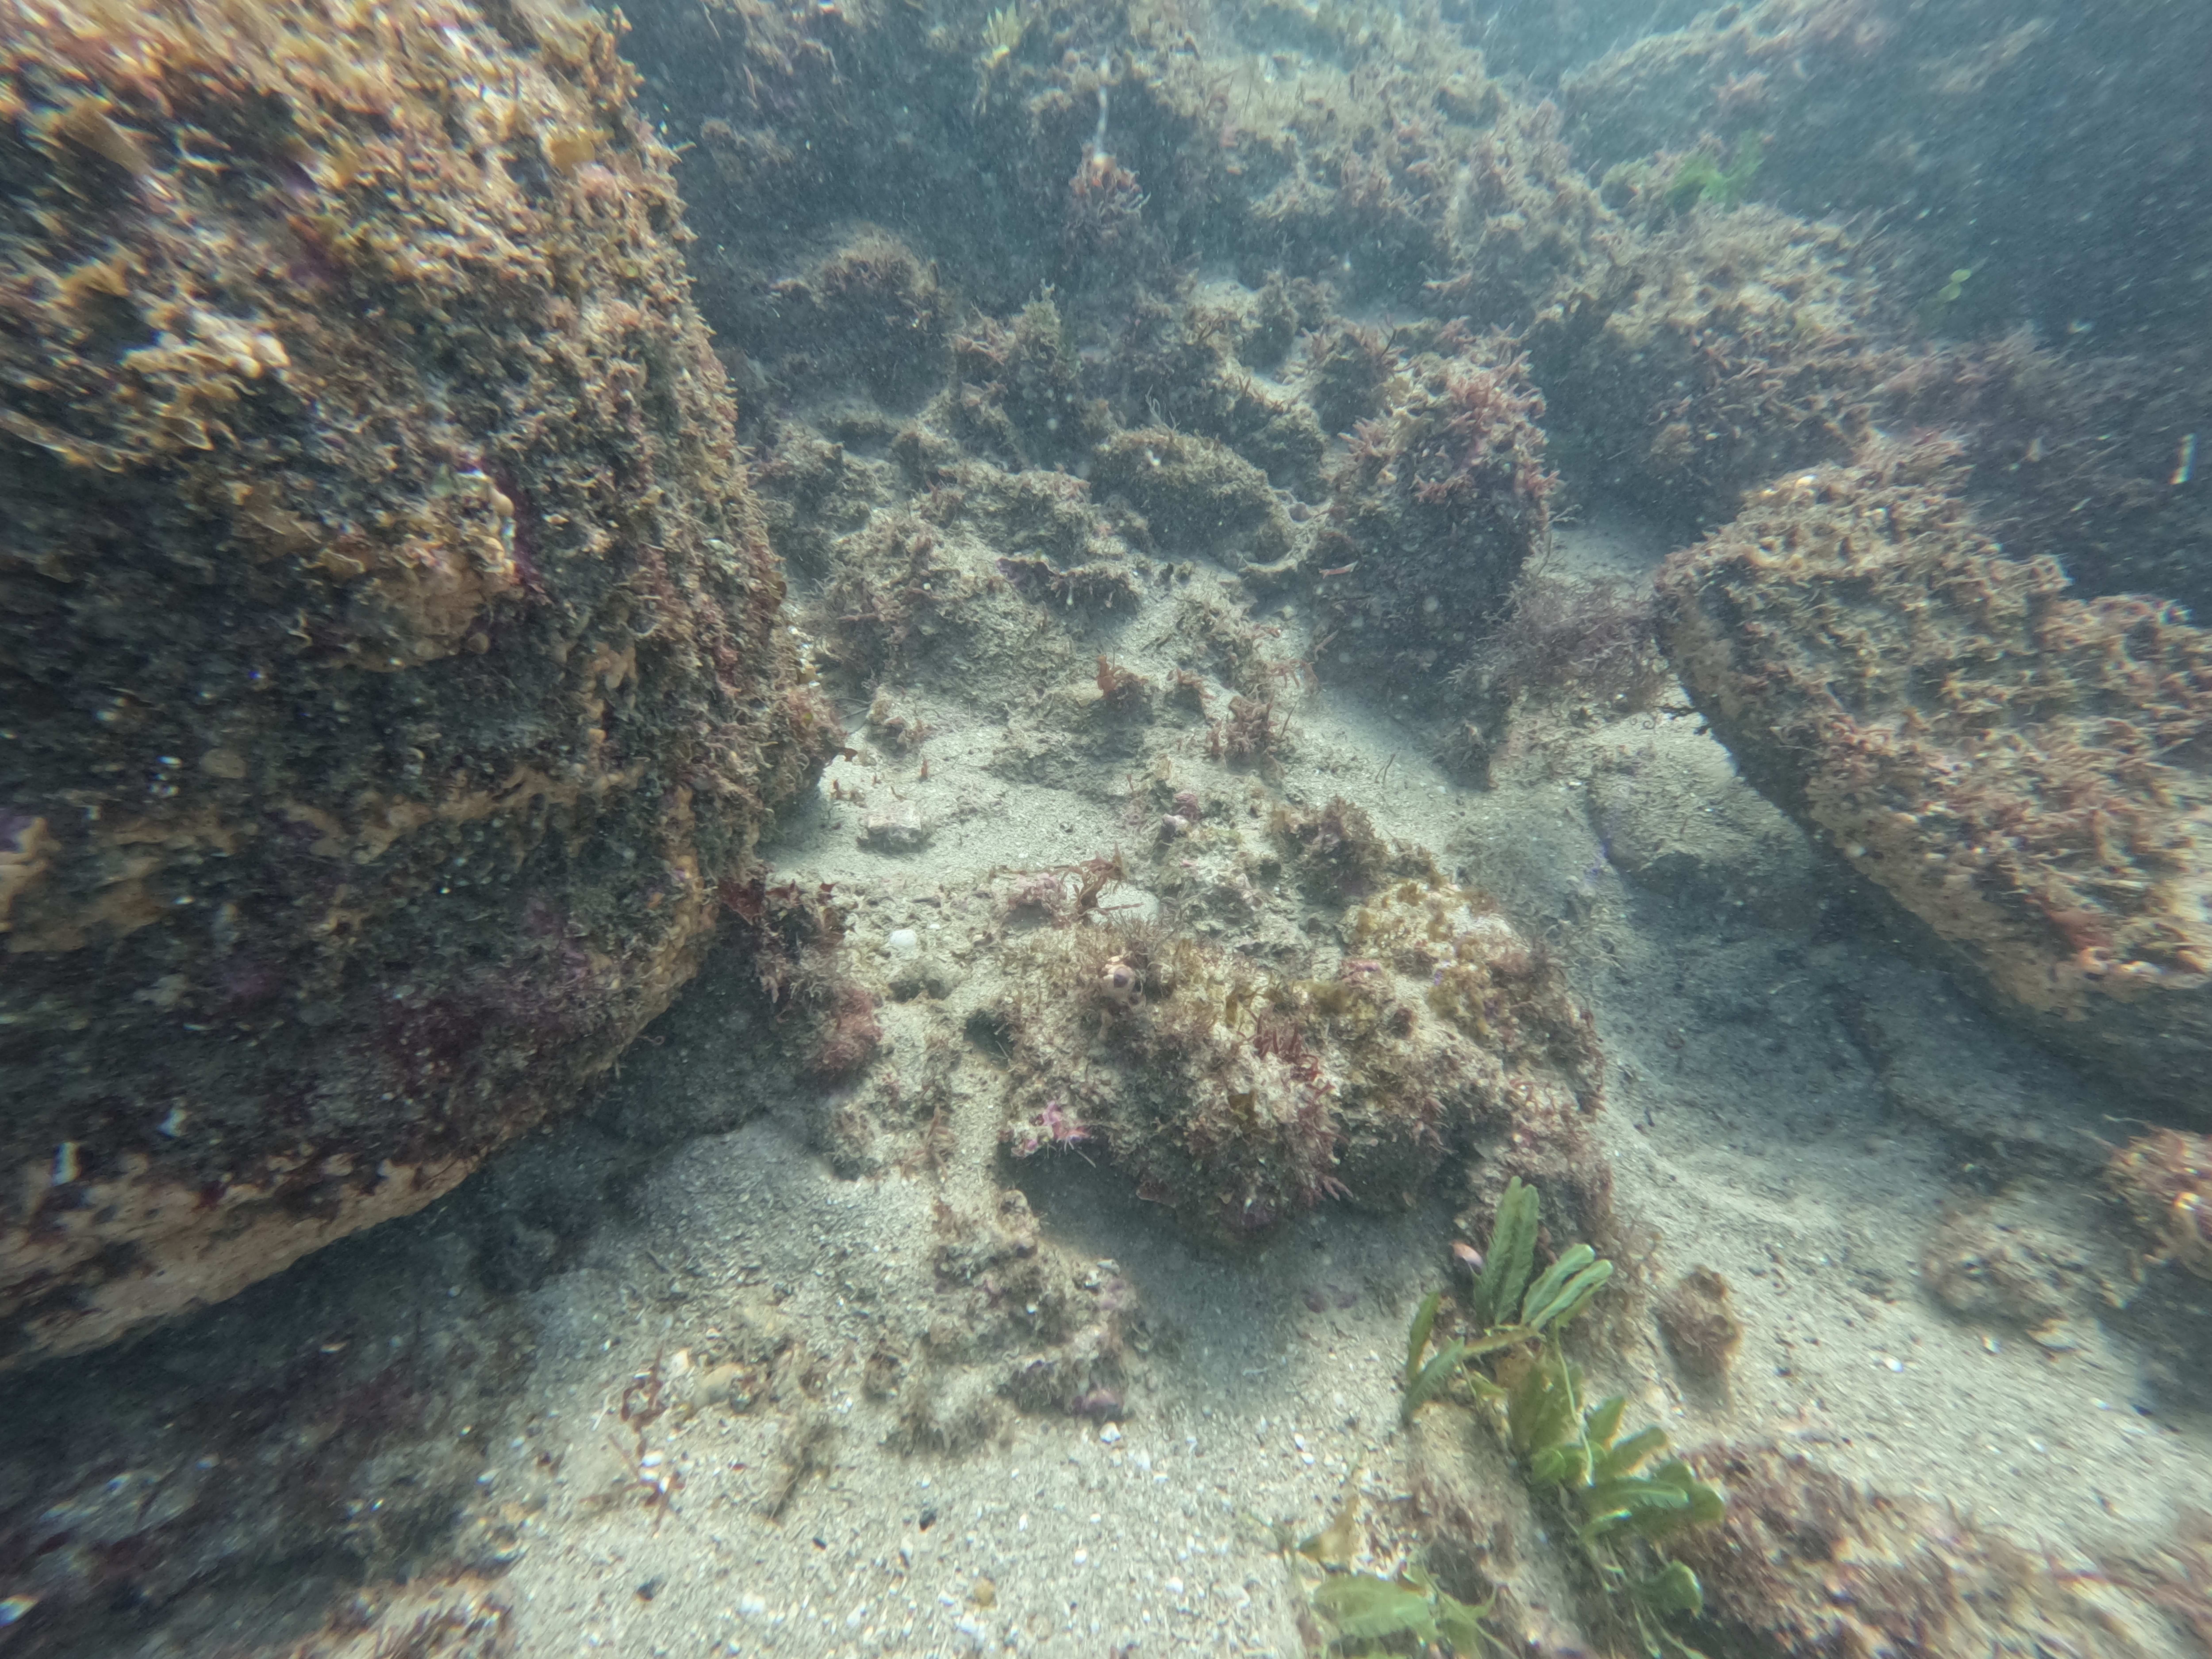

Supplement: Supplementary file 1643 [file G0027969.pdf › Ocean1/G0027969.pdf]

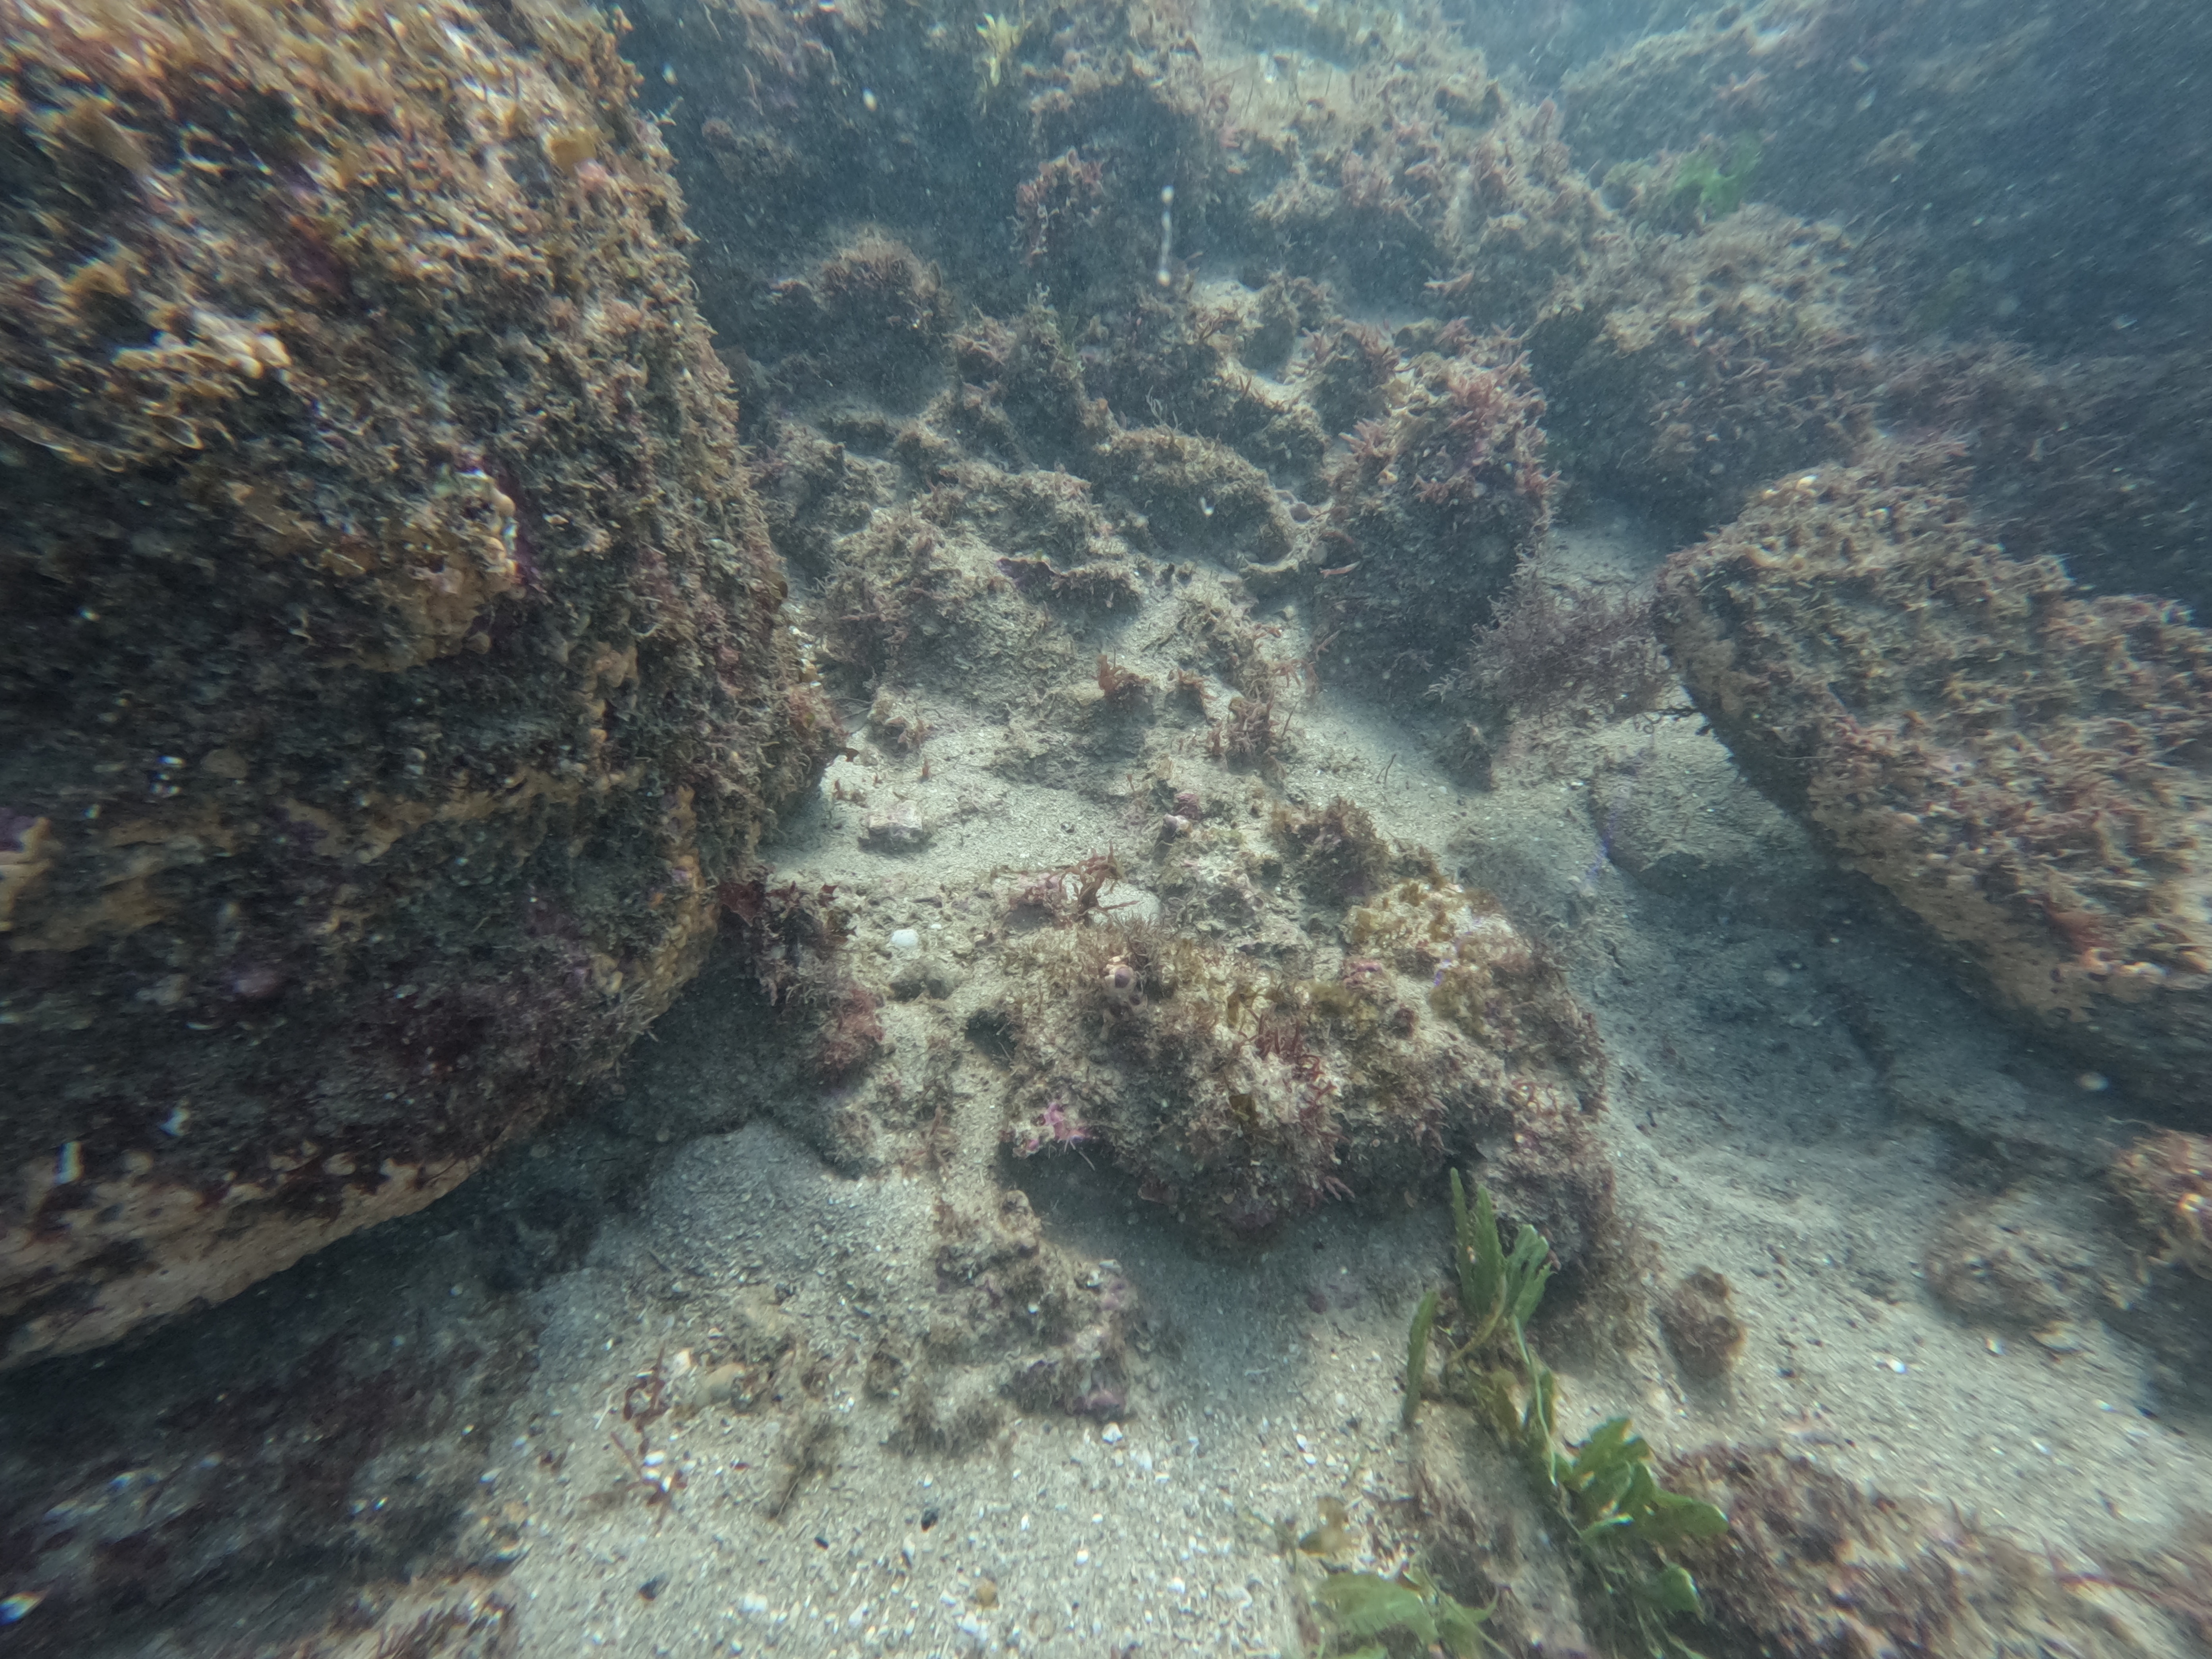

Supplement: Supplementary file 1644 [file G0027970.pdf › Ocean1/G0027970.pdf]

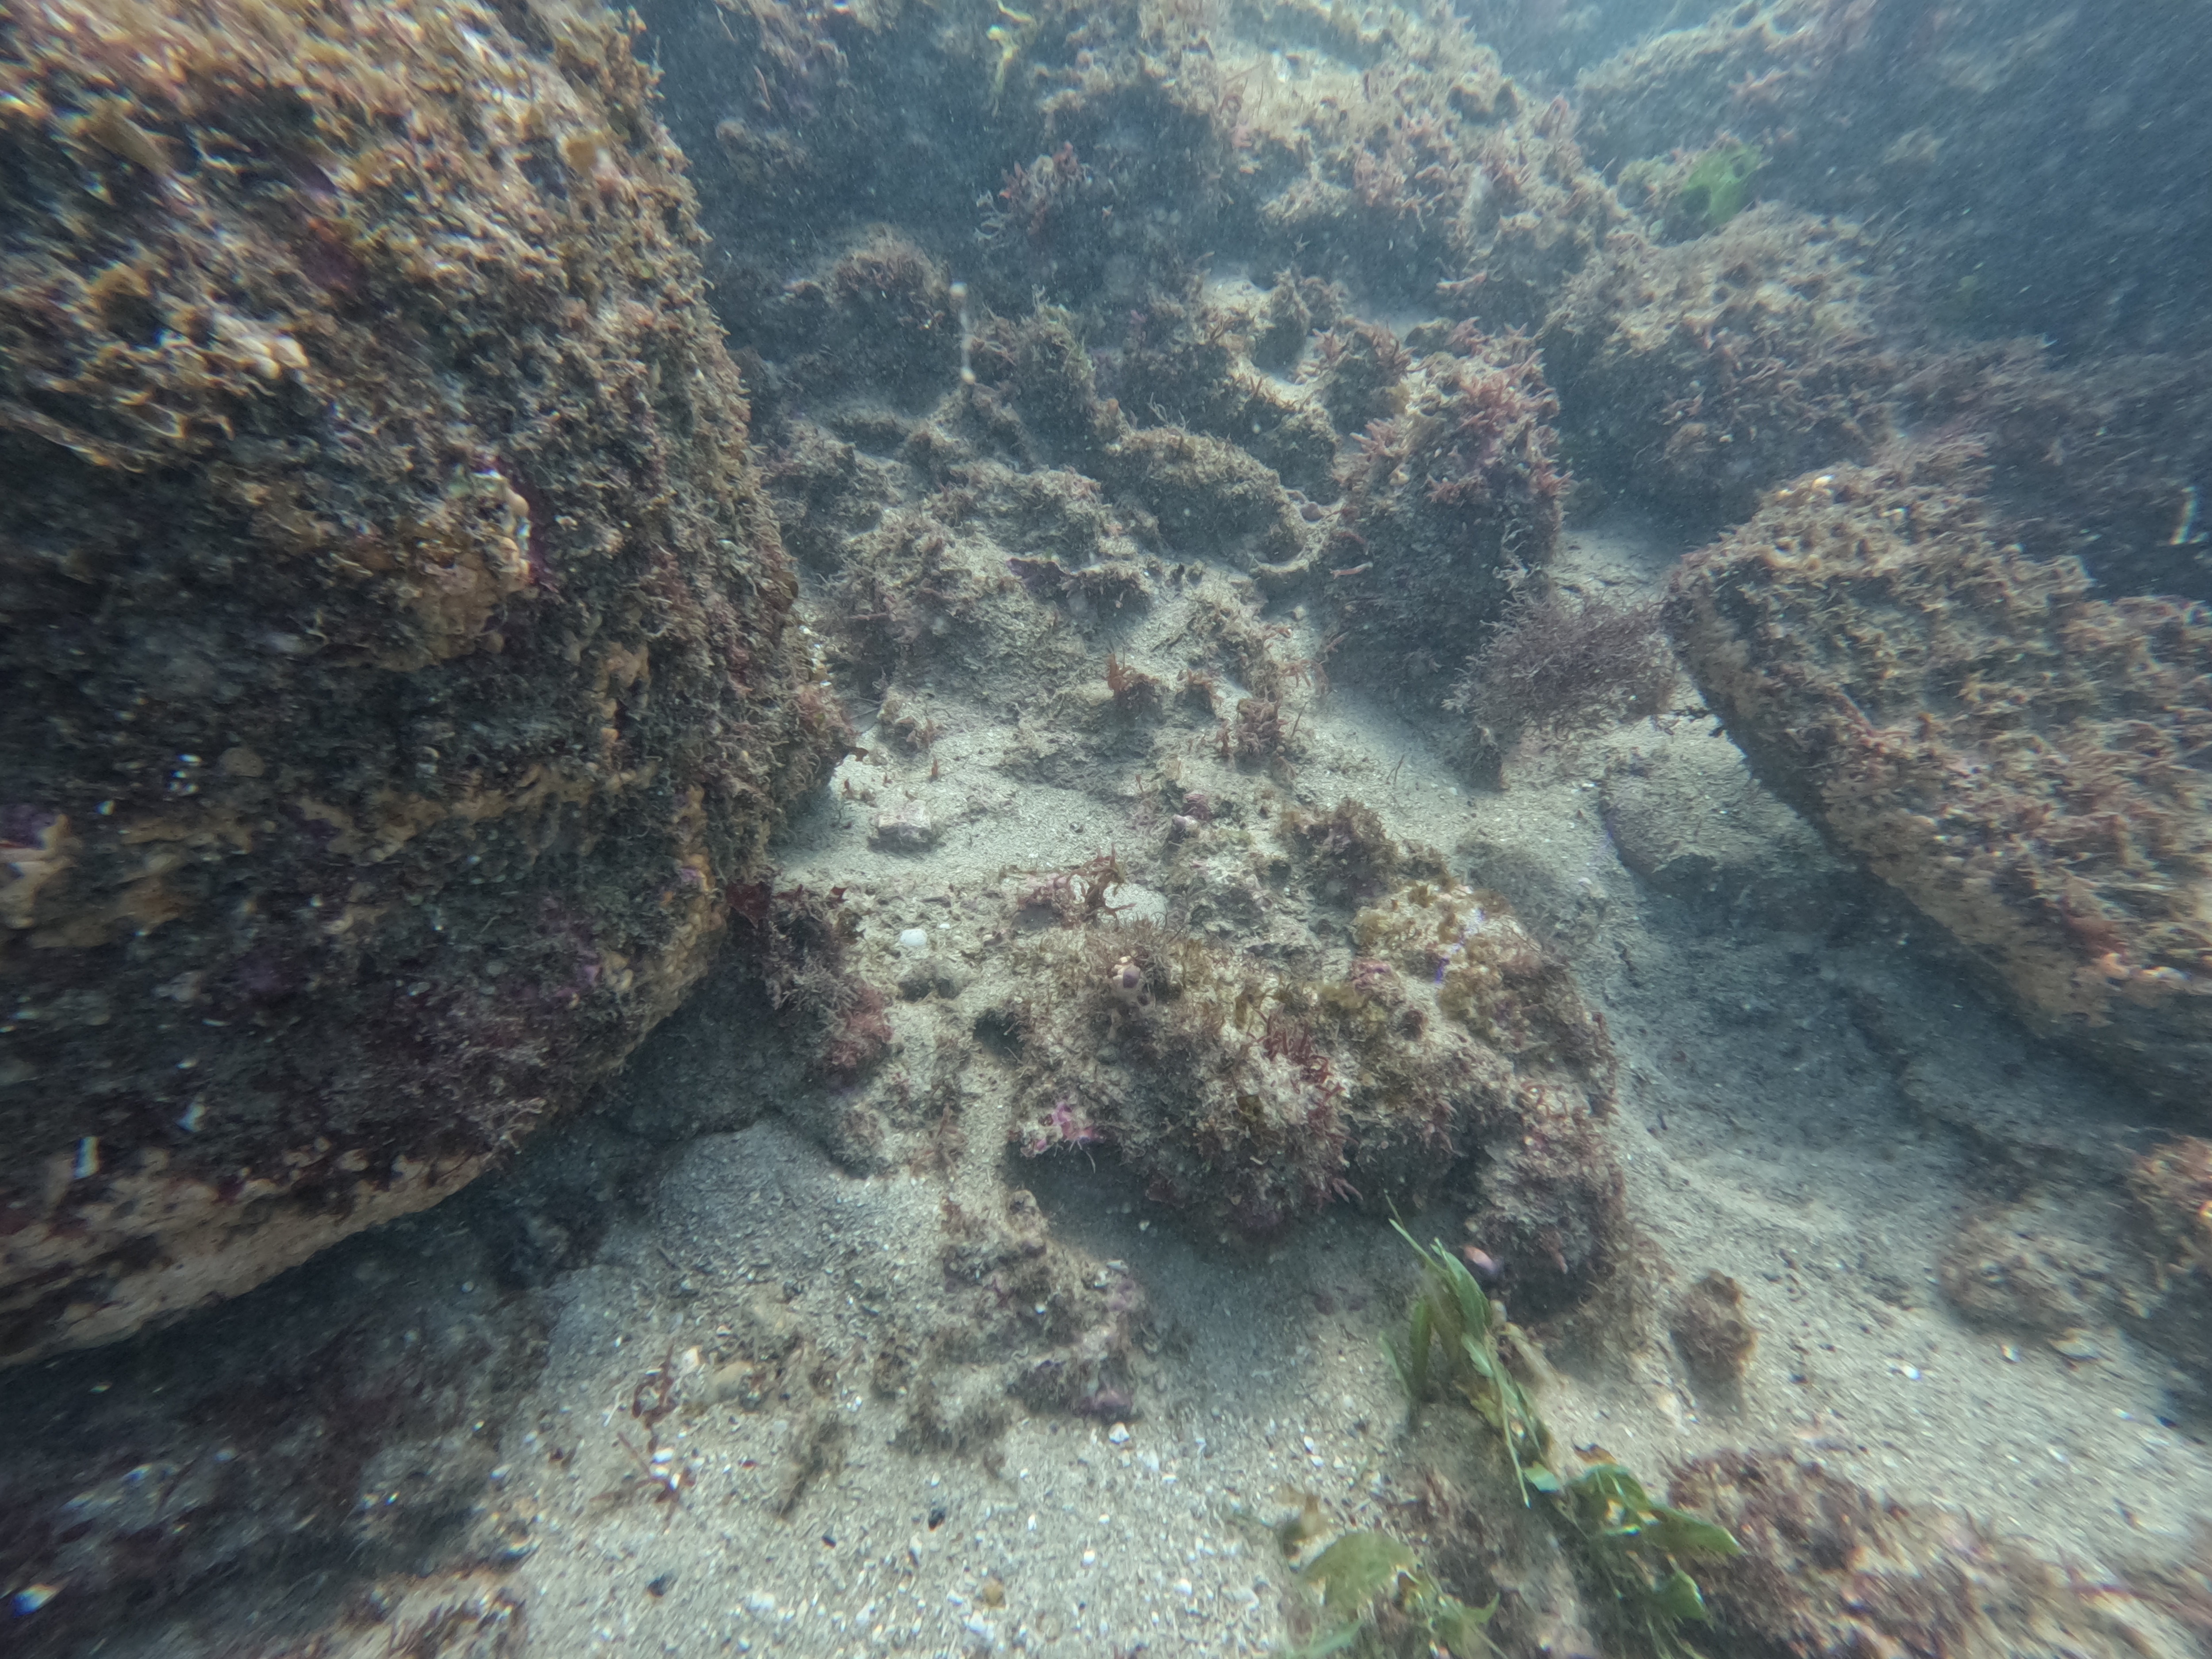

Supplement: Supplementary file 1645 [file G0027971.pdf › Ocean1/G0027971.pdf]

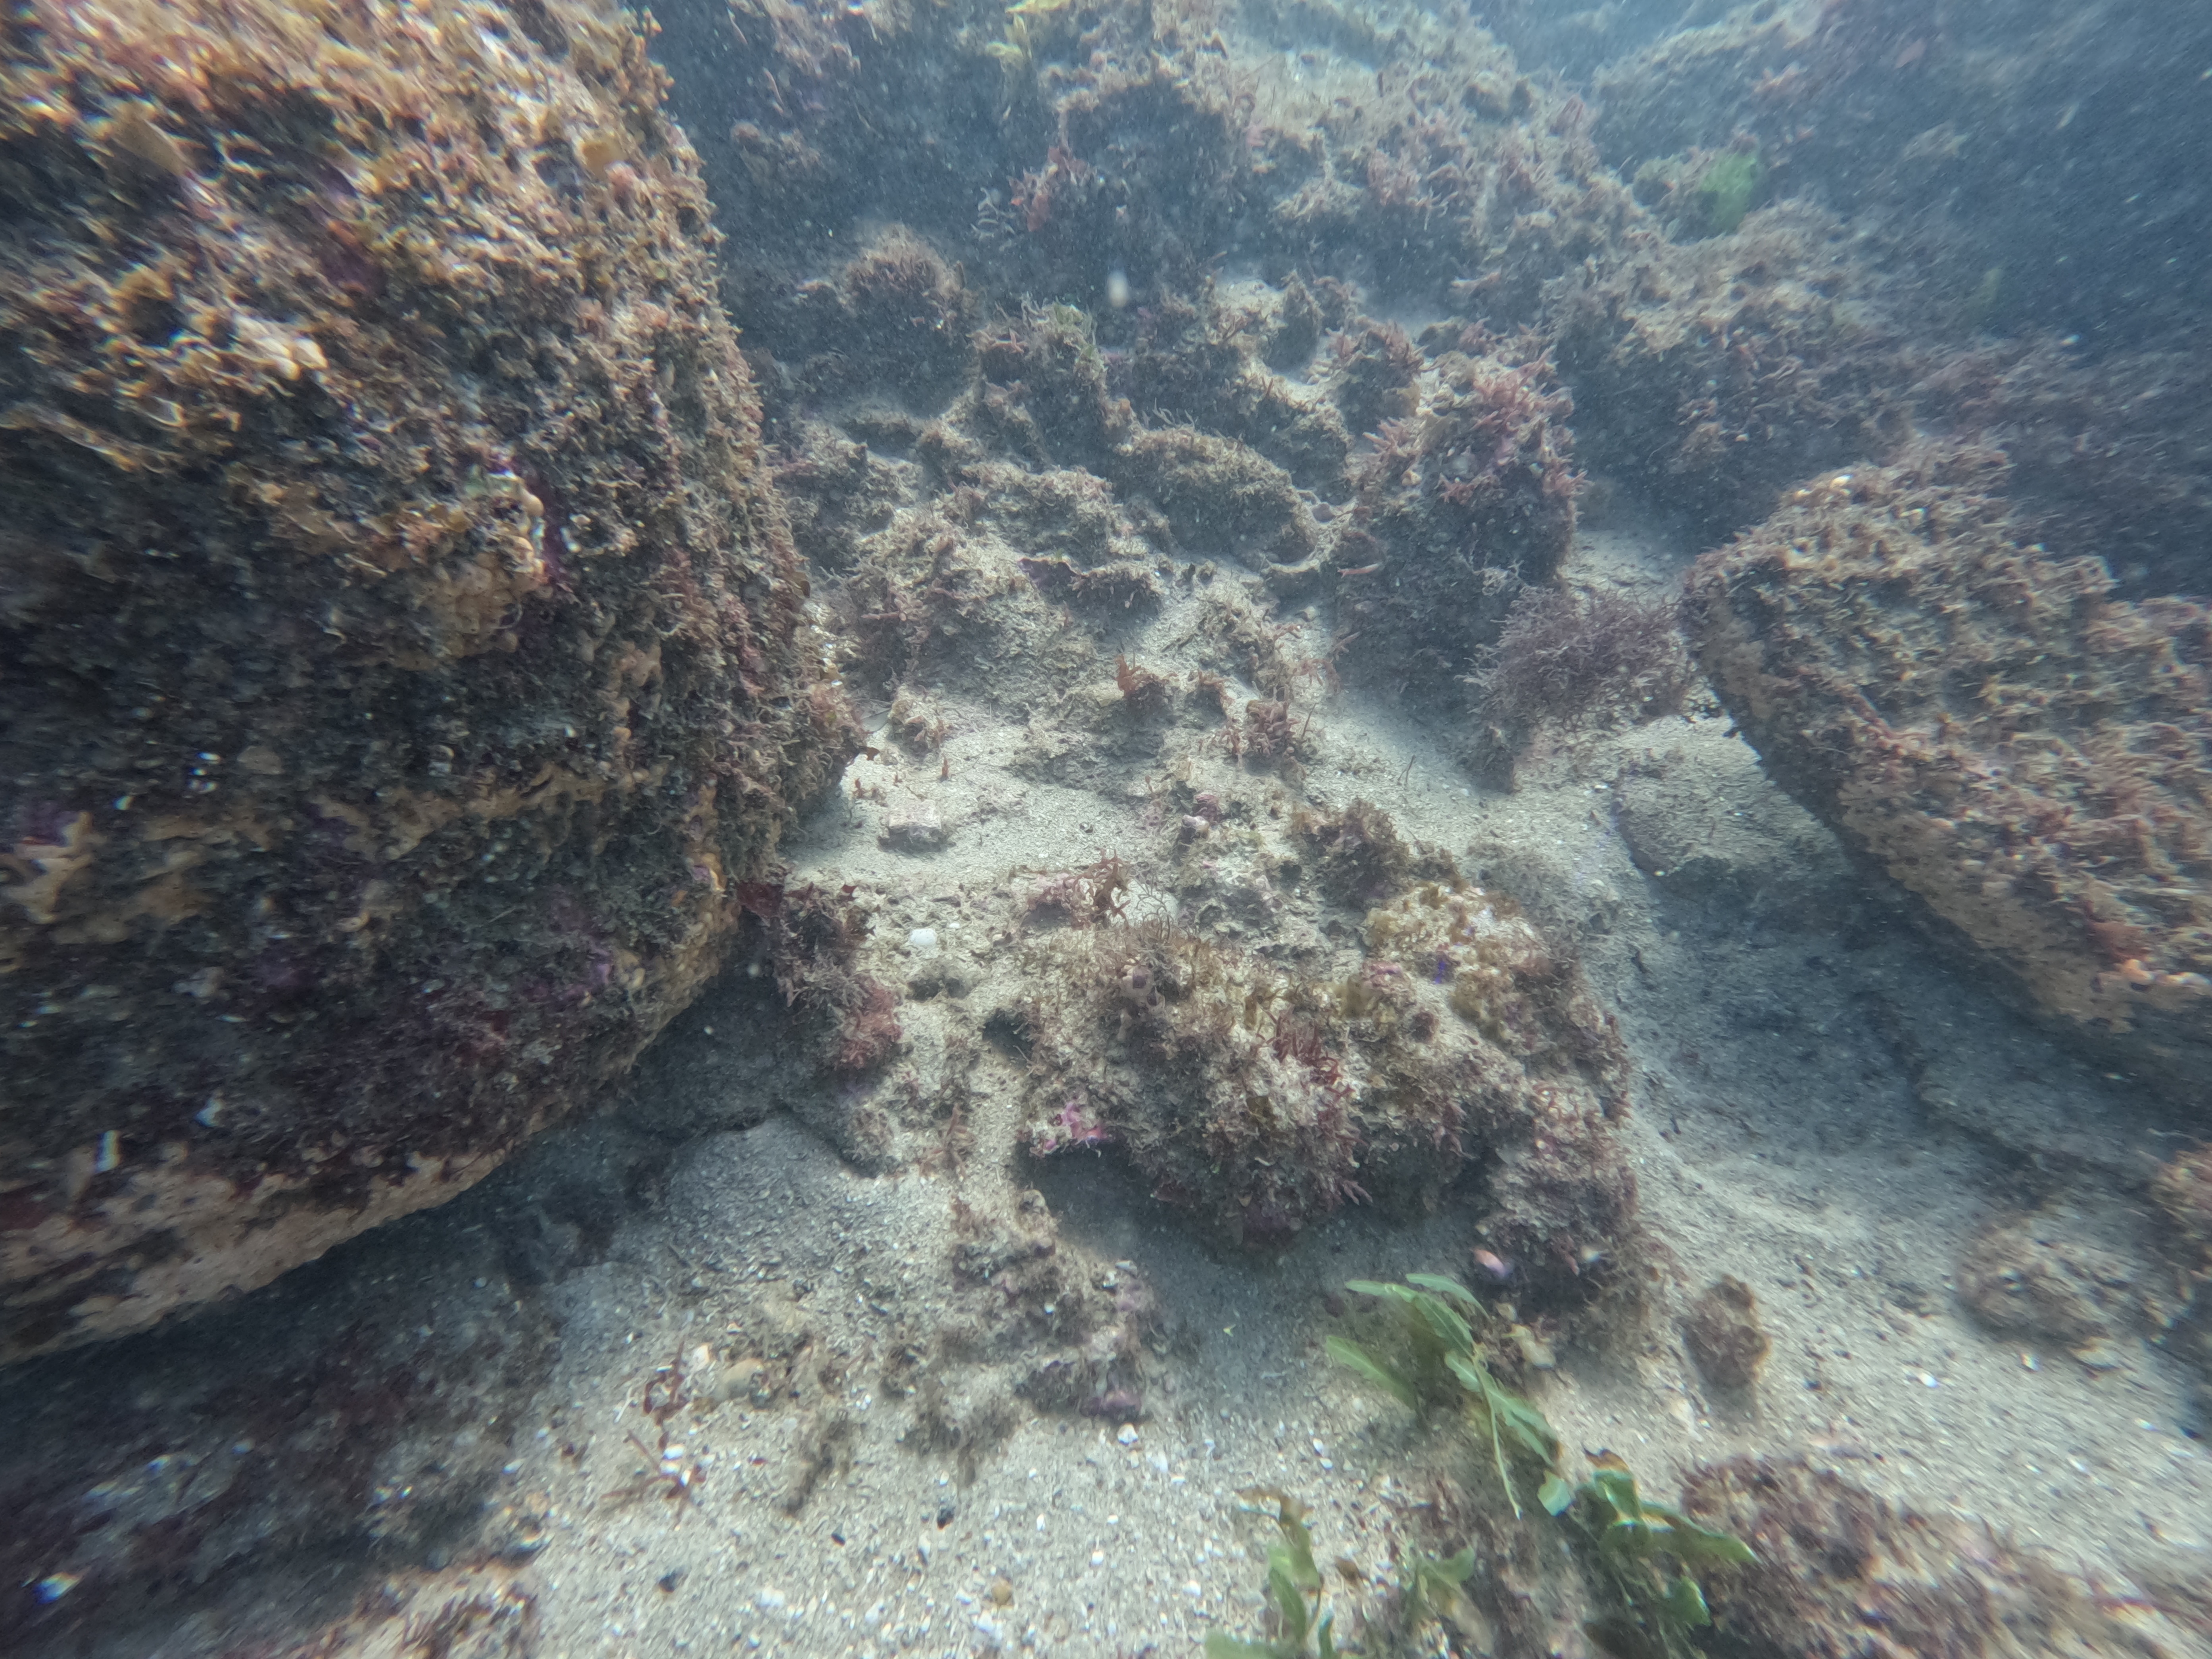

Supplement: Supplementary file 1646 [file G0027972.pdf › Ocean1/G0027972.pdf]

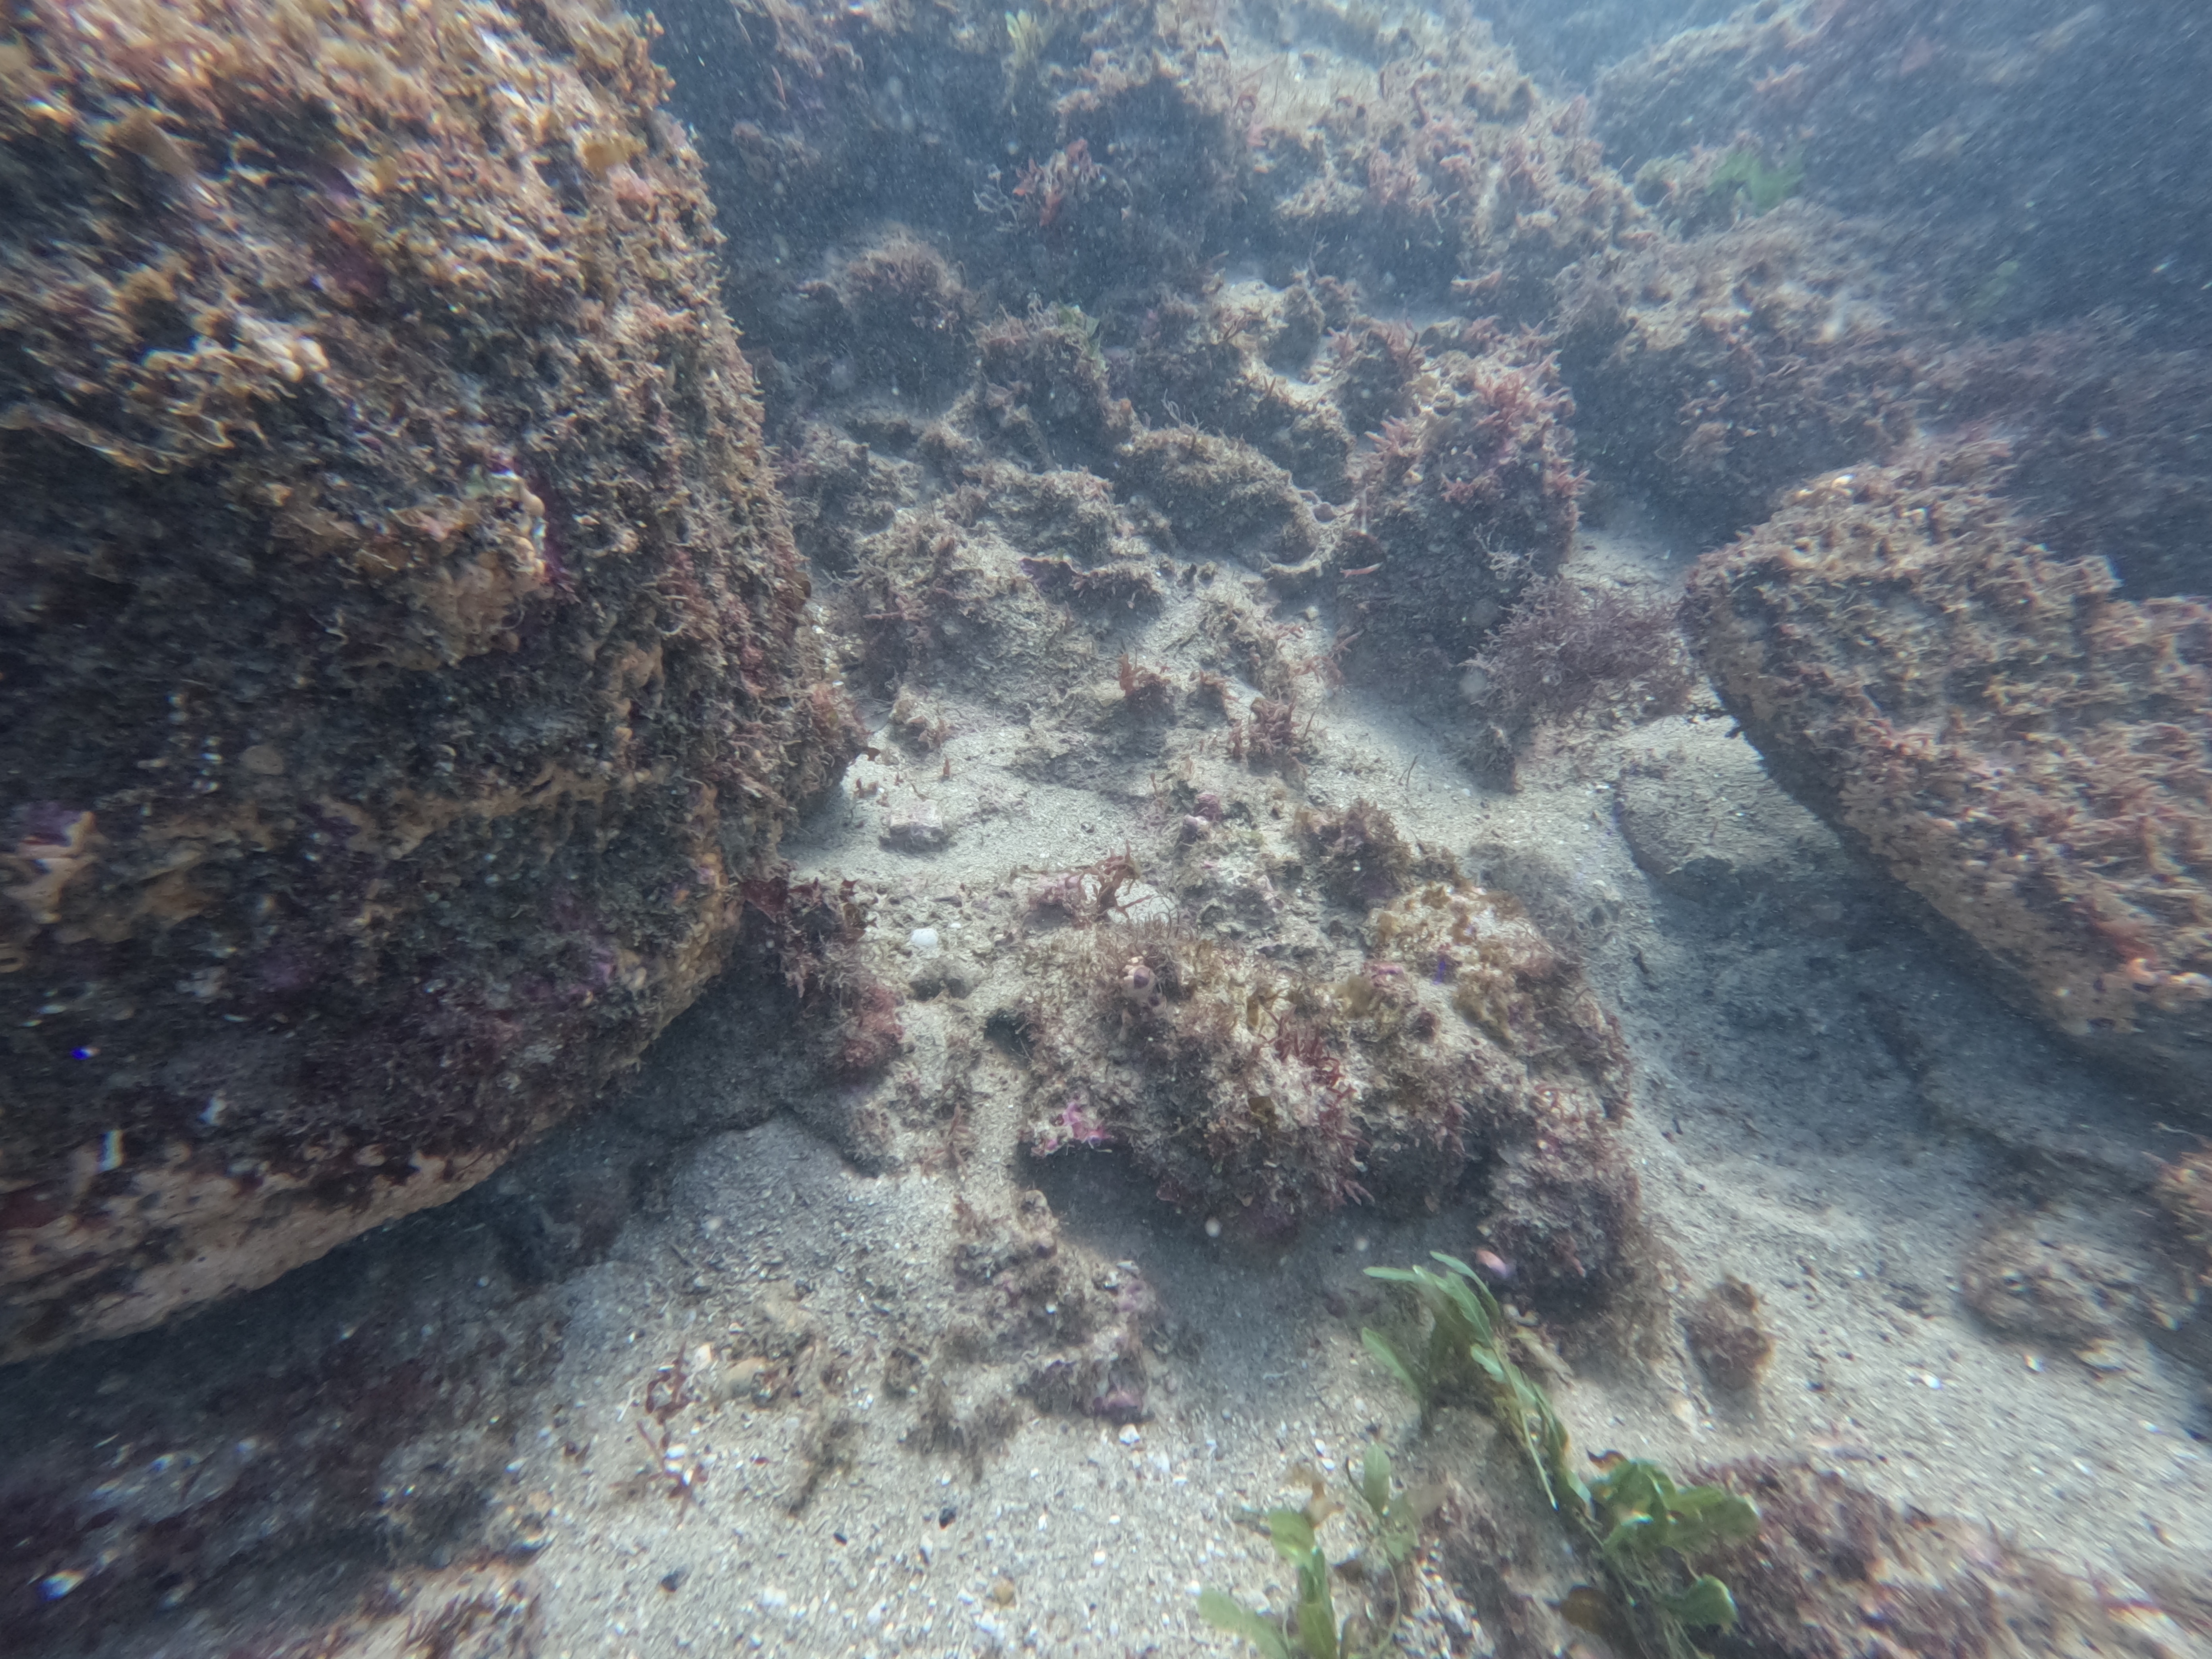

Supplement: Supplementary file 1647 [file G0027973.pdf › Ocean1/G0027973.pdf]

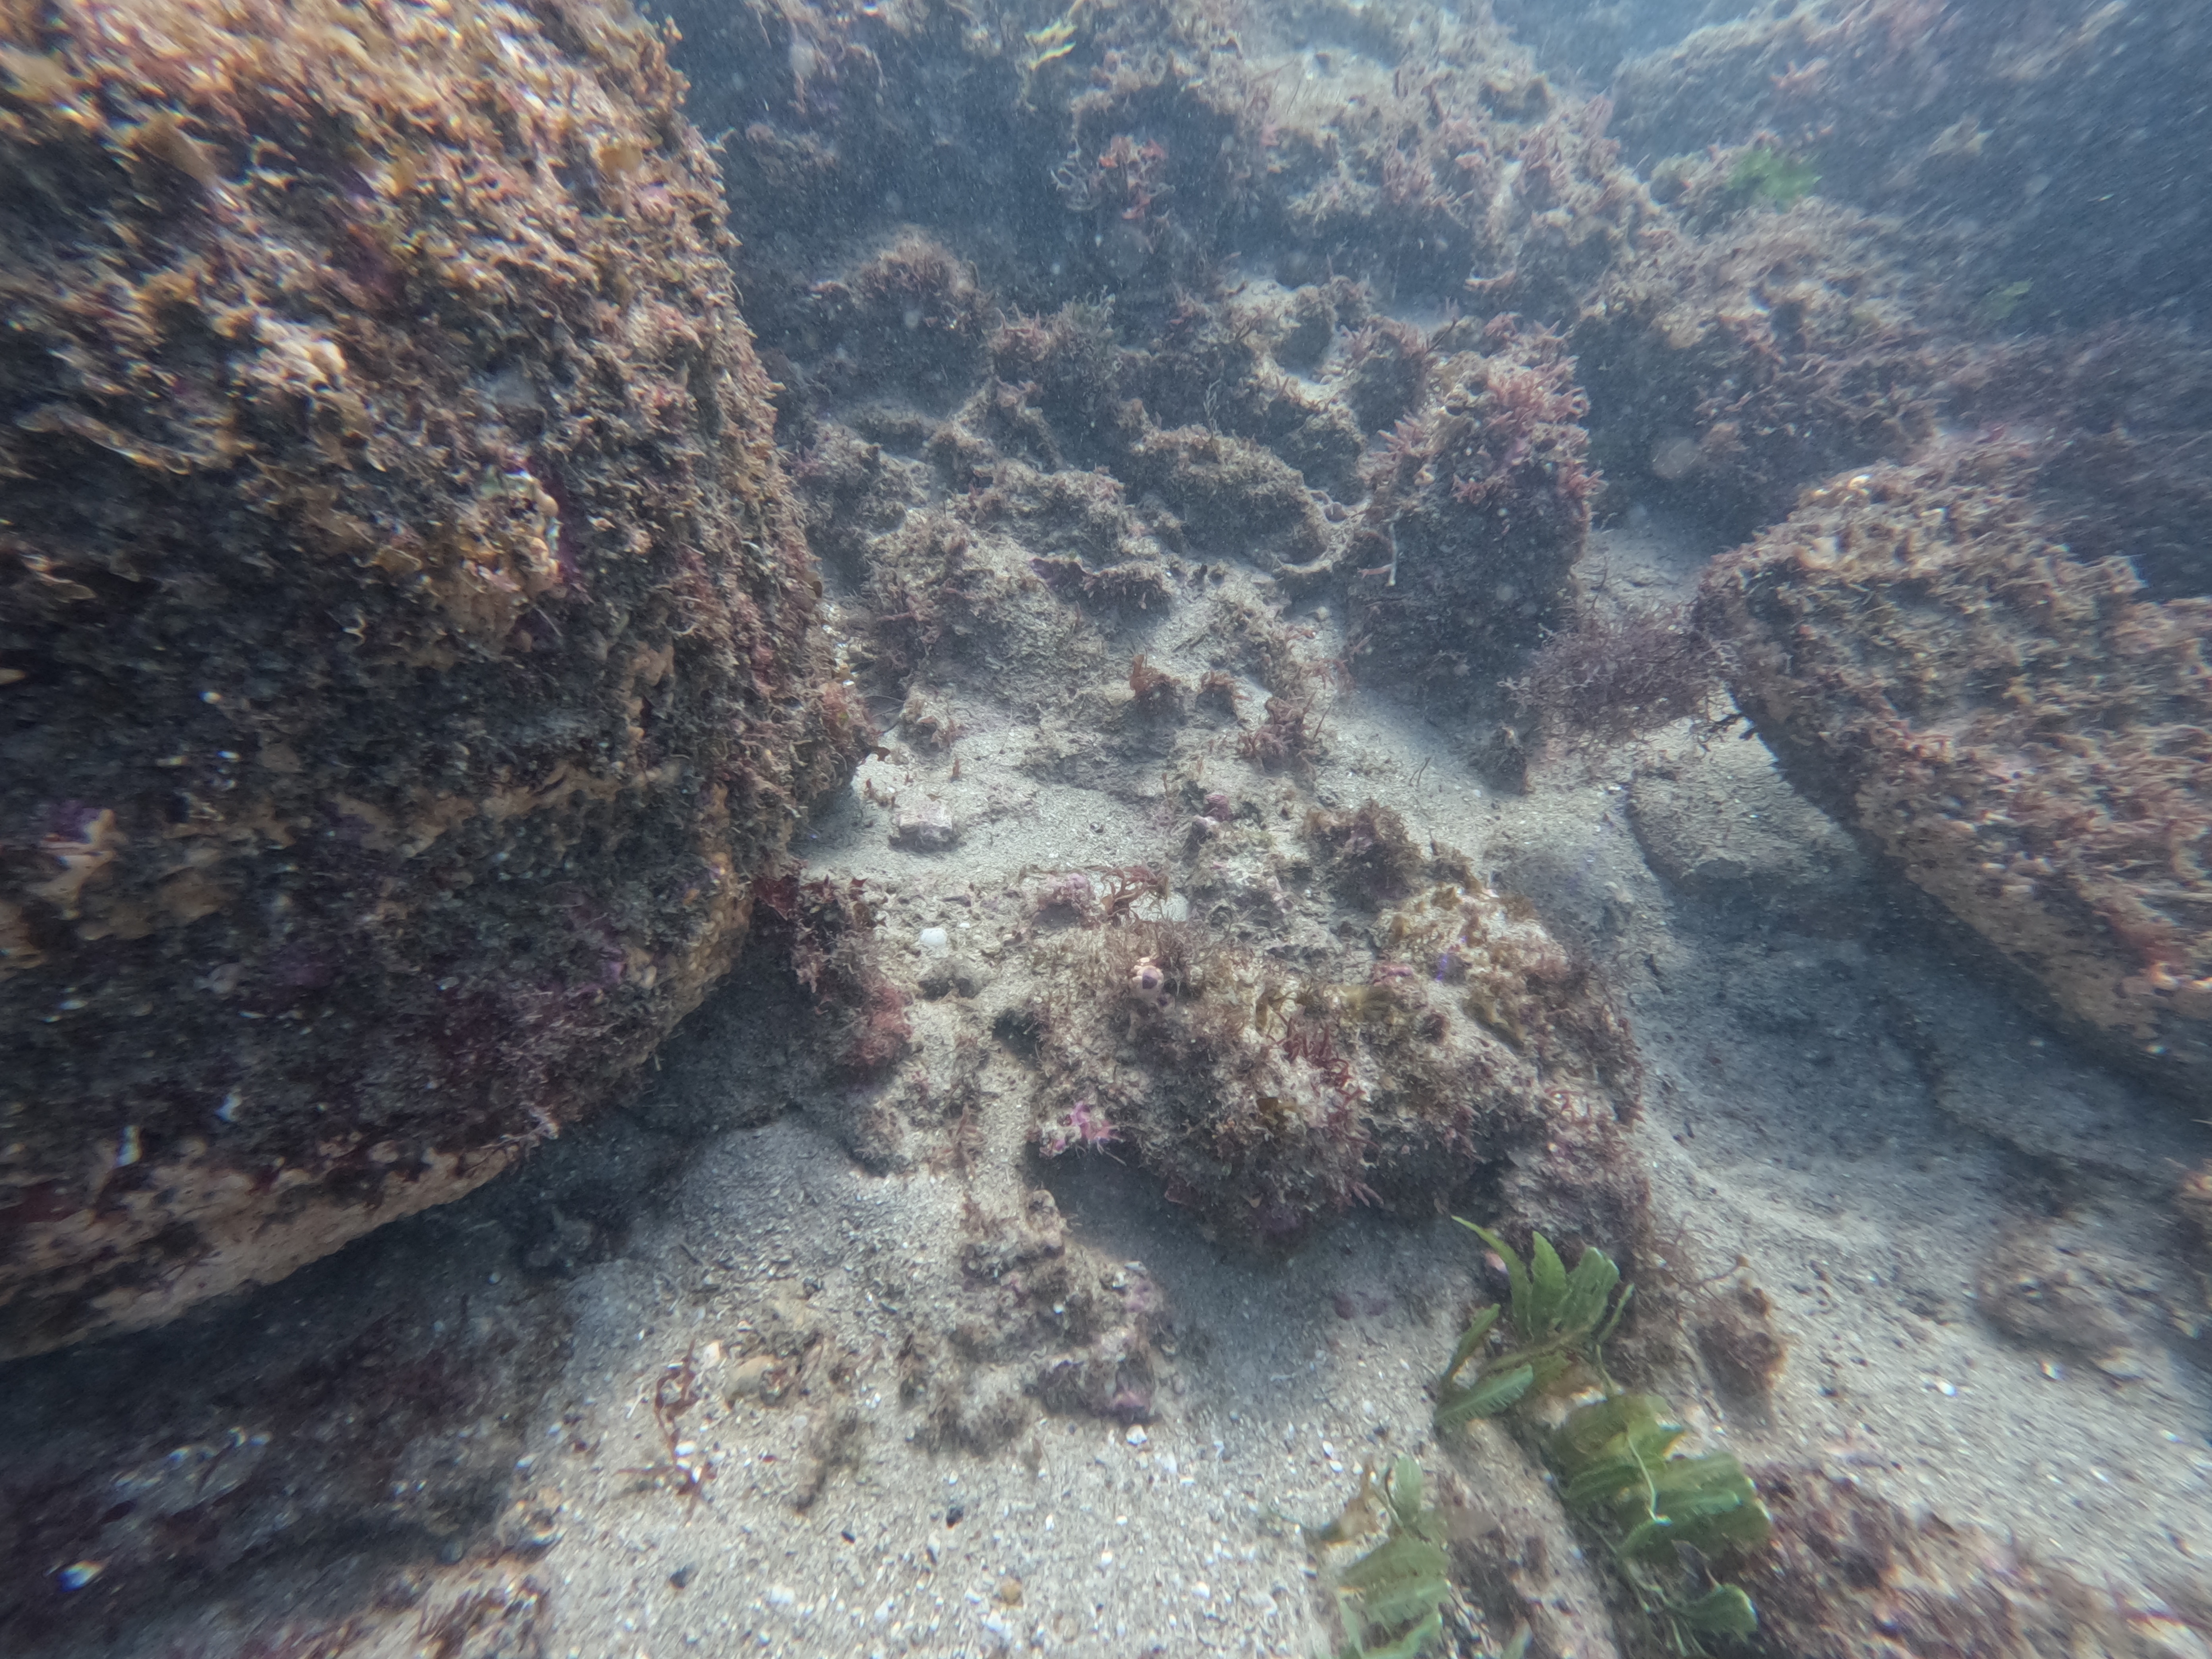

Supplement: Supplementary file 1648 [file G0027974.pdf › Ocean1/G0027974.pdf]

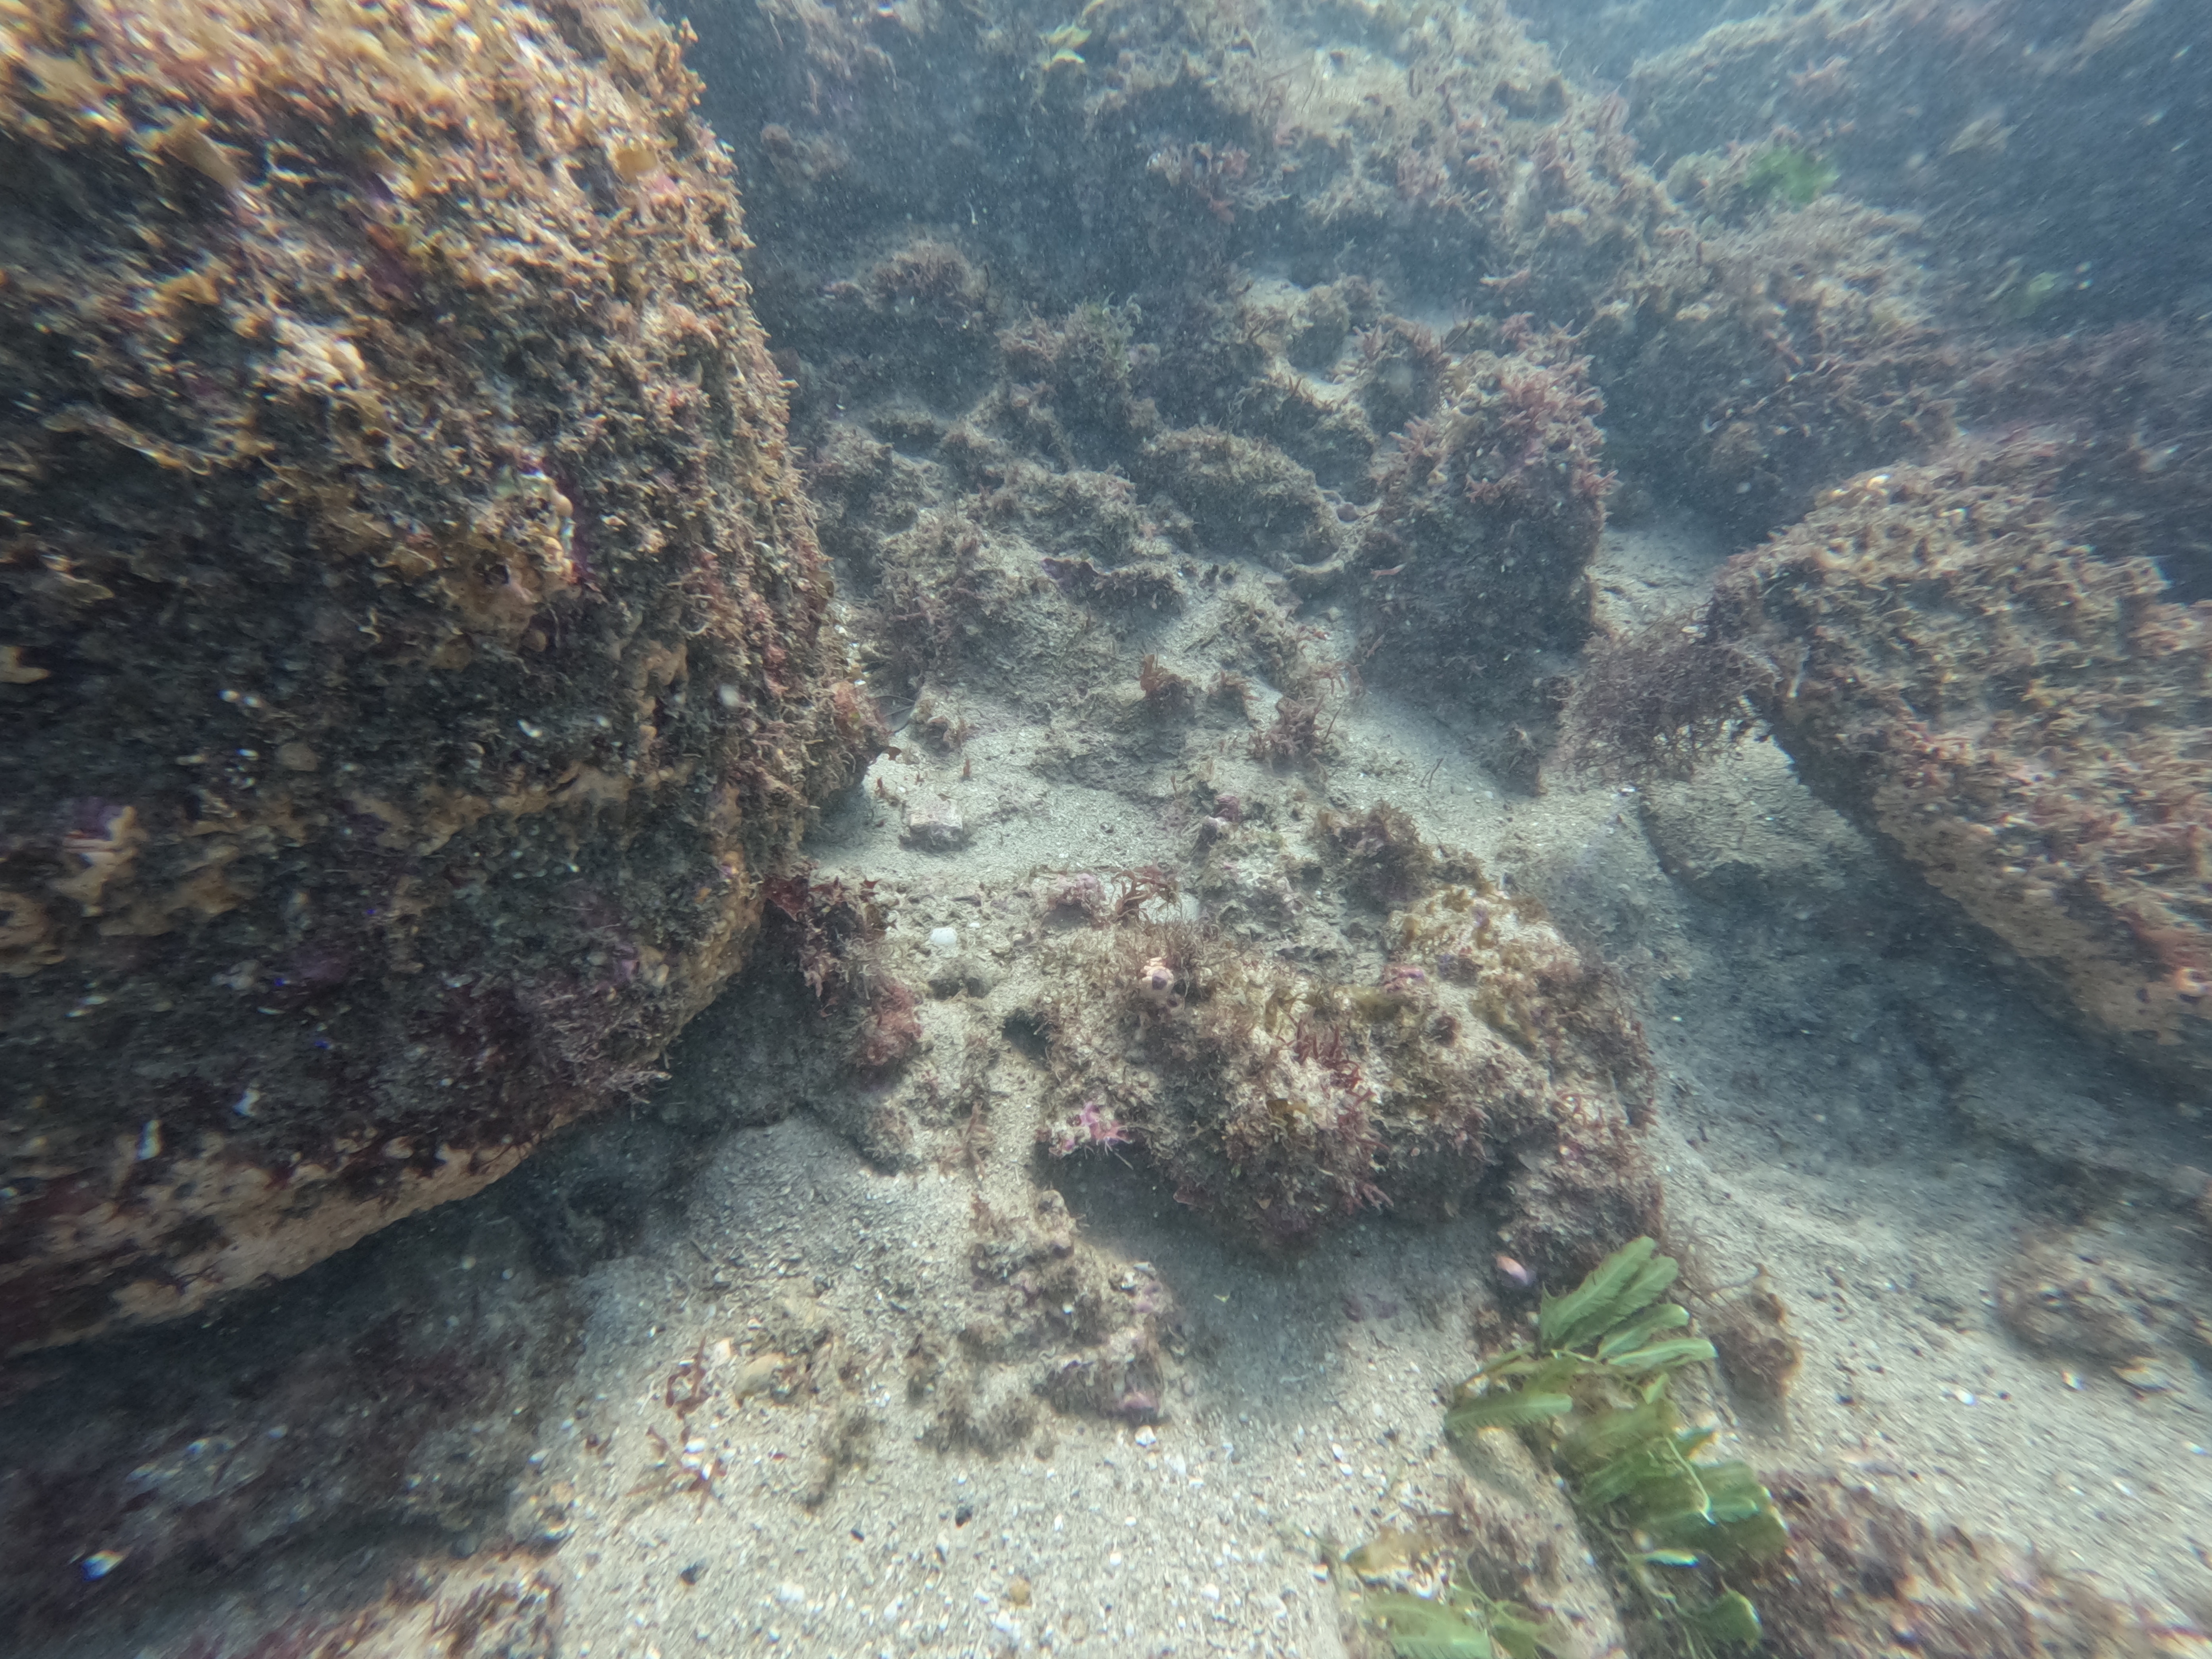

Supplement: Supplementary file 1649 [file G0027975.pdf › Ocean1/G0027975.pdf]

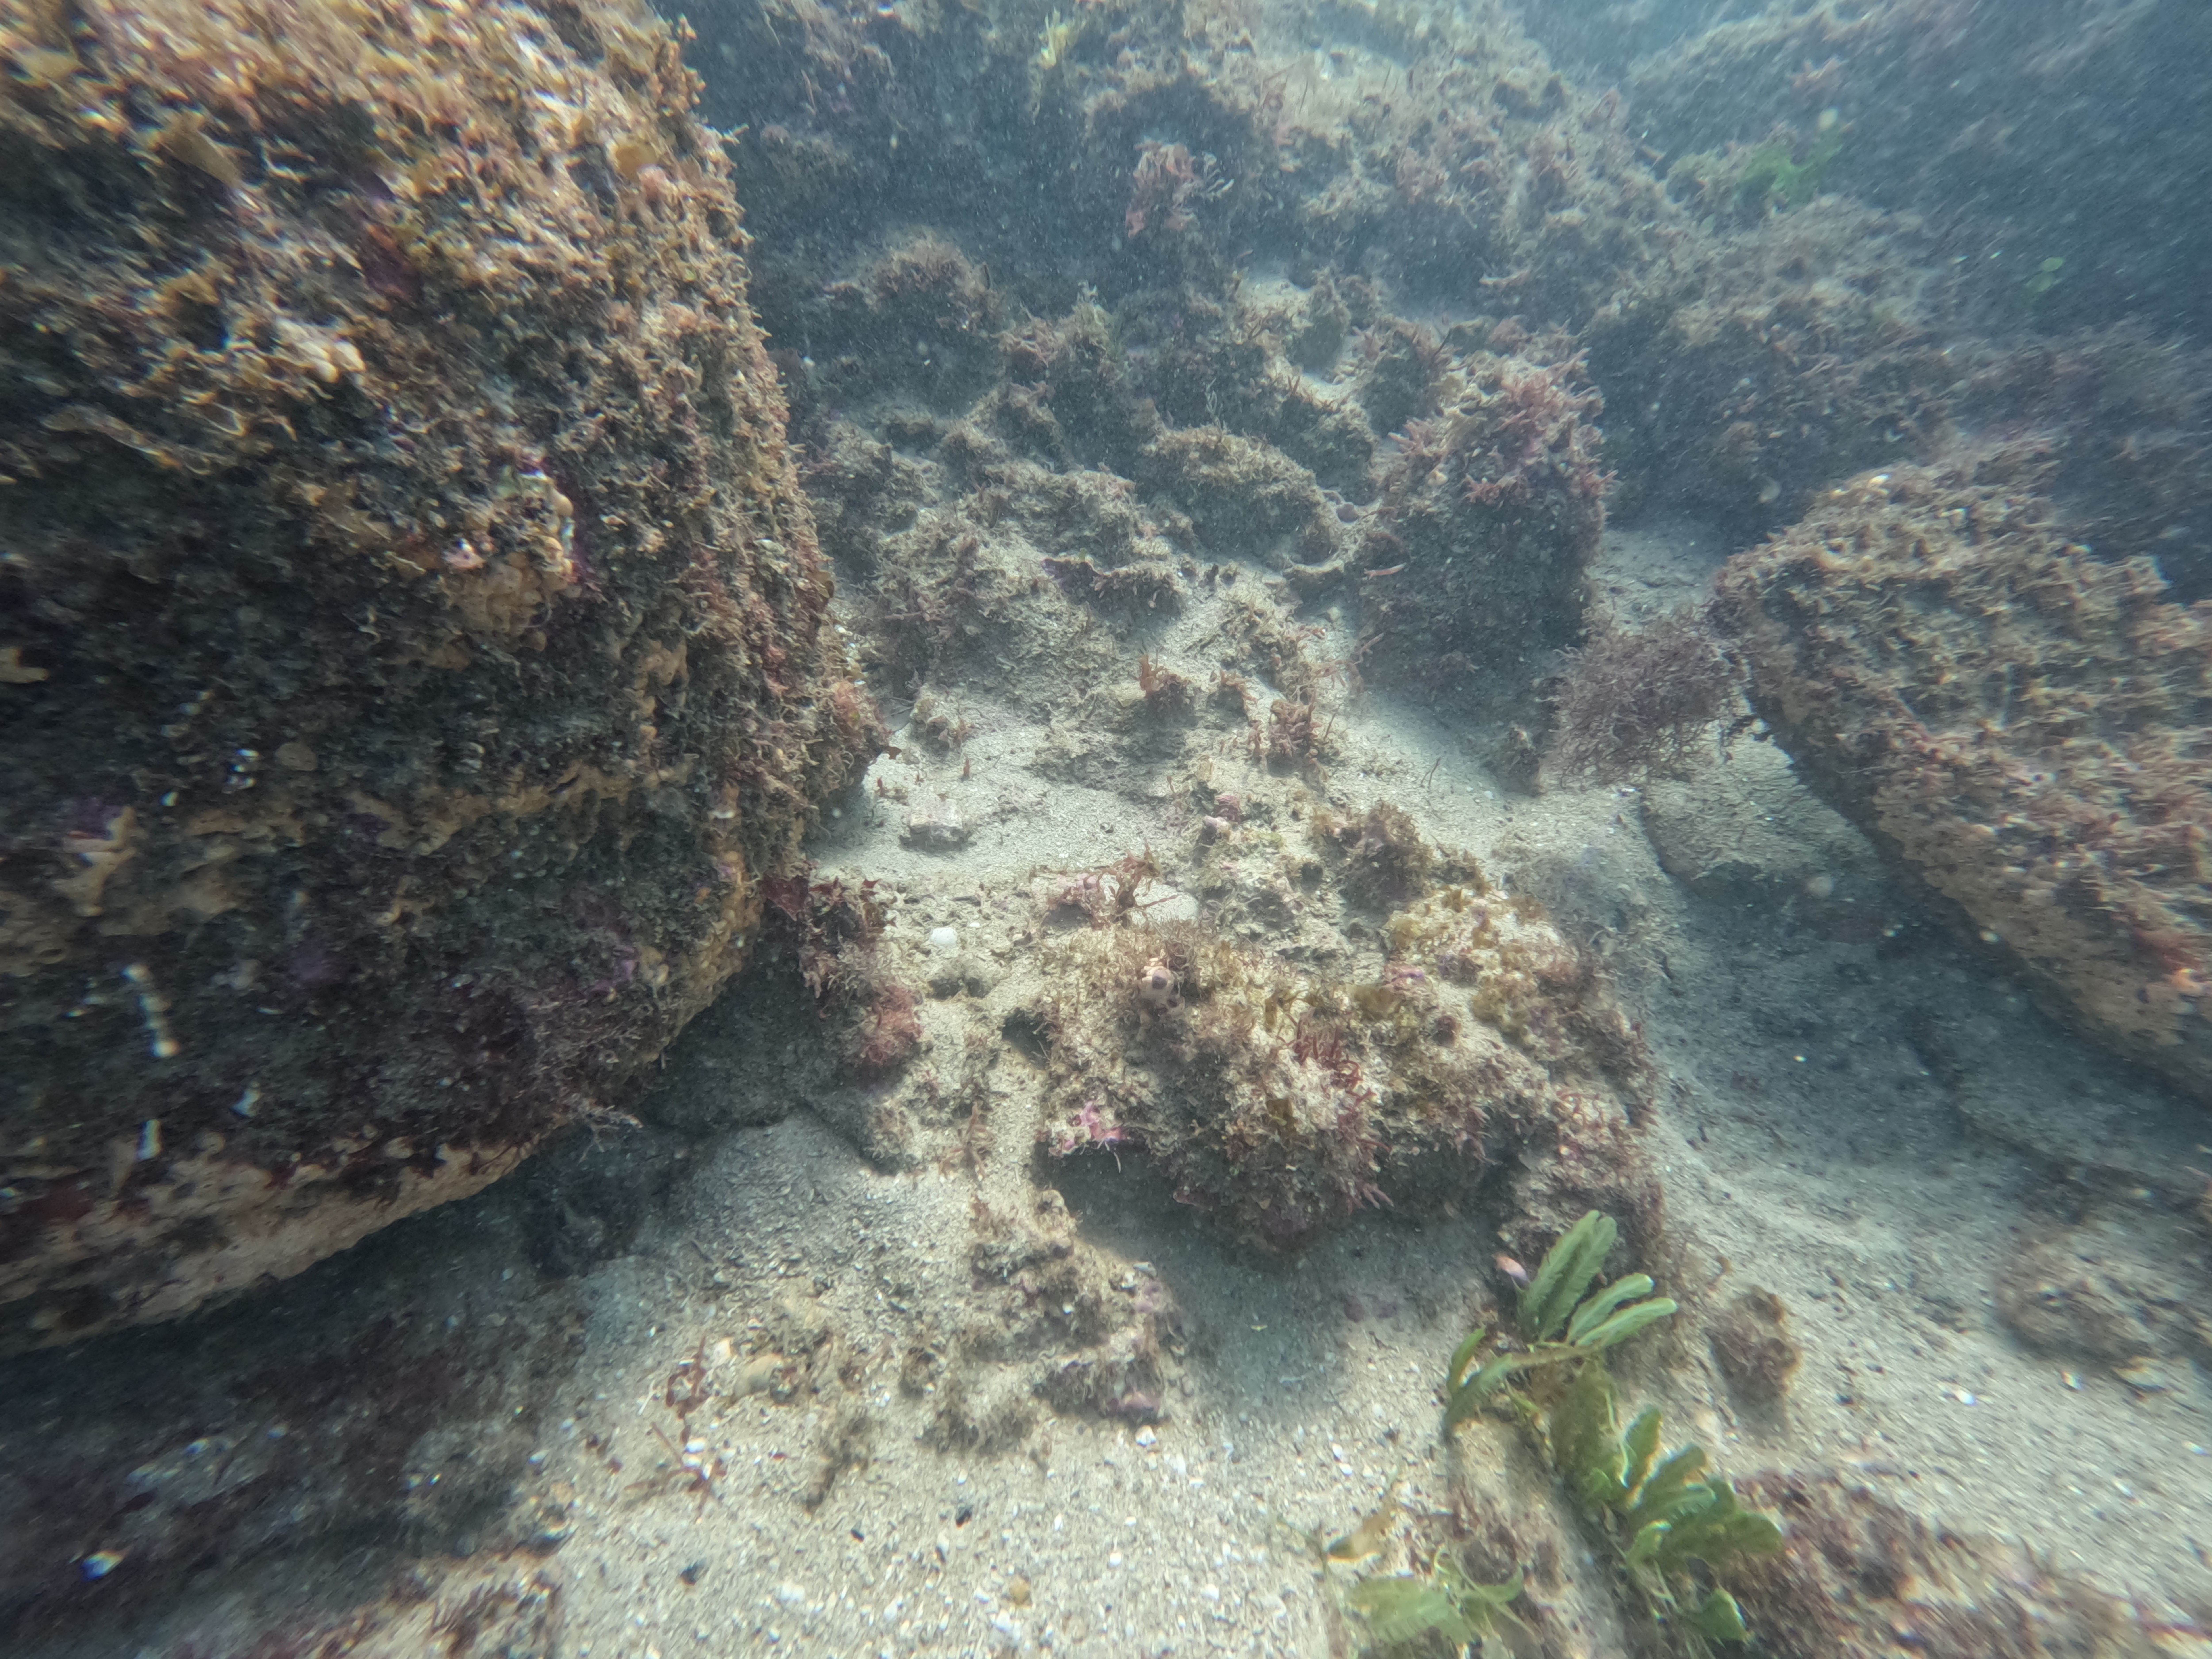

Supplement: Supplementary file 1650 [file G0027976.pdf › Ocean1/G0027976.pdf]

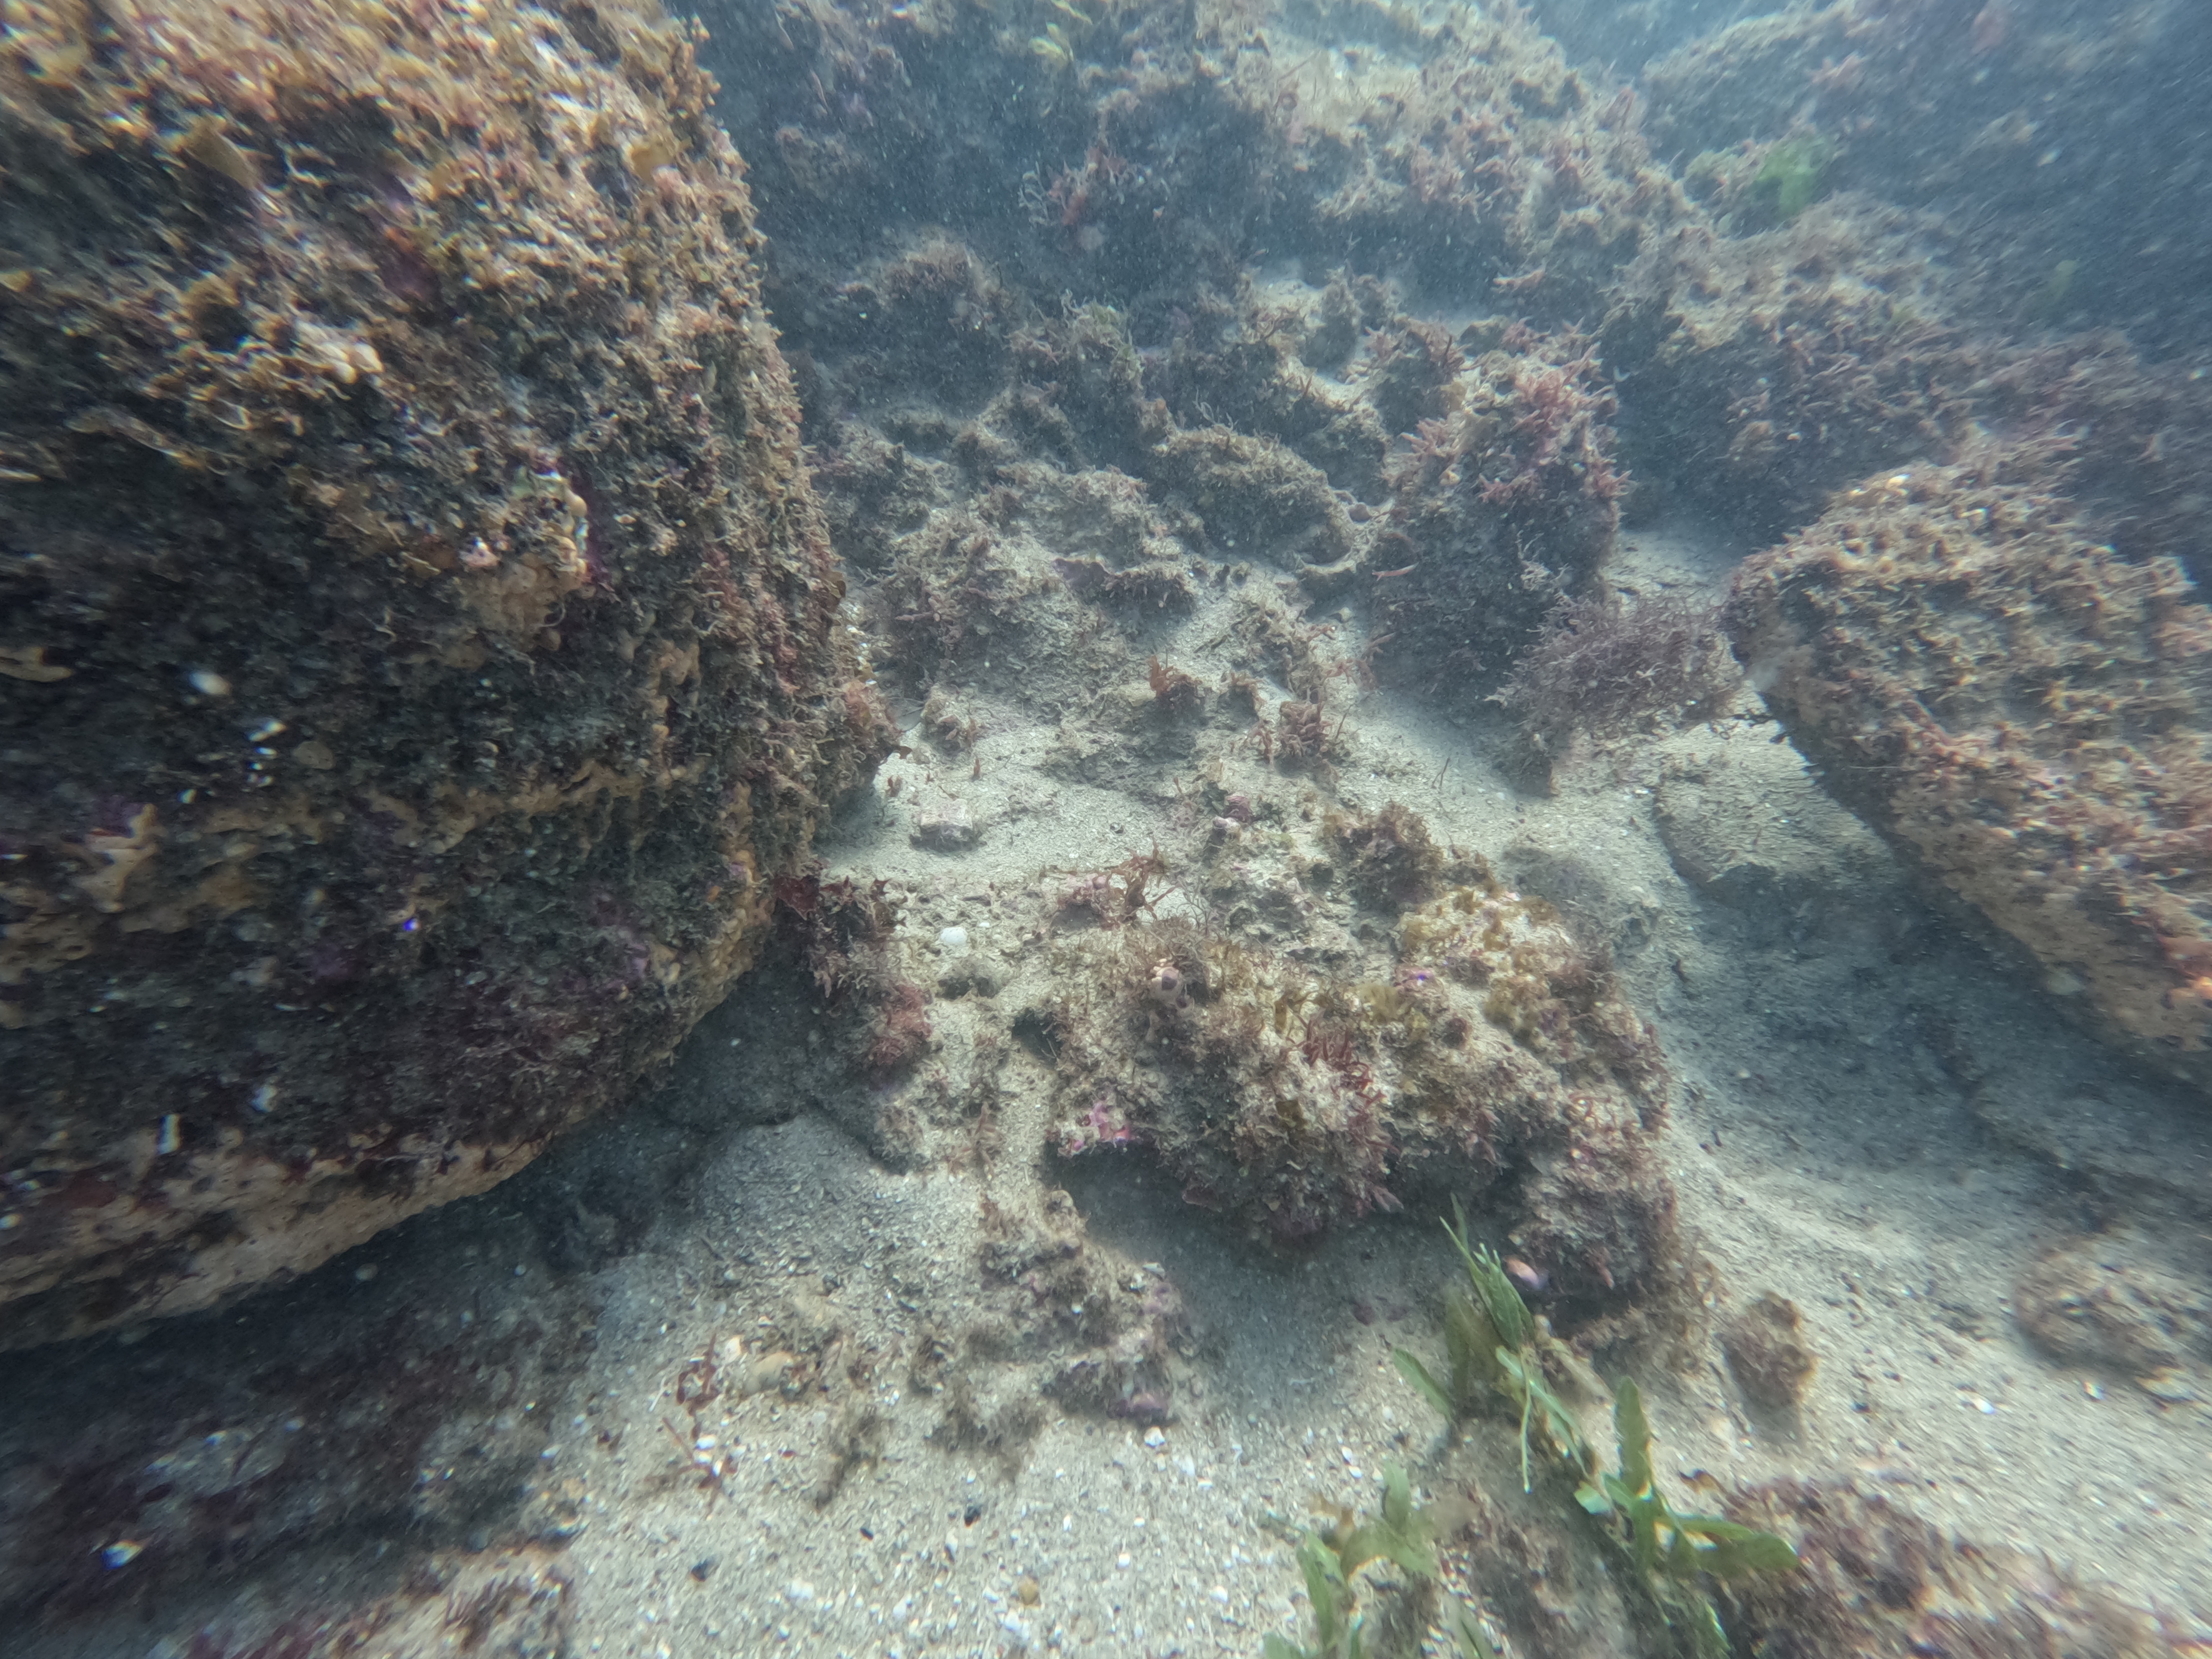

Supplement: Supplementary file 1651 [file G0027977.pdf › Ocean1/G0027977.pdf]

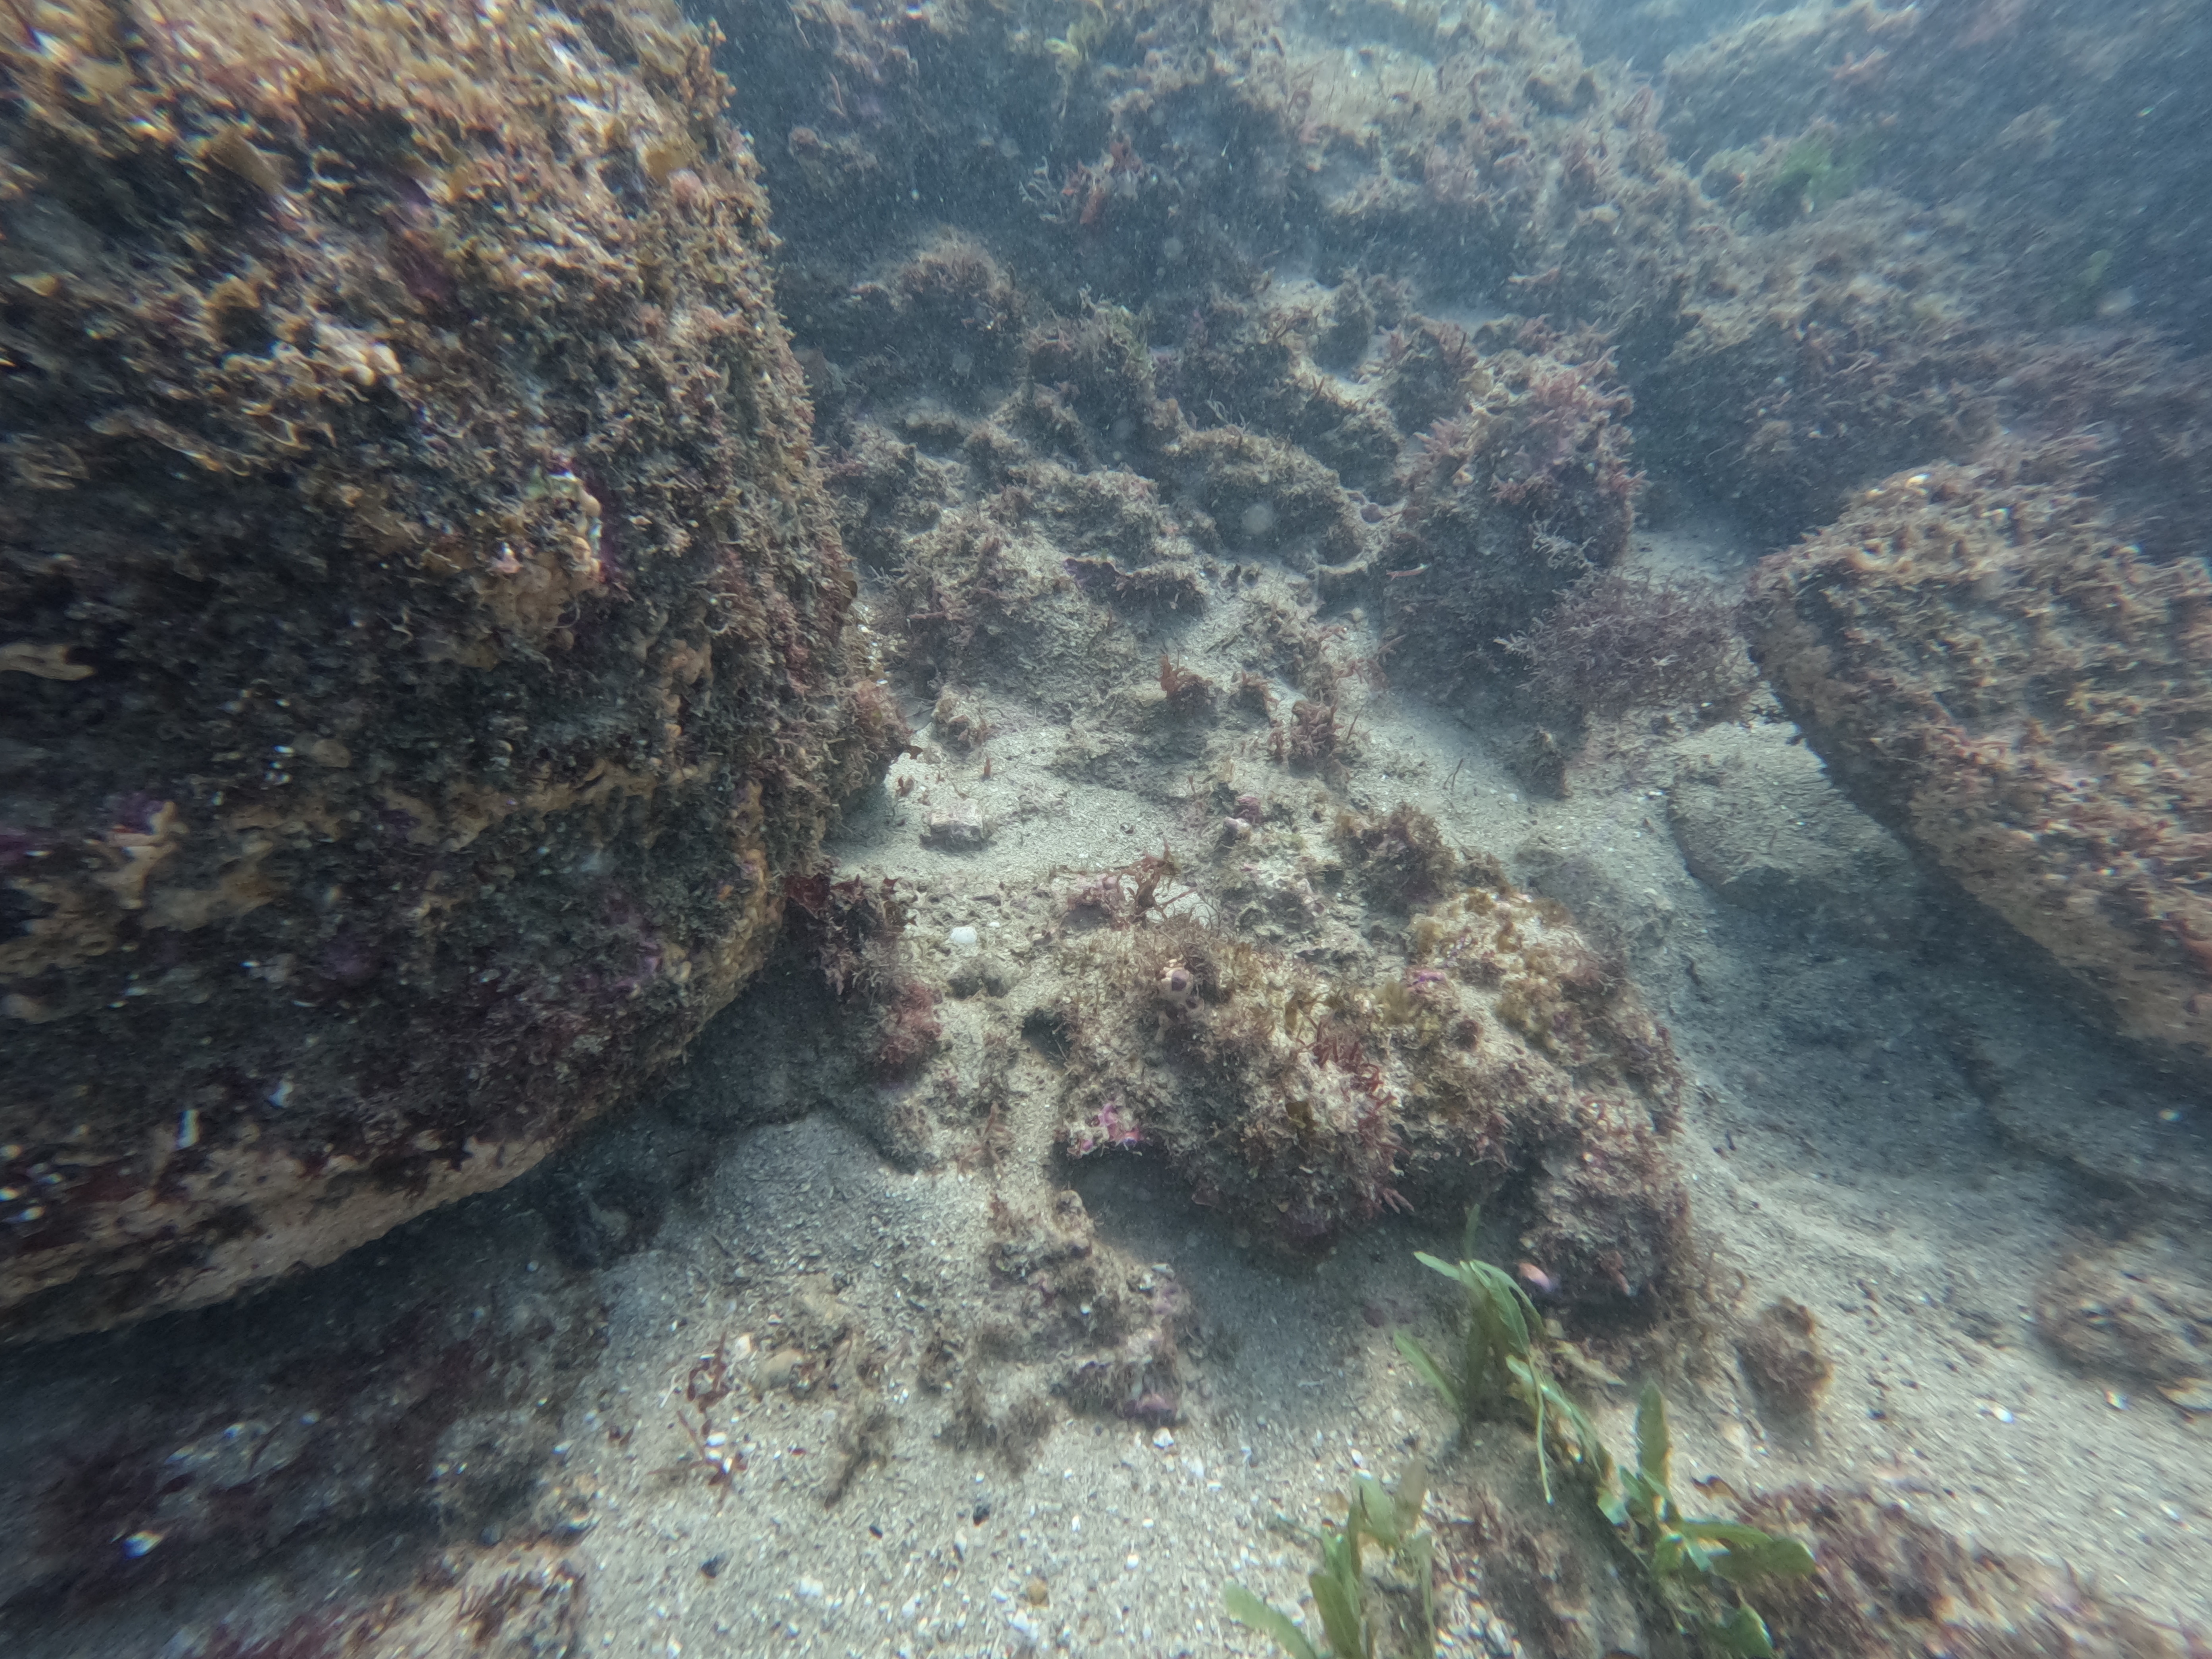

Supplement: Supplementary file 1652 [file G0027978.pdf › Ocean1/G0027978.pdf]

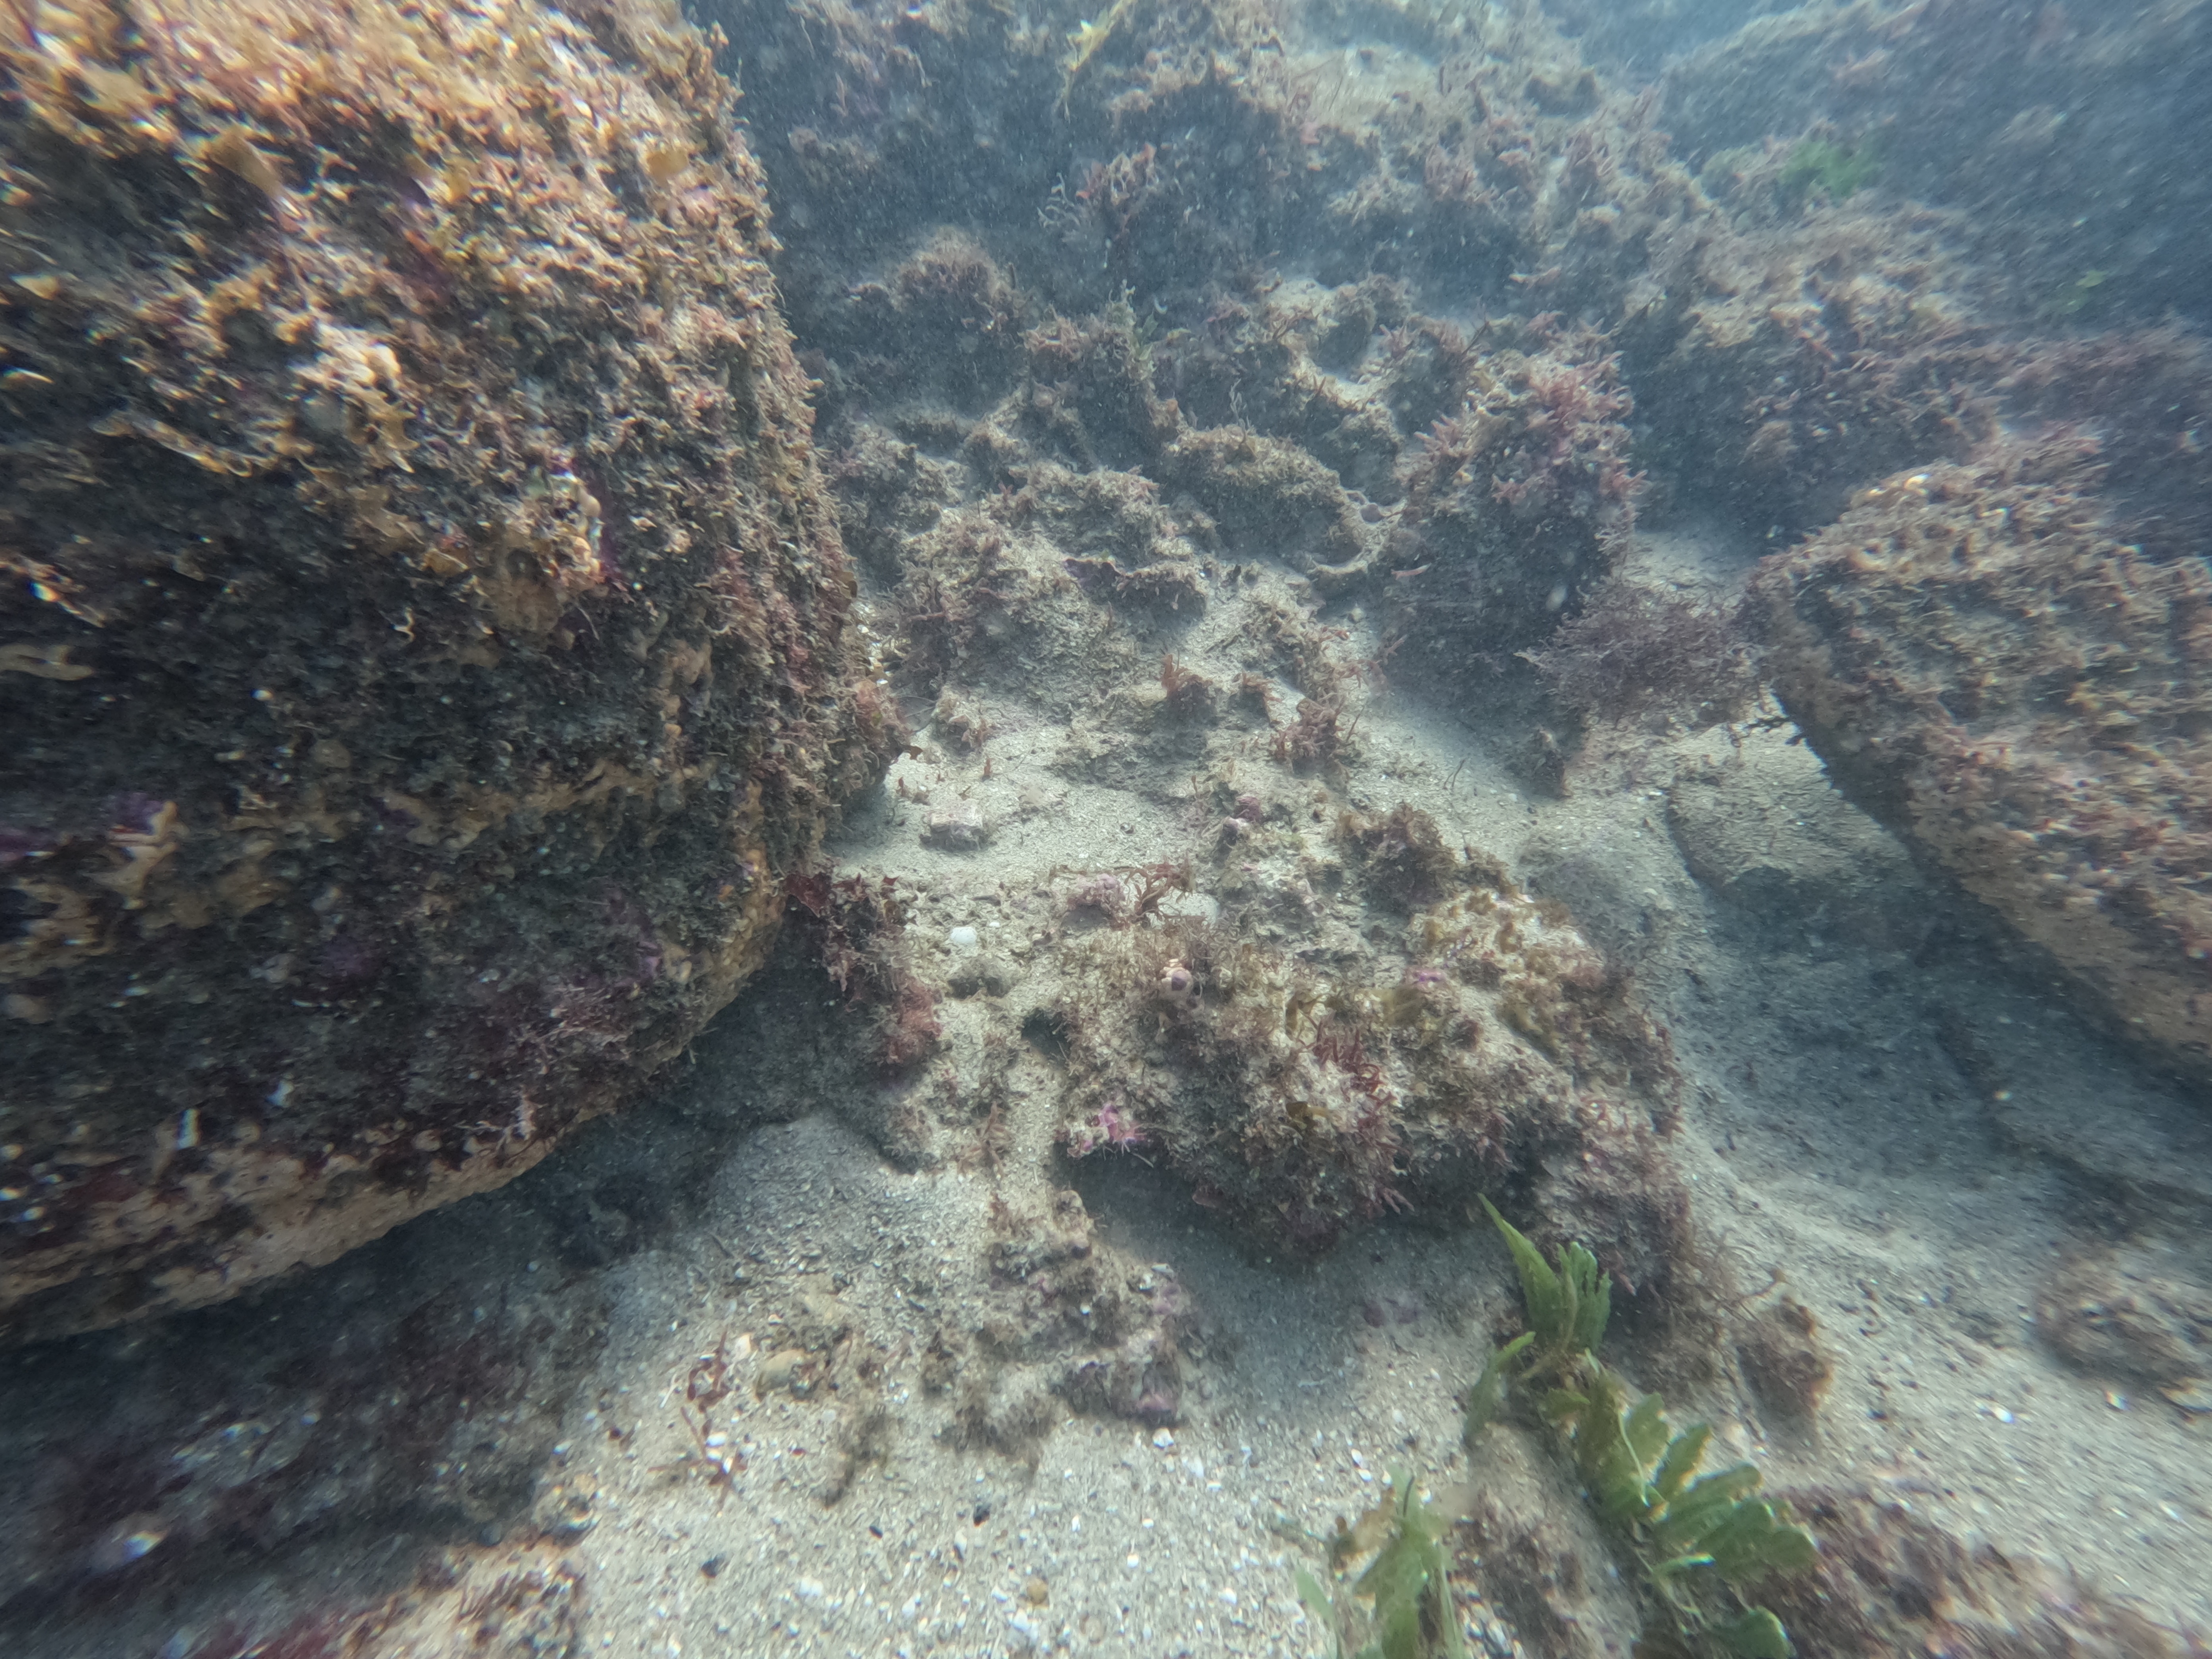

Supplement: Supplementary file 1653 [file G0027979.pdf › Ocean1/G0027979.pdf]

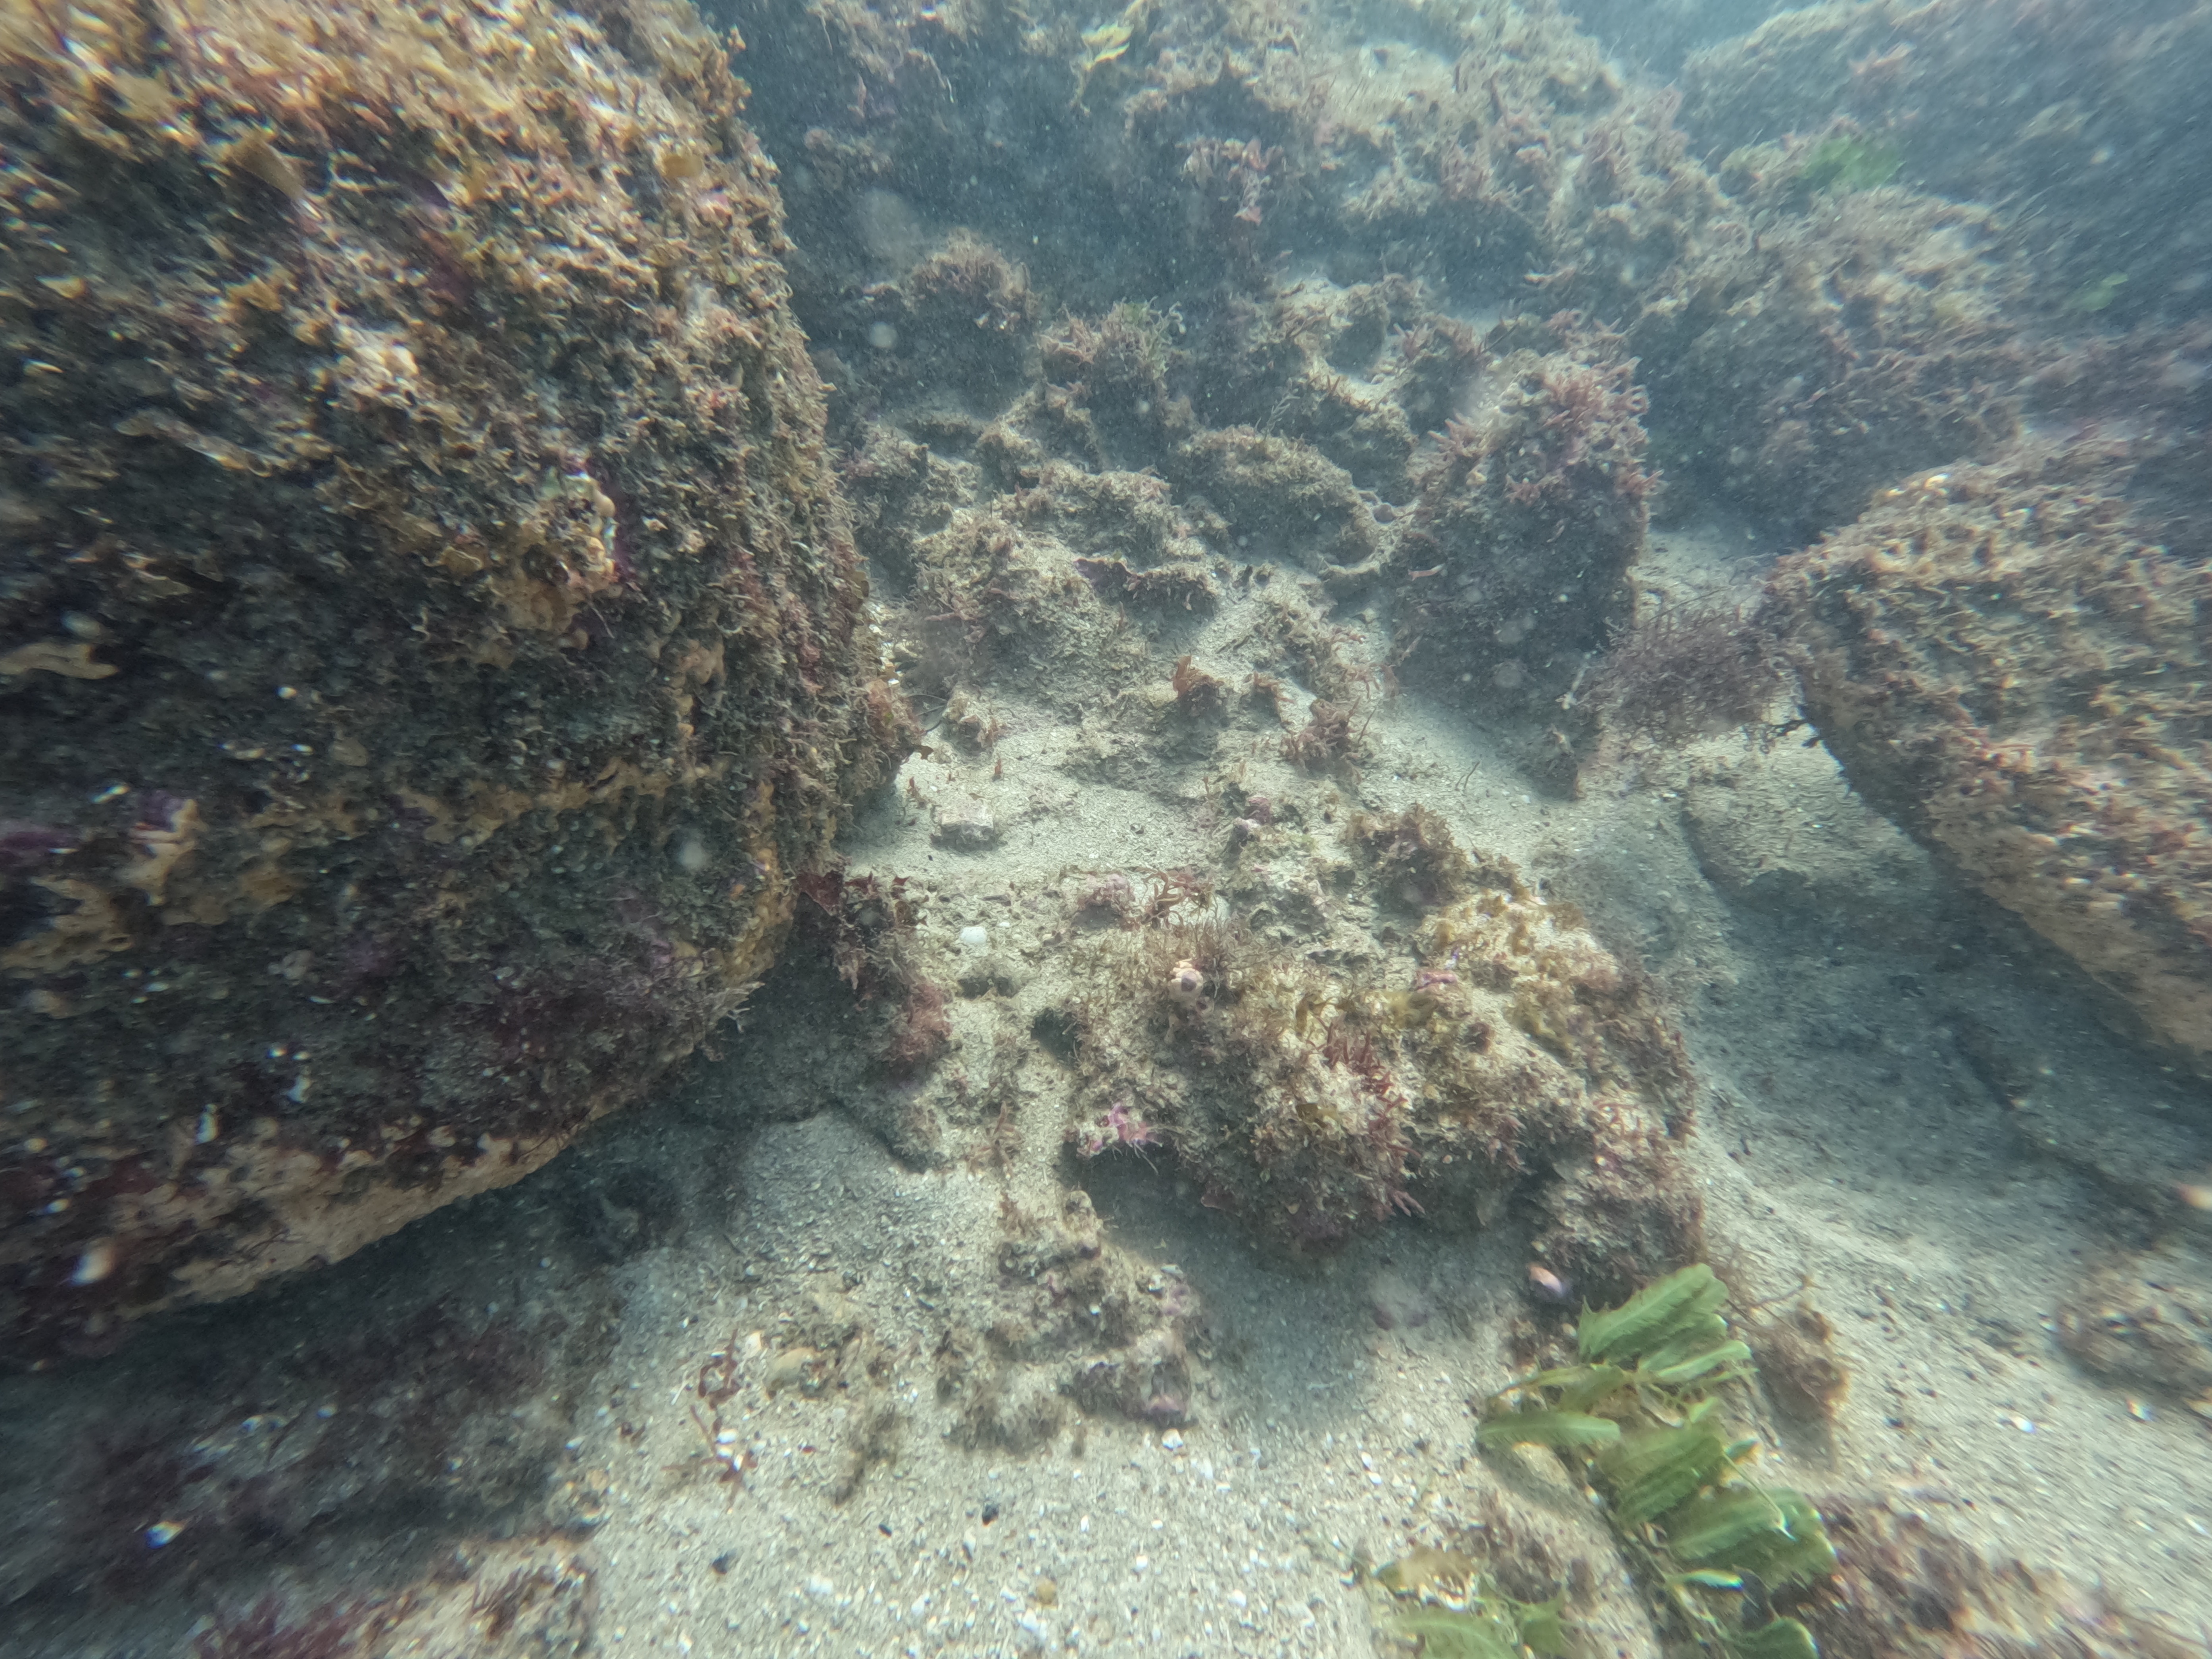

Supplement: Supplementary file 1654 [file G0027980.pdf › Ocean1/G0027980.pdf]

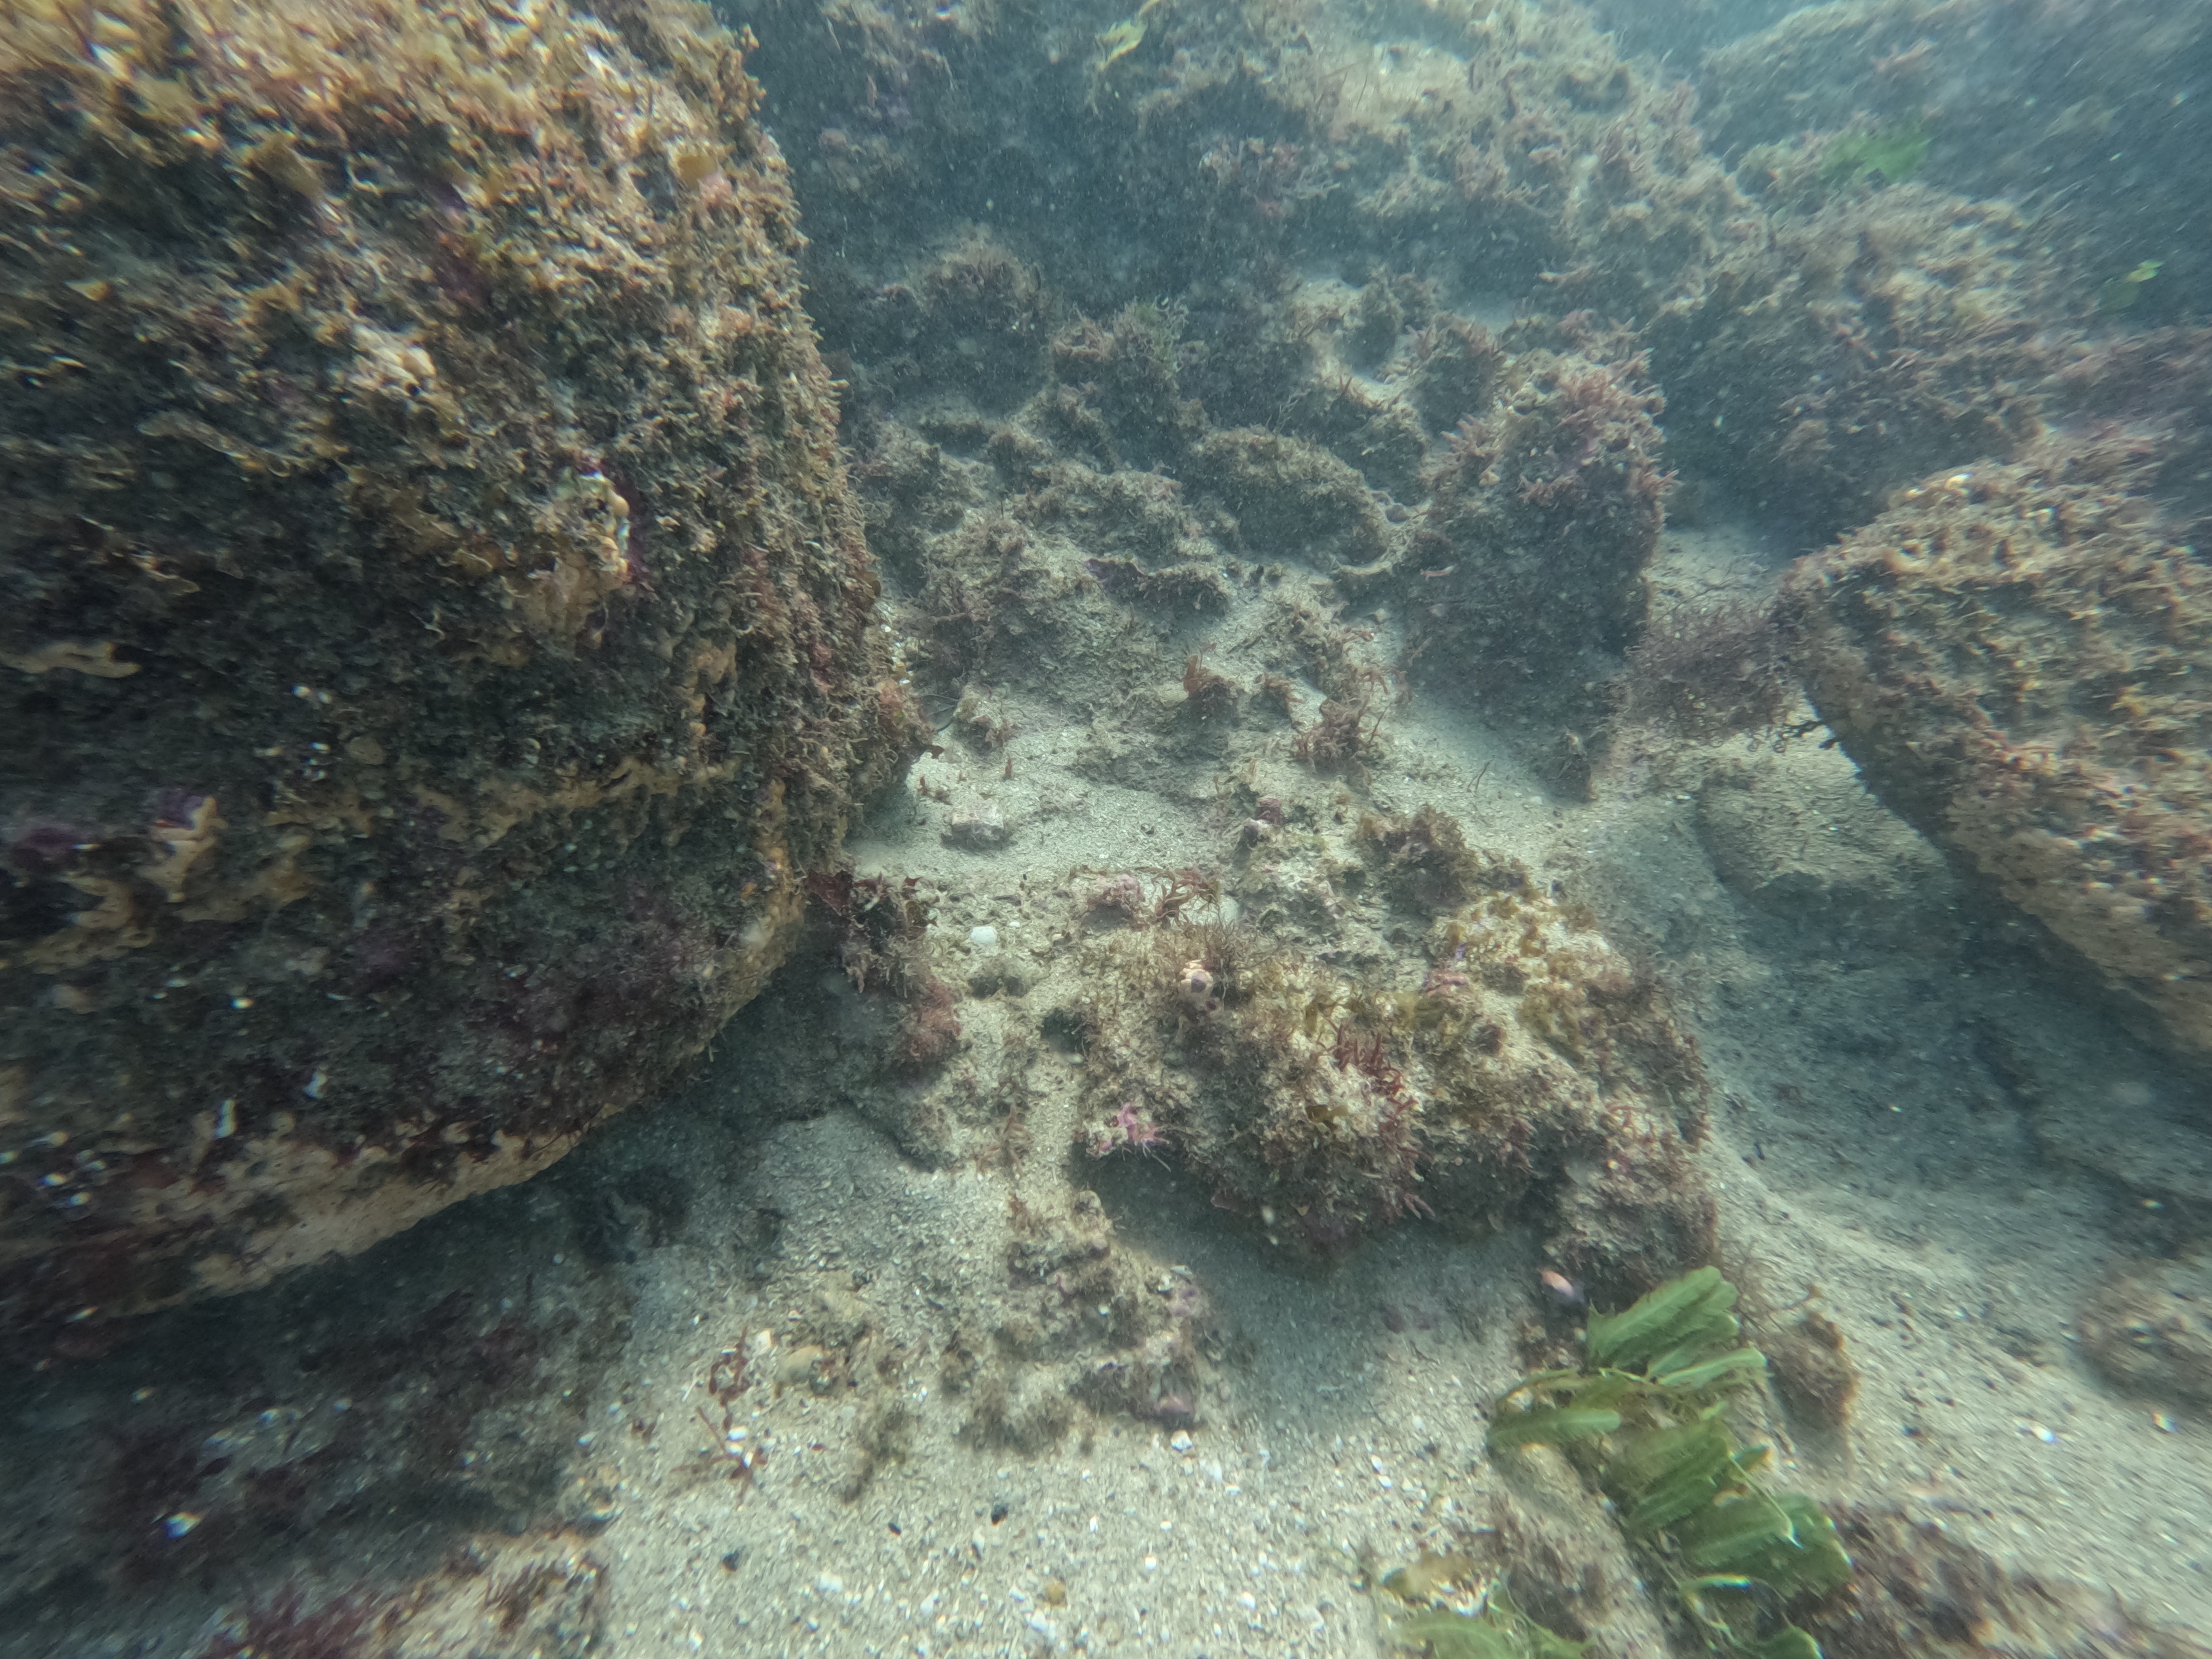

Supplement: Supplementary file 1655 [file G0027981.pdf › Ocean1/G0027981.pdf]

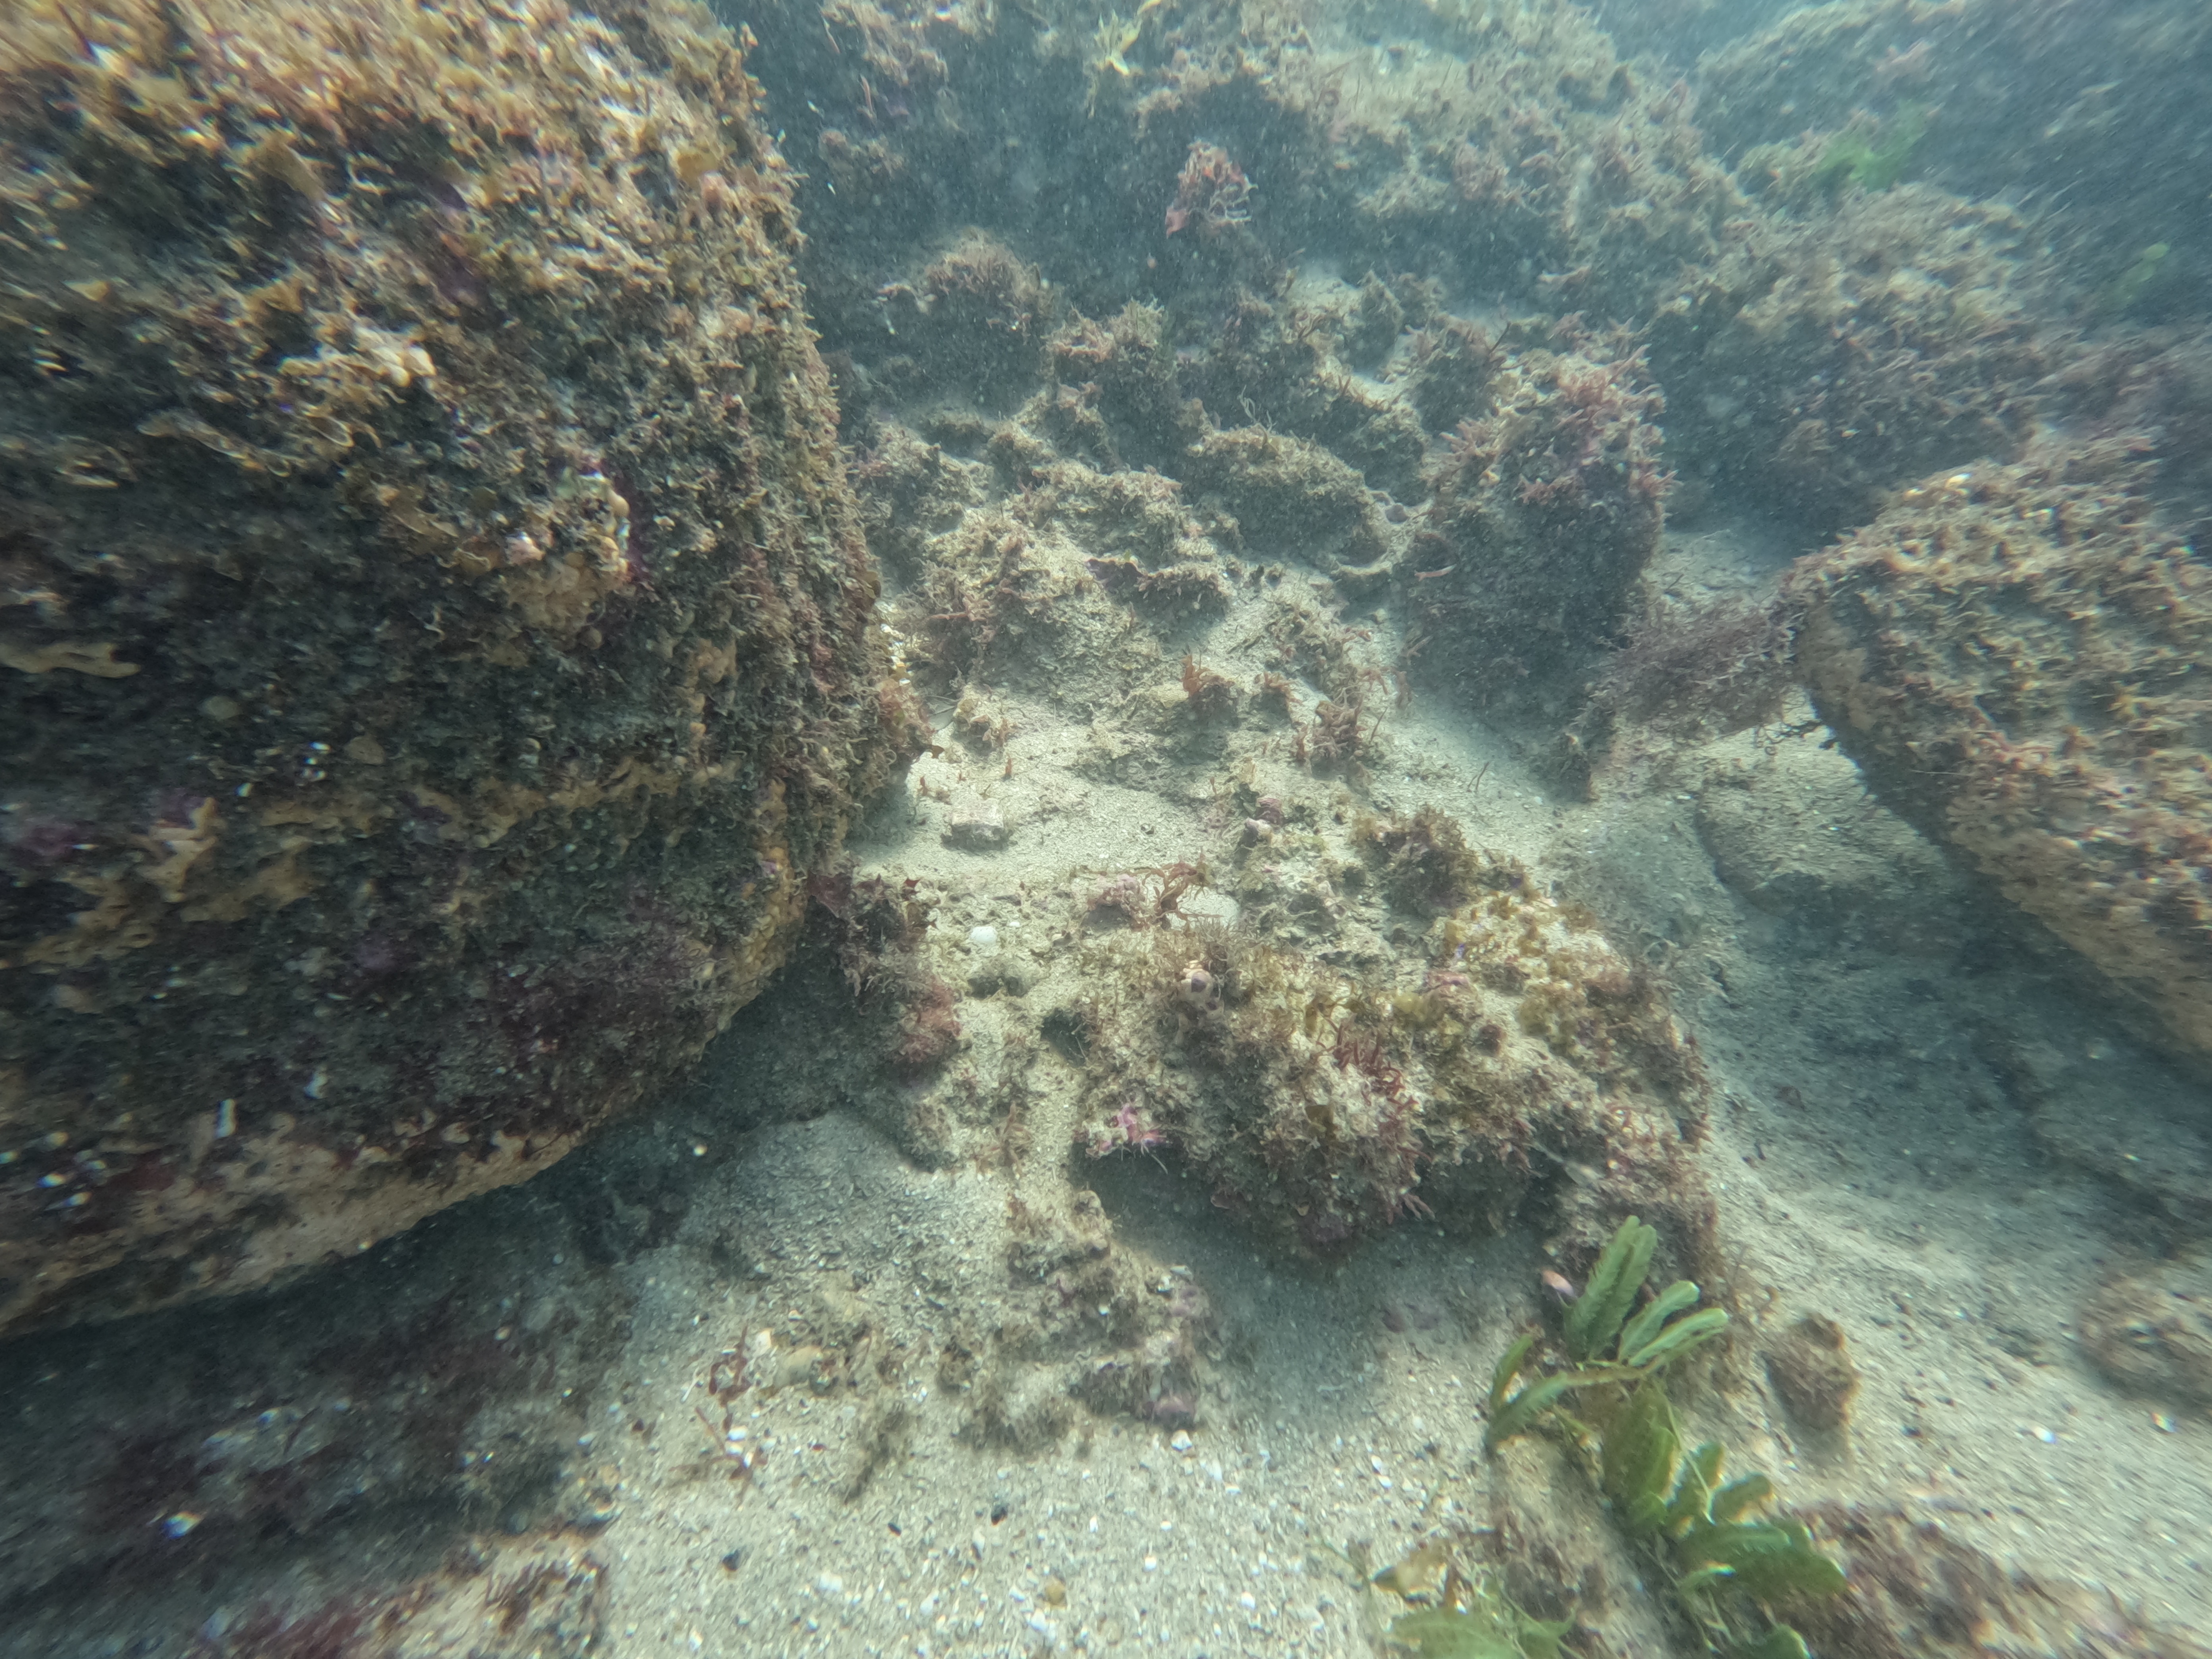

Supplement: Supplementary file 1656 [file G0027982.pdf › Ocean1/G0027982.pdf]

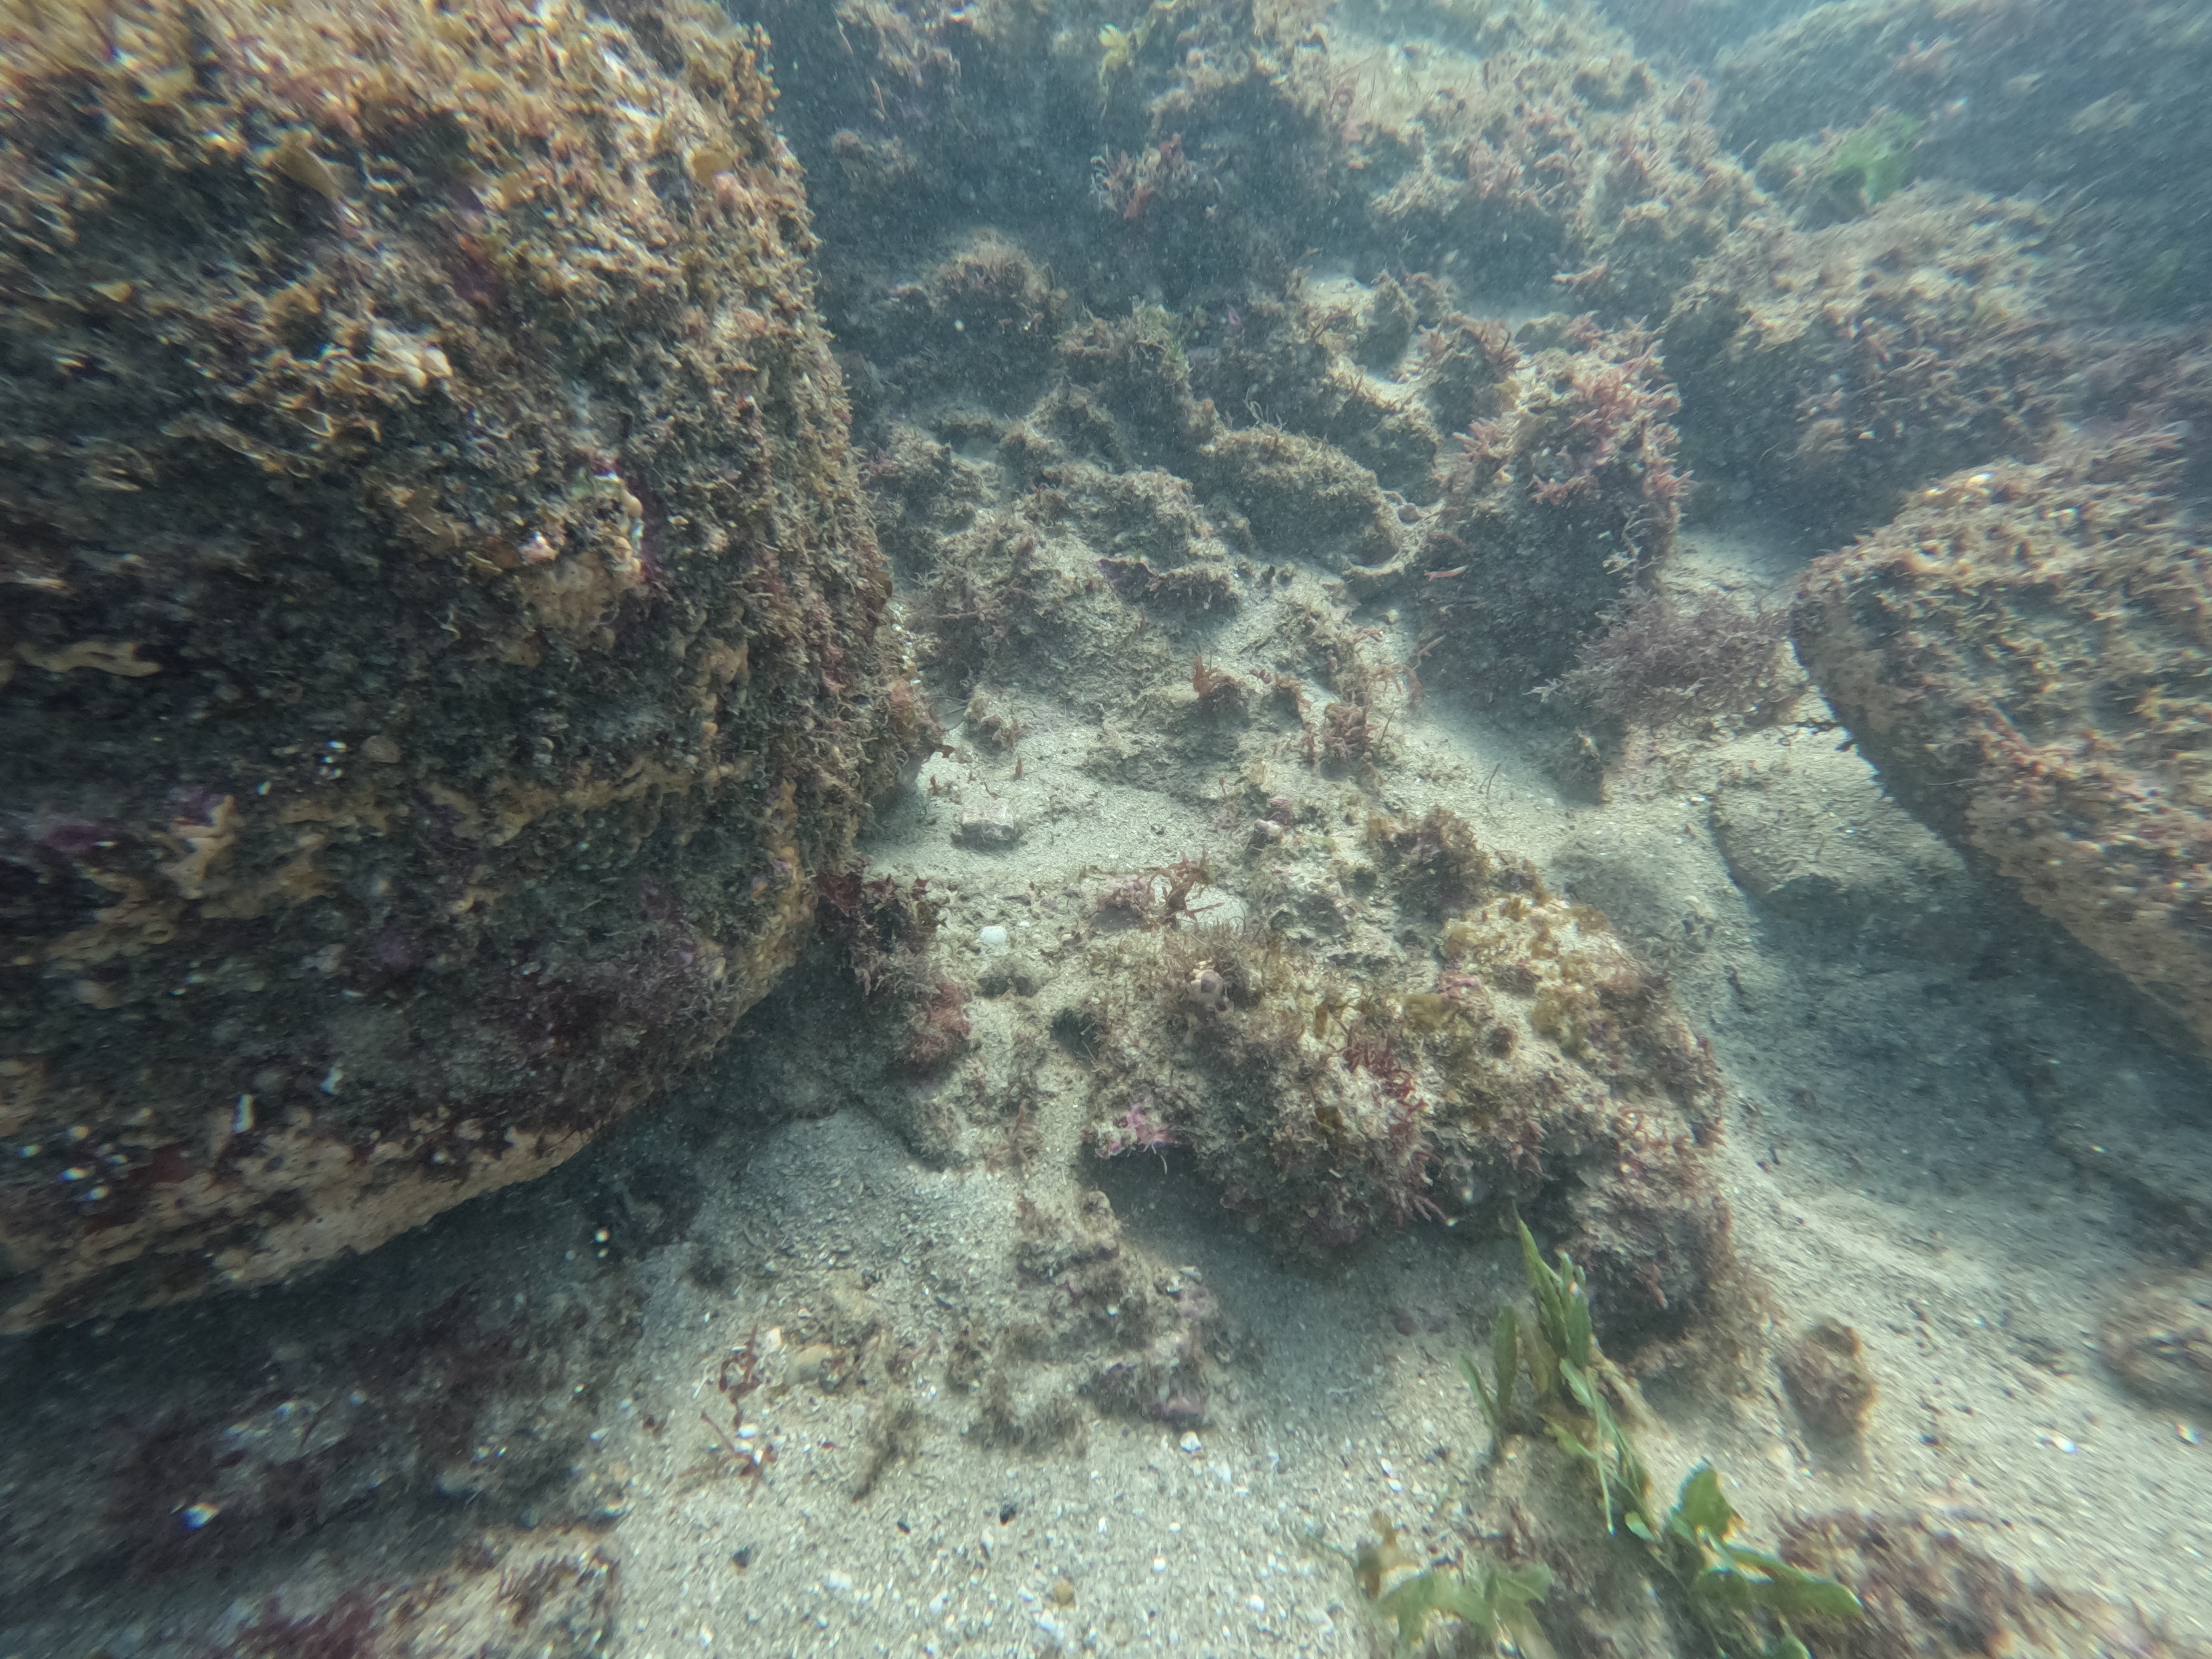

Supplement: Supplementary file 1657 [file G0027983.pdf › Ocean1/G0027983.pdf]

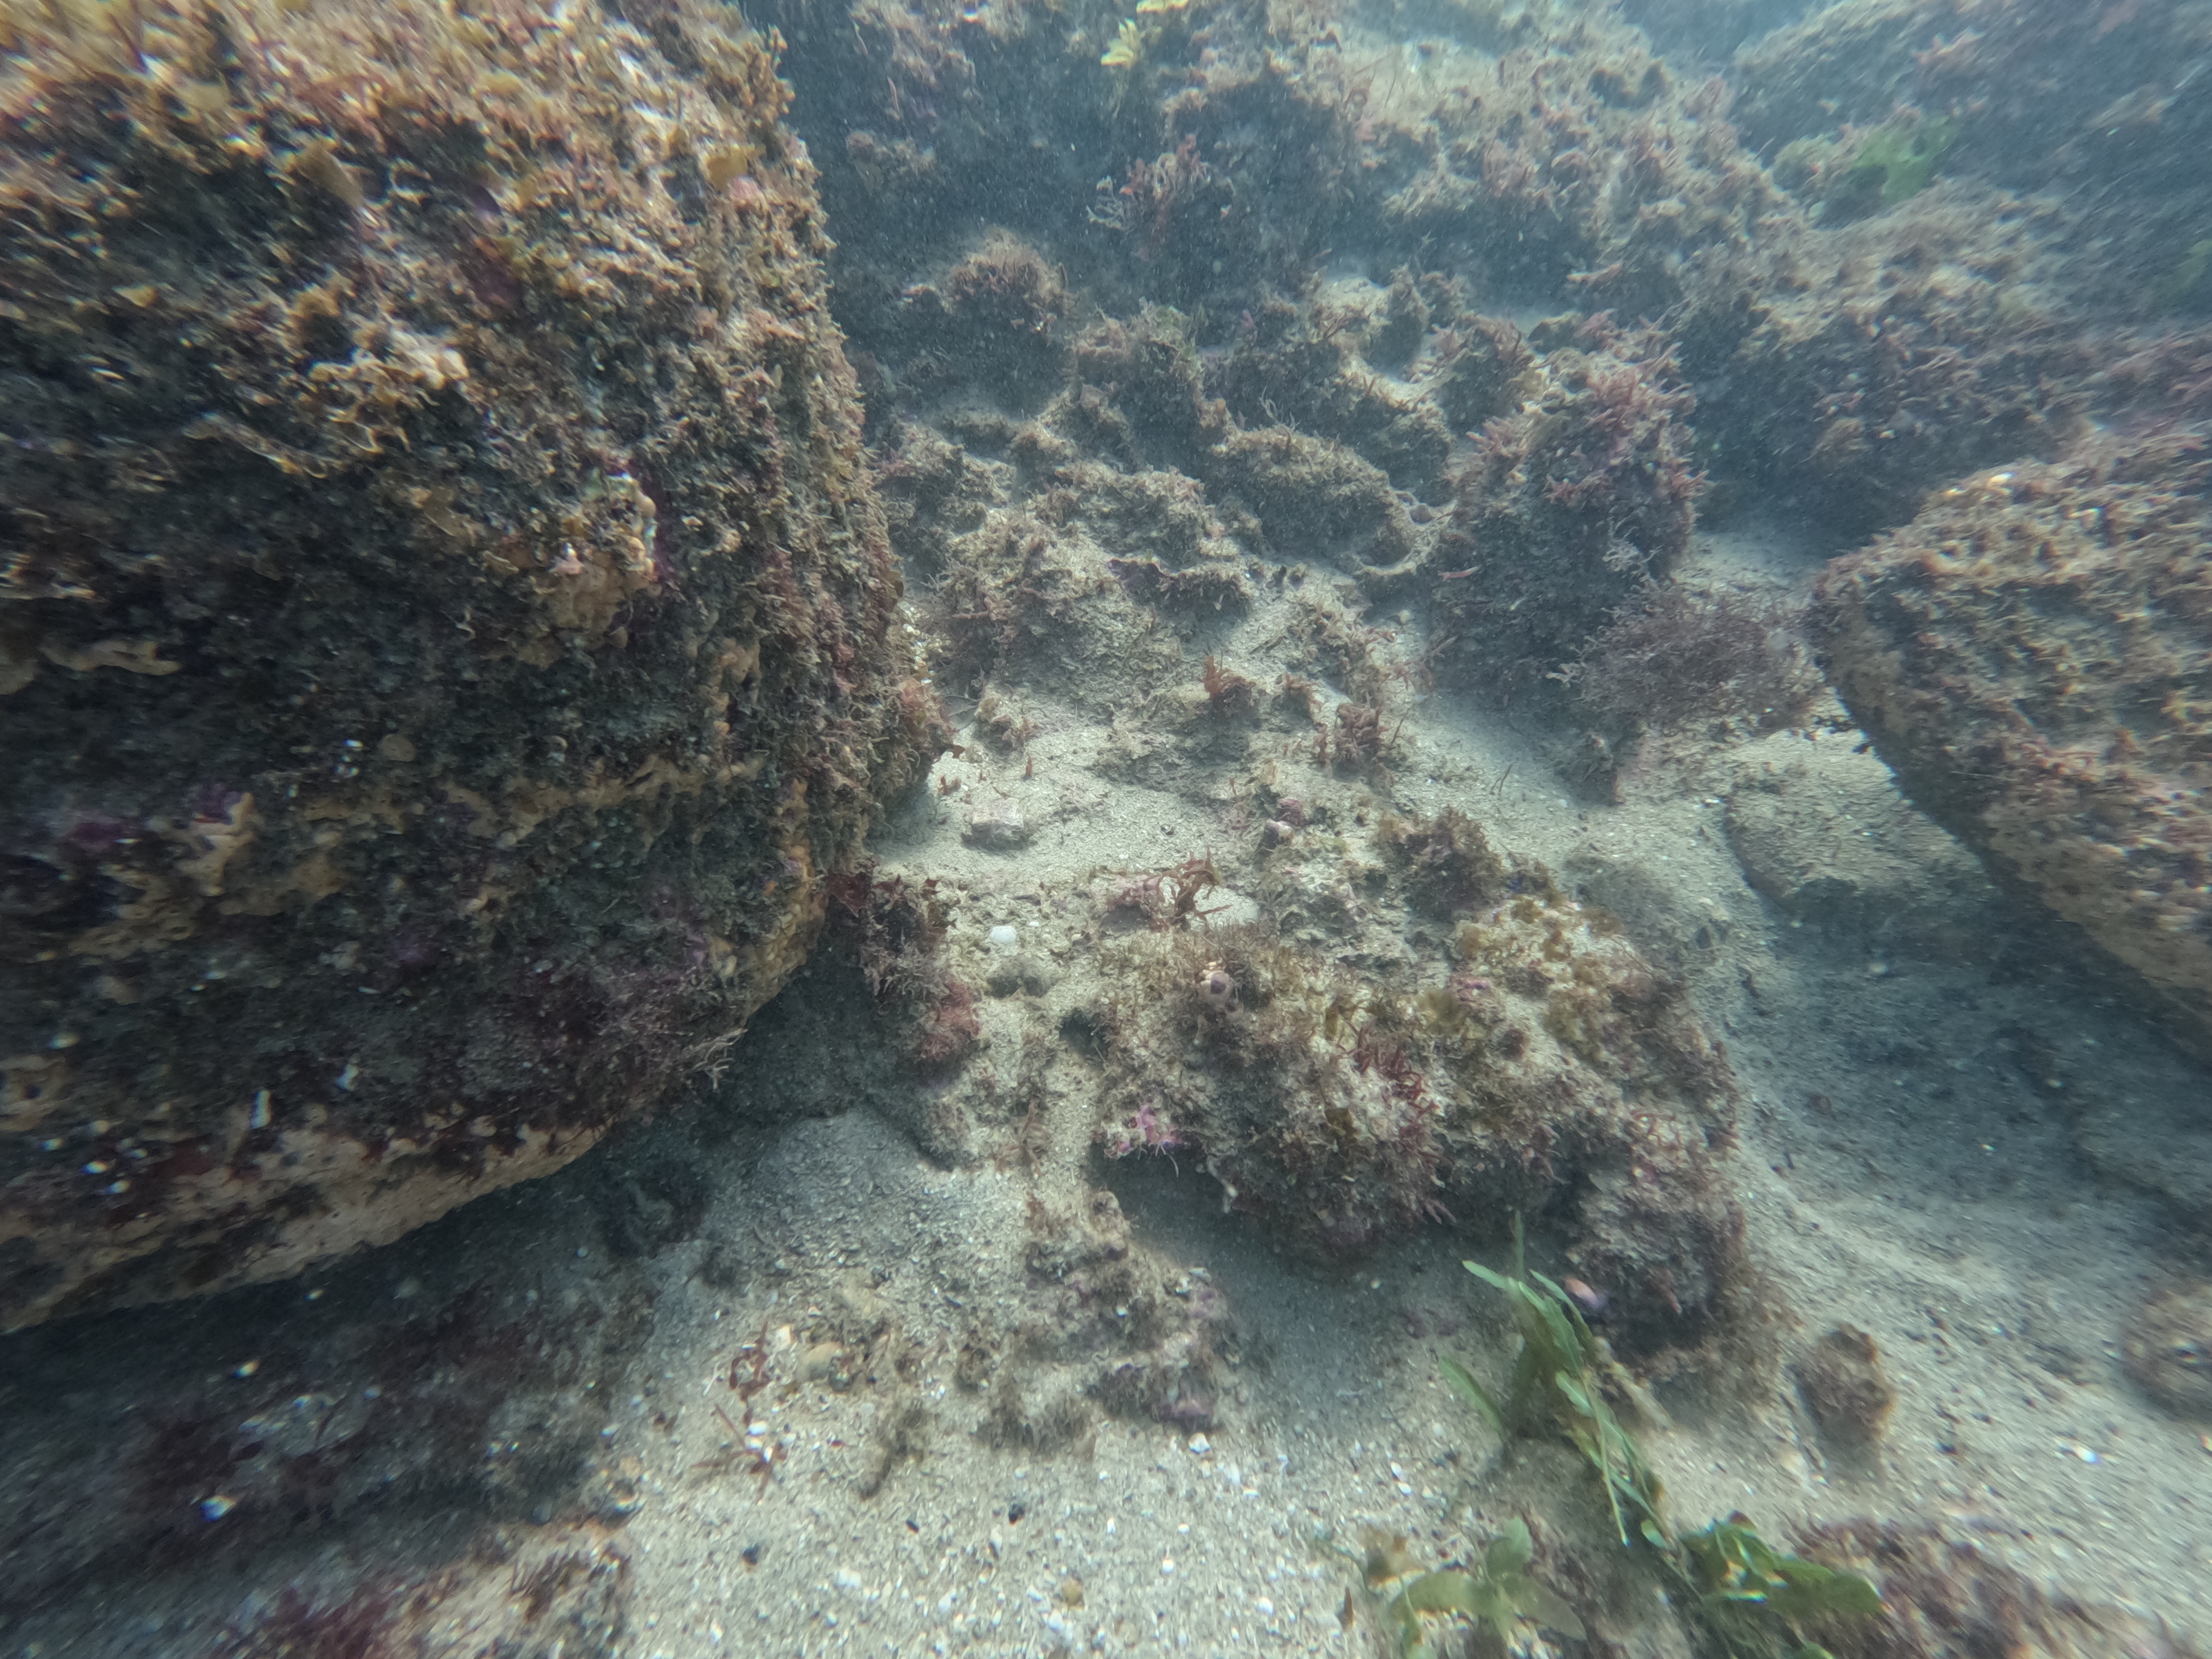

Supplement: Supplementary file 1658 [file G0027984.pdf › Ocean1/G0027984.pdf]

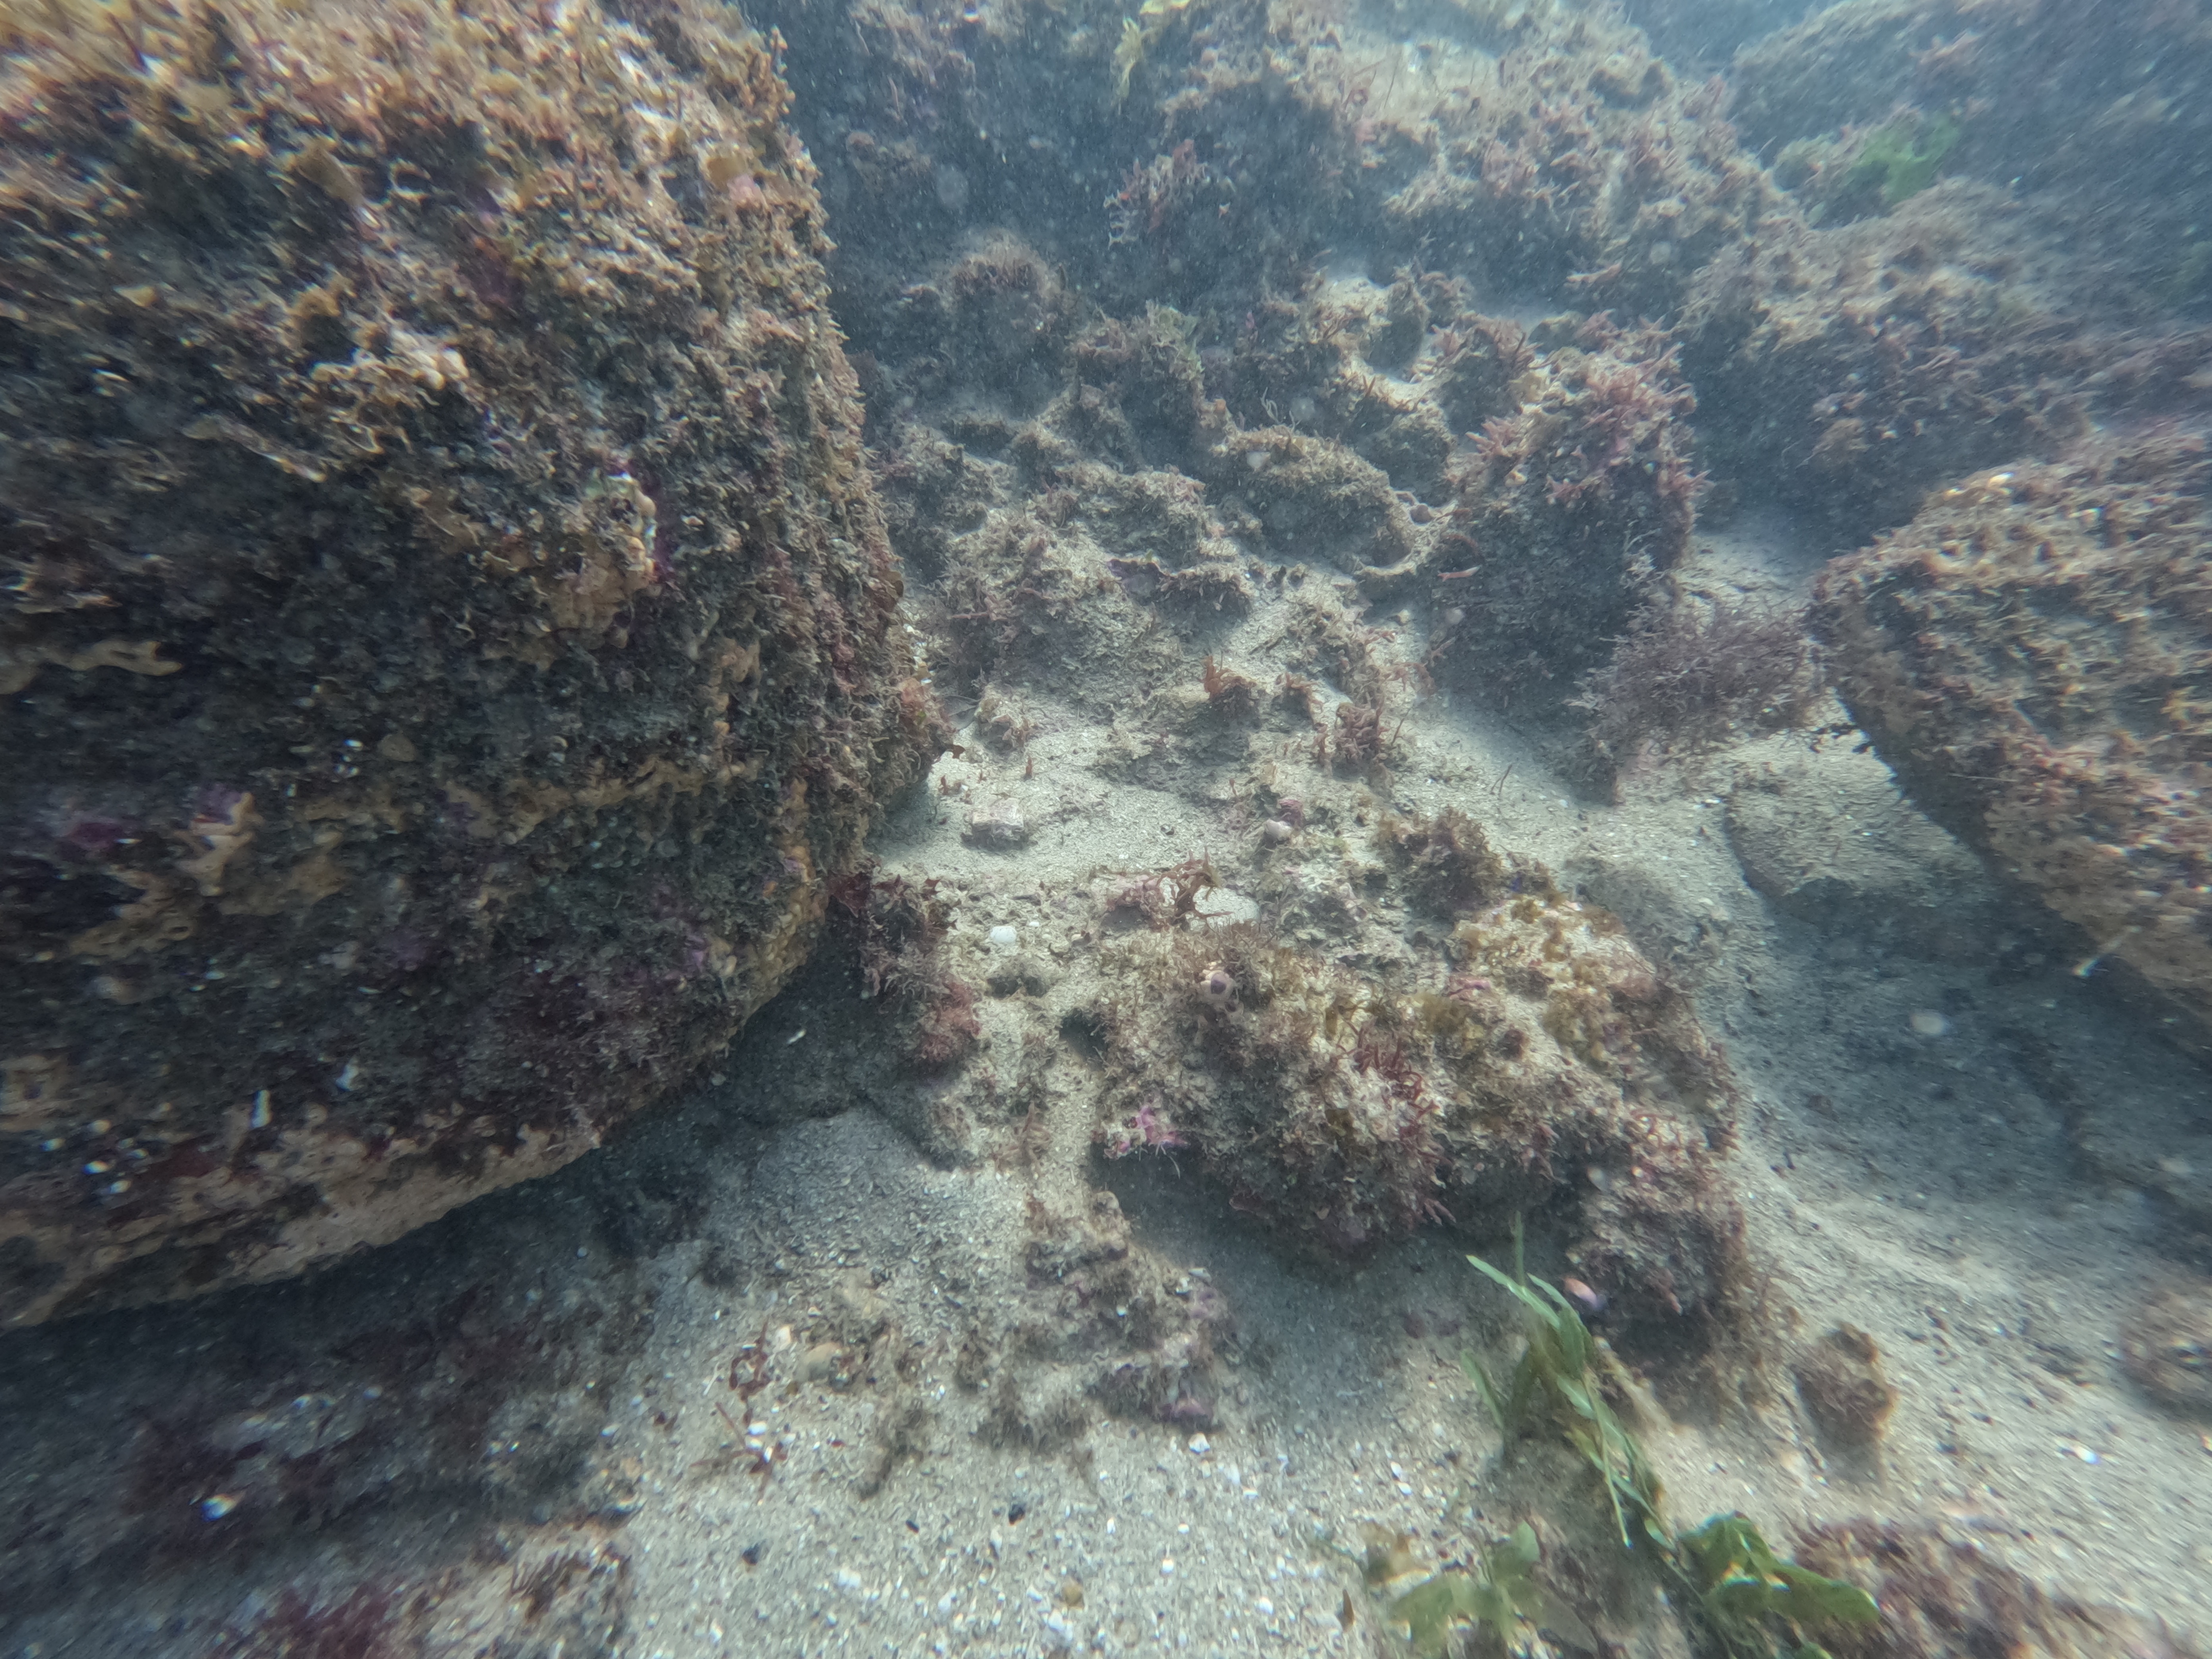

Supplement: Supplementary file 1659 [file G0027985.pdf › Ocean1/G0027985.pdf]

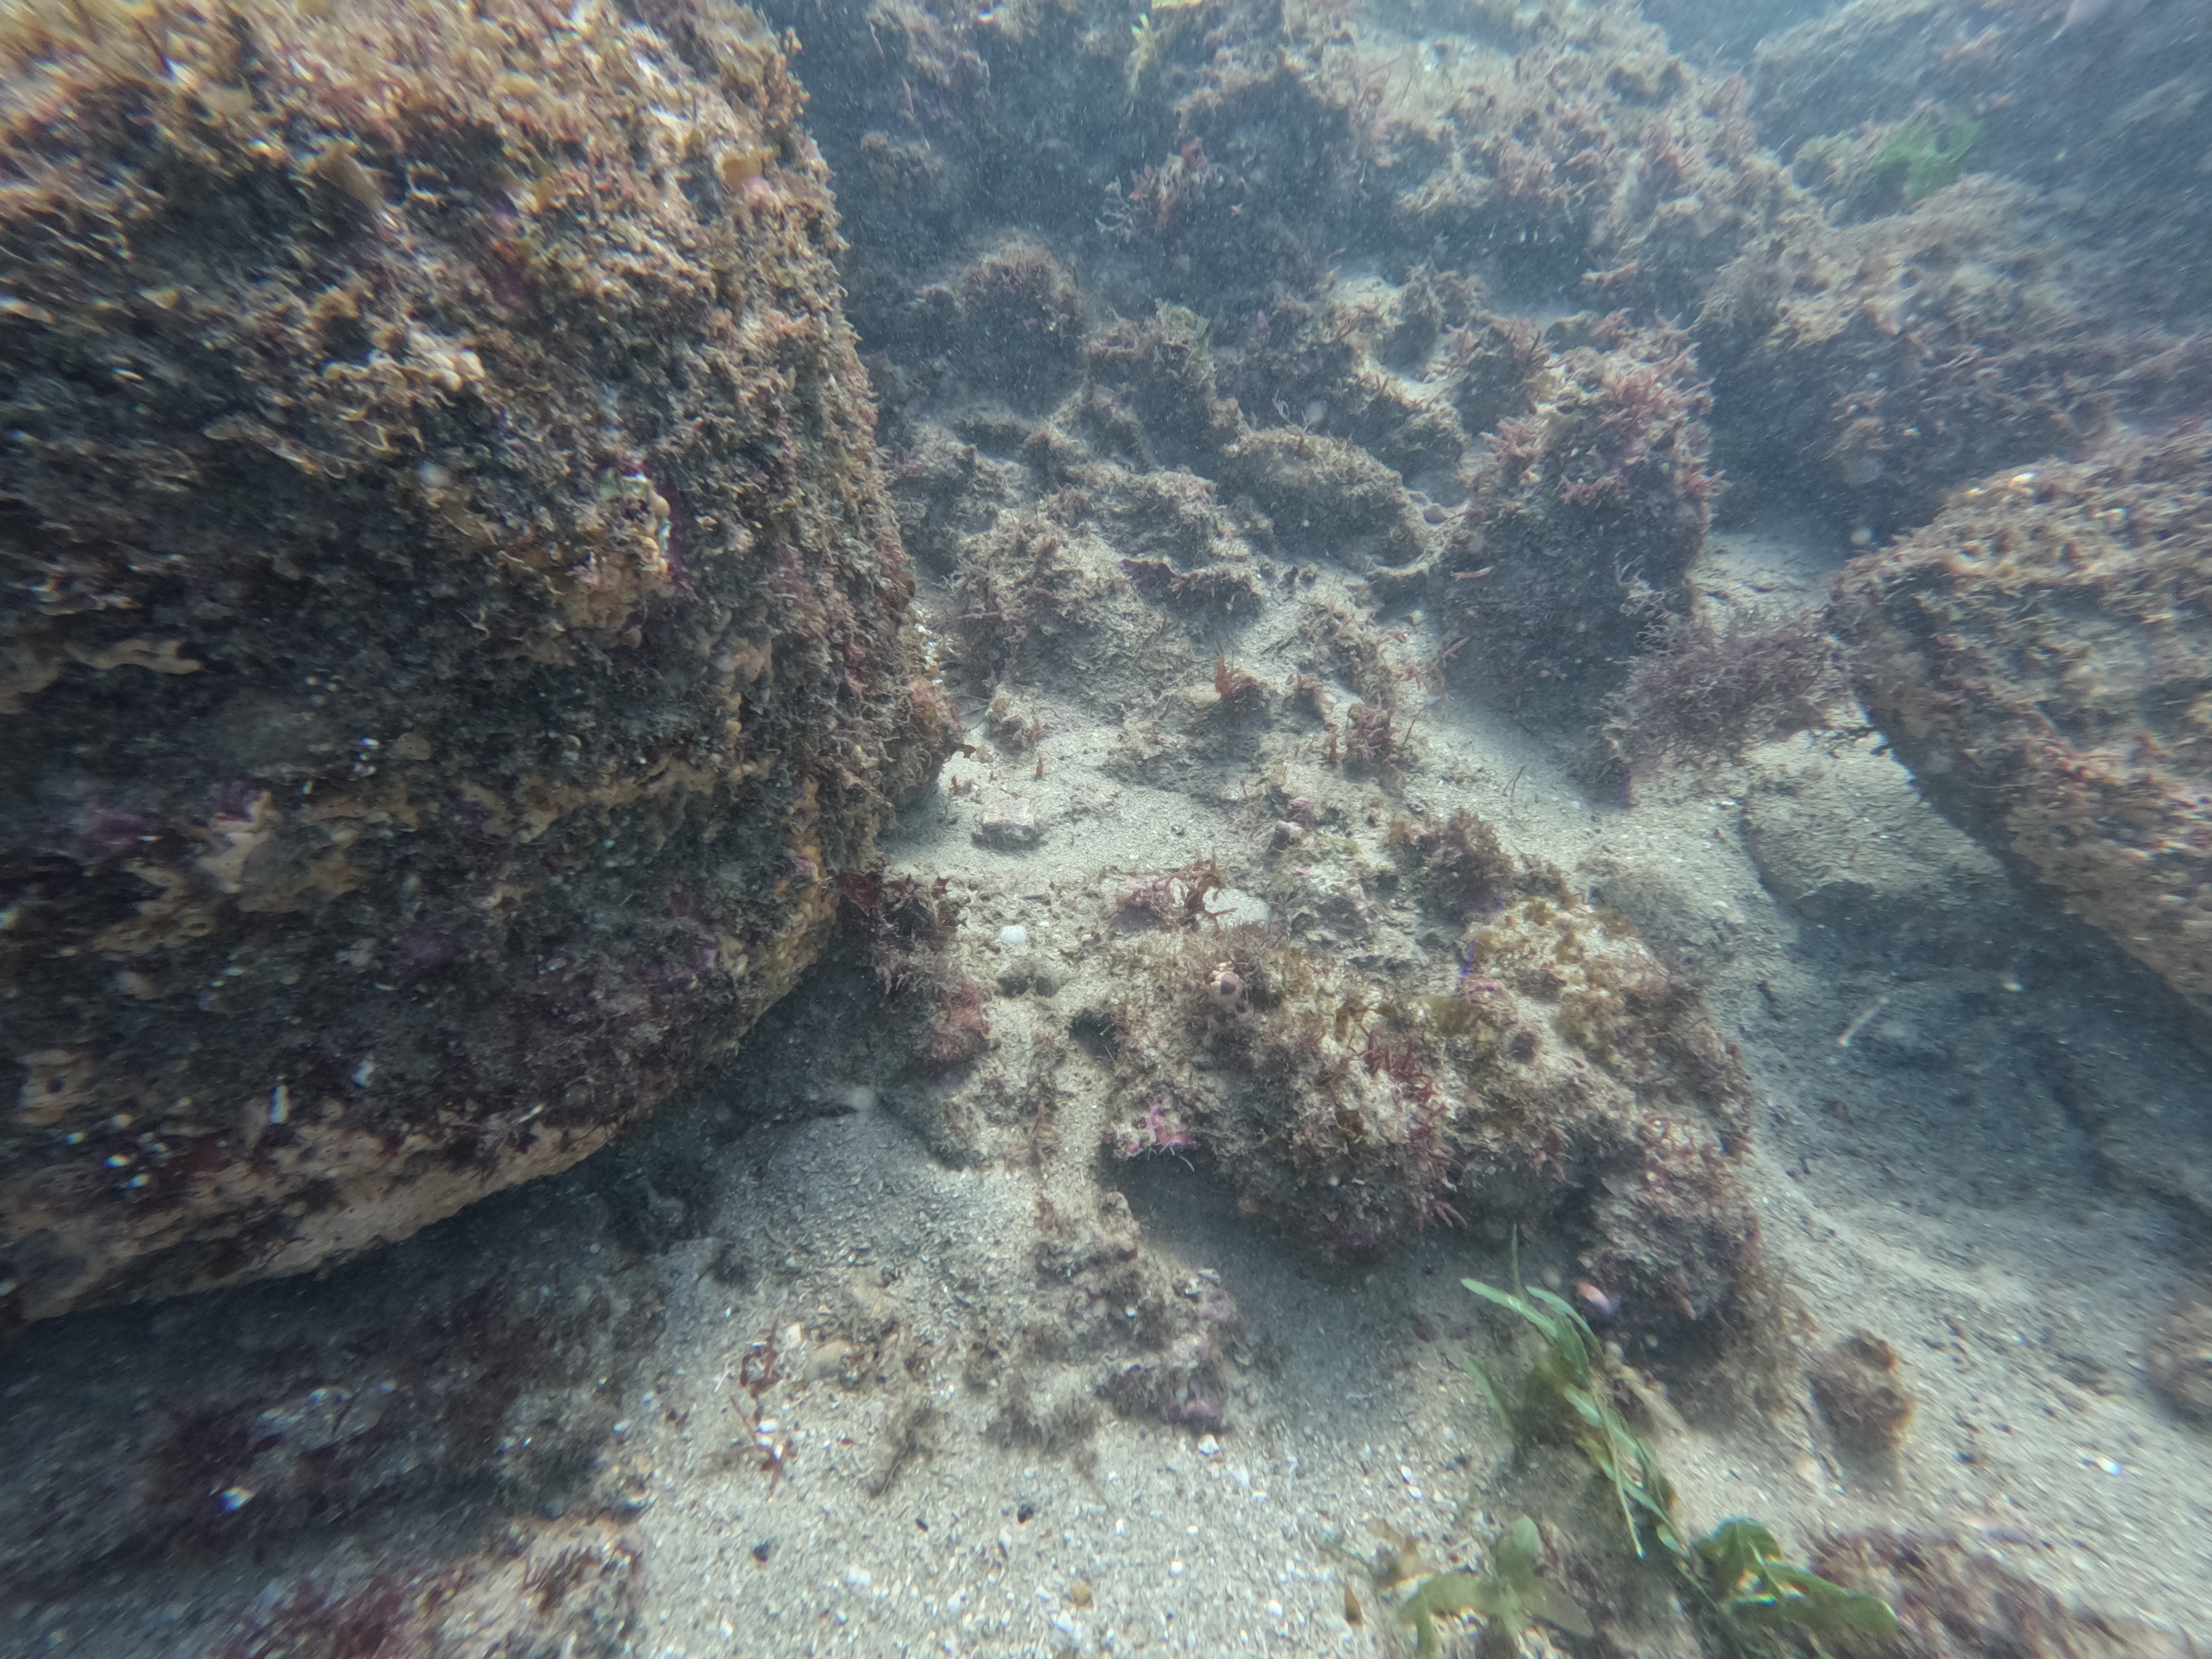

Supplement: Supplementary file 1660 [file G0027986.pdf › Ocean1/G0027986.pdf]

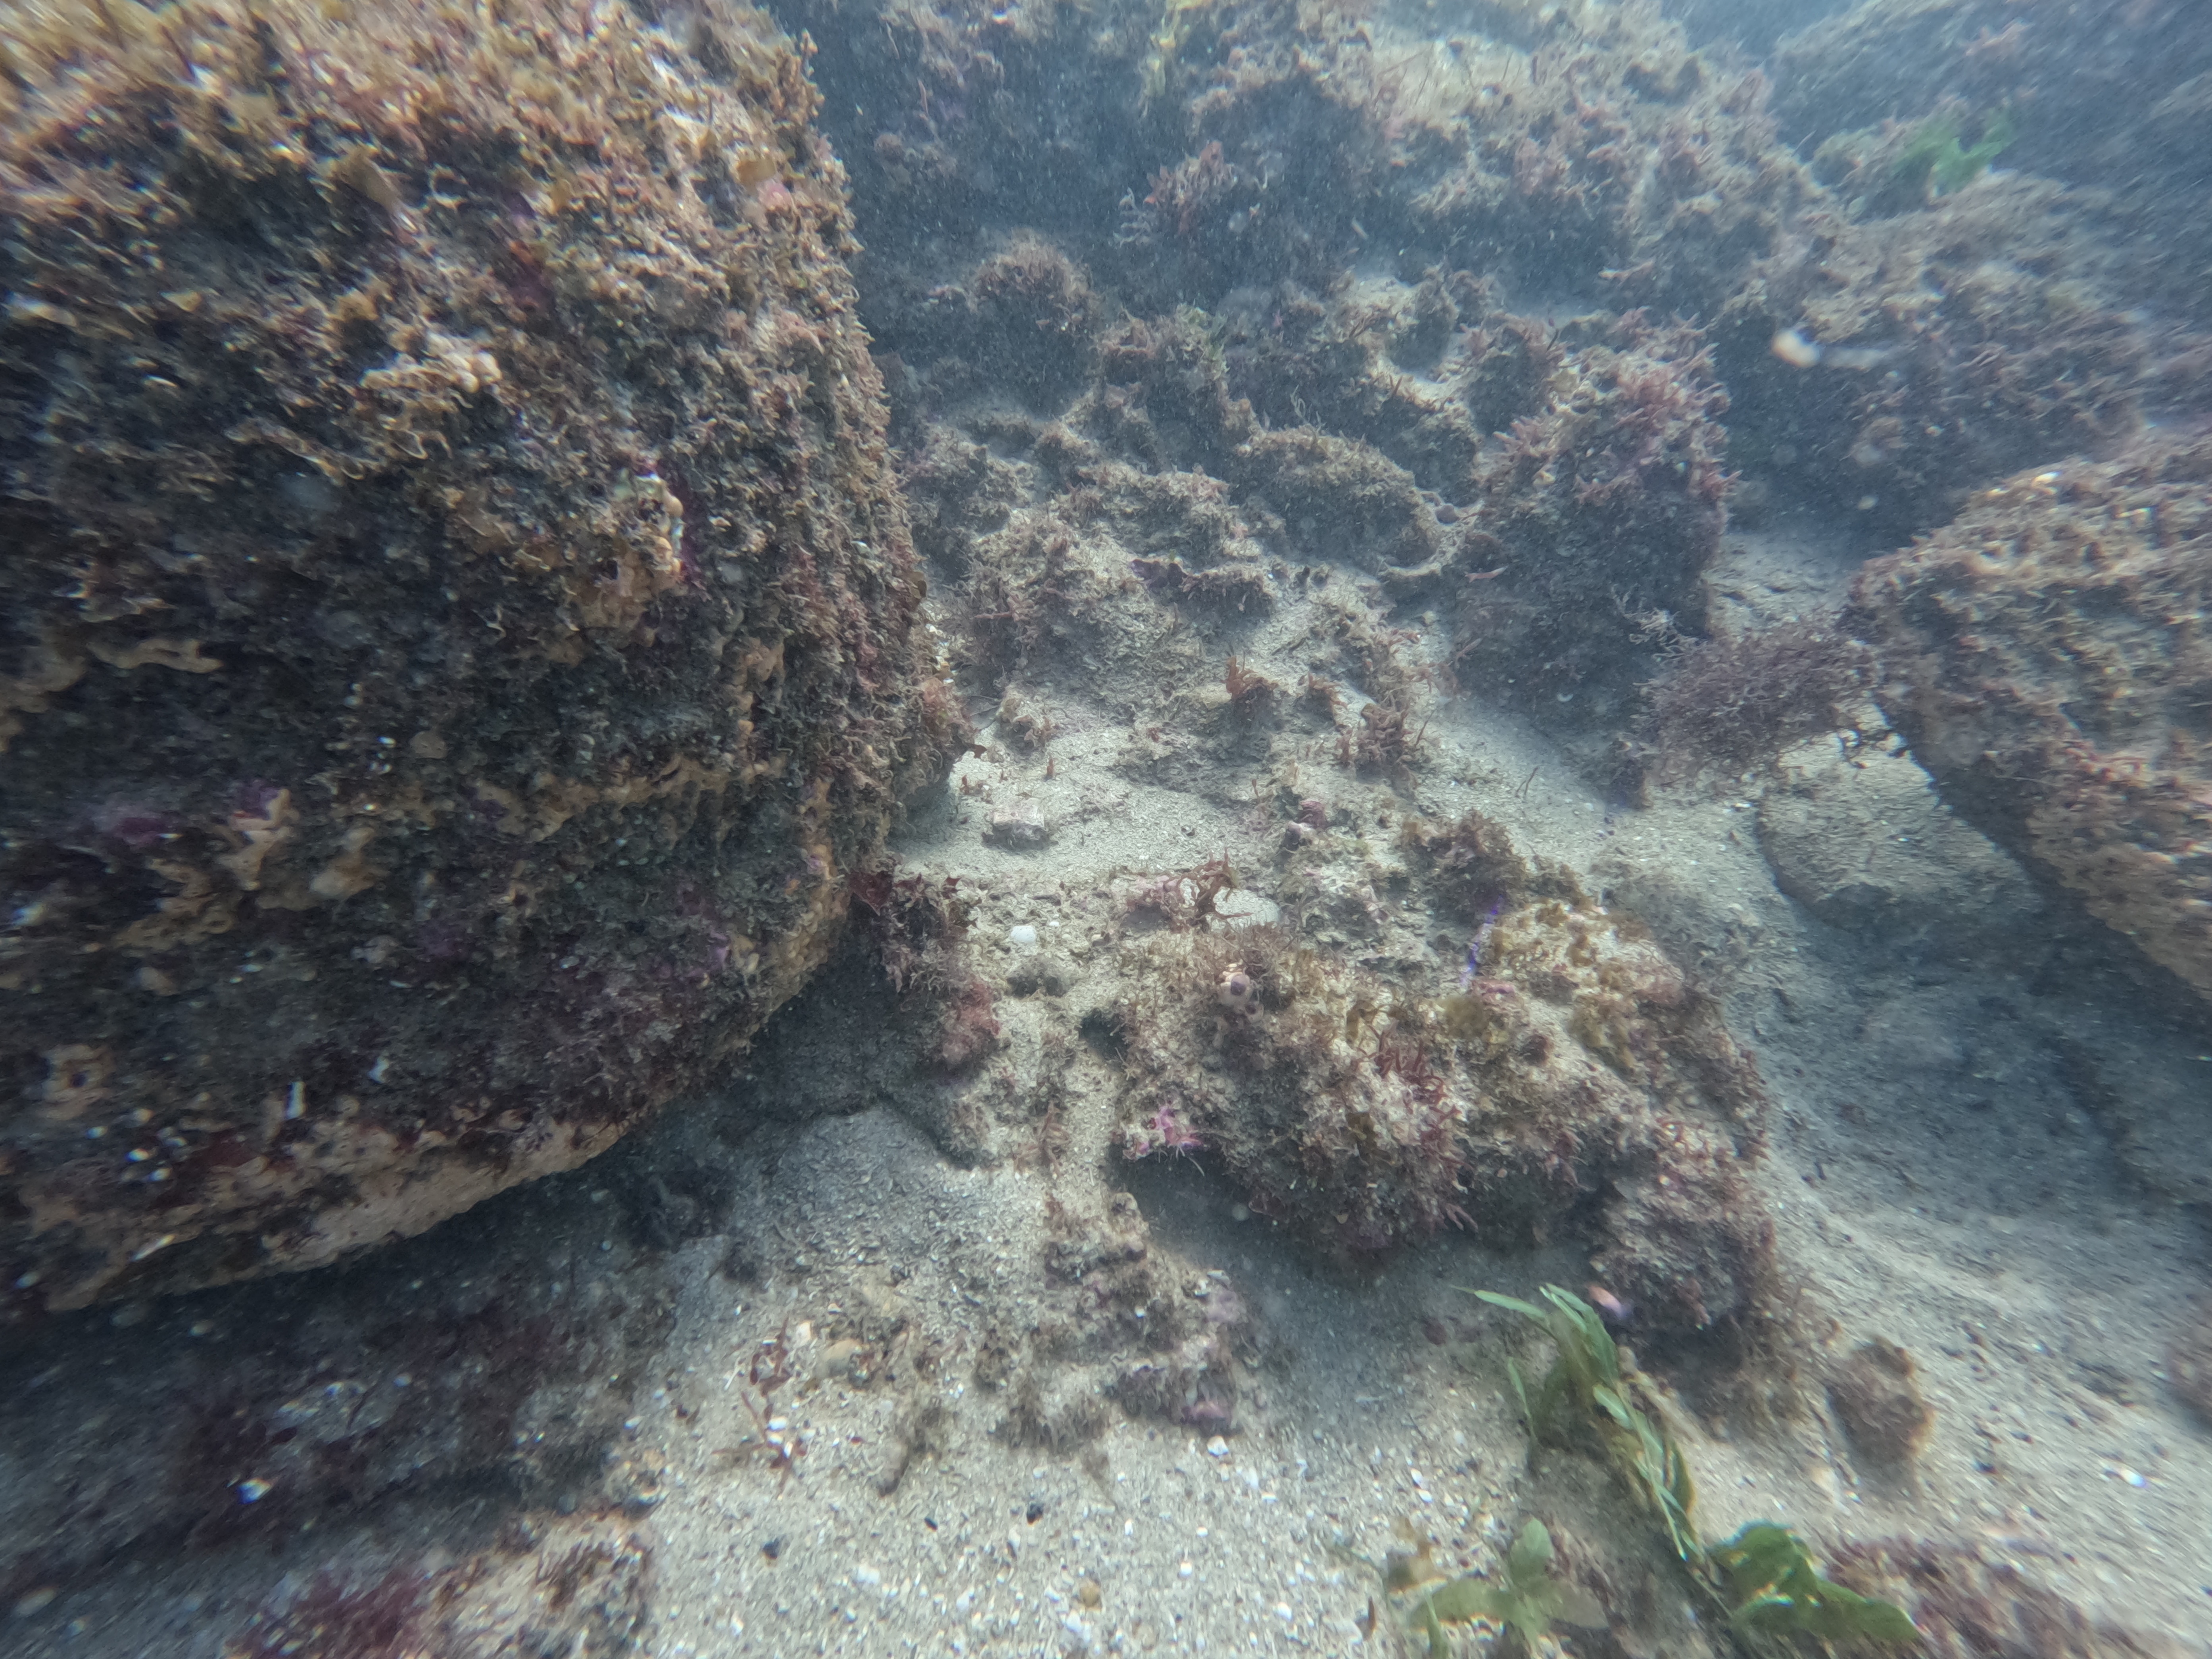

Supplement: Supplementary file 1661 [file G0027987.pdf › Ocean1/G0027987.pdf]

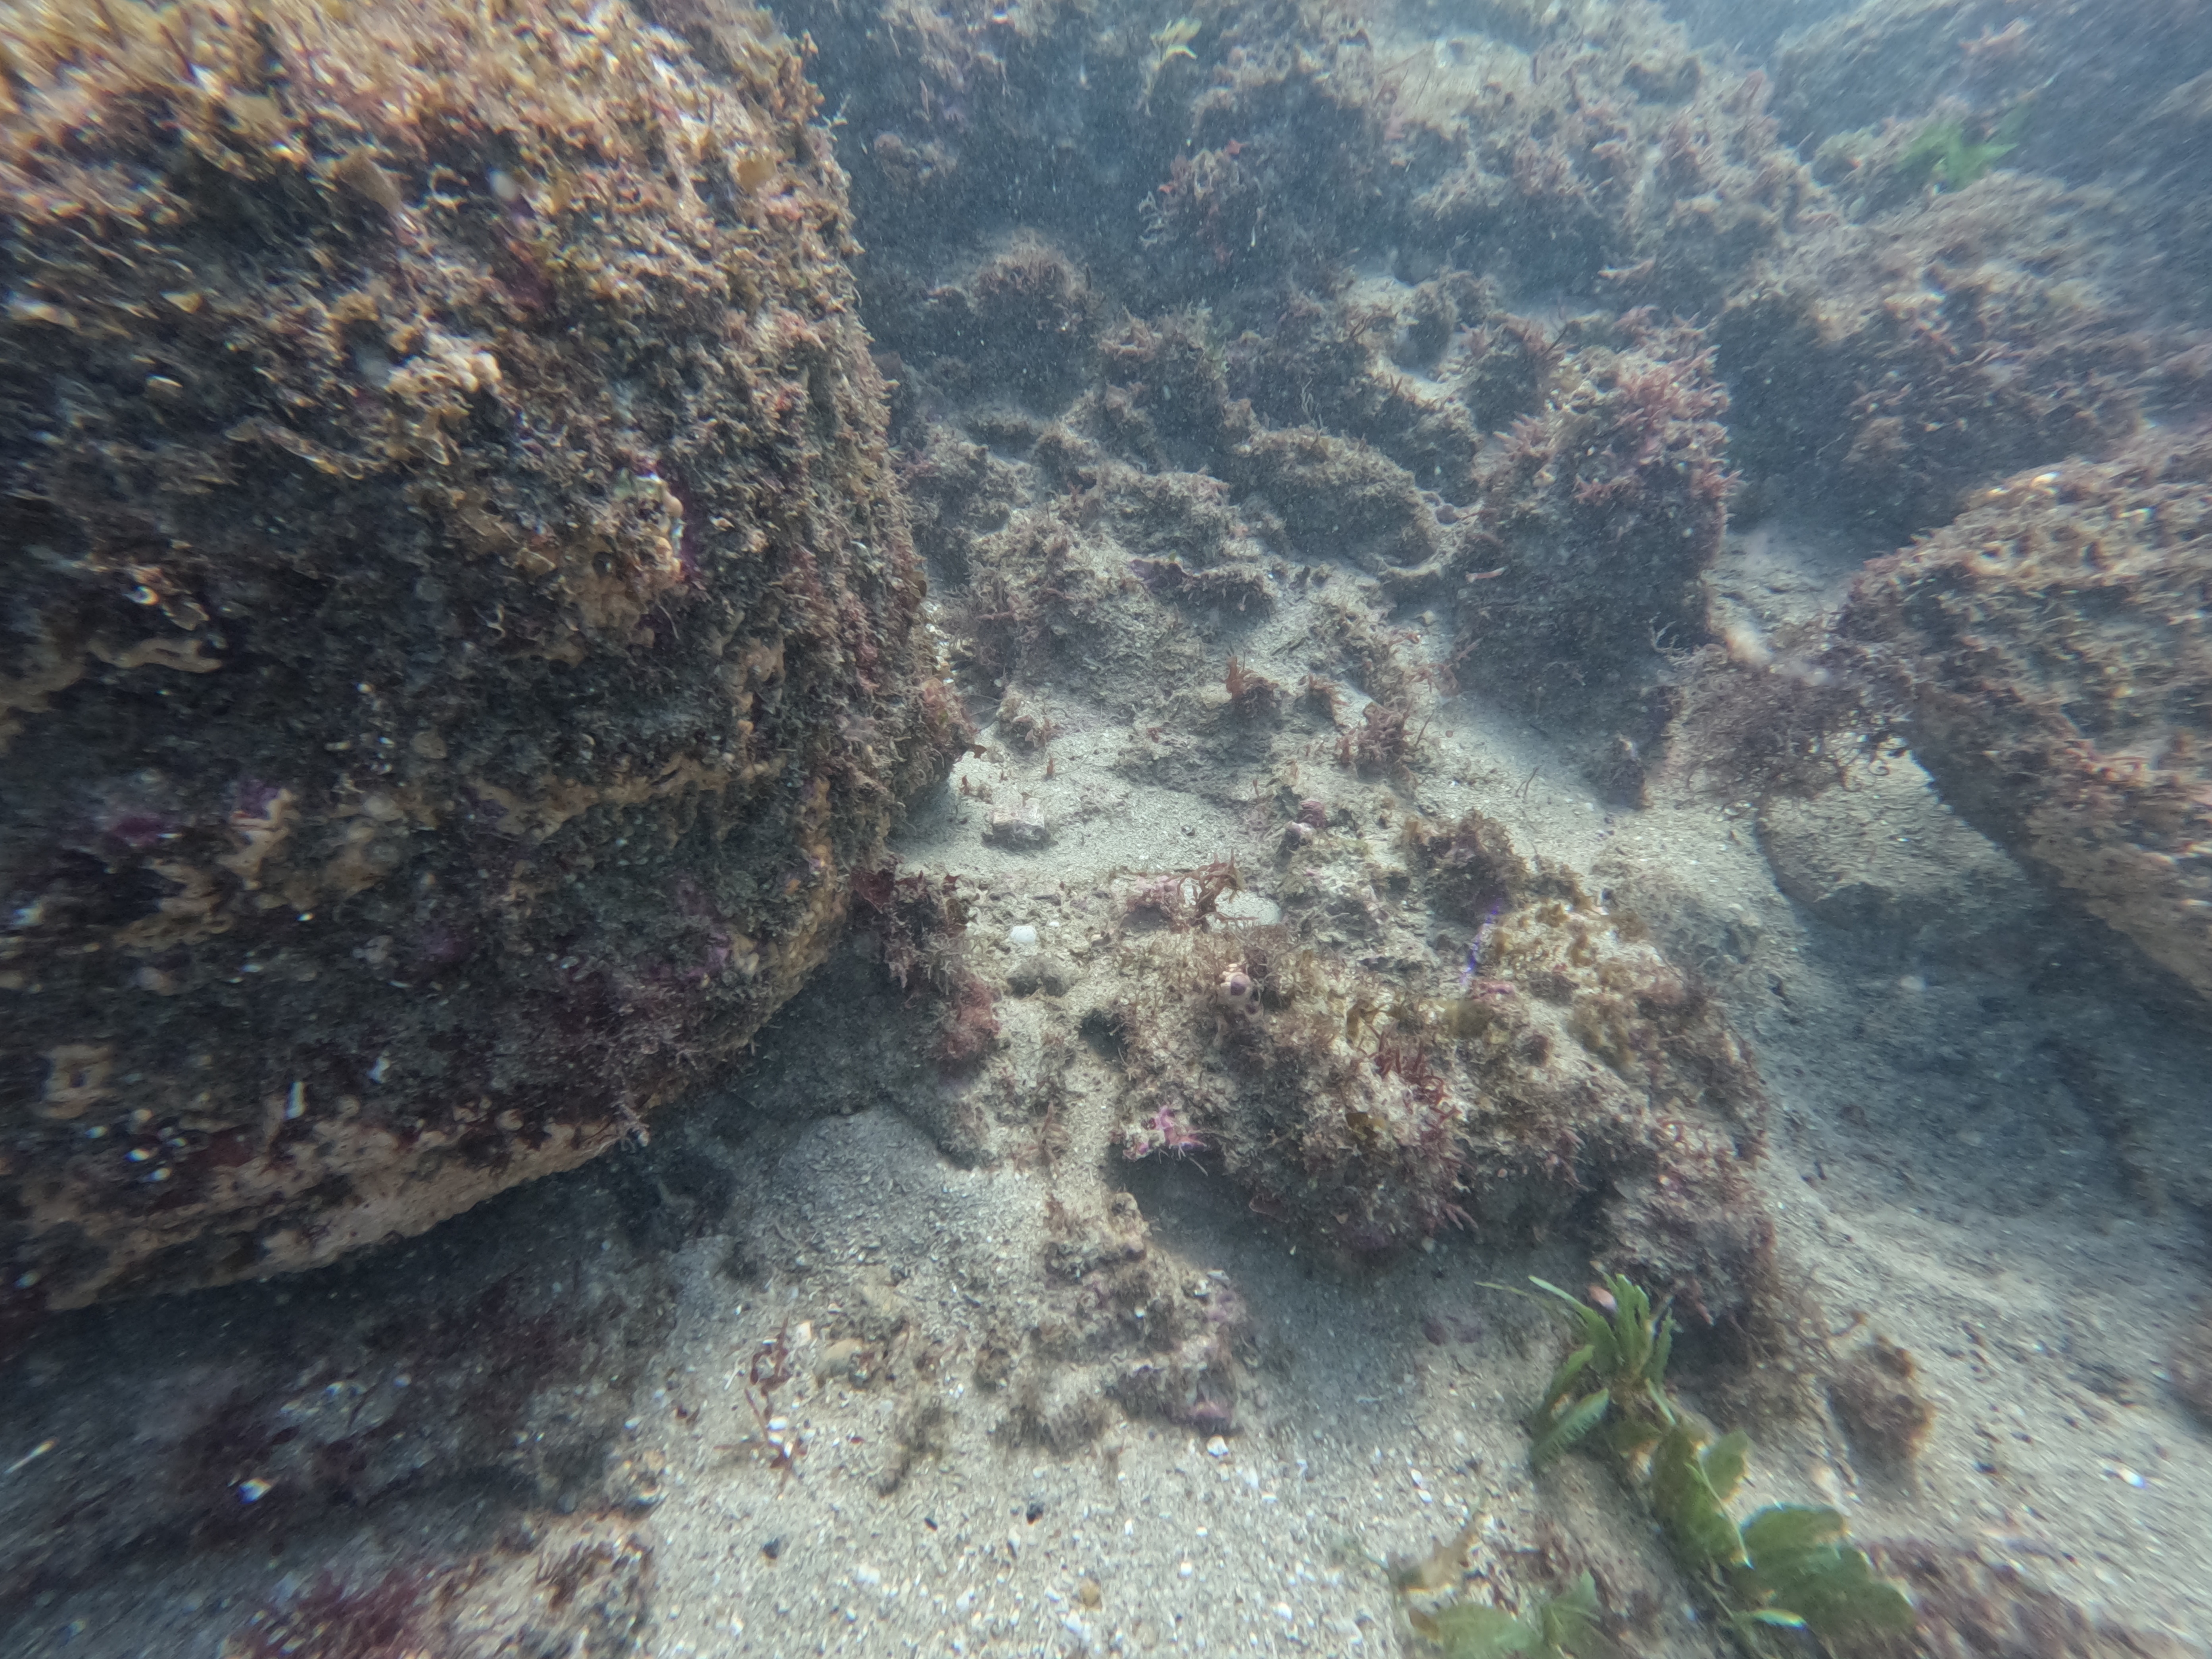

Supplement: Supplementary file 1662 [file G0027988.pdf › Ocean1/G0027988.pdf]

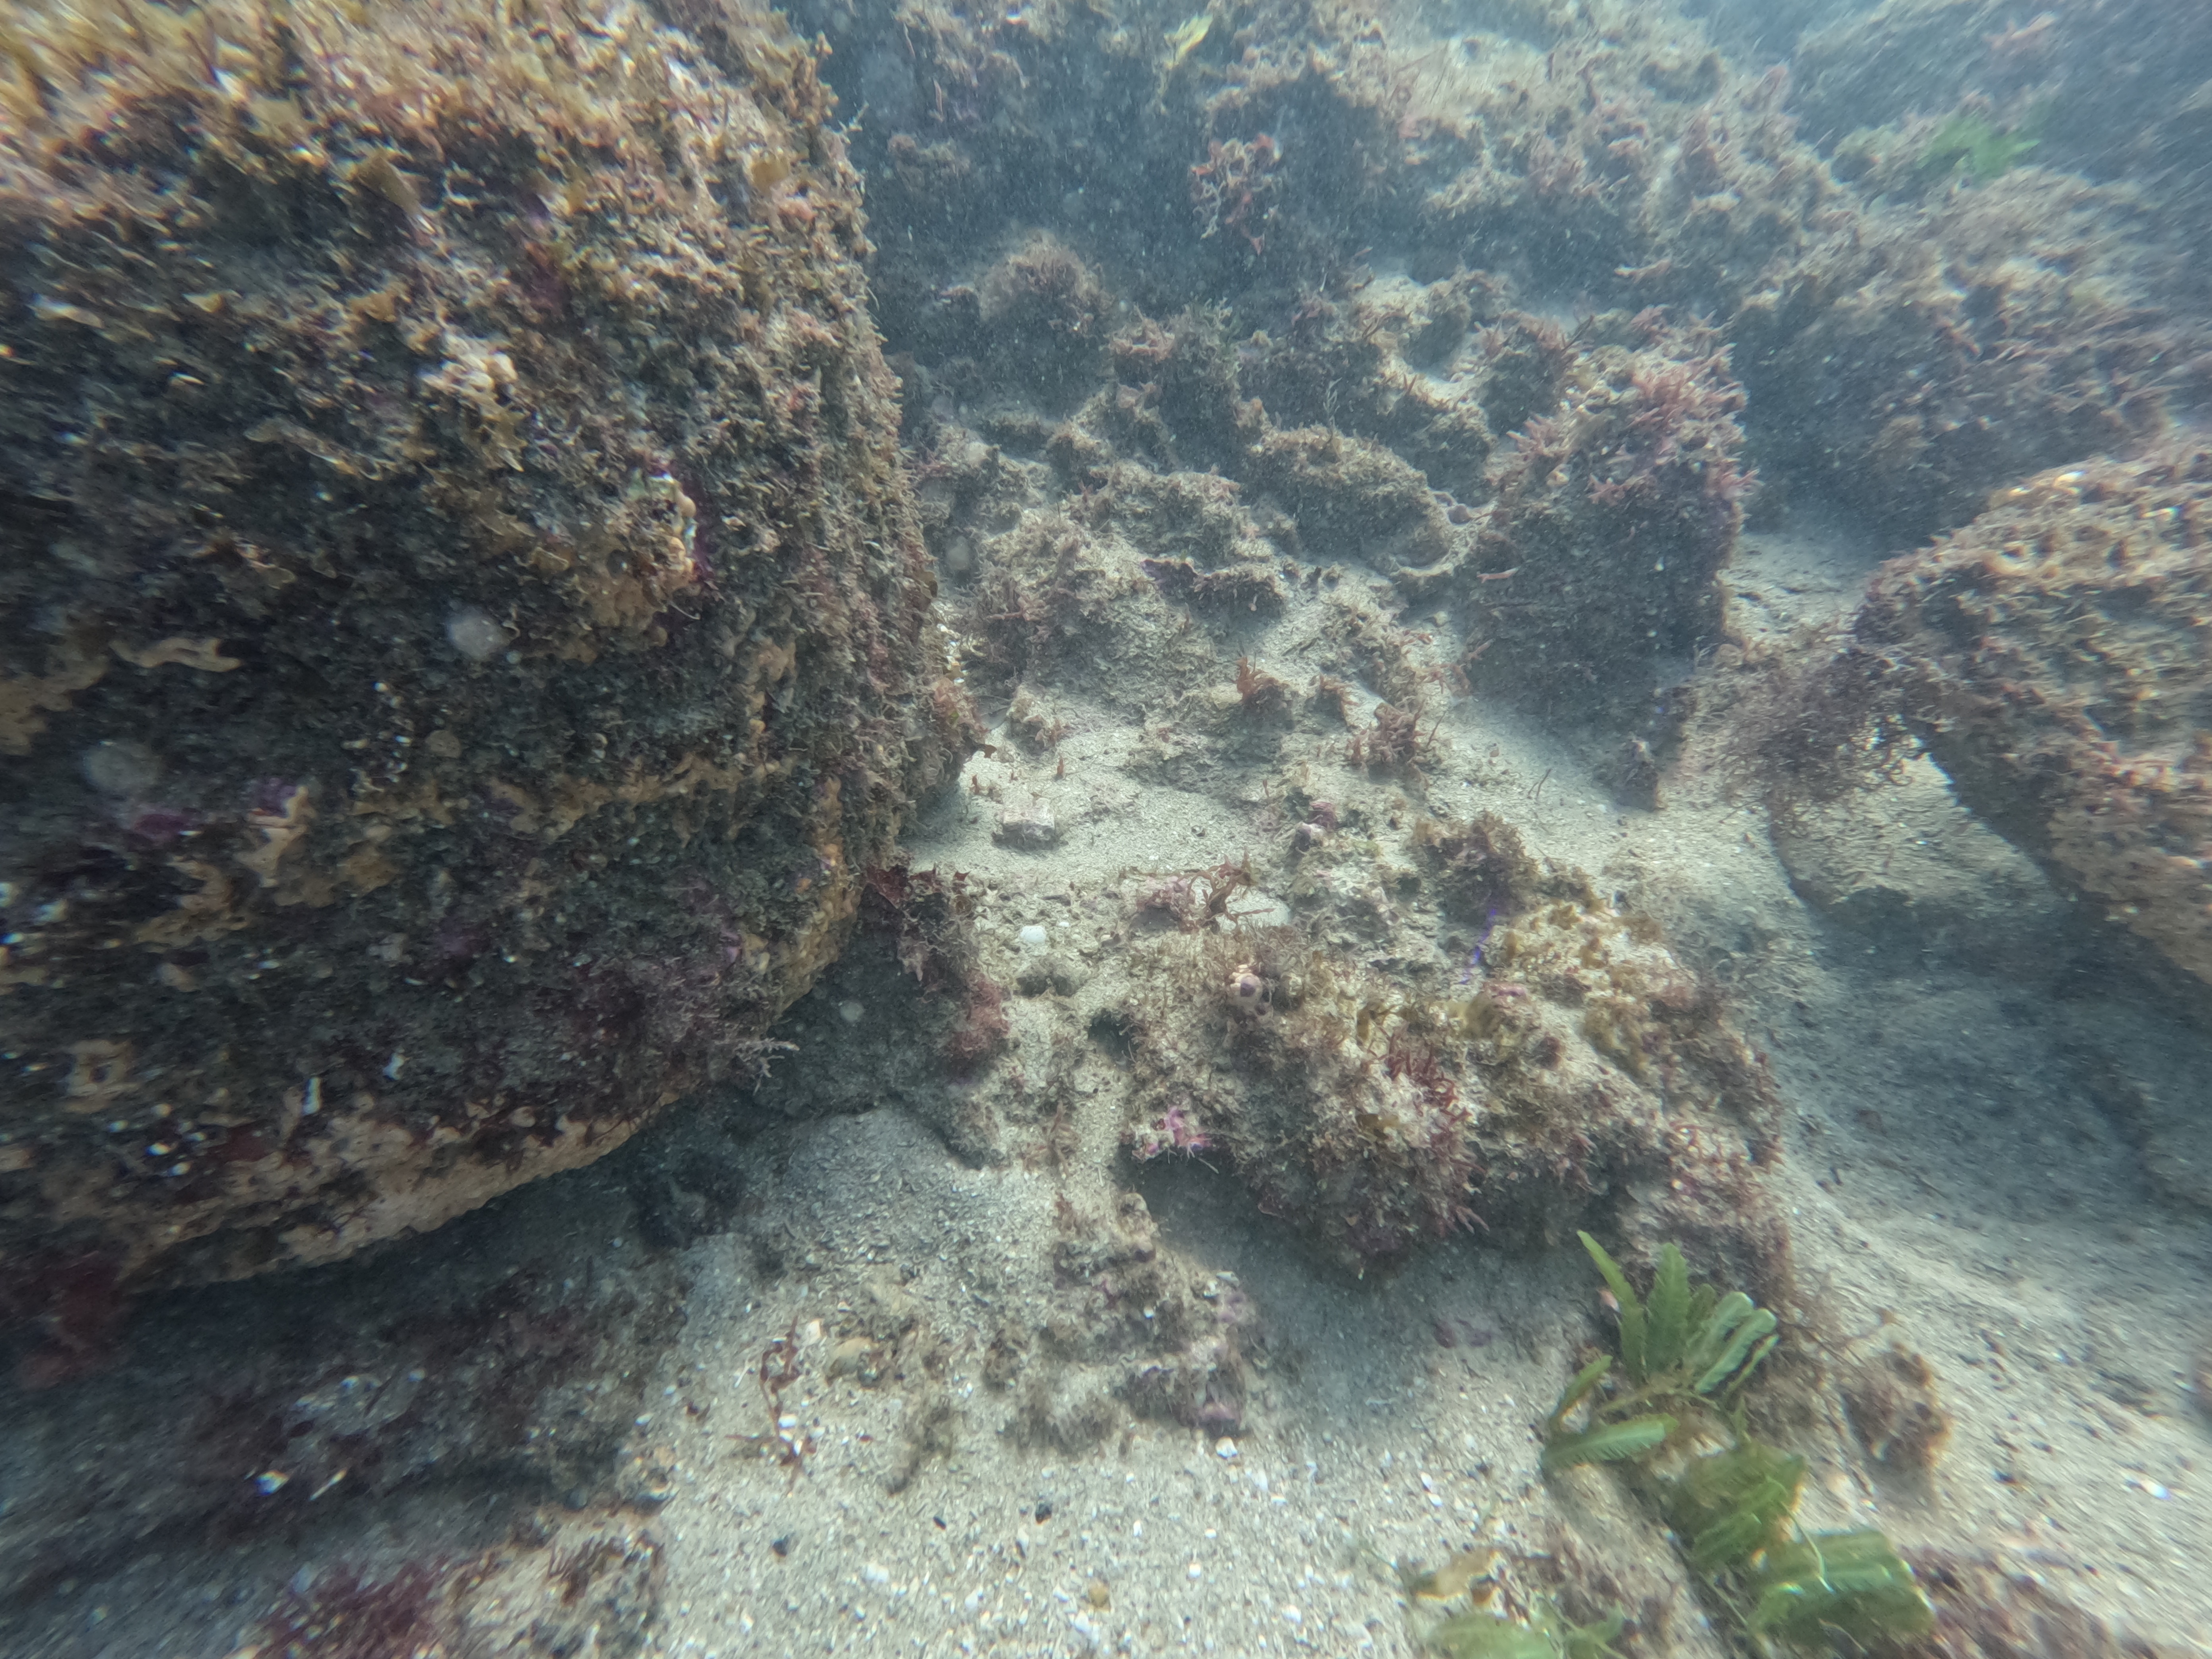

Supplement: Supplementary file 1663 [file G0027989.pdf › Ocean1/G0027989.pdf]

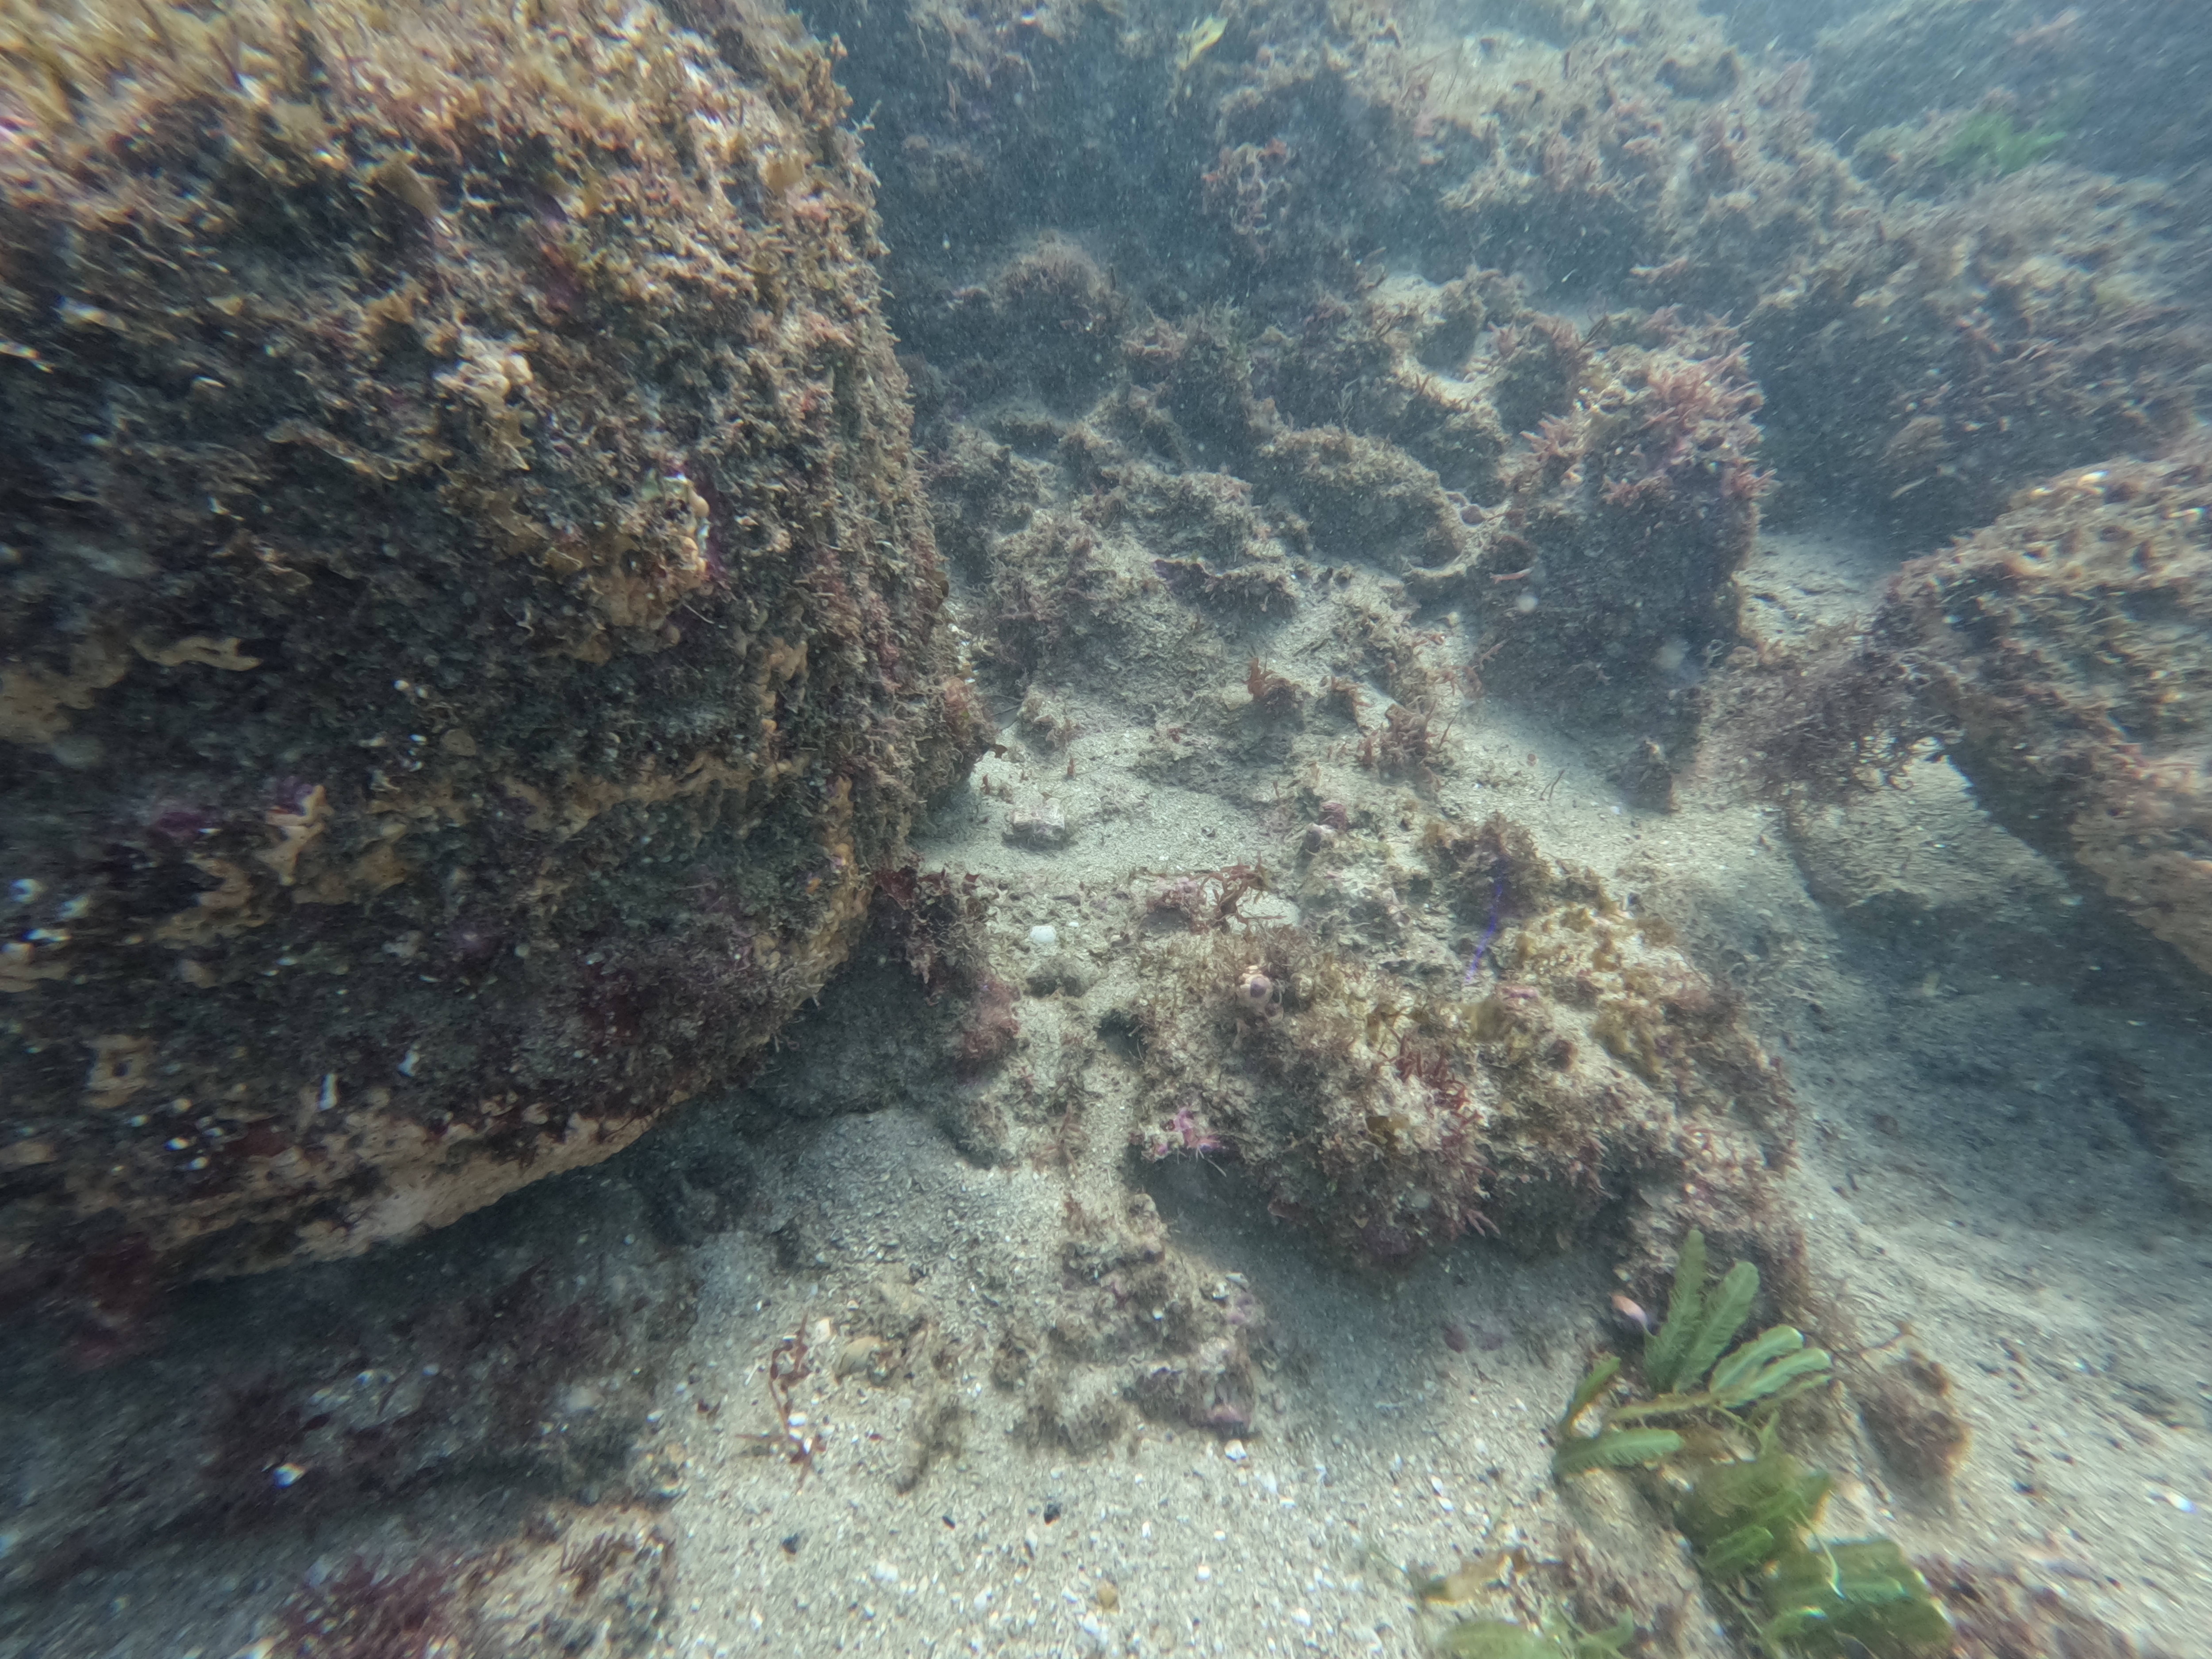

Supplement: Supplementary file 1664 [file G0027990.pdf › Ocean1/G0027990.pdf]

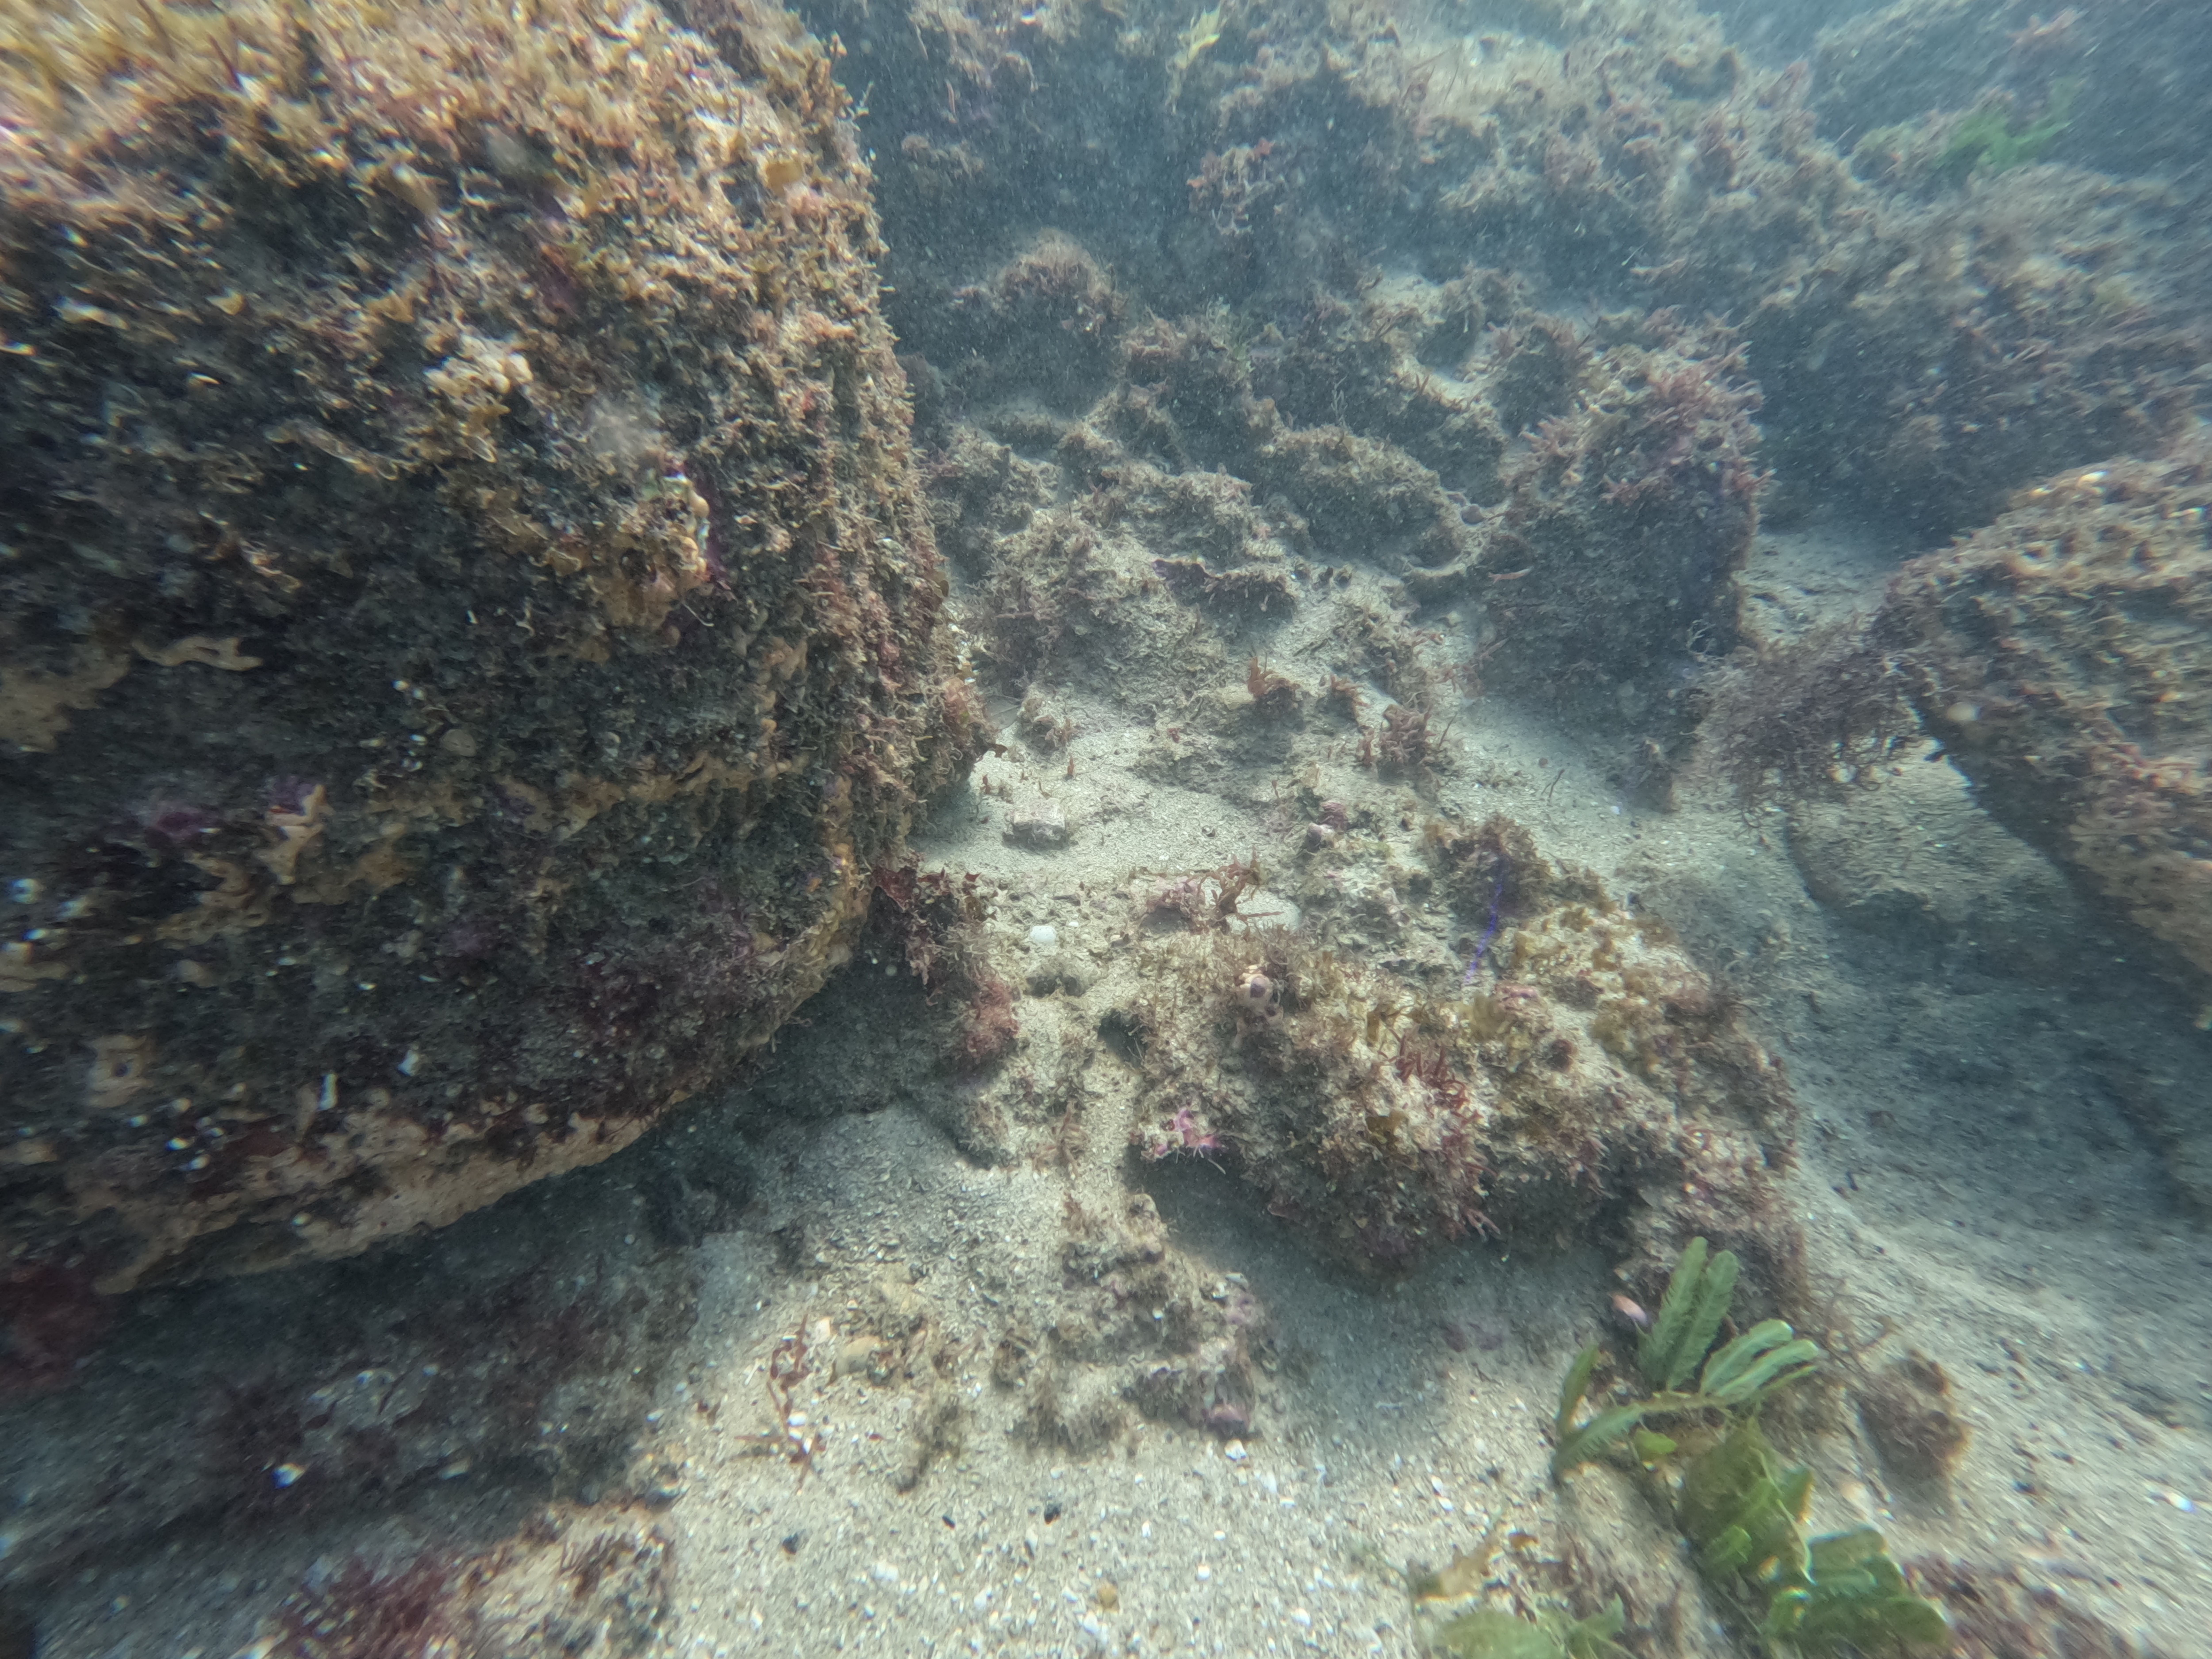

Supplement: Supplementary file 1665 [file G0027991.pdf › Ocean1/G0027991.pdf]

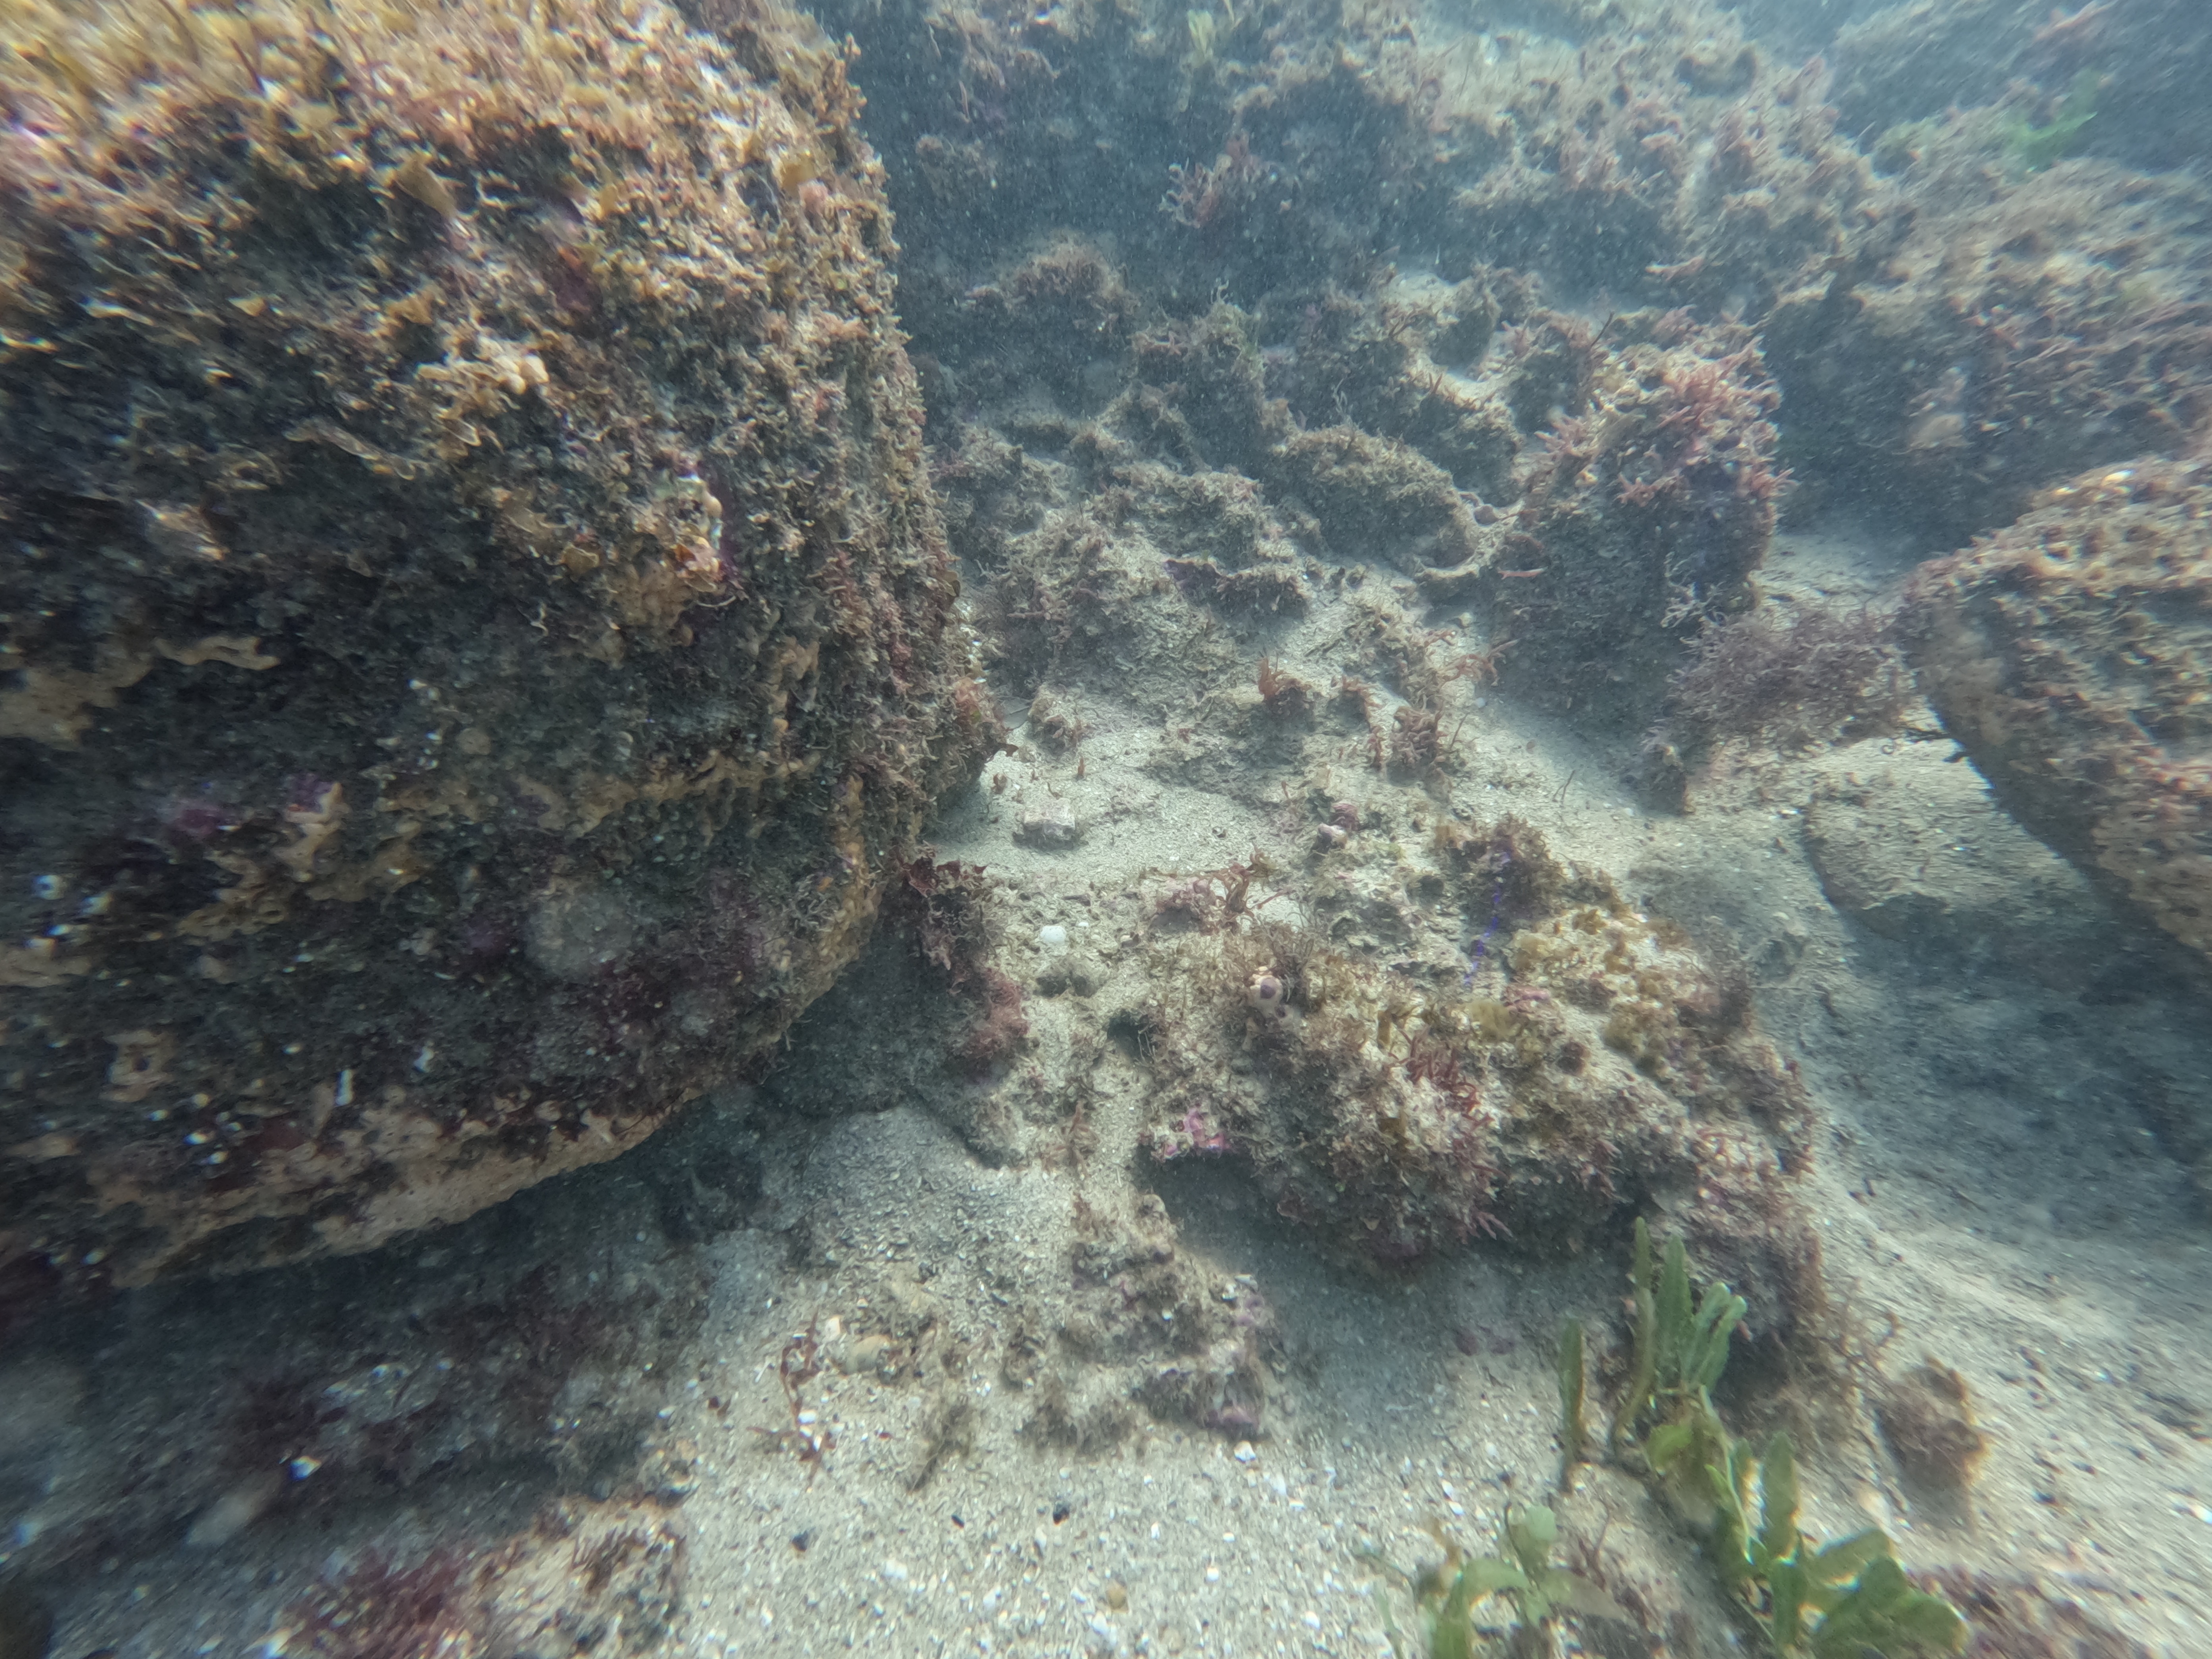

Supplement: Supplementary file 1666 [file G0027992.pdf › Ocean1/G0027992.pdf]

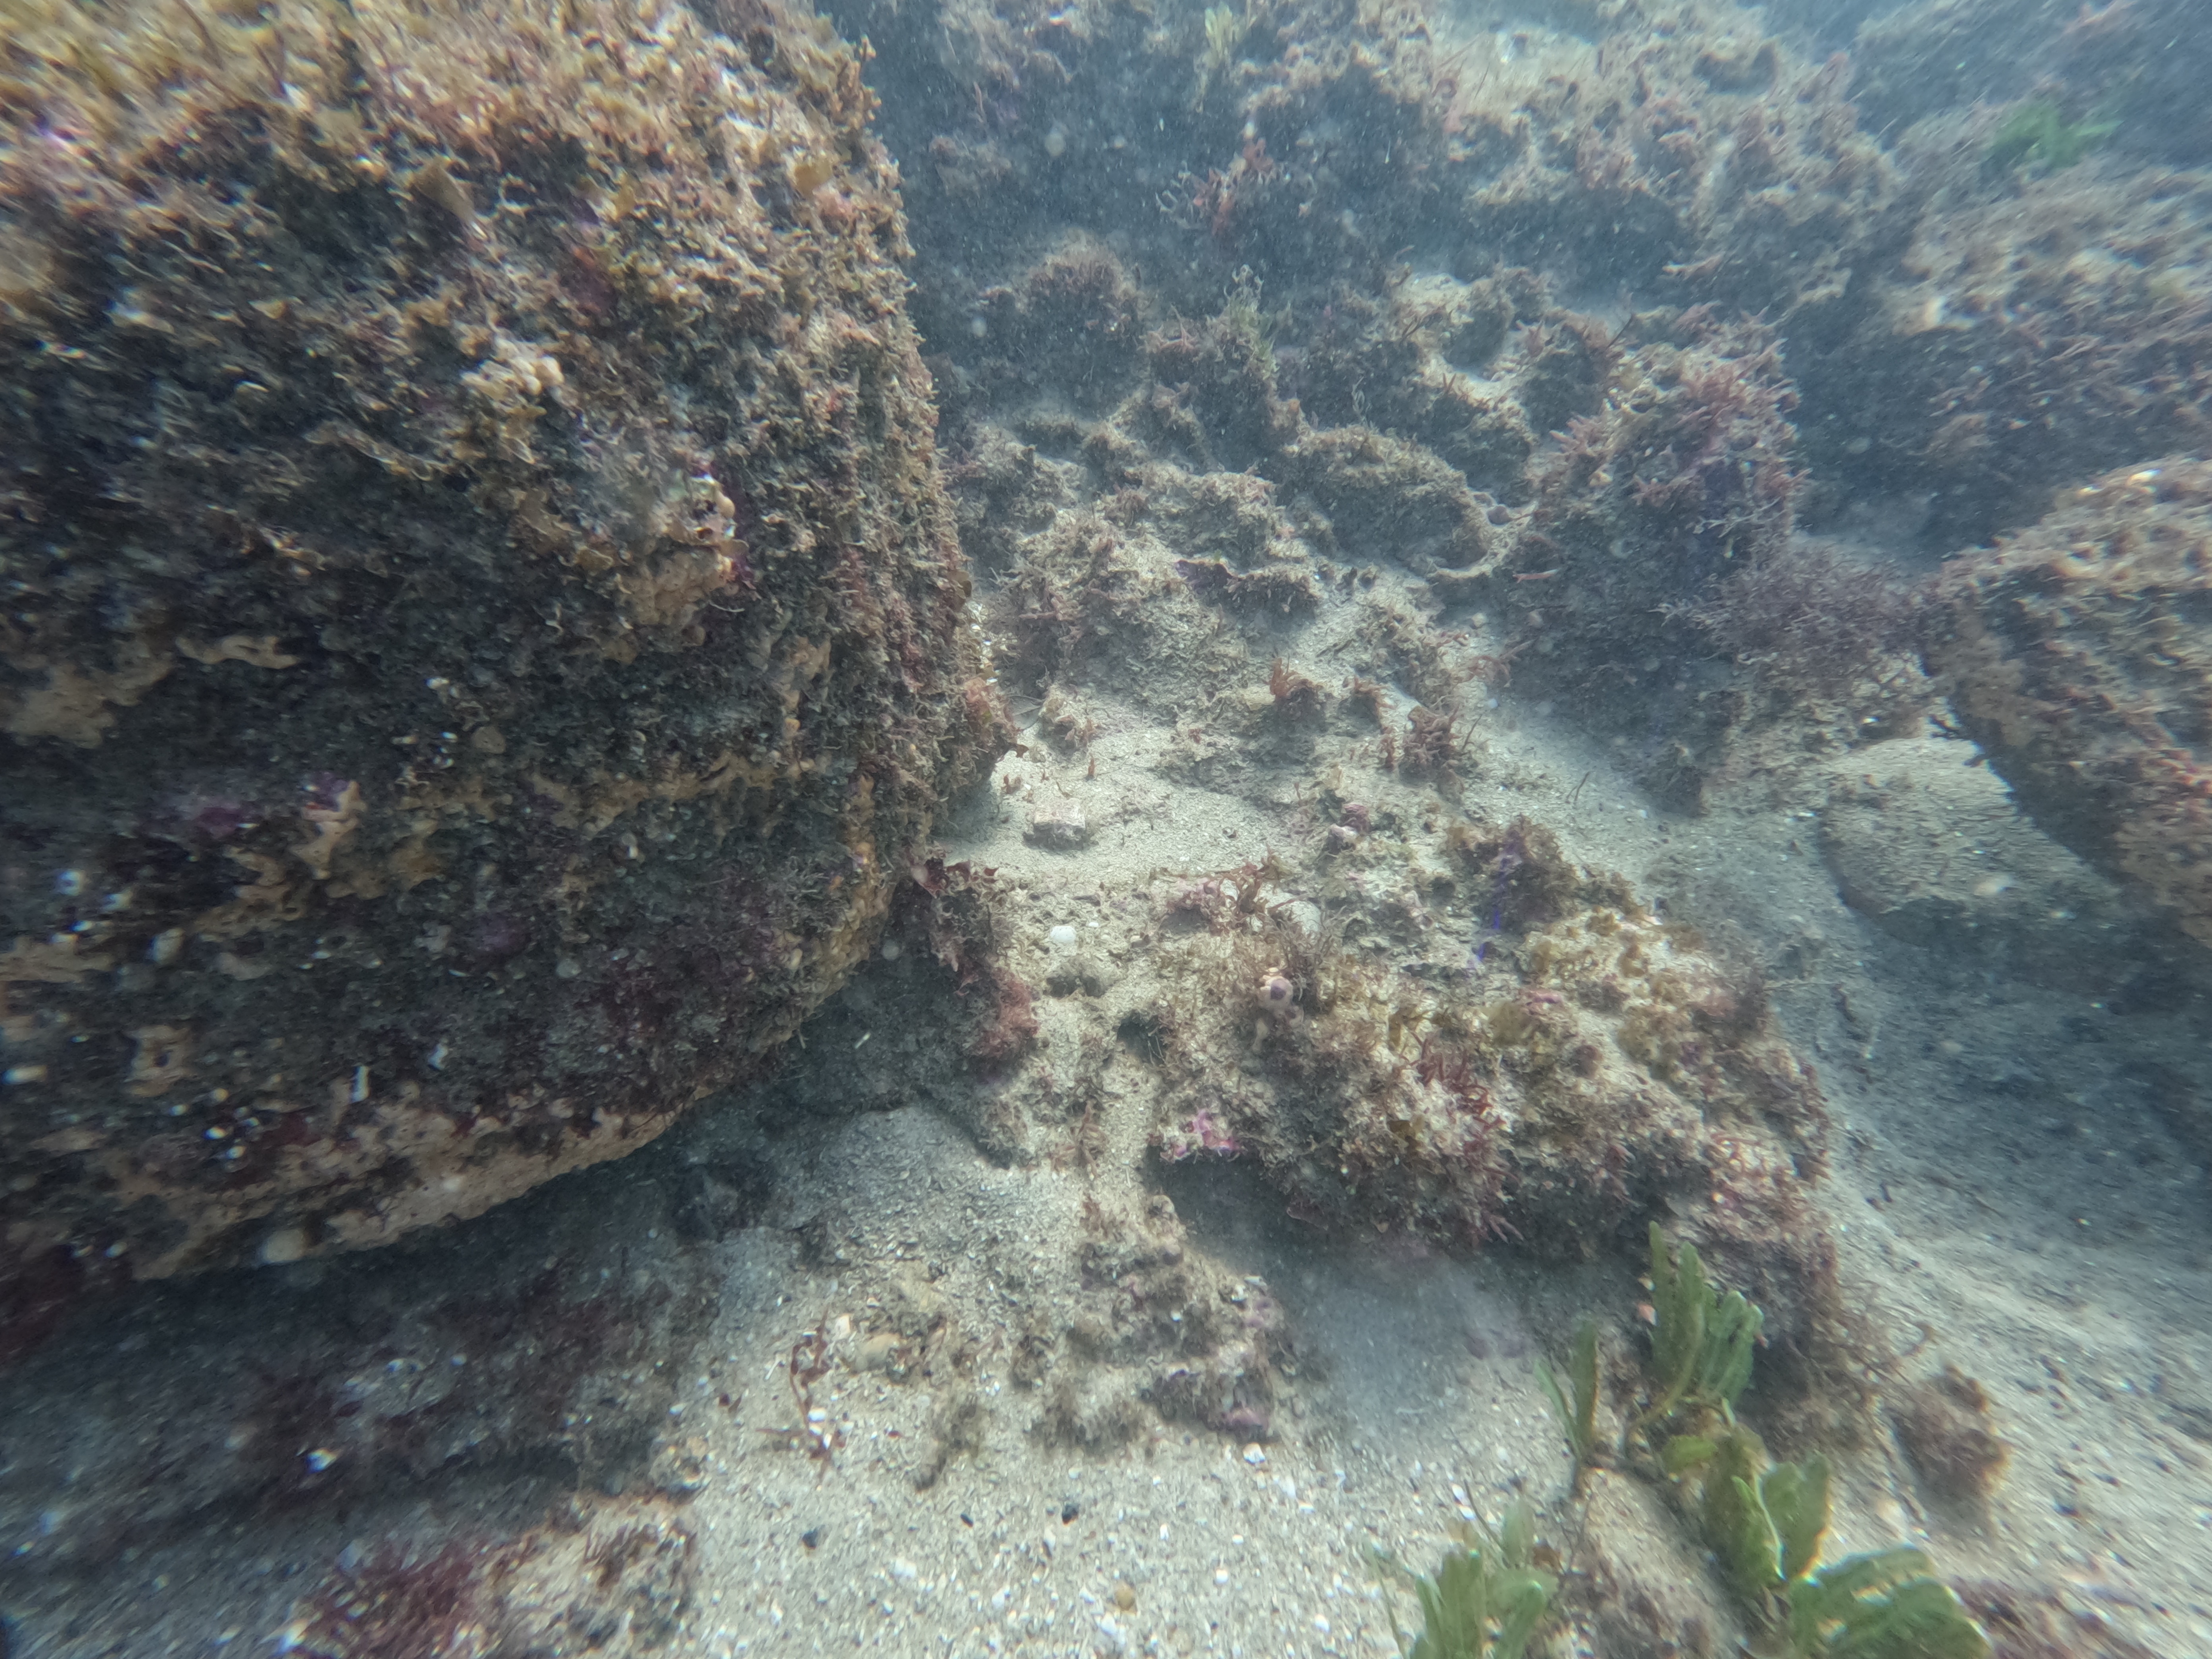

Supplement: Supplementary file 1667 [file G0027993.pdf › Ocean1/G0027993.pdf]

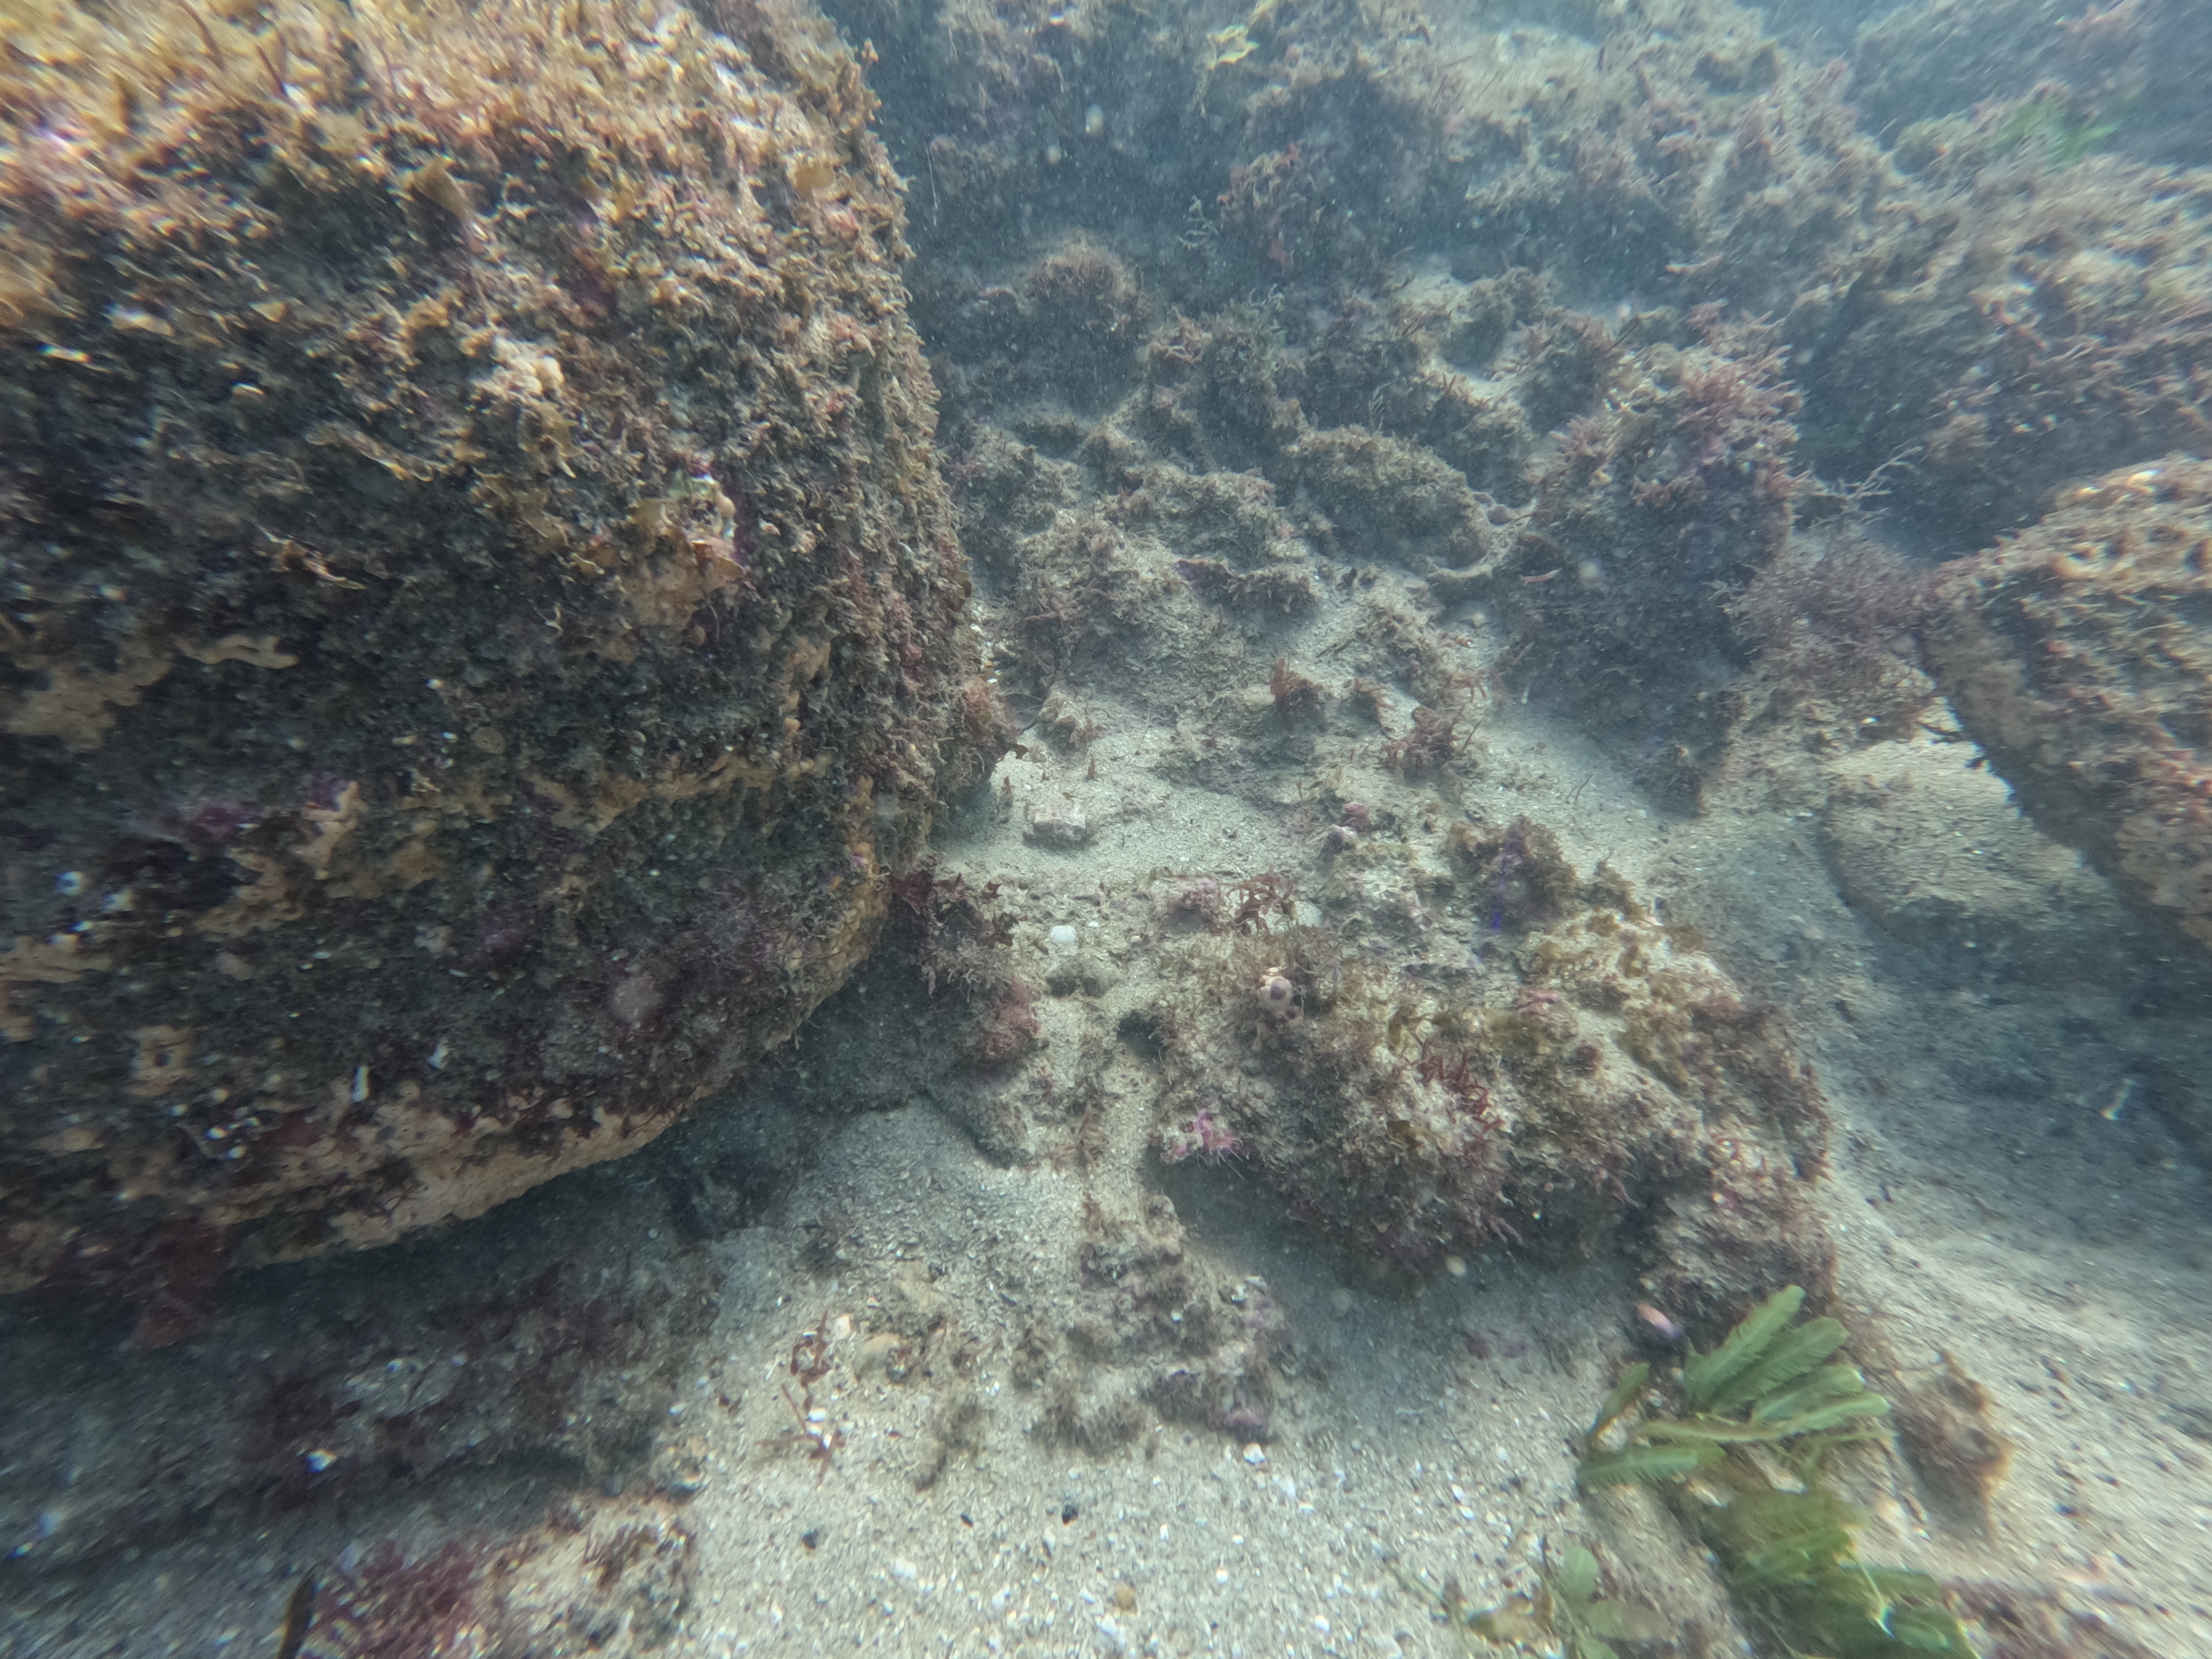

Supplement: Supplementary file 1668 [file G0027994.pdf › Ocean1/G0027994.pdf]

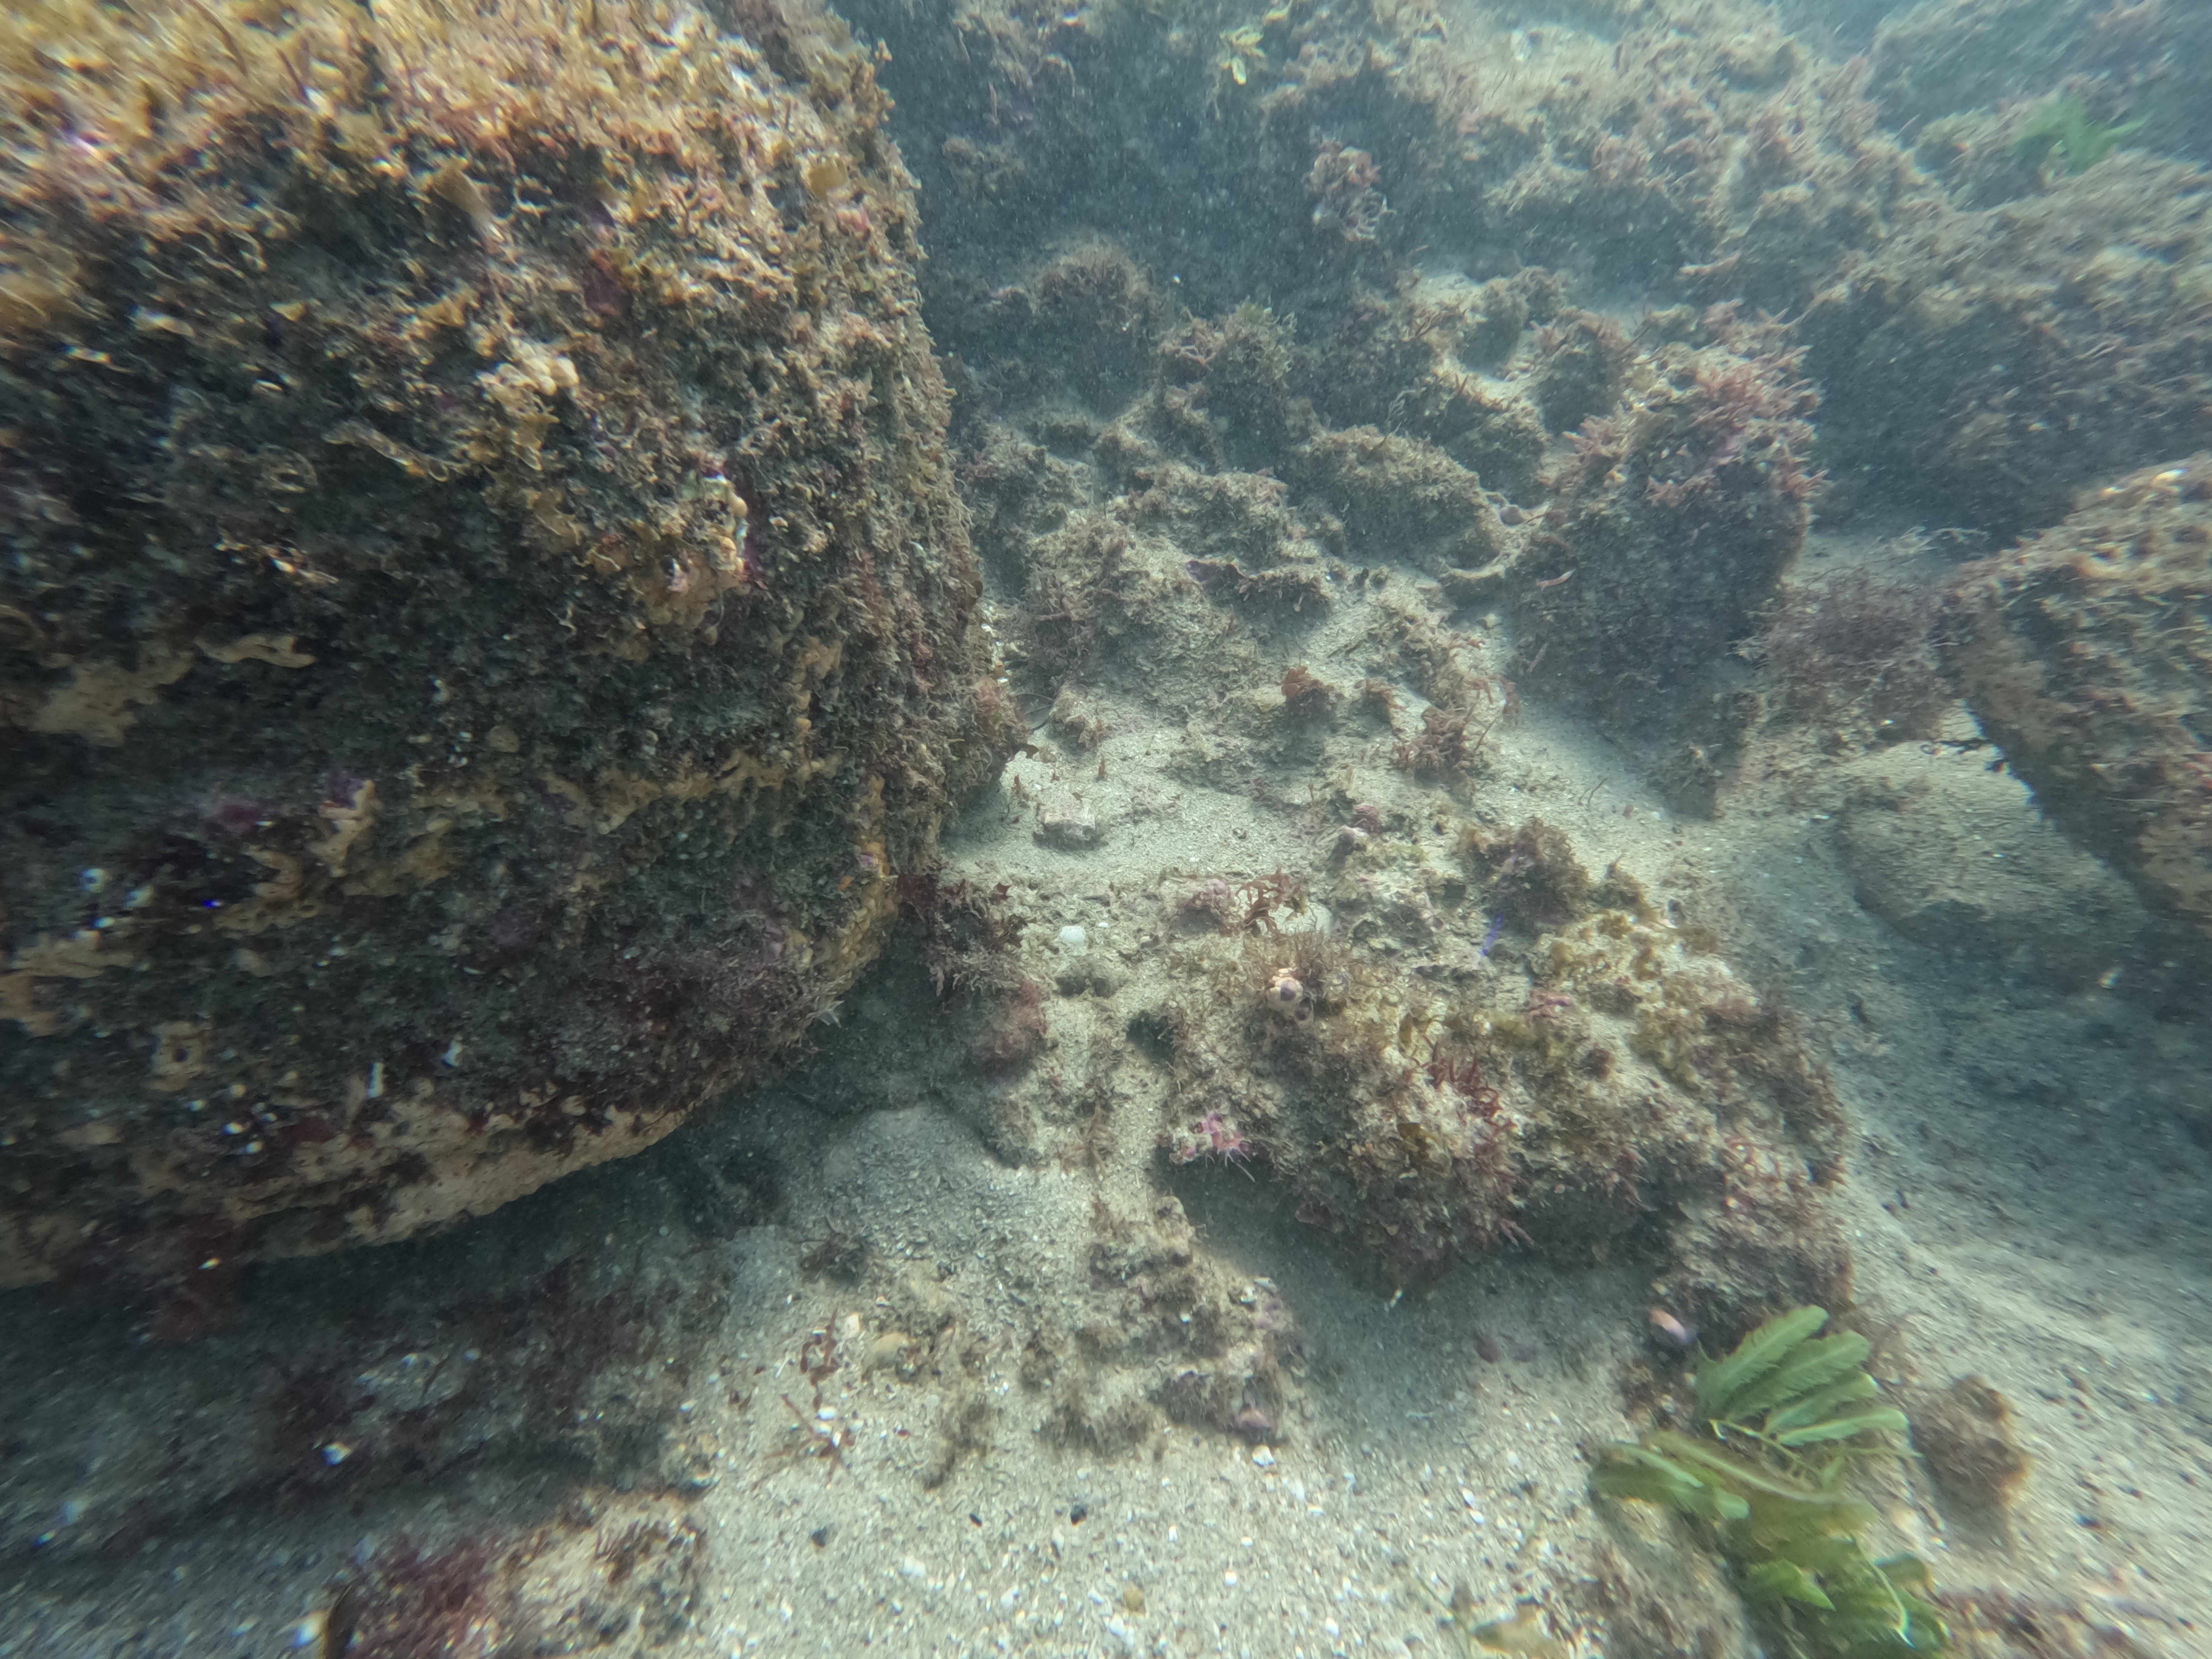

Supplement: Supplementary file 1669 [file G0027995.pdf › Ocean1/G0027995.pdf]

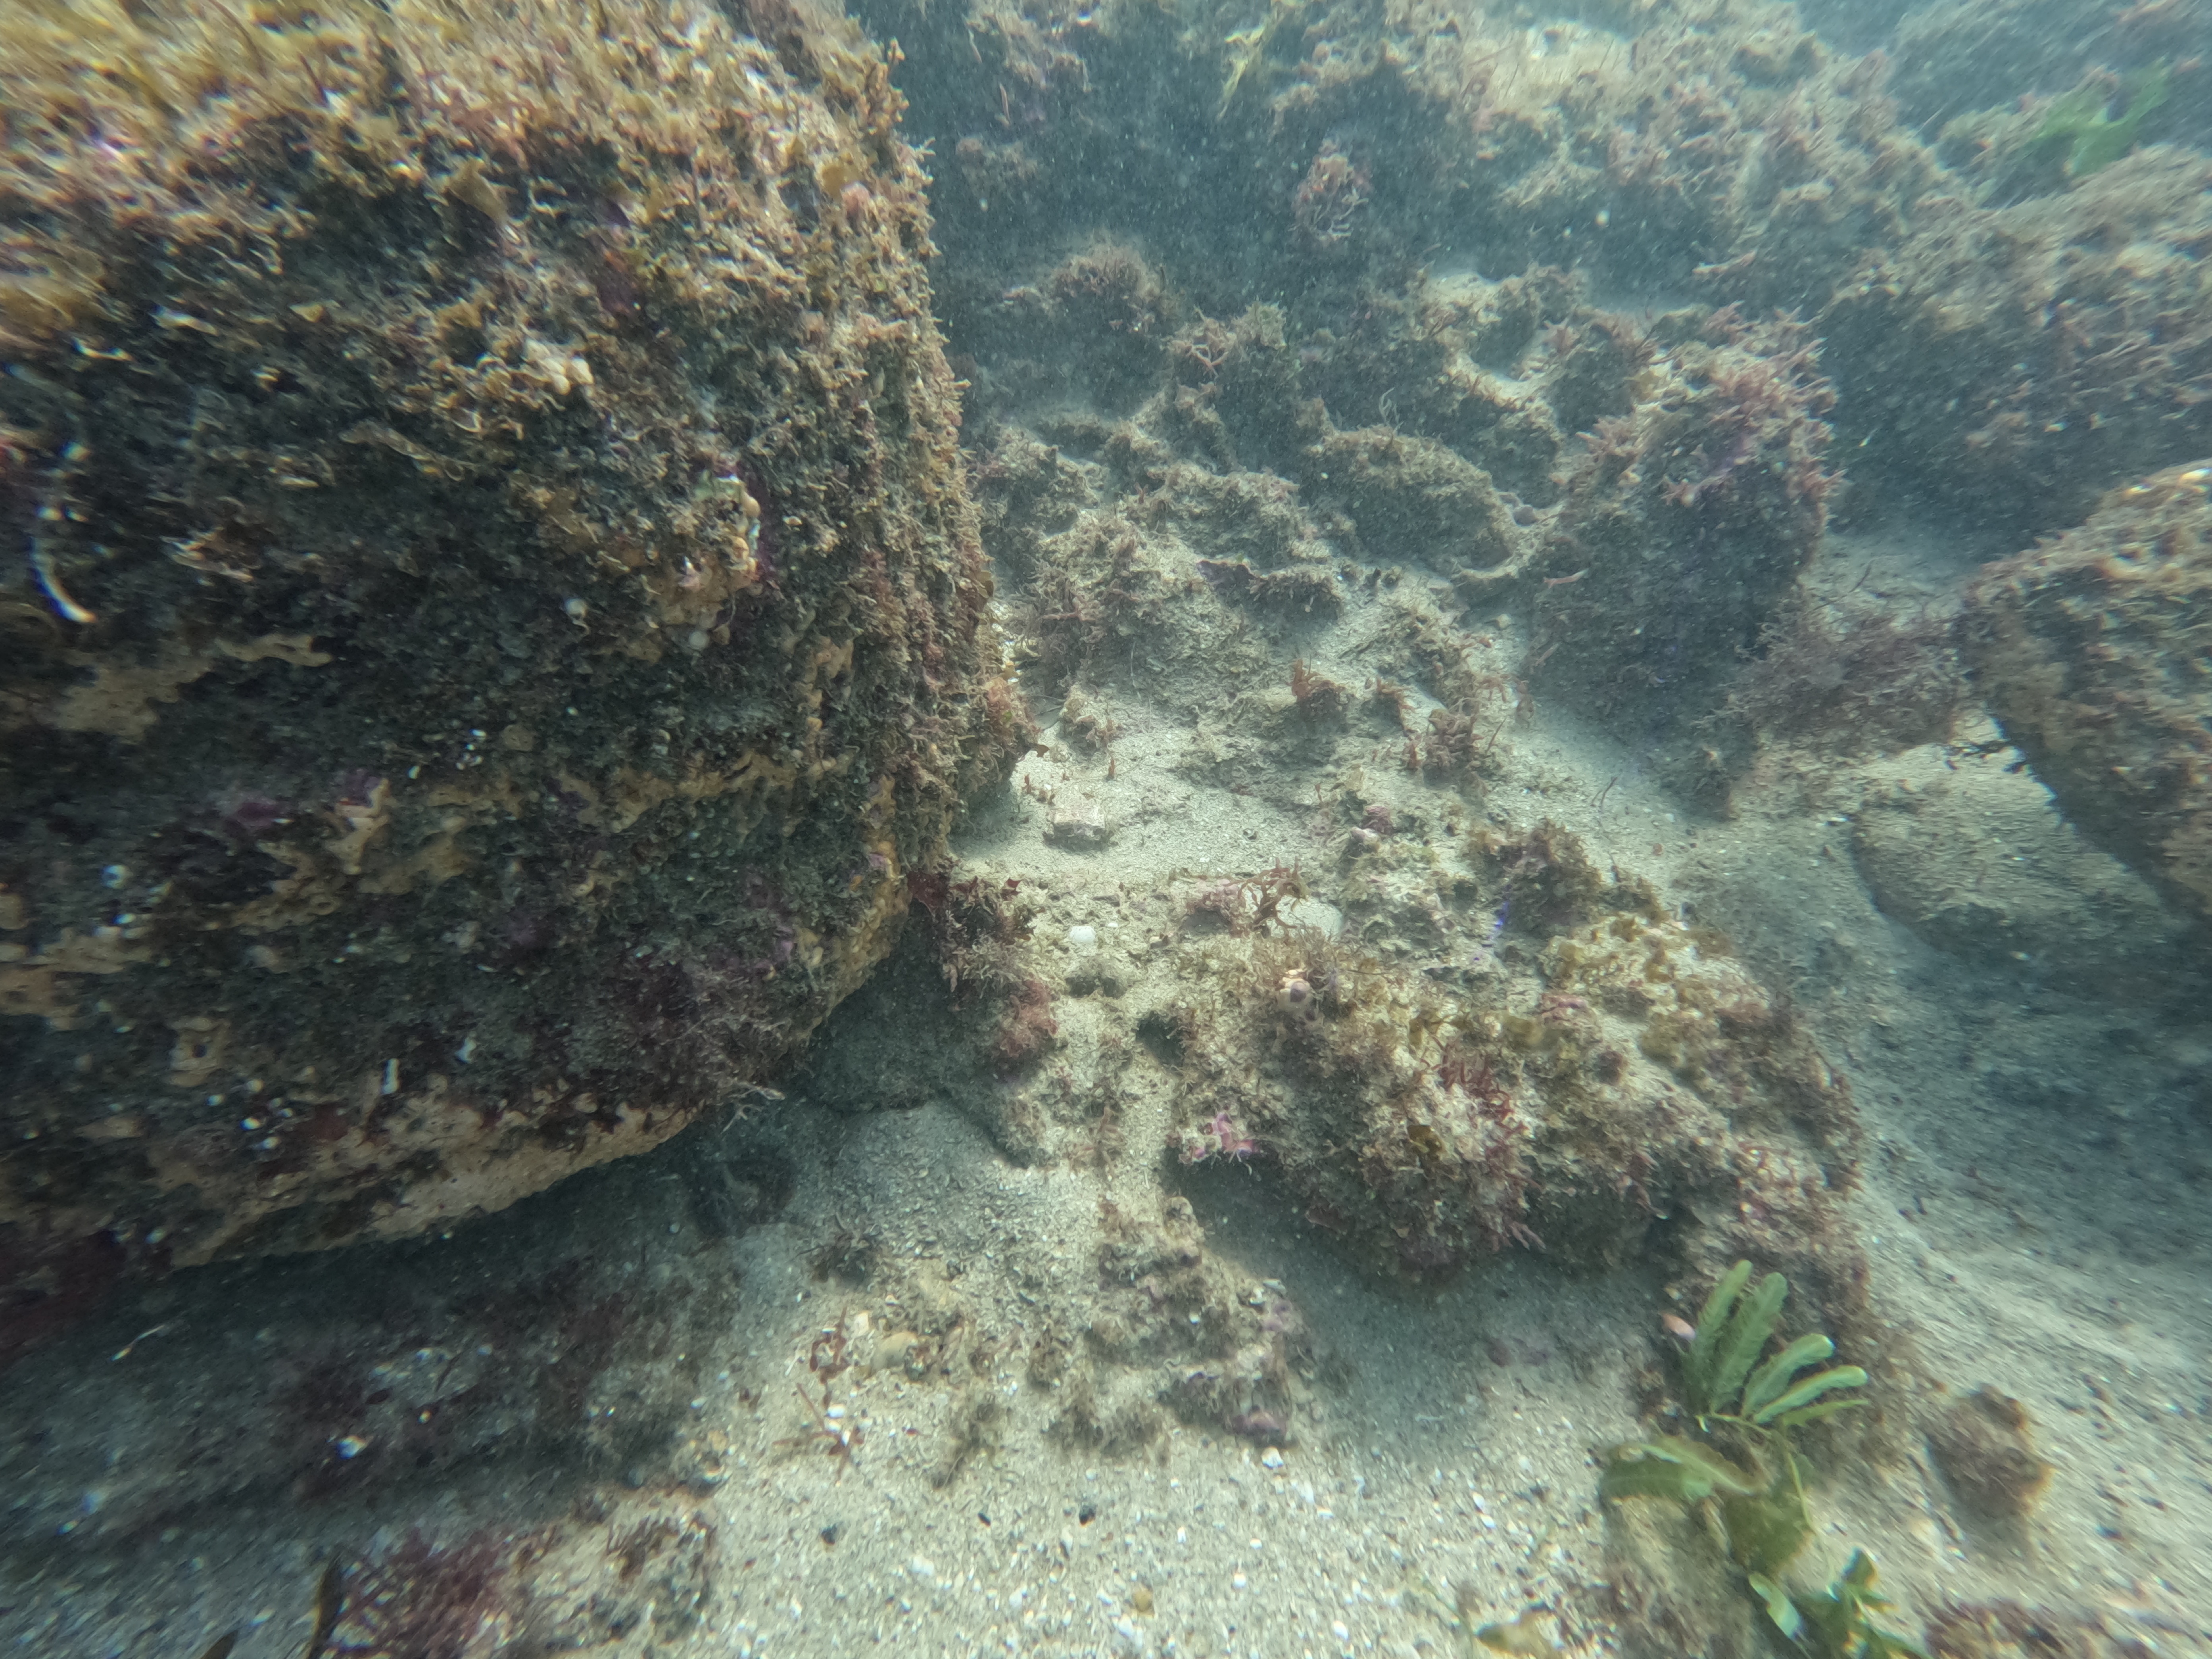

Supplement: Supplementary file 1670 [file G0027996.pdf › Ocean1/G0027996.pdf]

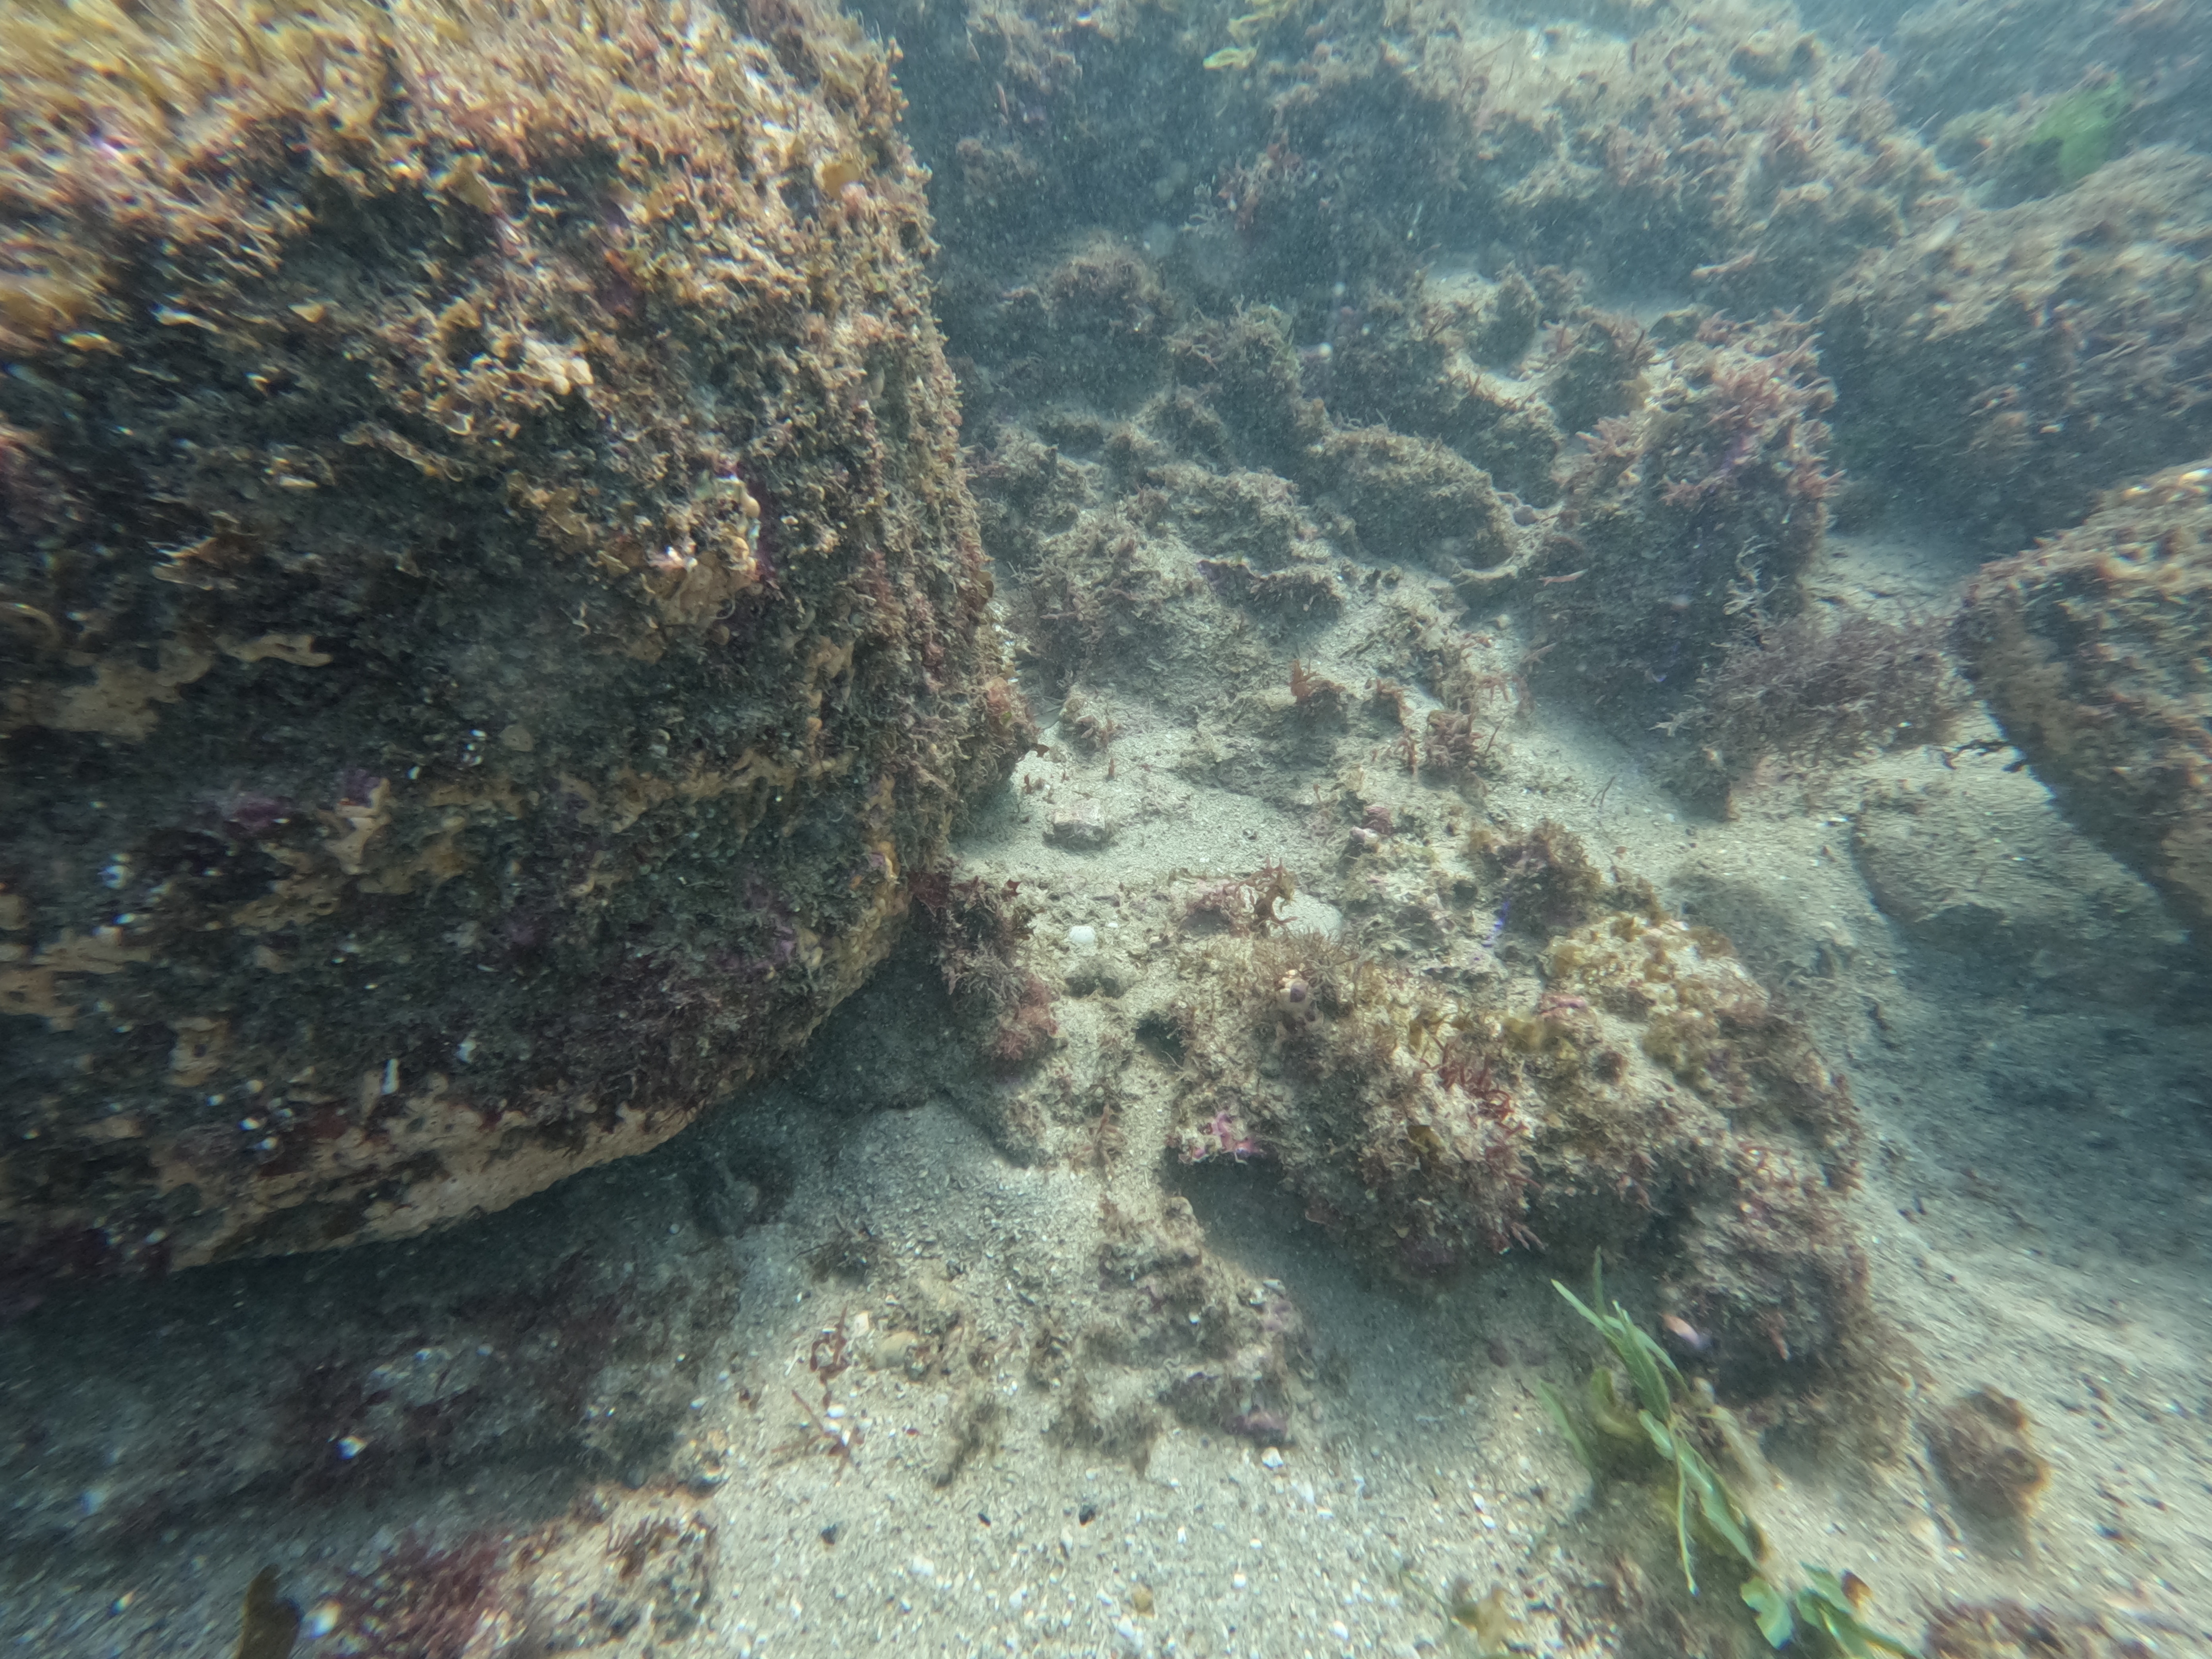

Supplement: Supplementary file 1671 [file G0027997.pdf › Ocean1/G0027997.pdf]

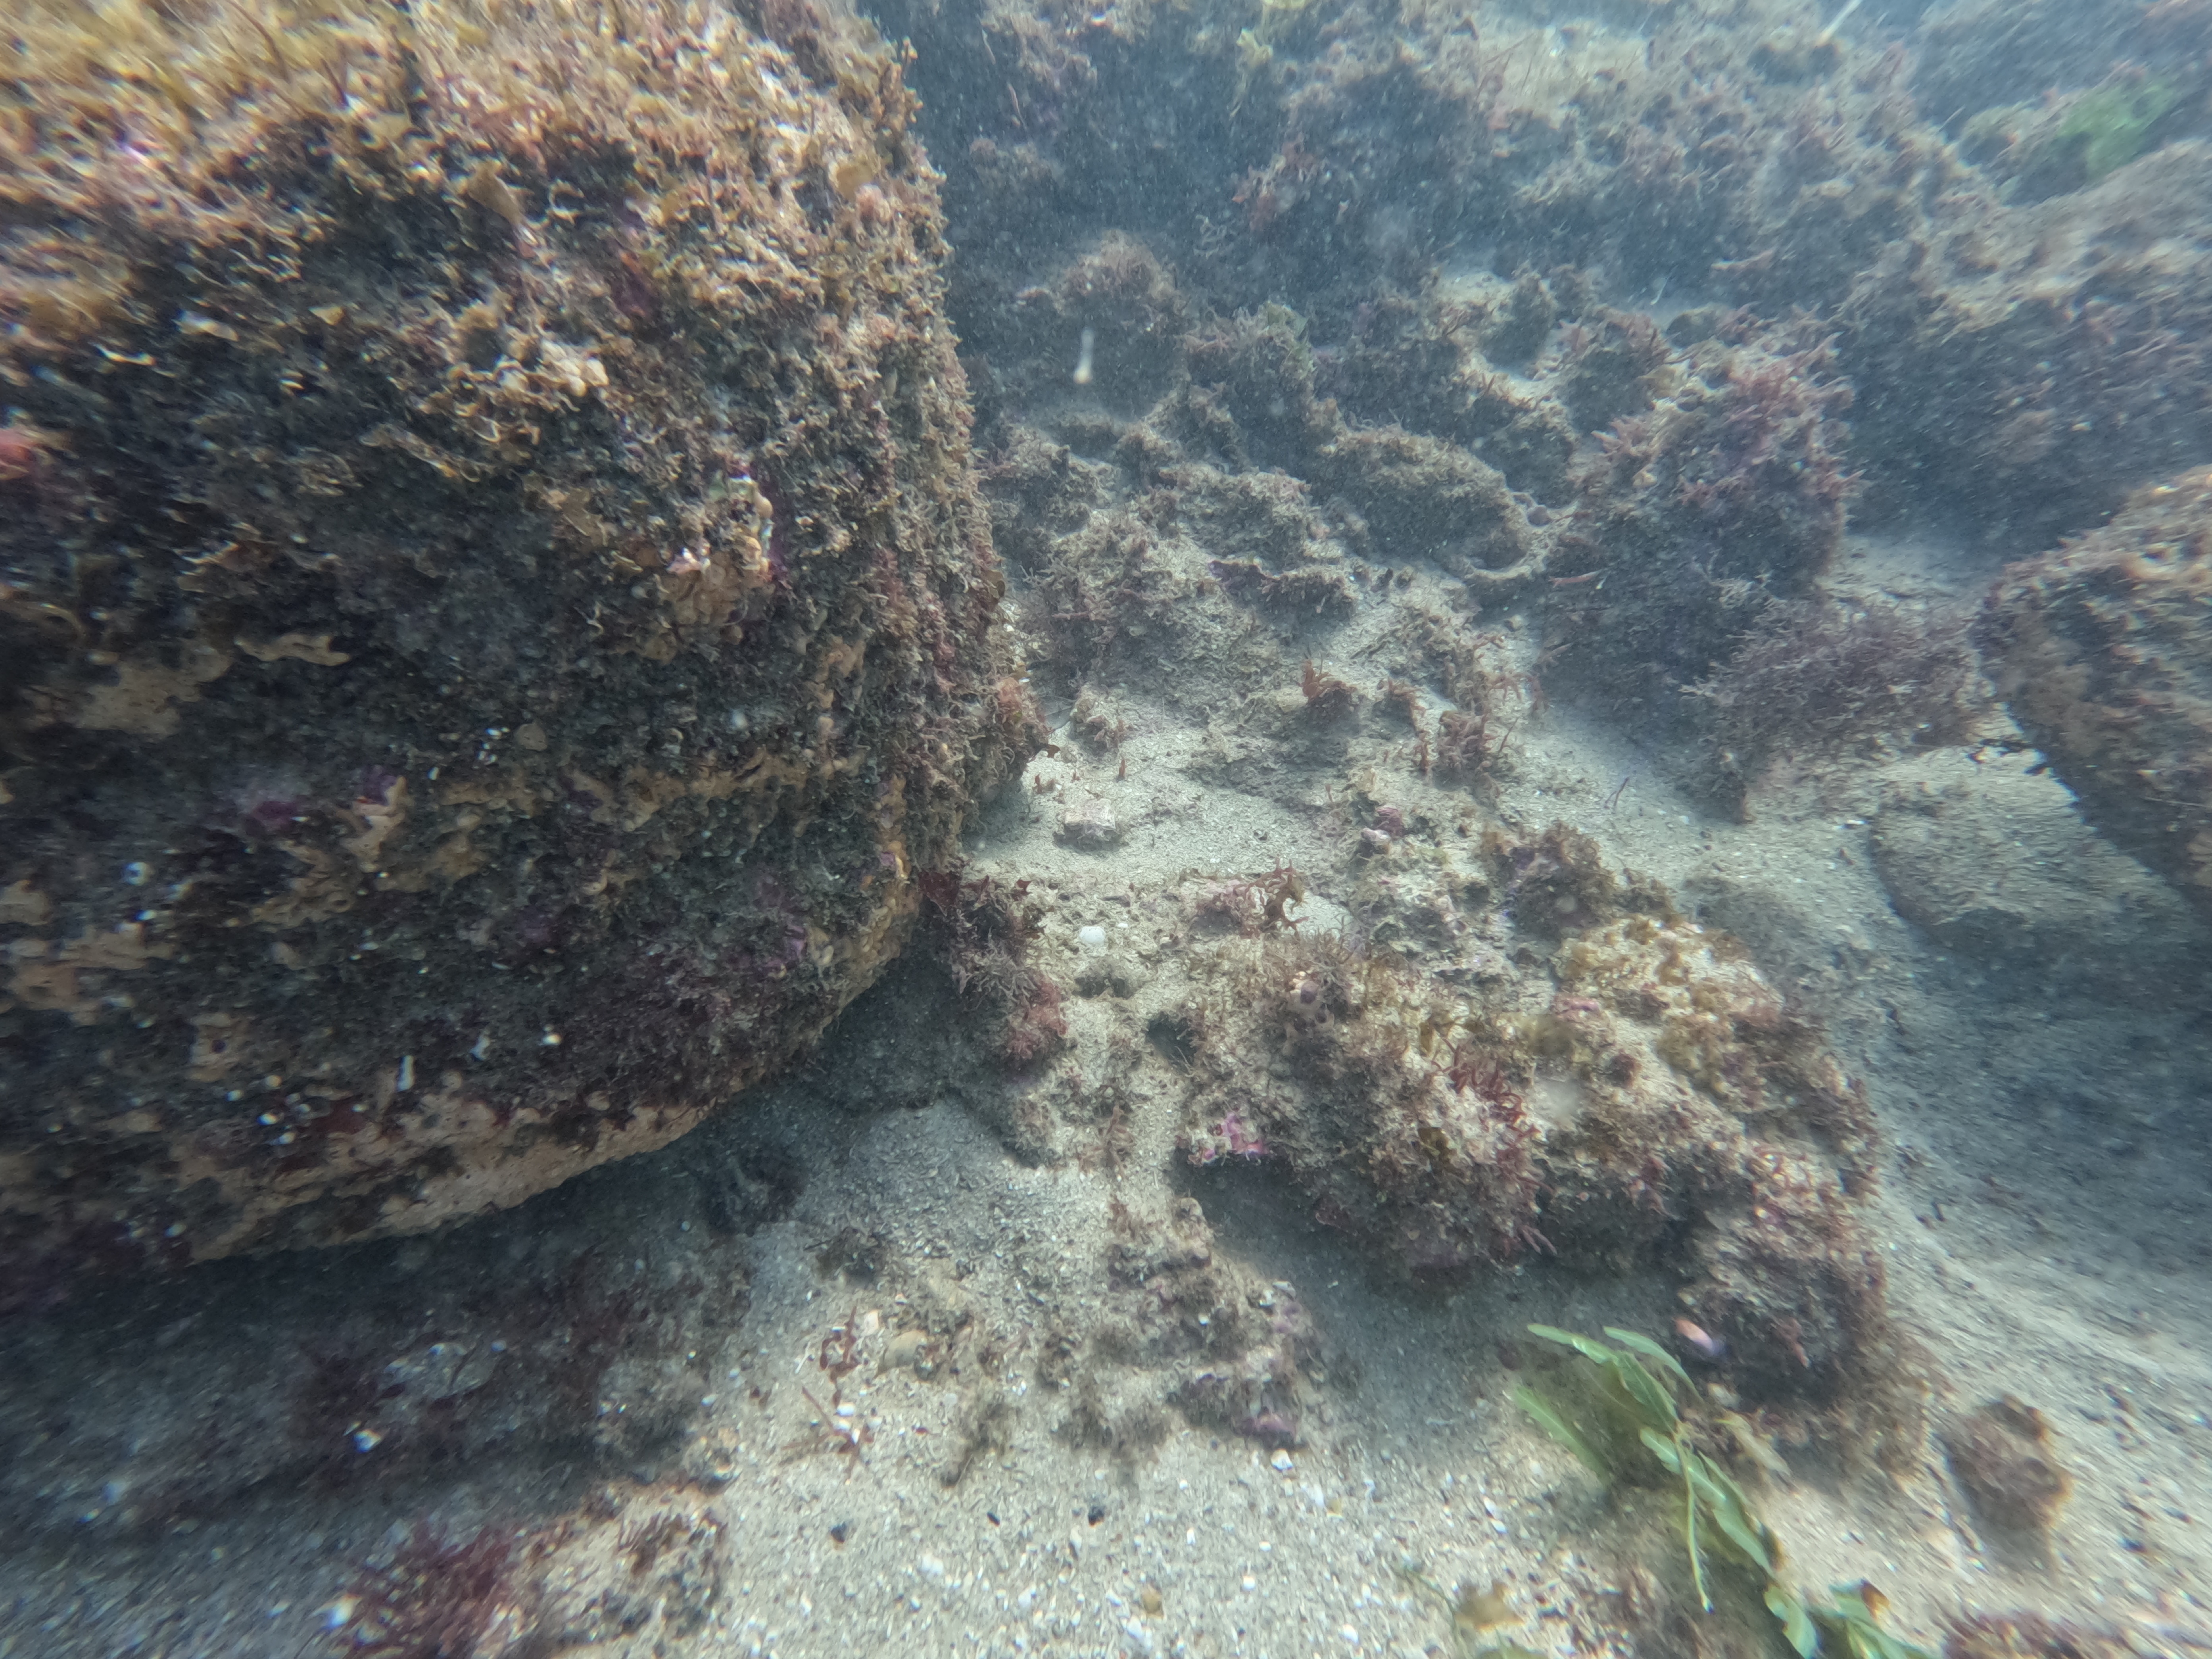

Supplement: Supplementary file 1672 [file G0027998.pdf › Ocean1/G0027998.pdf]

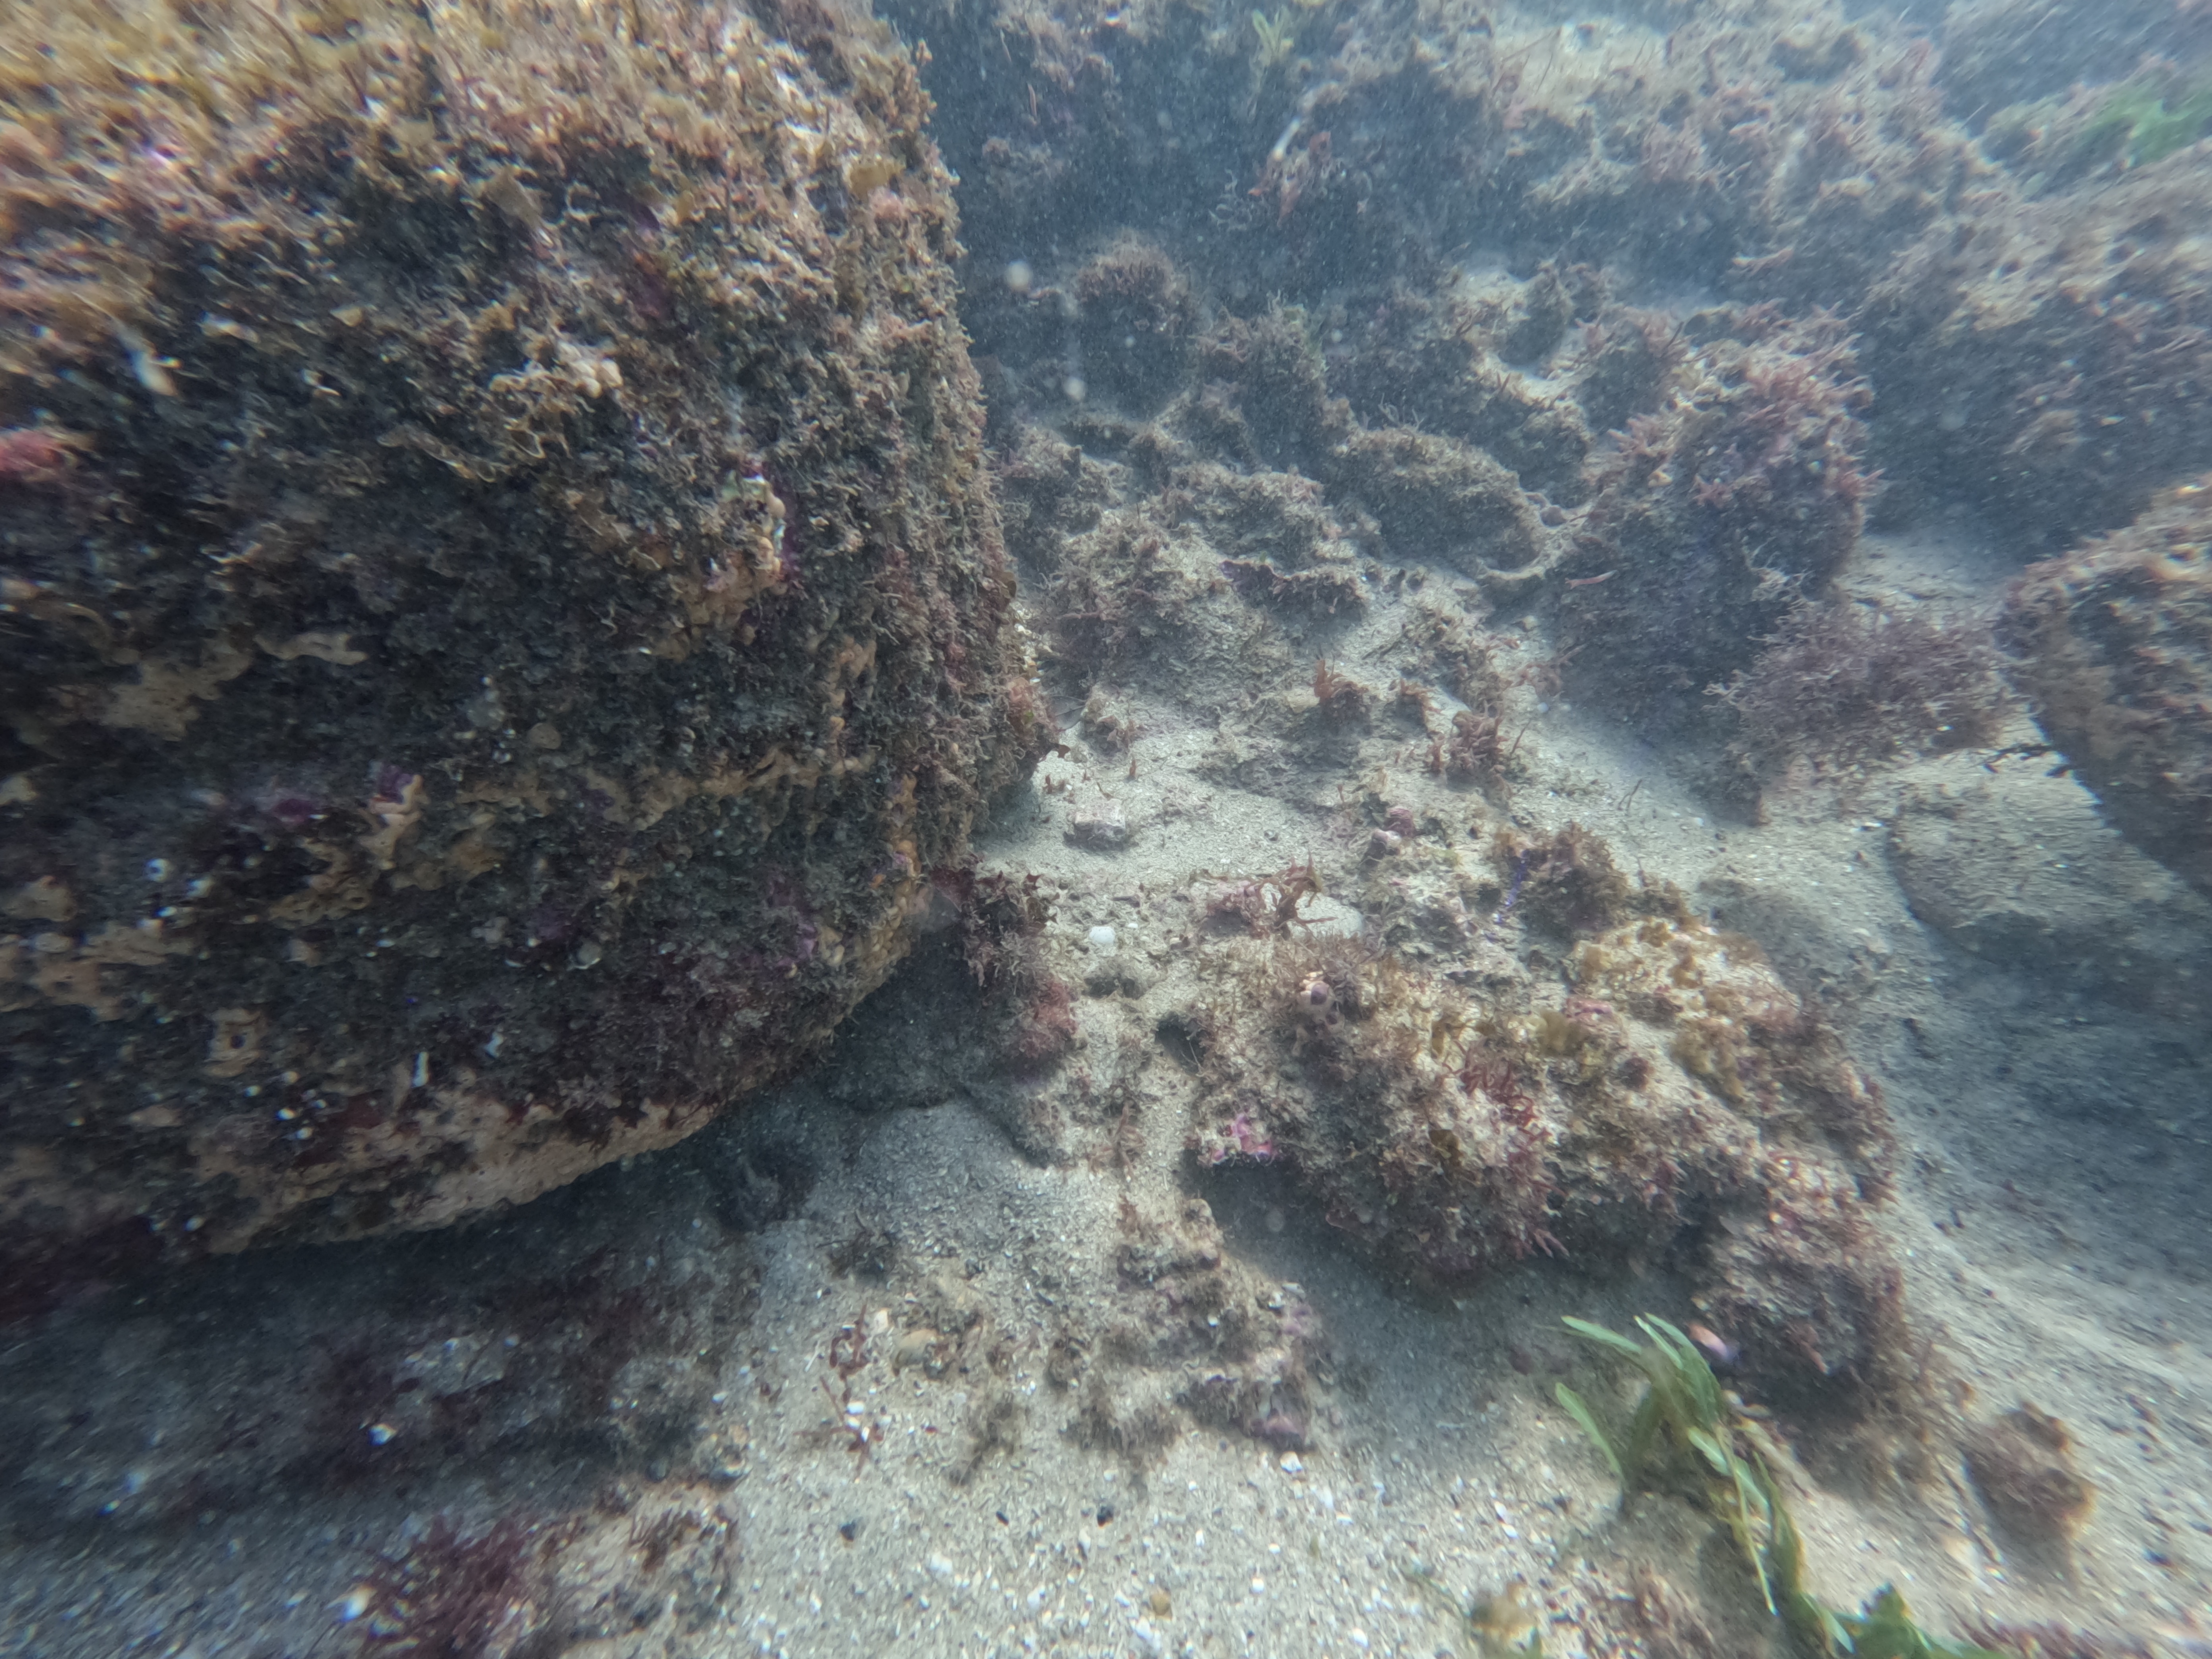

Supplement: Supplementary file 1673 [file G0027999.pdf › Ocean1/G0027999.pdf]

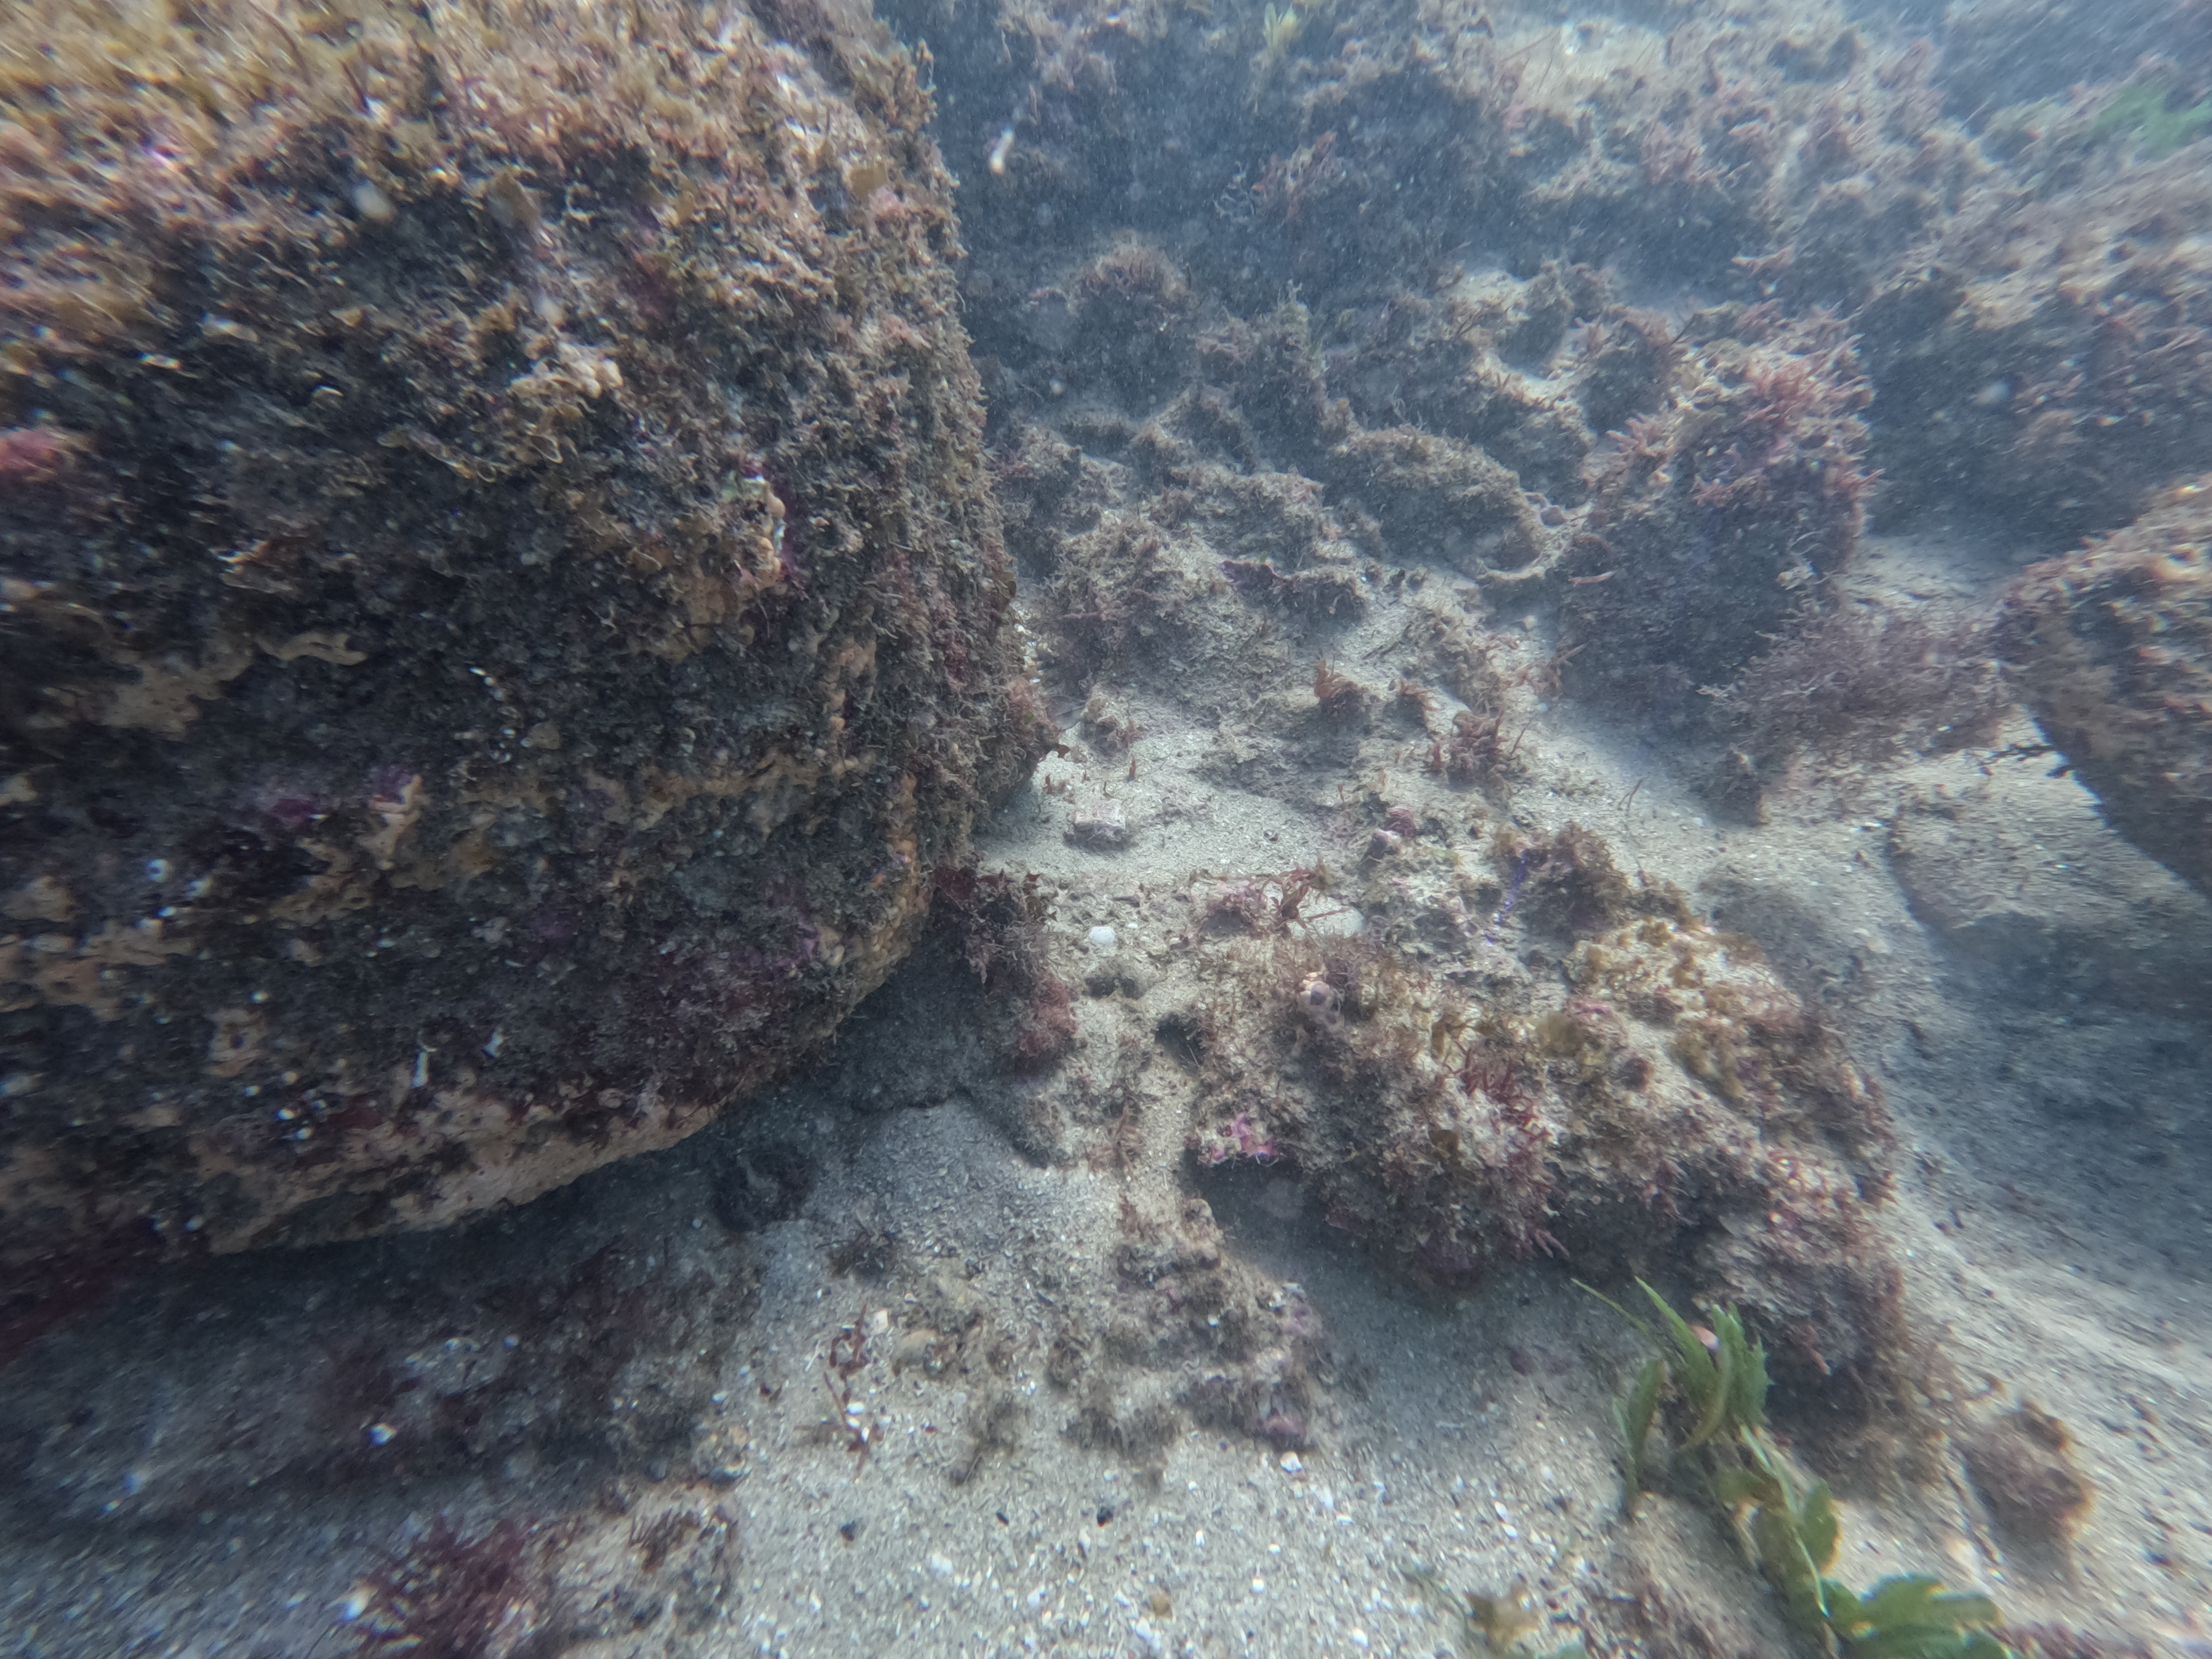

Supplement: Supplementary file 1674 [file G0028000.pdf › Ocean1/G0028000.pdf]

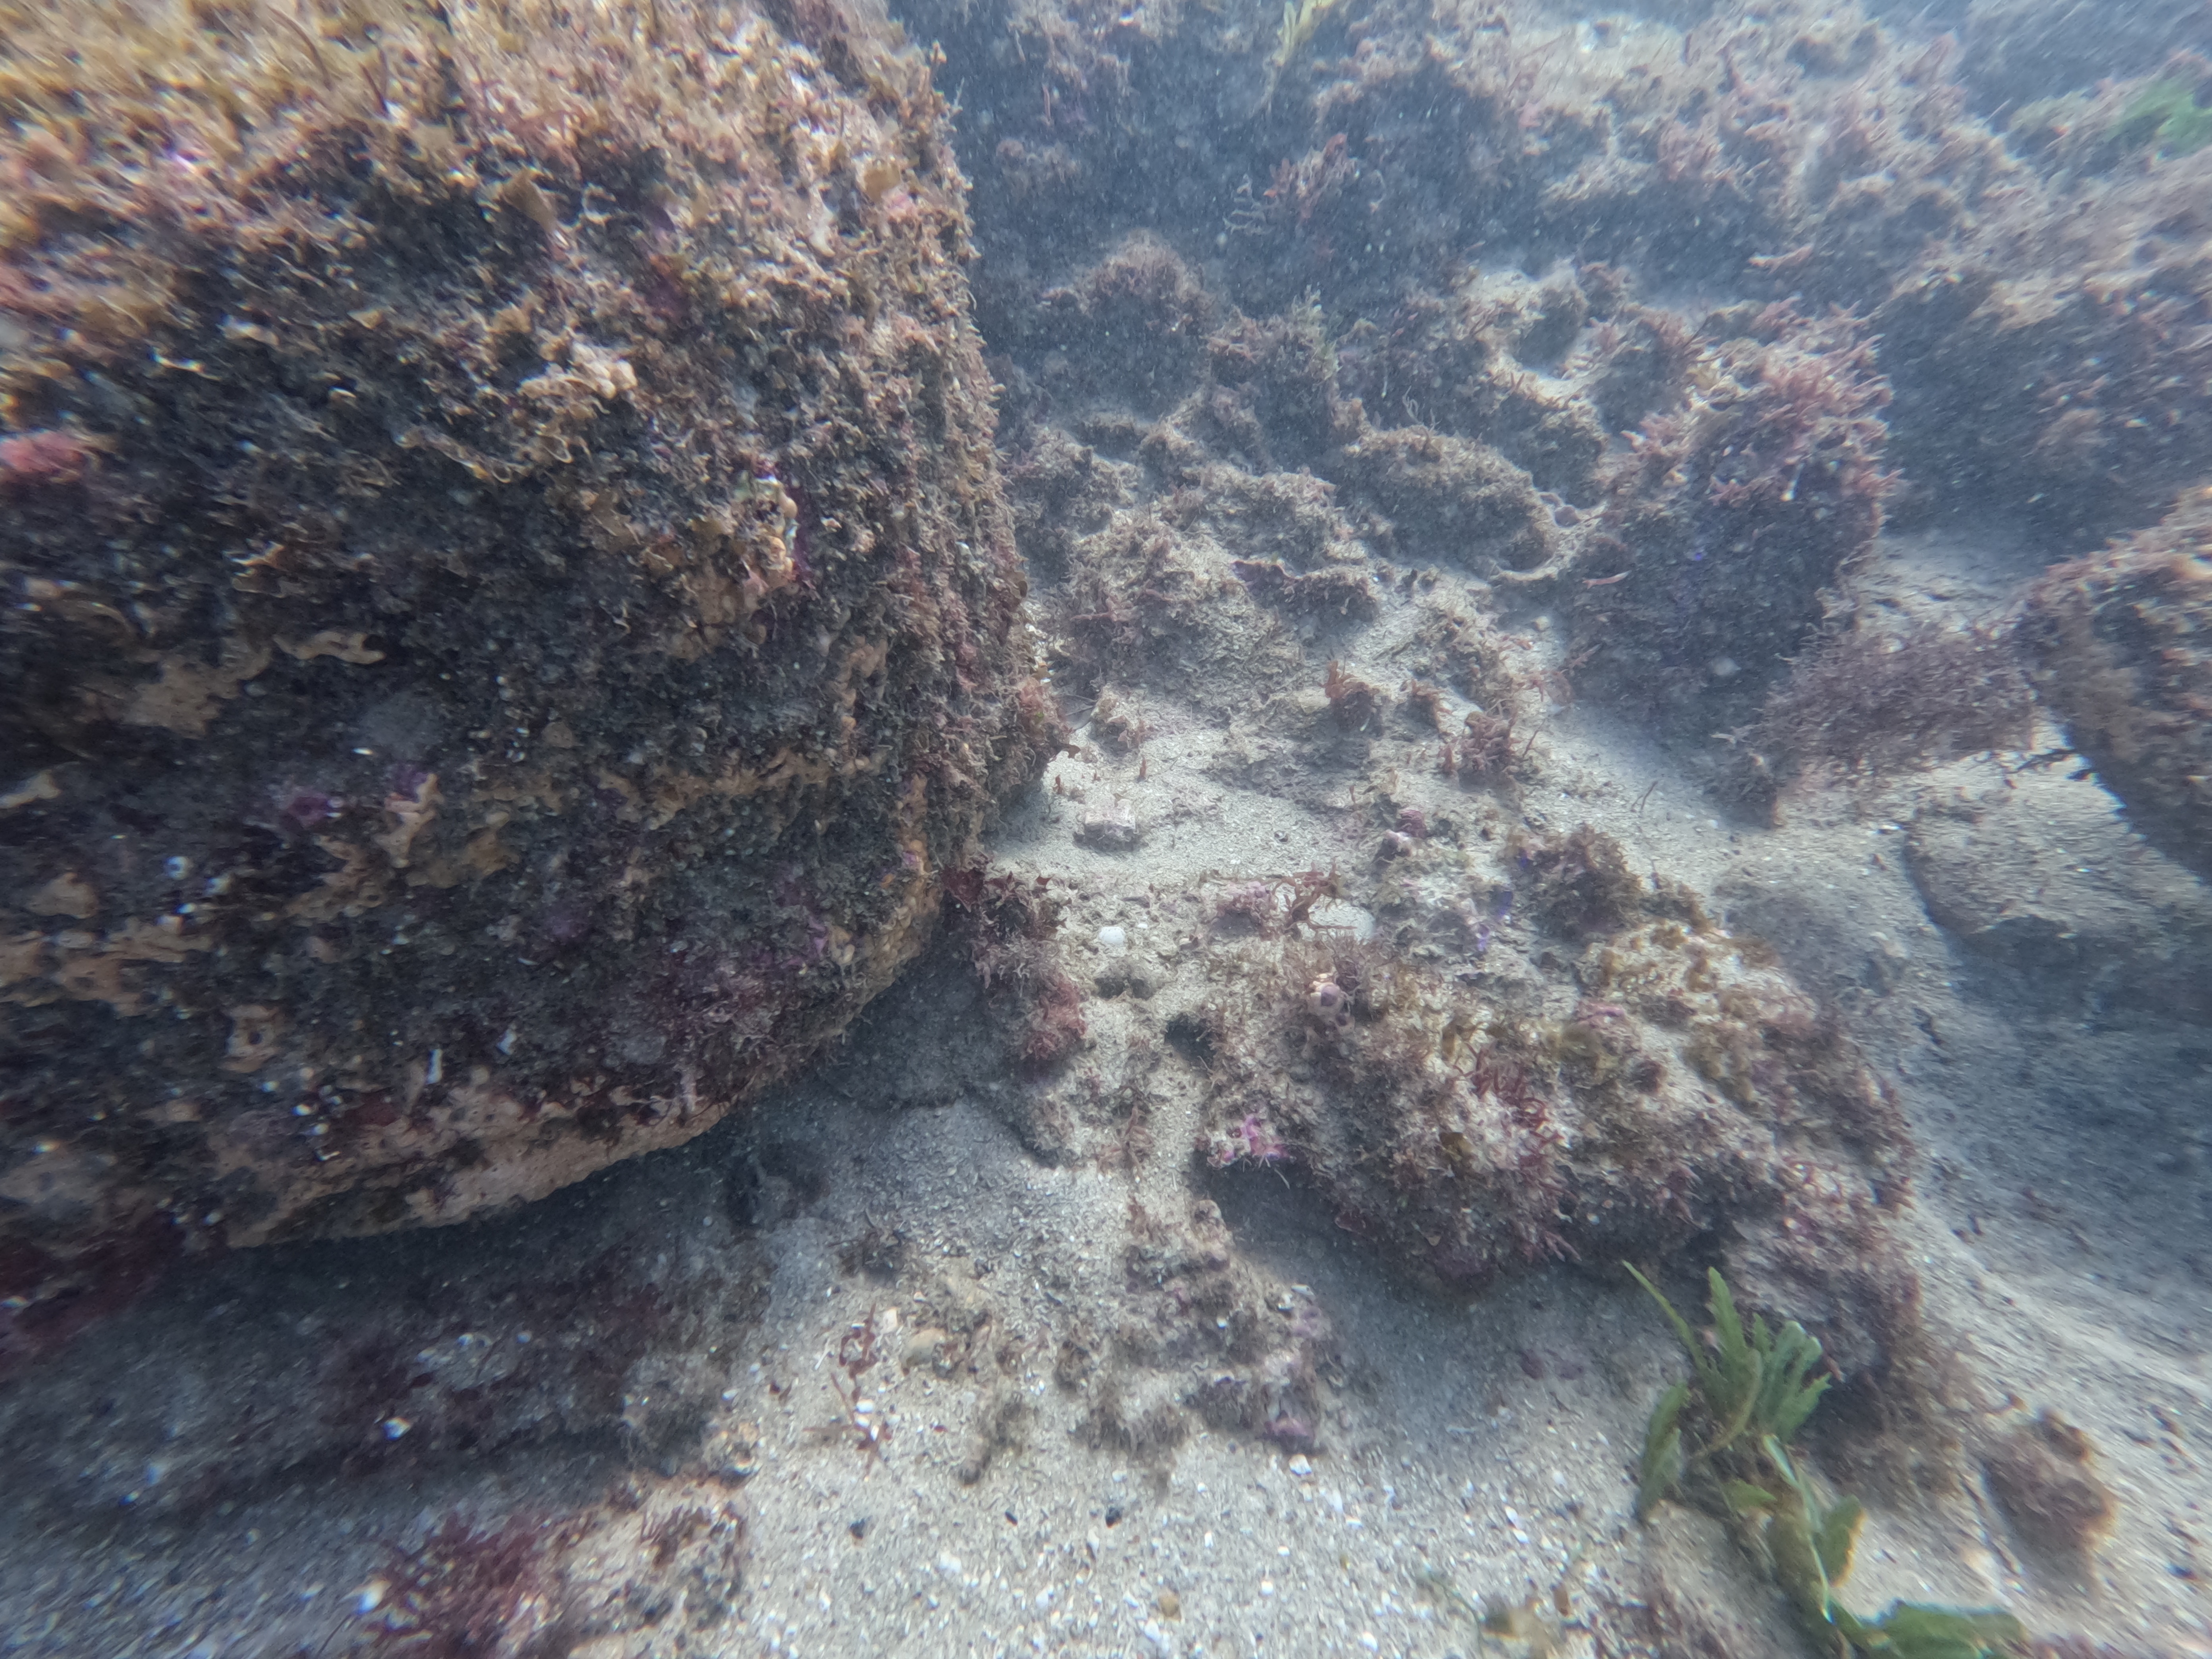

Supplement: Supplementary file 1675 [file G0028001.pdf › Ocean1/G0028001.pdf]

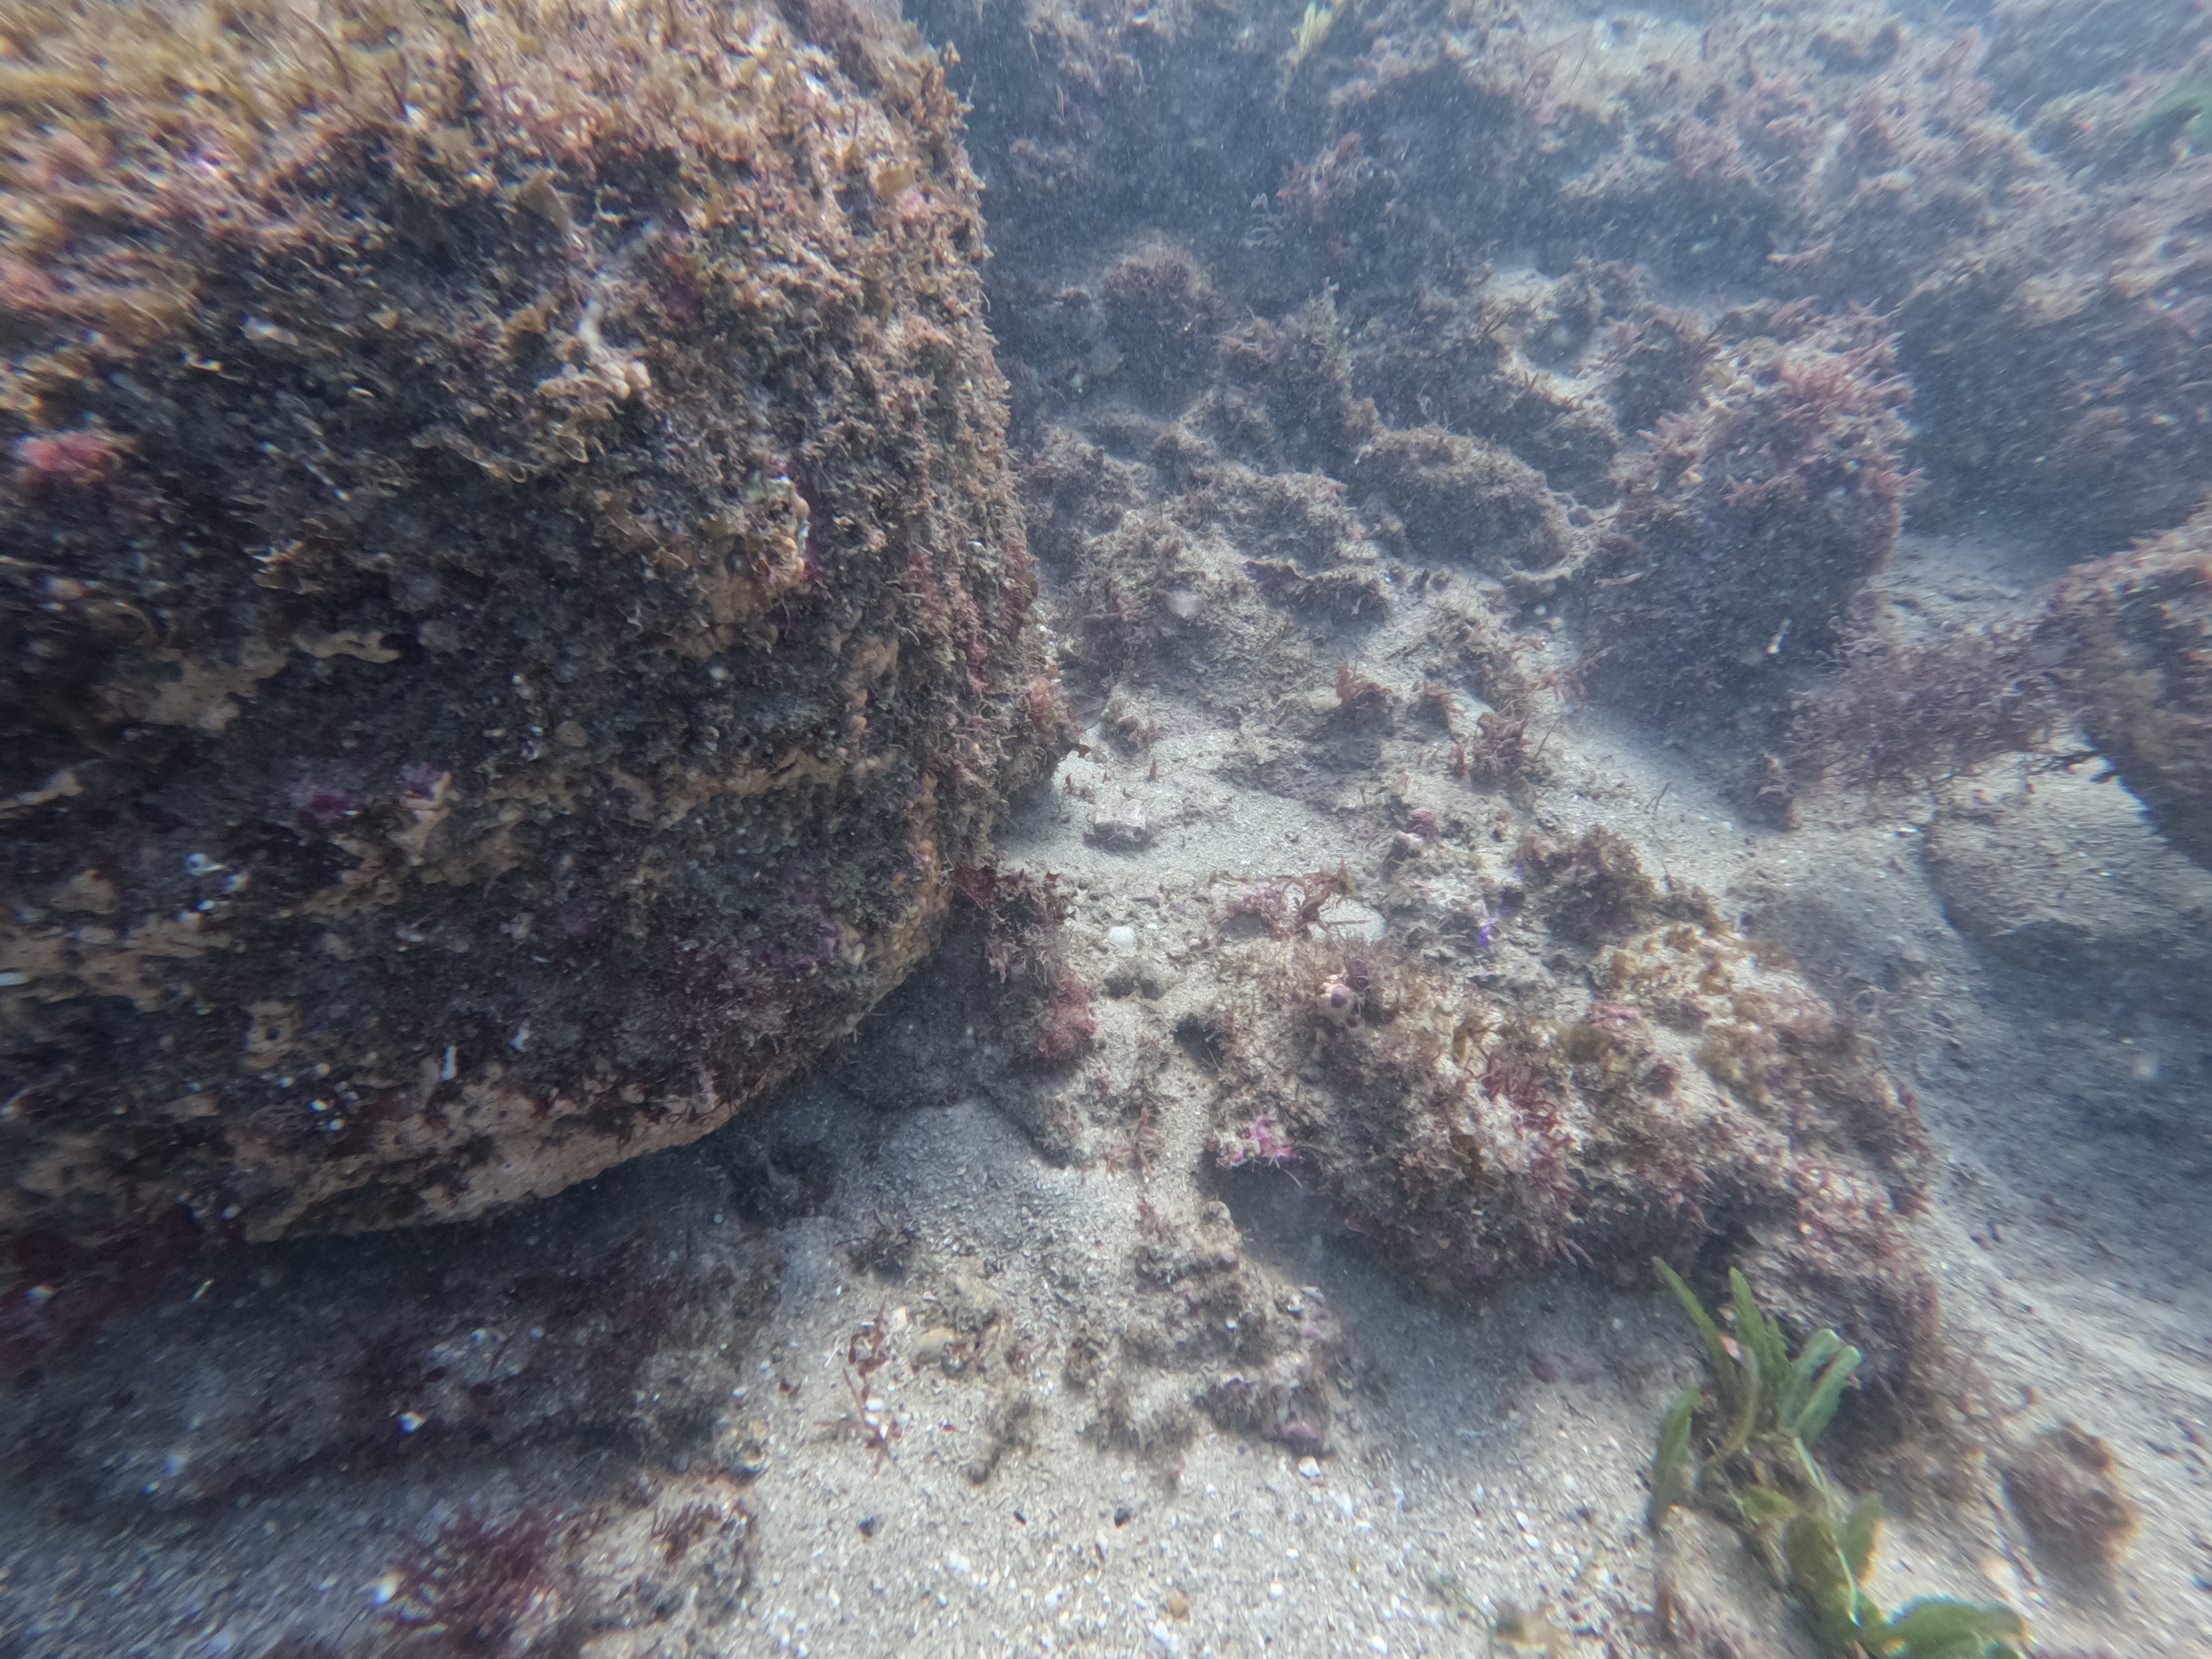

Supplement: Supplementary file 1676 [file G0028002.pdf › Ocean1/G0028002.pdf]

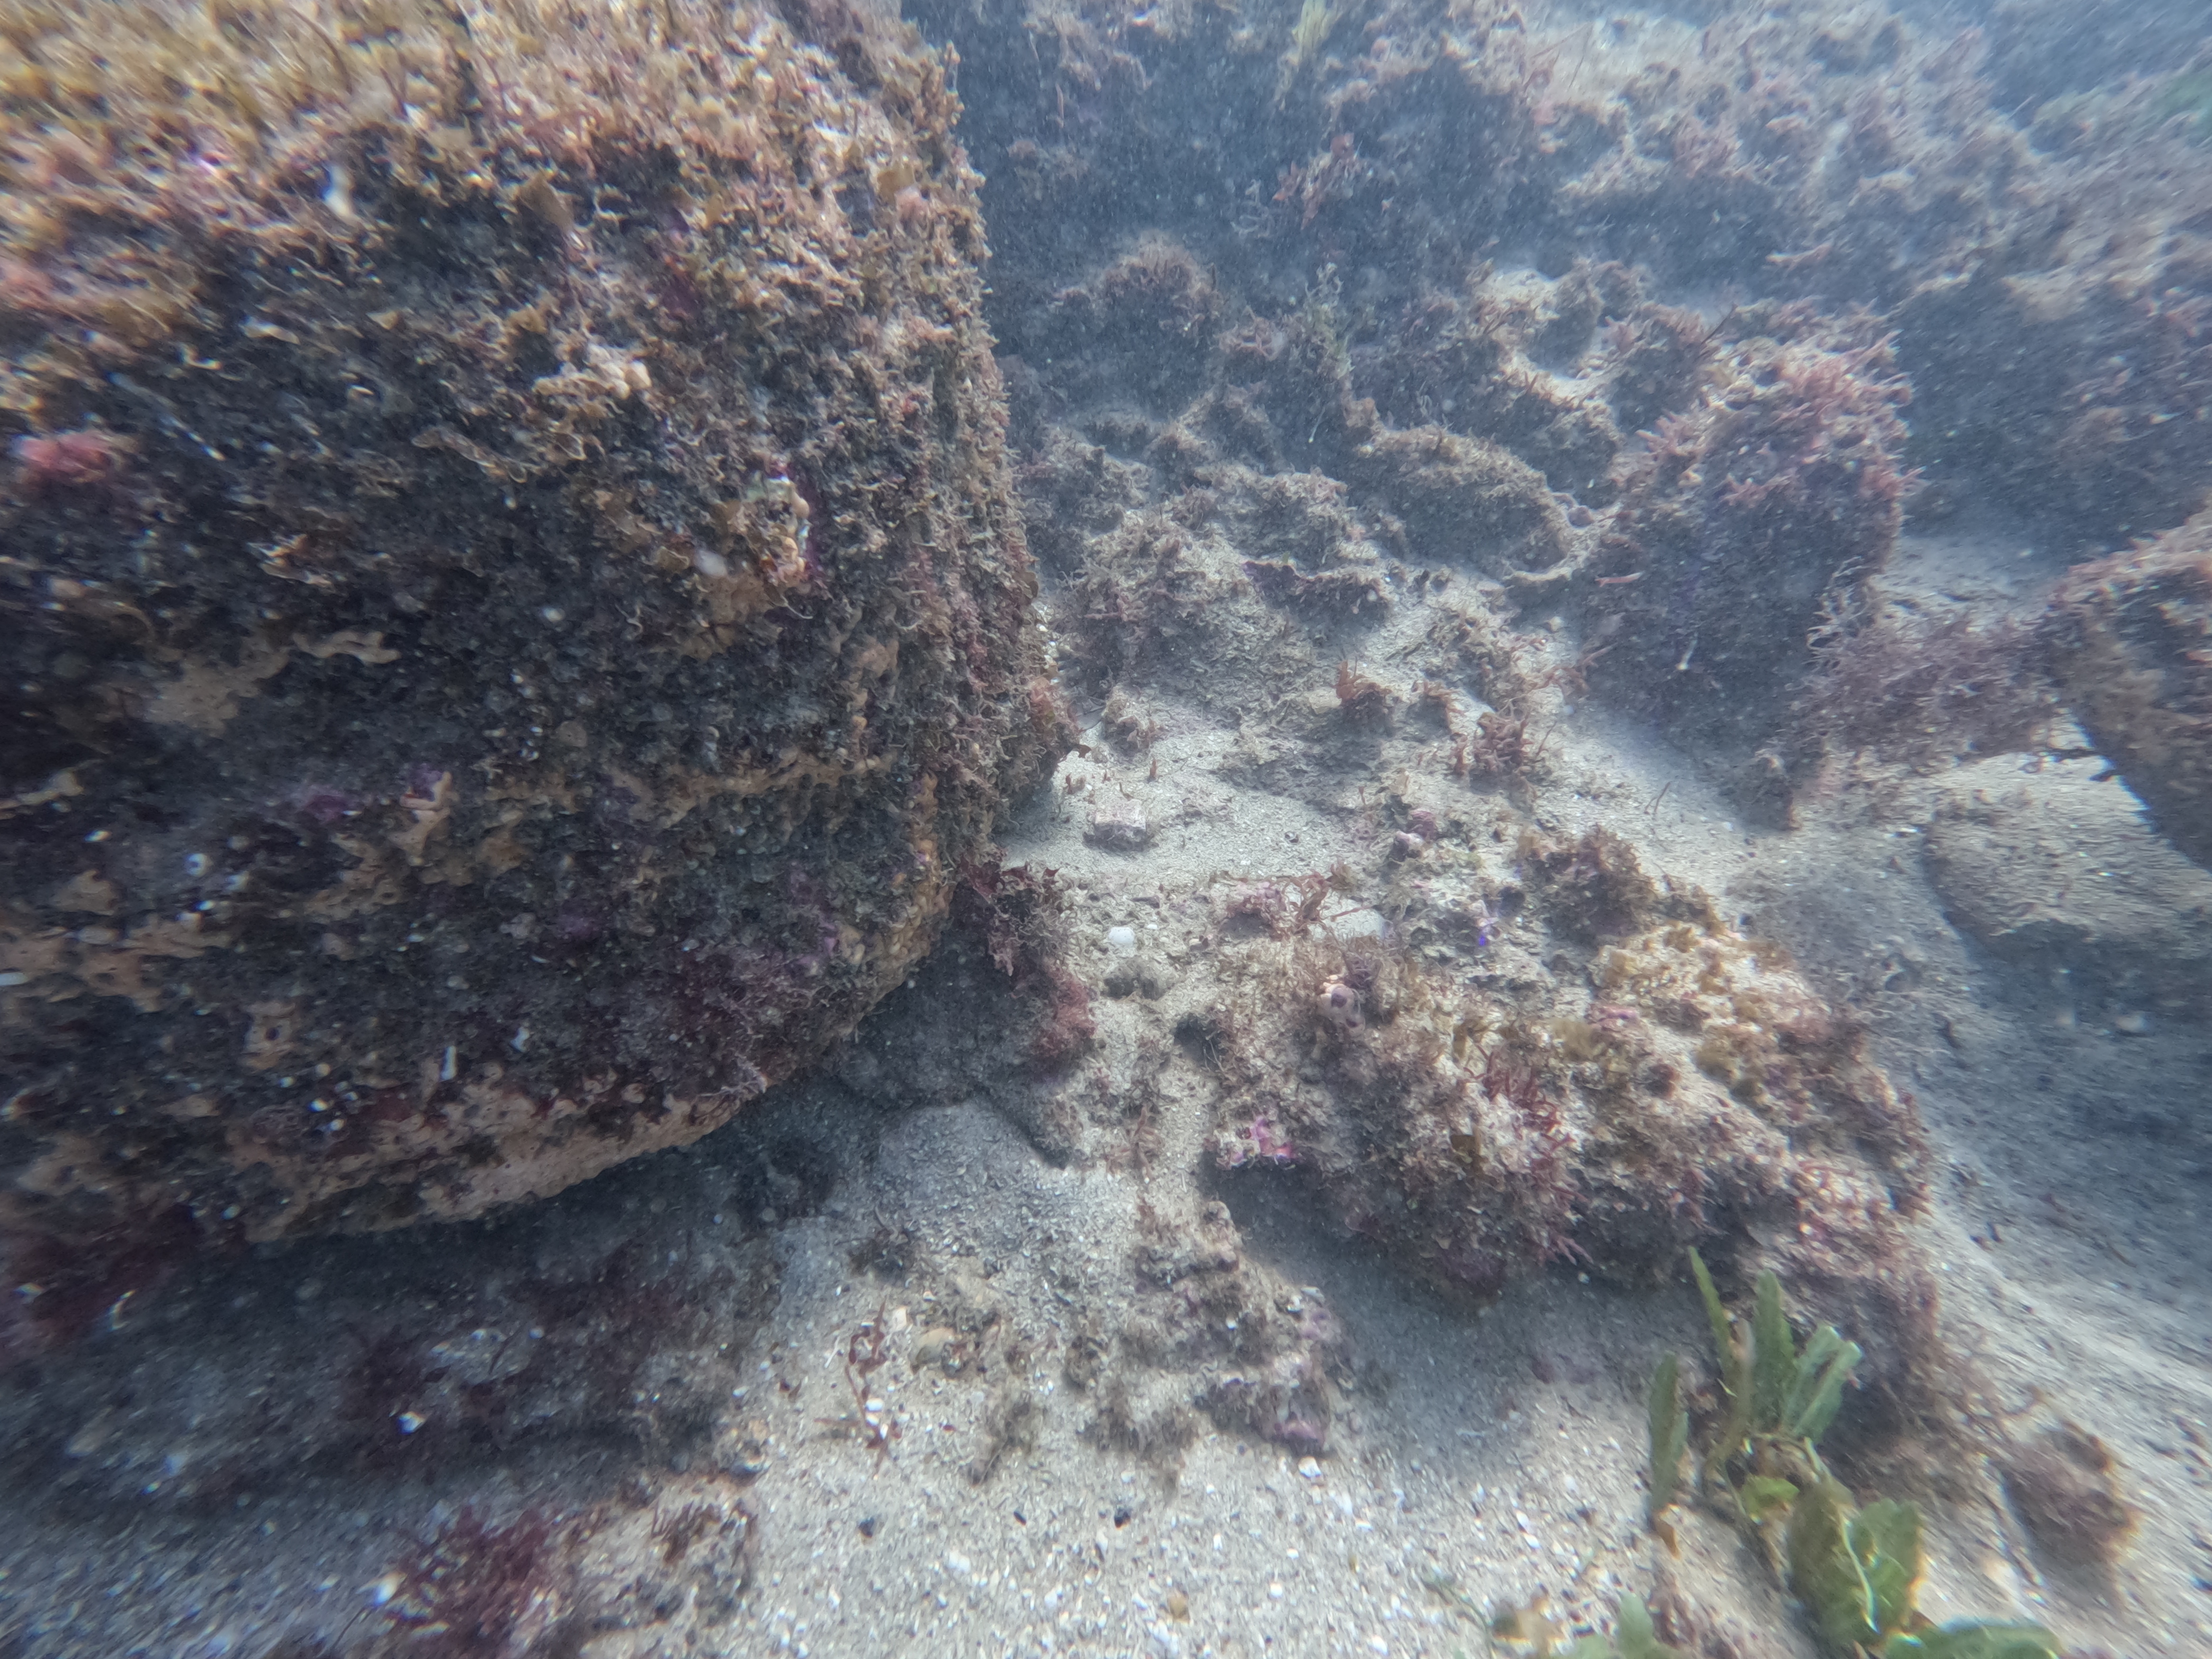

Supplement: Supplementary file 1677 [file G0028003.pdf › Ocean1/G0028003.pdf]

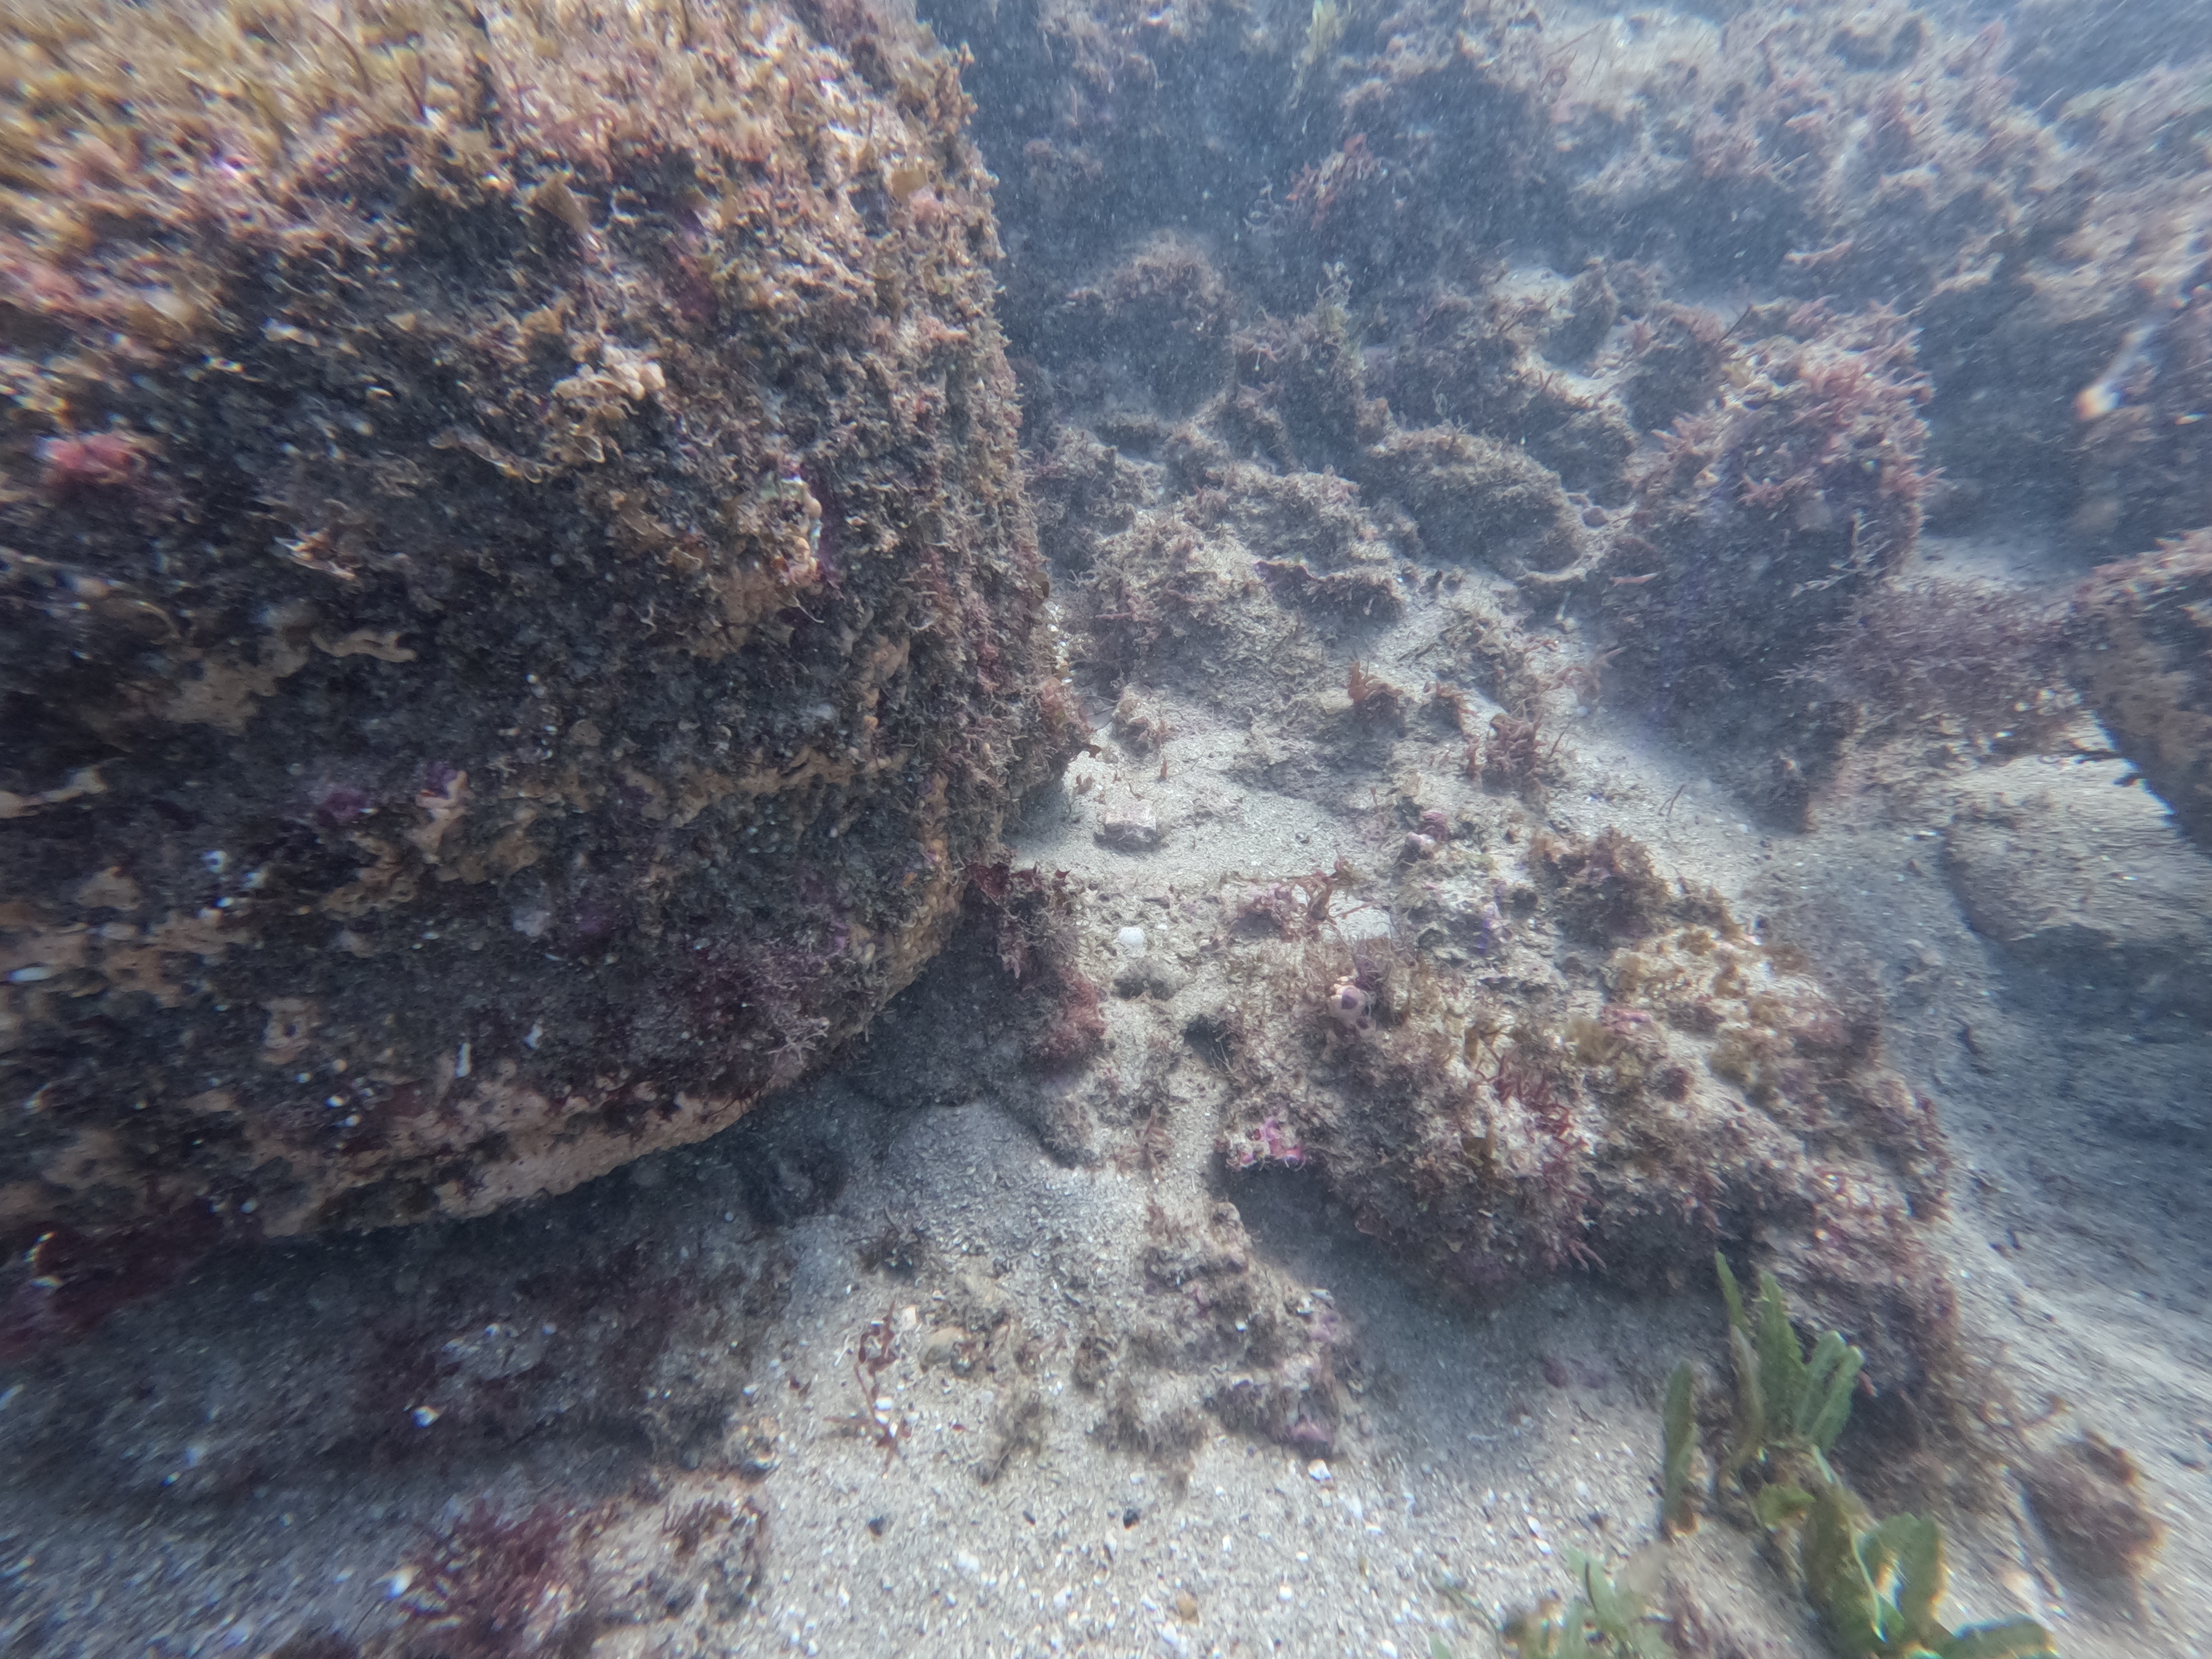

Supplement: Supplementary file 1678 [file G0028004.pdf › Ocean1/G0028004.pdf]

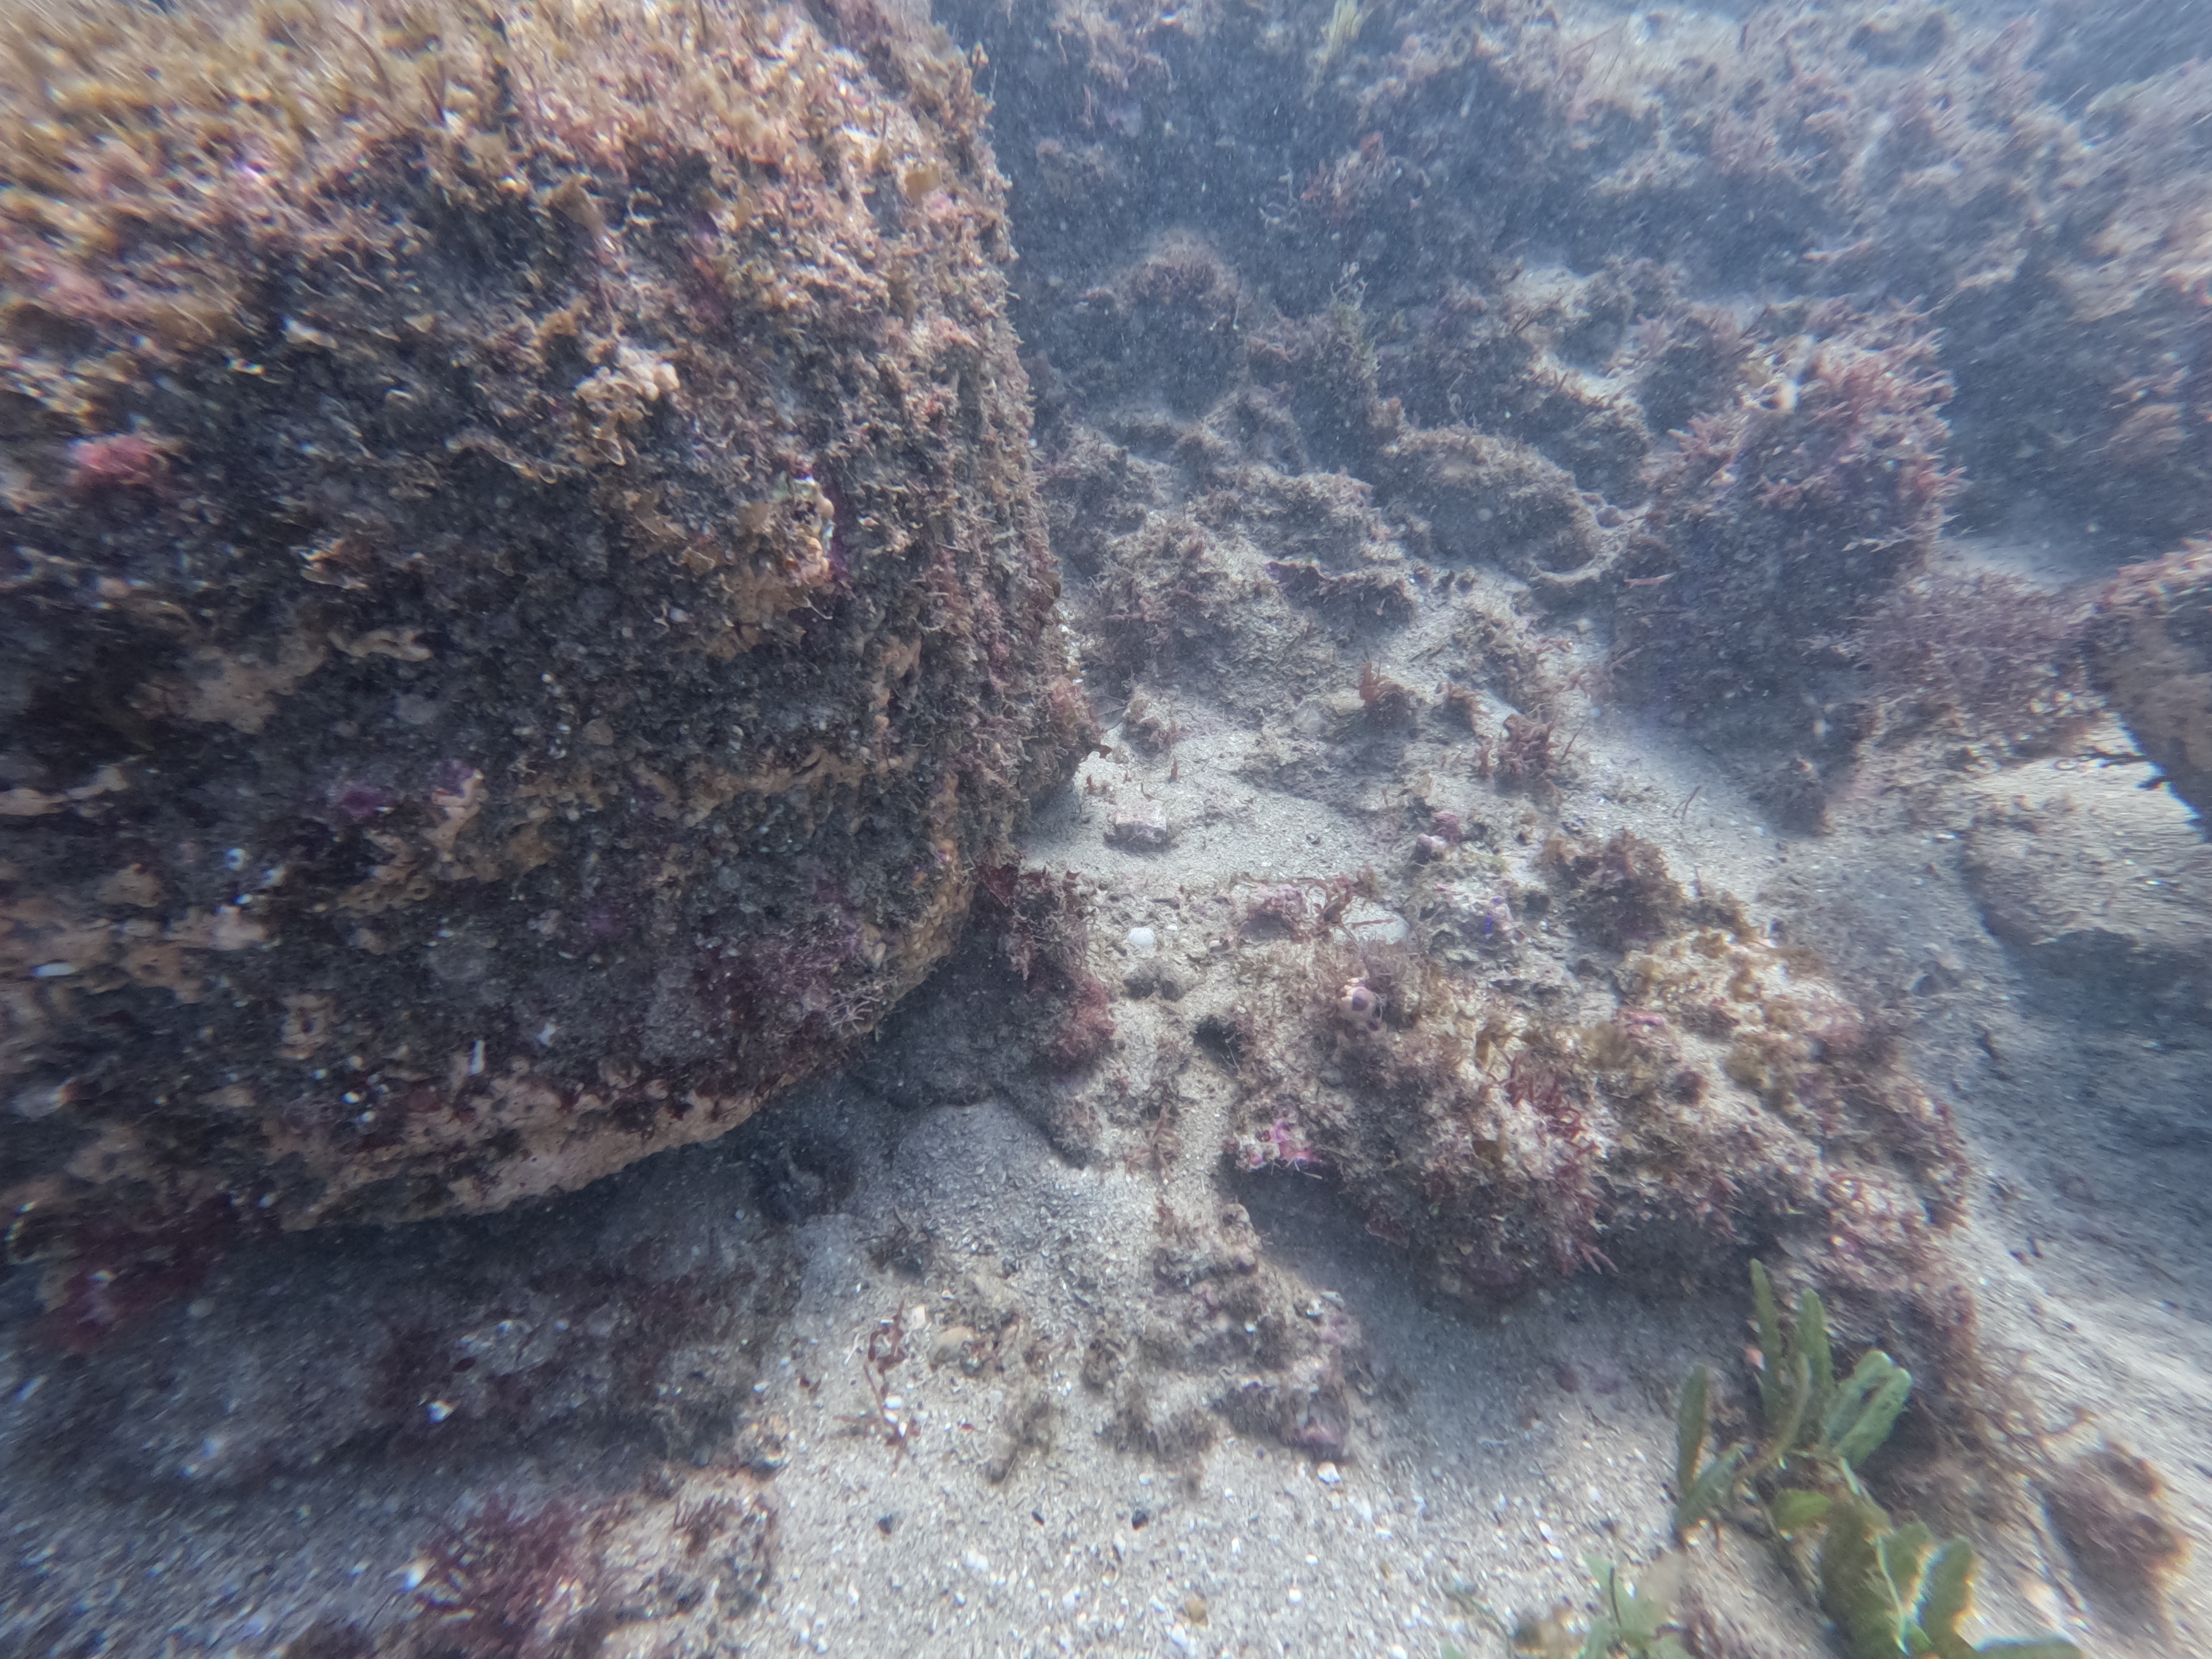

Supplement: Supplementary file 1679 [file G0028005.pdf › Ocean1/G0028005.pdf]

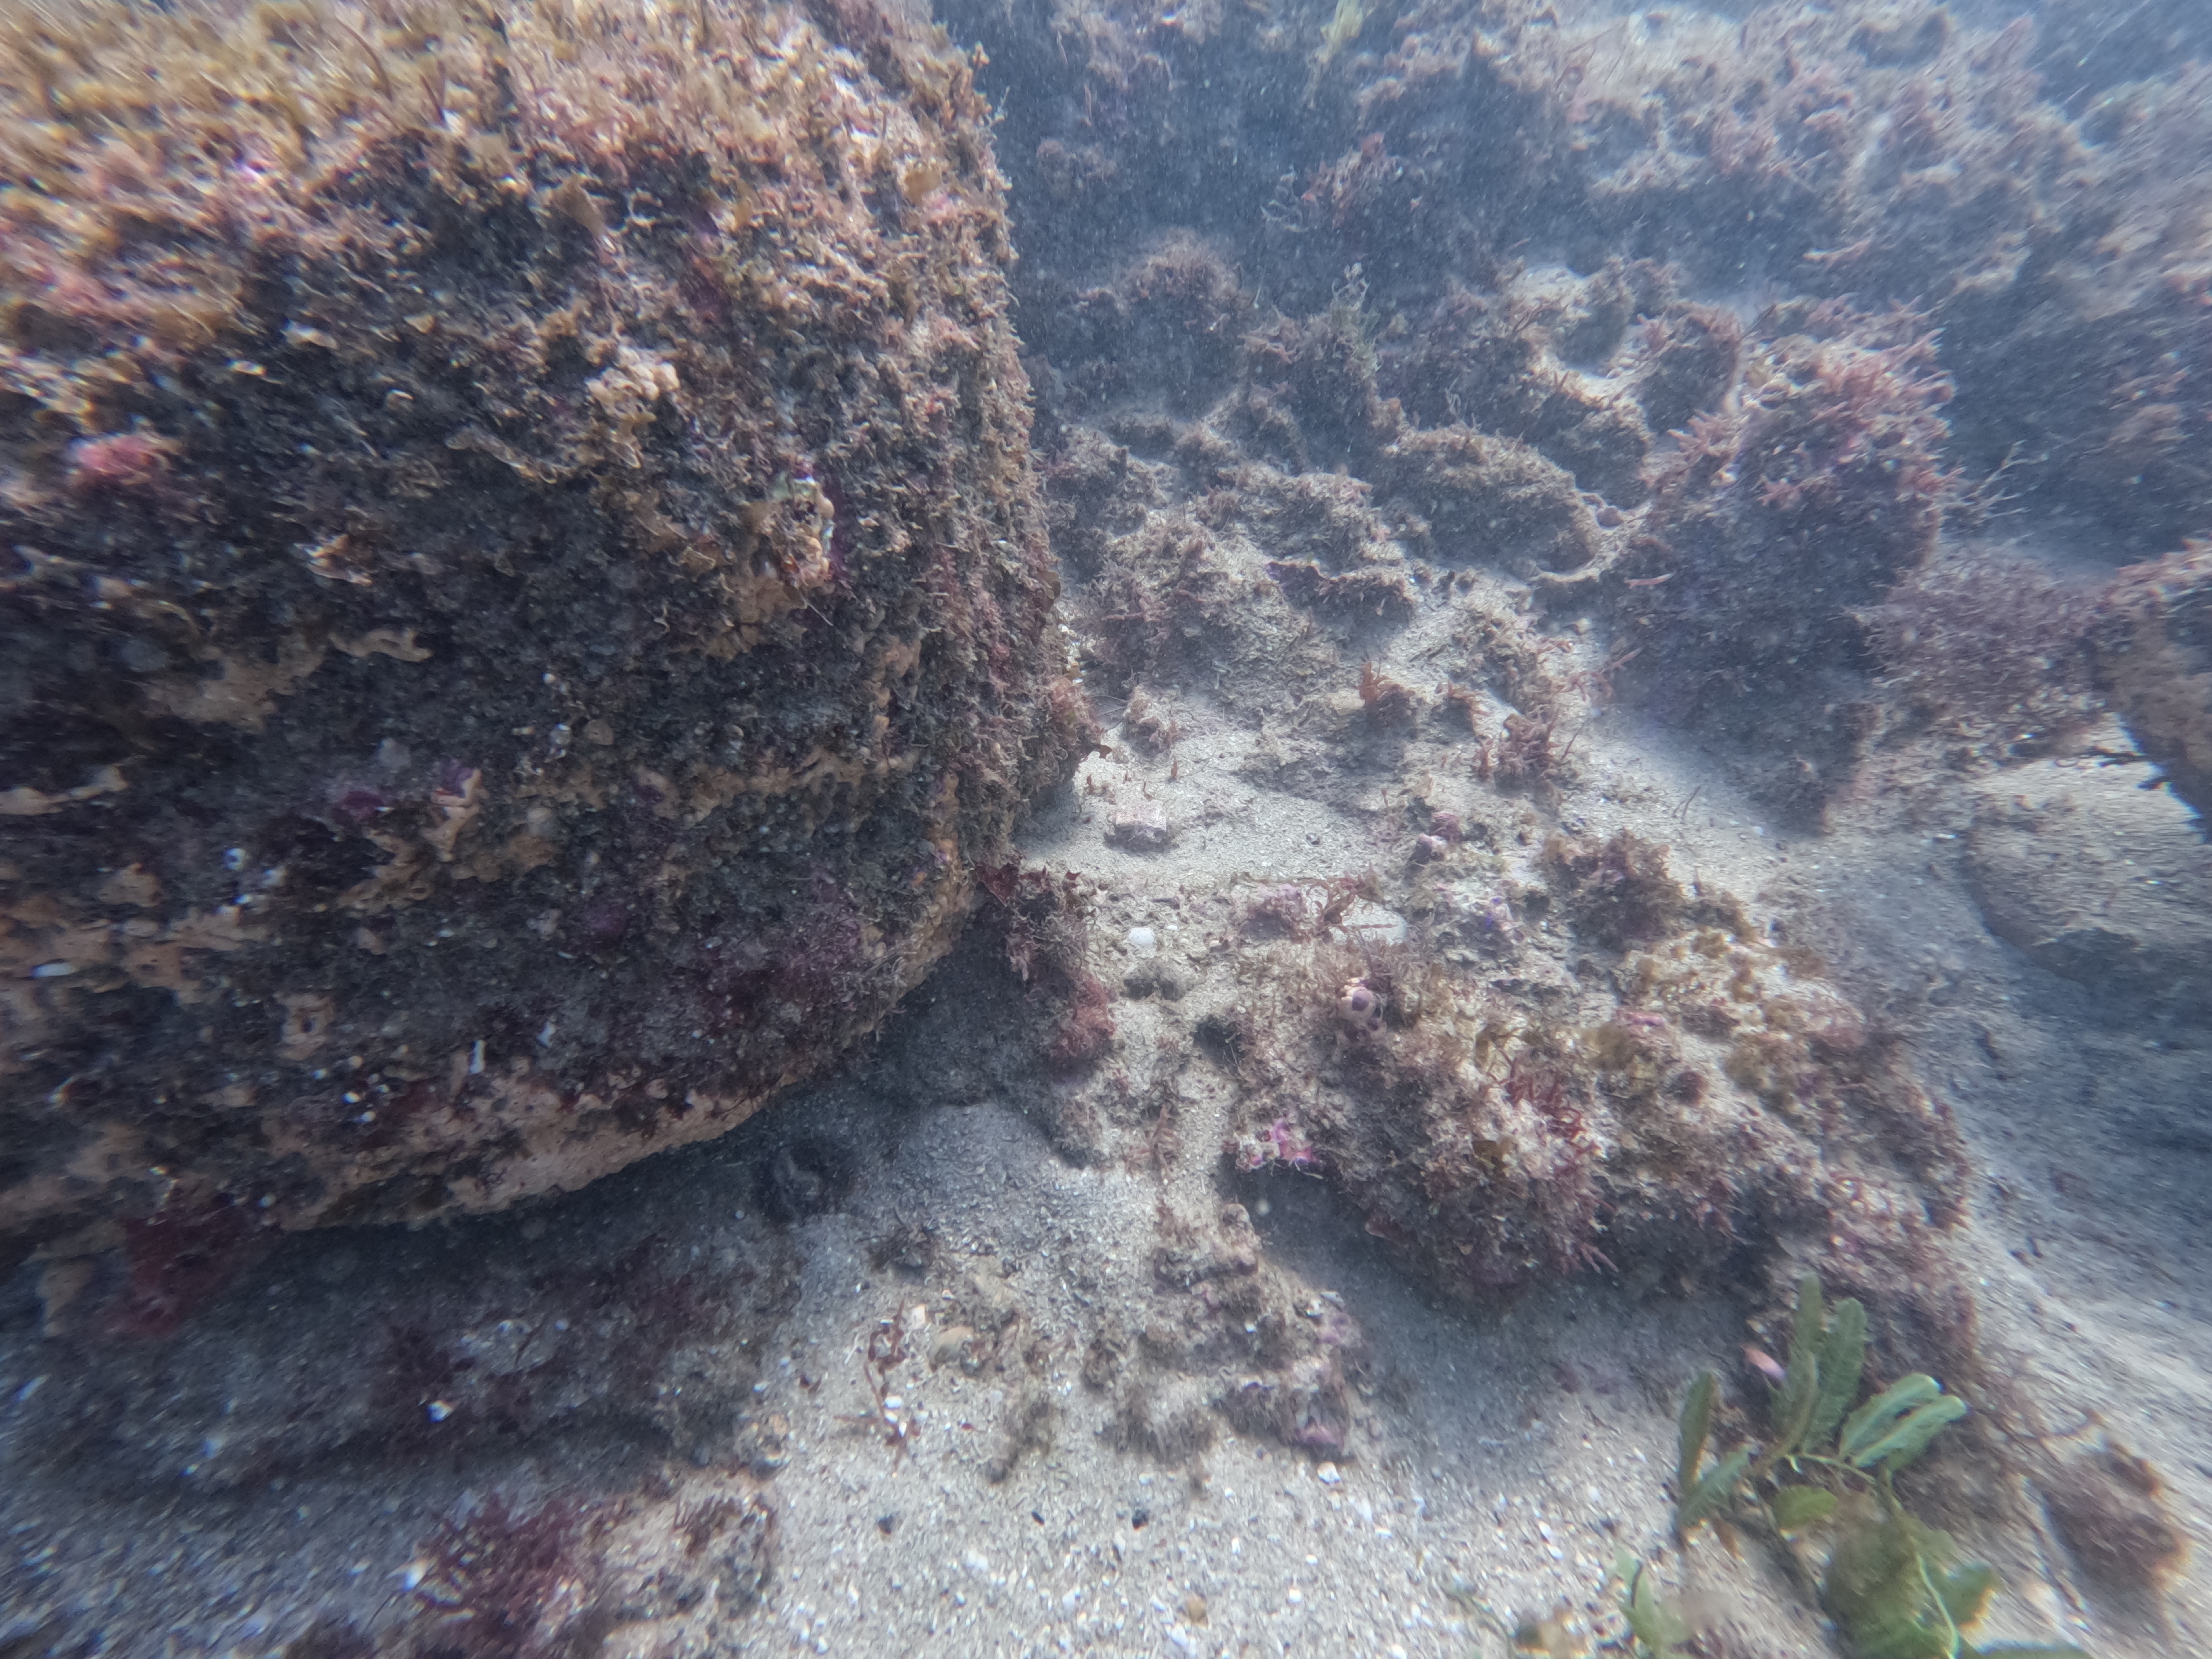

Supplement: Supplementary file 1680 [file G0028006.pdf › Ocean1/G0028006.pdf]

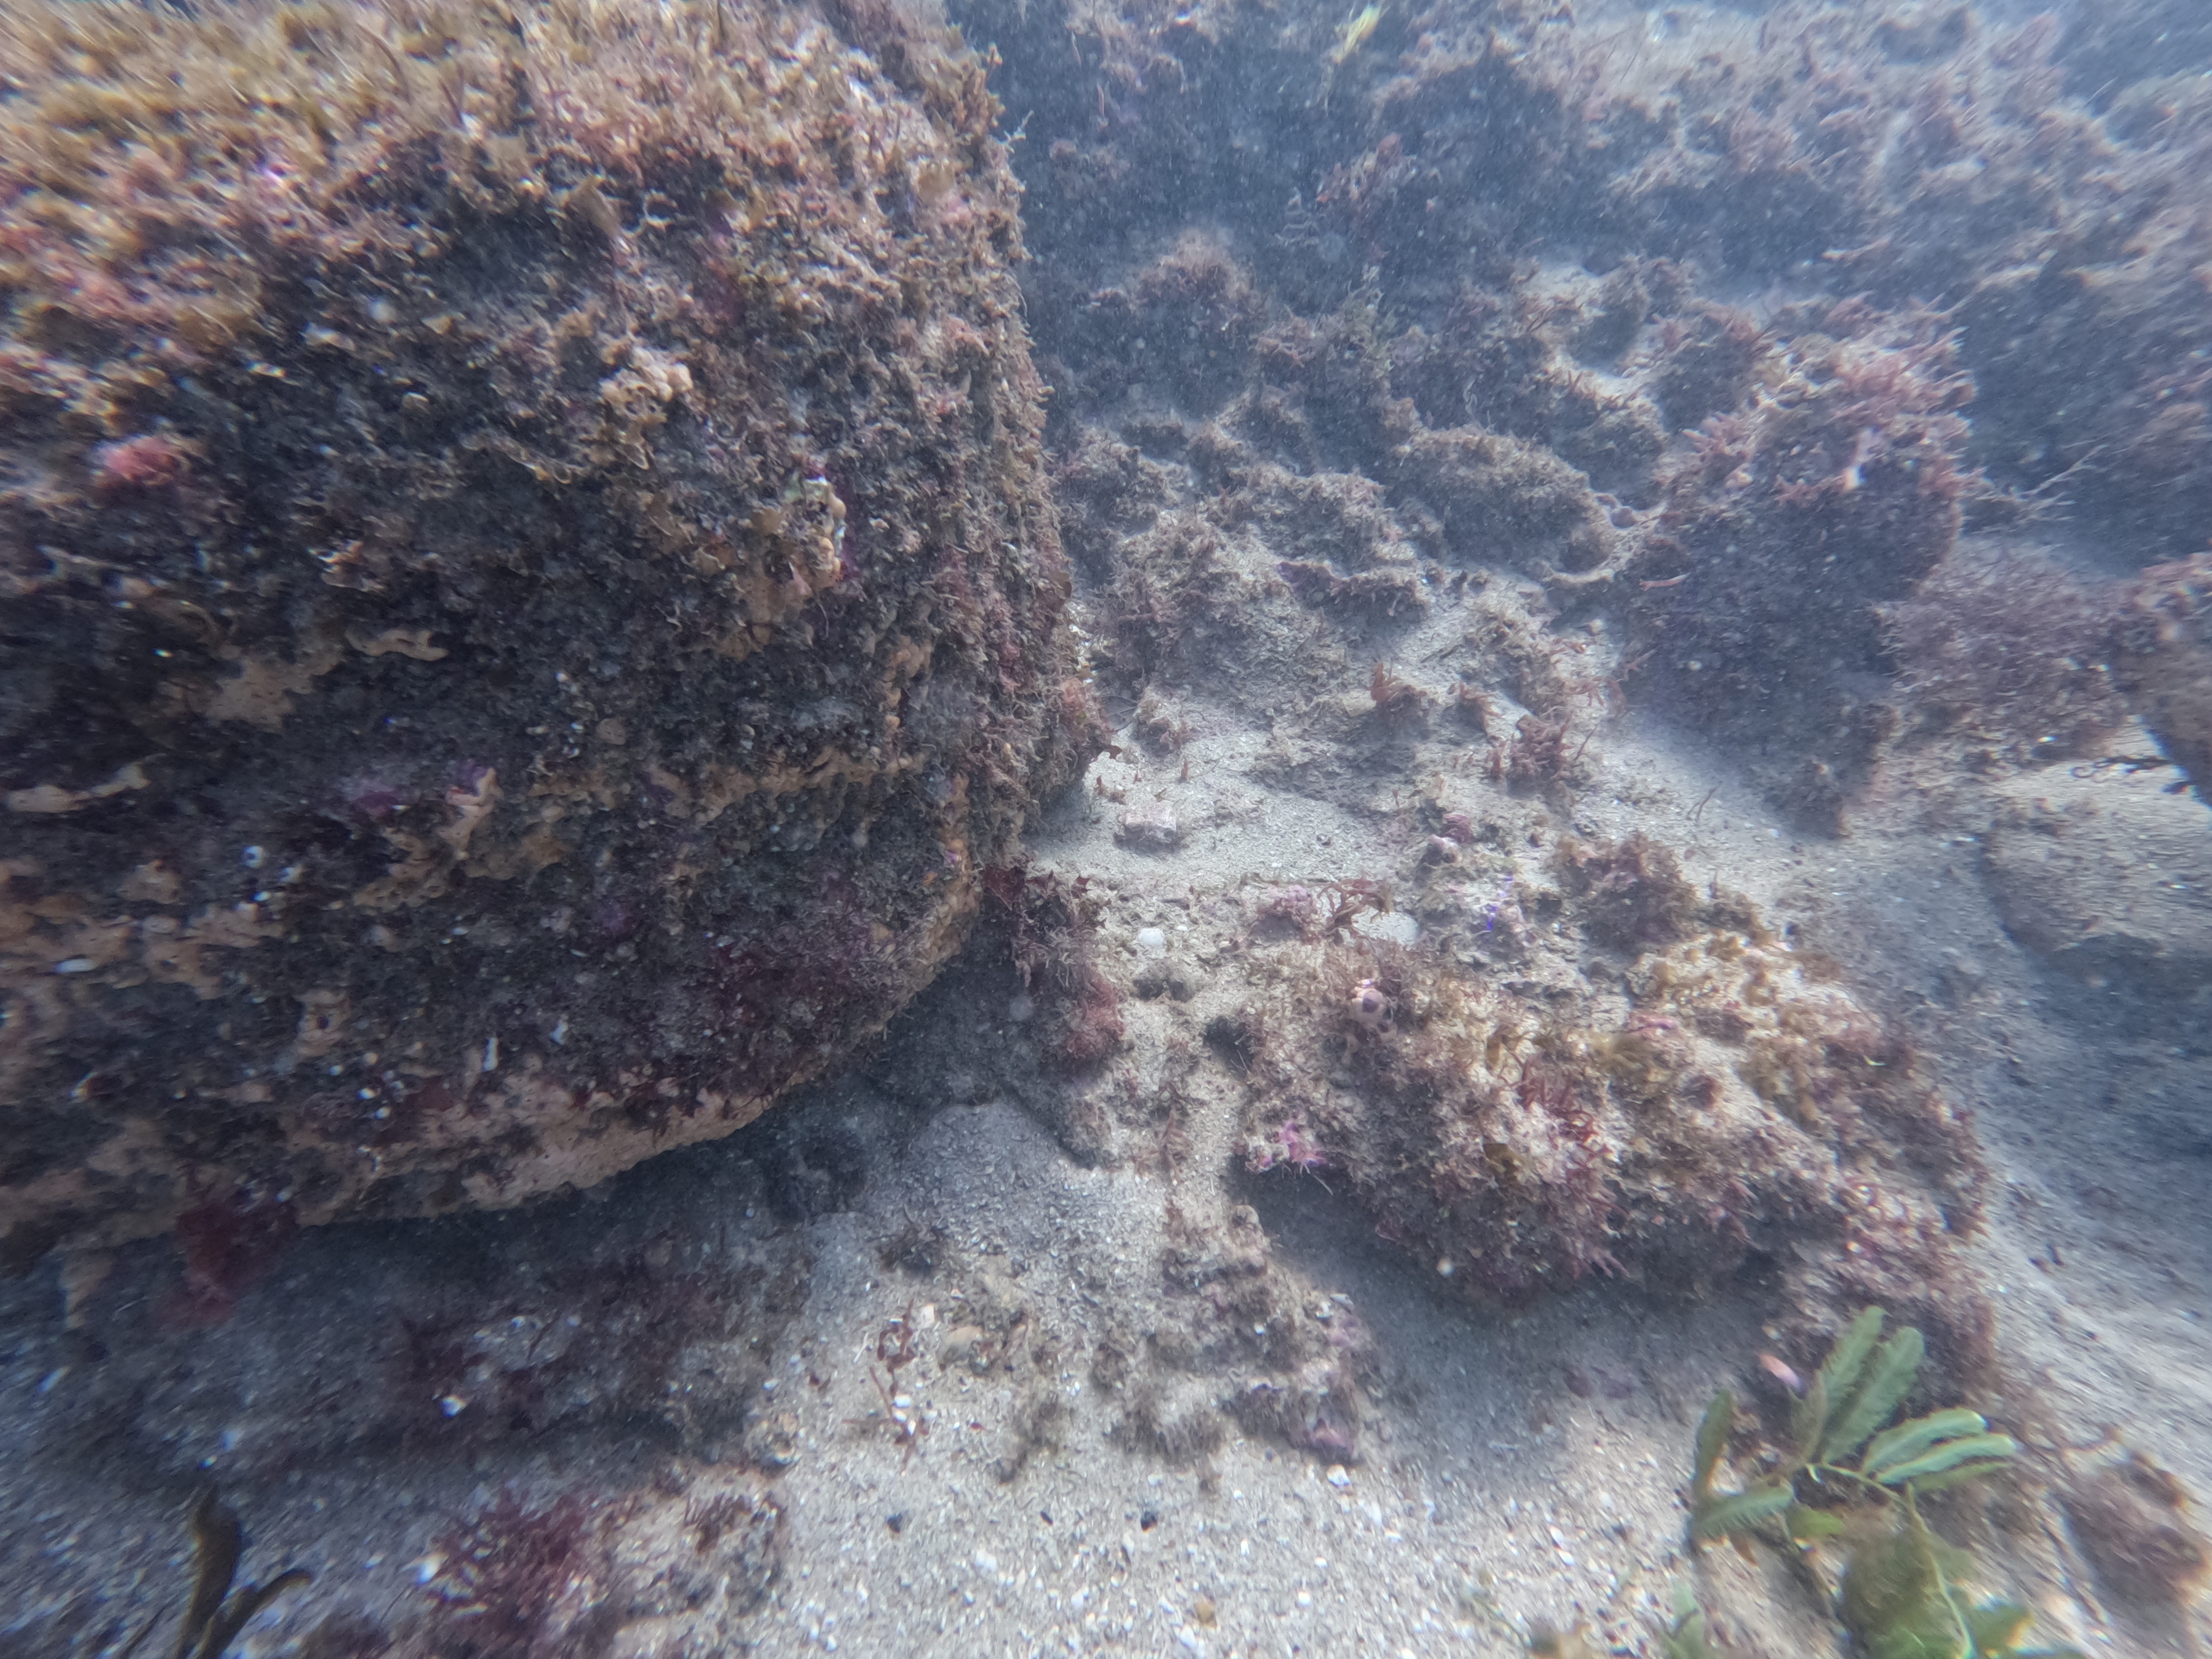

Supplement: Supplementary file 1681 [file G0028007.pdf › Ocean1/G0028007.pdf]

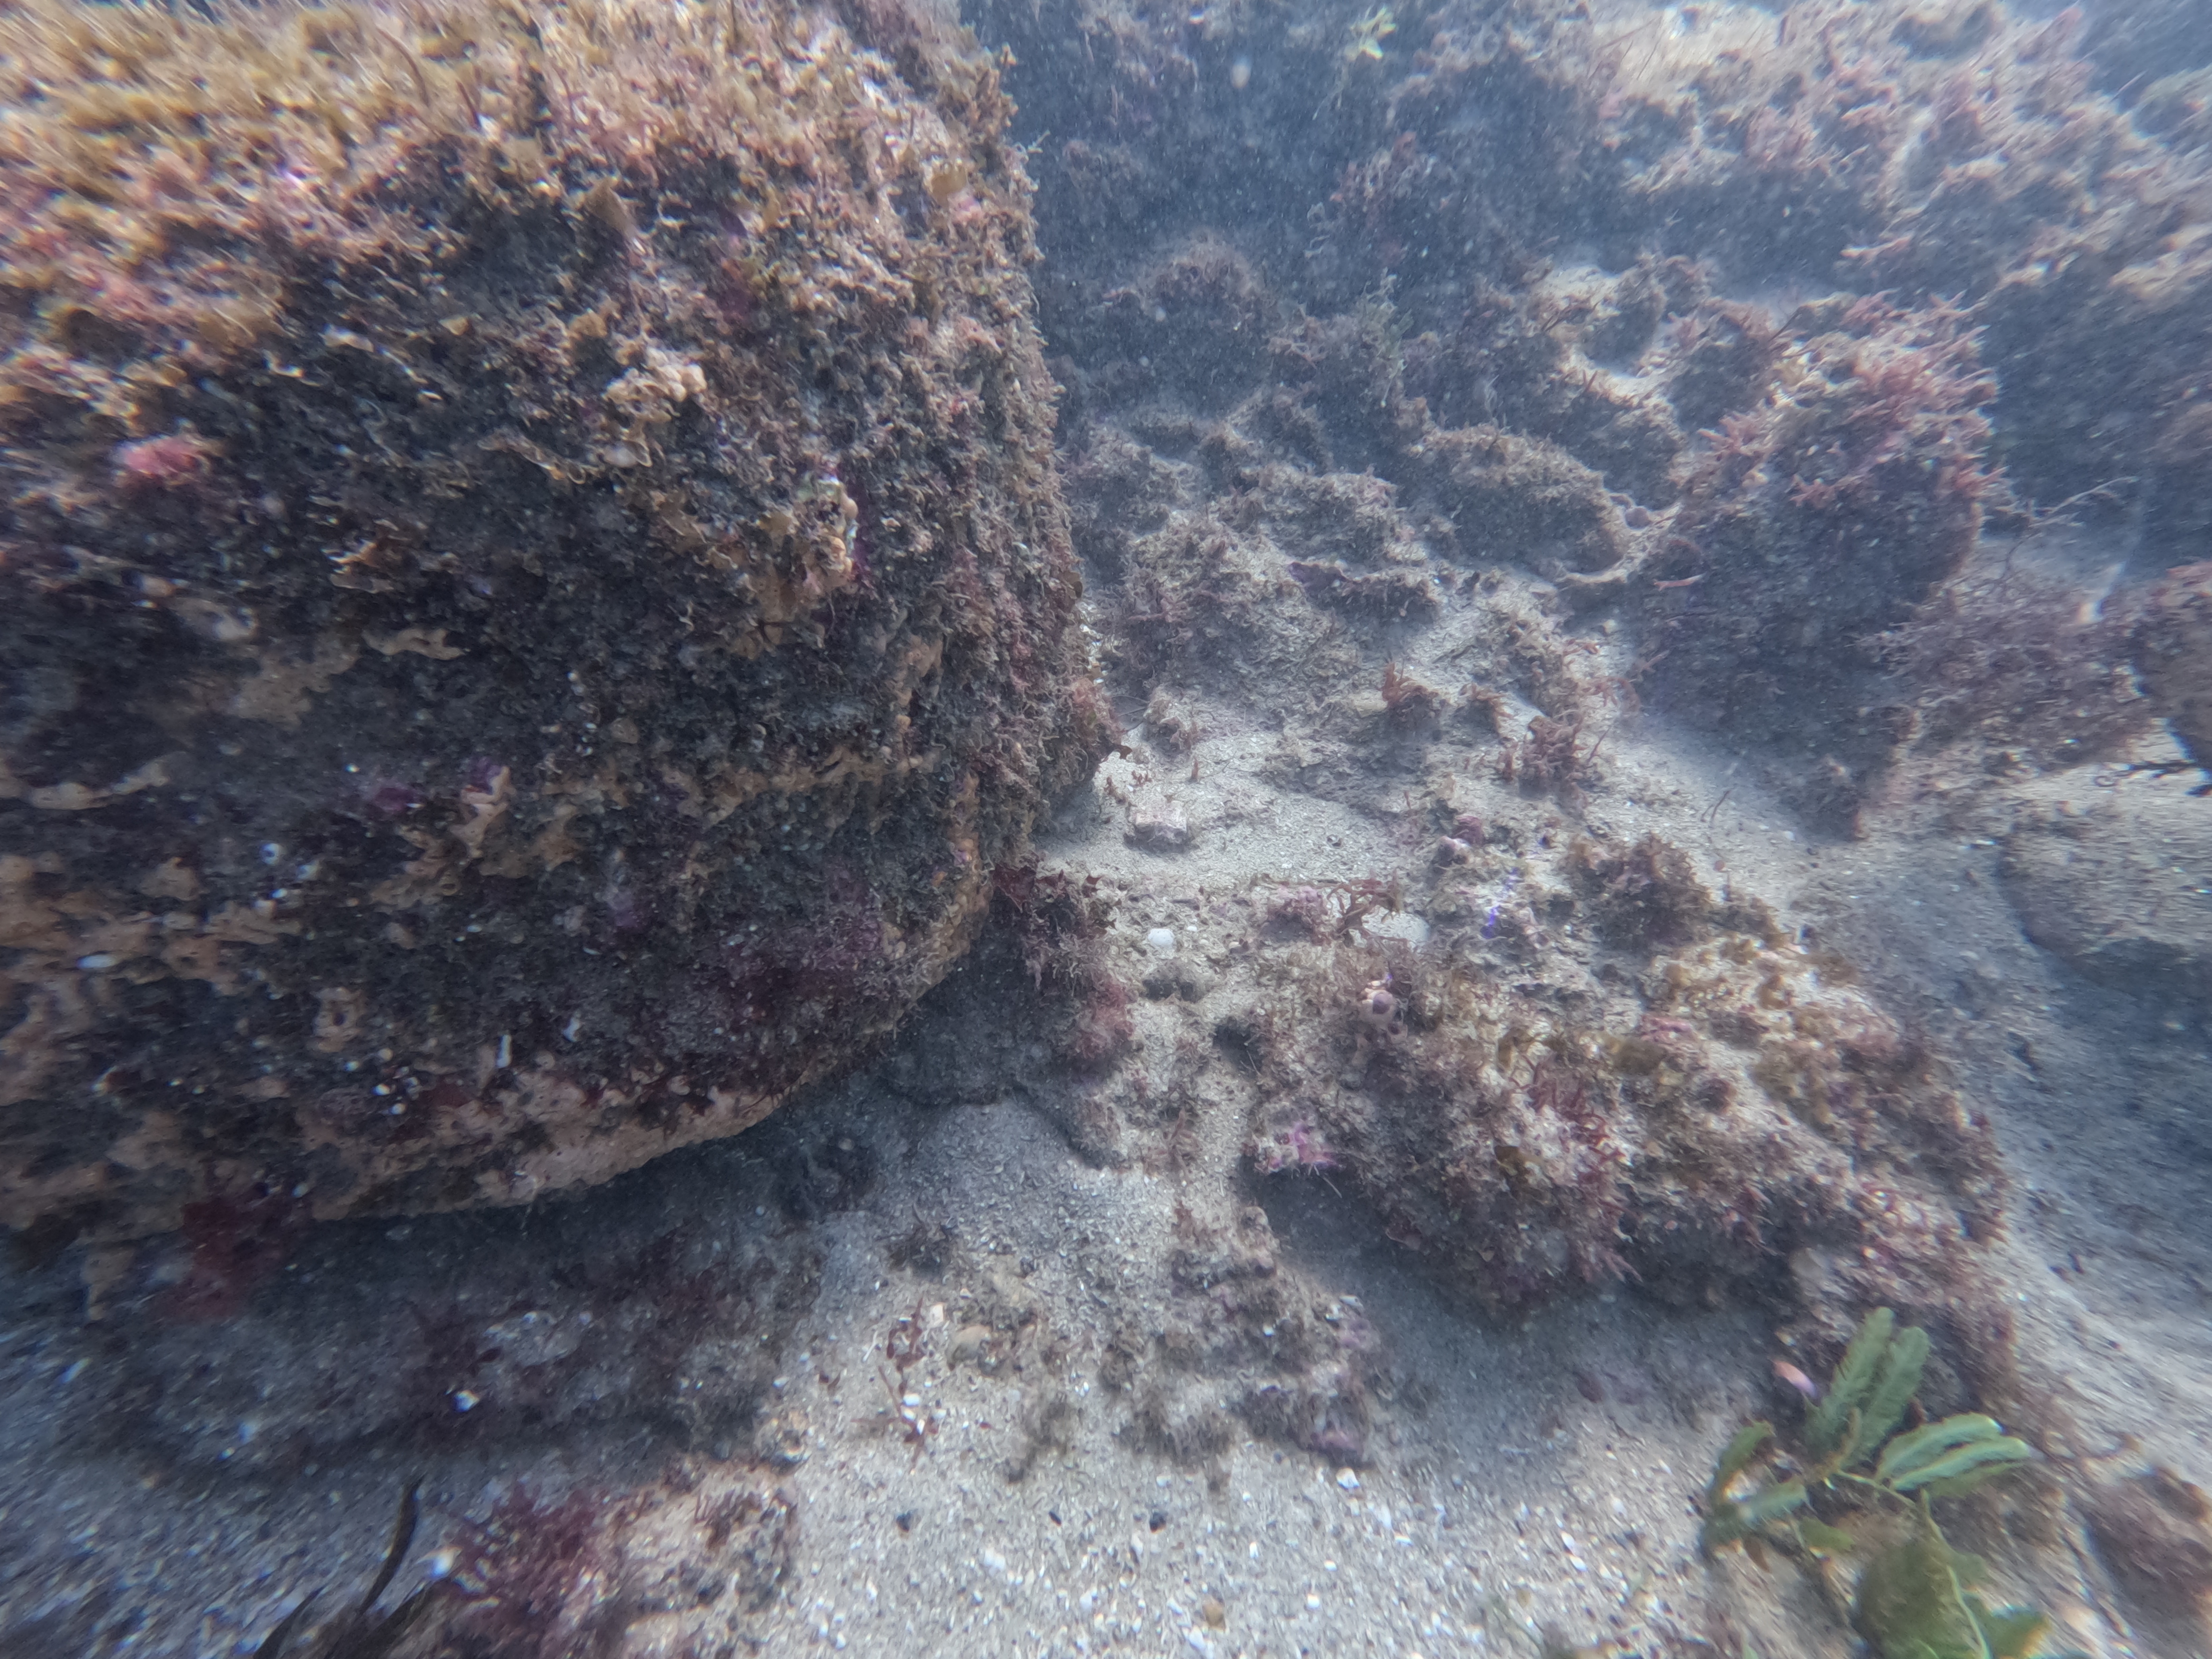

Supplement: Supplementary file 1682 [file G0028008.pdf › Ocean1/G0028008.pdf]

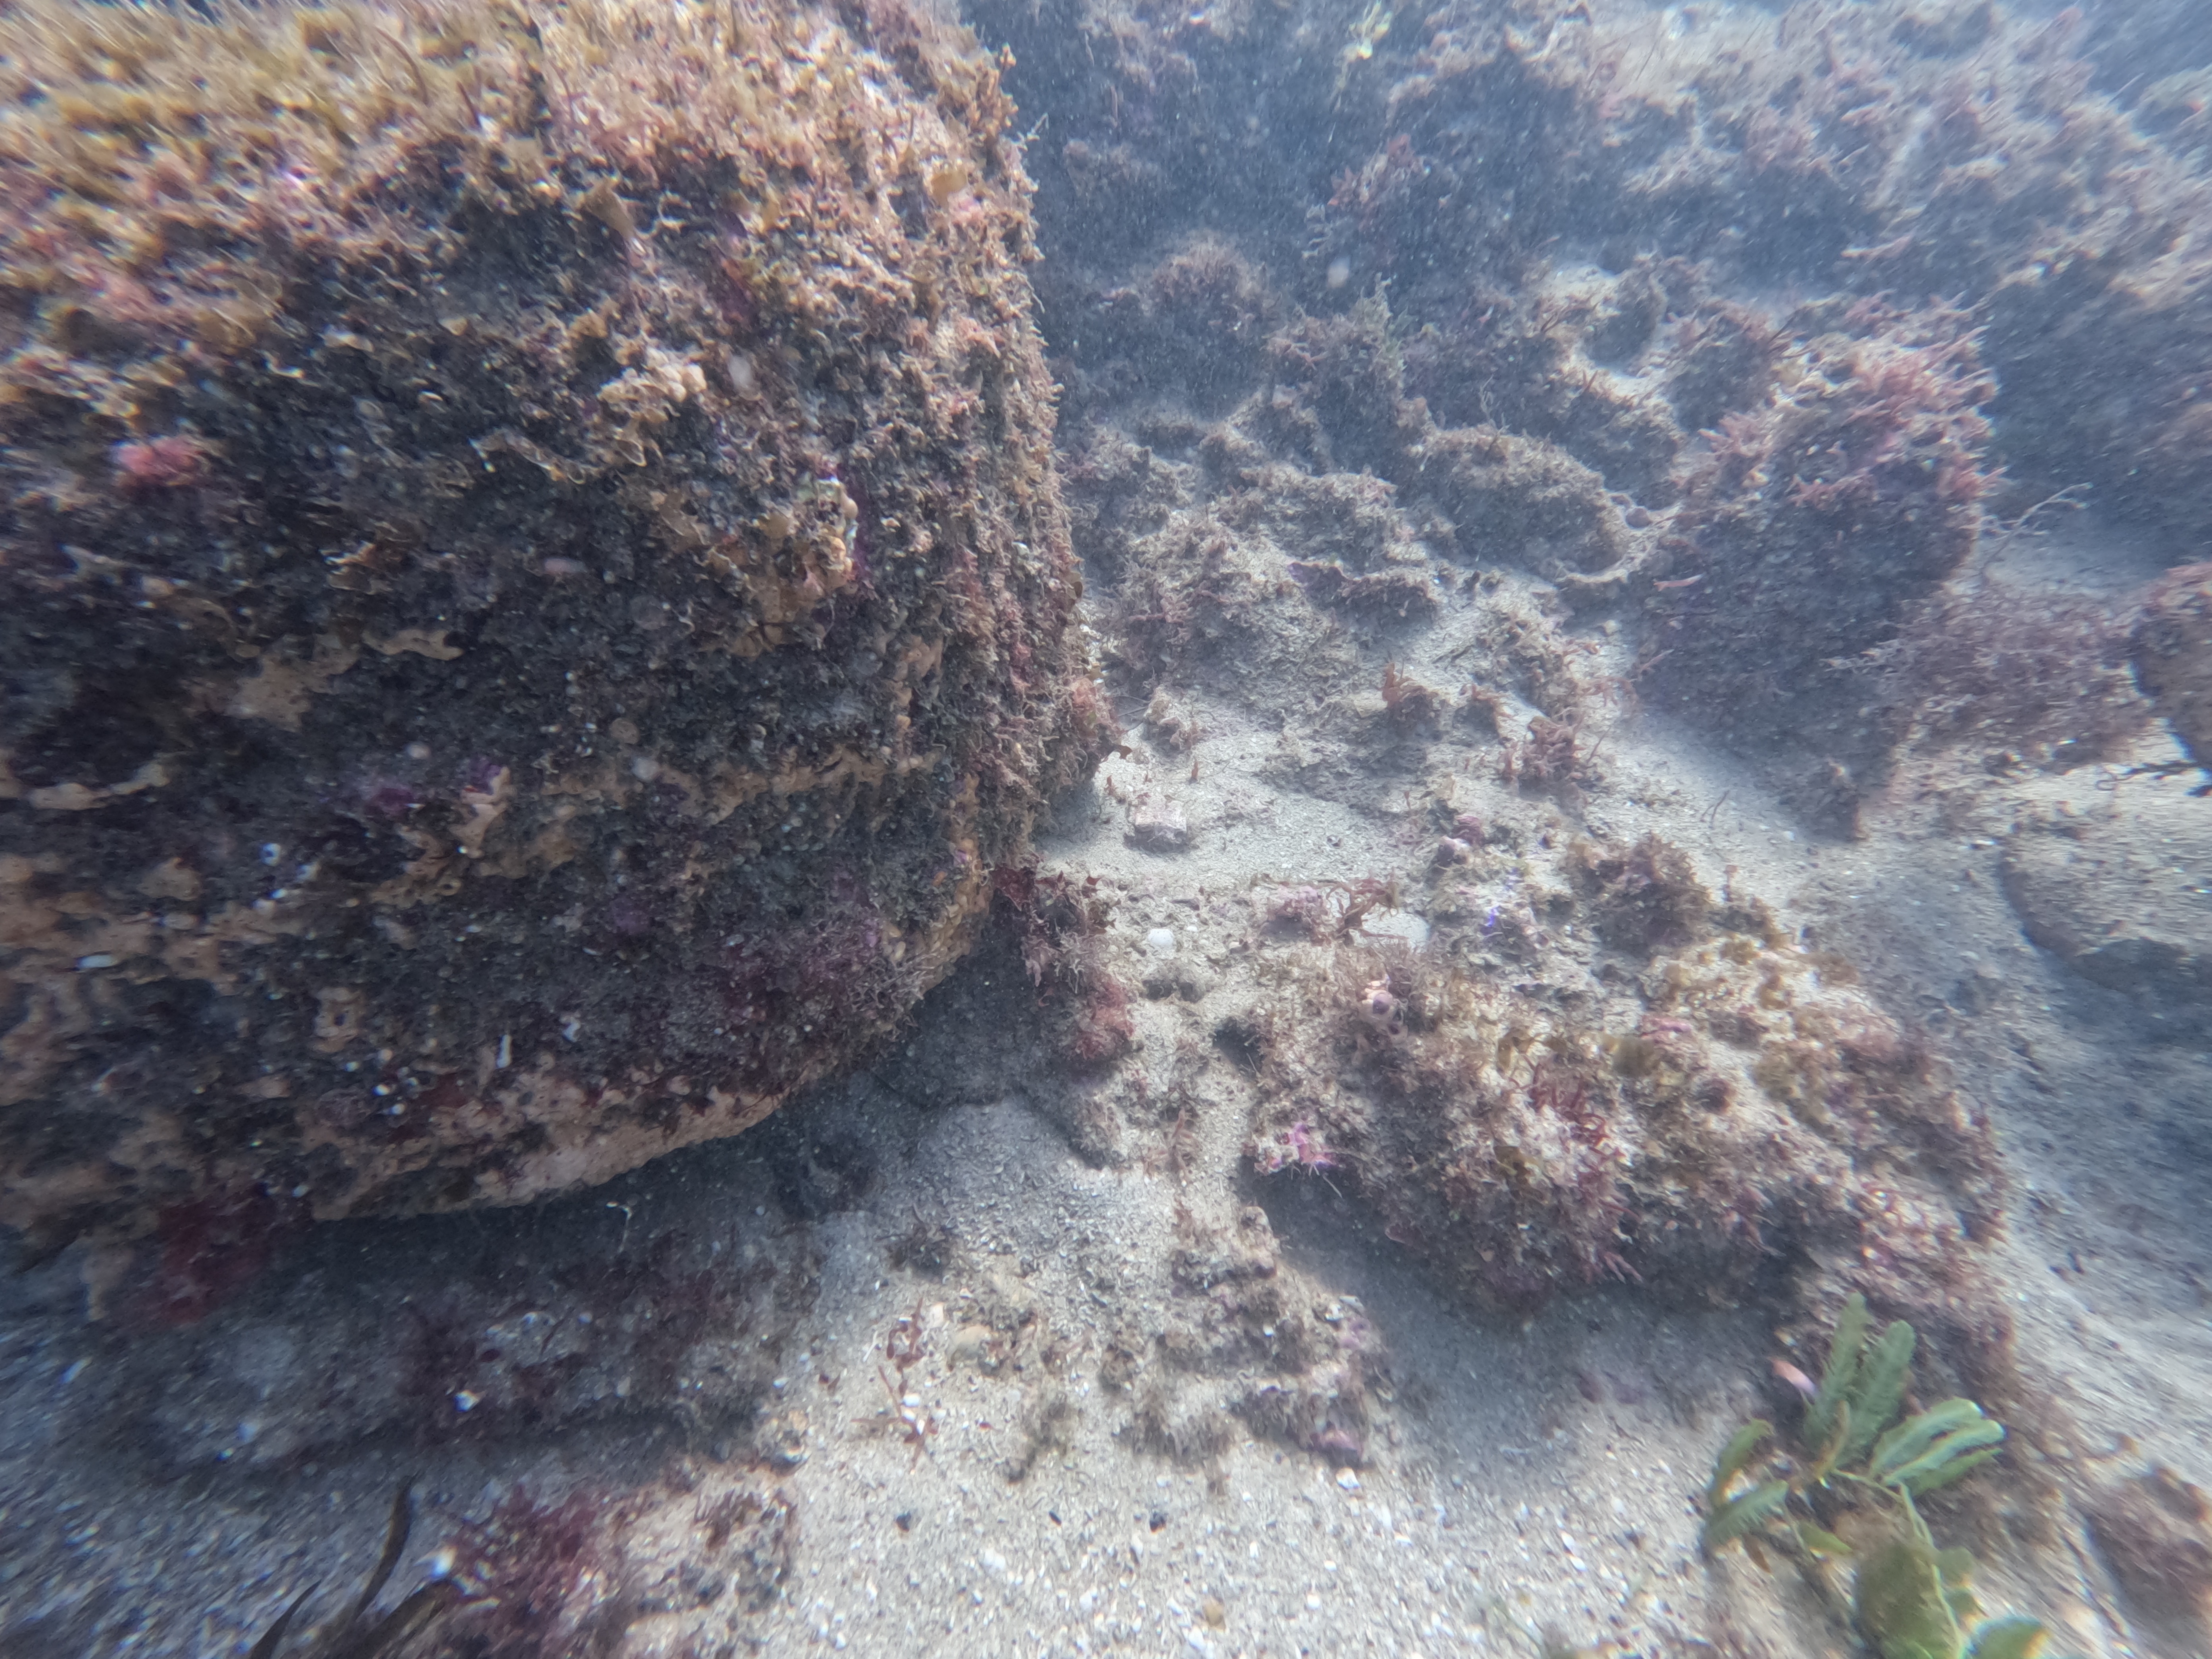

Supplement: Supplementary file 1683 [file G0028009.pdf › Ocean1/G0028009.pdf]

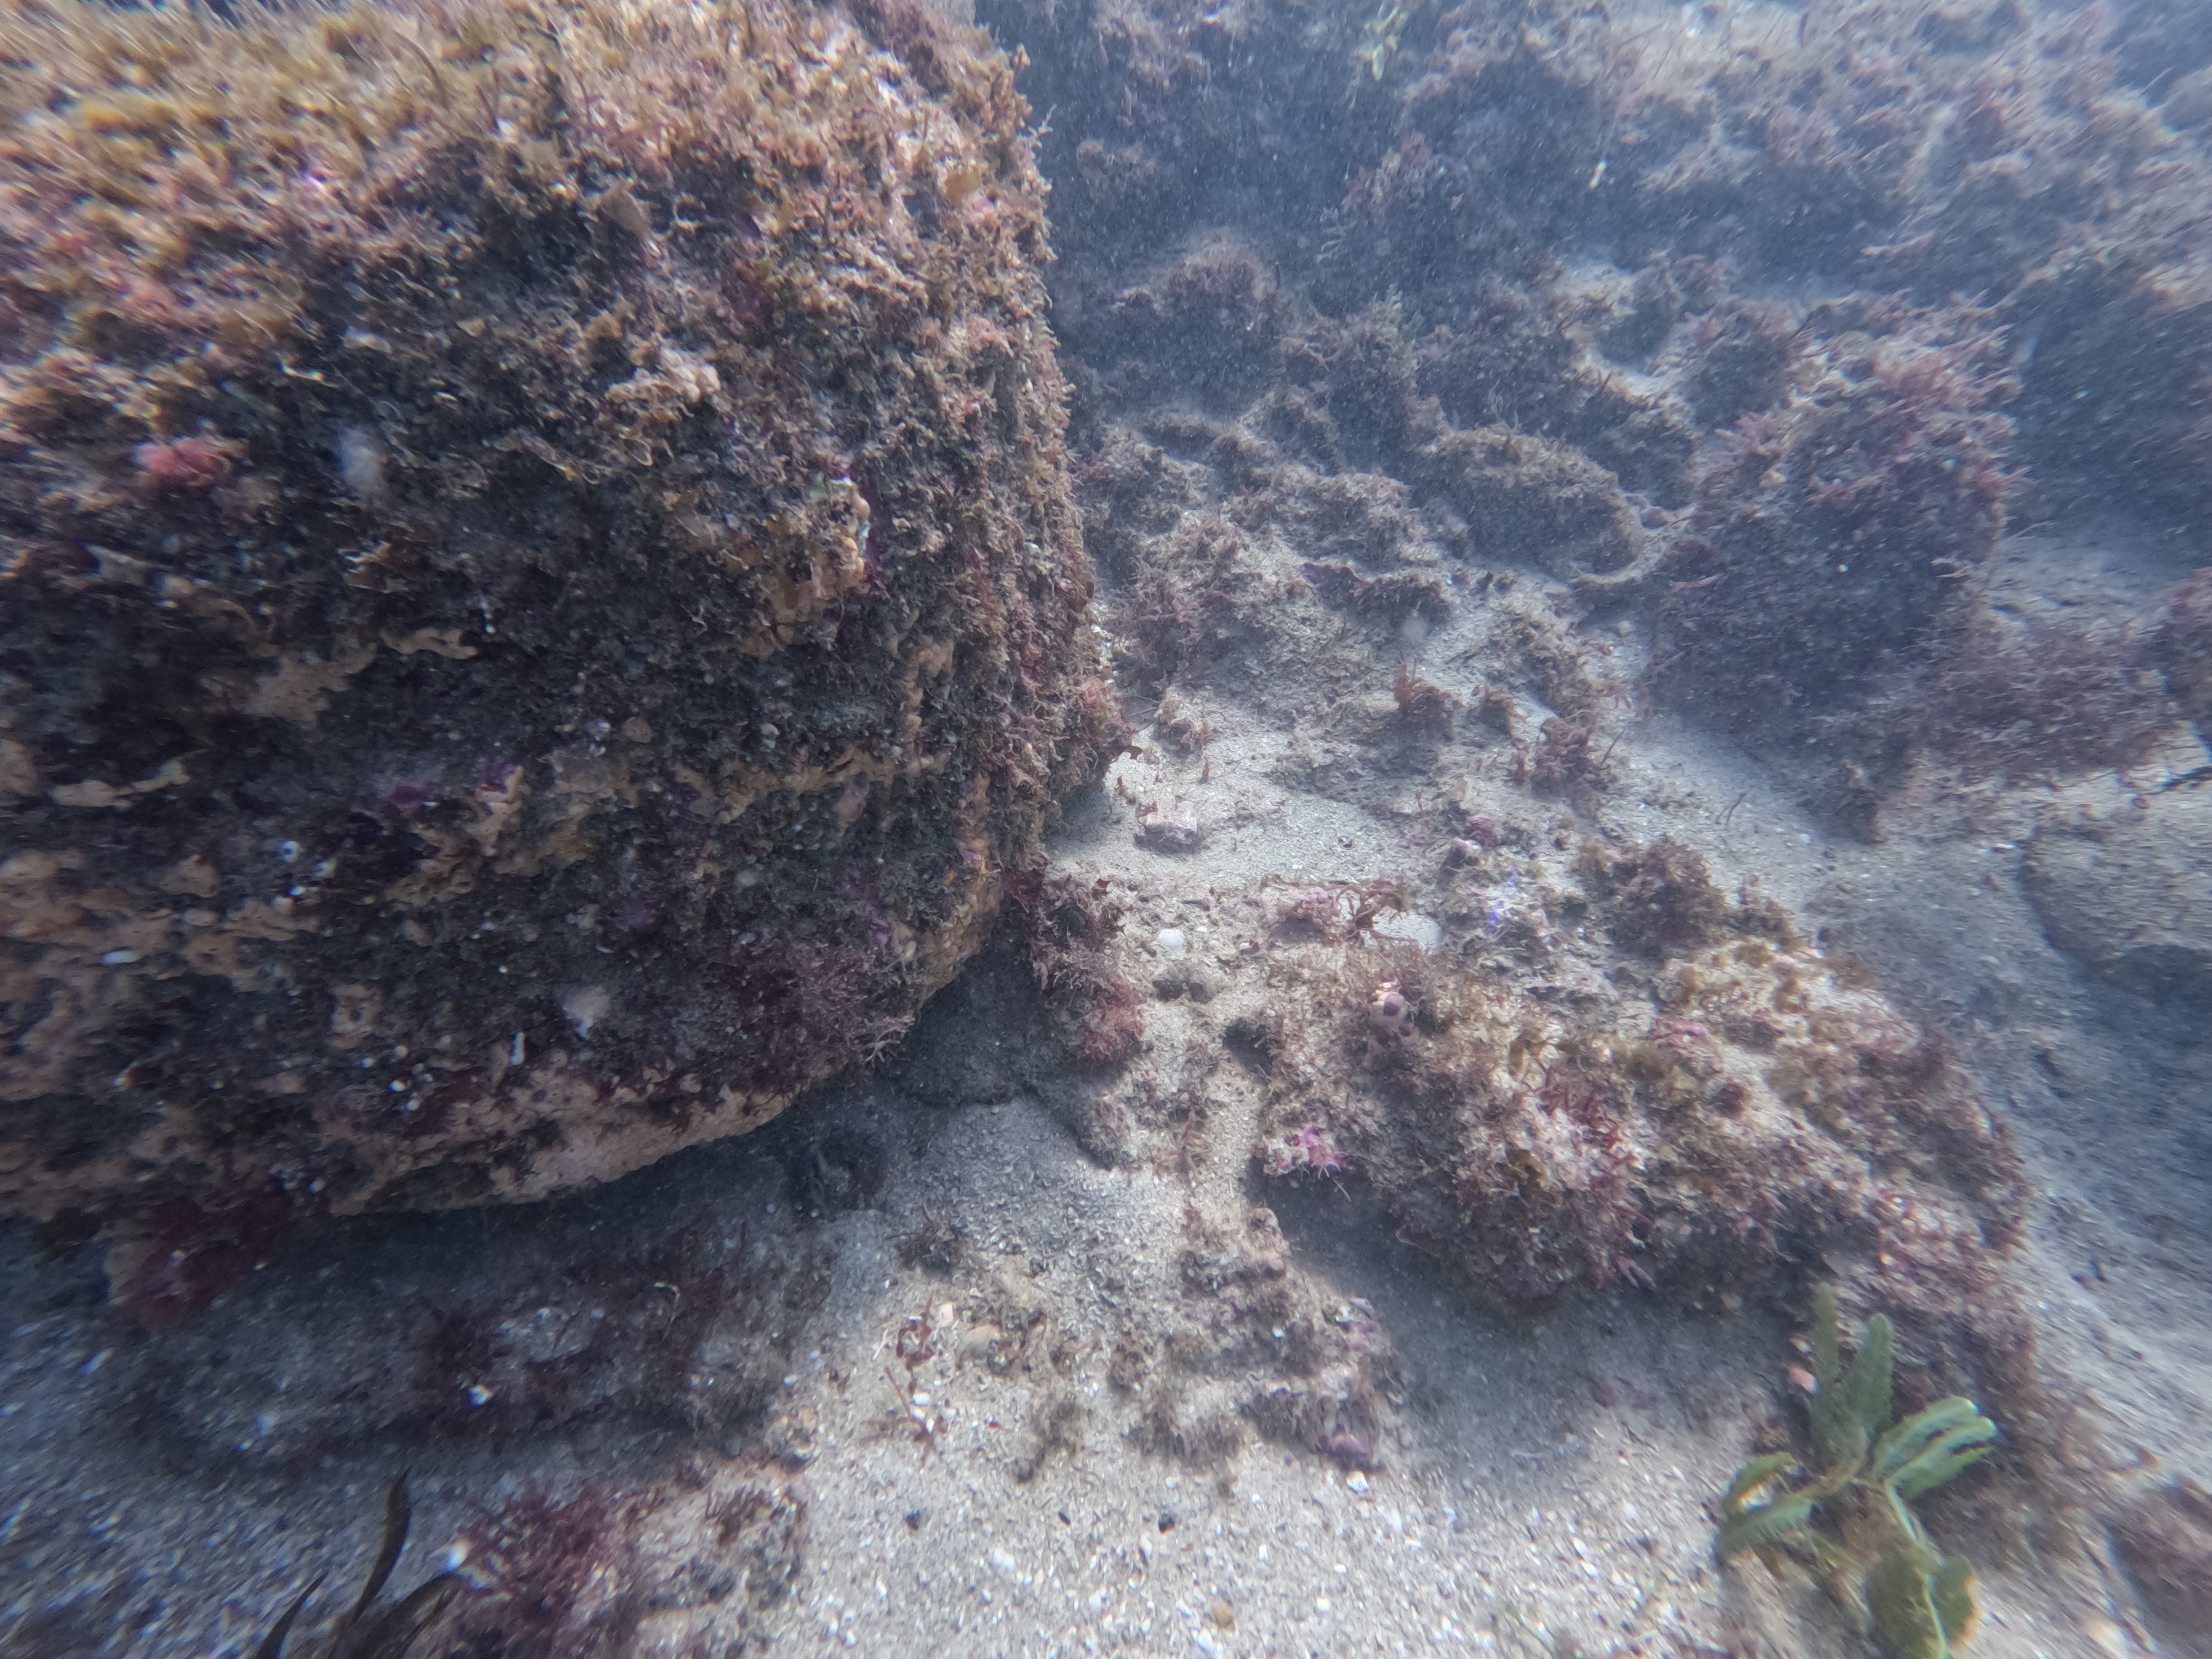

Supplement: Supplementary file 1684 [file G0028010.pdf › Ocean1/G0028010.pdf]

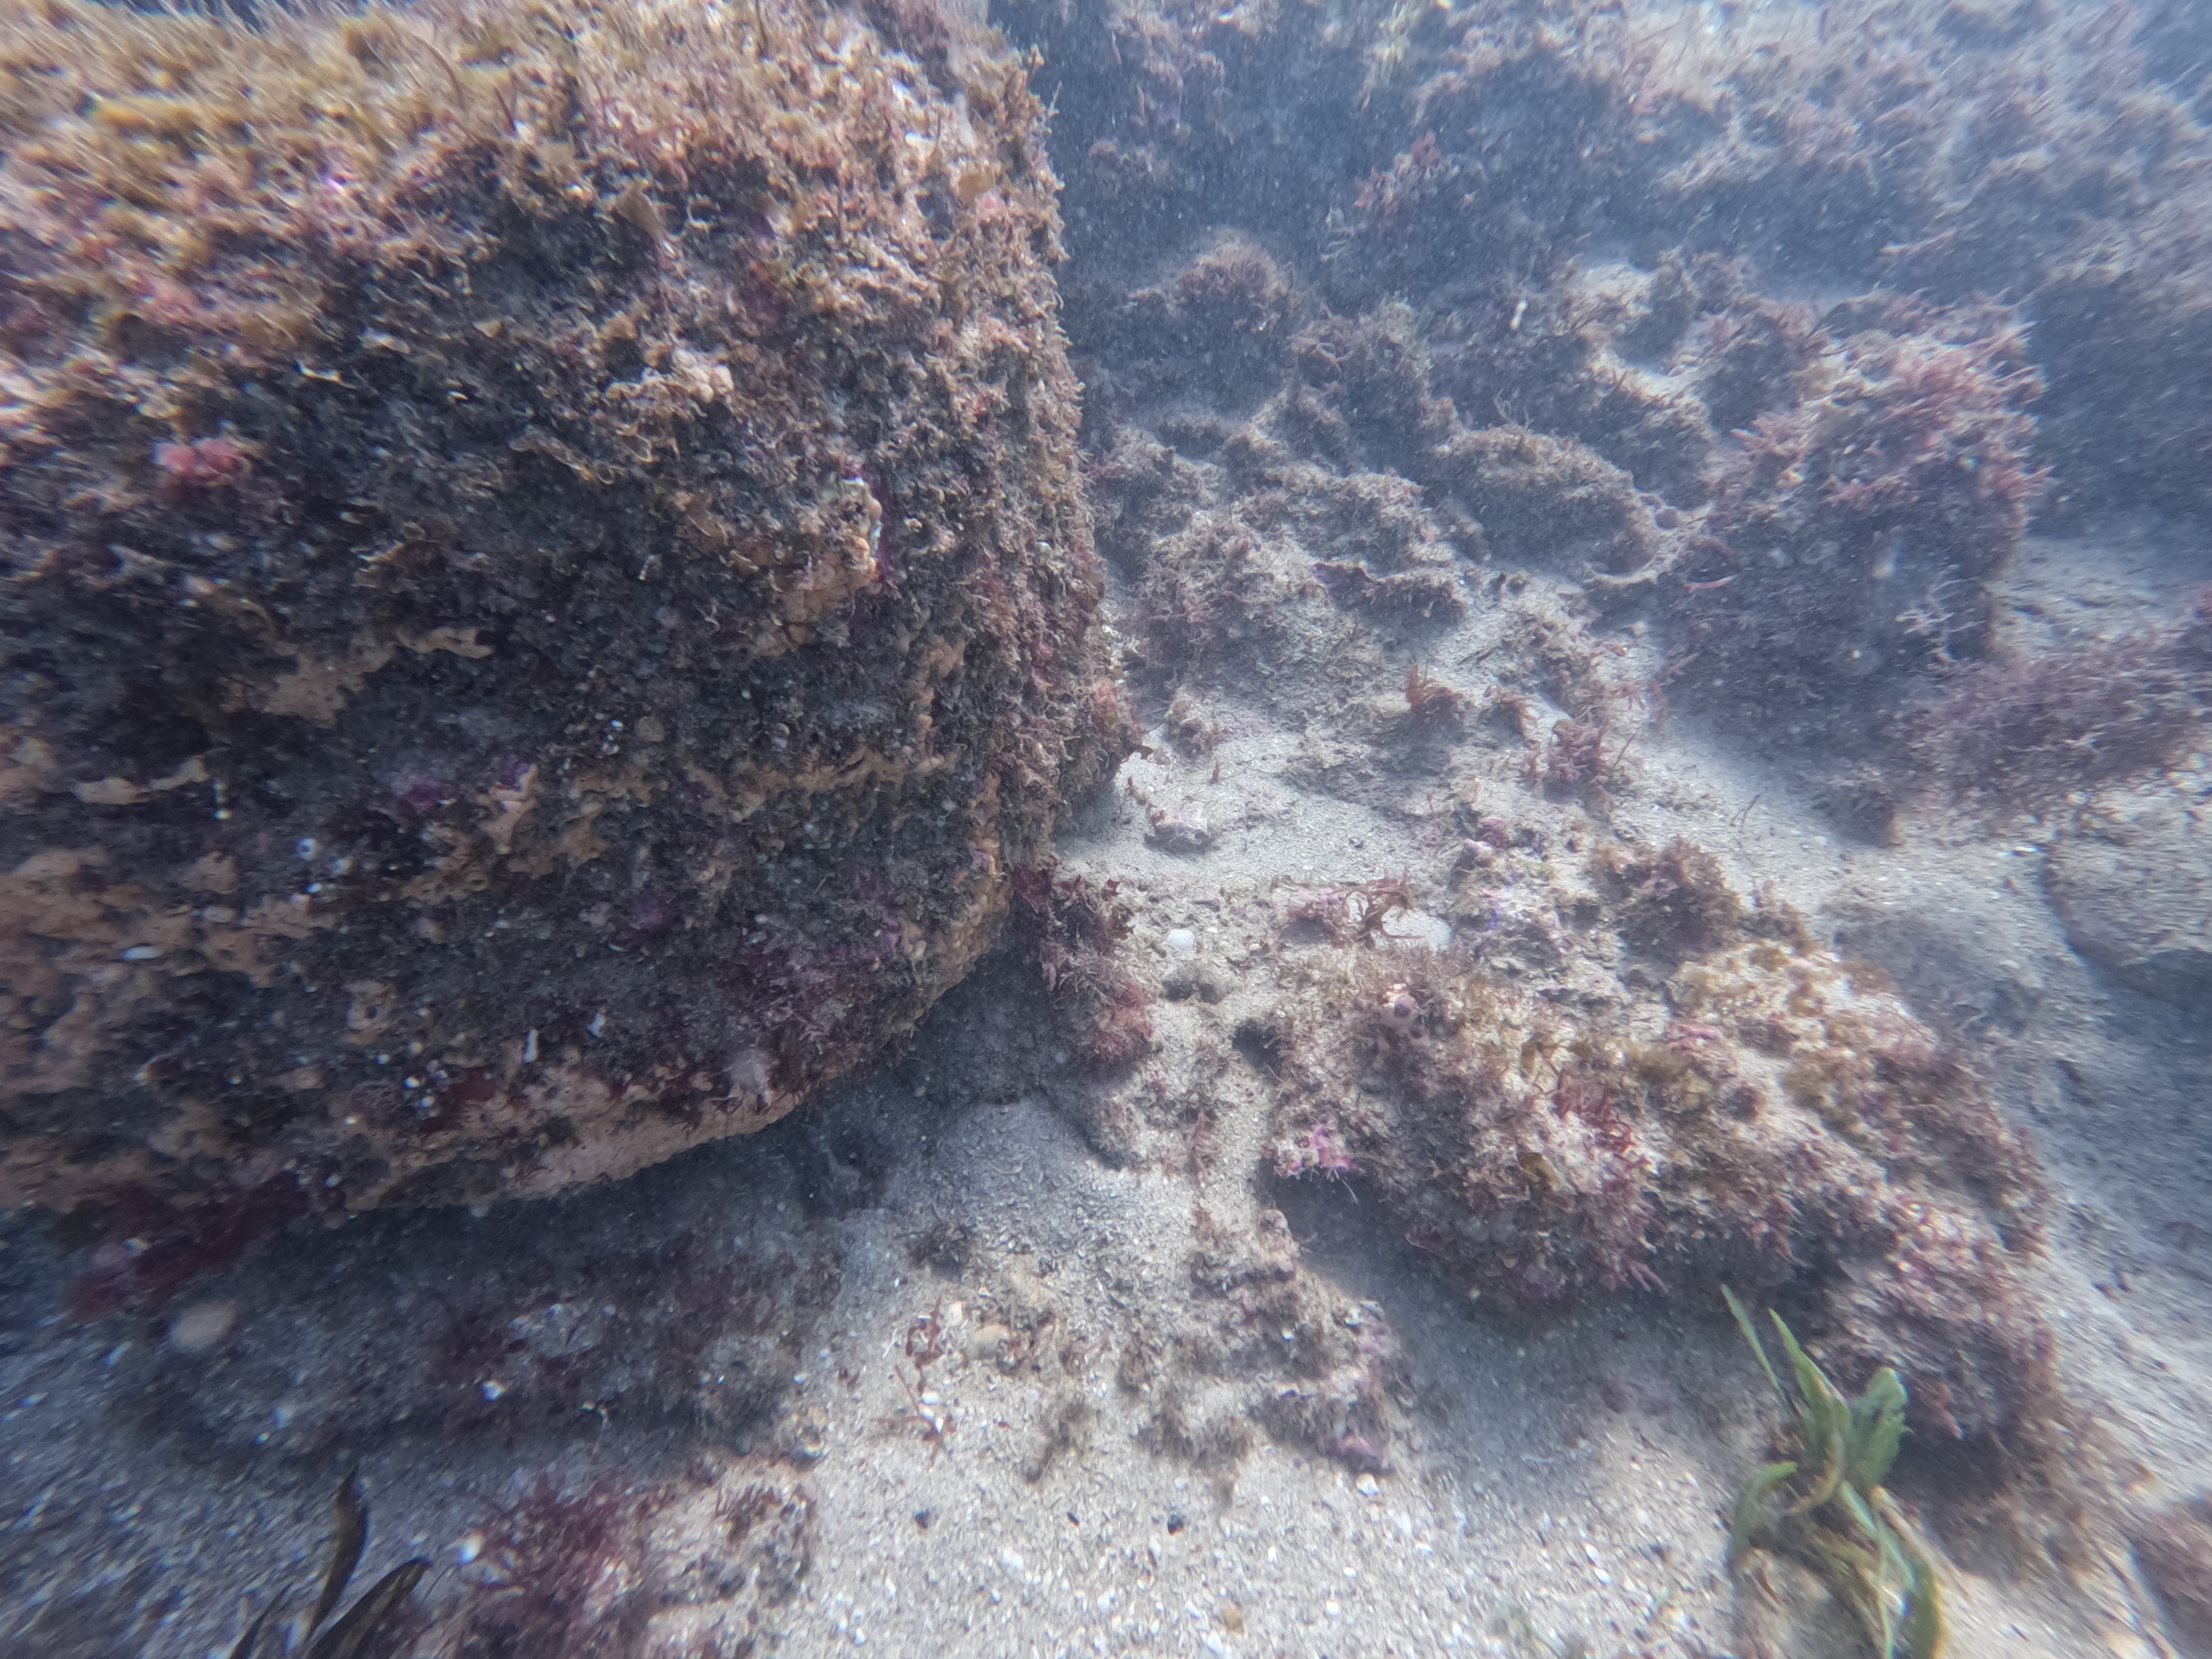

Supplement: Supplementary file 1685 [file G0028011.pdf › Ocean1/G0028011.pdf]

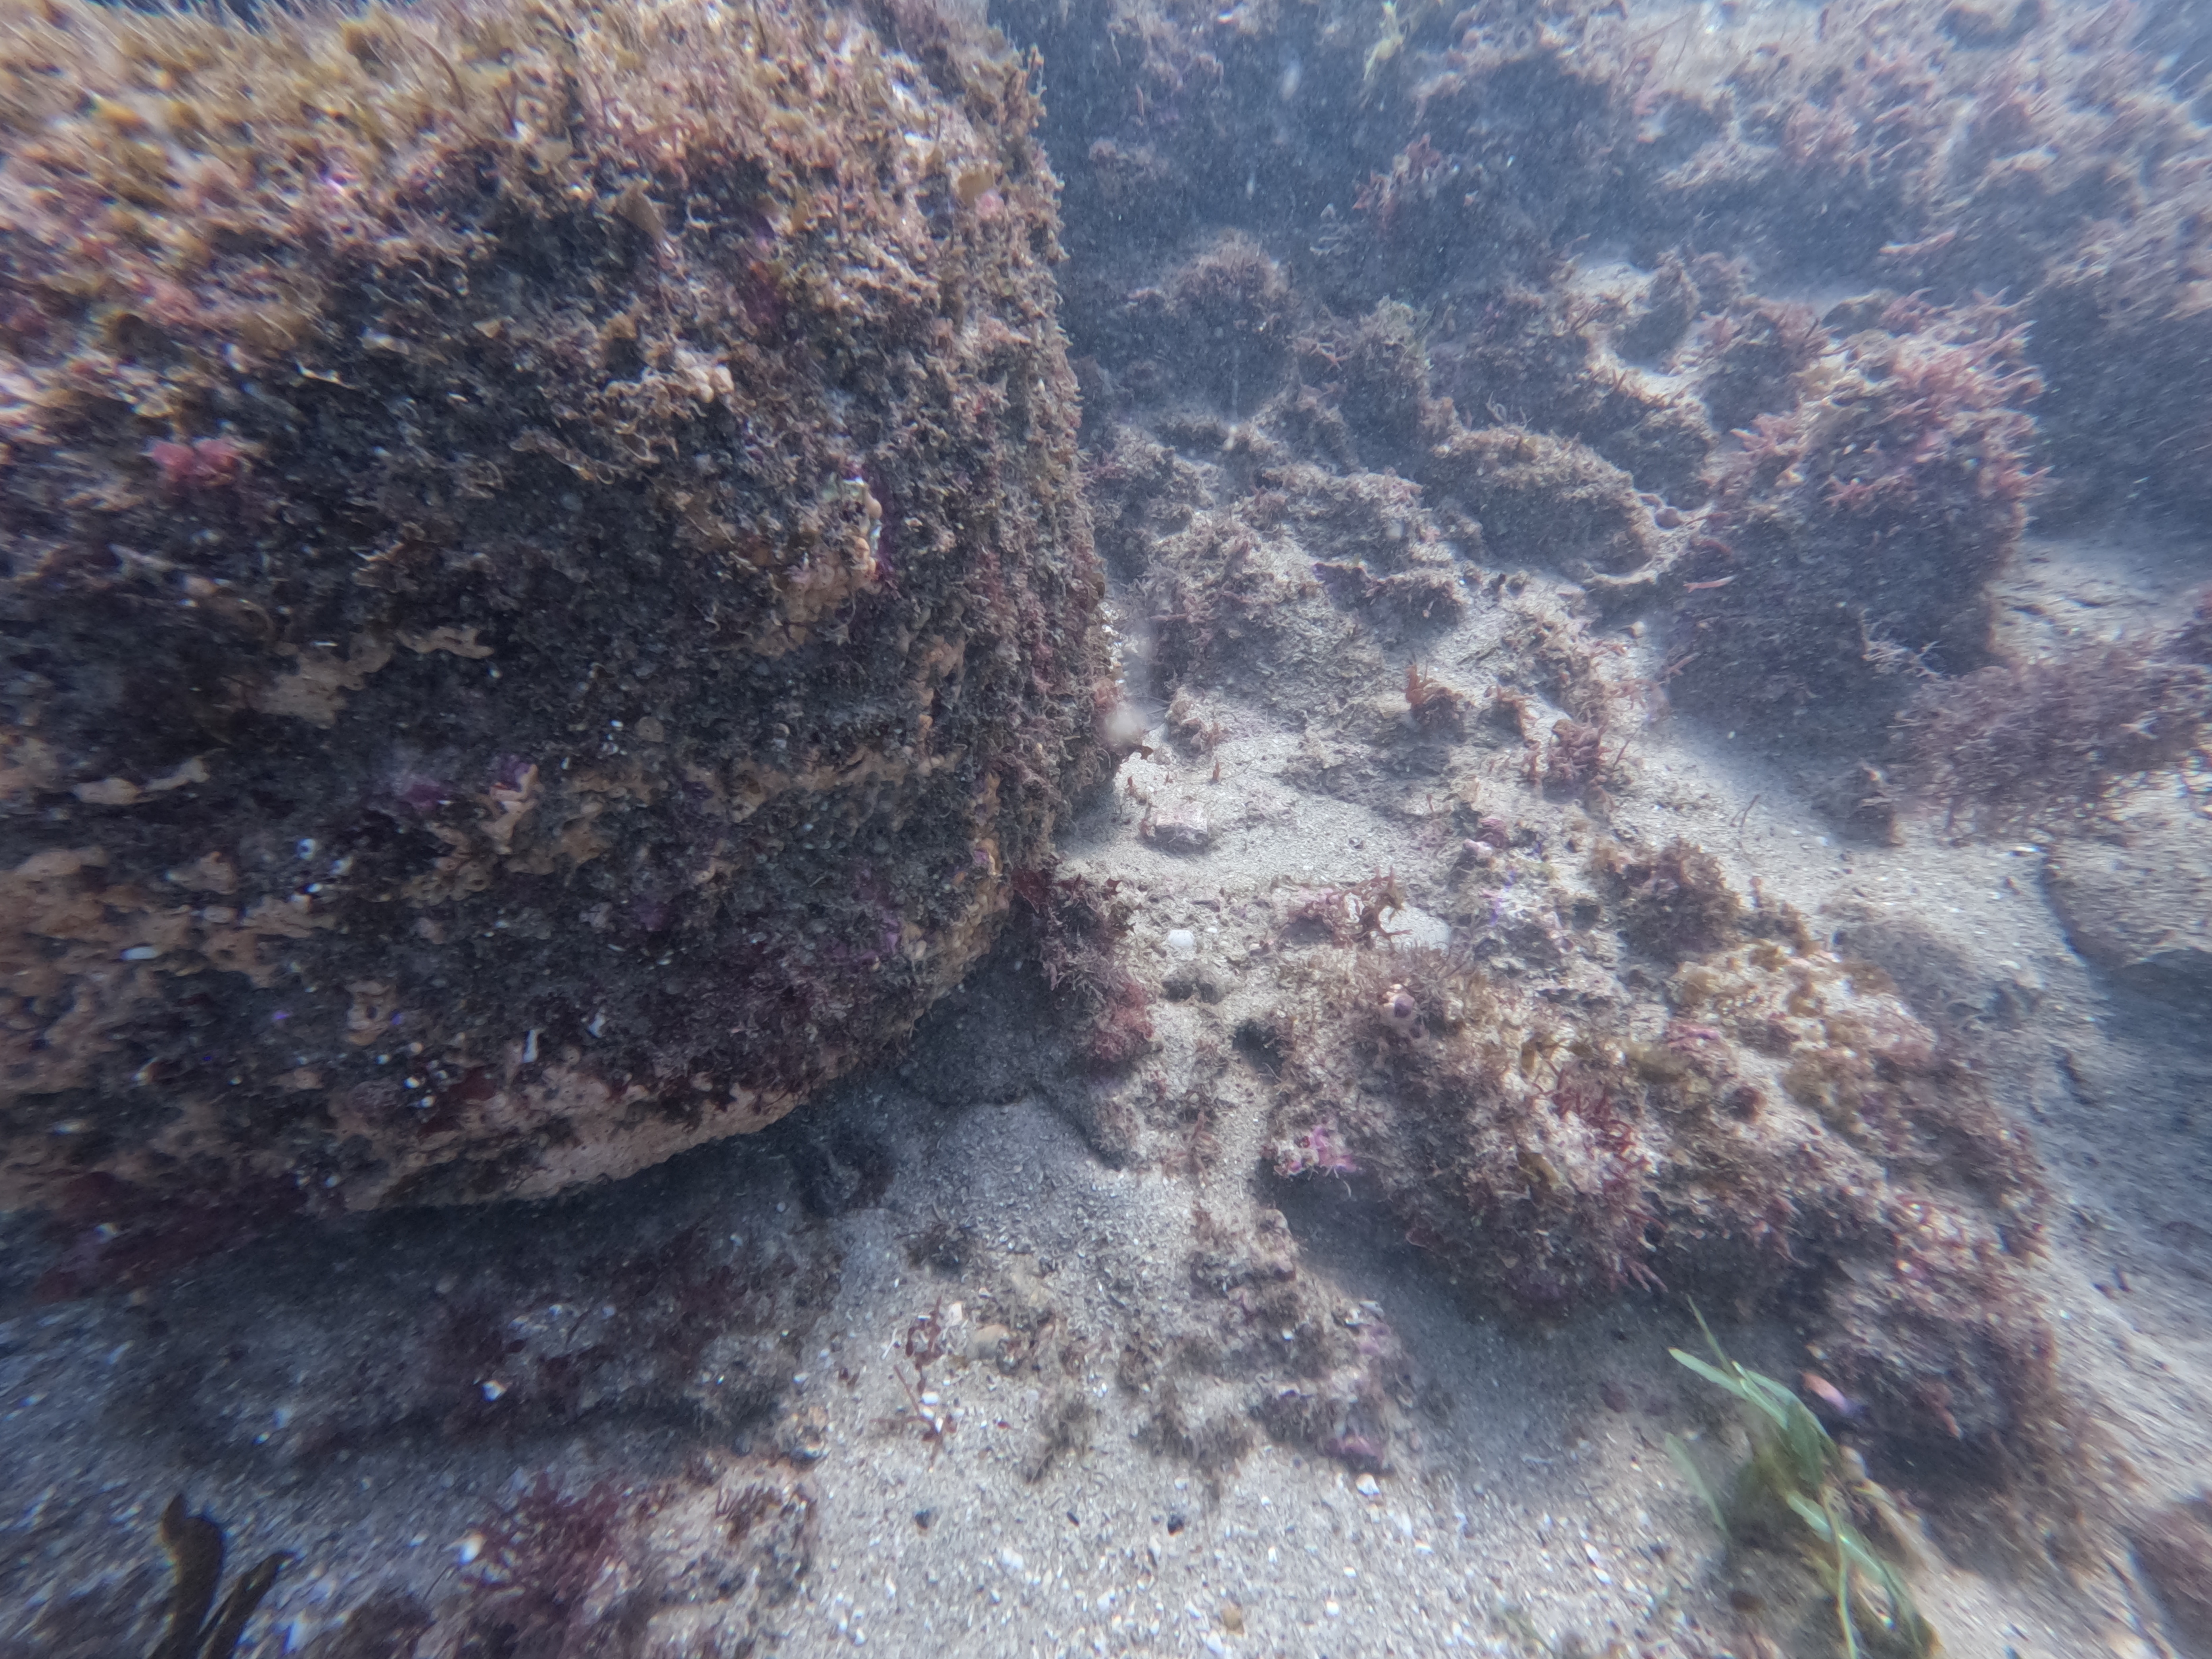

Supplement: Supplementary file 1686 [file G0028012.pdf › Ocean1/G0028012.pdf]

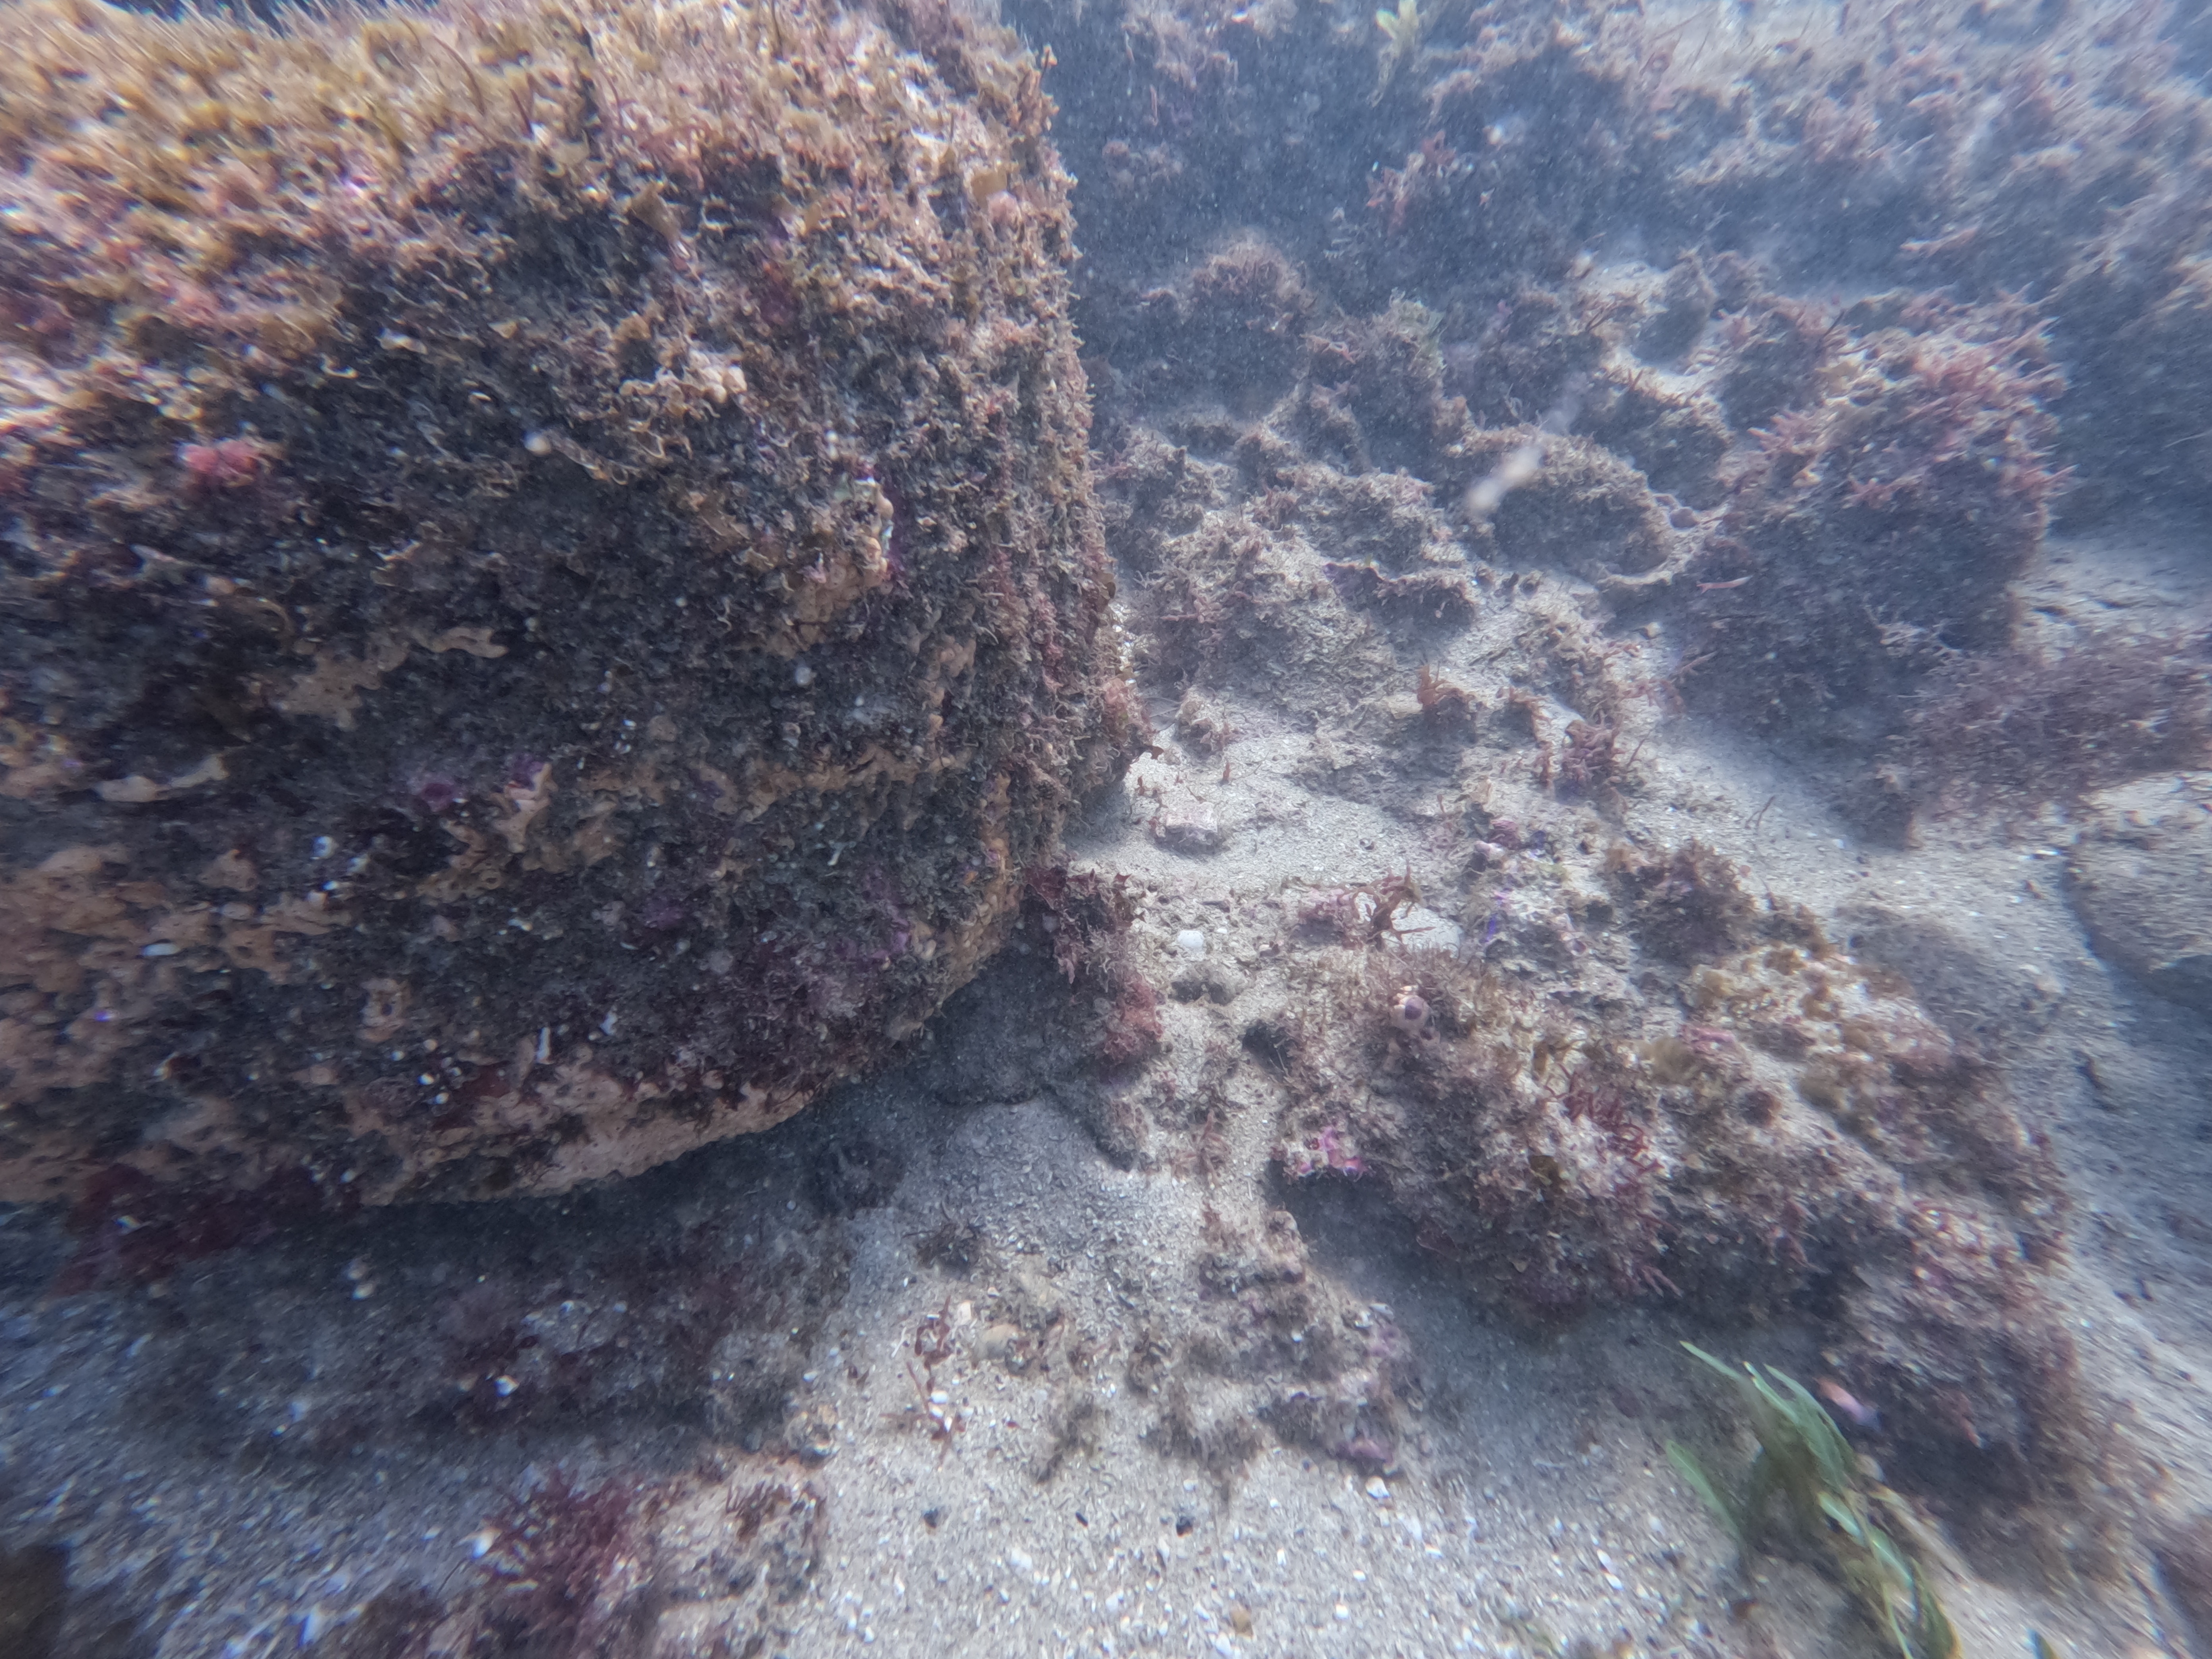

Supplement: Supplementary file 1687 [file G0028013.pdf › Ocean1/G0028013.pdf]

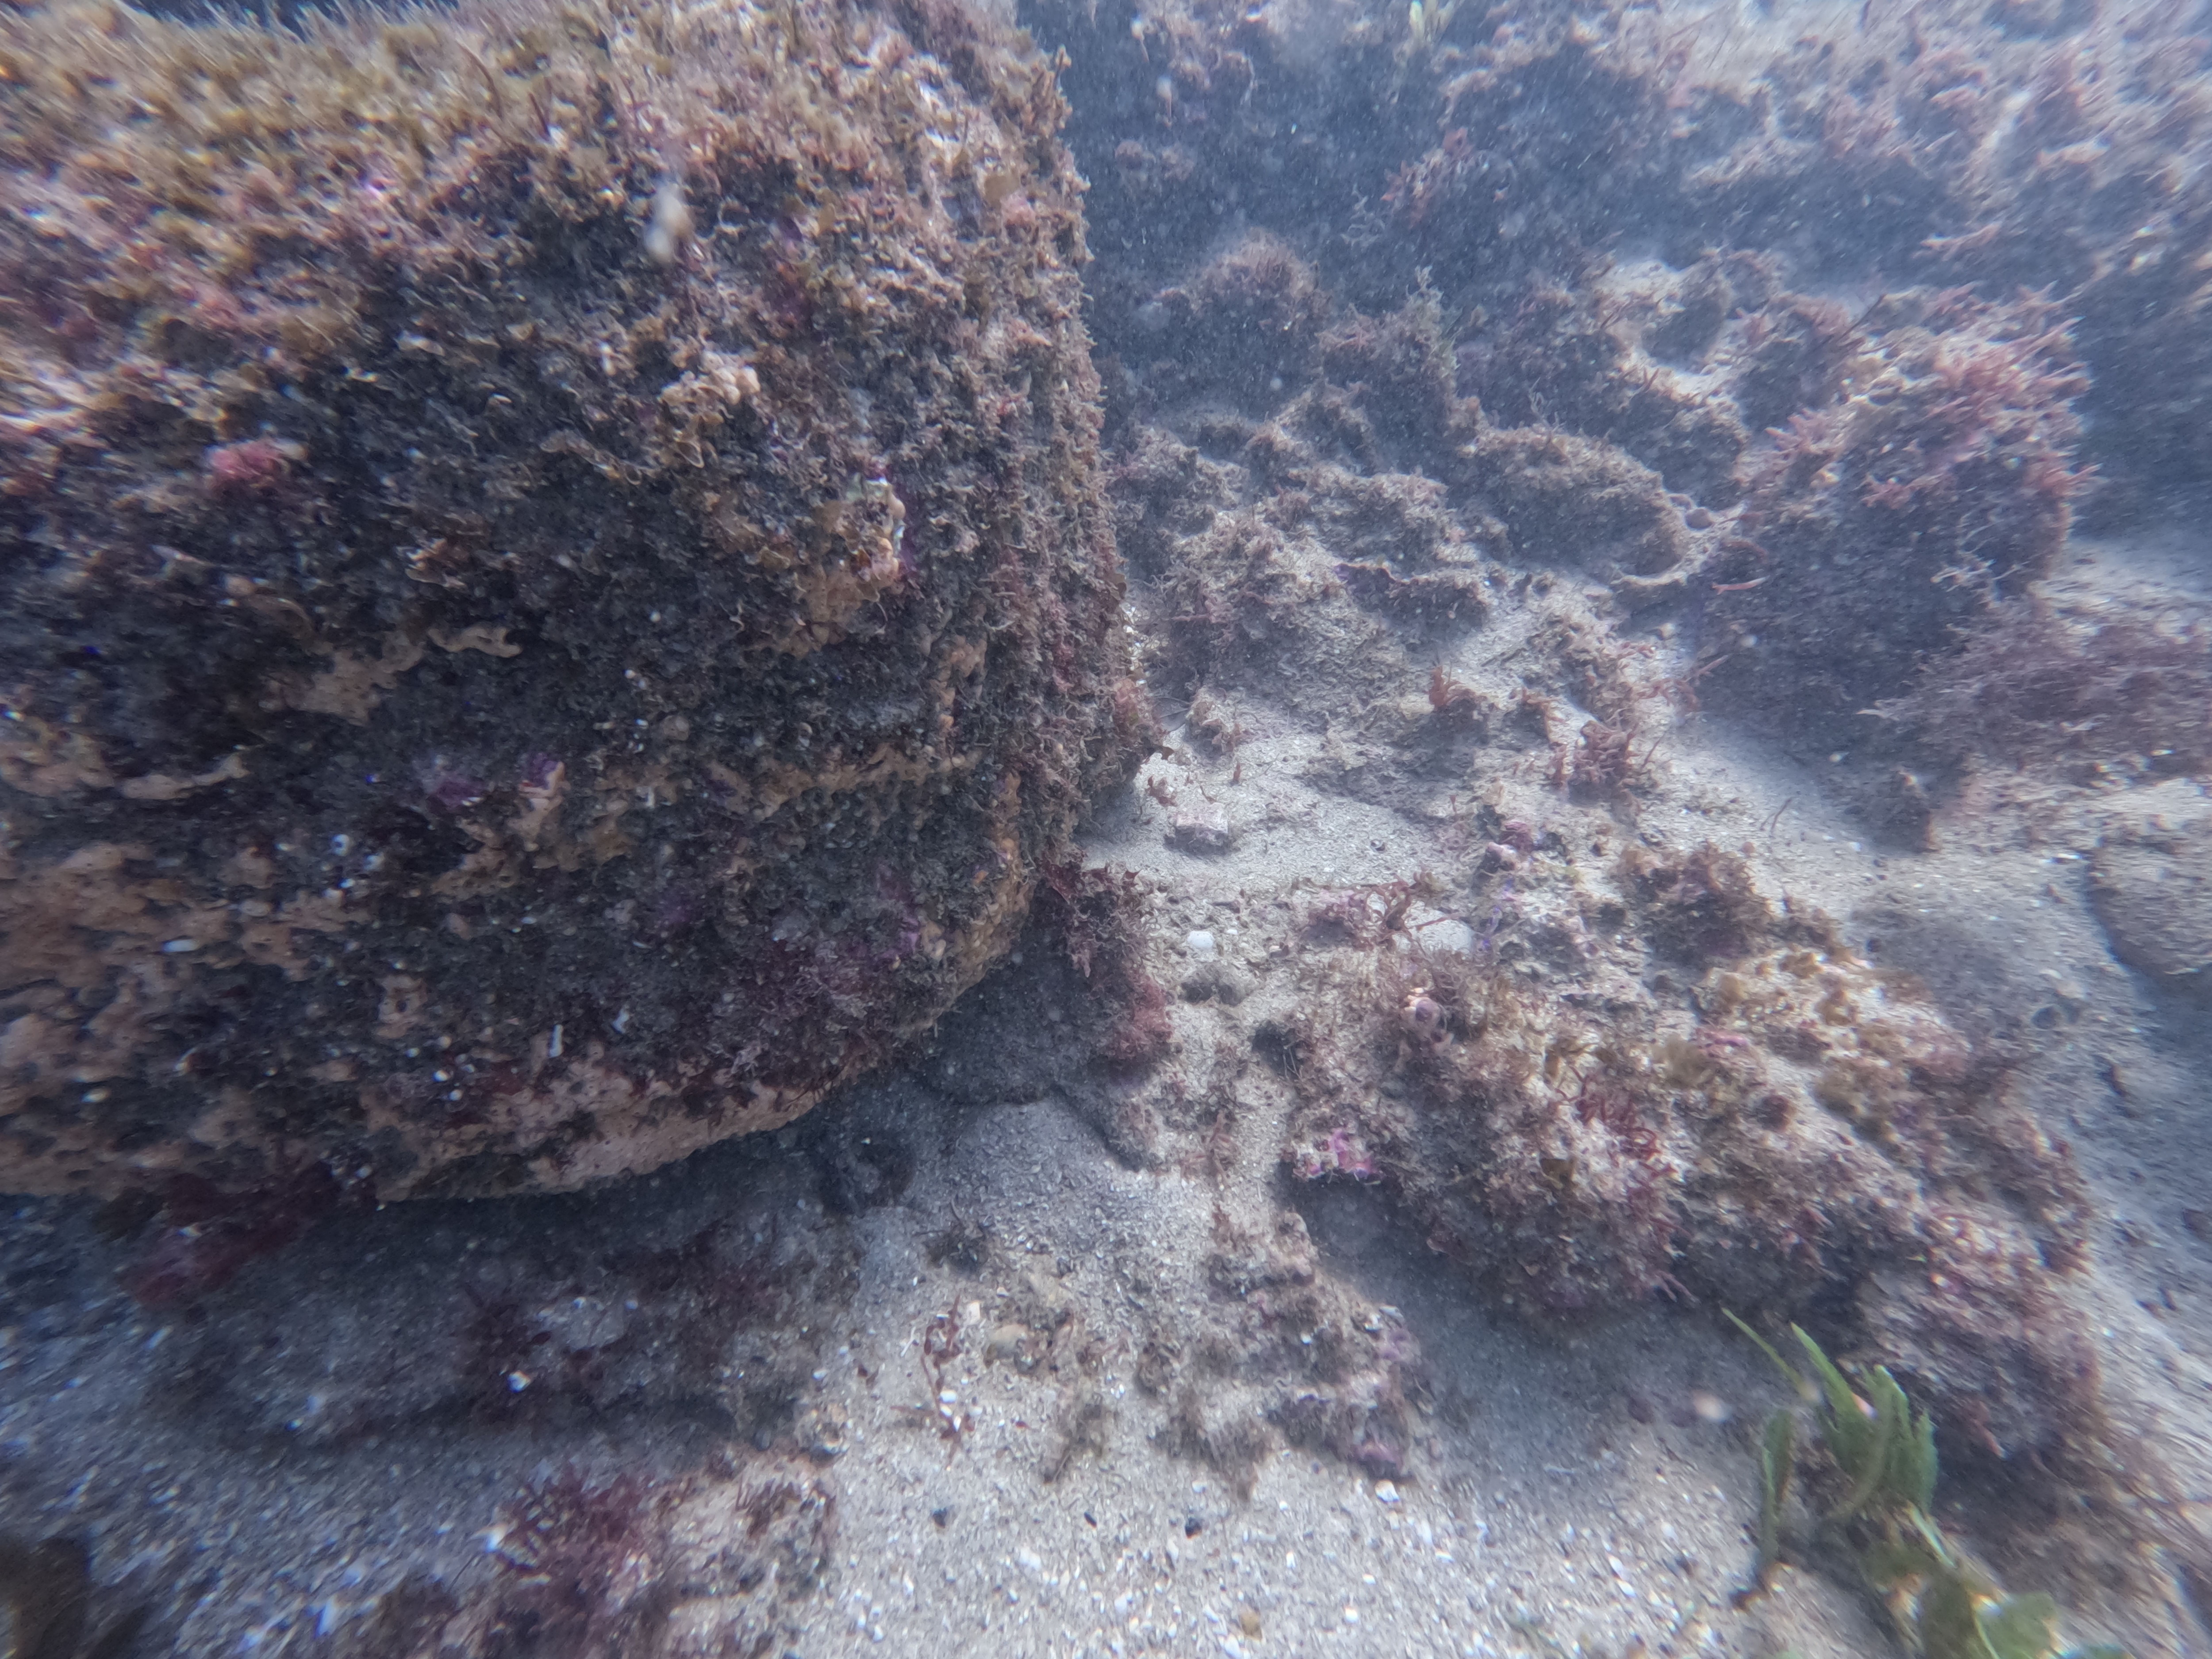

Supplement: Supplementary file 1688 [file G0028014.pdf › Ocean1/G0028014.pdf]

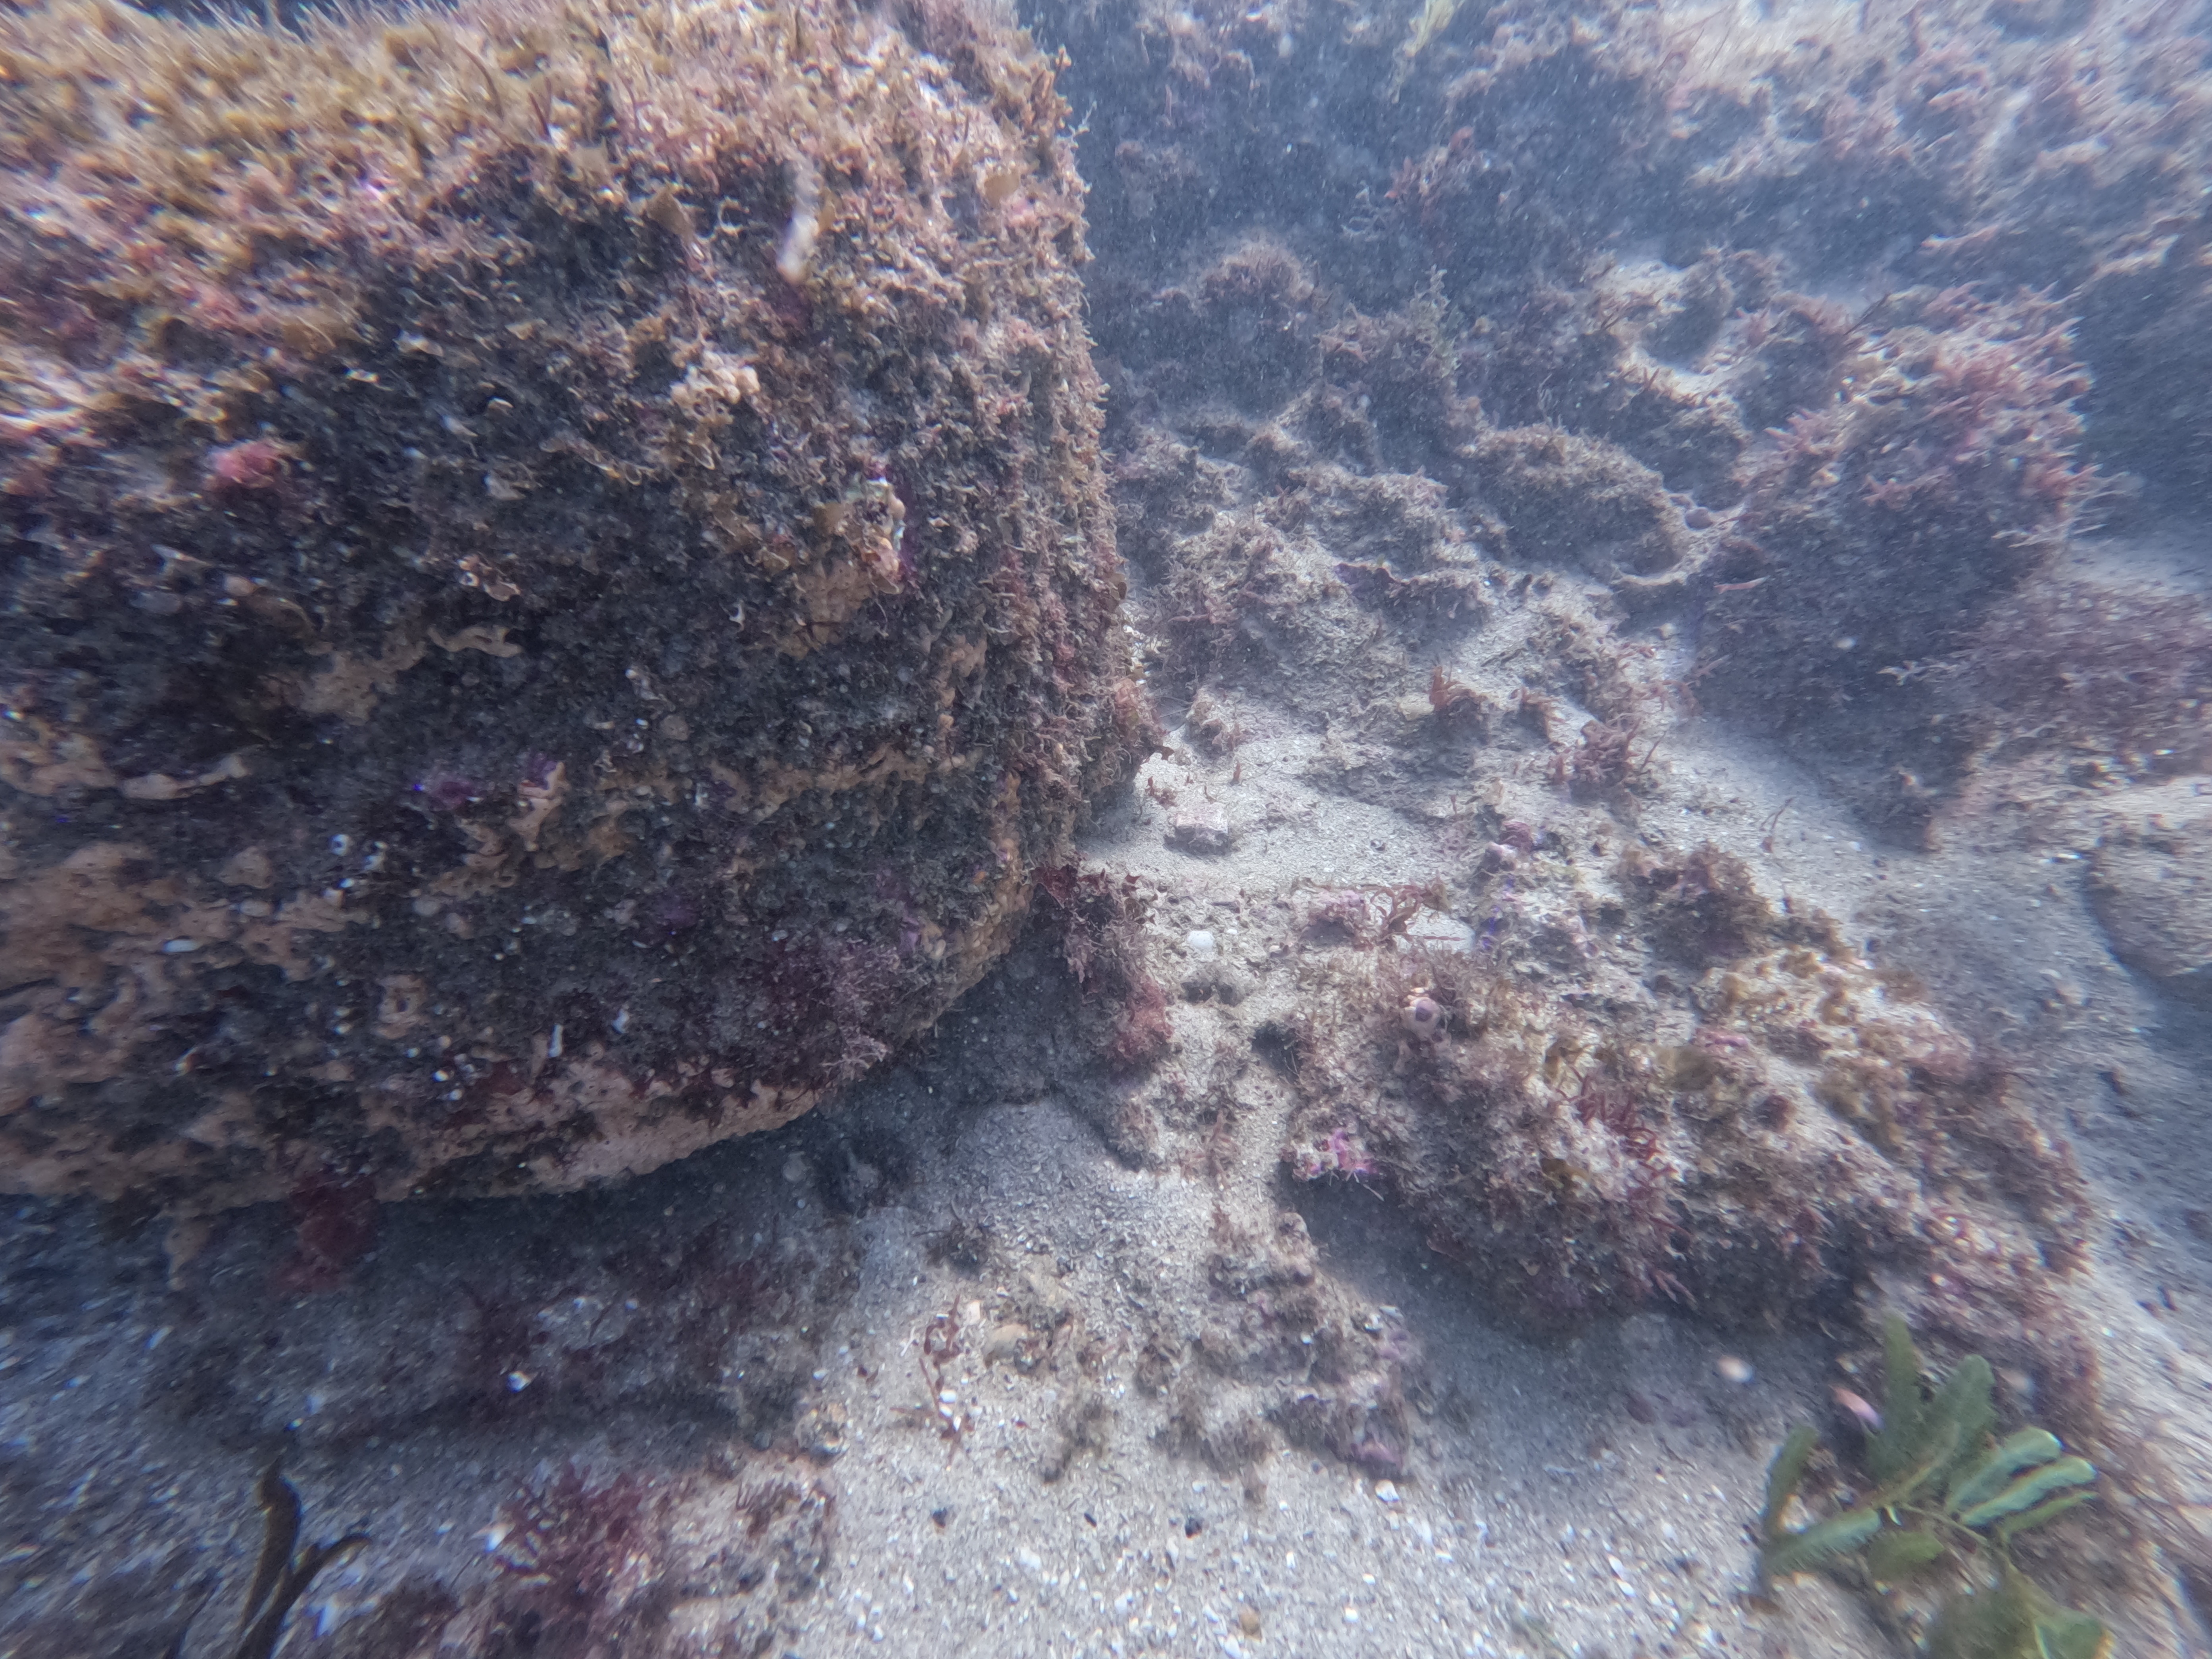

Supplement: Supplementary file 1689 [file G0028015.pdf › Ocean1/G0028015.pdf]

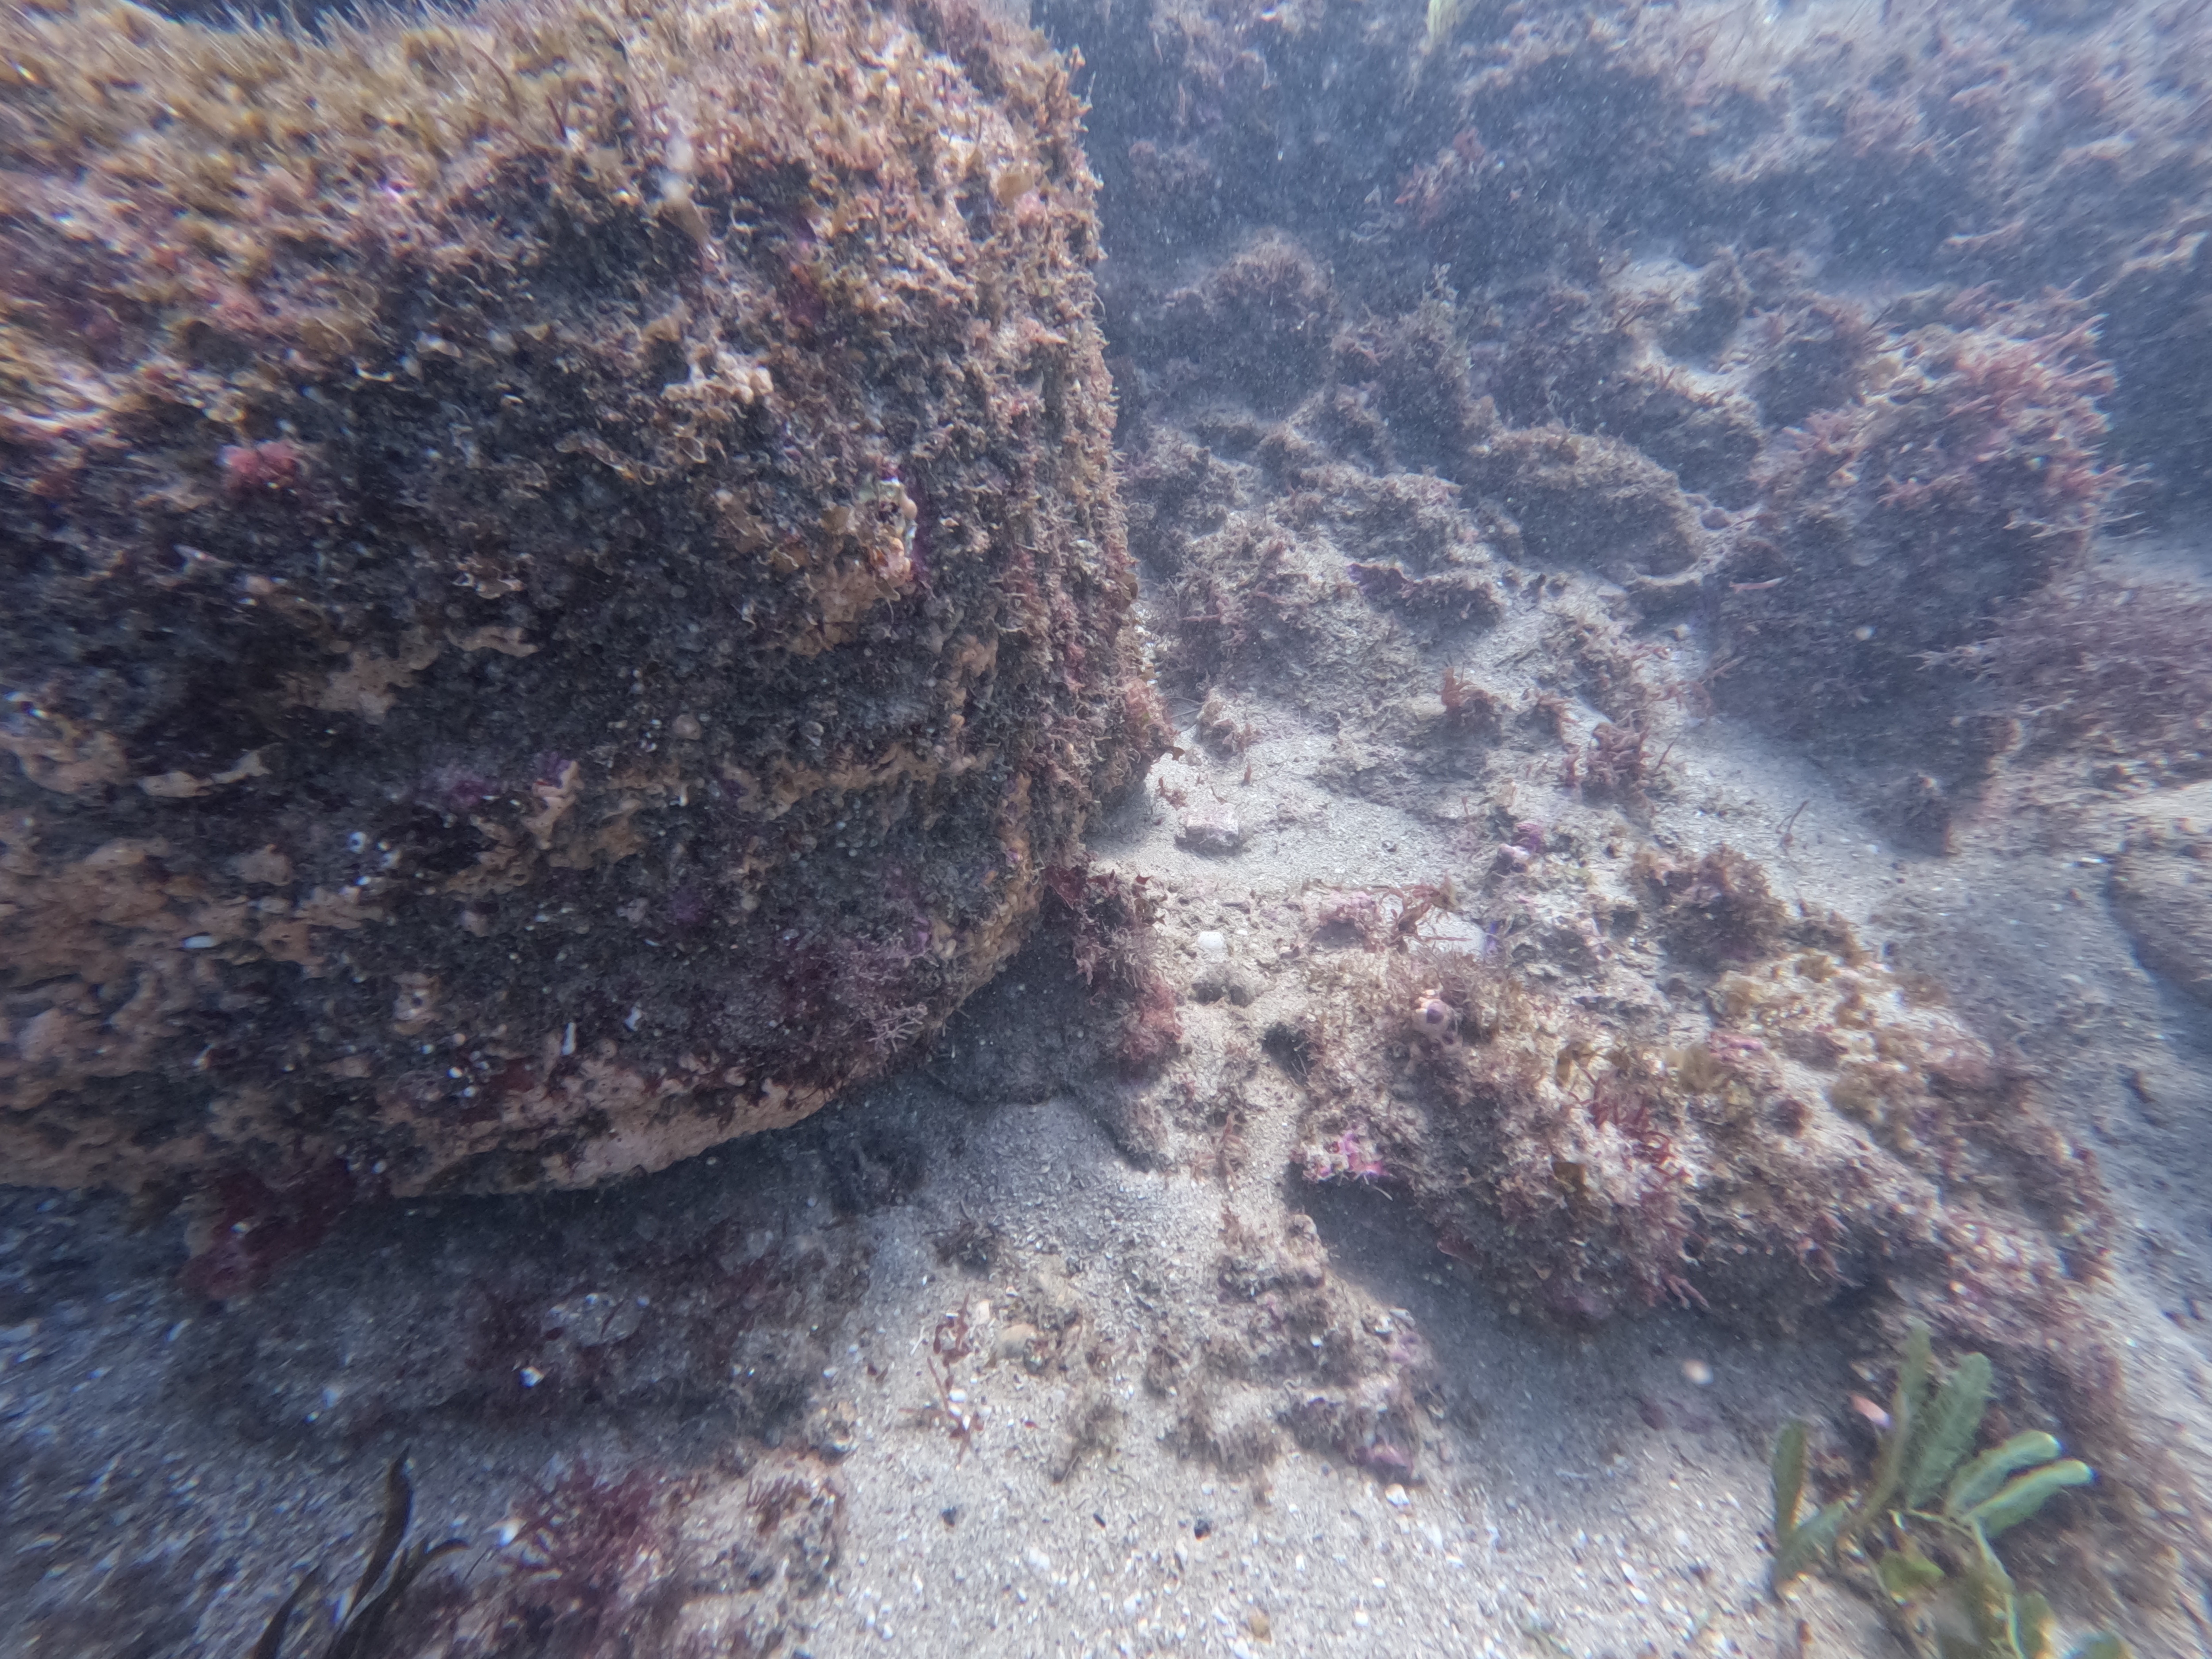

Supplement: Supplementary file 1690 [file G0028016.pdf › Ocean1/G0028016.pdf]
