# Supplementary figures and images for: 3D reconstruction of shallow sea environment using direct system calibration and faint laser line extraction (part 17 of 35)
Source: Research Square preprint supplement (doi:10.21203/rs.3.rs-5262658/v1), 2024-12-02

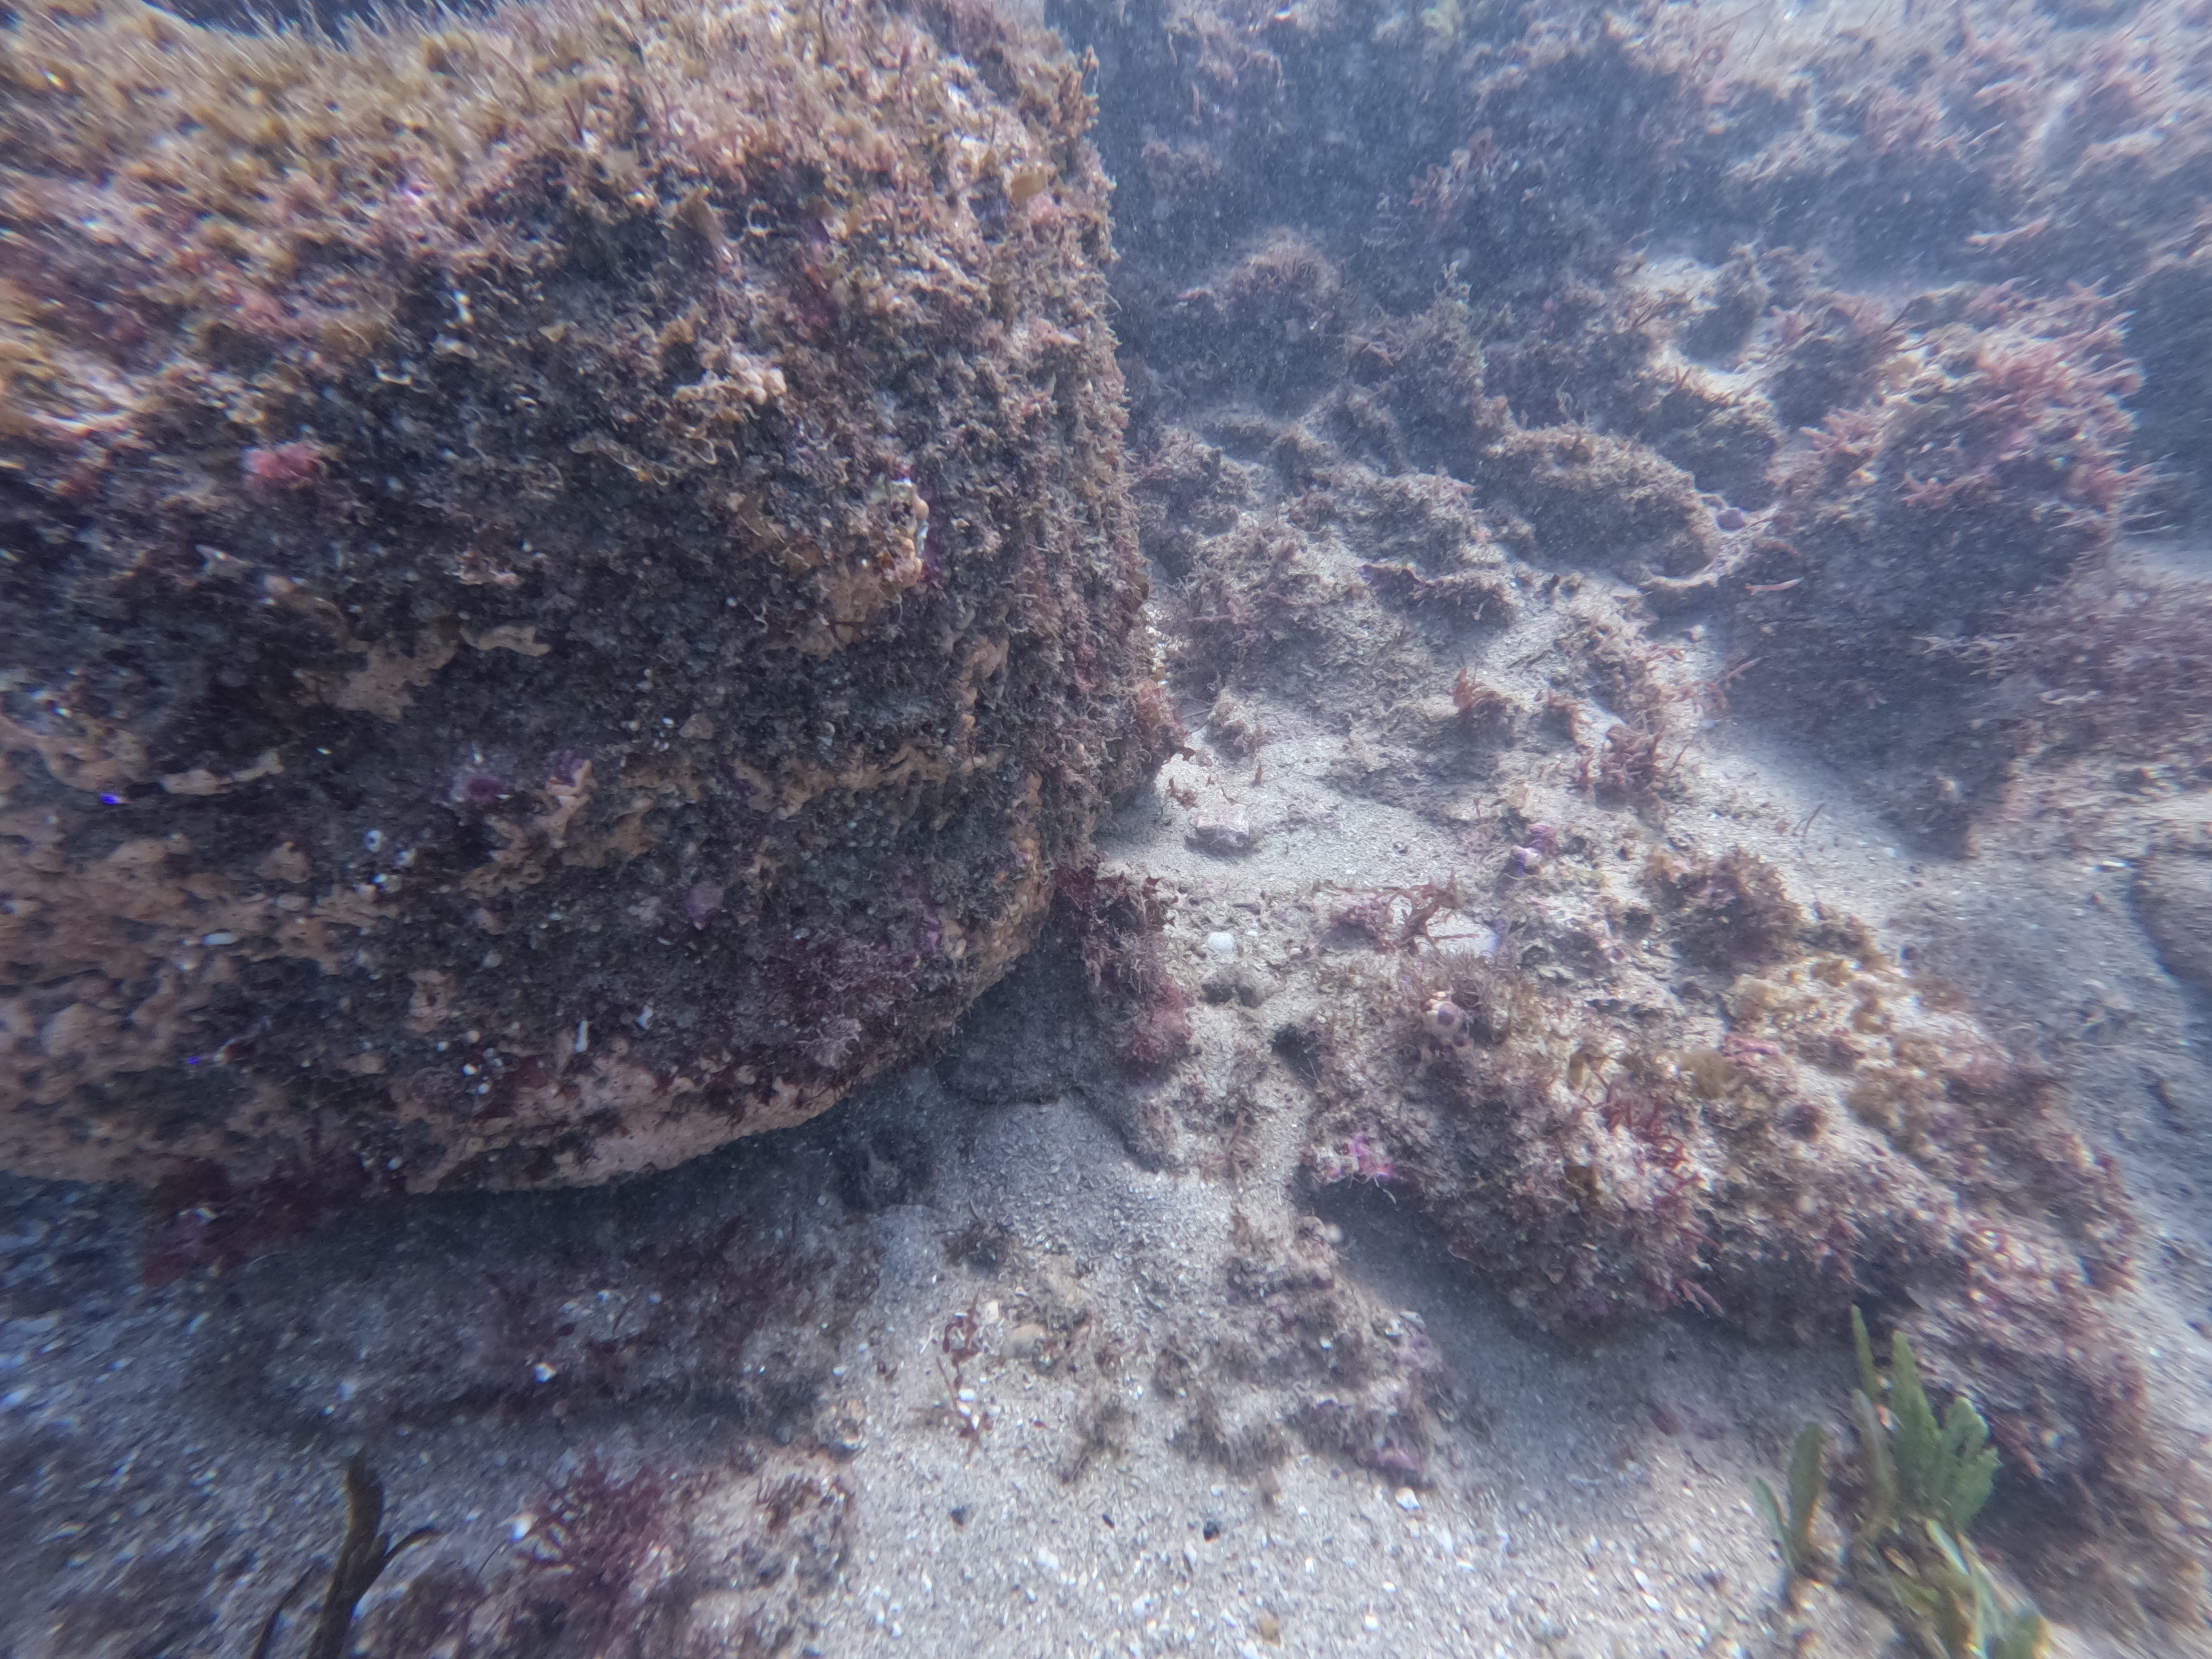

Supplement: Supplementary file 1691 [file G0028017.pdf › Ocean1/G0028017.pdf]

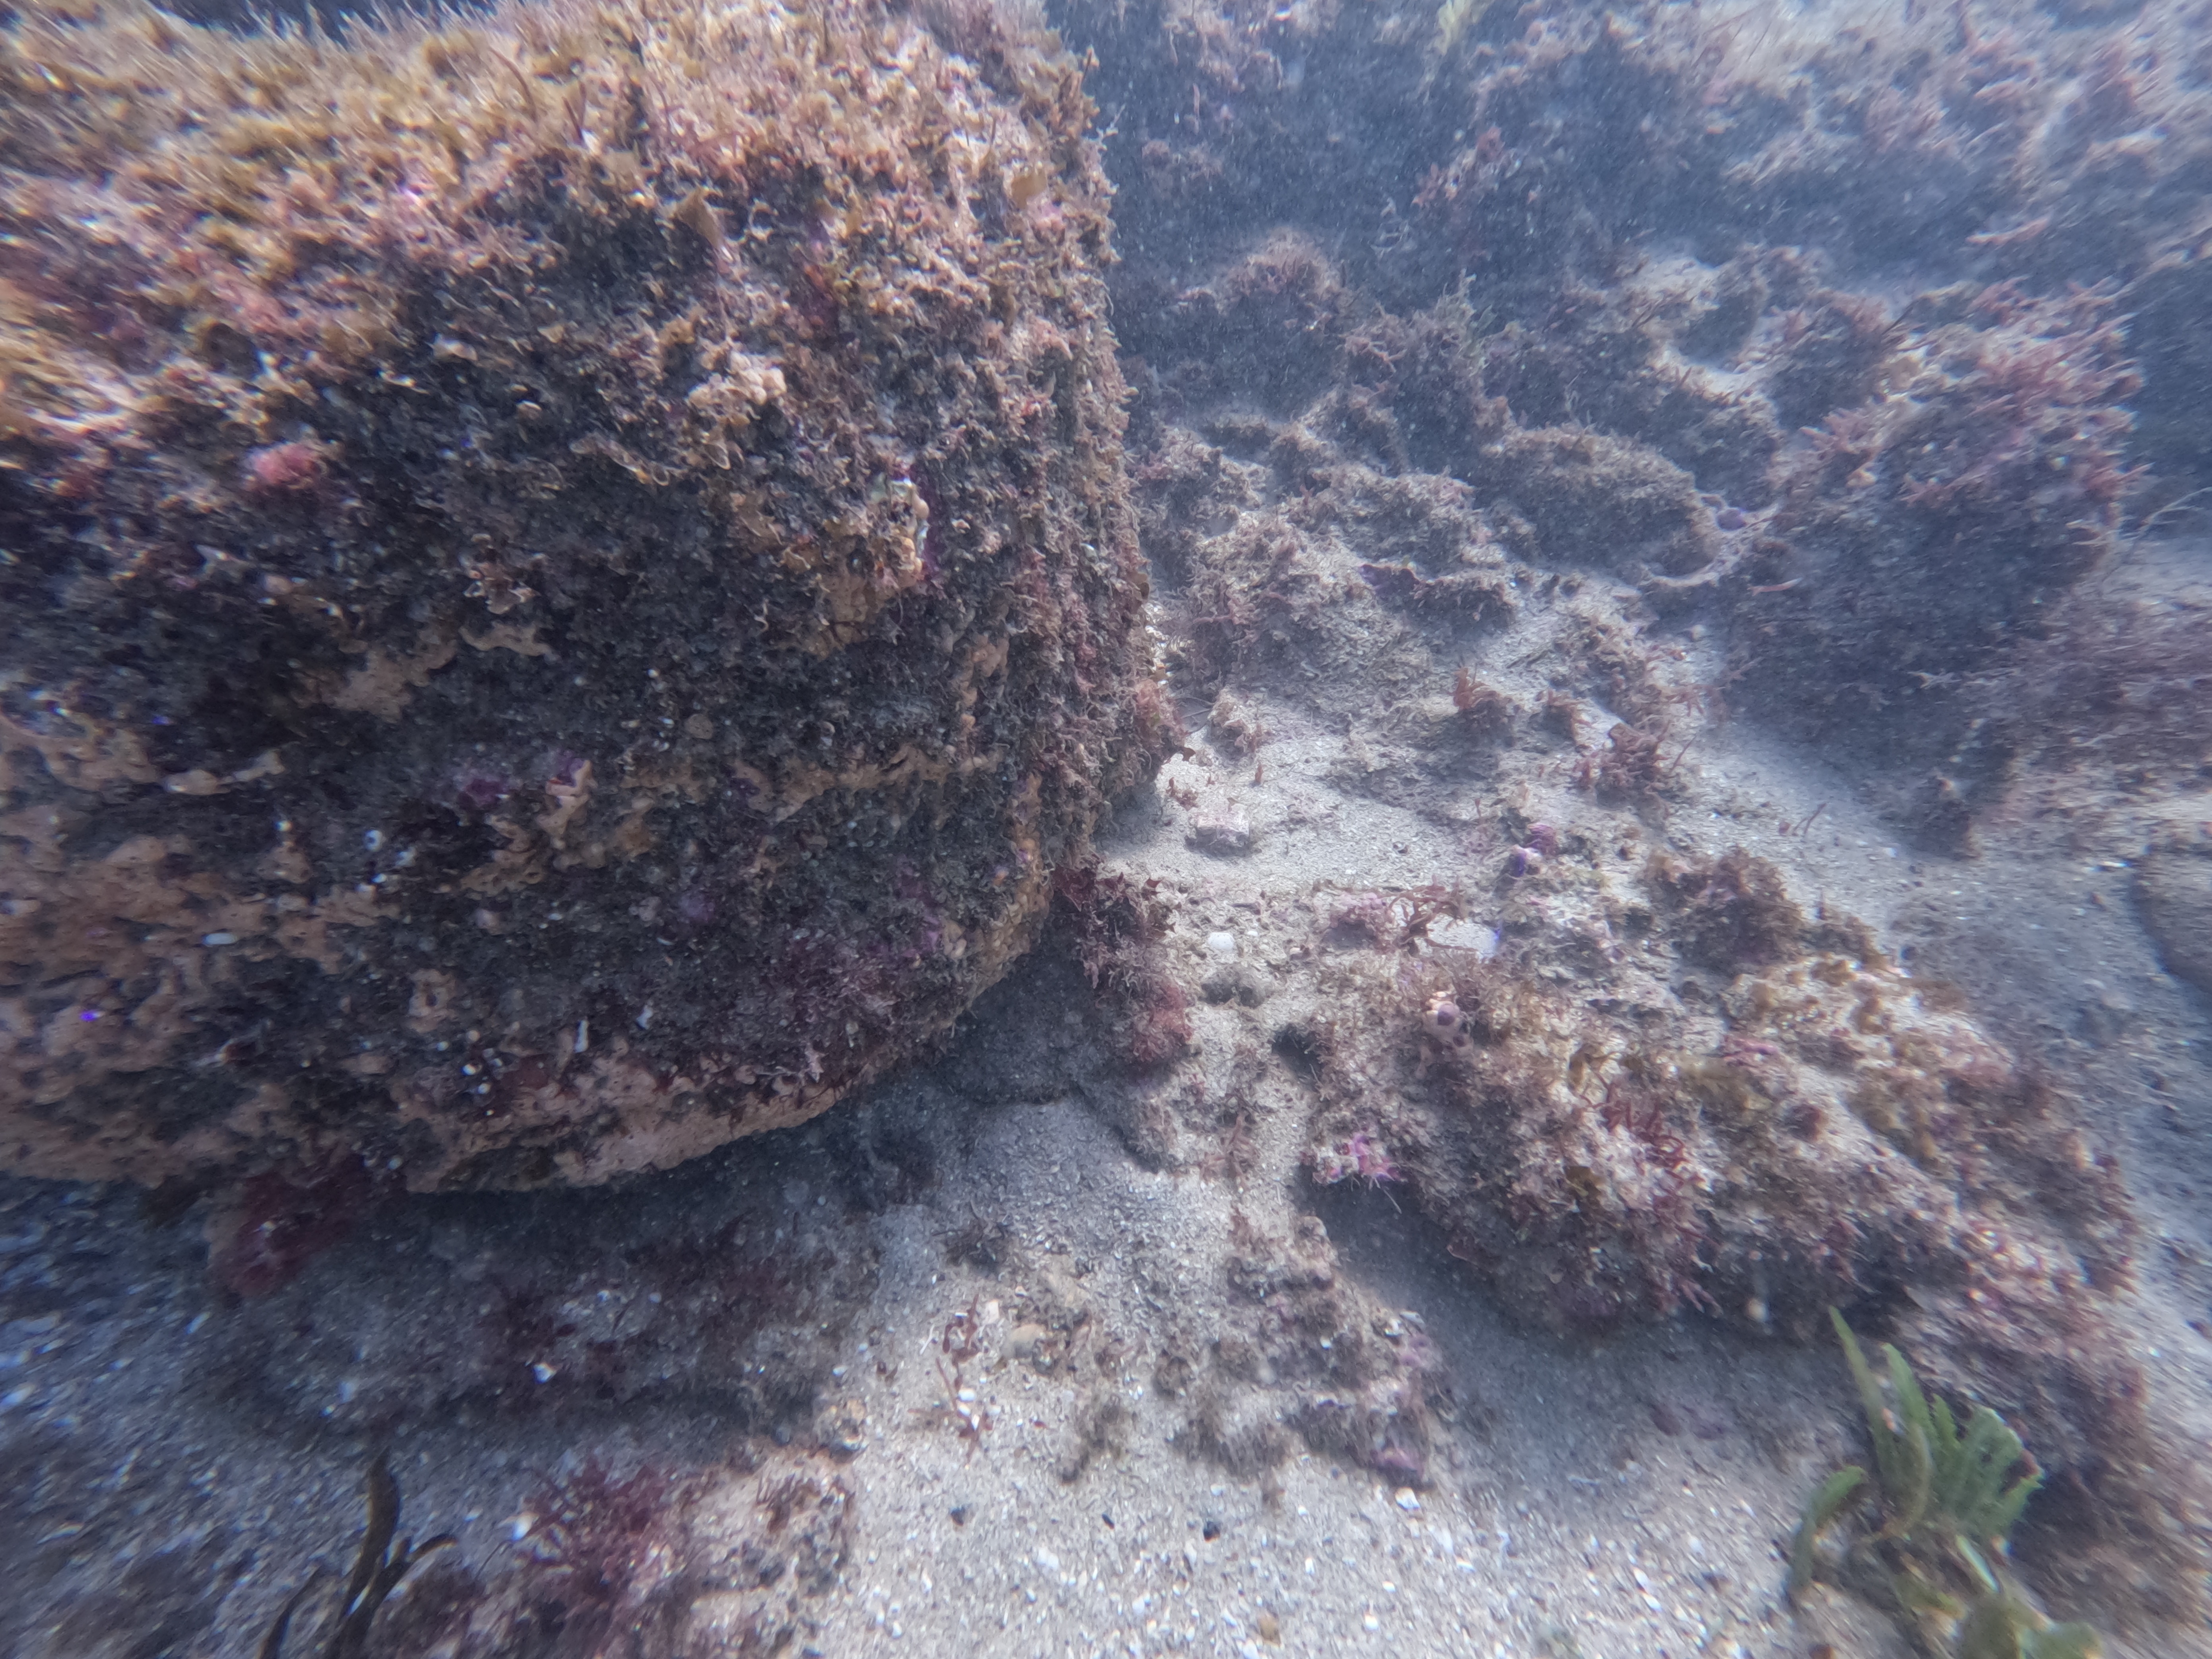

Supplement: Supplementary file 1692 [file G0028018.pdf › Ocean1/G0028018.pdf]

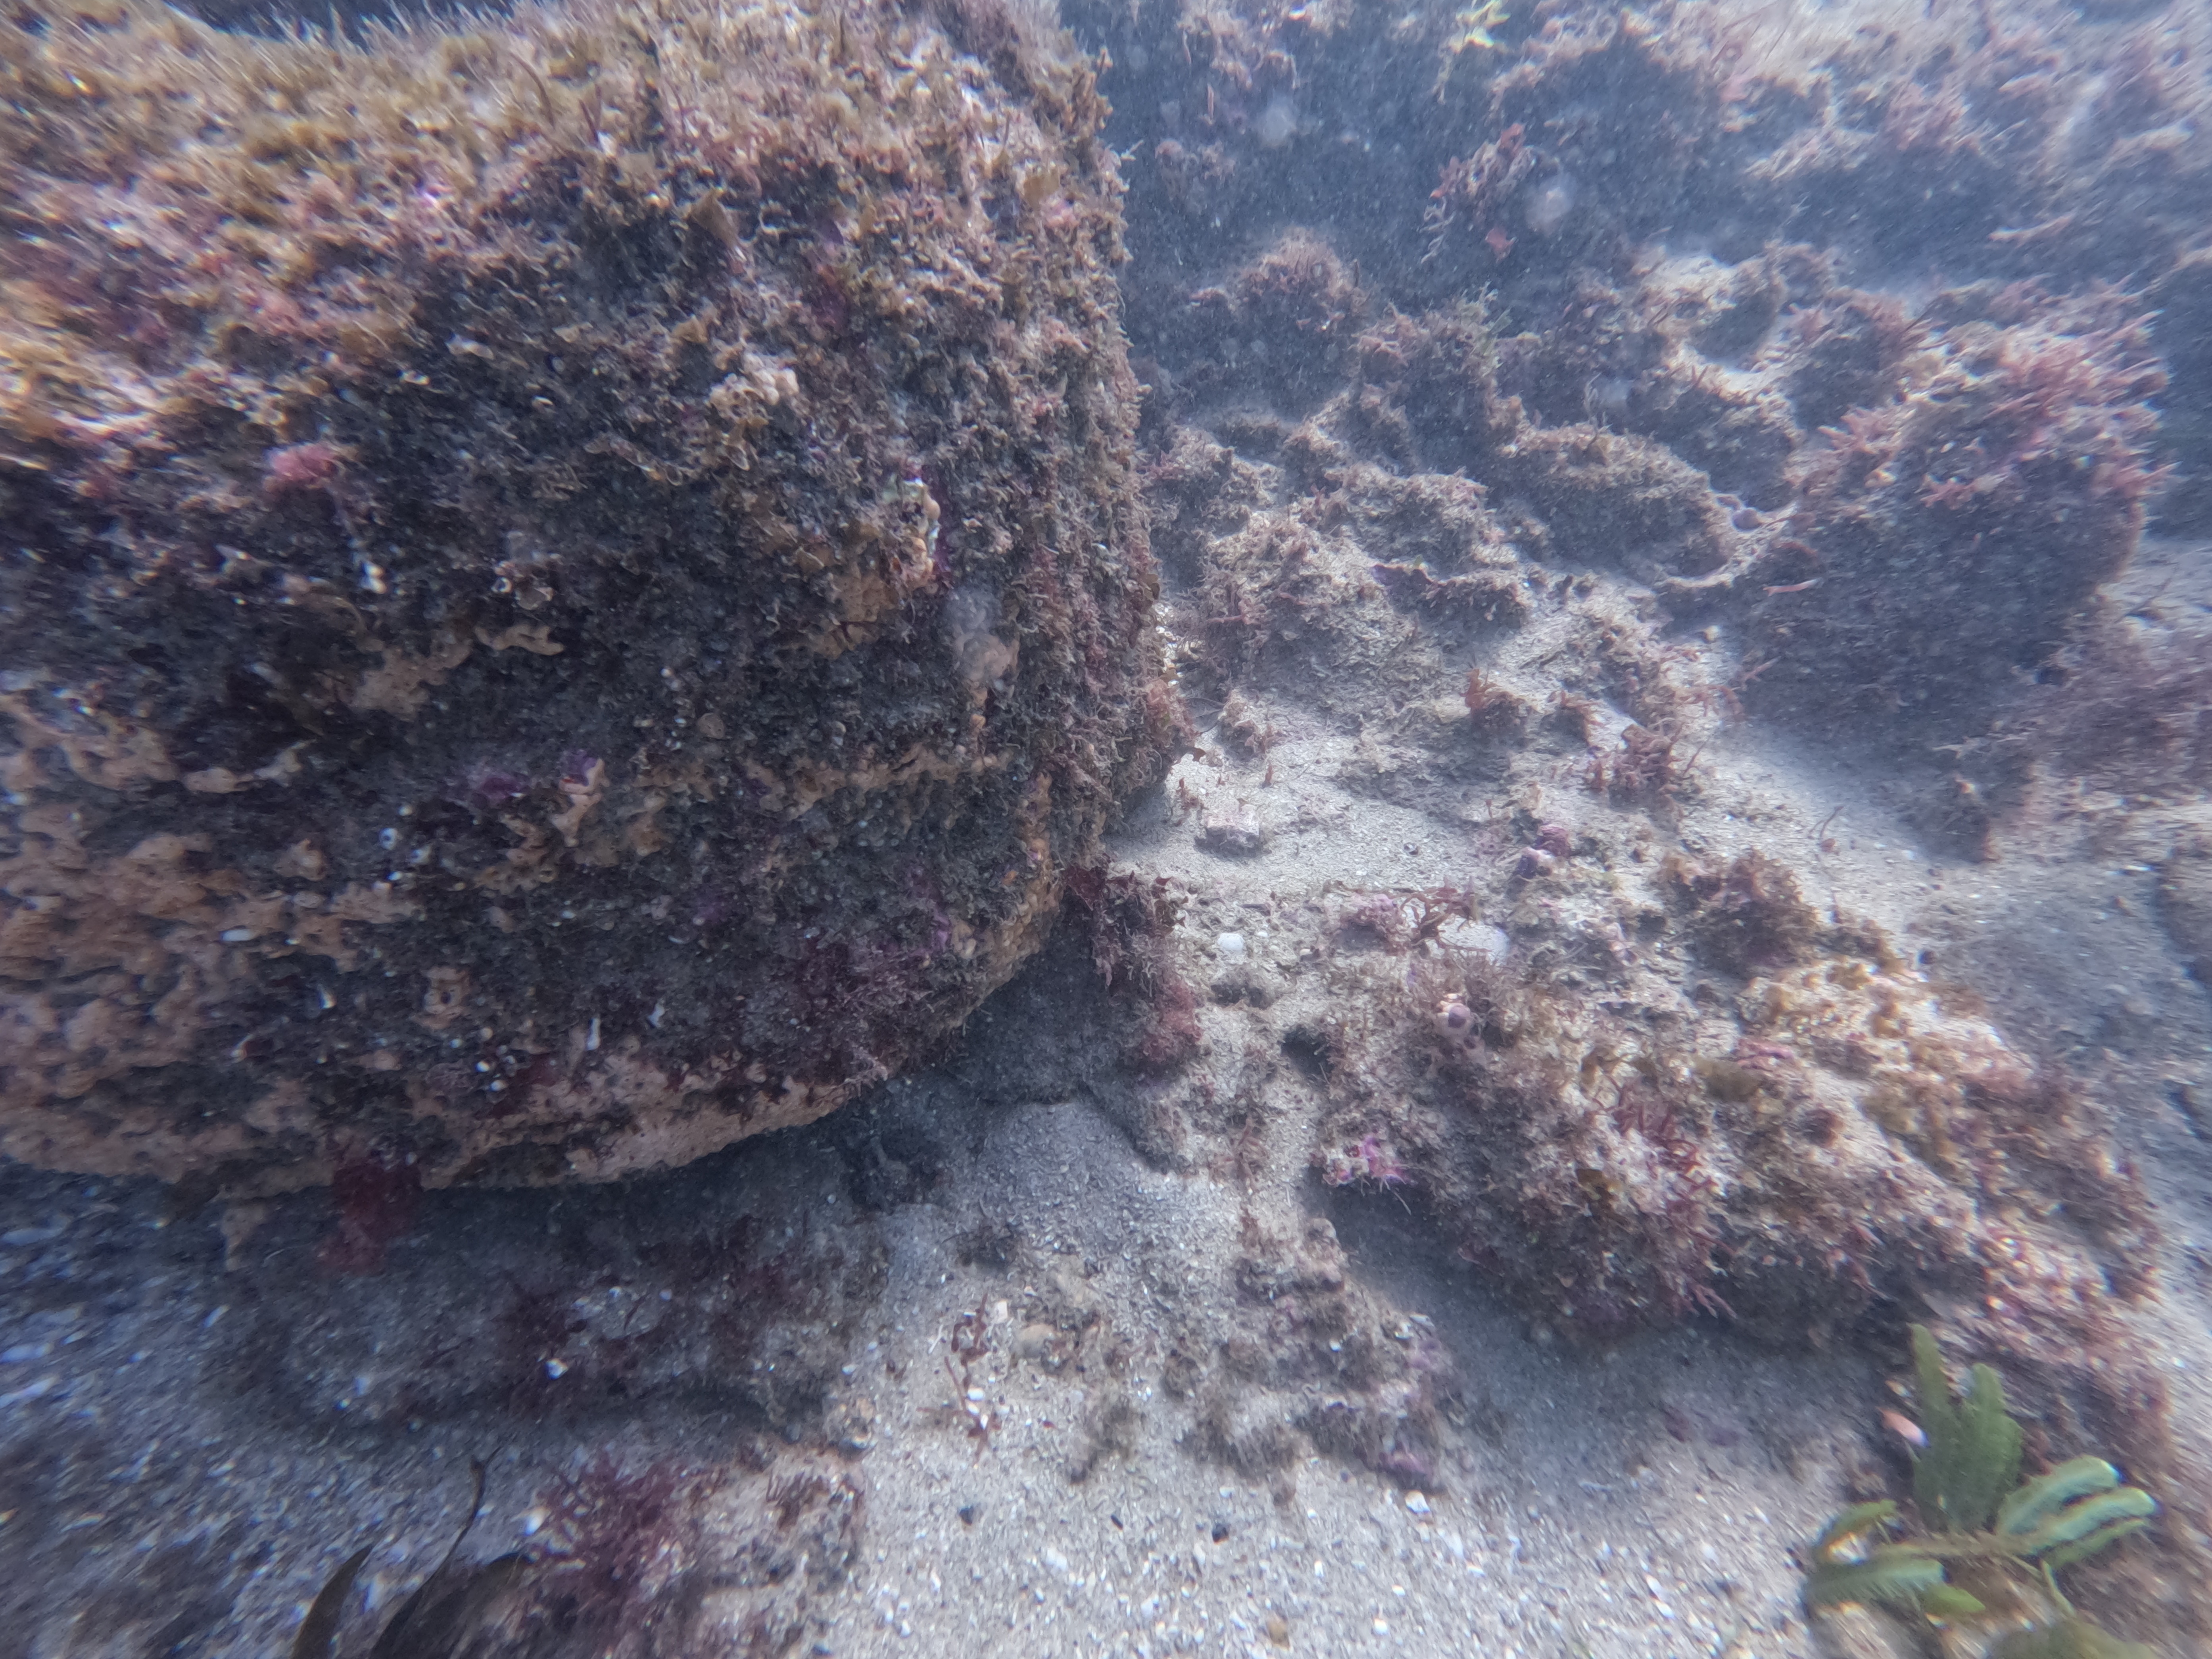

Supplement: Supplementary file 1693 [file G0028019.pdf › Ocean1/G0028019.pdf]

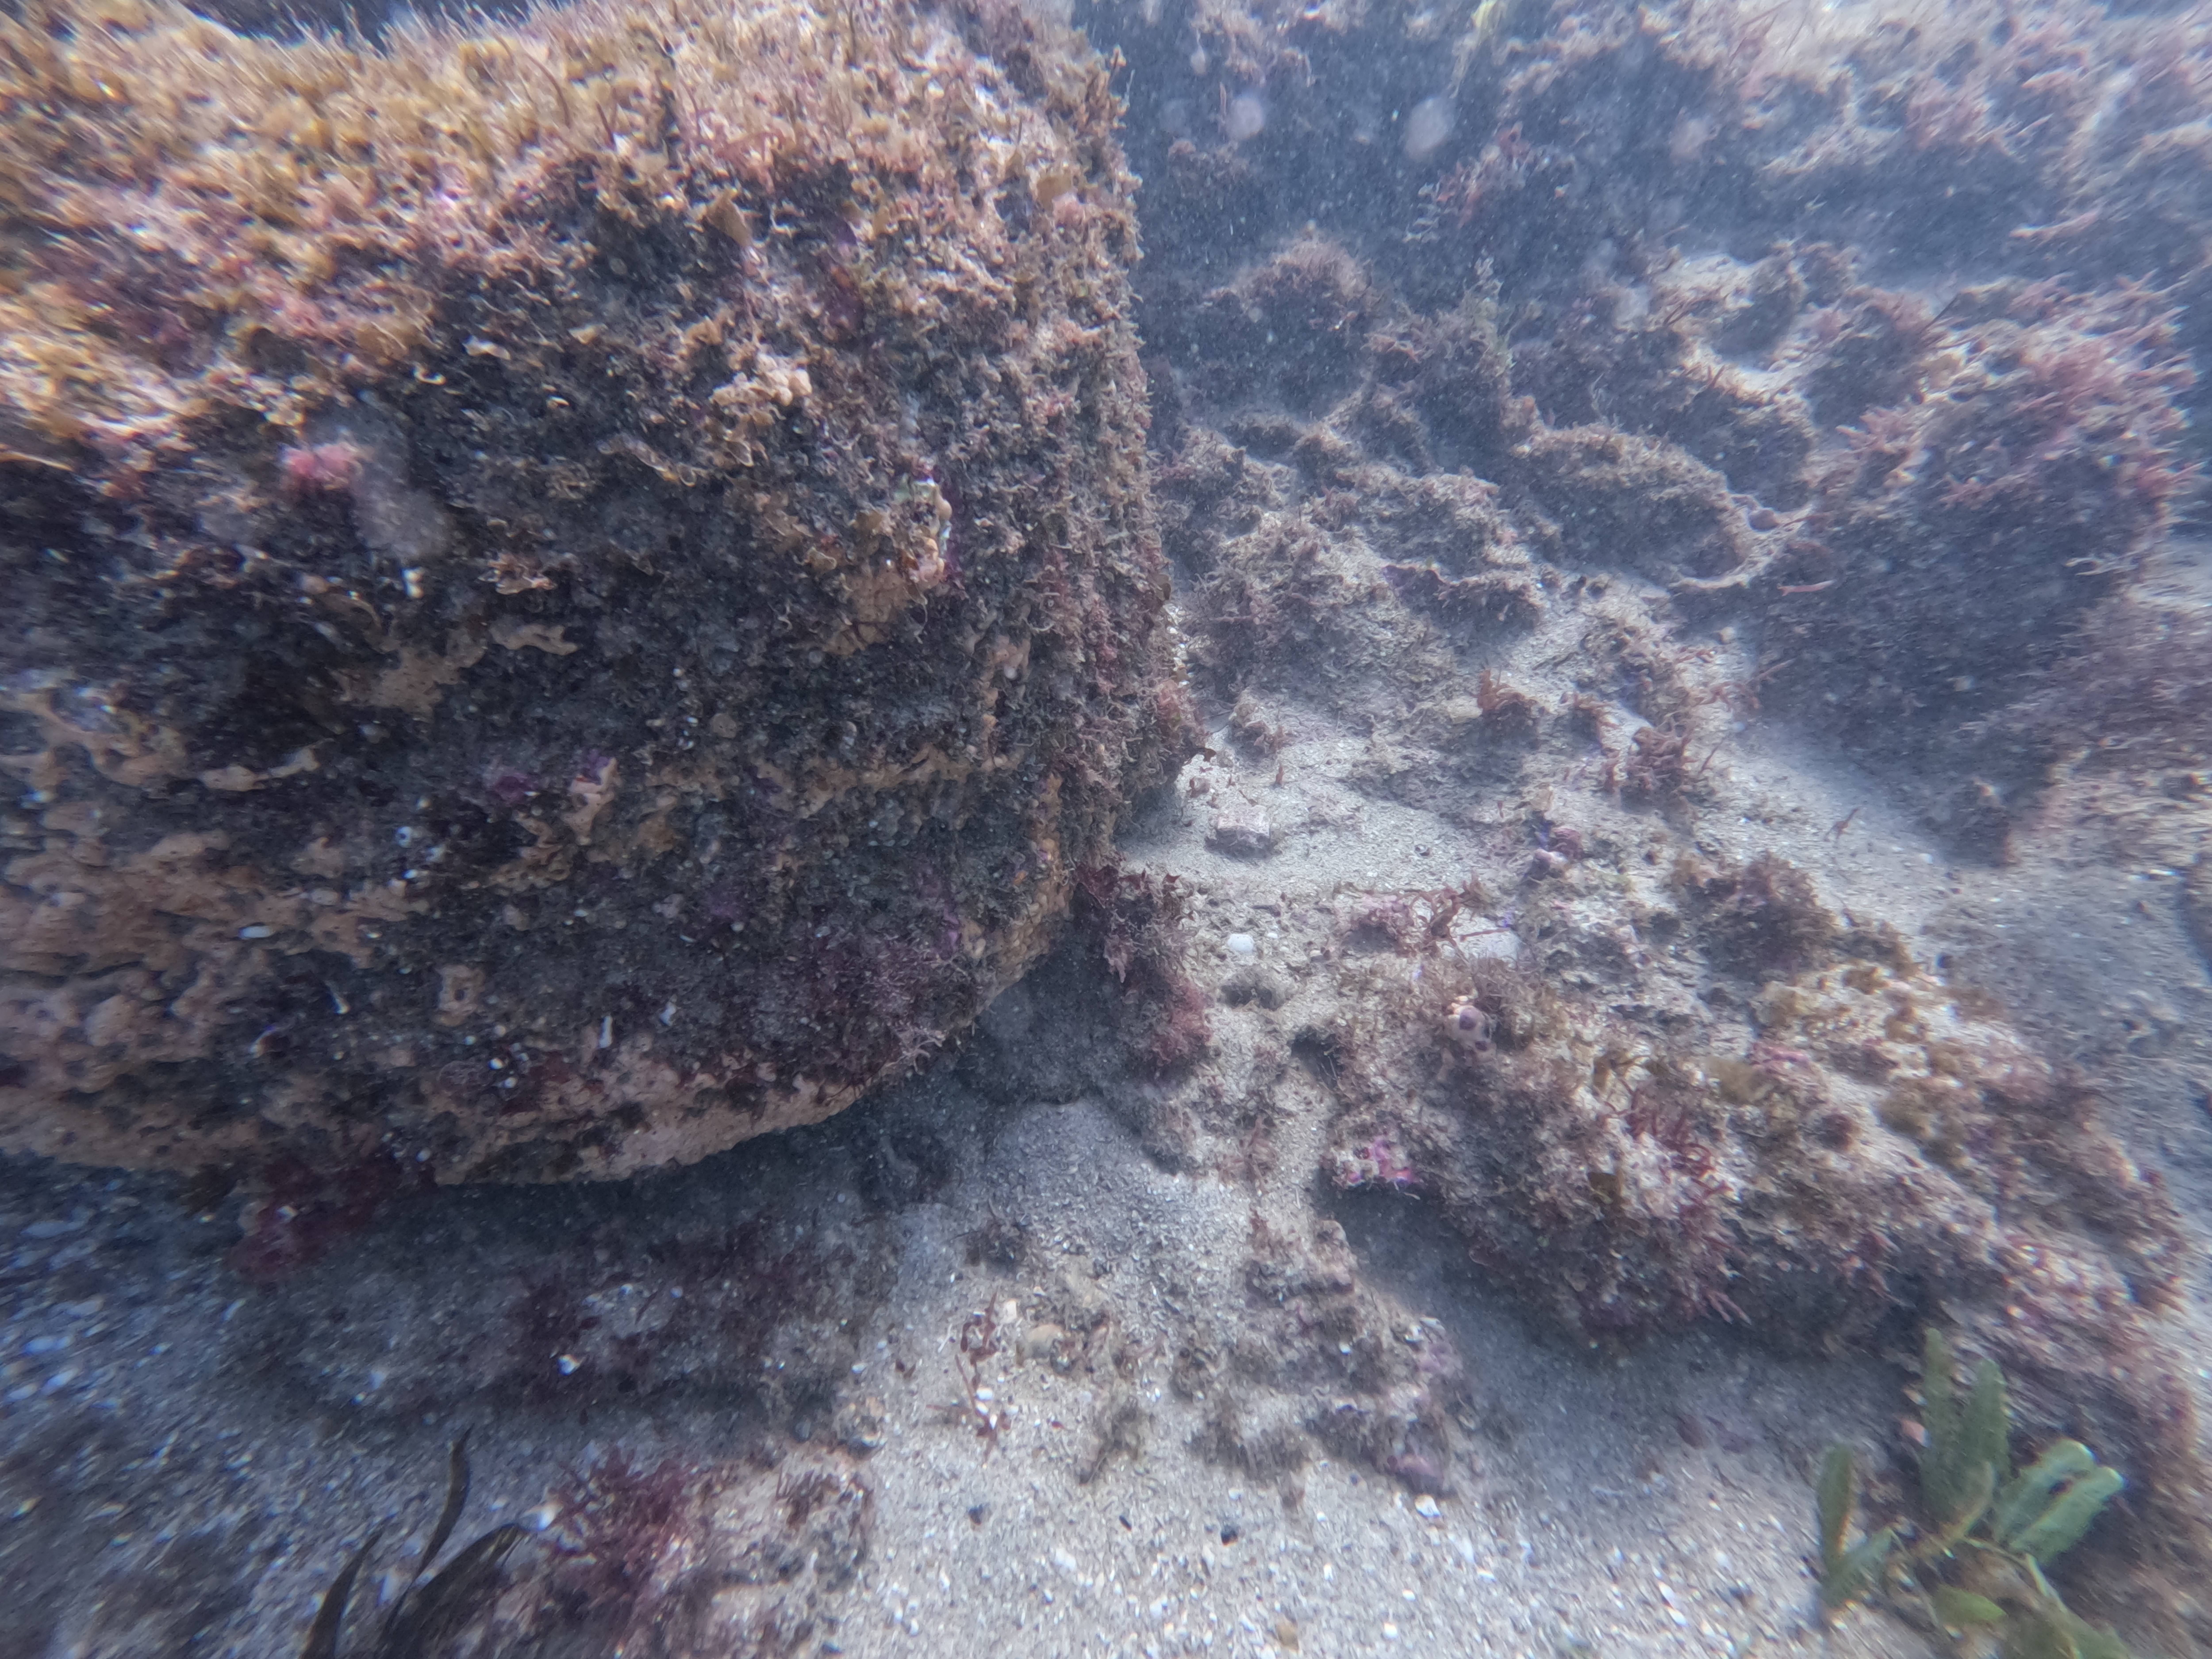

Supplement: Supplementary file 1694 [file G0028020.pdf › Ocean1/G0028020.pdf]

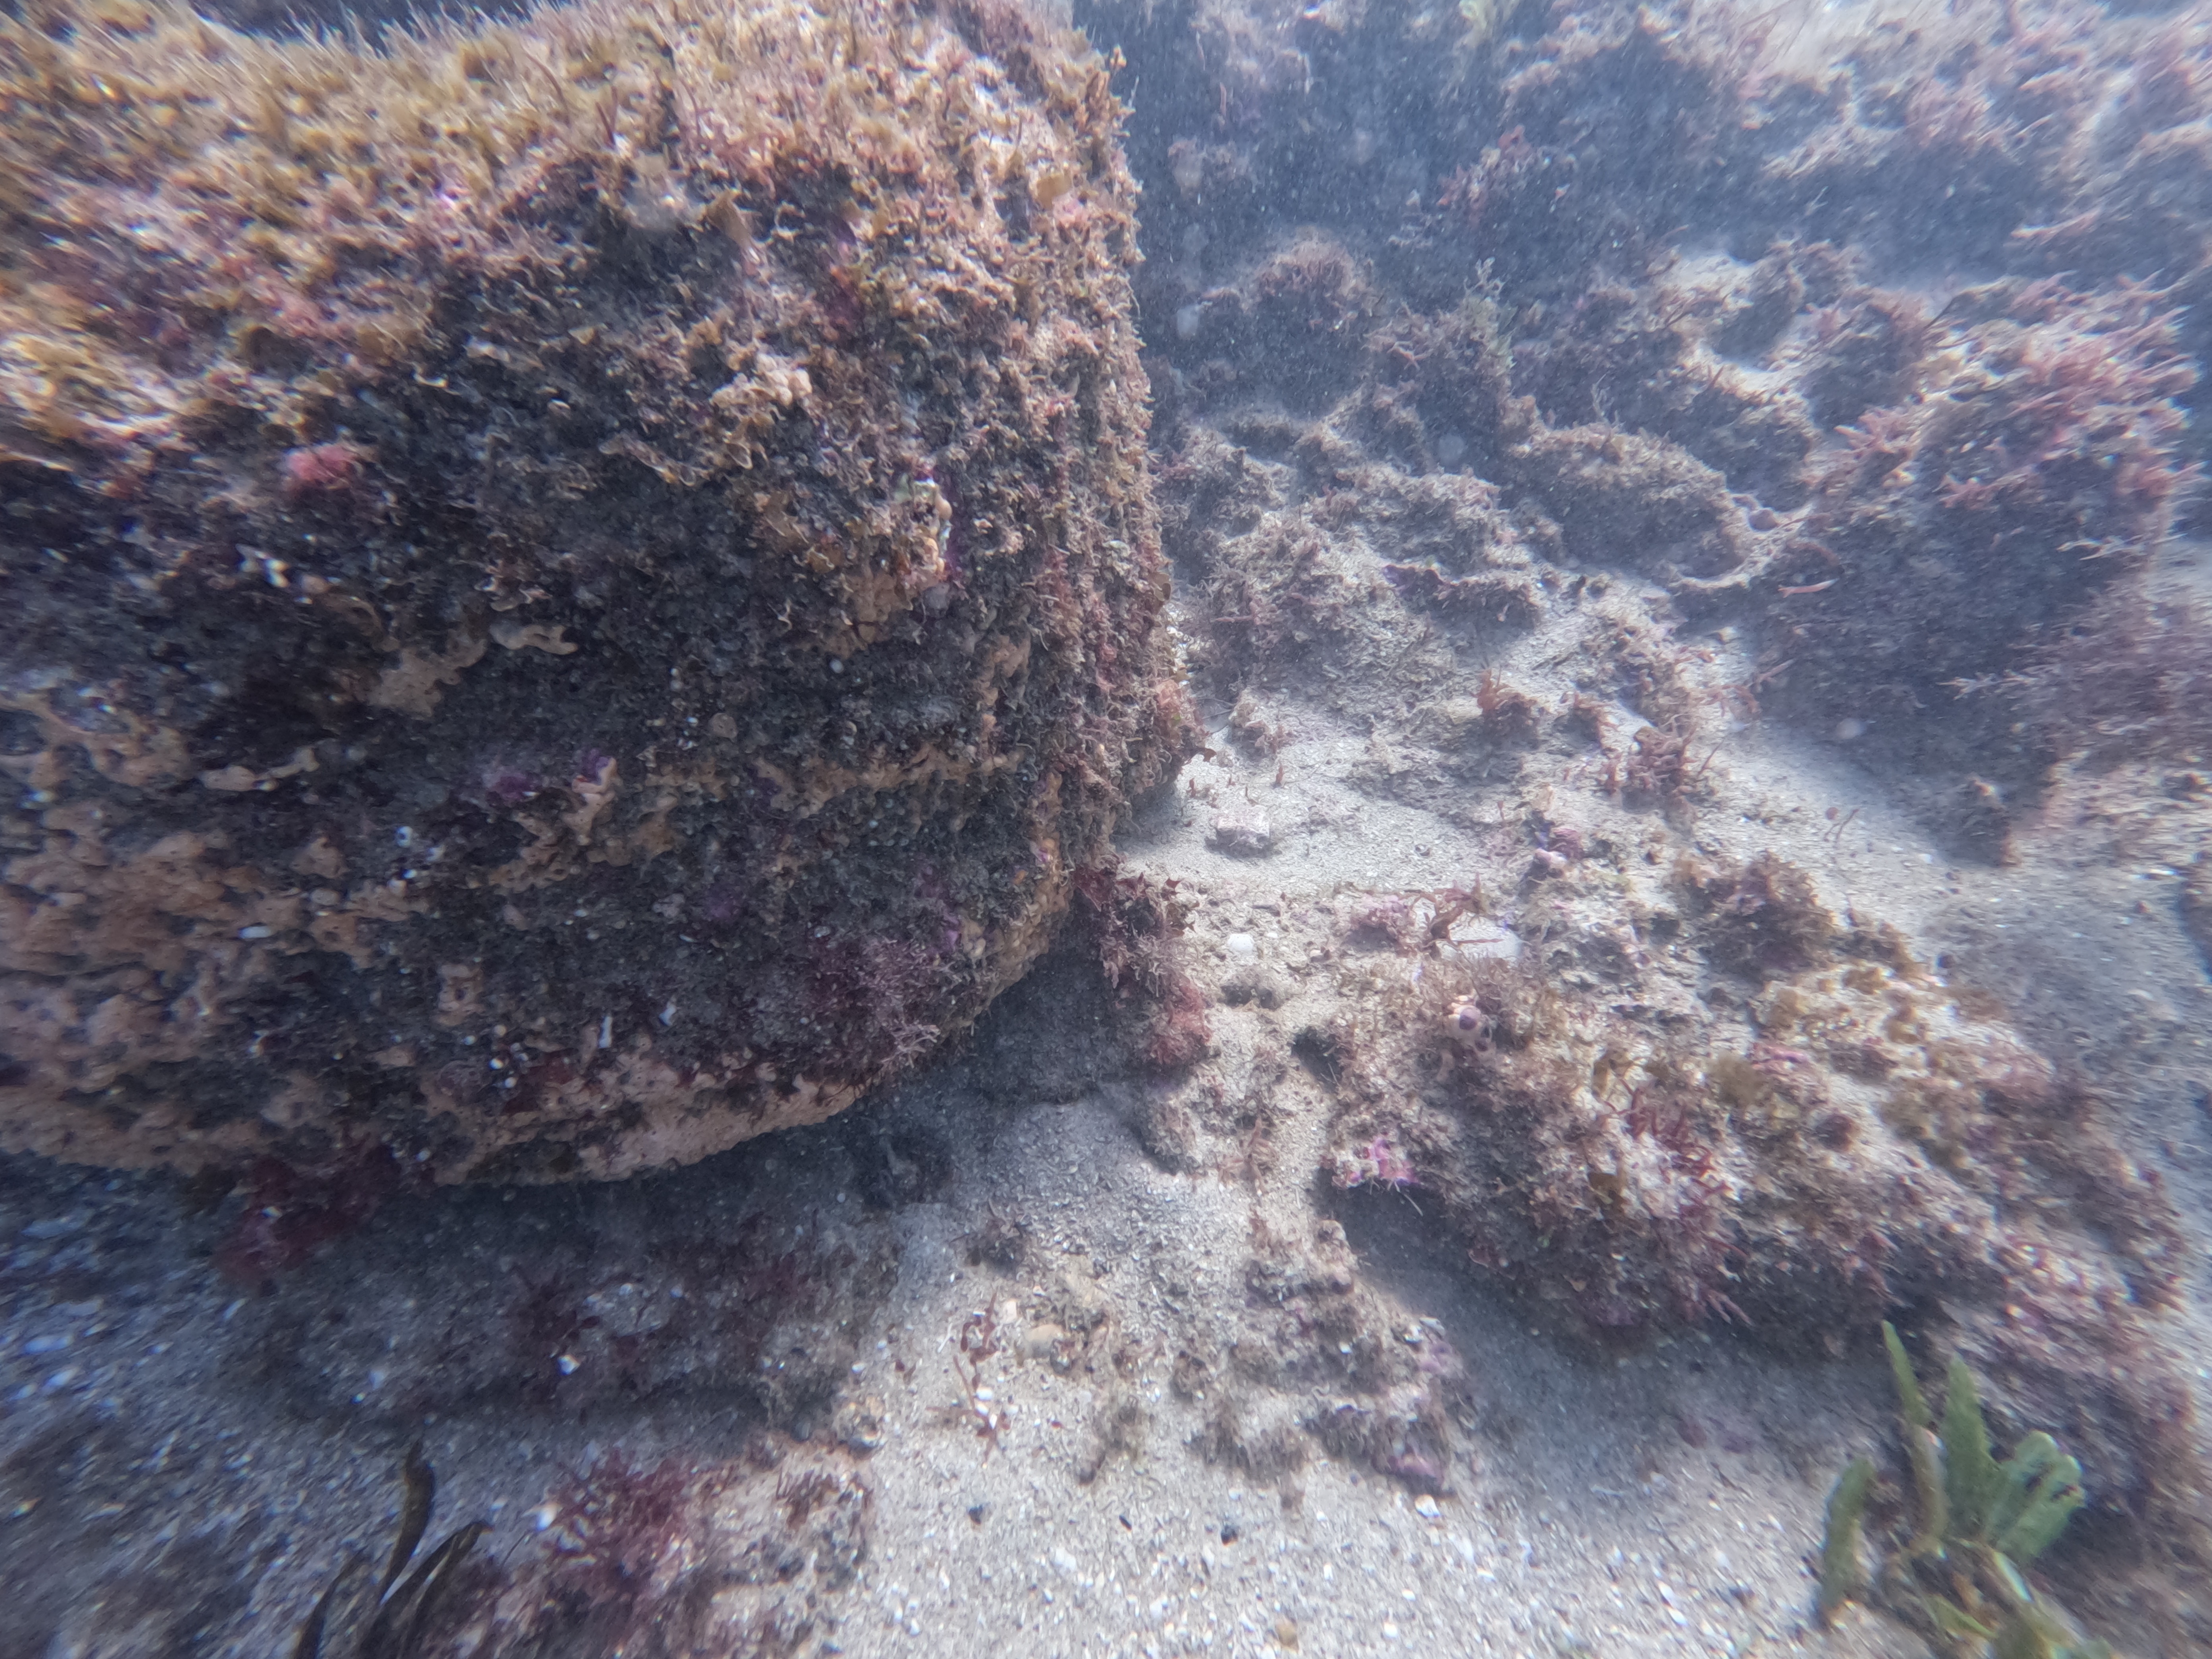

Supplement: Supplementary file 1695 [file G0028021.pdf › Ocean1/G0028021.pdf]

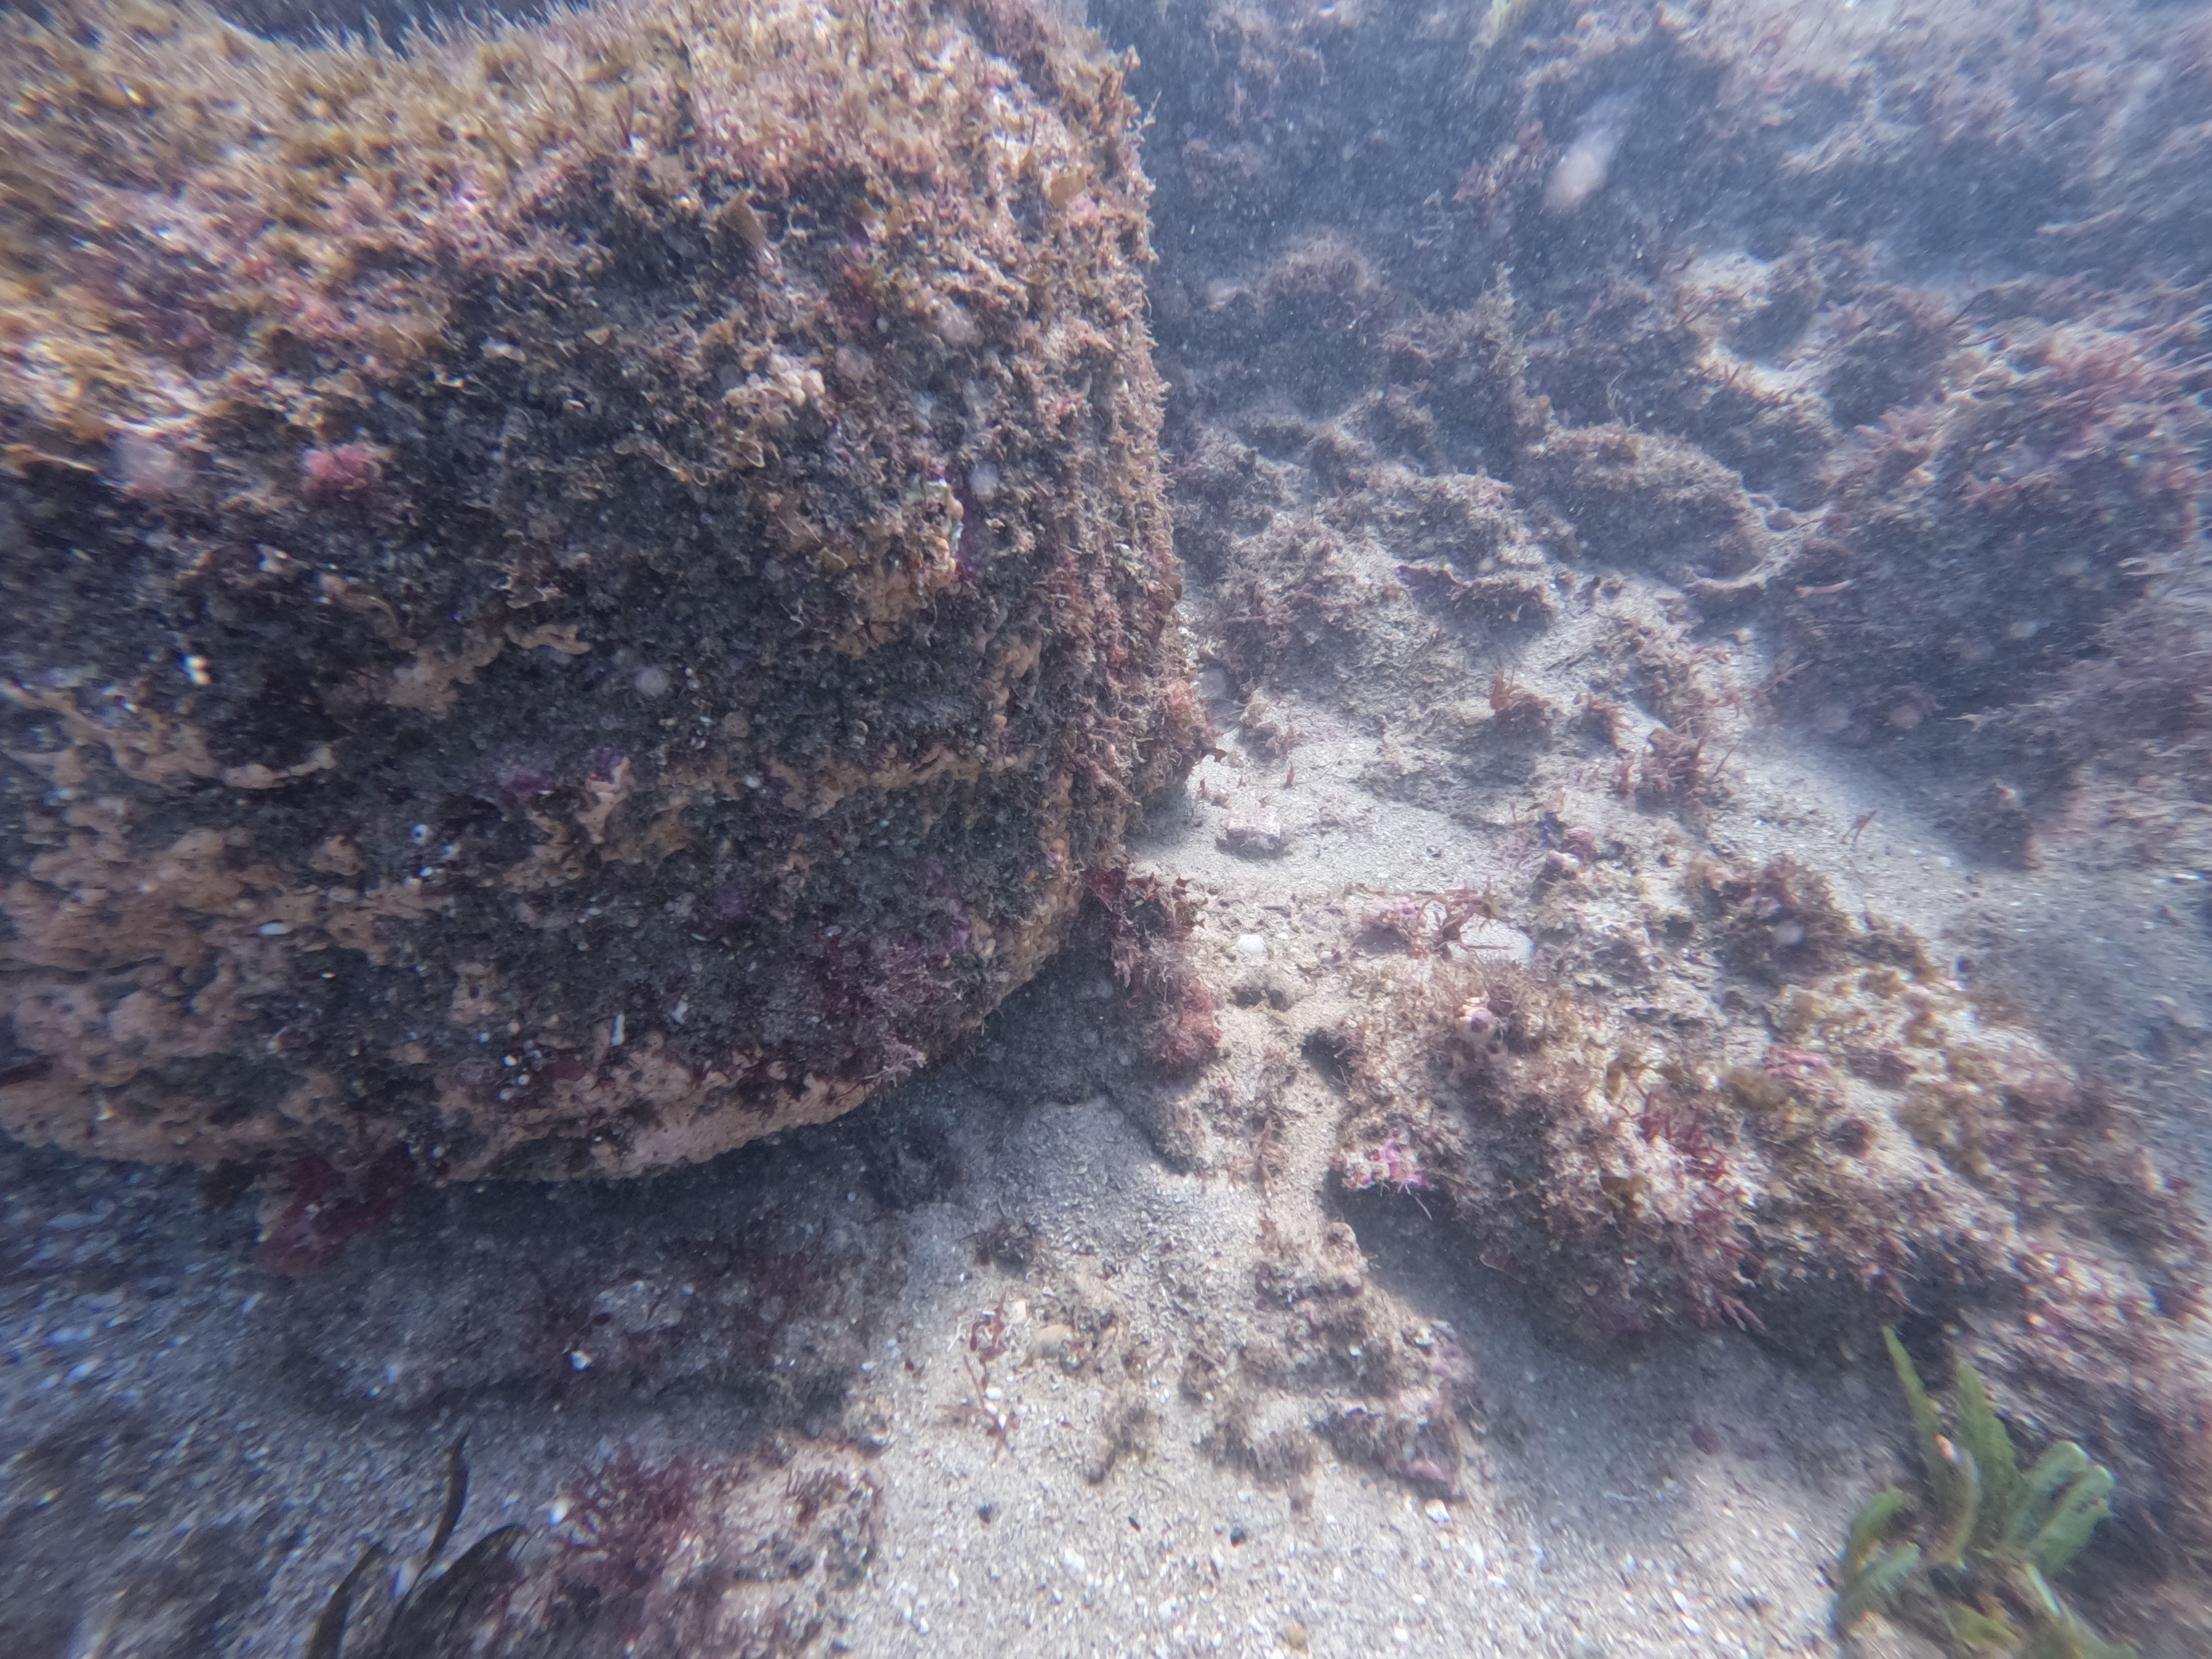

Supplement: Supplementary file 1696 [file G0028022.pdf › Ocean1/G0028022.pdf]

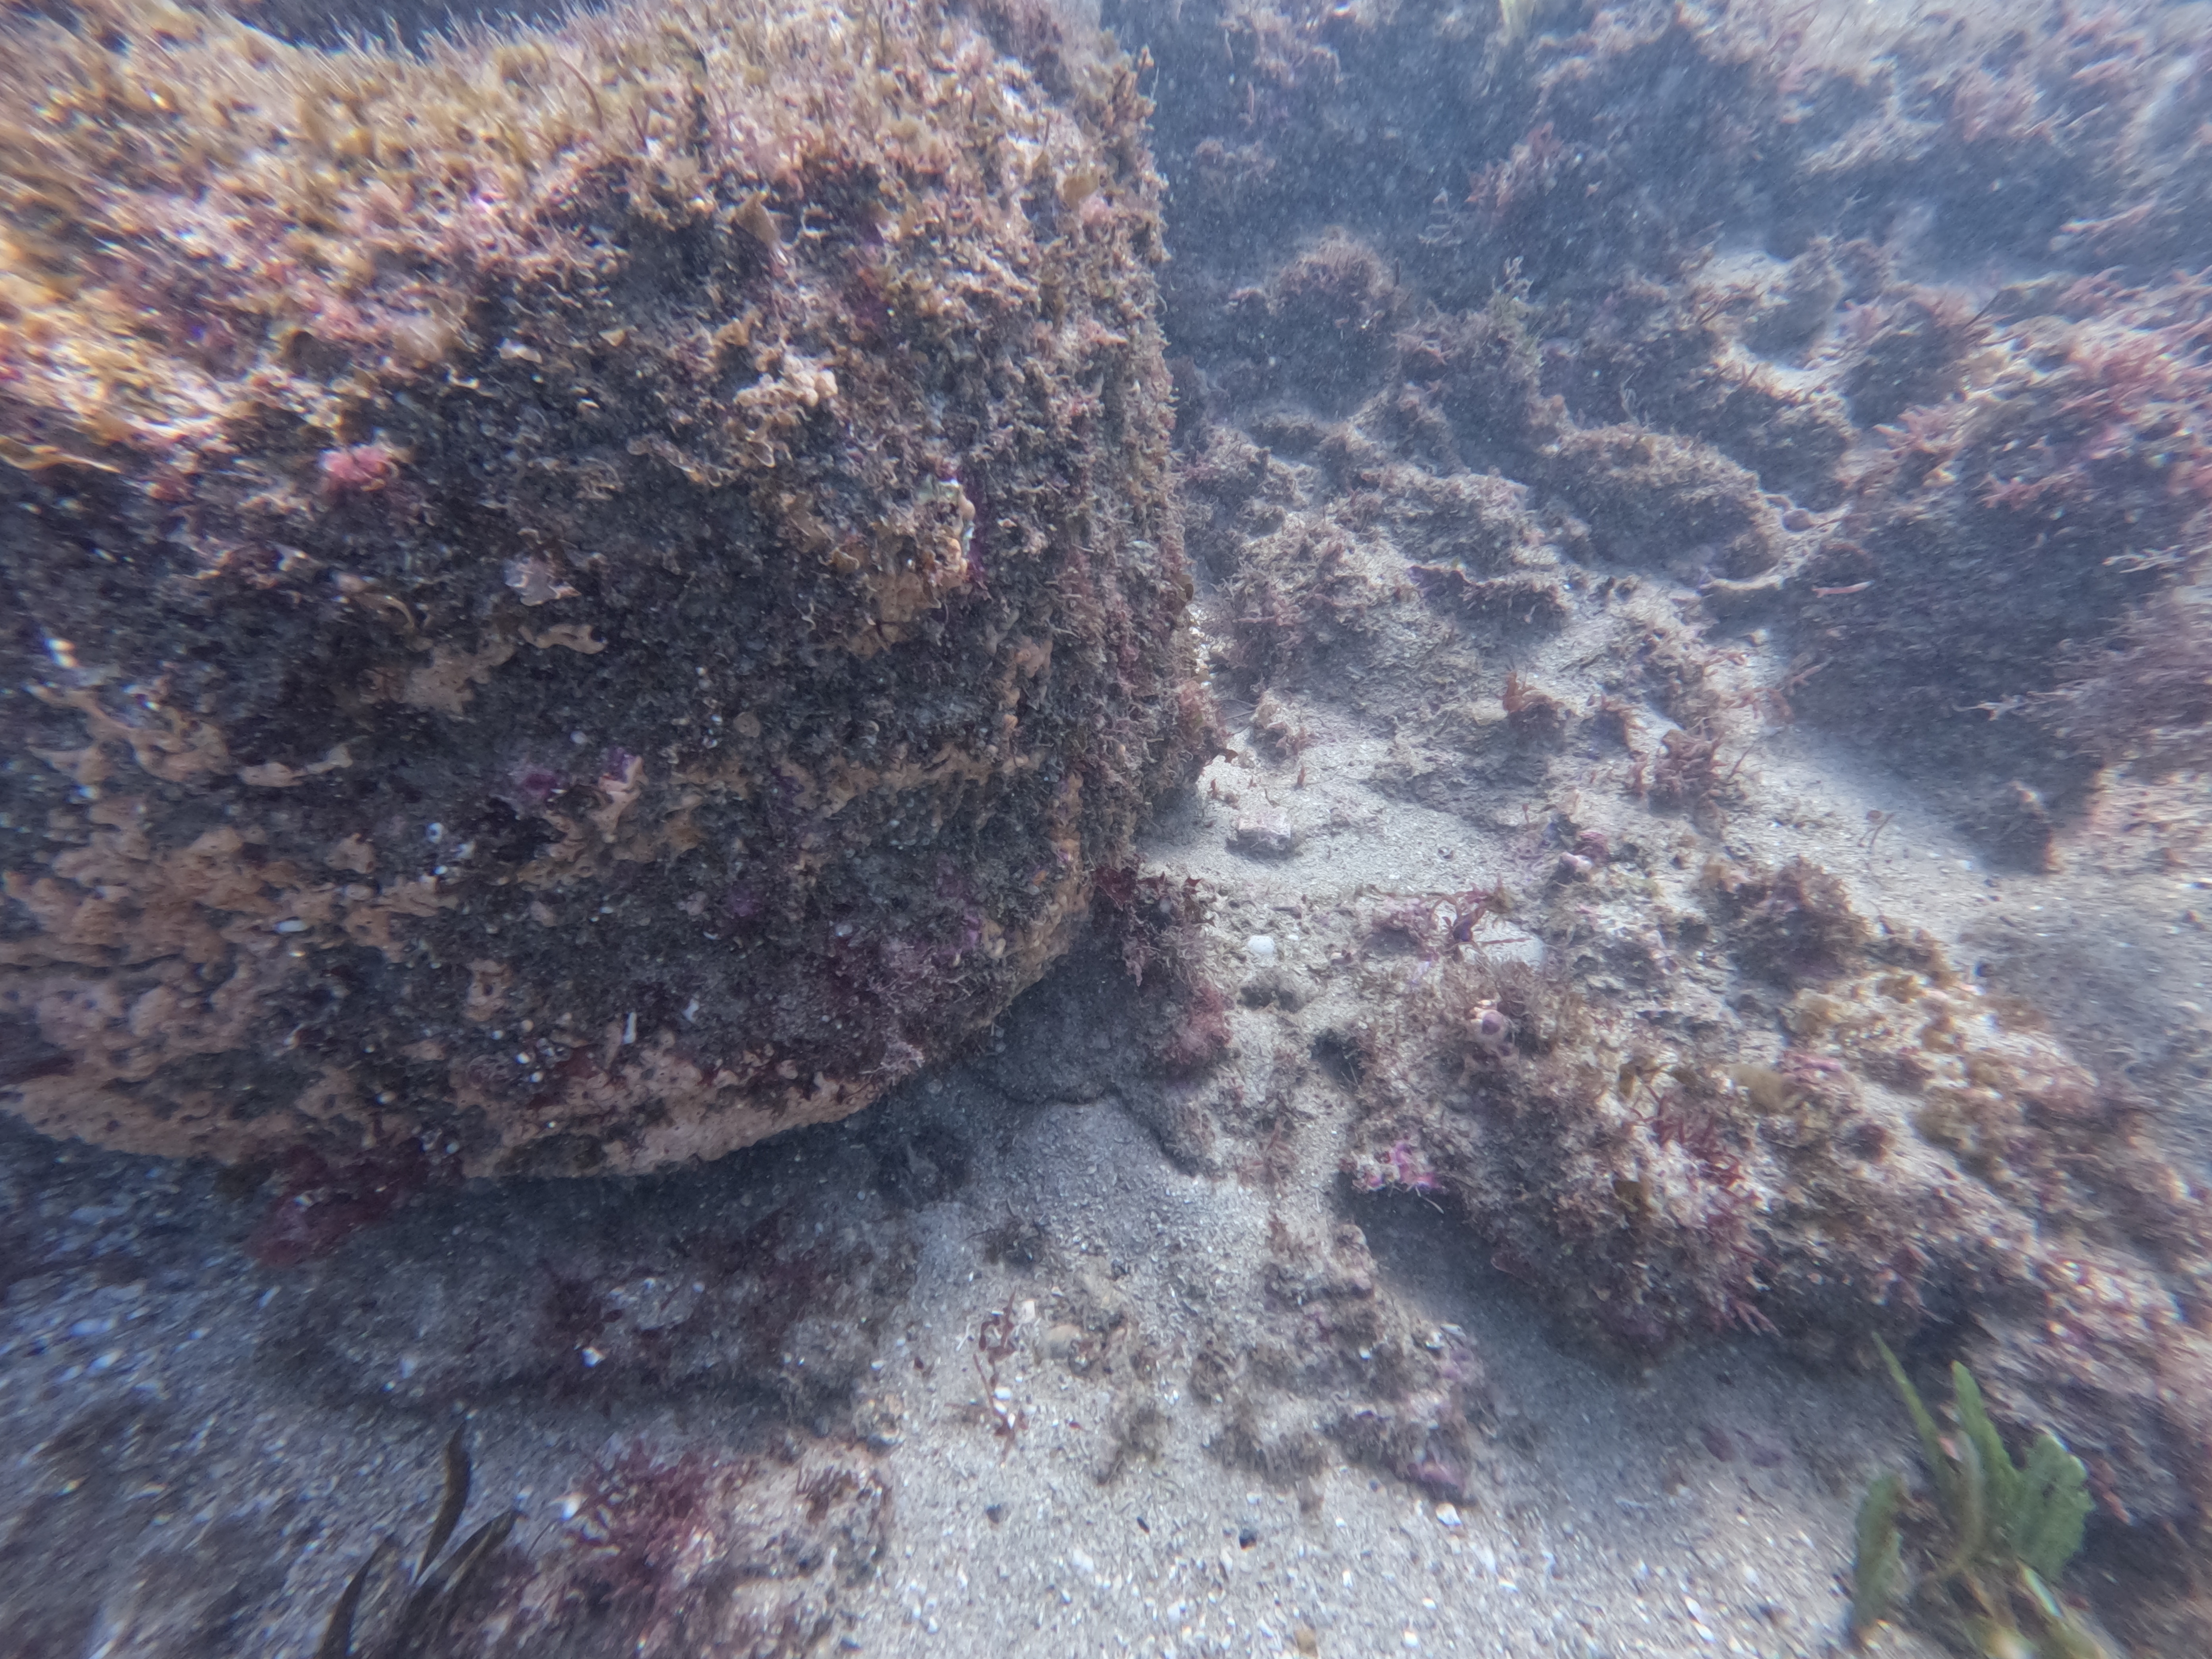

Supplement: Supplementary file 1697 [file G0028023.pdf › Ocean1/G0028023.pdf]

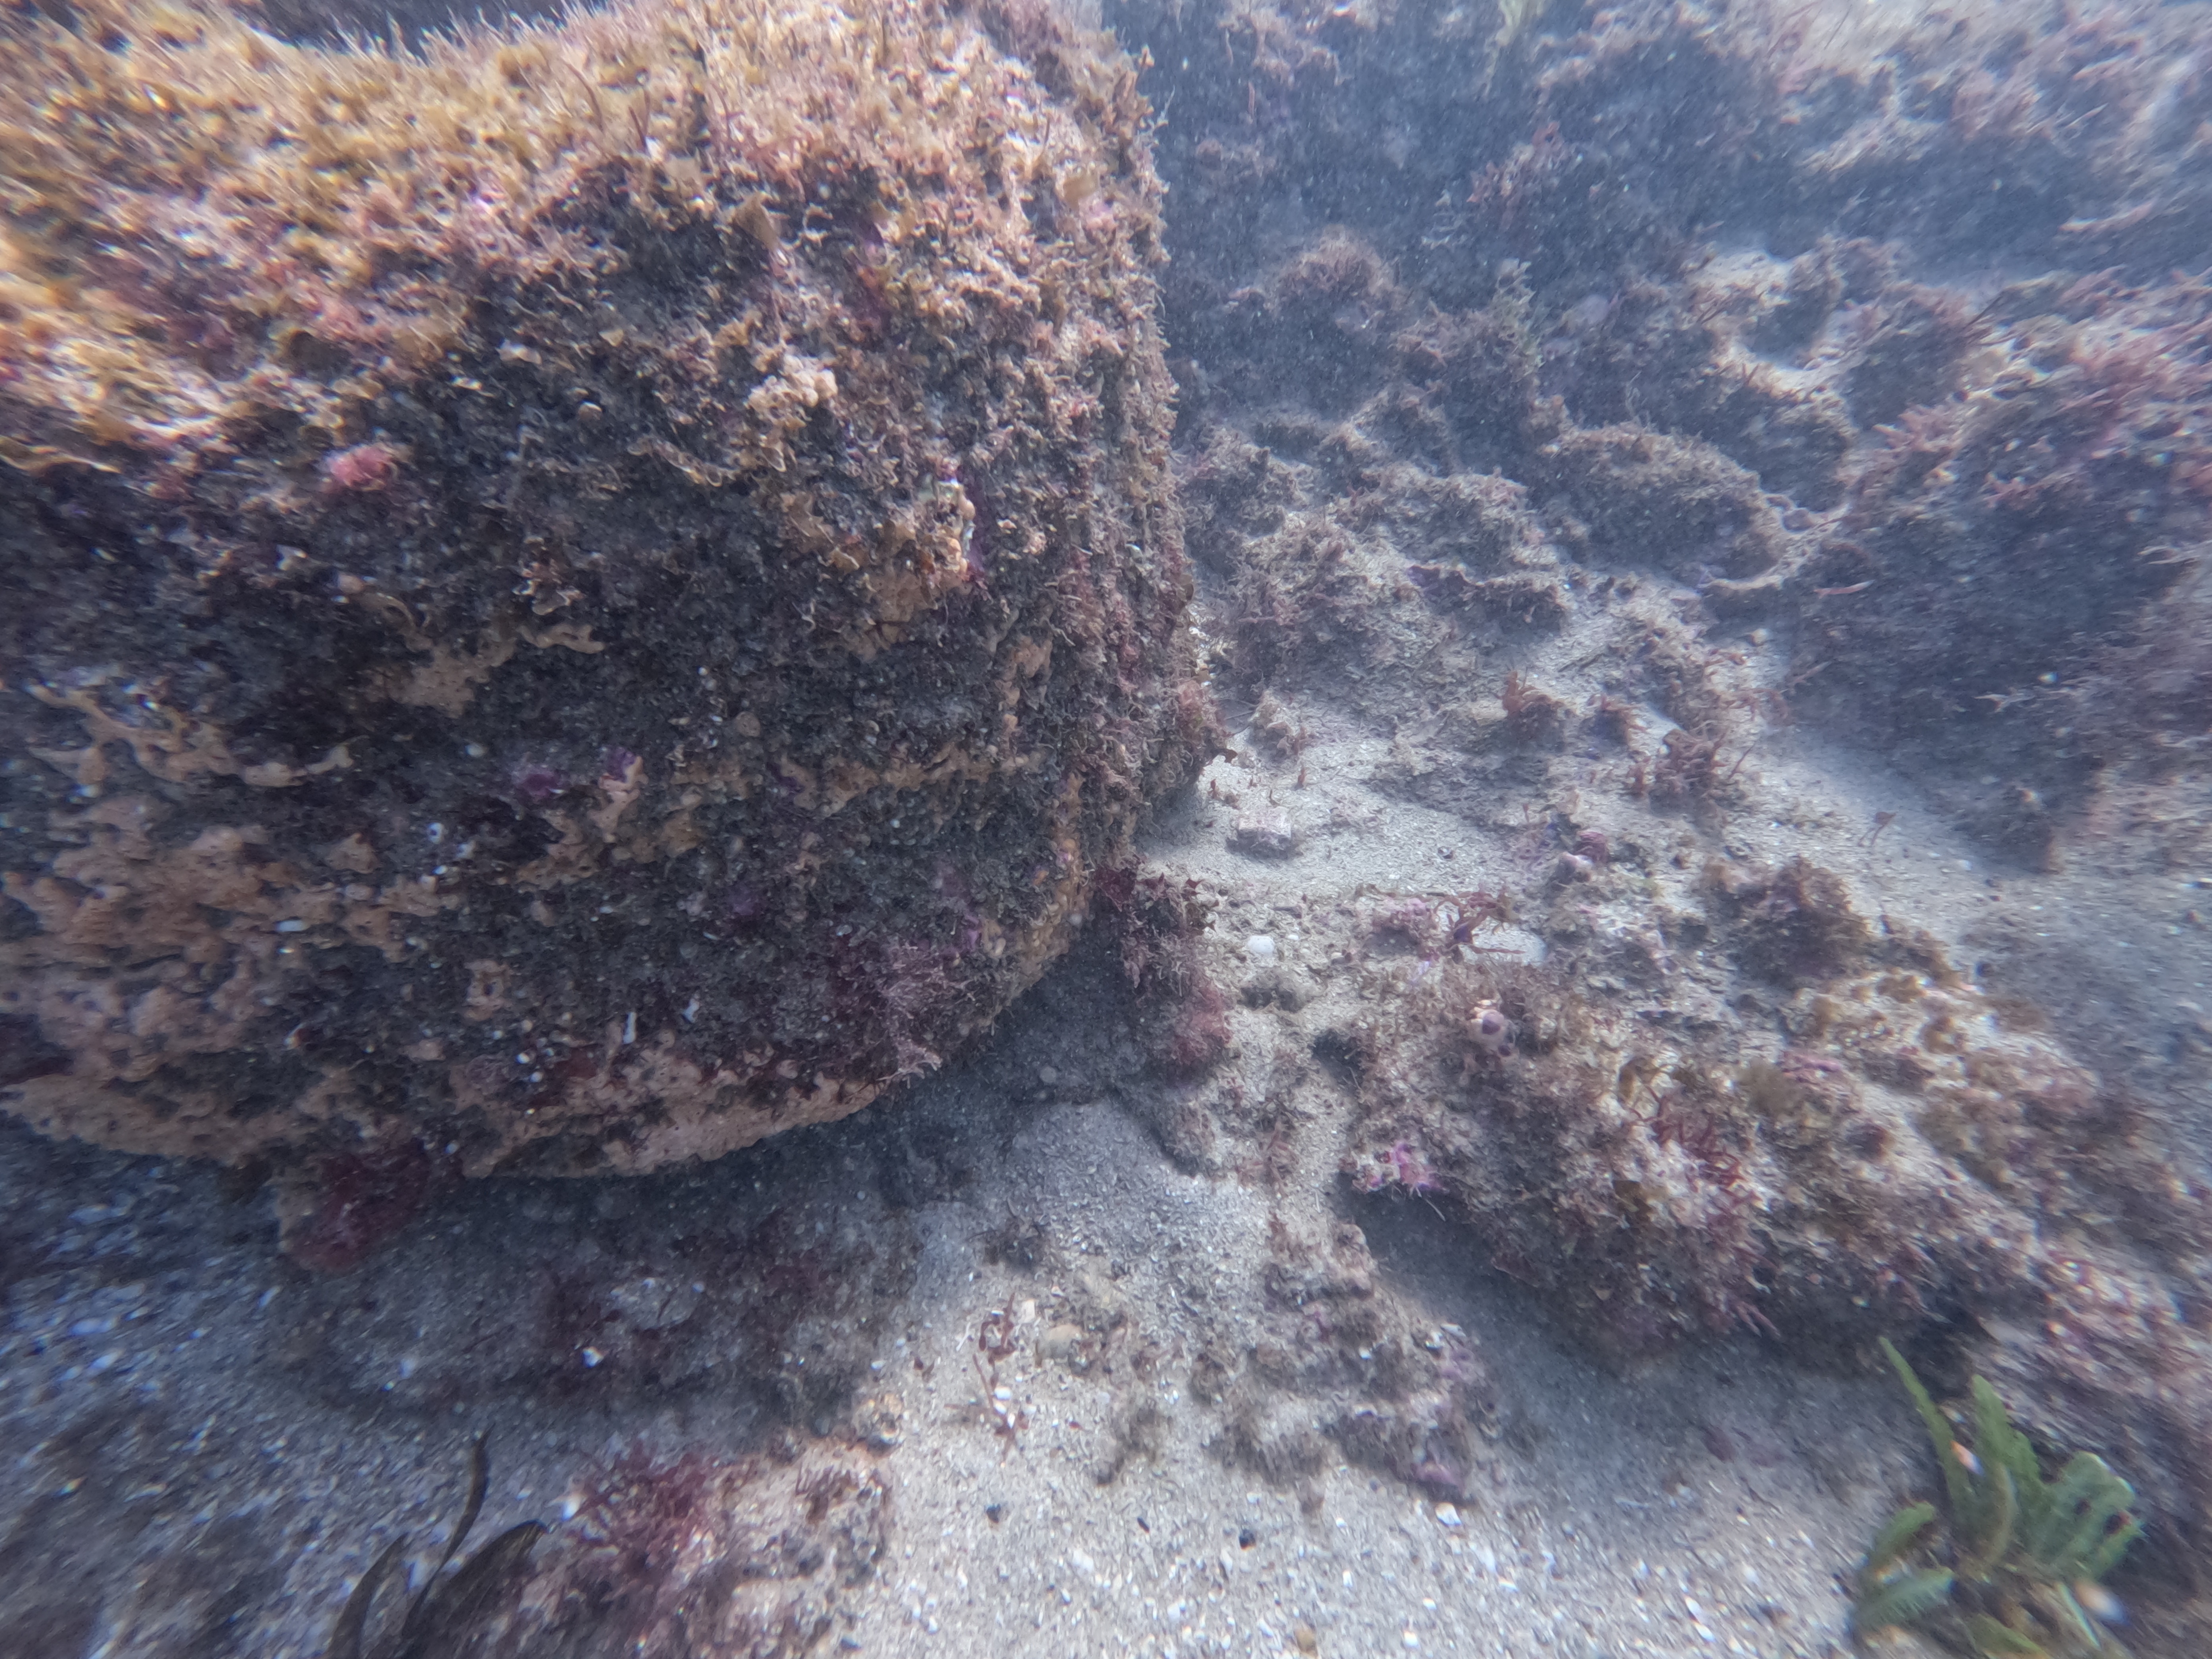

Supplement: Supplementary file 1698 [file G0028024.pdf › Ocean1/G0028024.pdf]

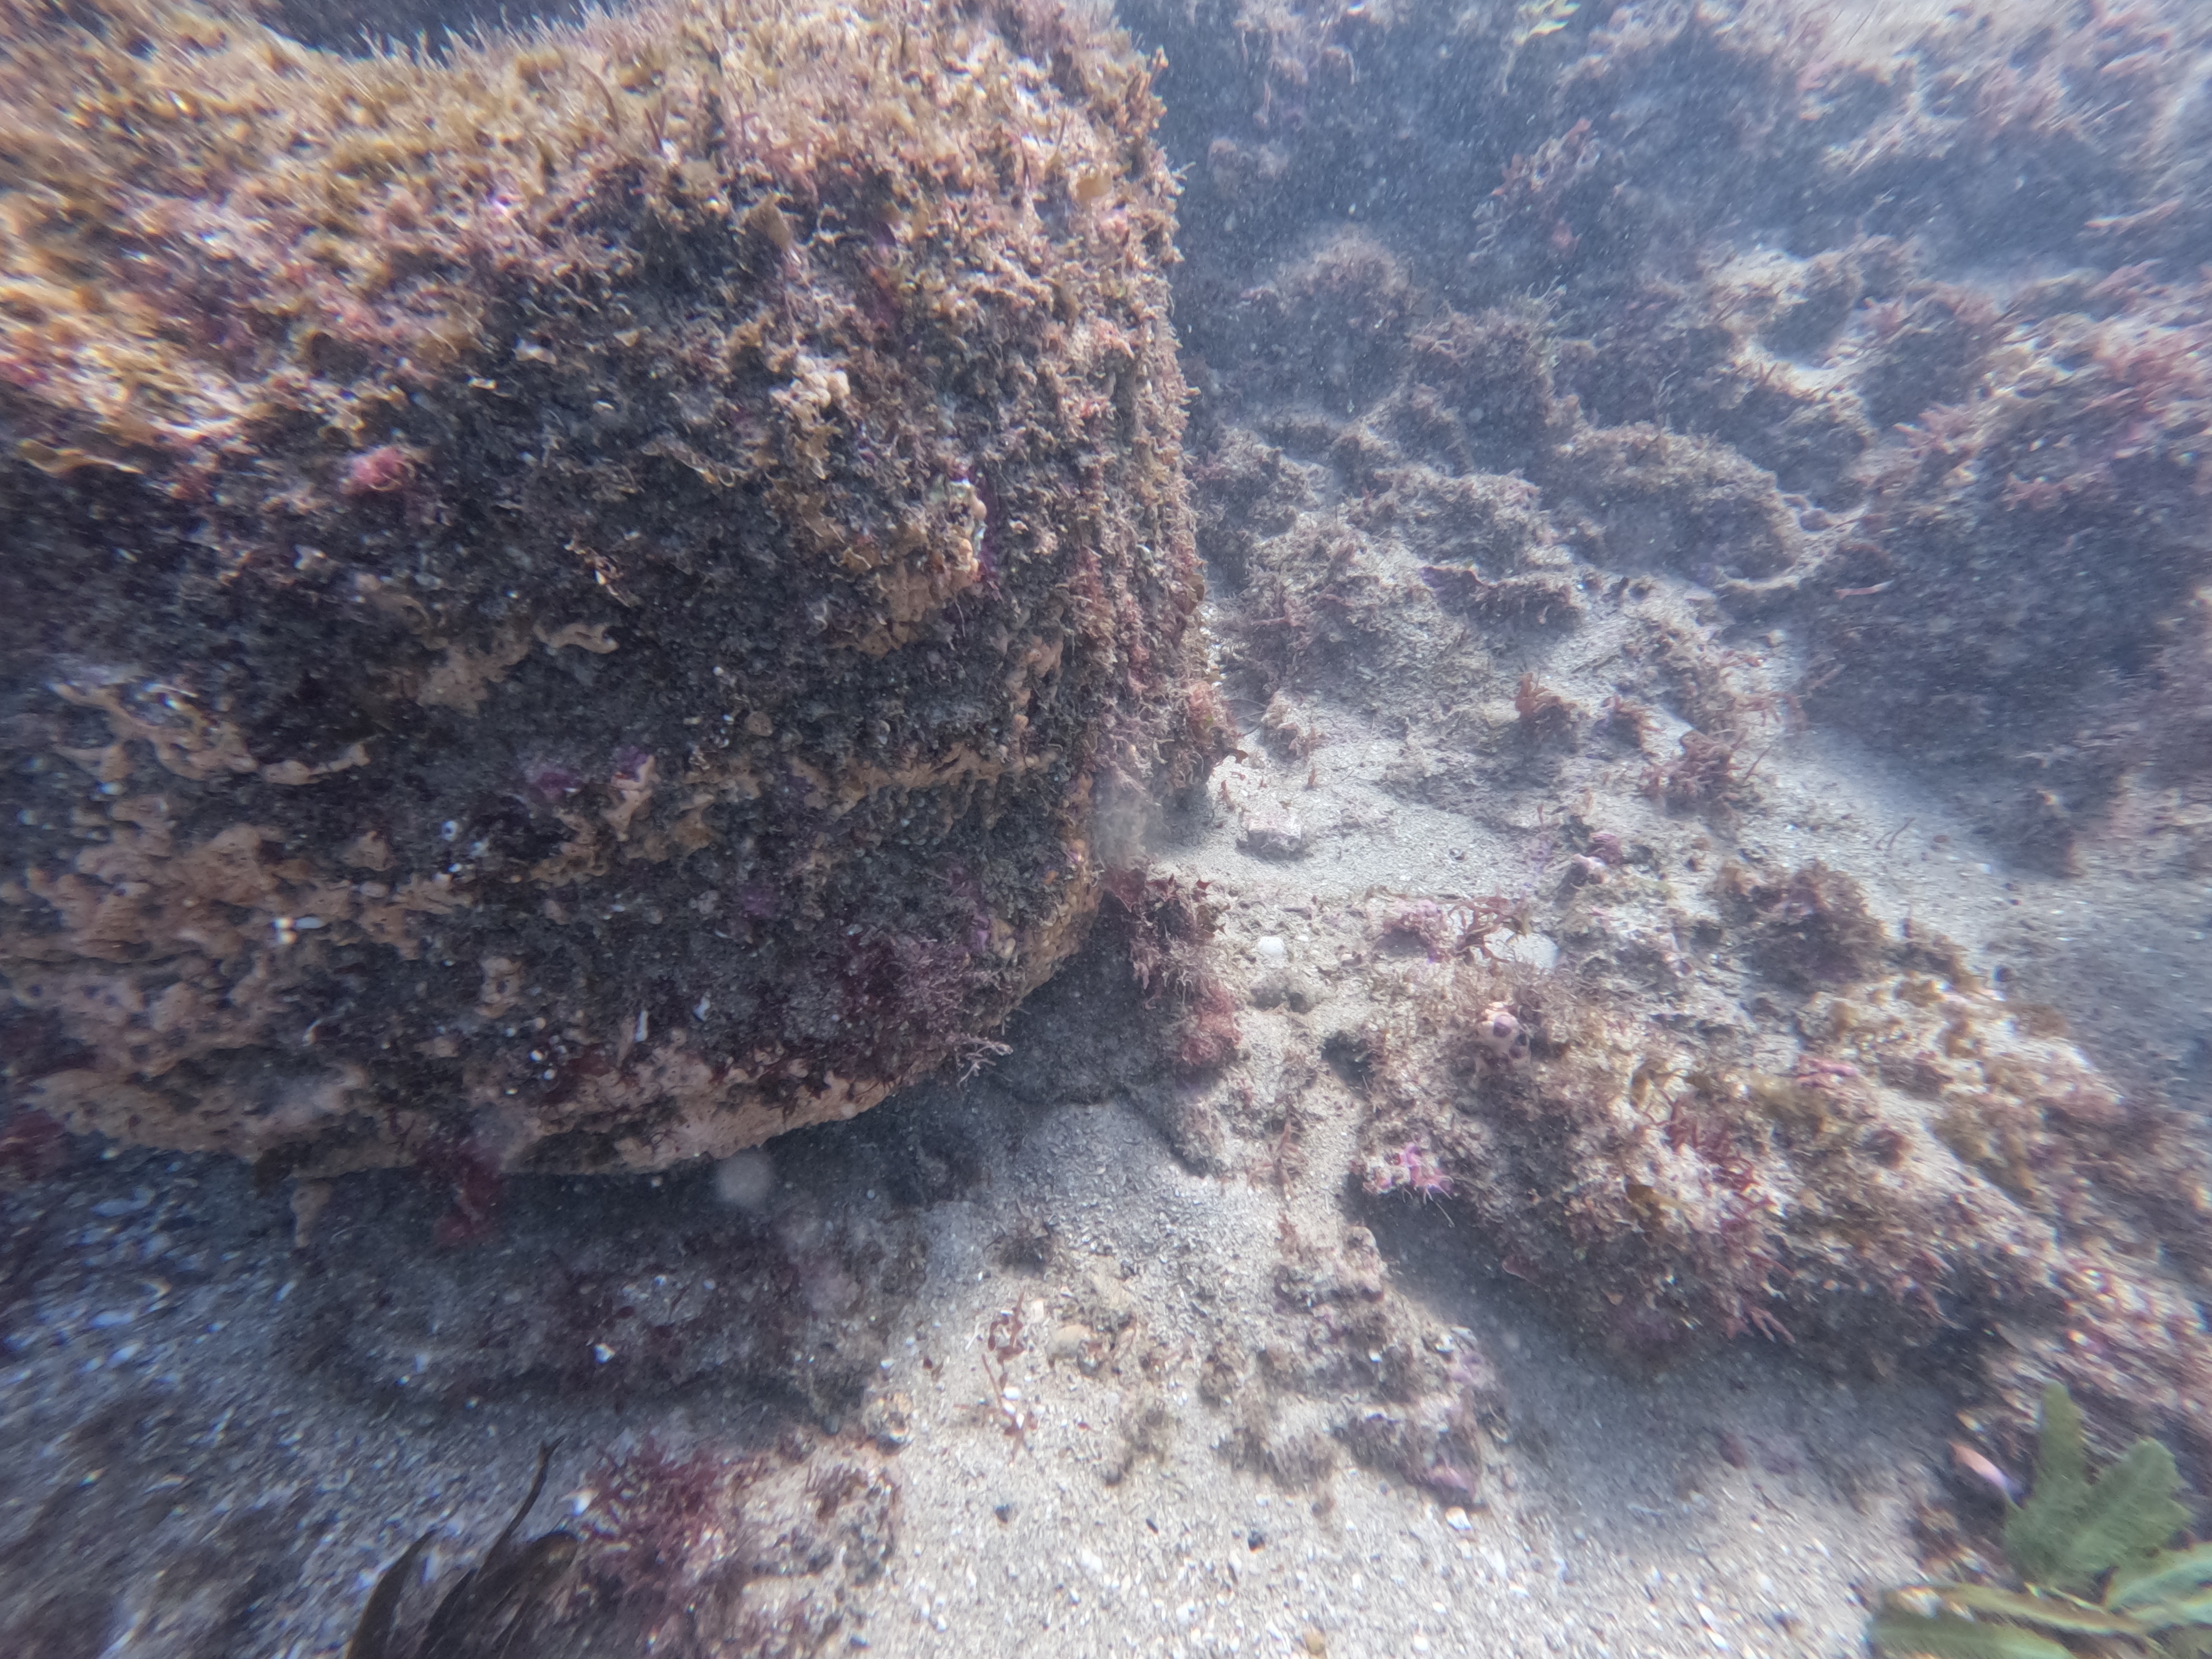

Supplement: Supplementary file 1699 [file G0028025.pdf › Ocean1/G0028025.pdf]

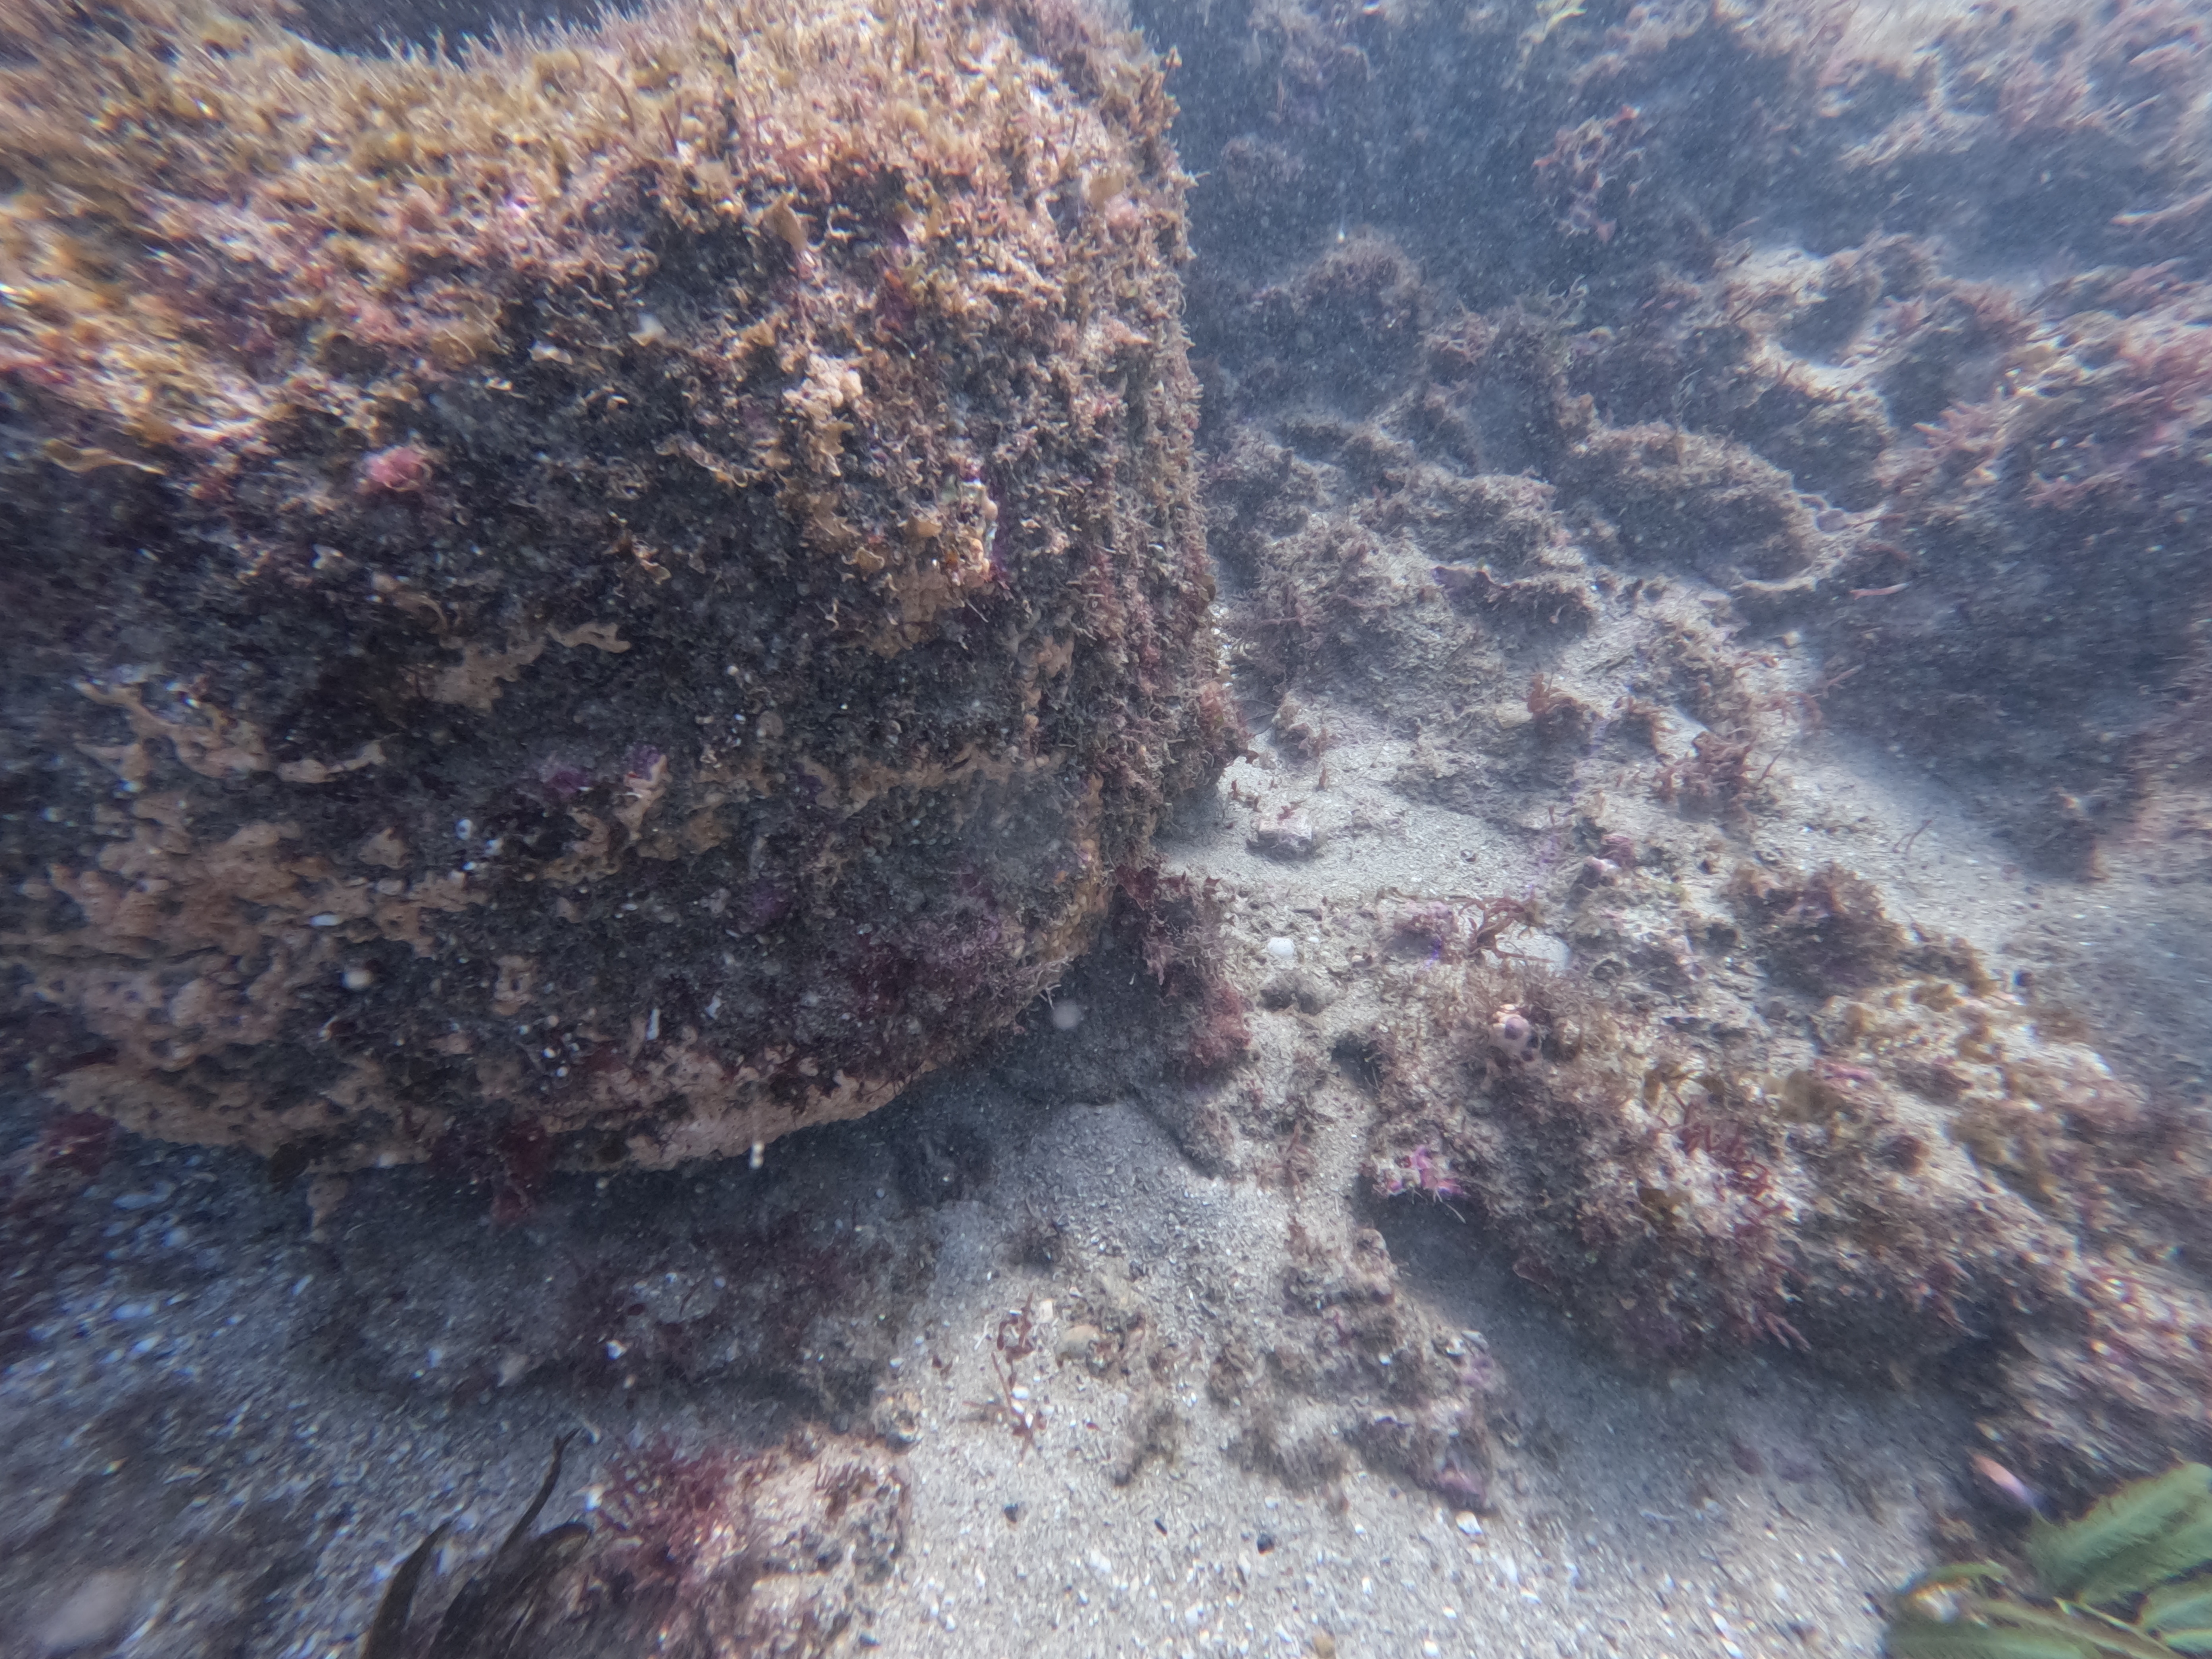

Supplement: Supplementary file 1700 [file G0028026.pdf › Ocean1/G0028026.pdf]

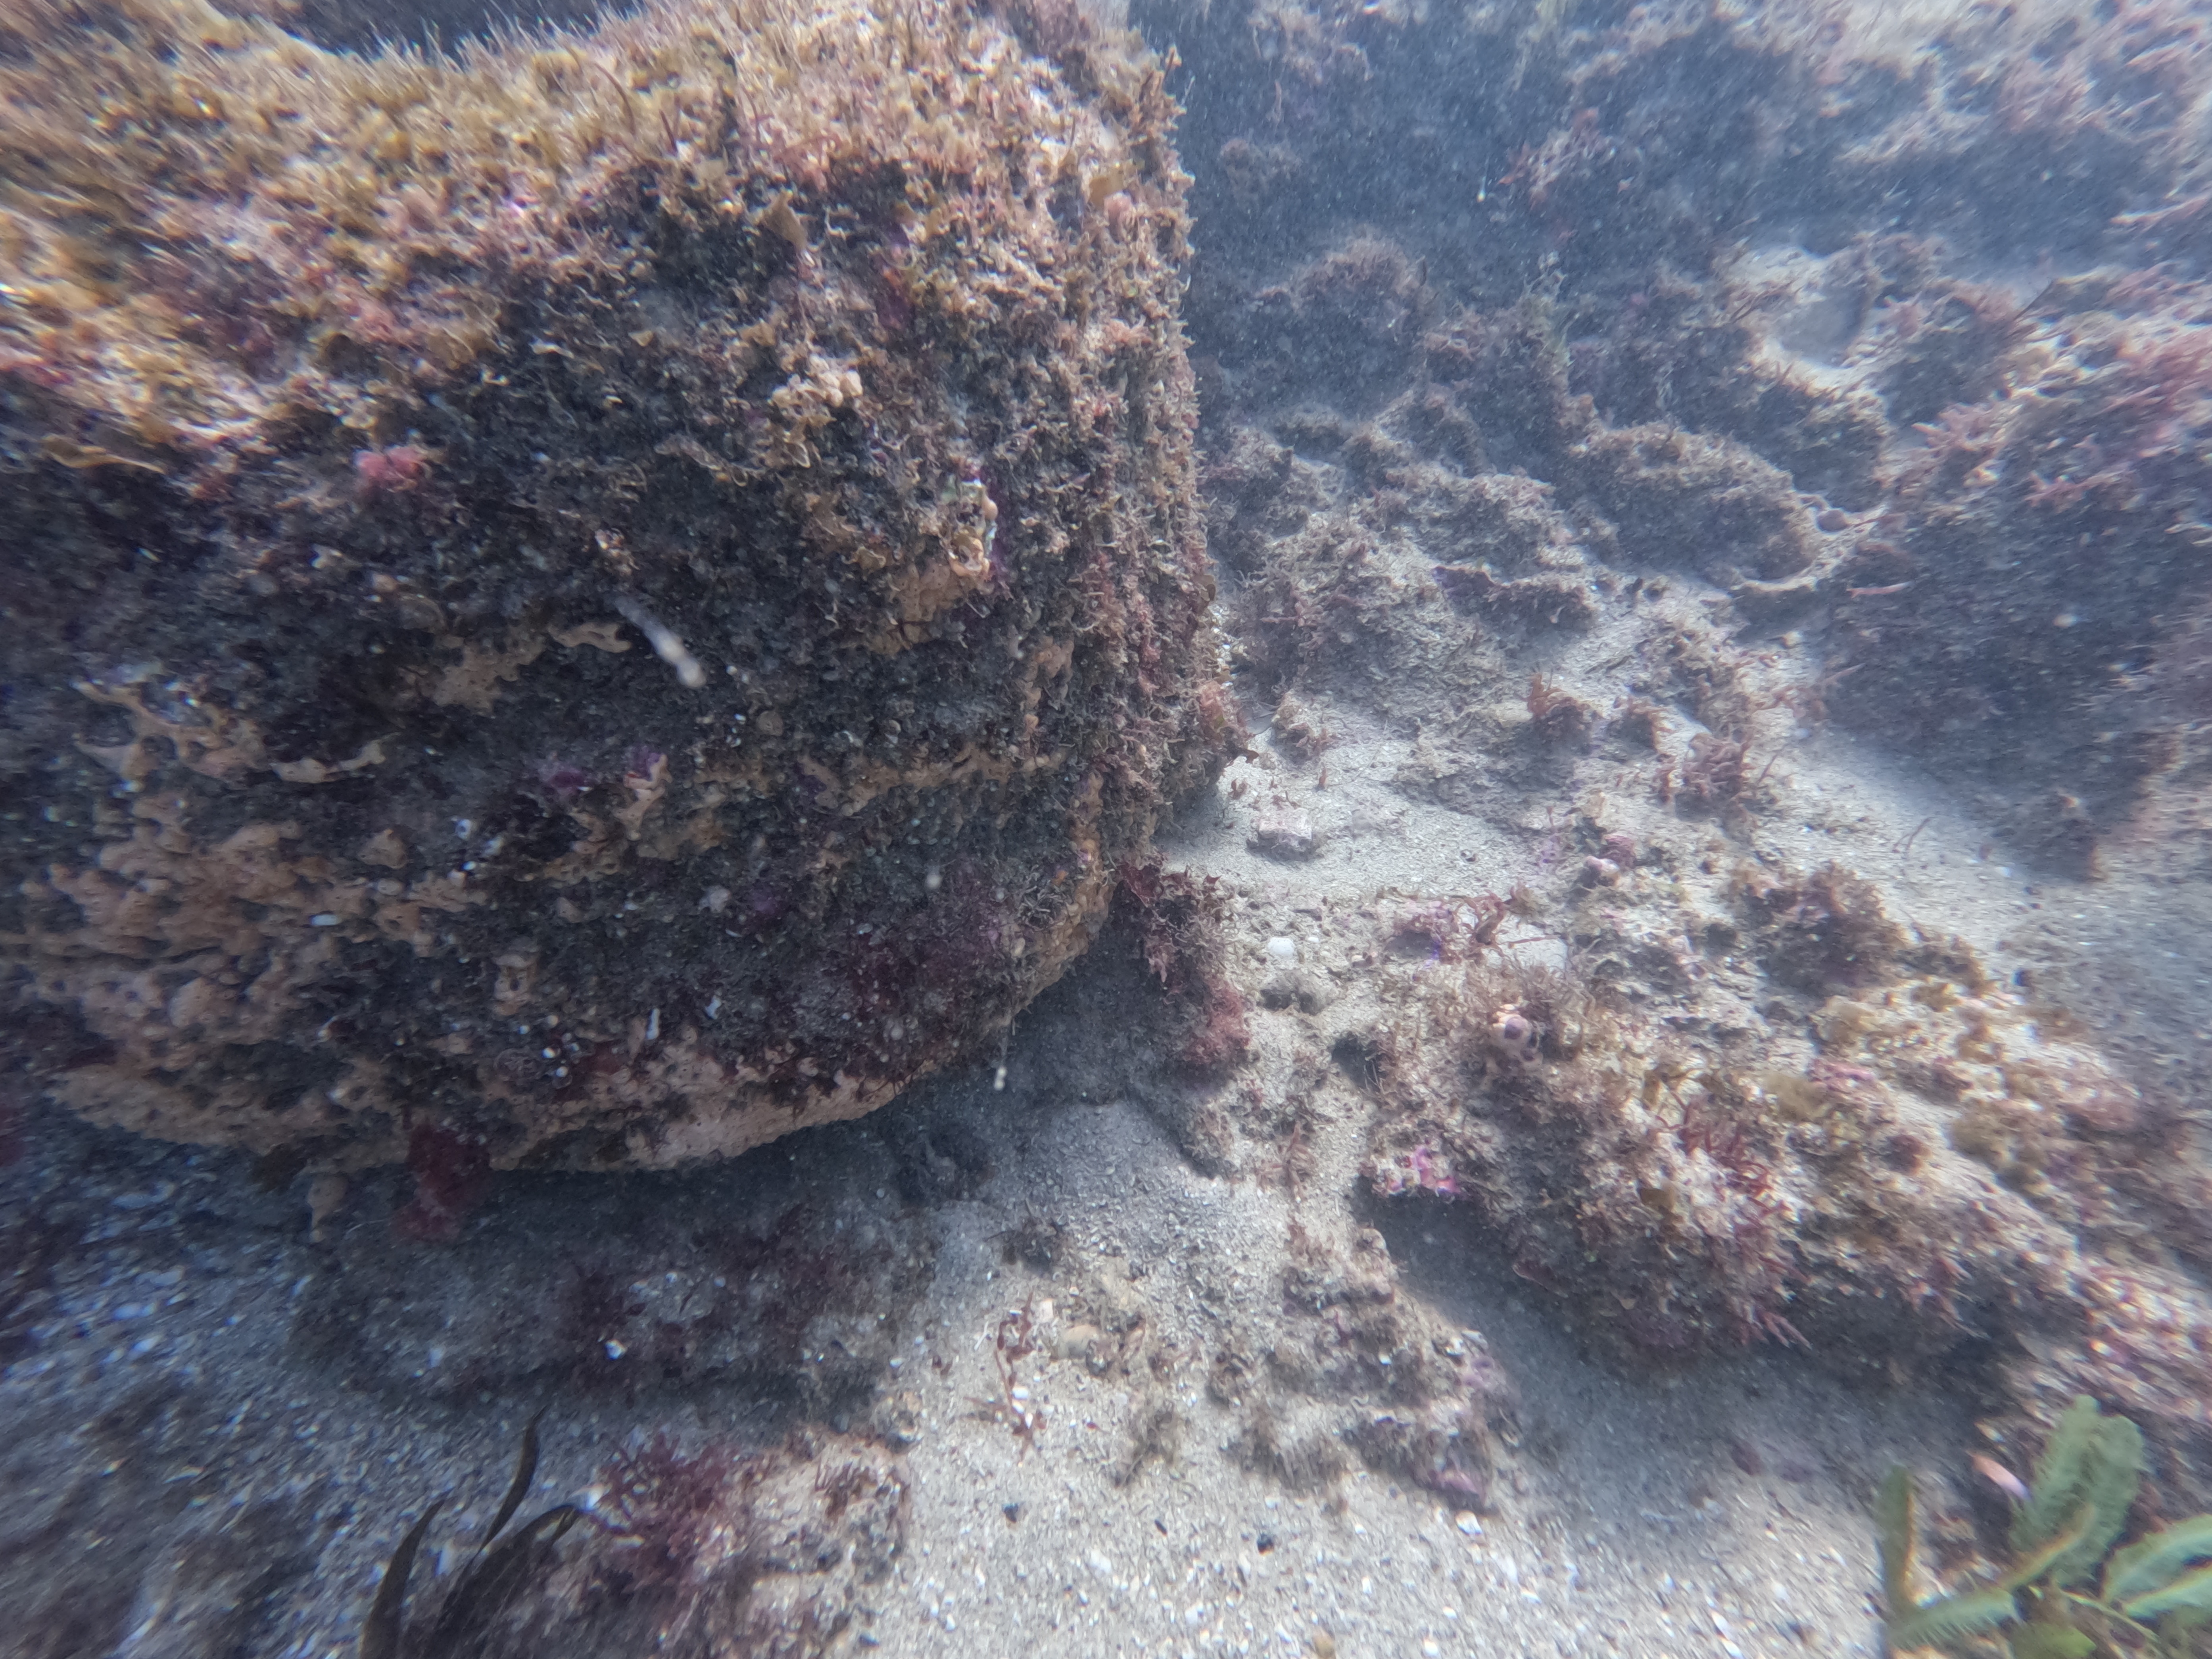

Supplement: Supplementary file 1701 [file G0028027.pdf › Ocean1/G0028027.pdf]

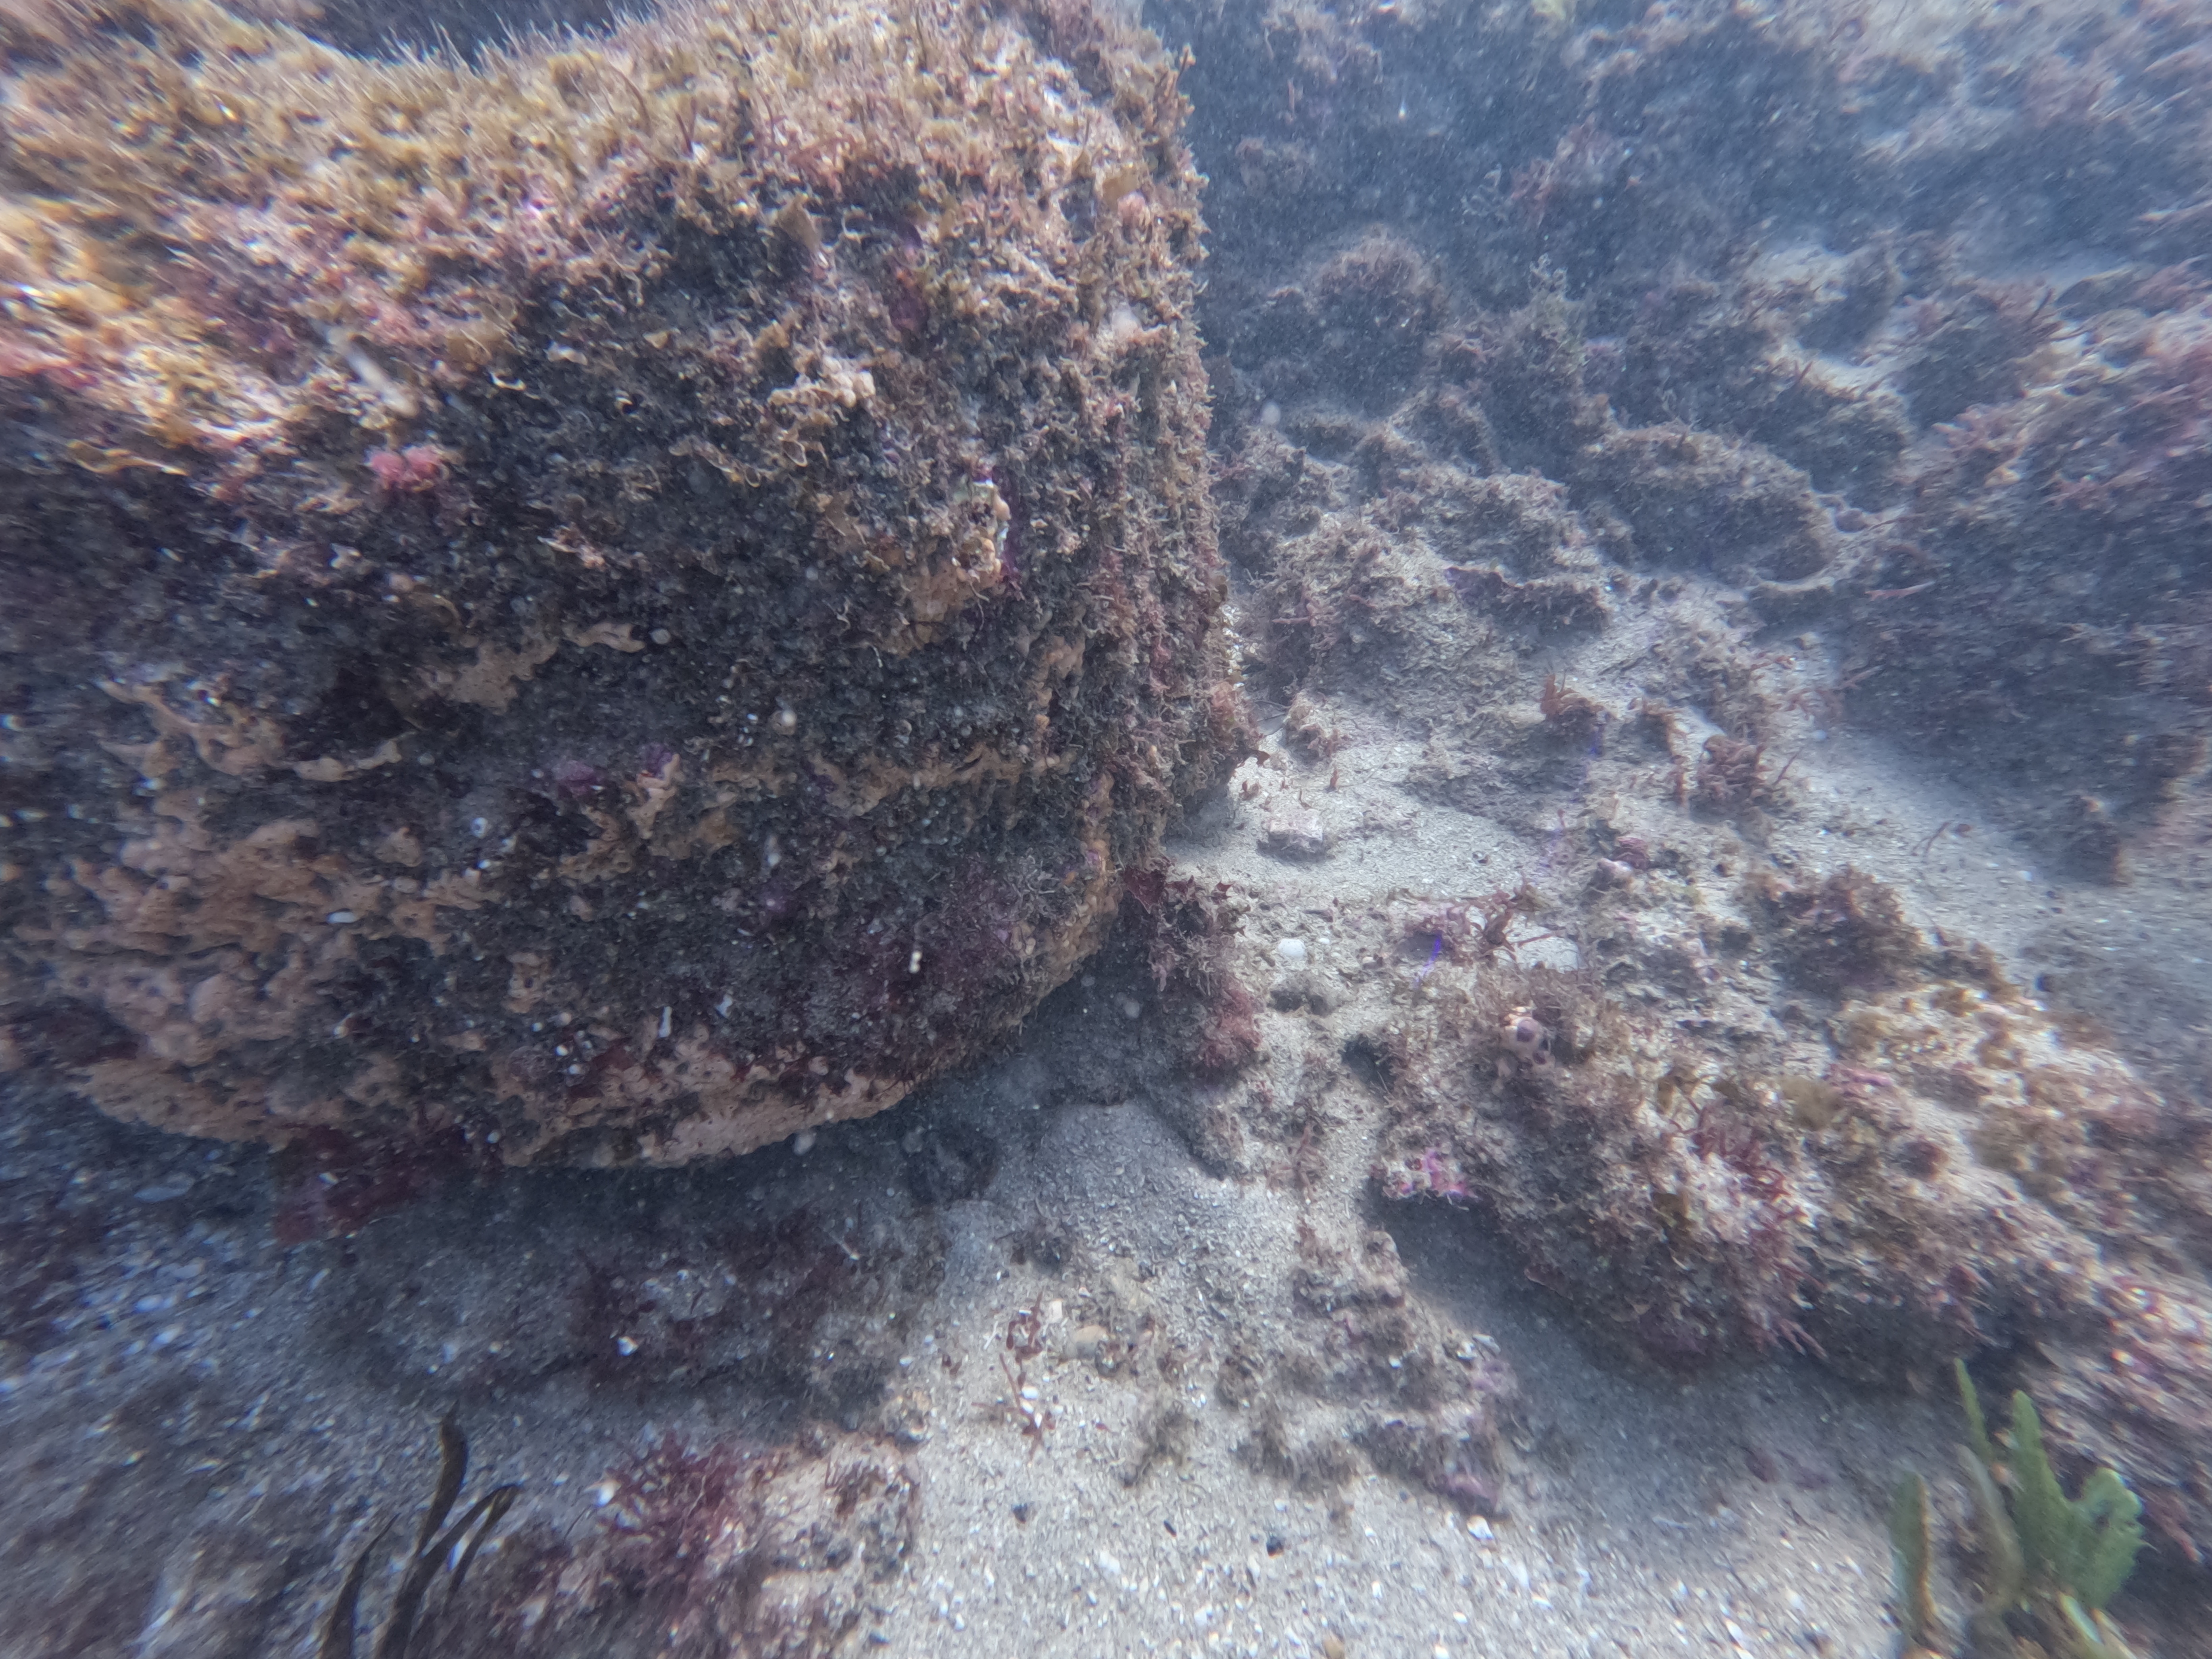

Supplement: Supplementary file 1702 [file G0028028.pdf › Ocean1/G0028028.pdf]

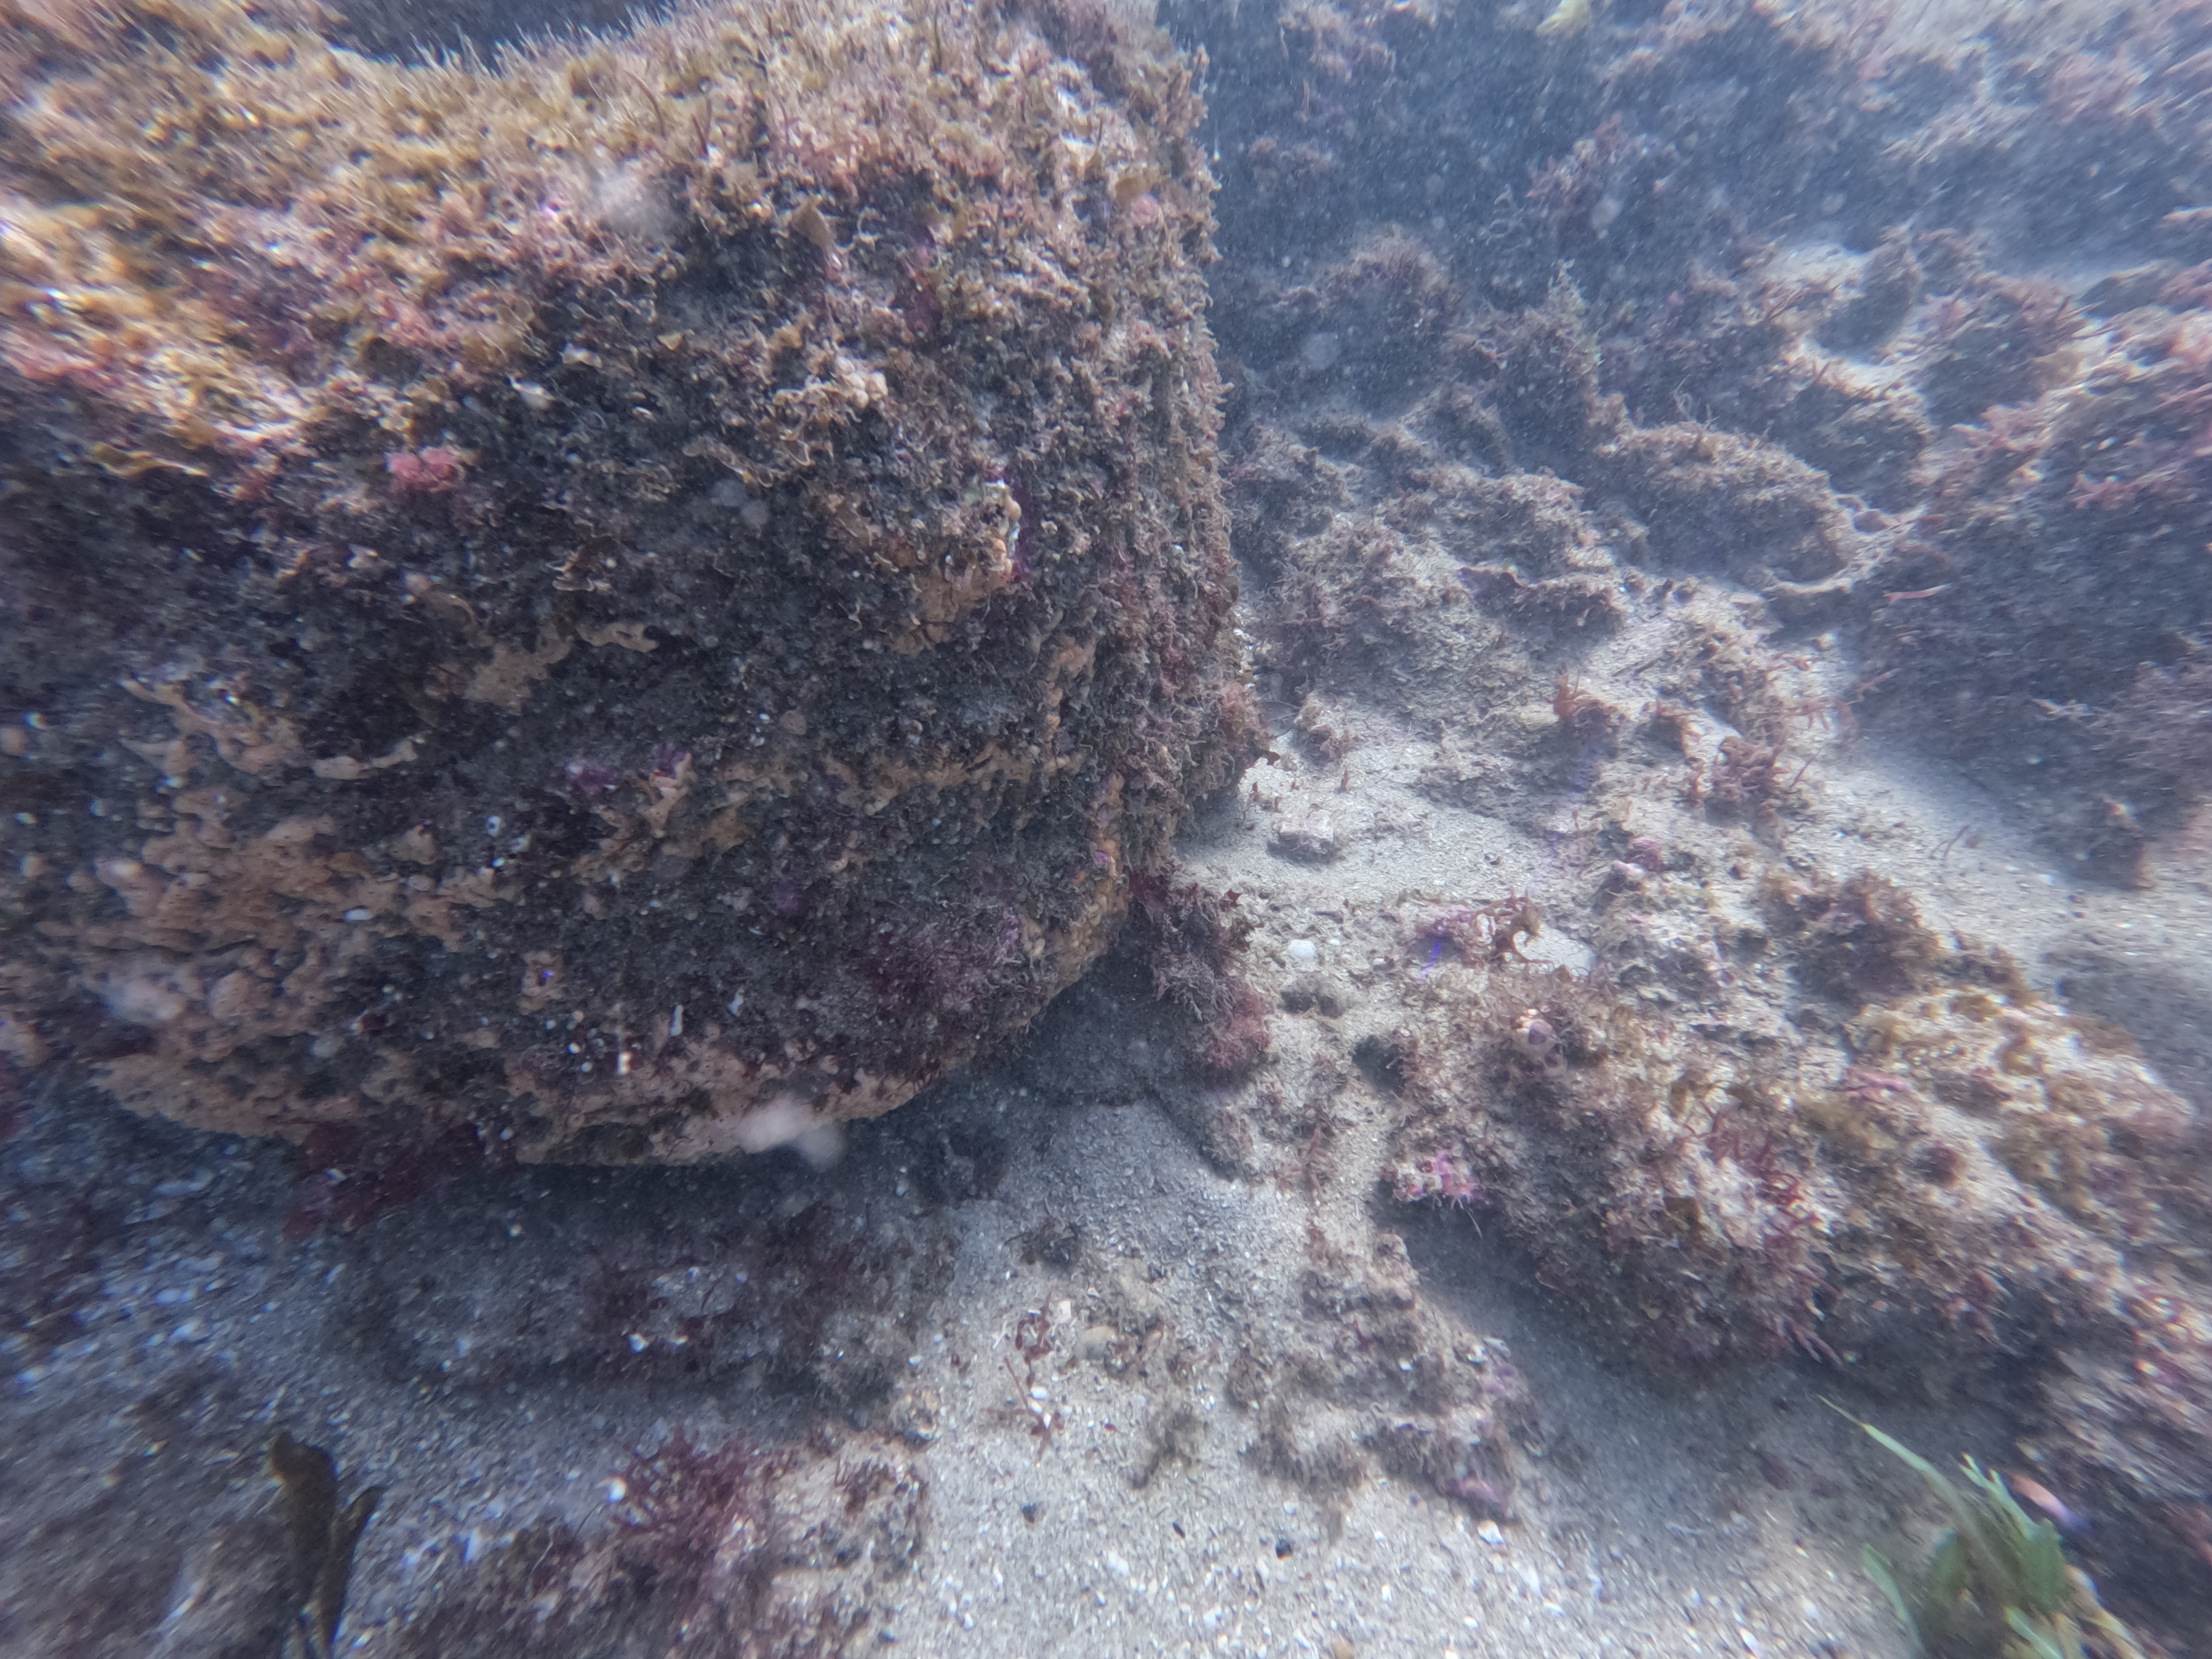

Supplement: Supplementary file 1703 [file G0028029.pdf › Ocean1/G0028029.pdf]

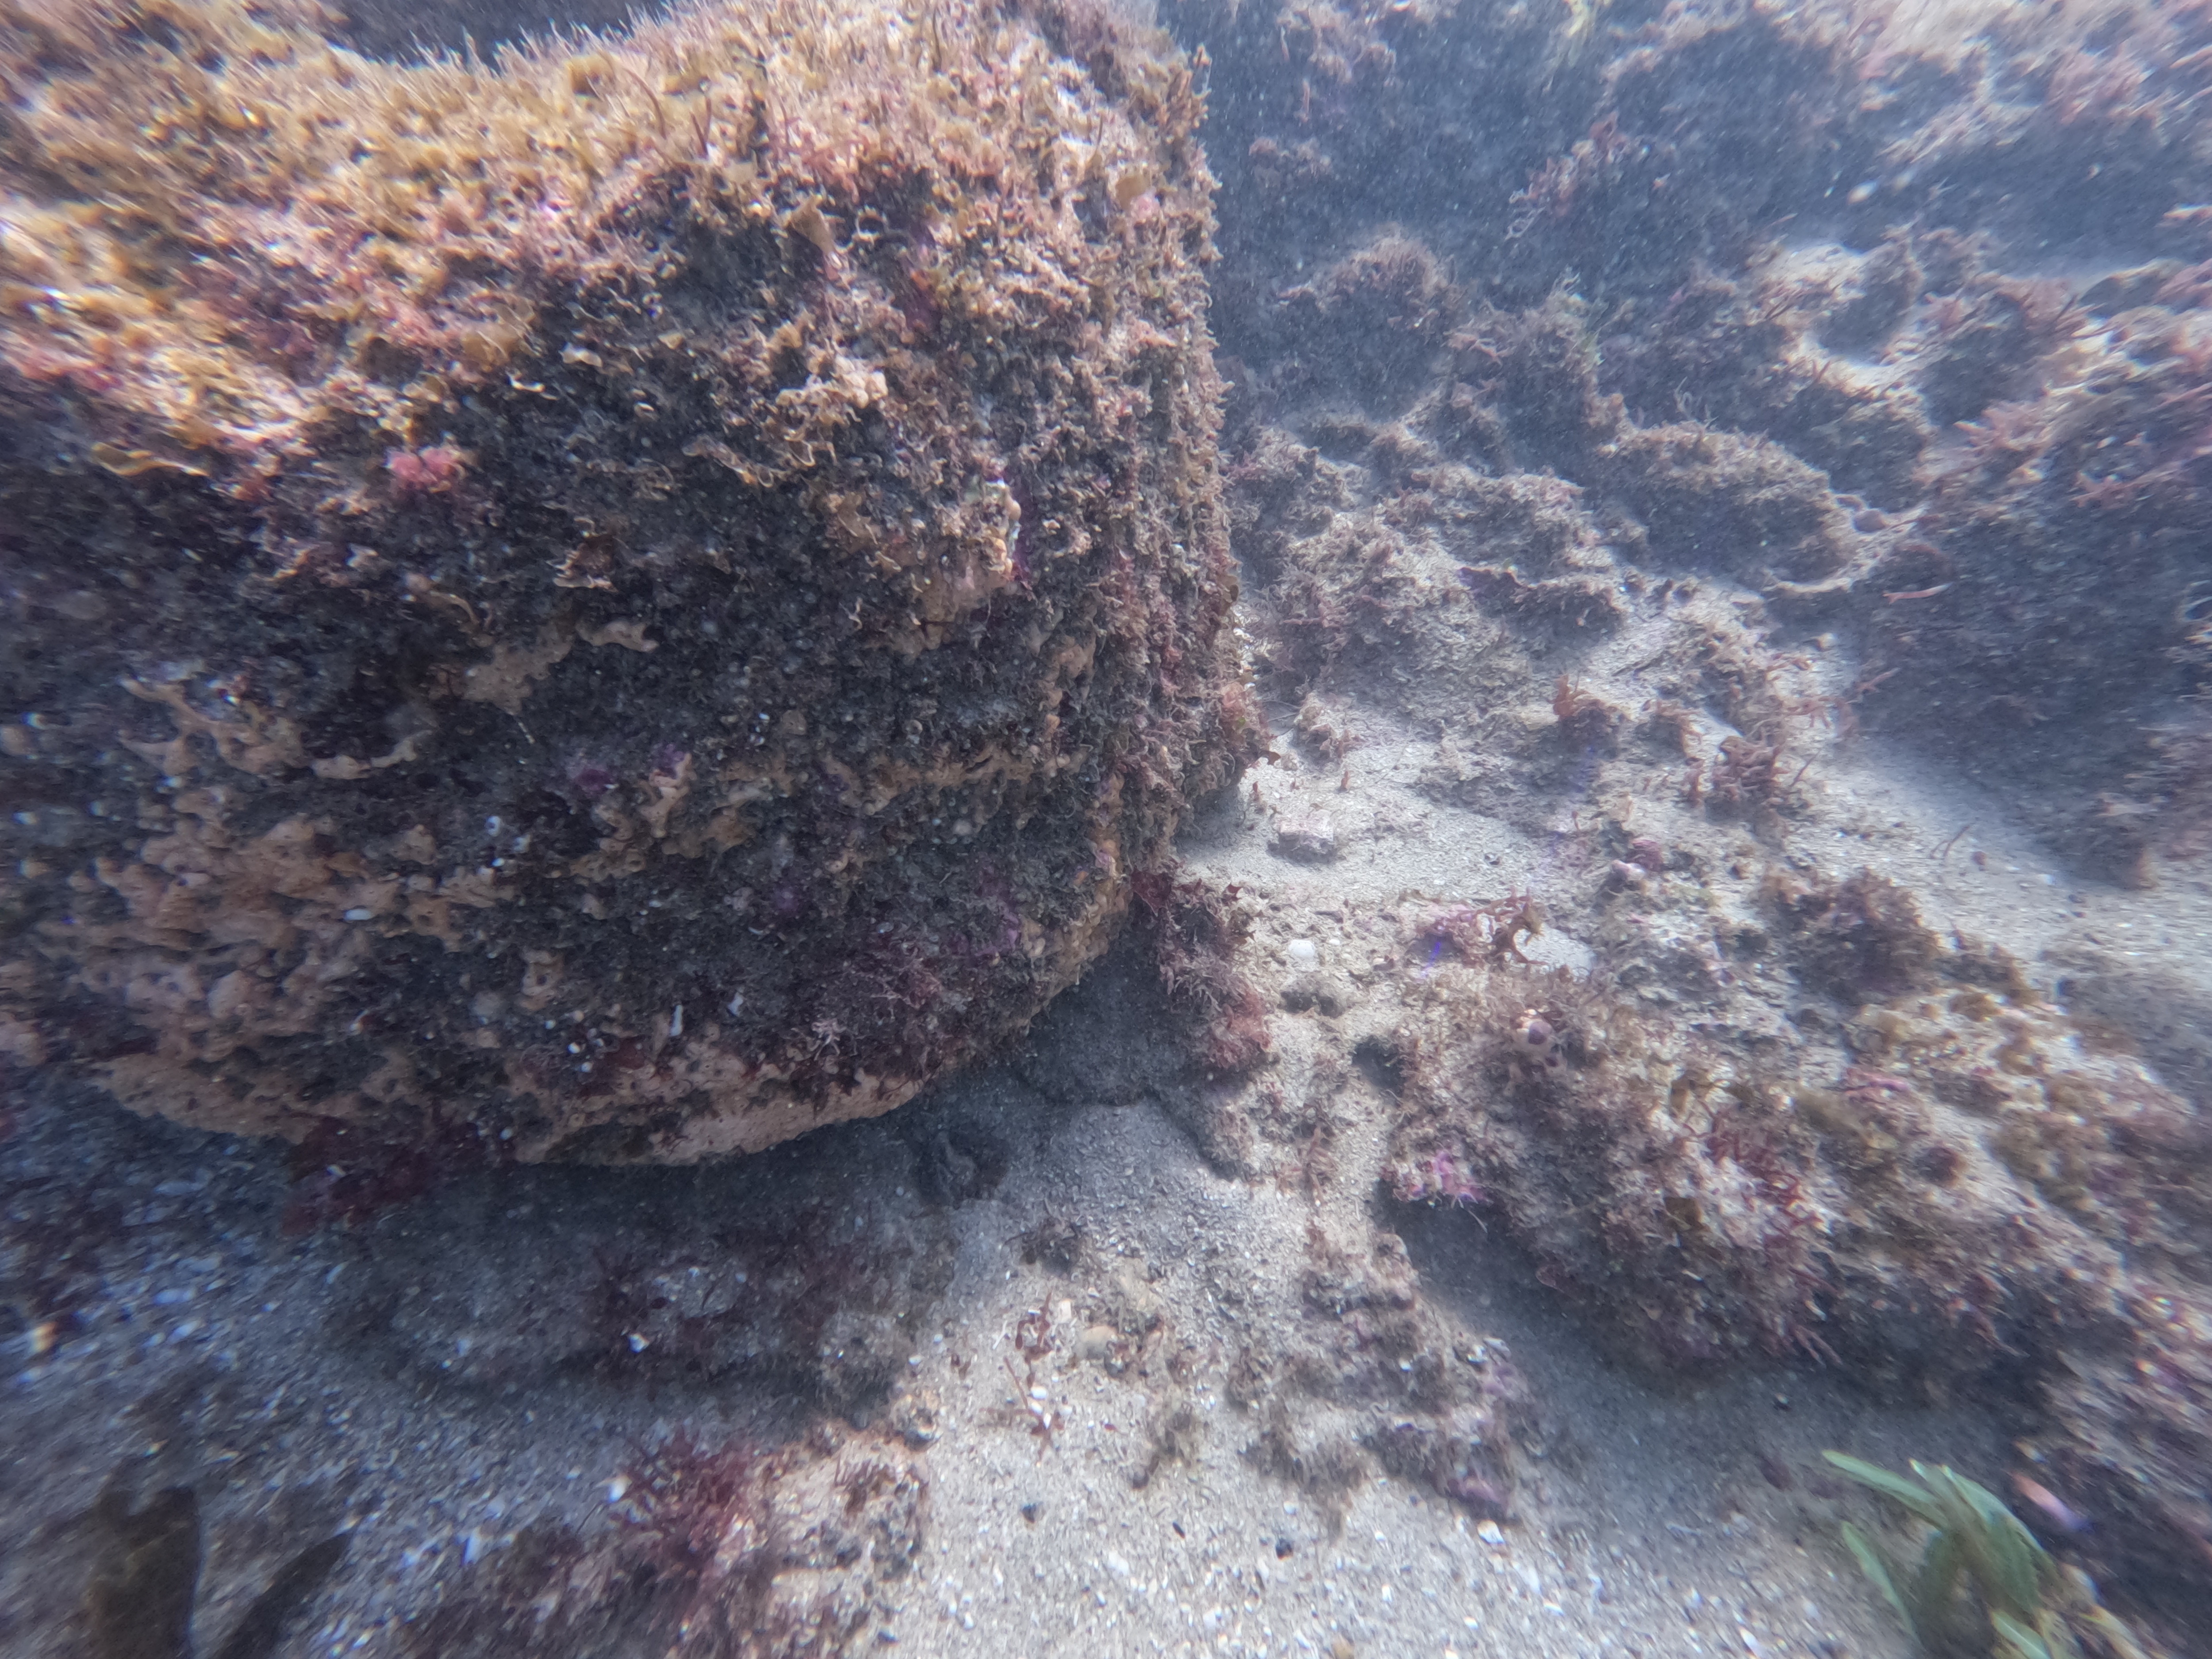

Supplement: Supplementary file 1704 [file G0028030.pdf › Ocean1/G0028030.pdf]

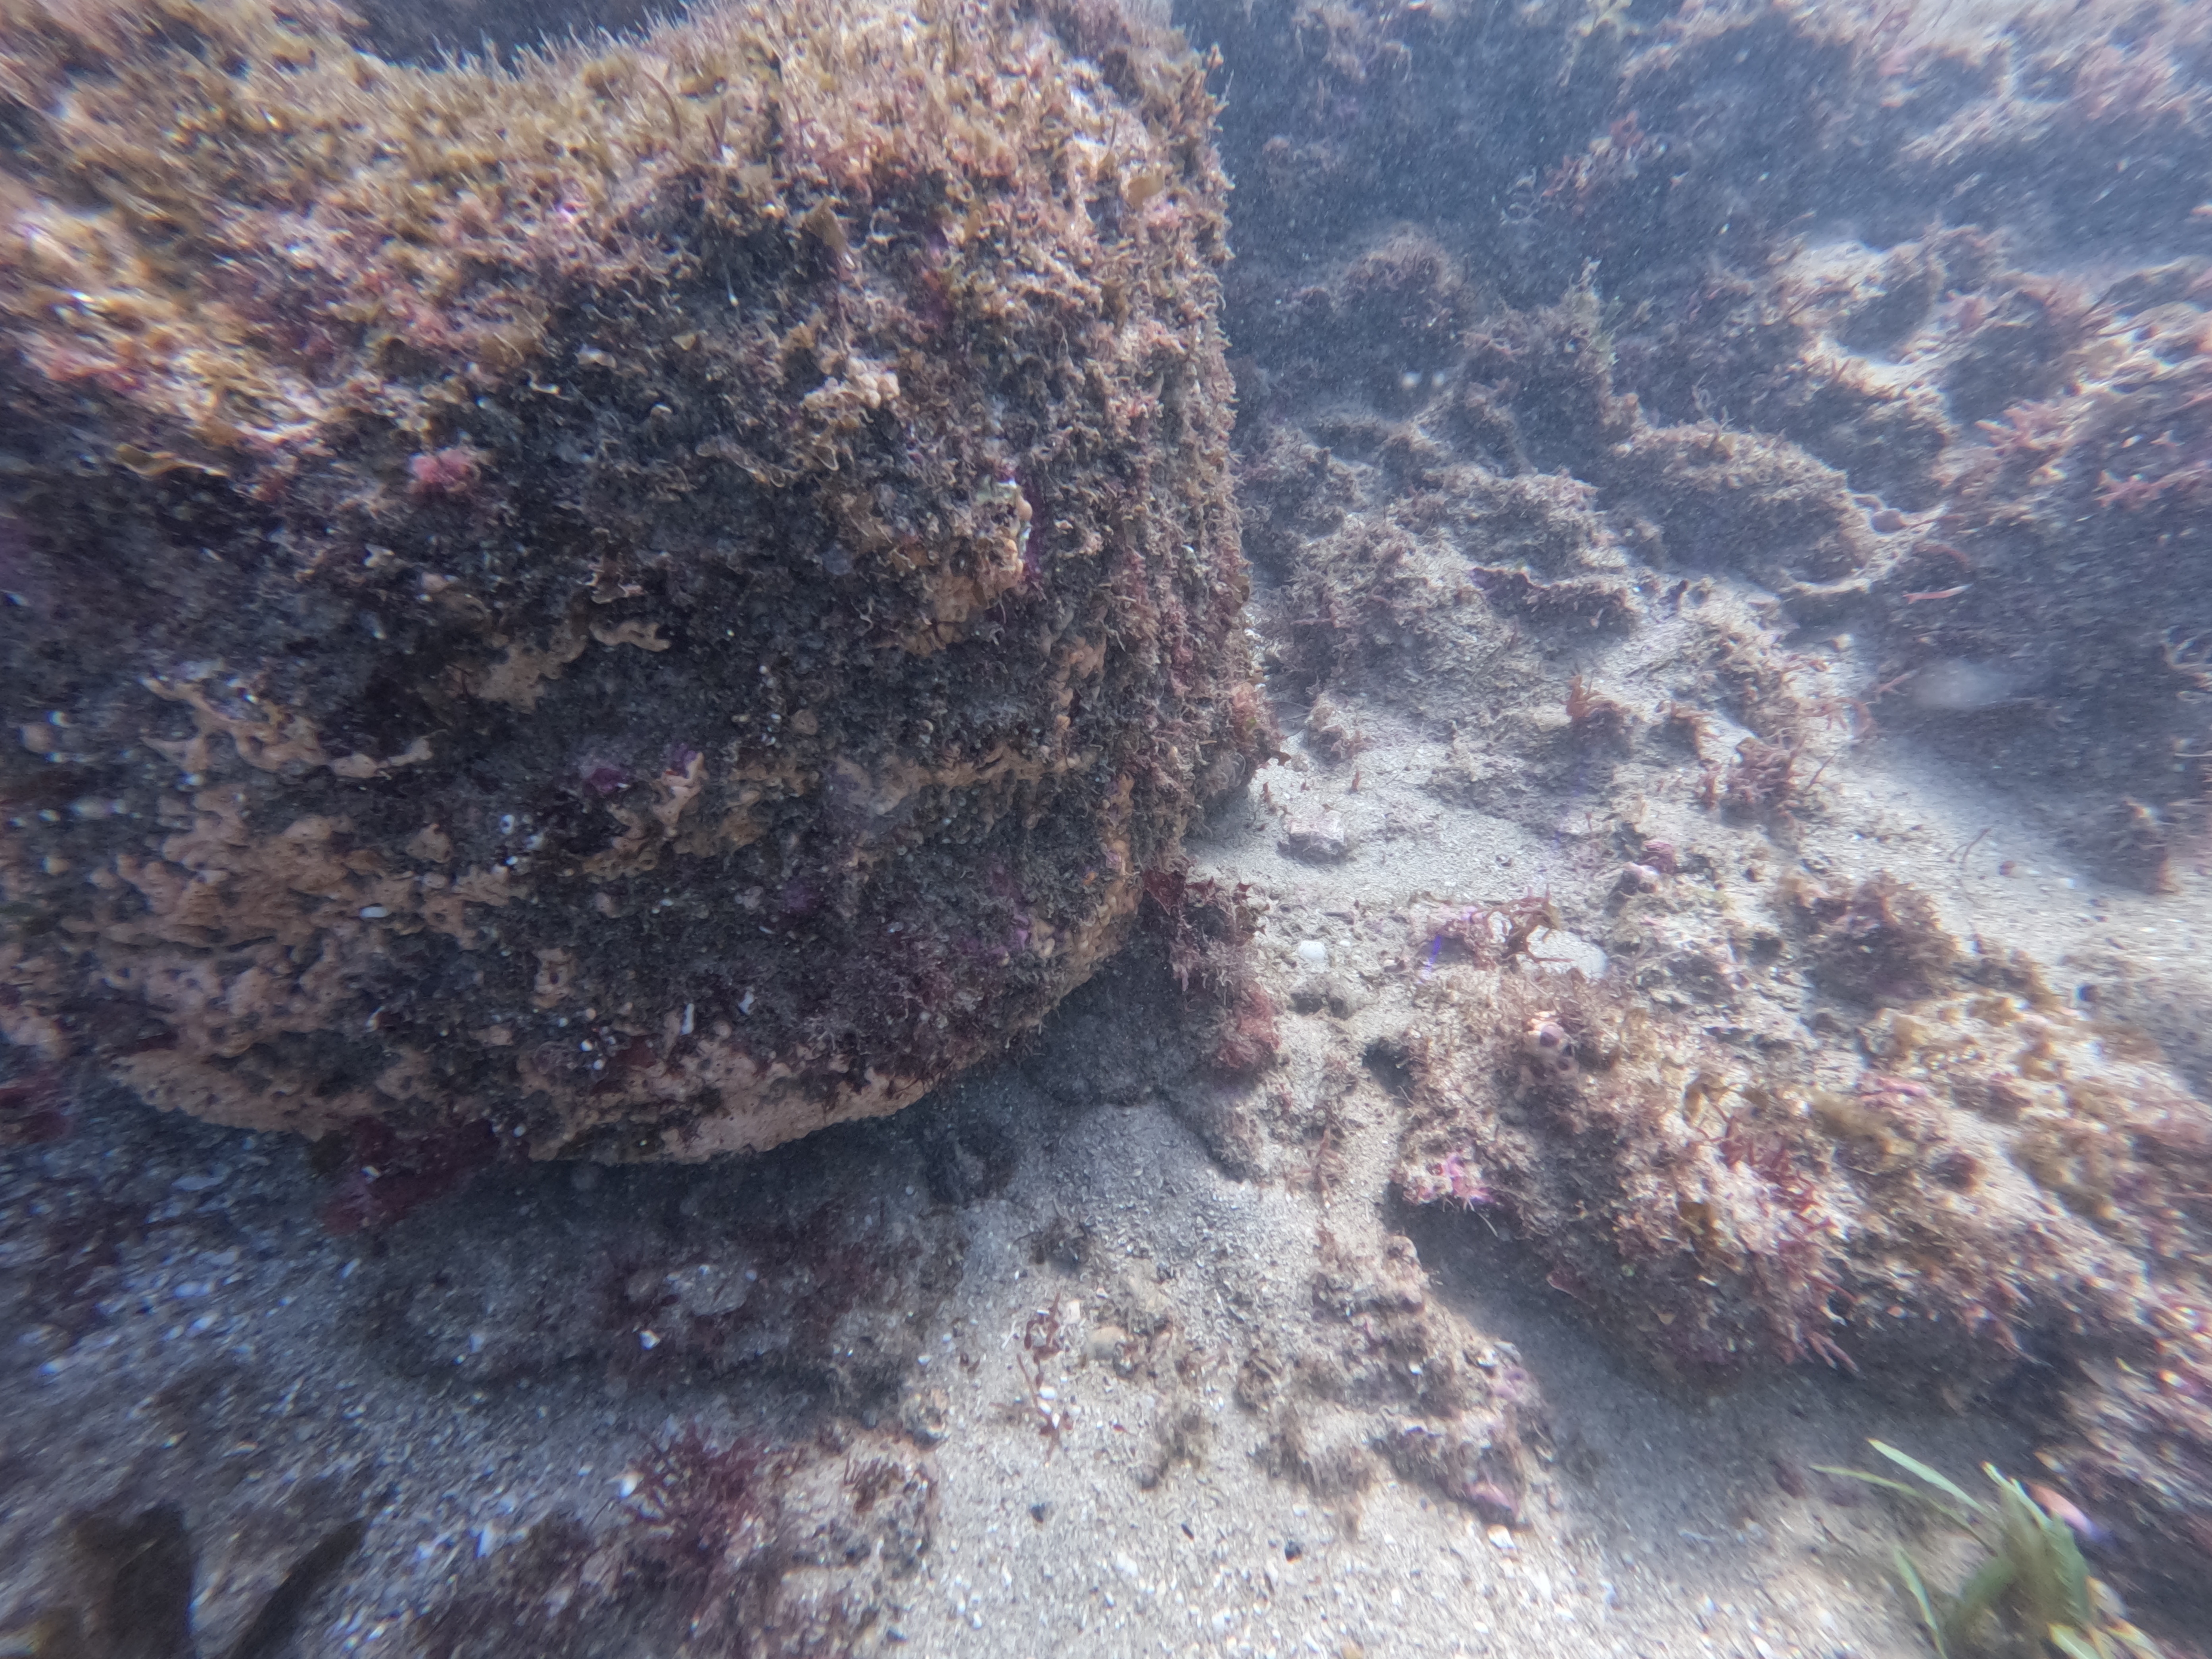

Supplement: Supplementary file 1705 [file G0028031.pdf › Ocean1/G0028031.pdf]

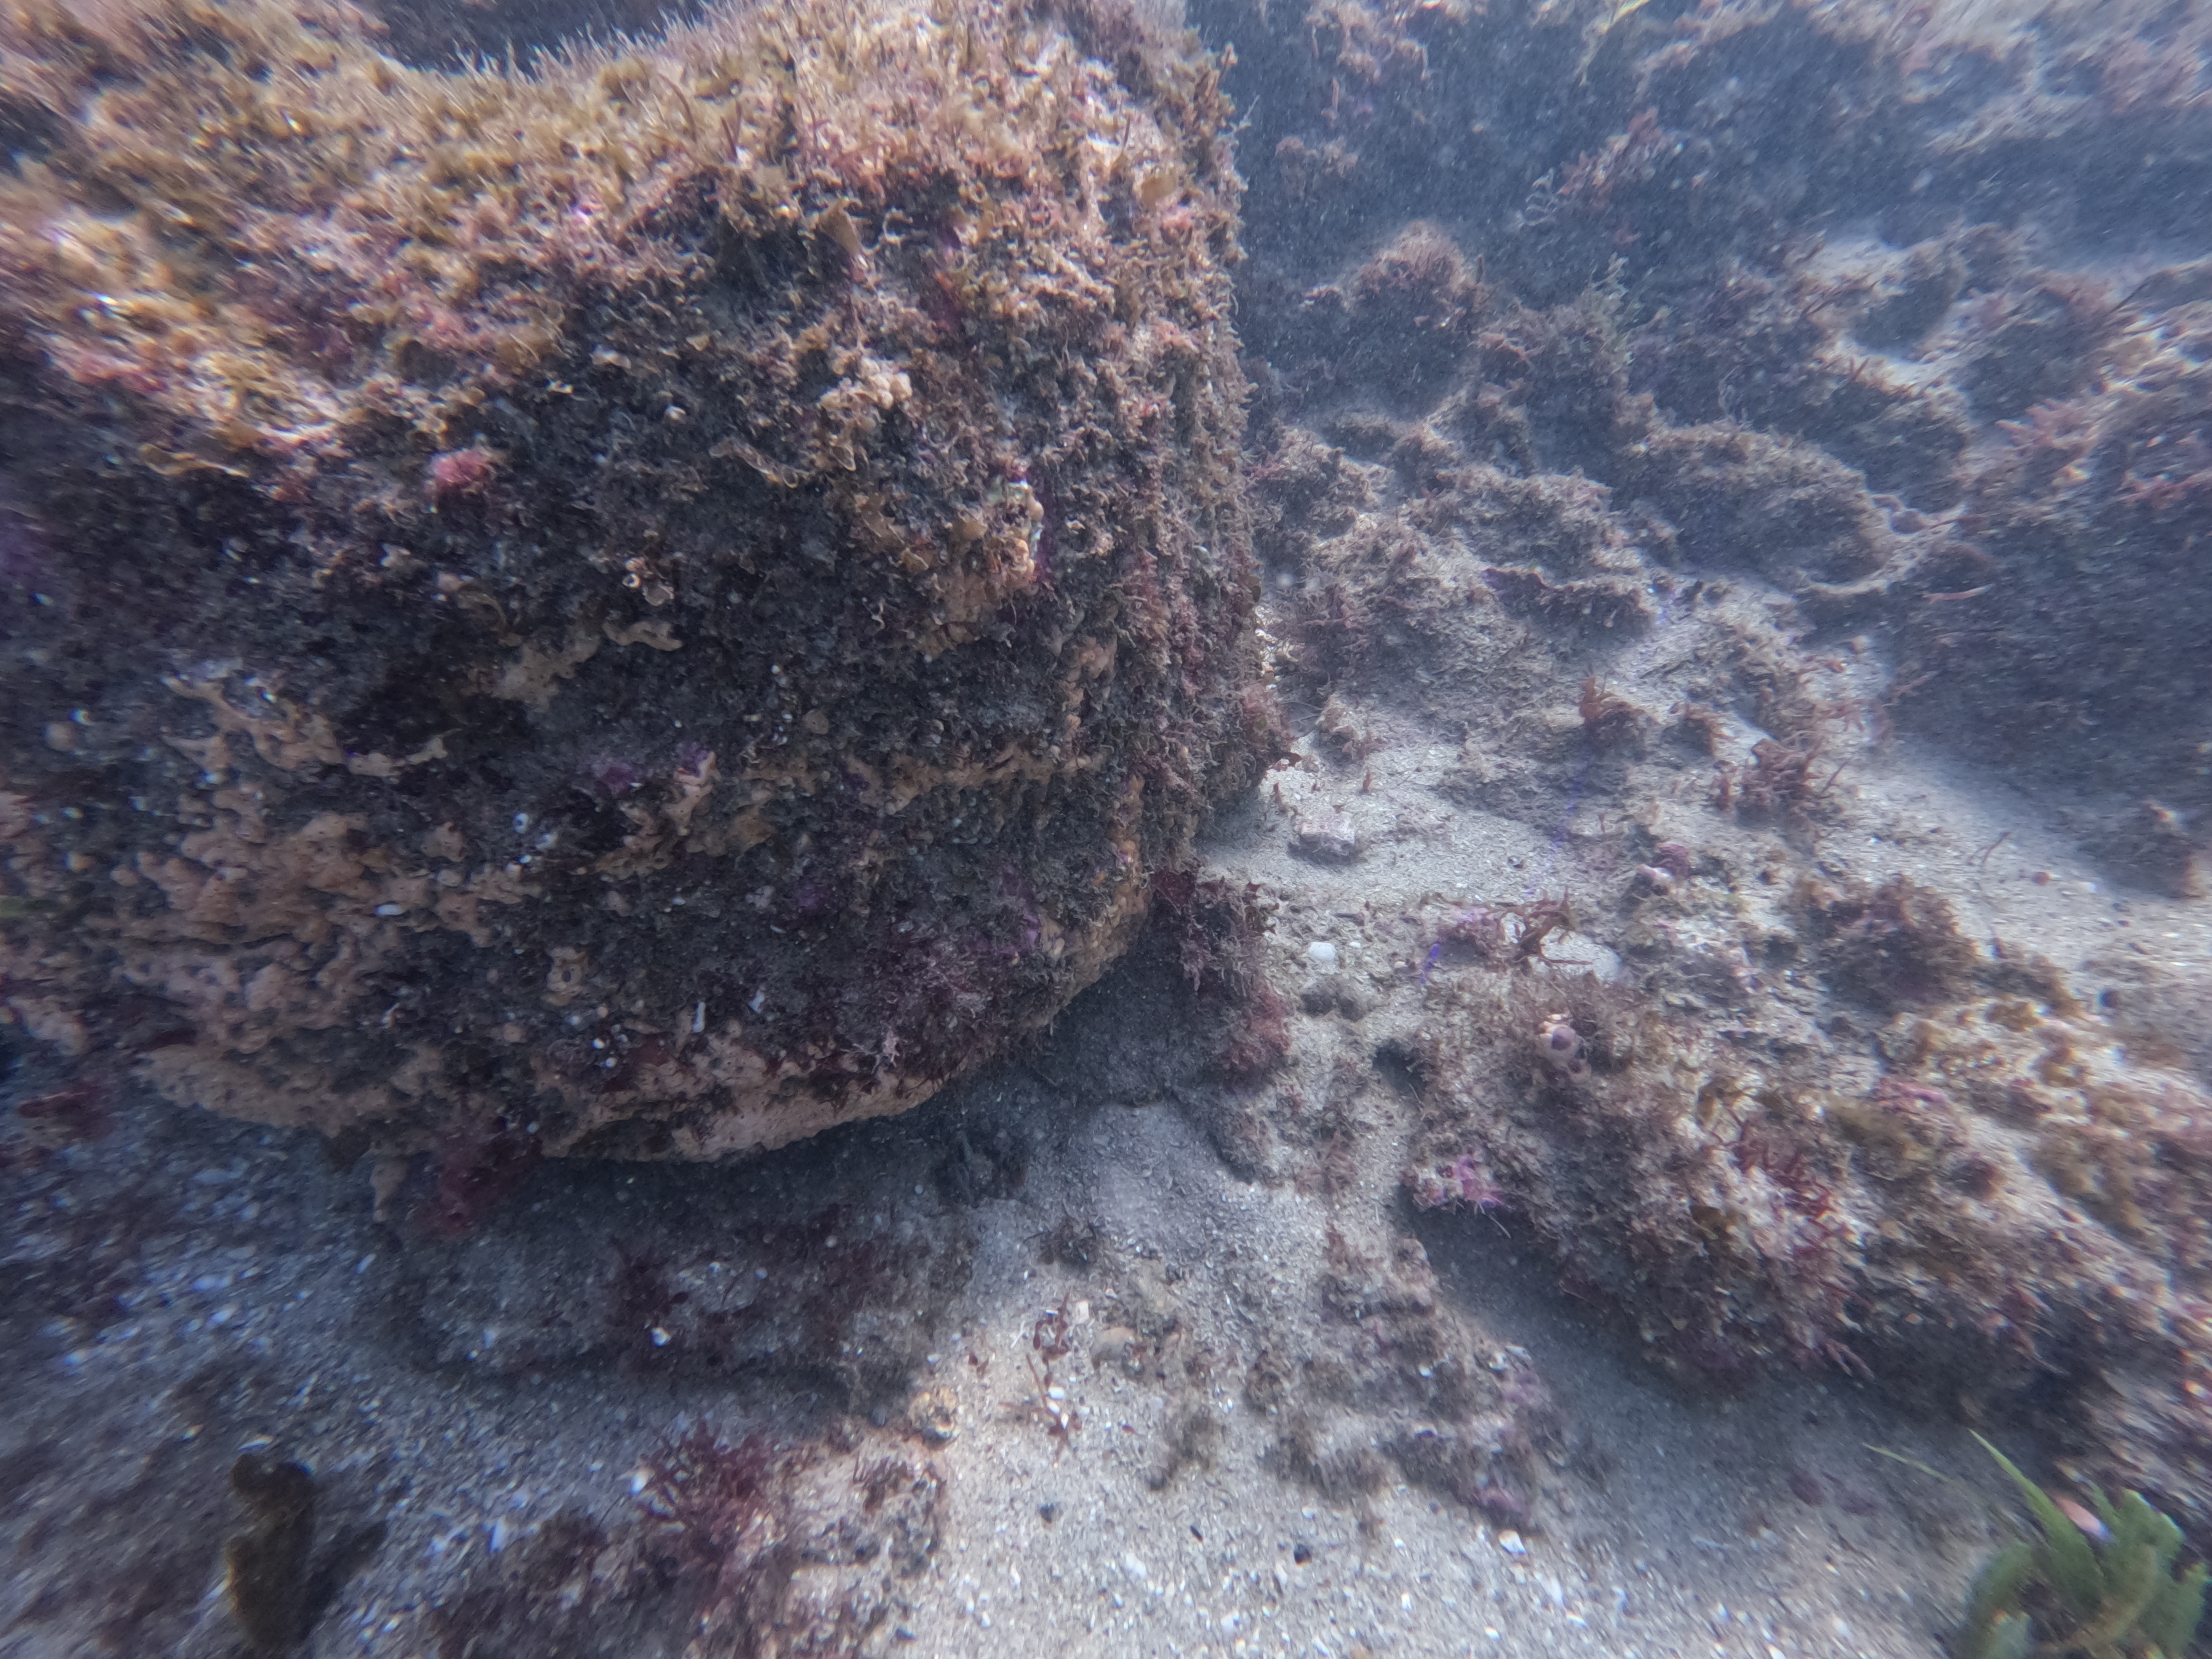

Supplement: Supplementary file 1706 [file G0028032.pdf › Ocean1/G0028032.pdf]

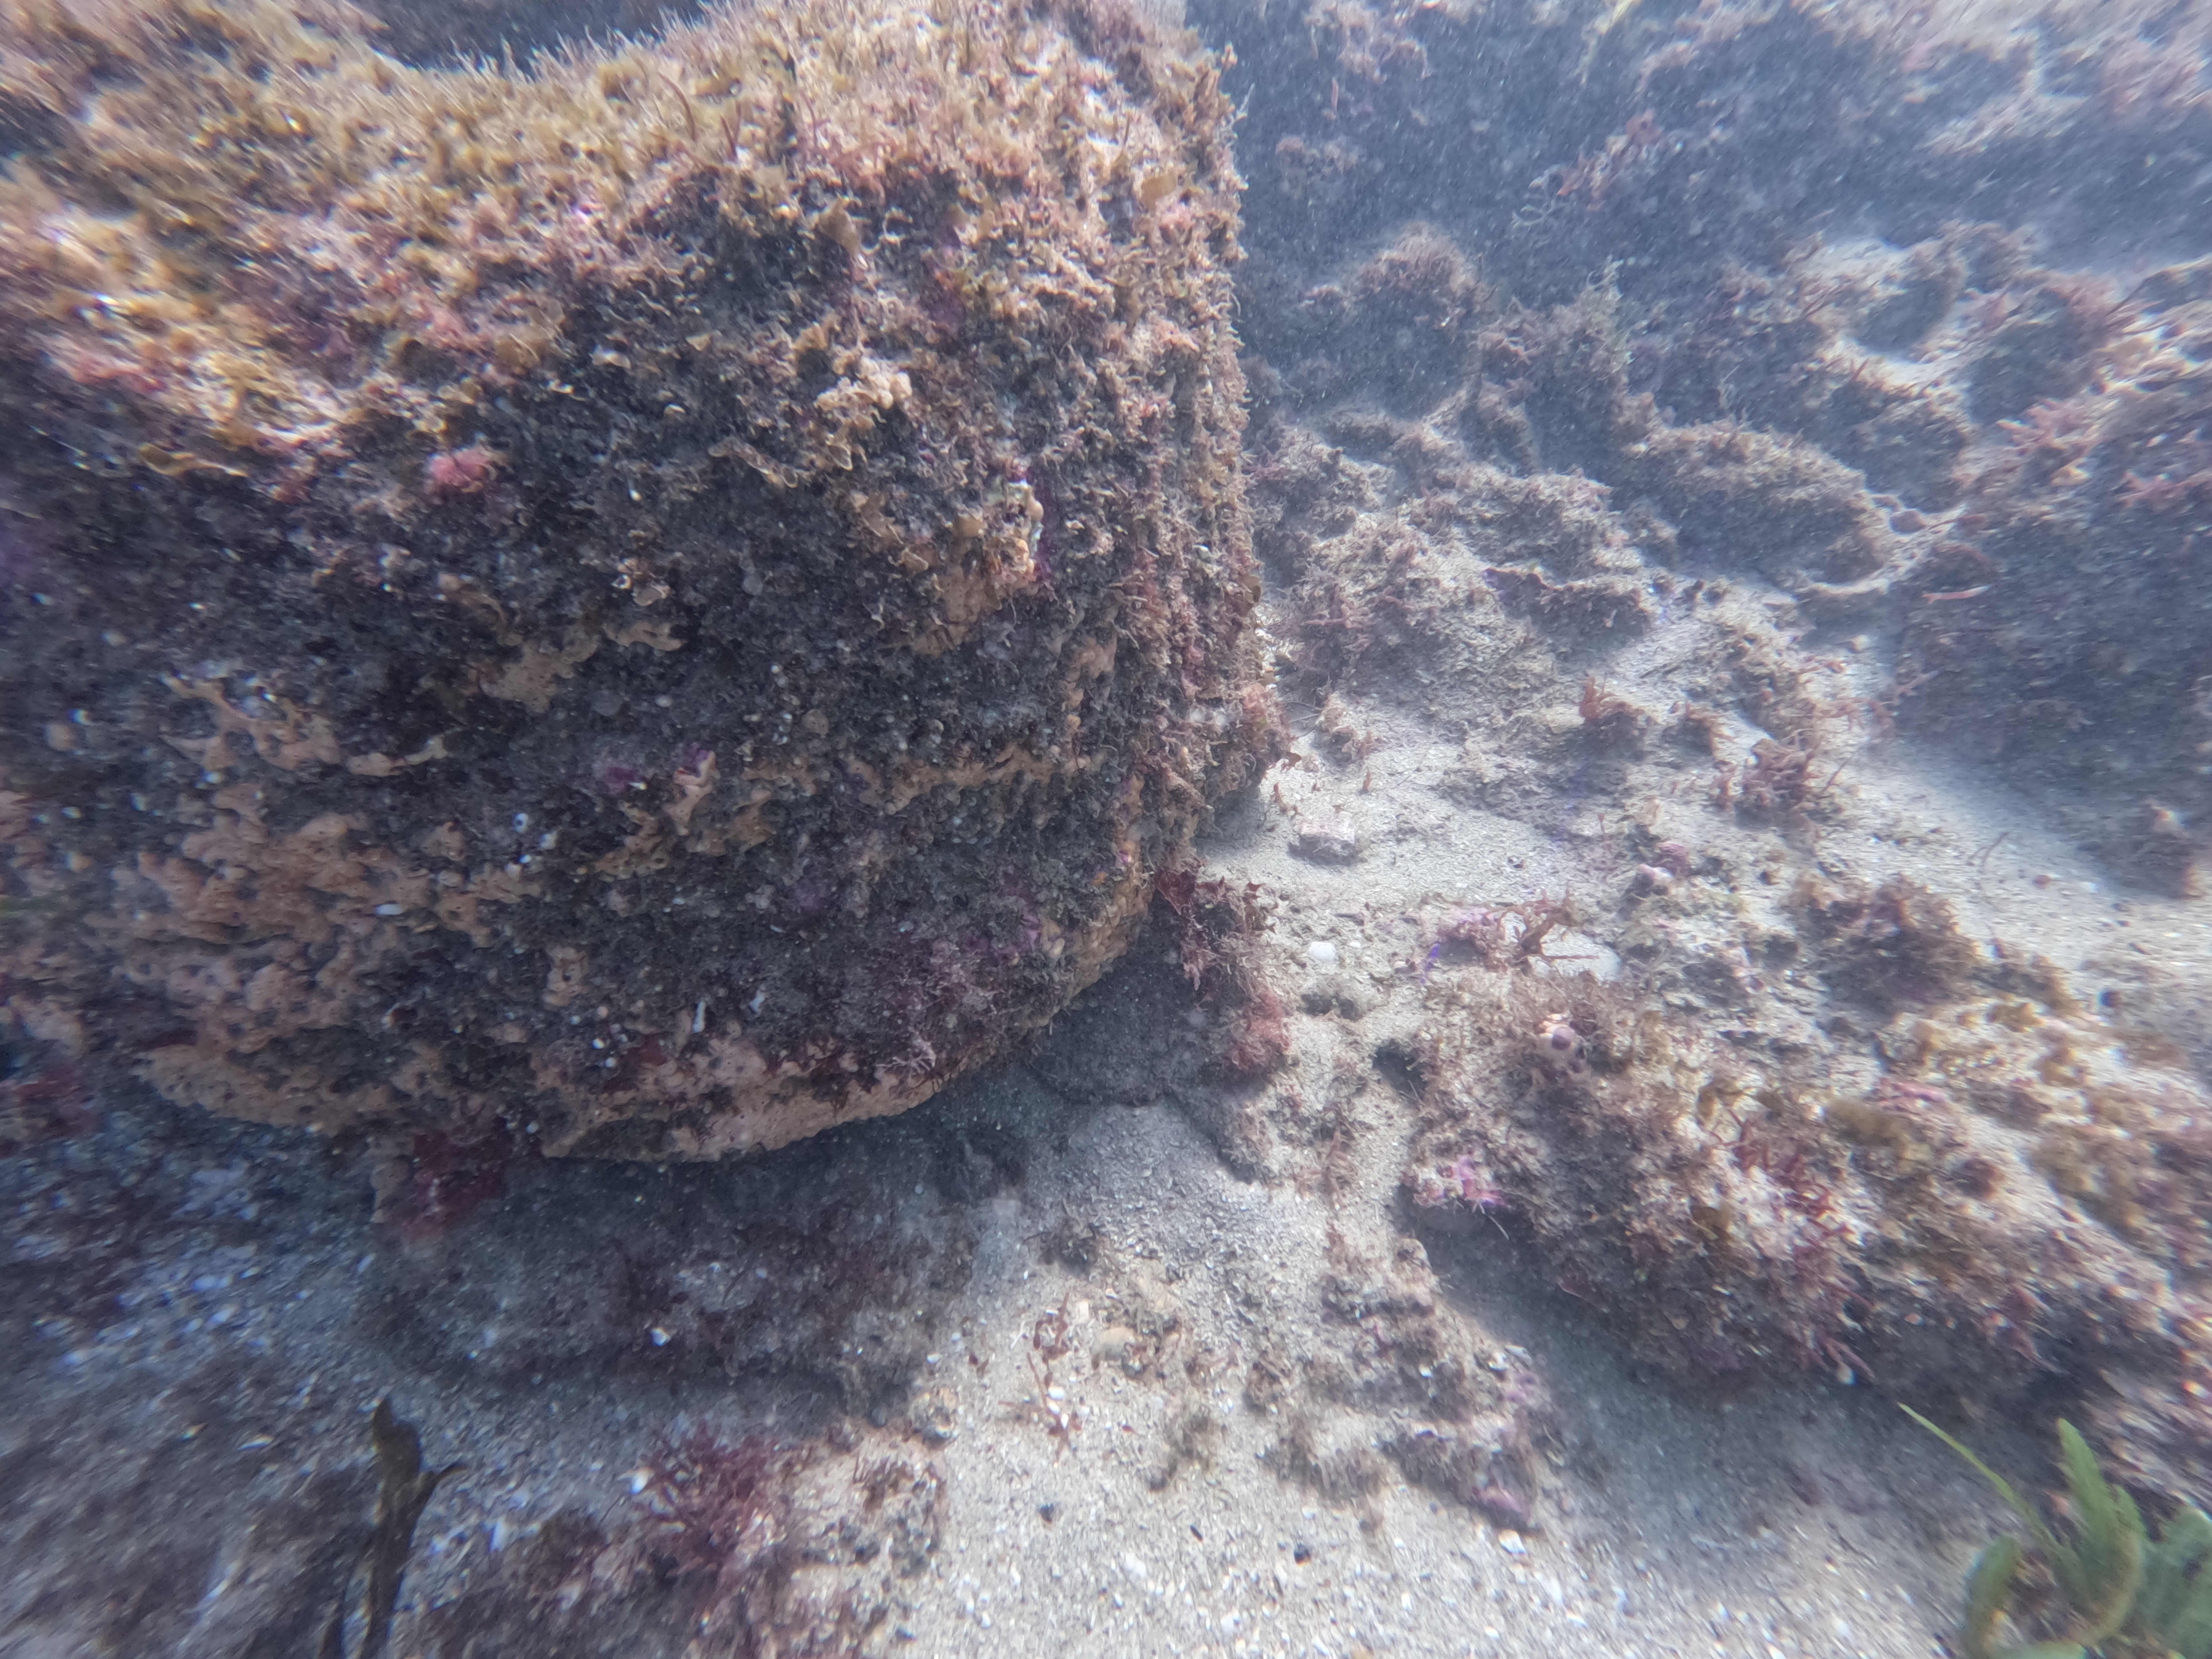

Supplement: Supplementary file 1707 [file G0028033.pdf › Ocean1/G0028033.pdf]

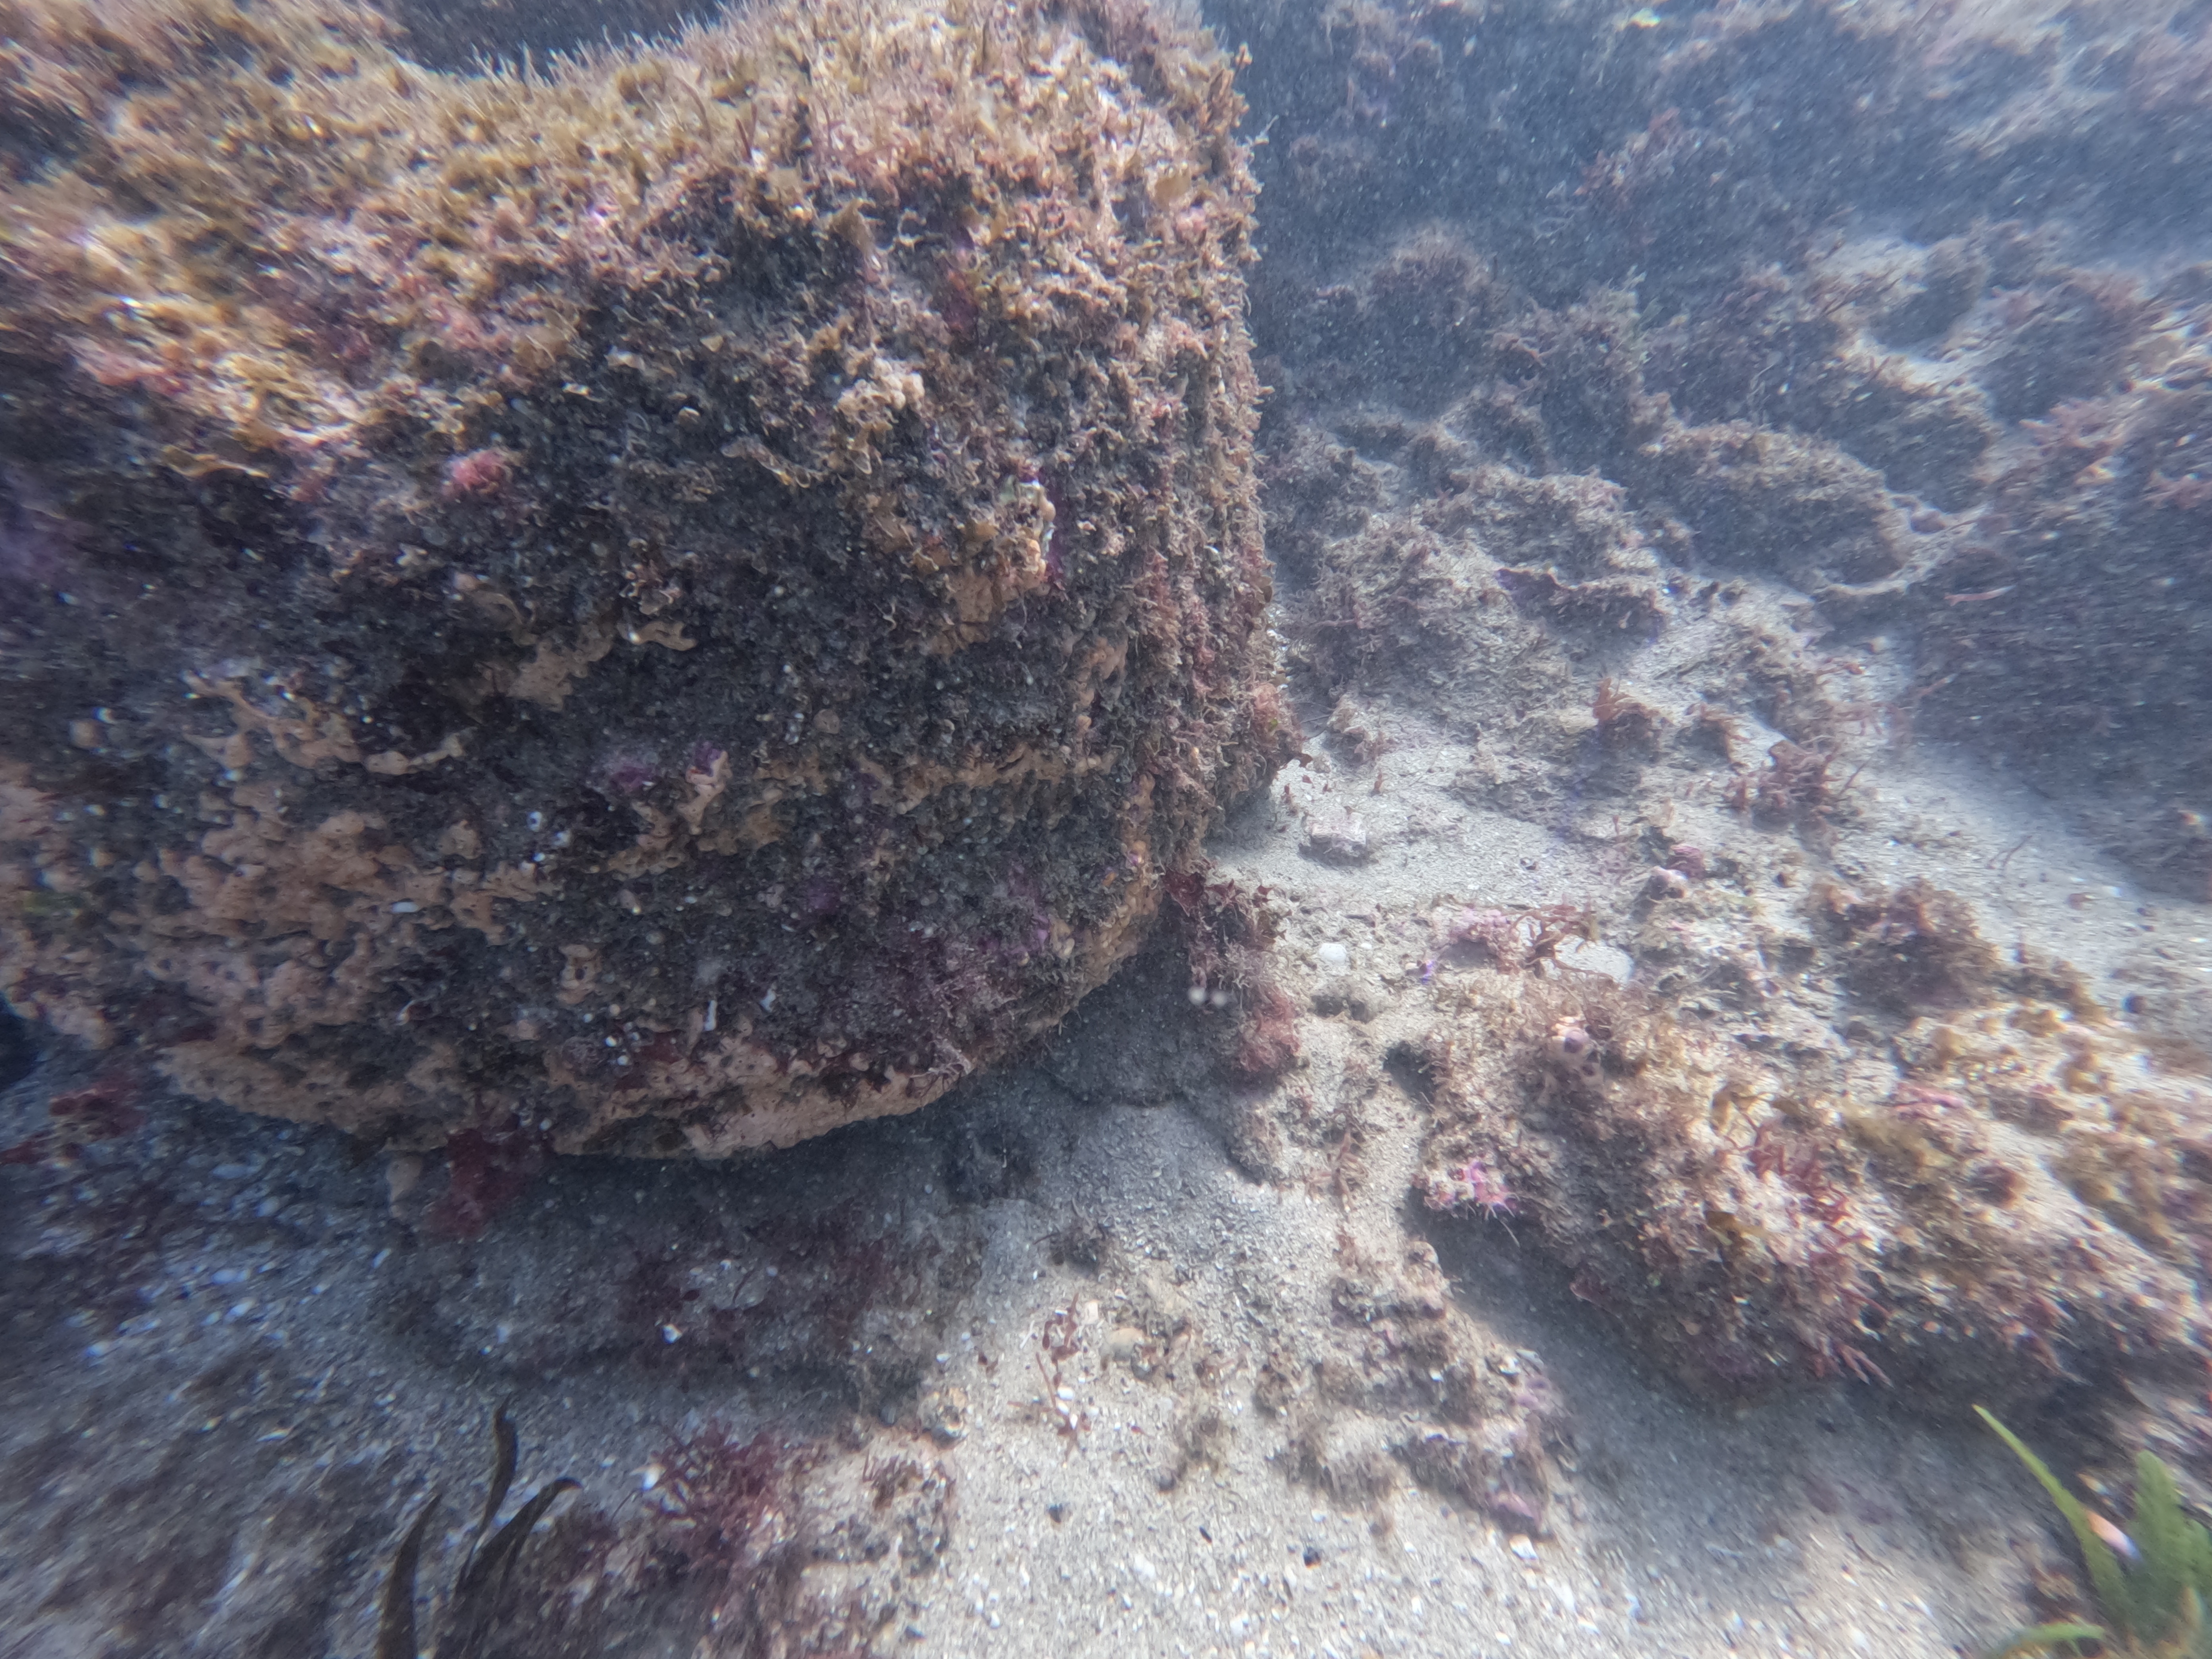

Supplement: Supplementary file 1708 [file G0028034.pdf › Ocean1/G0028034.pdf]

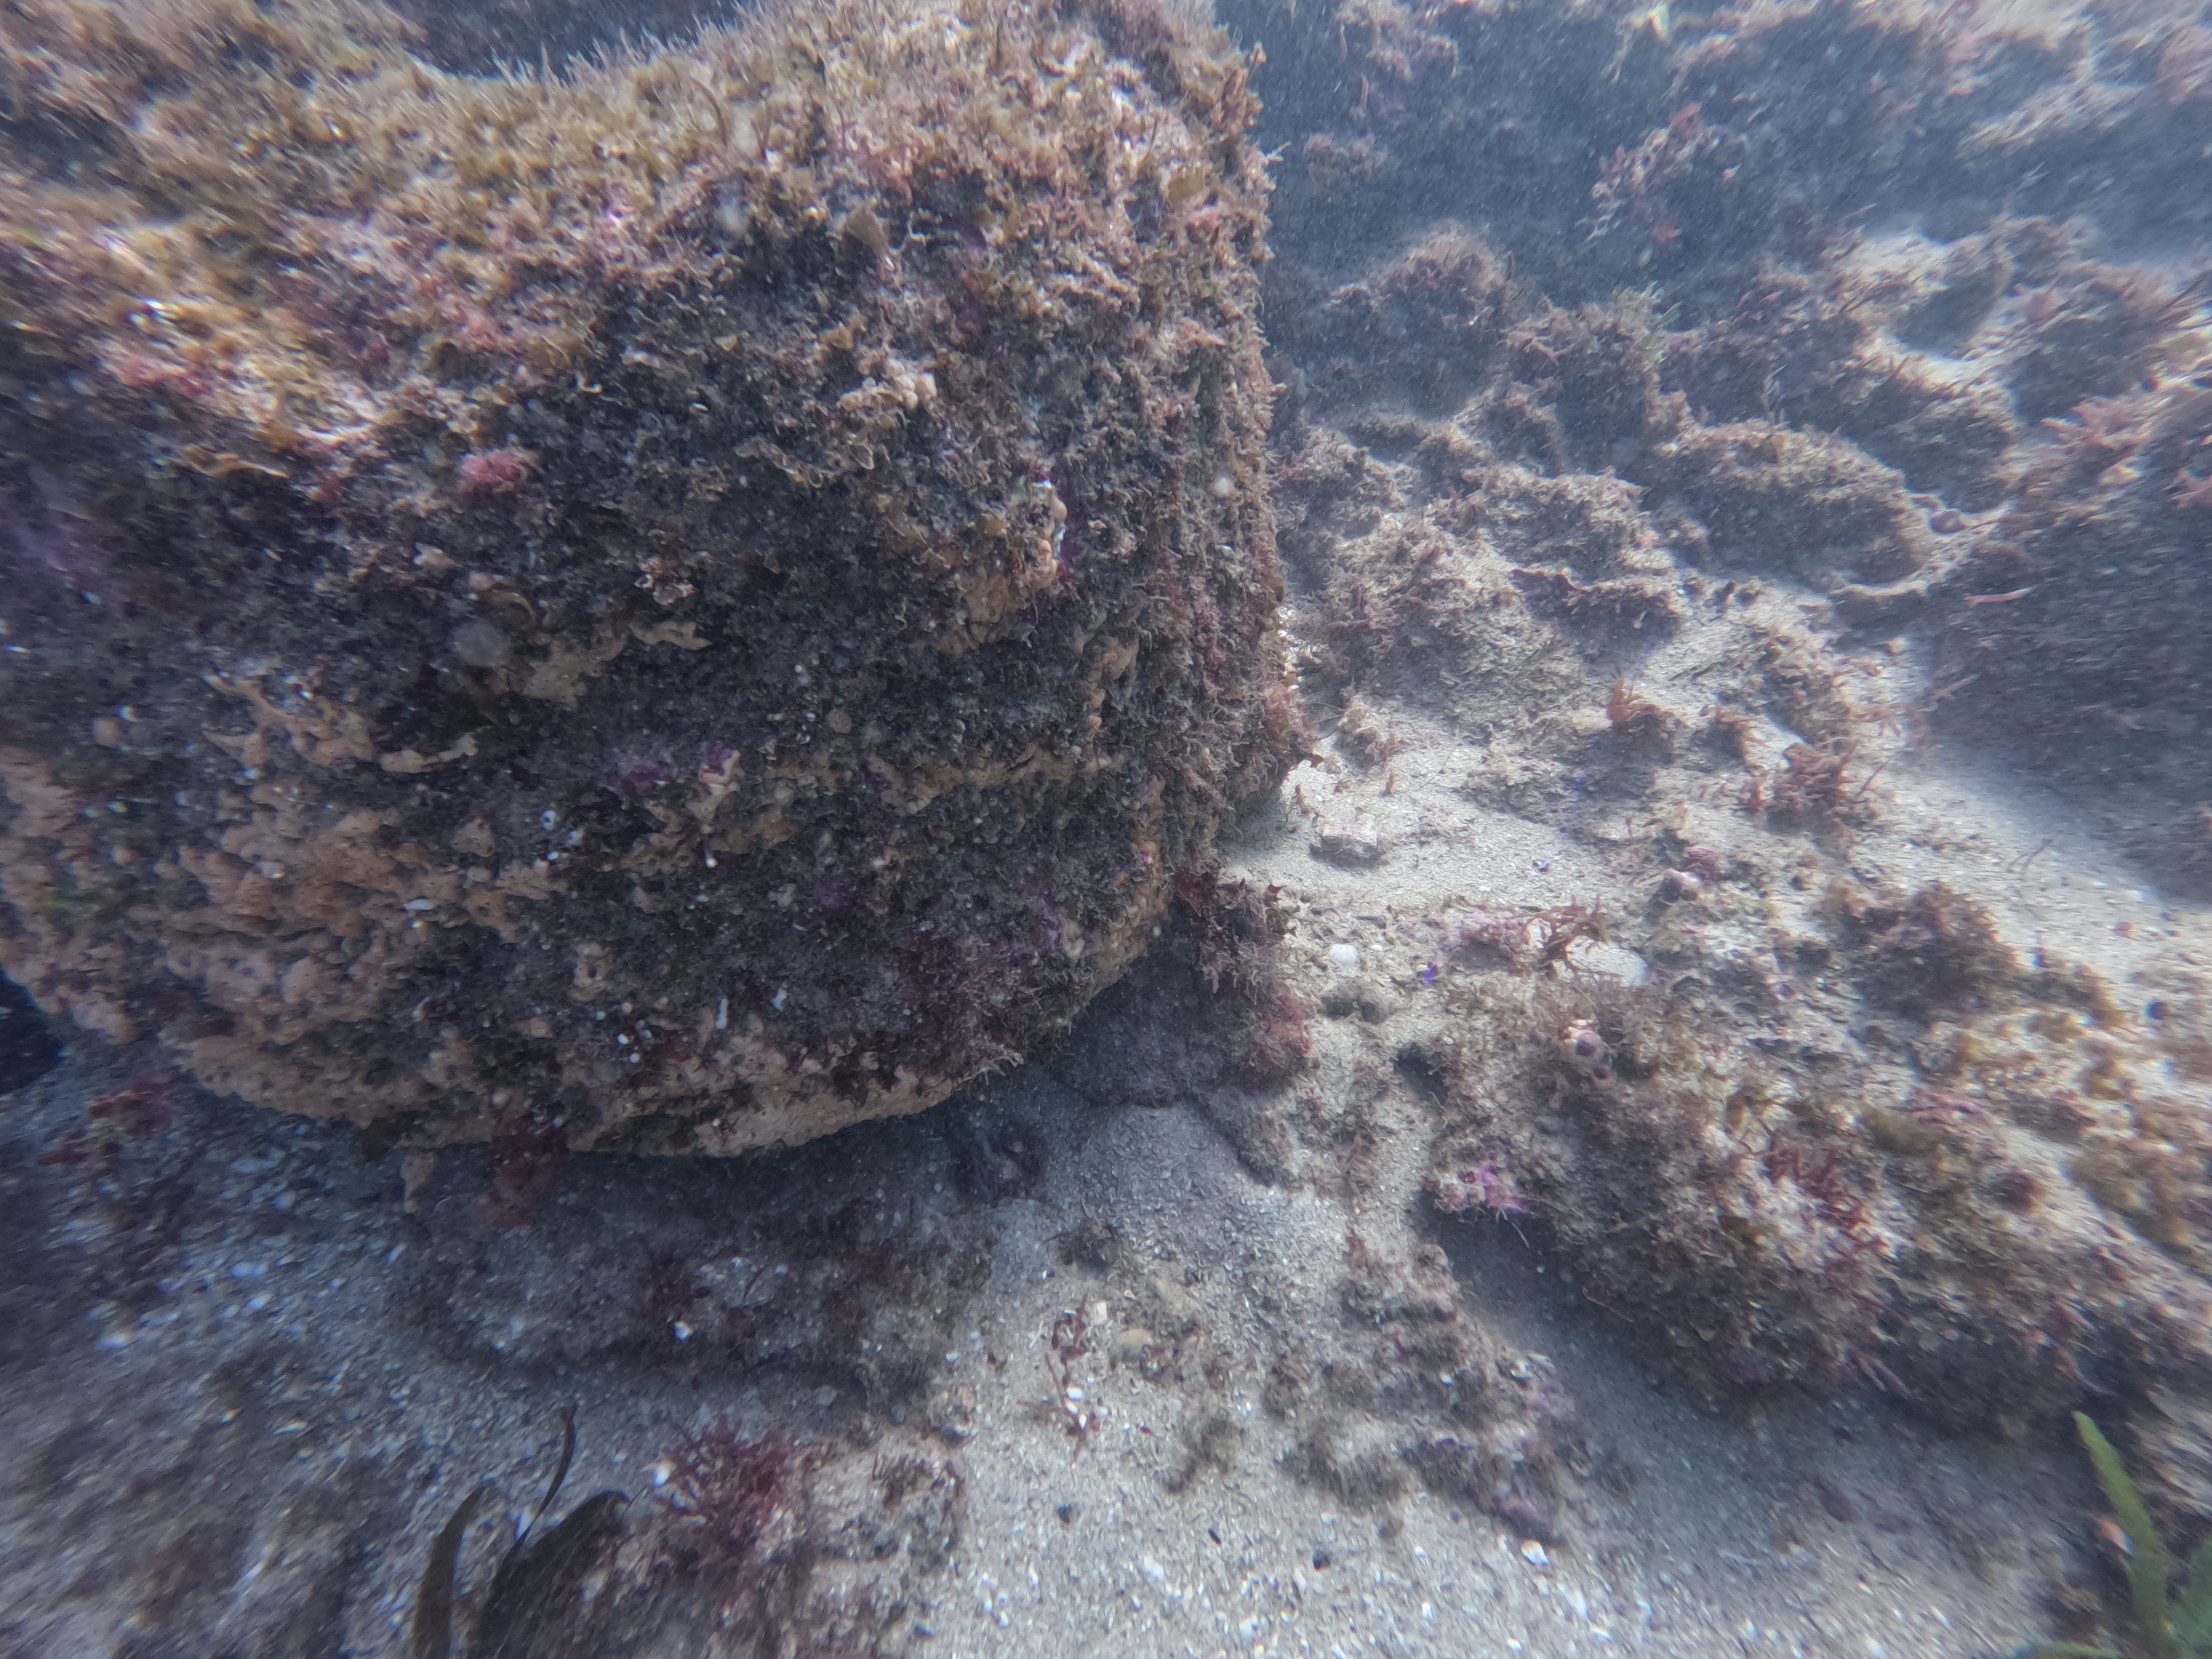

Supplement: Supplementary file 1709 [file G0028035.pdf › Ocean1/G0028035.pdf]

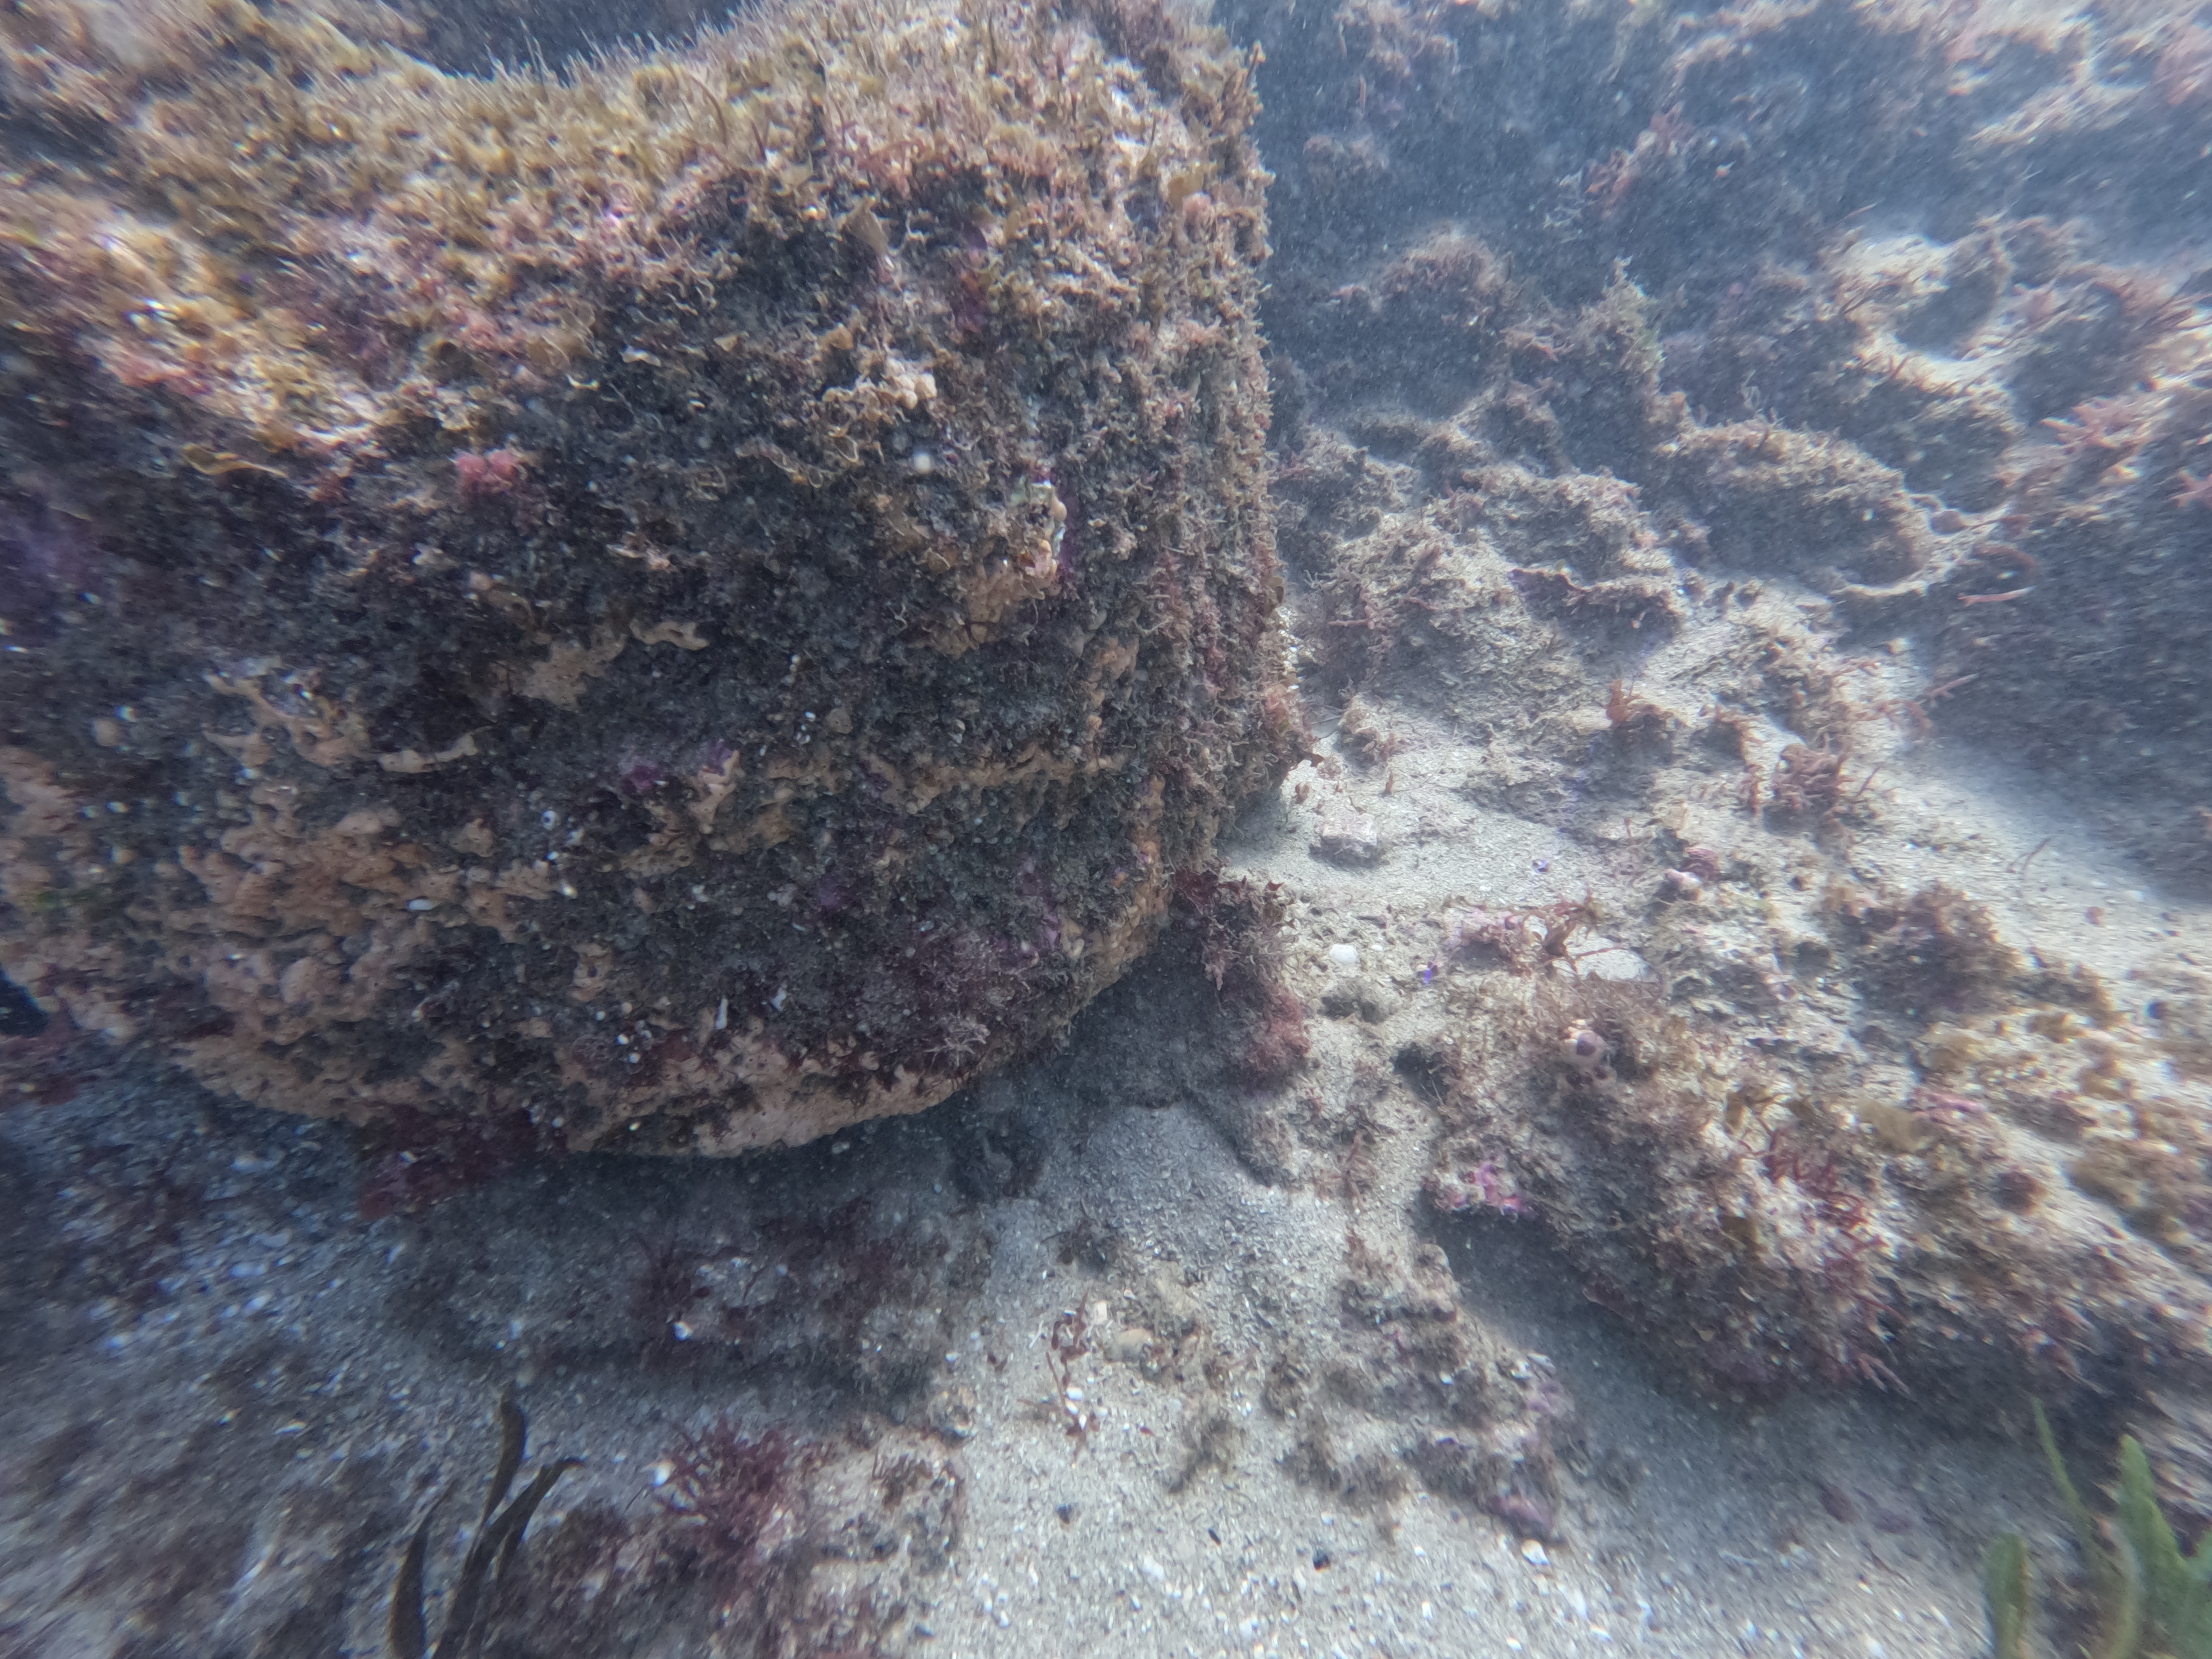

Supplement: Supplementary file 1710 [file G0028036.pdf › Ocean1/G0028036.pdf]

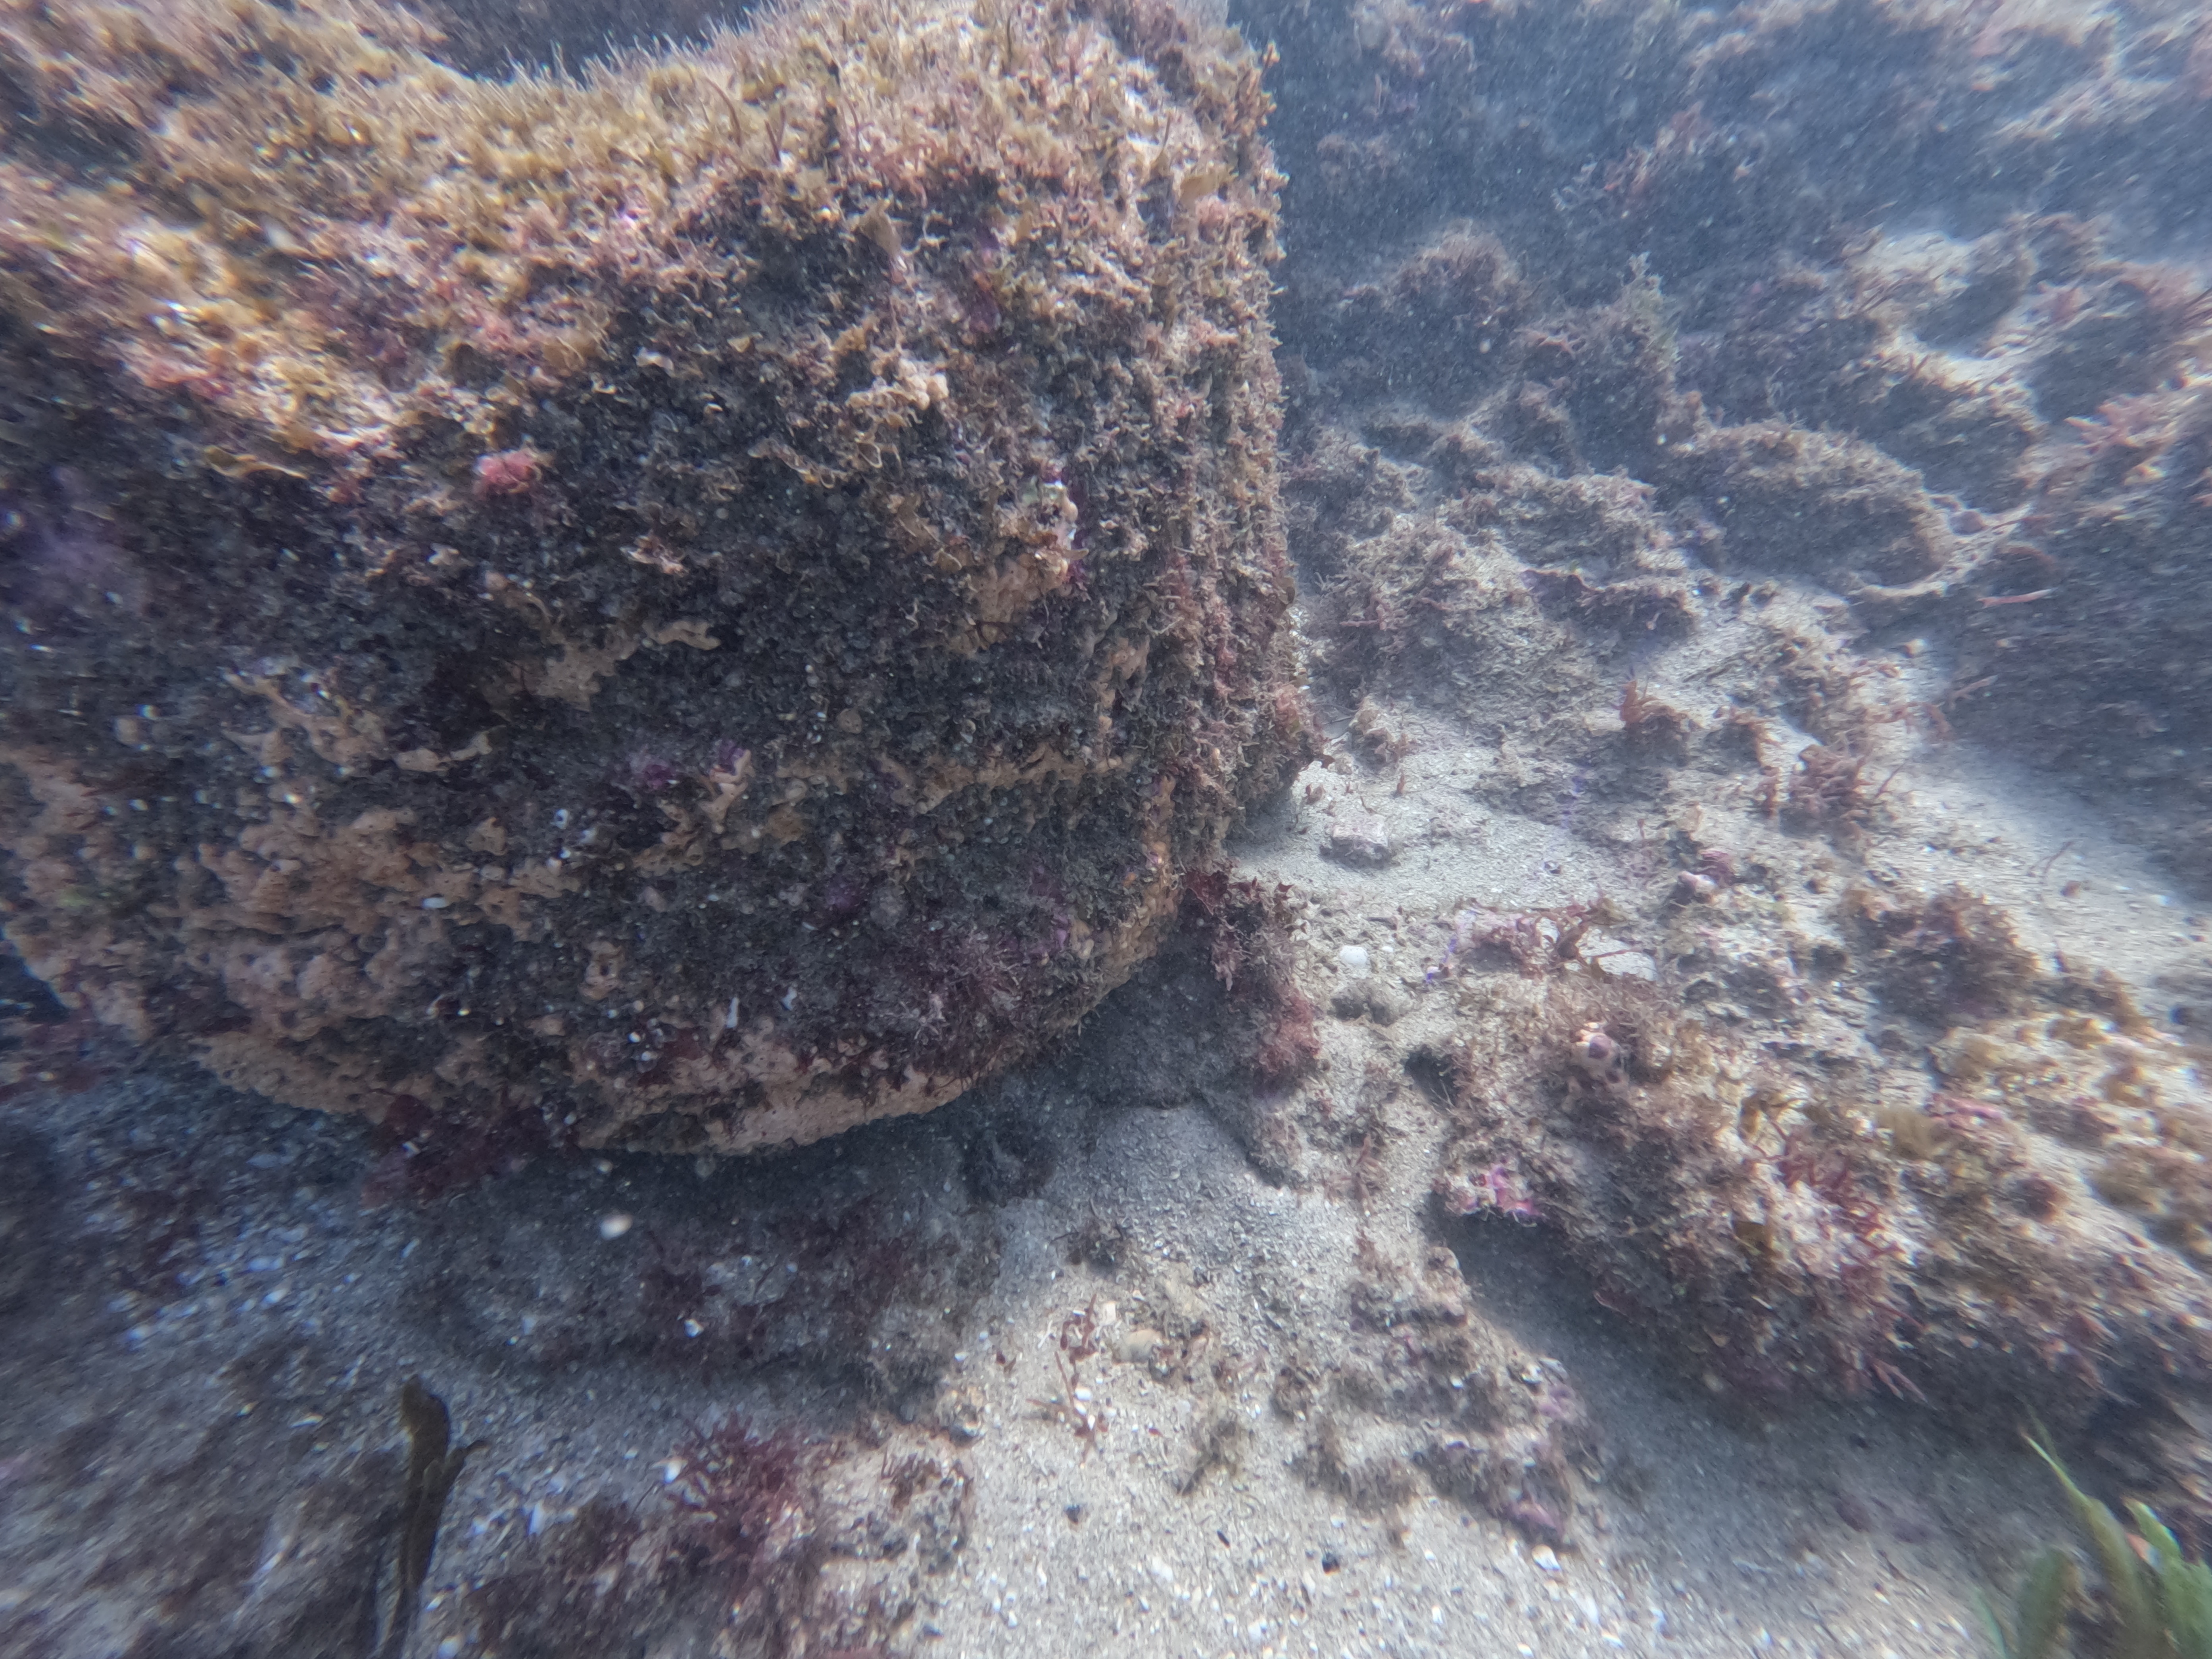

Supplement: Supplementary file 1711 [file G0028037.pdf › Ocean1/G0028037.pdf]

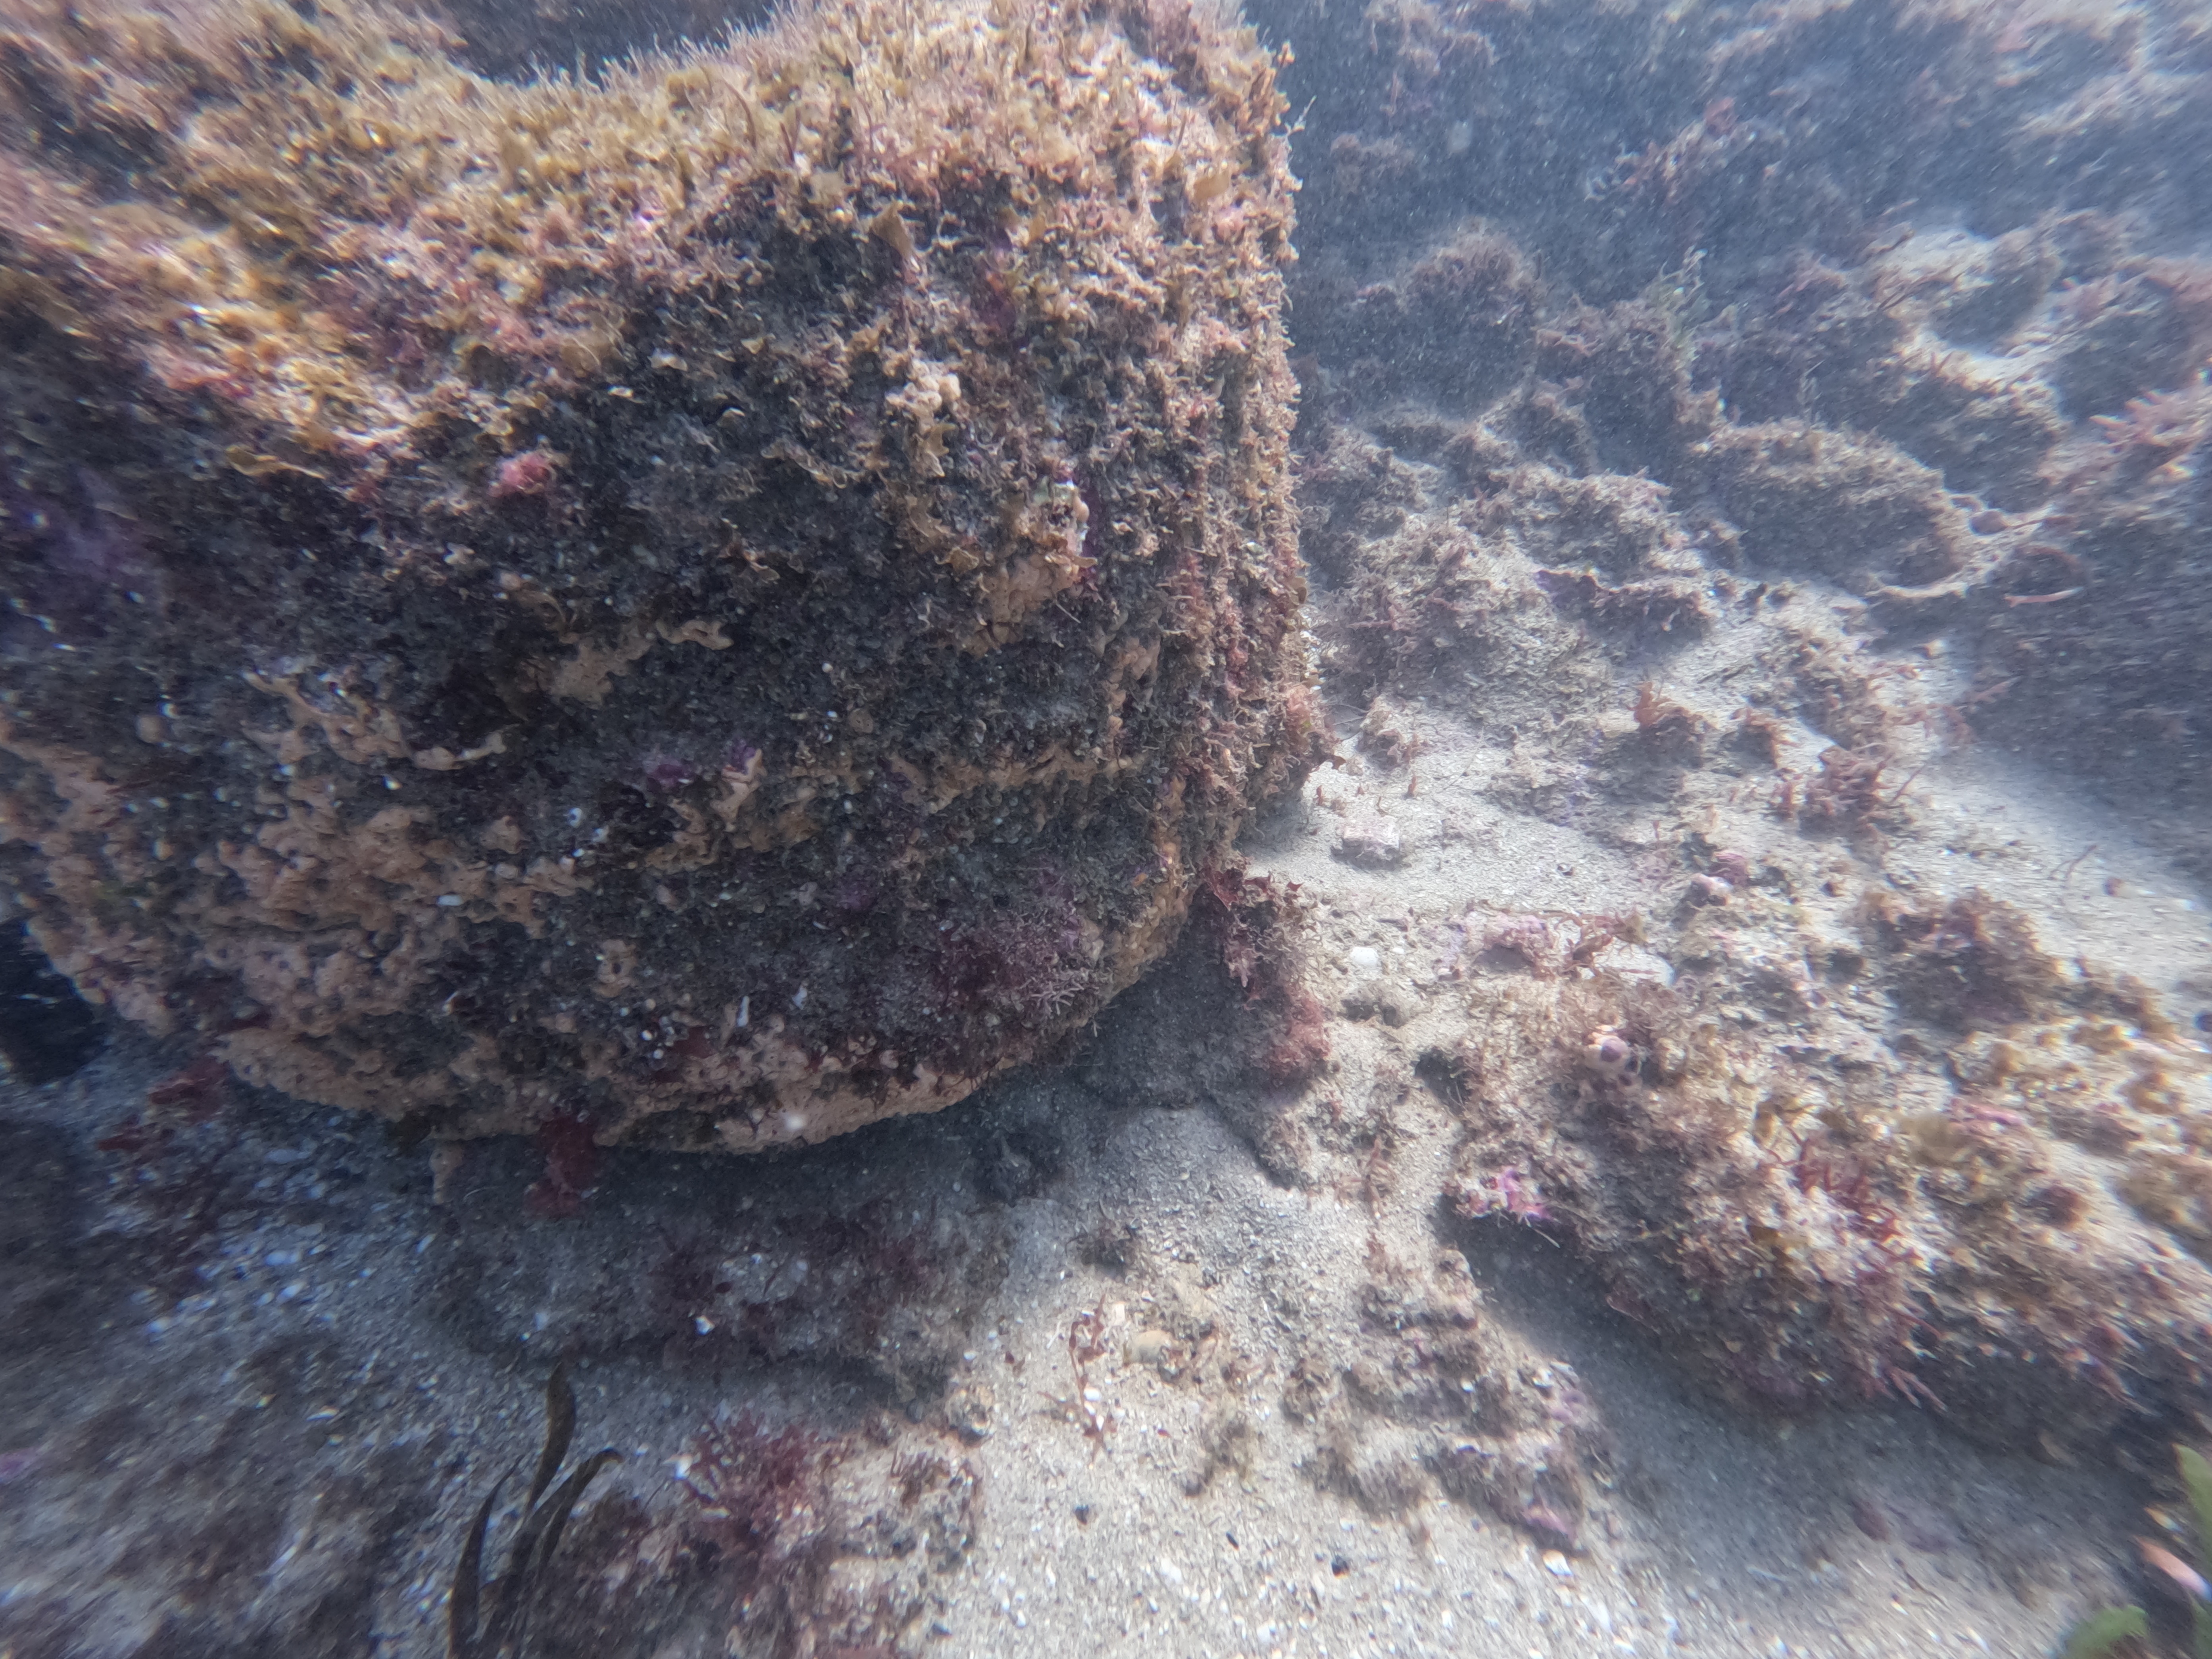

Supplement: Supplementary file 1712 [file G0028038.pdf › Ocean1/G0028038.pdf]

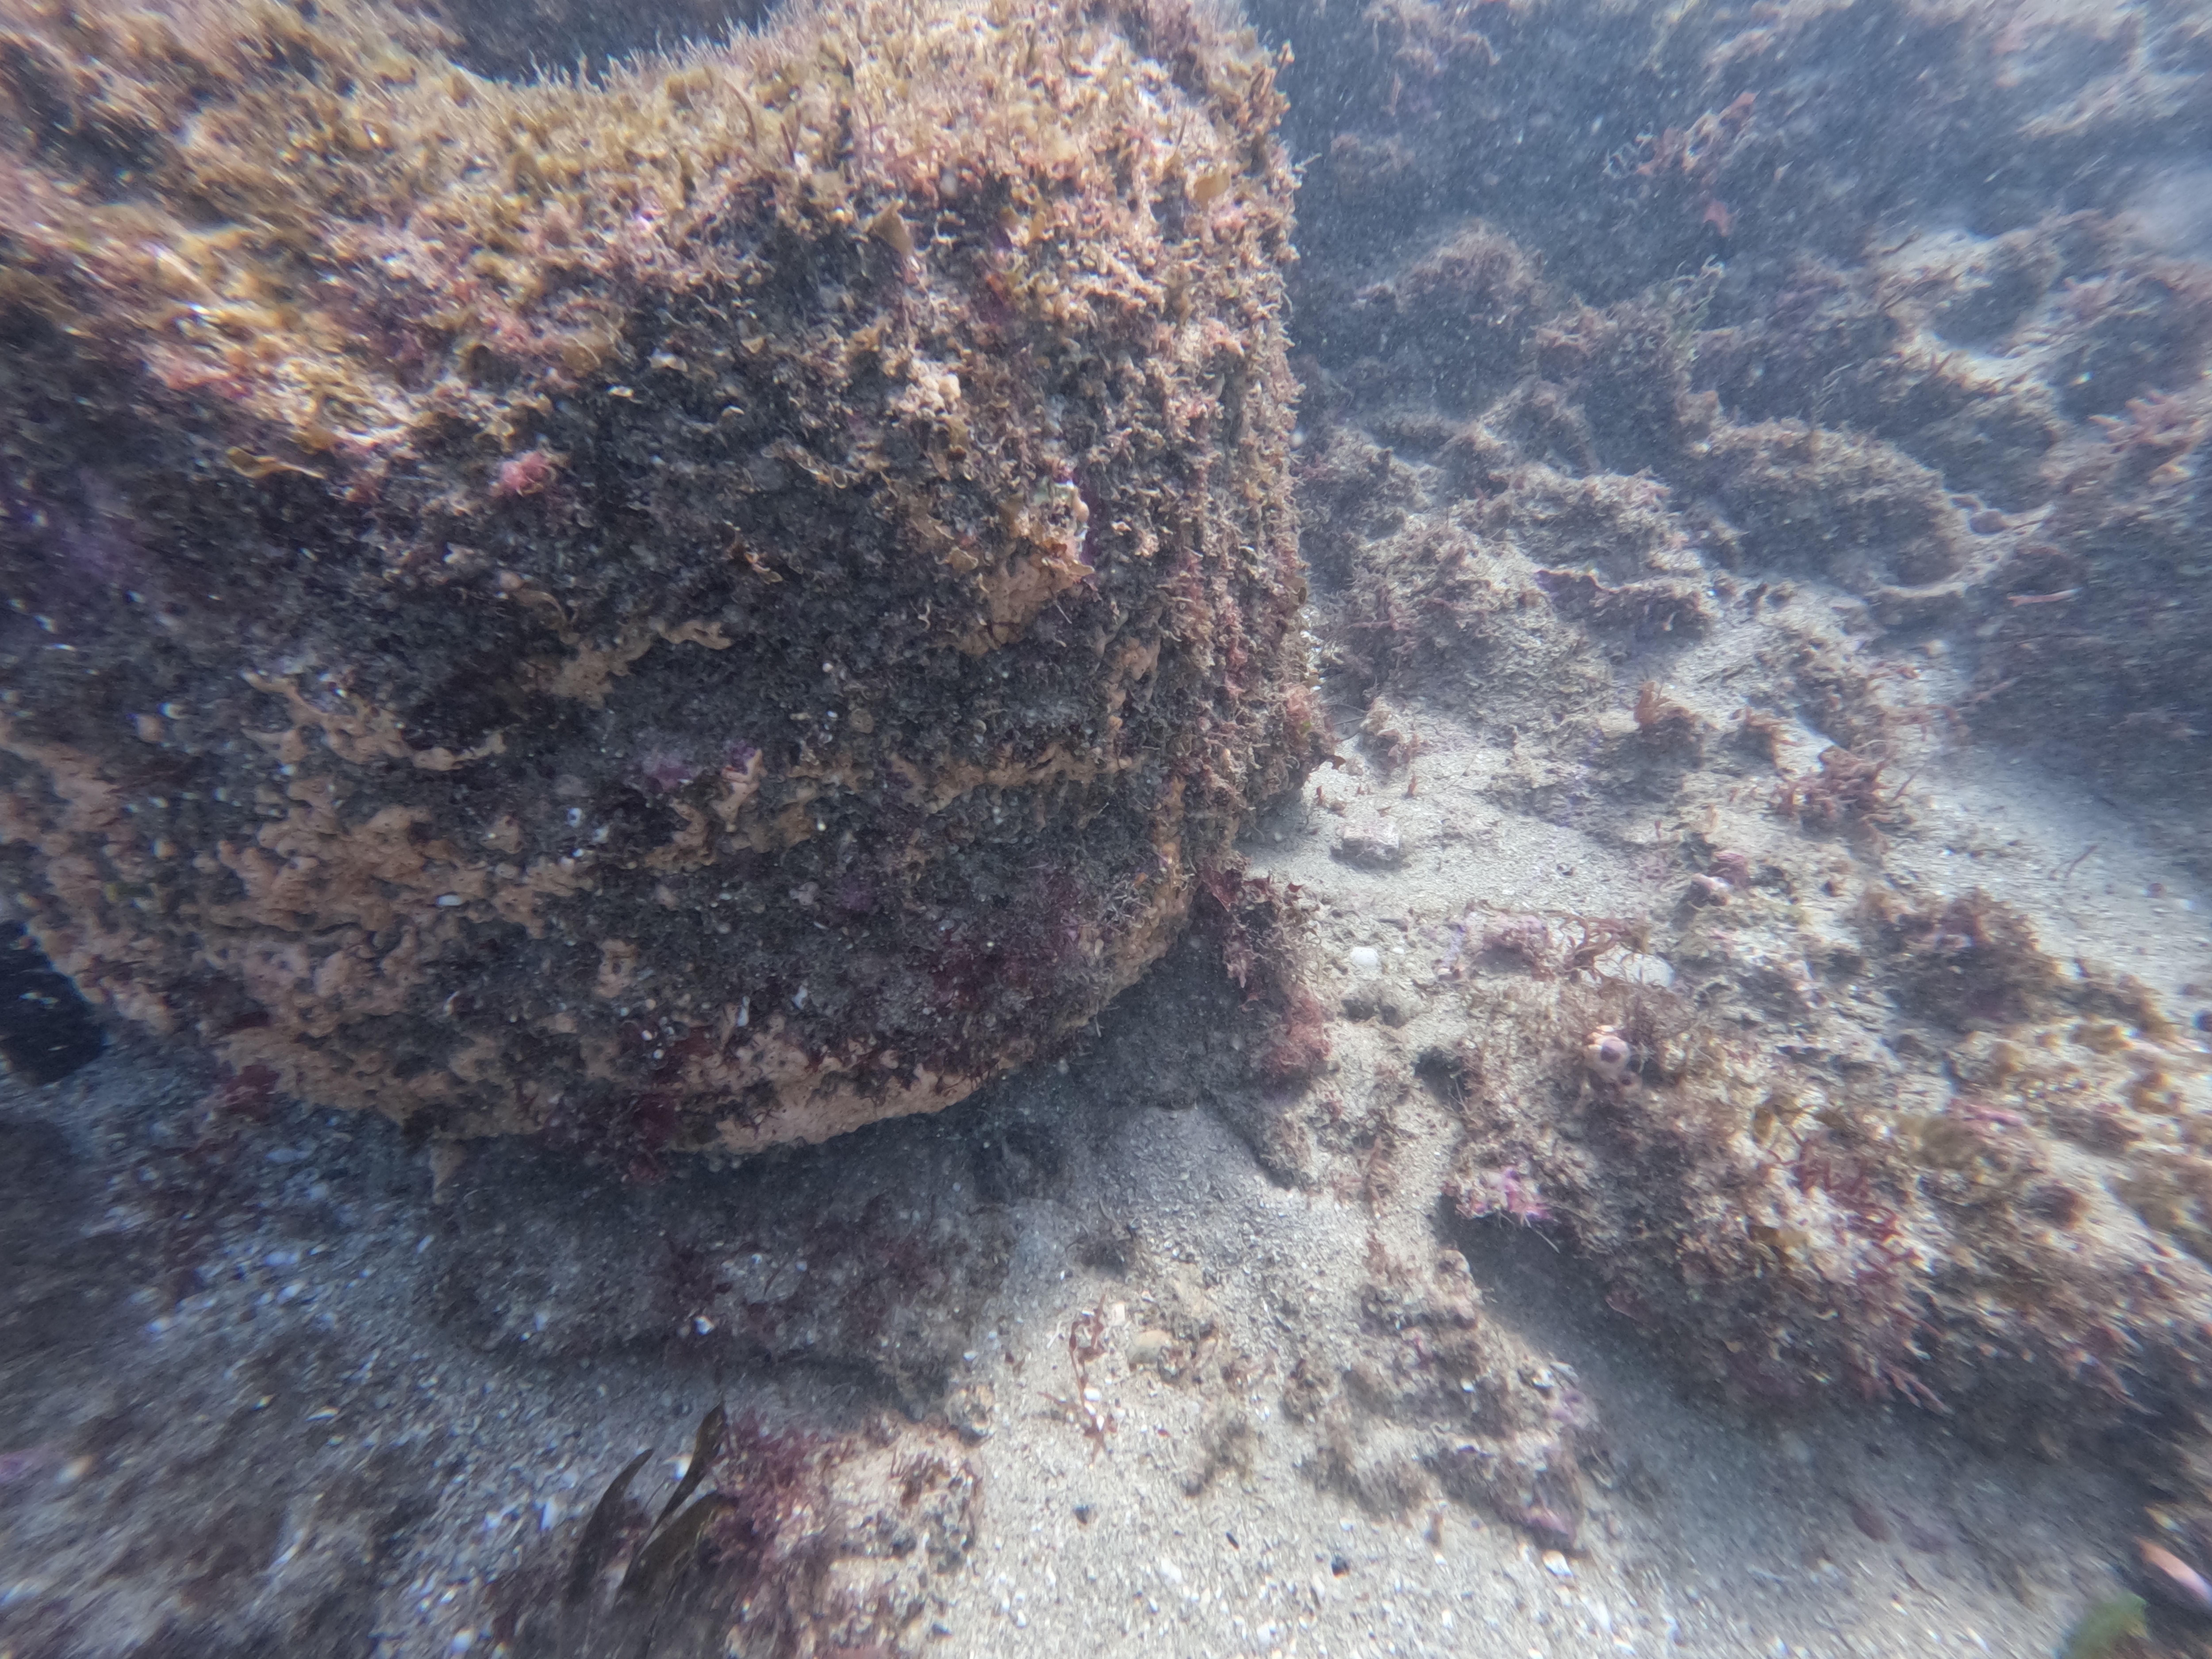

Supplement: Supplementary file 1713 [file G0028039.pdf › Ocean1/G0028039.pdf]

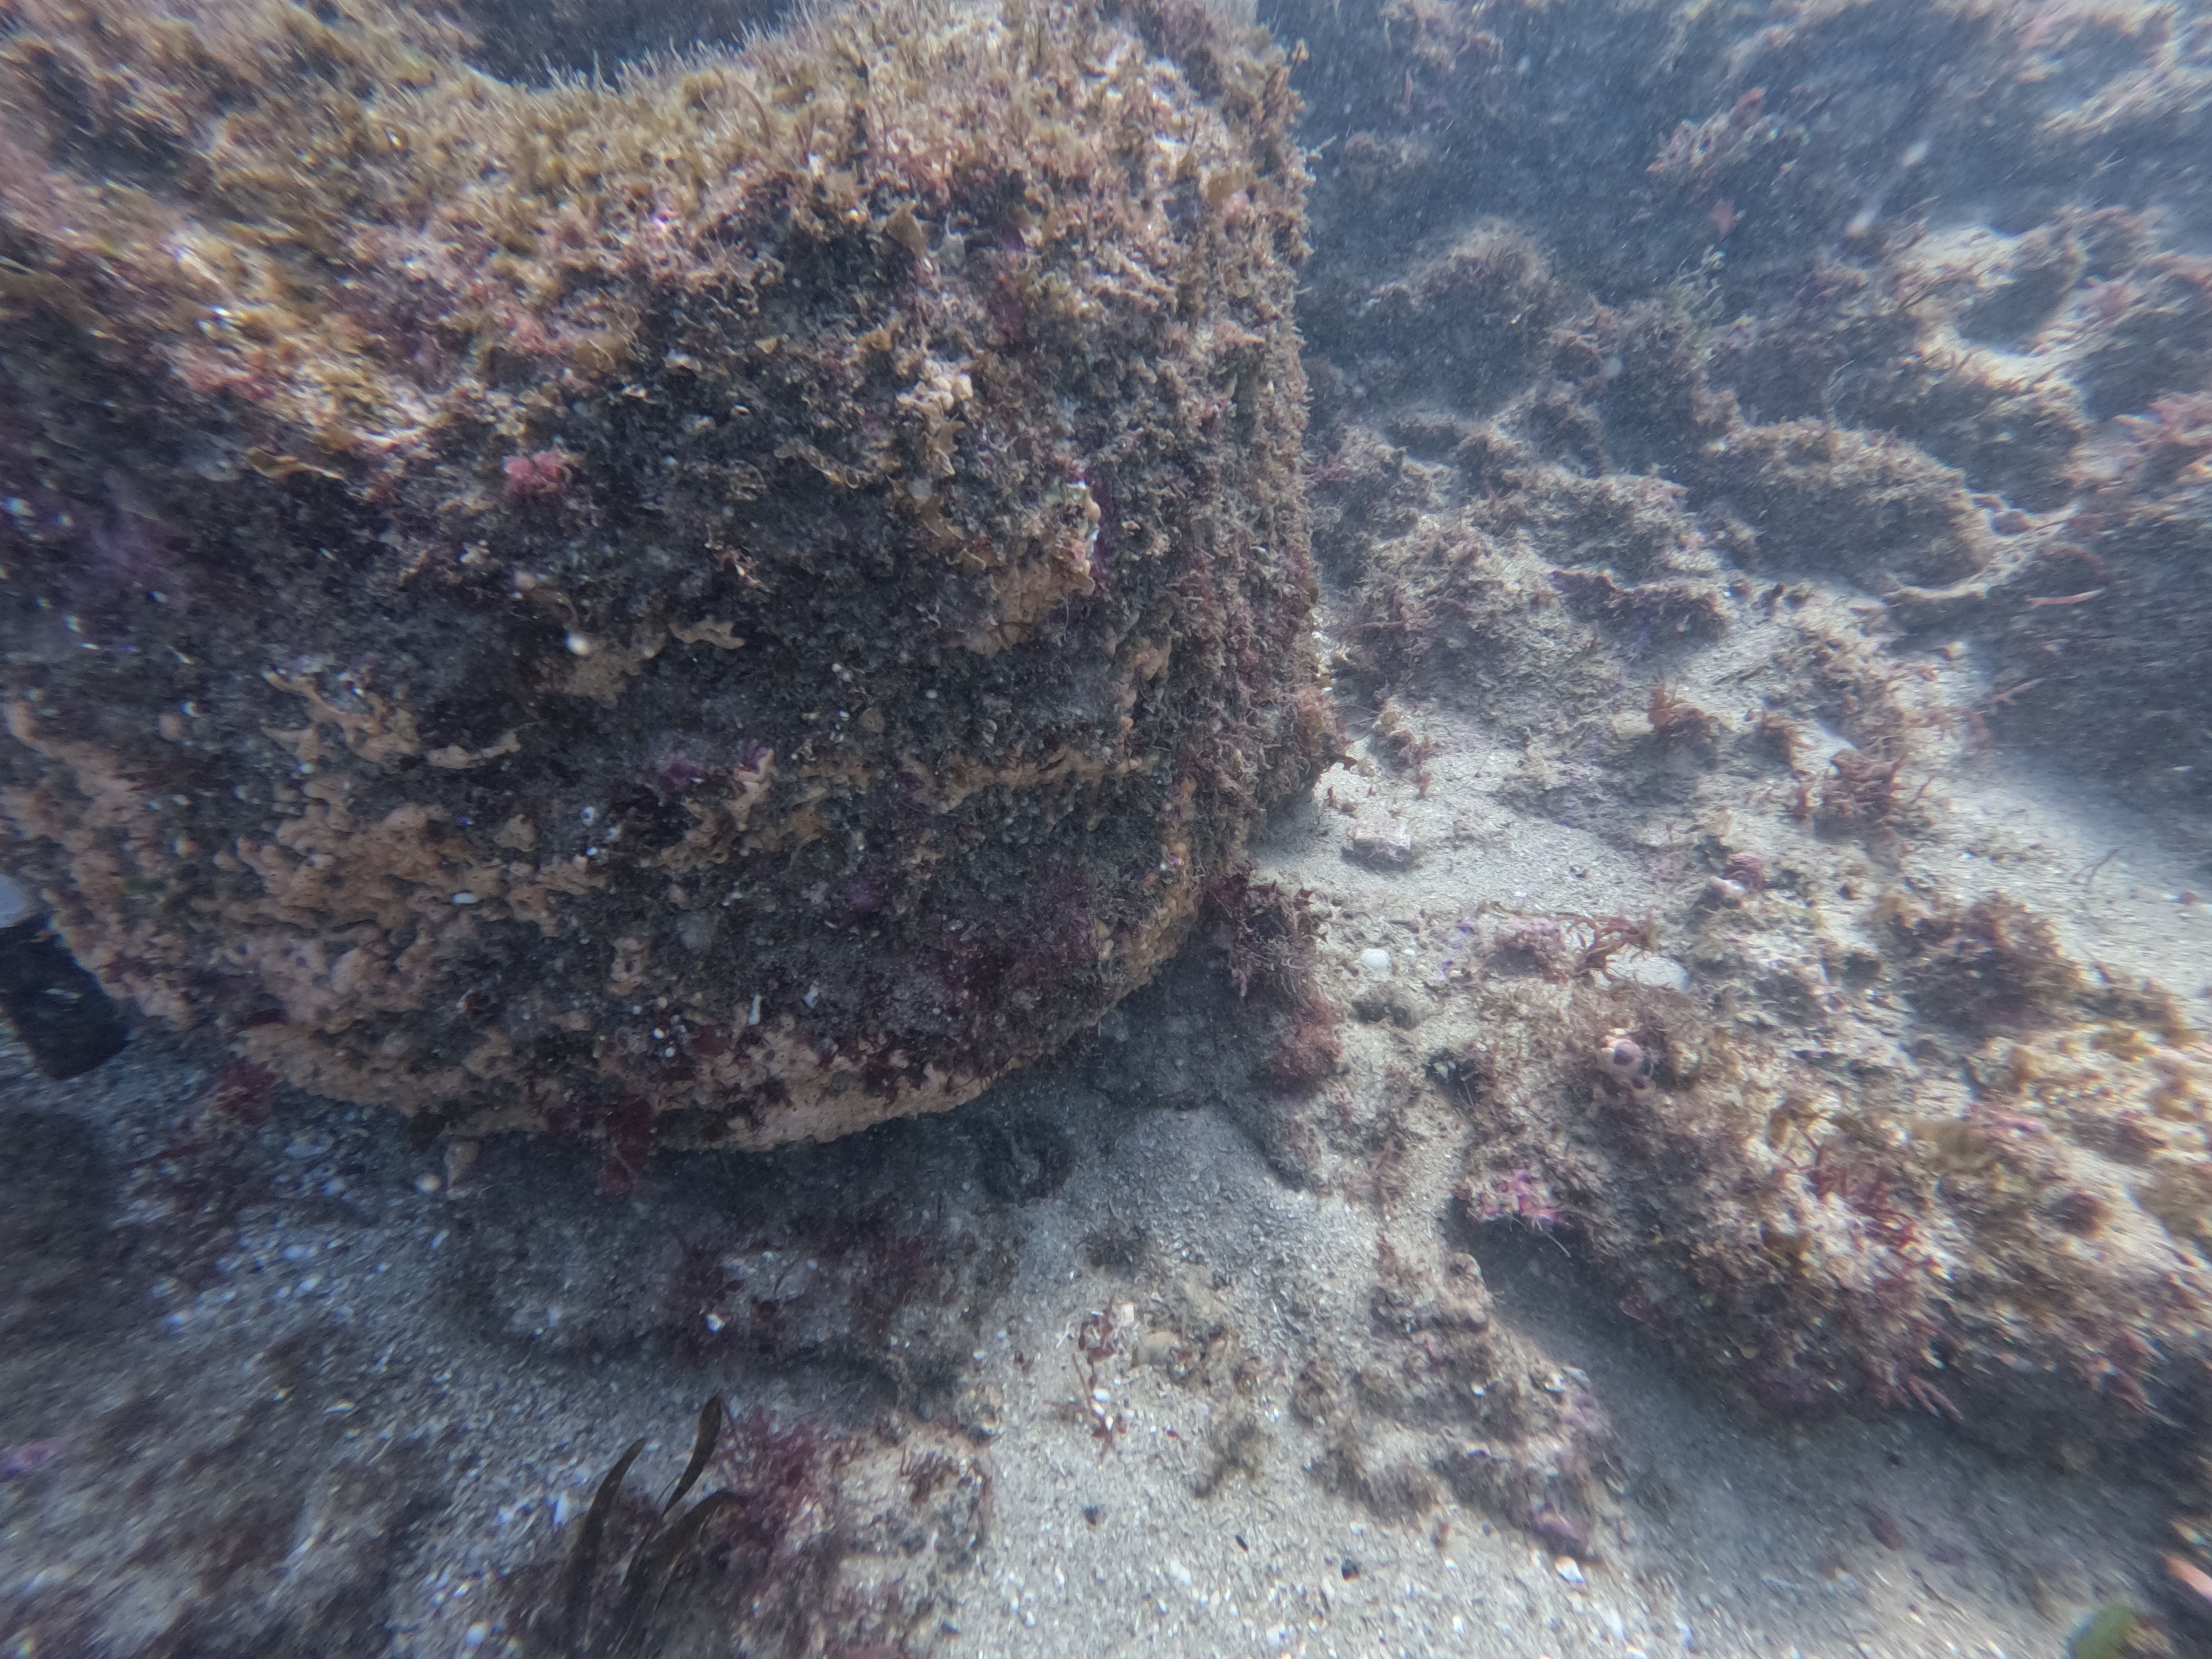

Supplement: Supplementary file 1714 [file G0028040.pdf › Ocean1/G0028040.pdf]

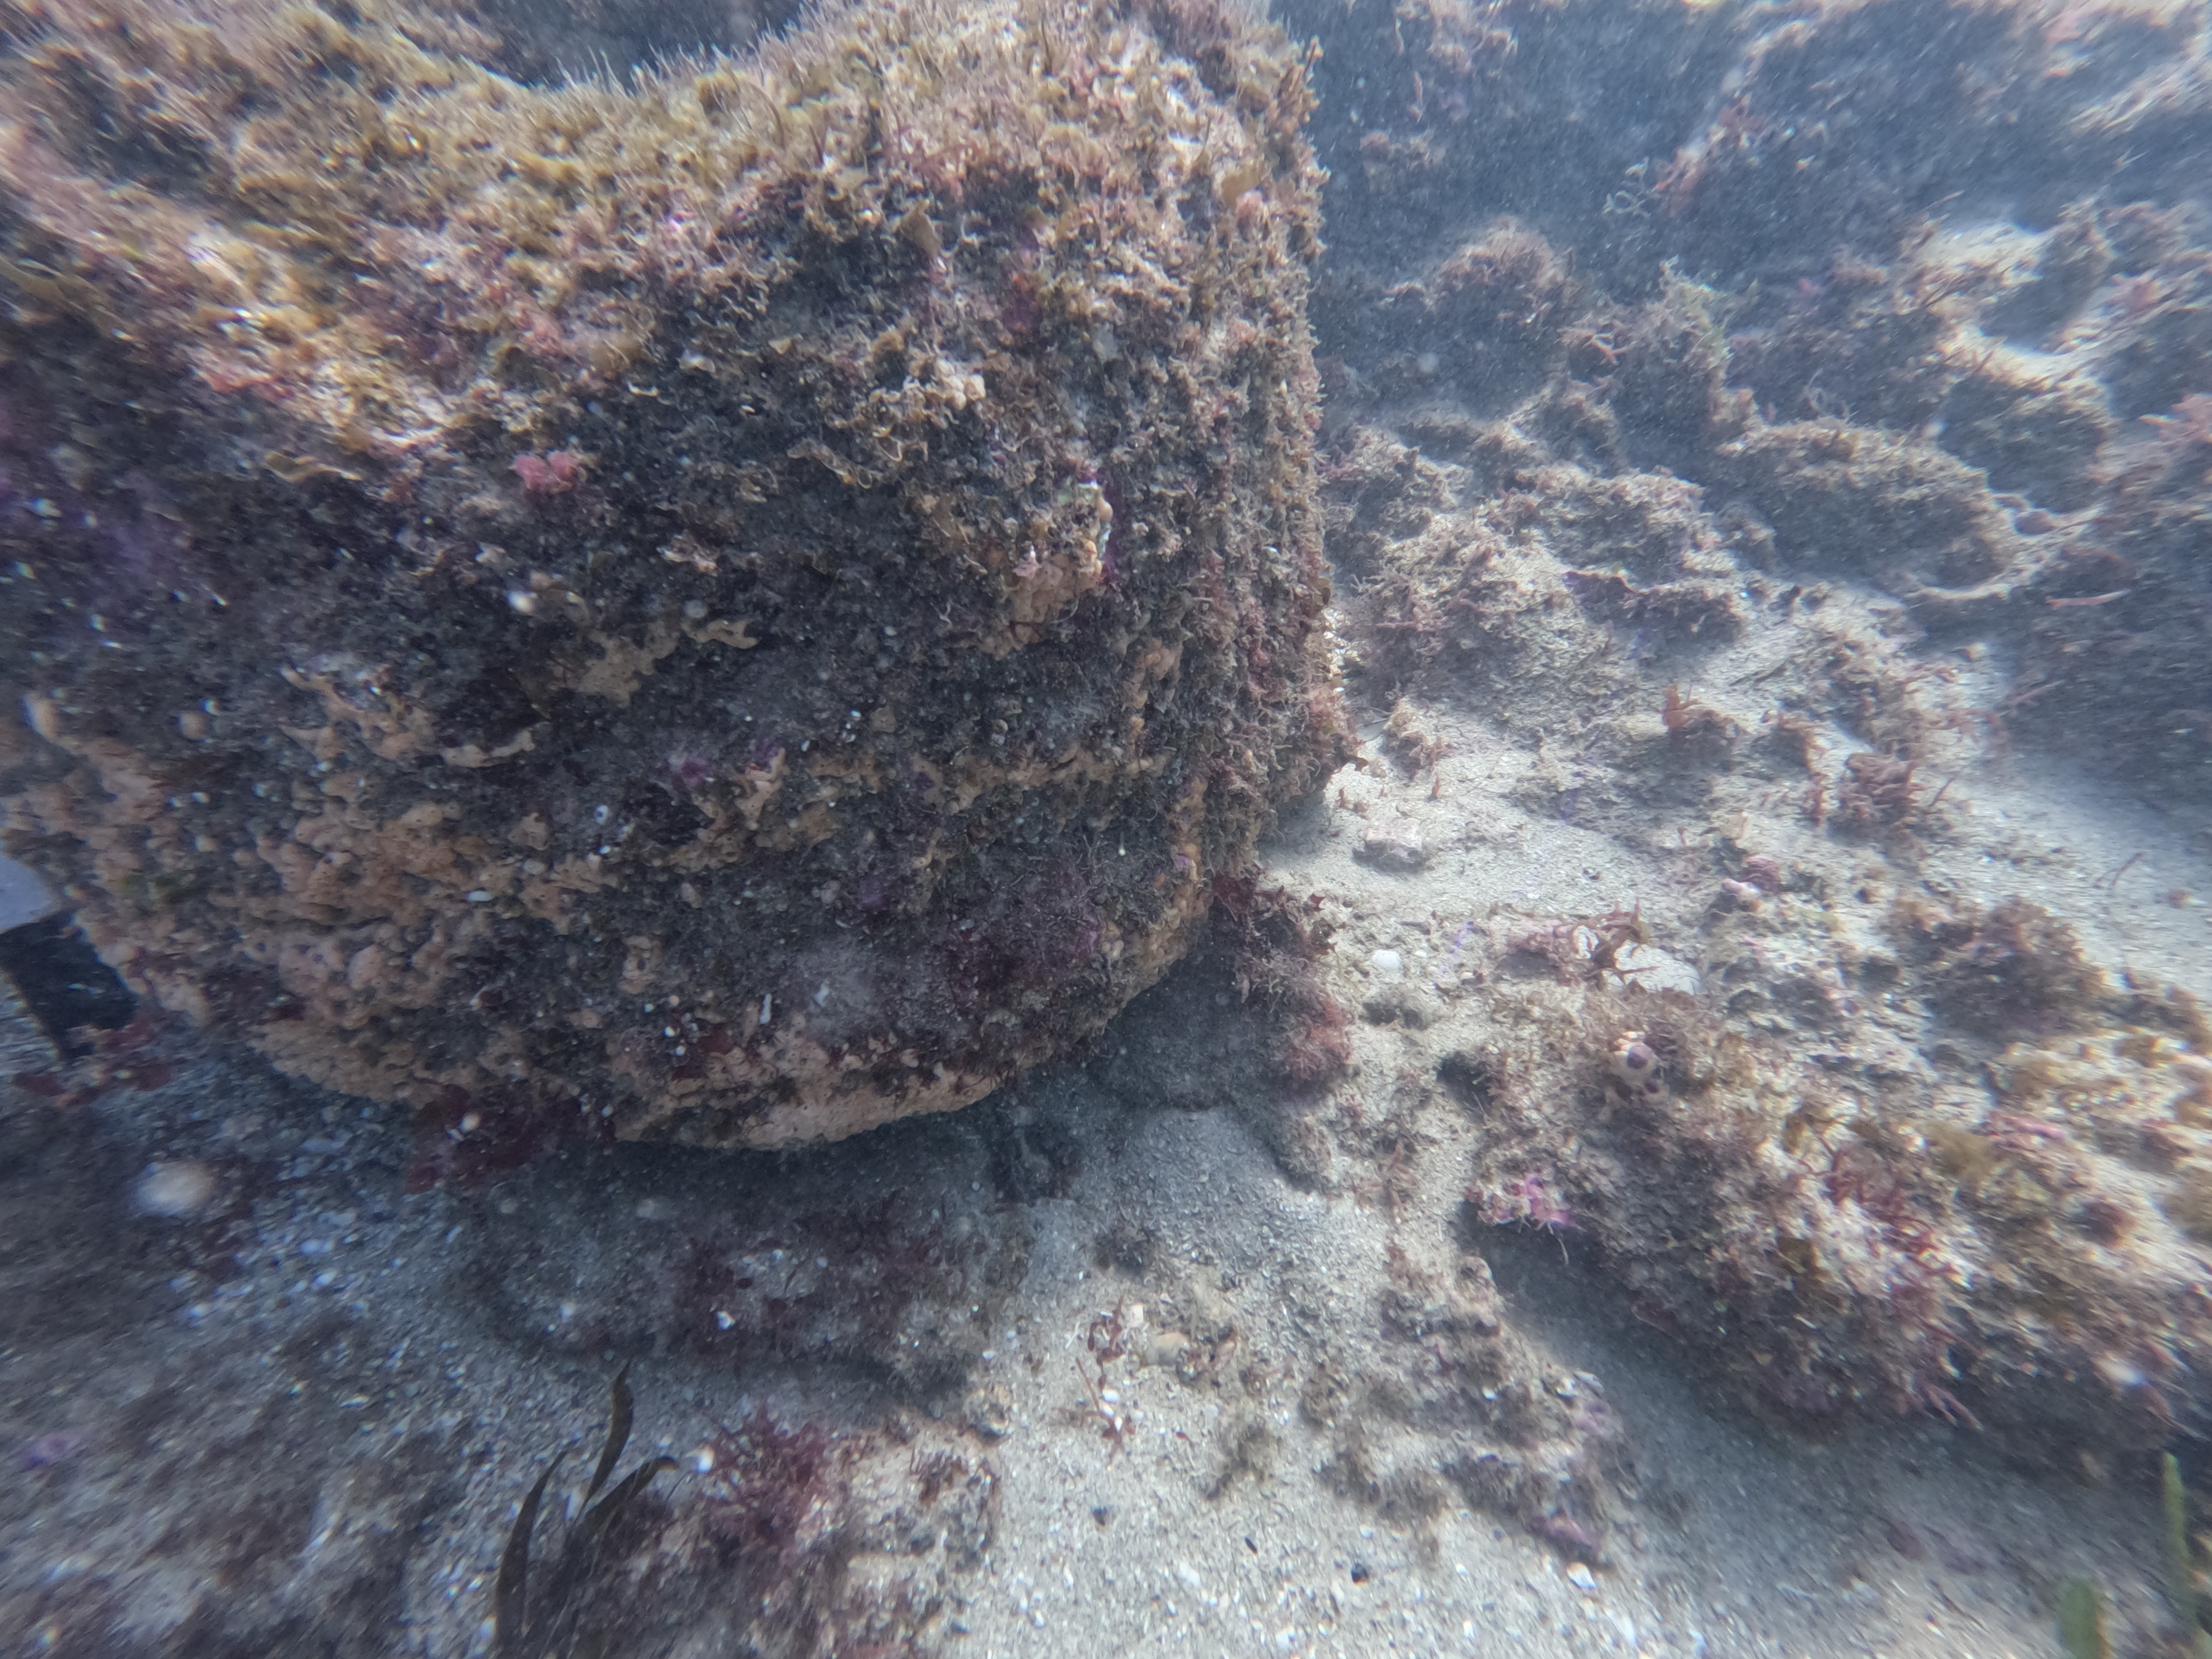

Supplement: Supplementary file 1715 [file G0028041.pdf › Ocean1/G0028041.pdf]

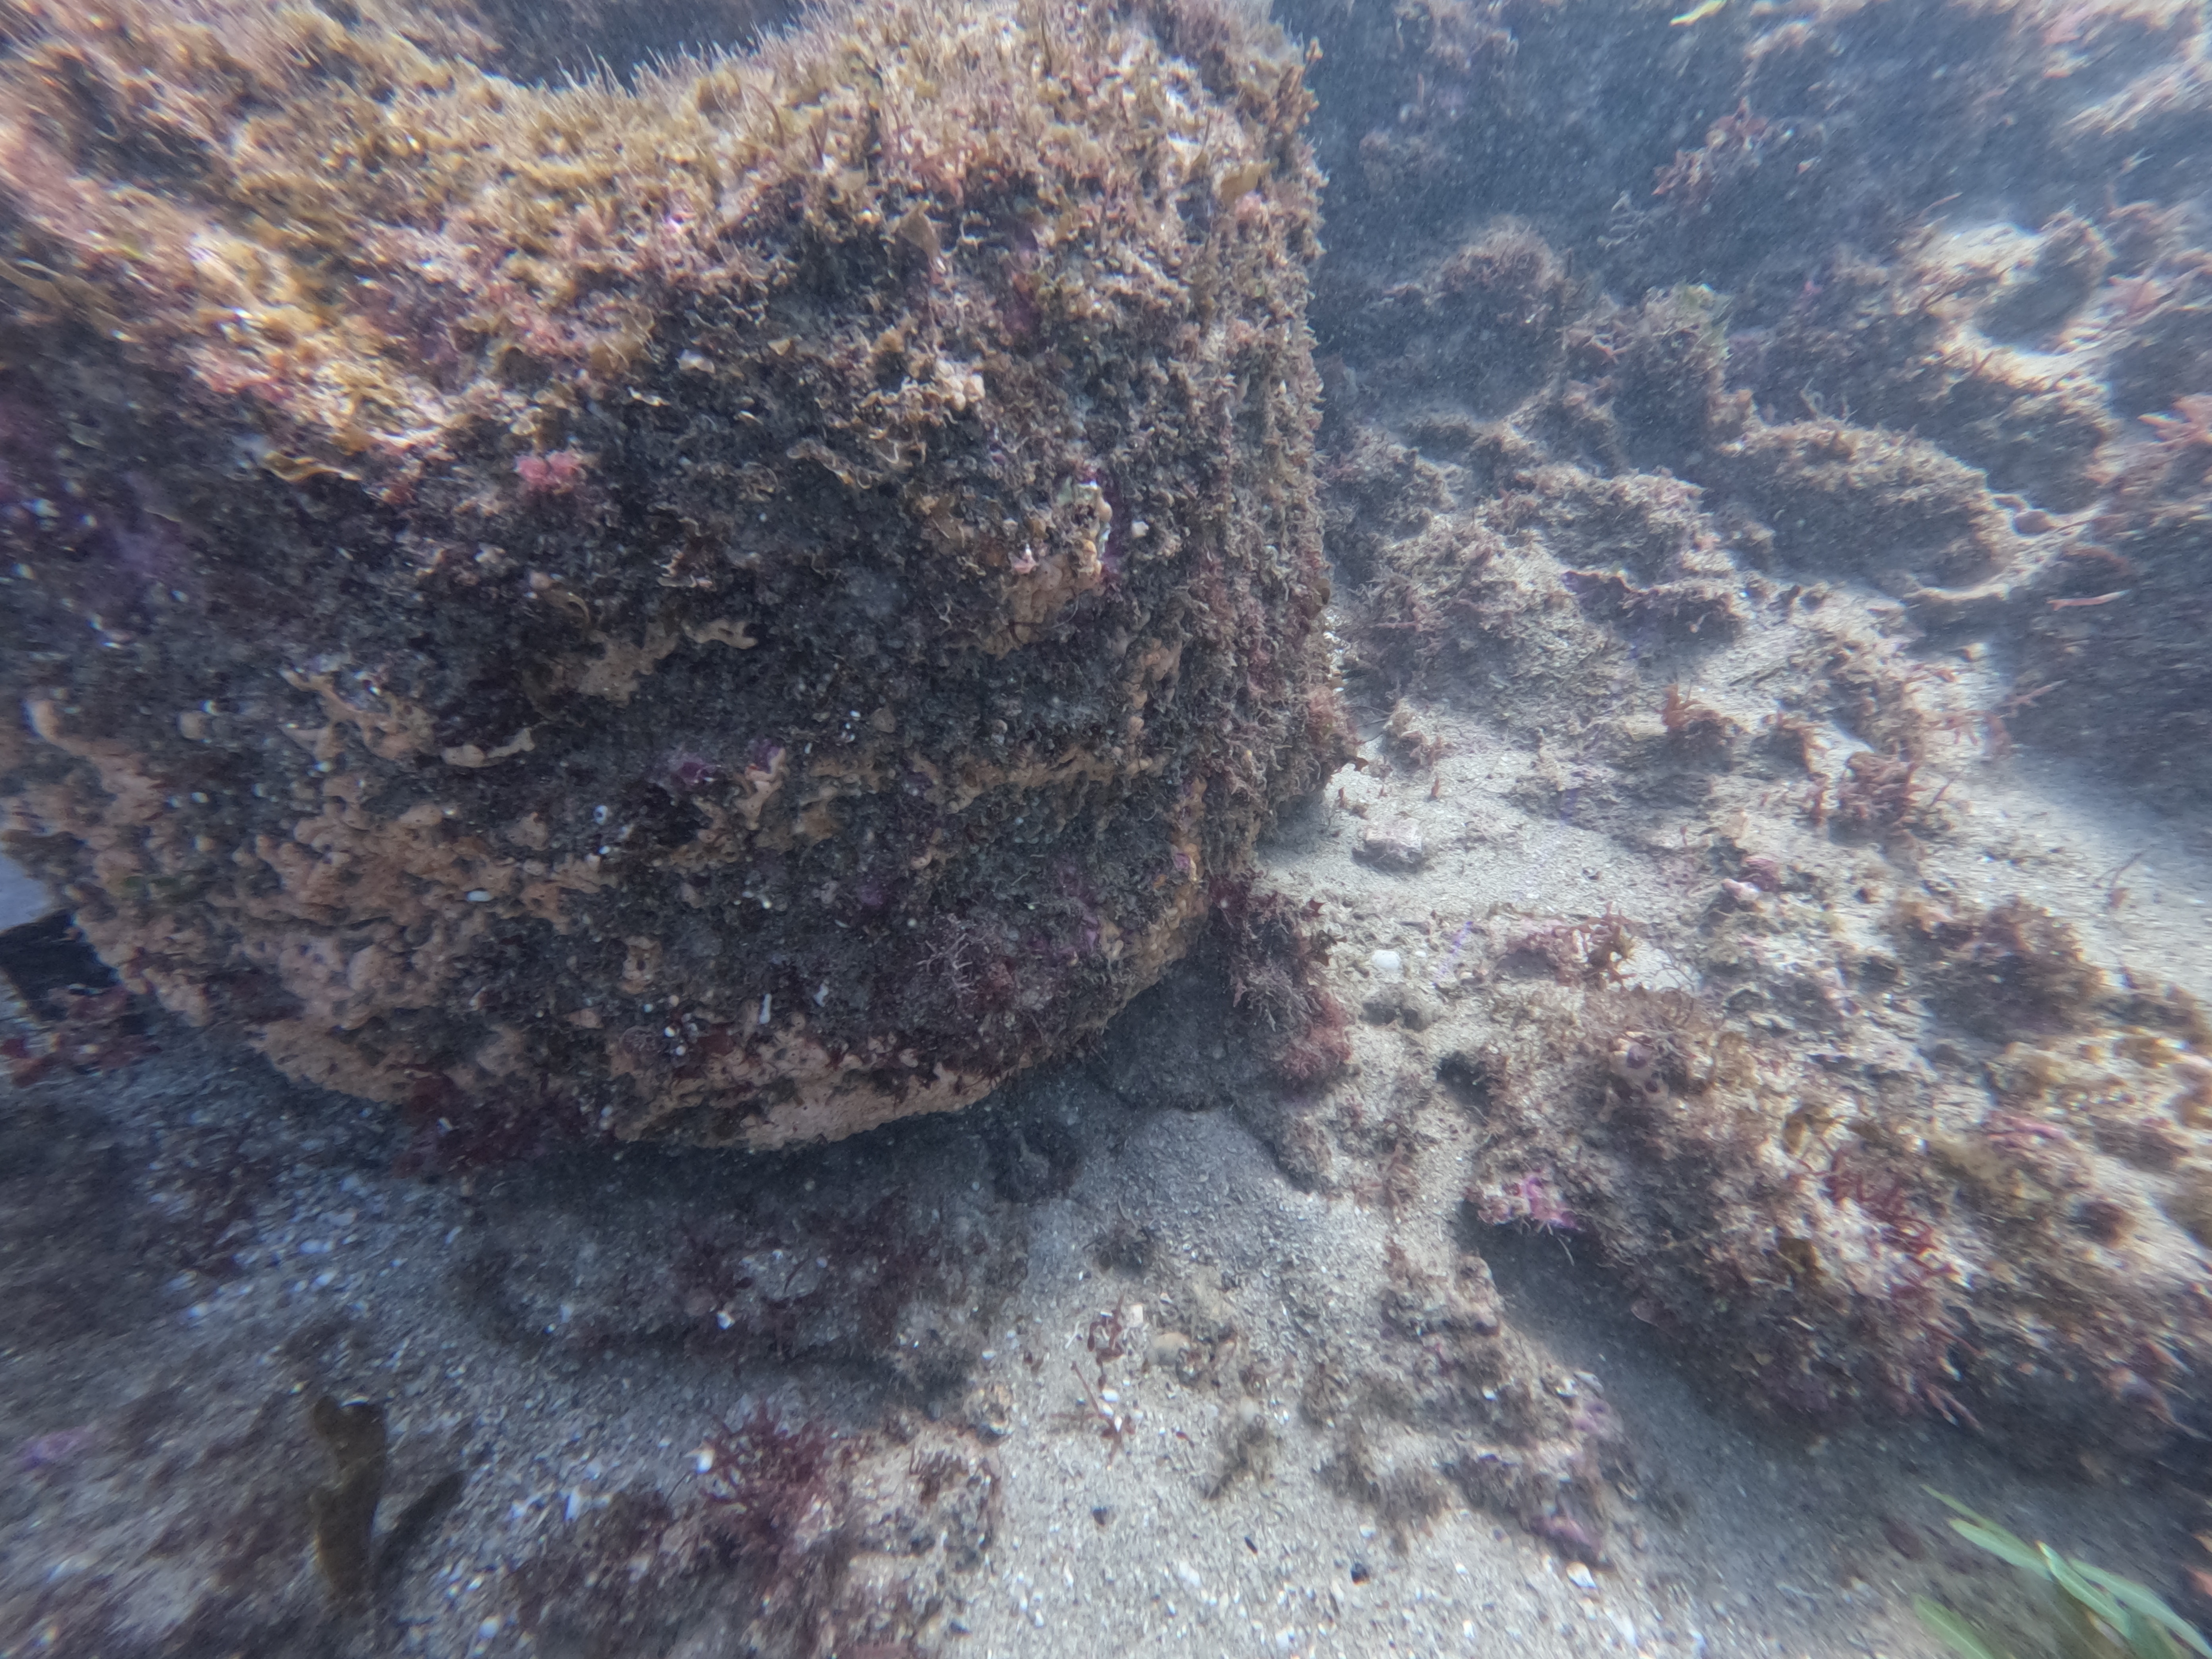

Supplement: Supplementary file 1716 [file G0028042.pdf › Ocean1/G0028042.pdf]

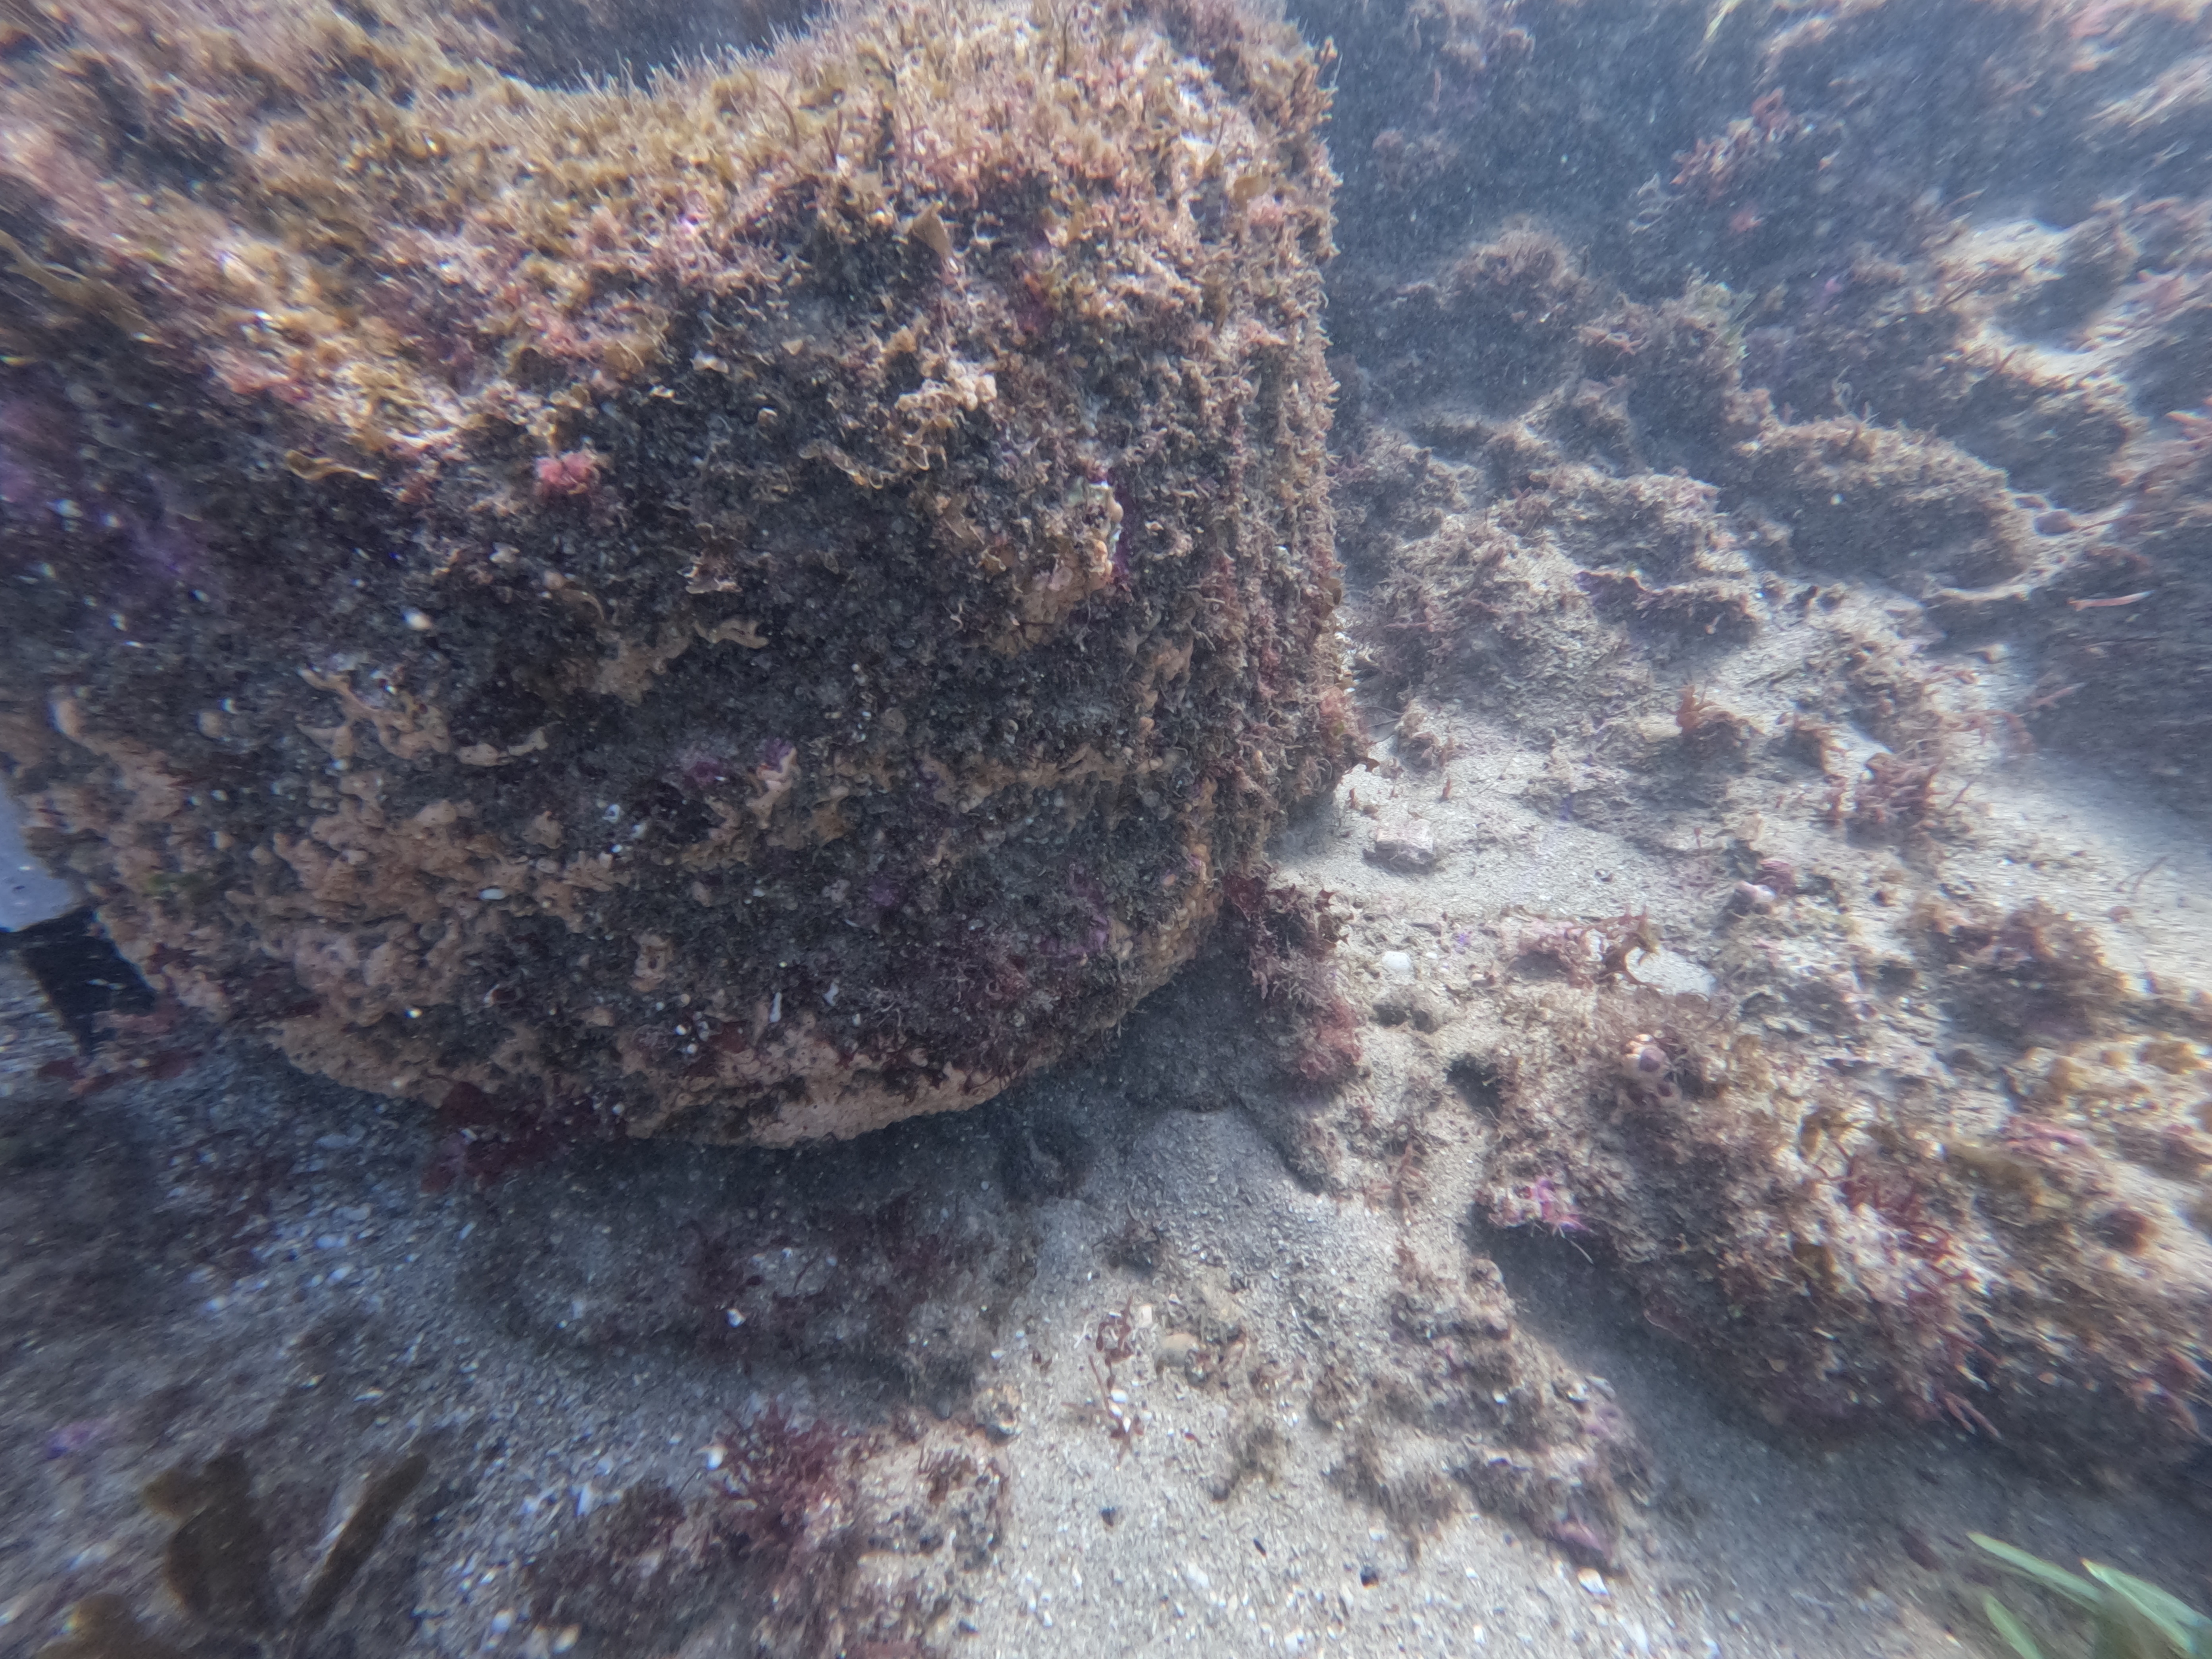

Supplement: Supplementary file 1717 [file G0028043.pdf › Ocean1/G0028043.pdf]

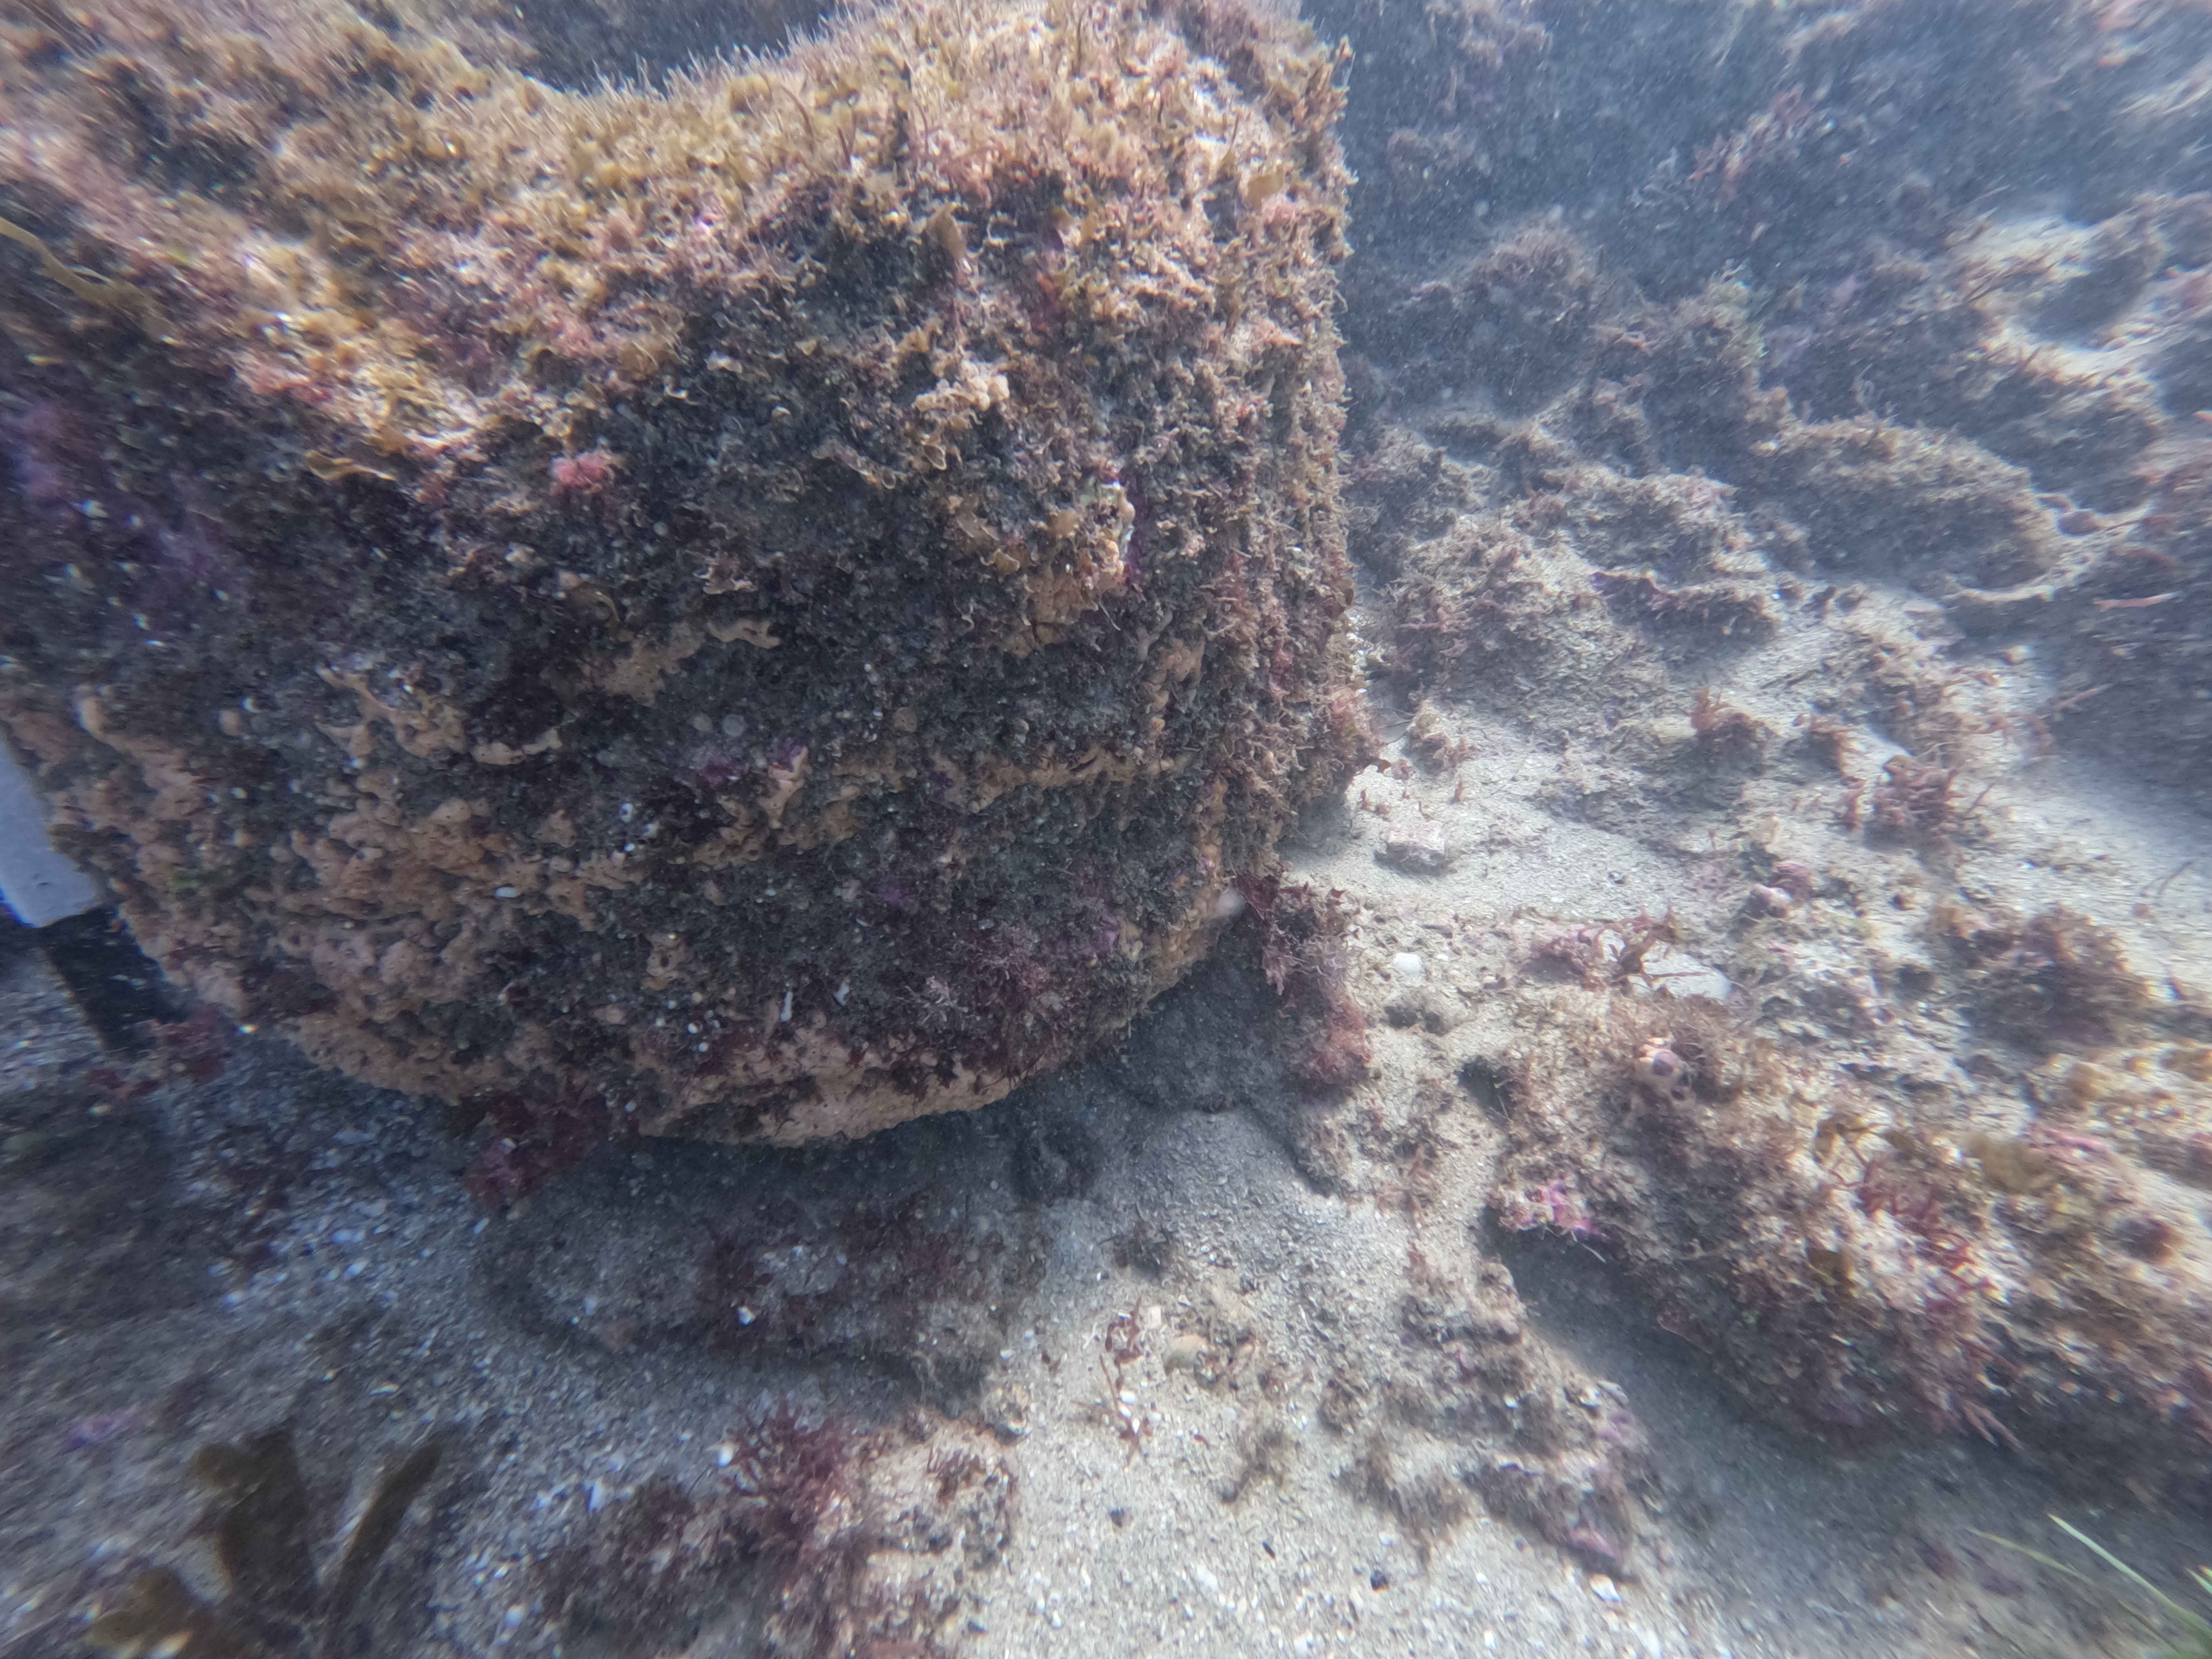

Supplement: Supplementary file 1718 [file G0028044.pdf › Ocean1/G0028044.pdf]

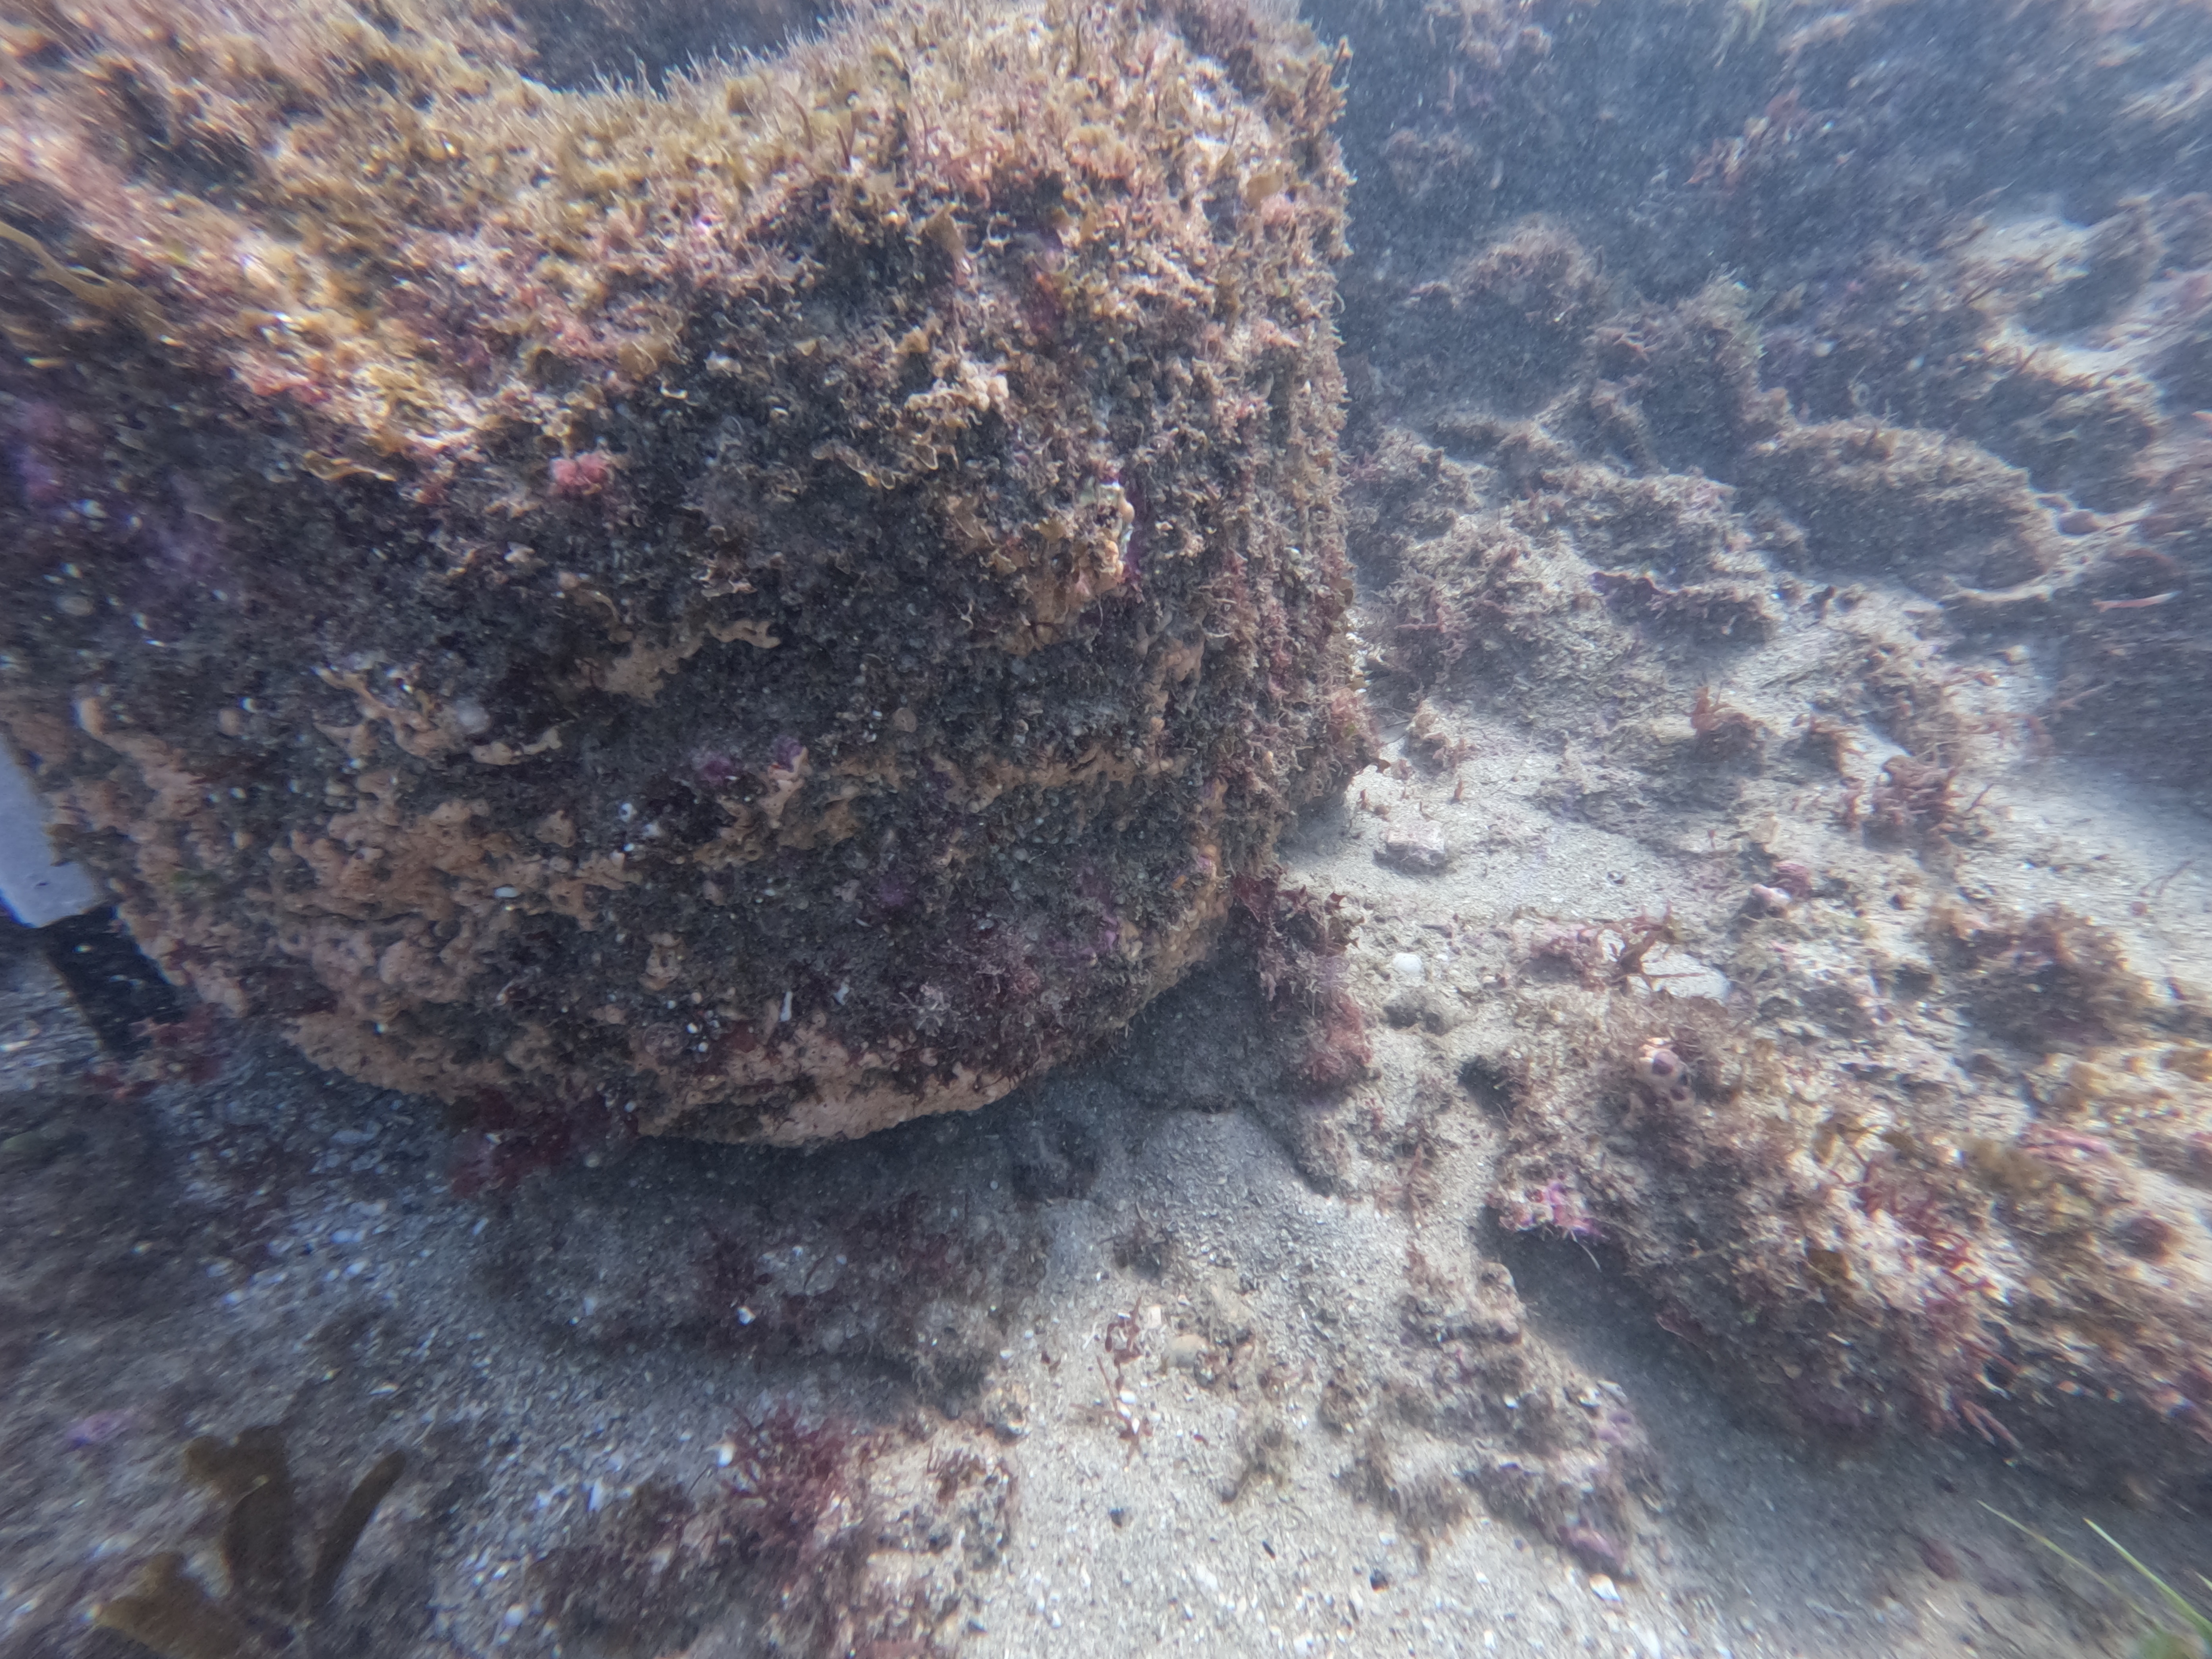

Supplement: Supplementary file 1719 [file G0028045.pdf › Ocean1/G0028045.pdf]

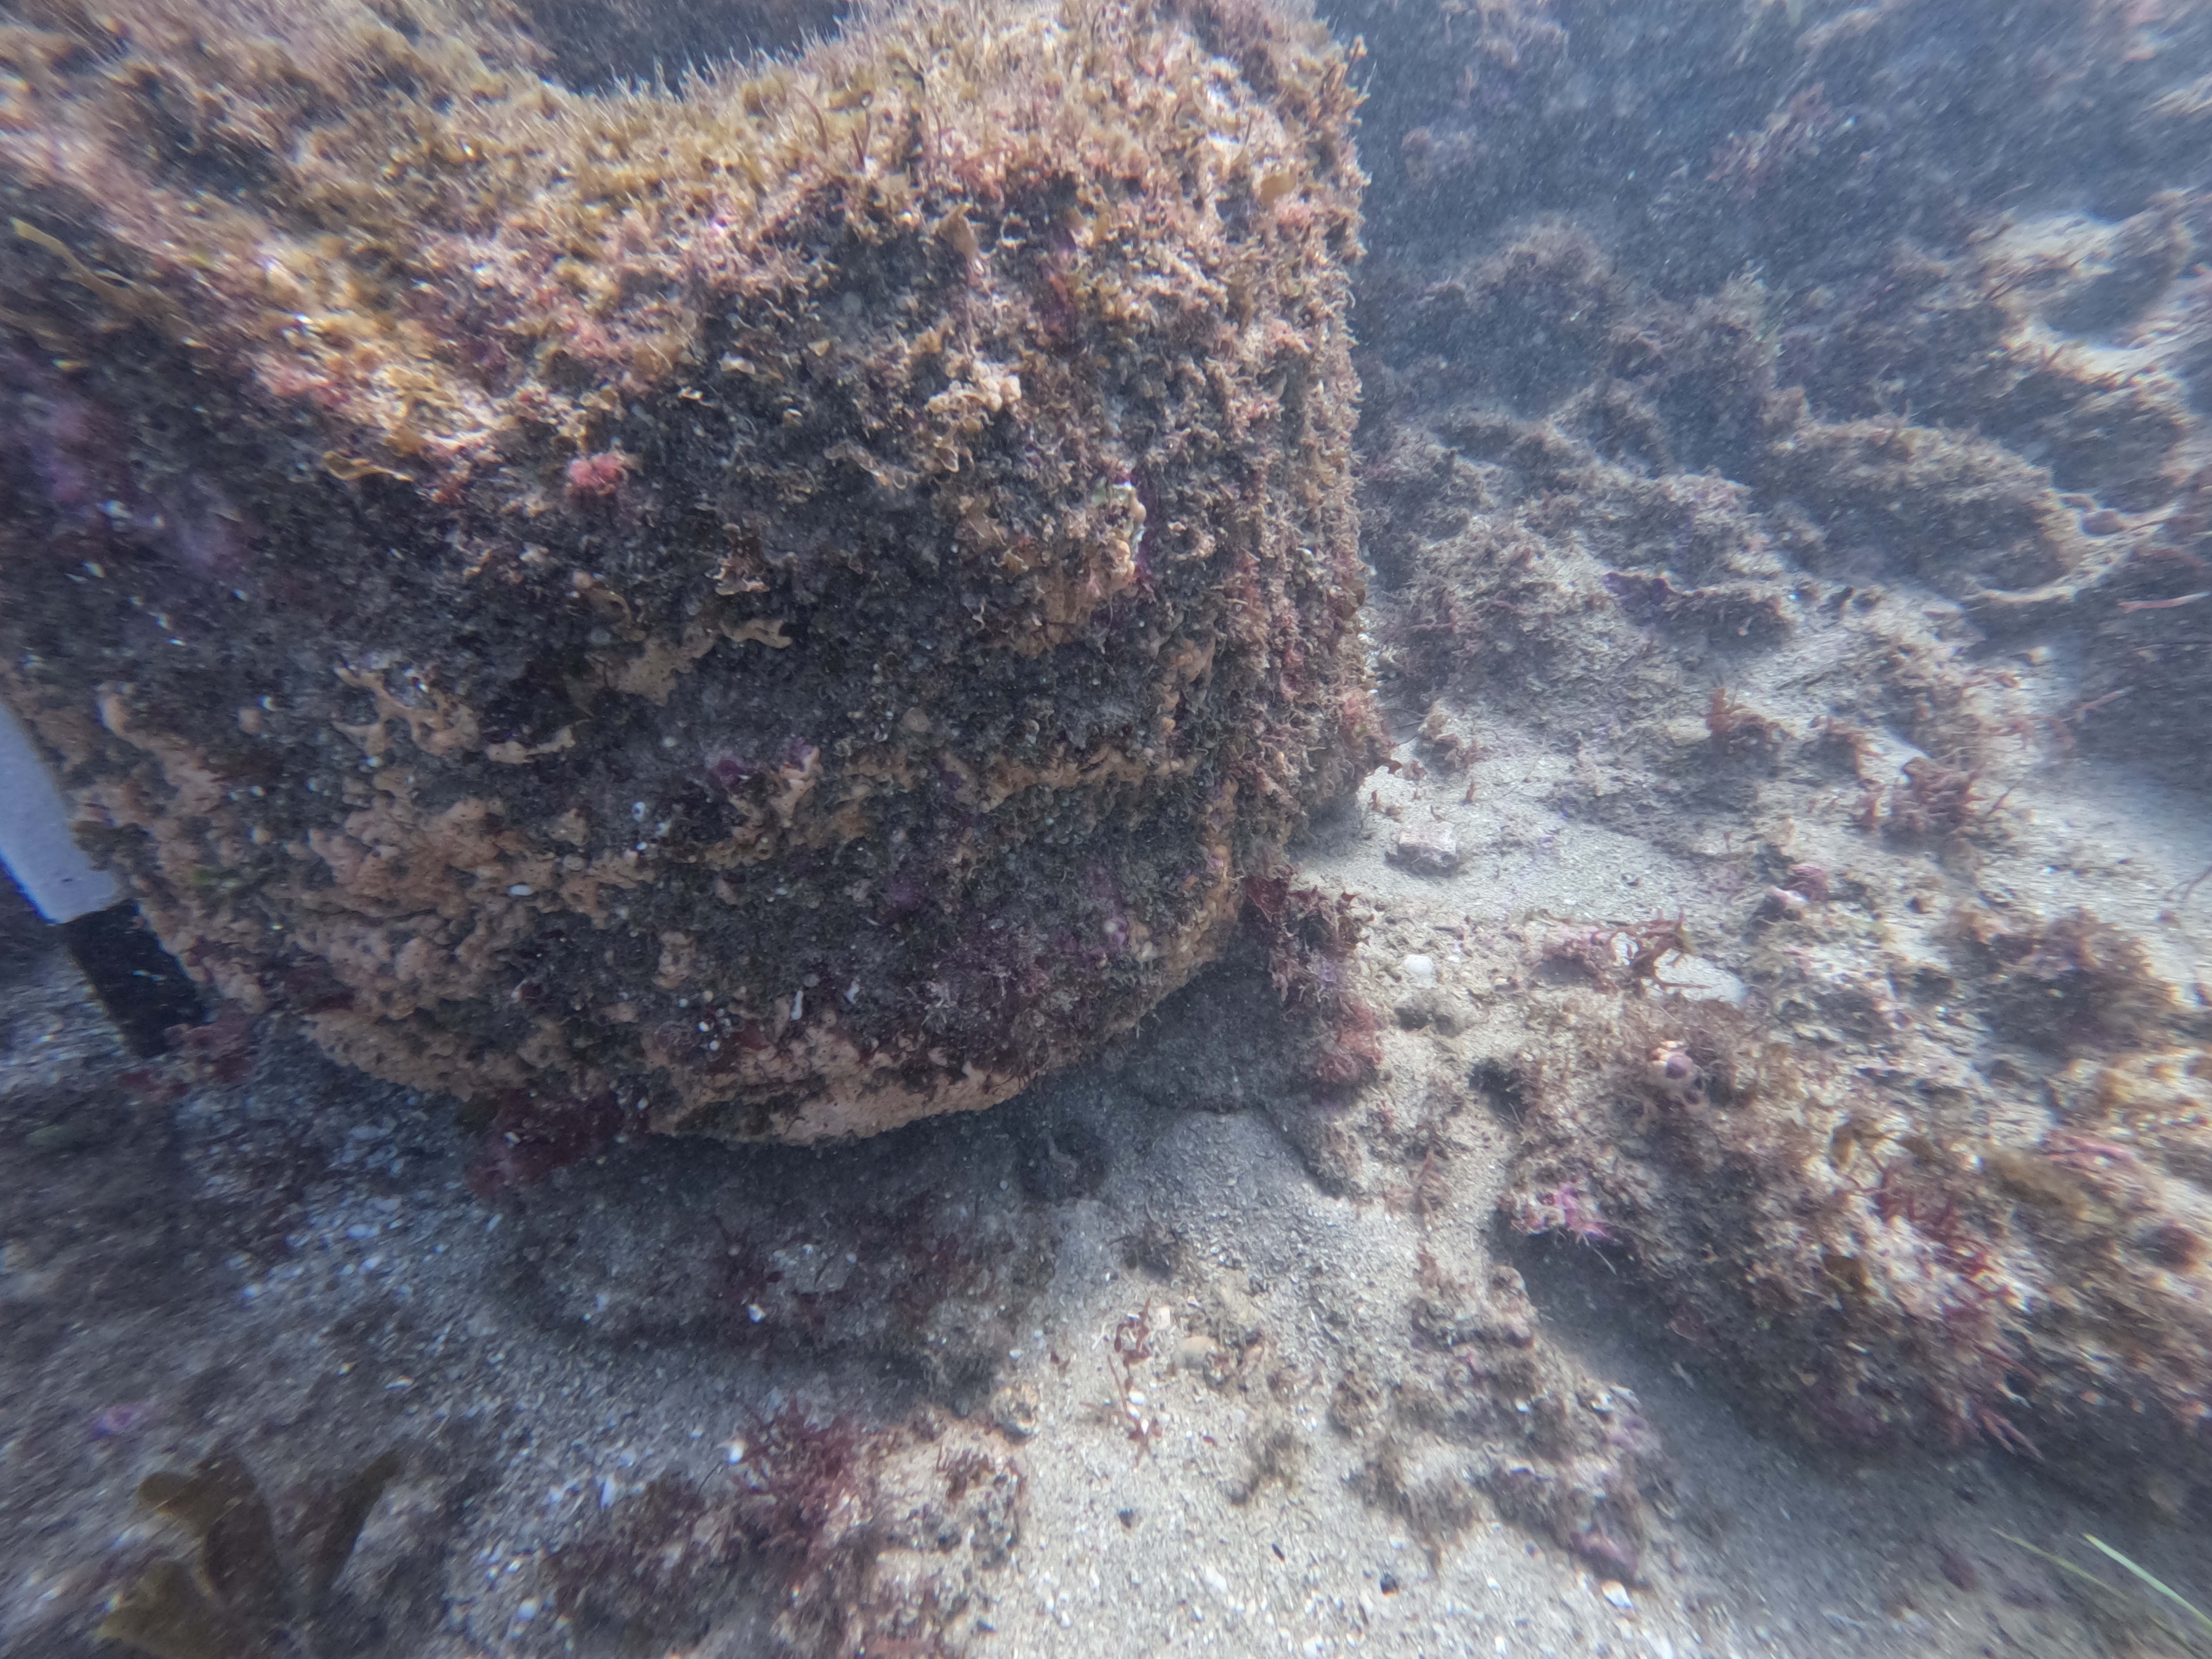

Supplement: Supplementary file 1720 [file G0028046.pdf › Ocean1/G0028046.pdf]

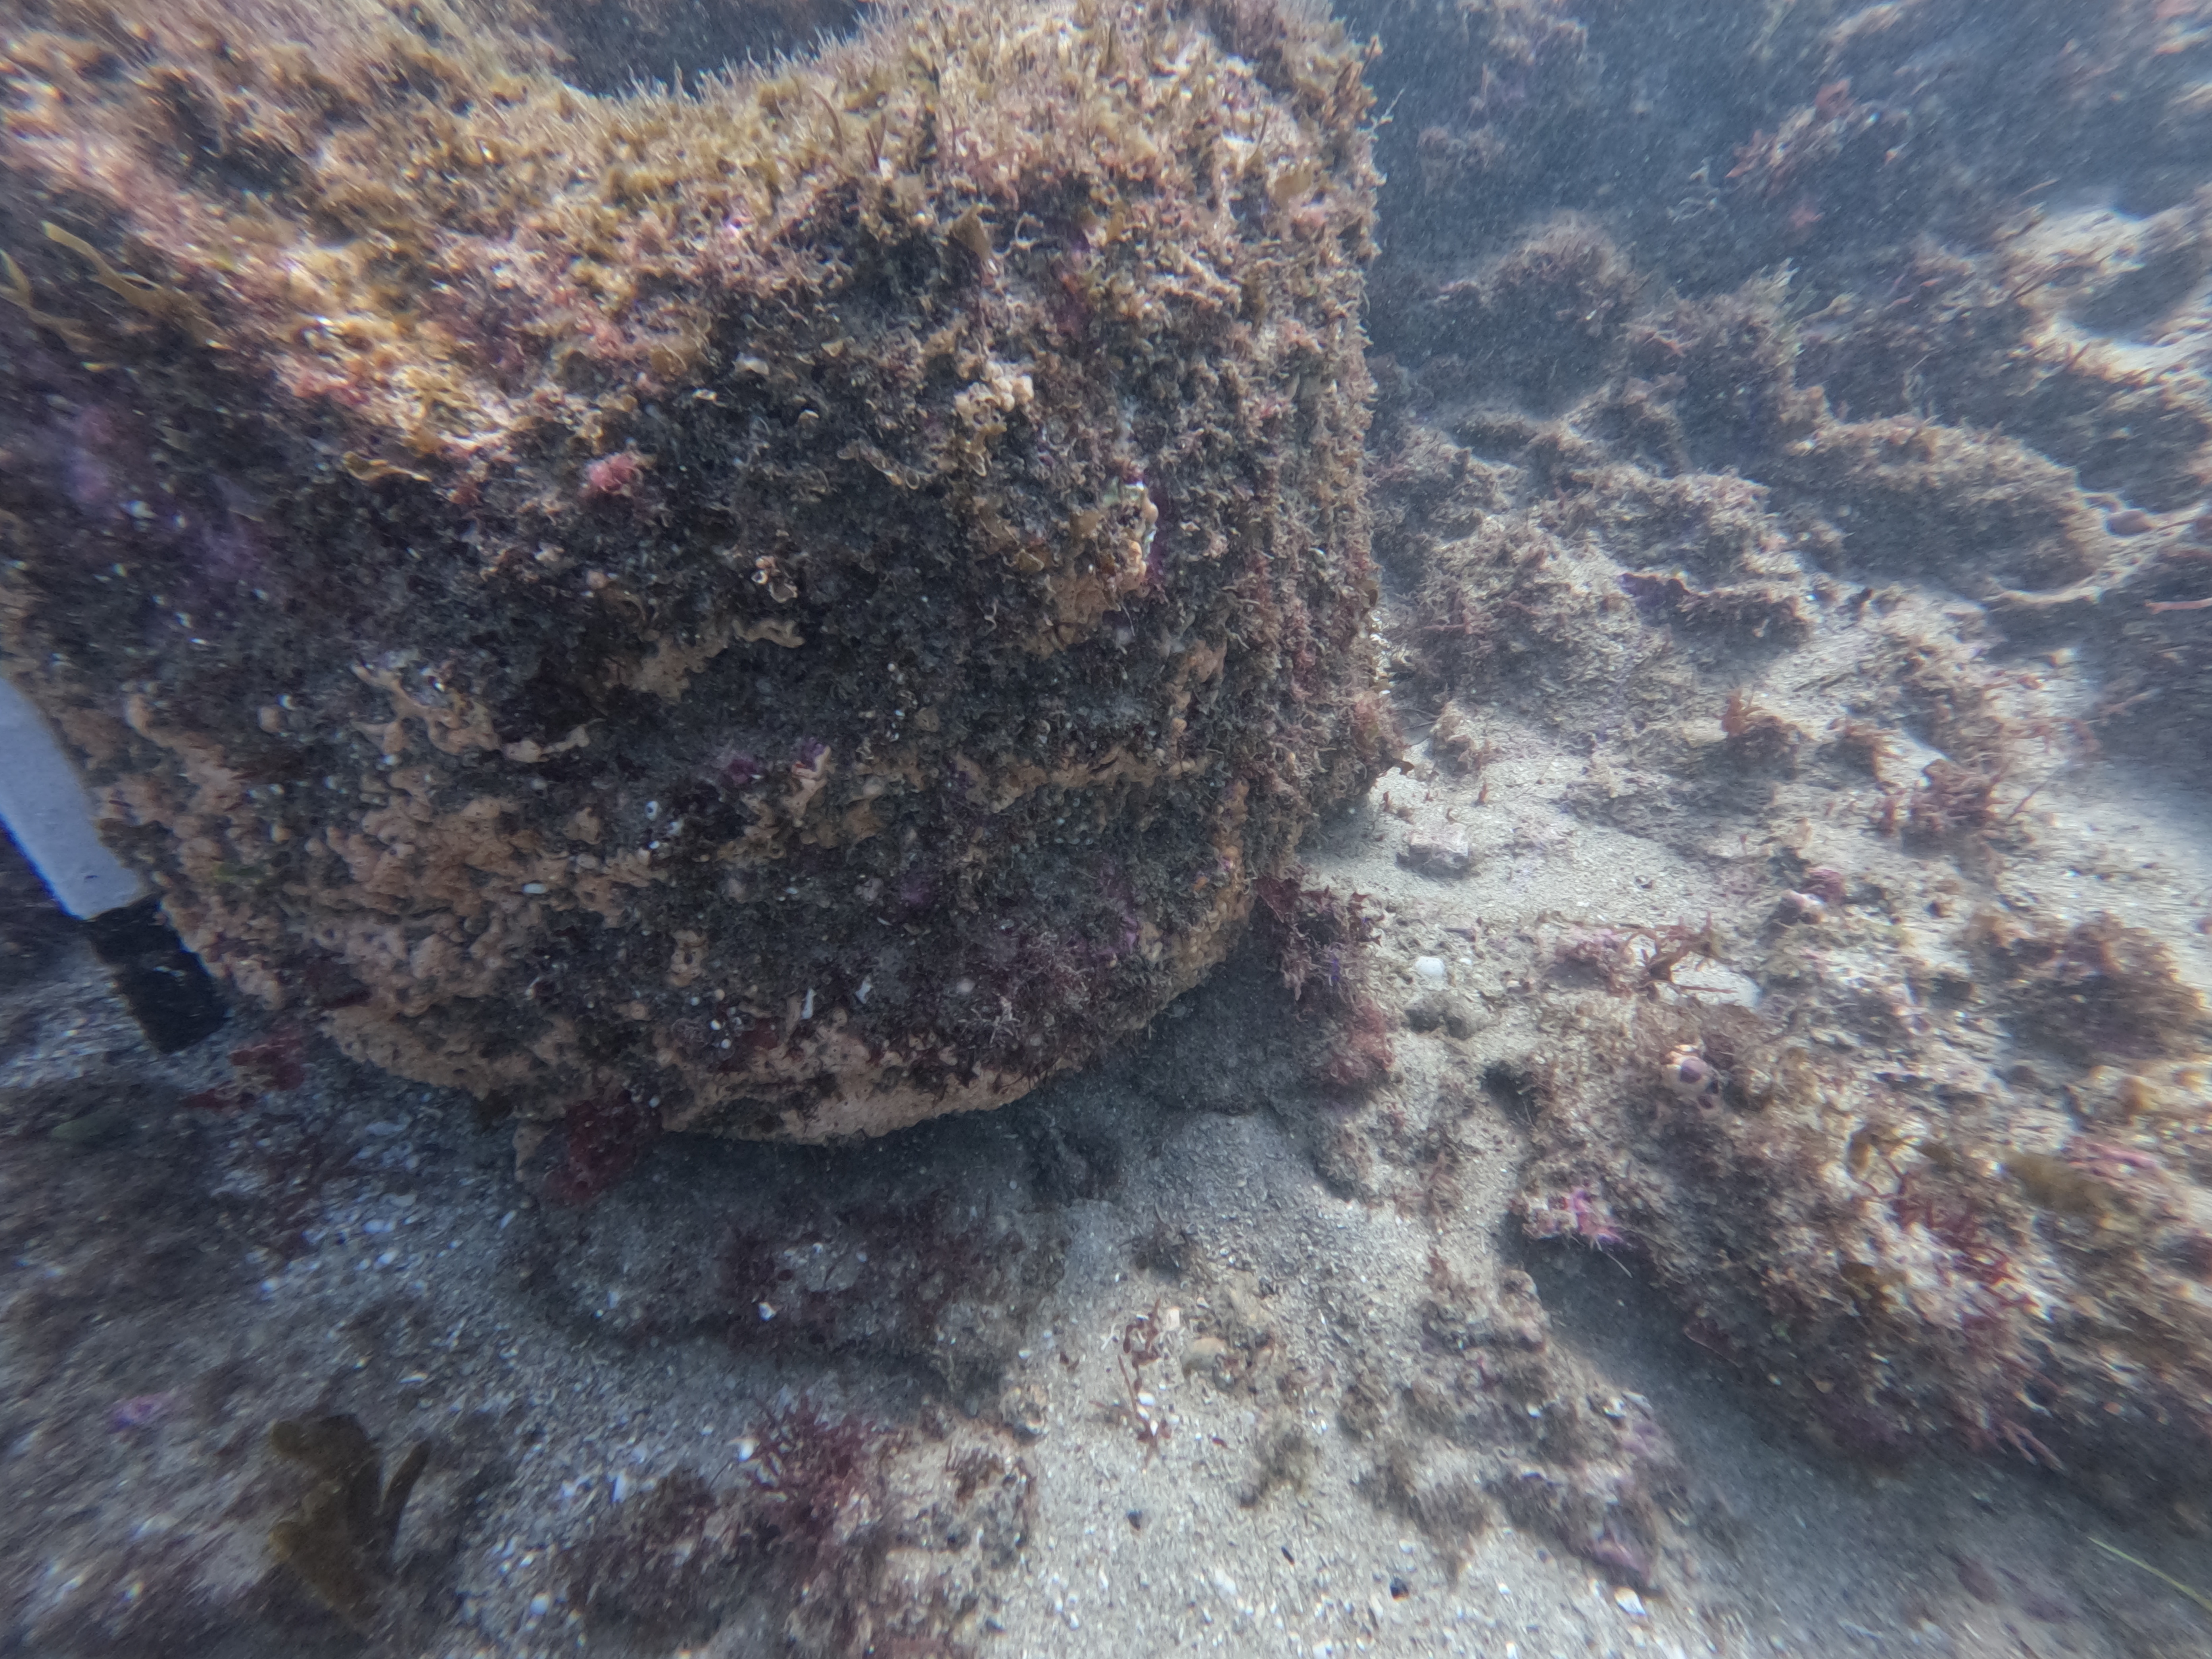

Supplement: Supplementary file 1721 [file G0028047.pdf › Ocean1/G0028047.pdf]

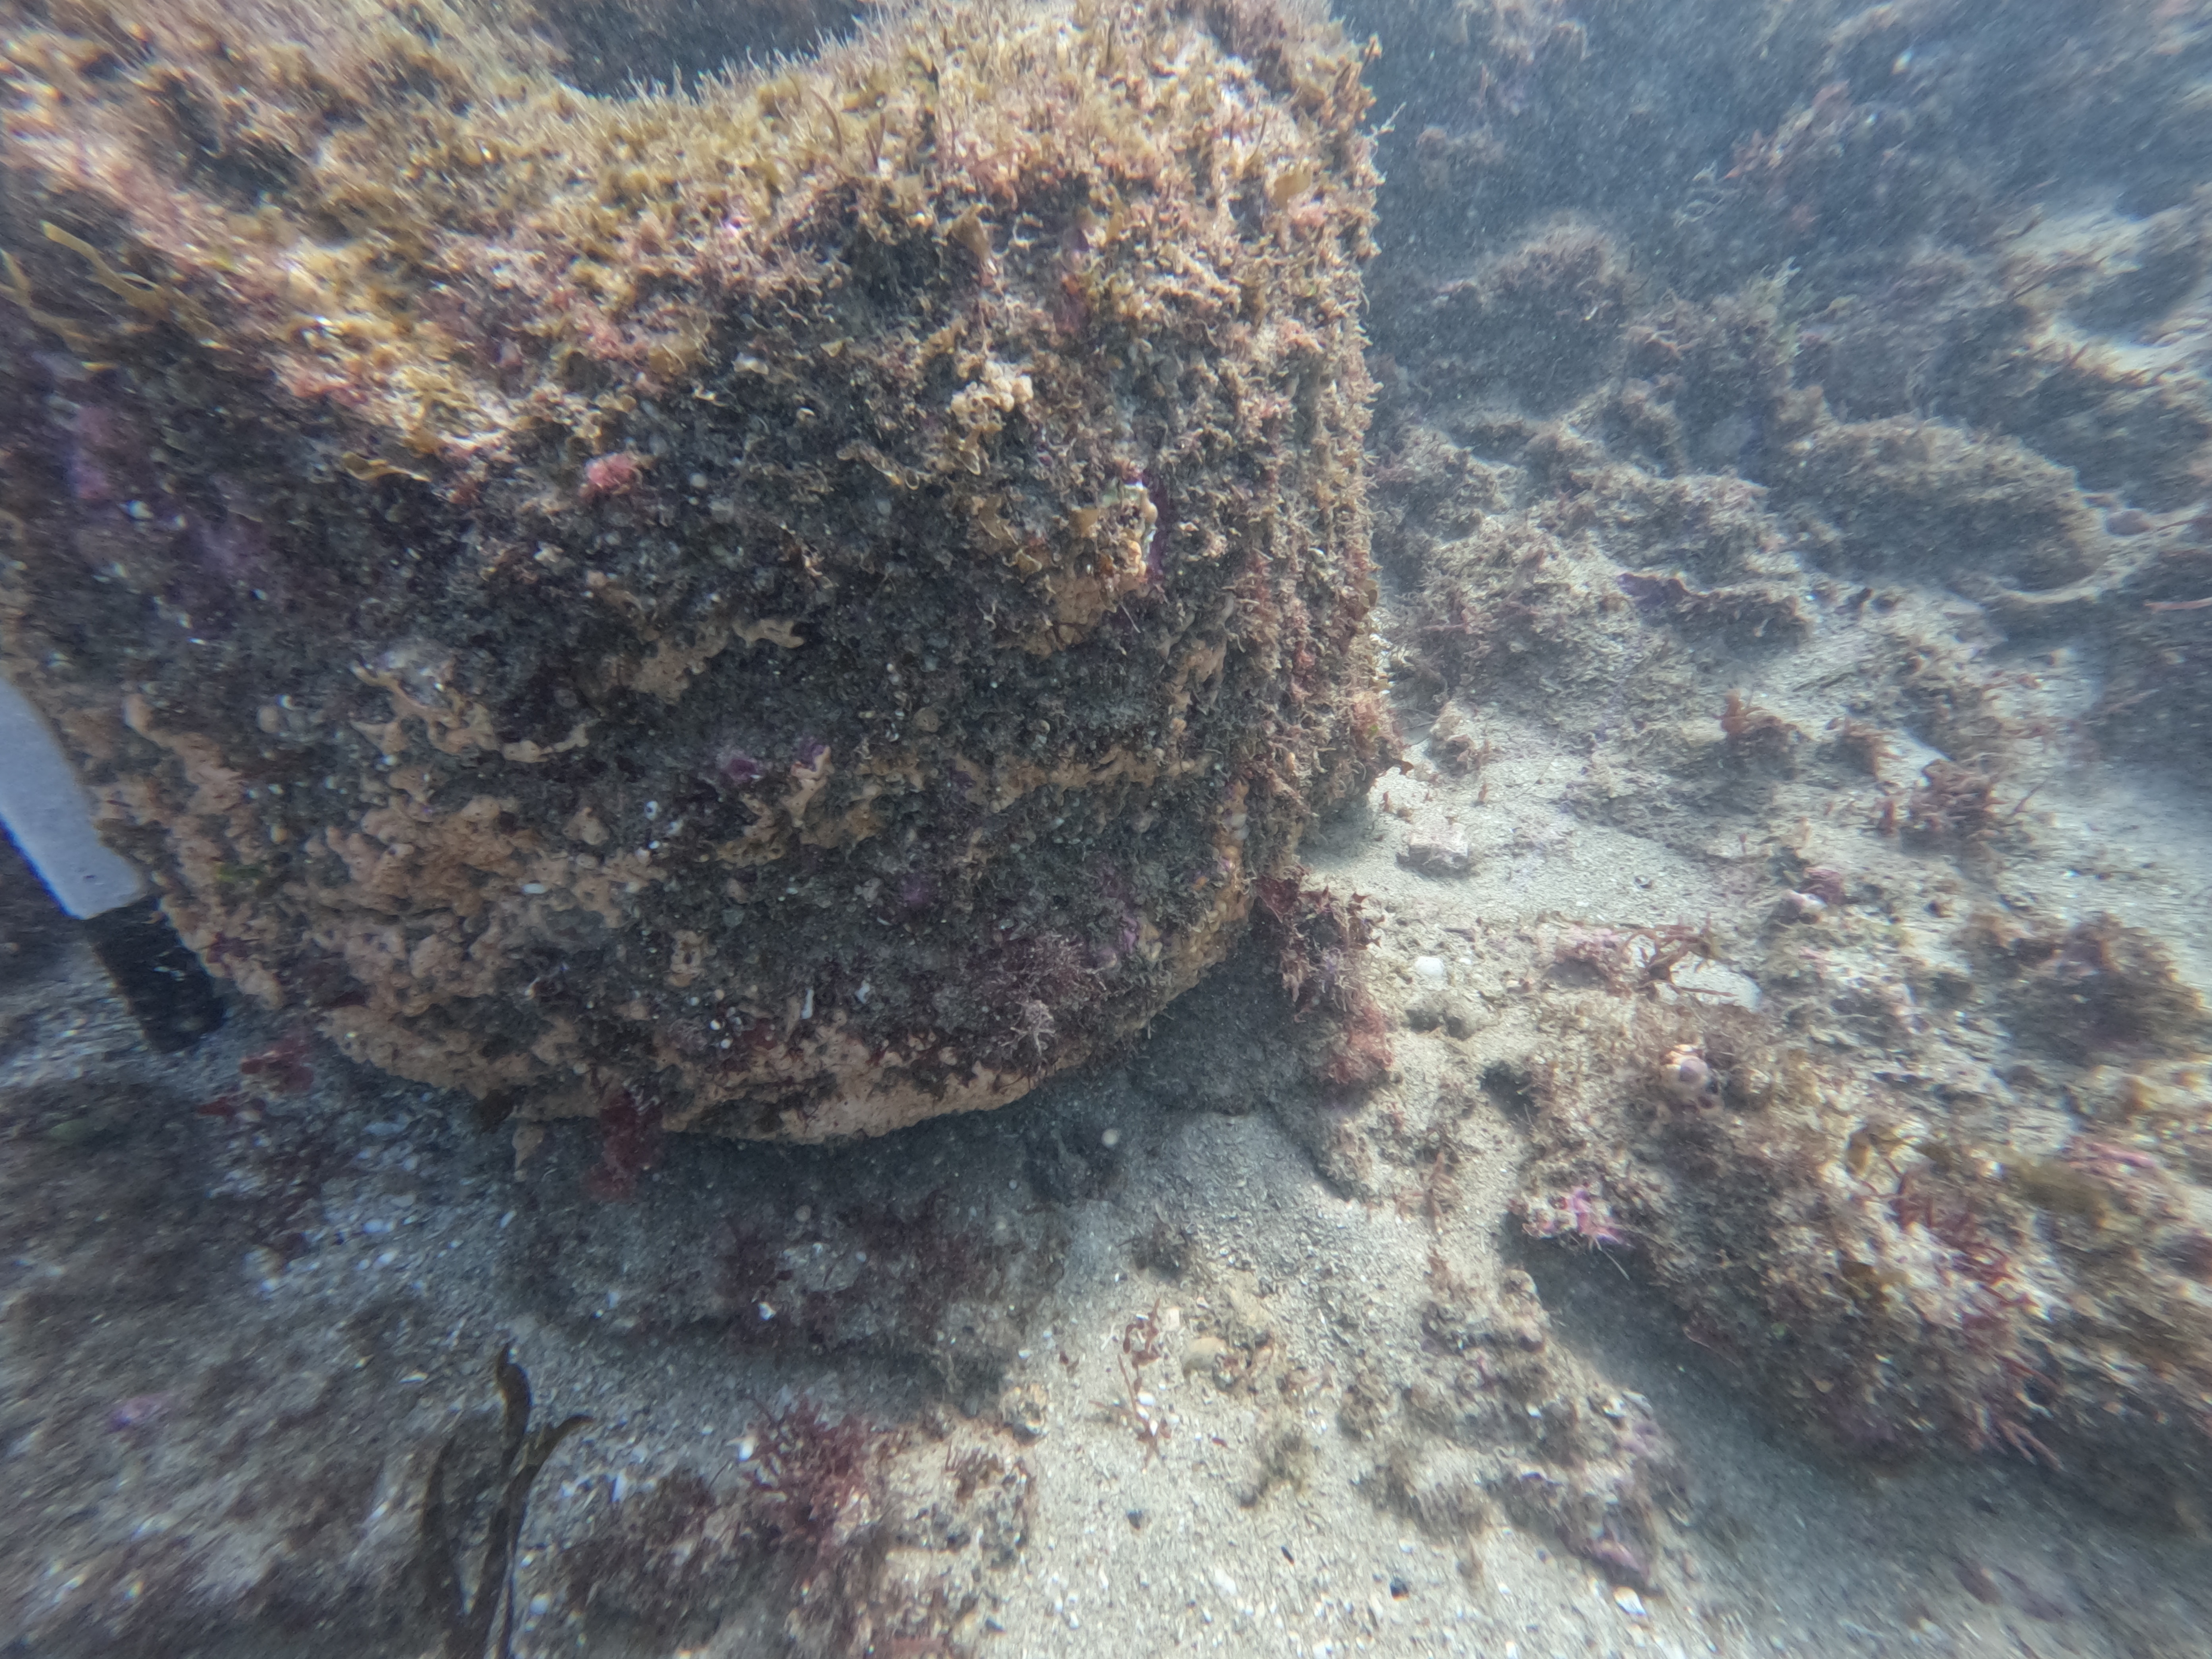

Supplement: Supplementary file 1722 [file G0028048.pdf › Ocean1/G0028048.pdf]

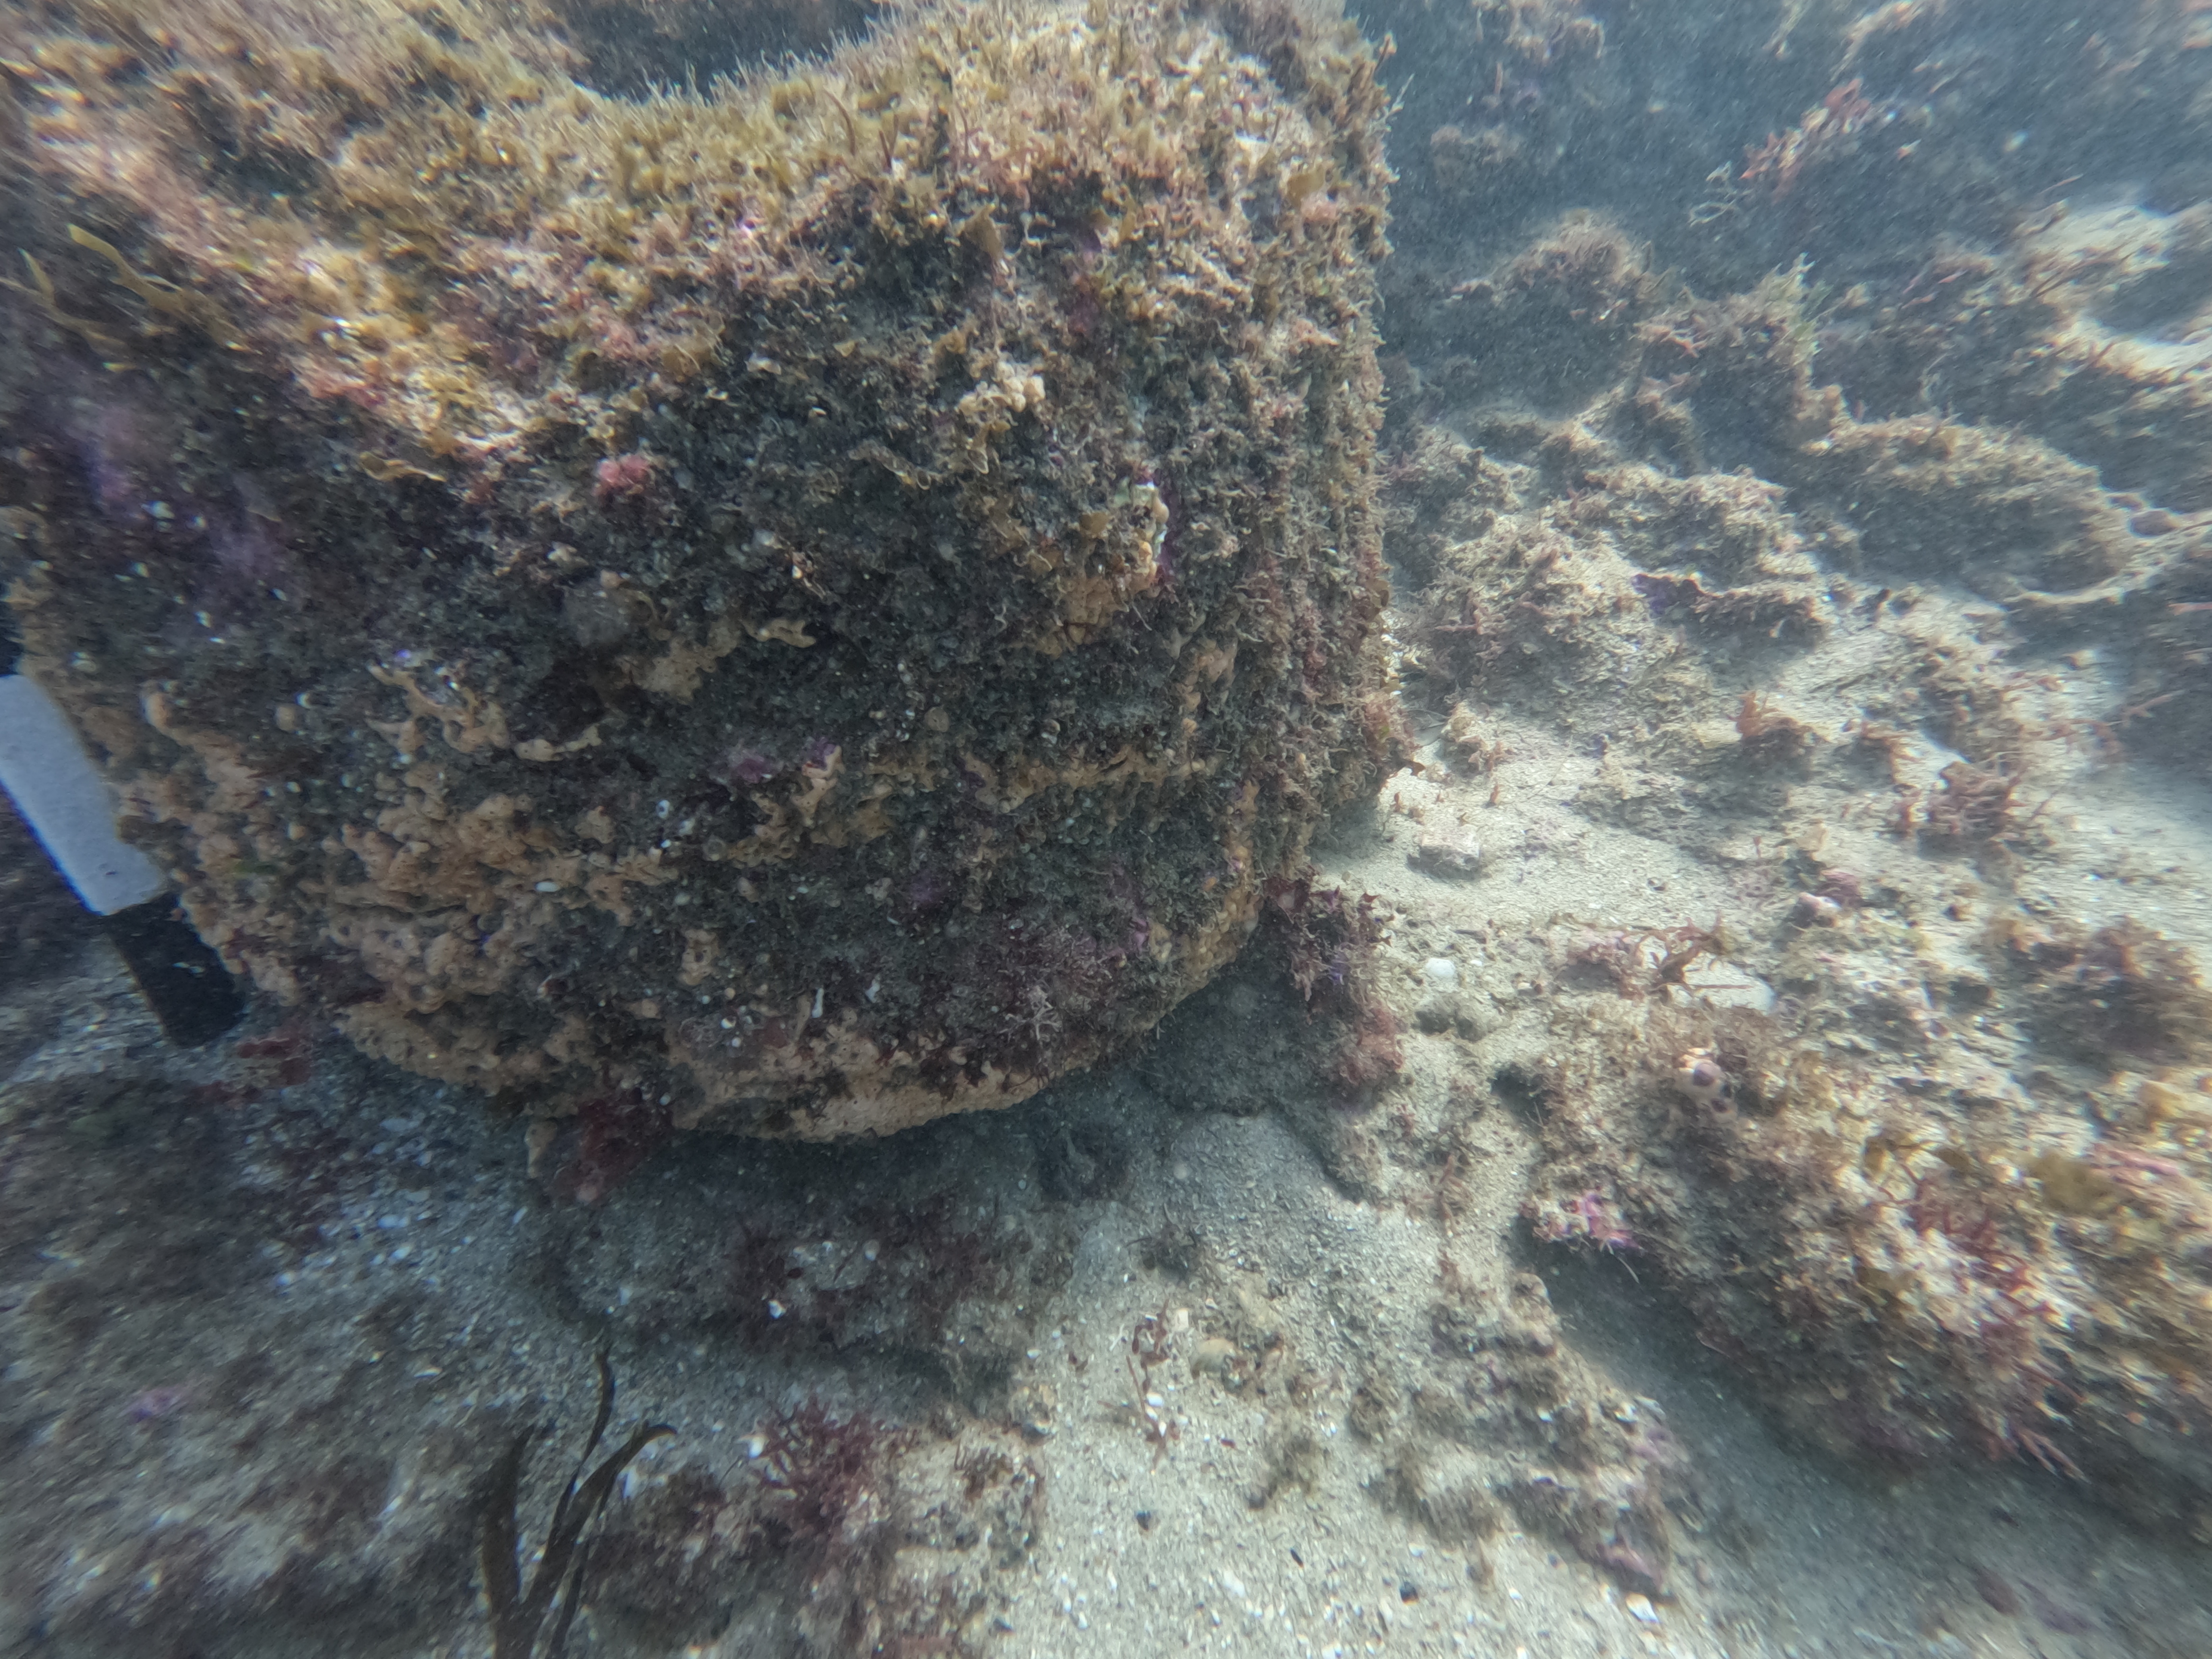

Supplement: Supplementary file 1723 [file G0028049.pdf › Ocean1/G0028049.pdf]

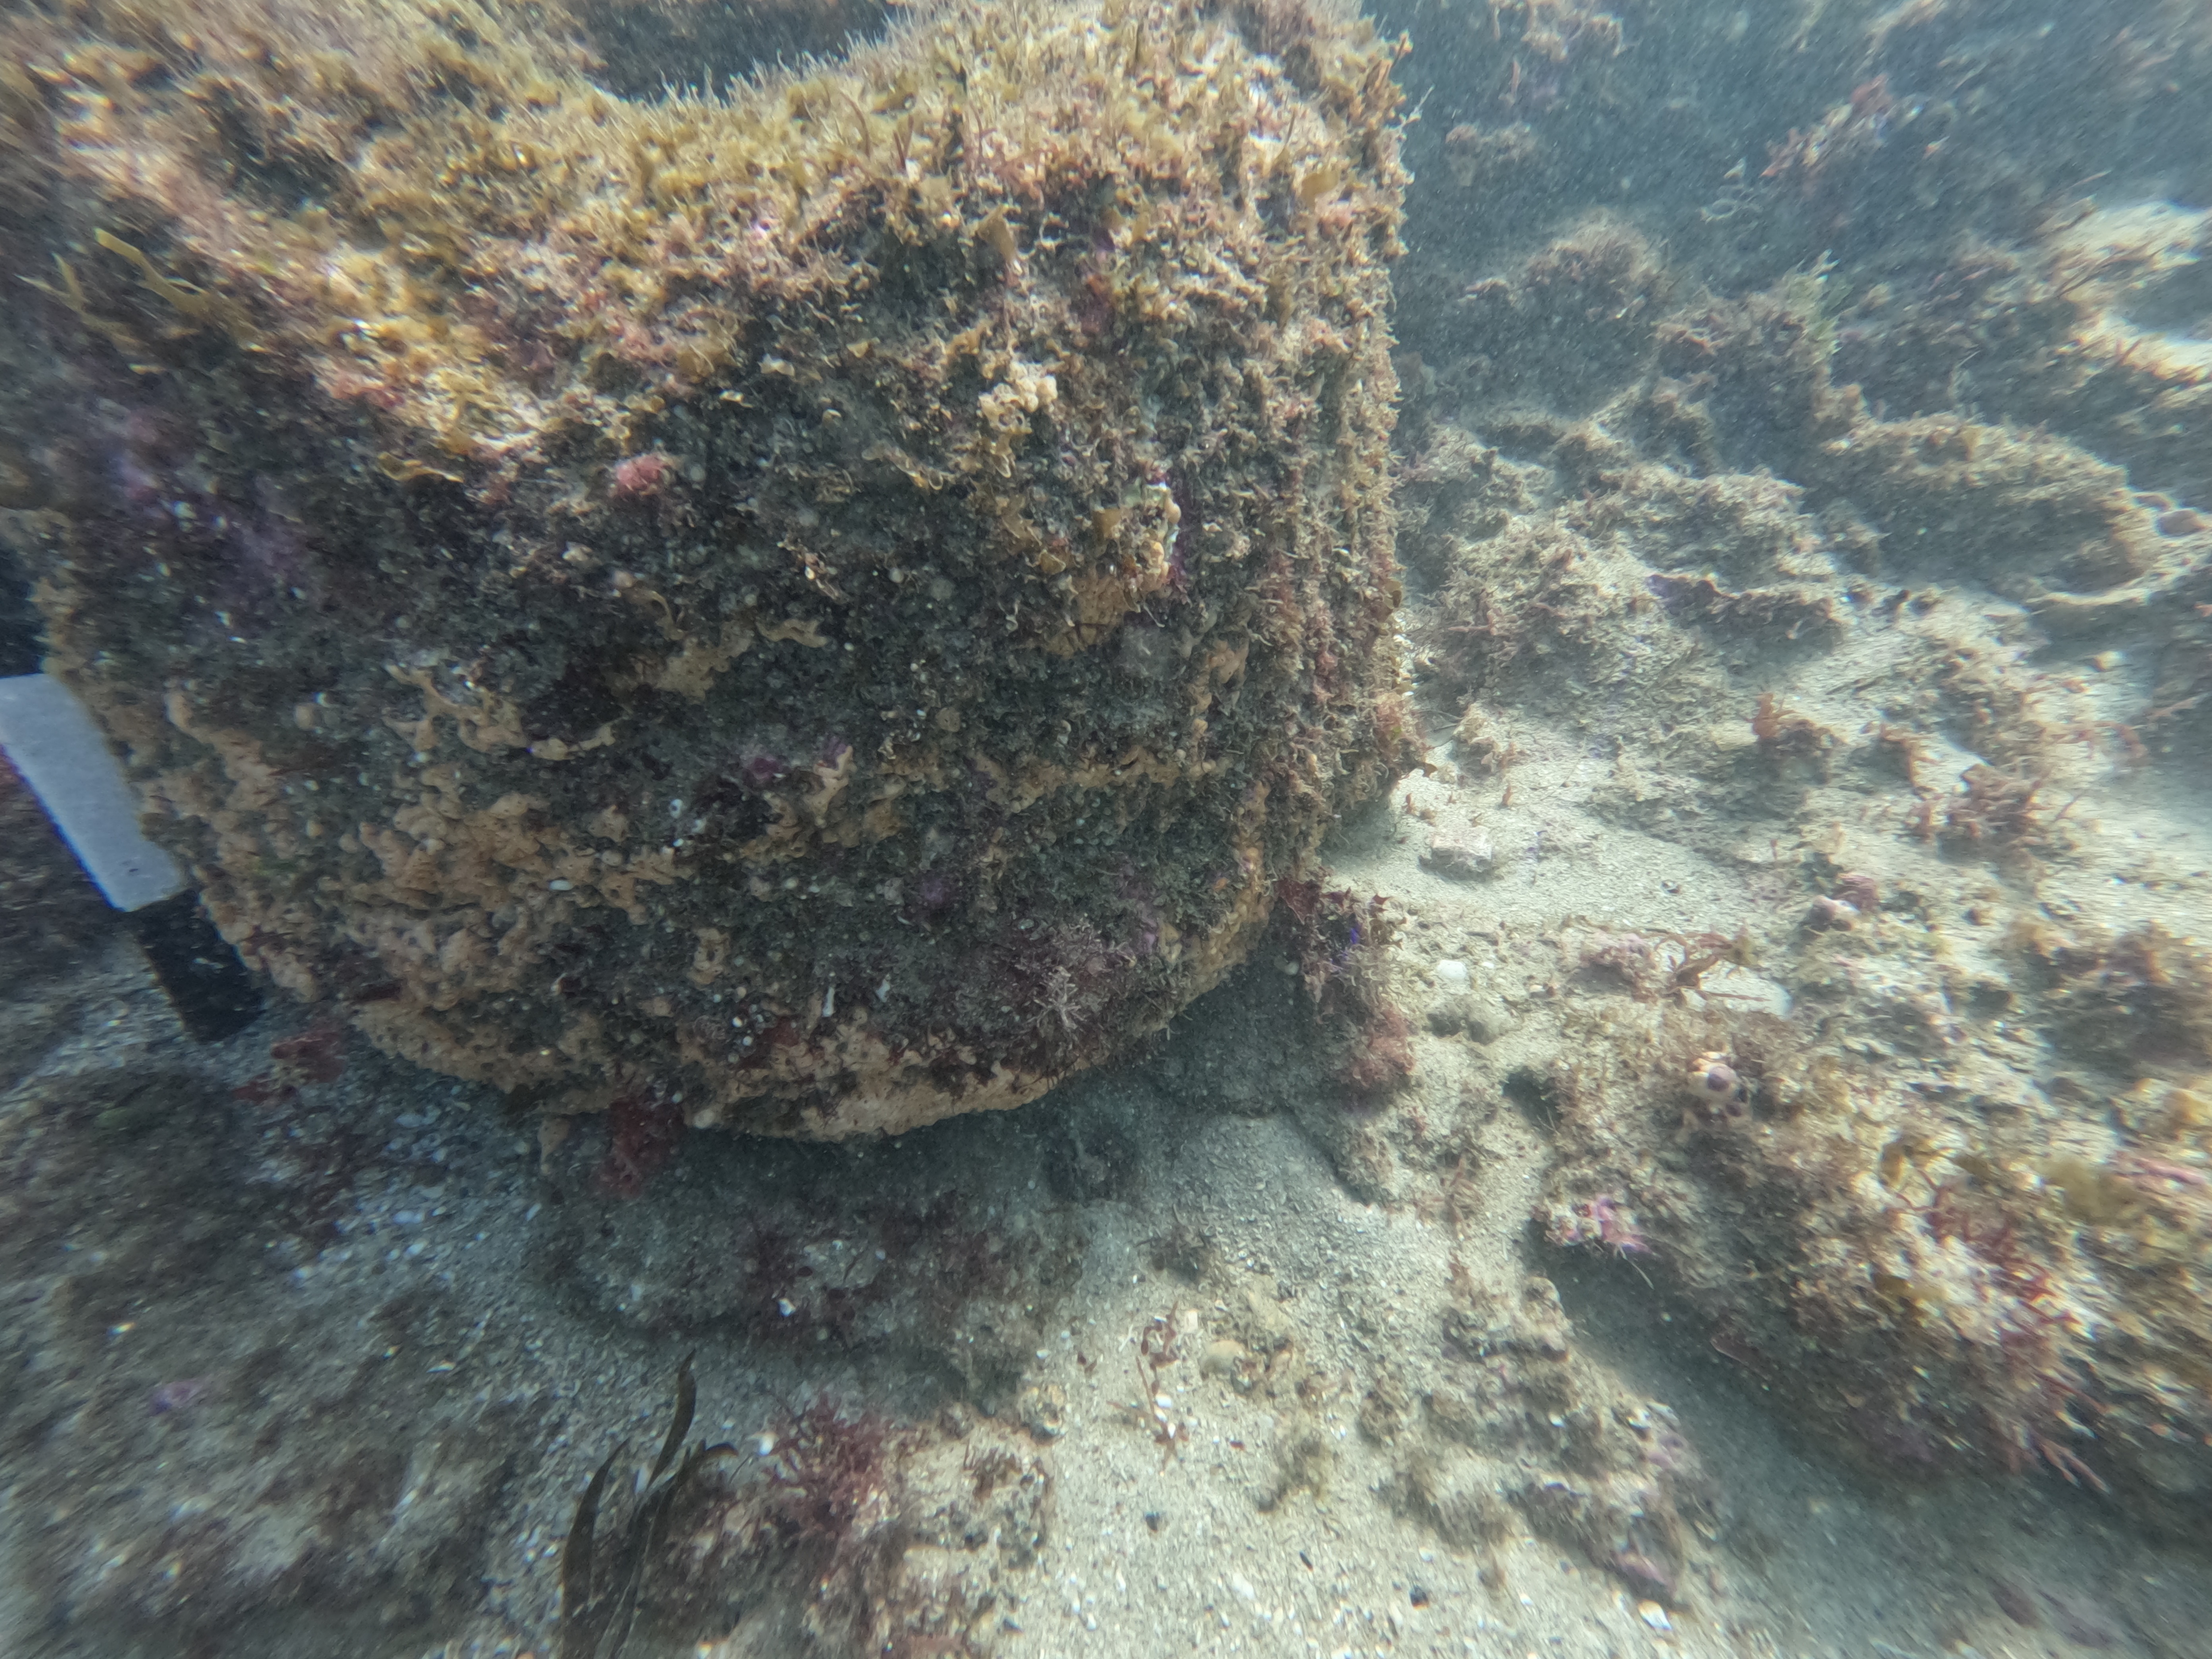

Supplement: Supplementary file 1724 [file G0028050.pdf › Ocean1/G0028050.pdf]

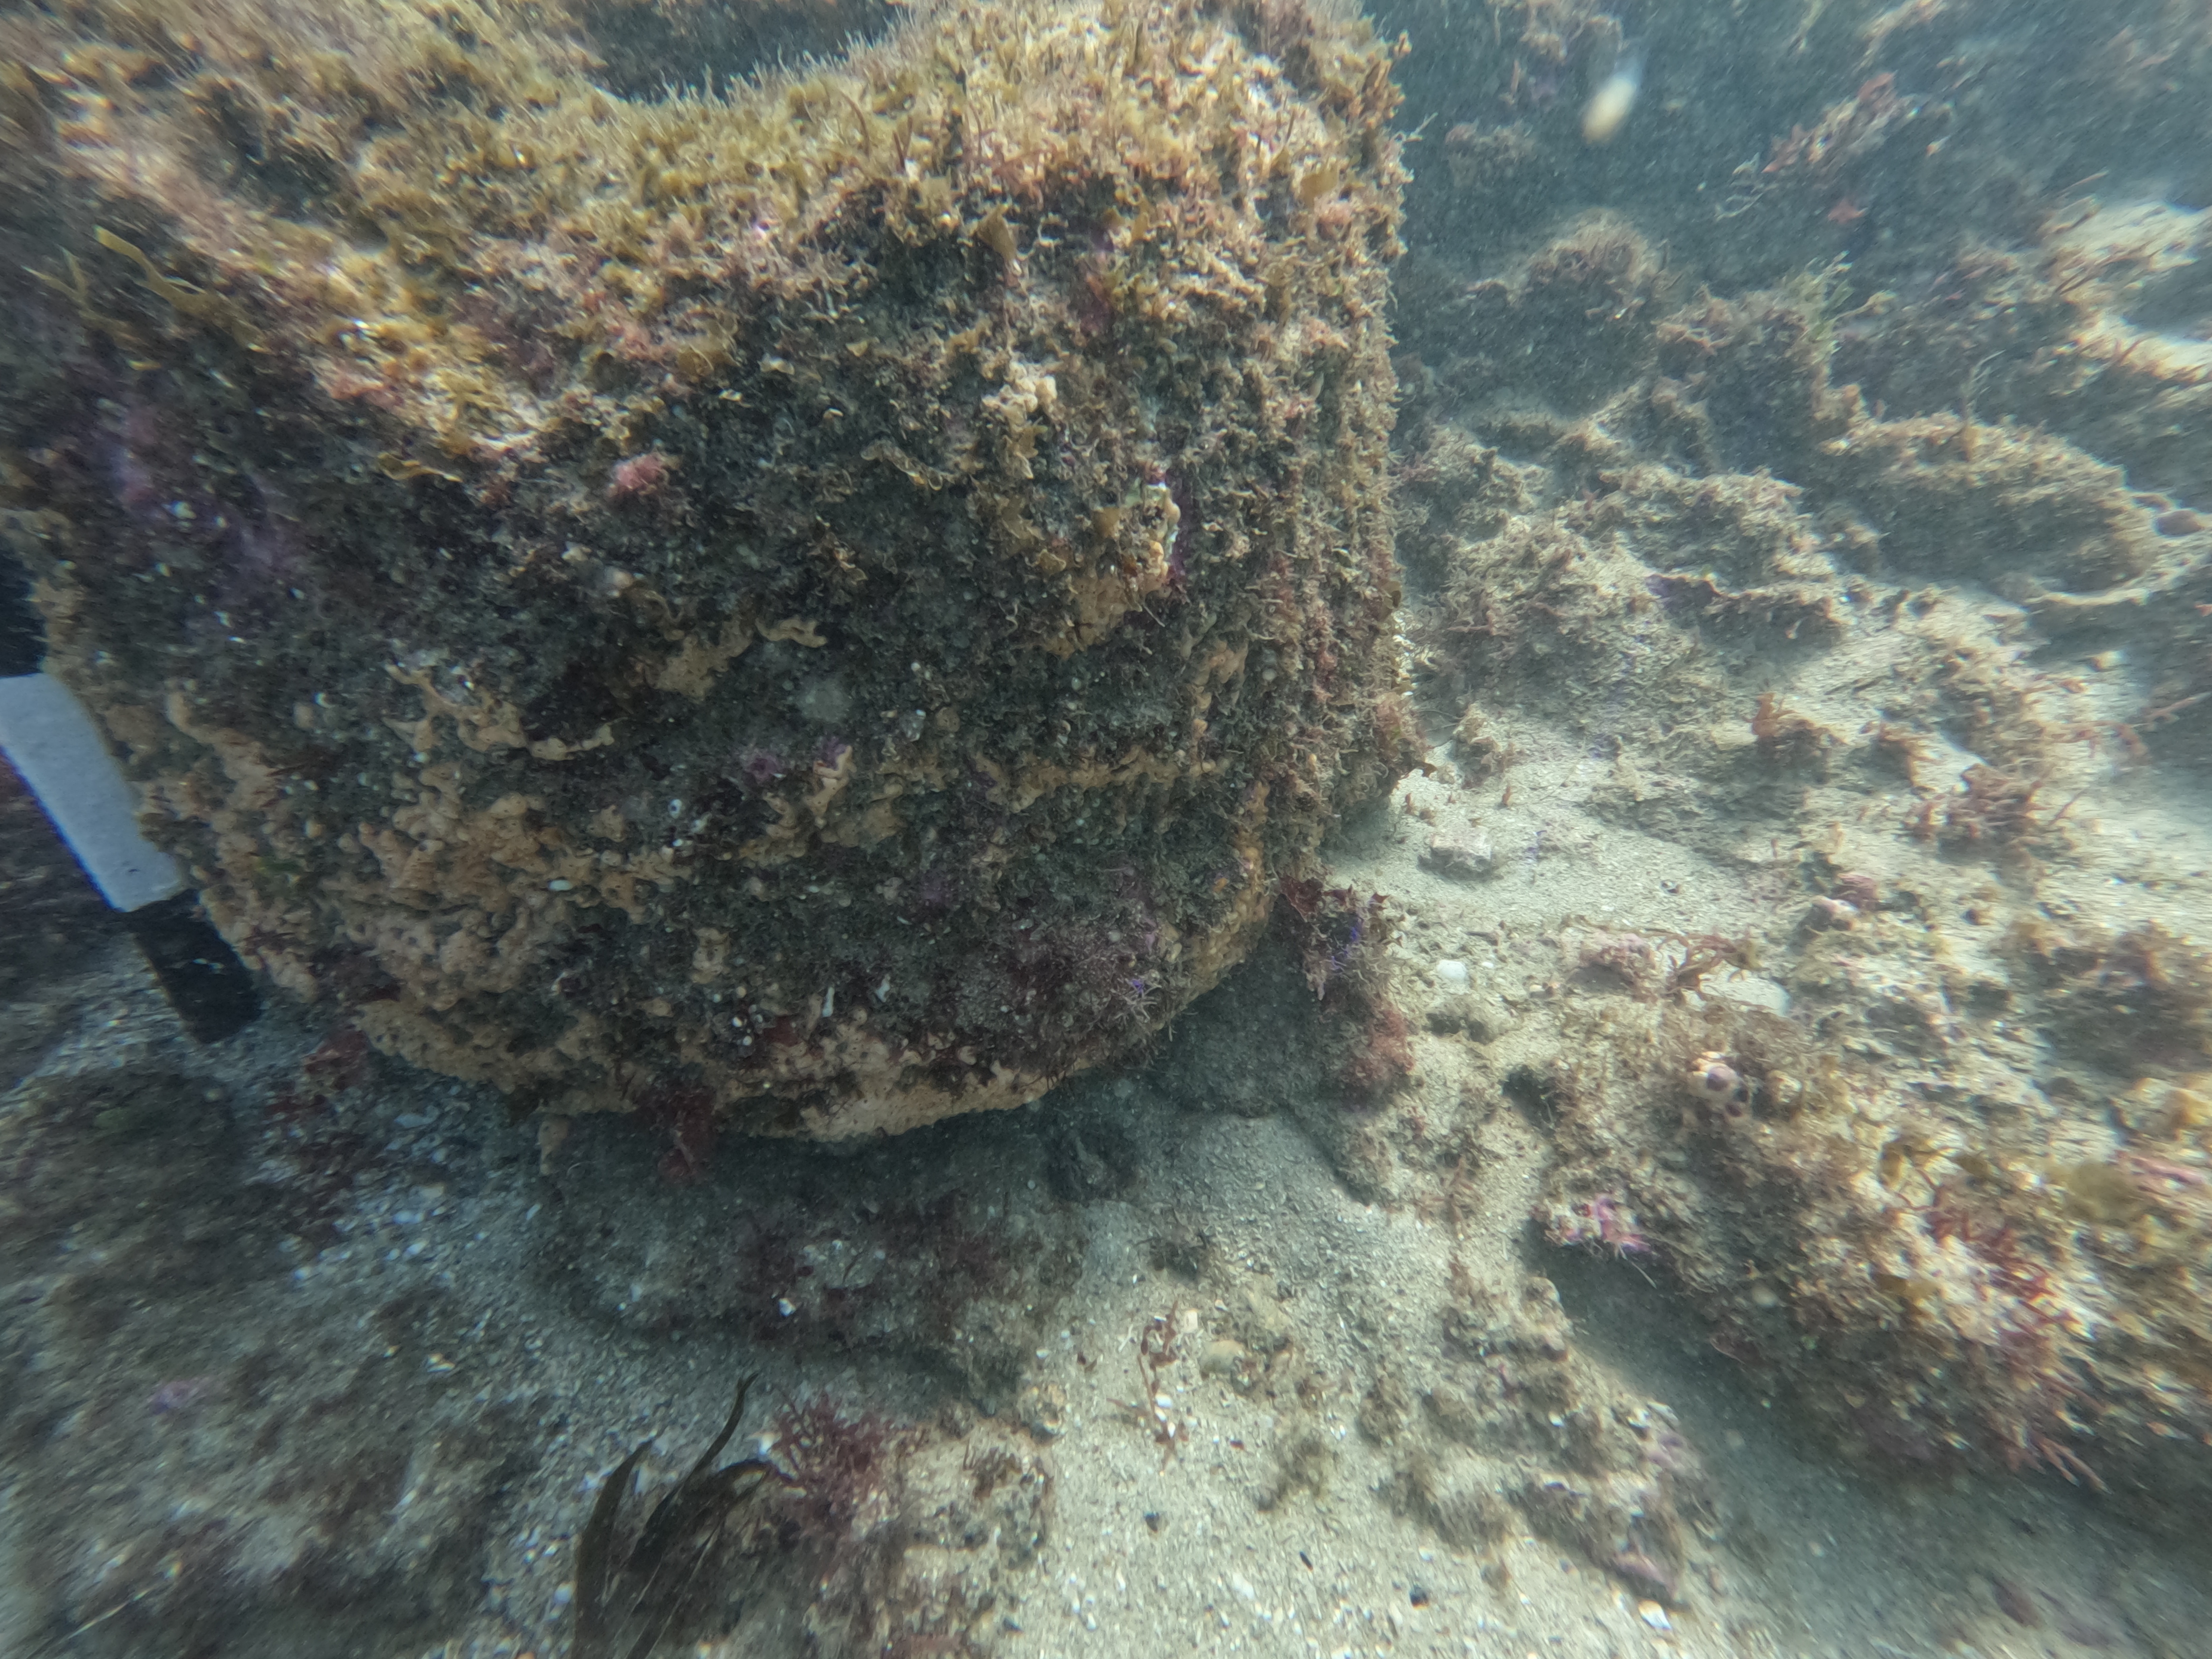

Supplement: Supplementary file 1725 [file G0028051.pdf › Ocean1/G0028051.pdf]

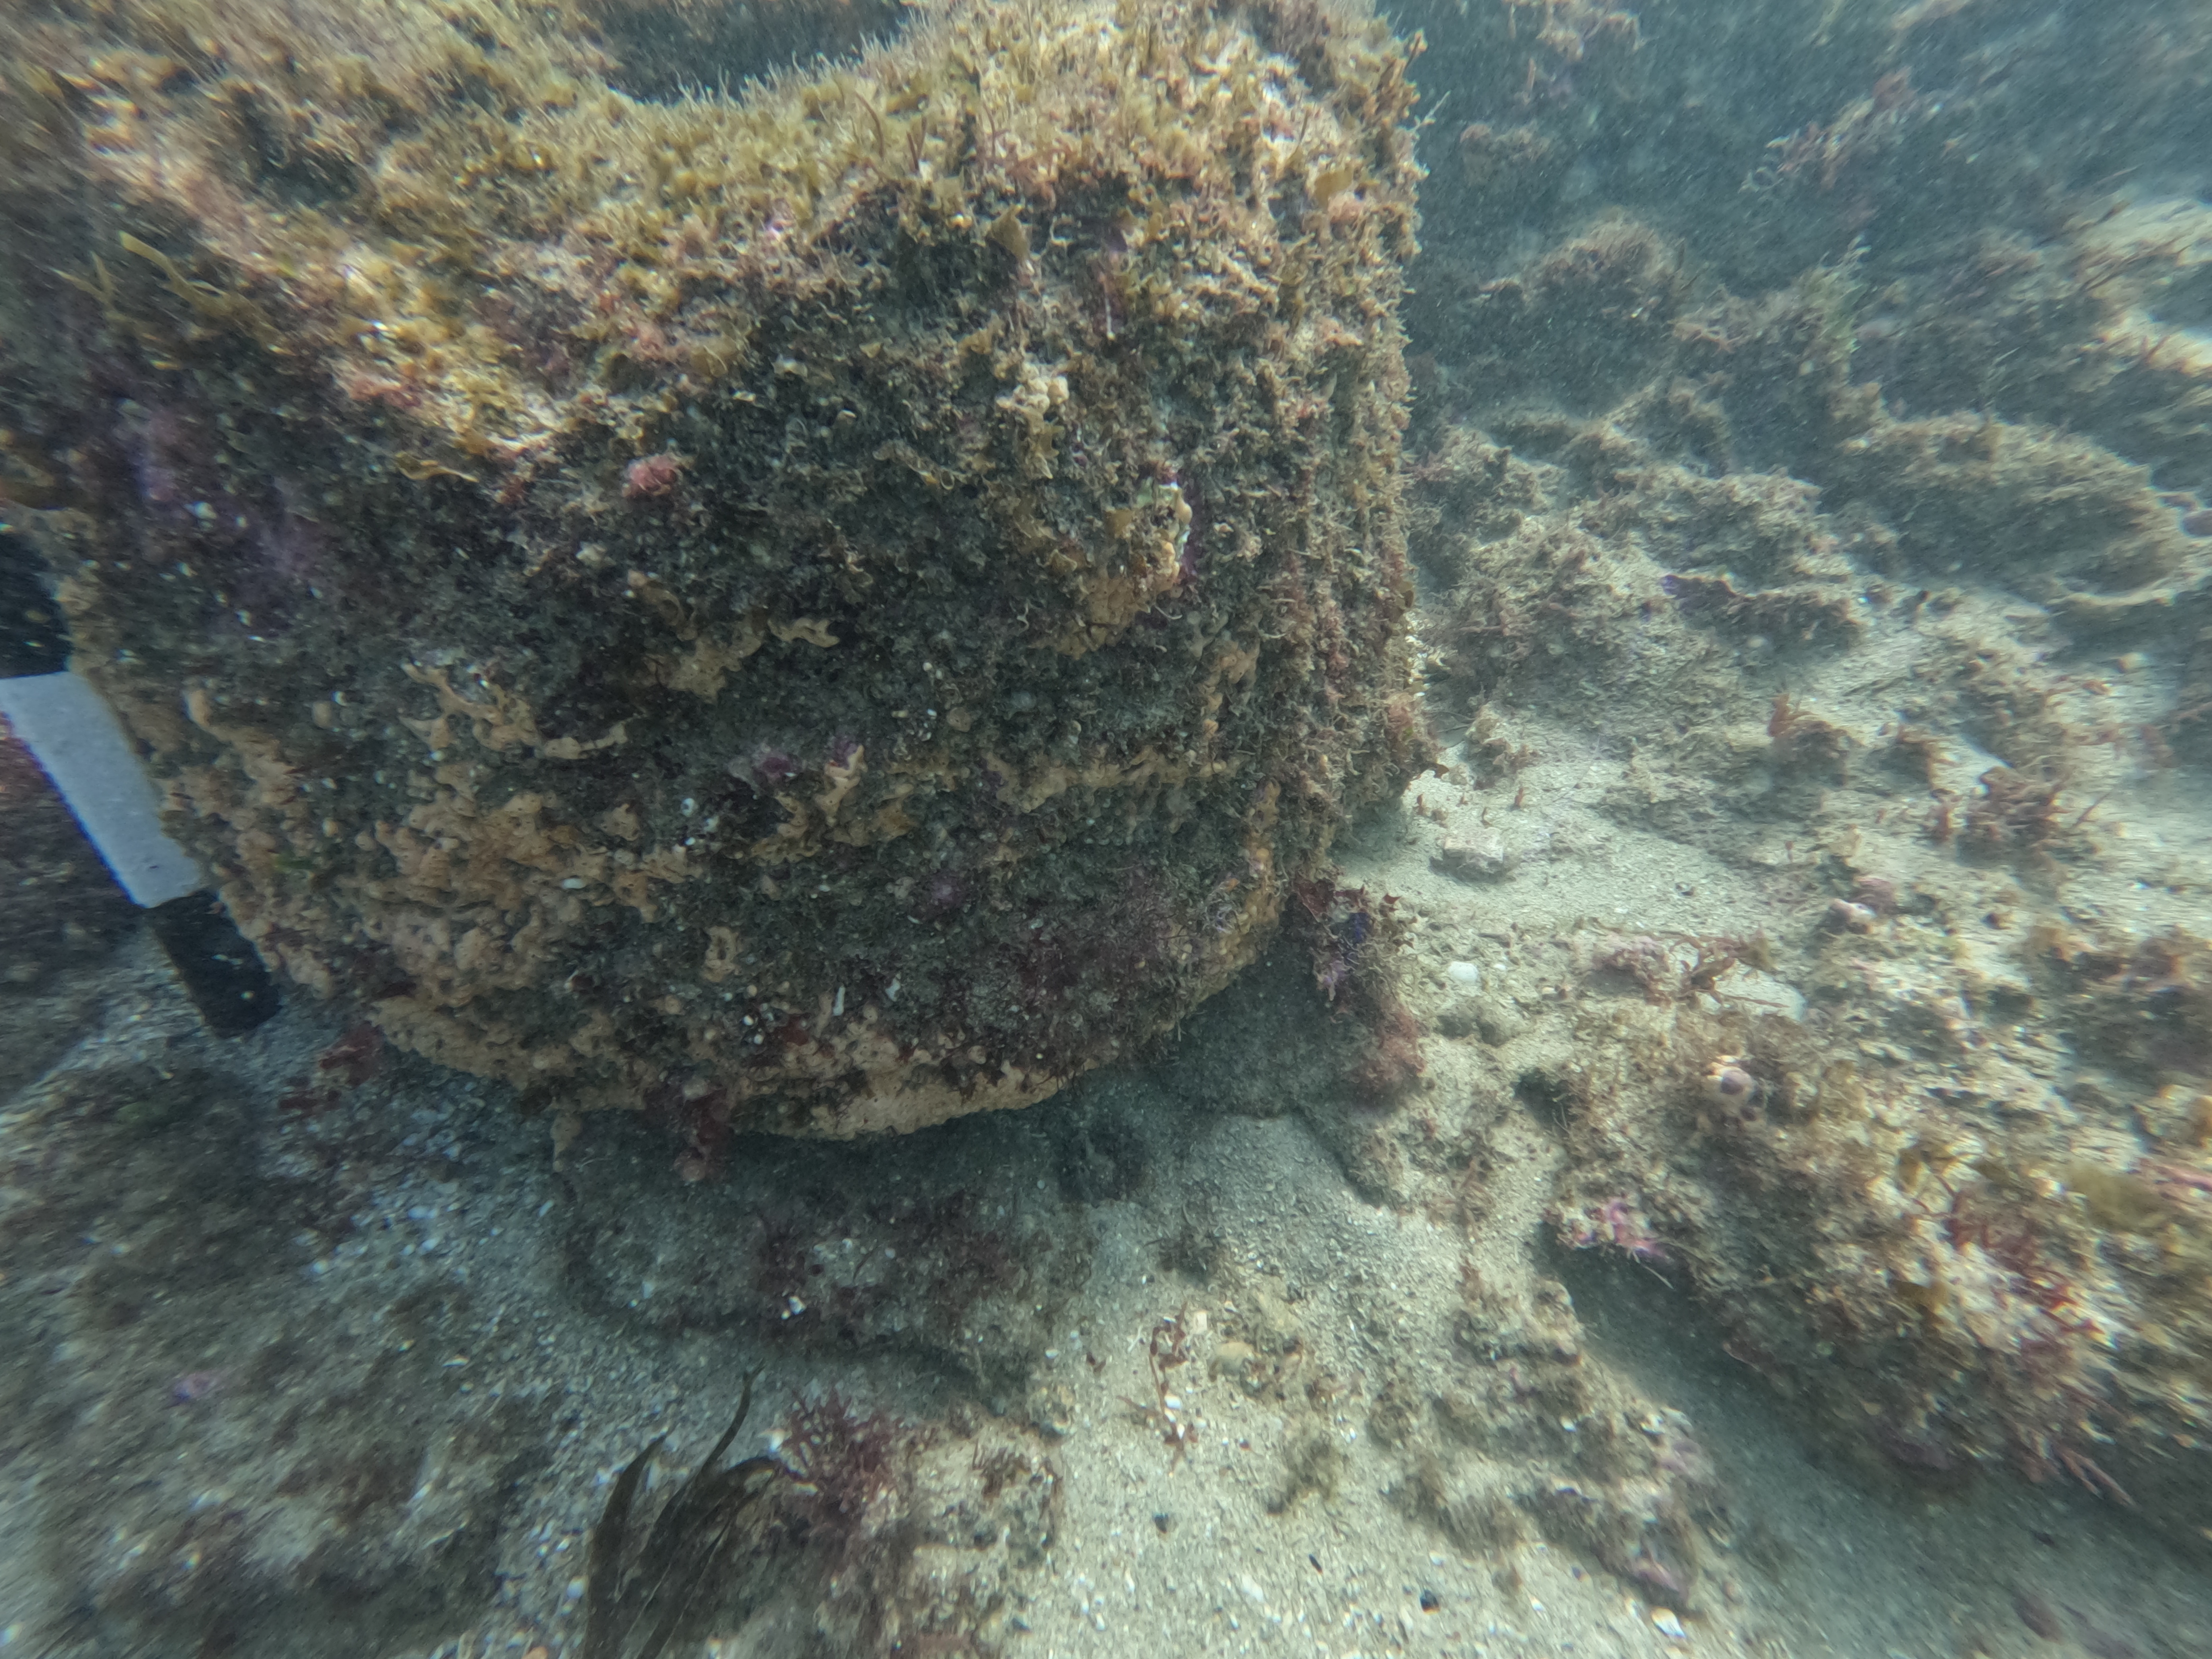

Supplement: Supplementary file 1726 [file G0028052.pdf › Ocean1/G0028052.pdf]

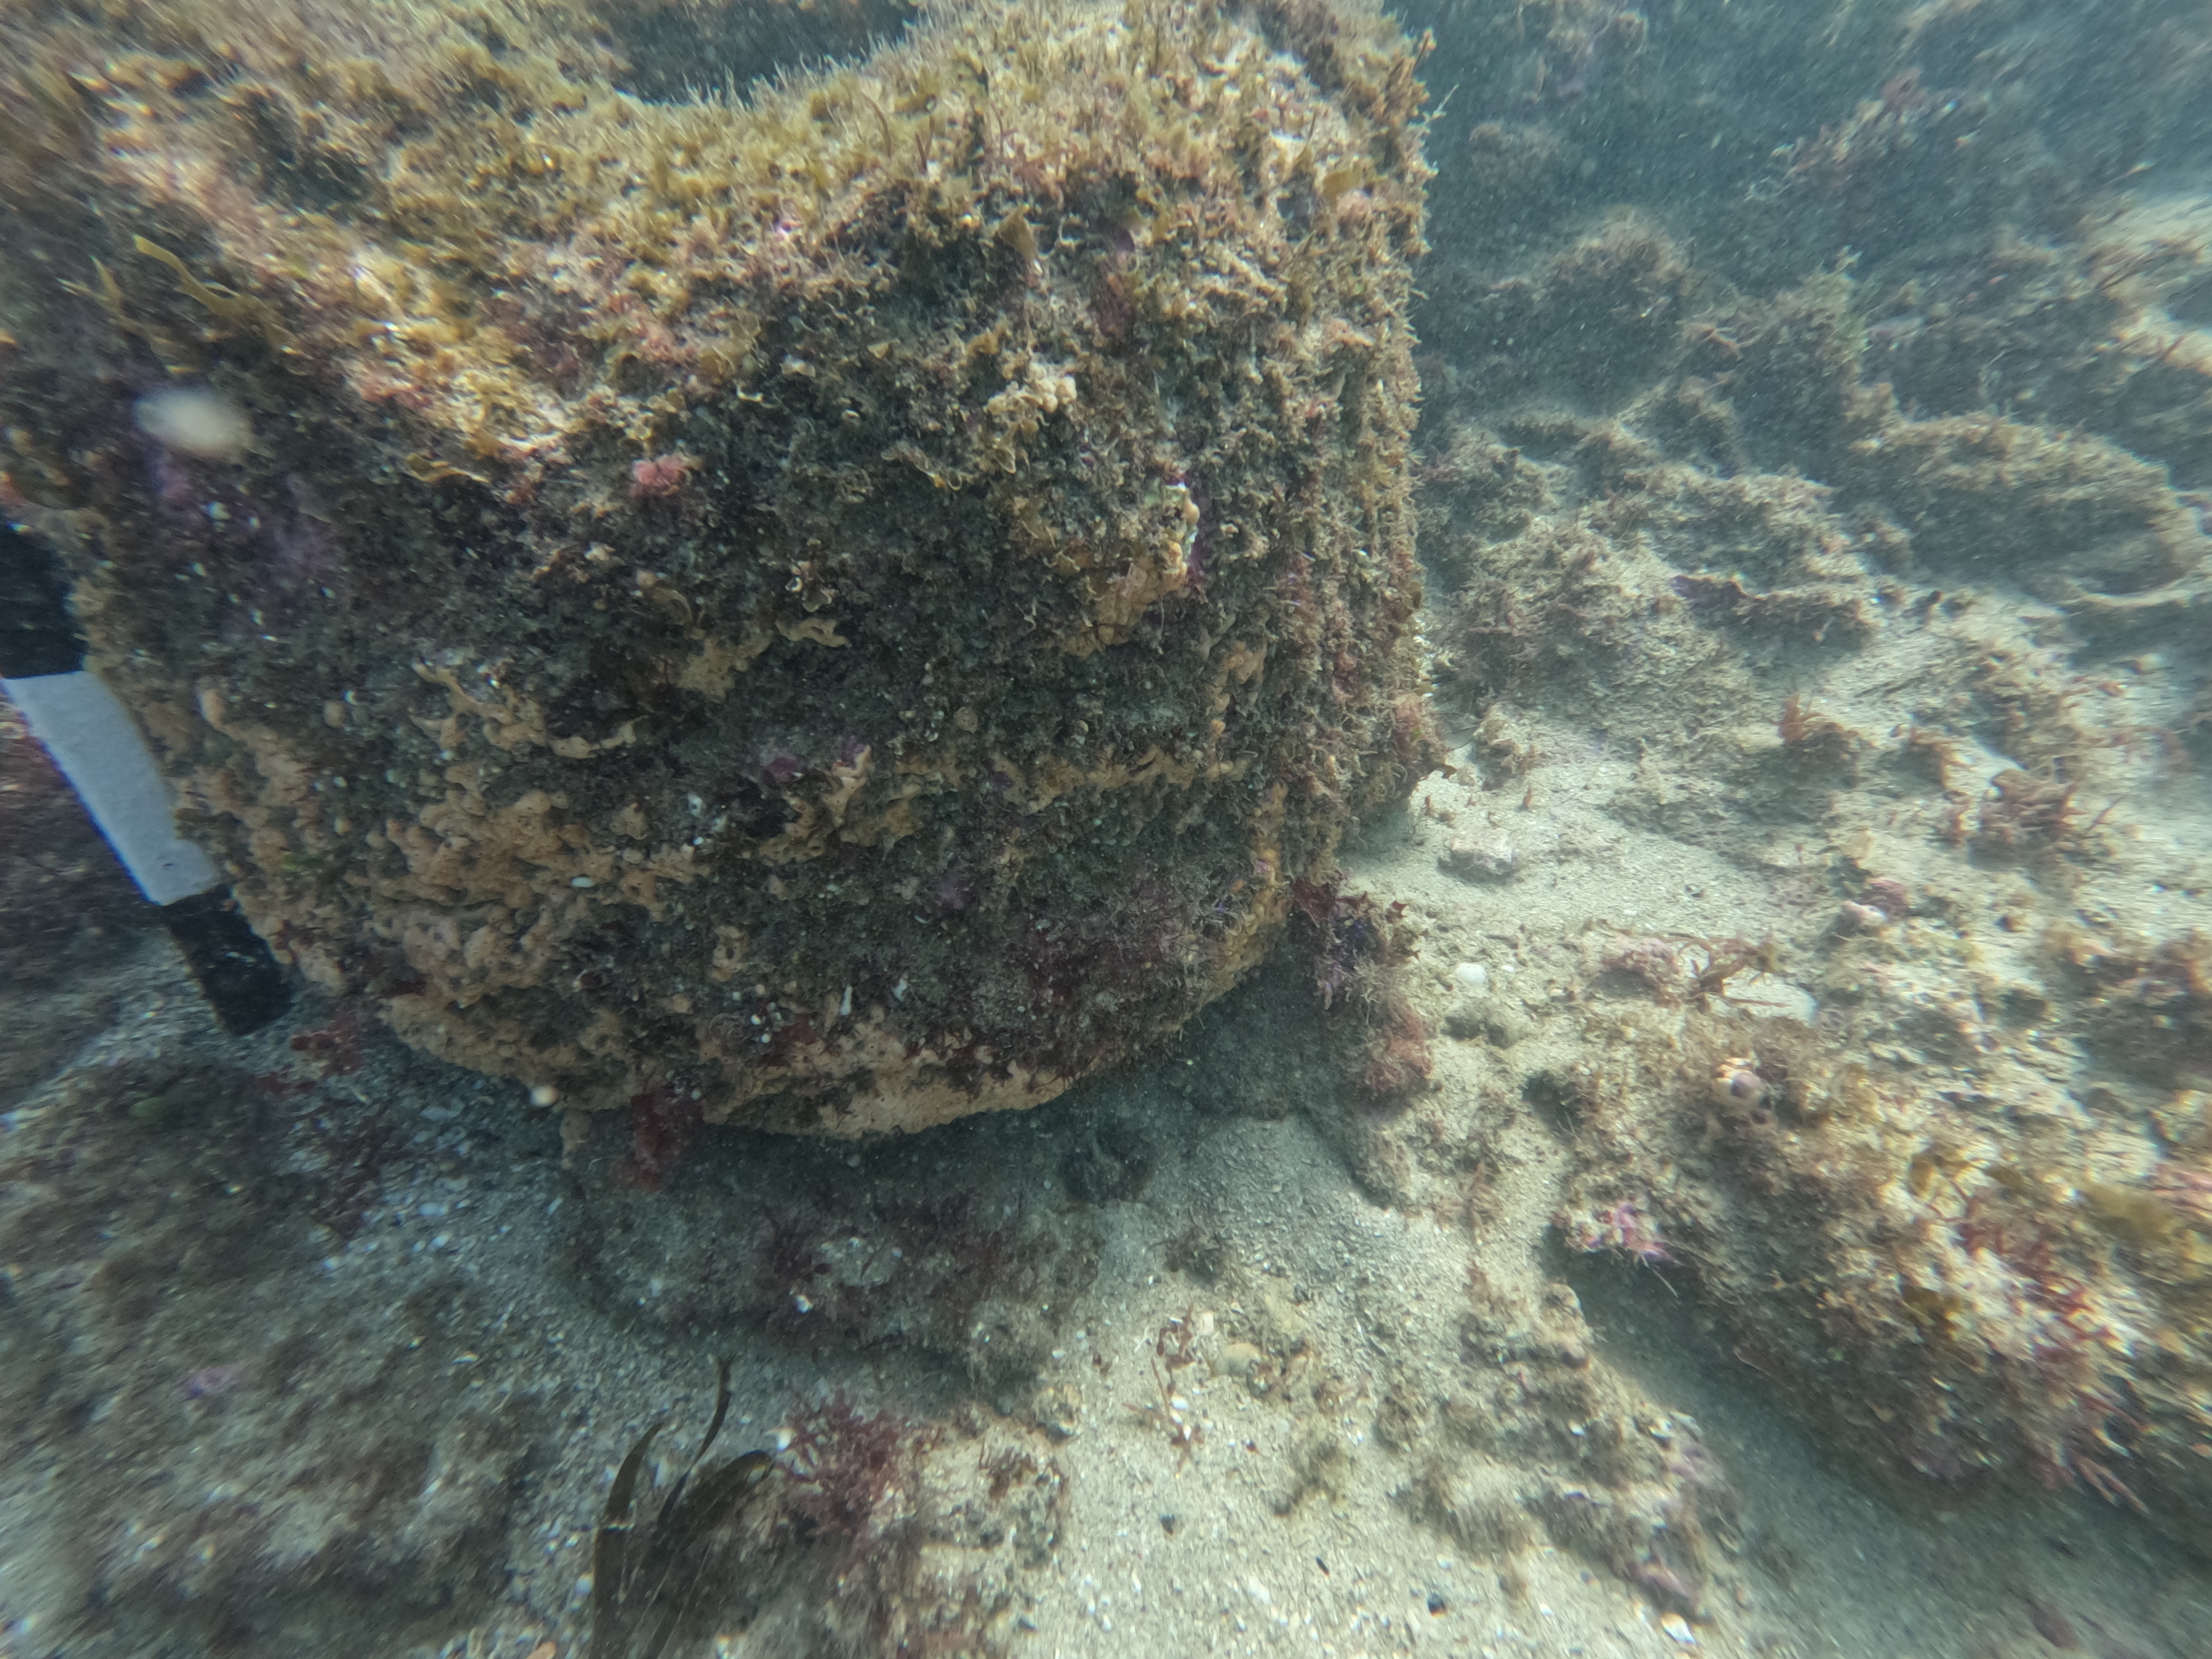

Supplement: Supplementary file 1727 [file G0028053.pdf › Ocean1/G0028053.pdf]

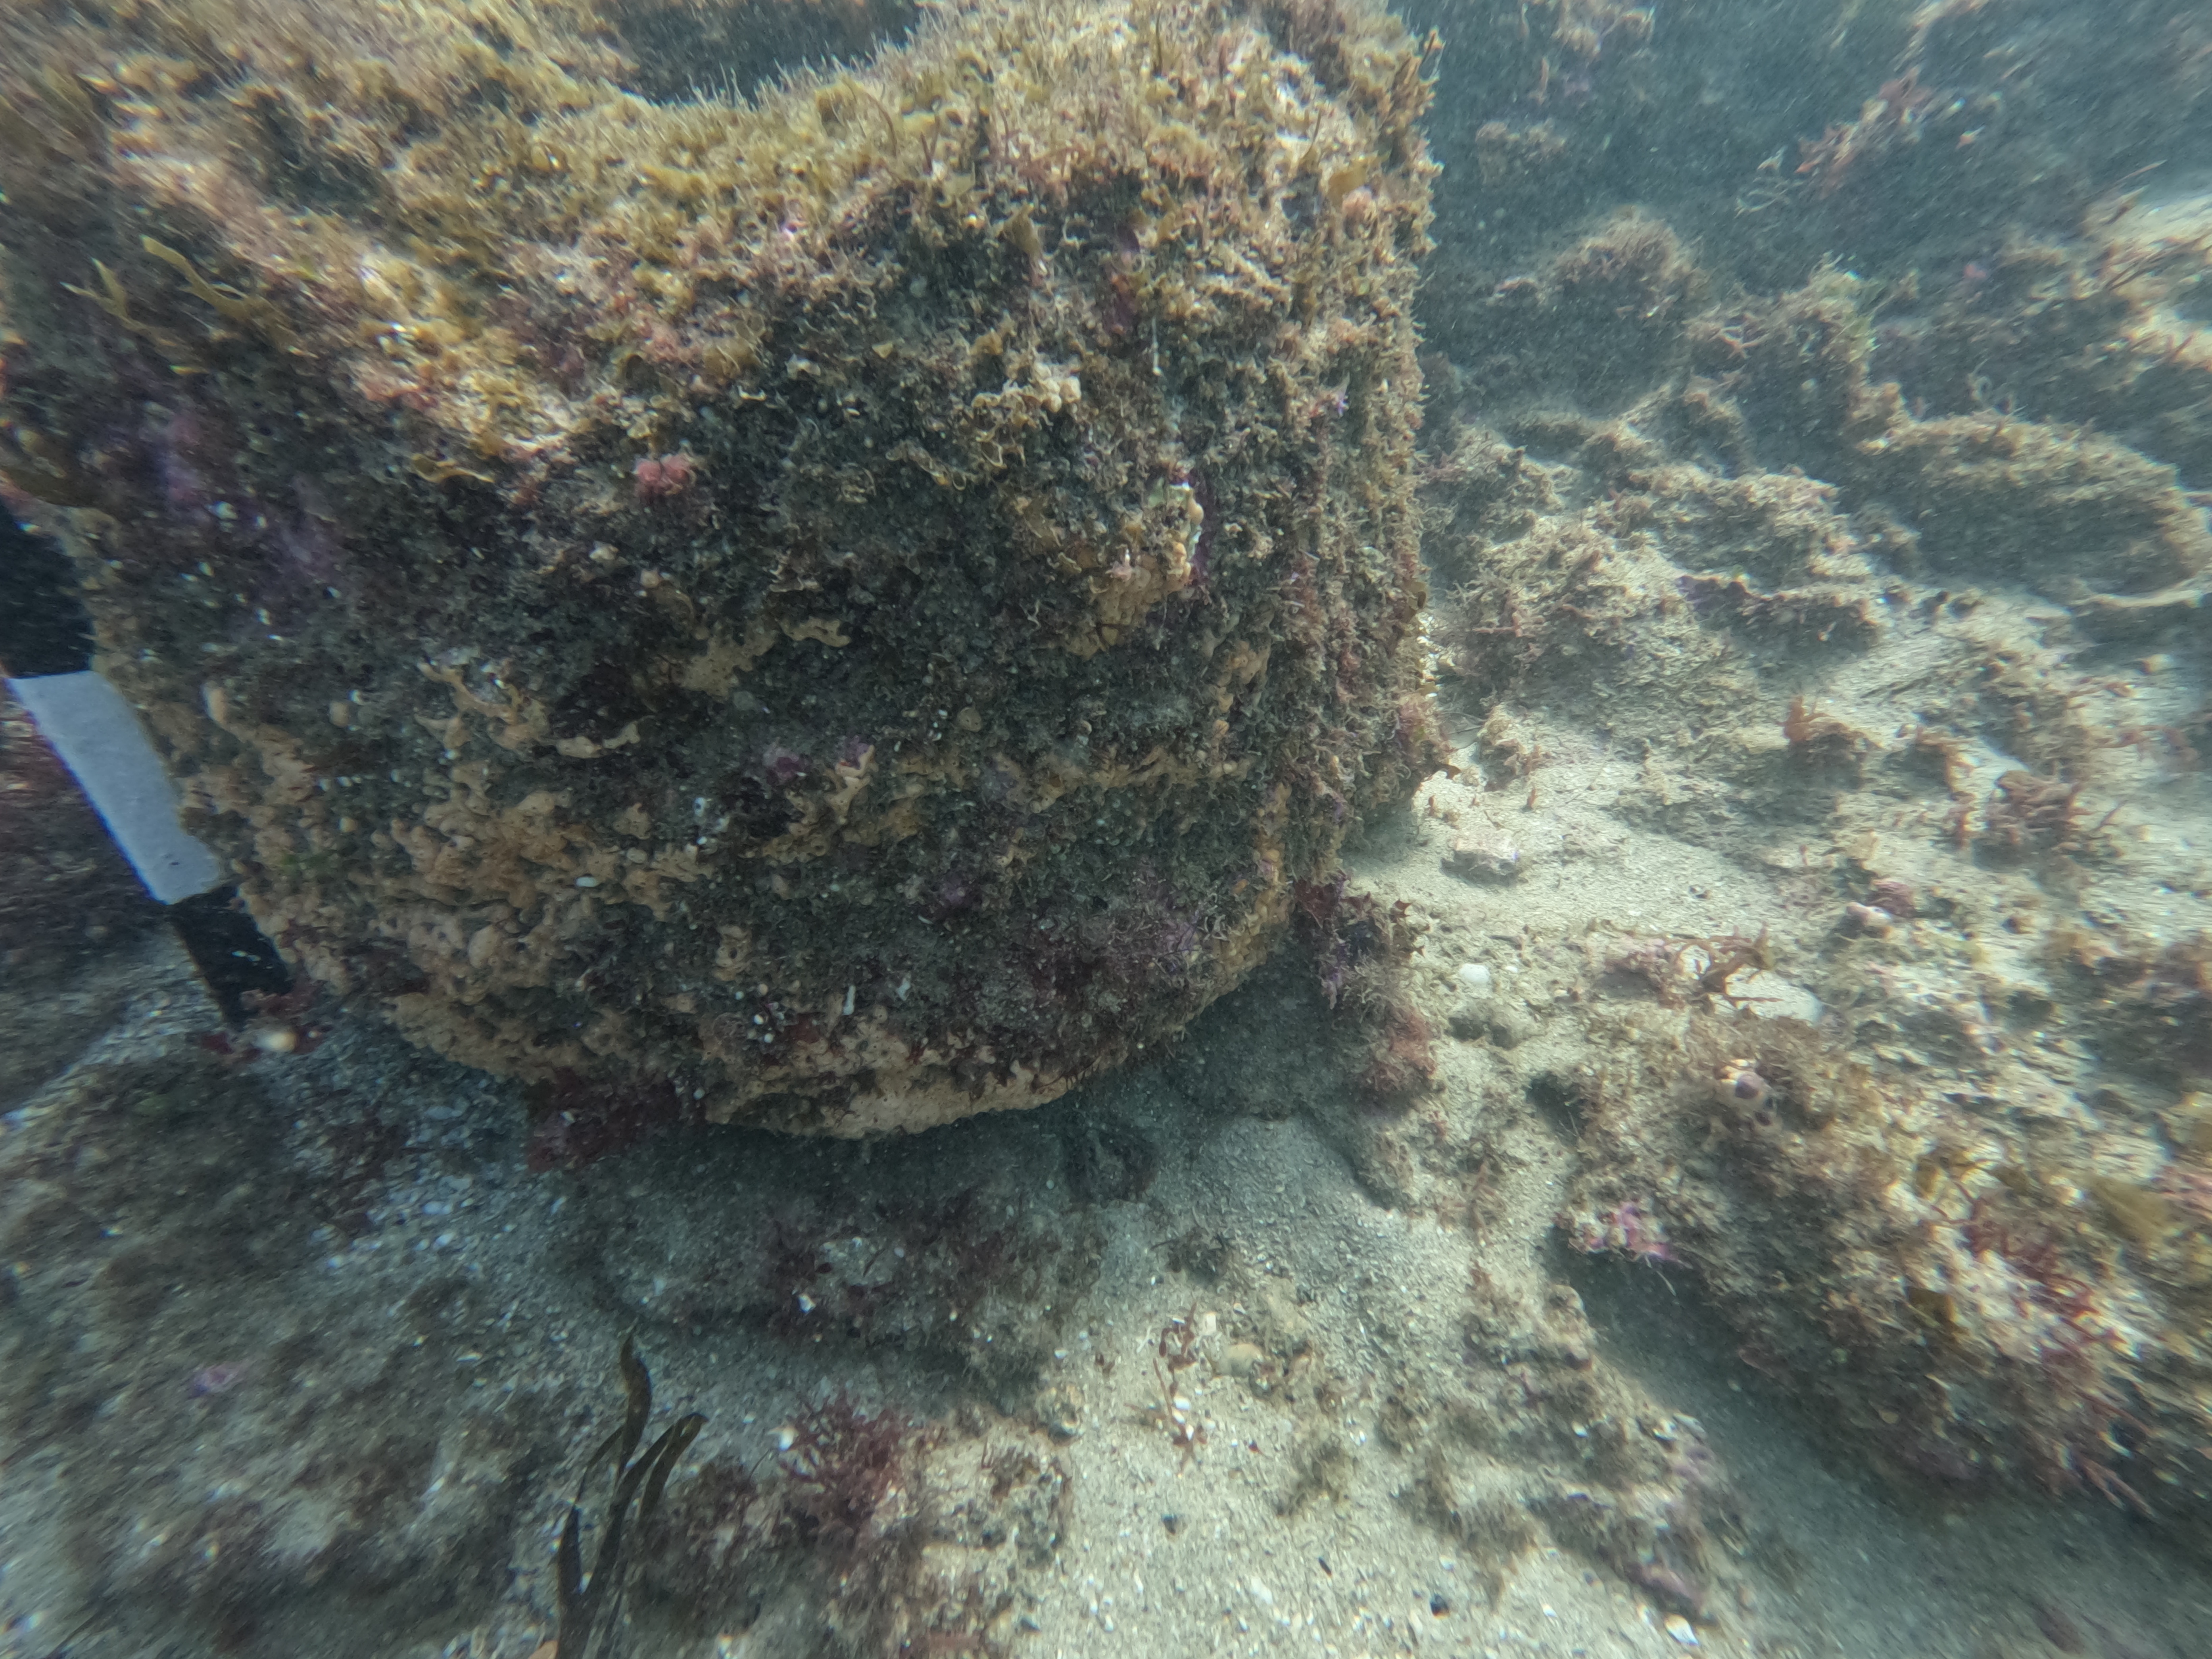

Supplement: Supplementary file 1728 [file G0028054.pdf › Ocean1/G0028054.pdf]

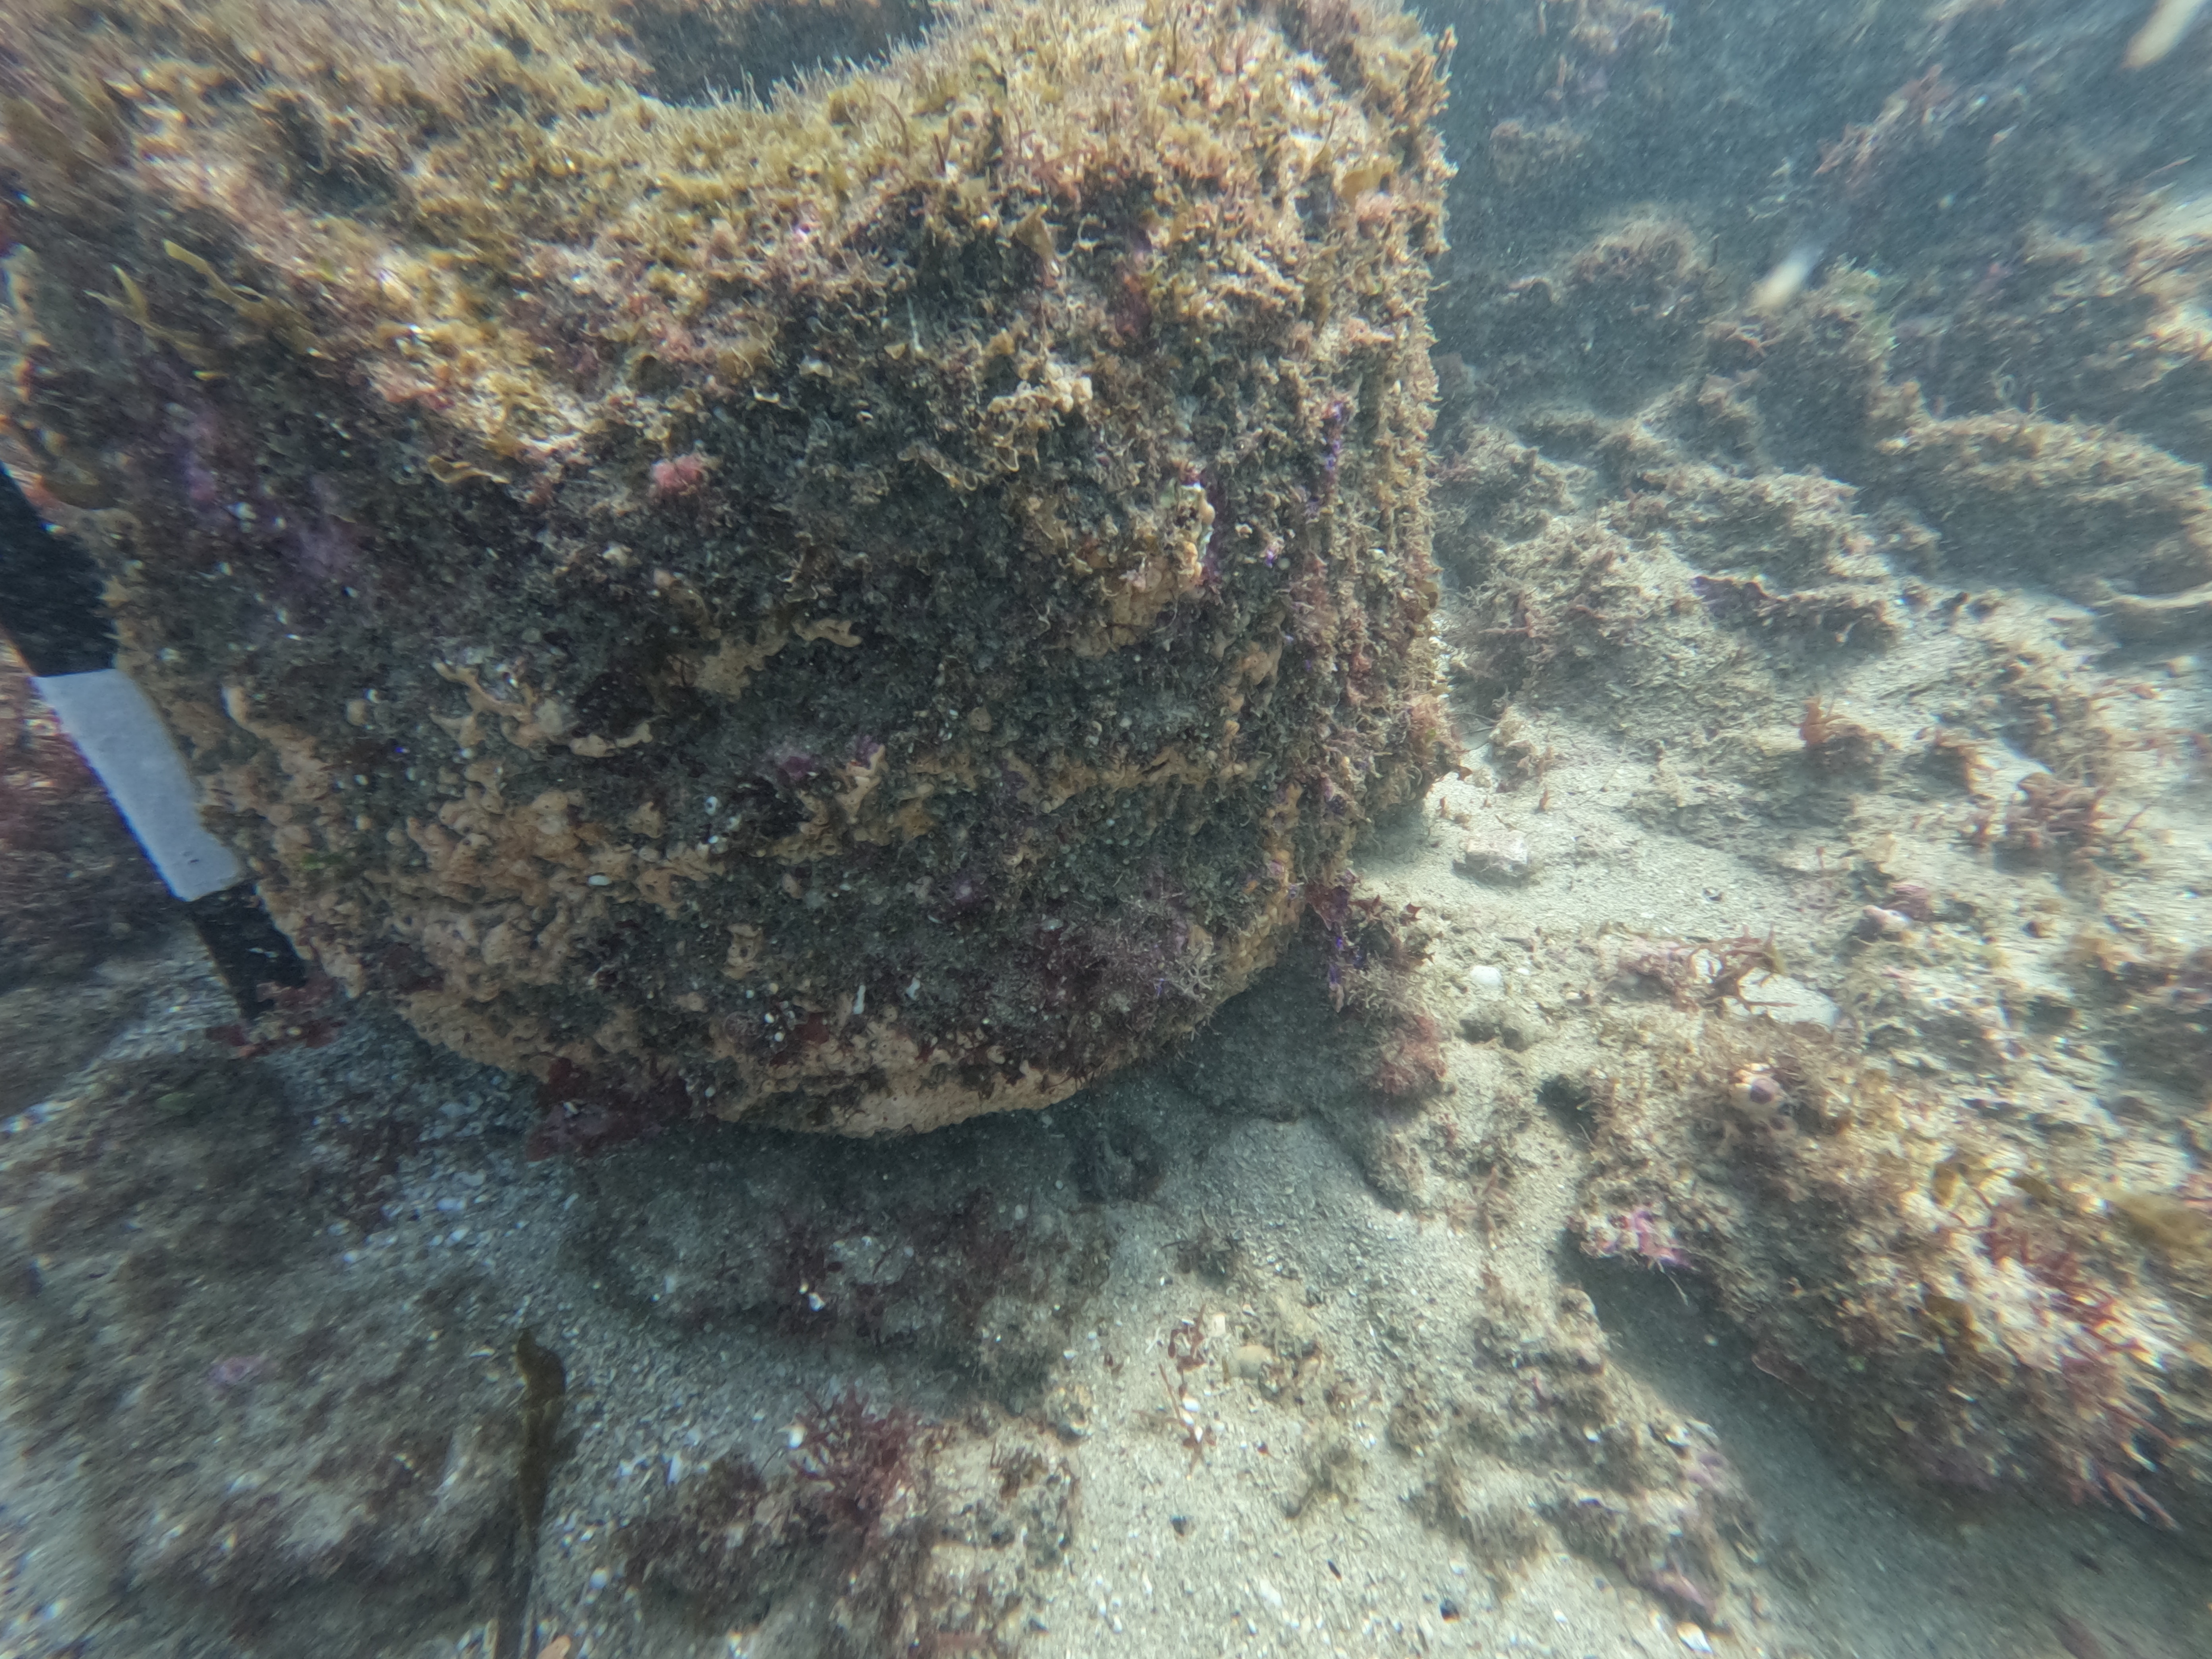

Supplement: Supplementary file 1729 [file G0028055.pdf › Ocean1/G0028055.pdf]

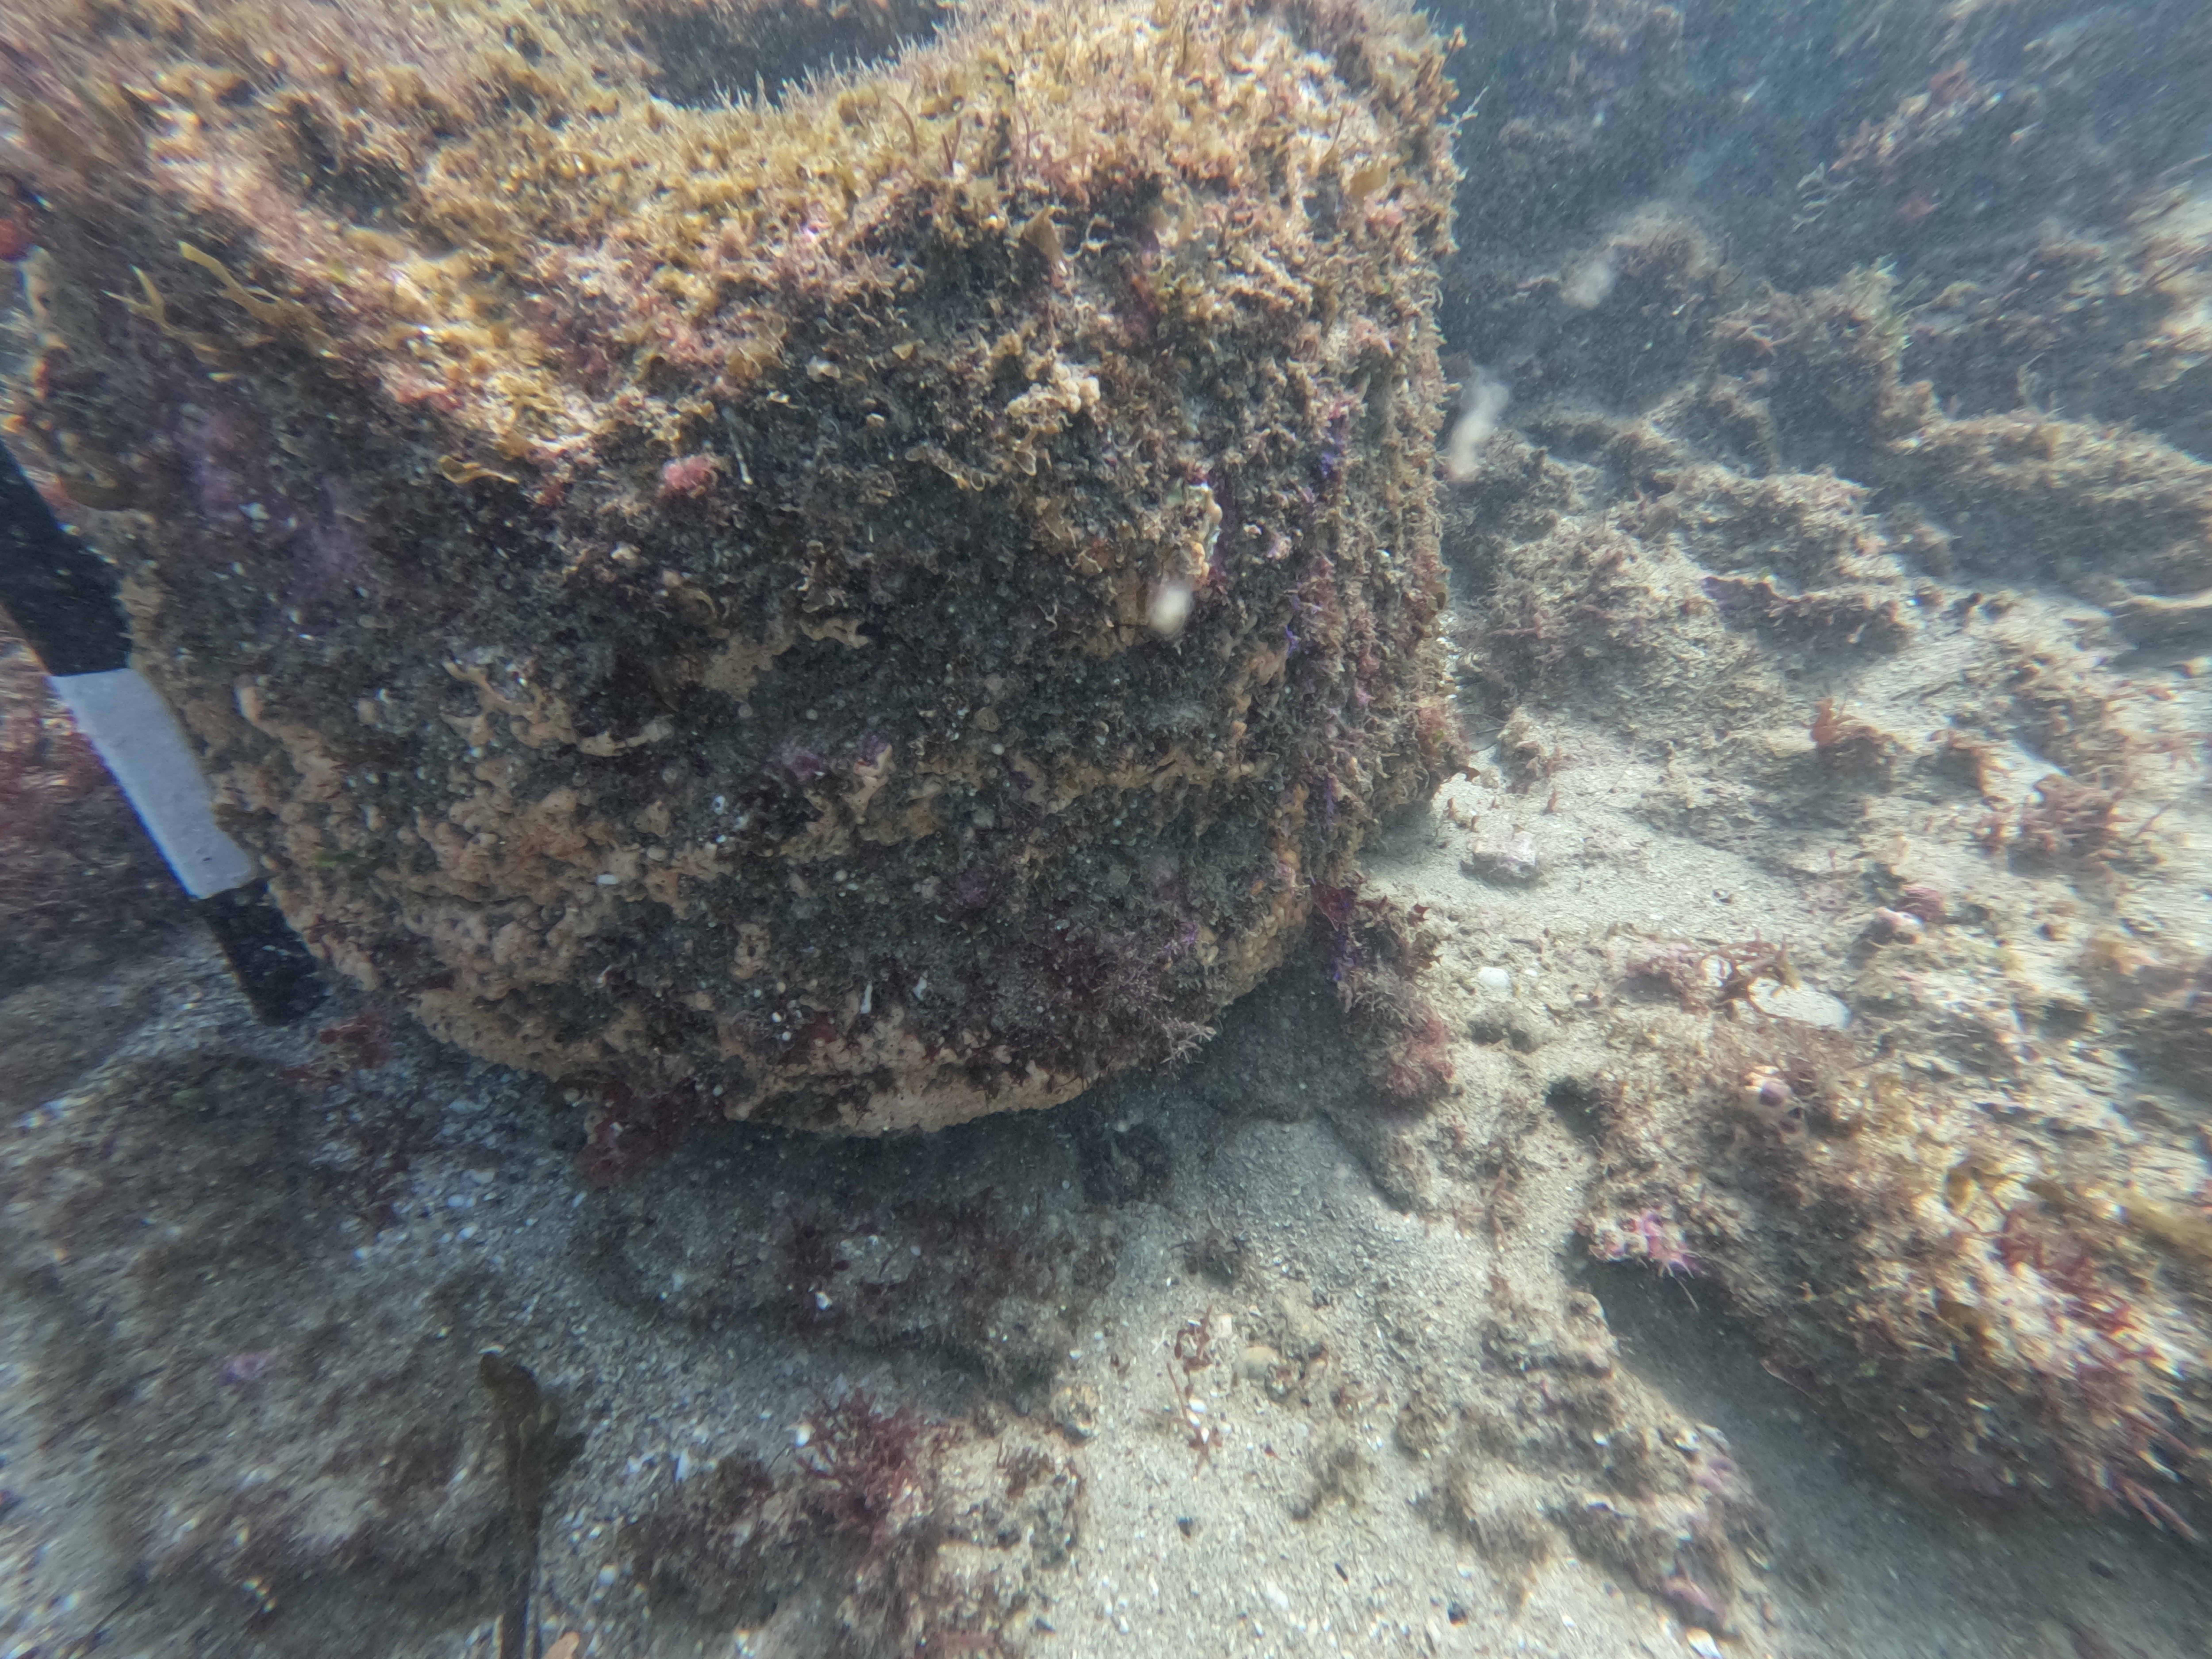

Supplement: Supplementary file 1730 [file G0028056.pdf › Ocean1/G0028056.pdf]

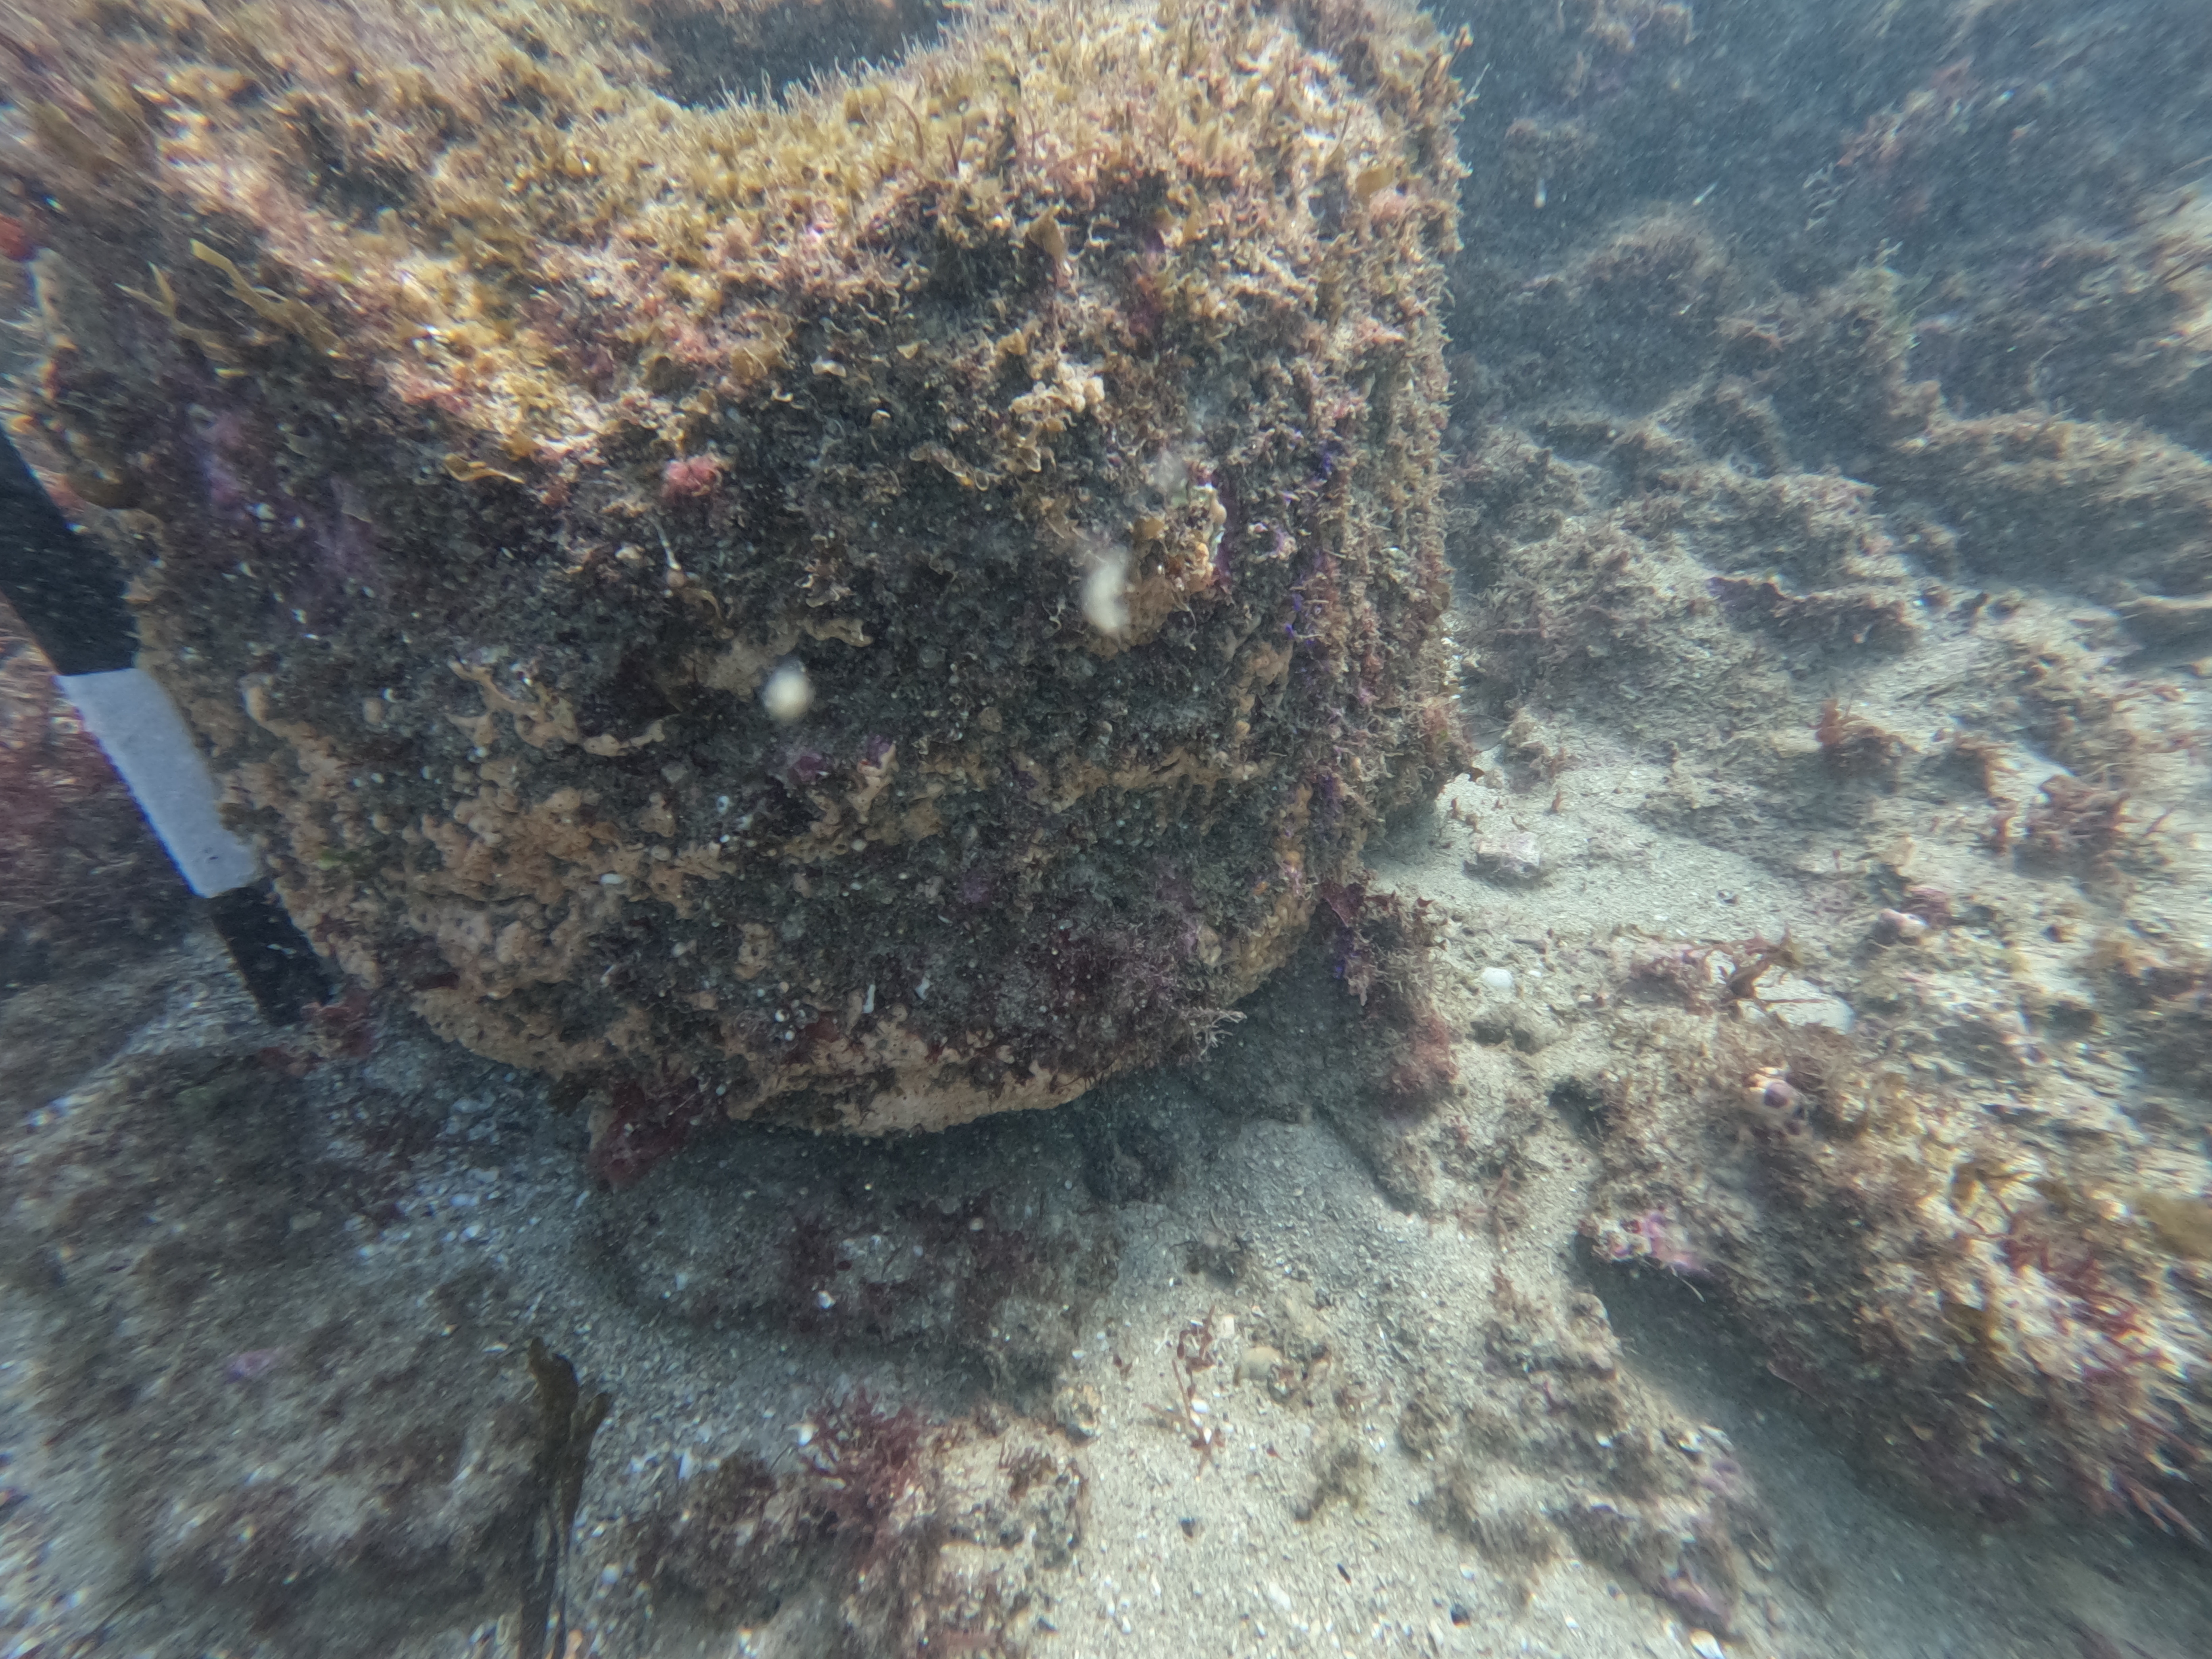

Supplement: Supplementary file 1731 [file G0028057.pdf › Ocean1/G0028057.pdf]

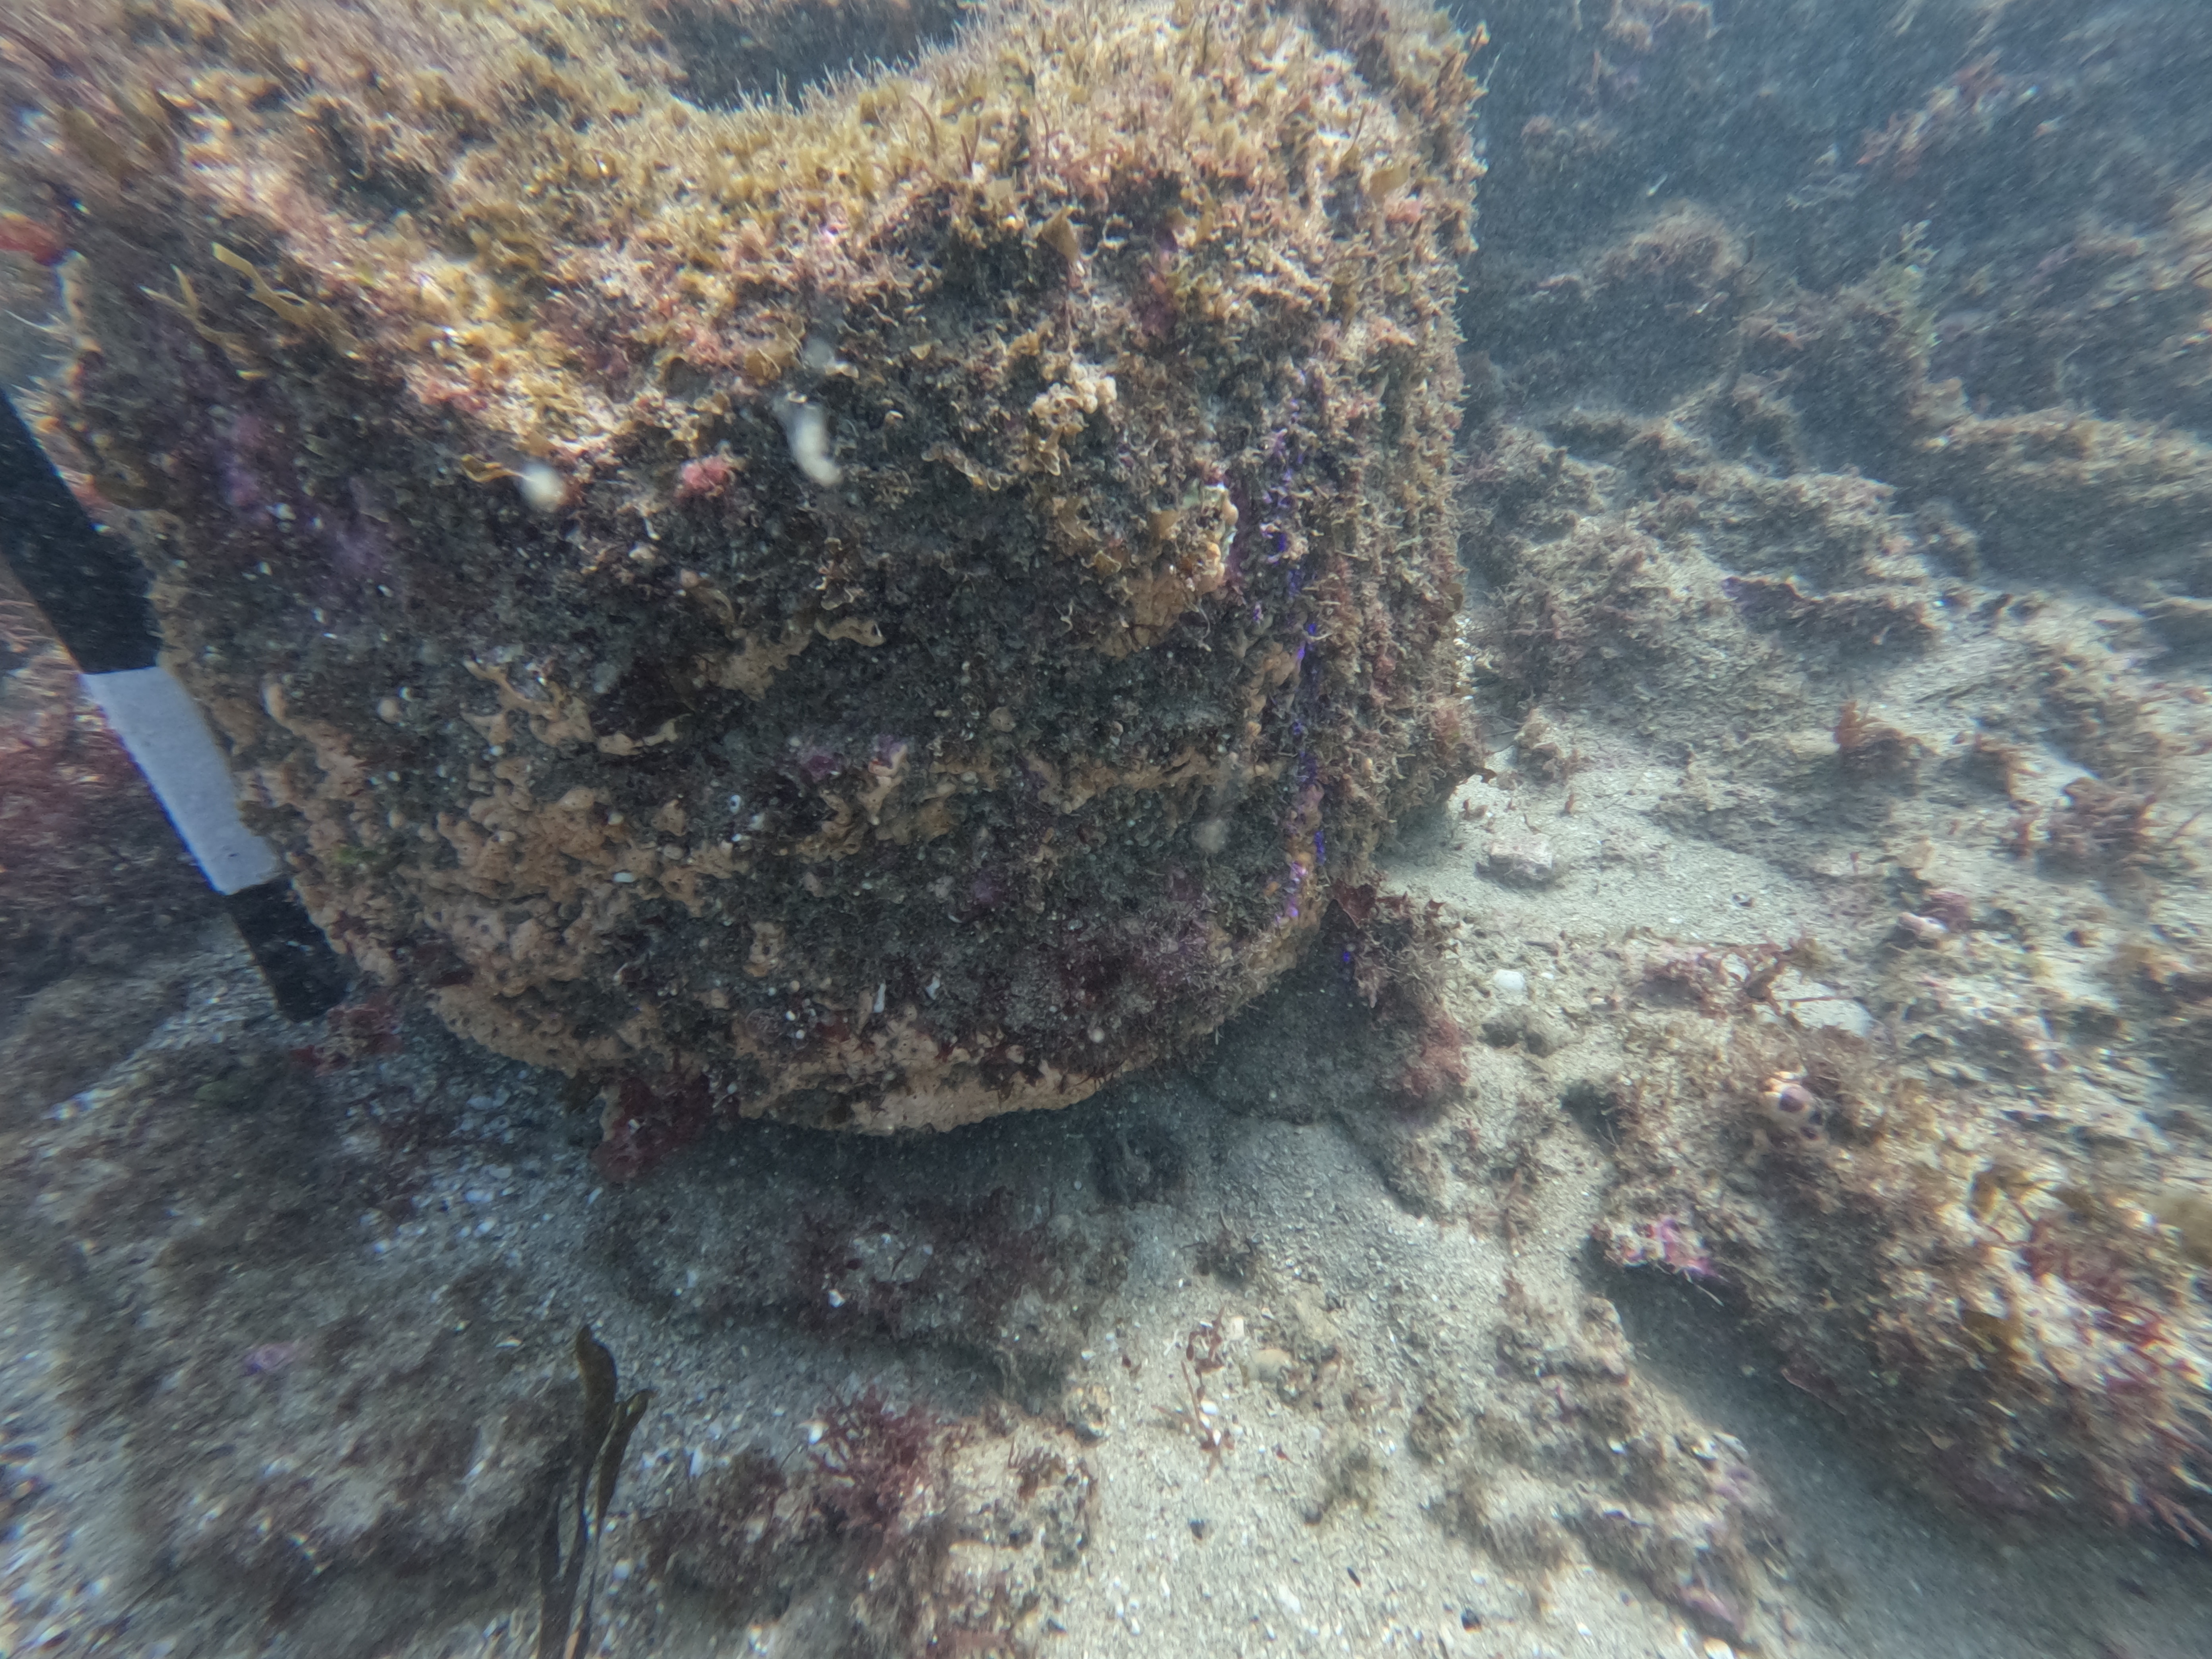

Supplement: Supplementary file 1732 [file G0028058.pdf › Ocean1/G0028058.pdf]

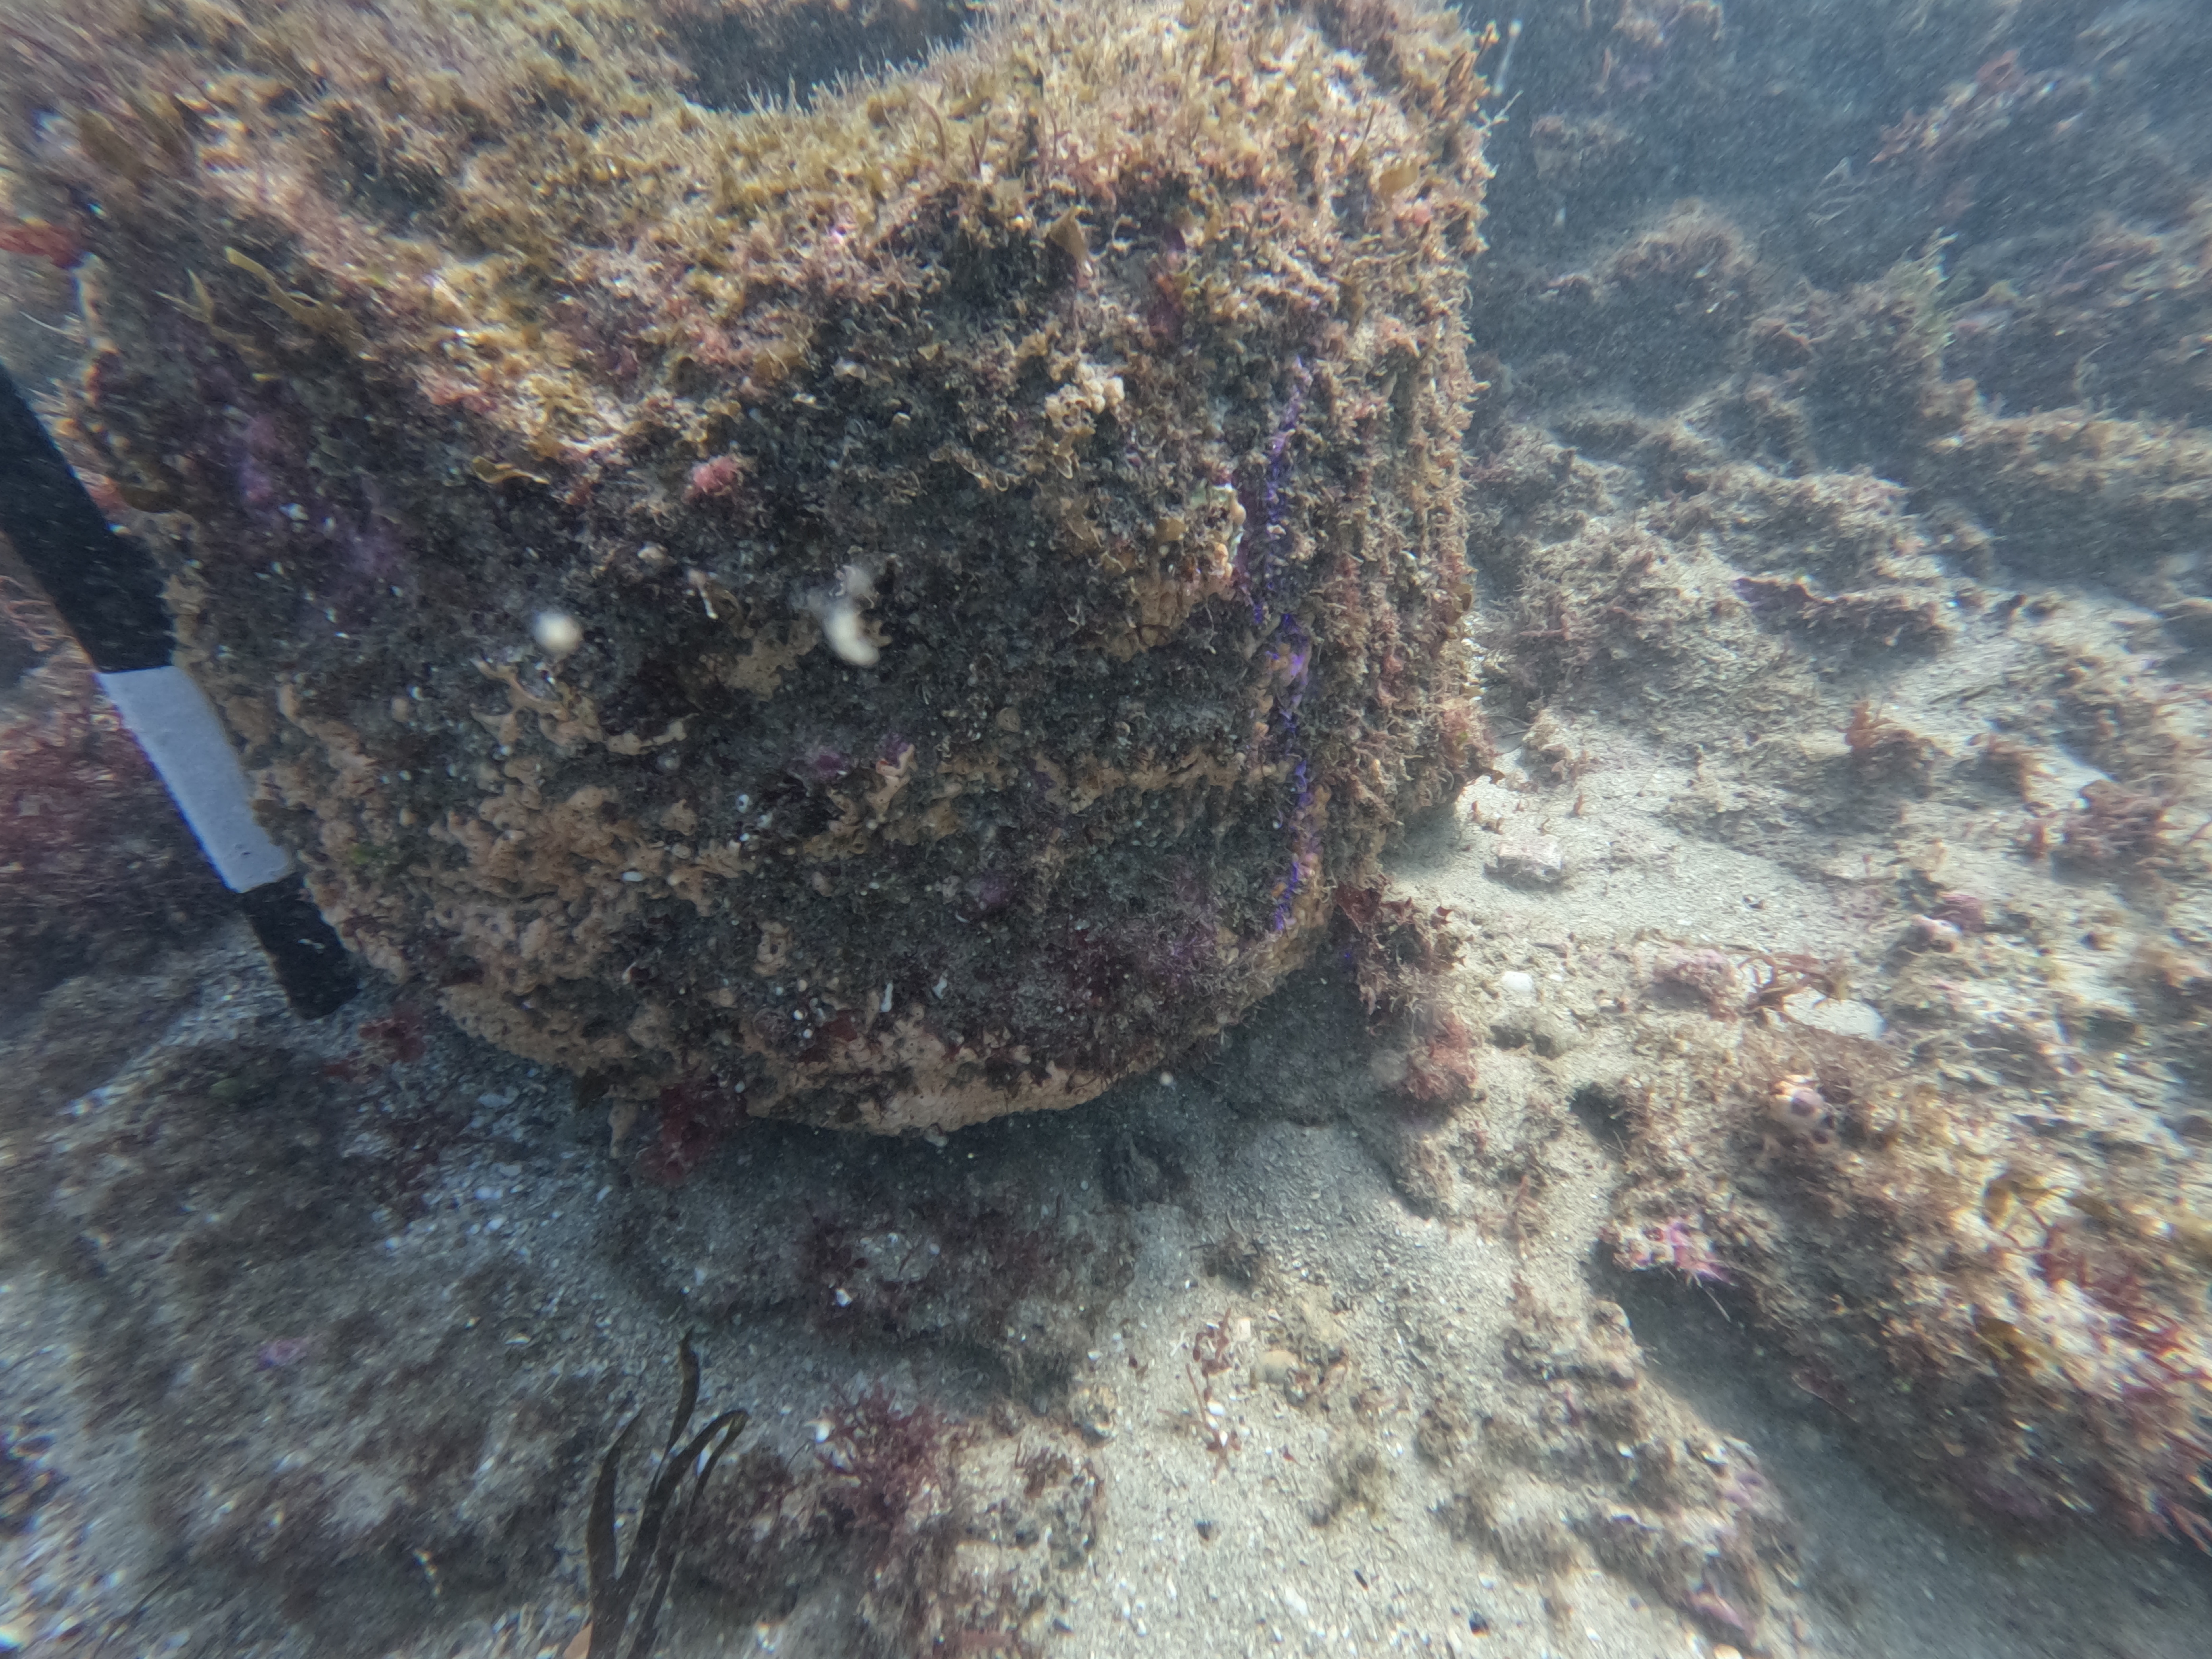

Supplement: Supplementary file 1733 [file G0028059.pdf › Ocean1/G0028059.pdf]

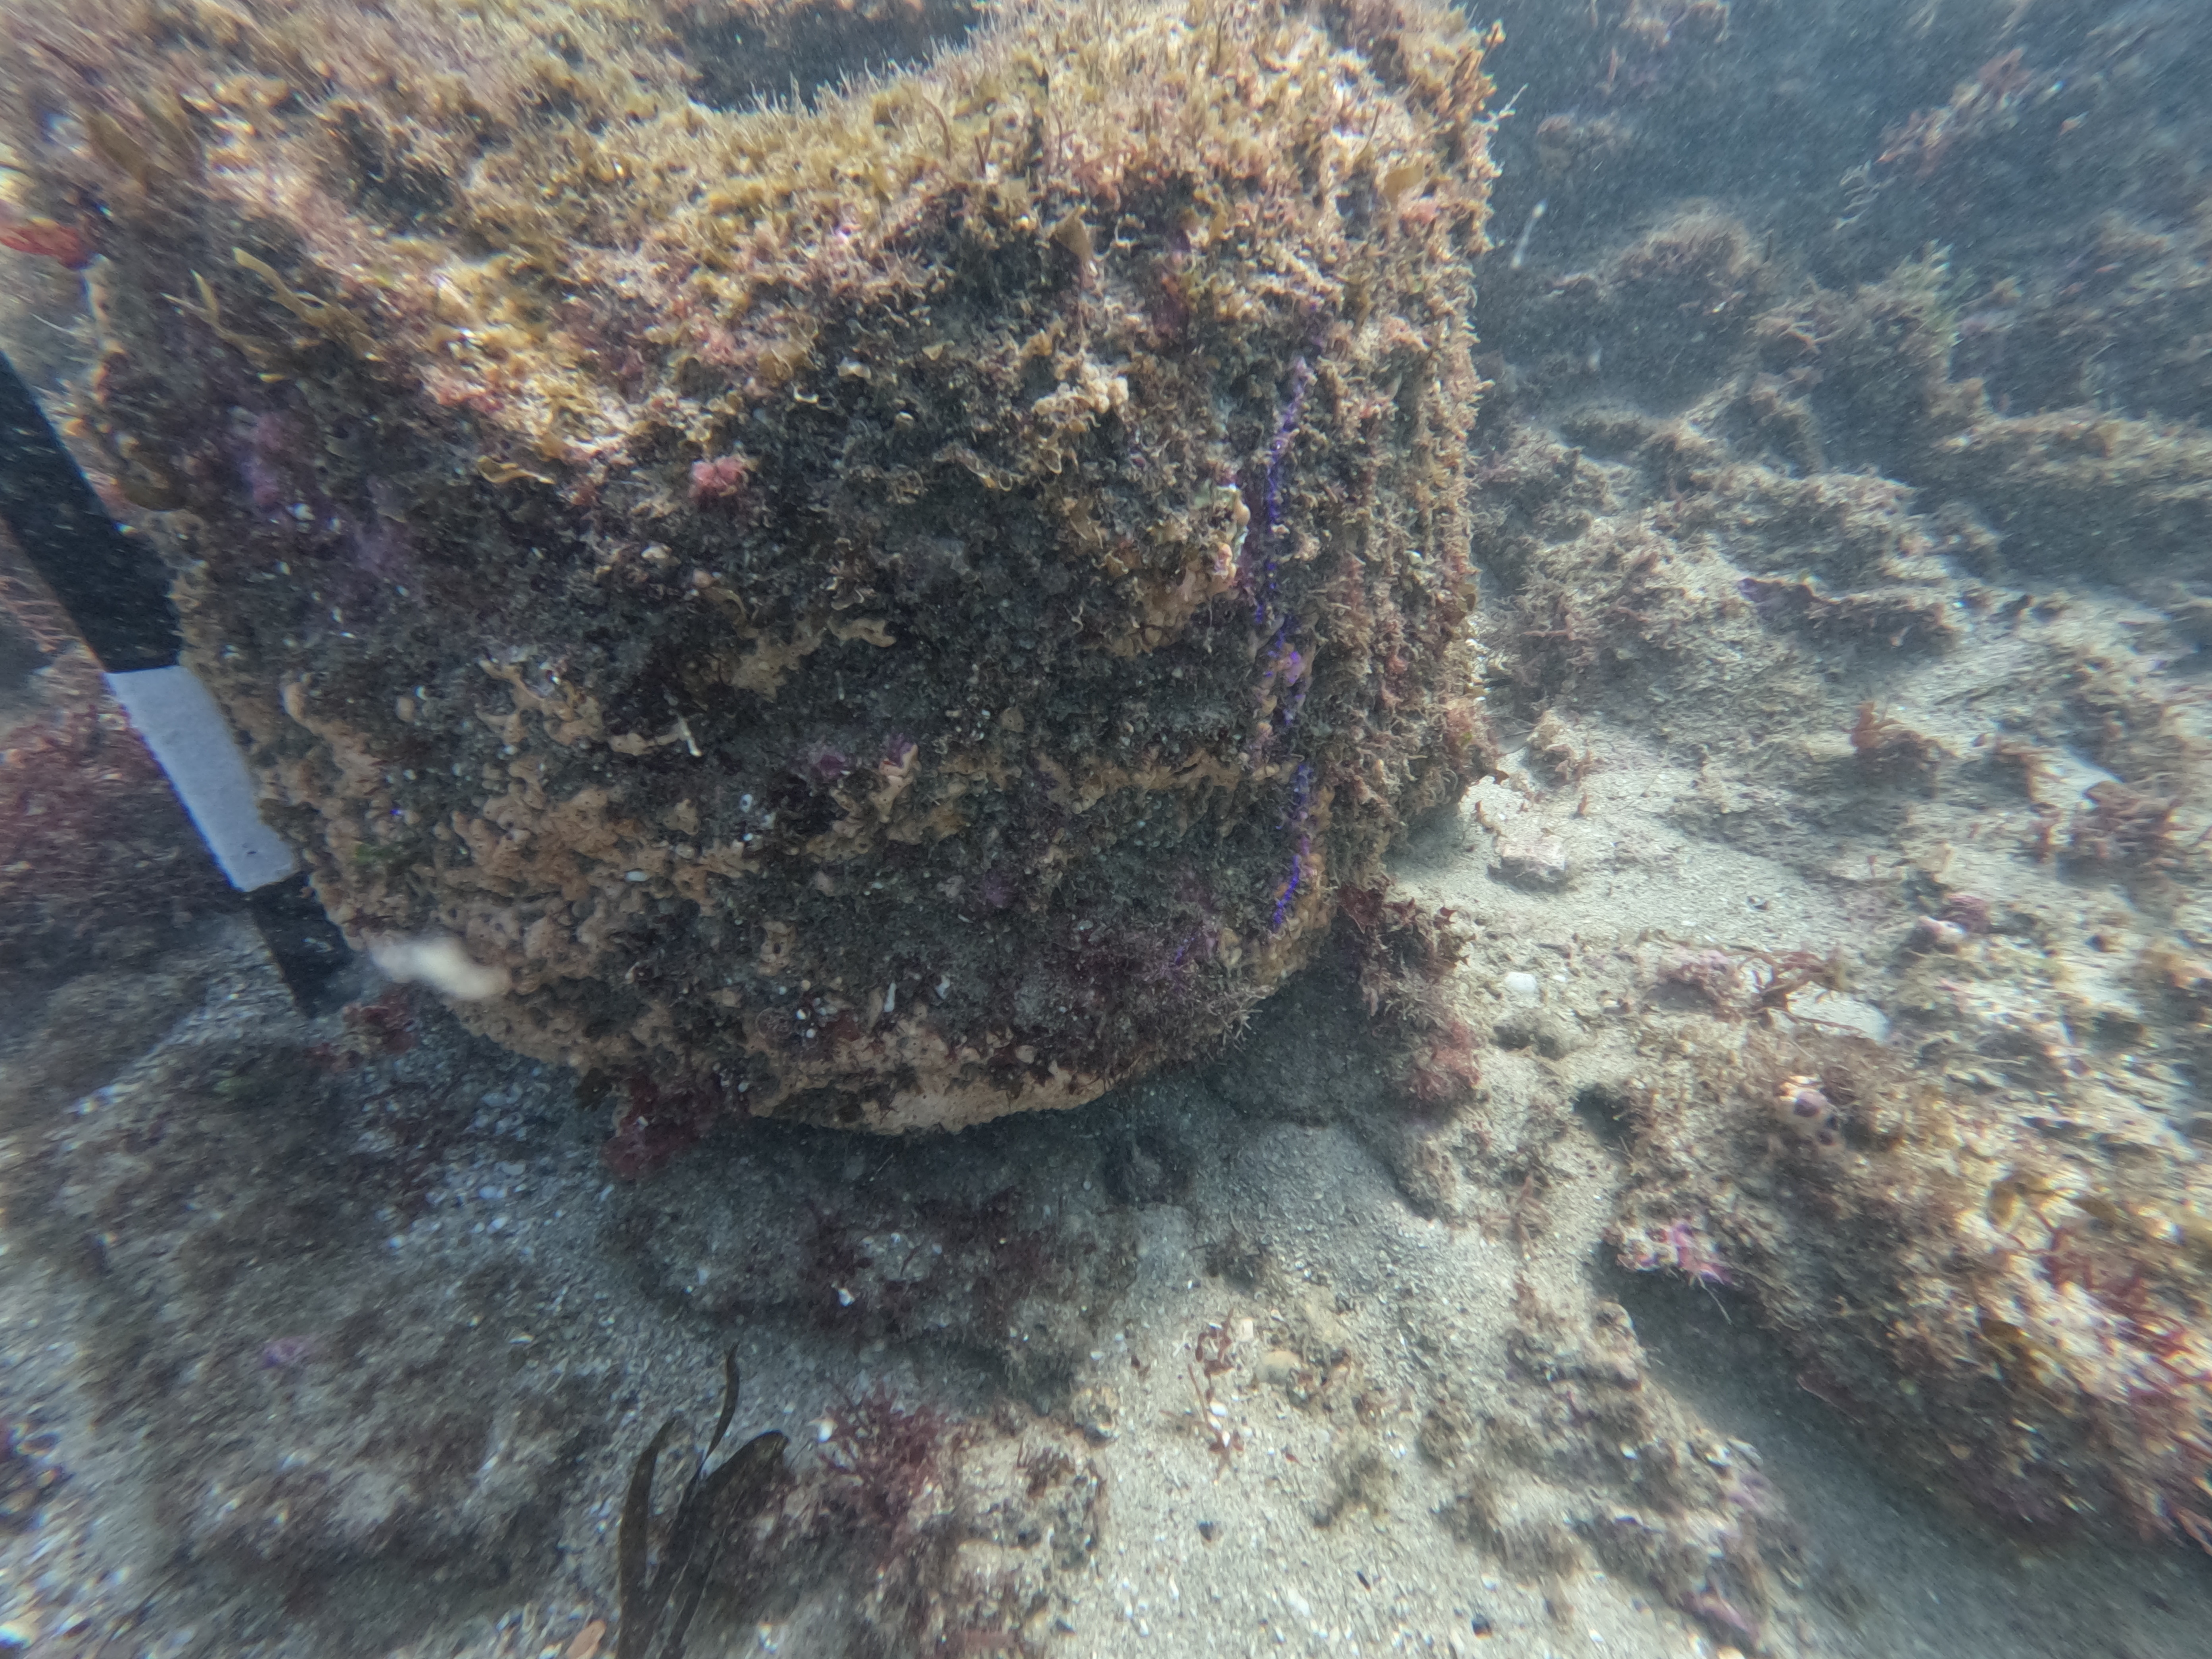

Supplement: Supplementary file 1734 [file G0028060.pdf › Ocean1/G0028060.pdf]

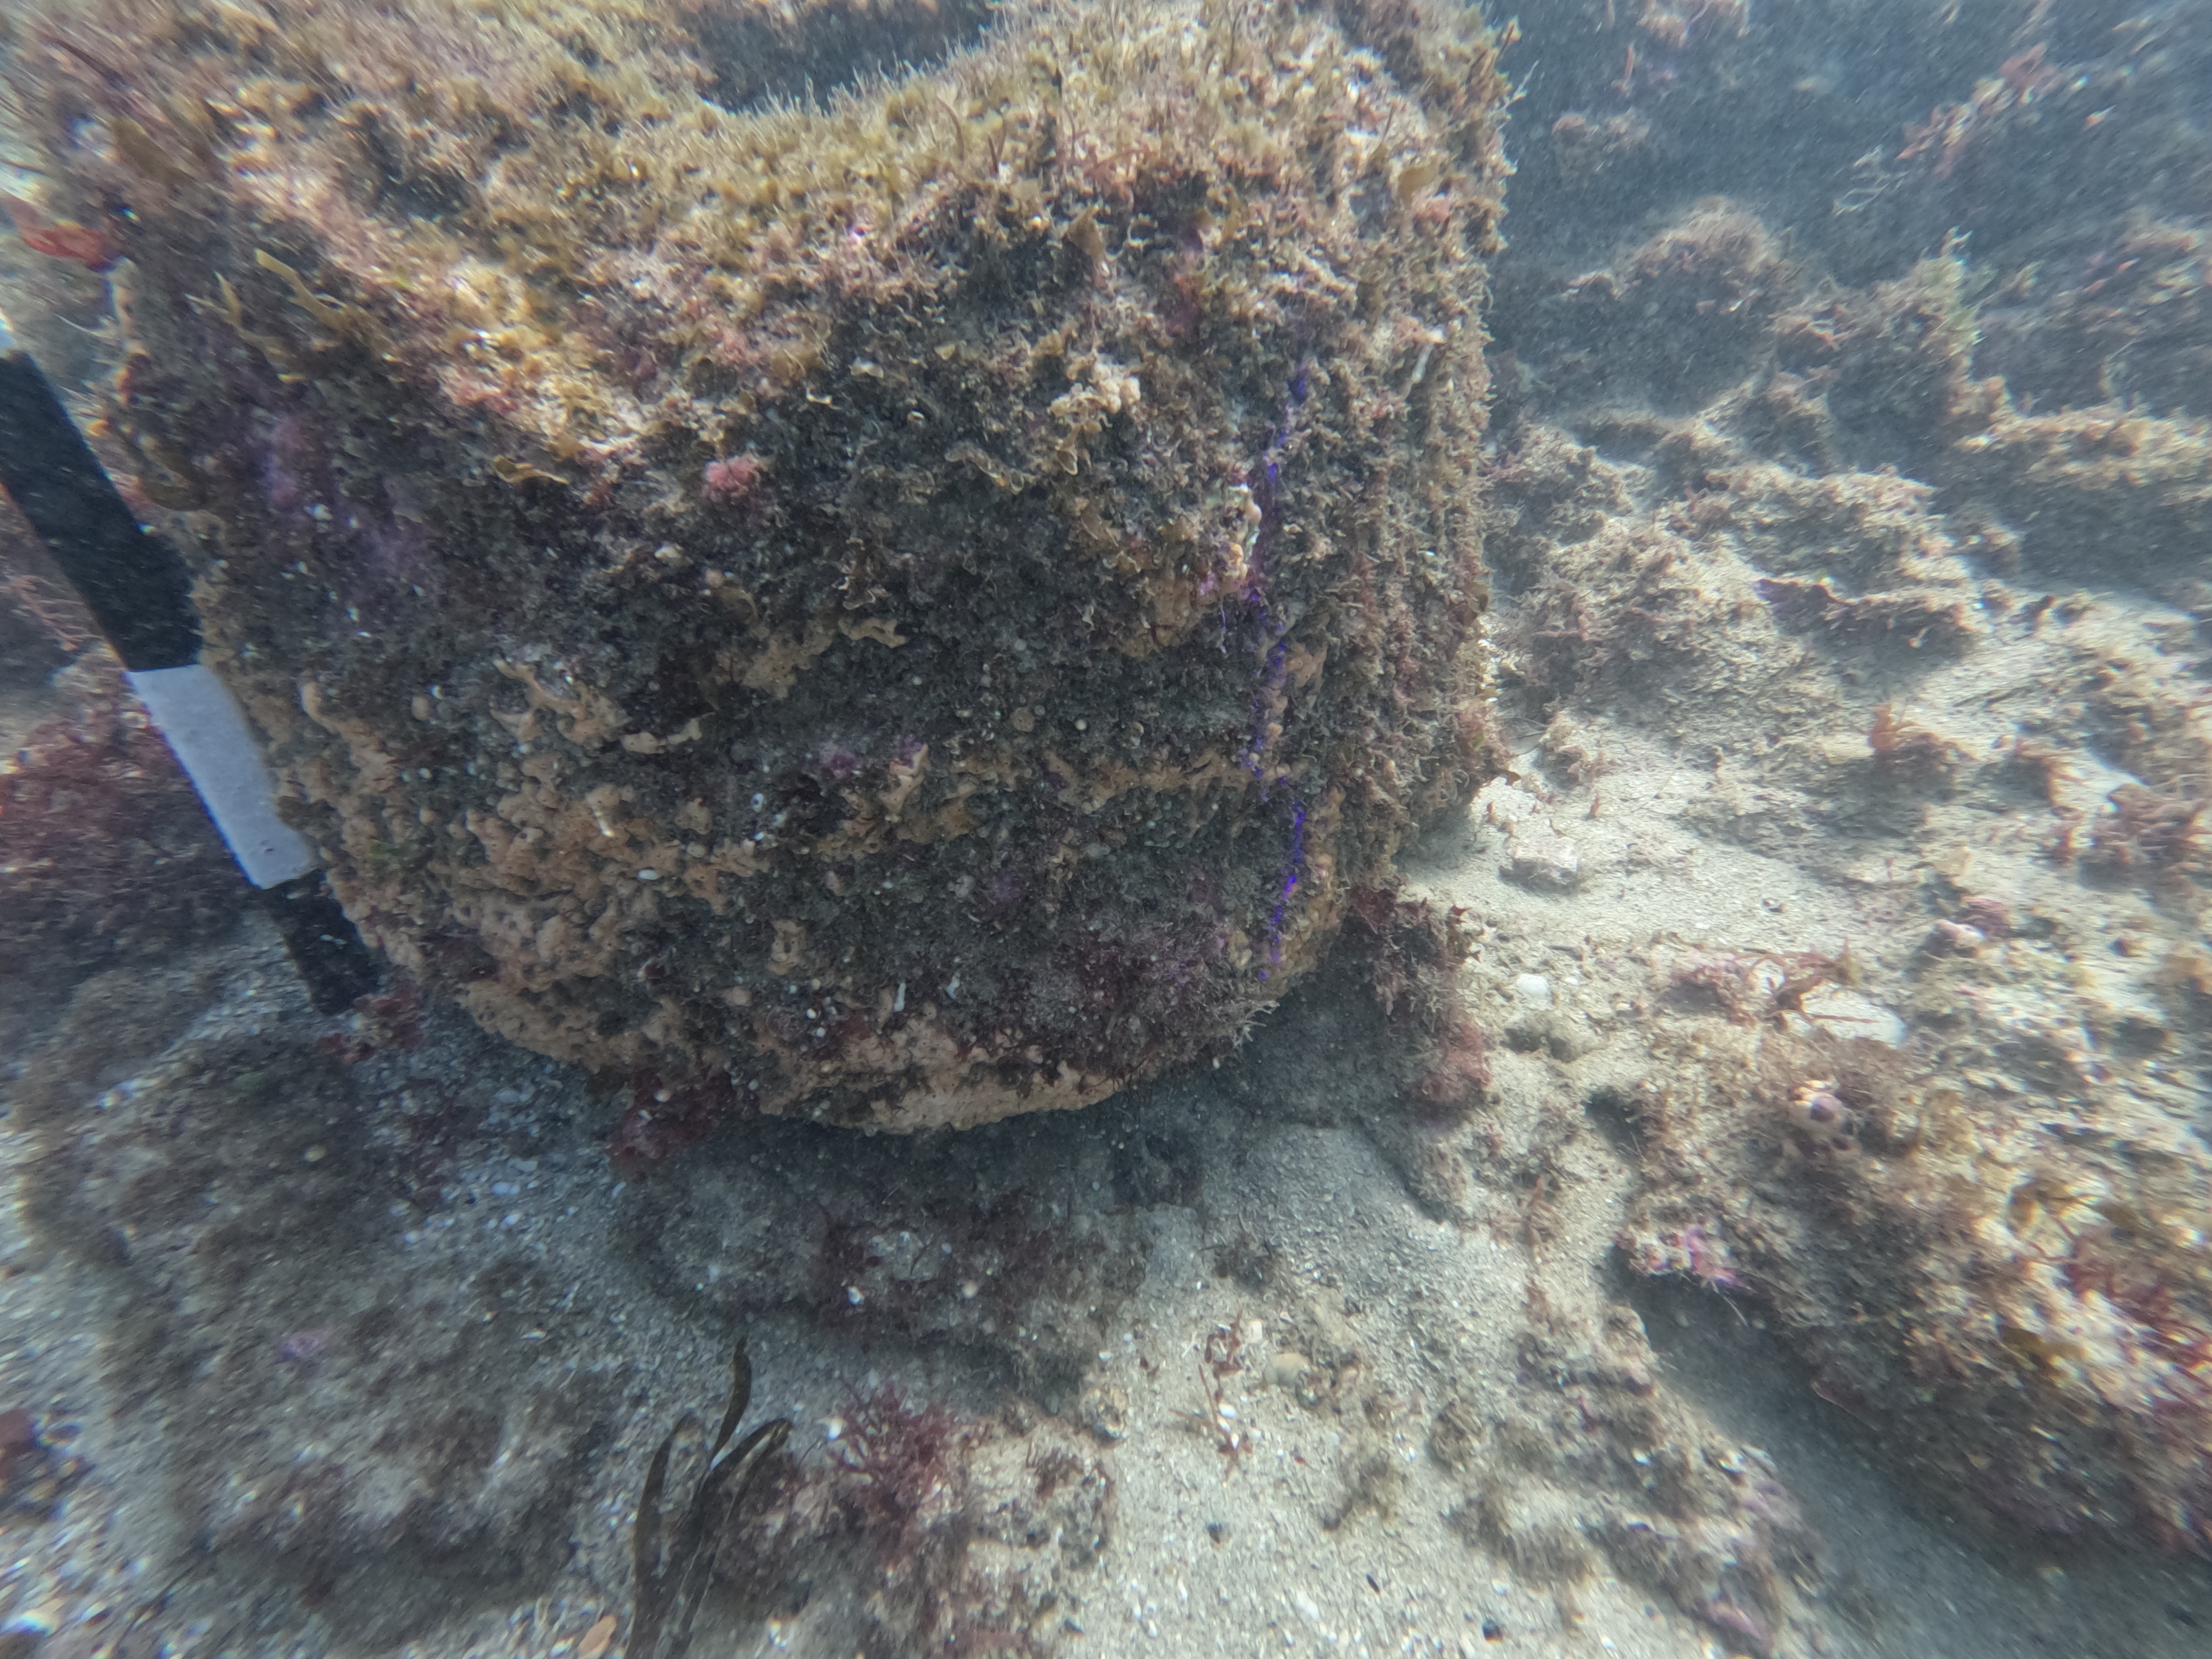

Supplement: Supplementary file 1735 [file G0028061.pdf › Ocean1/G0028061.pdf]

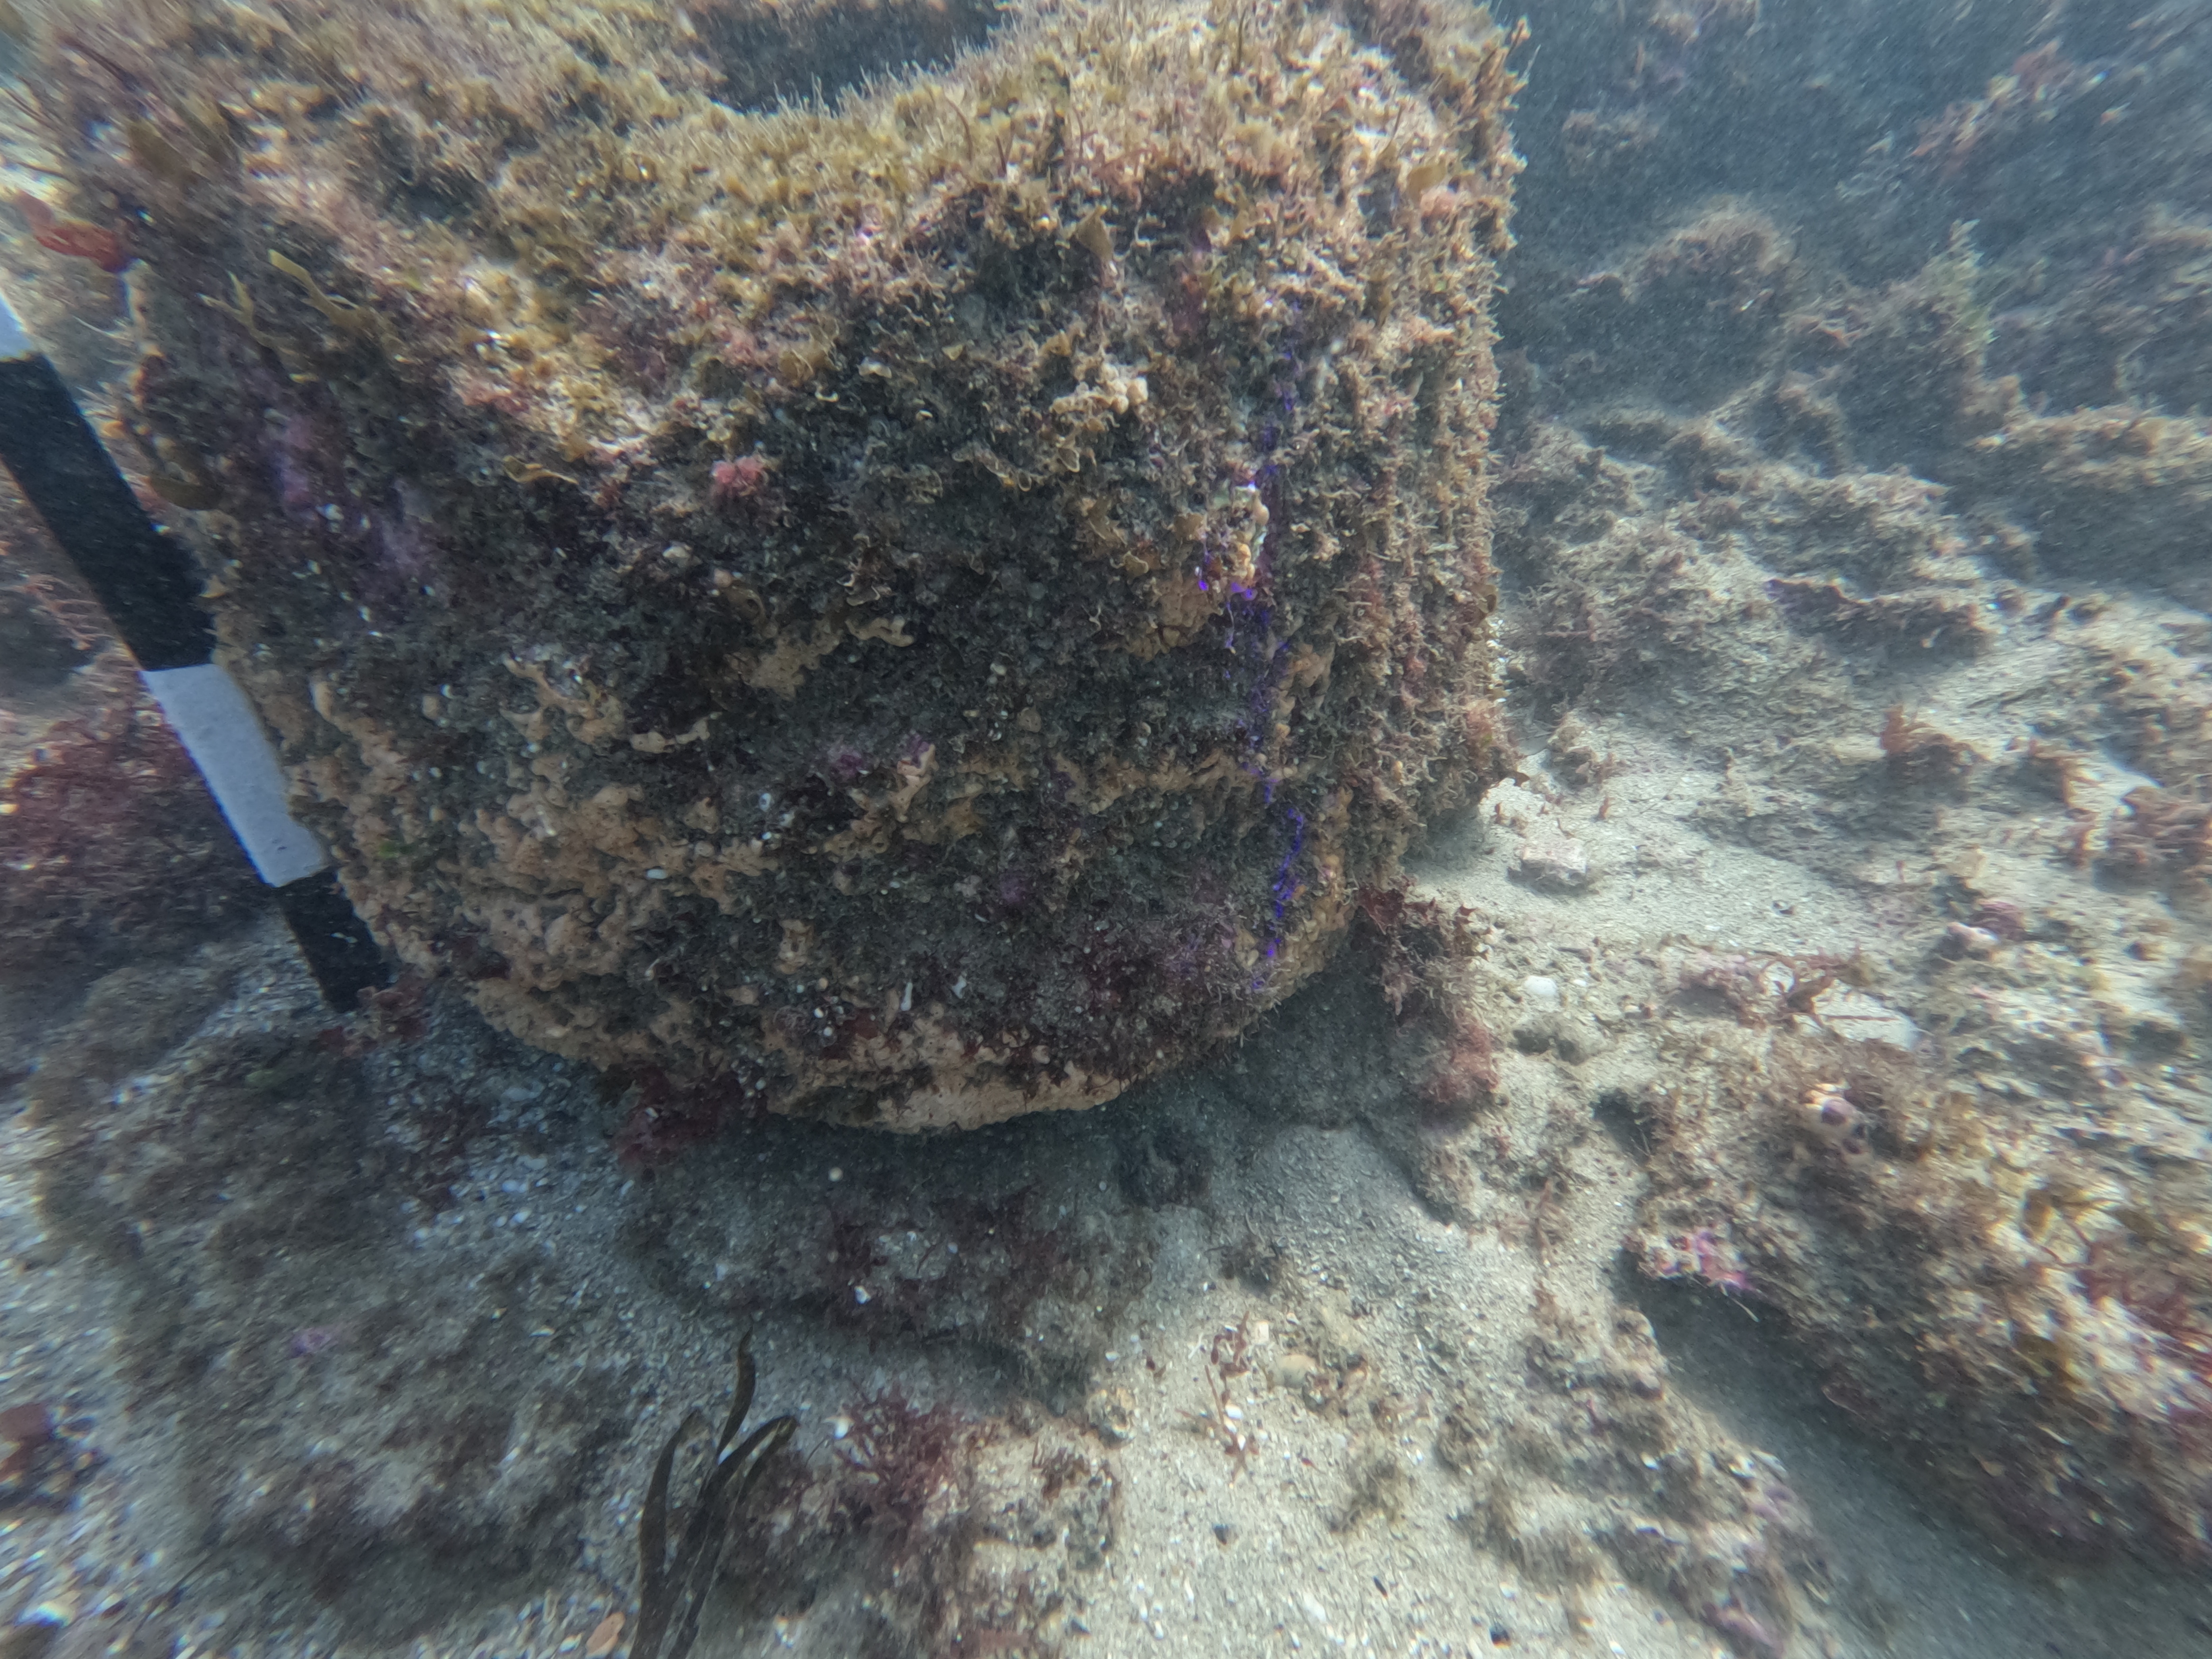

Supplement: Supplementary file 1736 [file G0028062.pdf › Ocean1/G0028062.pdf]

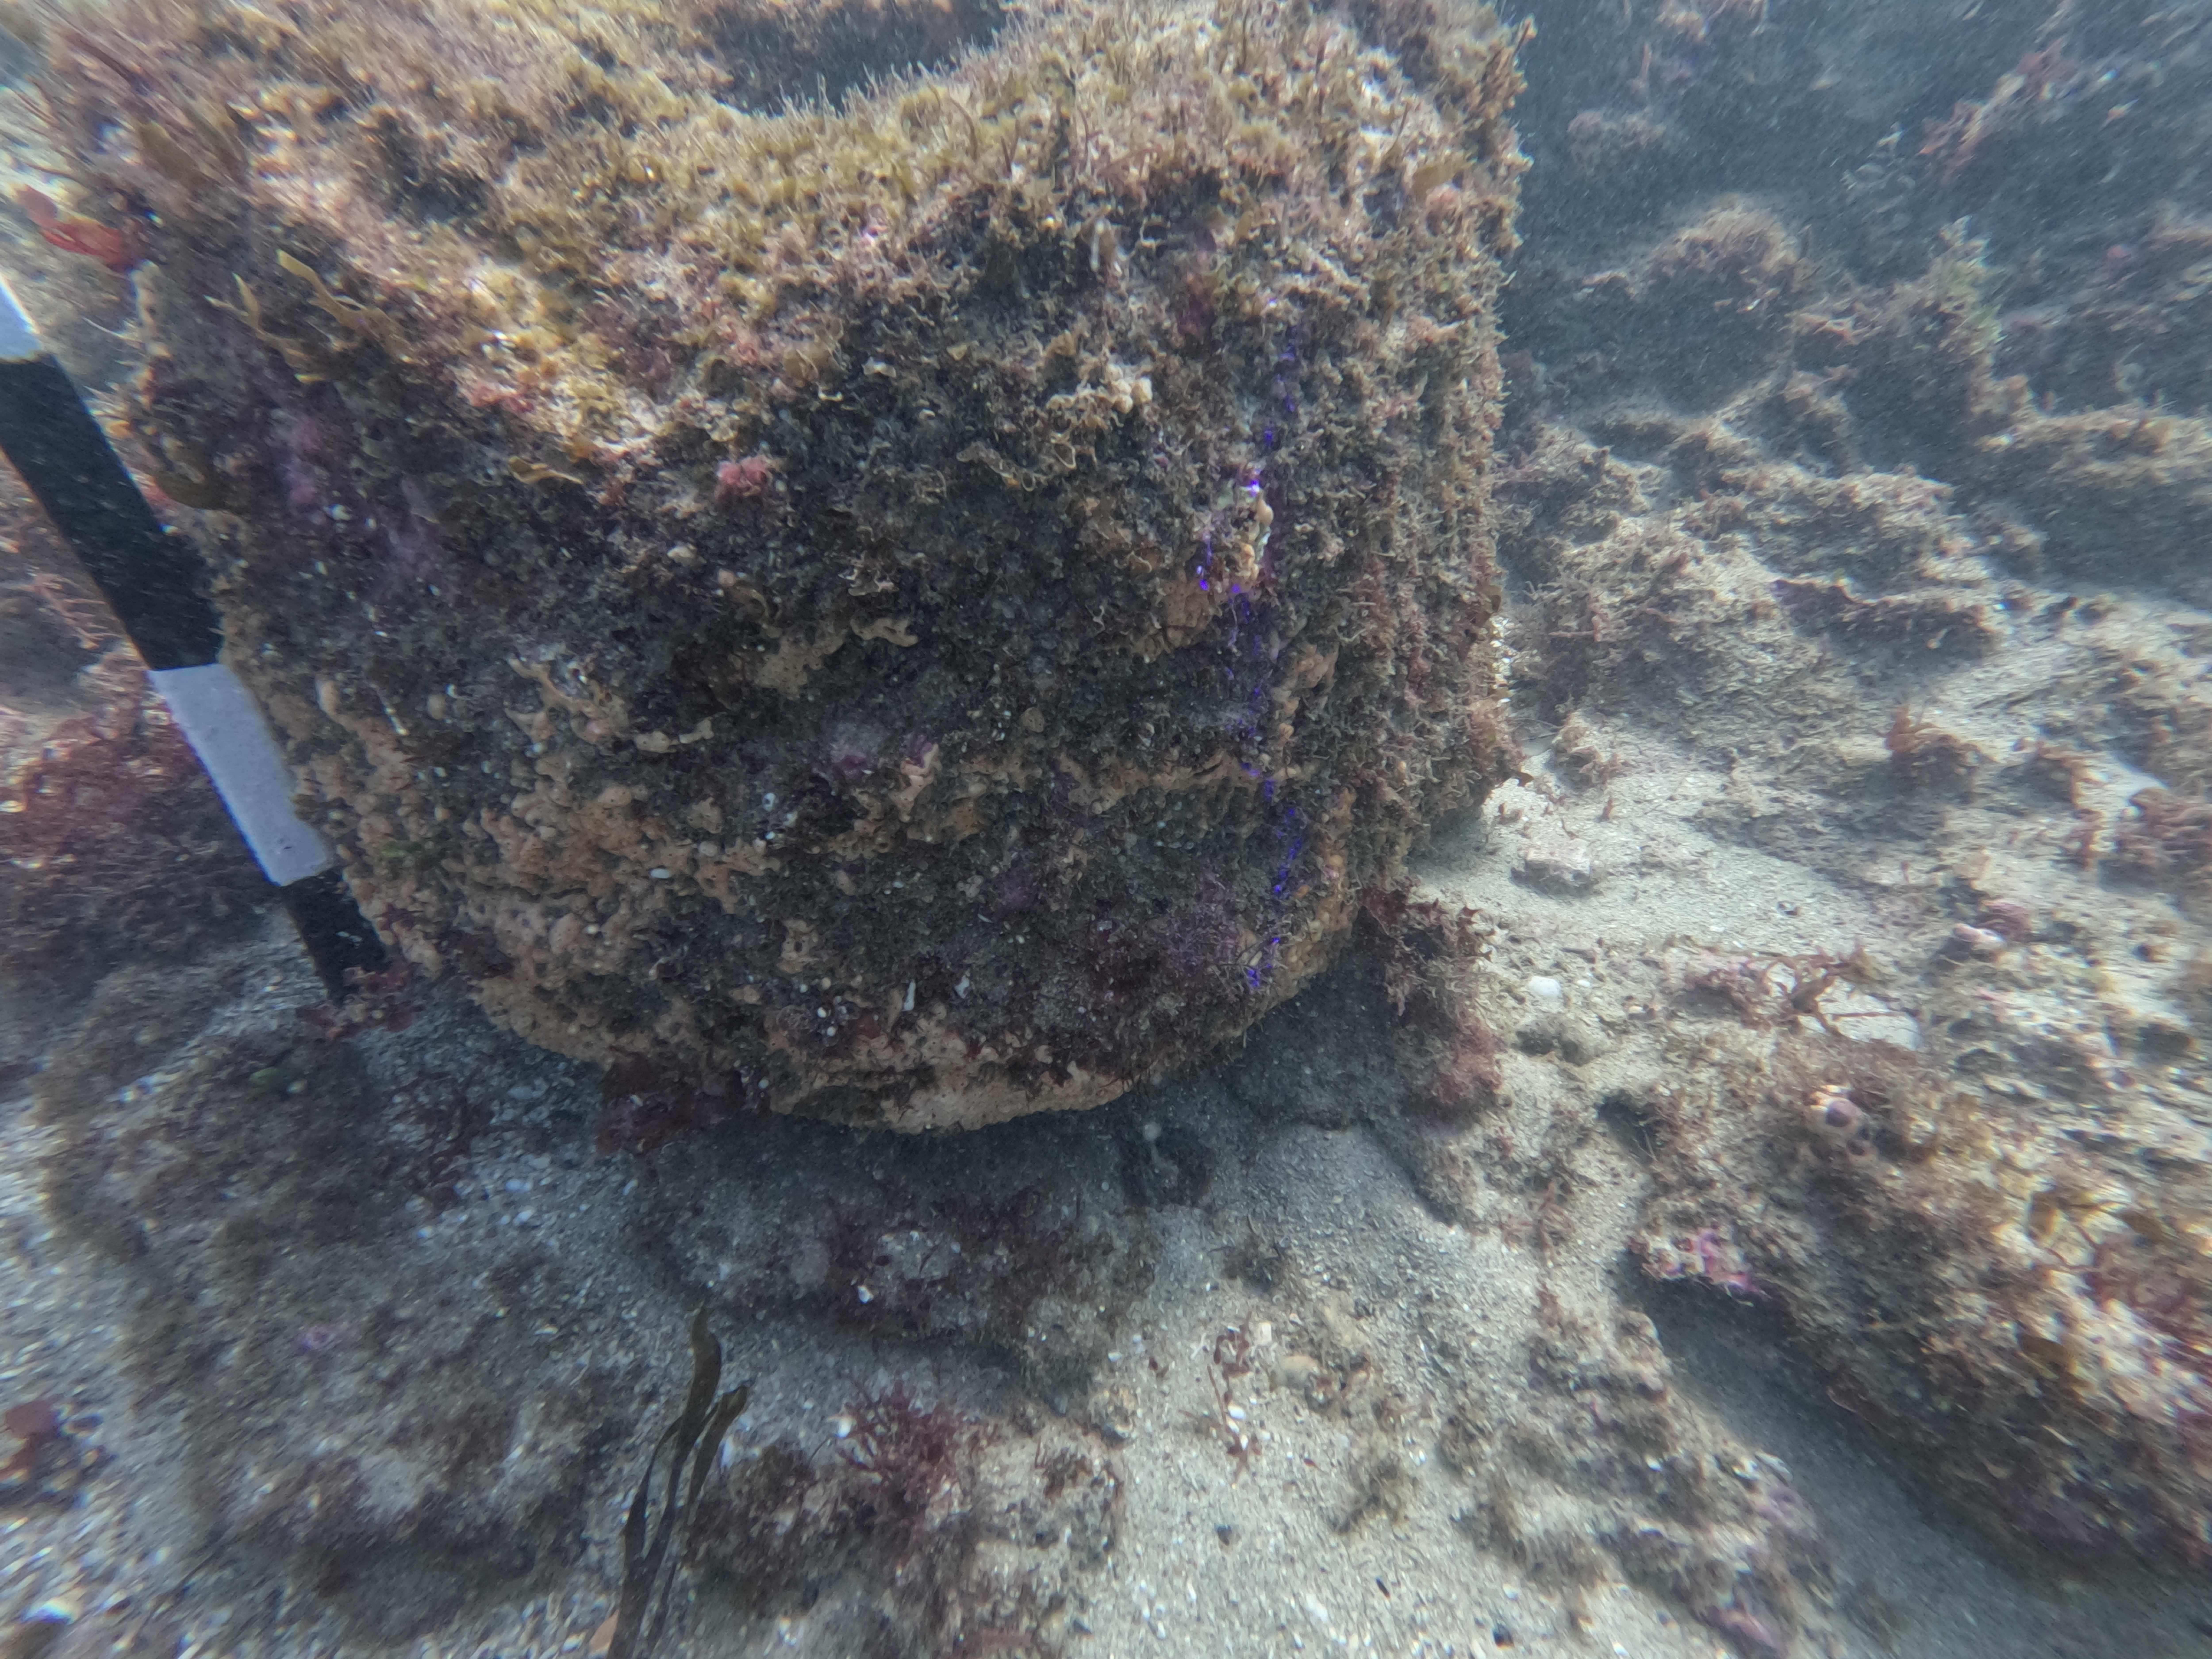

Supplement: Supplementary file 1737 [file G0028063.pdf › Ocean1/G0028063.pdf]

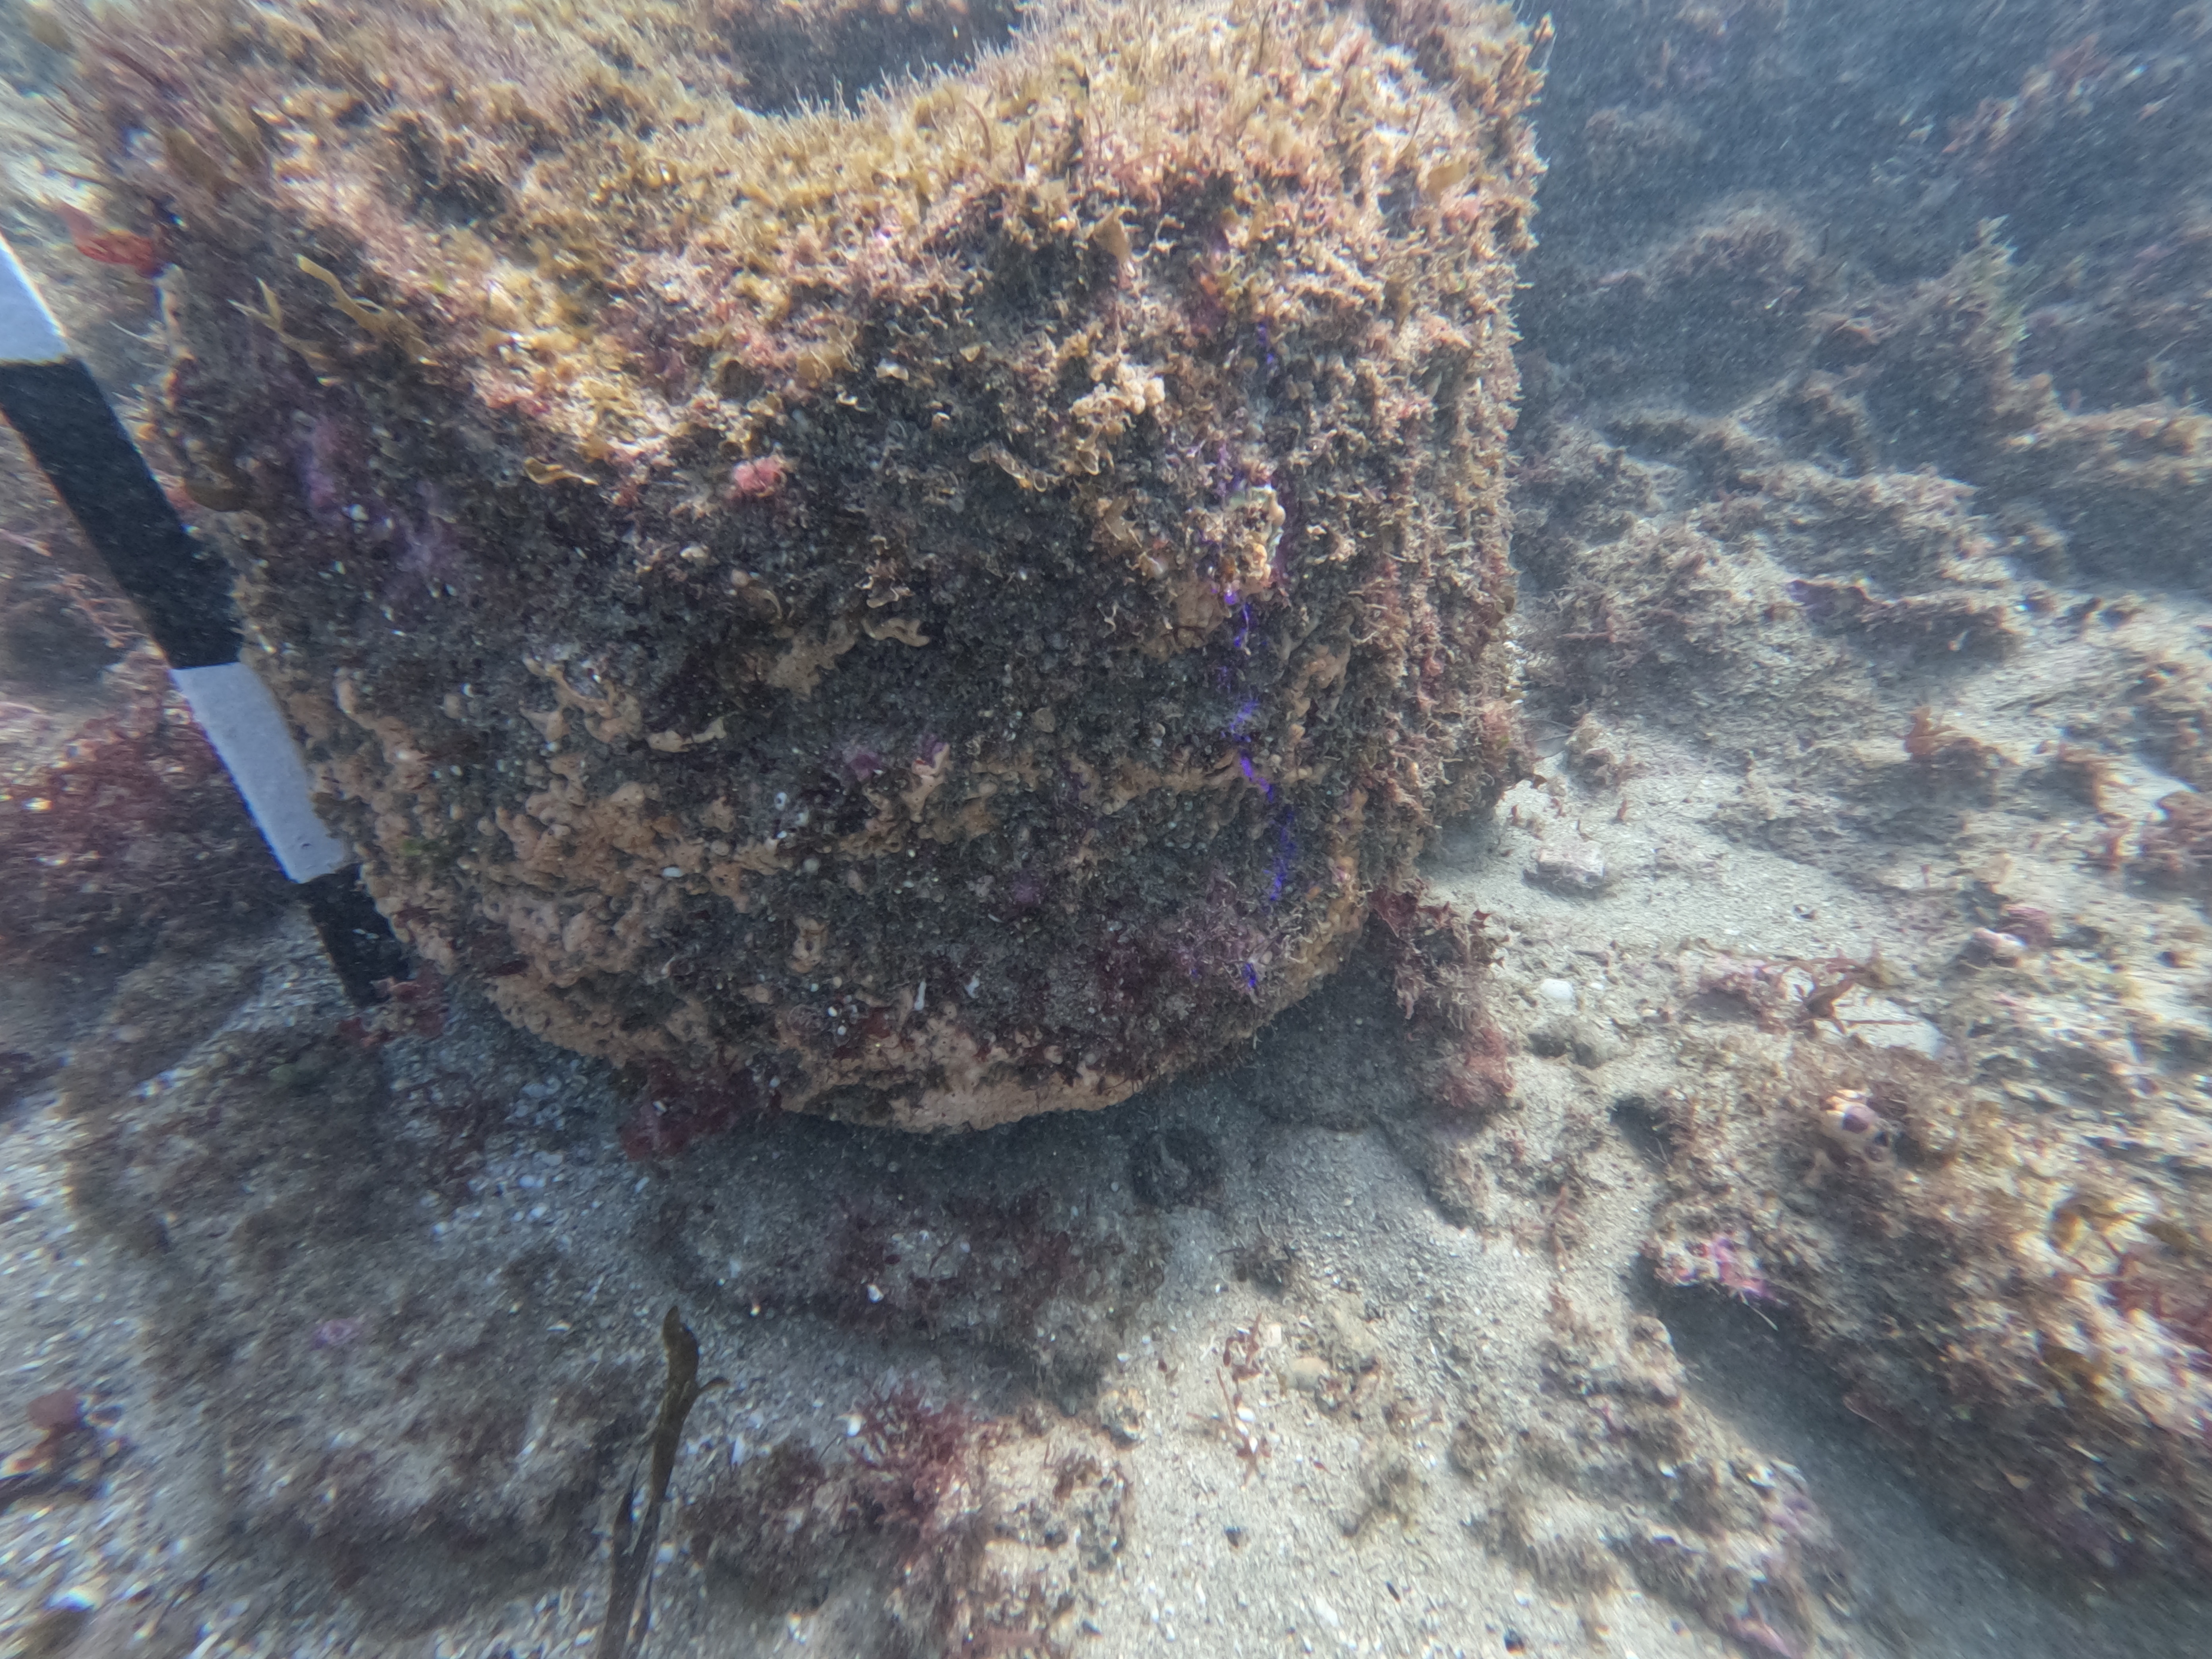

Supplement: Supplementary file 1738 [file G0028064.pdf › Ocean1/G0028064.pdf]

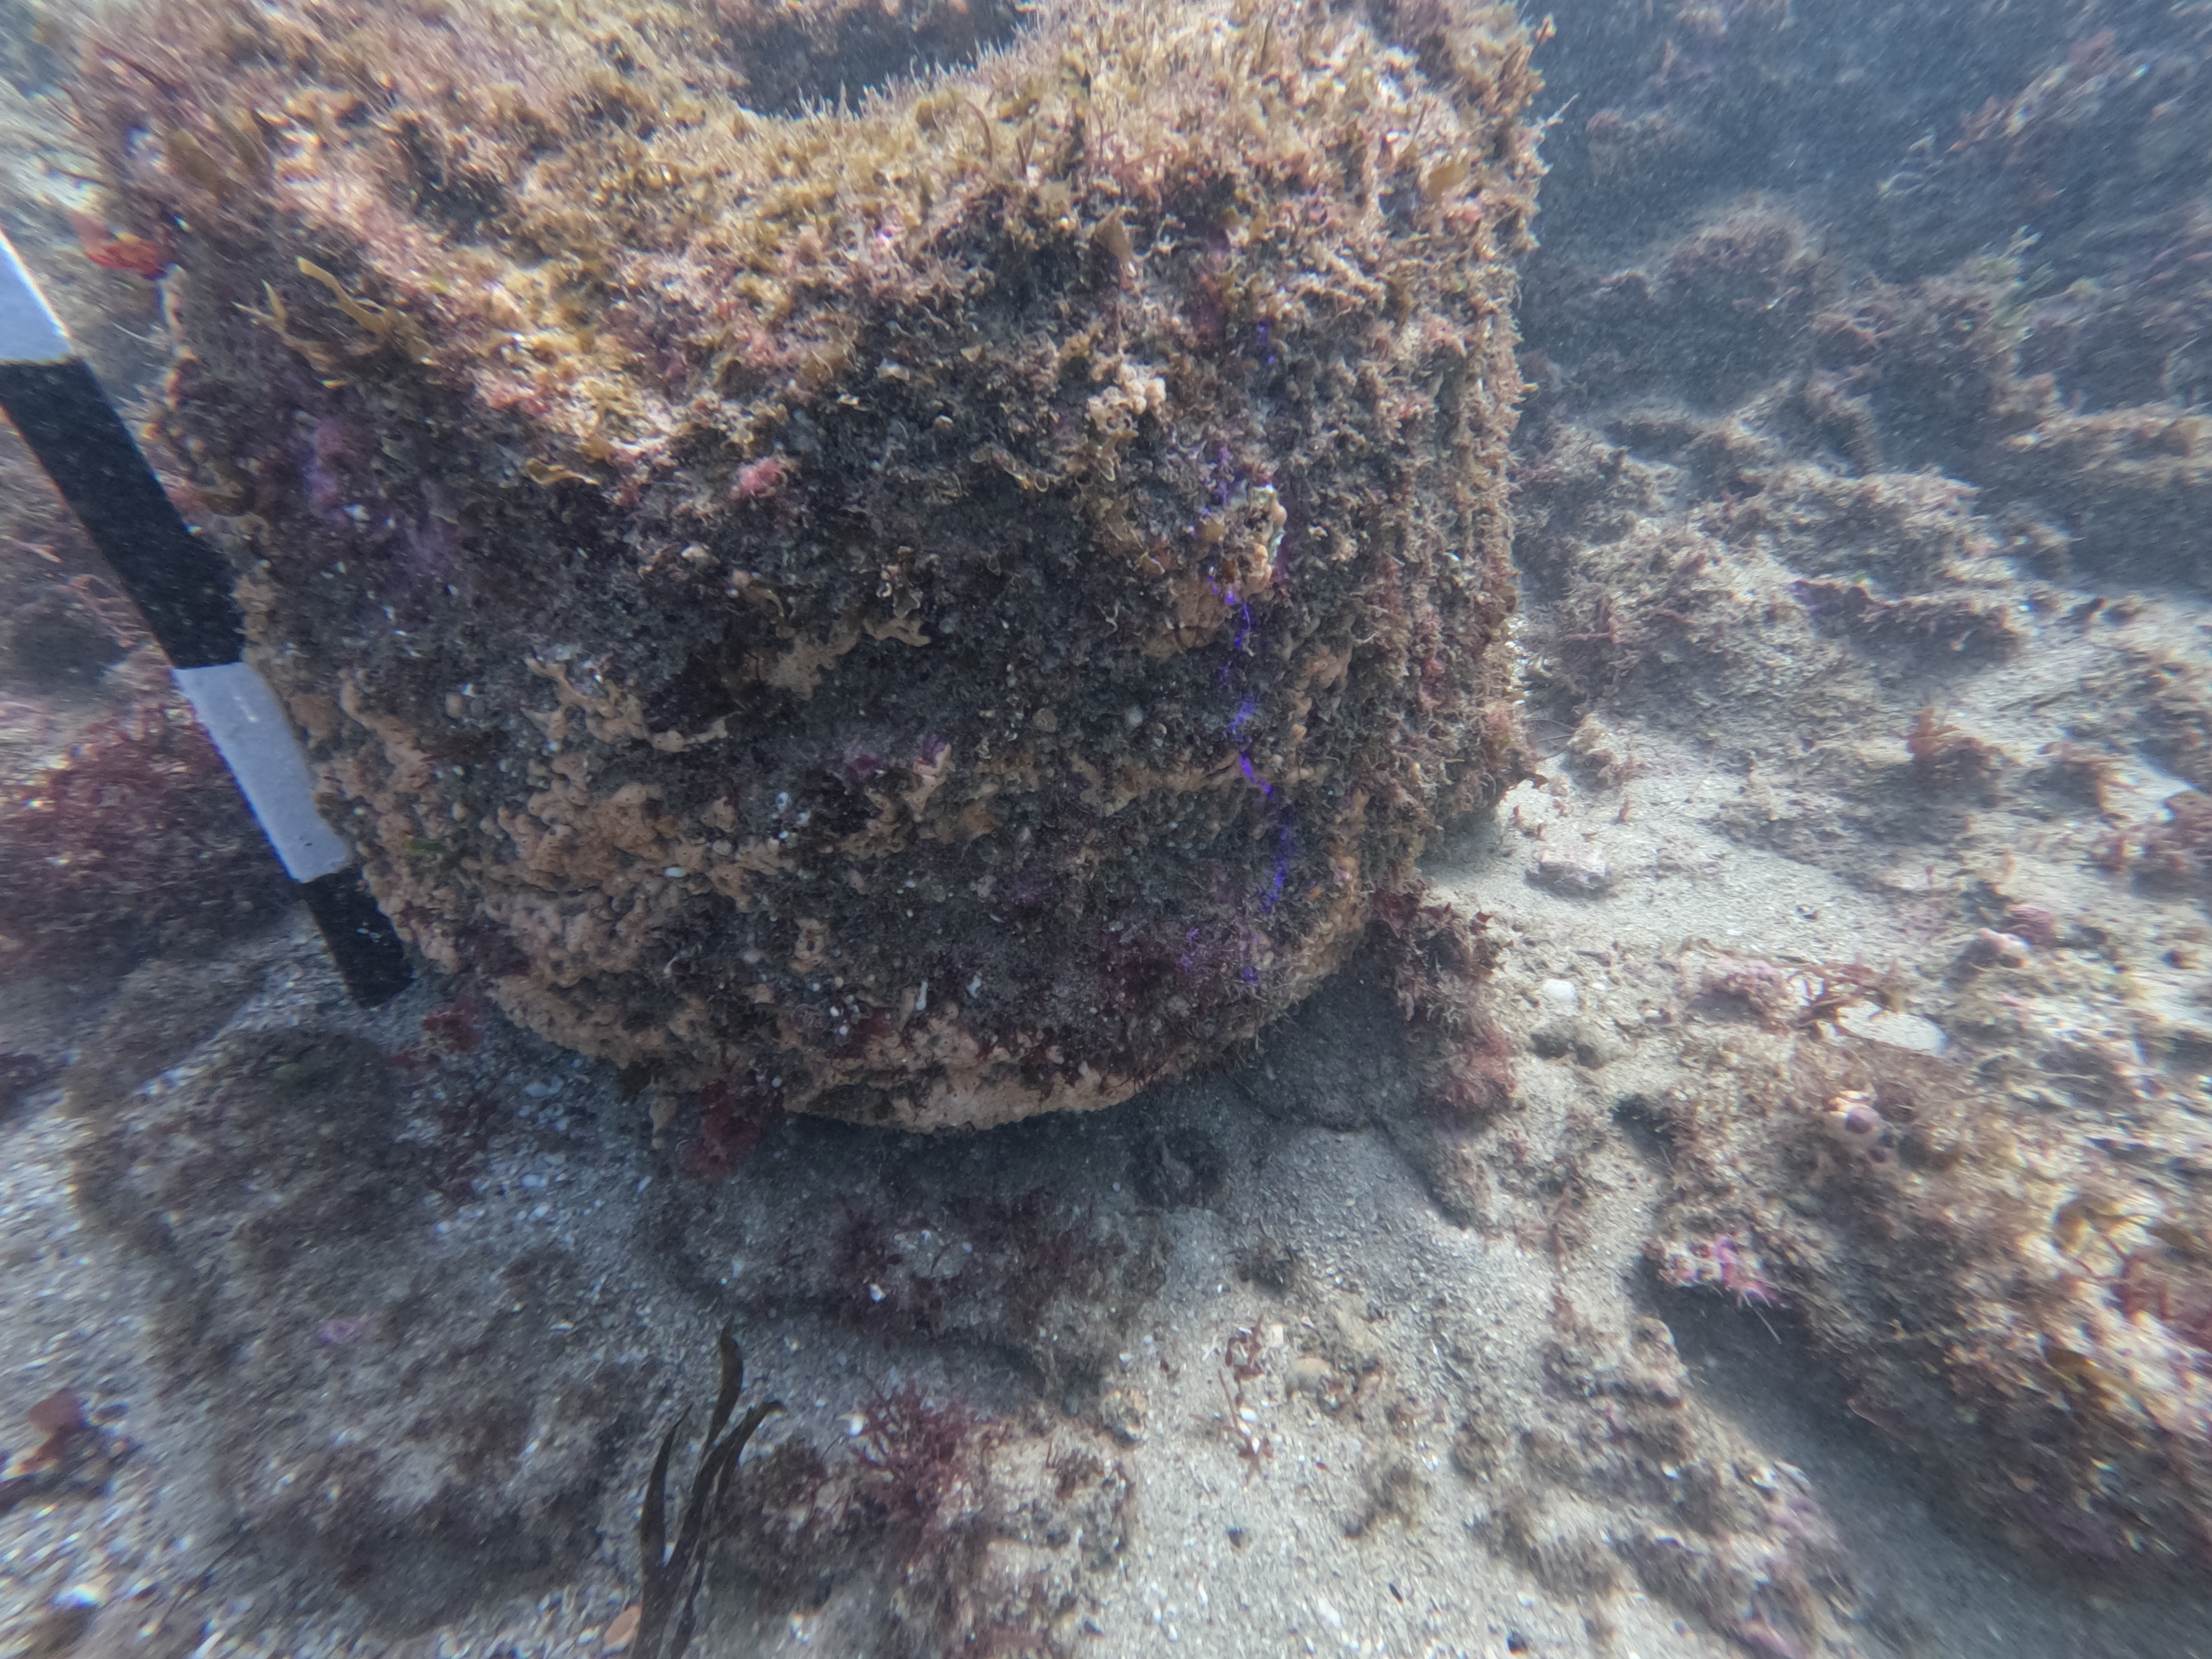

Supplement: Supplementary file 1739 [file G0028065.pdf › Ocean1/G0028065.pdf]

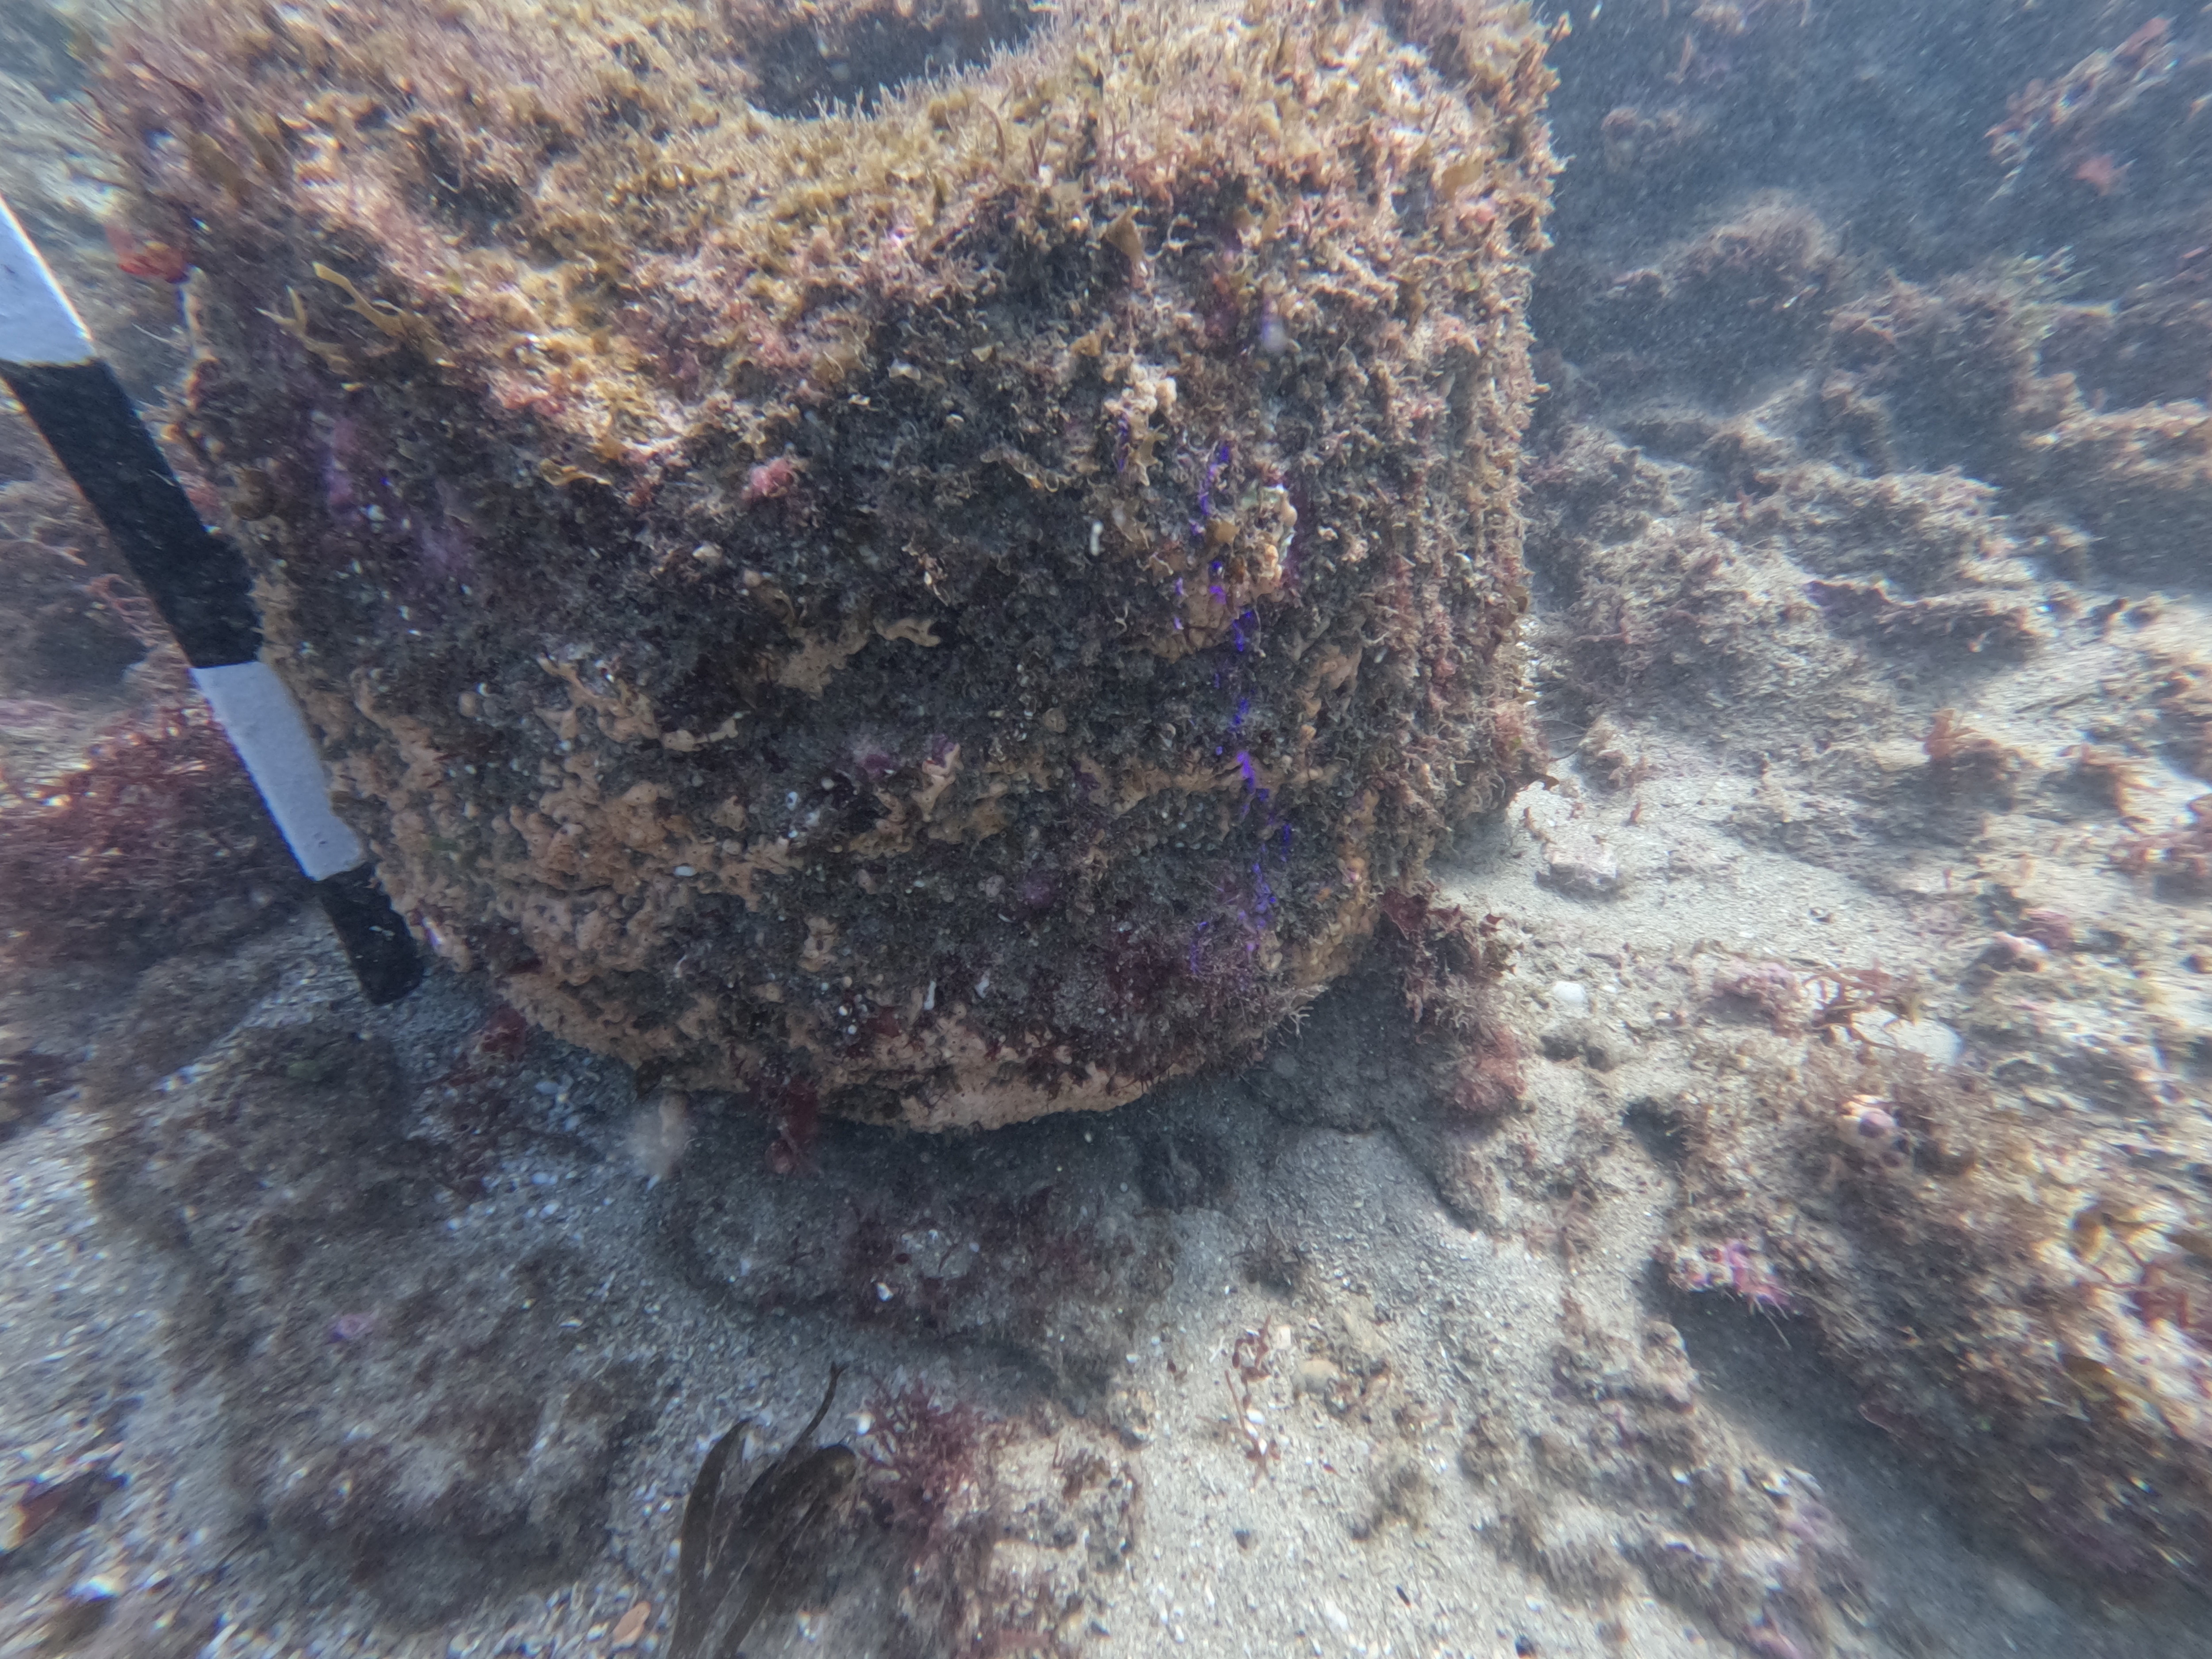

Supplement: Supplementary file 1740 [file G0028066.pdf › Ocean1/G0028066.pdf]

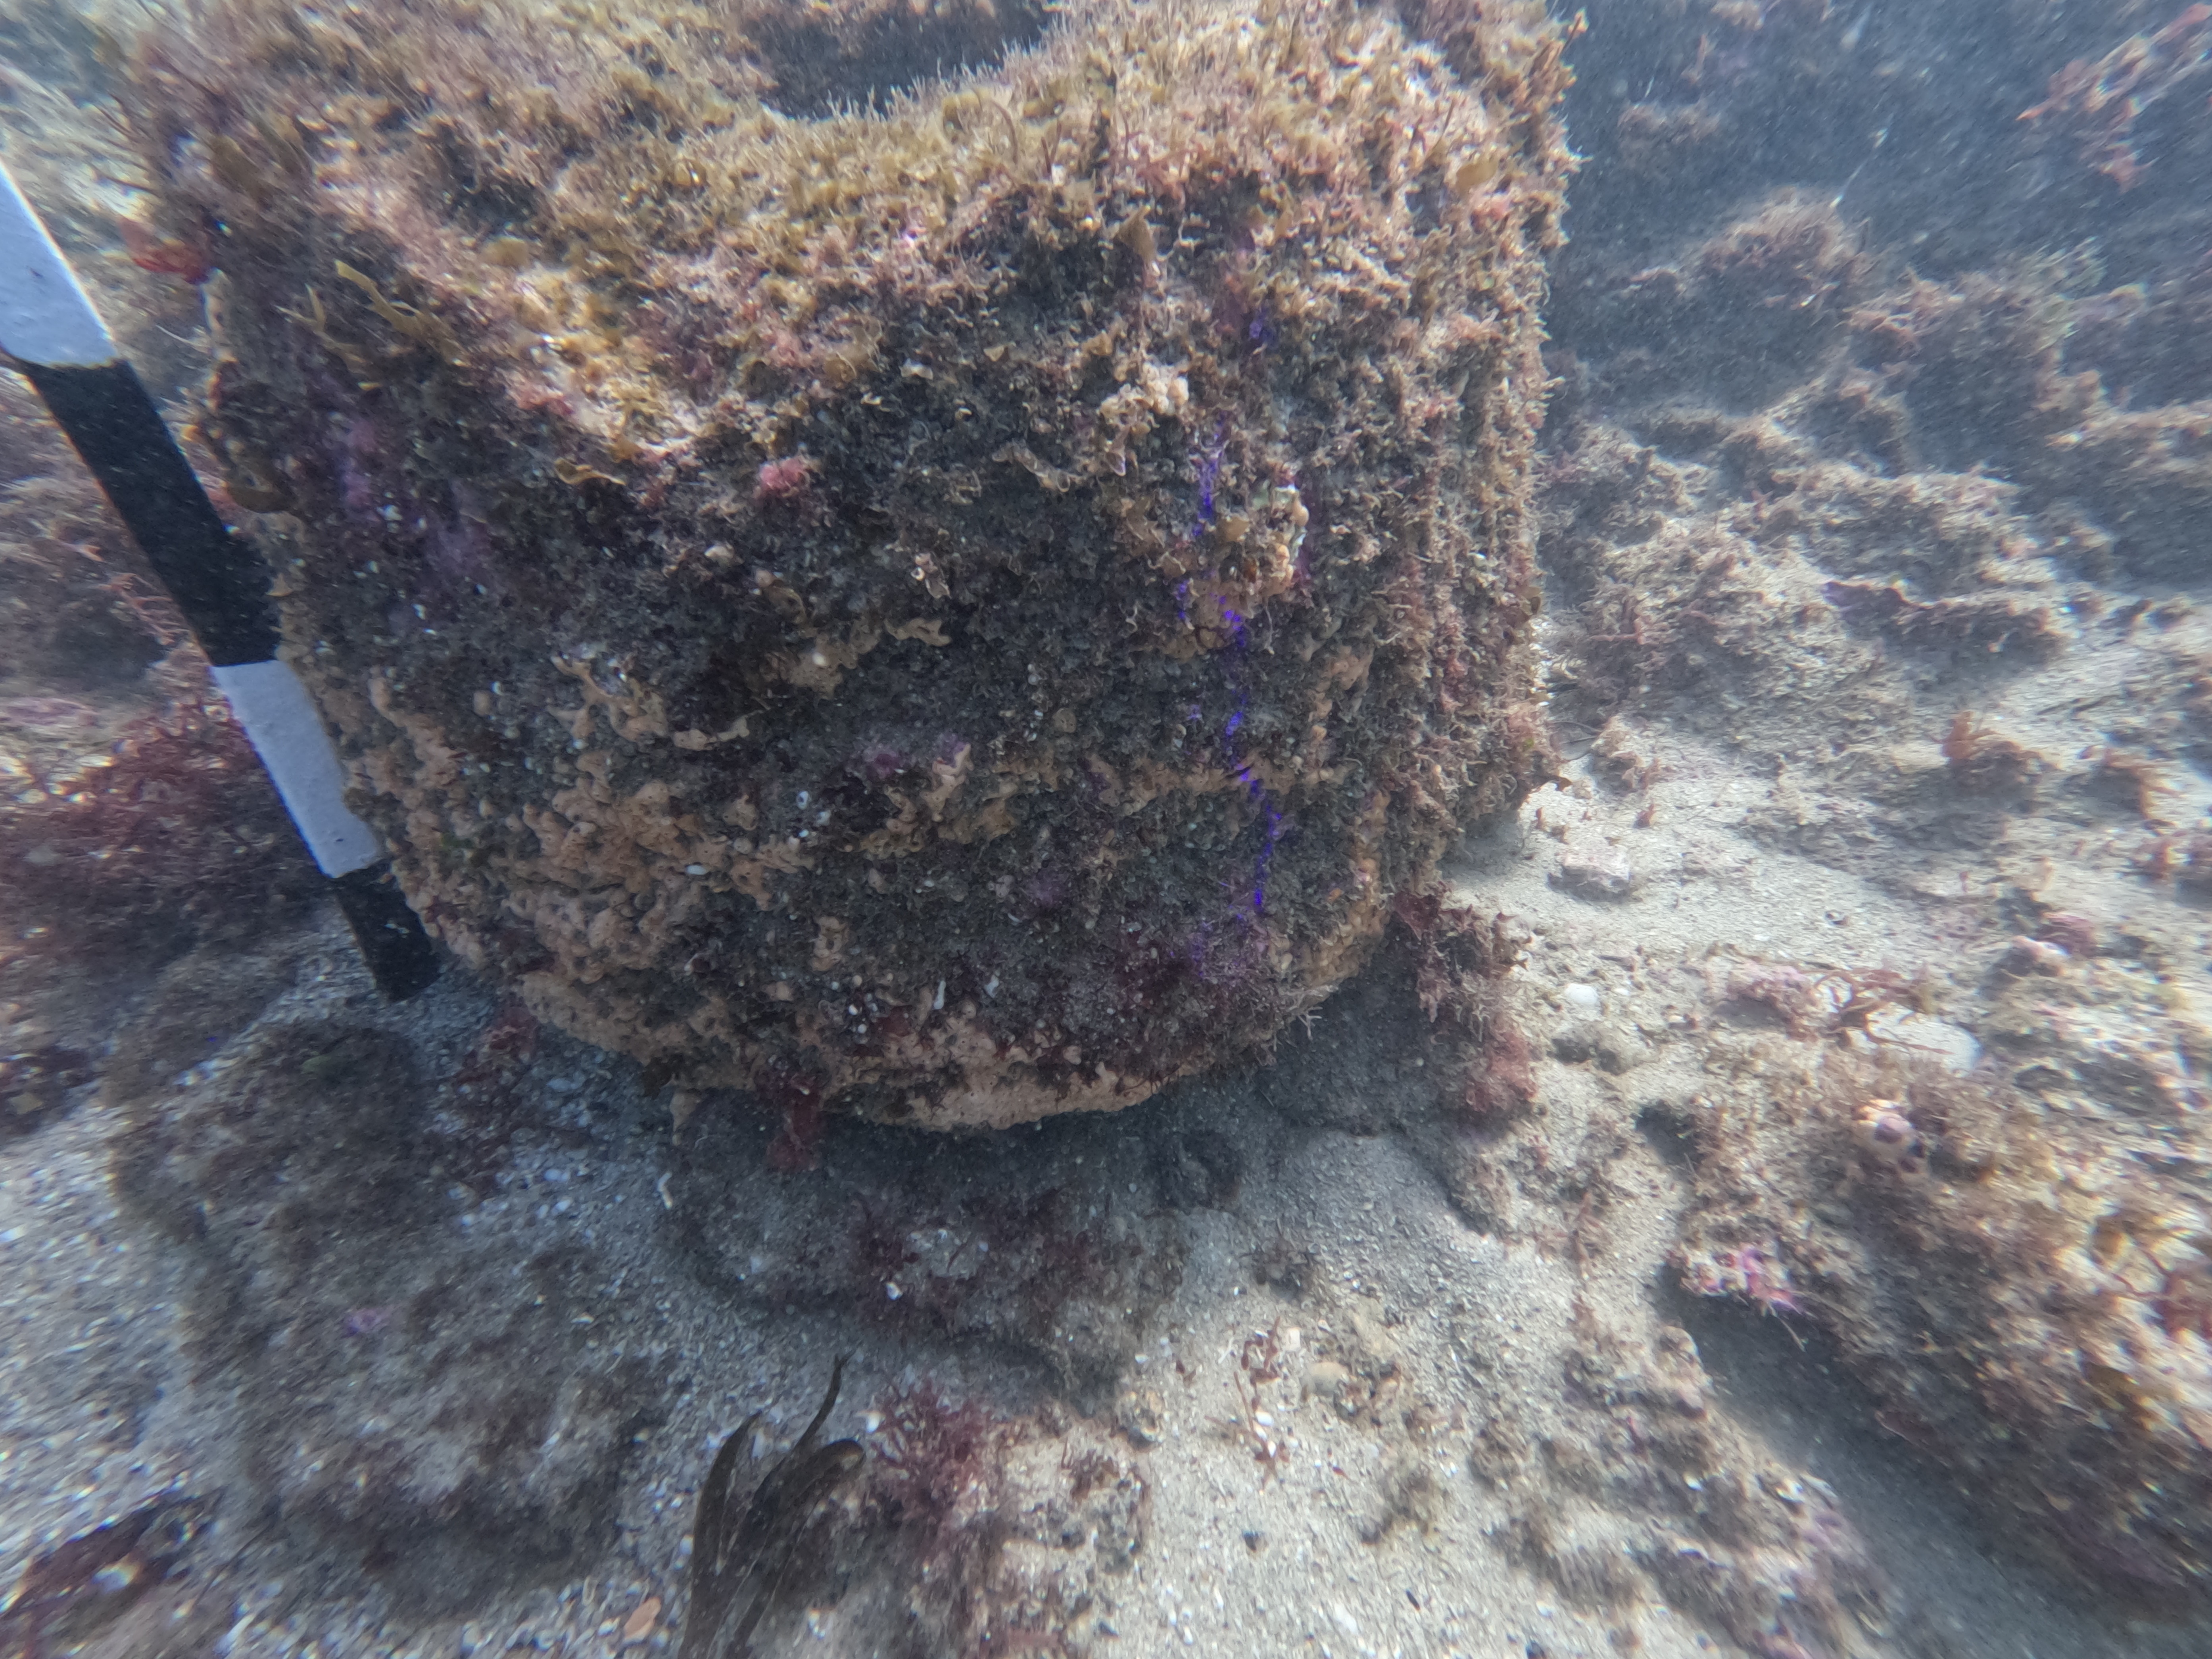

Supplement: Supplementary file 1741 [file G0028067.pdf › Ocean1/G0028067.pdf]

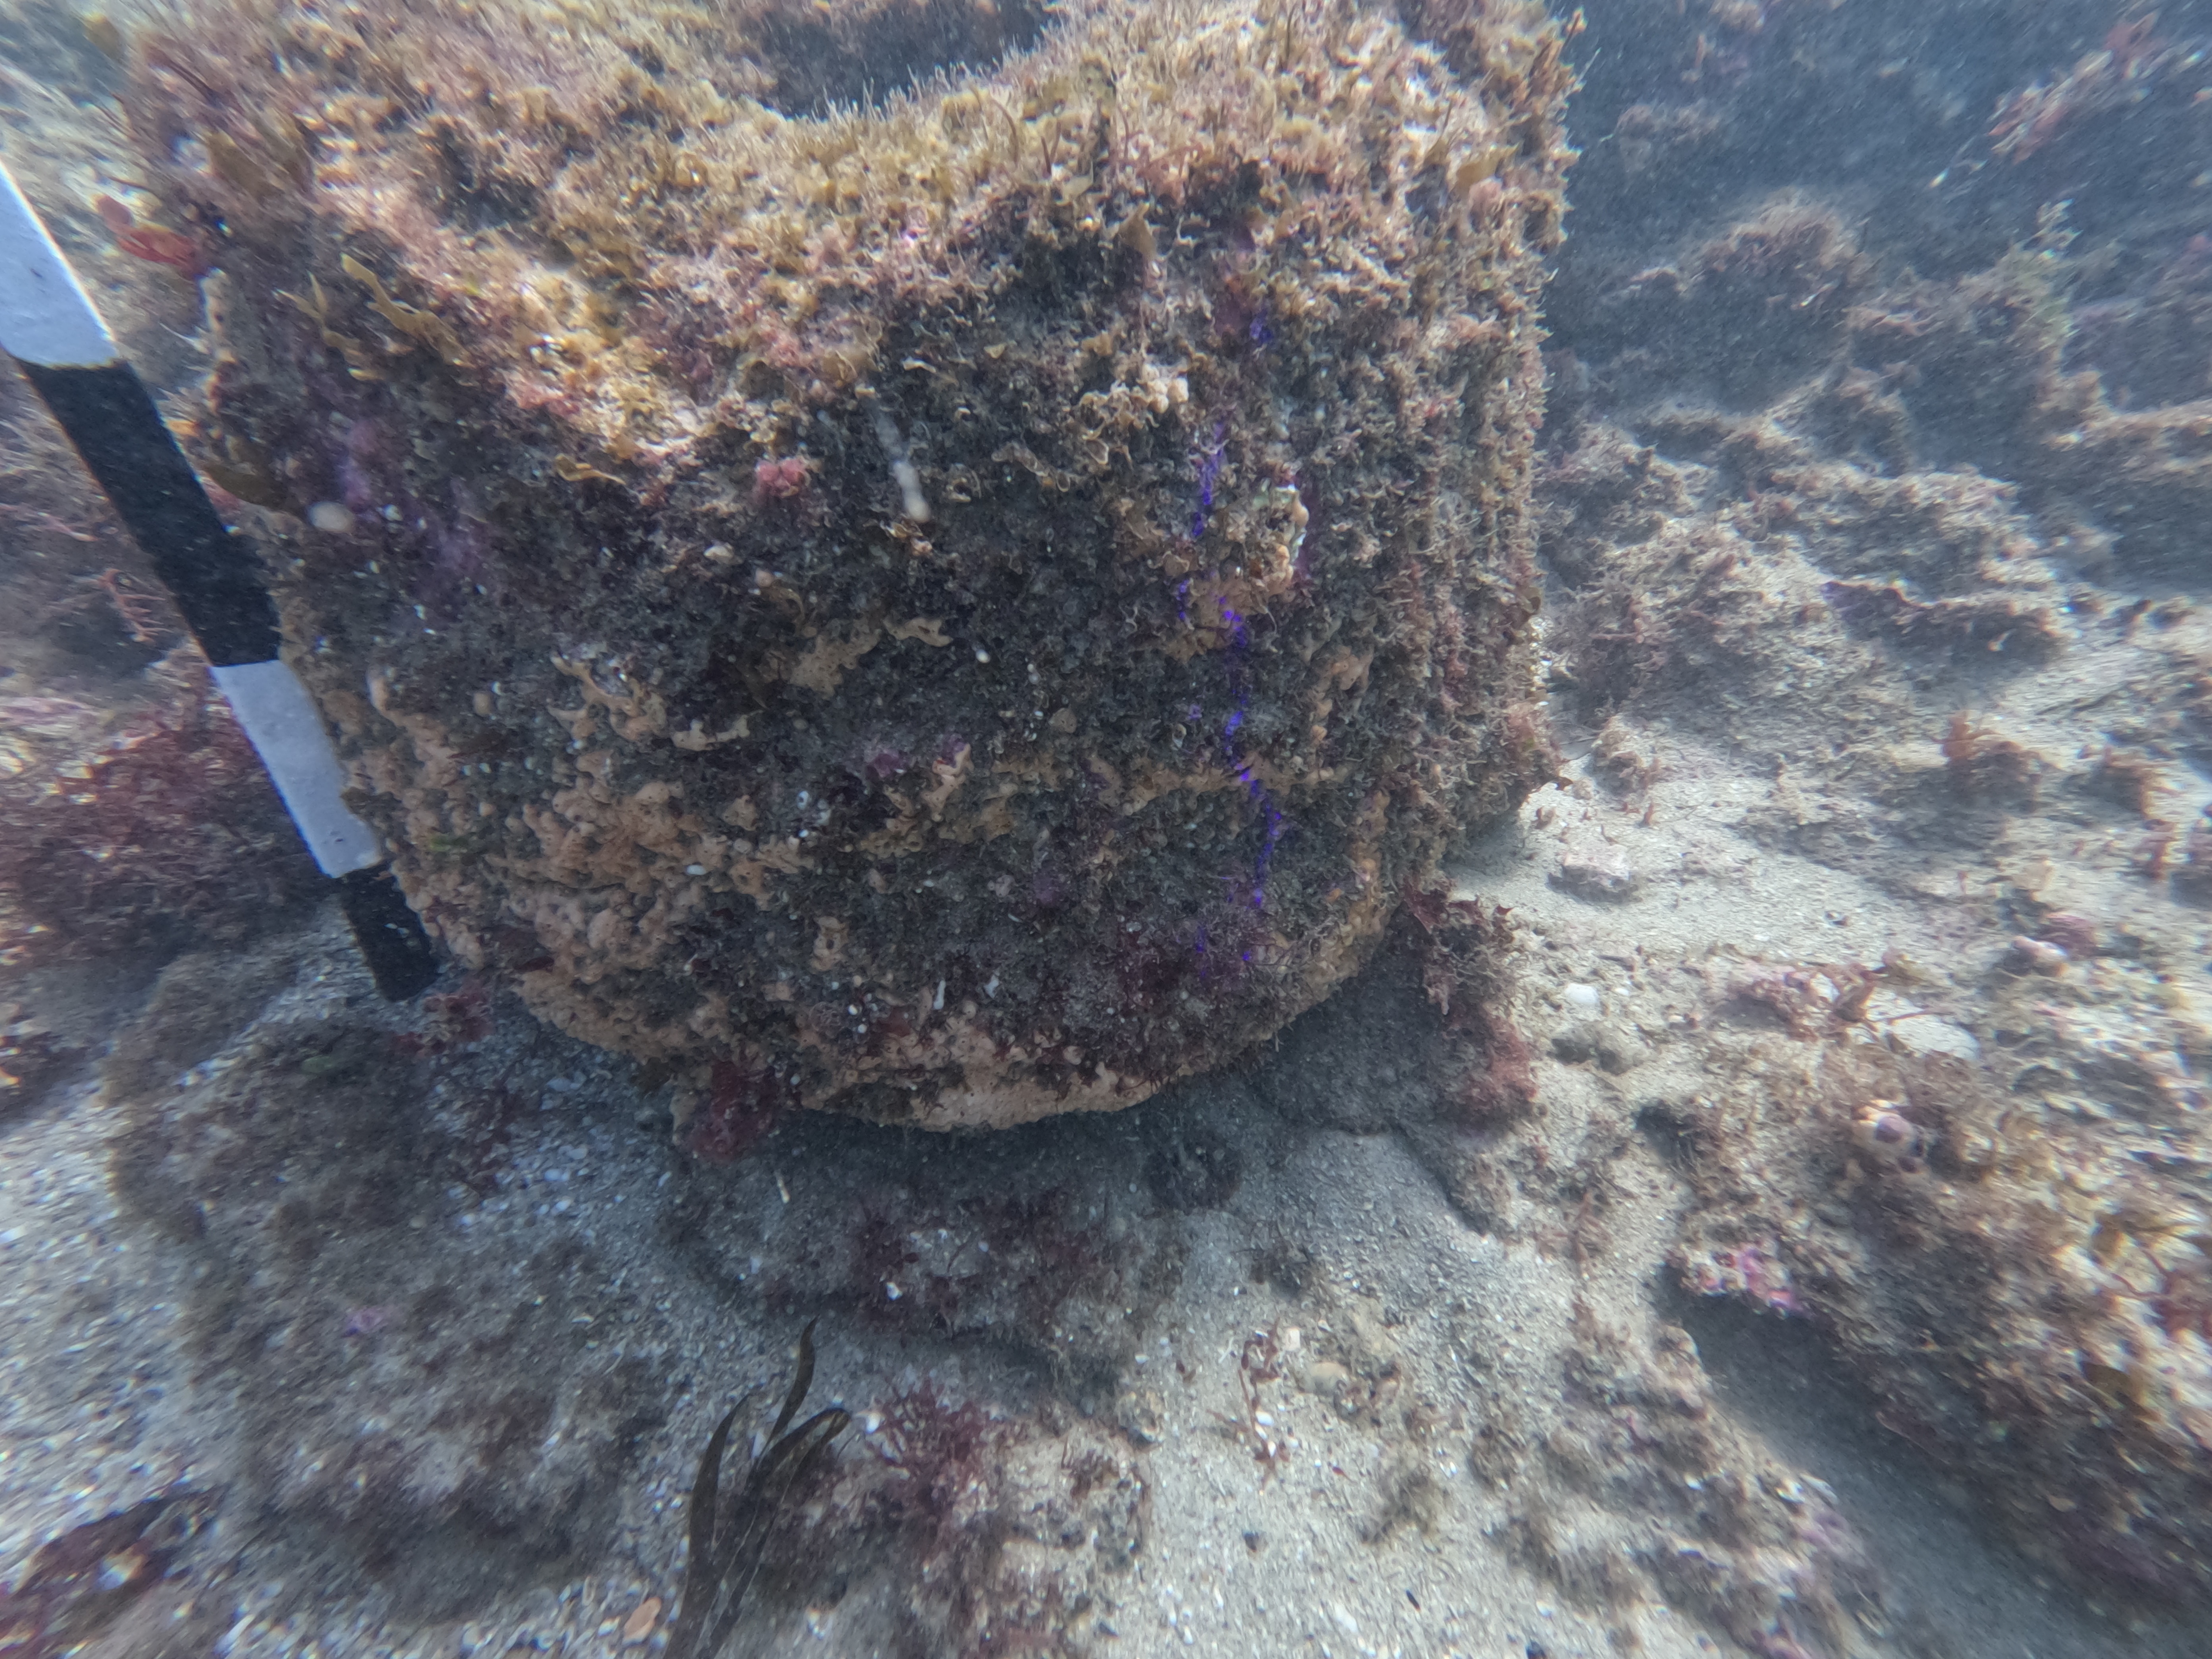

Supplement: Supplementary file 1742 [file G0028068.pdf › Ocean1/G0028068.pdf]

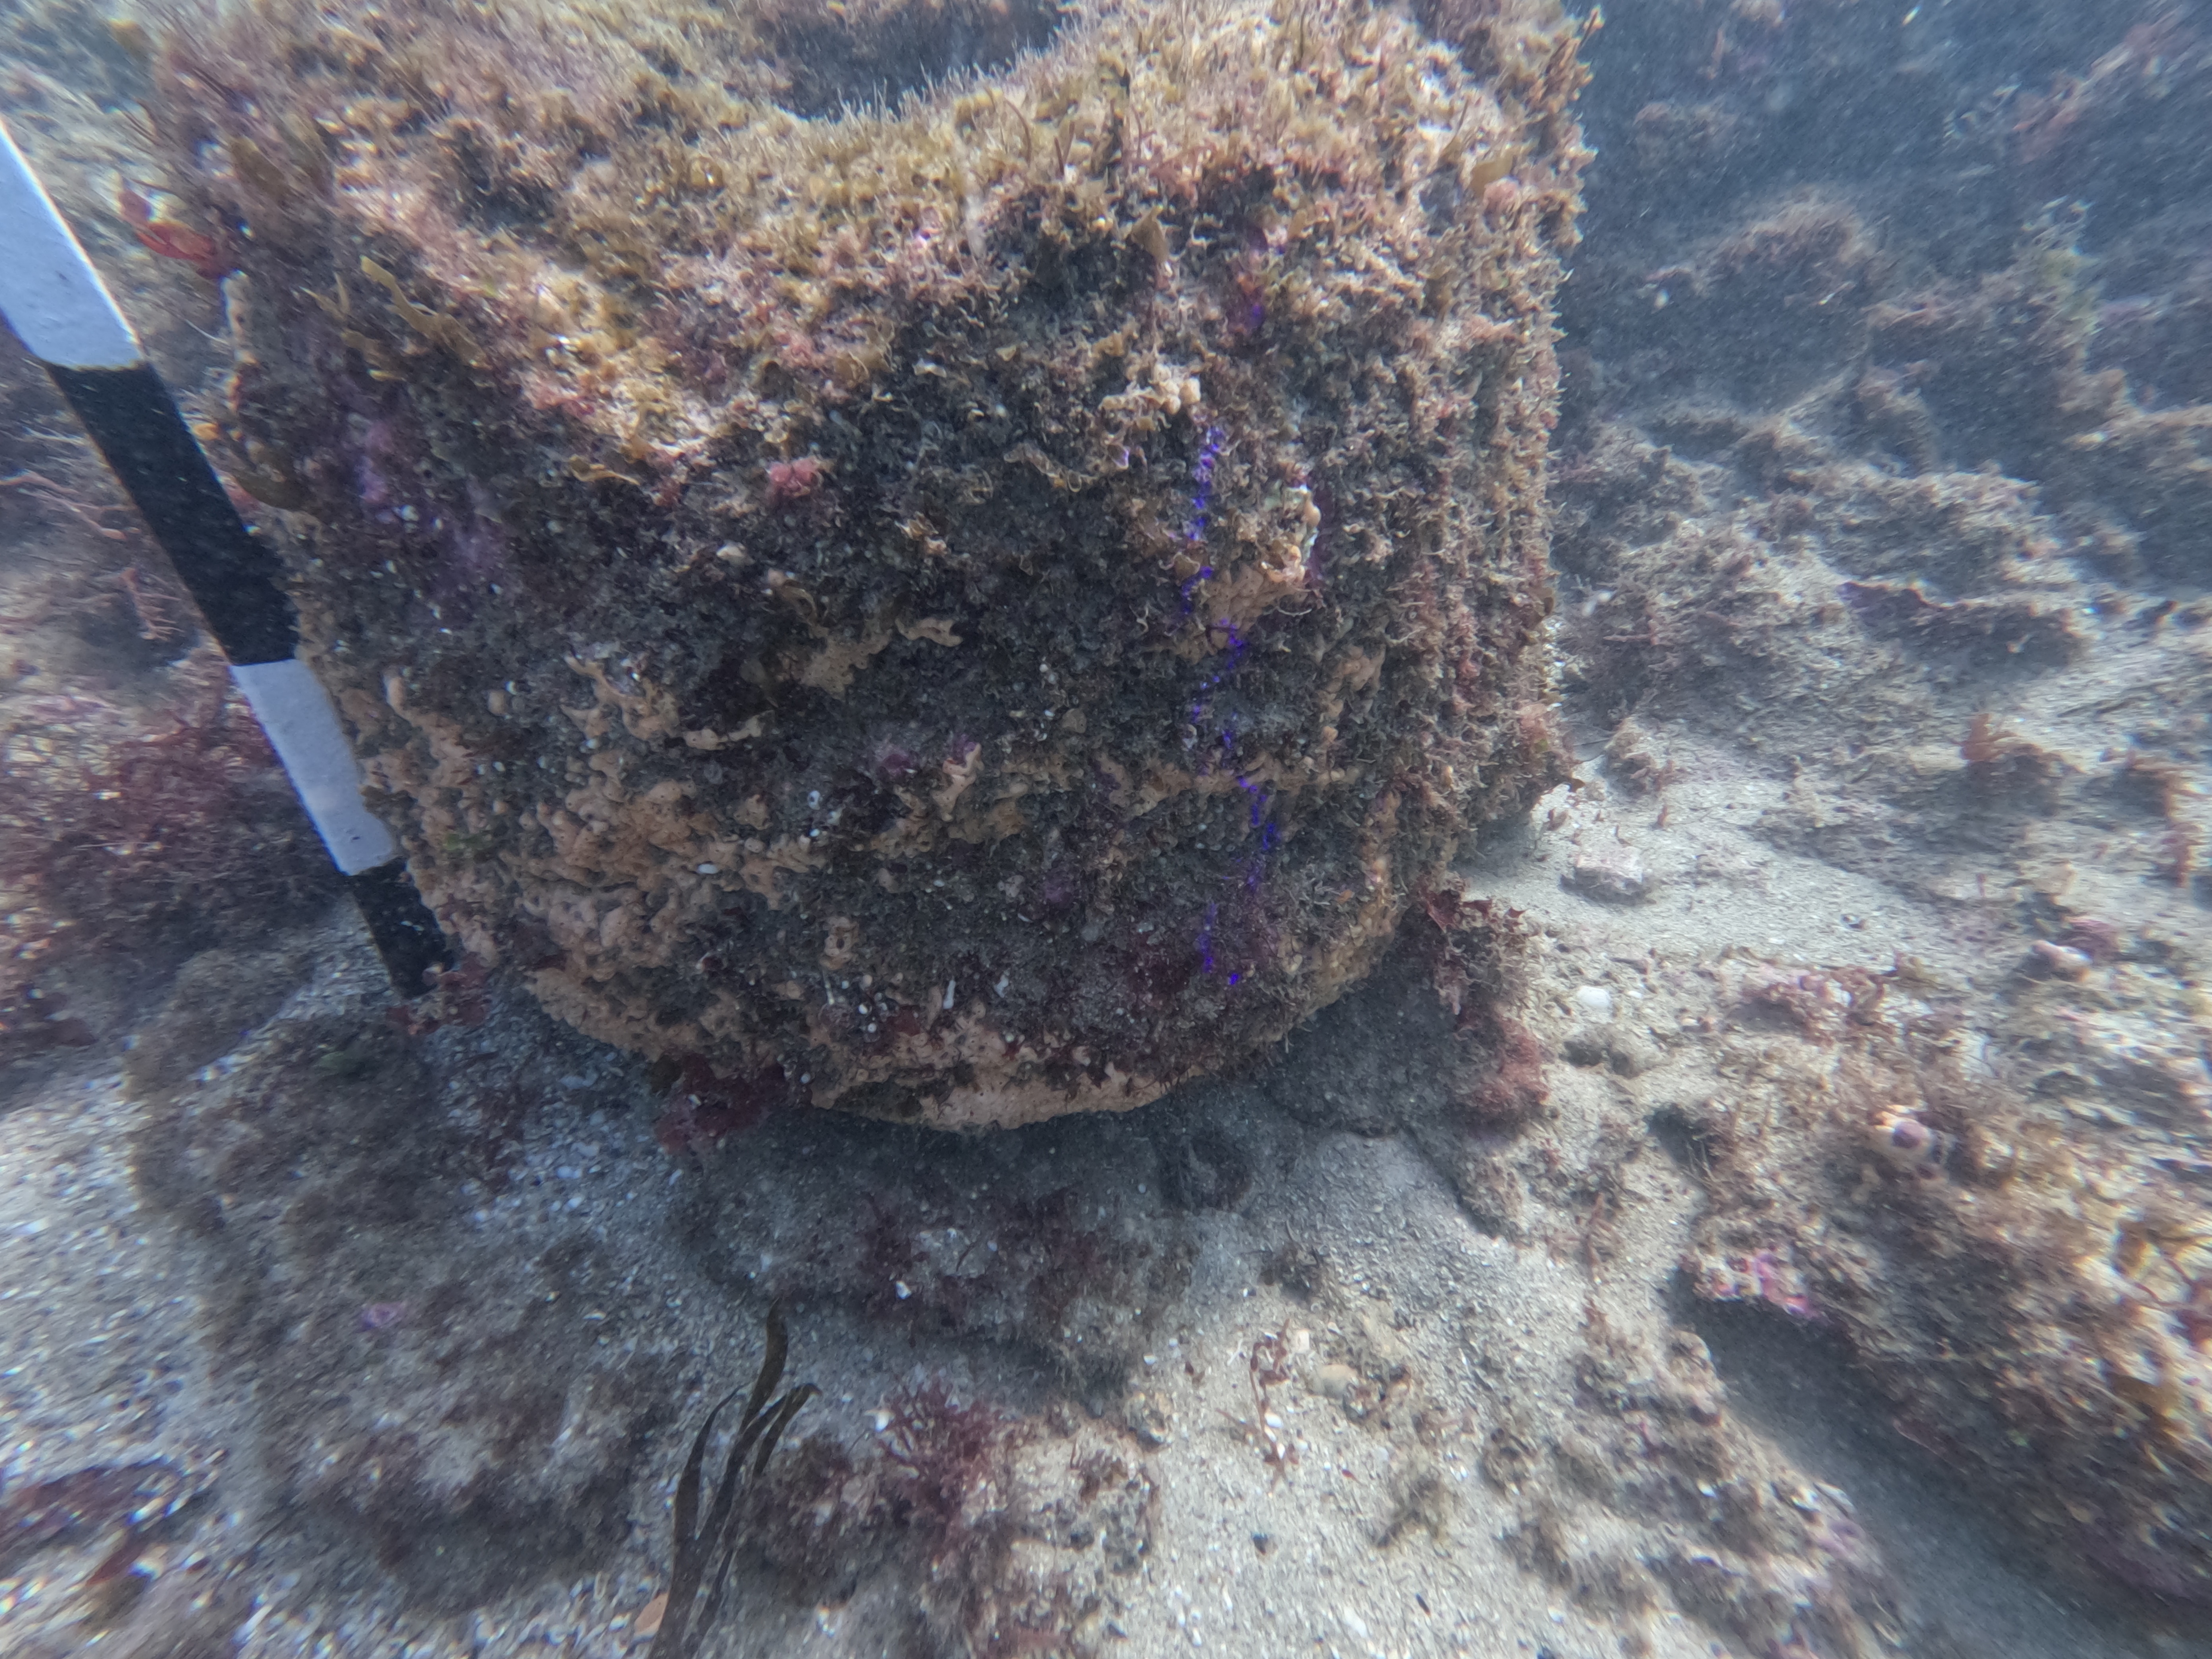

Supplement: Supplementary file 1743 [file G0028069.pdf › Ocean1/G0028069.pdf]

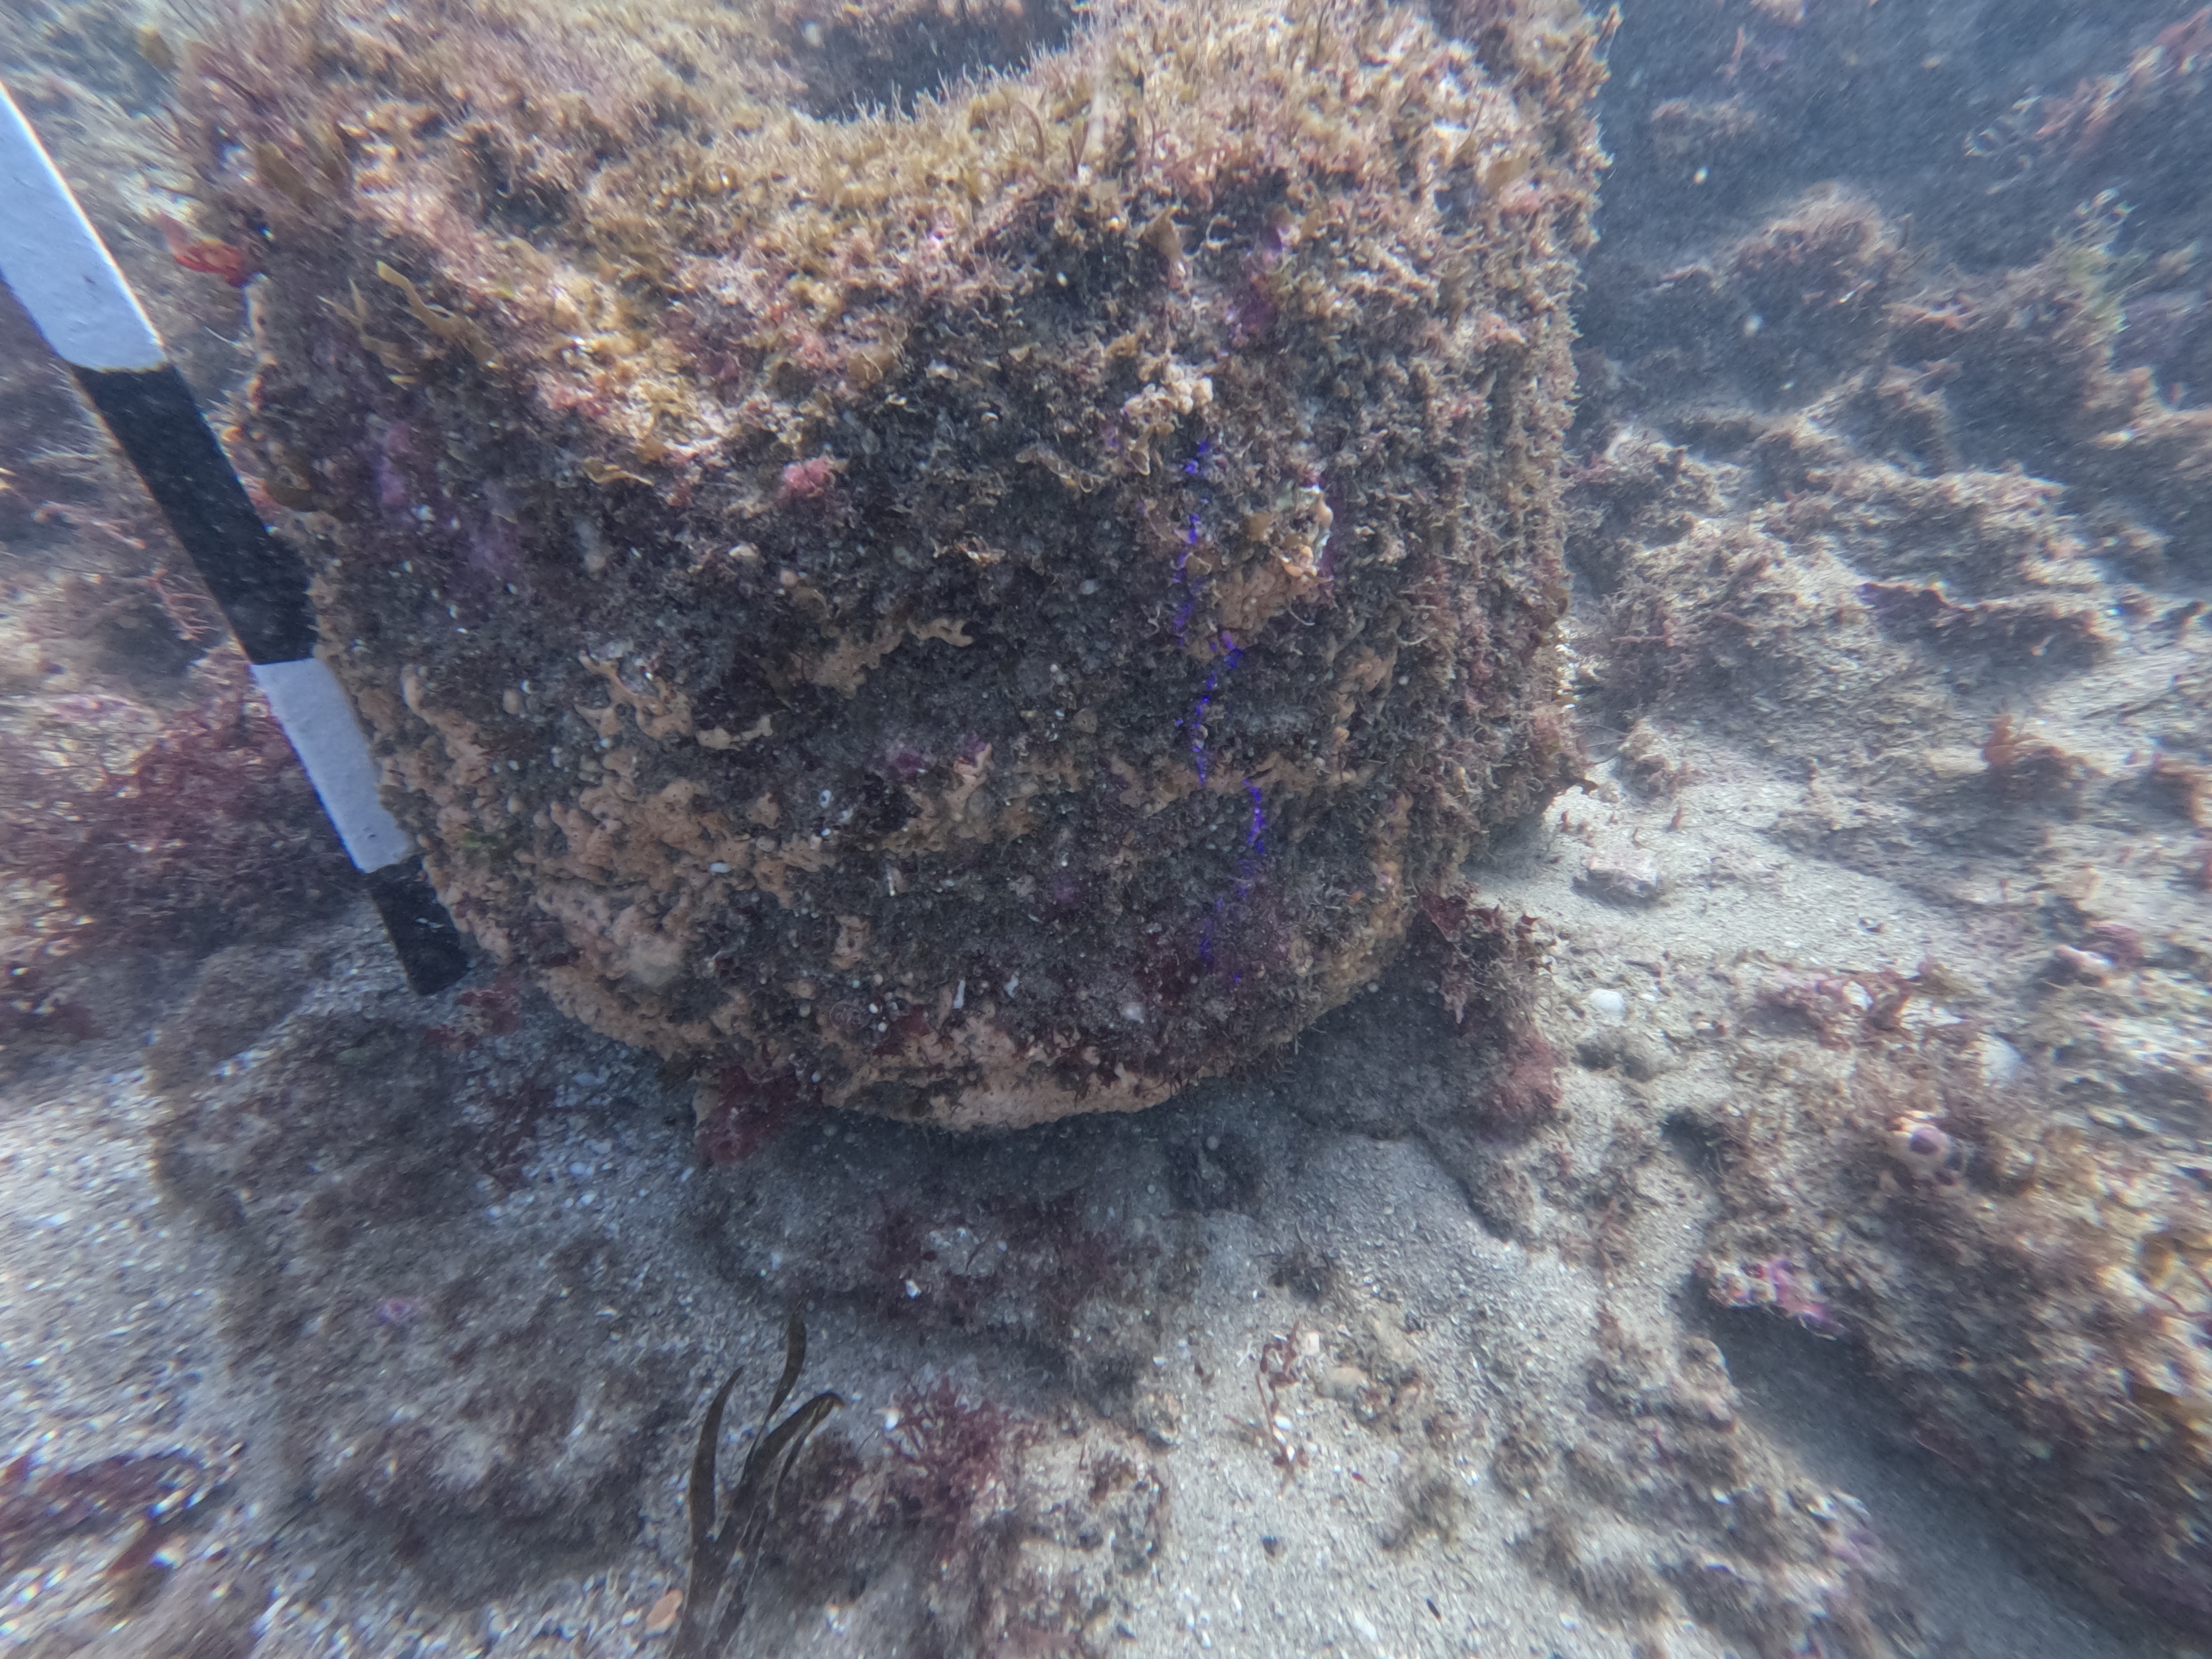

Supplement: Supplementary file 1744 [file G0028070.pdf › Ocean1/G0028070.pdf]

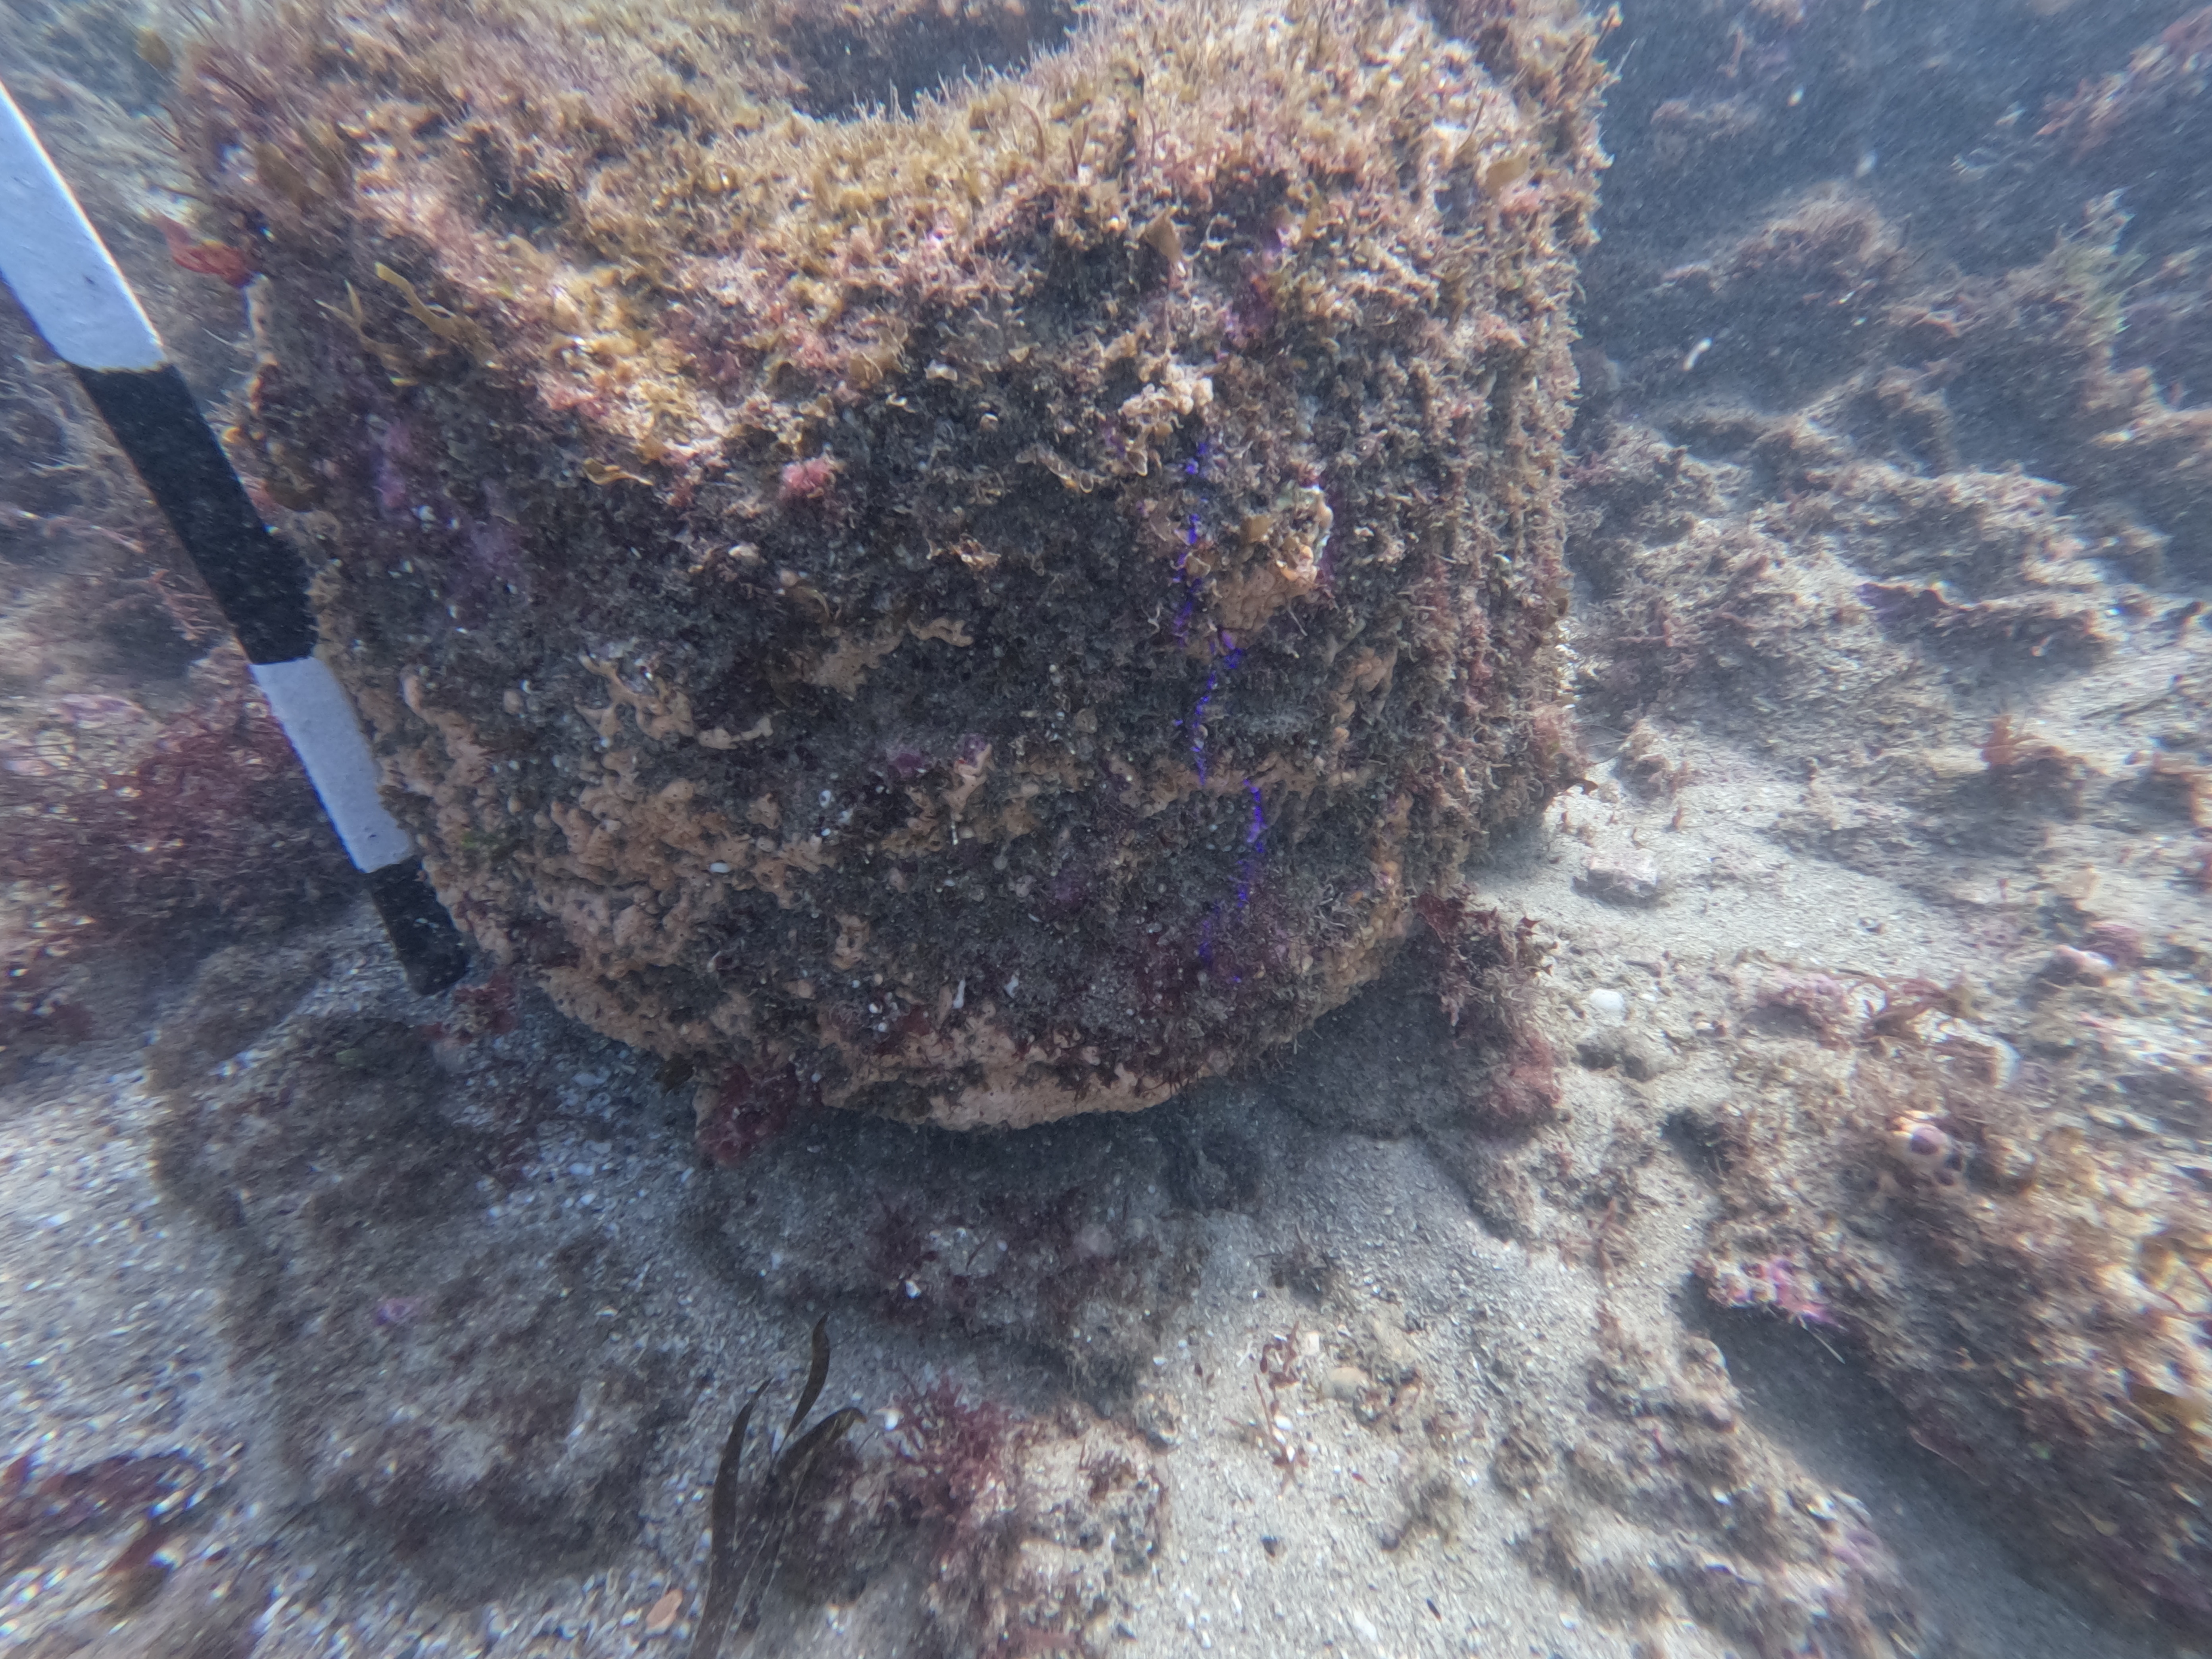

Supplement: Supplementary file 1745 [file G0028071.pdf › Ocean1/G0028071.pdf]

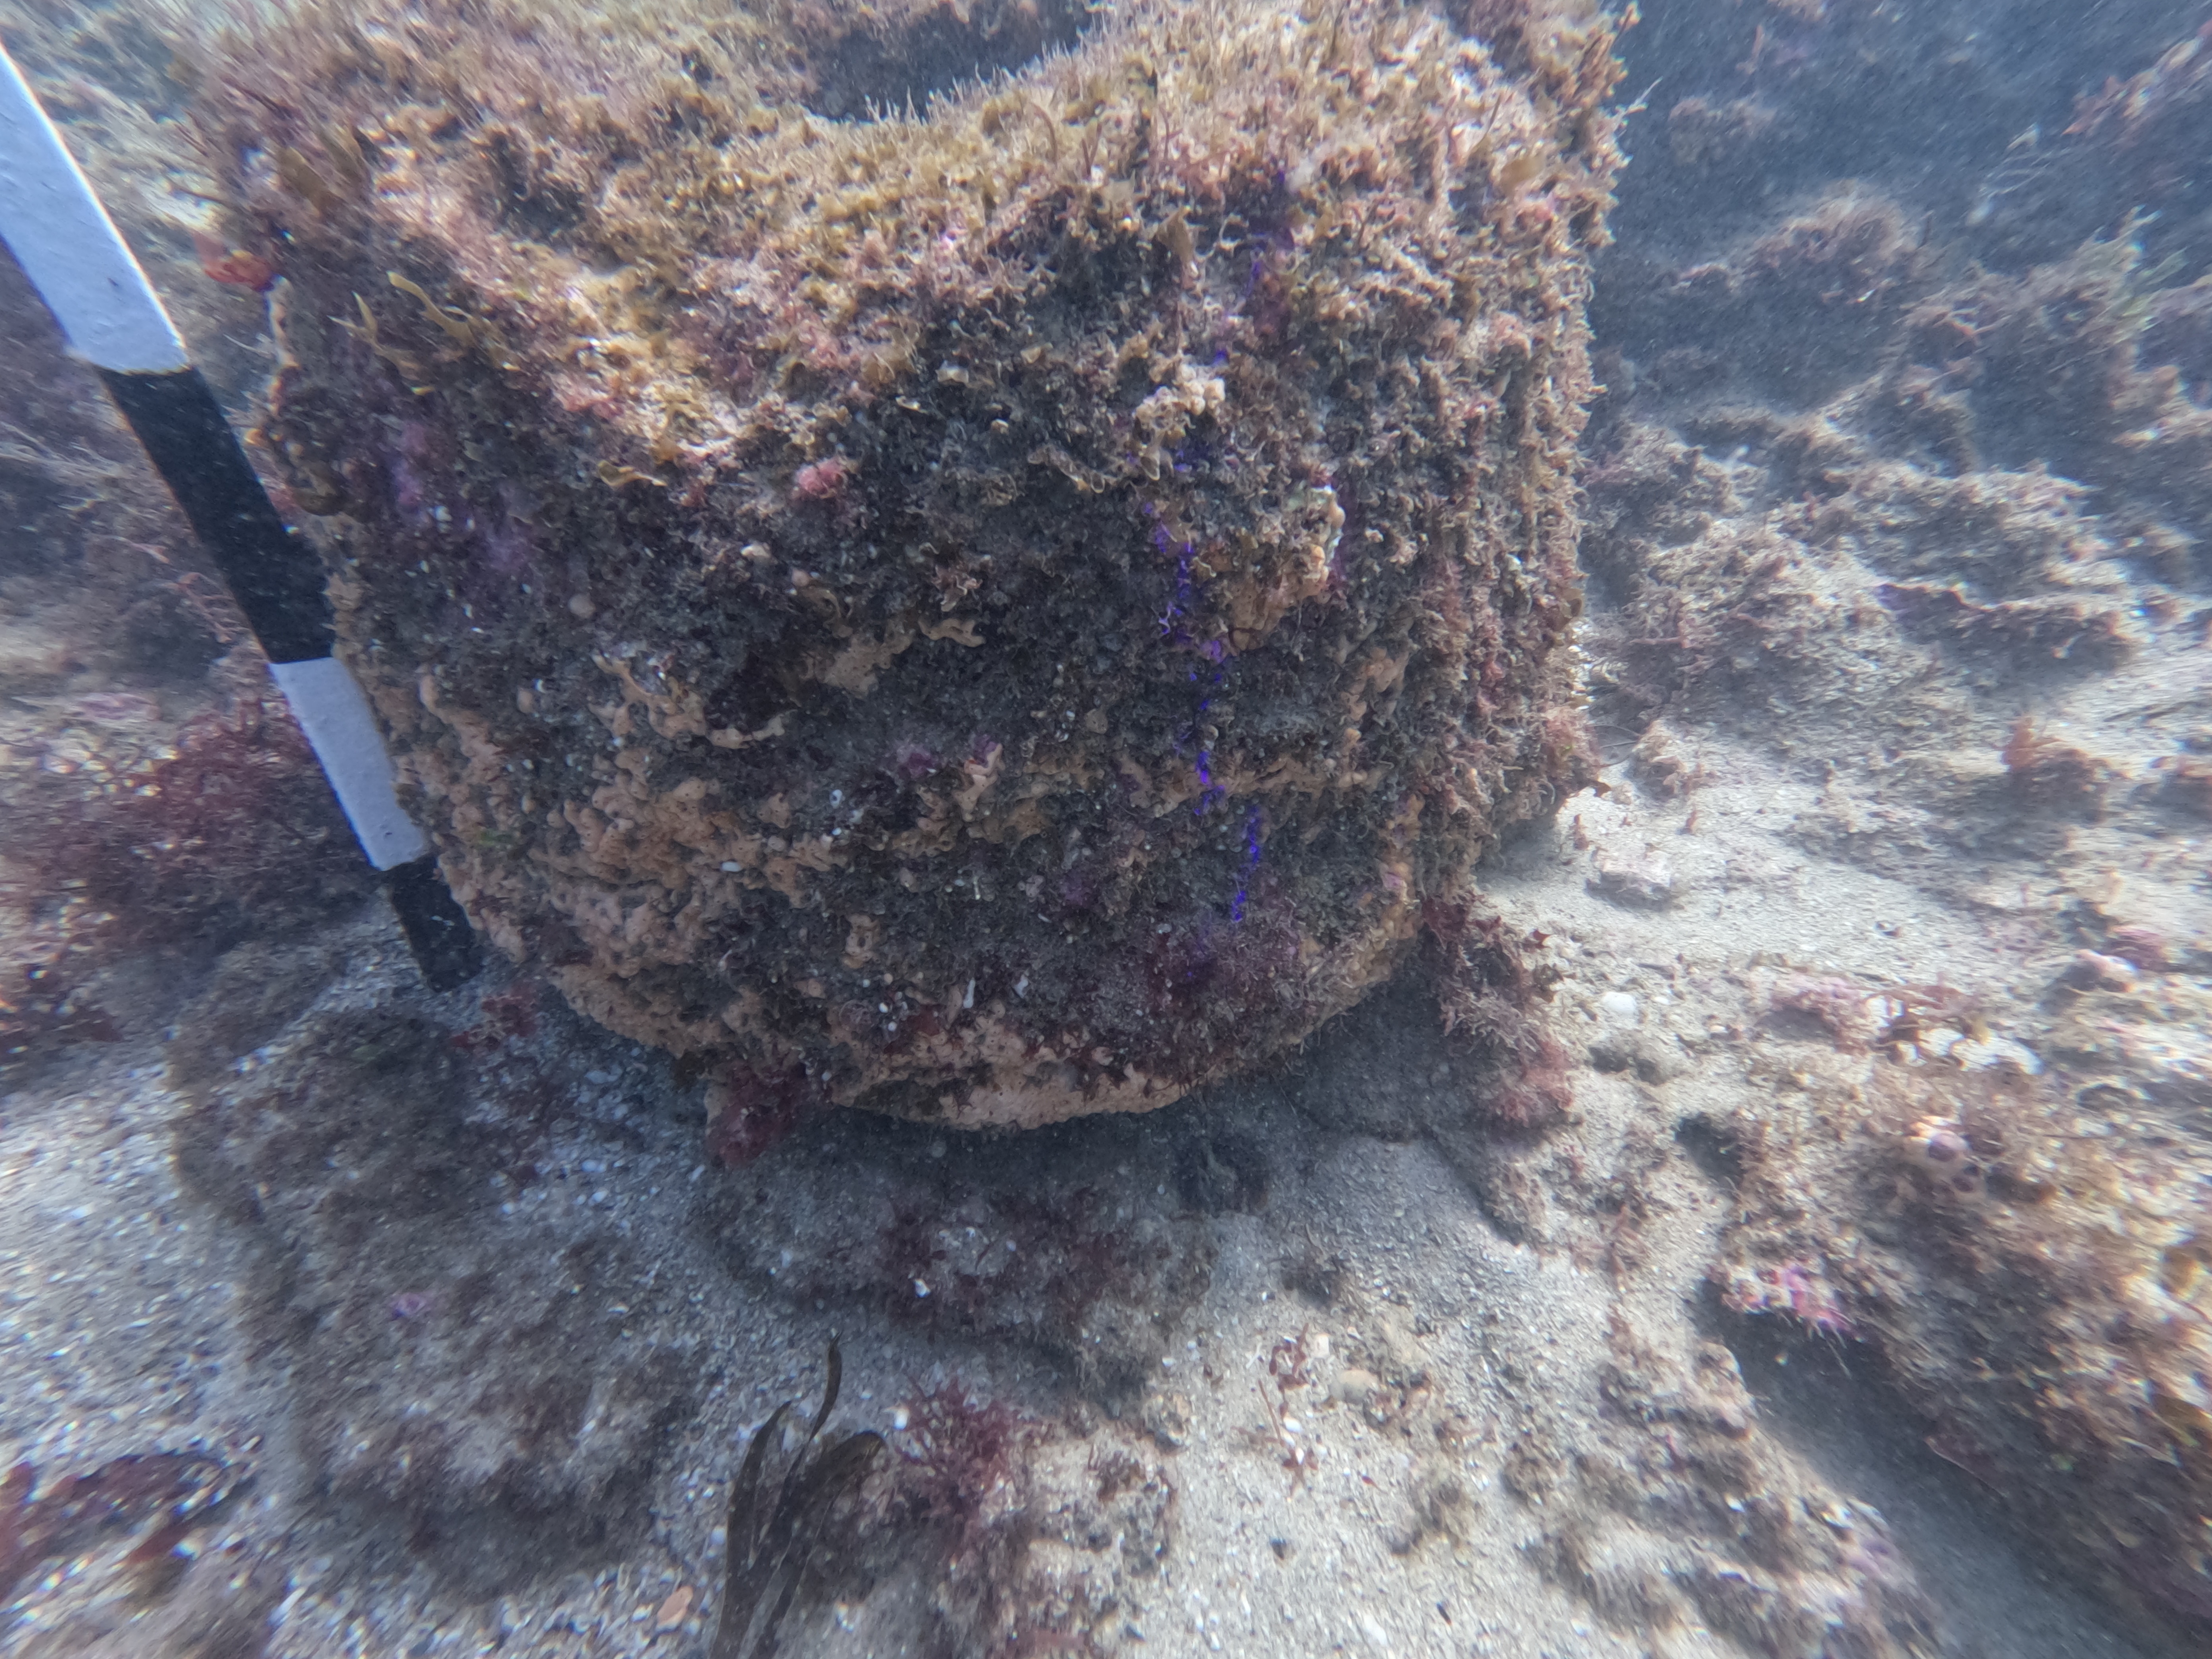

Supplement: Supplementary file 1746 [file G0028072.pdf › Ocean1/G0028072.pdf]

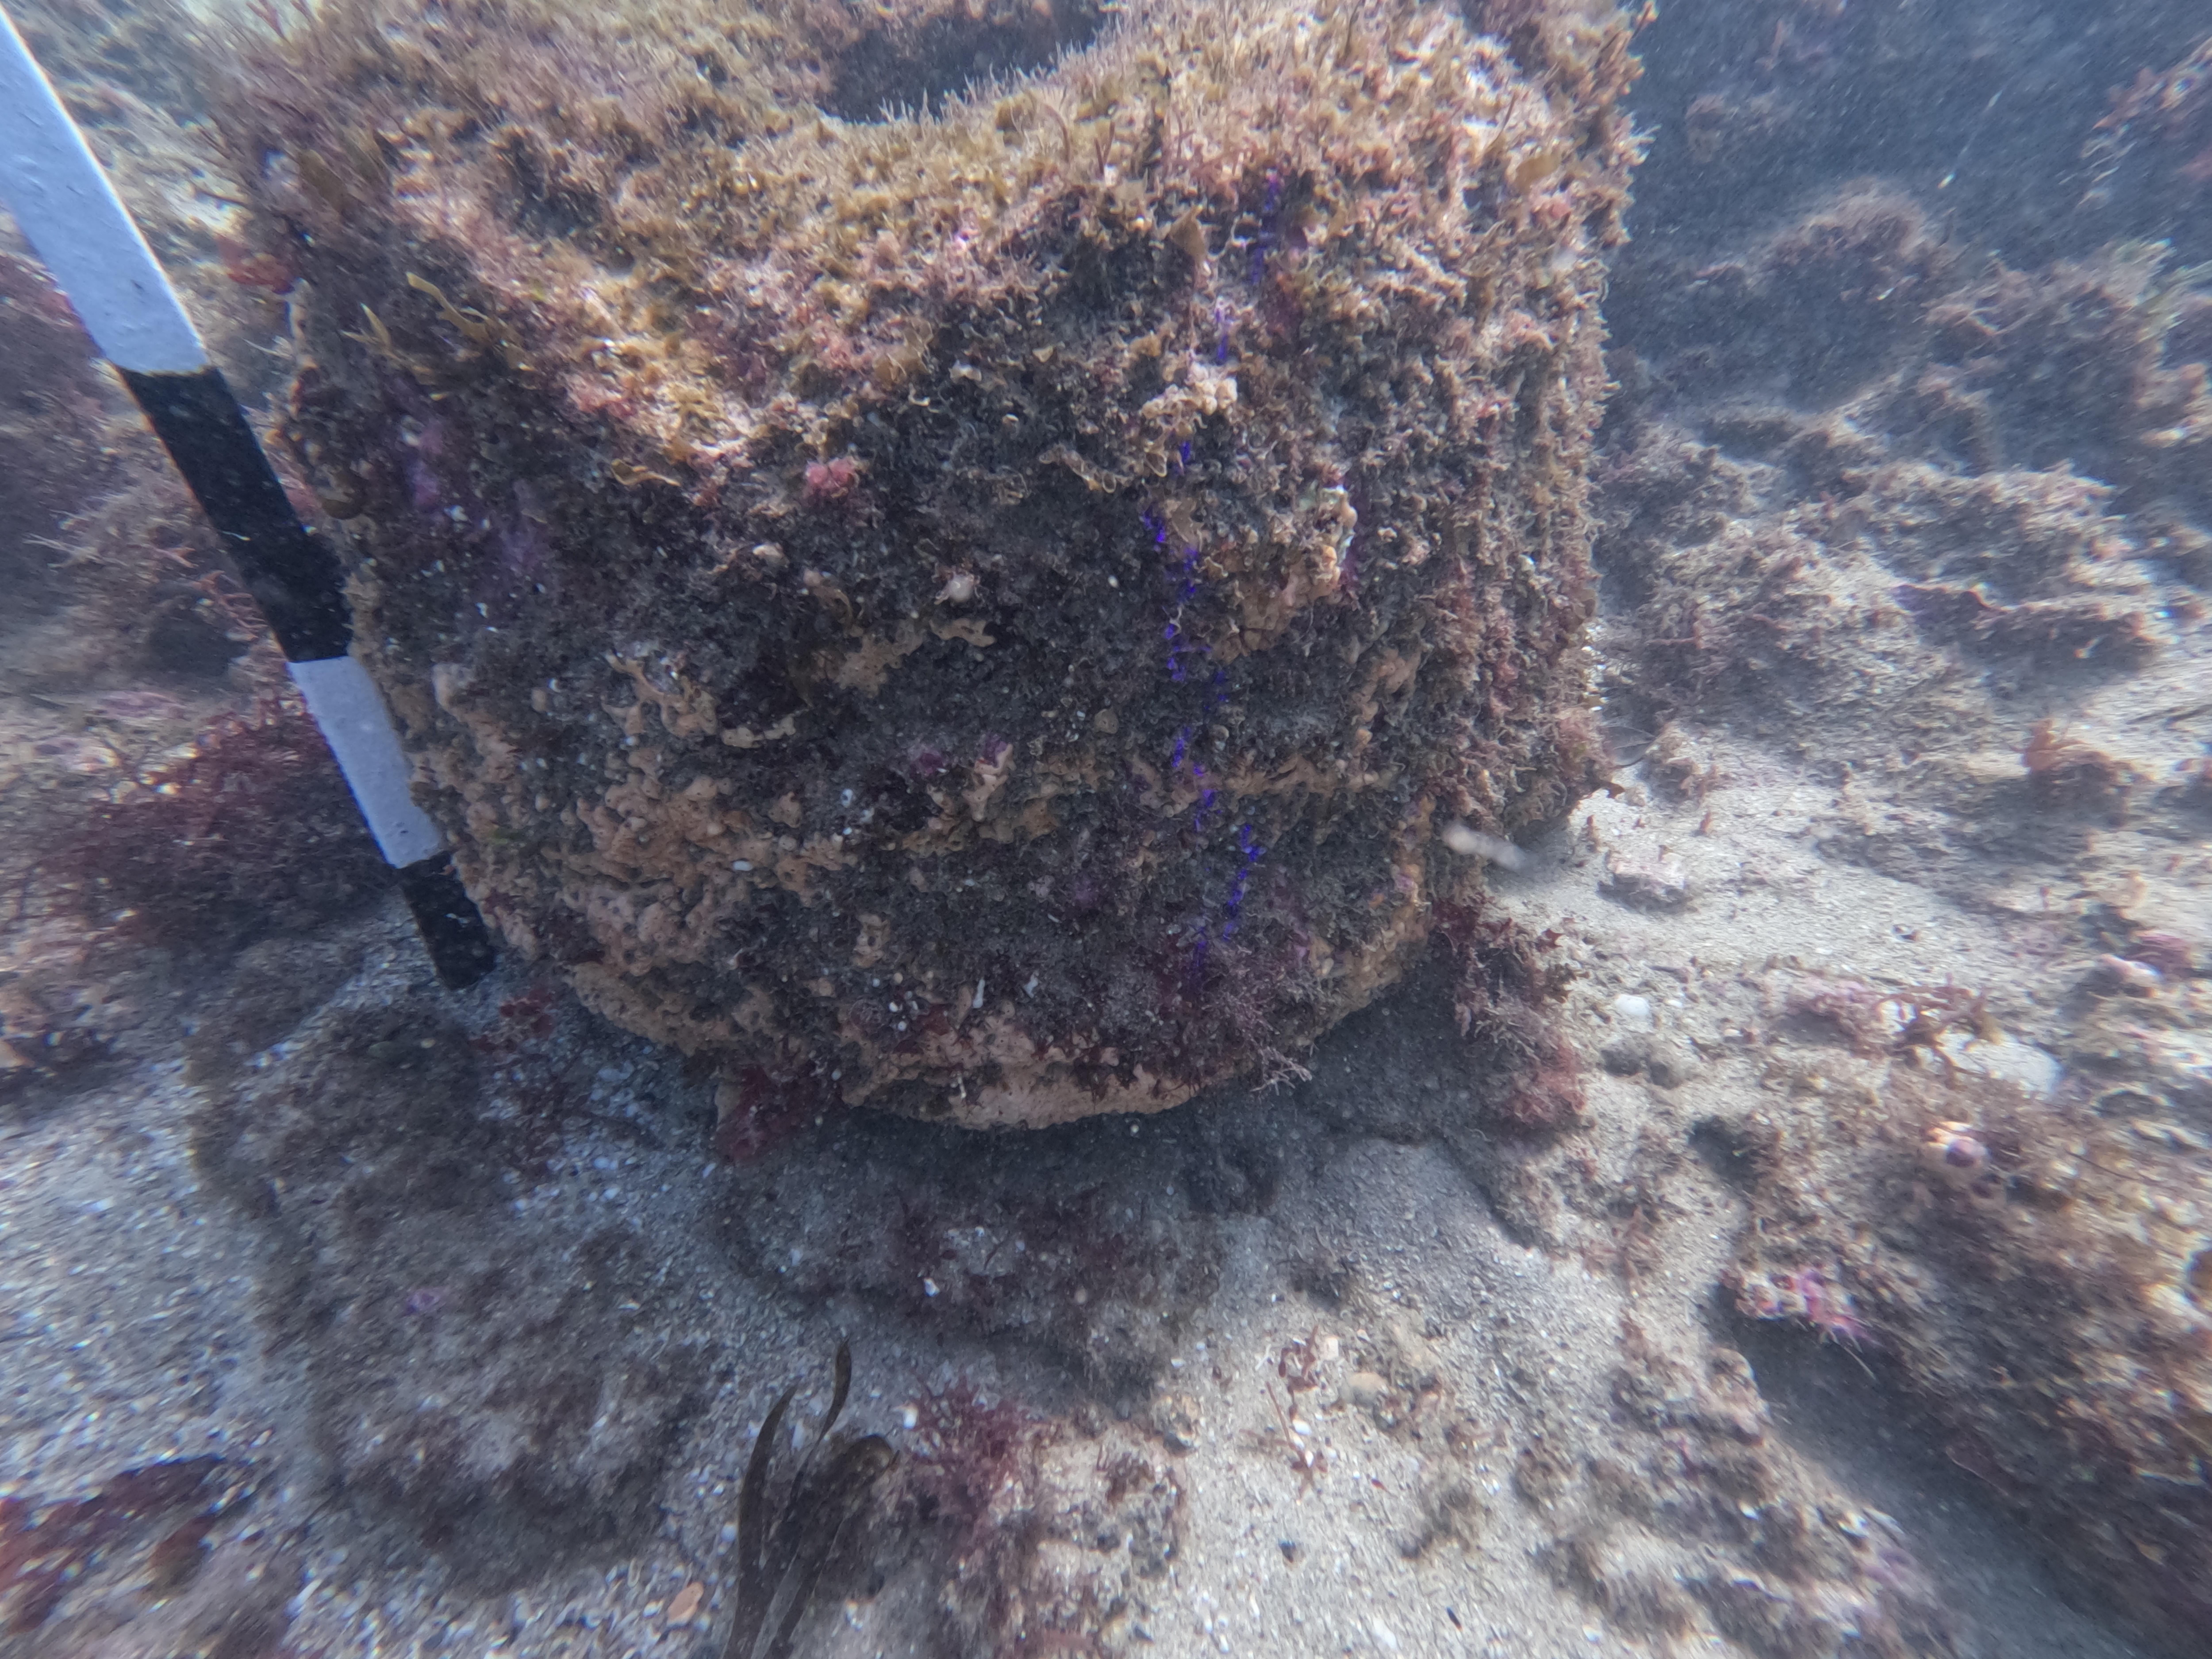

Supplement: Supplementary file 1747 [file G0028073.pdf › Ocean1/G0028073.pdf]

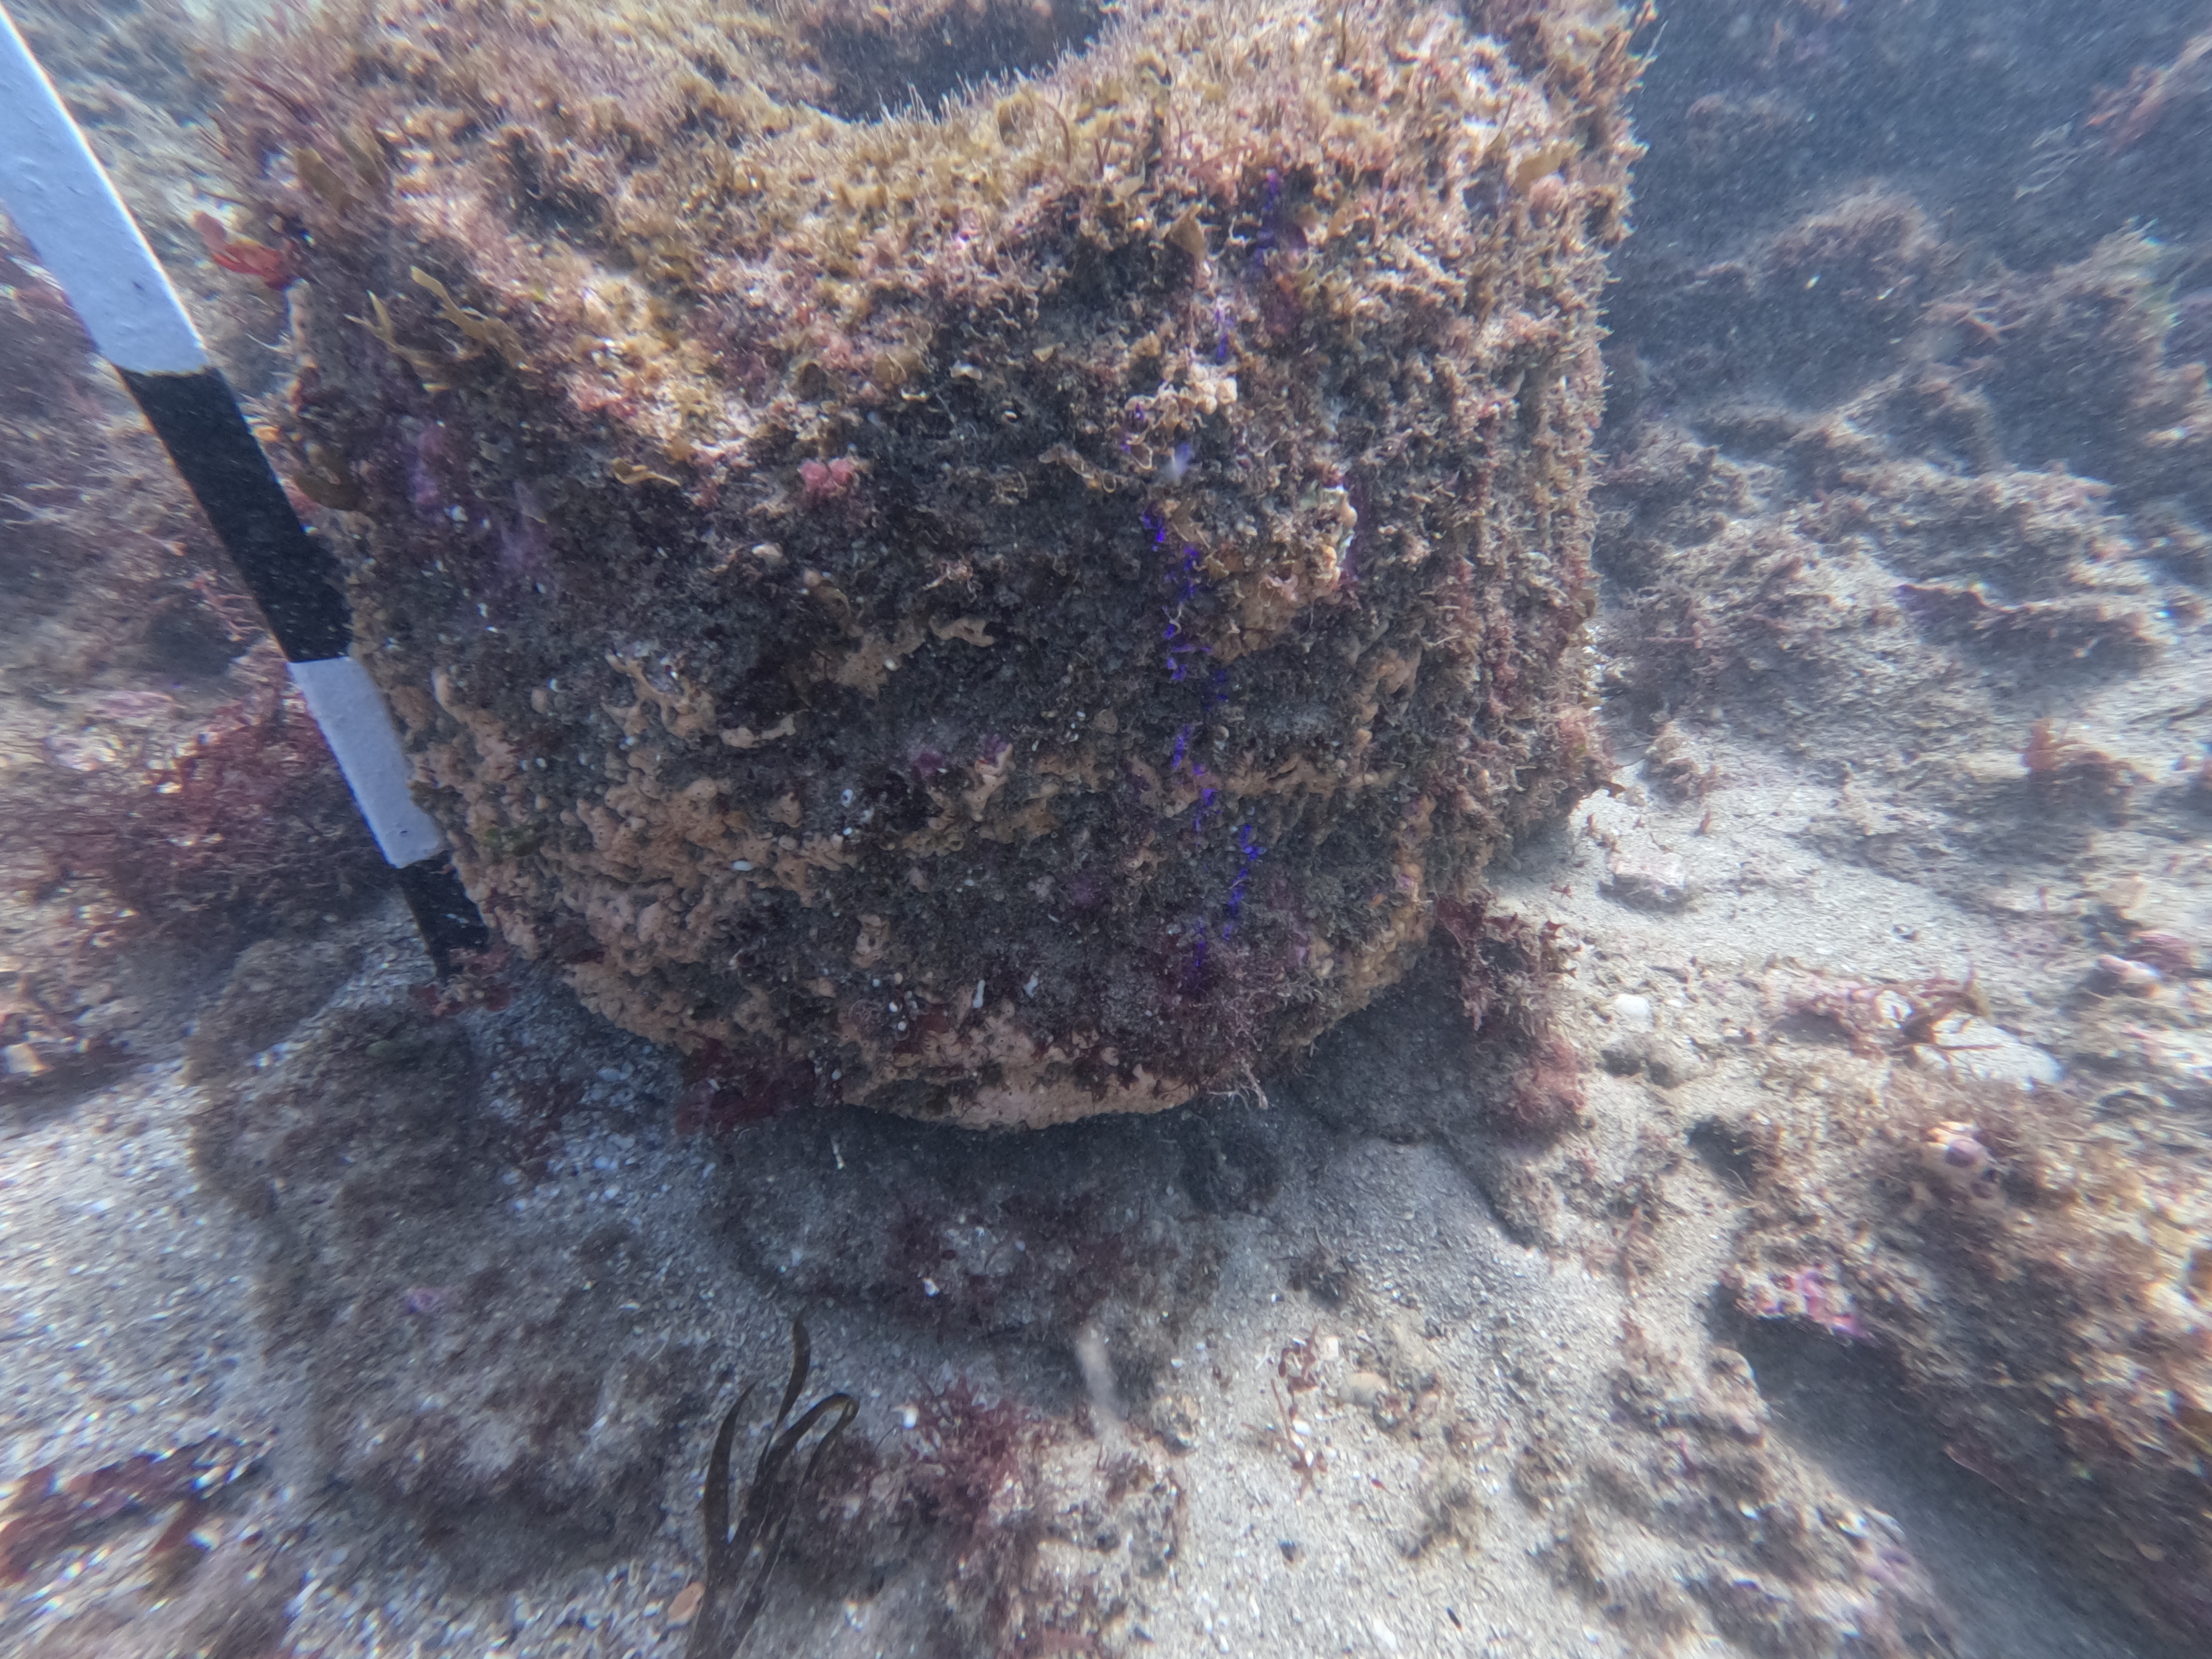

Supplement: Supplementary file 1748 [file G0028074.pdf › Ocean1/G0028074.pdf]

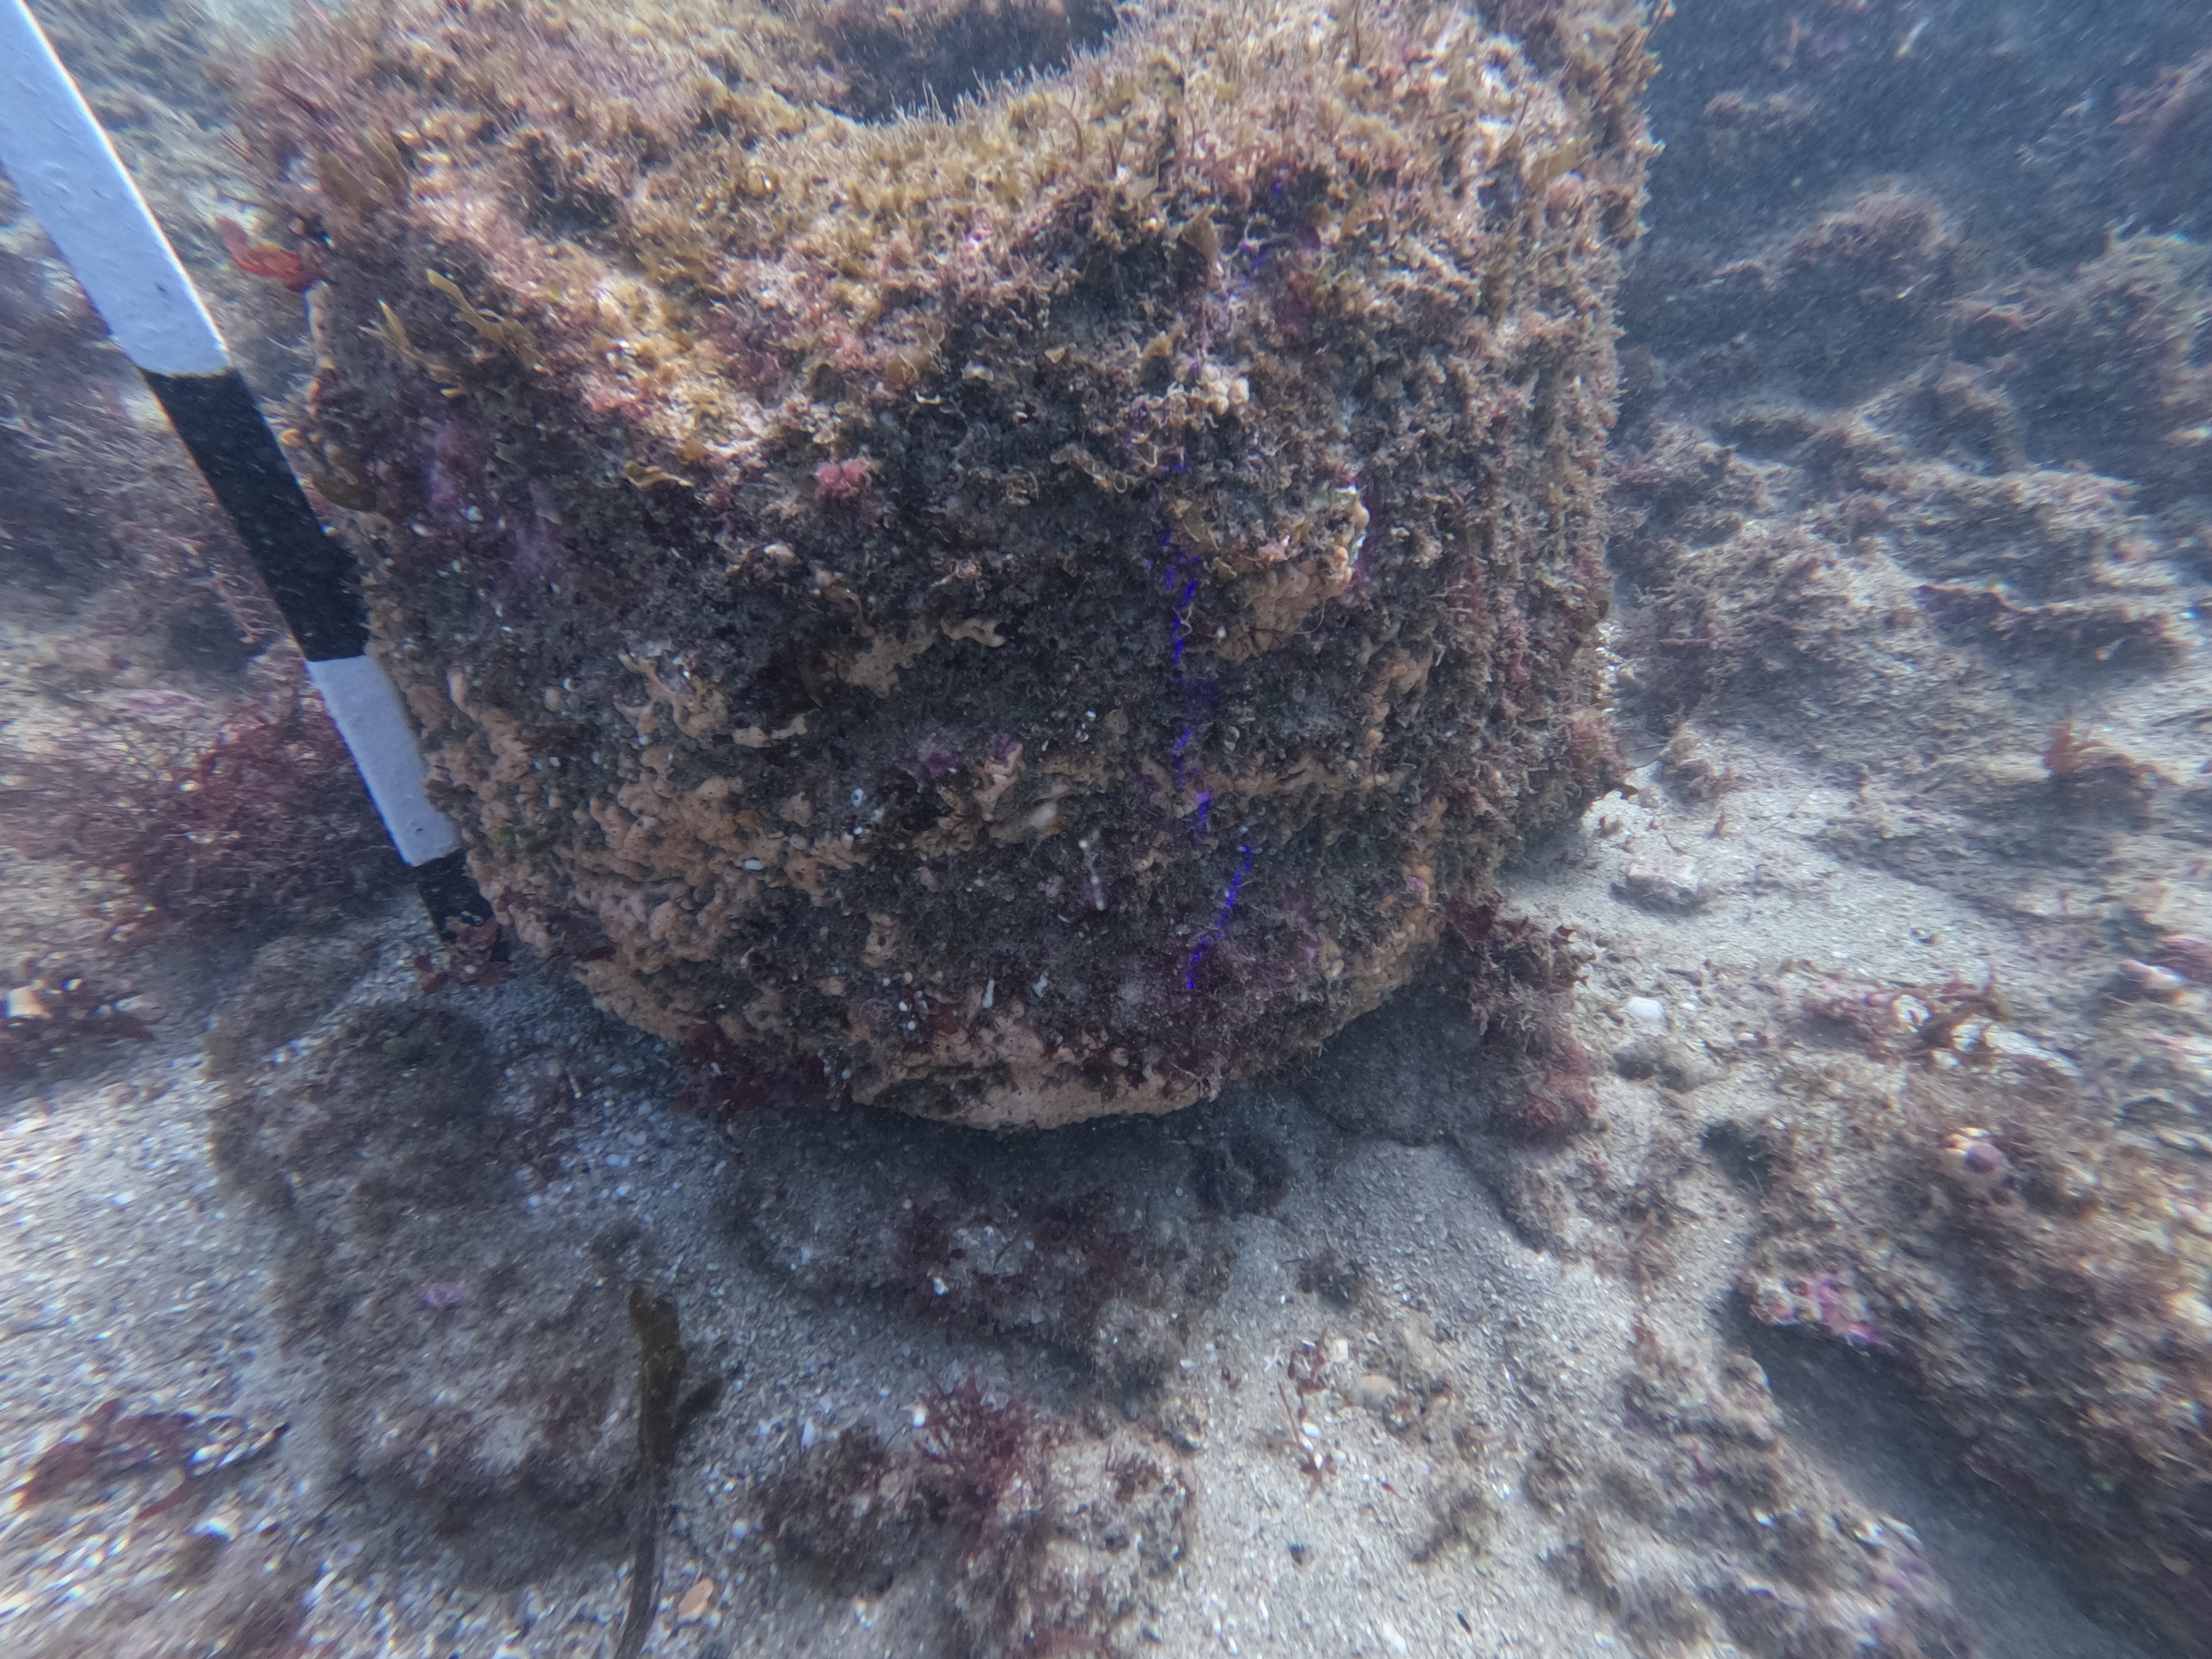

Supplement: Supplementary file 1749 [file G0028075.pdf › Ocean1/G0028075.pdf]

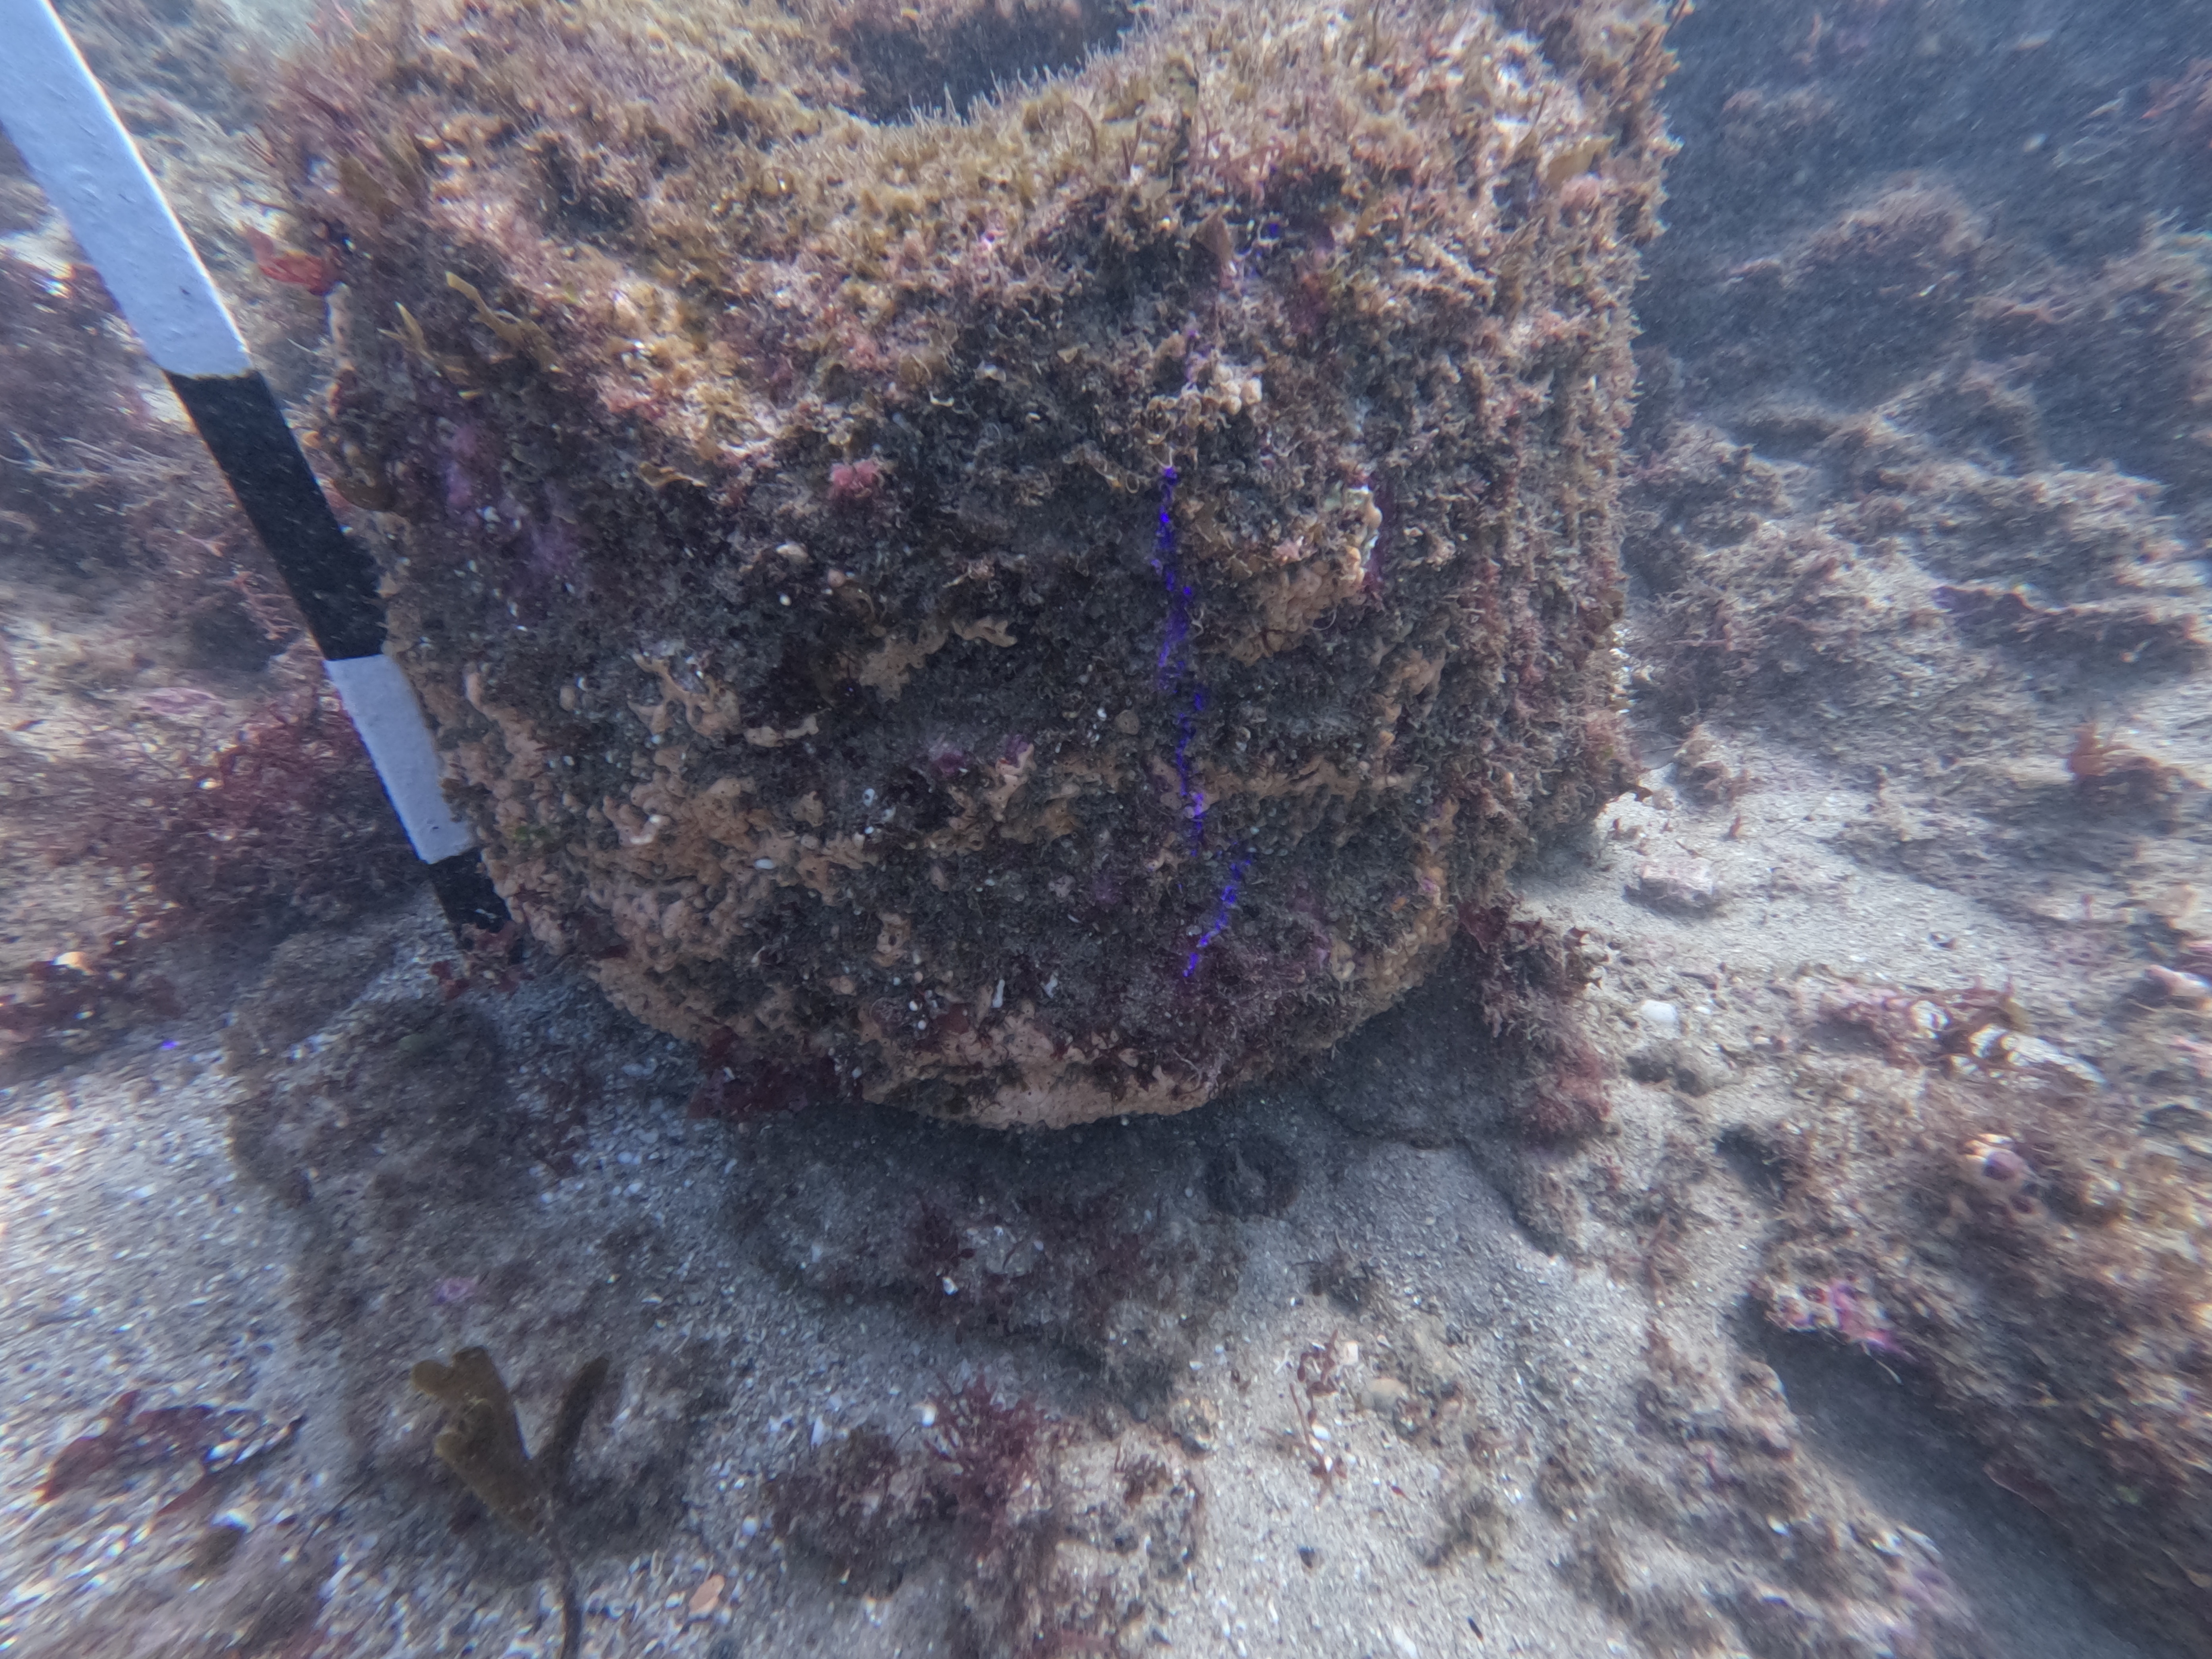

Supplement: Supplementary file 1750 [file G0028076.pdf › Ocean1/G0028076.pdf]

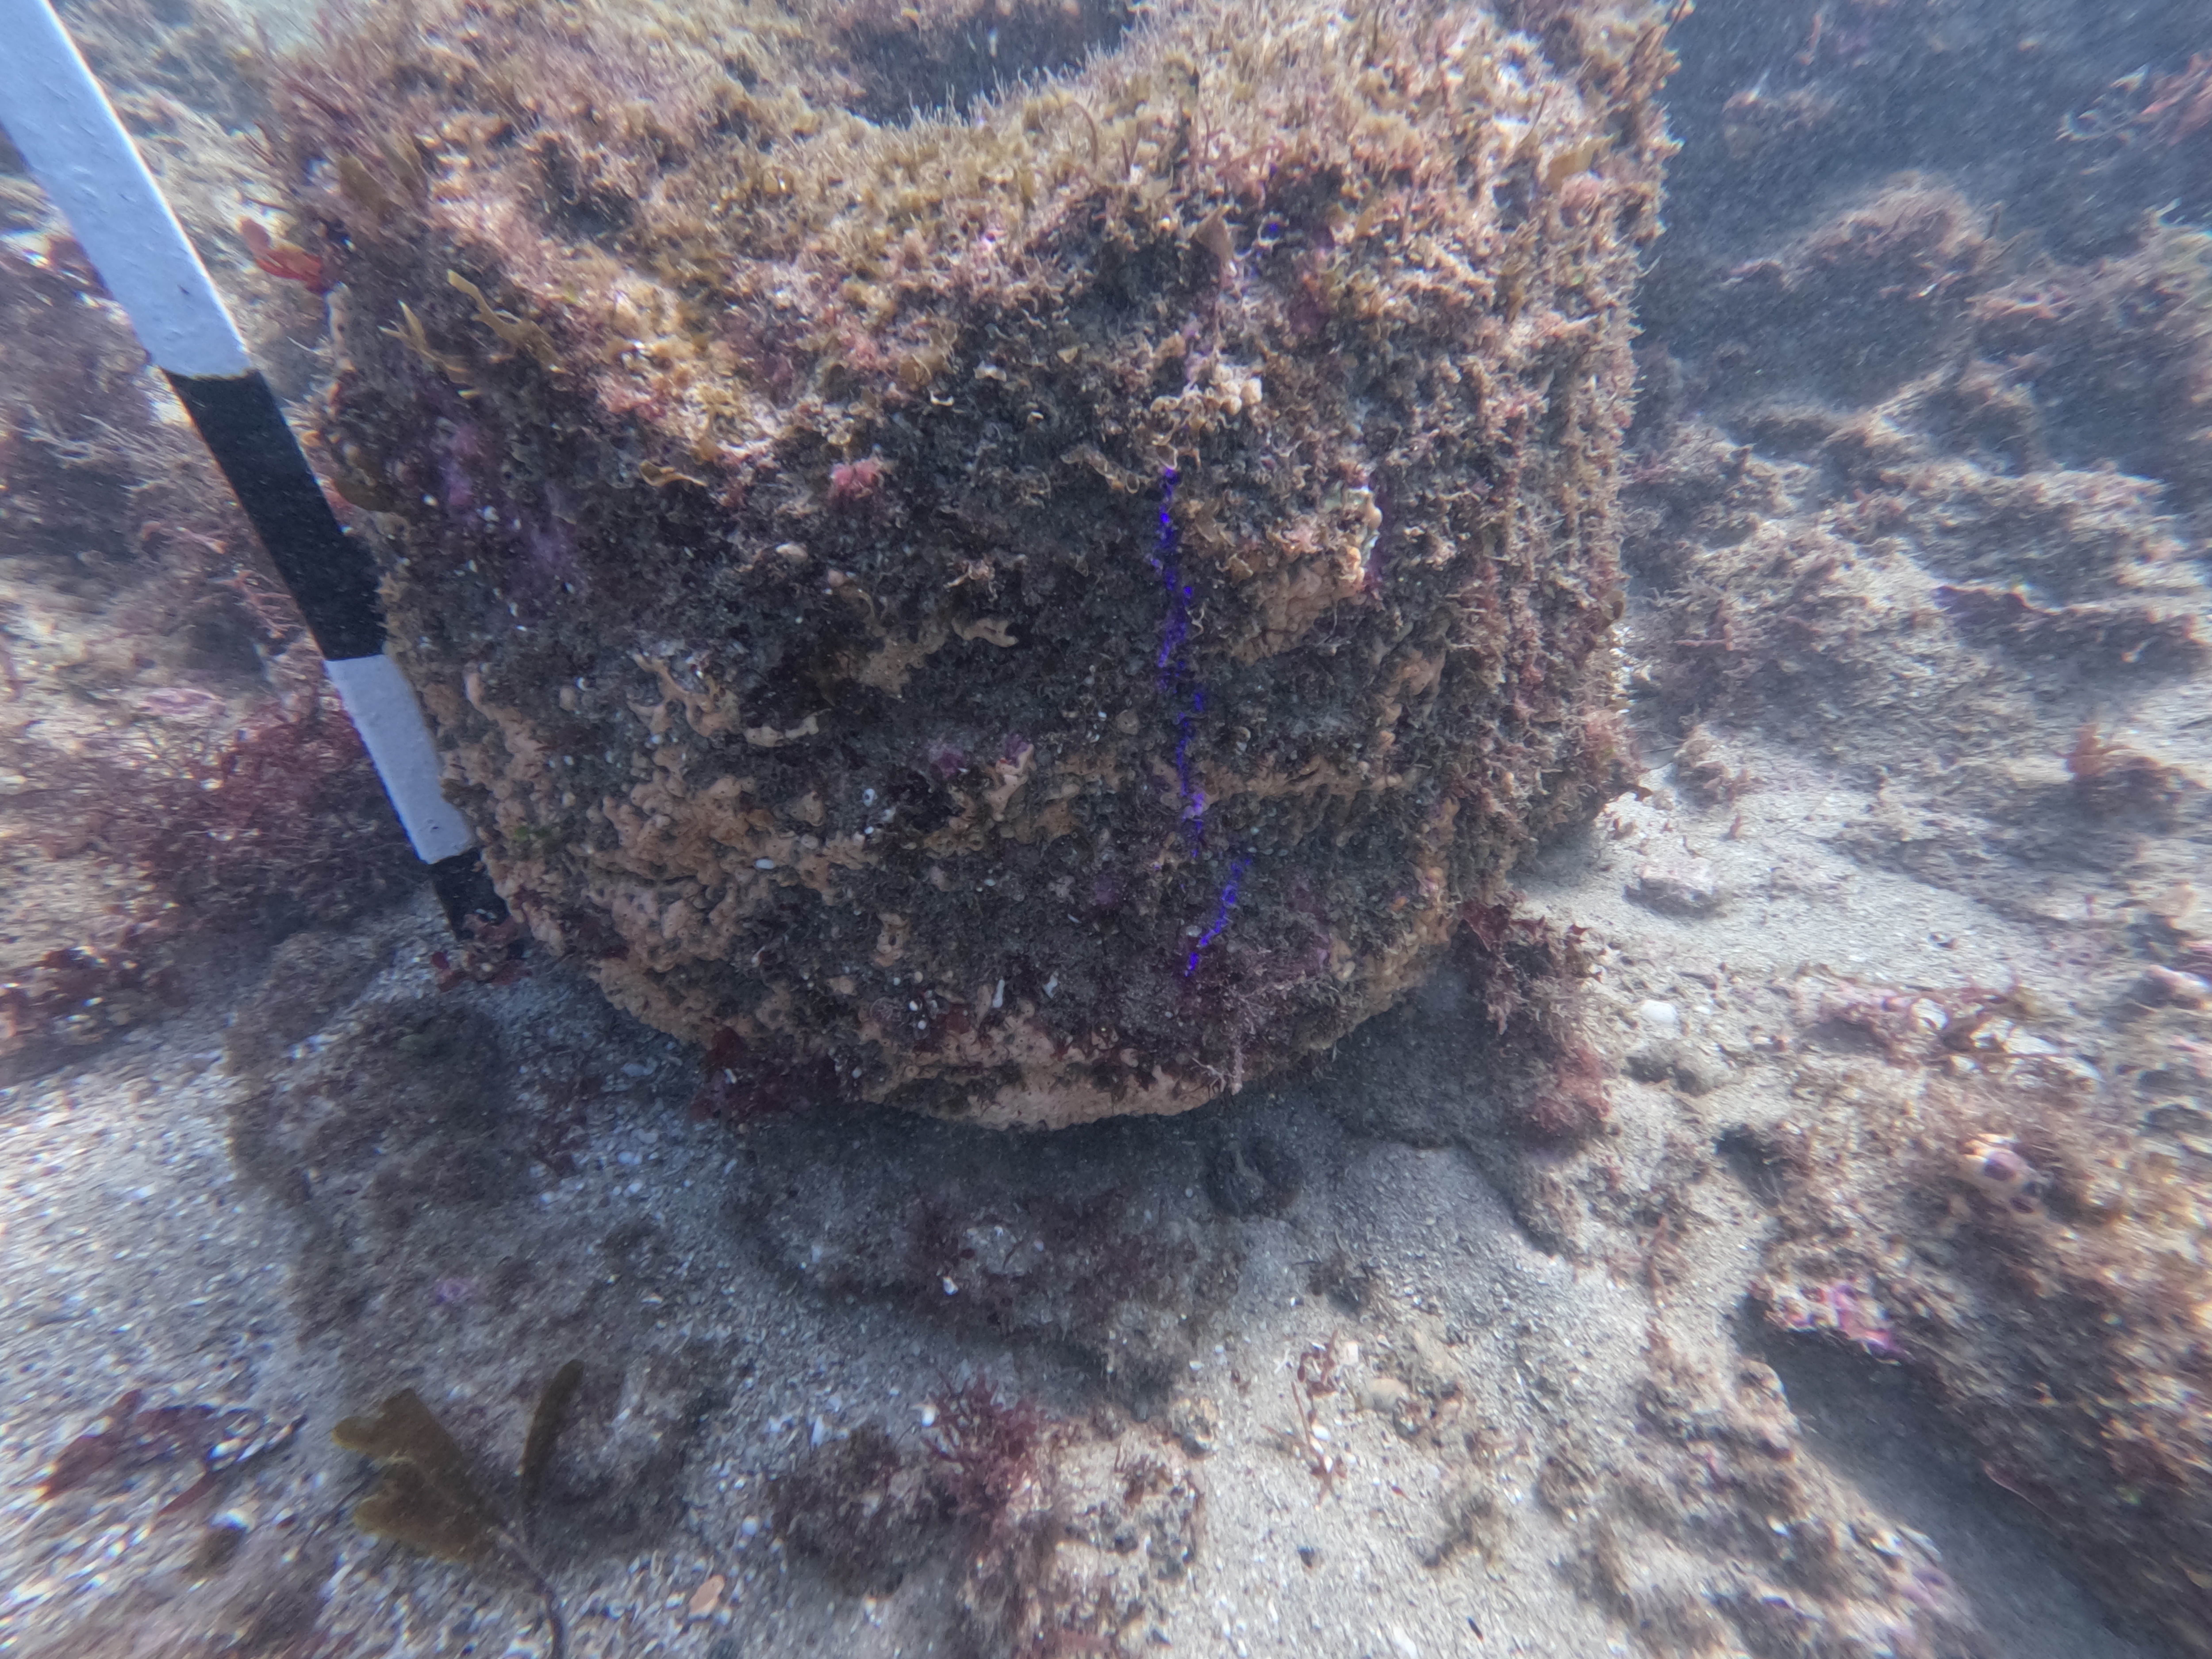

Supplement: Supplementary file 1751 [file G0028077.pdf › Ocean1/G0028077.pdf]

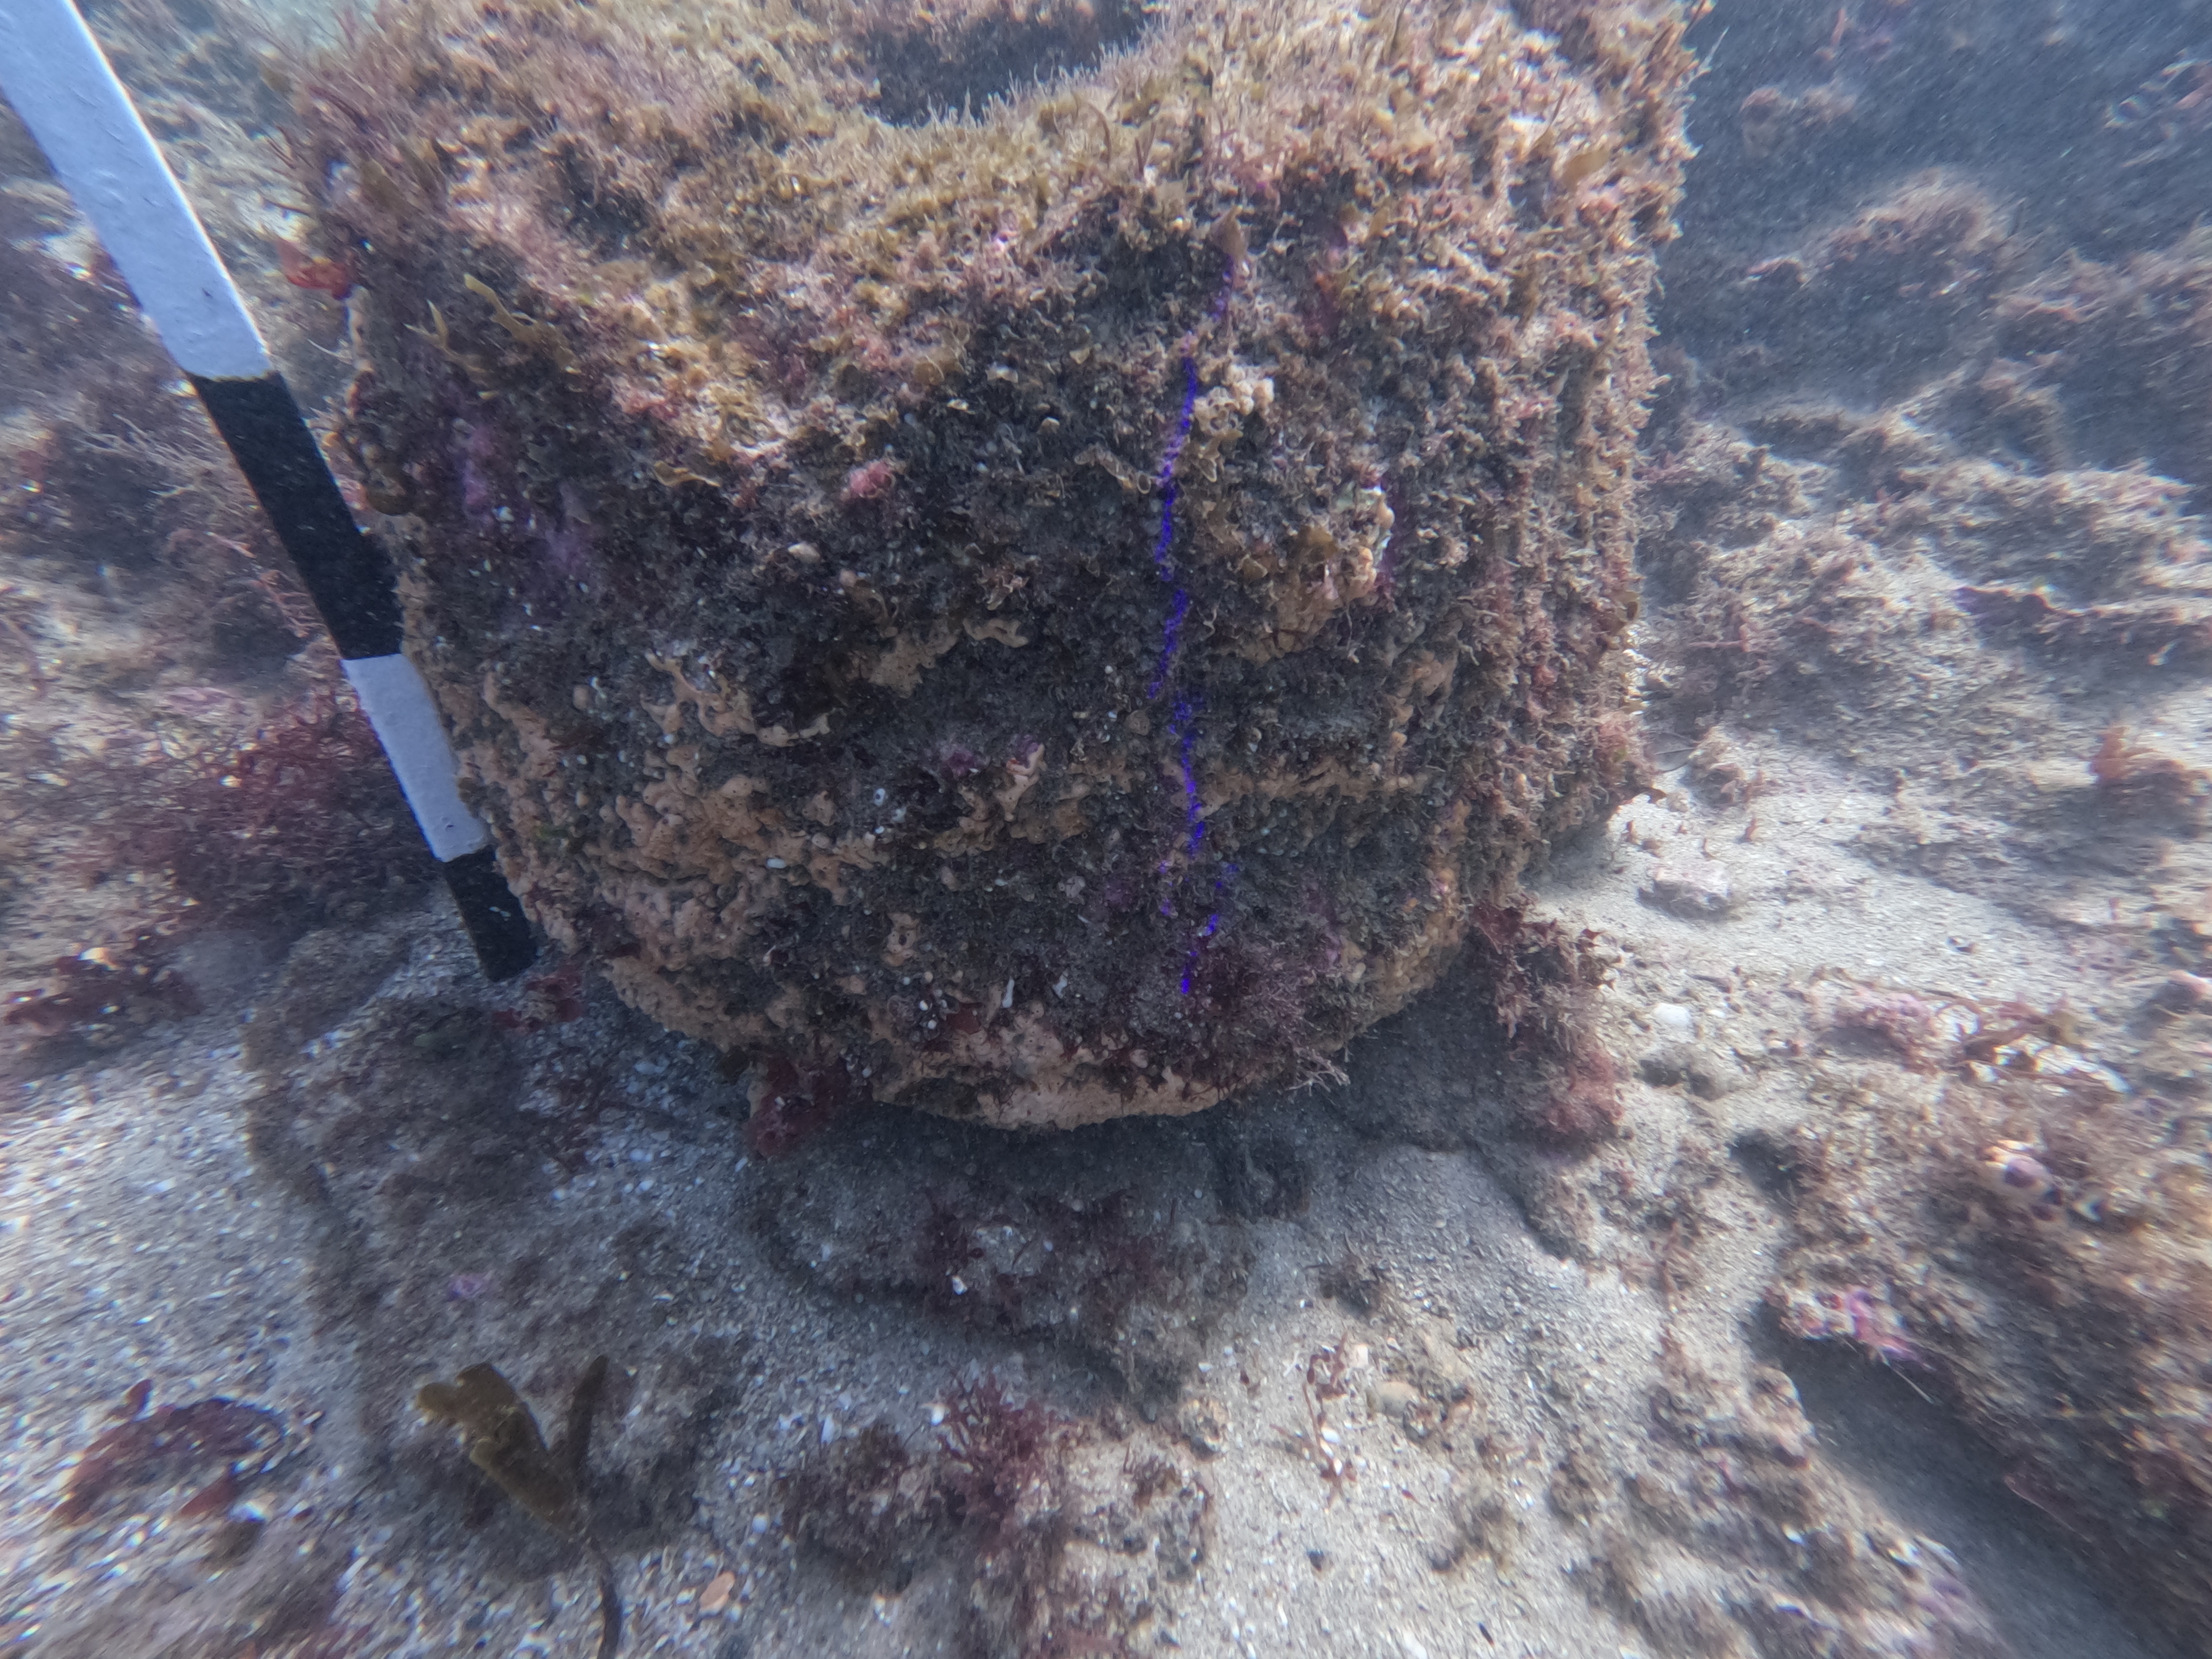

Supplement: Supplementary file 1752 [file G0028078.pdf › Ocean1/G0028078.pdf]

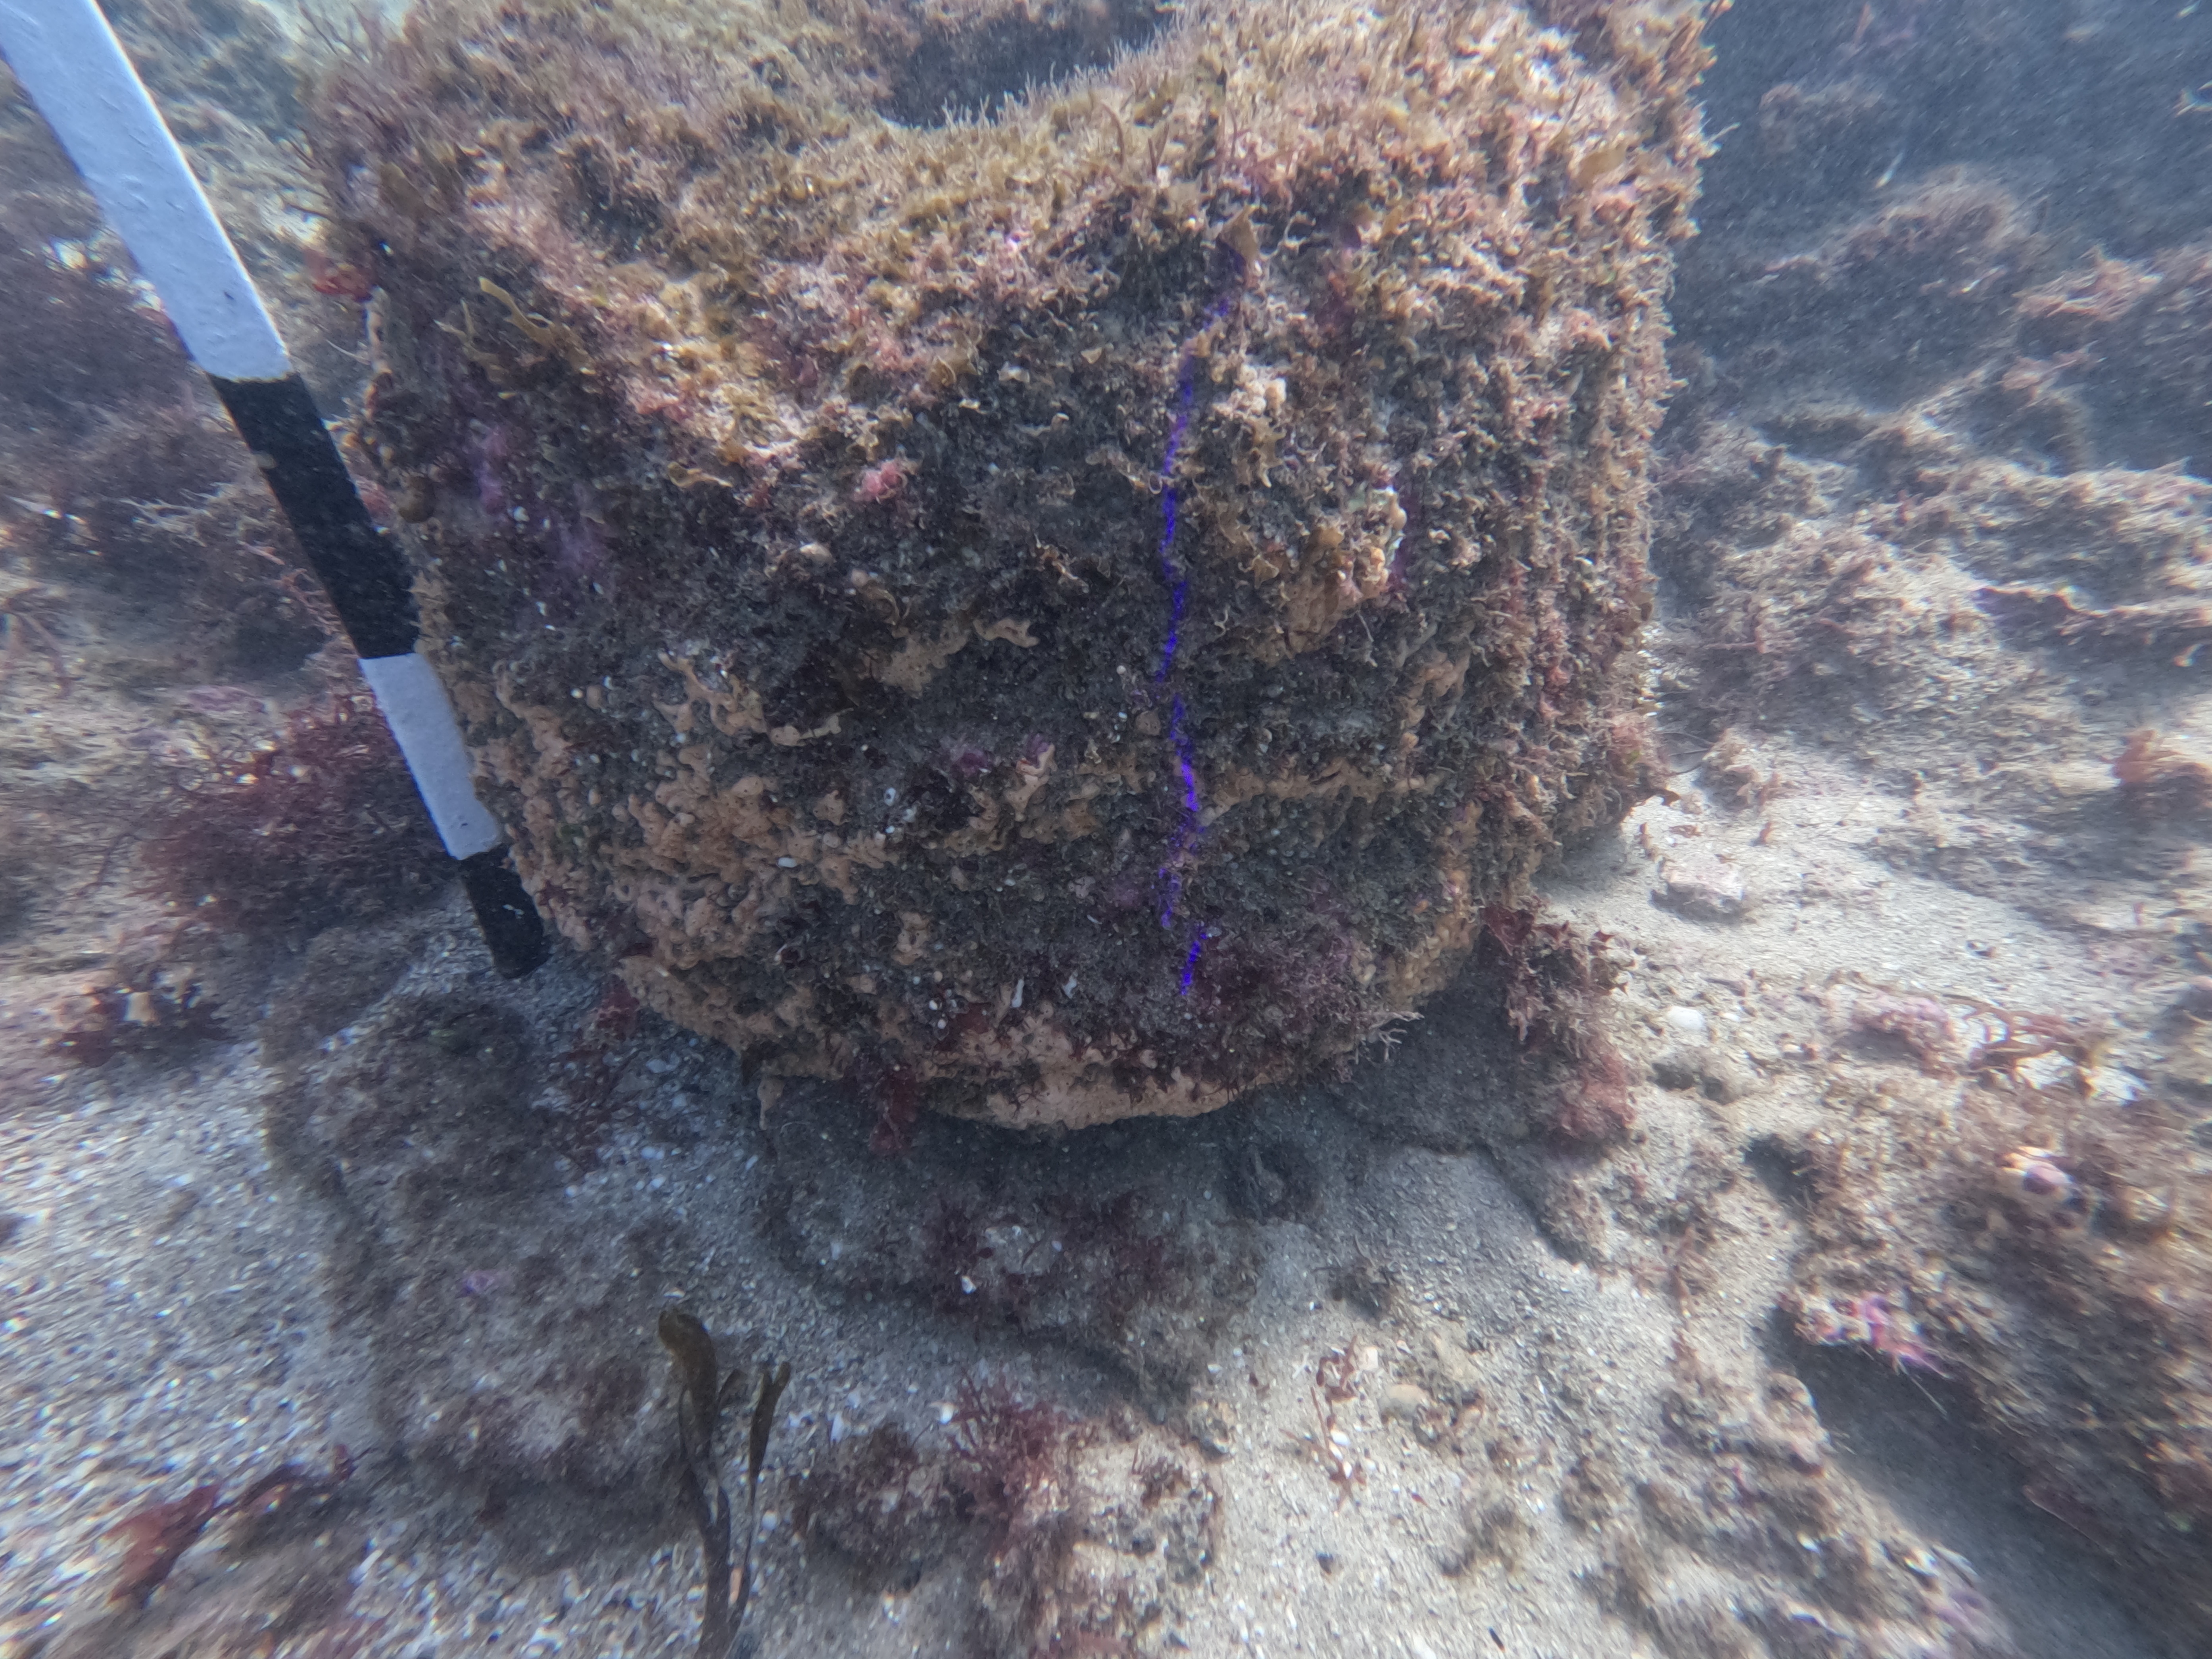

Supplement: Supplementary file 1753 [file G0028079.pdf › Ocean1/G0028079.pdf]

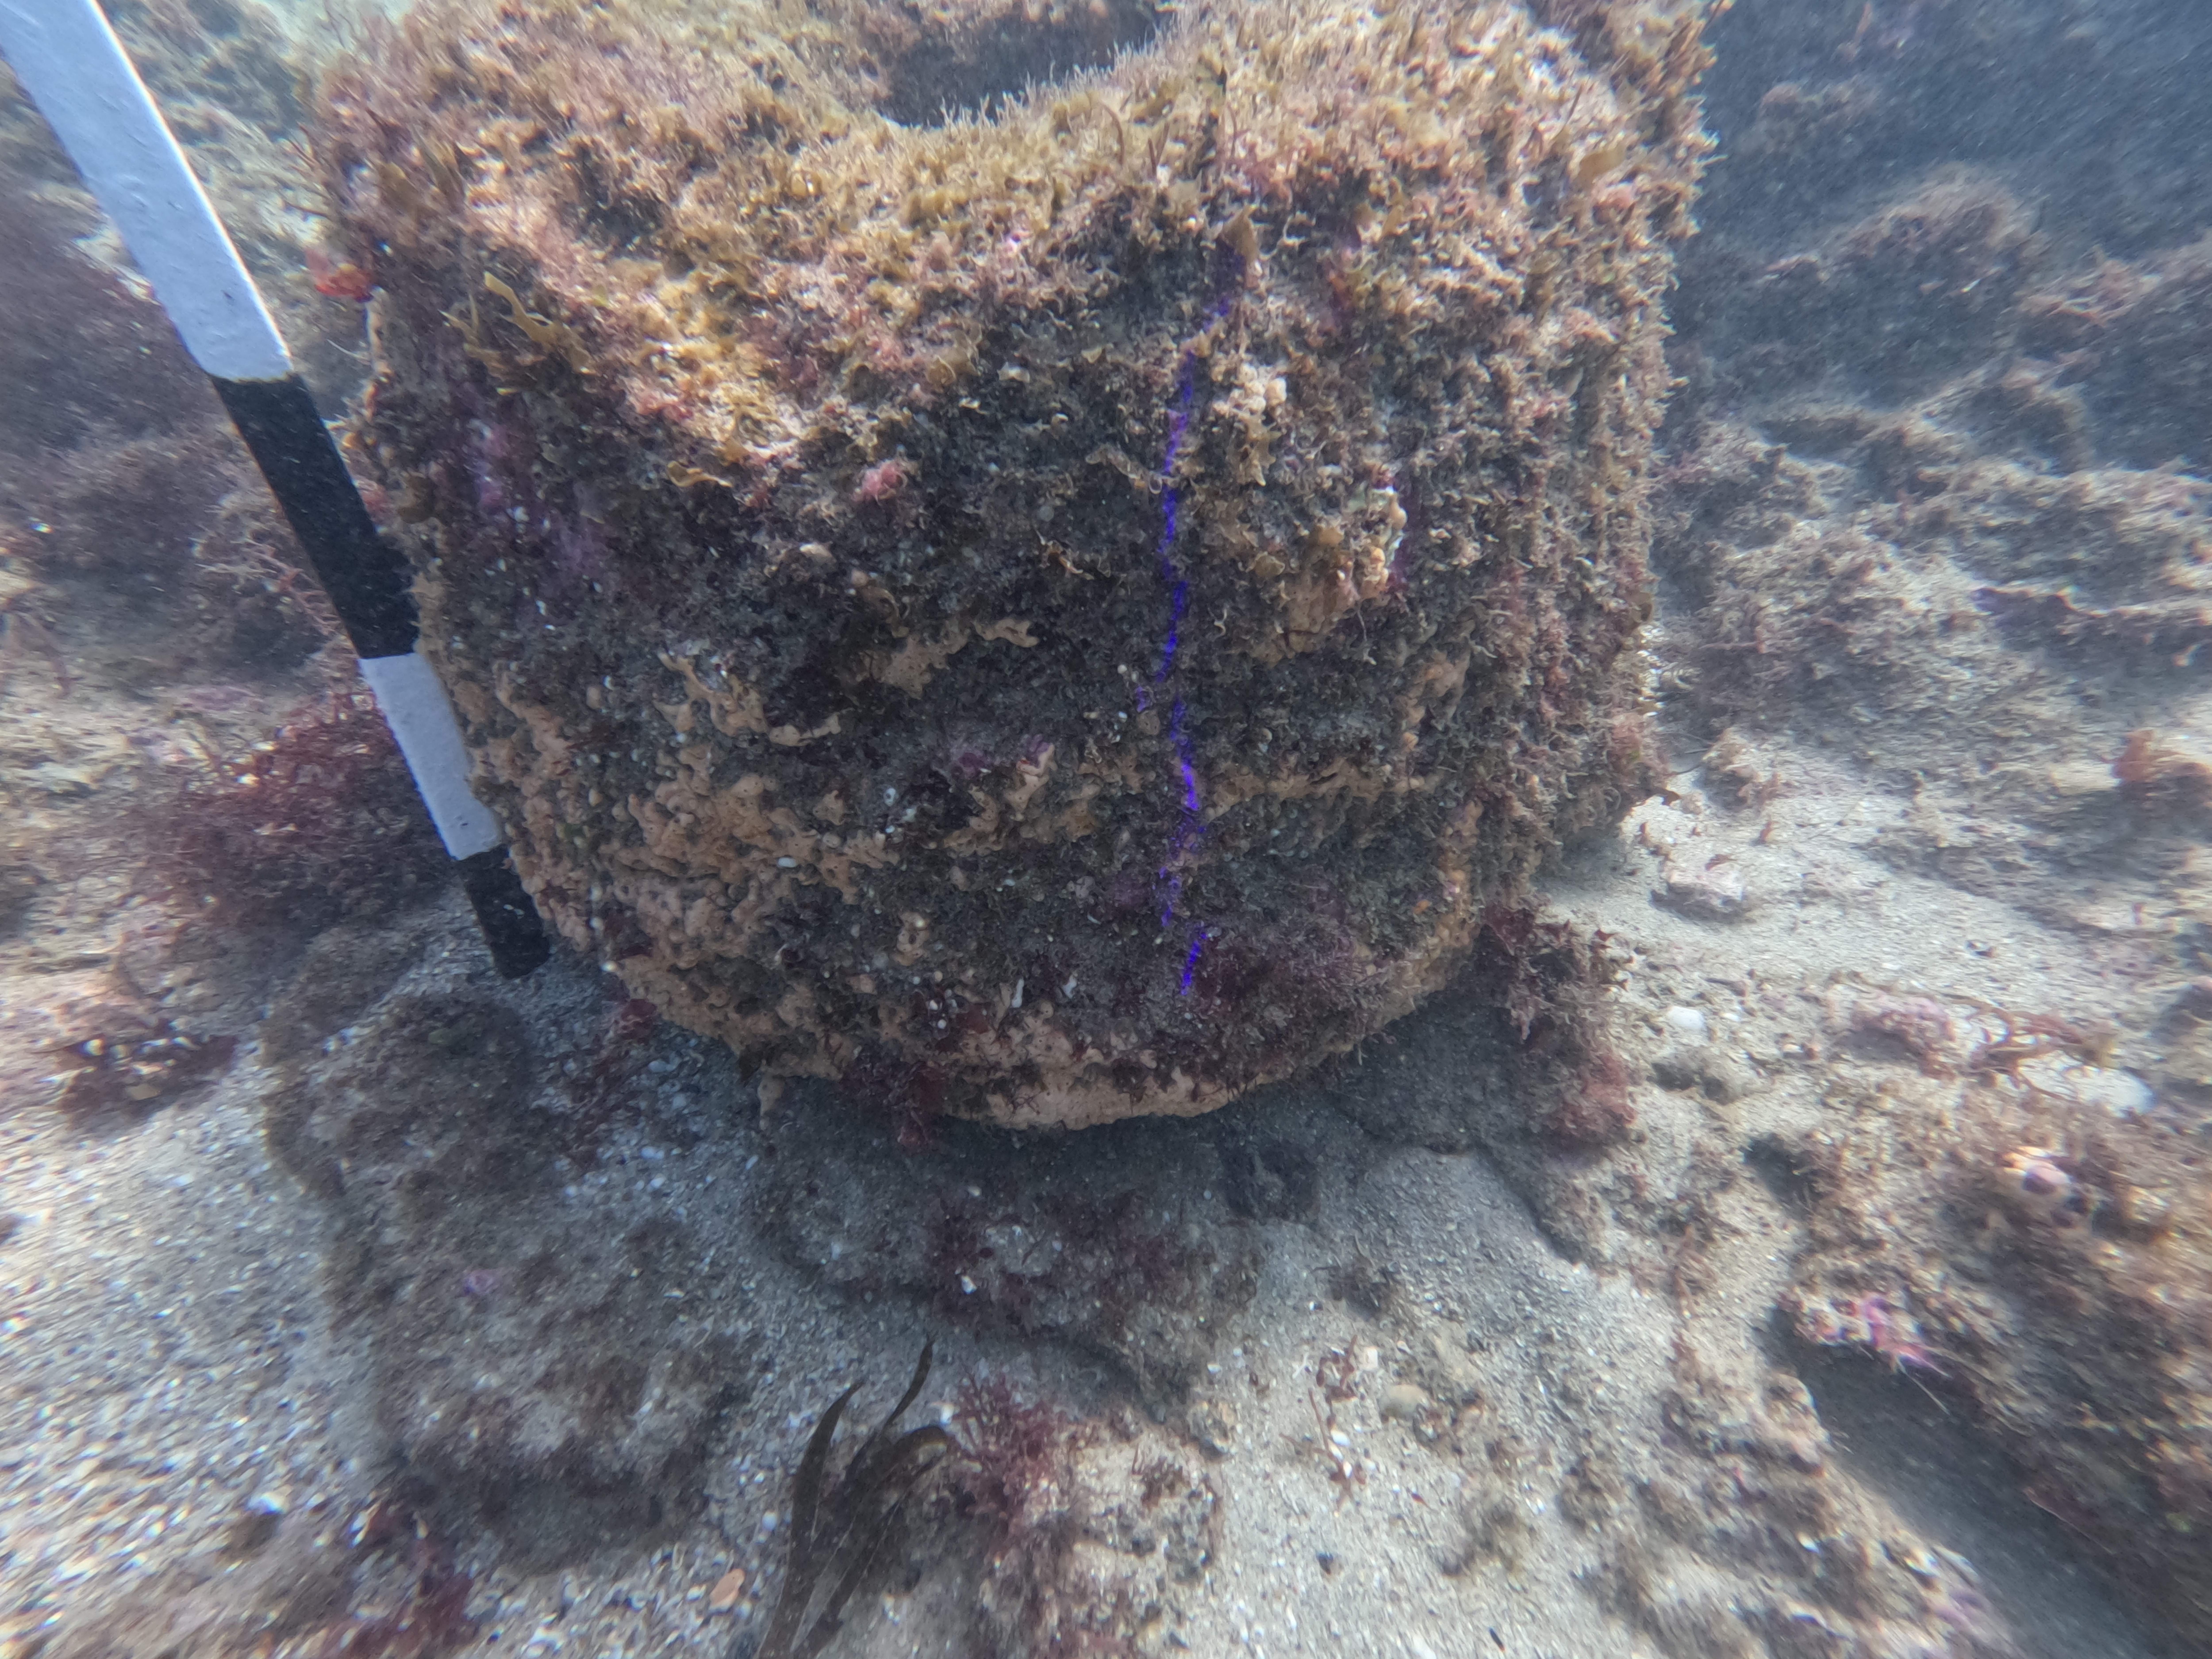

Supplement: Supplementary file 1754 [file G0028080.pdf › Ocean1/G0028080.pdf]

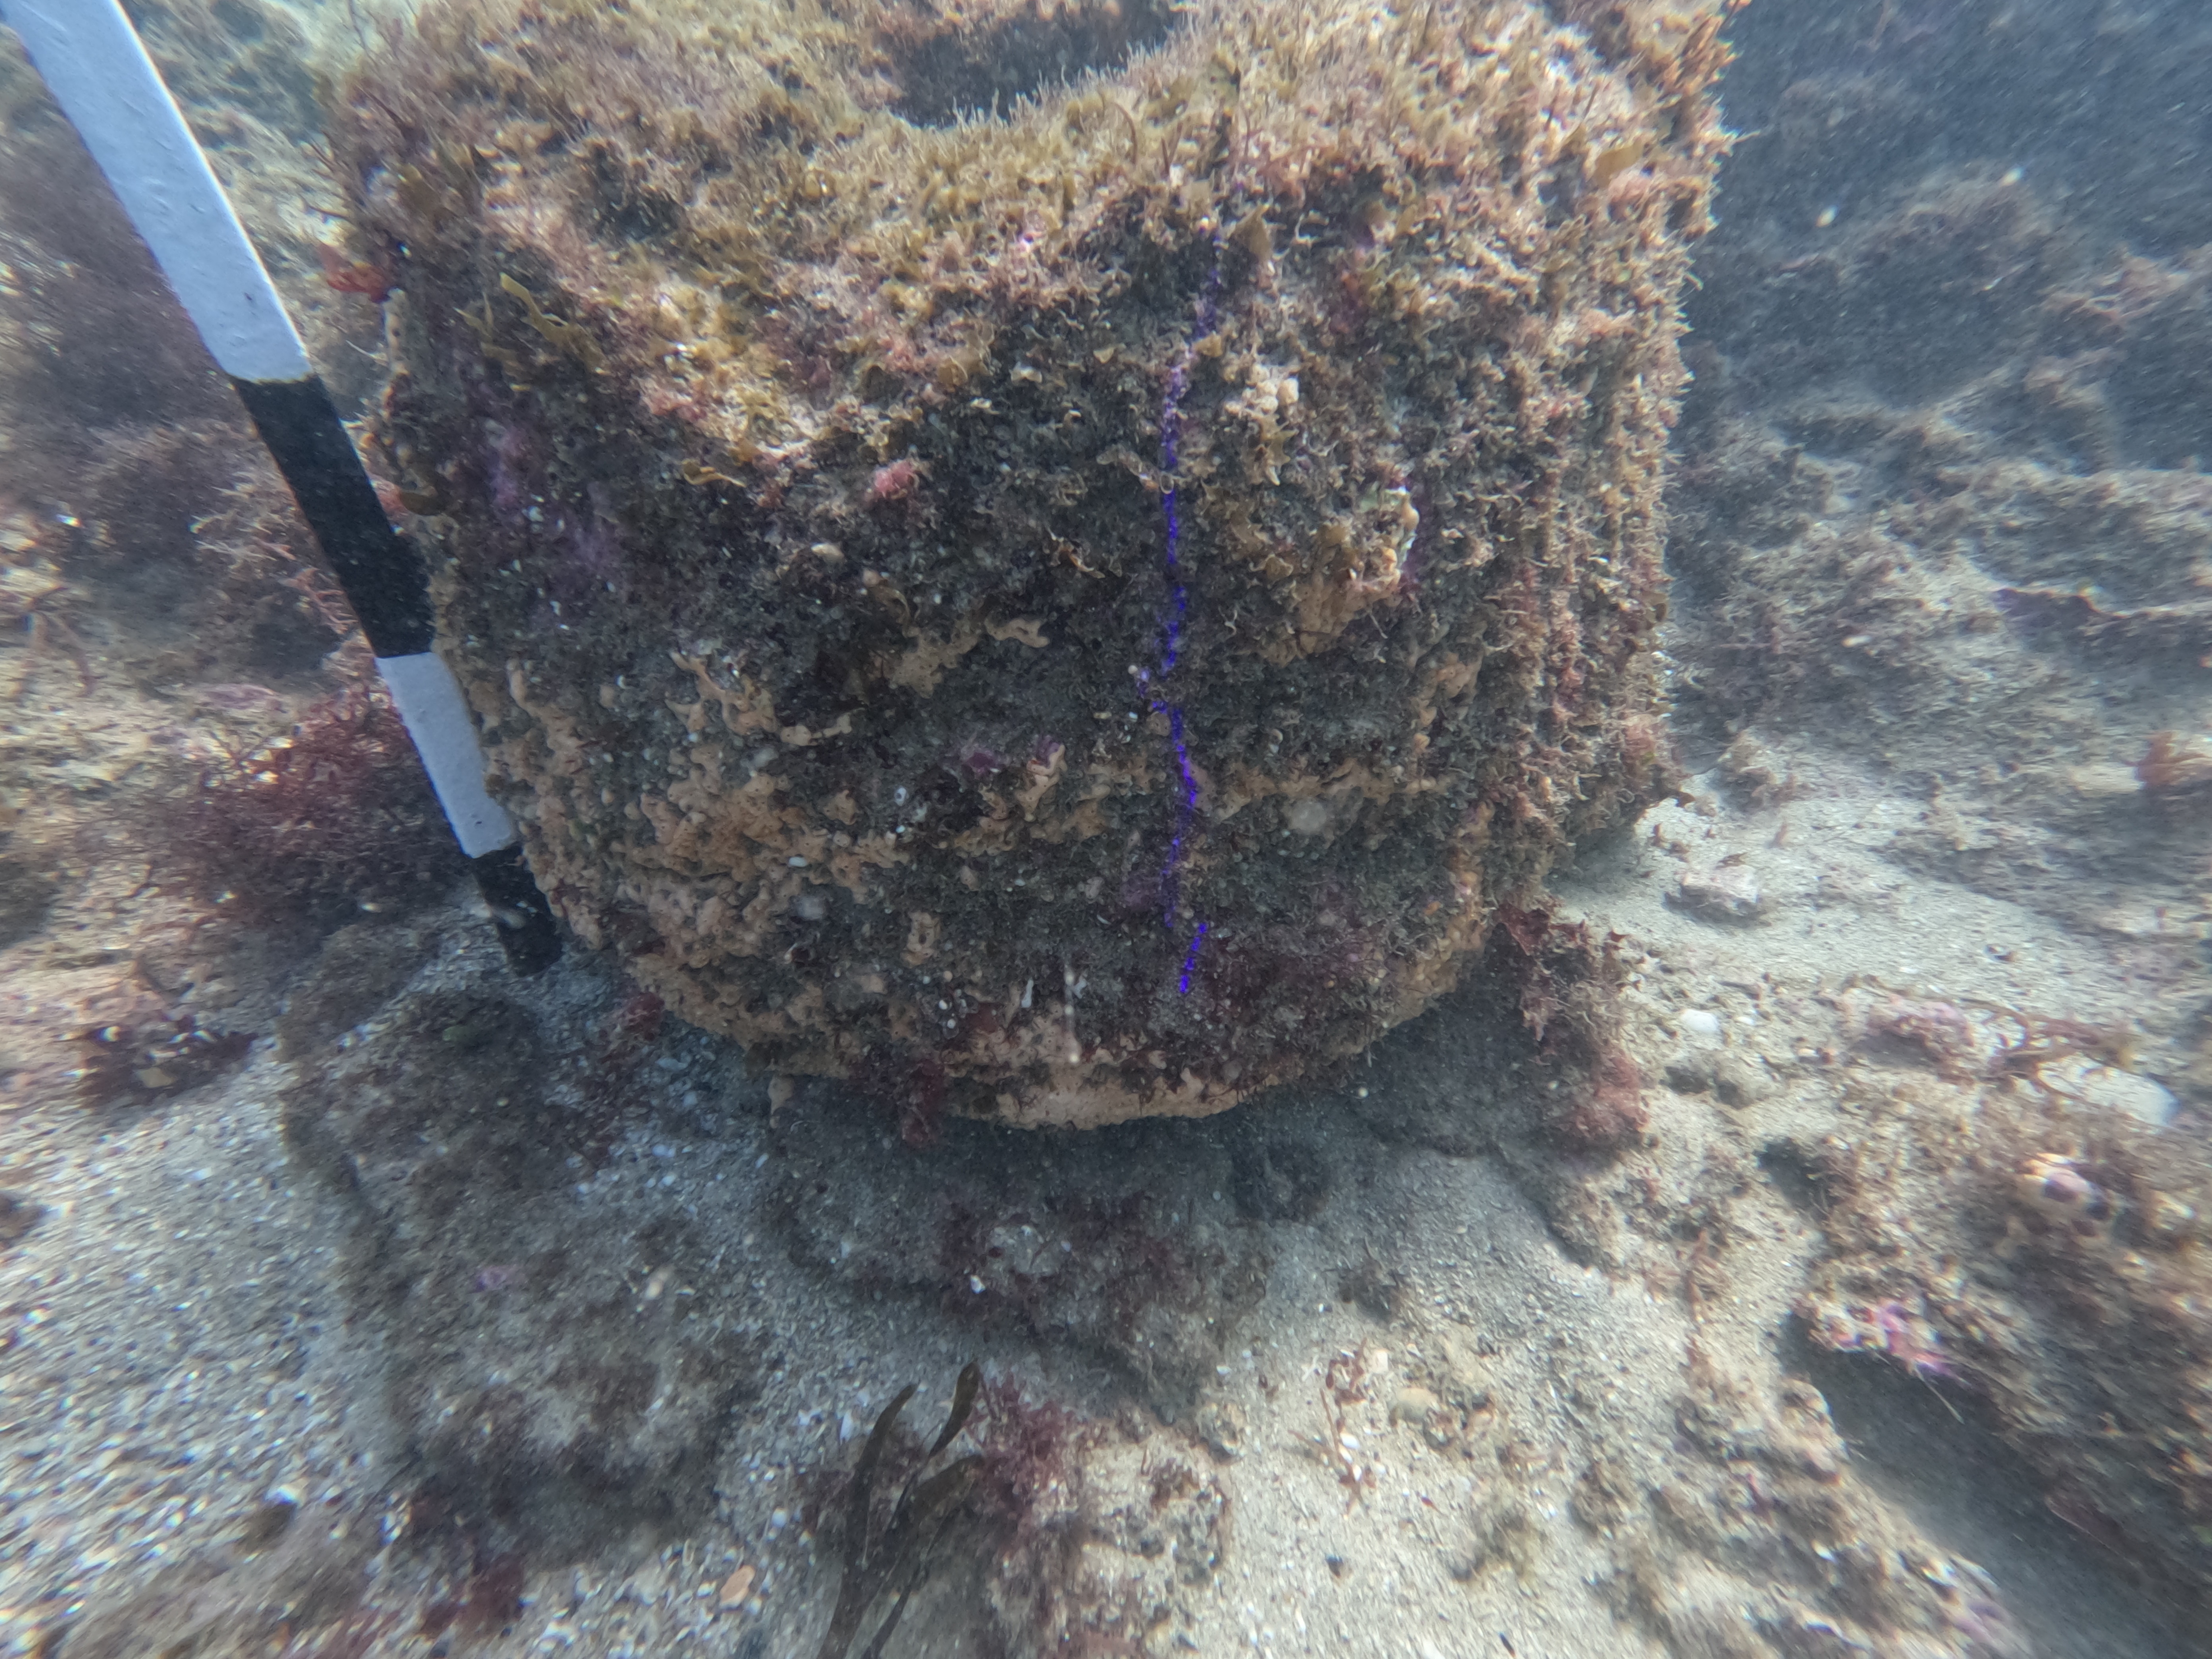

Supplement: Supplementary file 1755 [file G0028081.pdf › Ocean1/G0028081.pdf]

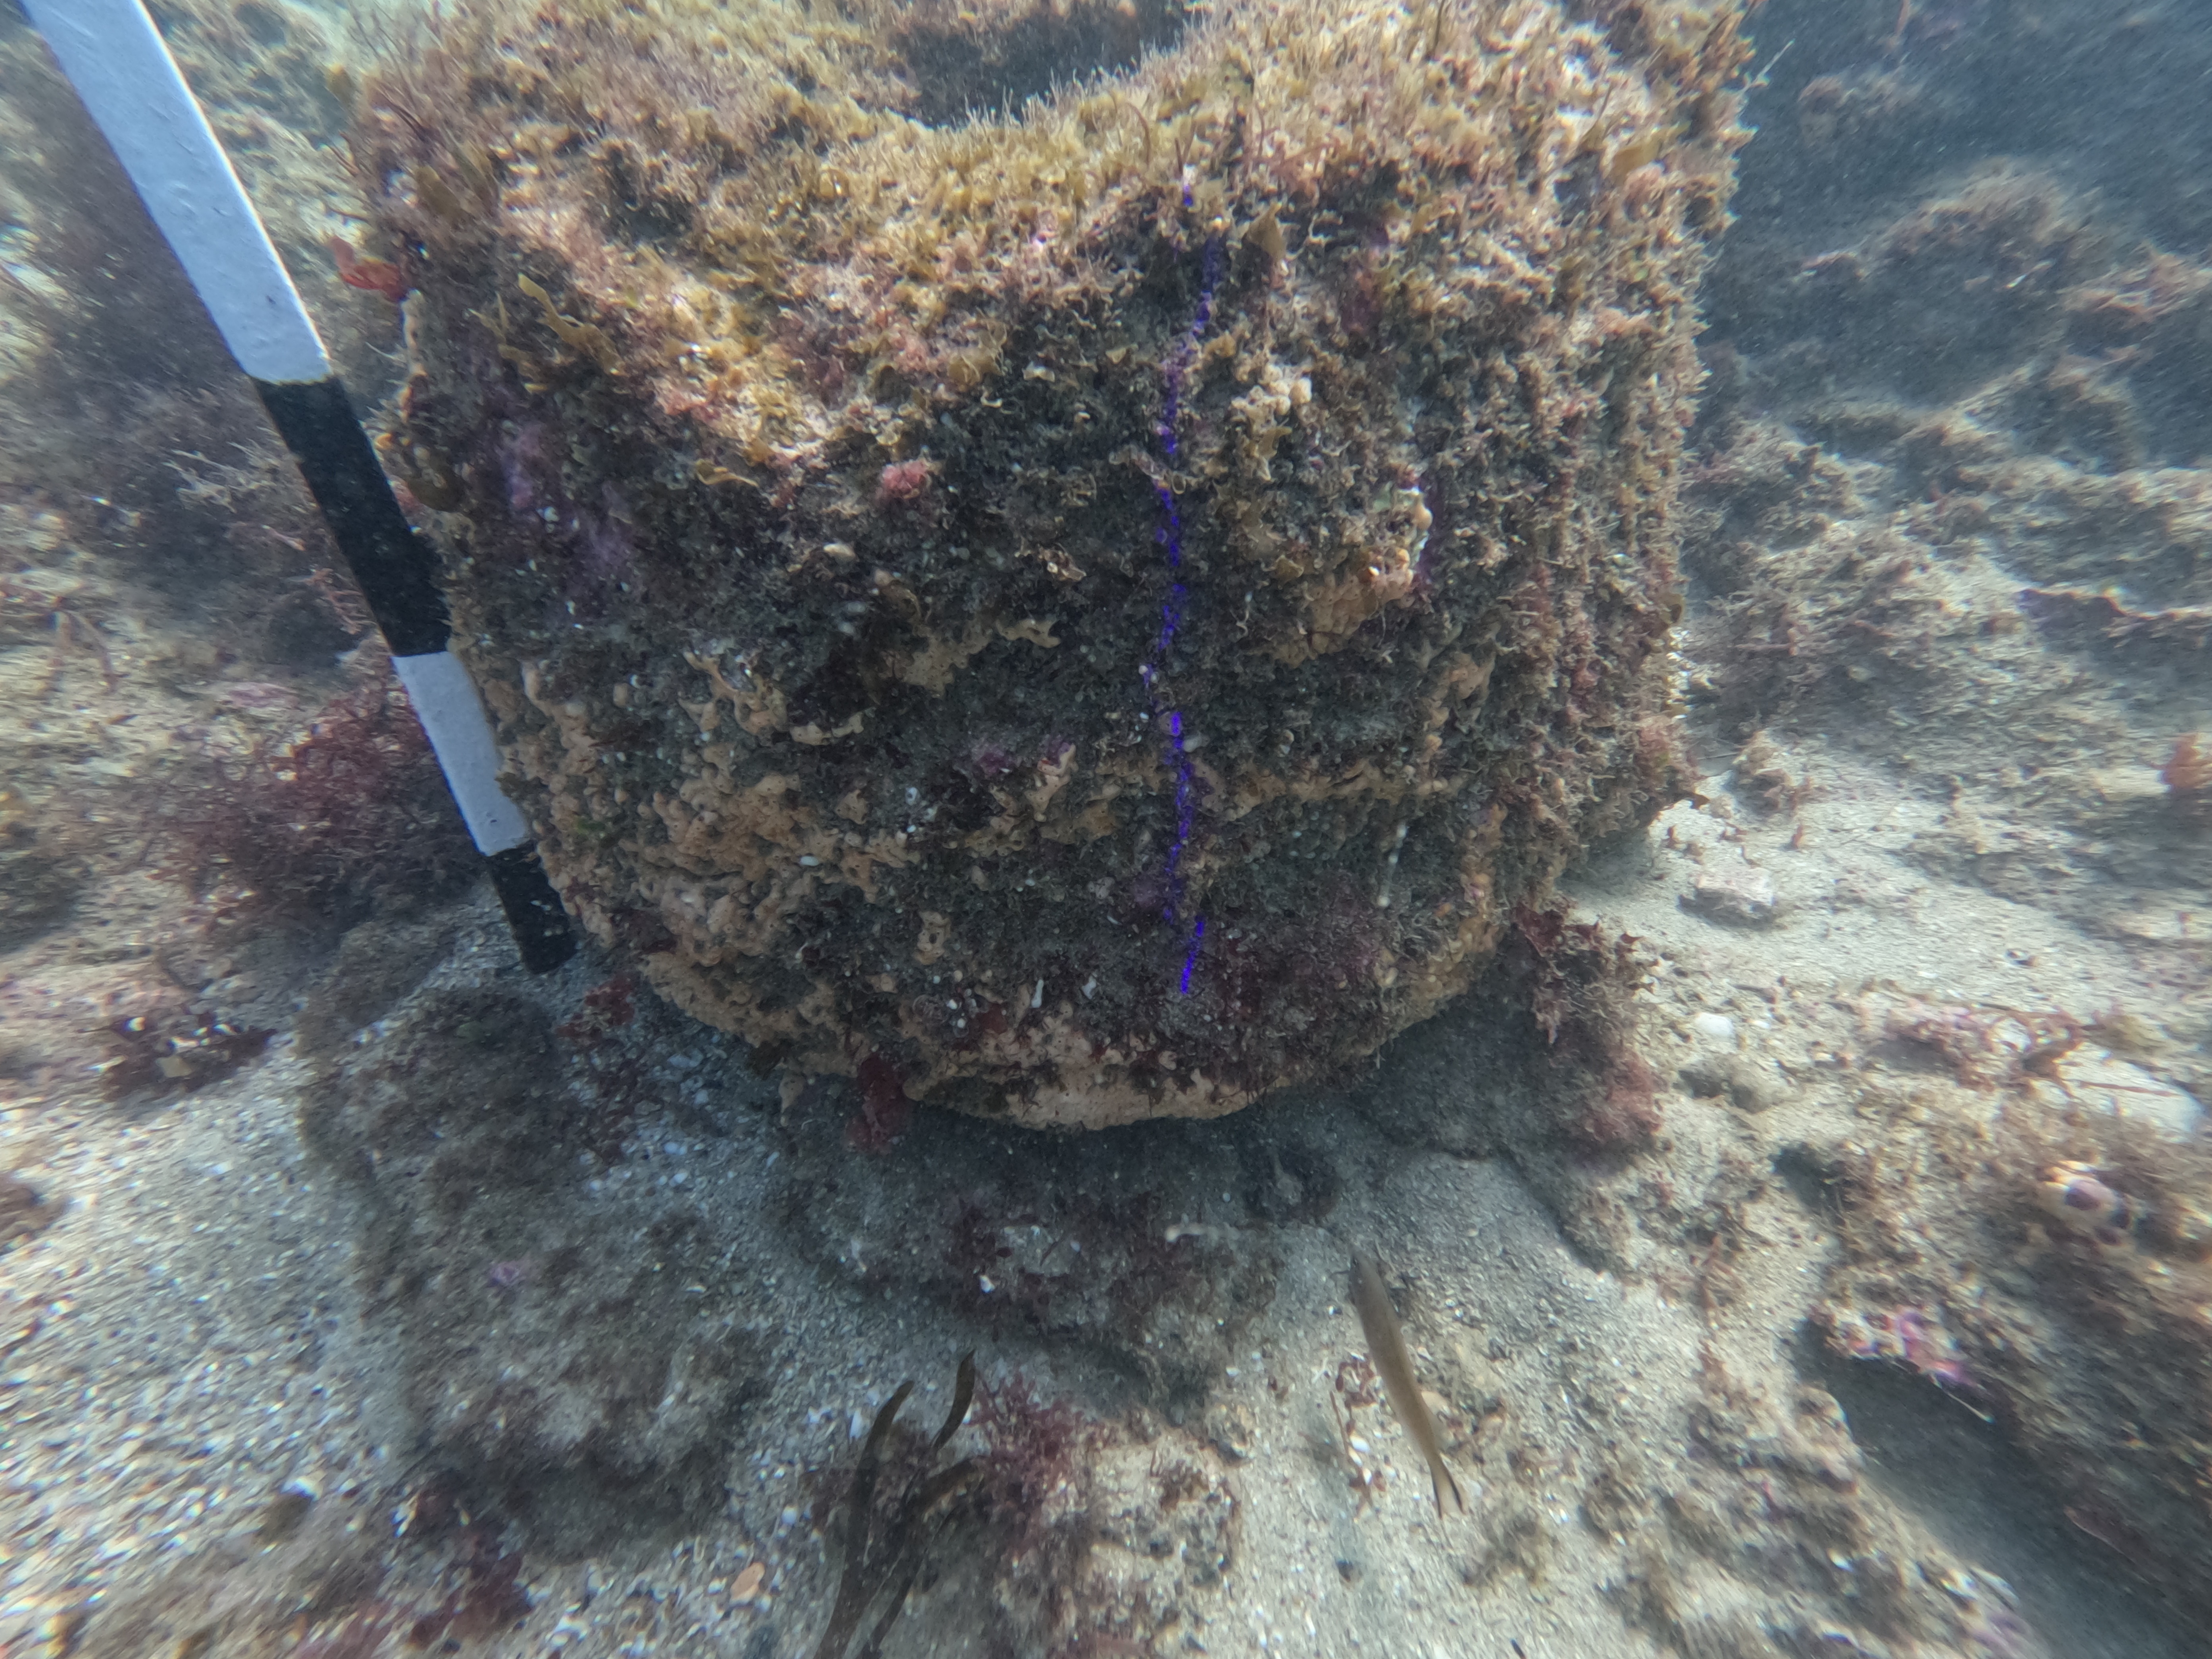

Supplement: Supplementary file 1756 [file G0028082.pdf › Ocean1/G0028082.pdf]

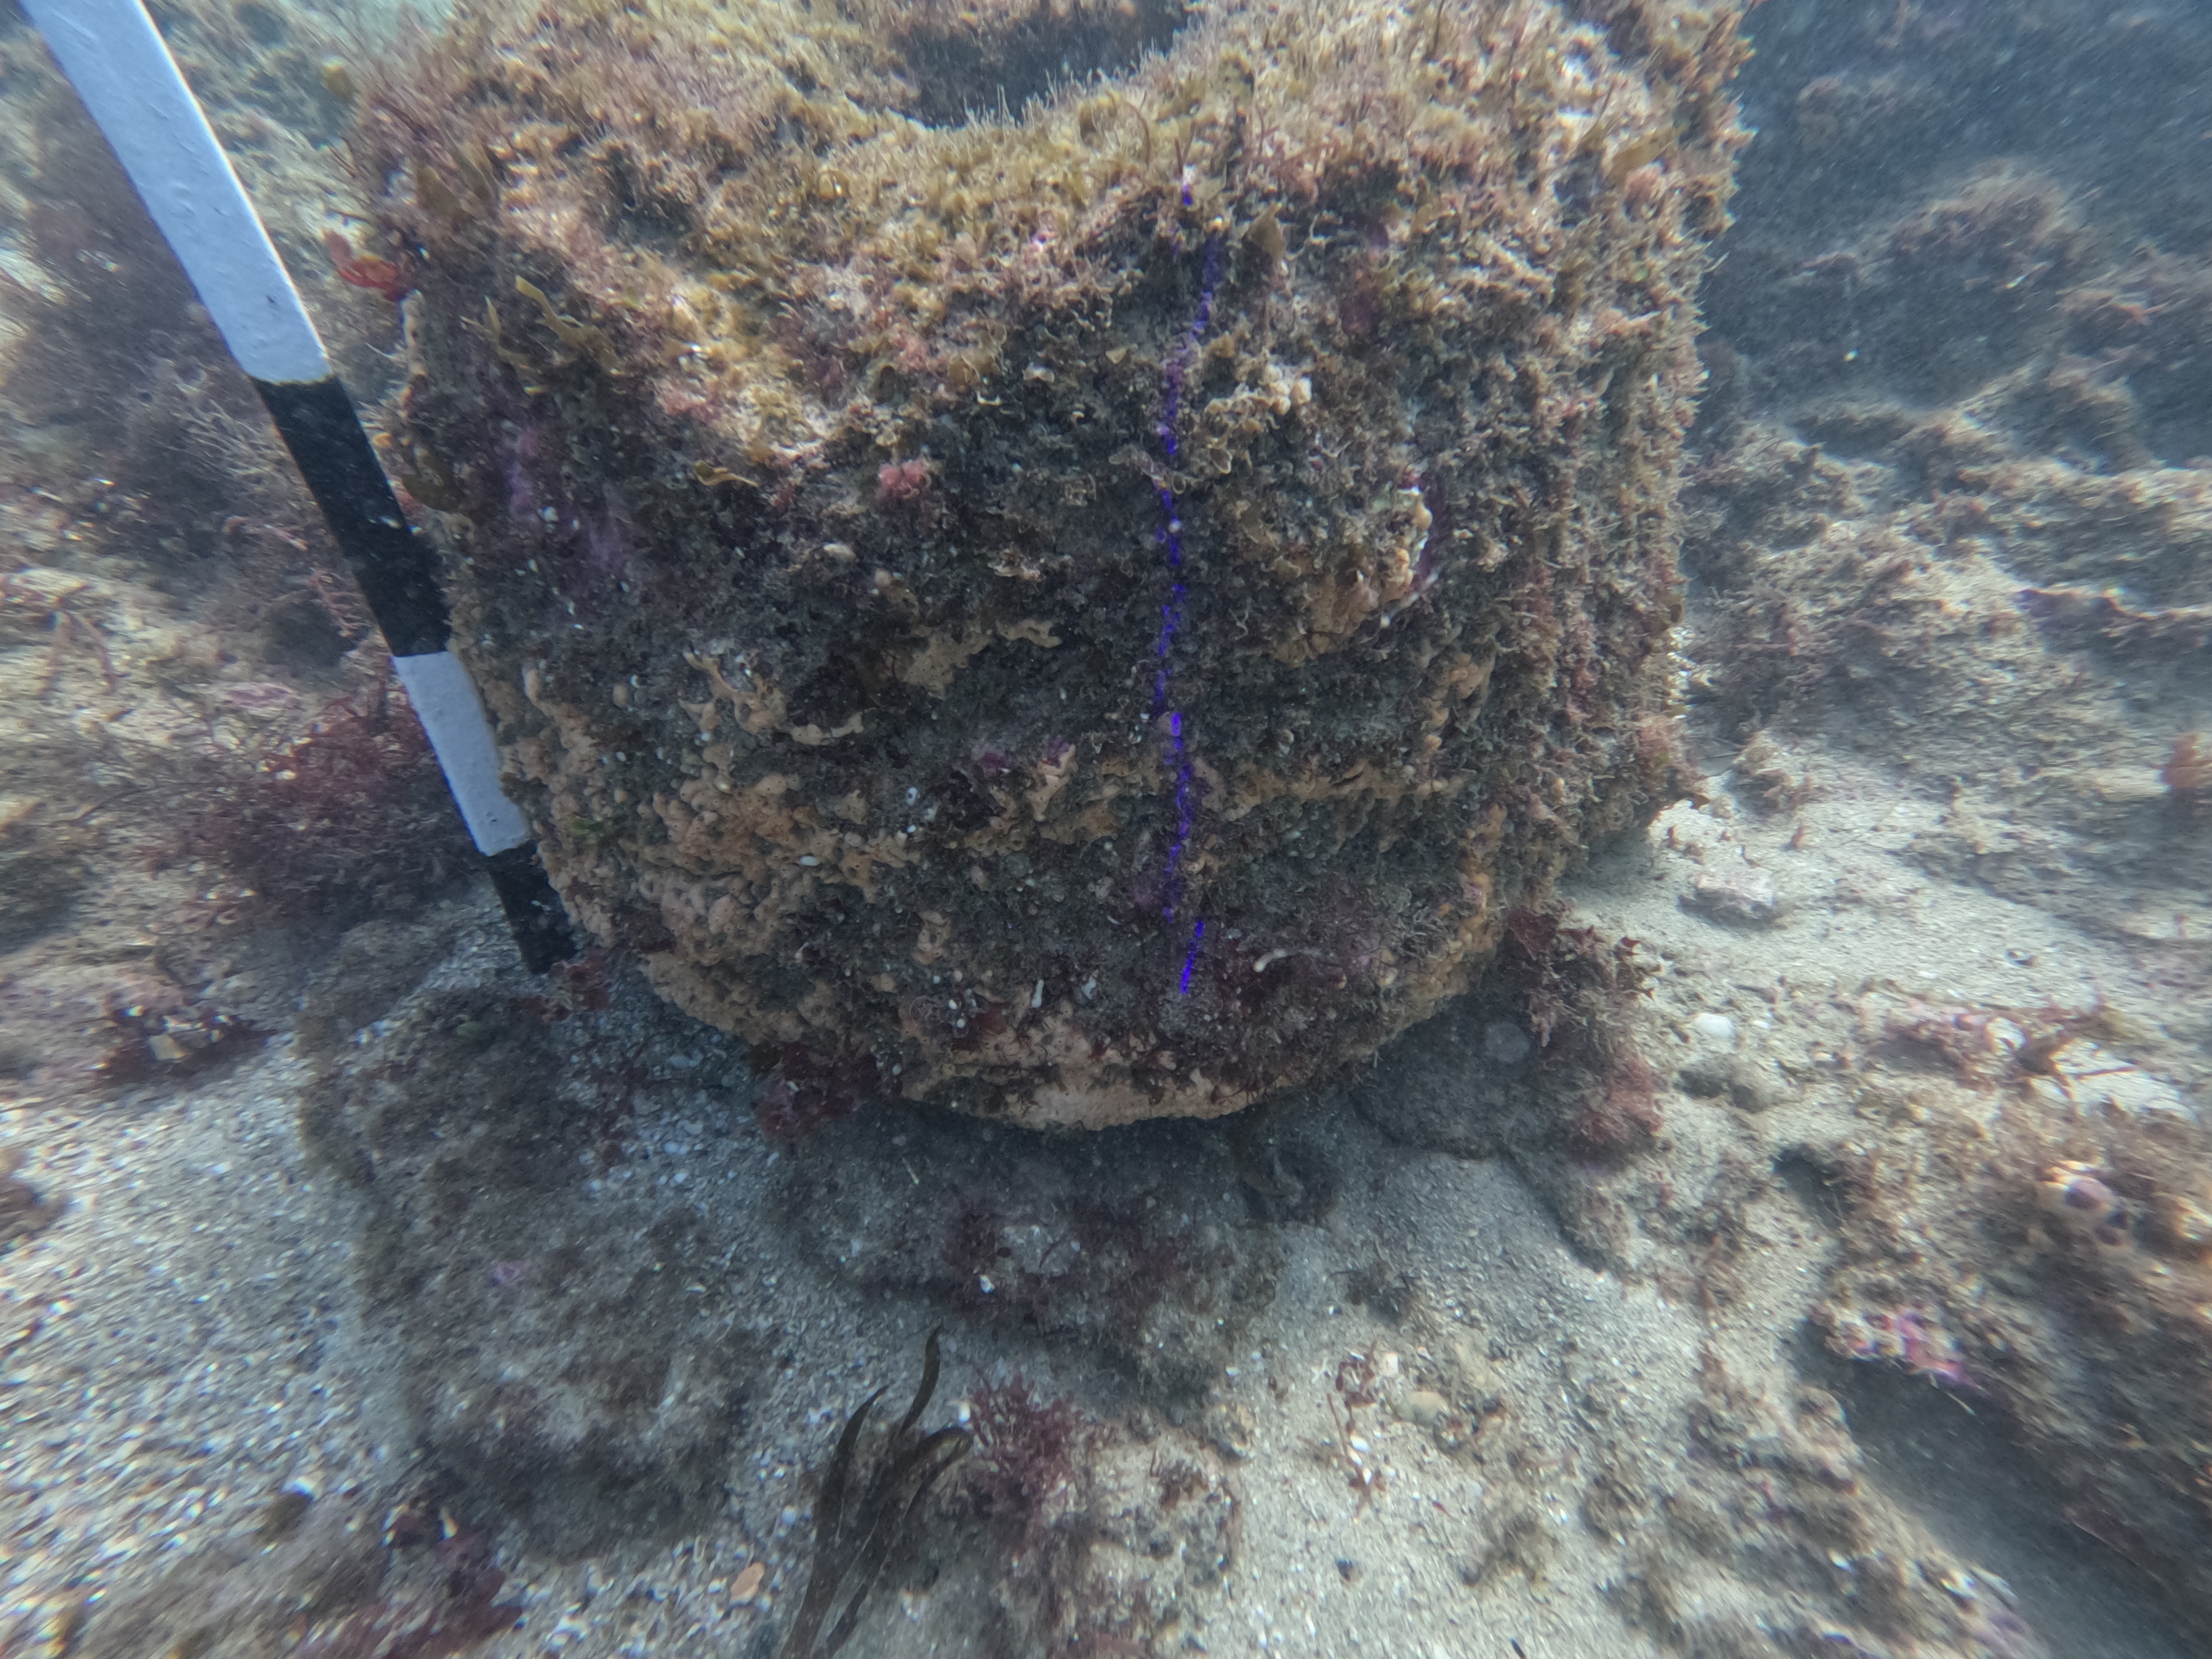

Supplement: Supplementary file 1757 [file G0028083.pdf › Ocean1/G0028083.pdf]

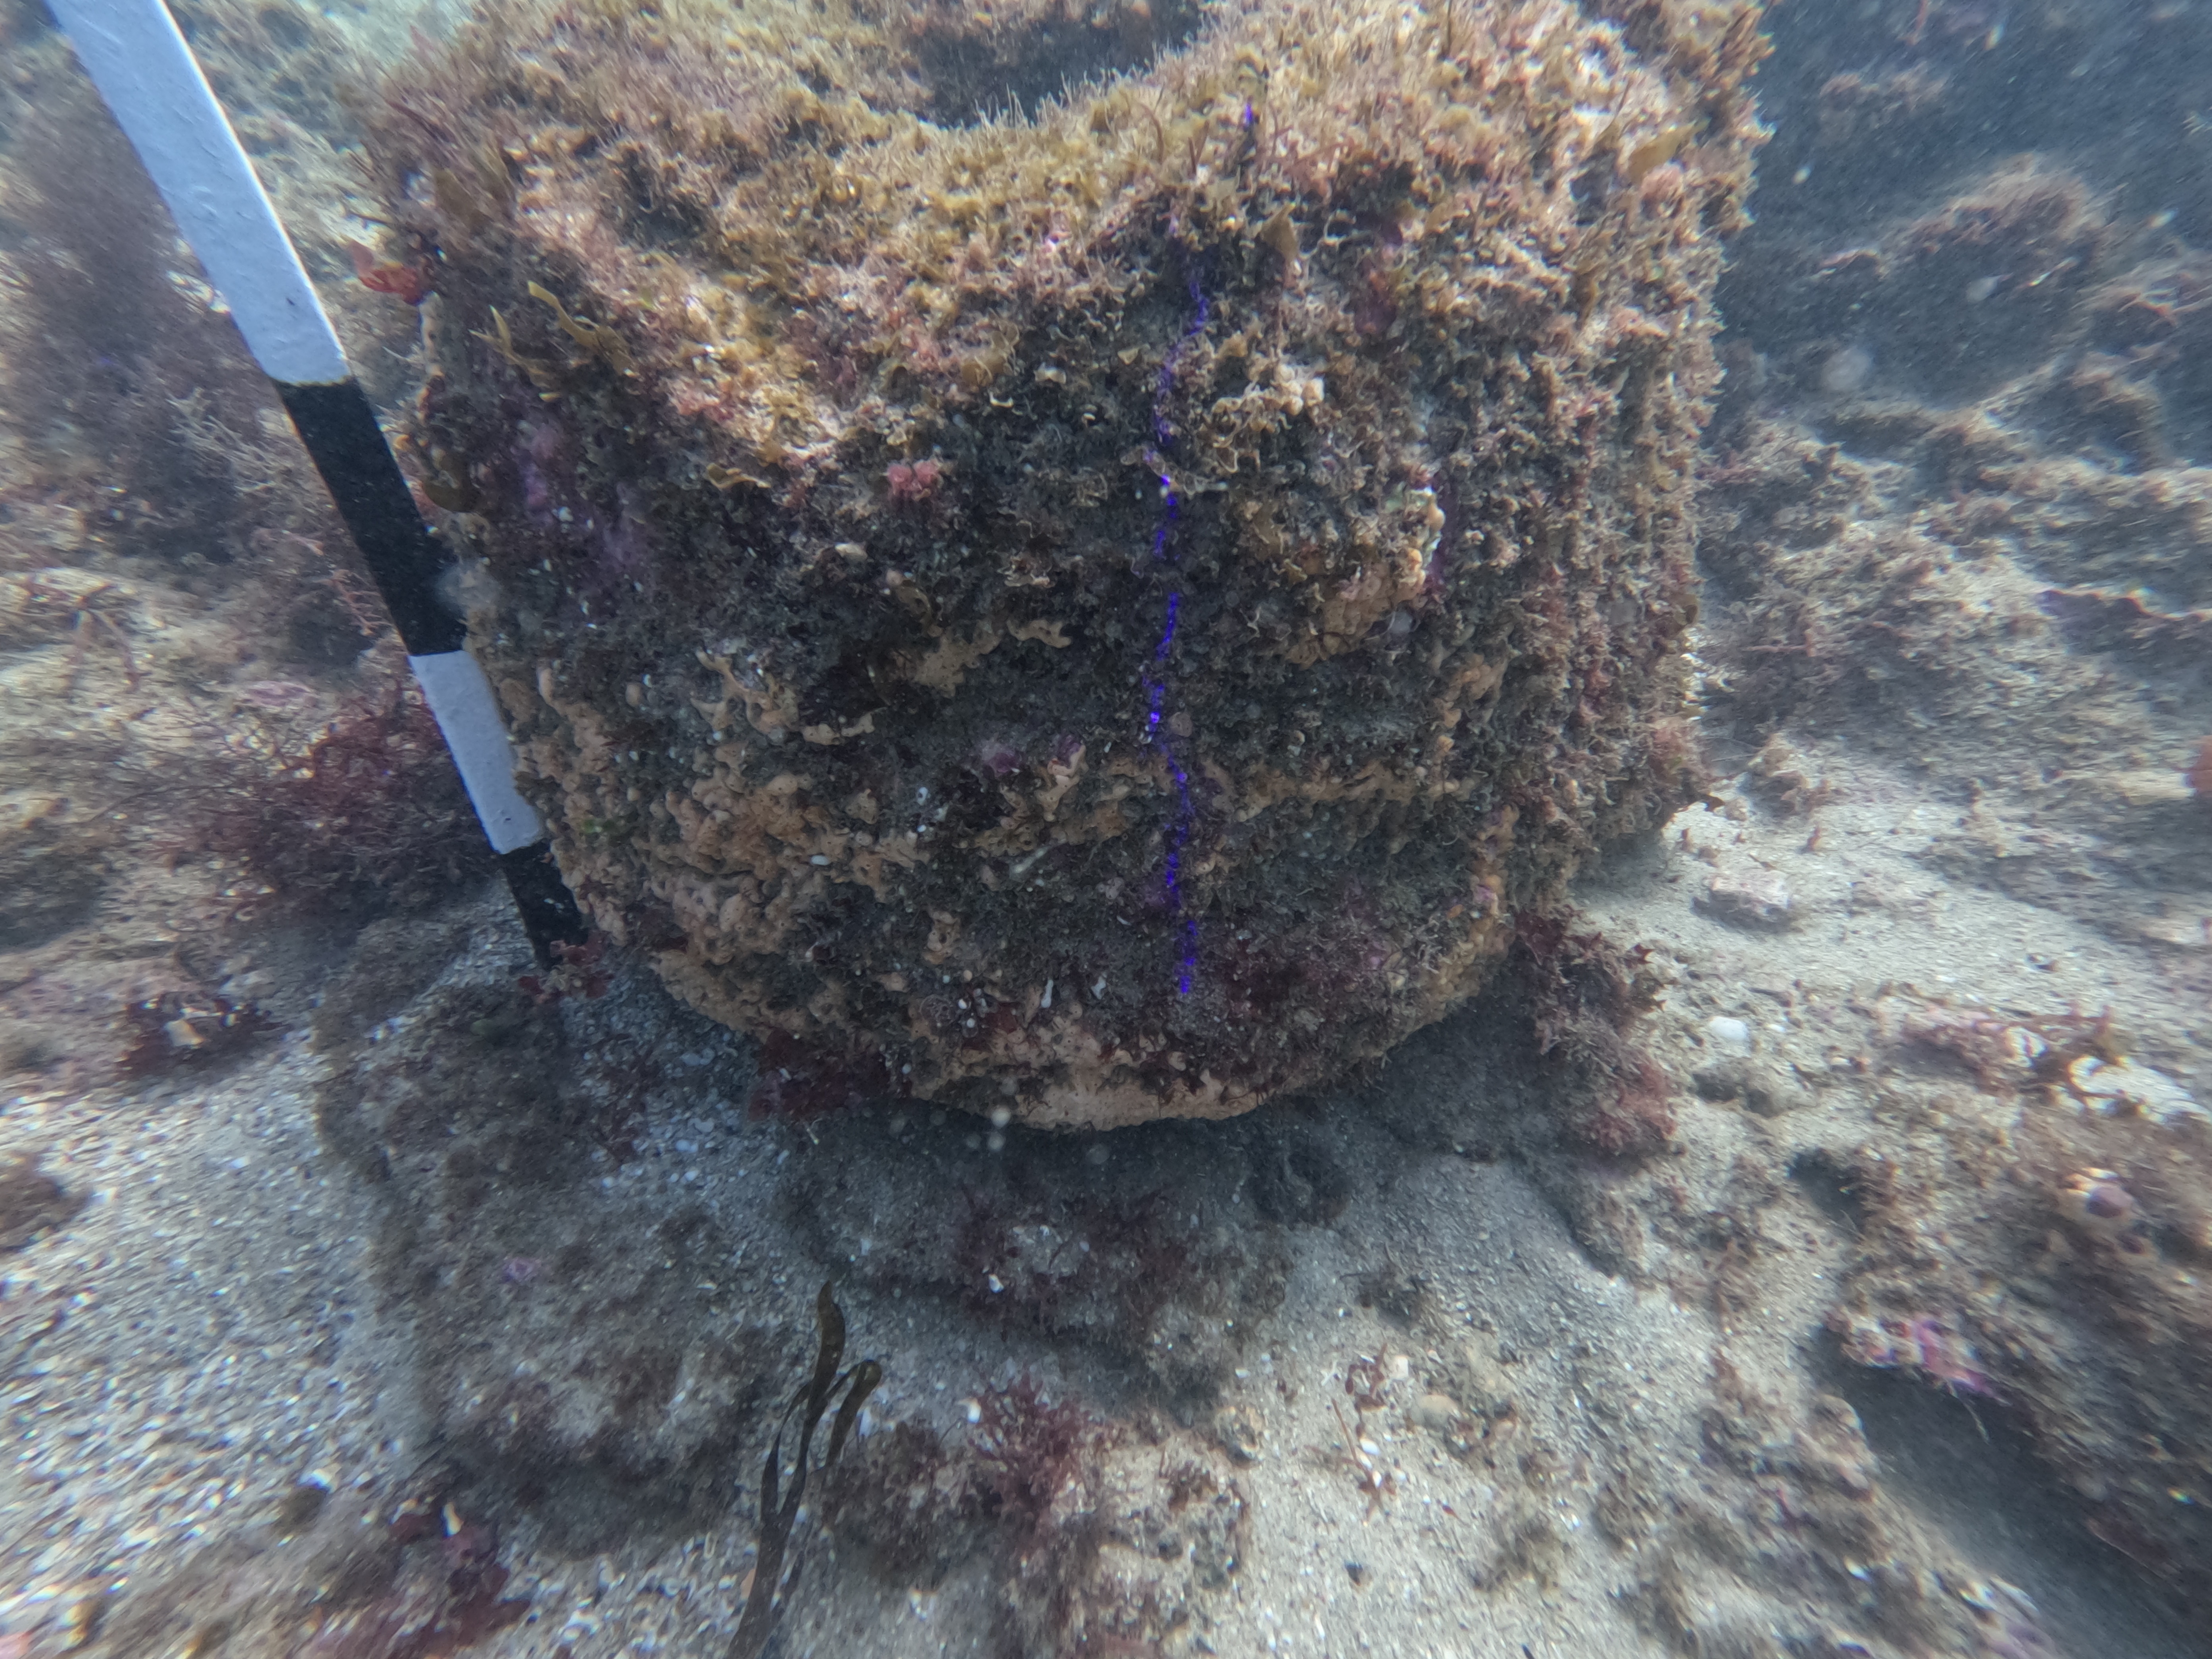

Supplement: Supplementary file 1758 [file G0028084.pdf › Ocean1/G0028084.pdf]

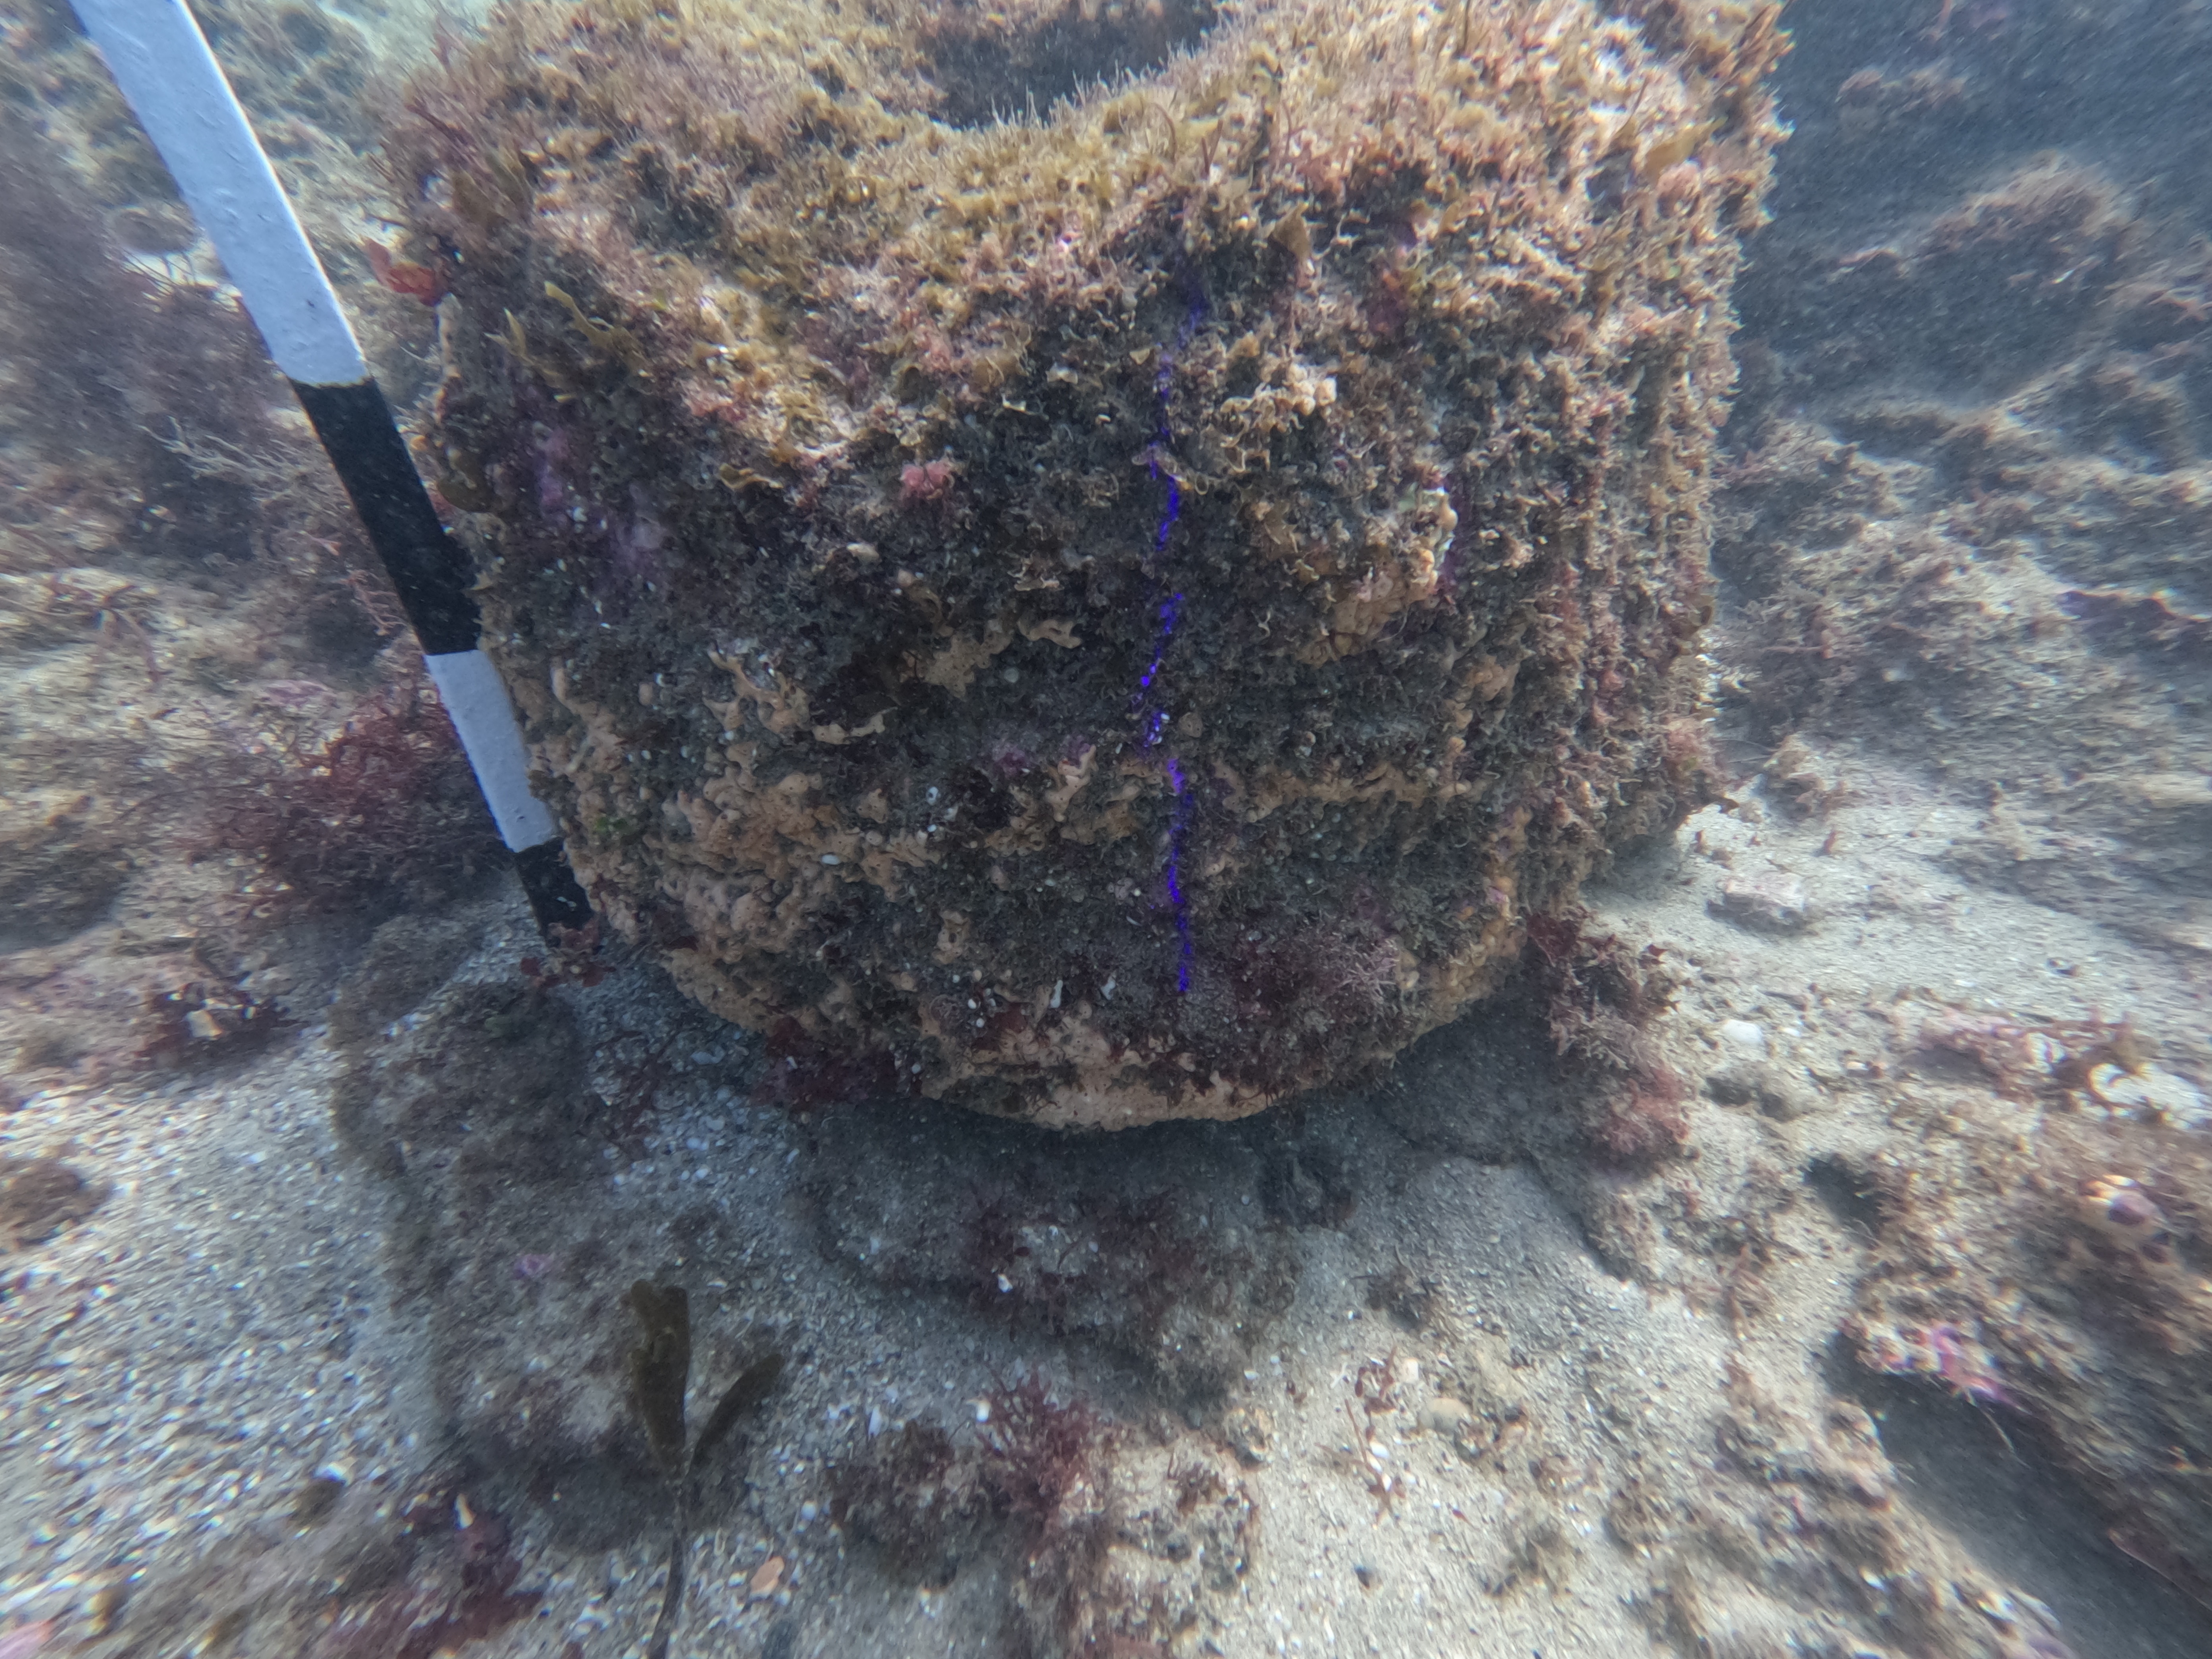

Supplement: Supplementary file 1759 [file G0028085.pdf › Ocean1/G0028085.pdf]

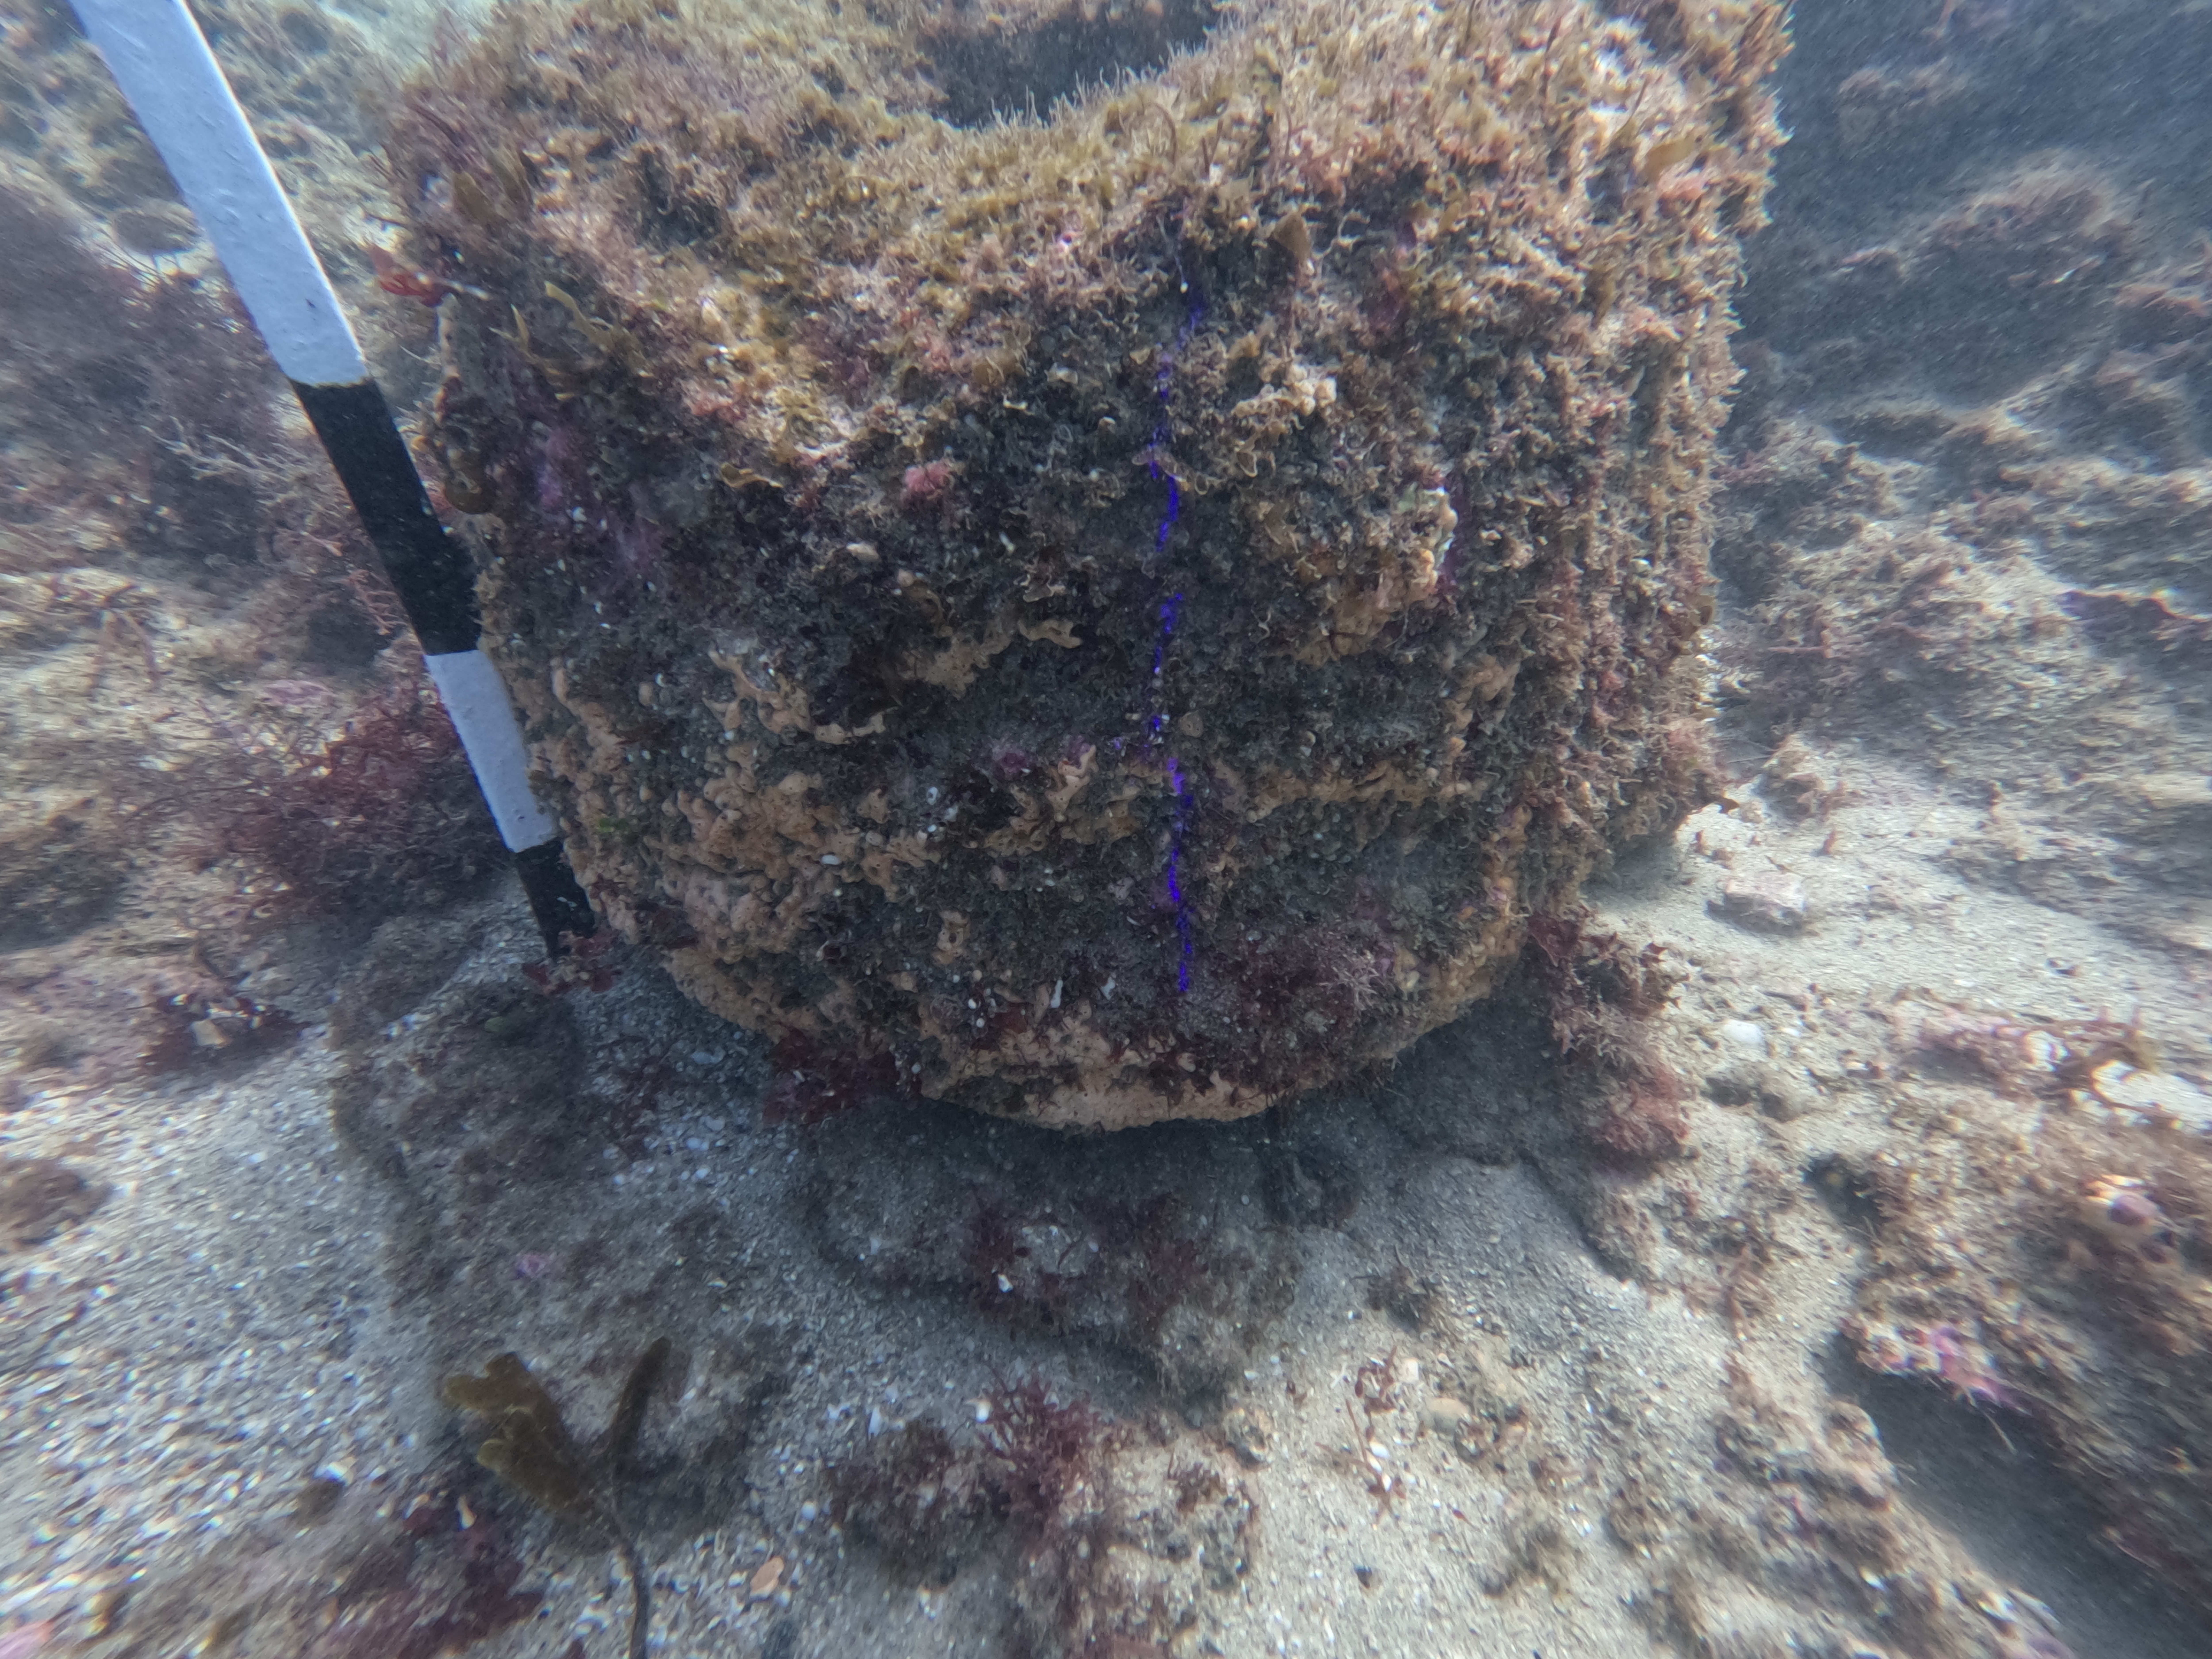

Supplement: Supplementary file 1760 [file G0028086.pdf › Ocean1/G0028086.pdf]

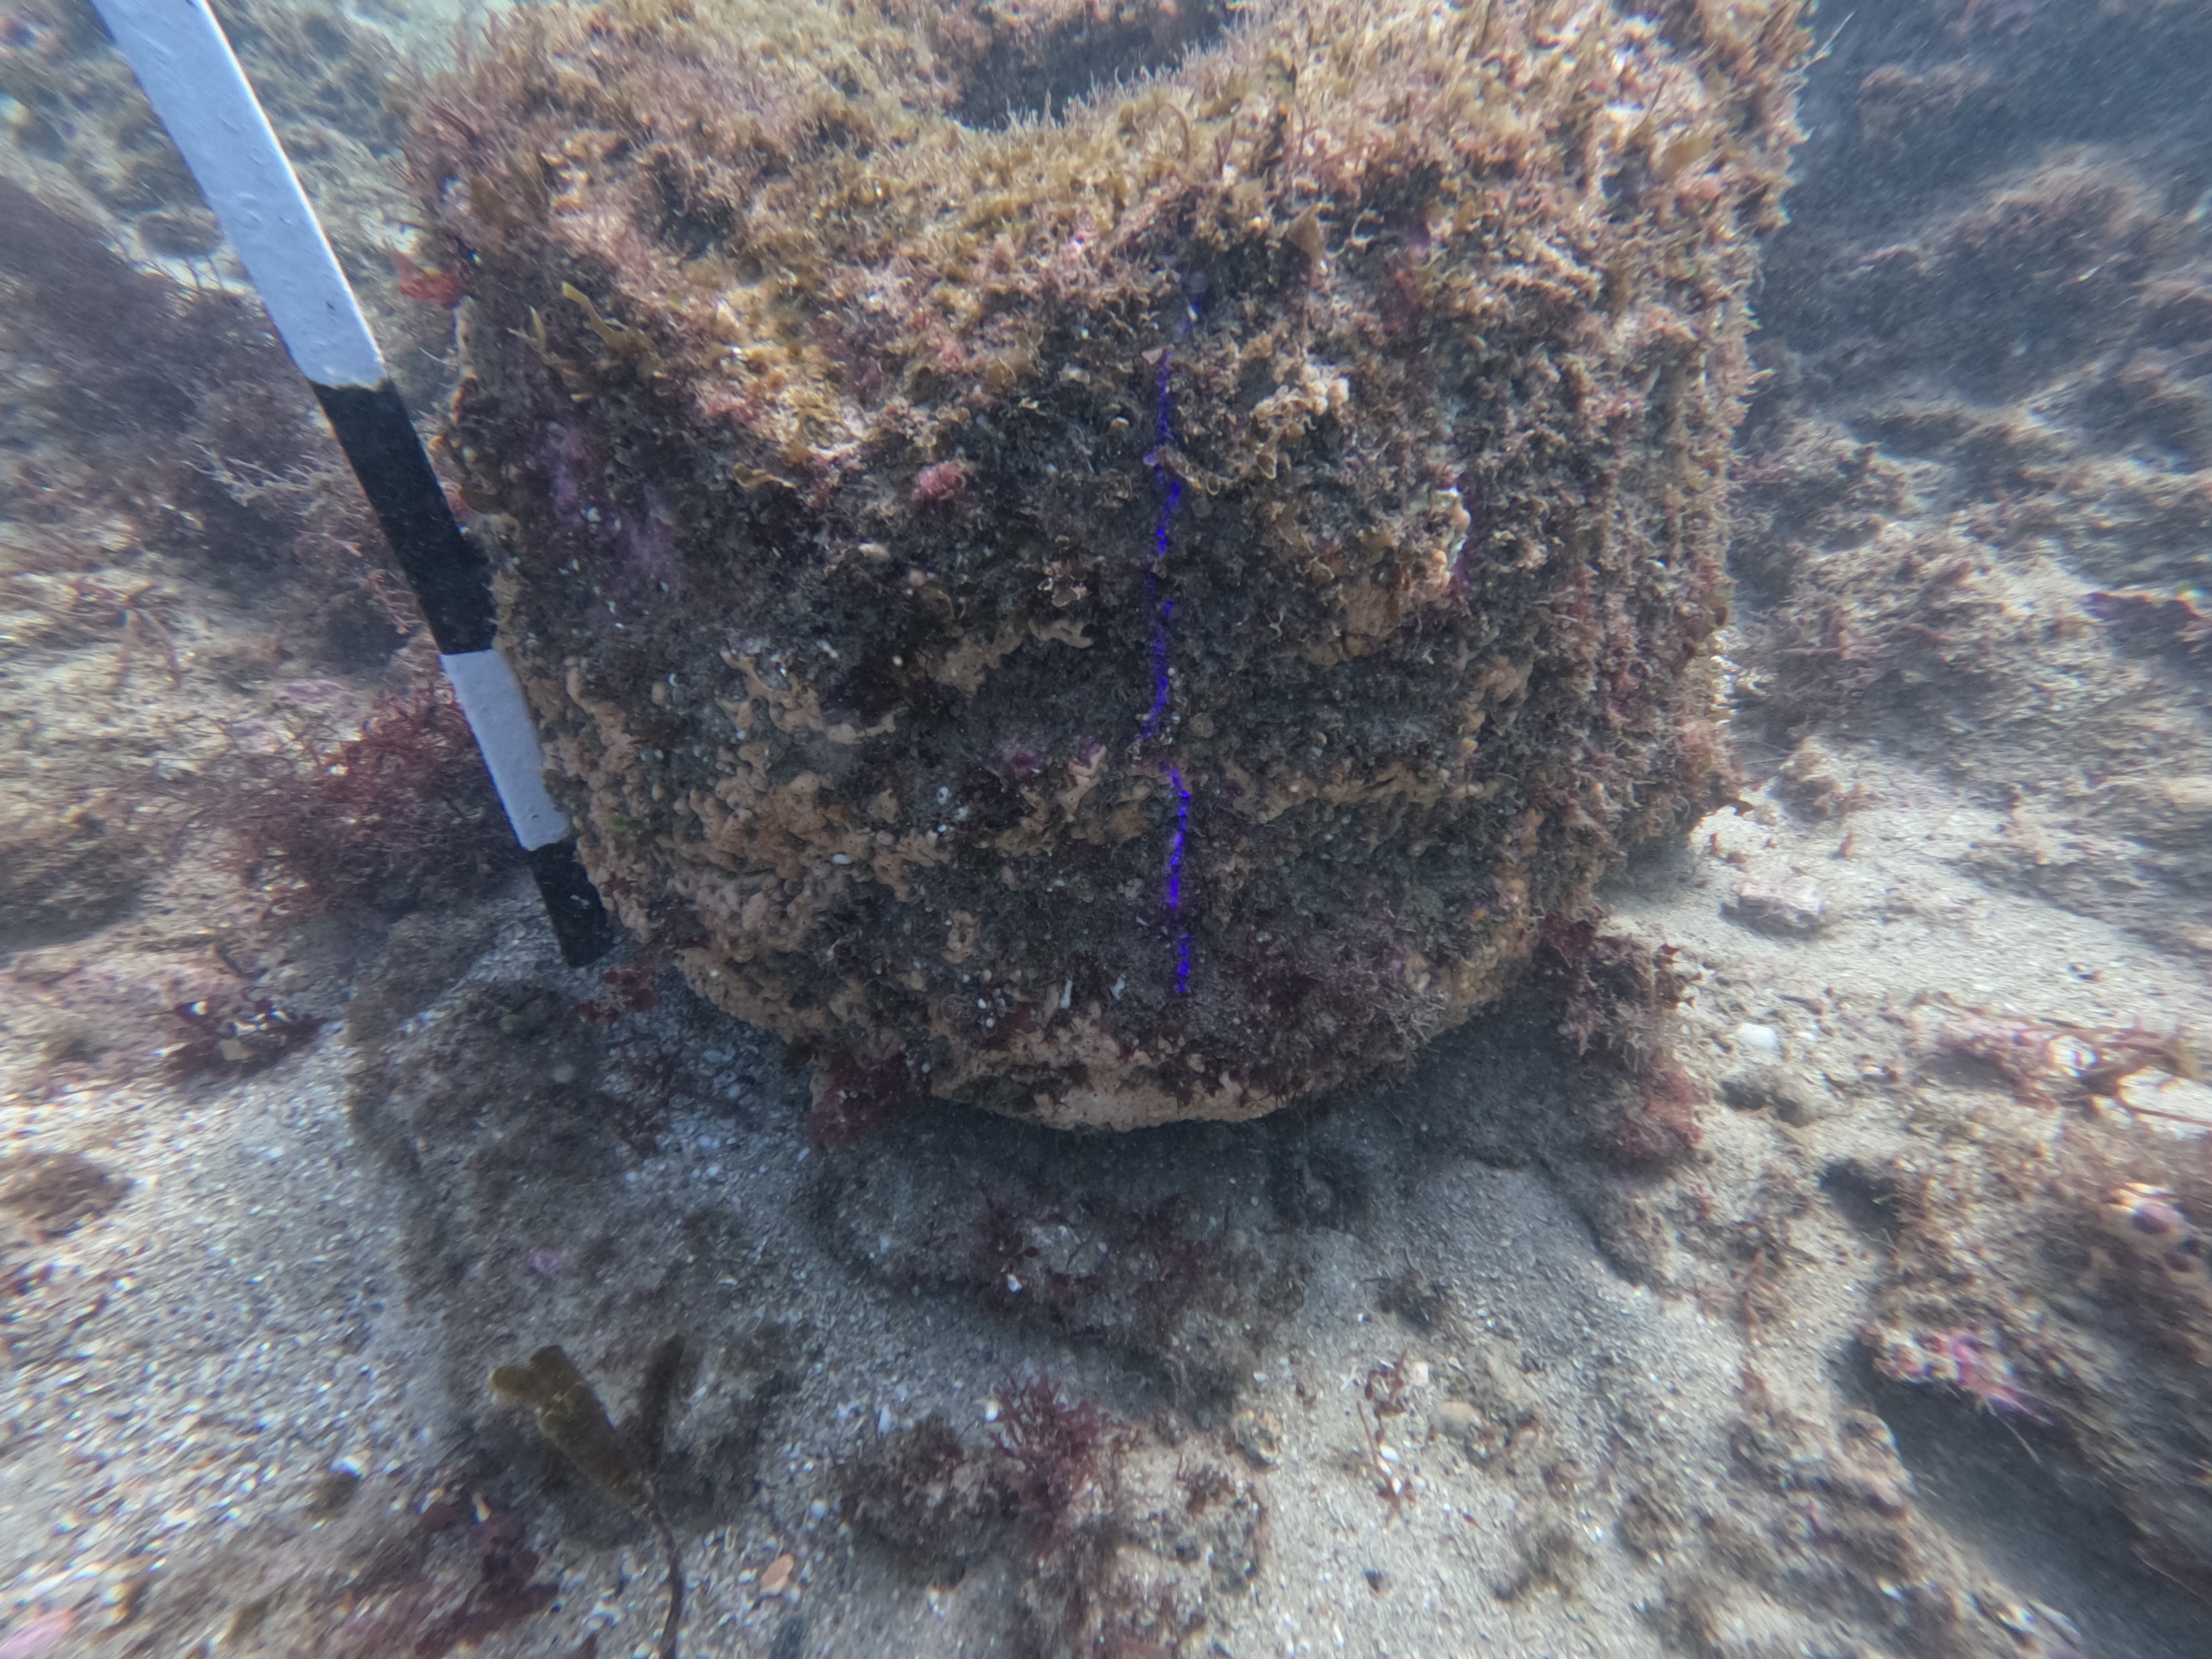

Supplement: Supplementary file 1761 [file G0028087.pdf › Ocean1/G0028087.pdf]

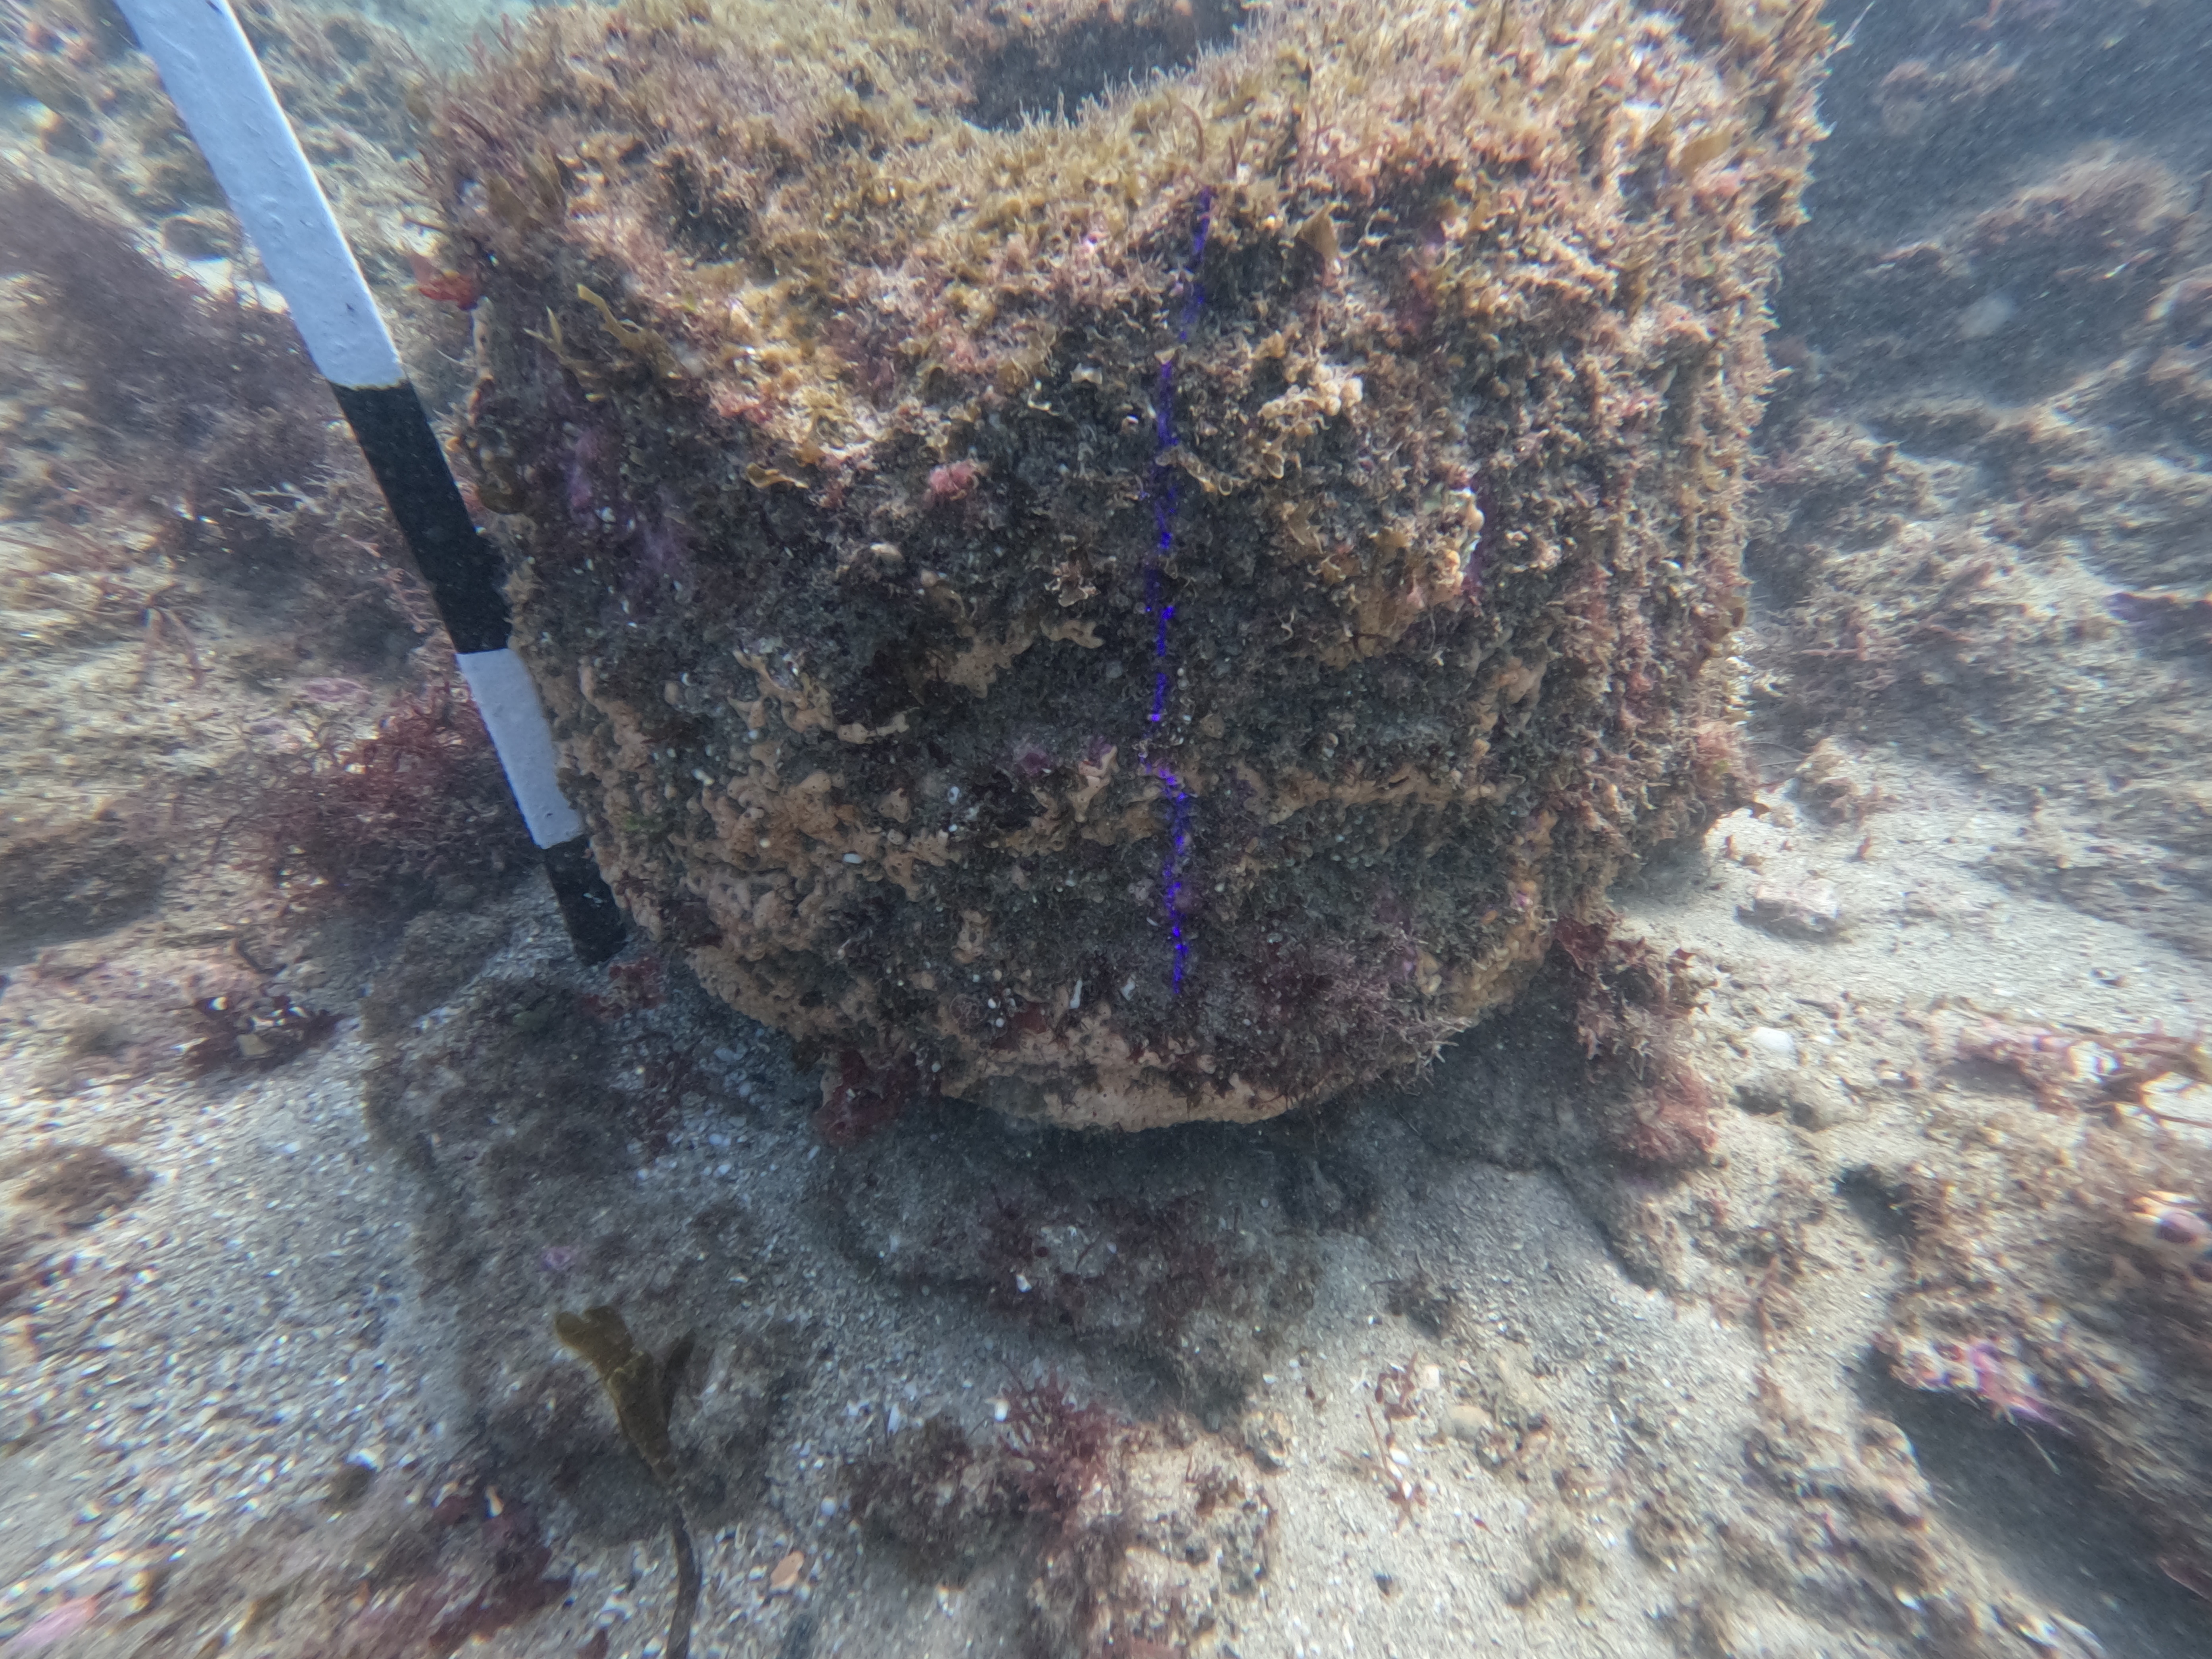

Supplement: Supplementary file 1762 [file G0028088.pdf › Ocean1/G0028088.pdf]

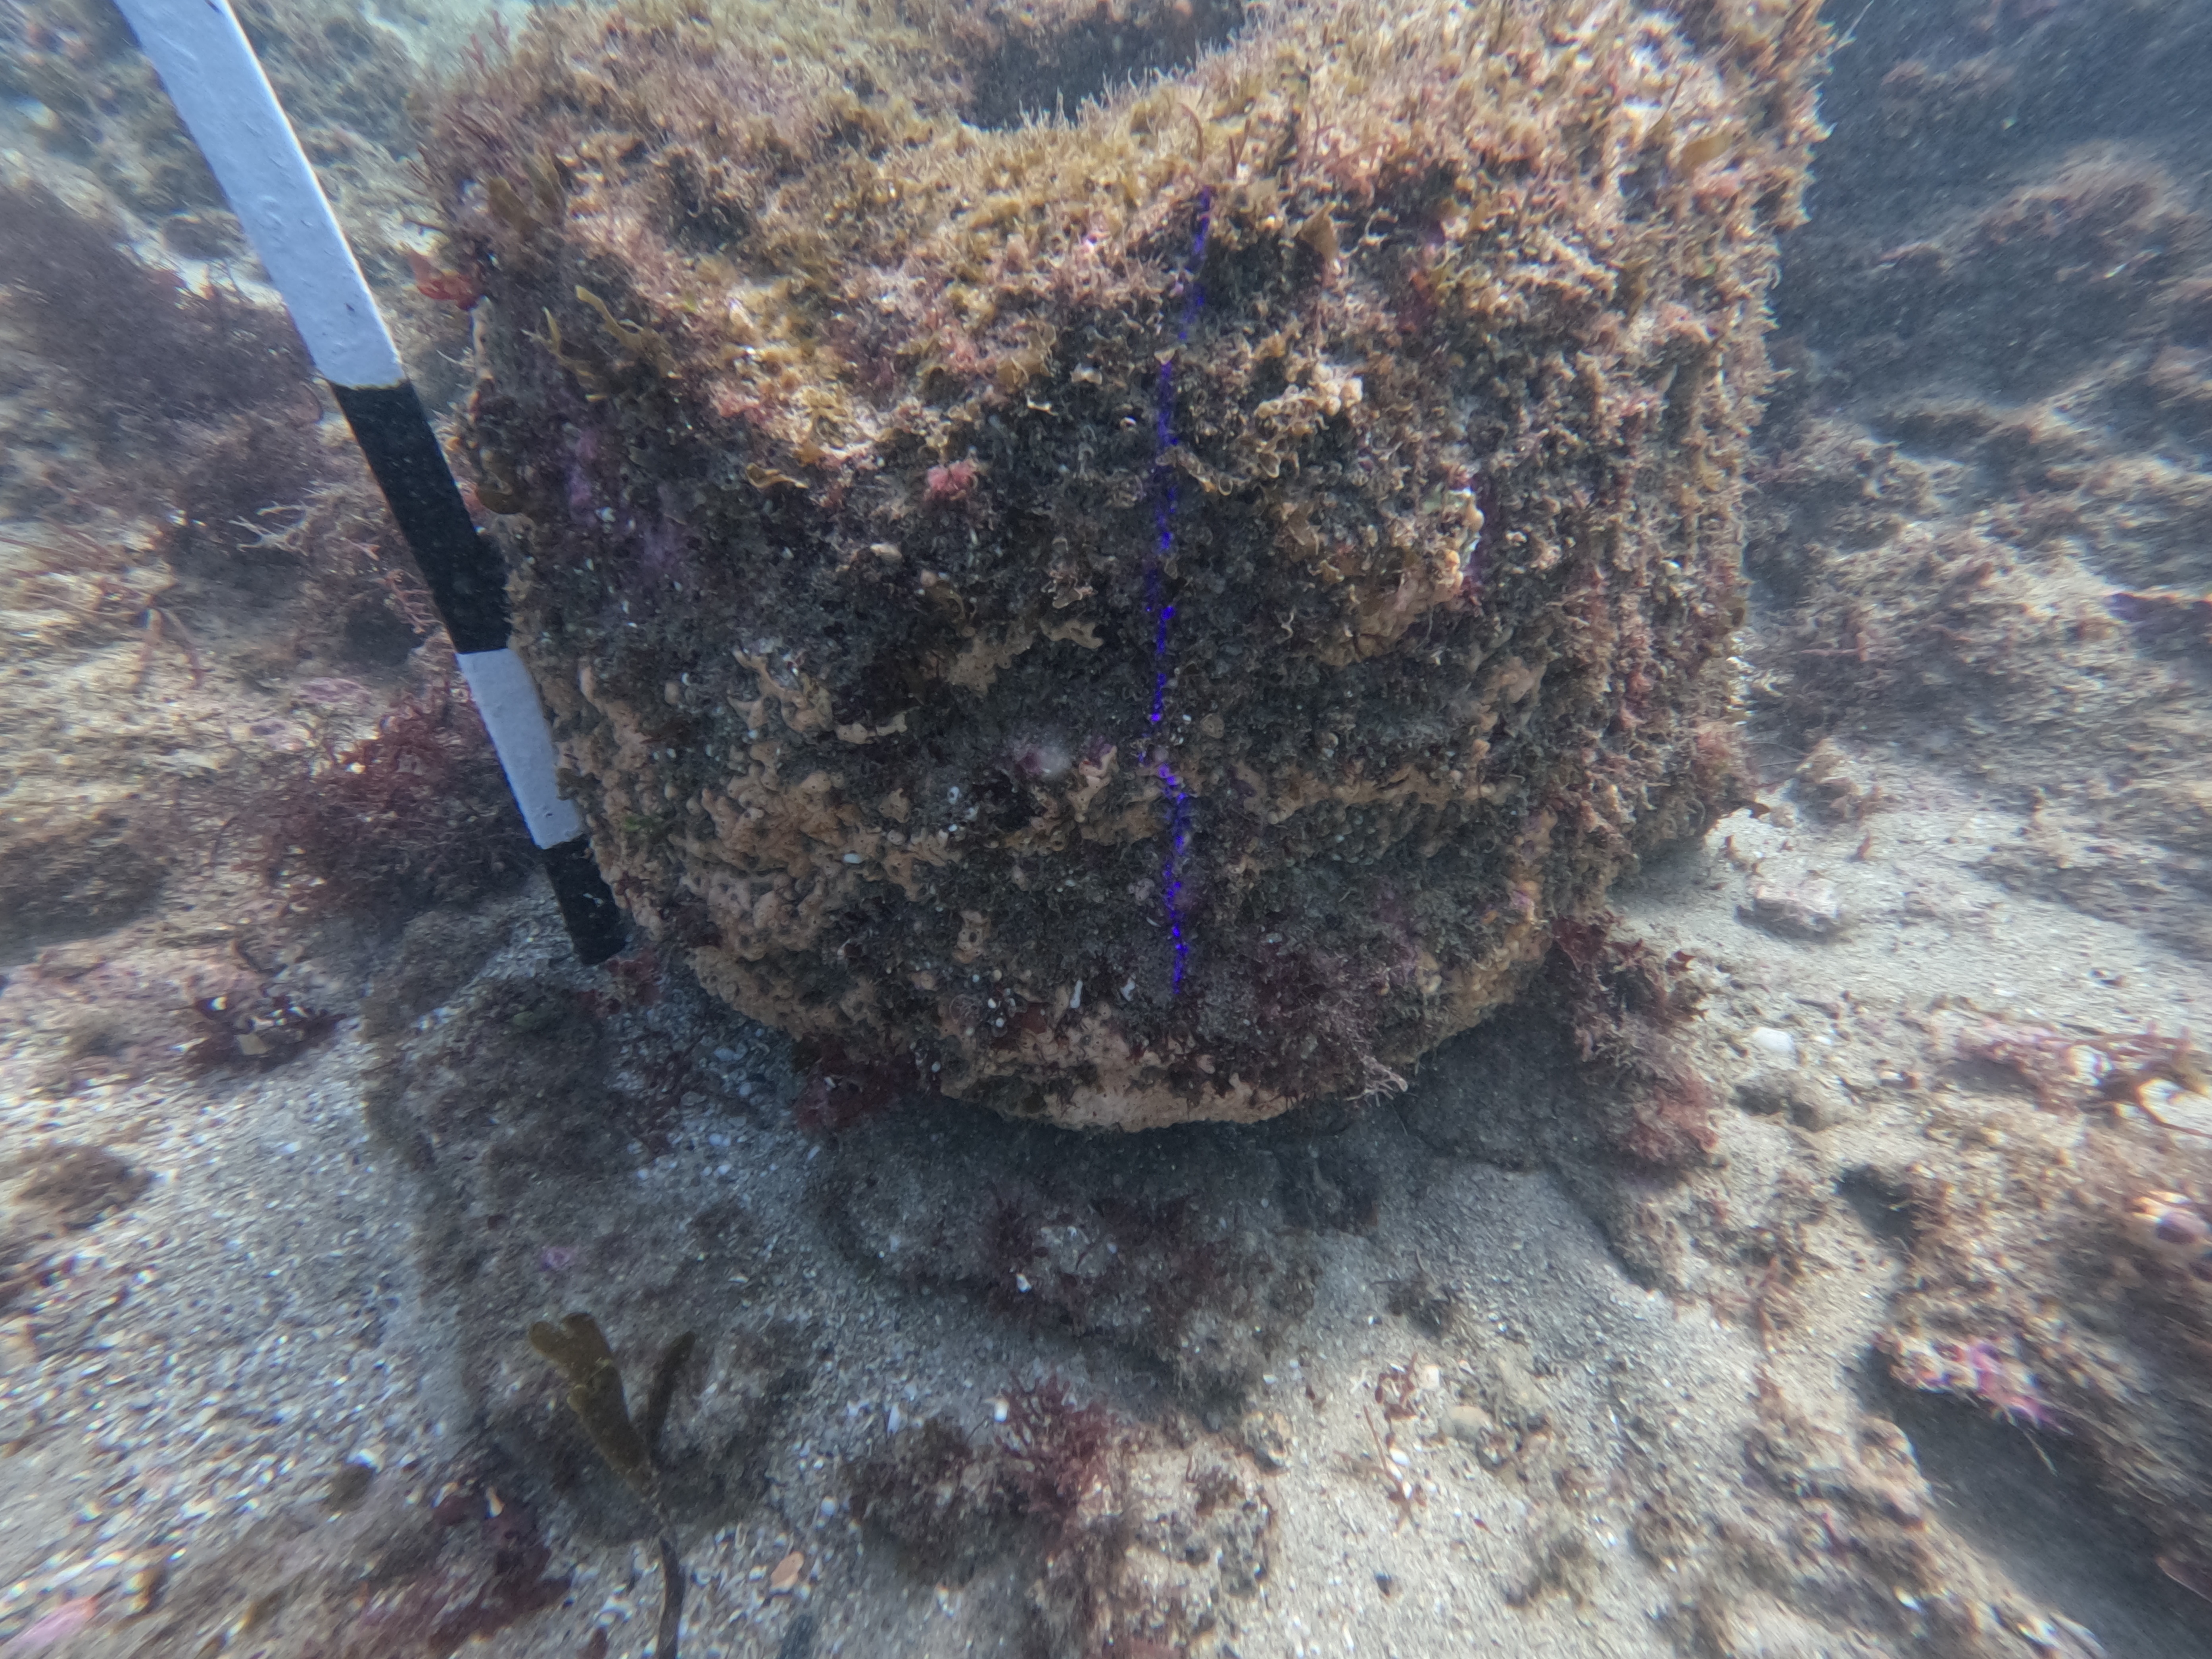

Supplement: Supplementary file 1763 [file G0028089.pdf › Ocean1/G0028089.pdf]

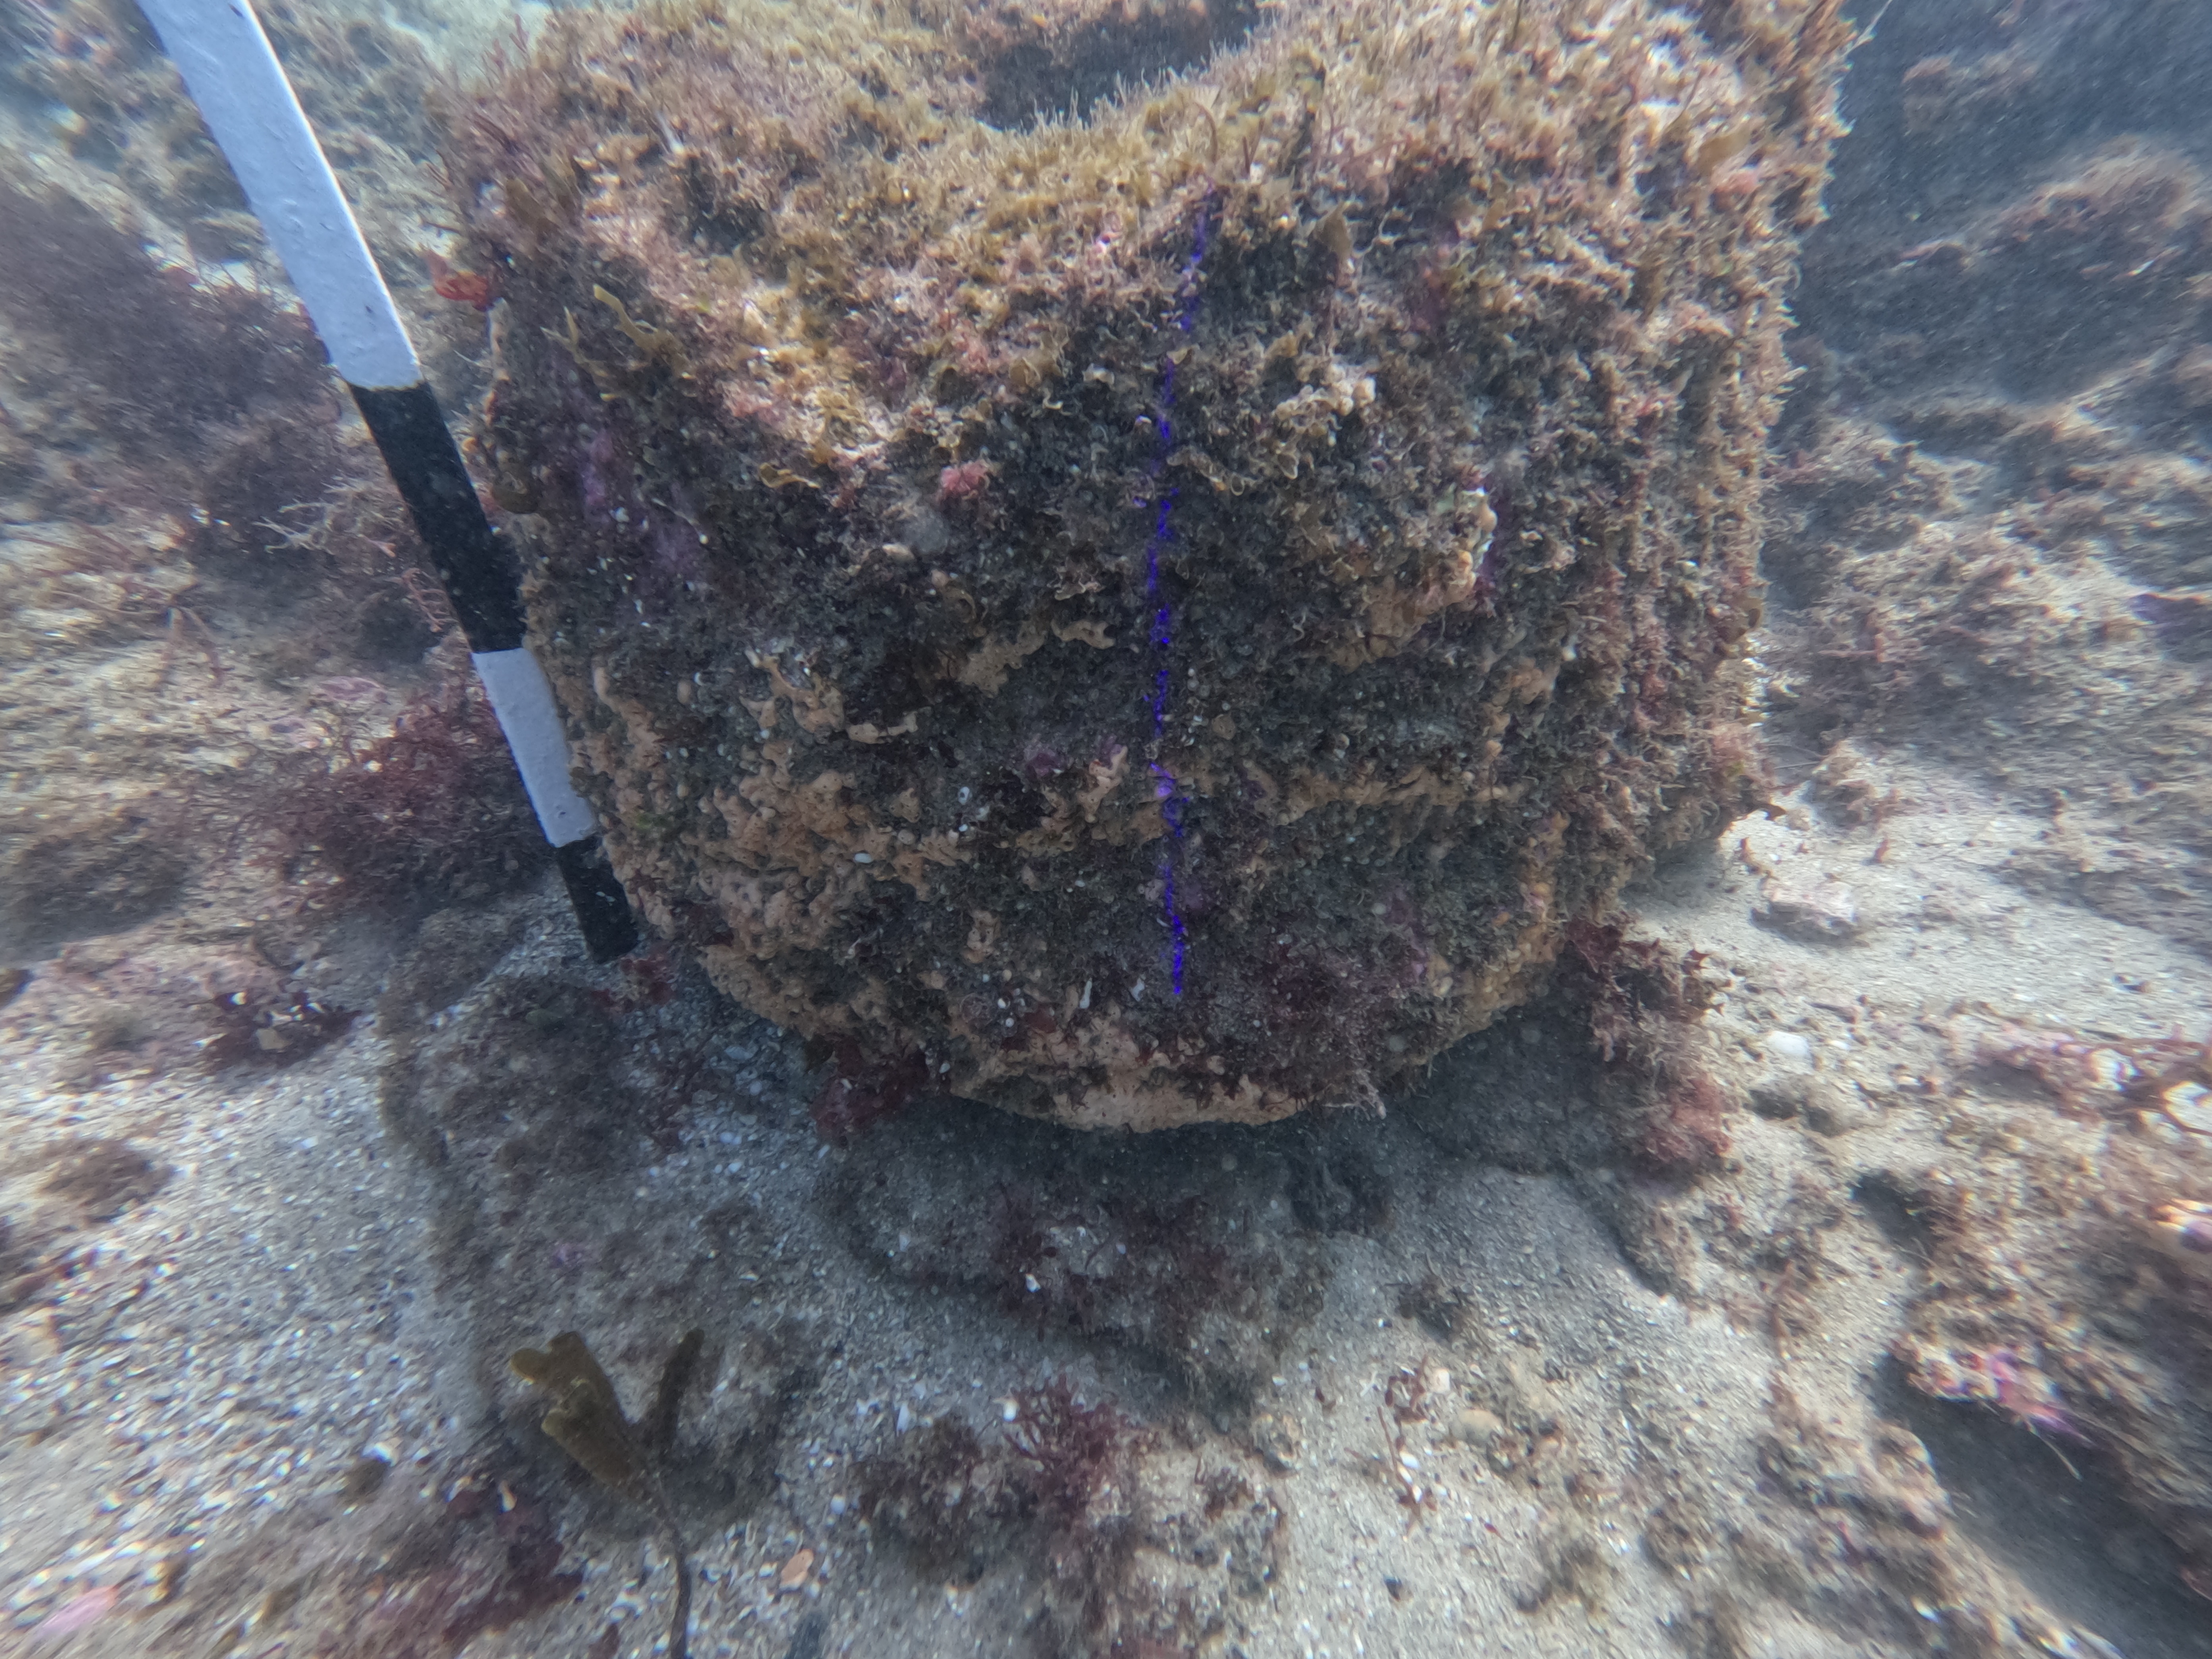

Supplement: Supplementary file 1764 [file G0028090.pdf › Ocean1/G0028090.pdf]

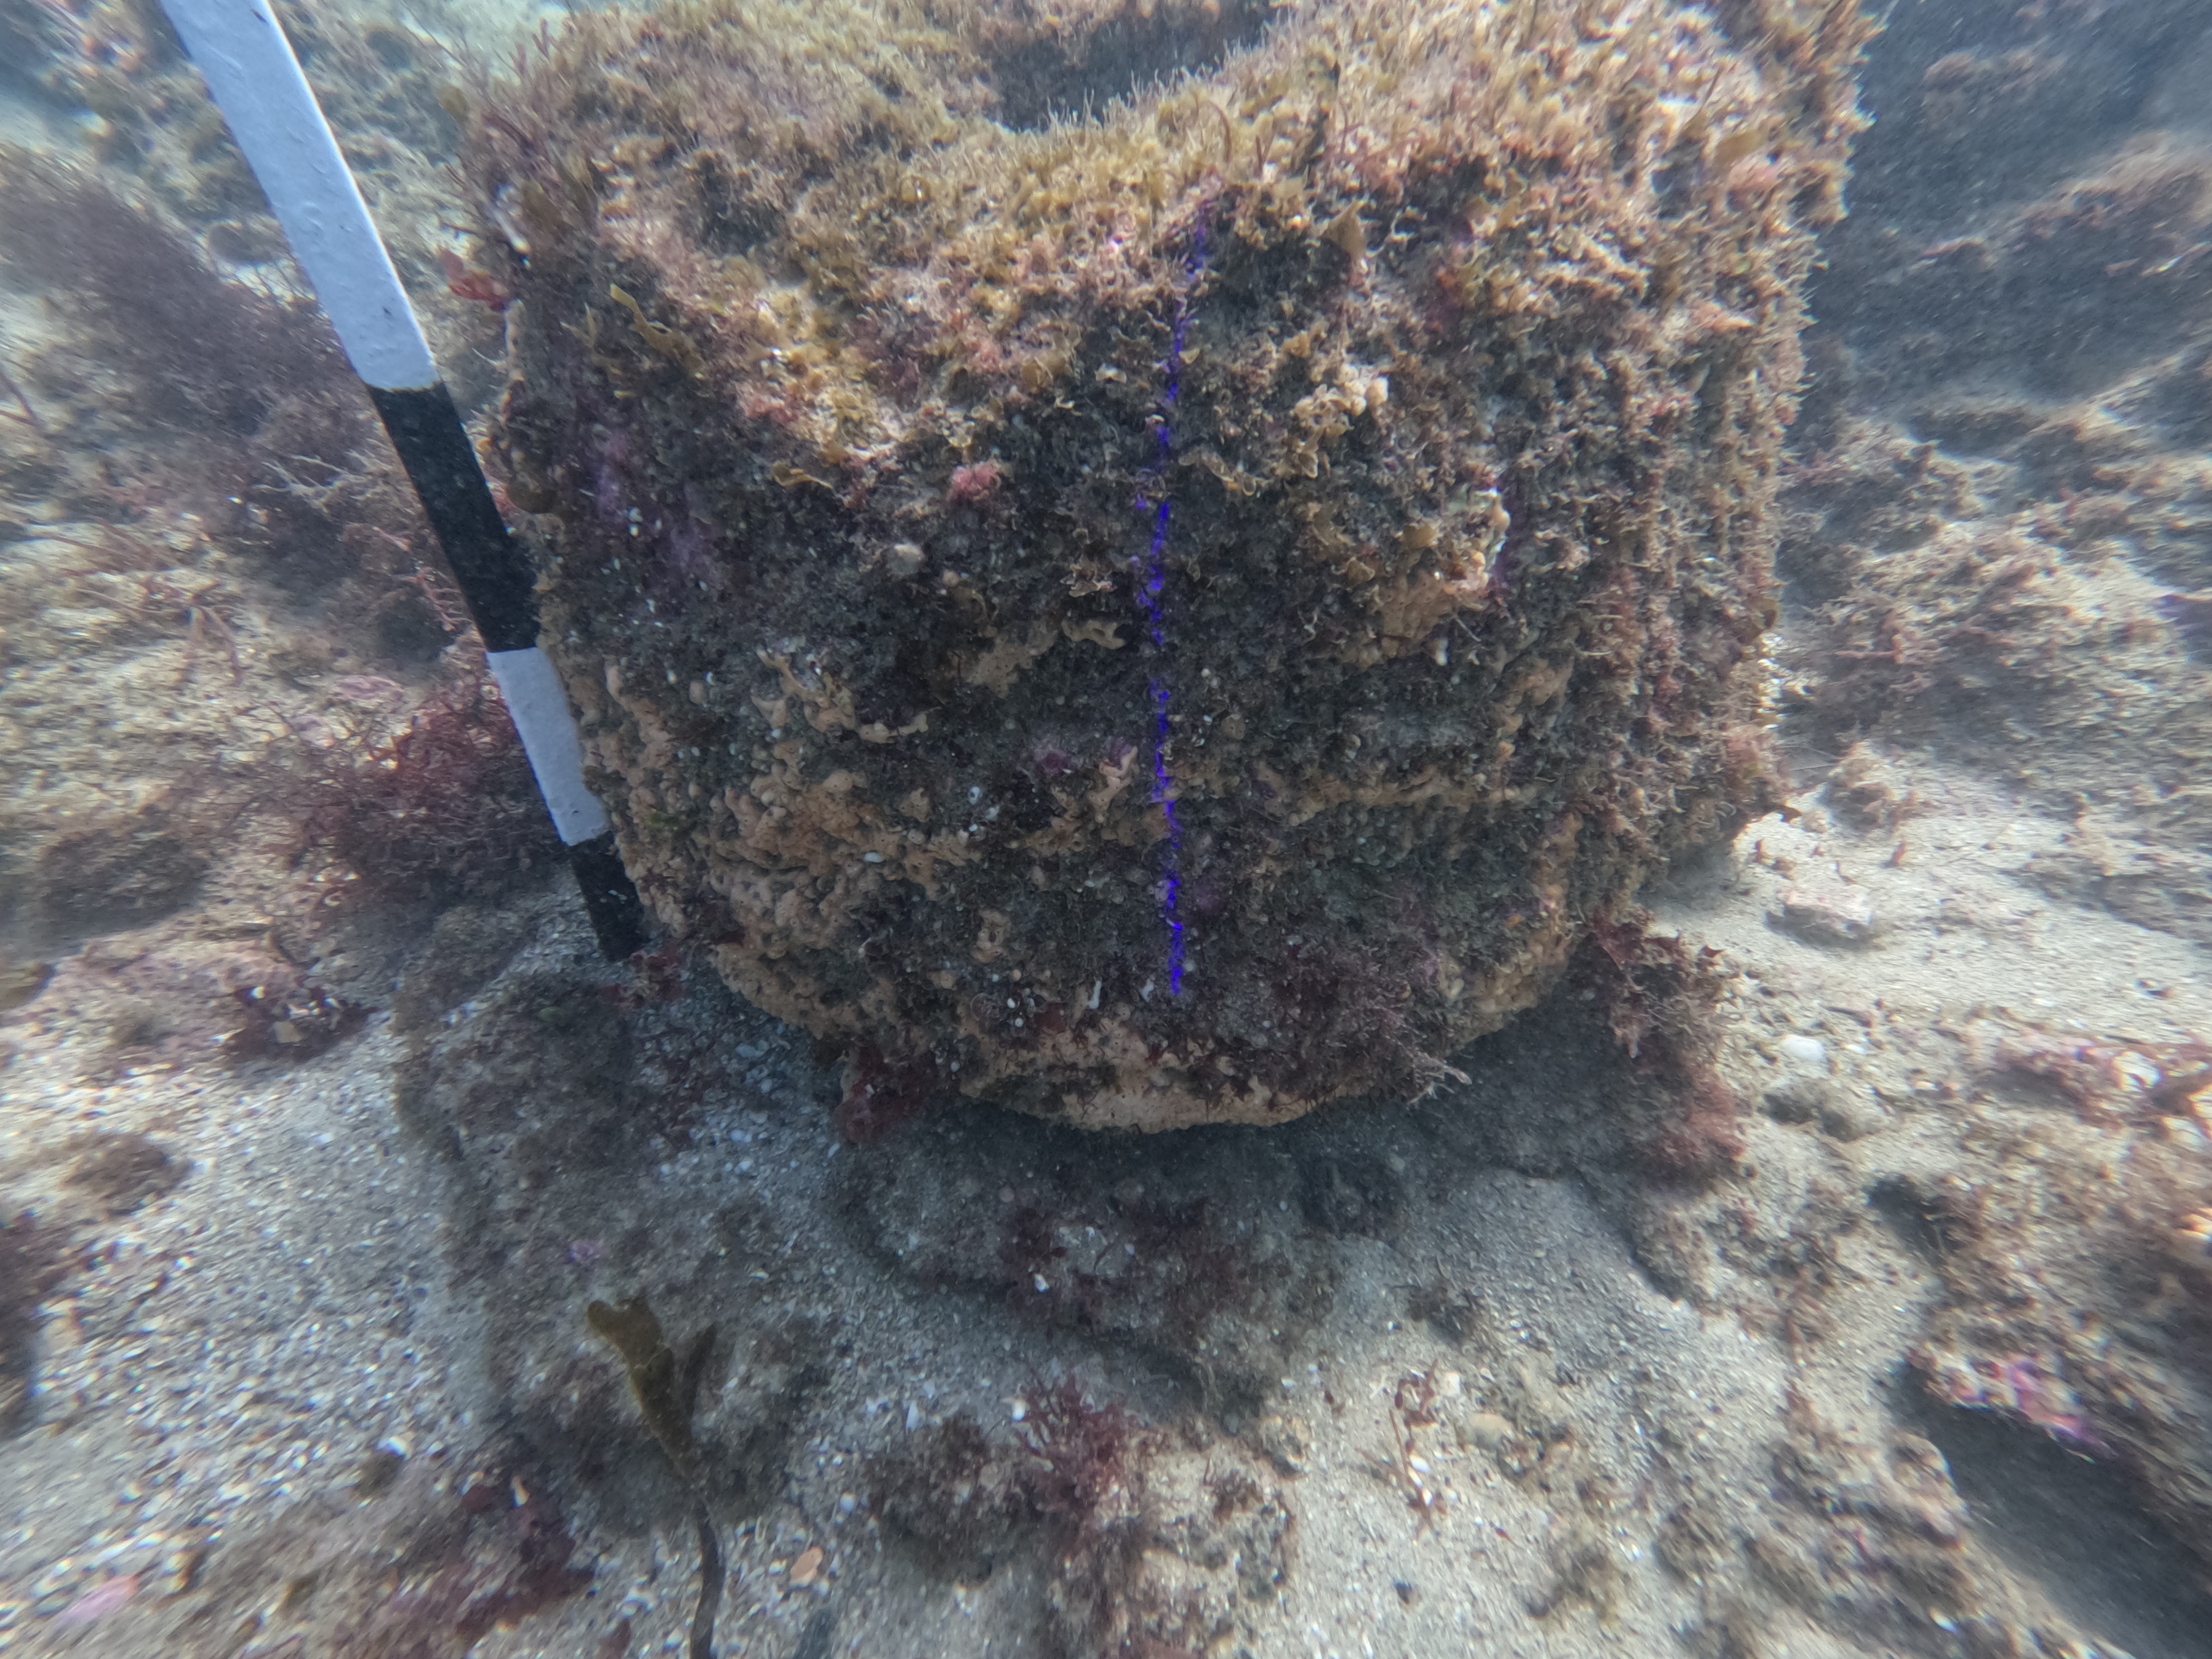

Supplement: Supplementary file 1765 [file G0028091.pdf › Ocean1/G0028091.pdf]

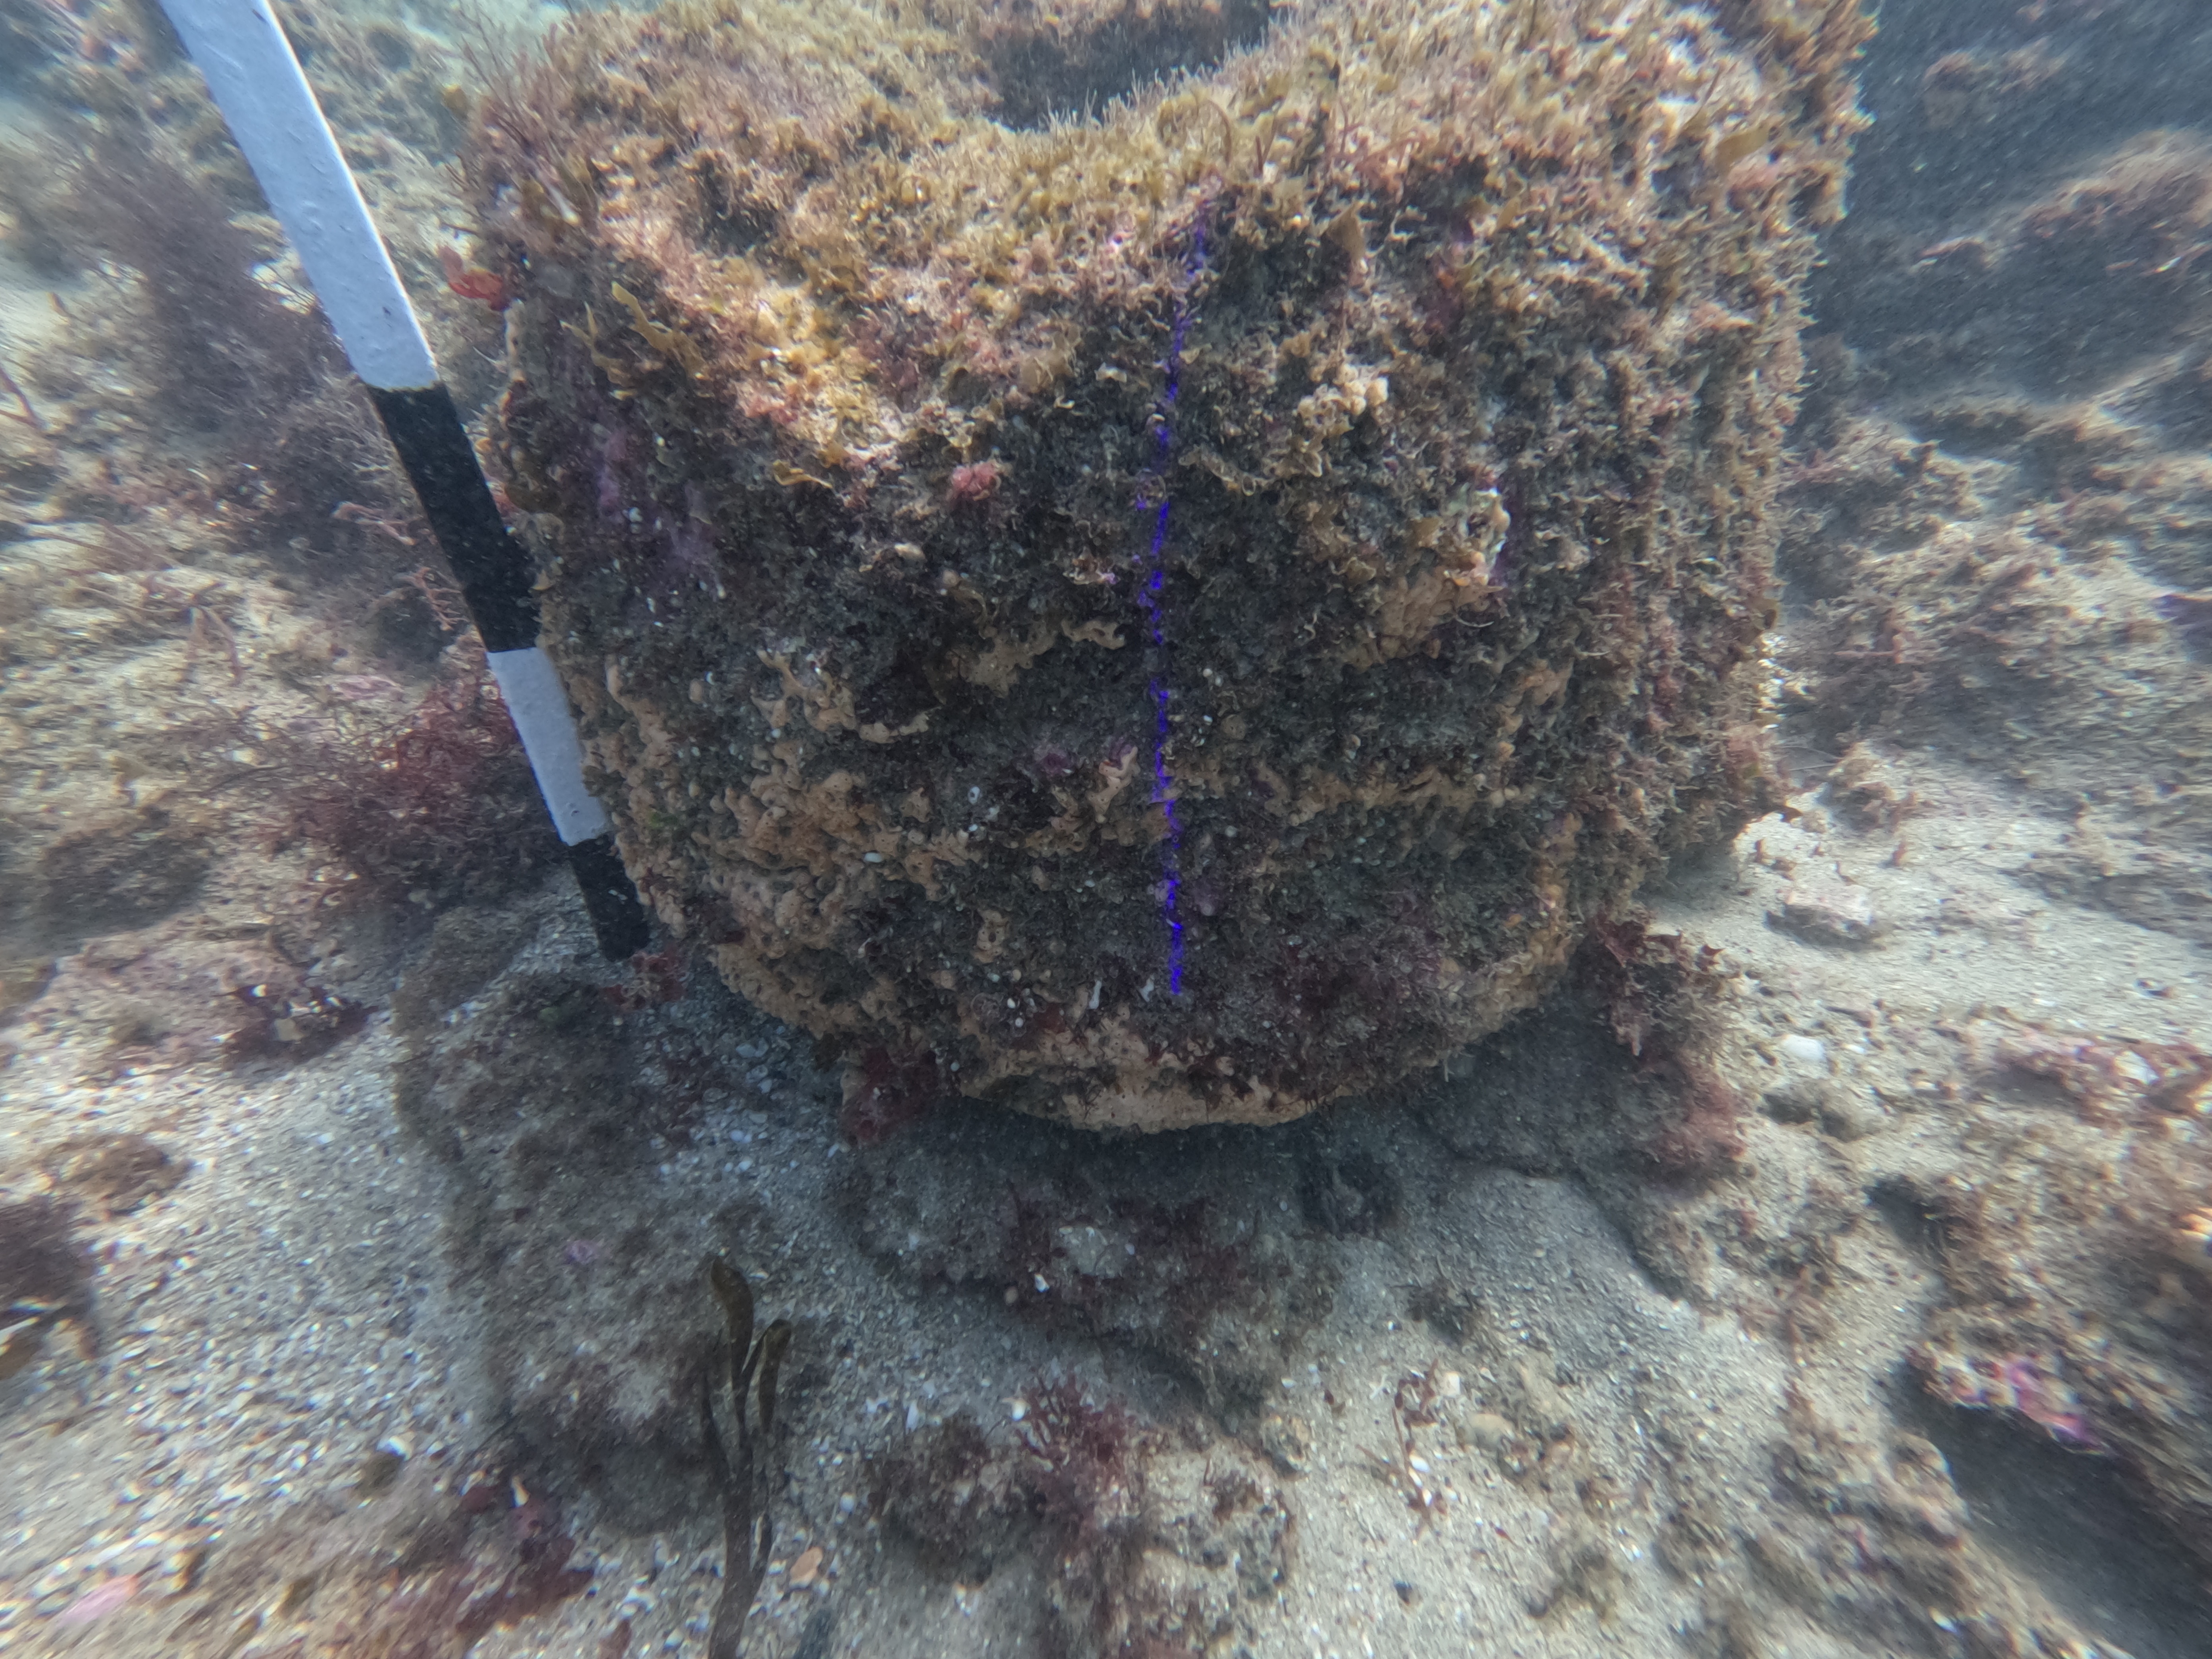

Supplement: Supplementary file 1766 [file G0028092.pdf › Ocean1/G0028092.pdf]

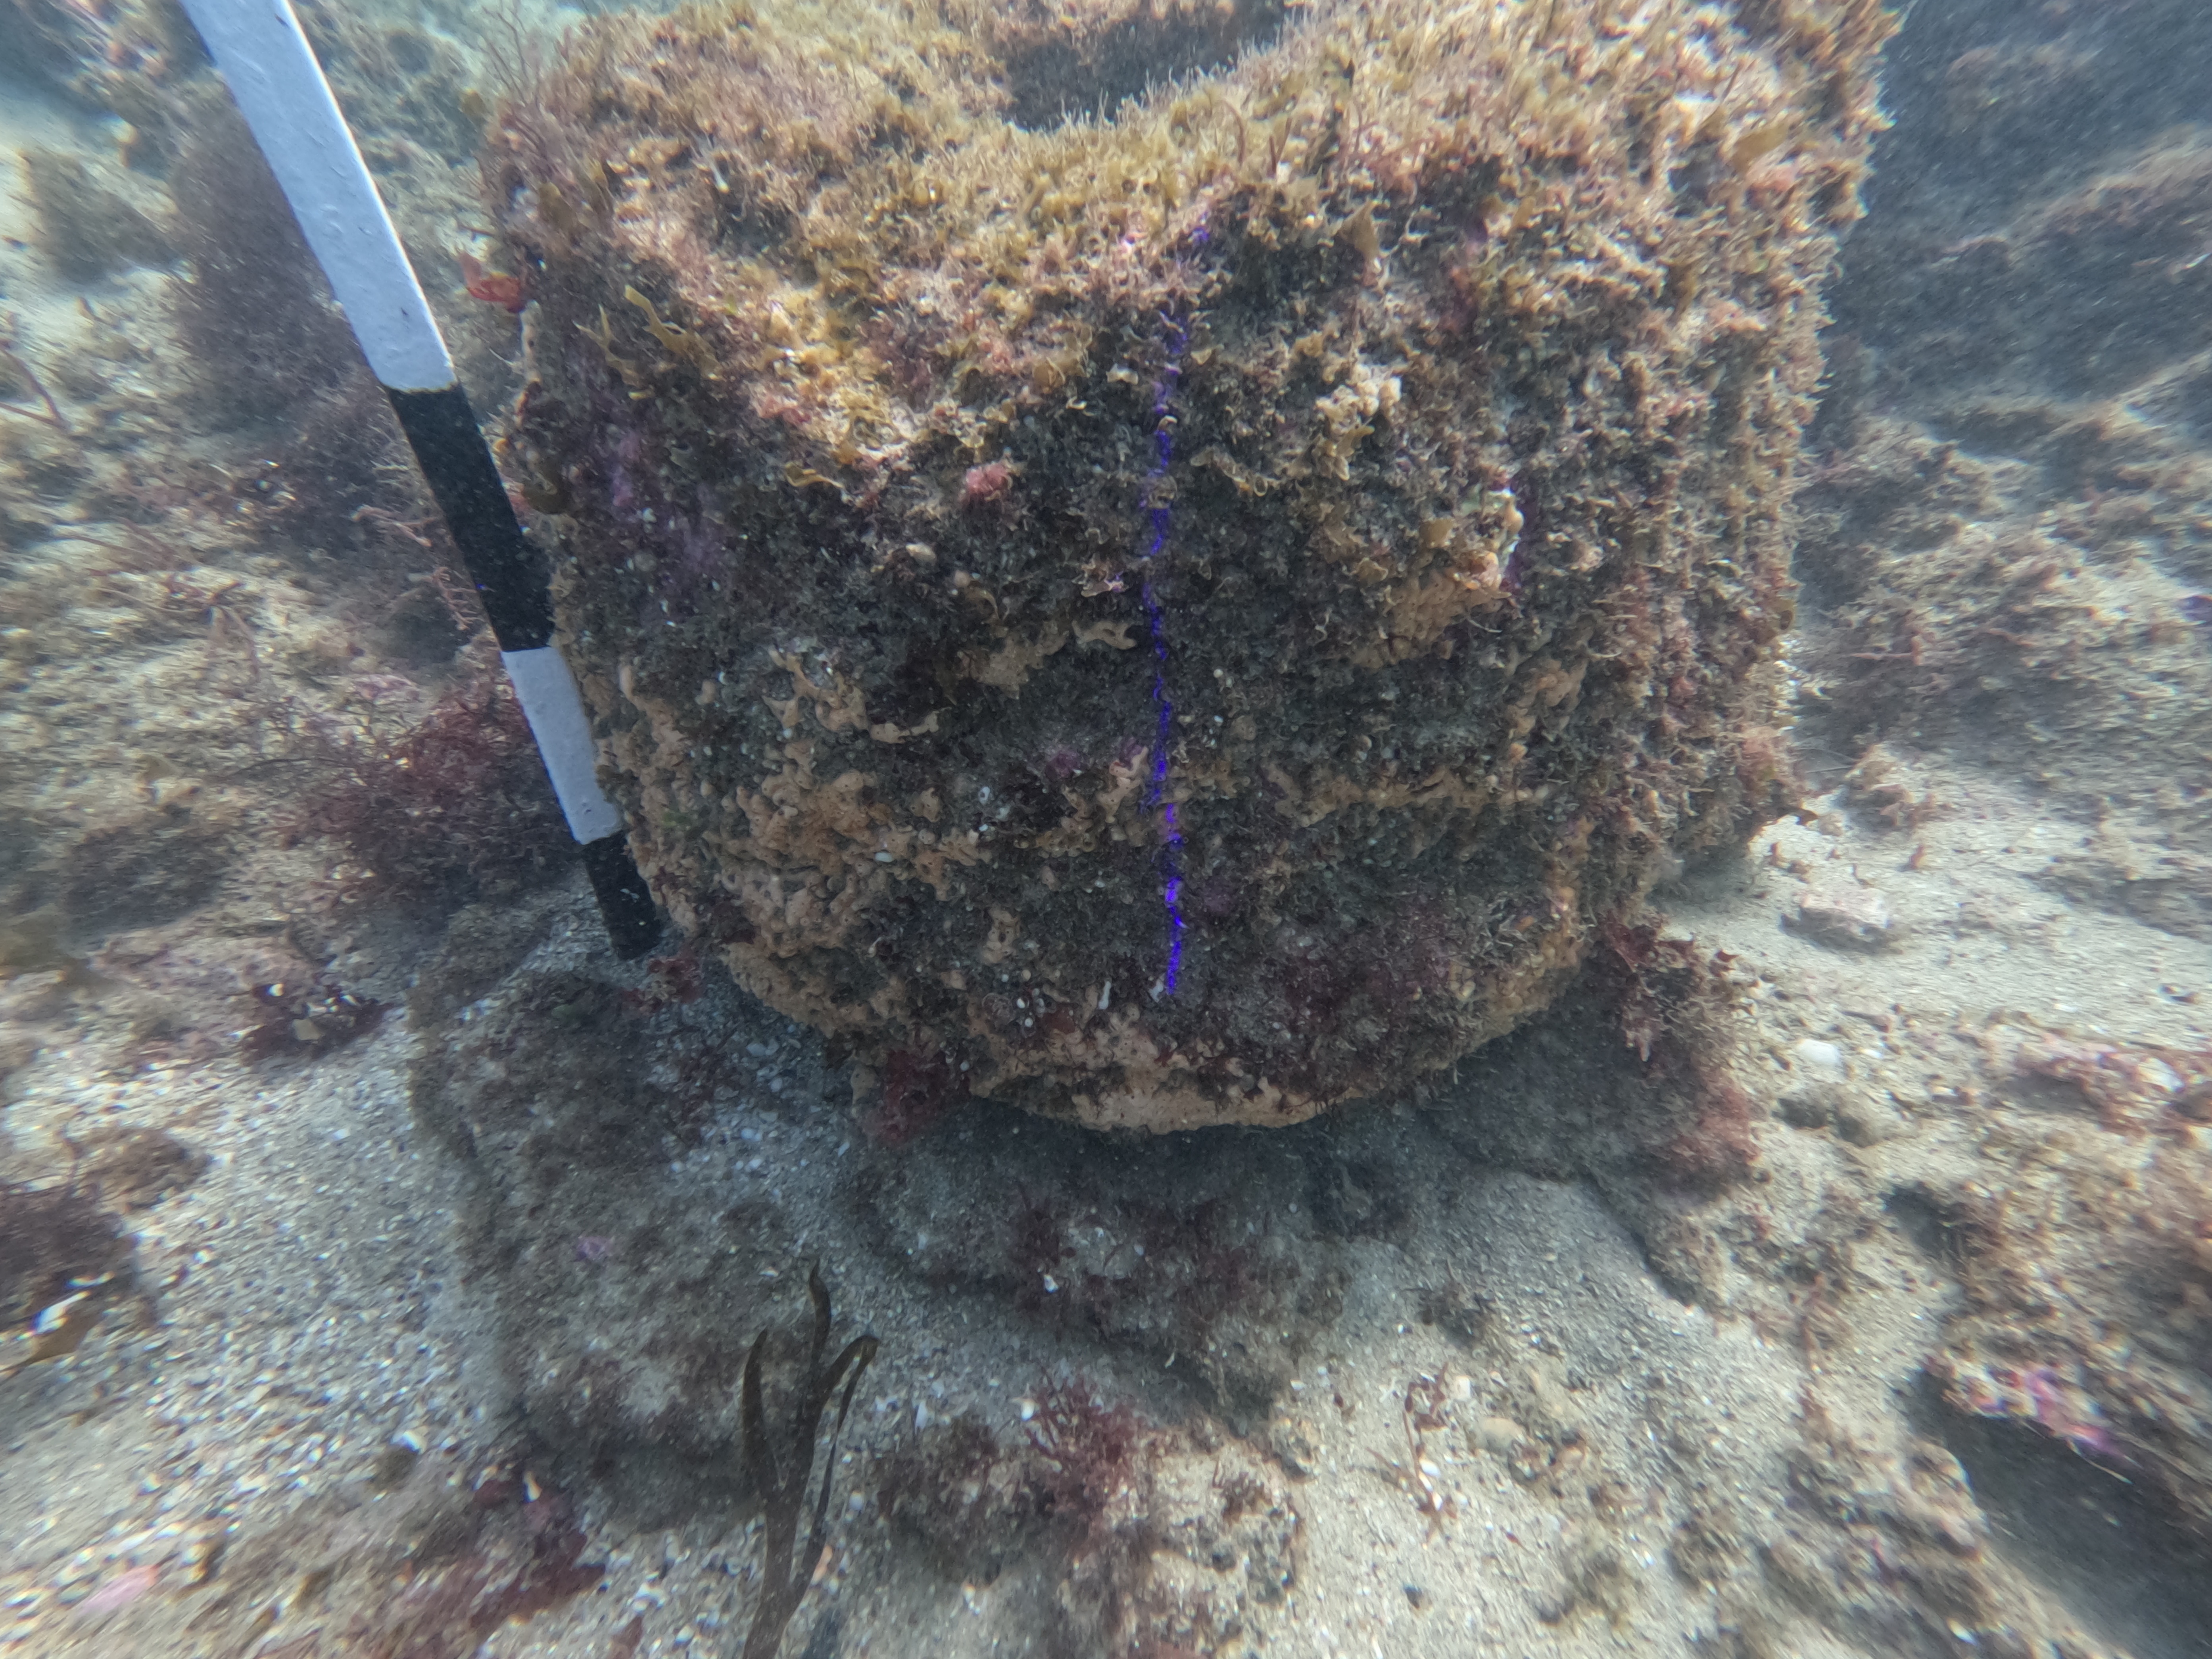

Supplement: Supplementary file 1767 [file G0028093.pdf › Ocean1/G0028093.pdf]

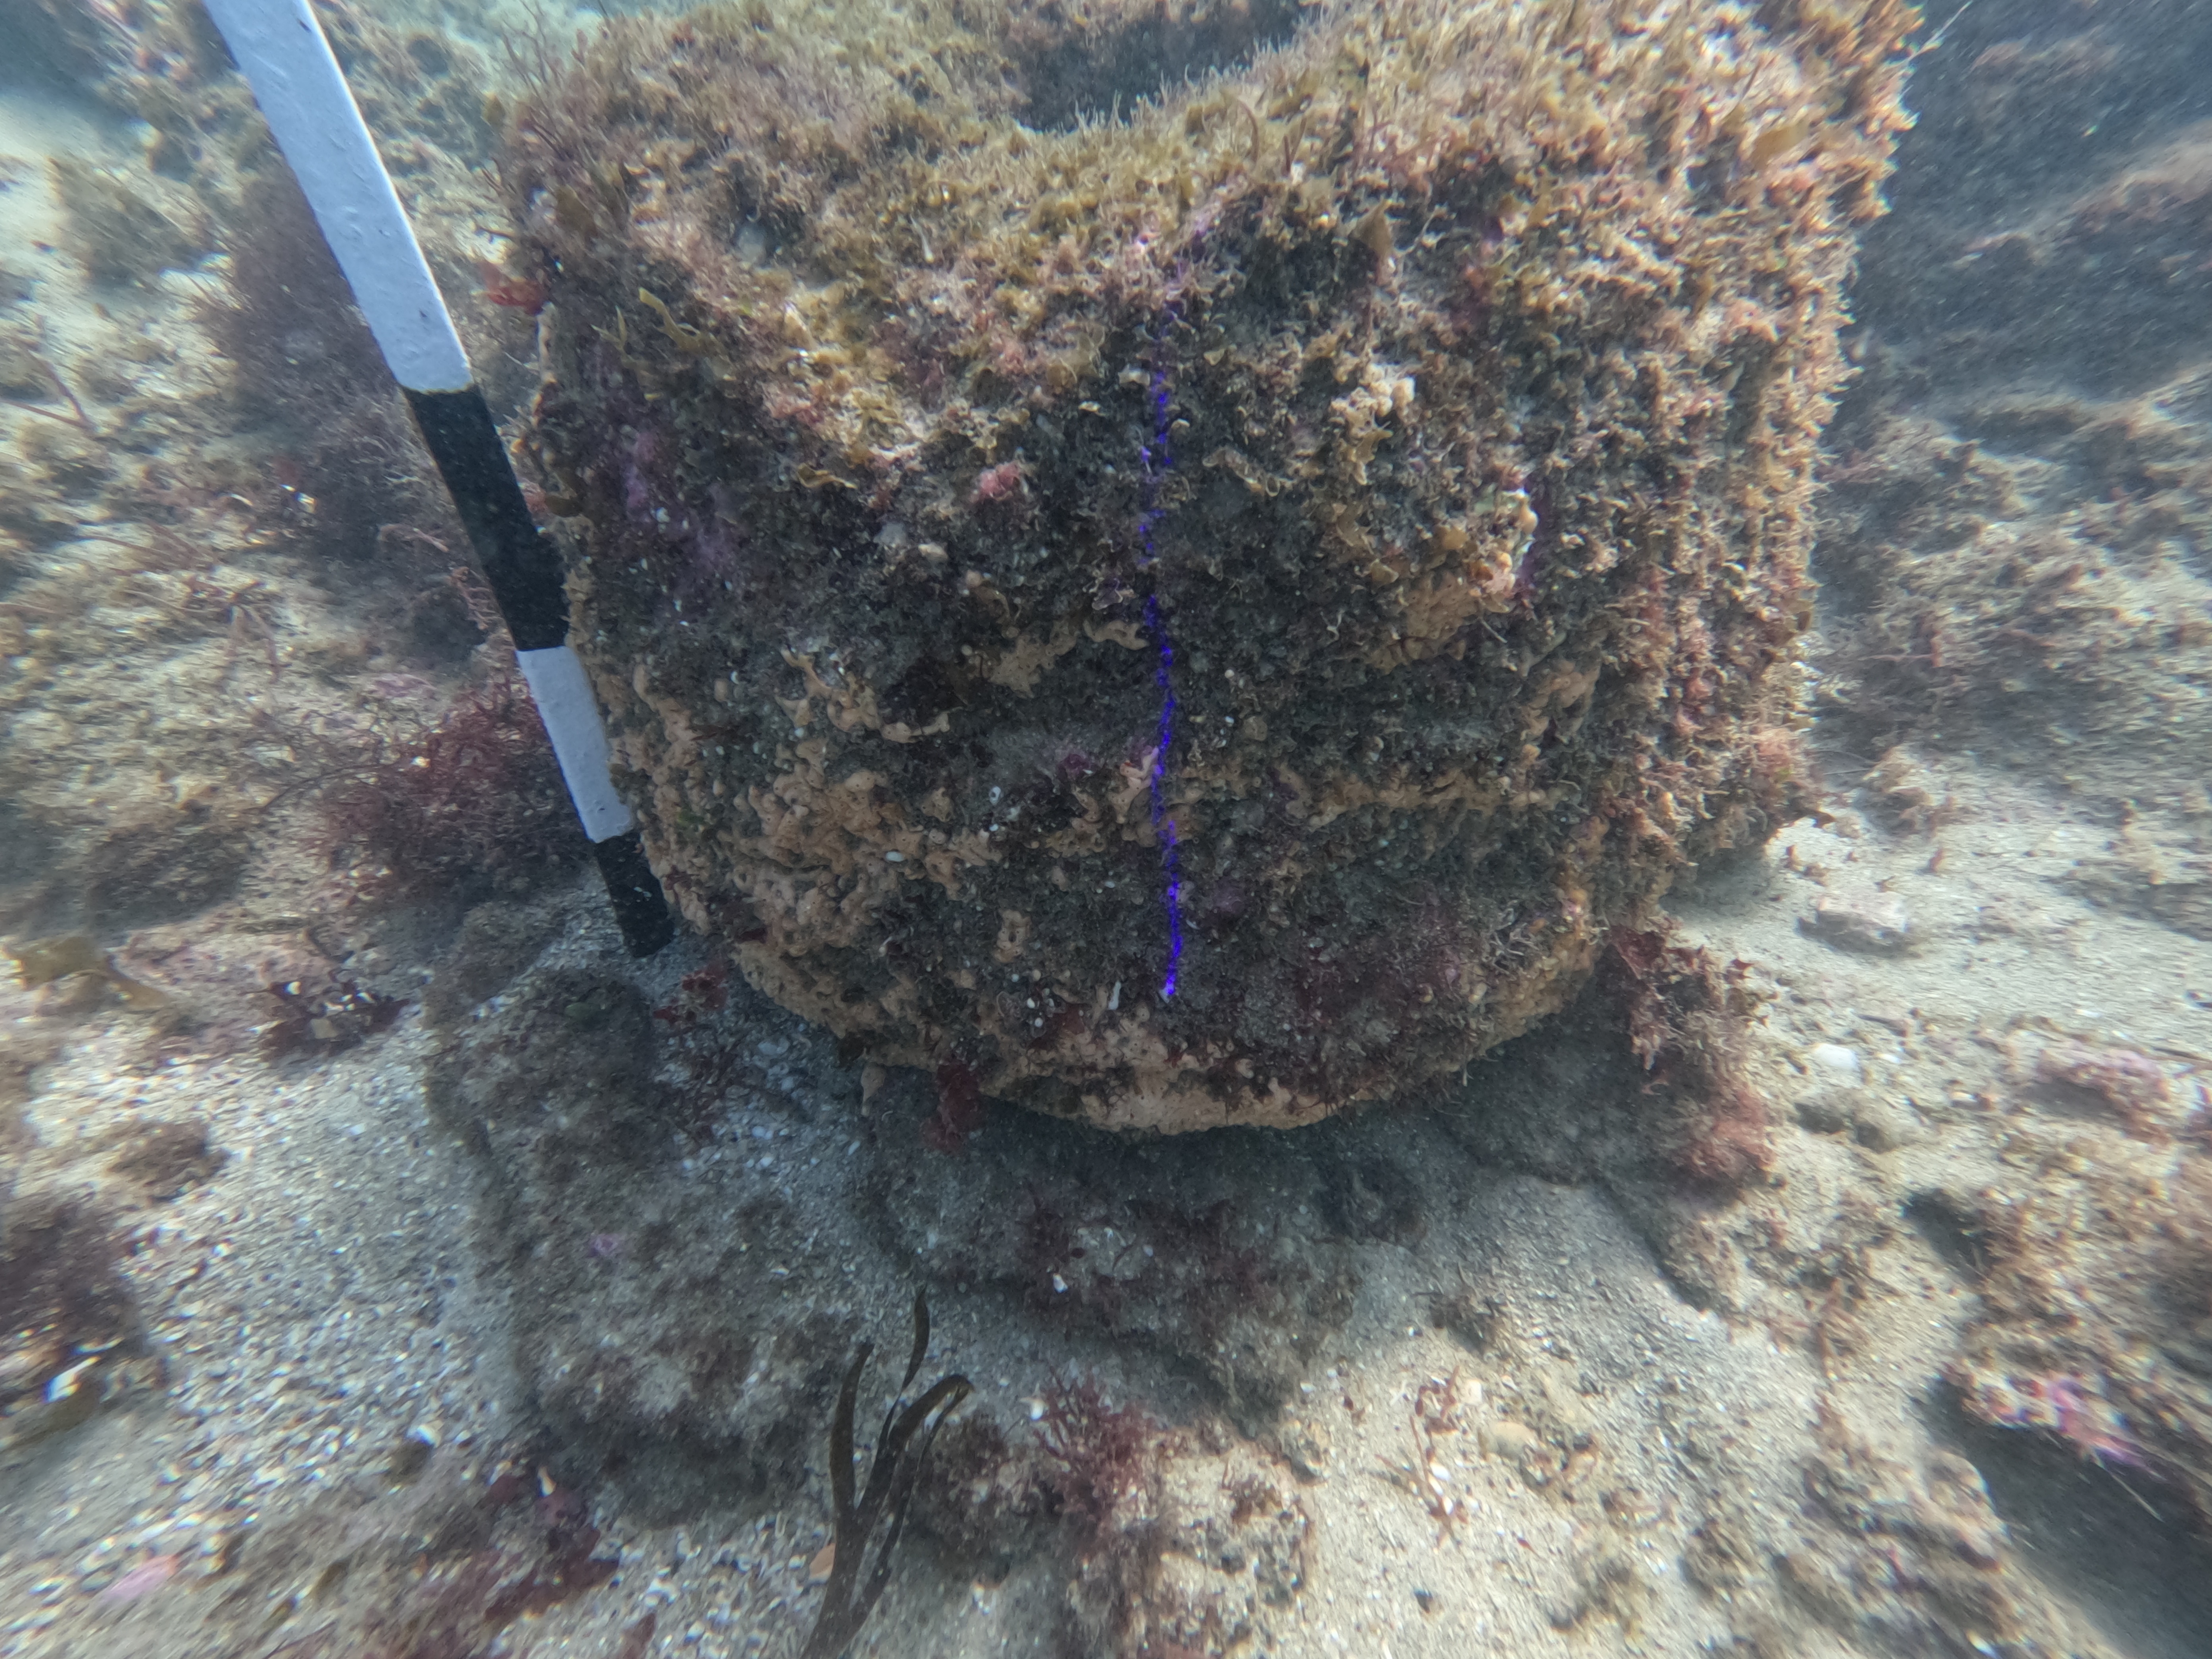

Supplement: Supplementary file 1768 [file G0028094.pdf › Ocean1/G0028094.pdf]

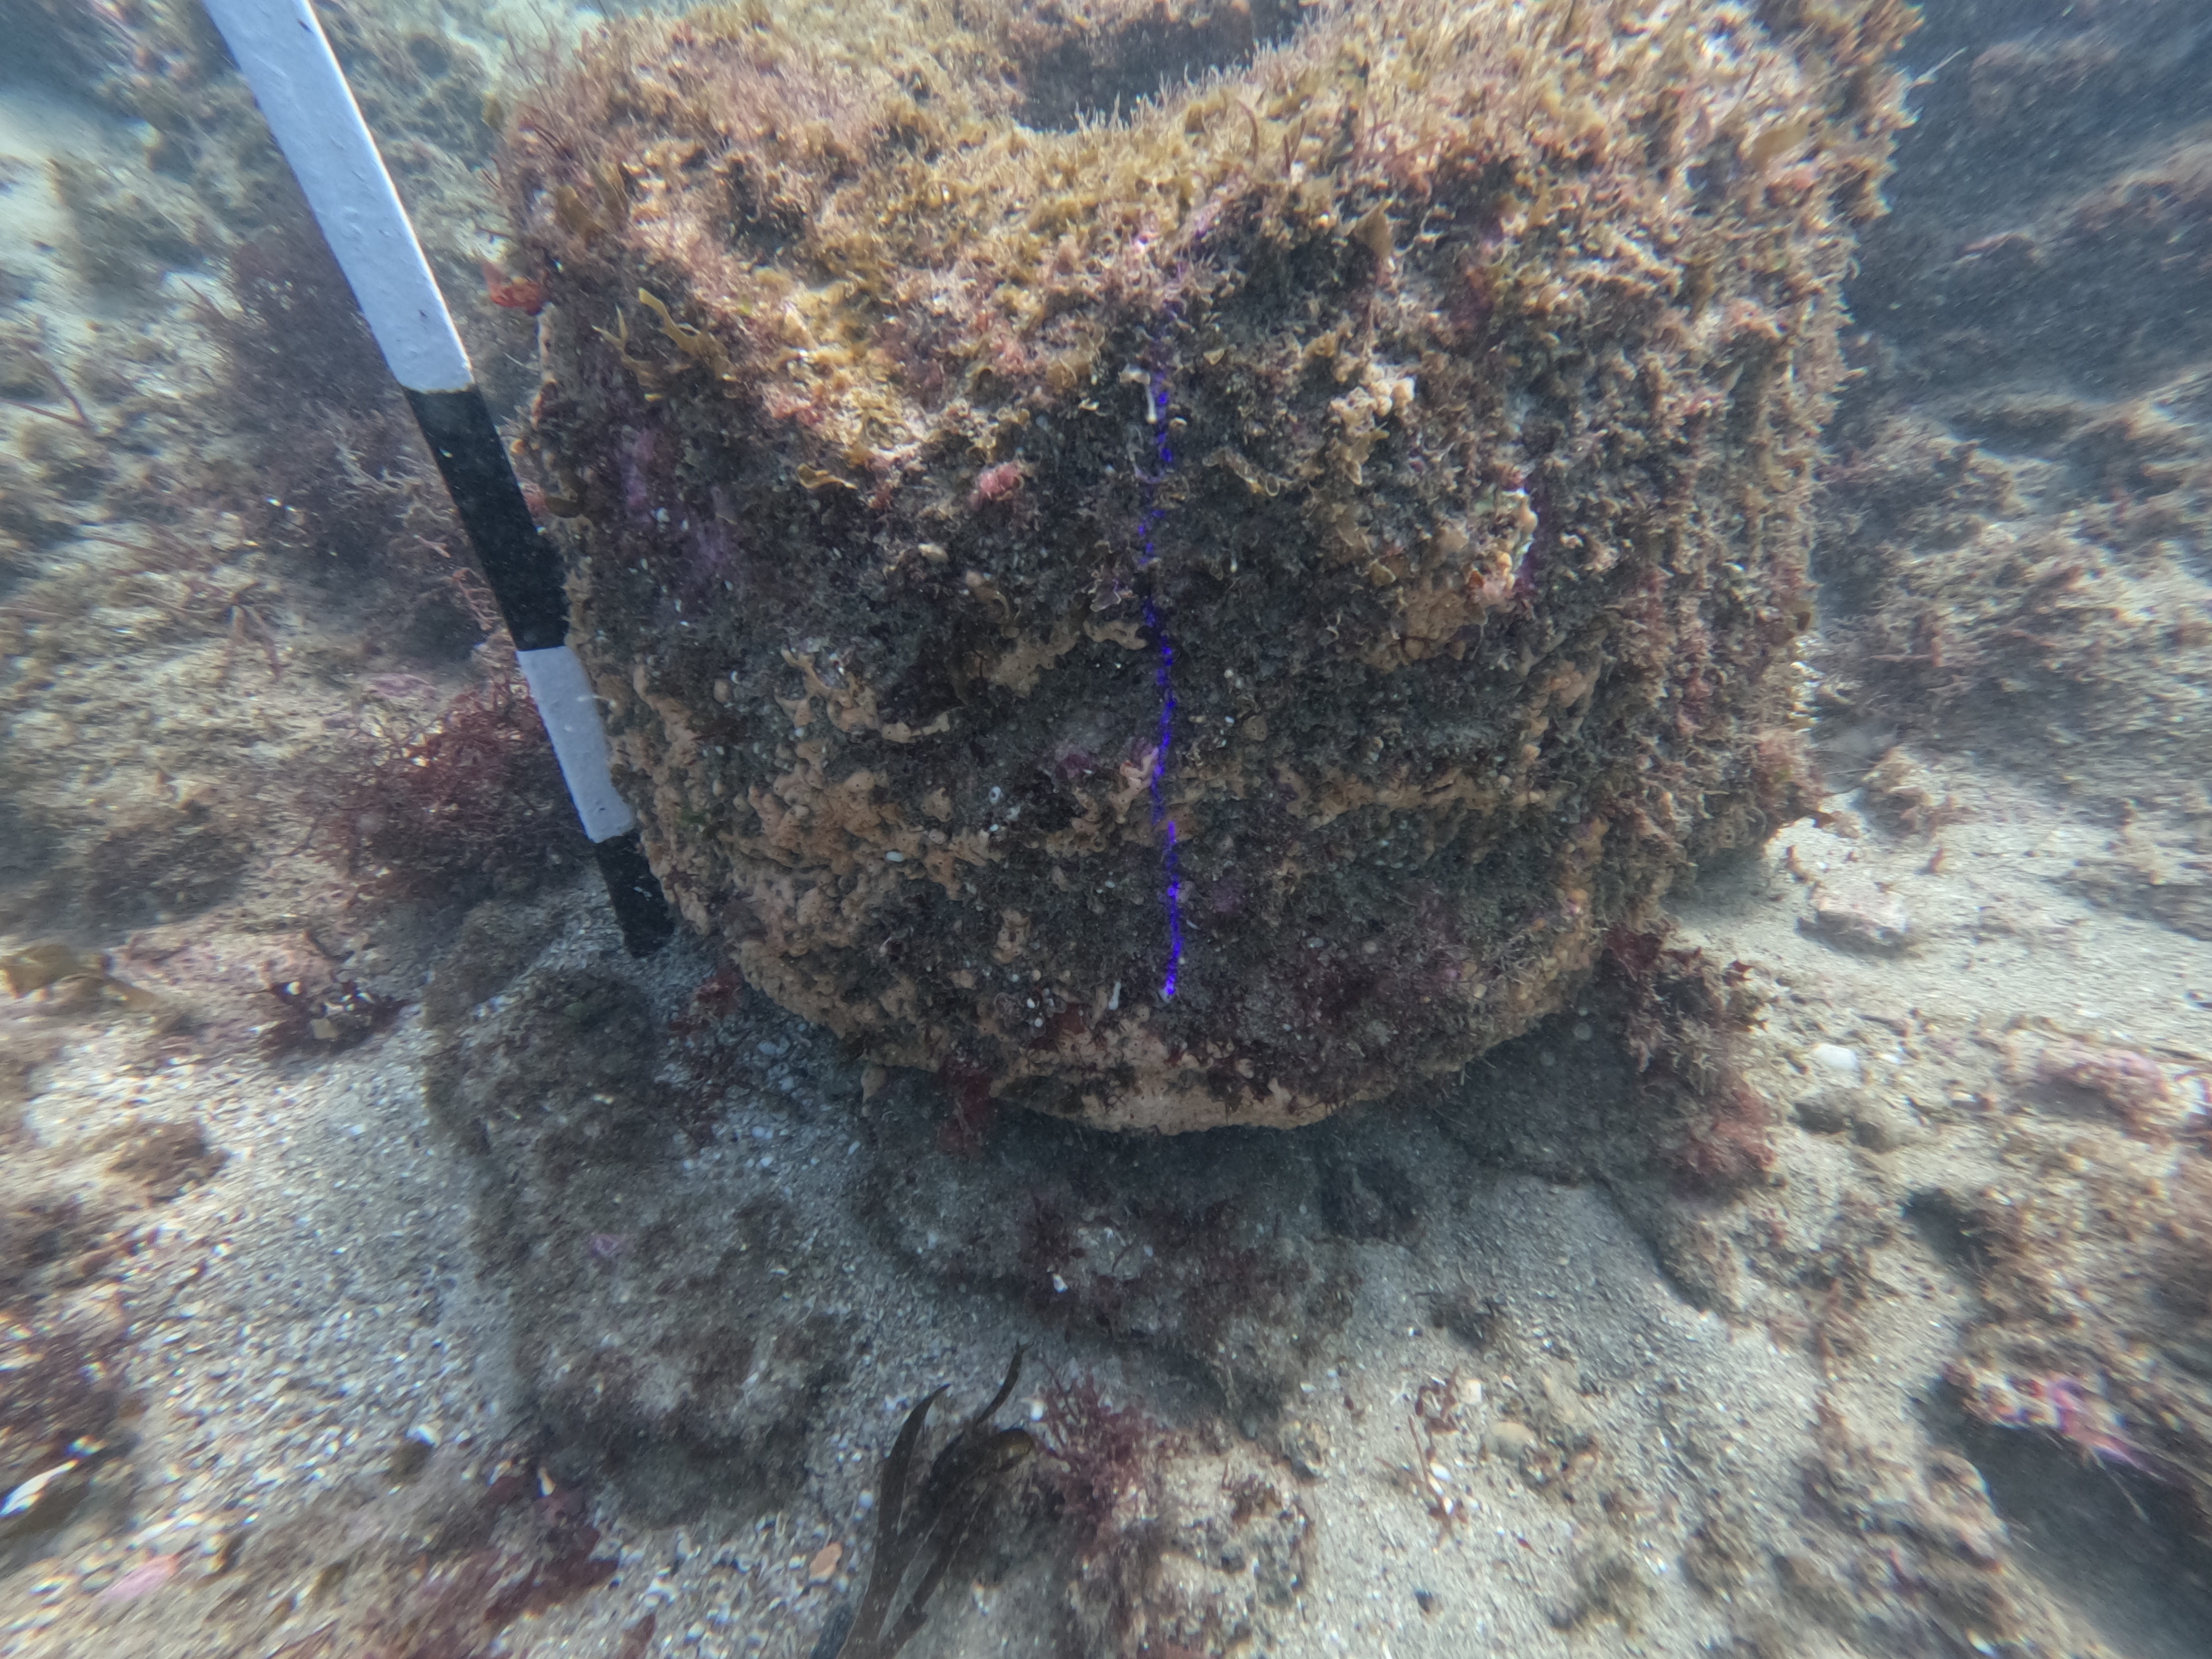

Supplement: Supplementary file 1769 [file G0028095.pdf › Ocean1/G0028095.pdf]

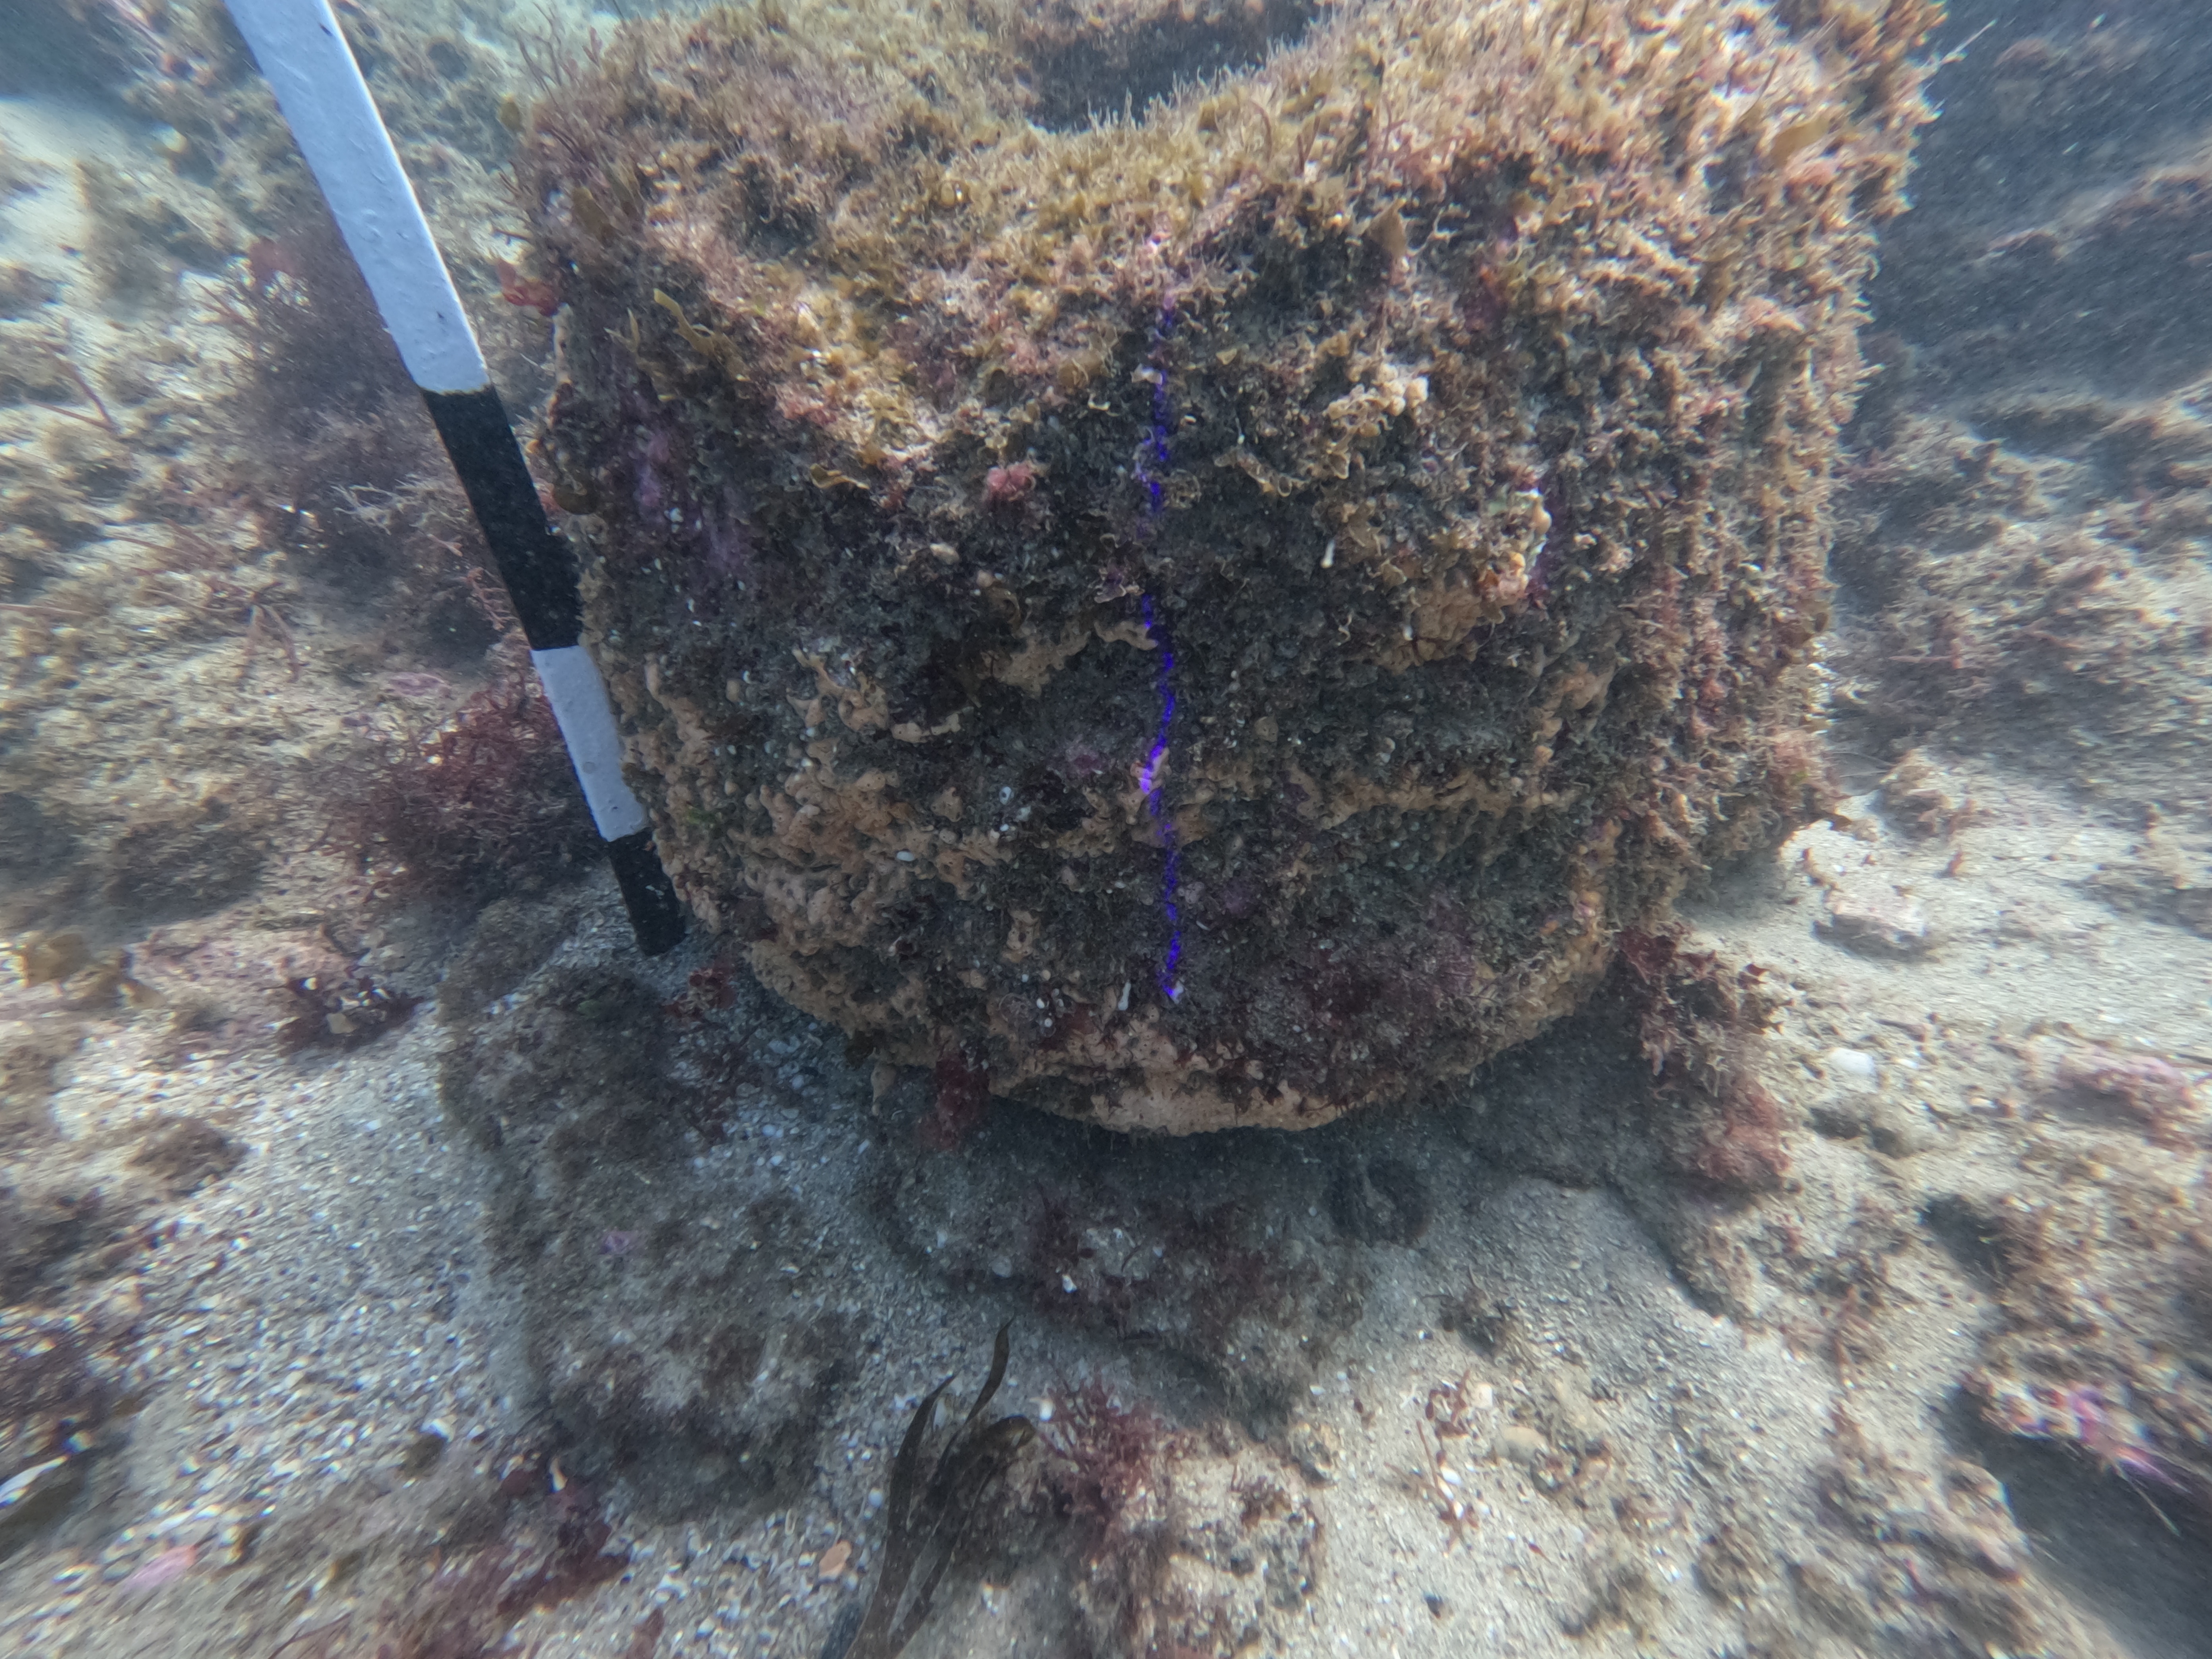

Supplement: Supplementary file 1770 [file G0028096.pdf › Ocean1/G0028096.pdf]

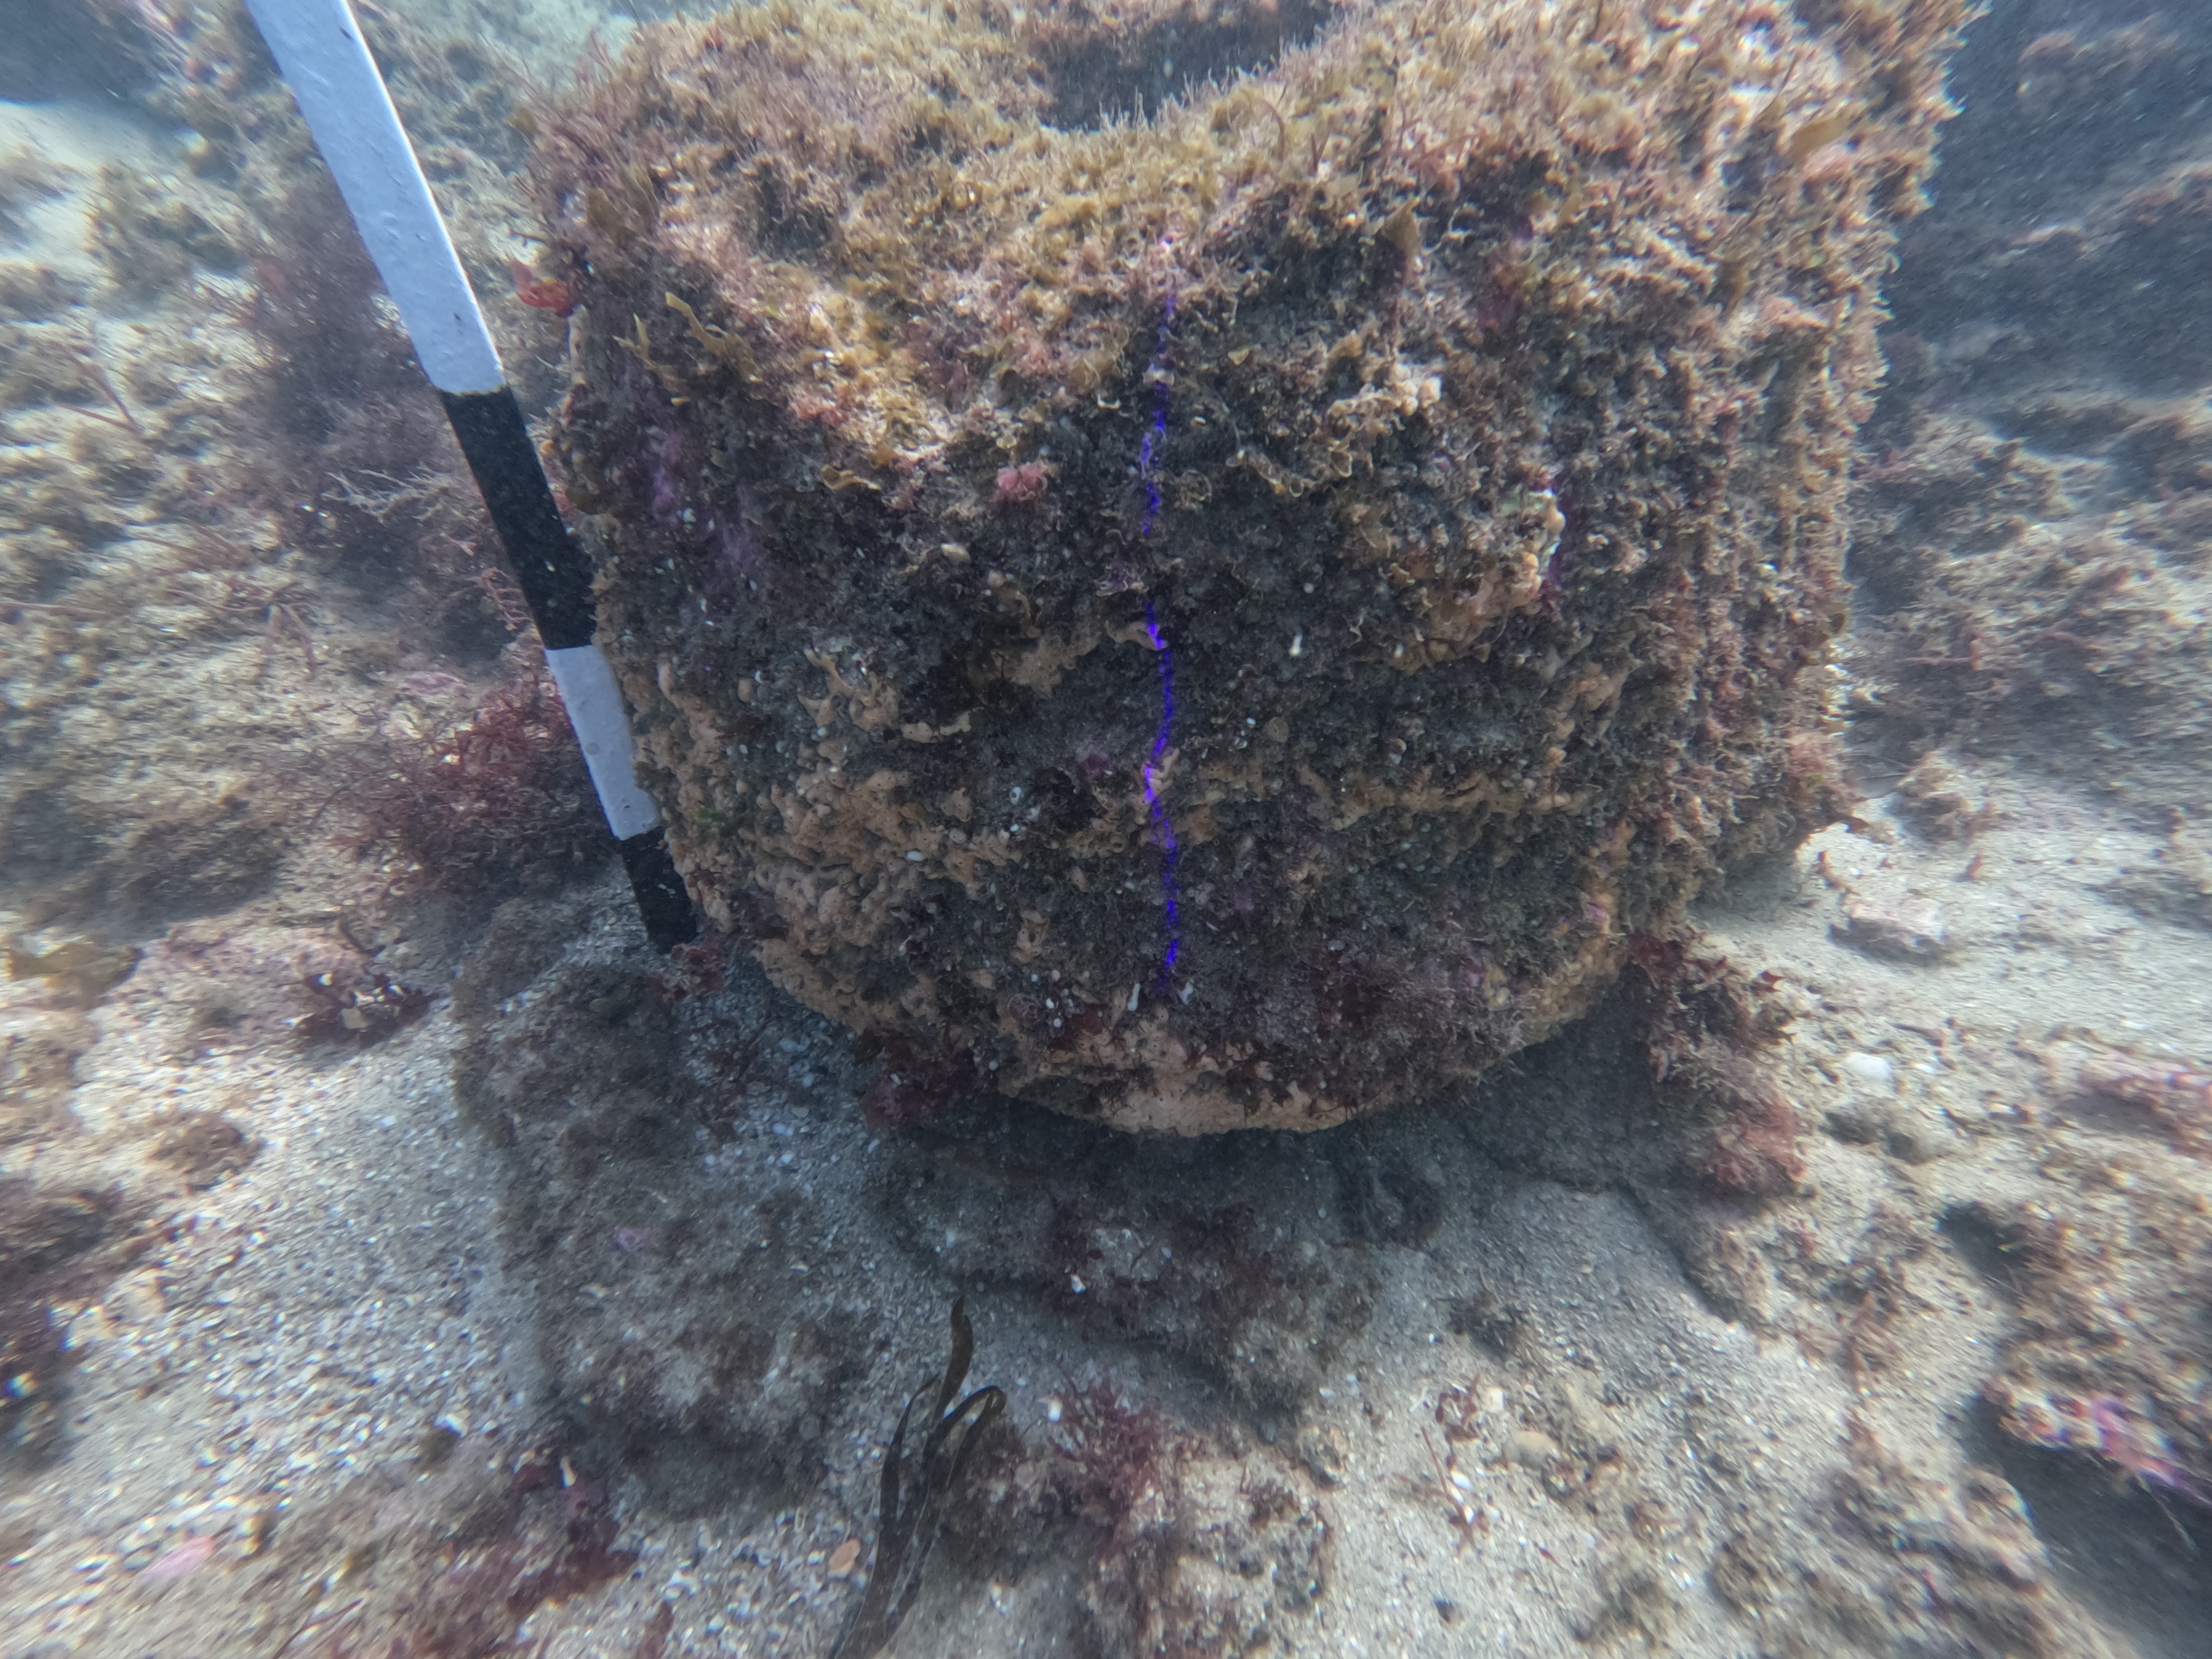

Supplement: Supplementary file 1771 [file G0028097.pdf › Ocean1/G0028097.pdf]

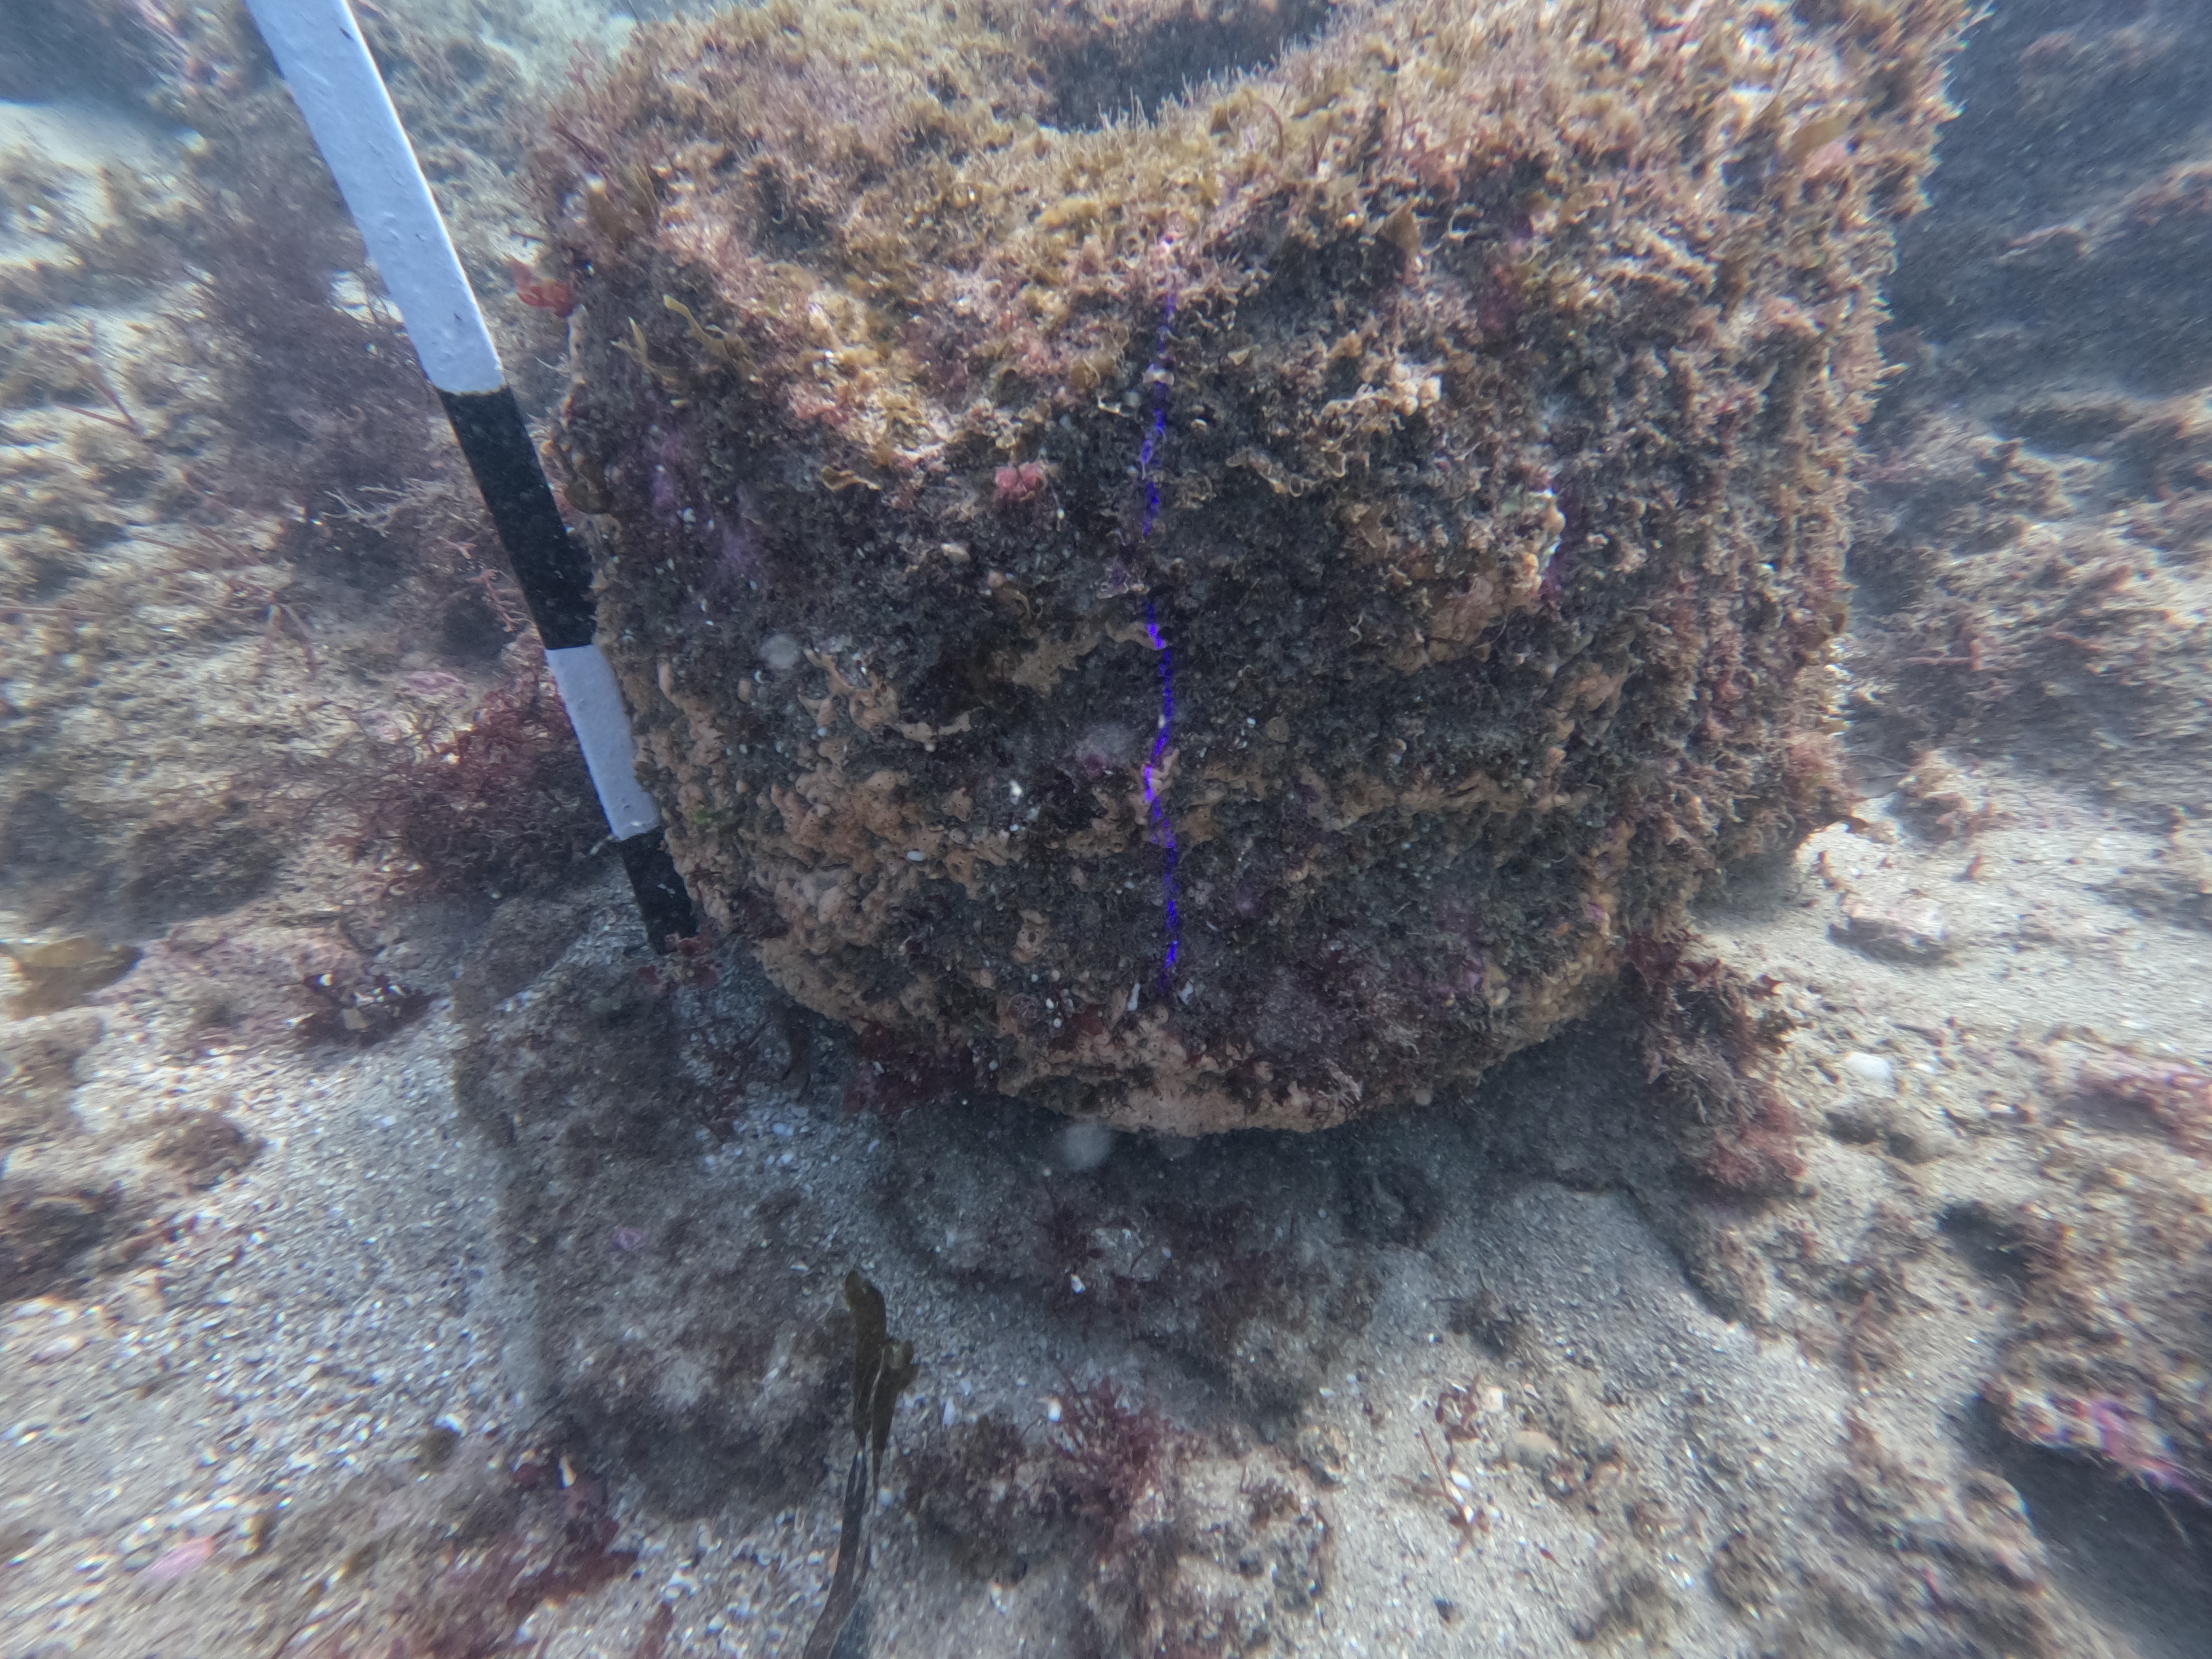

Supplement: Supplementary file 1772 [file G0028098.pdf › Ocean1/G0028098.pdf]

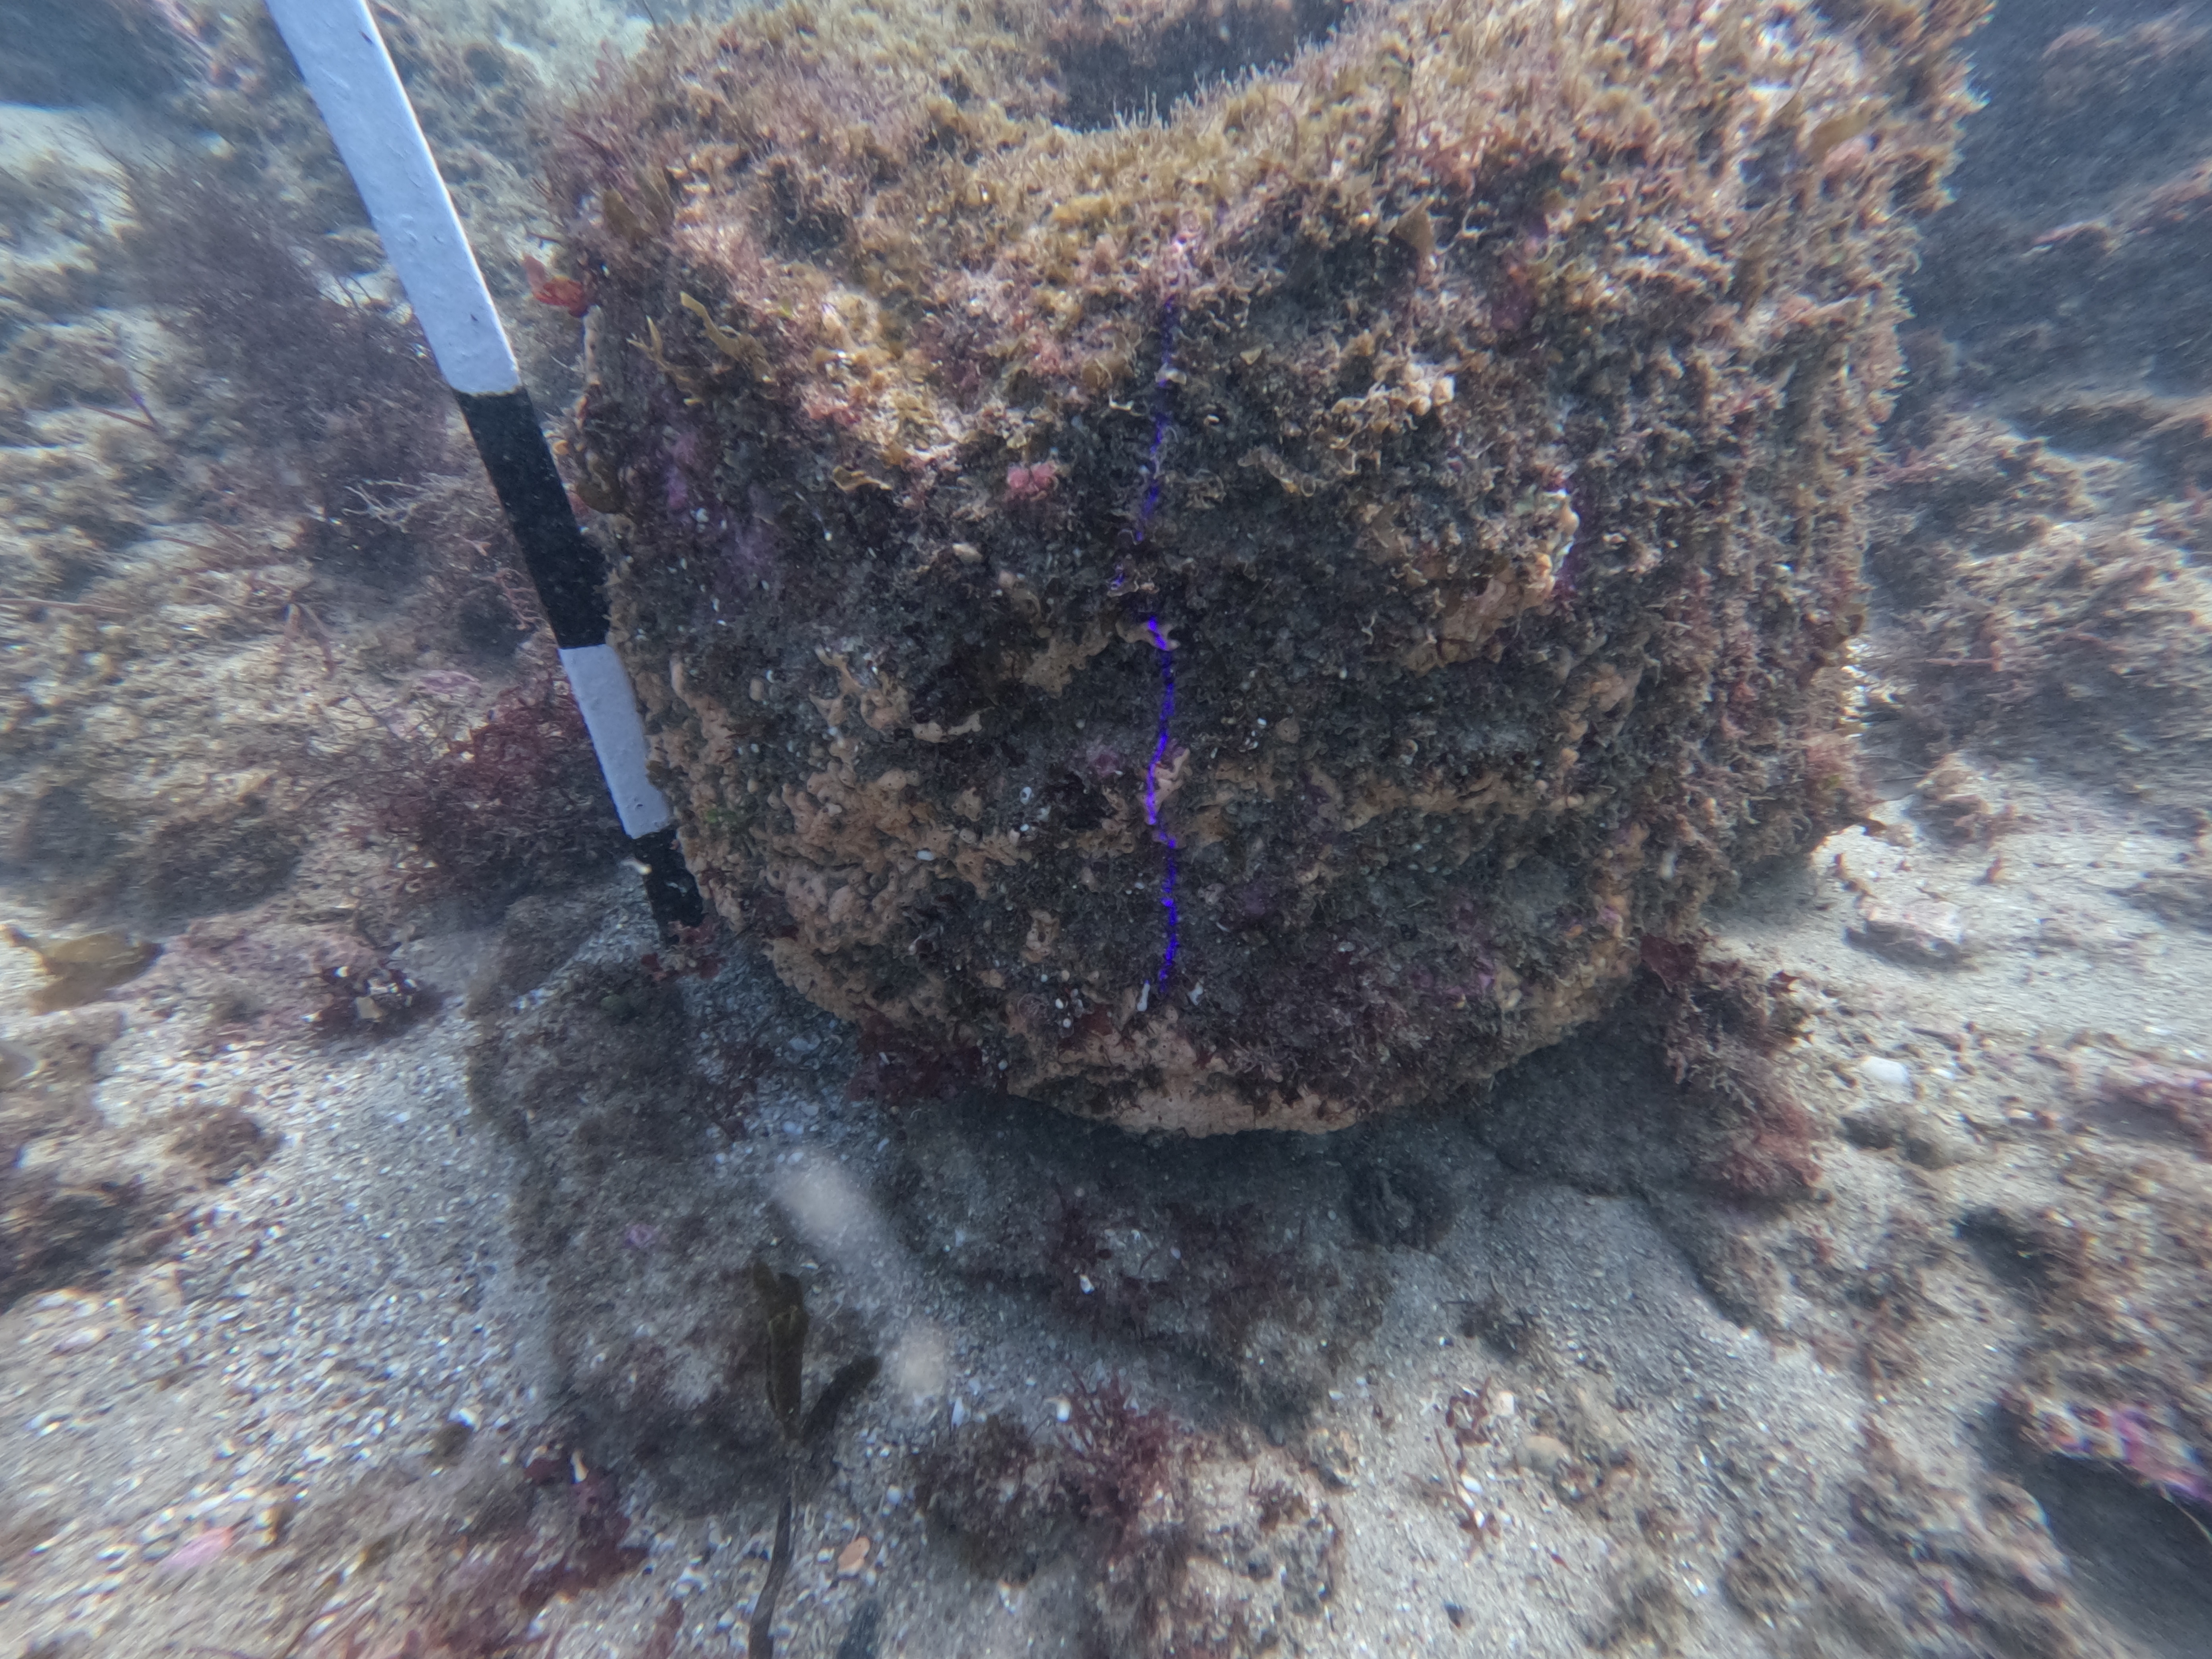

Supplement: Supplementary file 1773 [file G0028099.pdf › Ocean1/G0028099.pdf]

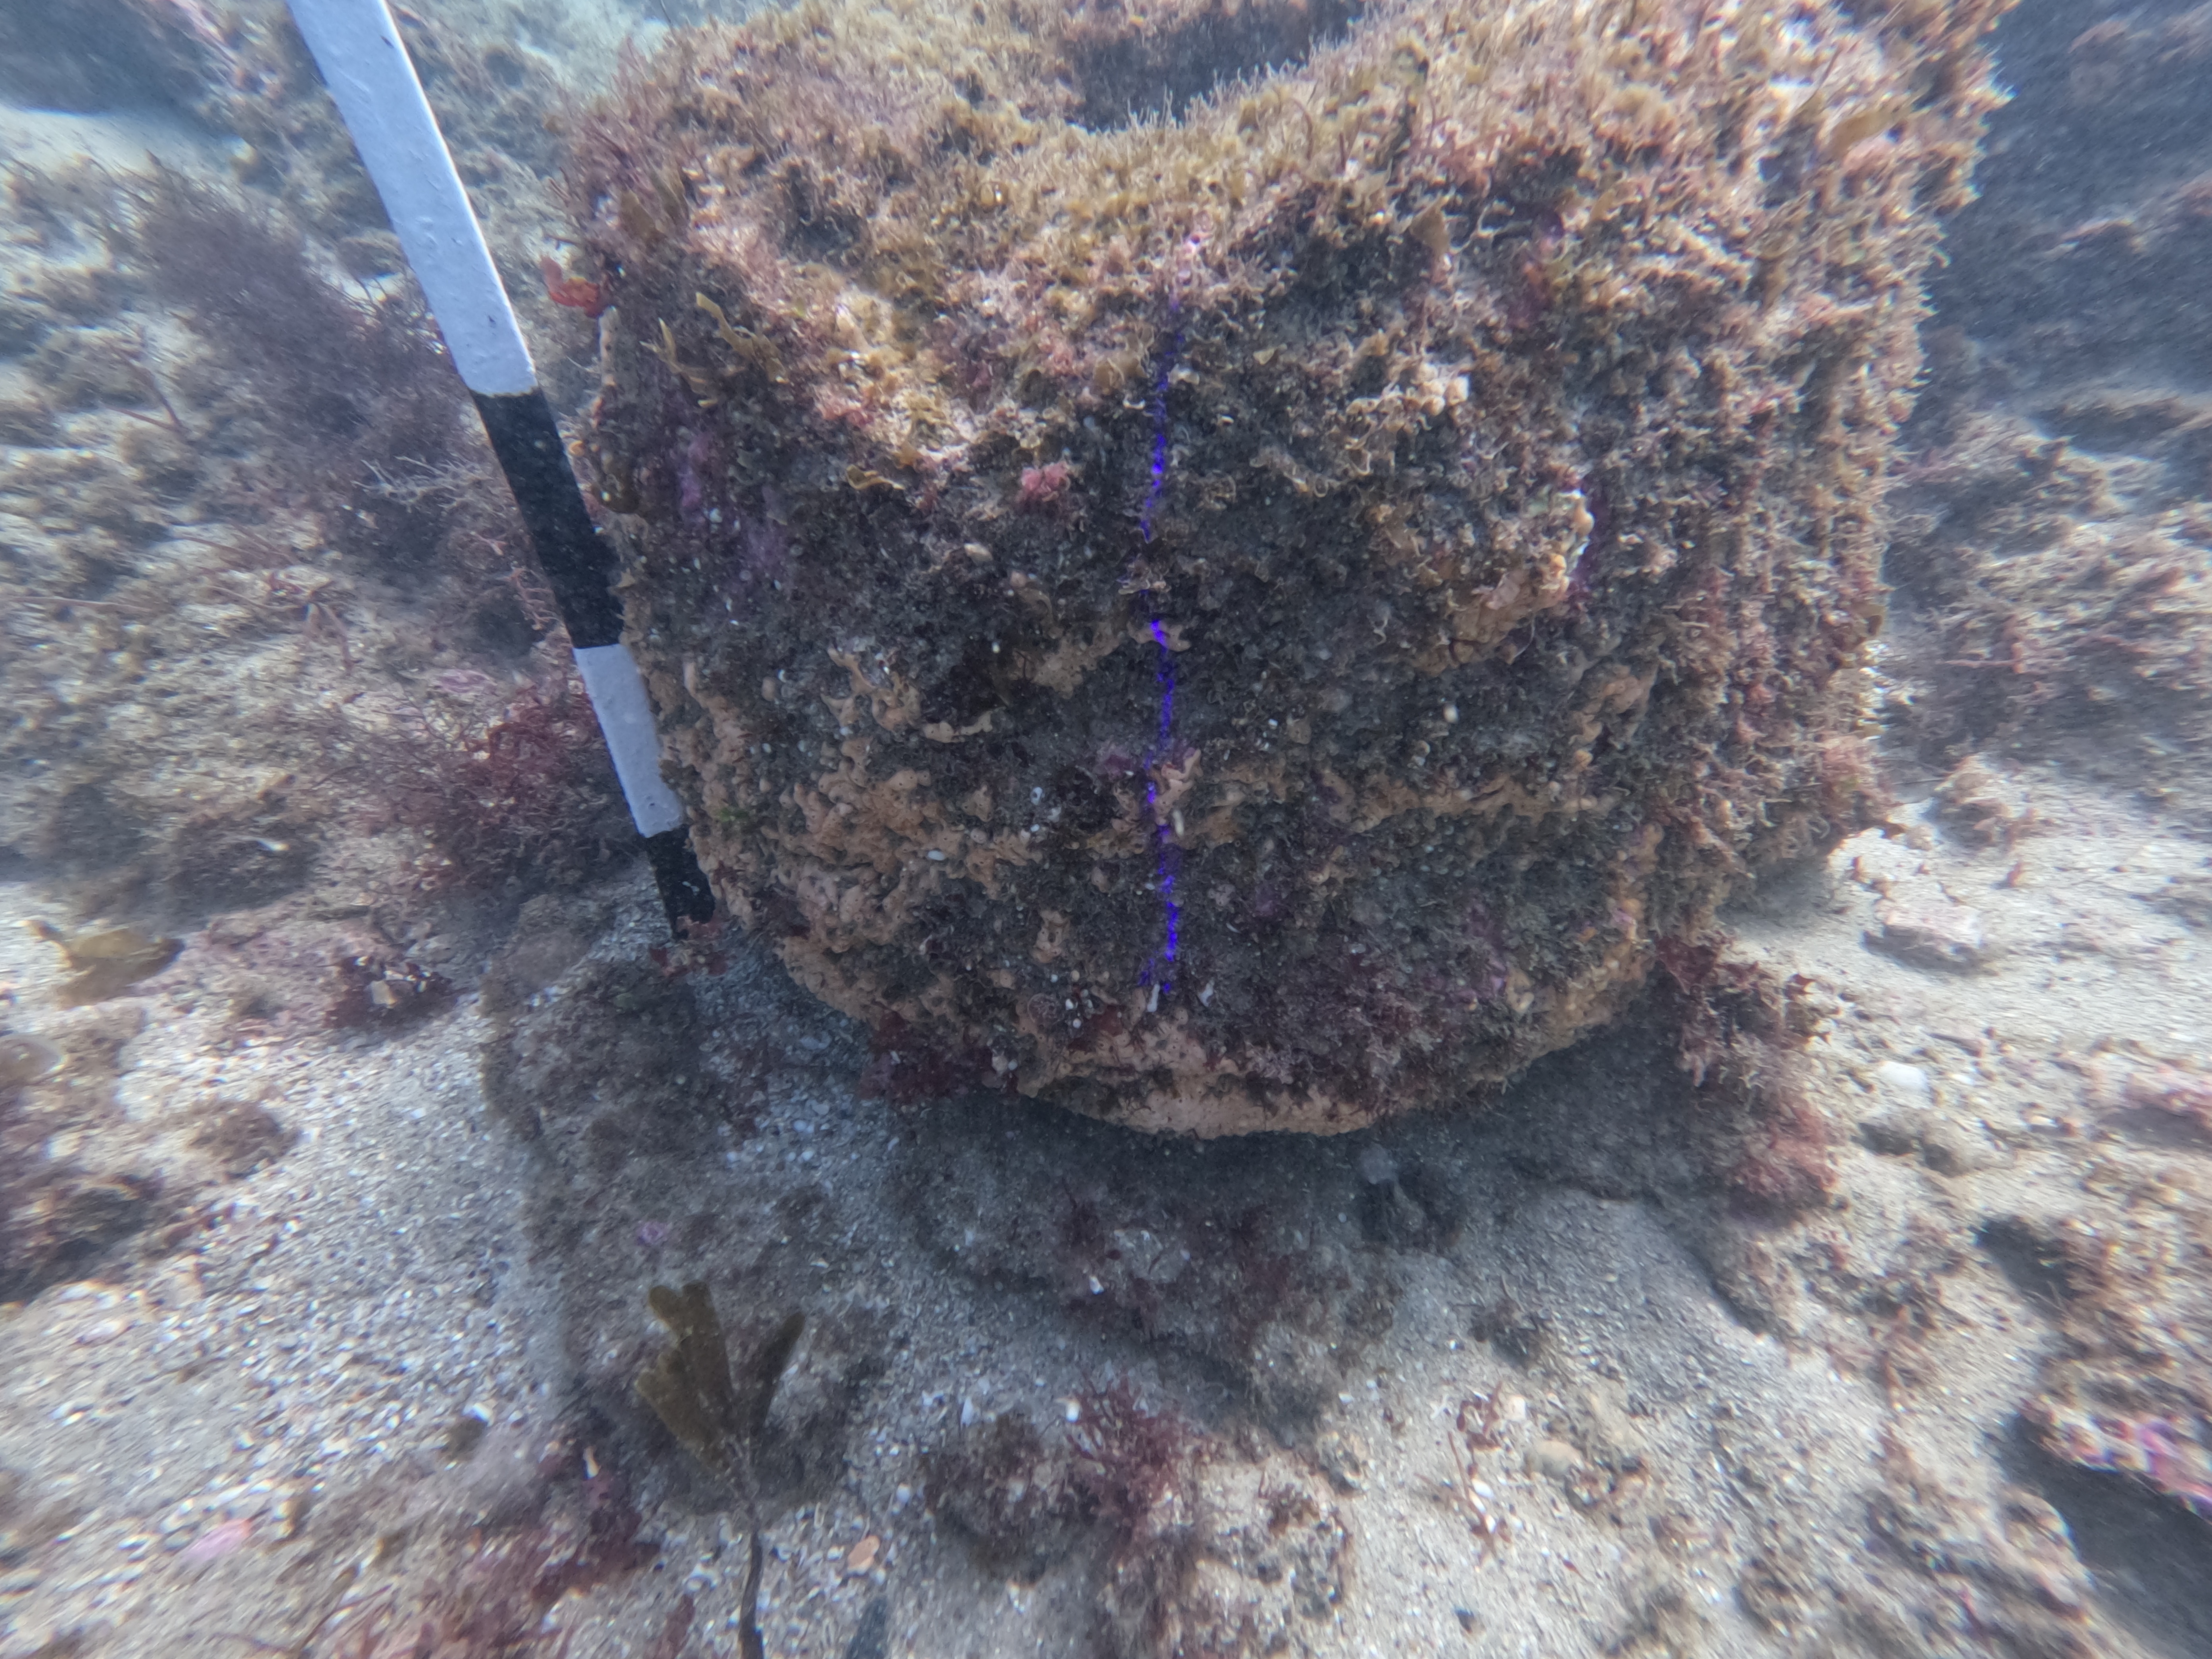

Supplement: Supplementary file 1774 [file G0028100.pdf › Ocean1/G0028100.pdf]

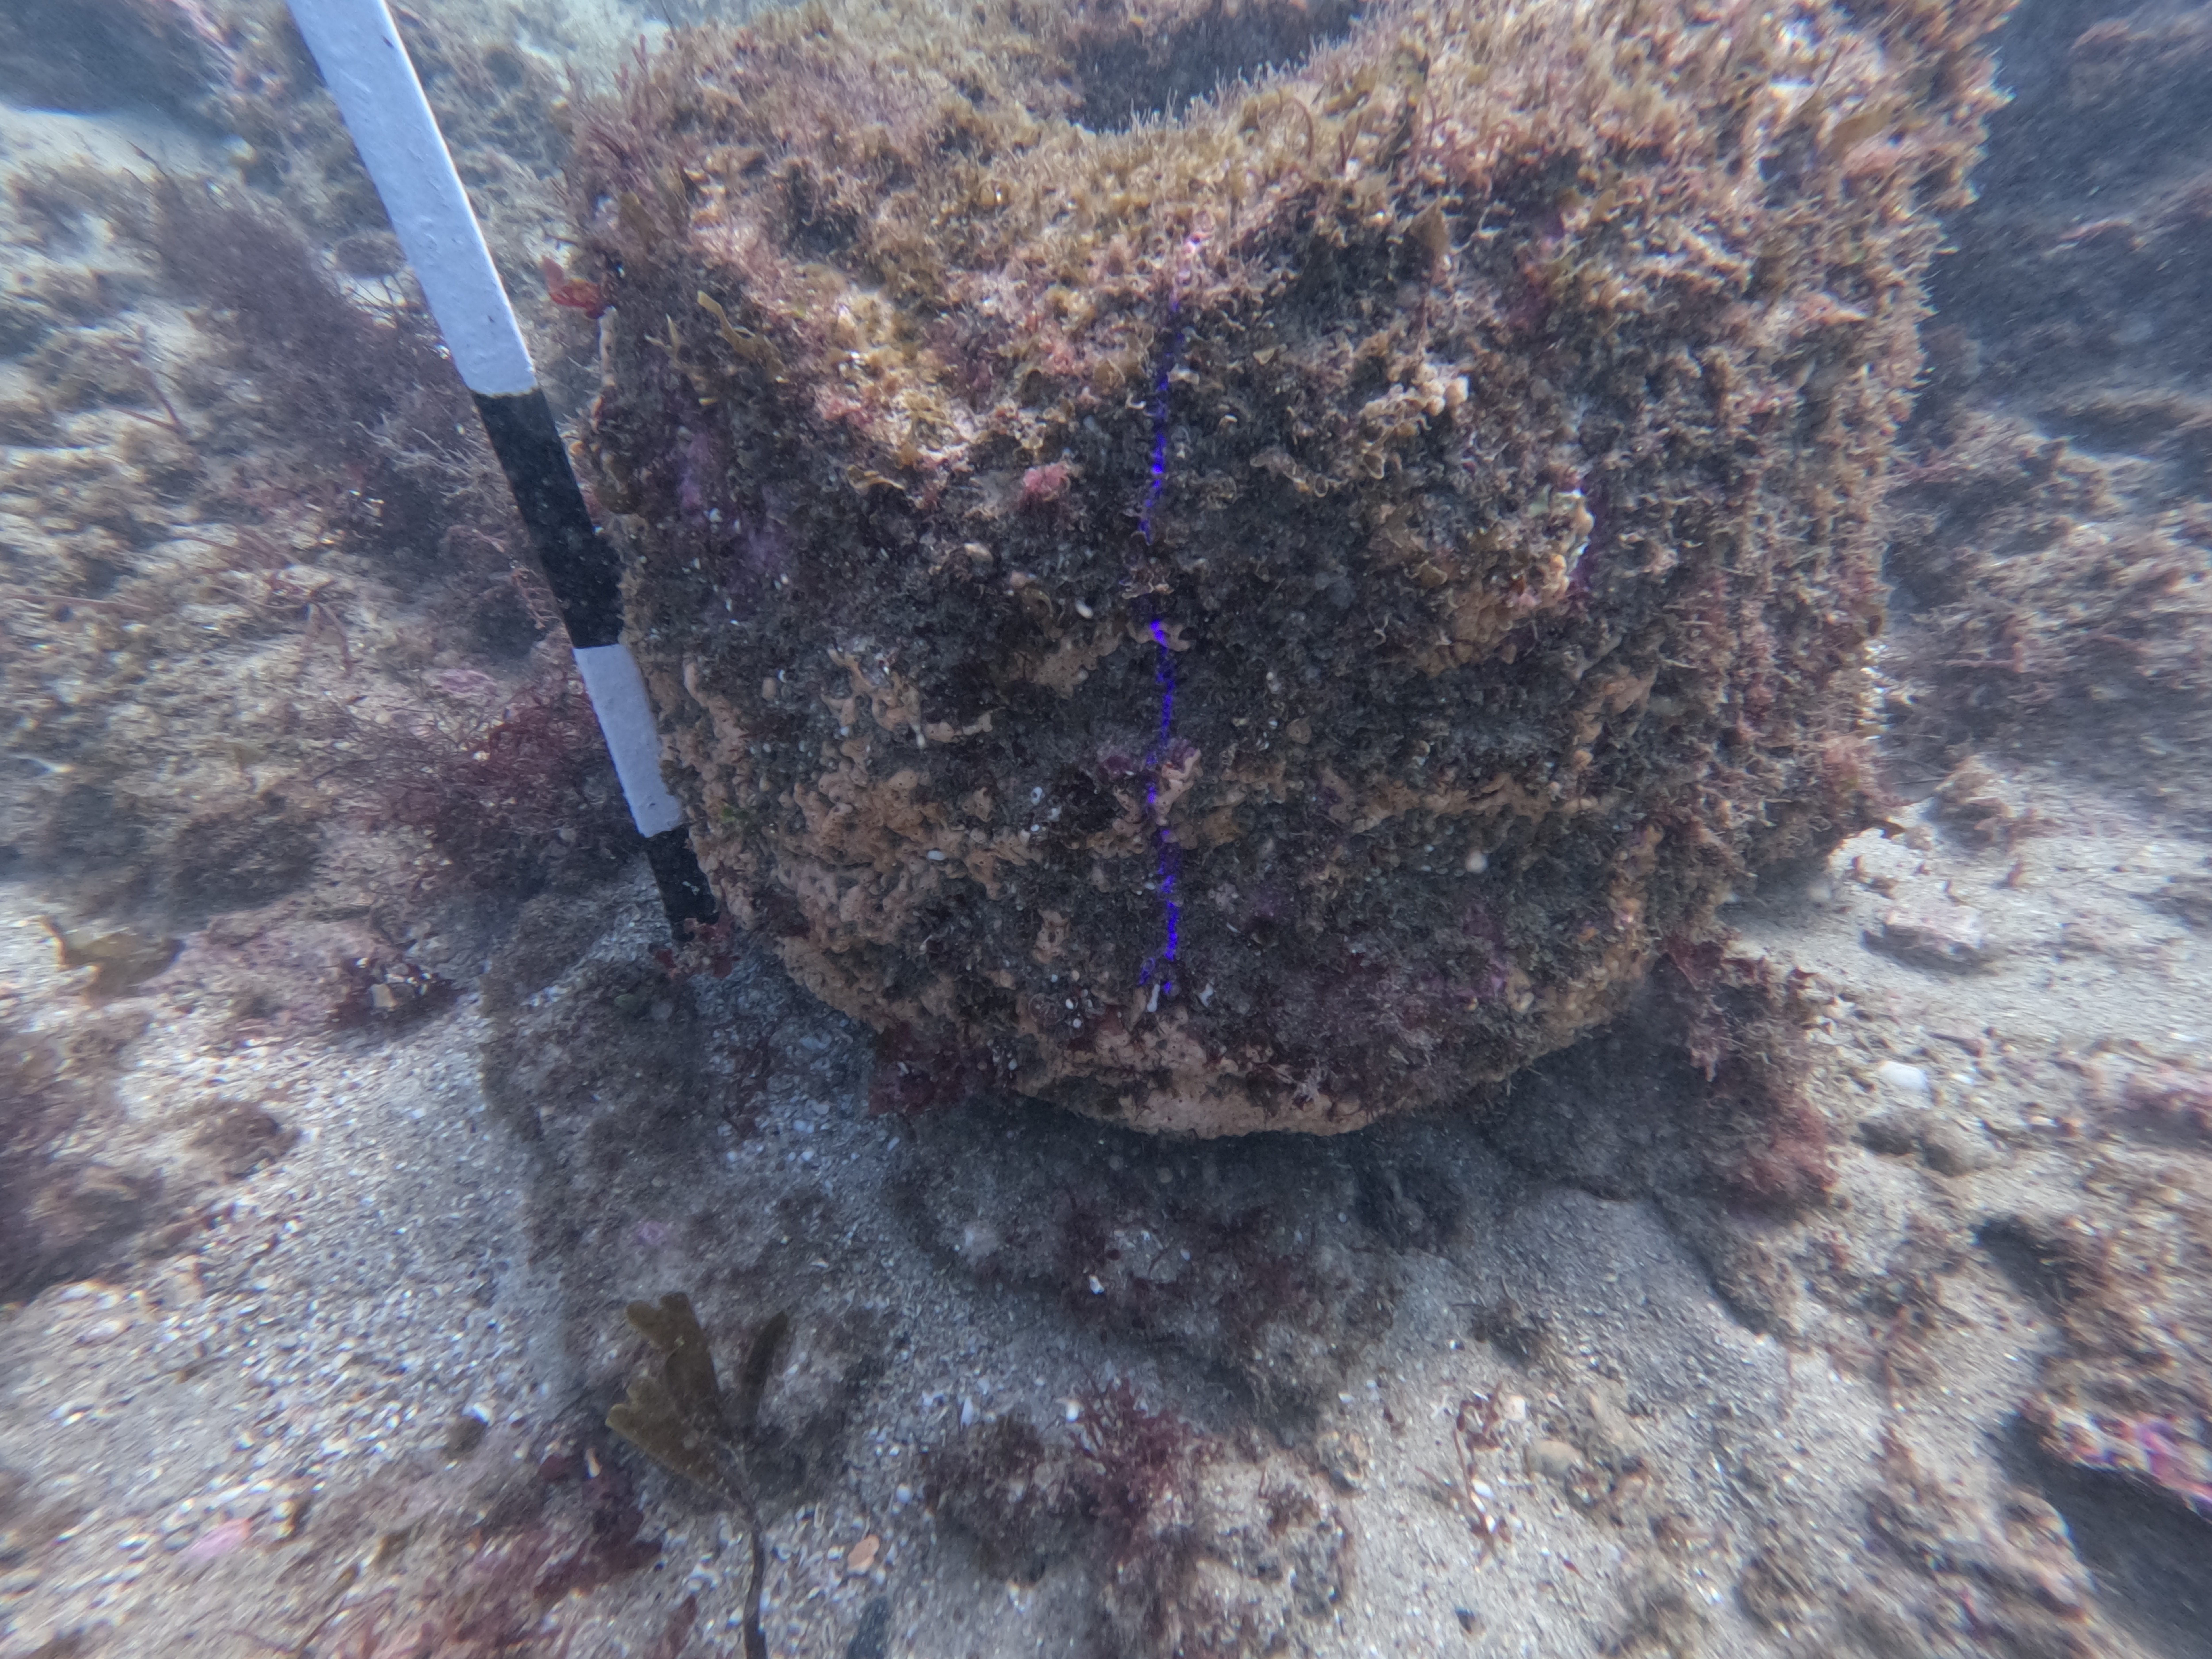

Supplement: Supplementary file 1775 [file G0028101.pdf › Ocean1/G0028101.pdf]

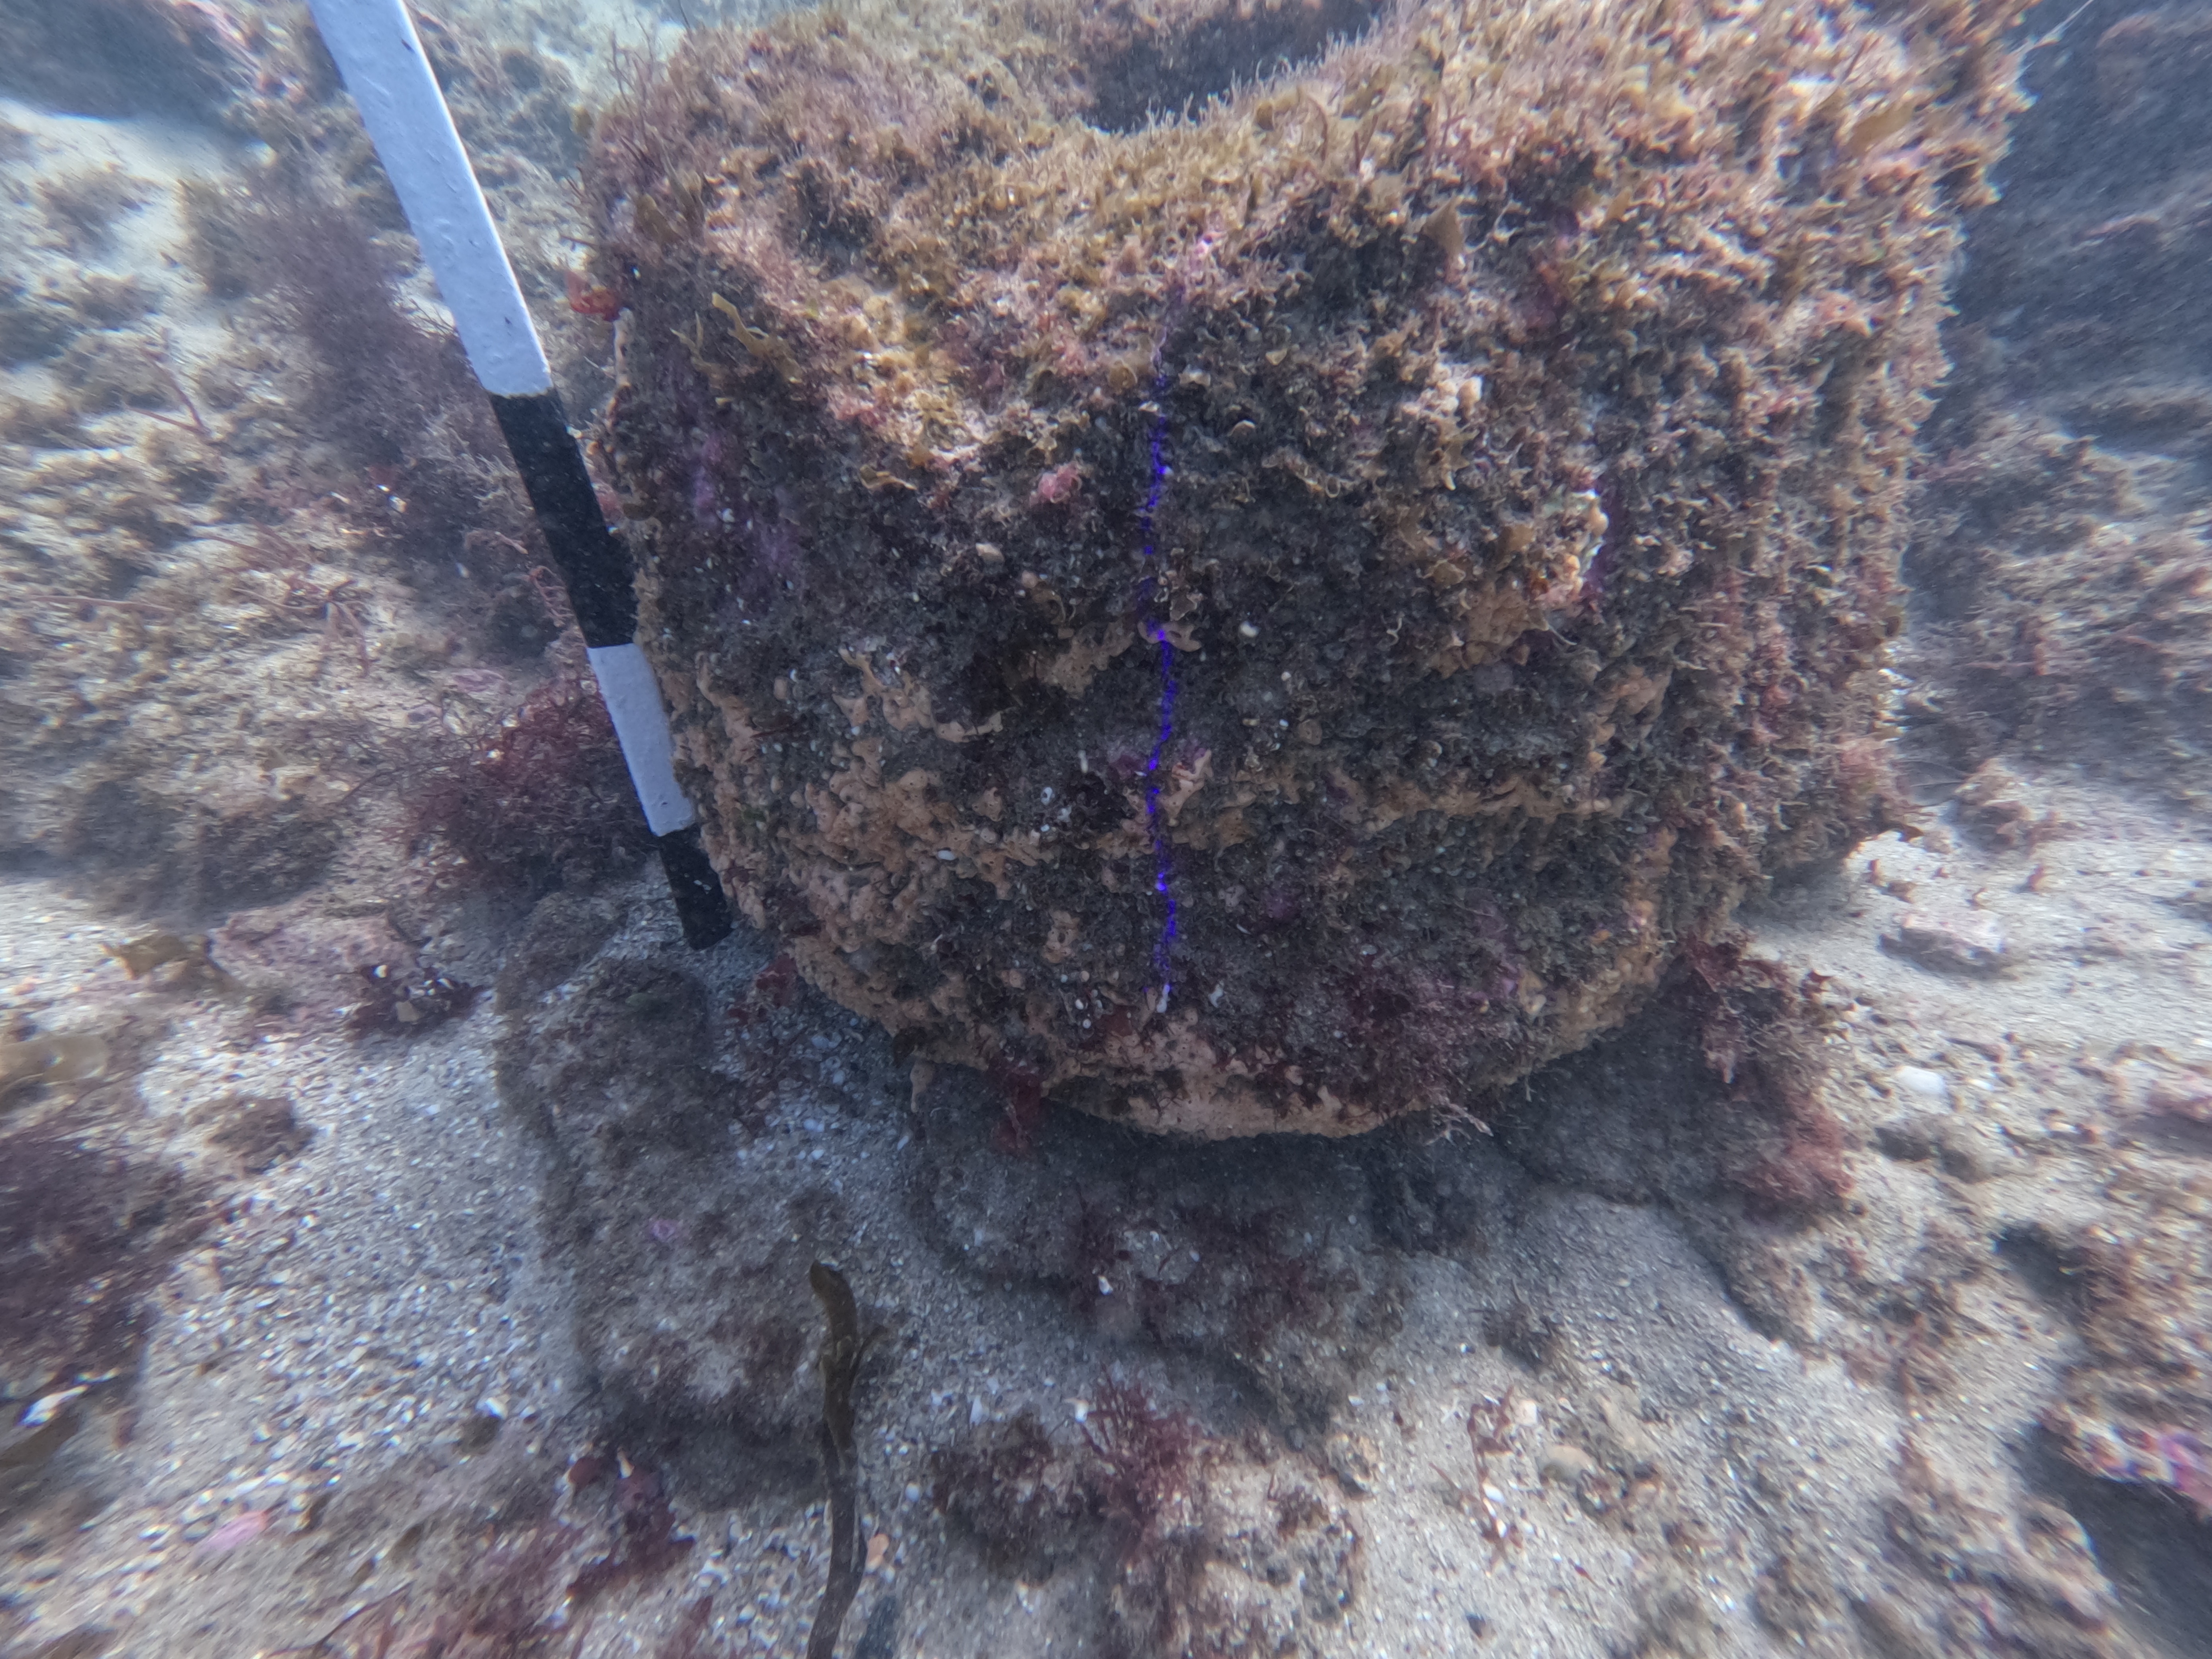

Supplement: Supplementary file 1776 [file G0028102.pdf › Ocean1/G0028102.pdf]

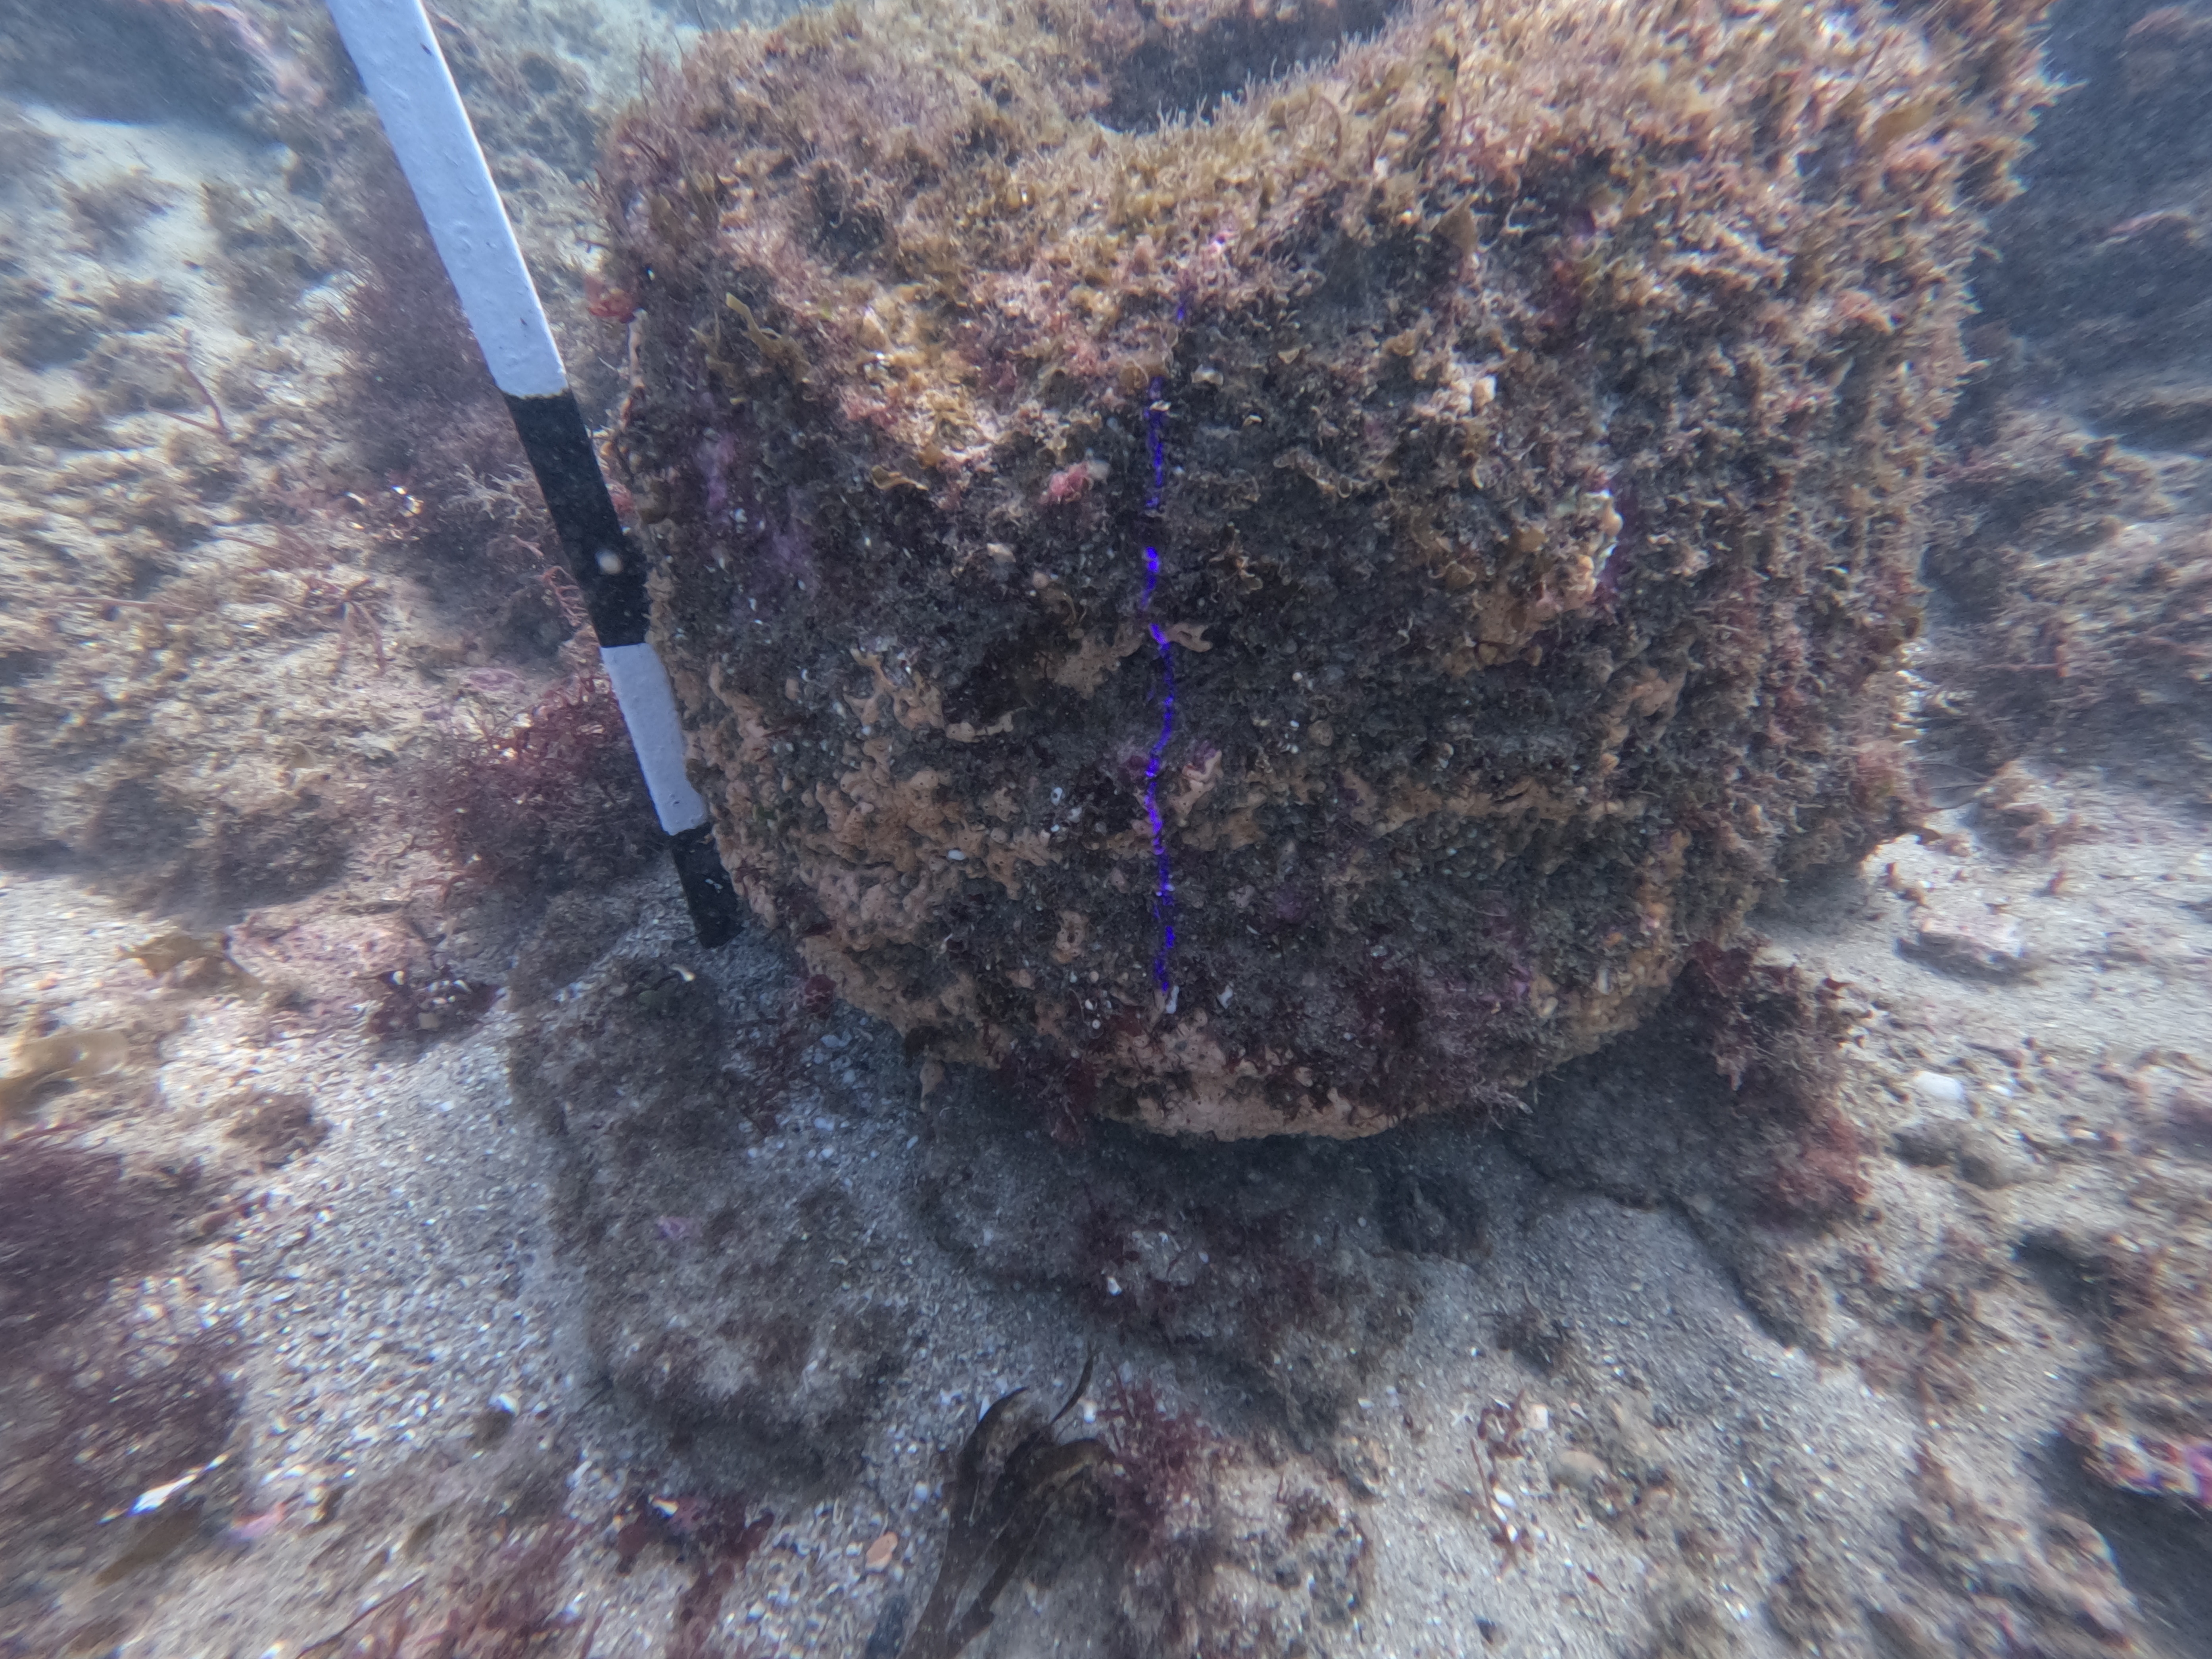

Supplement: Supplementary file 1777 [file G0028103.pdf › Ocean1/G0028103.pdf]

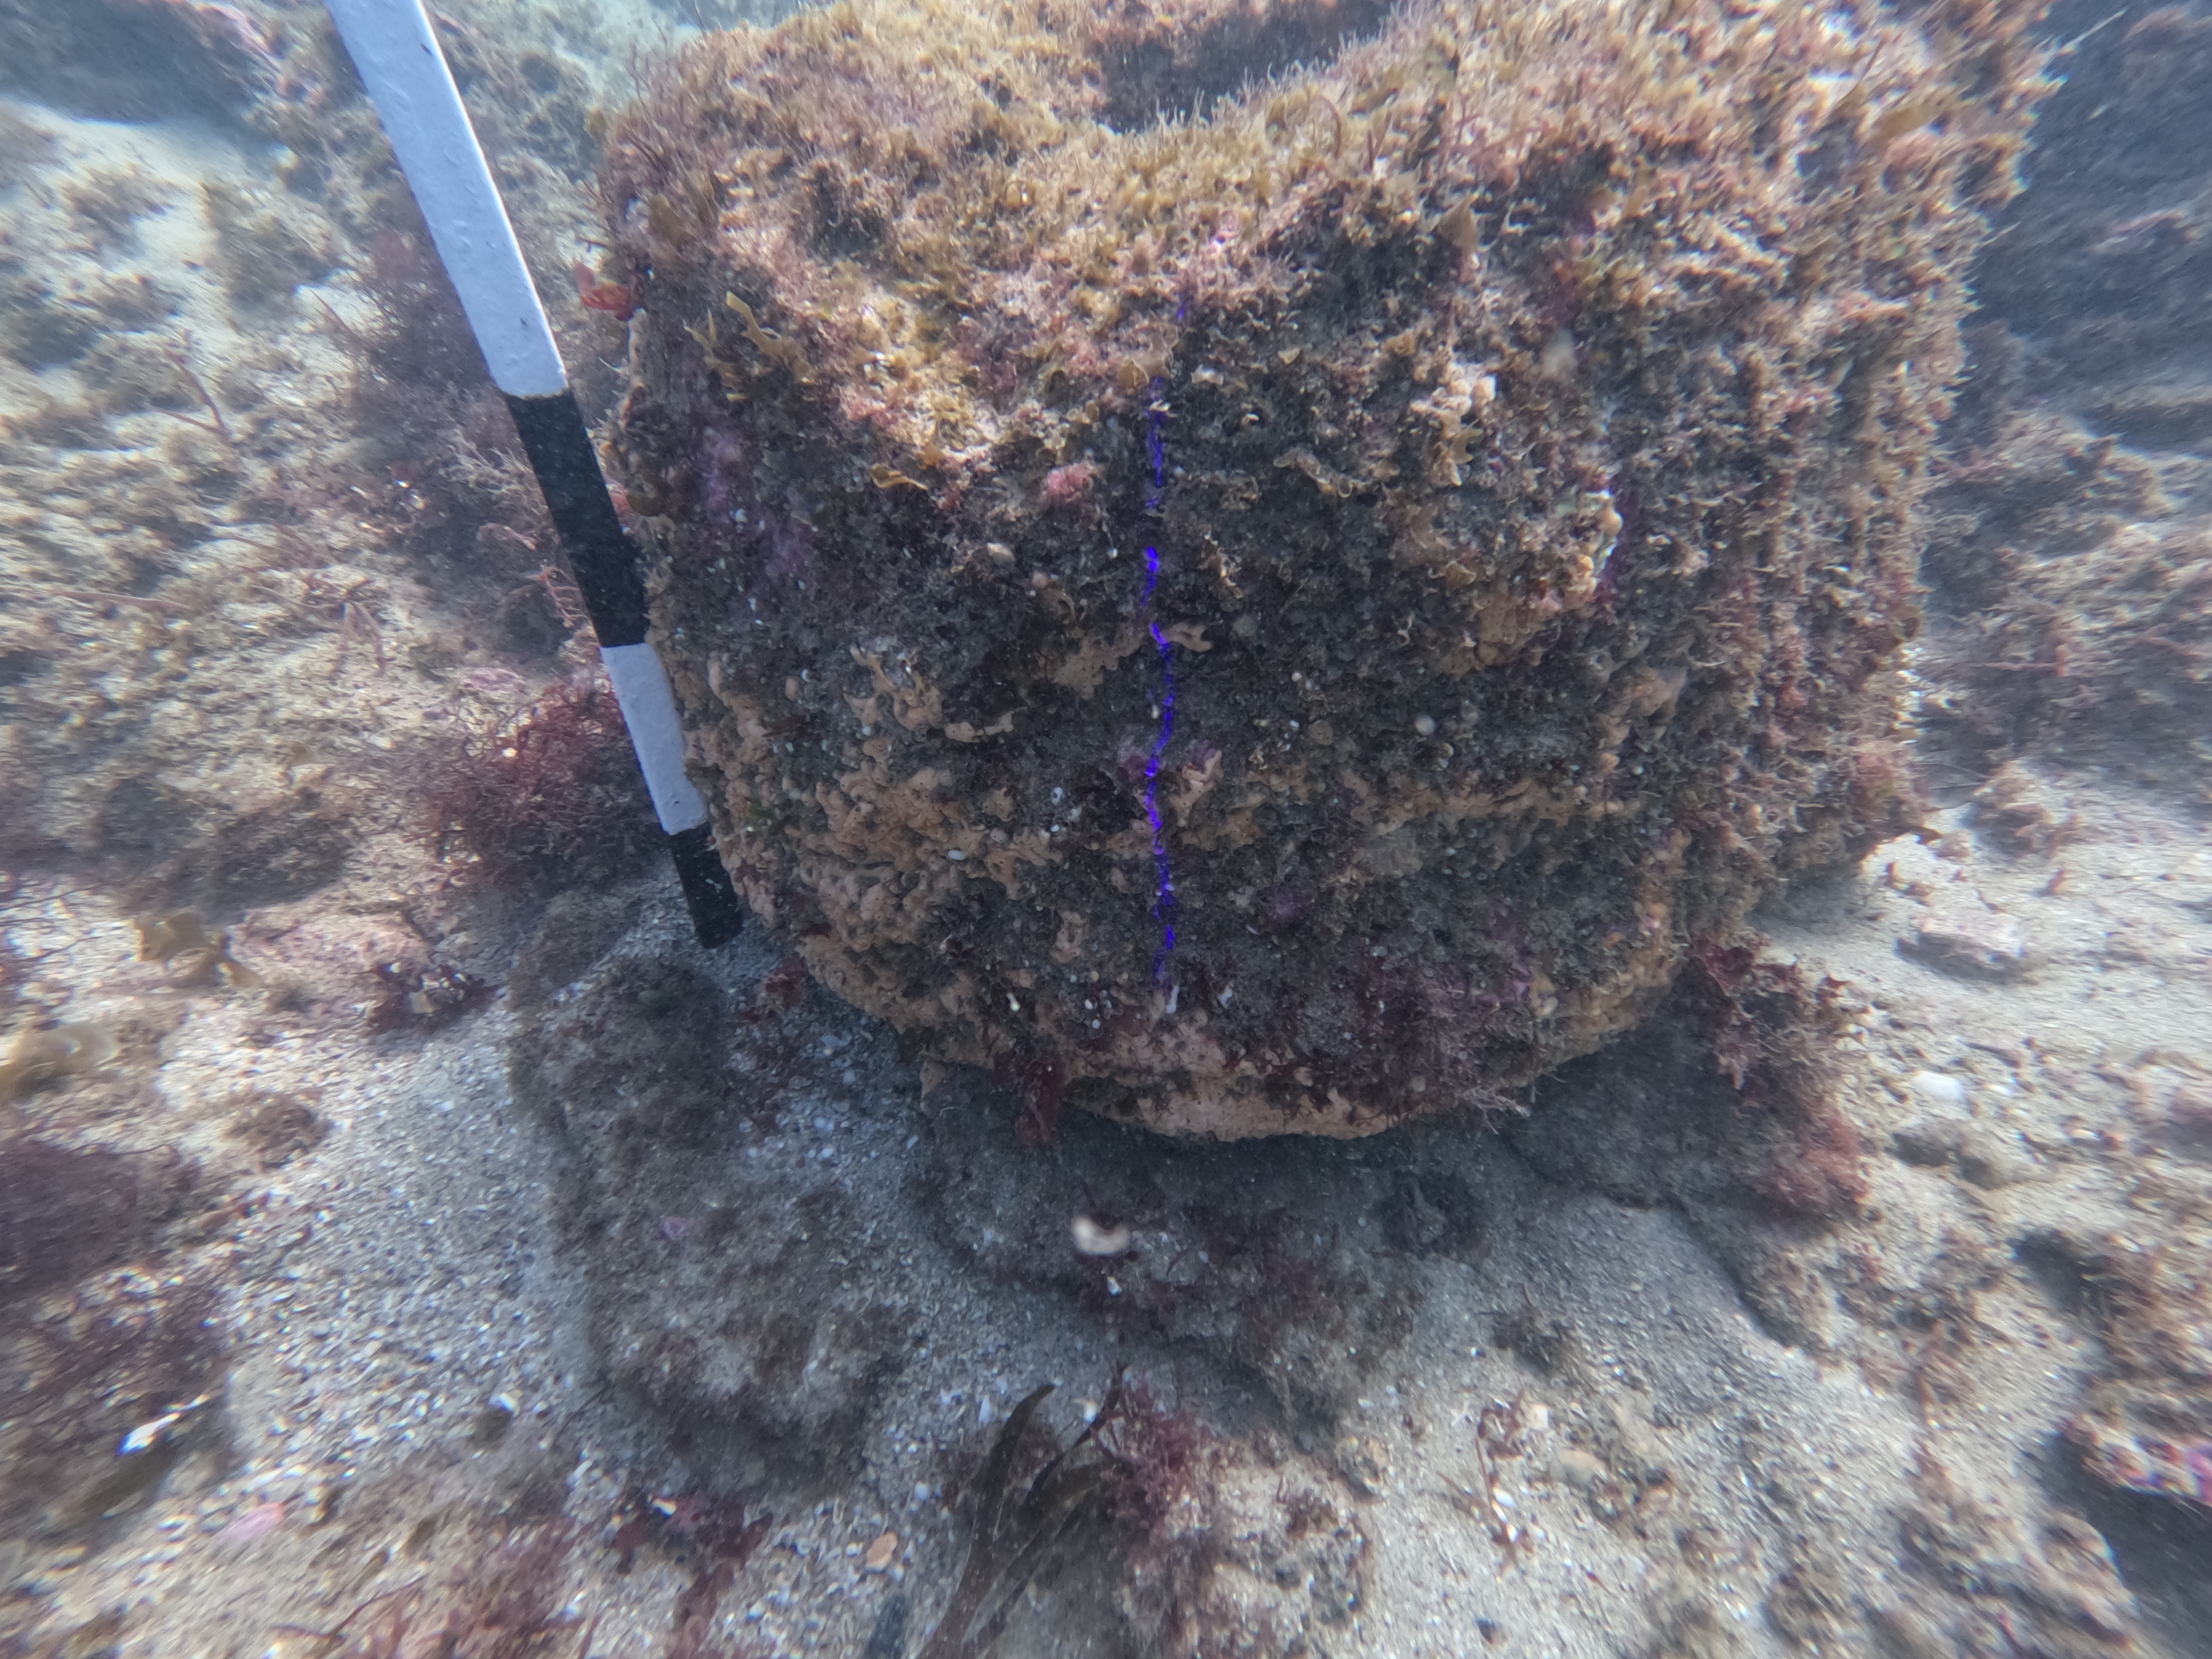

Supplement: Supplementary file 1778 [file G0028104.pdf › Ocean1/G0028104.pdf]

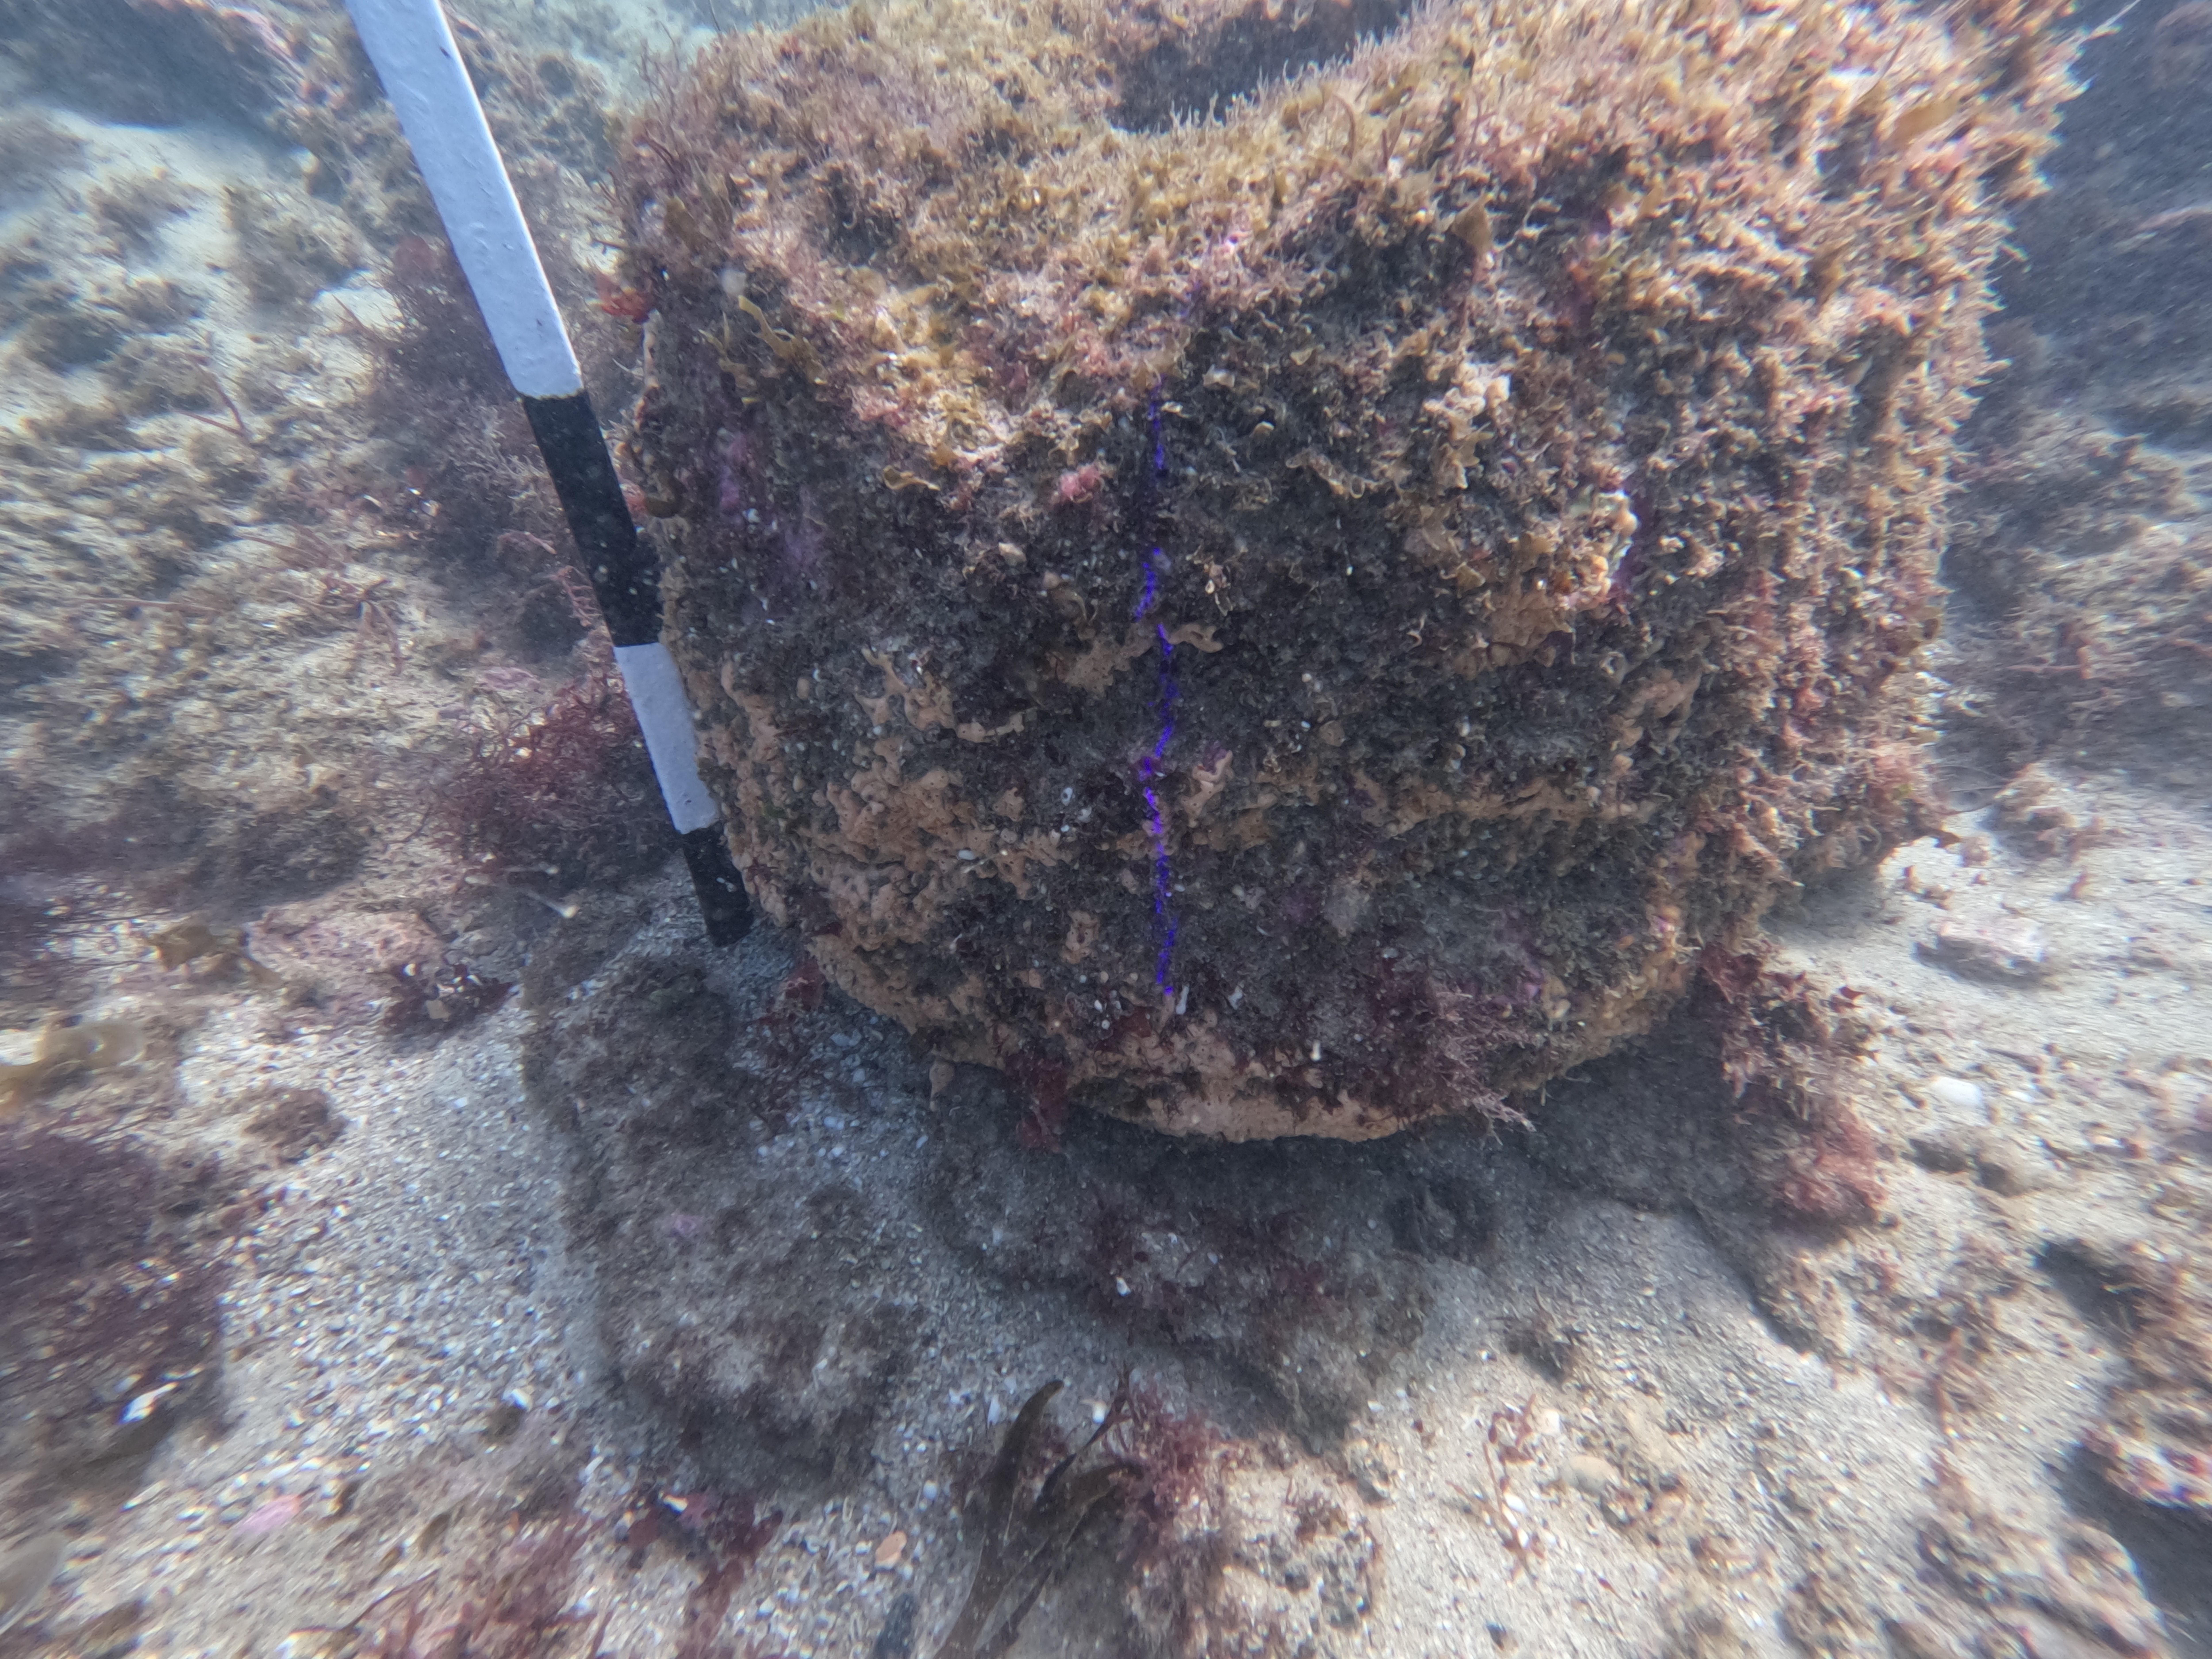

Supplement: Supplementary file 1779 [file G0028105.pdf › Ocean1/G0028105.pdf]

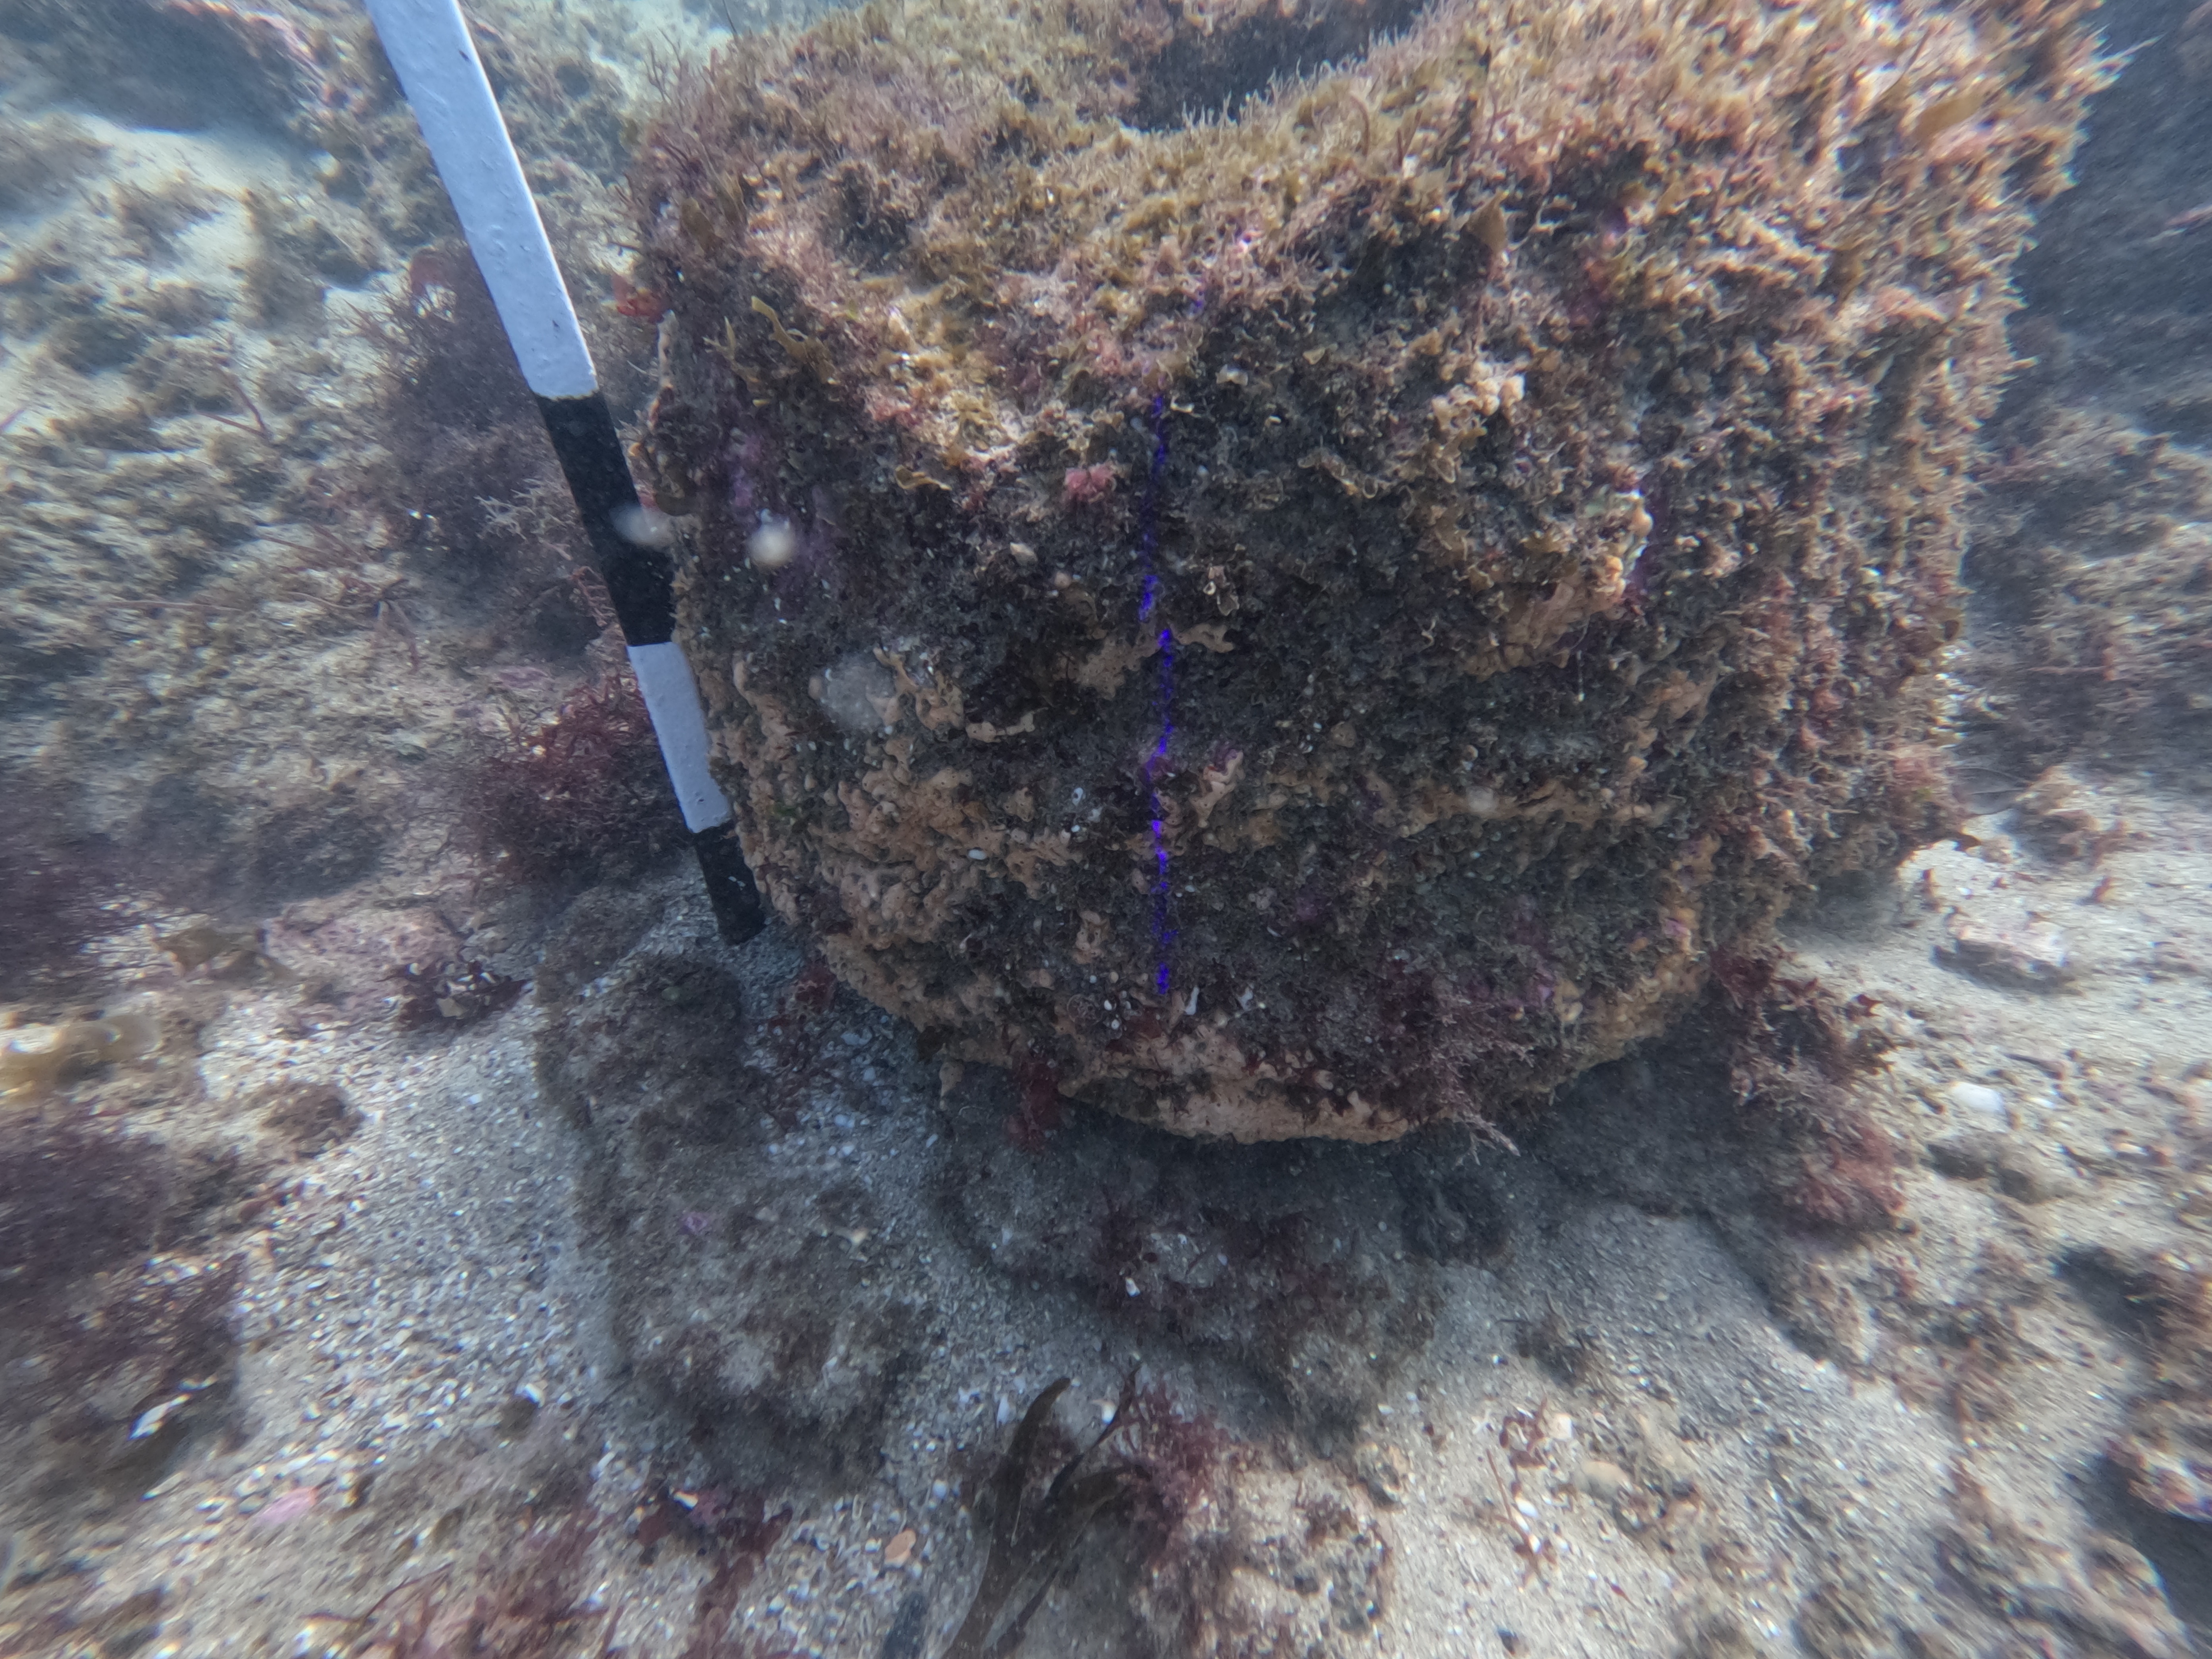

Supplement: Supplementary file 1780 [file G0028106.pdf › Ocean1/G0028106.pdf]

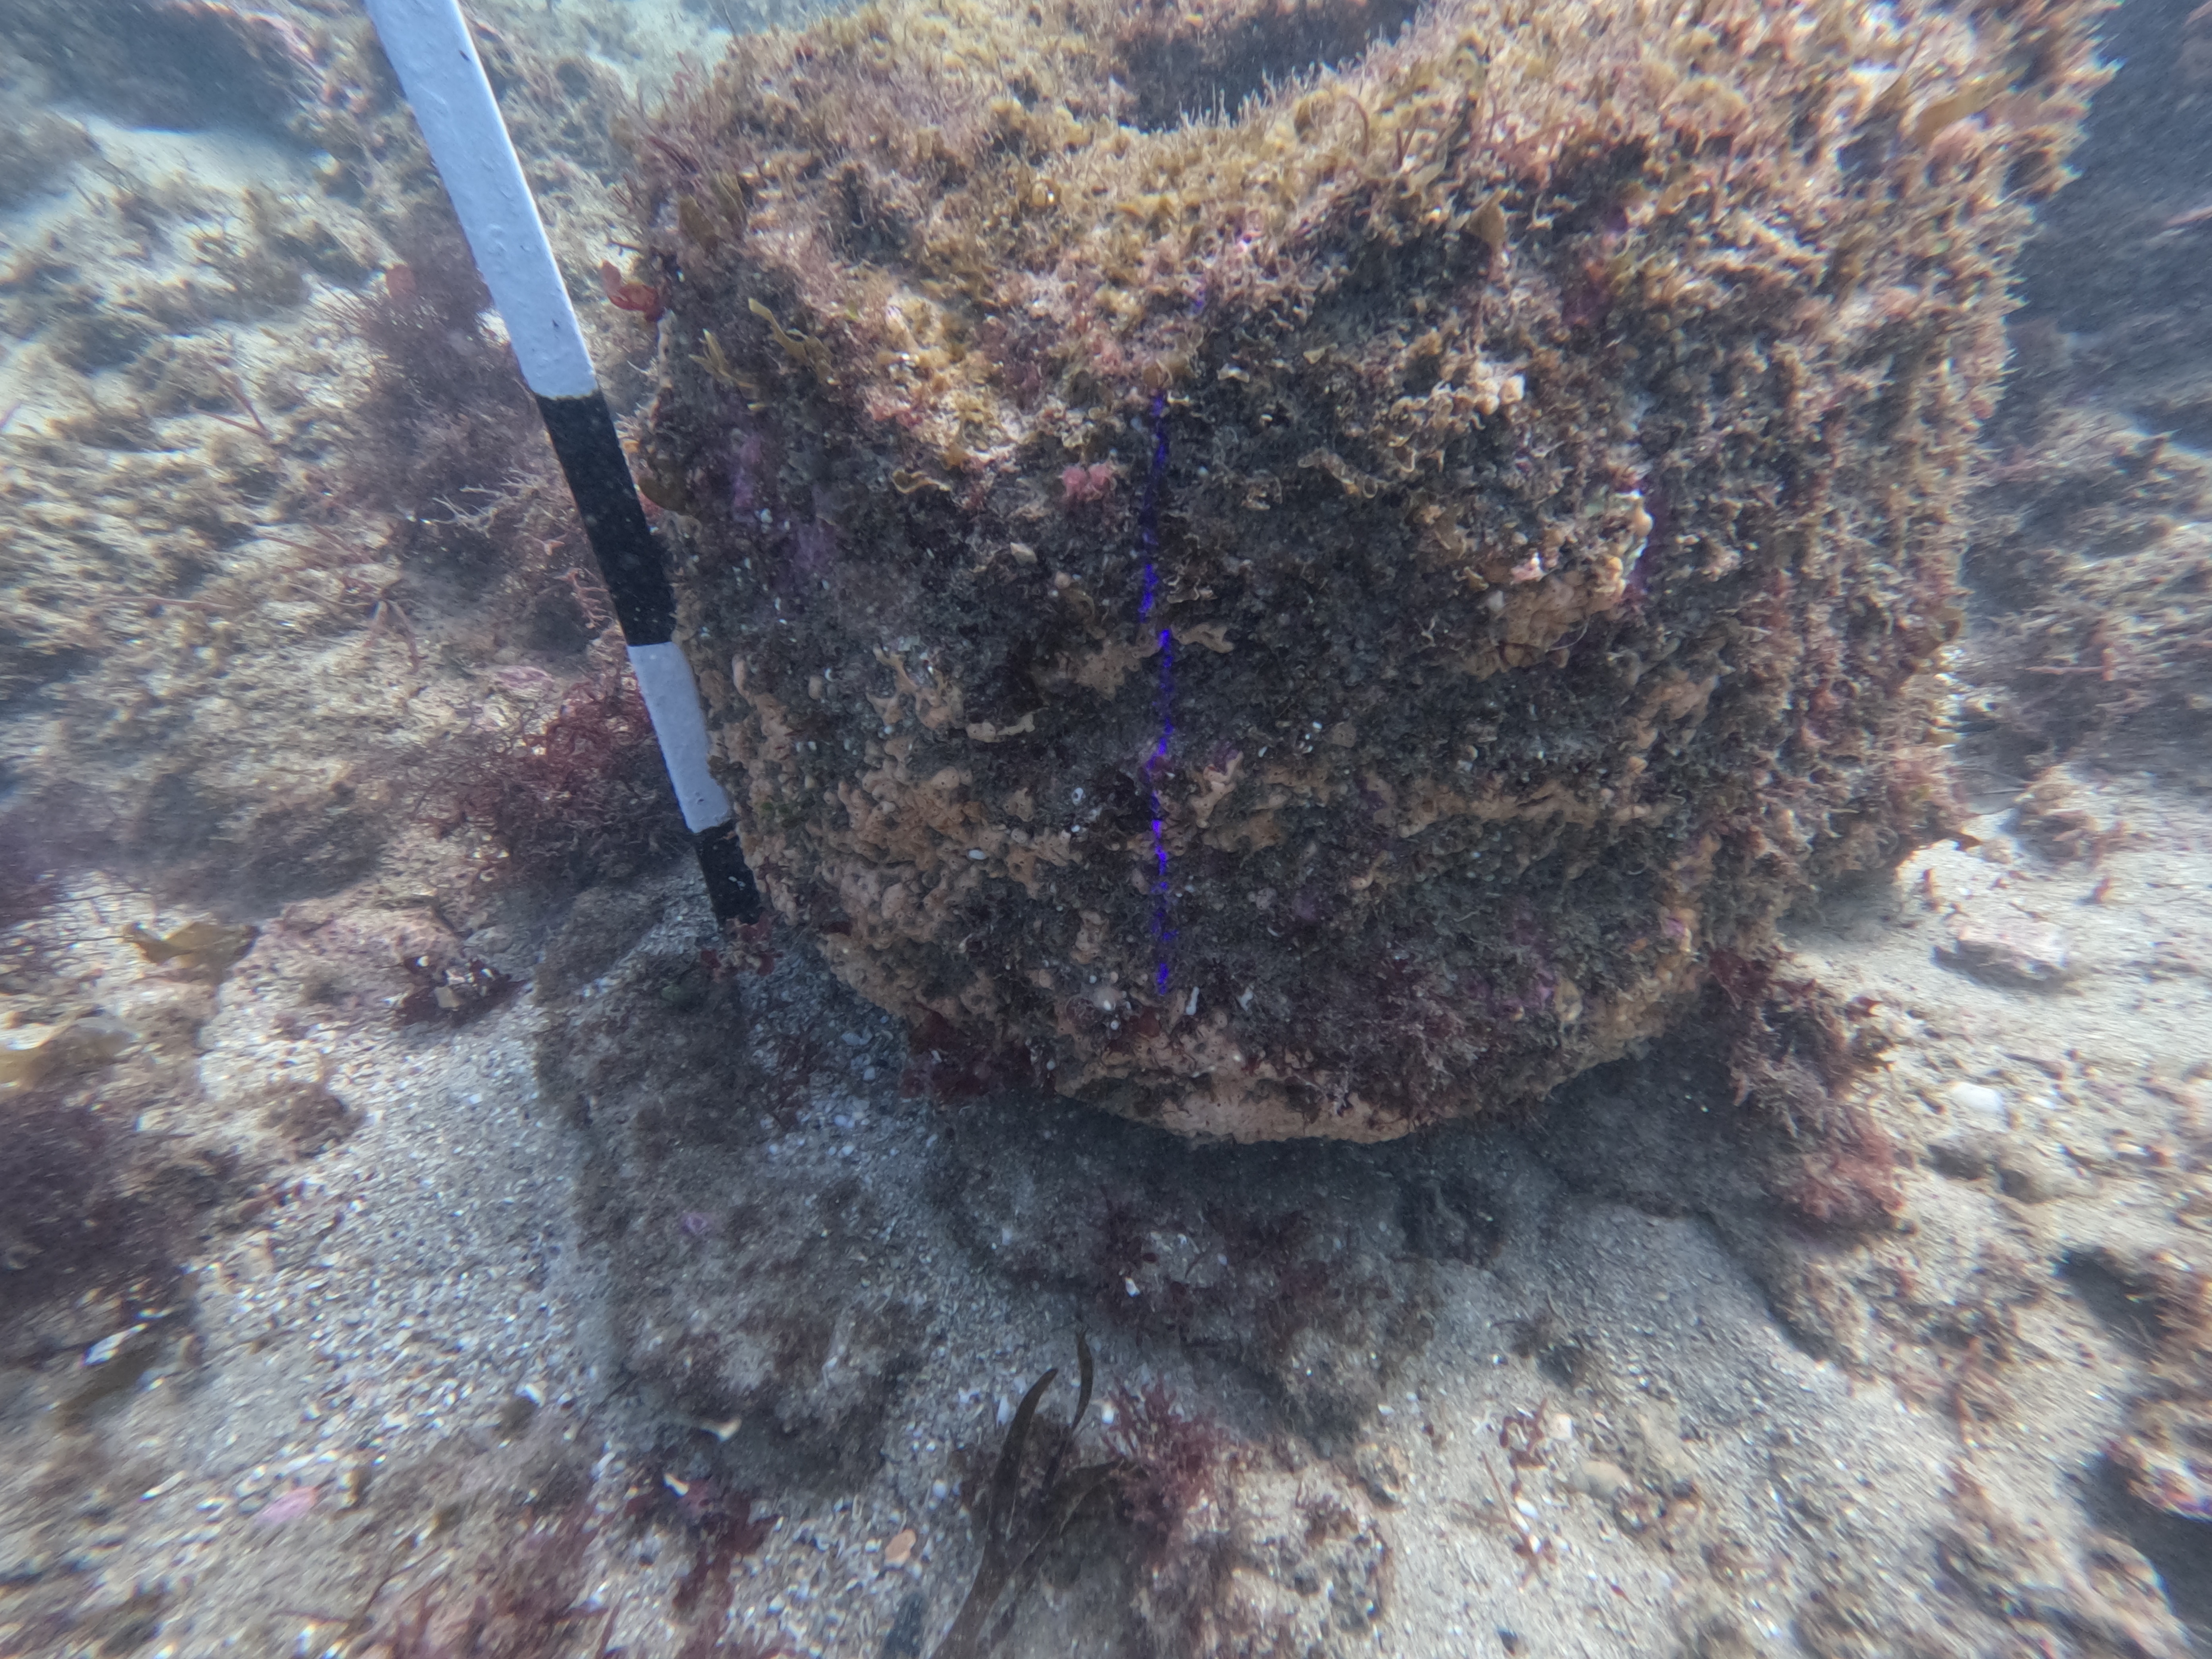

Supplement: Supplementary file 1781 [file G0028107.pdf › Ocean1/G0028107.pdf]

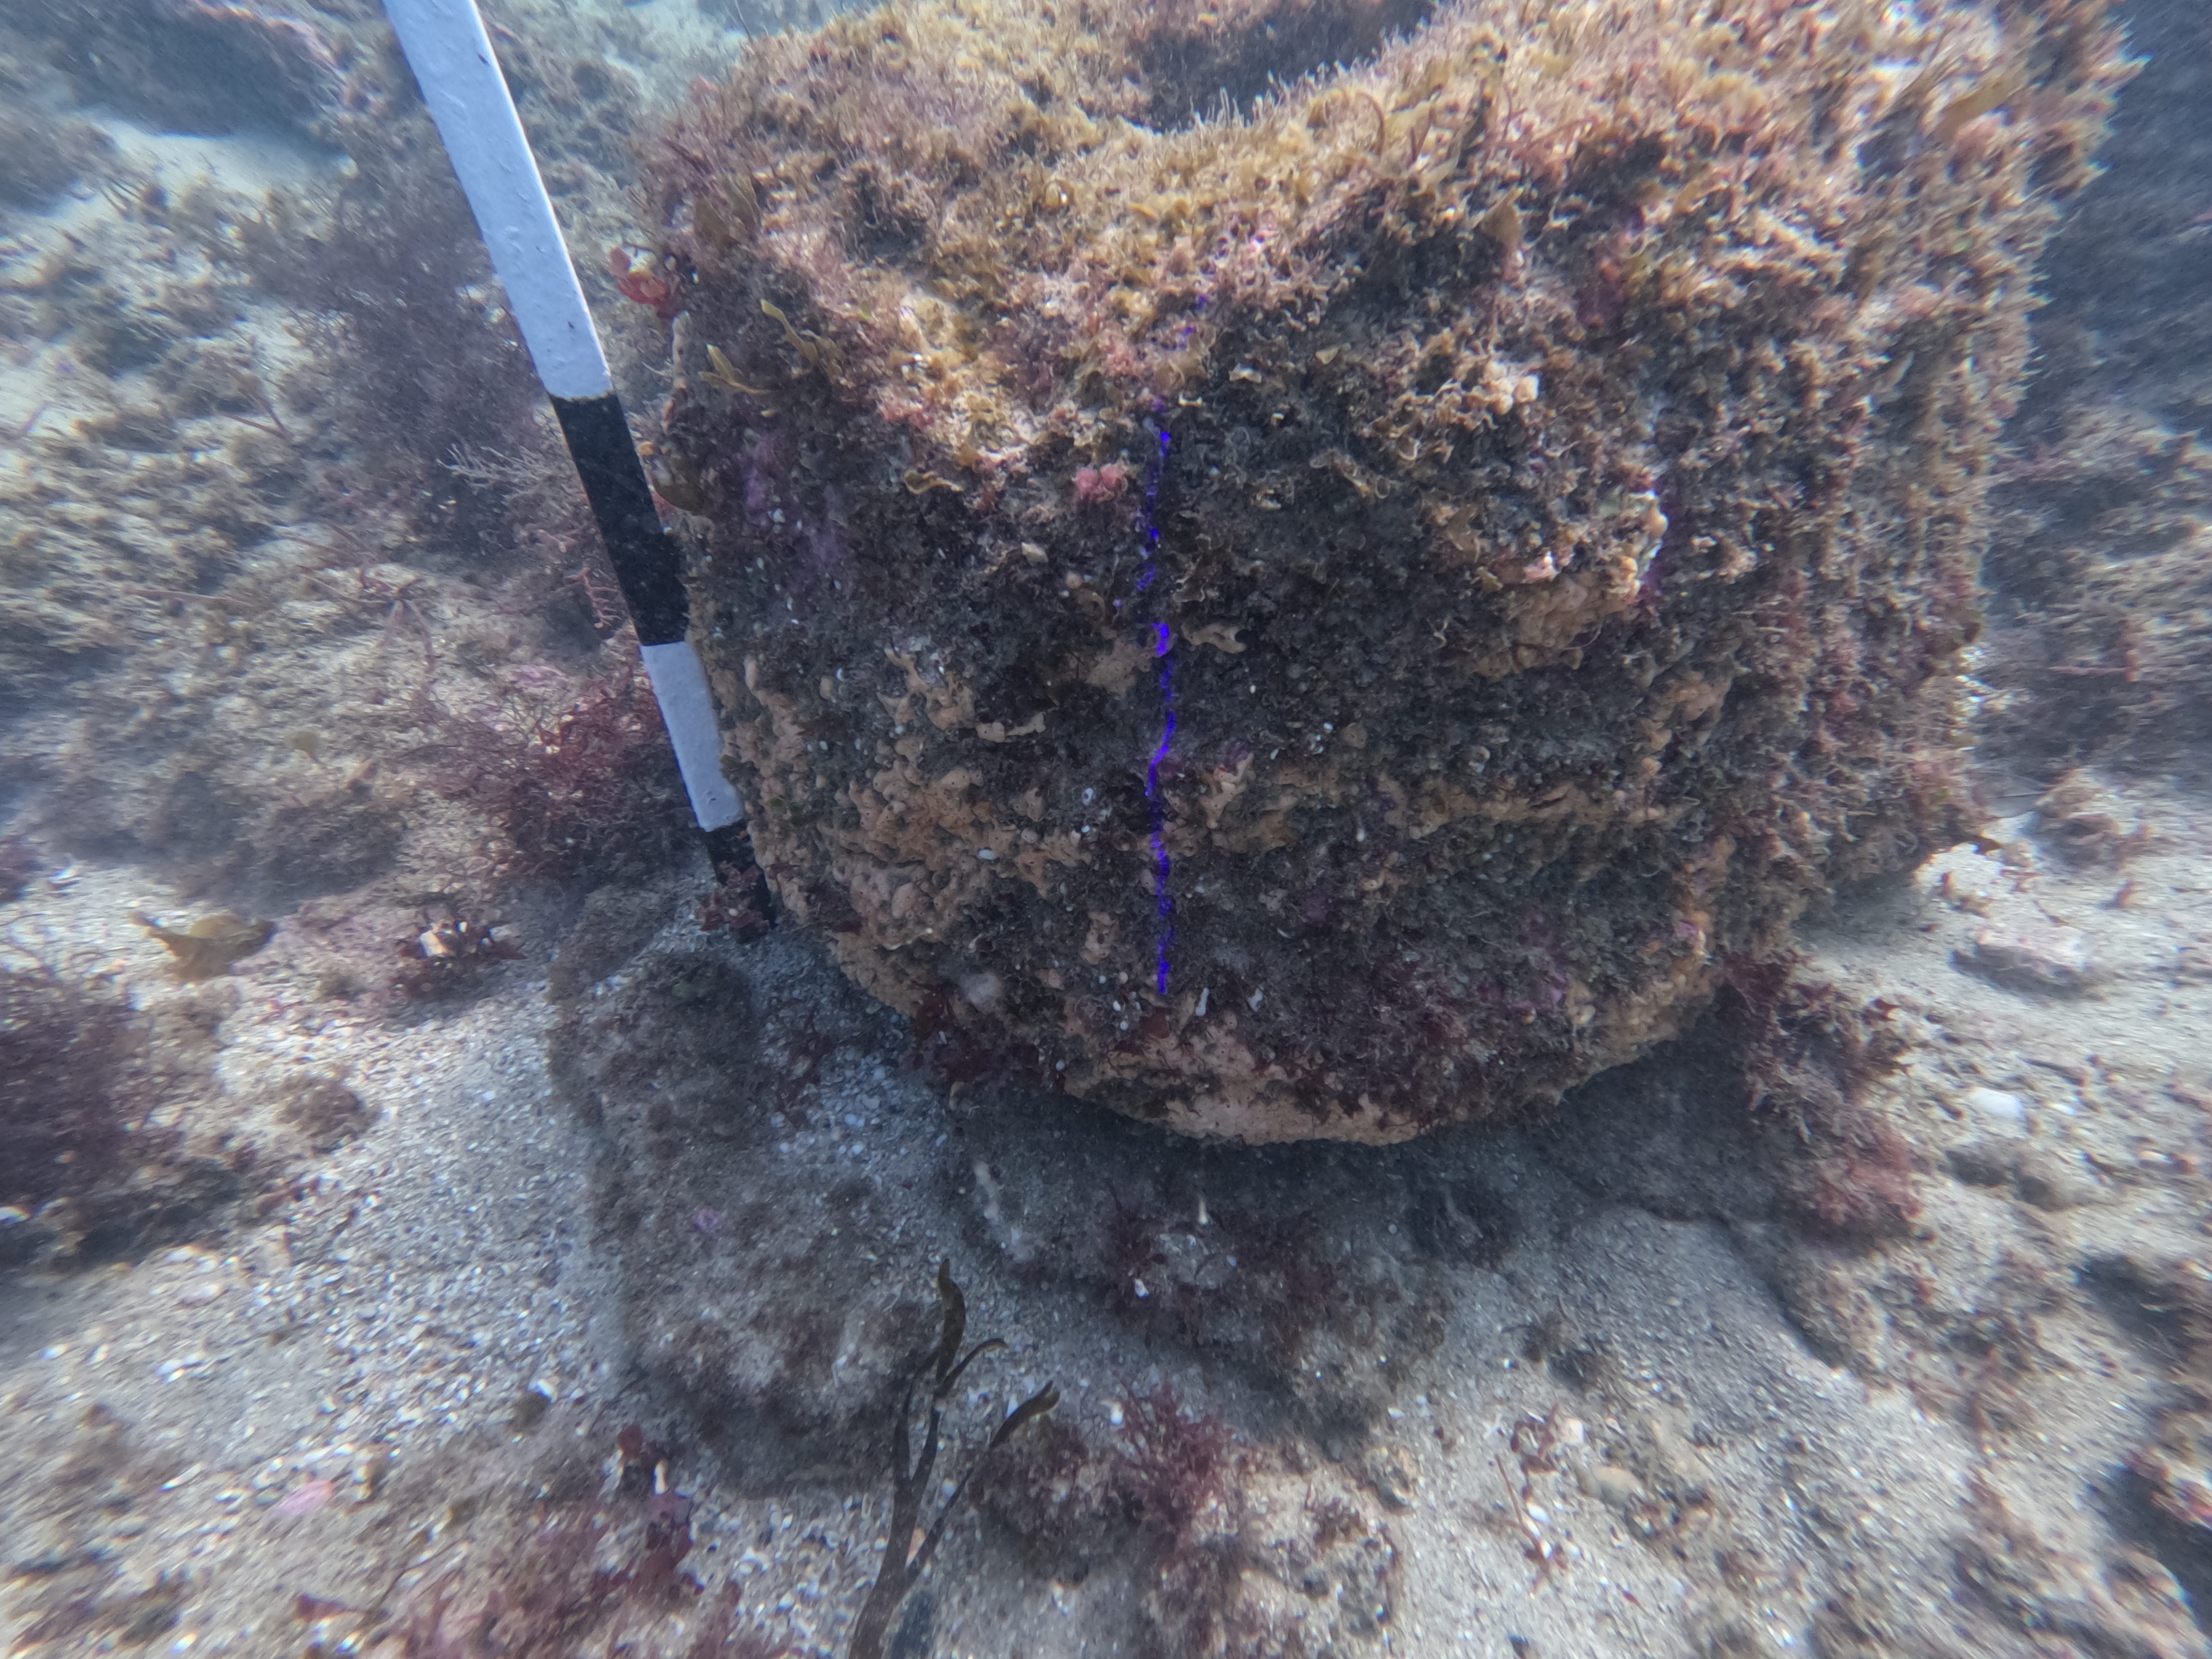

Supplement: Supplementary file 1782 [file G0028108.pdf › Ocean1/G0028108.pdf]

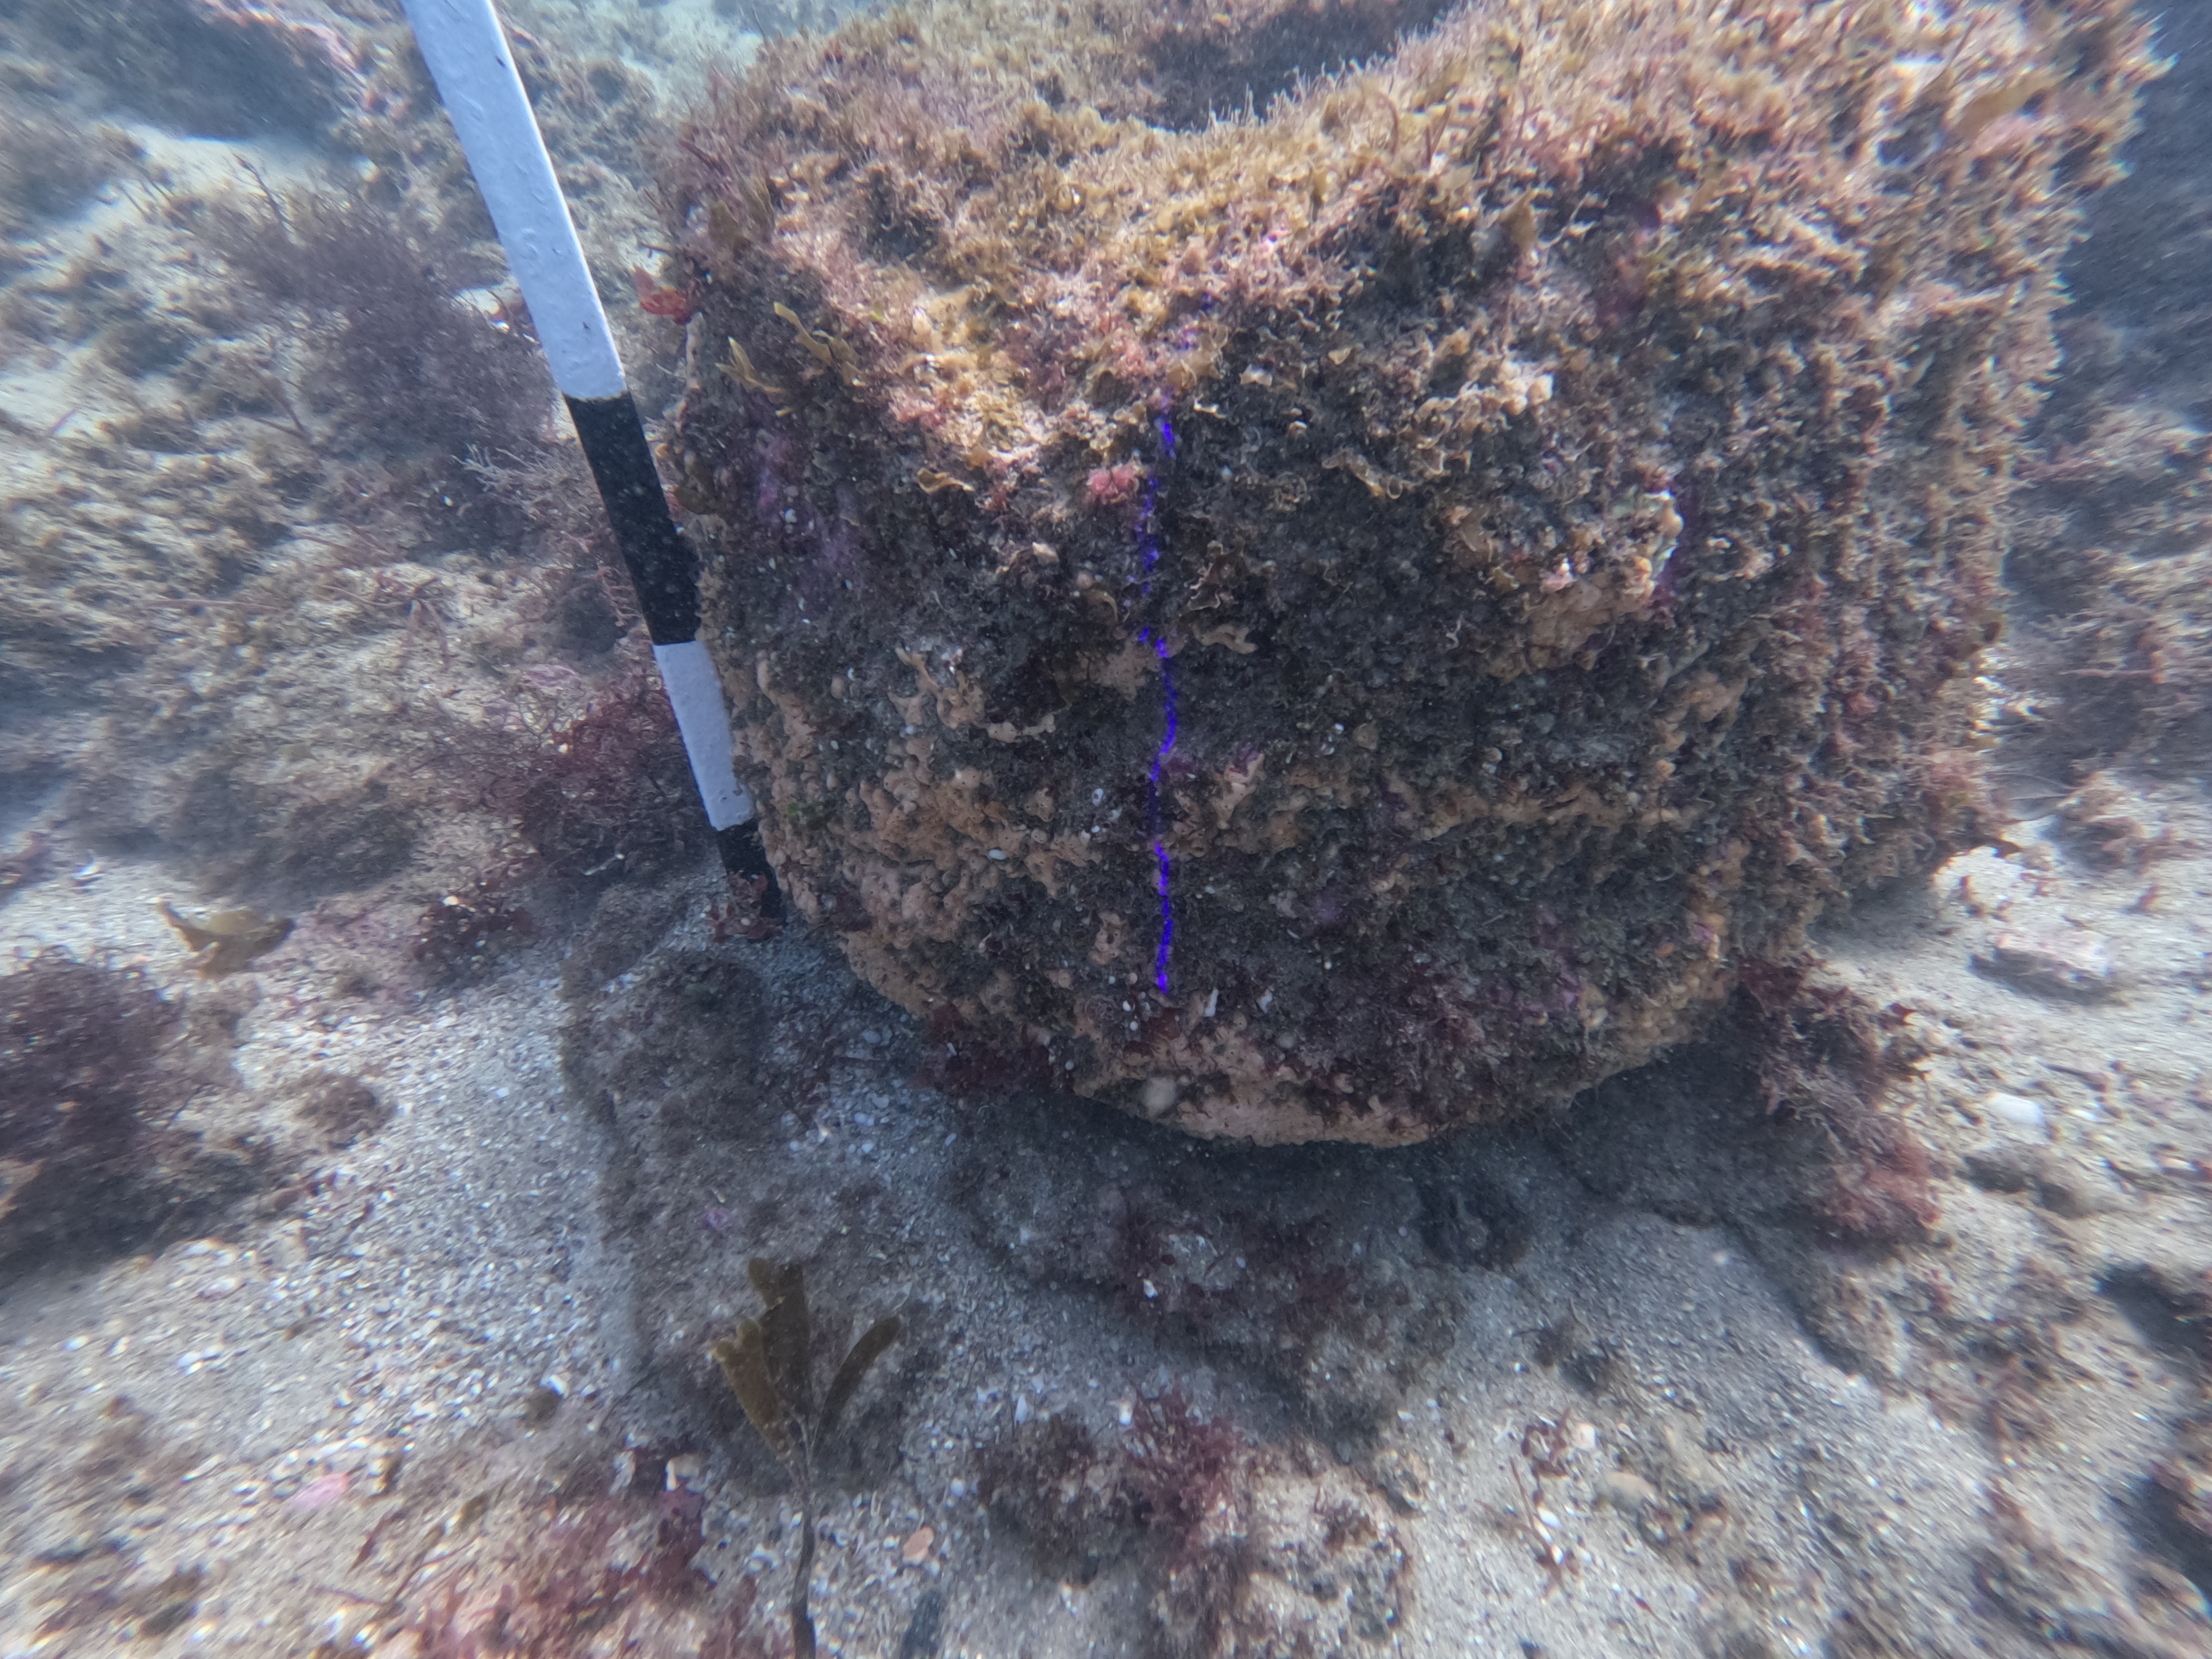

Supplement: Supplementary file 1783 [file G0028109.pdf › Ocean1/G0028109.pdf]

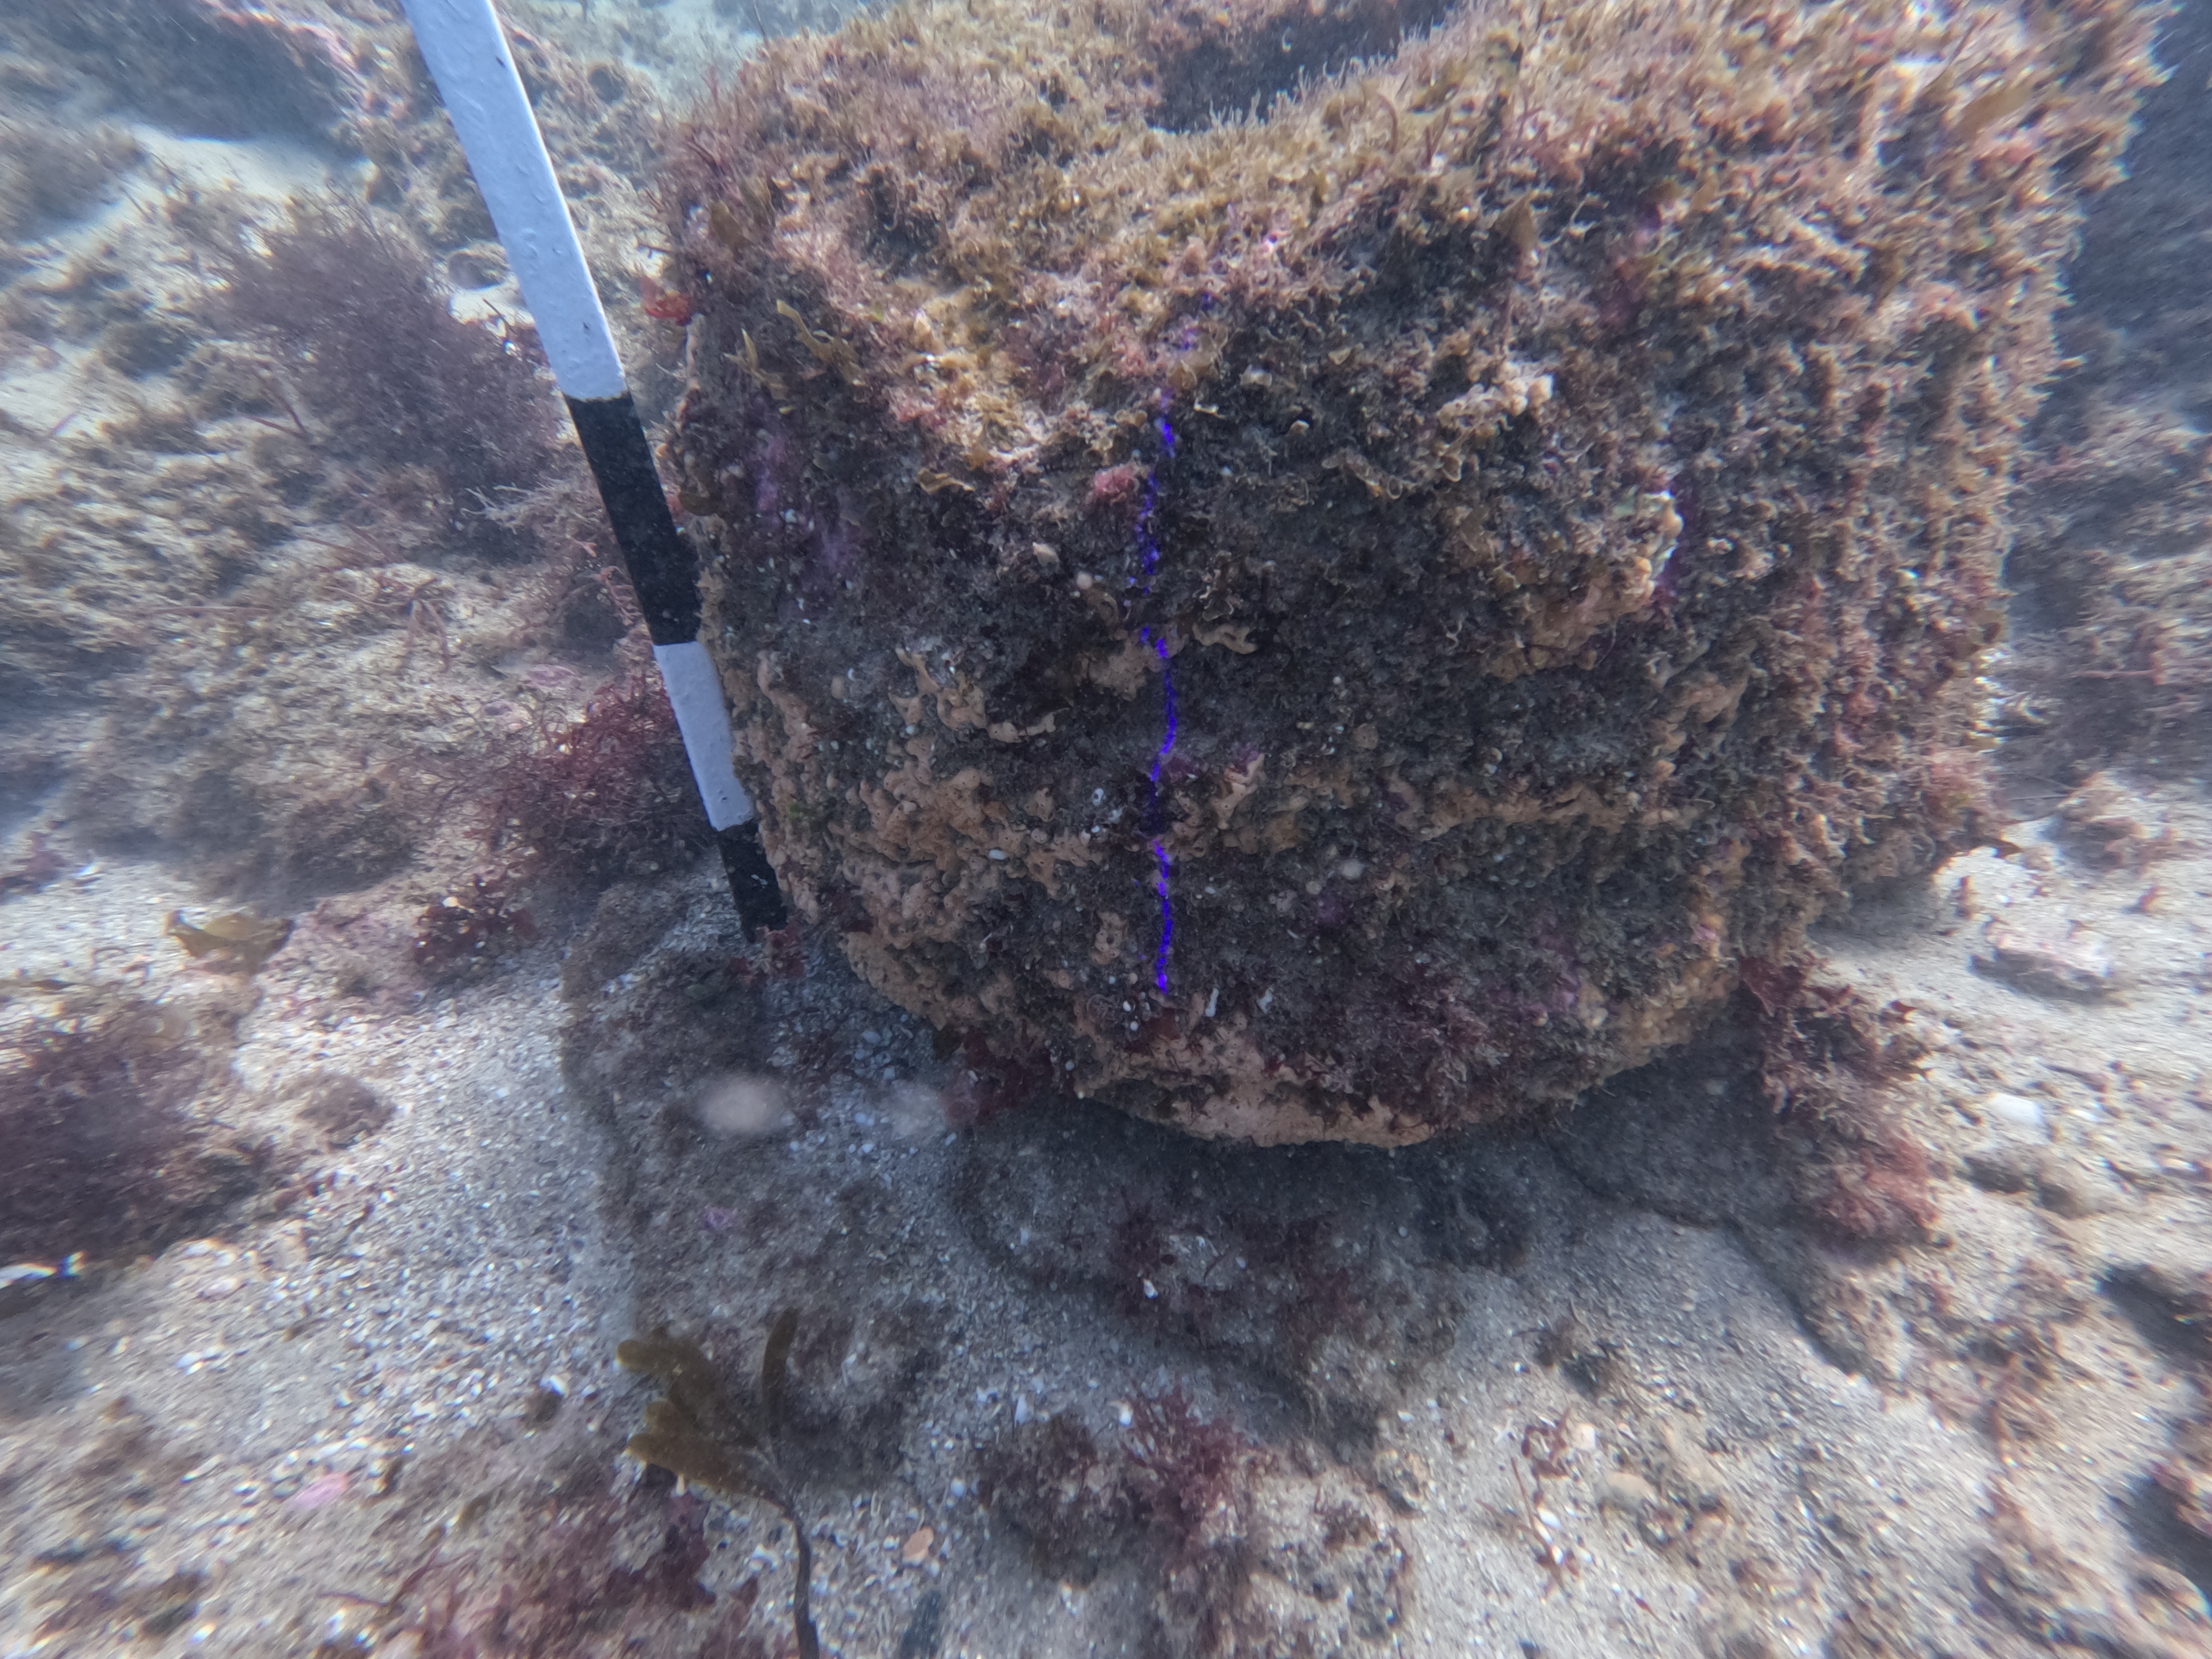

Supplement: Supplementary file 1784 [file G0028110.pdf › Ocean1/G0028110.pdf]

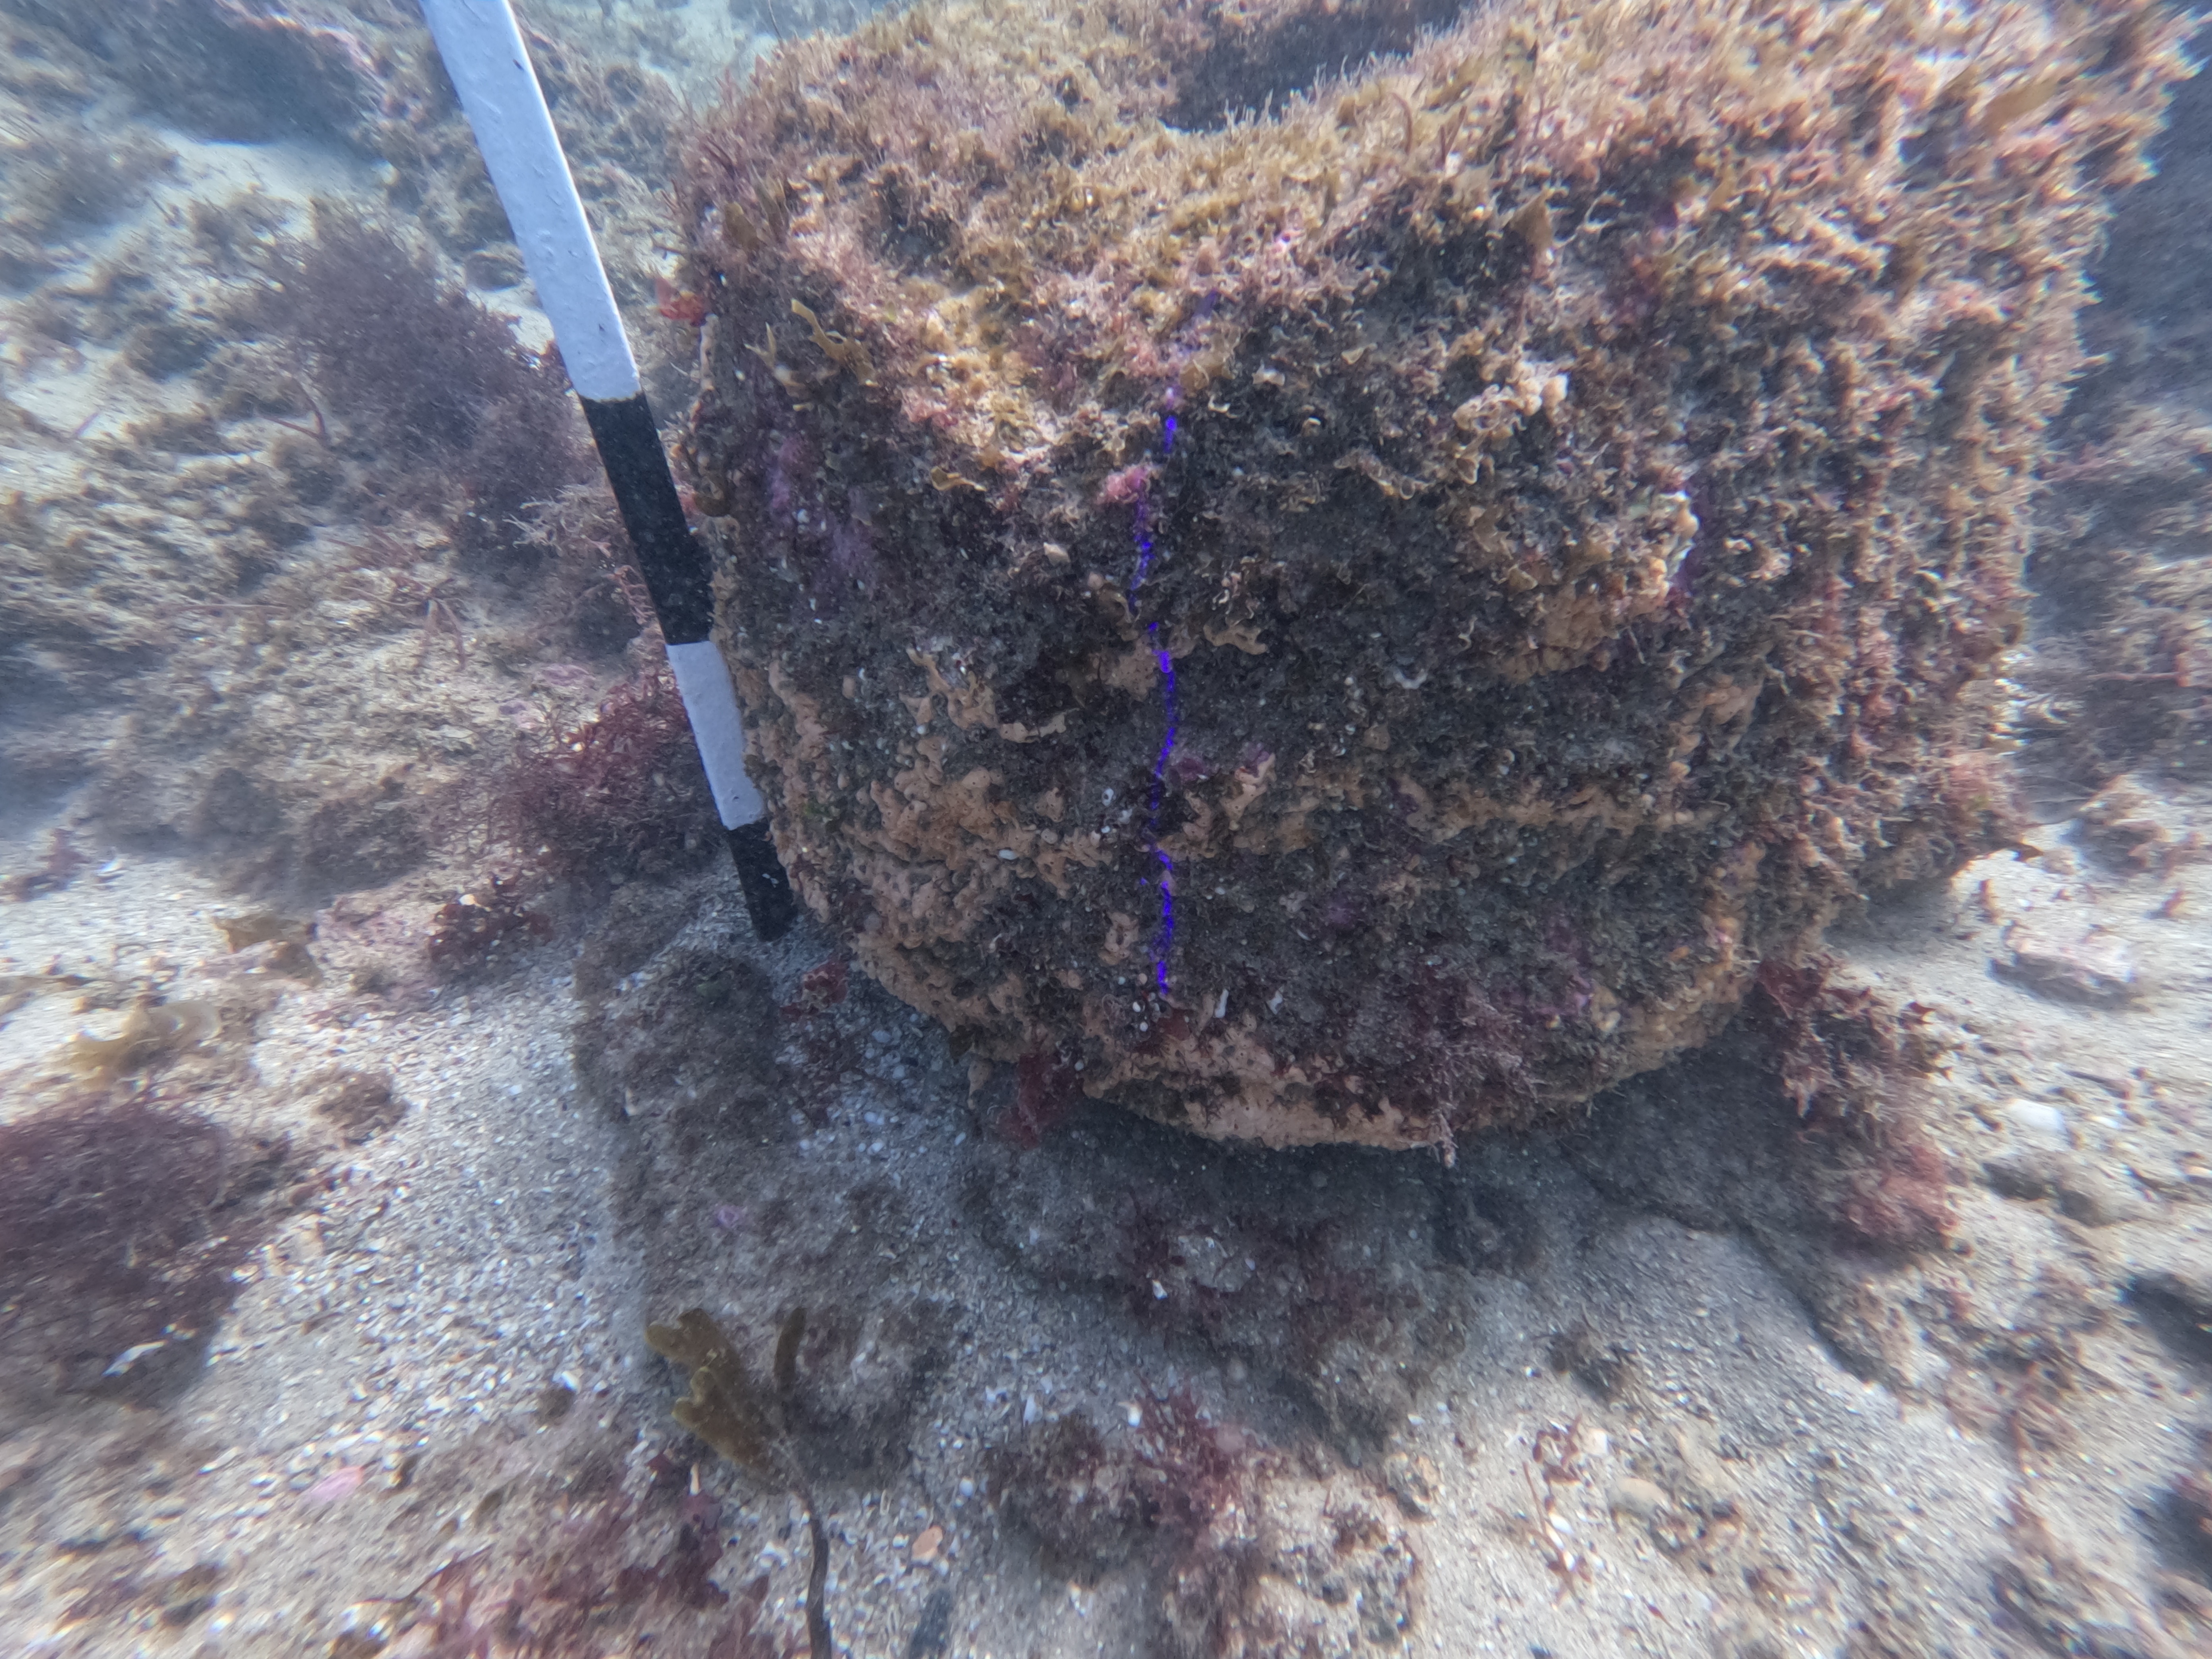

Supplement: Supplementary file 1785 [file G0028111.pdf › Ocean1/G0028111.pdf]

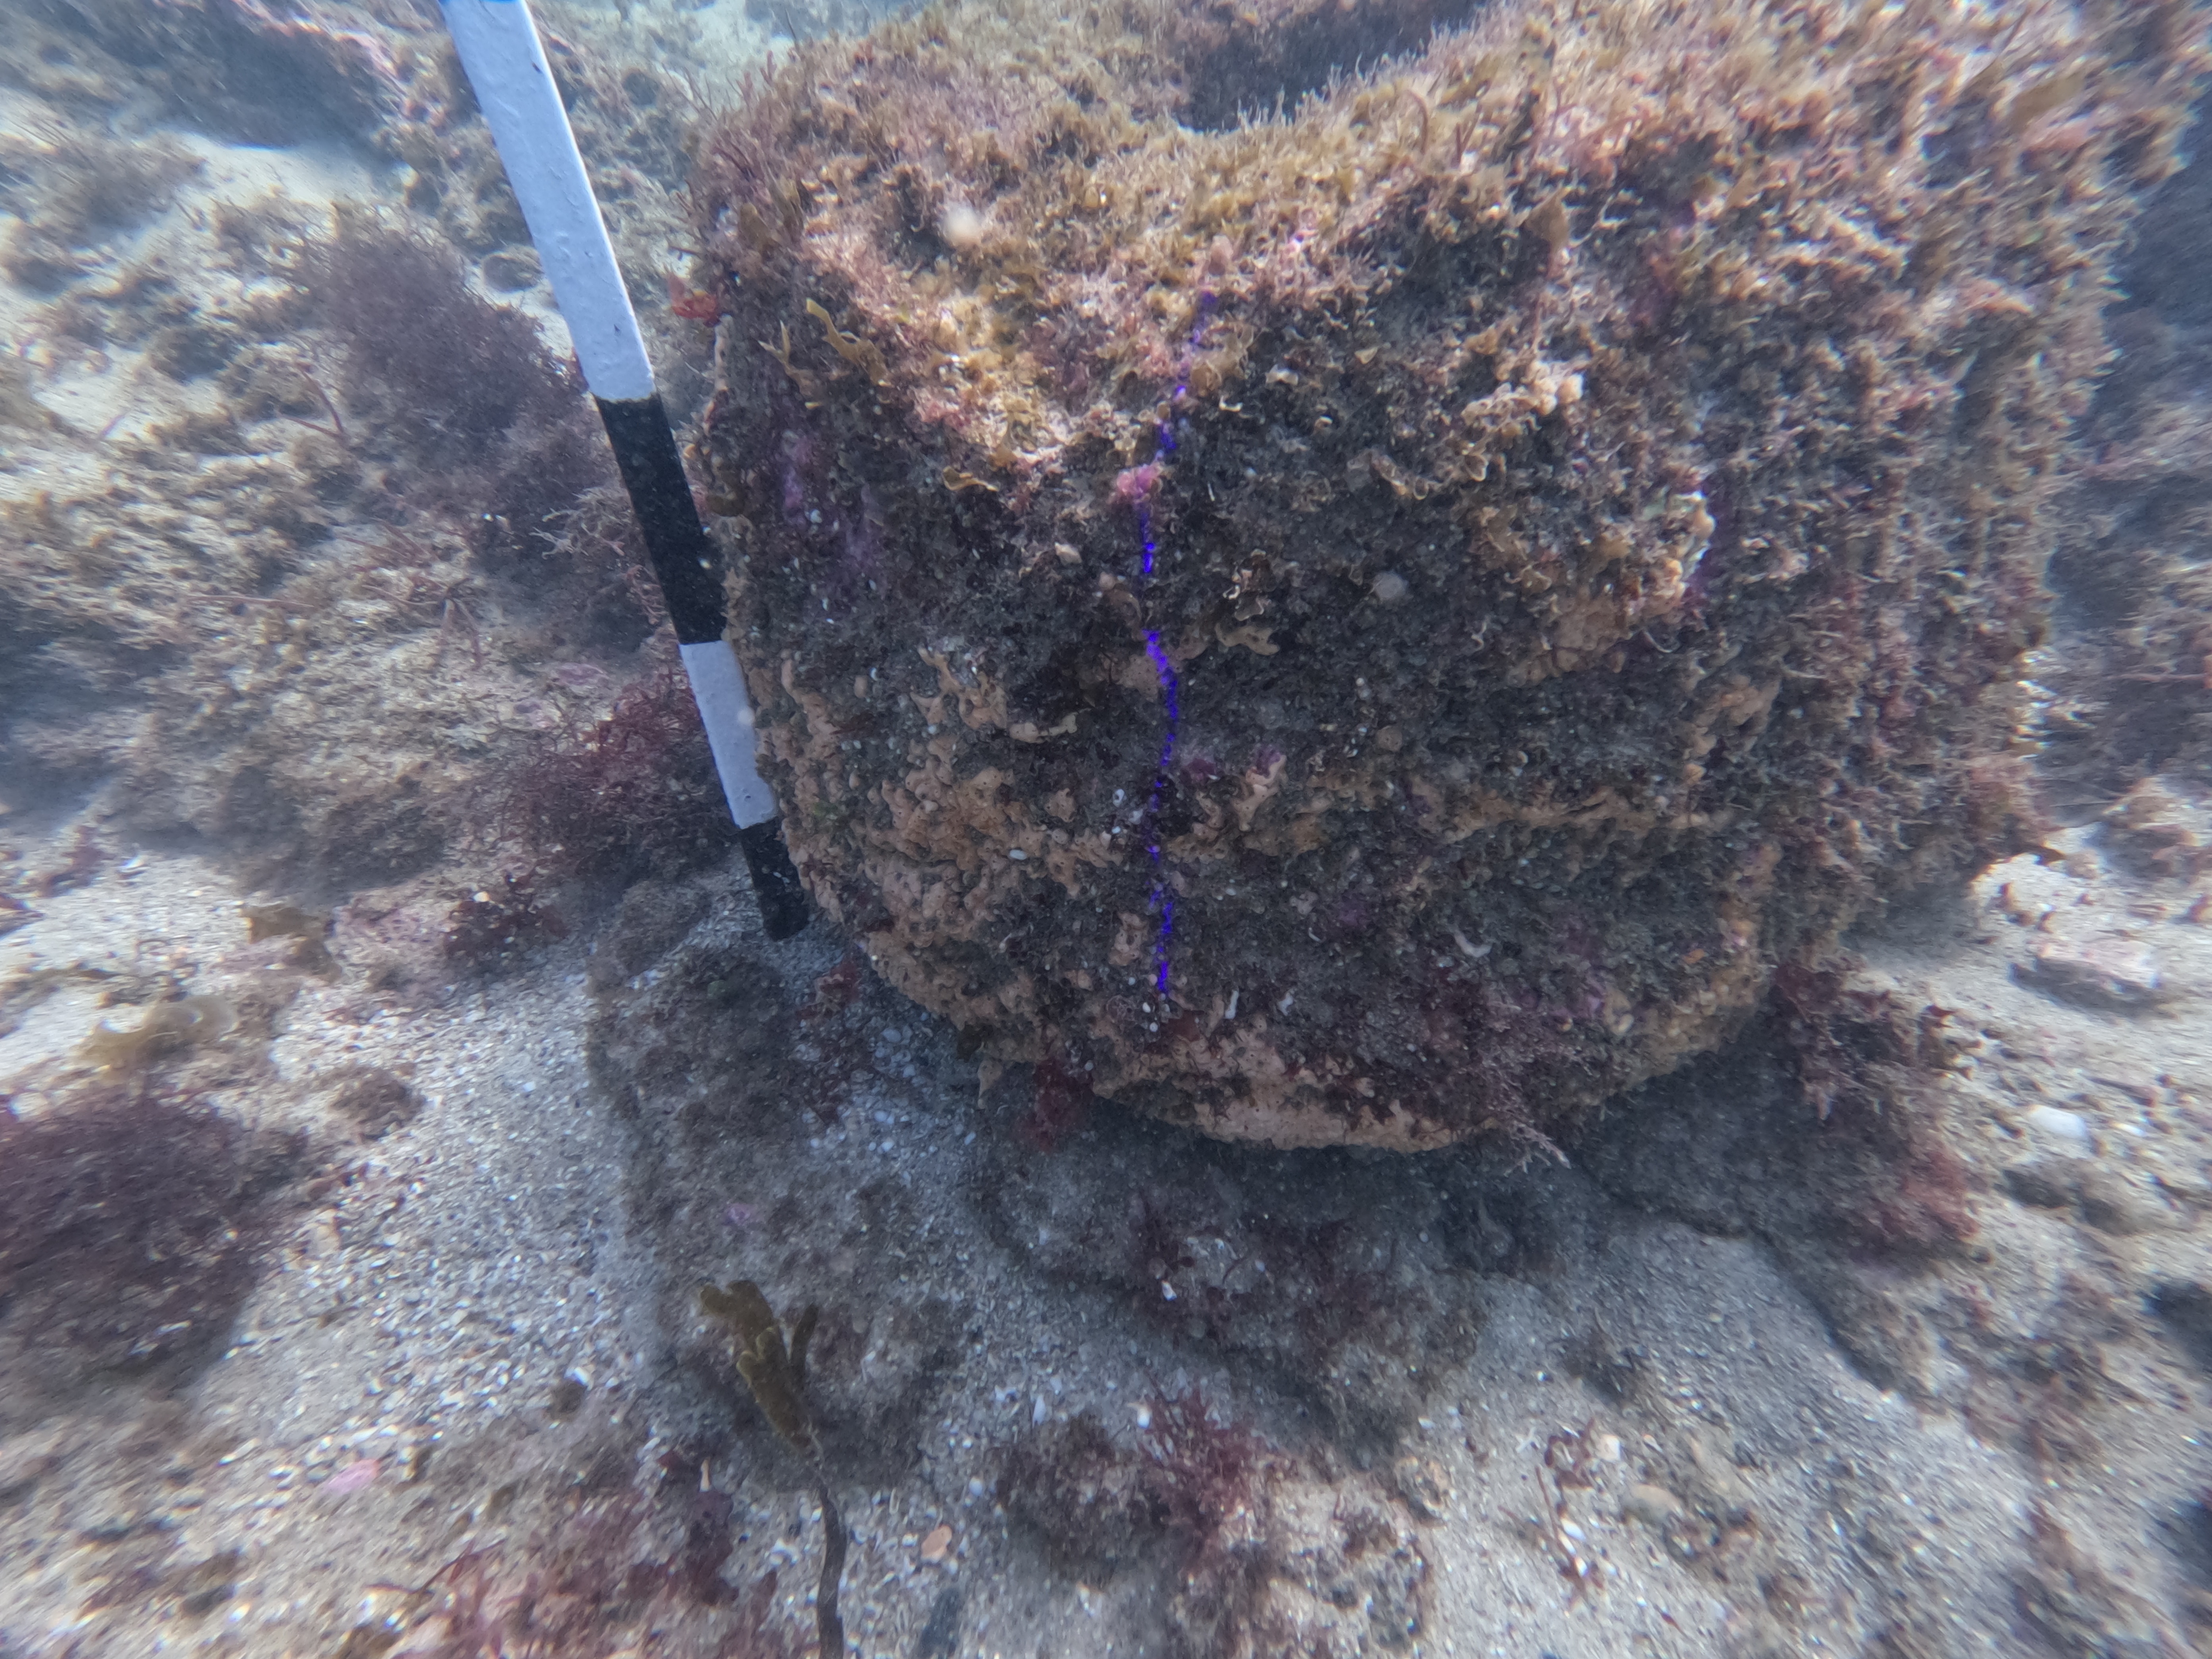

Supplement: Supplementary file 1786 [file G0028112.pdf › Ocean1/G0028112.pdf]

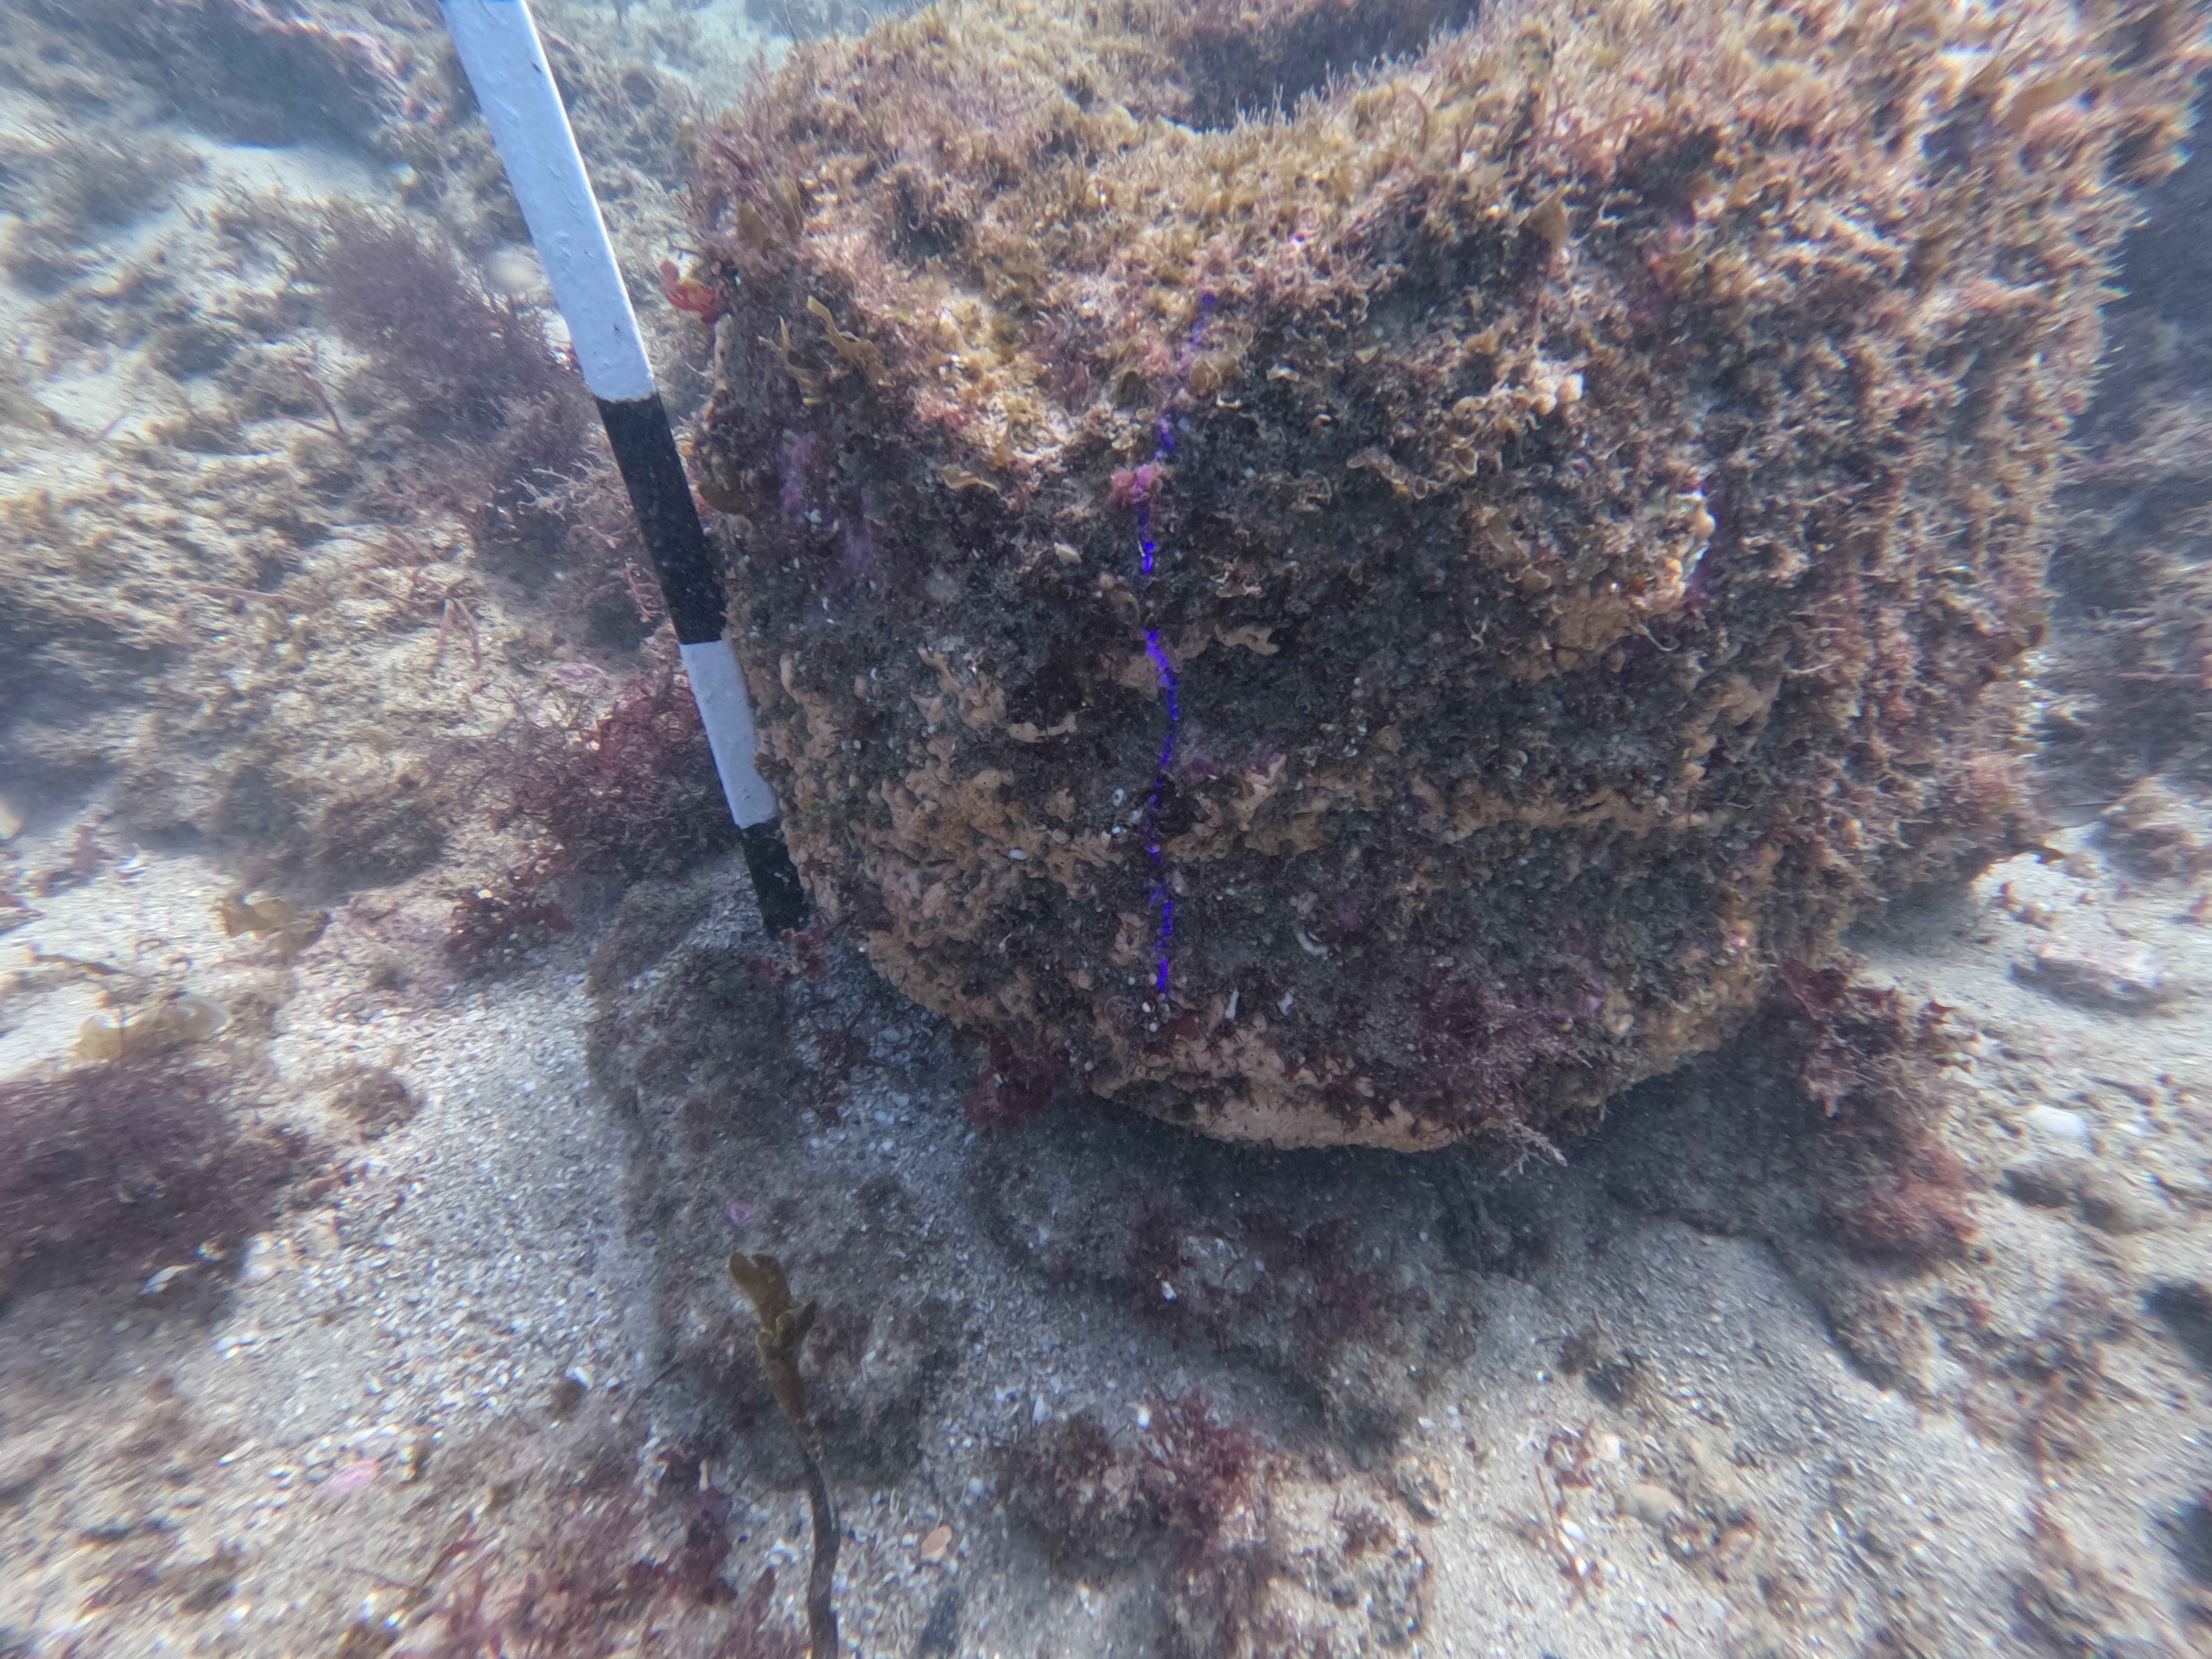

Supplement: Supplementary file 1787 [file G0028113.pdf › Ocean1/G0028113.pdf]

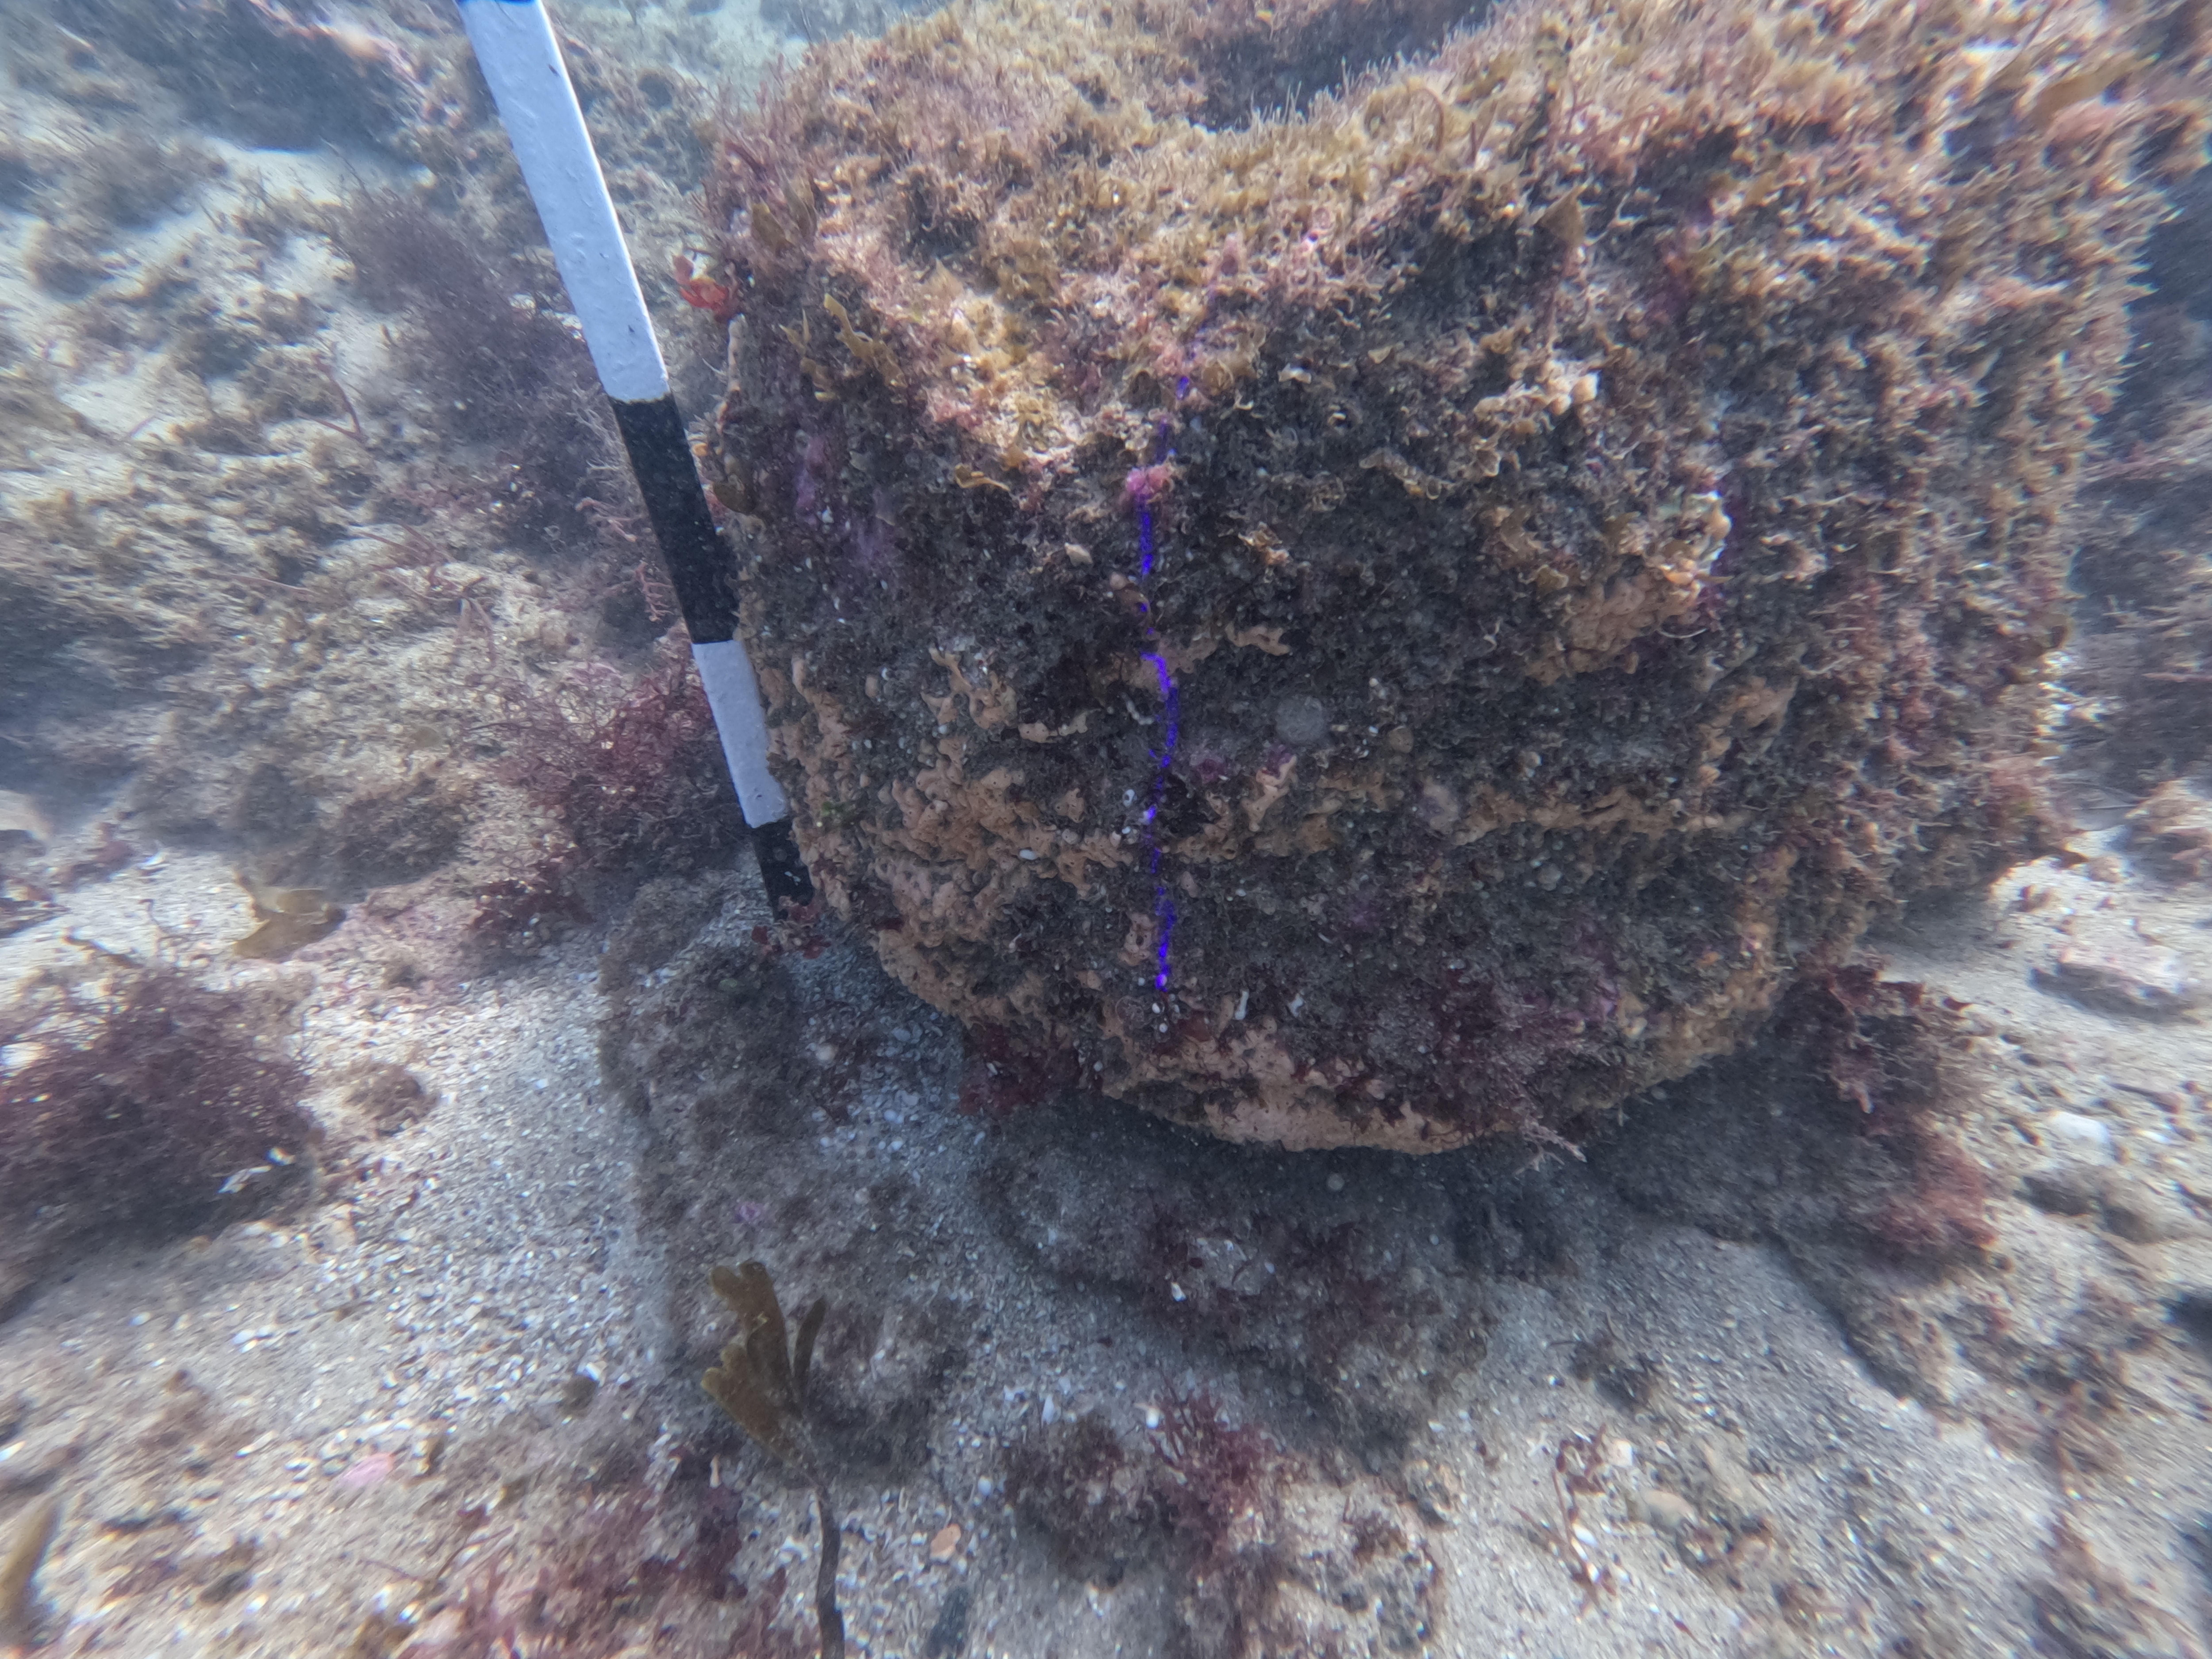

Supplement: Supplementary file 1788 [file G0028114.pdf › Ocean1/G0028114.pdf]

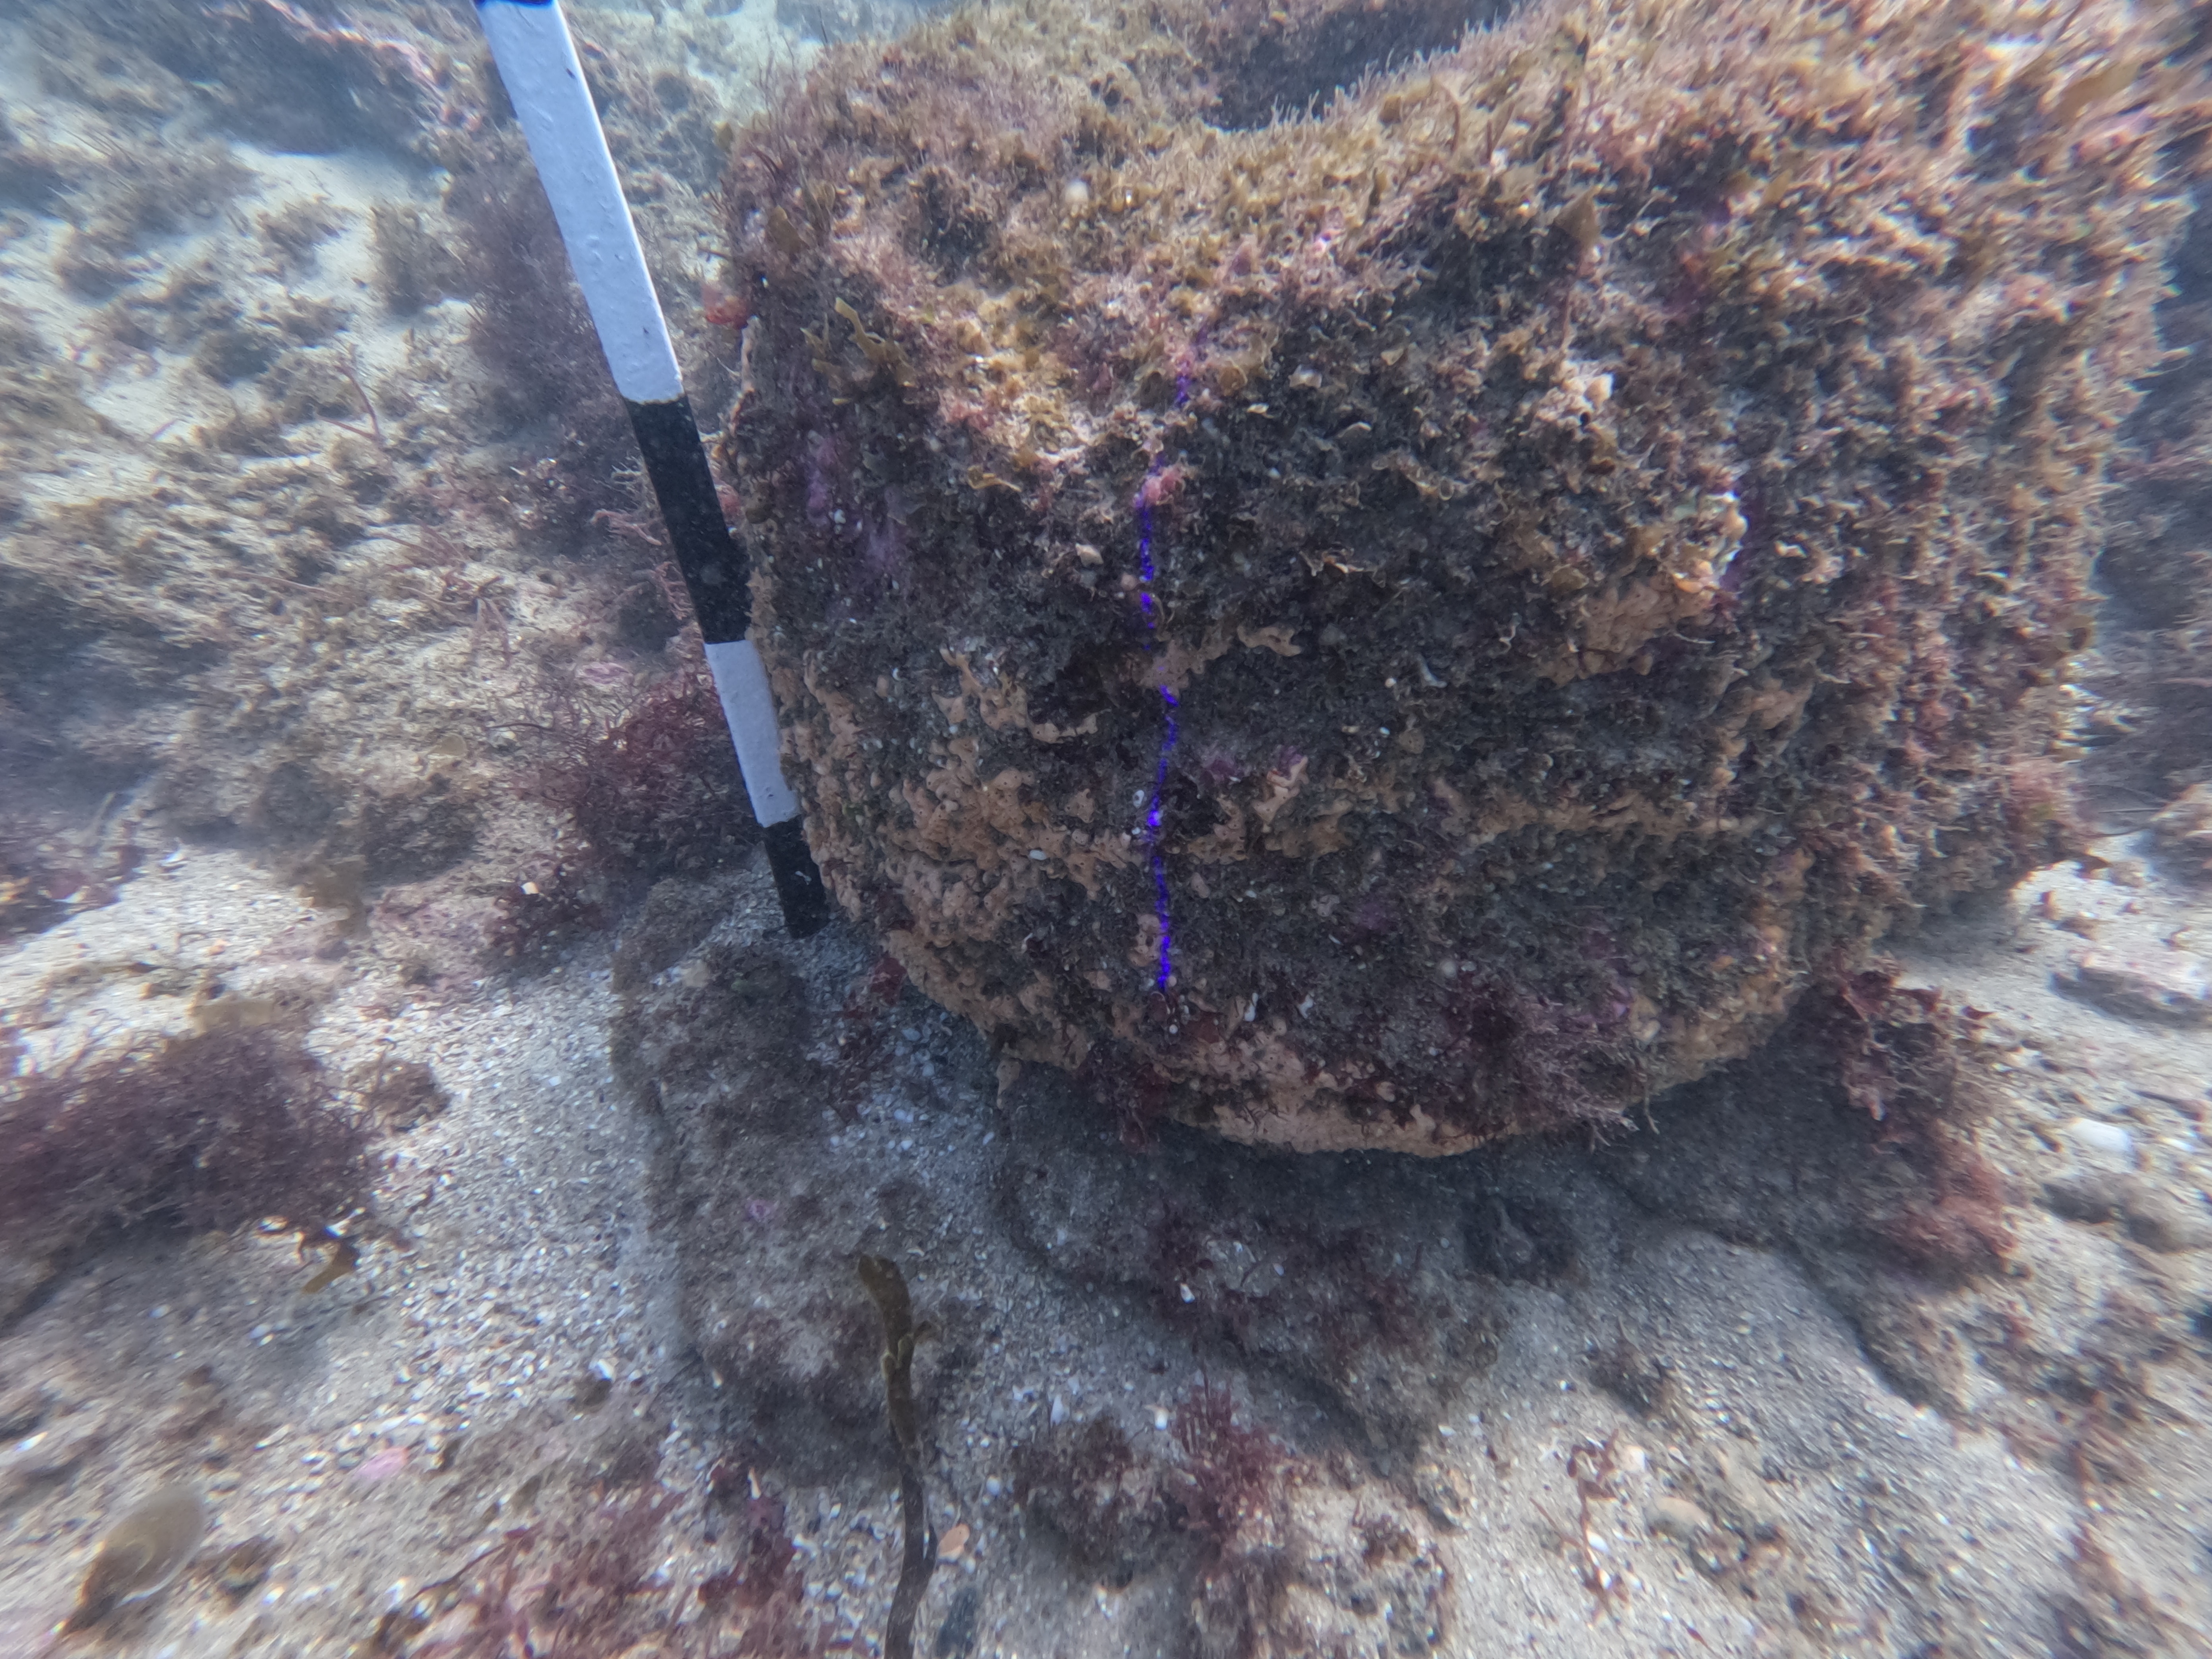

Supplement: Supplementary file 1789 [file G0028115.pdf › Ocean1/G0028115.pdf]

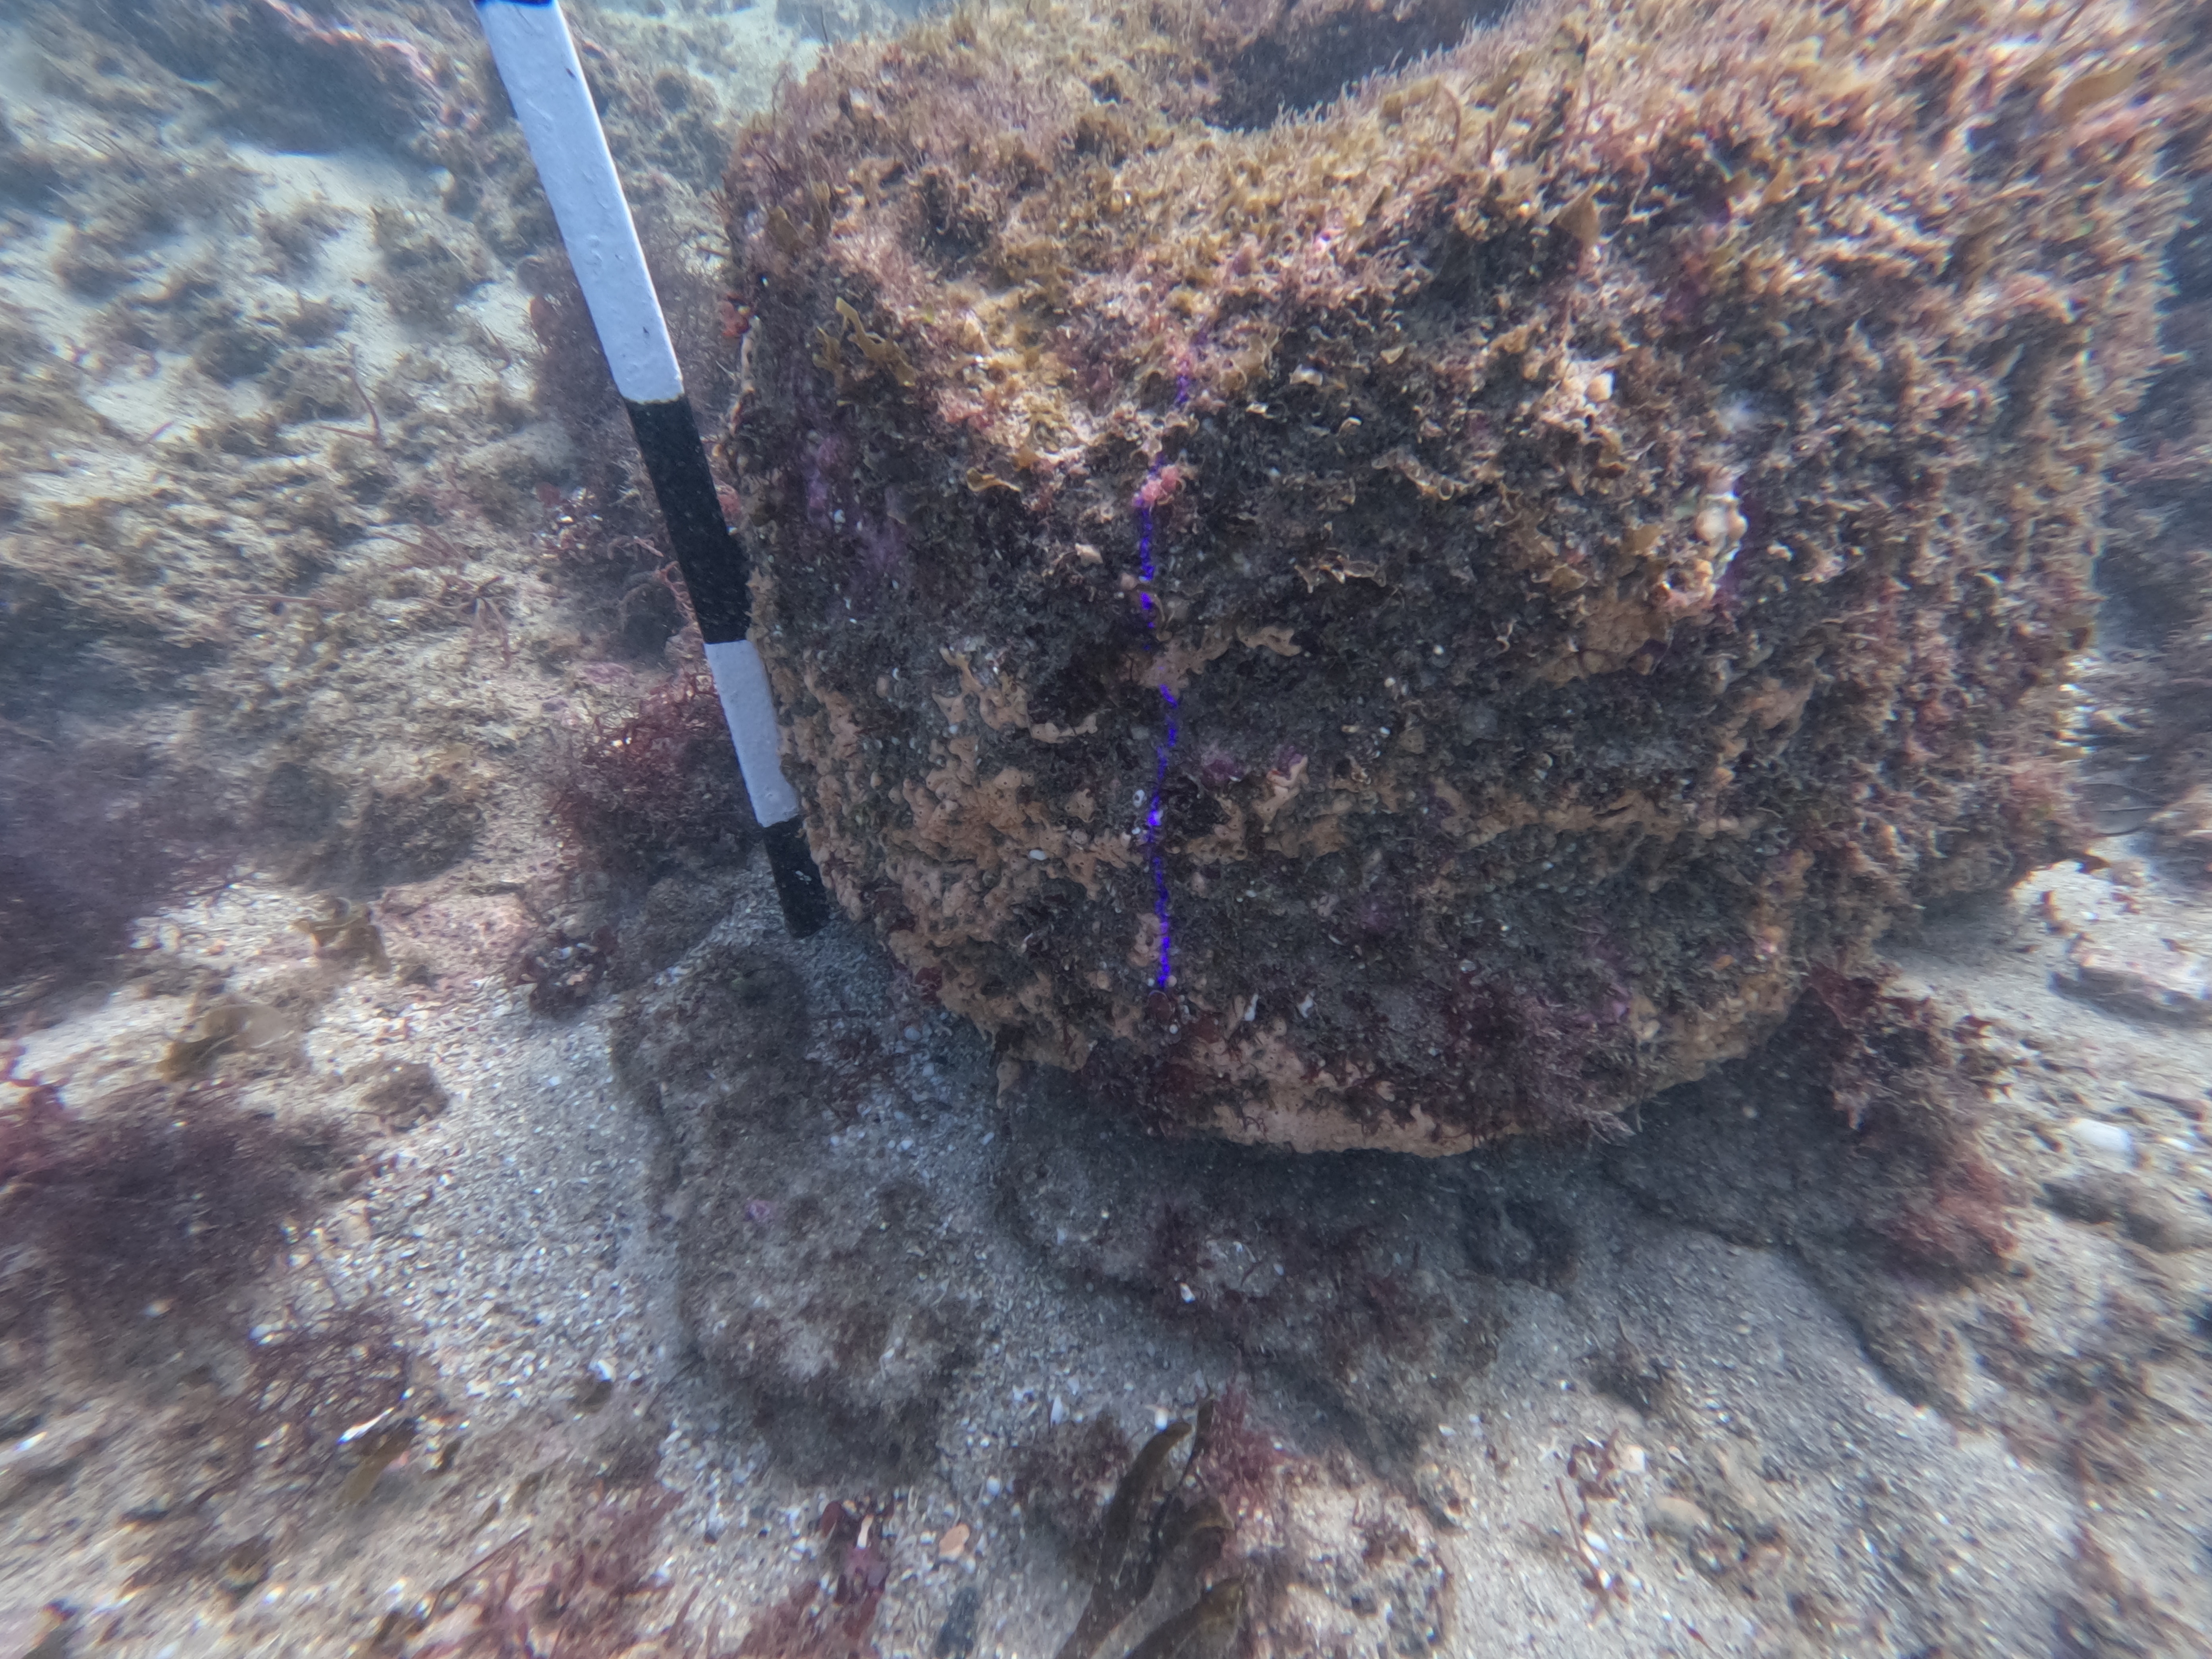

Supplement: Supplementary file 1790 [file G0028116.pdf › Ocean1/G0028116.pdf]
