# Supplementary figures and images for: 3D reconstruction of shallow sea environment using direct system calibration and faint laser line extraction (part 18 of 35)
Source: Research Square preprint supplement (doi:10.21203/rs.3.rs-5262658/v1), 2024-12-02

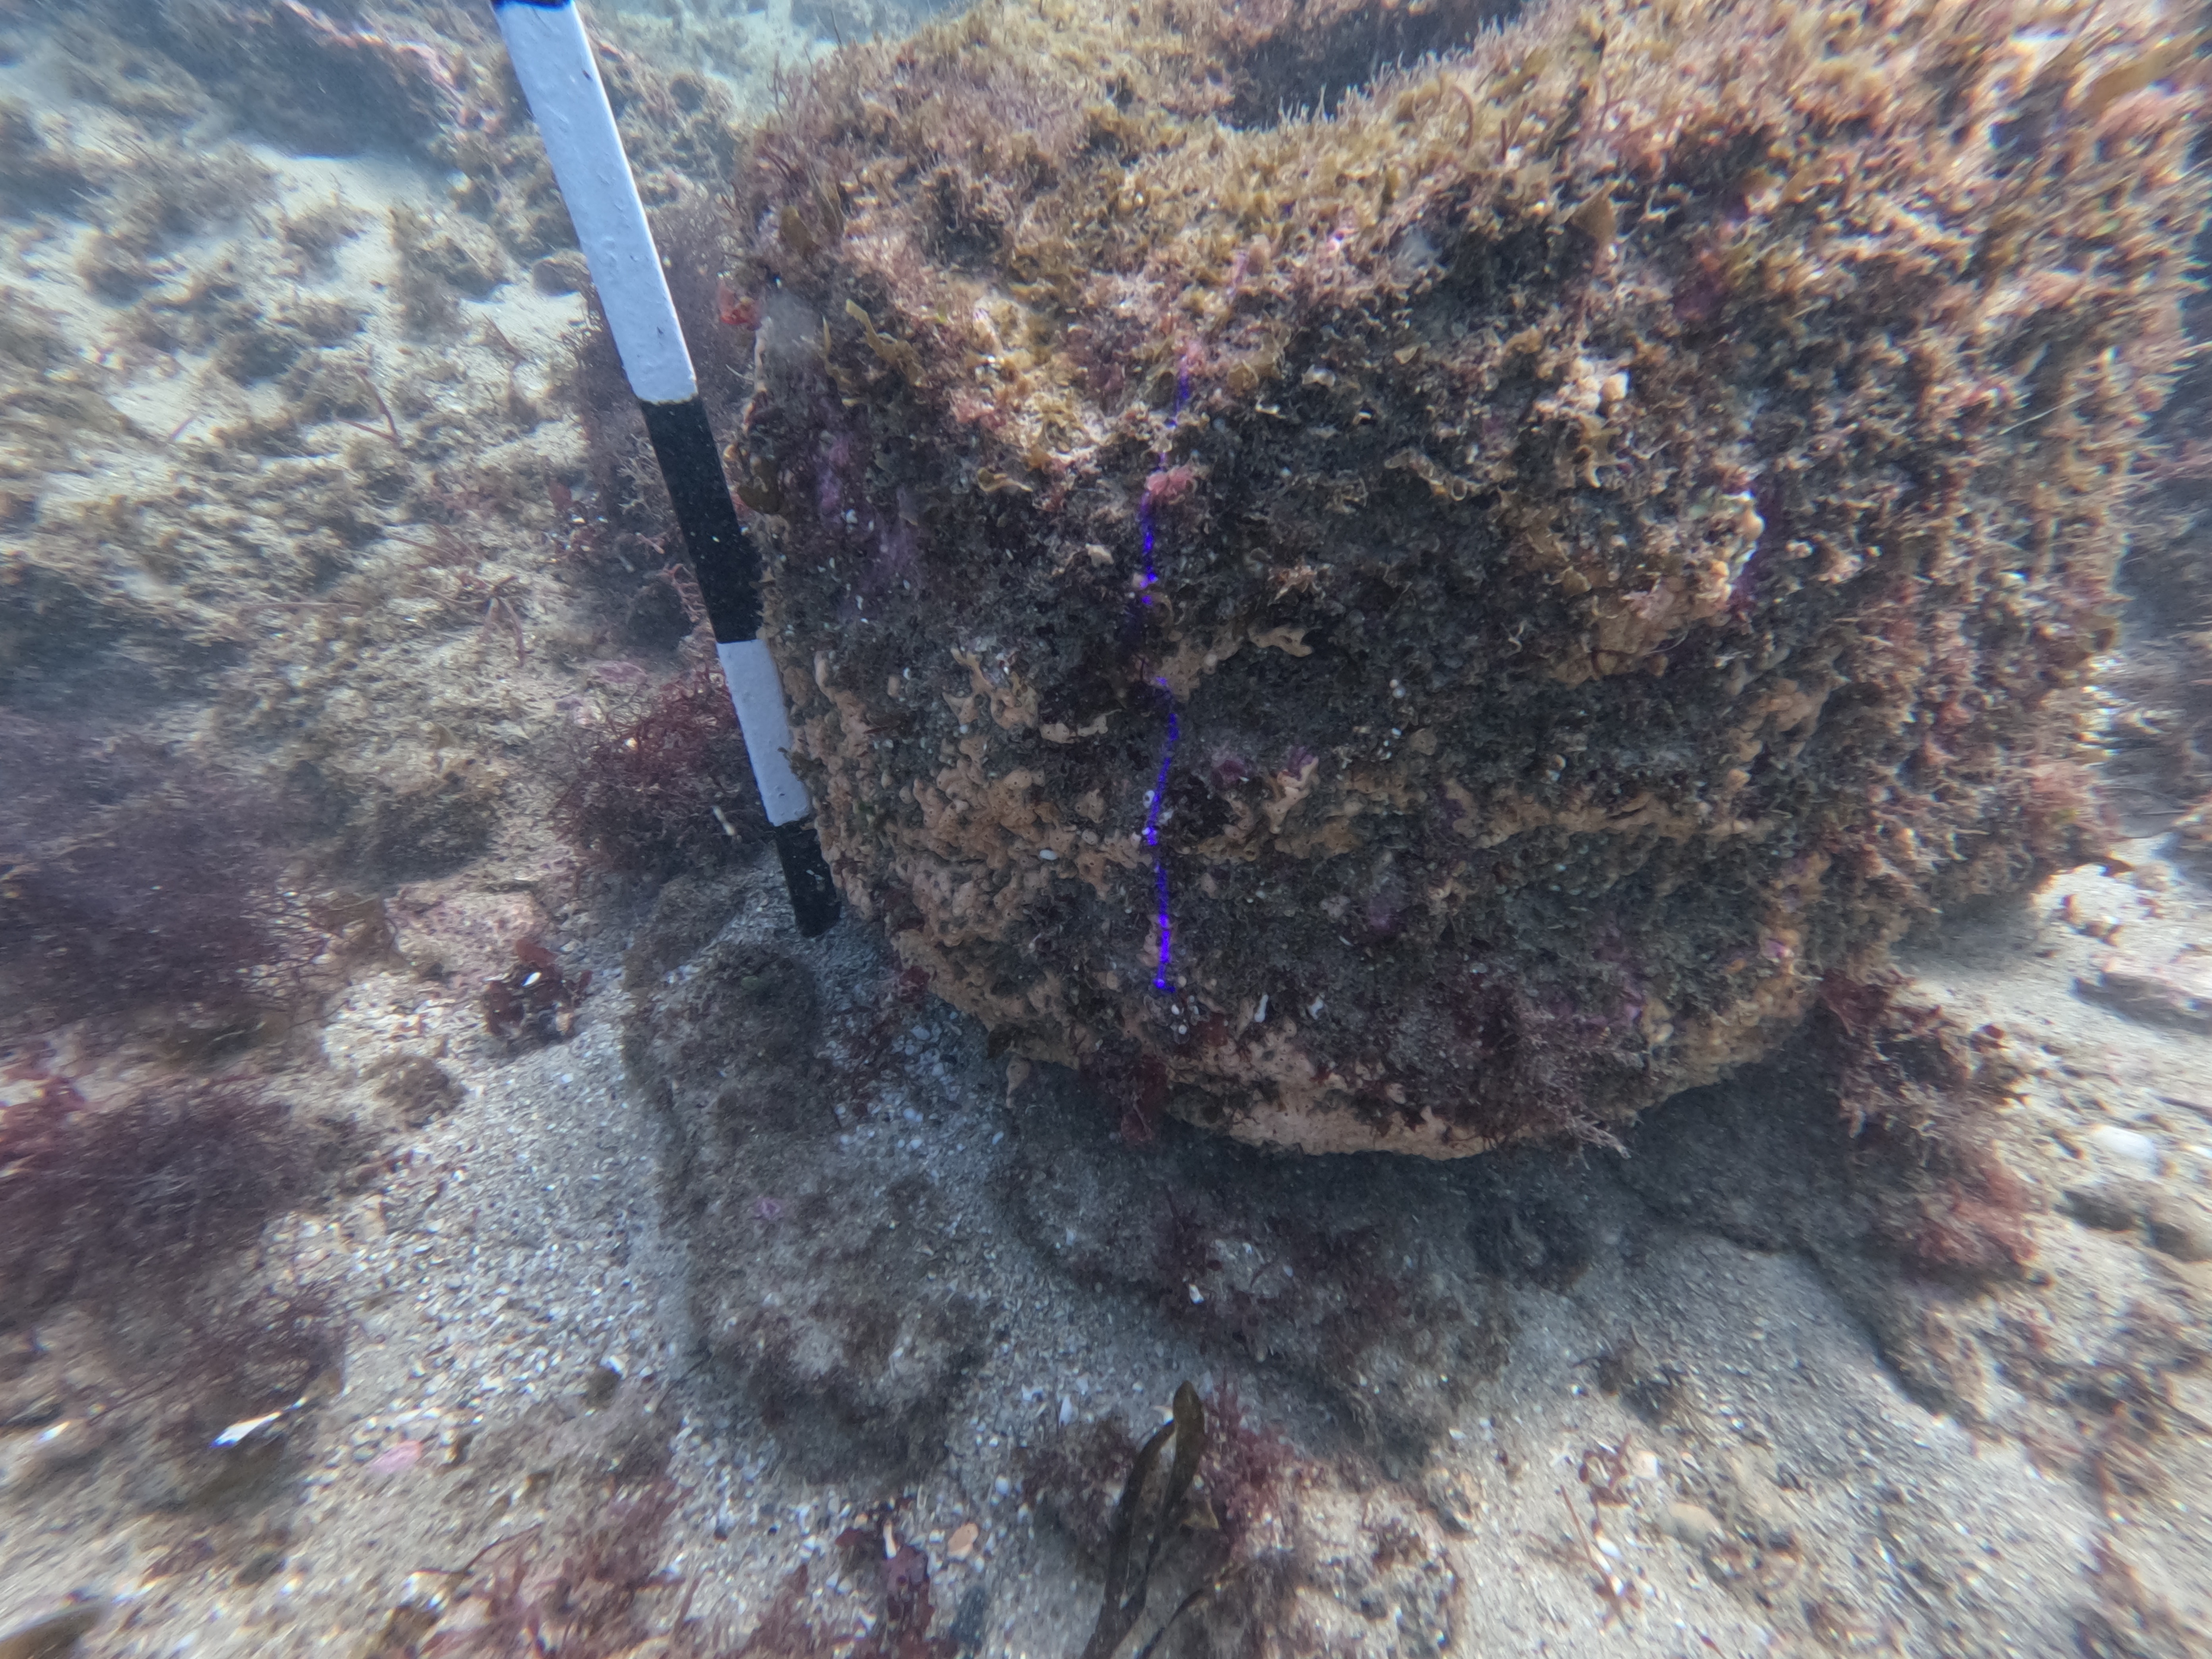

Supplement: Supplementary file 1791 [file G0028117.pdf › Ocean1/G0028117.pdf]

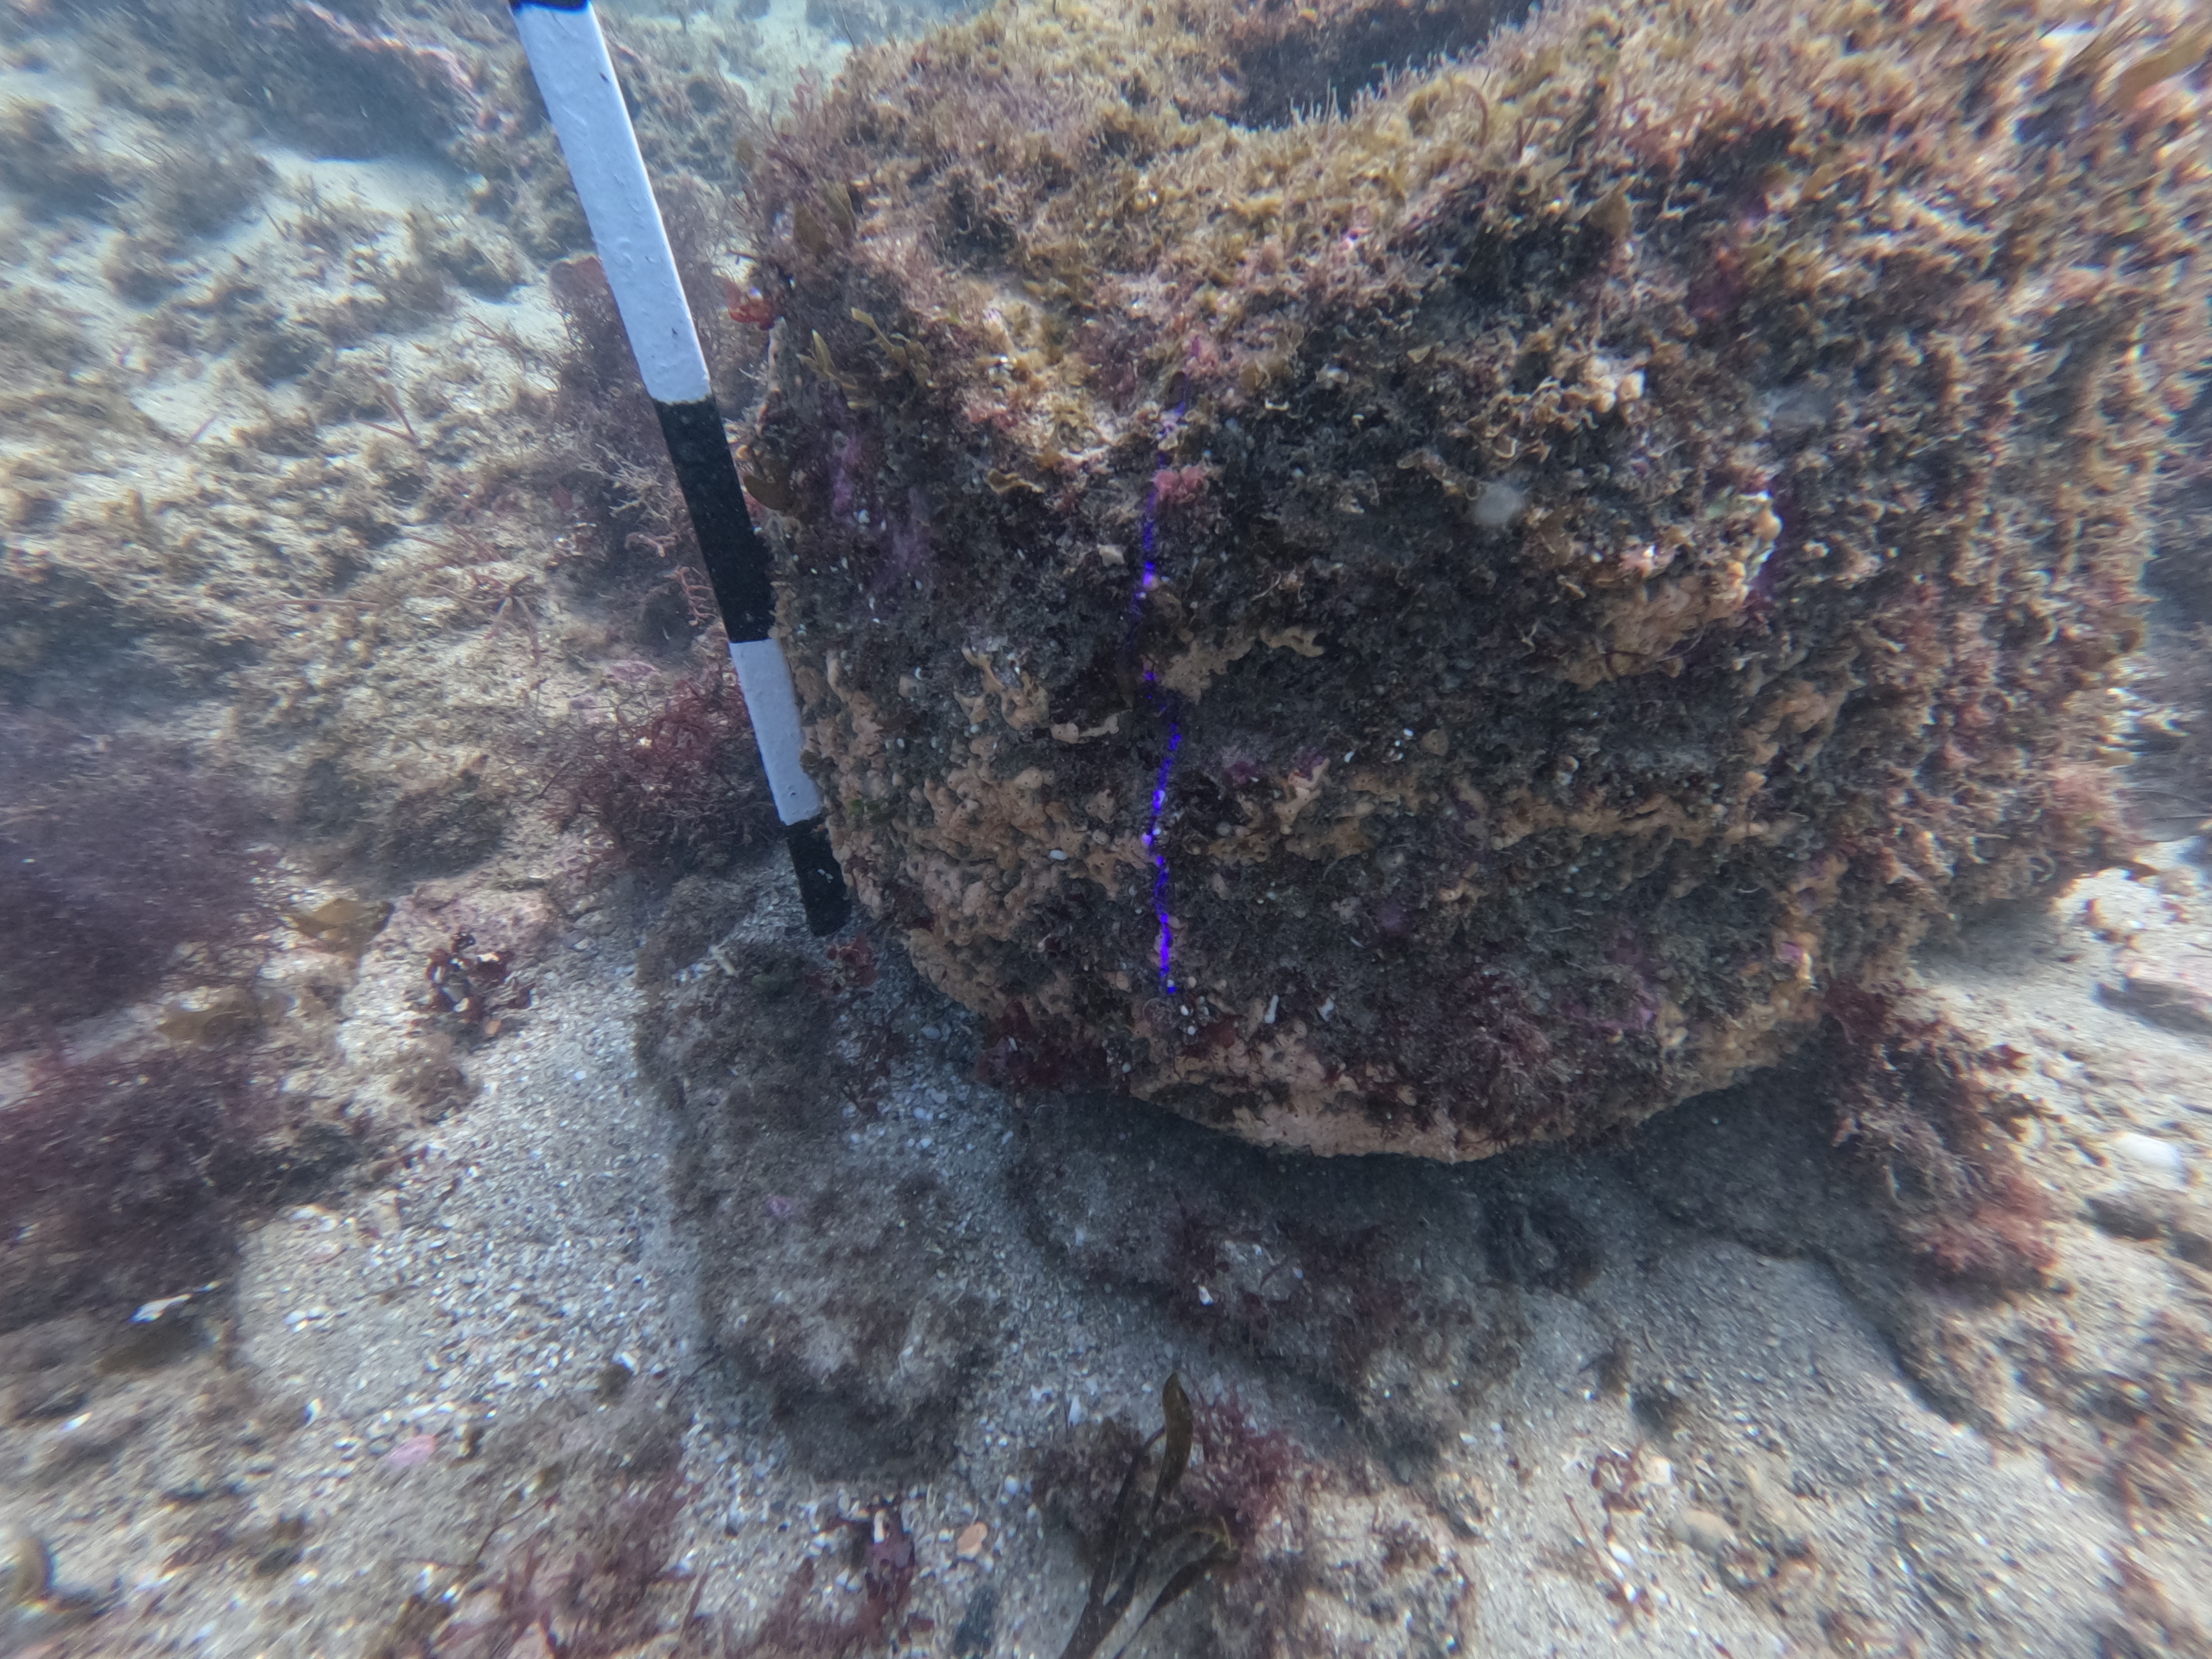

Supplement: Supplementary file 1792 [file G0028118.pdf › Ocean1/G0028118.pdf]

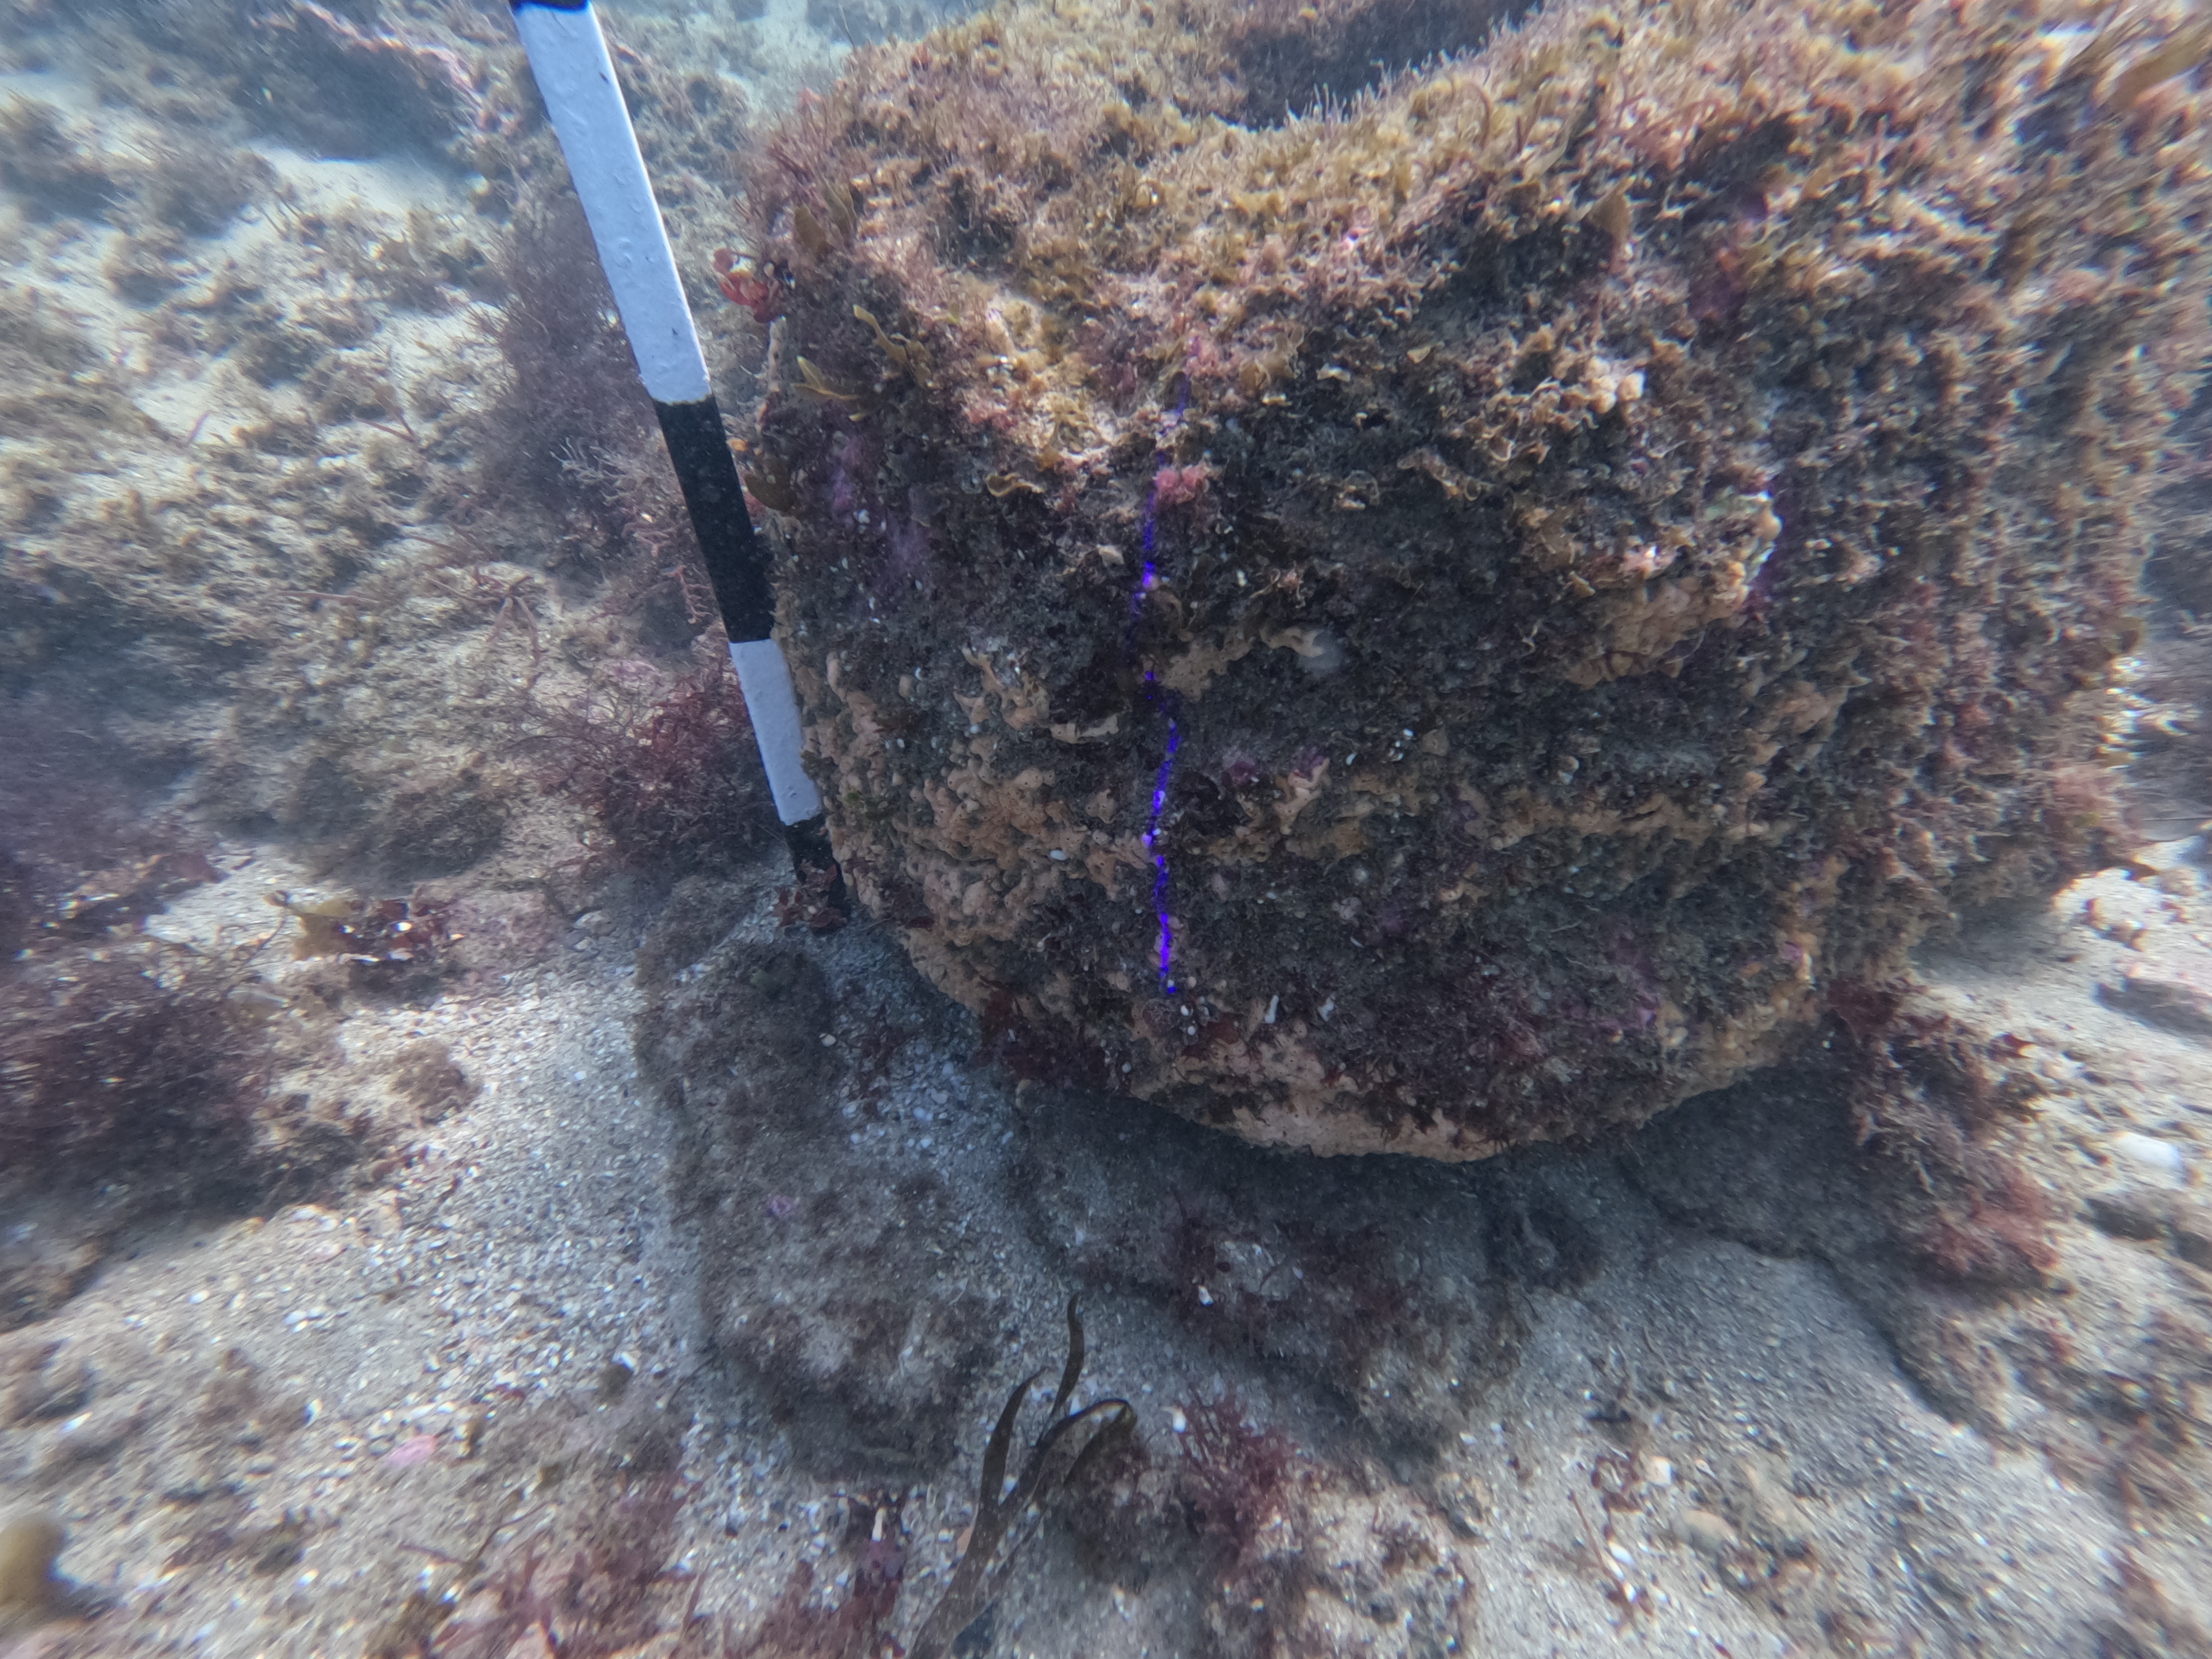

Supplement: Supplementary file 1793 [file G0028119.pdf › Ocean1/G0028119.pdf]

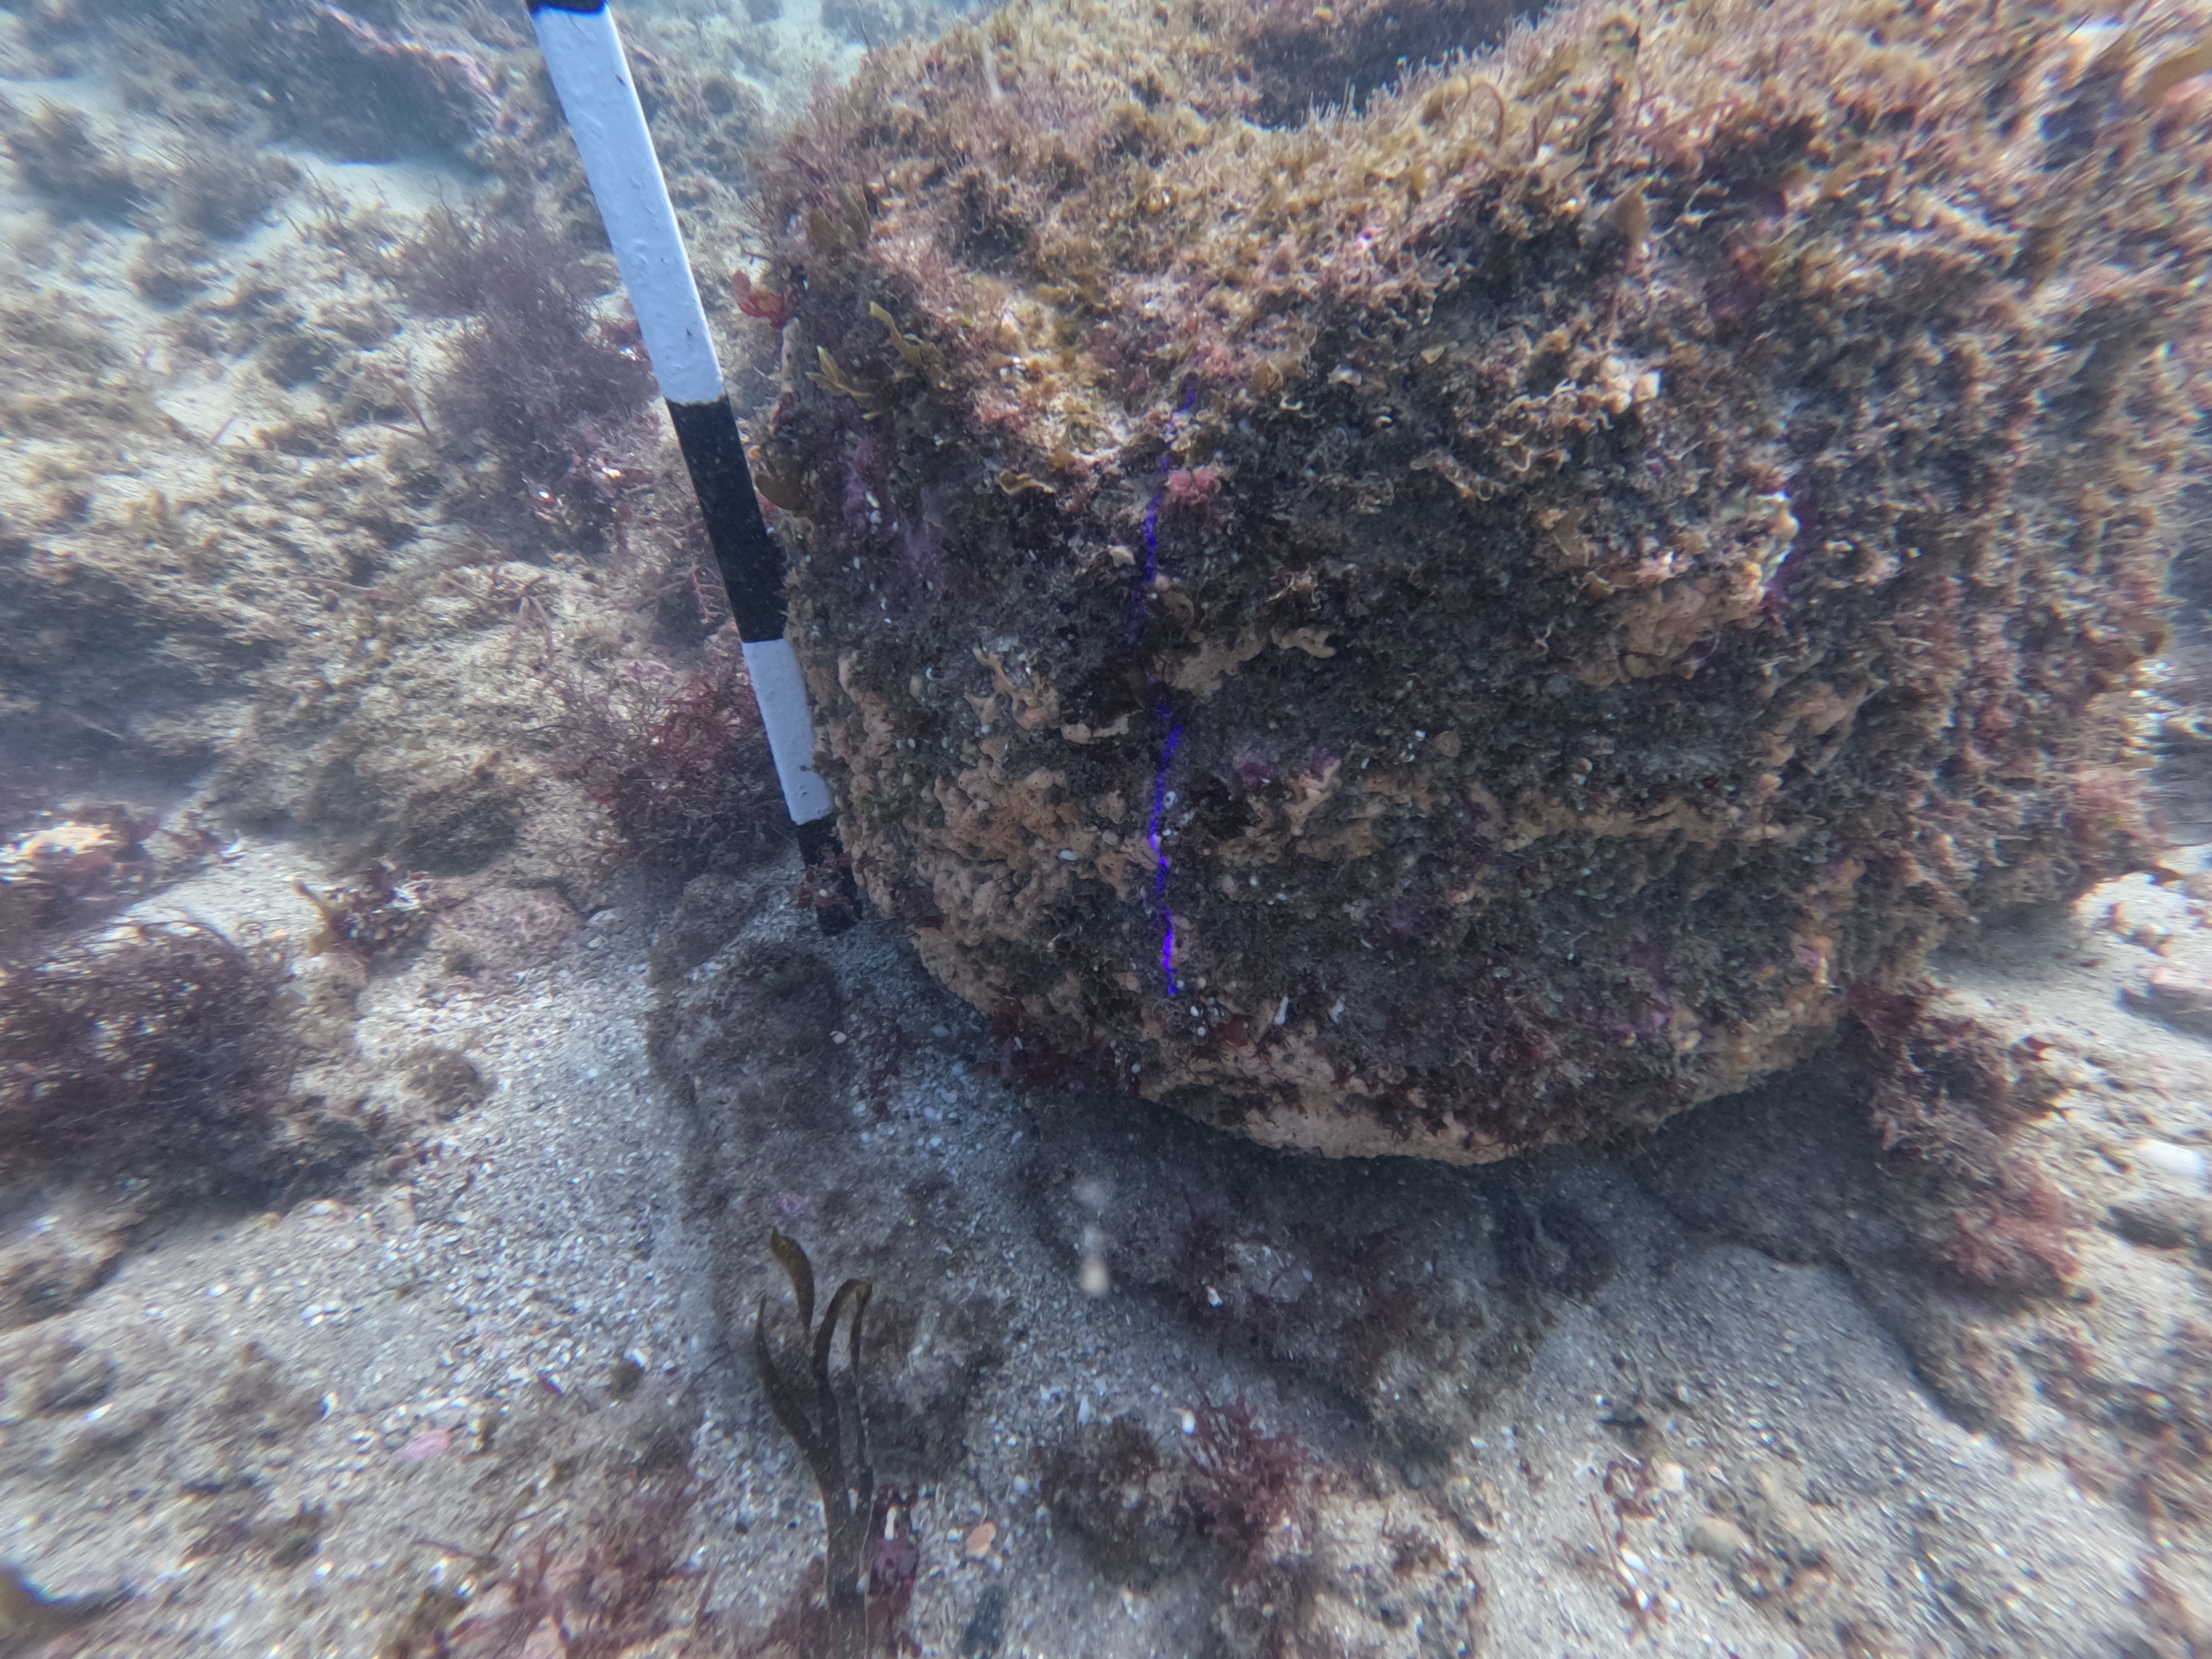

Supplement: Supplementary file 1794 [file G0028120.pdf › Ocean1/G0028120.pdf]

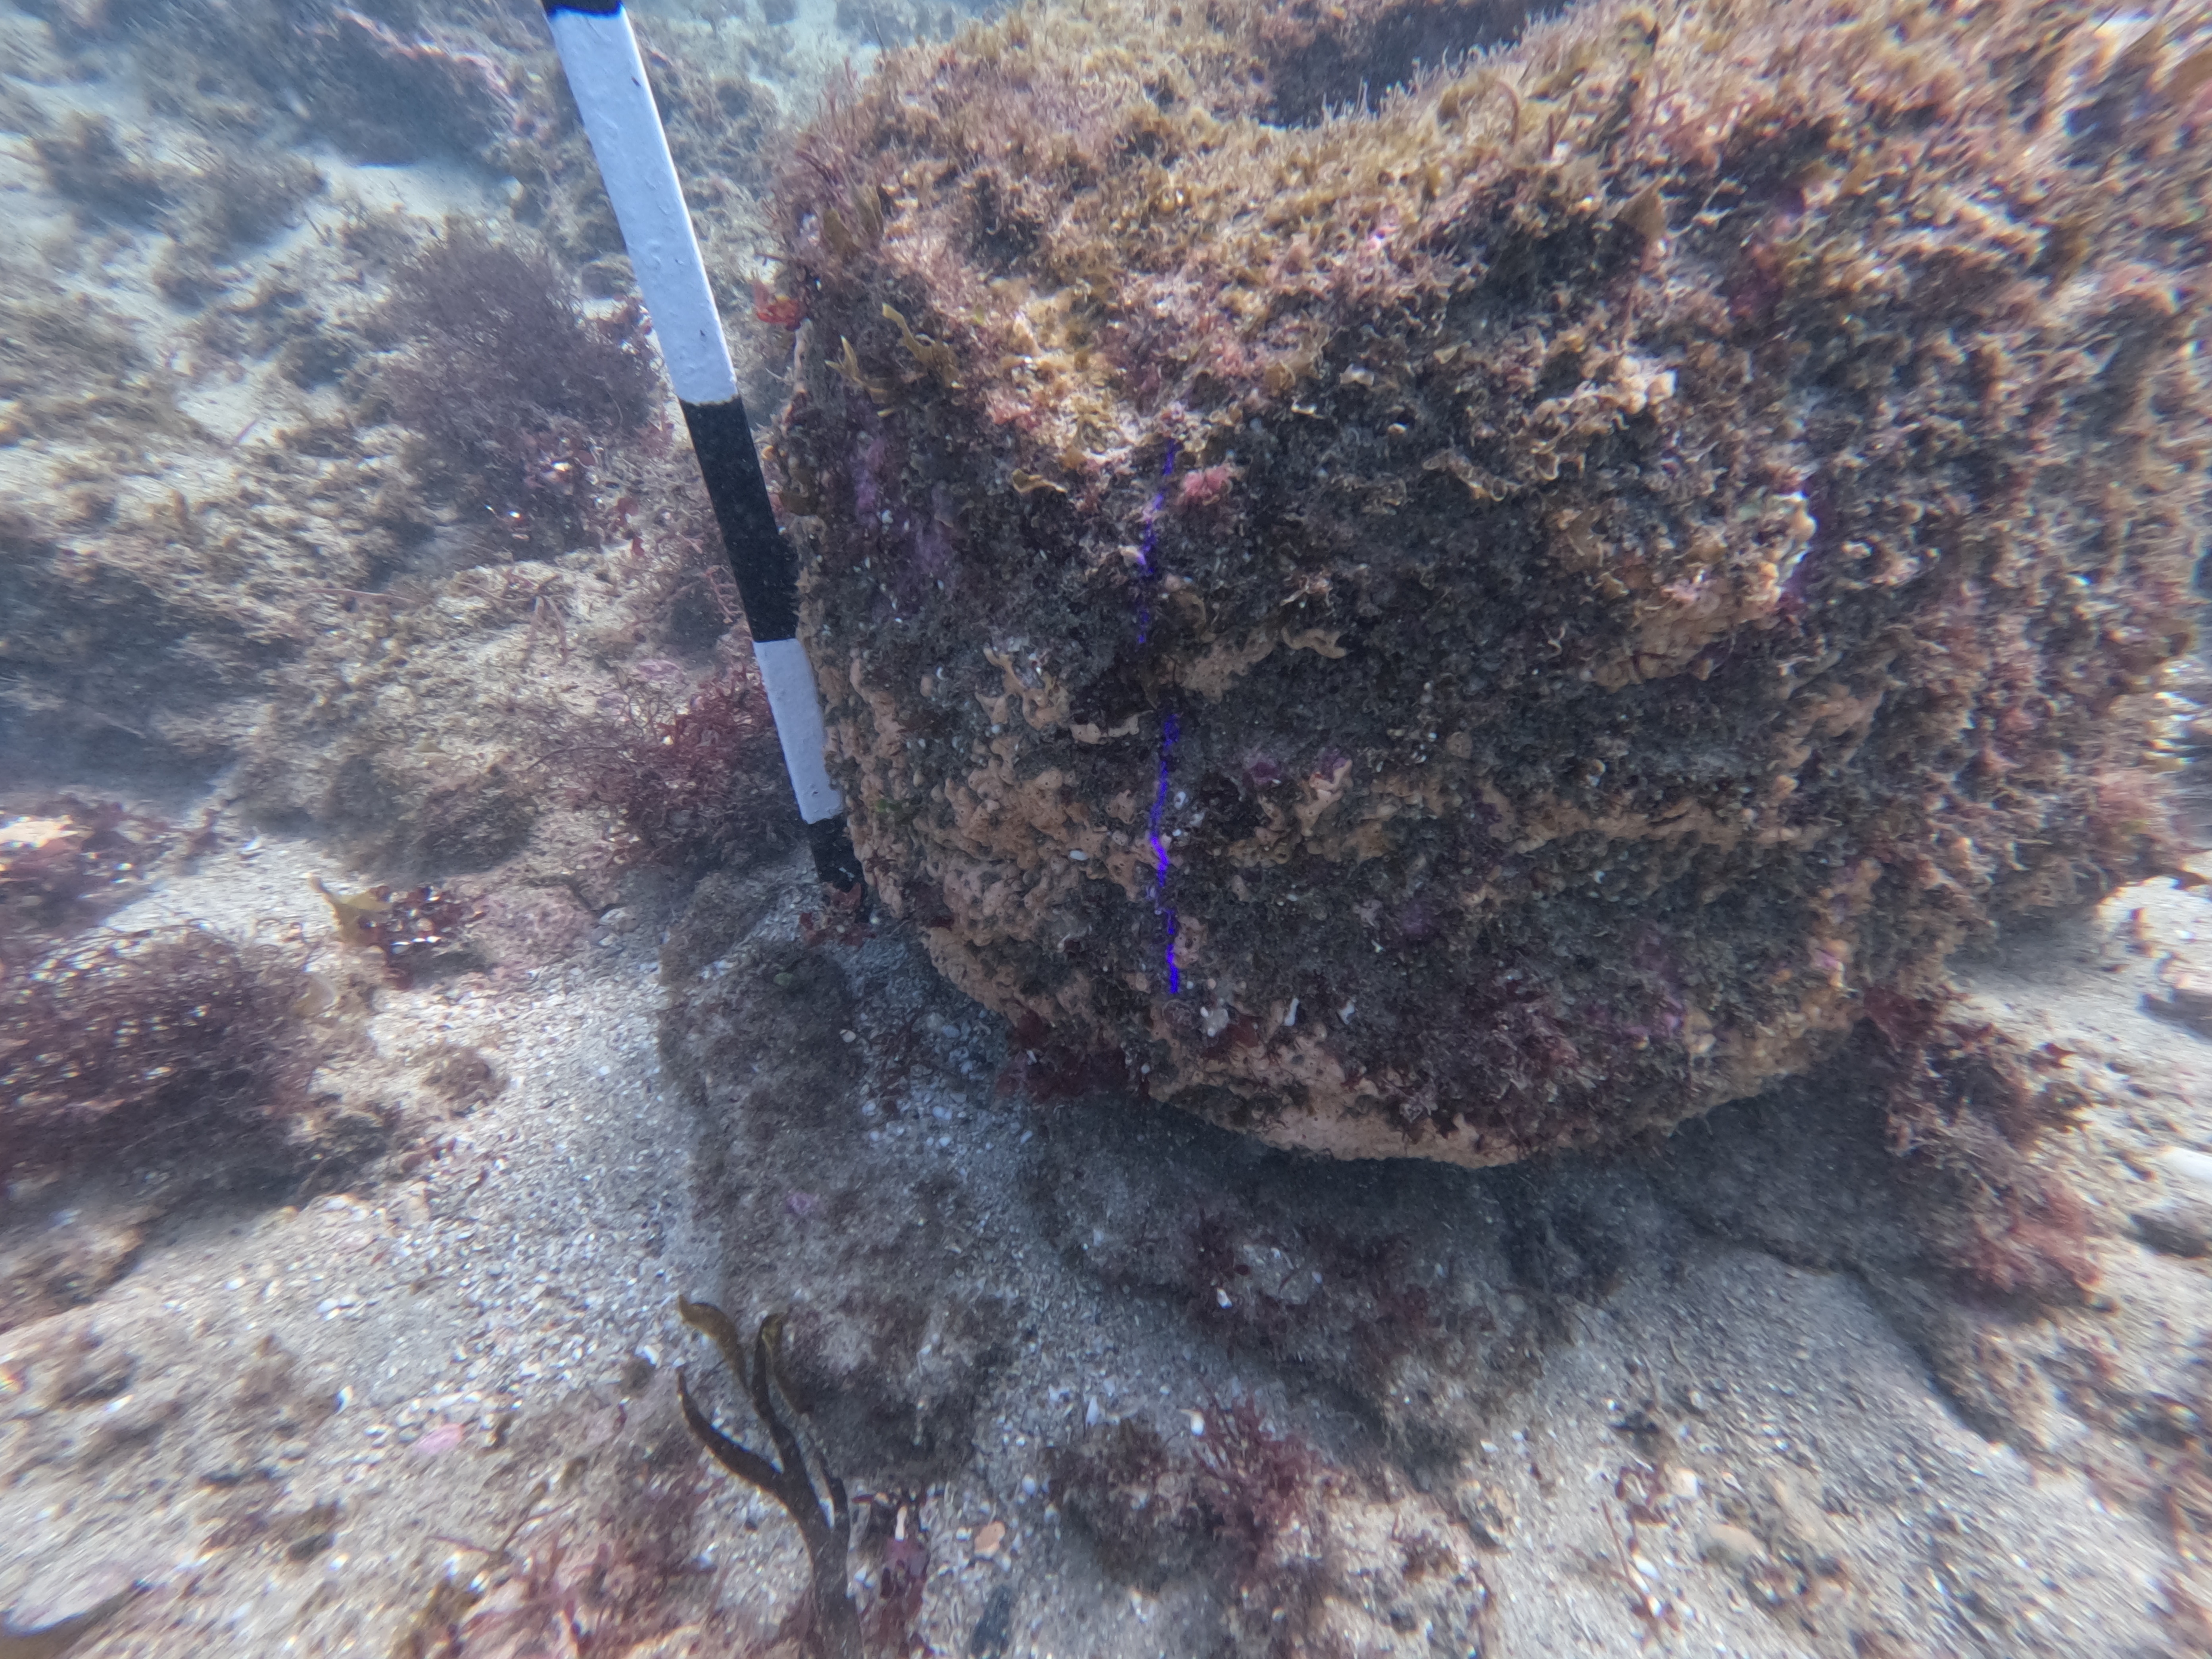

Supplement: Supplementary file 1795 [file G0028121.pdf › Ocean1/G0028121.pdf]

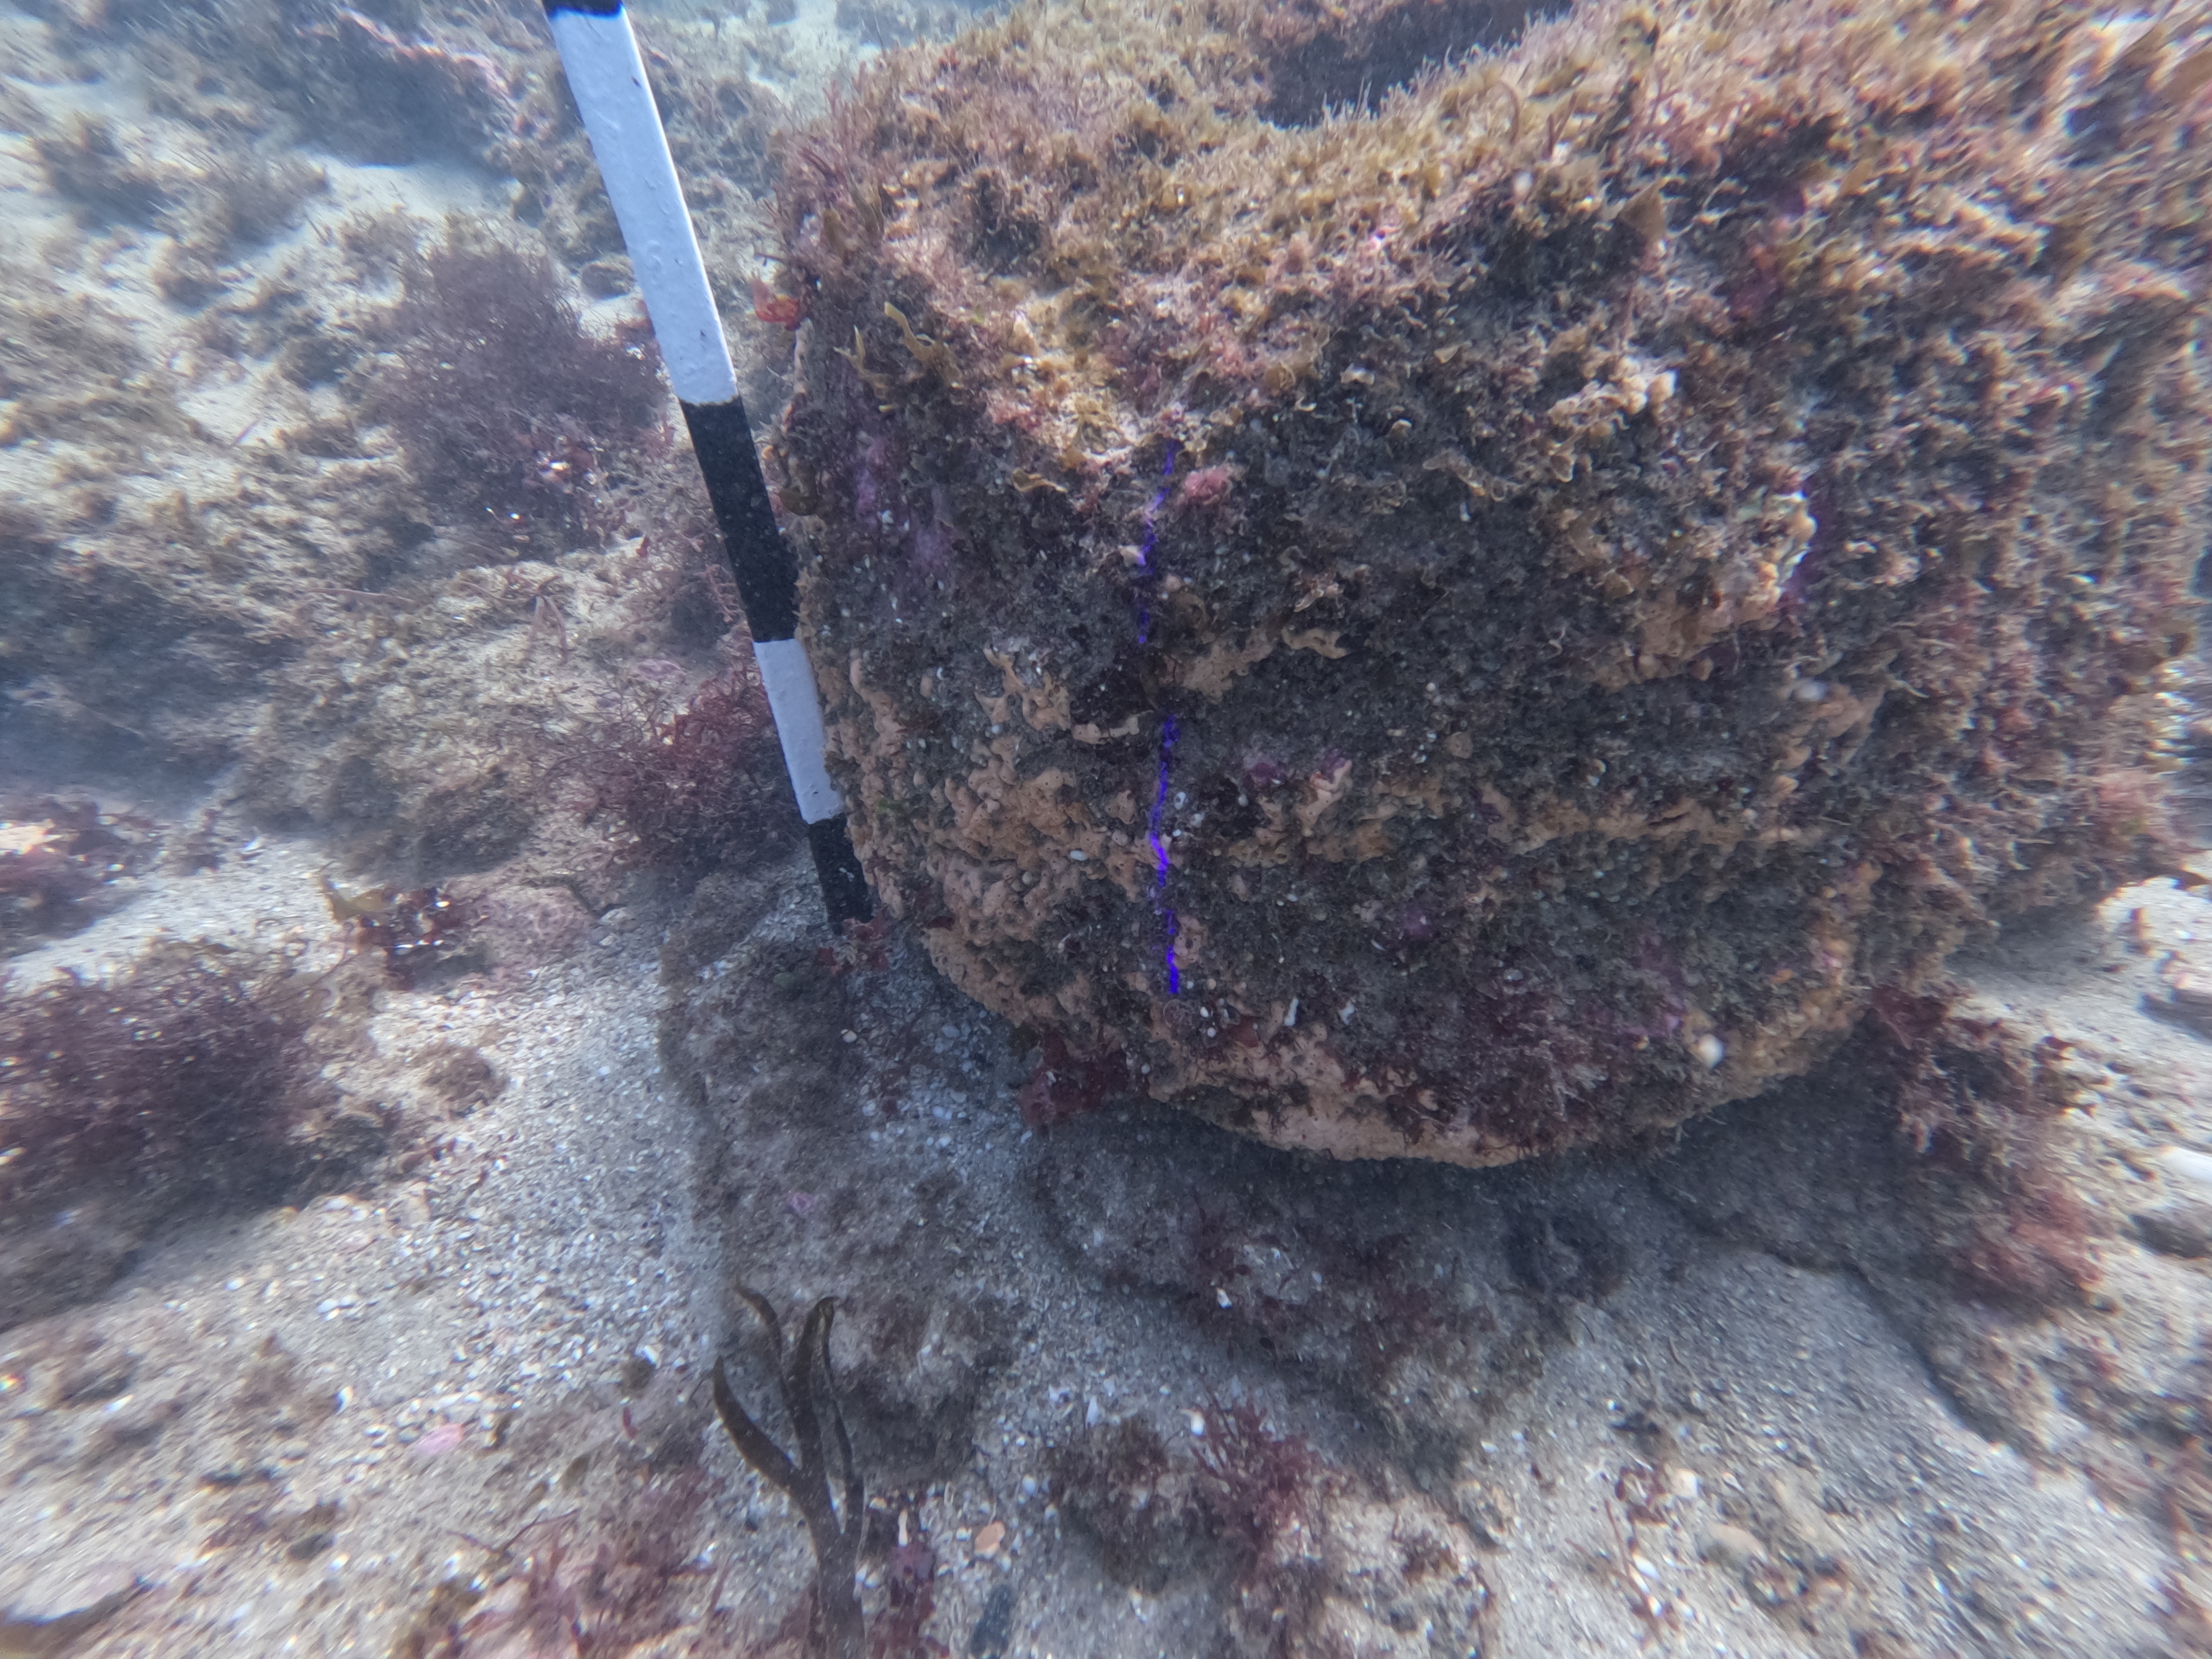

Supplement: Supplementary file 1796 [file G0028122.pdf › Ocean1/G0028122.pdf]

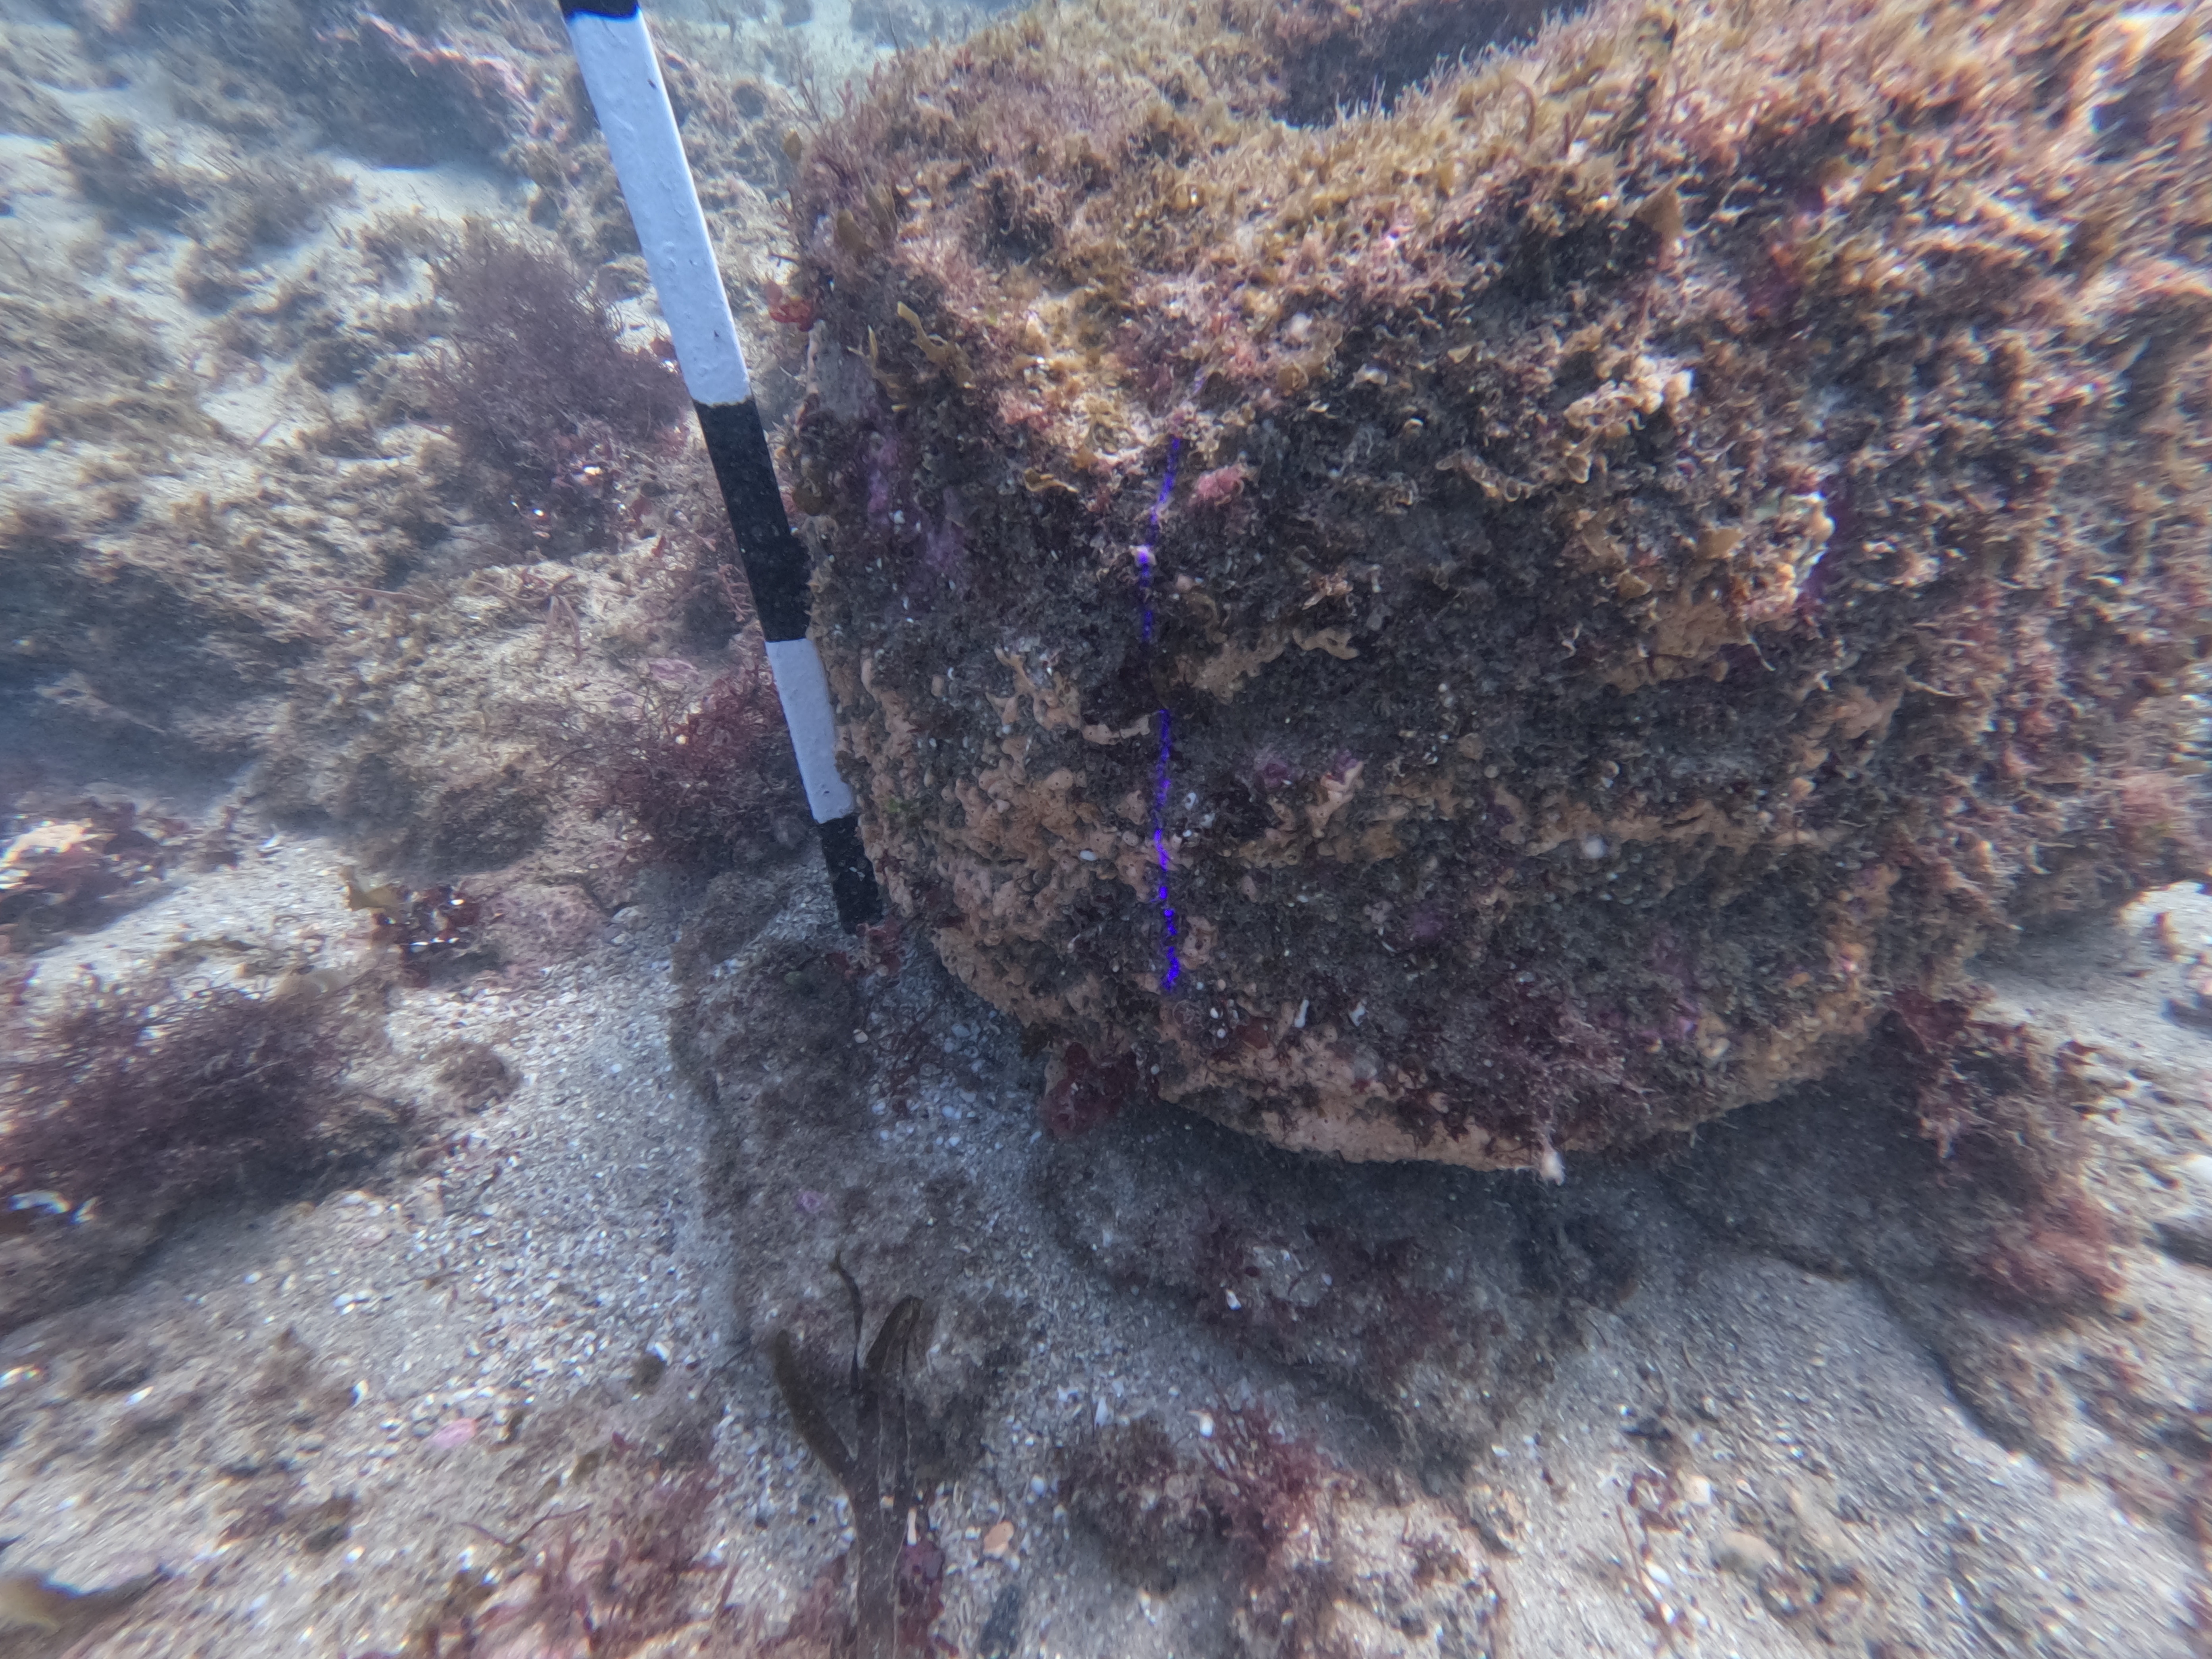

Supplement: Supplementary file 1797 [file G0028123.pdf › Ocean1/G0028123.pdf]

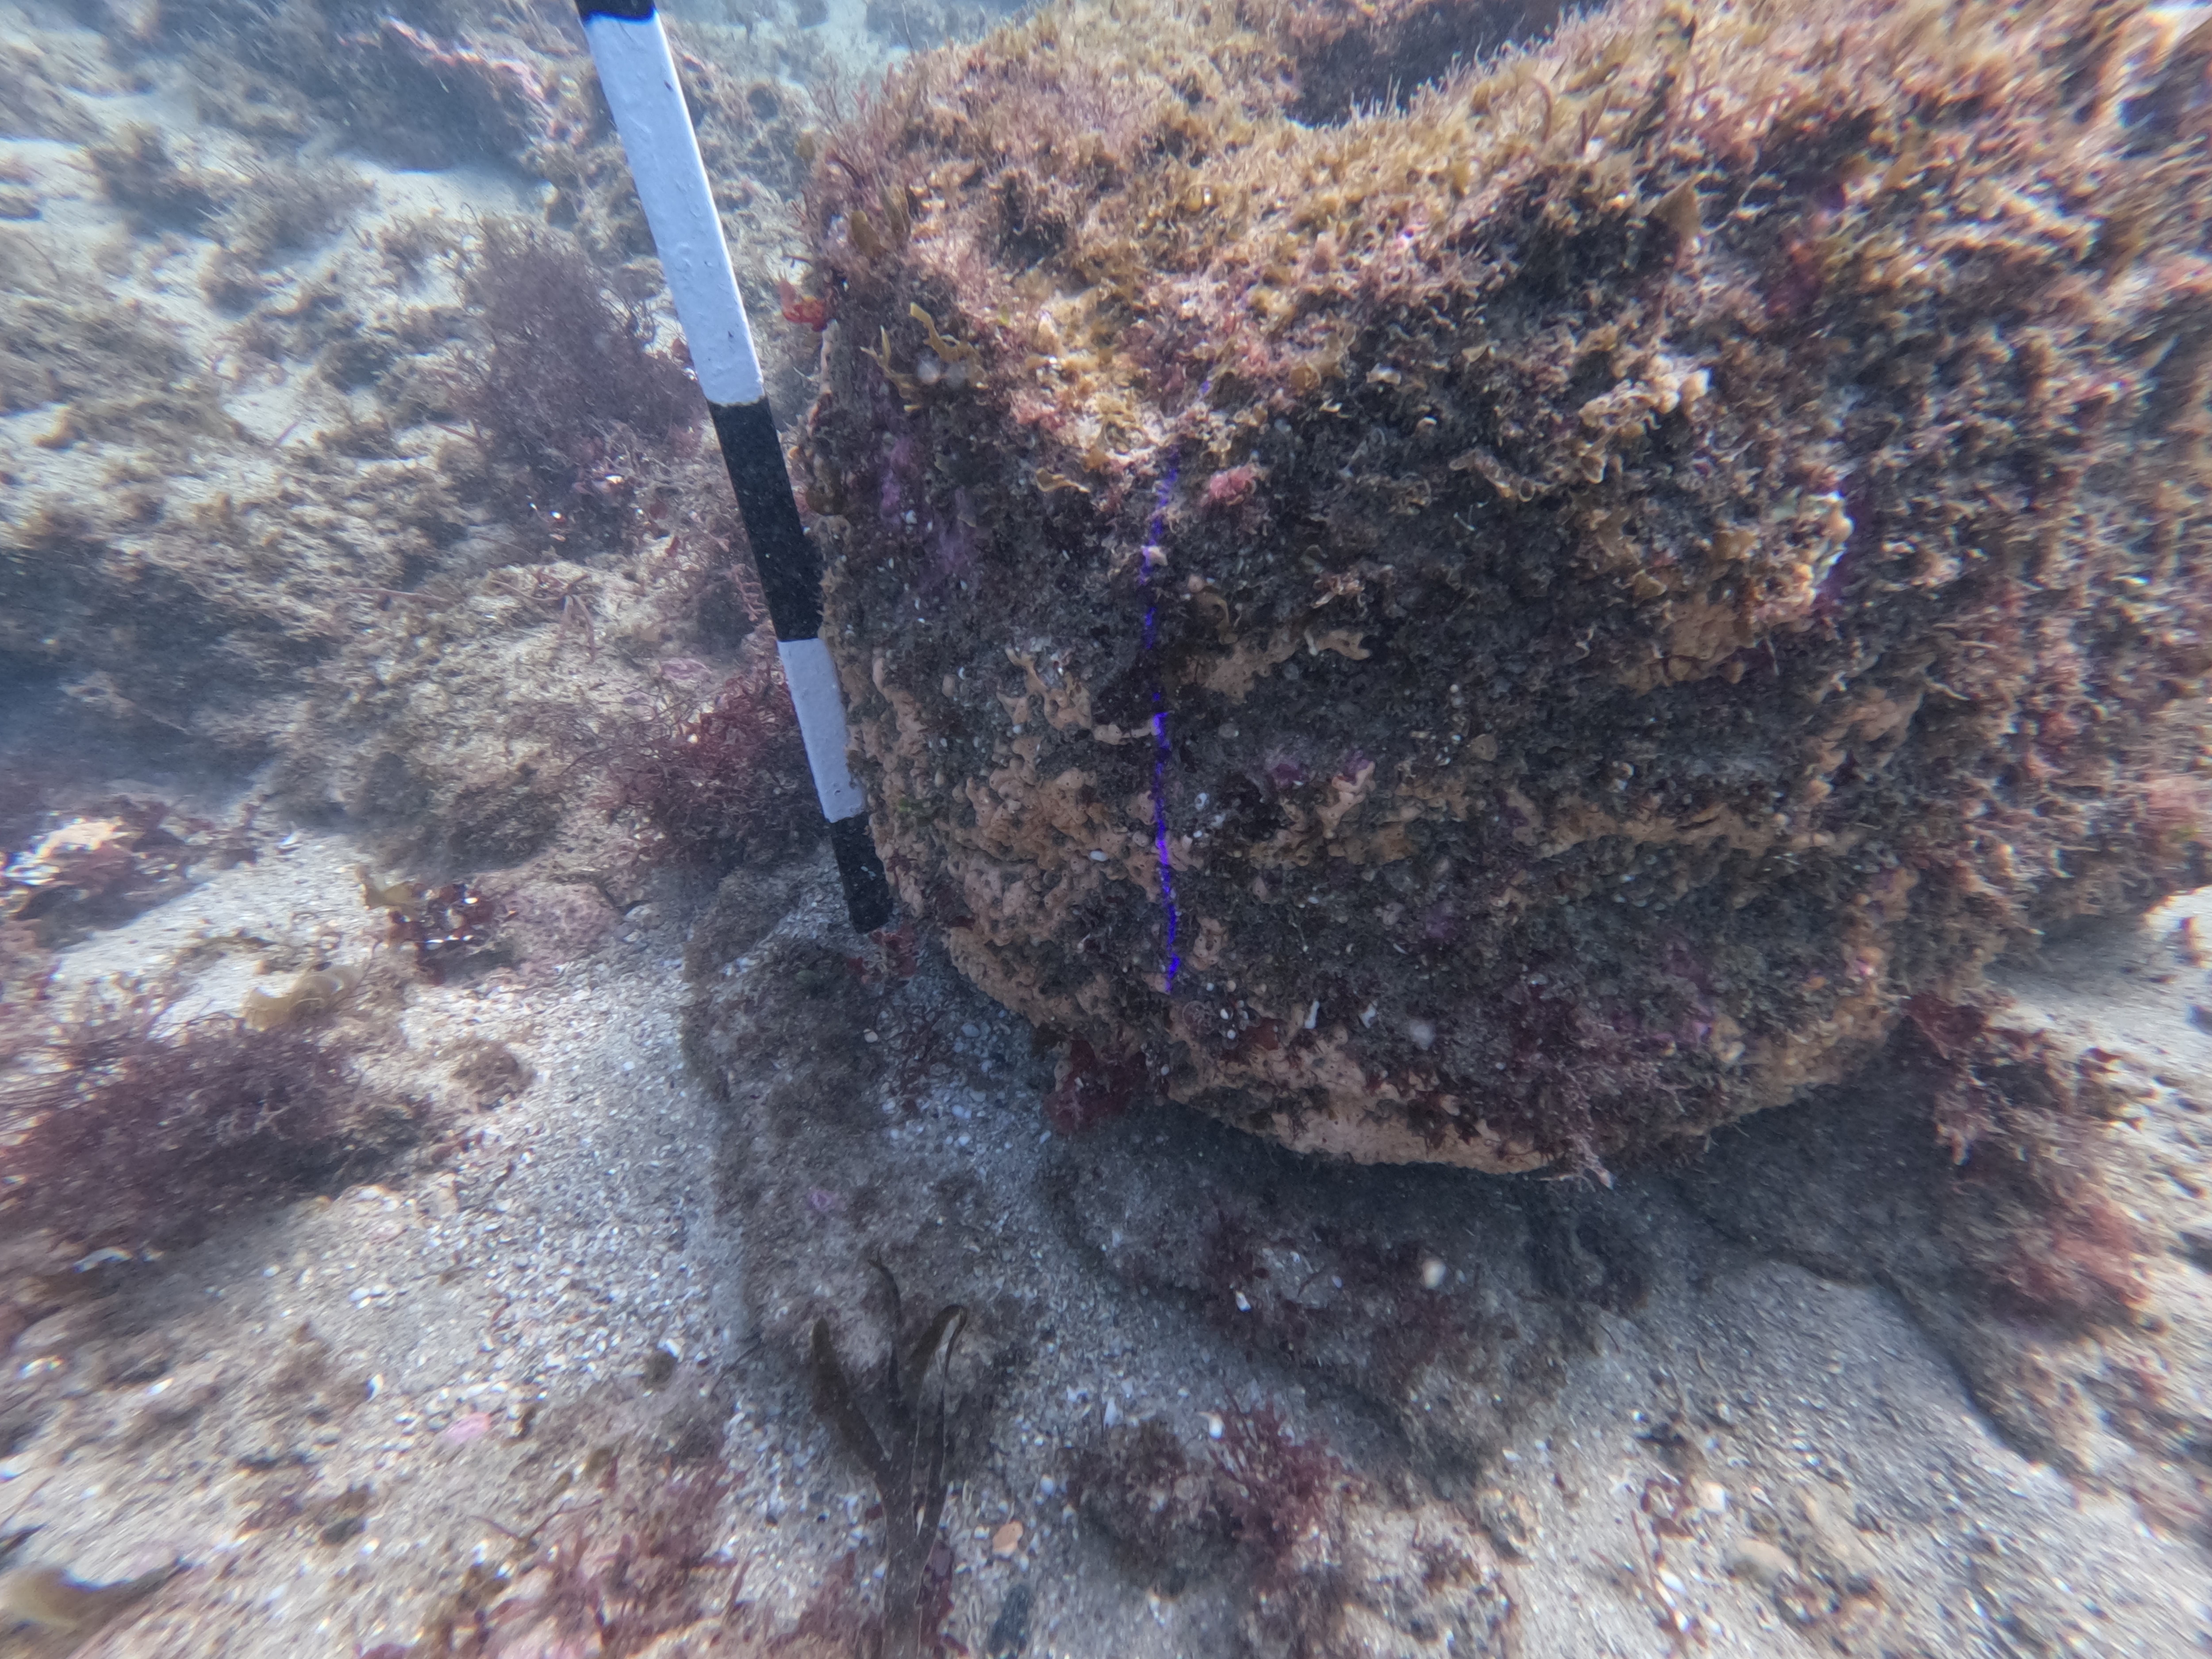

Supplement: Supplementary file 1798 [file G0028124.pdf › Ocean1/G0028124.pdf]

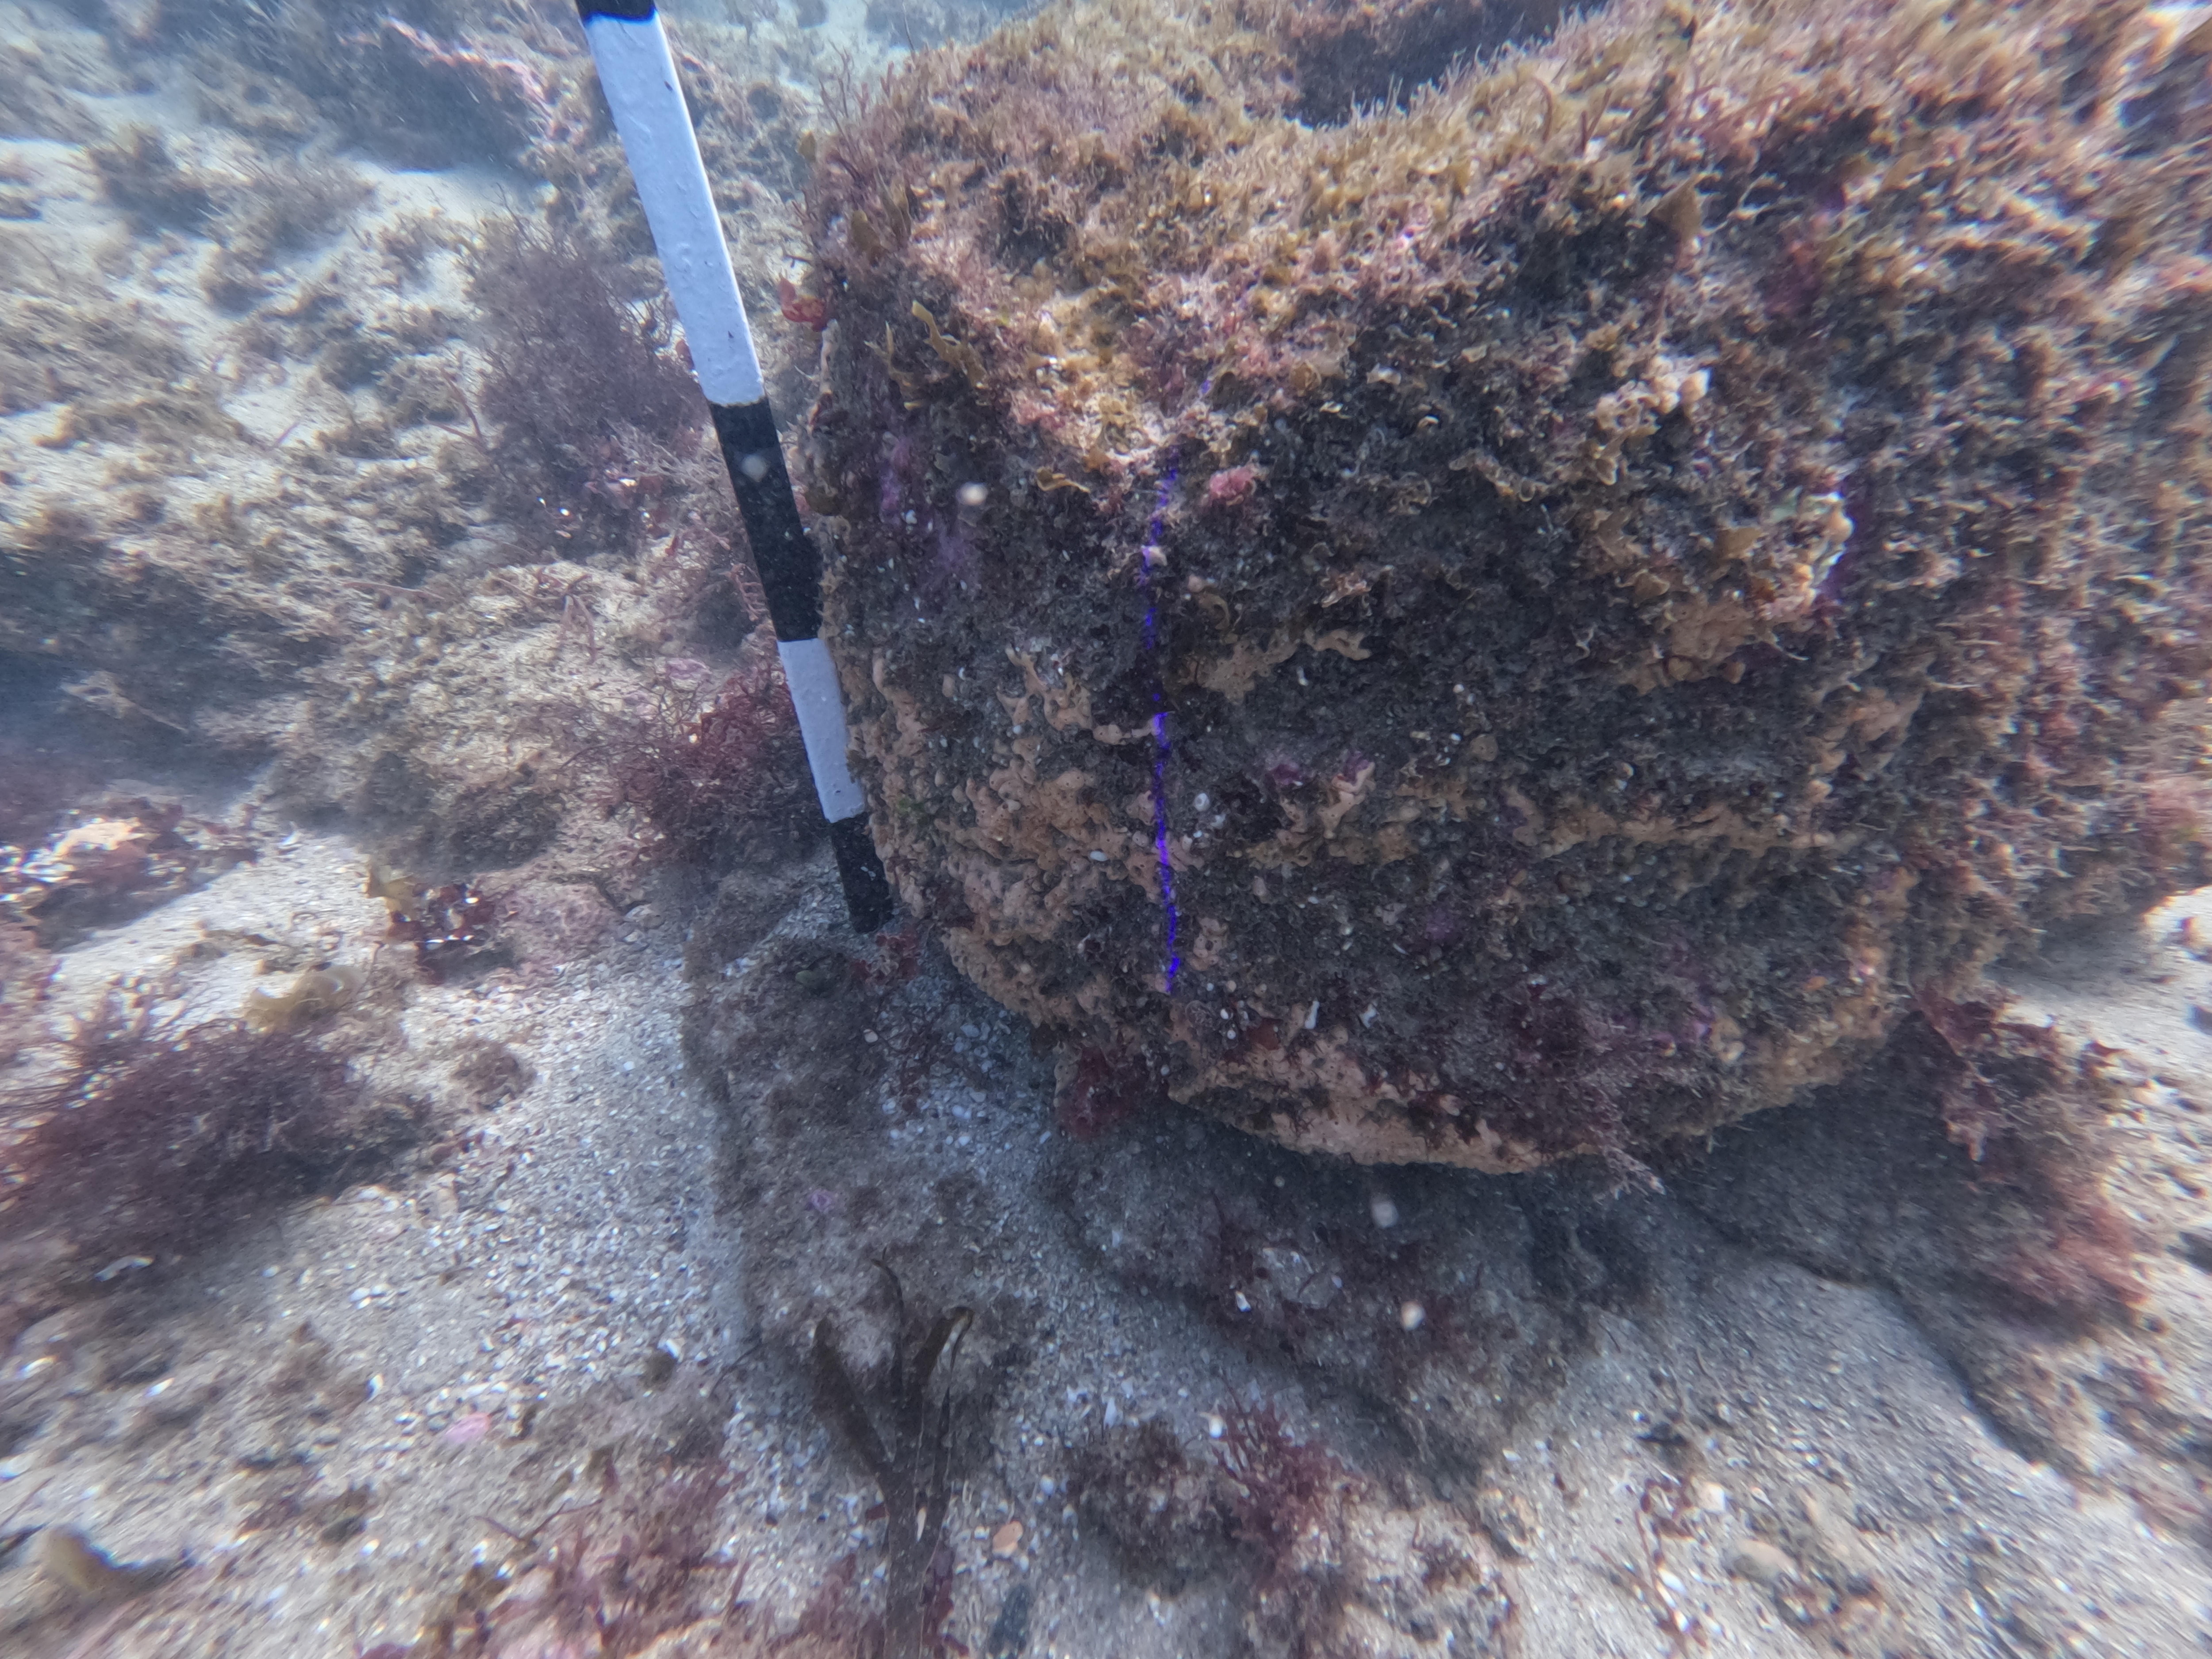

Supplement: Supplementary file 1799 [file G0028125.pdf › Ocean1/G0028125.pdf]

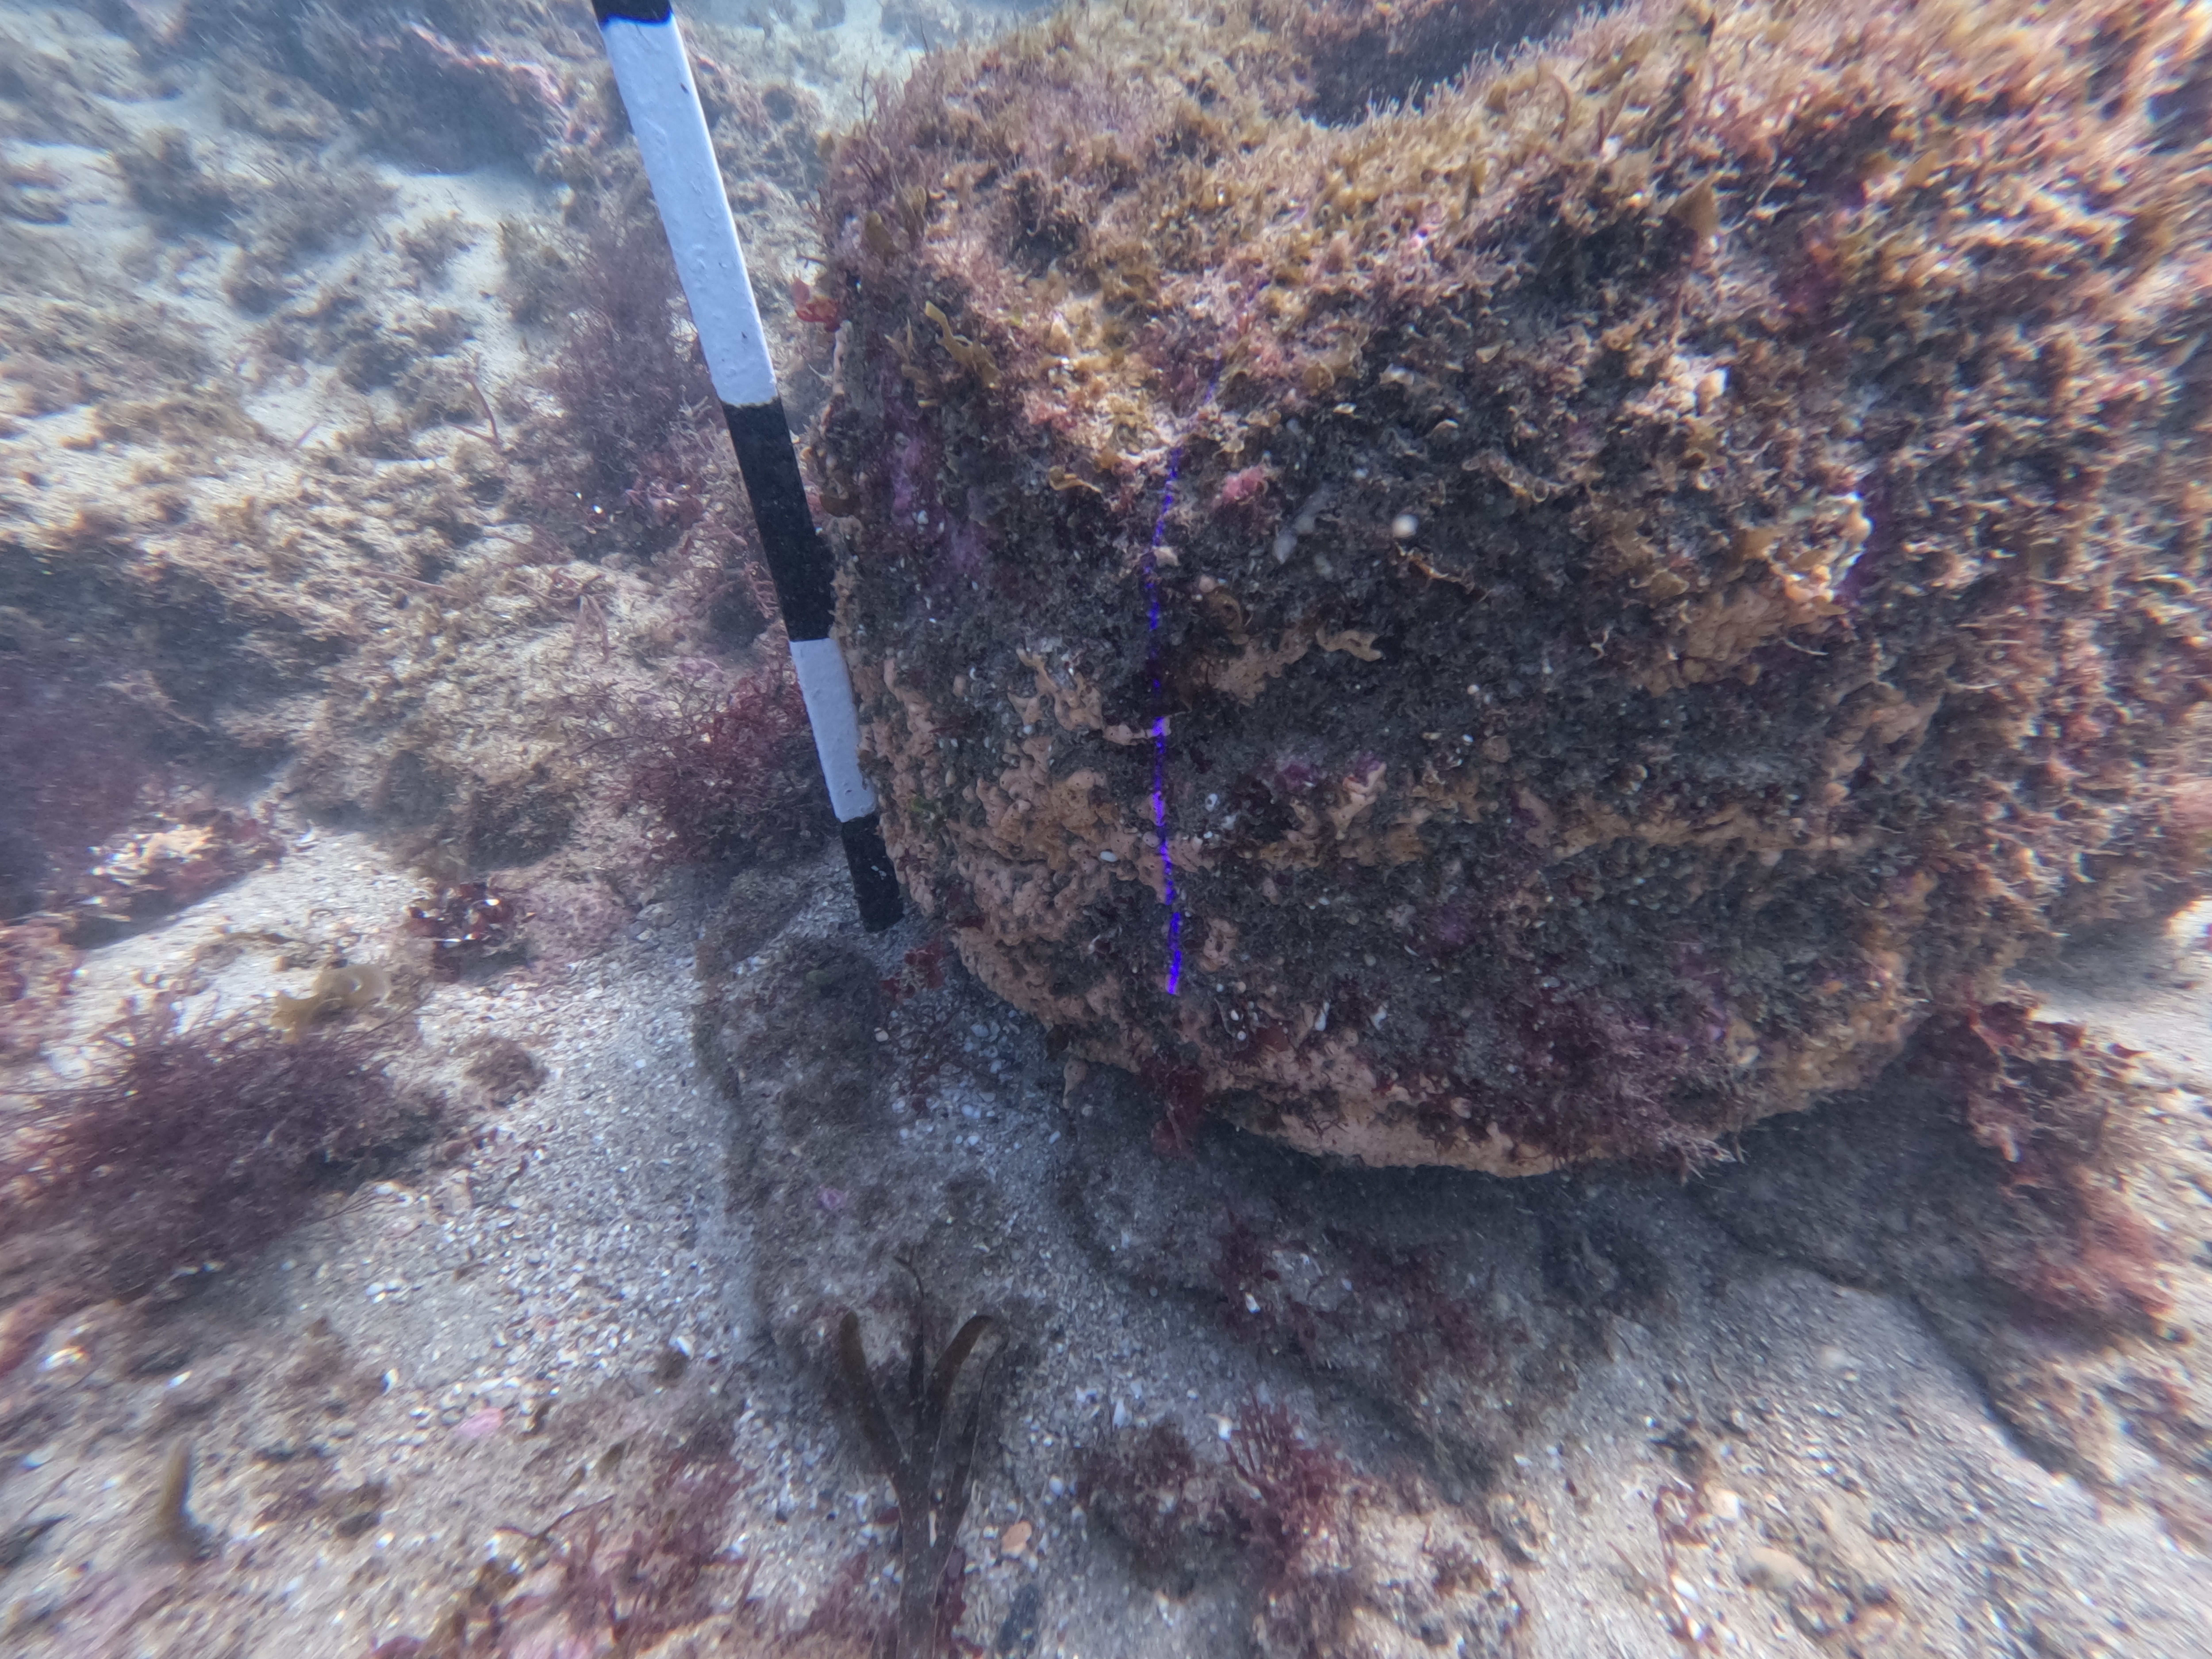

Supplement: Supplementary file 1800 [file G0028126.pdf › Ocean1/G0028126.pdf]

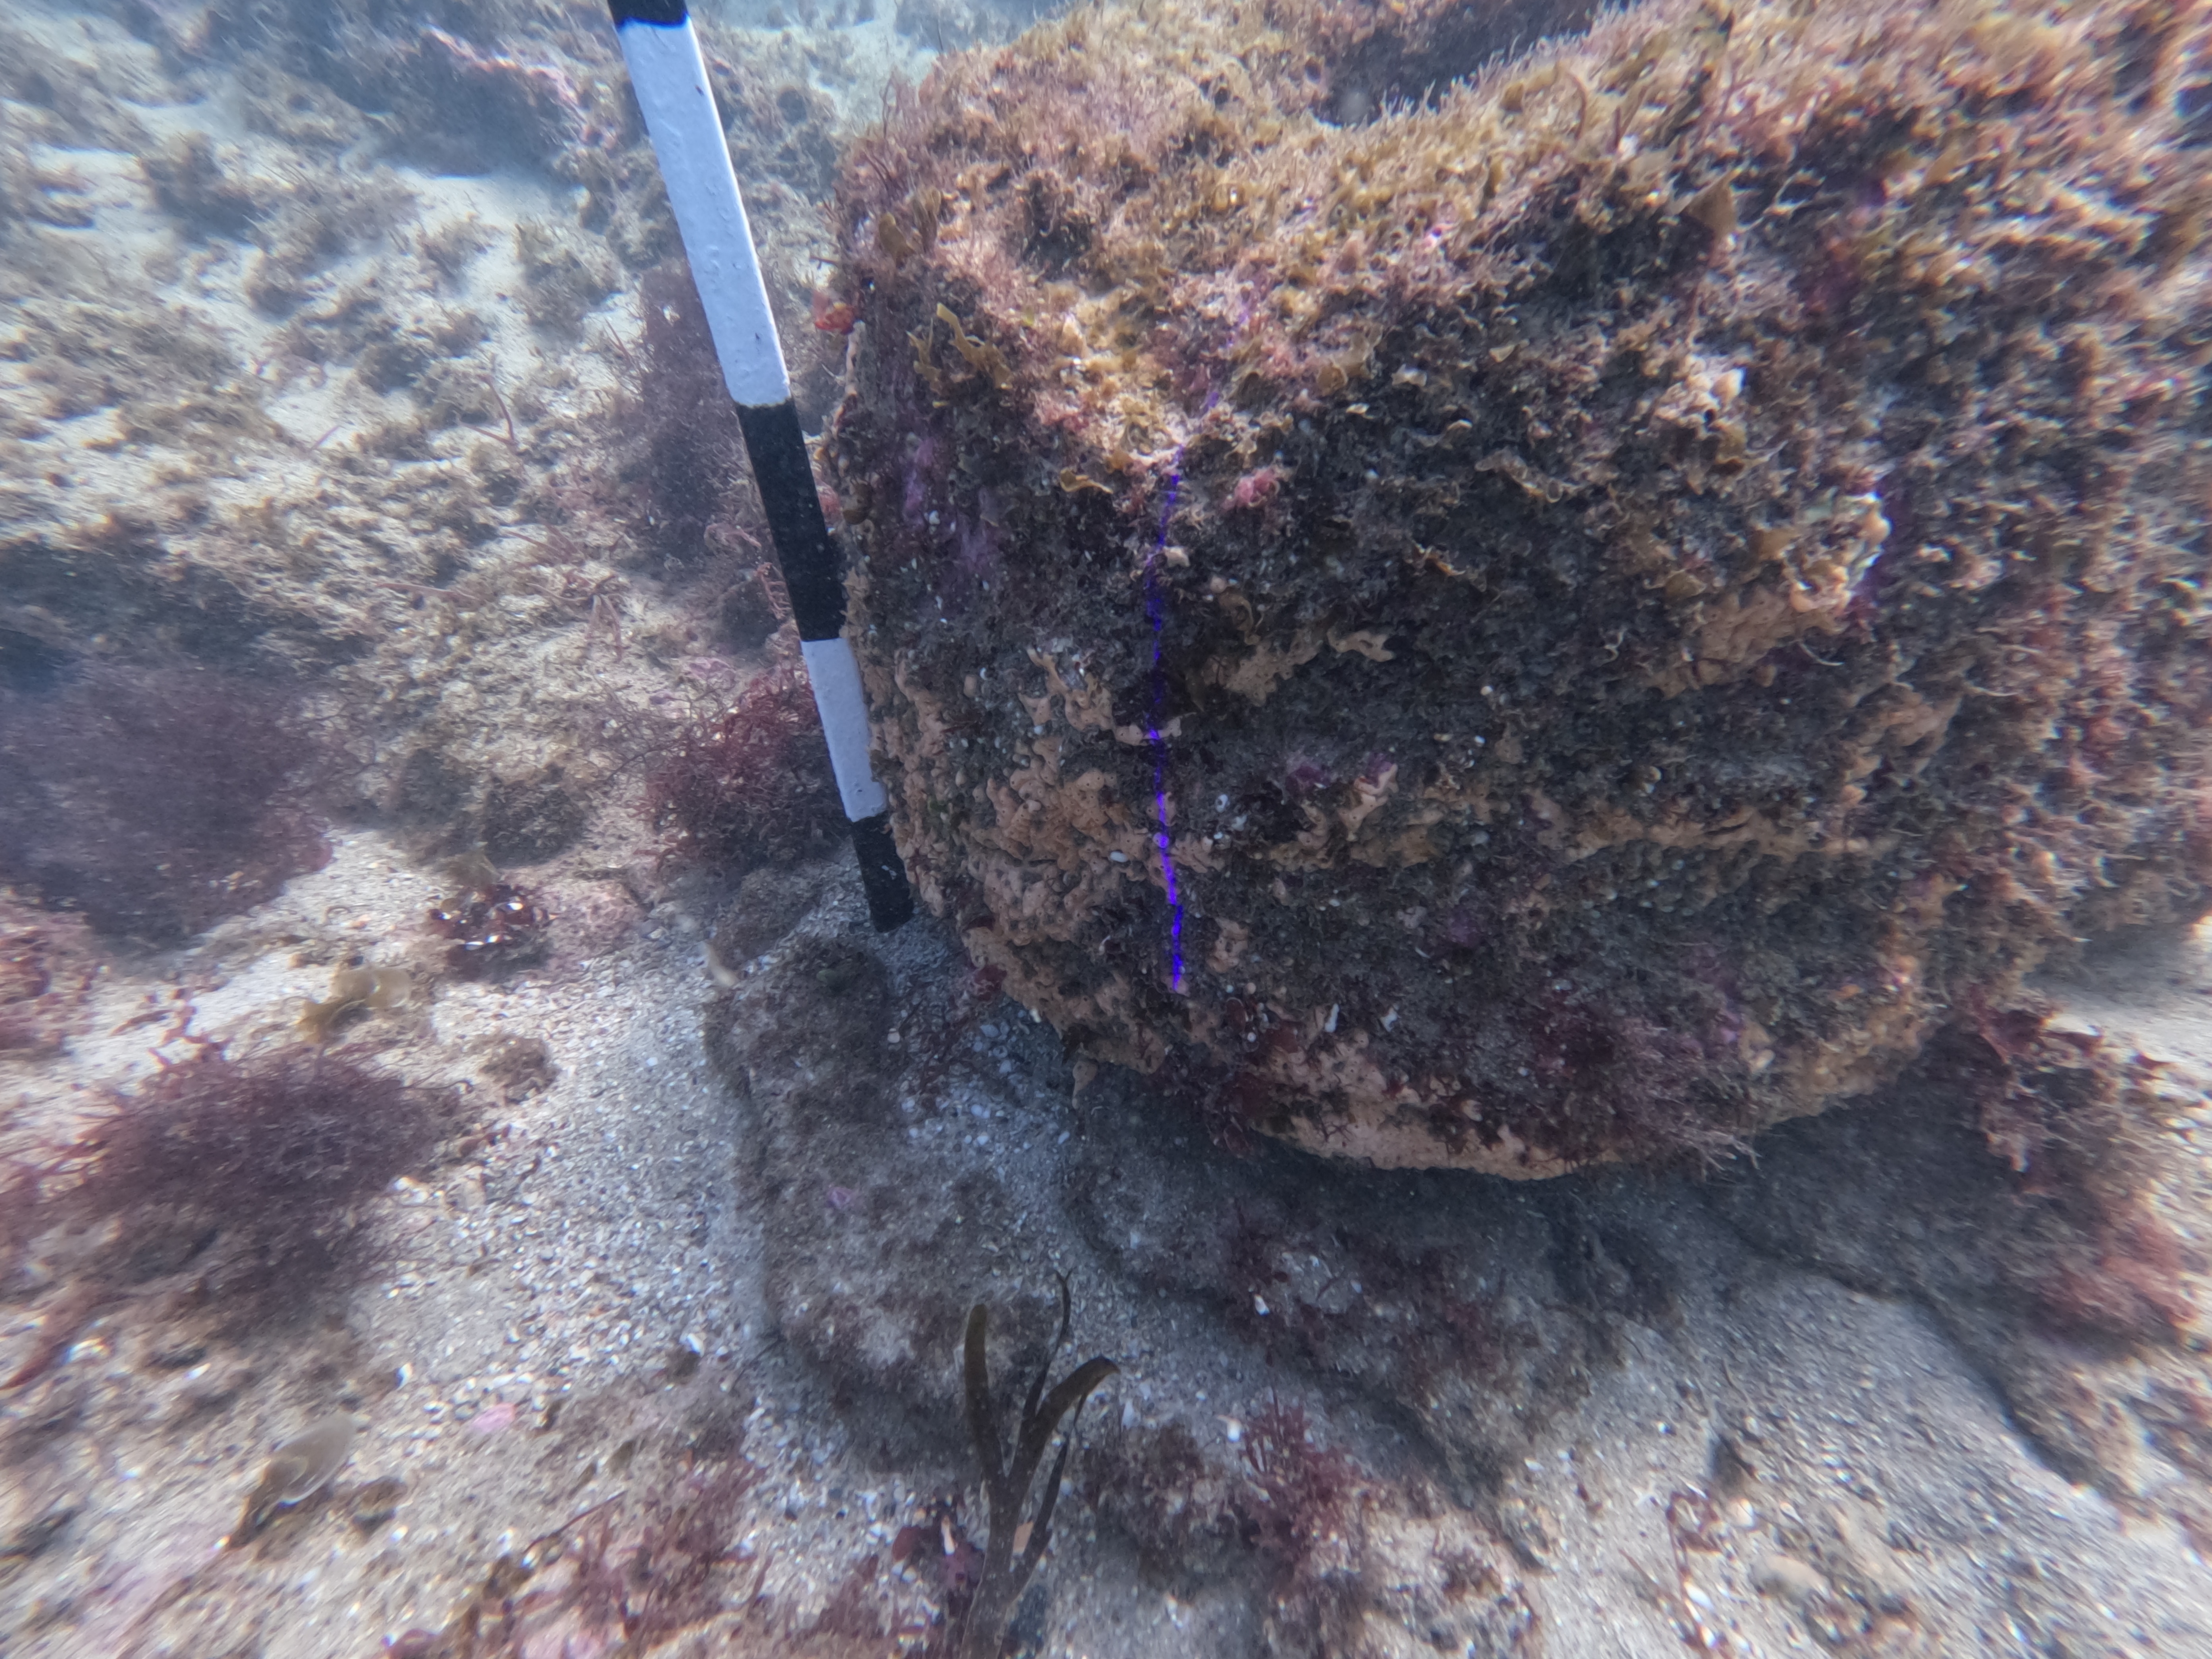

Supplement: Supplementary file 1801 [file G0028127.pdf › Ocean1/G0028127.pdf]

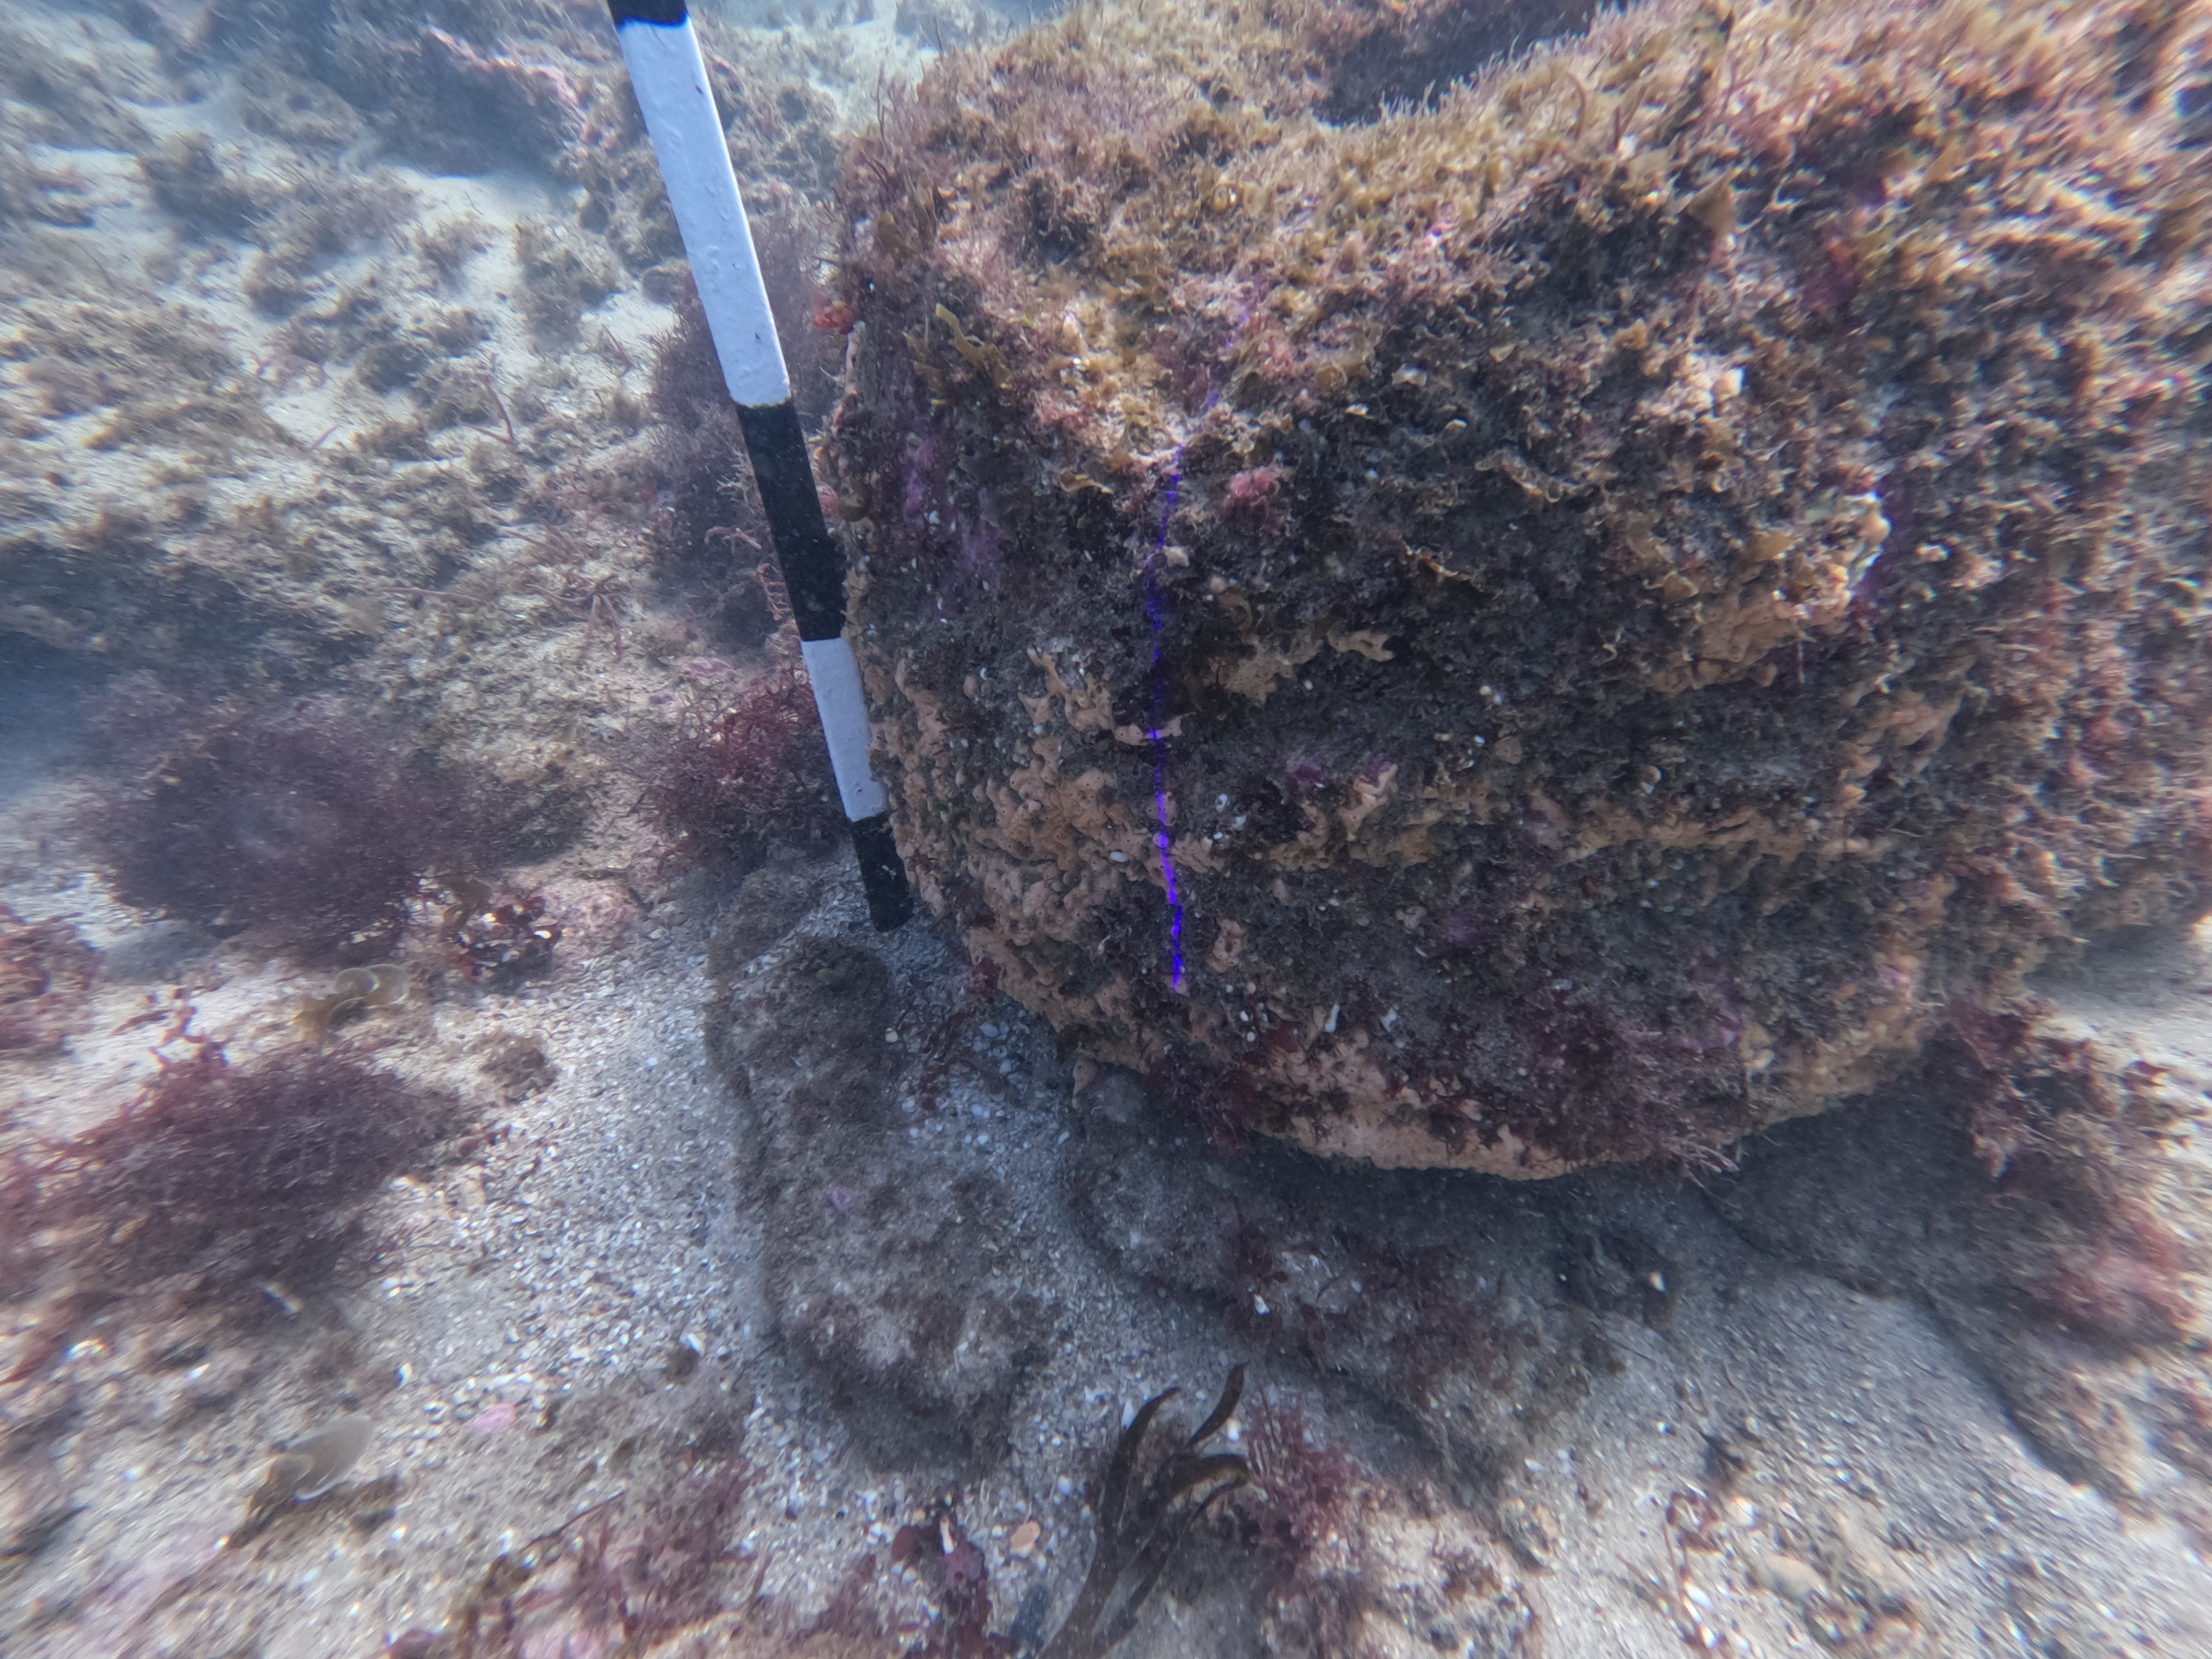

Supplement: Supplementary file 1802 [file G0028128.pdf › Ocean1/G0028128.pdf]

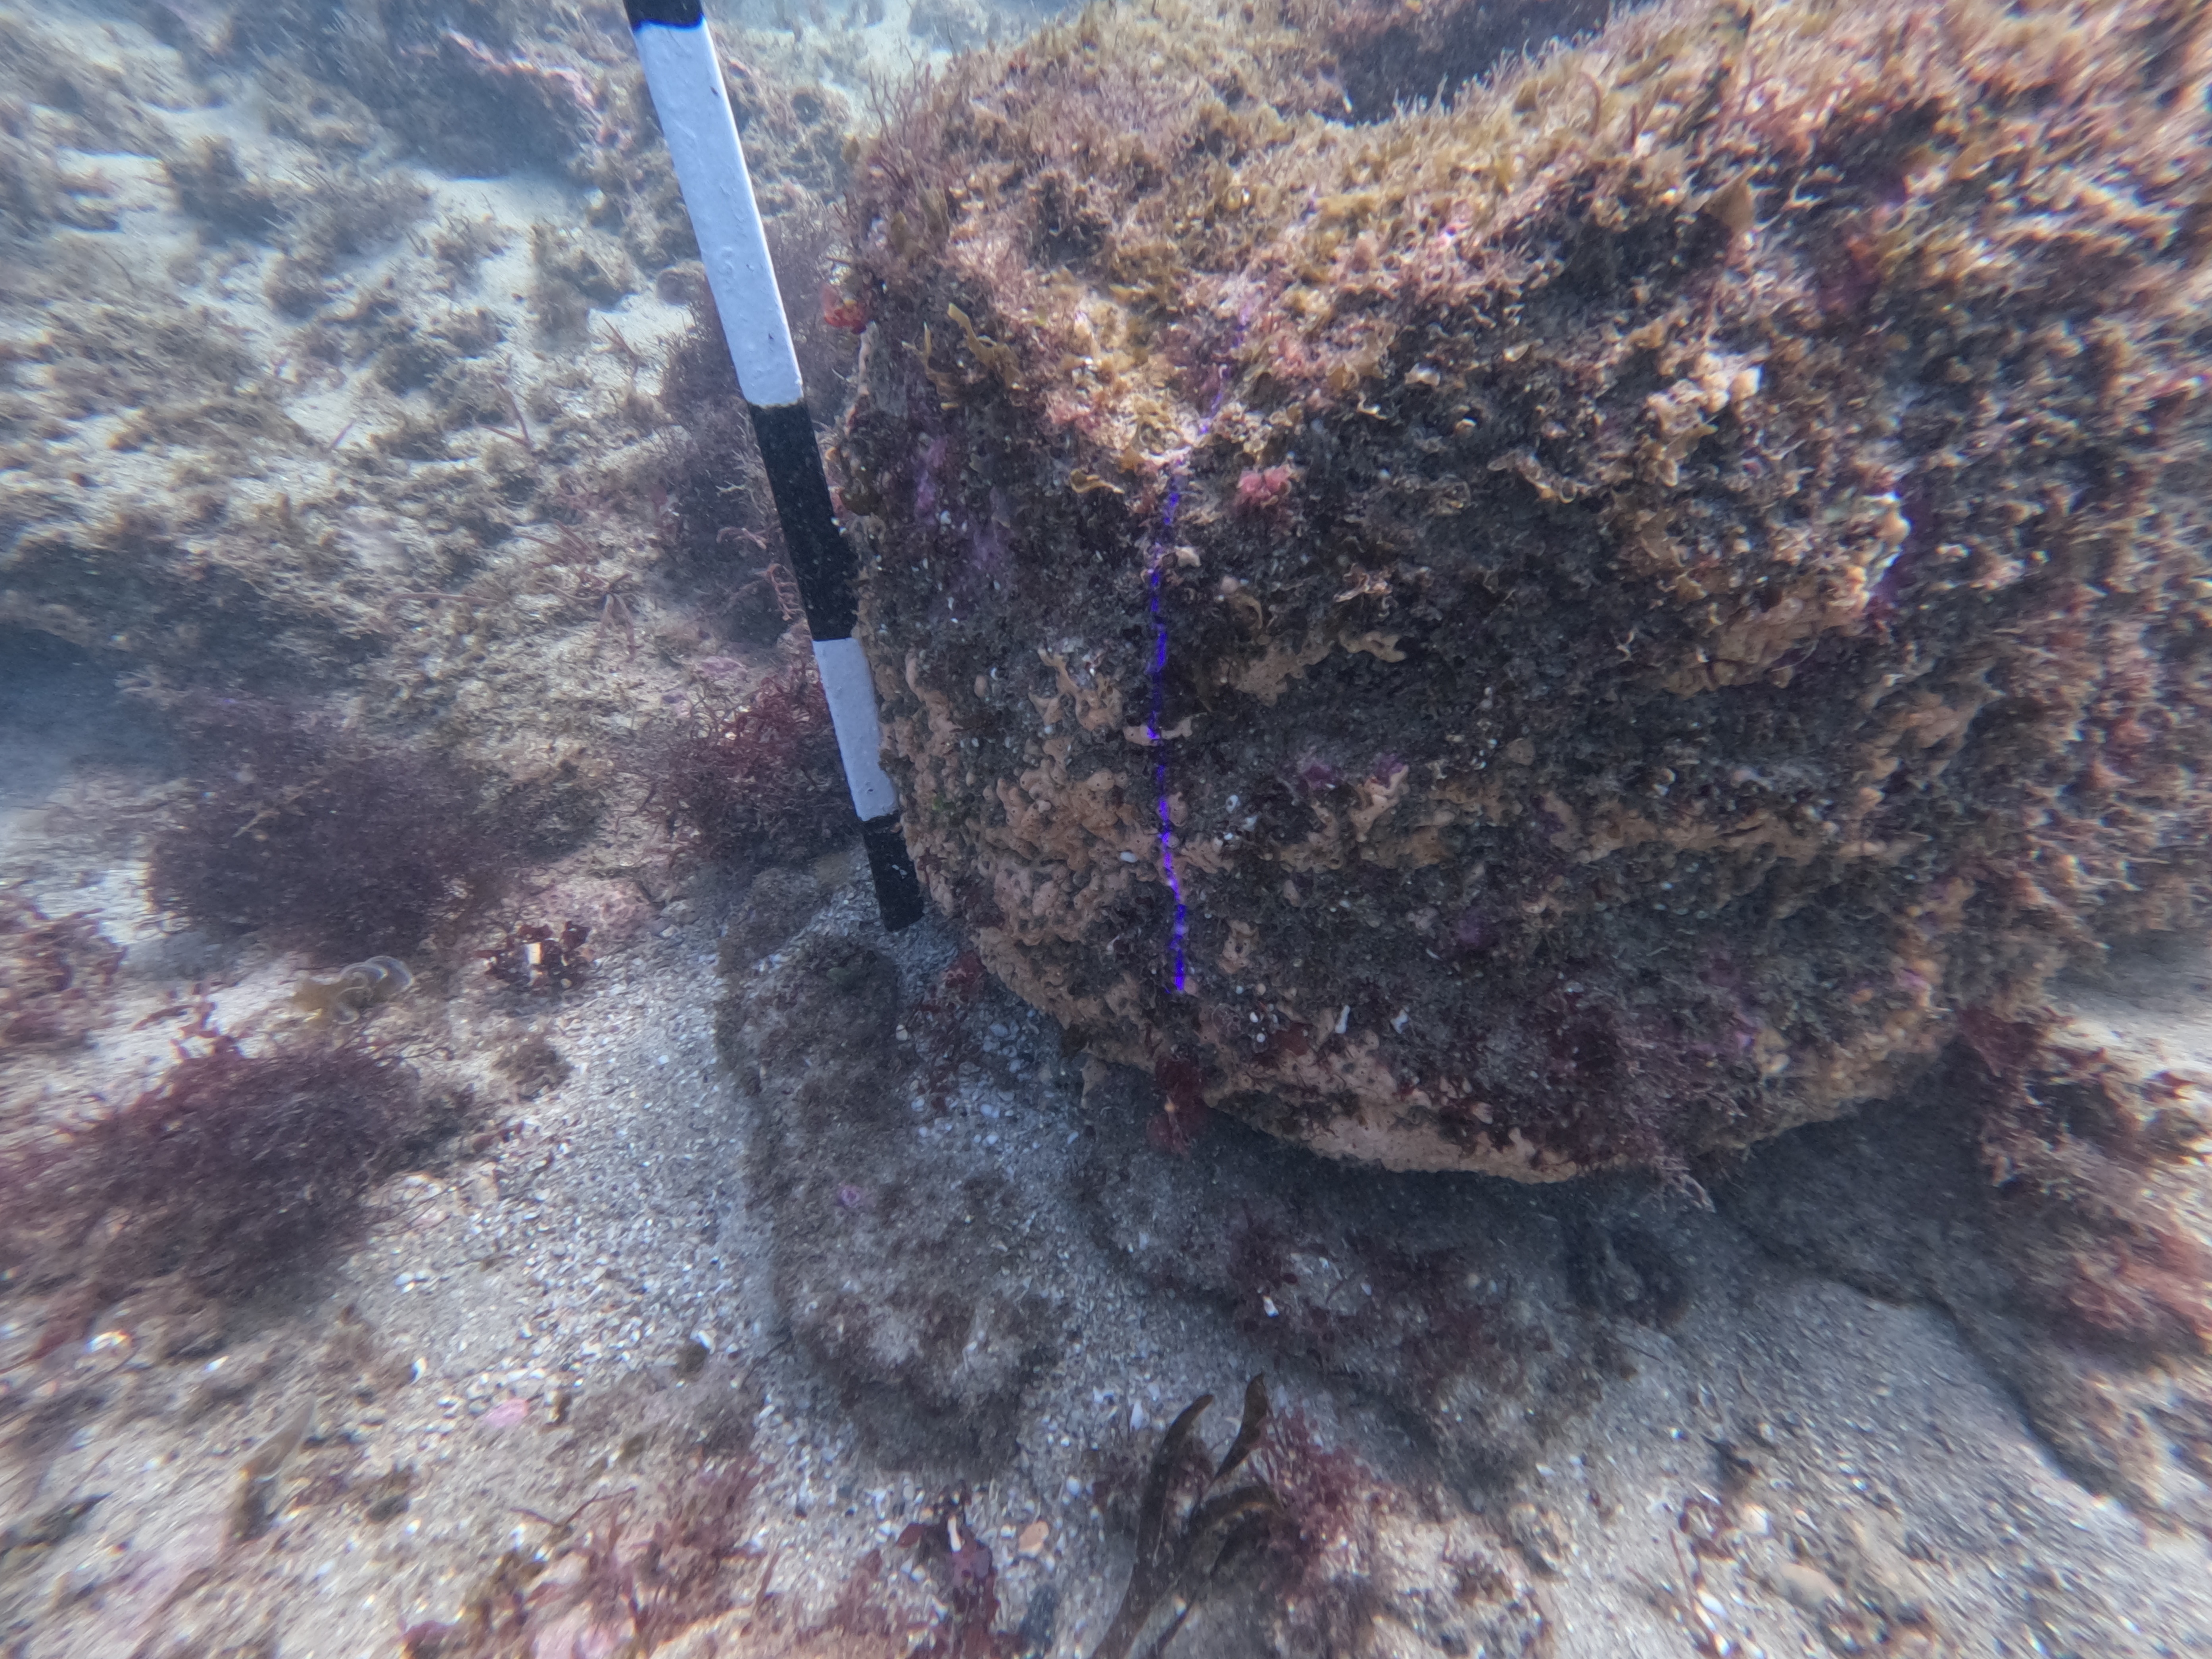

Supplement: Supplementary file 1803 [file G0028129.pdf › Ocean1/G0028129.pdf]

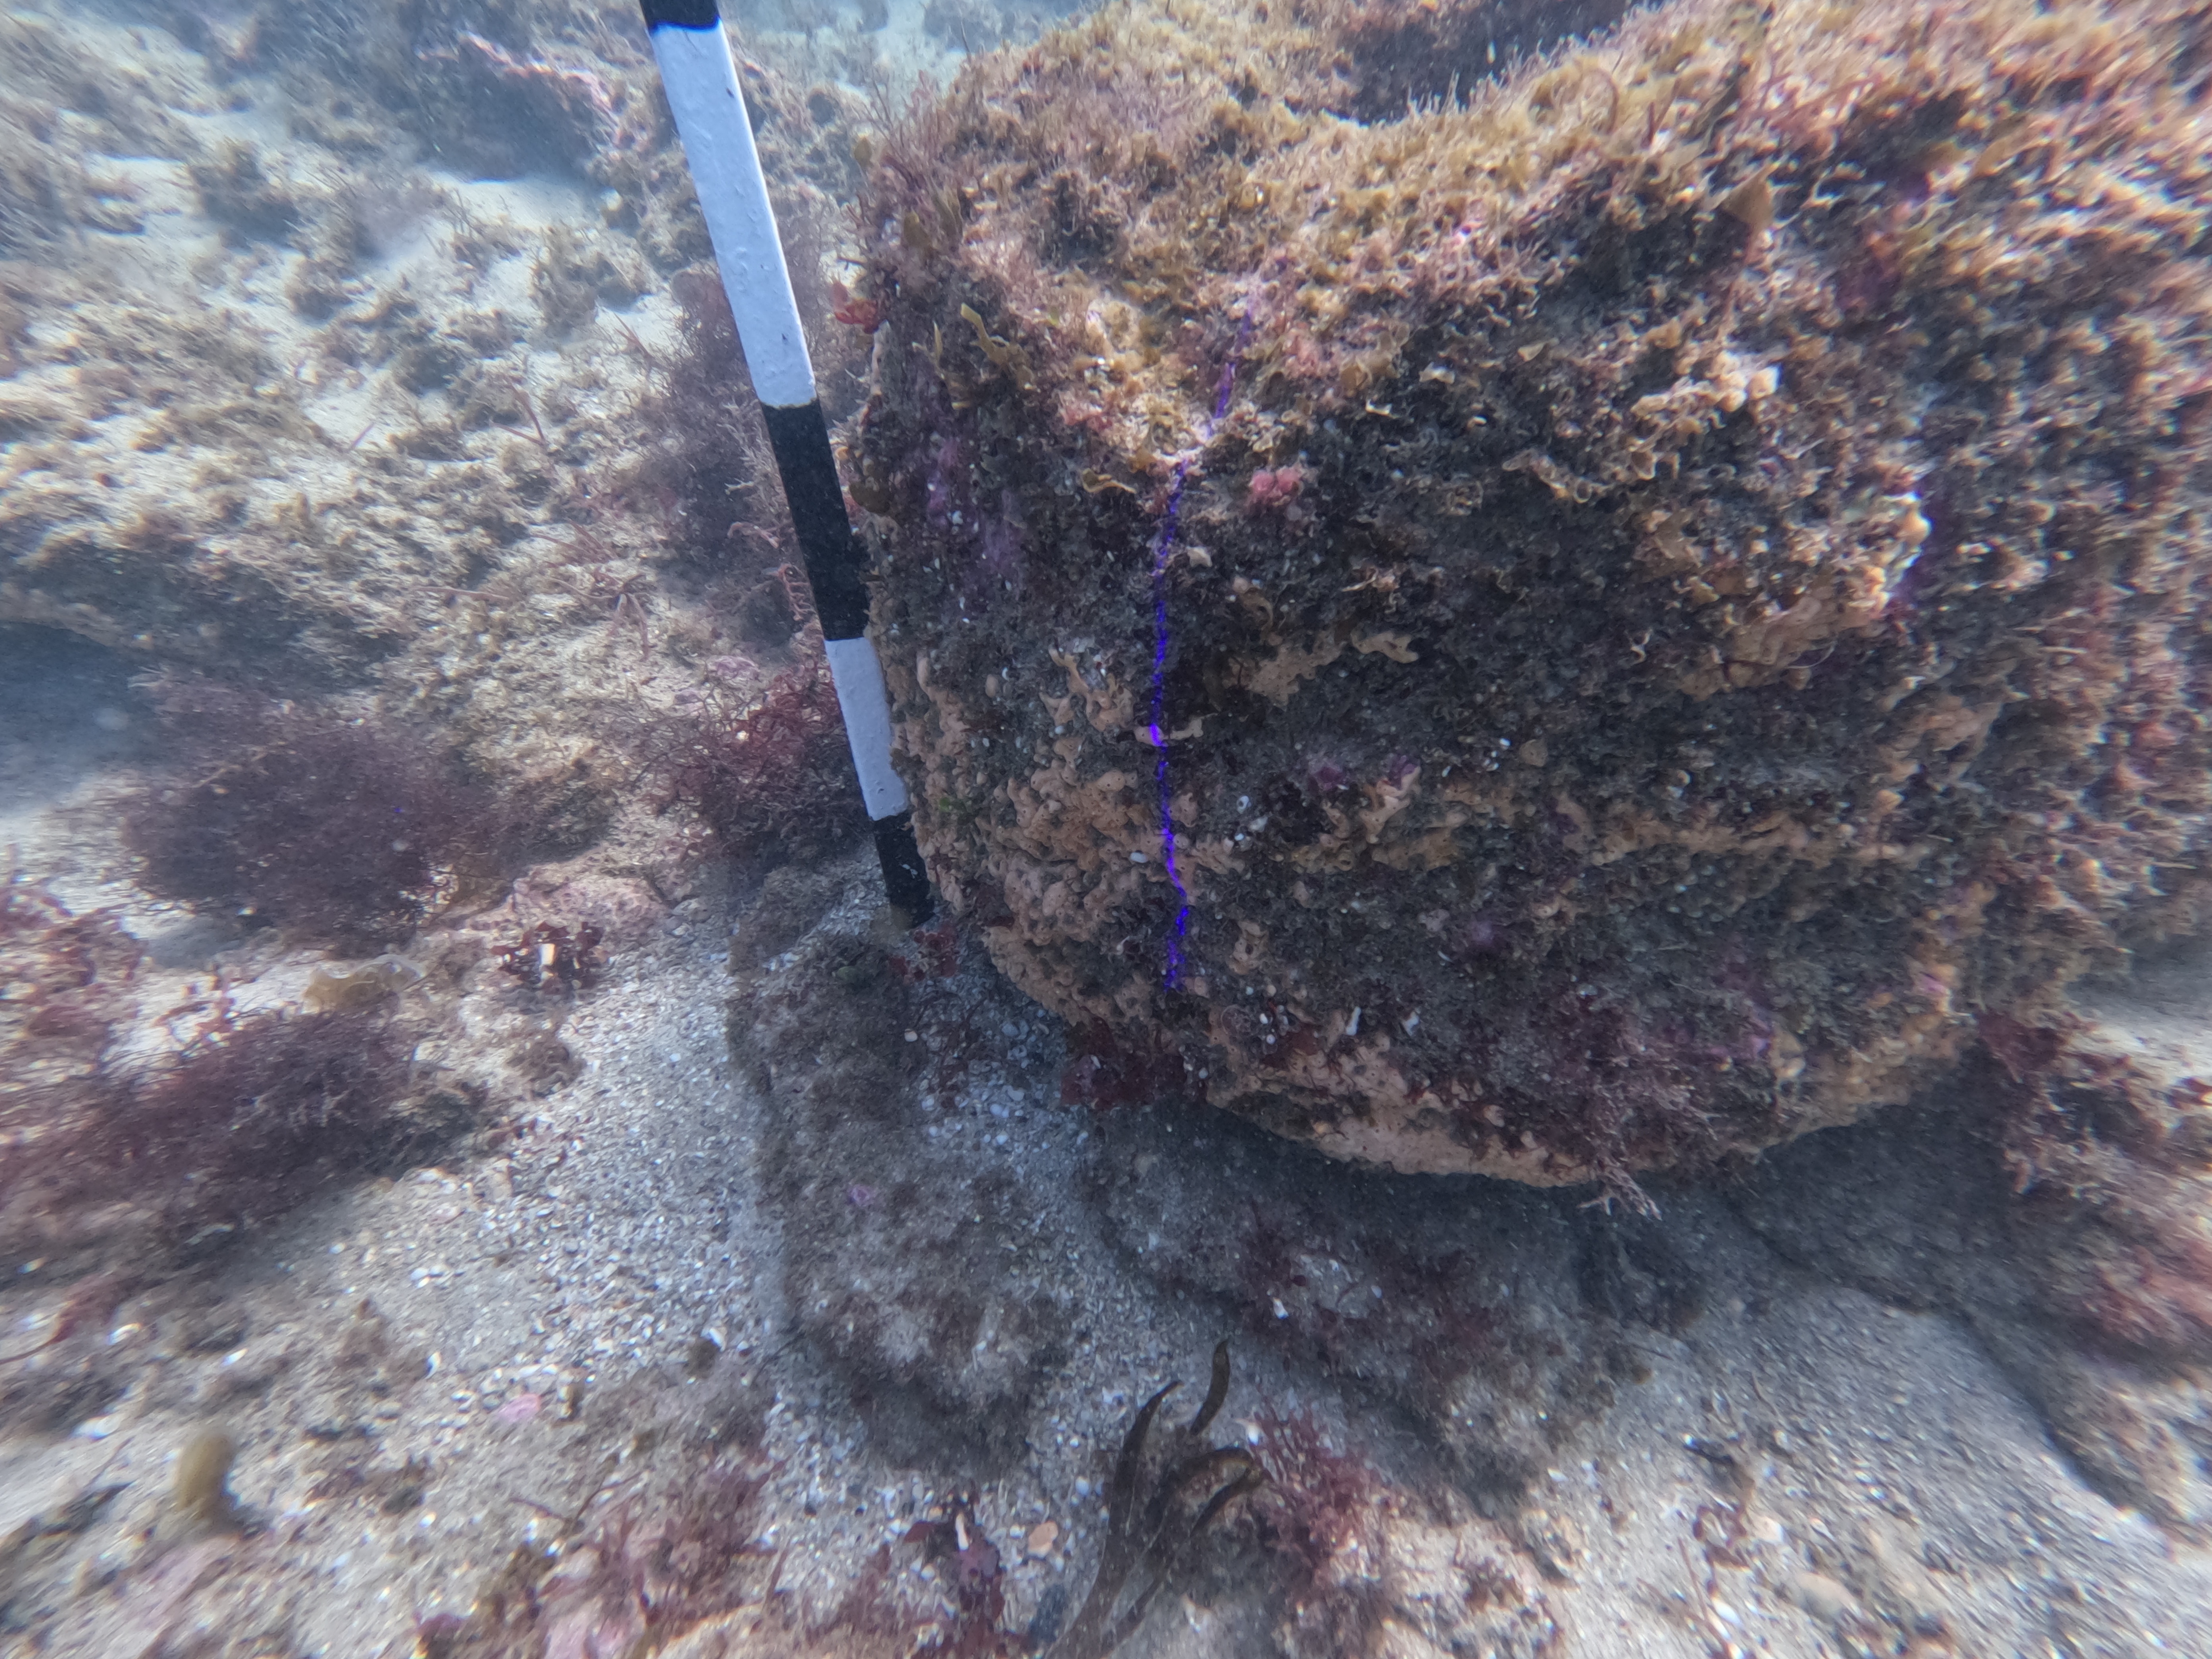

Supplement: Supplementary file 1804 [file G0028130.pdf › Ocean1/G0028130.pdf]

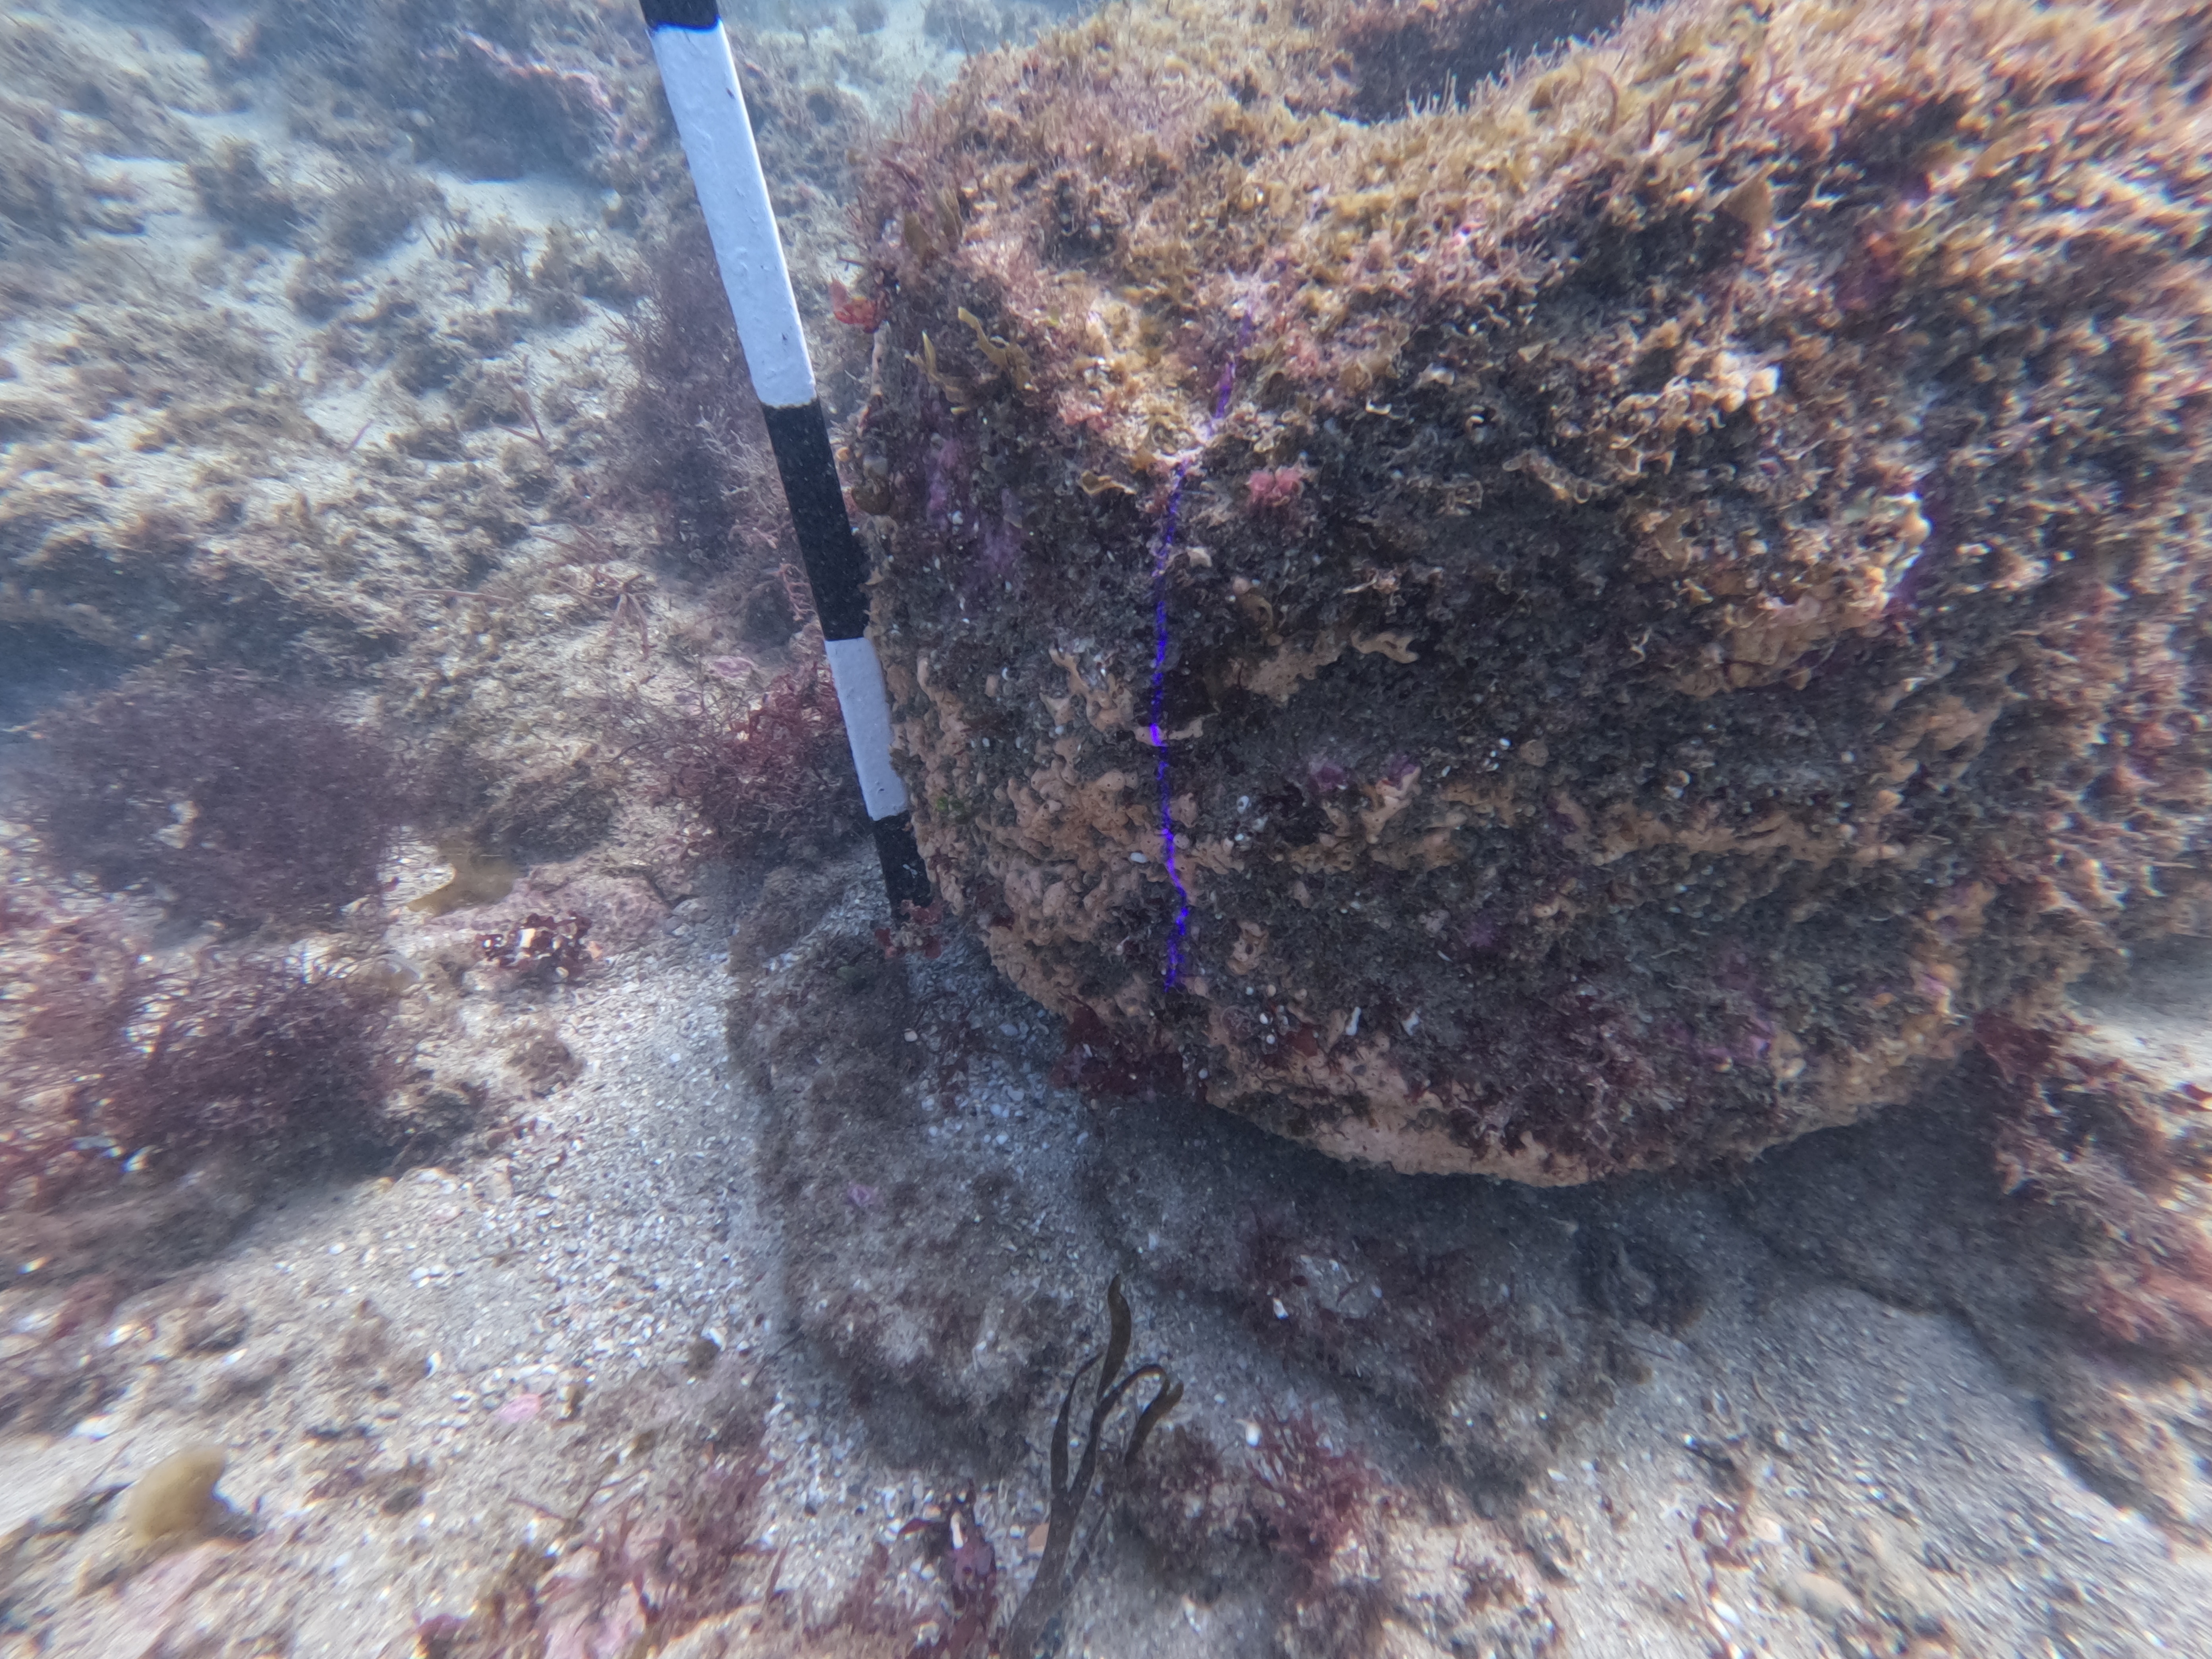

Supplement: Supplementary file 1805 [file G0028131.pdf › Ocean1/G0028131.pdf]

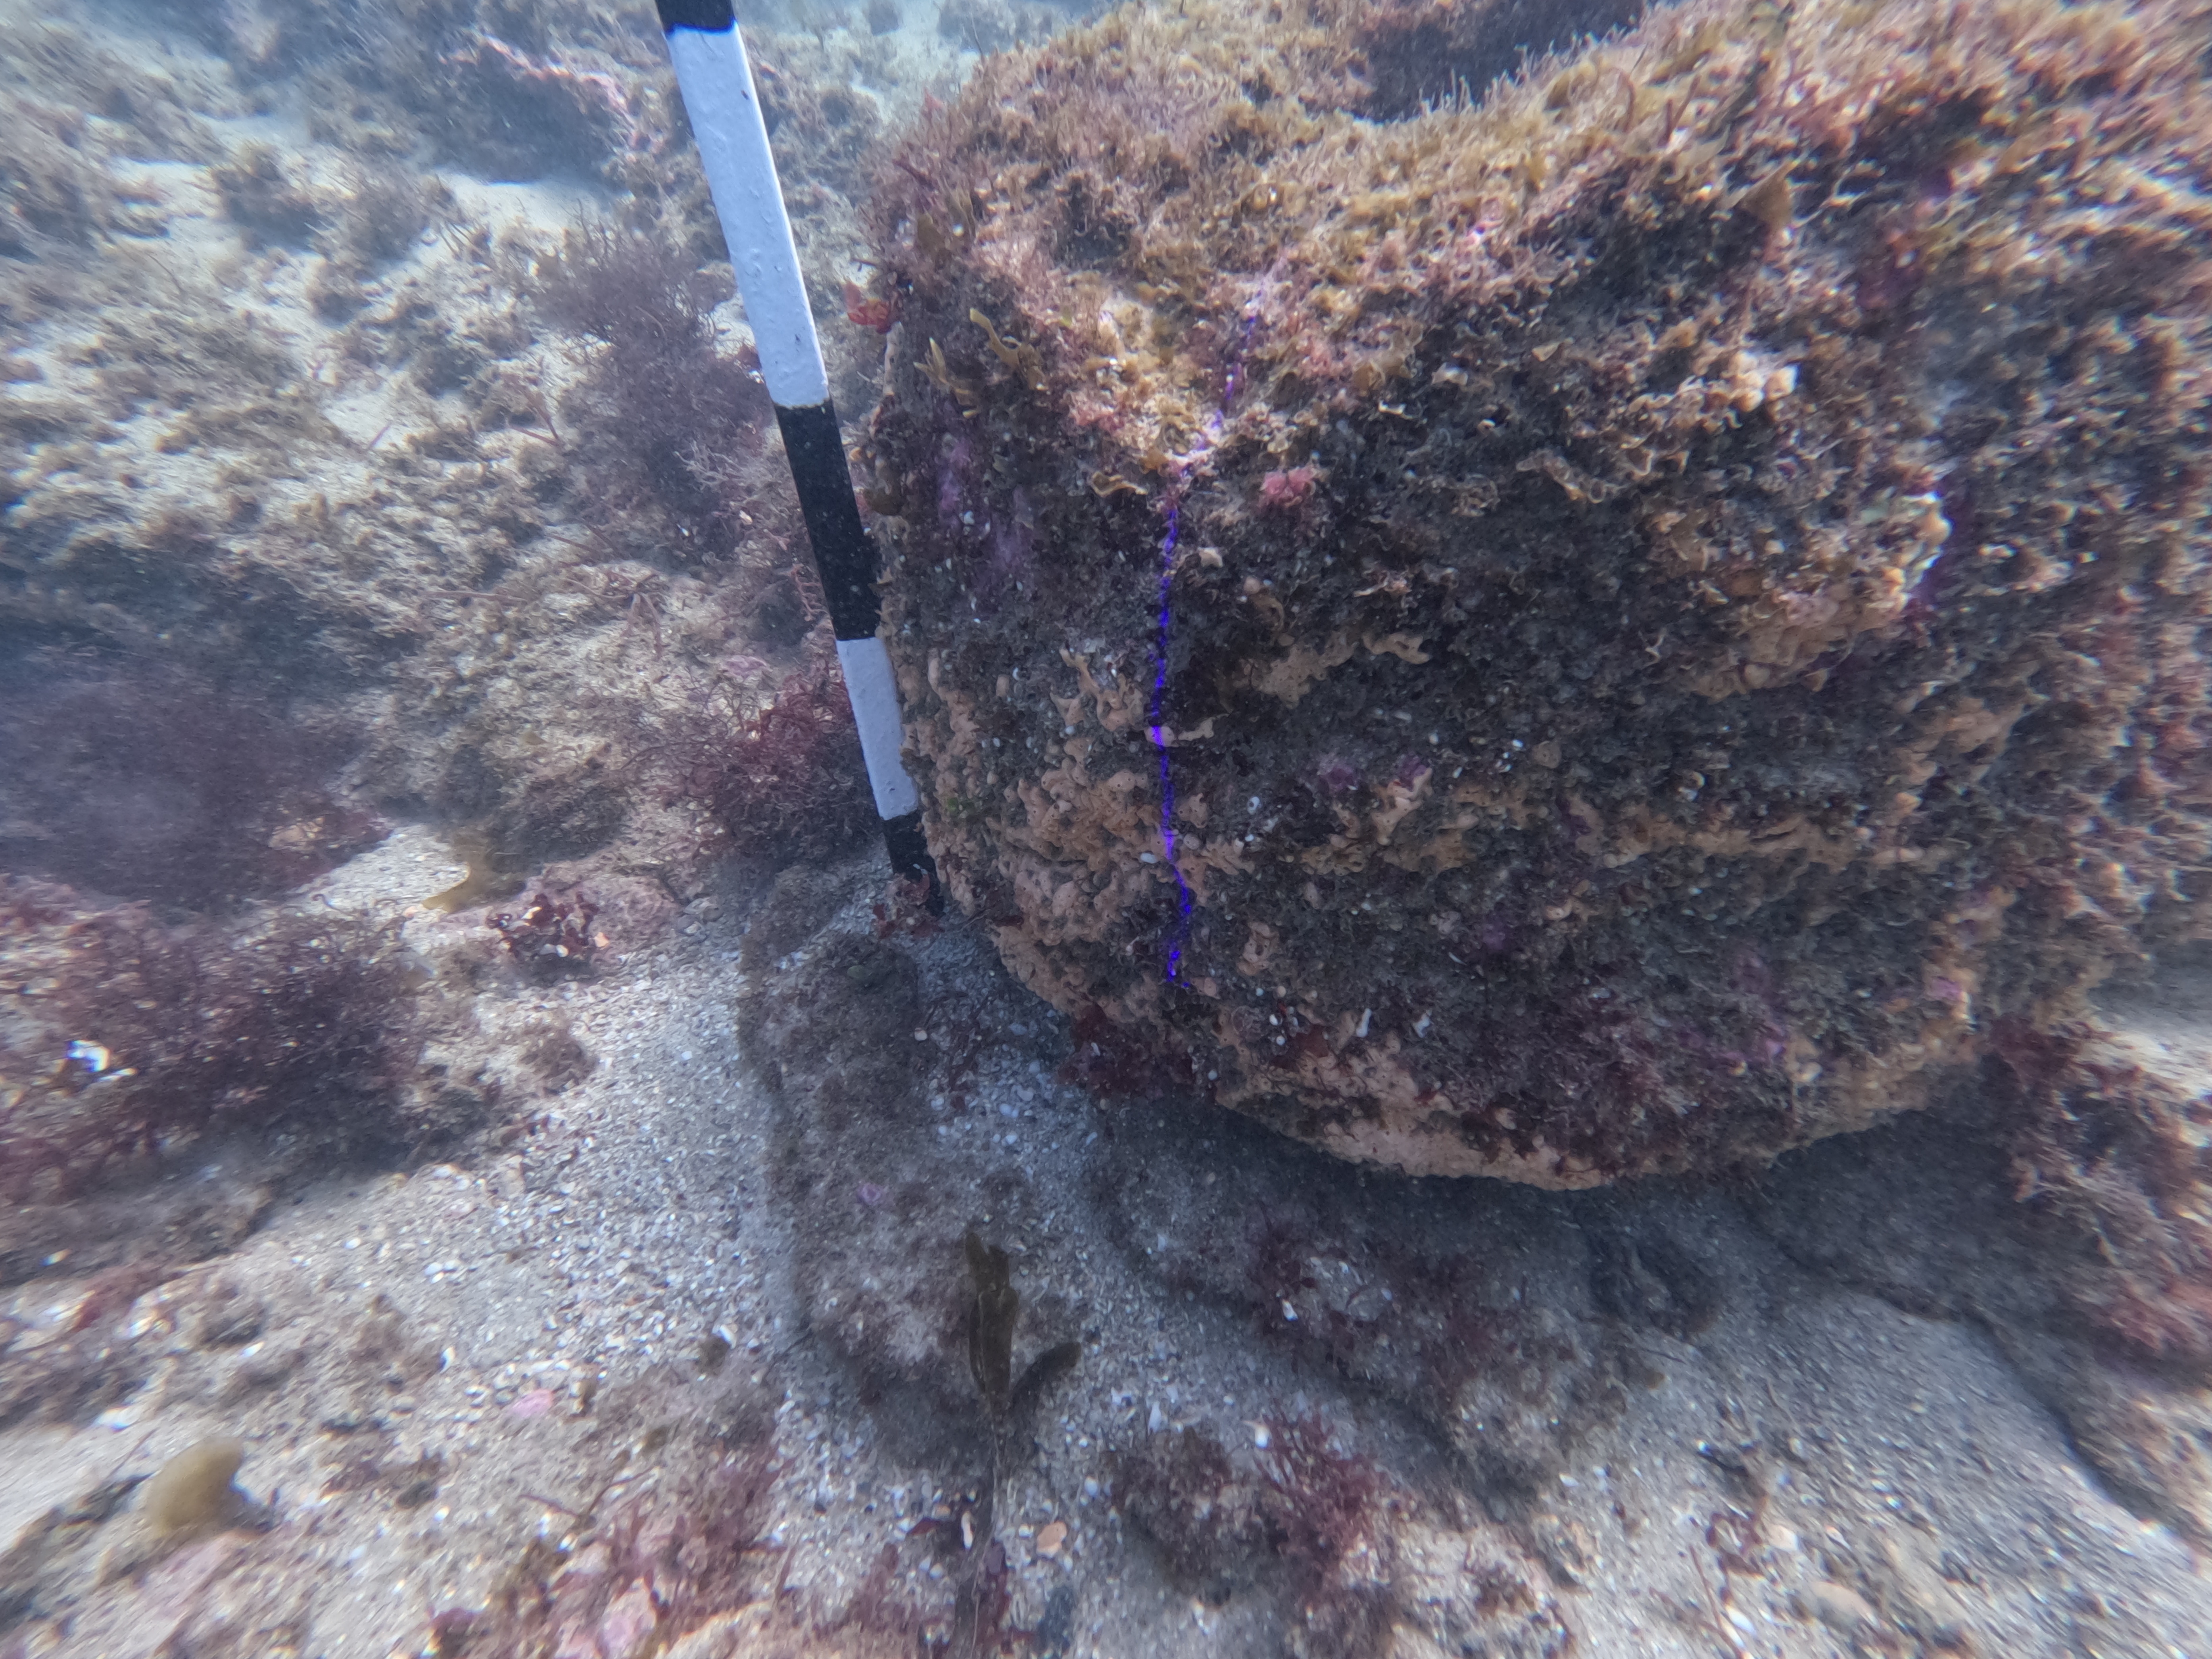

Supplement: Supplementary file 1806 [file G0028132.pdf › Ocean1/G0028132.pdf]

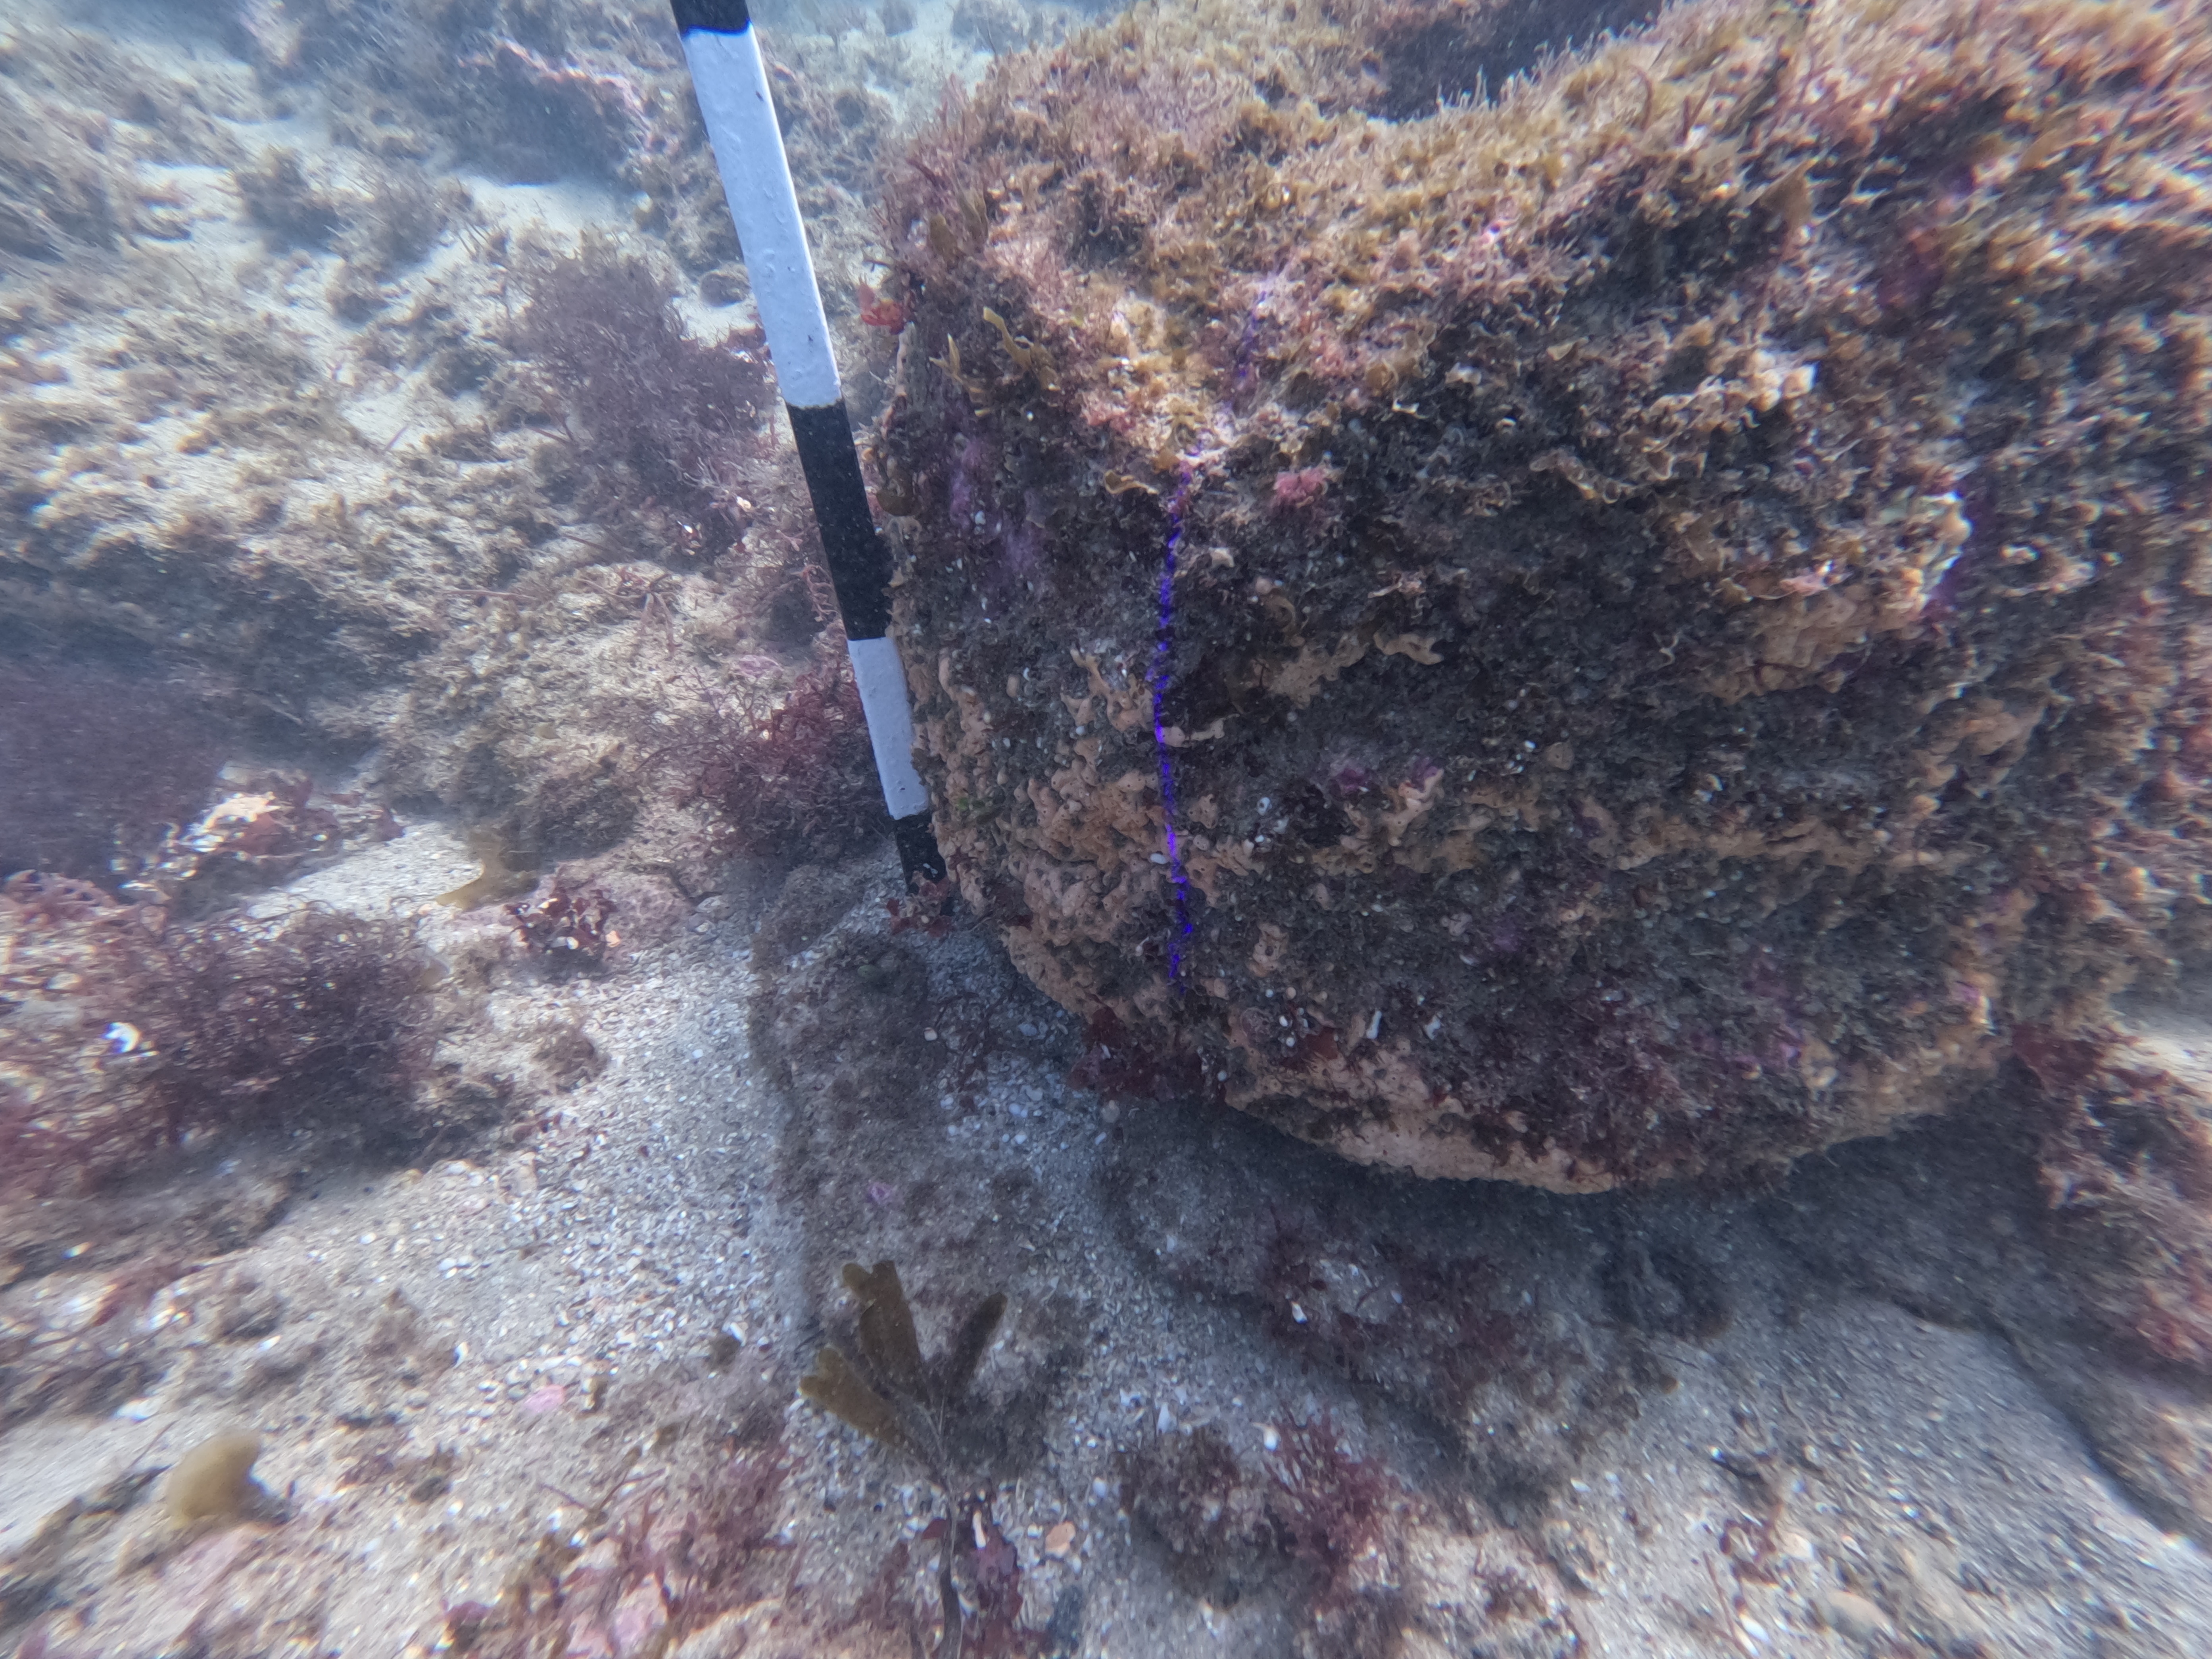

Supplement: Supplementary file 1807 [file G0028133.pdf › Ocean1/G0028133.pdf]

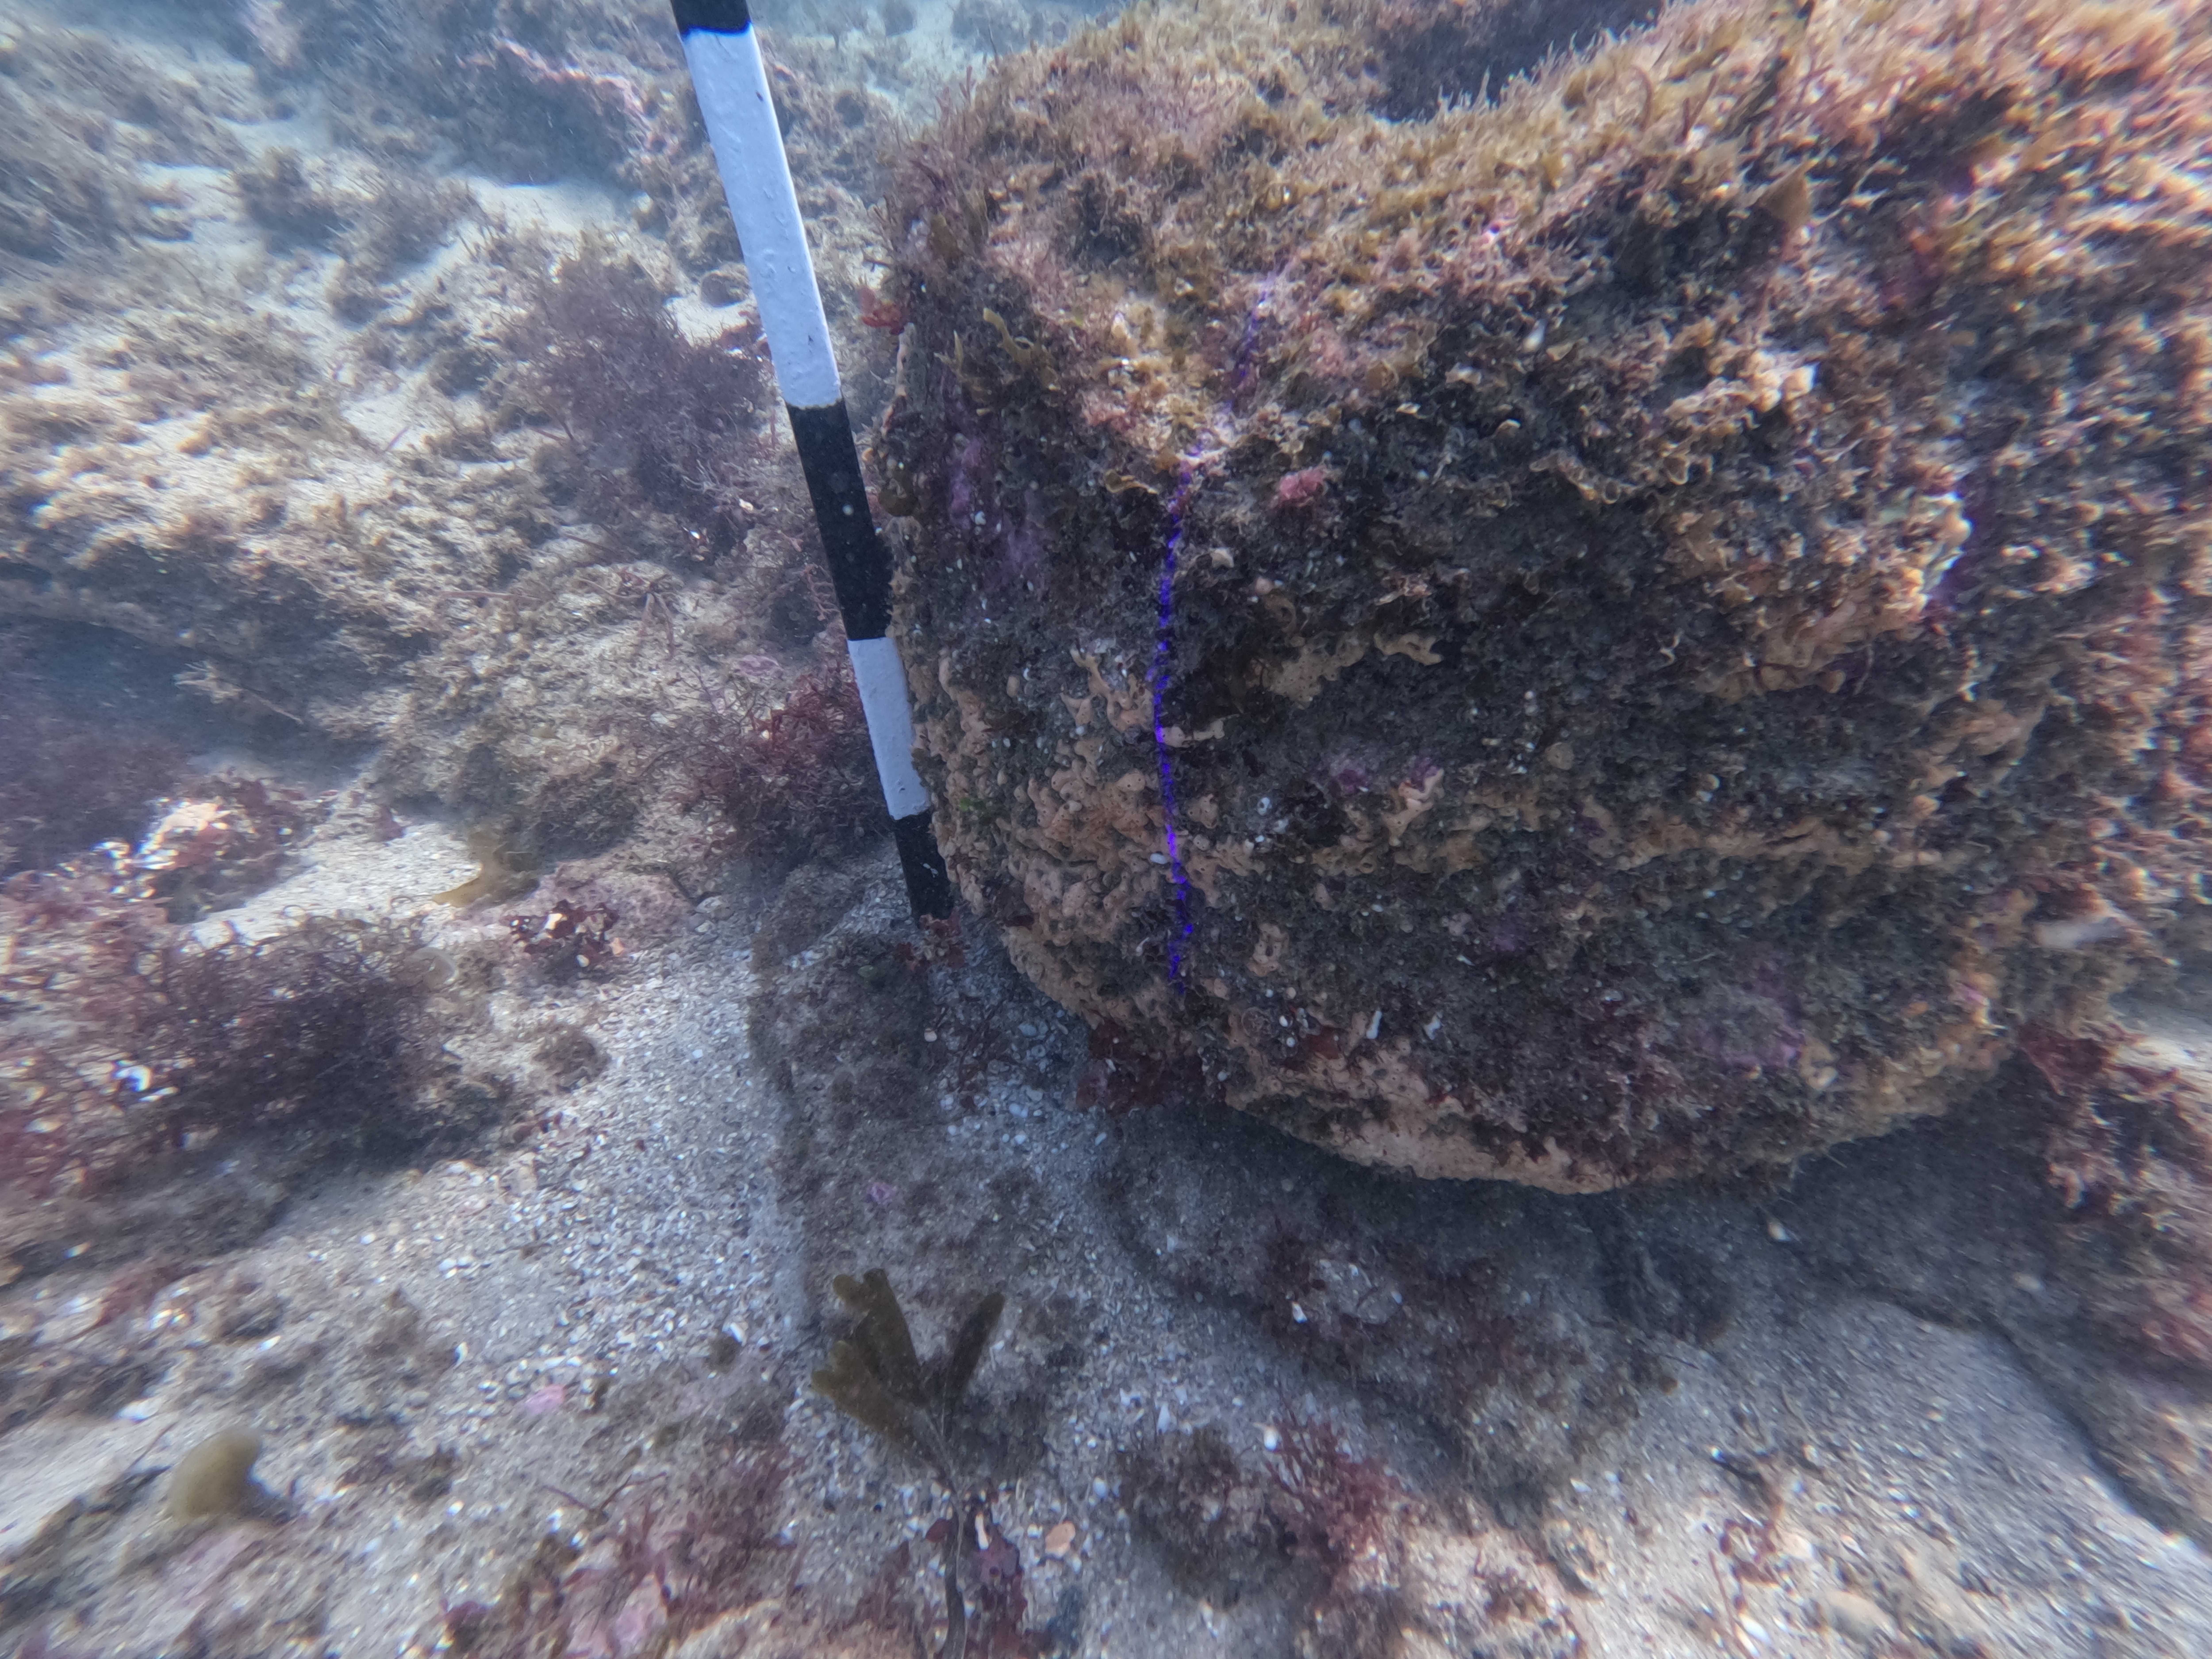

Supplement: Supplementary file 1808 [file G0028134.pdf › Ocean1/G0028134.pdf]

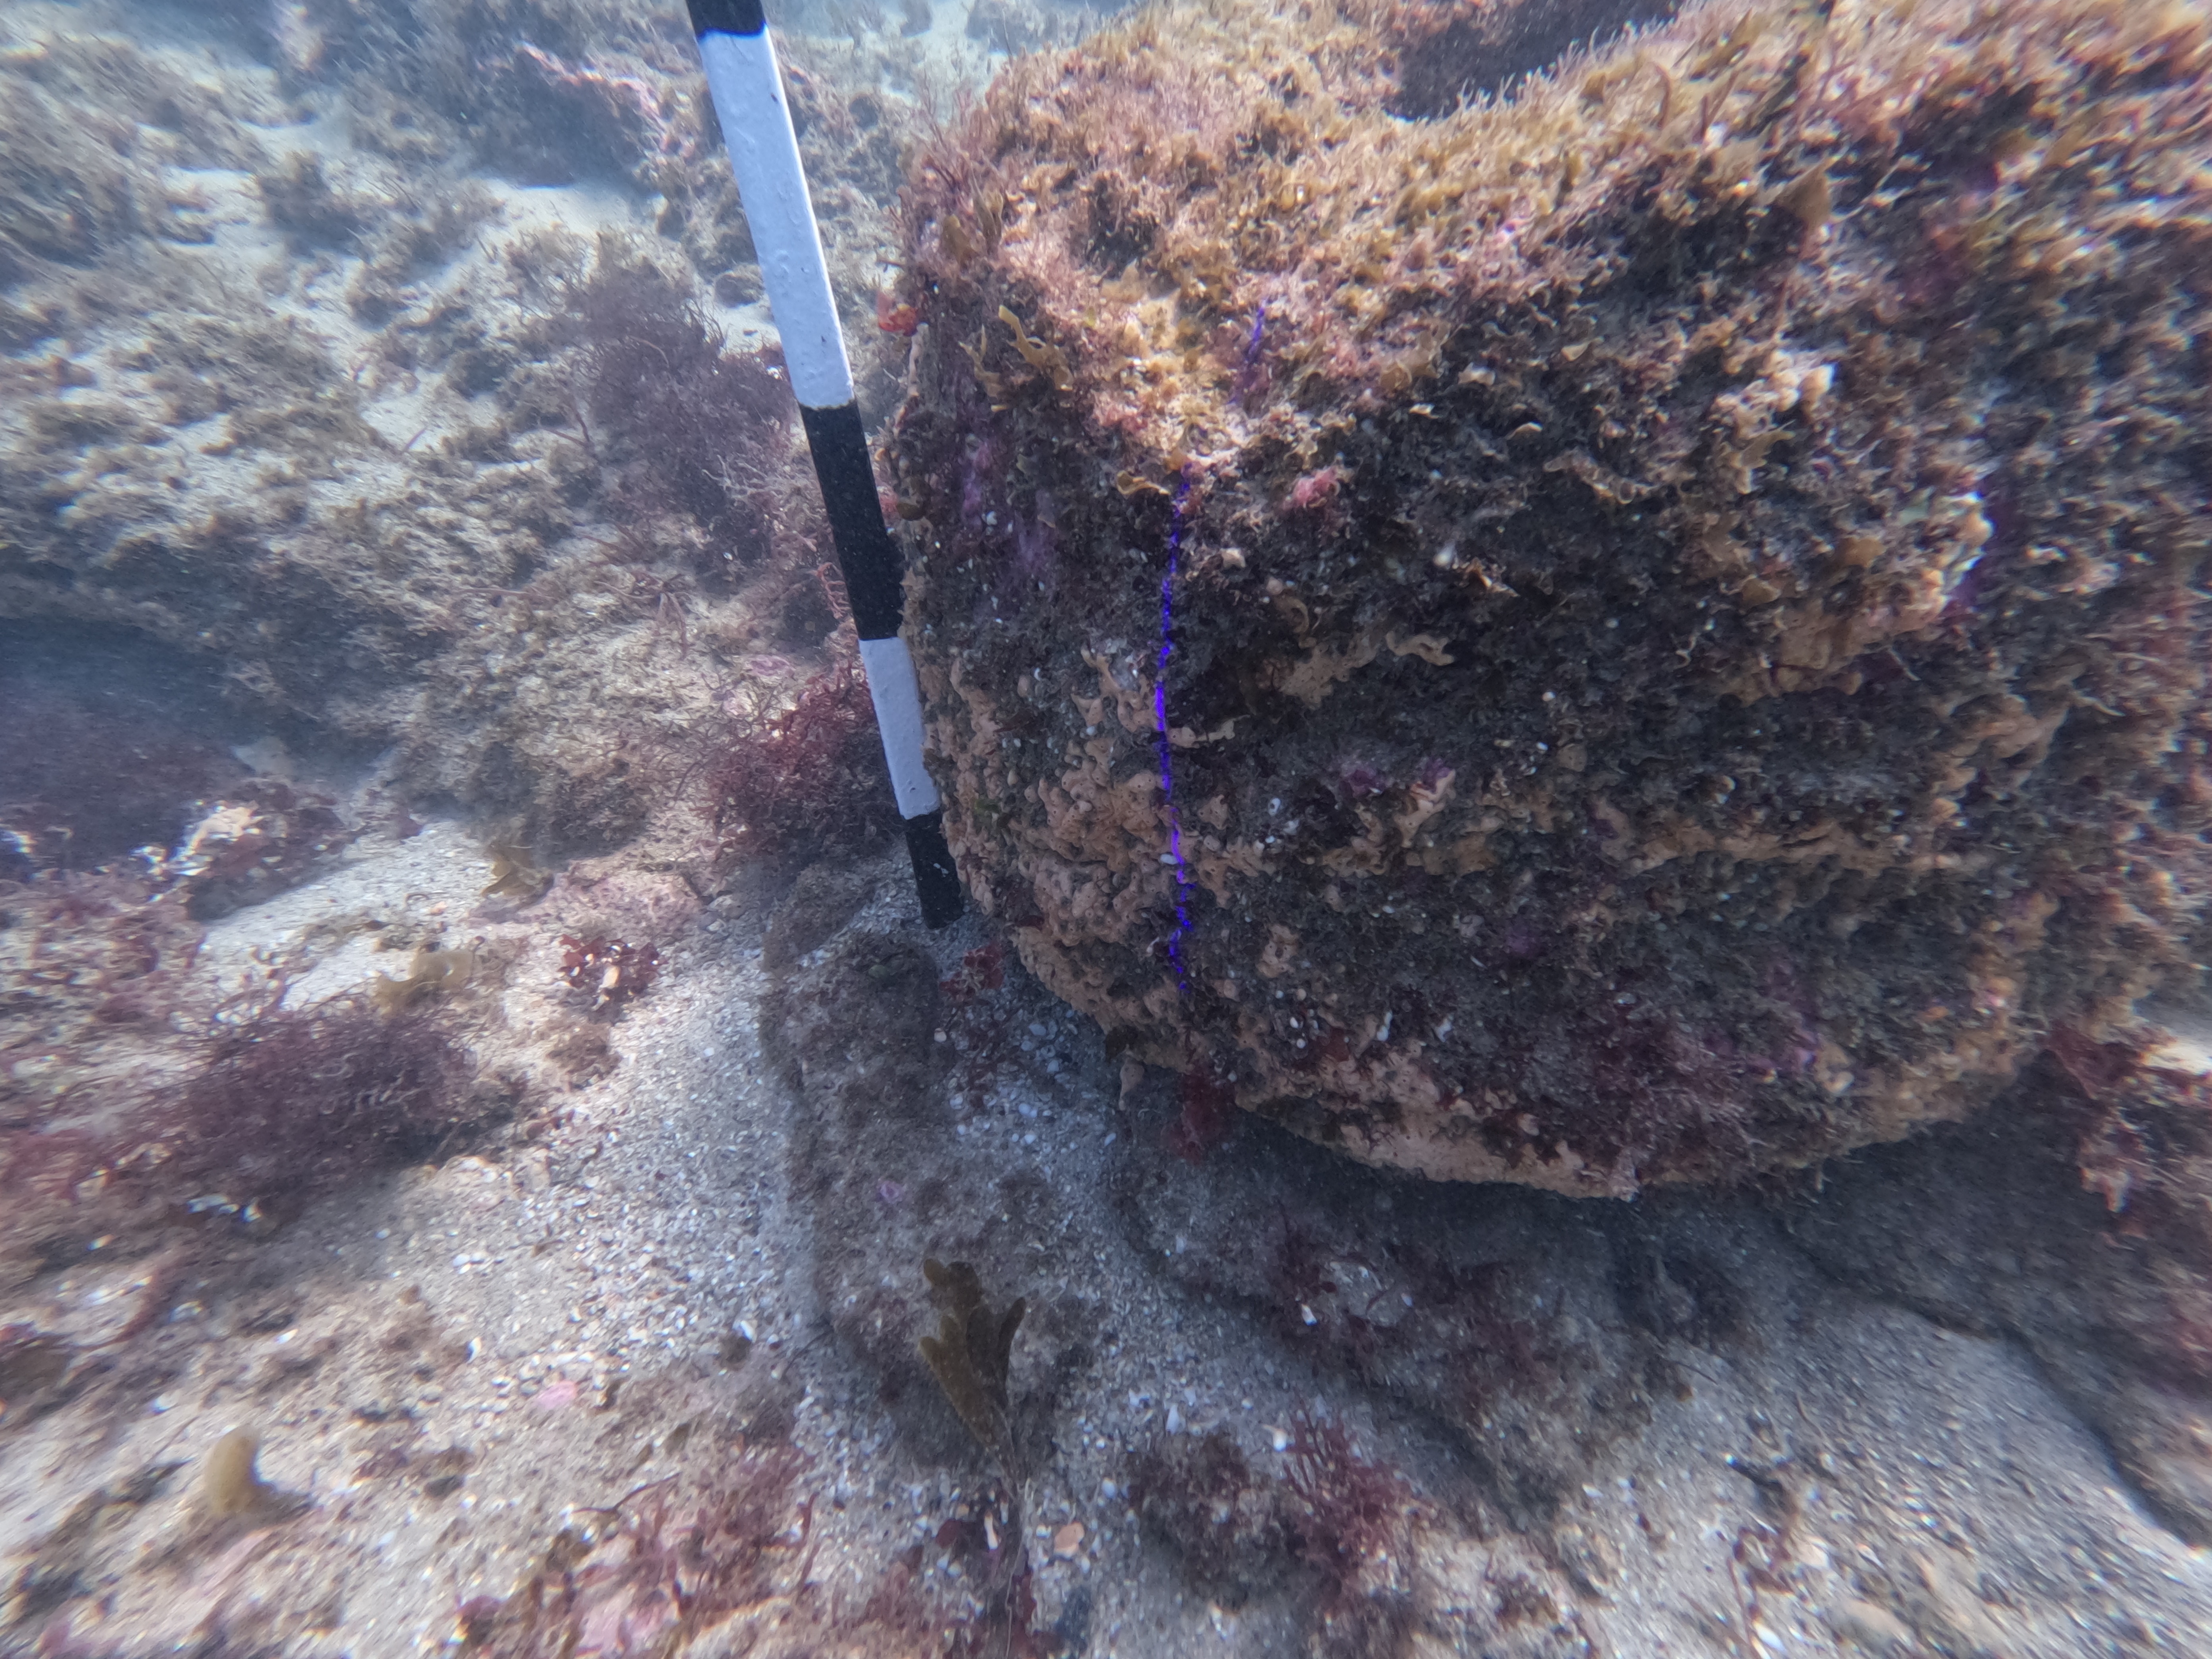

Supplement: Supplementary file 1809 [file G0028135.pdf › Ocean1/G0028135.pdf]

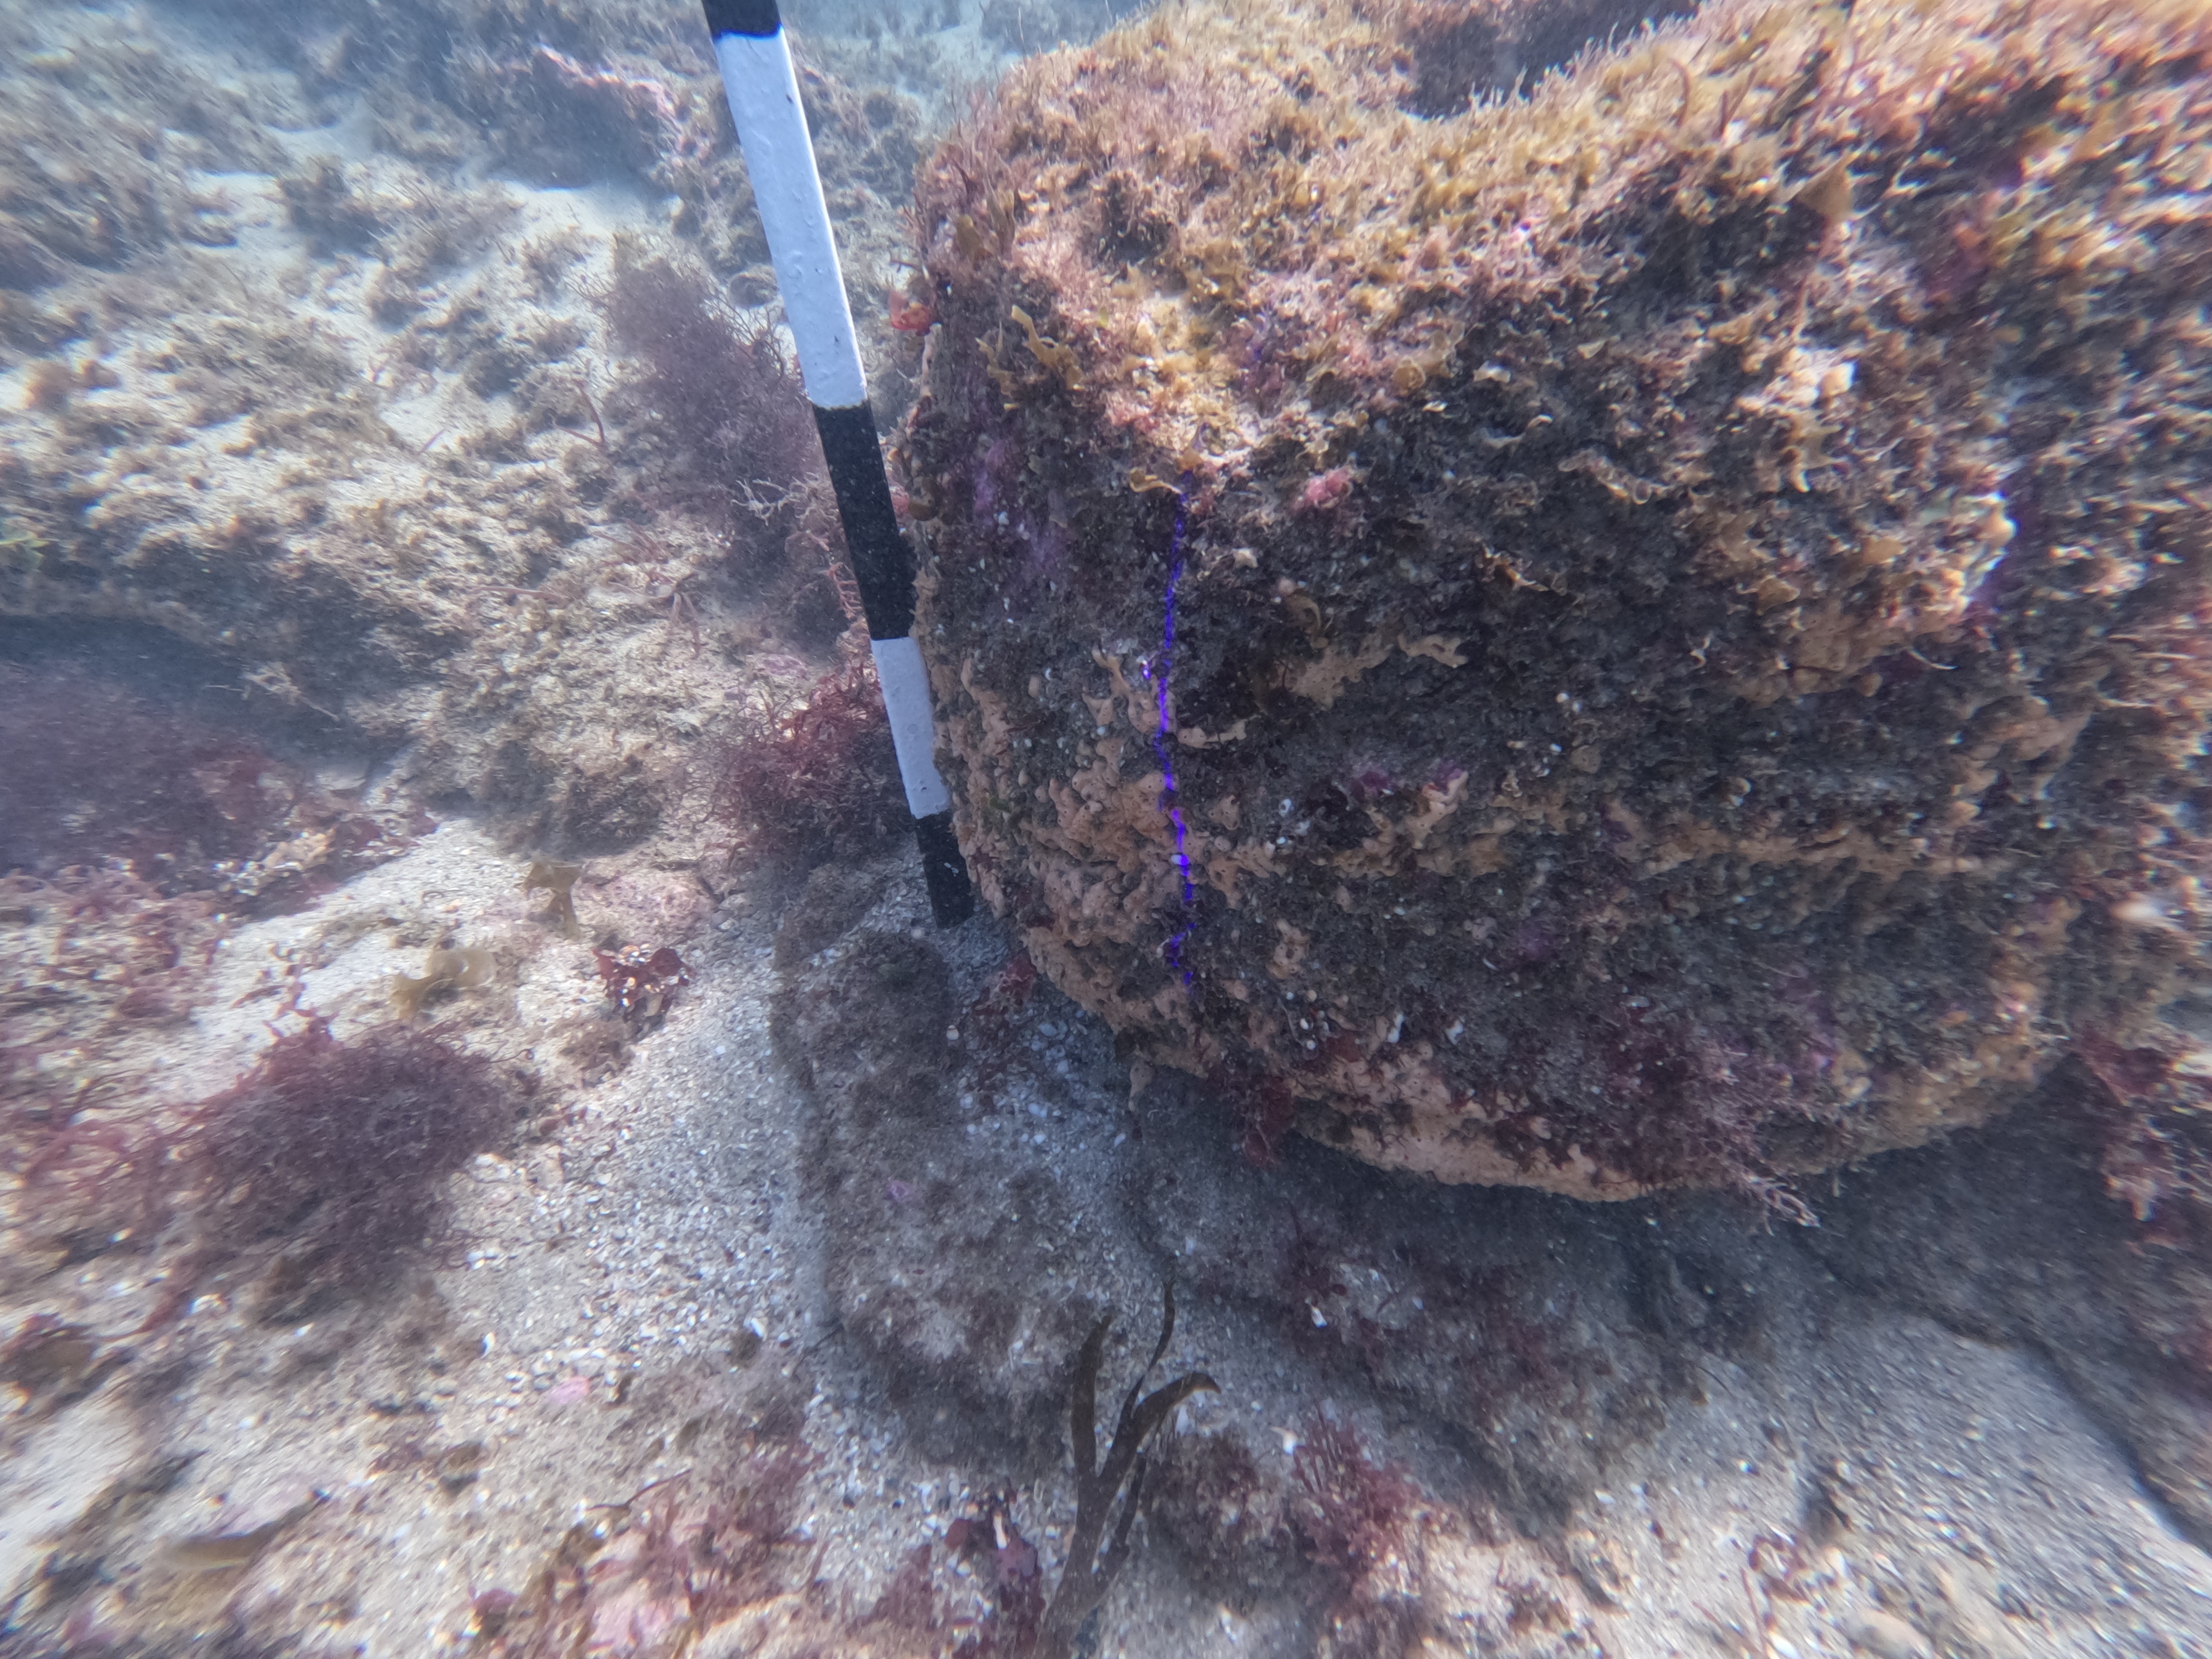

Supplement: Supplementary file 1810 [file G0028136.pdf › Ocean1/G0028136.pdf]

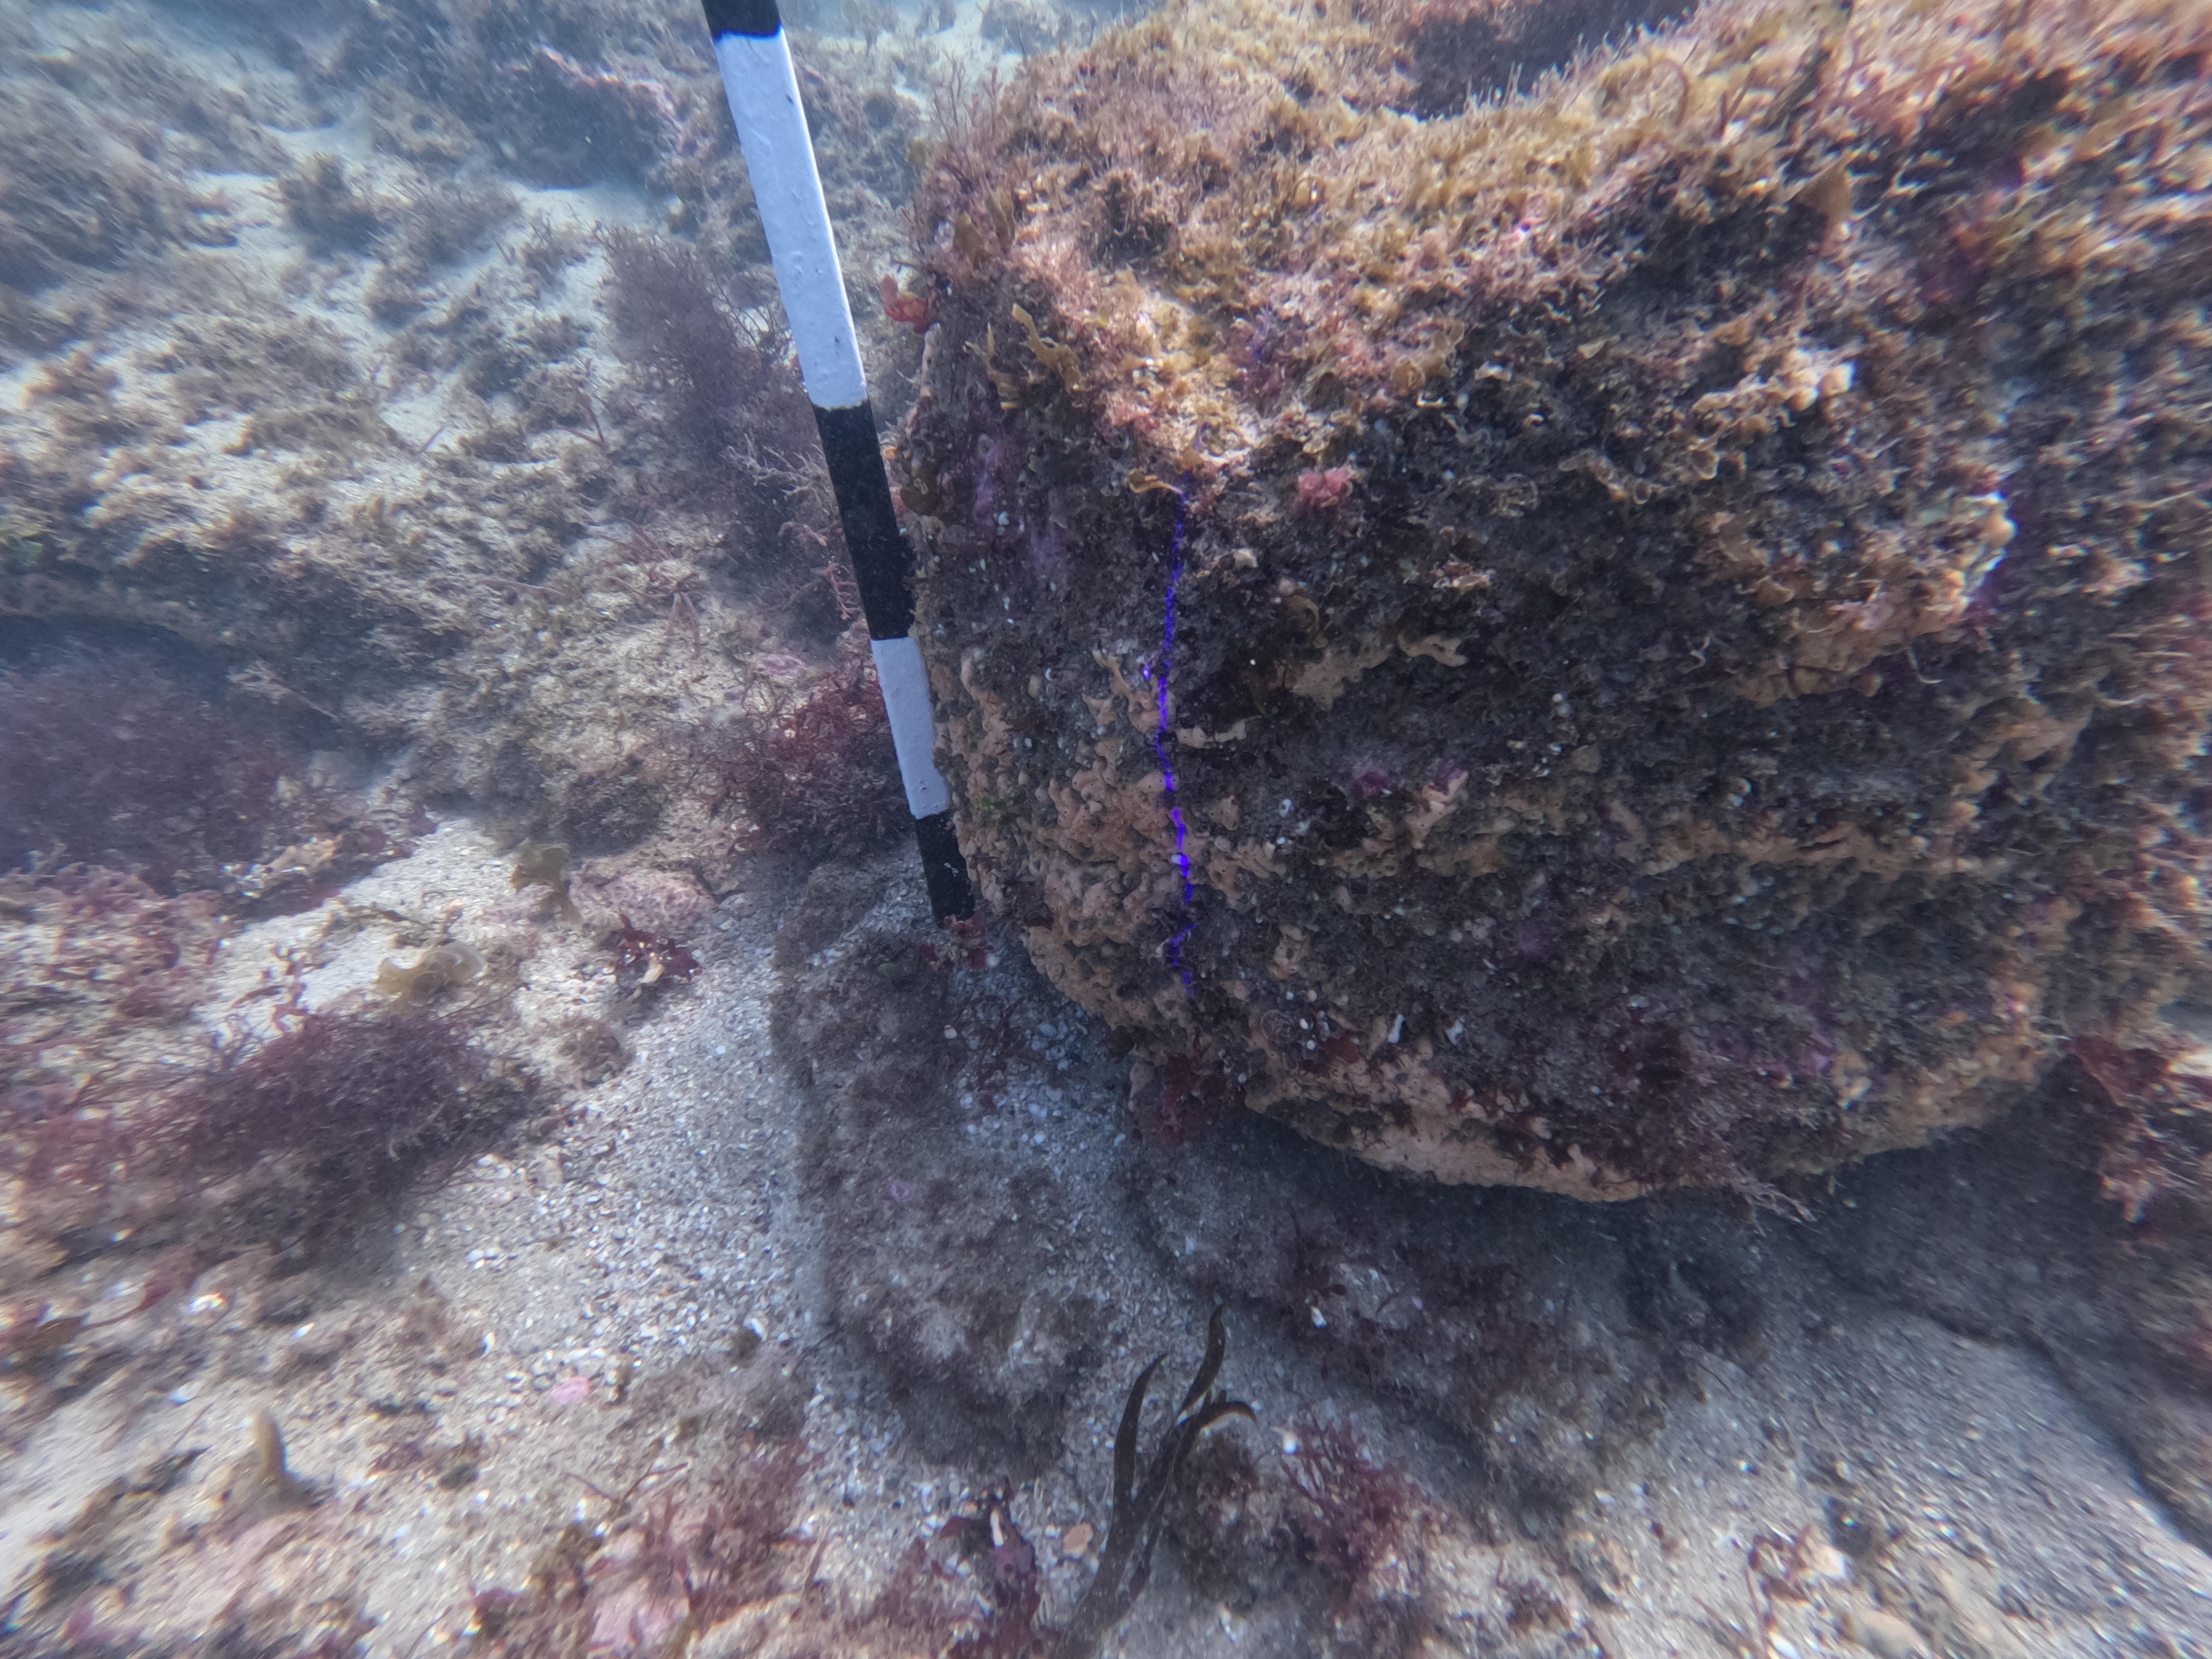

Supplement: Supplementary file 1811 [file G0028137.pdf › Ocean1/G0028137.pdf]

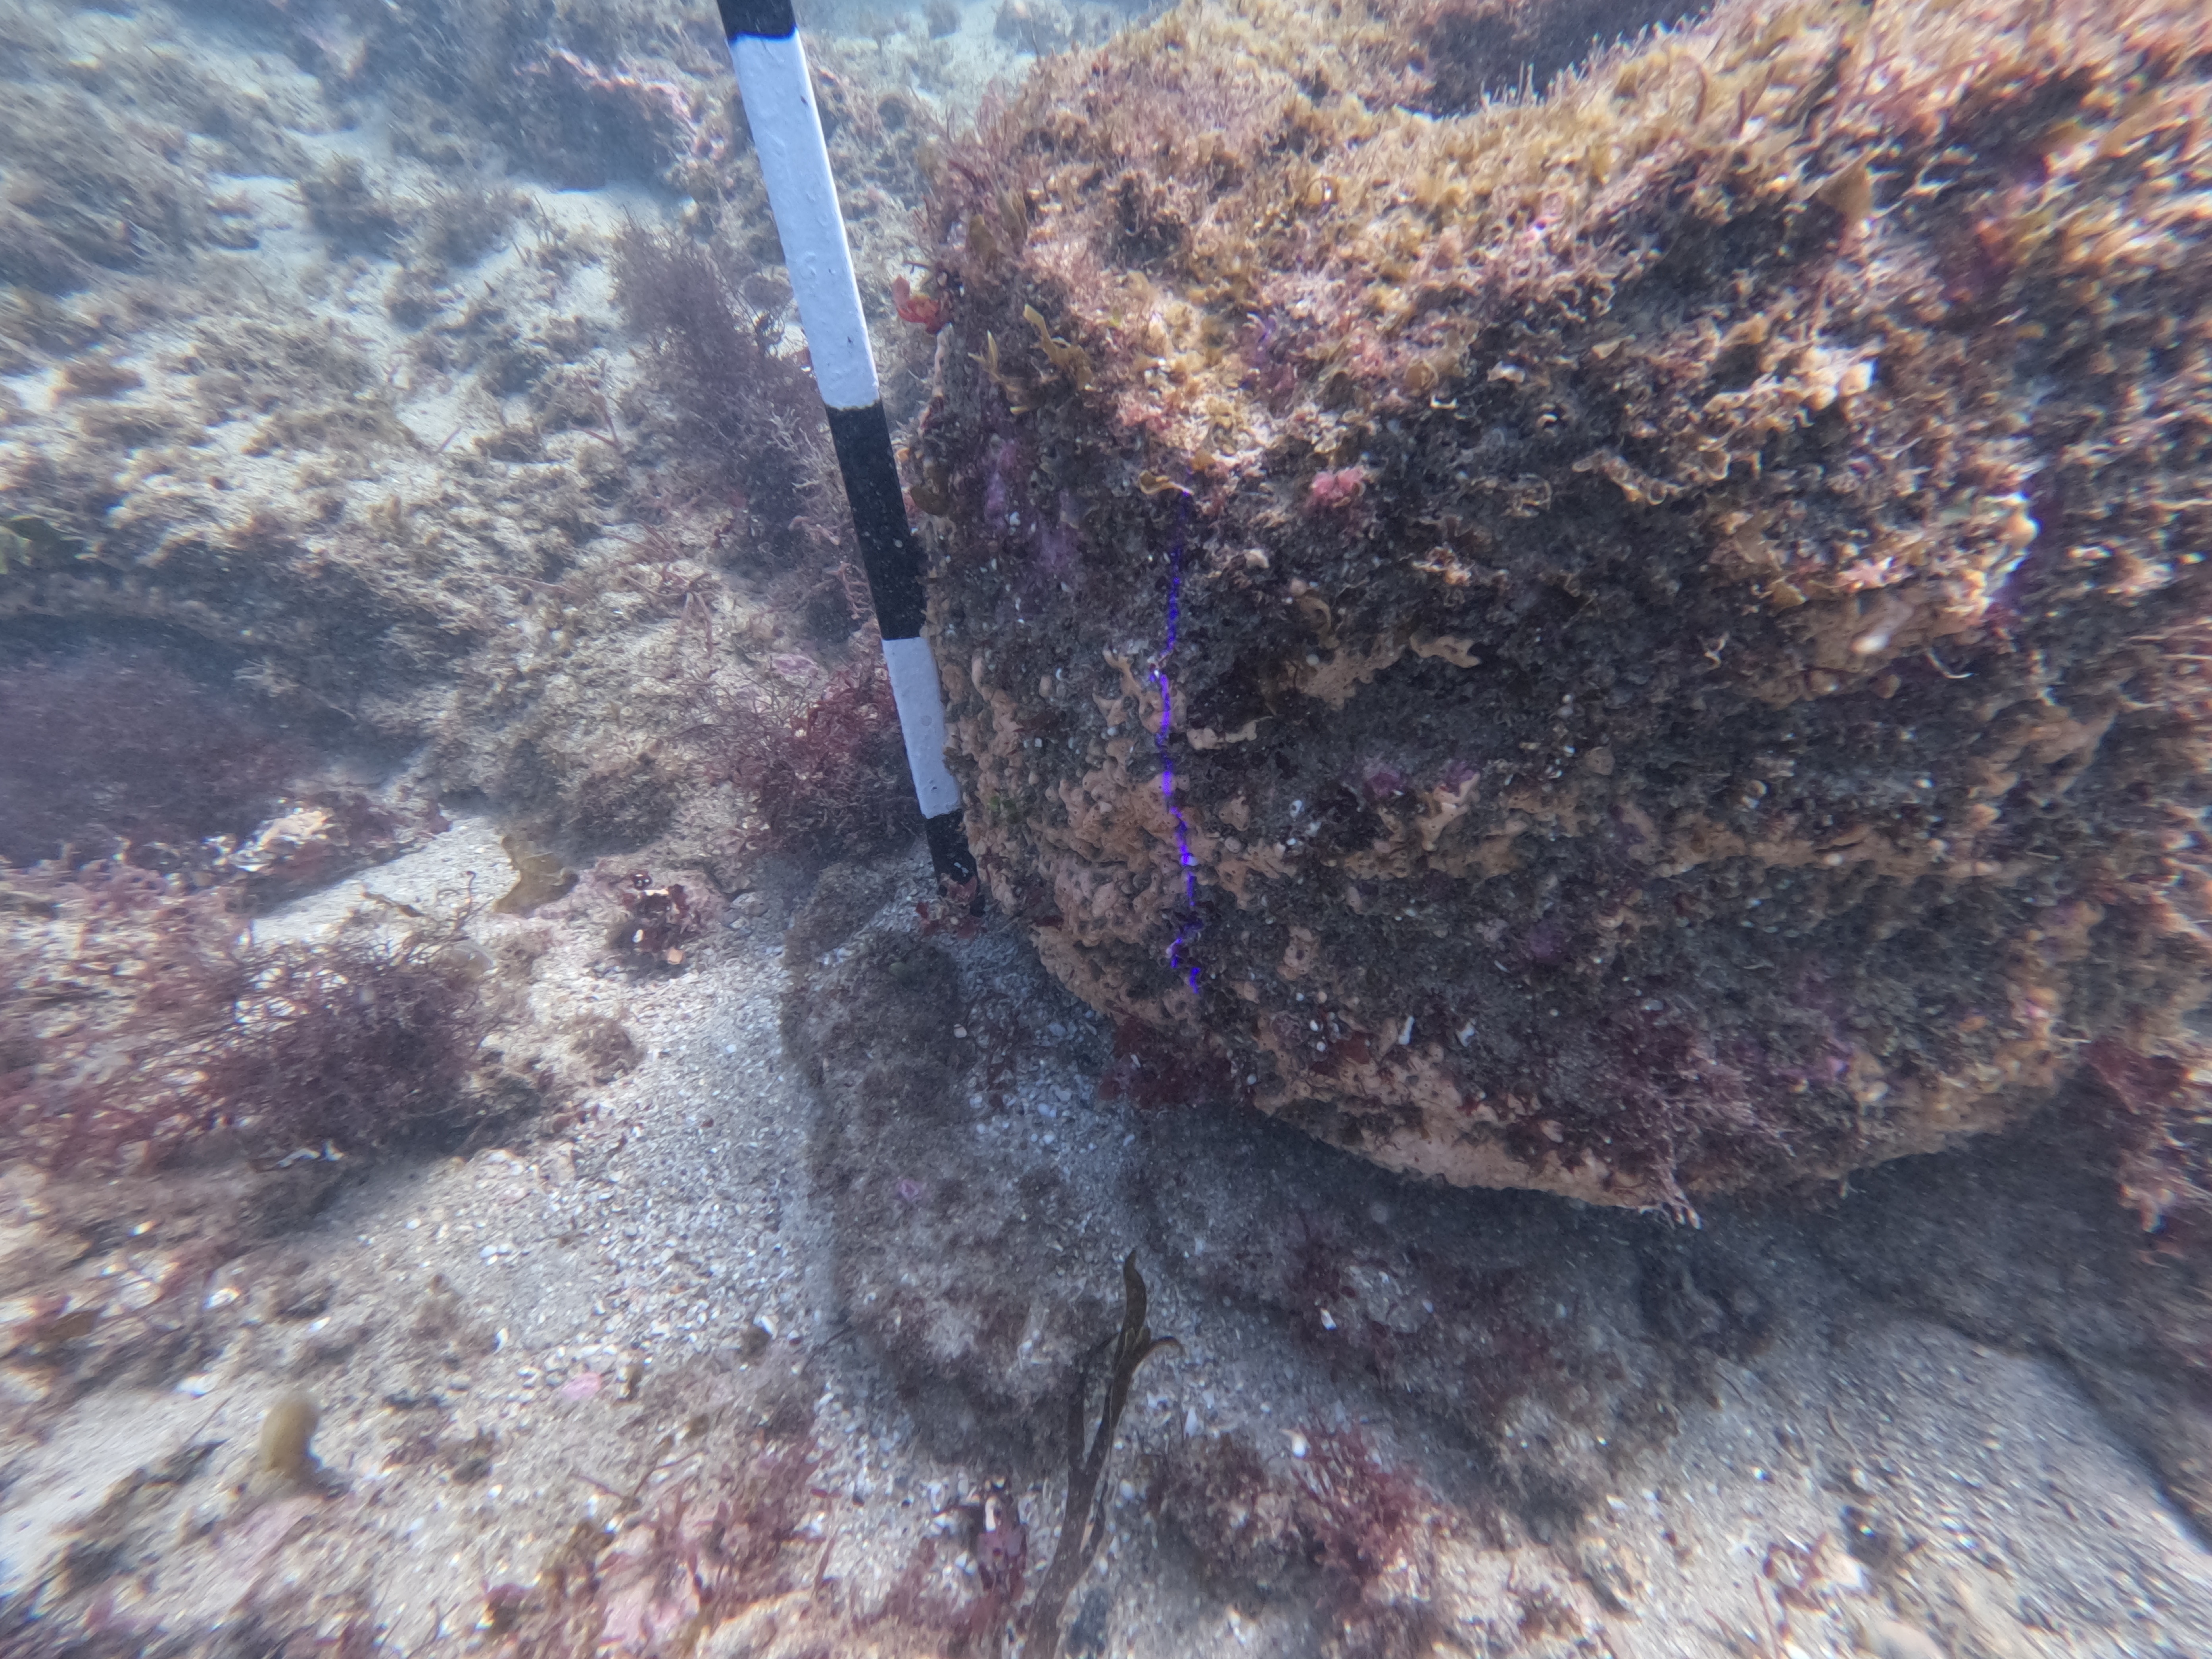

Supplement: Supplementary file 1812 [file G0028138.pdf › Ocean1/G0028138.pdf]

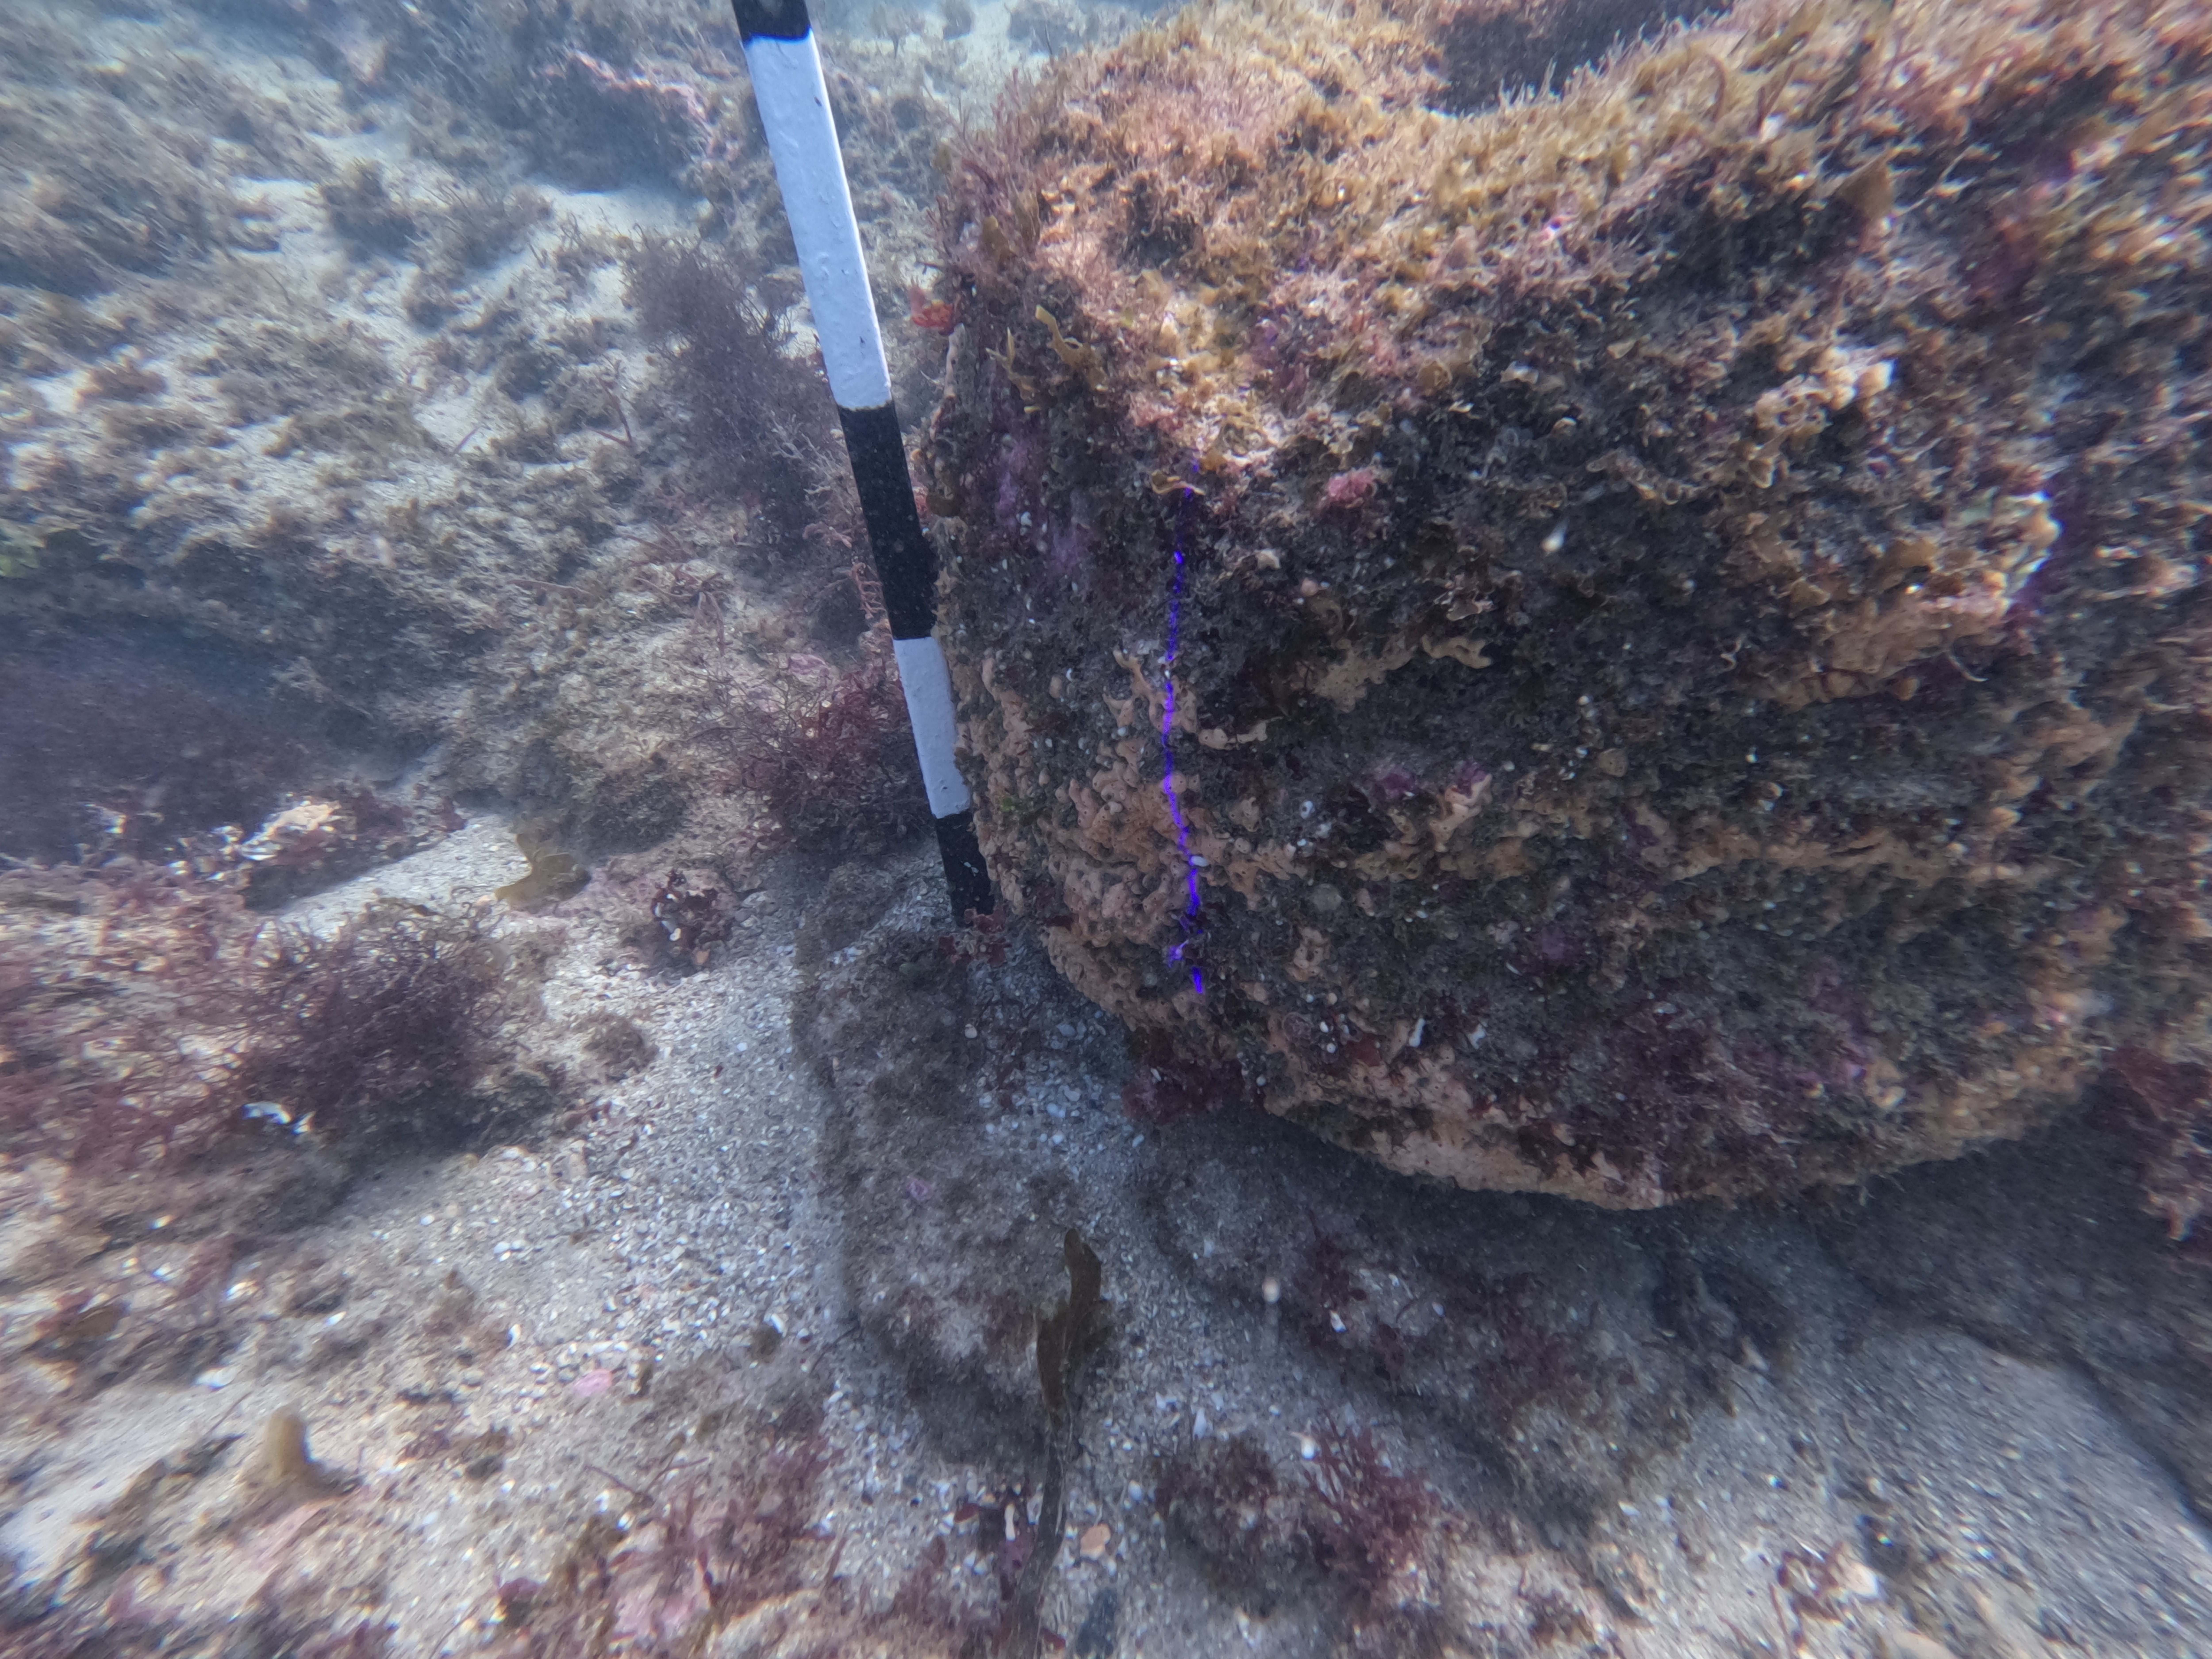

Supplement: Supplementary file 1813 [file G0028139.pdf › Ocean1/G0028139.pdf]

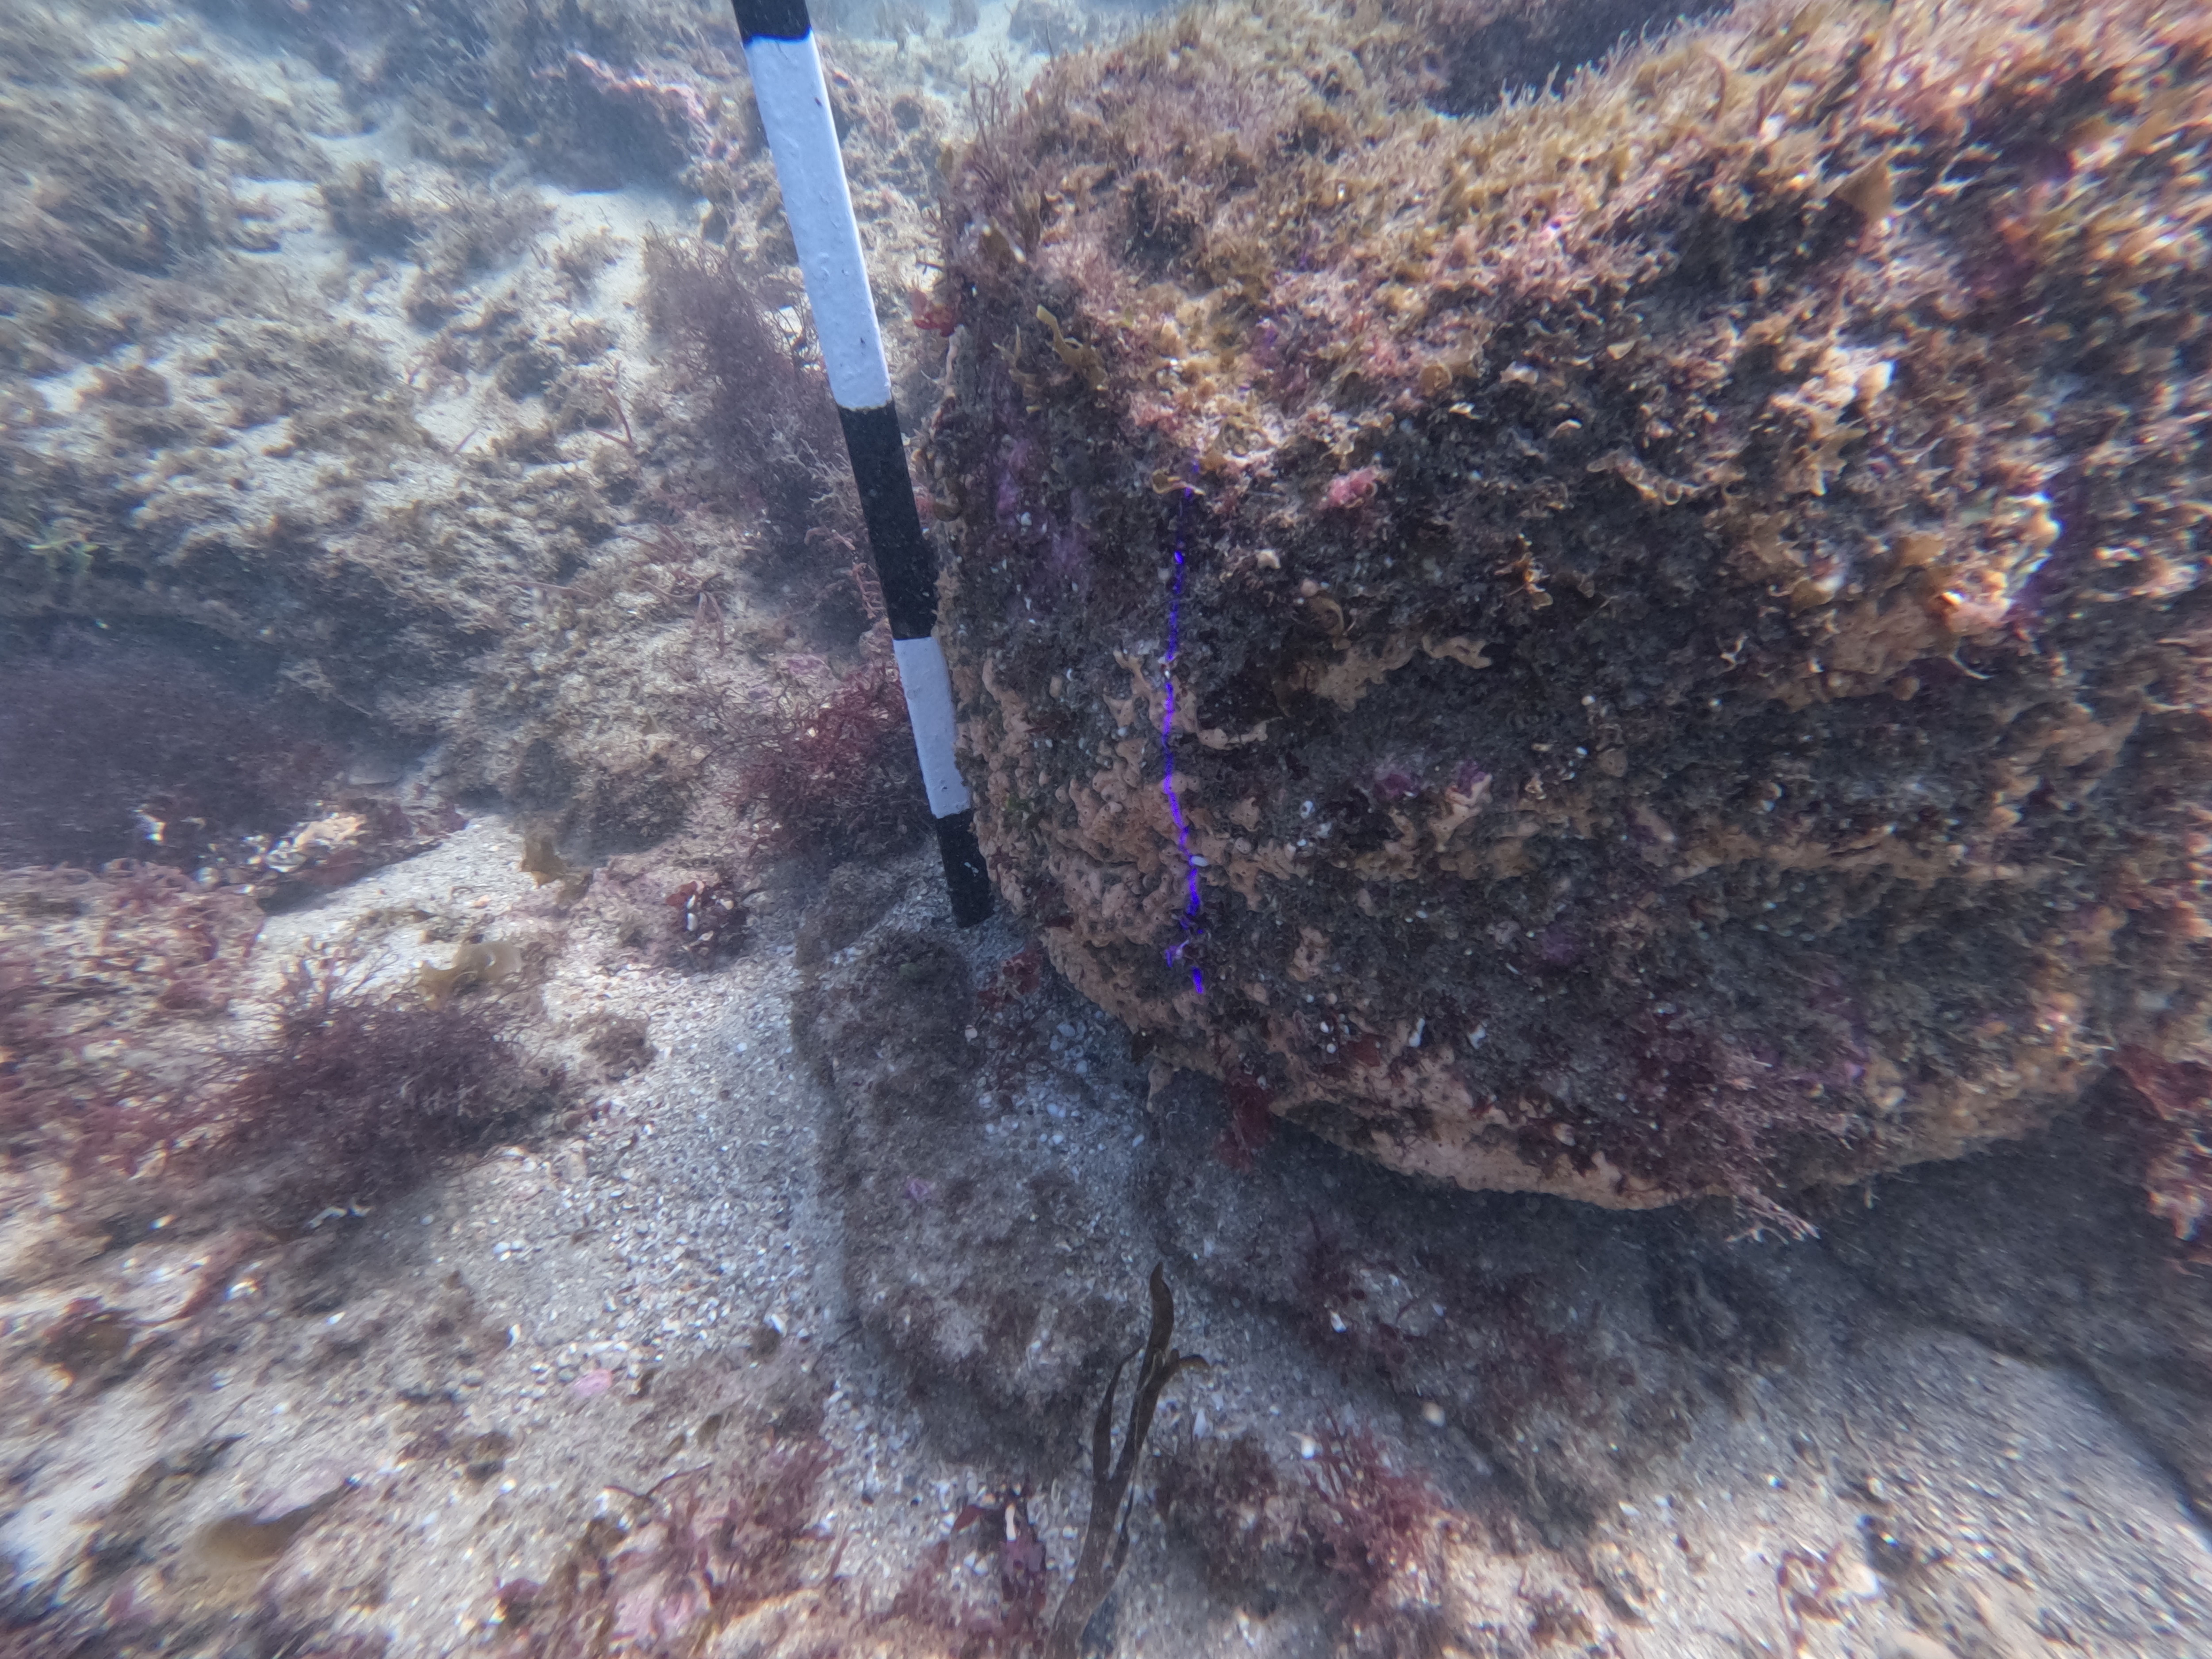

Supplement: Supplementary file 1814 [file G0028140.pdf › Ocean1/G0028140.pdf]

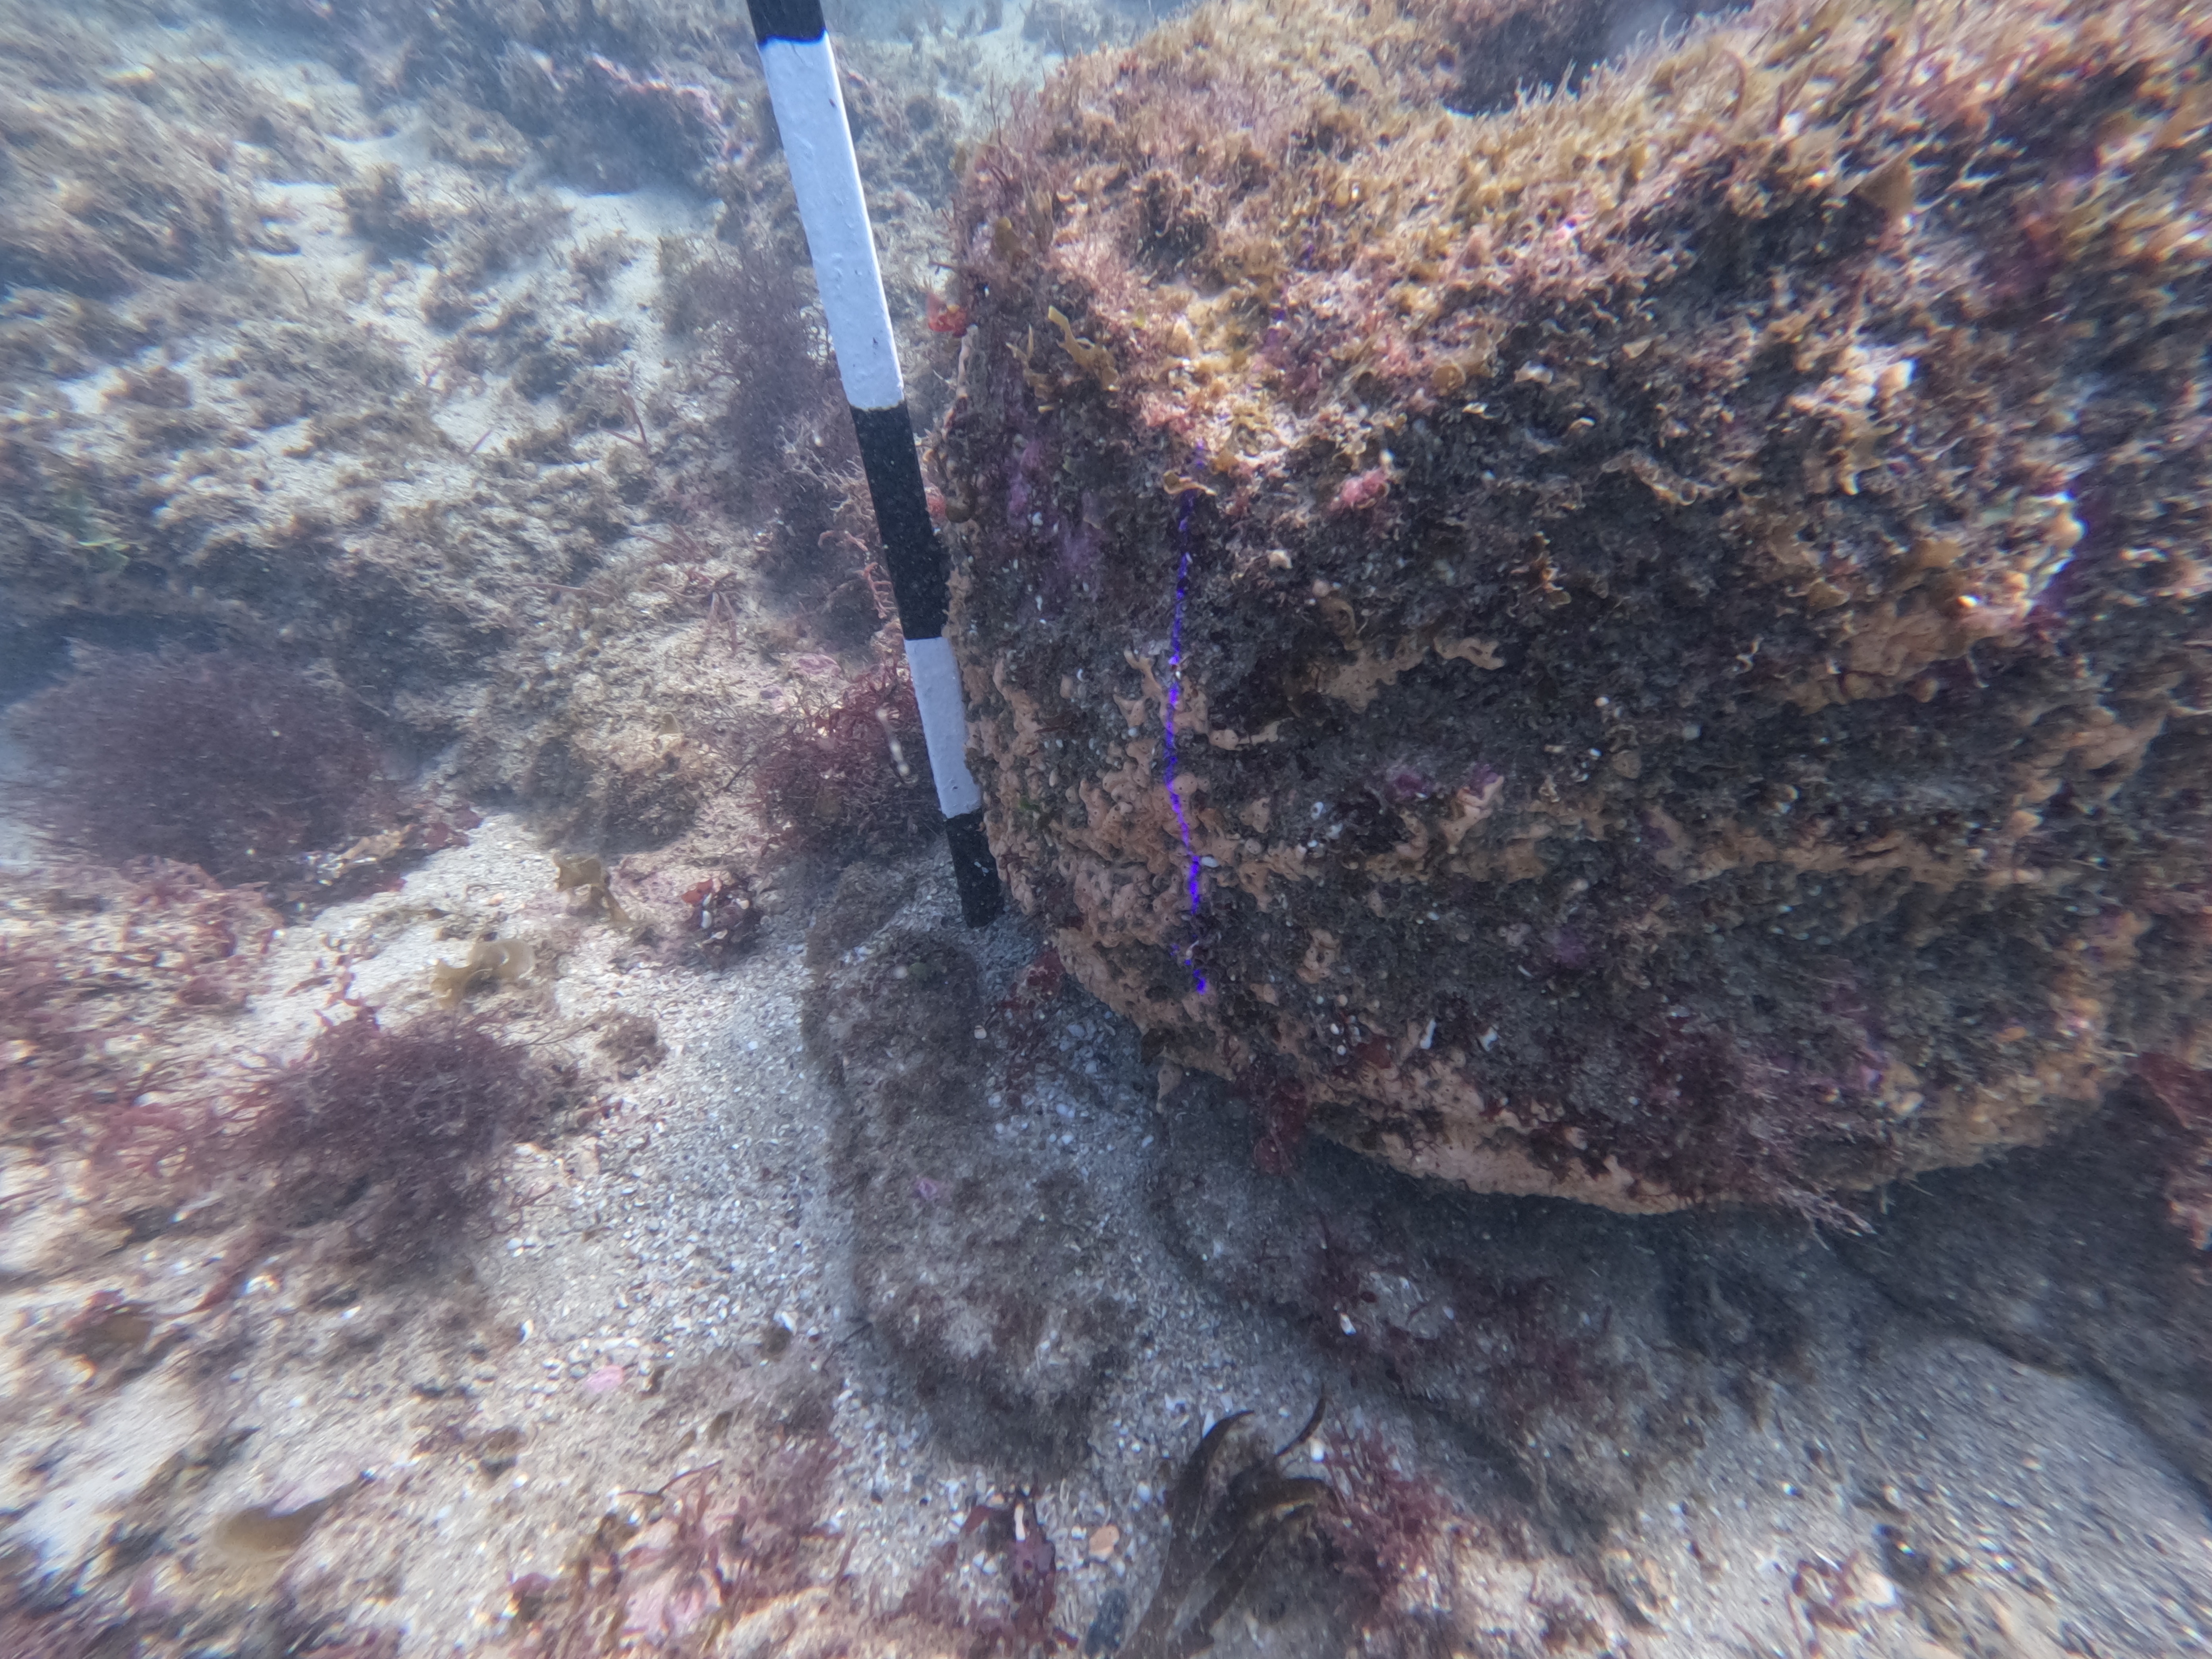

Supplement: Supplementary file 1815 [file G0028141.pdf › Ocean1/G0028141.pdf]

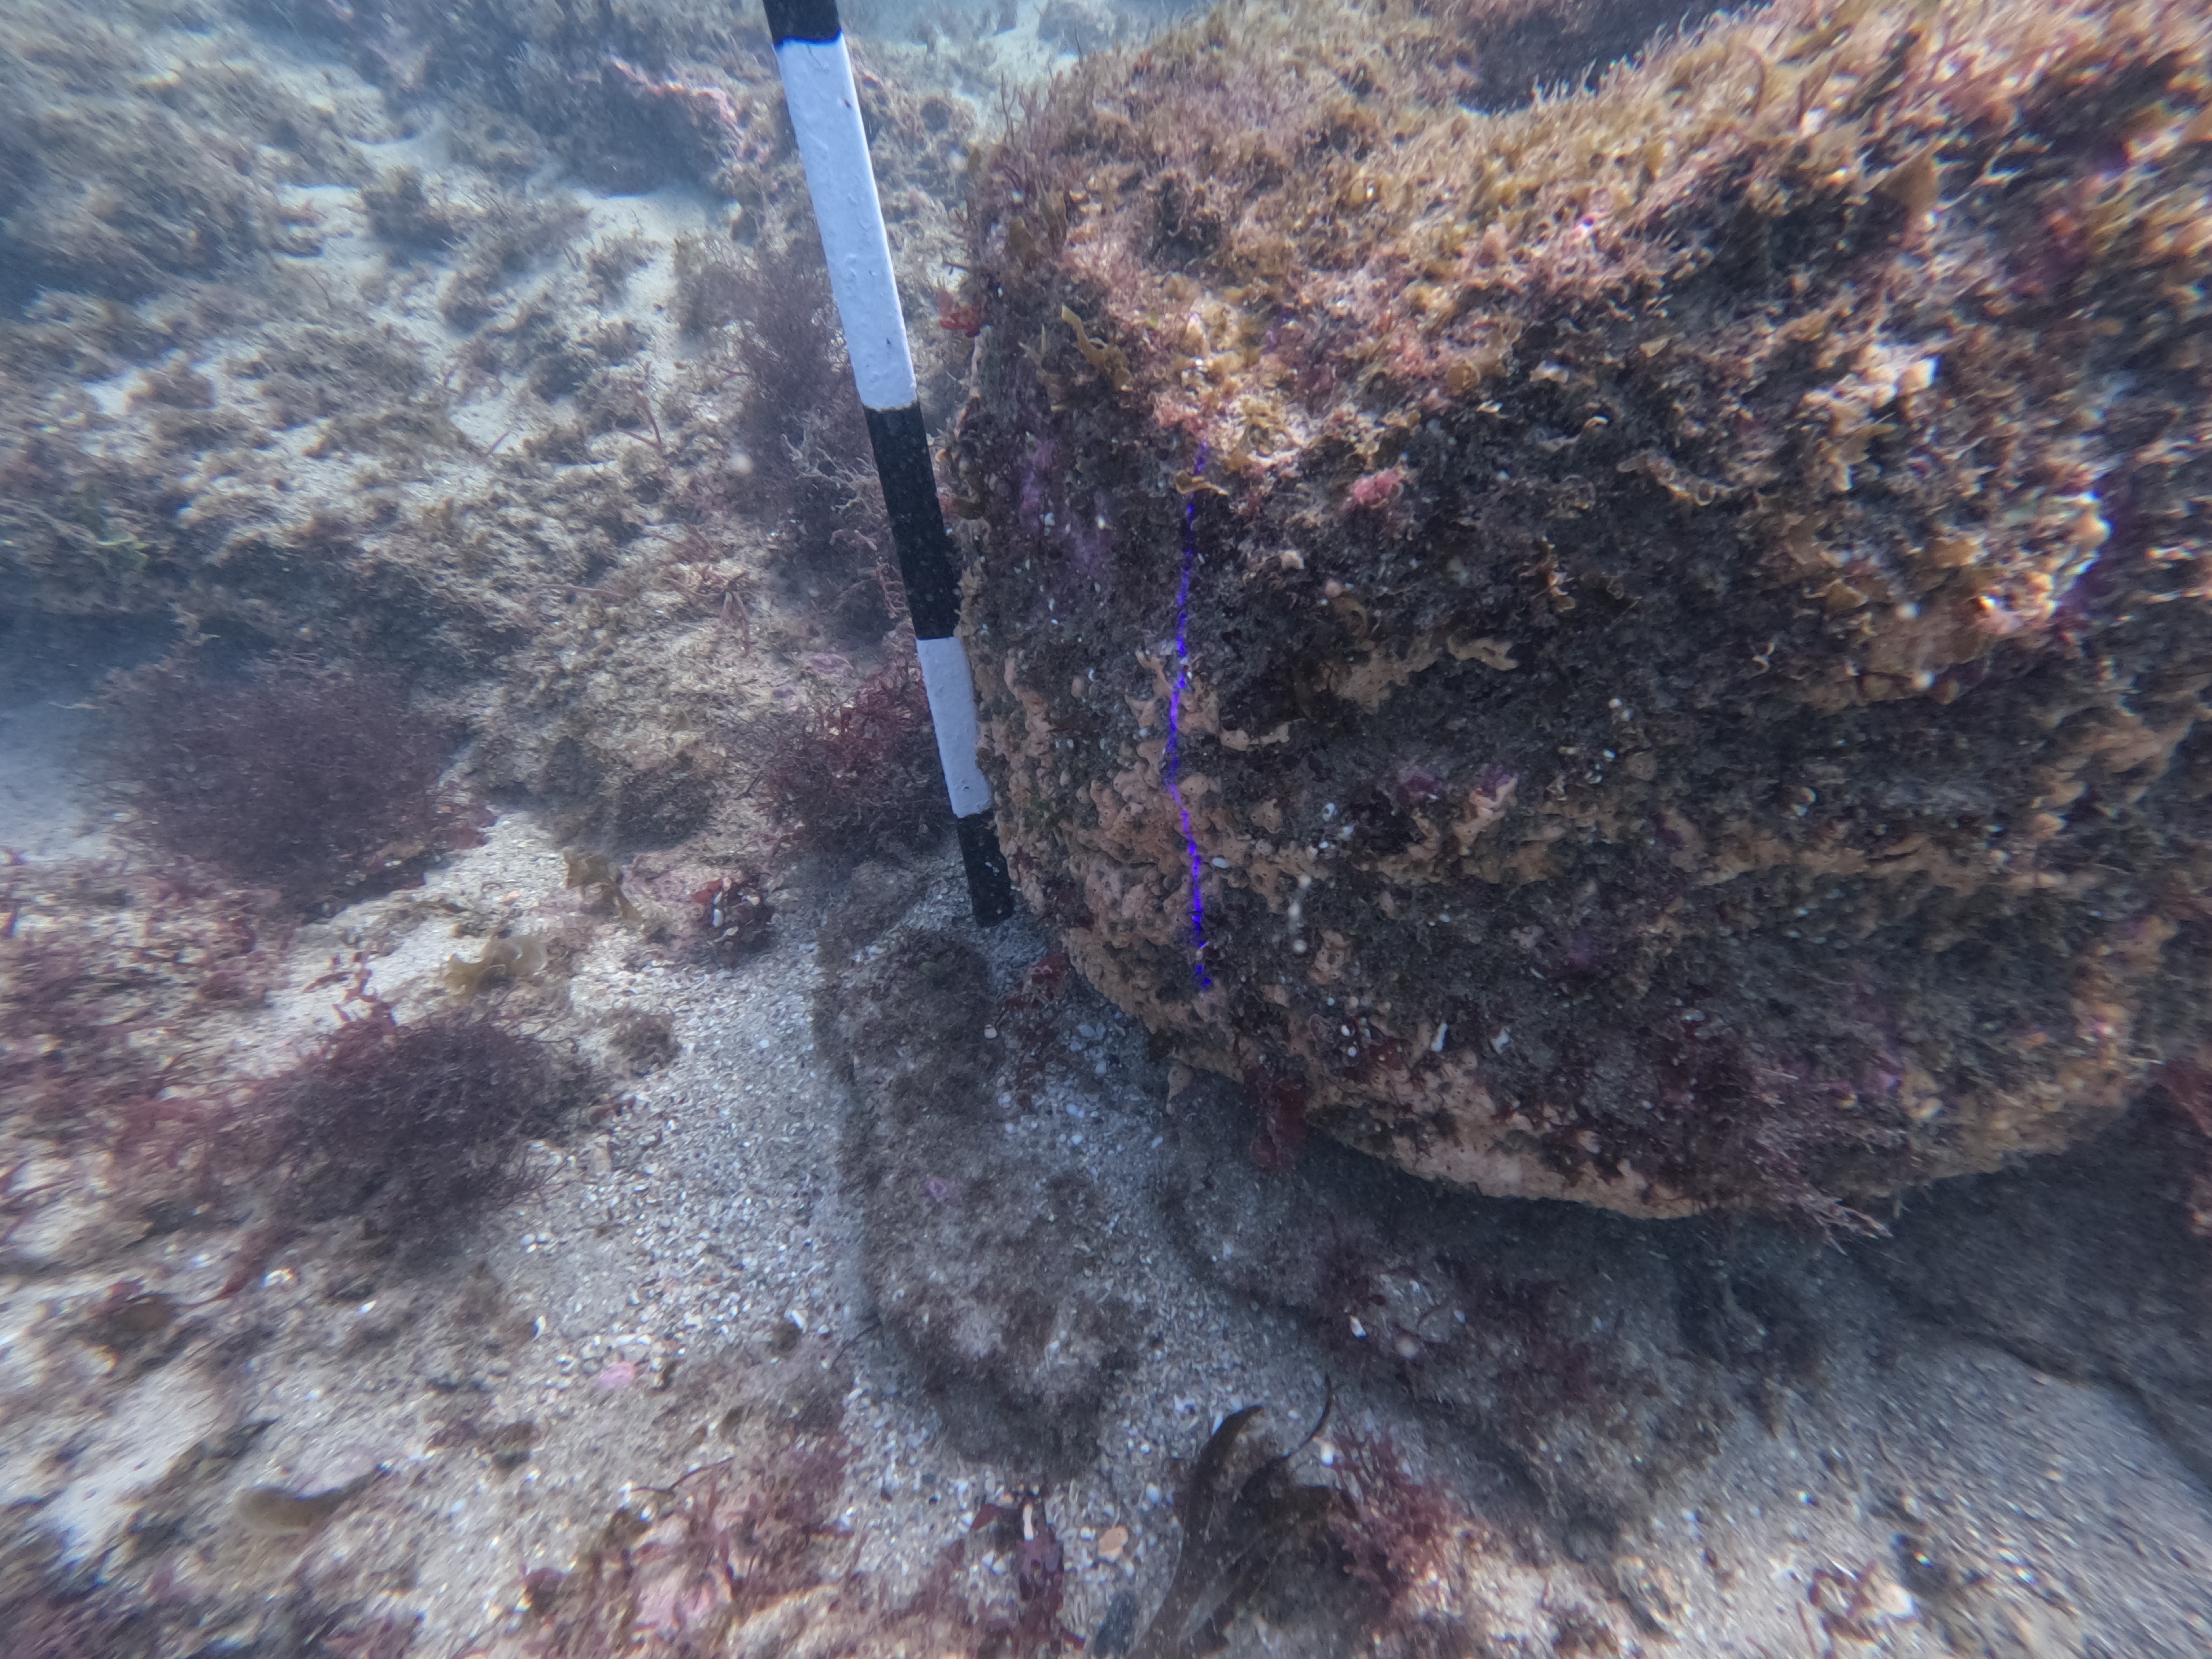

Supplement: Supplementary file 1816 [file G0028142.pdf › Ocean1/G0028142.pdf]

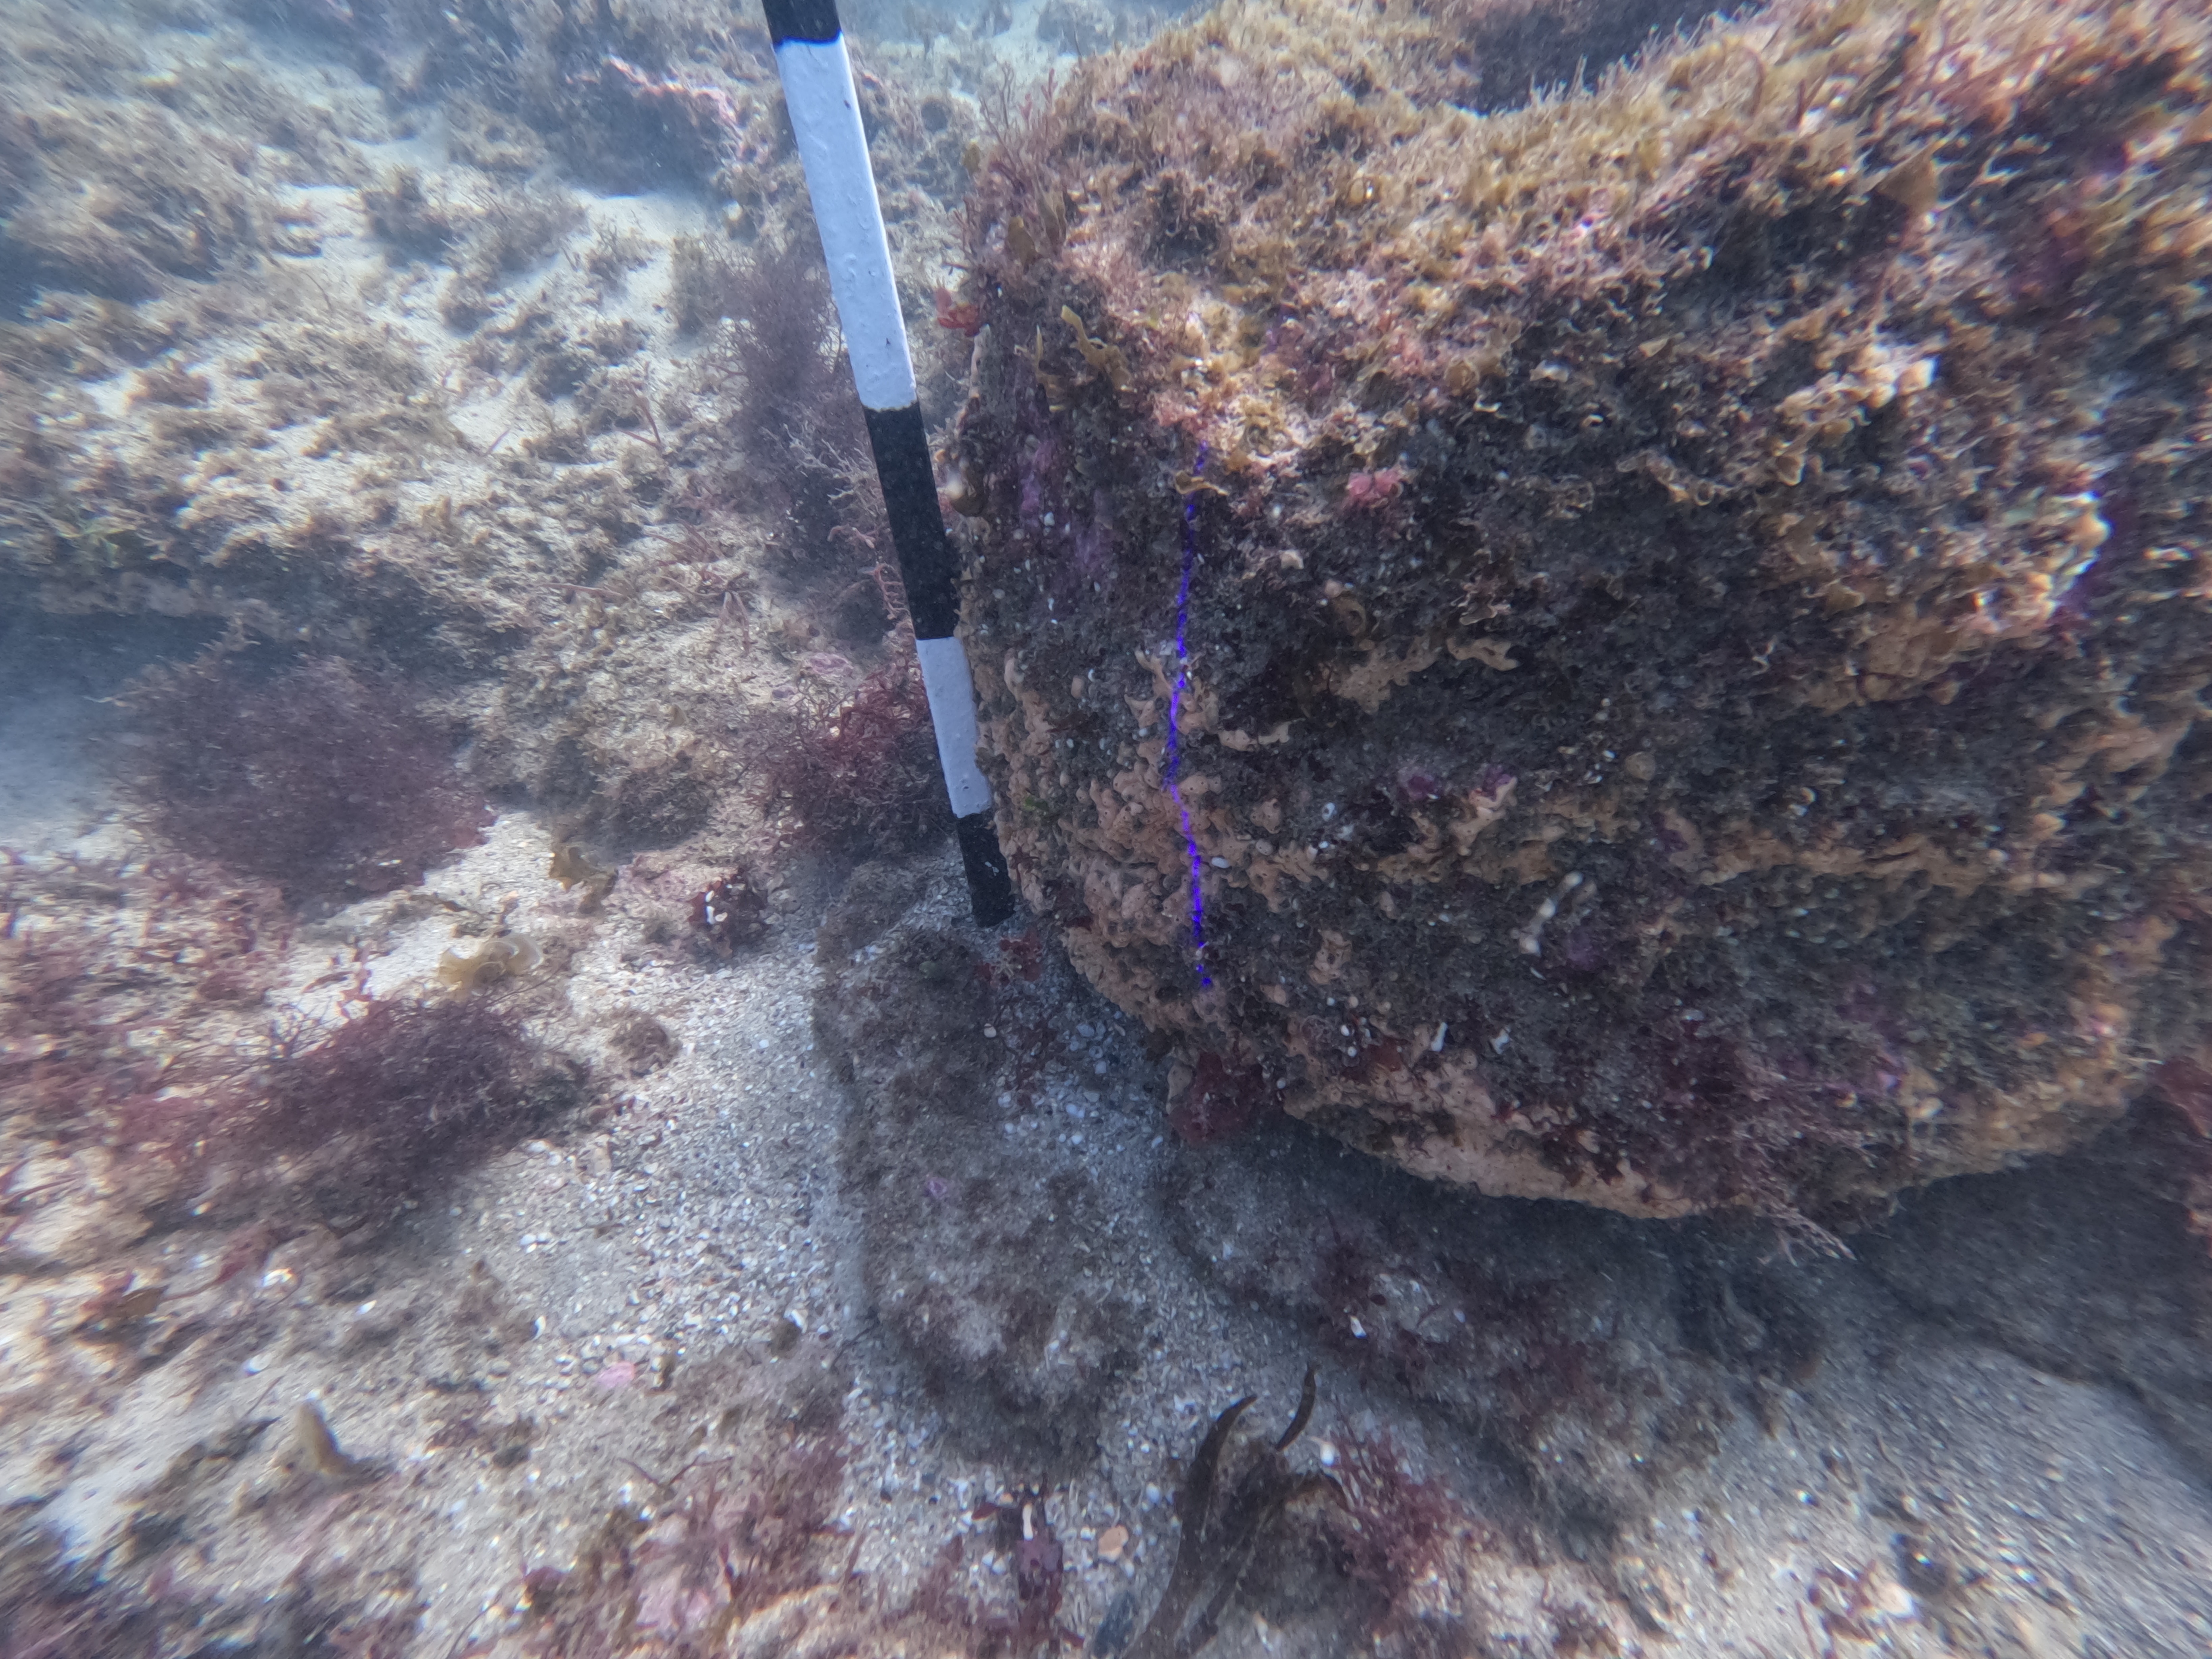

Supplement: Supplementary file 1817 [file G0028143.pdf › Ocean1/G0028143.pdf]

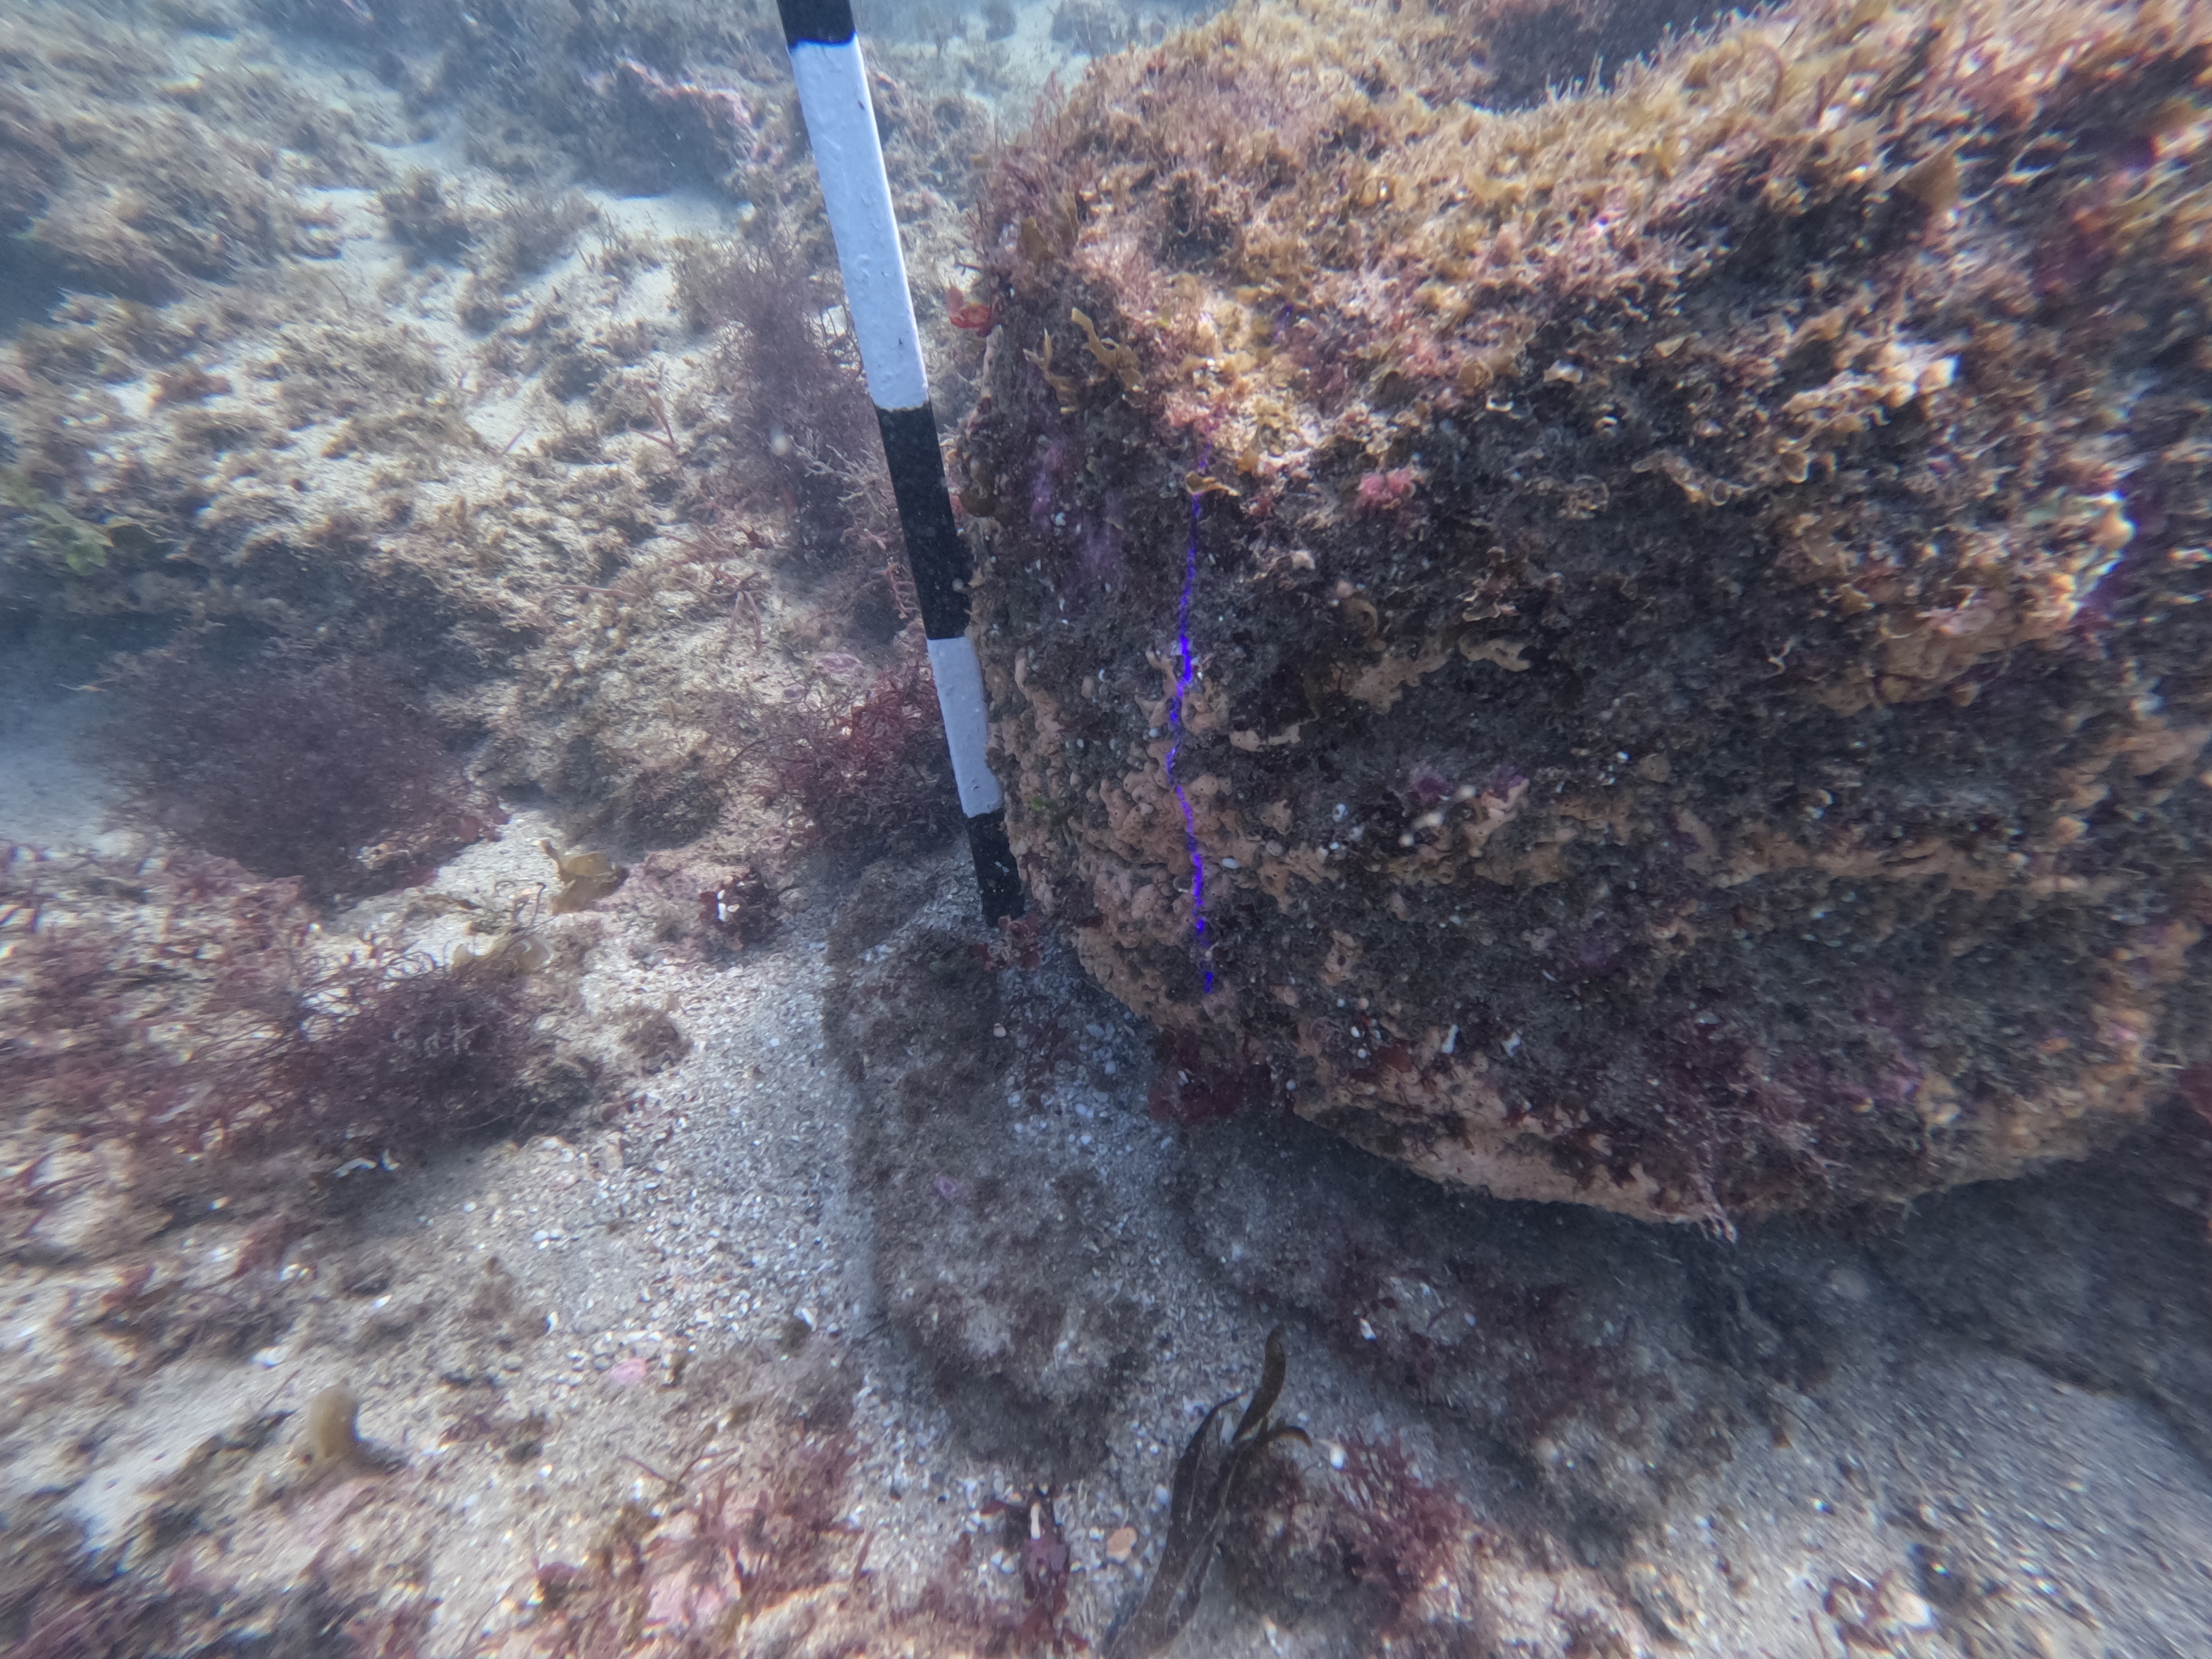

Supplement: Supplementary file 1818 [file G0028144.pdf › Ocean1/G0028144.pdf]

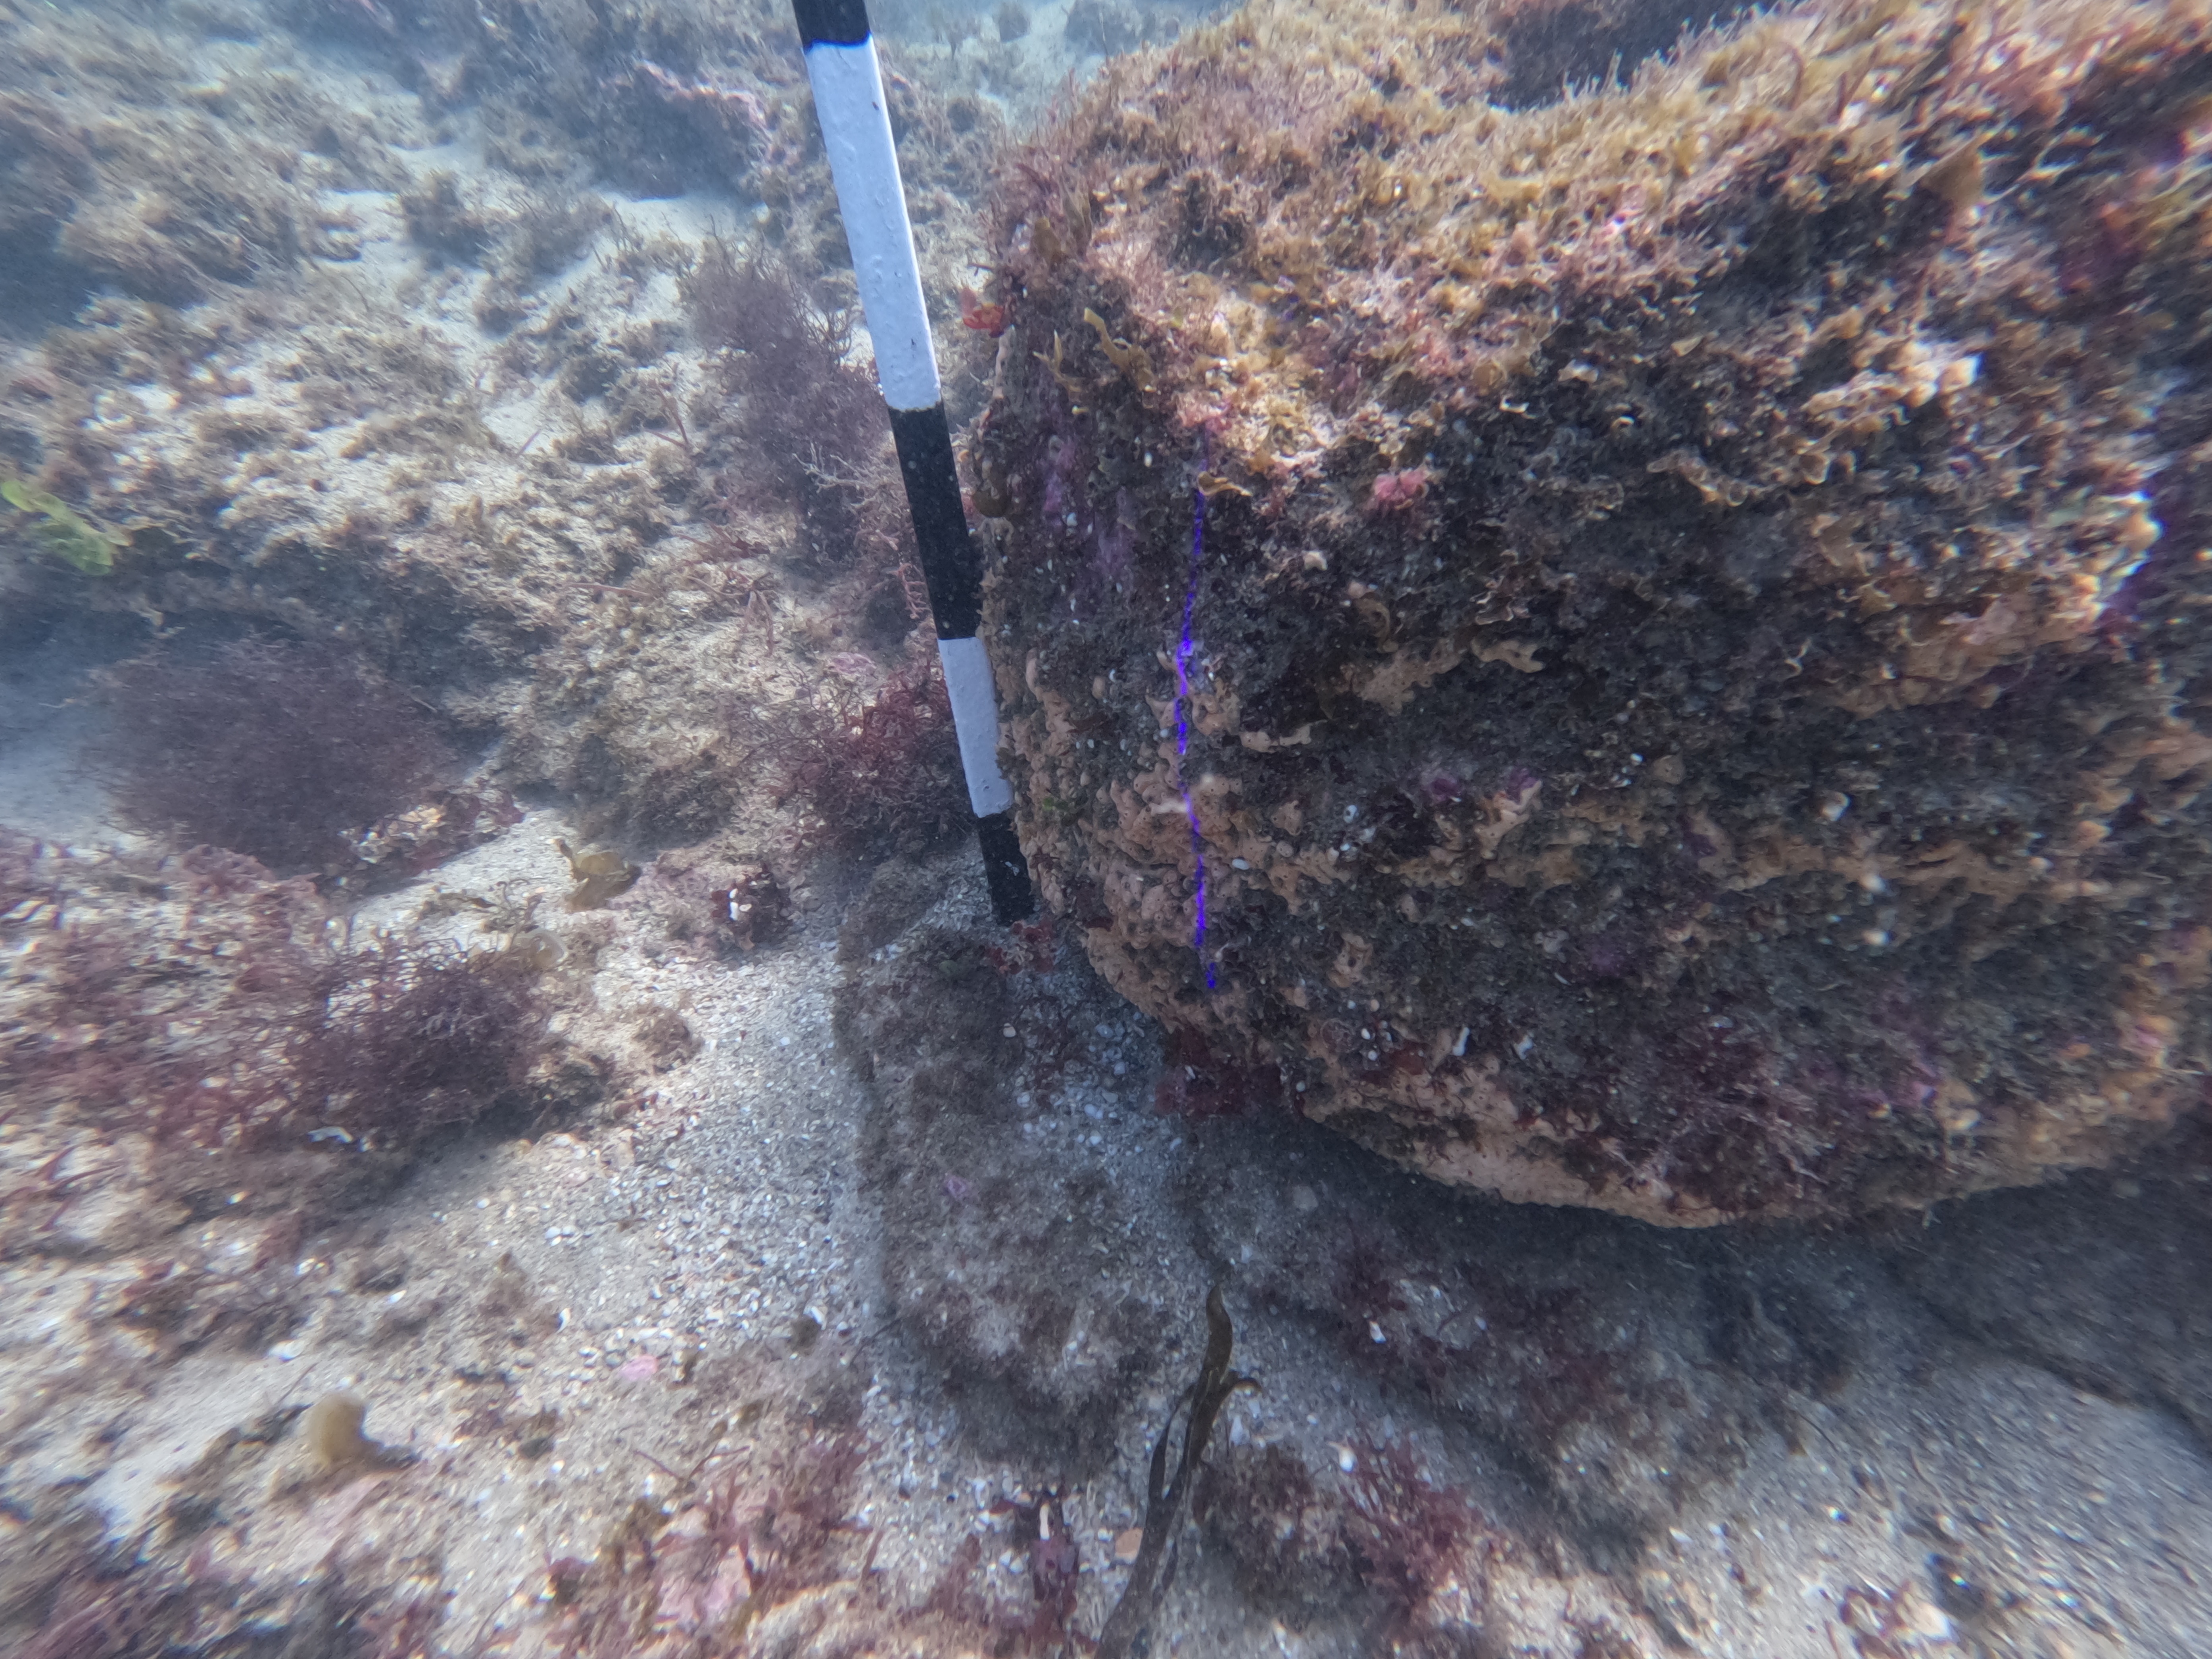

Supplement: Supplementary file 1819 [file G0028145.pdf › Ocean1/G0028145.pdf]

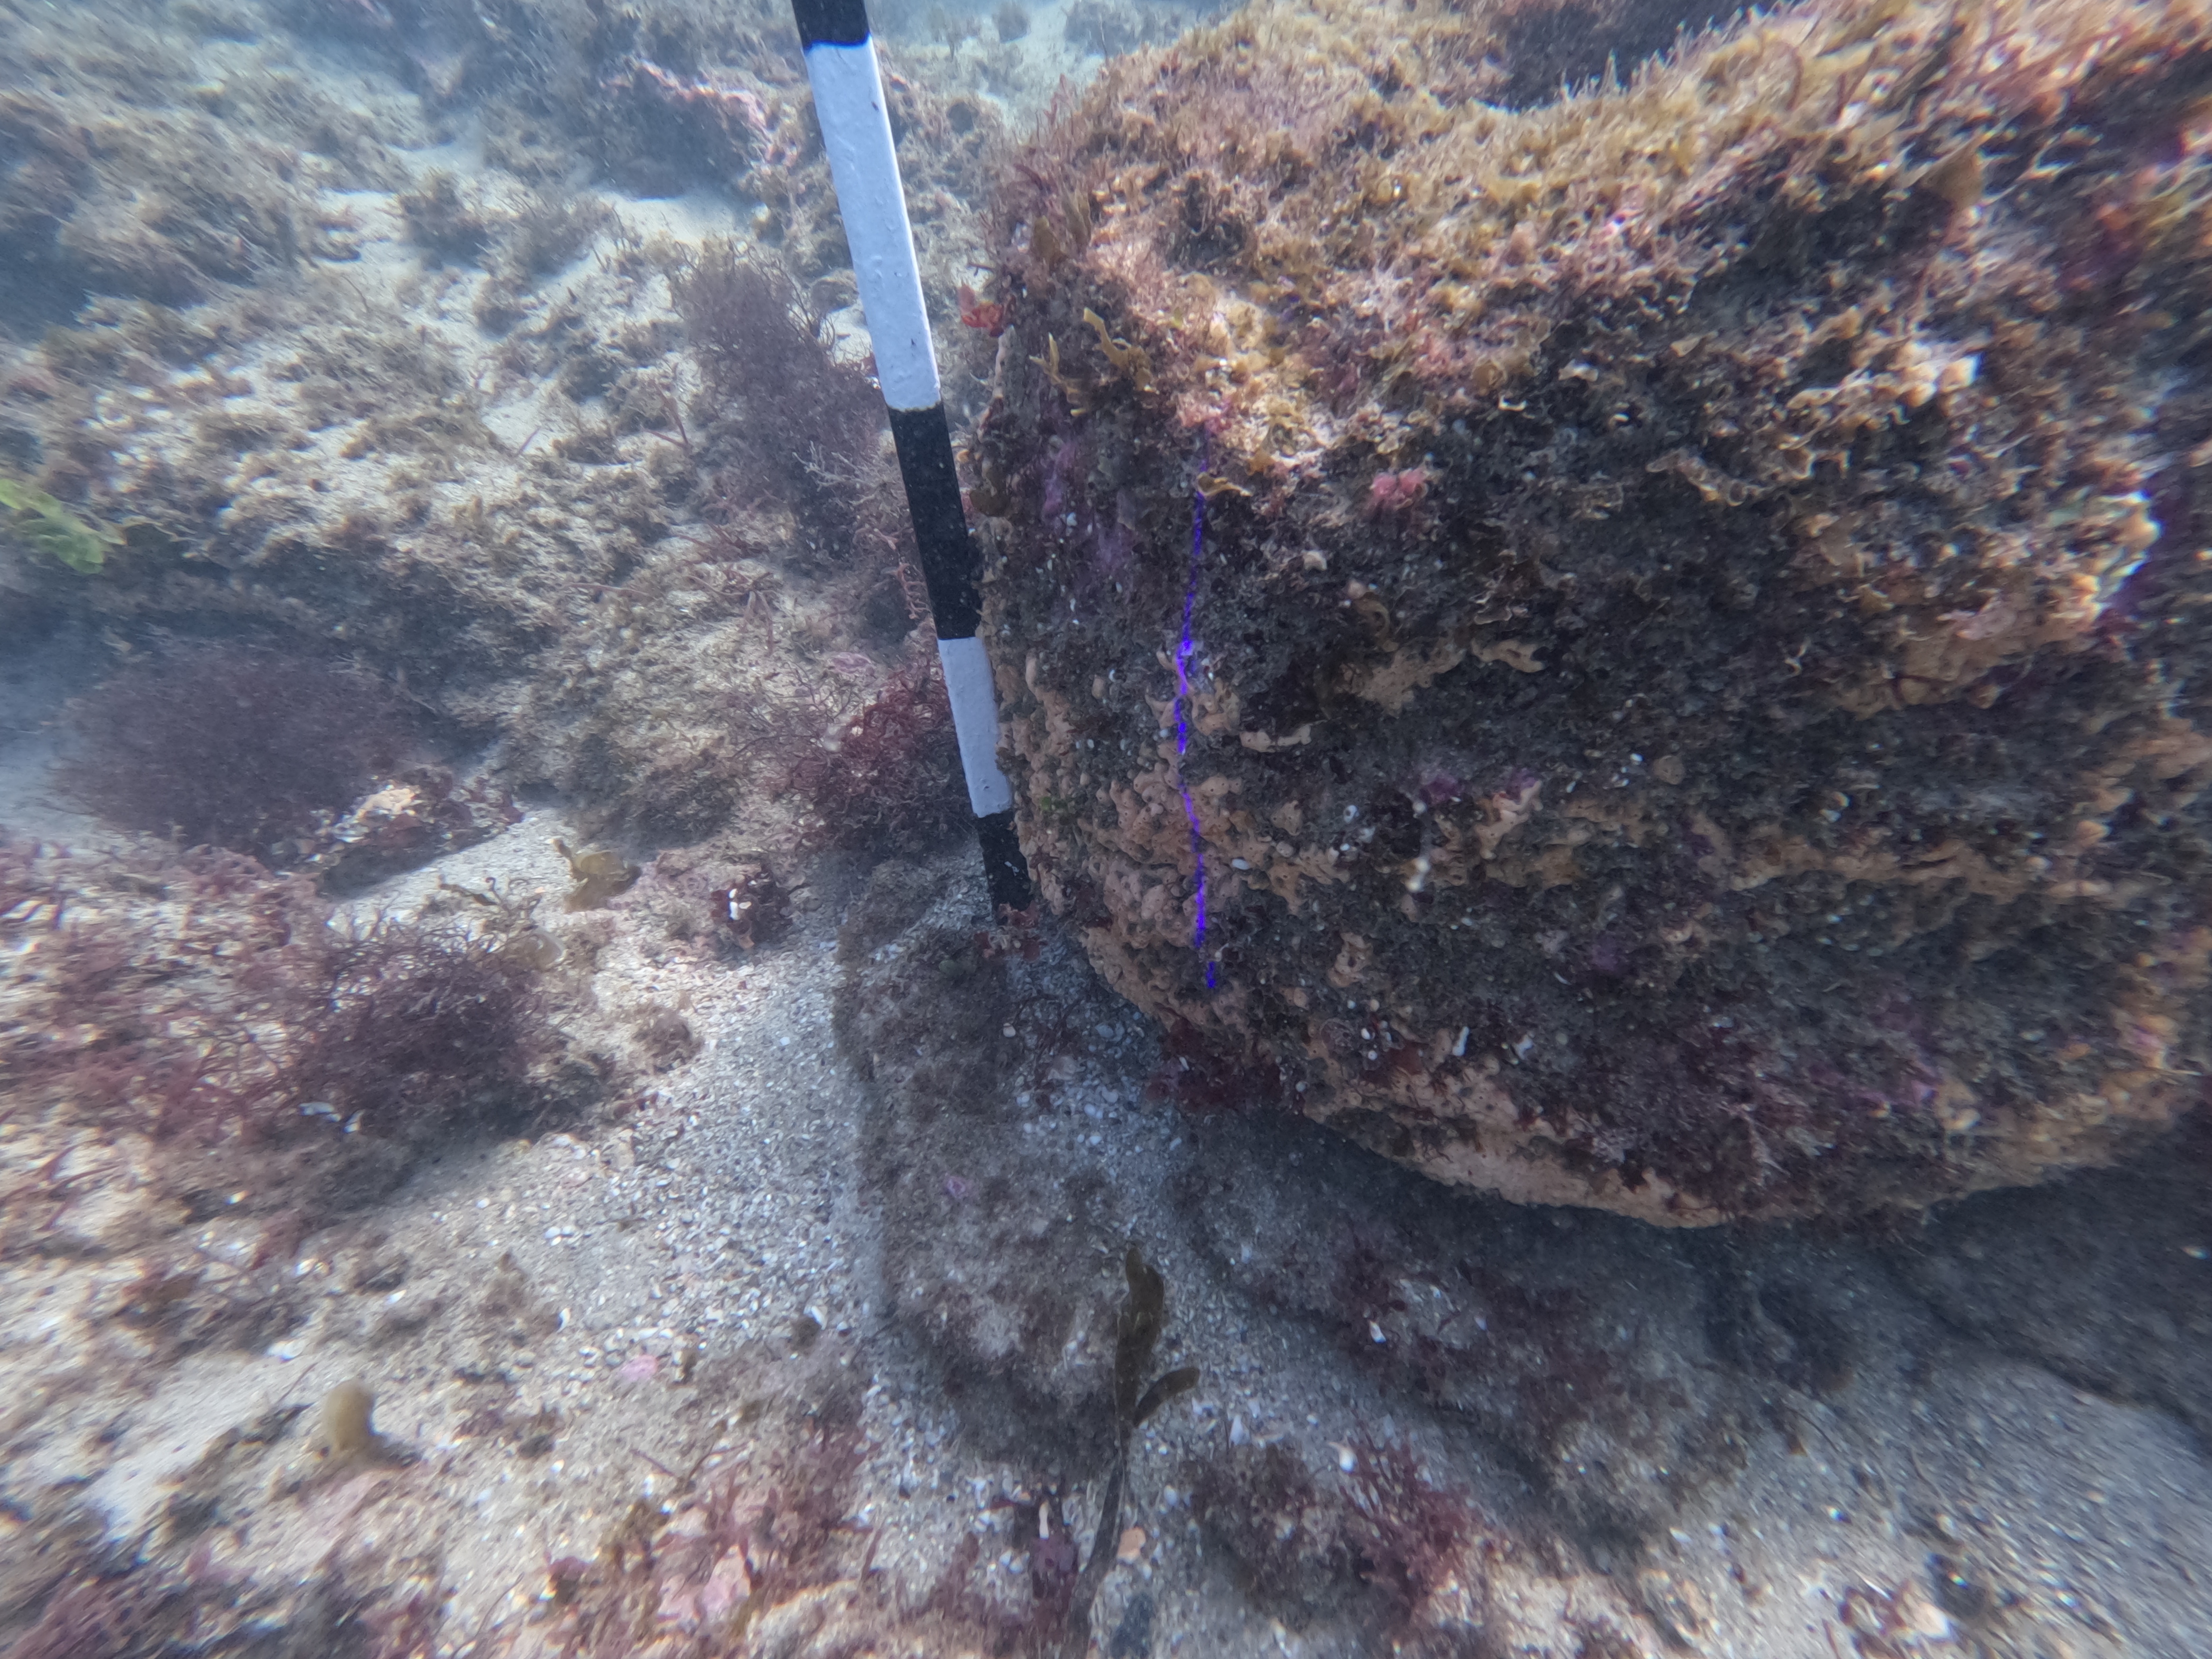

Supplement: Supplementary file 1820 [file G0028146.pdf › Ocean1/G0028146.pdf]

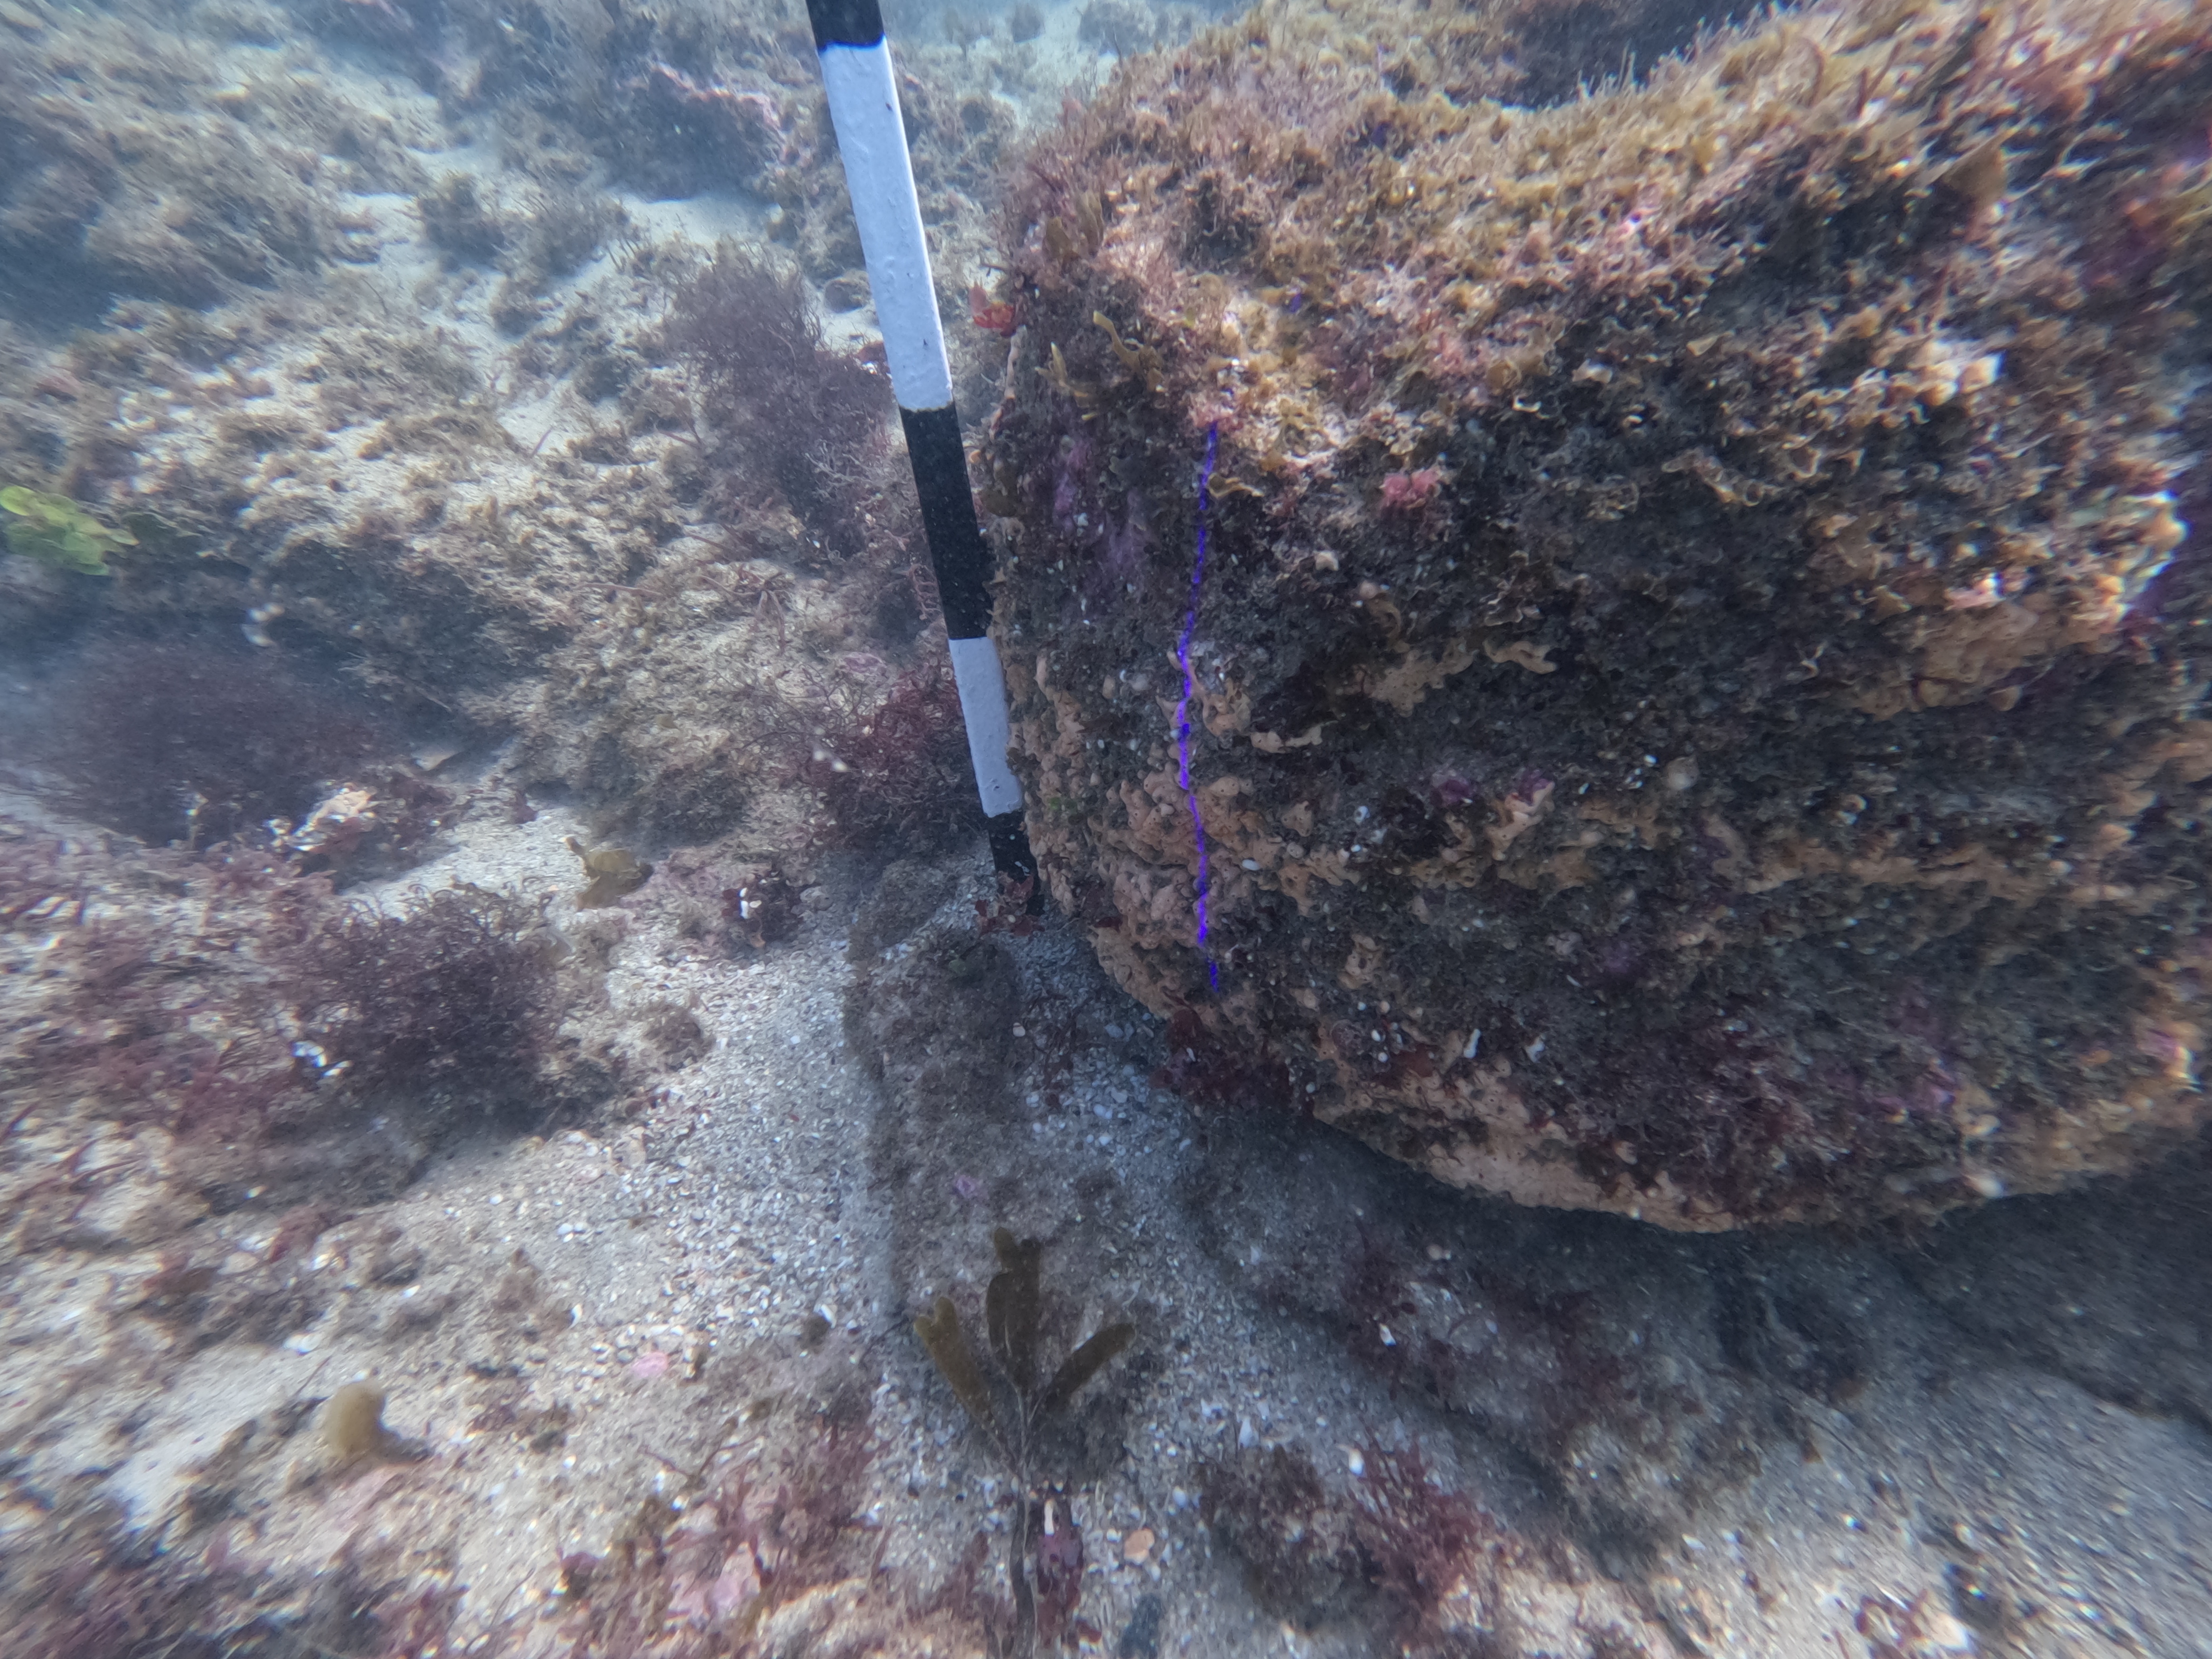

Supplement: Supplementary file 1821 [file G0028147.pdf › Ocean1/G0028147.pdf]

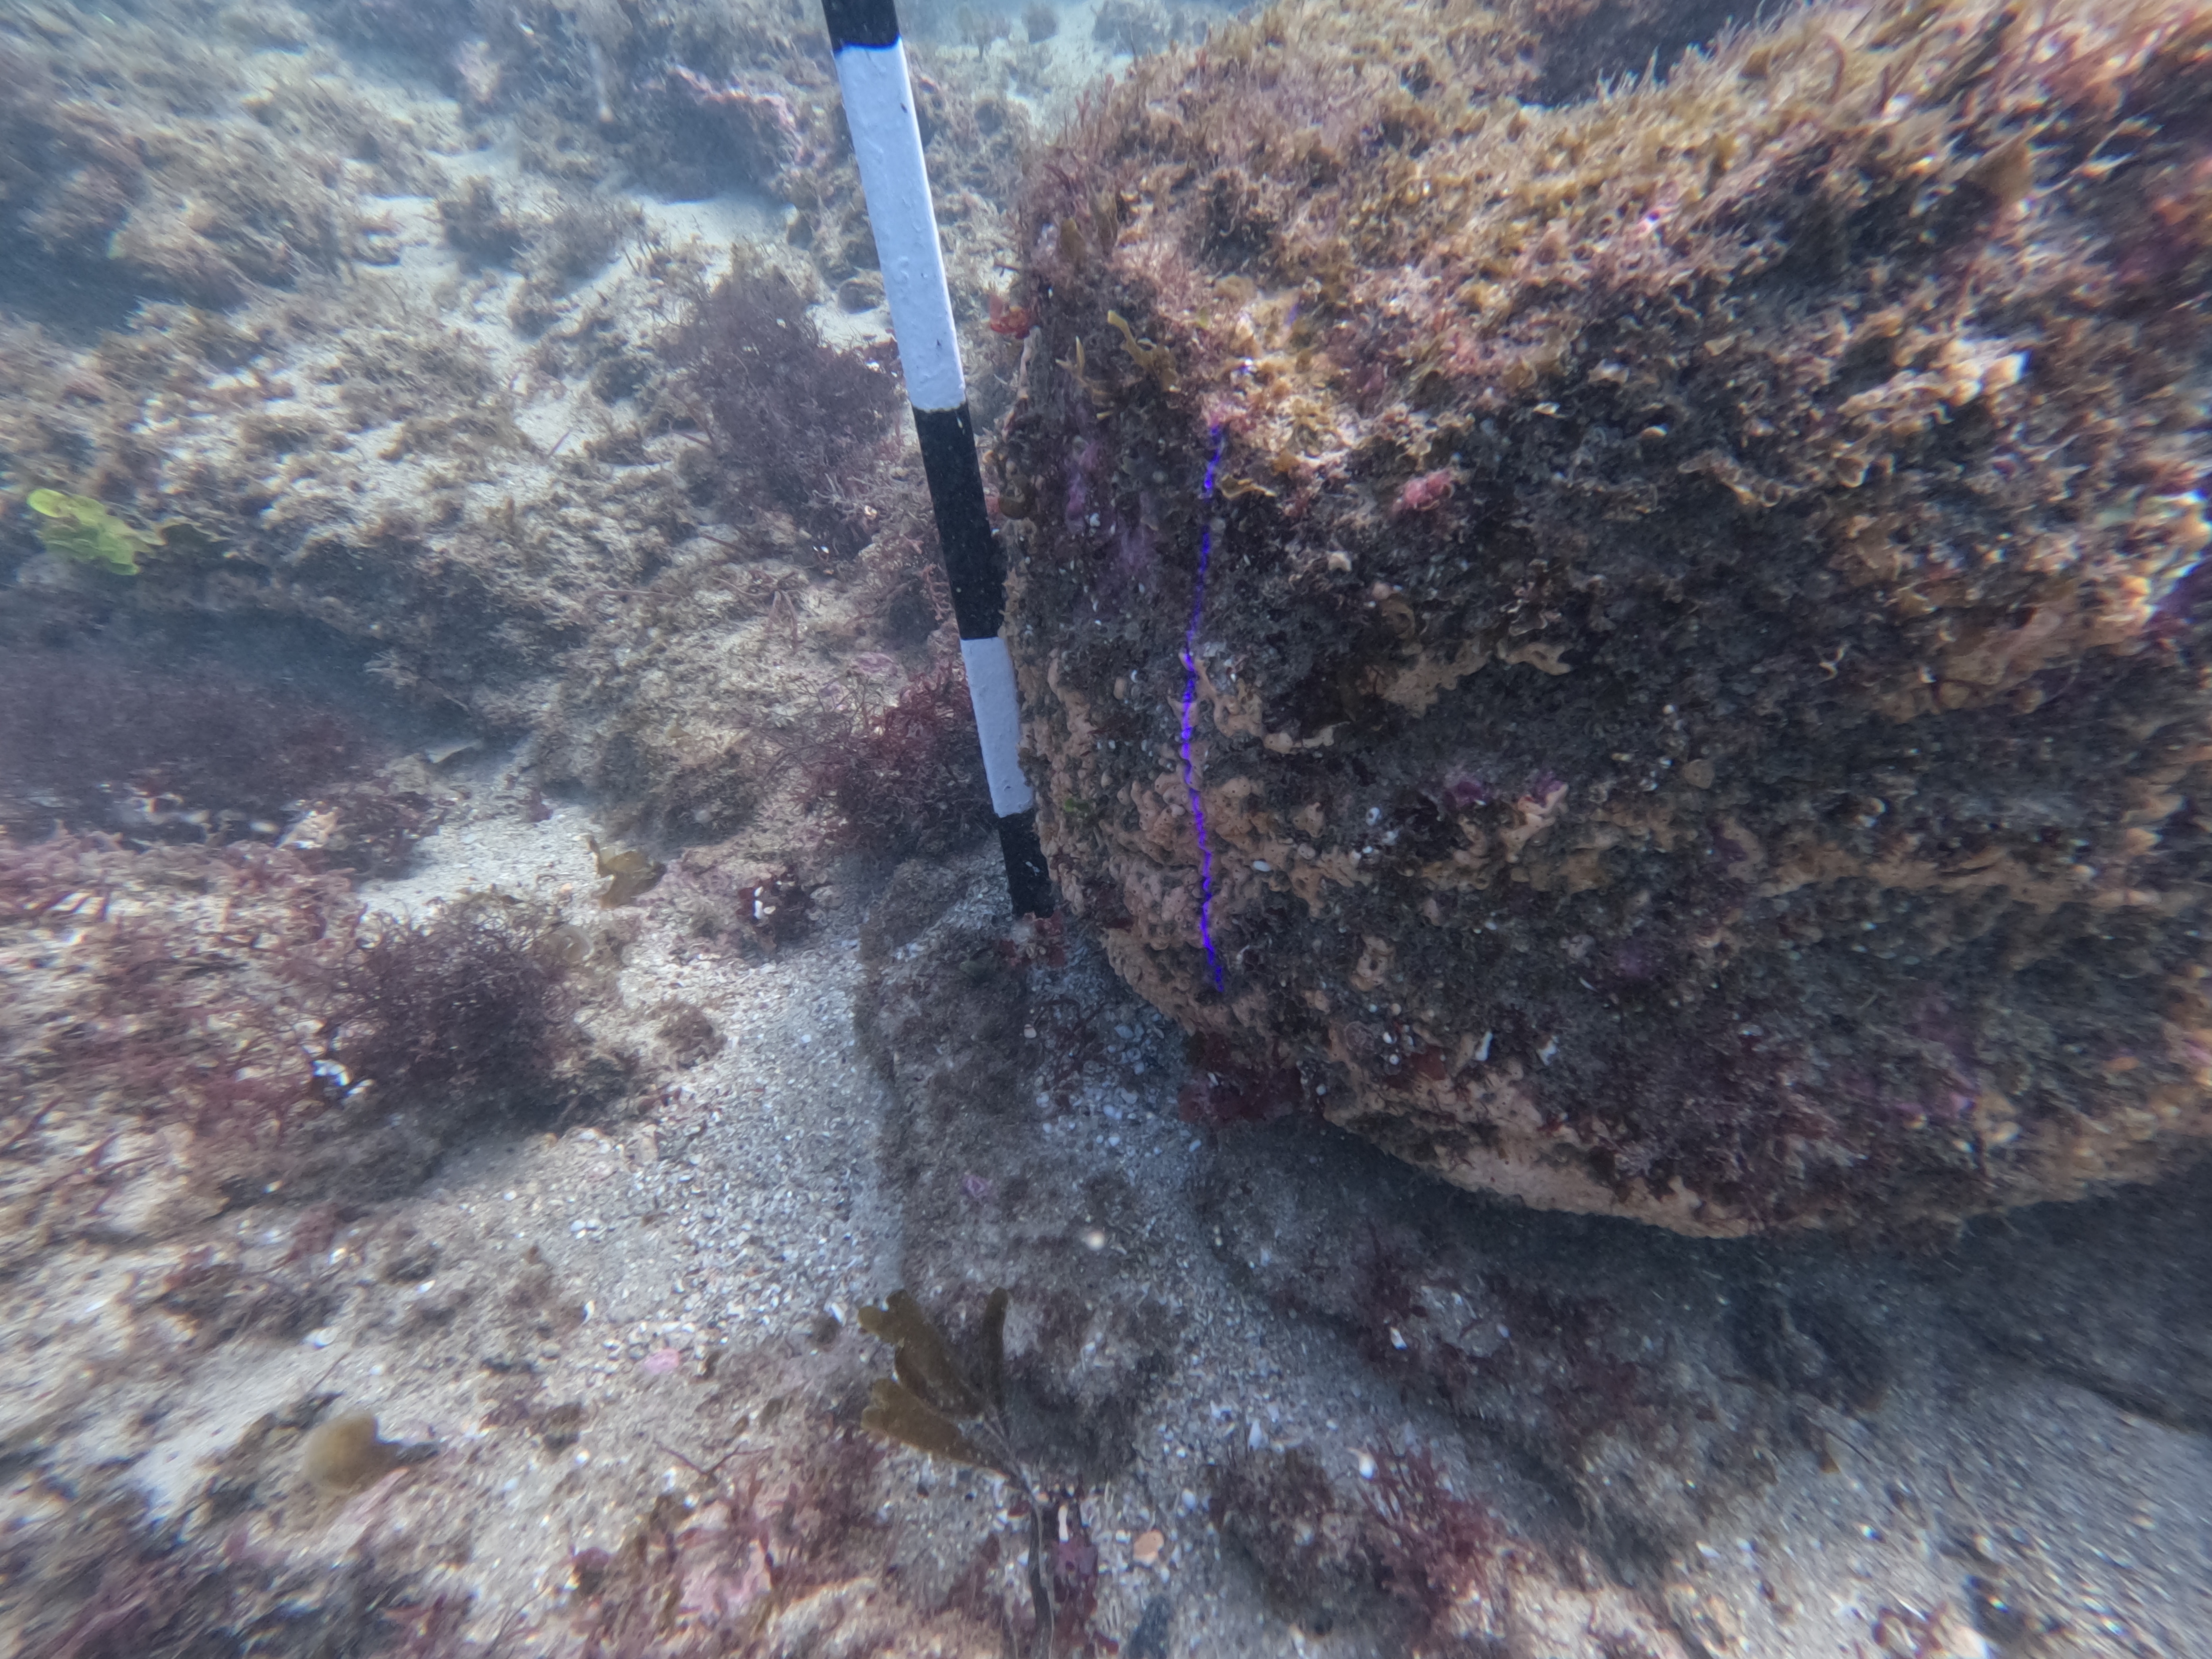

Supplement: Supplementary file 1822 [file G0028148.pdf › Ocean1/G0028148.pdf]

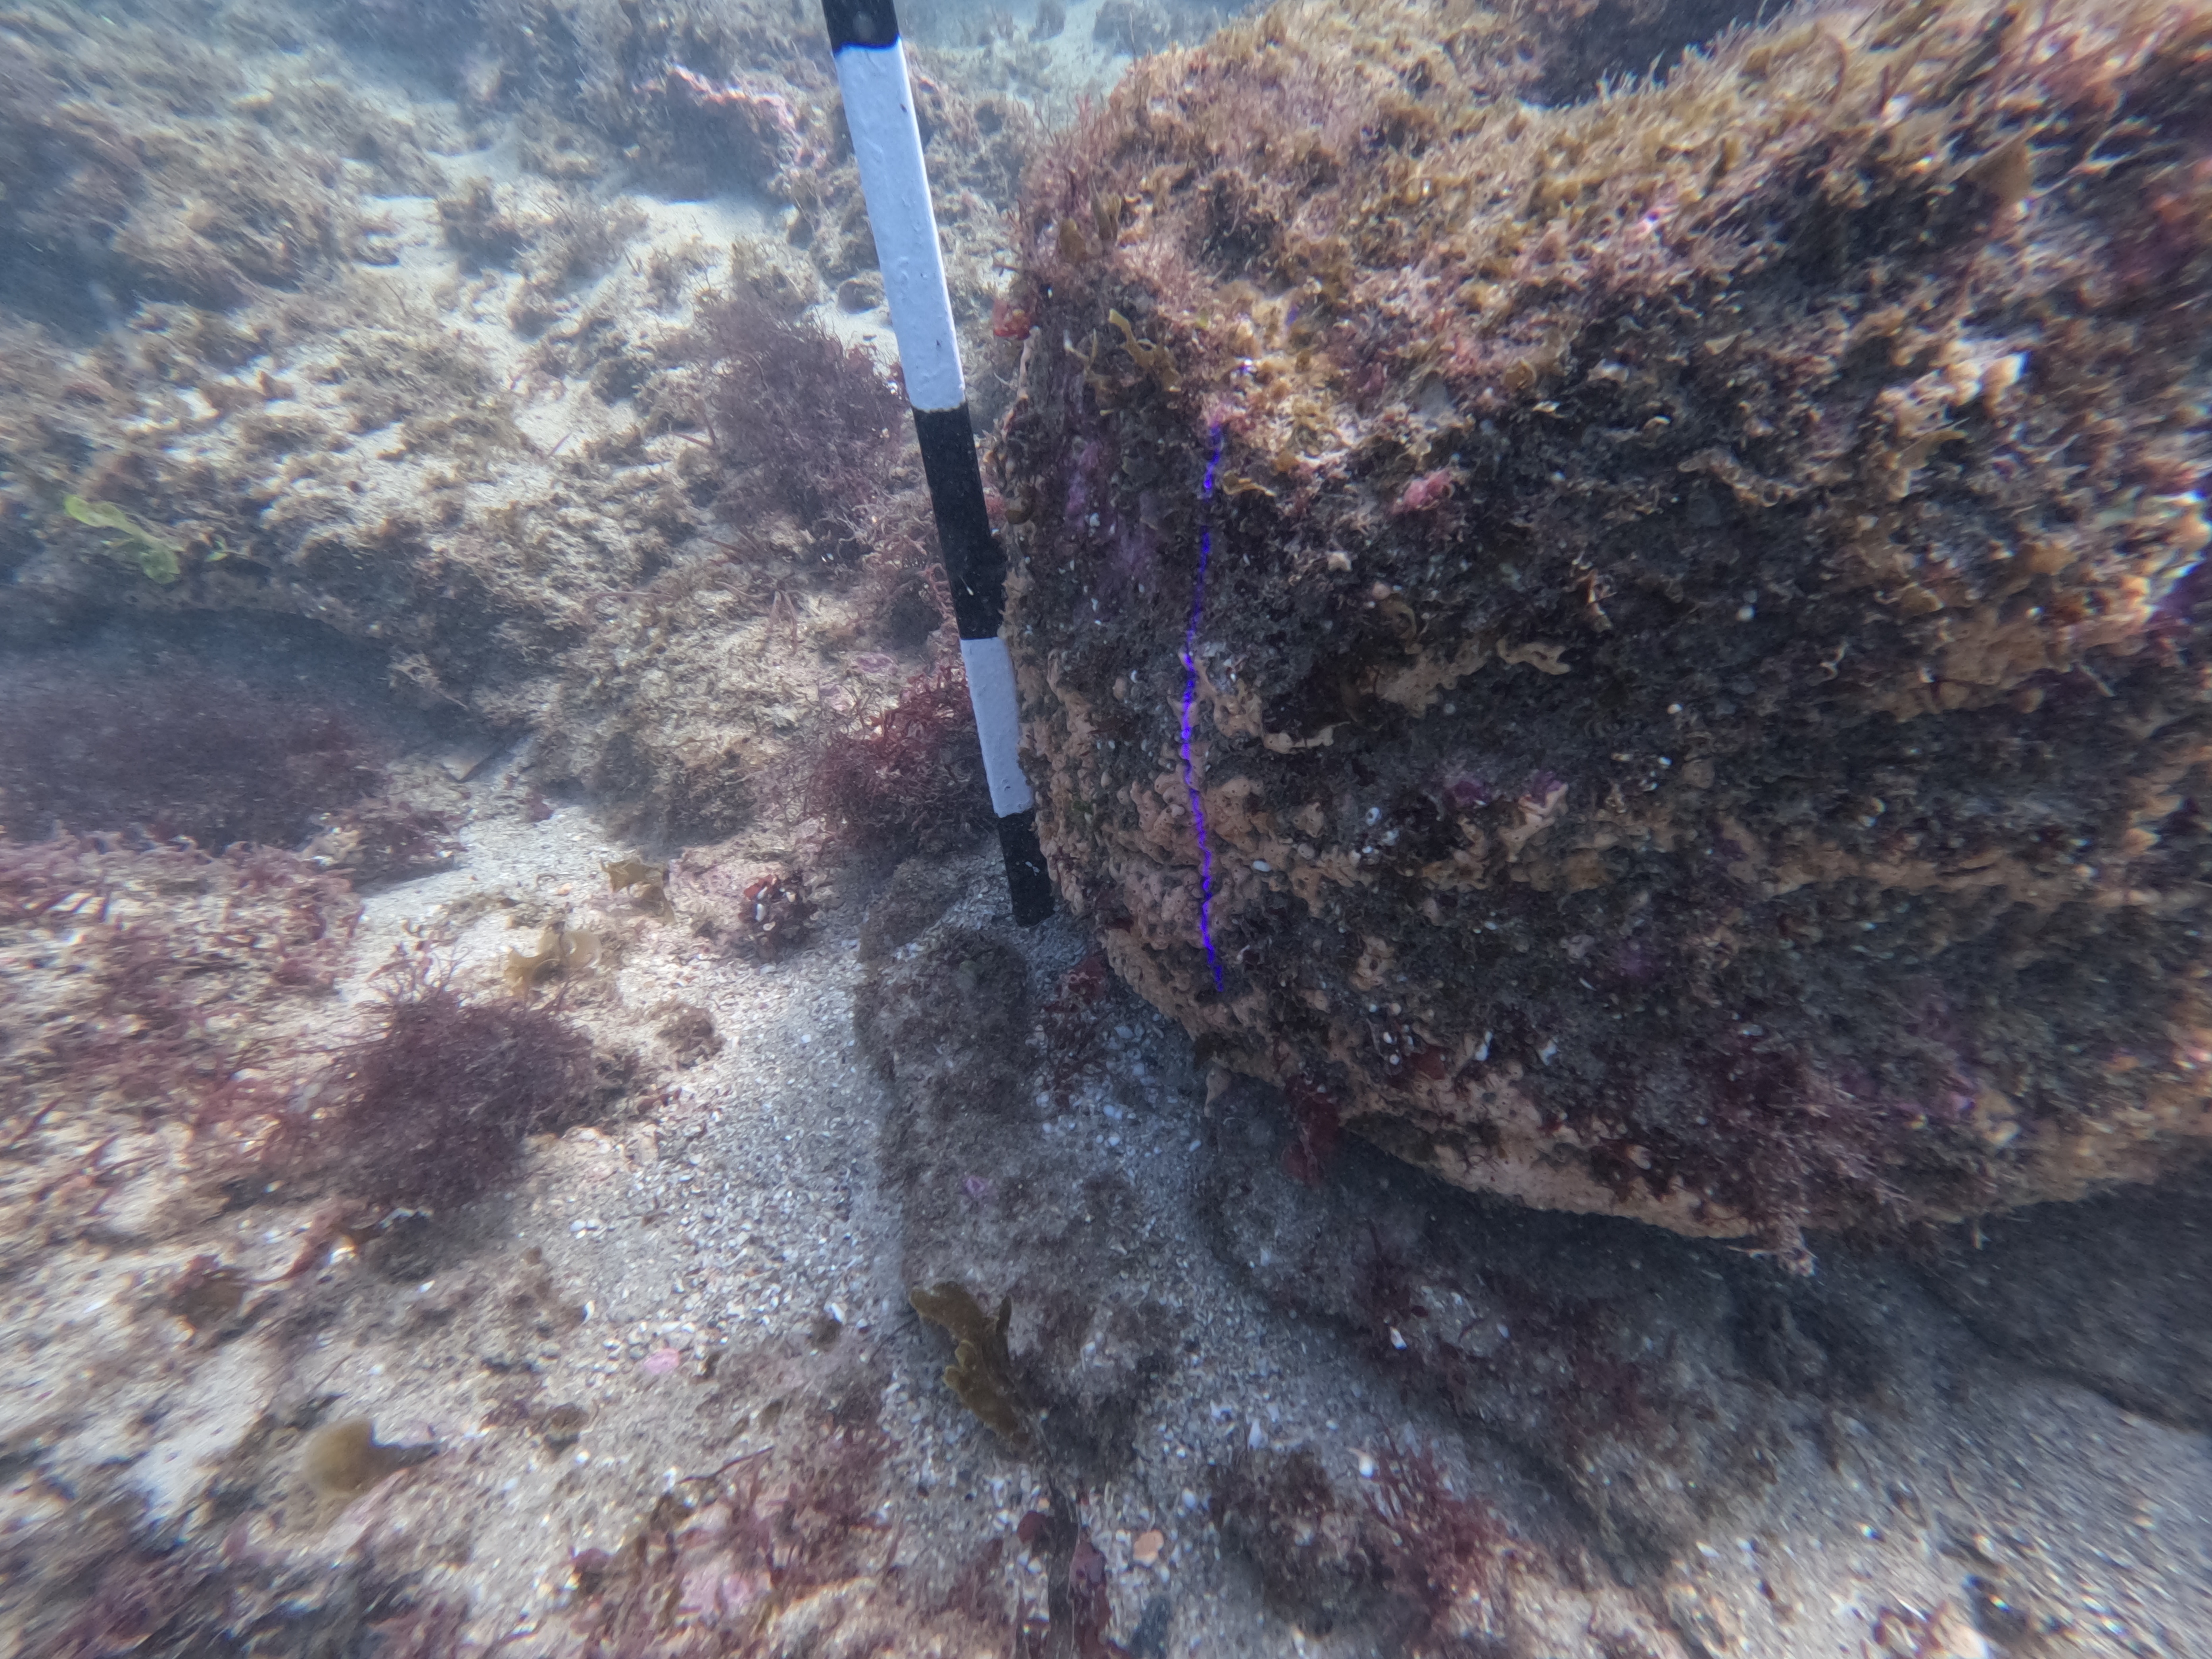

Supplement: Supplementary file 1823 [file G0028149.pdf › Ocean1/G0028149.pdf]

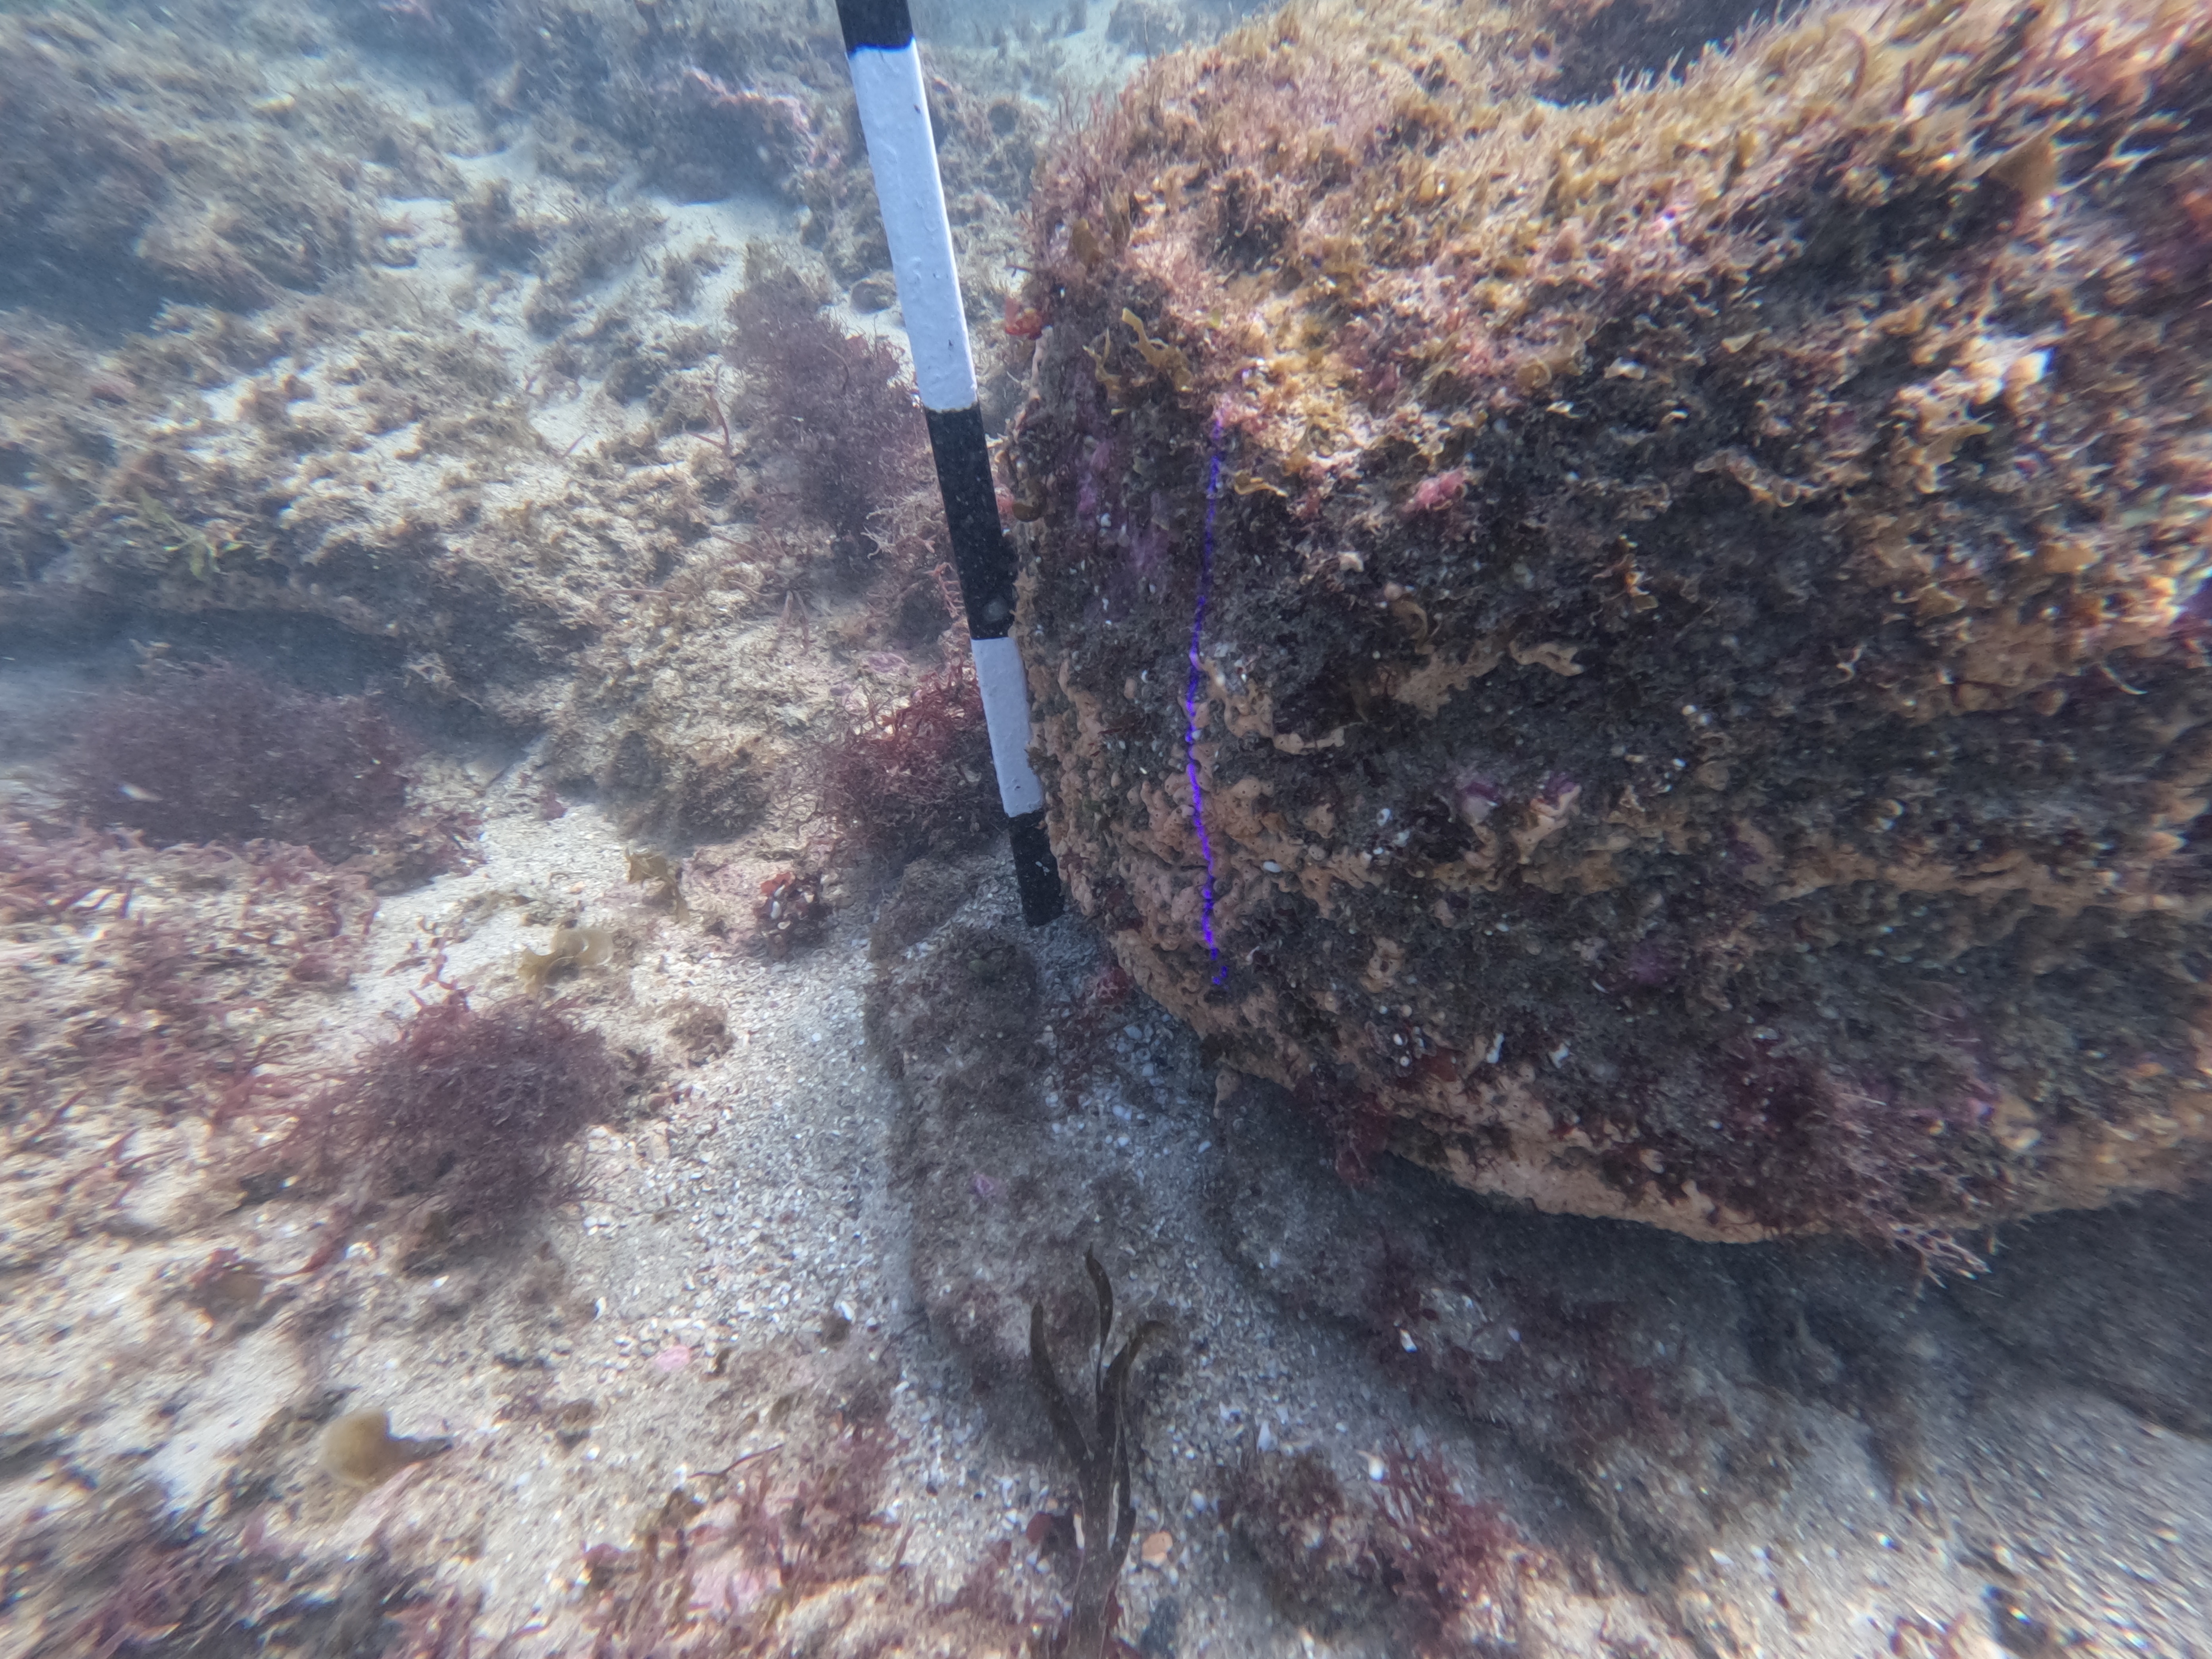

Supplement: Supplementary file 1824 [file G0028150.pdf › Ocean1/G0028150.pdf]

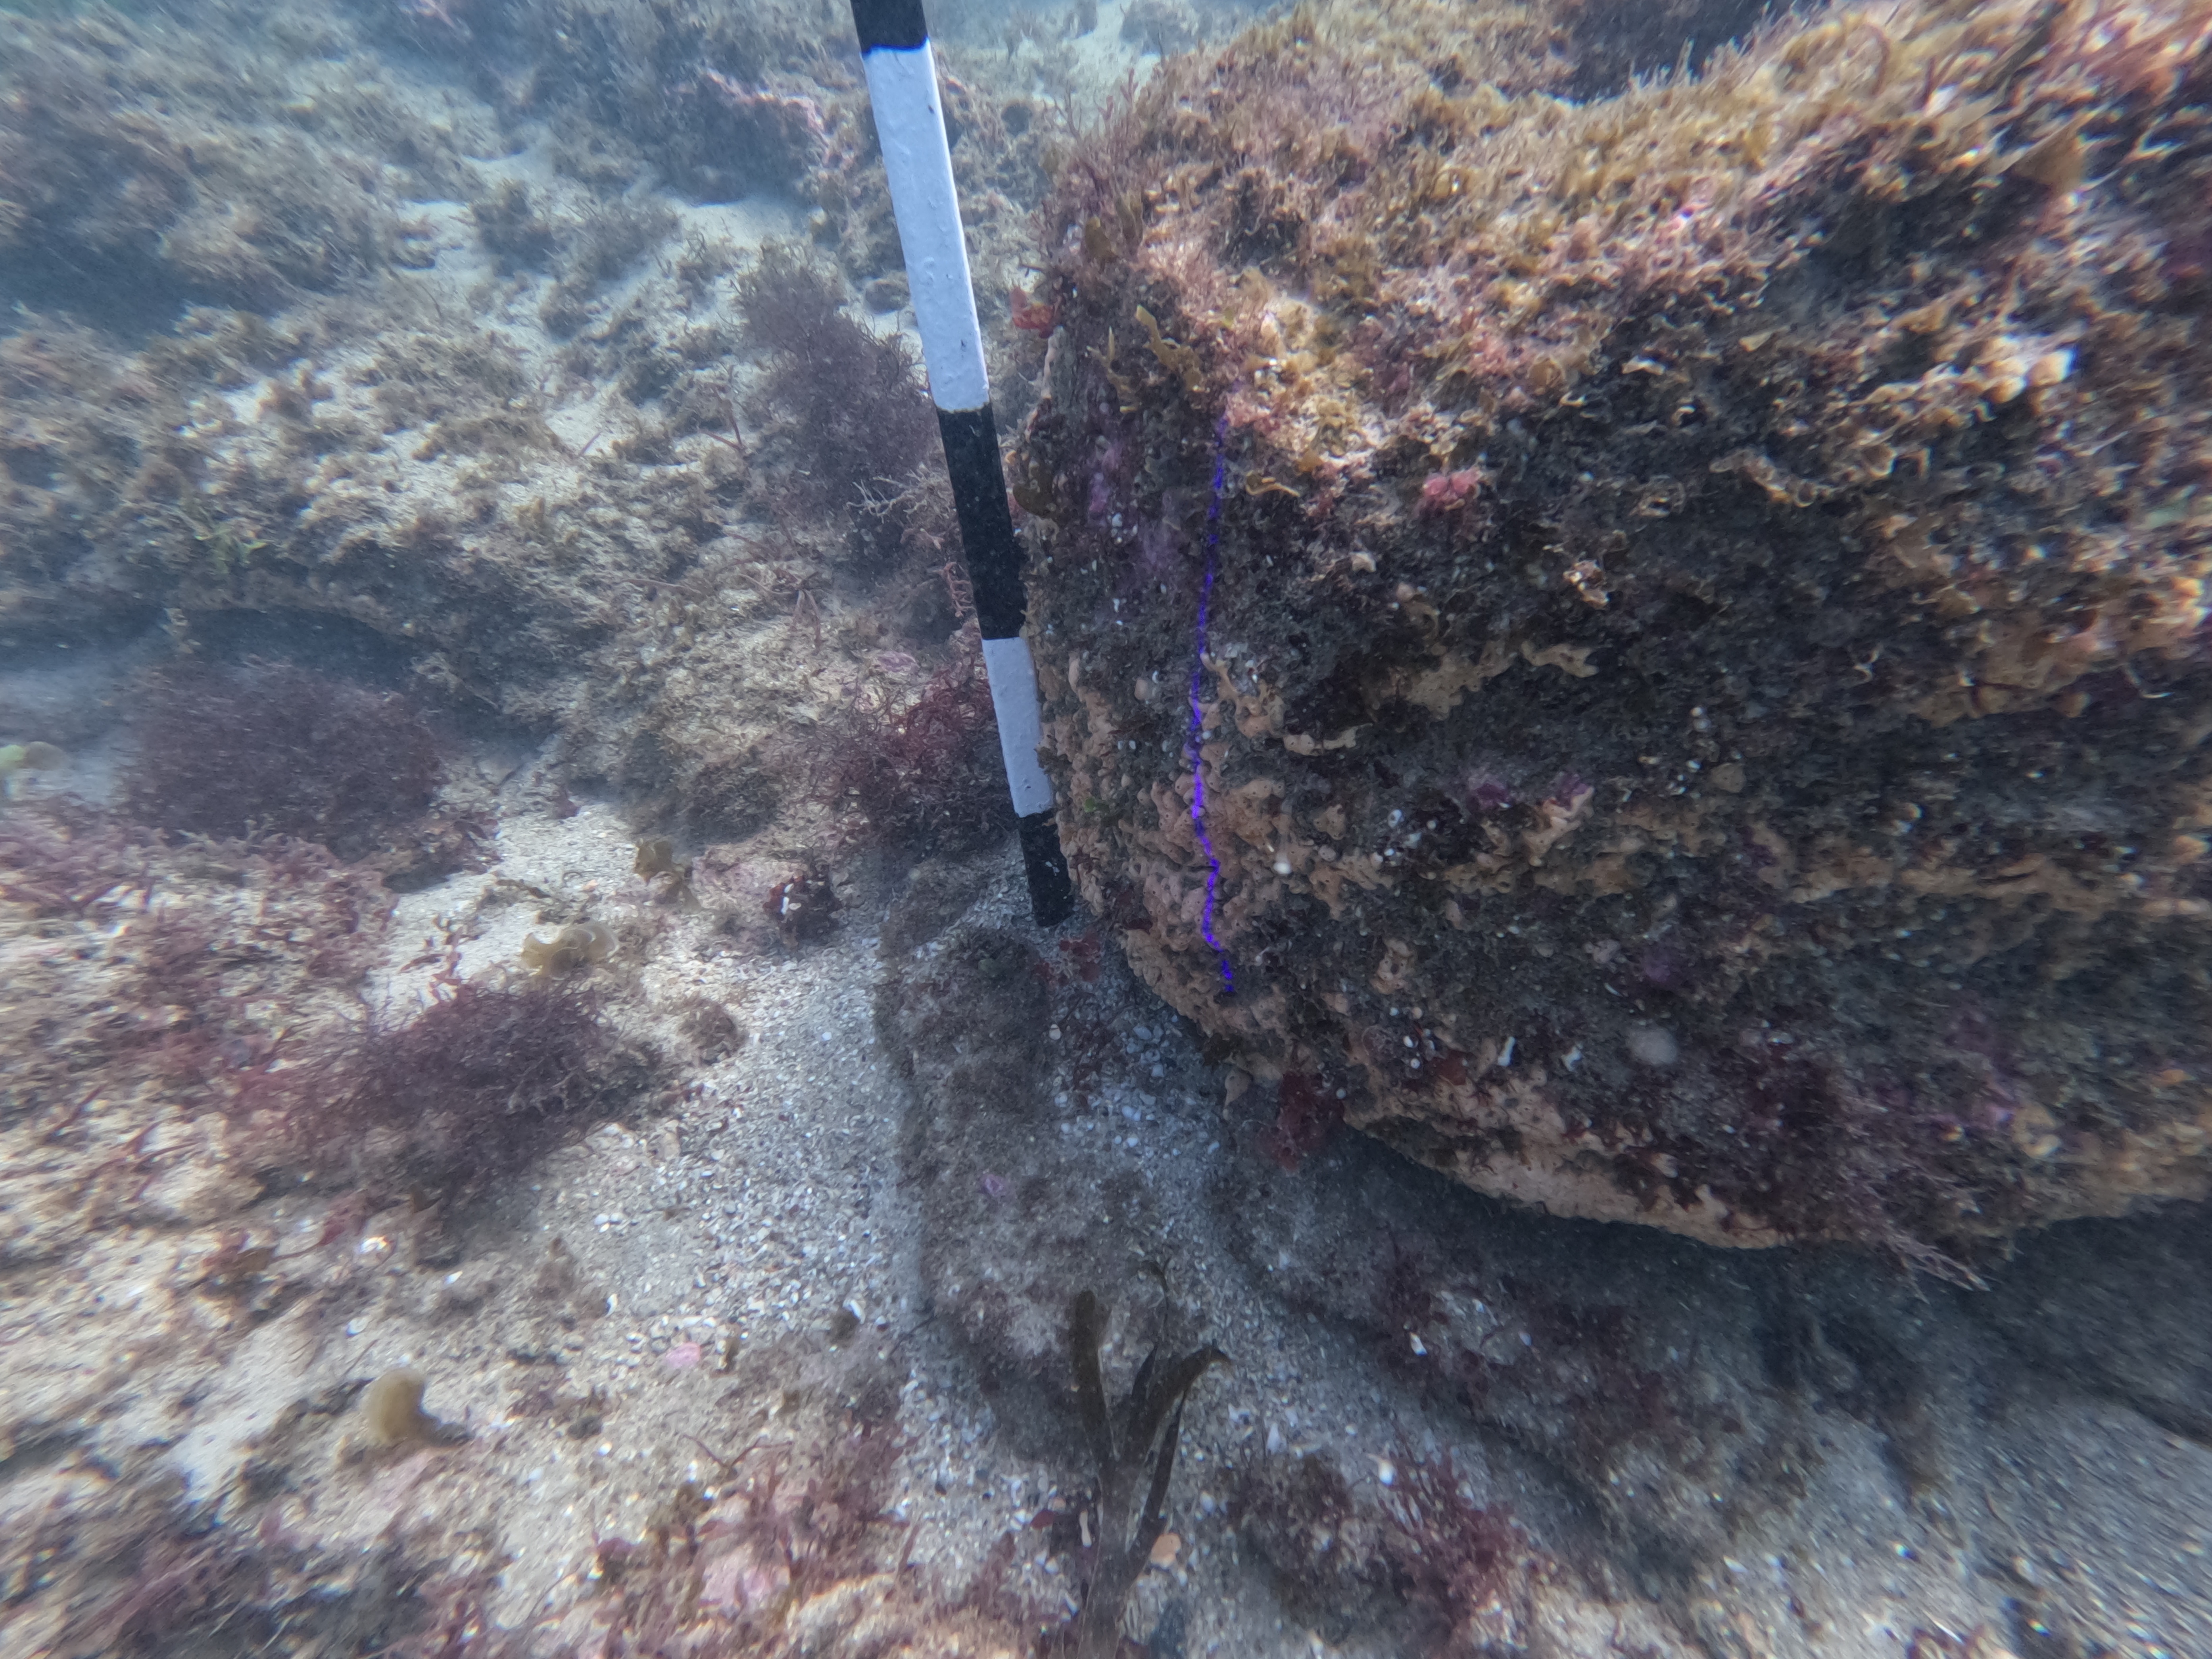

Supplement: Supplementary file 1825 [file G0028151.pdf › Ocean1/G0028151.pdf]

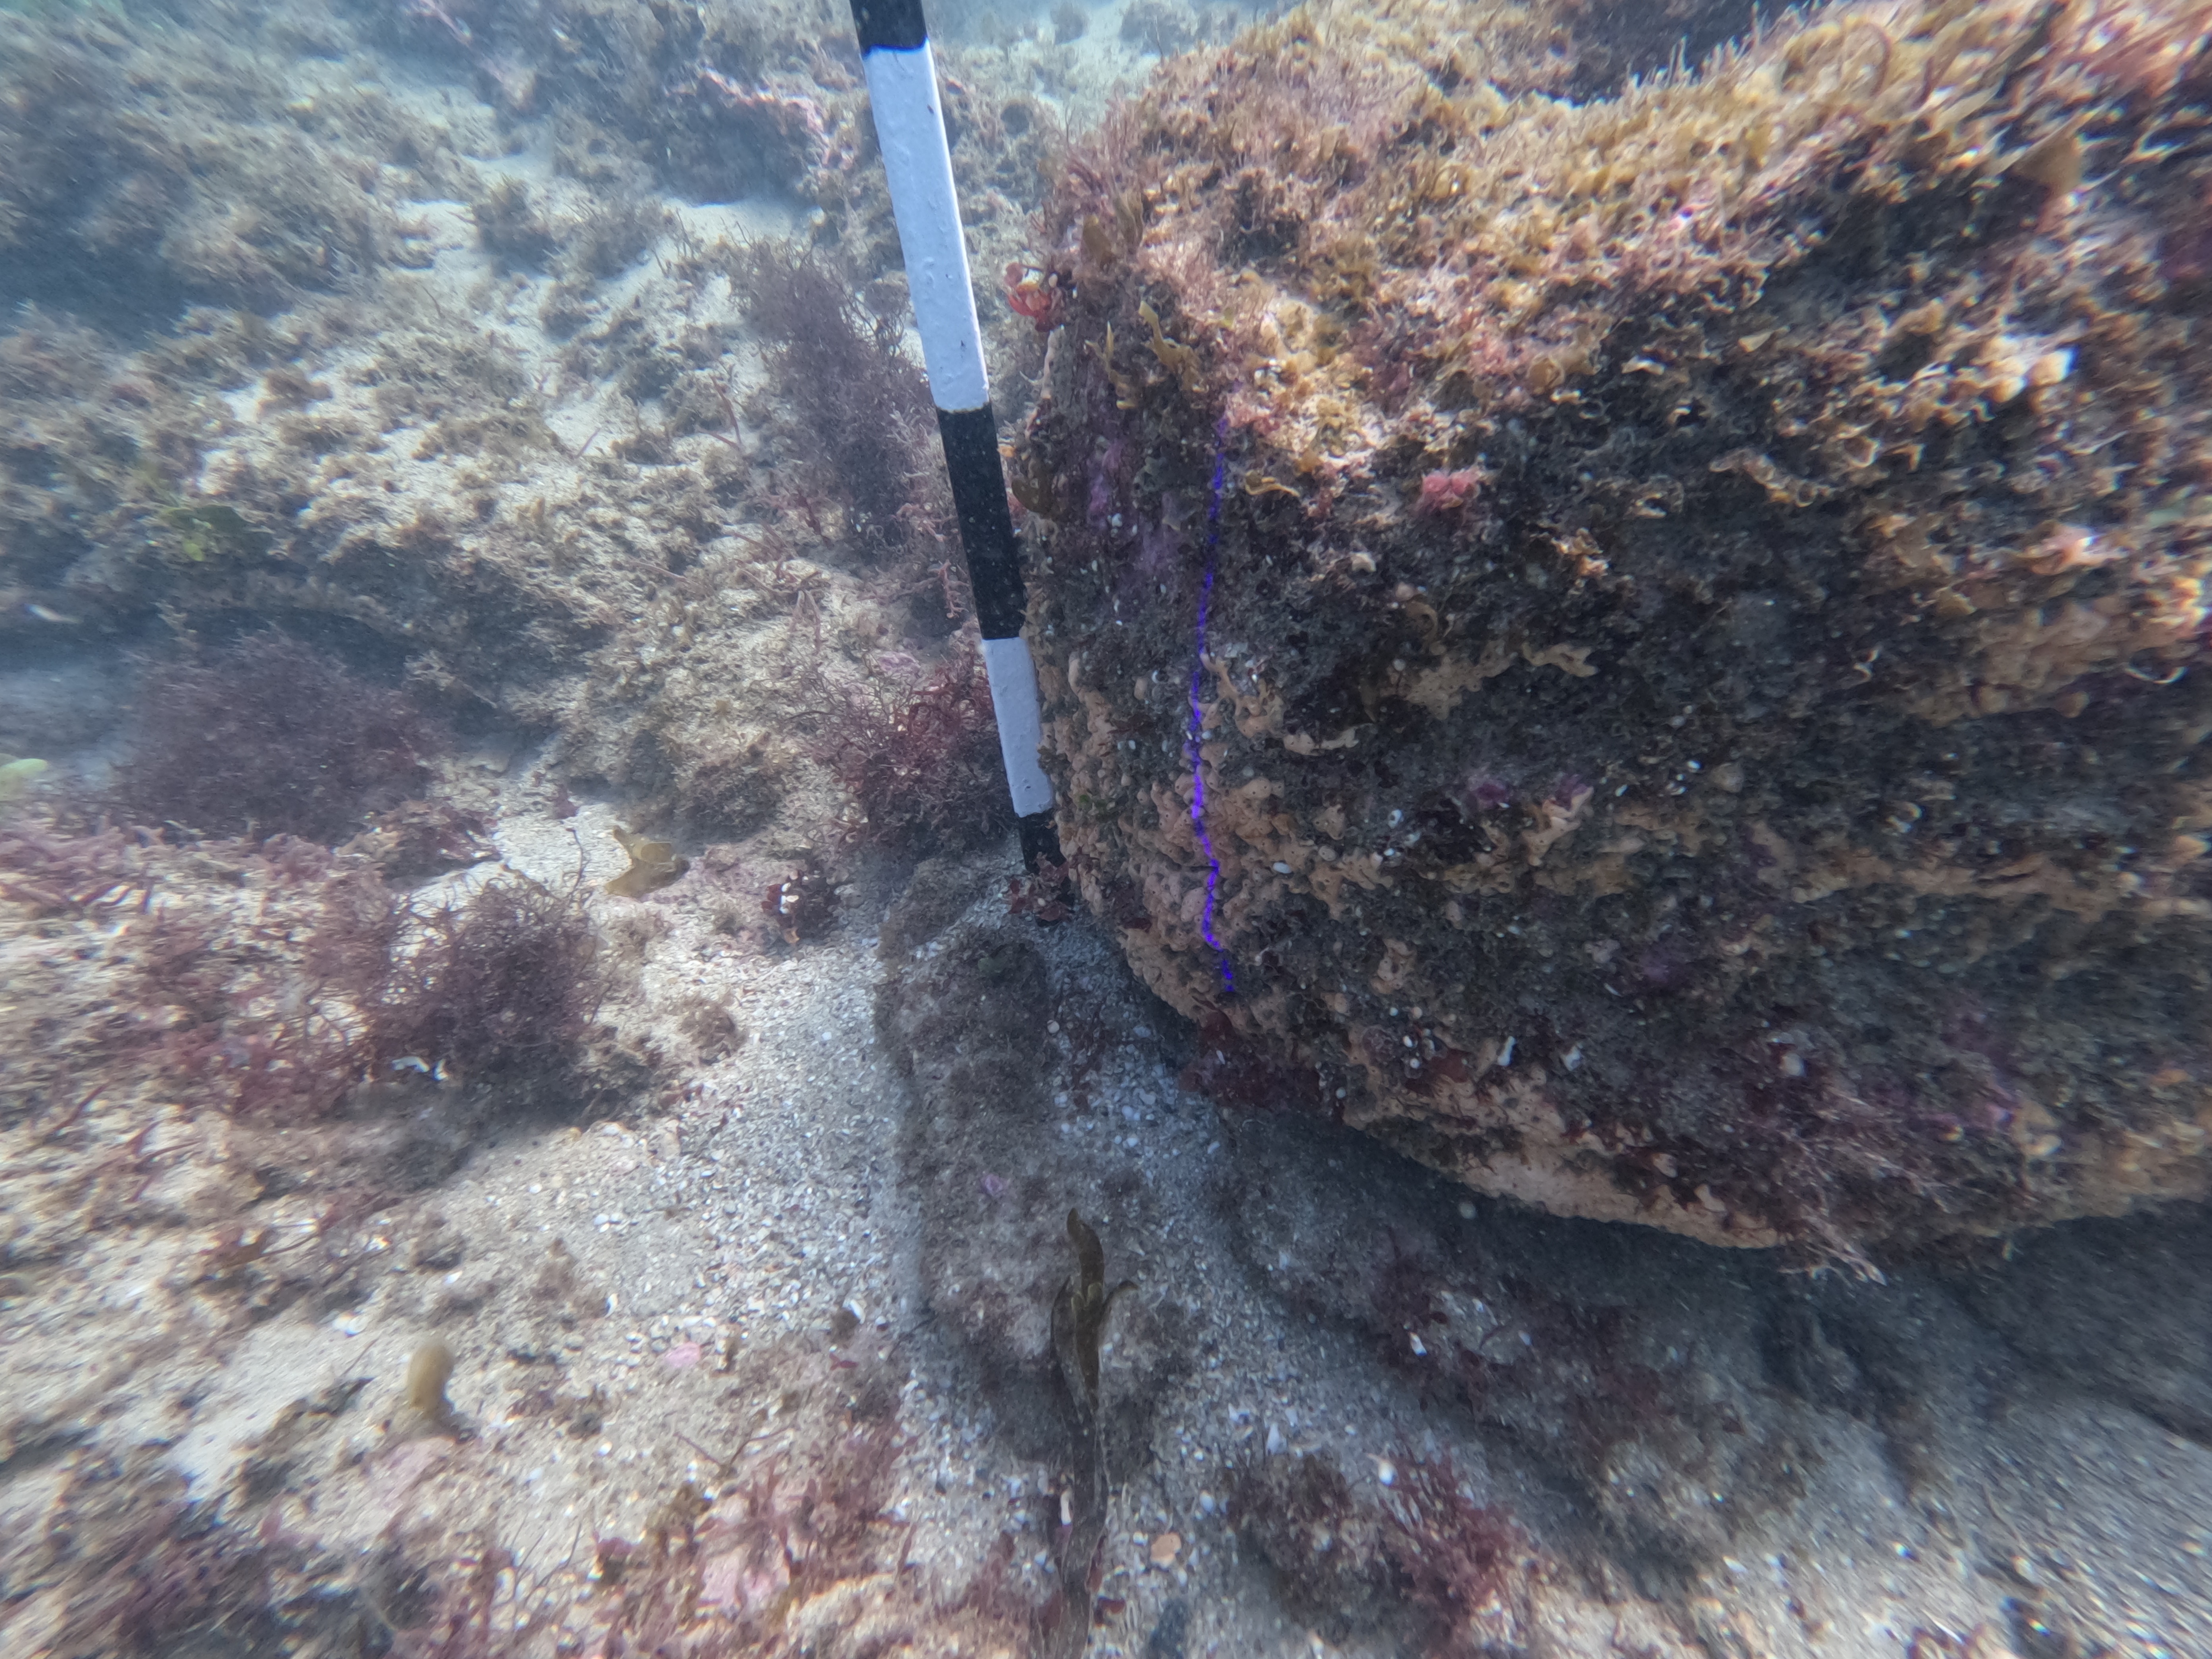

Supplement: Supplementary file 1826 [file G0028152.pdf › Ocean1/G0028152.pdf]

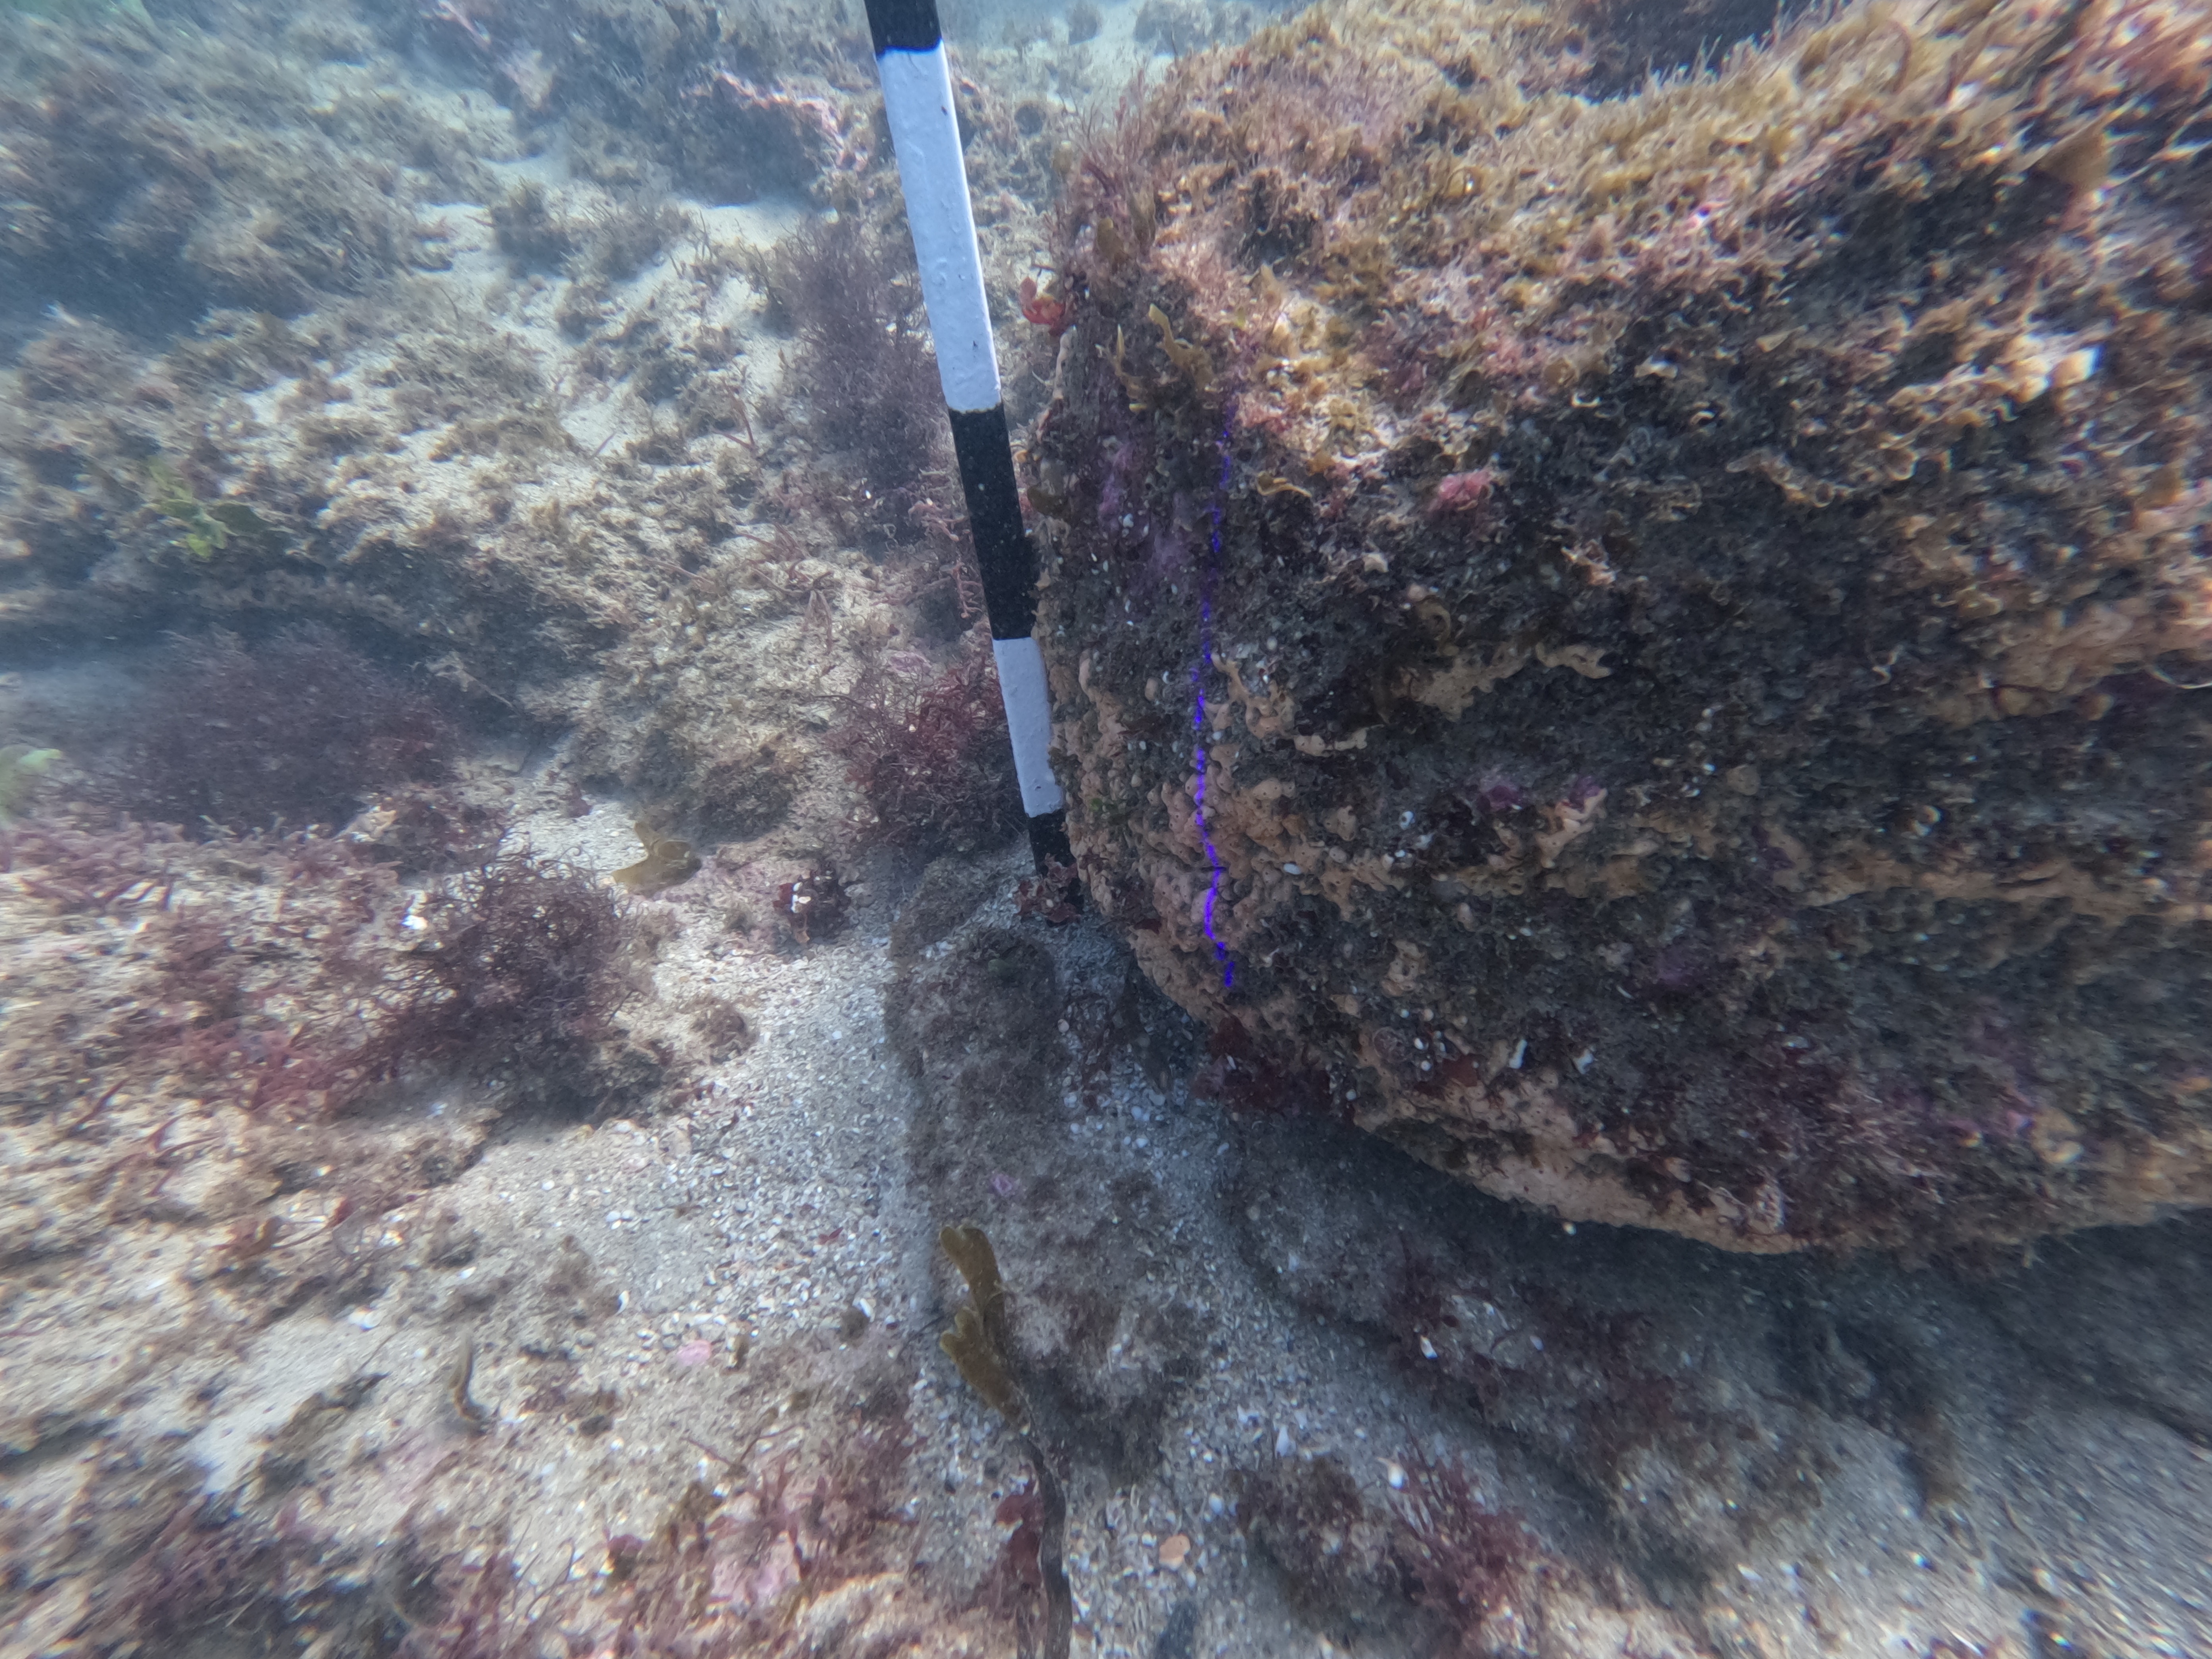

Supplement: Supplementary file 1827 [file G0028153.pdf › Ocean1/G0028153.pdf]

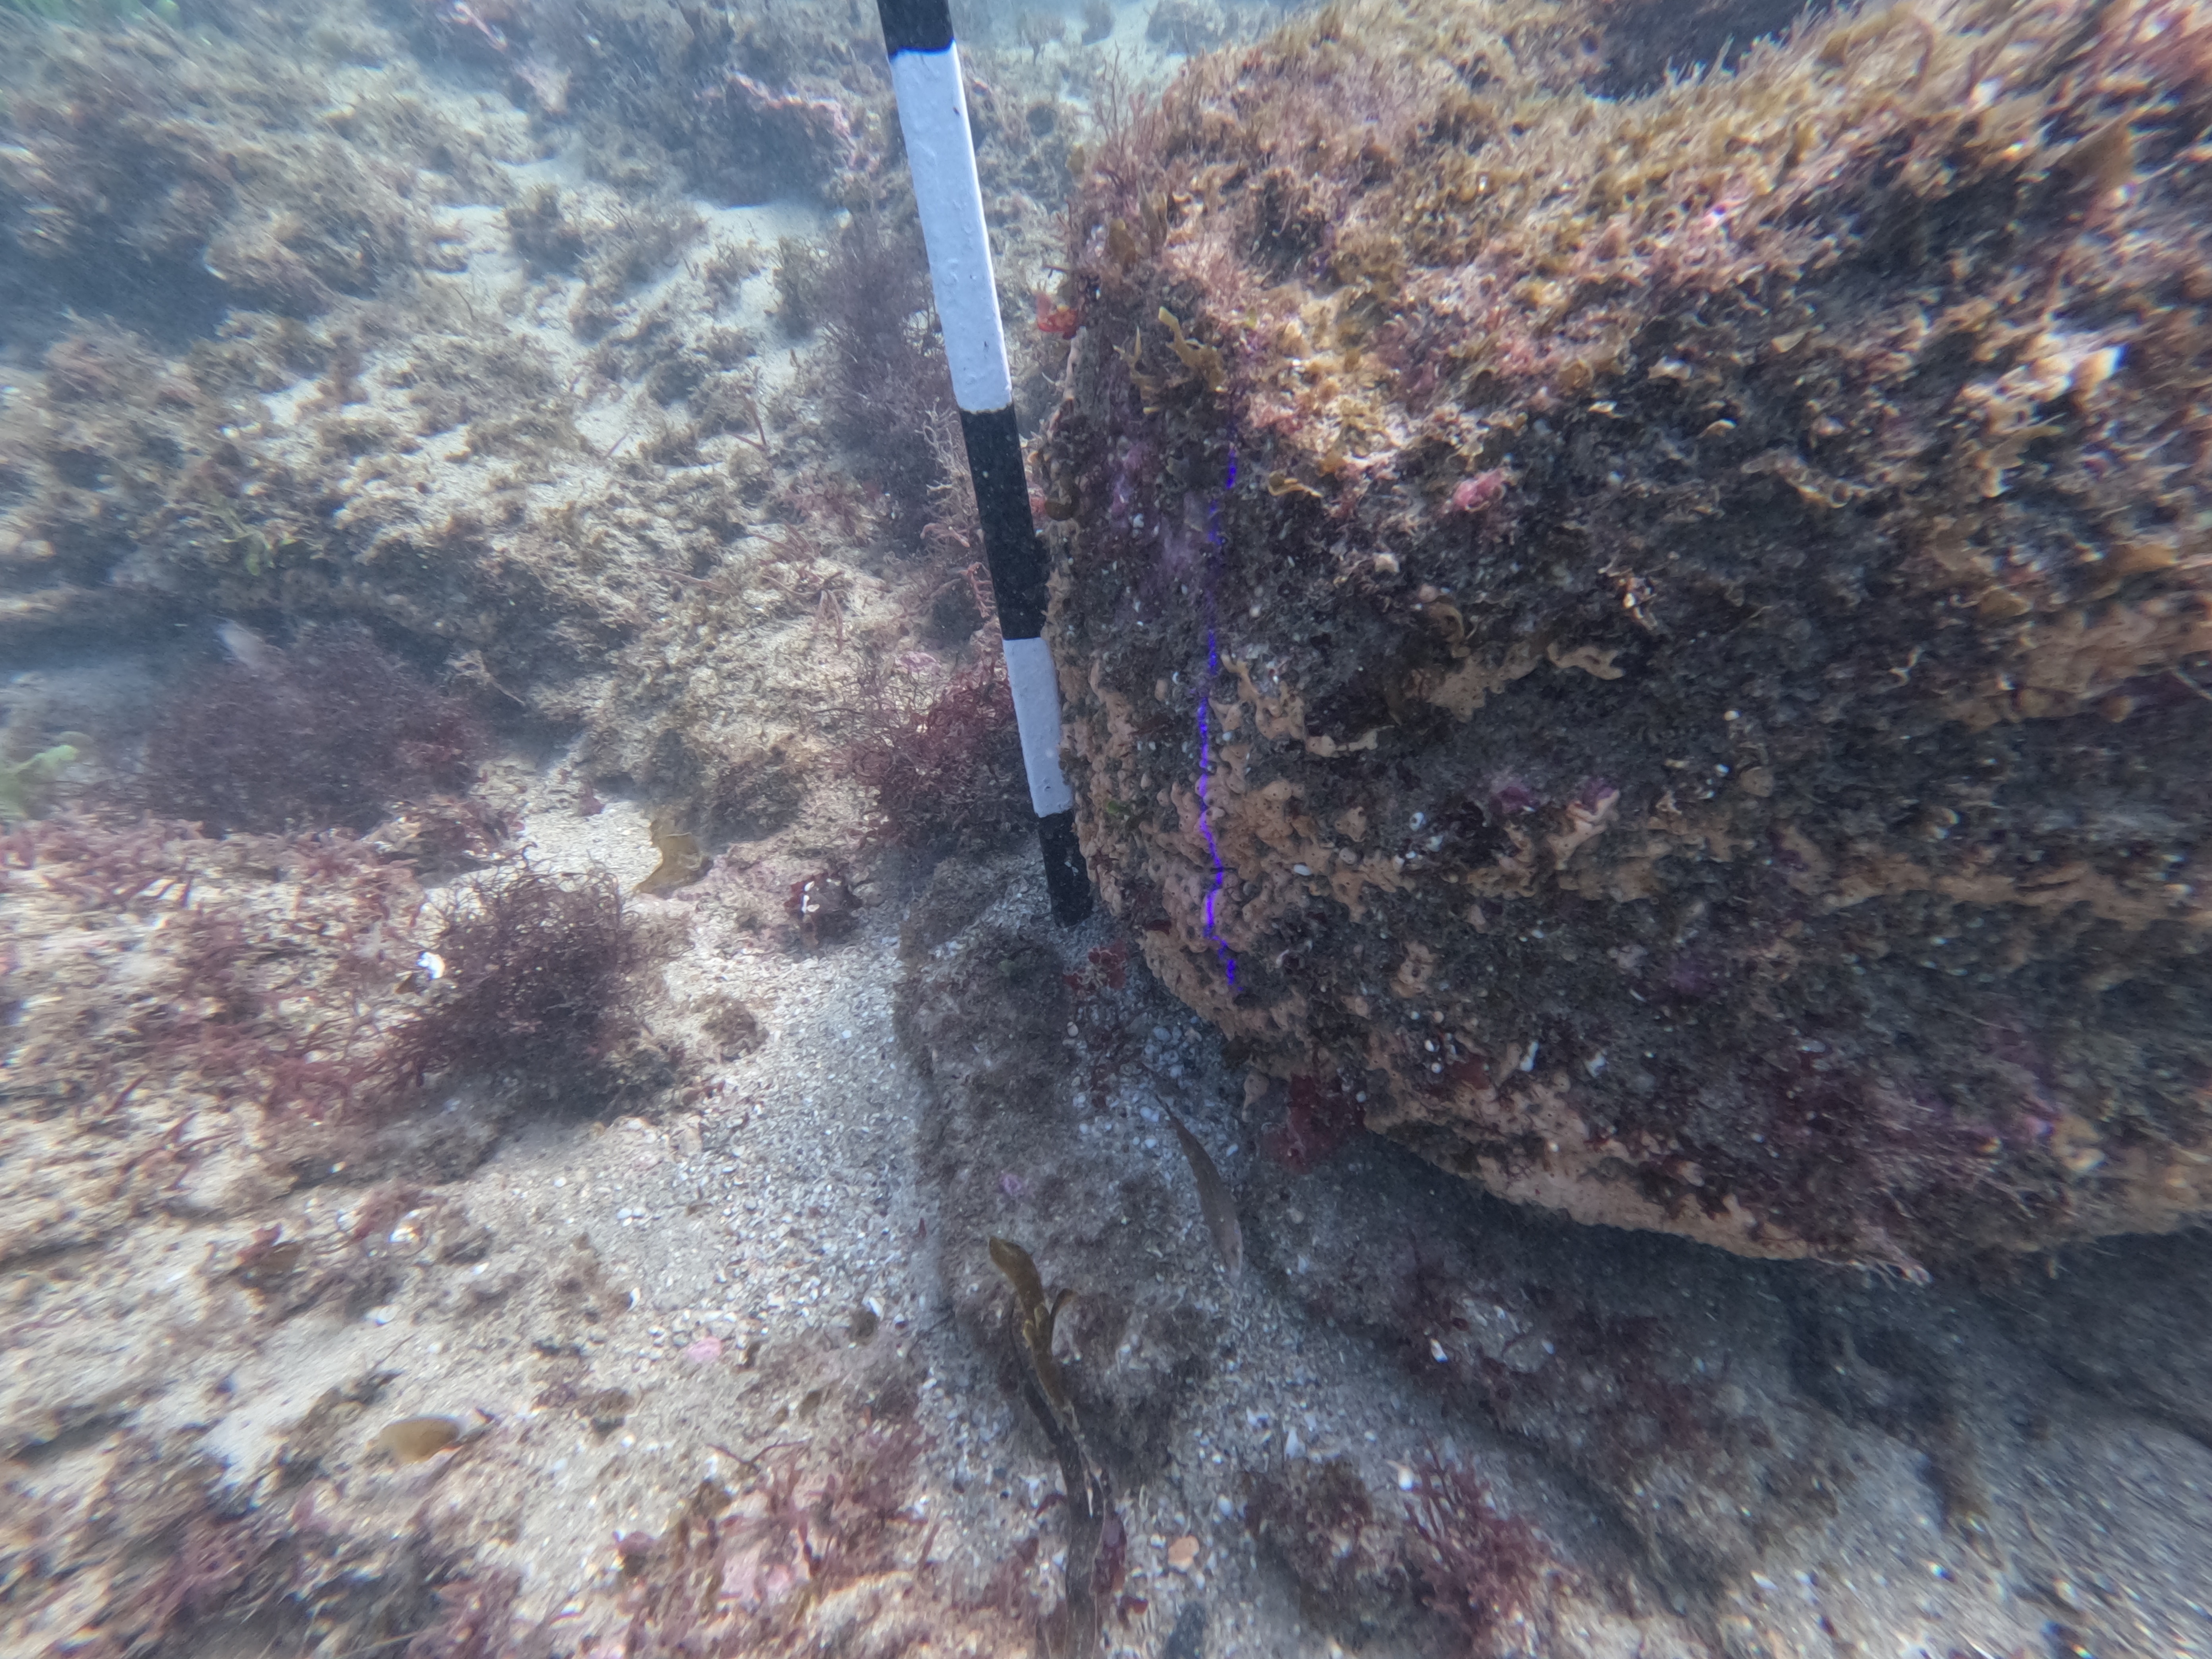

Supplement: Supplementary file 1828 [file G0028154.pdf › Ocean1/G0028154.pdf]

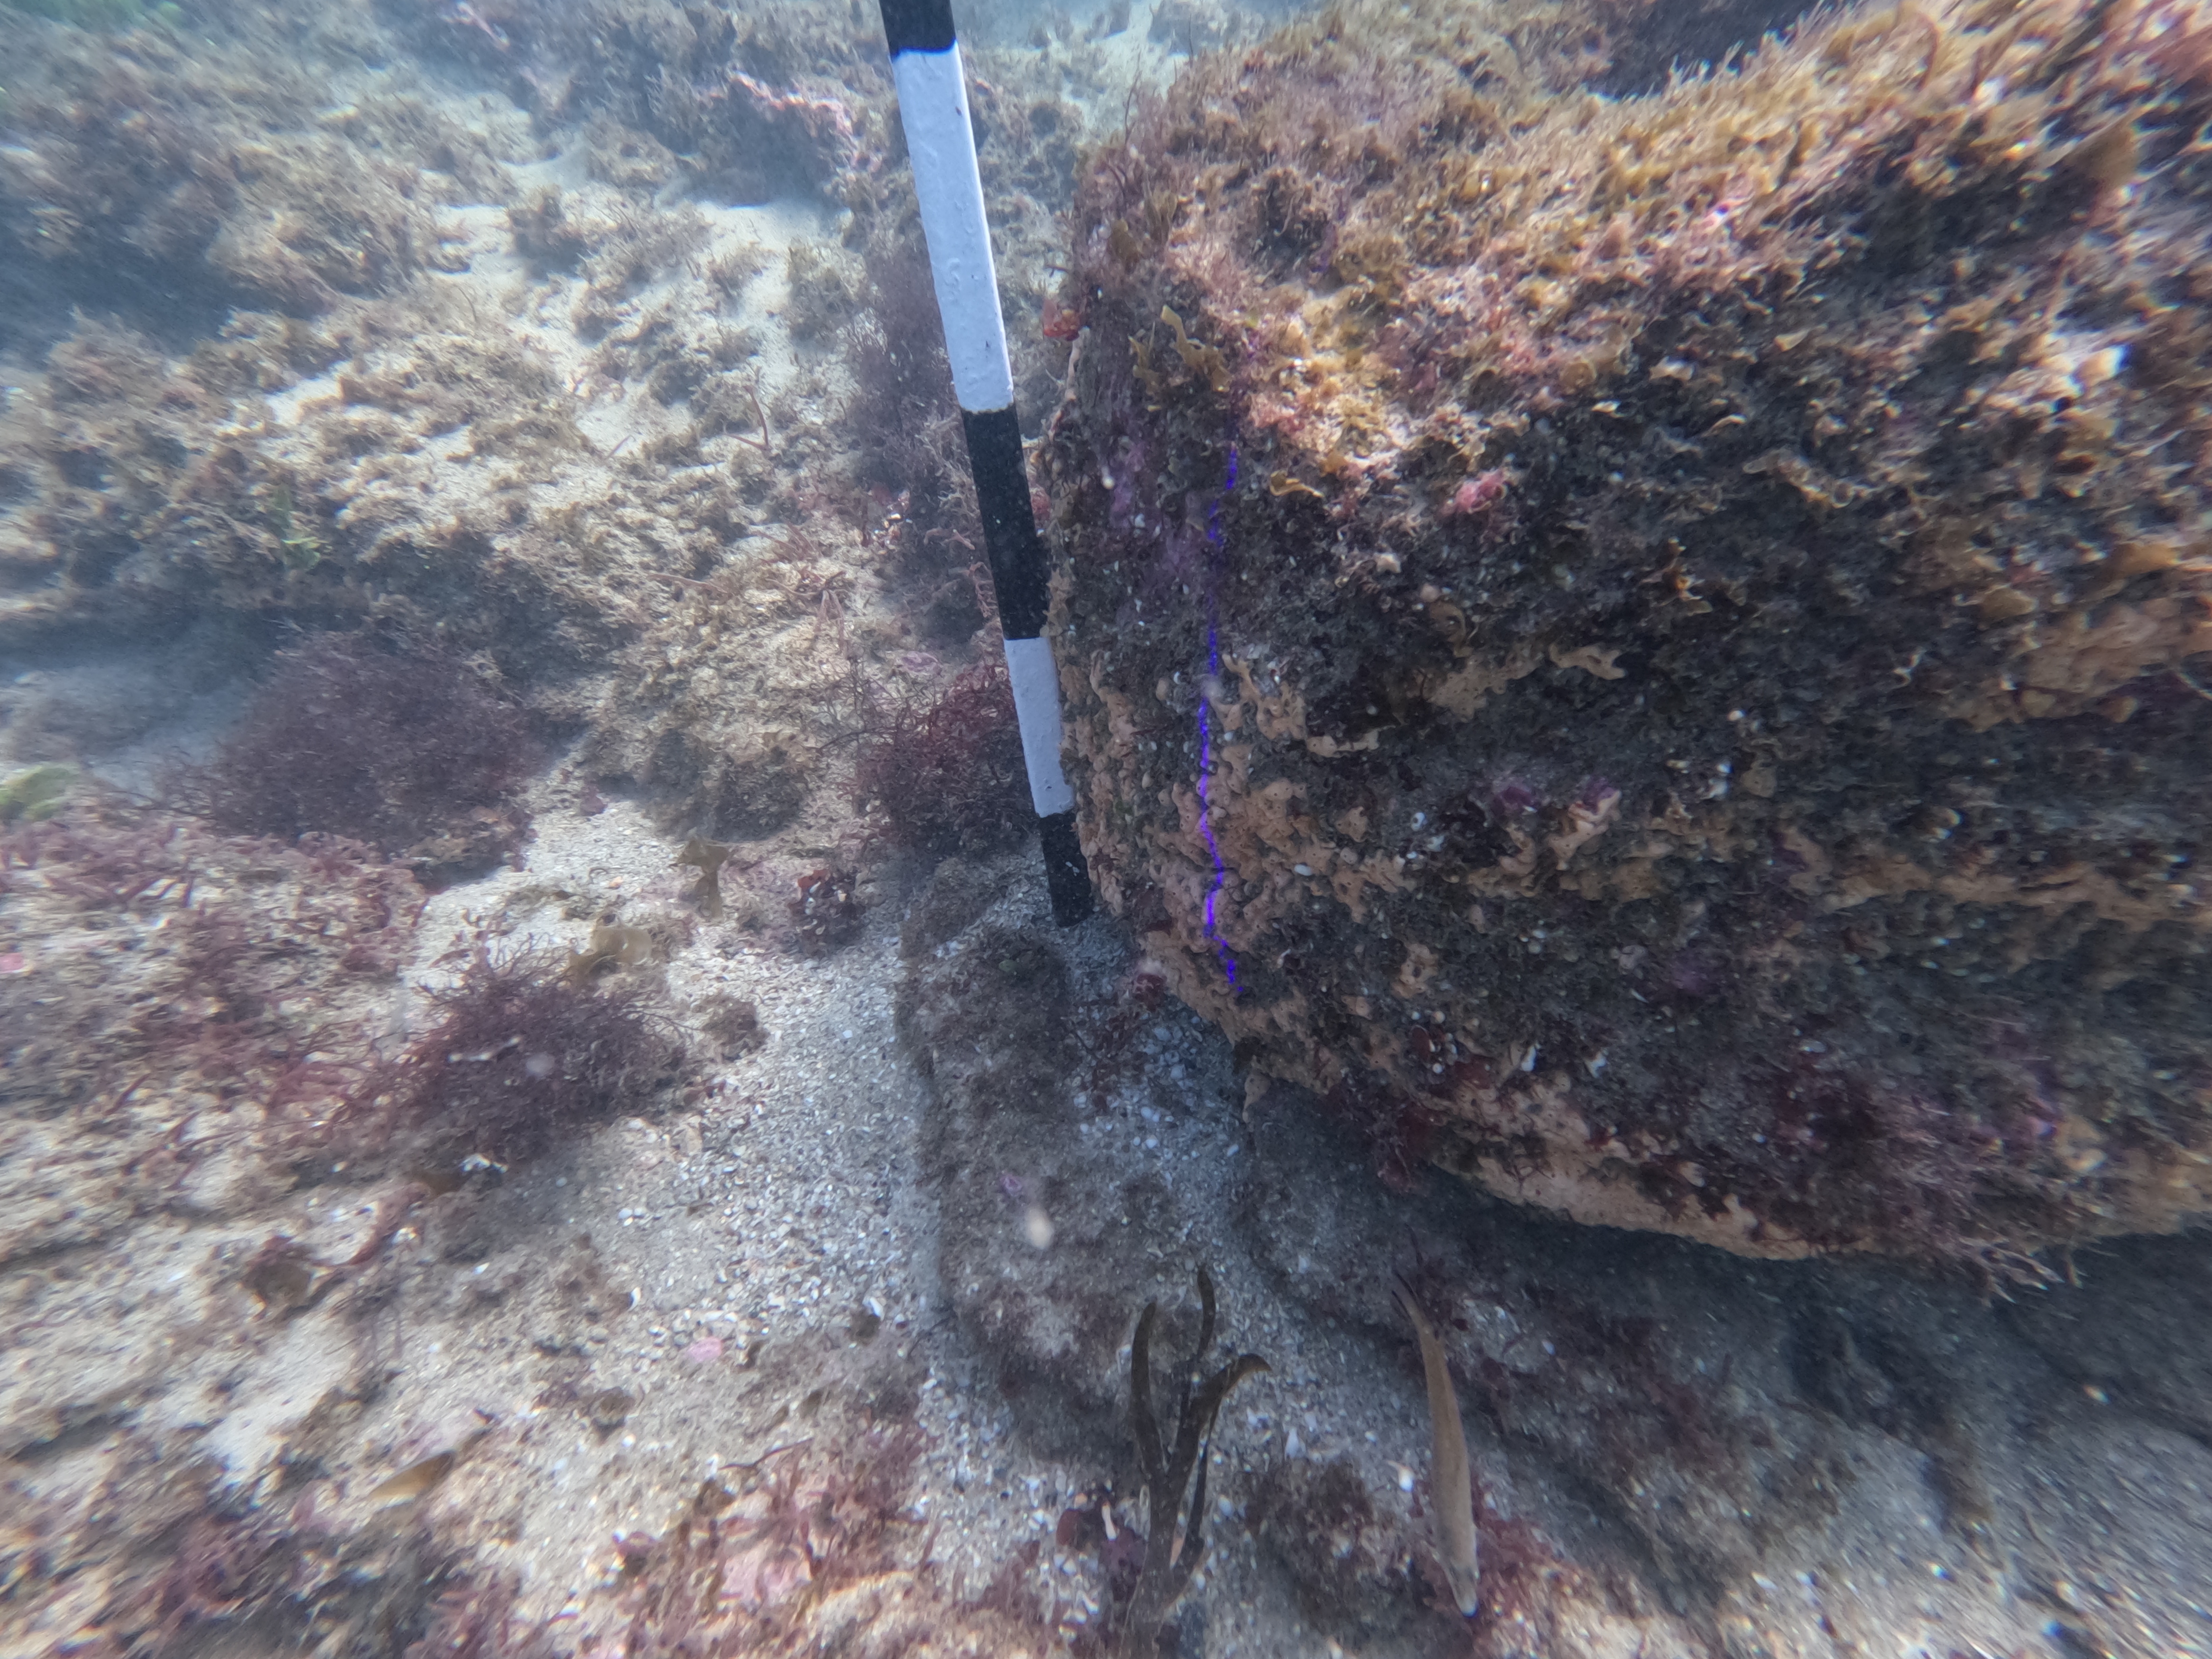

Supplement: Supplementary file 1829 [file G0028155.pdf › Ocean1/G0028155.pdf]

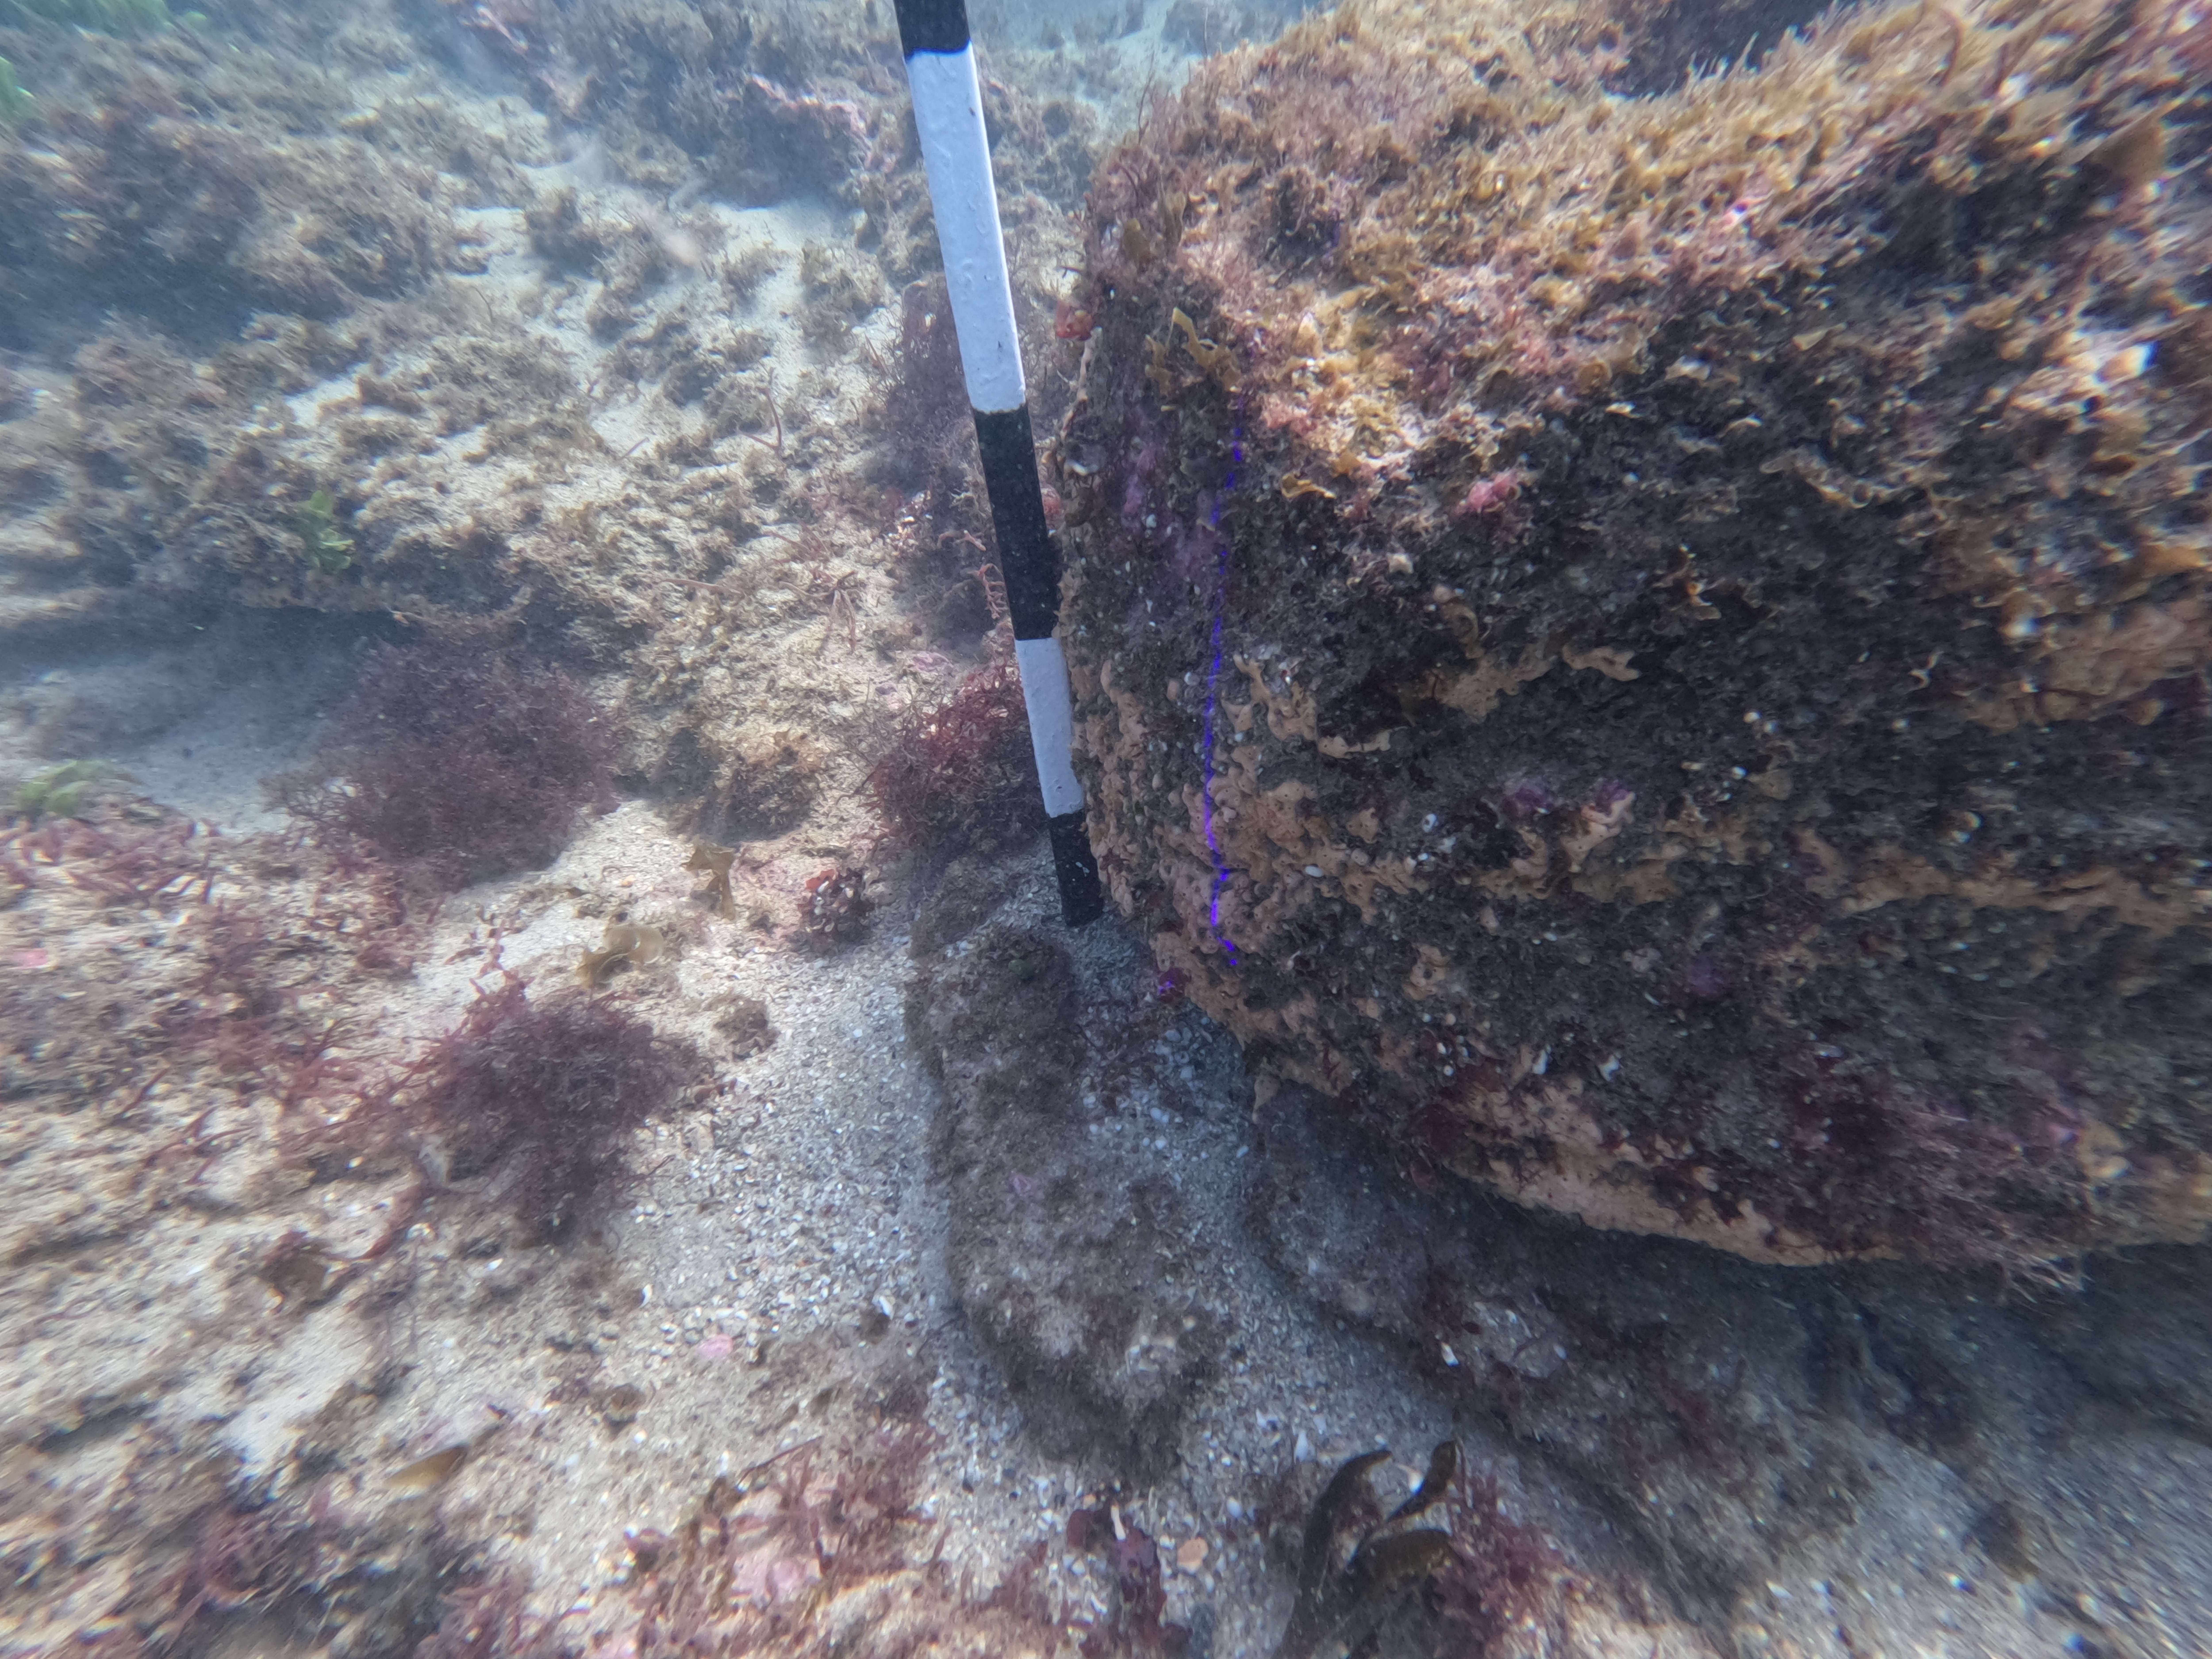

Supplement: Supplementary file 1830 [file G0028156.pdf › Ocean1/G0028156.pdf]

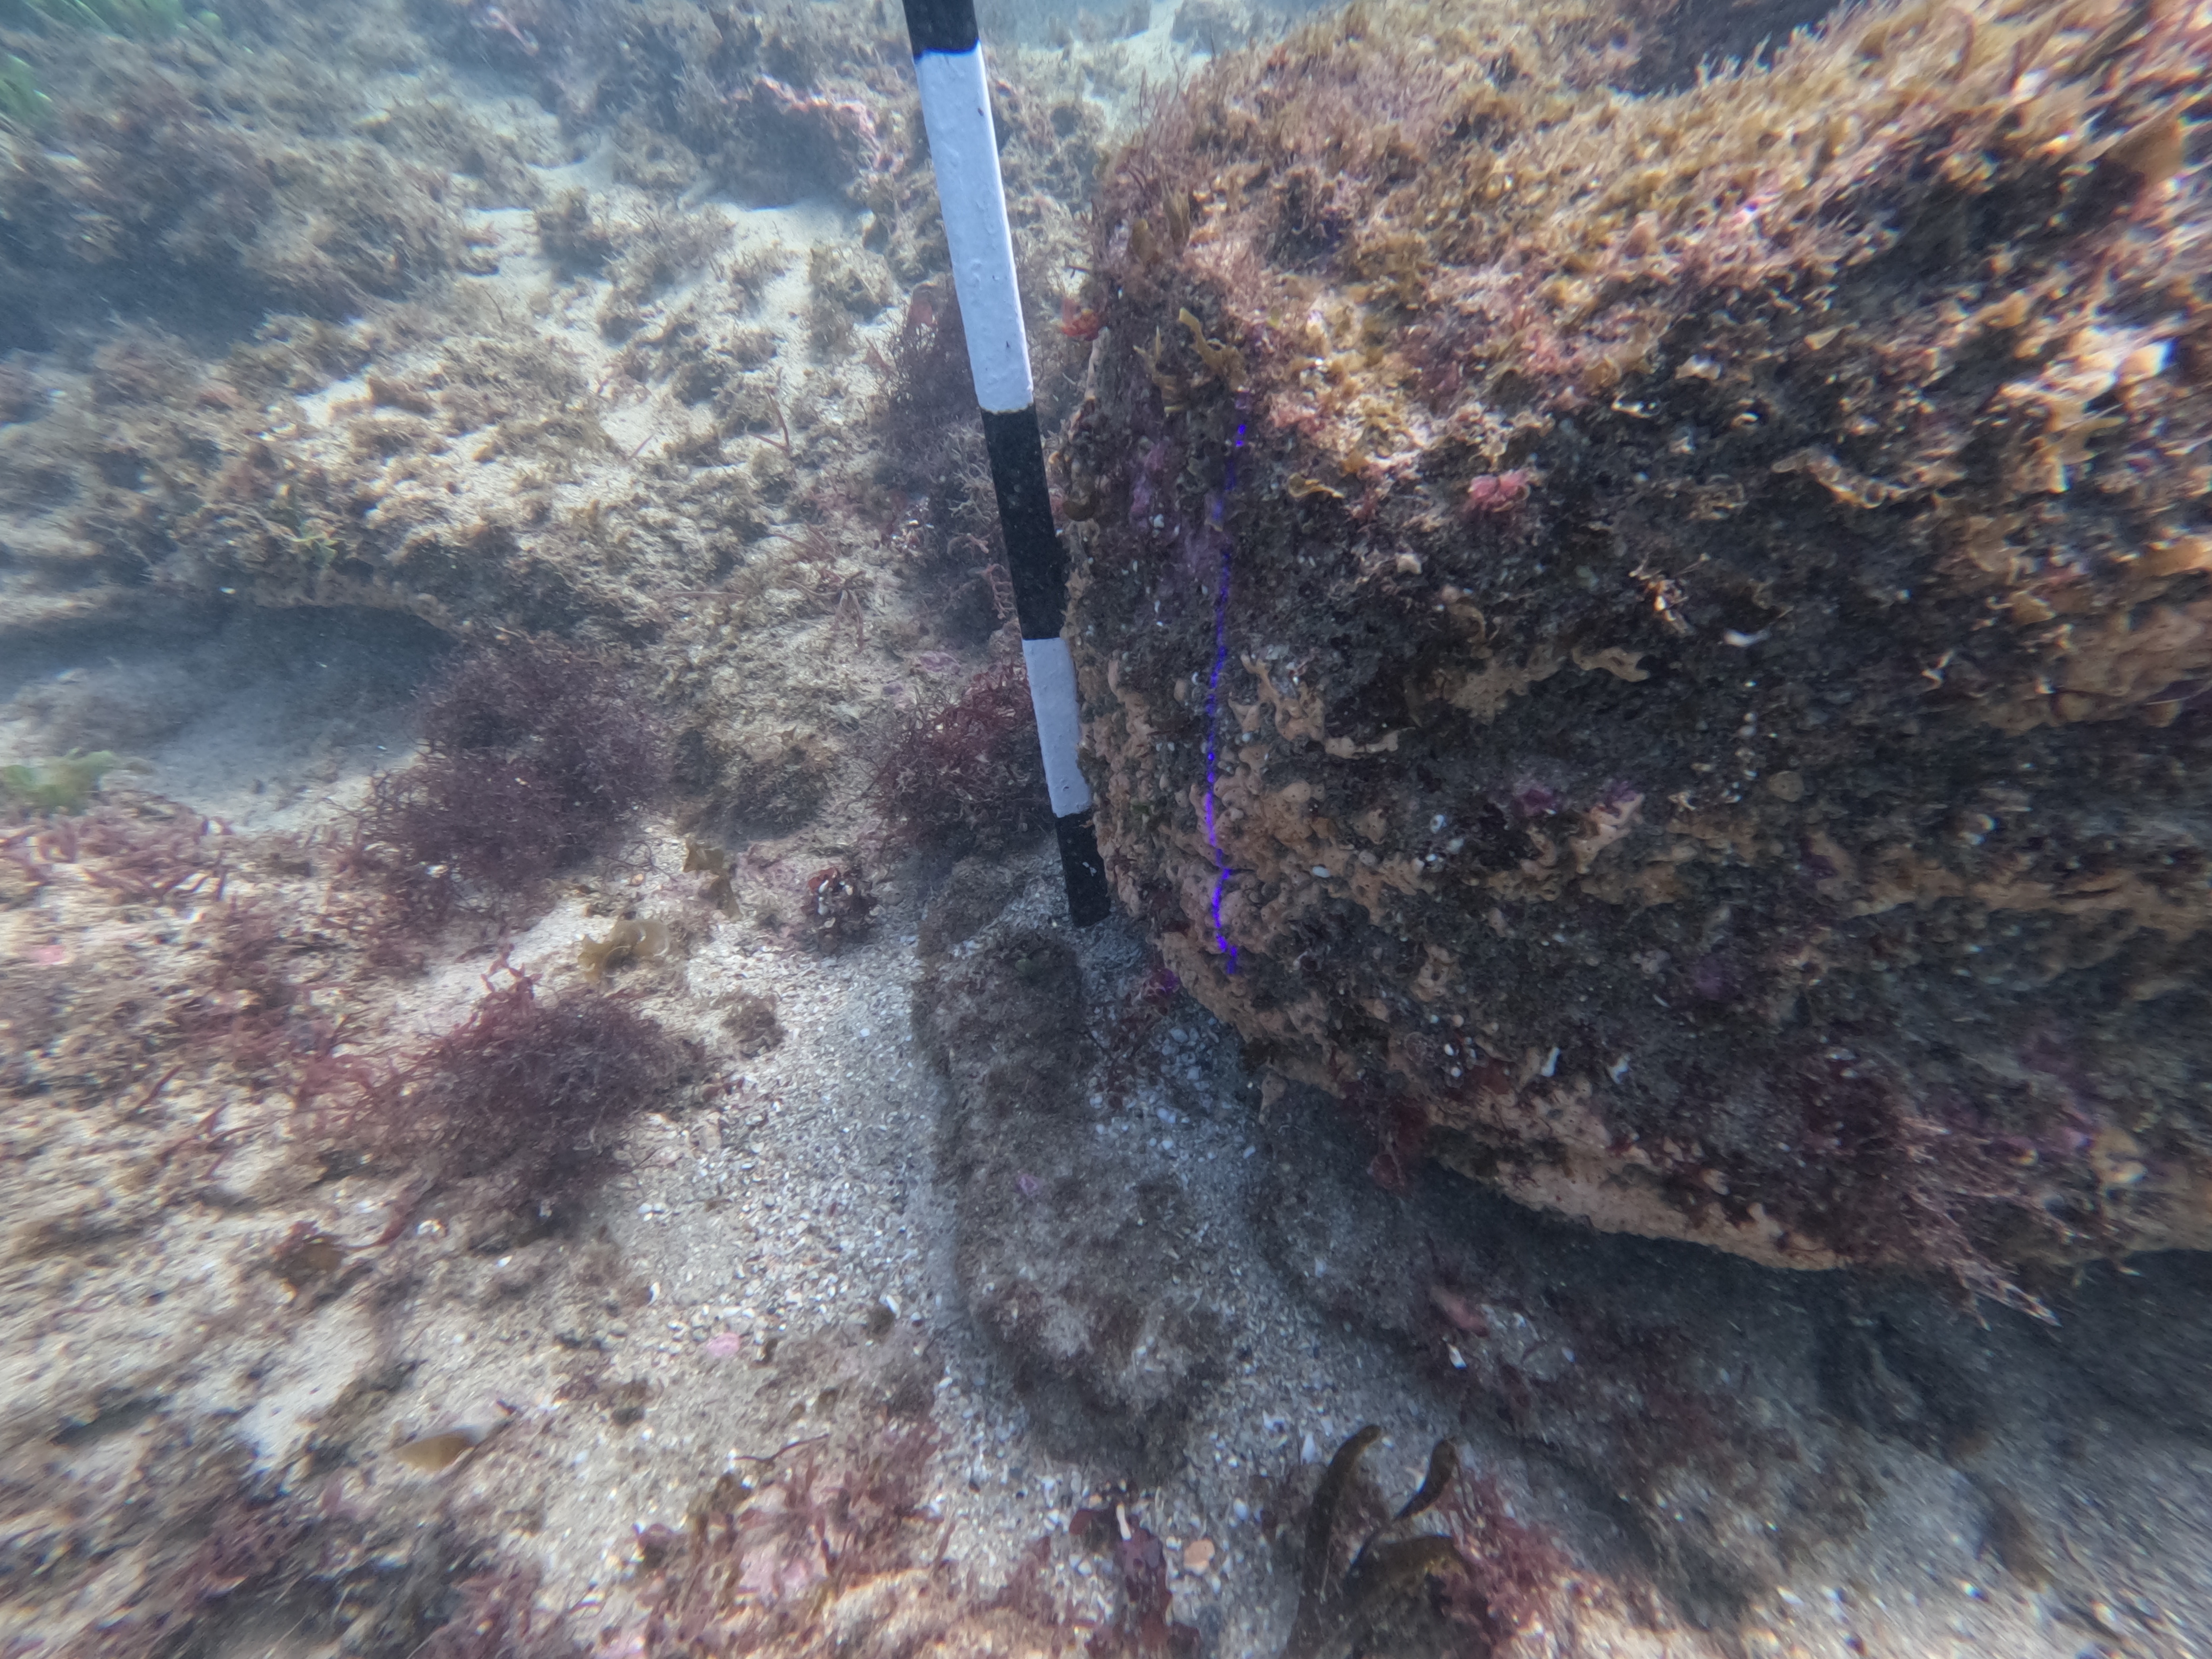

Supplement: Supplementary file 1831 [file G0028157.pdf › Ocean1/G0028157.pdf]

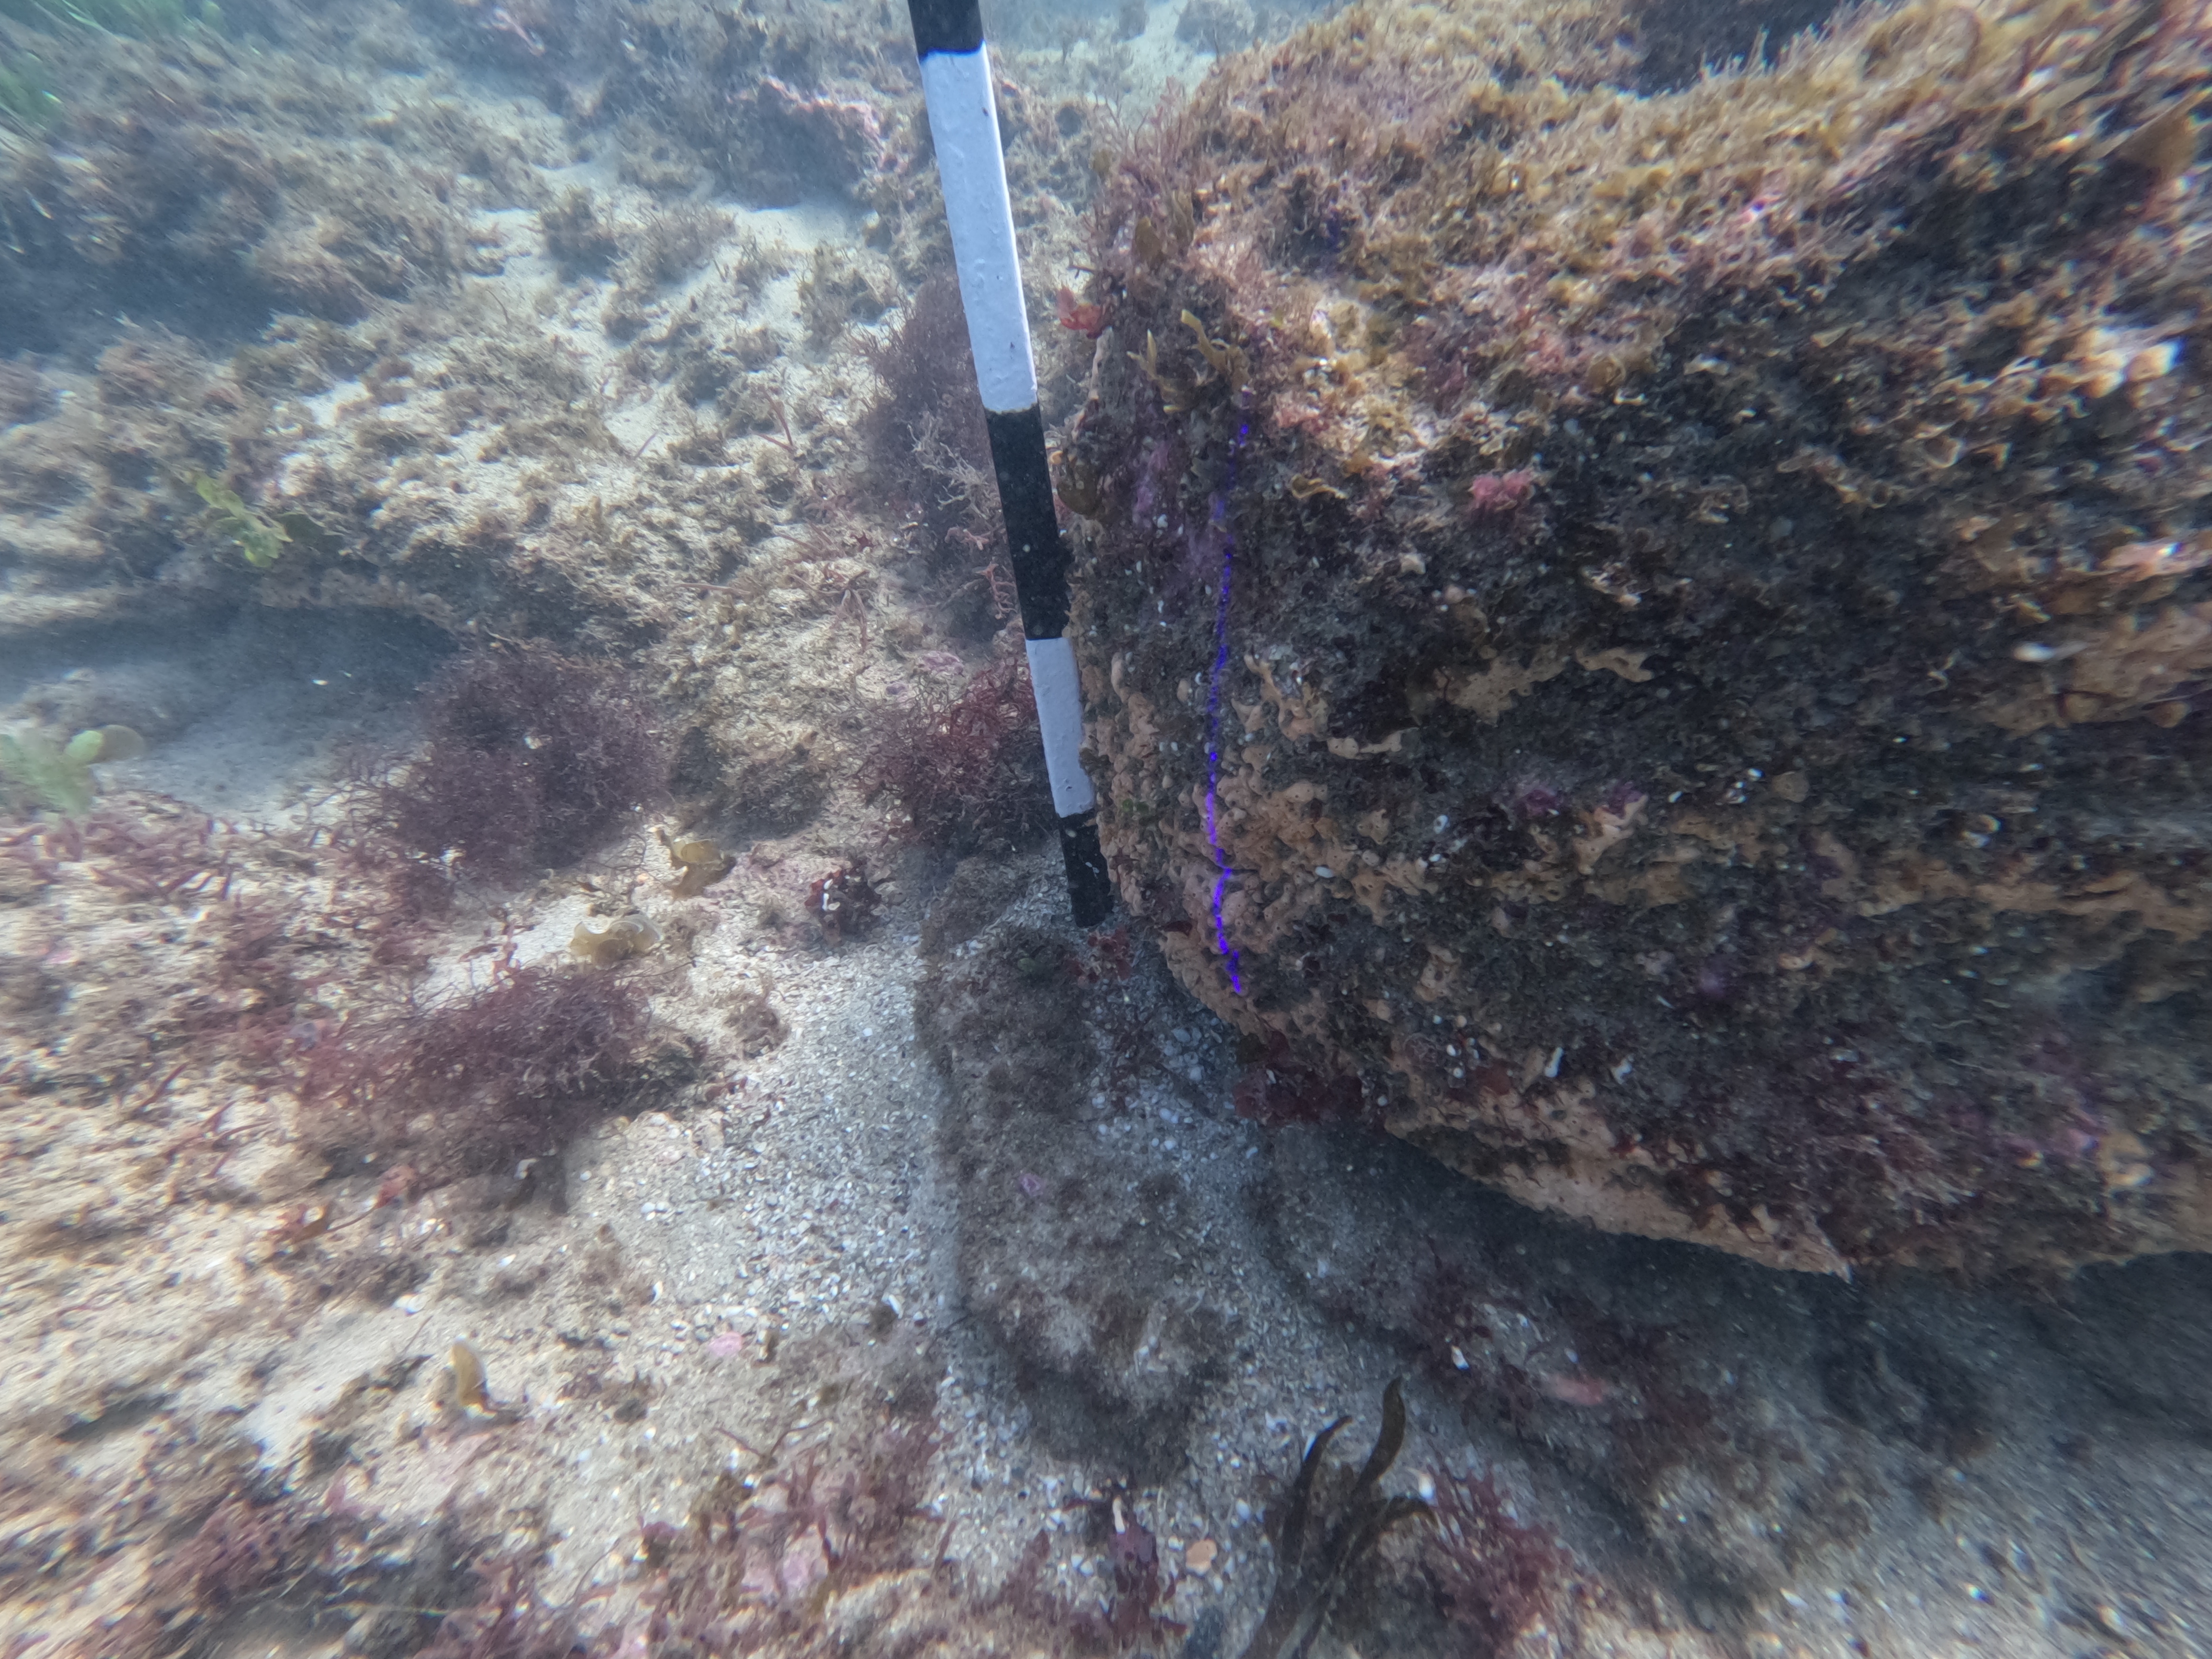

Supplement: Supplementary file 1832 [file G0028158.pdf › Ocean1/G0028158.pdf]

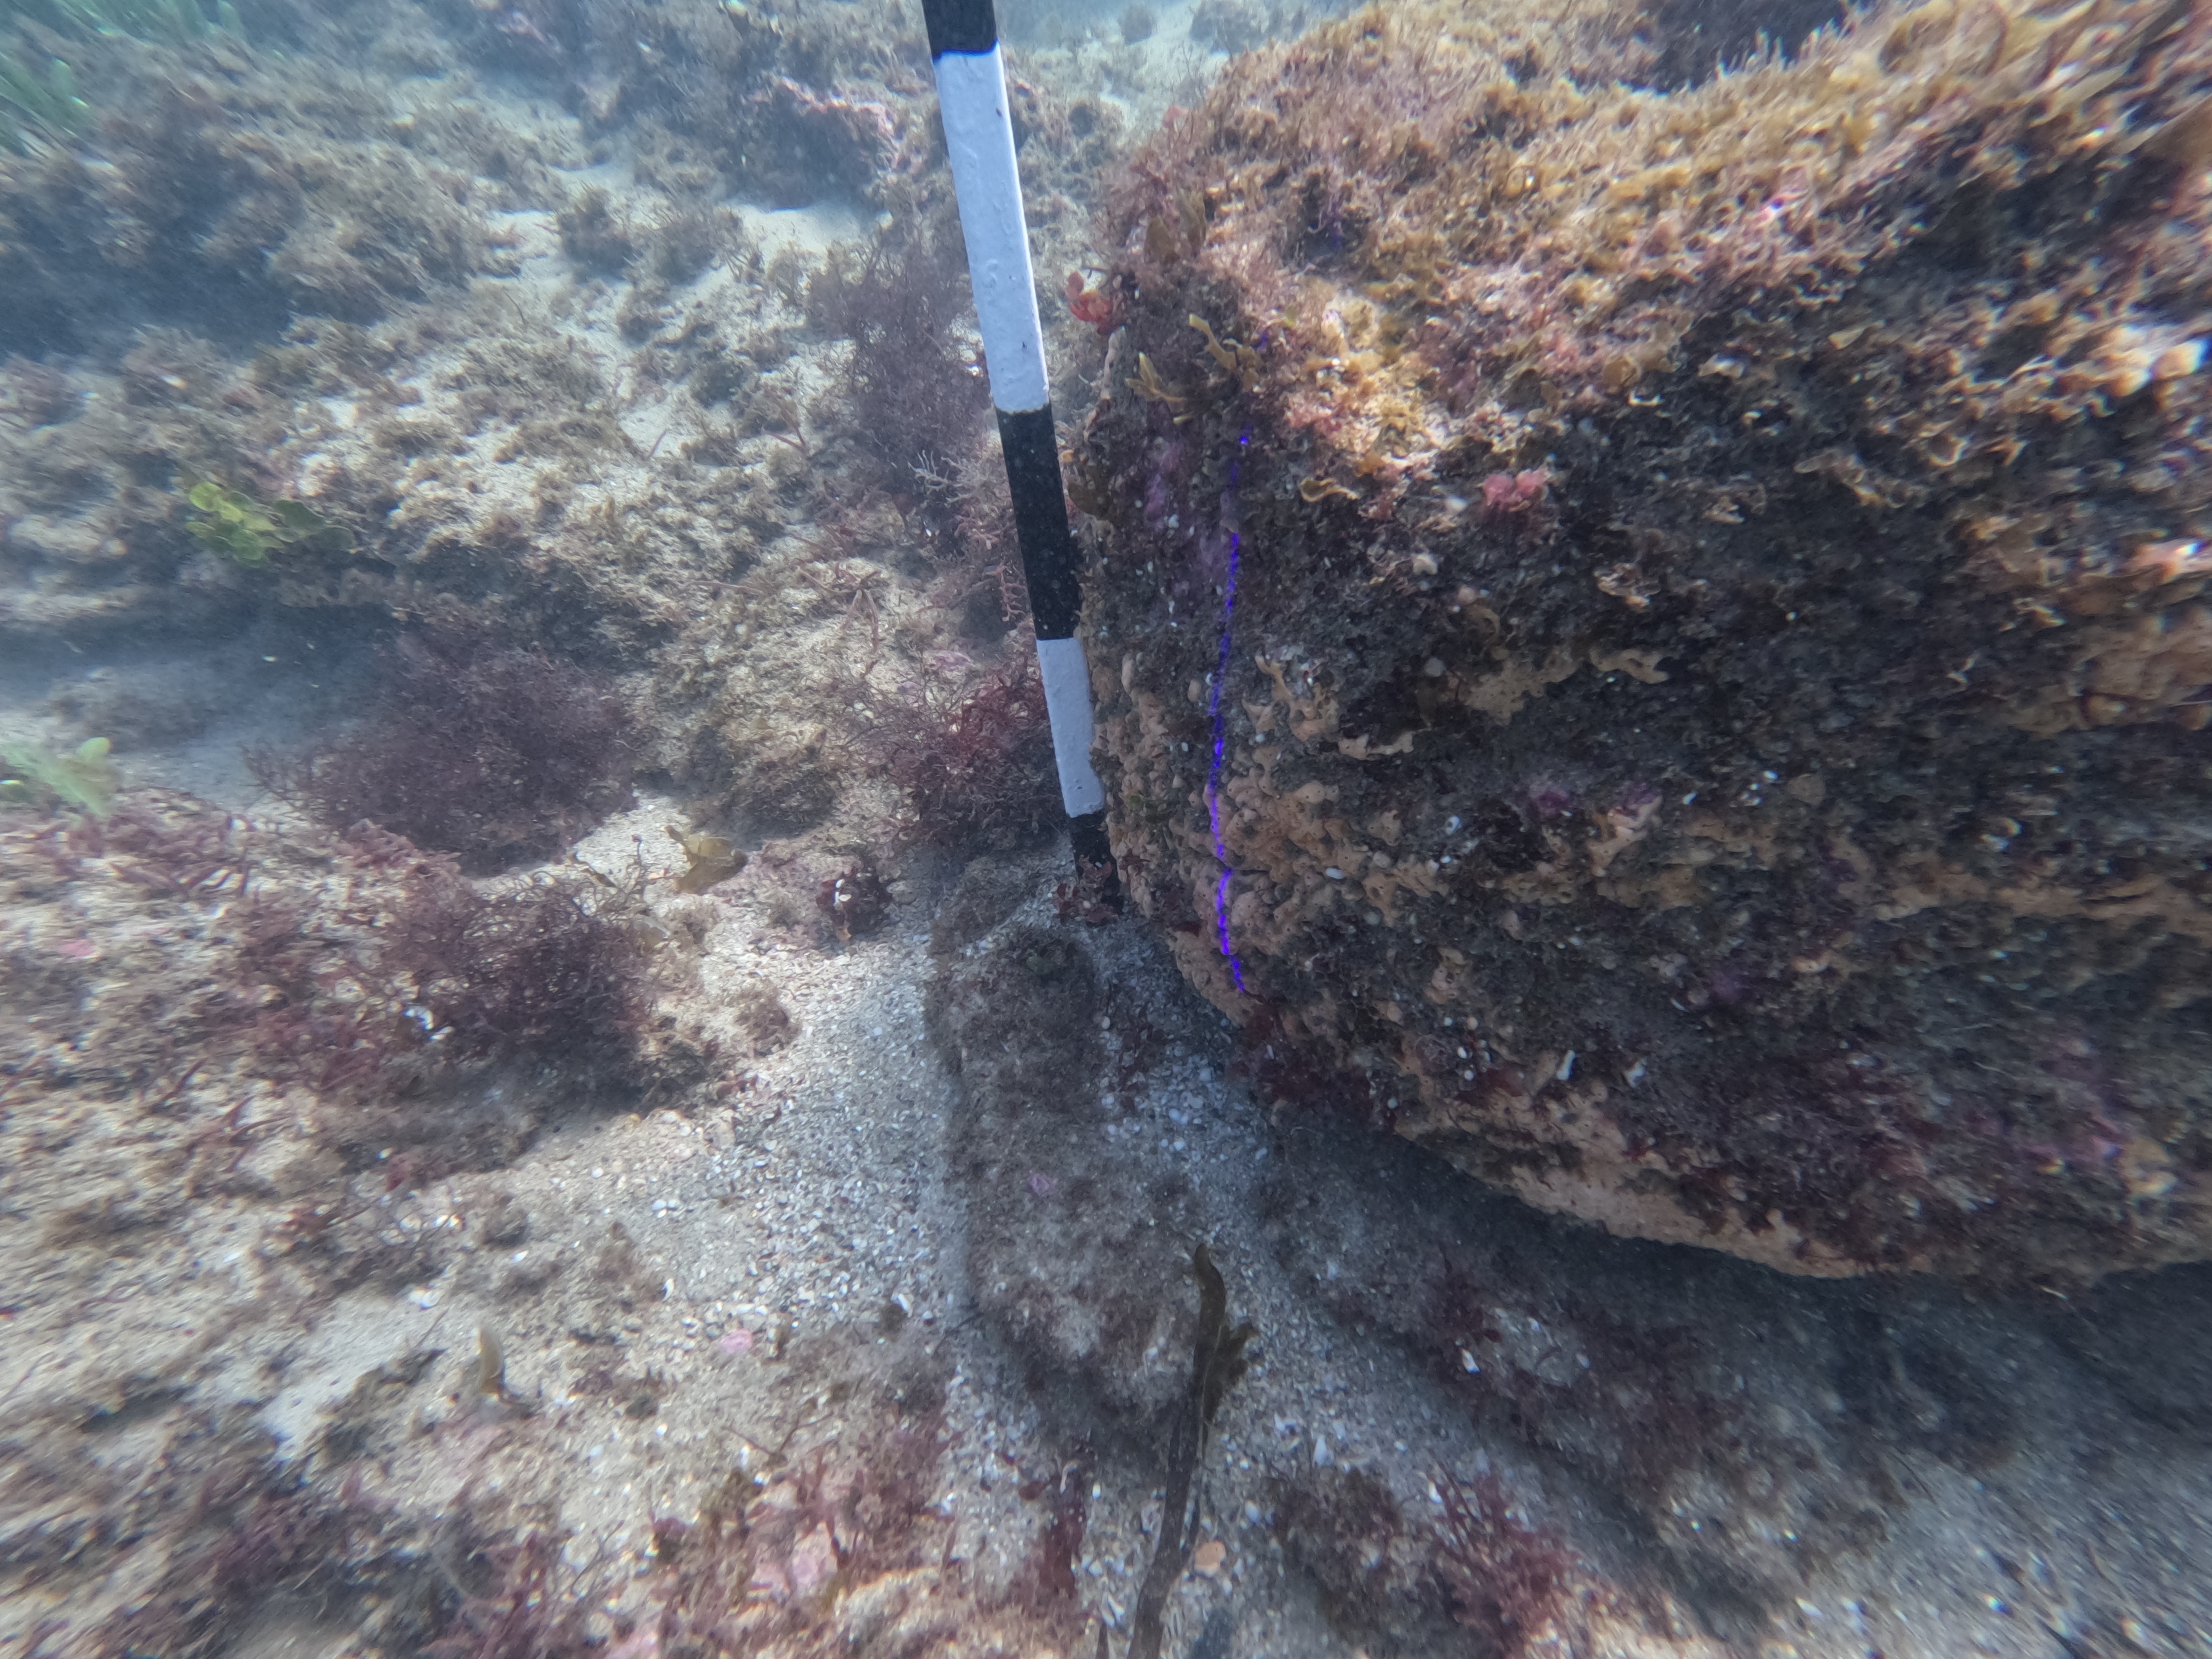

Supplement: Supplementary file 1833 [file G0028159.pdf › Ocean1/G0028159.pdf]

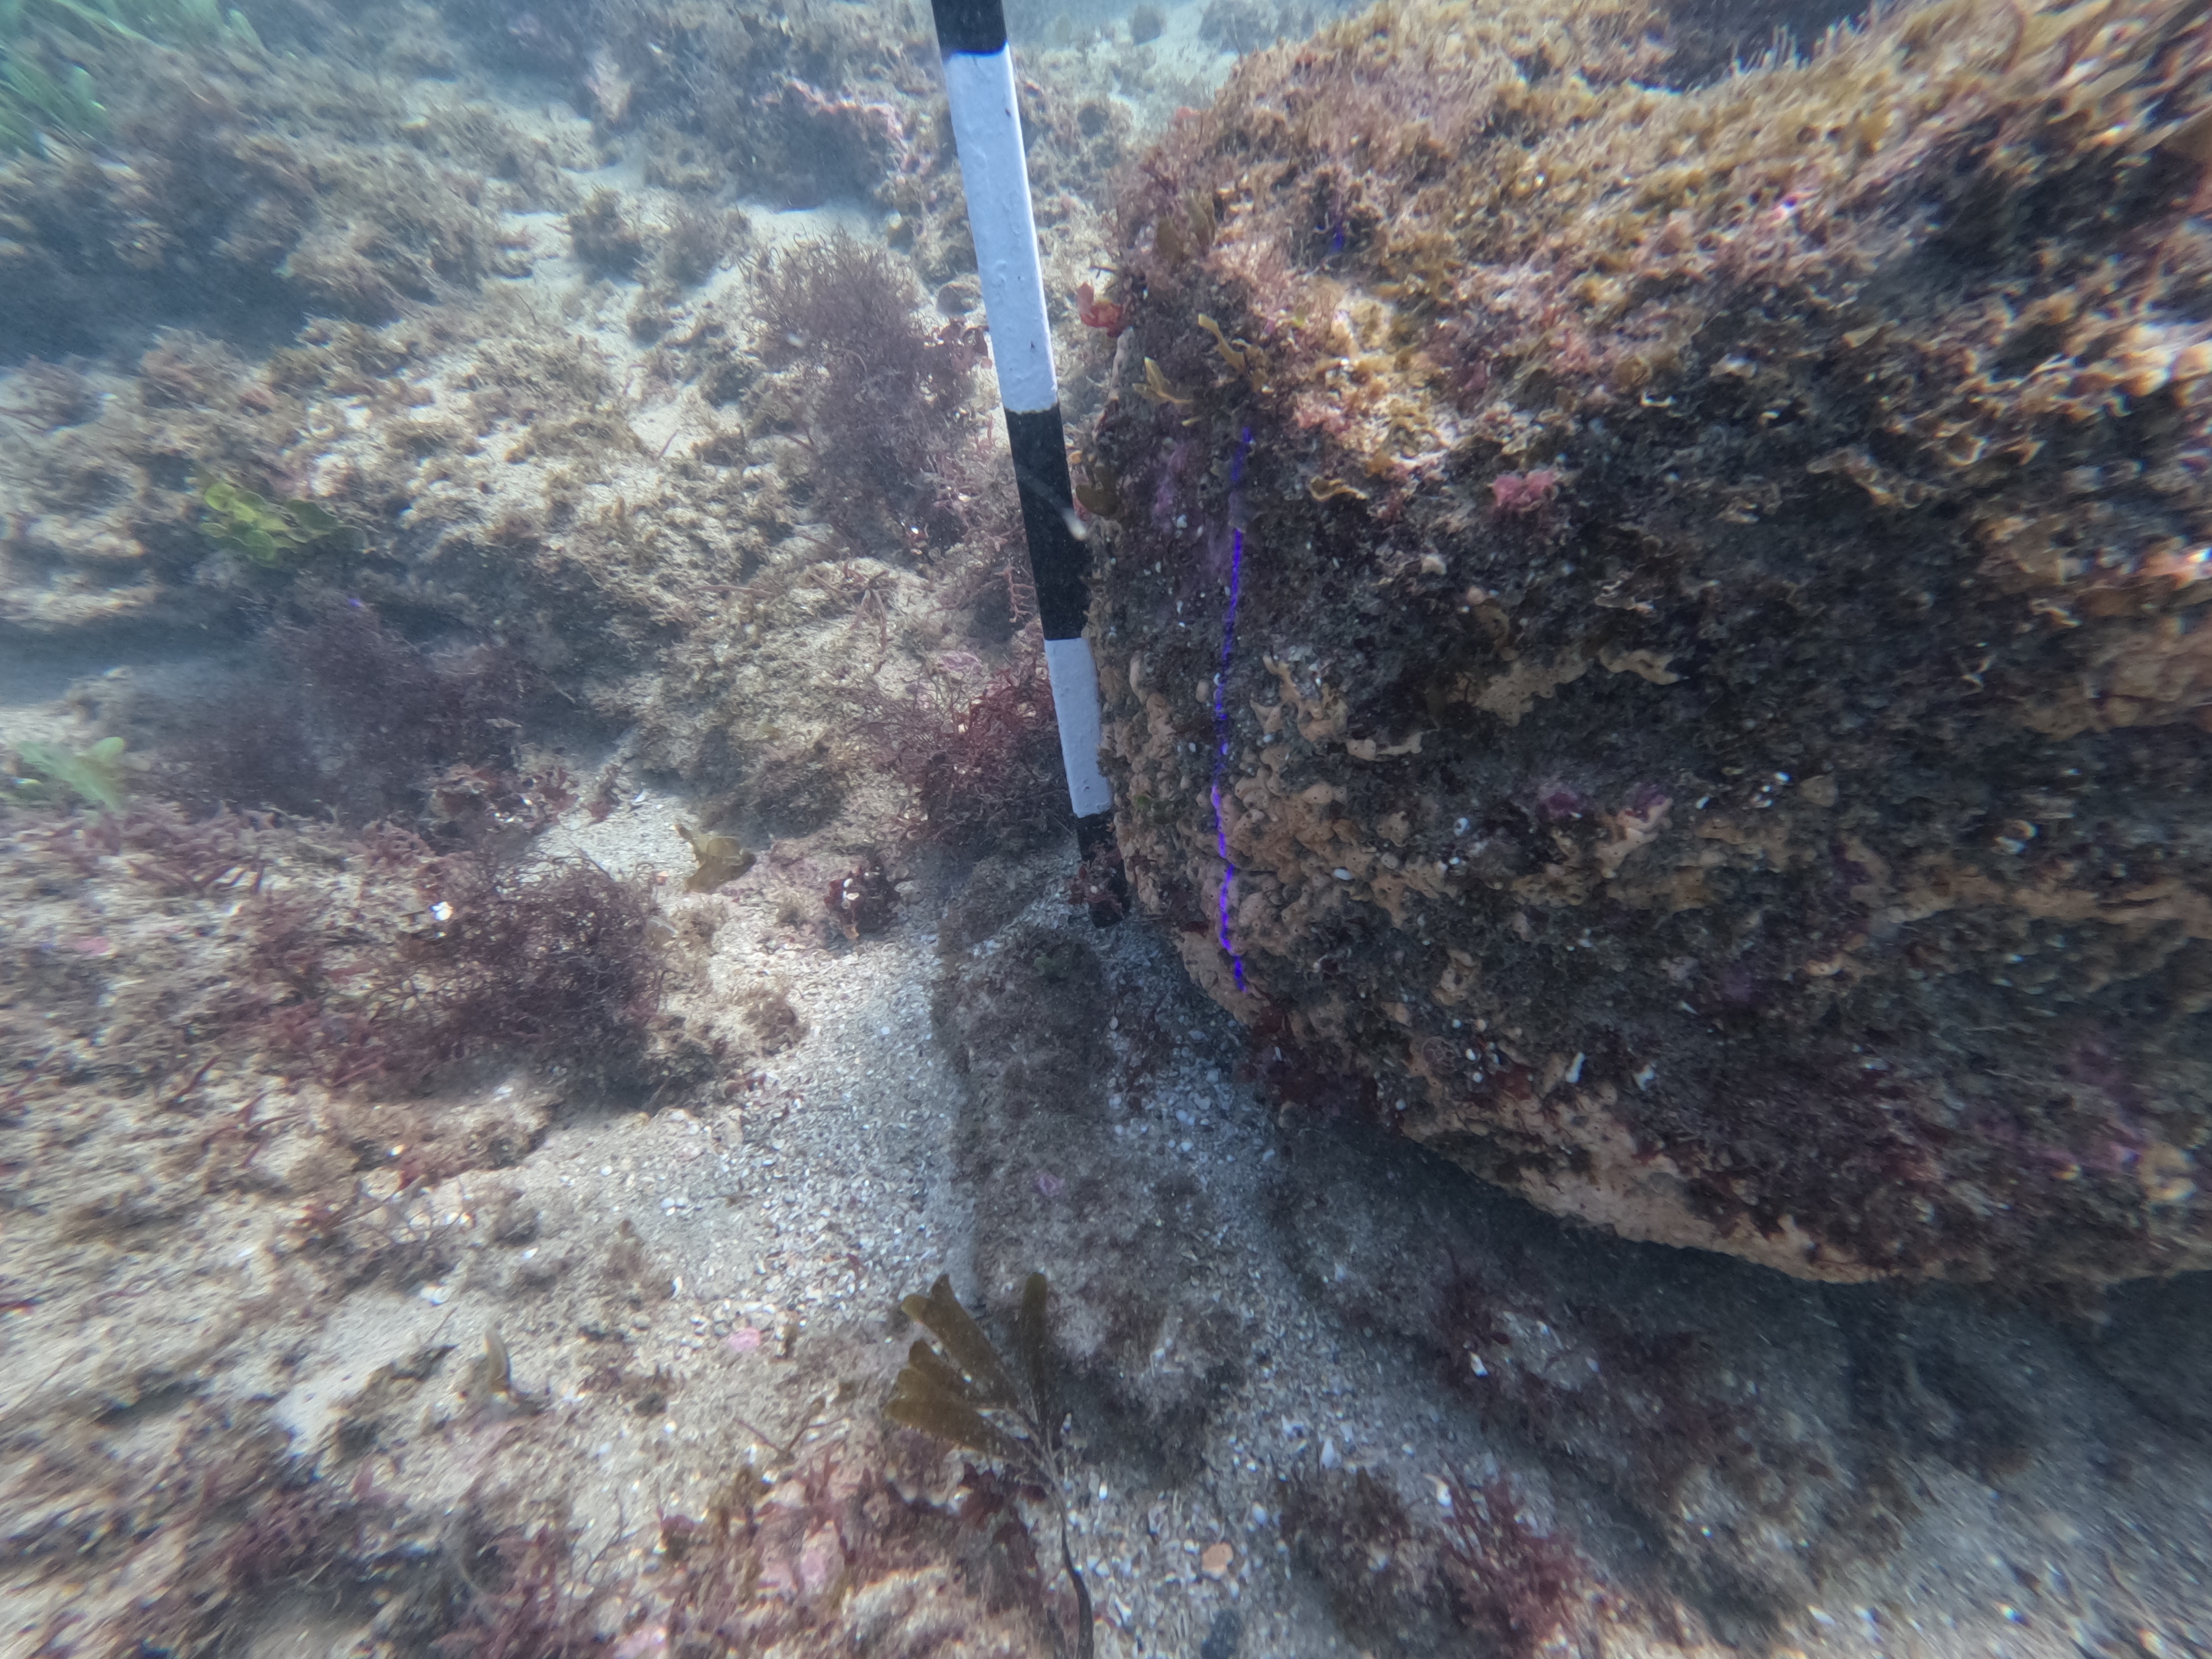

Supplement: Supplementary file 1834 [file G0028160.pdf › Ocean1/G0028160.pdf]

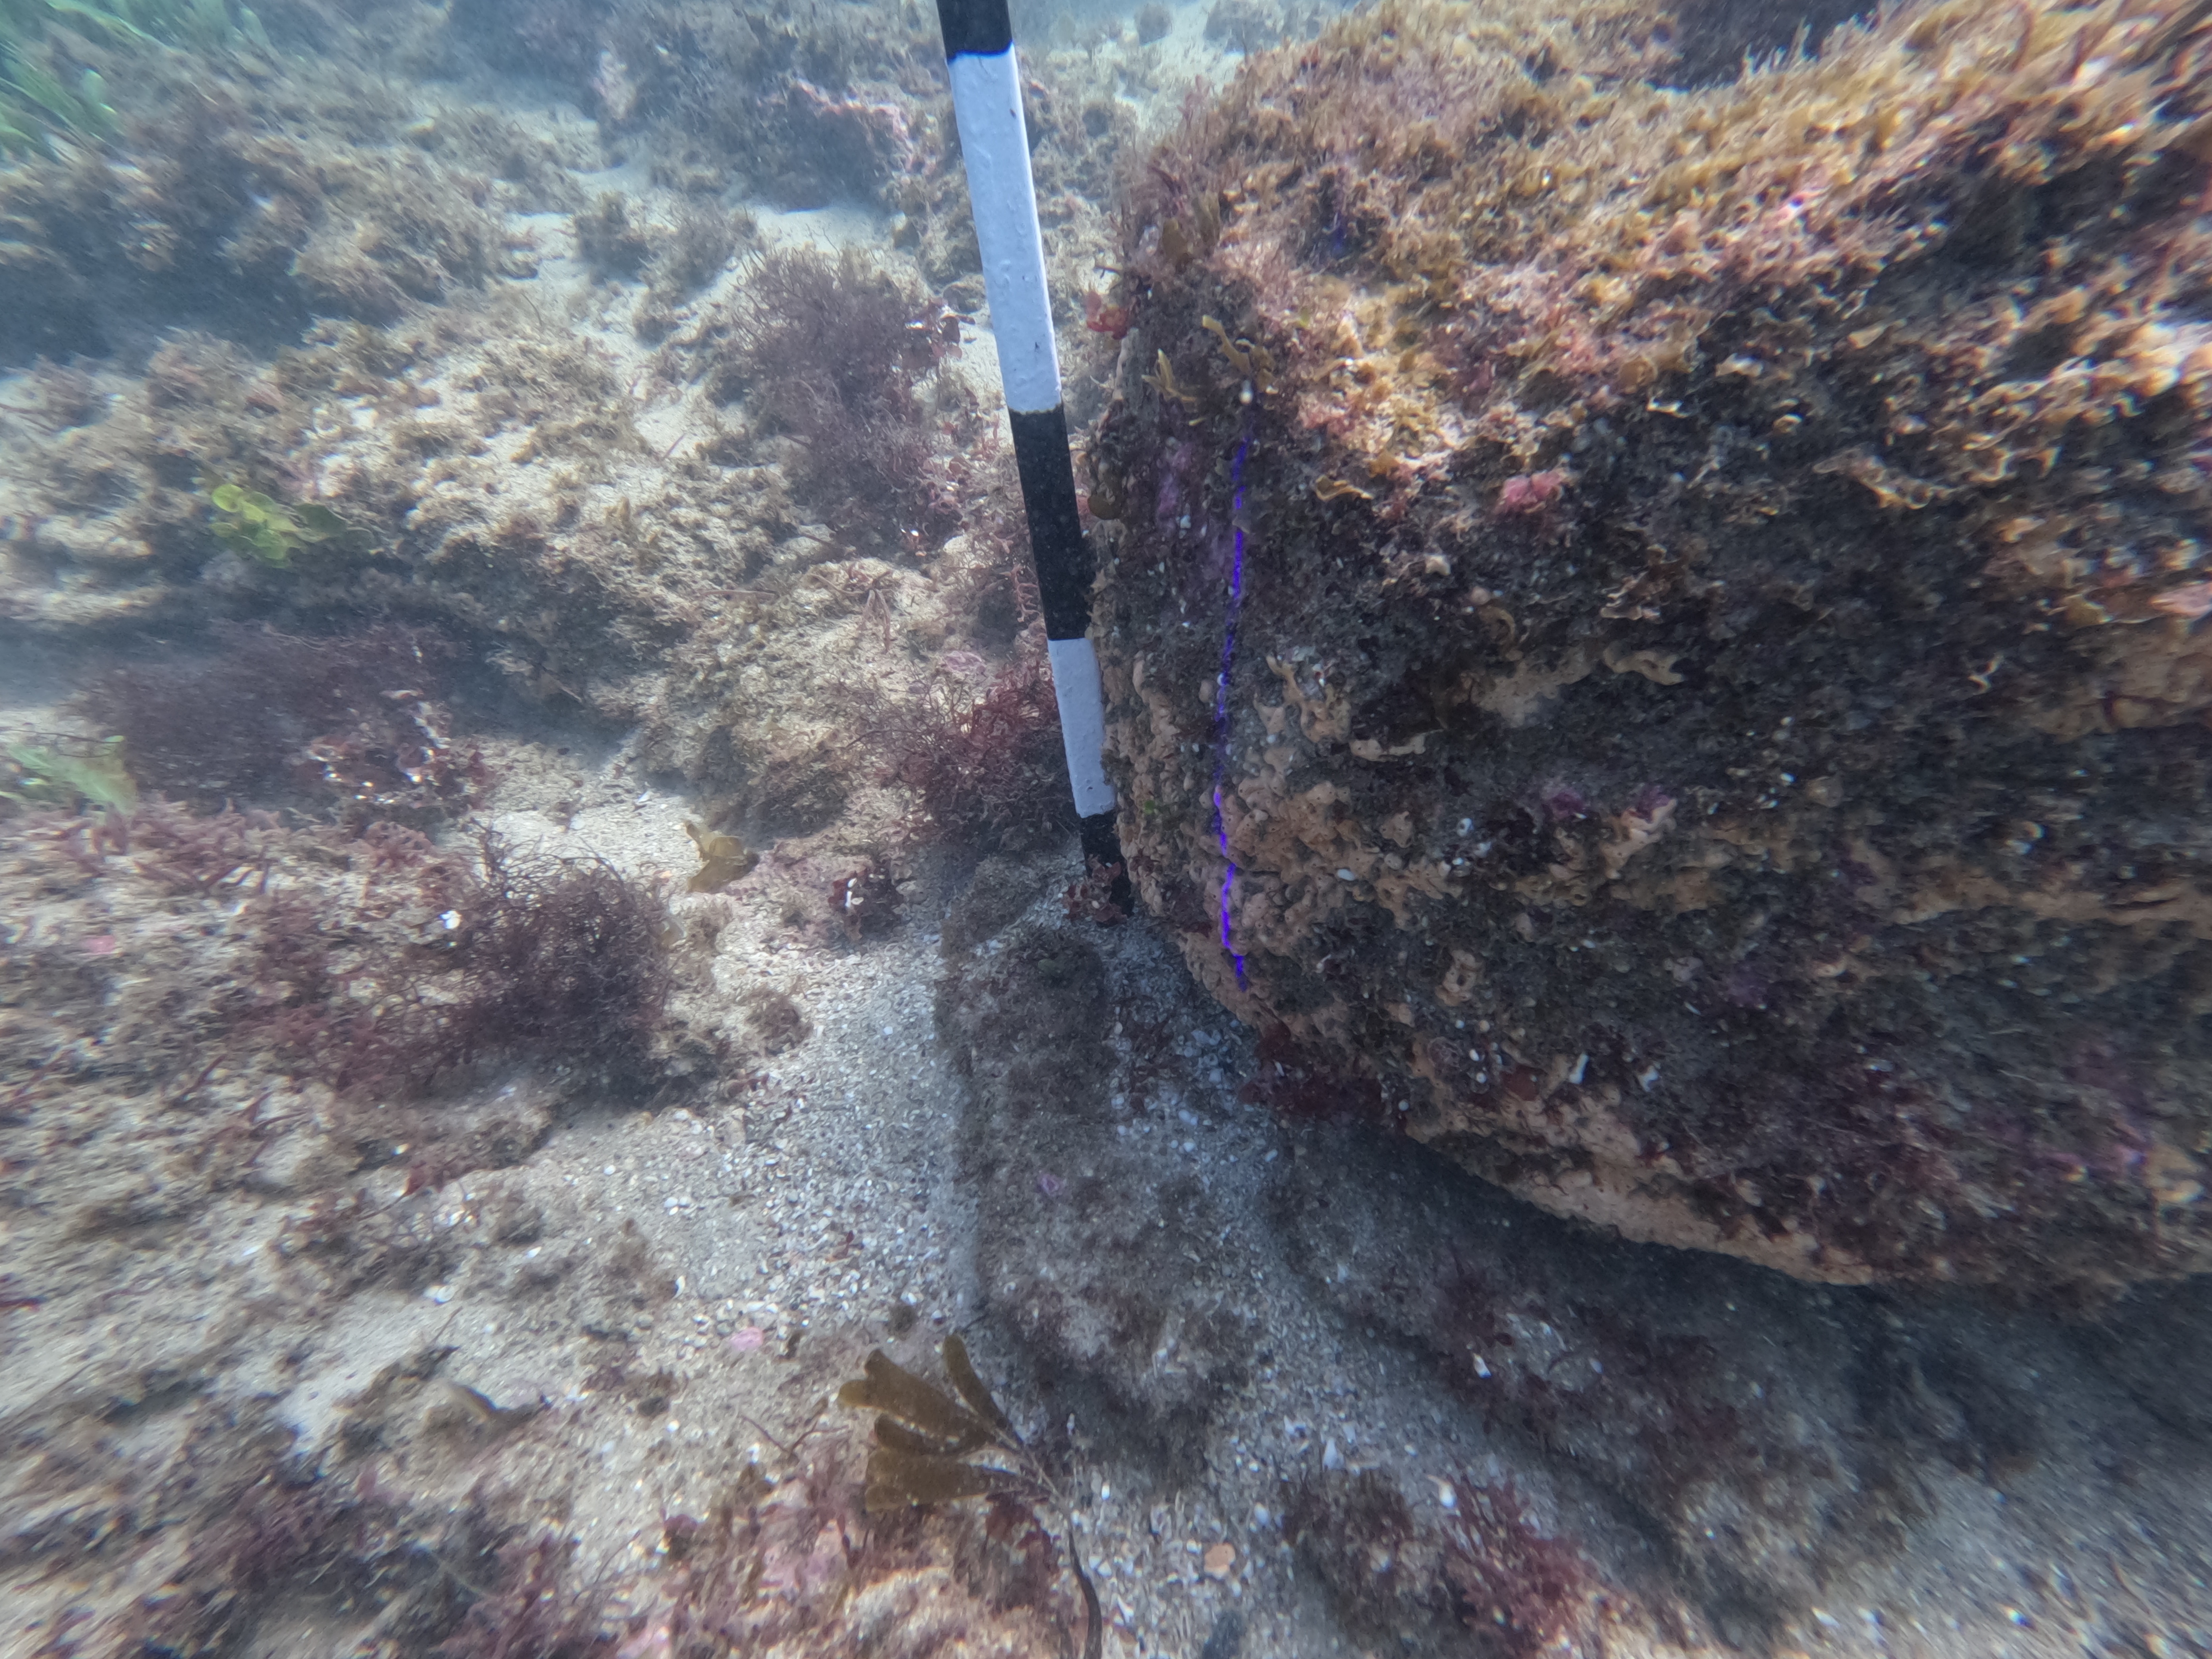

Supplement: Supplementary file 1835 [file G0028161.pdf › Ocean1/G0028161.pdf]

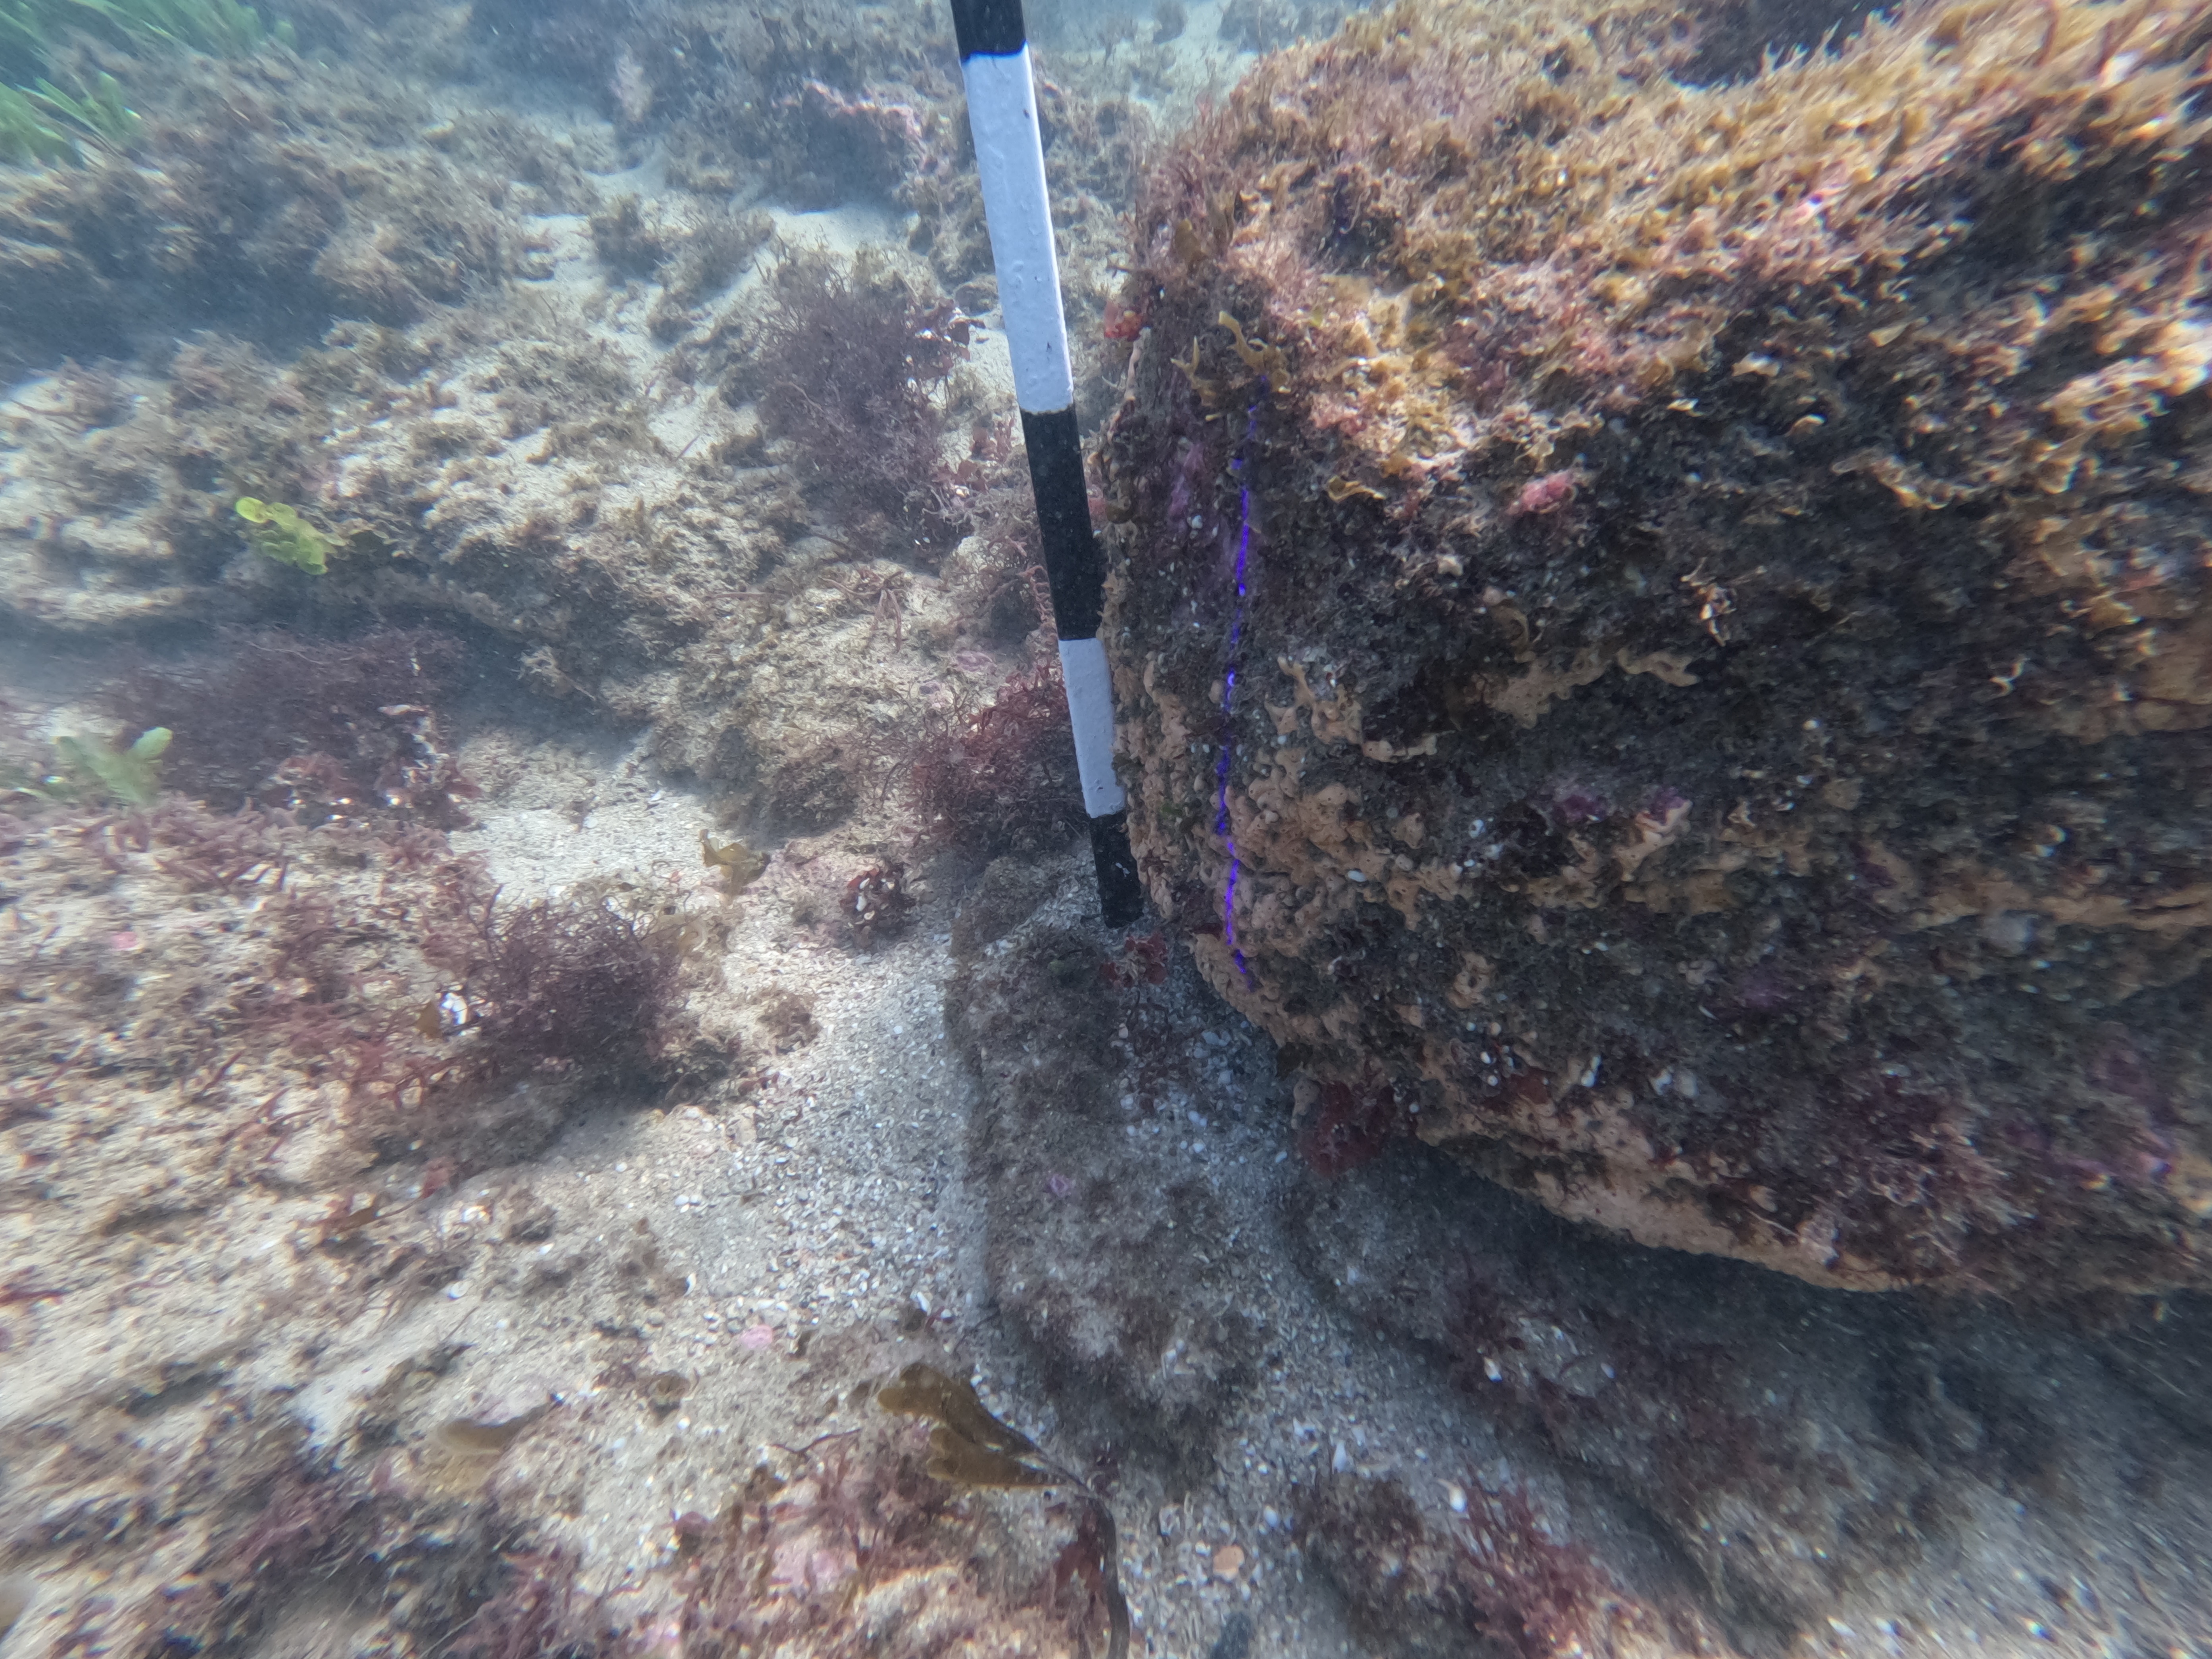

Supplement: Supplementary file 1836 [file G0028162.pdf › Ocean1/G0028162.pdf]

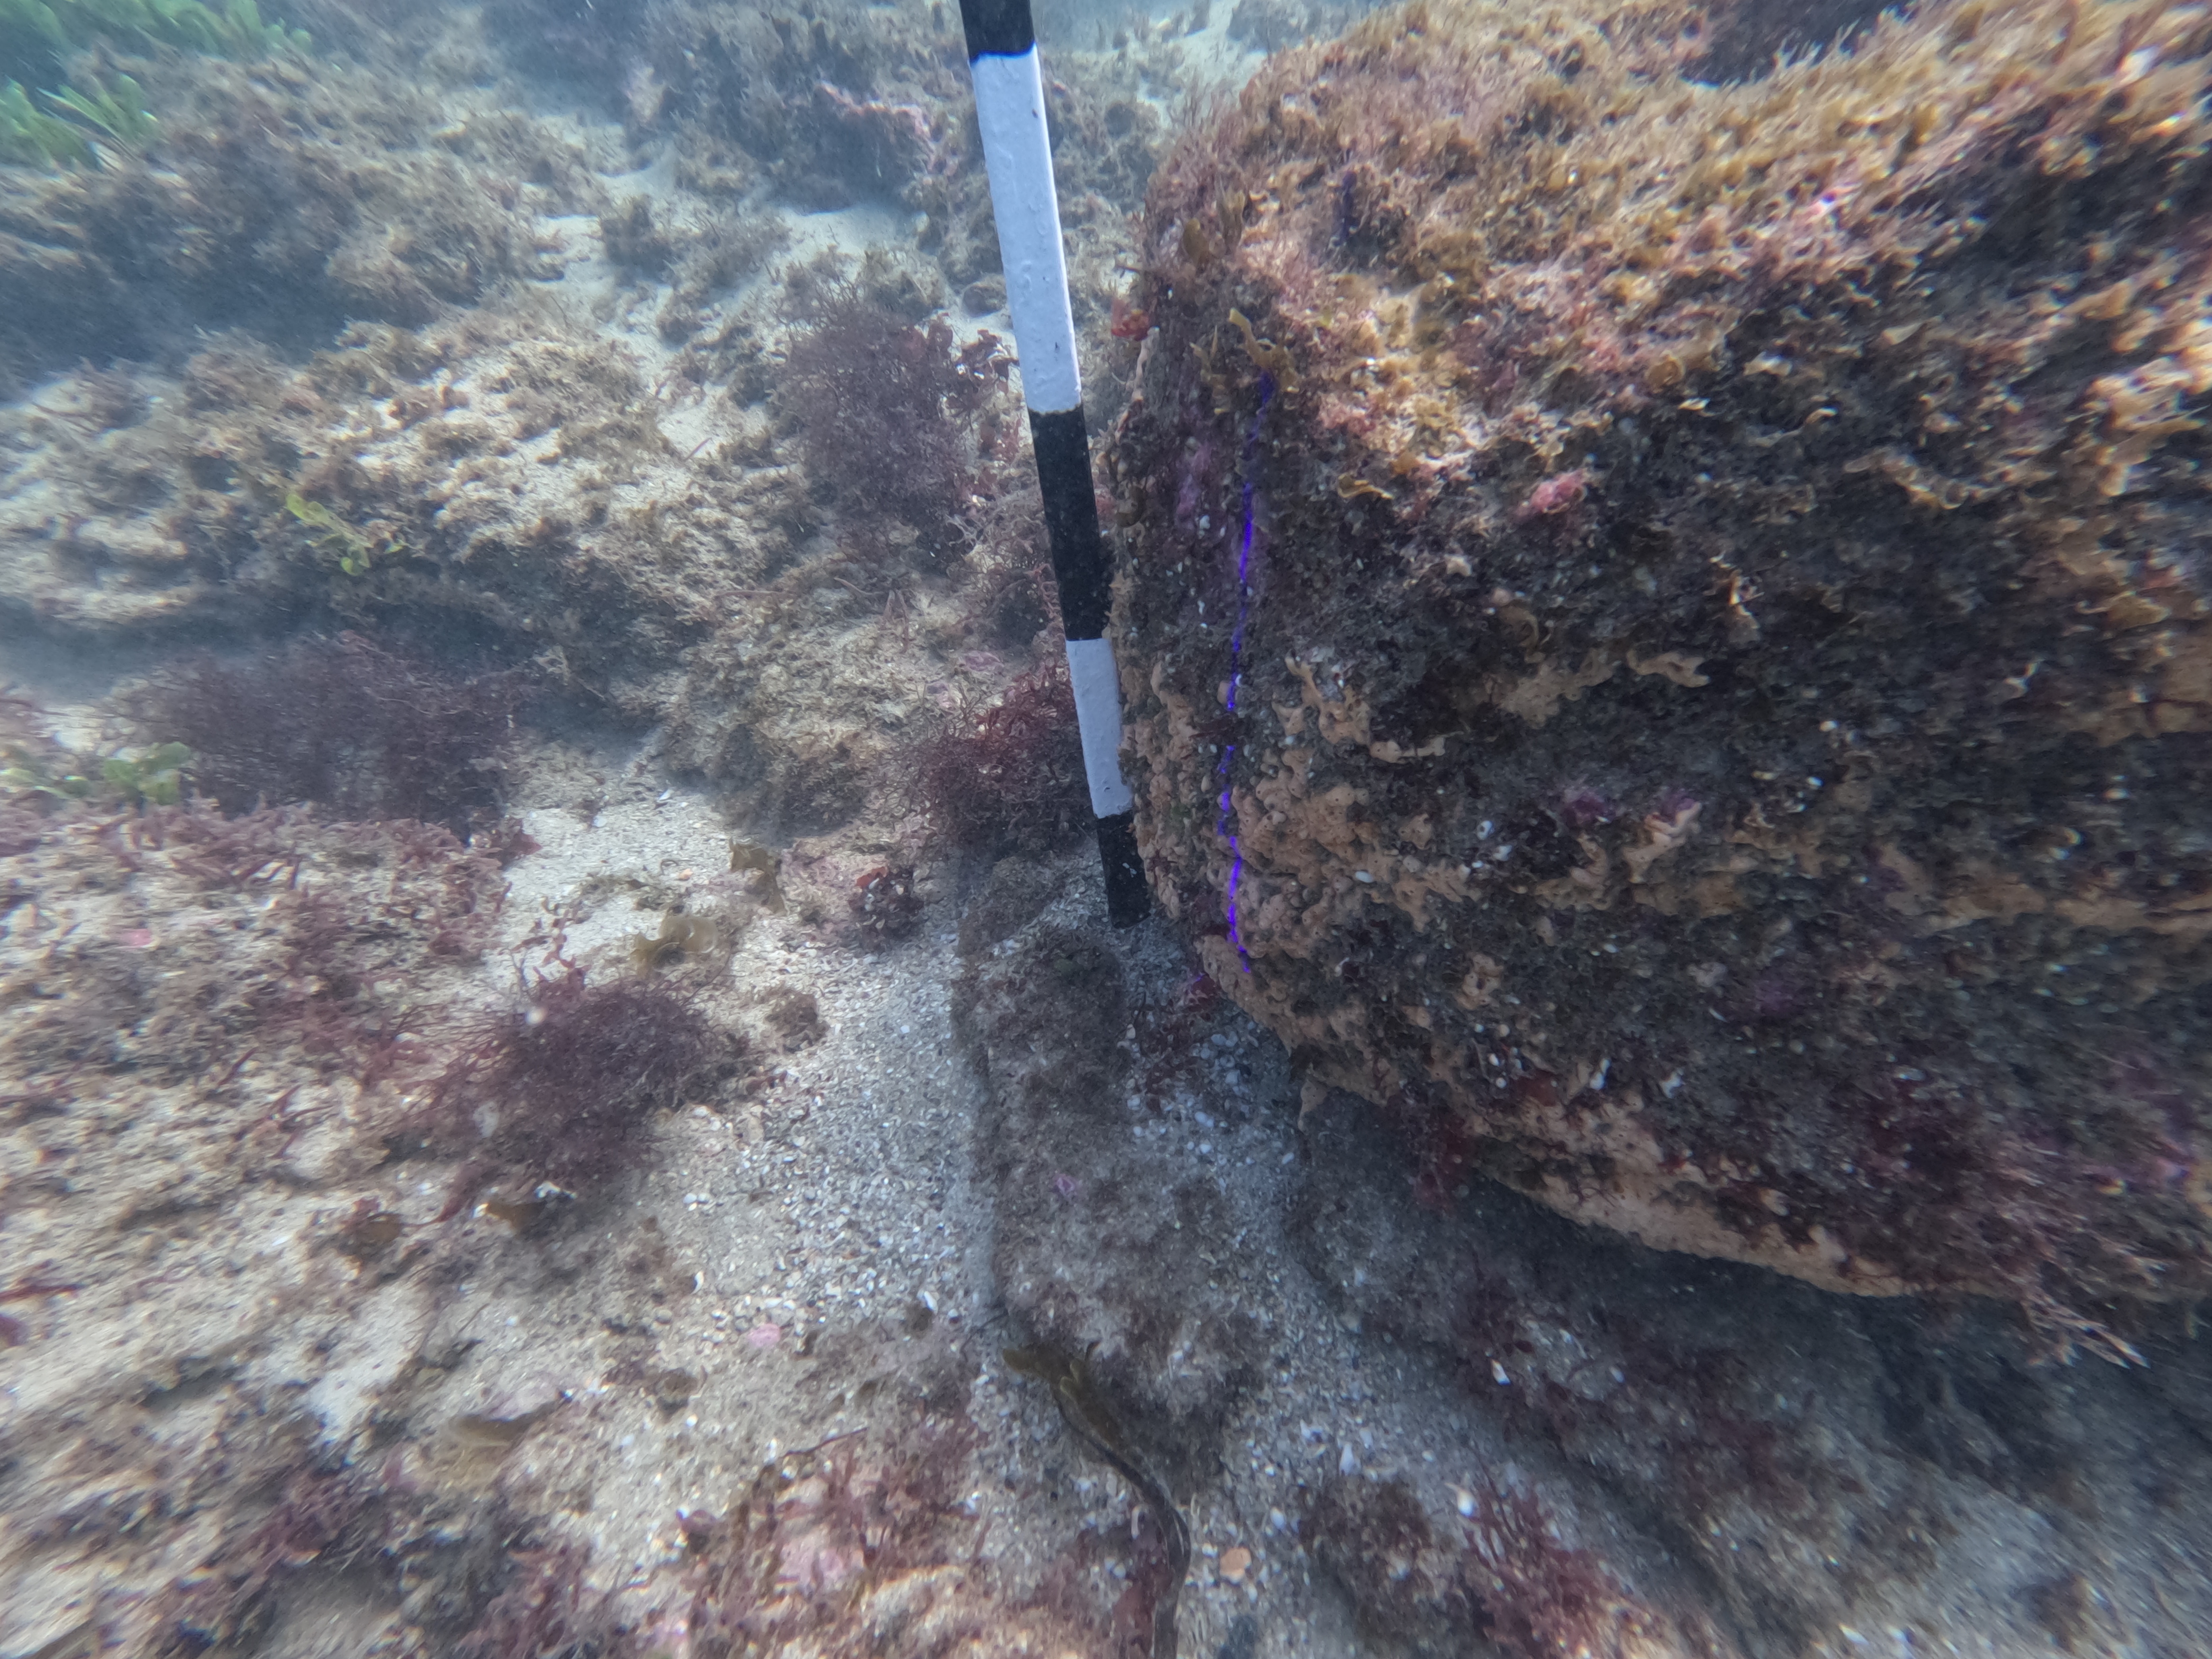

Supplement: Supplementary file 1837 [file G0028163.pdf › Ocean1/G0028163.pdf]

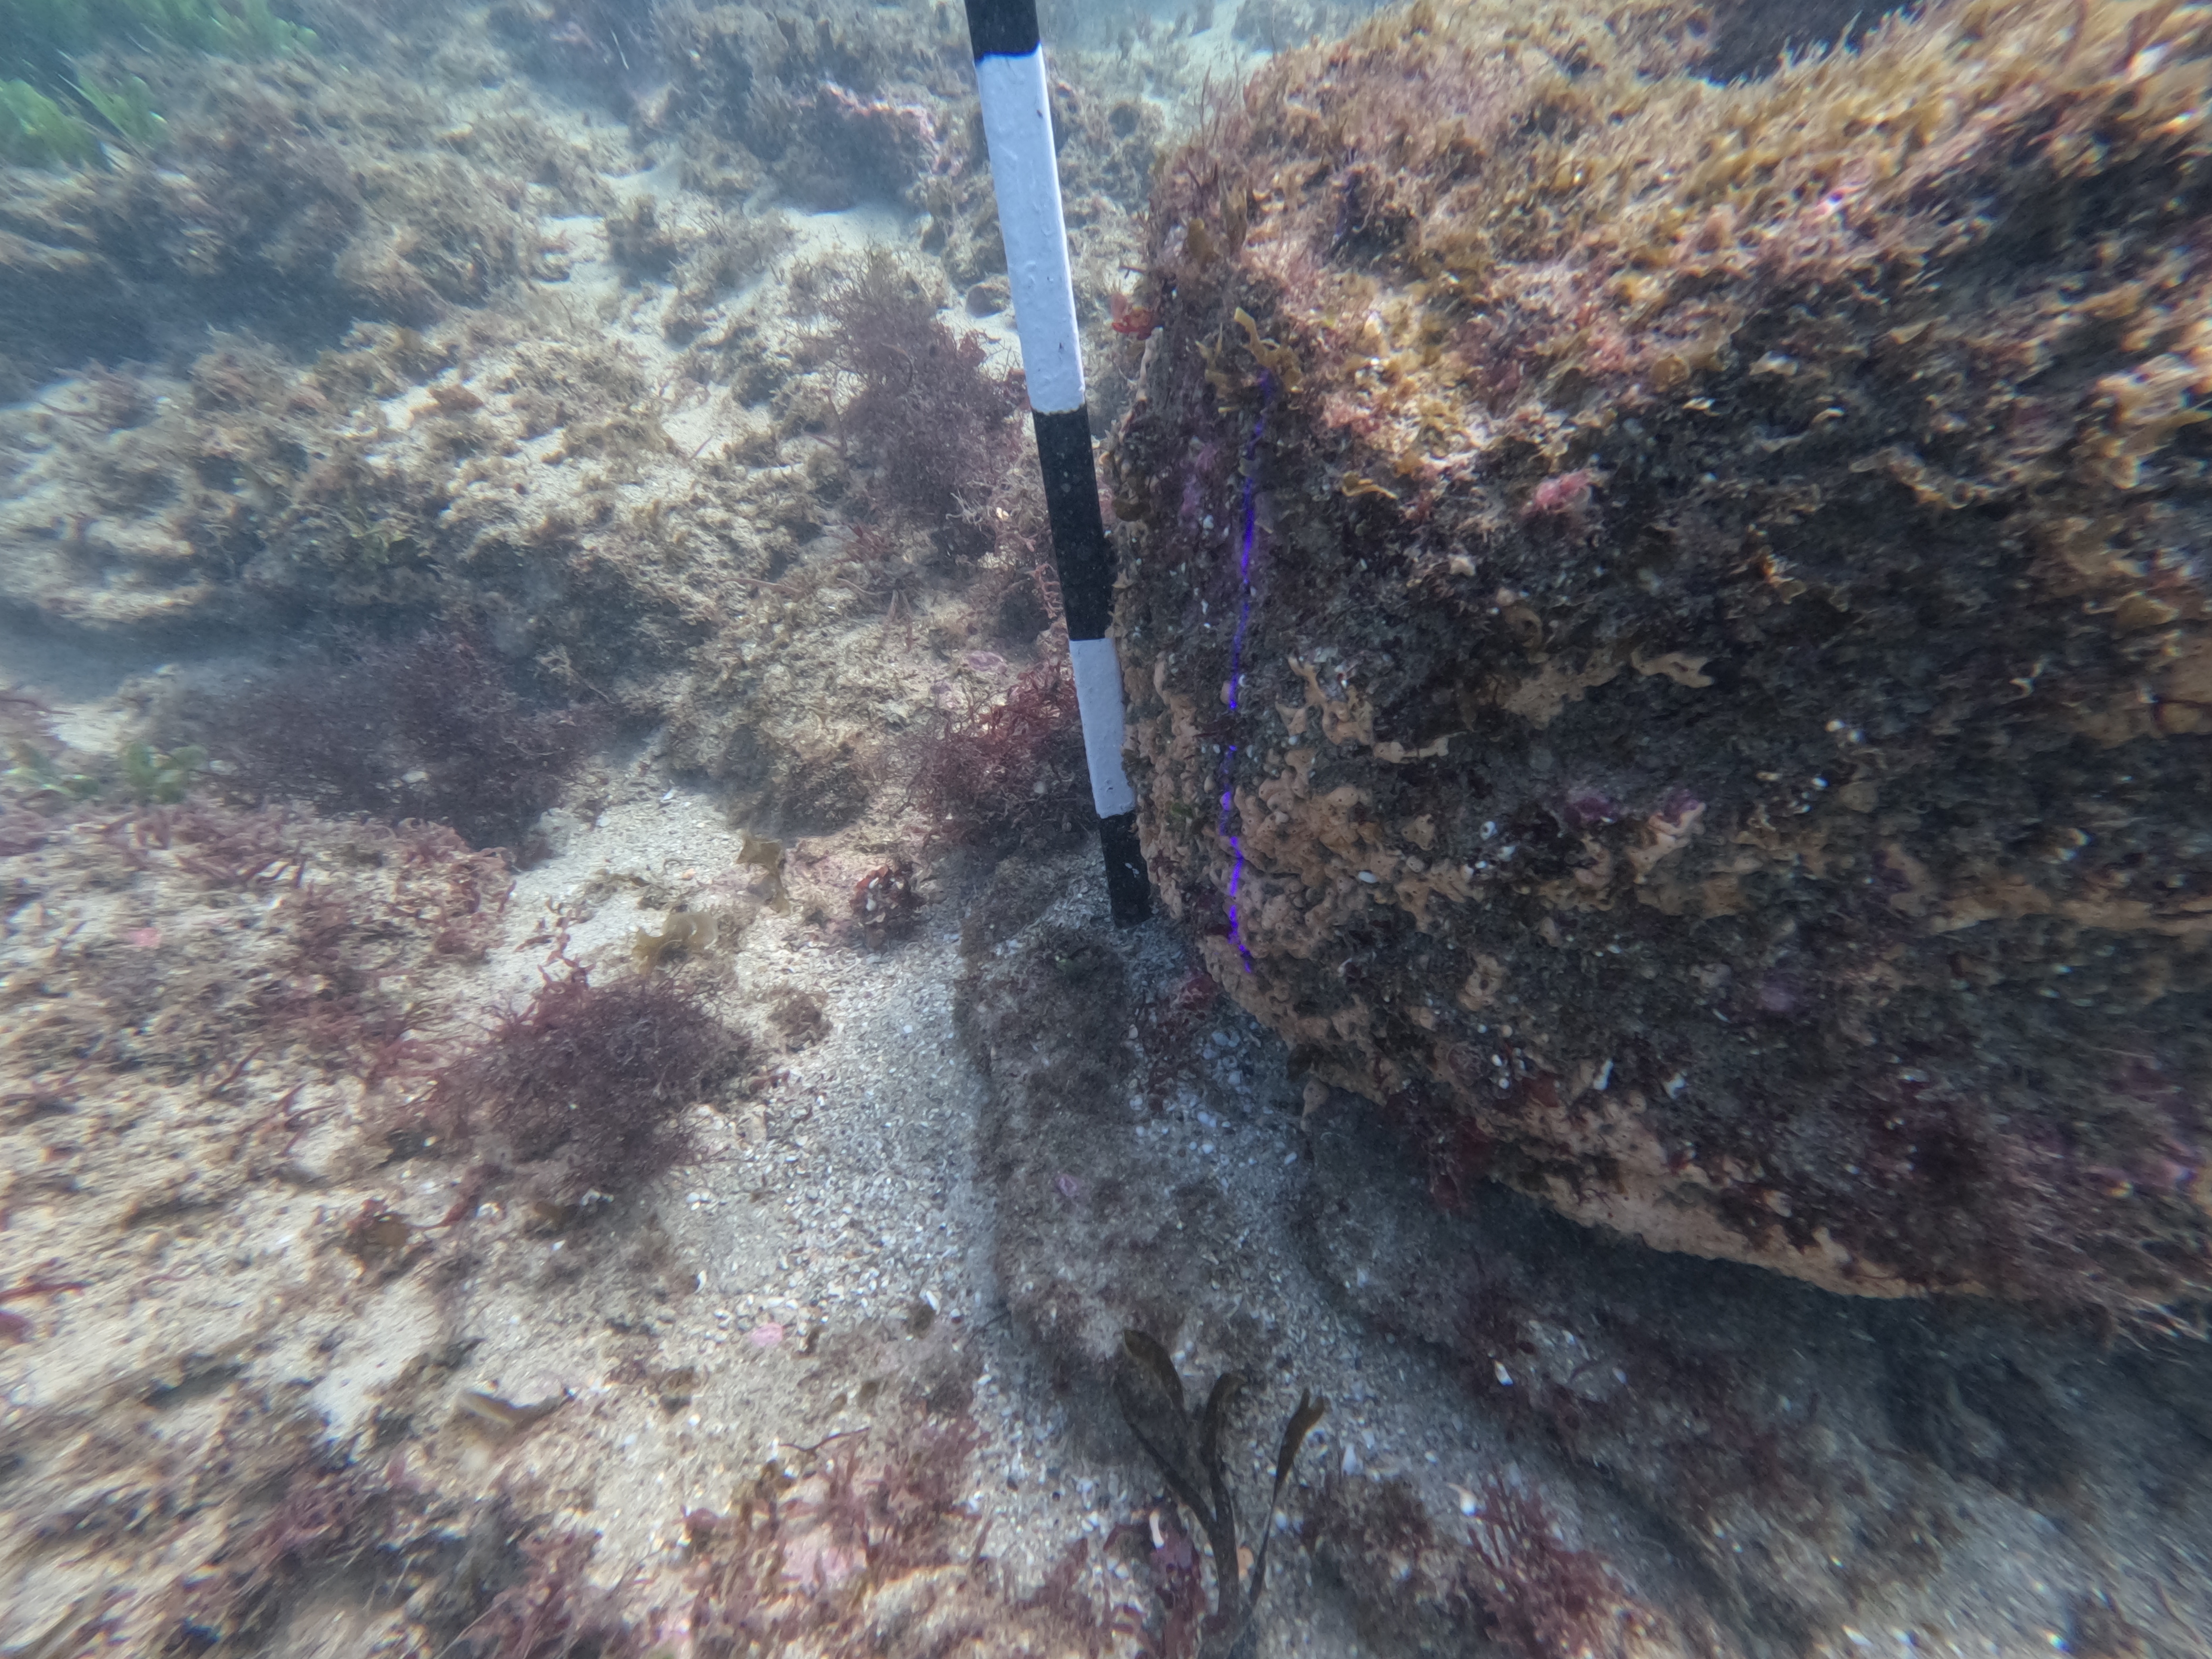

Supplement: Supplementary file 1838 [file G0028164.pdf › Ocean1/G0028164.pdf]

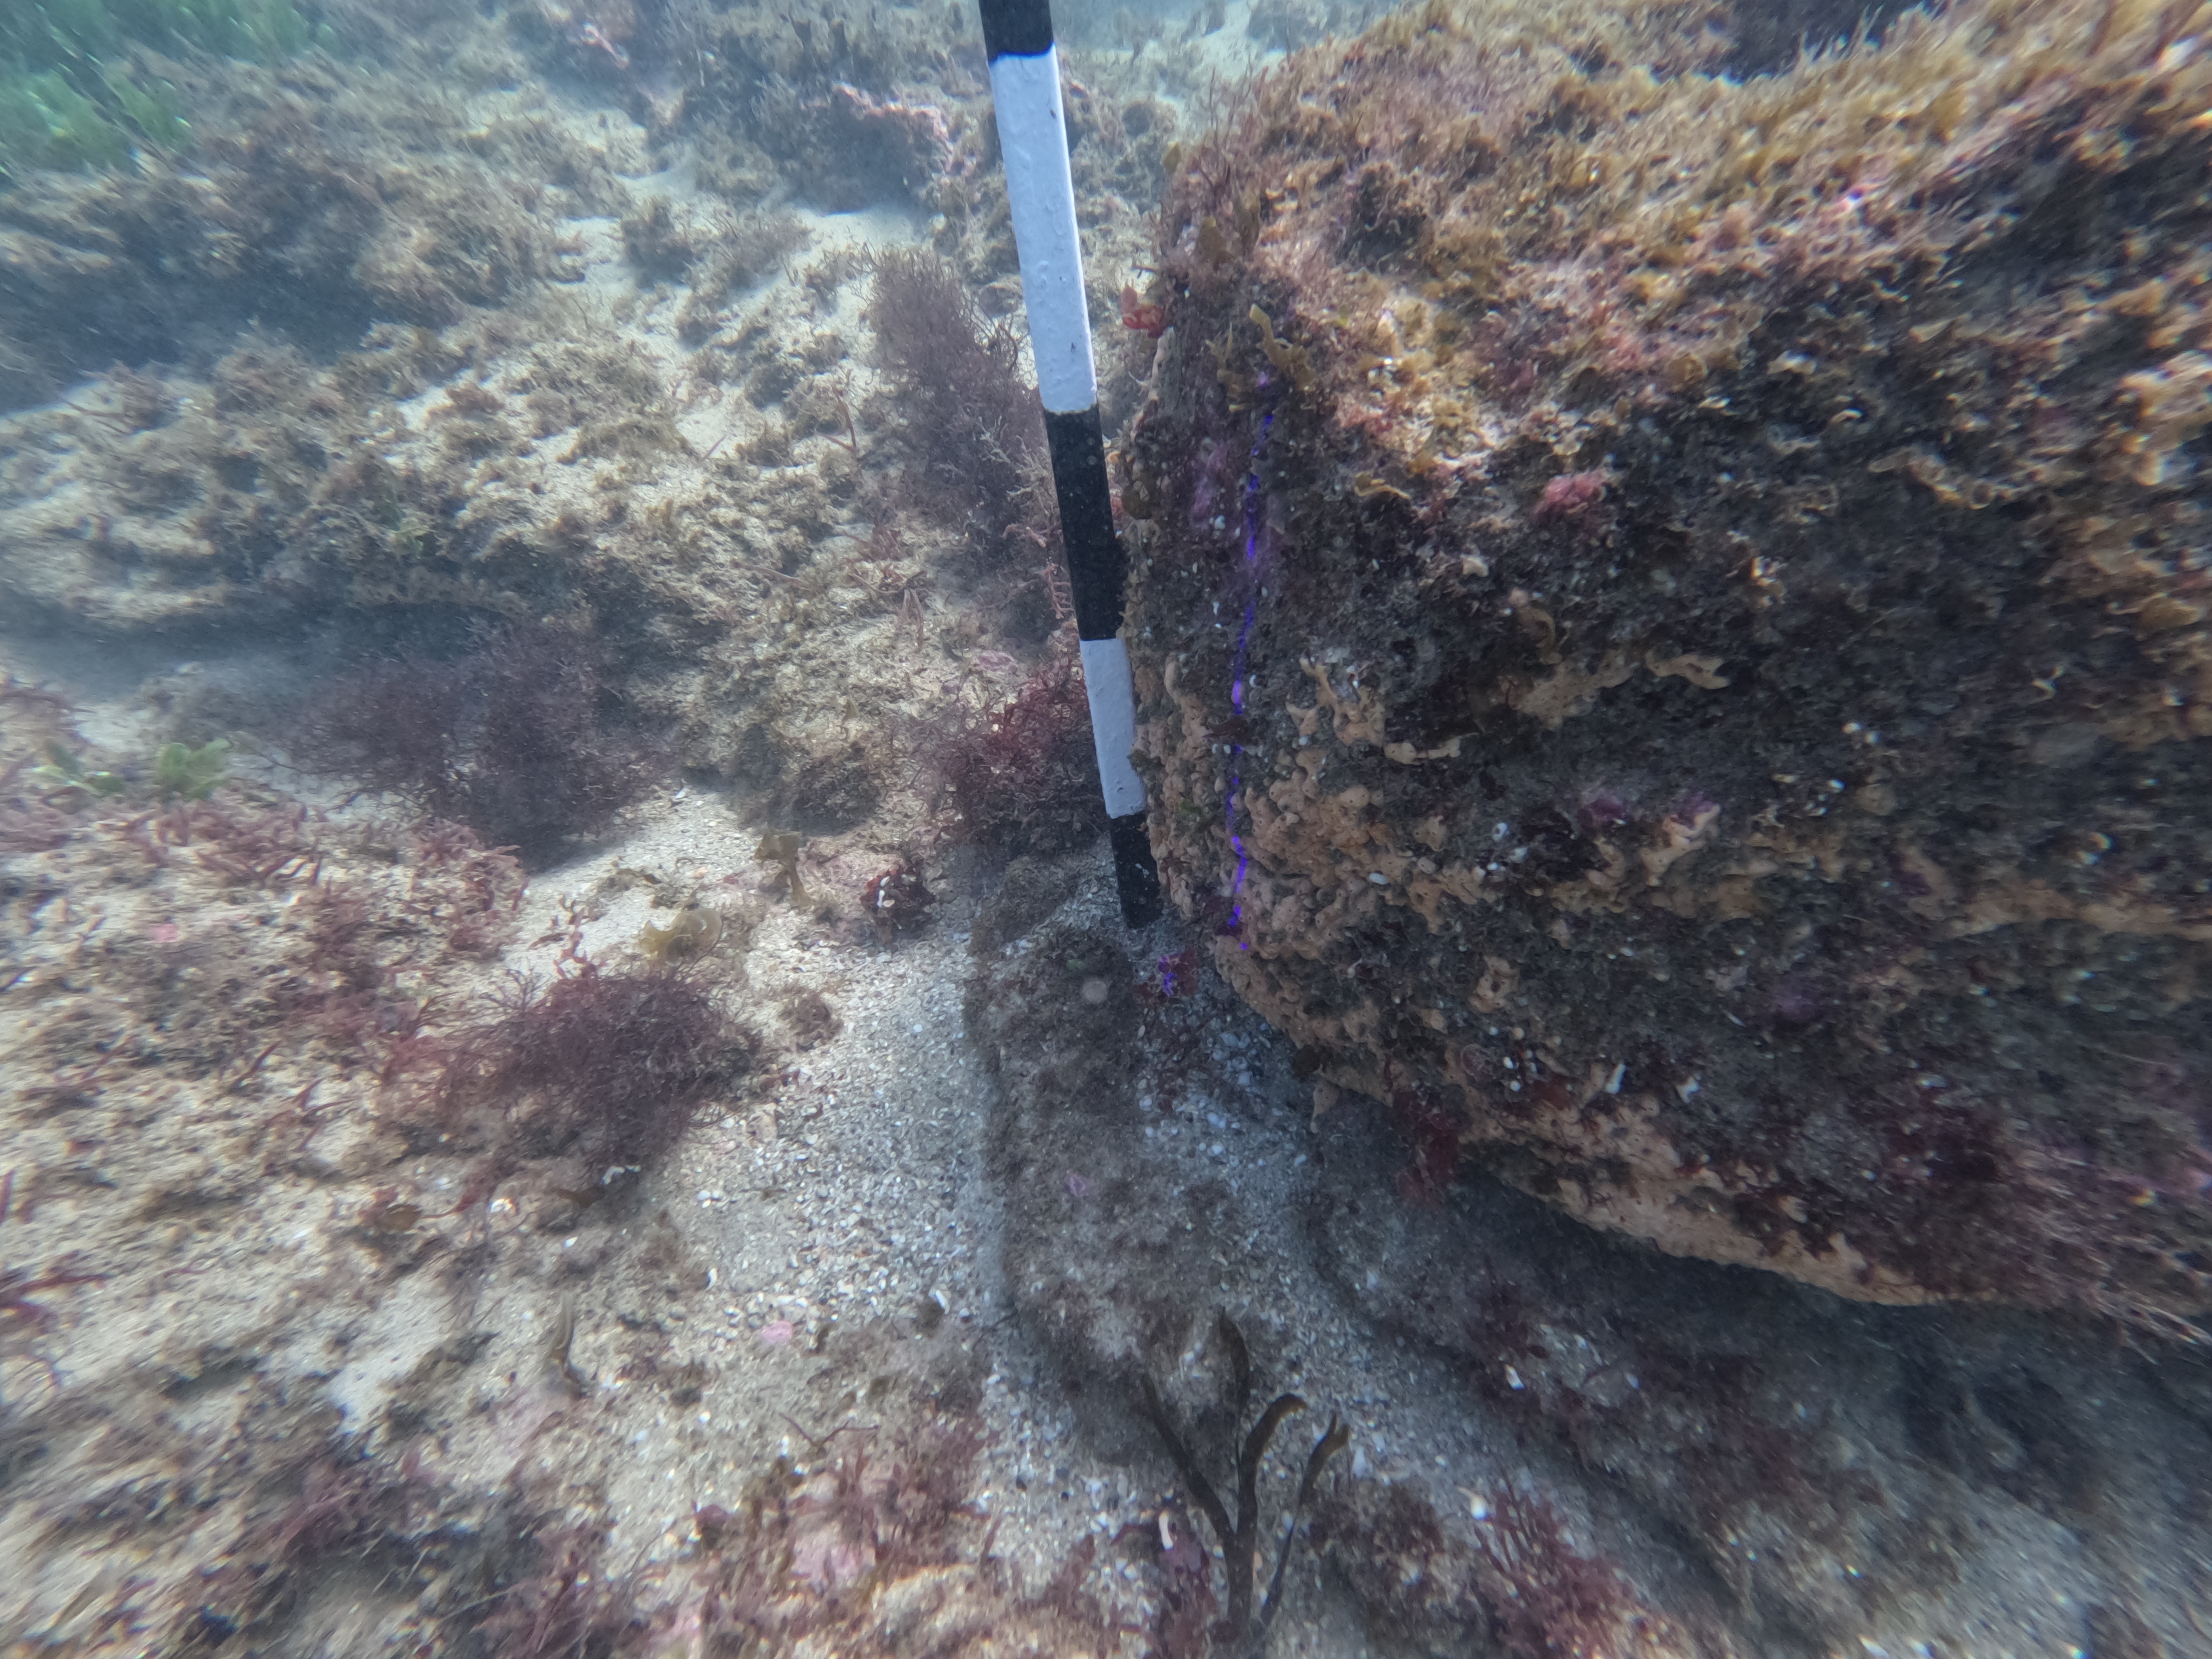

Supplement: Supplementary file 1839 [file G0028165.pdf › Ocean1/G0028165.pdf]

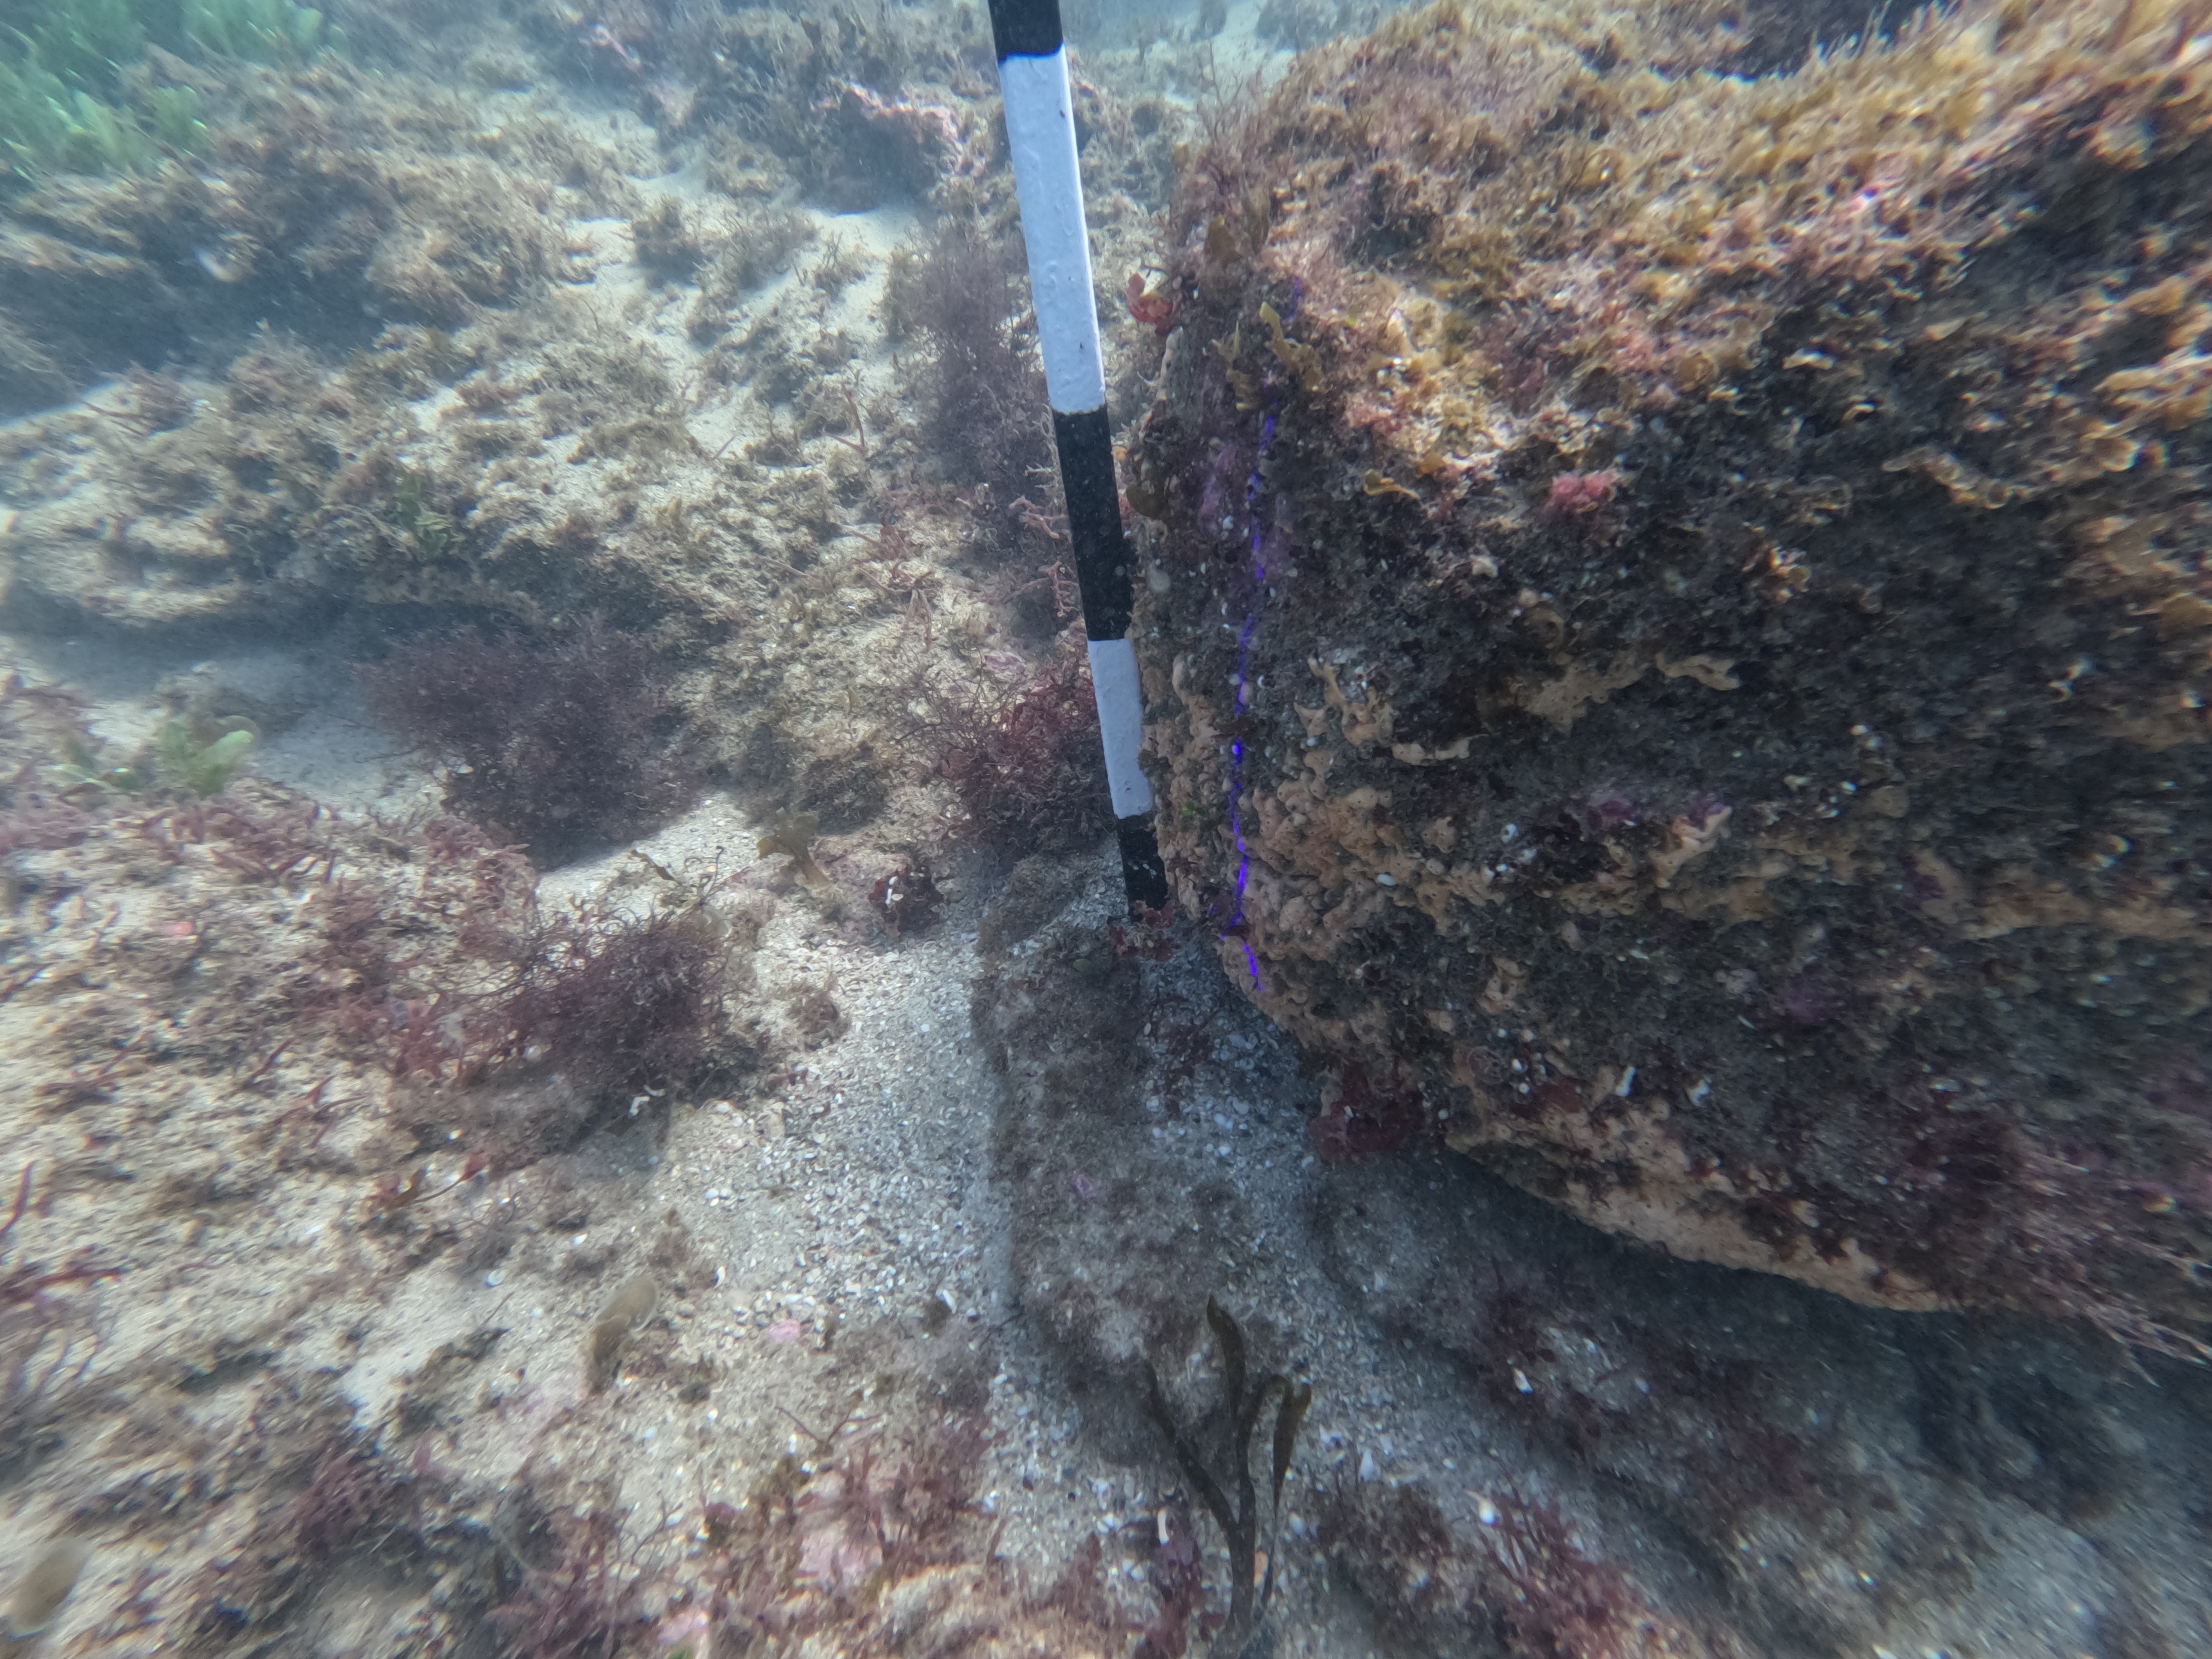

Supplement: Supplementary file 1840 [file G0028166.pdf › Ocean1/G0028166.pdf]

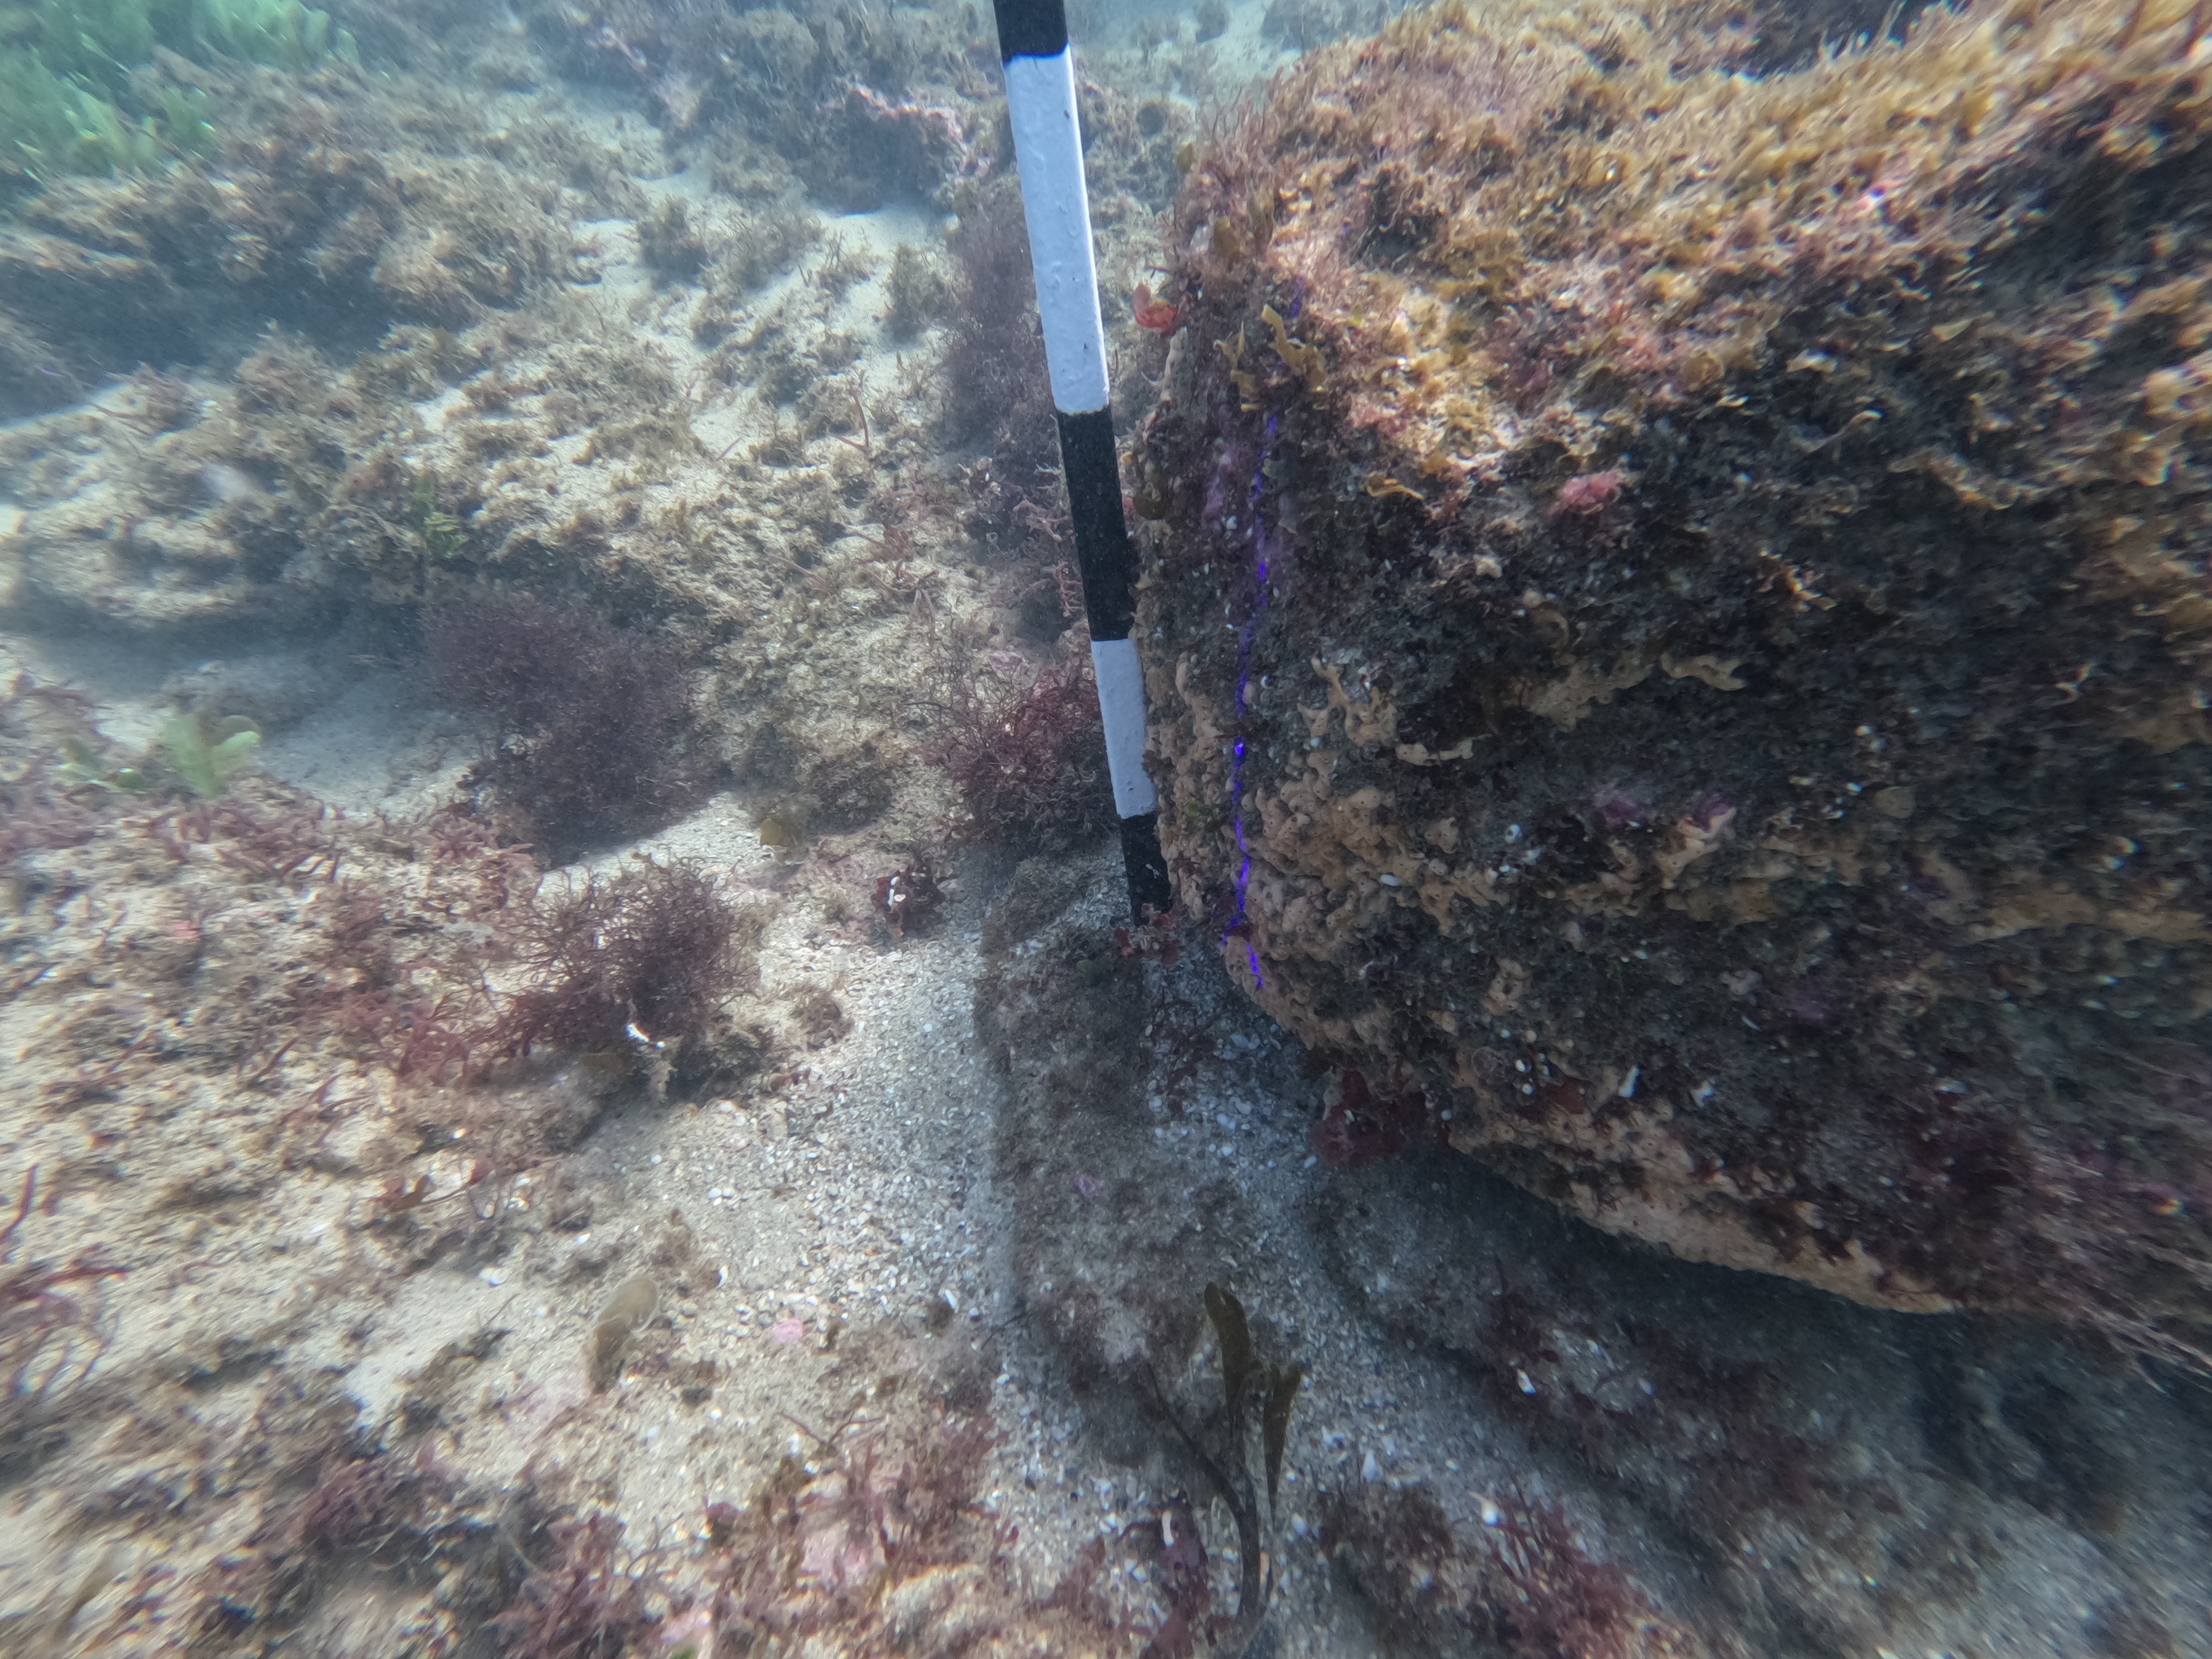

Supplement: Supplementary file 1841 [file G0028167.pdf › Ocean1/G0028167.pdf]

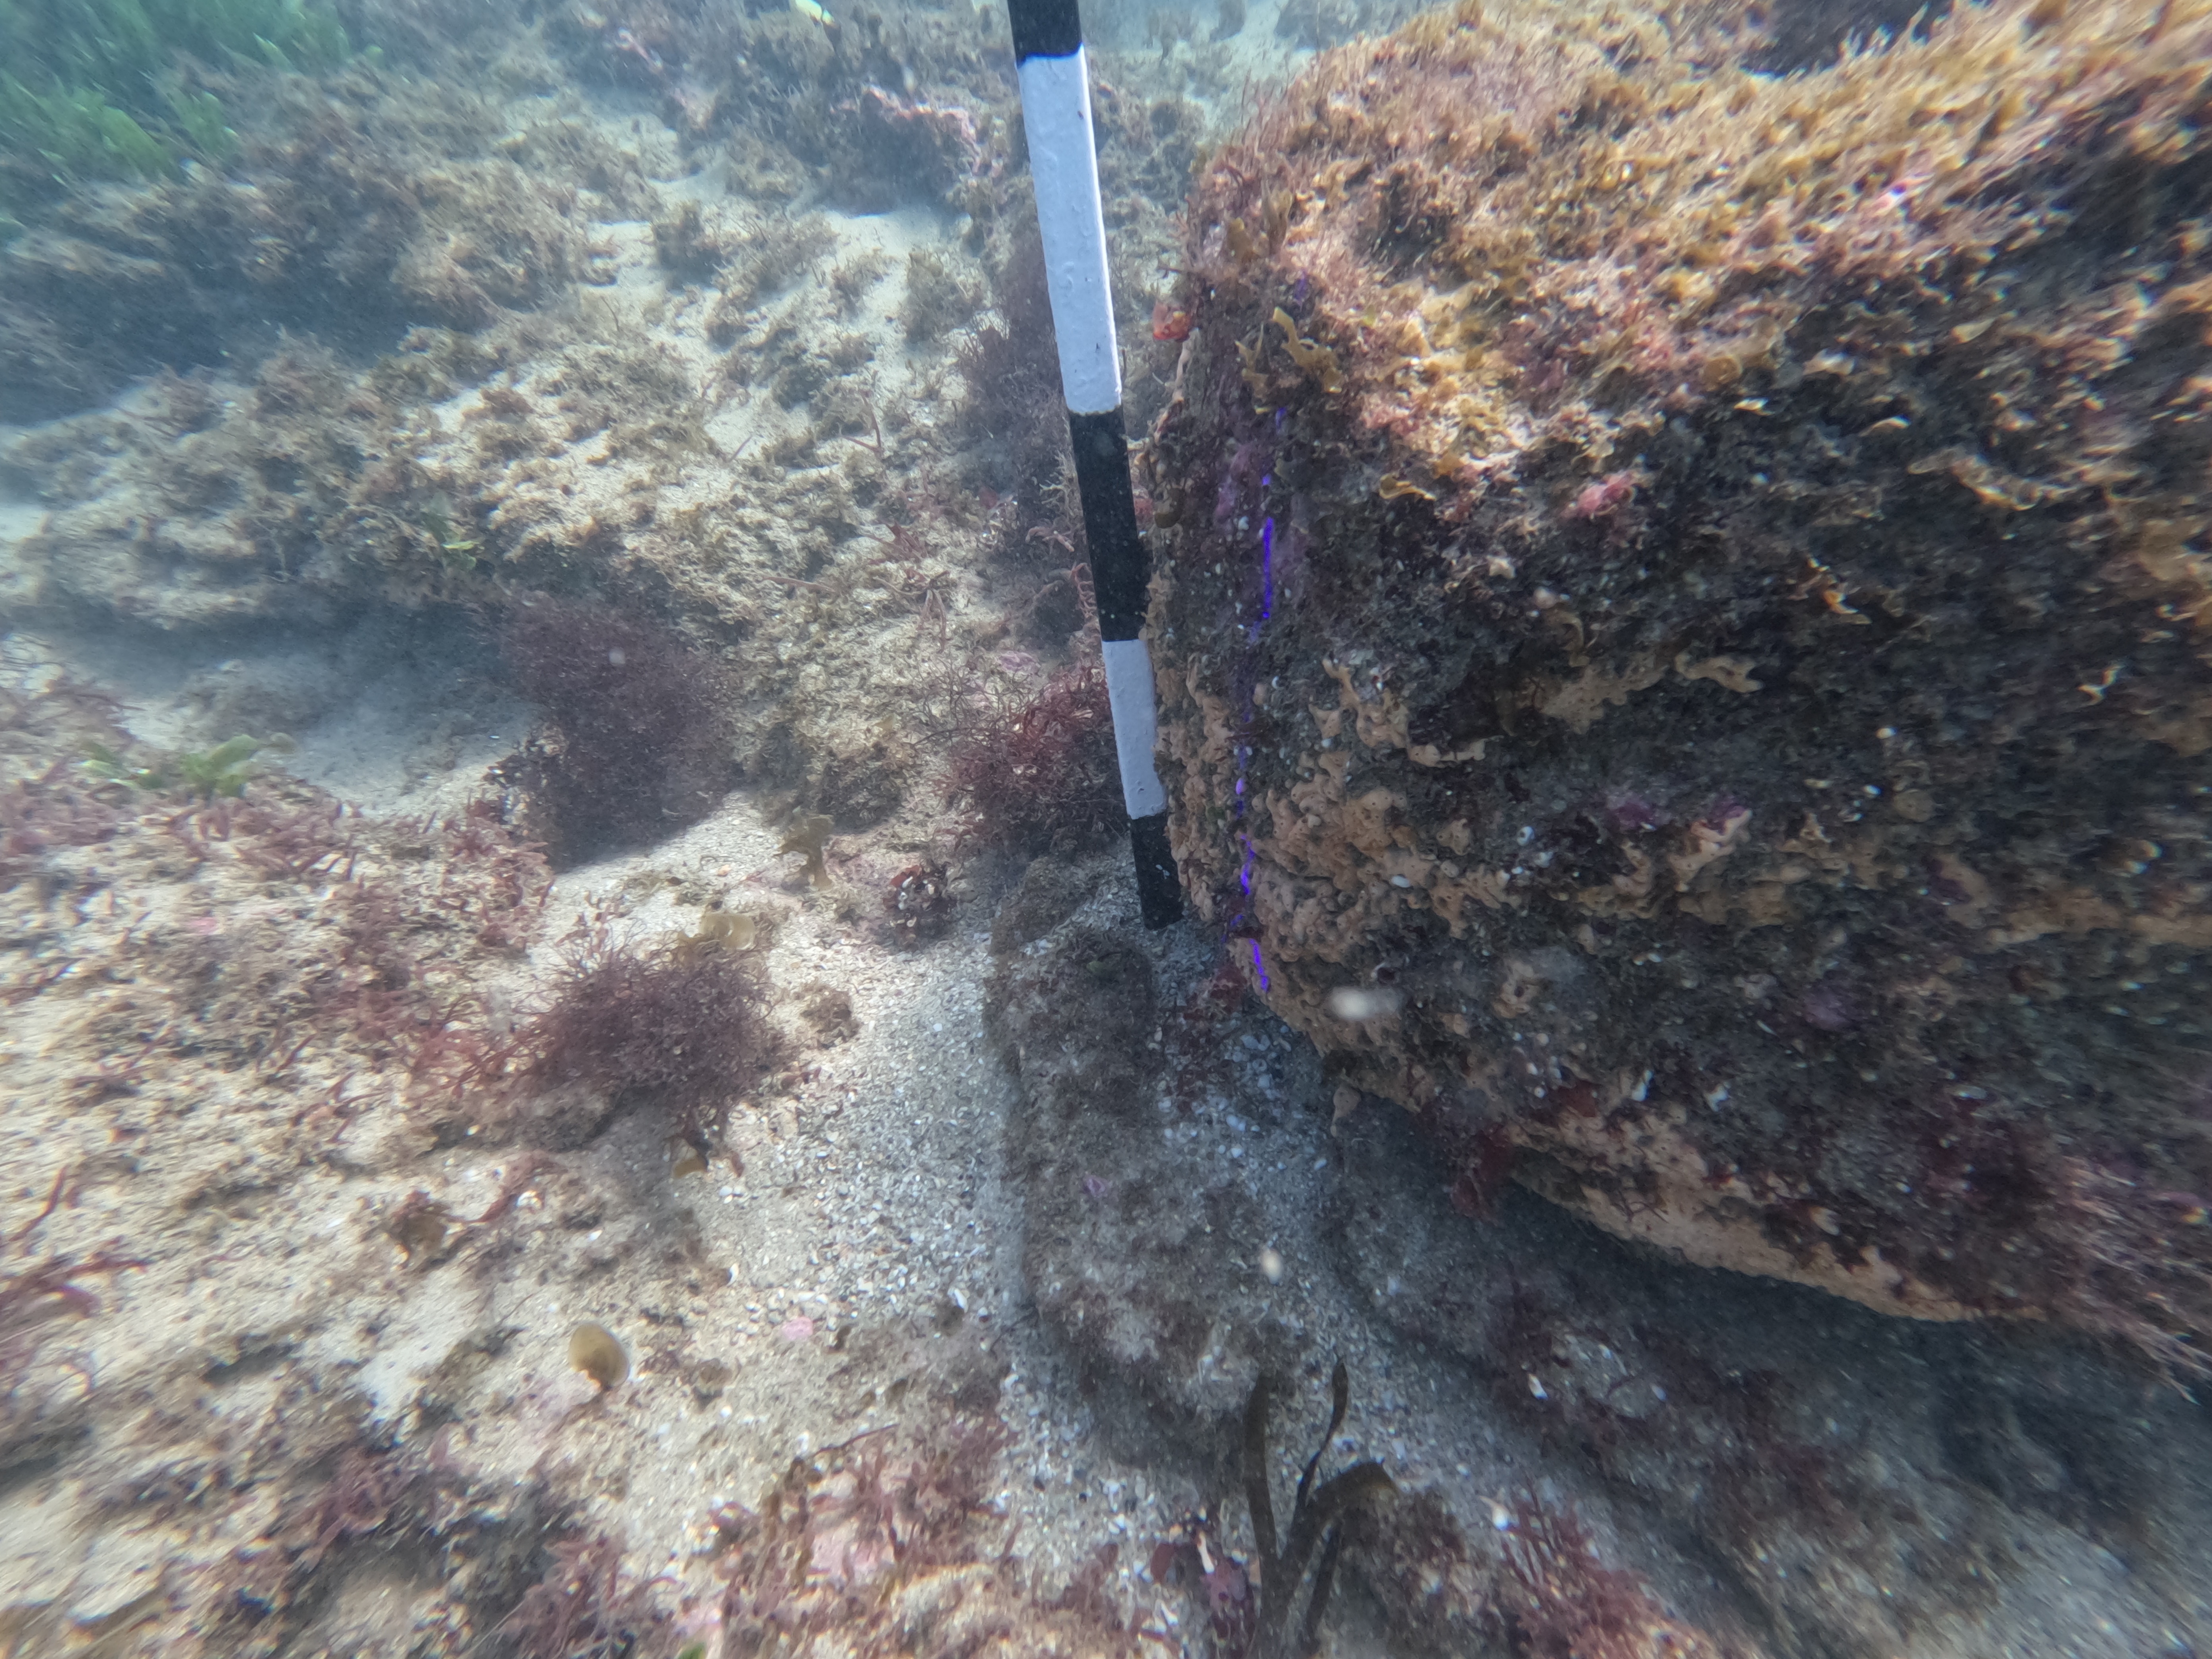

Supplement: Supplementary file 1842 [file G0028168.pdf › Ocean1/G0028168.pdf]

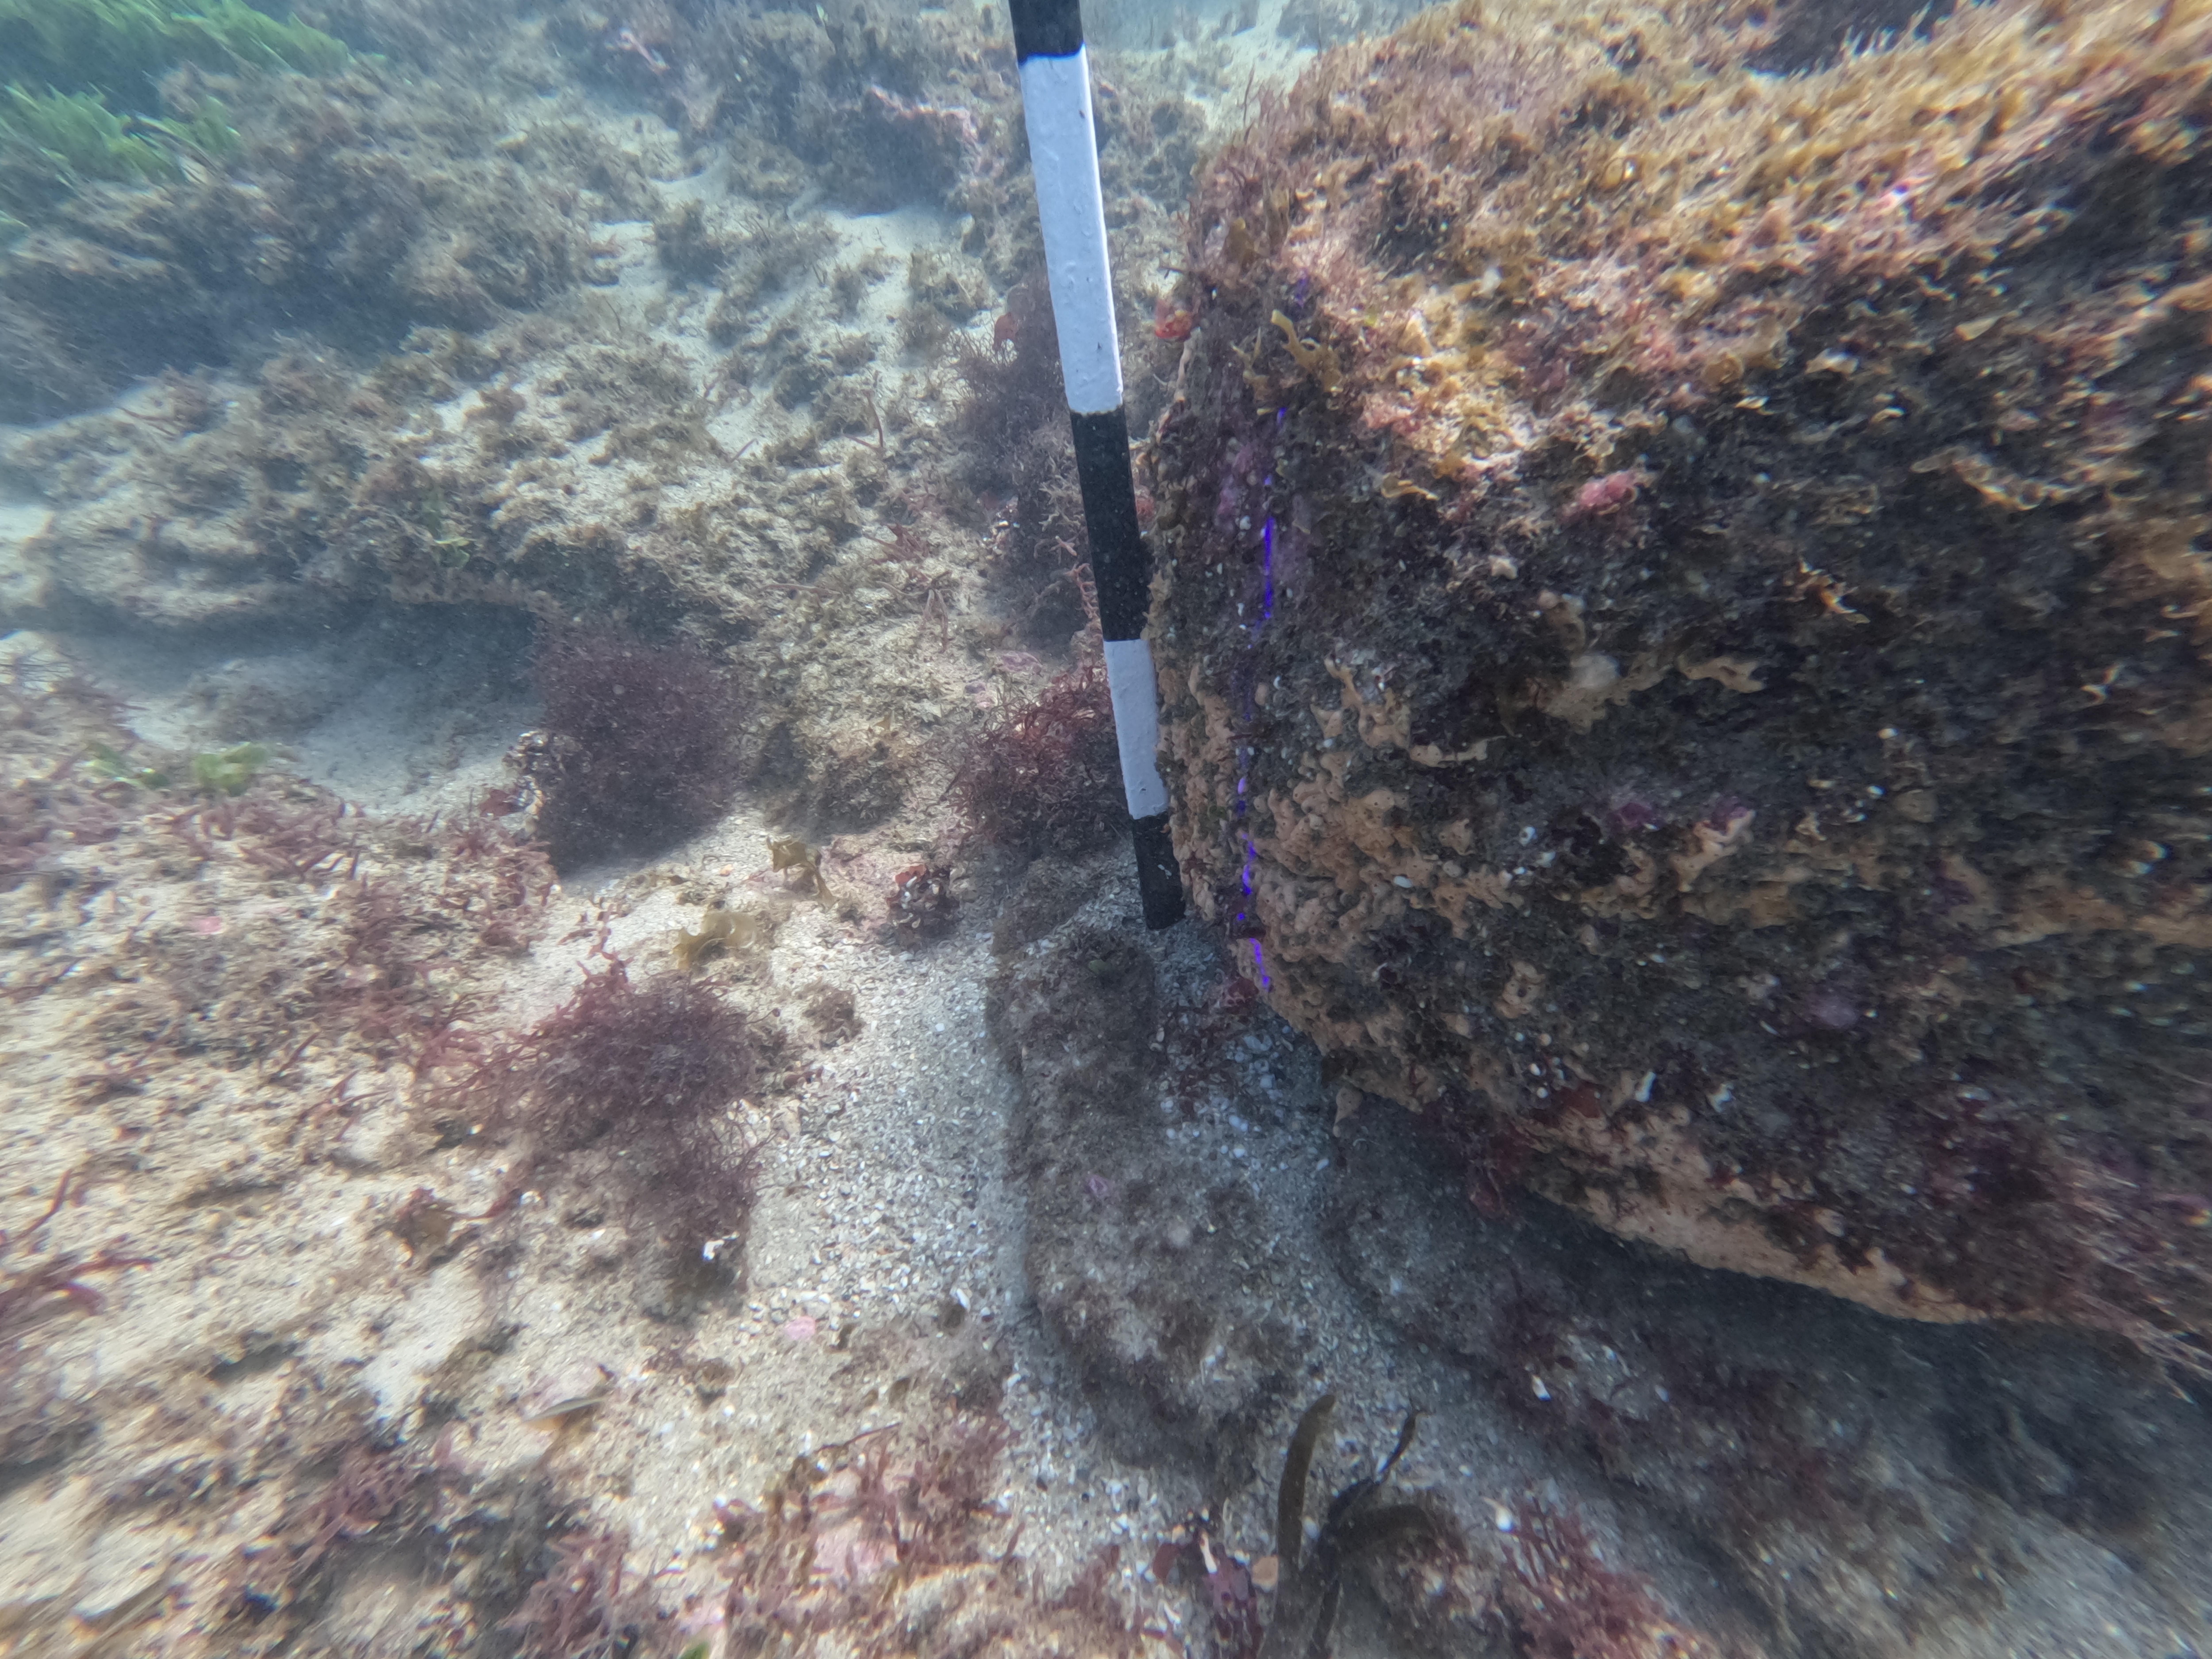

Supplement: Supplementary file 1843 [file G0028169.pdf › Ocean1/G0028169.pdf]

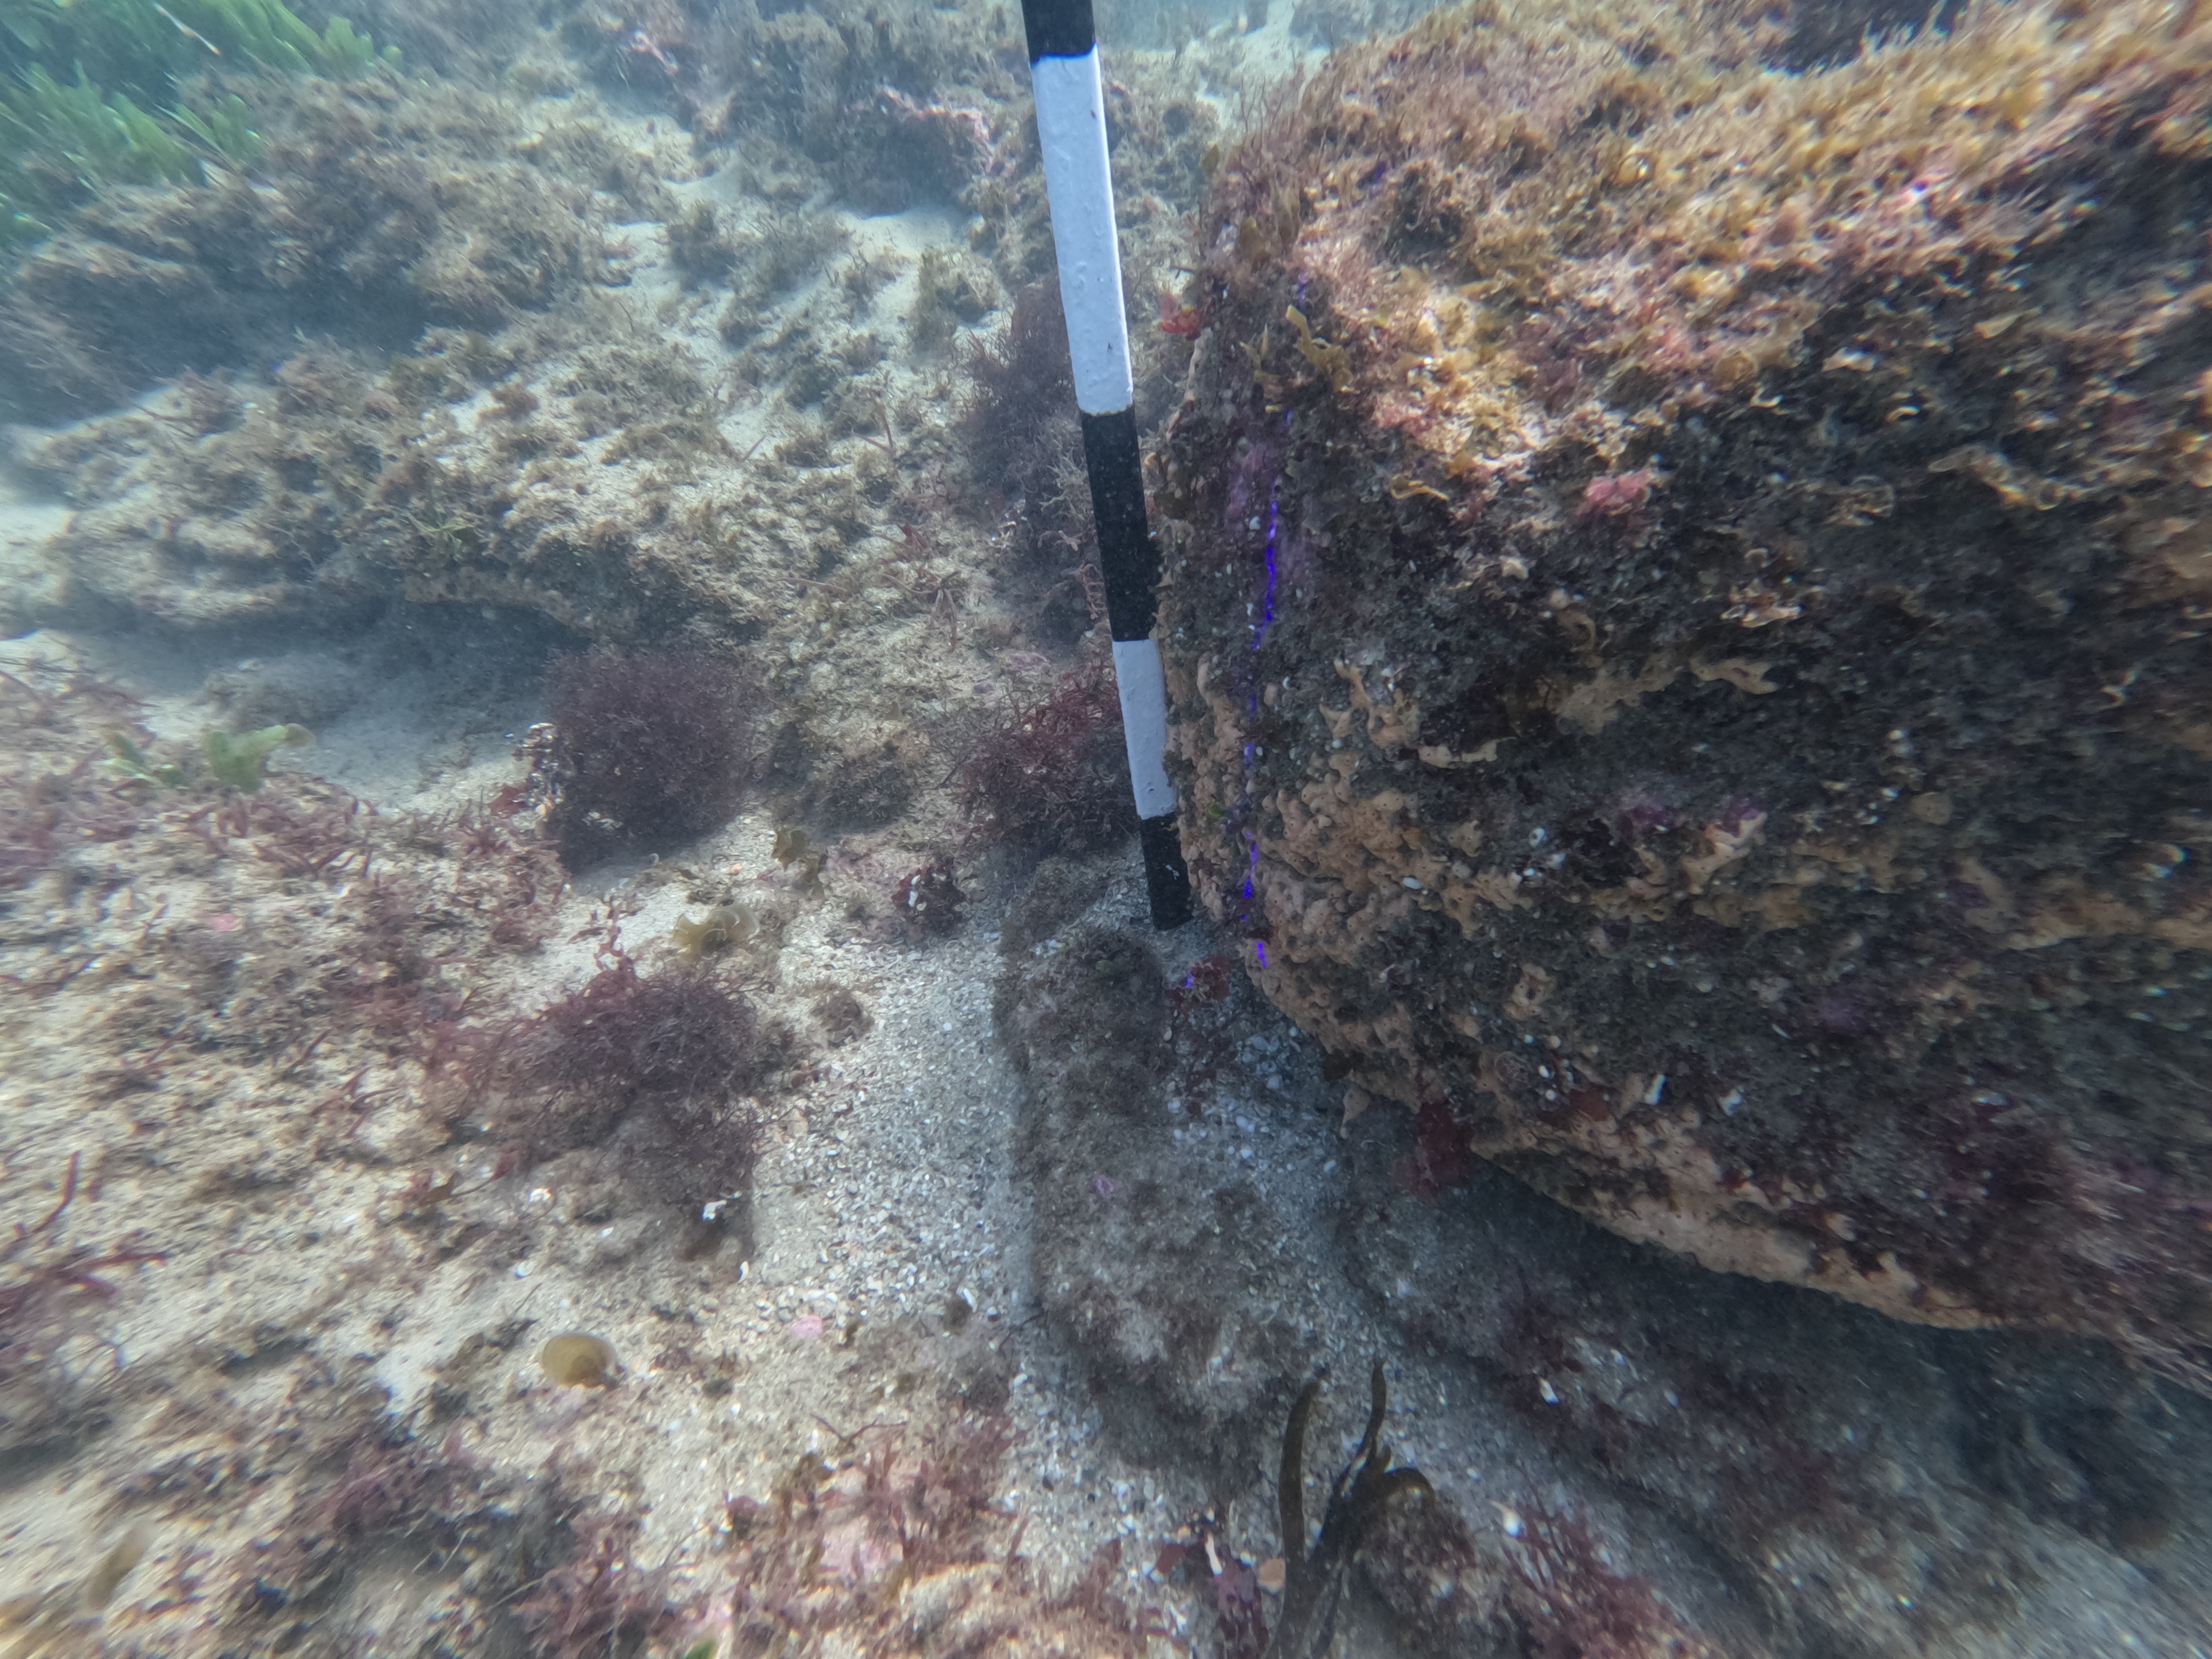

Supplement: Supplementary file 1844 [file G0028170.pdf › Ocean1/G0028170.pdf]

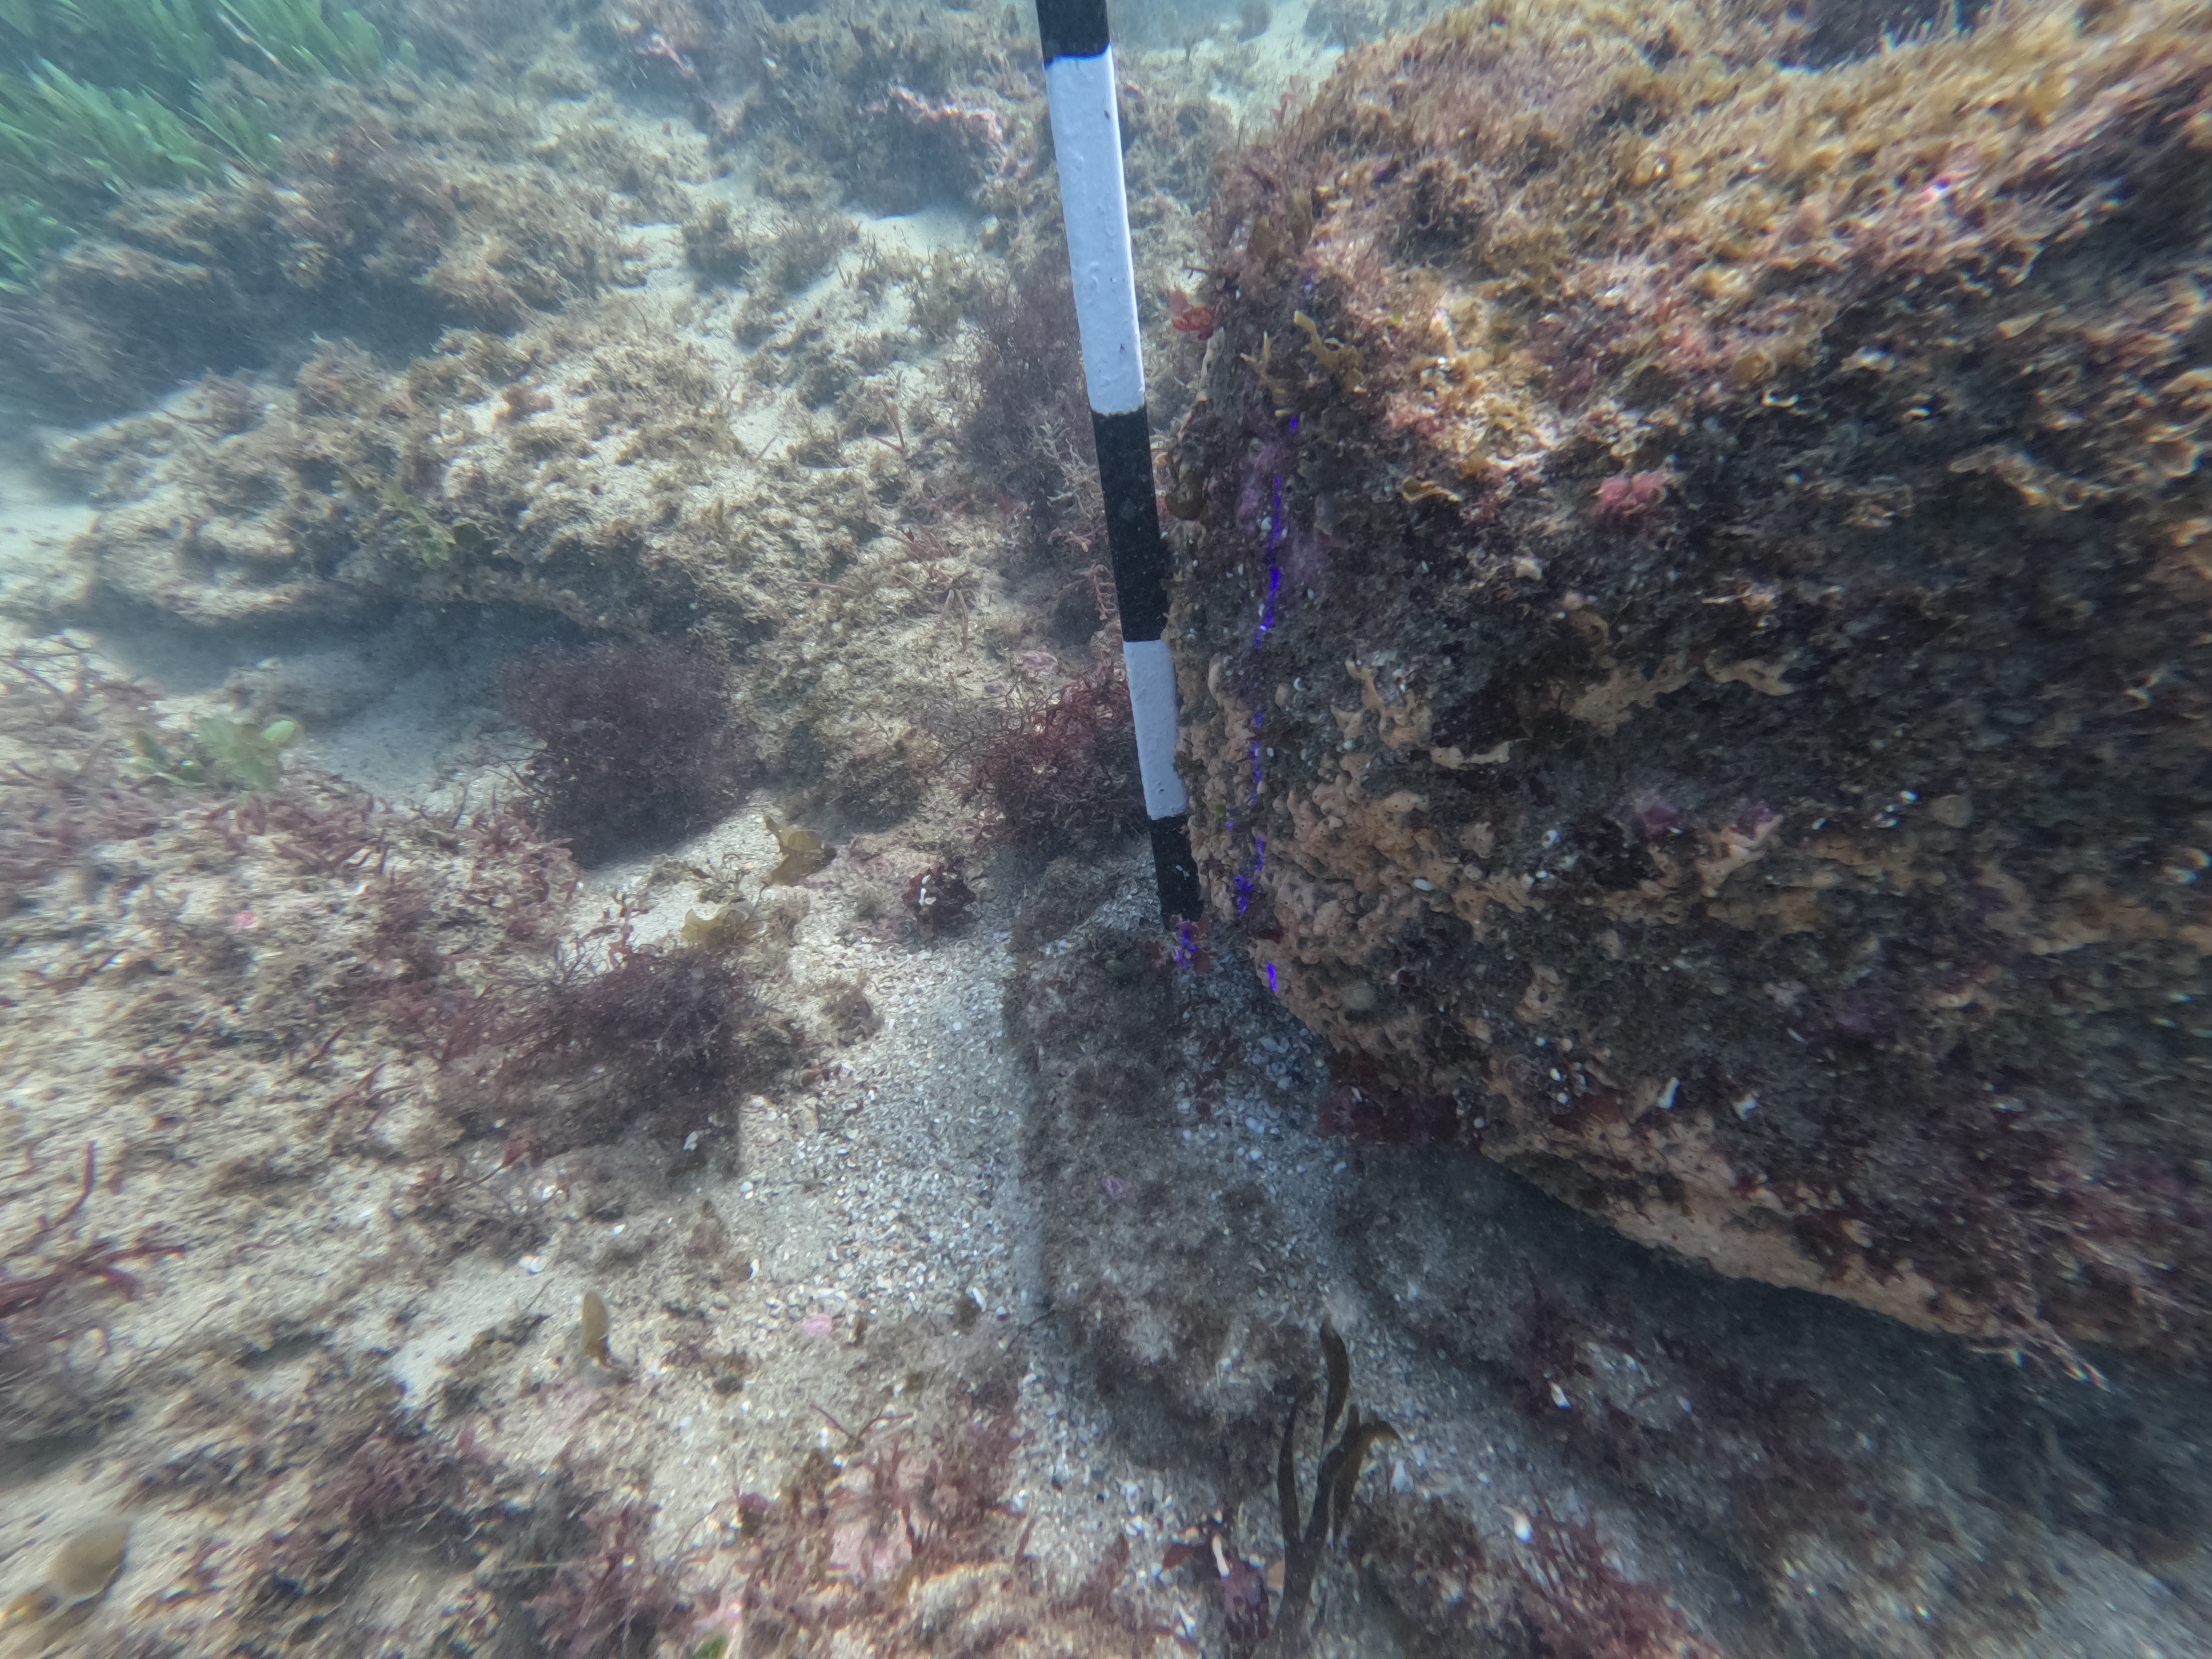

Supplement: Supplementary file 1845 [file G0028171.pdf › Ocean1/G0028171.pdf]

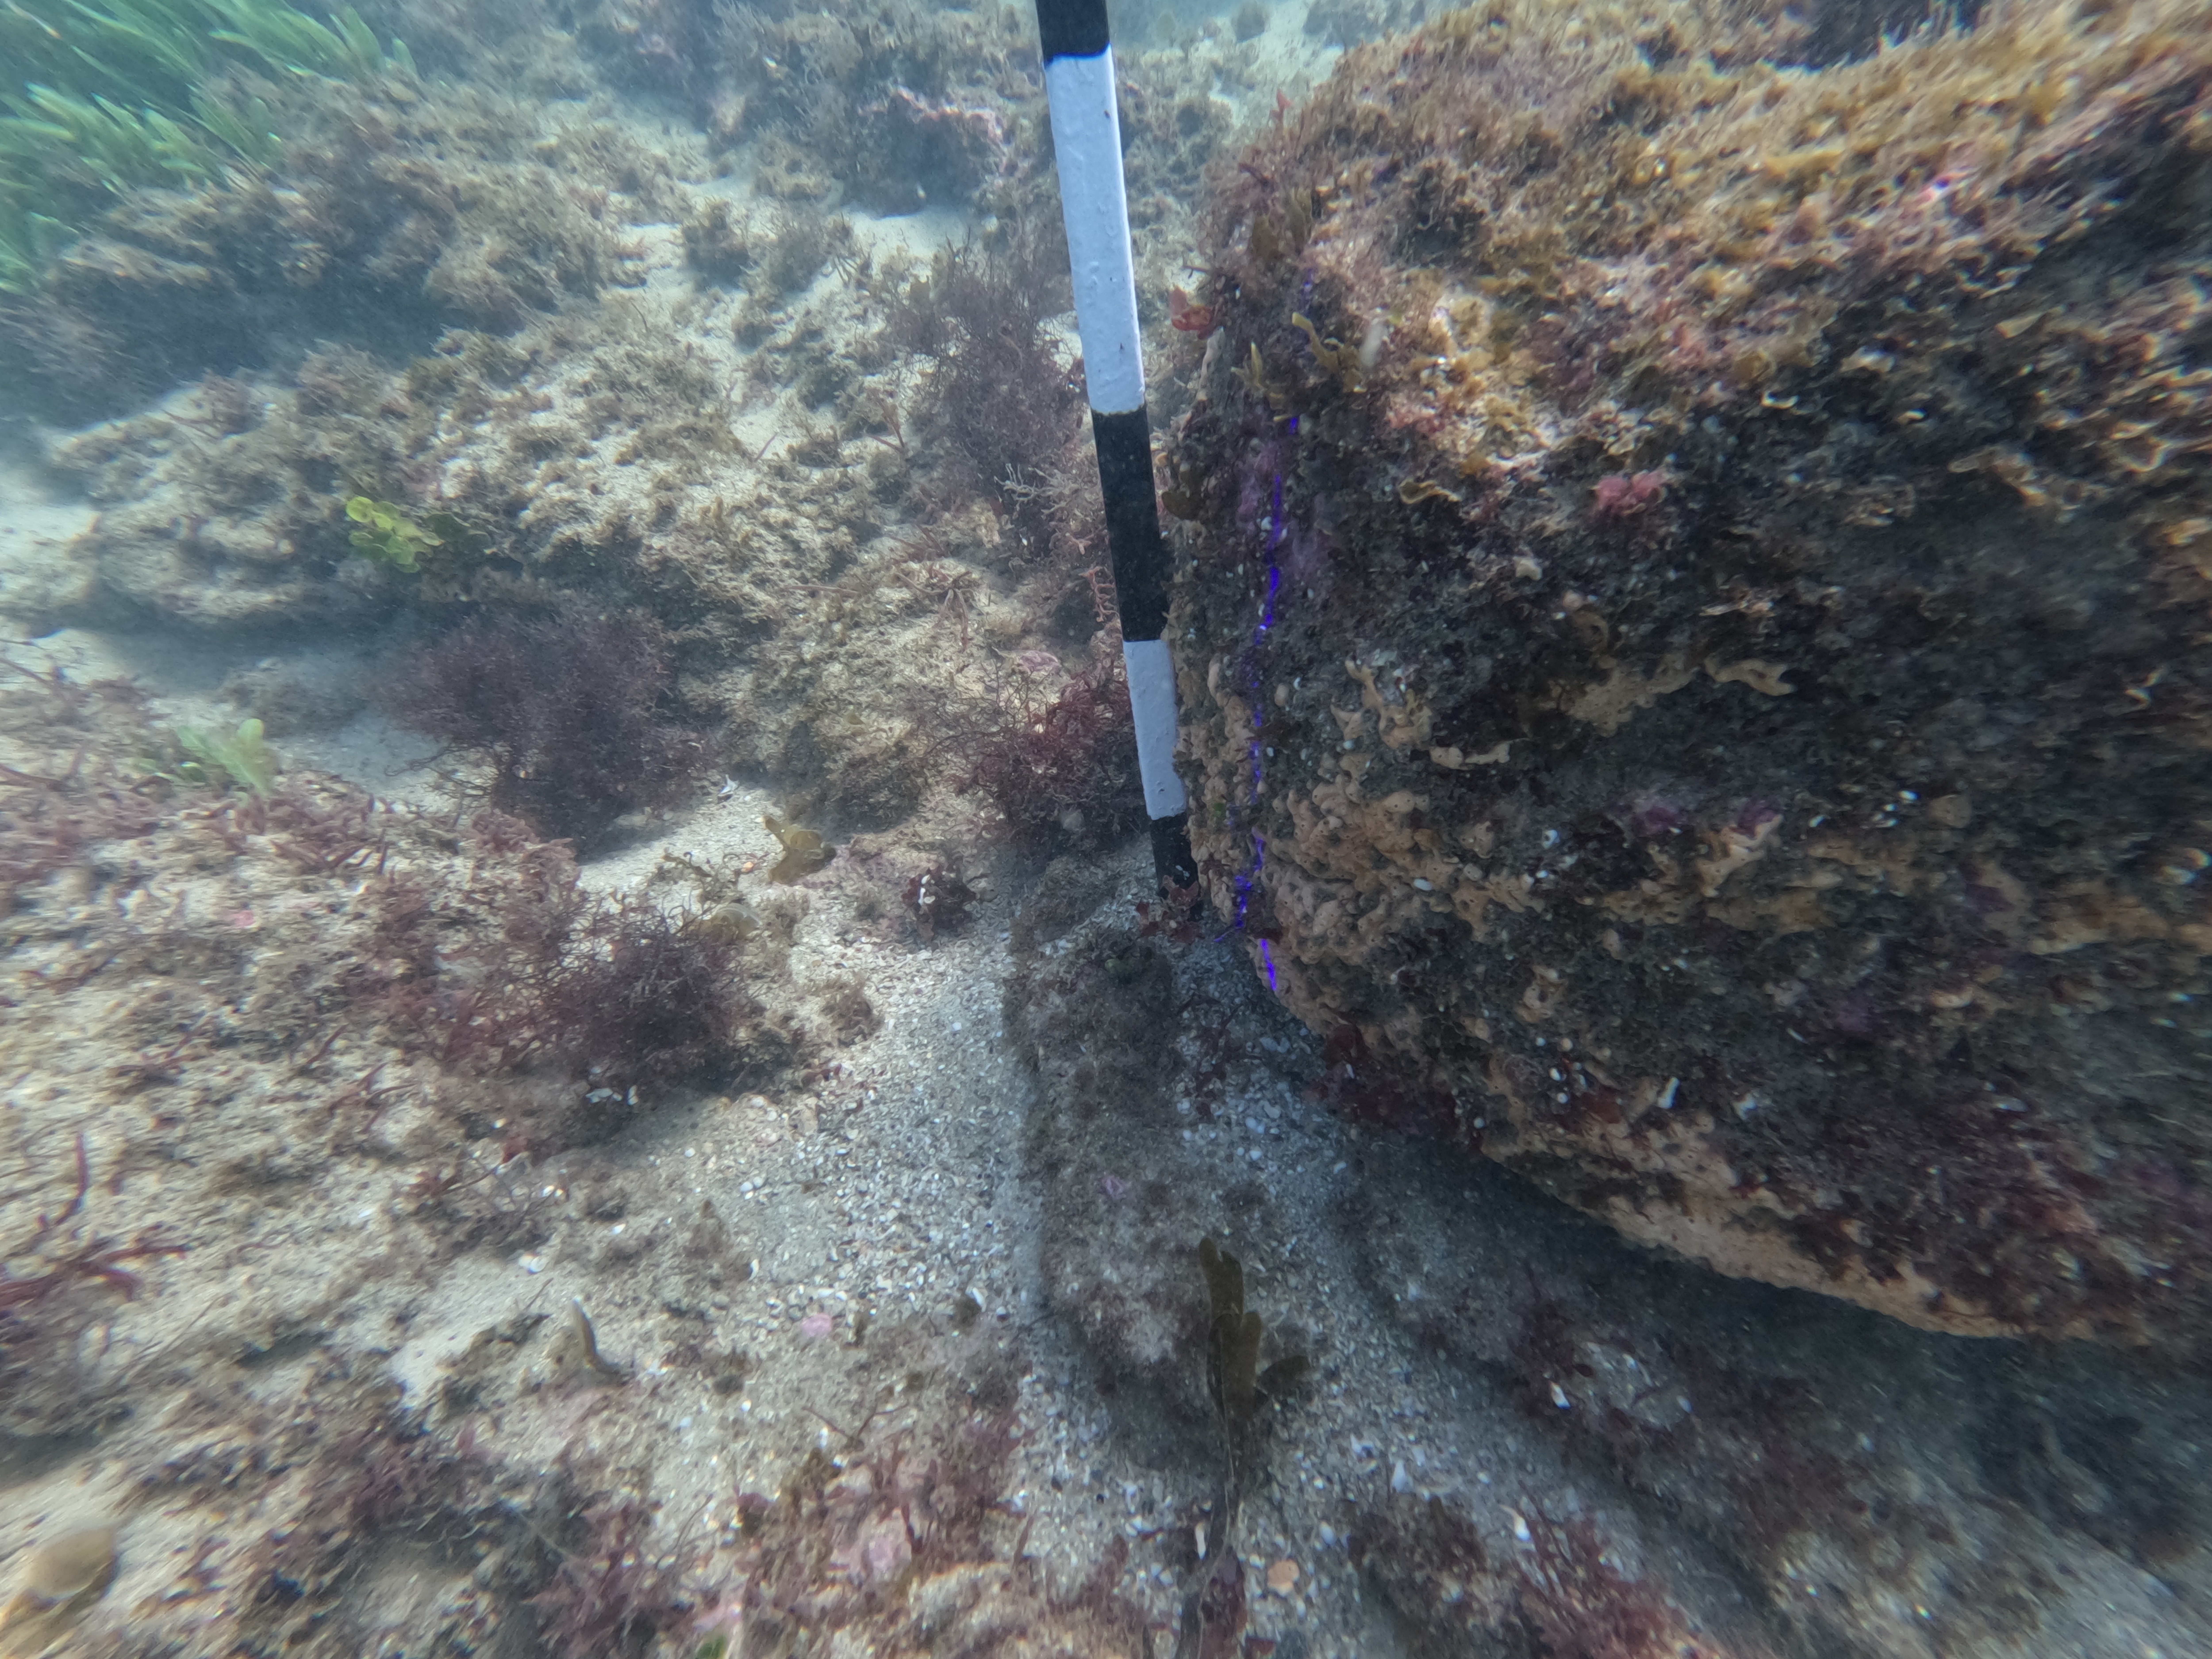

Supplement: Supplementary file 1846 [file G0028172.pdf › Ocean1/G0028172.pdf]

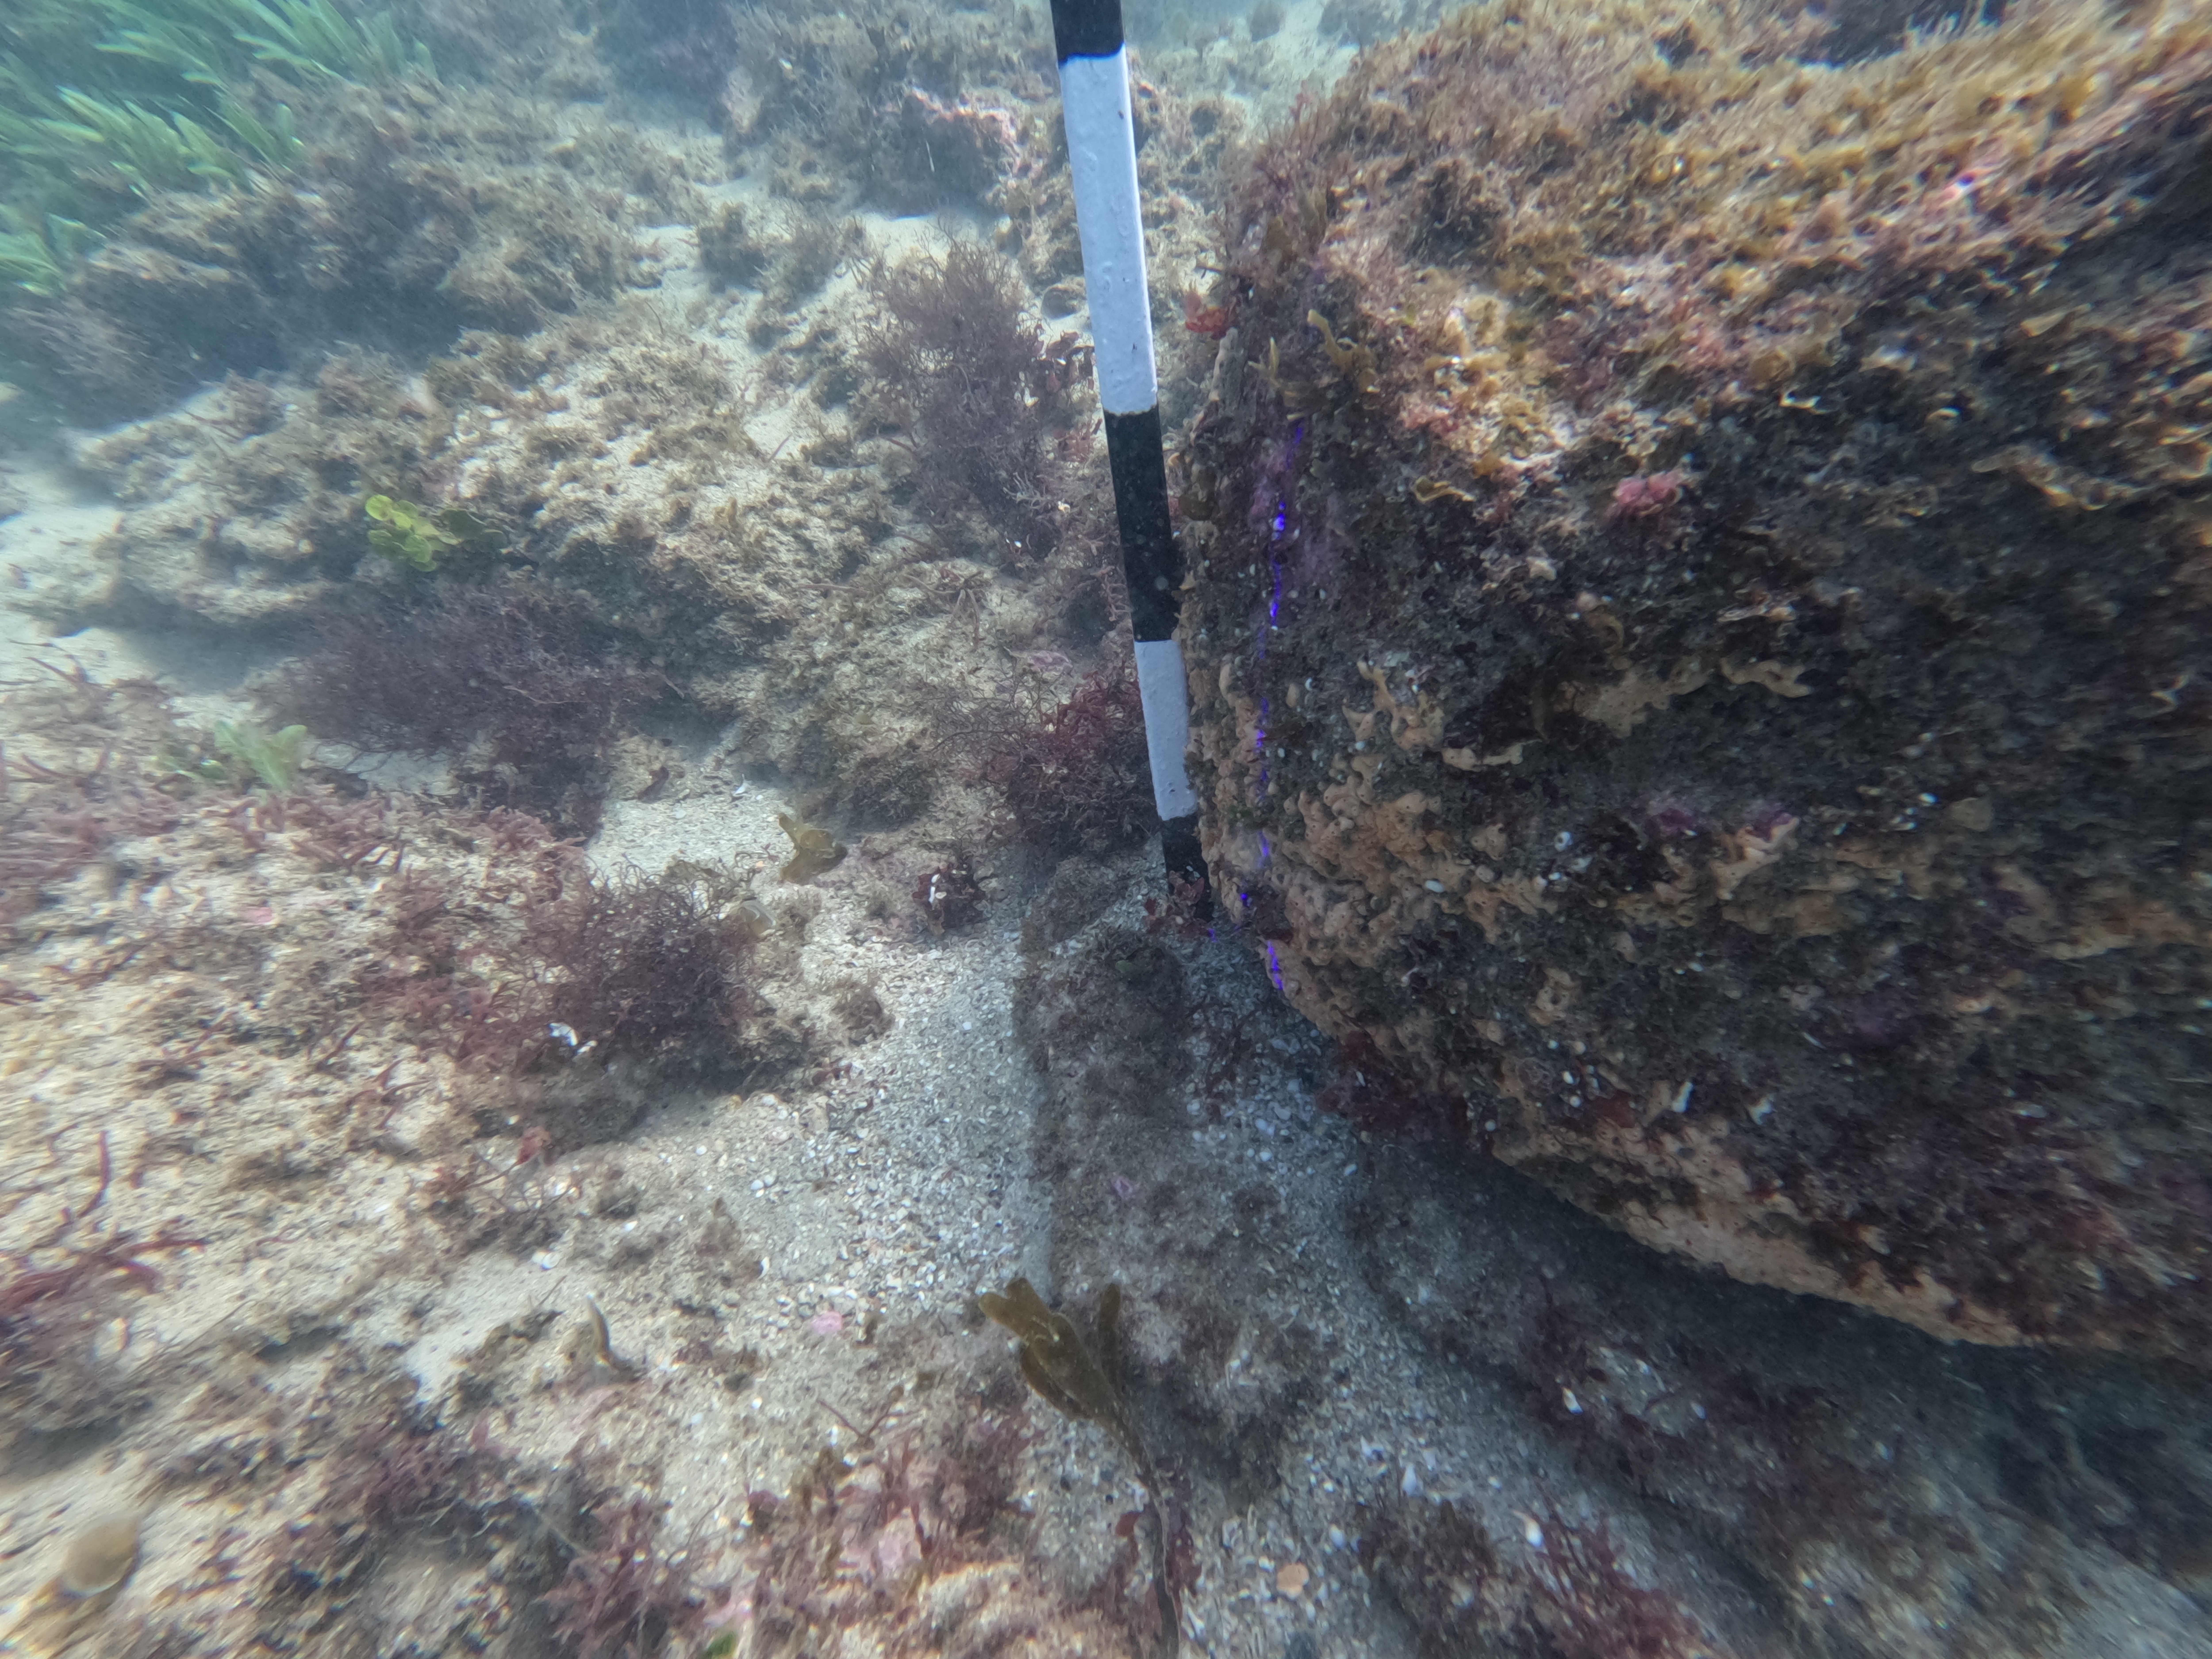

Supplement: Supplementary file 1847 [file G0028173.pdf › Ocean1/G0028173.pdf]

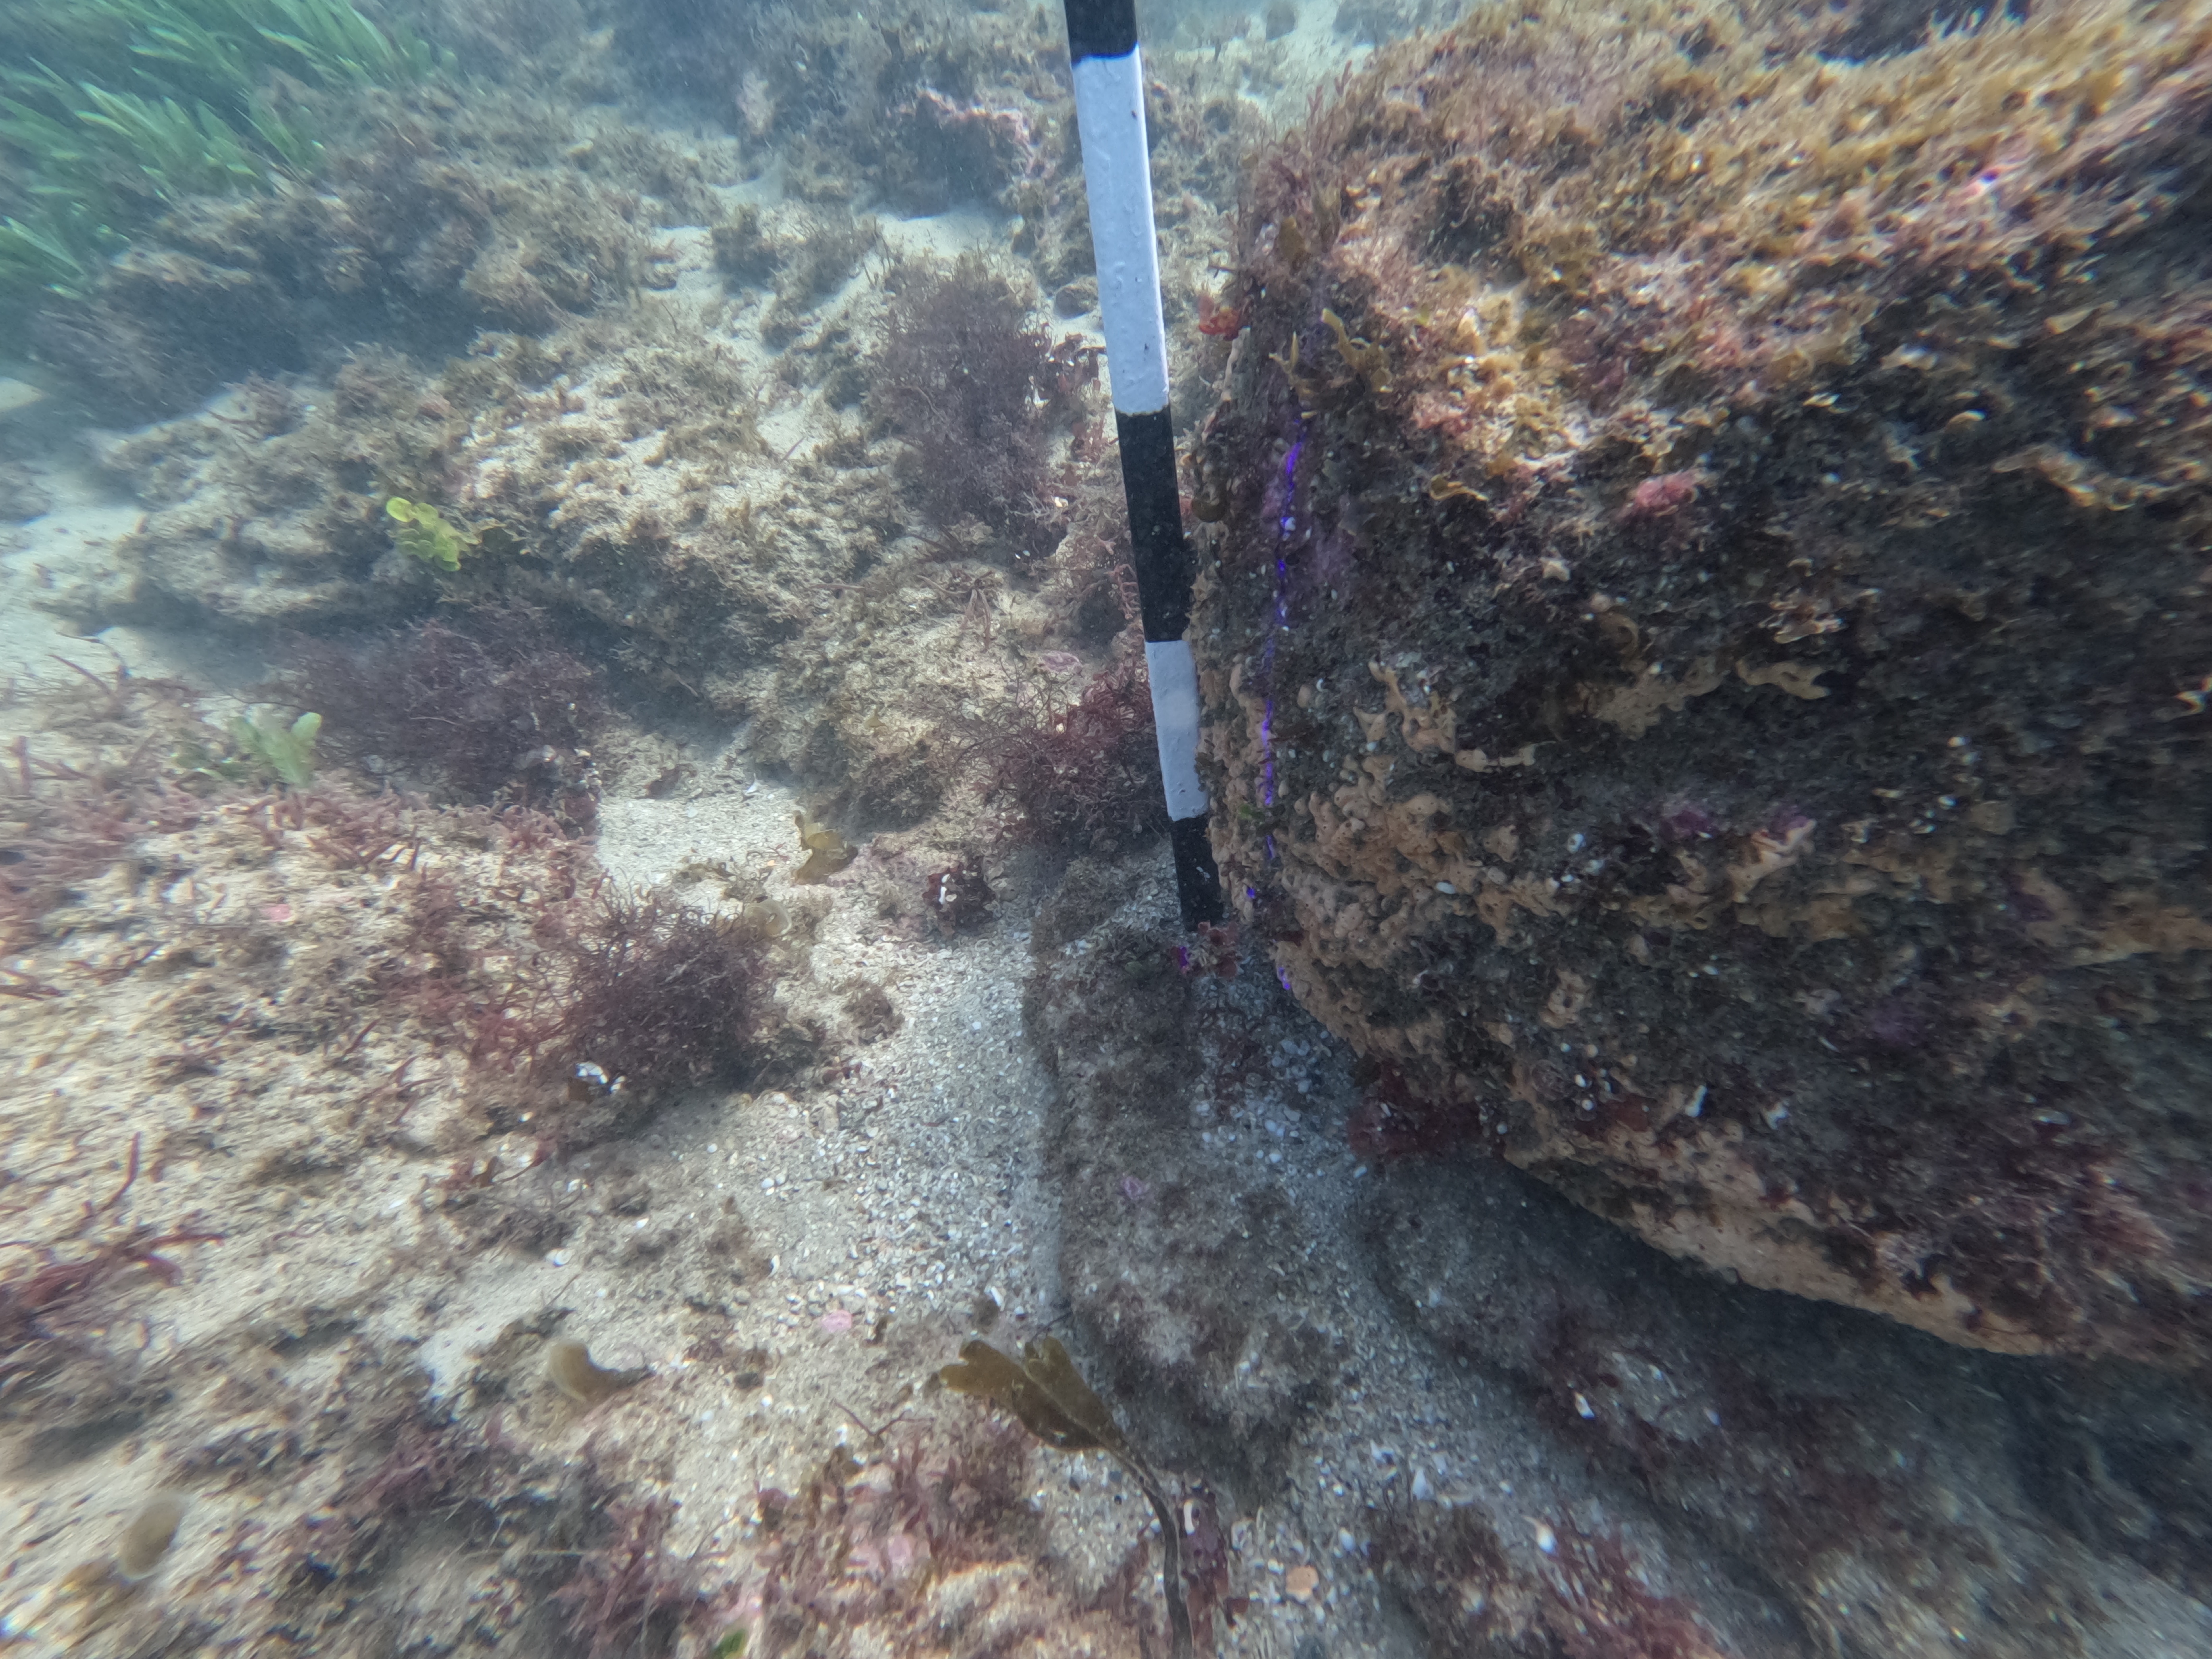

Supplement: Supplementary file 1848 [file G0028174.pdf › Ocean1/G0028174.pdf]

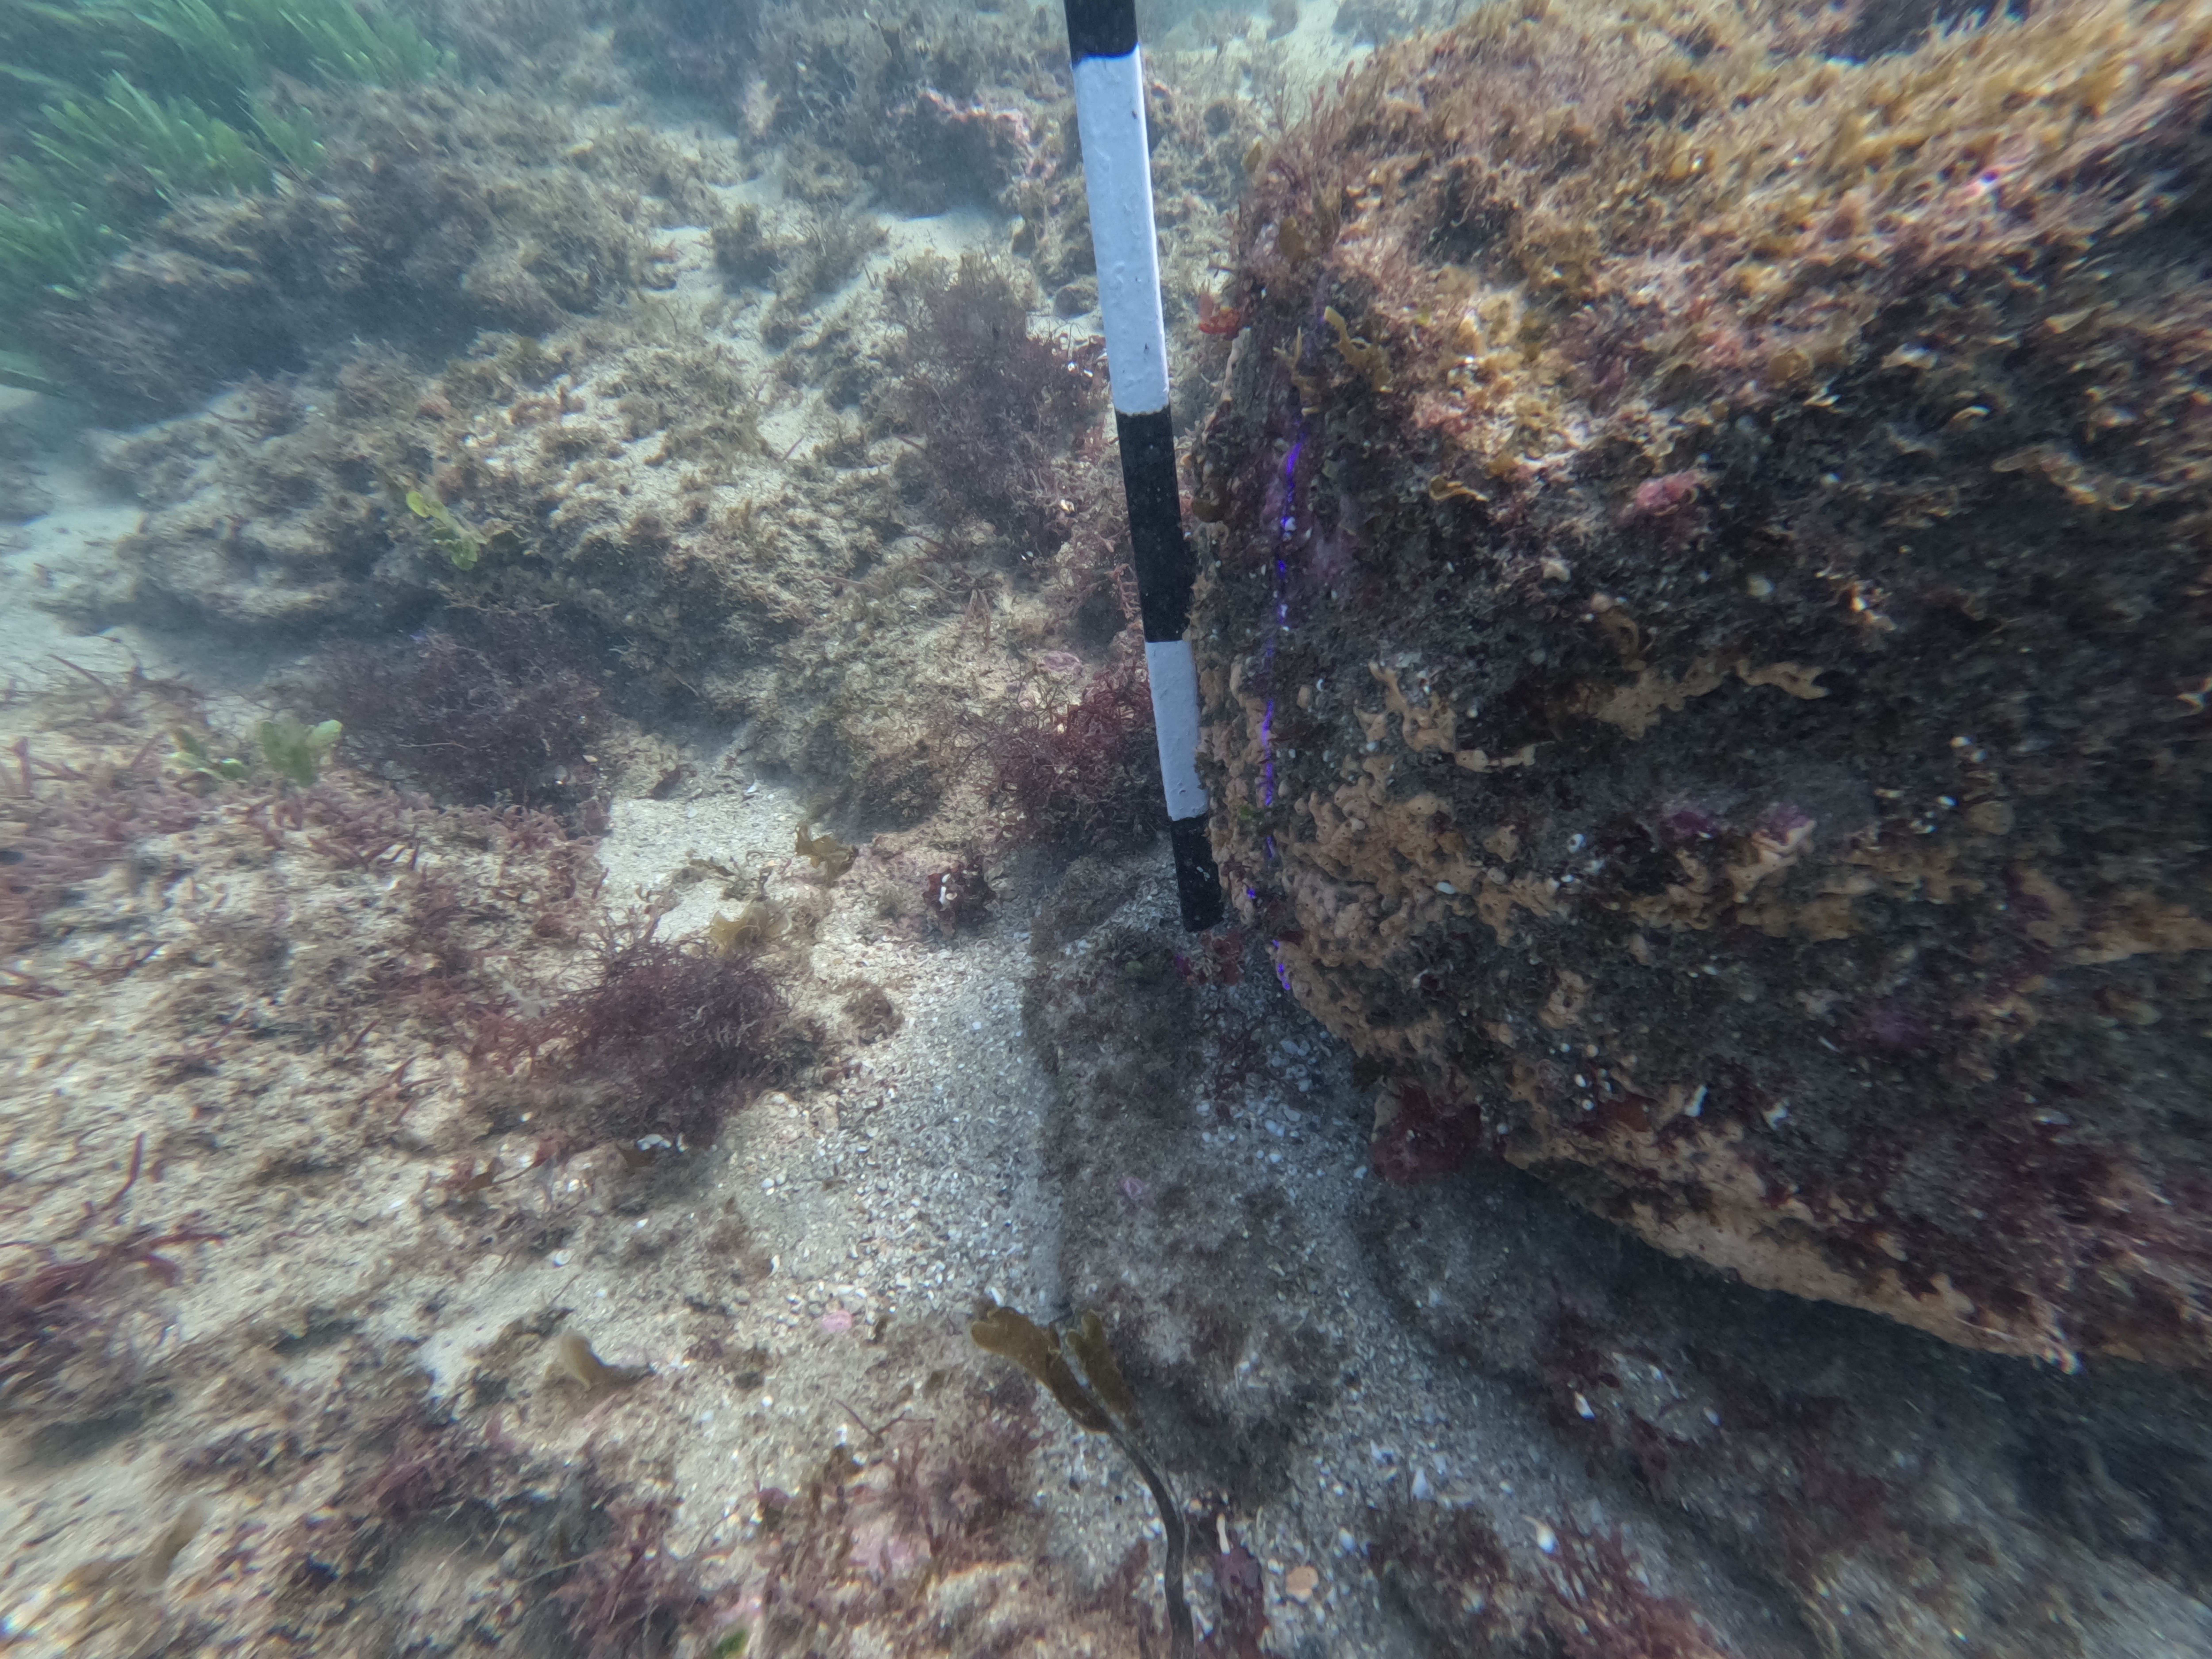

Supplement: Supplementary file 1849 [file G0028175.pdf › Ocean1/G0028175.pdf]

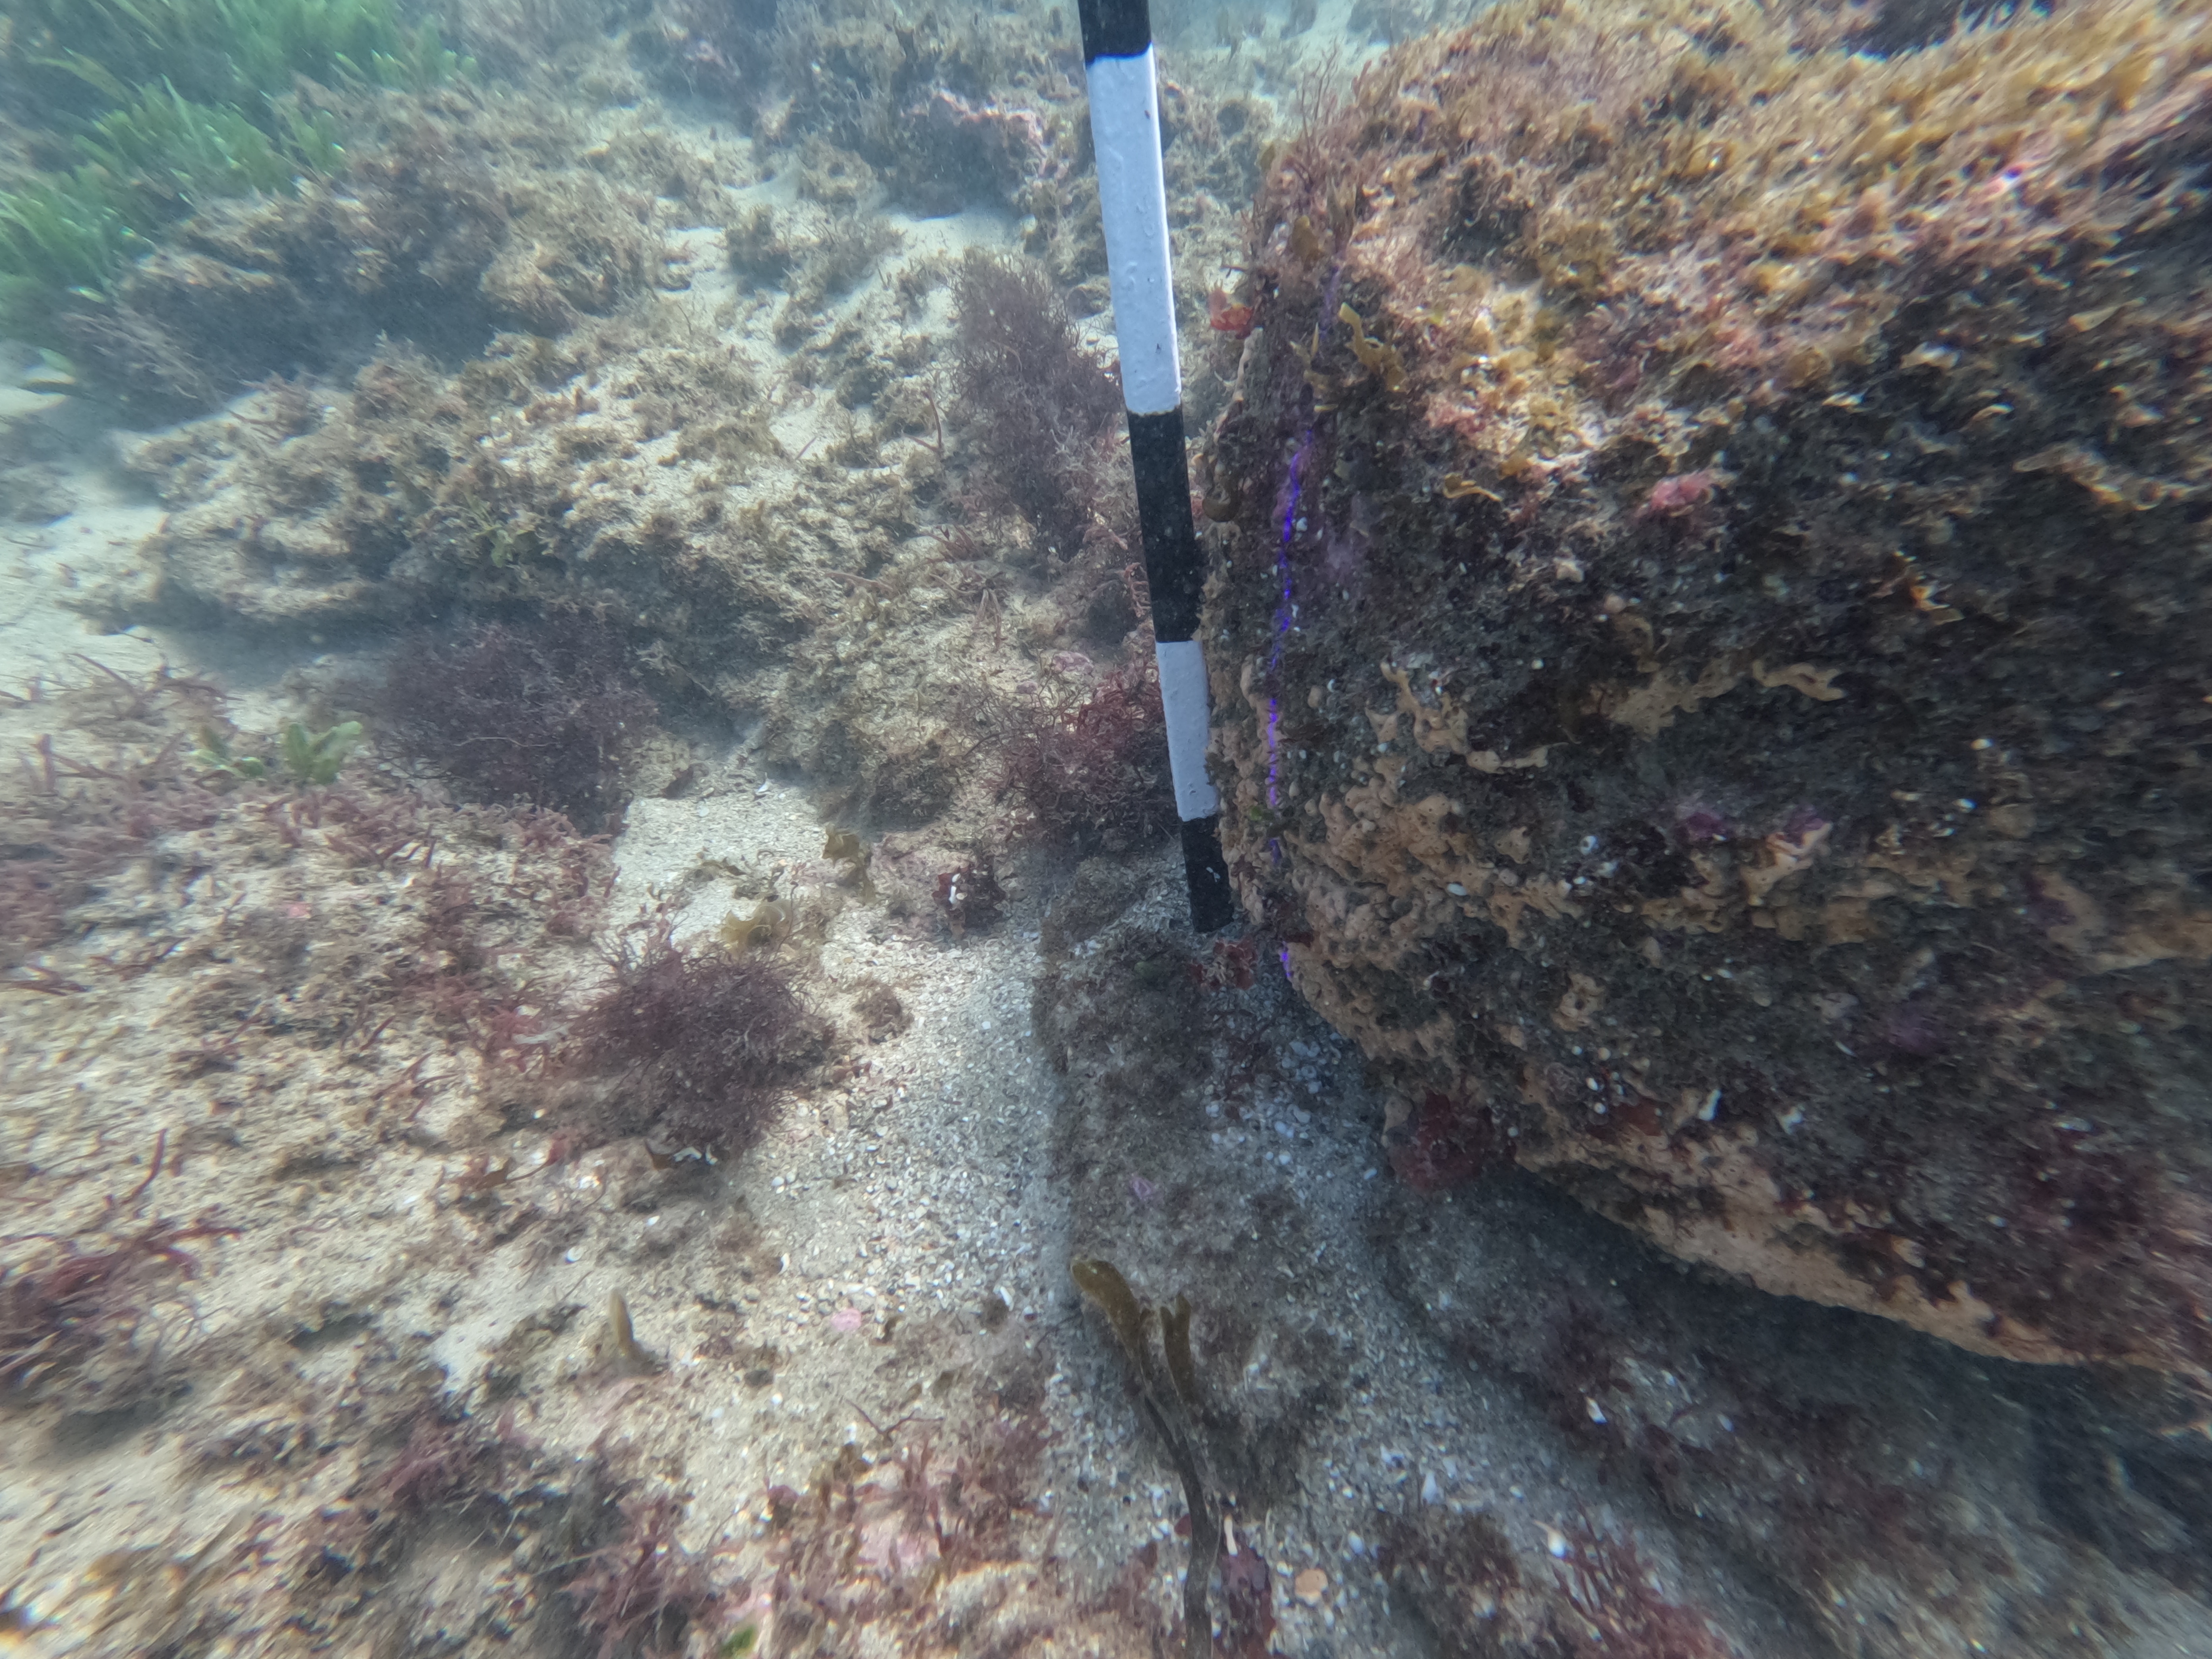

Supplement: Supplementary file 1850 [file G0028176.pdf › Ocean1/G0028176.pdf]

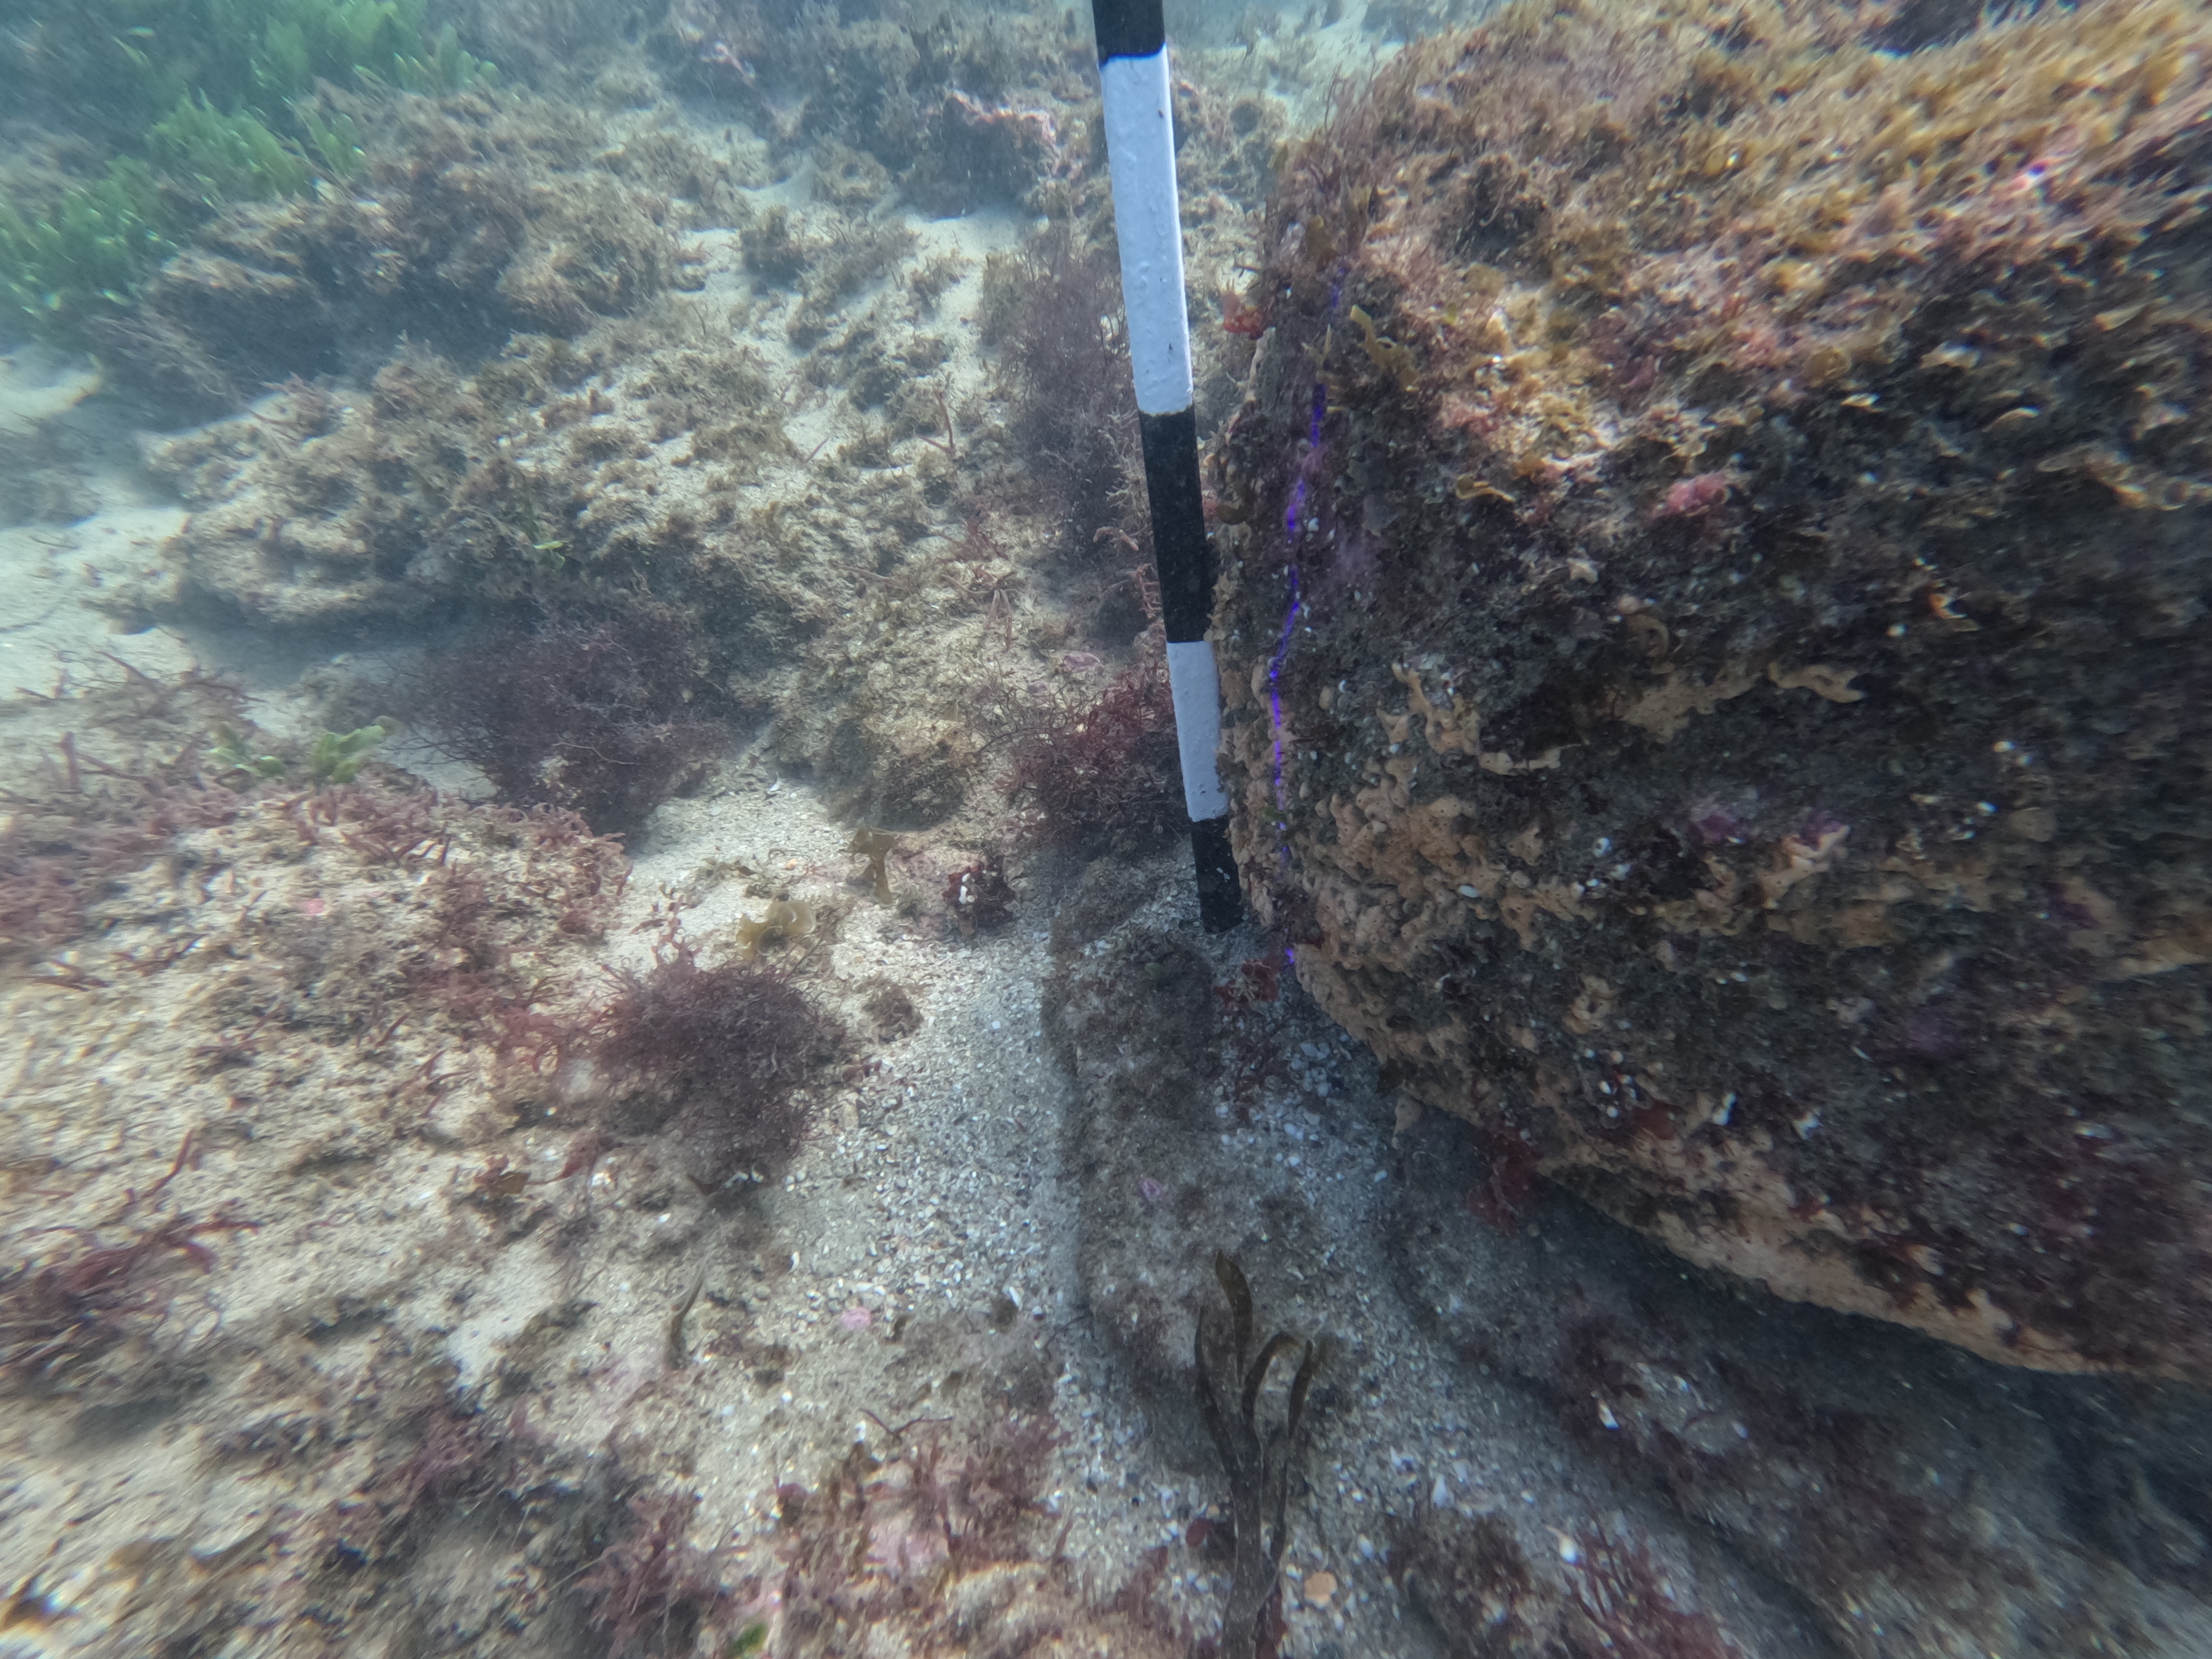

Supplement: Supplementary file 1851 [file G0028177.pdf › Ocean1/G0028177.pdf]

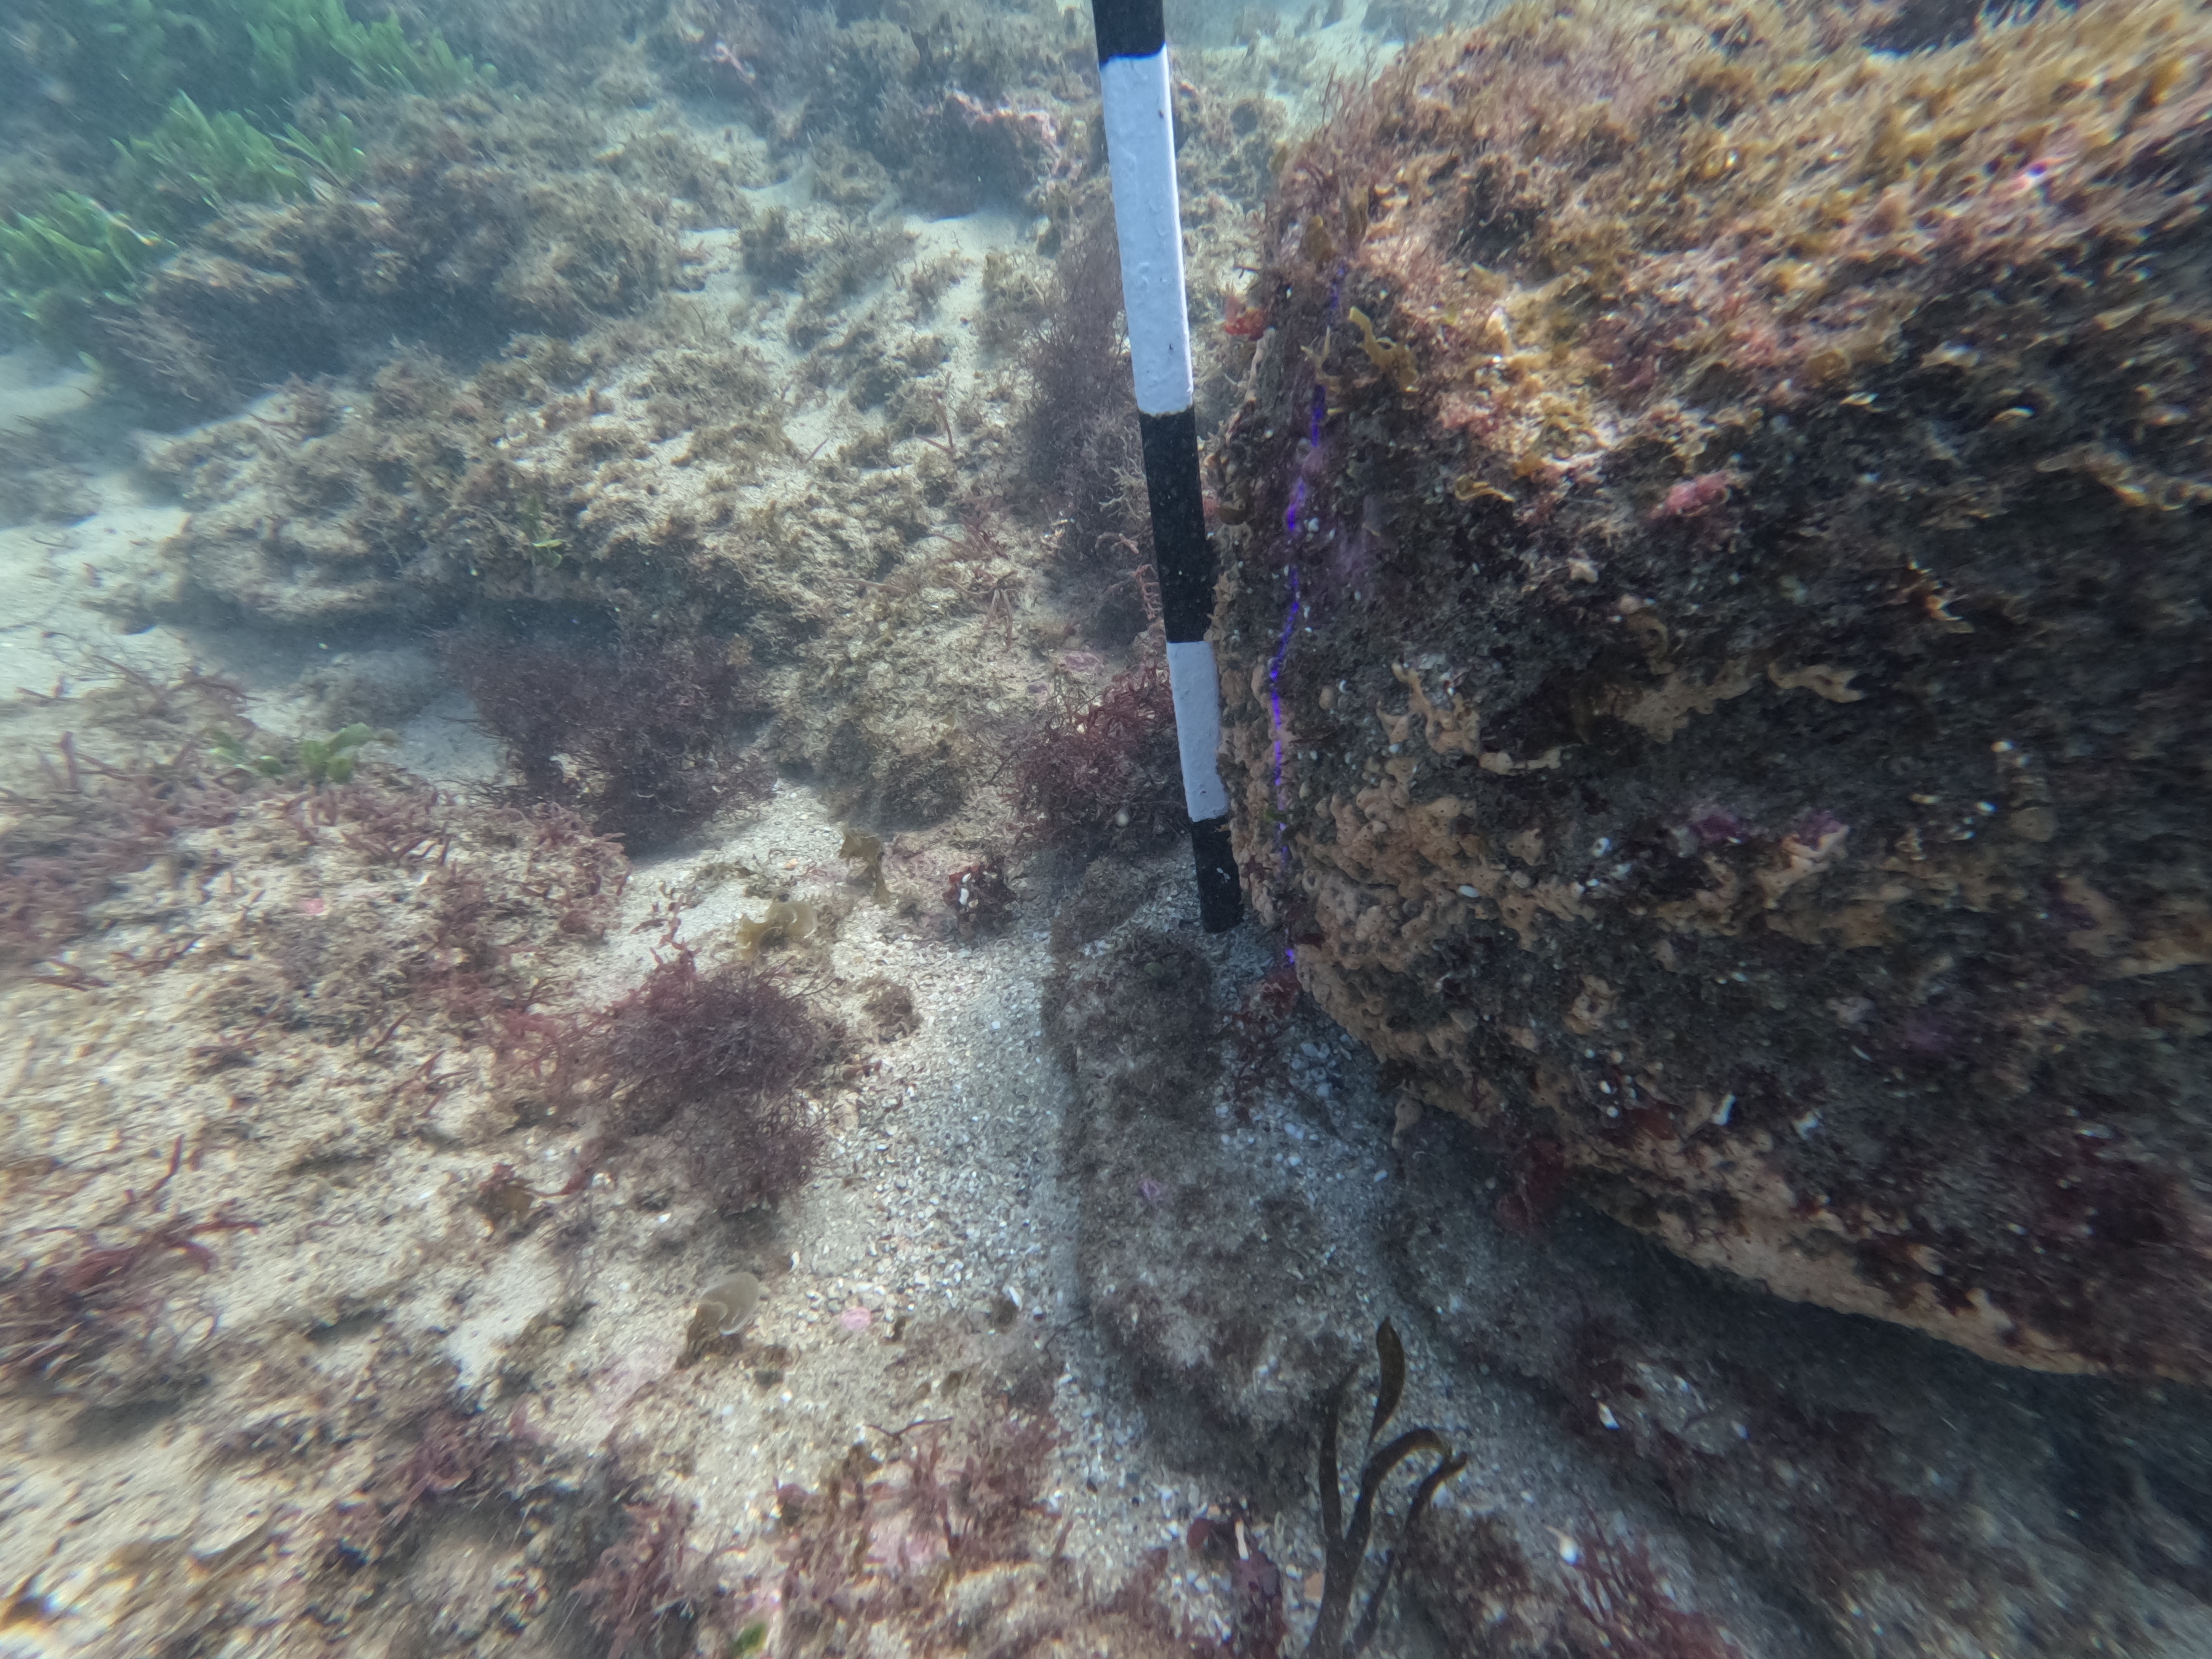

Supplement: Supplementary file 1852 [file G0028178.pdf › Ocean1/G0028178.pdf]

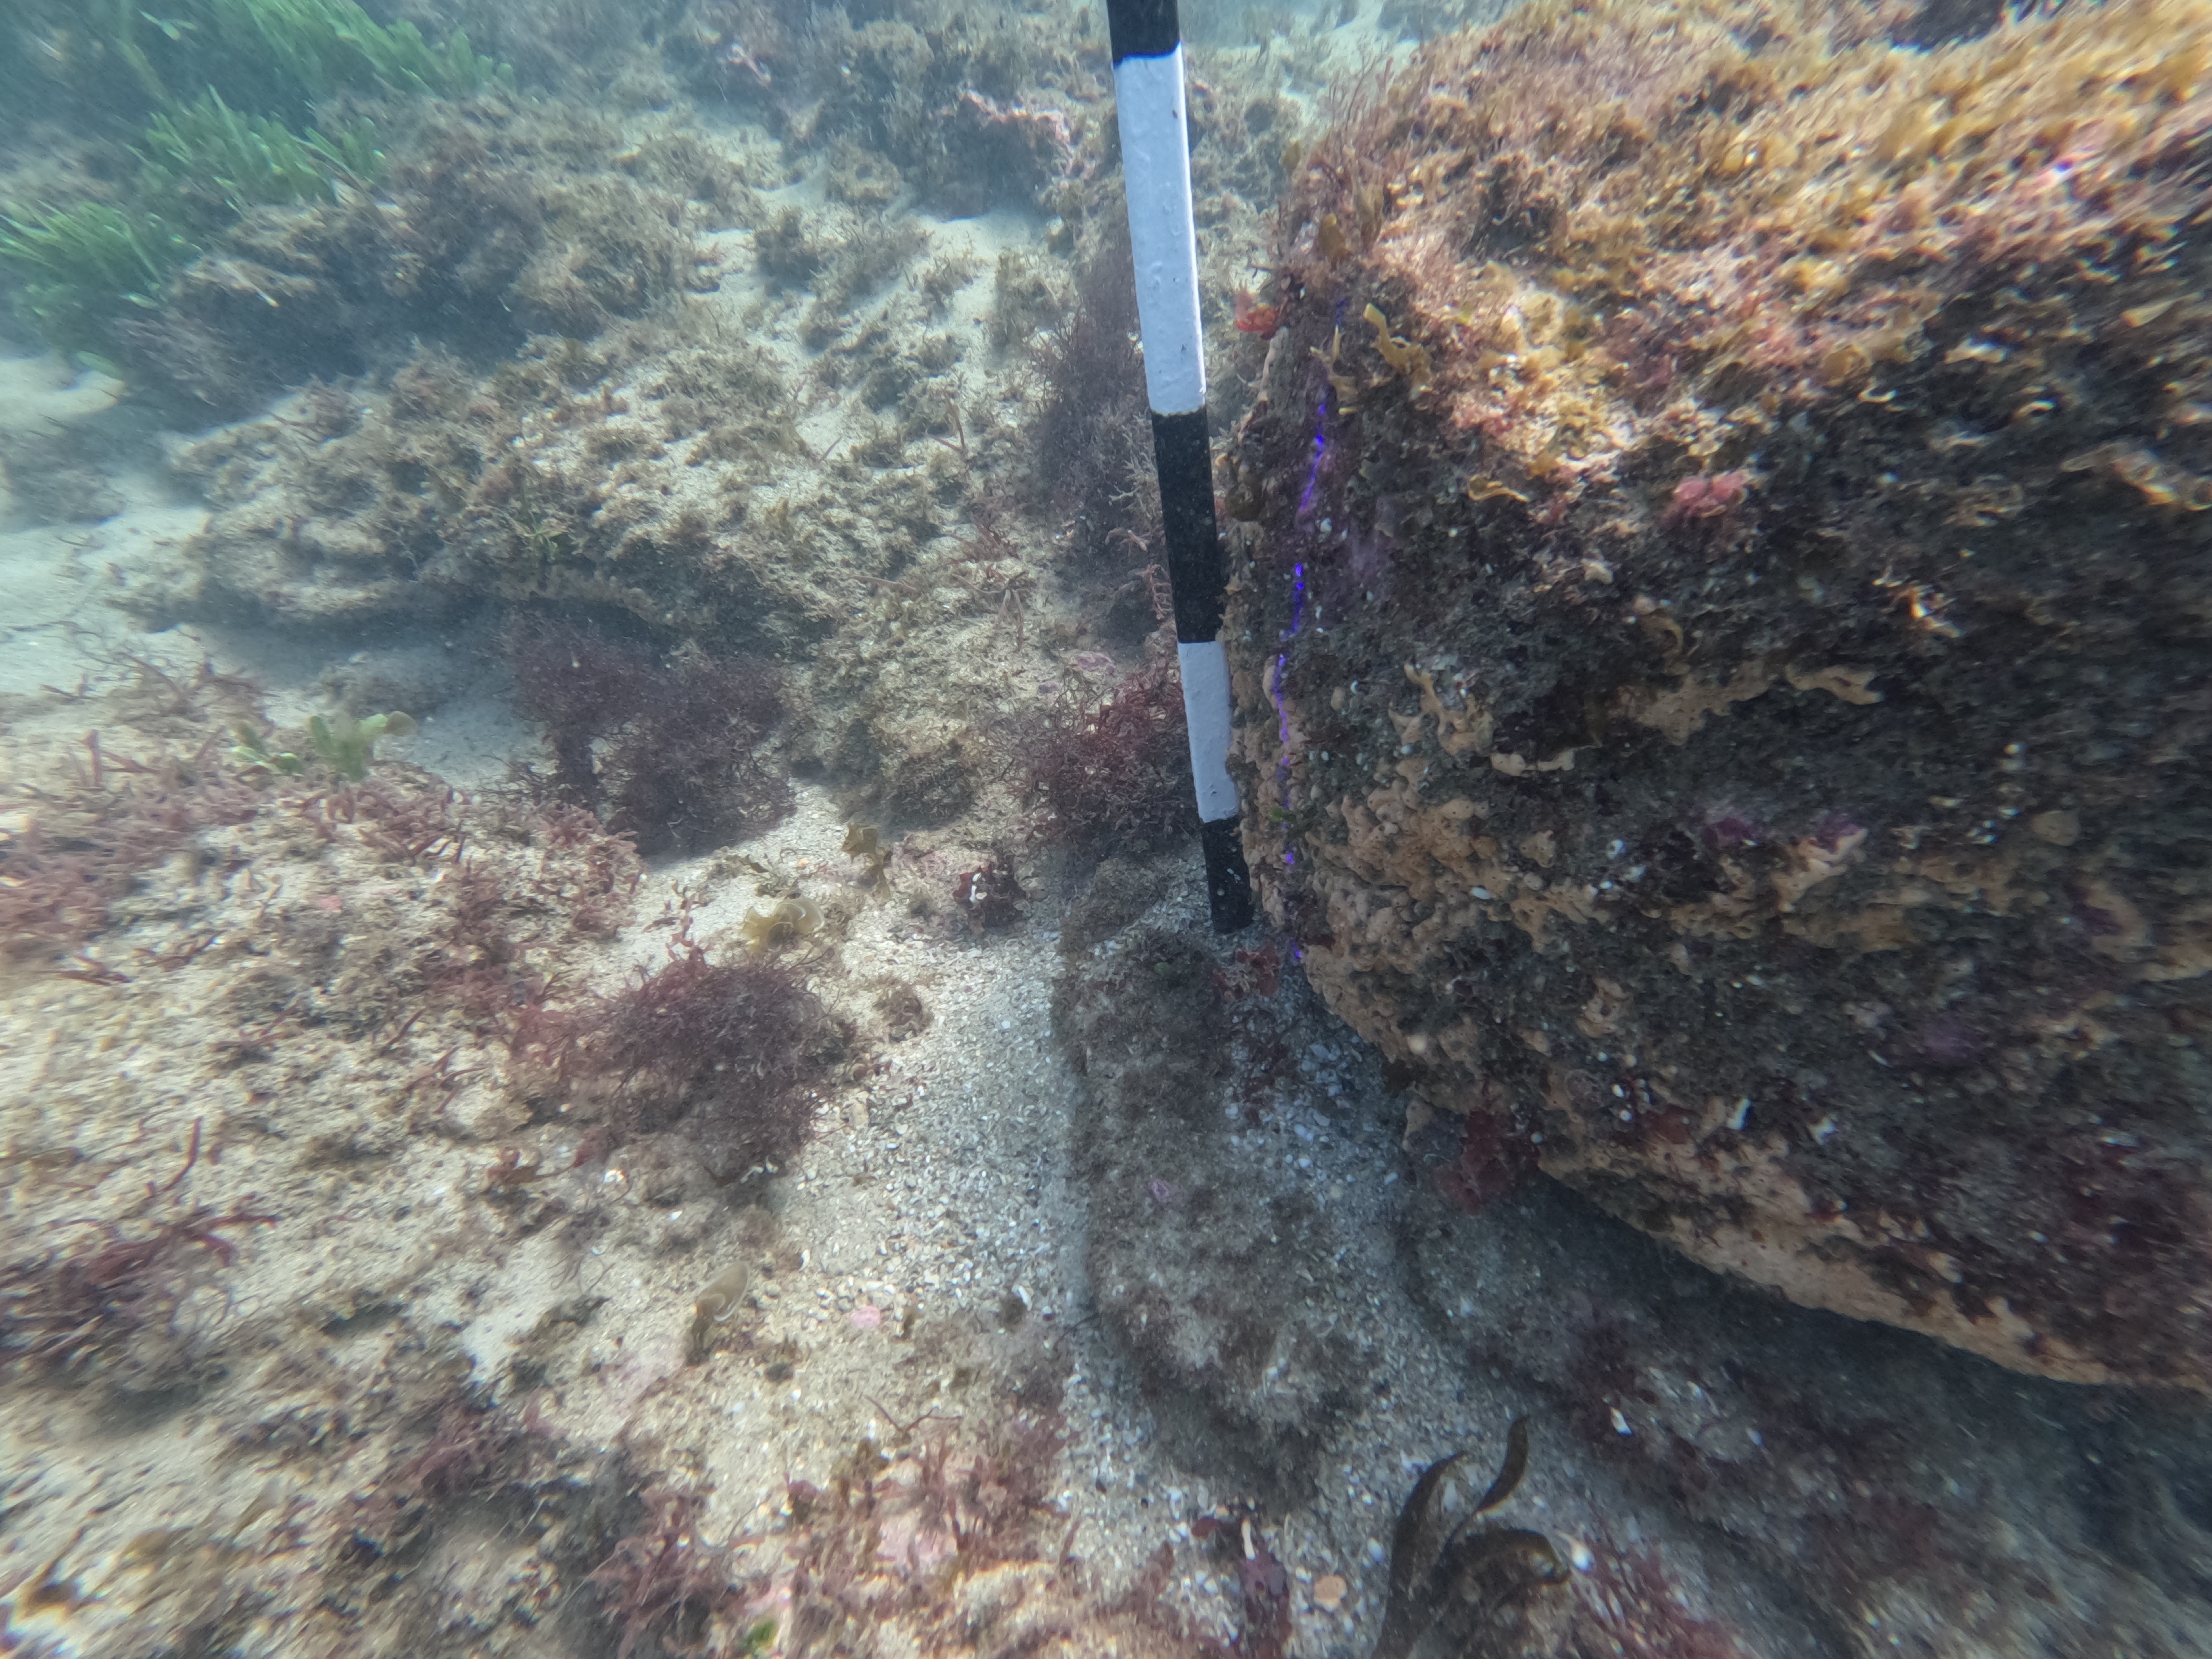

Supplement: Supplementary file 1853 [file G0028179.pdf › Ocean1/G0028179.pdf]

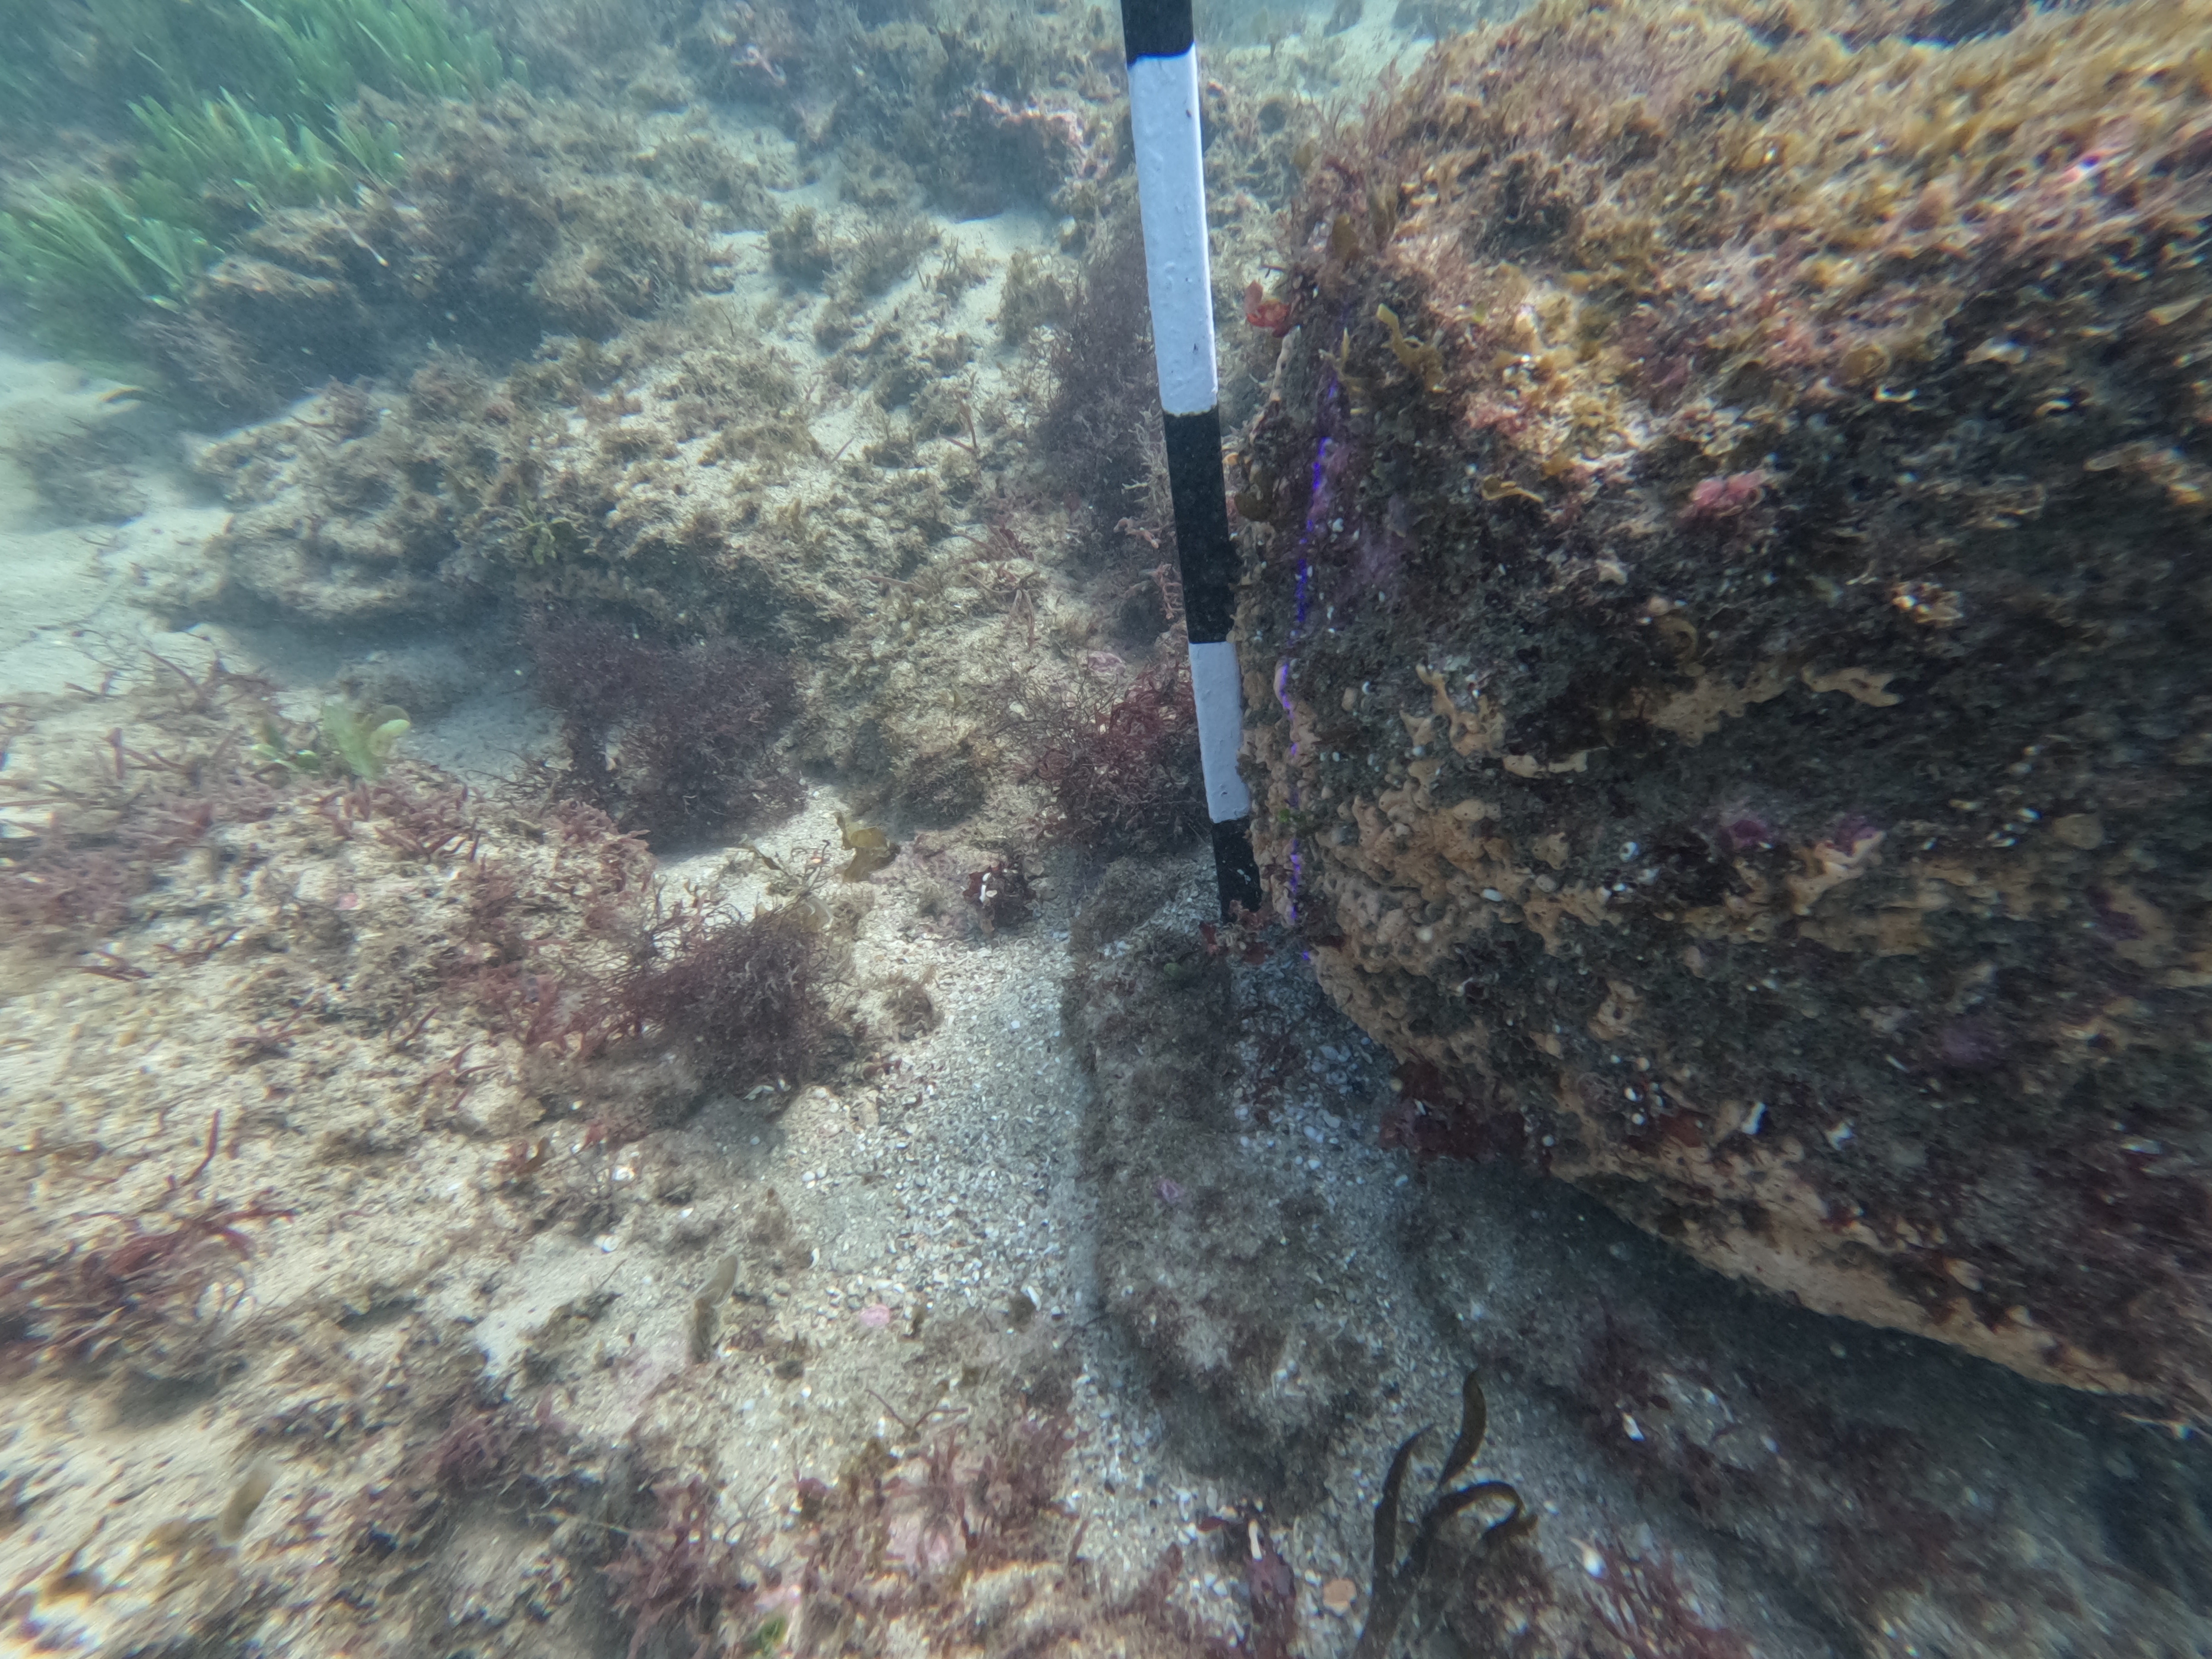

Supplement: Supplementary file 1854 [file G0028180.pdf › Ocean1/G0028180.pdf]

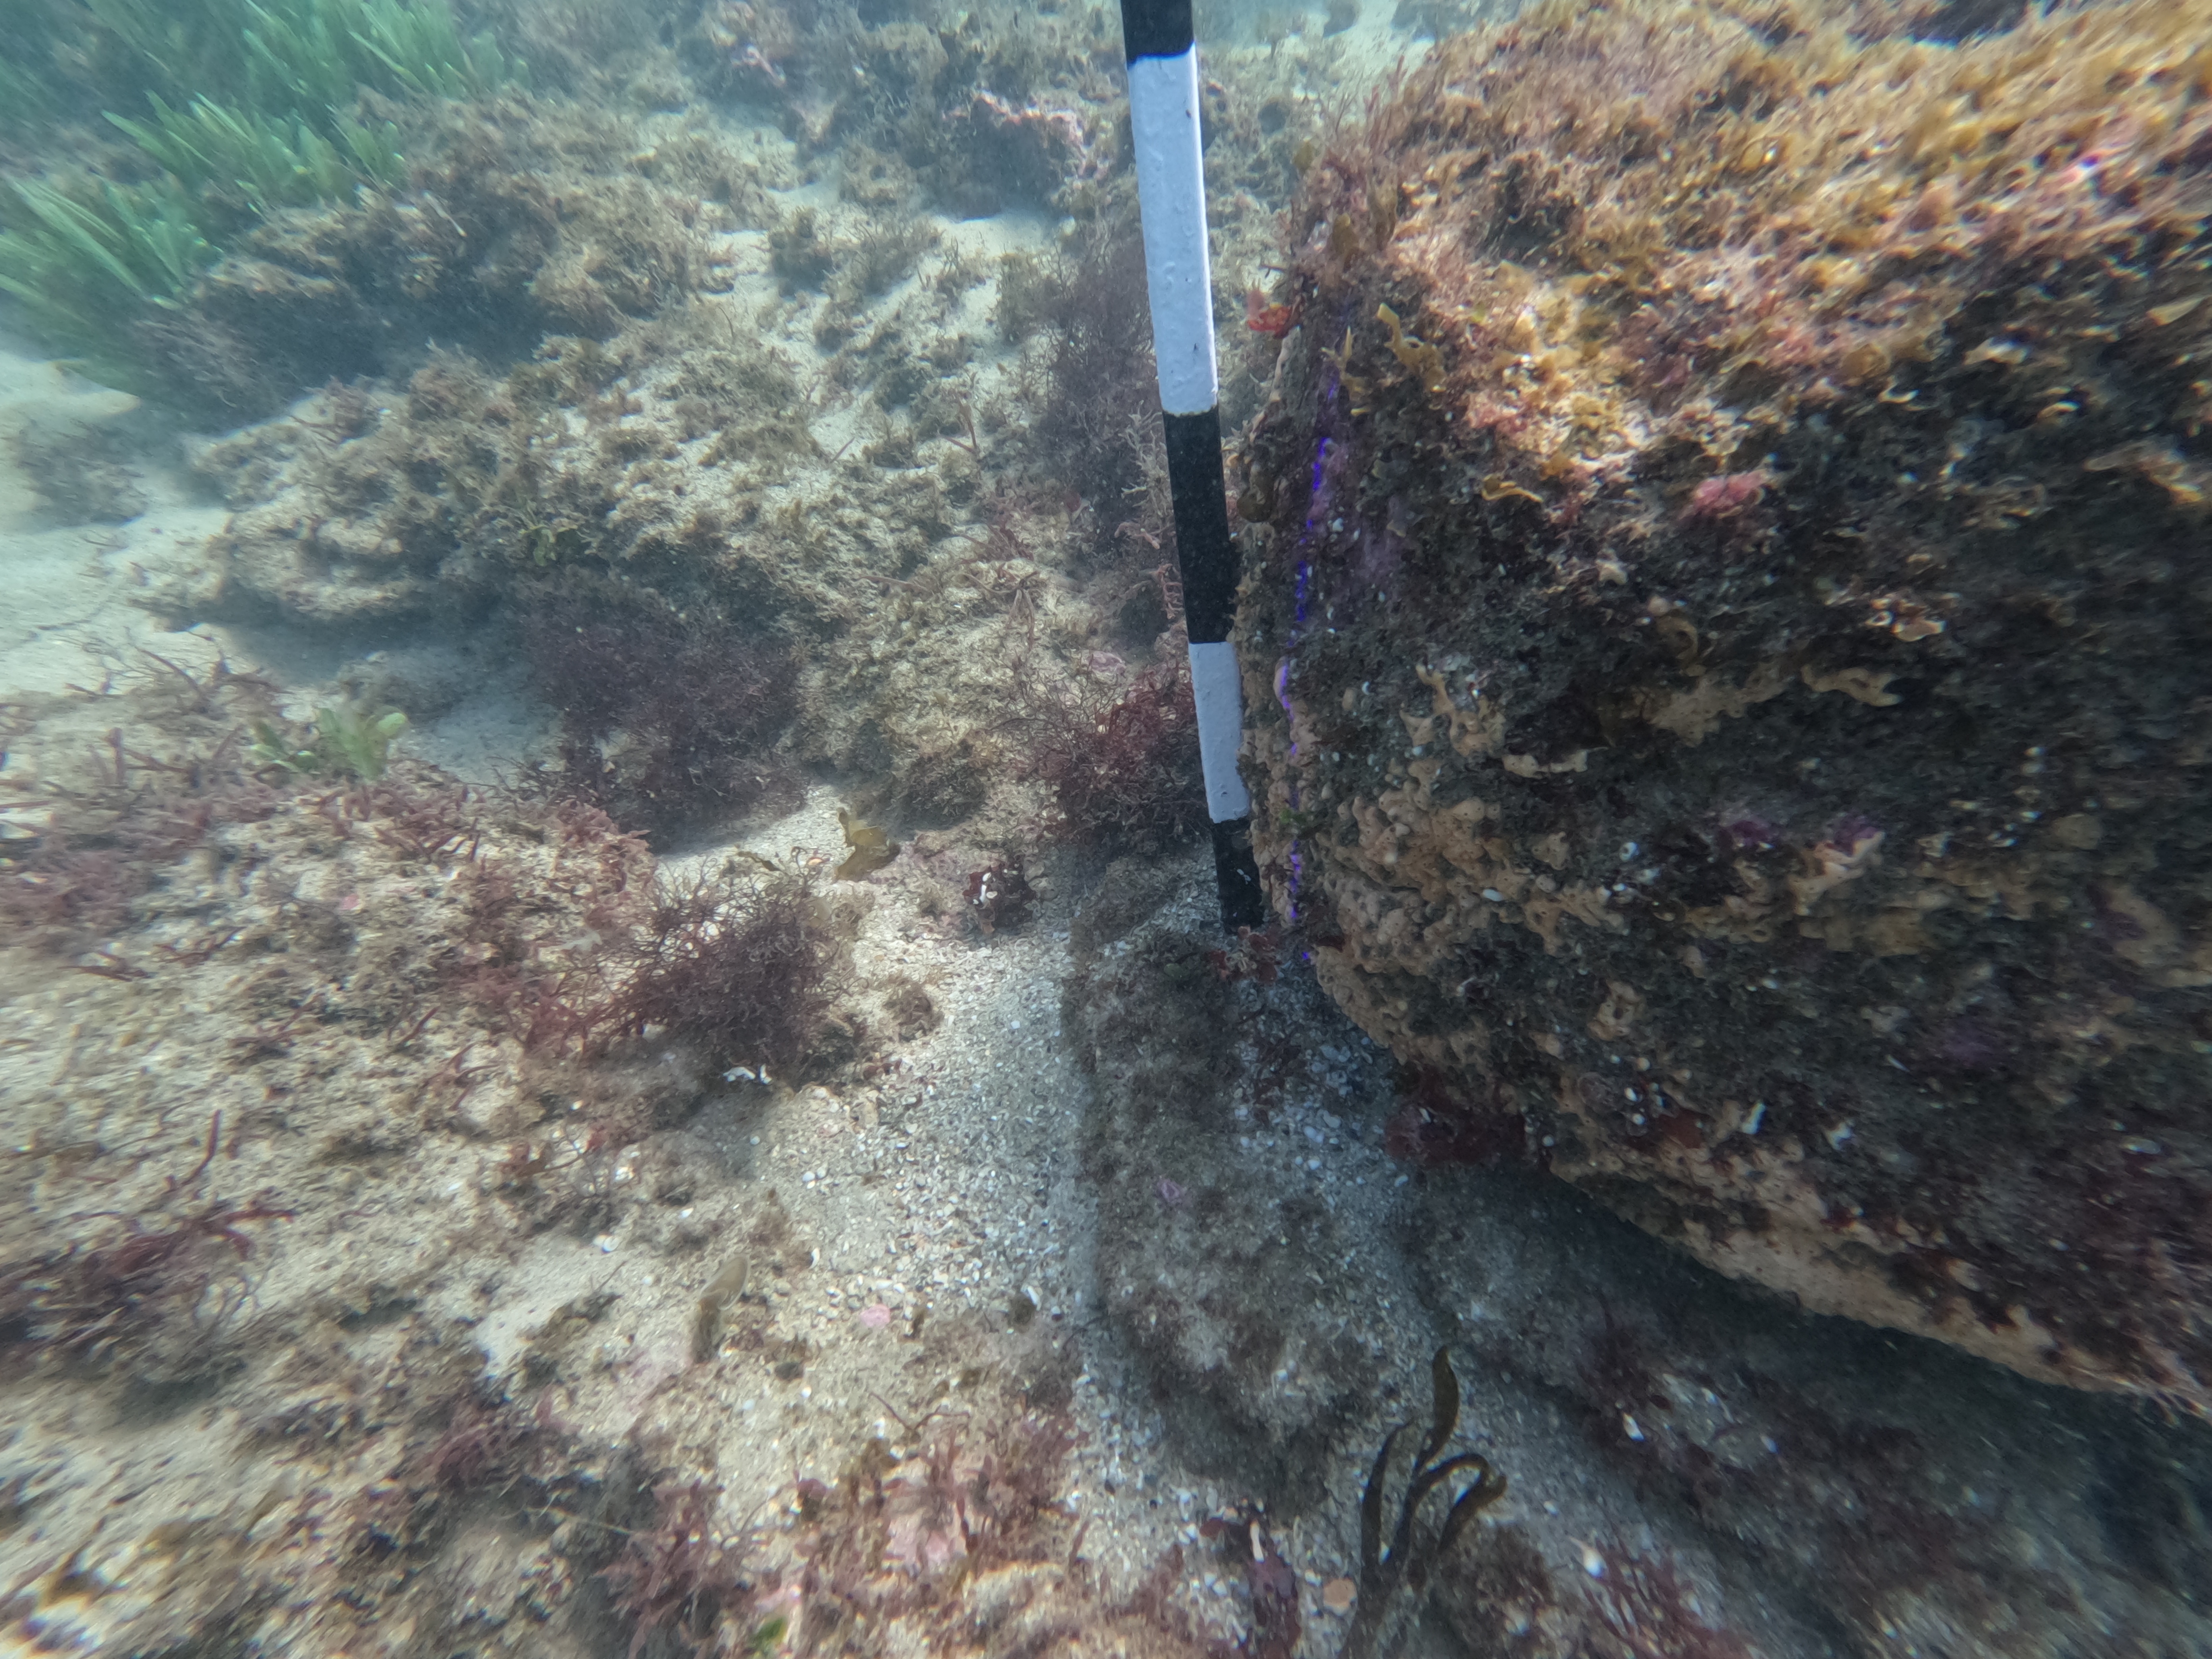

Supplement: Supplementary file 1855 [file G0028181.pdf › Ocean1/G0028181.pdf]

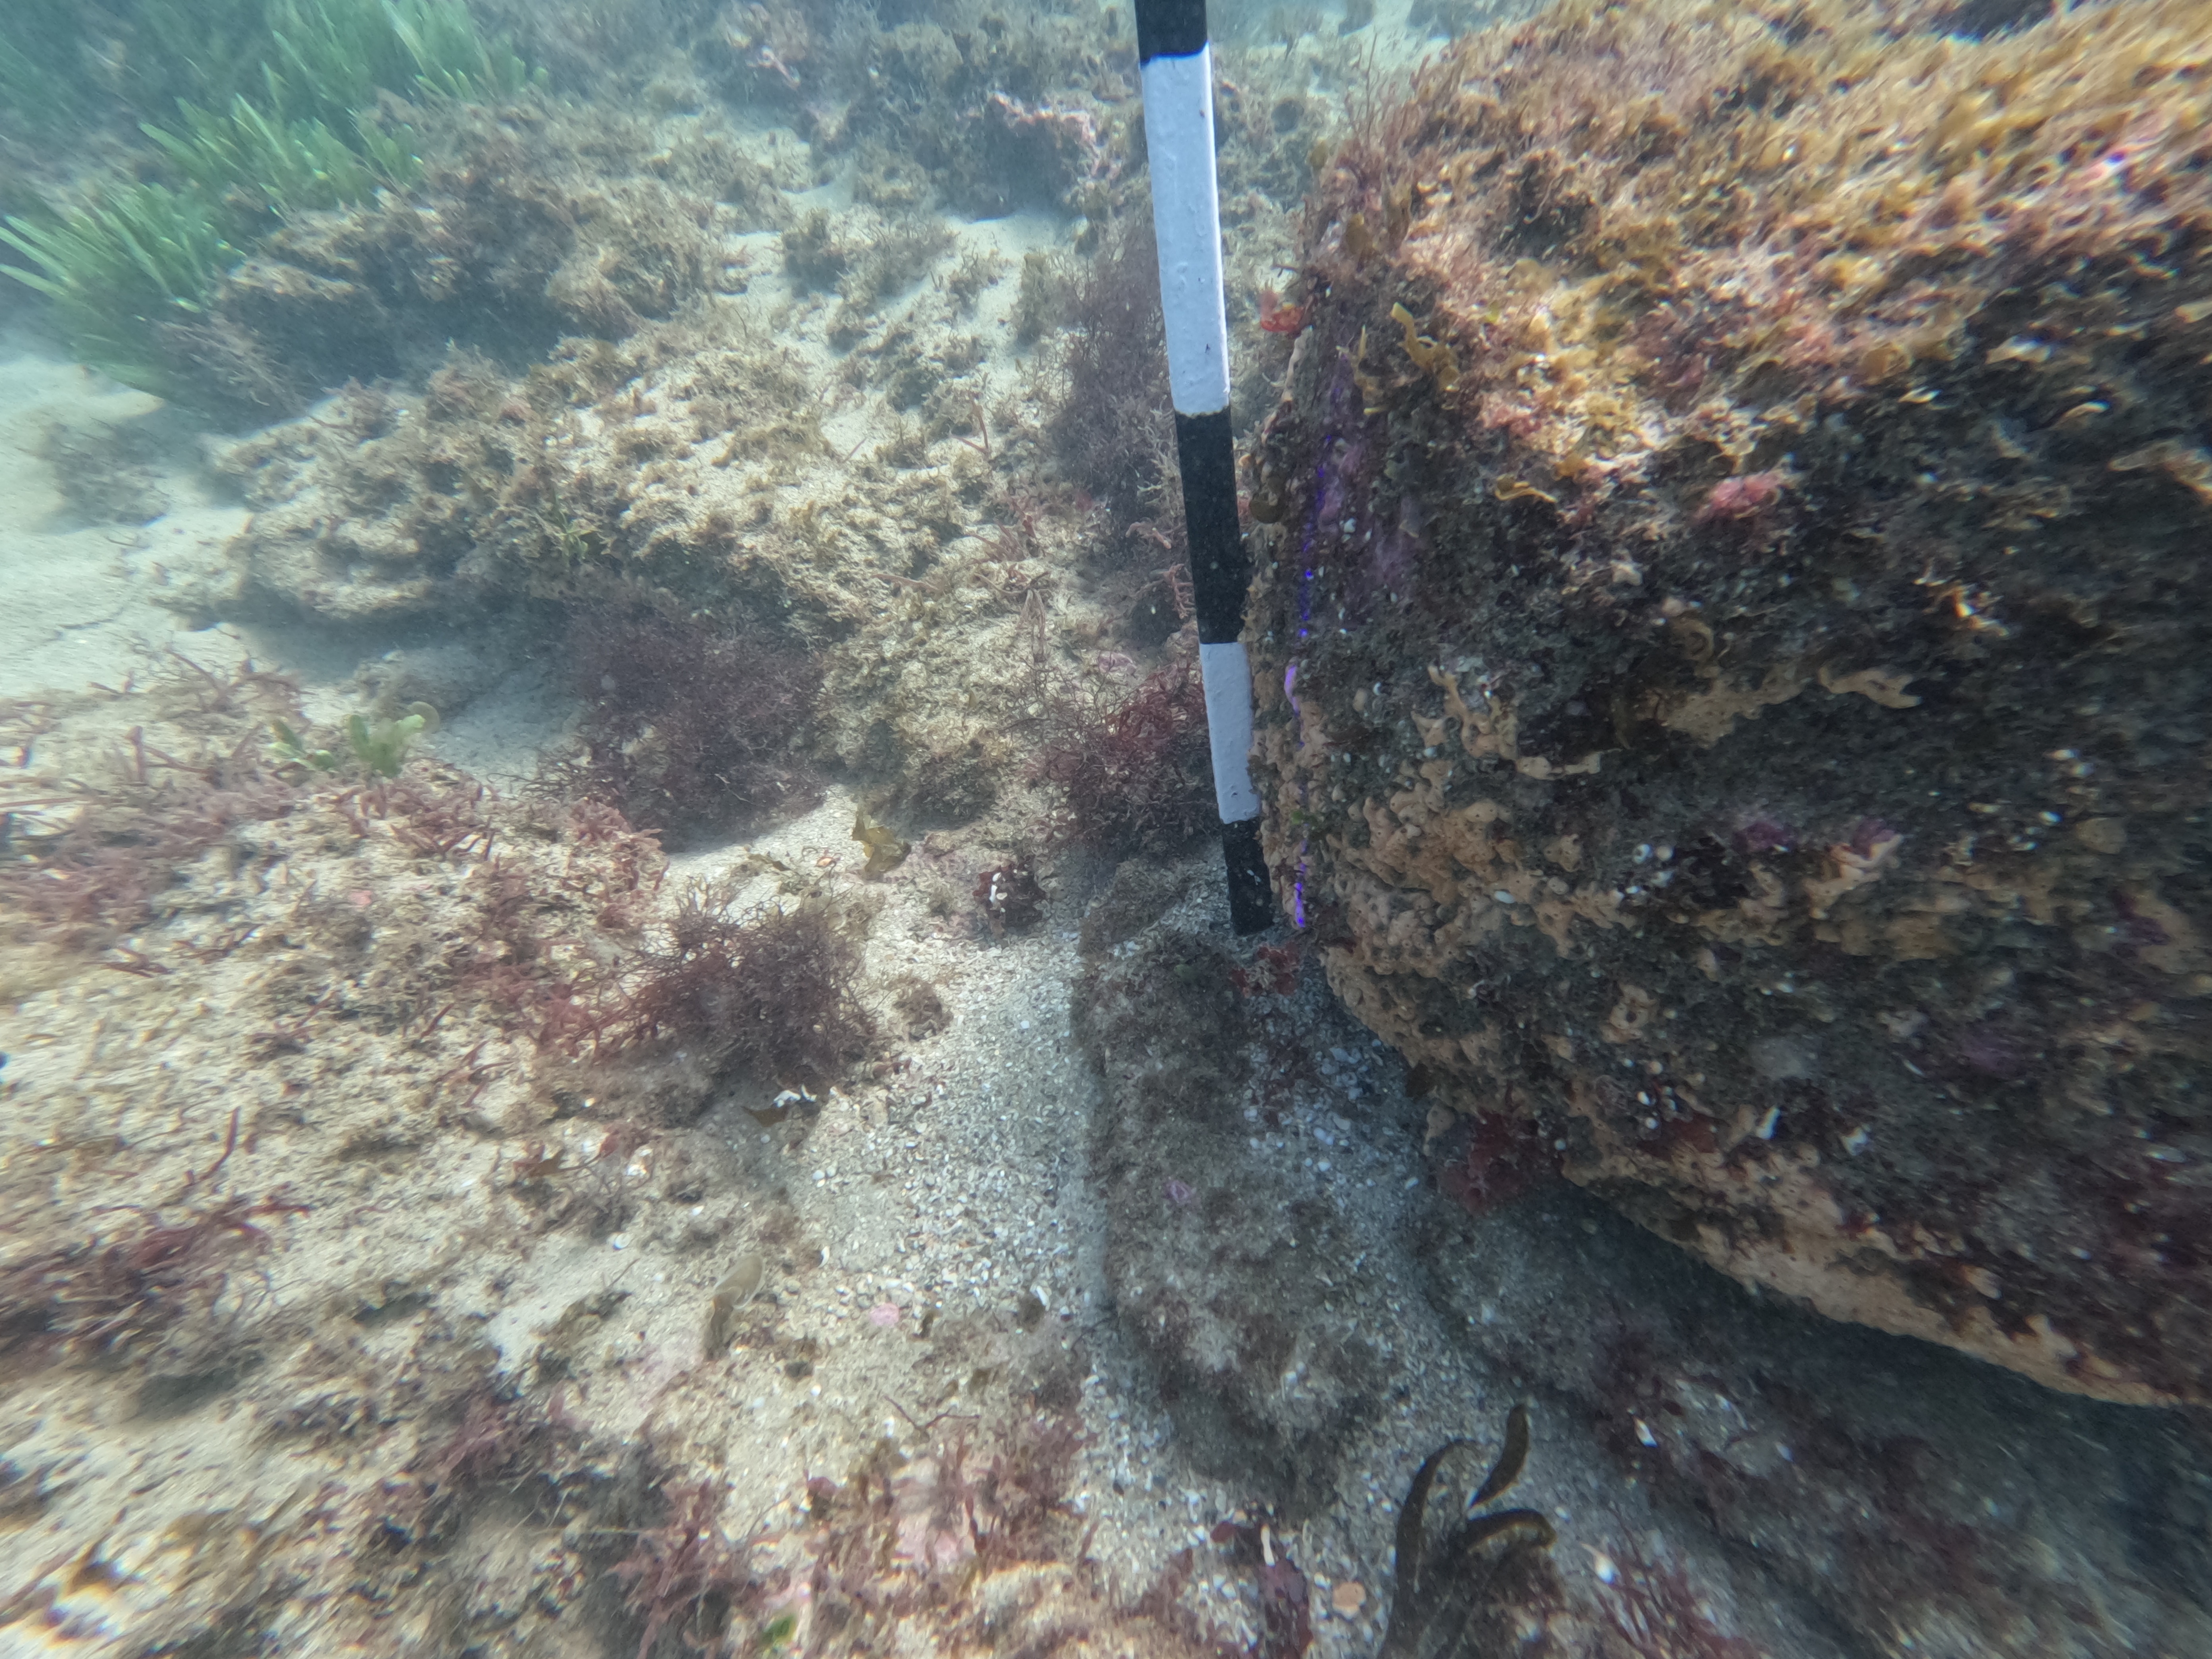

Supplement: Supplementary file 1856 [file G0028182.pdf › Ocean1/G0028182.pdf]

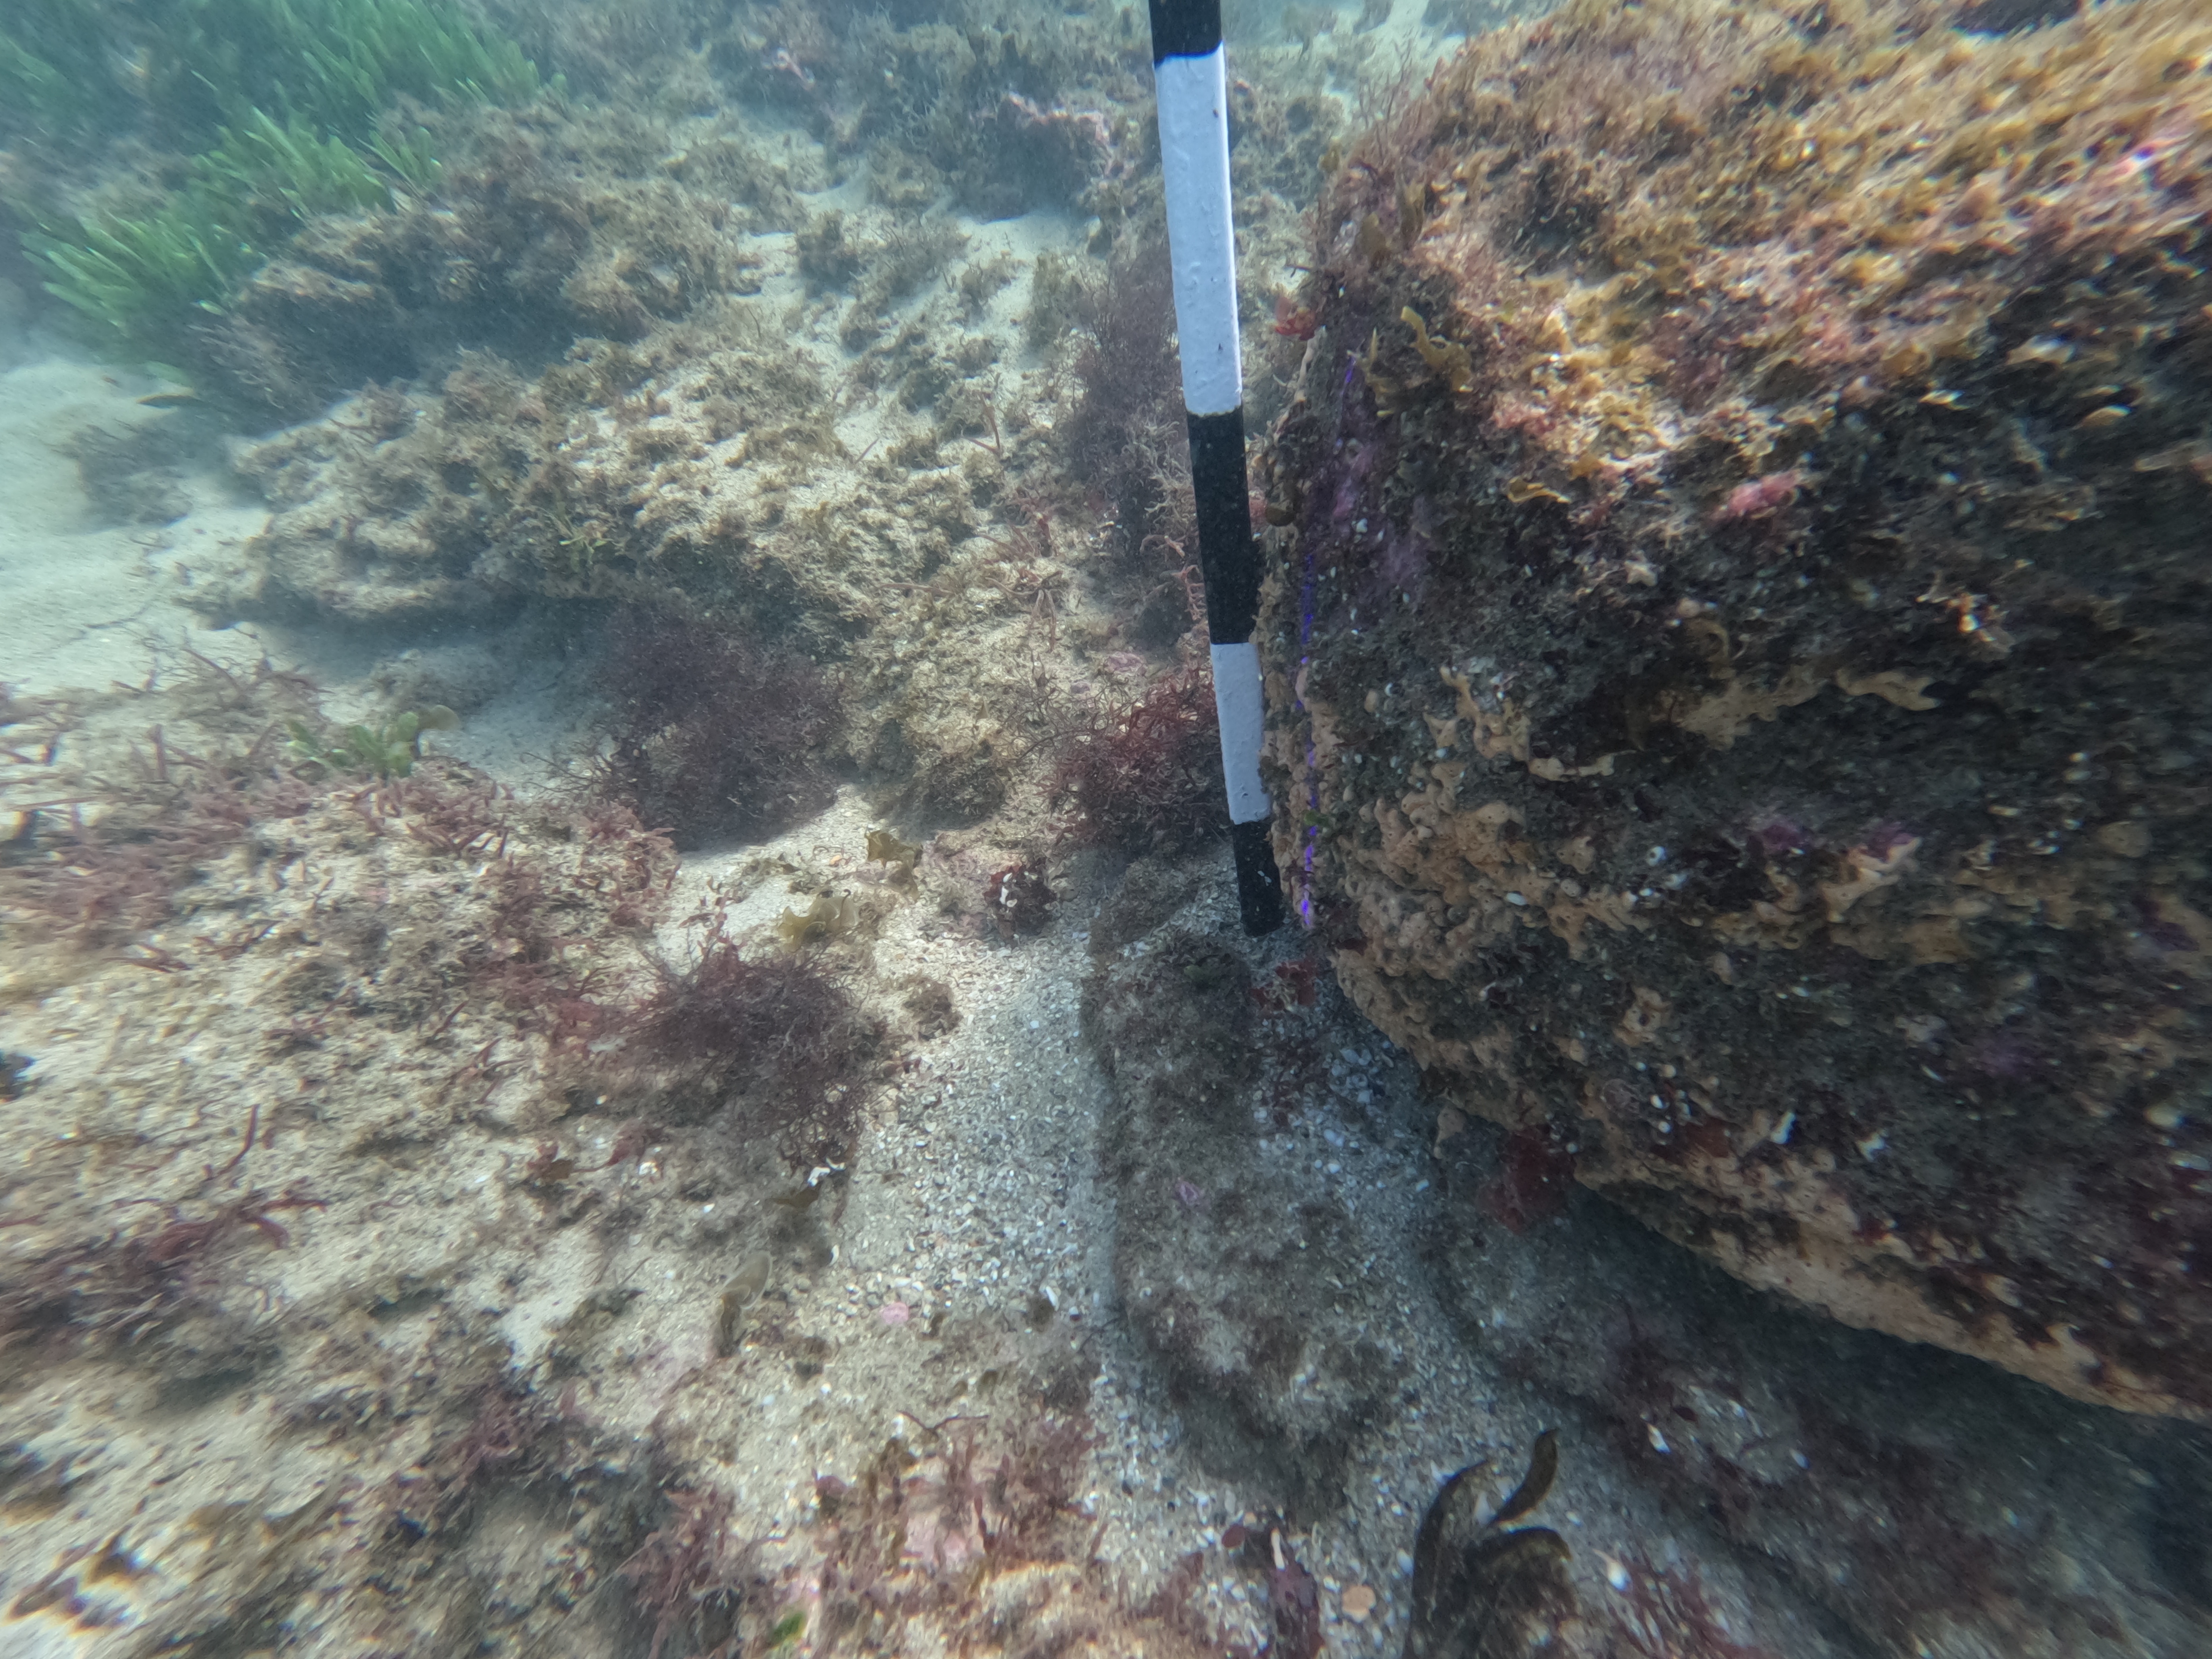

Supplement: Supplementary file 1857 [file G0028183.pdf › Ocean1/G0028183.pdf]

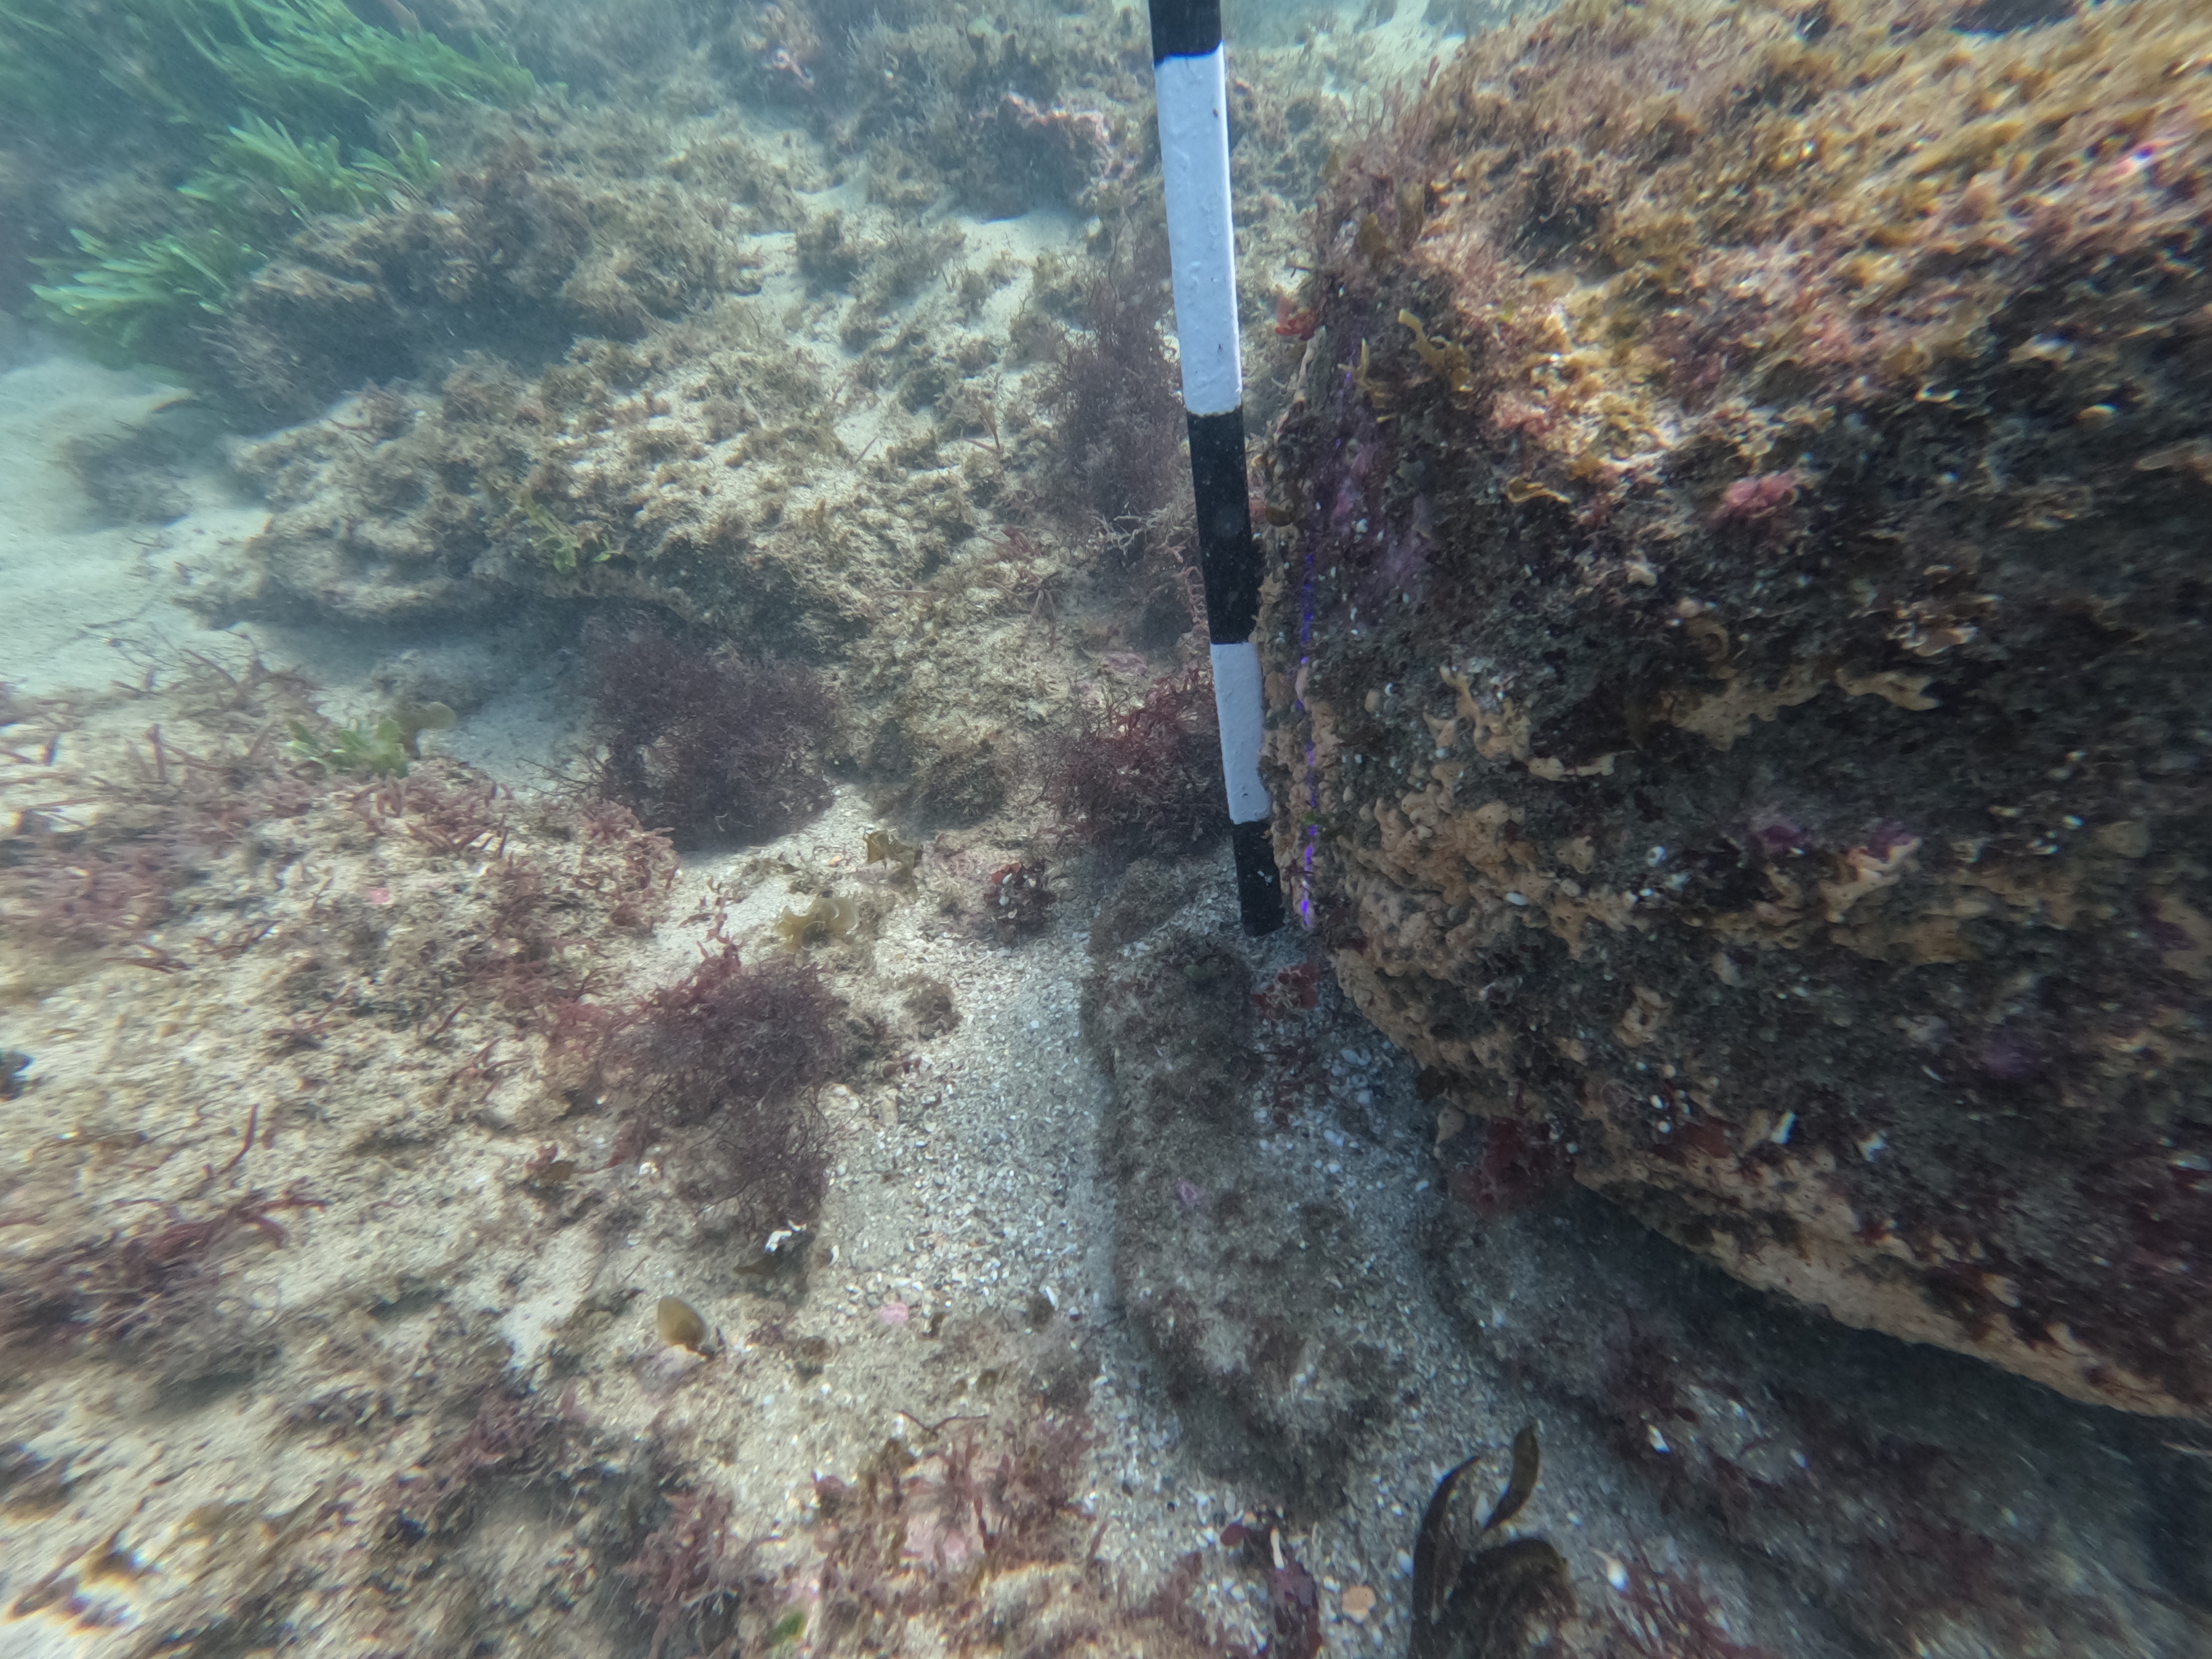

Supplement: Supplementary file 1858 [file G0028184.pdf › Ocean1/G0028184.pdf]

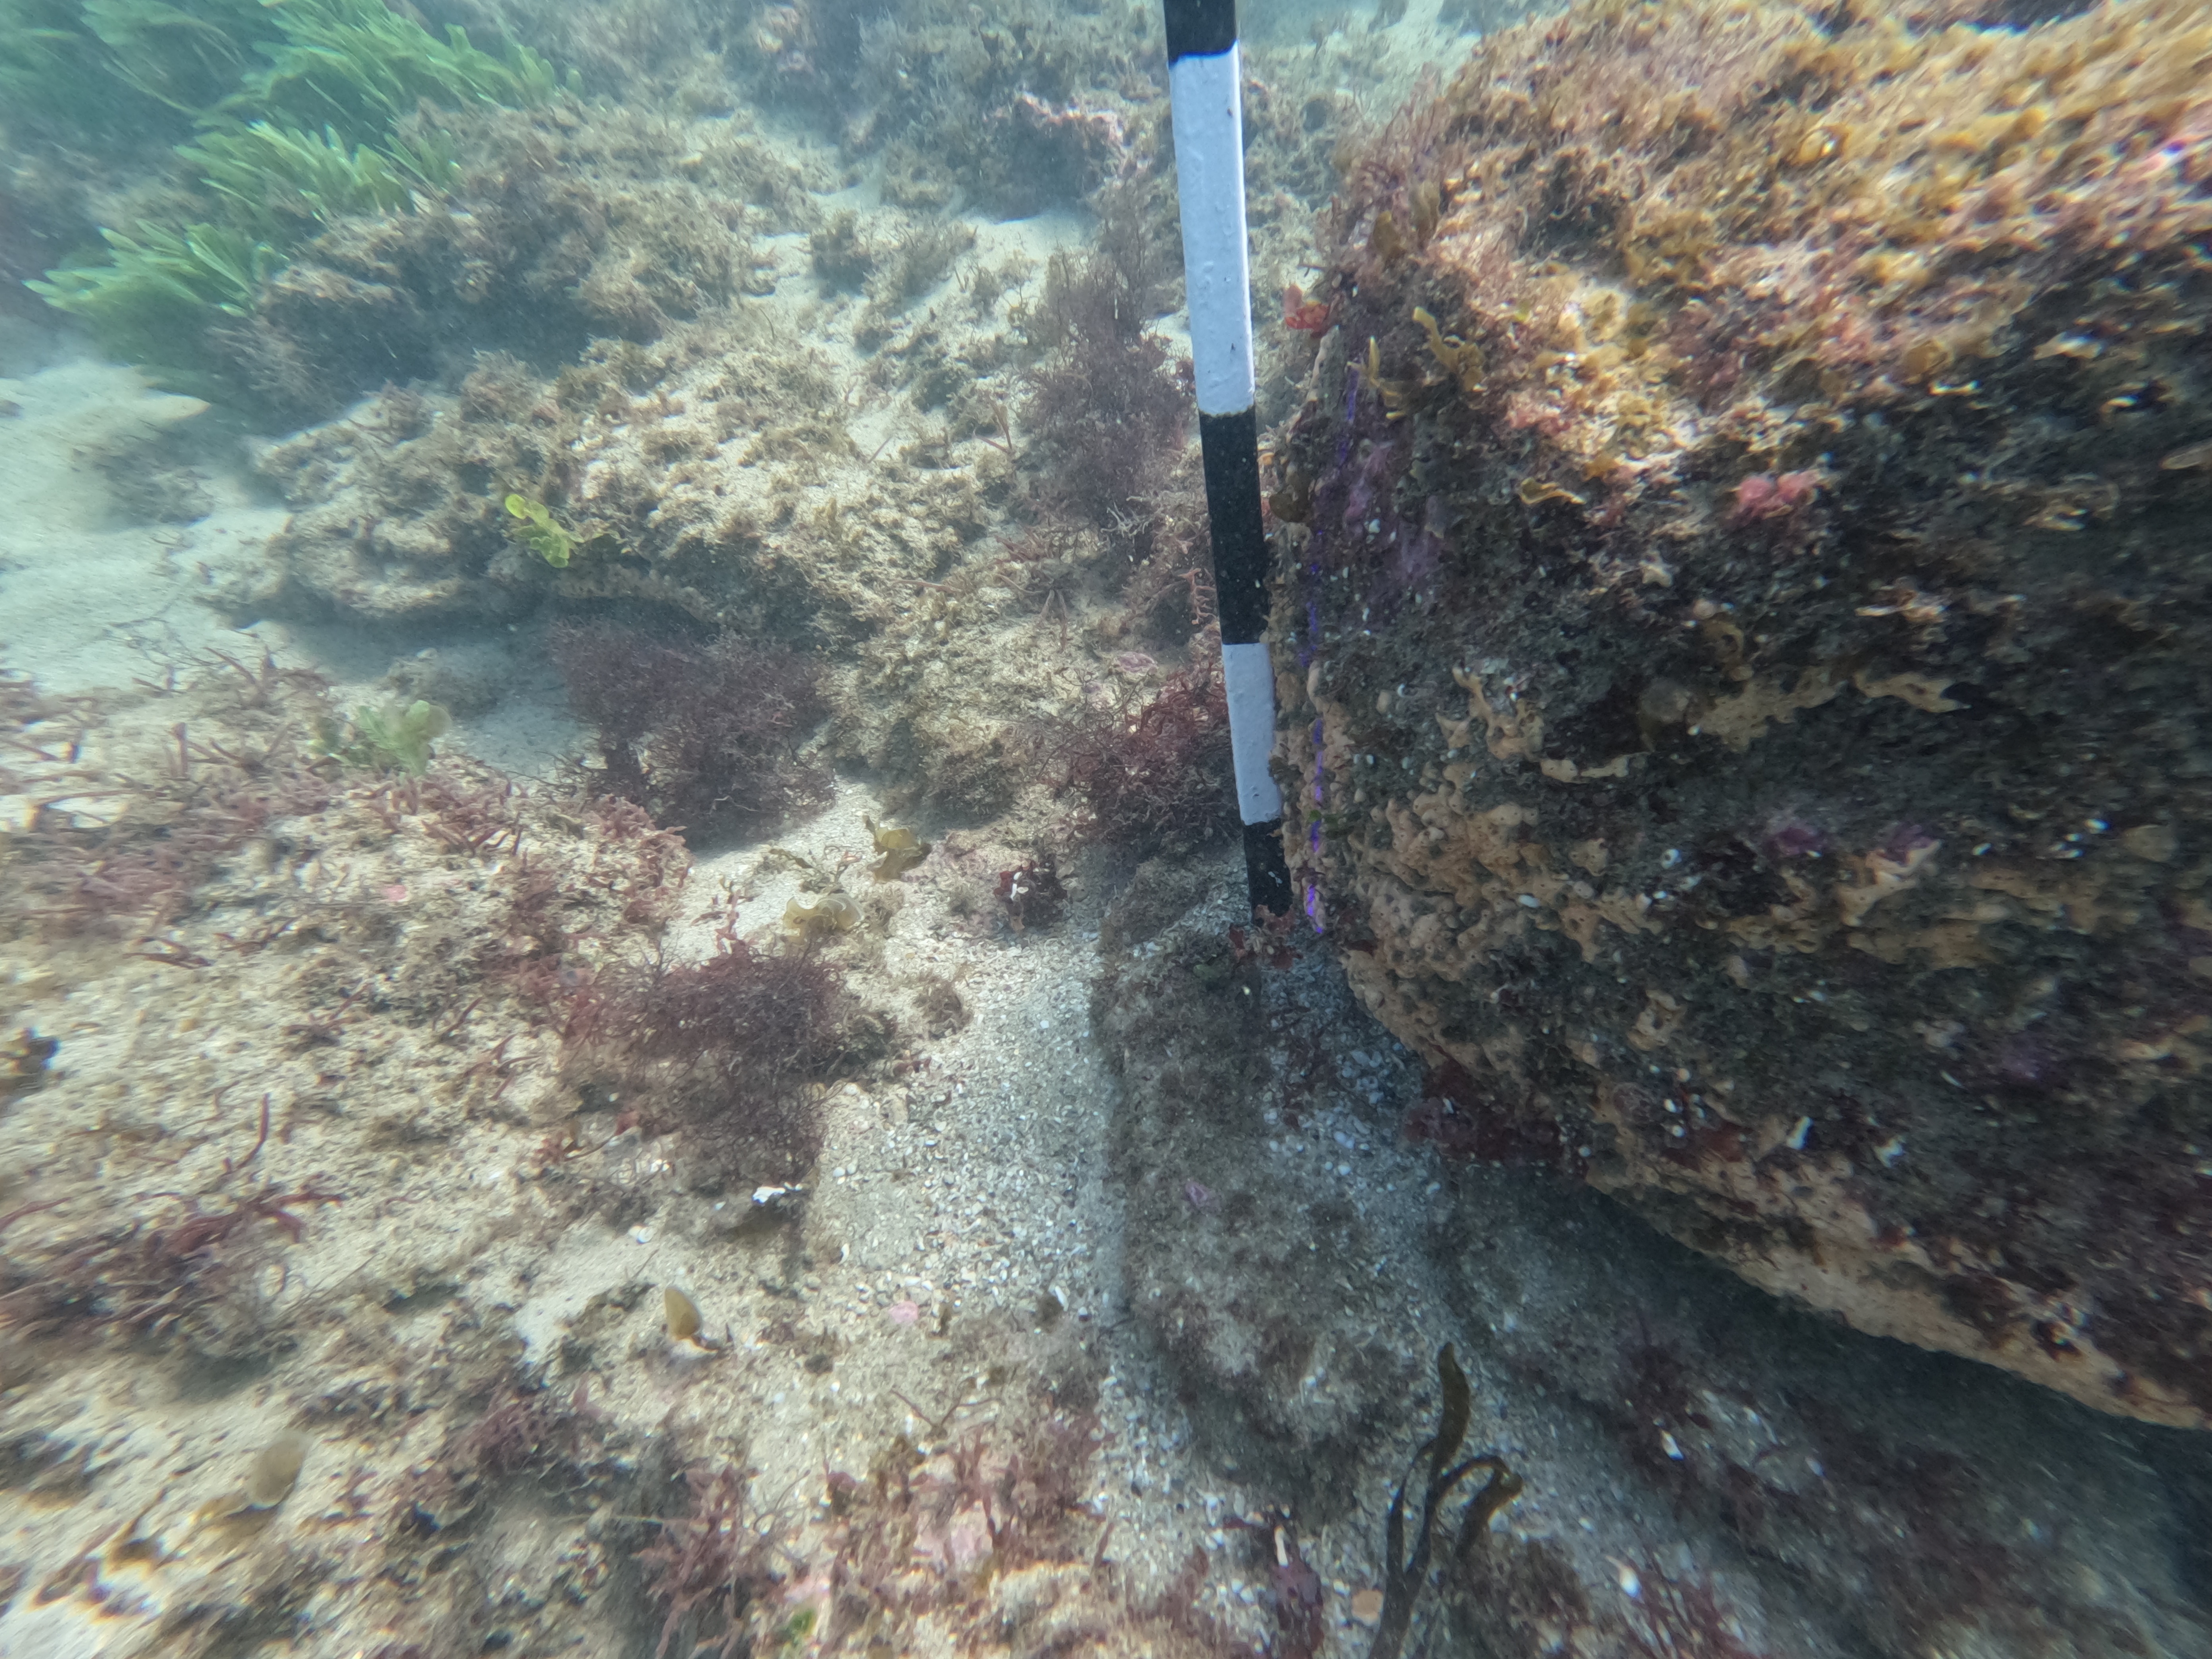

Supplement: Supplementary file 1859 [file G0028185.pdf › Ocean1/G0028185.pdf]

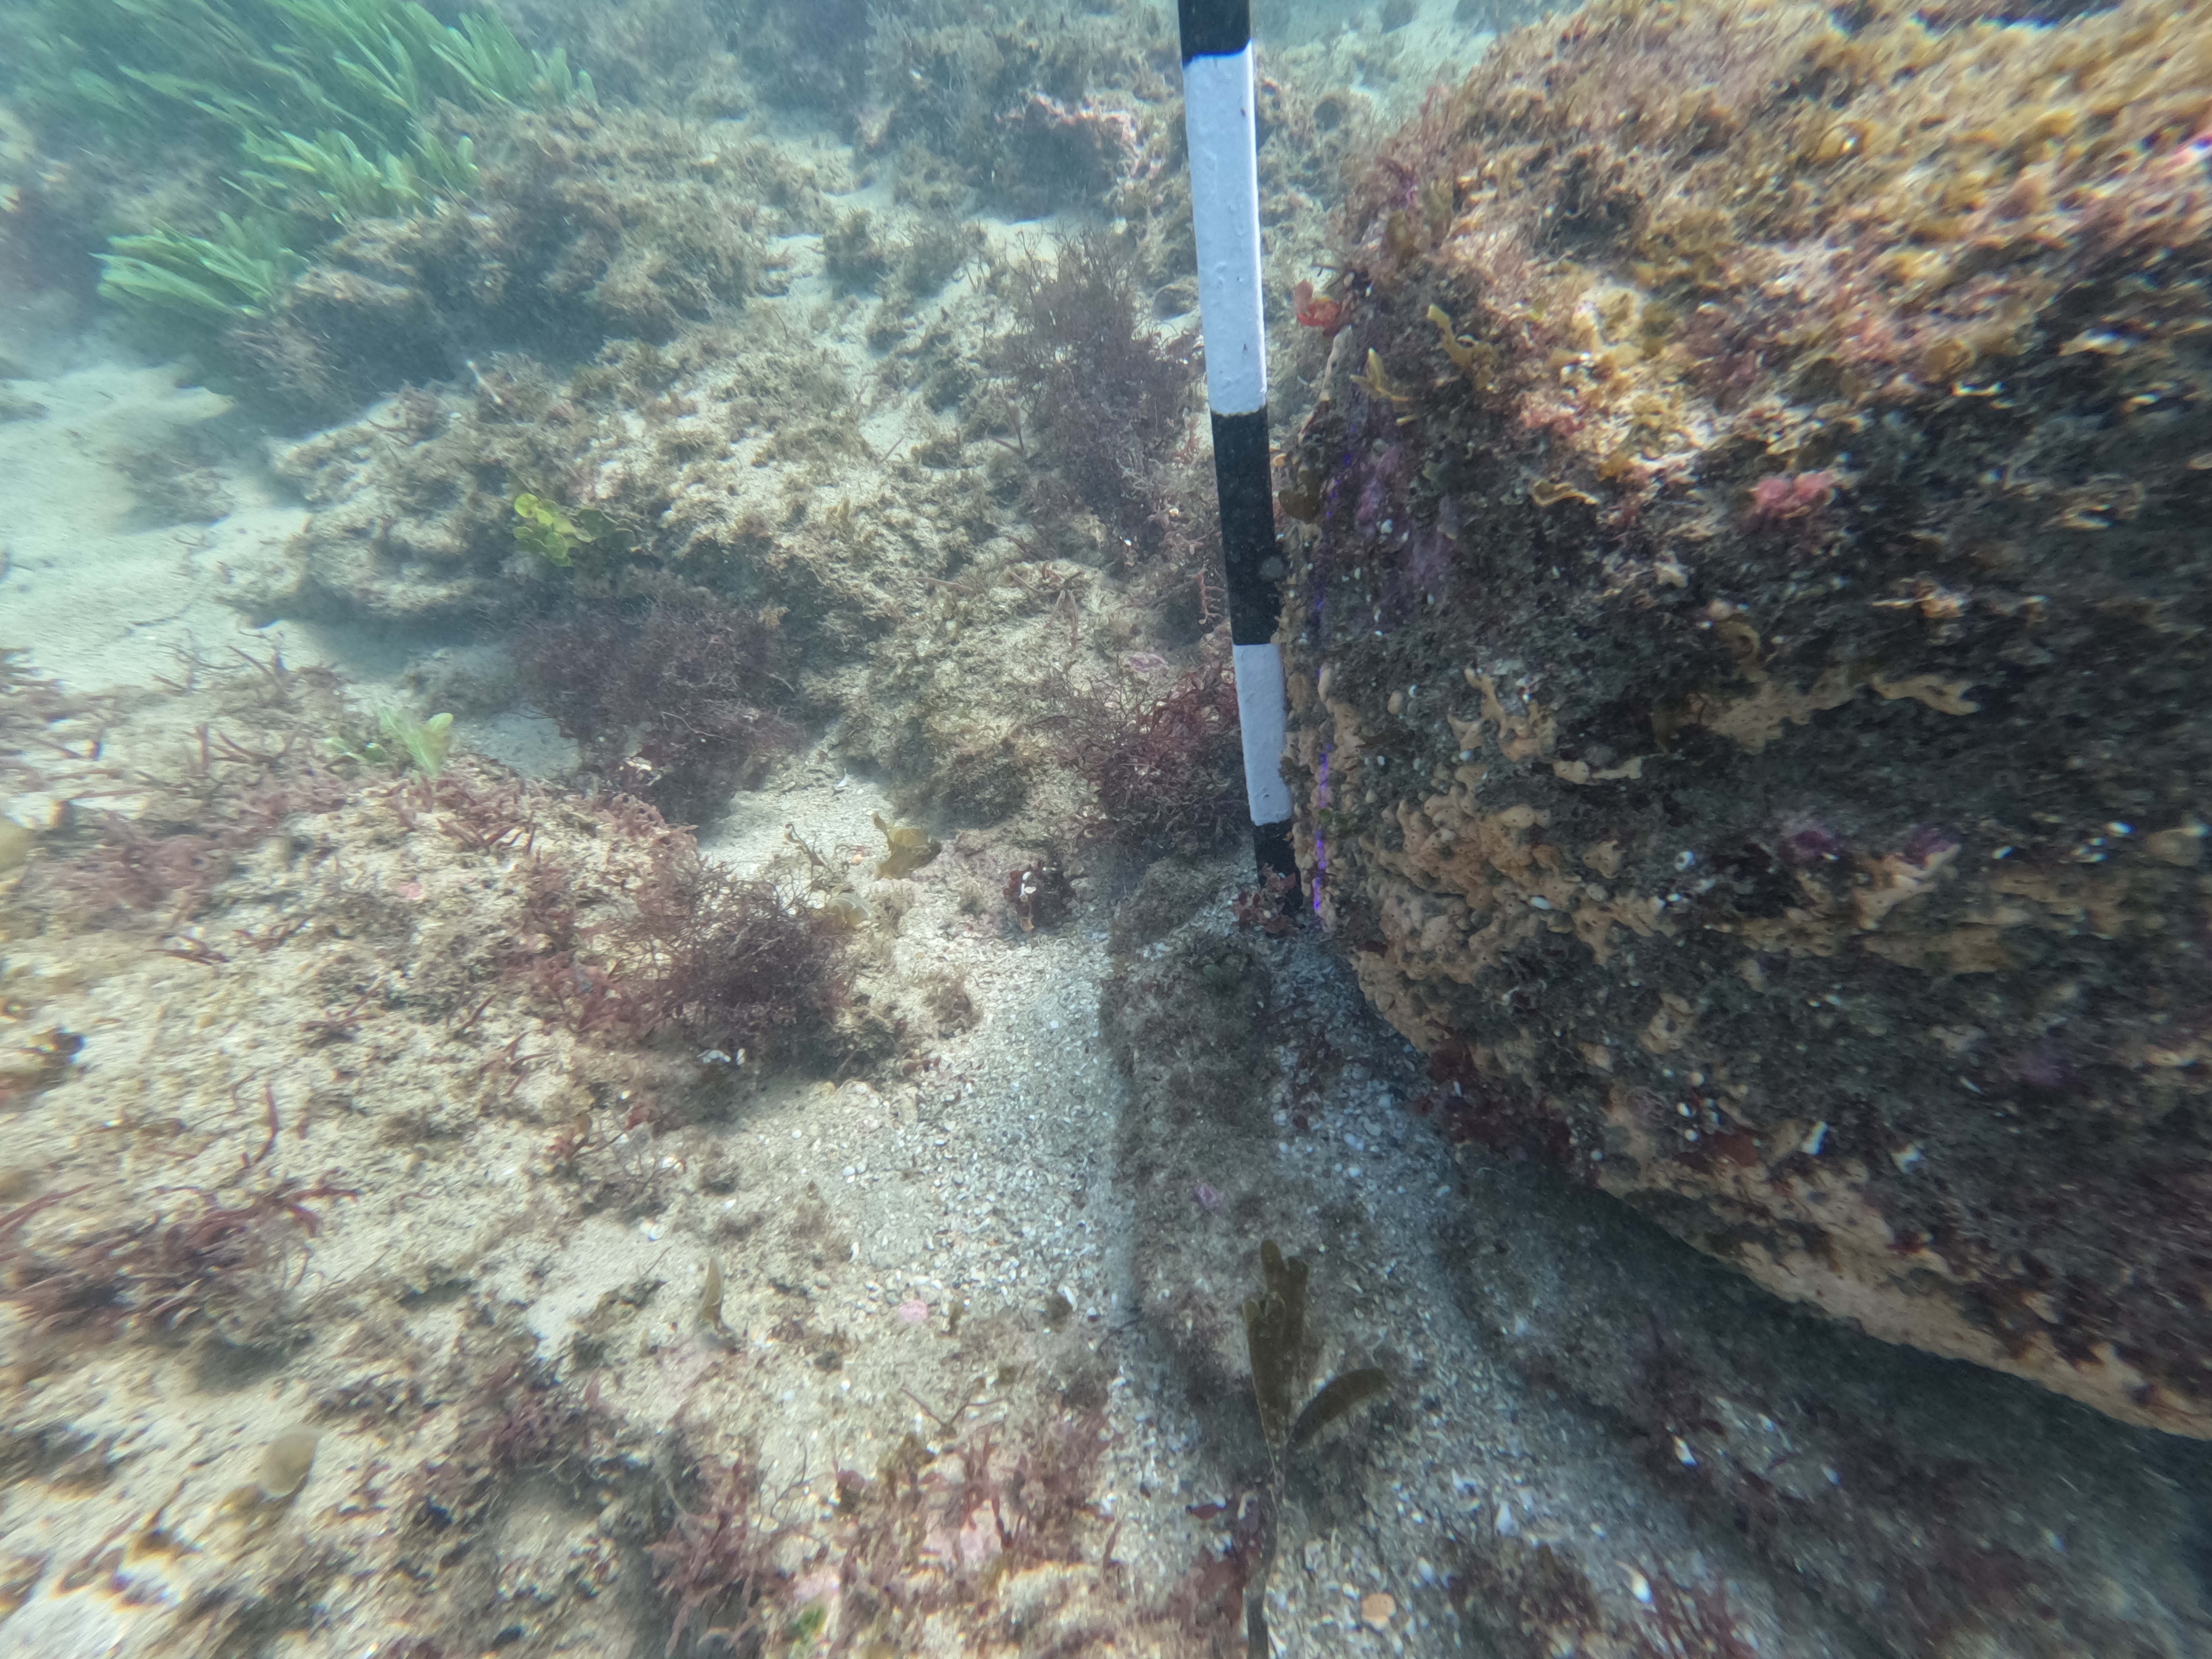

Supplement: Supplementary file 1860 [file G0028186.pdf › Ocean1/G0028186.pdf]

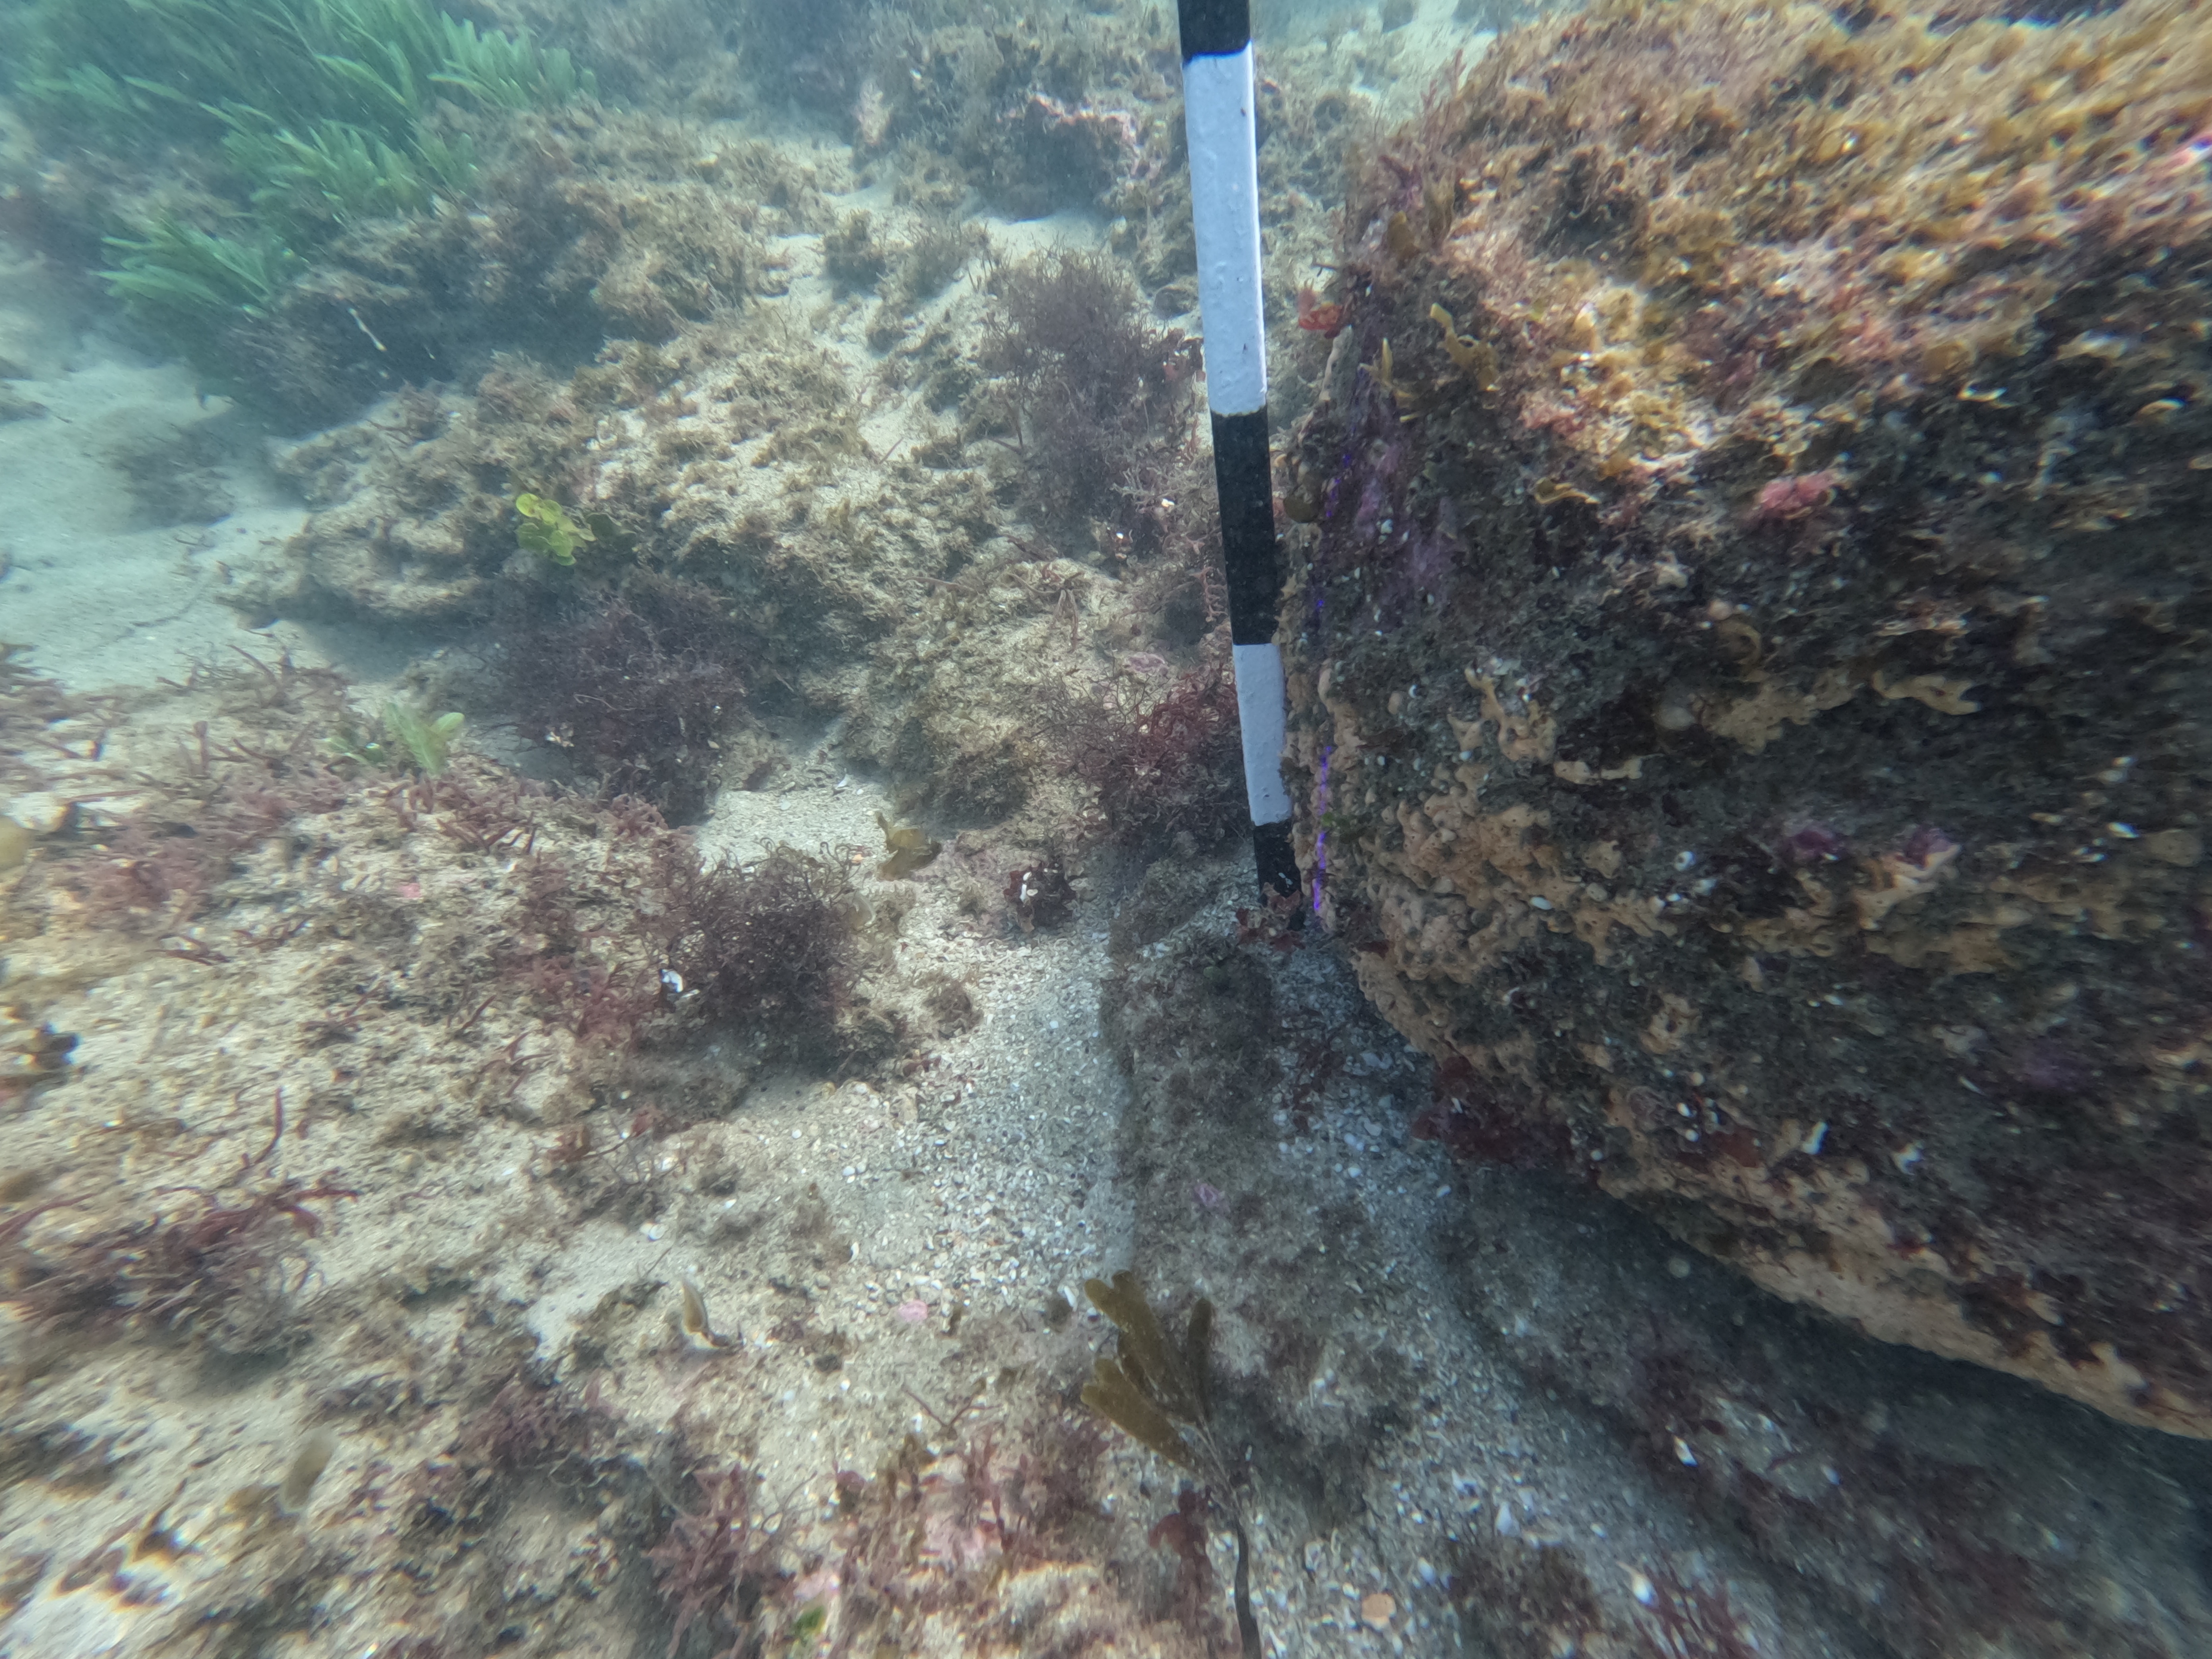

Supplement: Supplementary file 1861 [file G0028187.pdf › Ocean1/G0028187.pdf]

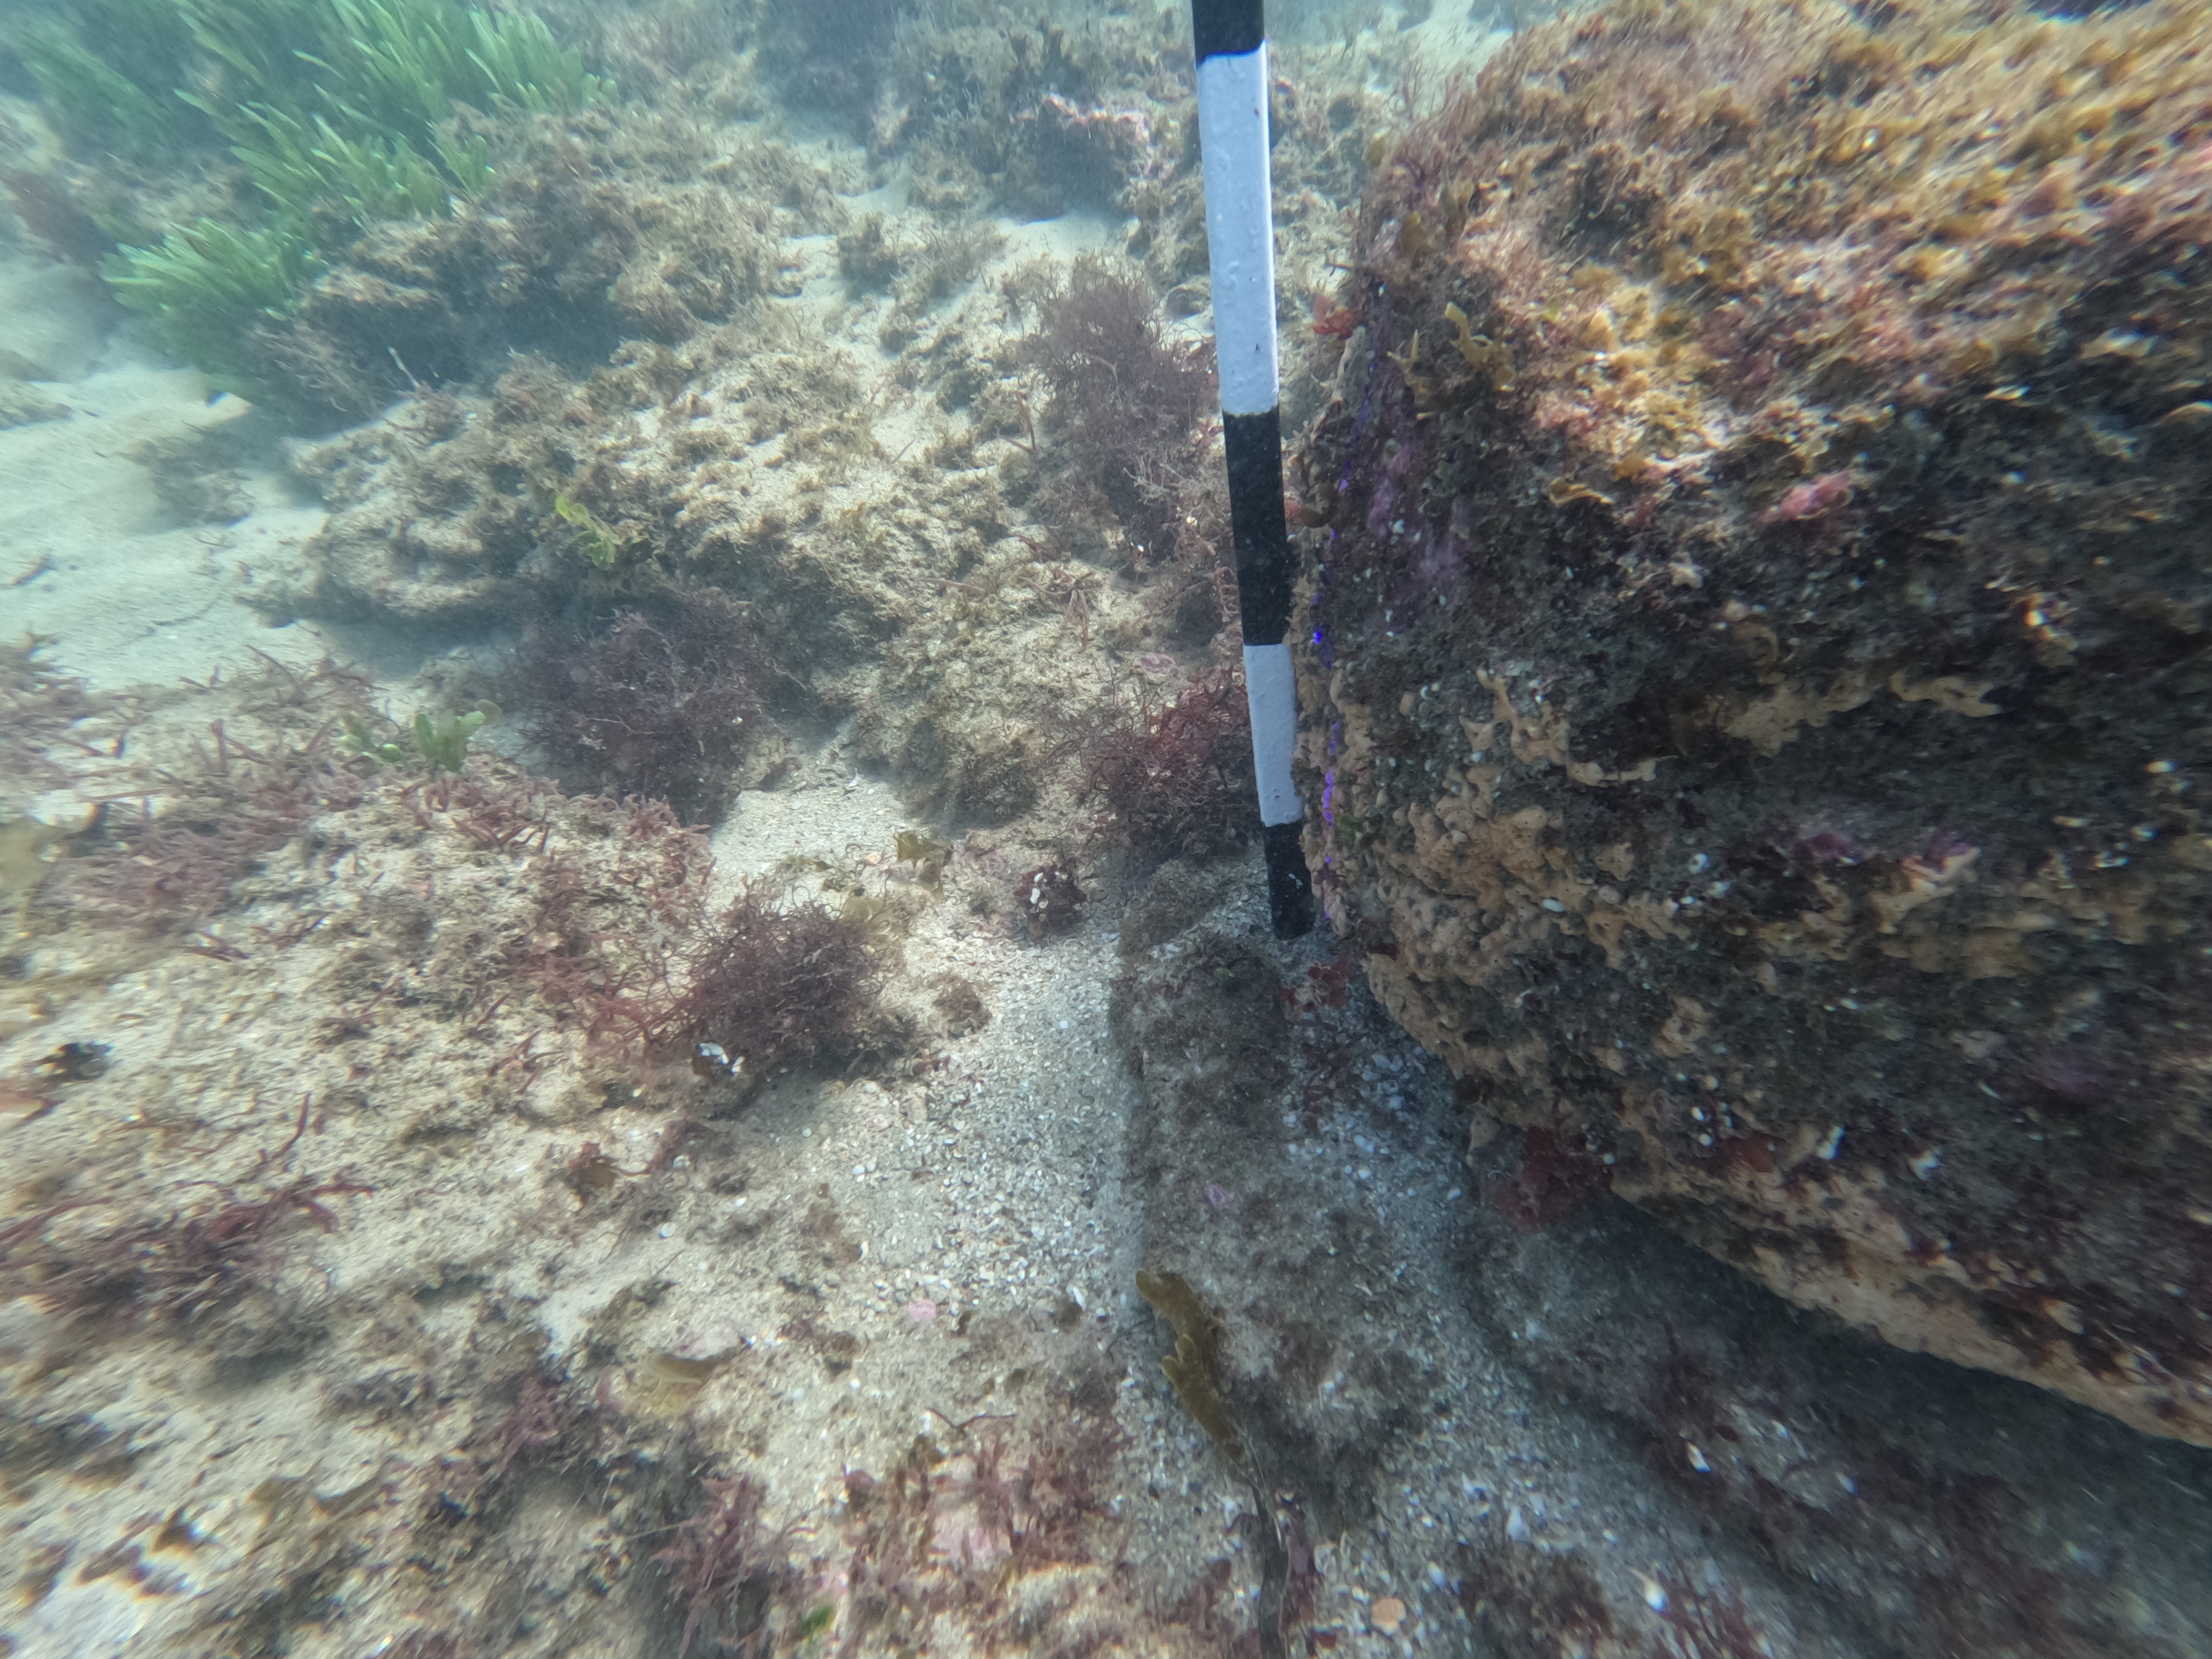

Supplement: Supplementary file 1862 [file G0028188.pdf › Ocean1/G0028188.pdf]

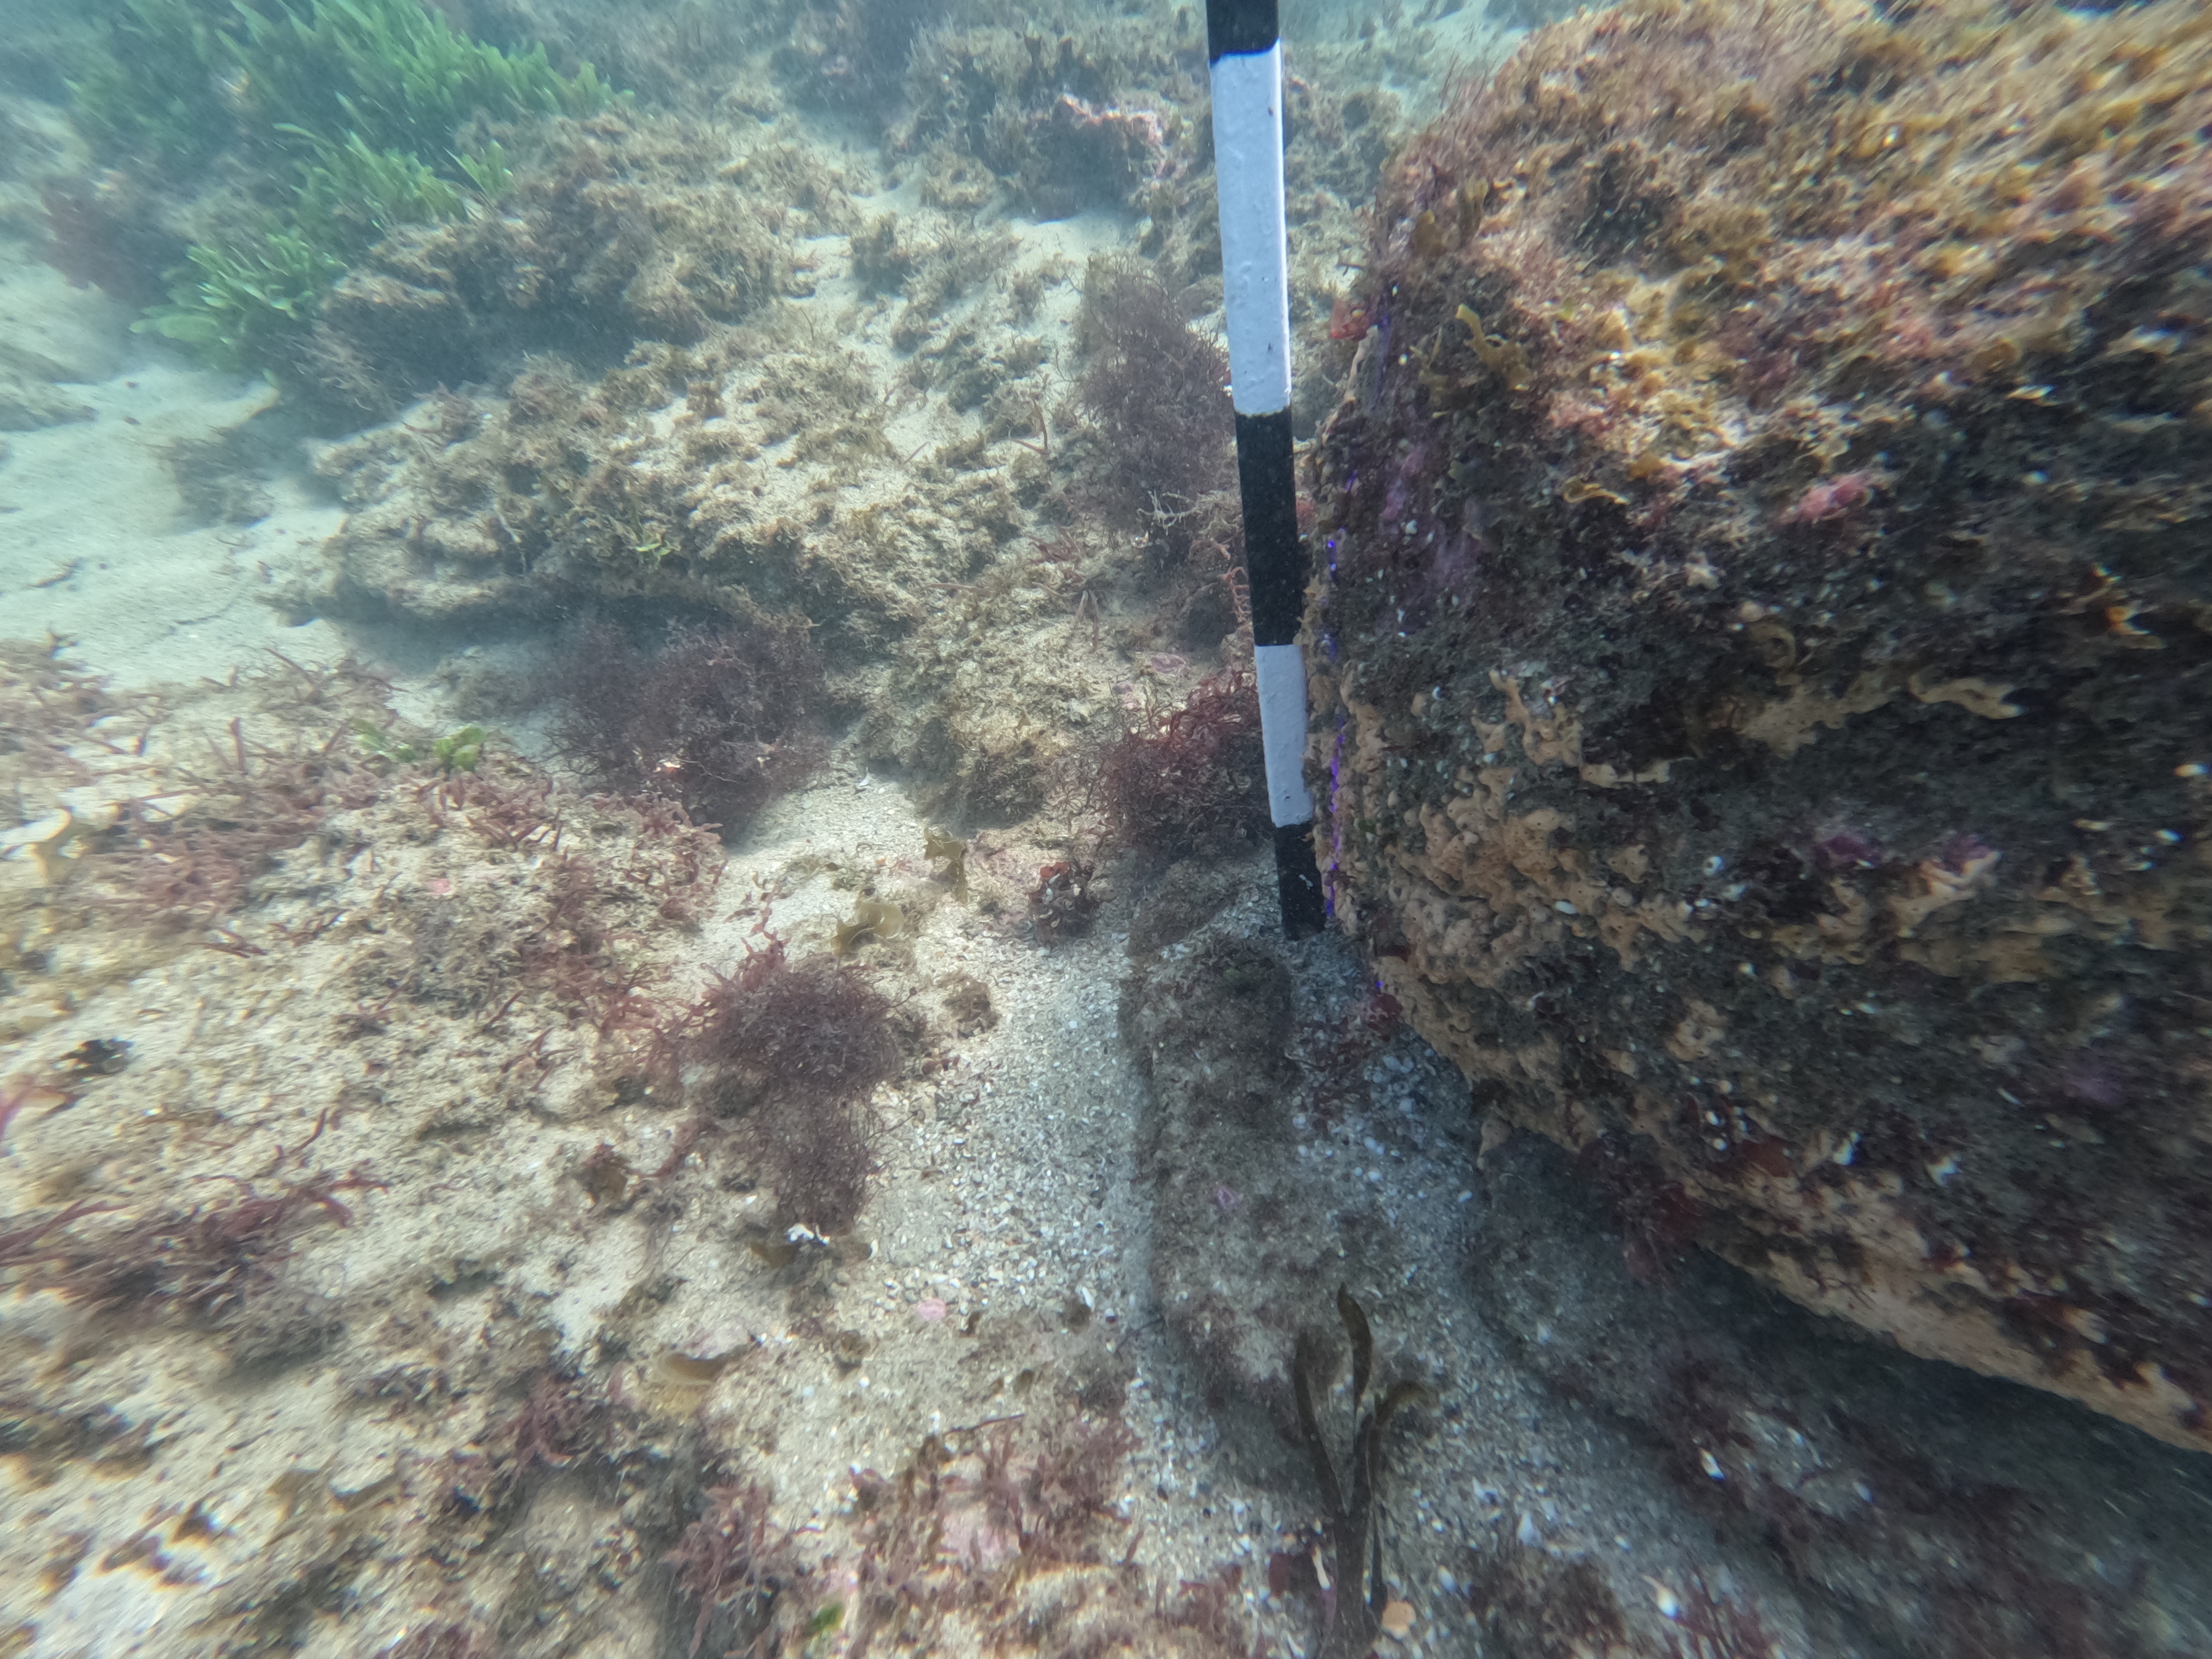

Supplement: Supplementary file 1863 [file G0028189.pdf › Ocean1/G0028189.pdf]

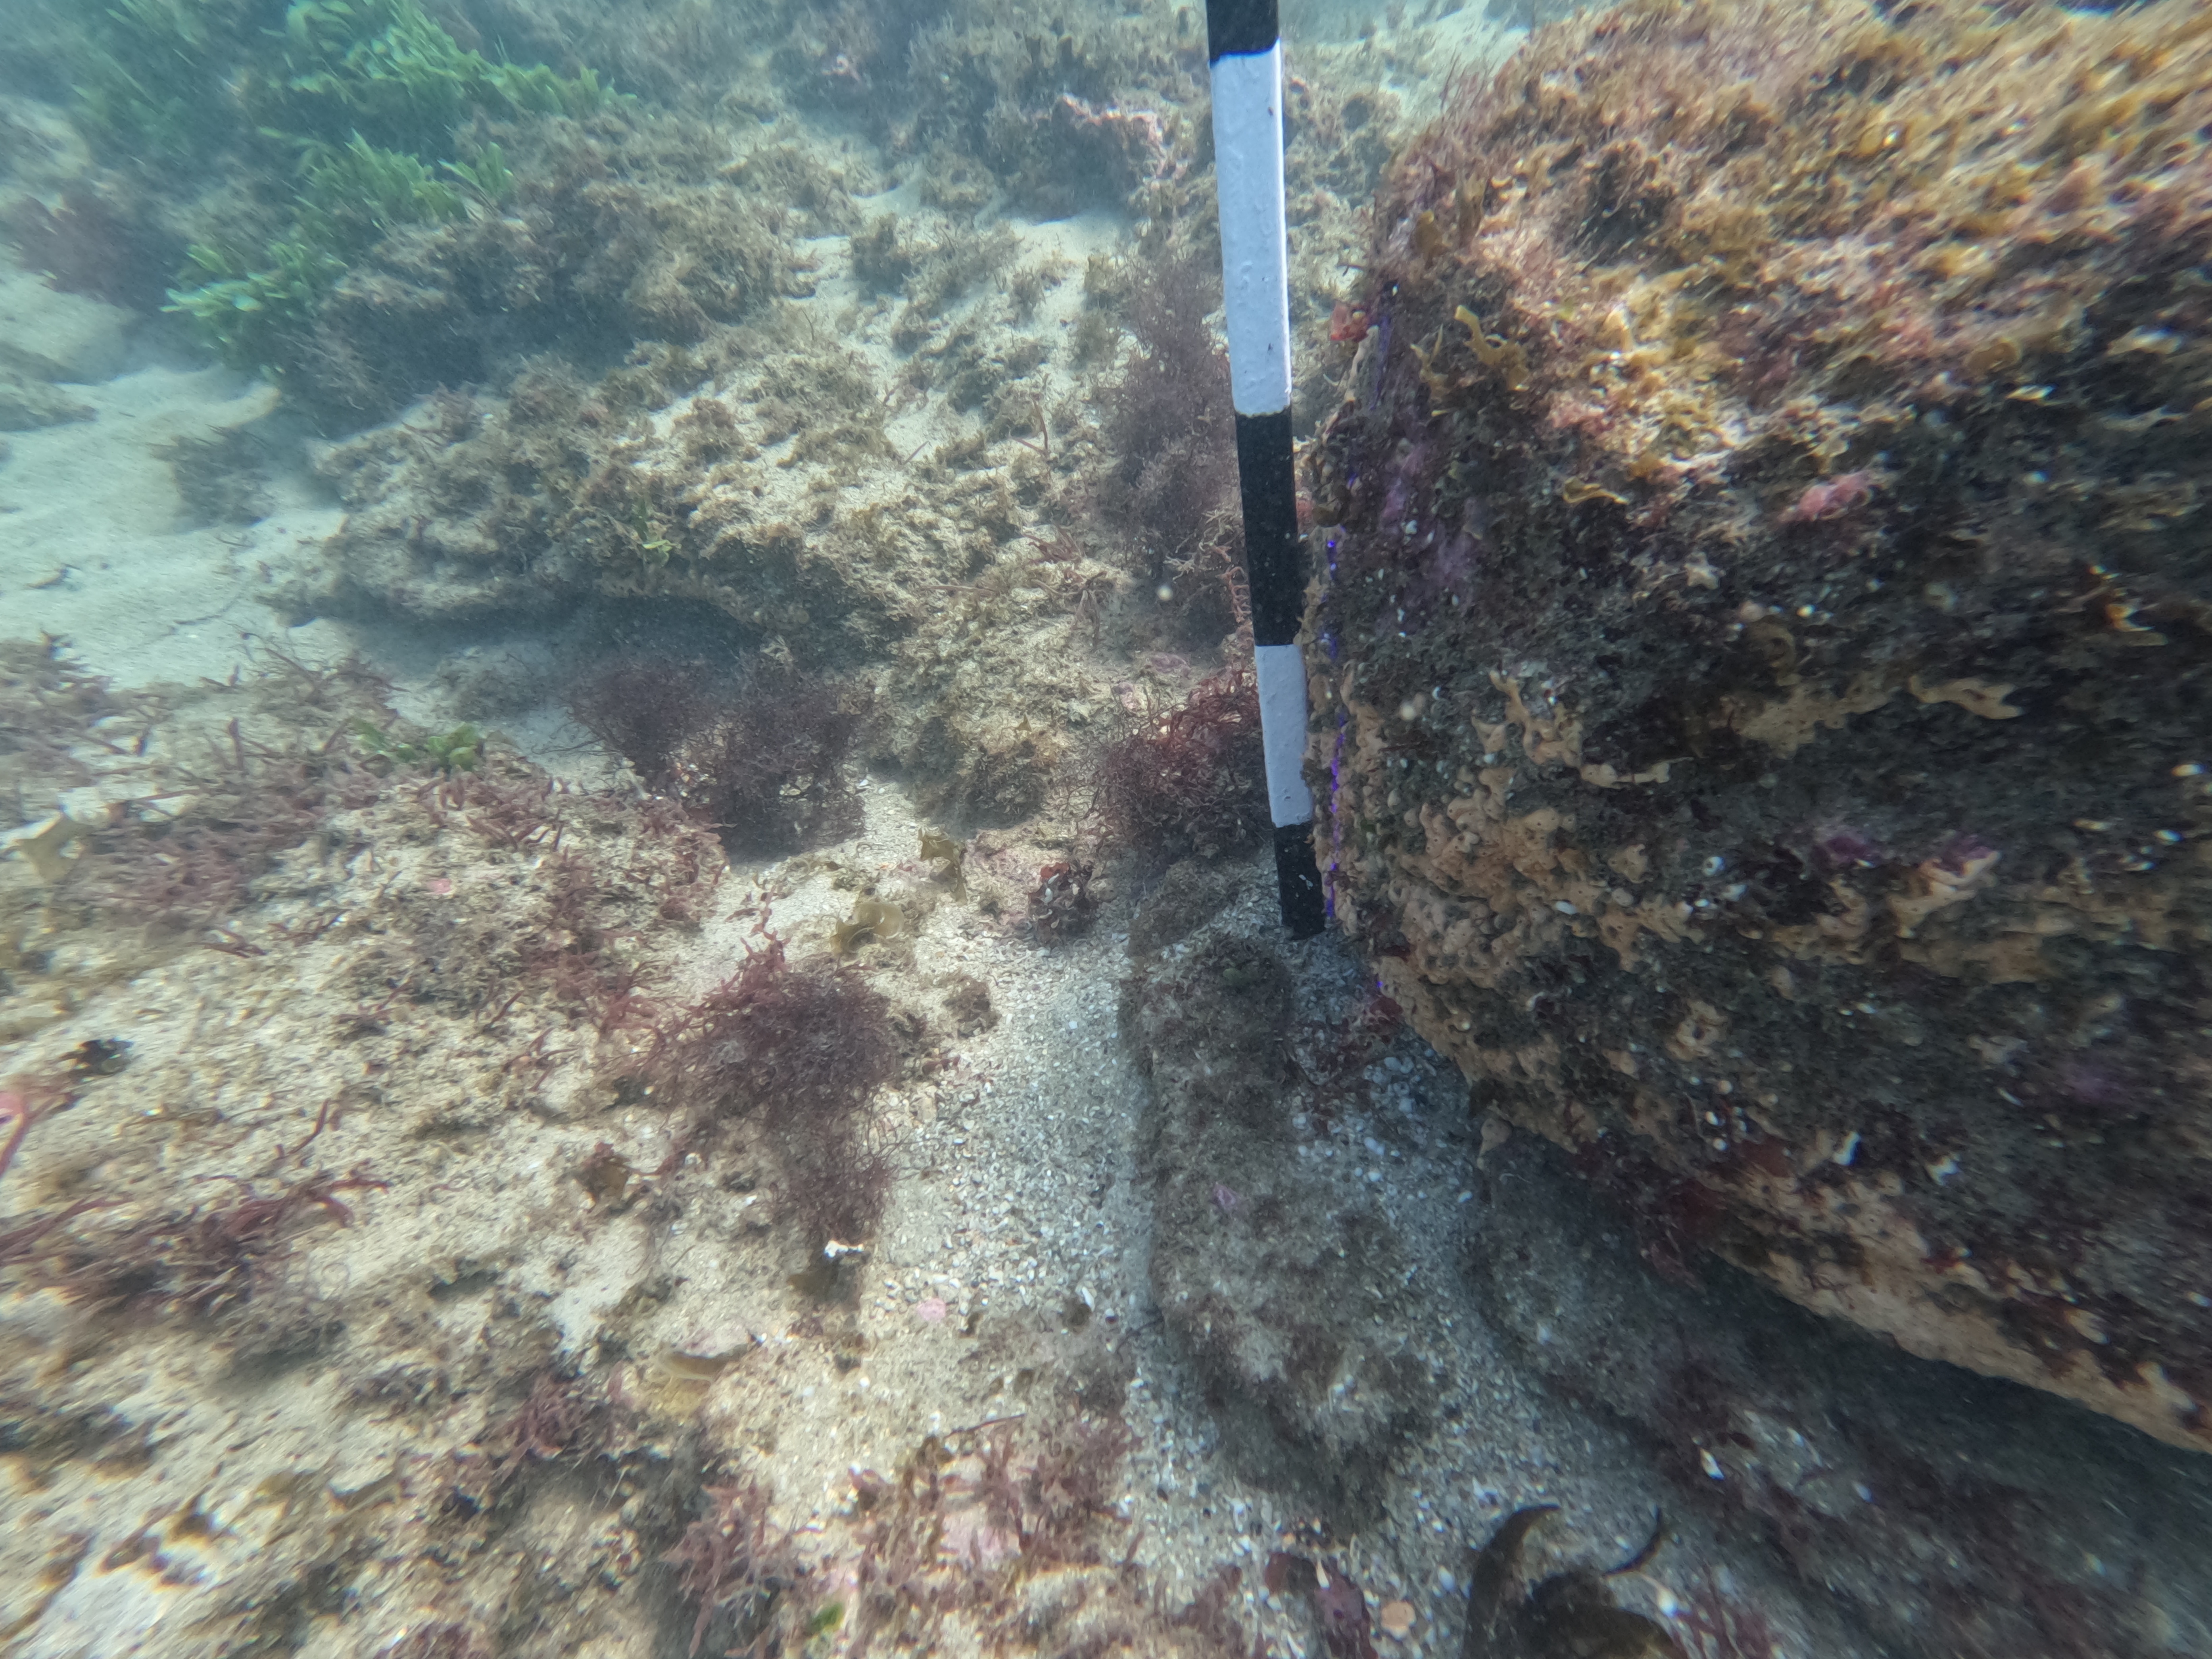

Supplement: Supplementary file 1864 [file G0028190.pdf › Ocean1/G0028190.pdf]

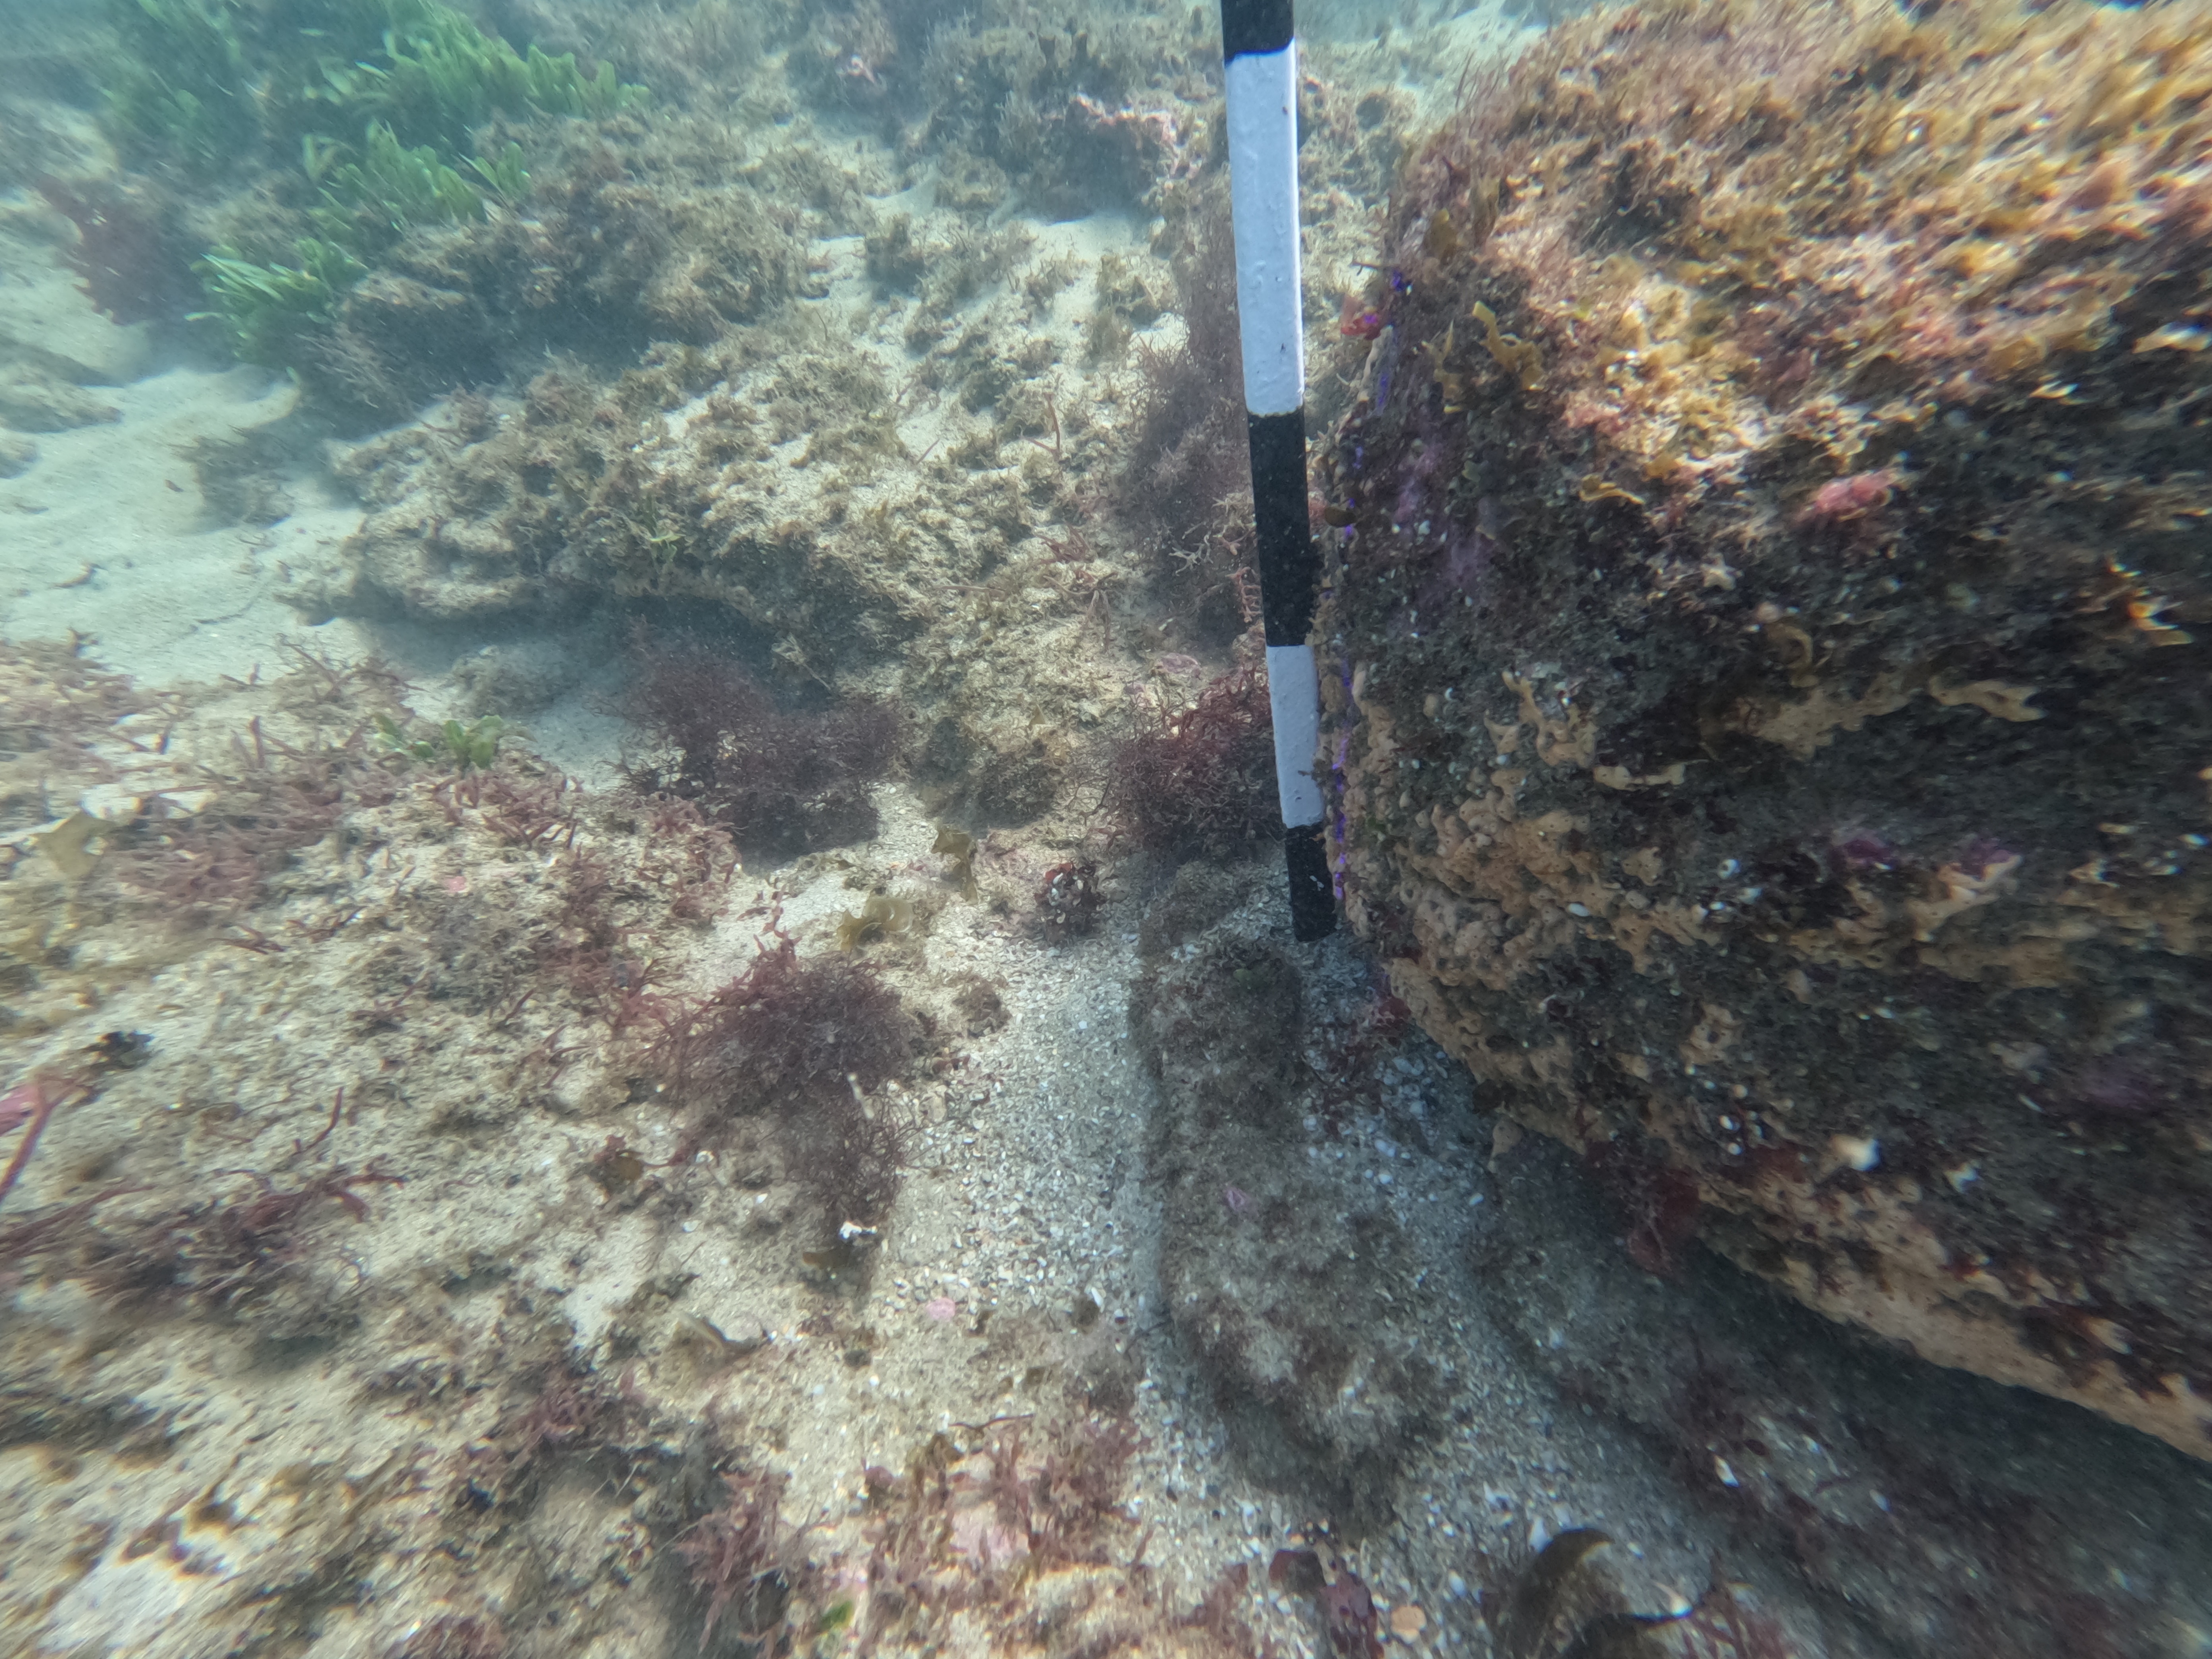

Supplement: Supplementary file 1865 [file G0028191.pdf › Ocean1/G0028191.pdf]

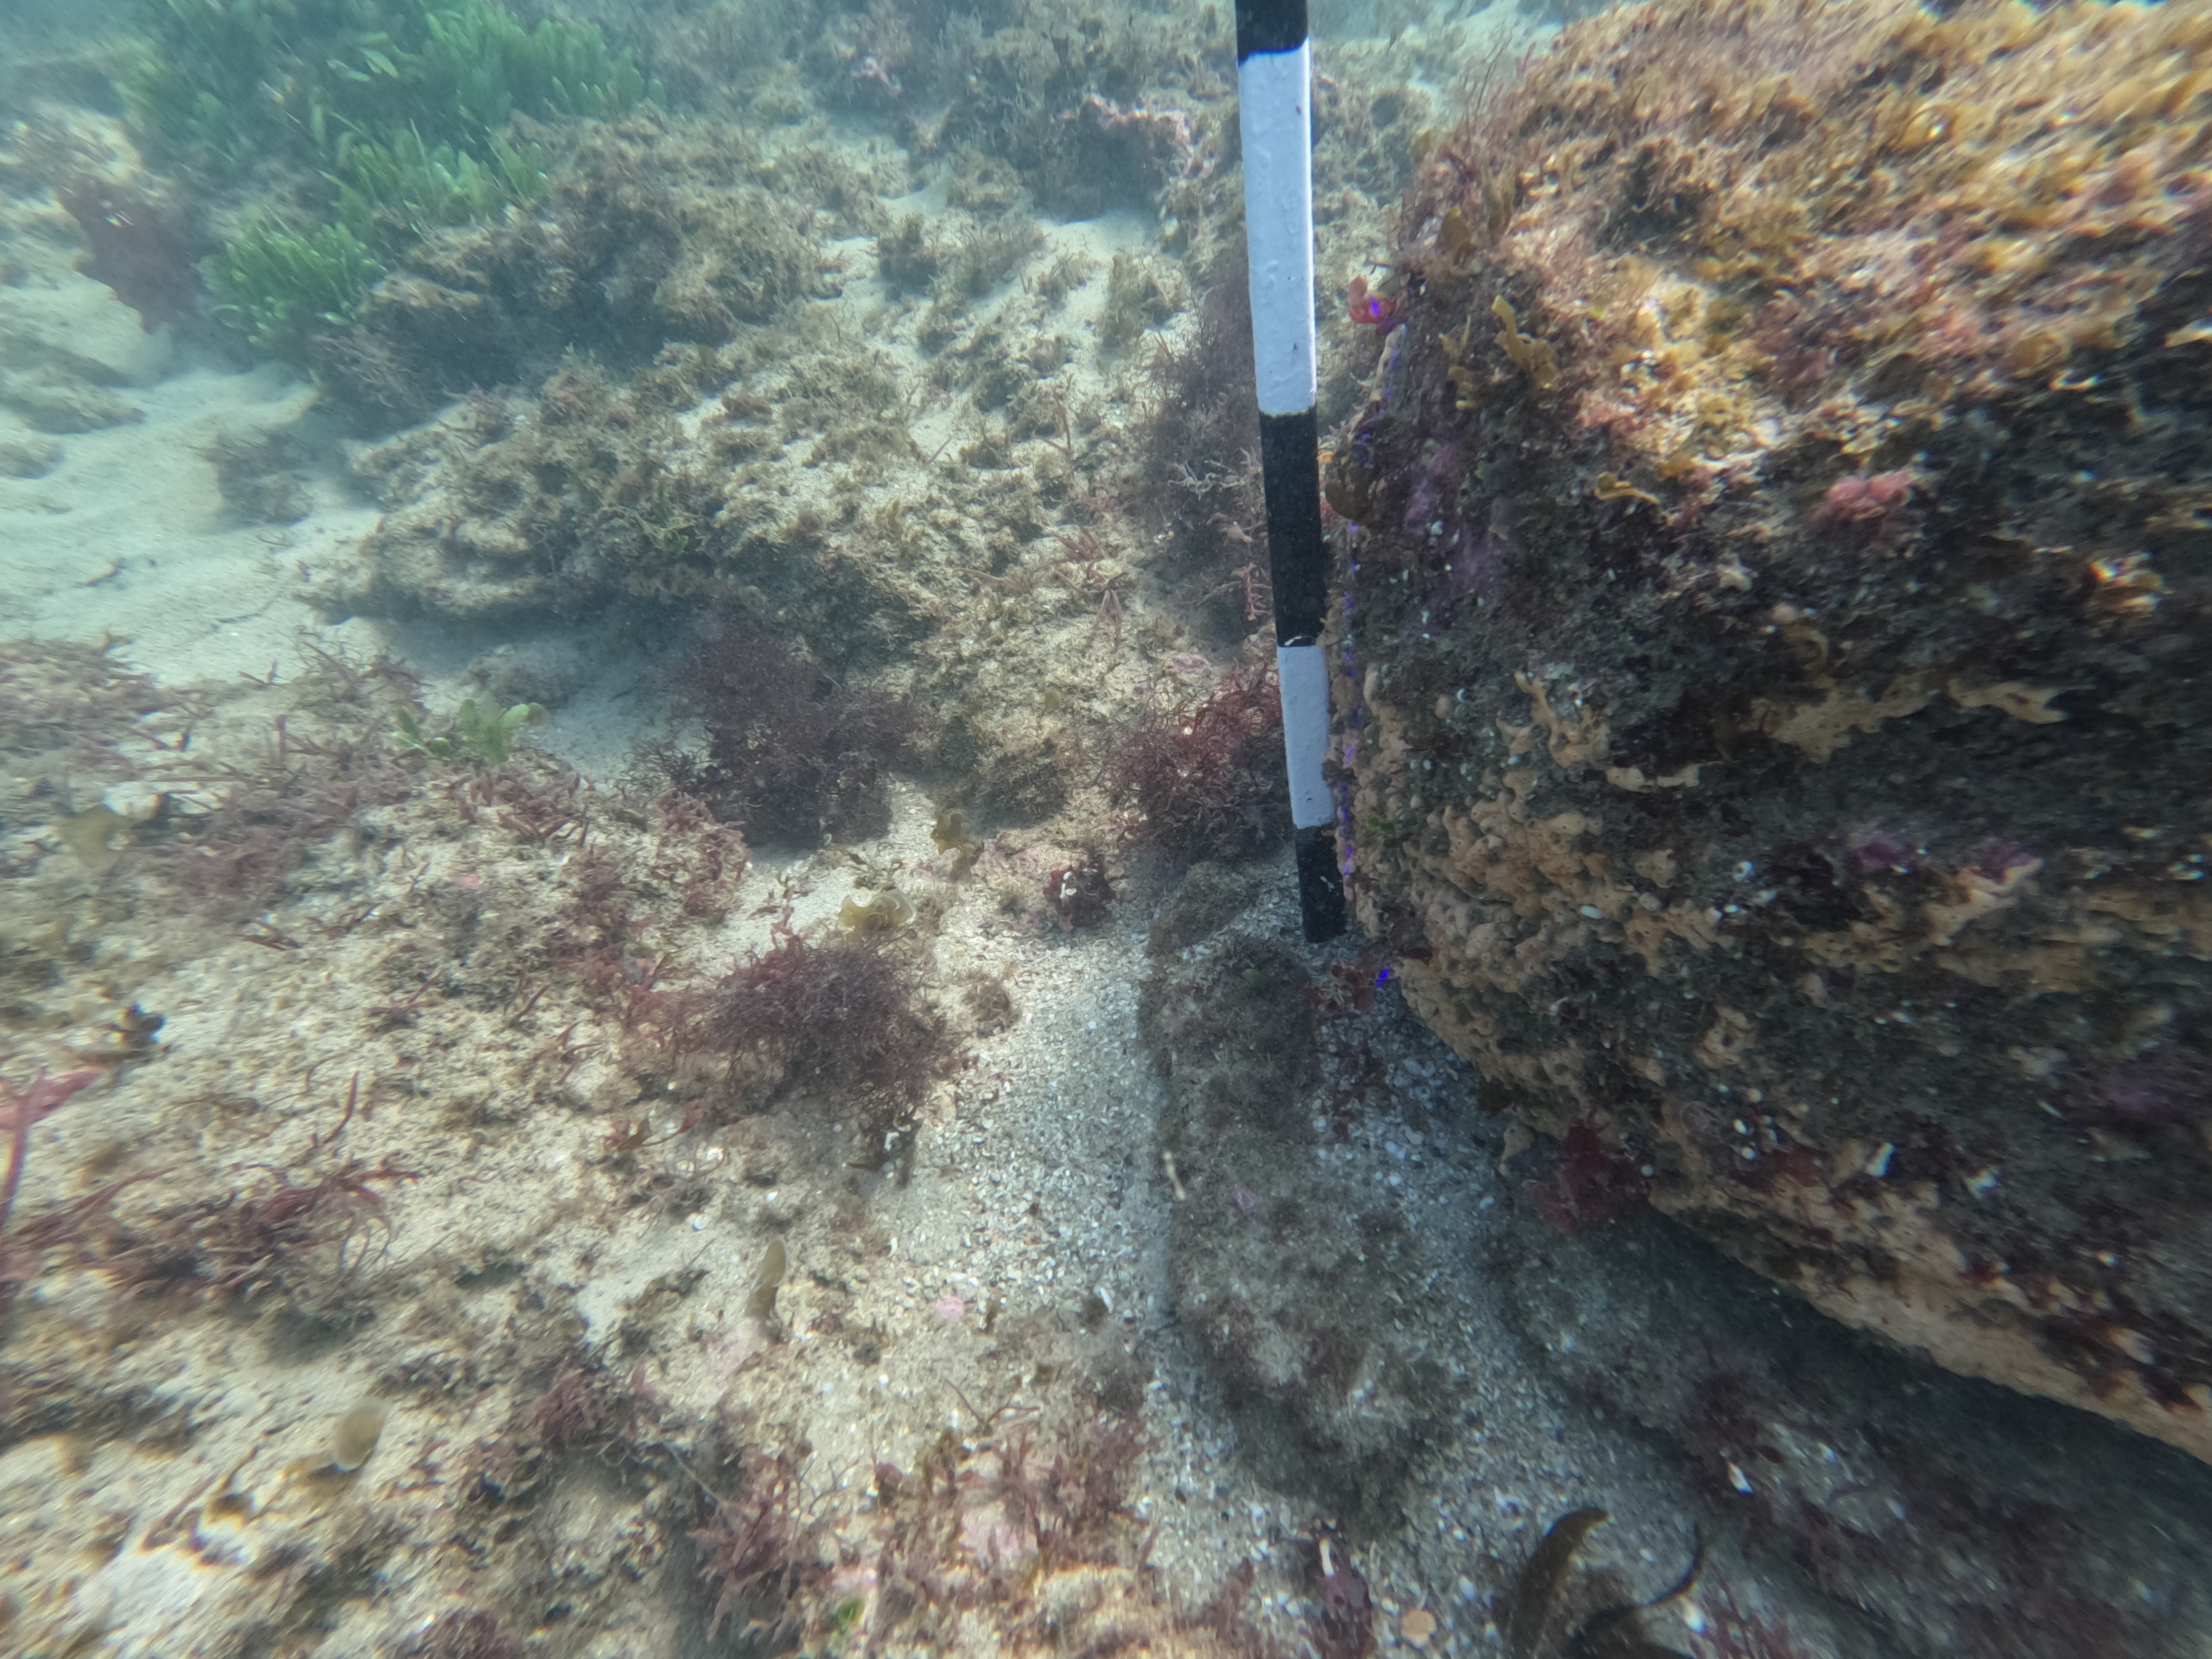

Supplement: Supplementary file 1866 [file G0028192.pdf › Ocean1/G0028192.pdf]

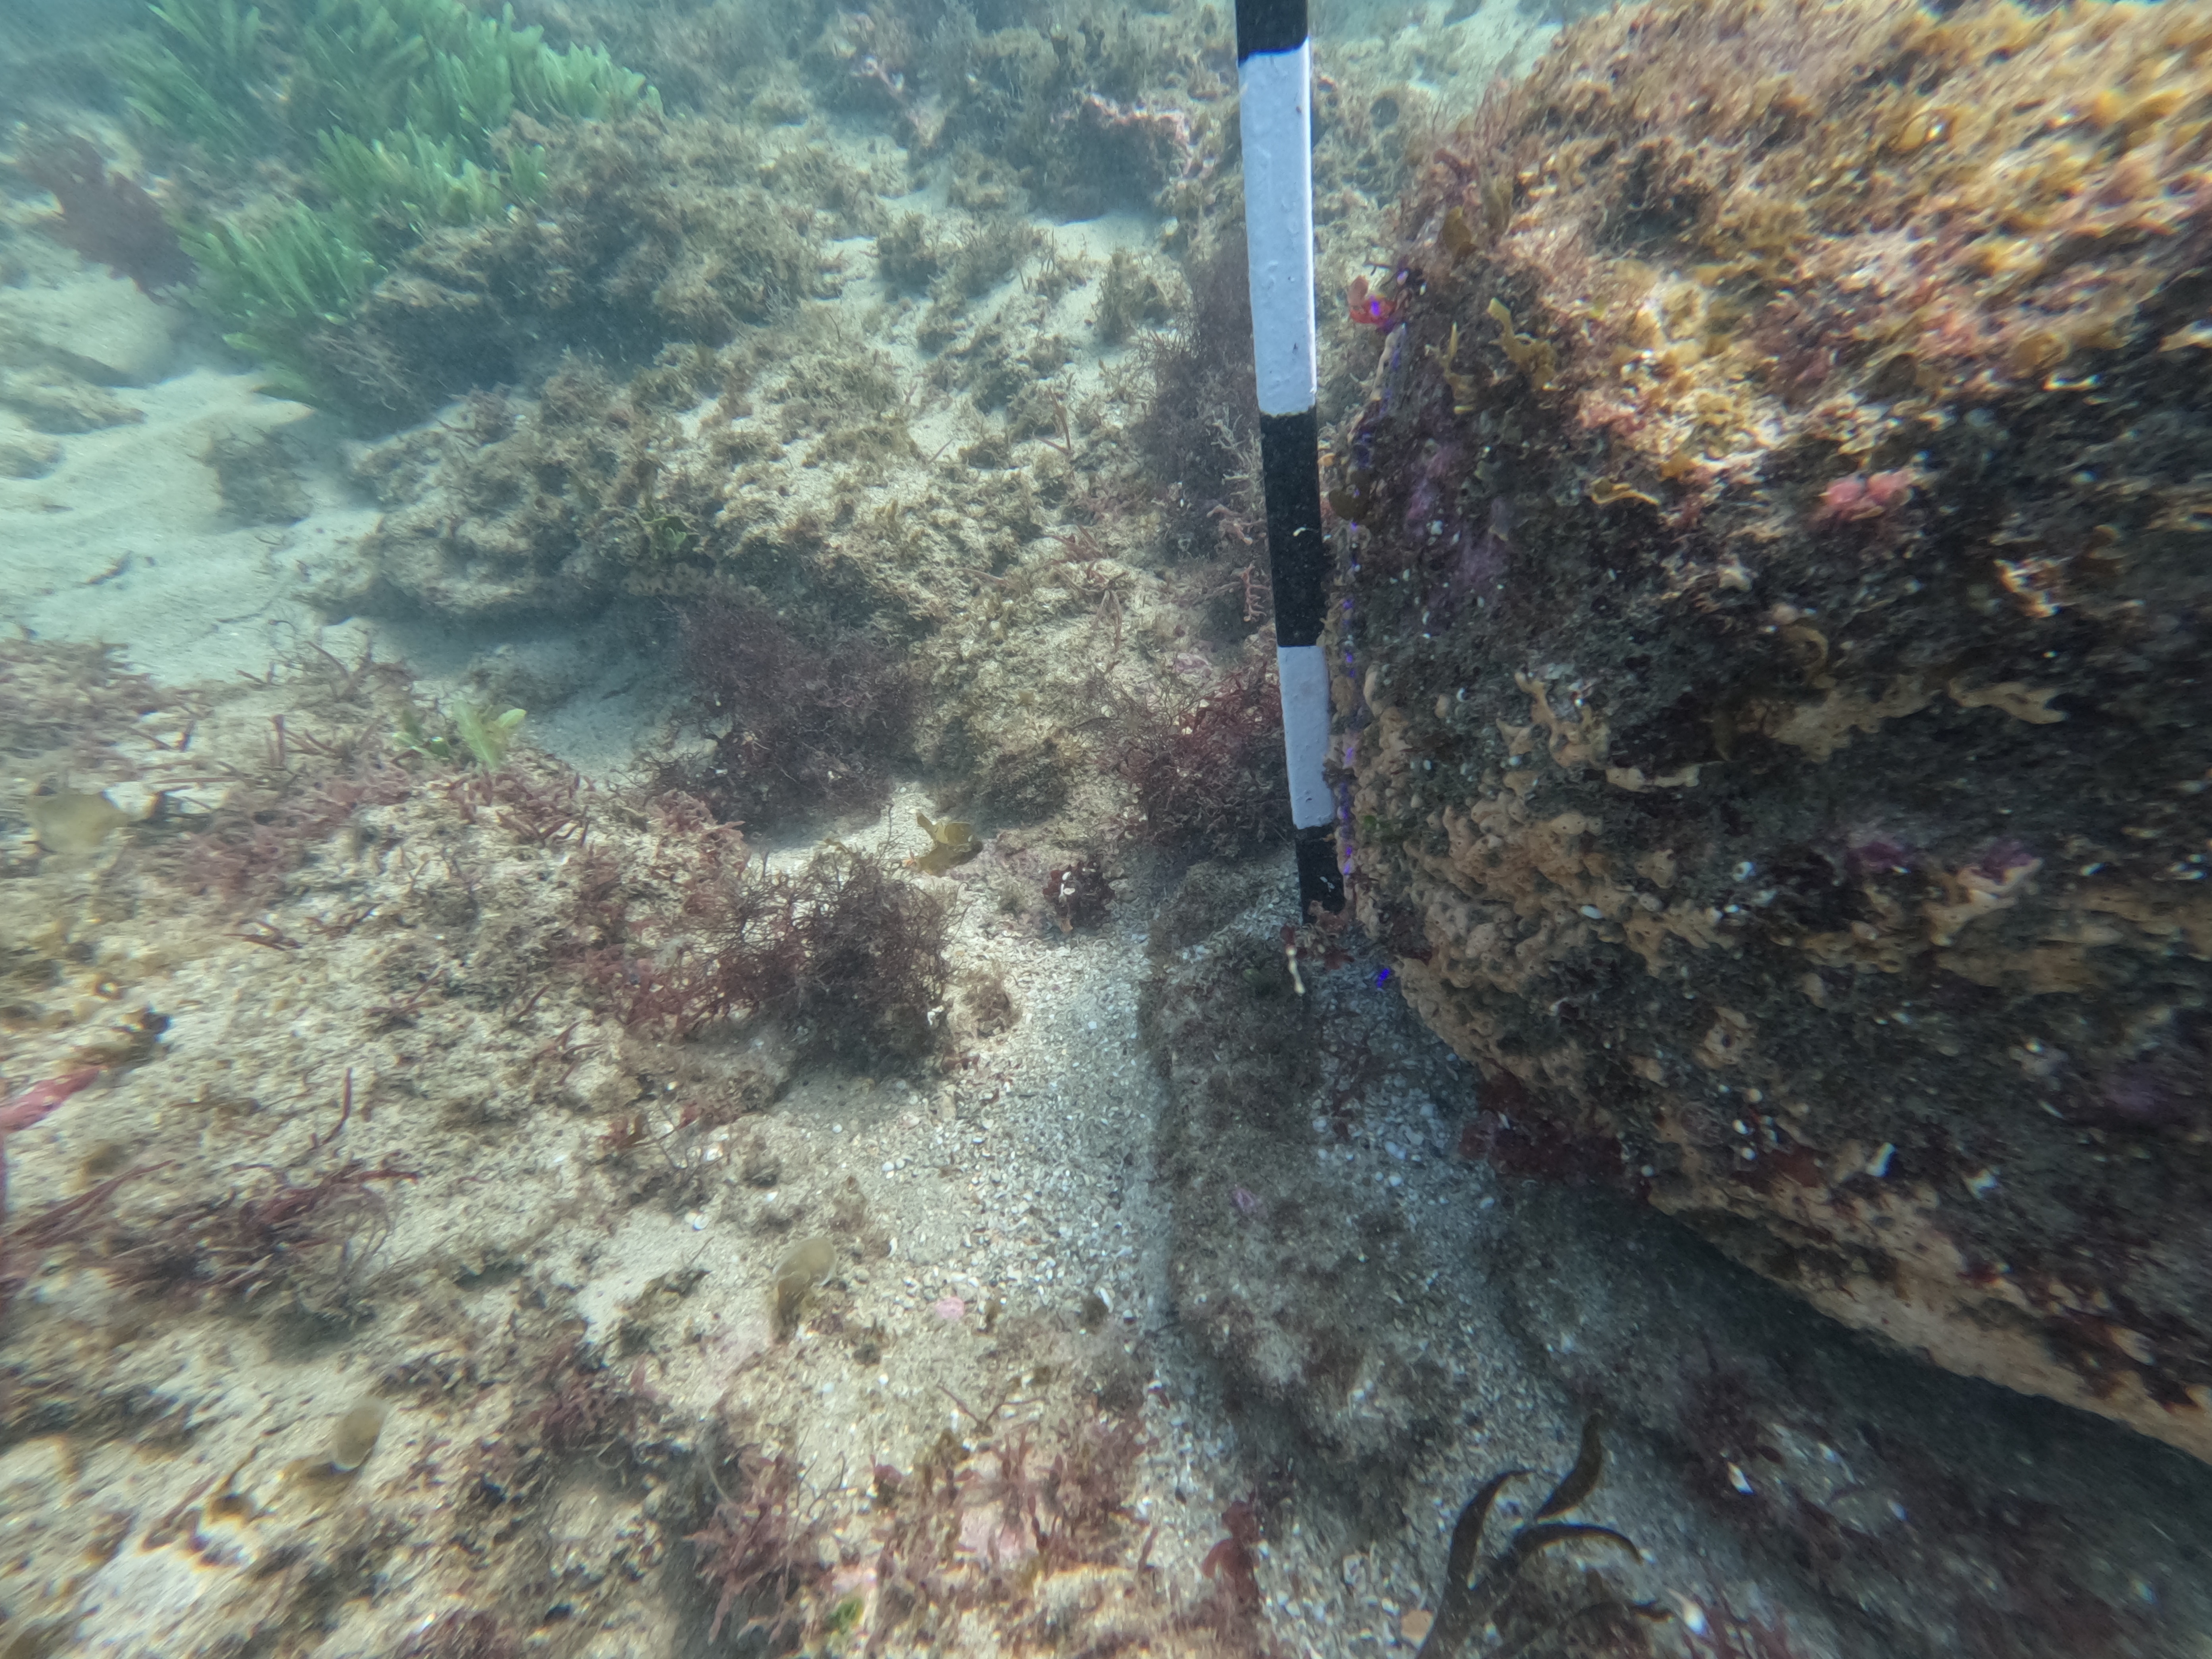

Supplement: Supplementary file 1867 [file G0028193.pdf › Ocean1/G0028193.pdf]

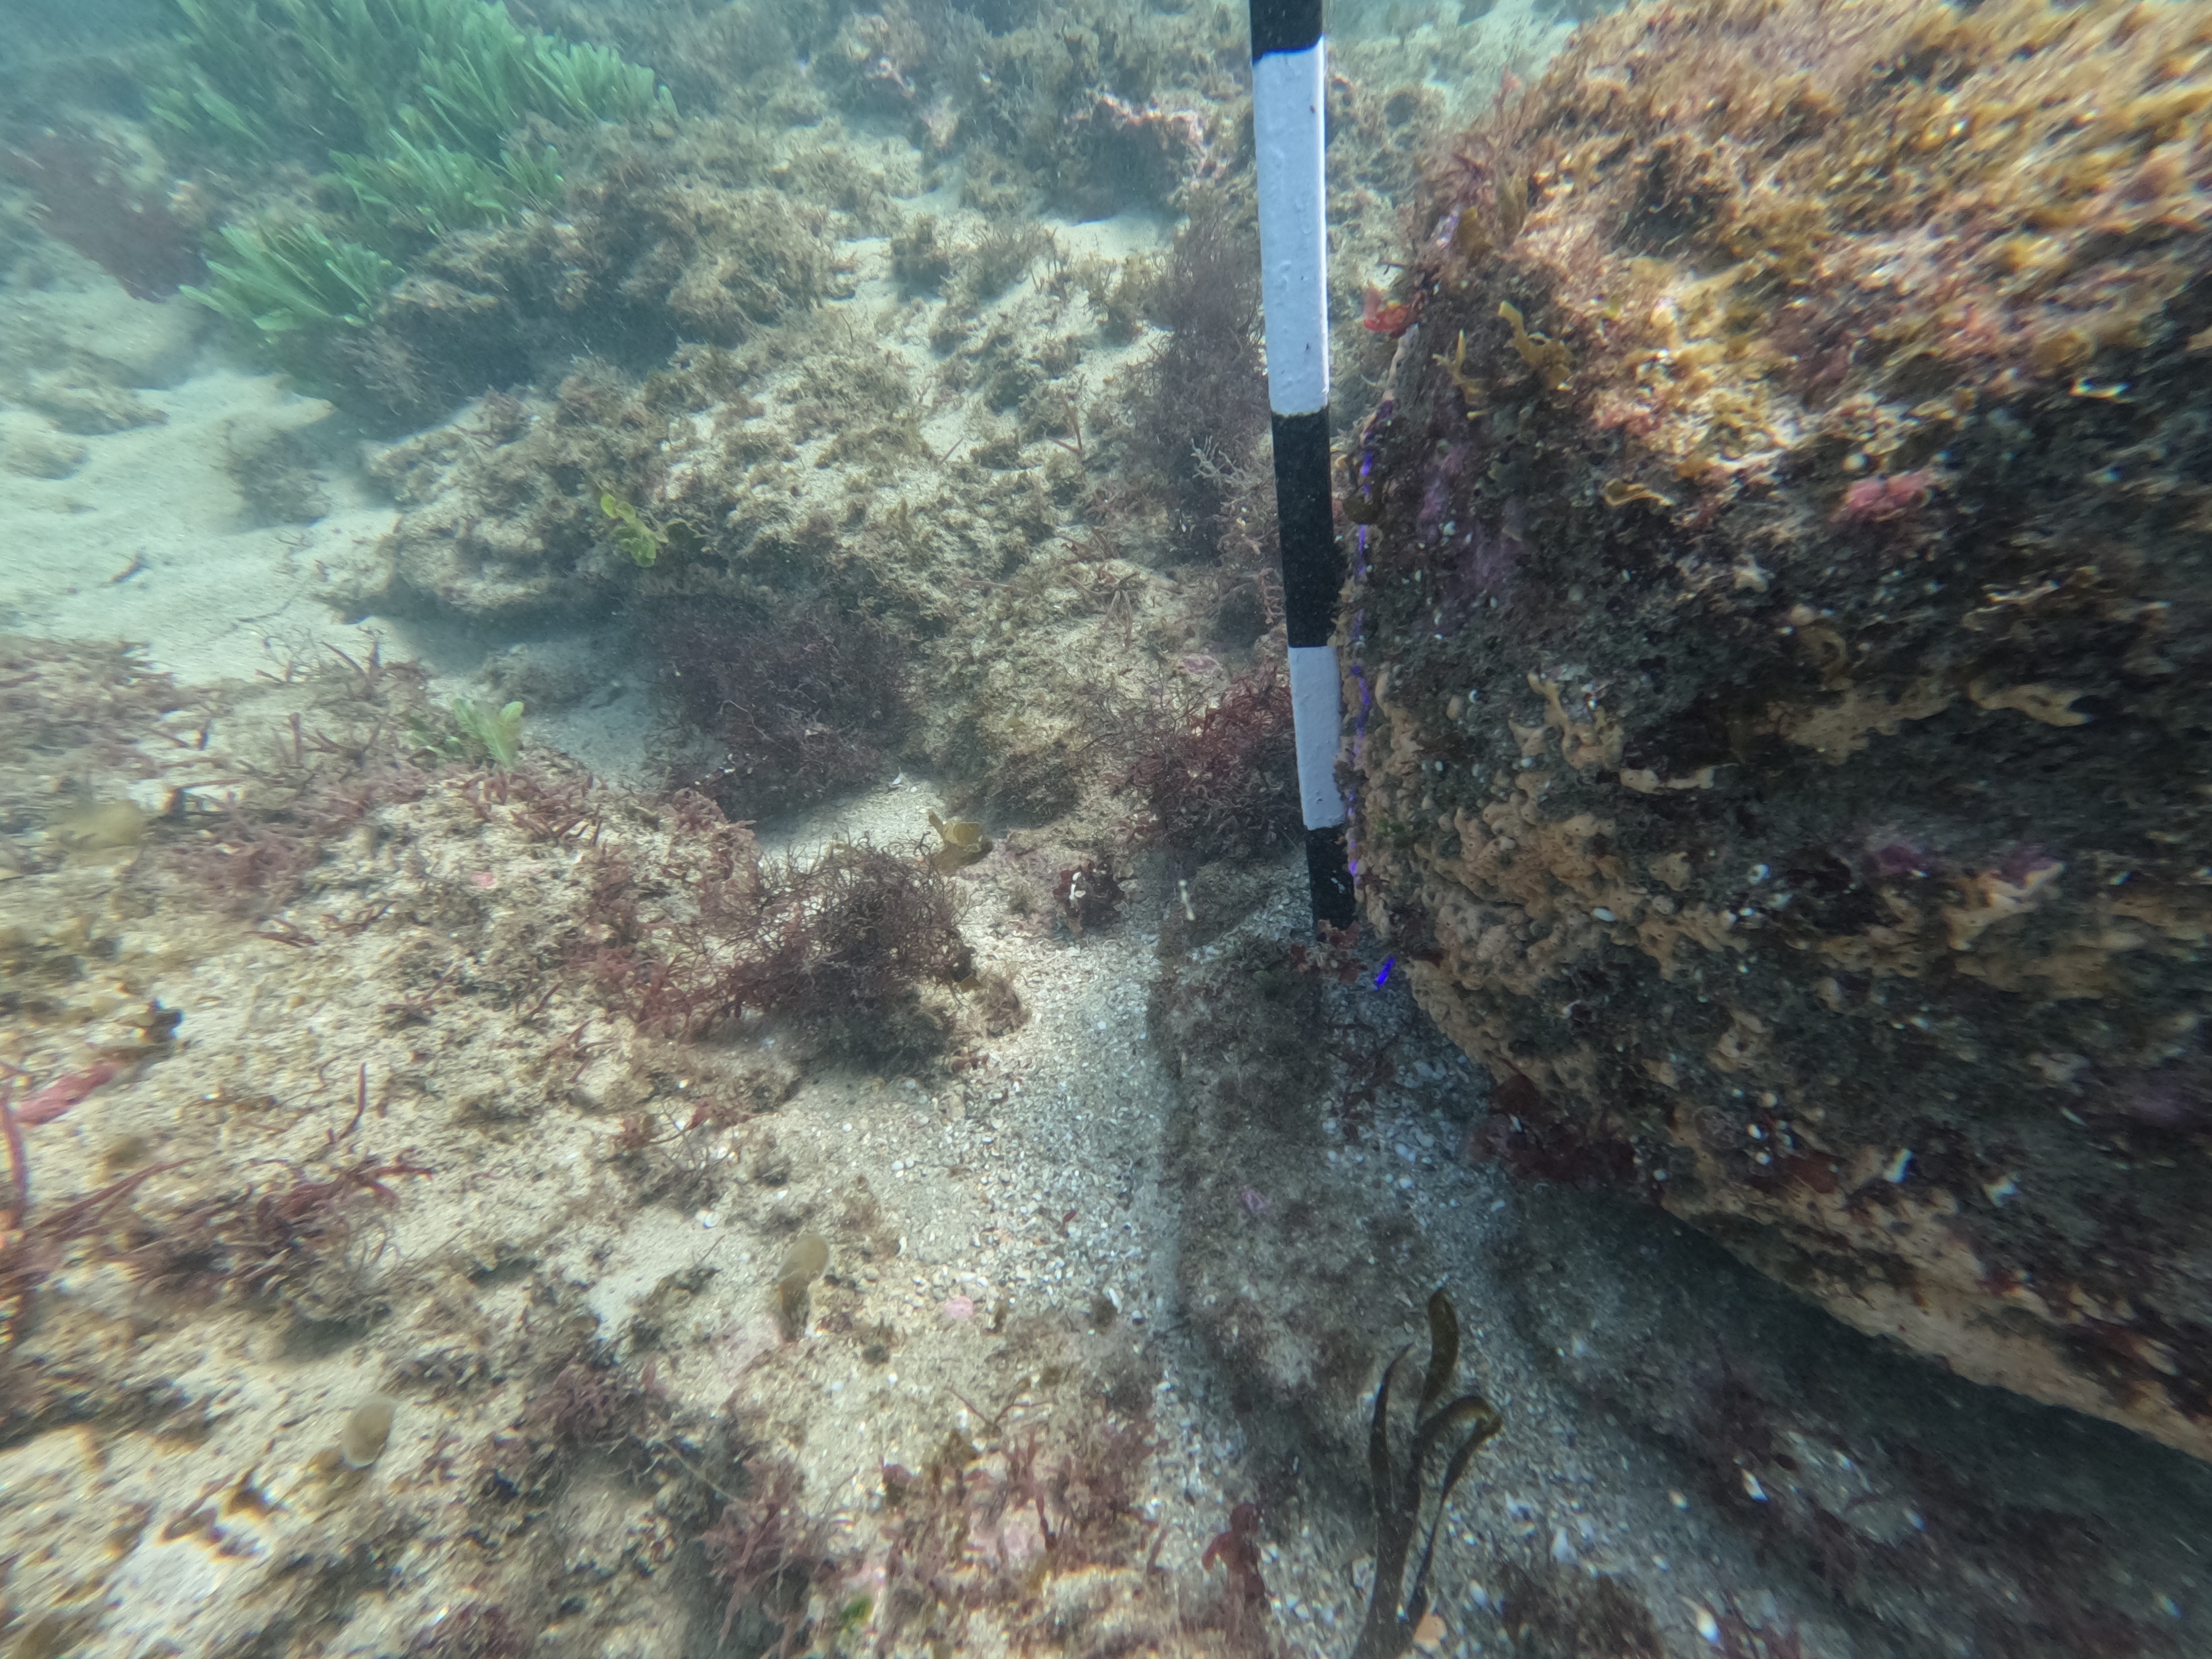

Supplement: Supplementary file 1868 [file G0028194.pdf › Ocean1/G0028194.pdf]

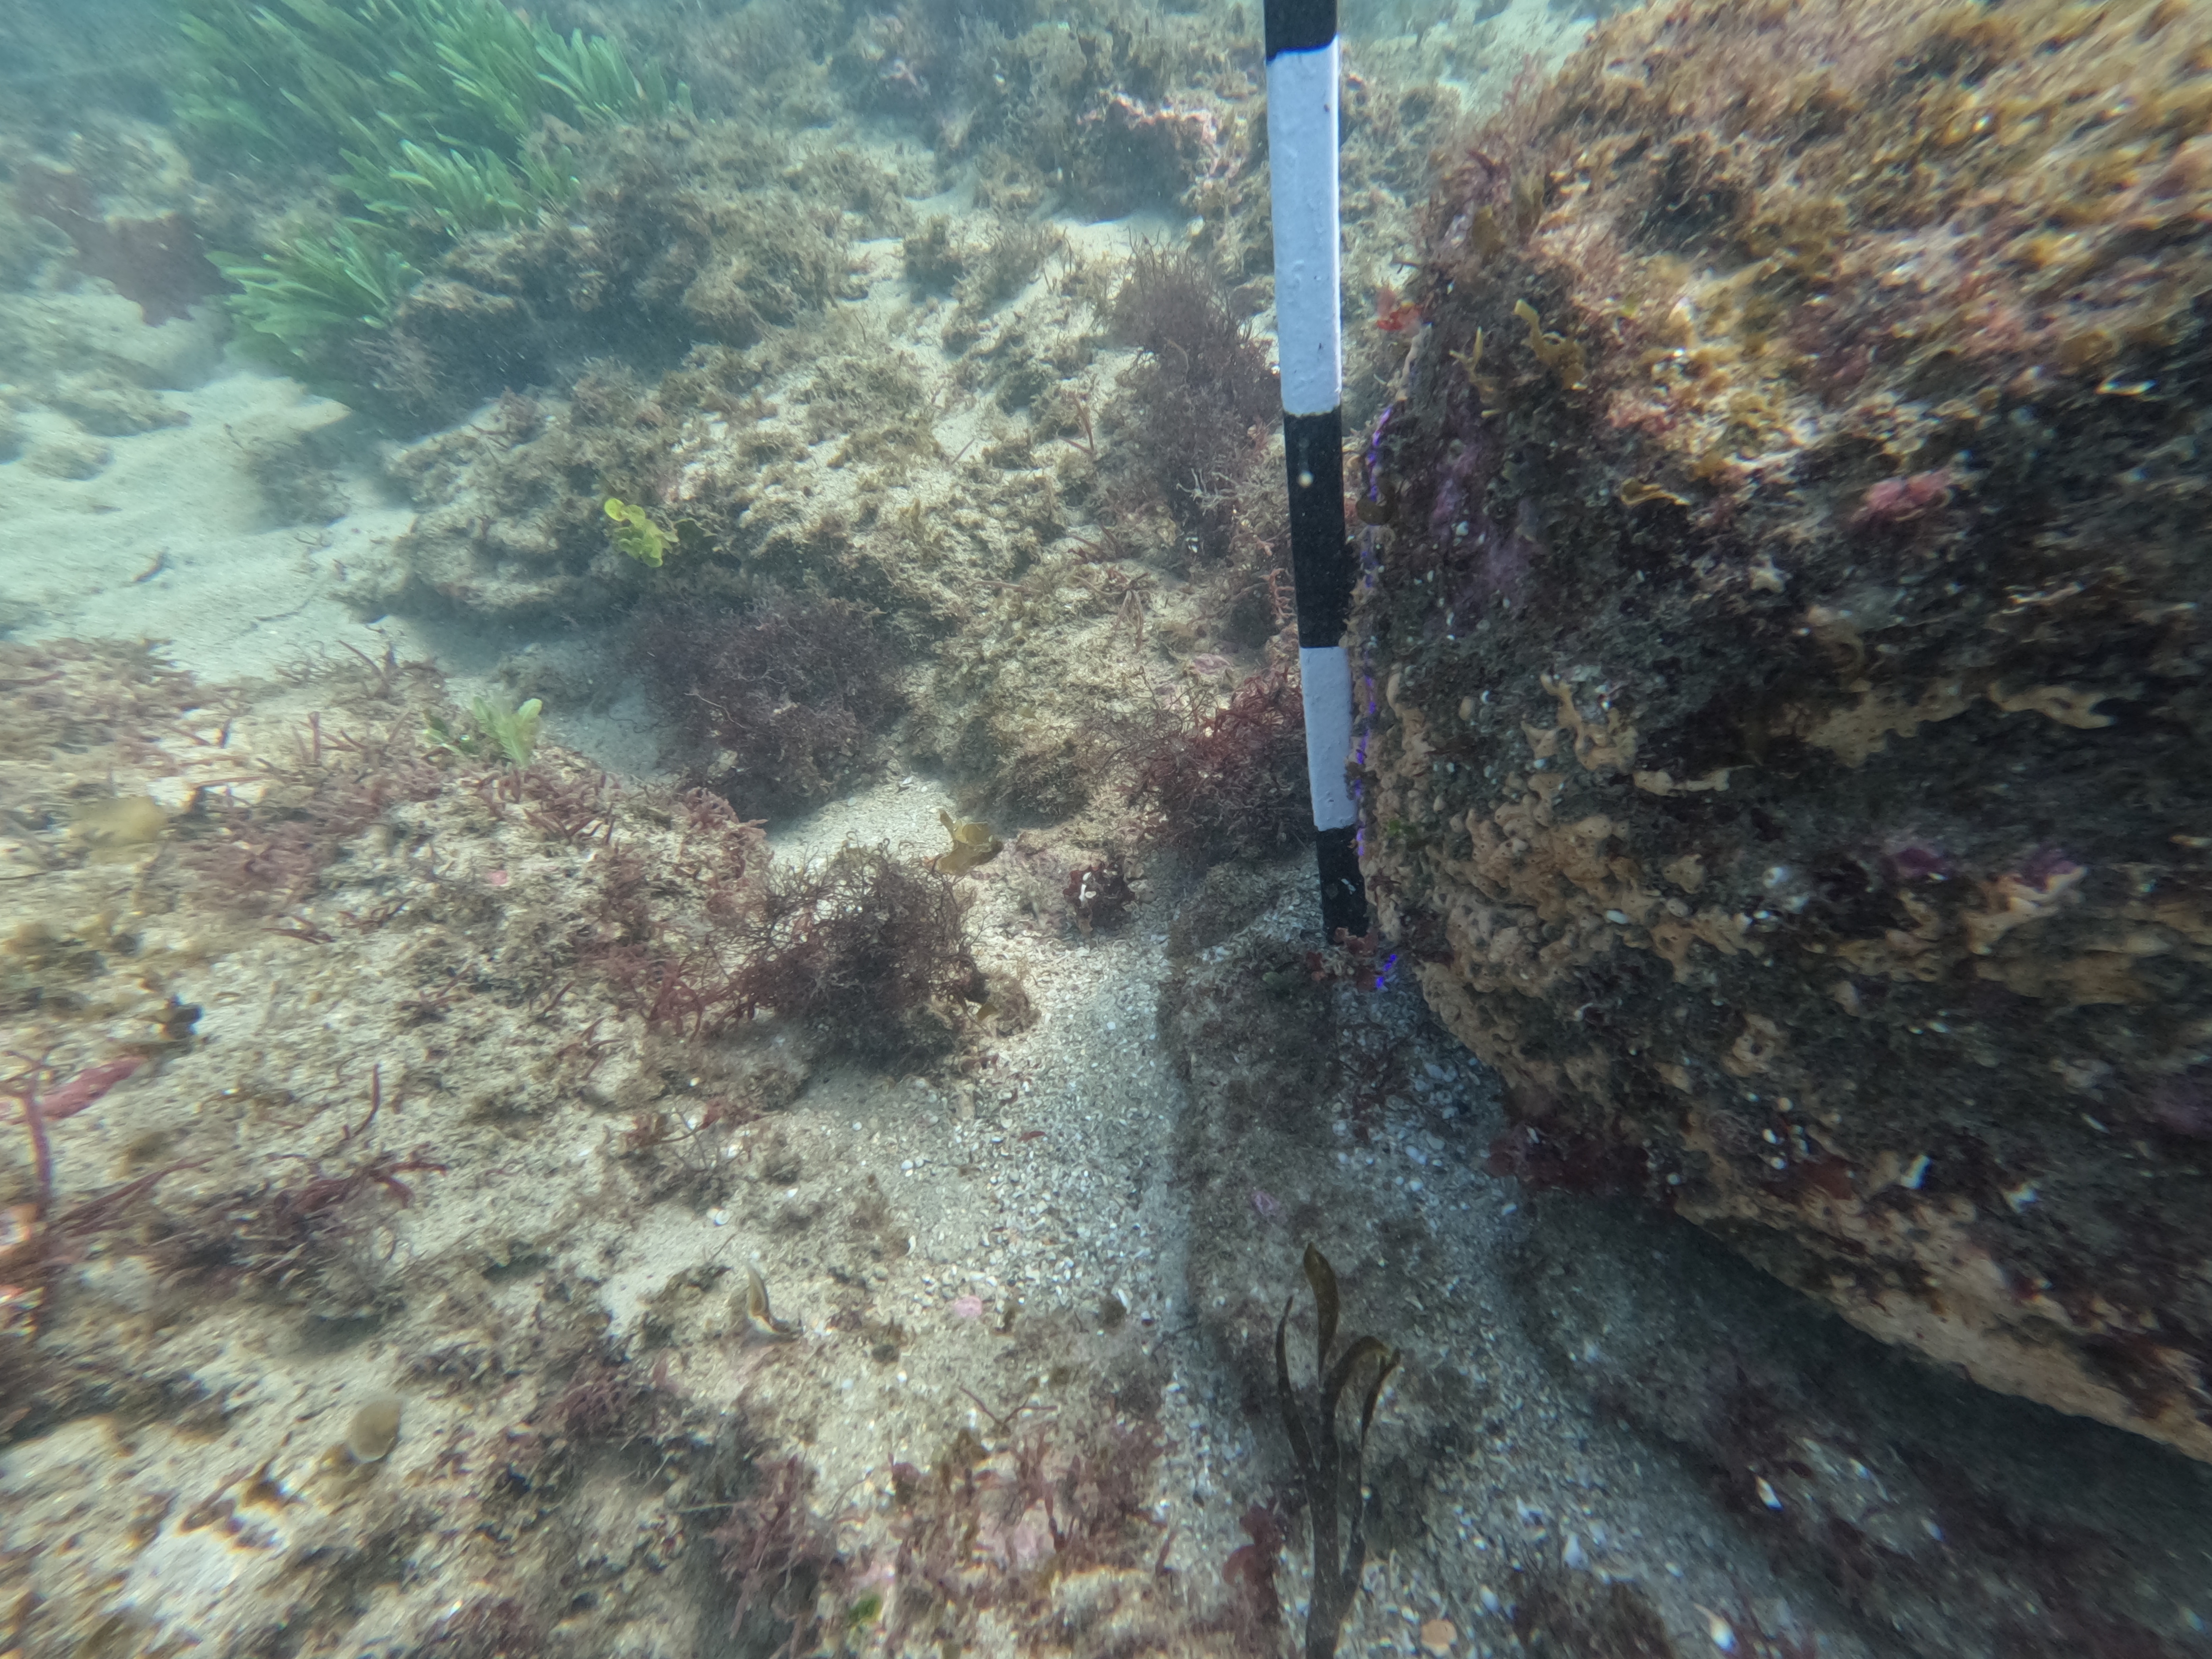

Supplement: Supplementary file 1869 [file G0028195.pdf › Ocean1/G0028195.pdf]

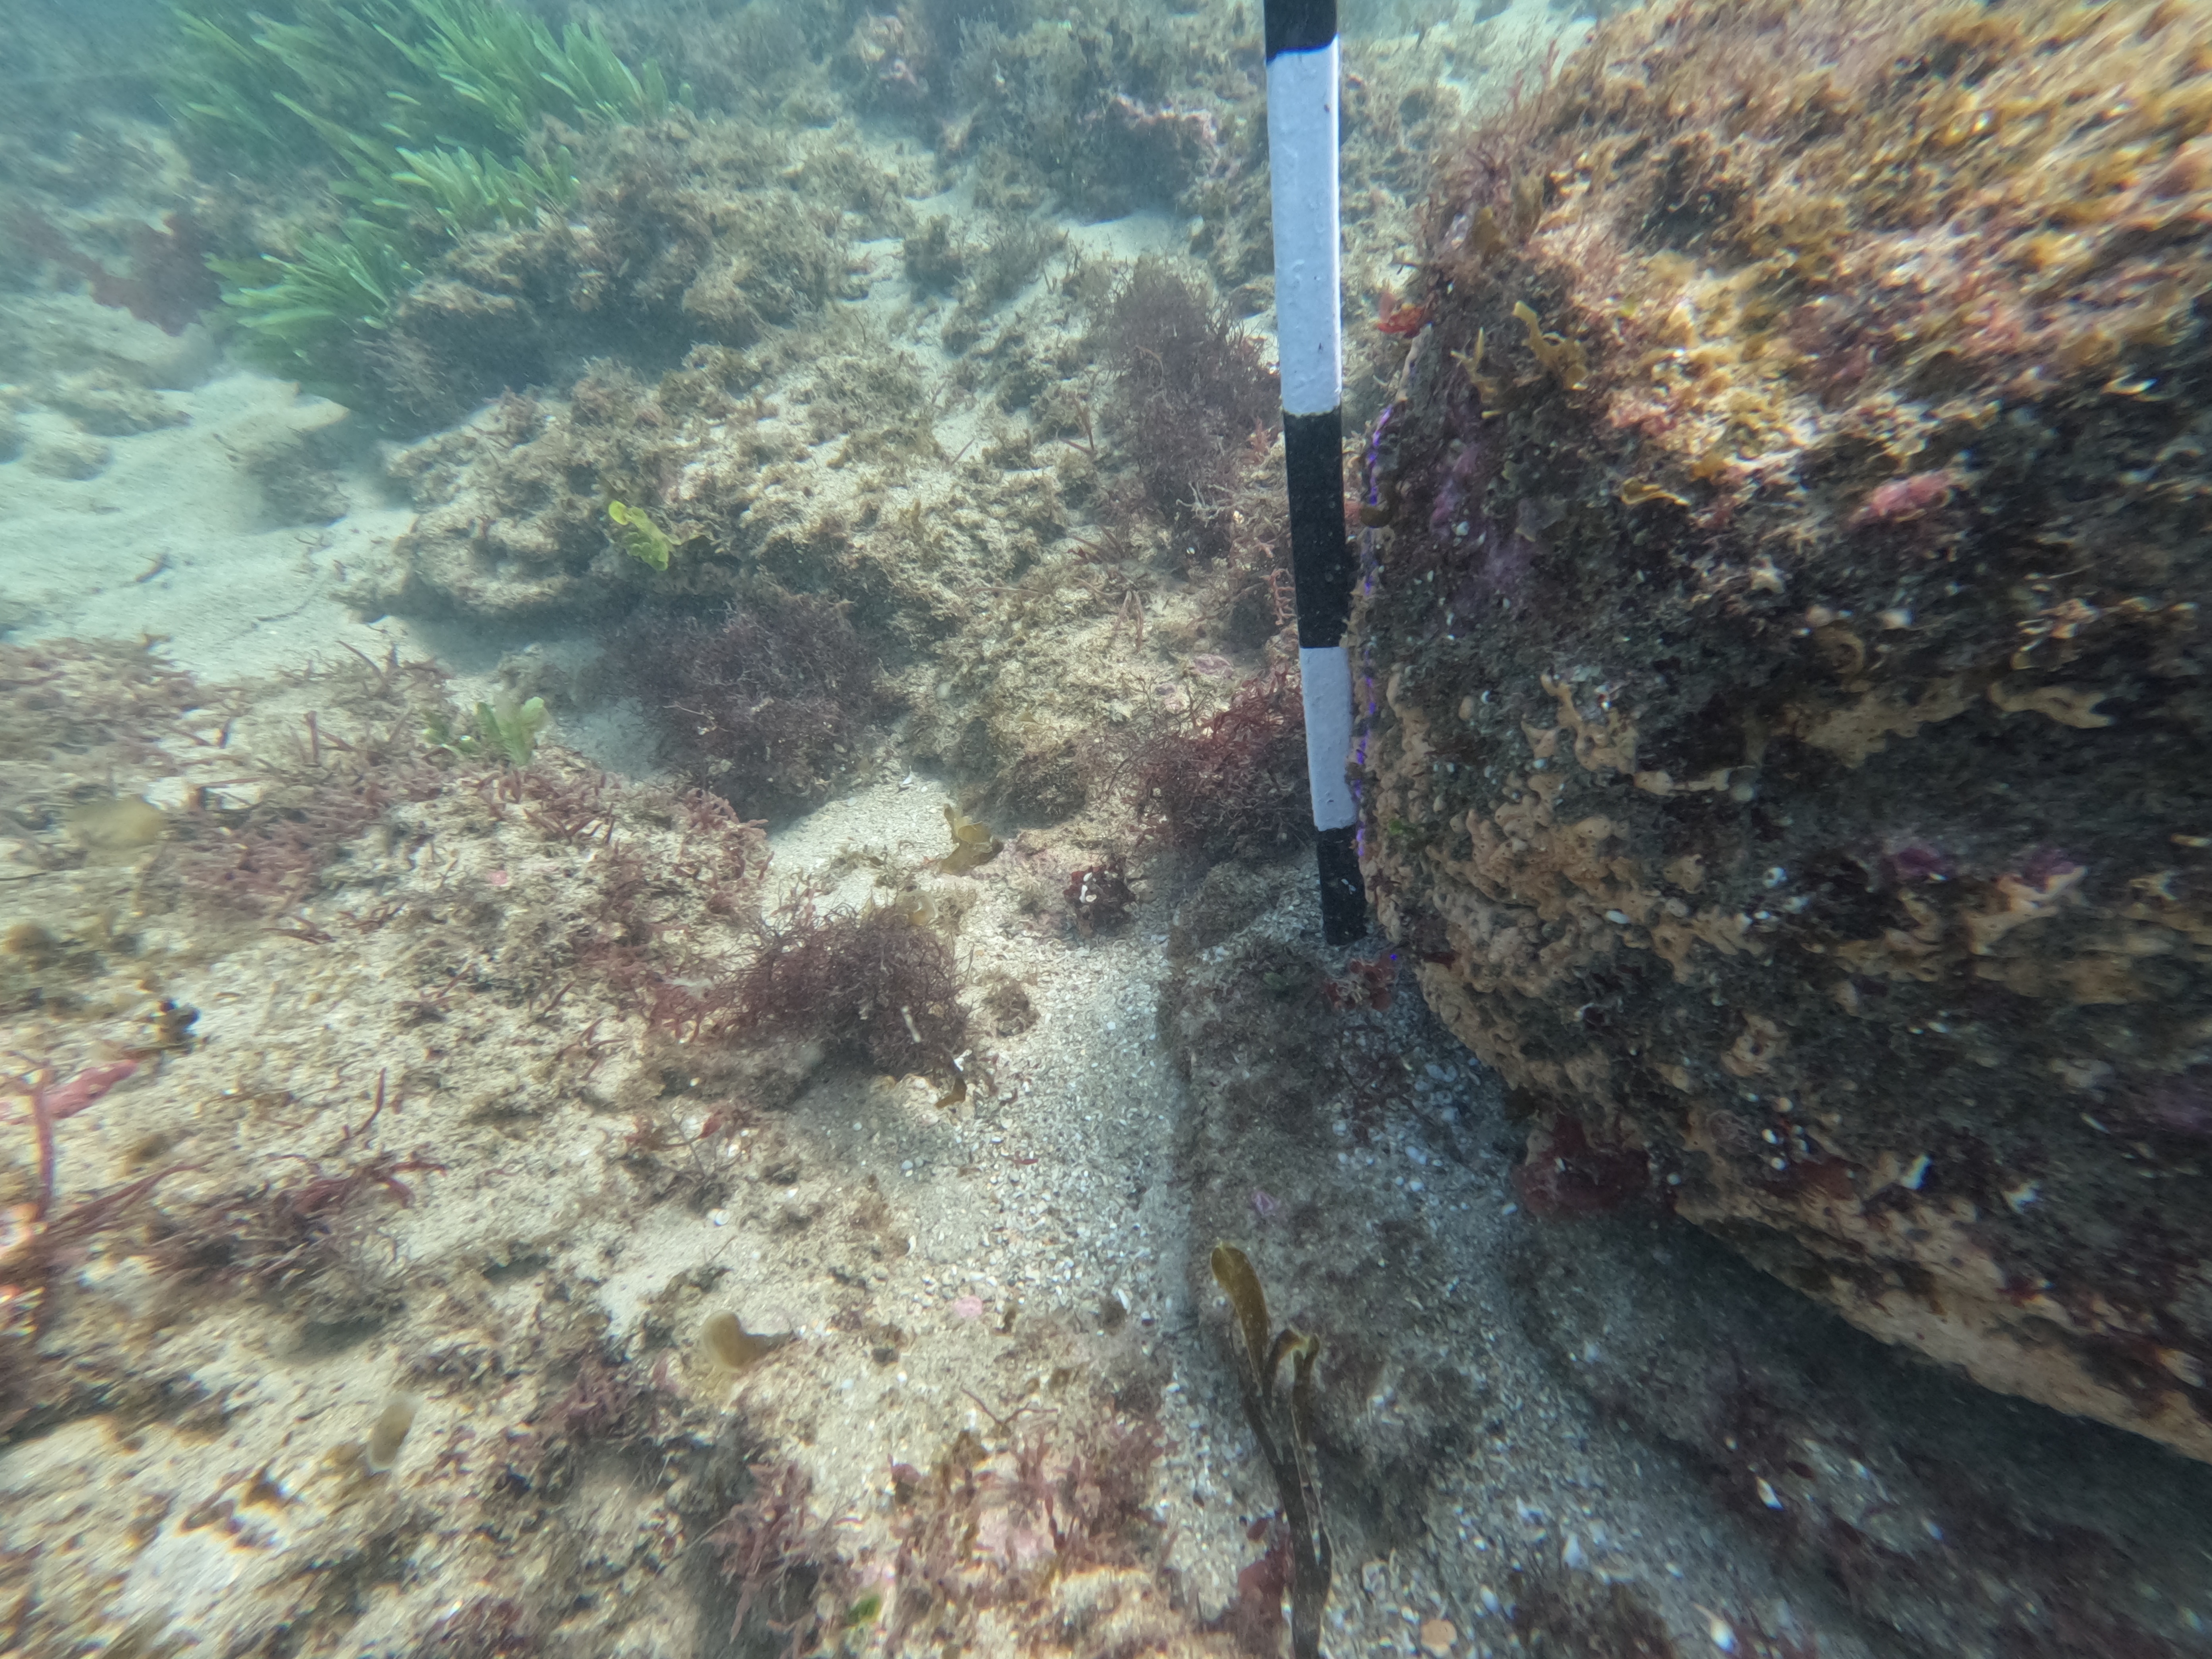

Supplement: Supplementary file 1870 [file G0028196.pdf › Ocean1/G0028196.pdf]

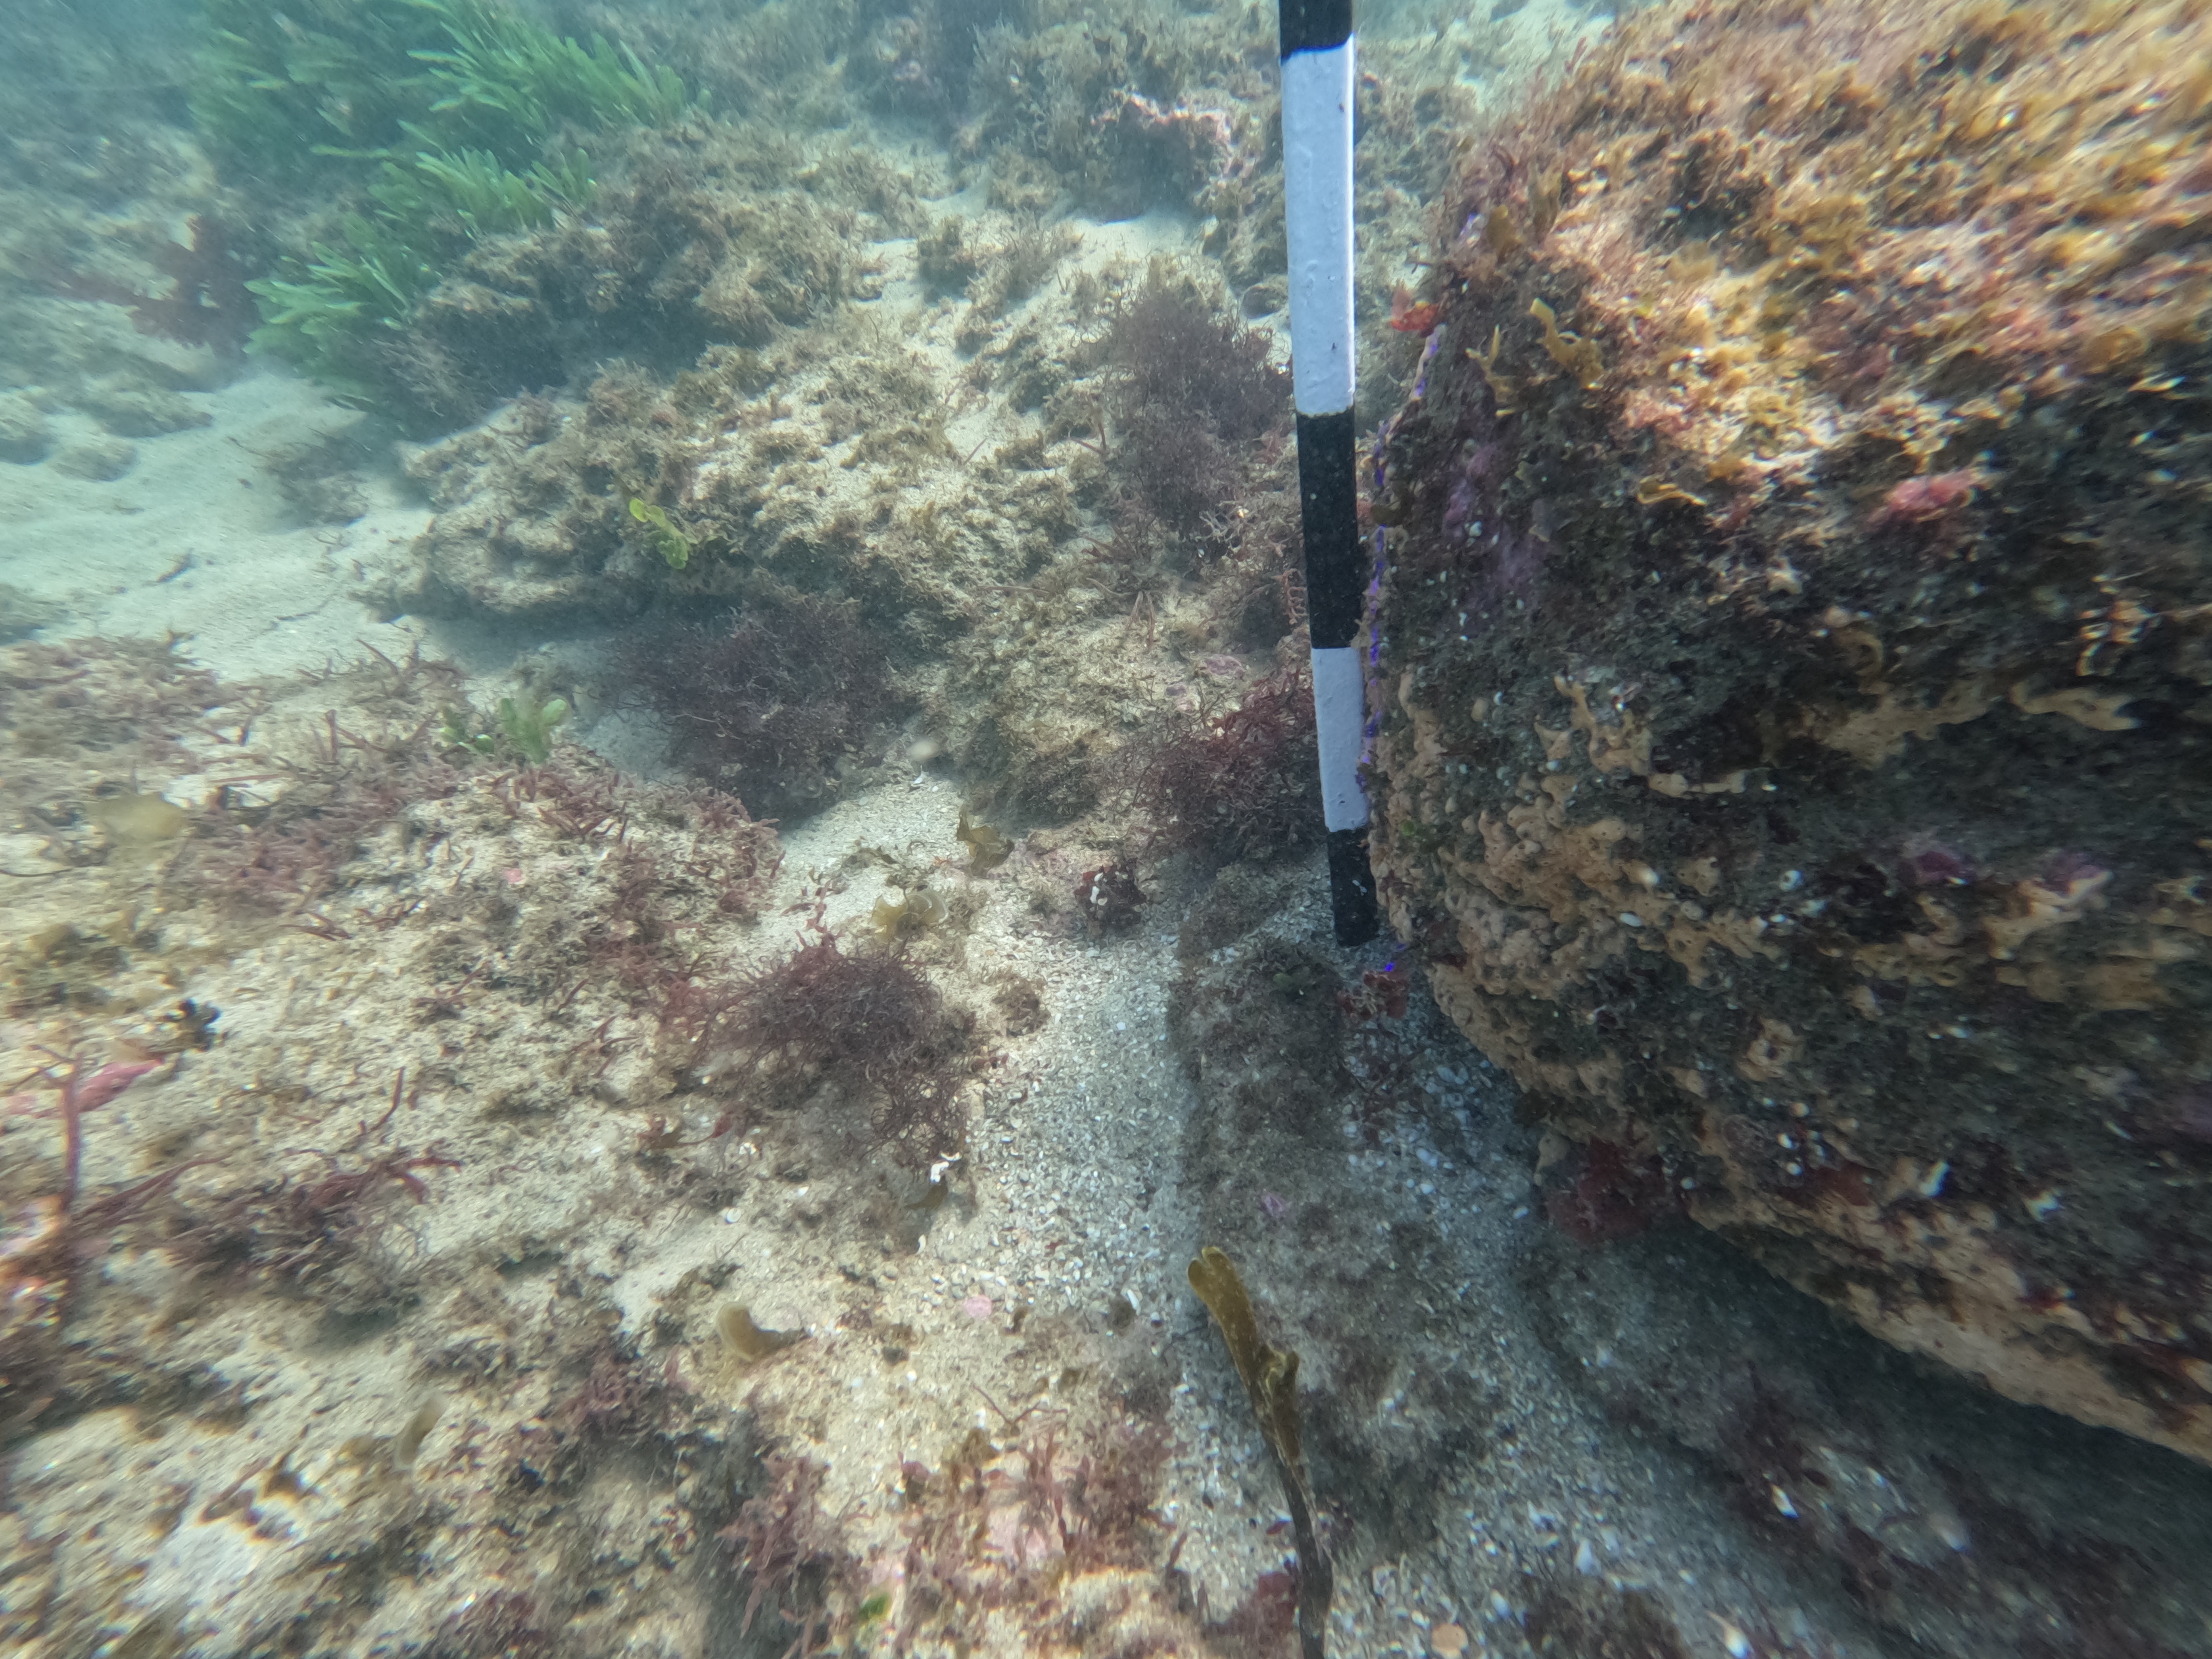

Supplement: Supplementary file 1871 [file G0028197.pdf › Ocean1/G0028197.pdf]

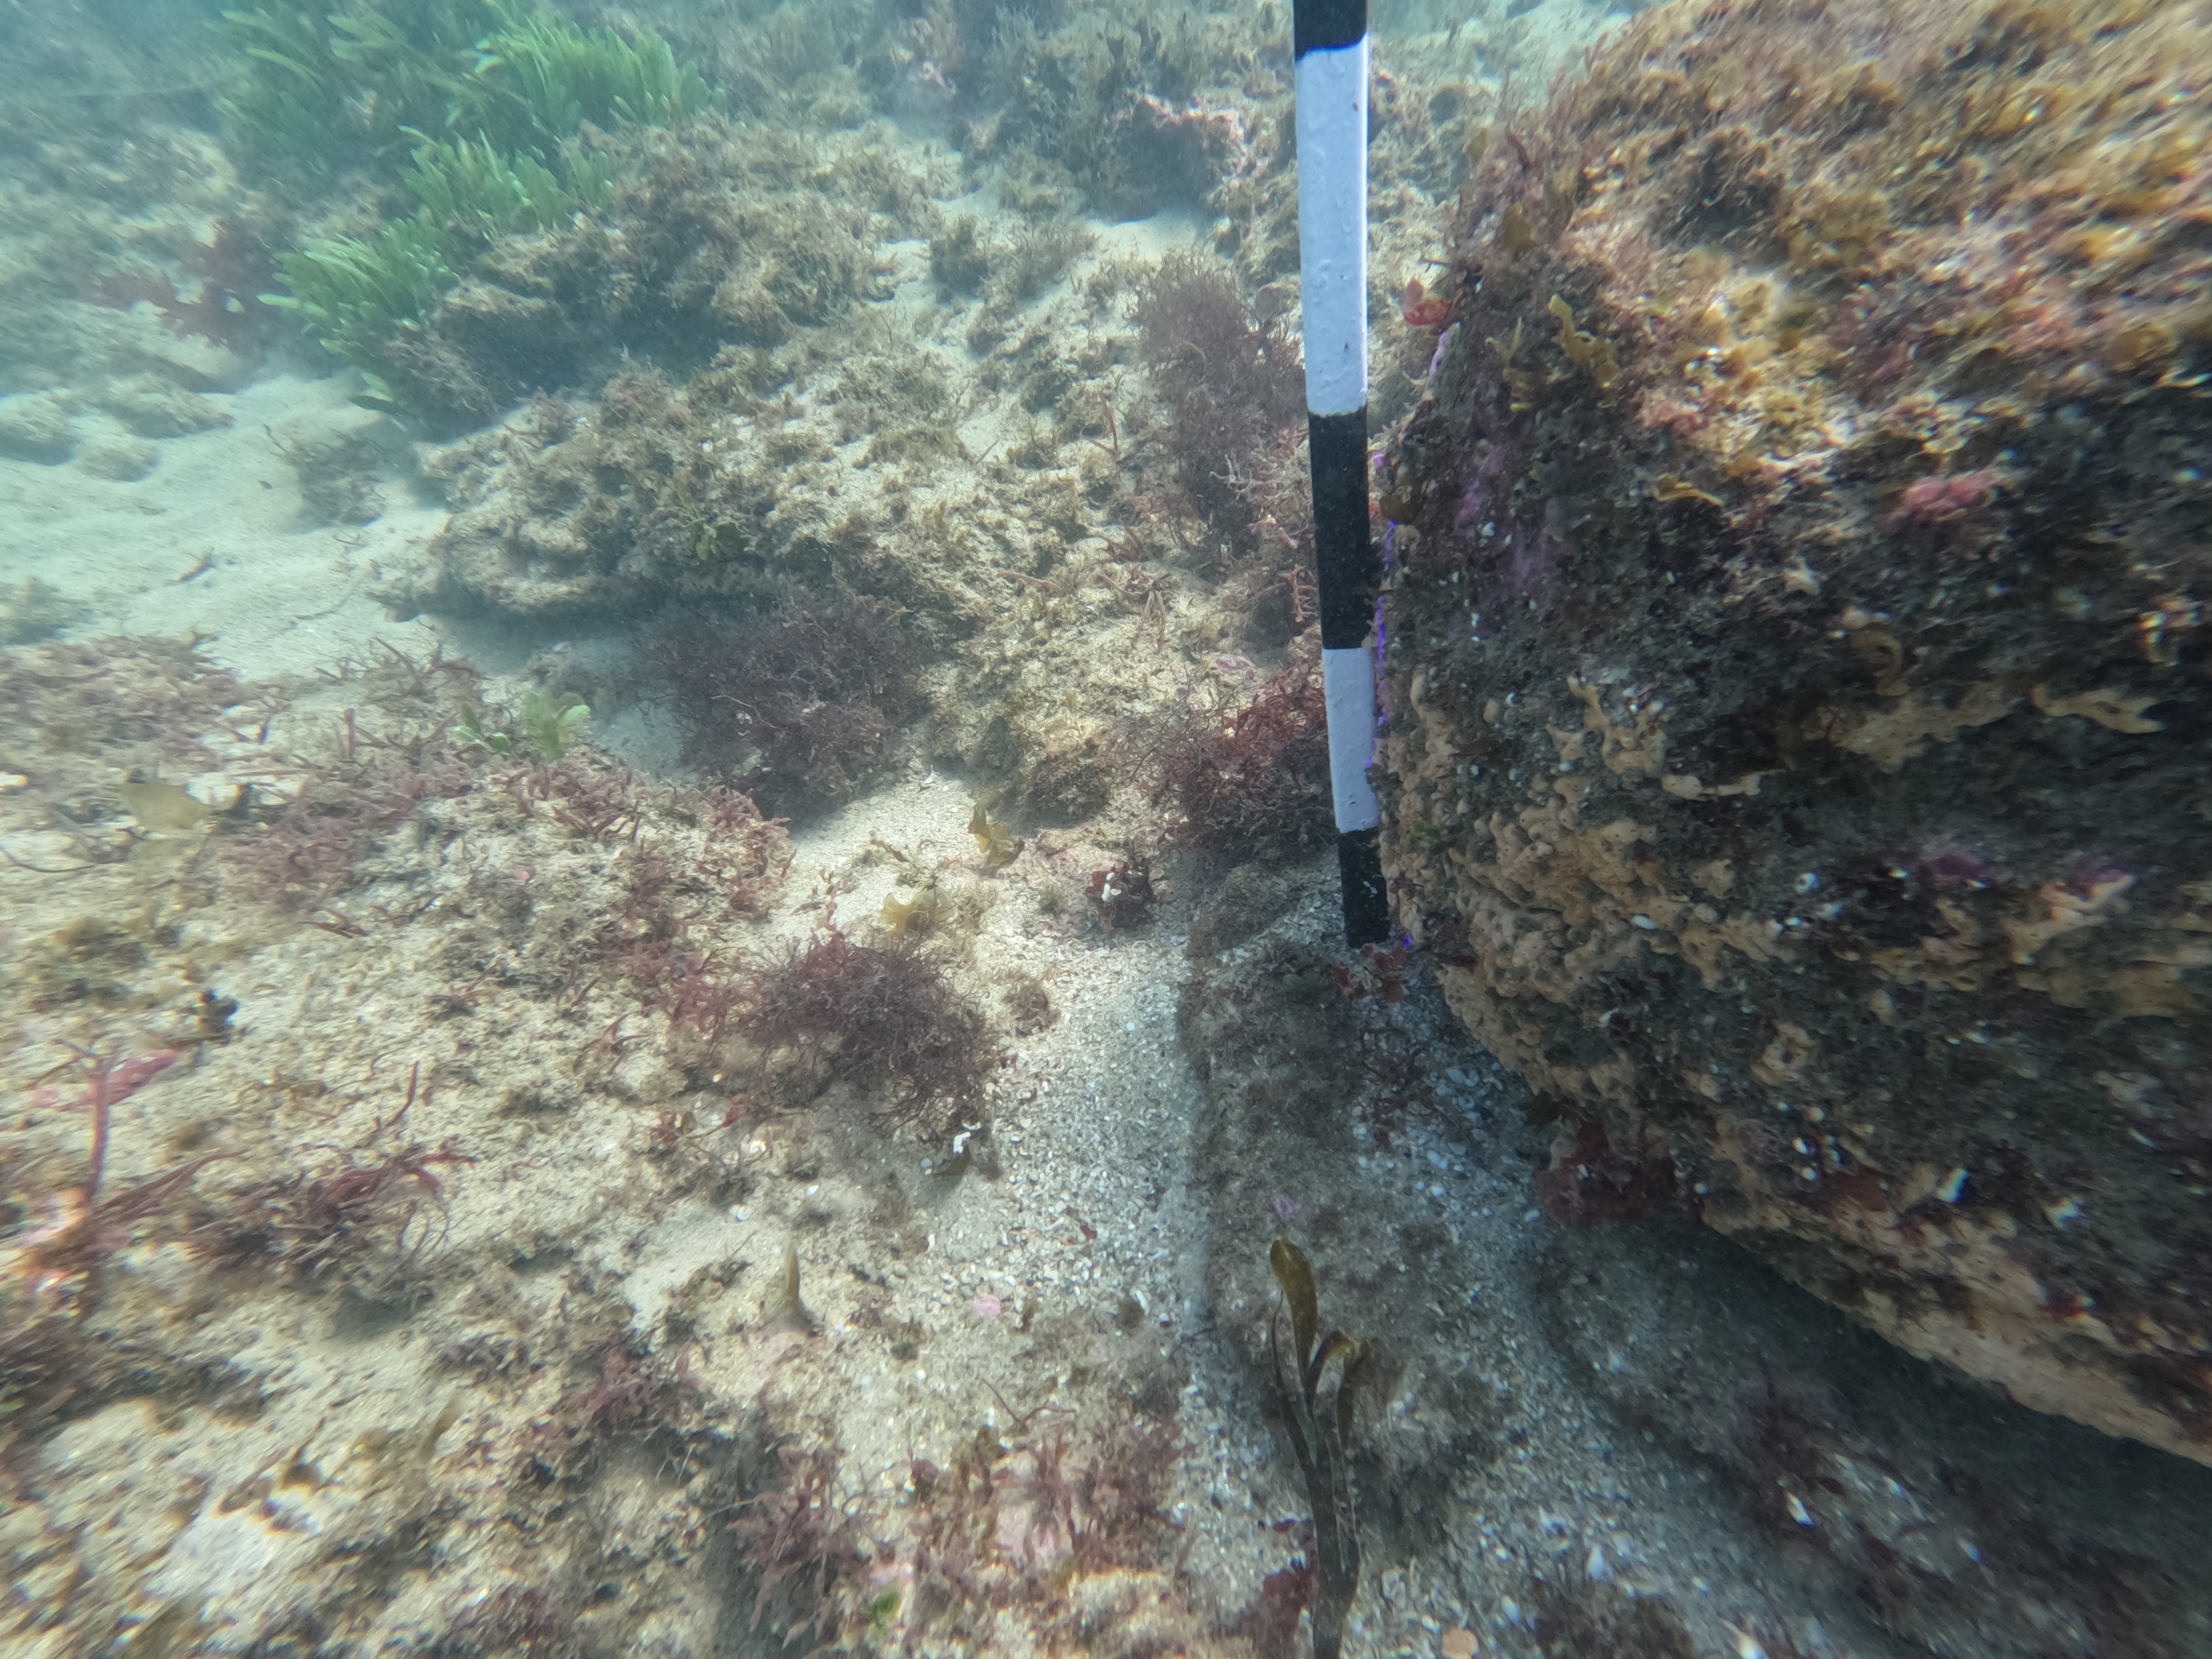

Supplement: Supplementary file 1872 [file G0028198.pdf › Ocean1/G0028198.pdf]

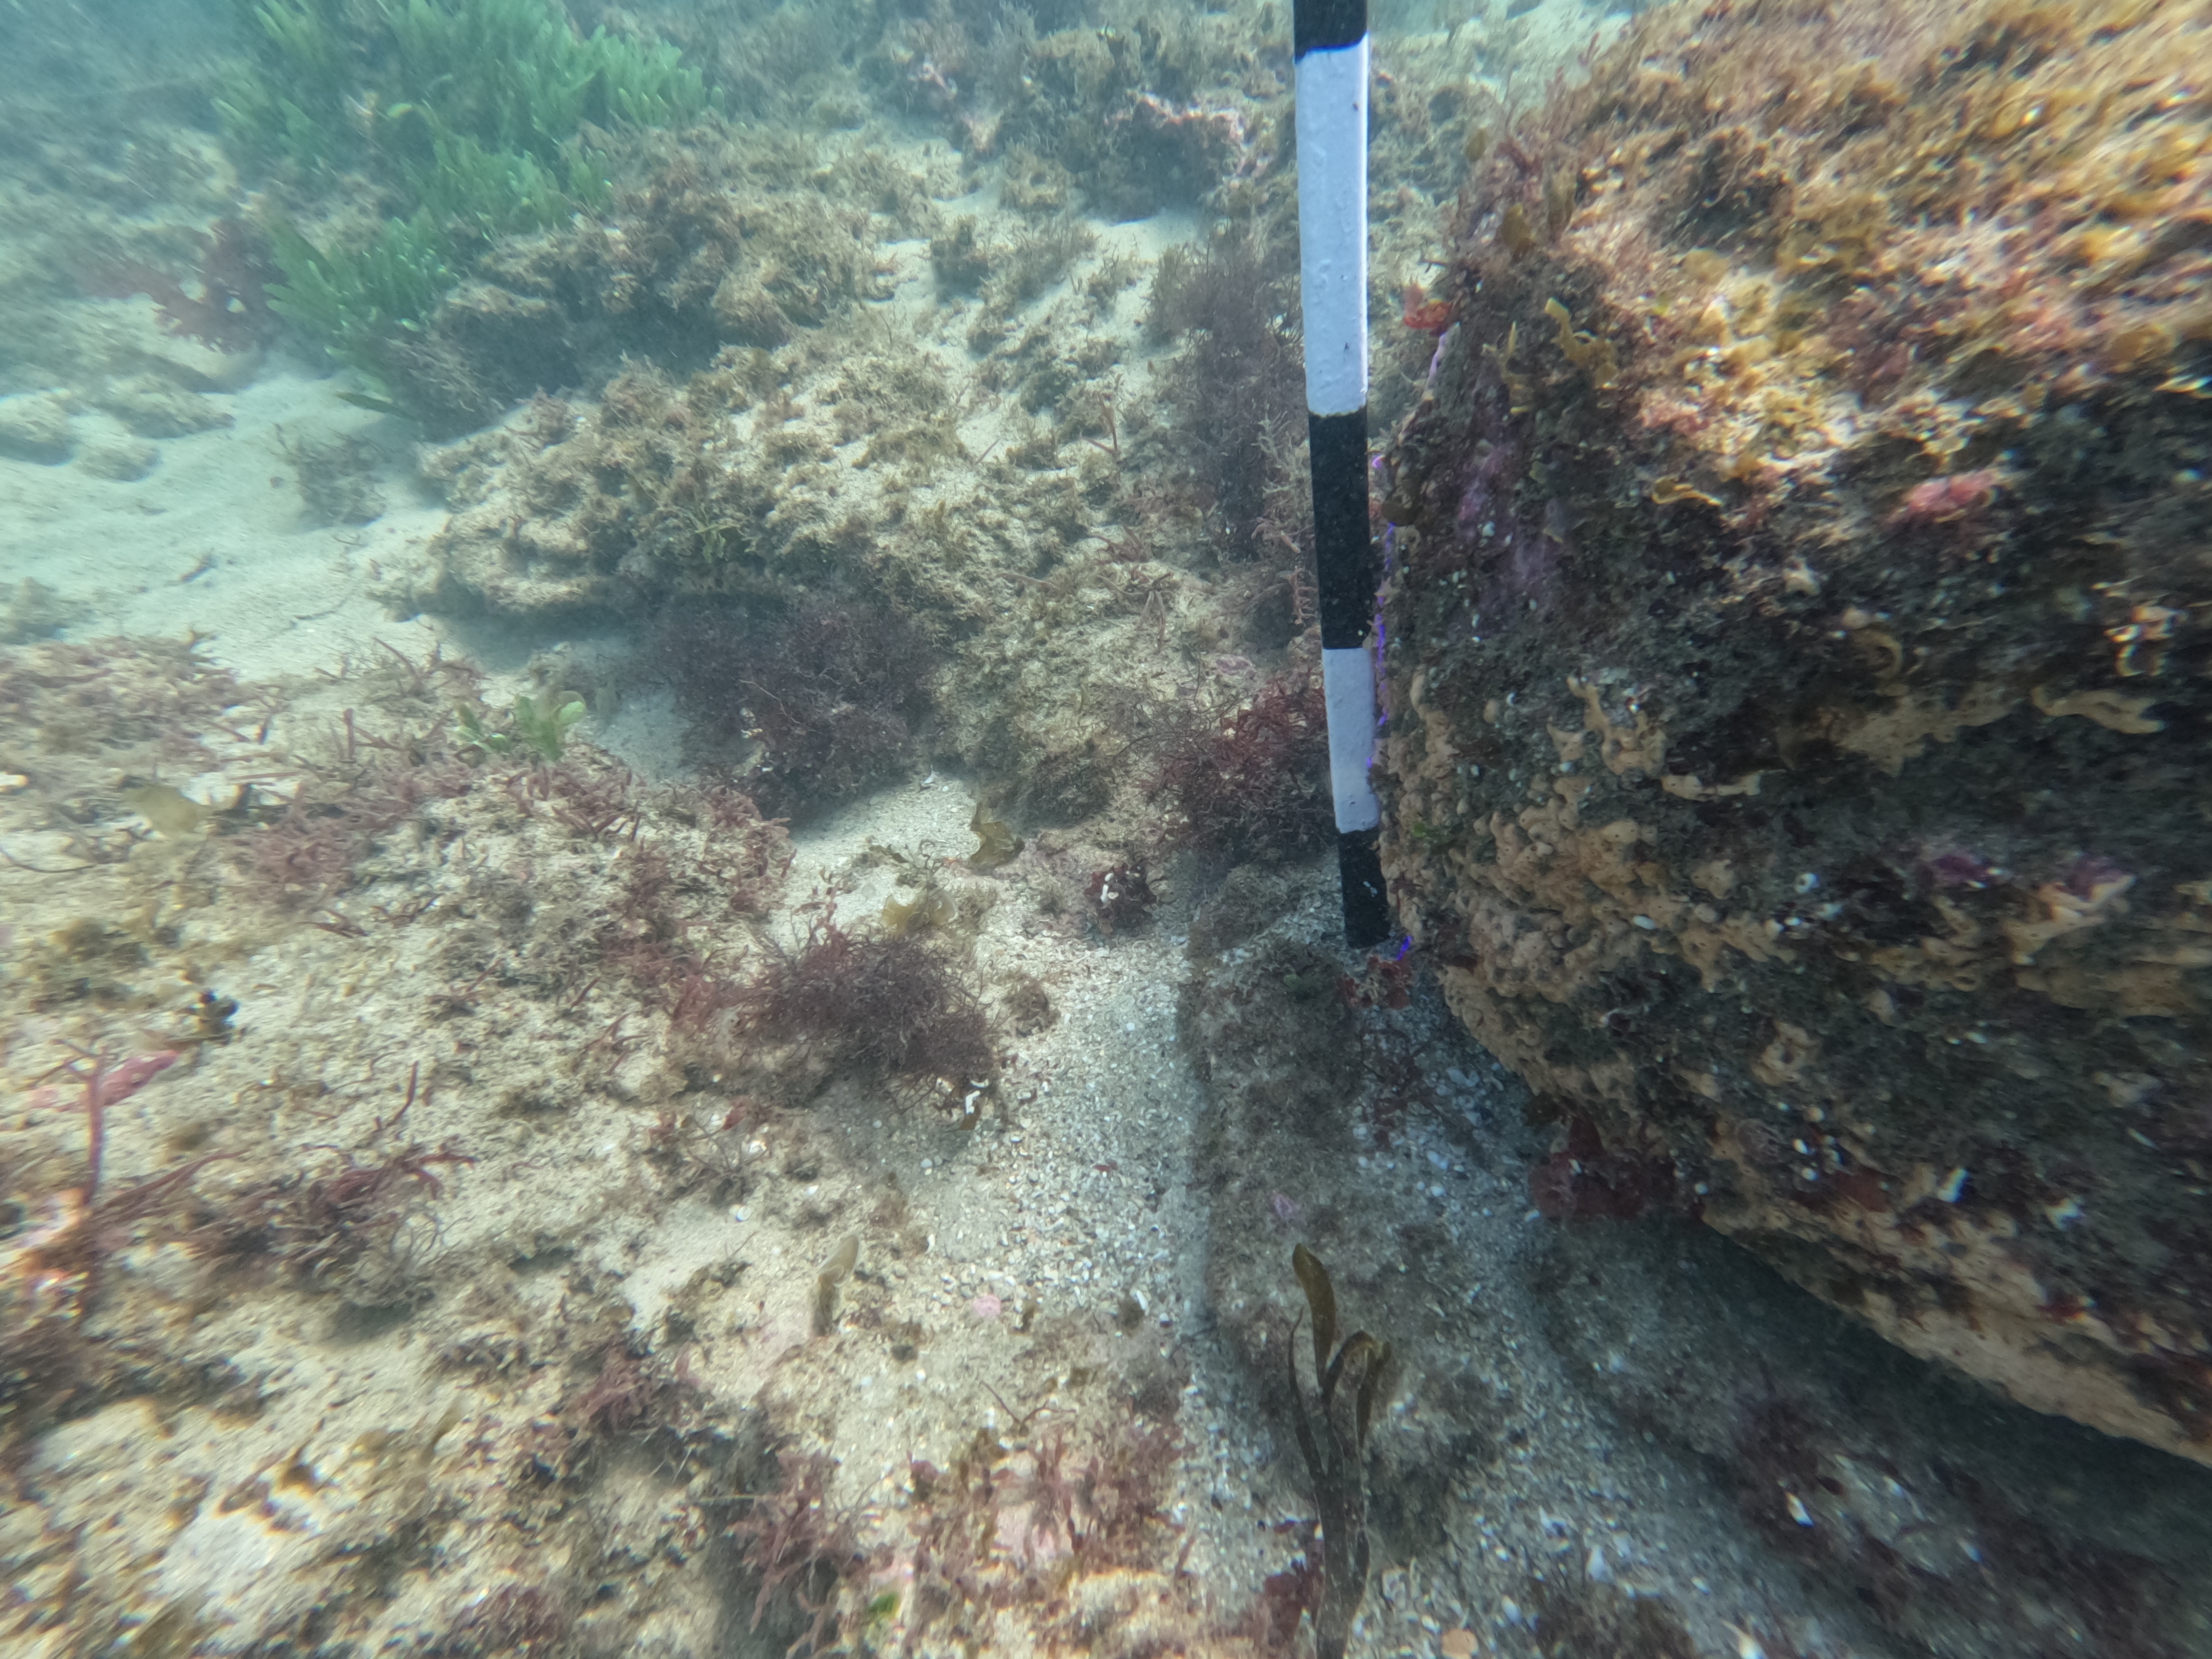

Supplement: Supplementary file 1873 [file G0028199.pdf › Ocean1/G0028199.pdf]

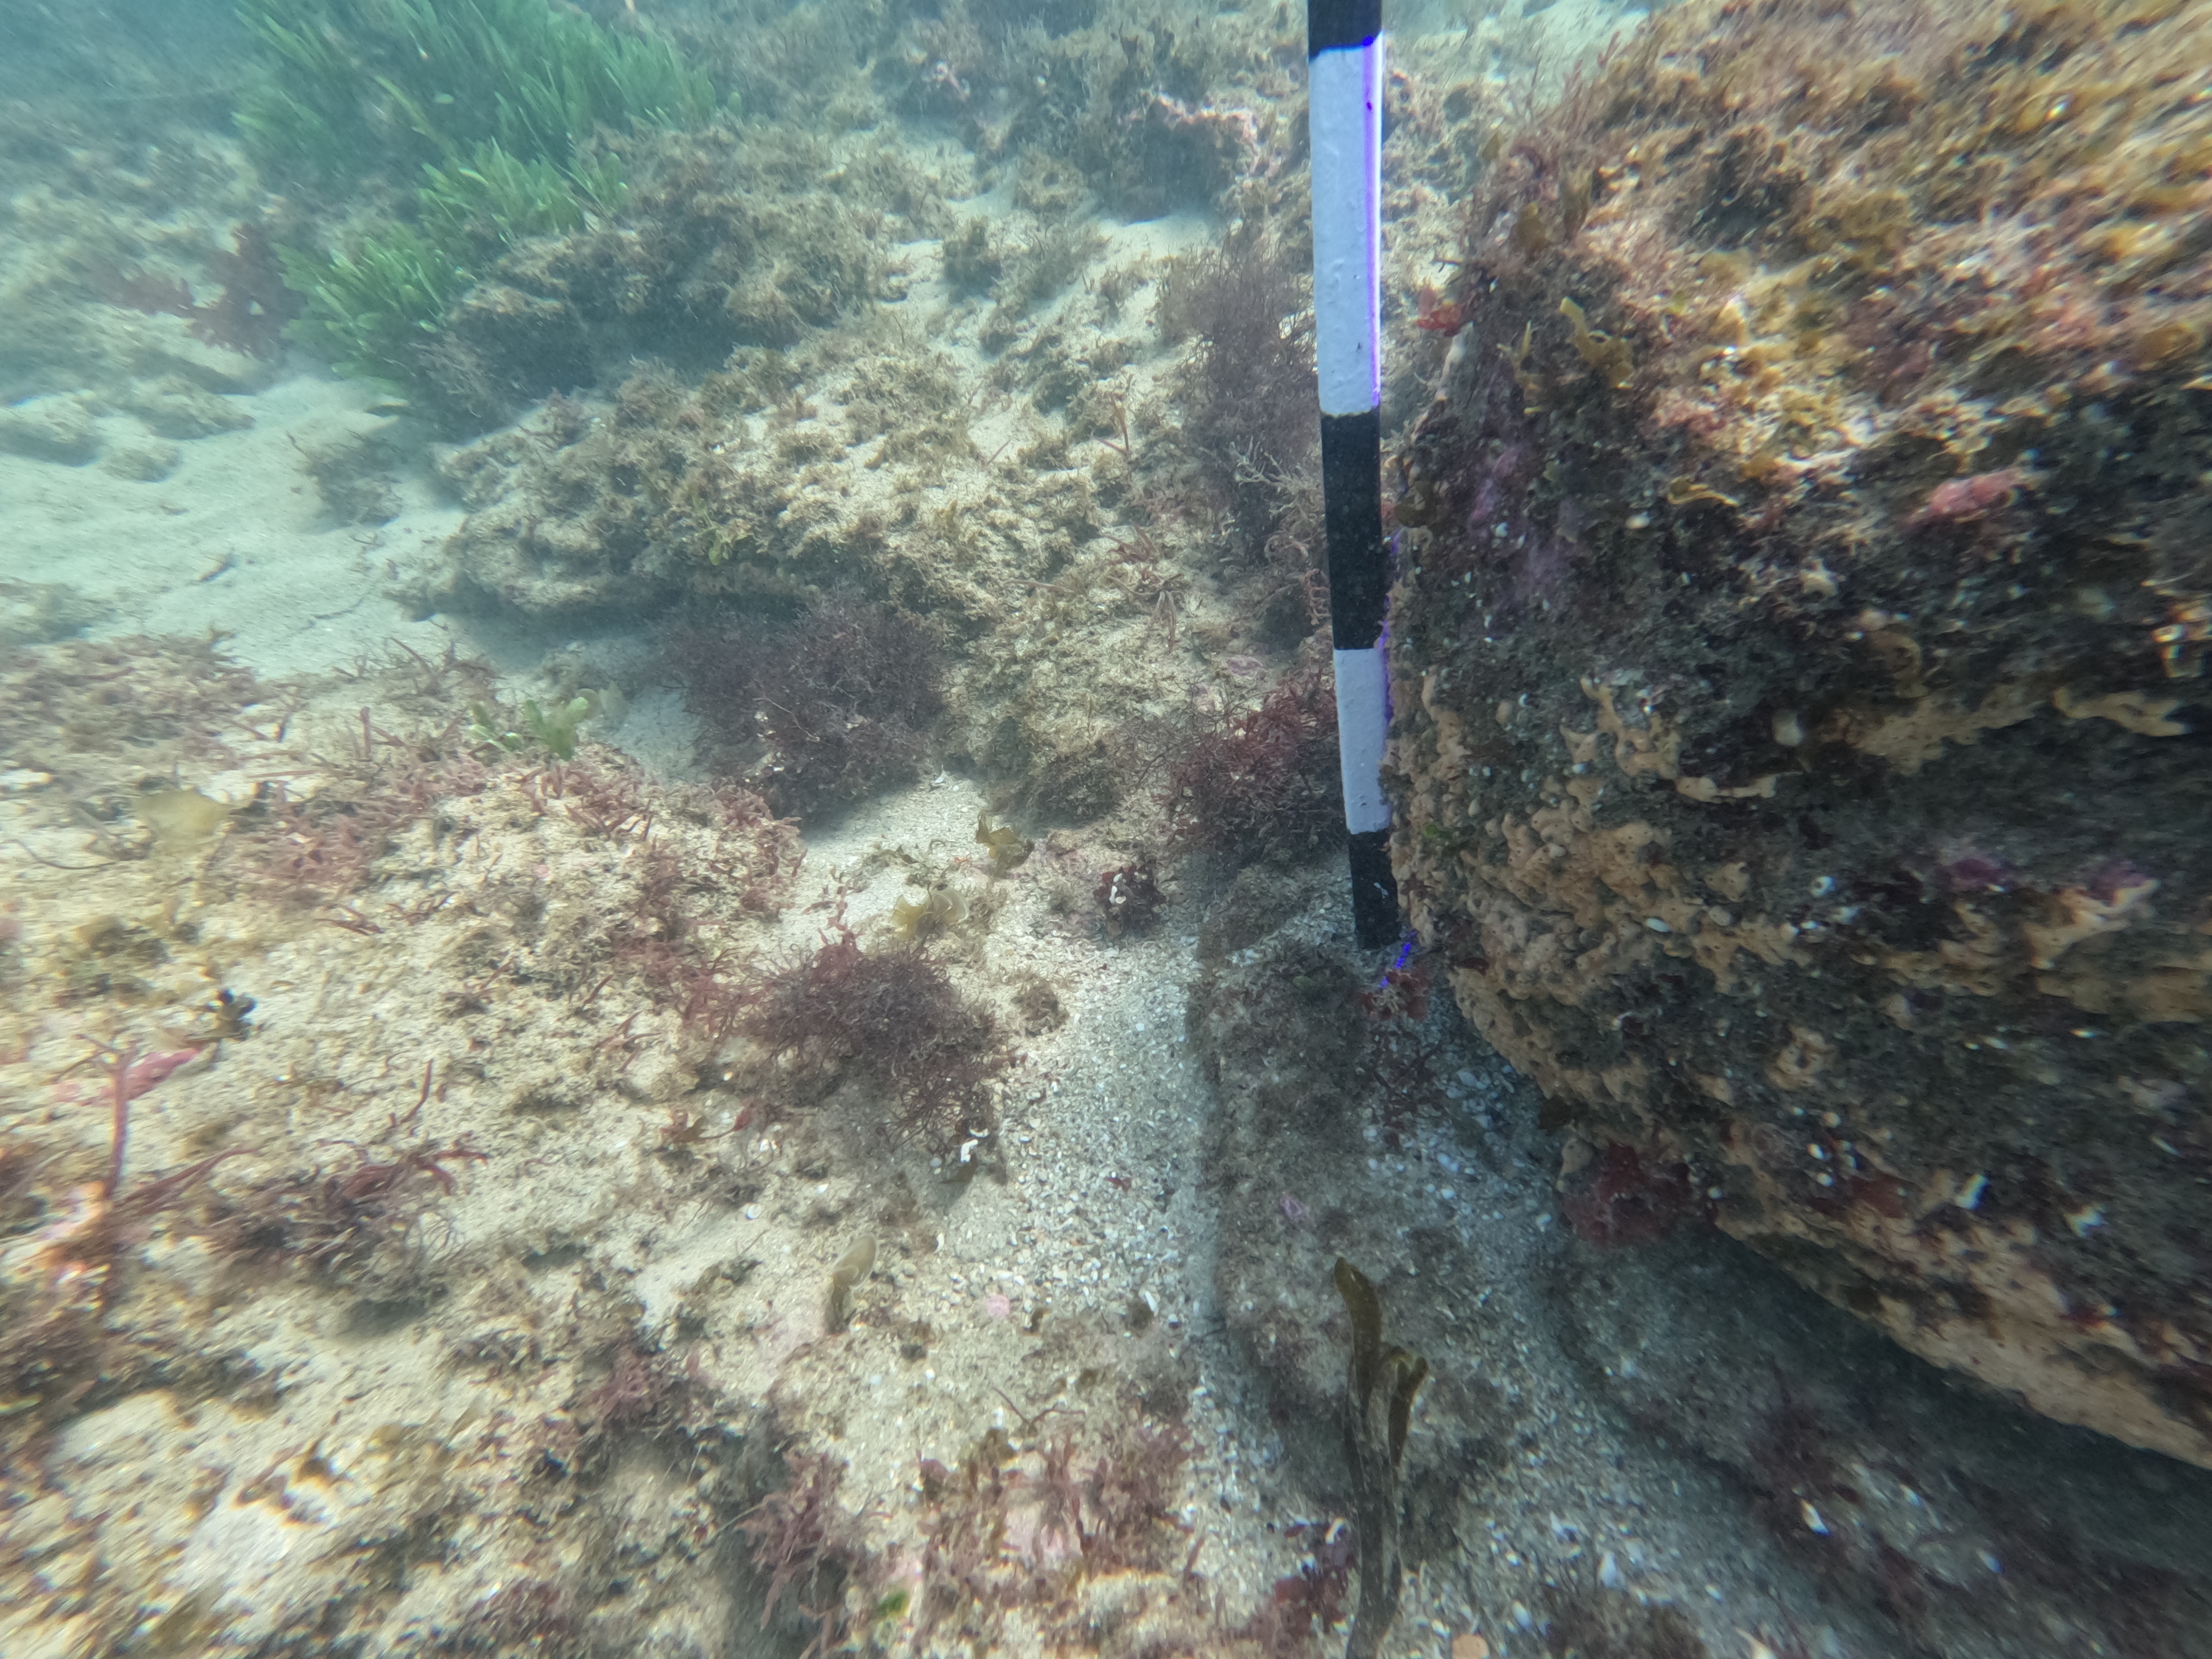

Supplement: Supplementary file 1874 [file G0028200.pdf › Ocean1/G0028200.pdf]

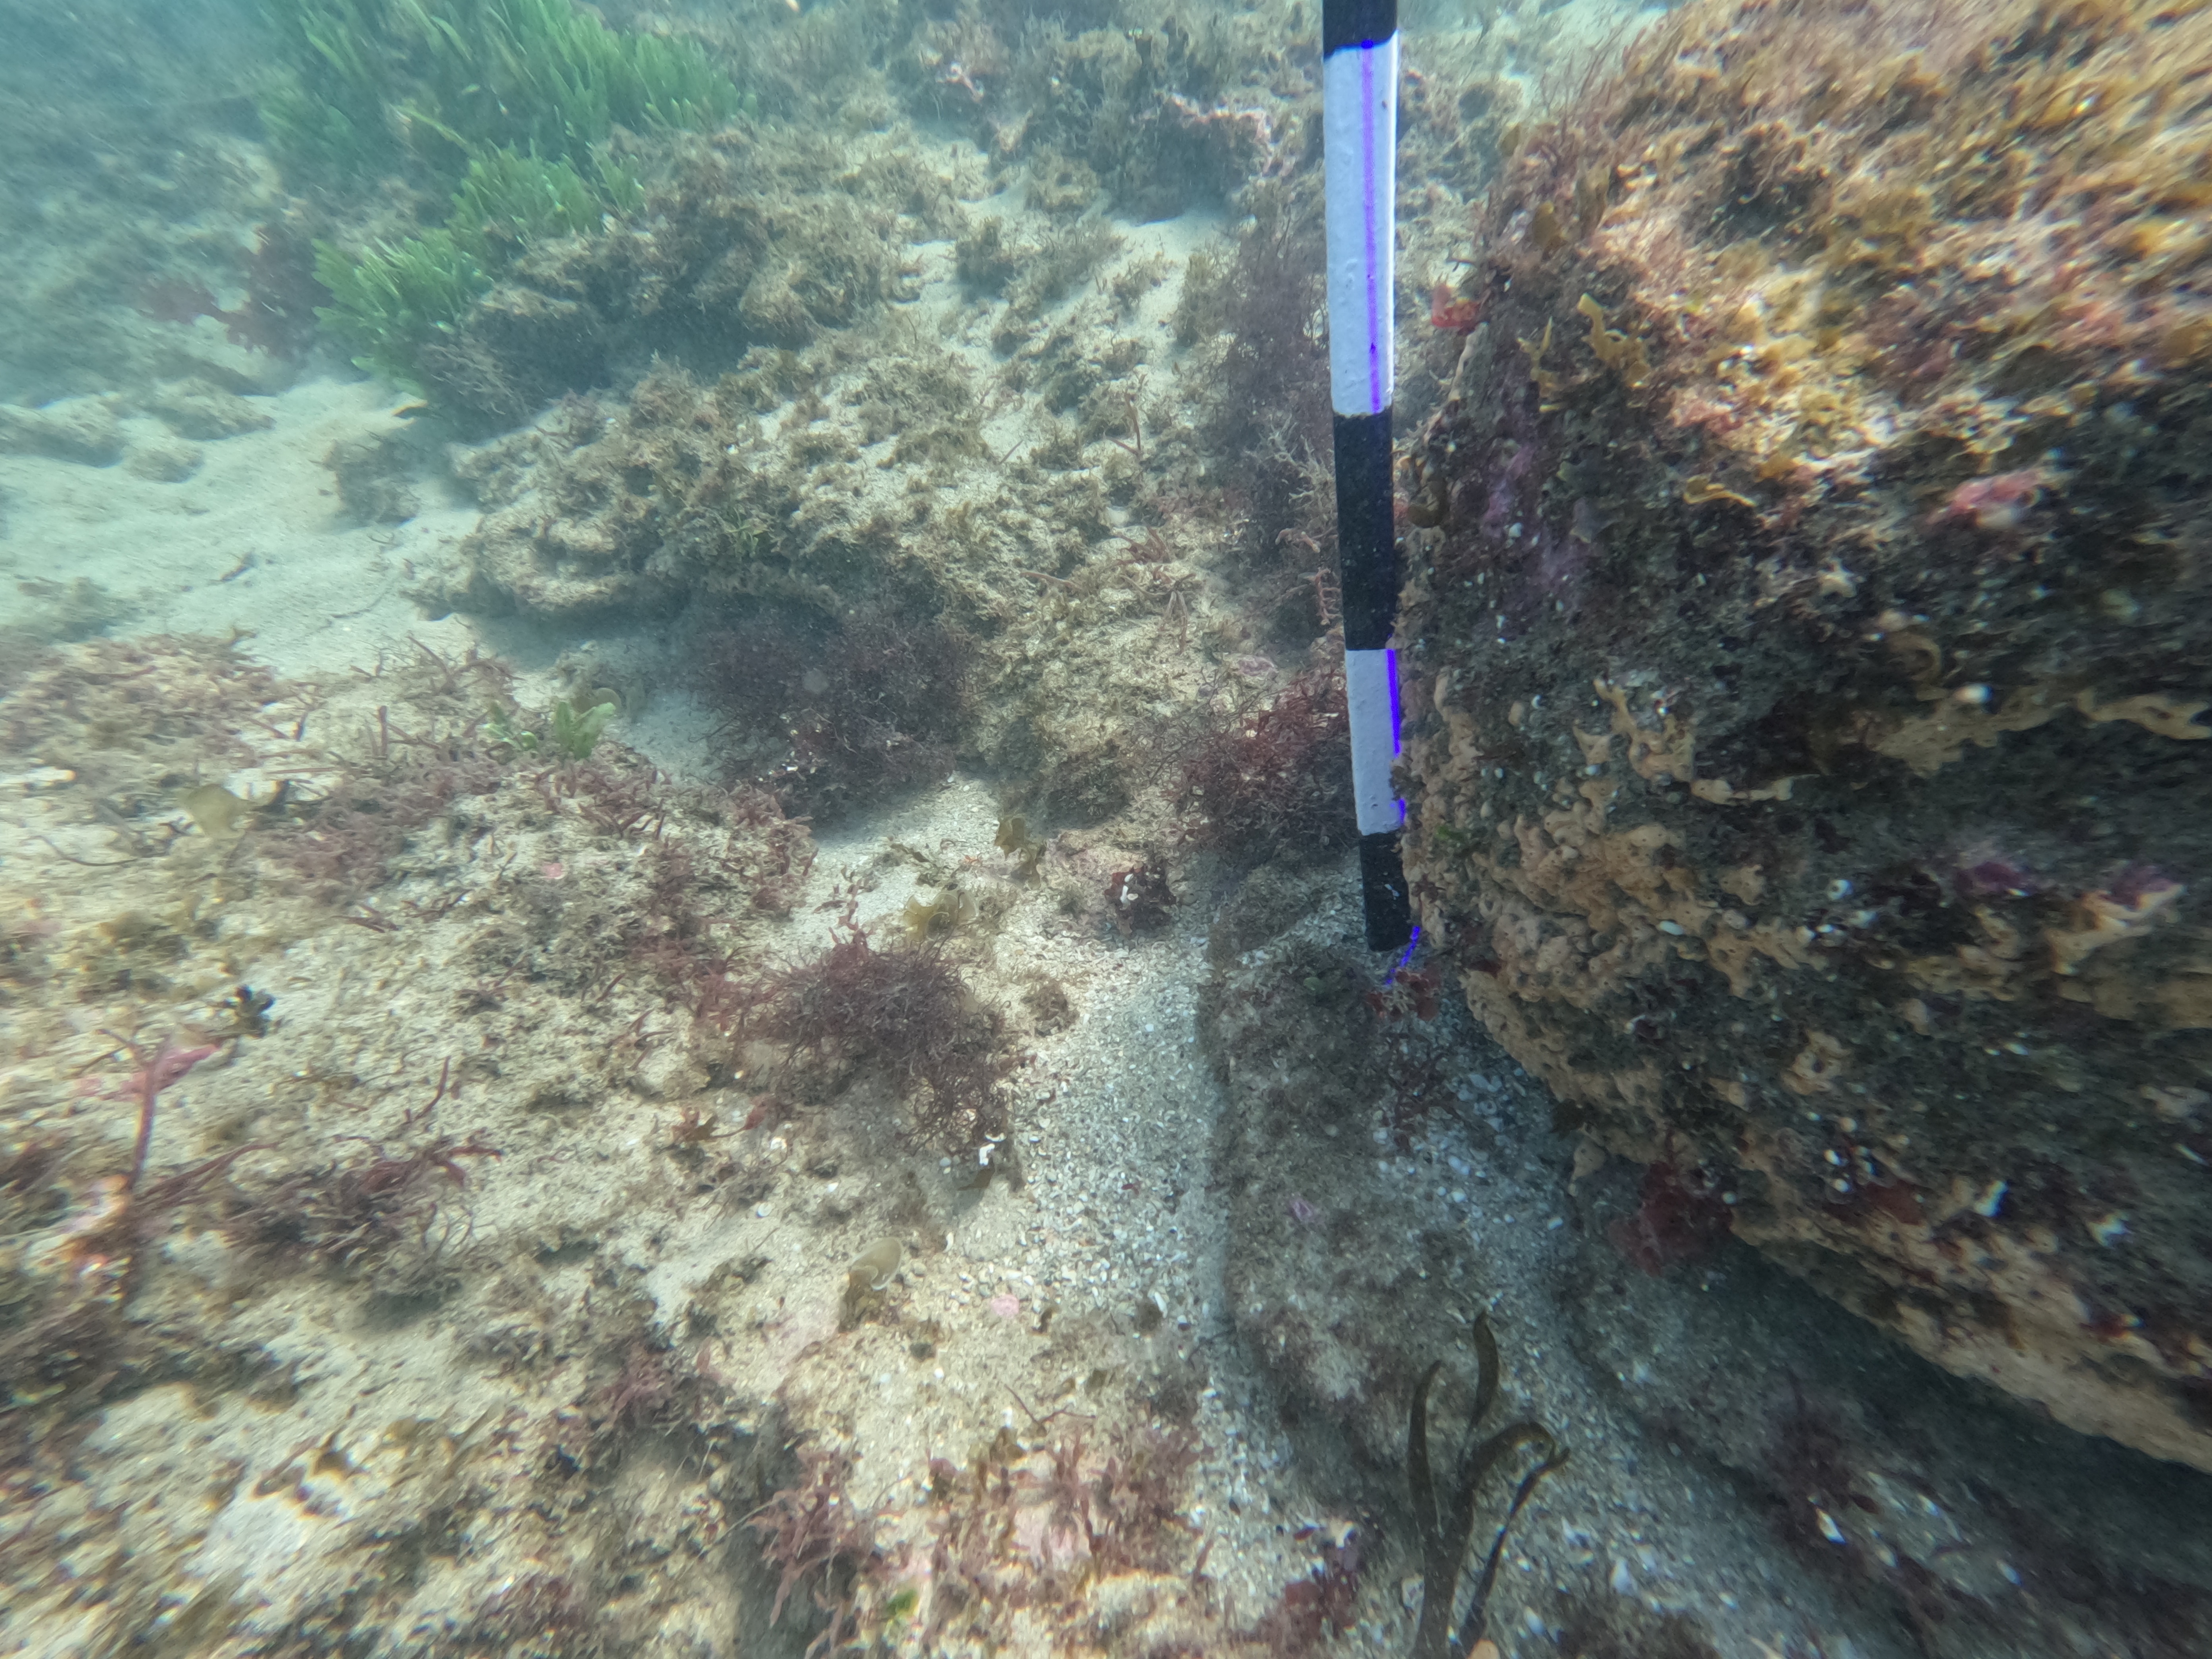

Supplement: Supplementary file 1875 [file G0028201.pdf › Ocean1/G0028201.pdf]

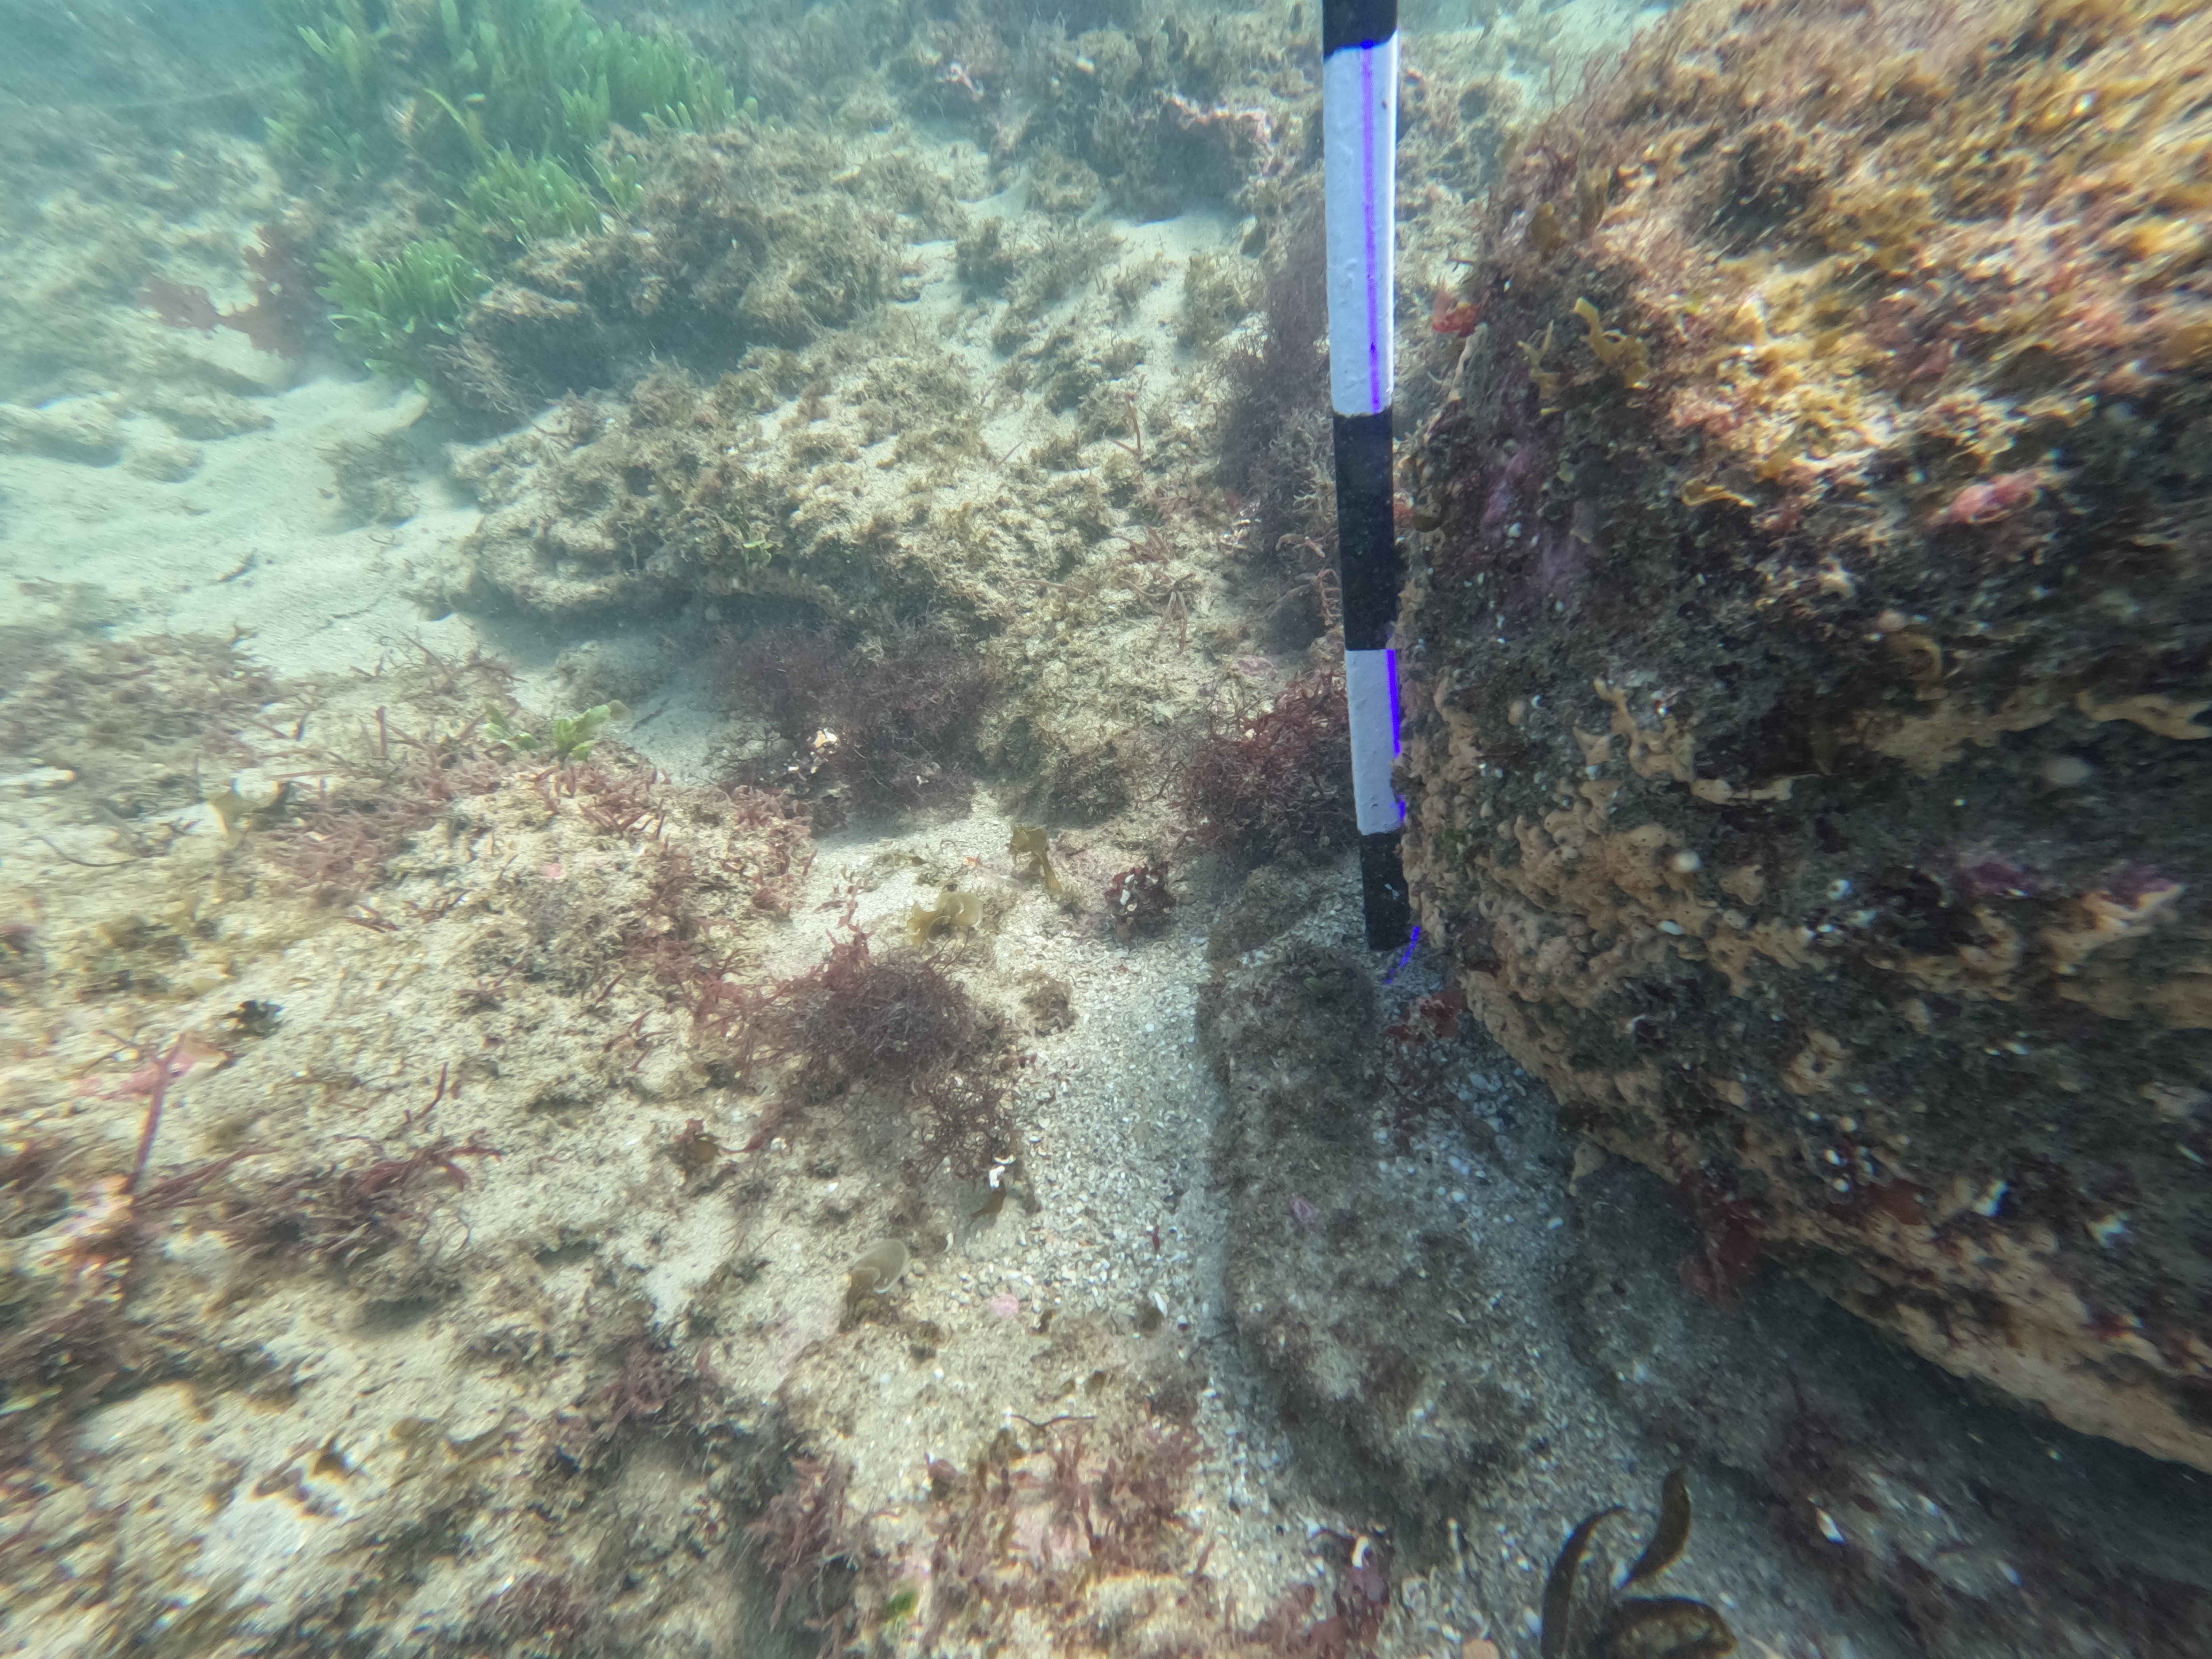

Supplement: Supplementary file 1876 [file G0028202.pdf › Ocean1/G0028202.pdf]

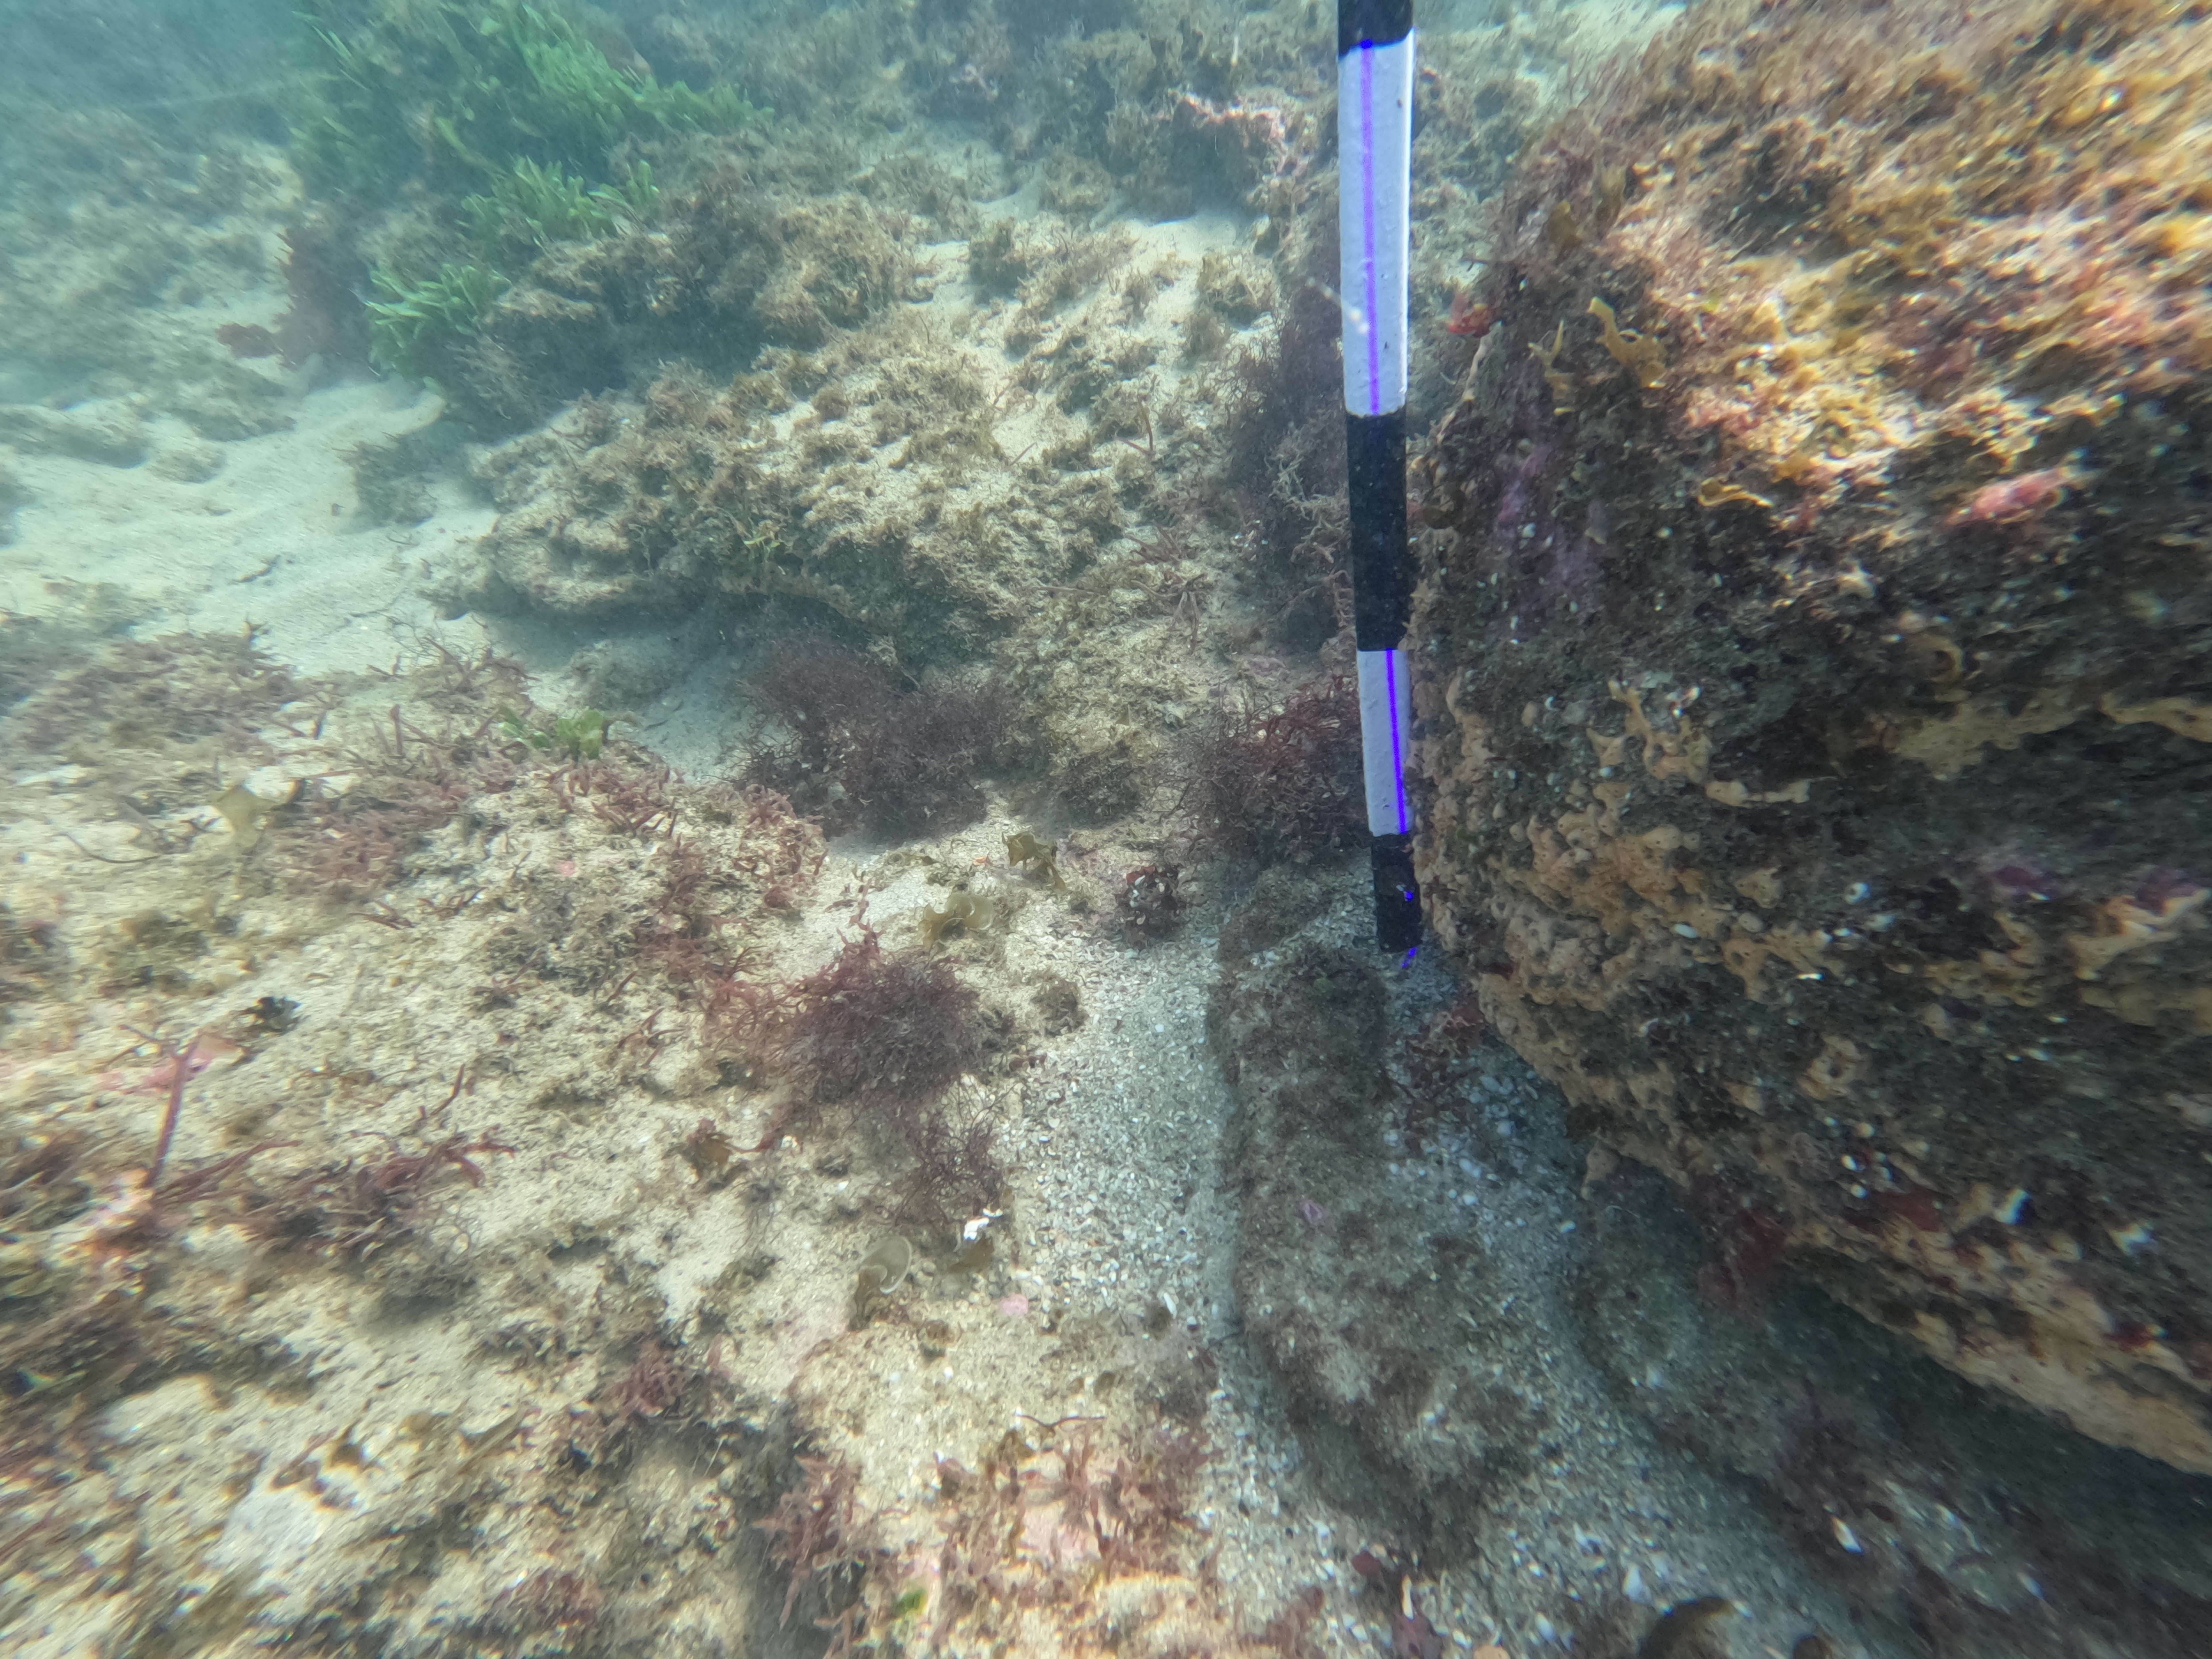

Supplement: Supplementary file 1877 [file G0028203.pdf › Ocean1/G0028203.pdf]

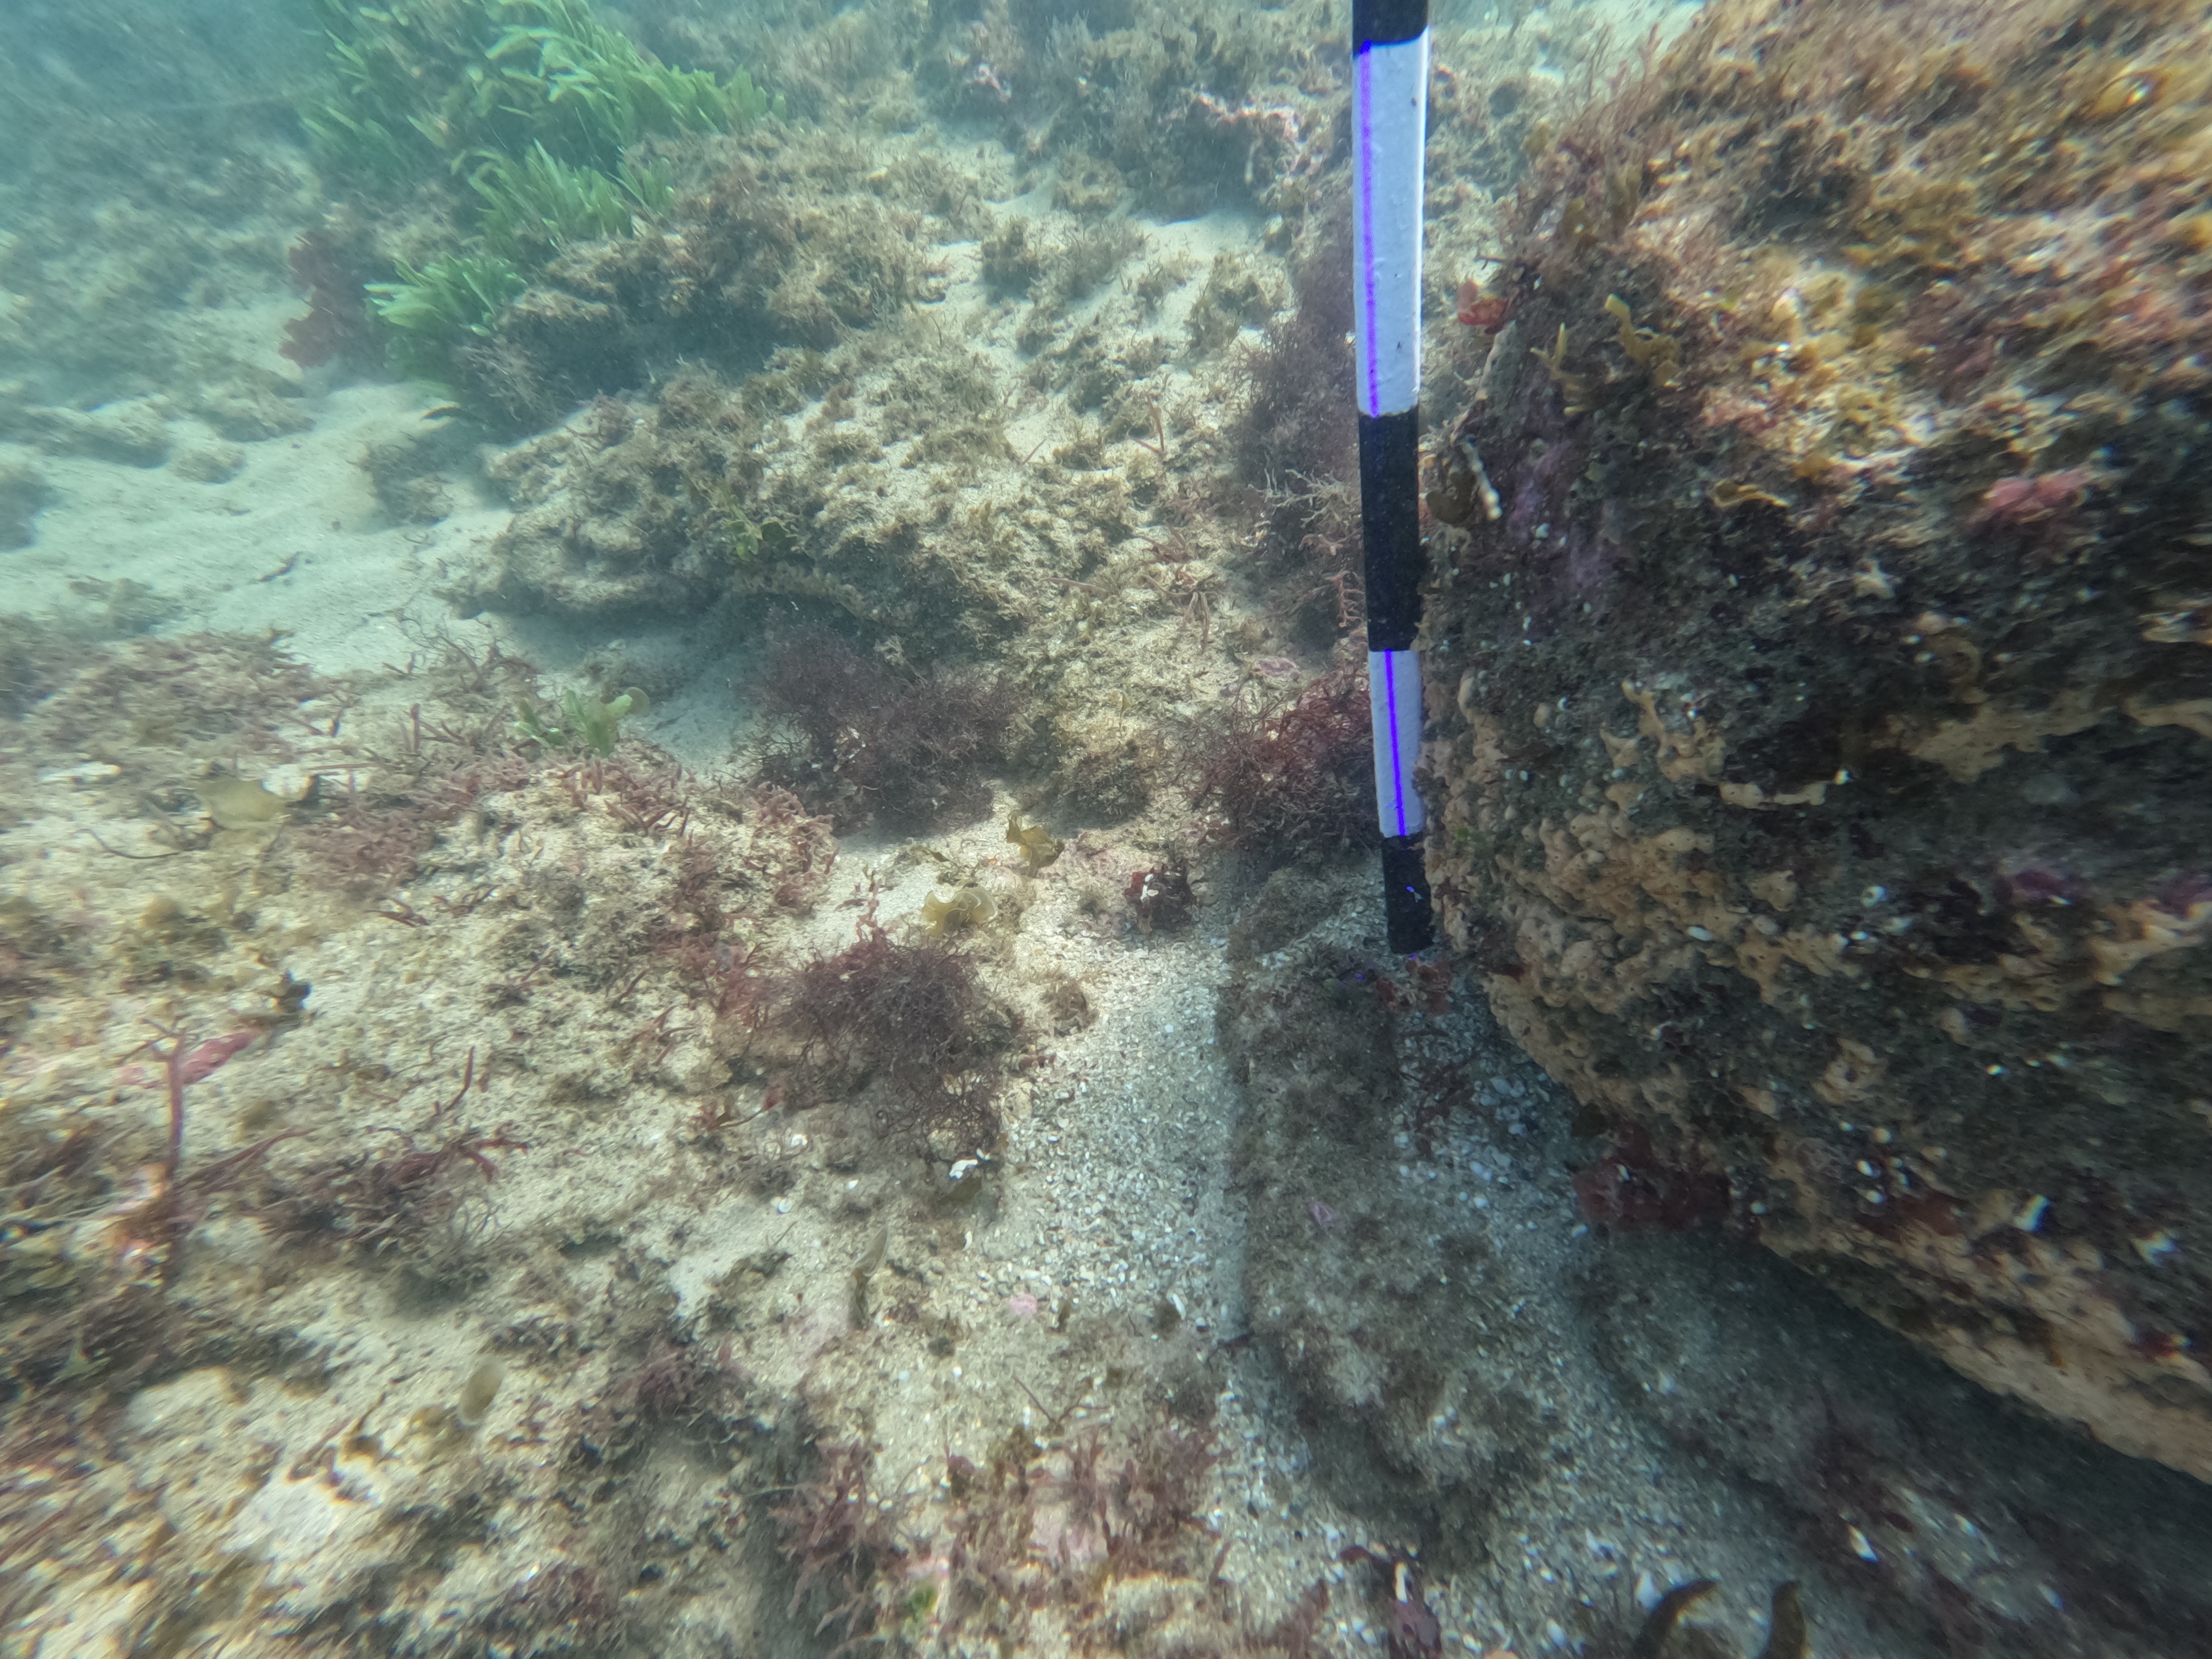

Supplement: Supplementary file 1878 [file G0028204.pdf › Ocean1/G0028204.pdf]

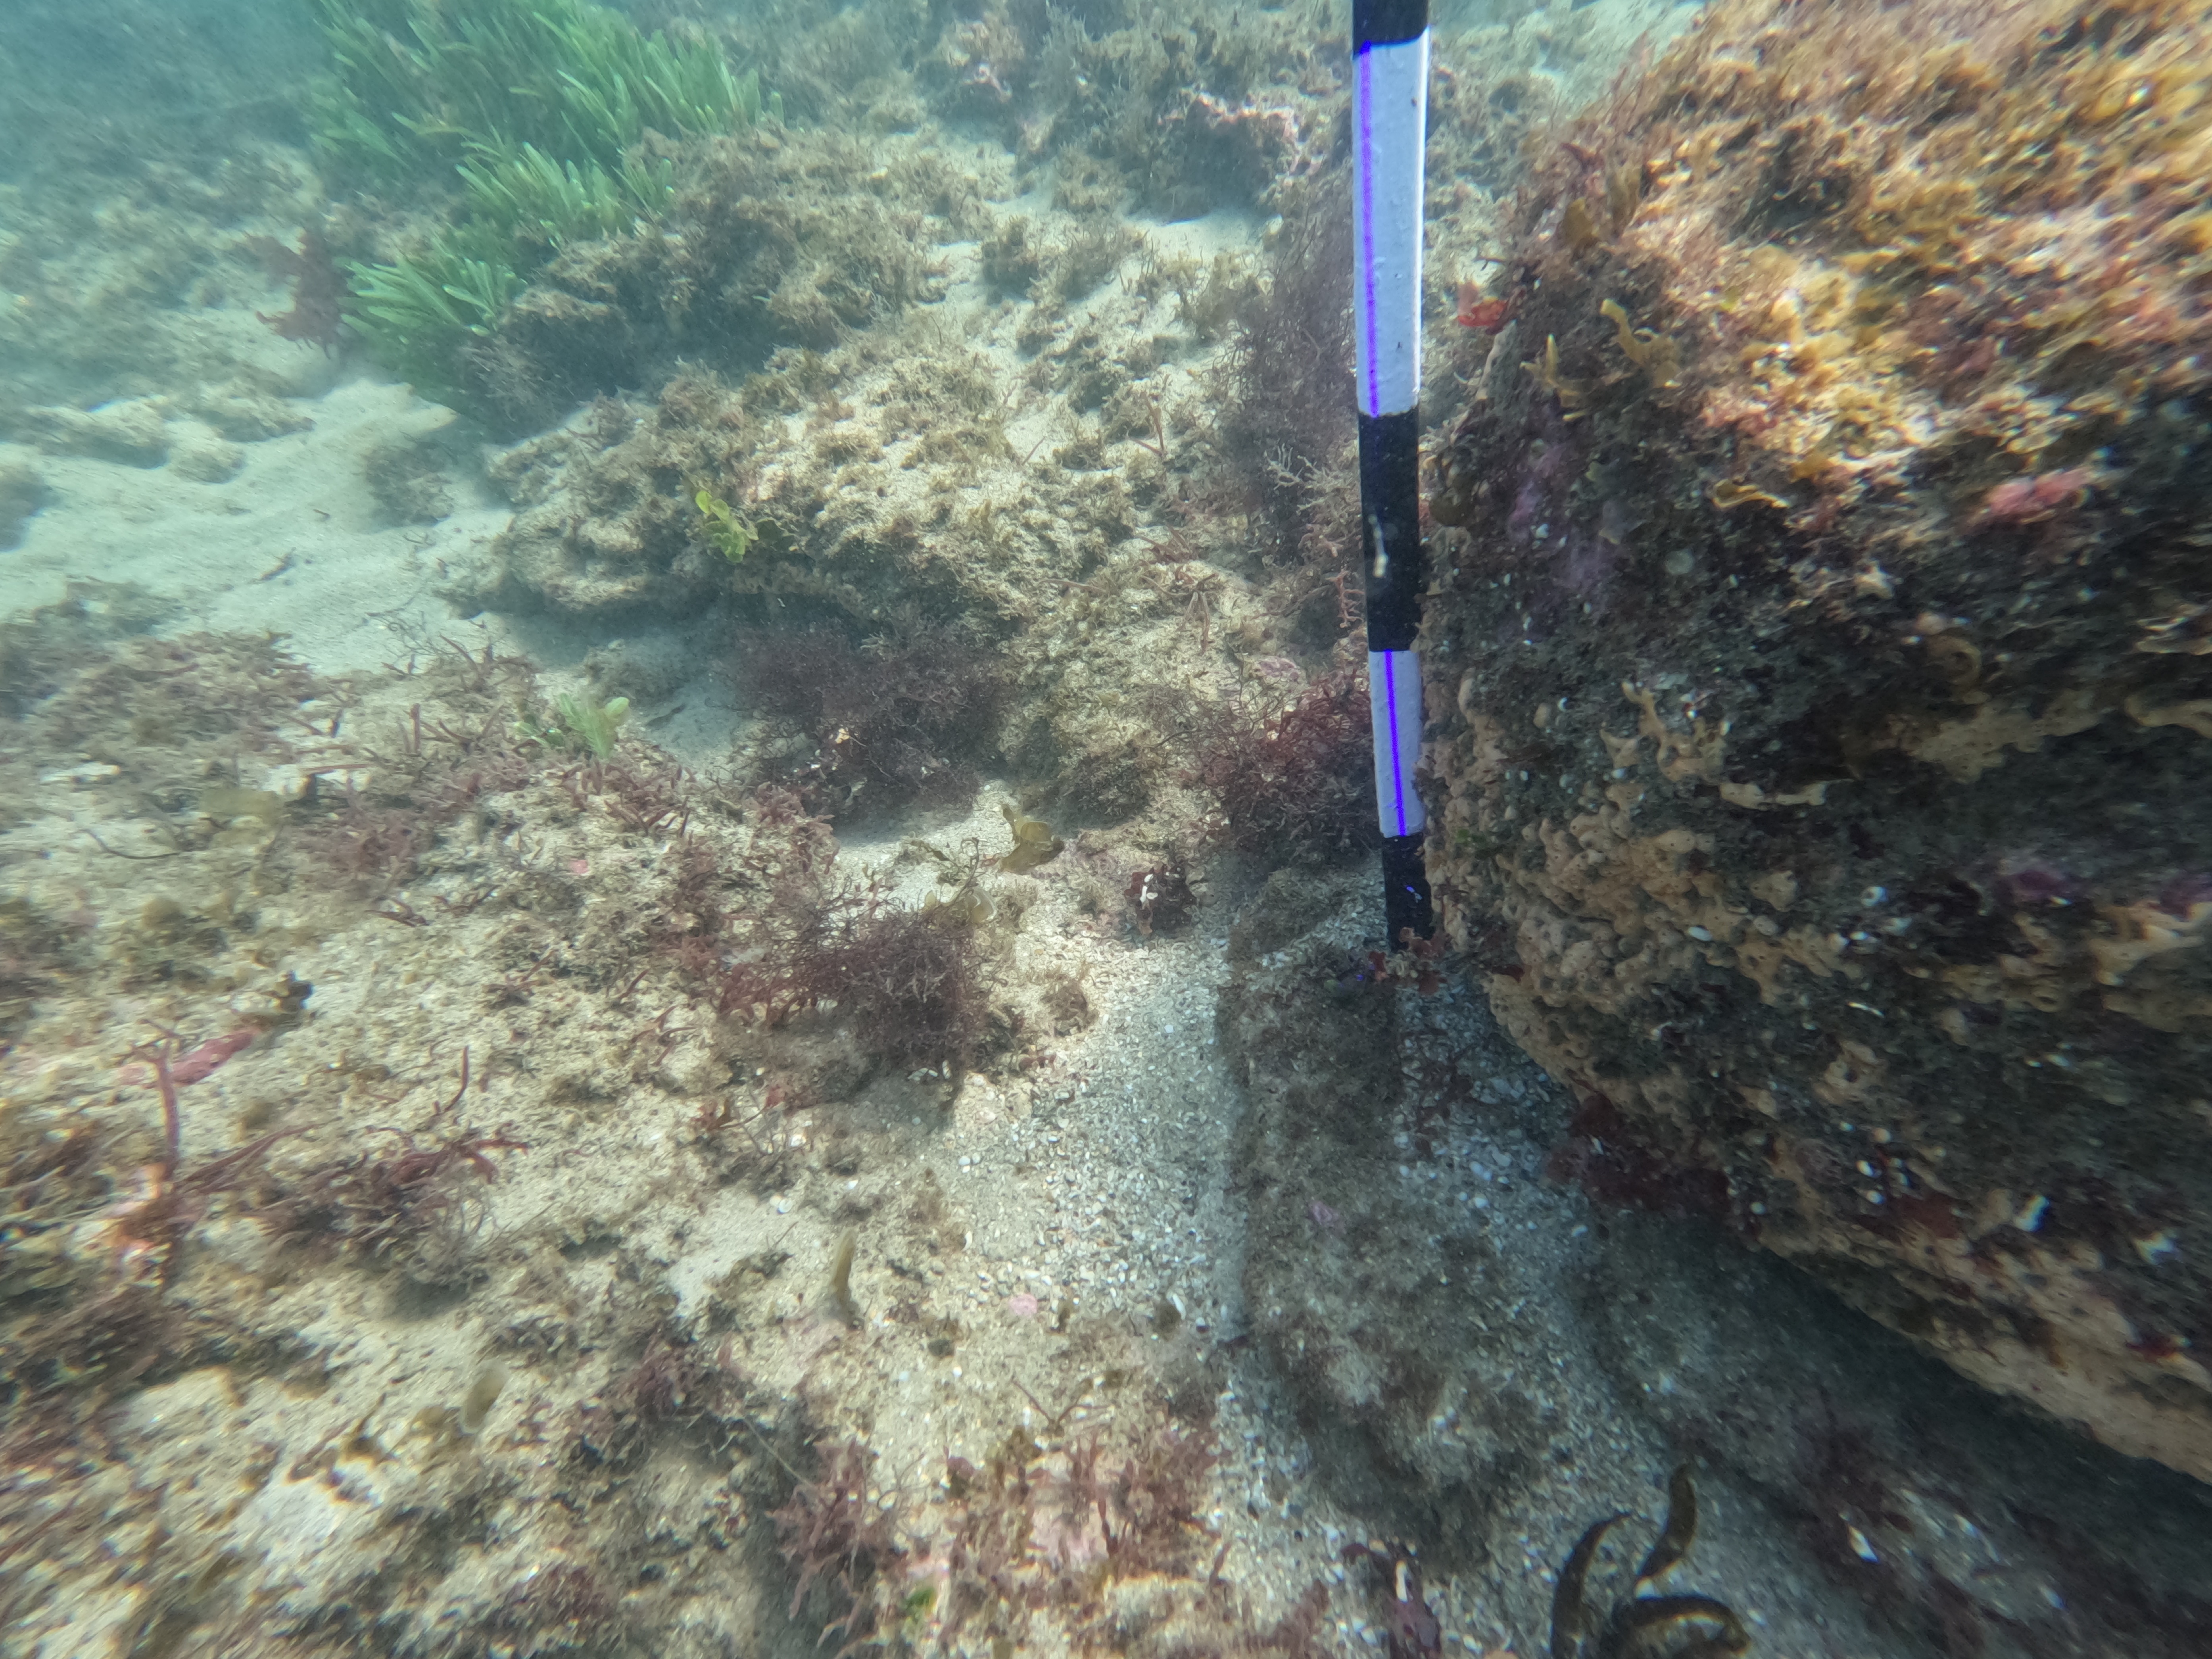

Supplement: Supplementary file 1879 [file G0028205.pdf › Ocean1/G0028205.pdf]

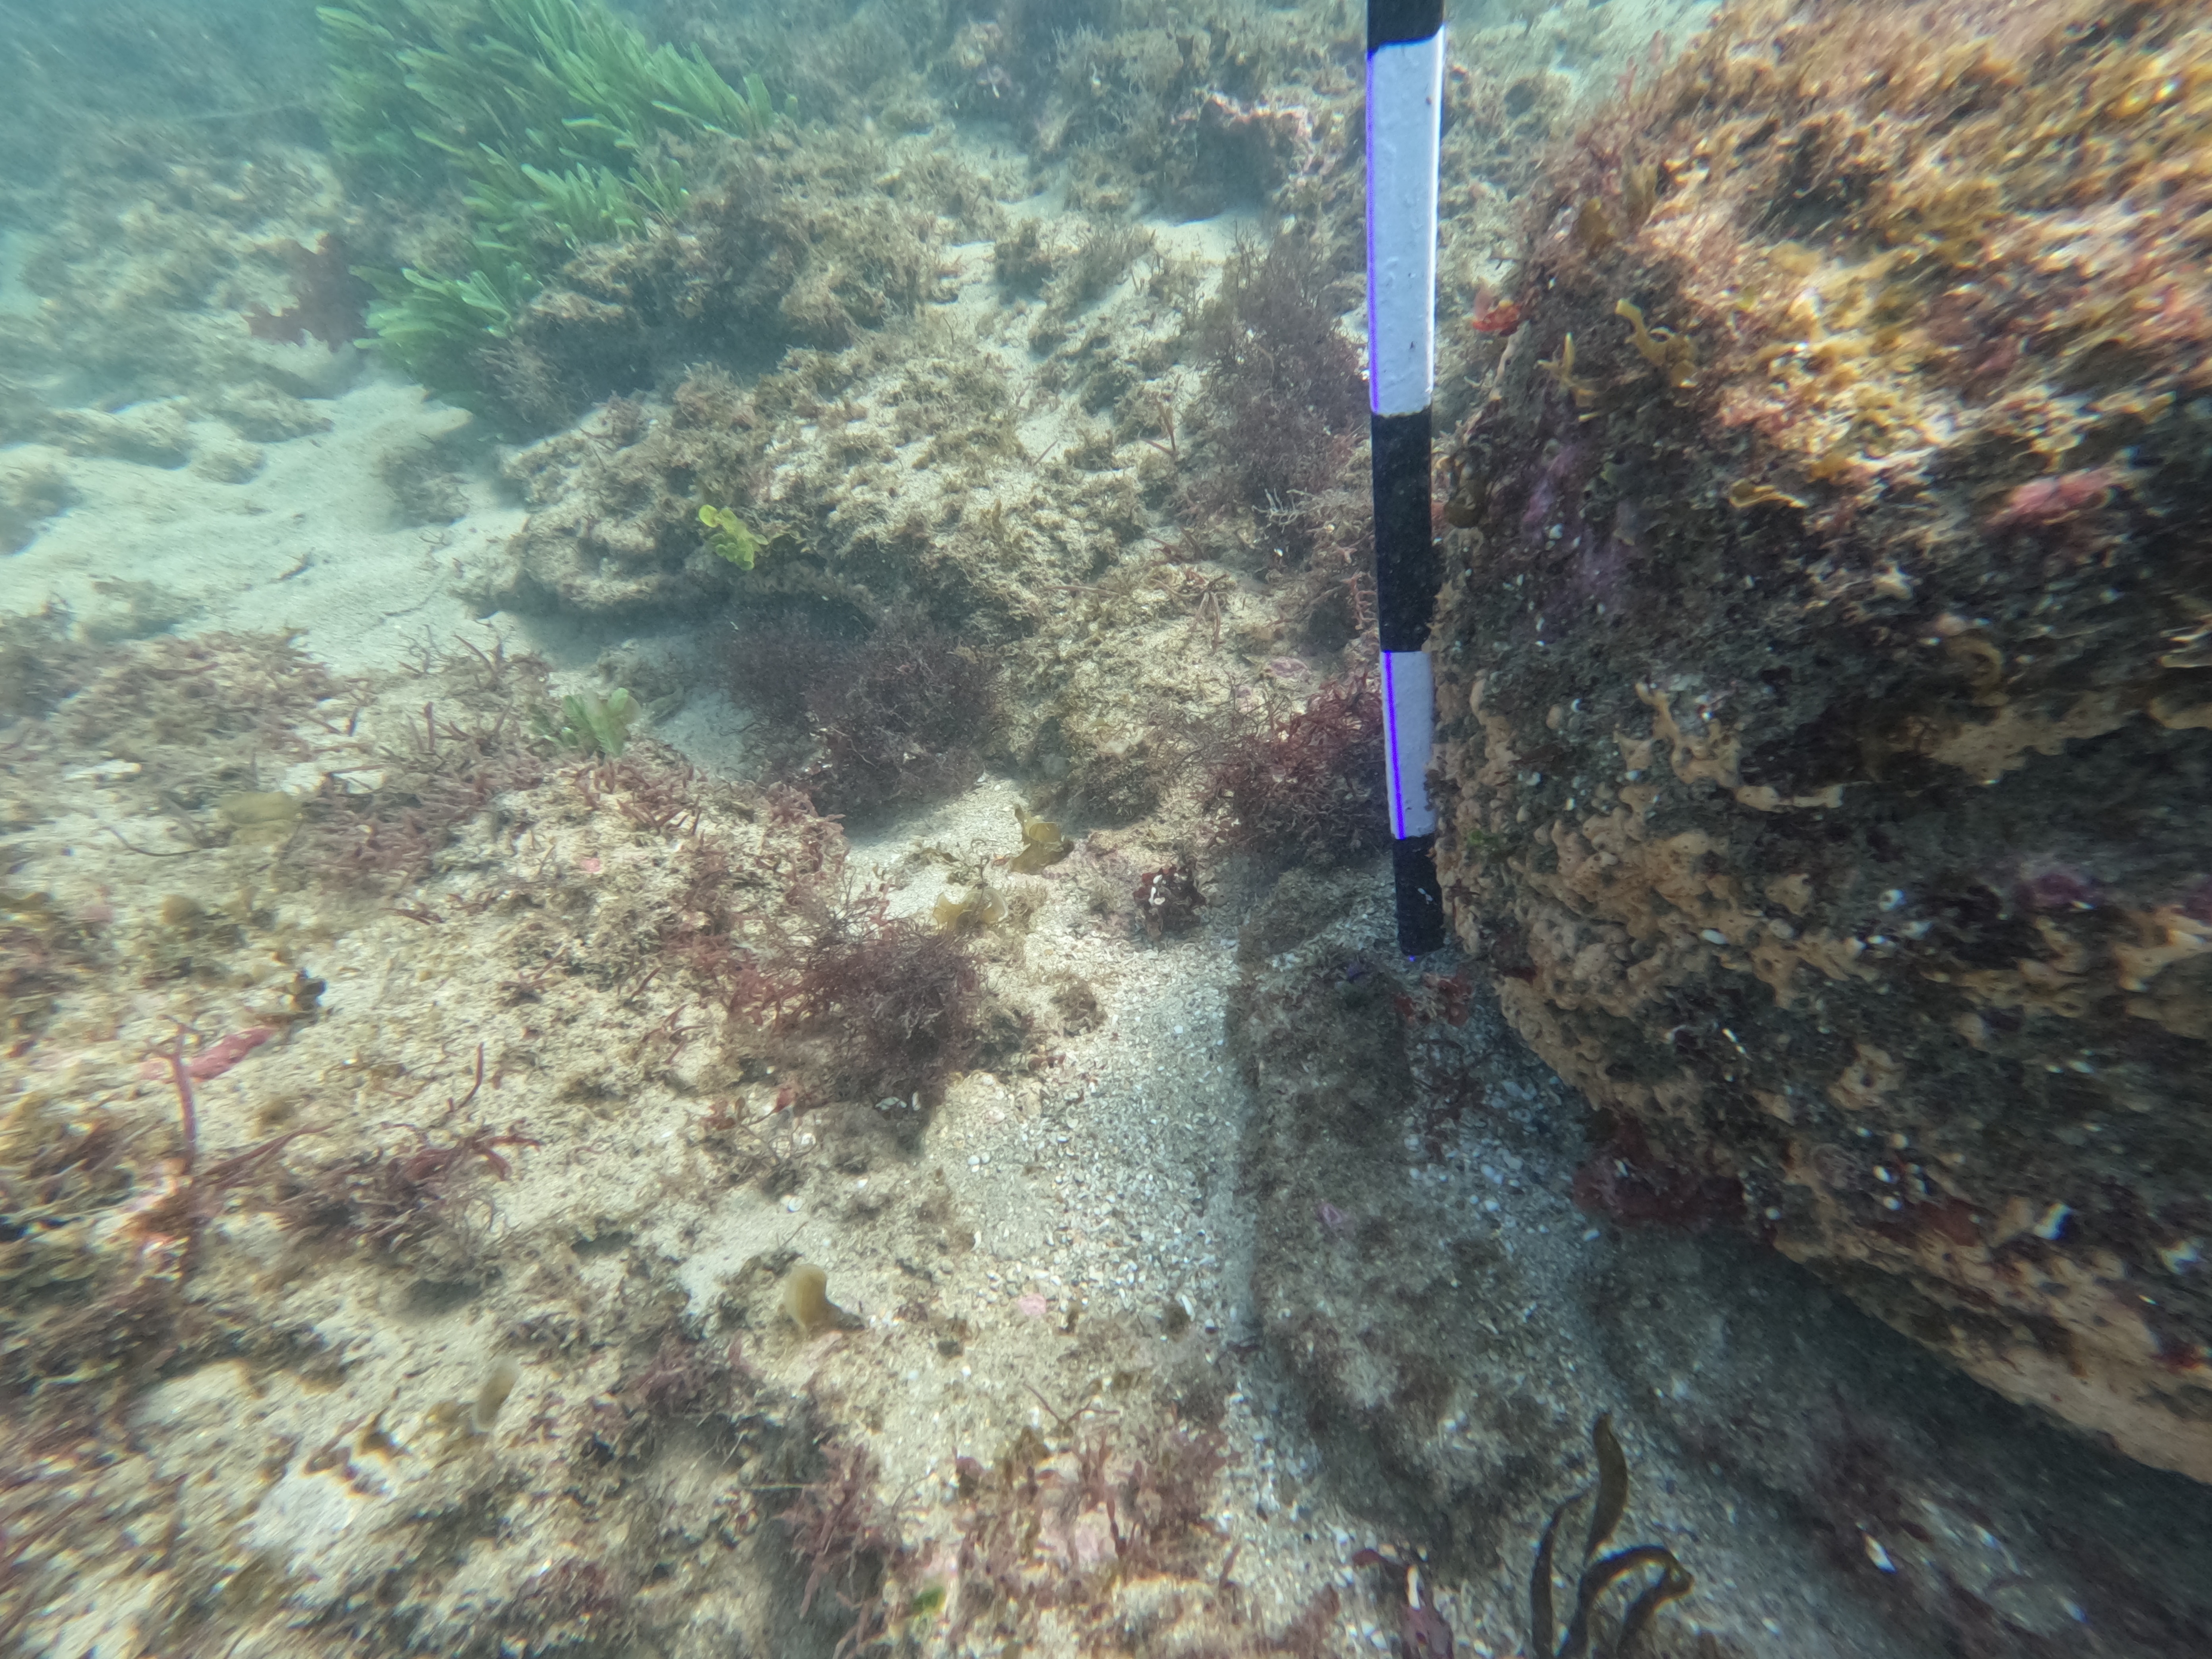

Supplement: Supplementary file 1880 [file G0028206.pdf › Ocean1/G0028206.pdf]

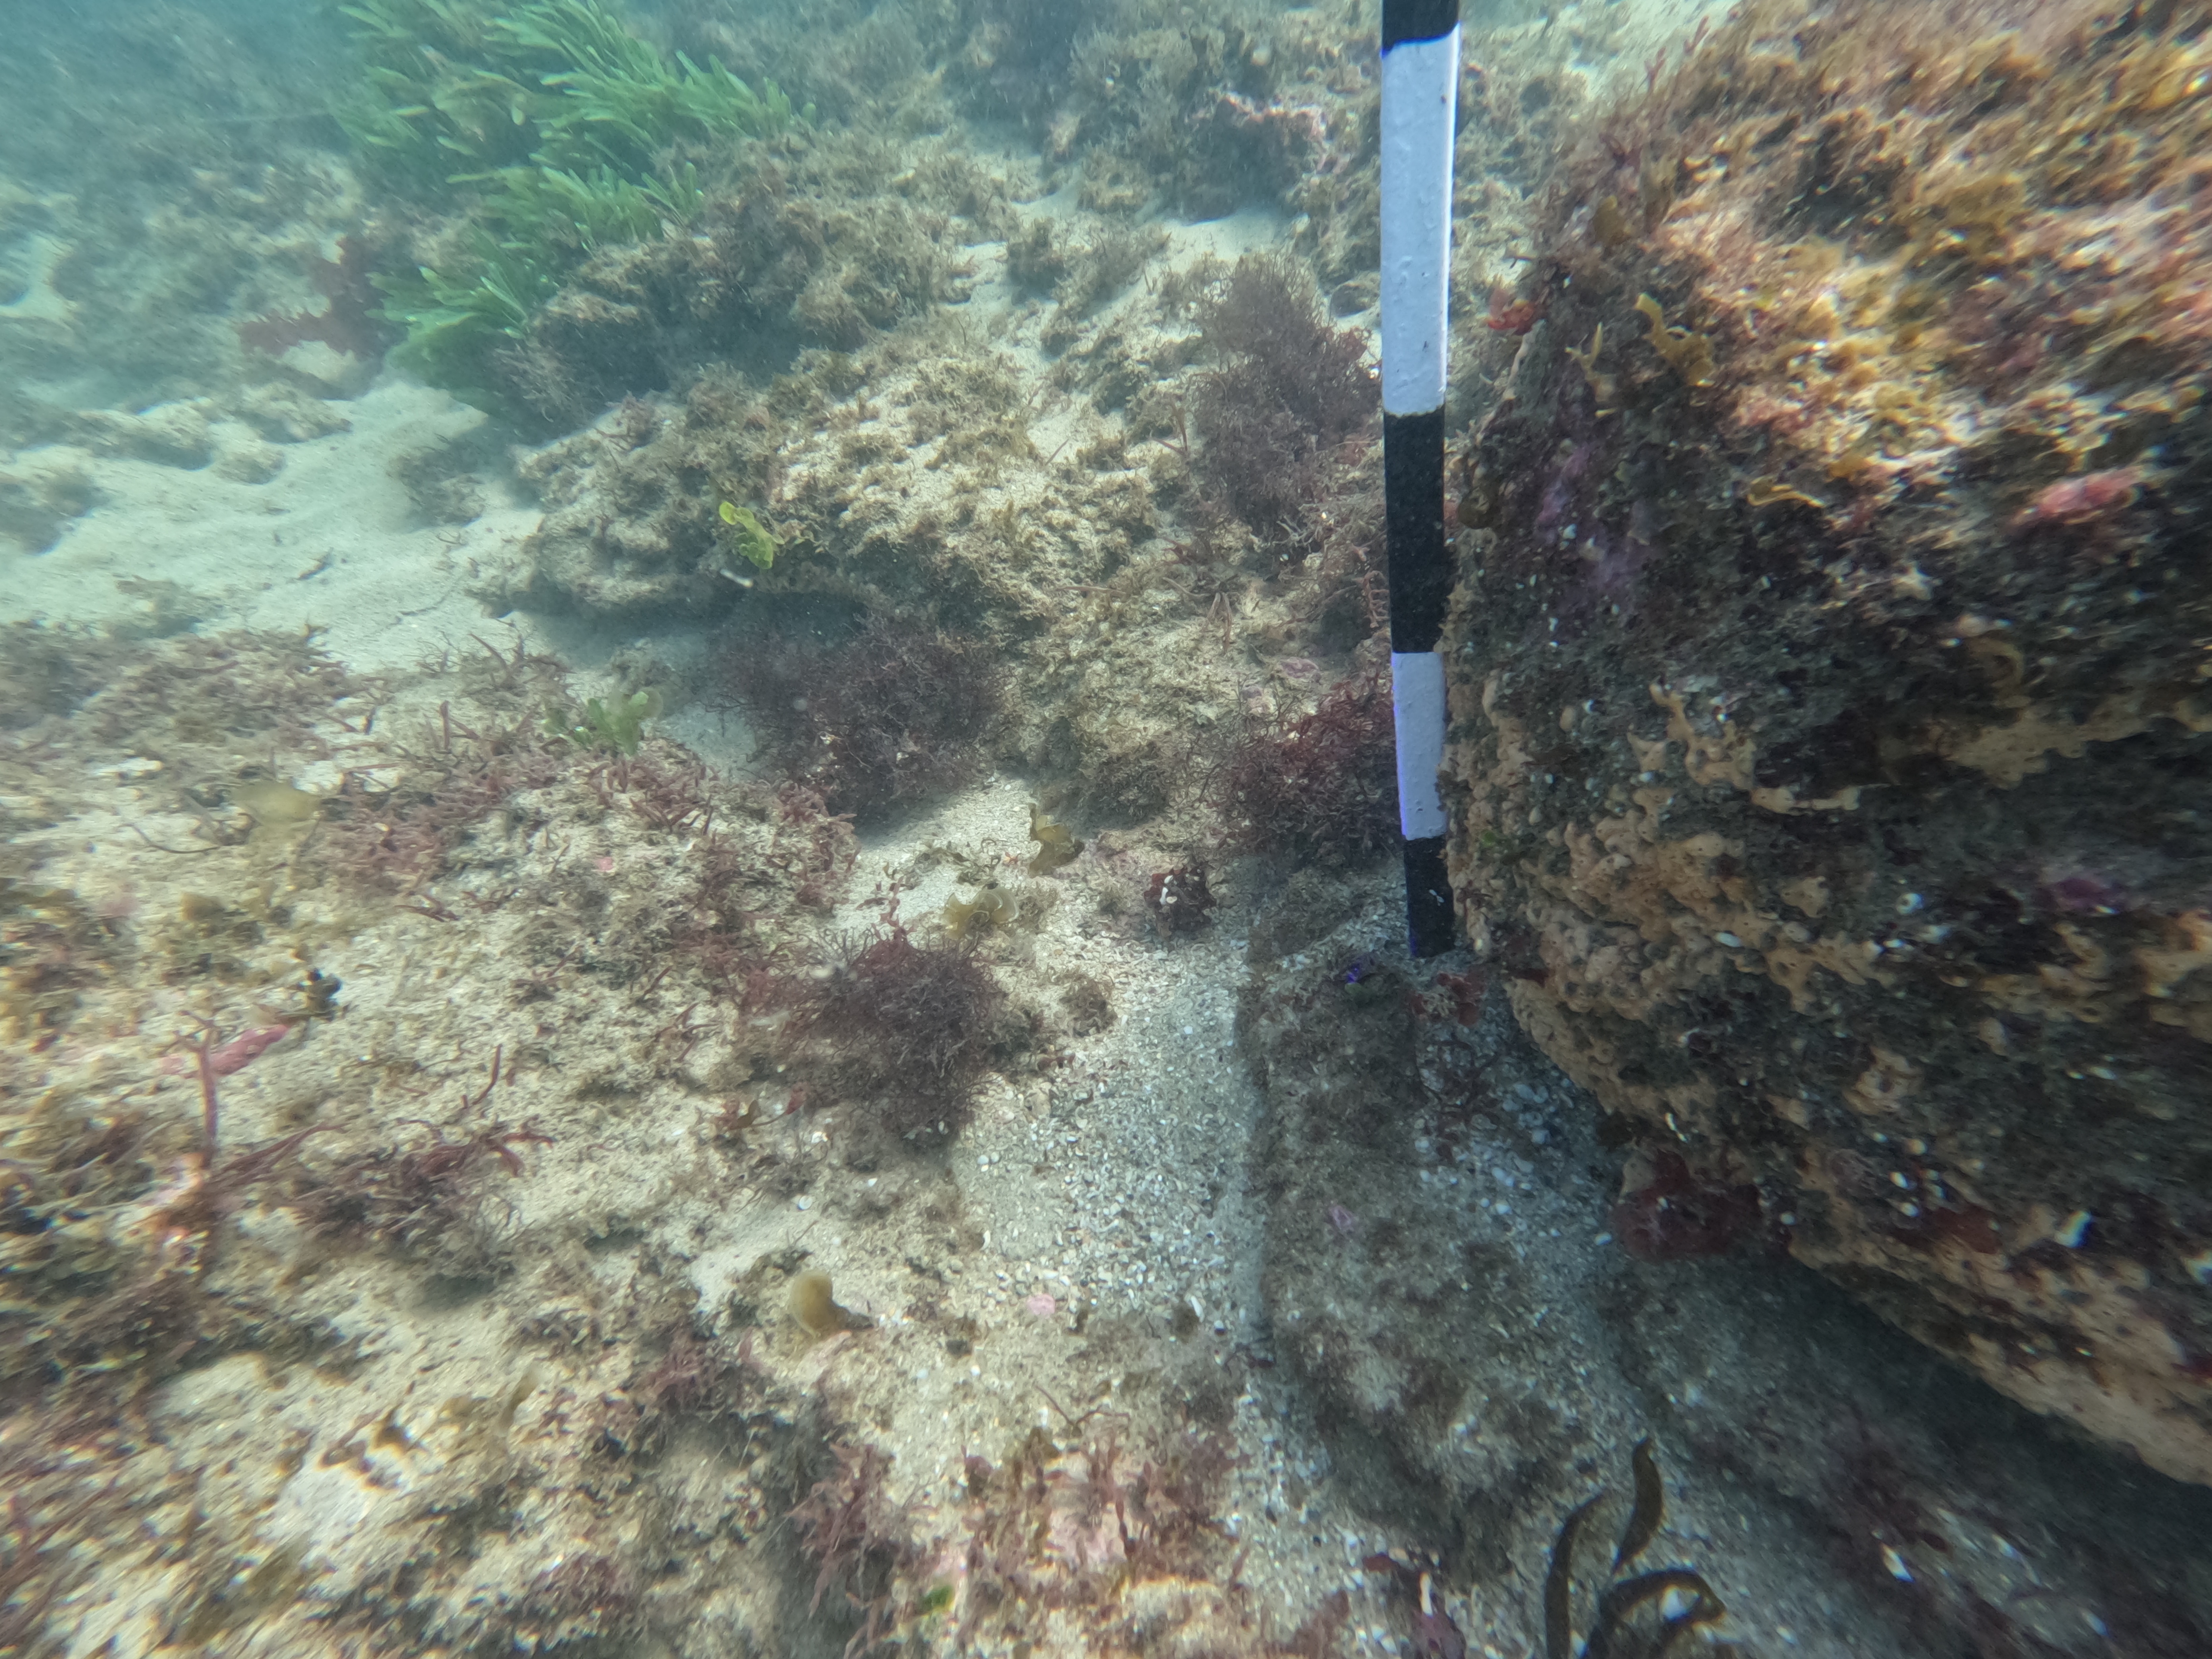

Supplement: Supplementary file 1881 [file G0028207.pdf › Ocean1/G0028207.pdf]

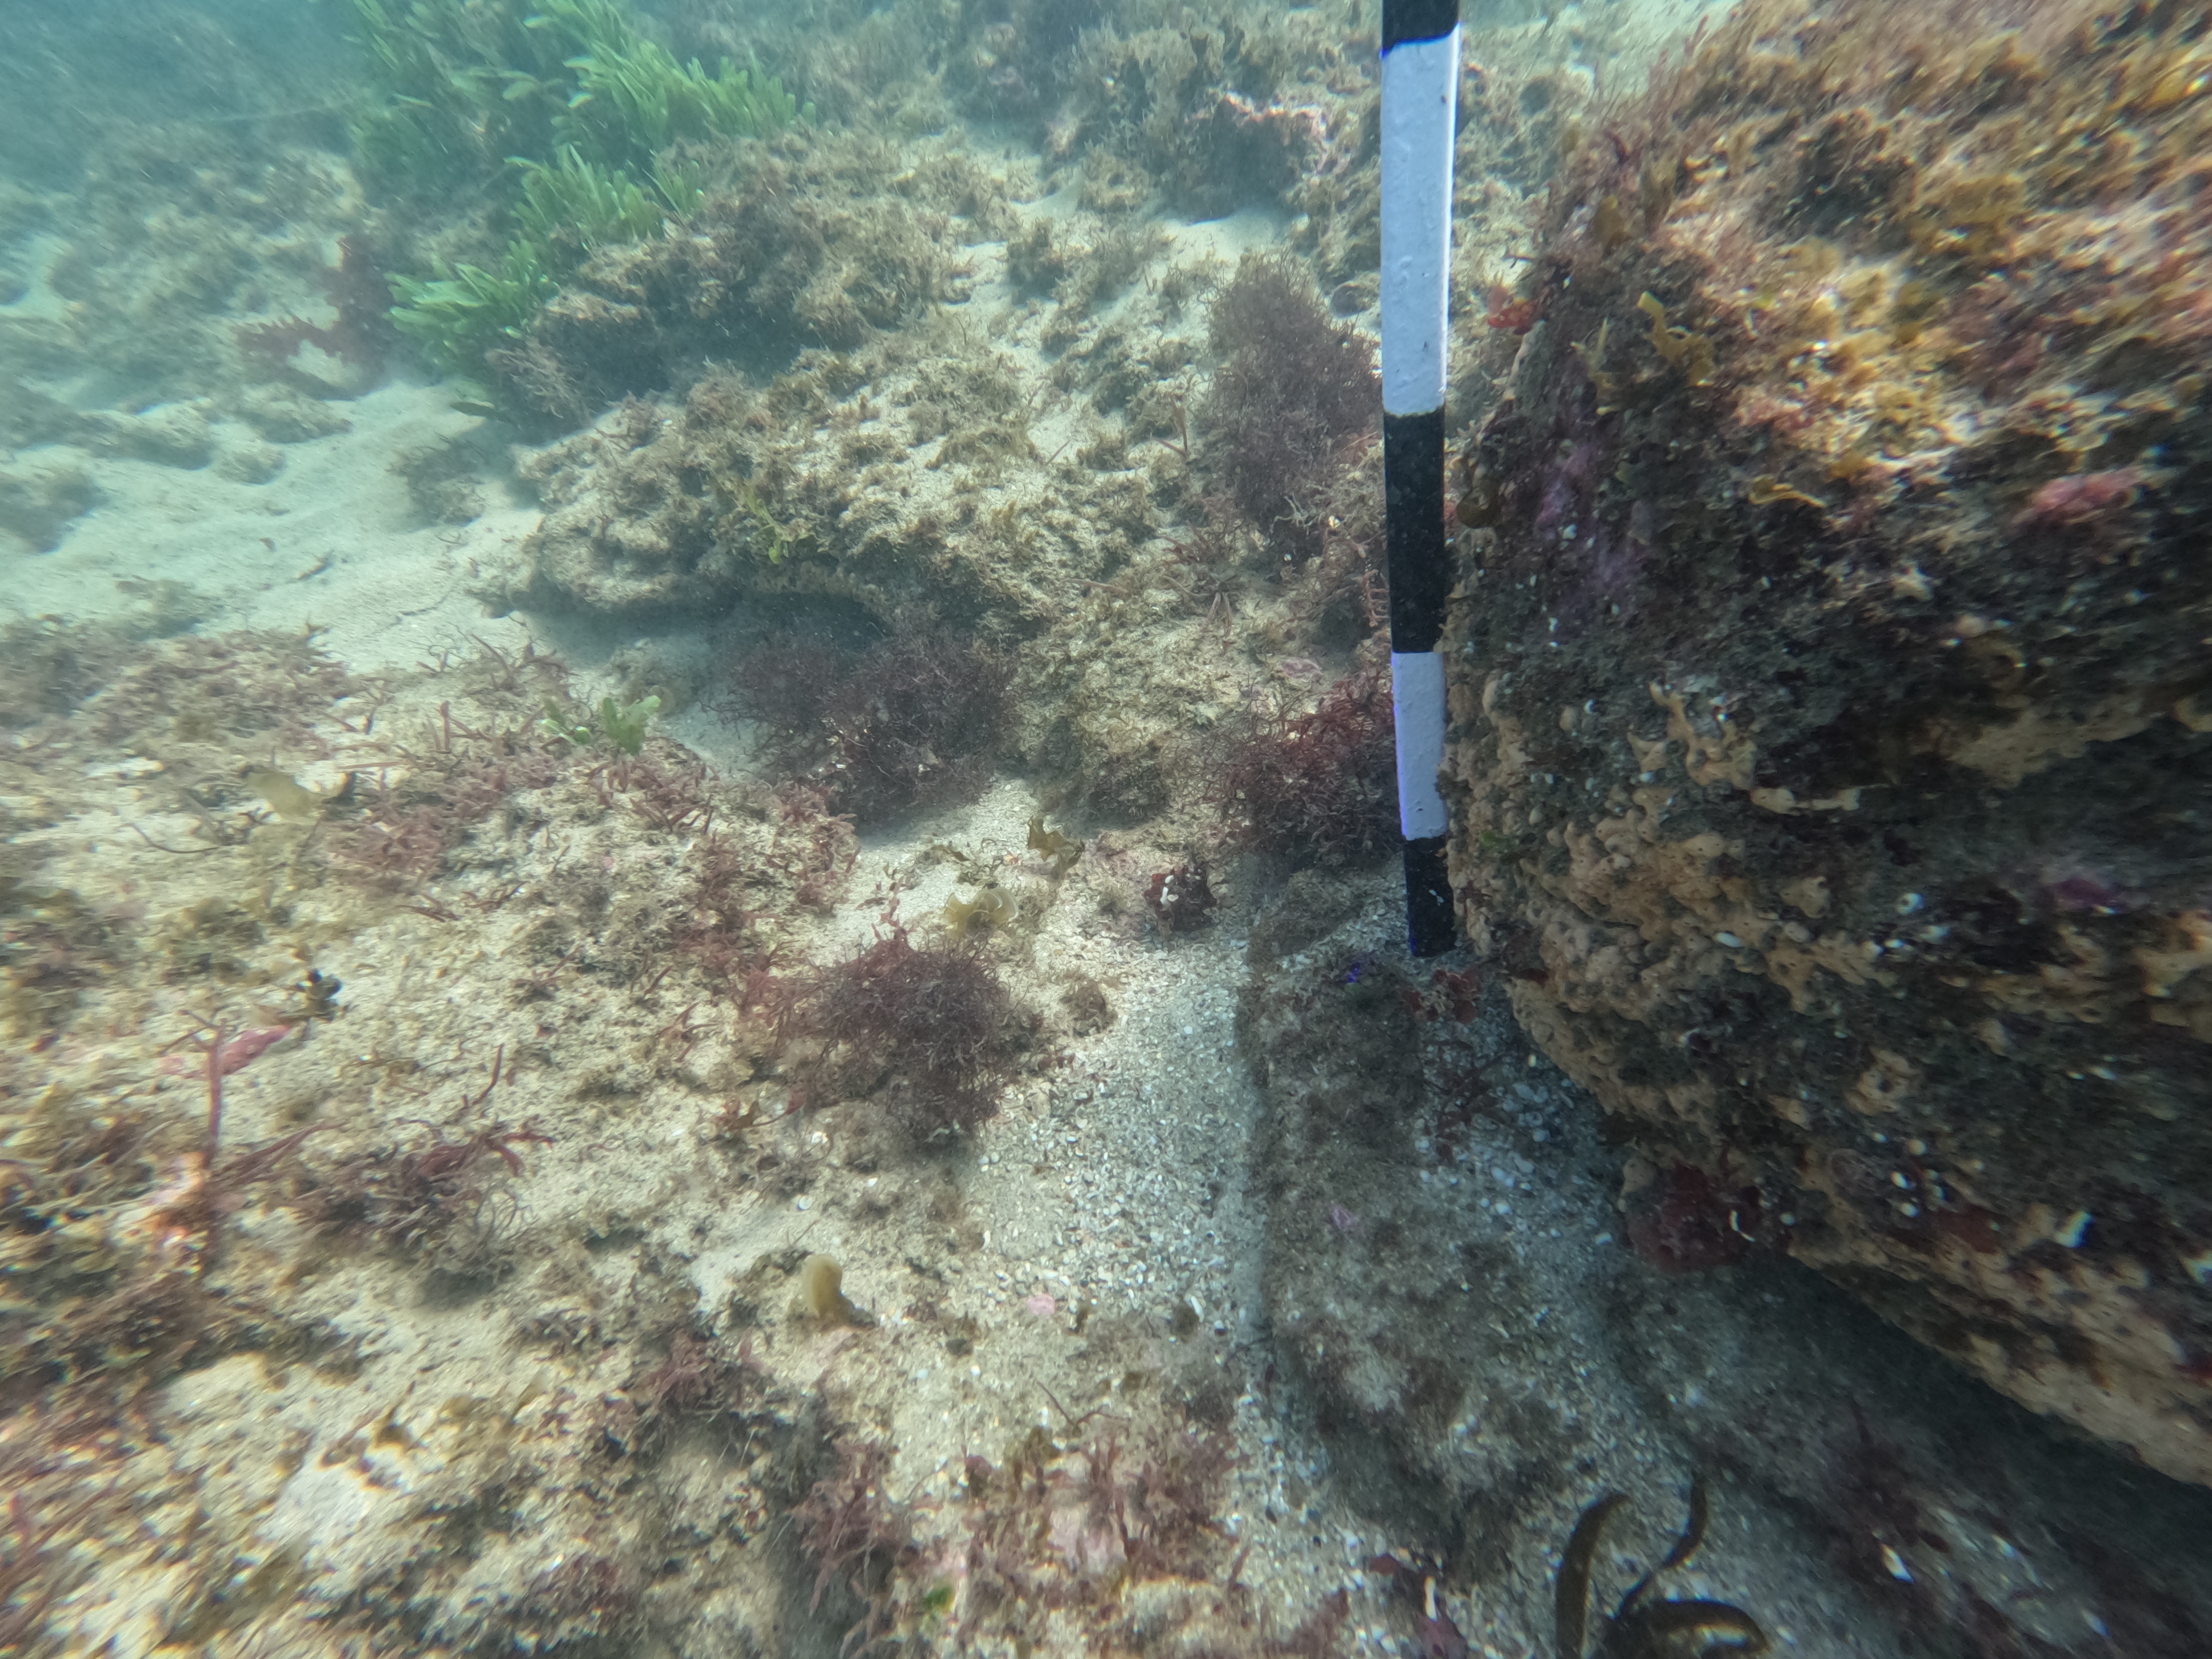

Supplement: Supplementary file 1882 [file G0028208.pdf › Ocean1/G0028208.pdf]

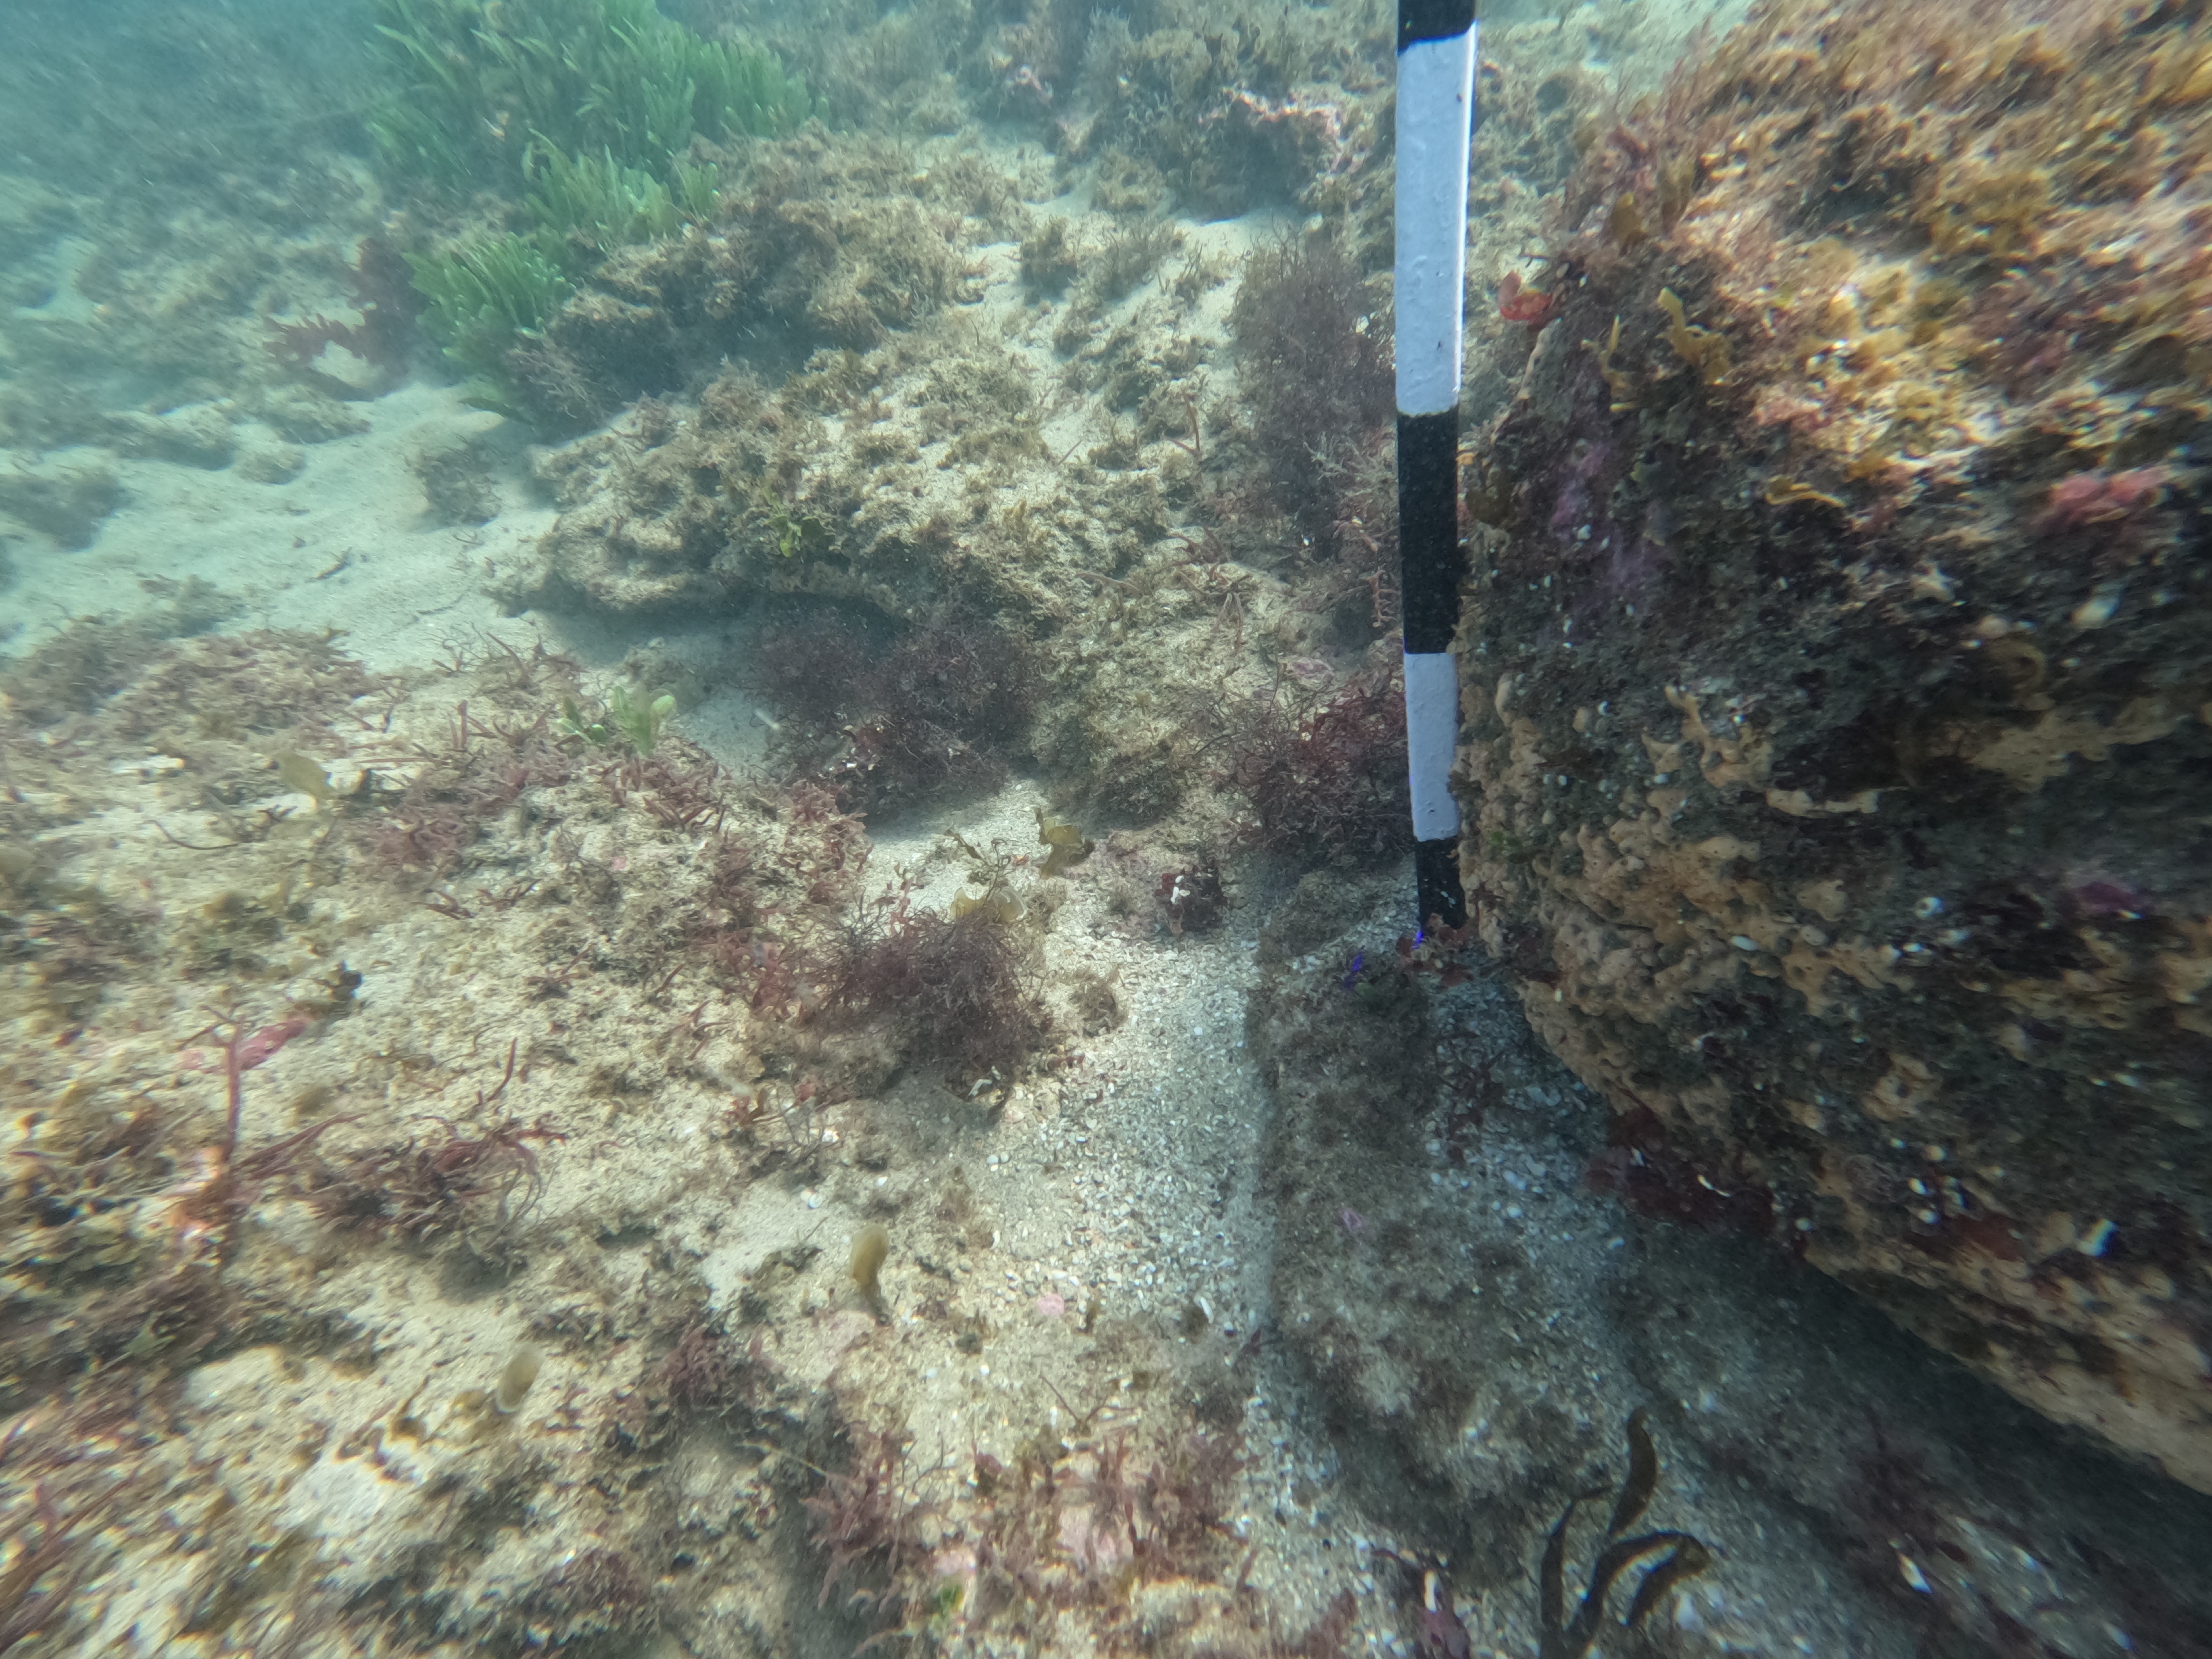

Supplement: Supplementary file 1883 [file G0028209.pdf › Ocean1/G0028209.pdf]

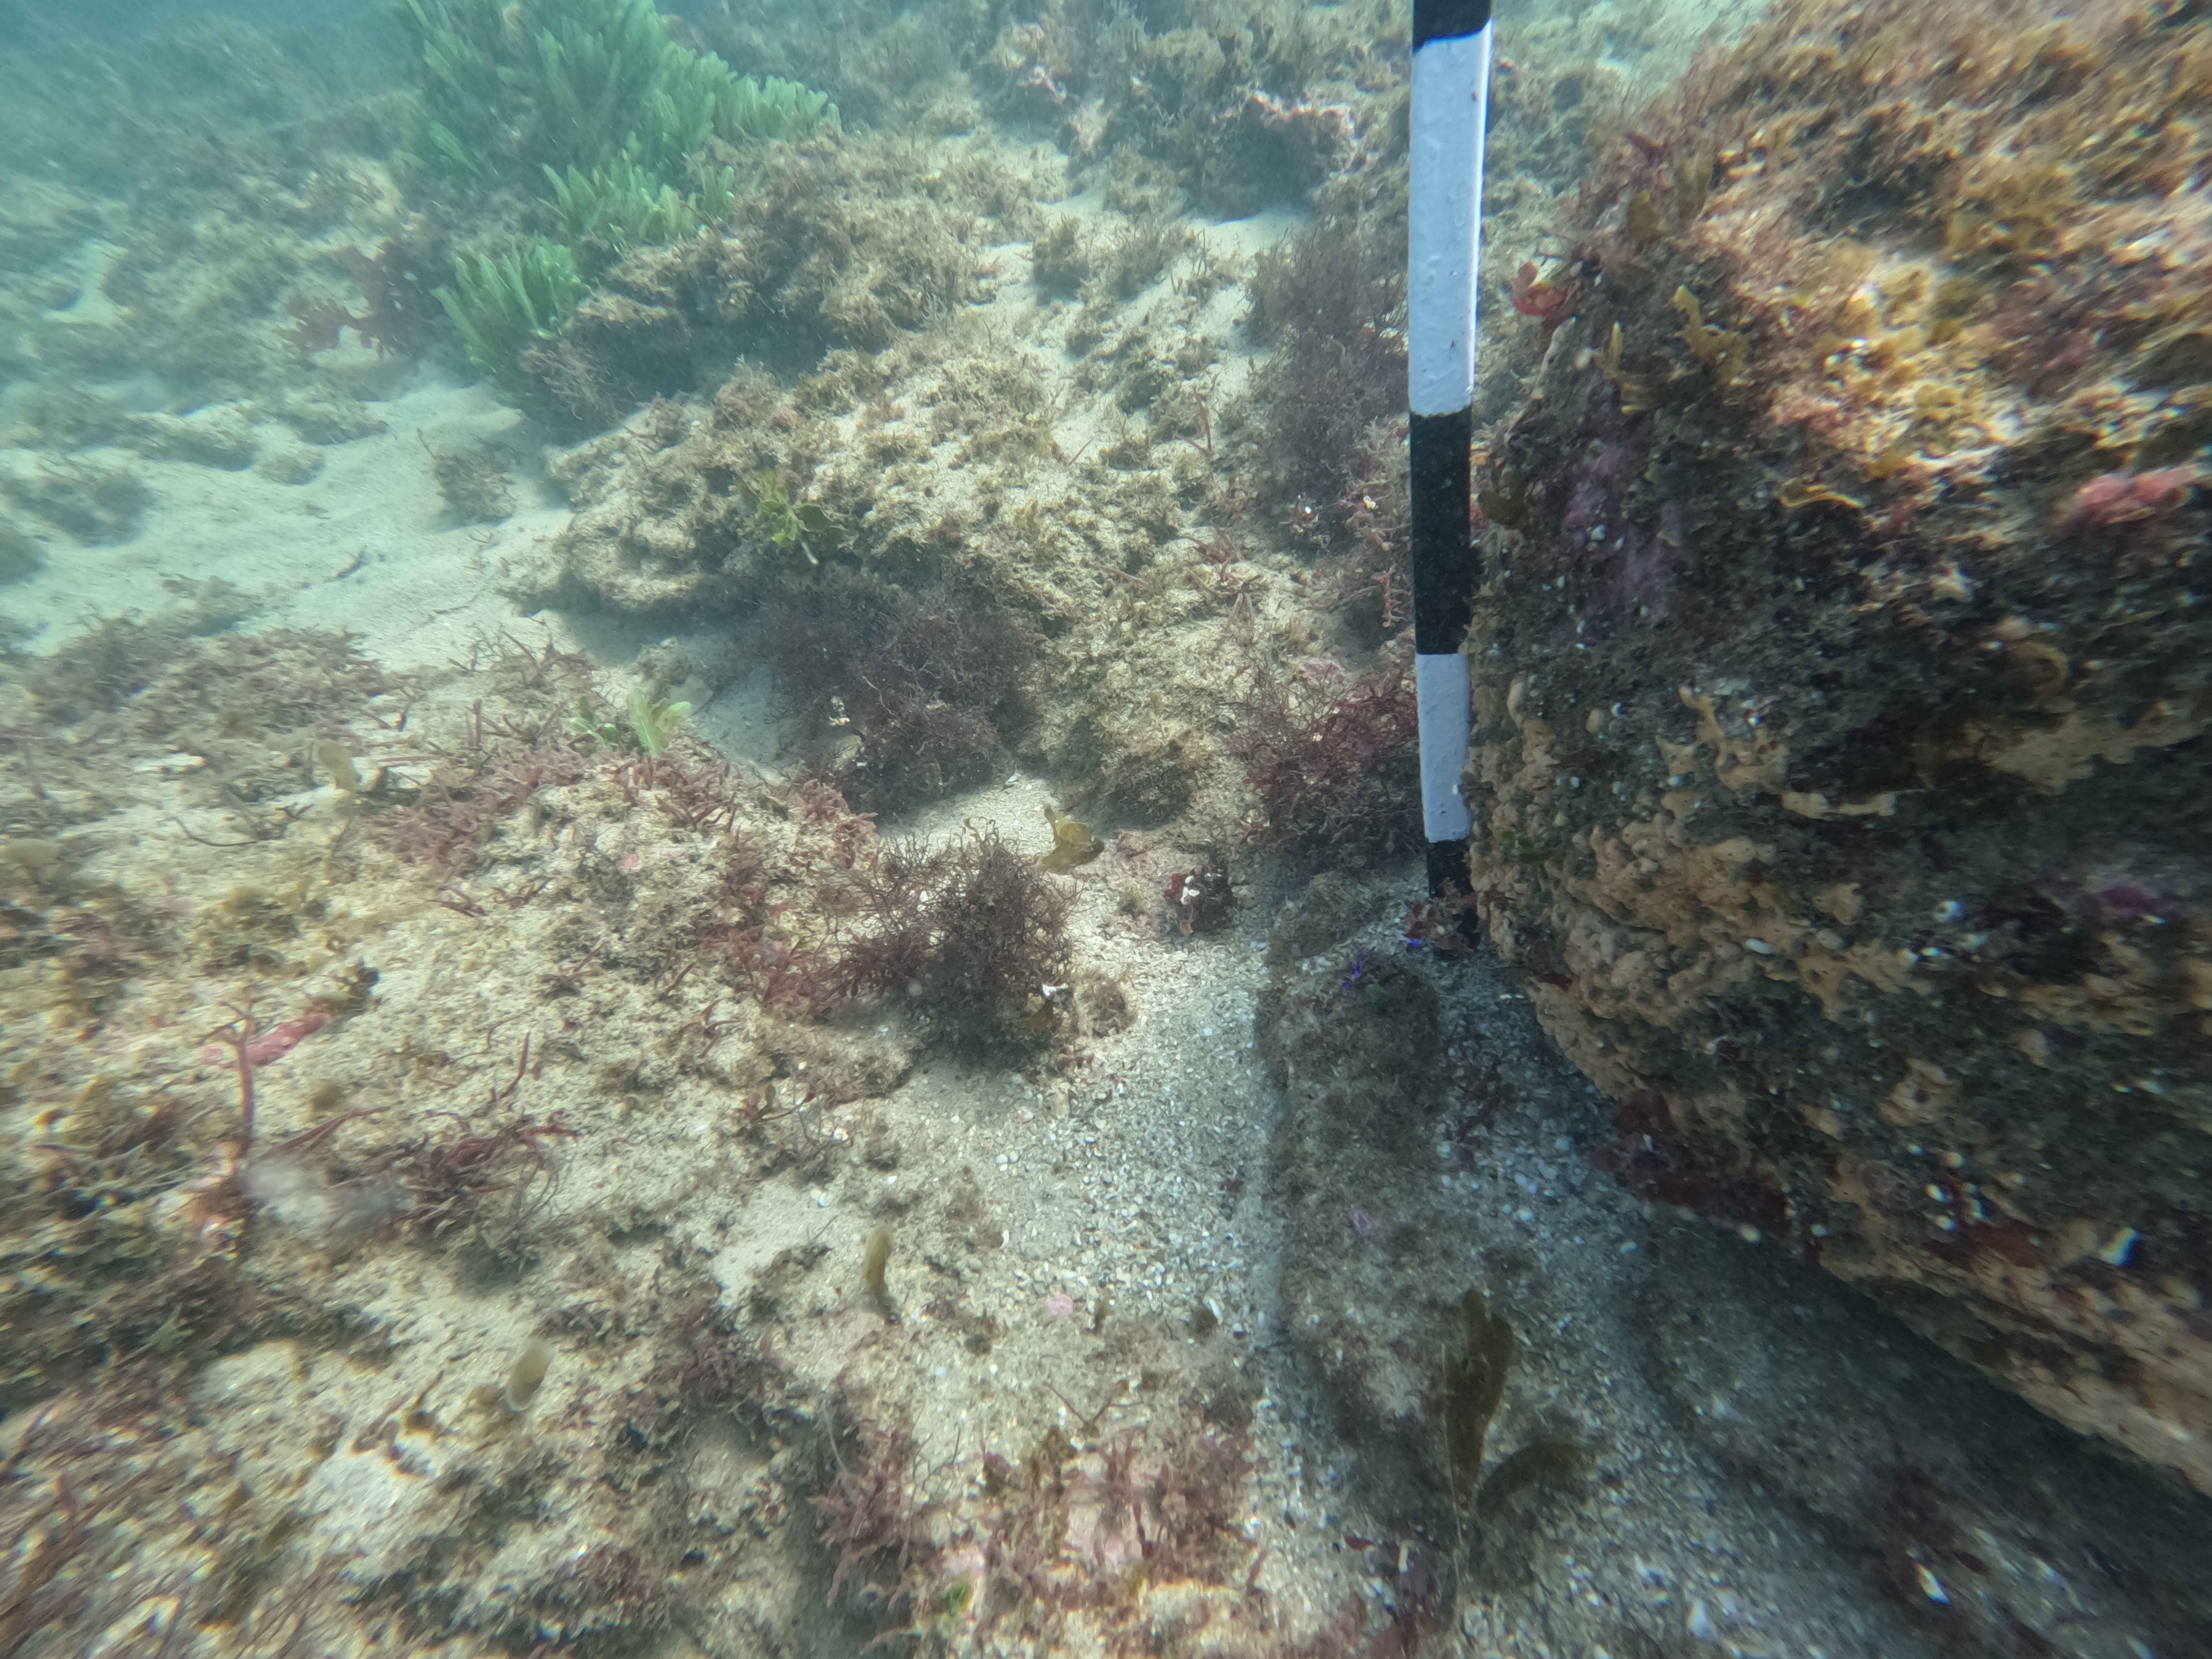

Supplement: Supplementary file 1884 [file G0028210.pdf › Ocean1/G0028210.pdf]

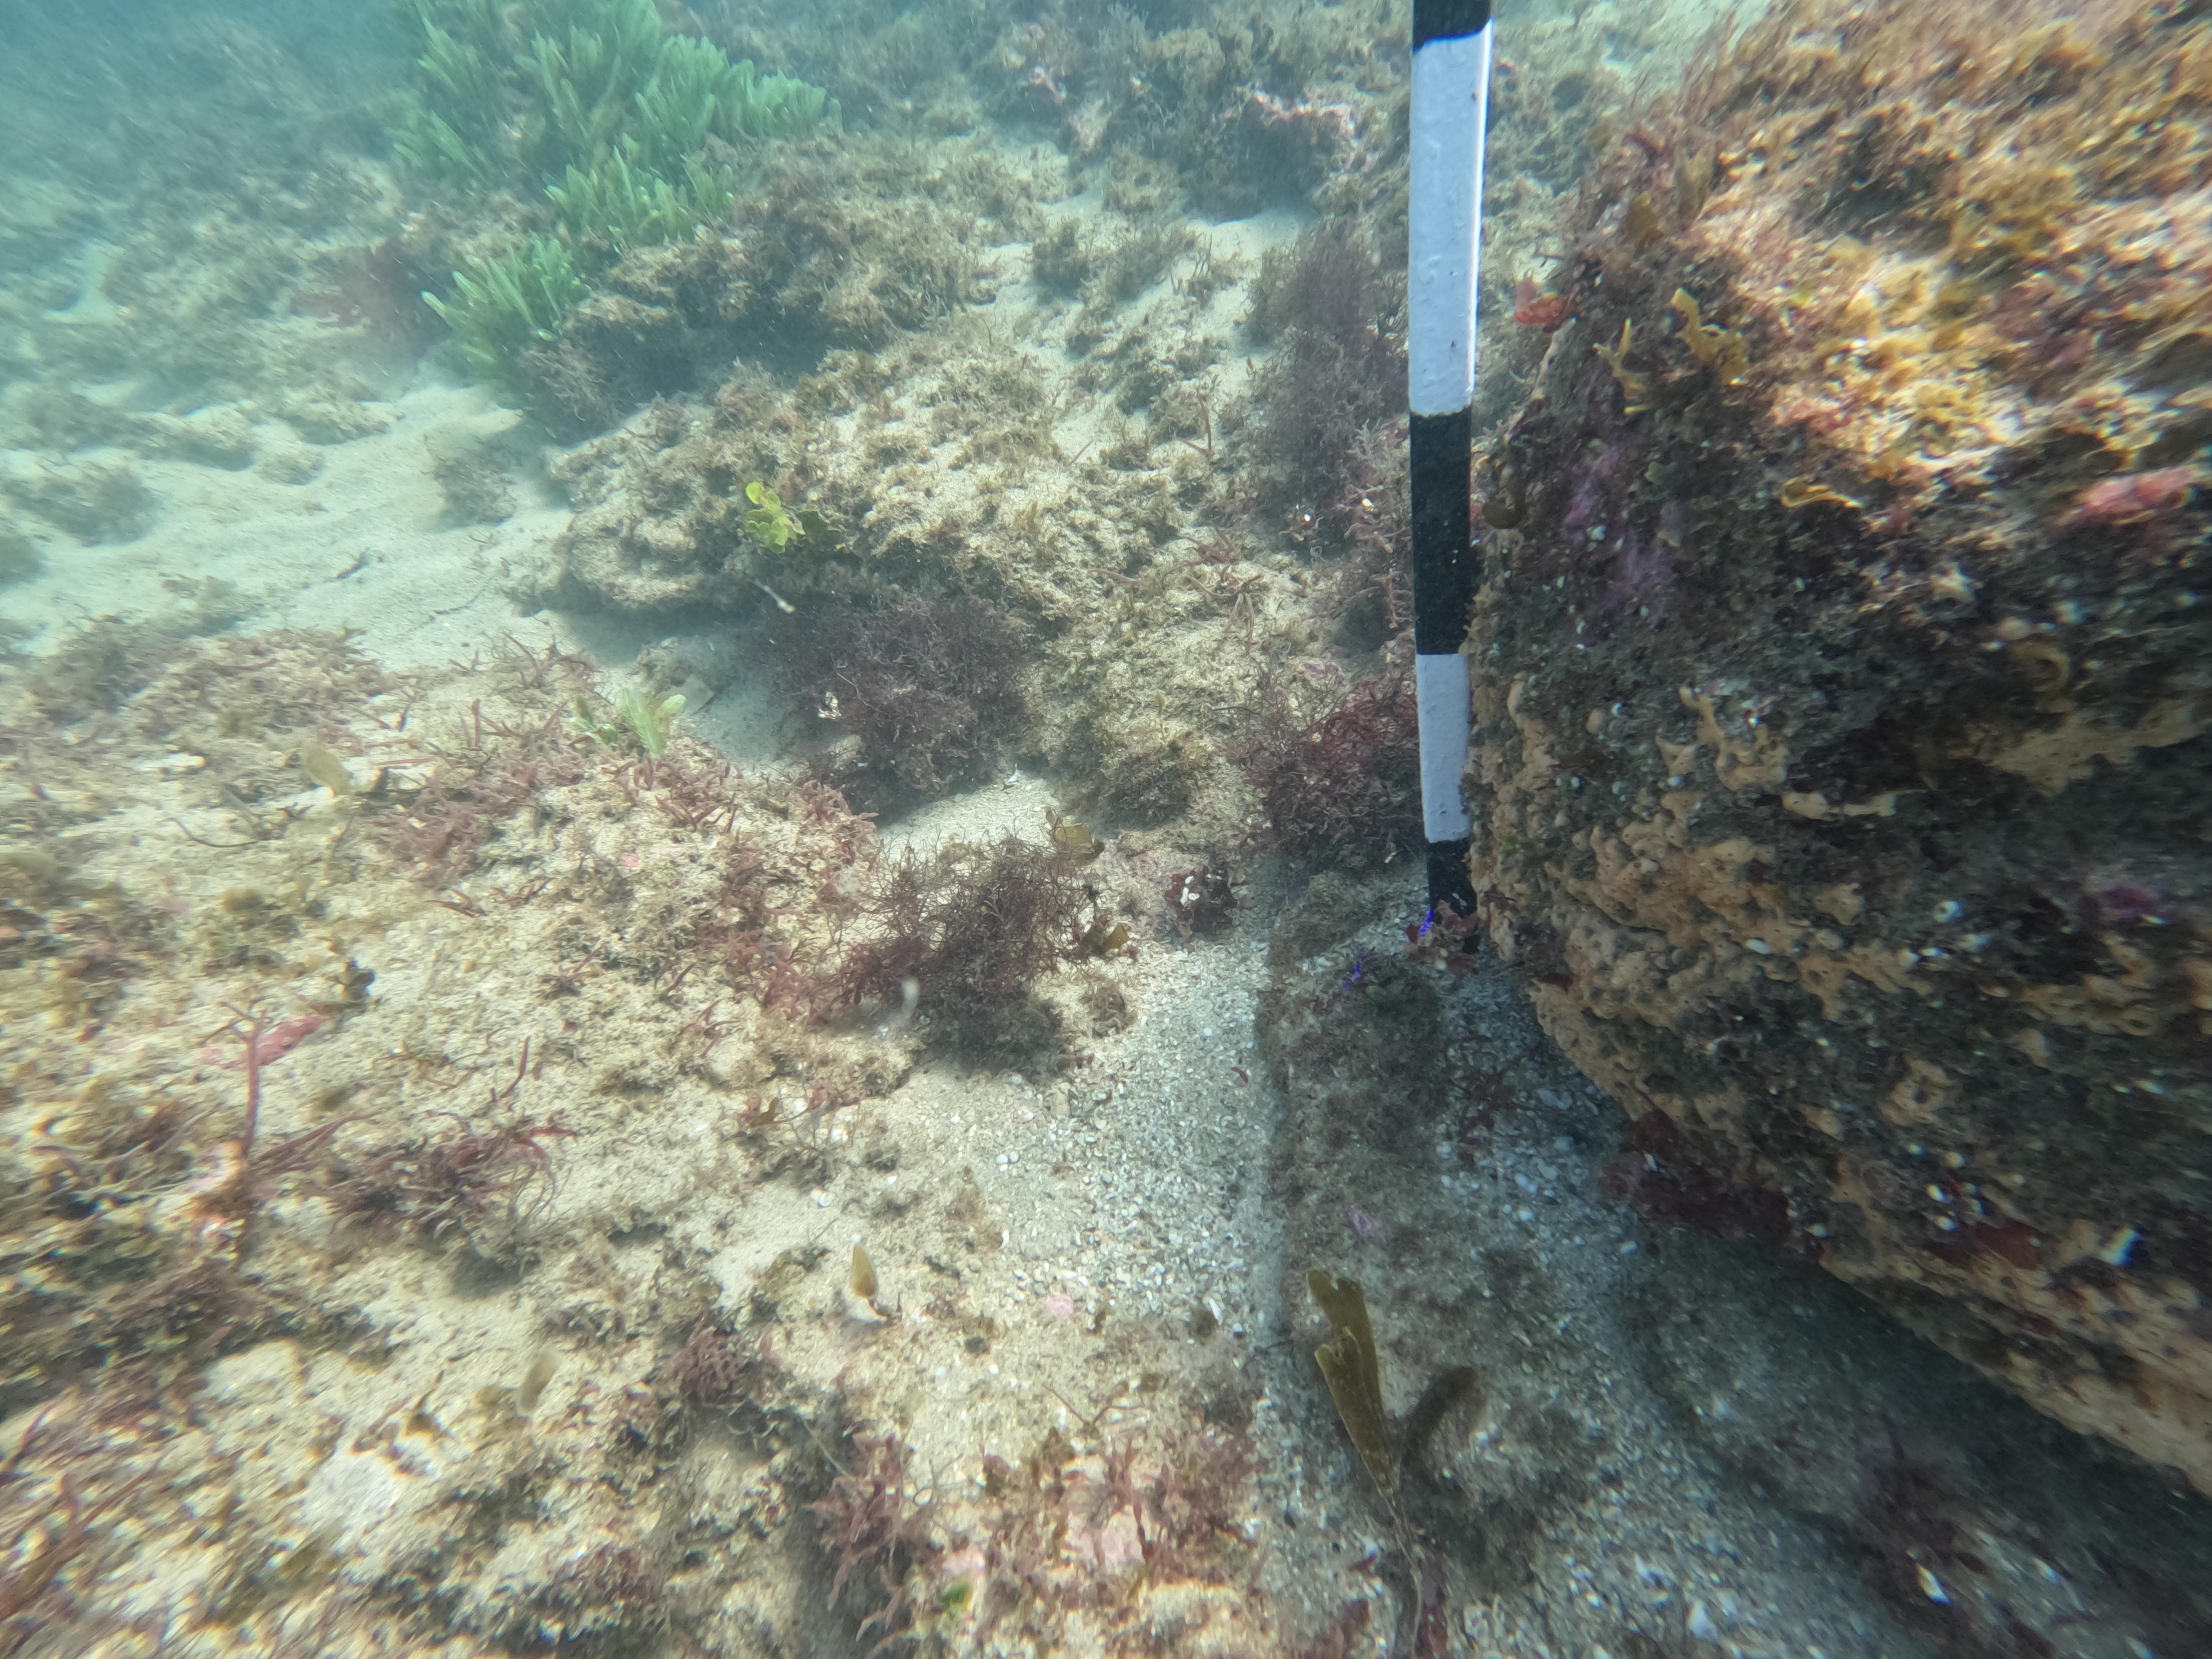

Supplement: Supplementary file 1885 [file G0028211.pdf › Ocean1/G0028211.pdf]

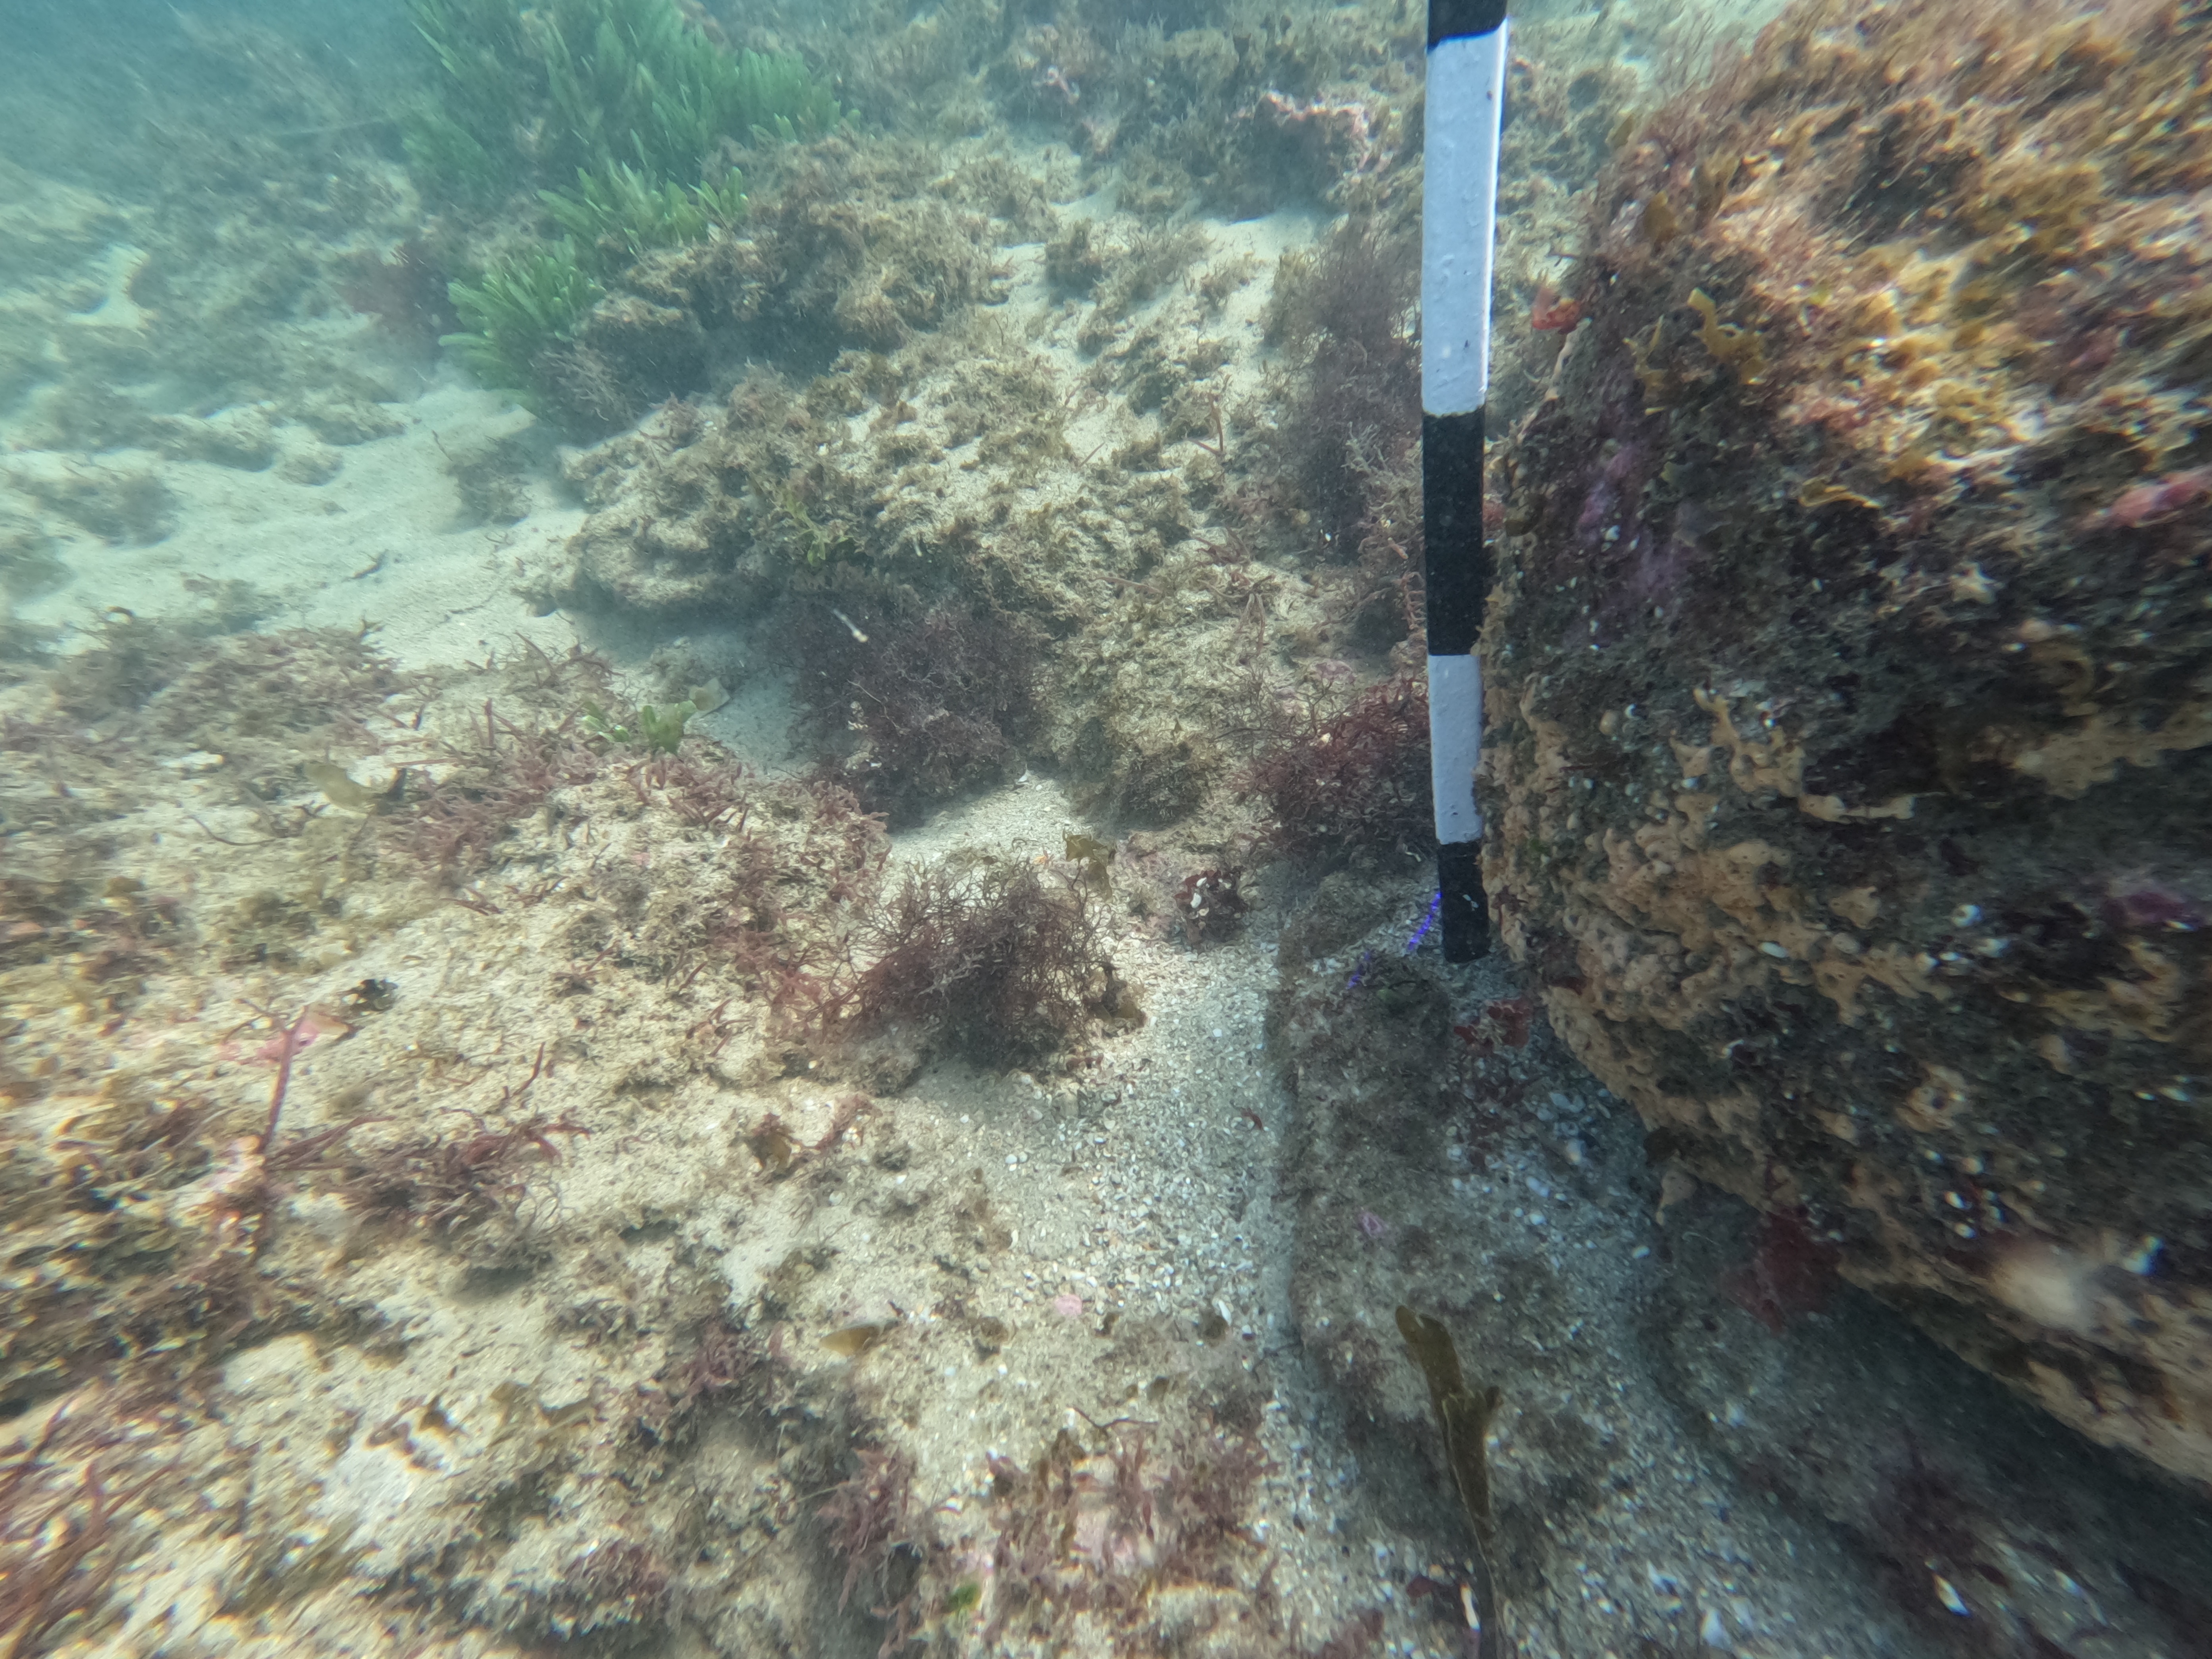

Supplement: Supplementary file 1886 [file G0028212.pdf › Ocean1/G0028212.pdf]

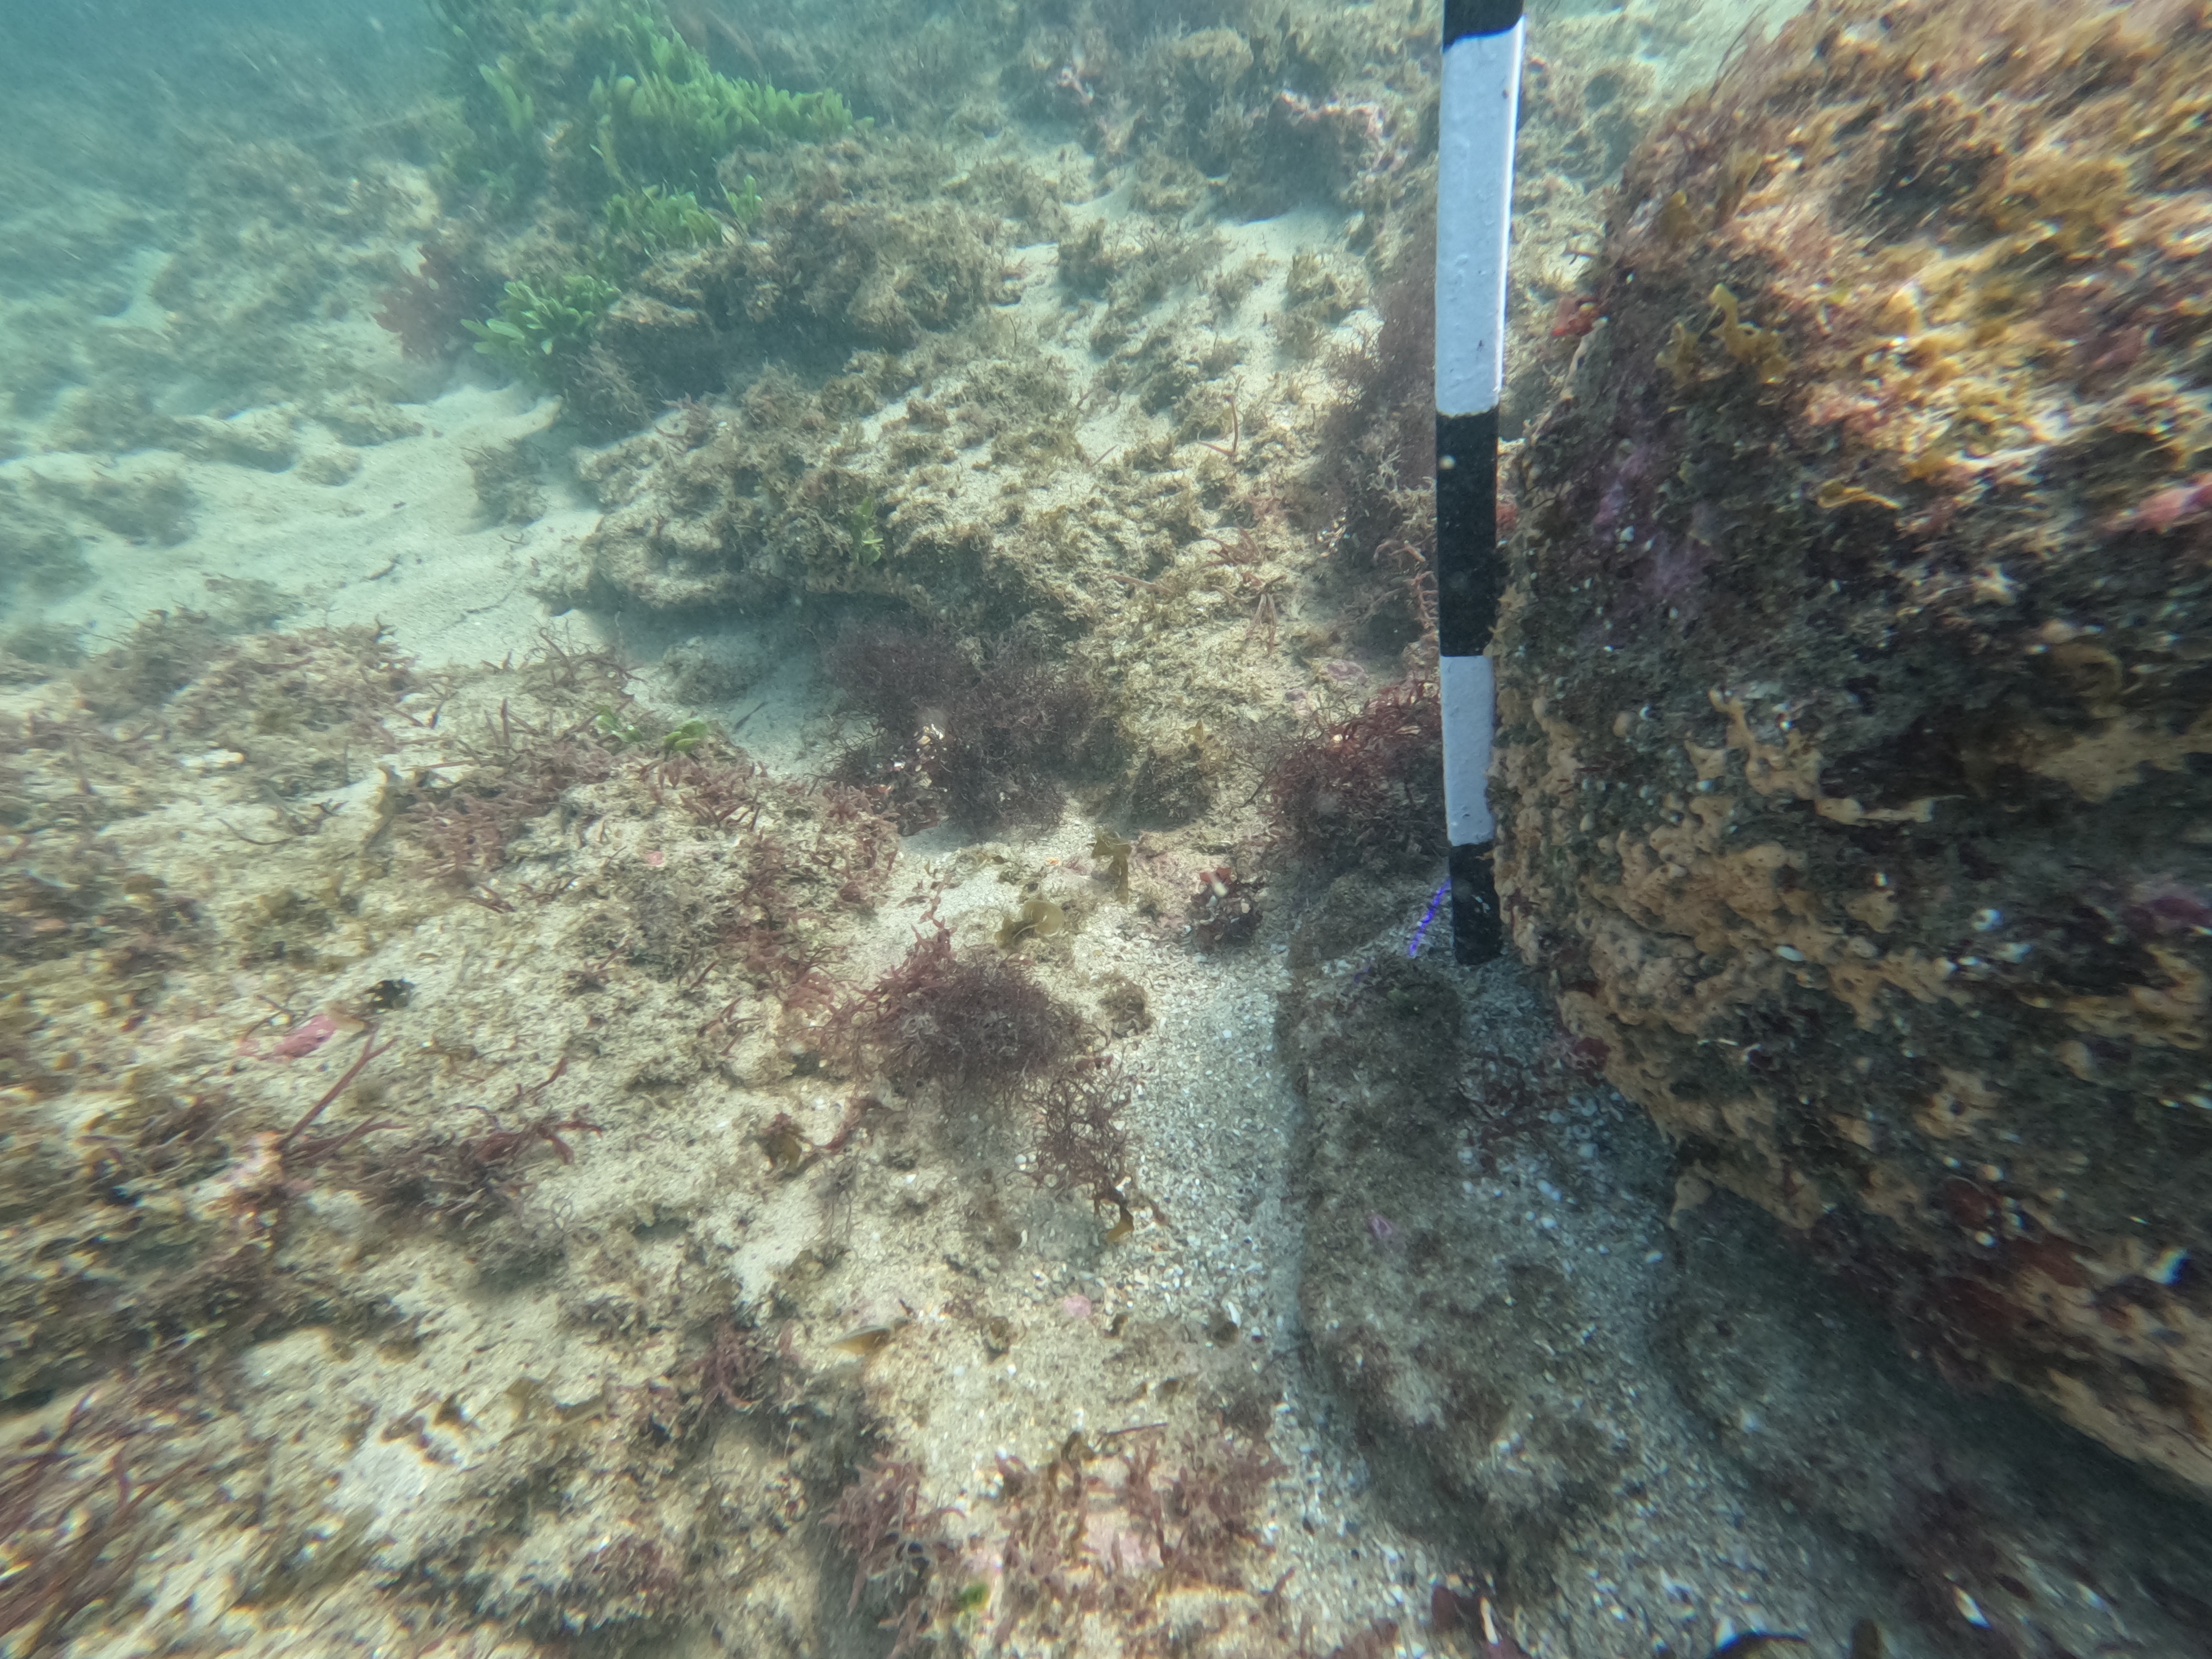

Supplement: Supplementary file 1887 [file G0028213.pdf › Ocean1/G0028213.pdf]

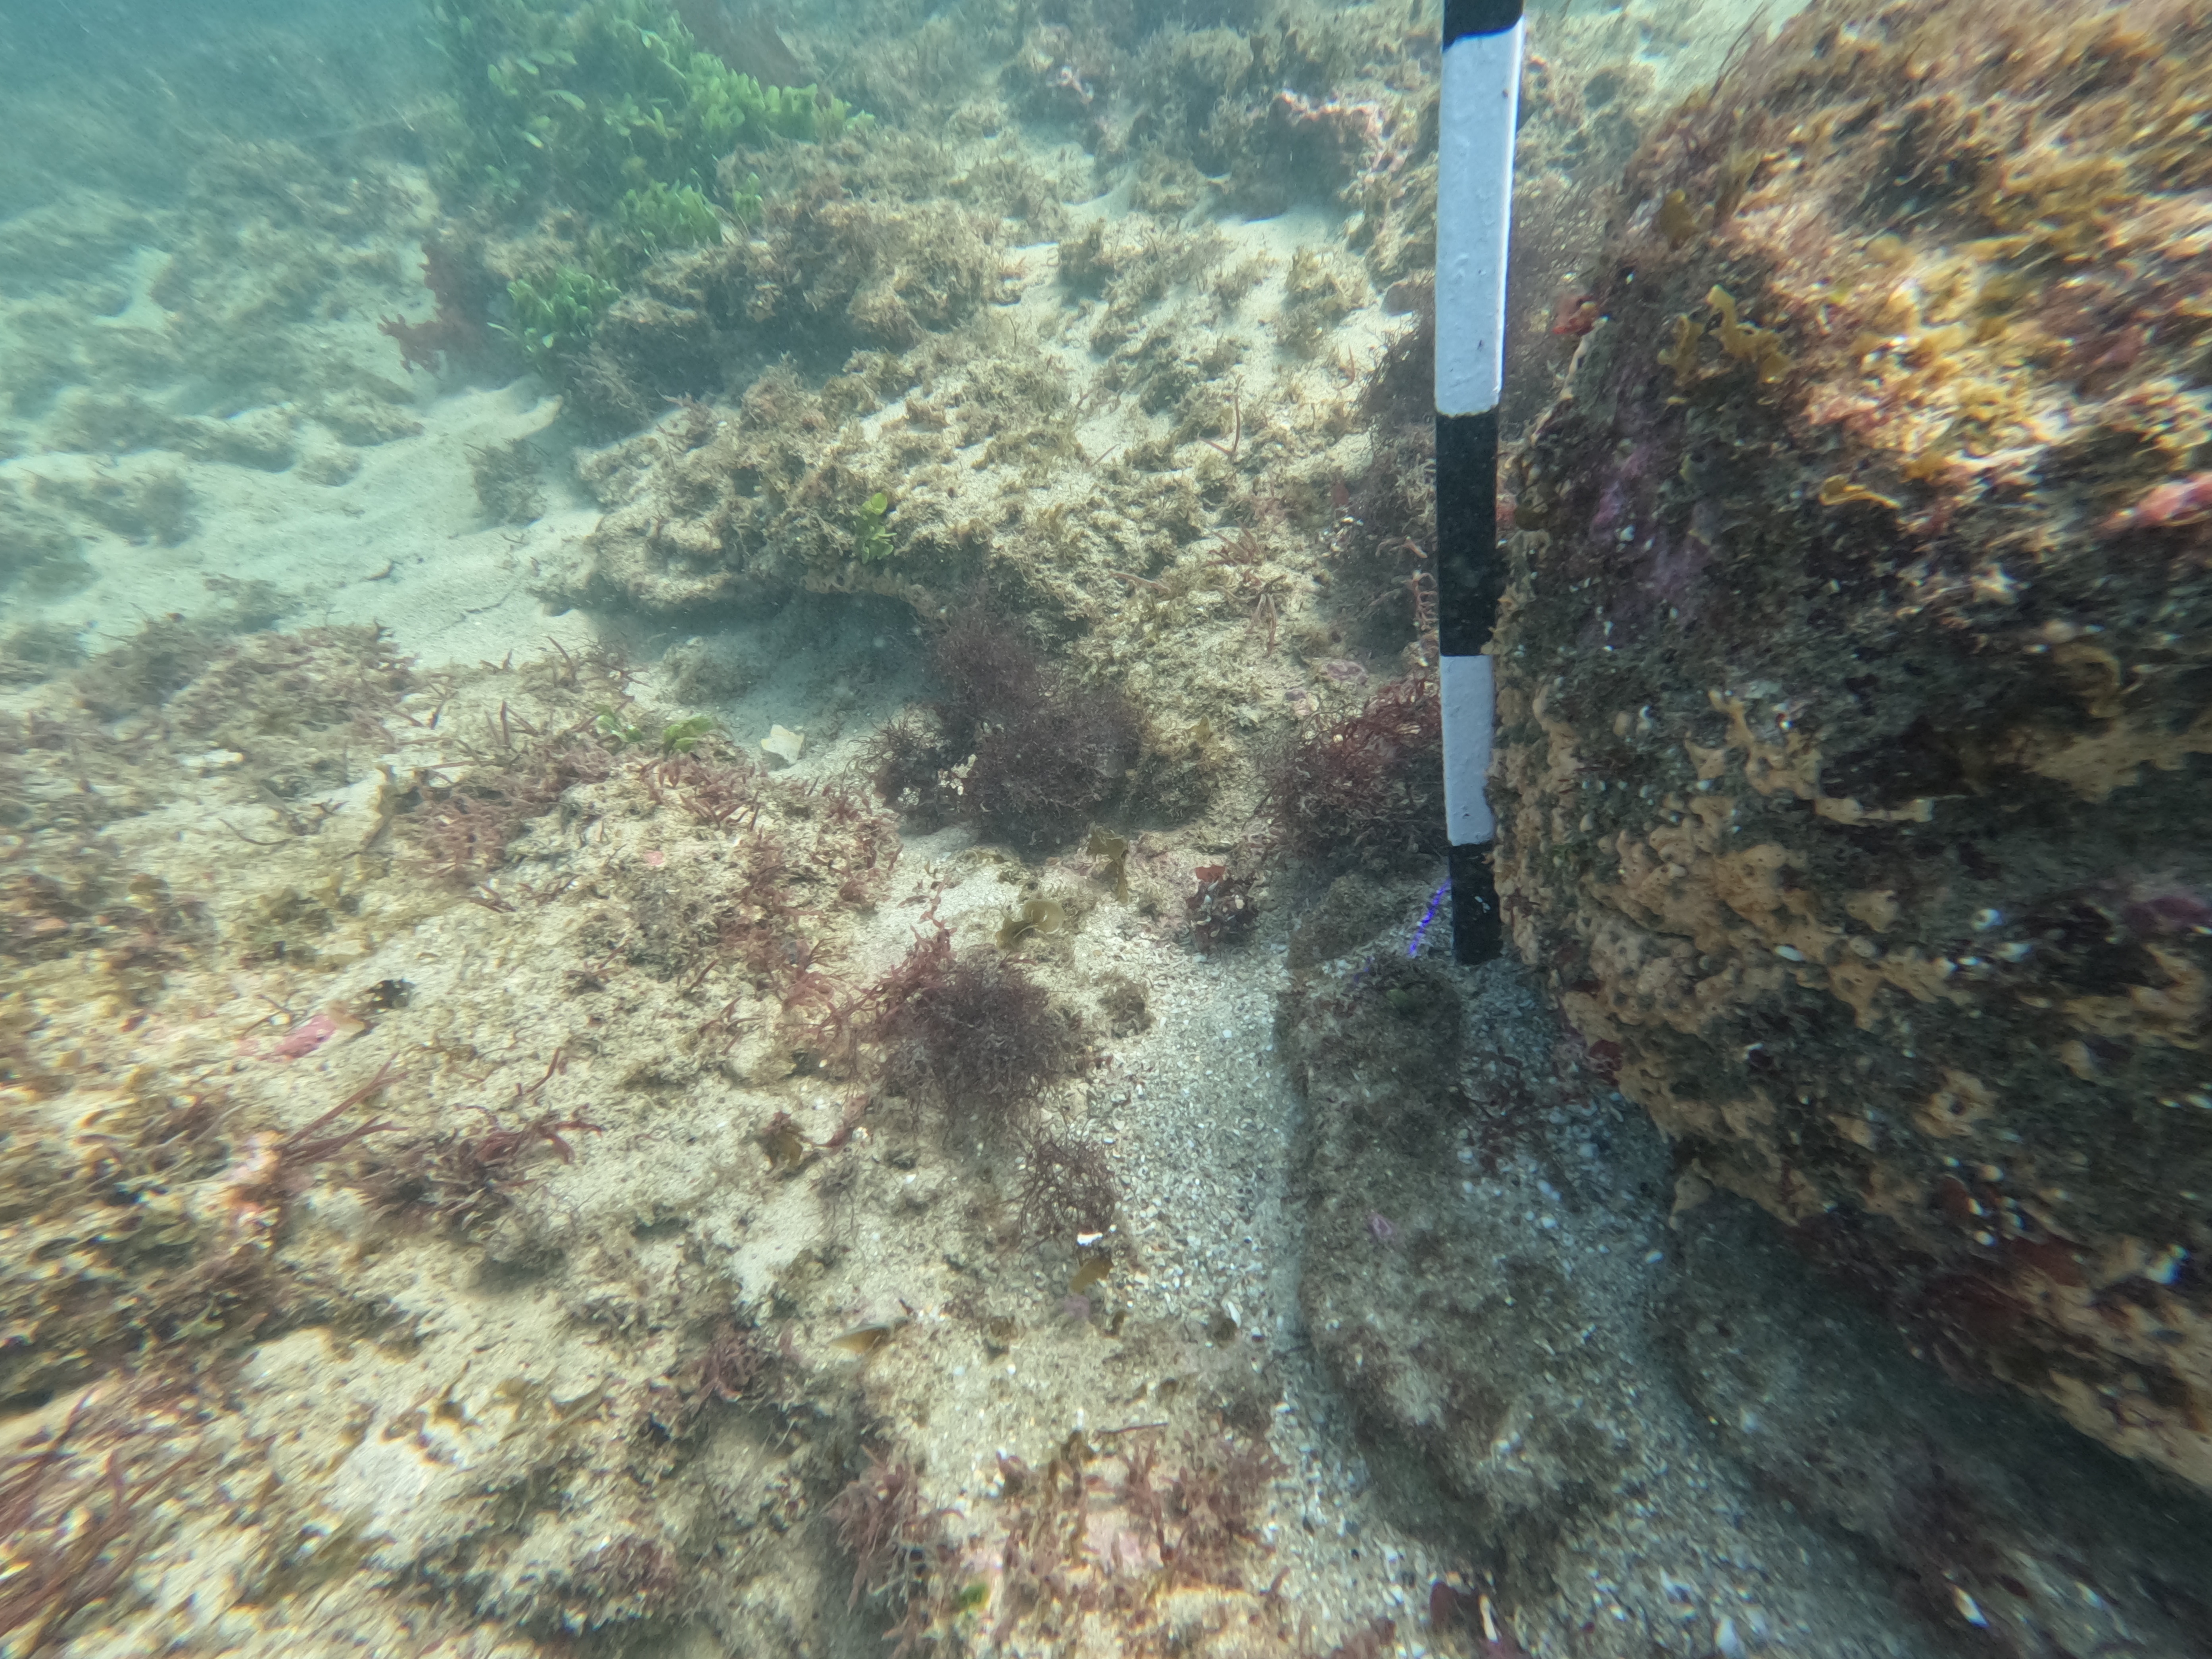

Supplement: Supplementary file 1888 [file G0028214.pdf › Ocean1/G0028214.pdf]

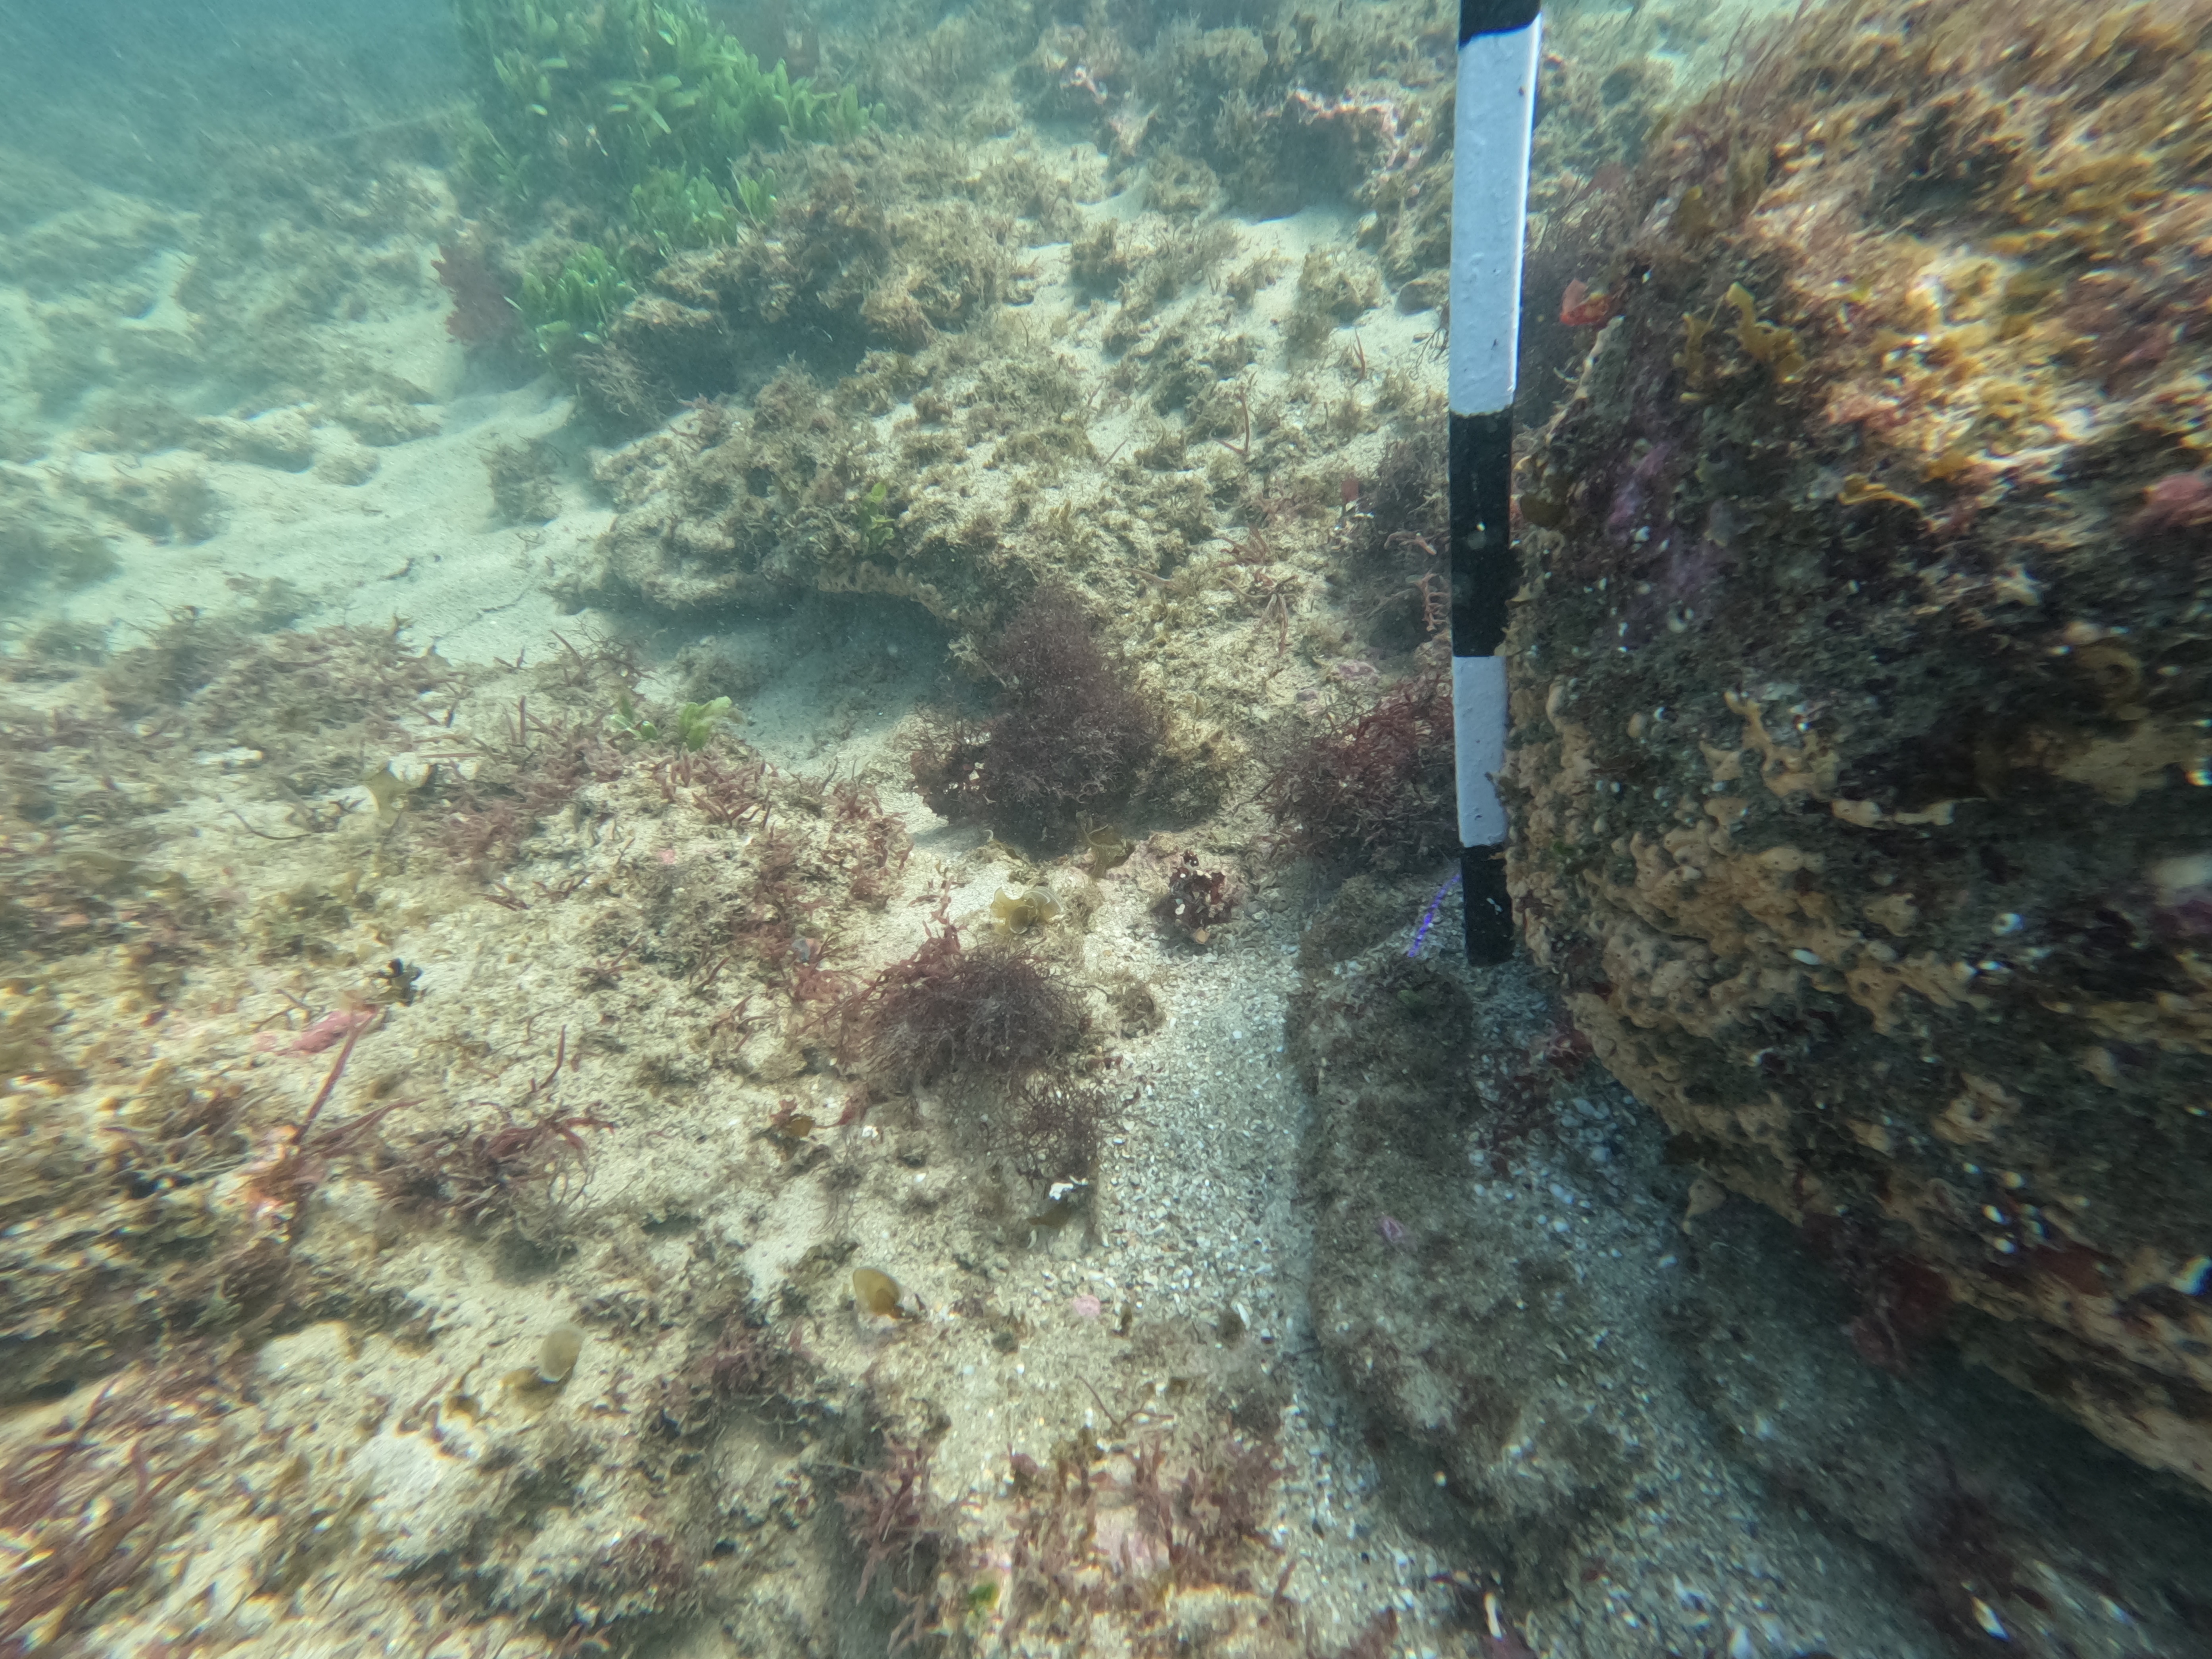

Supplement: Supplementary file 1889 [file G0028215.pdf › Ocean1/G0028215.pdf]

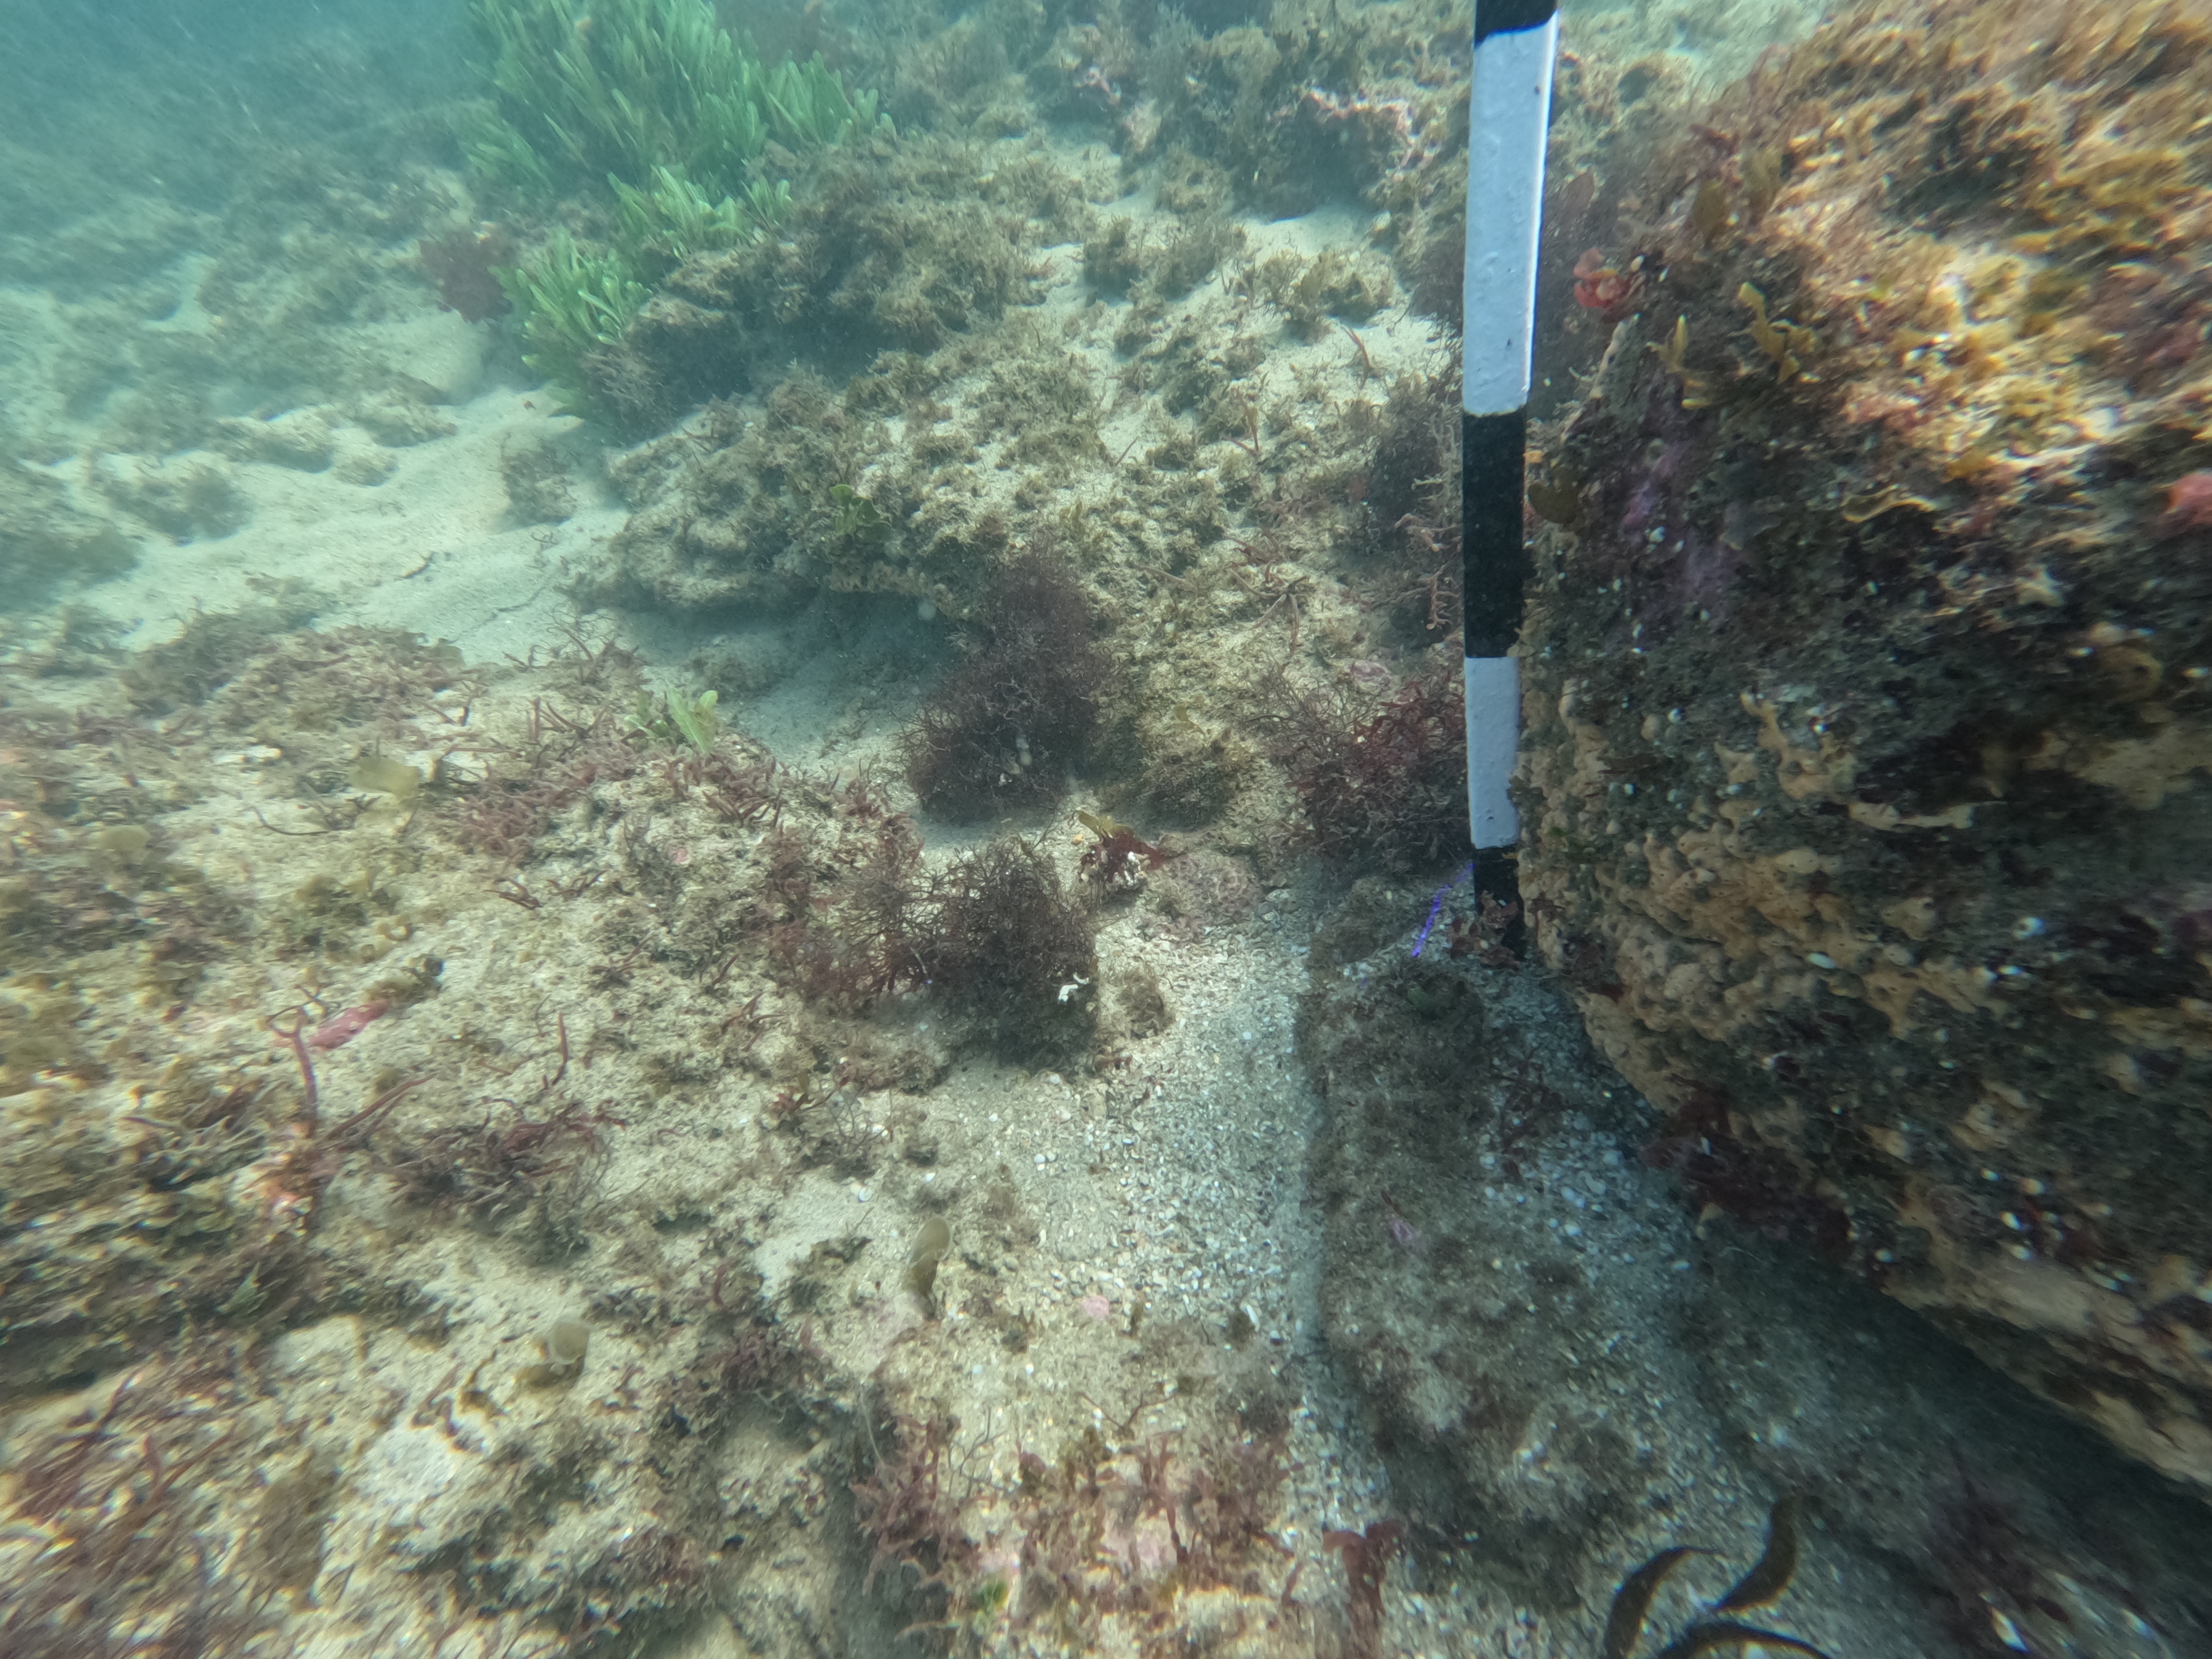

Supplement: Supplementary file 1890 [file G0028216.pdf › Ocean1/G0028216.pdf]
