# Supplementary figures and images for: 3D reconstruction of shallow sea environment using direct system calibration and faint laser line extraction (part 19 of 35)
Source: Research Square preprint supplement (doi:10.21203/rs.3.rs-5262658/v1), 2024-12-02

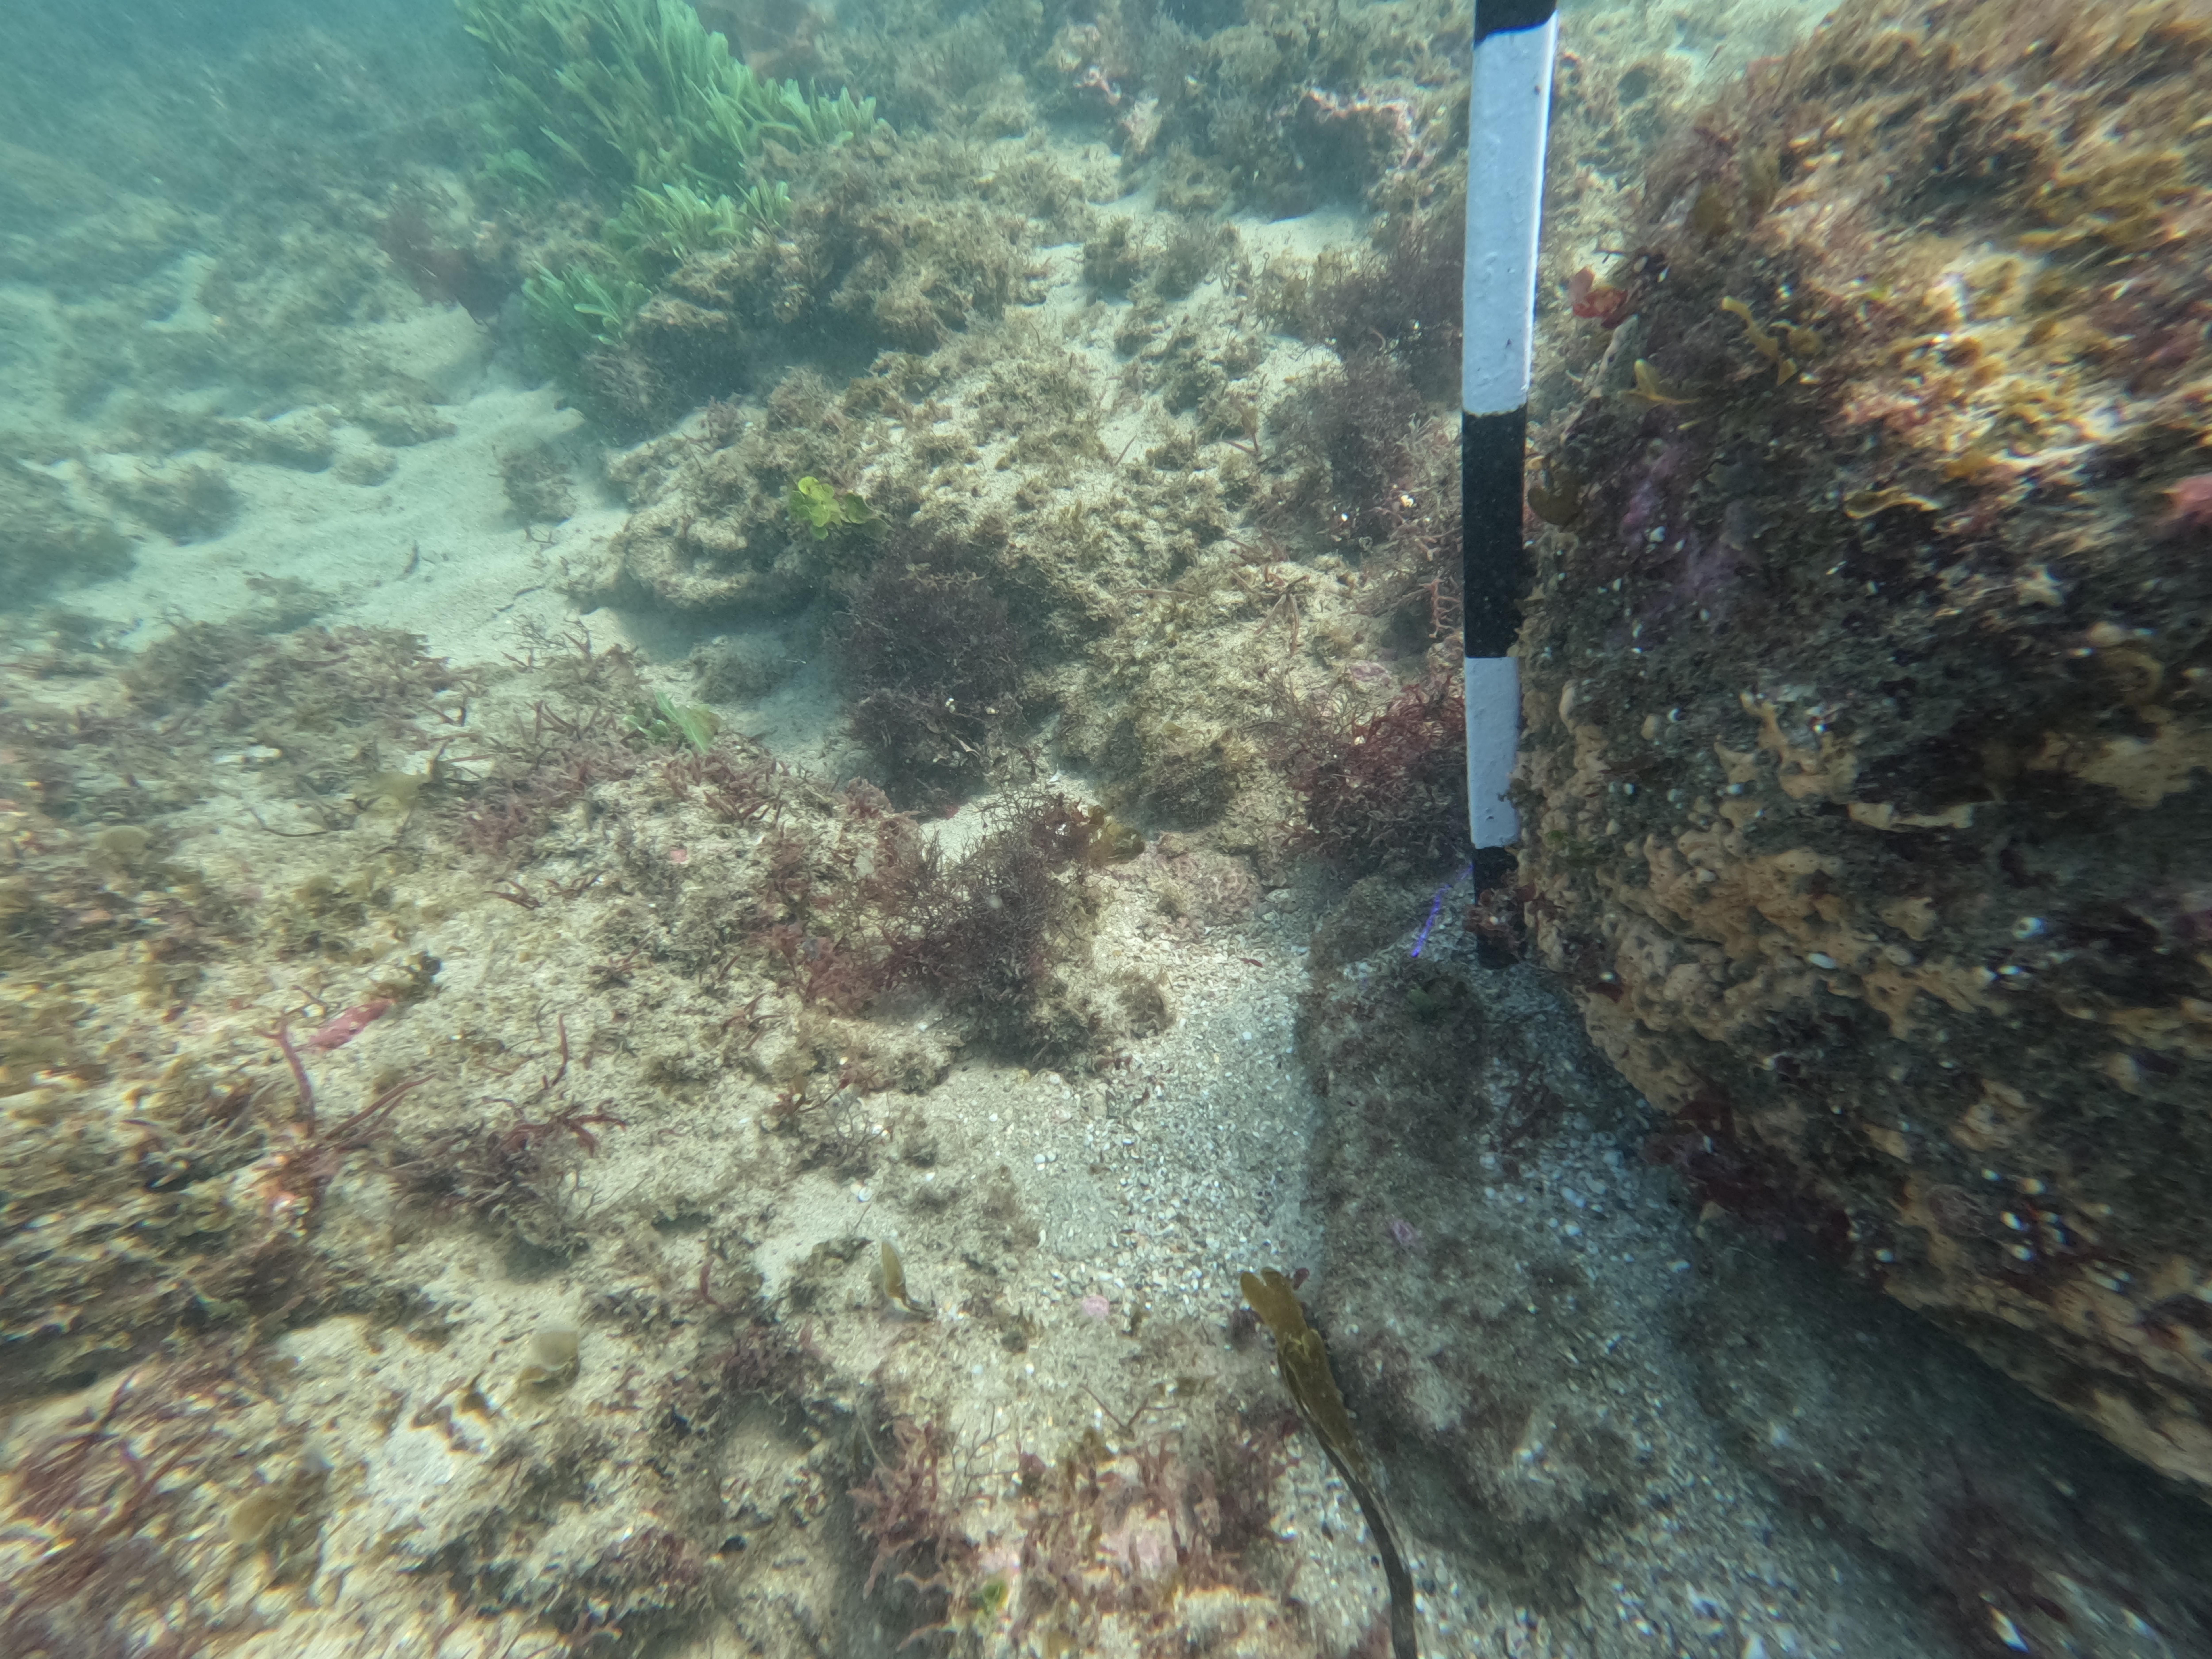

Supplement: Supplementary file 1891 [file G0028217.pdf › Ocean1/G0028217.pdf]

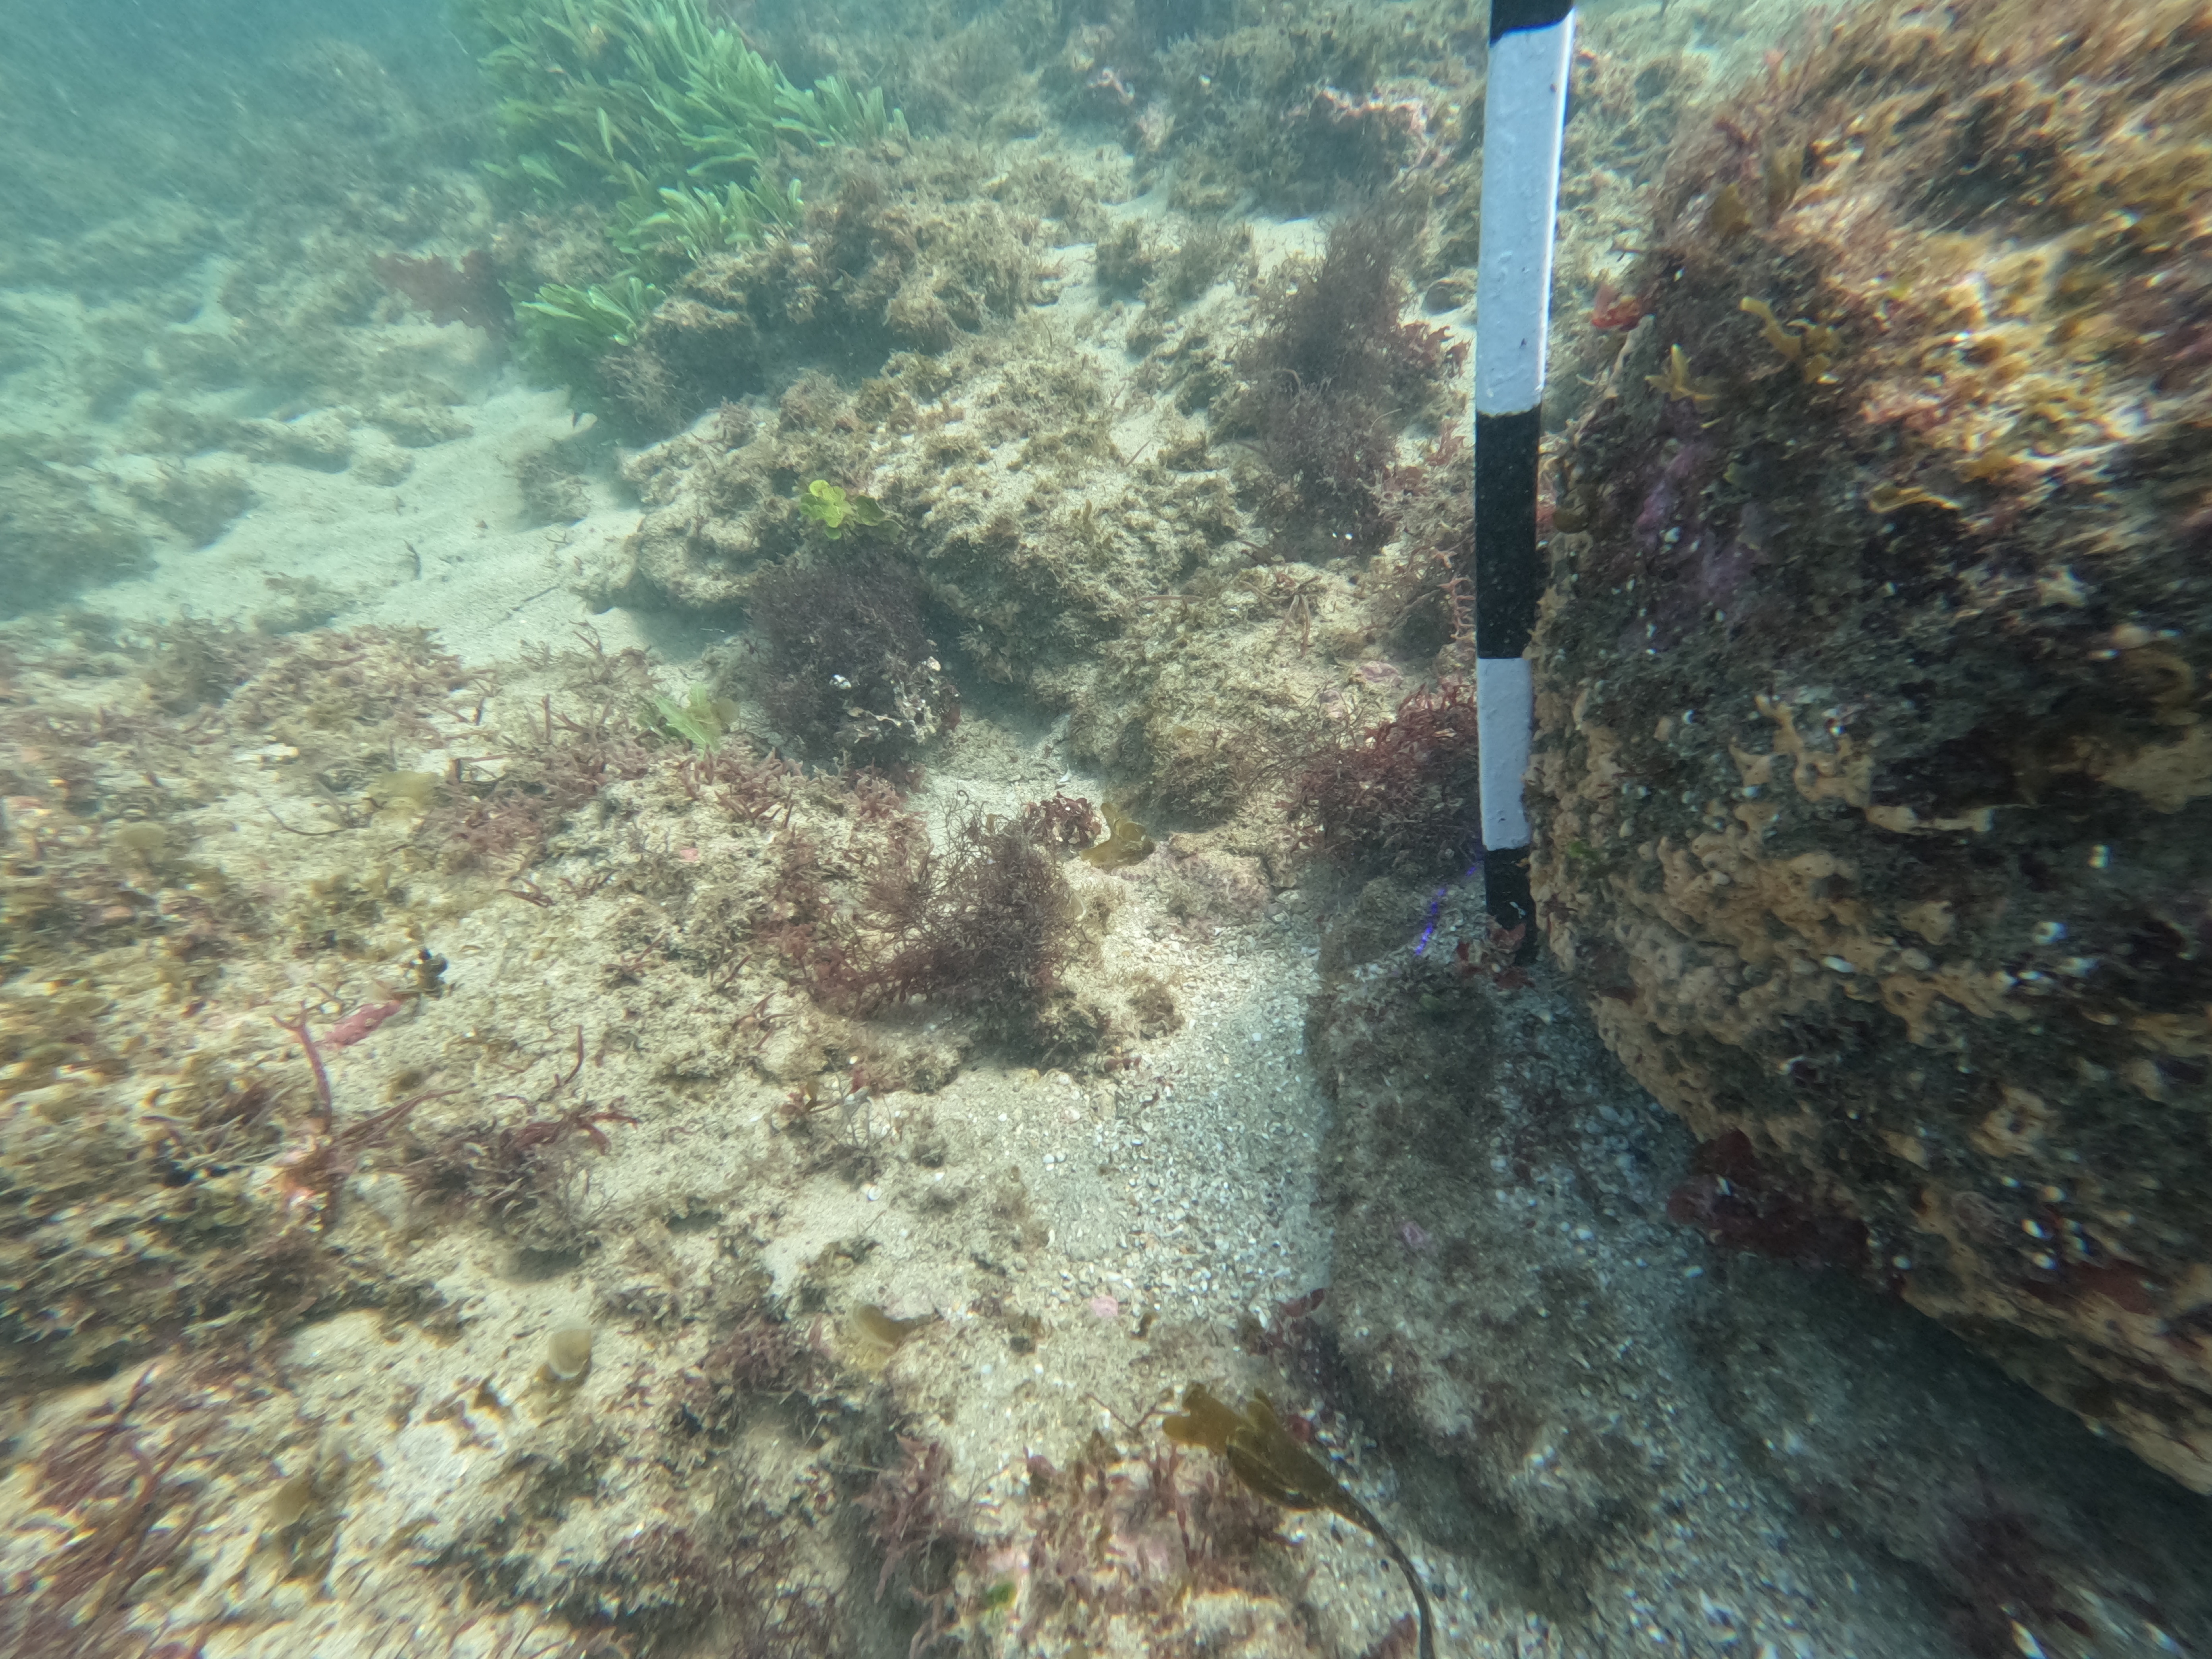

Supplement: Supplementary file 1892 [file G0028218.pdf › Ocean1/G0028218.pdf]

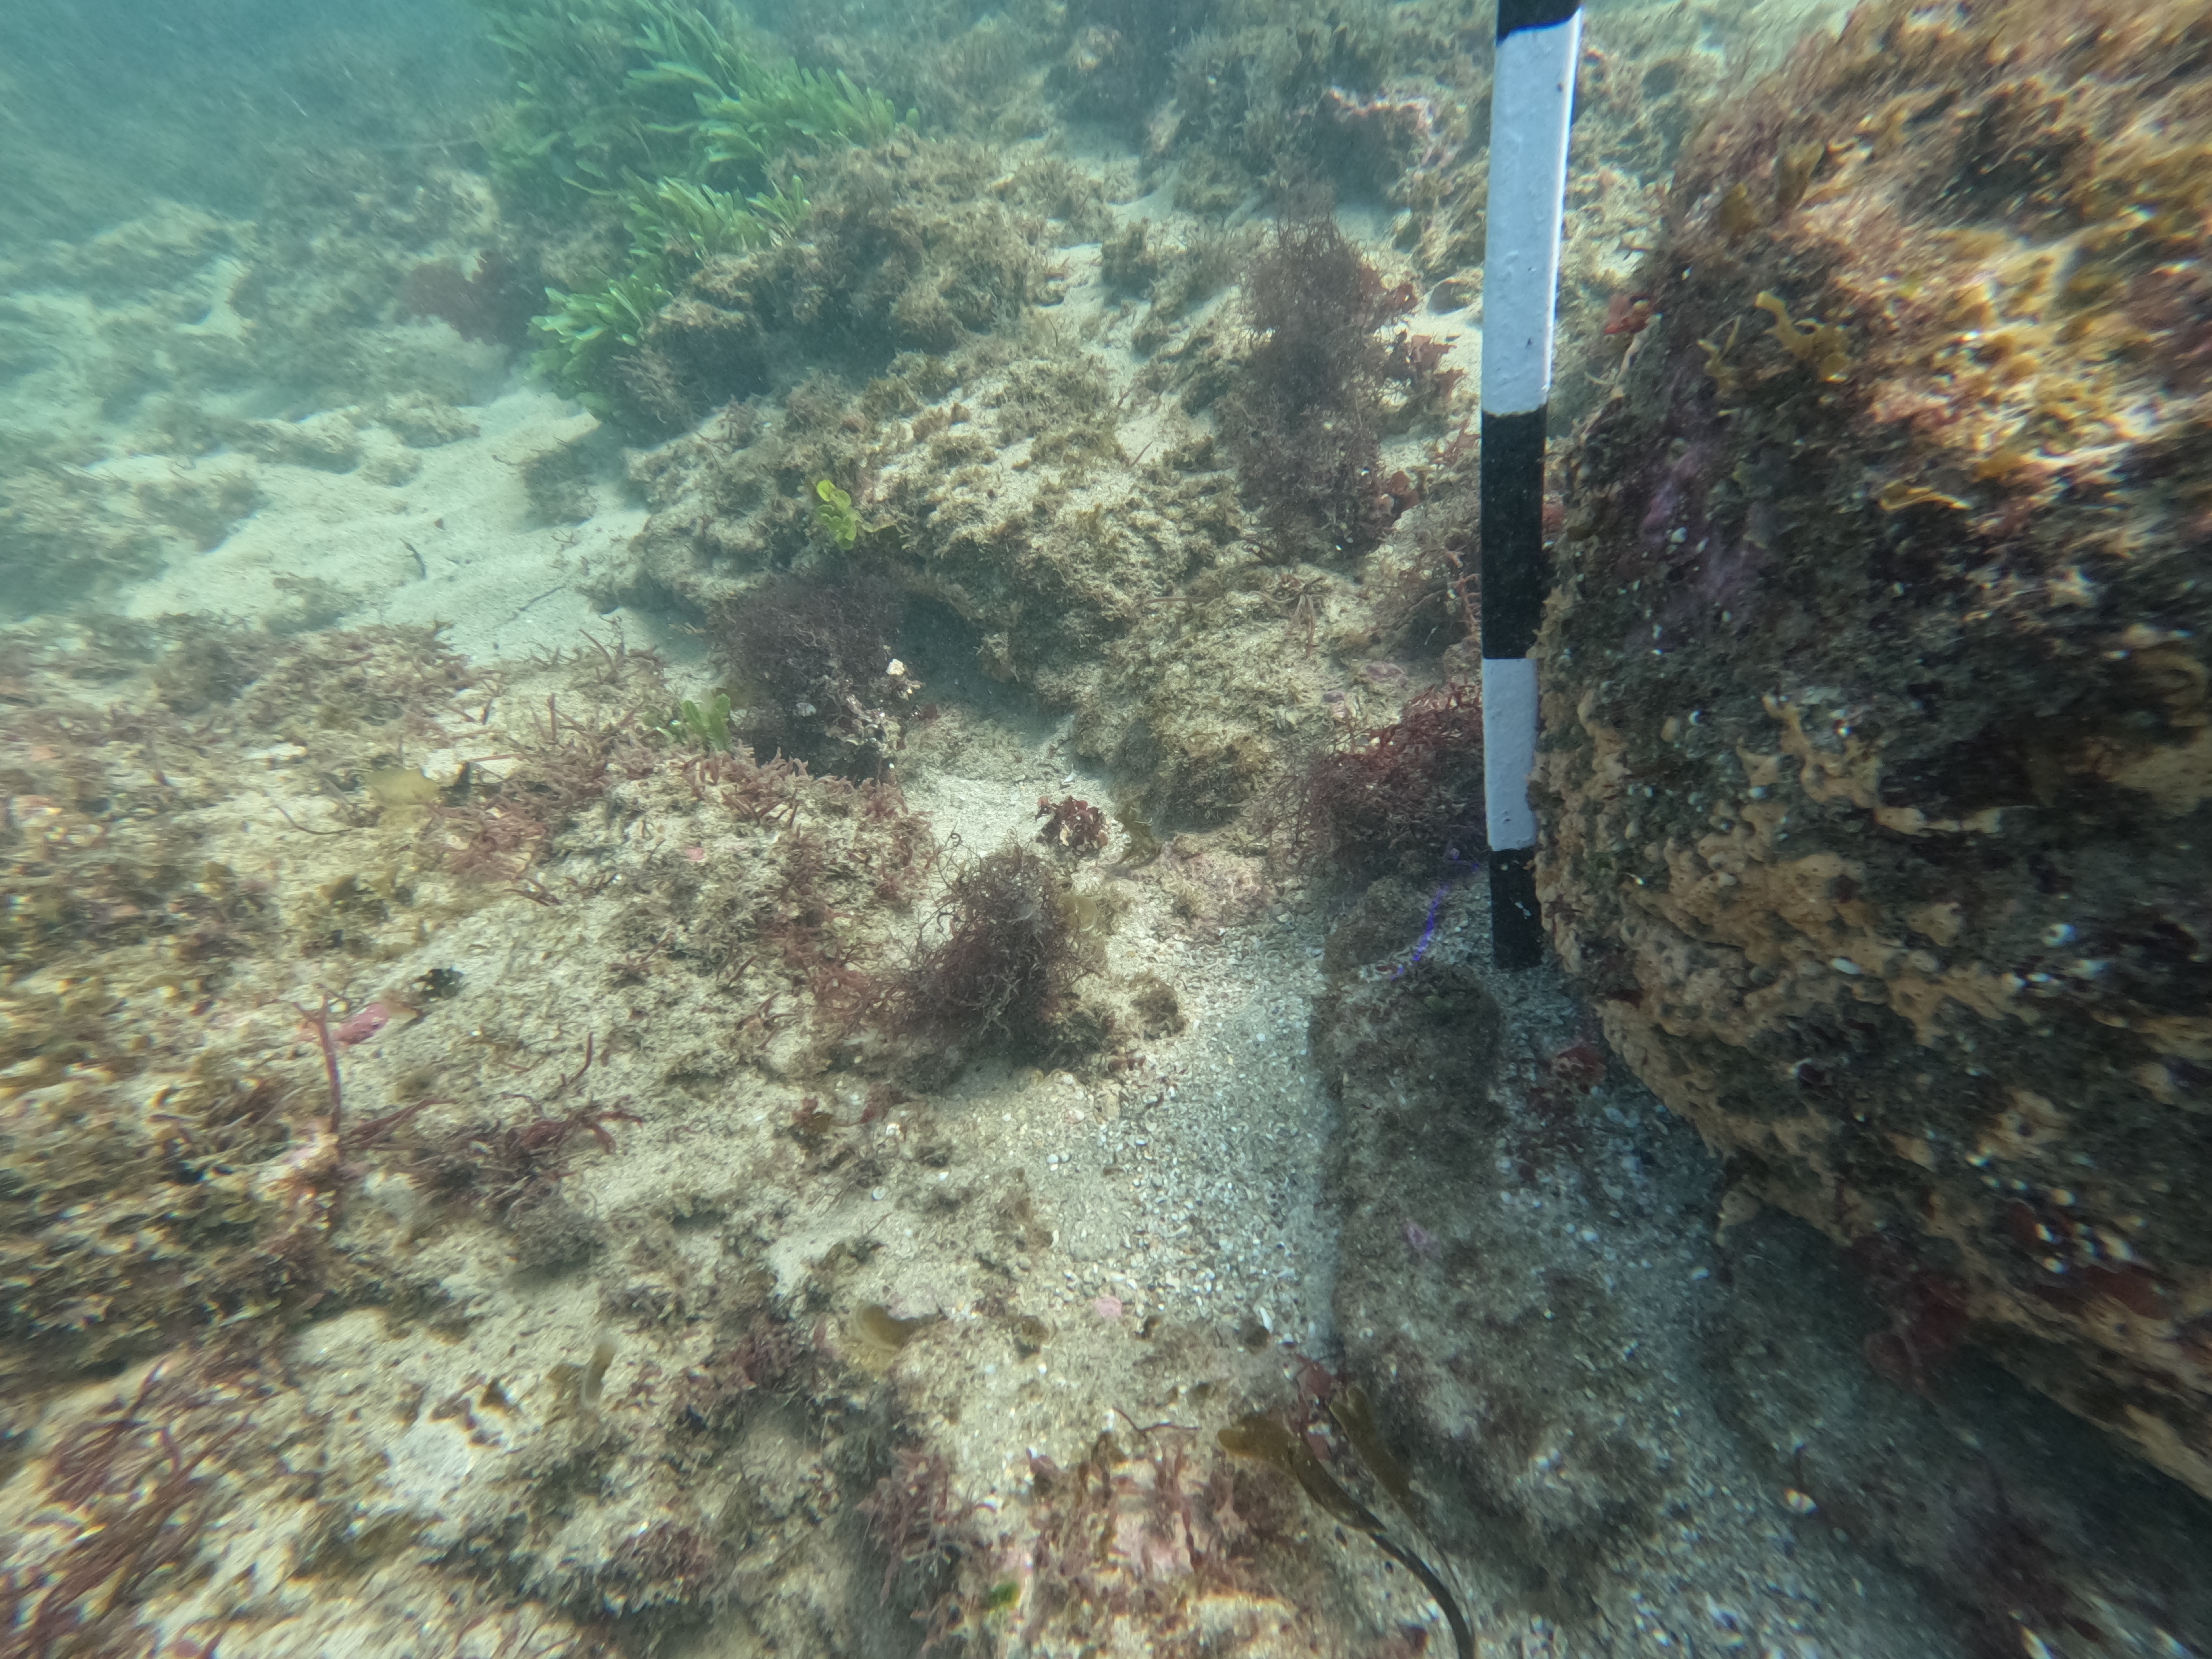

Supplement: Supplementary file 1893 [file G0028219.pdf › Ocean1/G0028219.pdf]

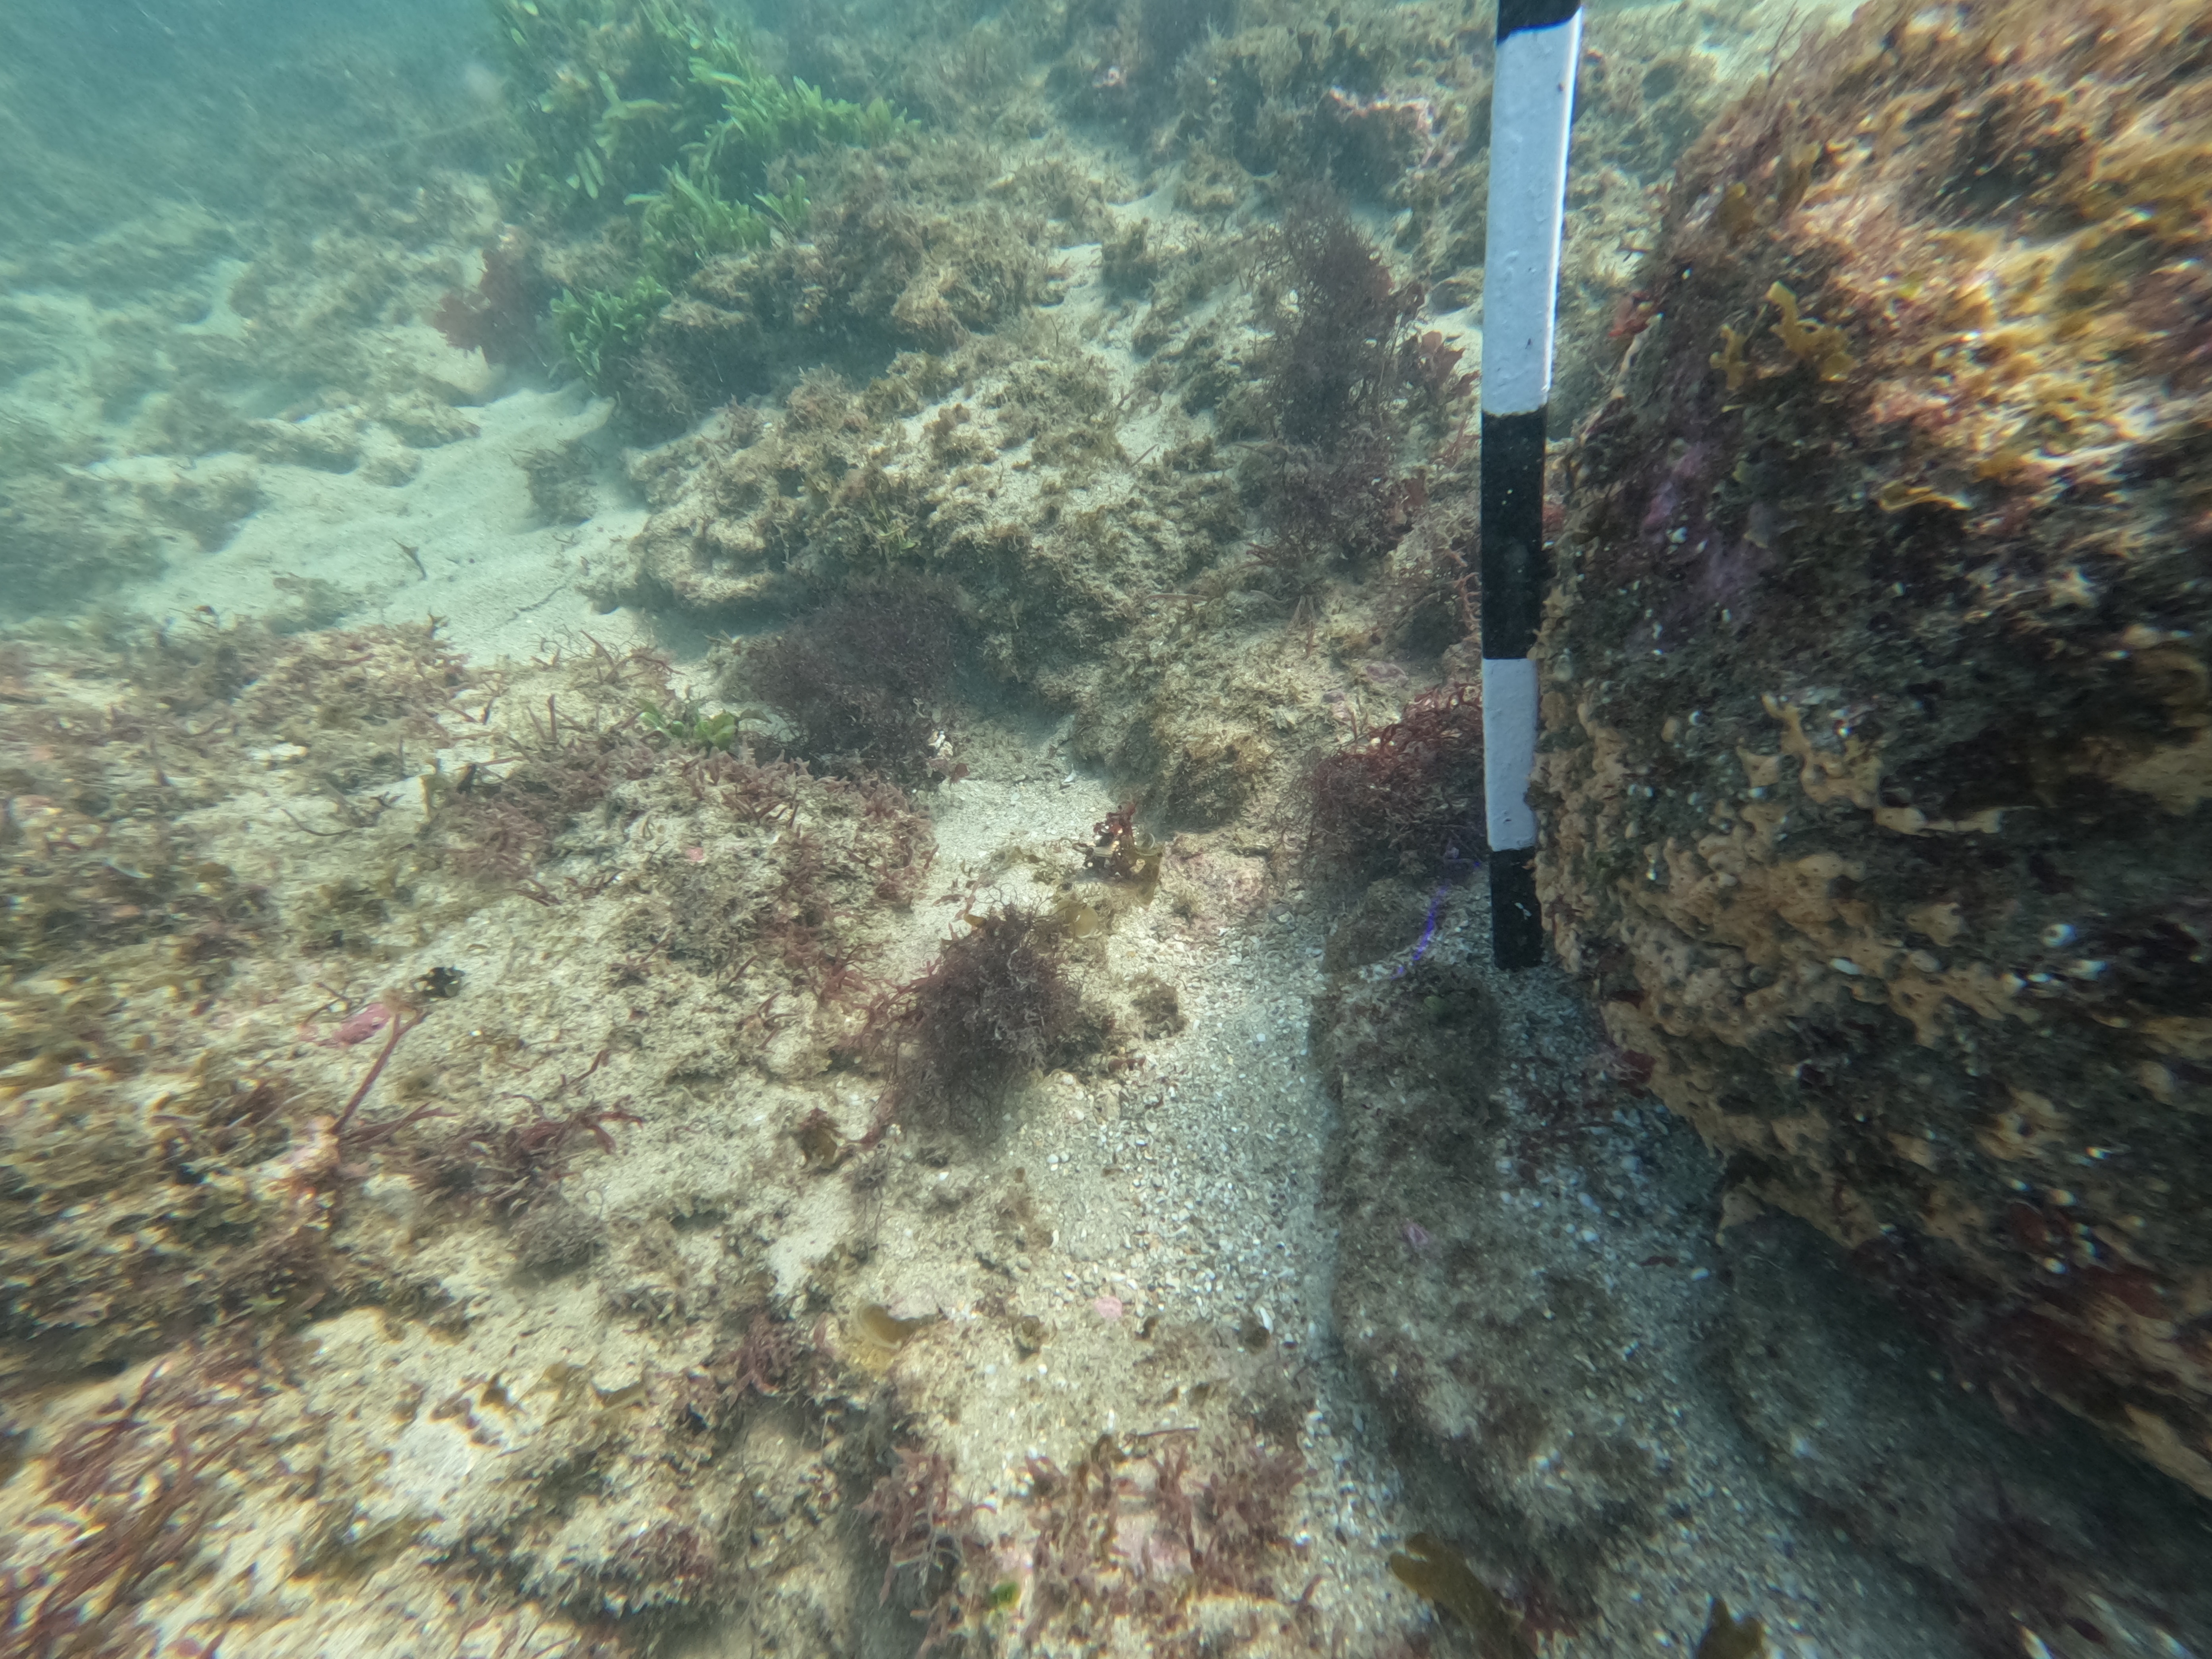

Supplement: Supplementary file 1894 [file G0028220.pdf › Ocean1/G0028220.pdf]

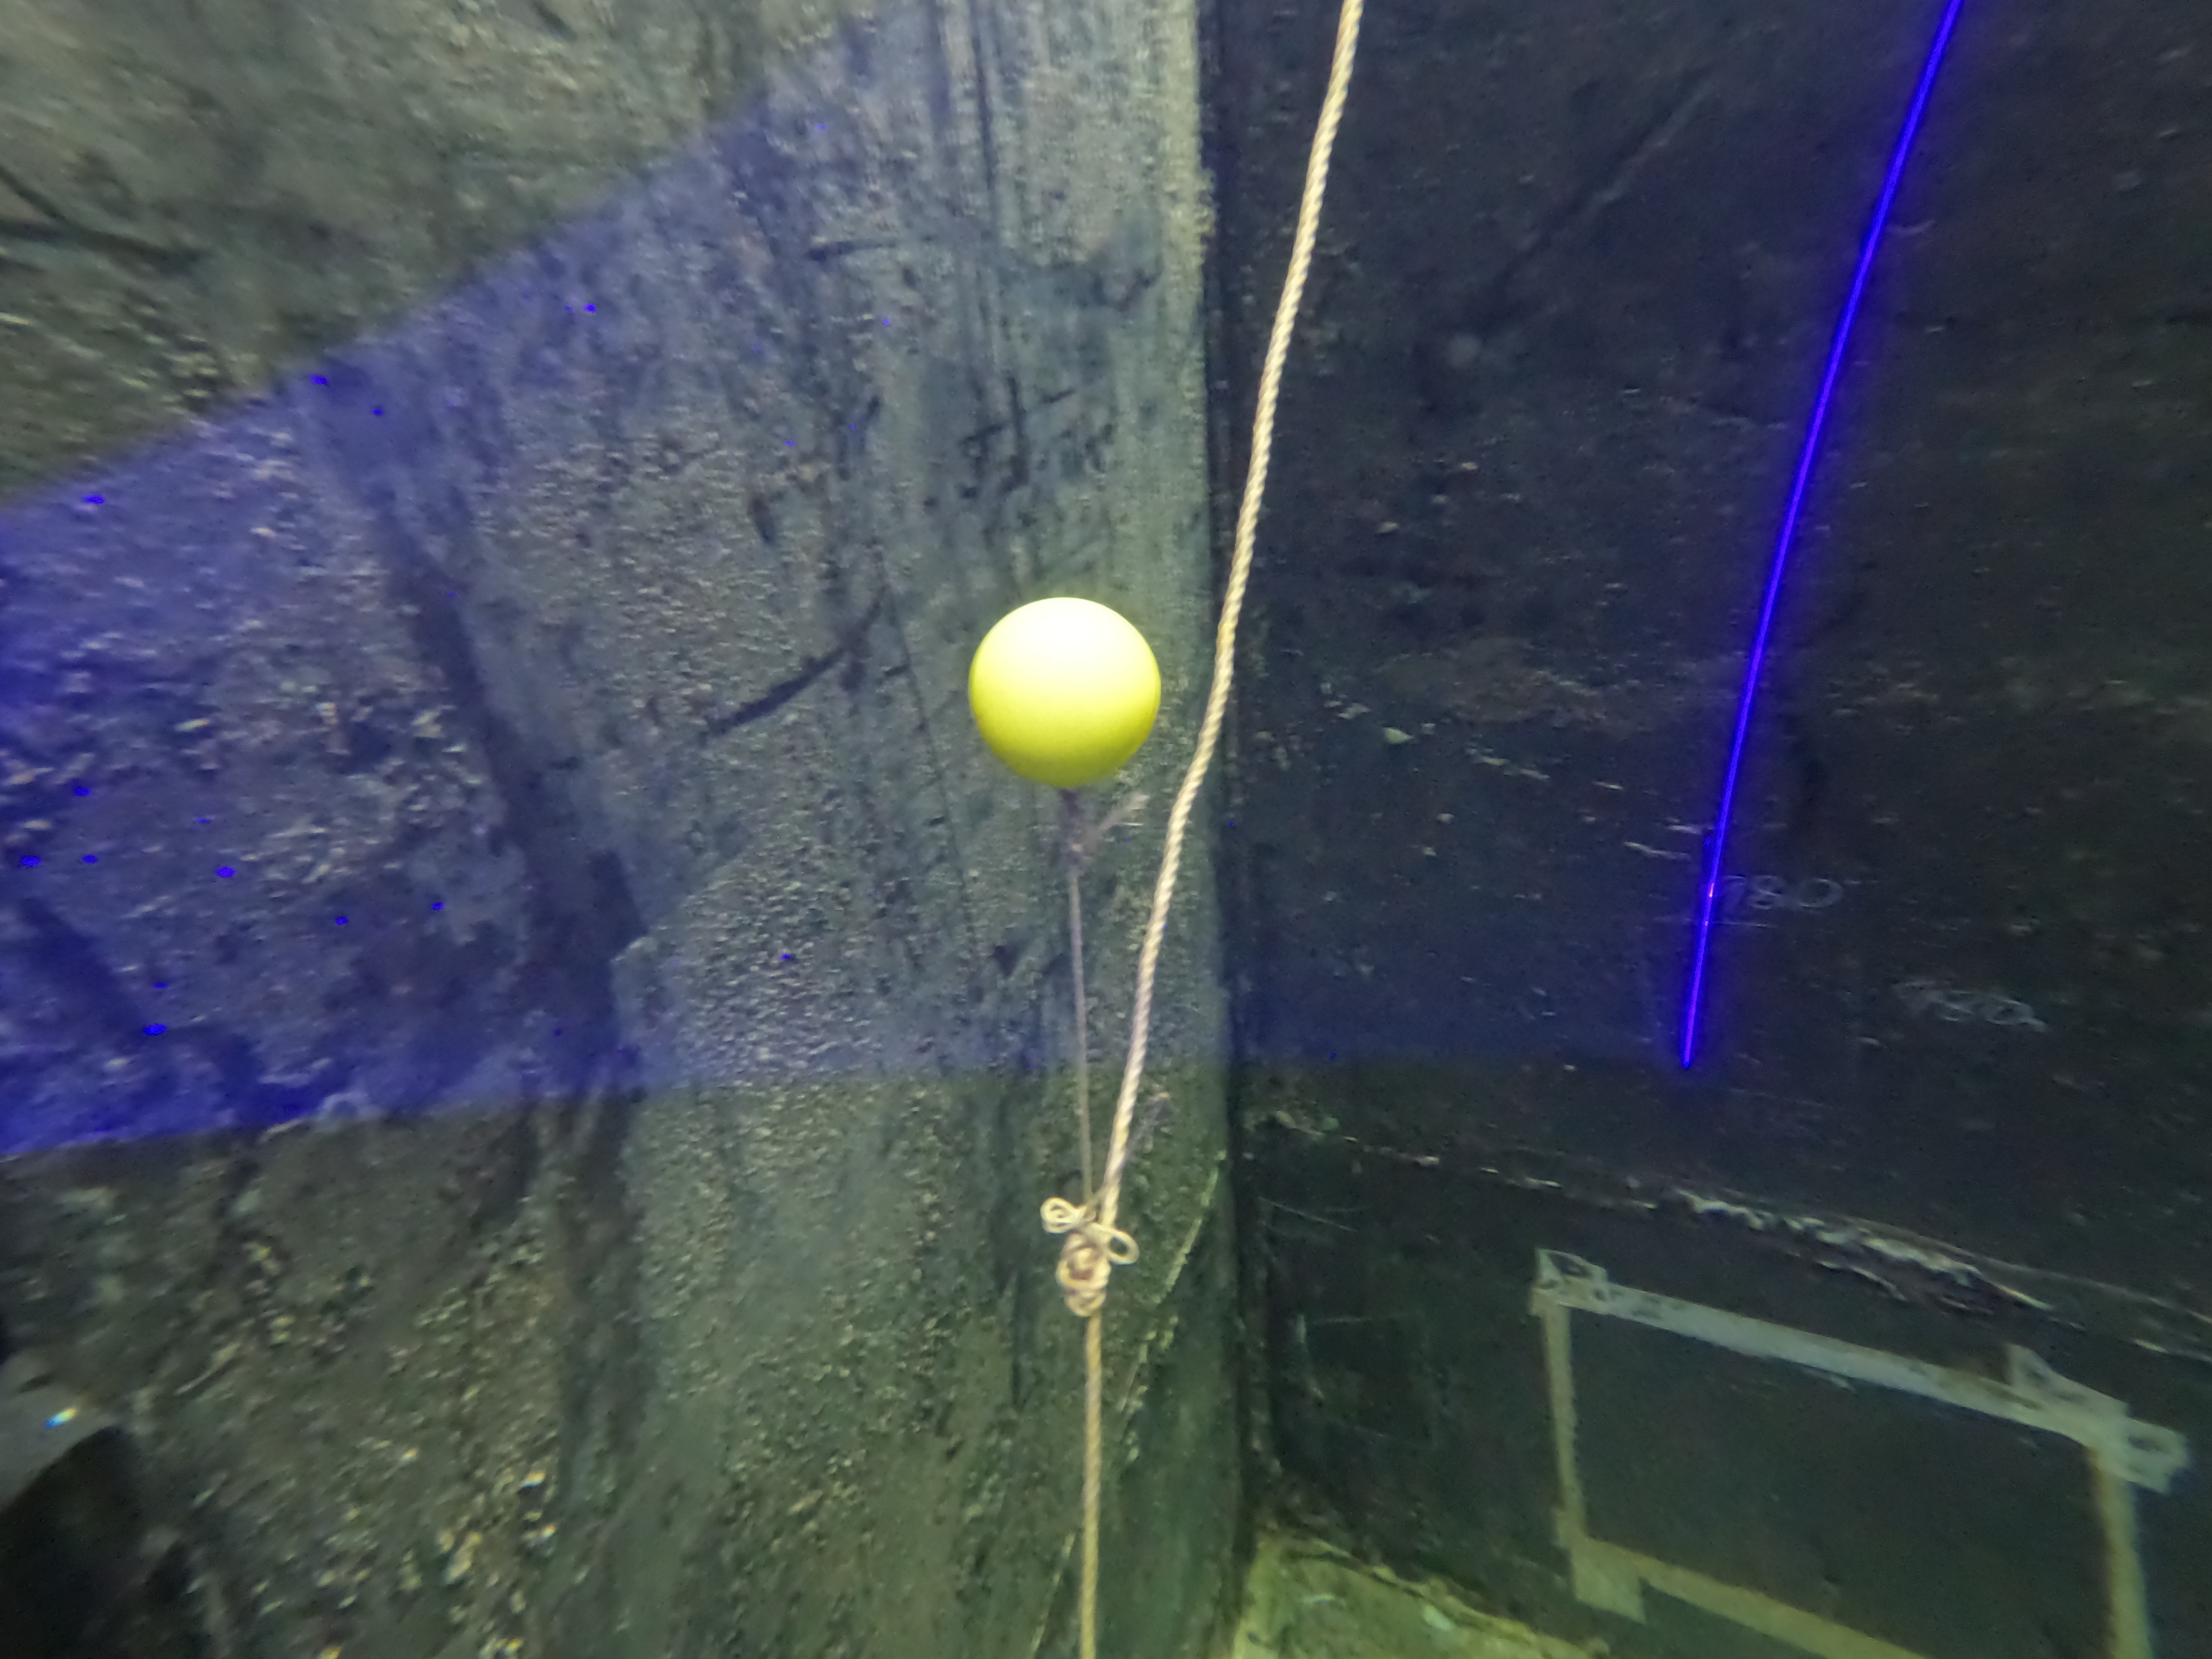

Supplement: Supplementary file 1895 [file G0034287.pdf › 5/G0034287.pdf]

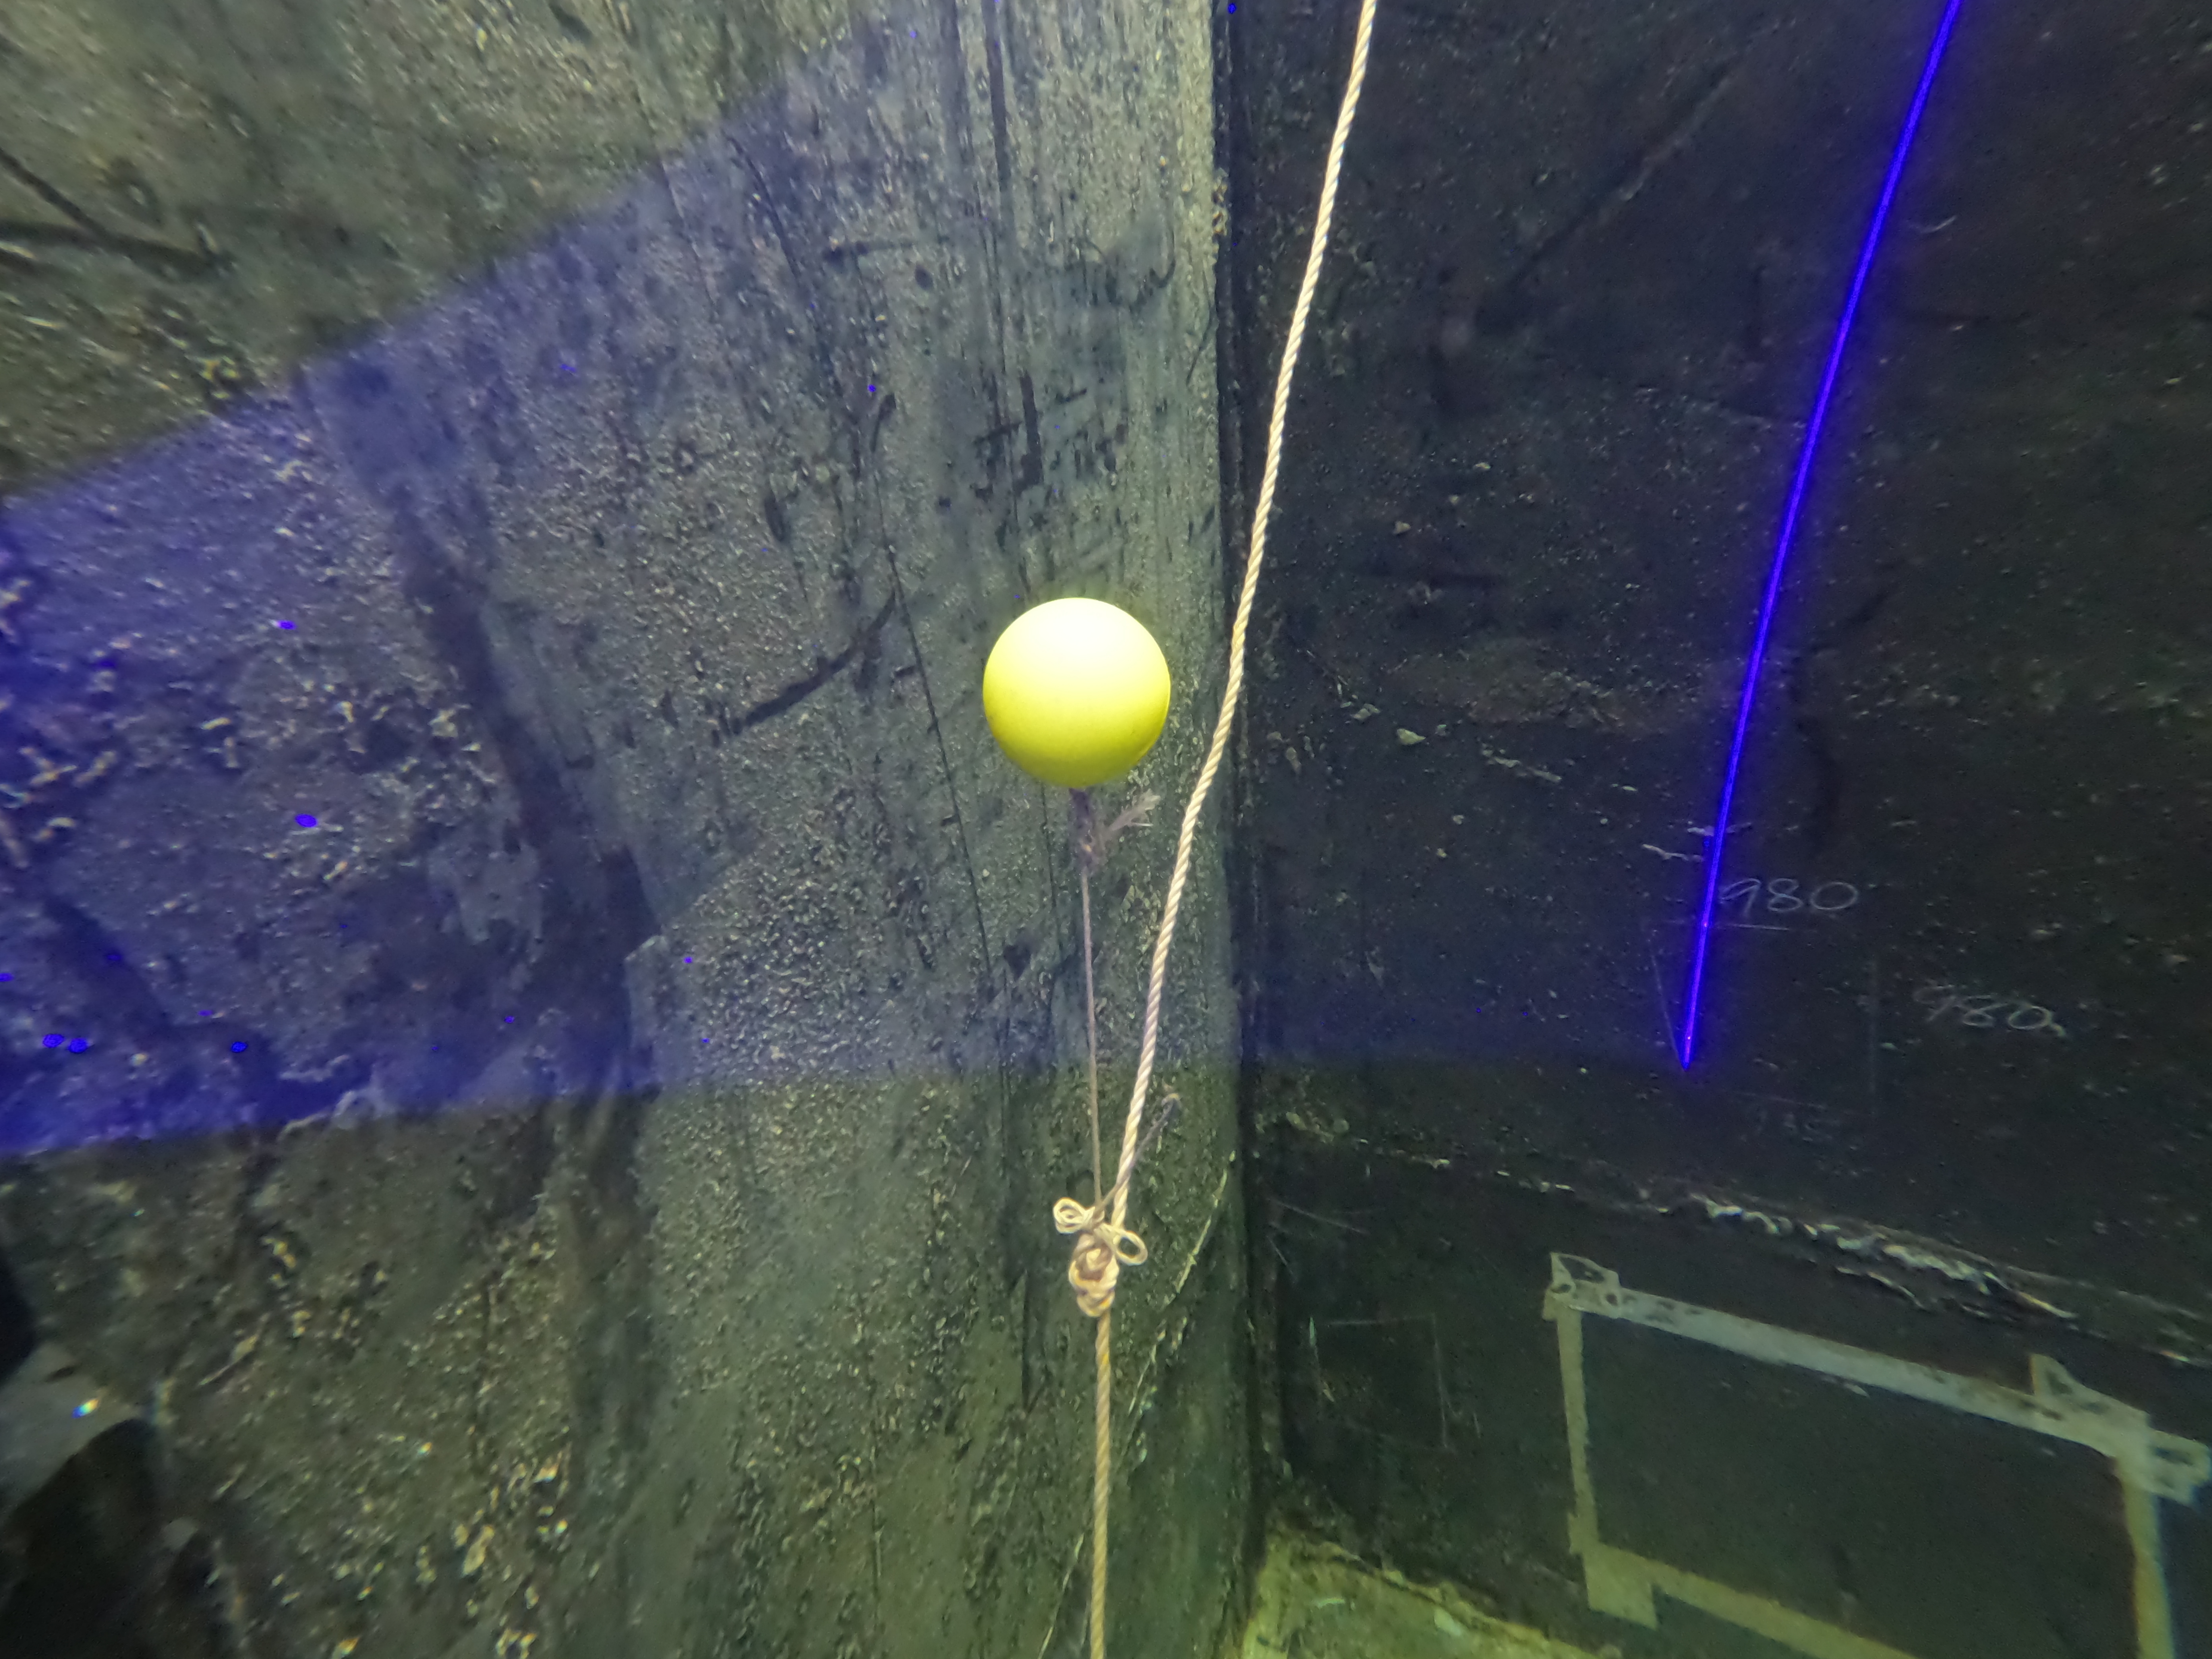

Supplement: Supplementary file 1896 [file G0034288.pdf › 5/G0034288.pdf]

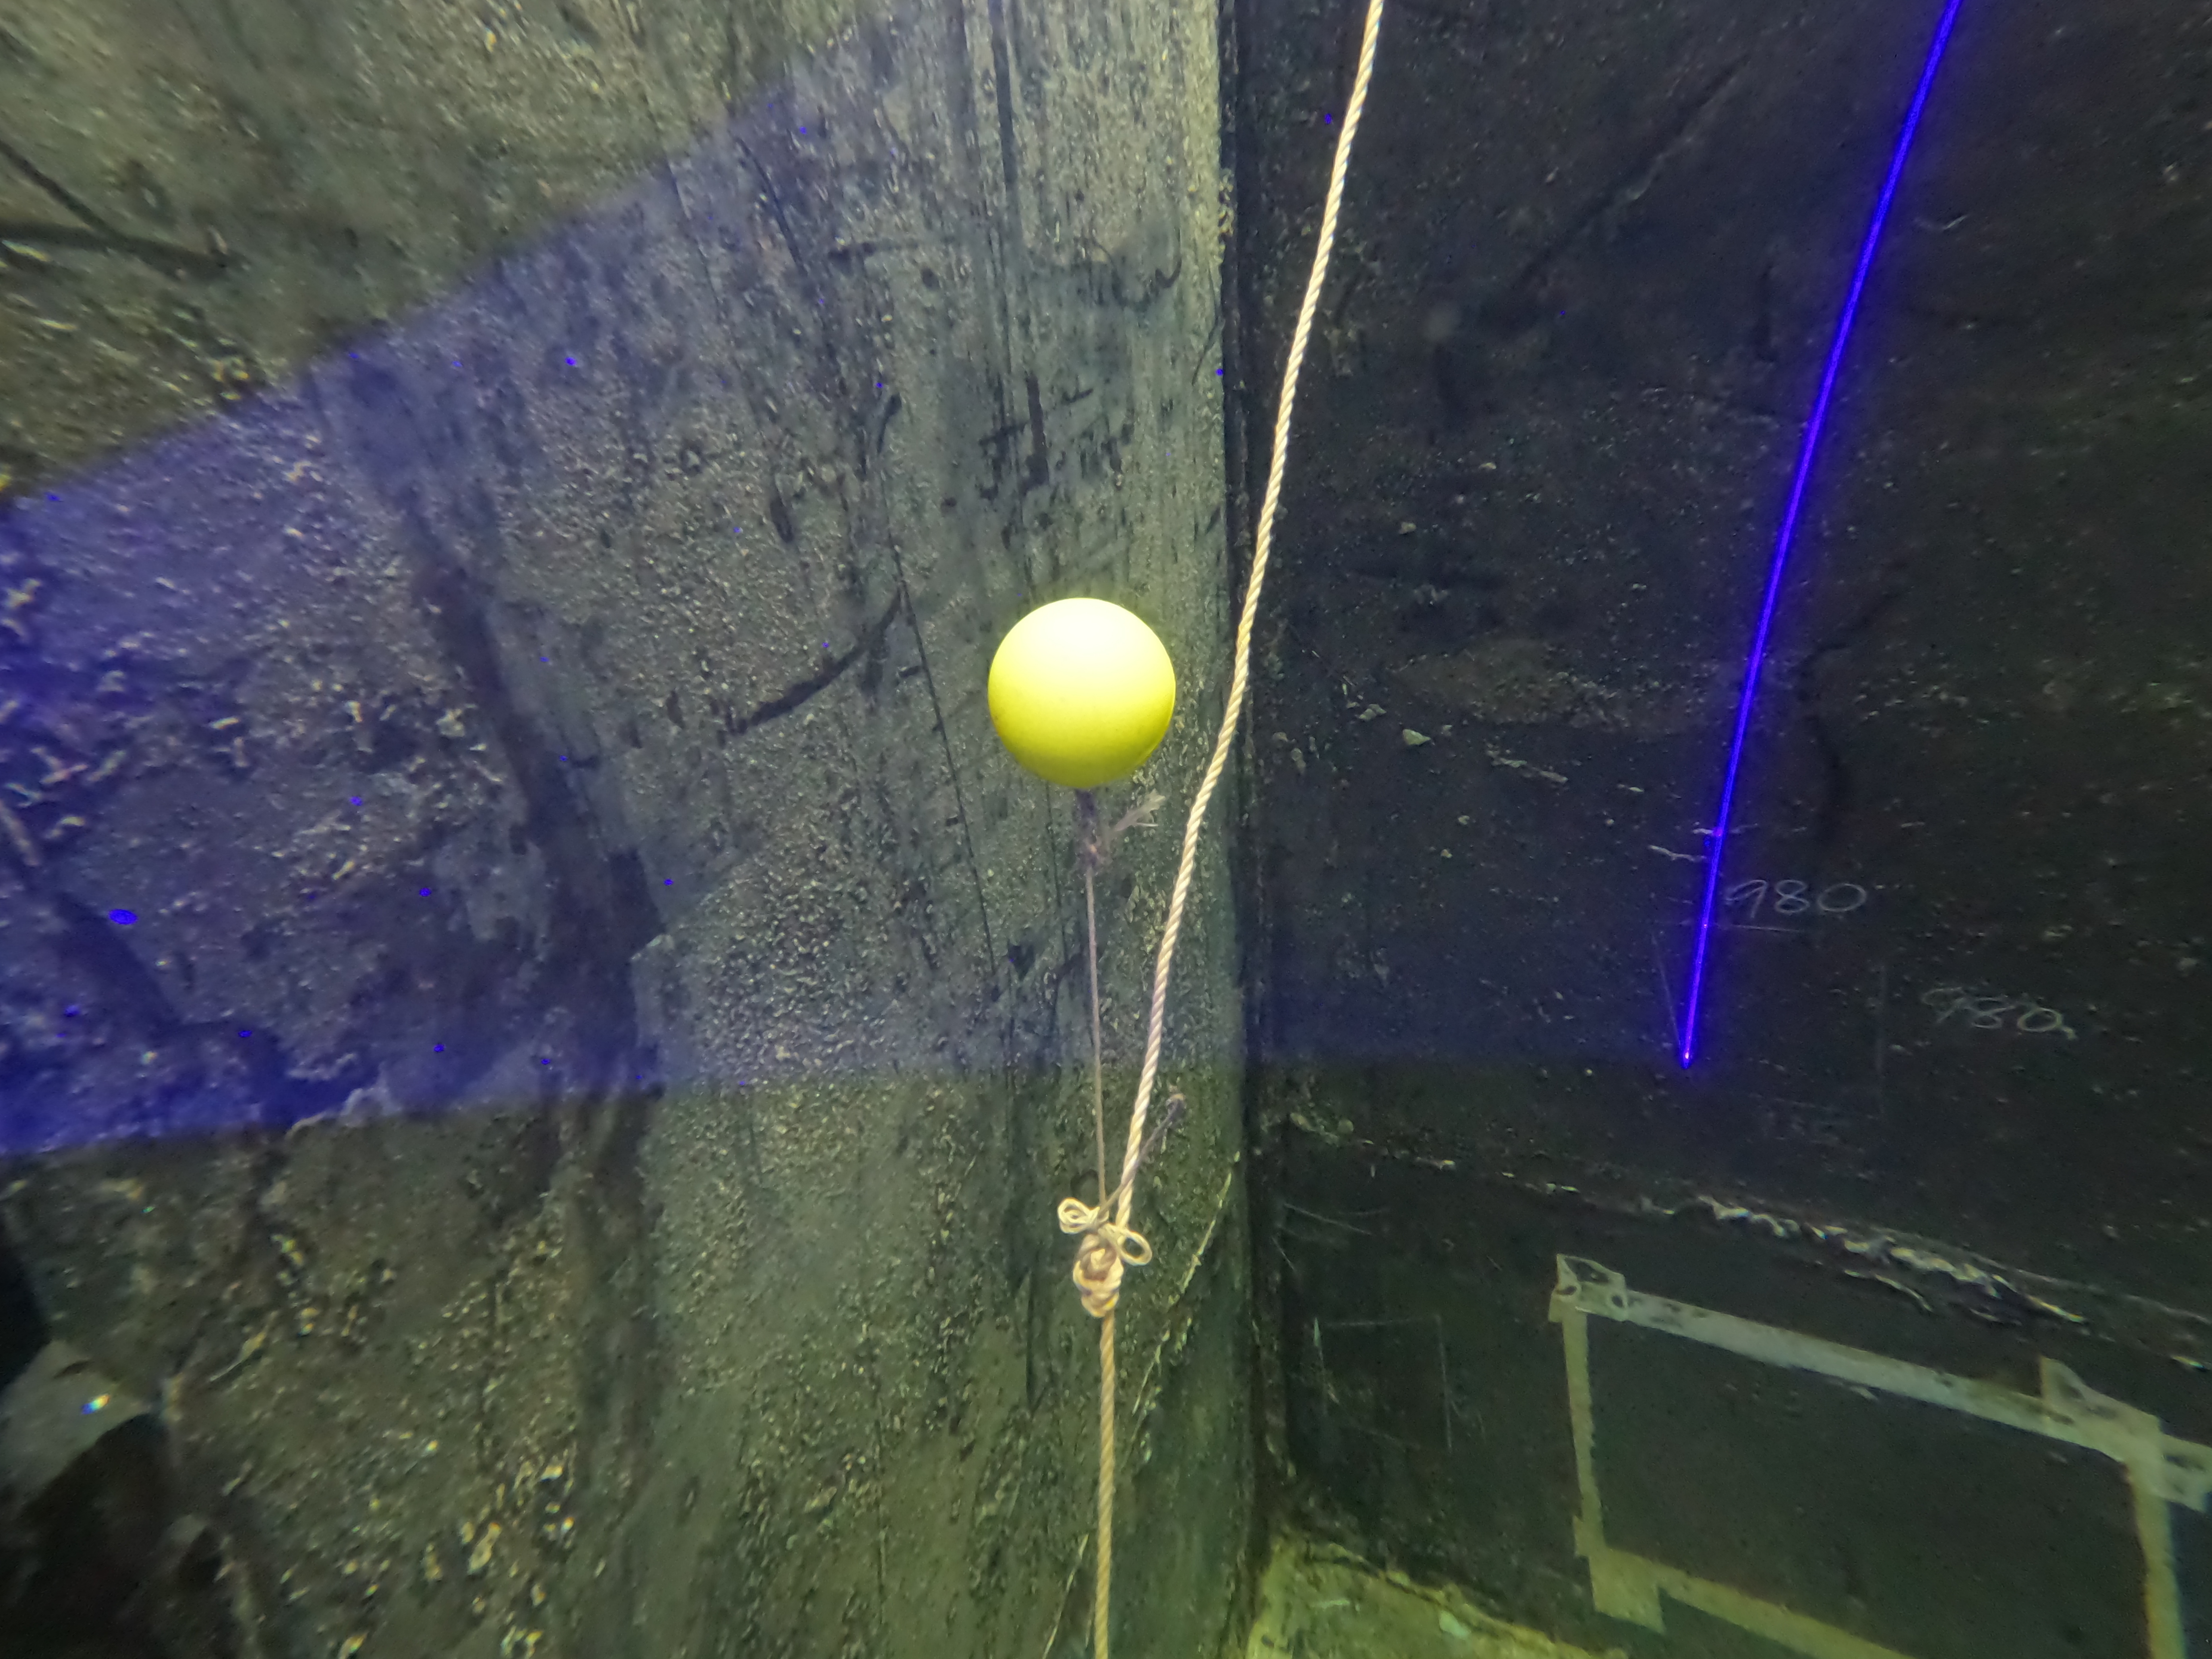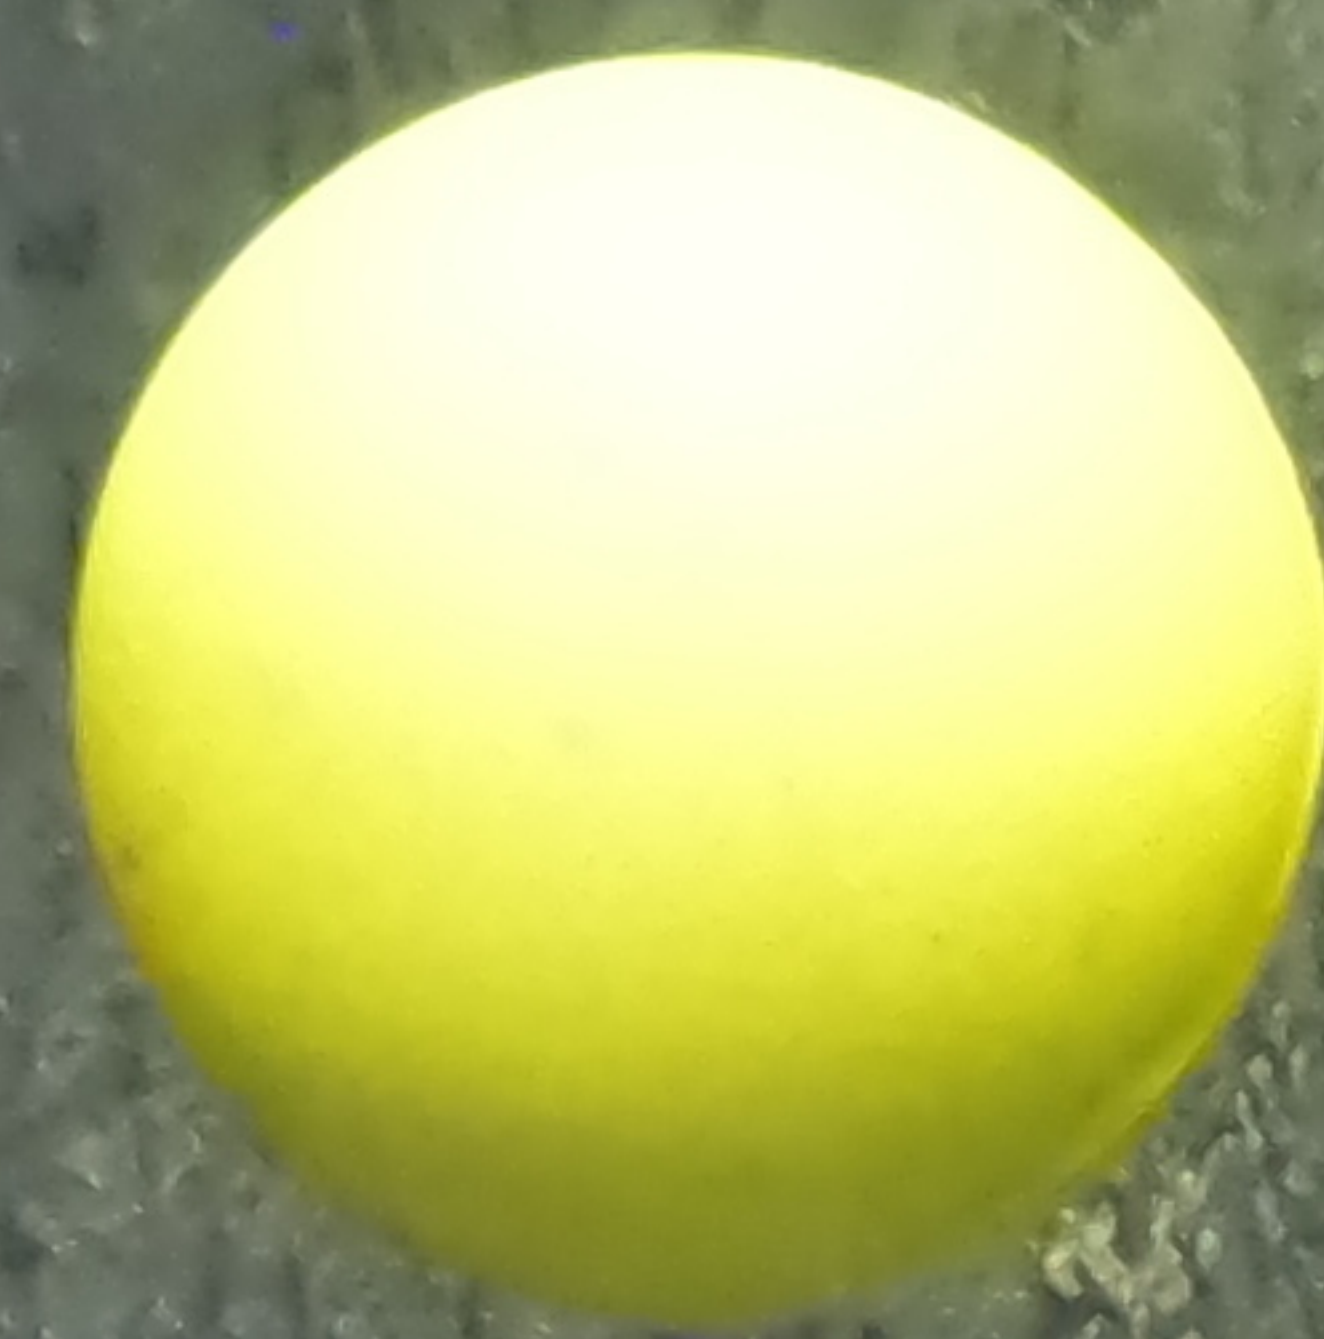

980

980

Supplement: Supplementary file 1897 [file G0034289.pdf › 5/G0034289.pdf]

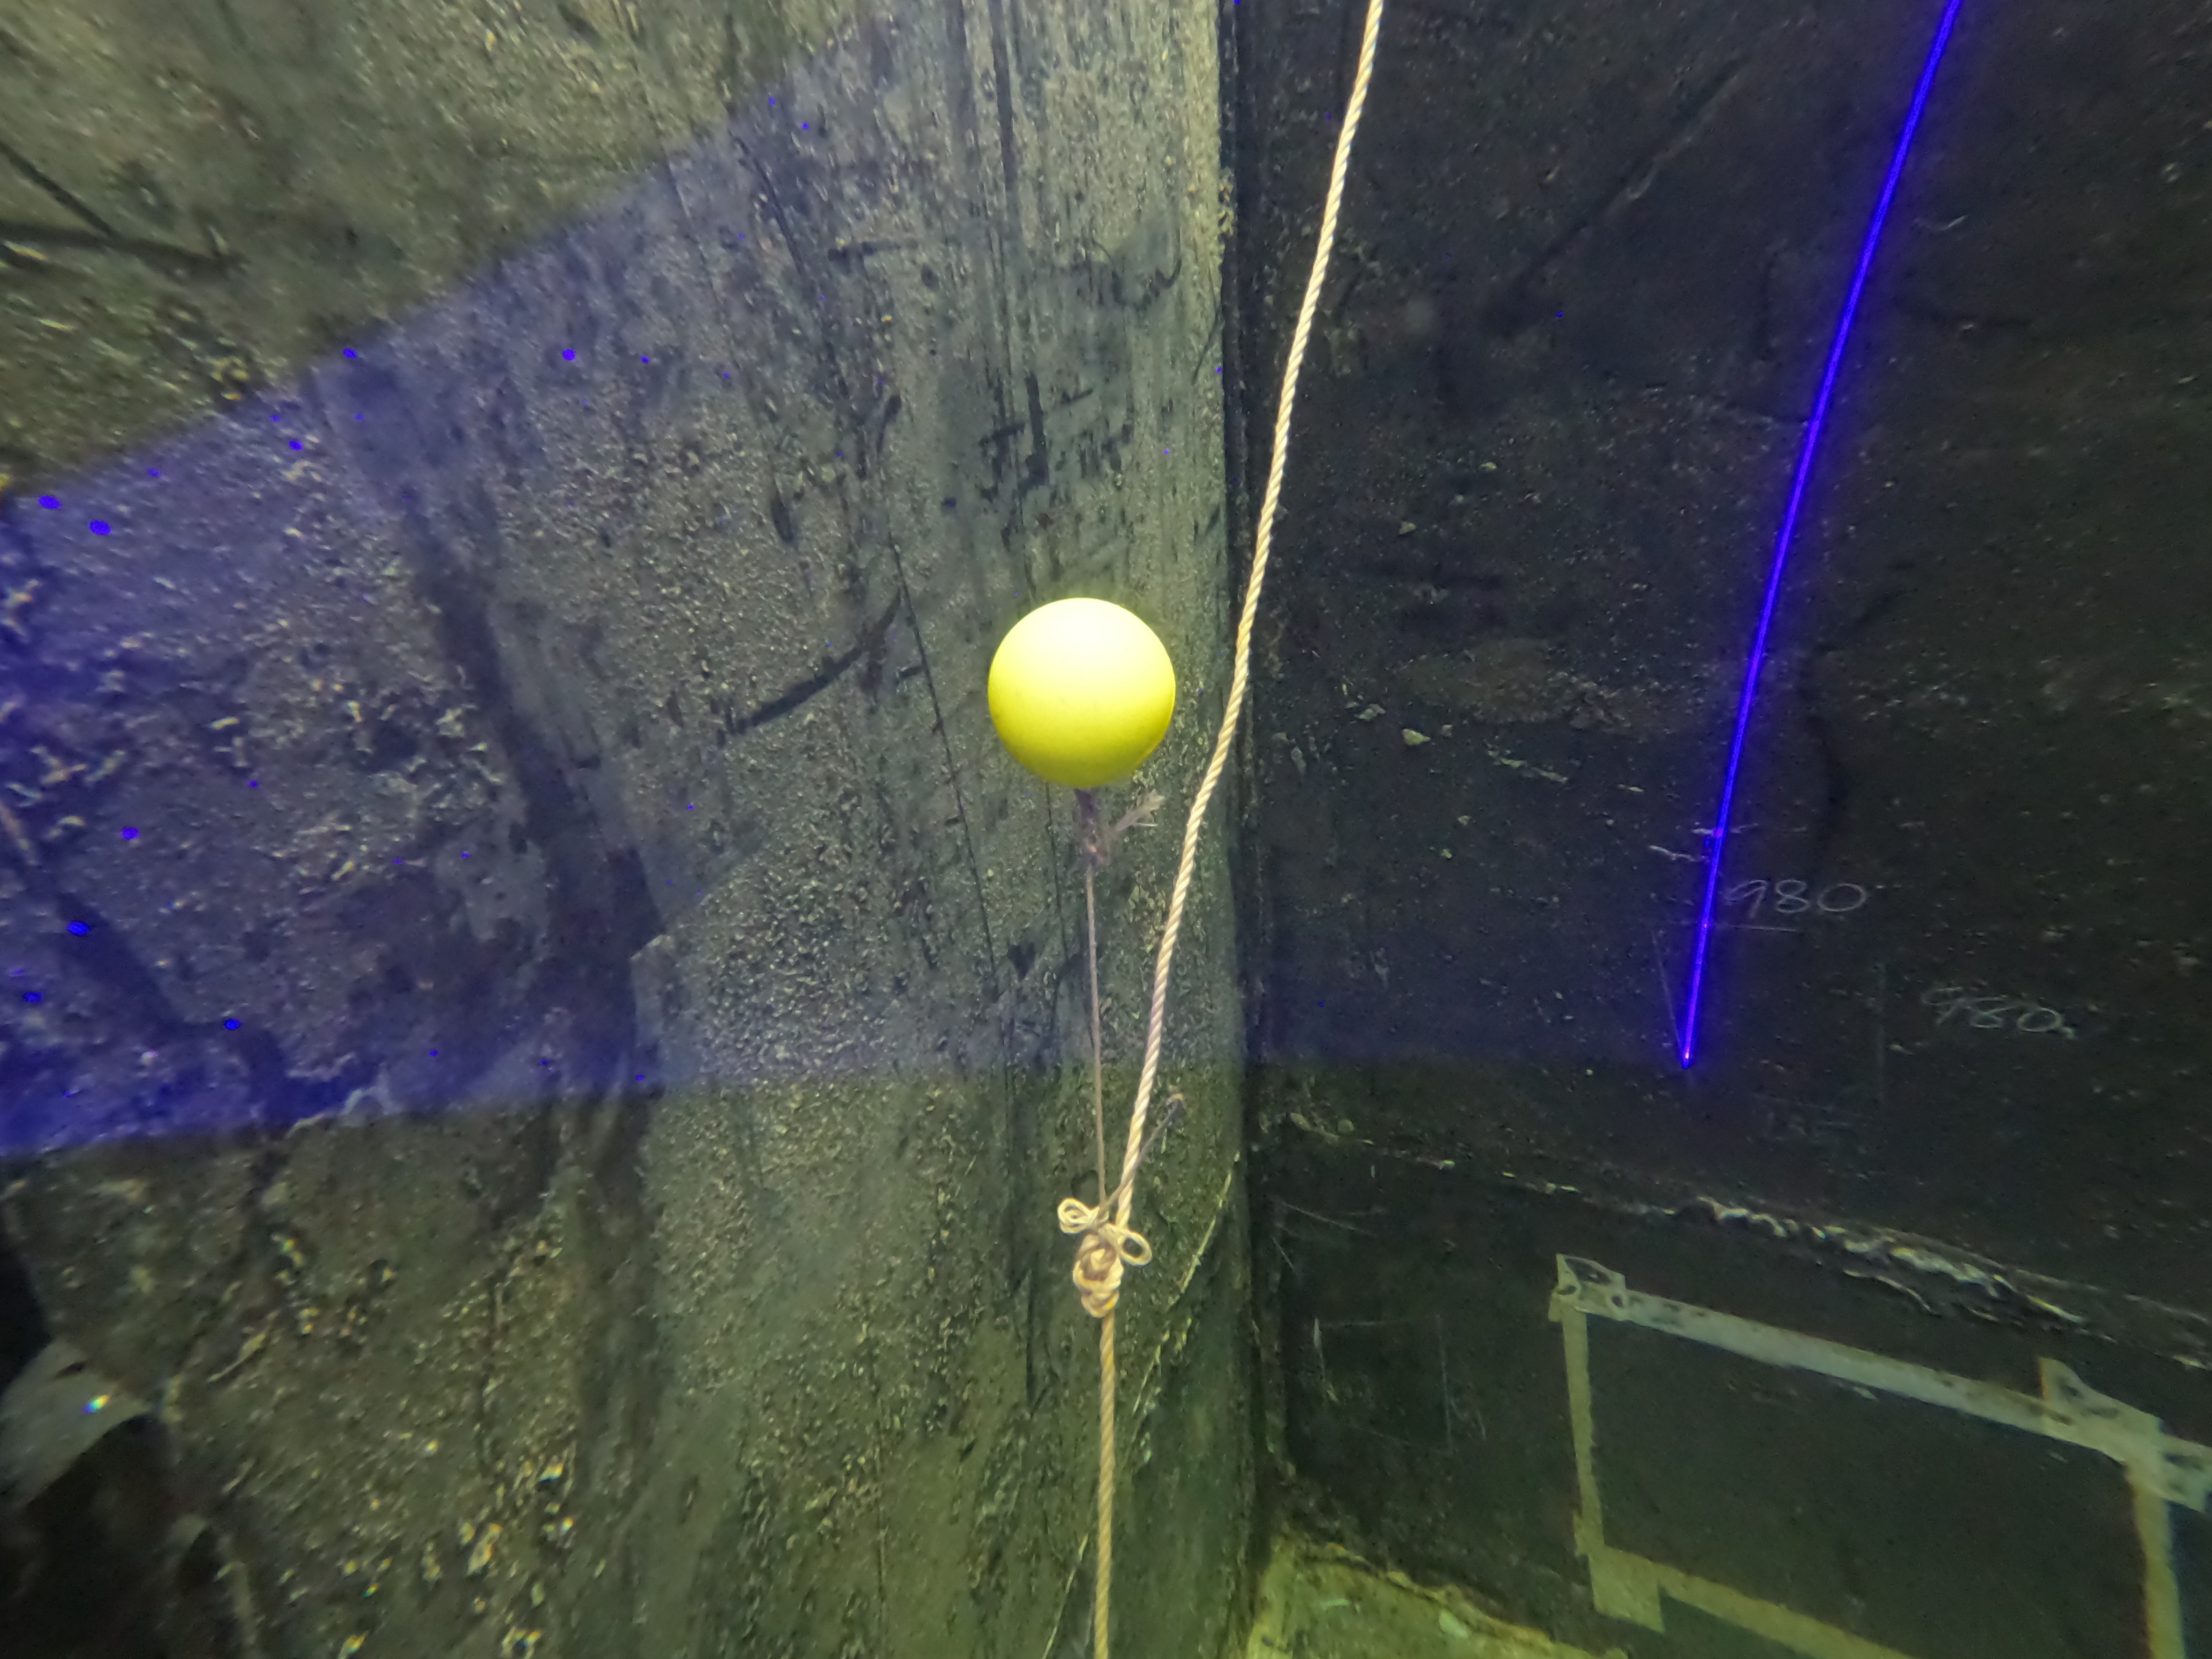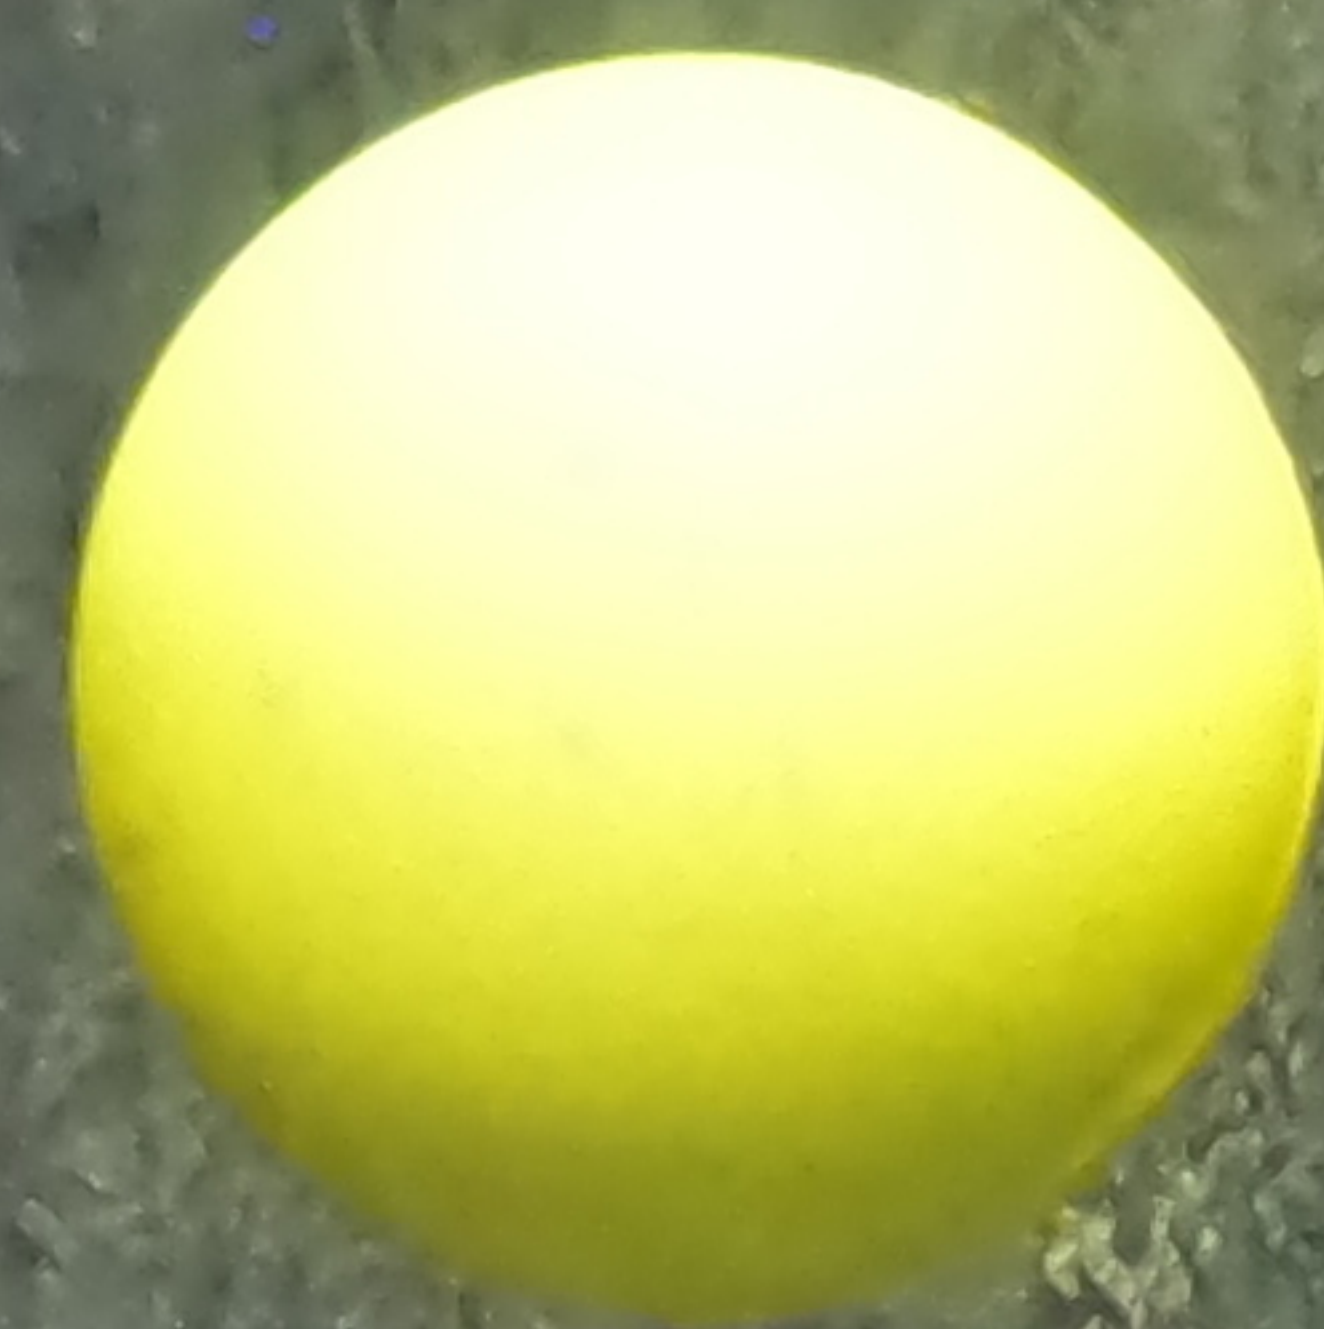

980

980

Supplement: Supplementary file 1898 [file G0034290.pdf › 5/G0034290.pdf]

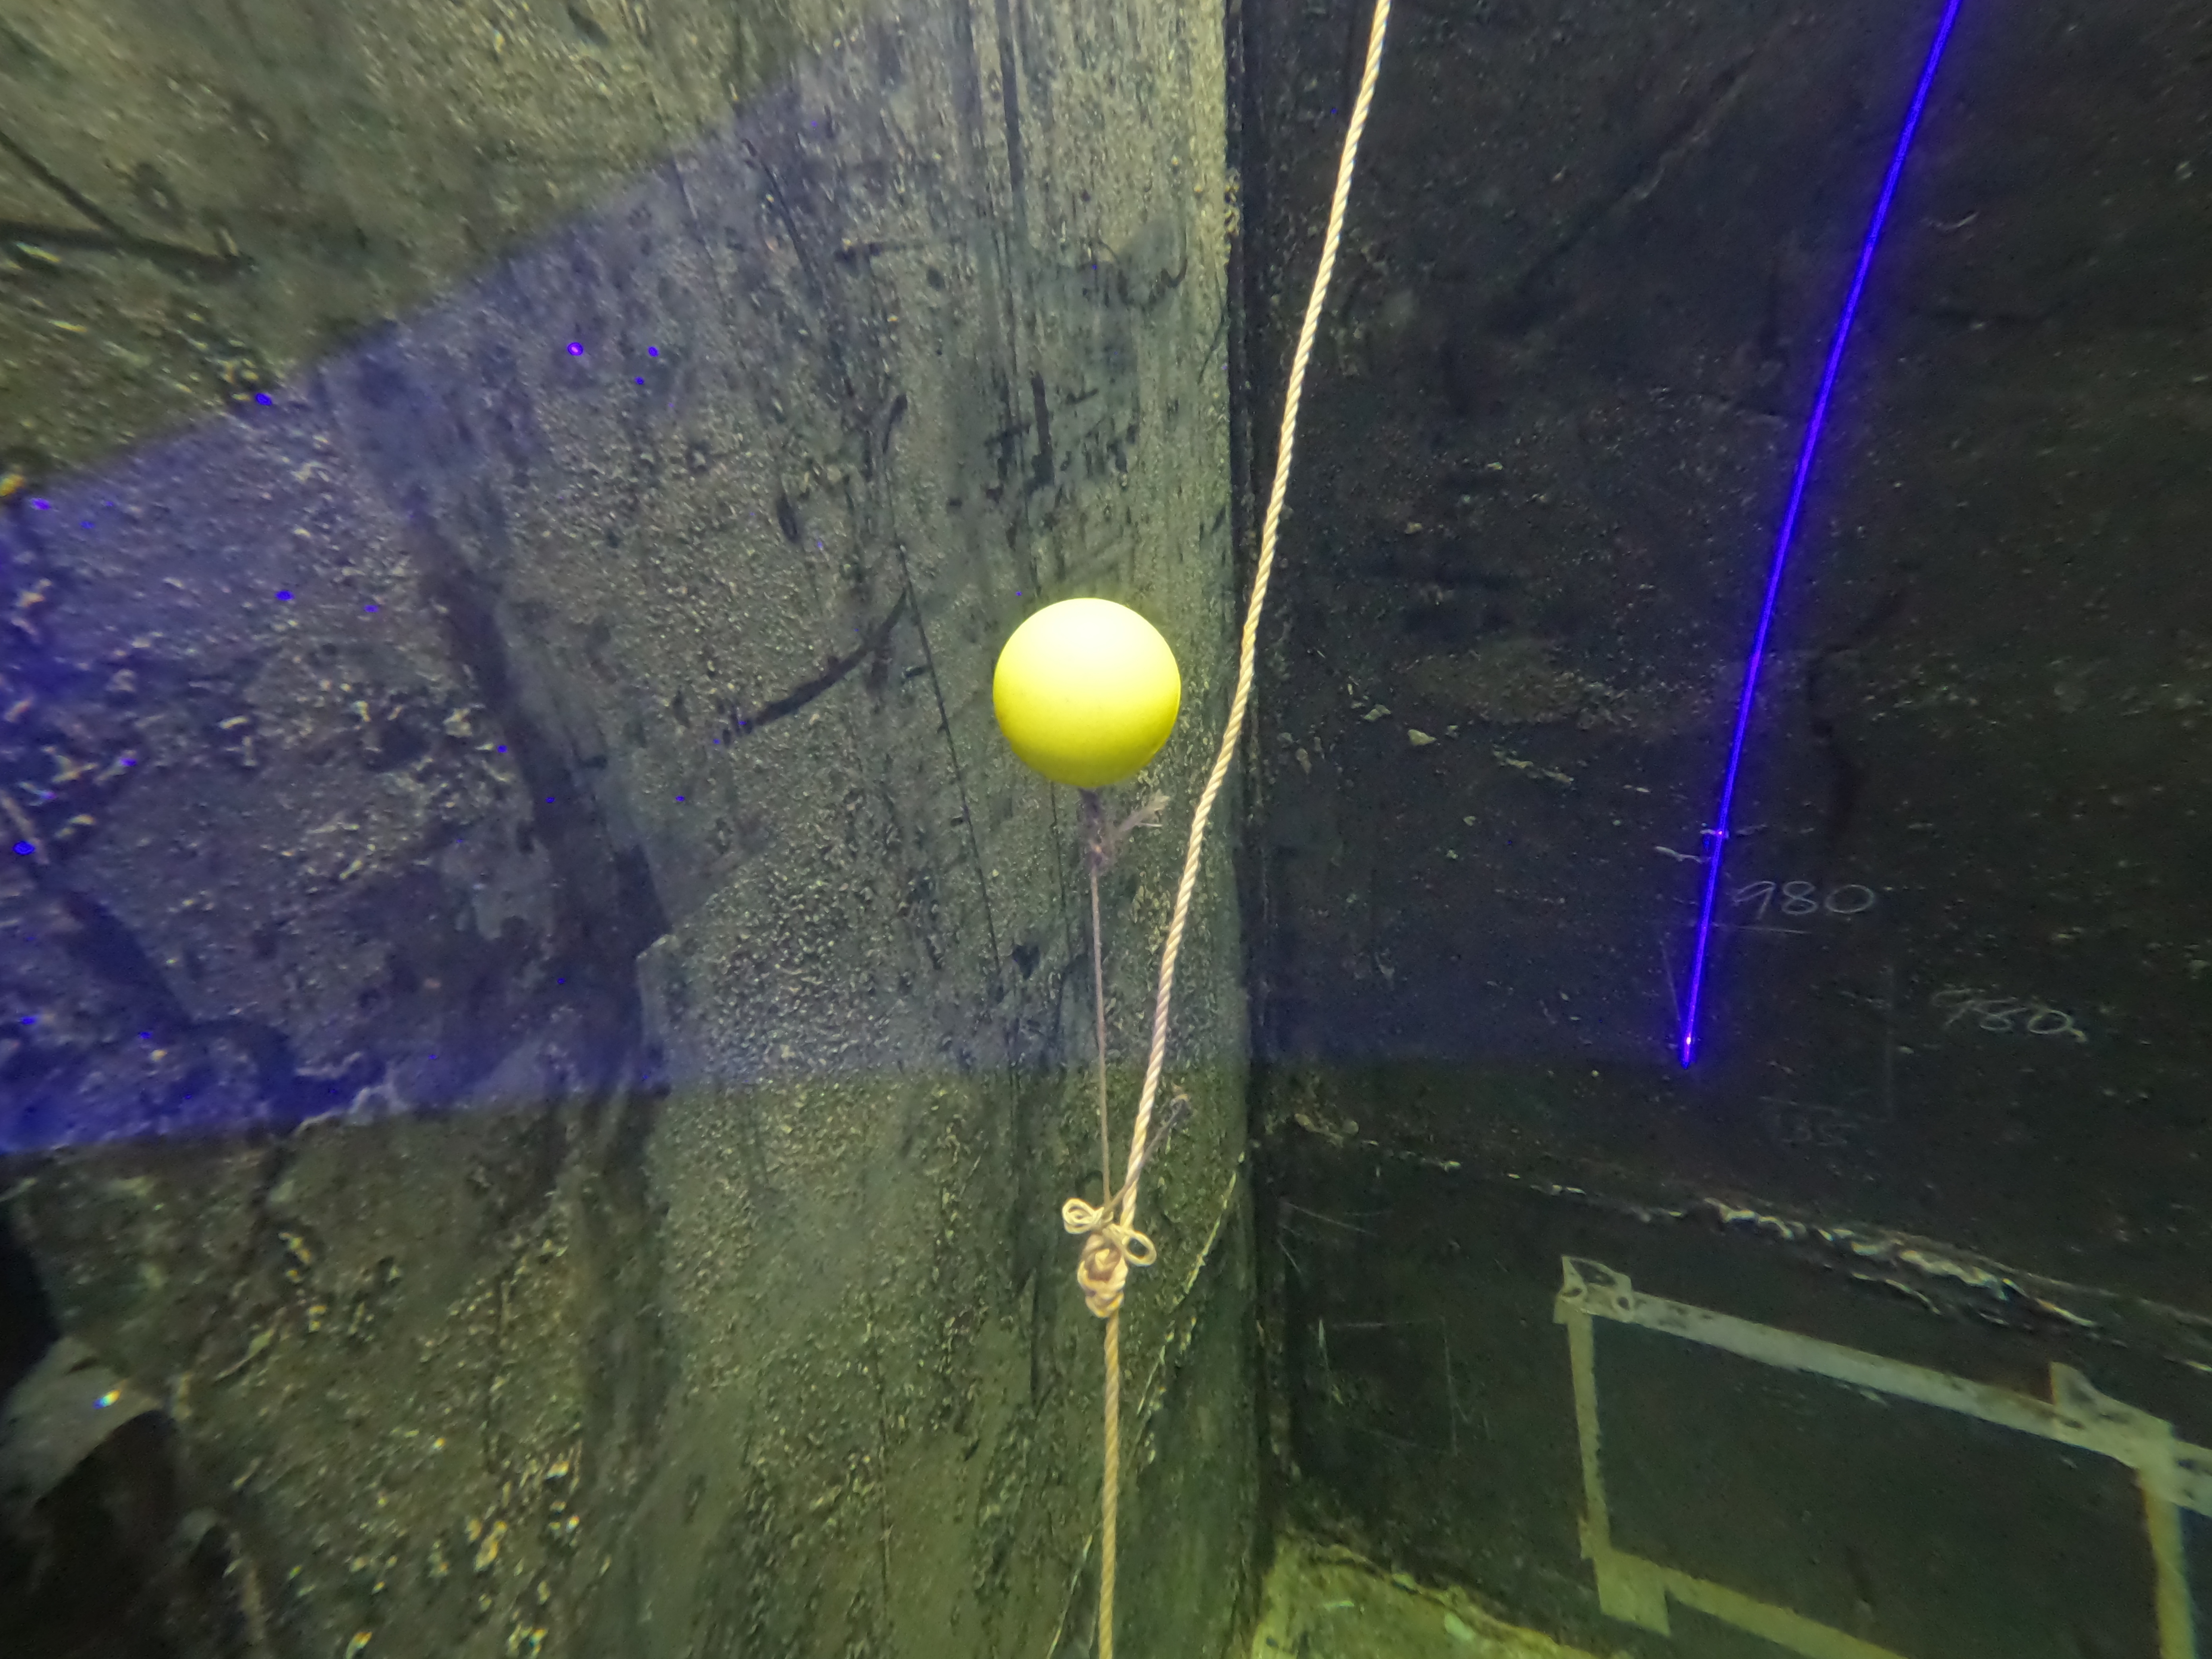

Supplement: Supplementary file 1899 [file G0034291.pdf › 5/G0034291.pdf]

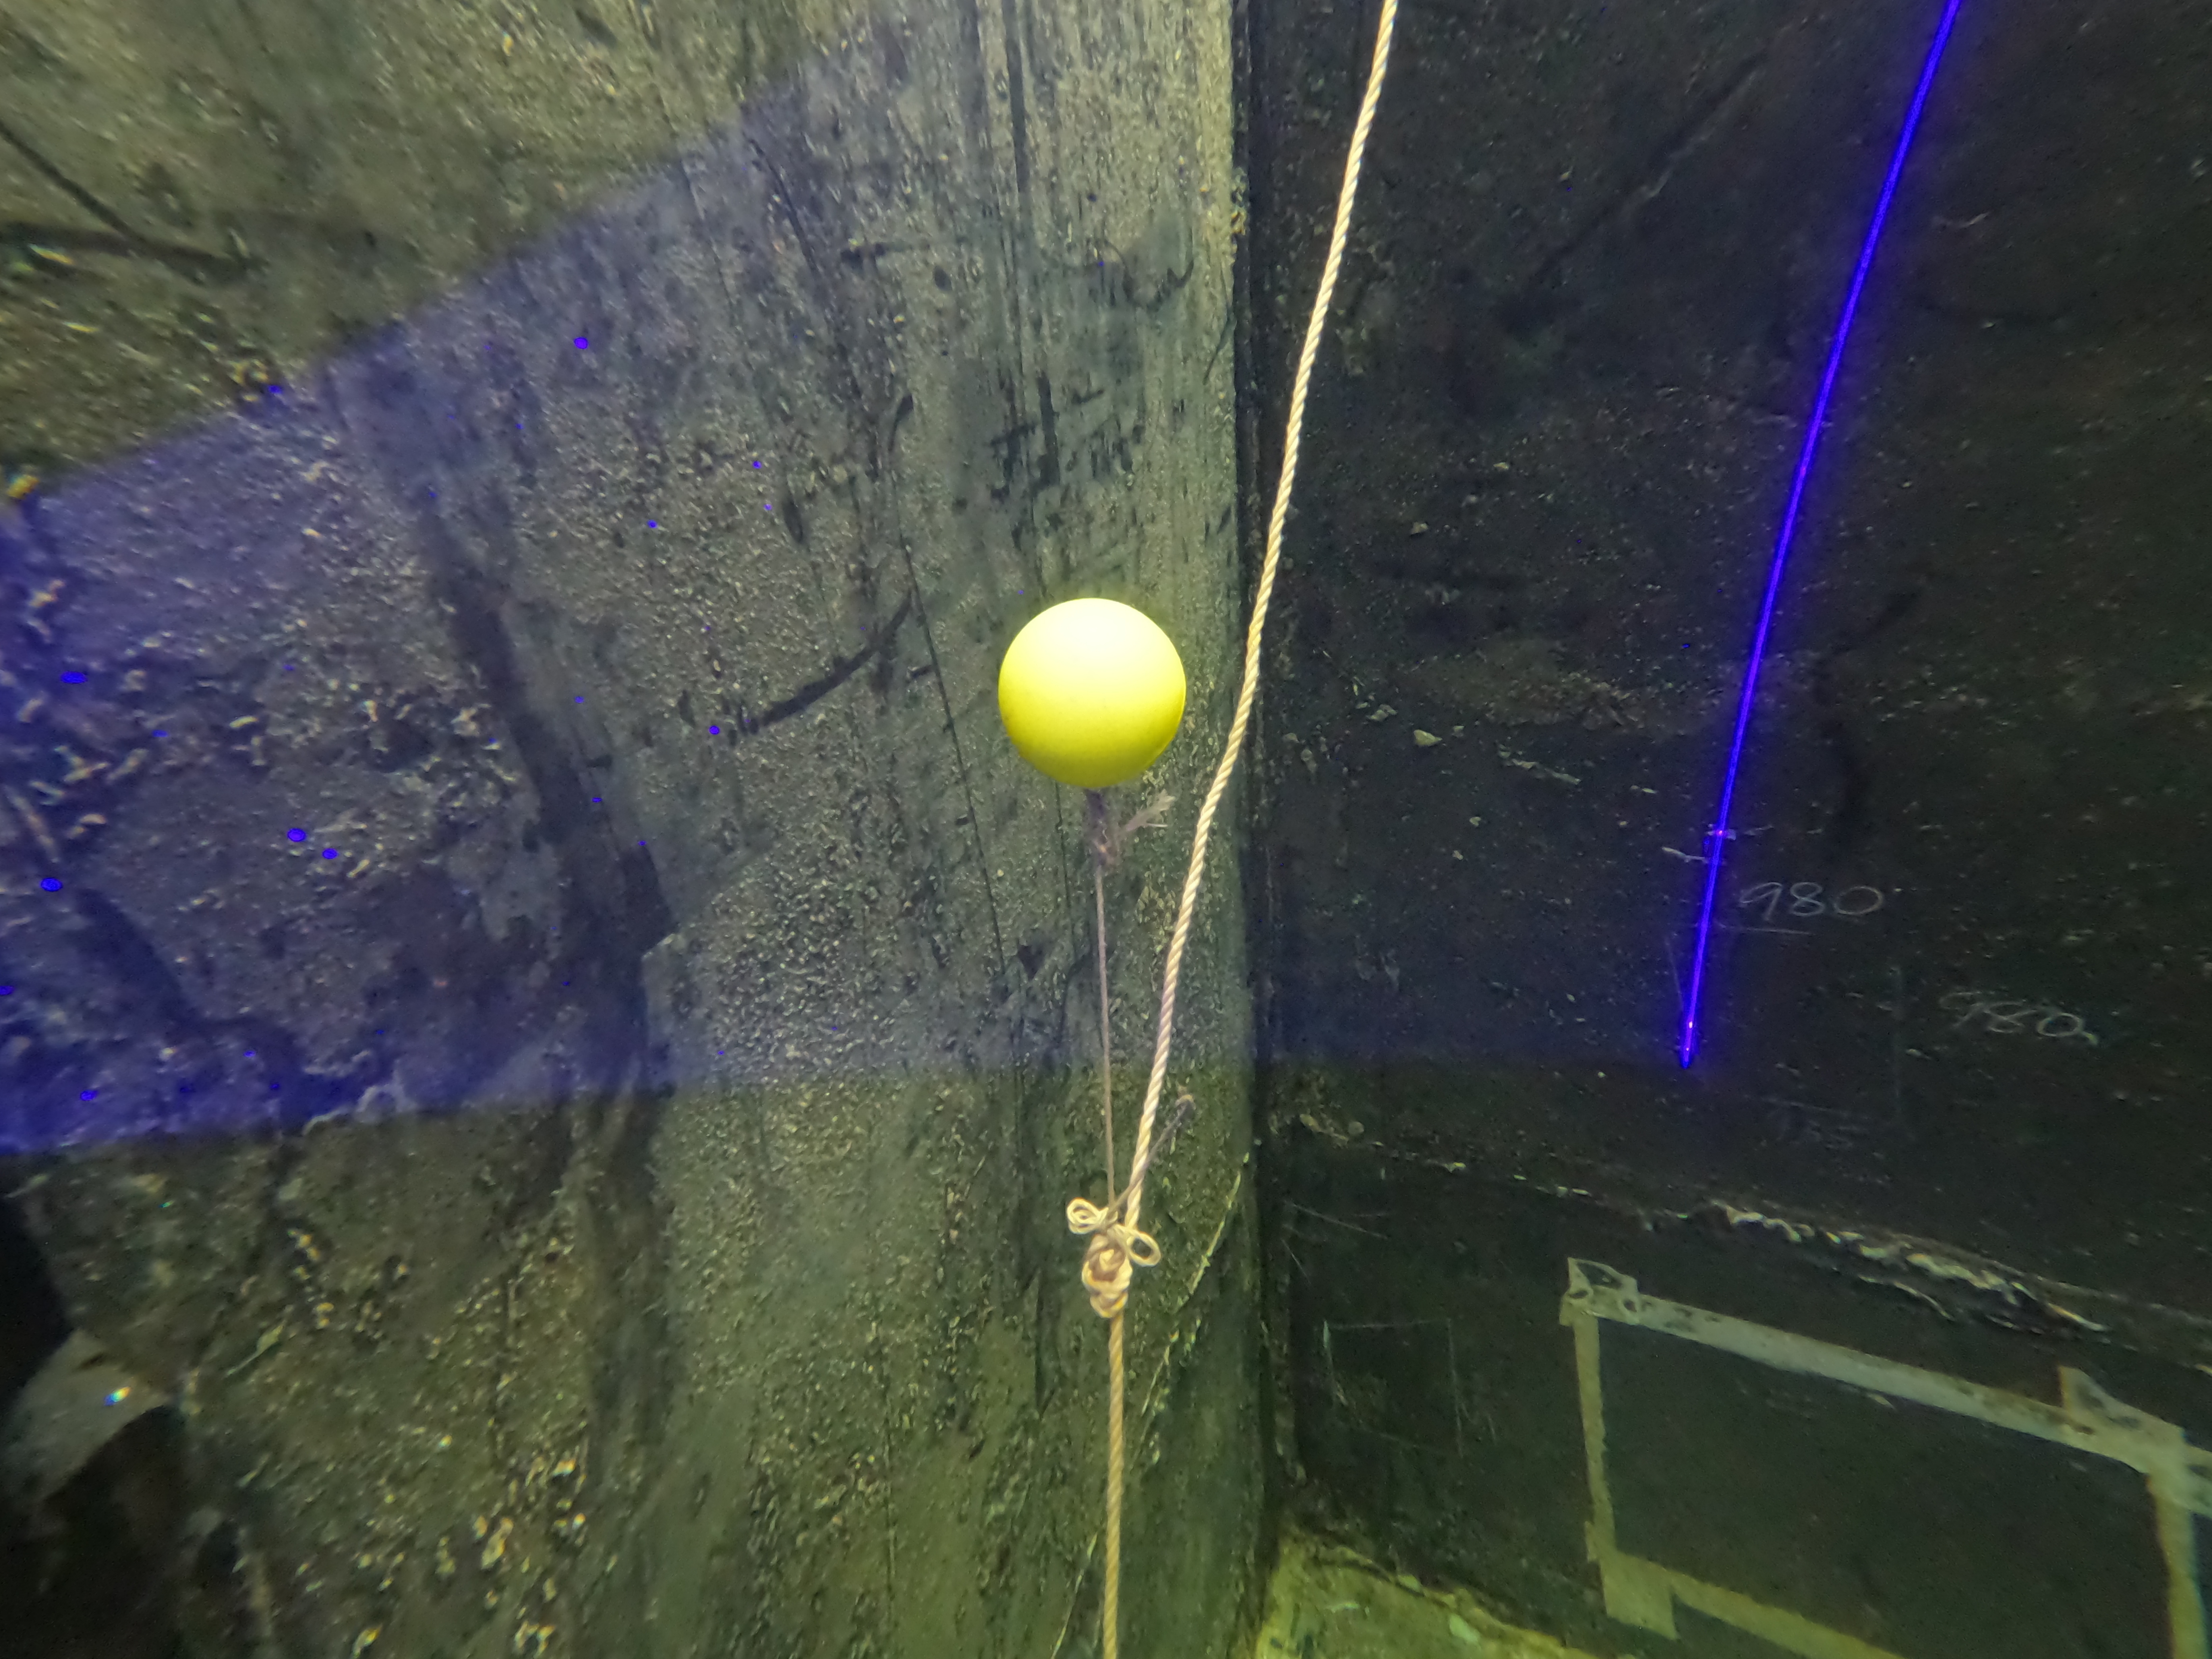

Supplement: Supplementary file 1900 [file G0034292.pdf › 5/G0034292.pdf]

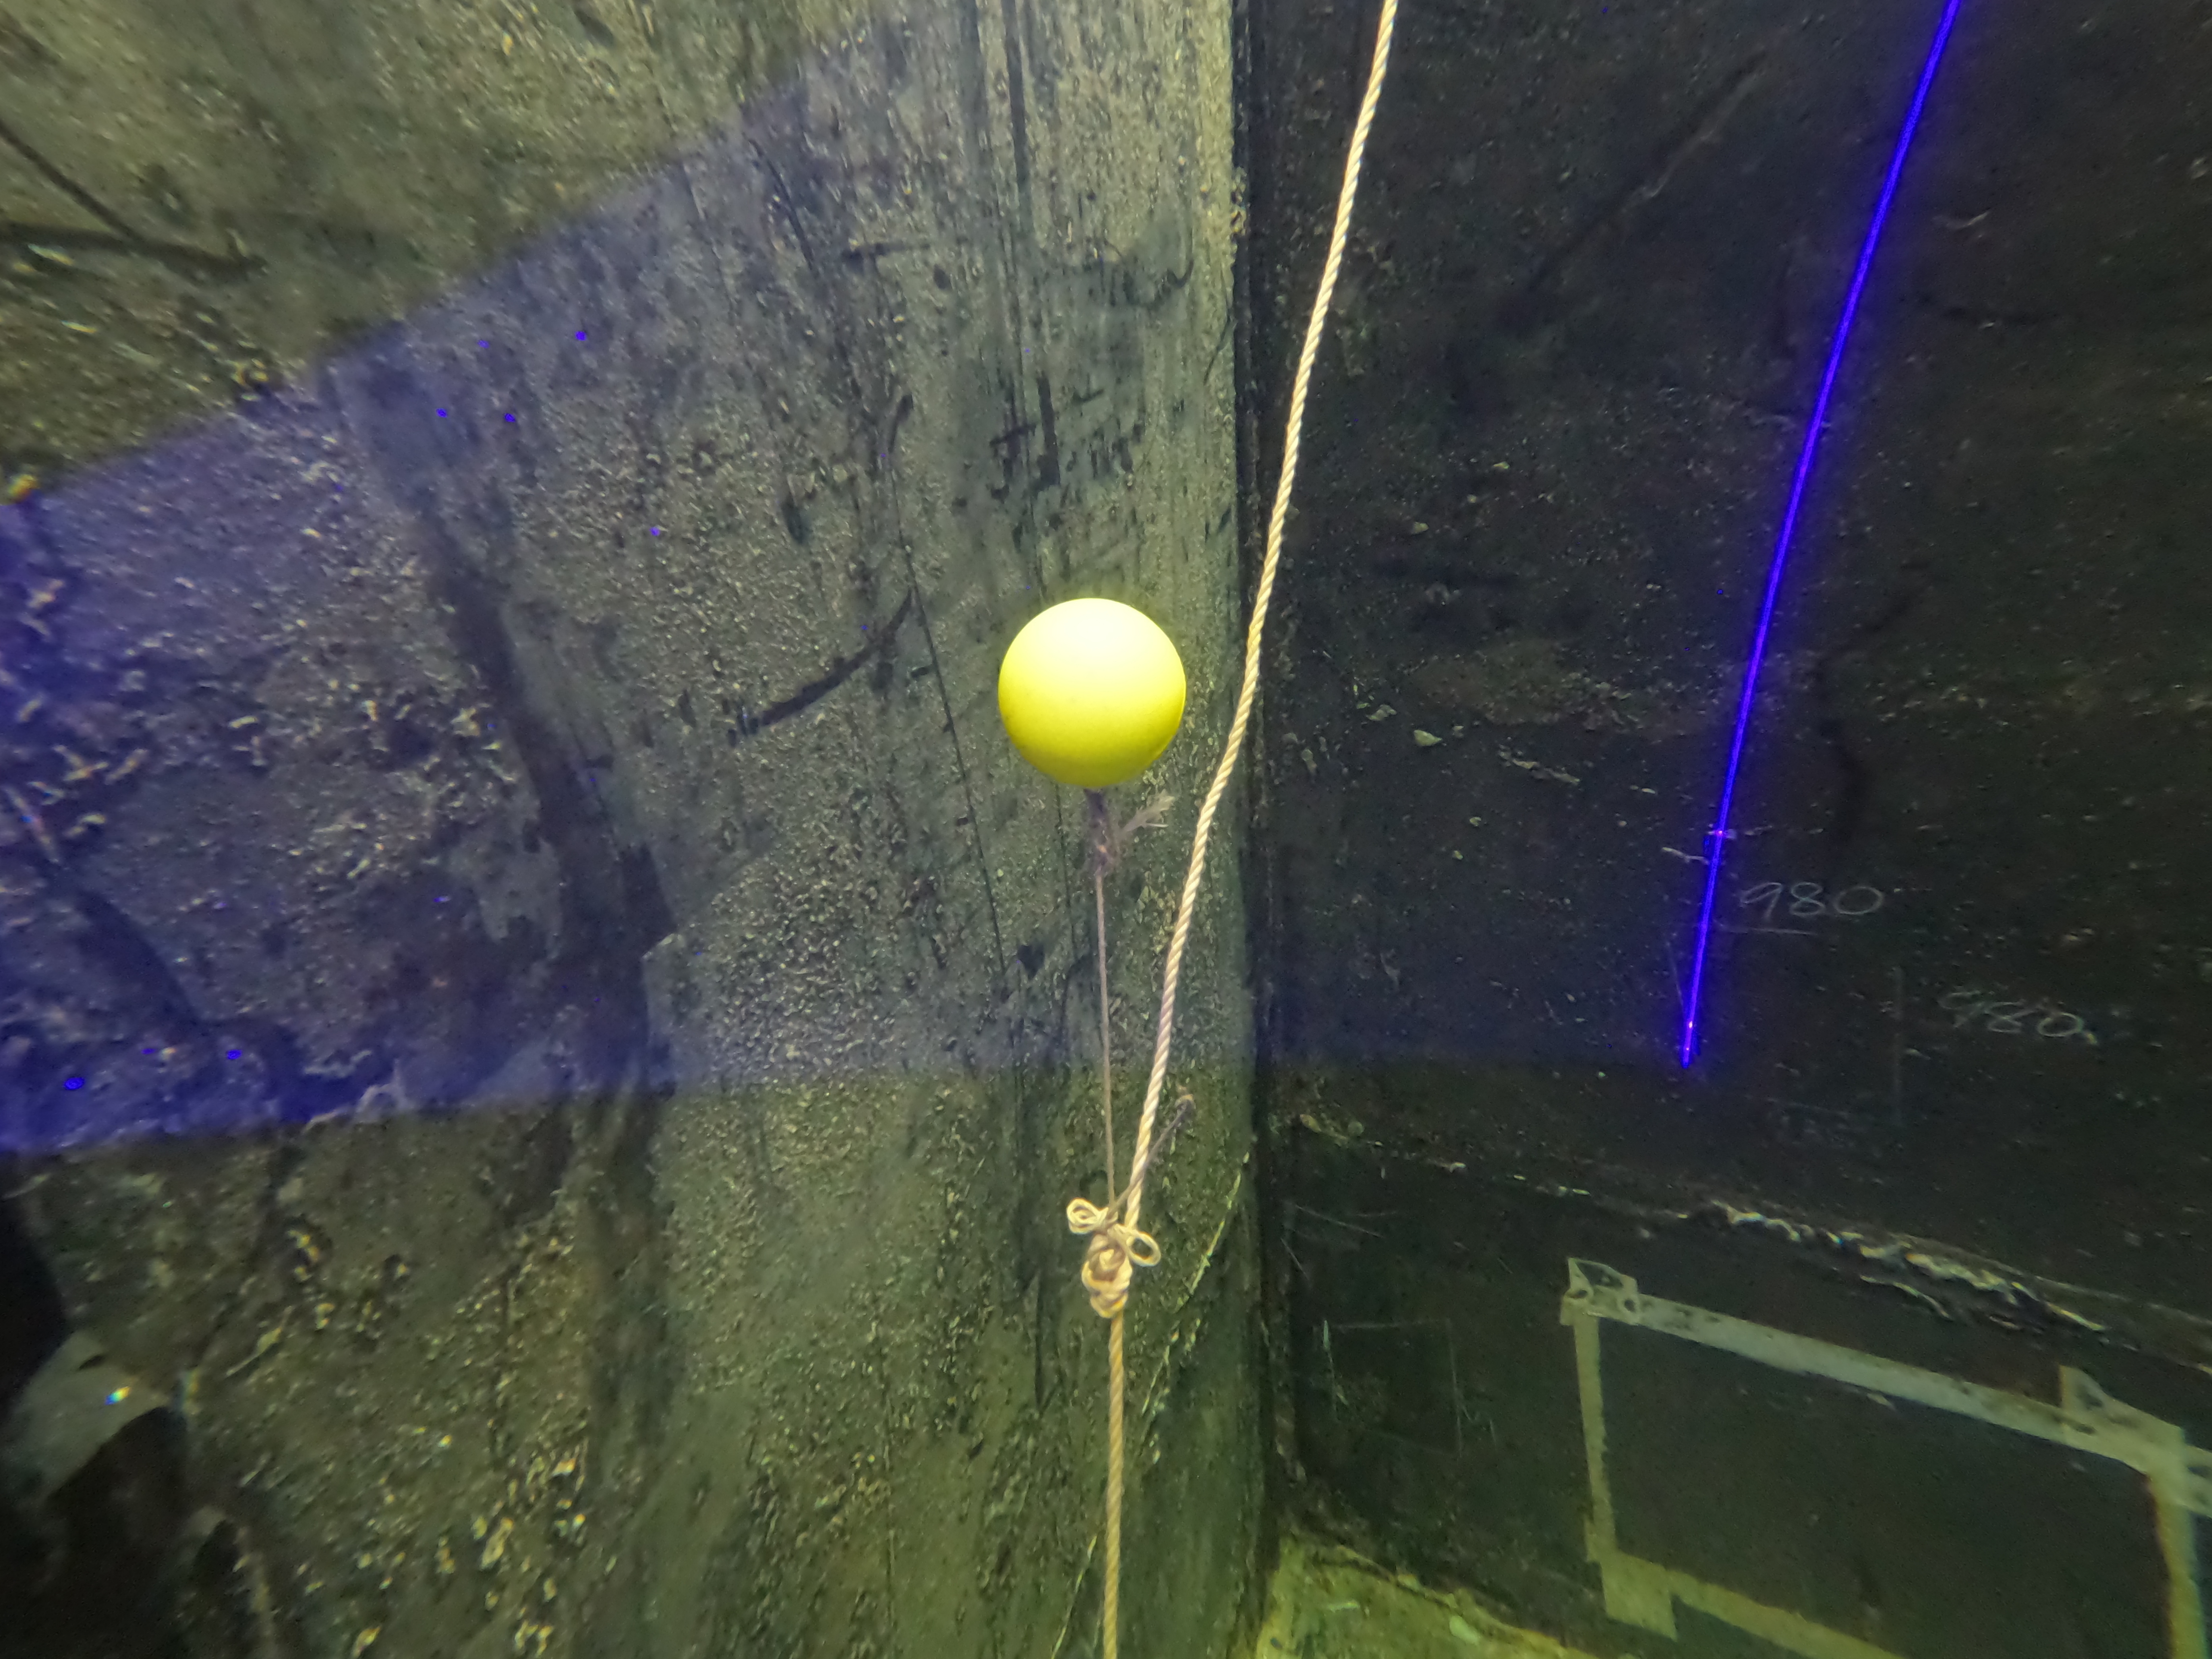

Supplement: Supplementary file 1901 [file G0034293.pdf › 5/G0034293.pdf]

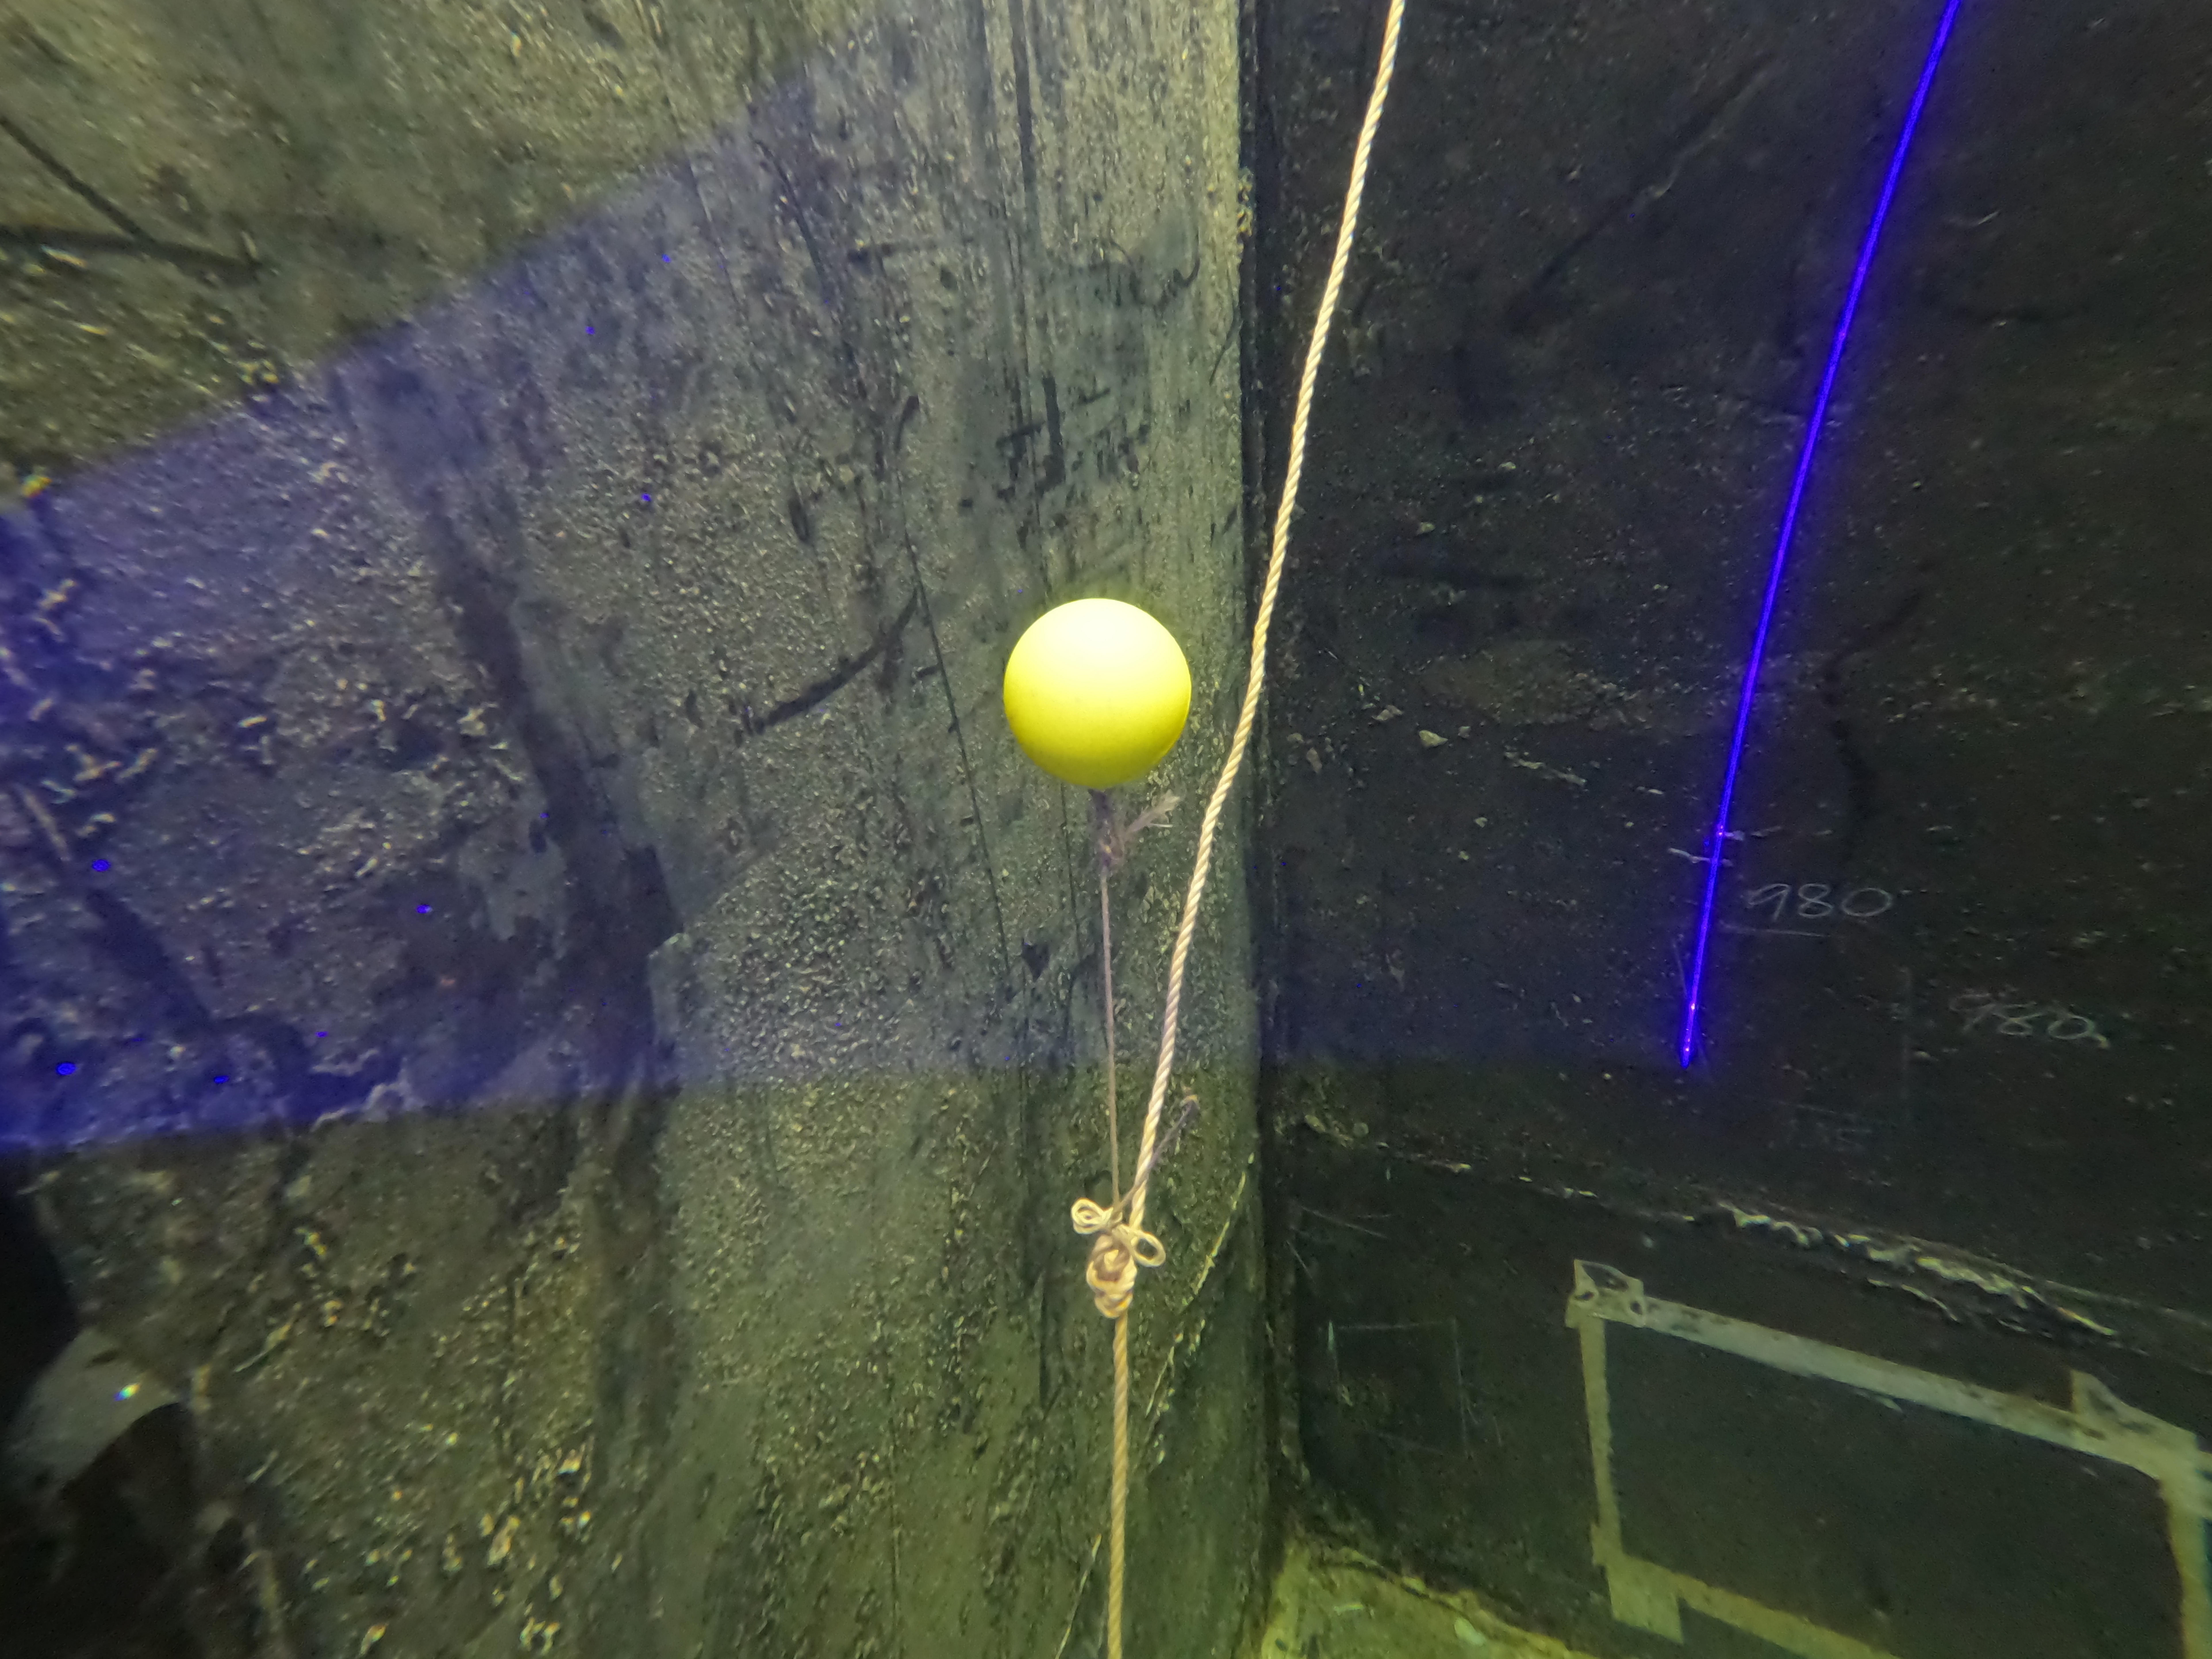

Supplement: Supplementary file 1902 [file G0034294.pdf › 5/G0034294.pdf]

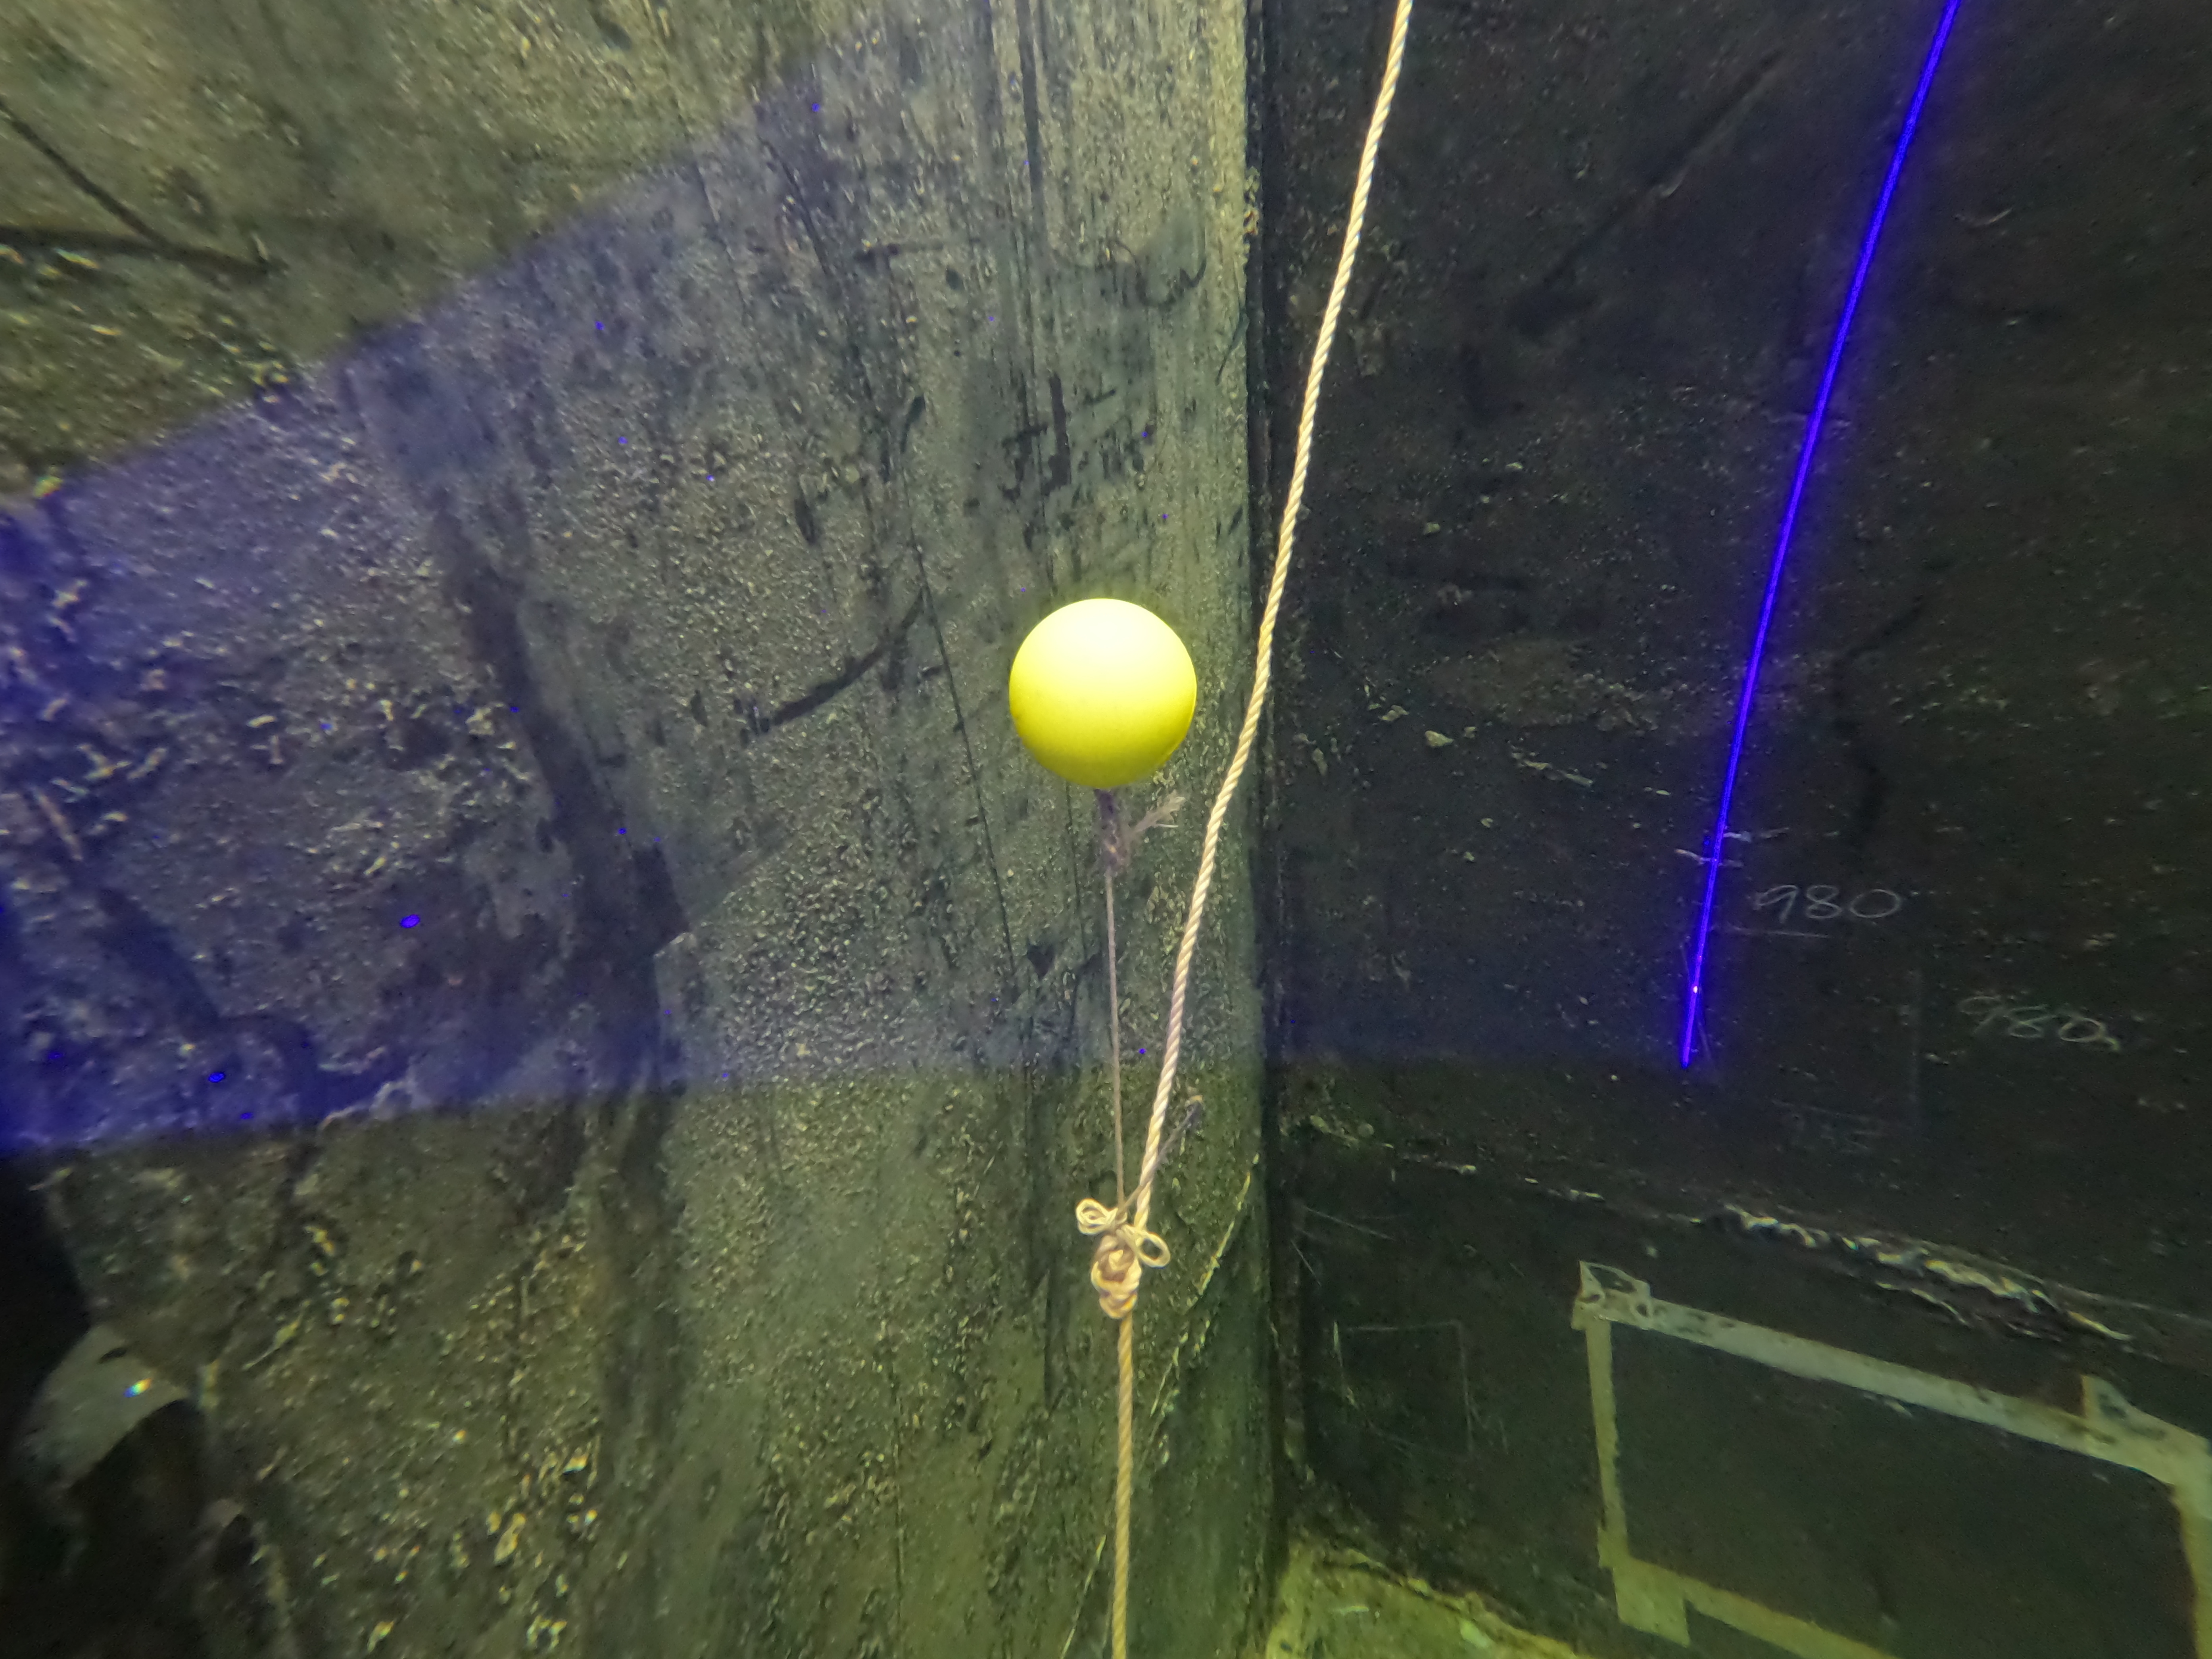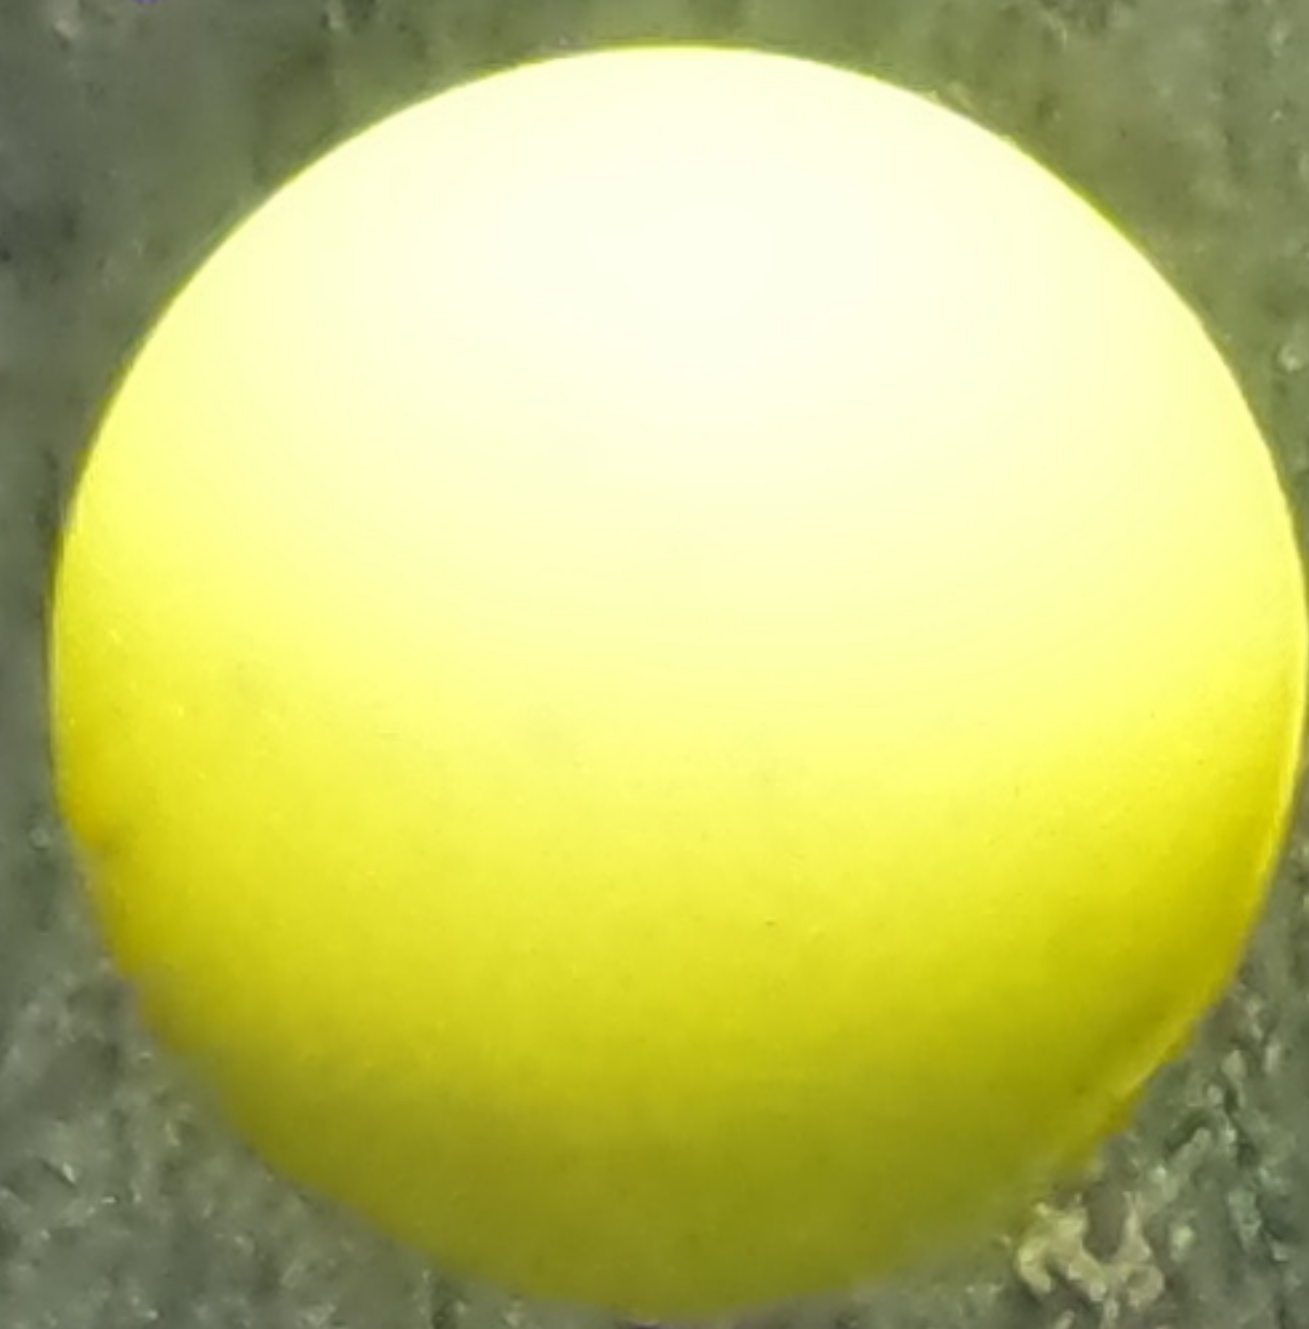

980

980

Supplement: Supplementary file 1903 [file G0034295.pdf › 5/G0034295.pdf]

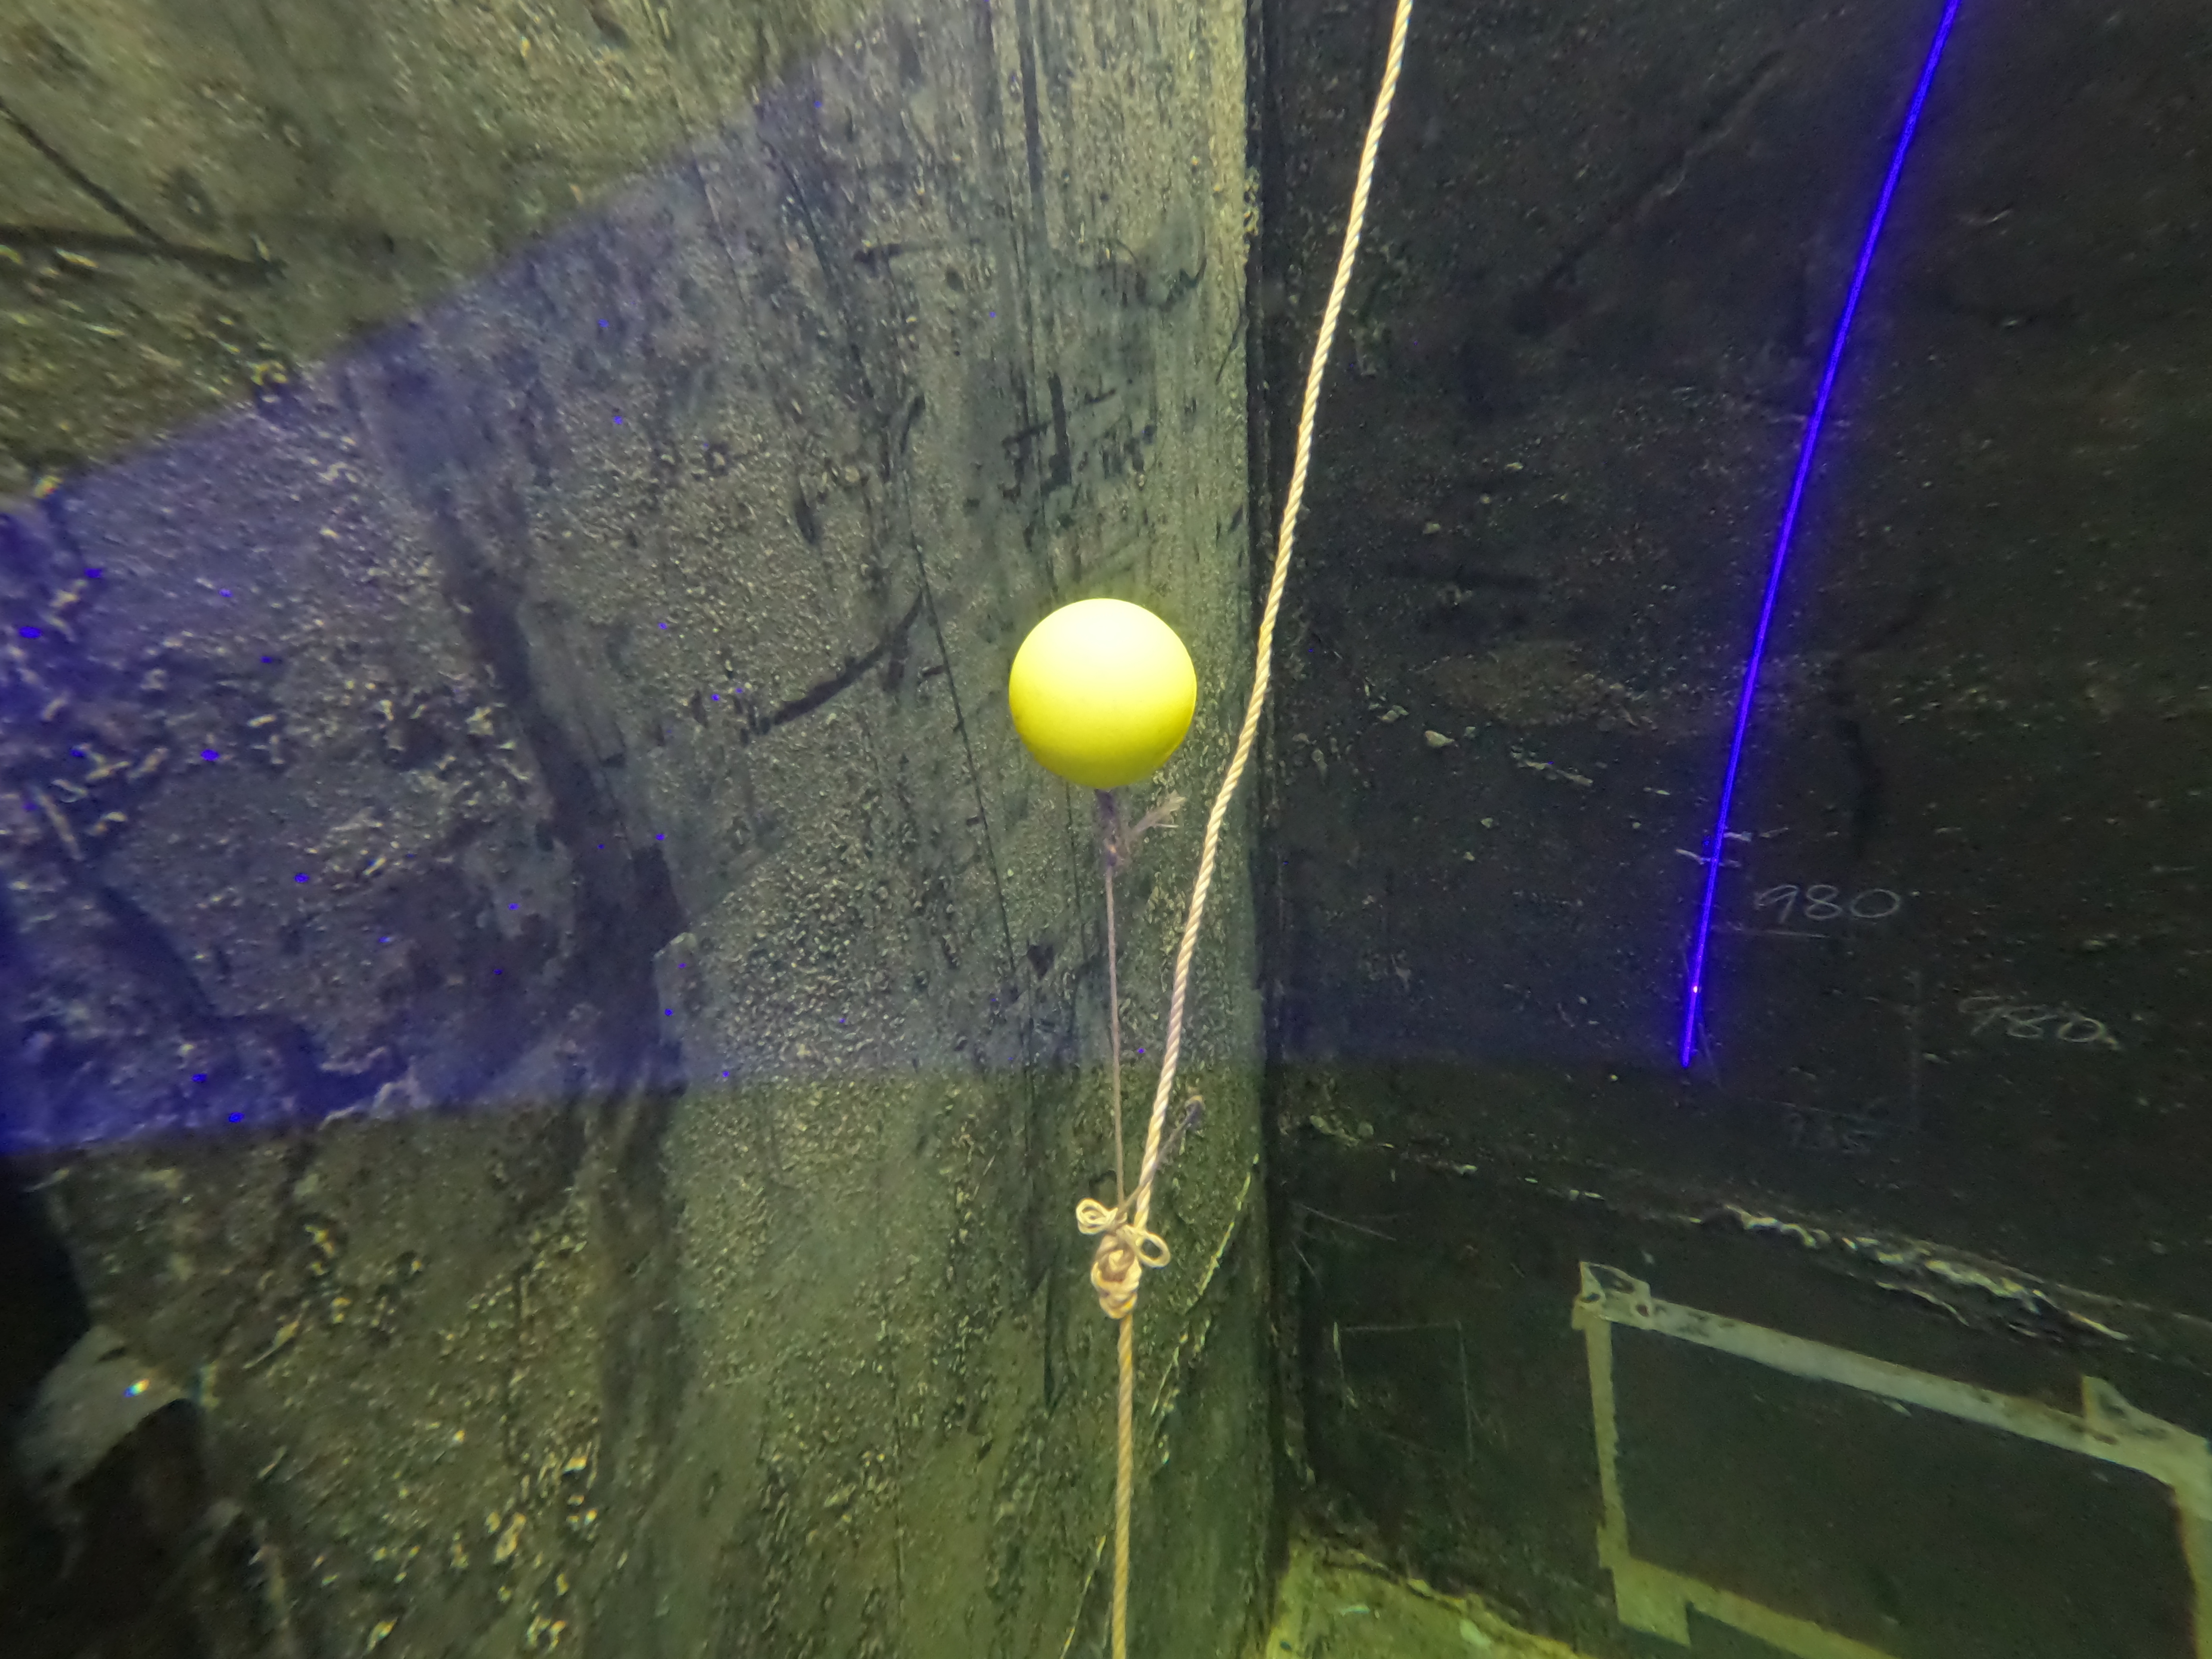

Supplement: Supplementary file 1904 [file G0034296.pdf › 5/G0034296.pdf]

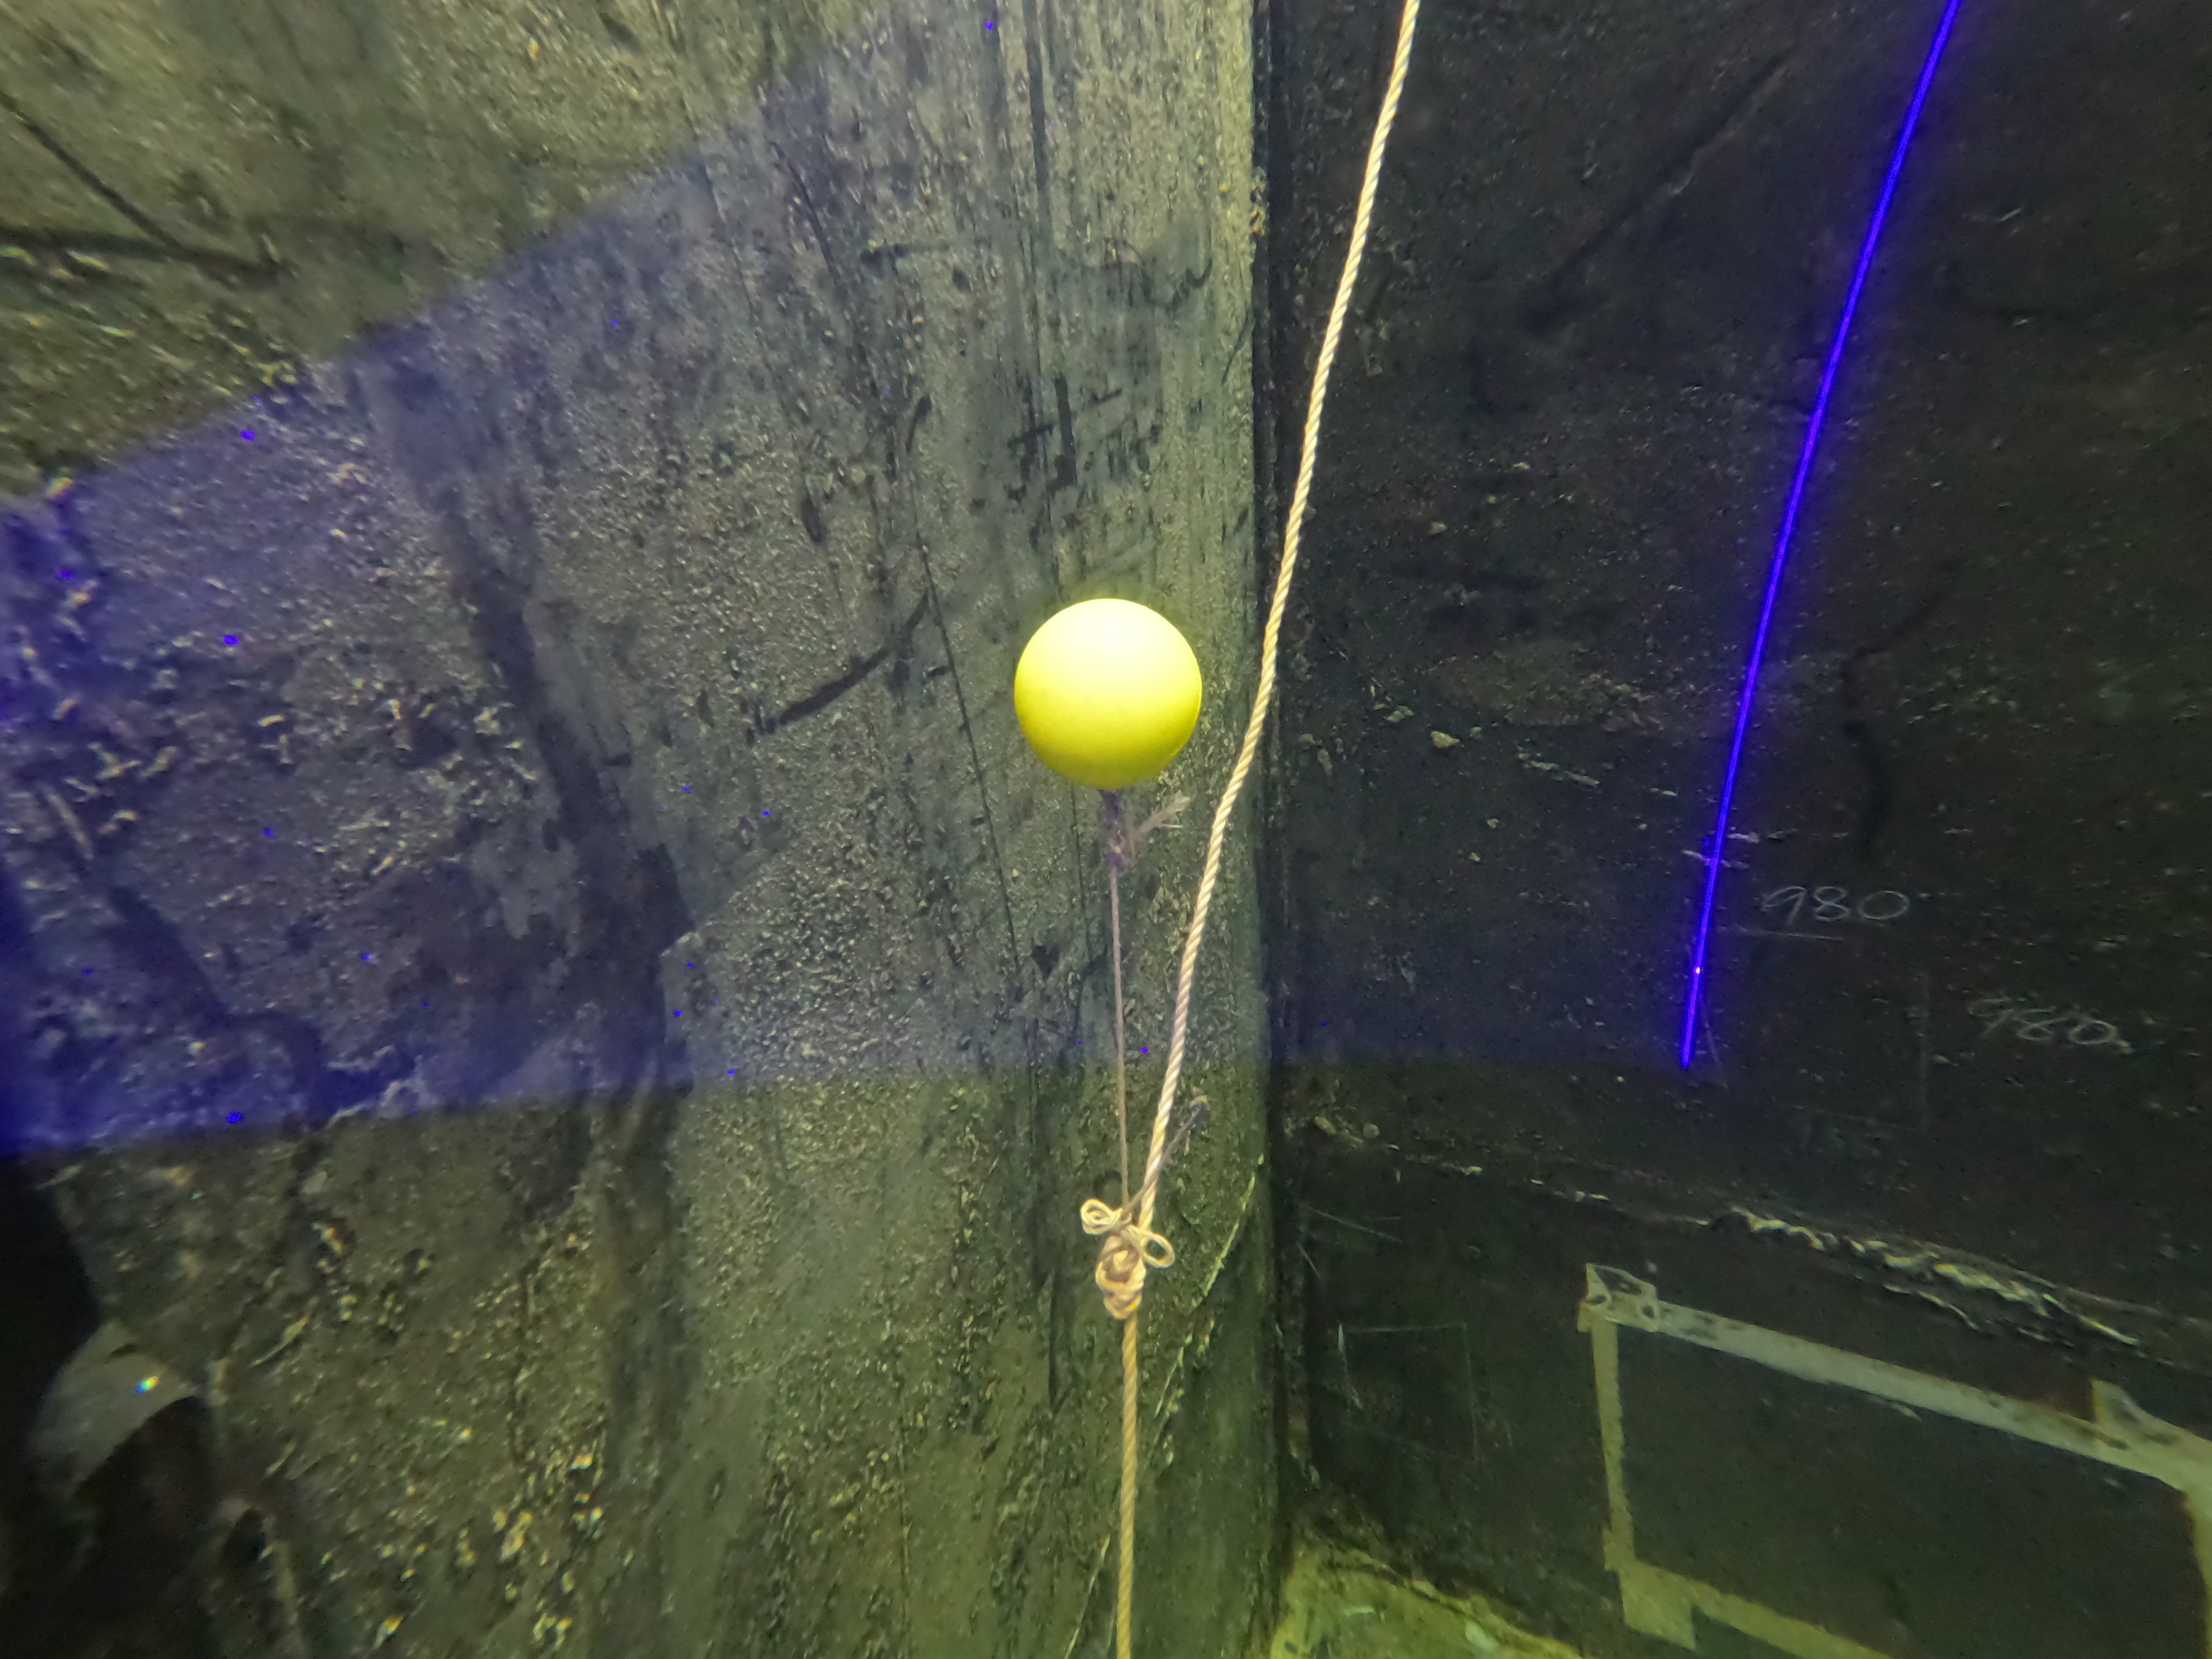

Supplement: Supplementary file 1905 [file G0034297.pdf › 5/G0034297.pdf]

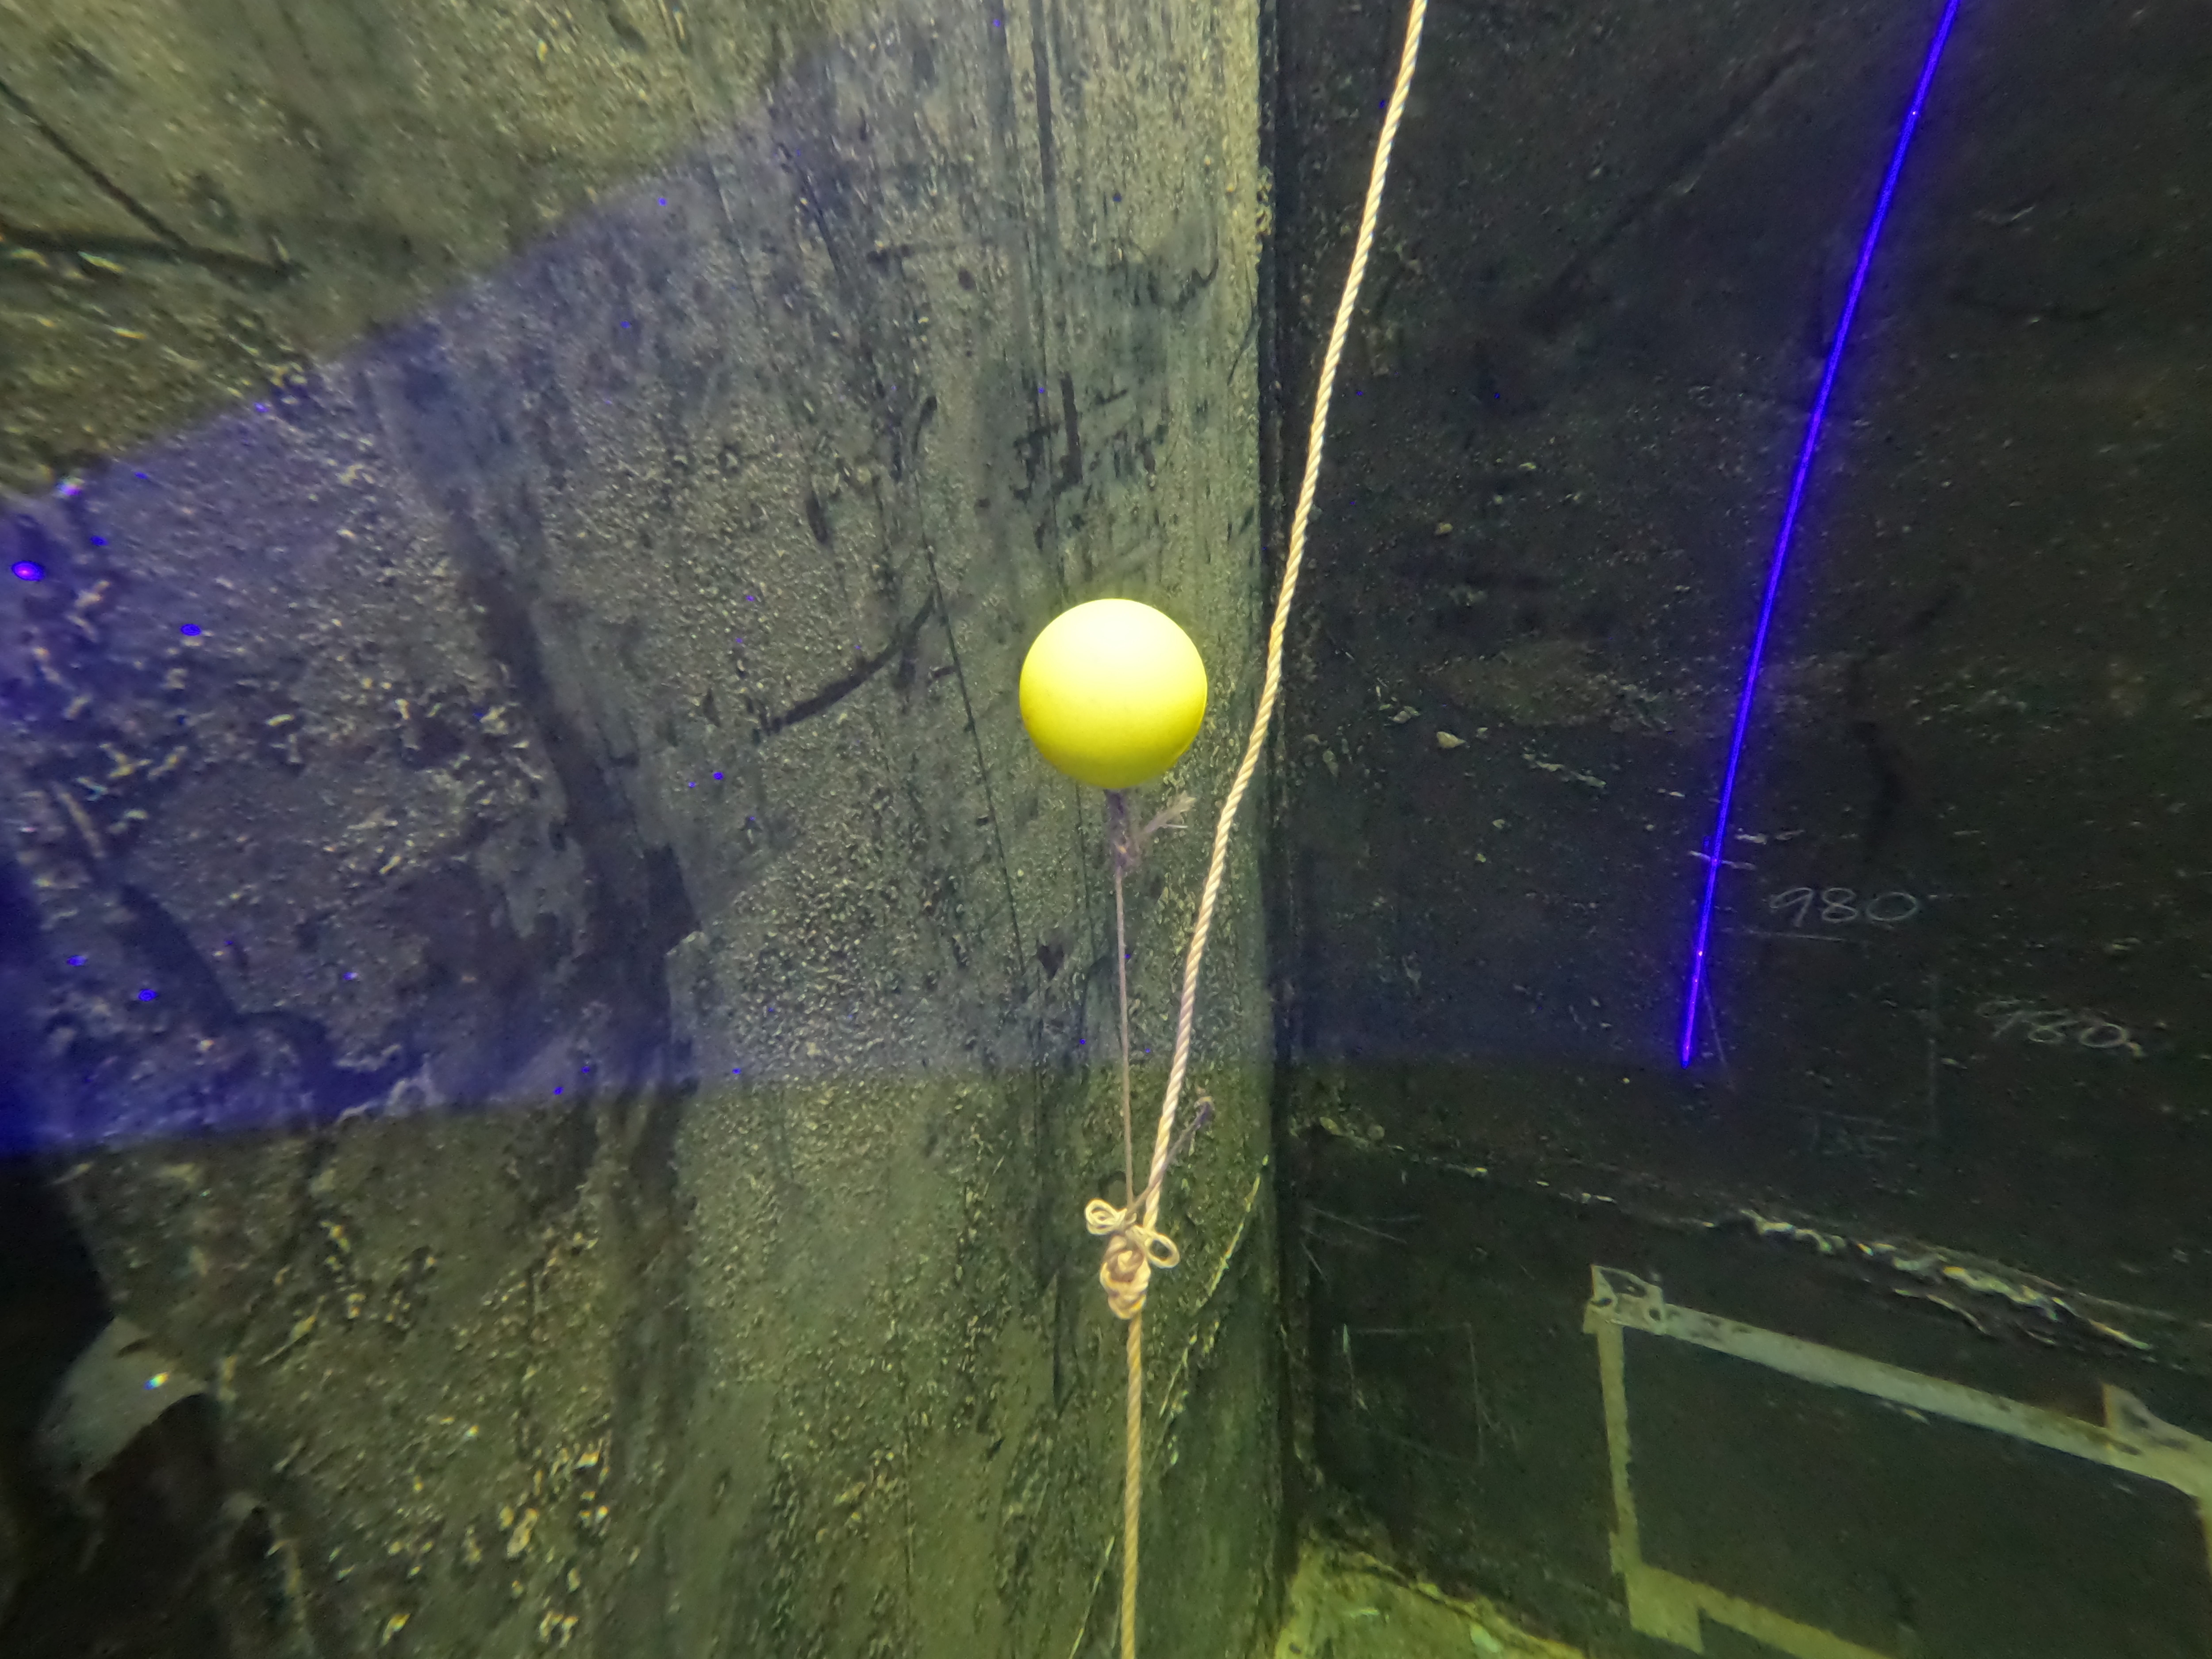

Supplement: Supplementary file 1906 [file G0034298.pdf › 5/G0034298.pdf]

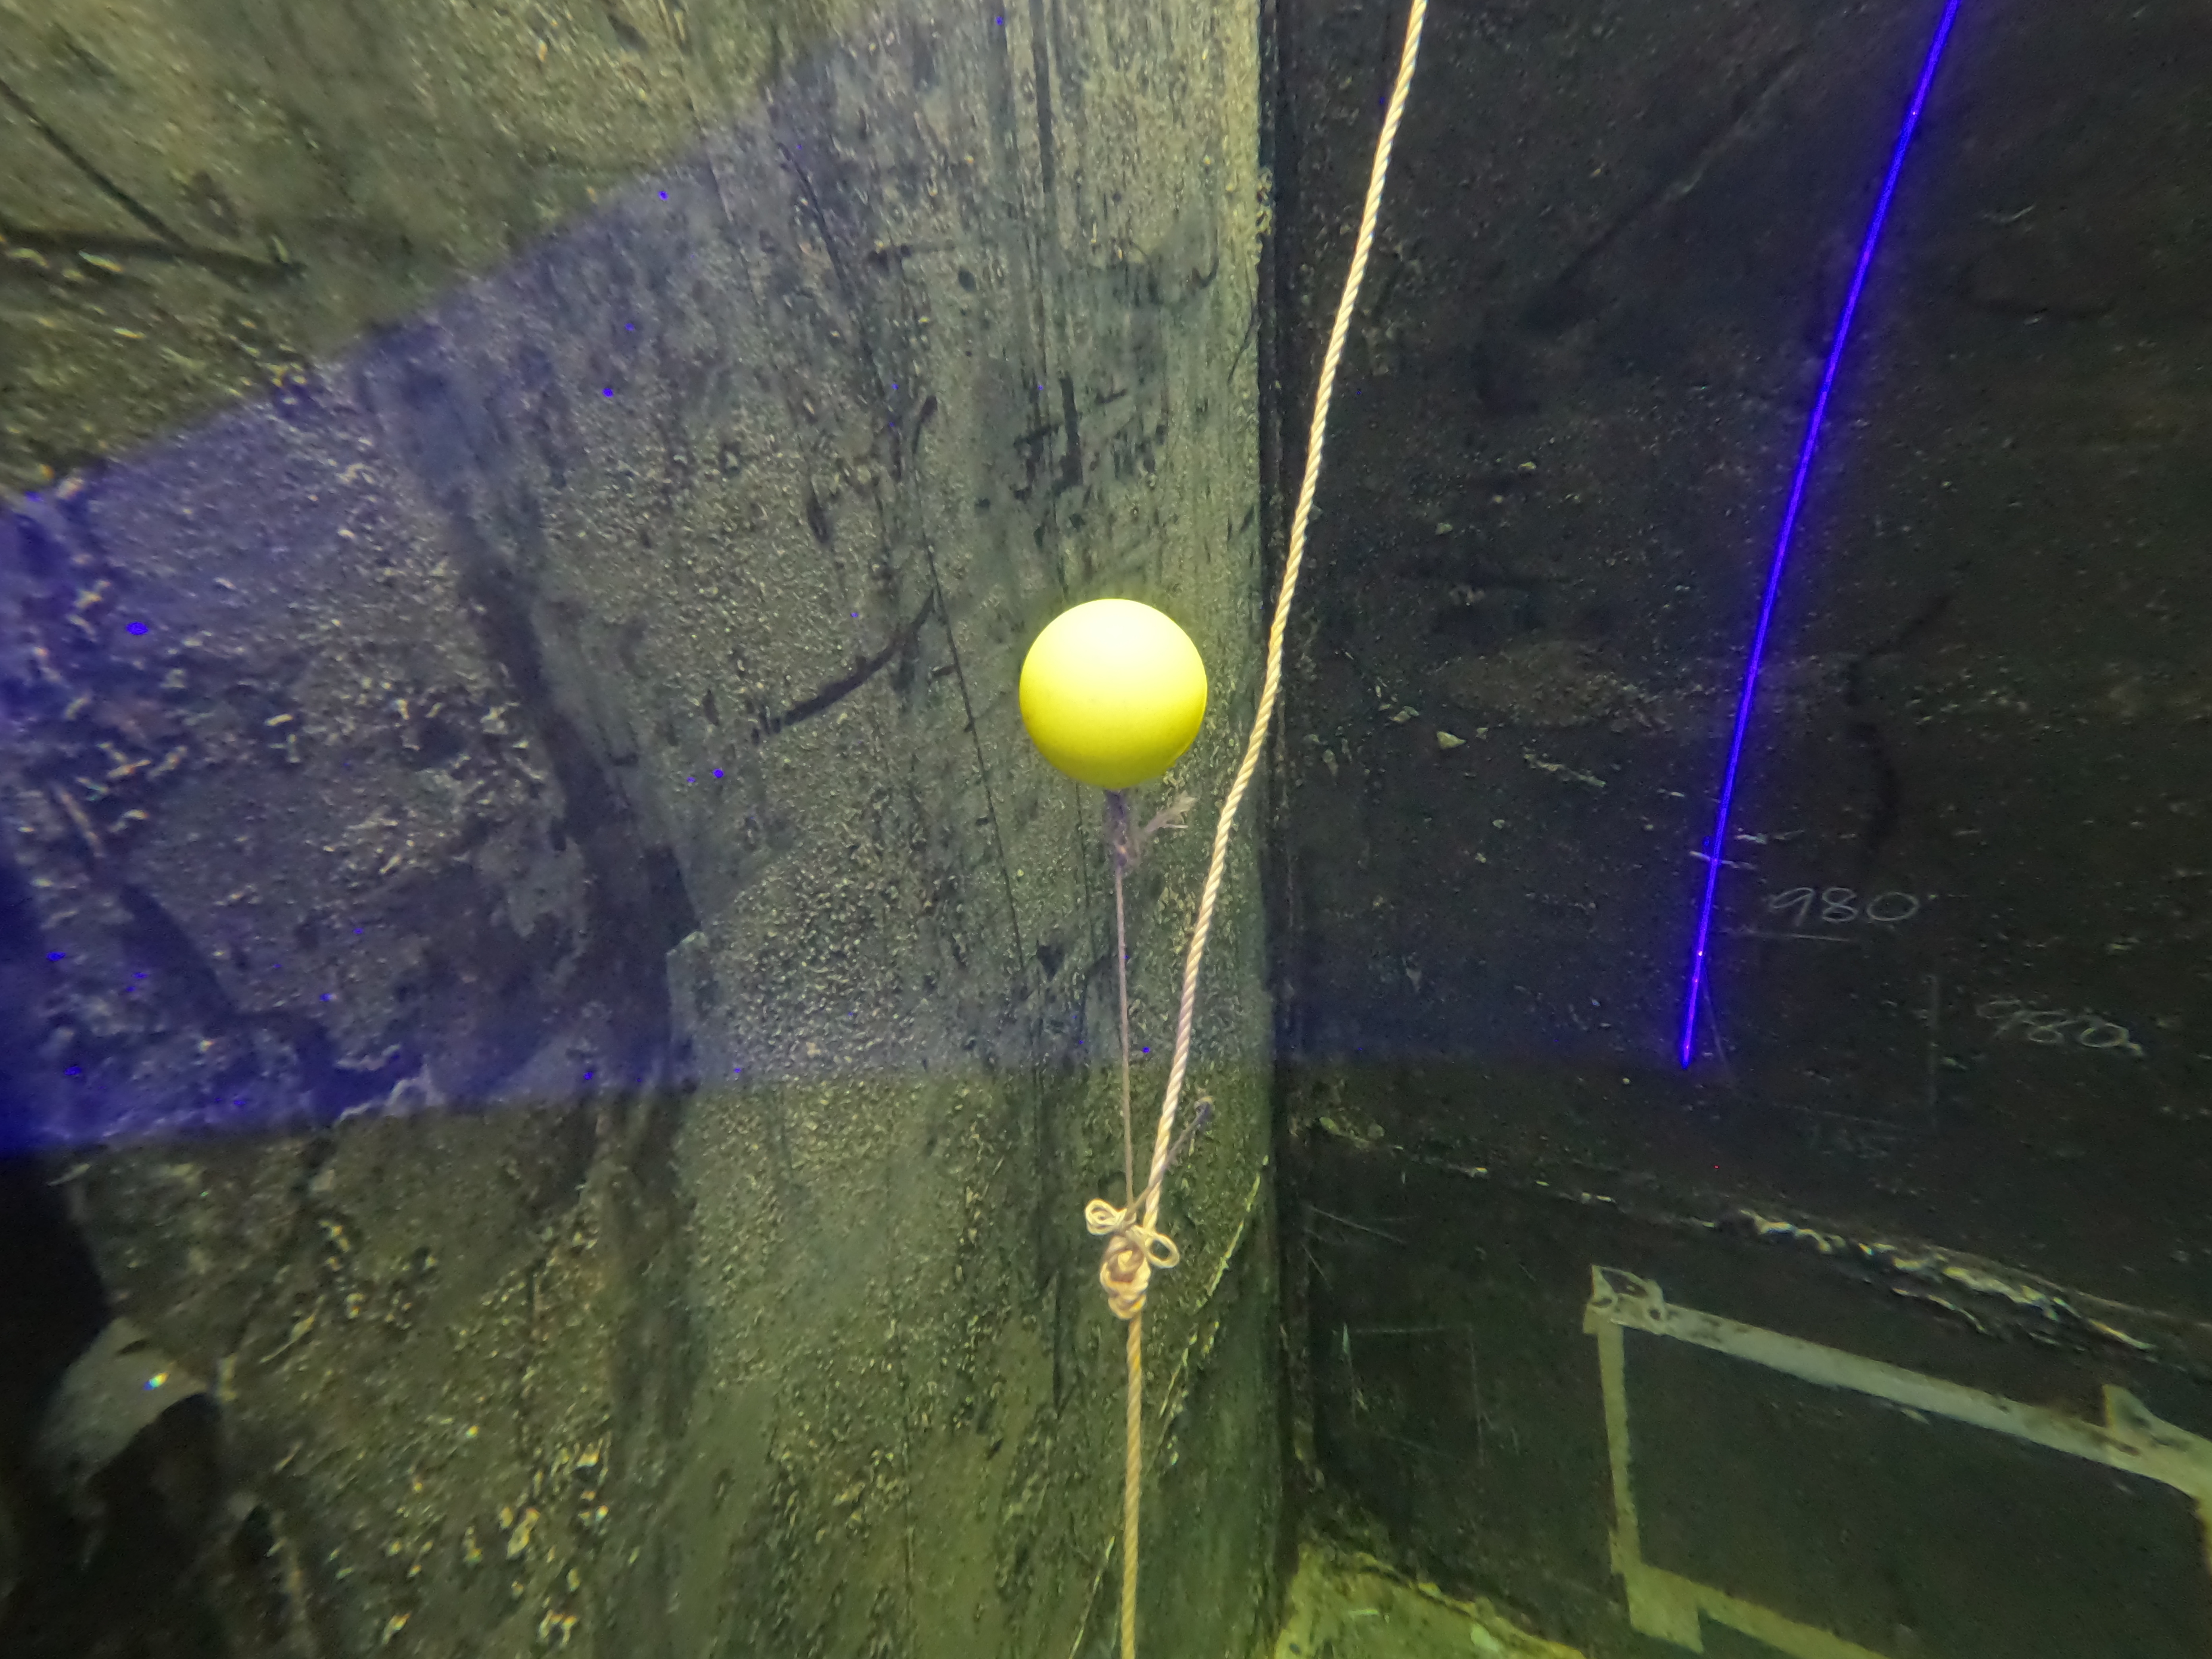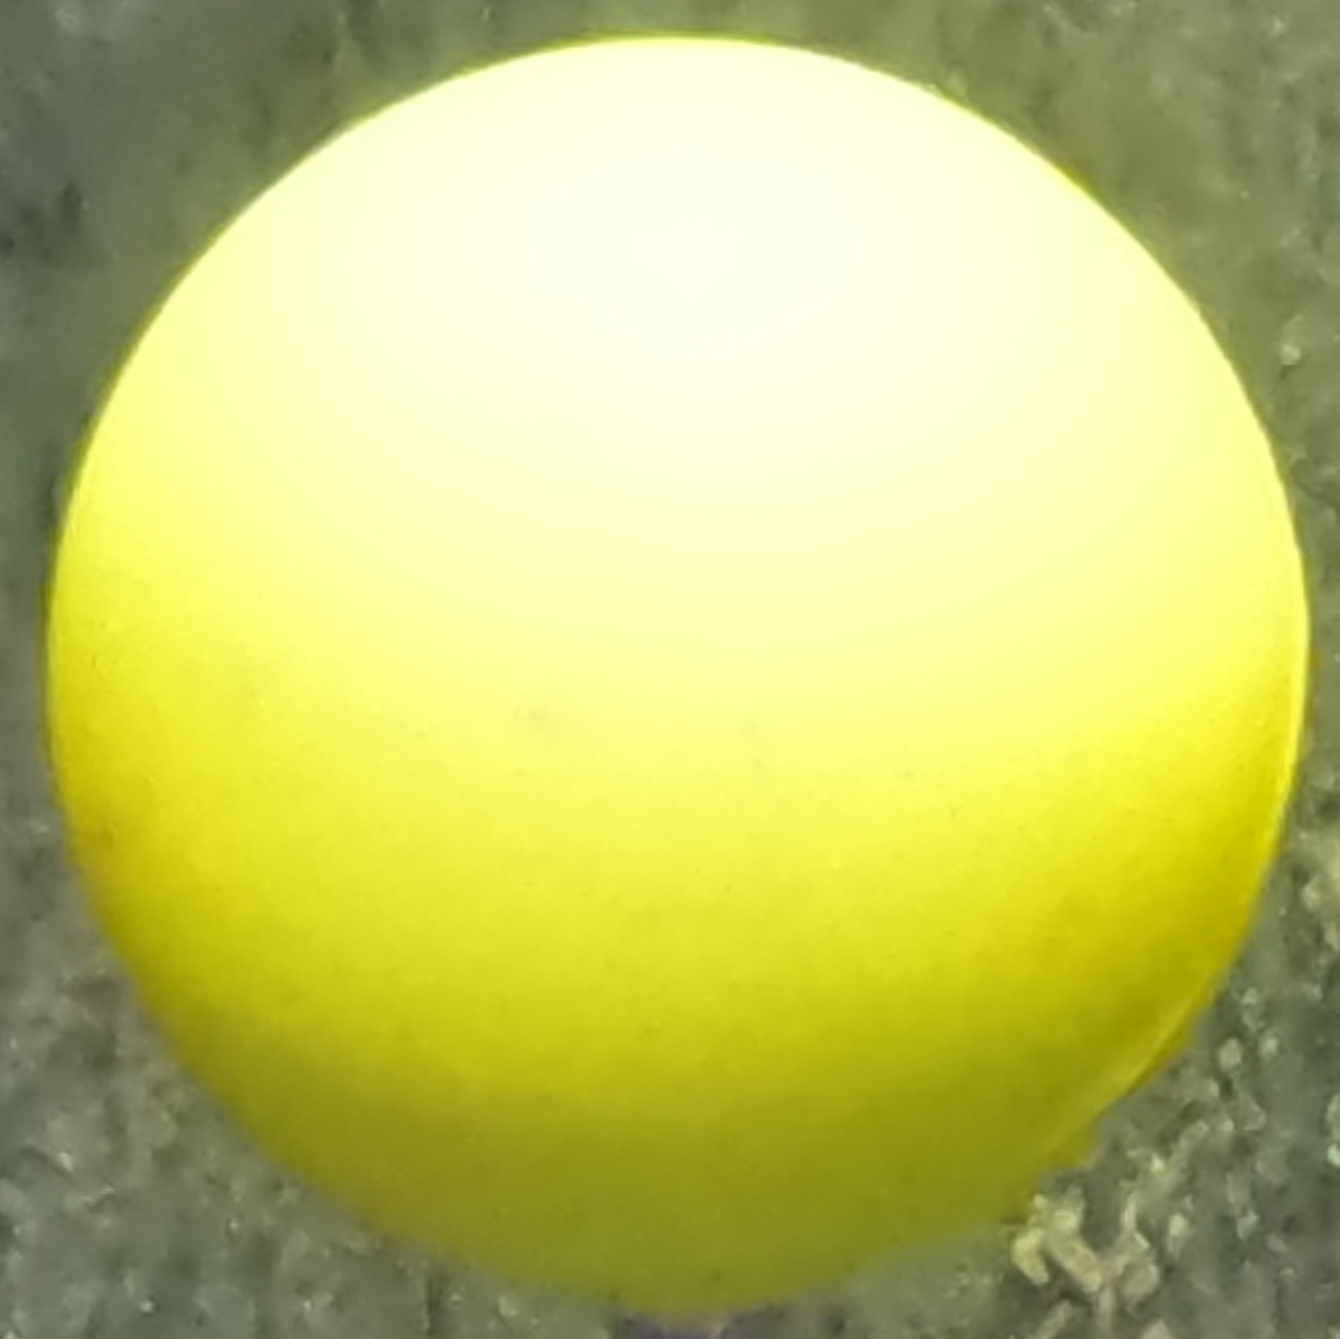

980

980

Supplement: Supplementary file 1907 [file G0034299.pdf › 5/G0034299.pdf]

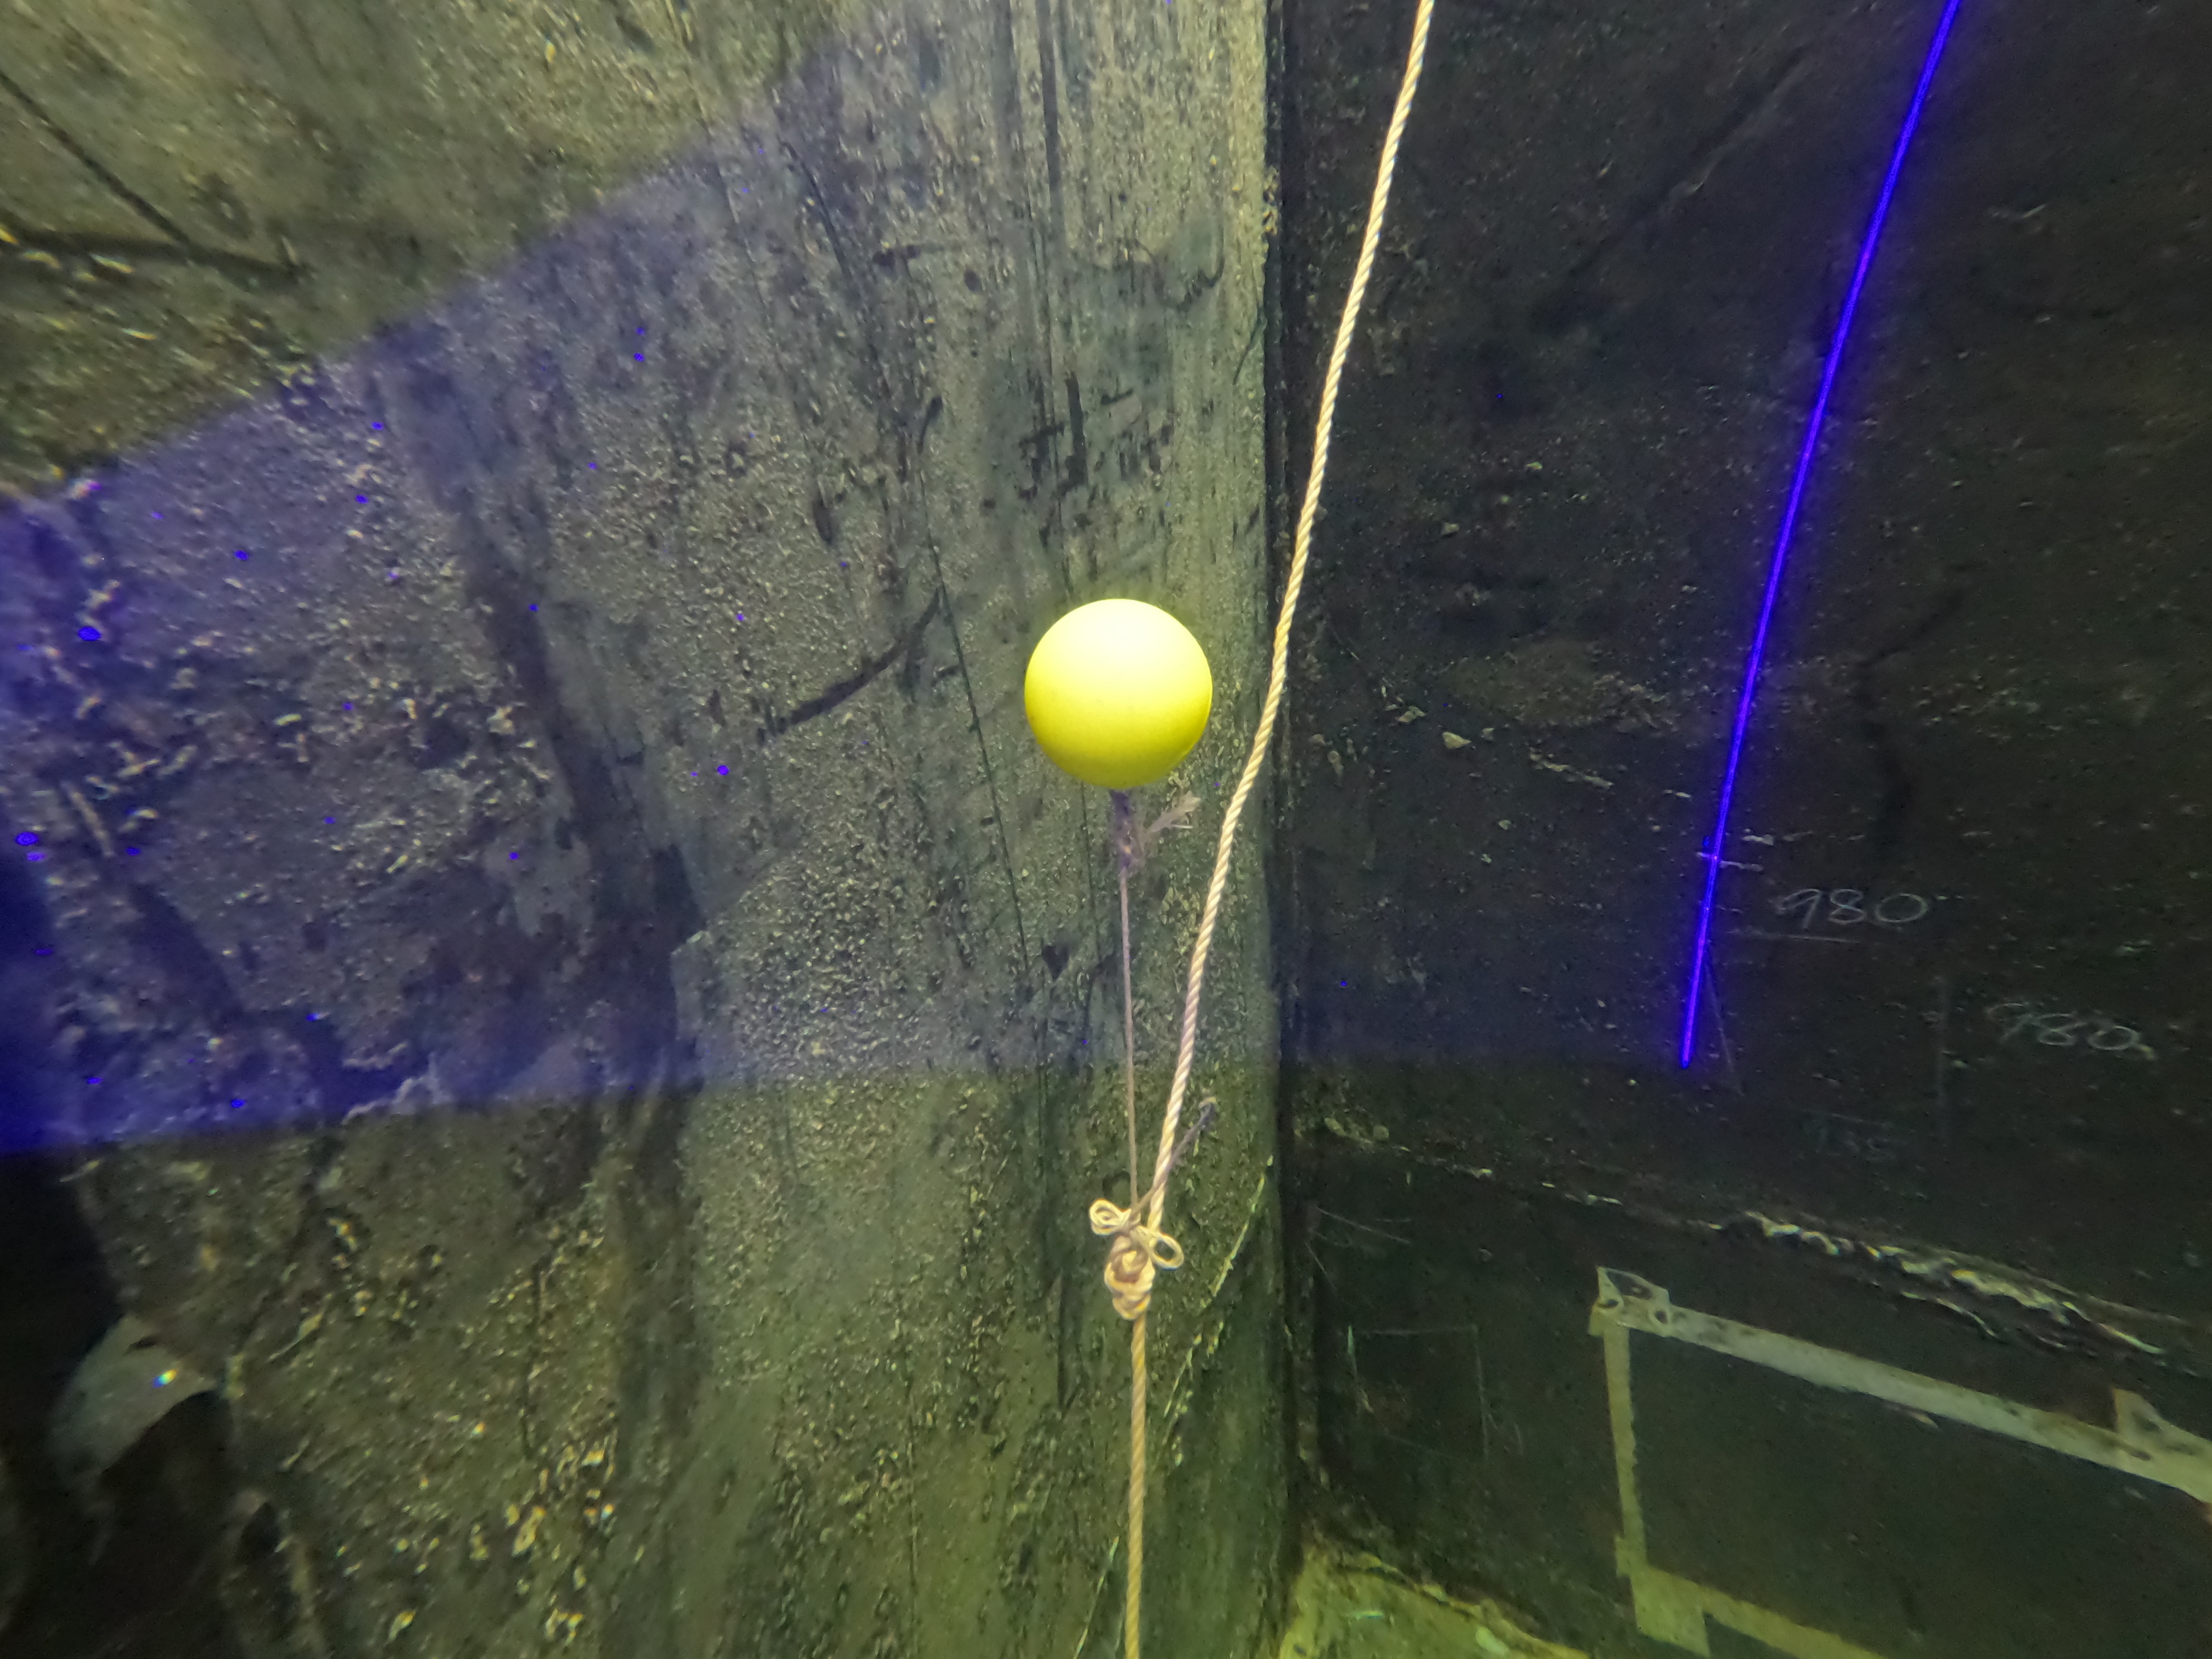

Supplement: Supplementary file 1908 [file G0034300.pdf › 5/G0034300.pdf]

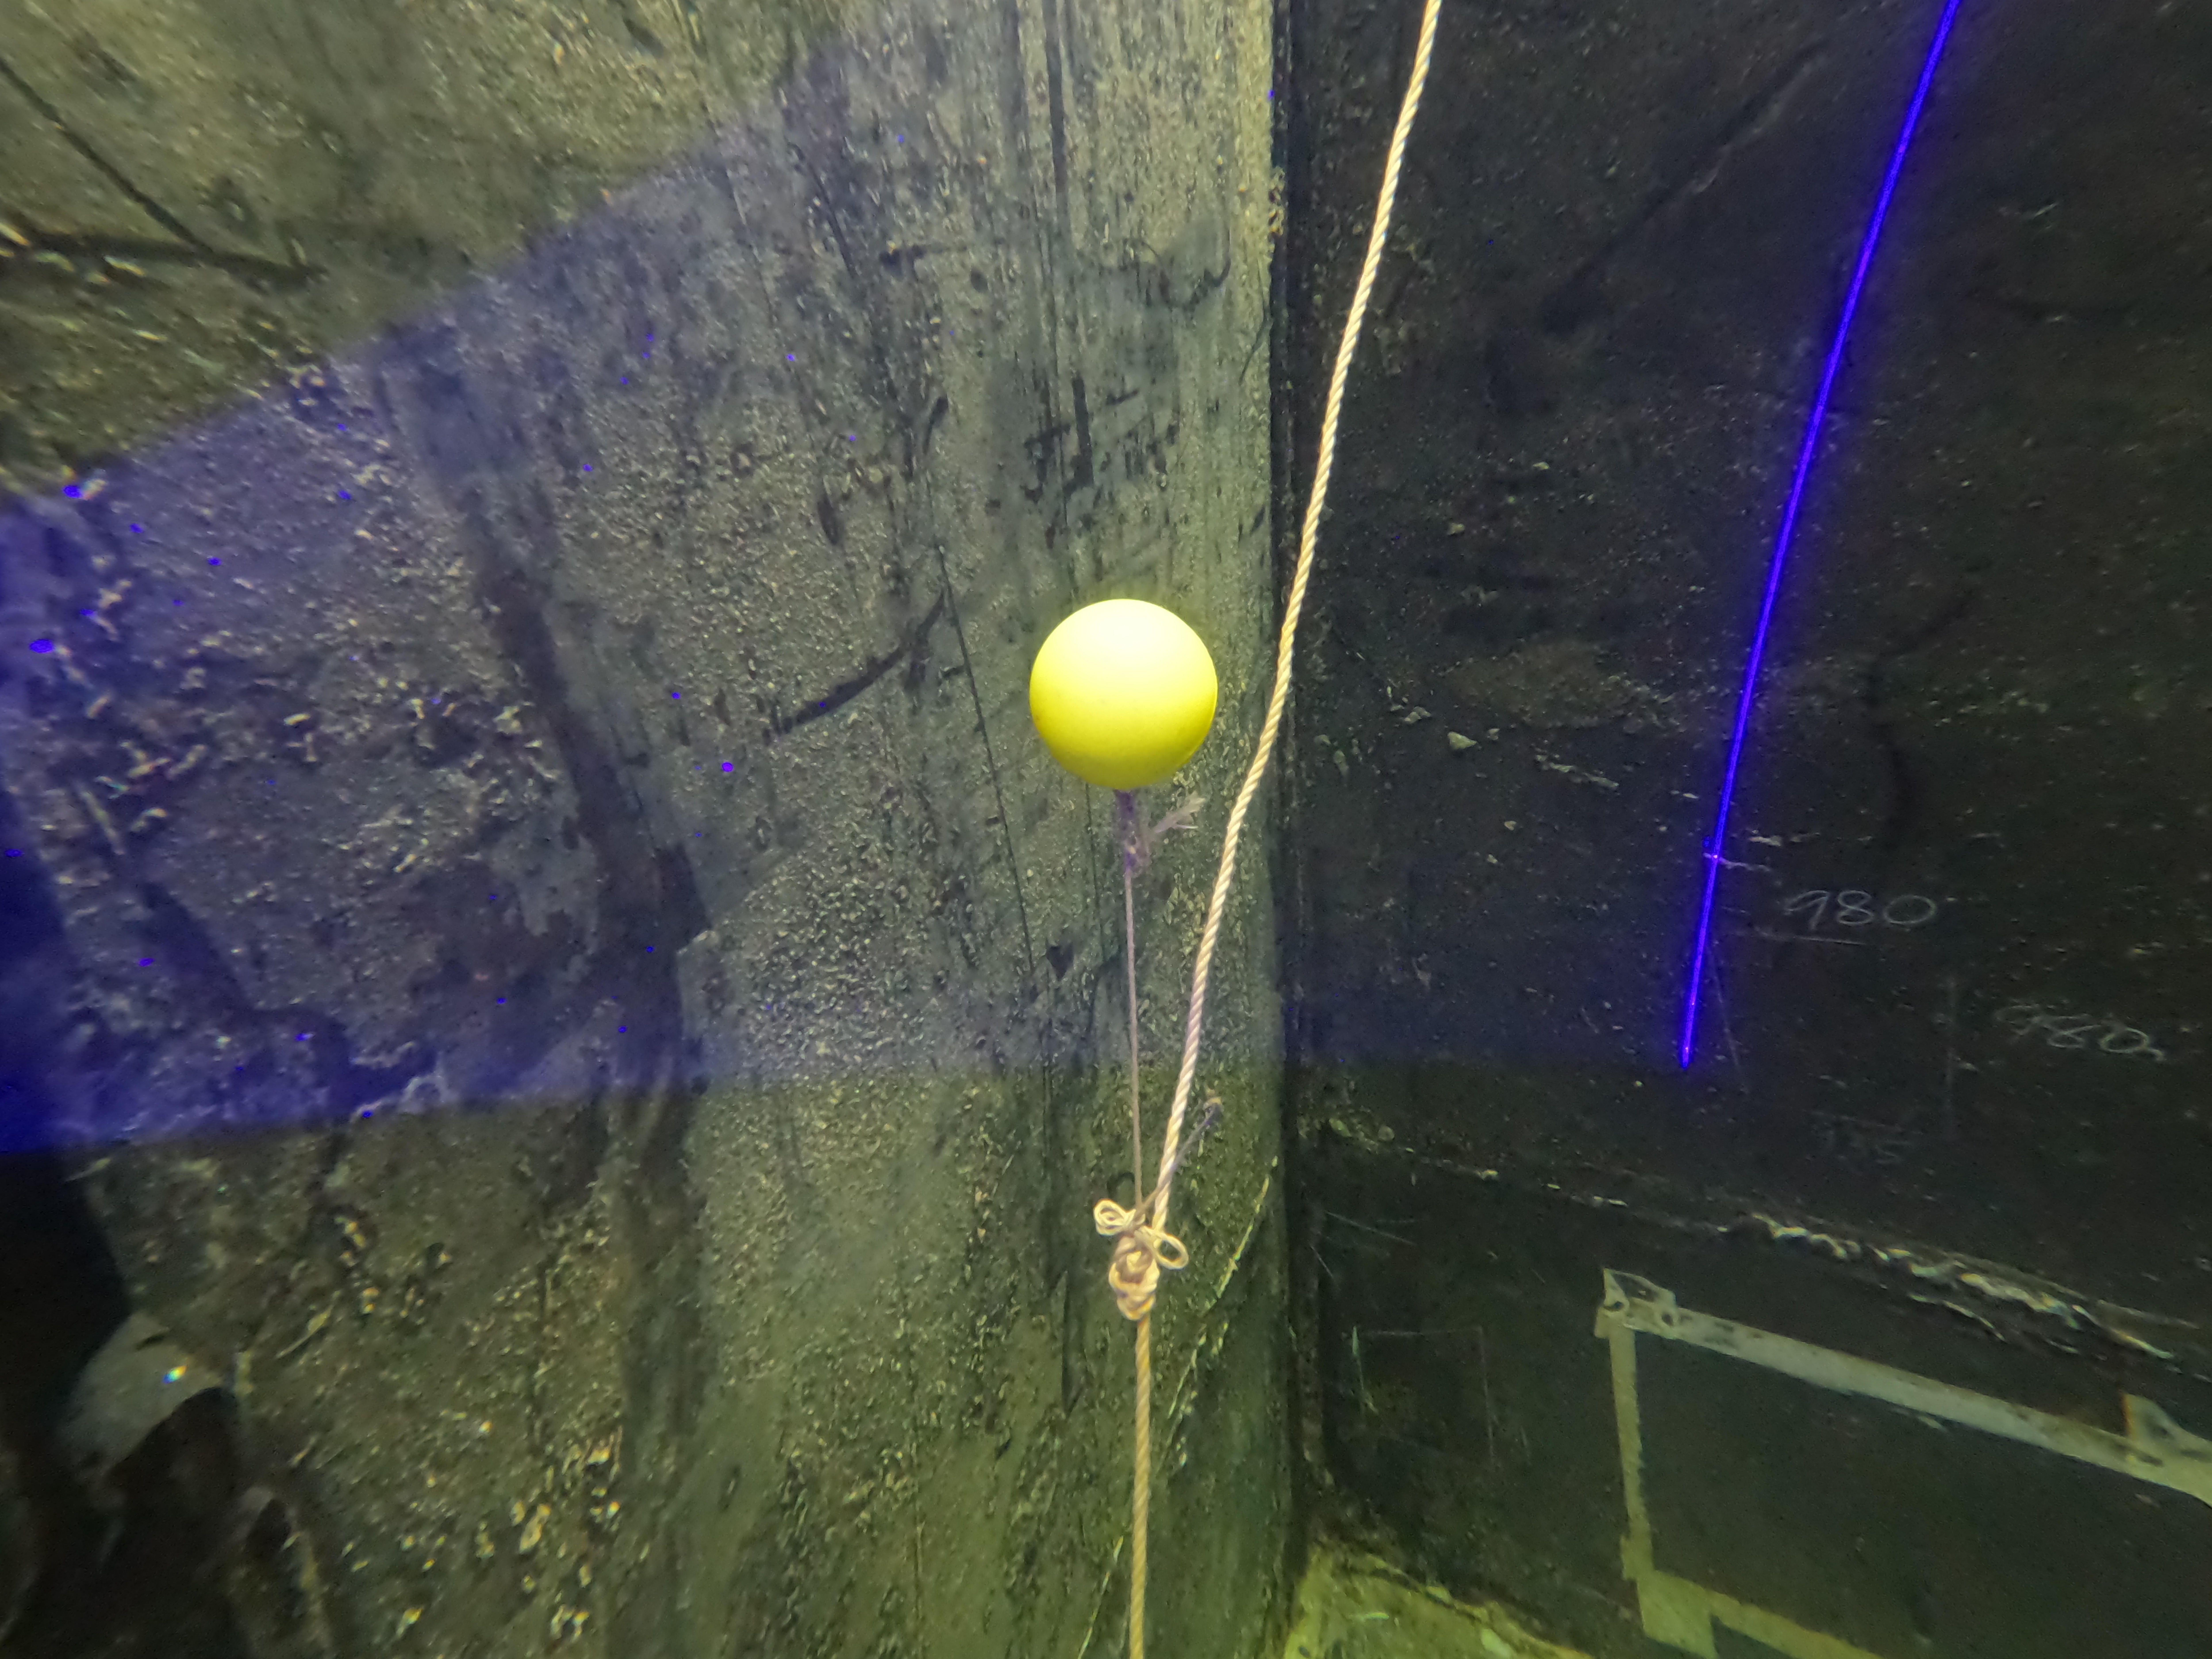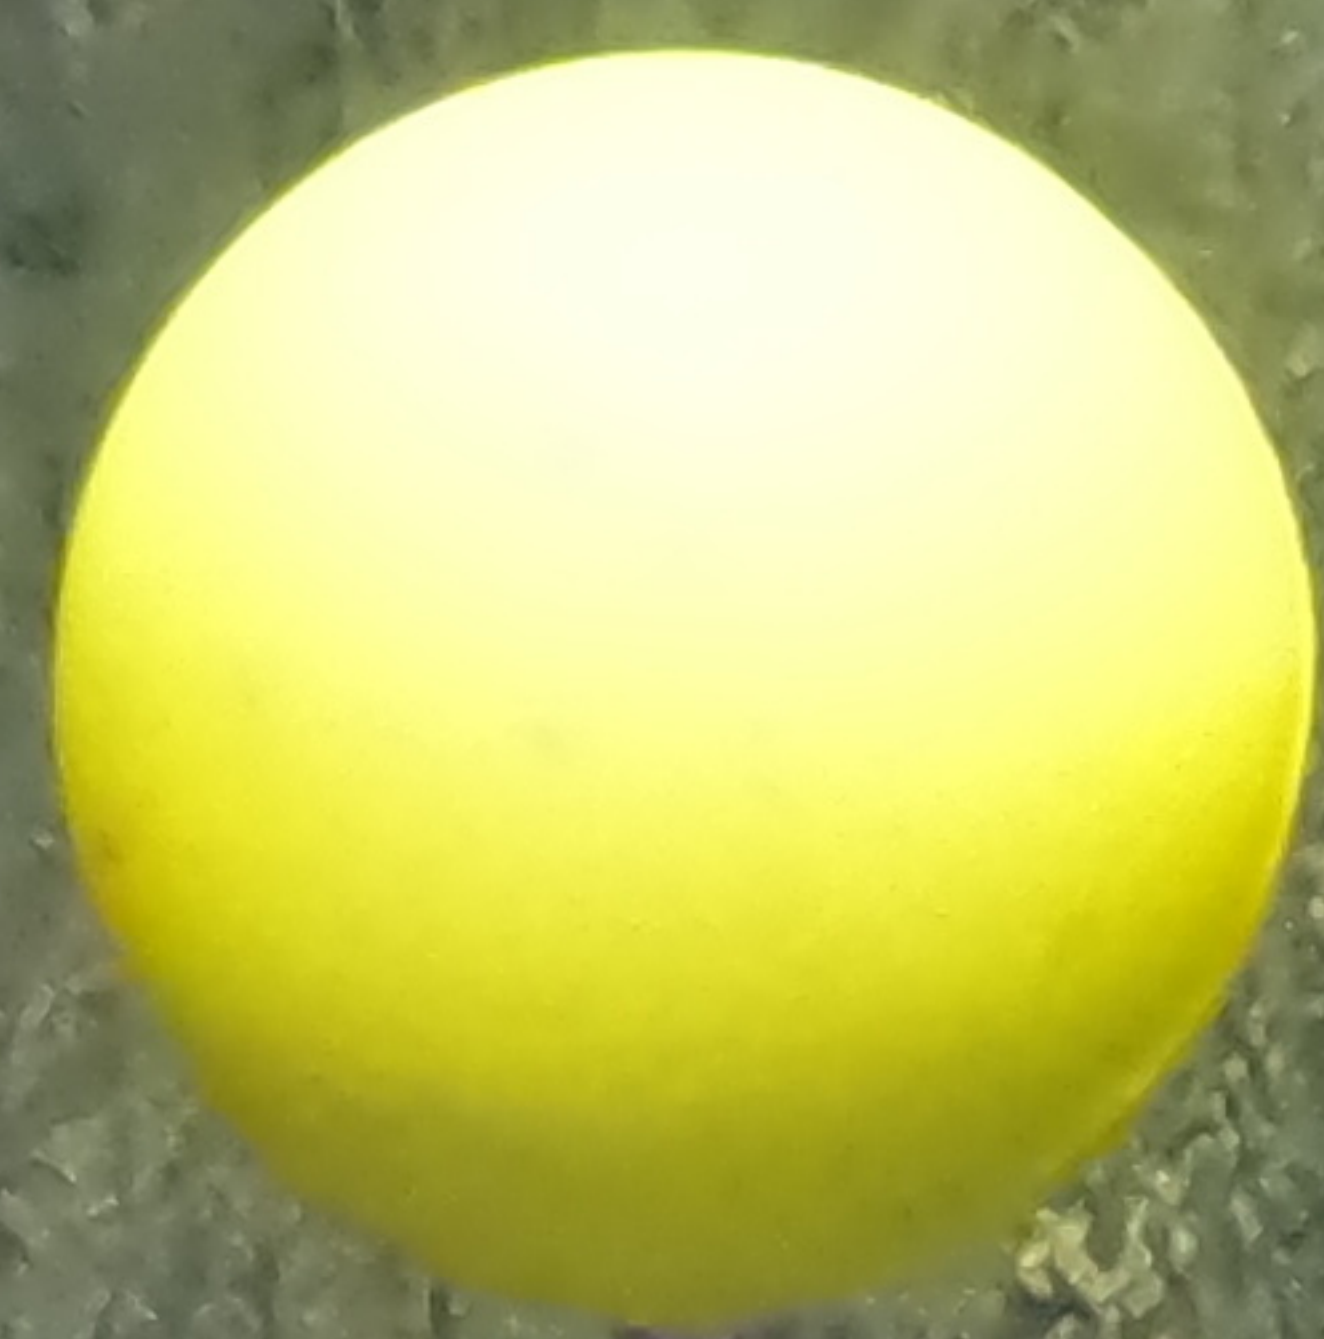

980

980

Supplement: Supplementary file 1909 [file G0034301.pdf › 5/G0034301.pdf]

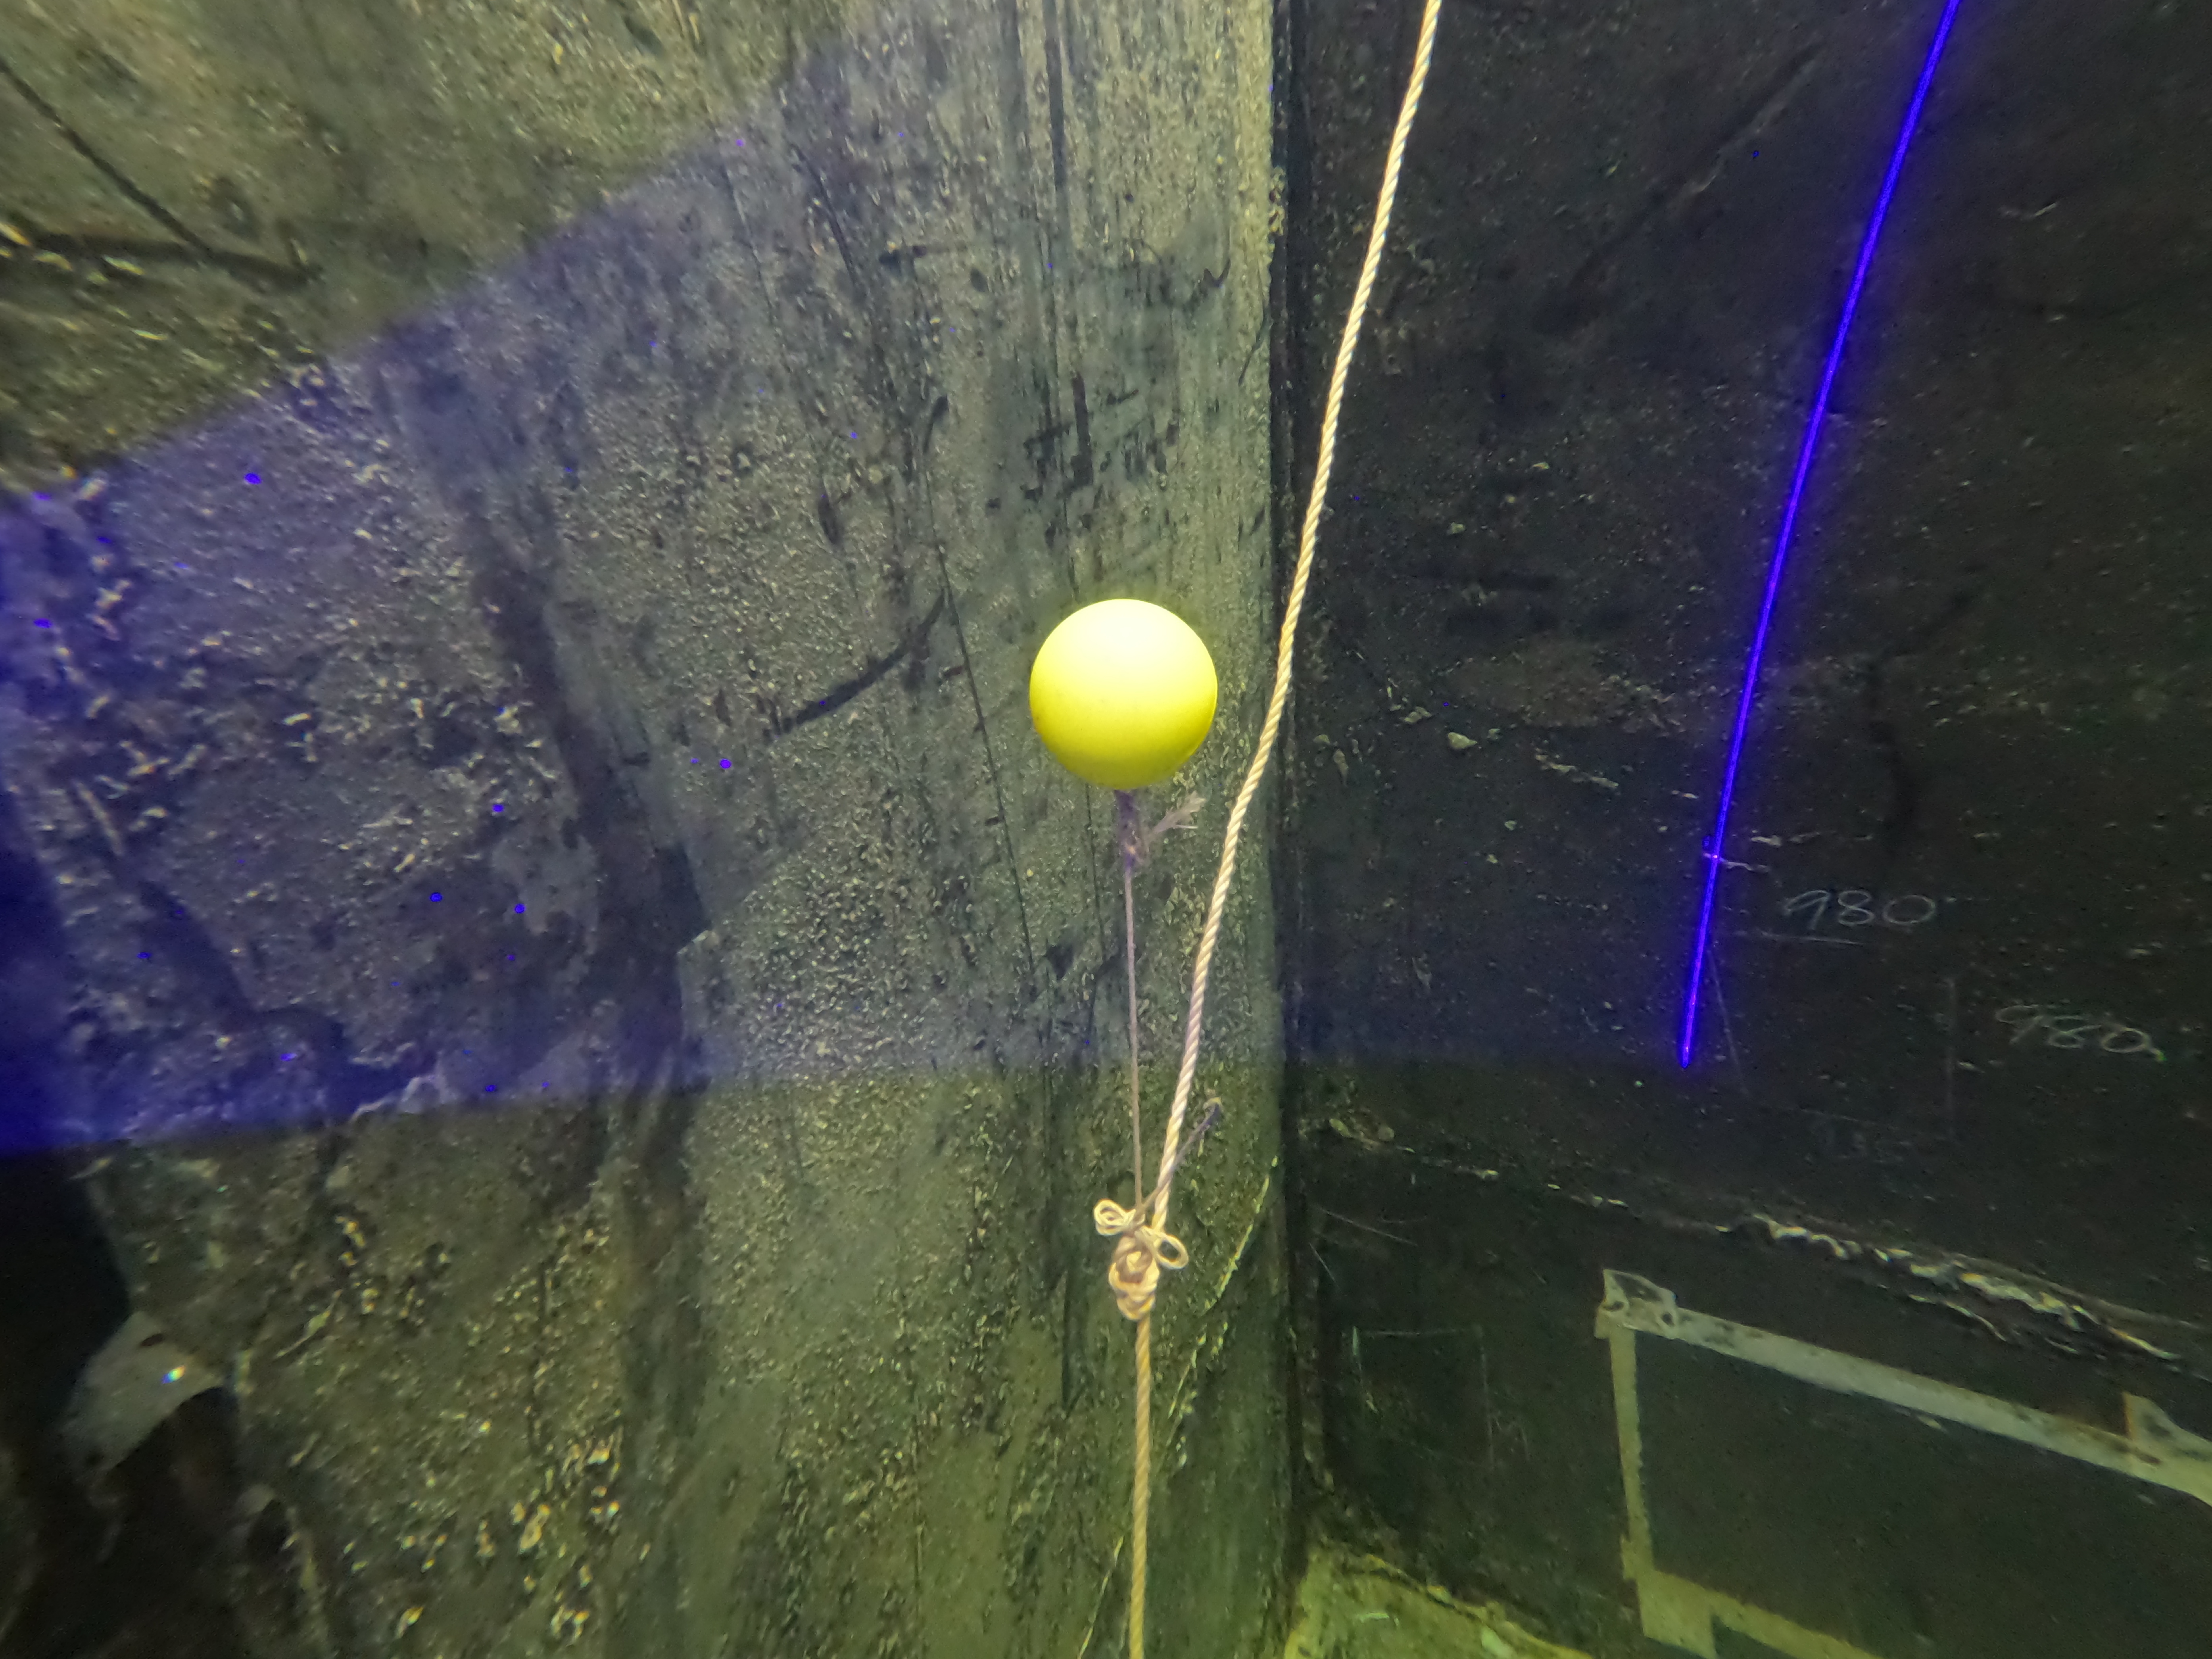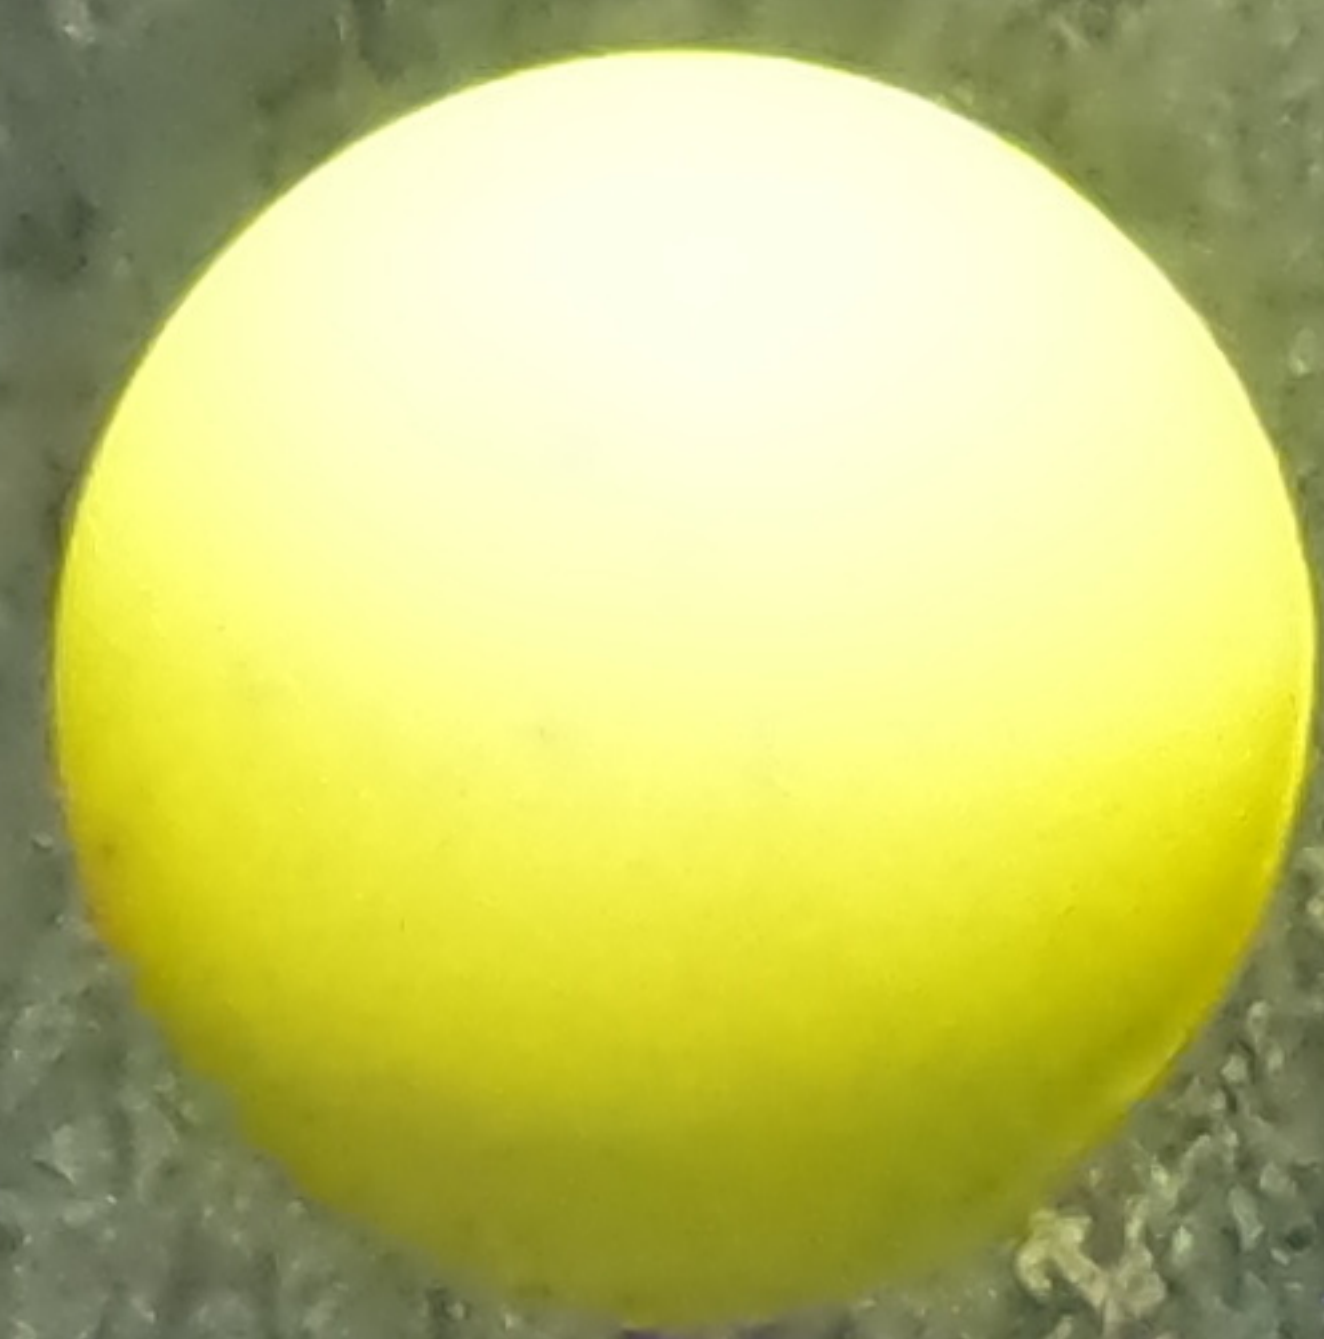

980

980

Supplement: Supplementary file 1910 [file G0034302.pdf › 5/G0034302.pdf]

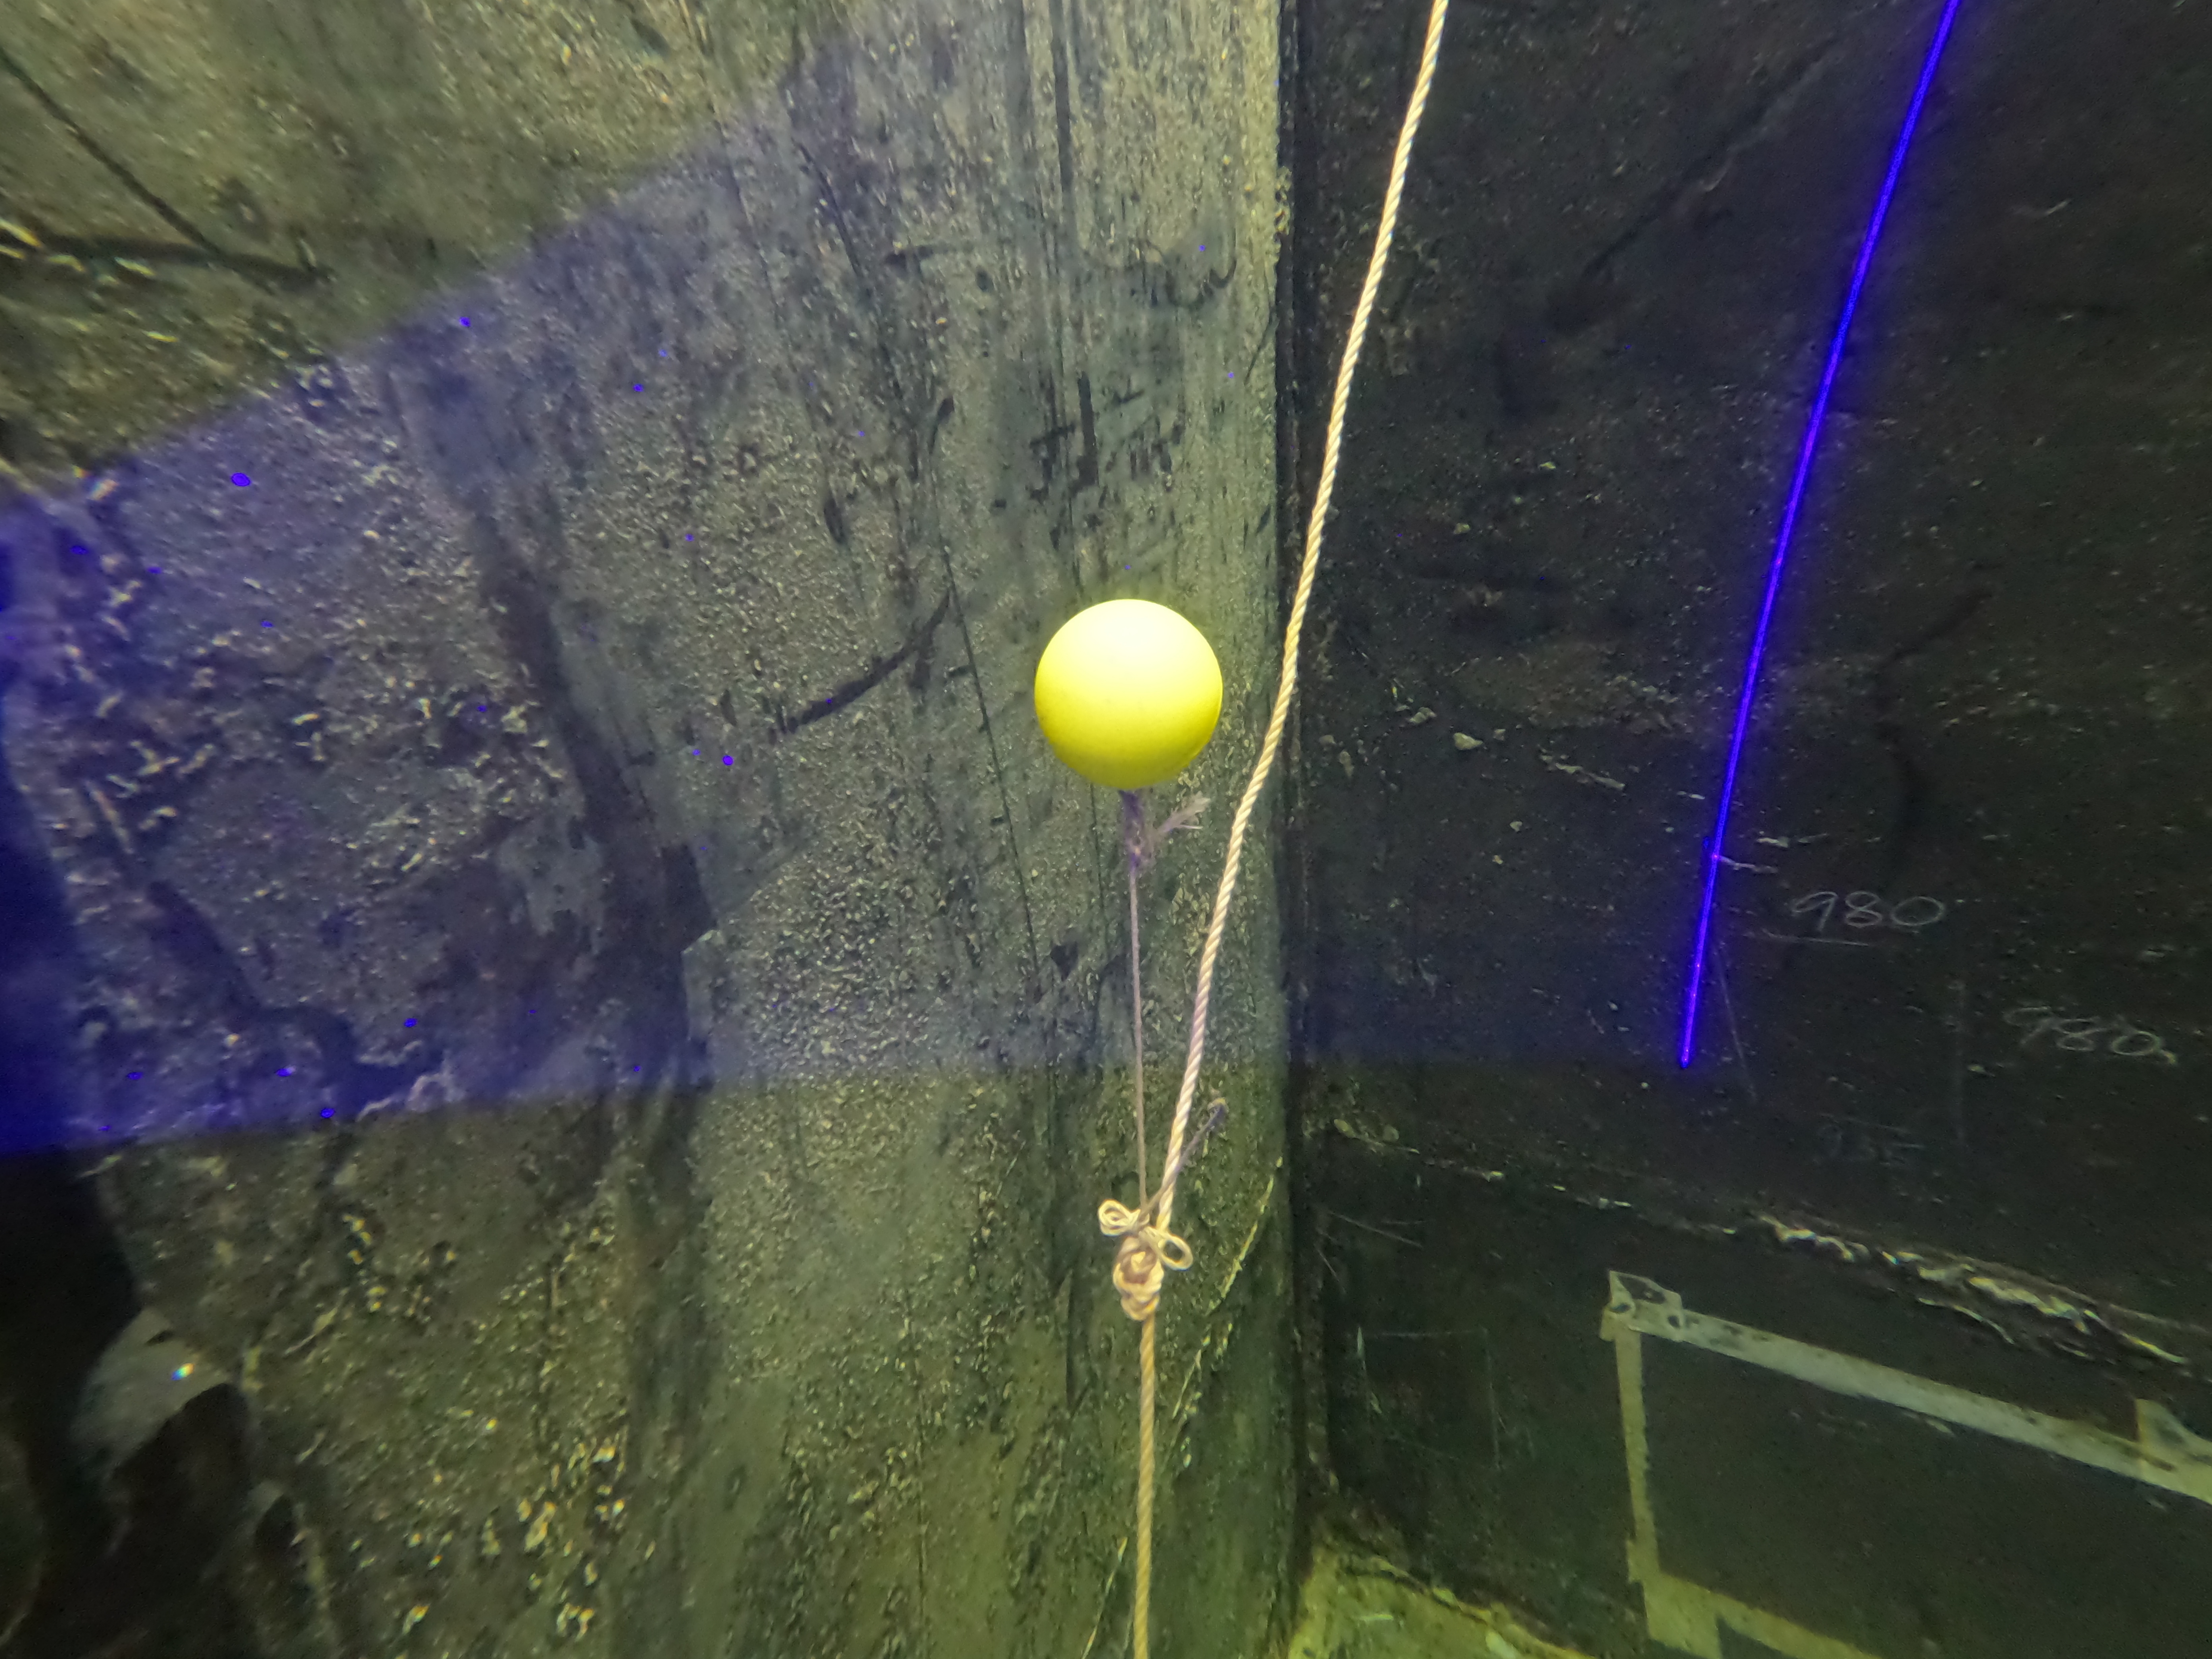

Supplement: Supplementary file 1911 [file G0034303.pdf › 5/G0034303.pdf]

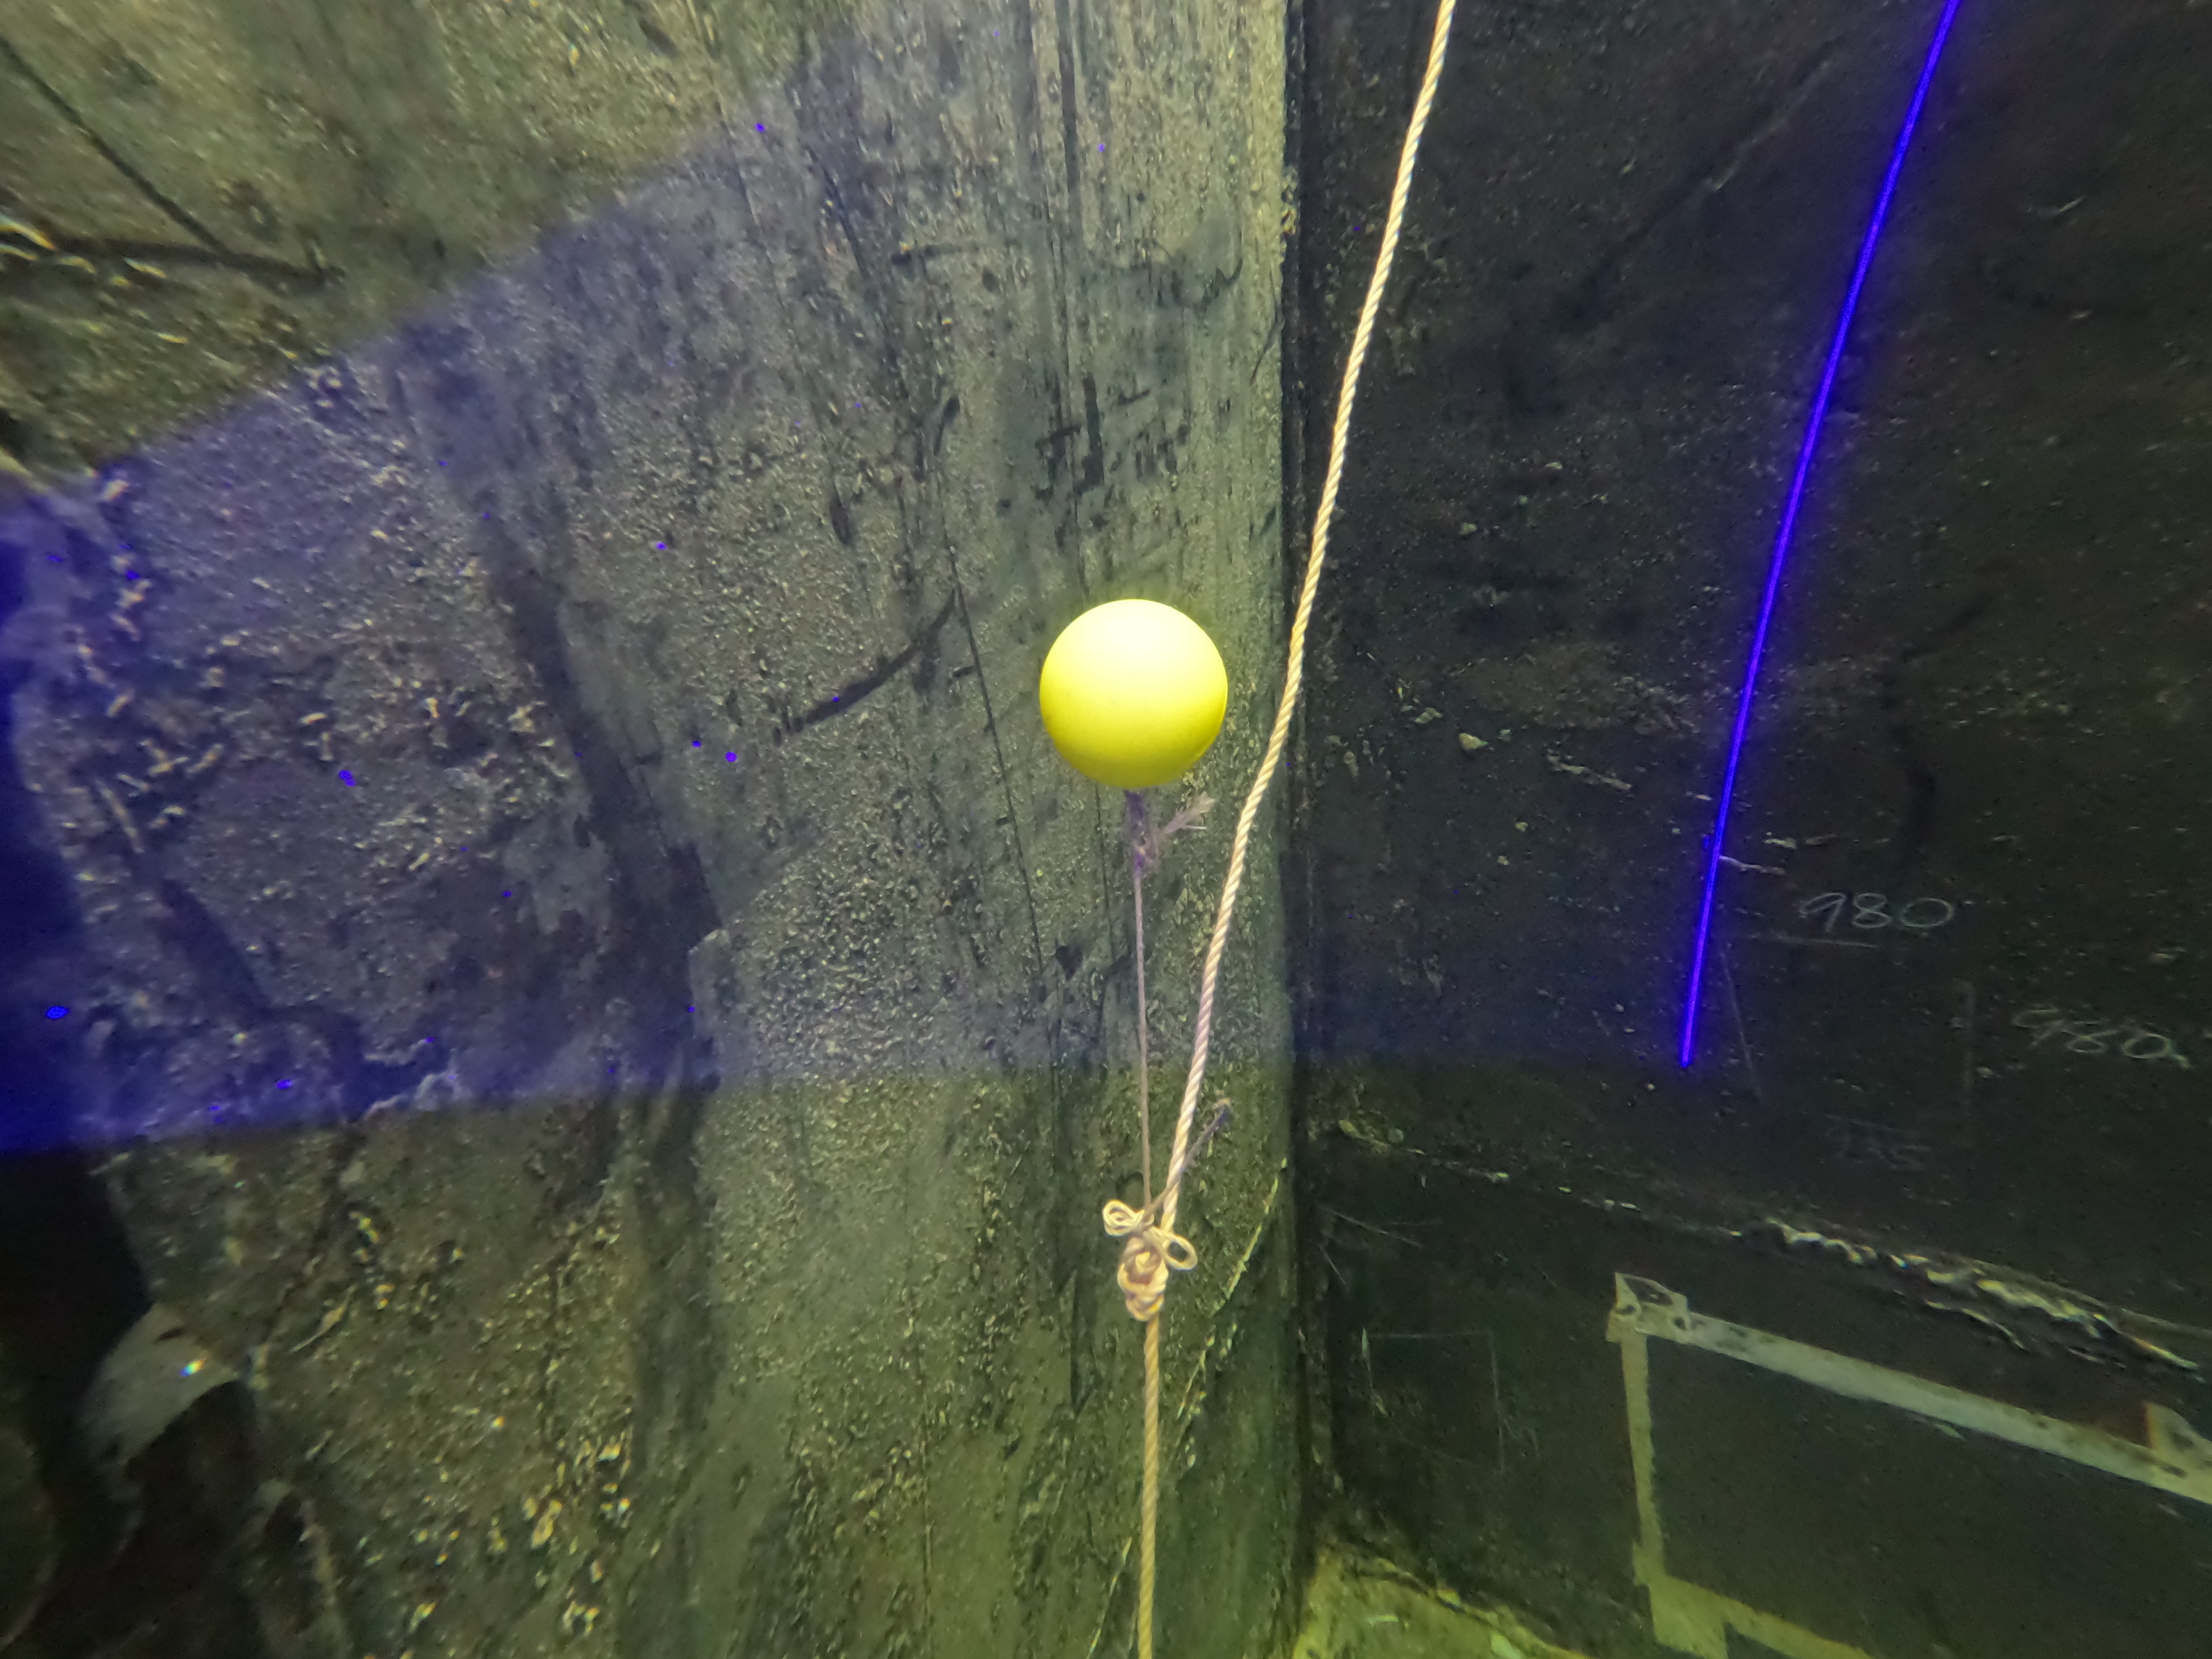

Supplement: Supplementary file 1912 [file G0034304.pdf › 5/G0034304.pdf]

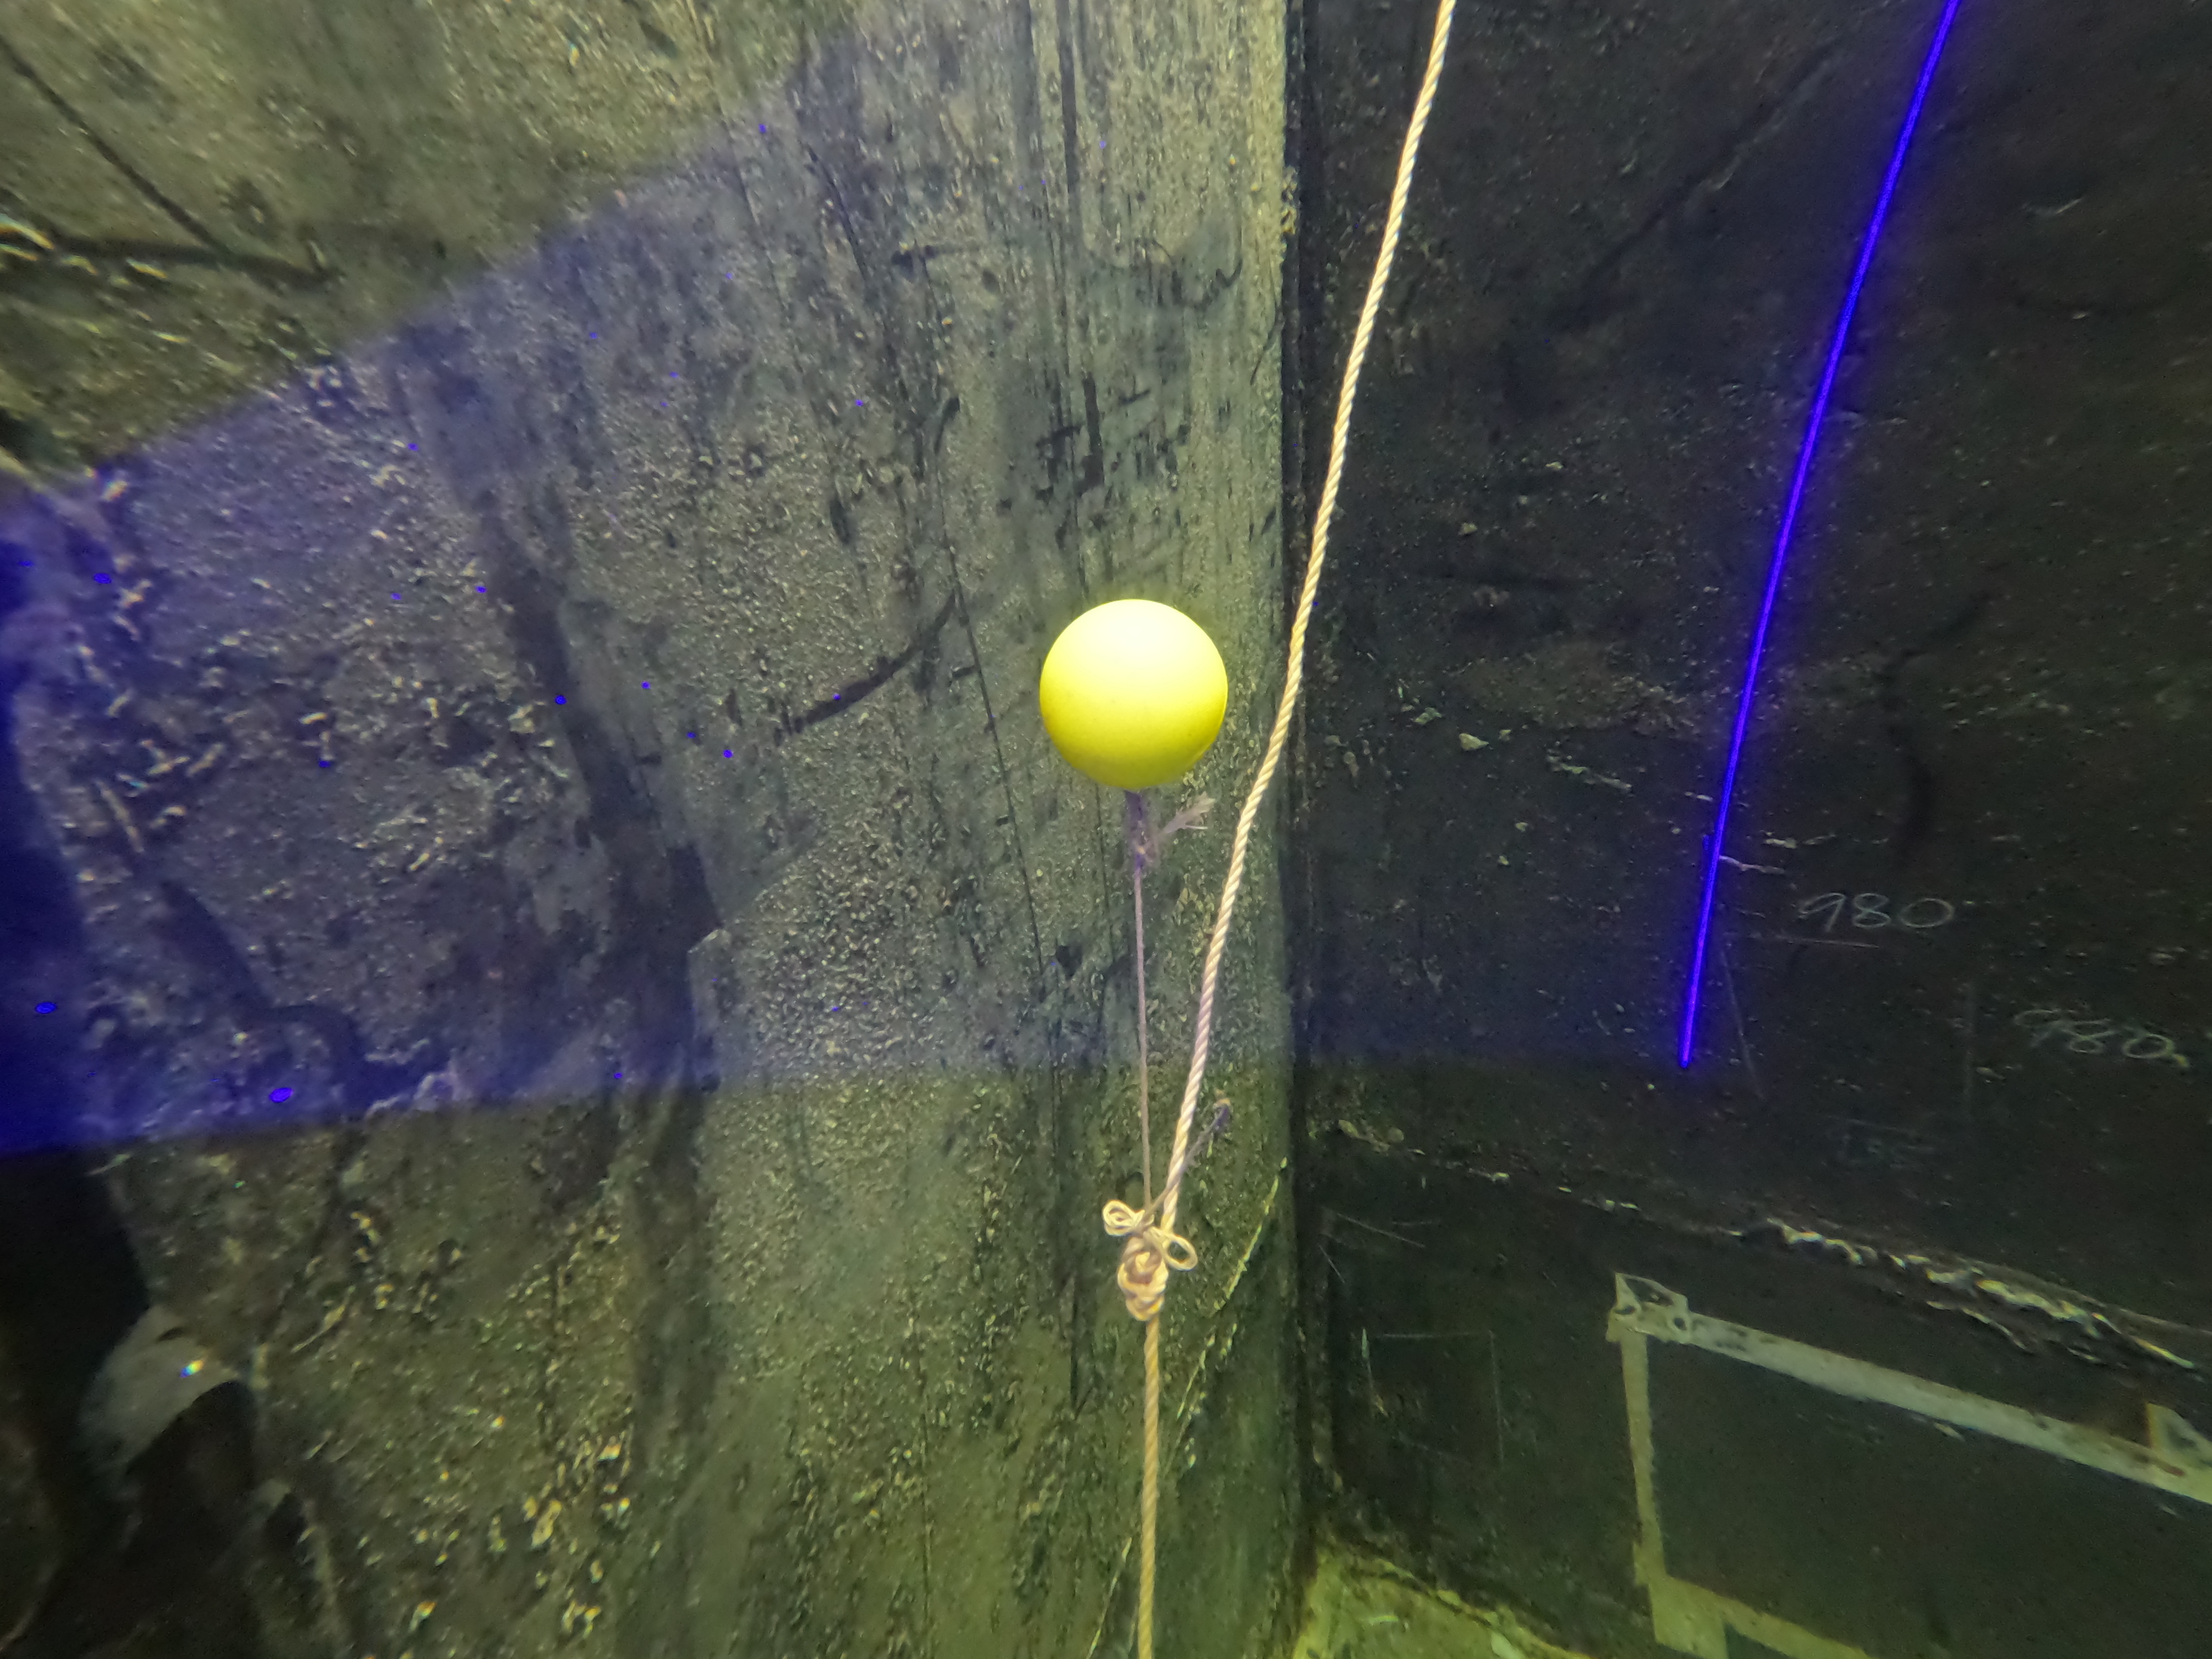

Supplement: Supplementary file 1913 [file G0034305.pdf › 5/G0034305.pdf]

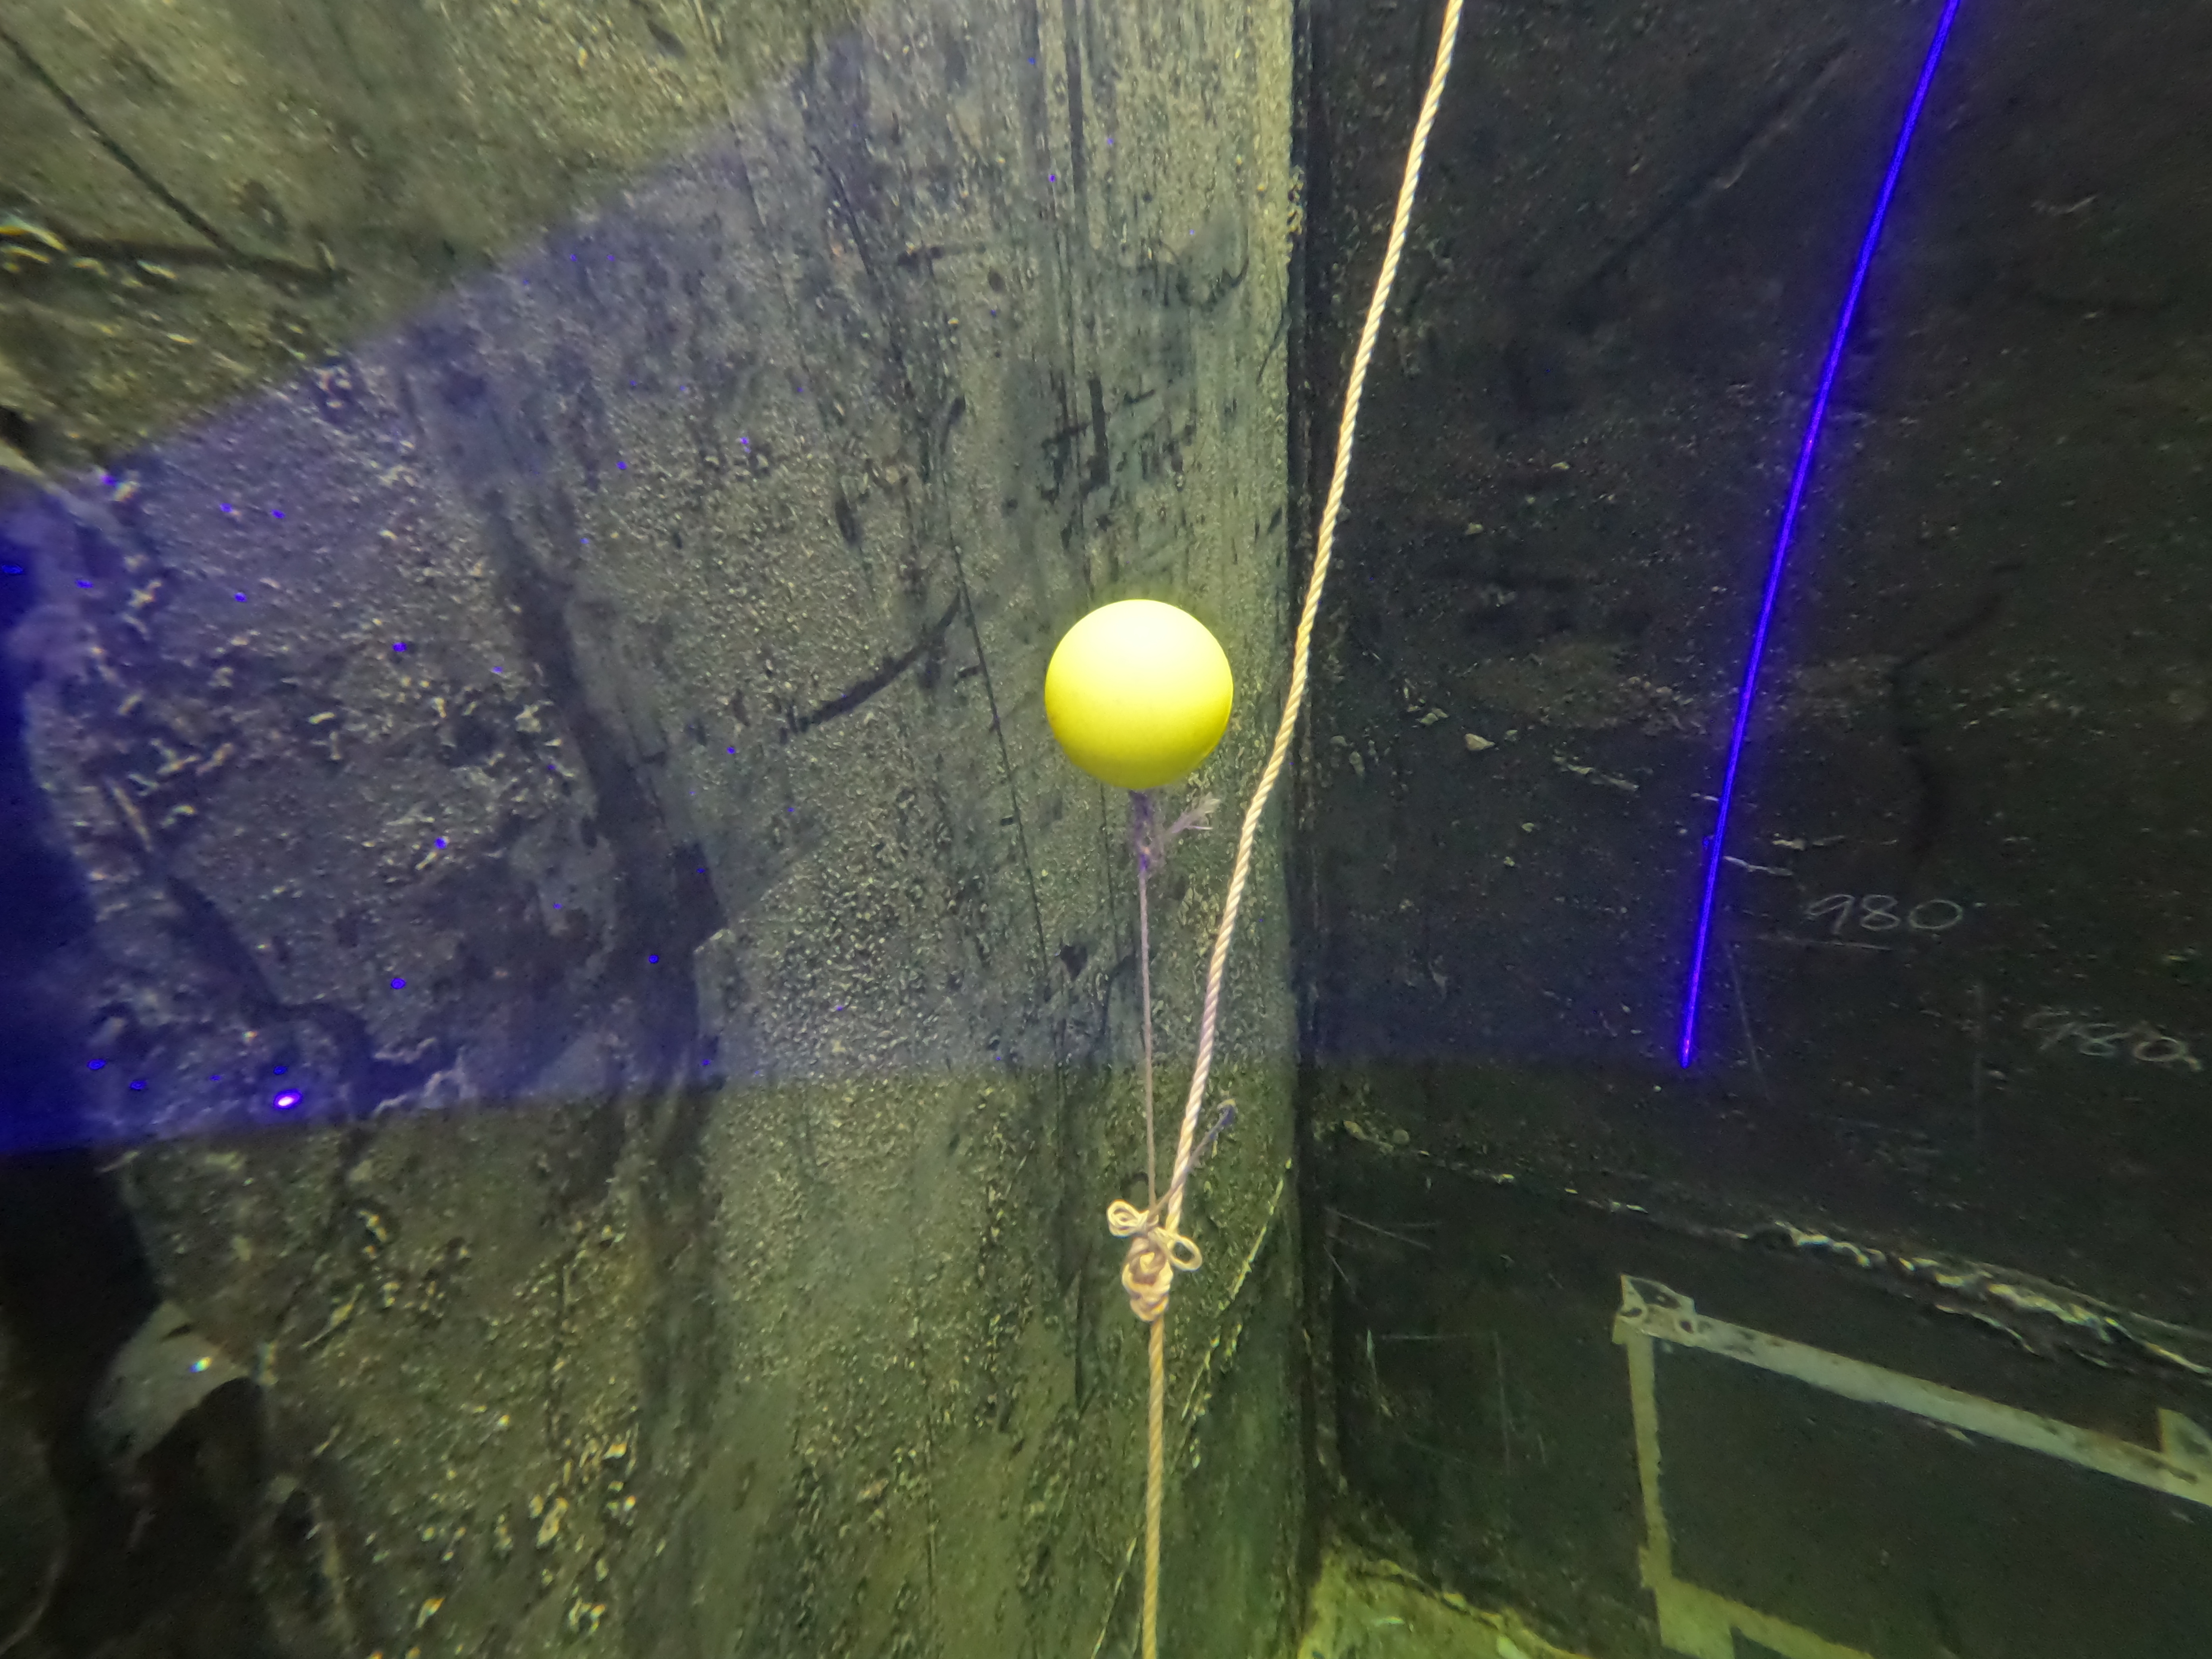

Supplement: Supplementary file 1914 [file G0034306.pdf › 5/G0034306.pdf]

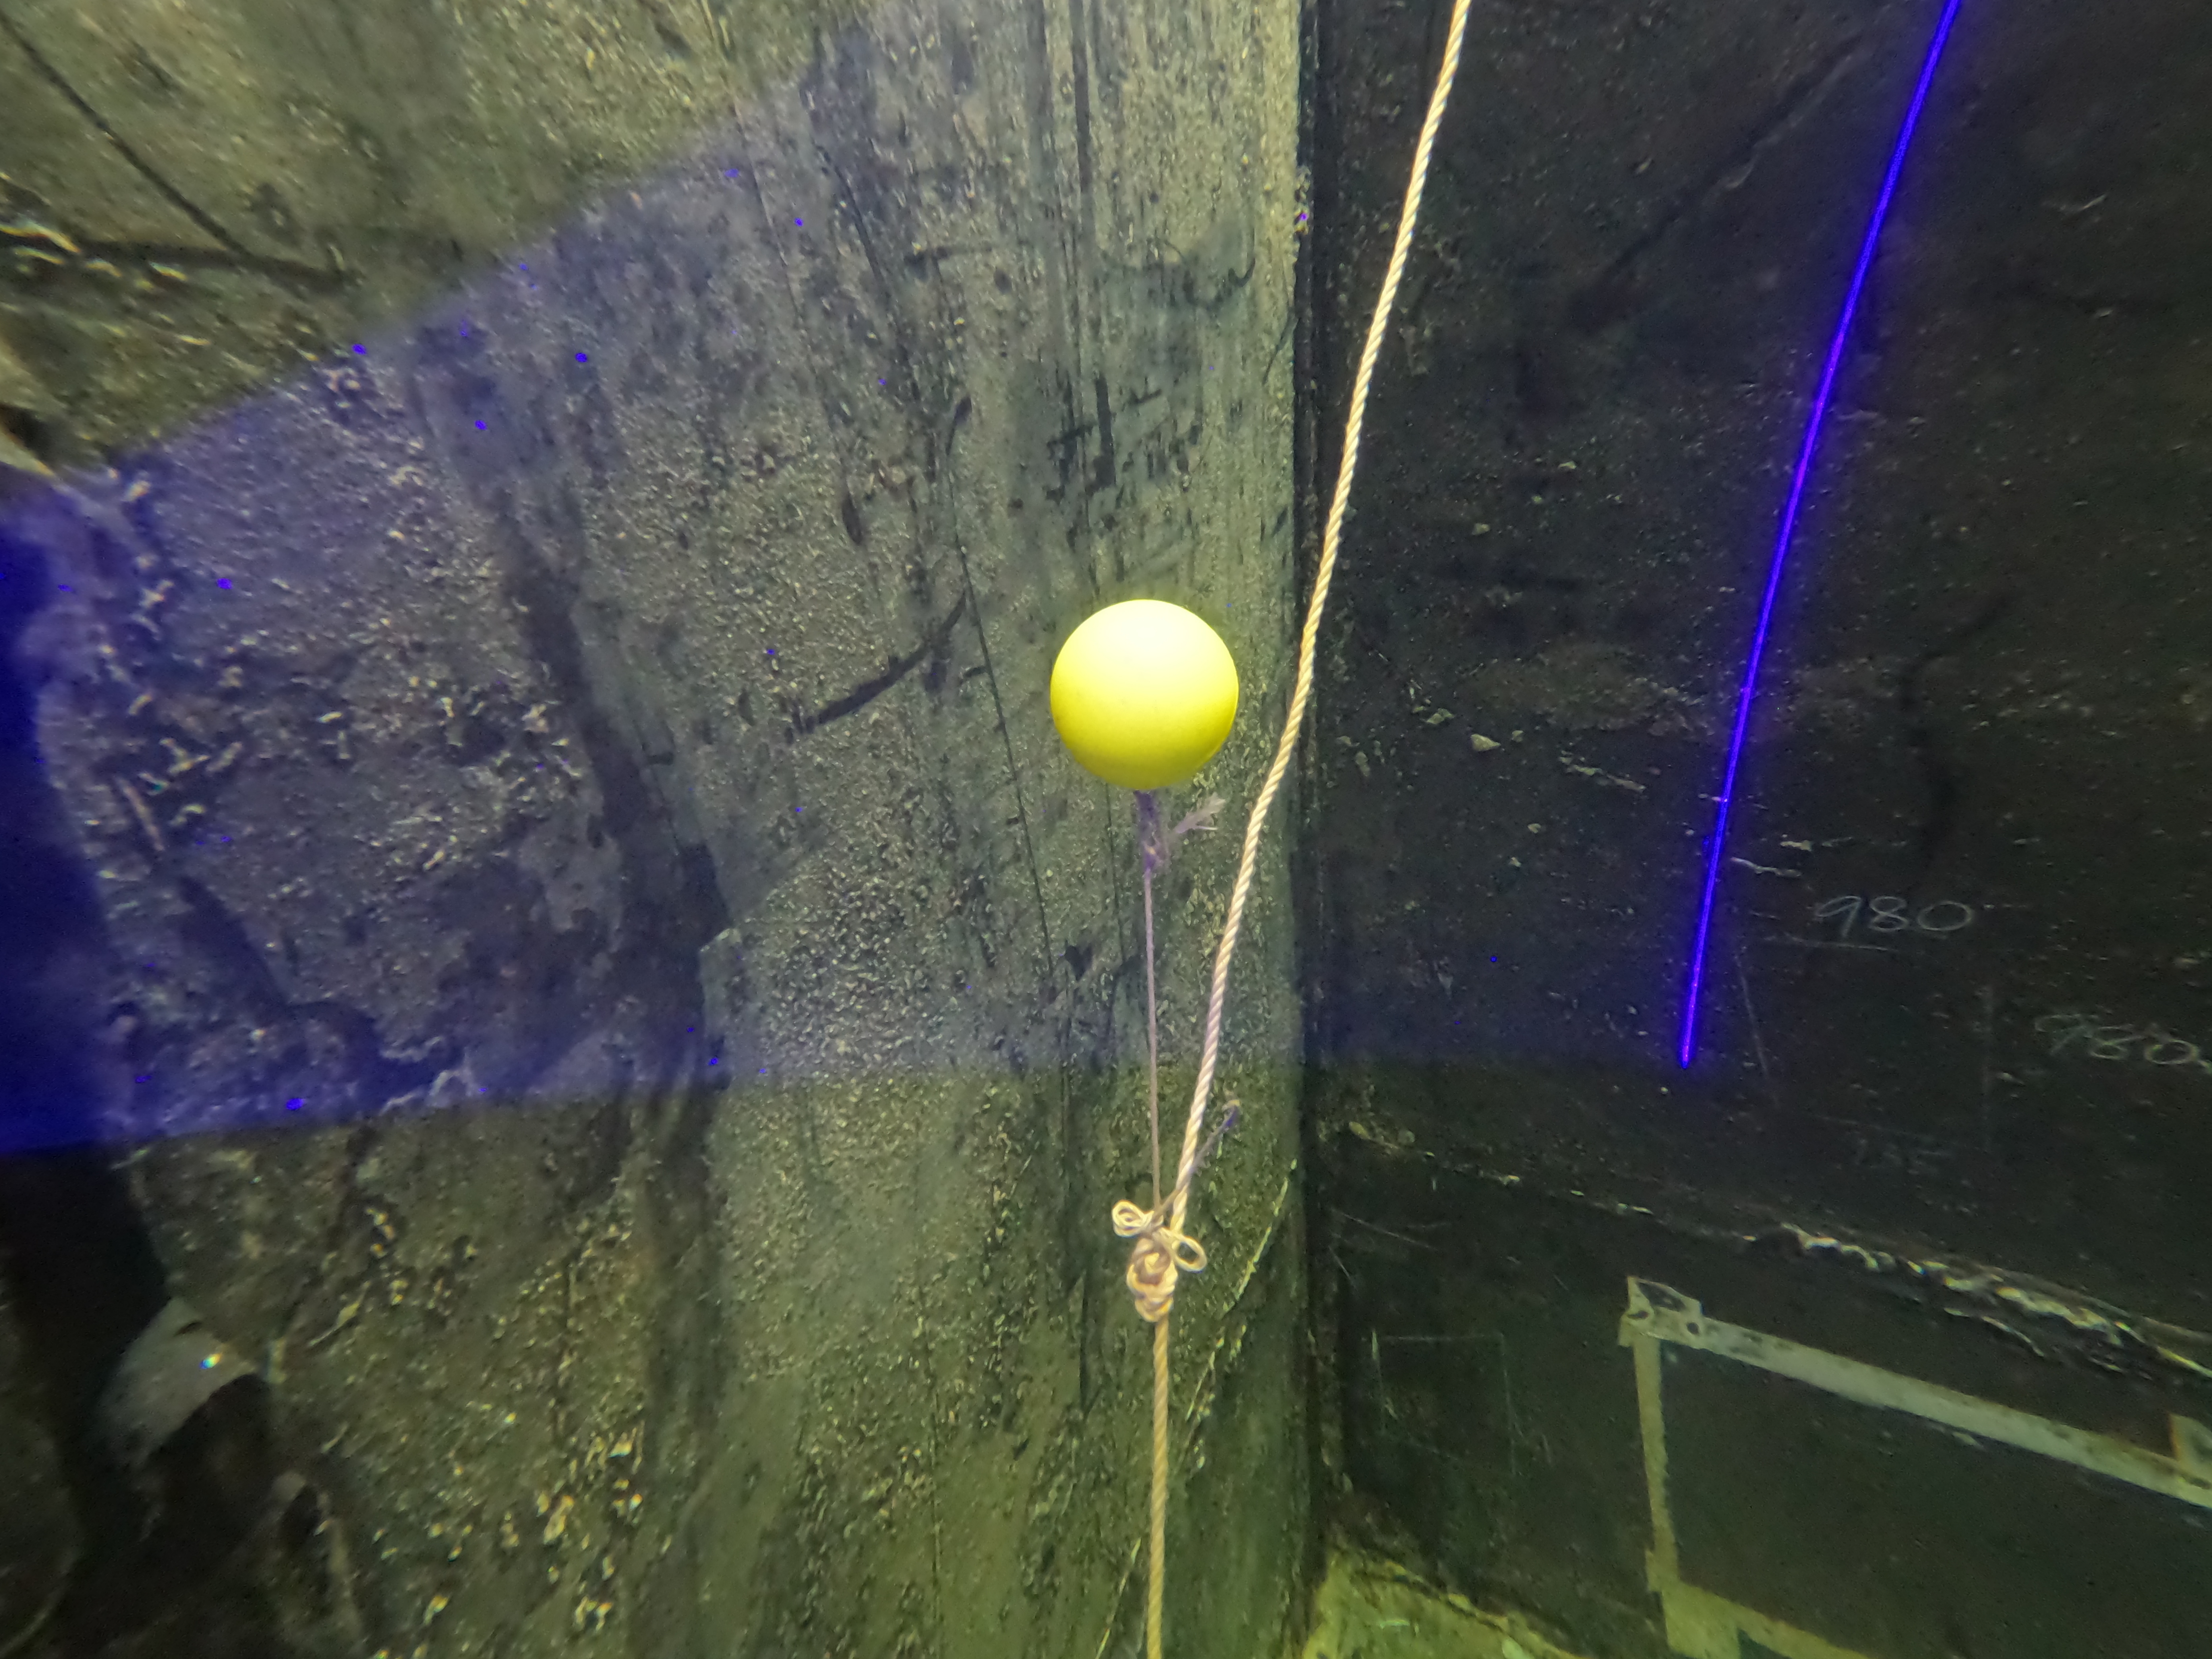

Supplement: Supplementary file 1915 [file G0034307.pdf › 5/G0034307.pdf]

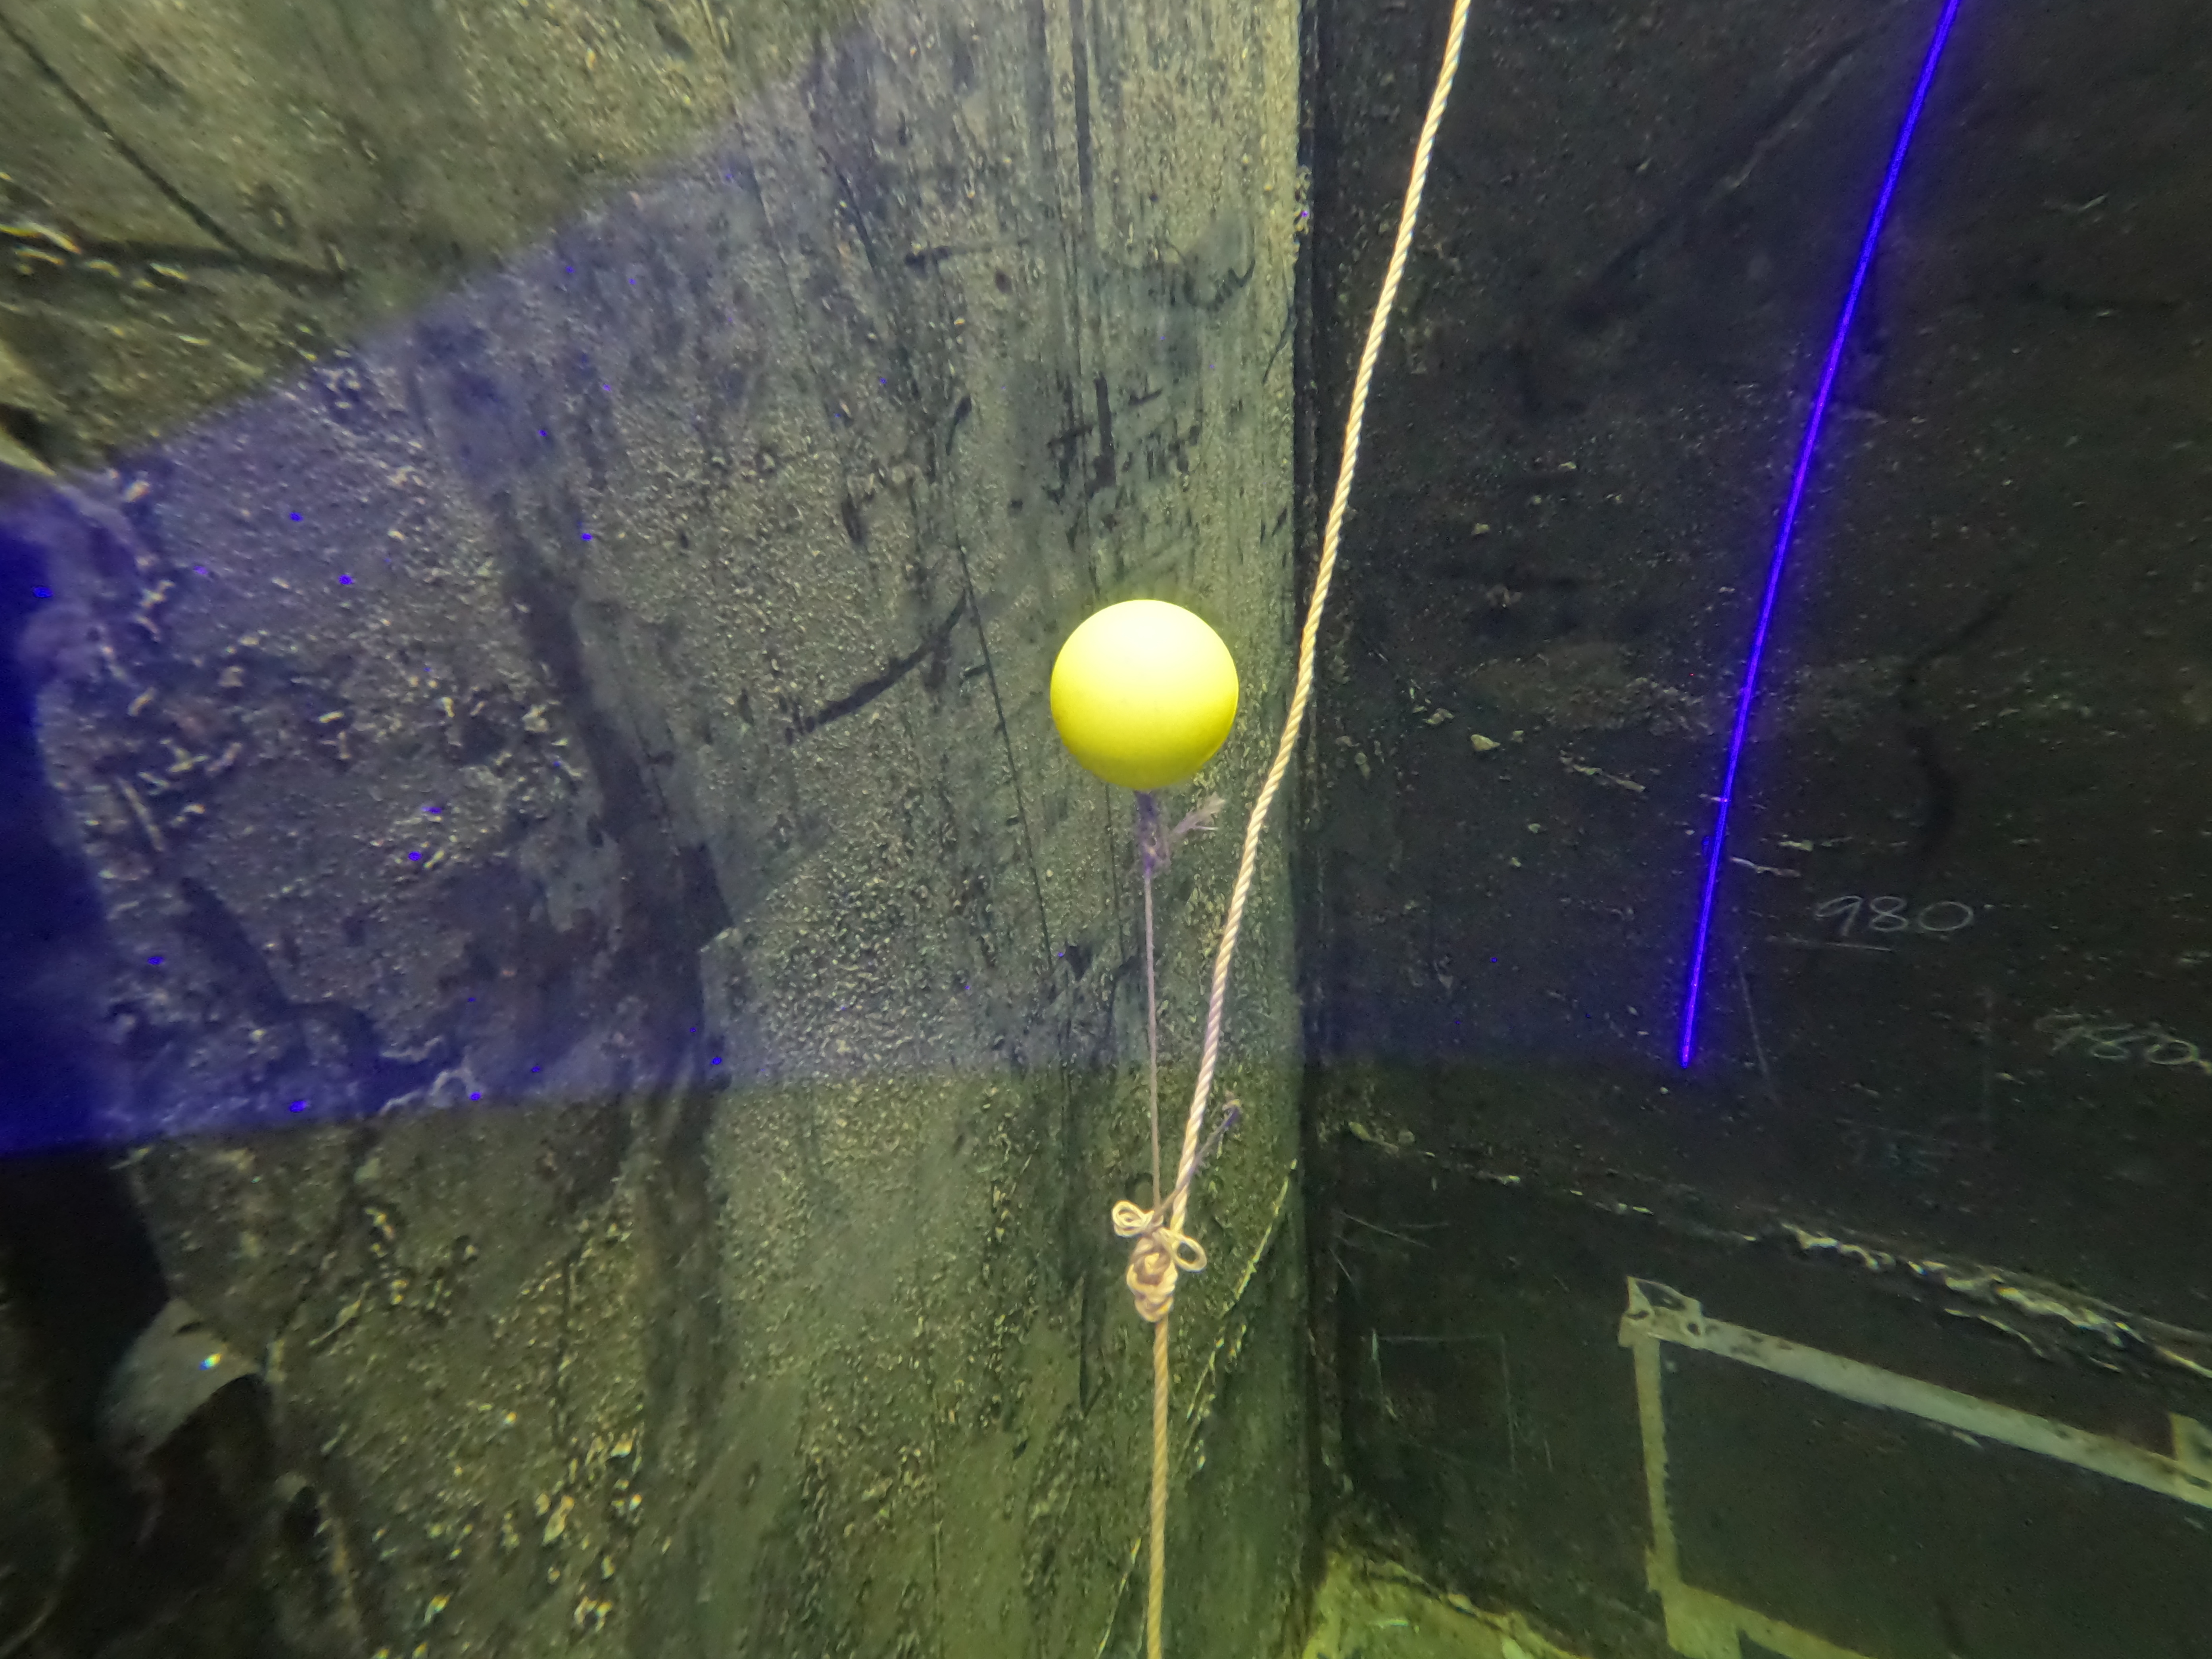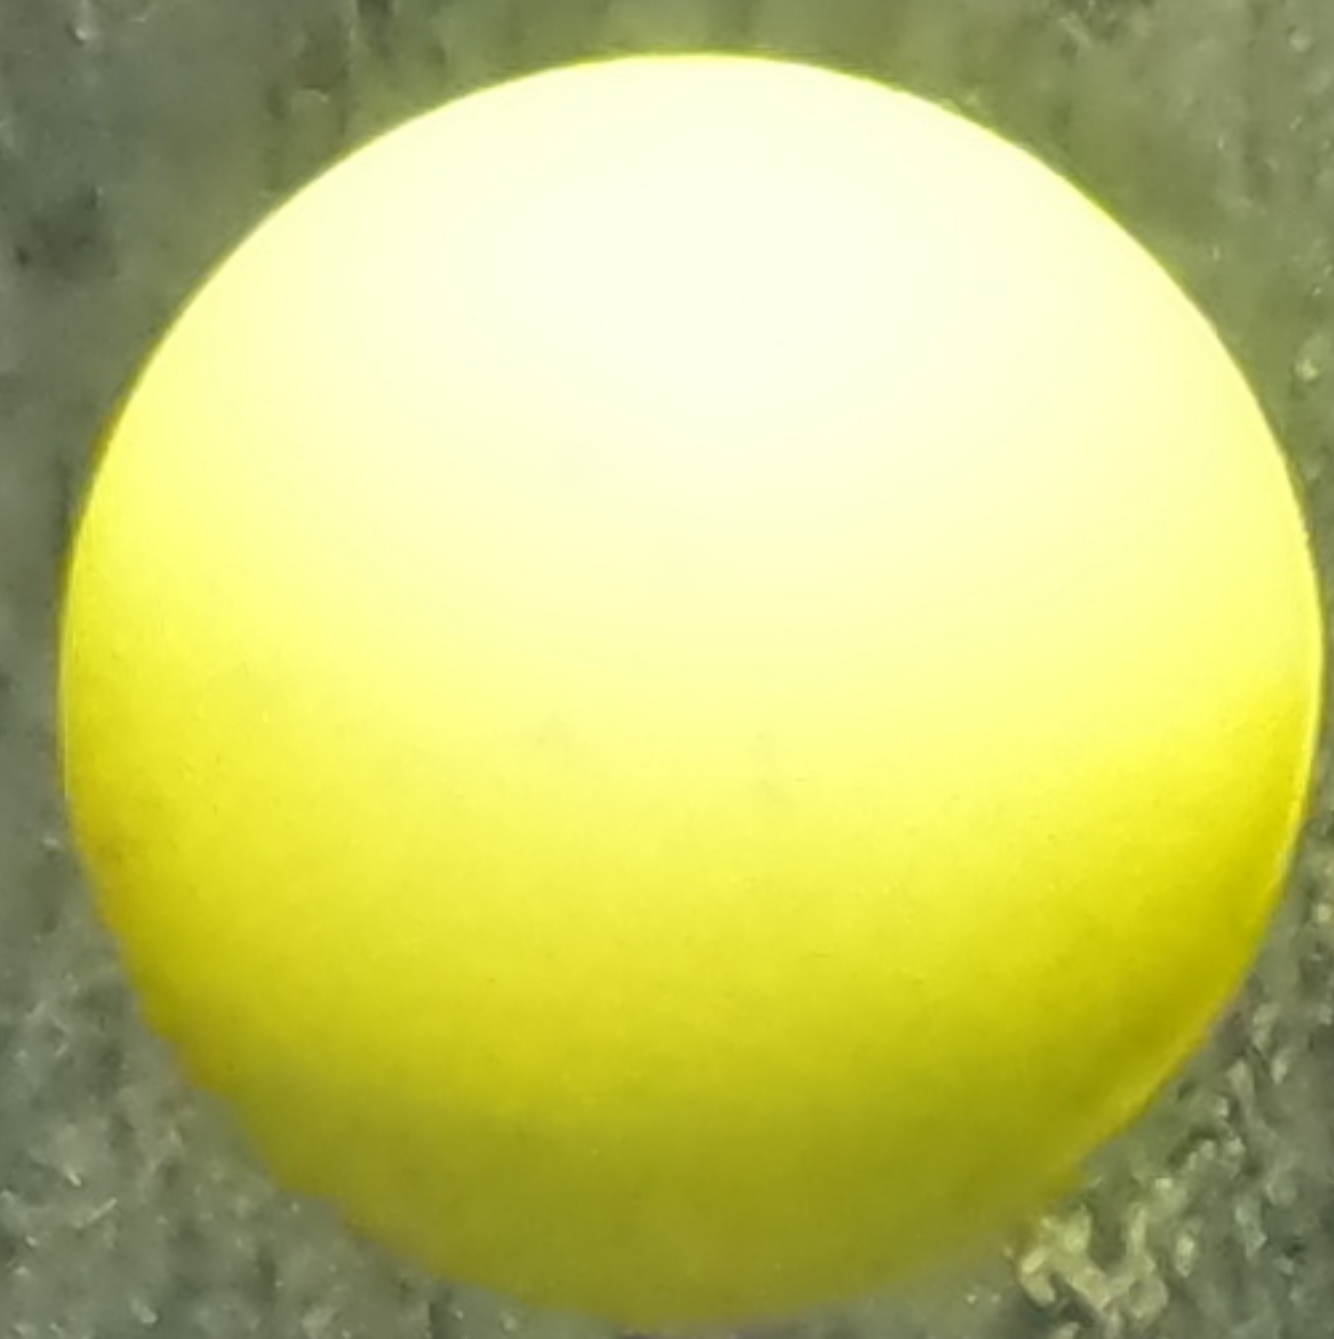

980

980

Supplement: Supplementary file 1916 [file G0034308.pdf › 5/G0034308.pdf]

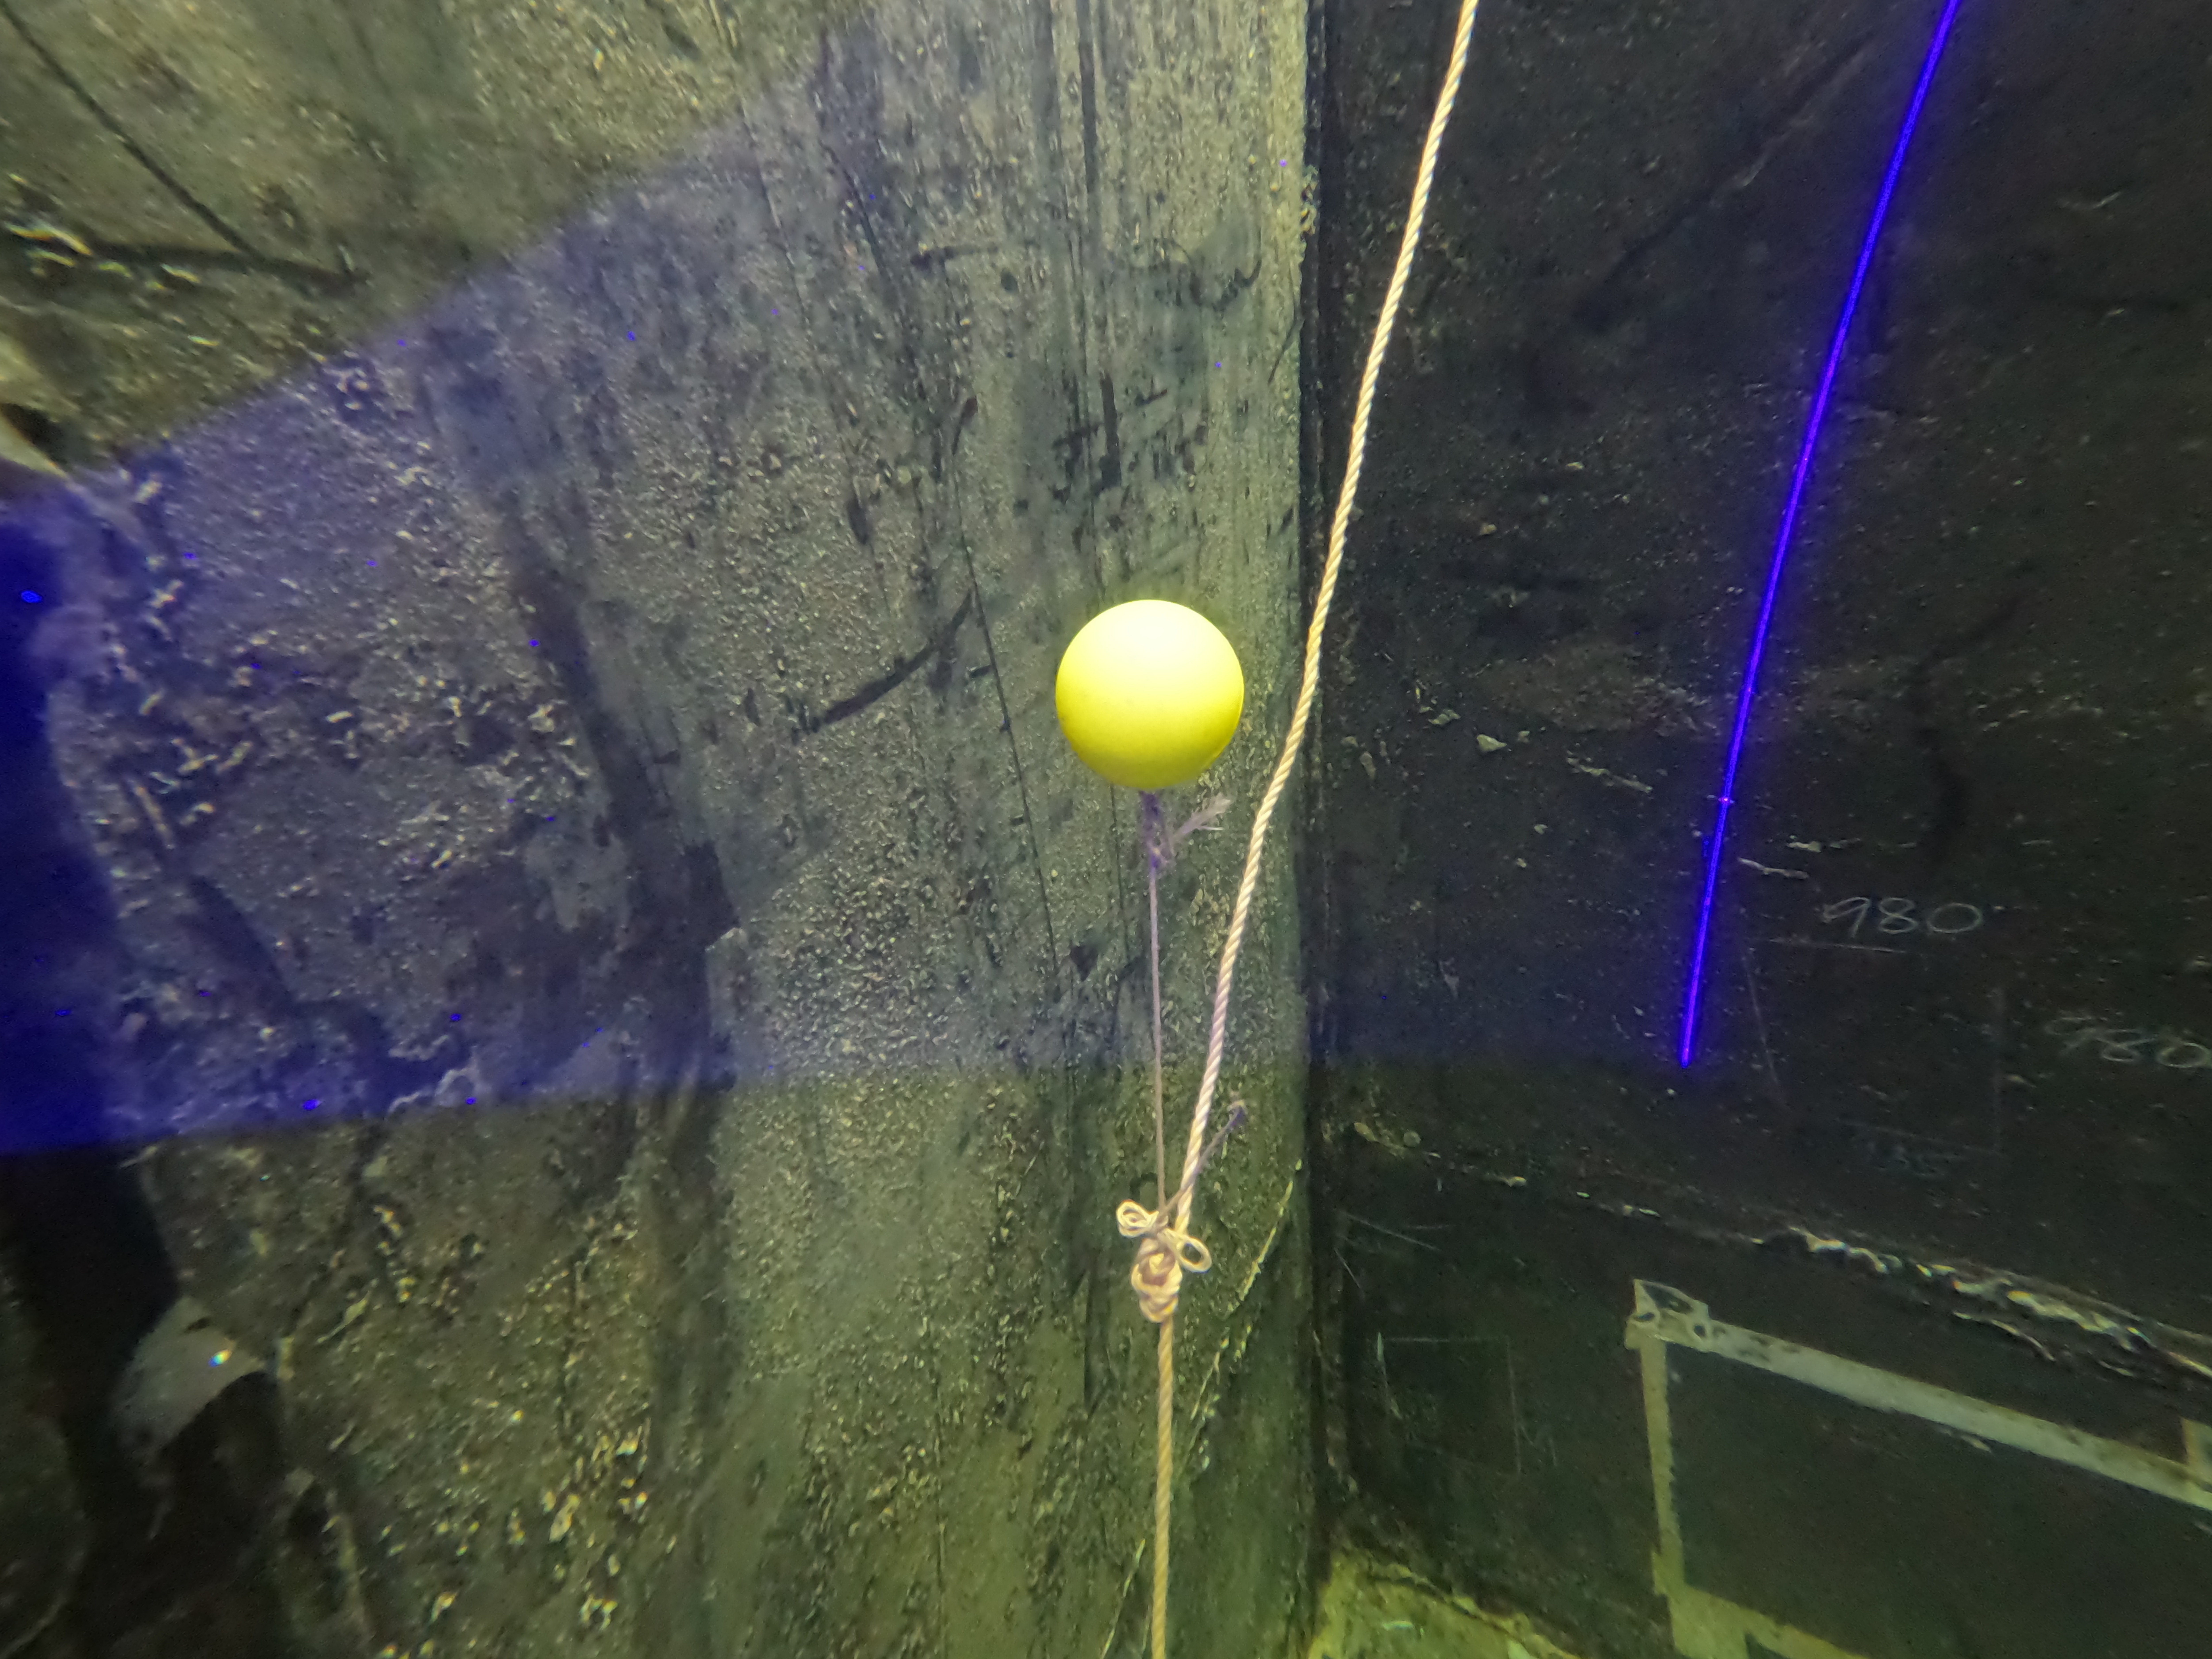

Supplement: Supplementary file 1917 [file G0034309.pdf › 5/G0034309.pdf]

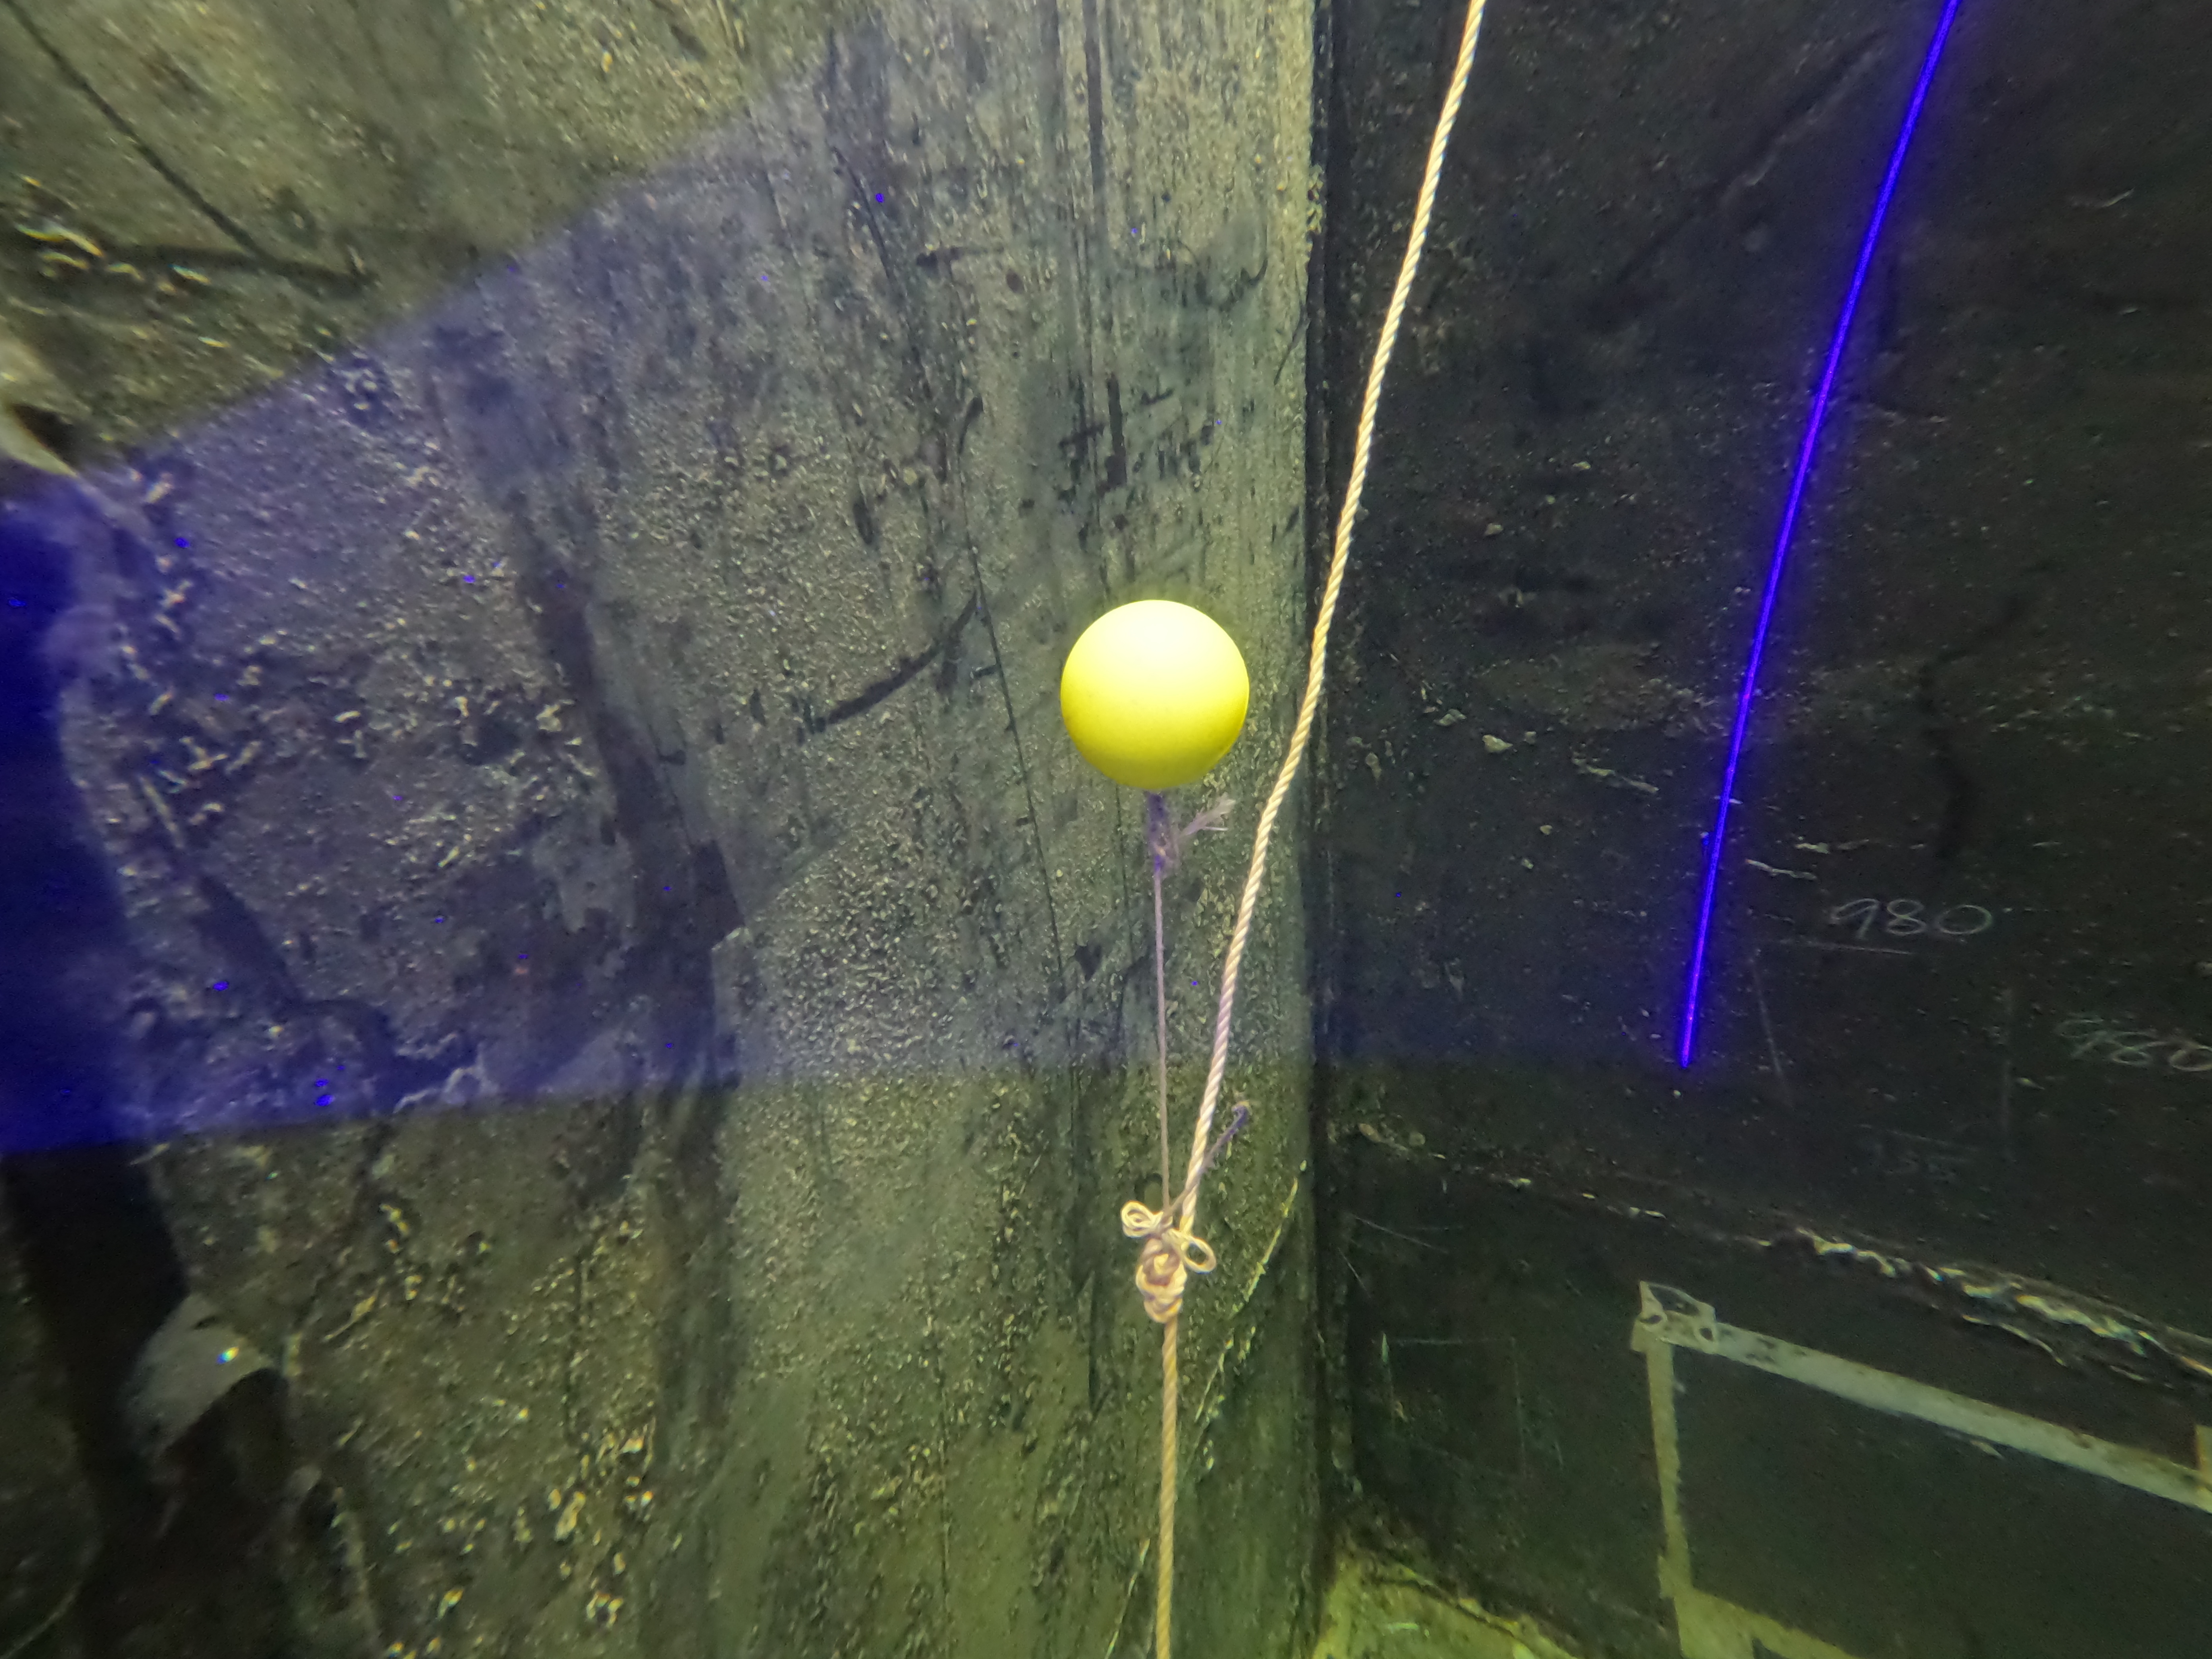

Supplement: Supplementary file 1918 [file G0034310.pdf › 5/G0034310.pdf]

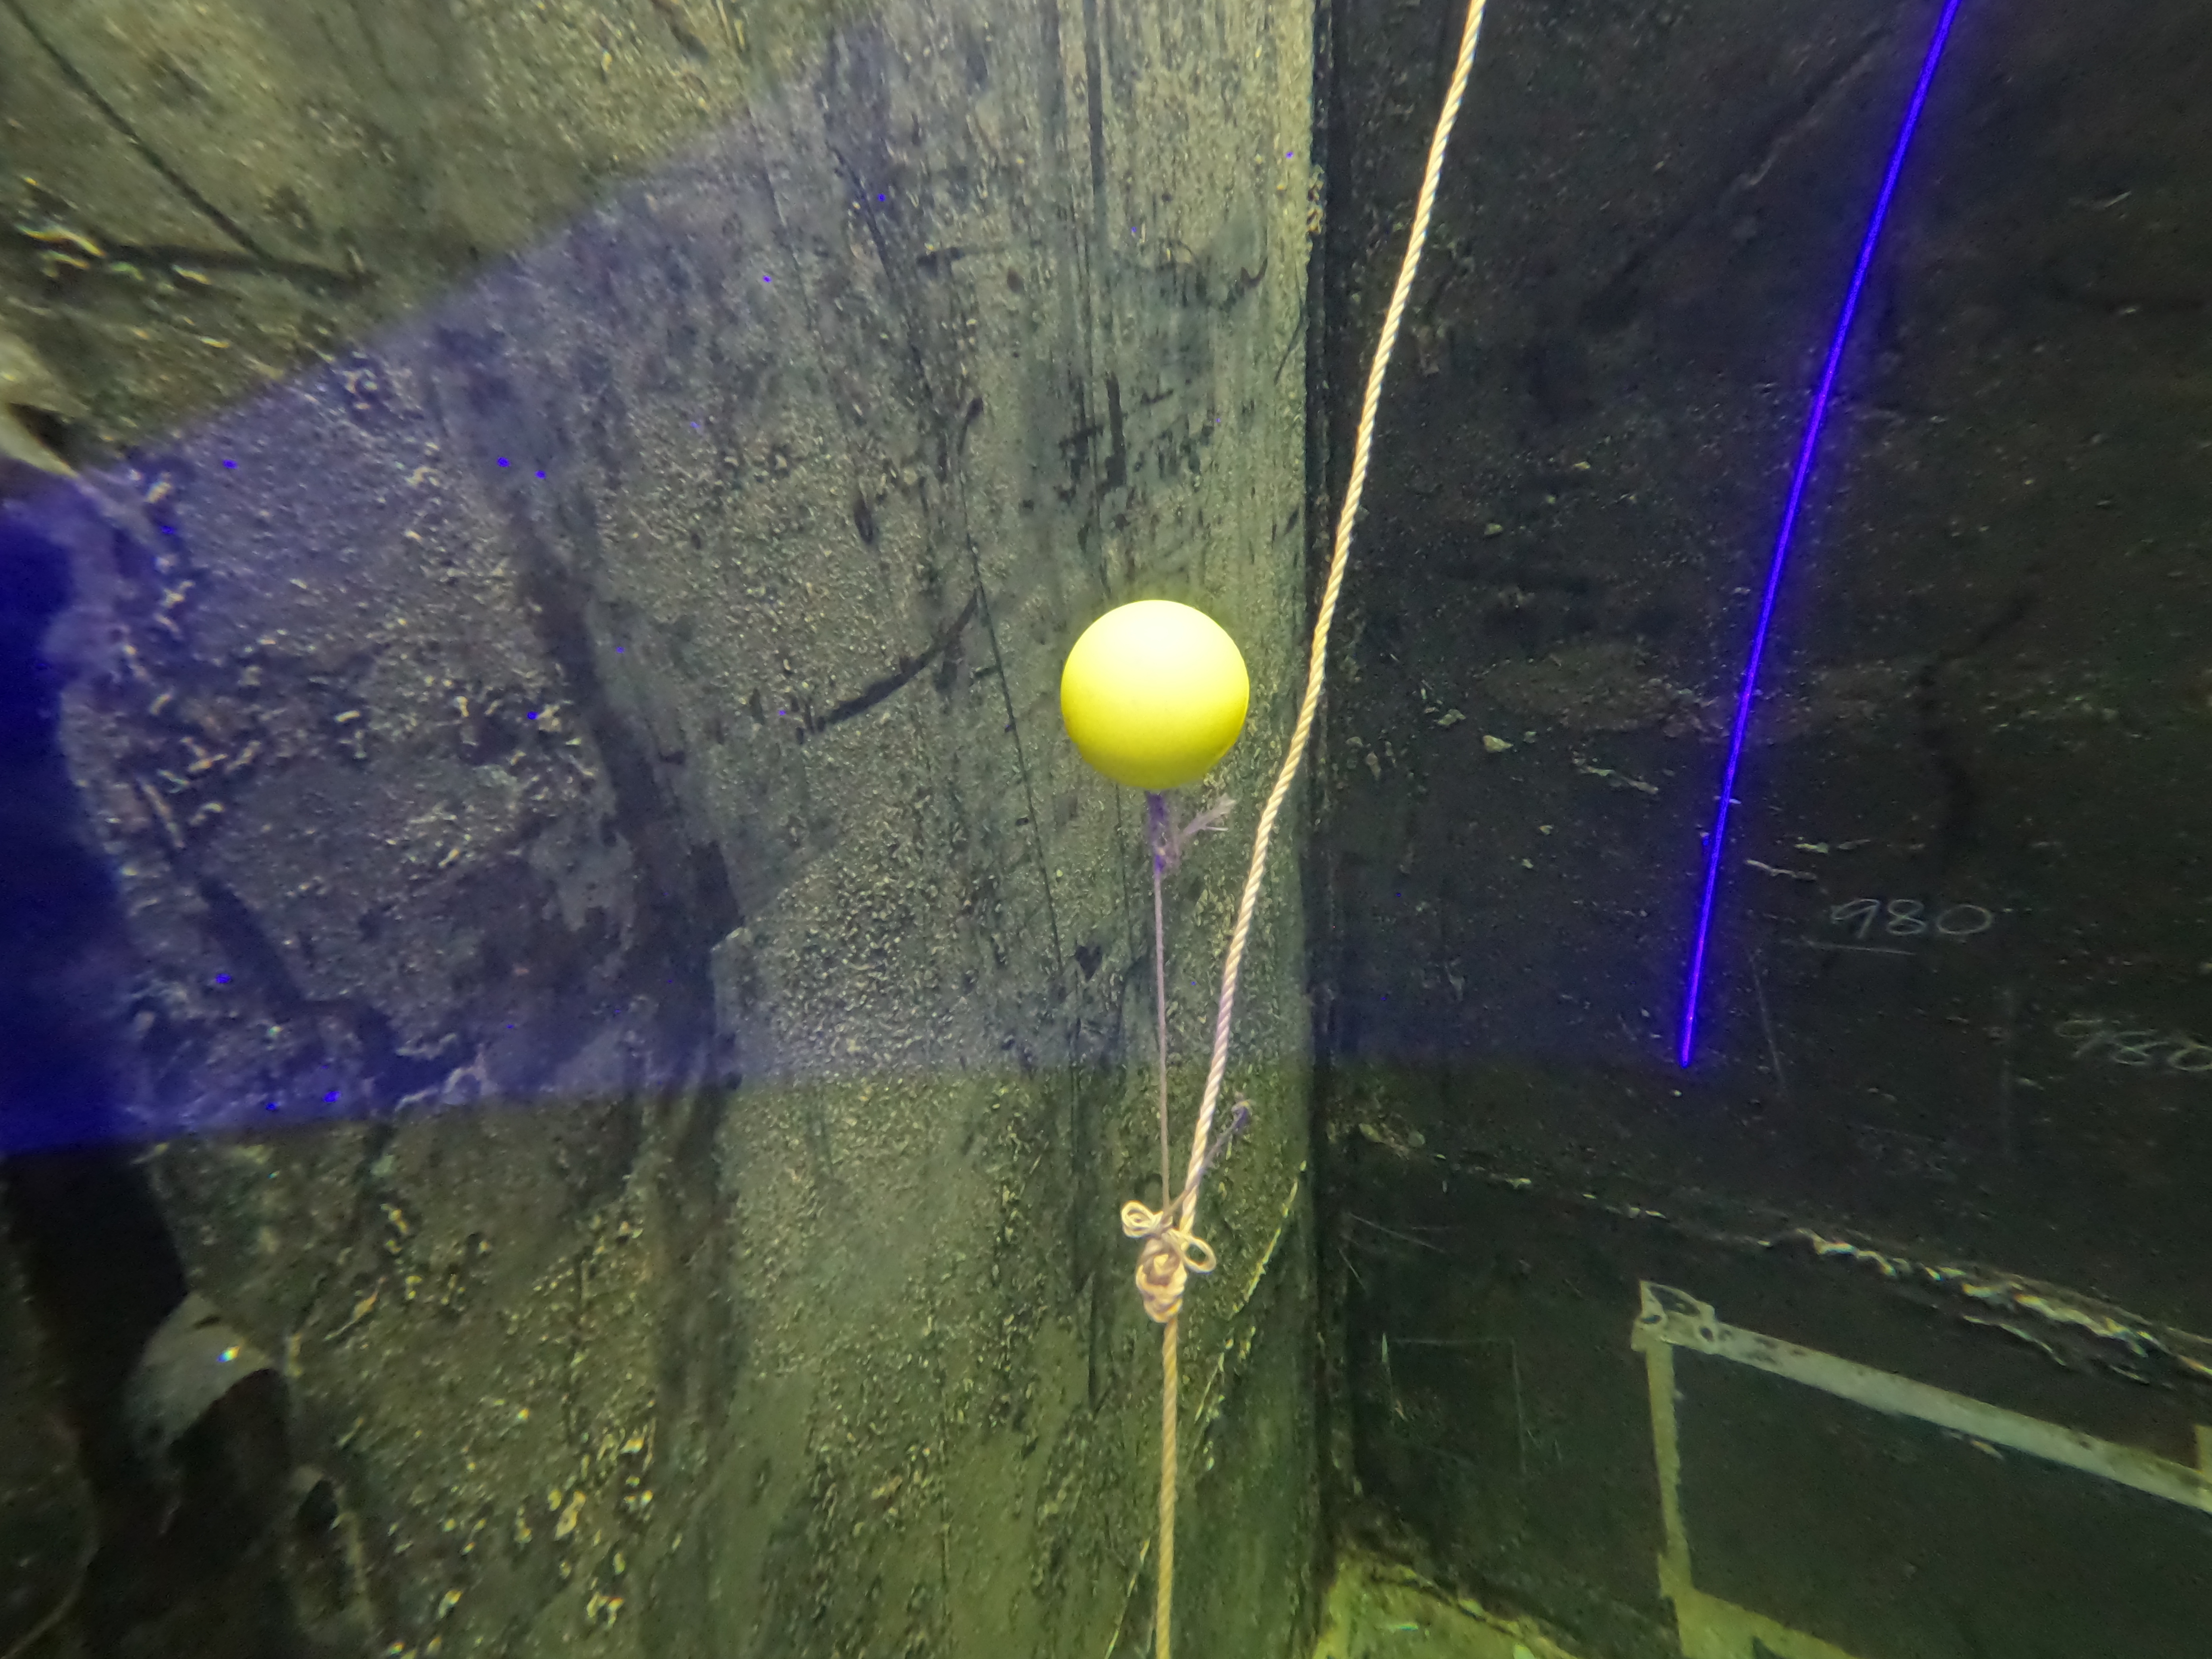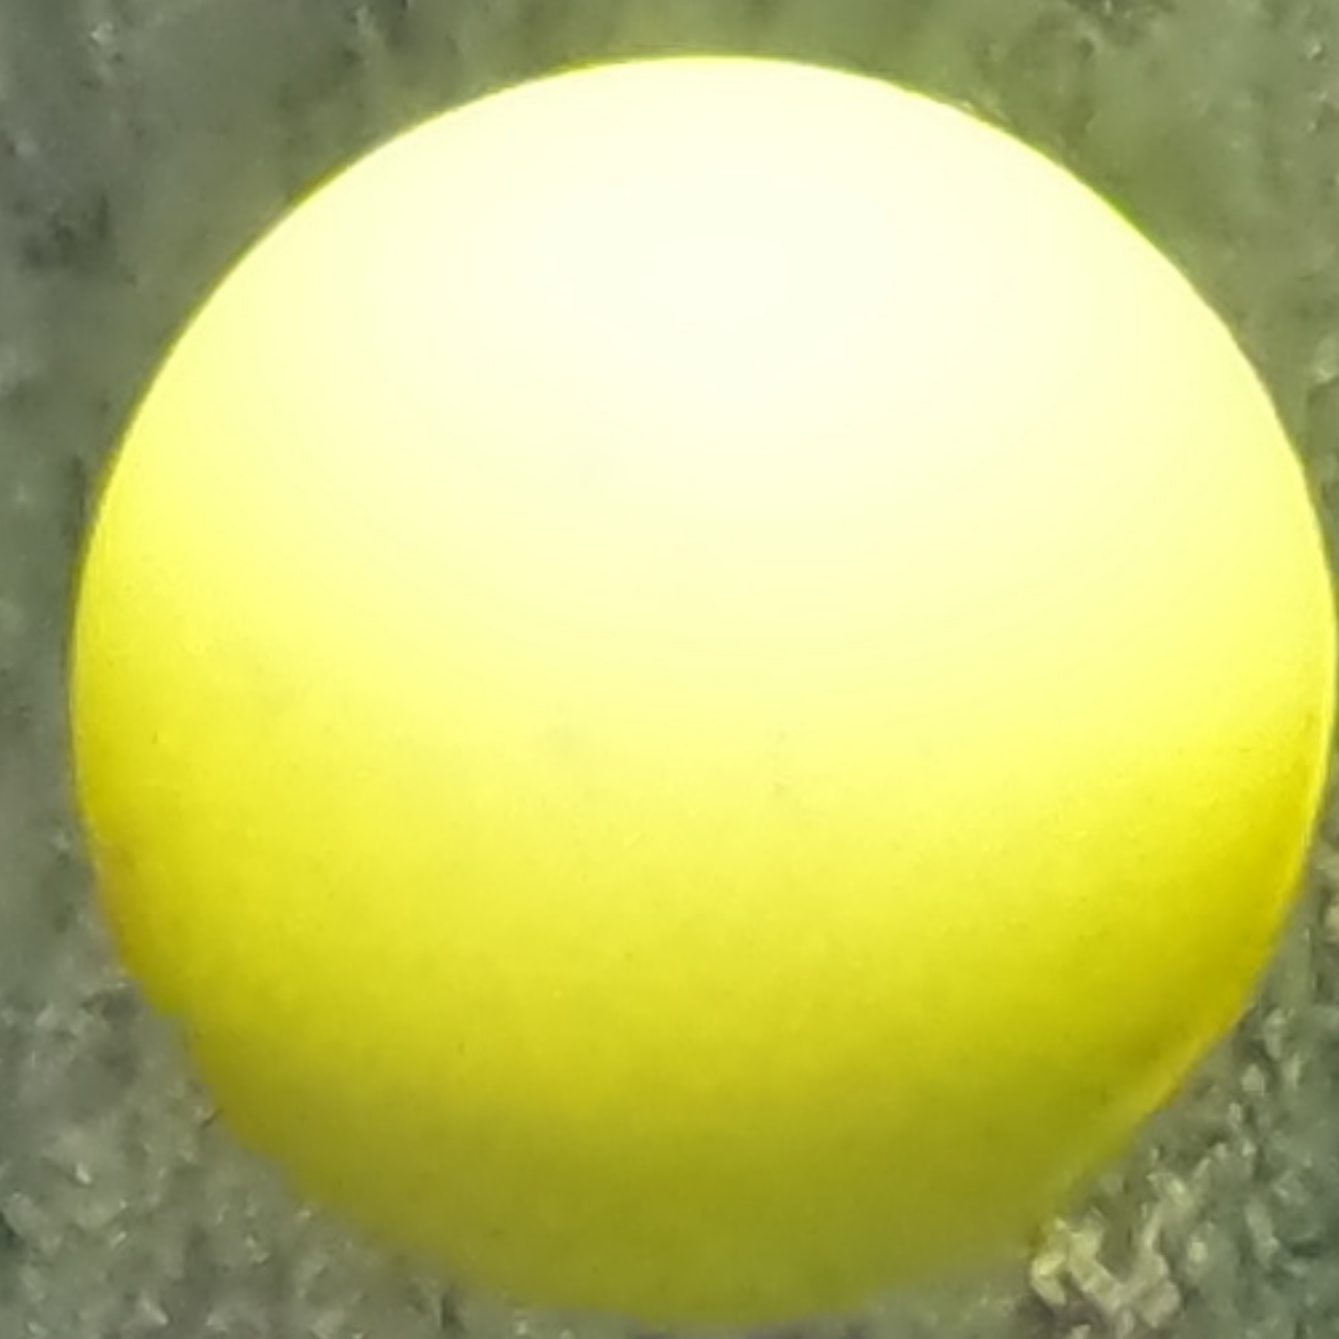

980

980

Supplement: Supplementary file 1919 [file G0034311.pdf › 5/G0034311.pdf]

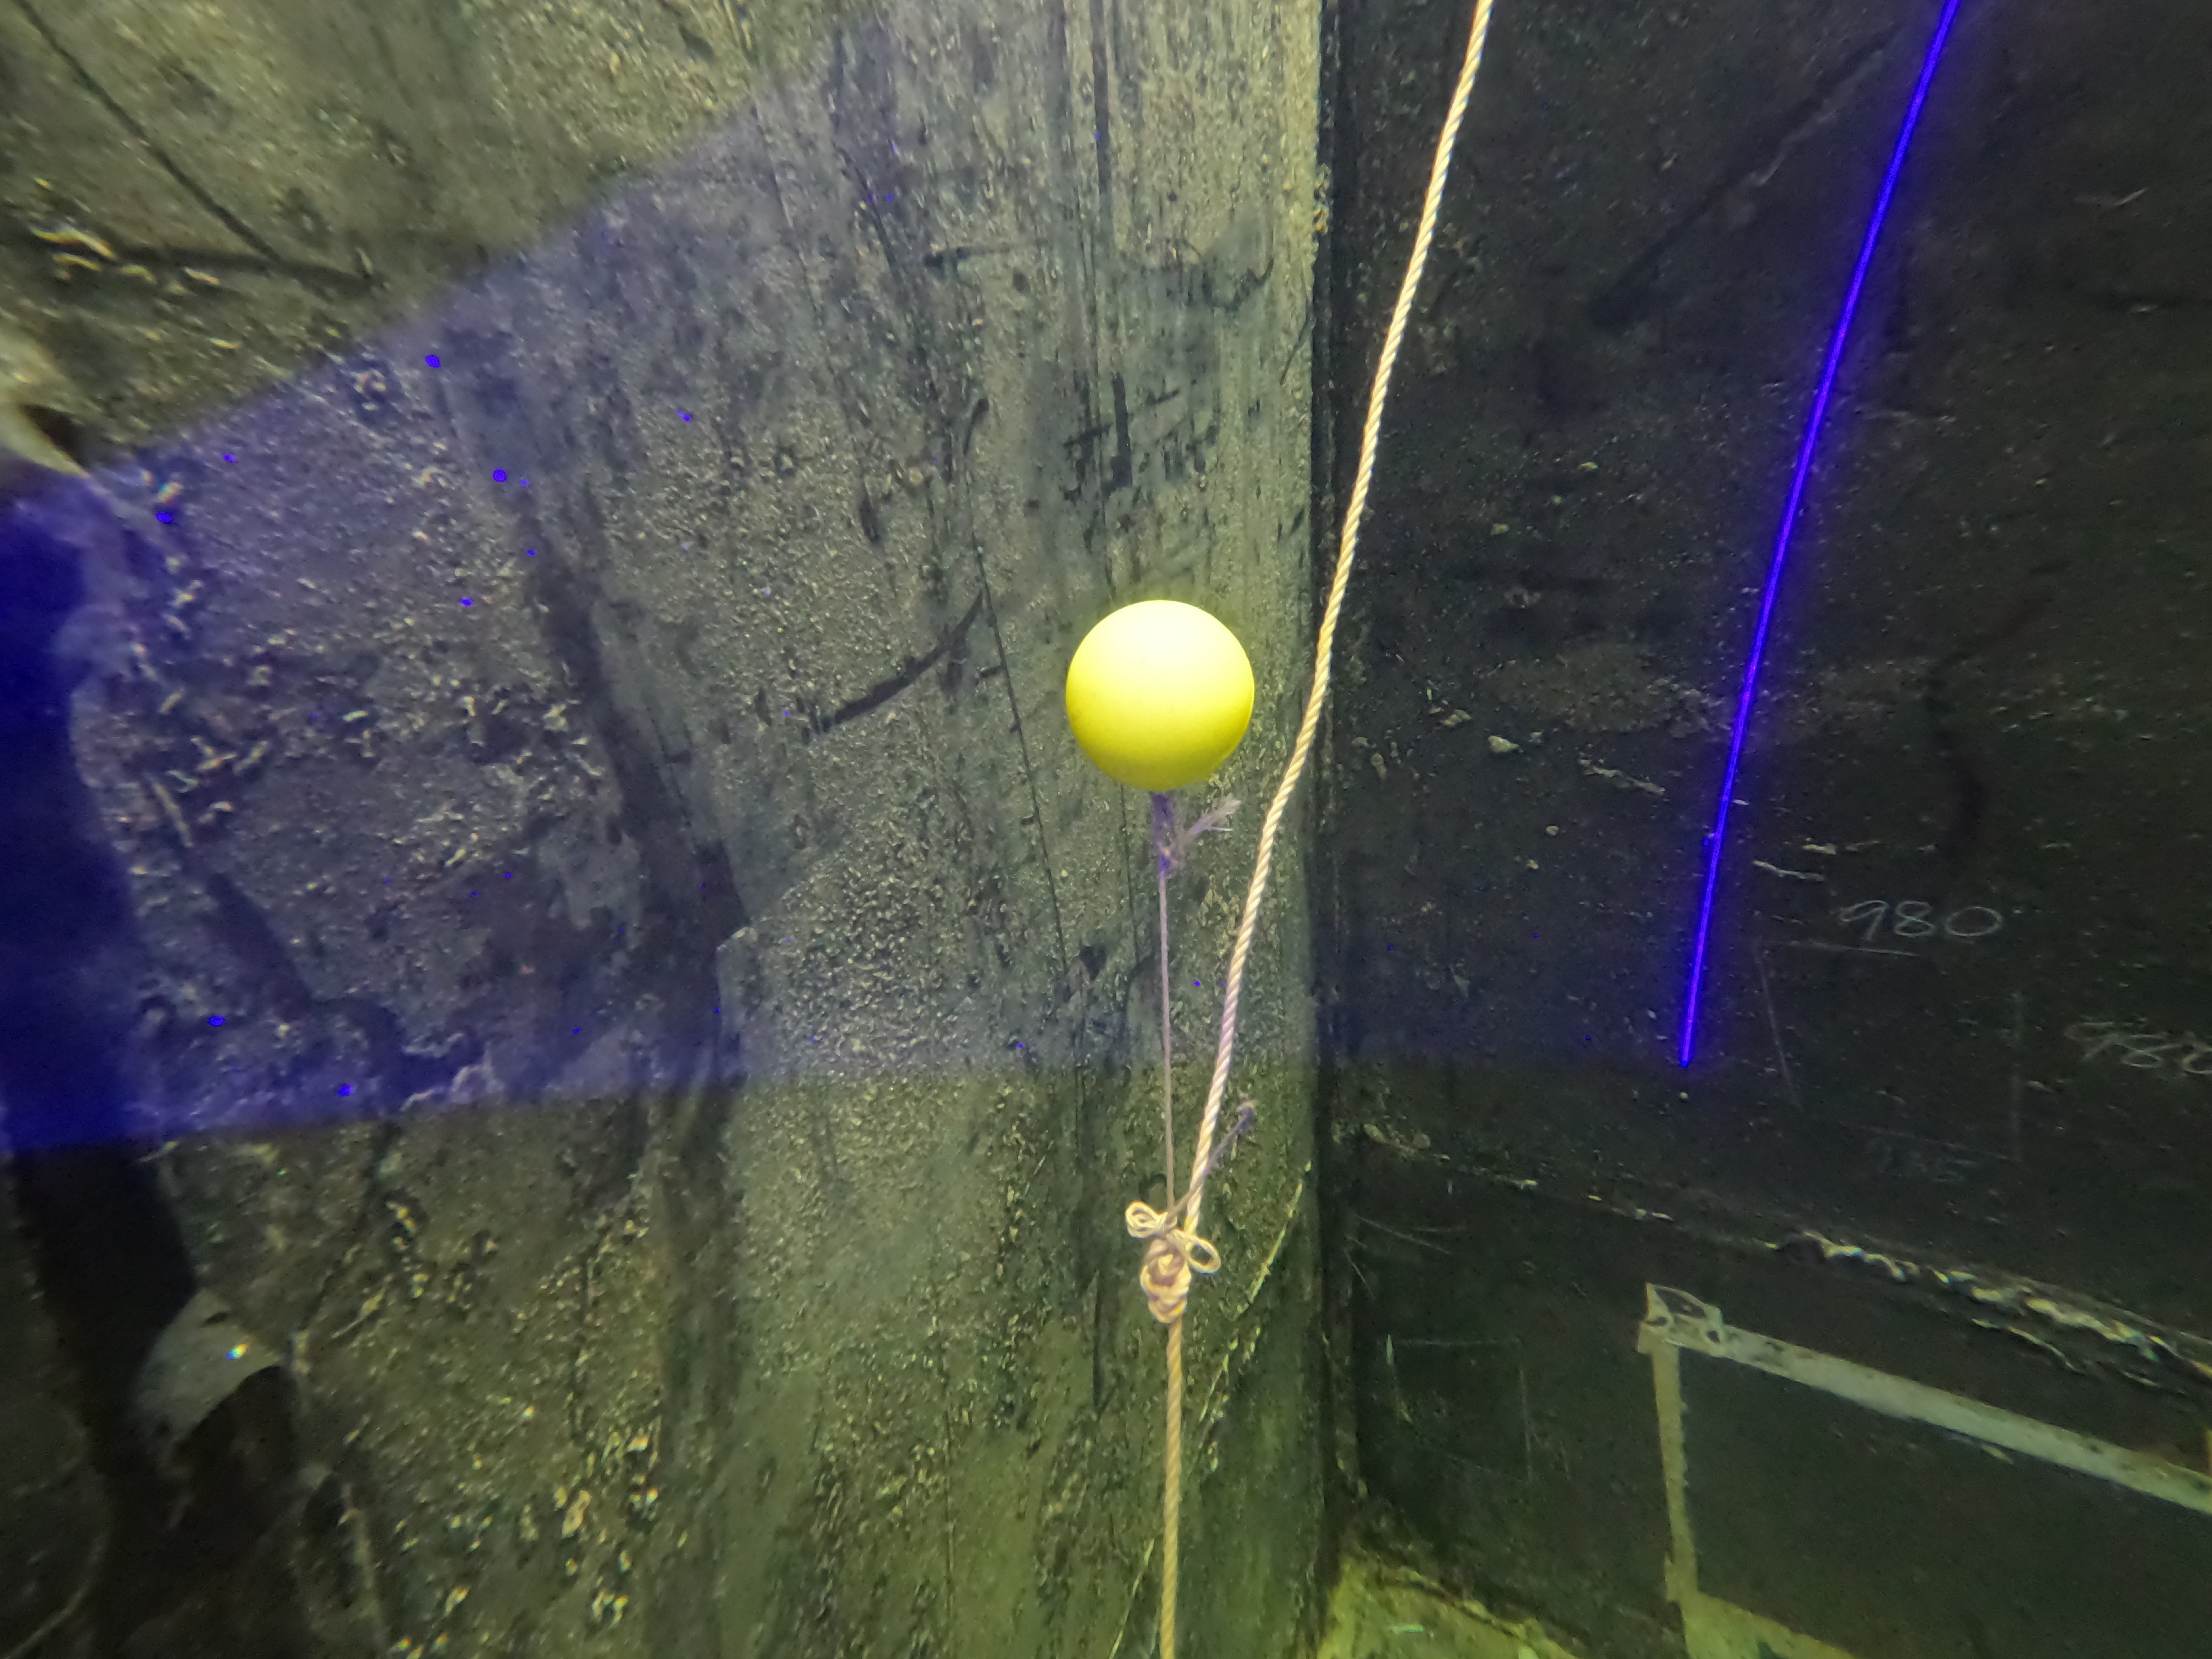

Supplement: Supplementary file 1920 [file G0034312.pdf › 5/G0034312.pdf]

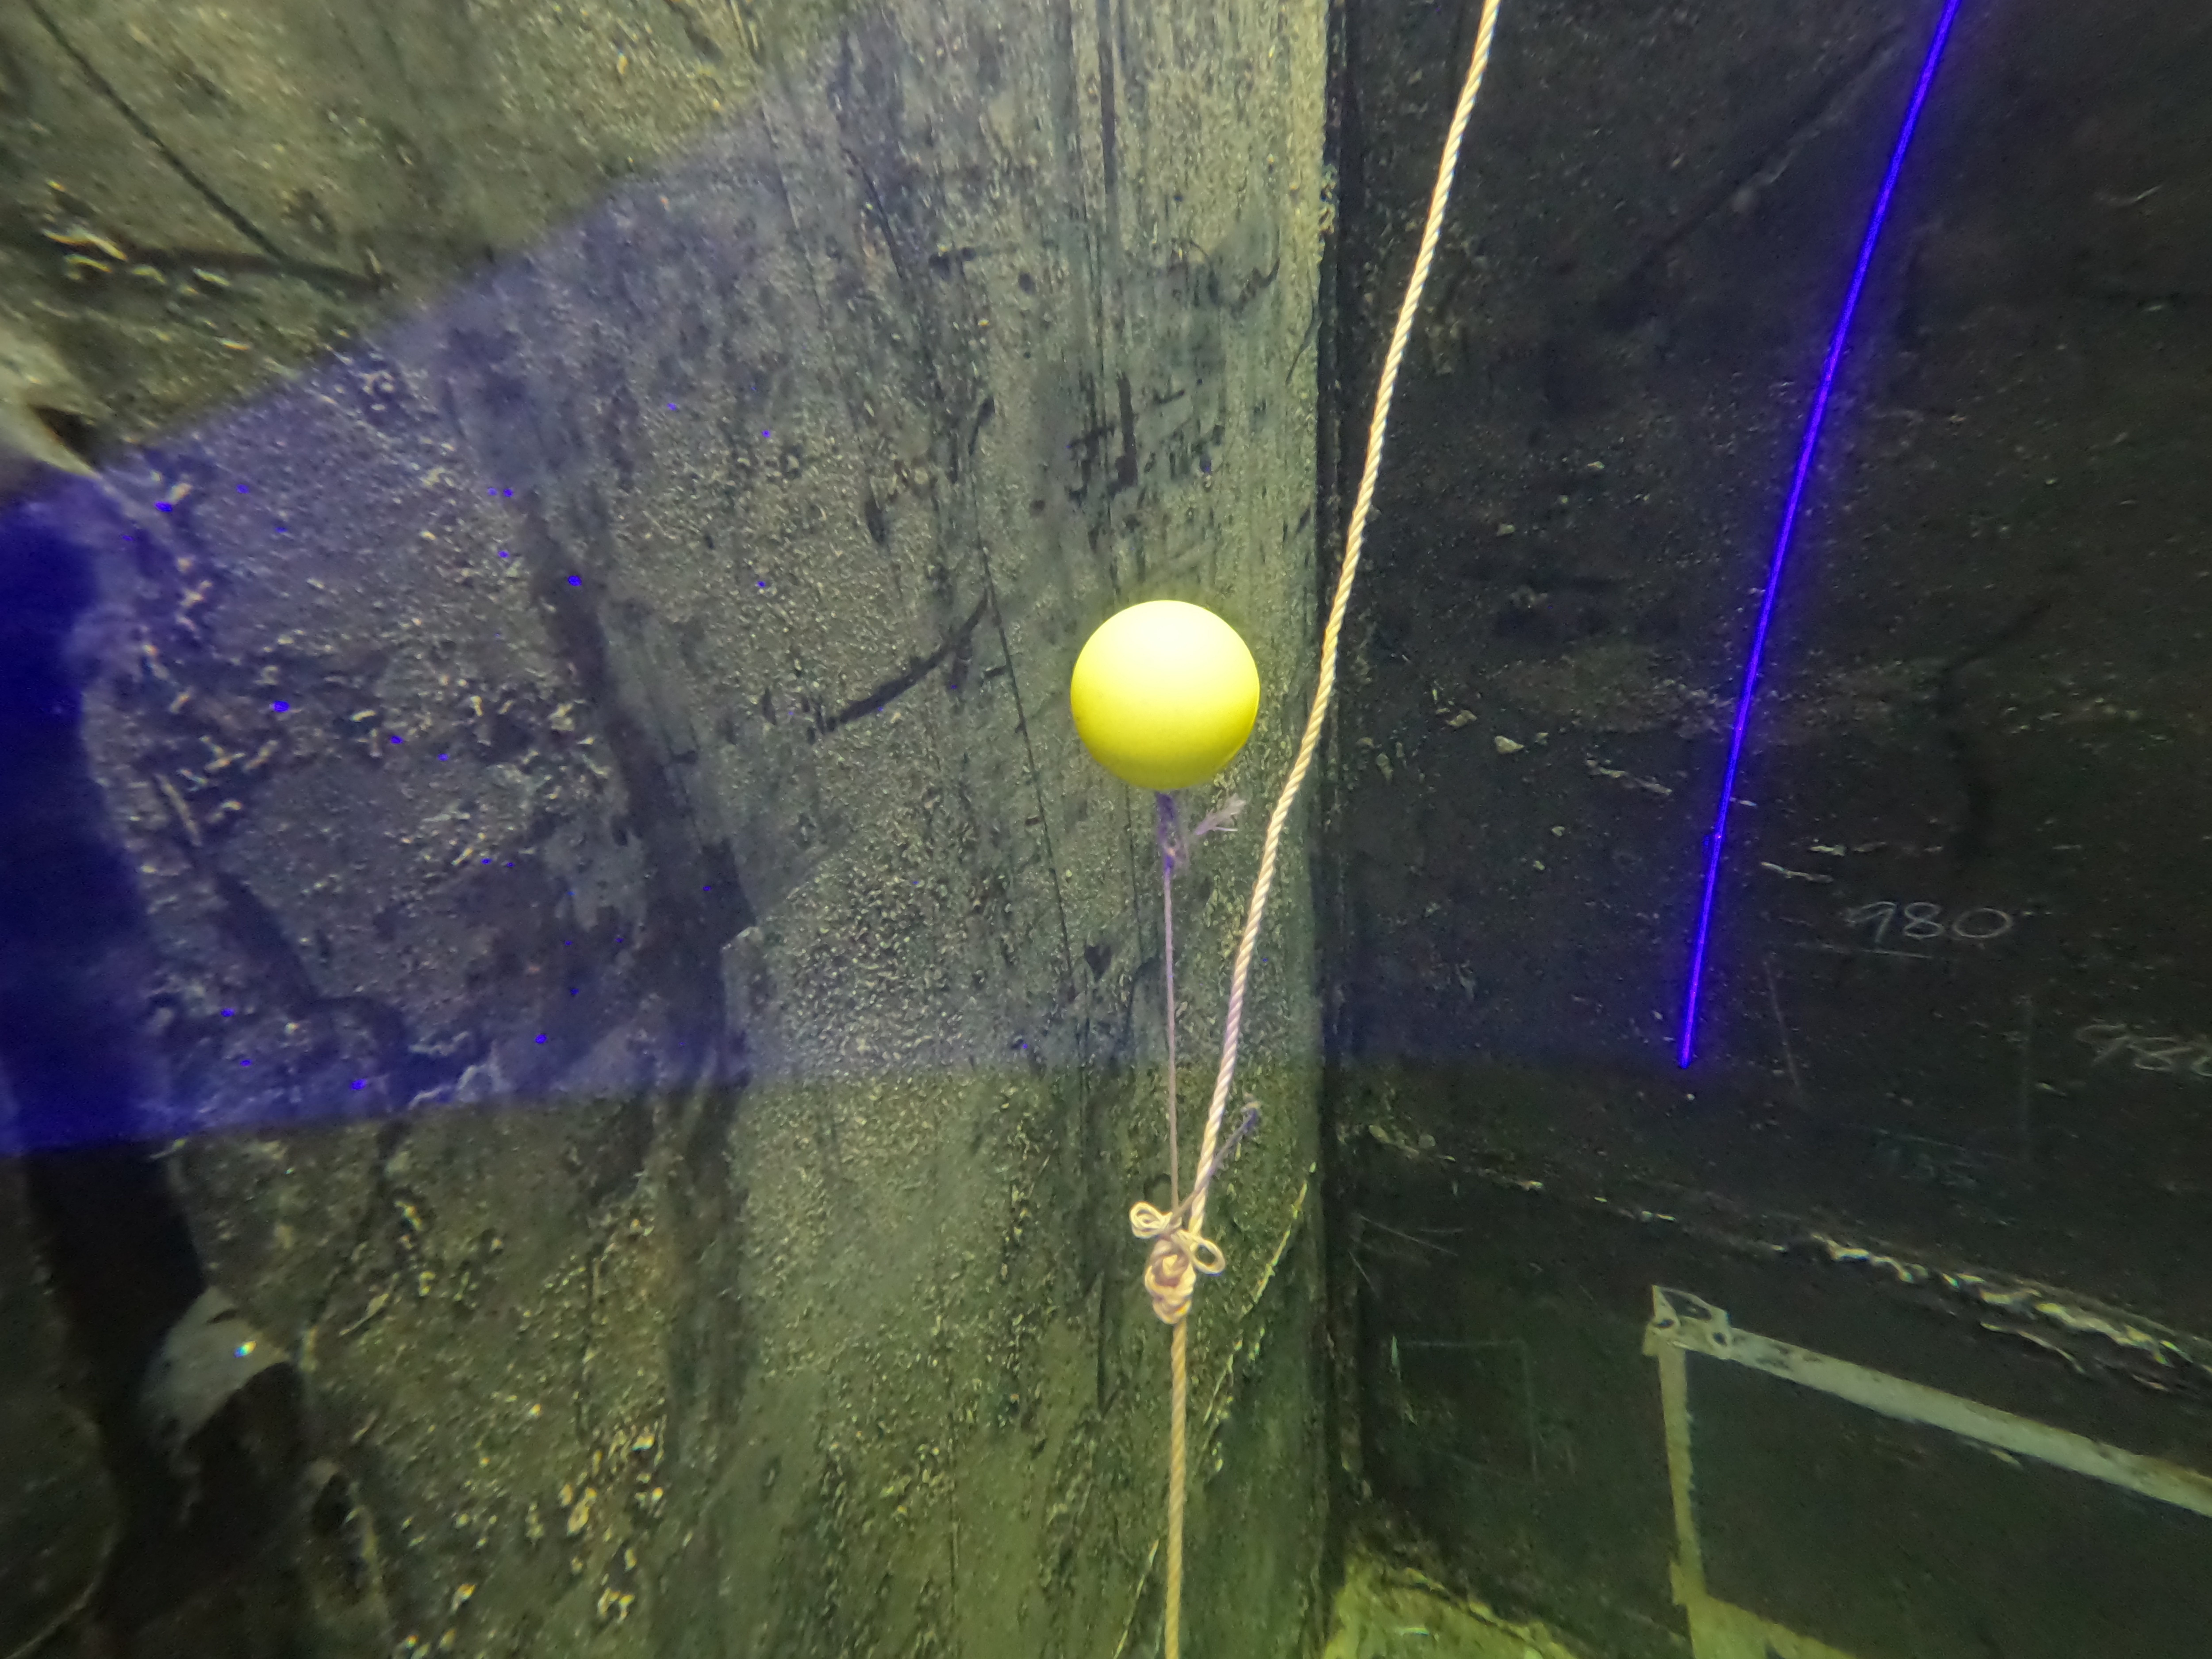

Supplement: Supplementary file 1921 [file G0034313.pdf › 5/G0034313.pdf]

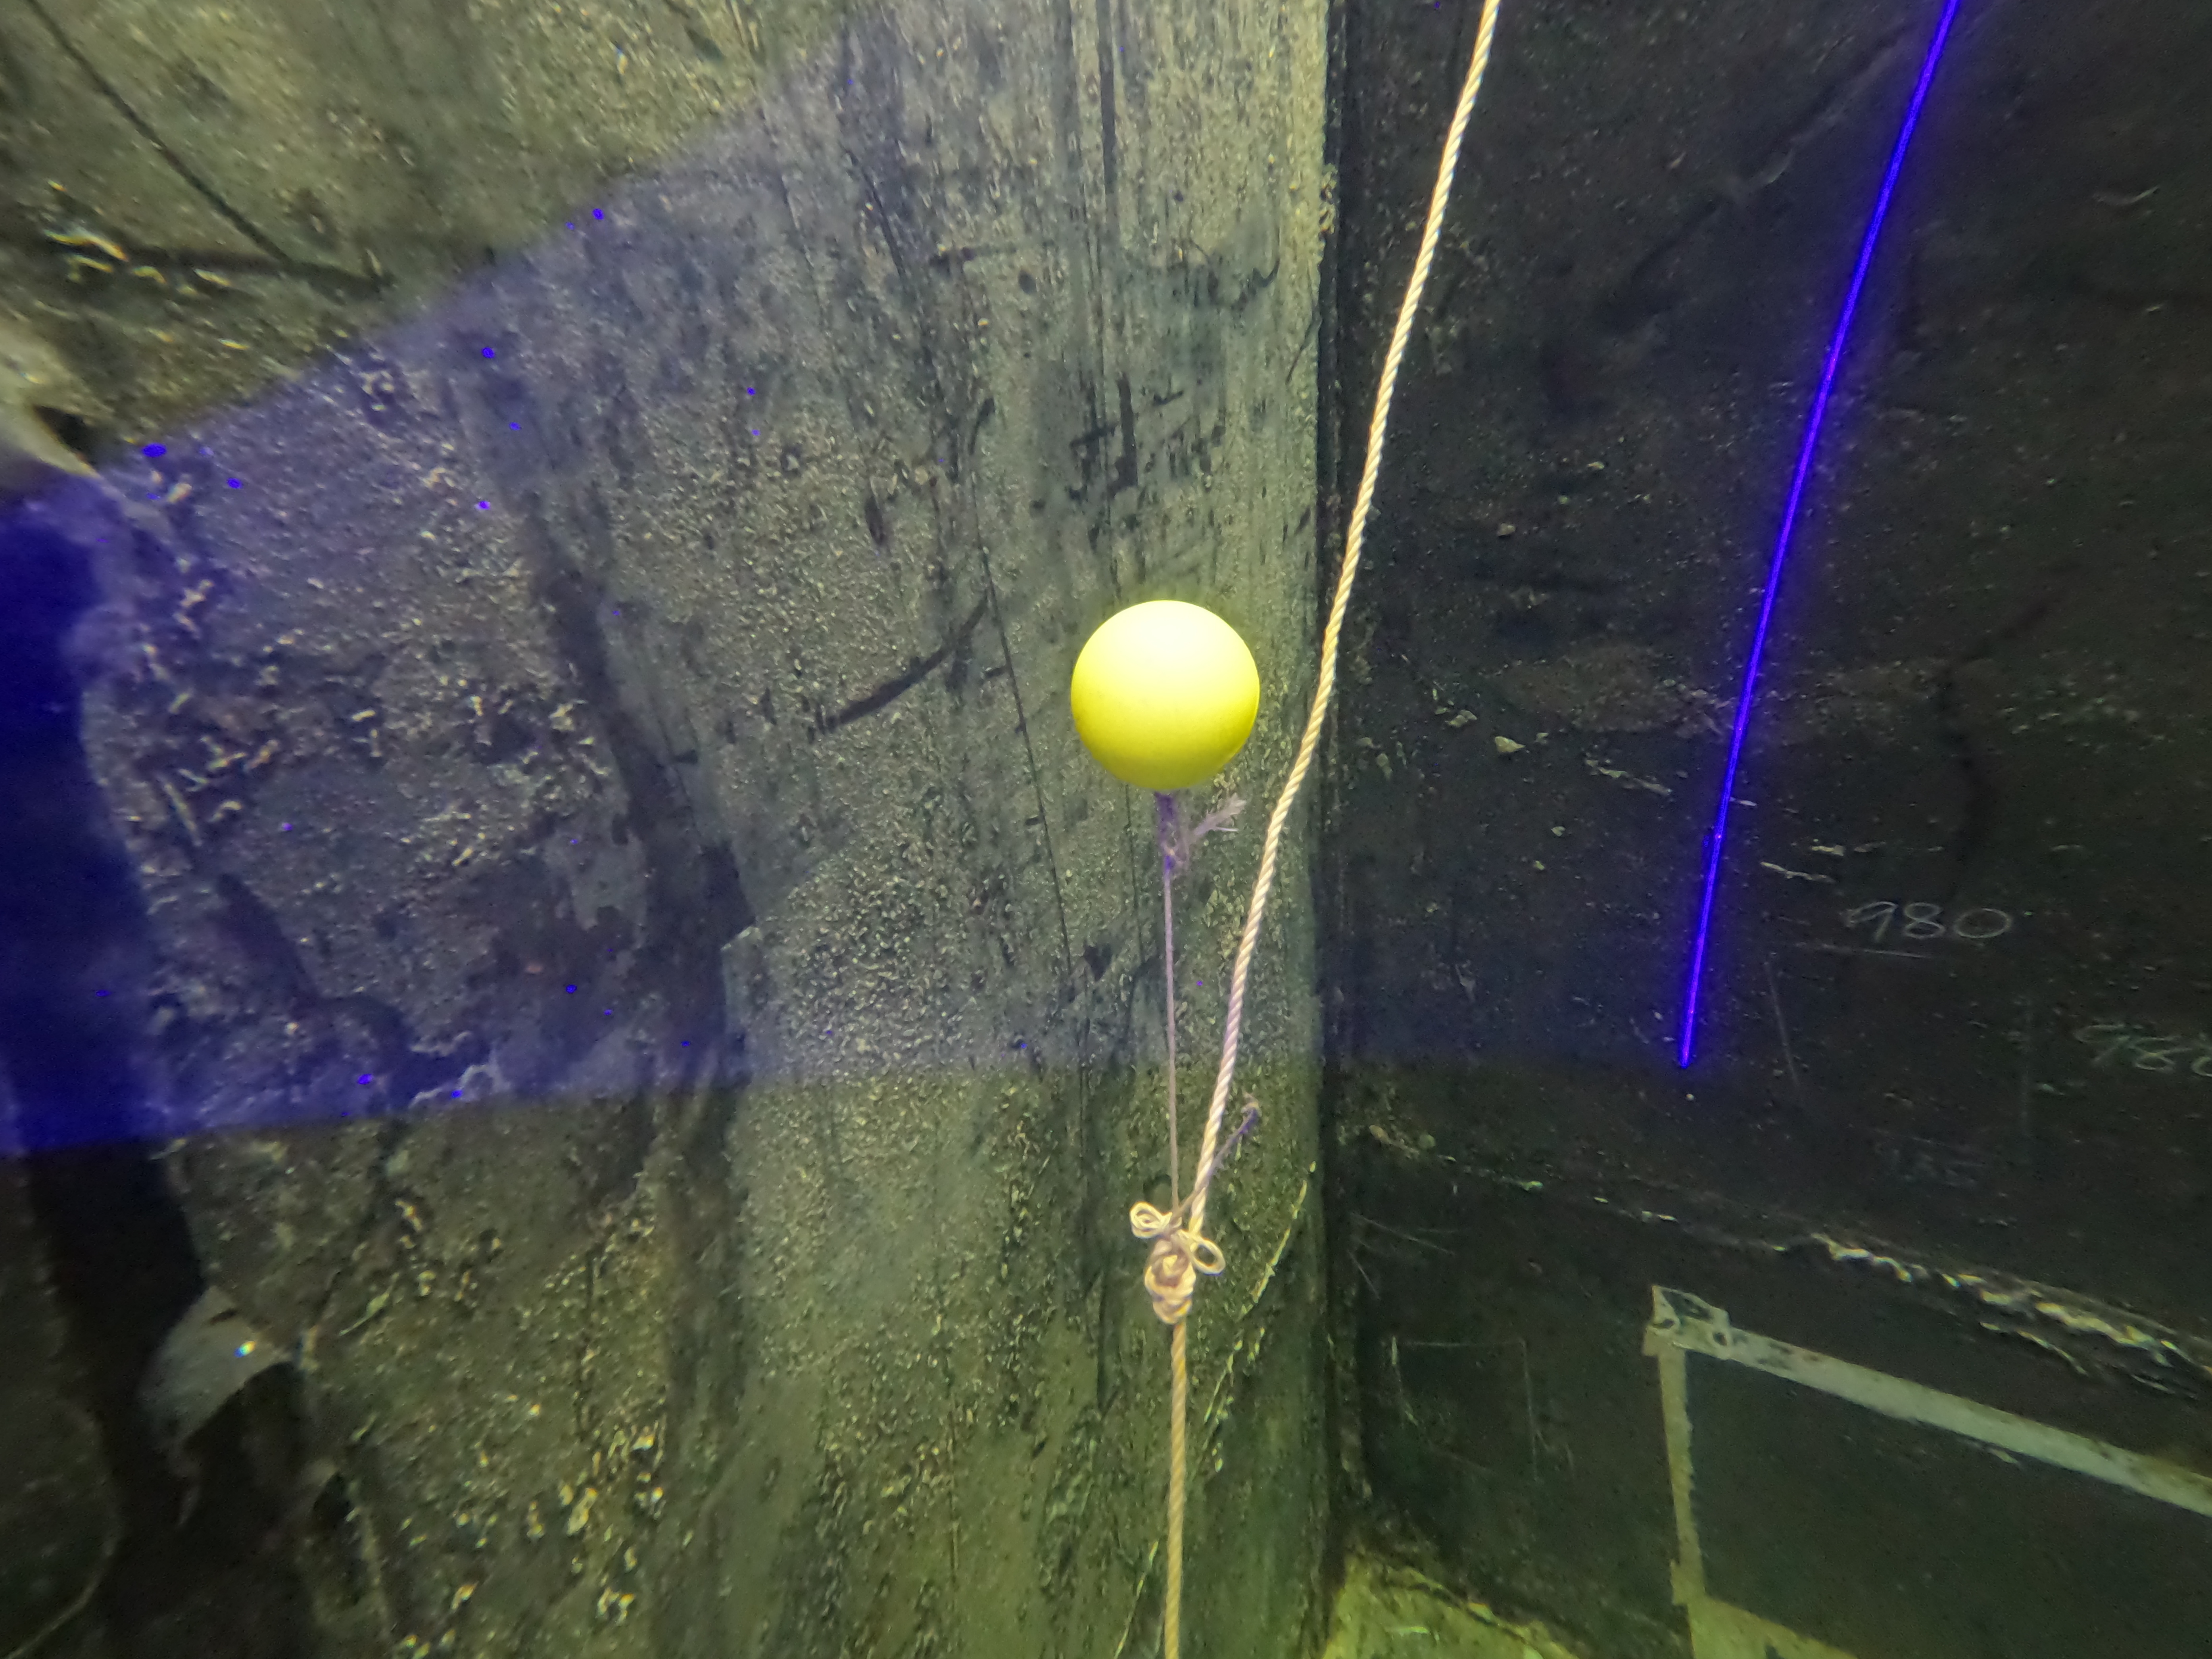

Supplement: Supplementary file 1922 [file G0034314.pdf › 5/G0034314.pdf]

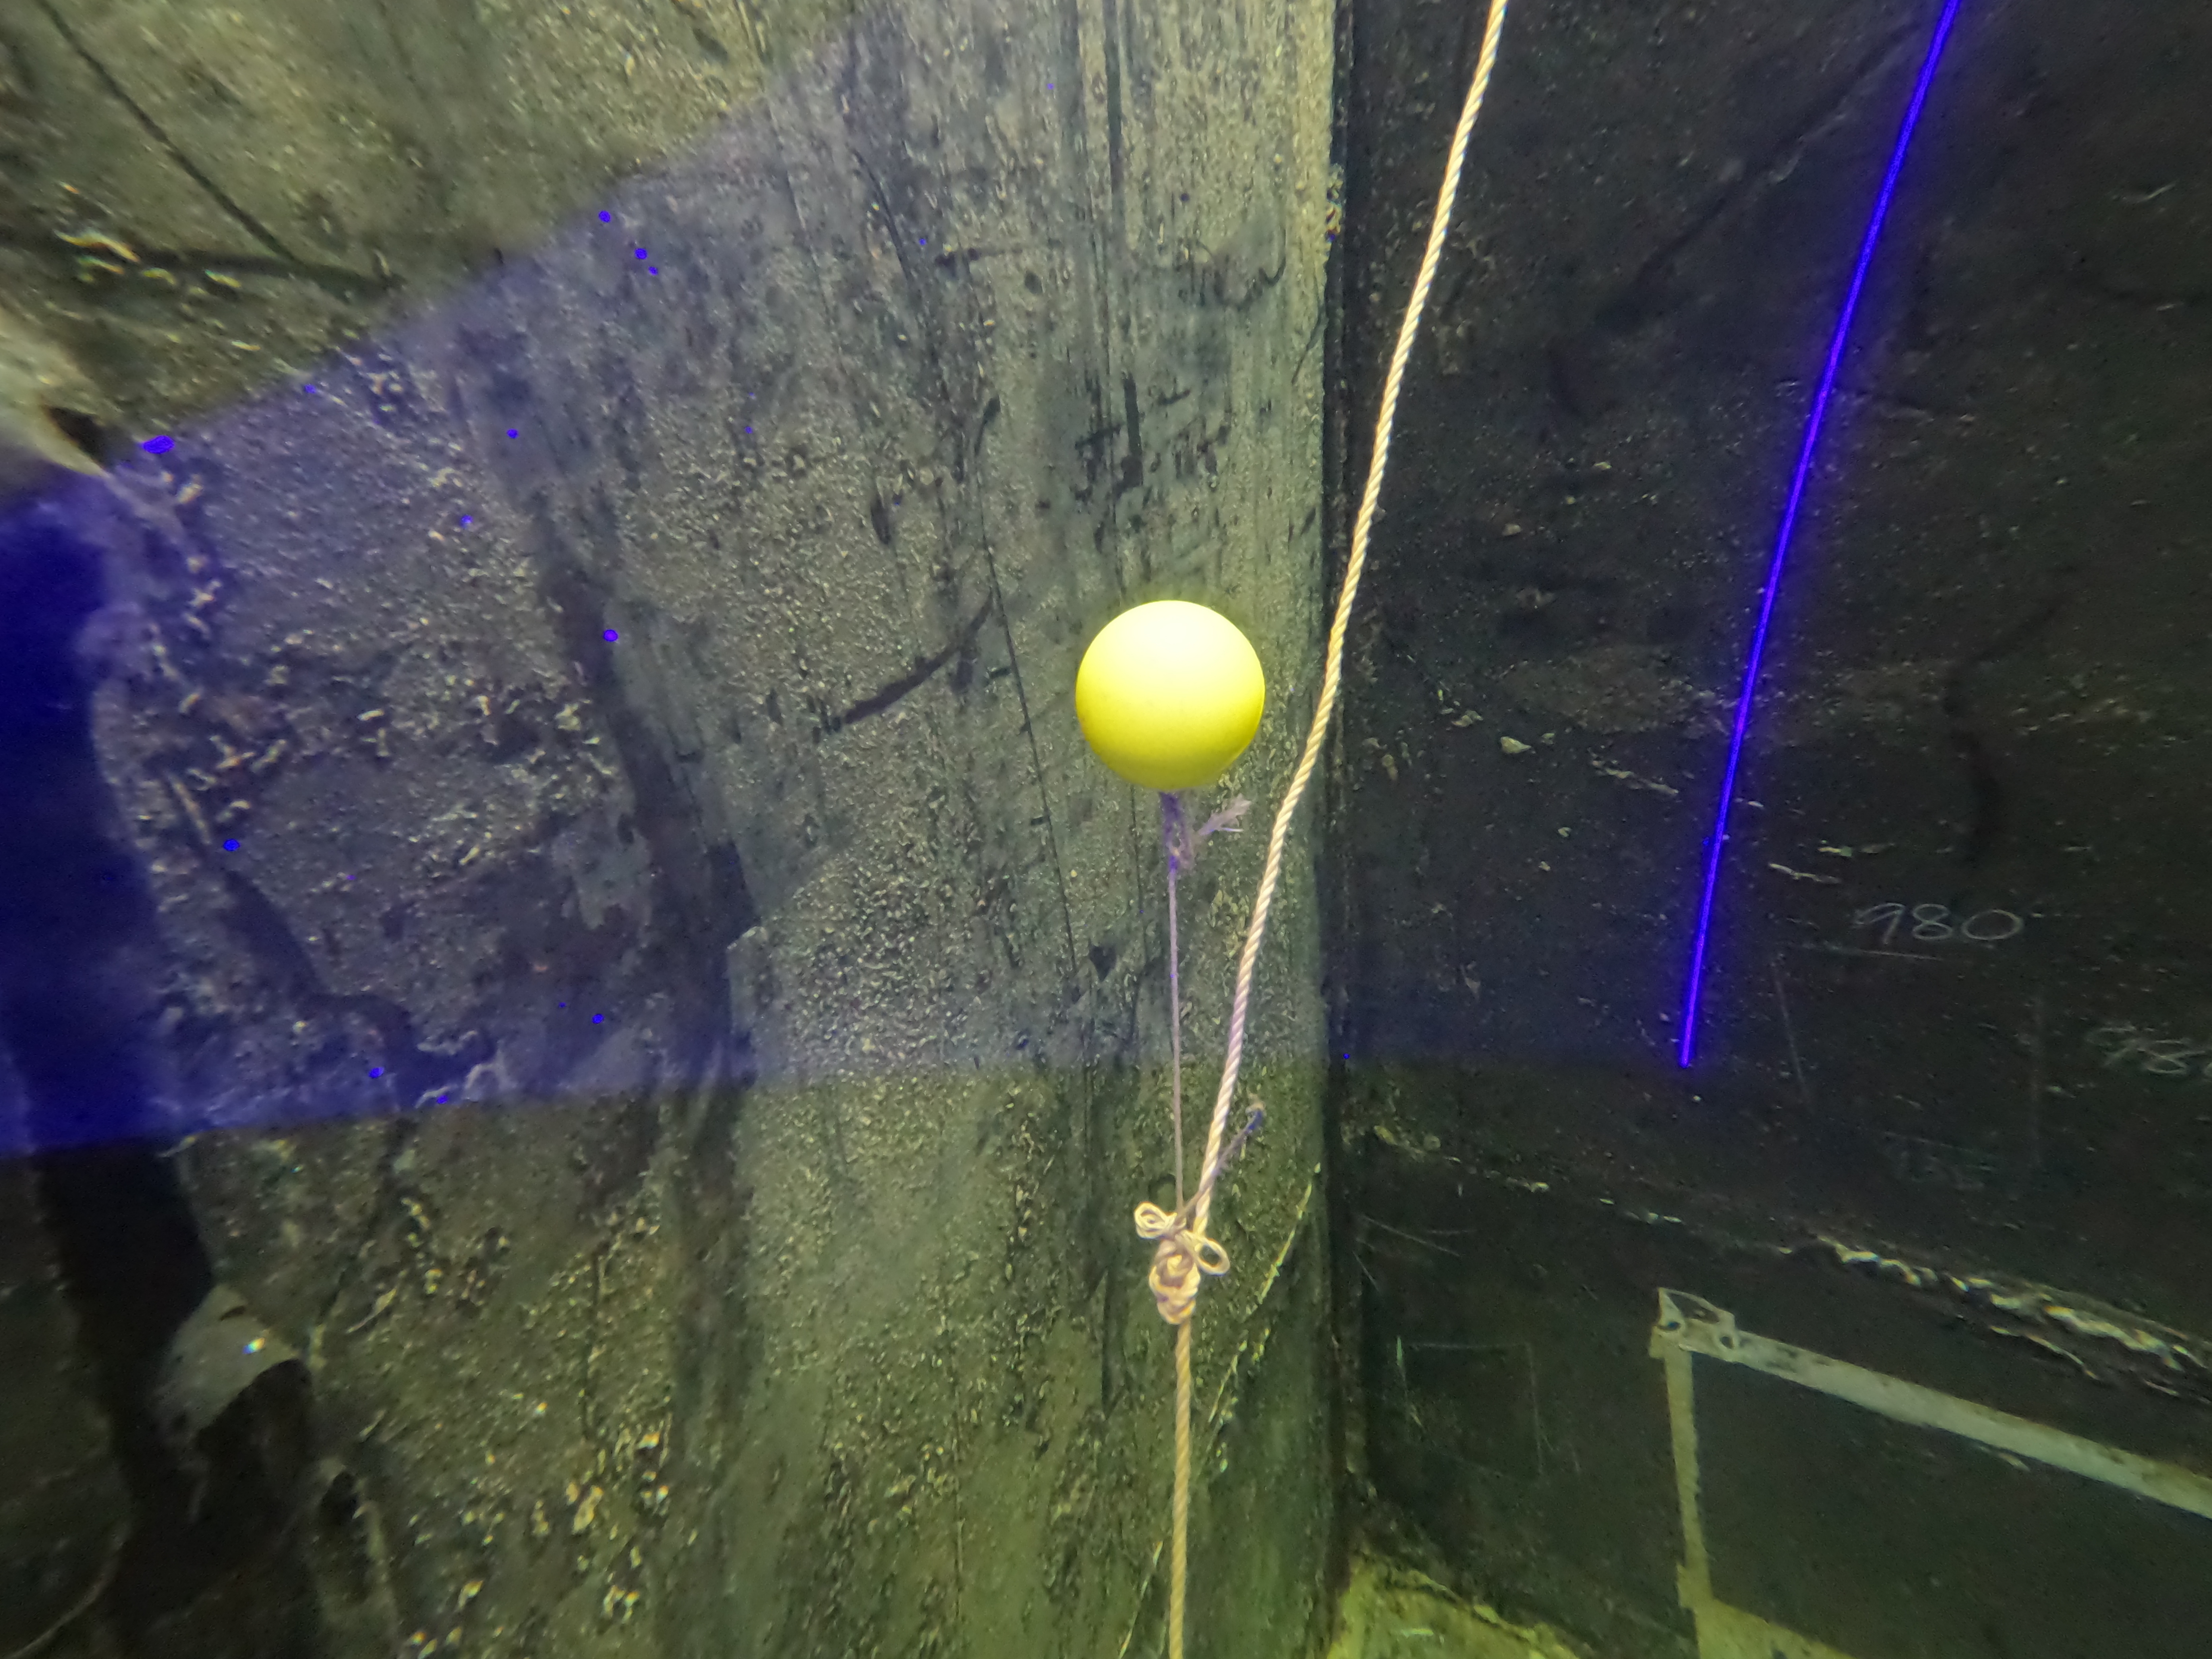

Supplement: Supplementary file 1923 [file G0034315.pdf › 5/G0034315.pdf]

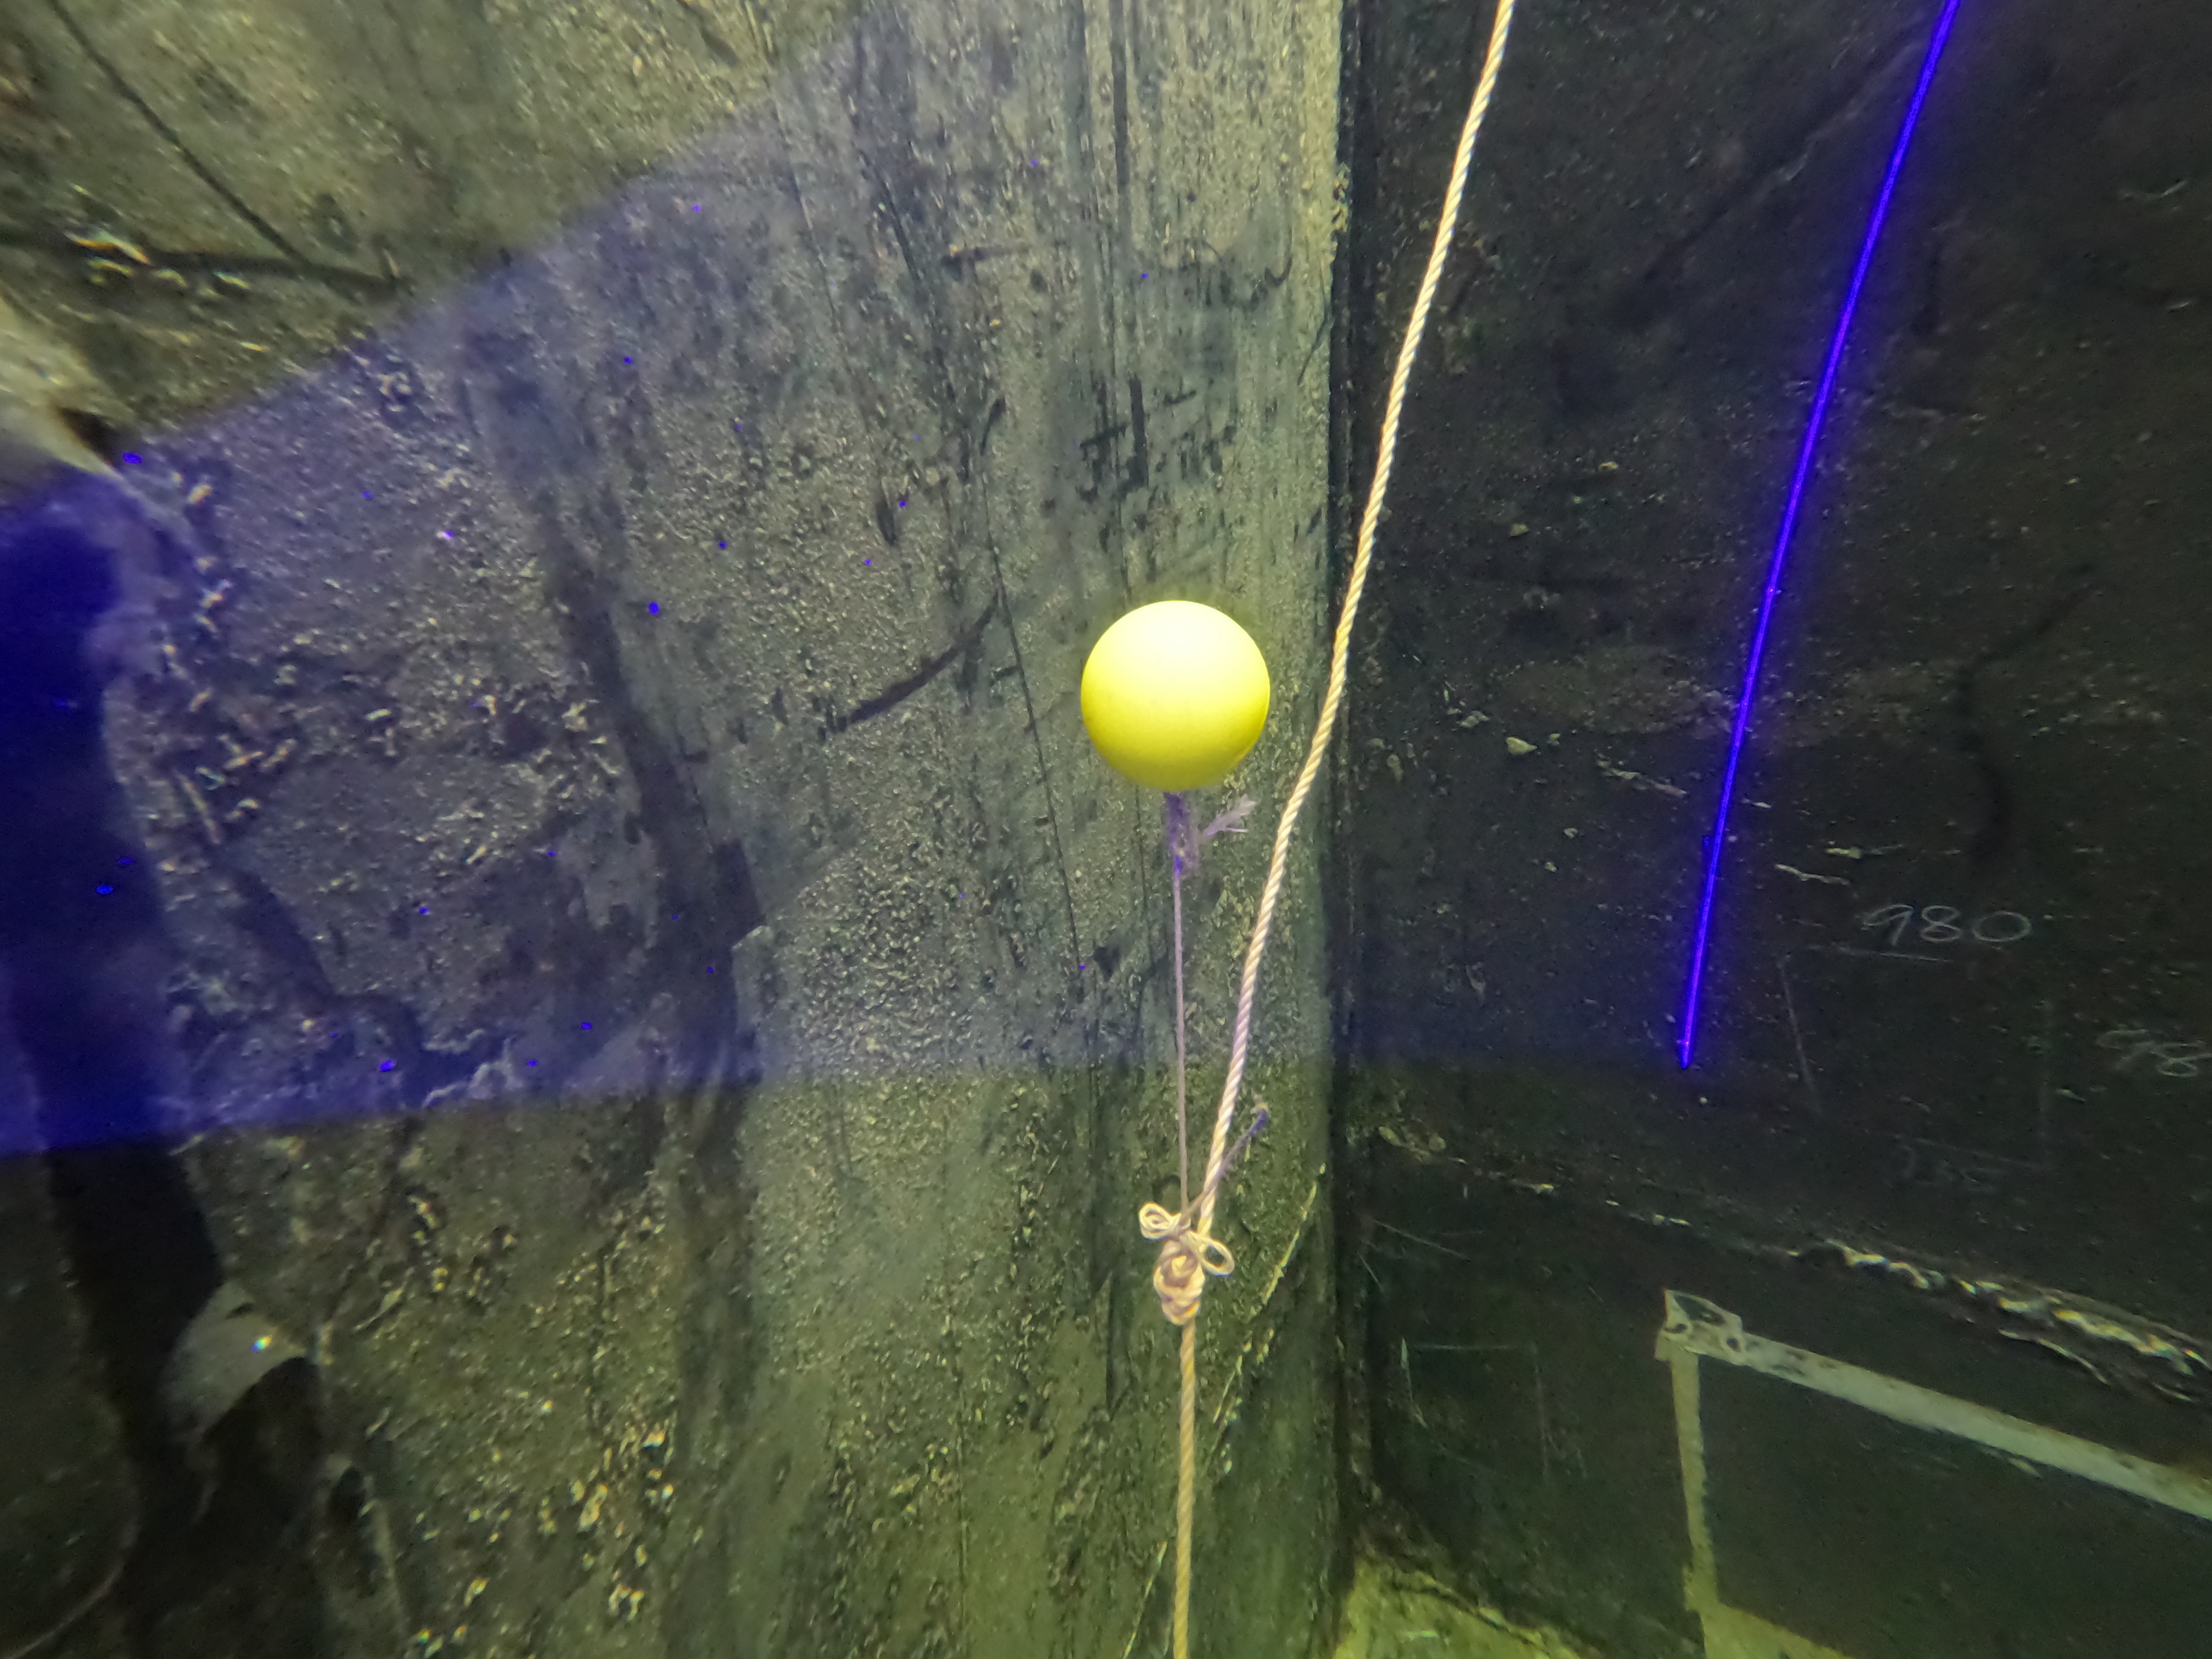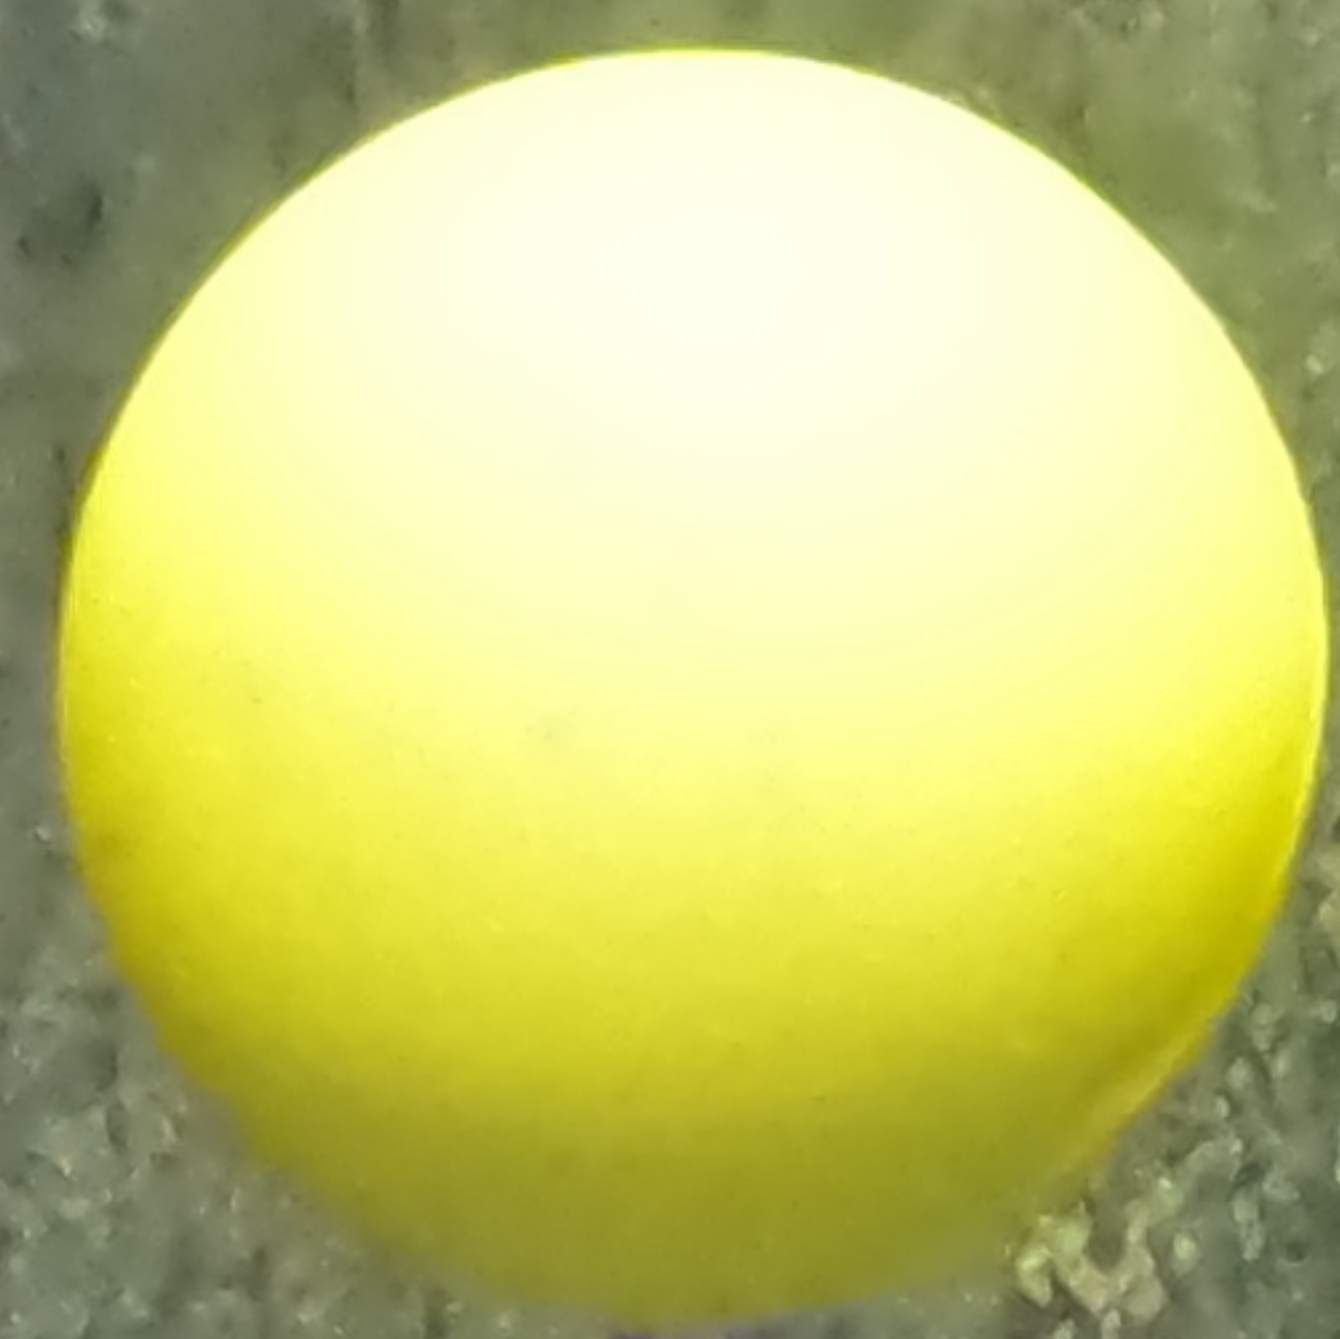

980

Supplement: Supplementary file 1924 [file G0034316.pdf › 5/G0034316.pdf]

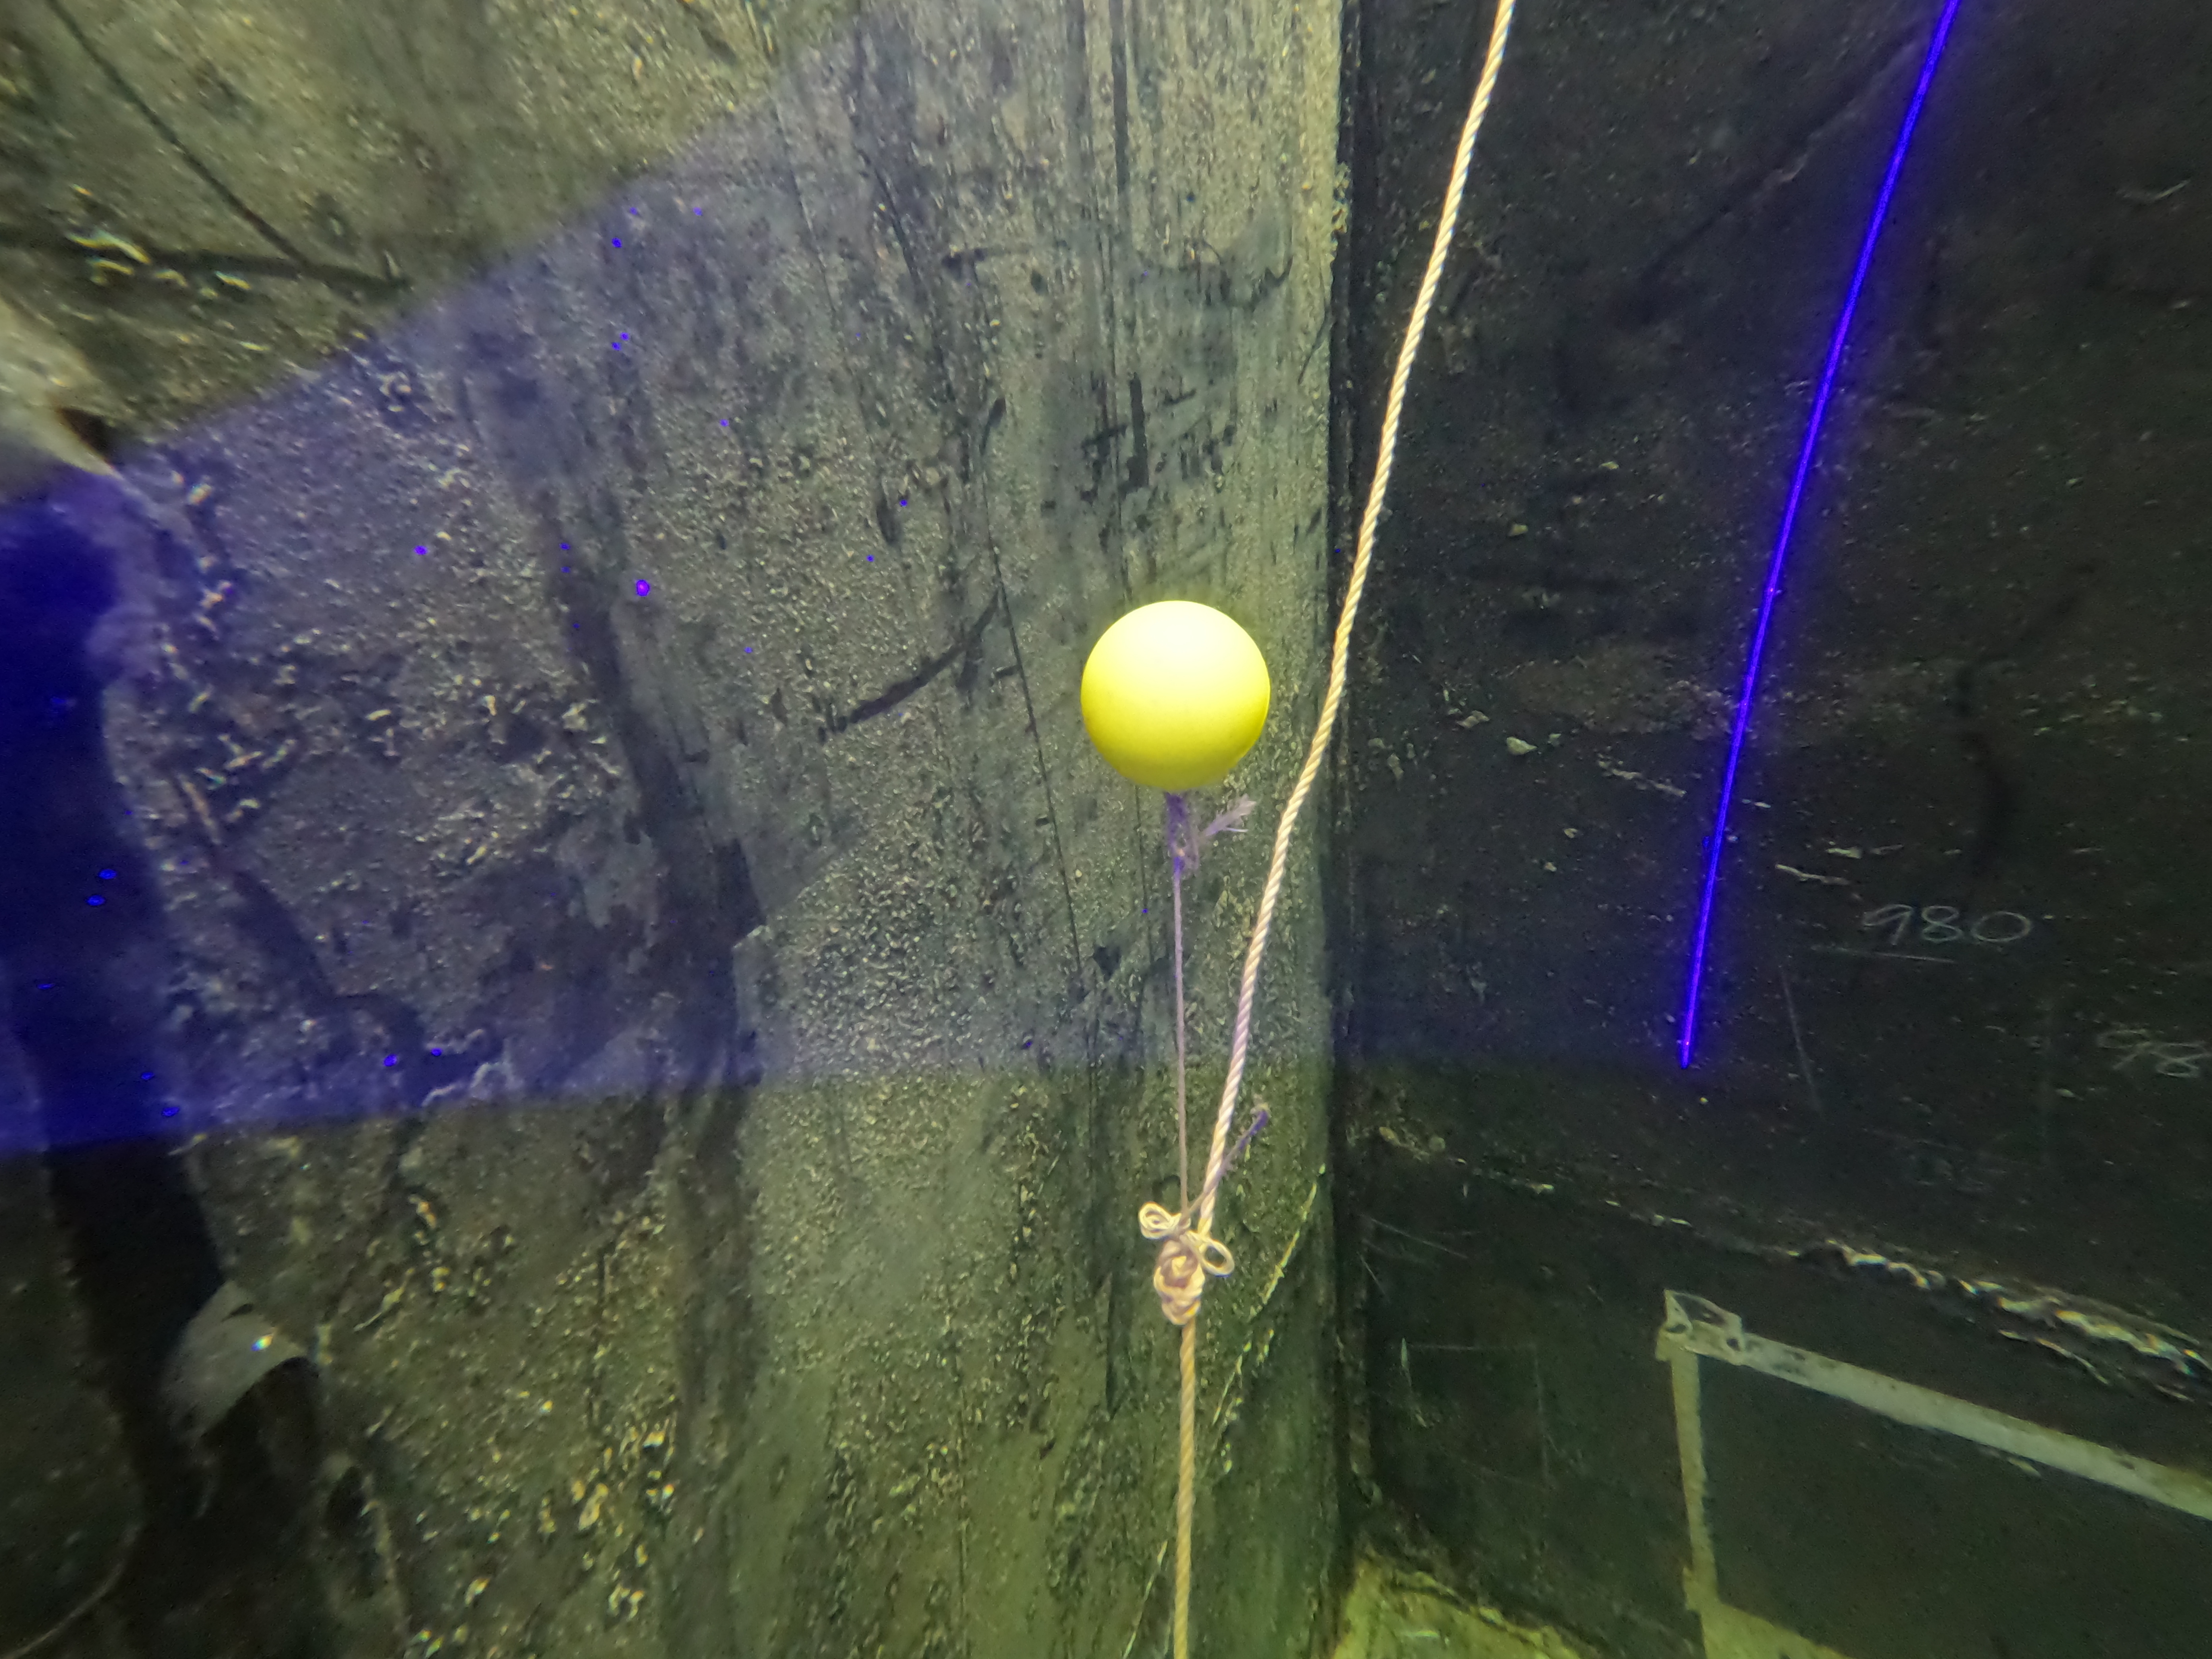

Supplement: Supplementary file 1925 [file G0034317.pdf › 5/G0034317.pdf]

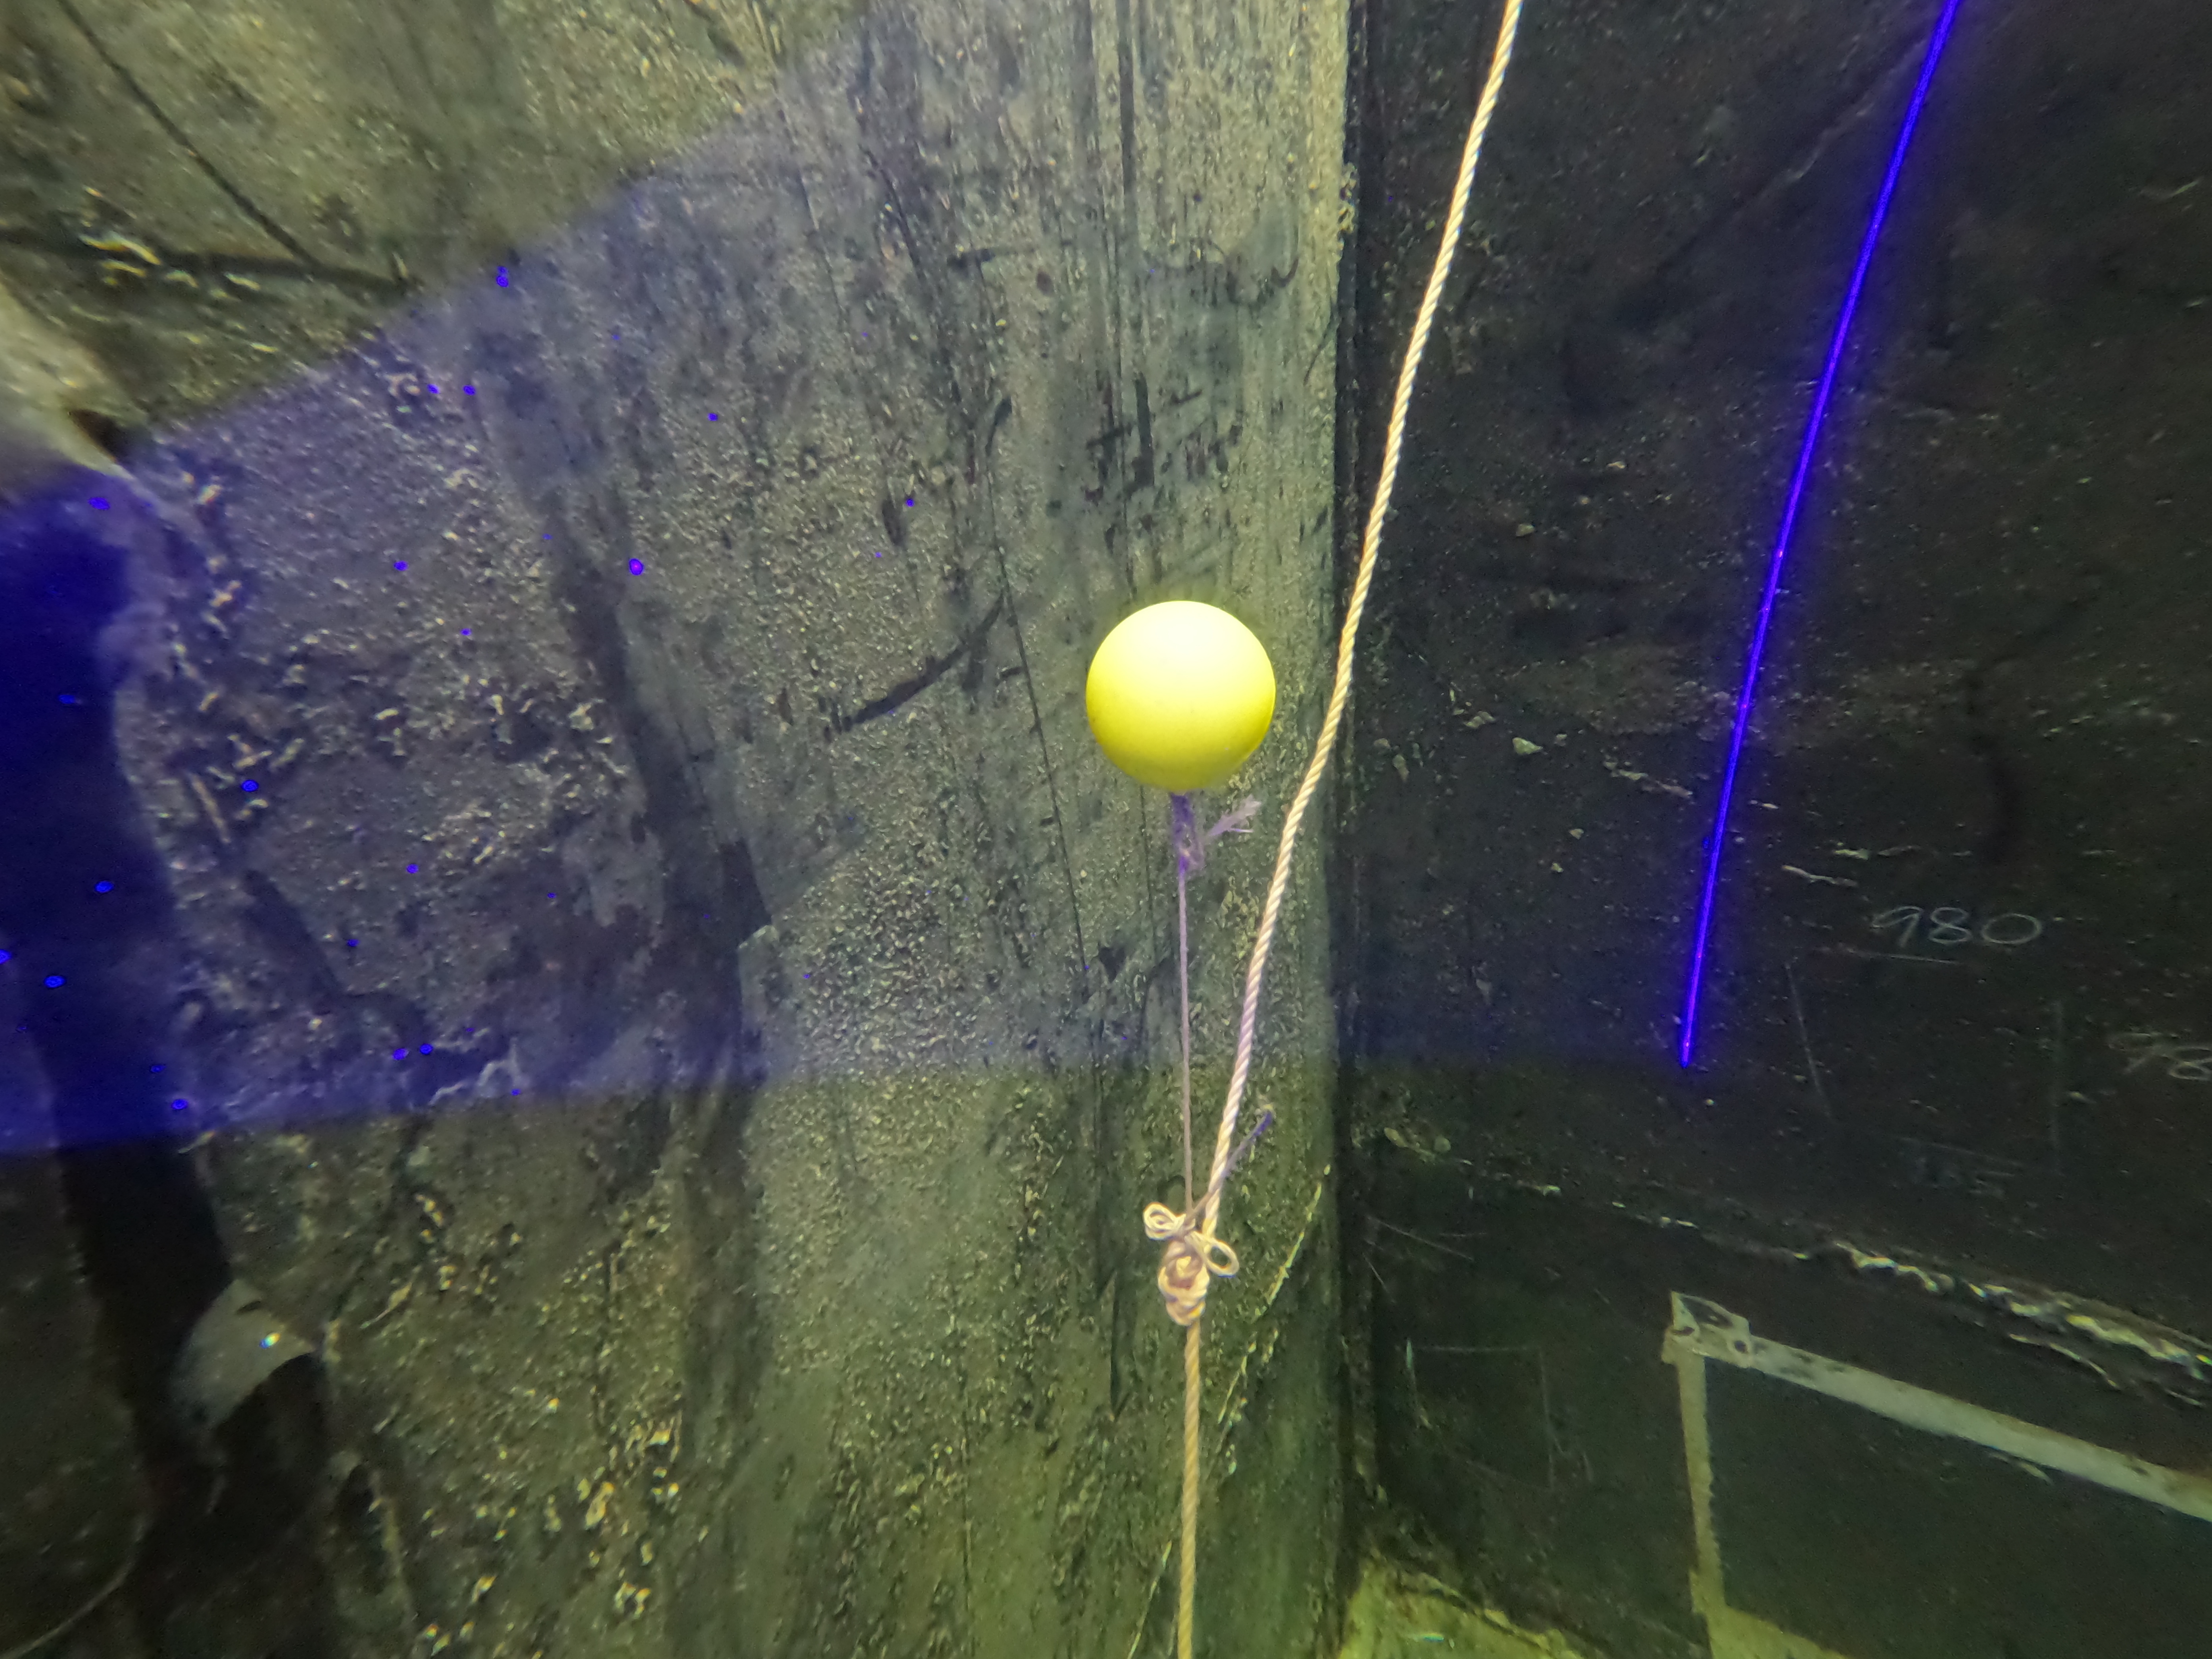

Supplement: Supplementary file 1926 [file G0034318.pdf › 5/G0034318.pdf]

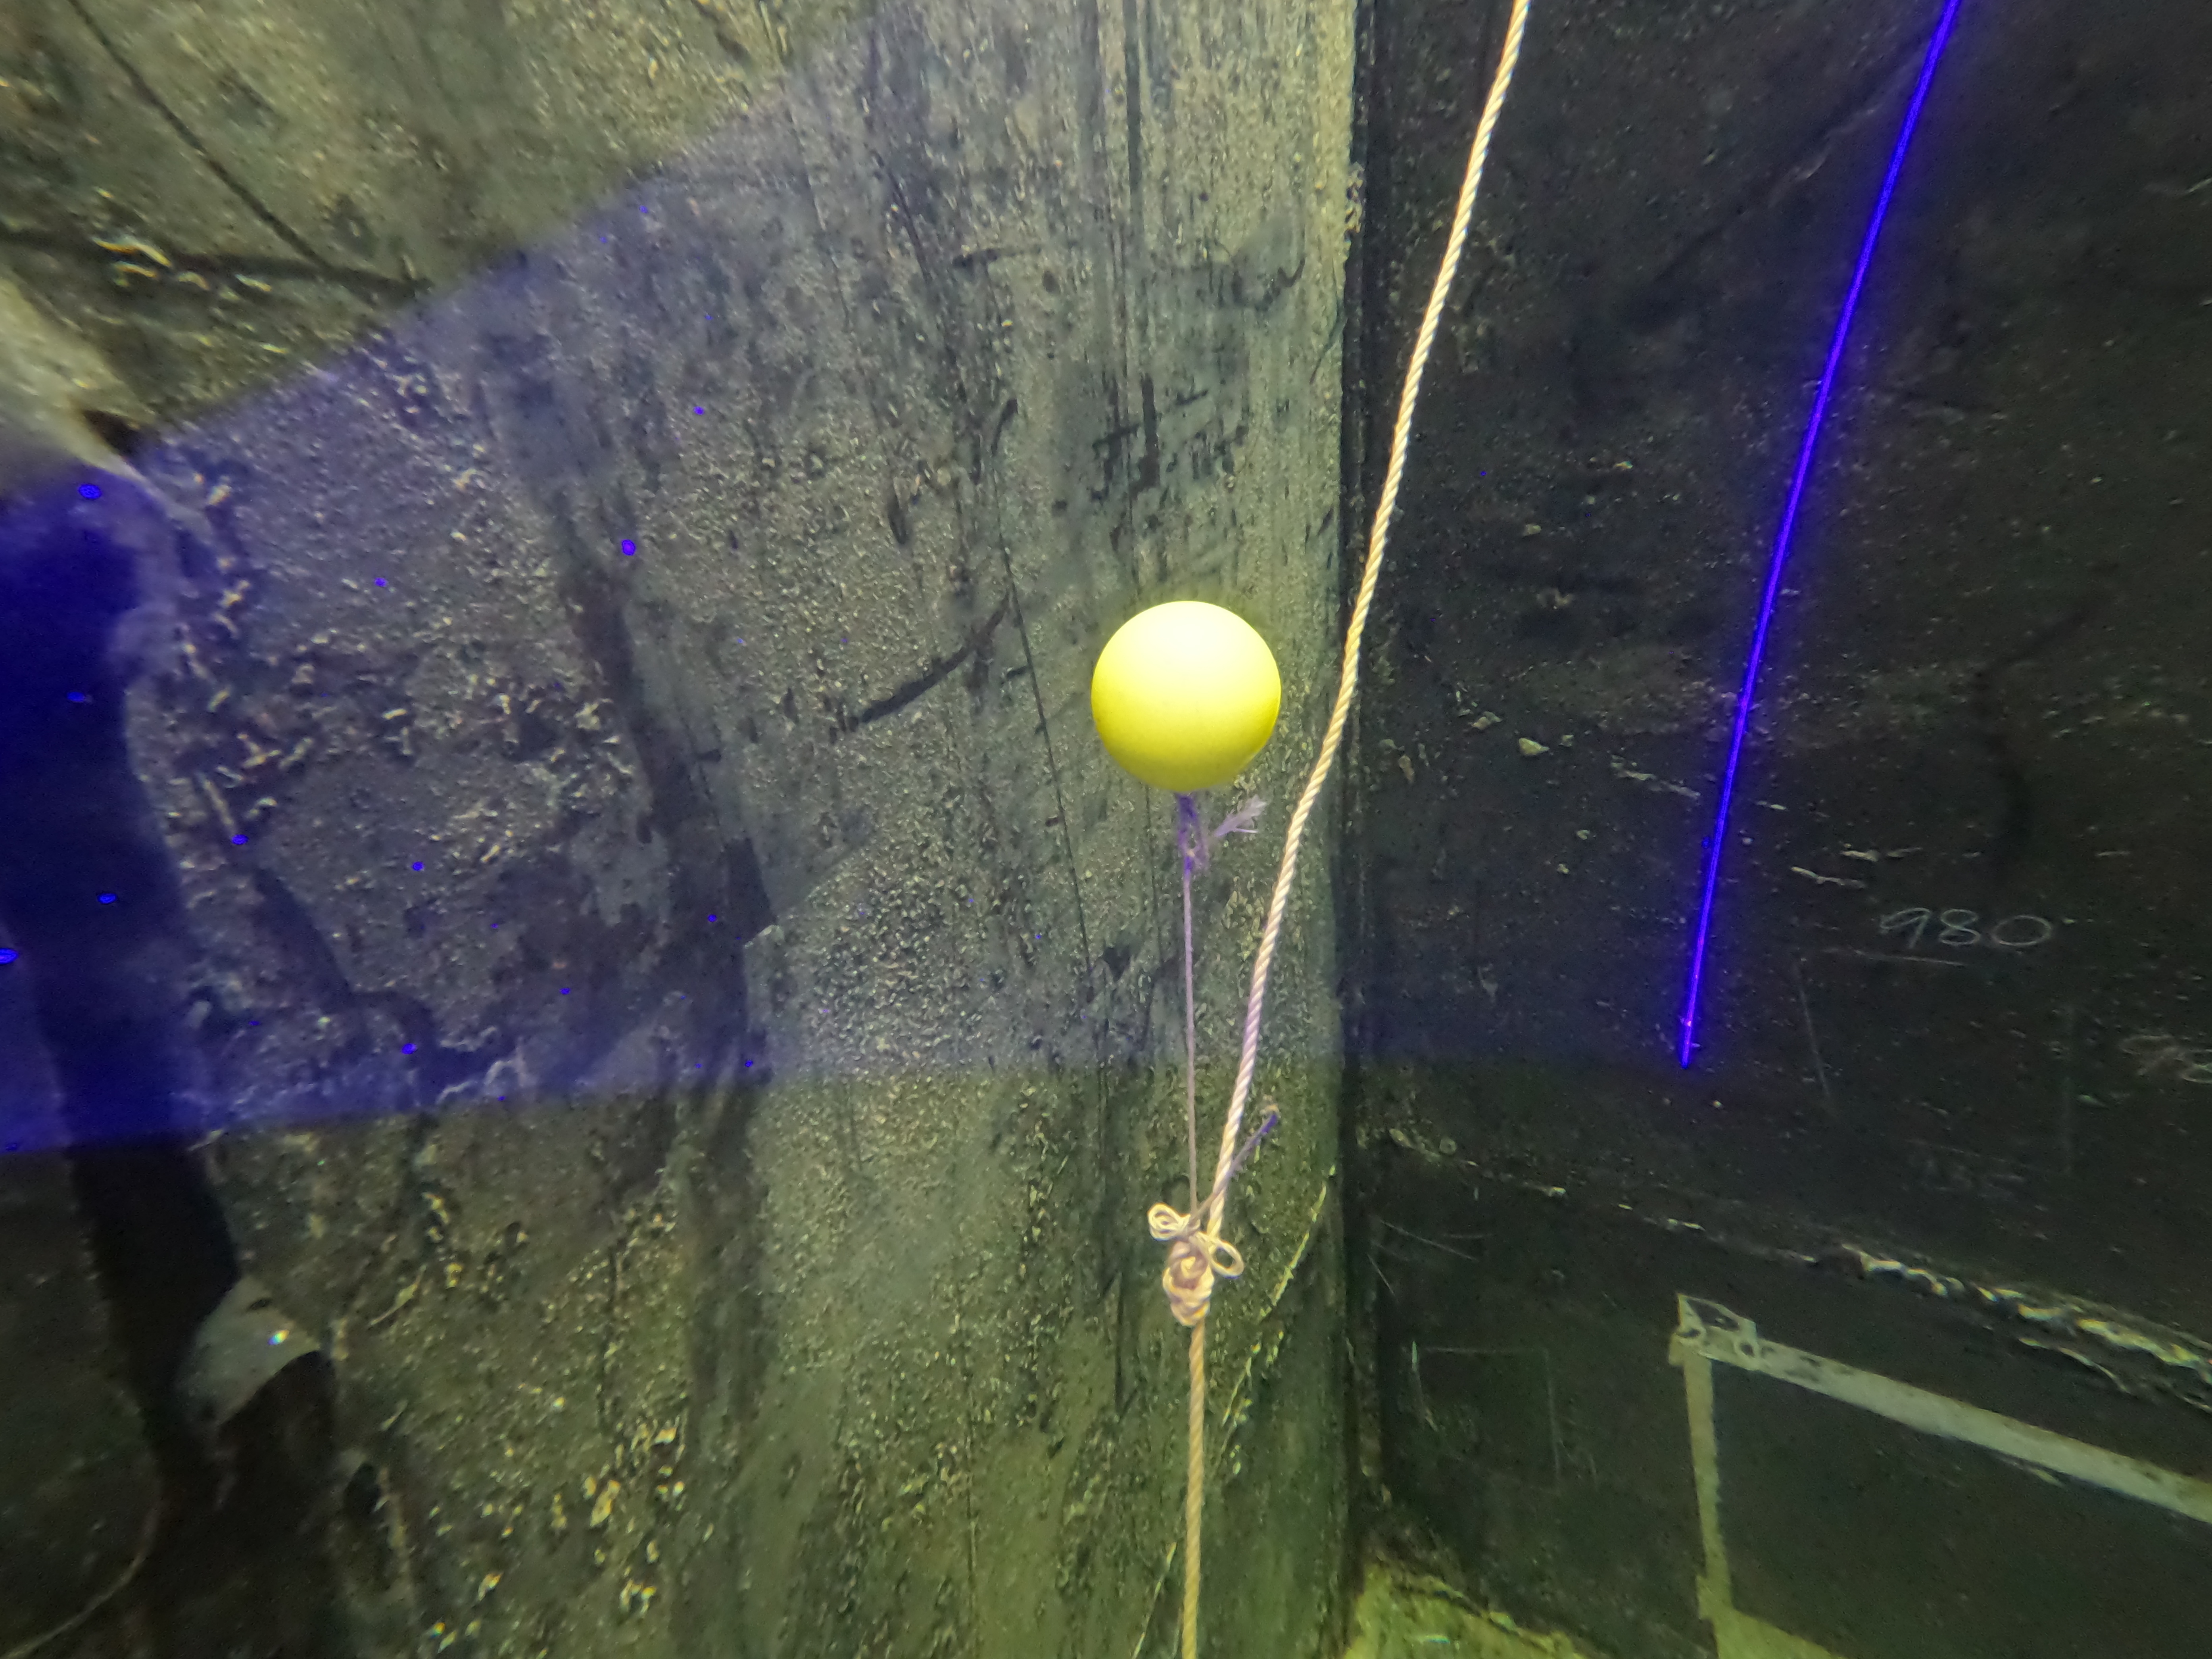

980

Supplement: Supplementary file 1927 [file G0034319.pdf › 5/G0034319.pdf]

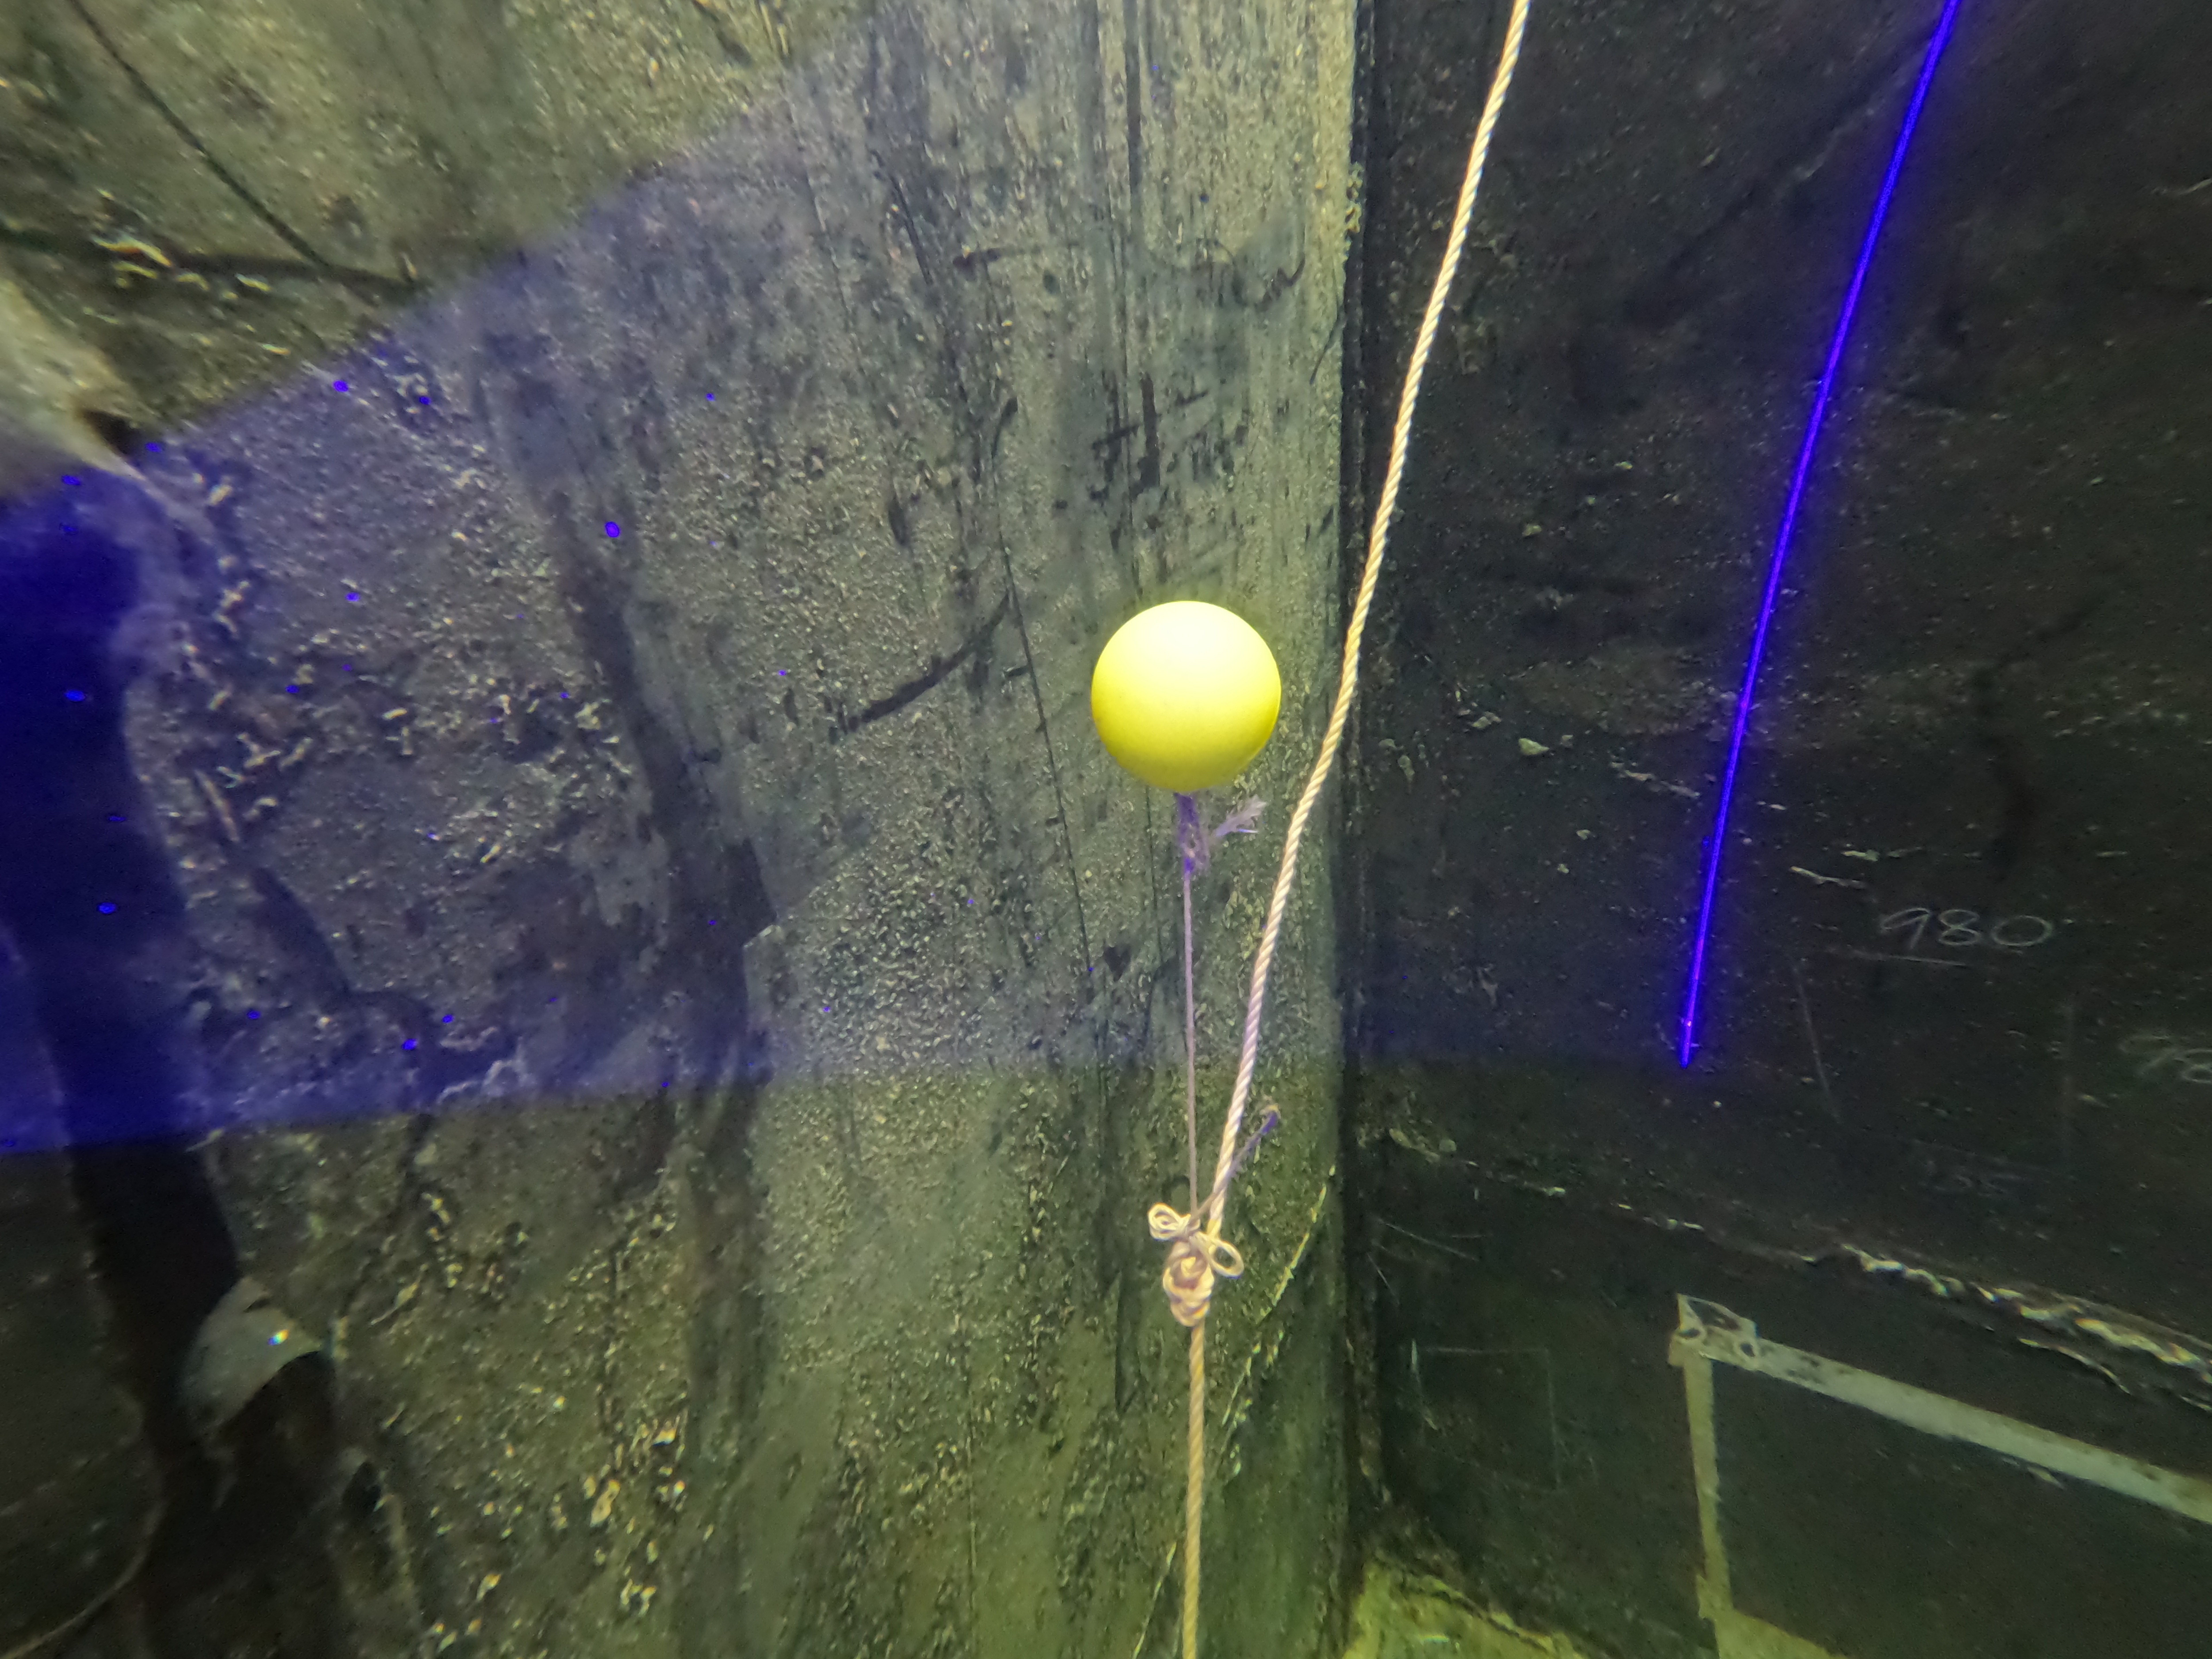

Supplement: Supplementary file 1928 [file G0034320.pdf › 5/G0034320.pdf]

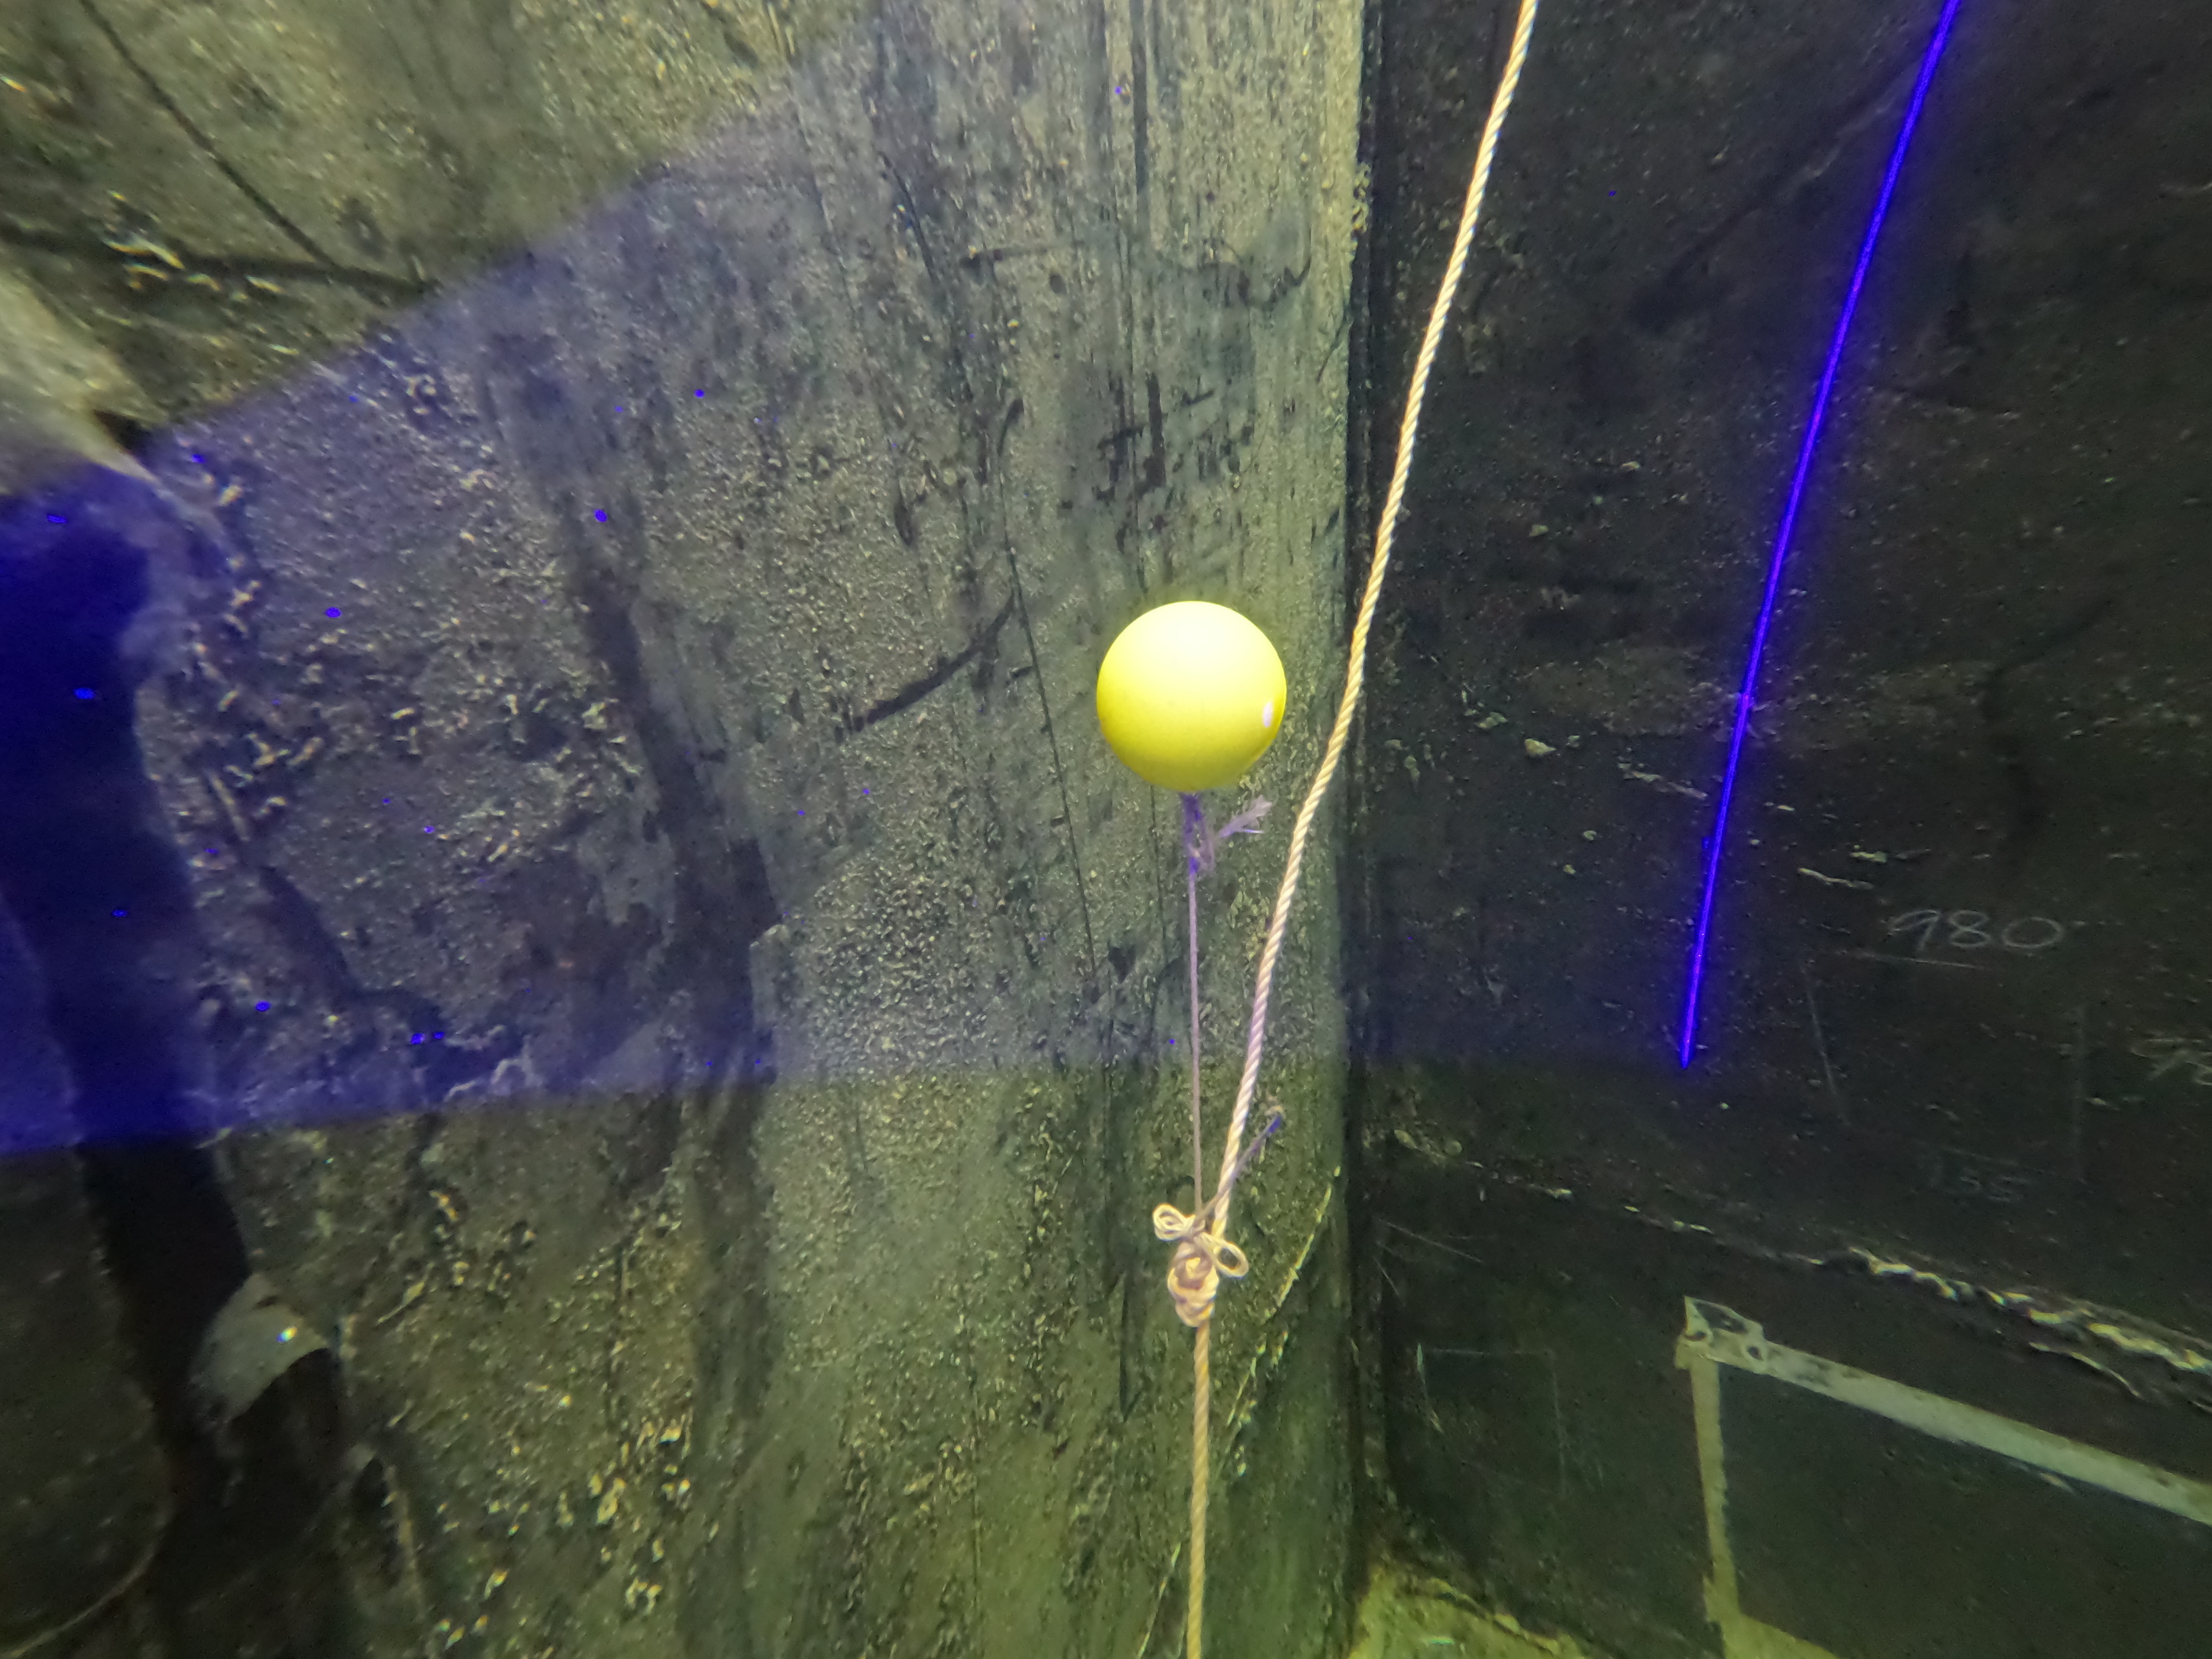

Supplement: Supplementary file 1929 [file G0034321.pdf › 5/G0034321.pdf]

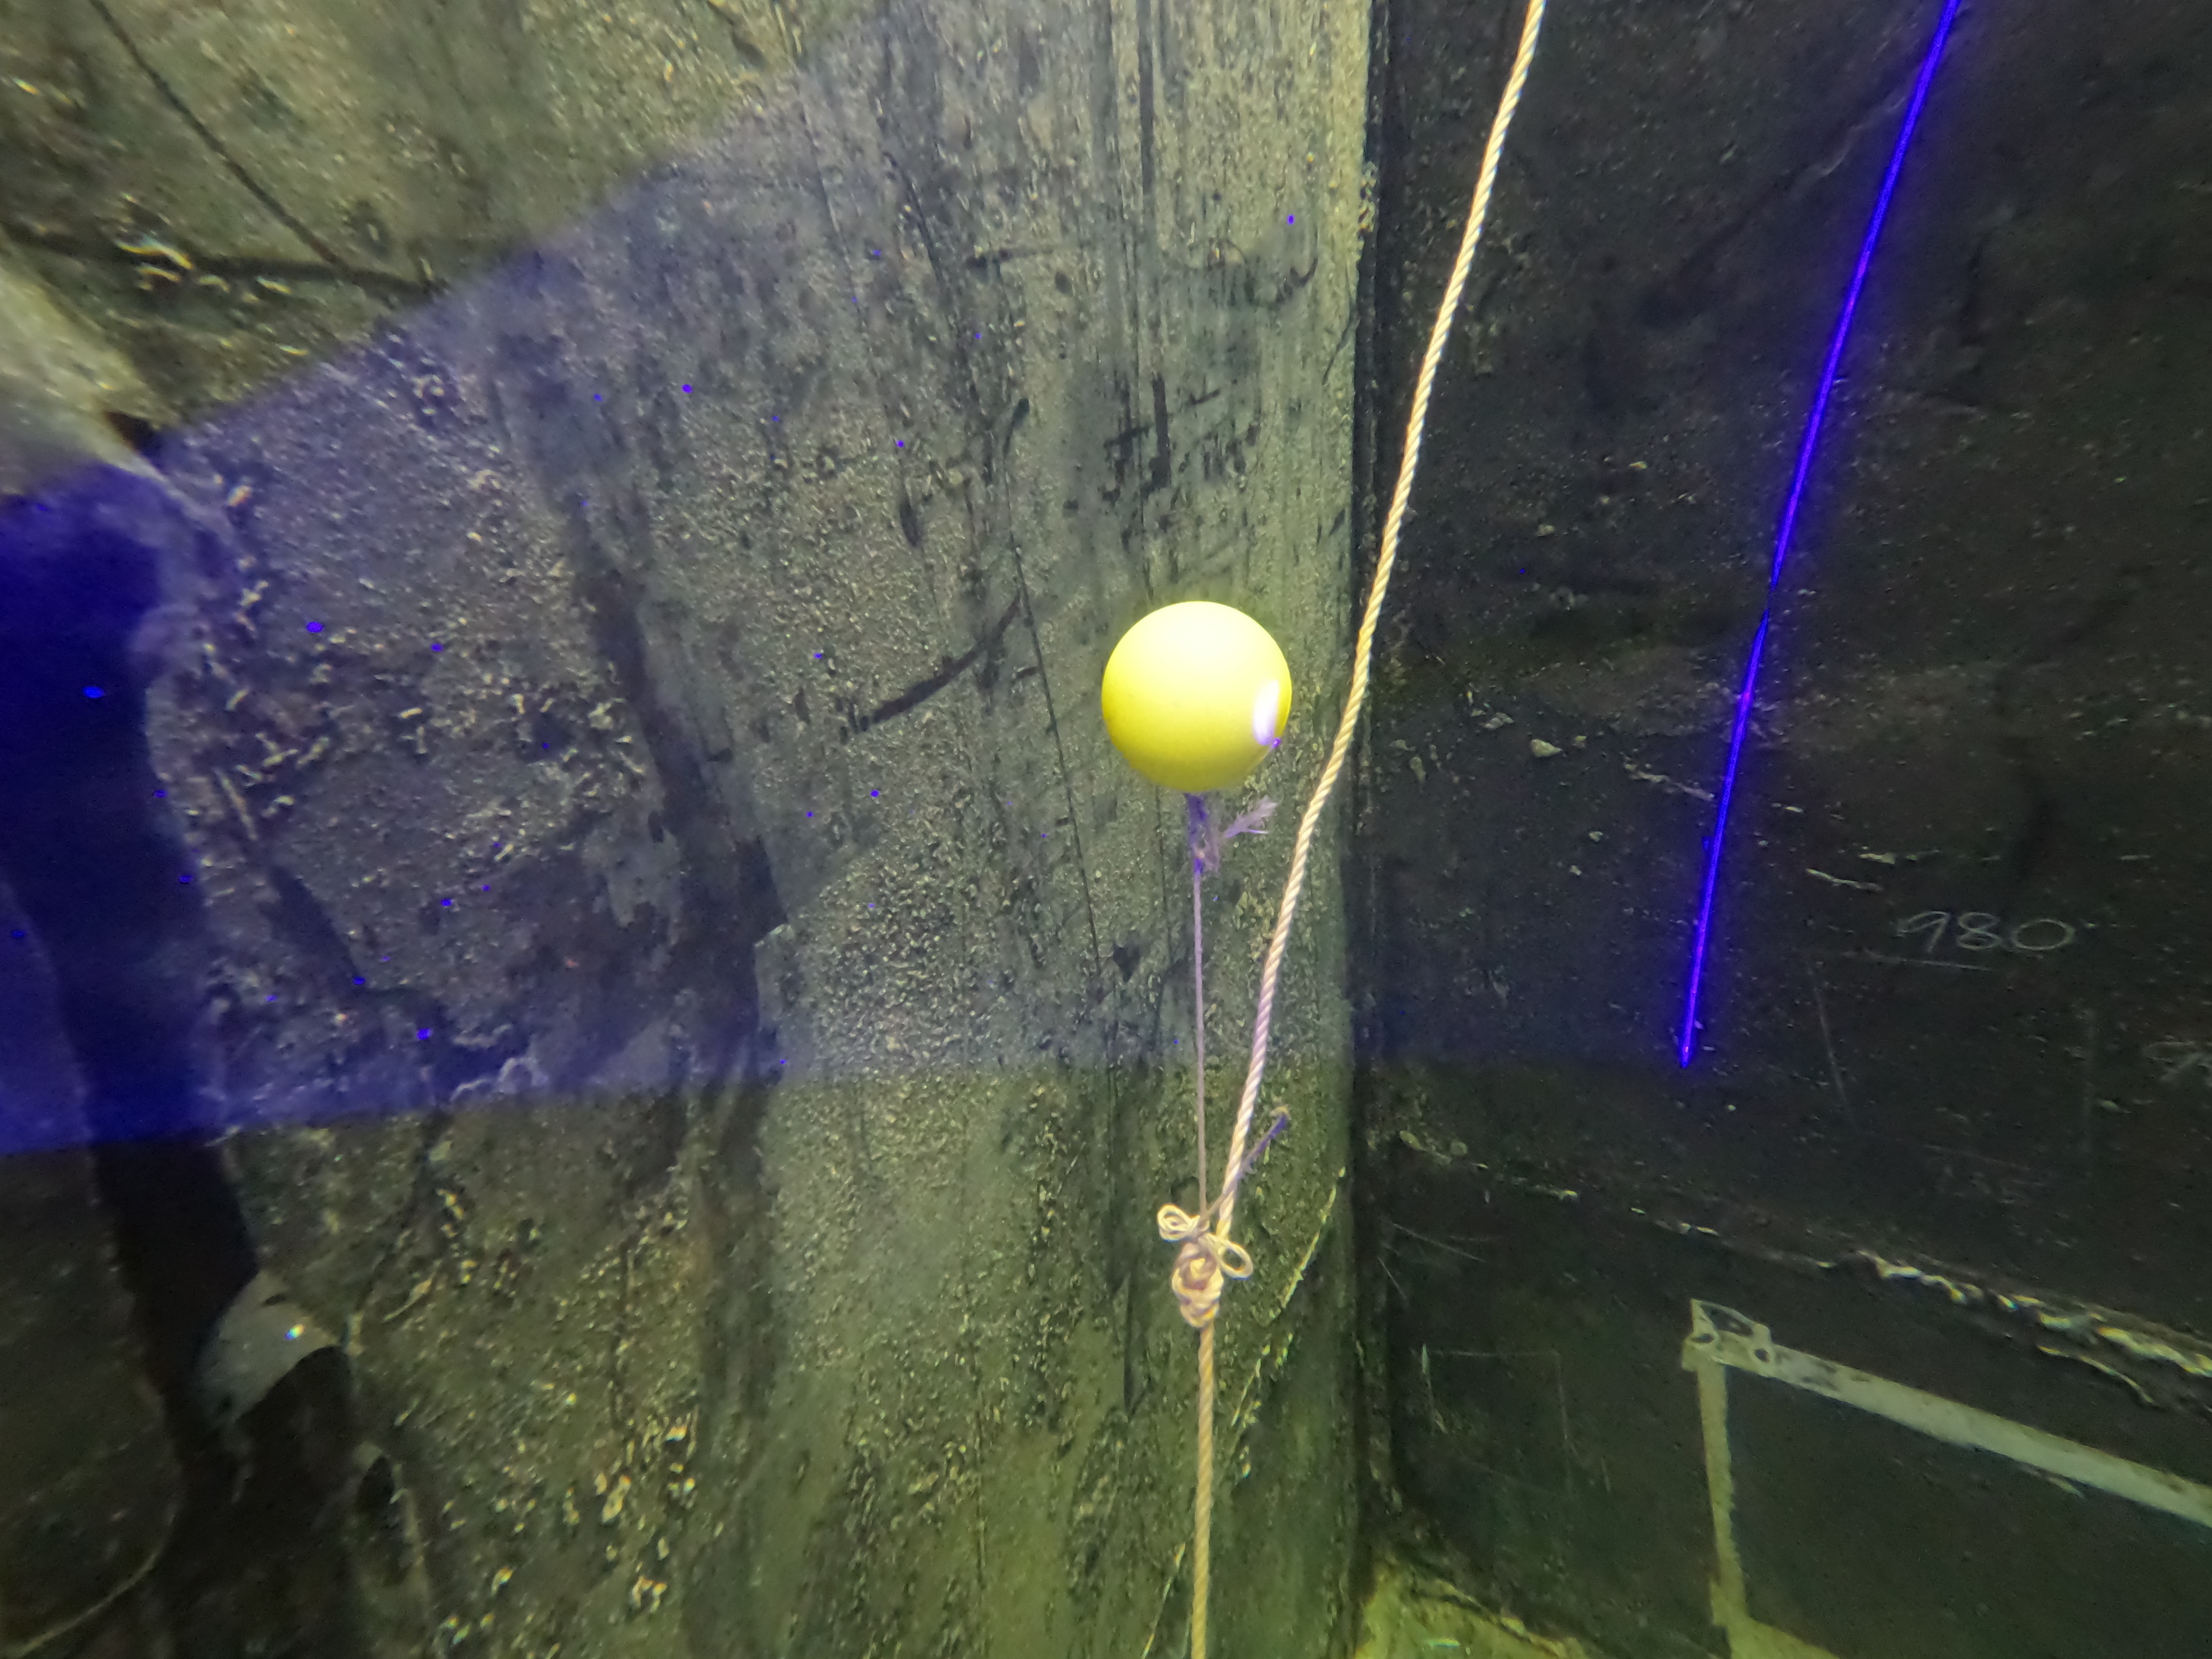

Supplement: Supplementary file 1930 [file G0034322.pdf › 5/G0034322.pdf]

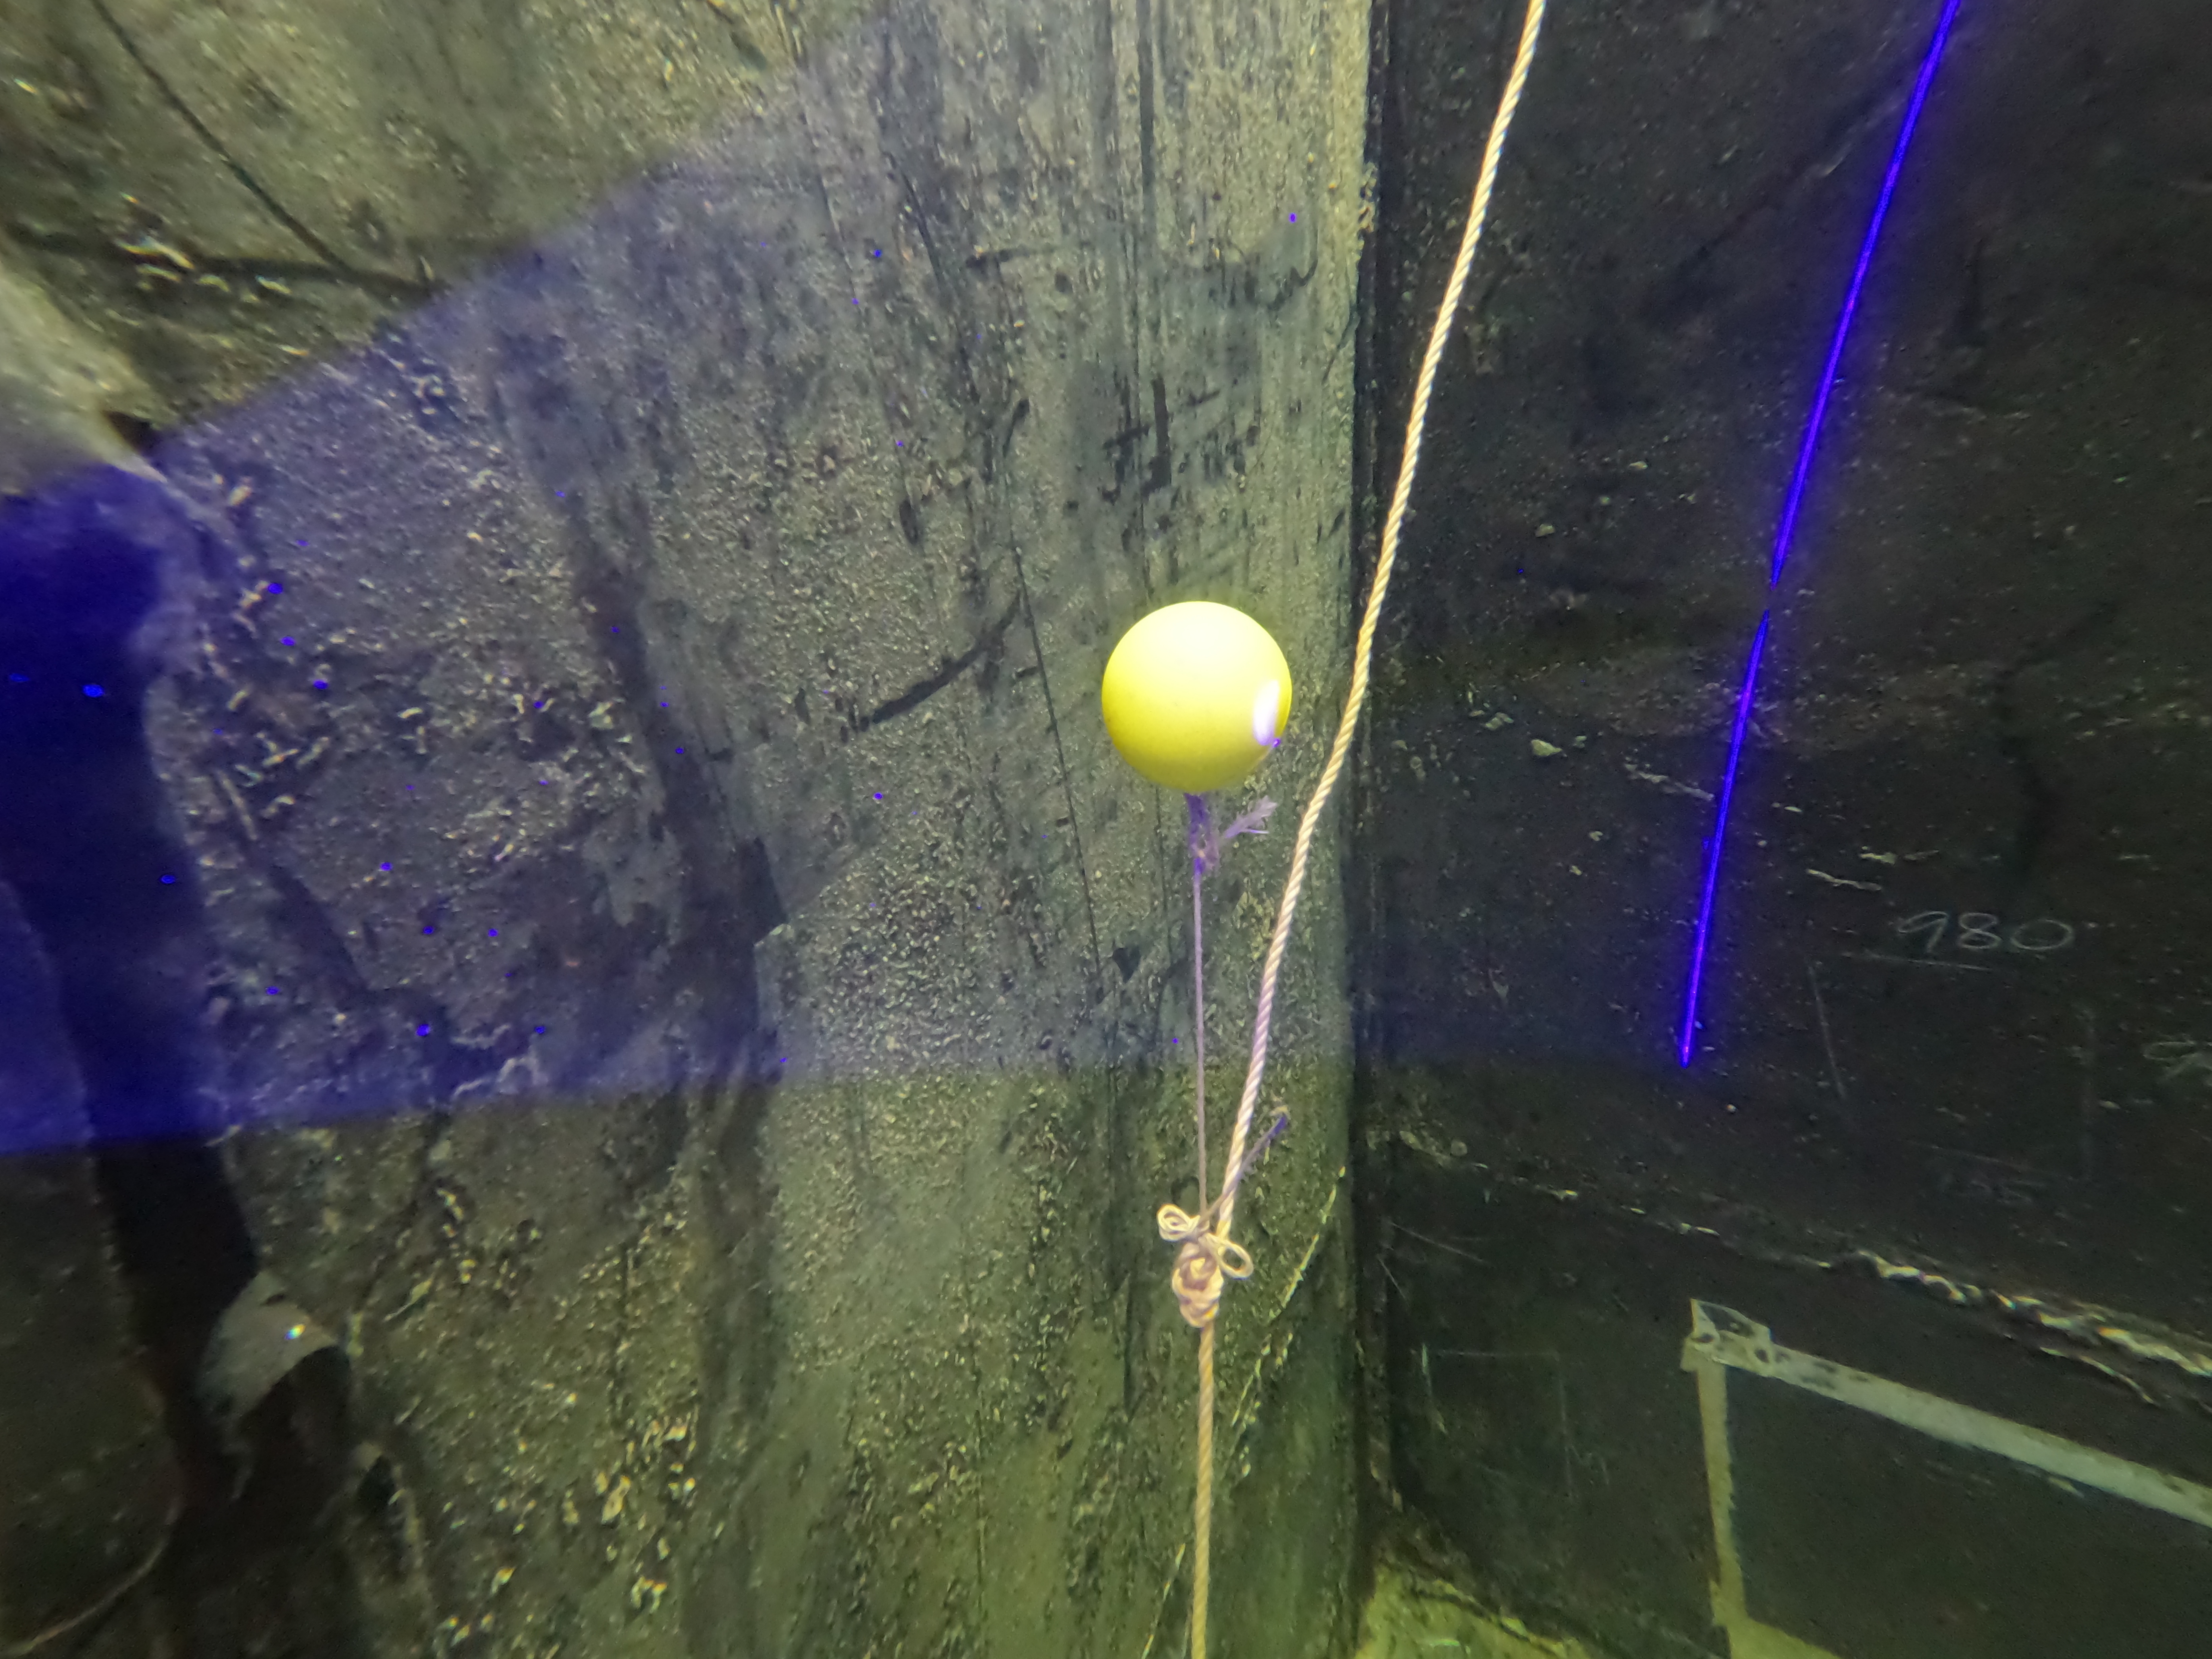

980

Supplement: Supplementary file 1931 [file G0034323.pdf › 5/G0034323.pdf]

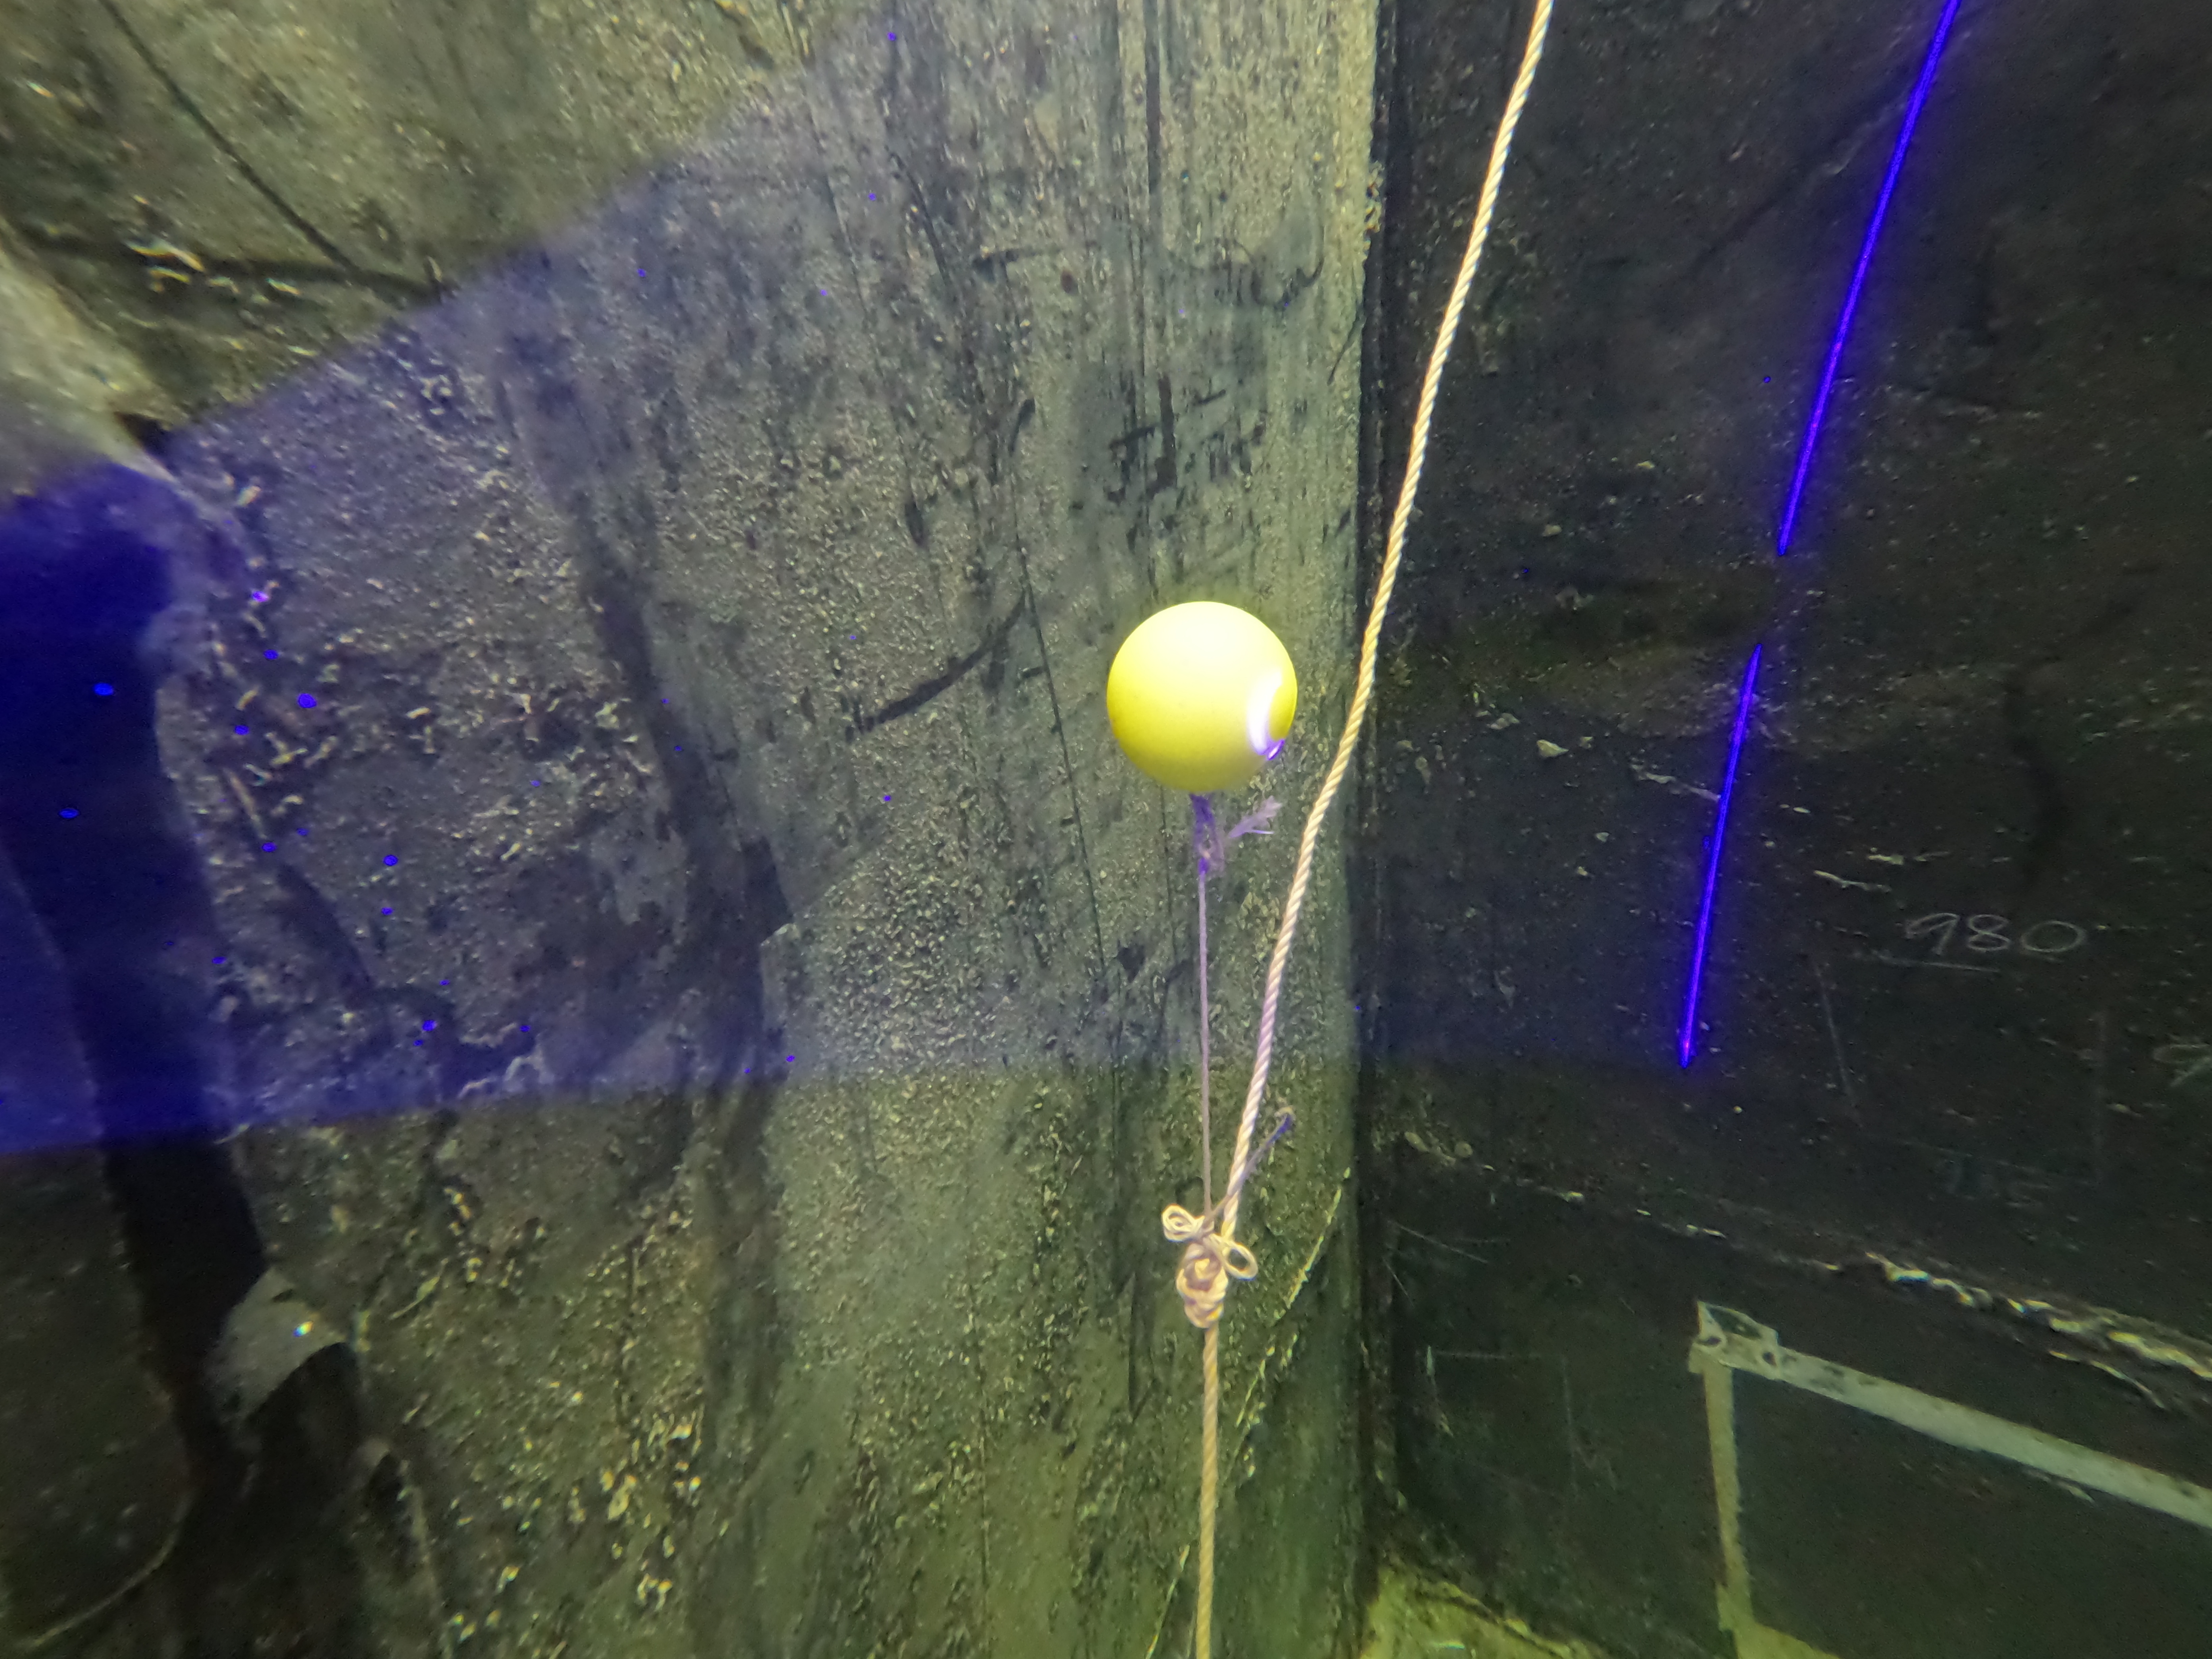

Supplement: Supplementary file 1932 [file G0034324.pdf › 5/G0034324.pdf]

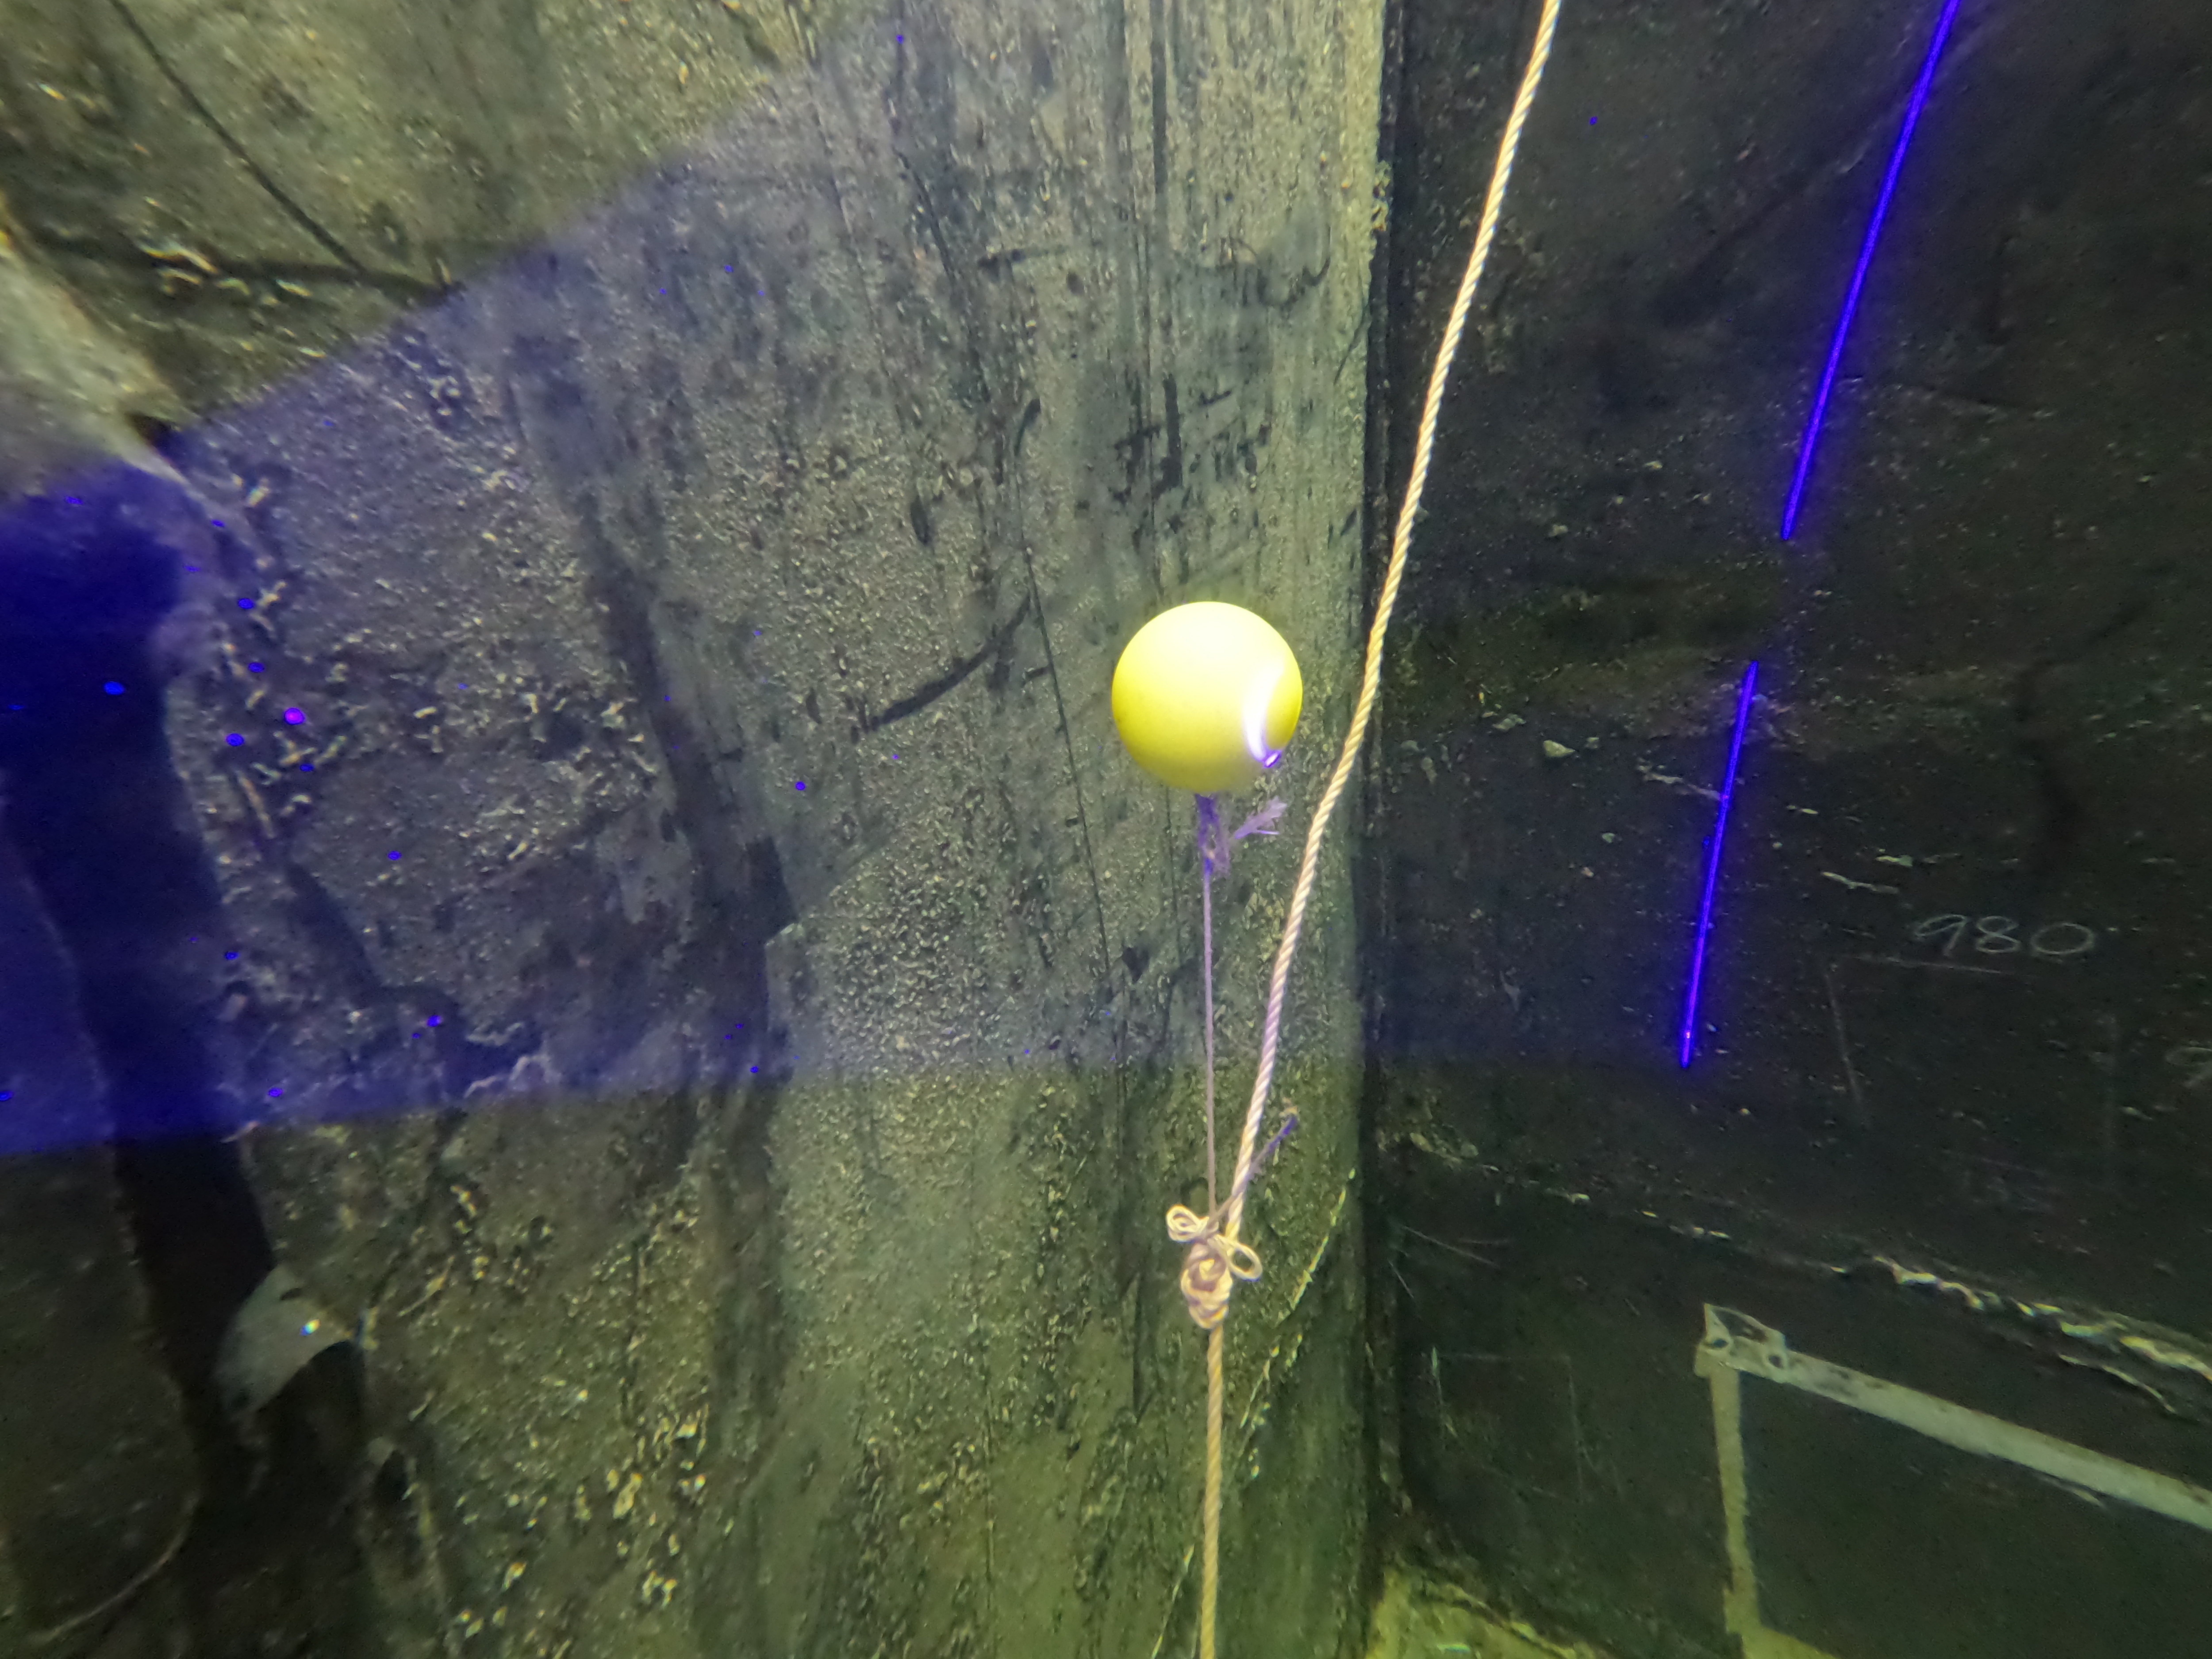

980

Supplement: Supplementary file 1933 [file G0034325.pdf › 5/G0034325.pdf]

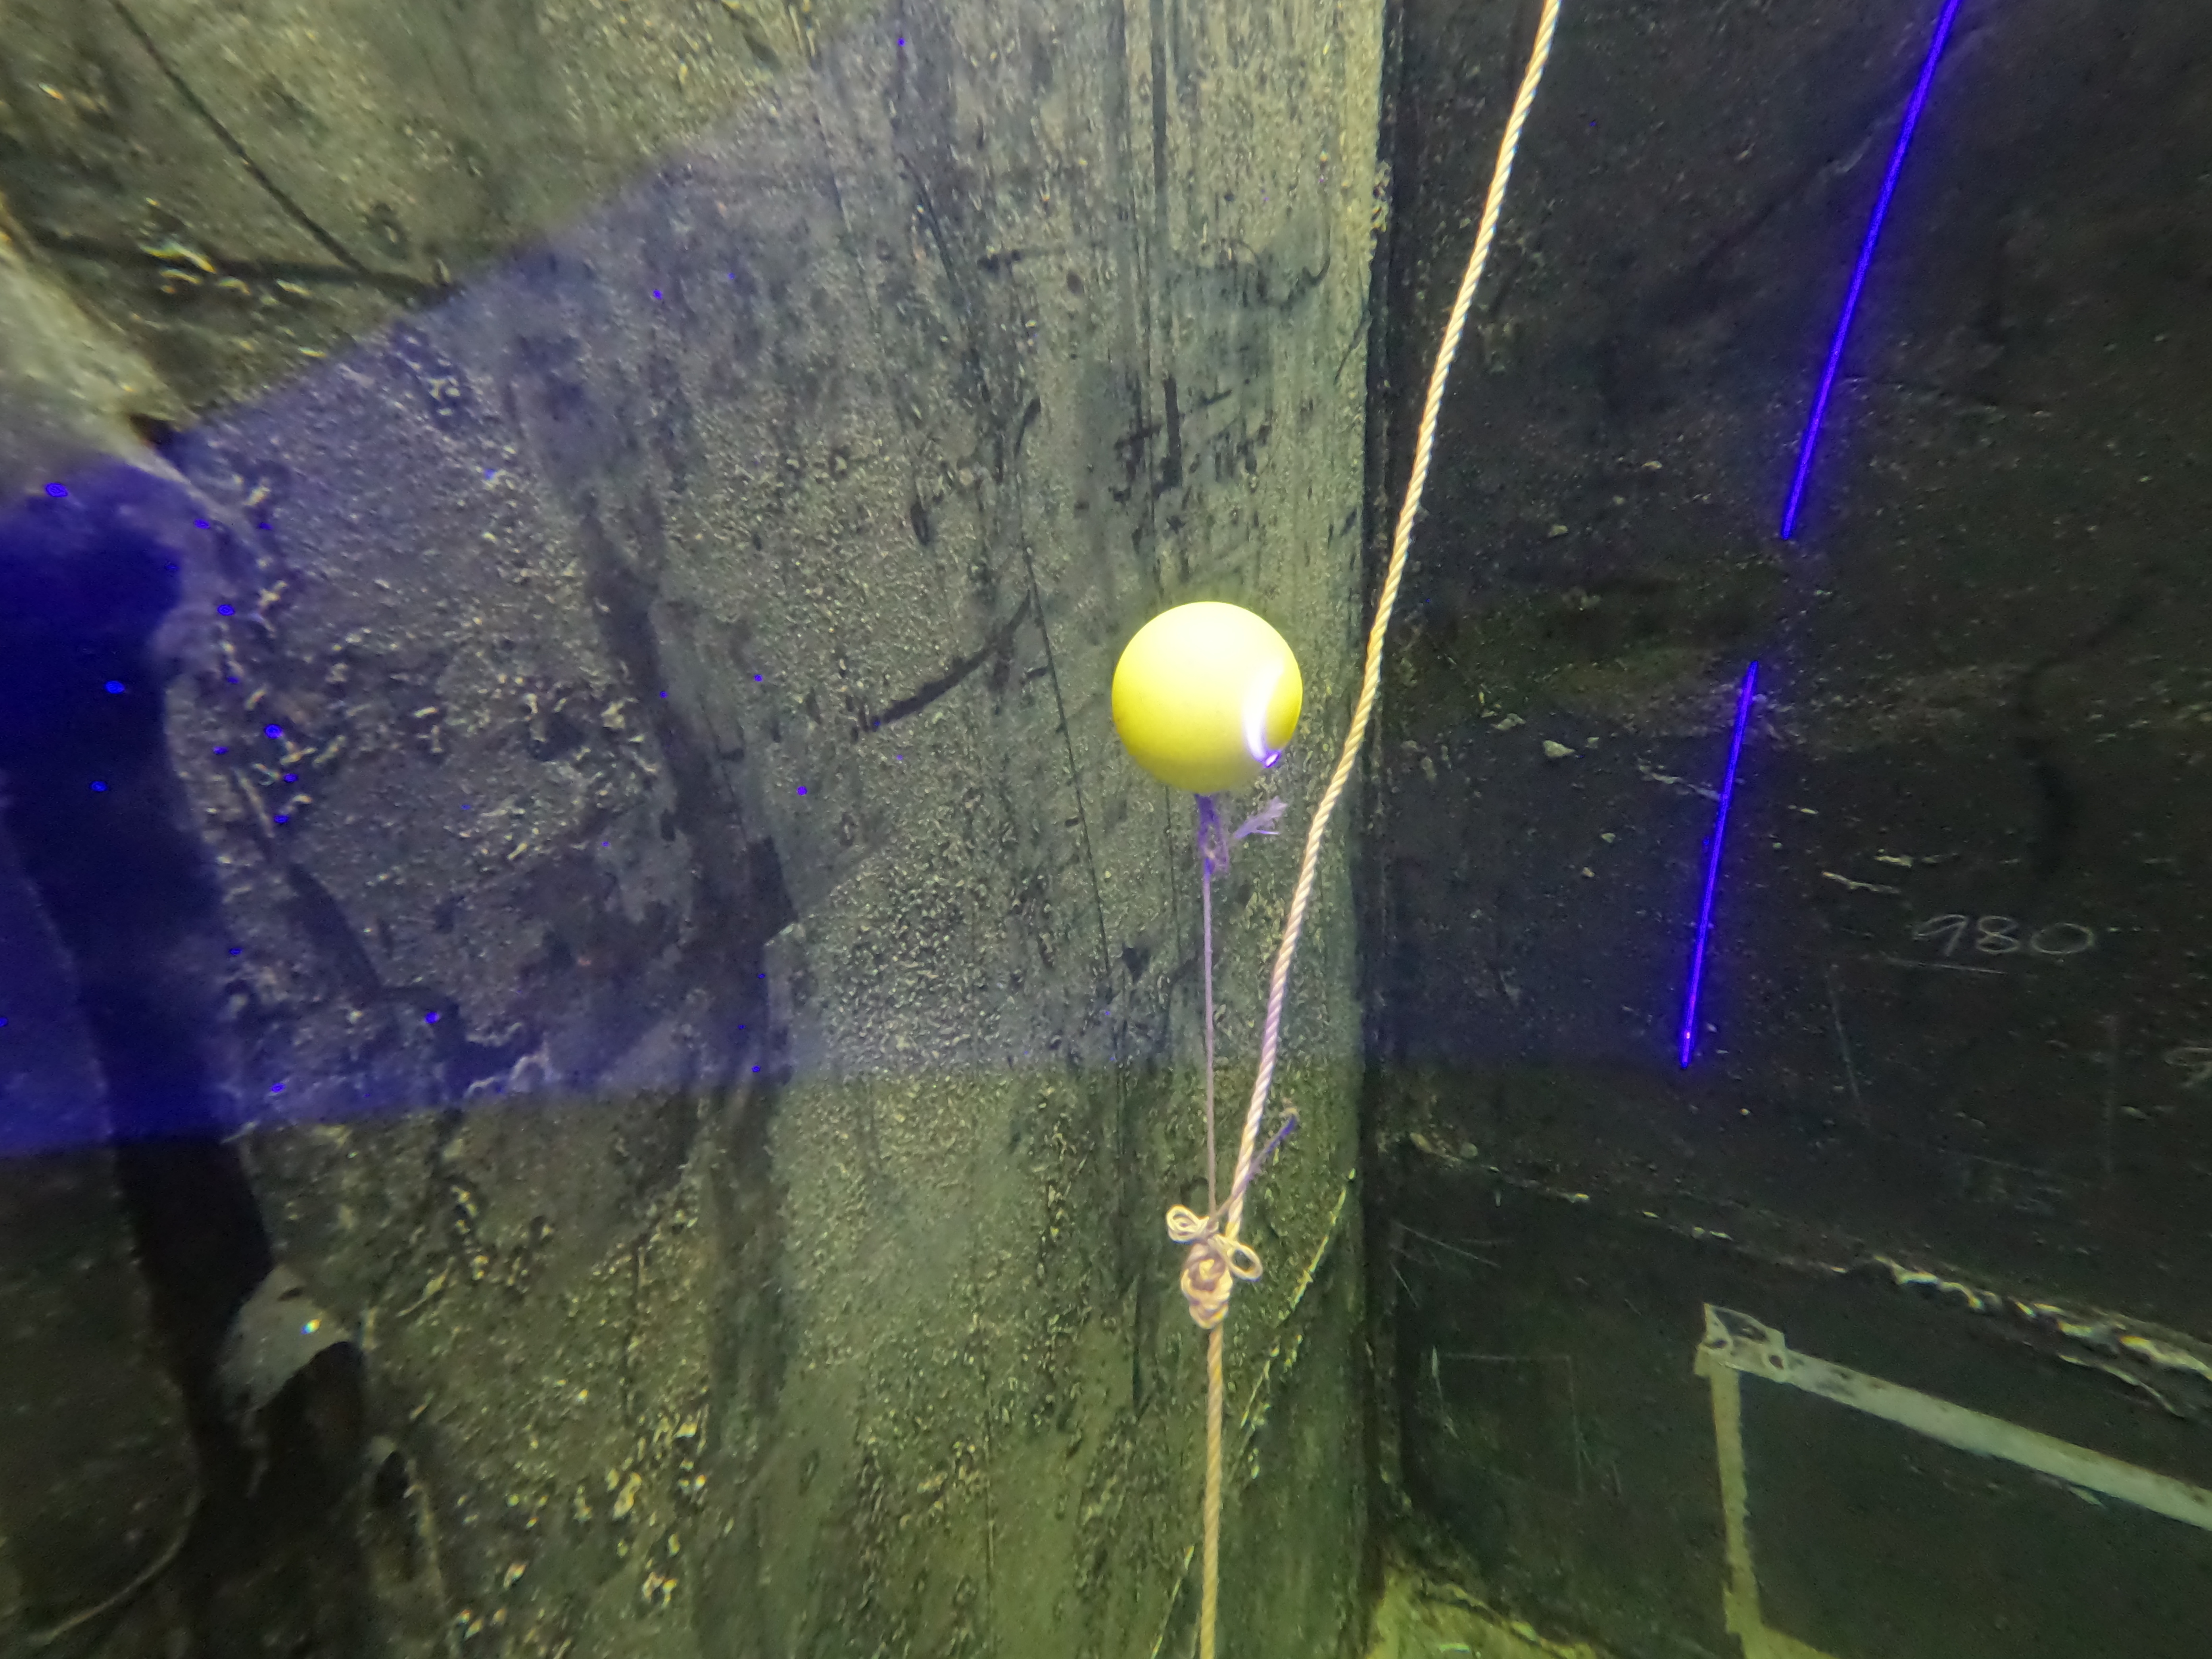

Supplement: Supplementary file 1934 [file G0034326.pdf › 5/G0034326.pdf]

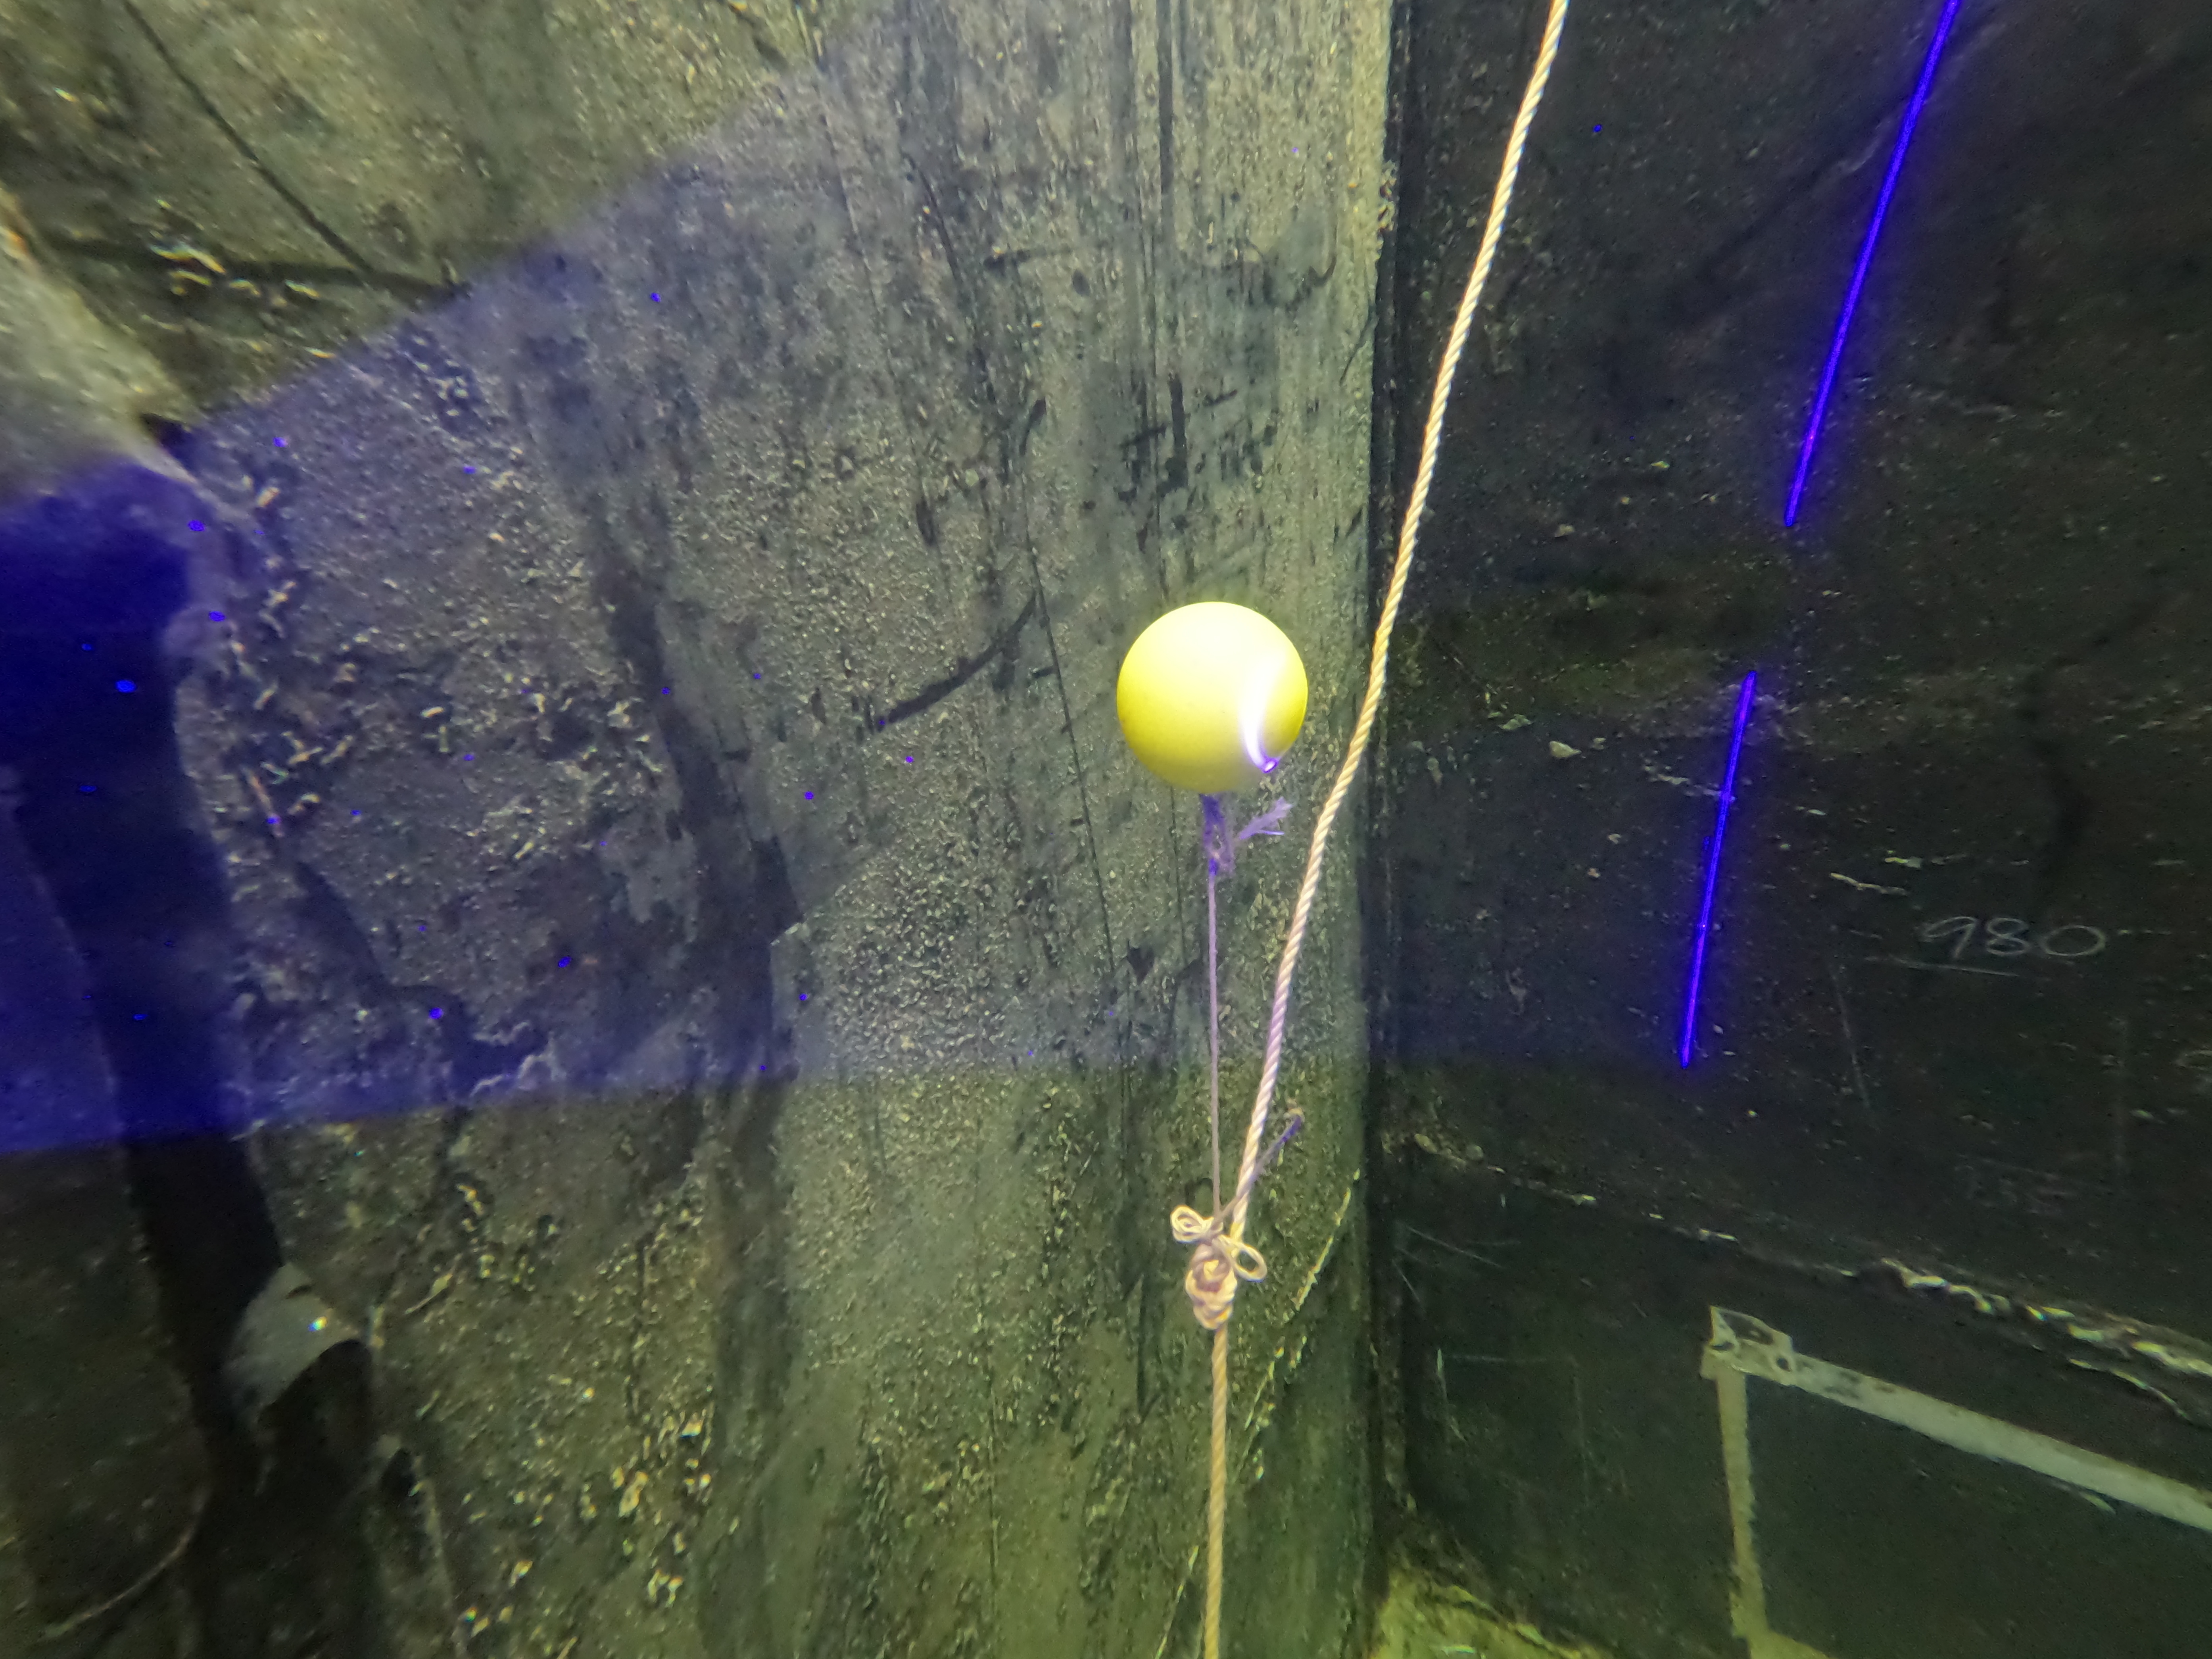

Supplement: Supplementary file 1935 [file G0034327.pdf › 5/G0034327.pdf]

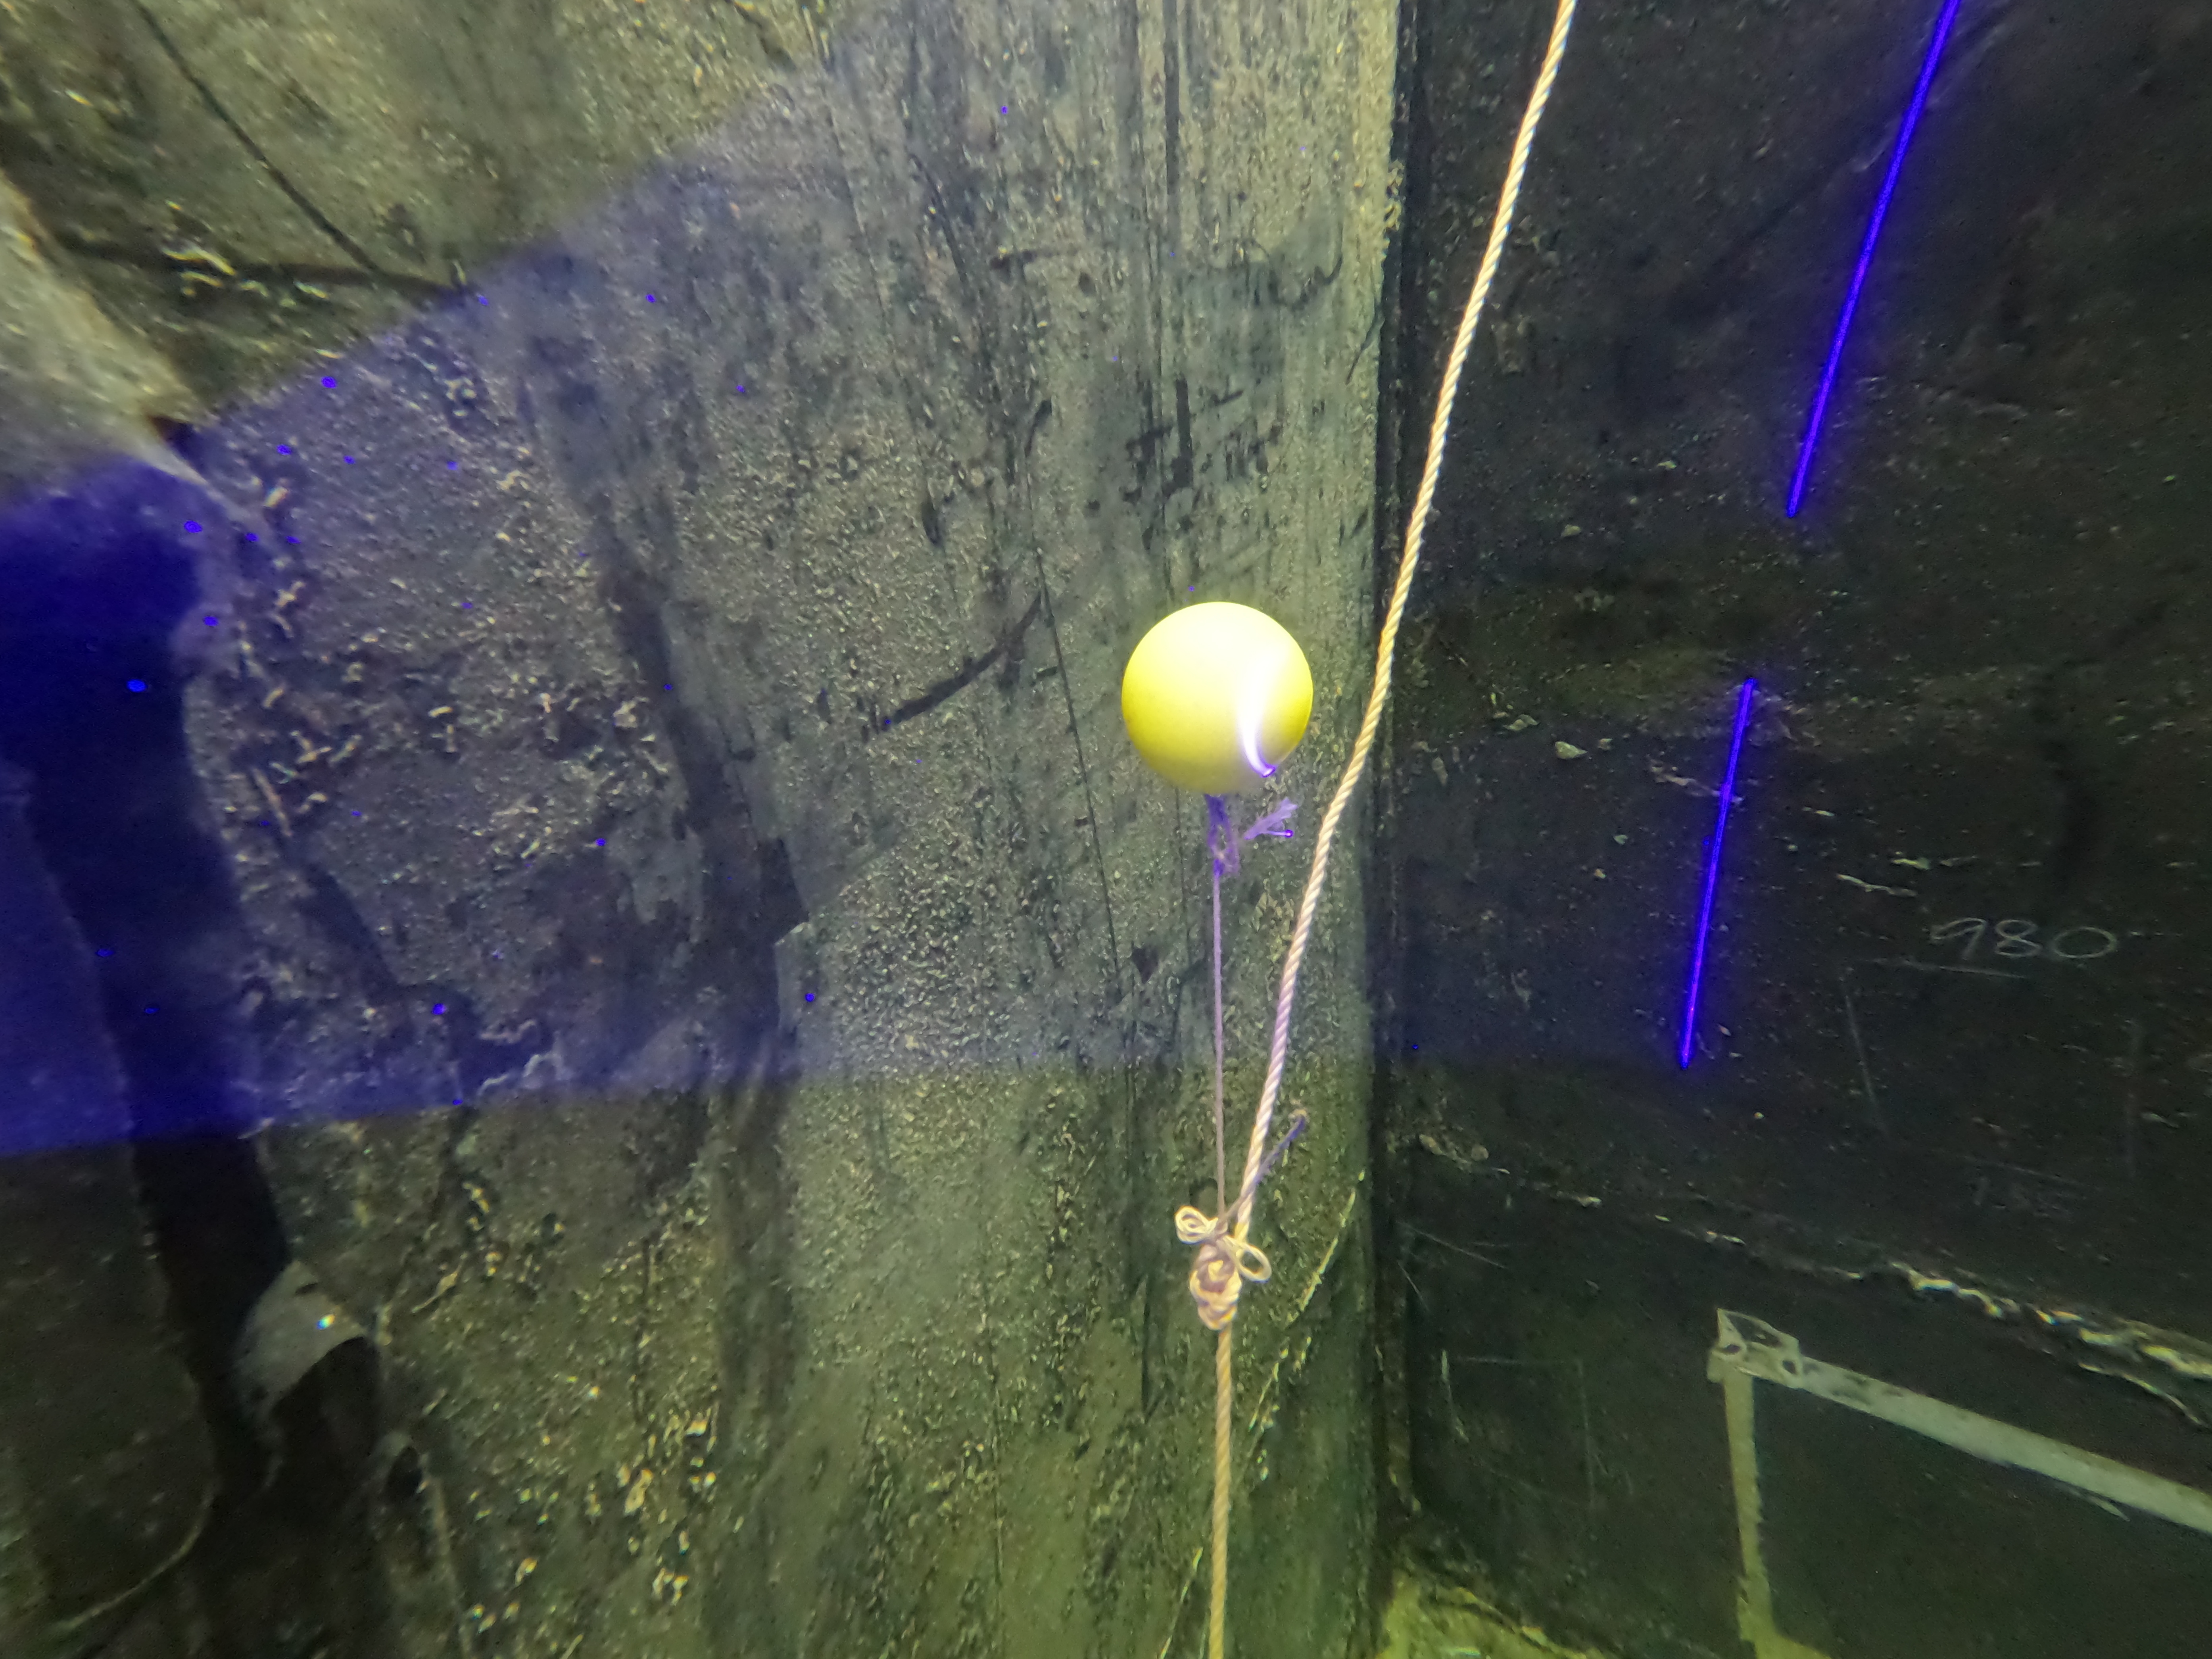

980

Supplement: Supplementary file 1936 [file G0034328.pdf › 5/G0034328.pdf]

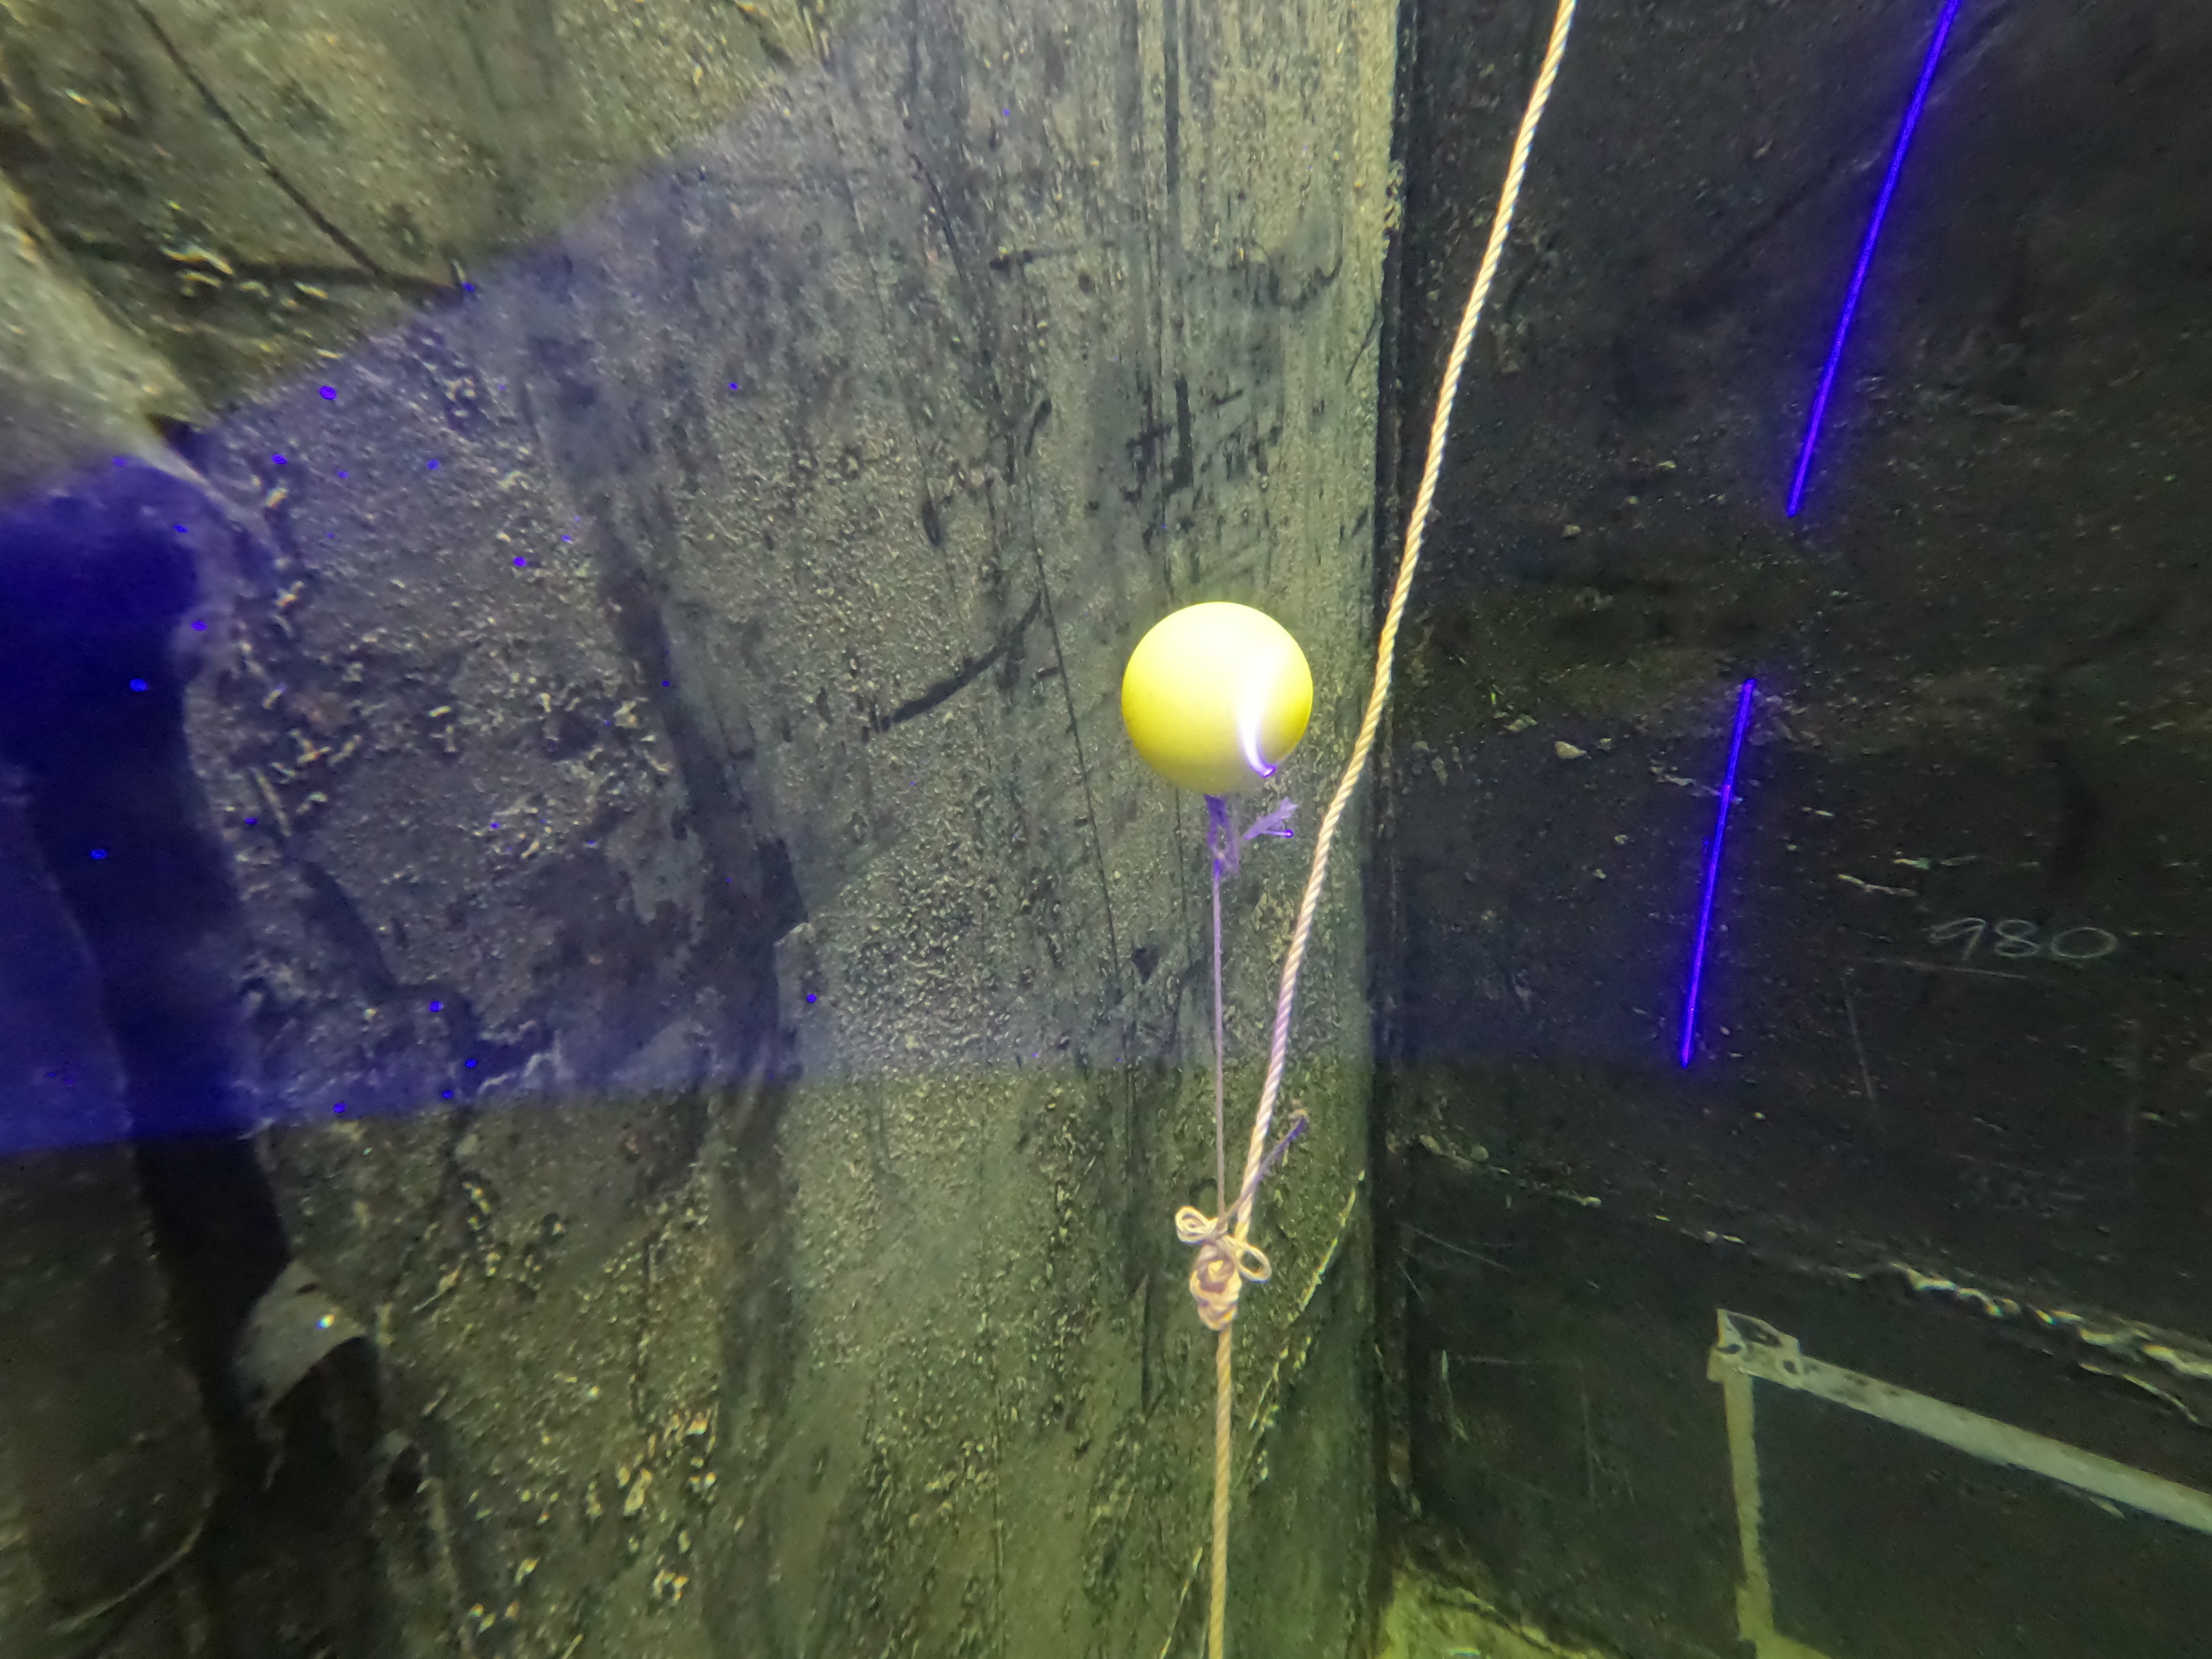

Supplement: Supplementary file 1937 [file G0034329.pdf › 5/G0034329.pdf]

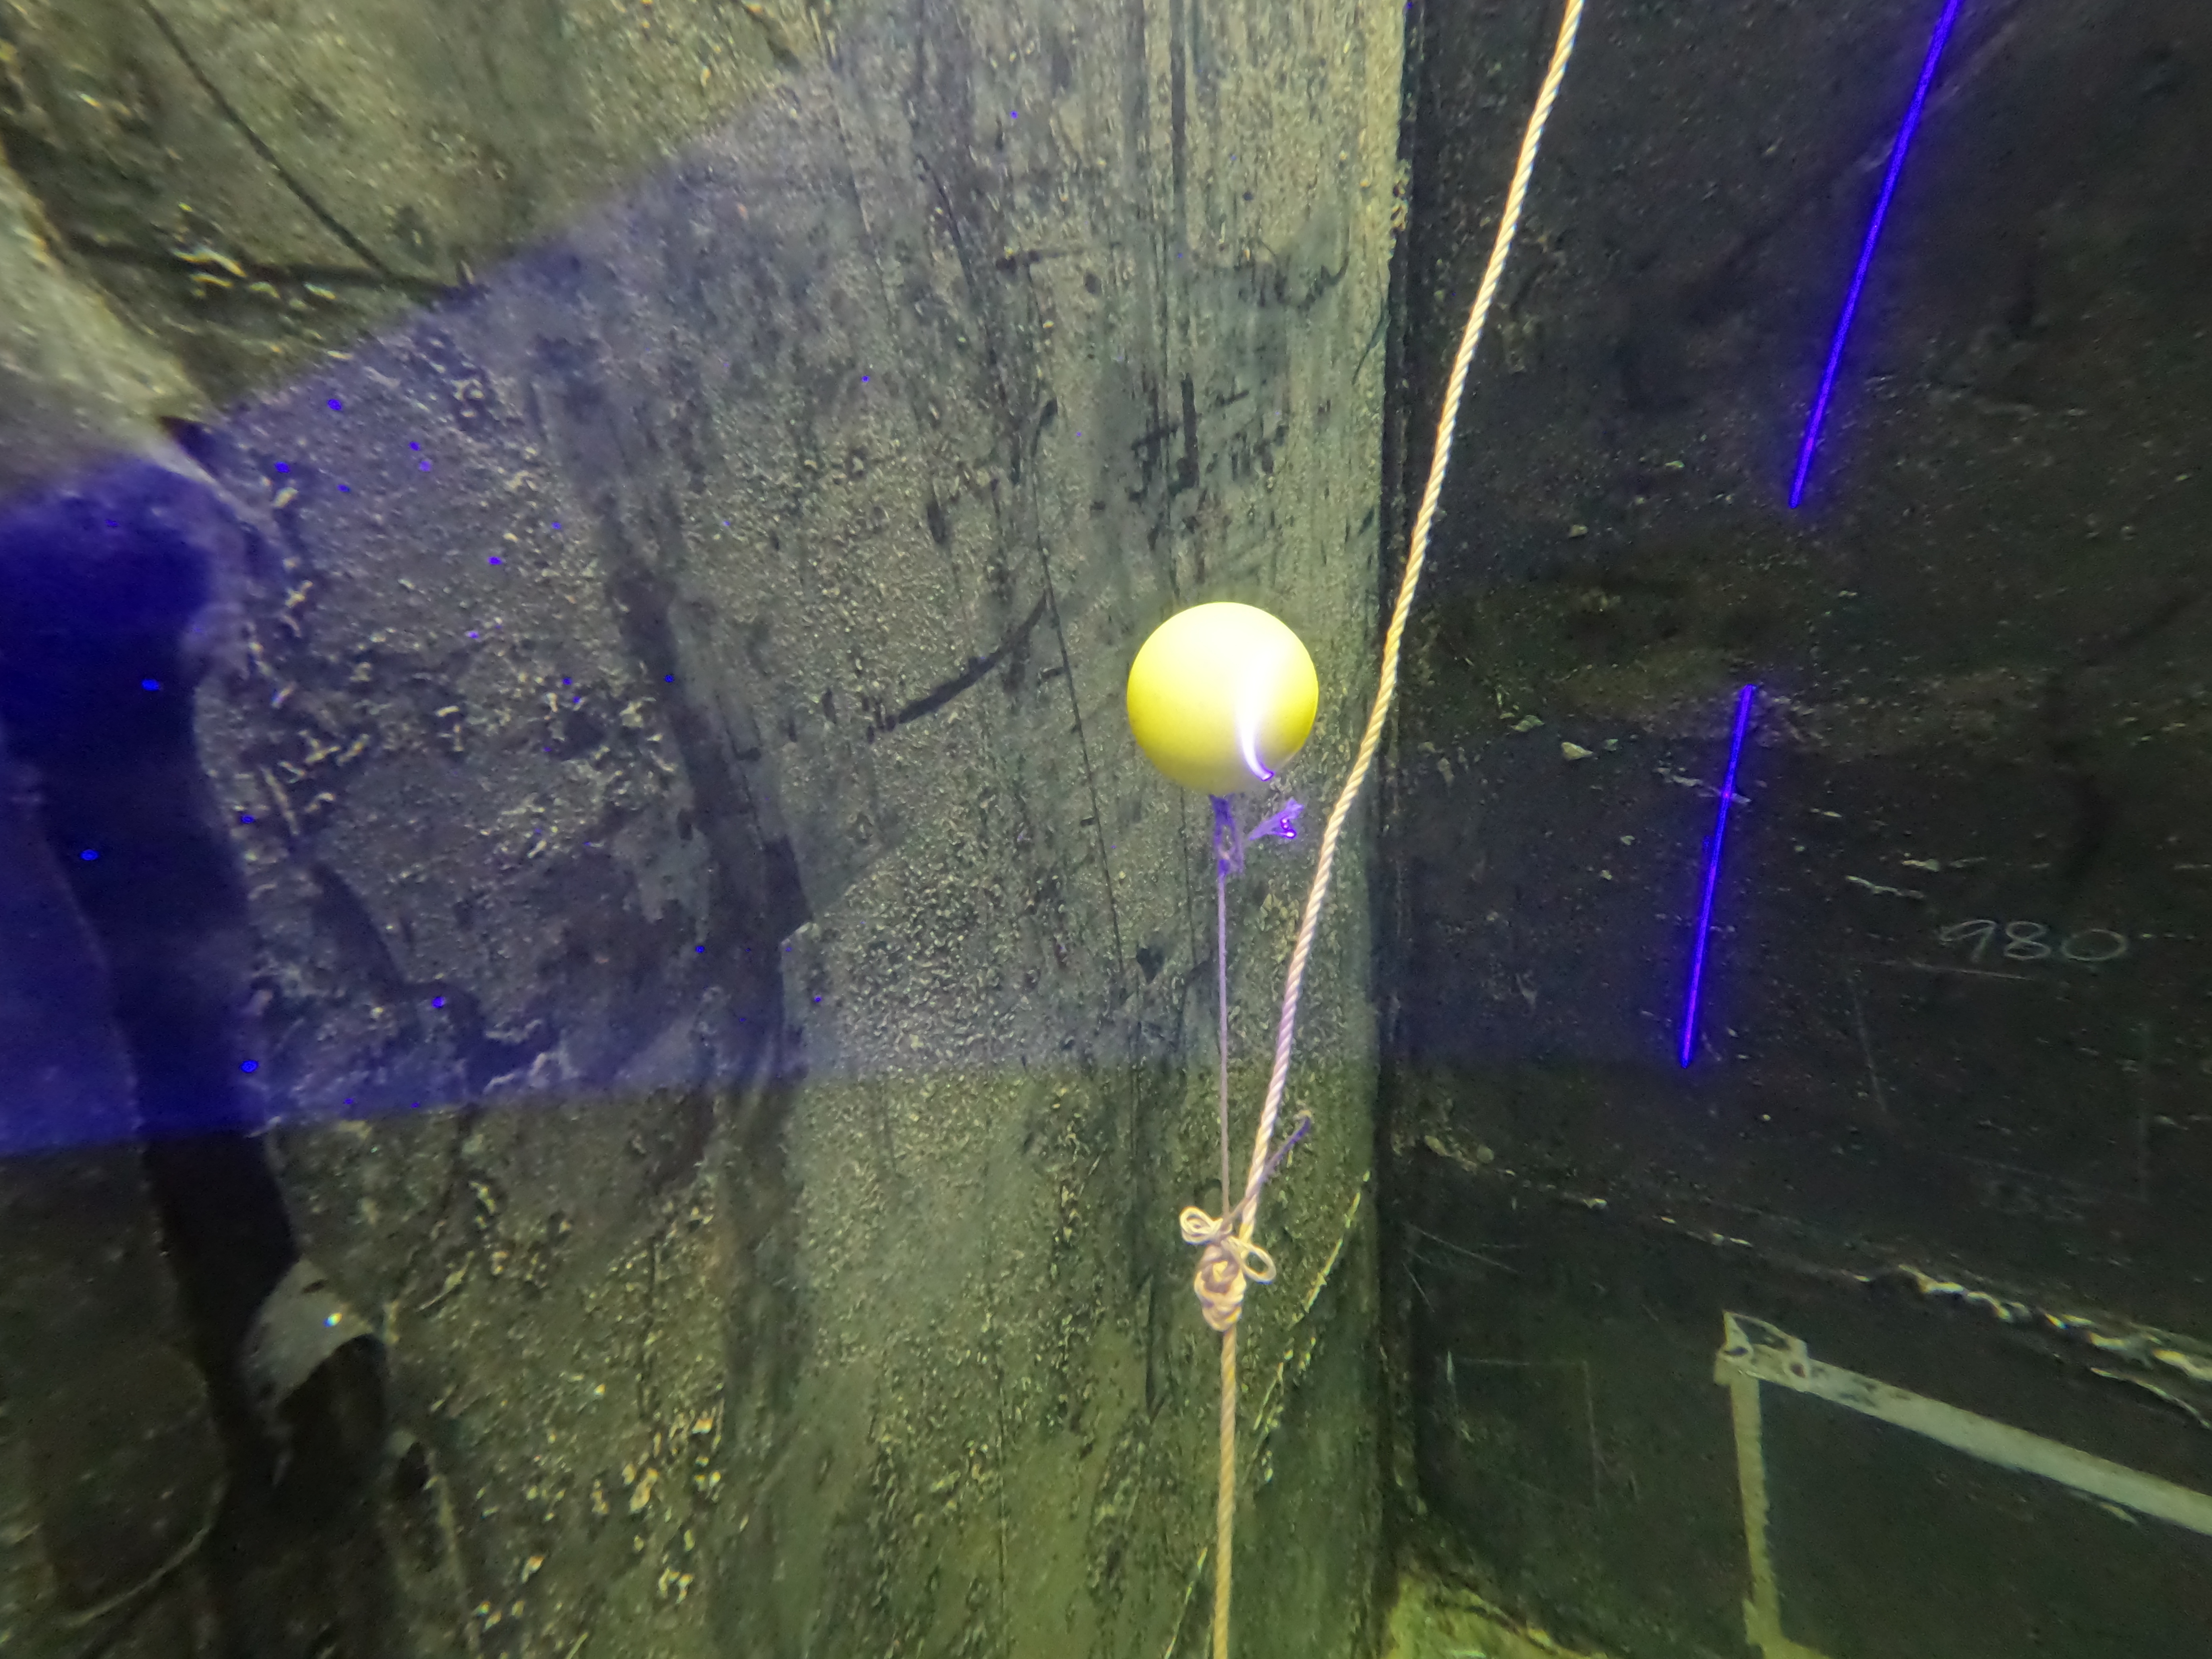

Supplement: Supplementary file 1938 [file G0034330.pdf › 5/G0034330.pdf]

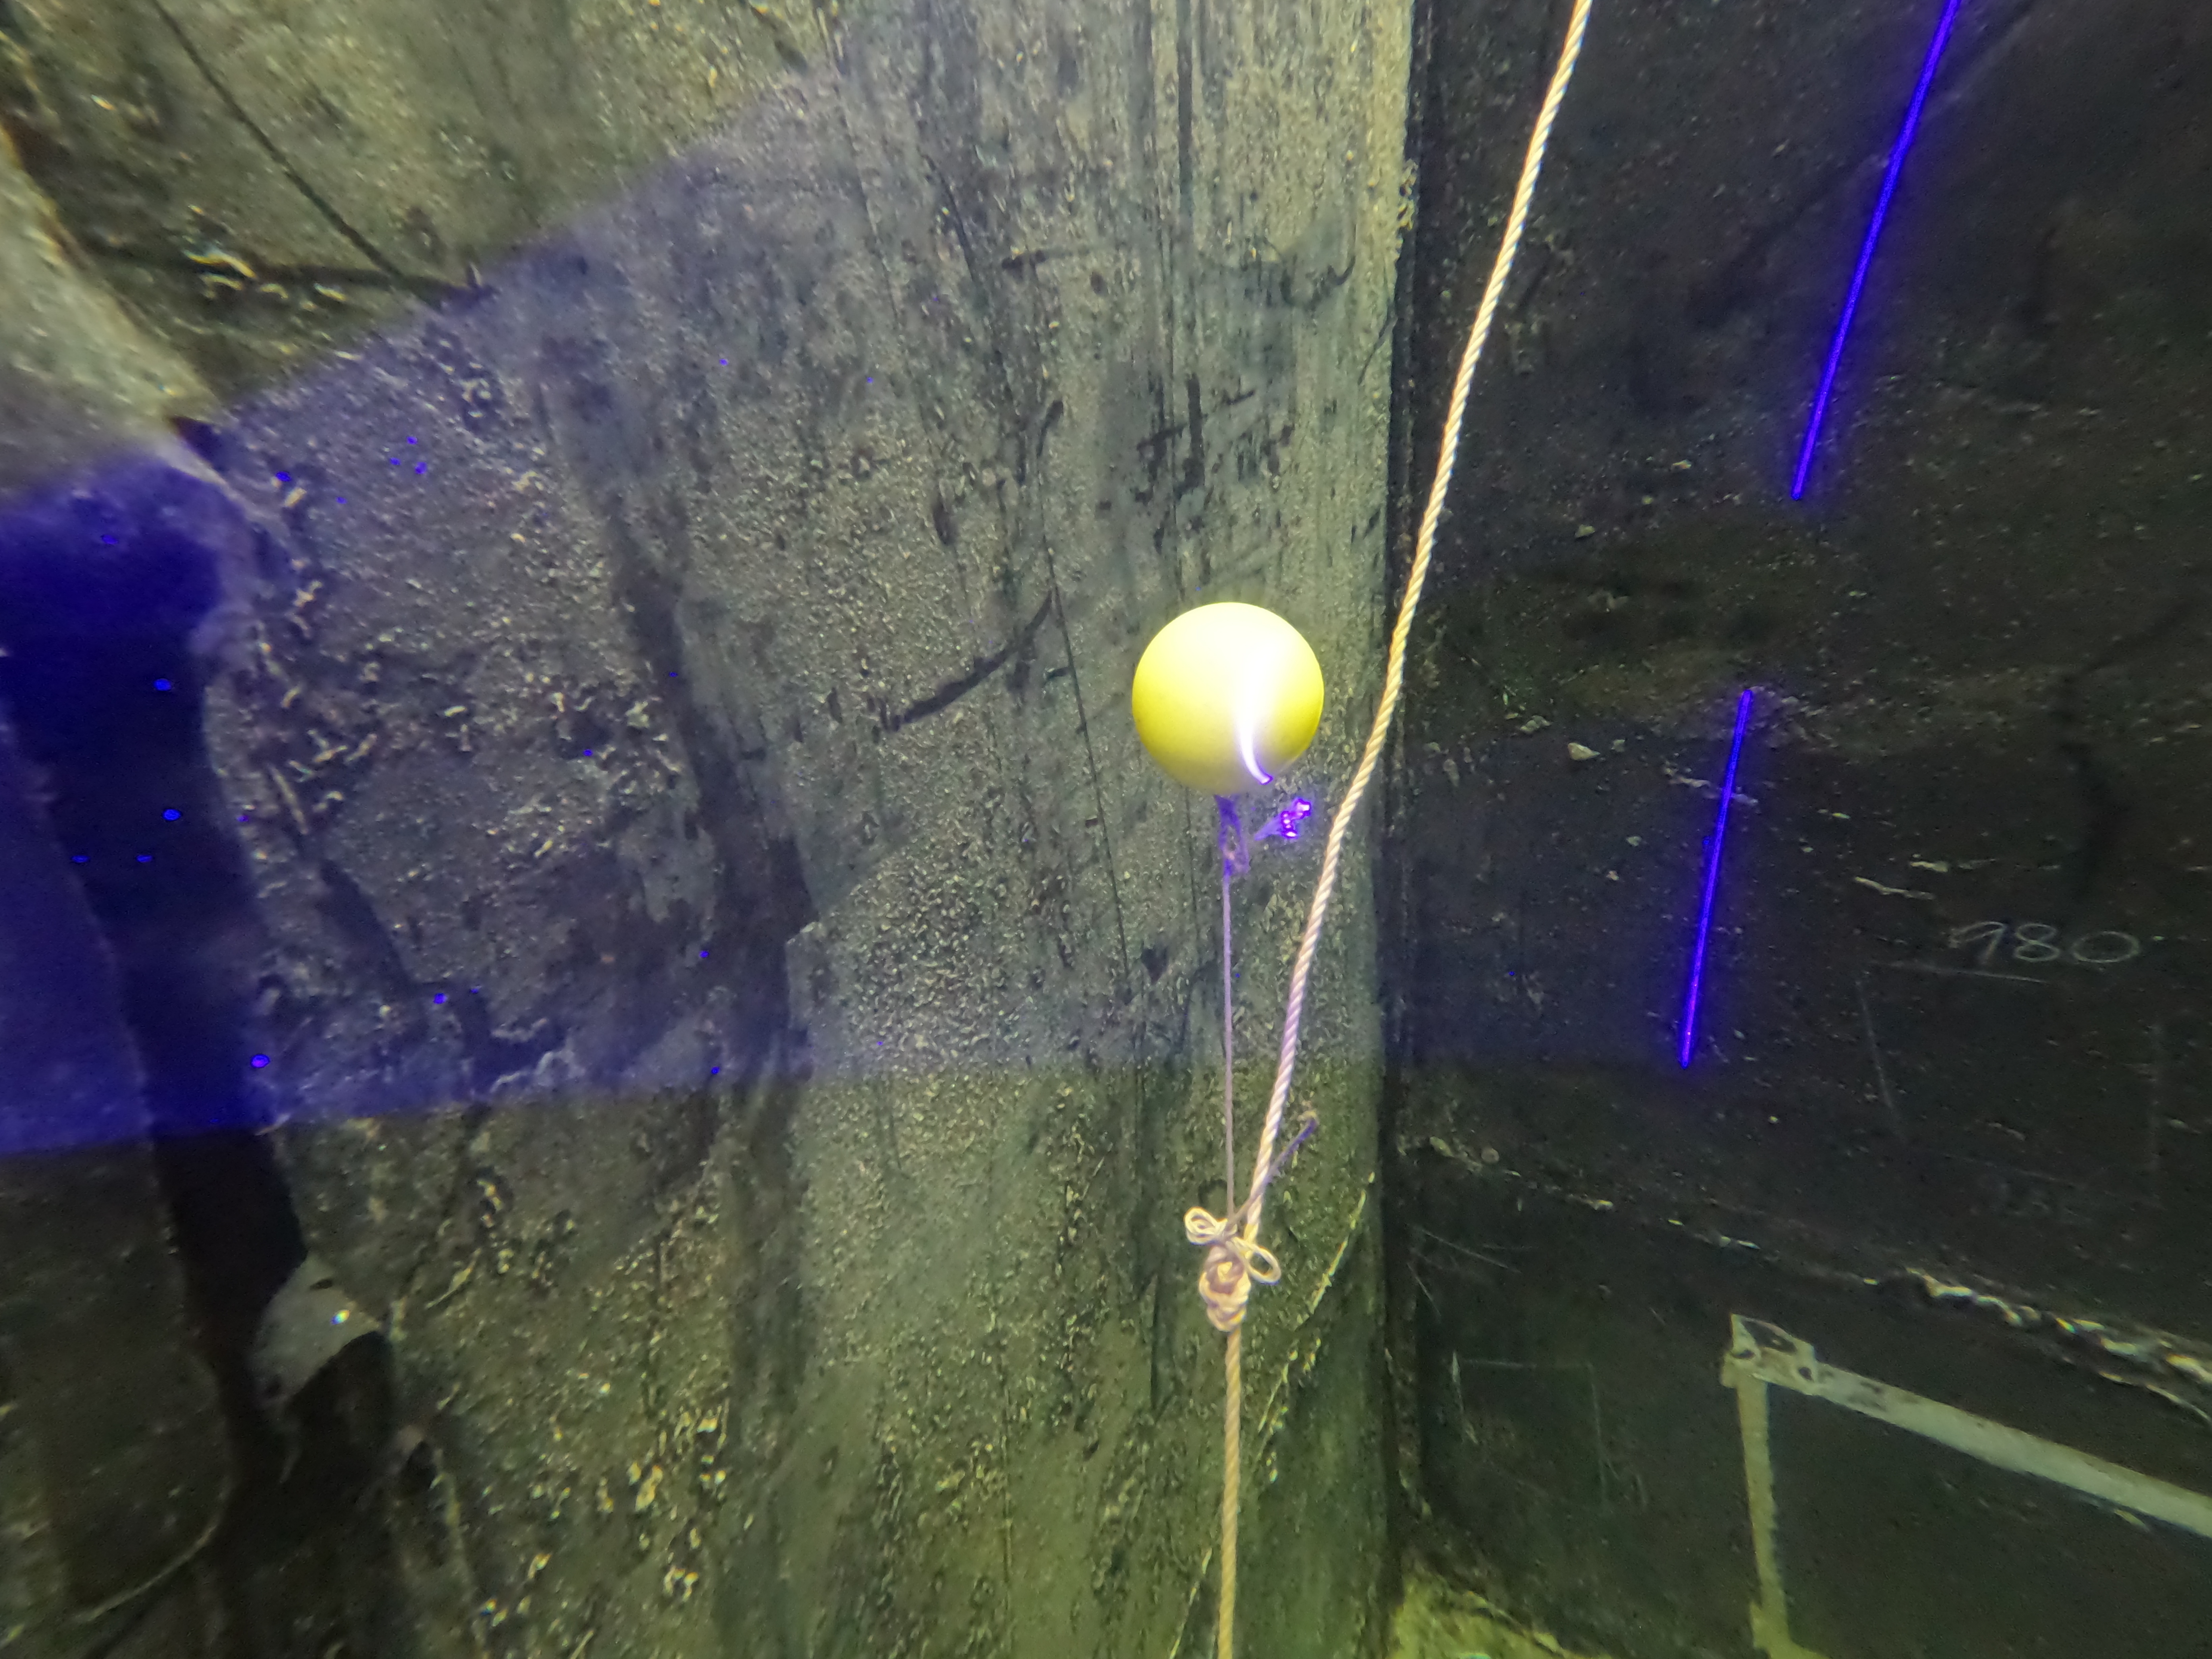

980

Supplement: Supplementary file 1939 [file G0034331.pdf › 5/G0034331.pdf]

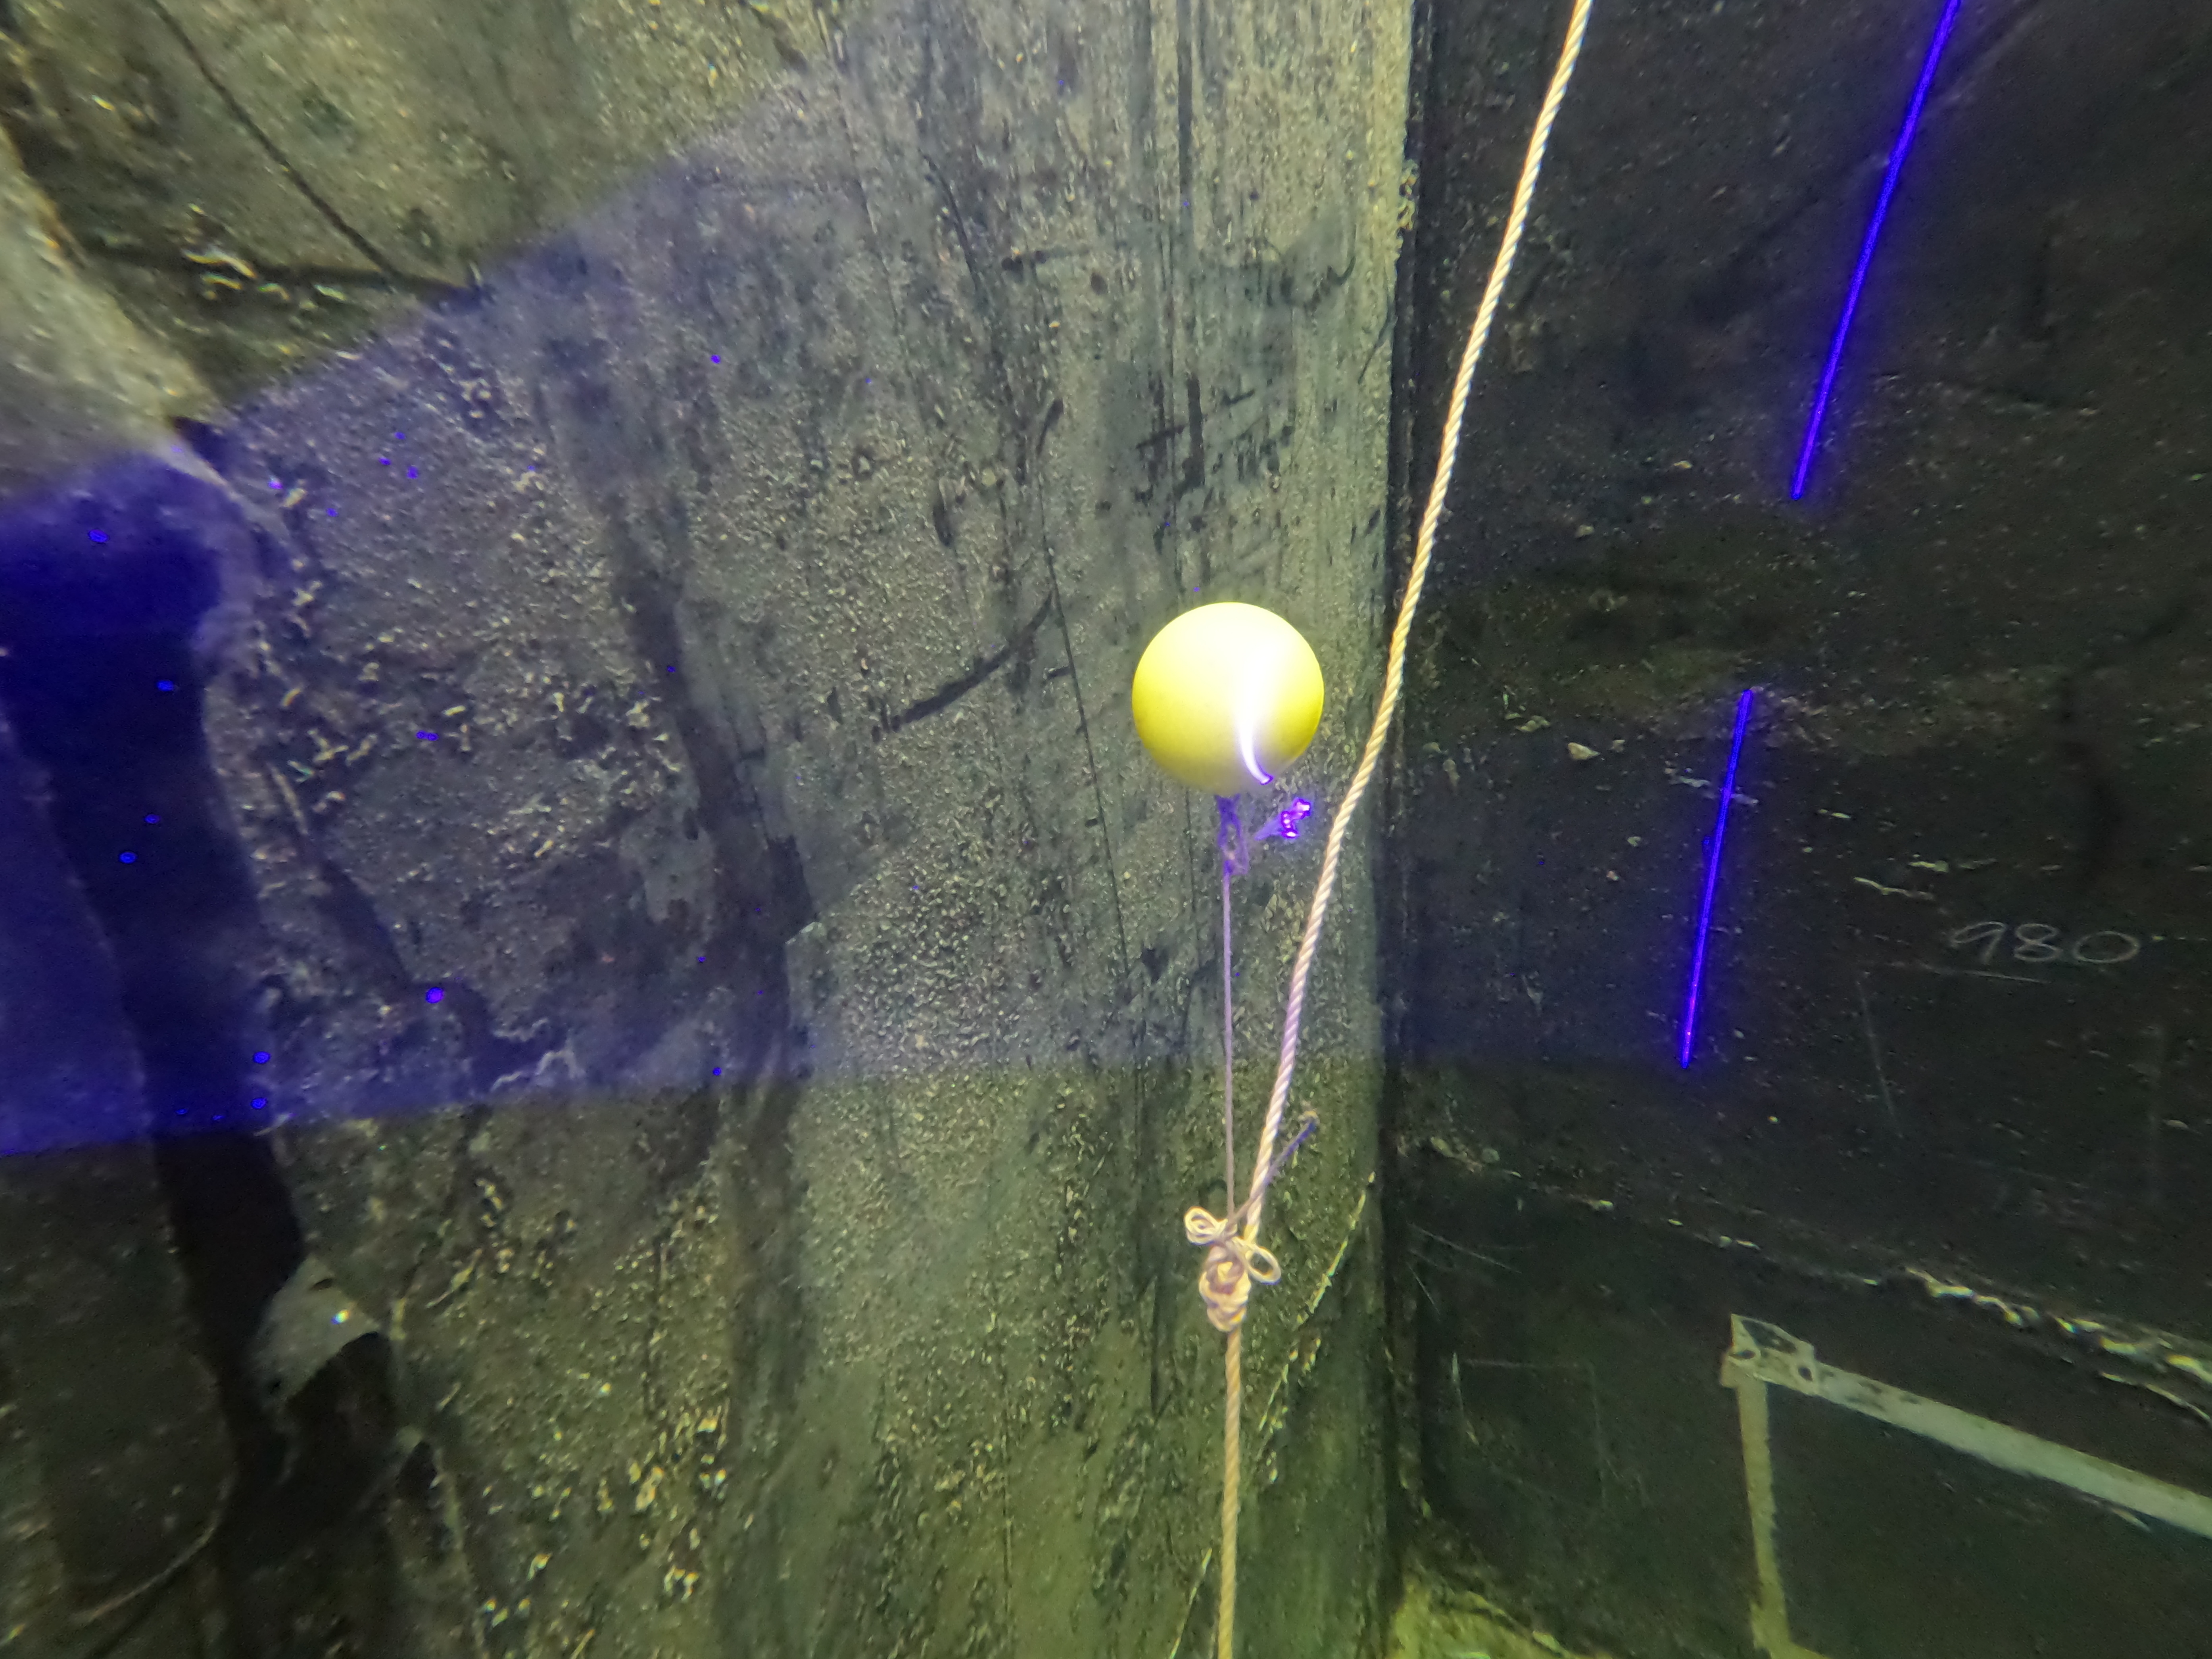

Supplement: Supplementary file 1940 [file G0034332.pdf › 5/G0034332.pdf]

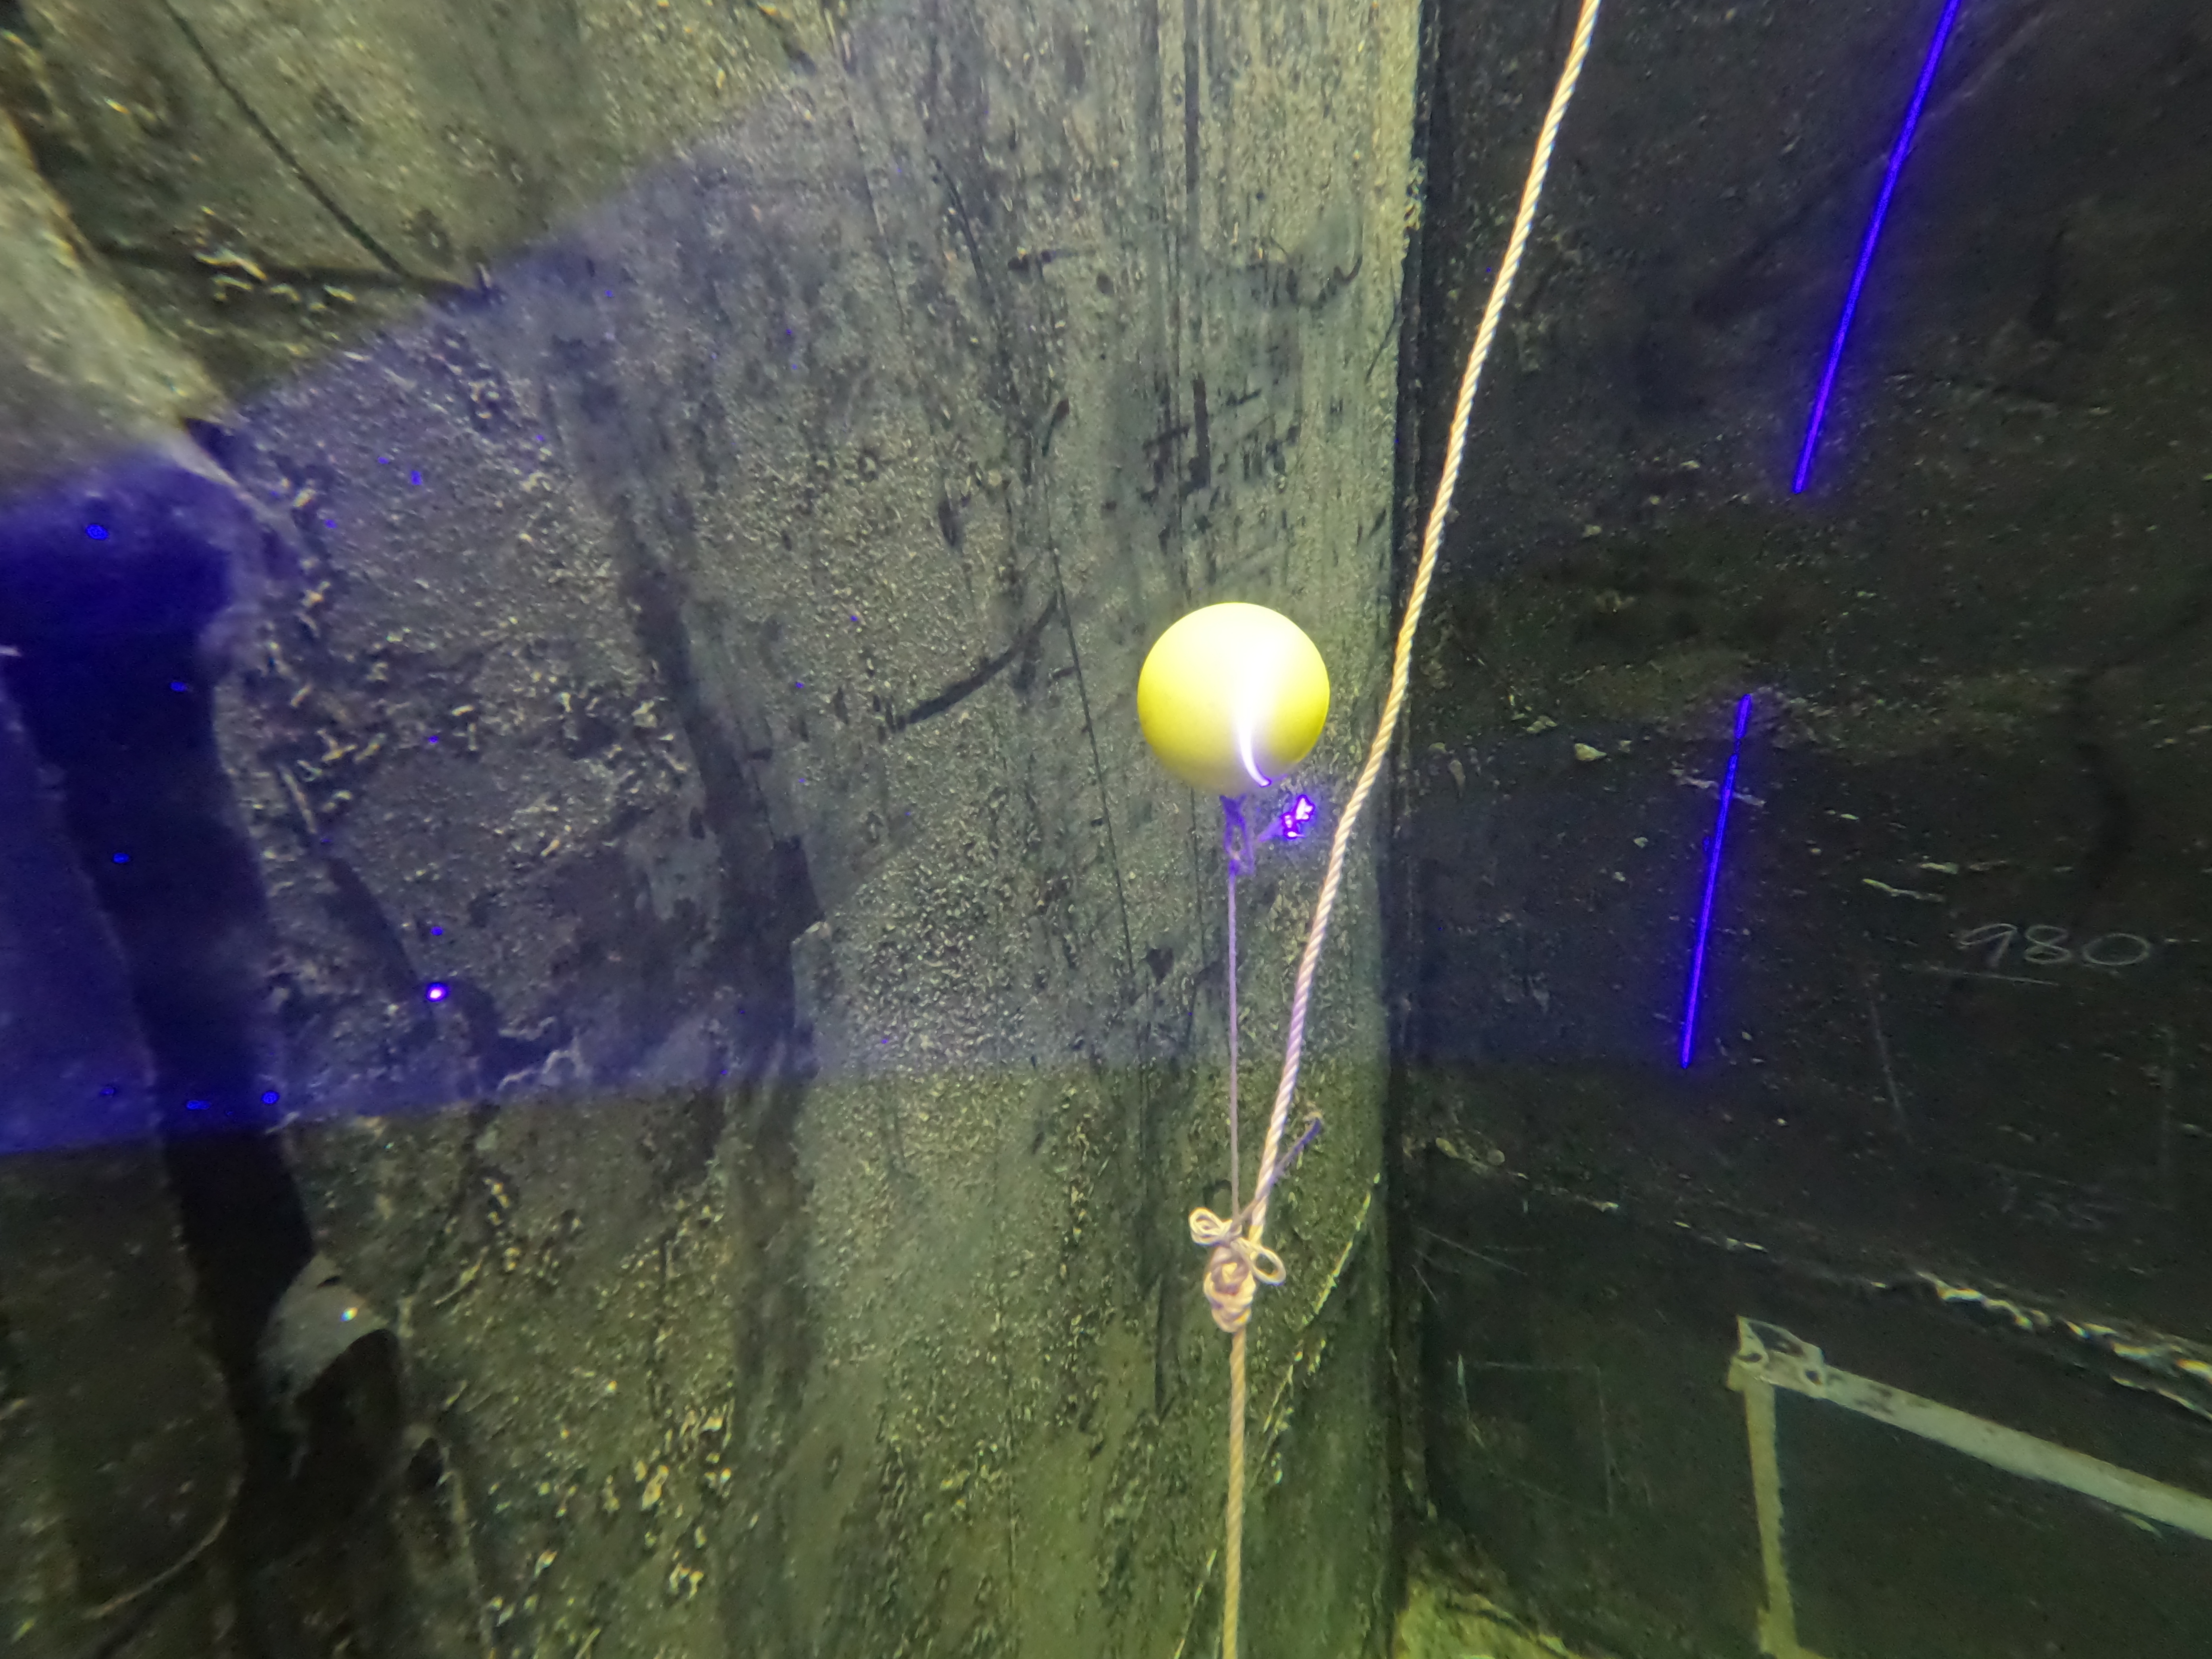

Supplement: Supplementary file 1941 [file G0034333.pdf › 5/G0034333.pdf]

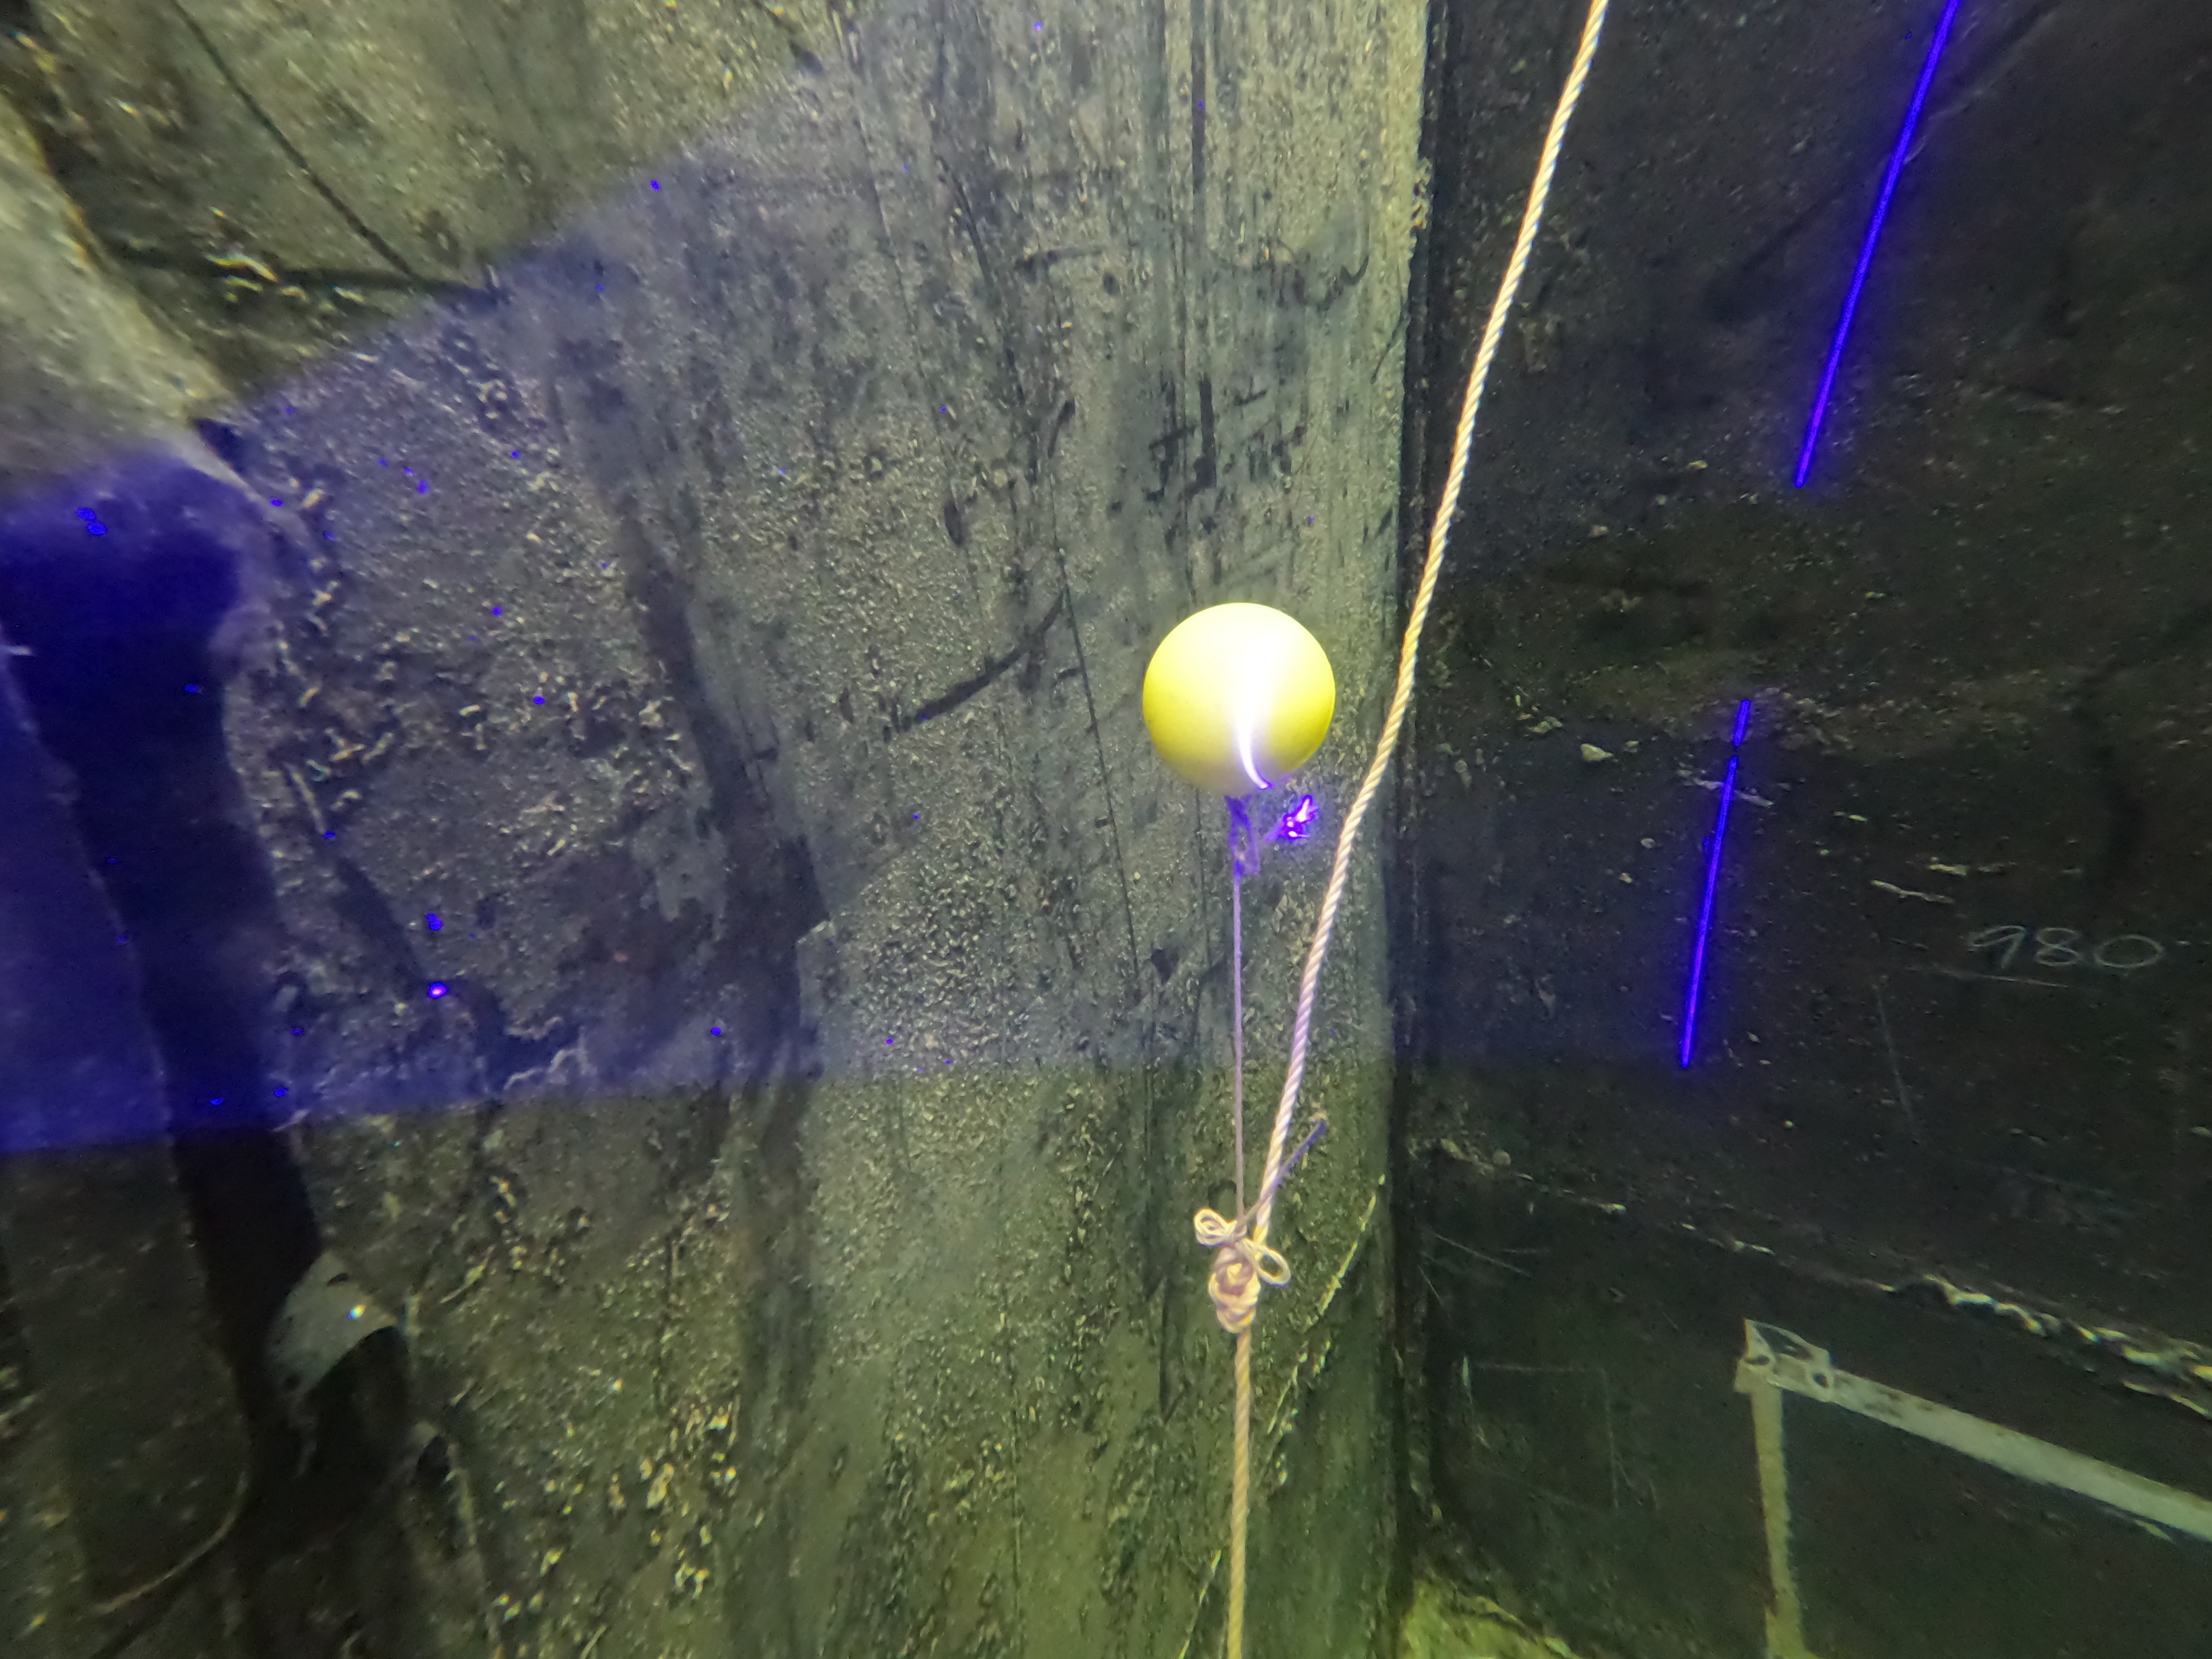

980

Supplement: Supplementary file 1942 [file G0034334.pdf › 5/G0034334.pdf]

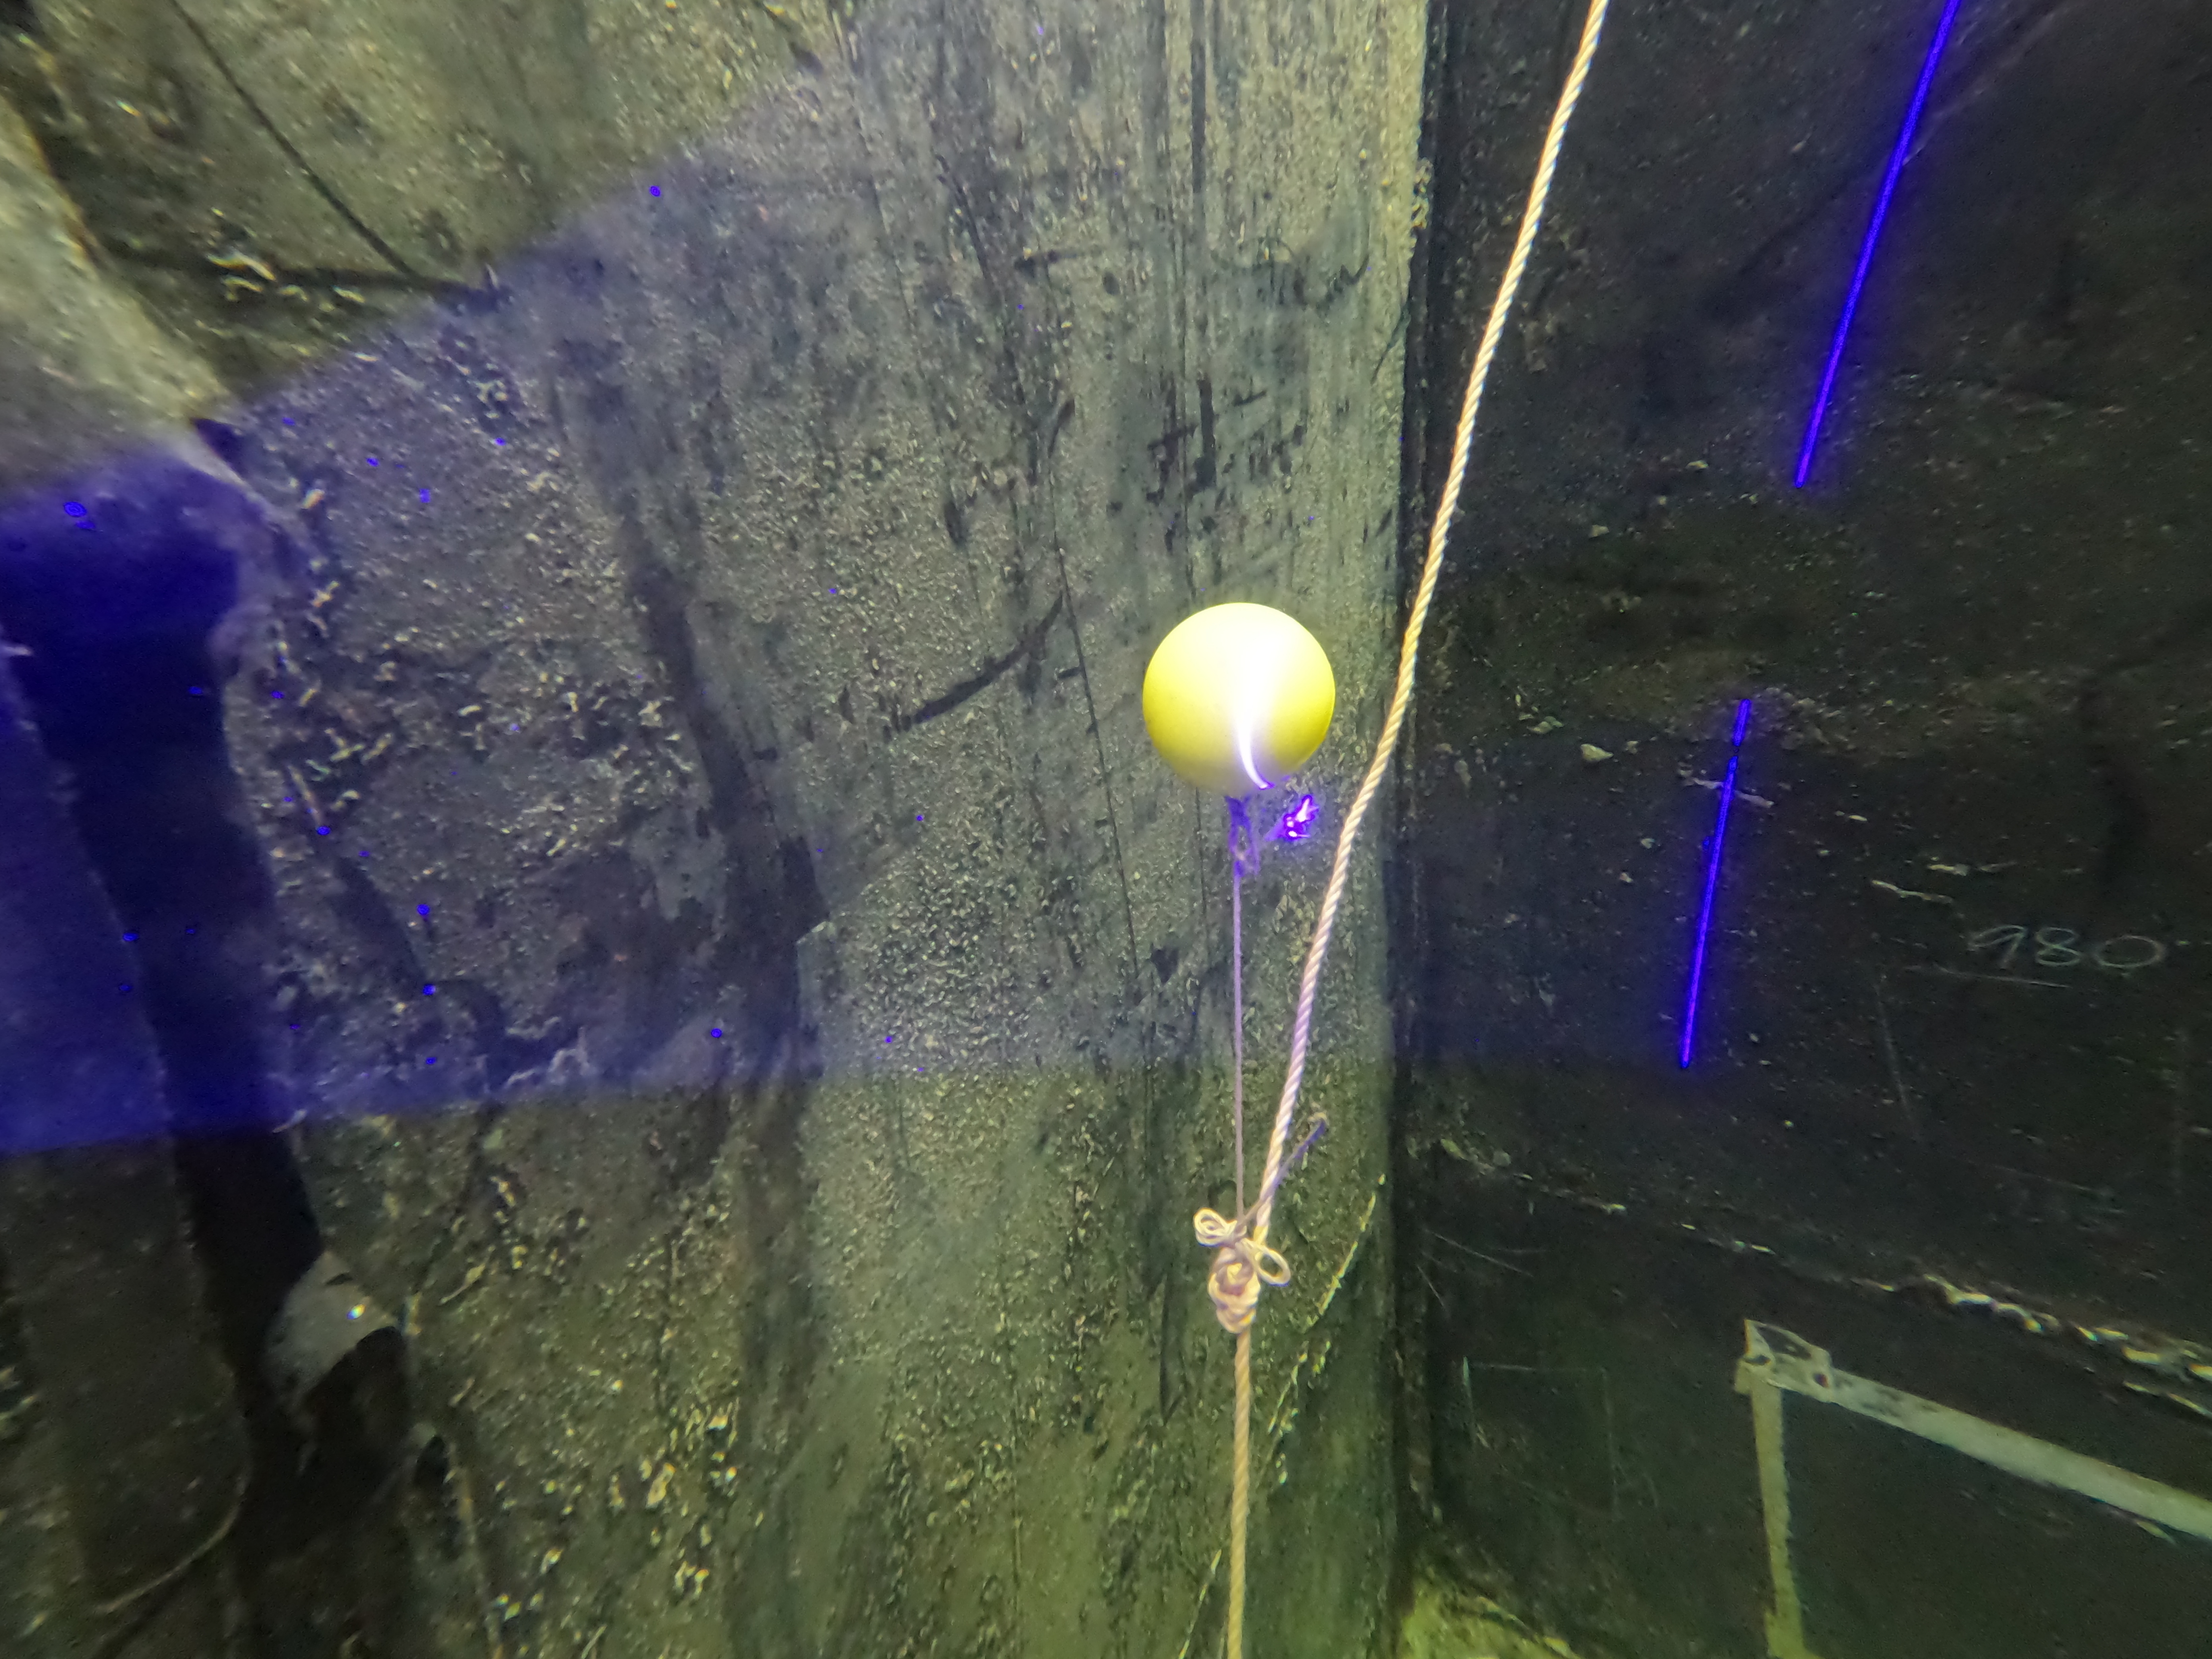

Supplement: Supplementary file 1943 [file G0034335.pdf › 5/G0034335.pdf]

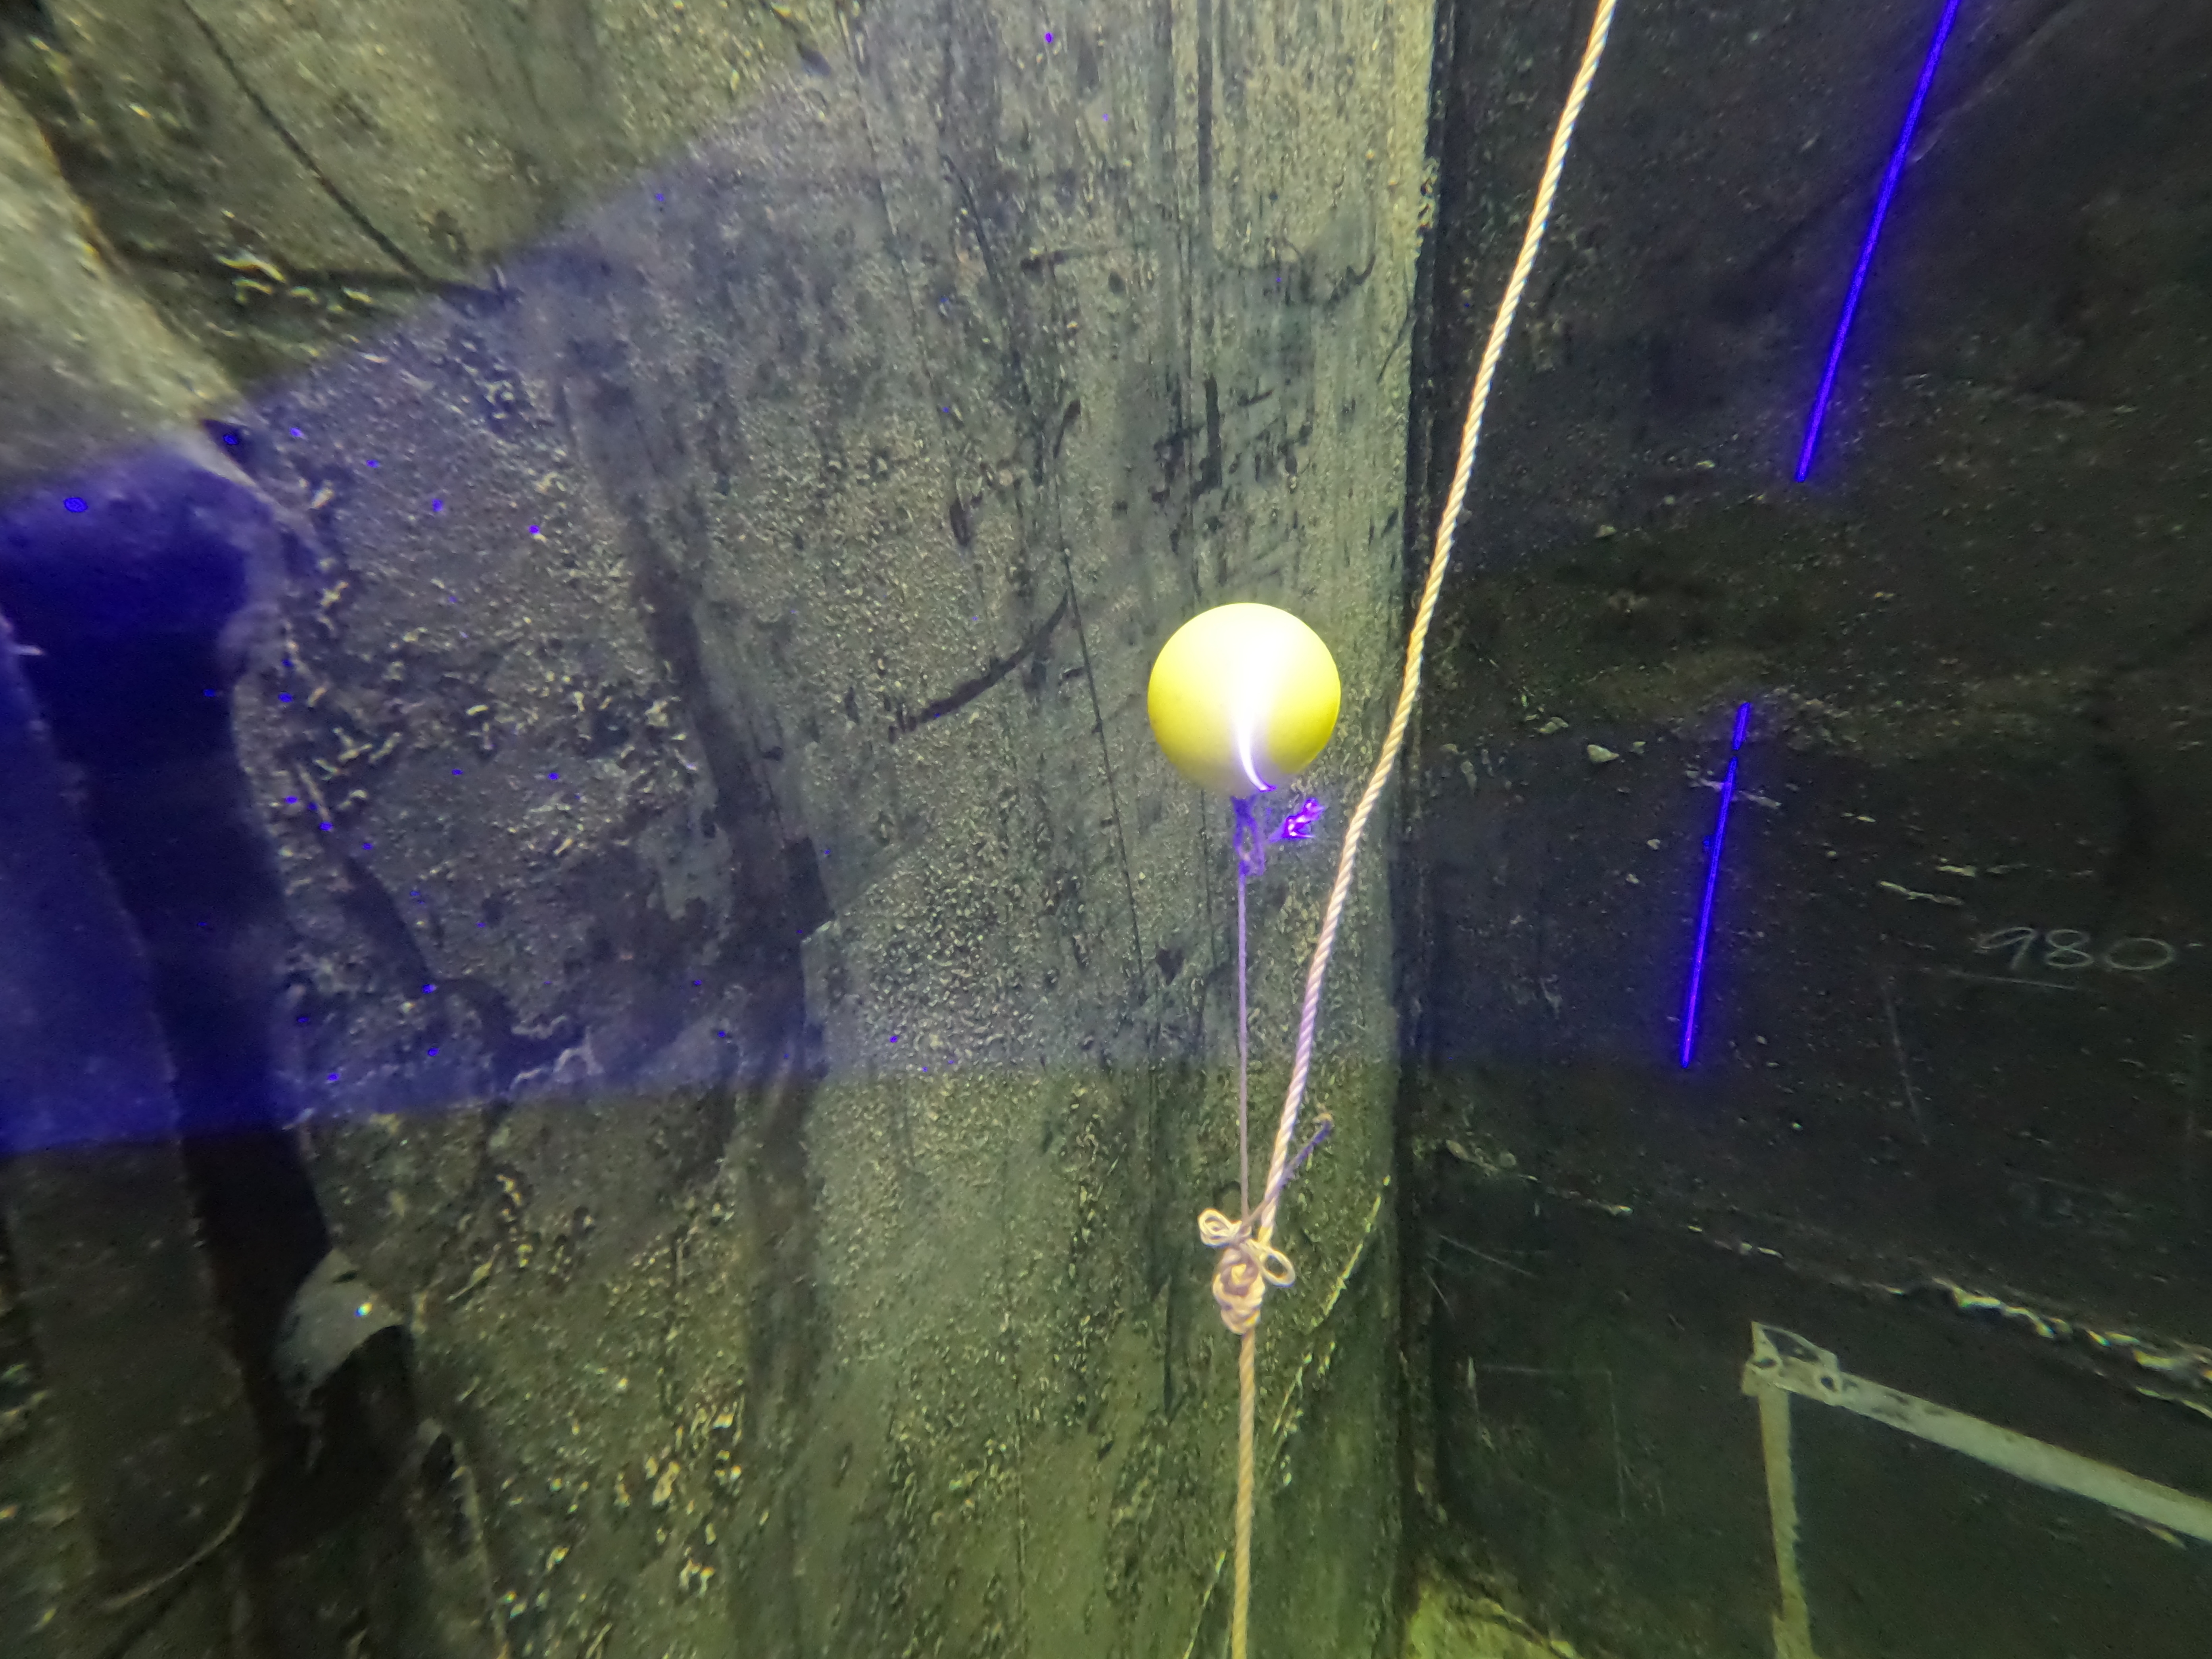

980

Supplement: Supplementary file 1944 [file G0034336.pdf › 5/G0034336.pdf]

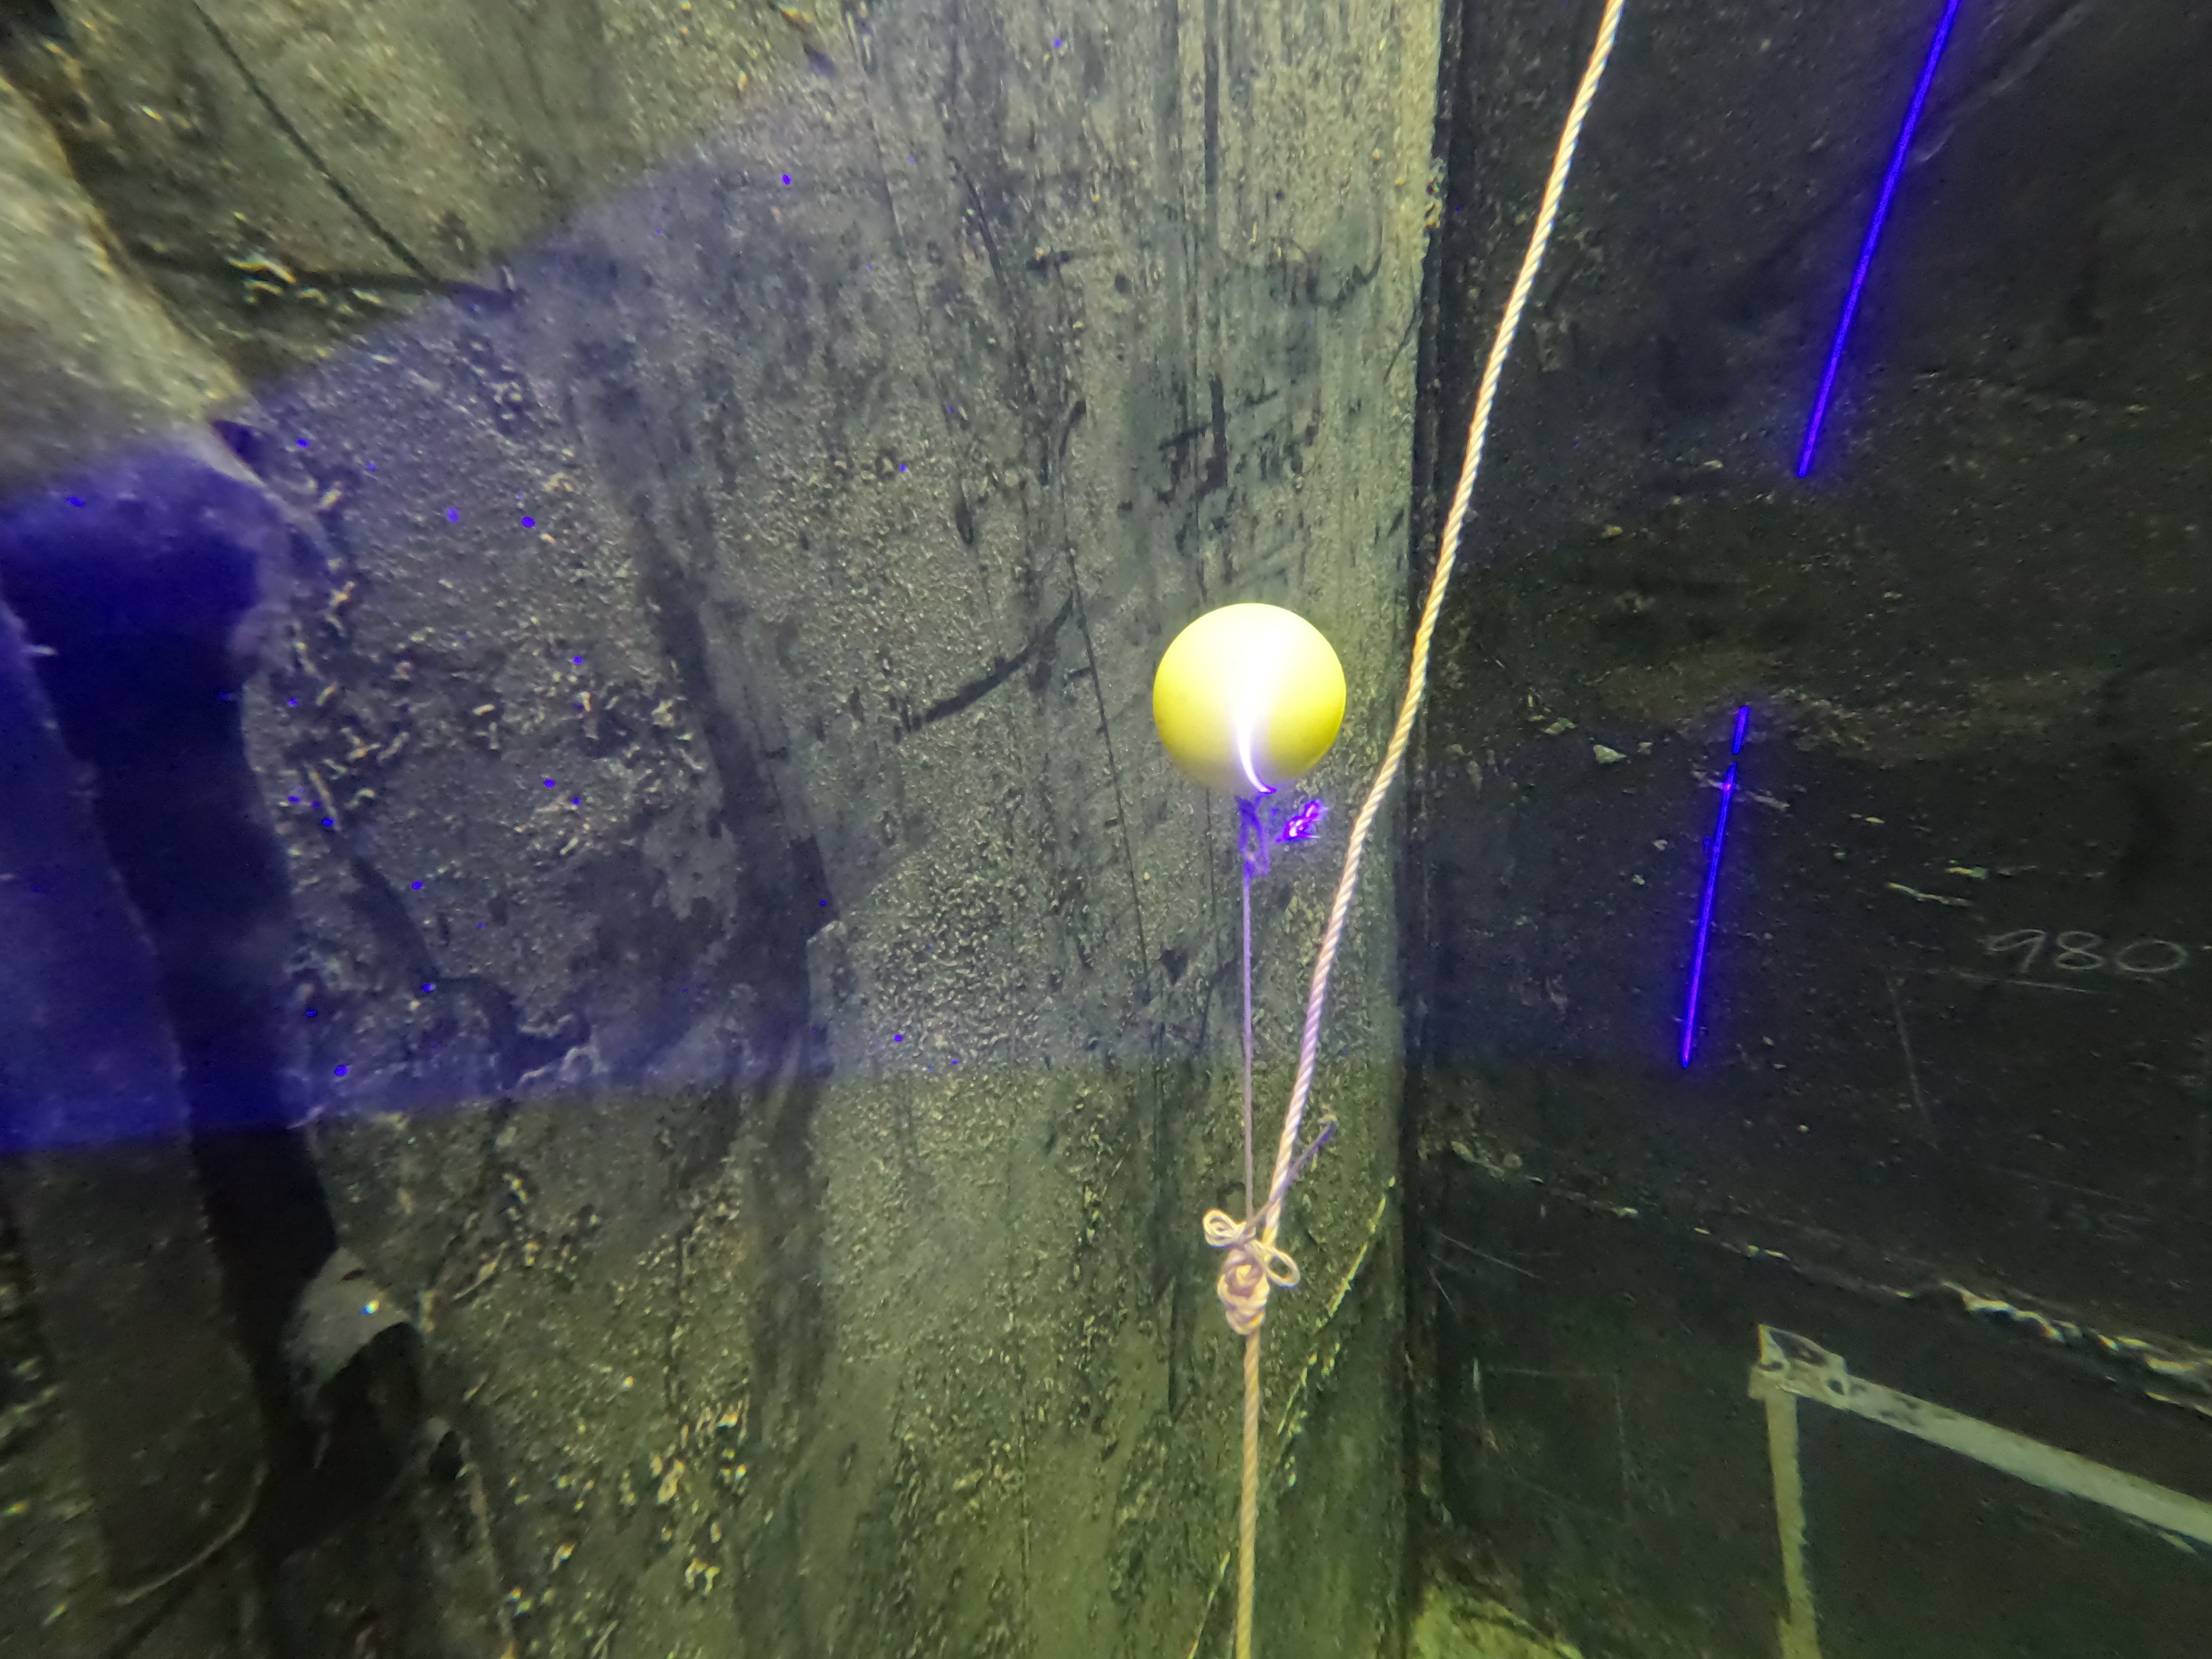

980

Supplement: Supplementary file 1945 [file G0034337.pdf › 5/G0034337.pdf]

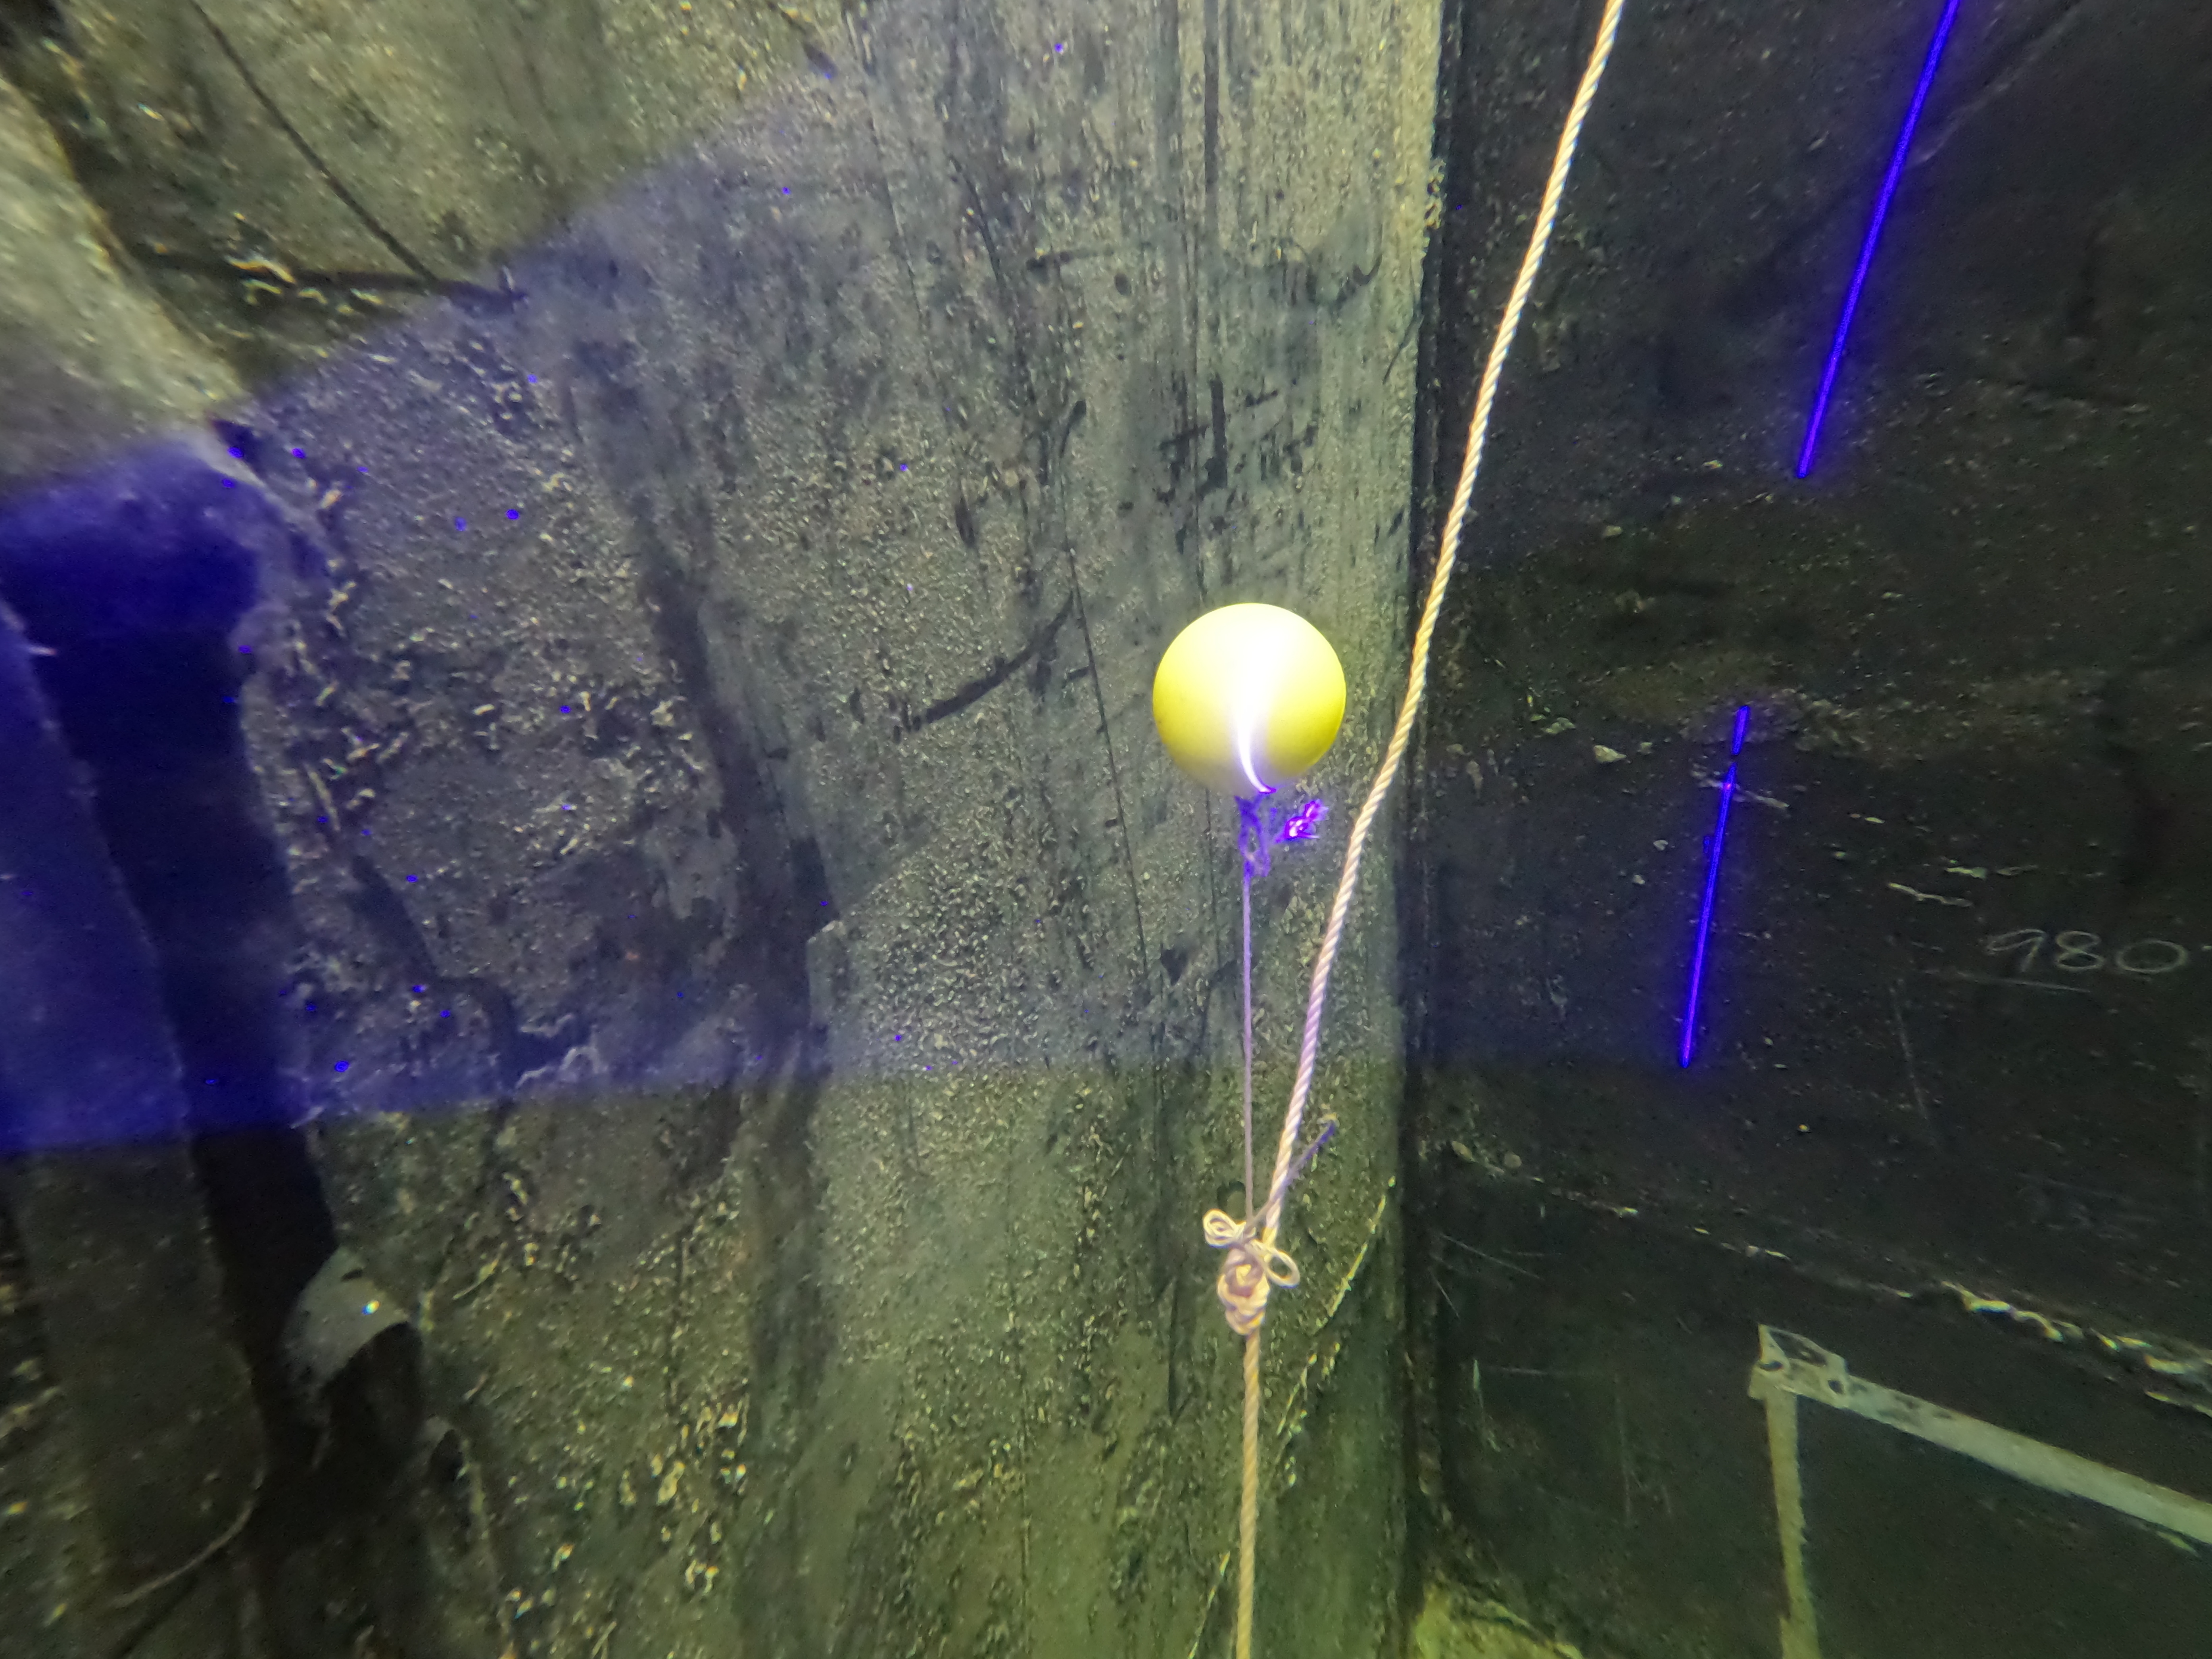

Supplement: Supplementary file 1946 [file G0034338.pdf › 5/G0034338.pdf]

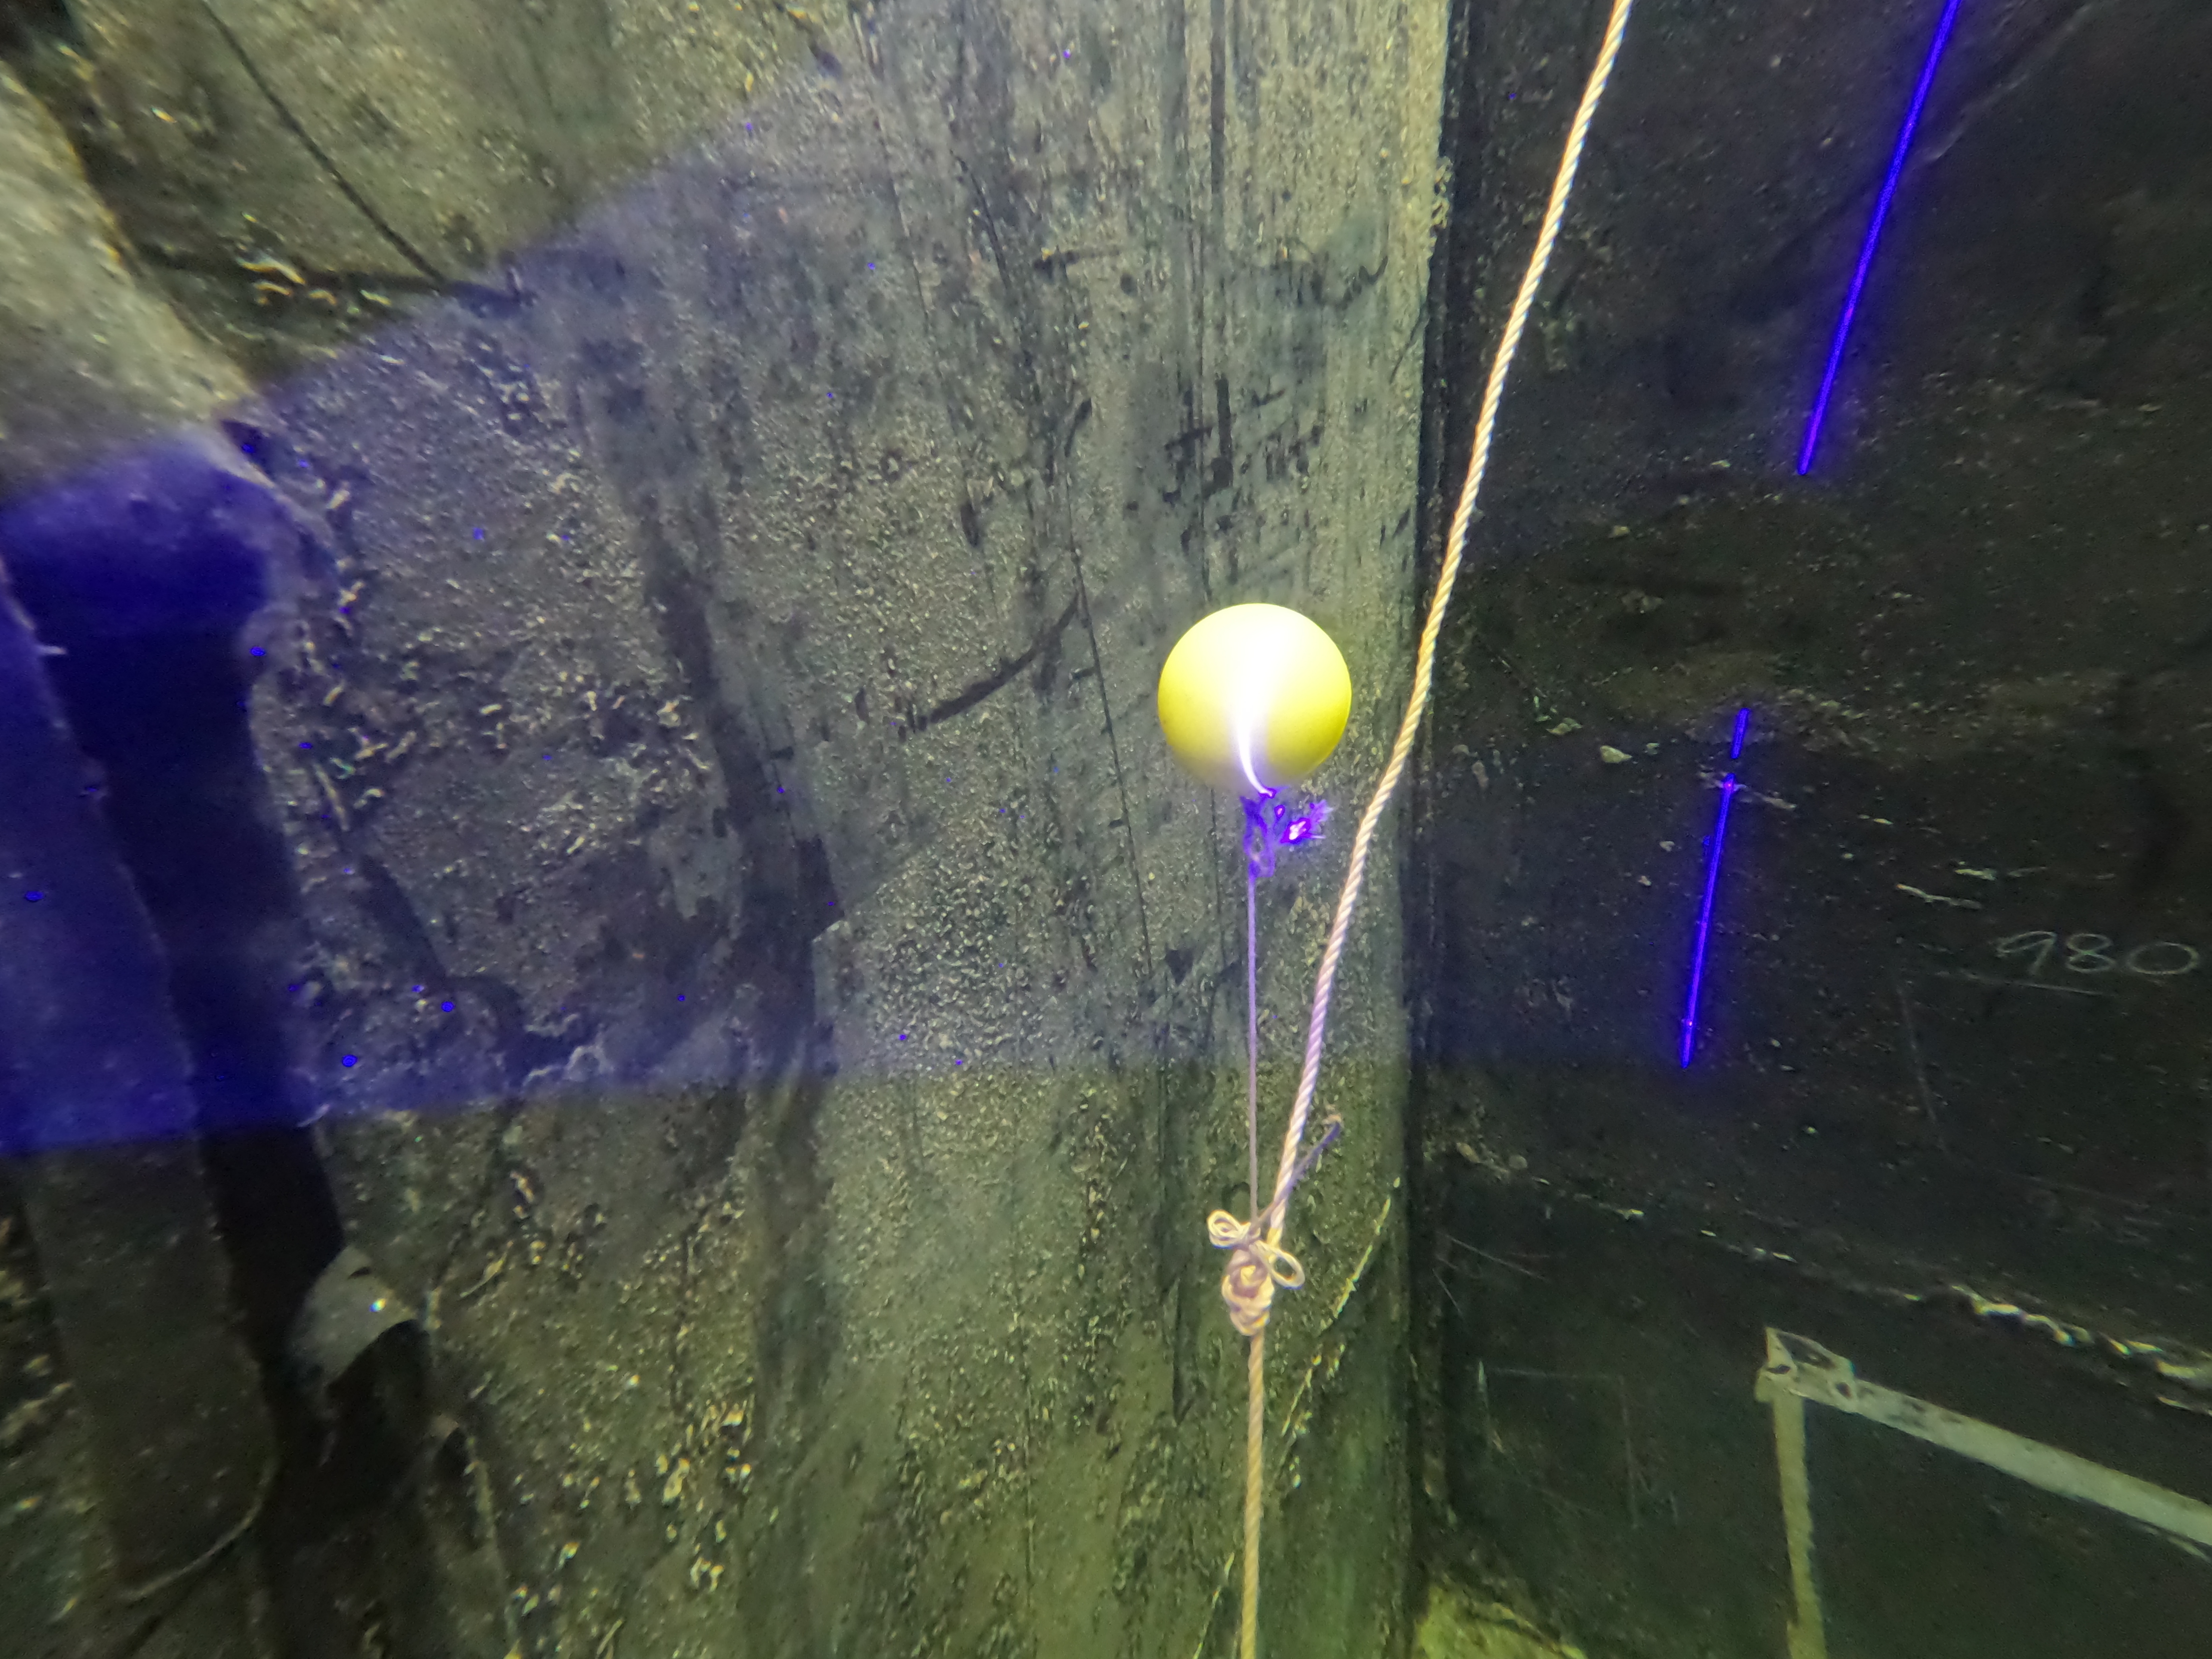

980

Supplement: Supplementary file 1947 [file G0034339.pdf › 5/G0034339.pdf]

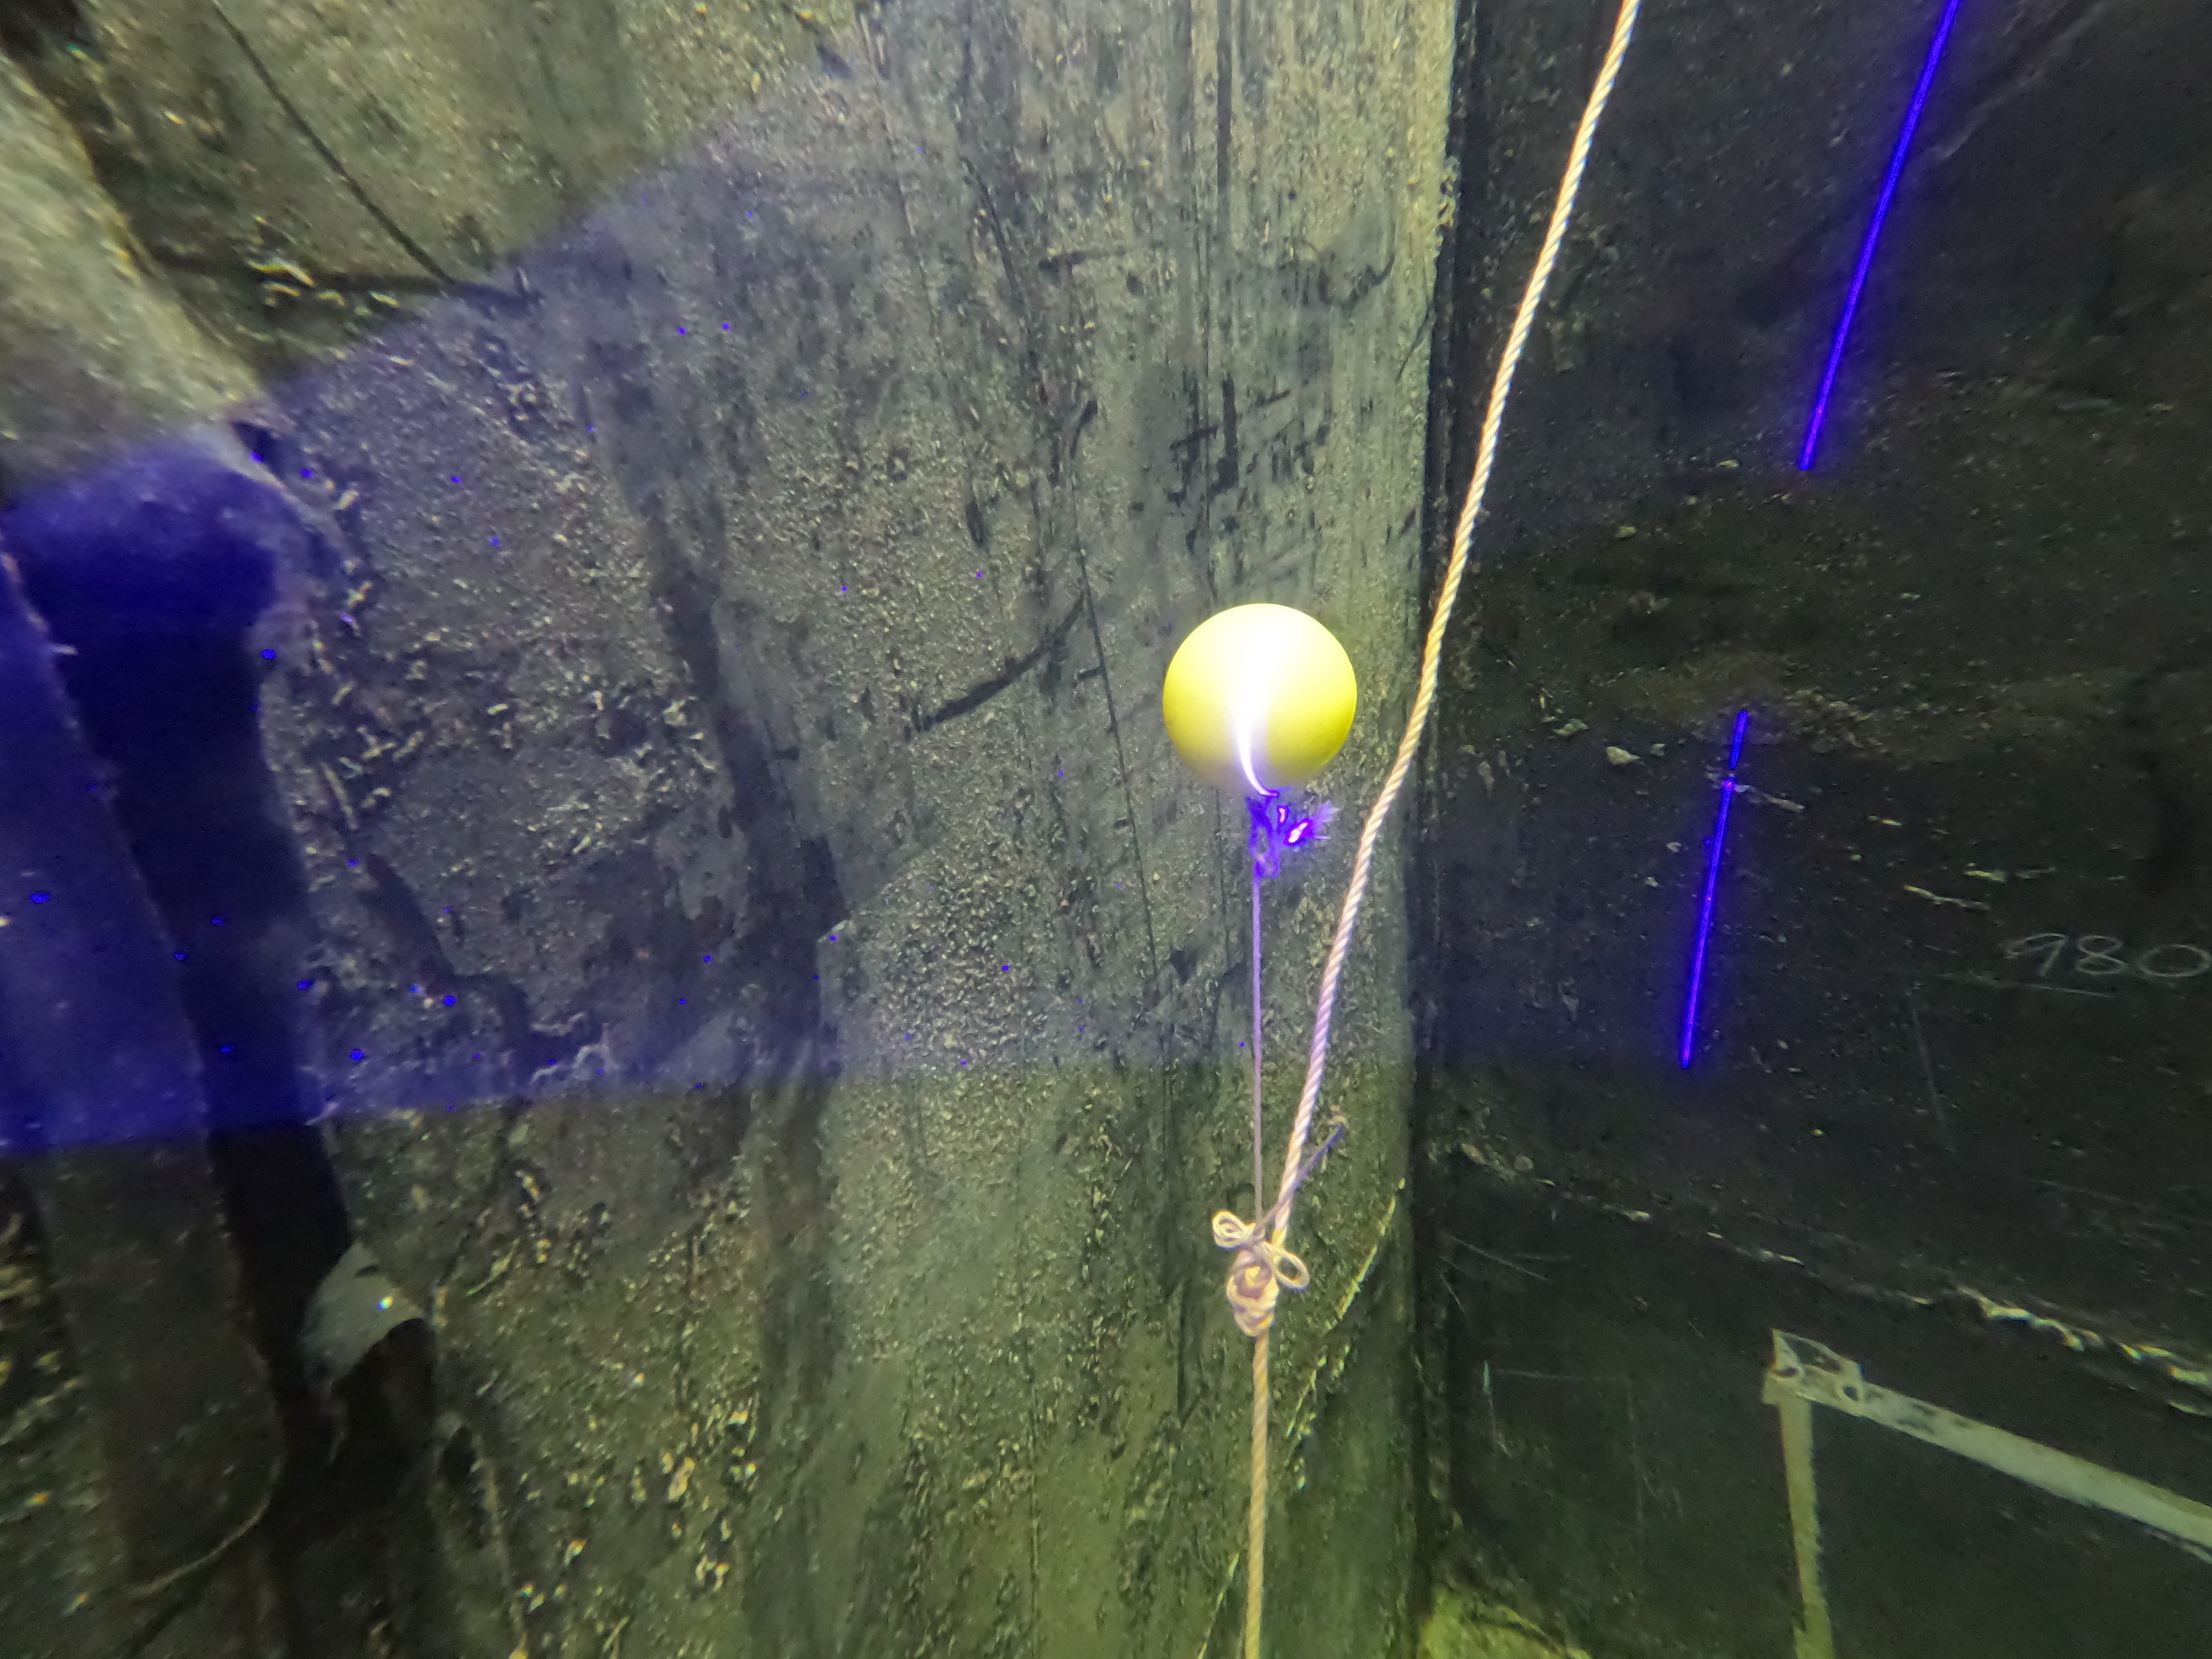

Supplement: Supplementary file 1948 [file G0034340.pdf › 5/G0034340.pdf]

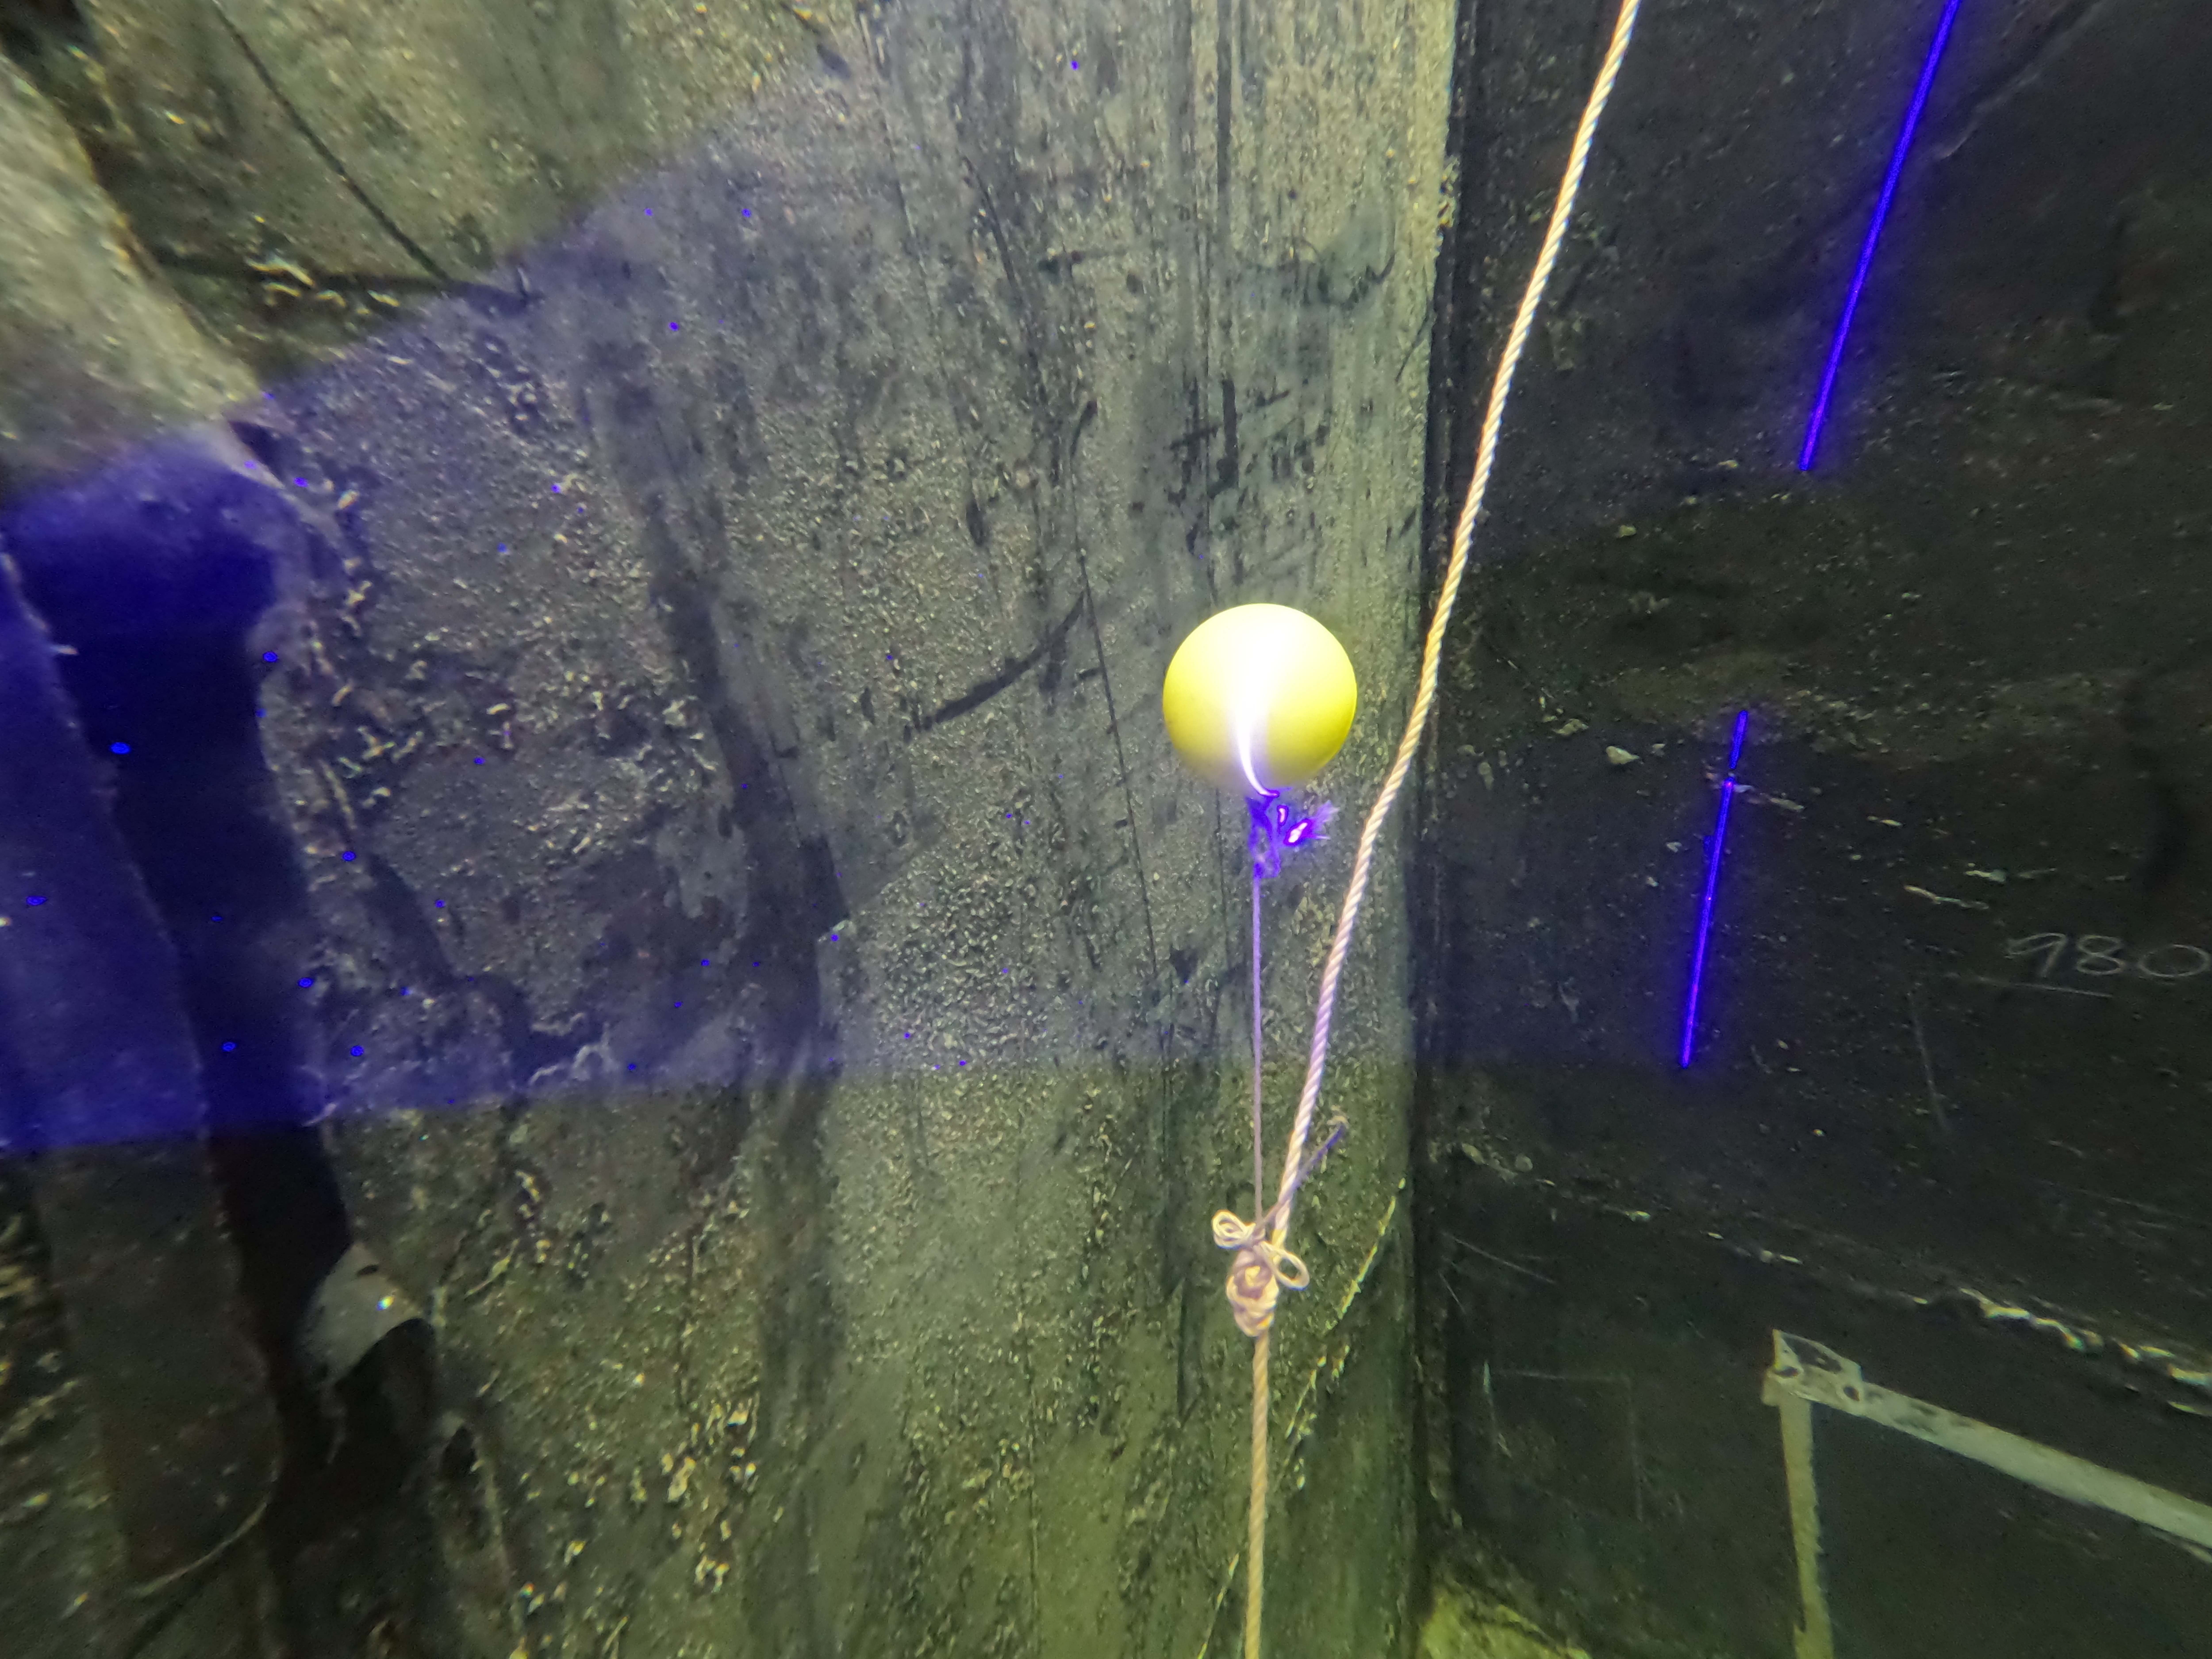

980

Supplement: Supplementary file 1949 [file G0034341.pdf › 5/G0034341.pdf]

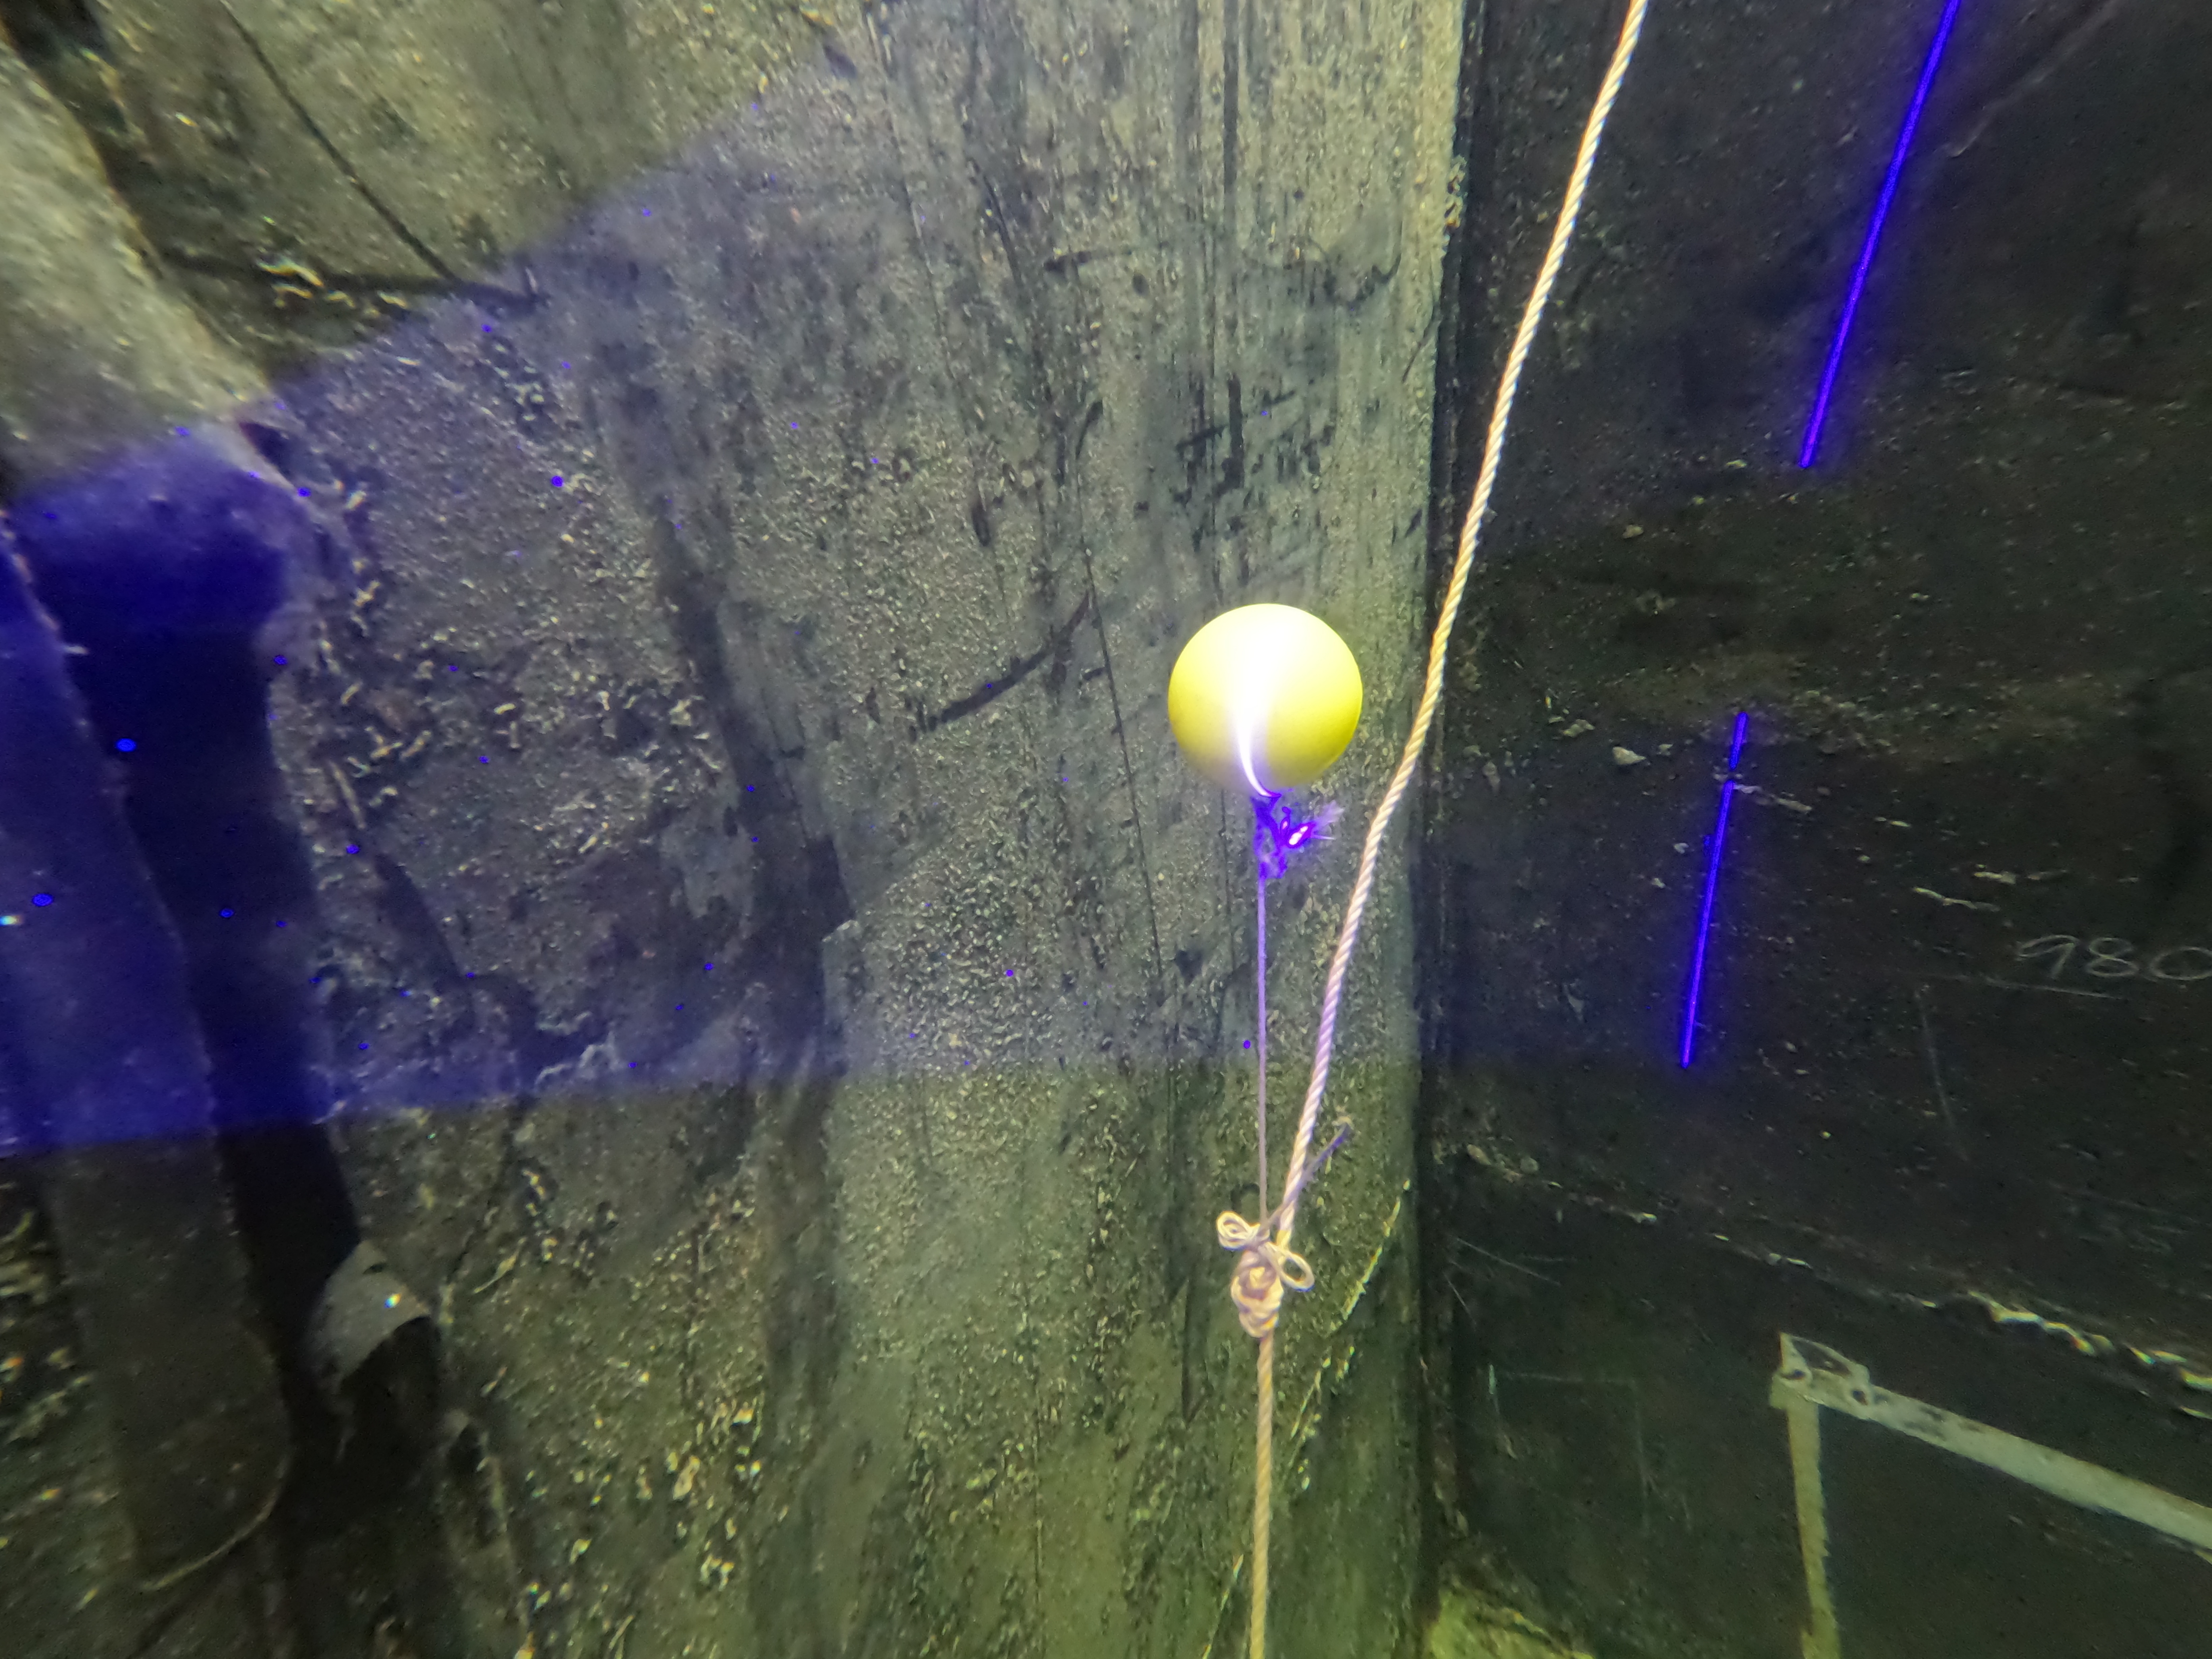

Supplement: Supplementary file 1950 [file G0034342.pdf › 5/G0034342.pdf]

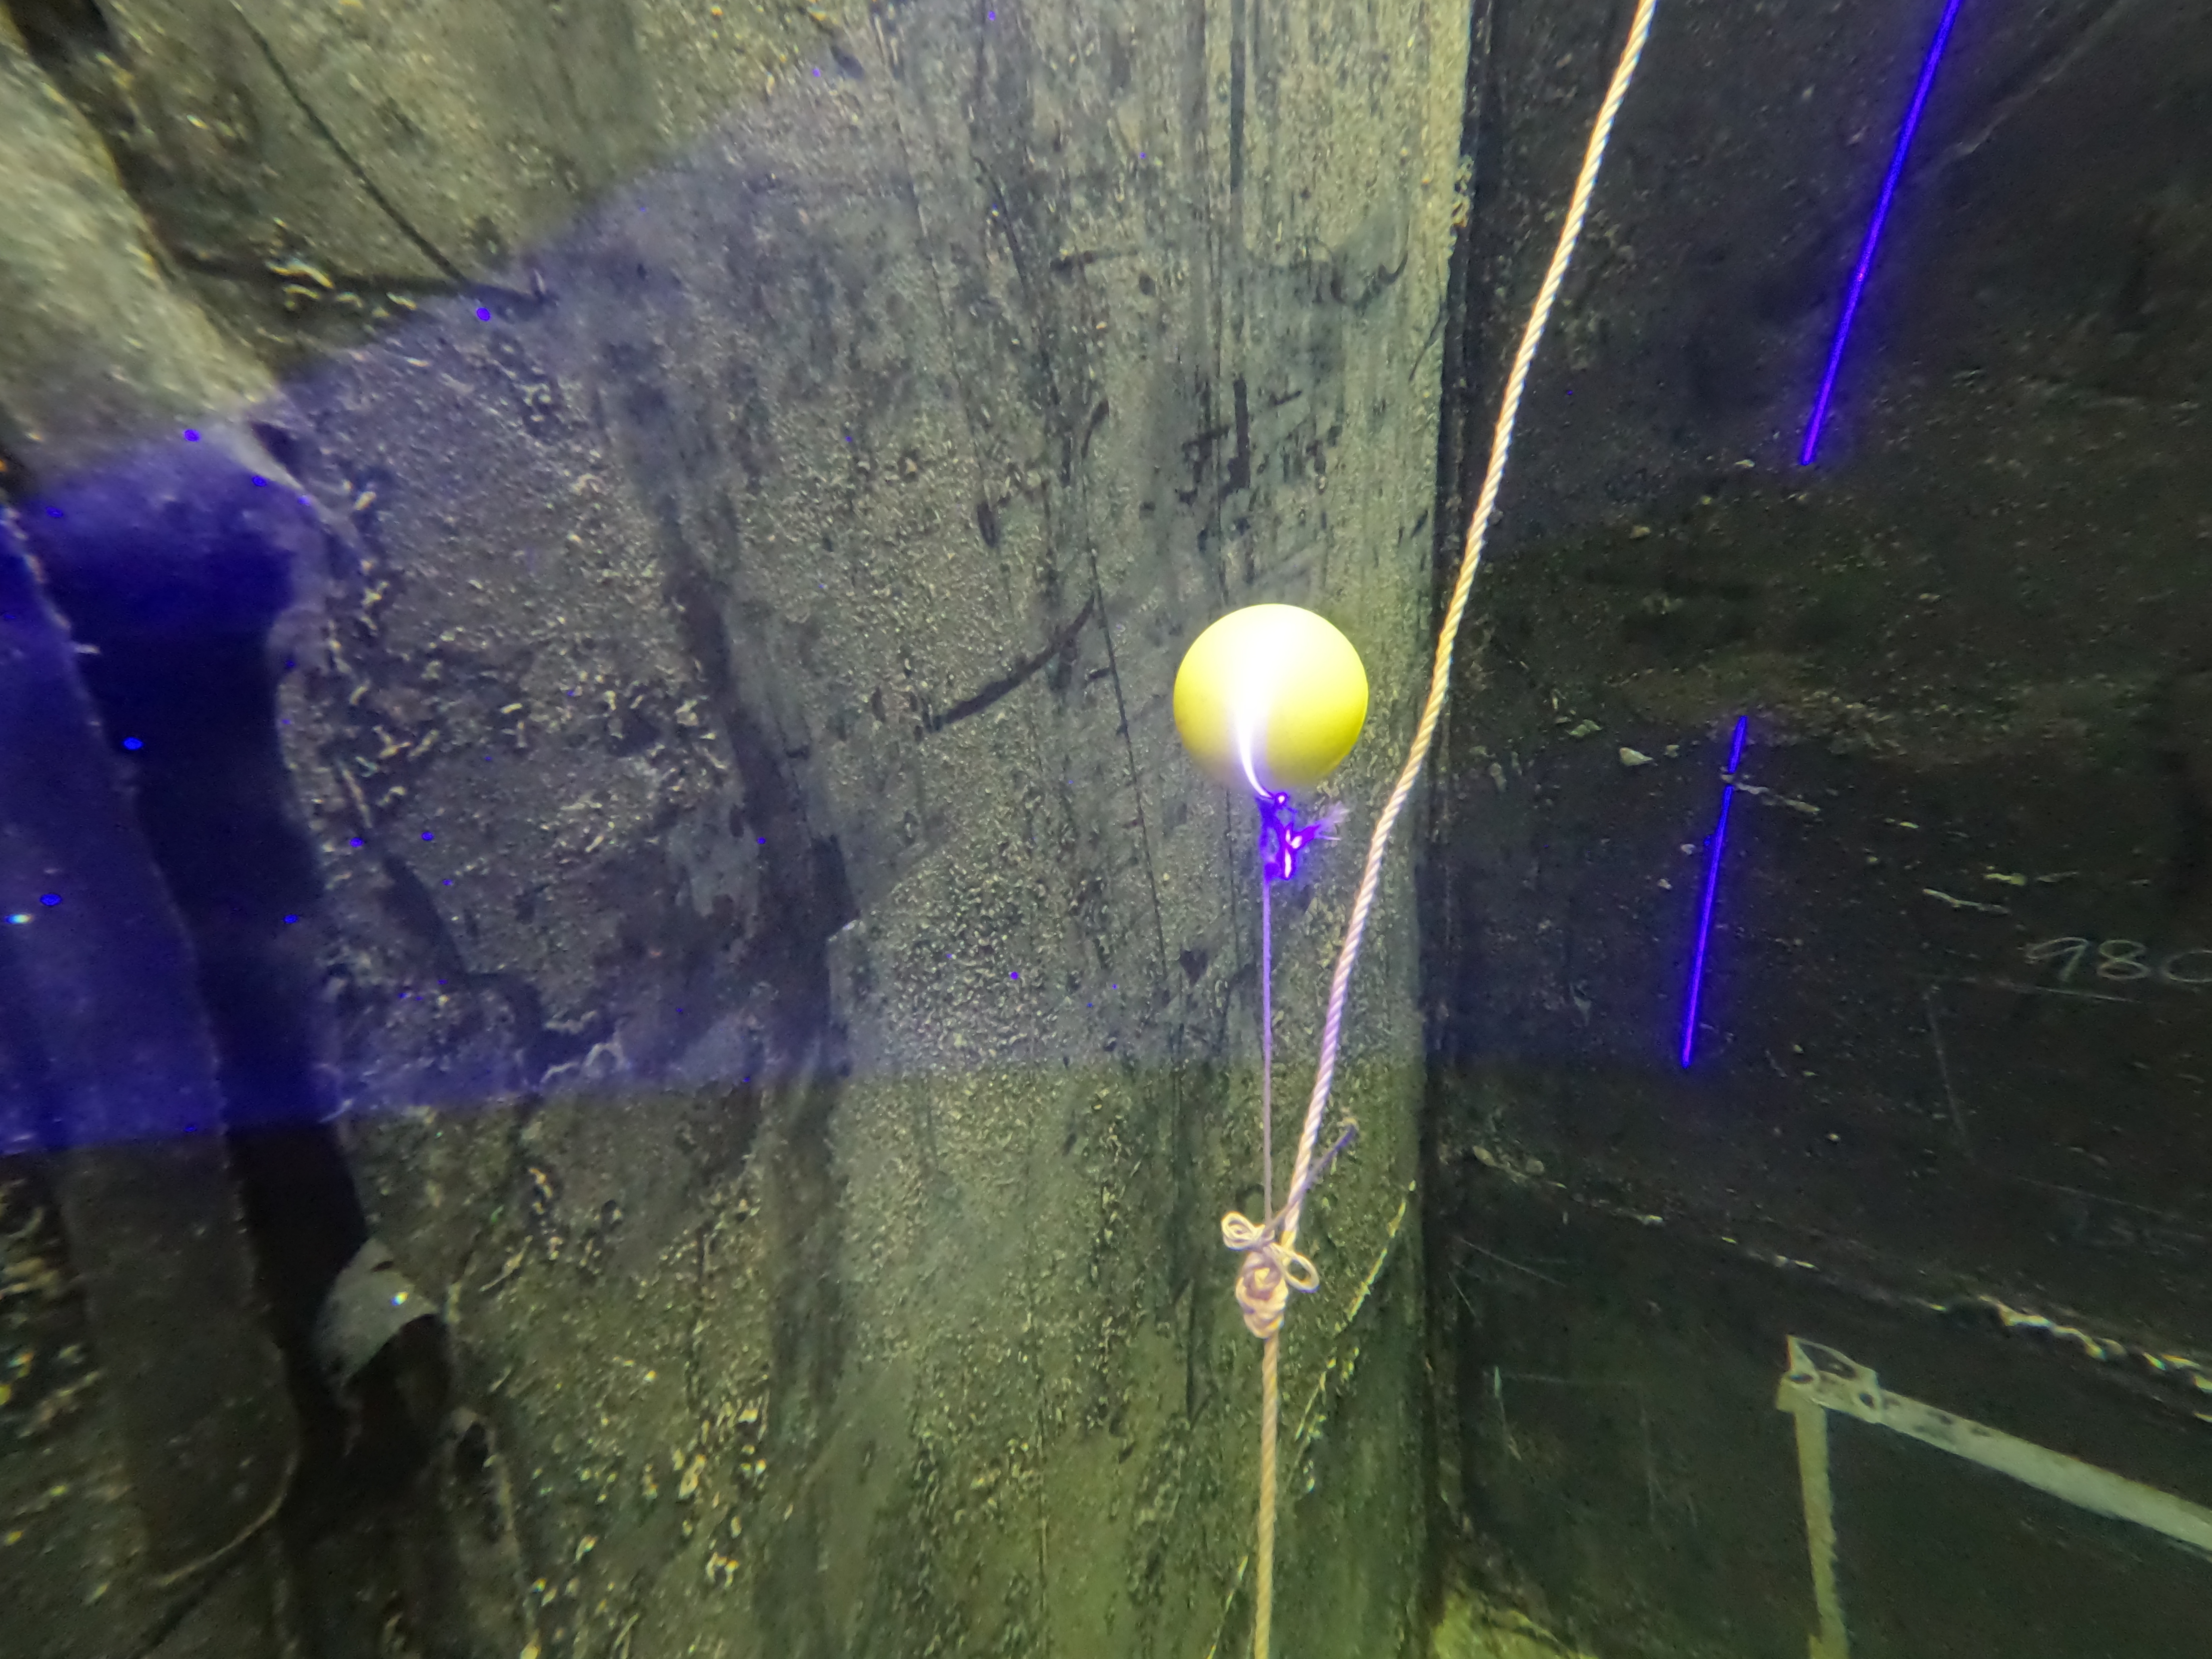

Supplement: Supplementary file 1951 [file G0034343.pdf › 5/G0034343.pdf]

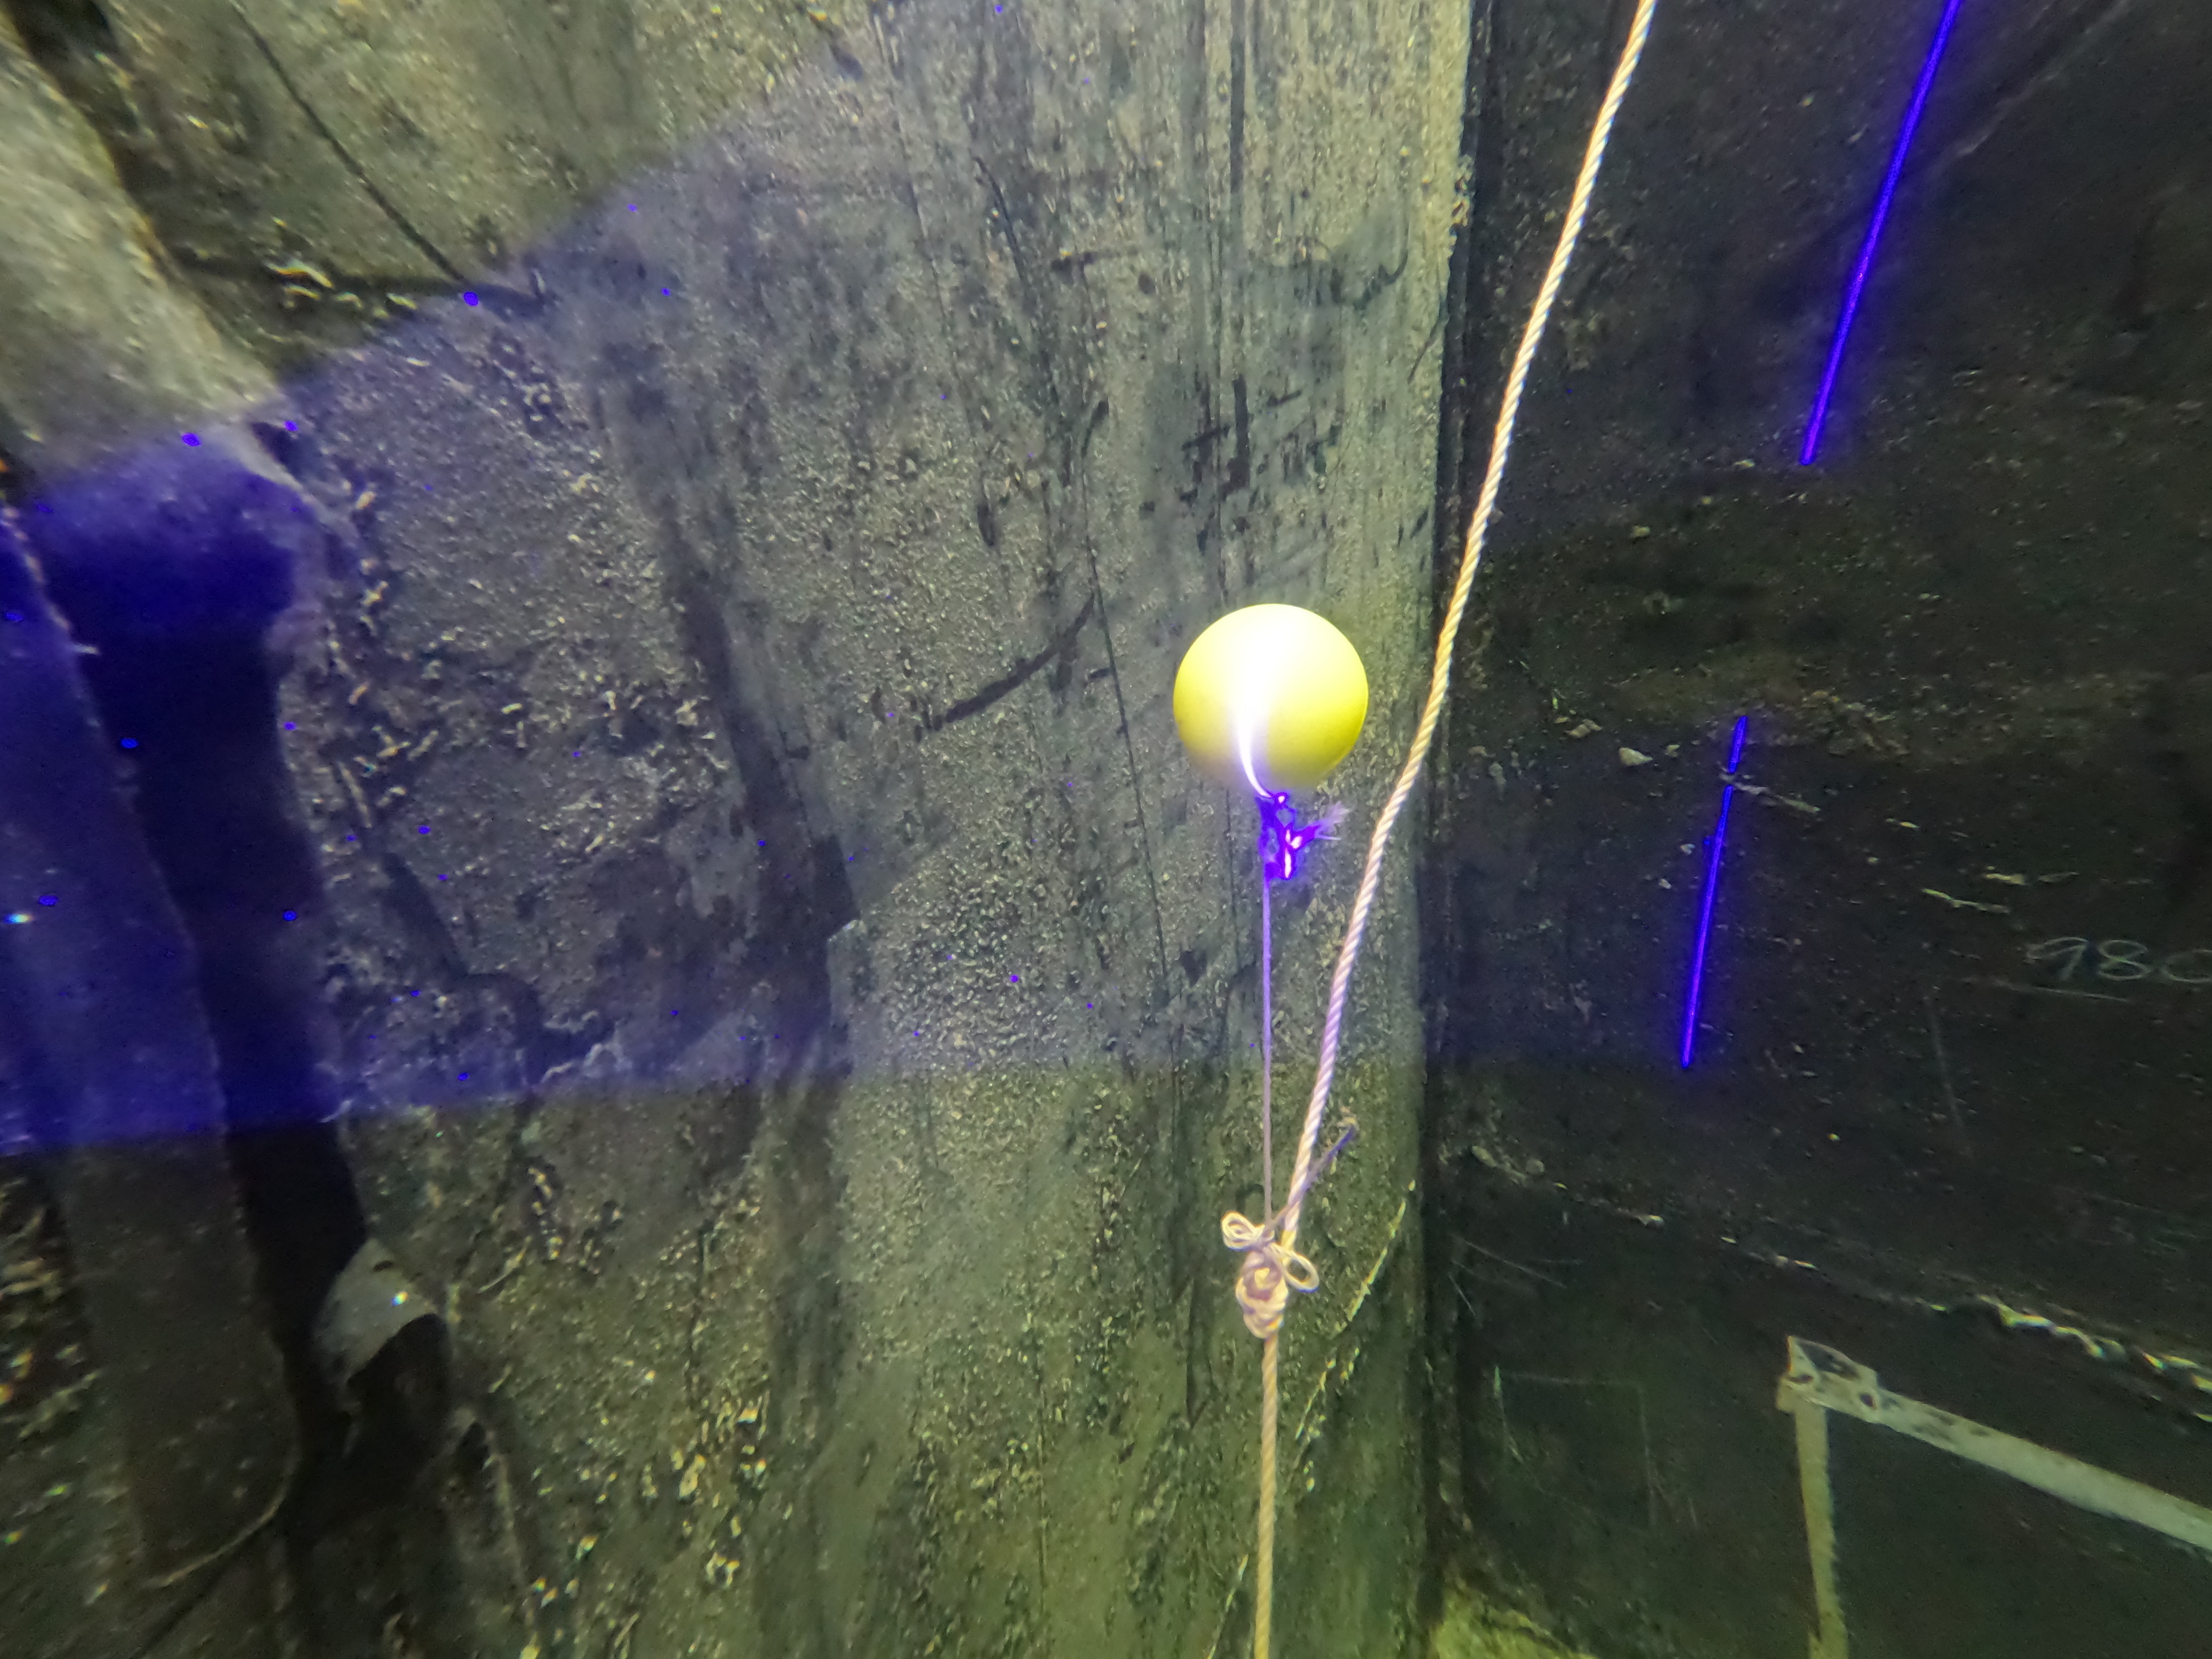

Supplement: Supplementary file 1952 [file G0034344.pdf › 5/G0034344.pdf]

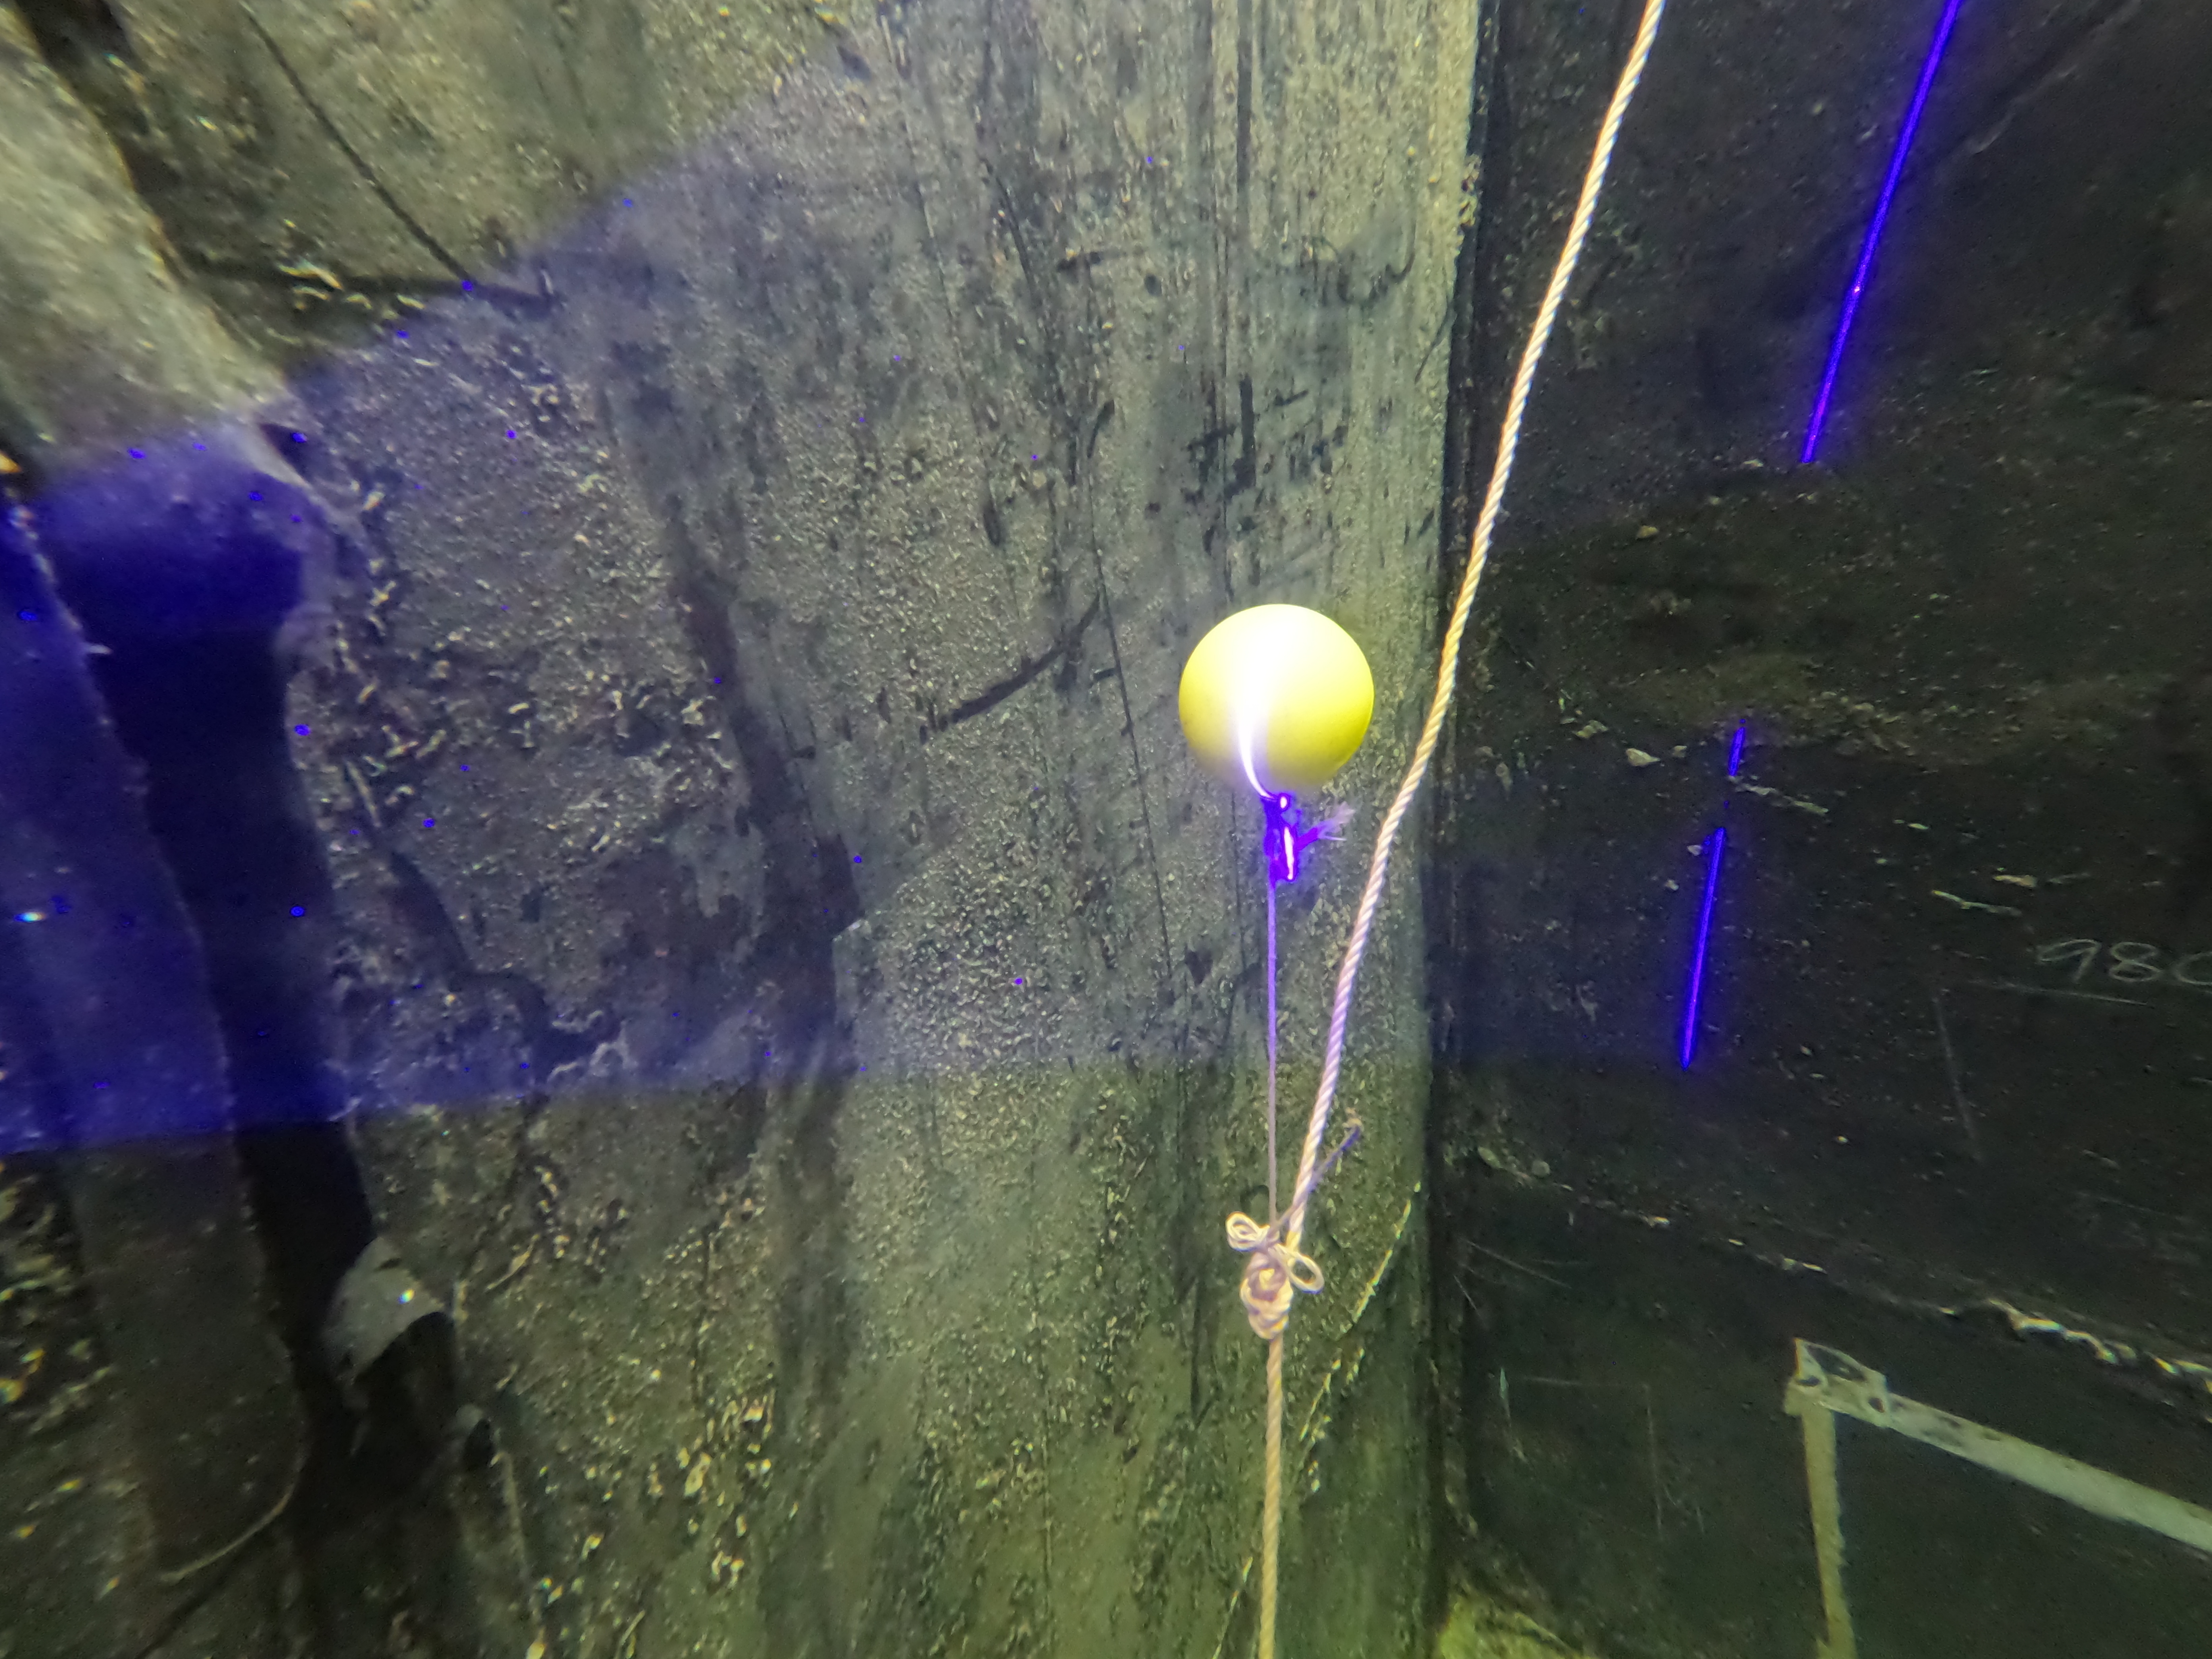

Supplement: Supplementary file 1953 [file G0034345.pdf › 5/G0034345.pdf]

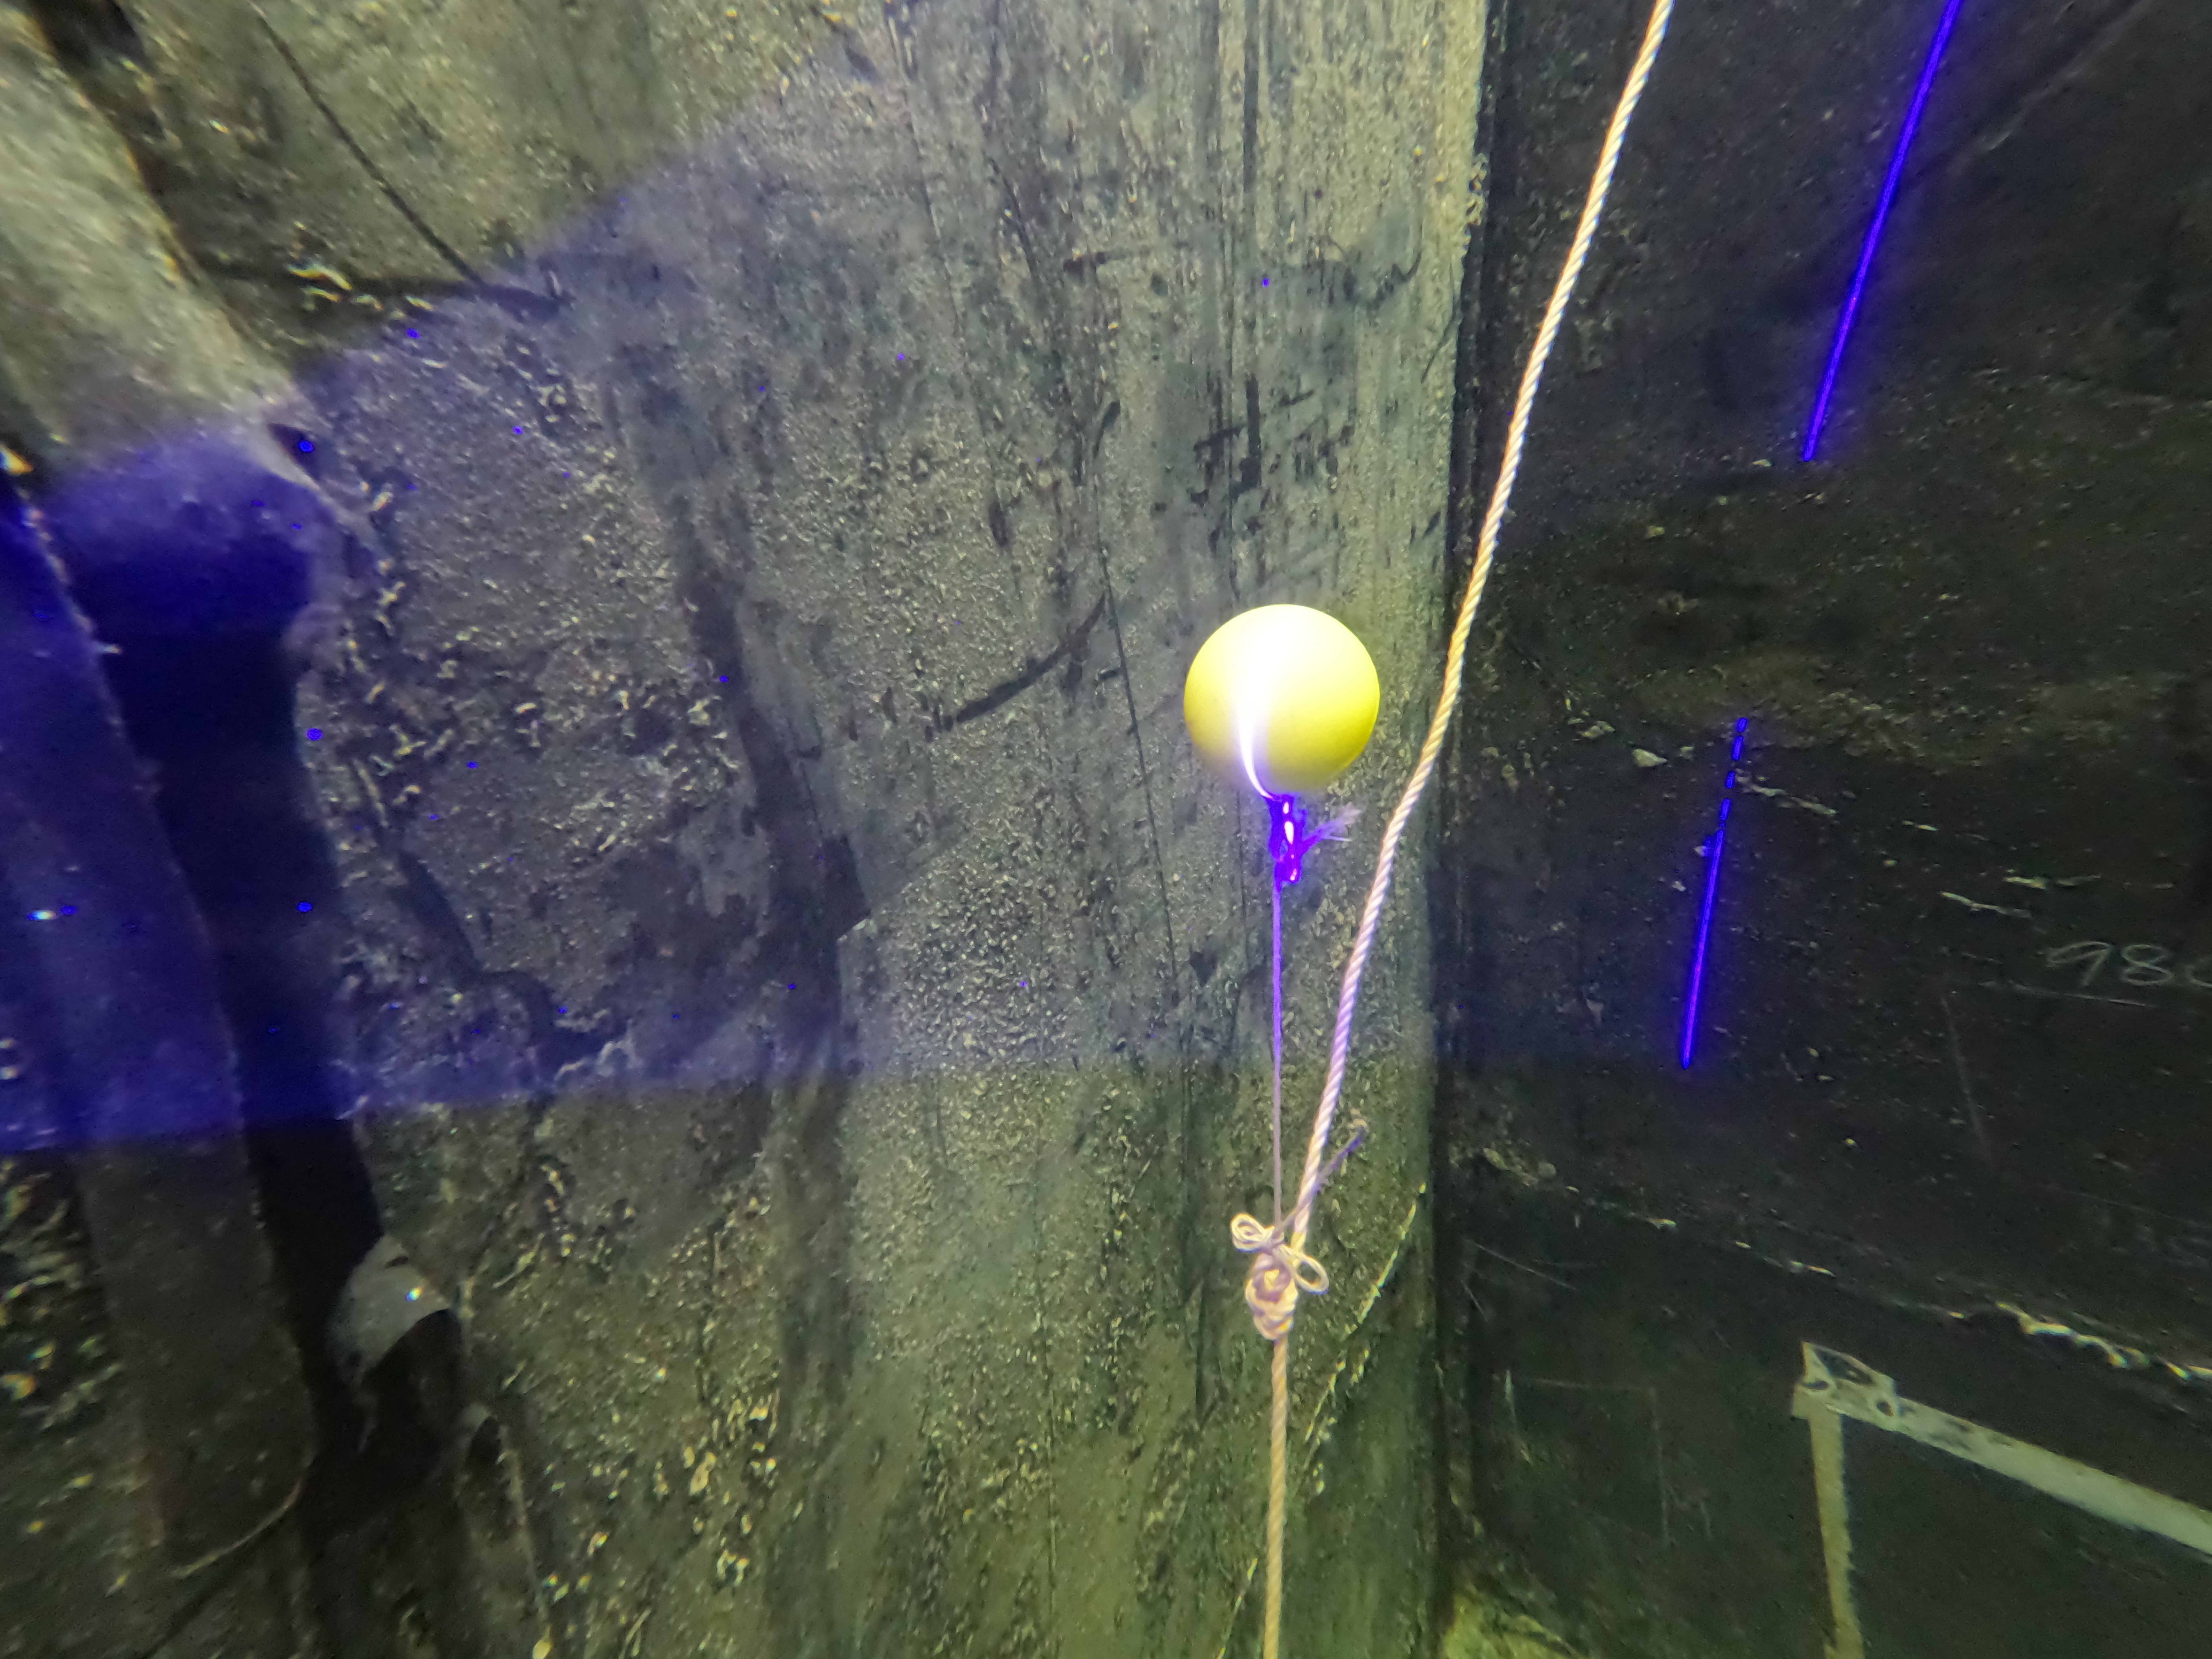

Supplement: Supplementary file 1954 [file G0034346.pdf › 5/G0034346.pdf]

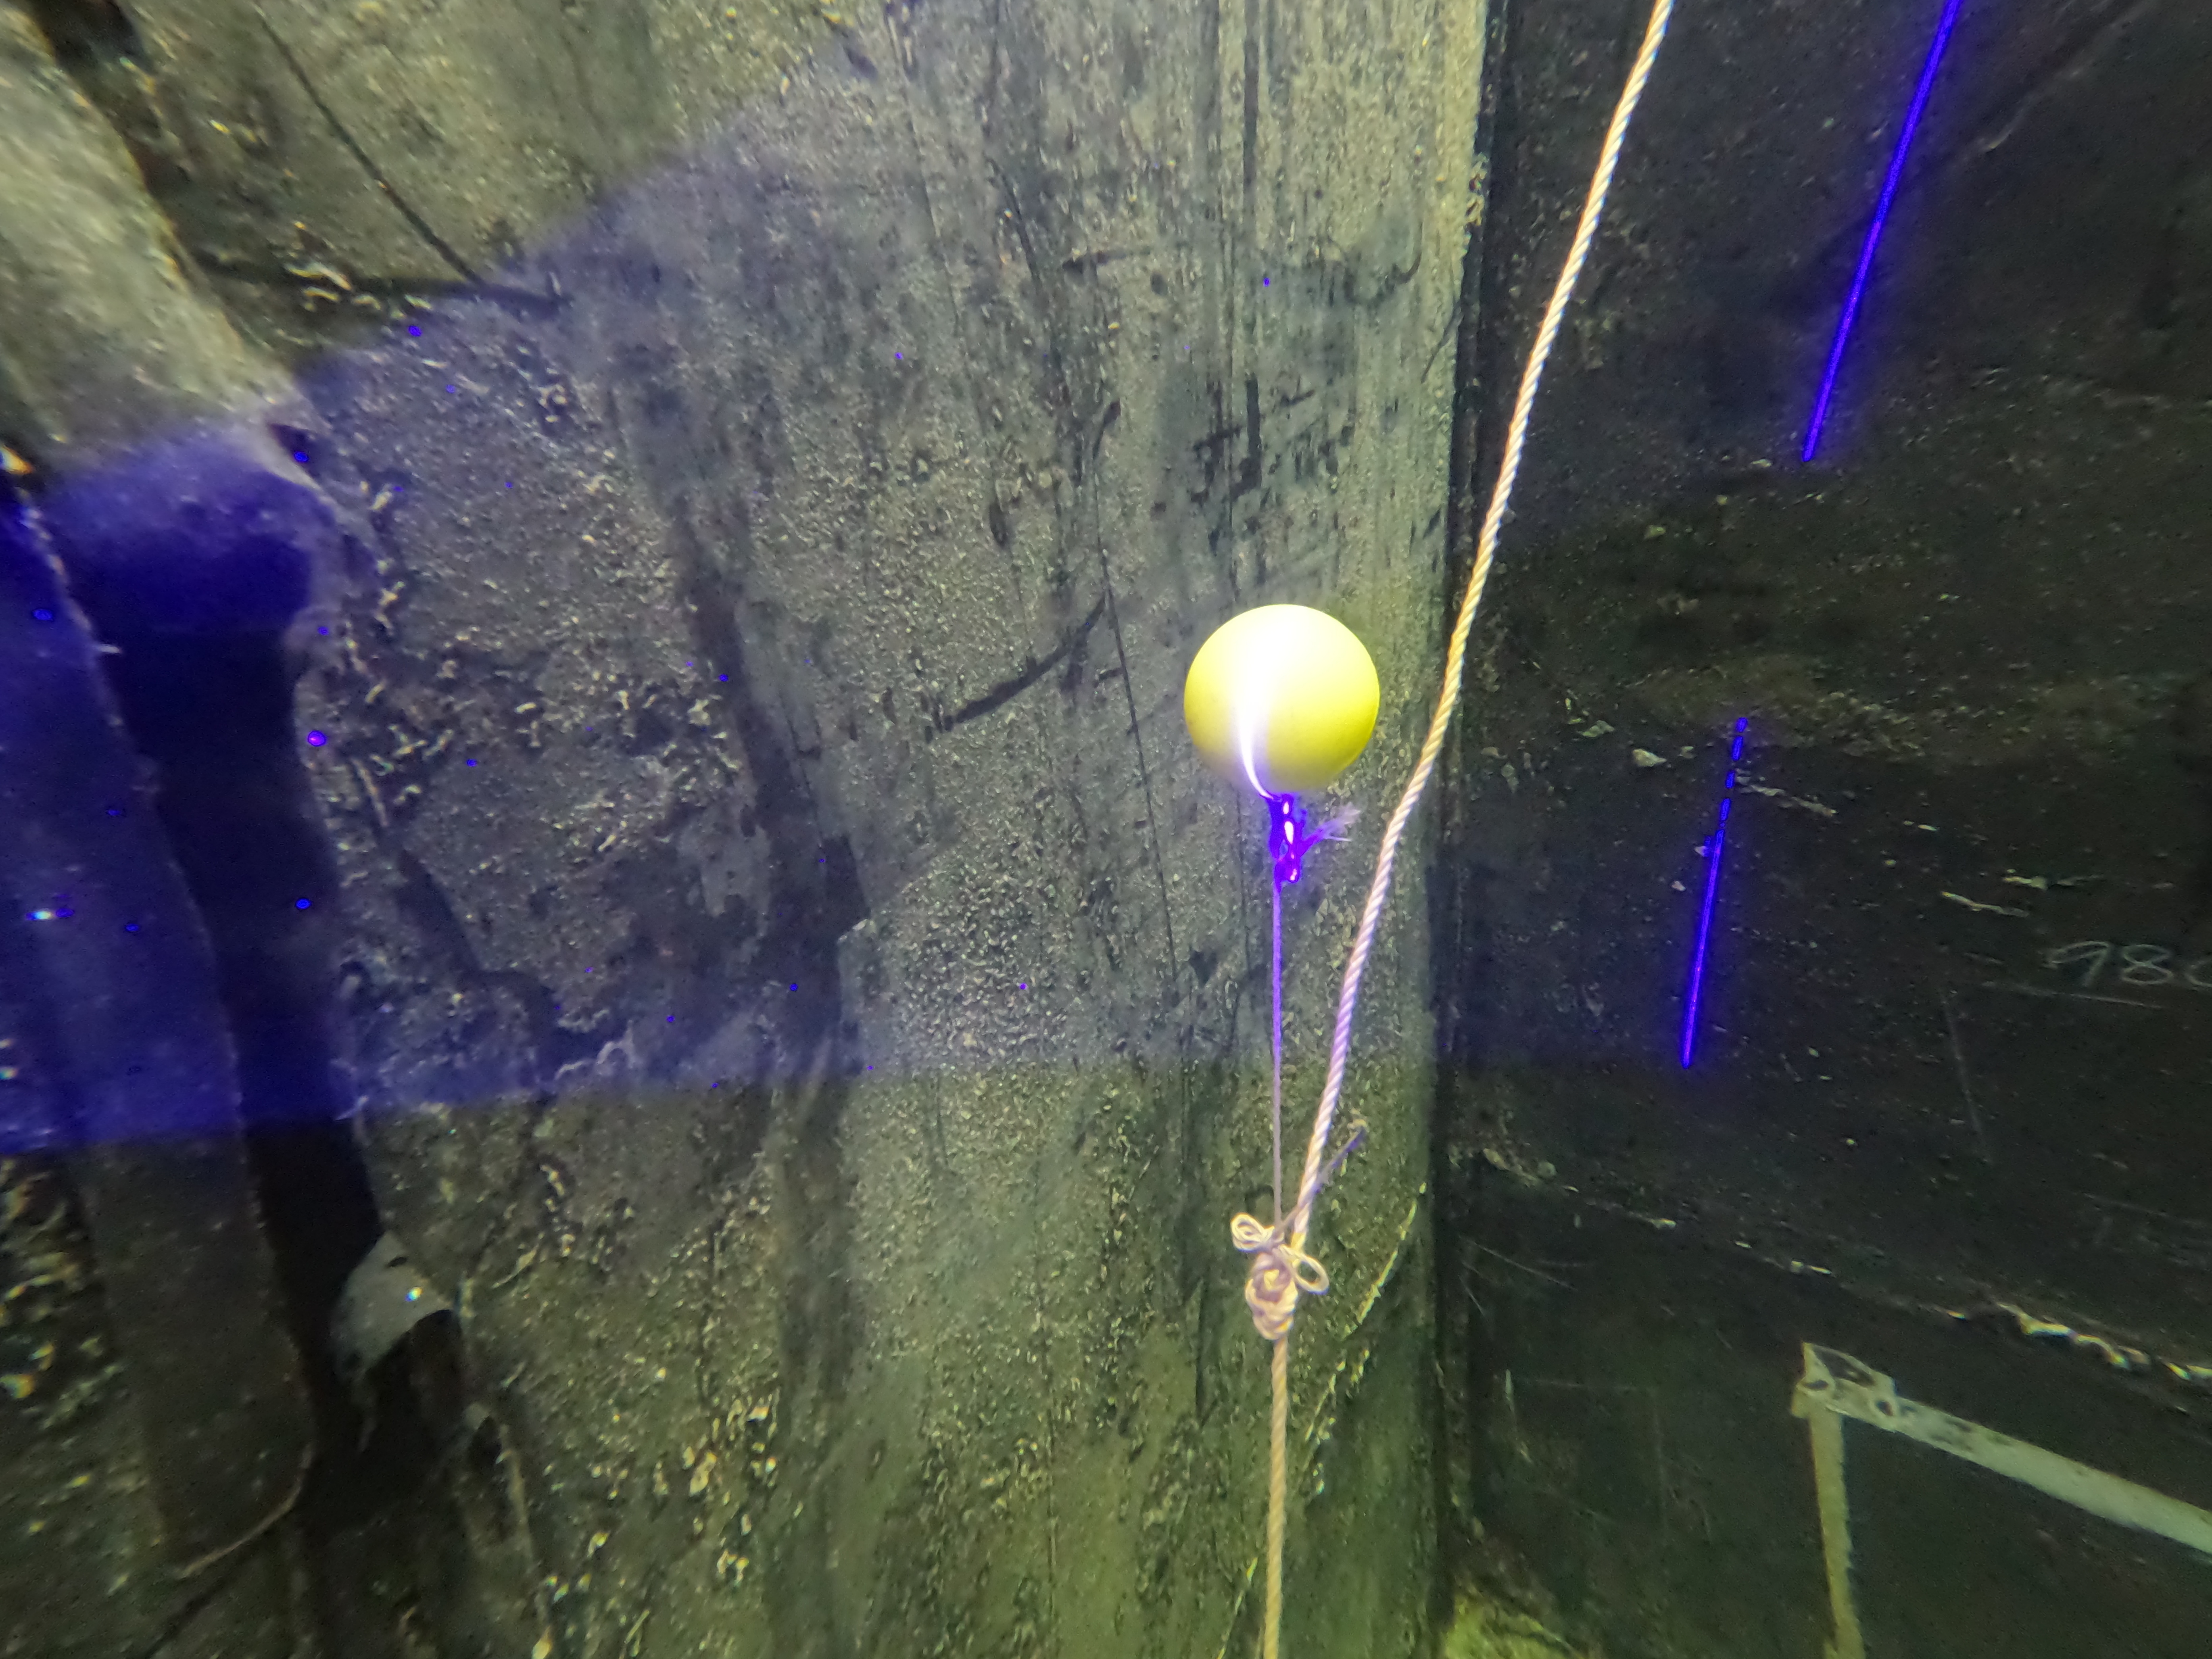

Supplement: Supplementary file 1955 [file G0034347.pdf › 5/G0034347.pdf]

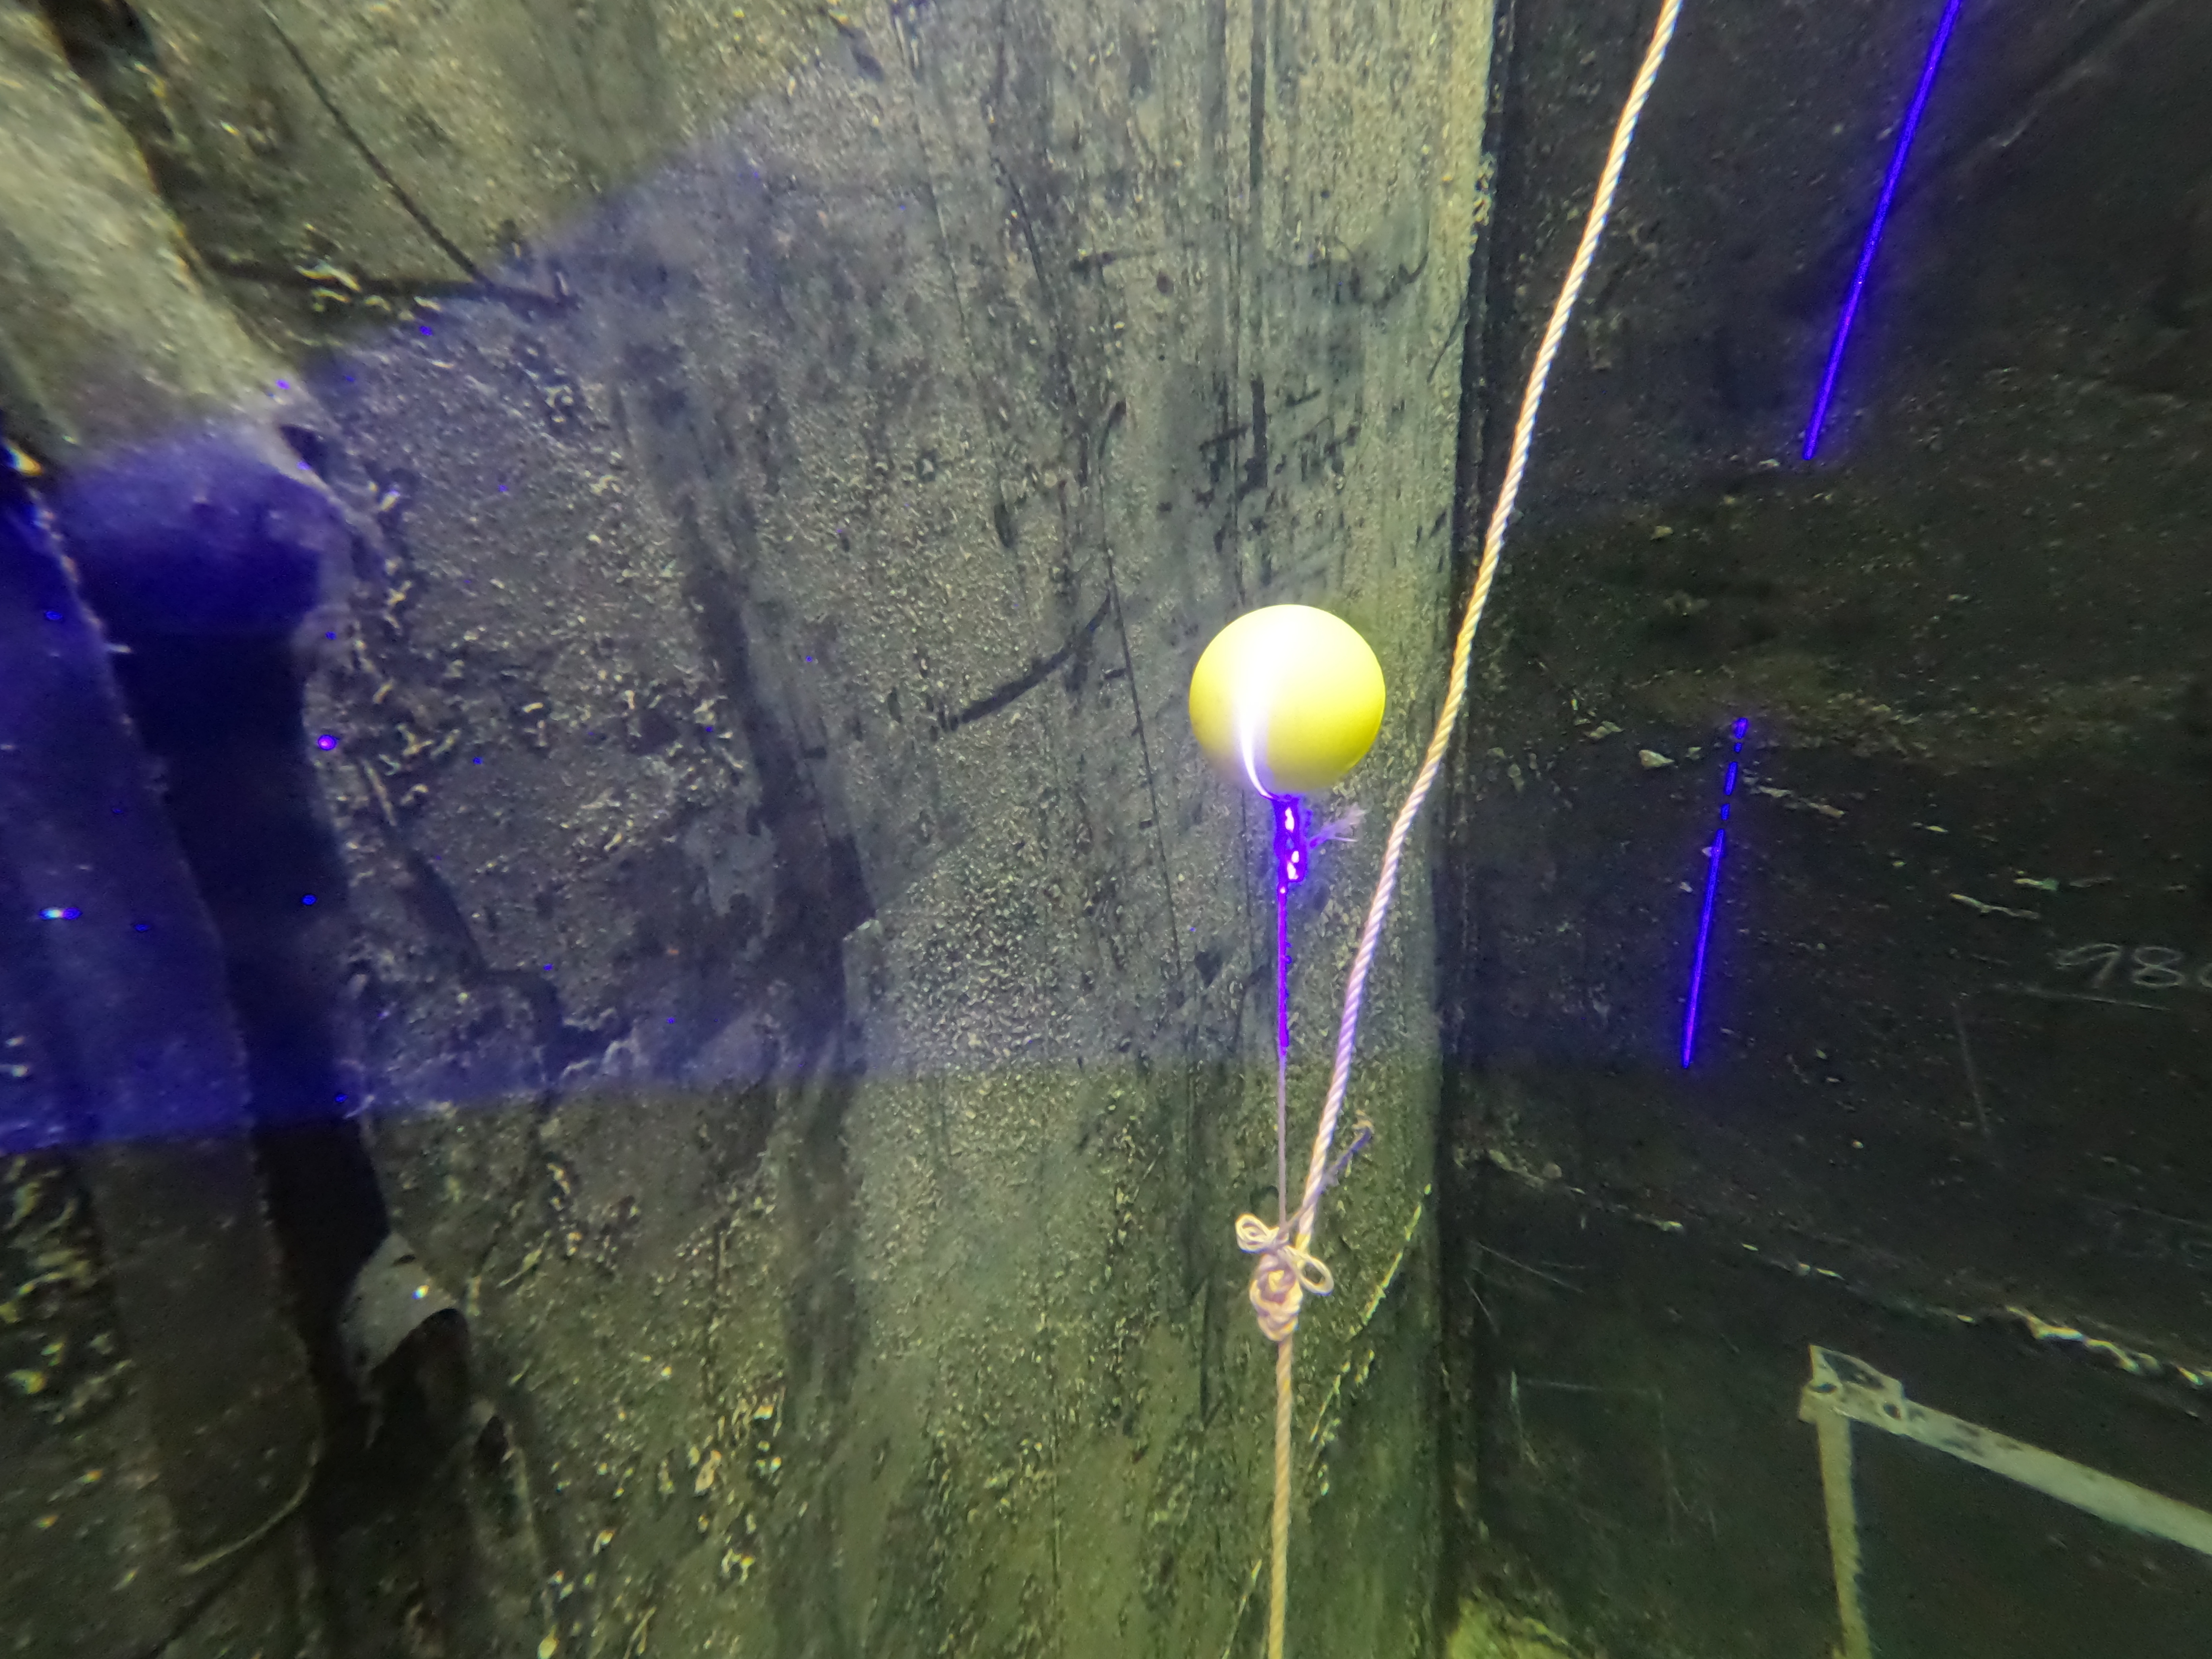

Supplement: Supplementary file 1956 [file G0034348.pdf › 5/G0034348.pdf]

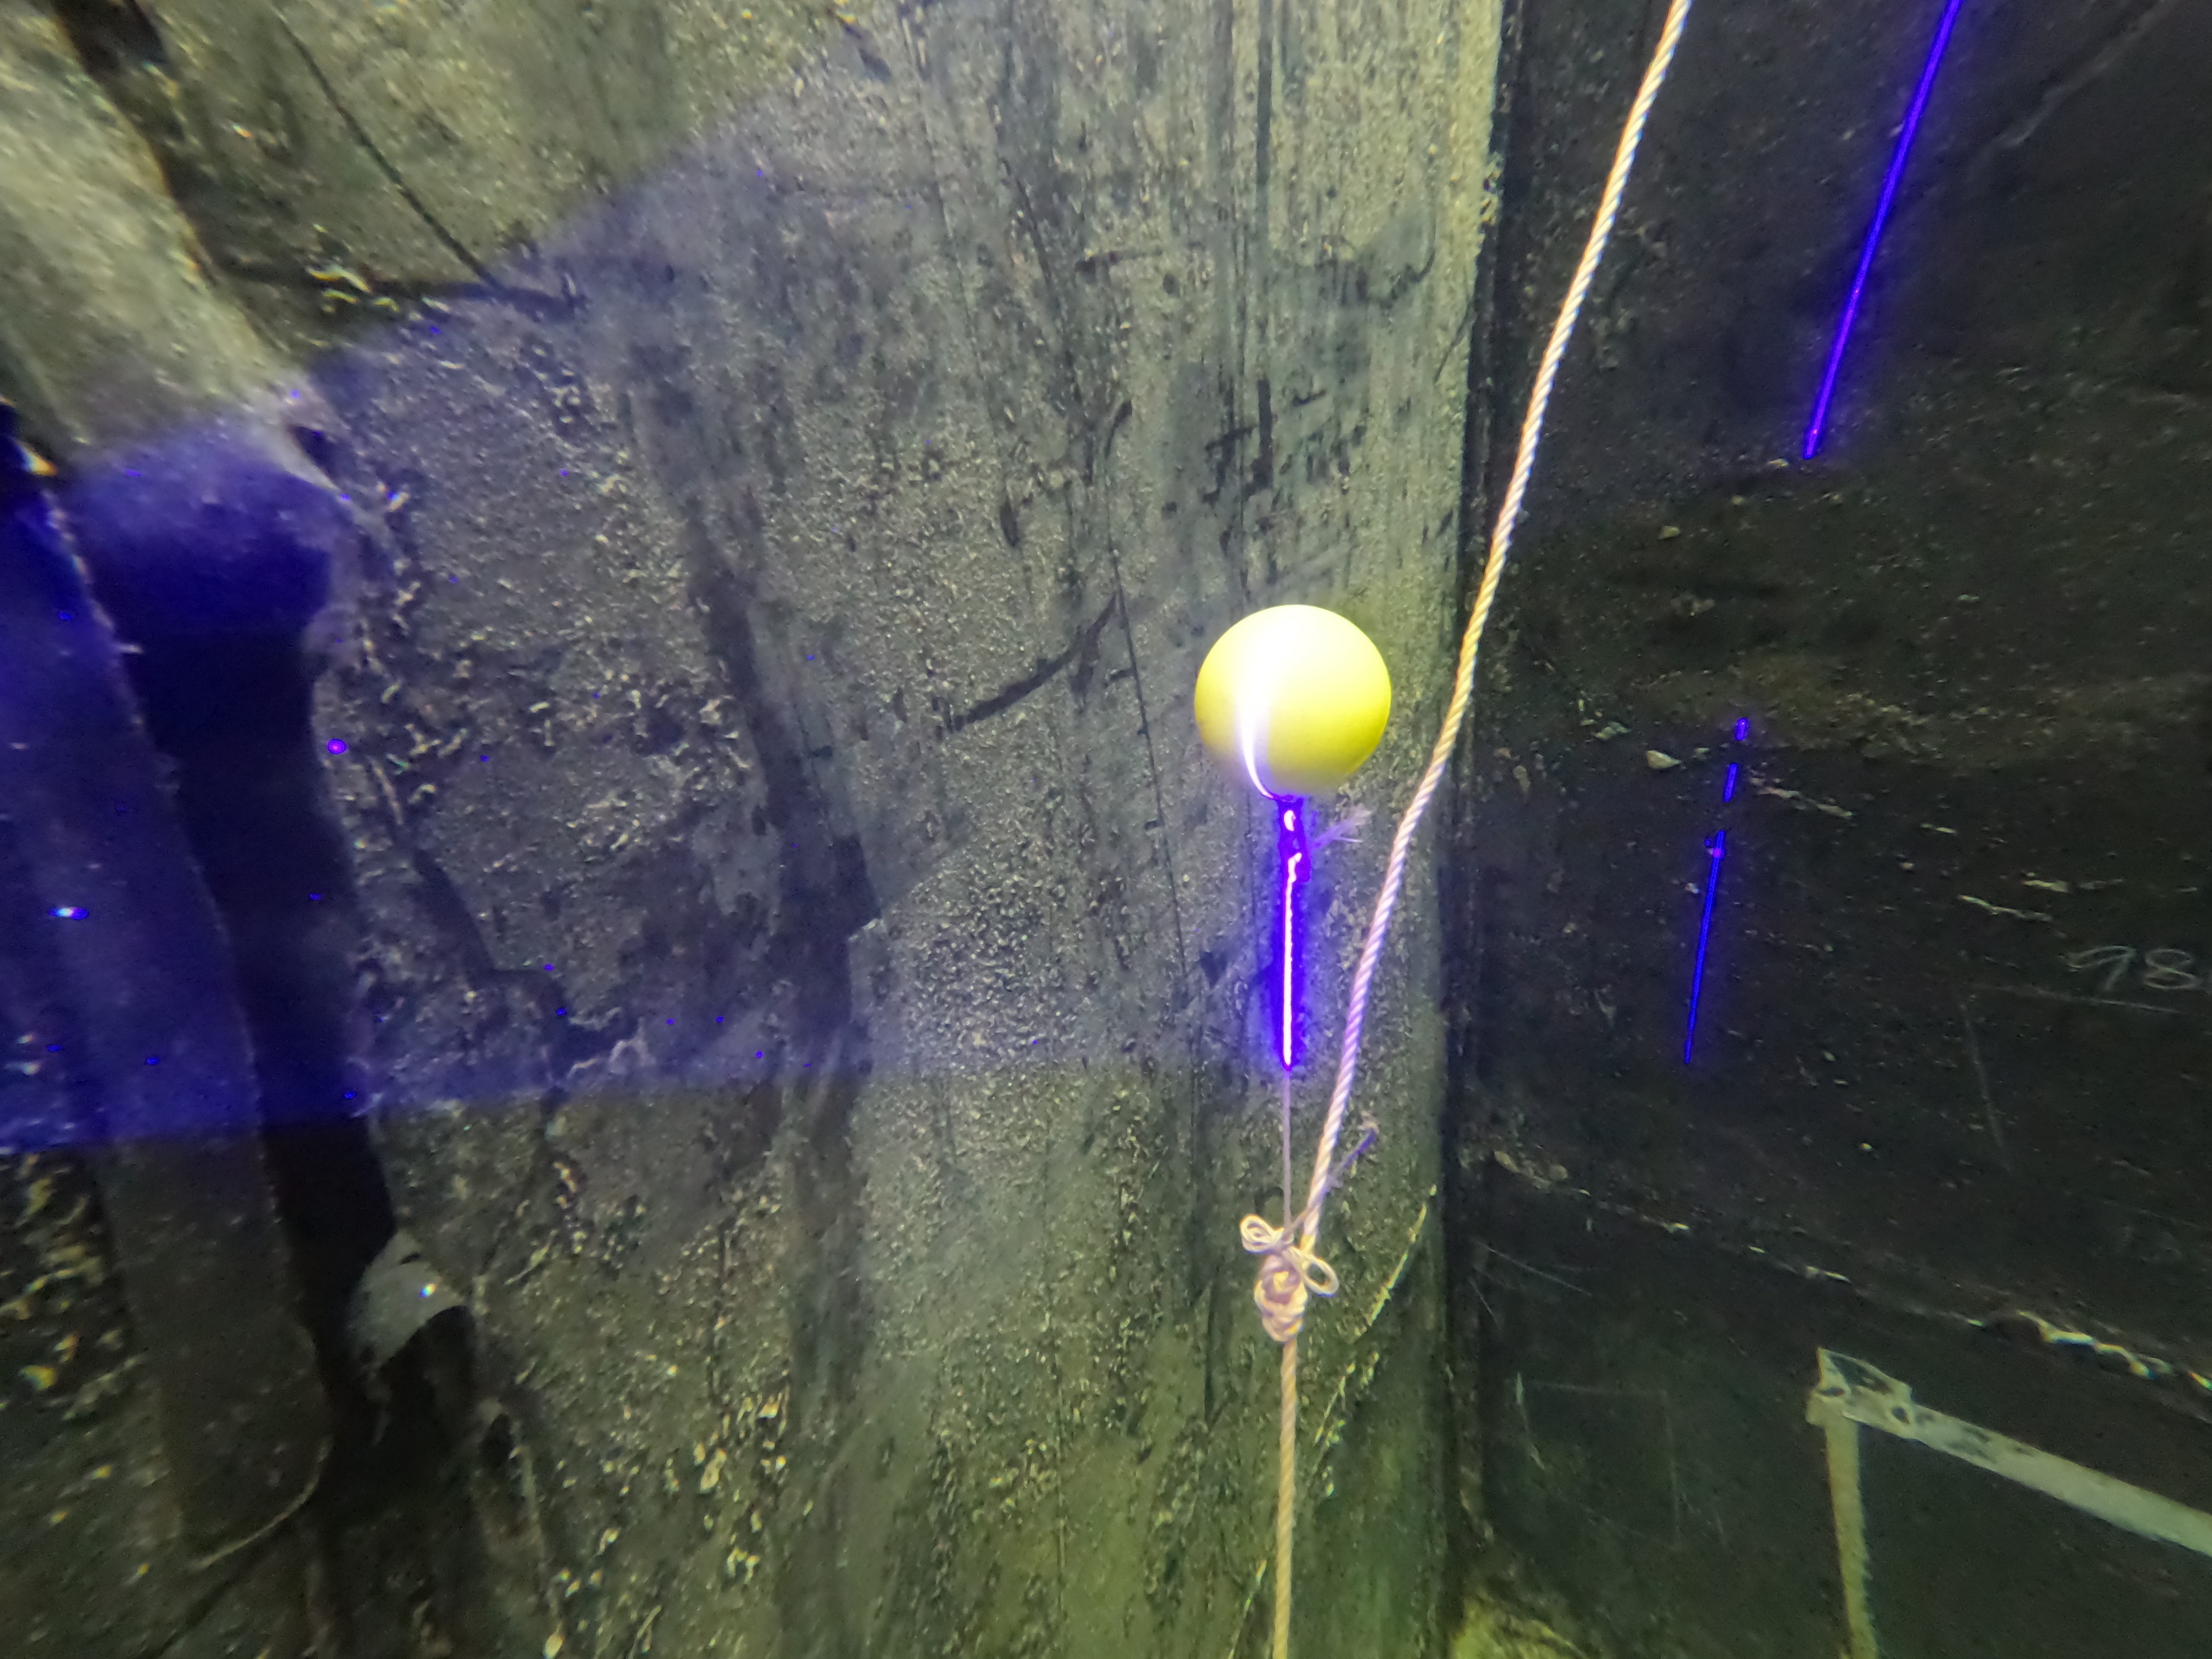

Supplement: Supplementary file 1957 [file G0034349.pdf › 5/G0034349.pdf]

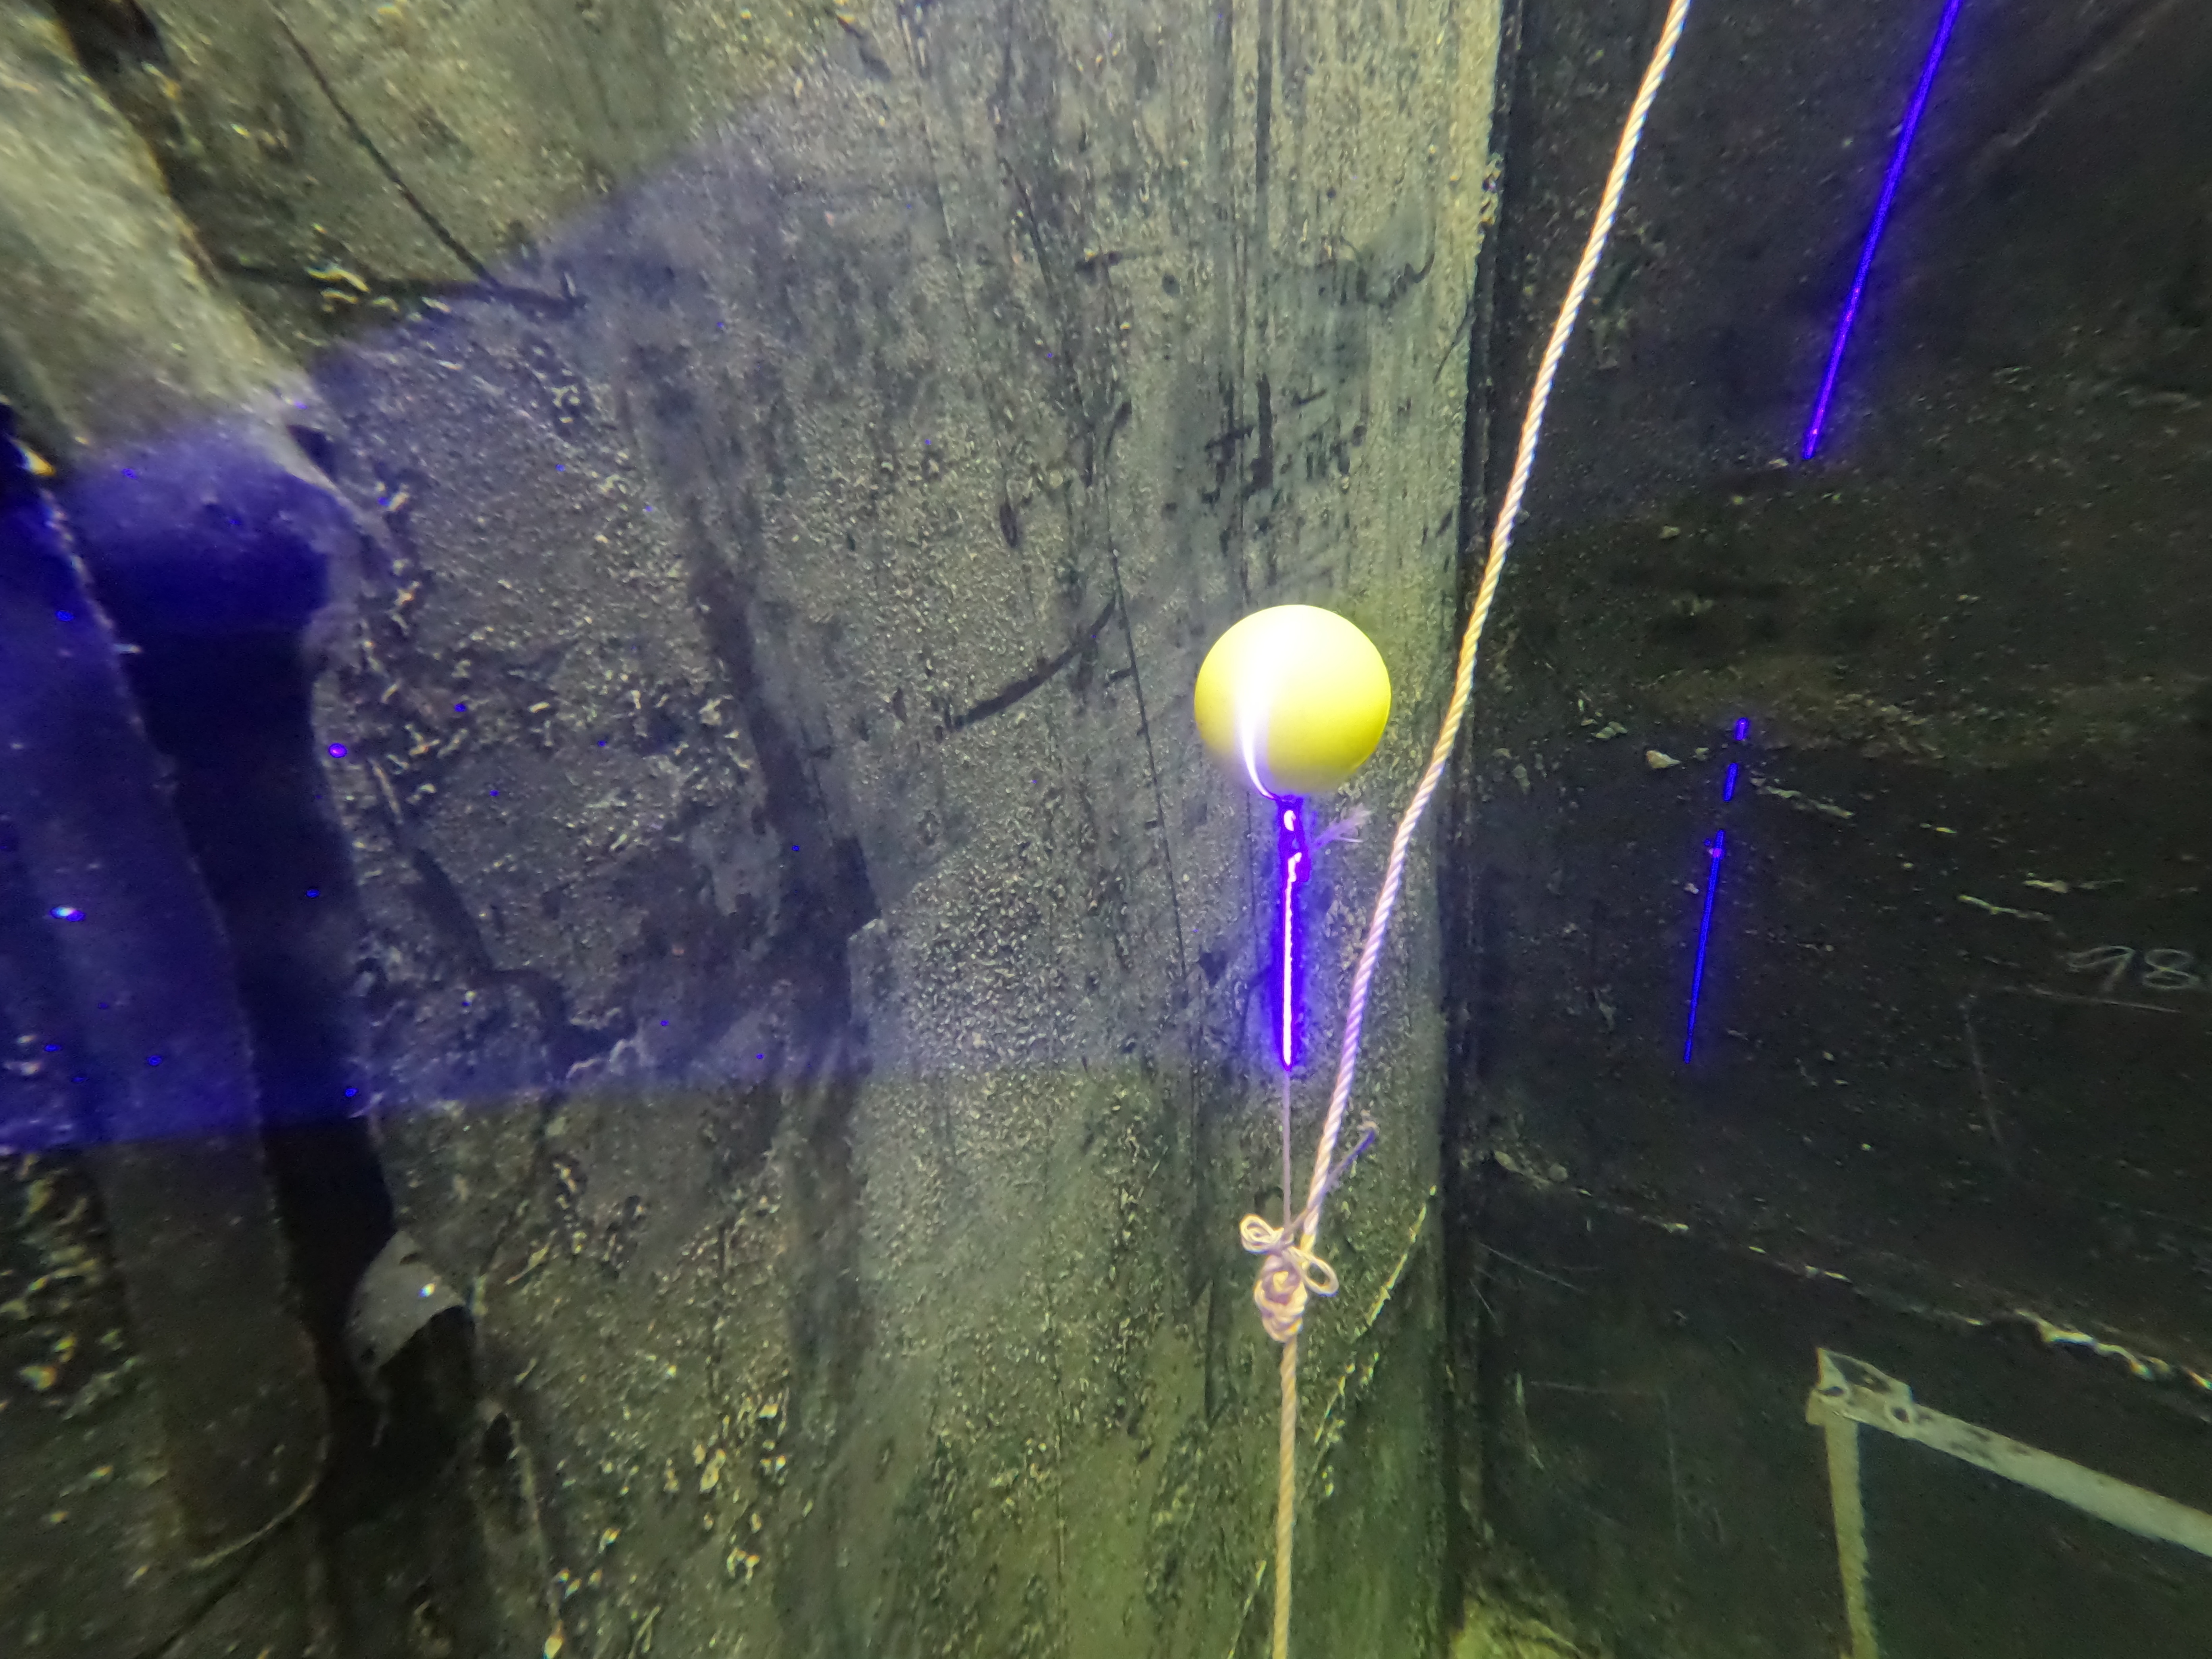

Supplement: Supplementary file 1958 [file G0034350.pdf › 5/G0034350.pdf]

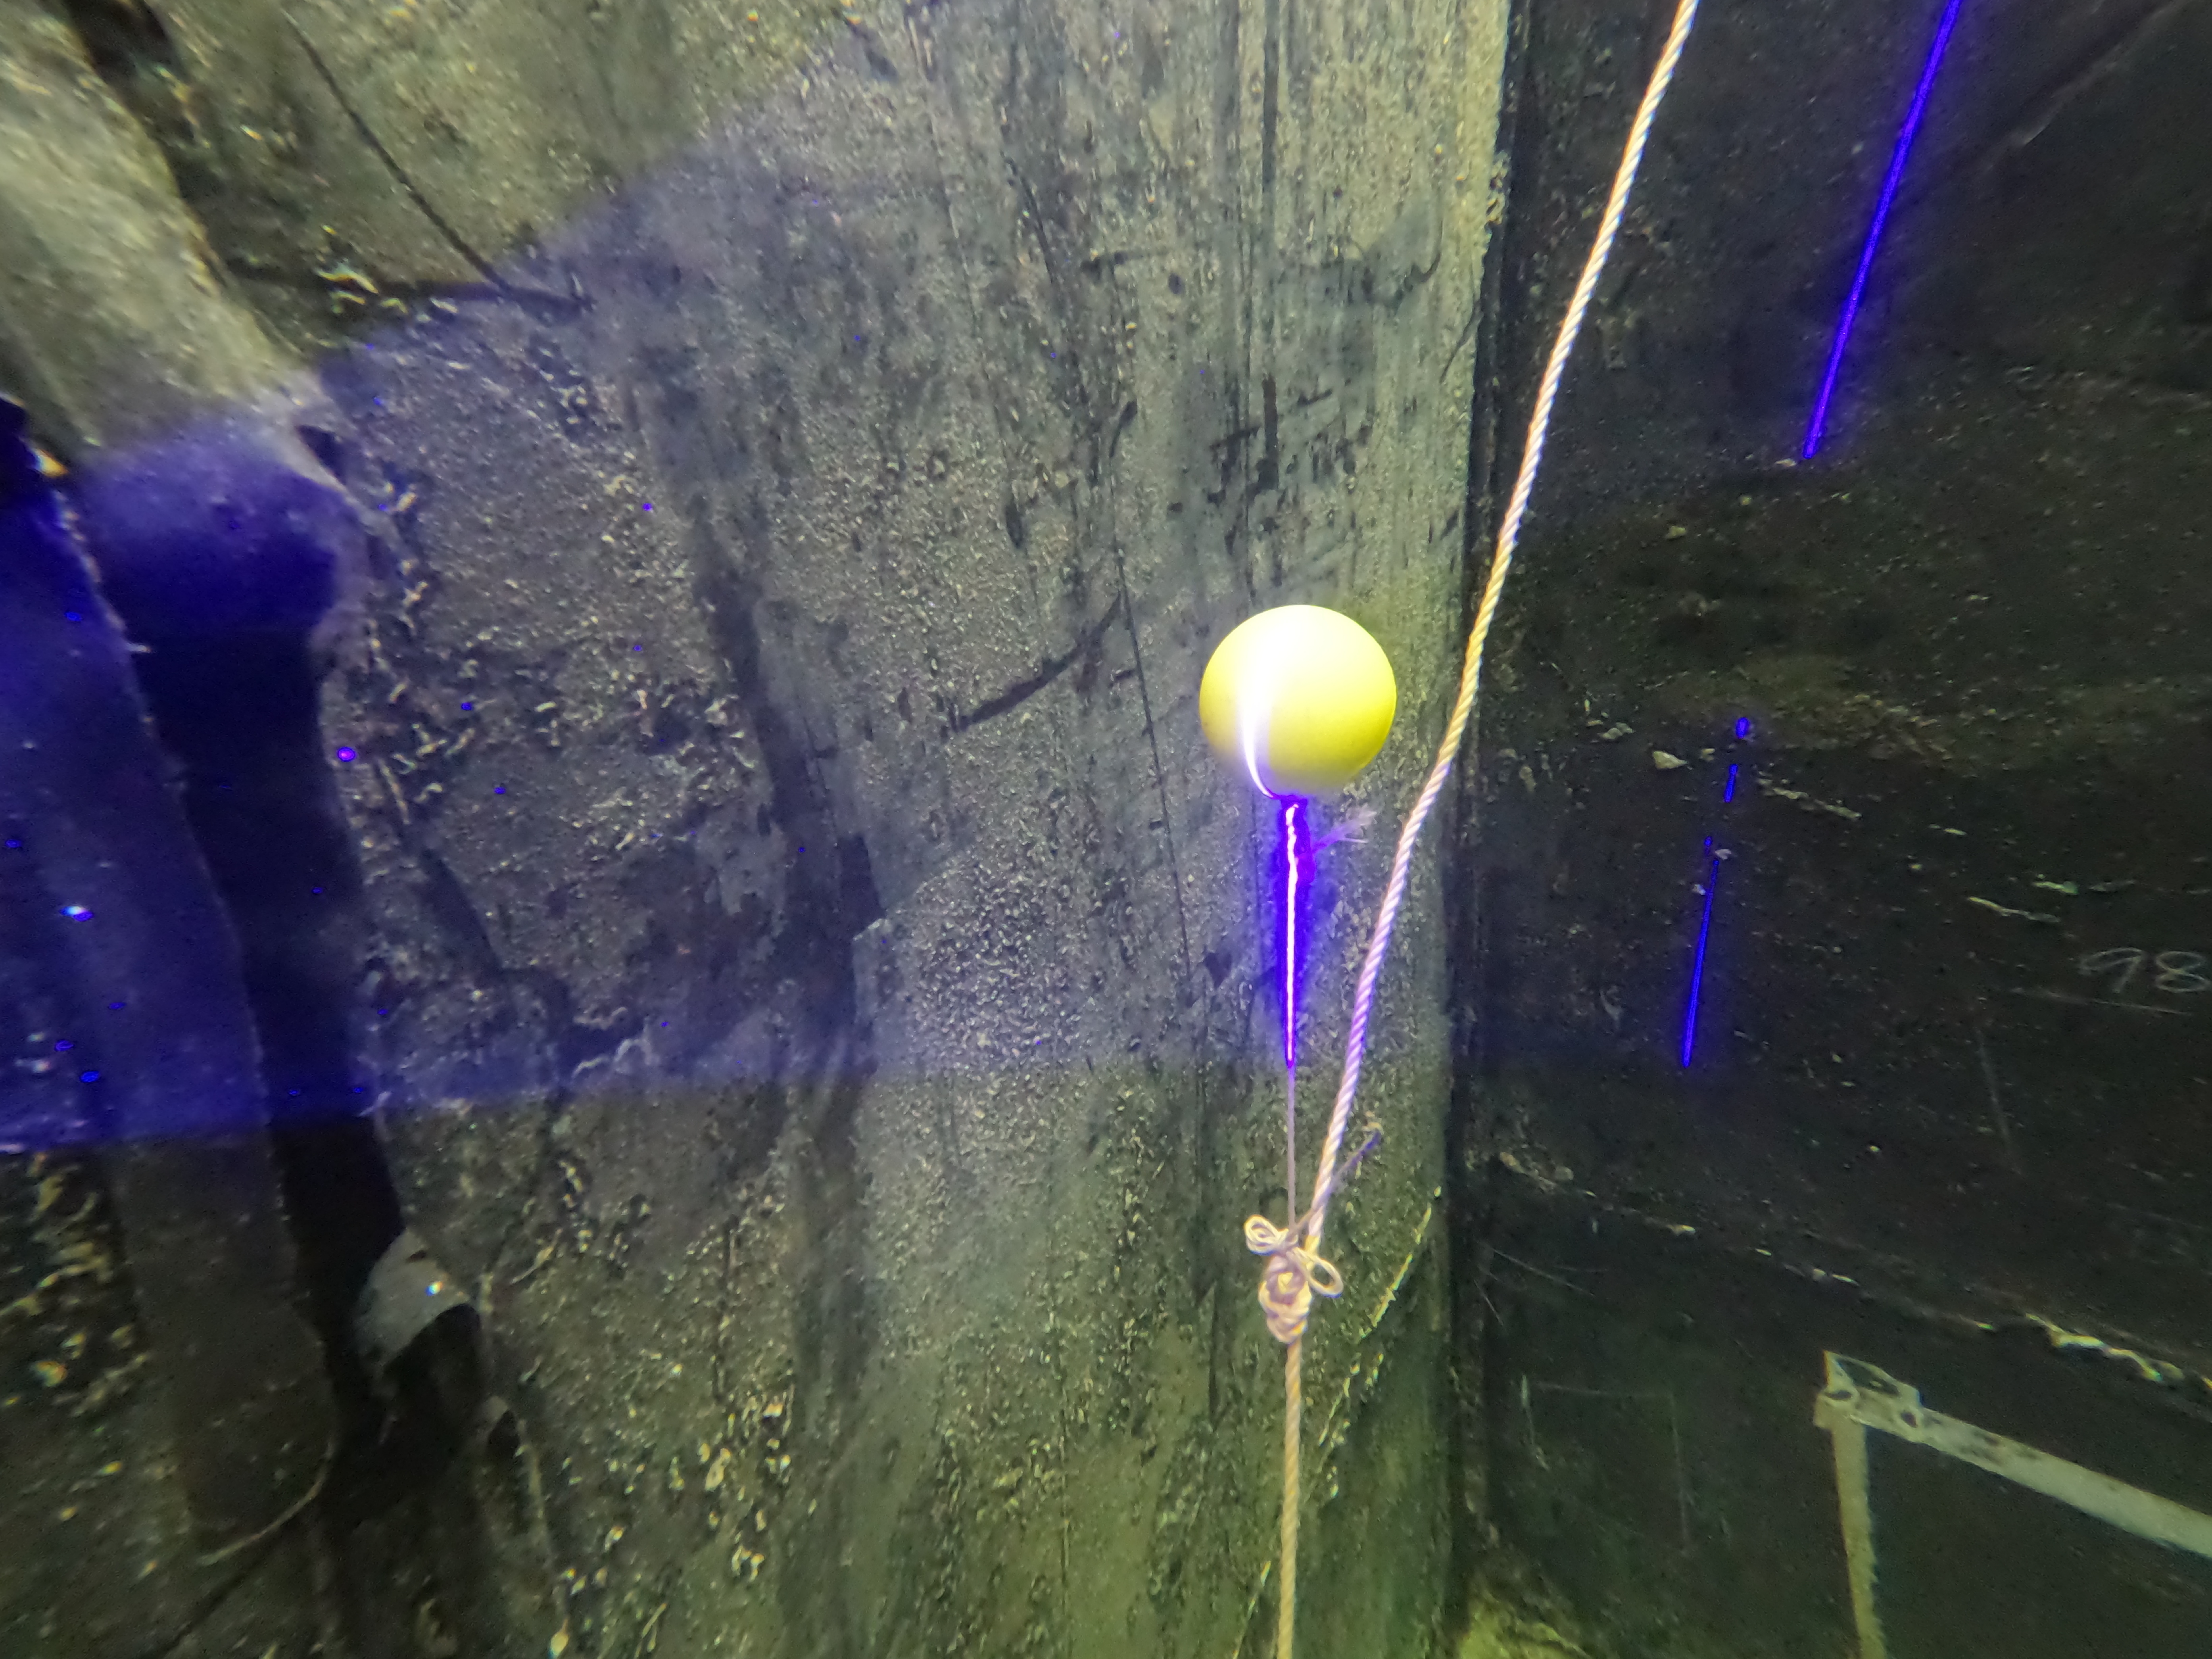

Supplement: Supplementary file 1959 [file G0034351.pdf › 5/G0034351.pdf]

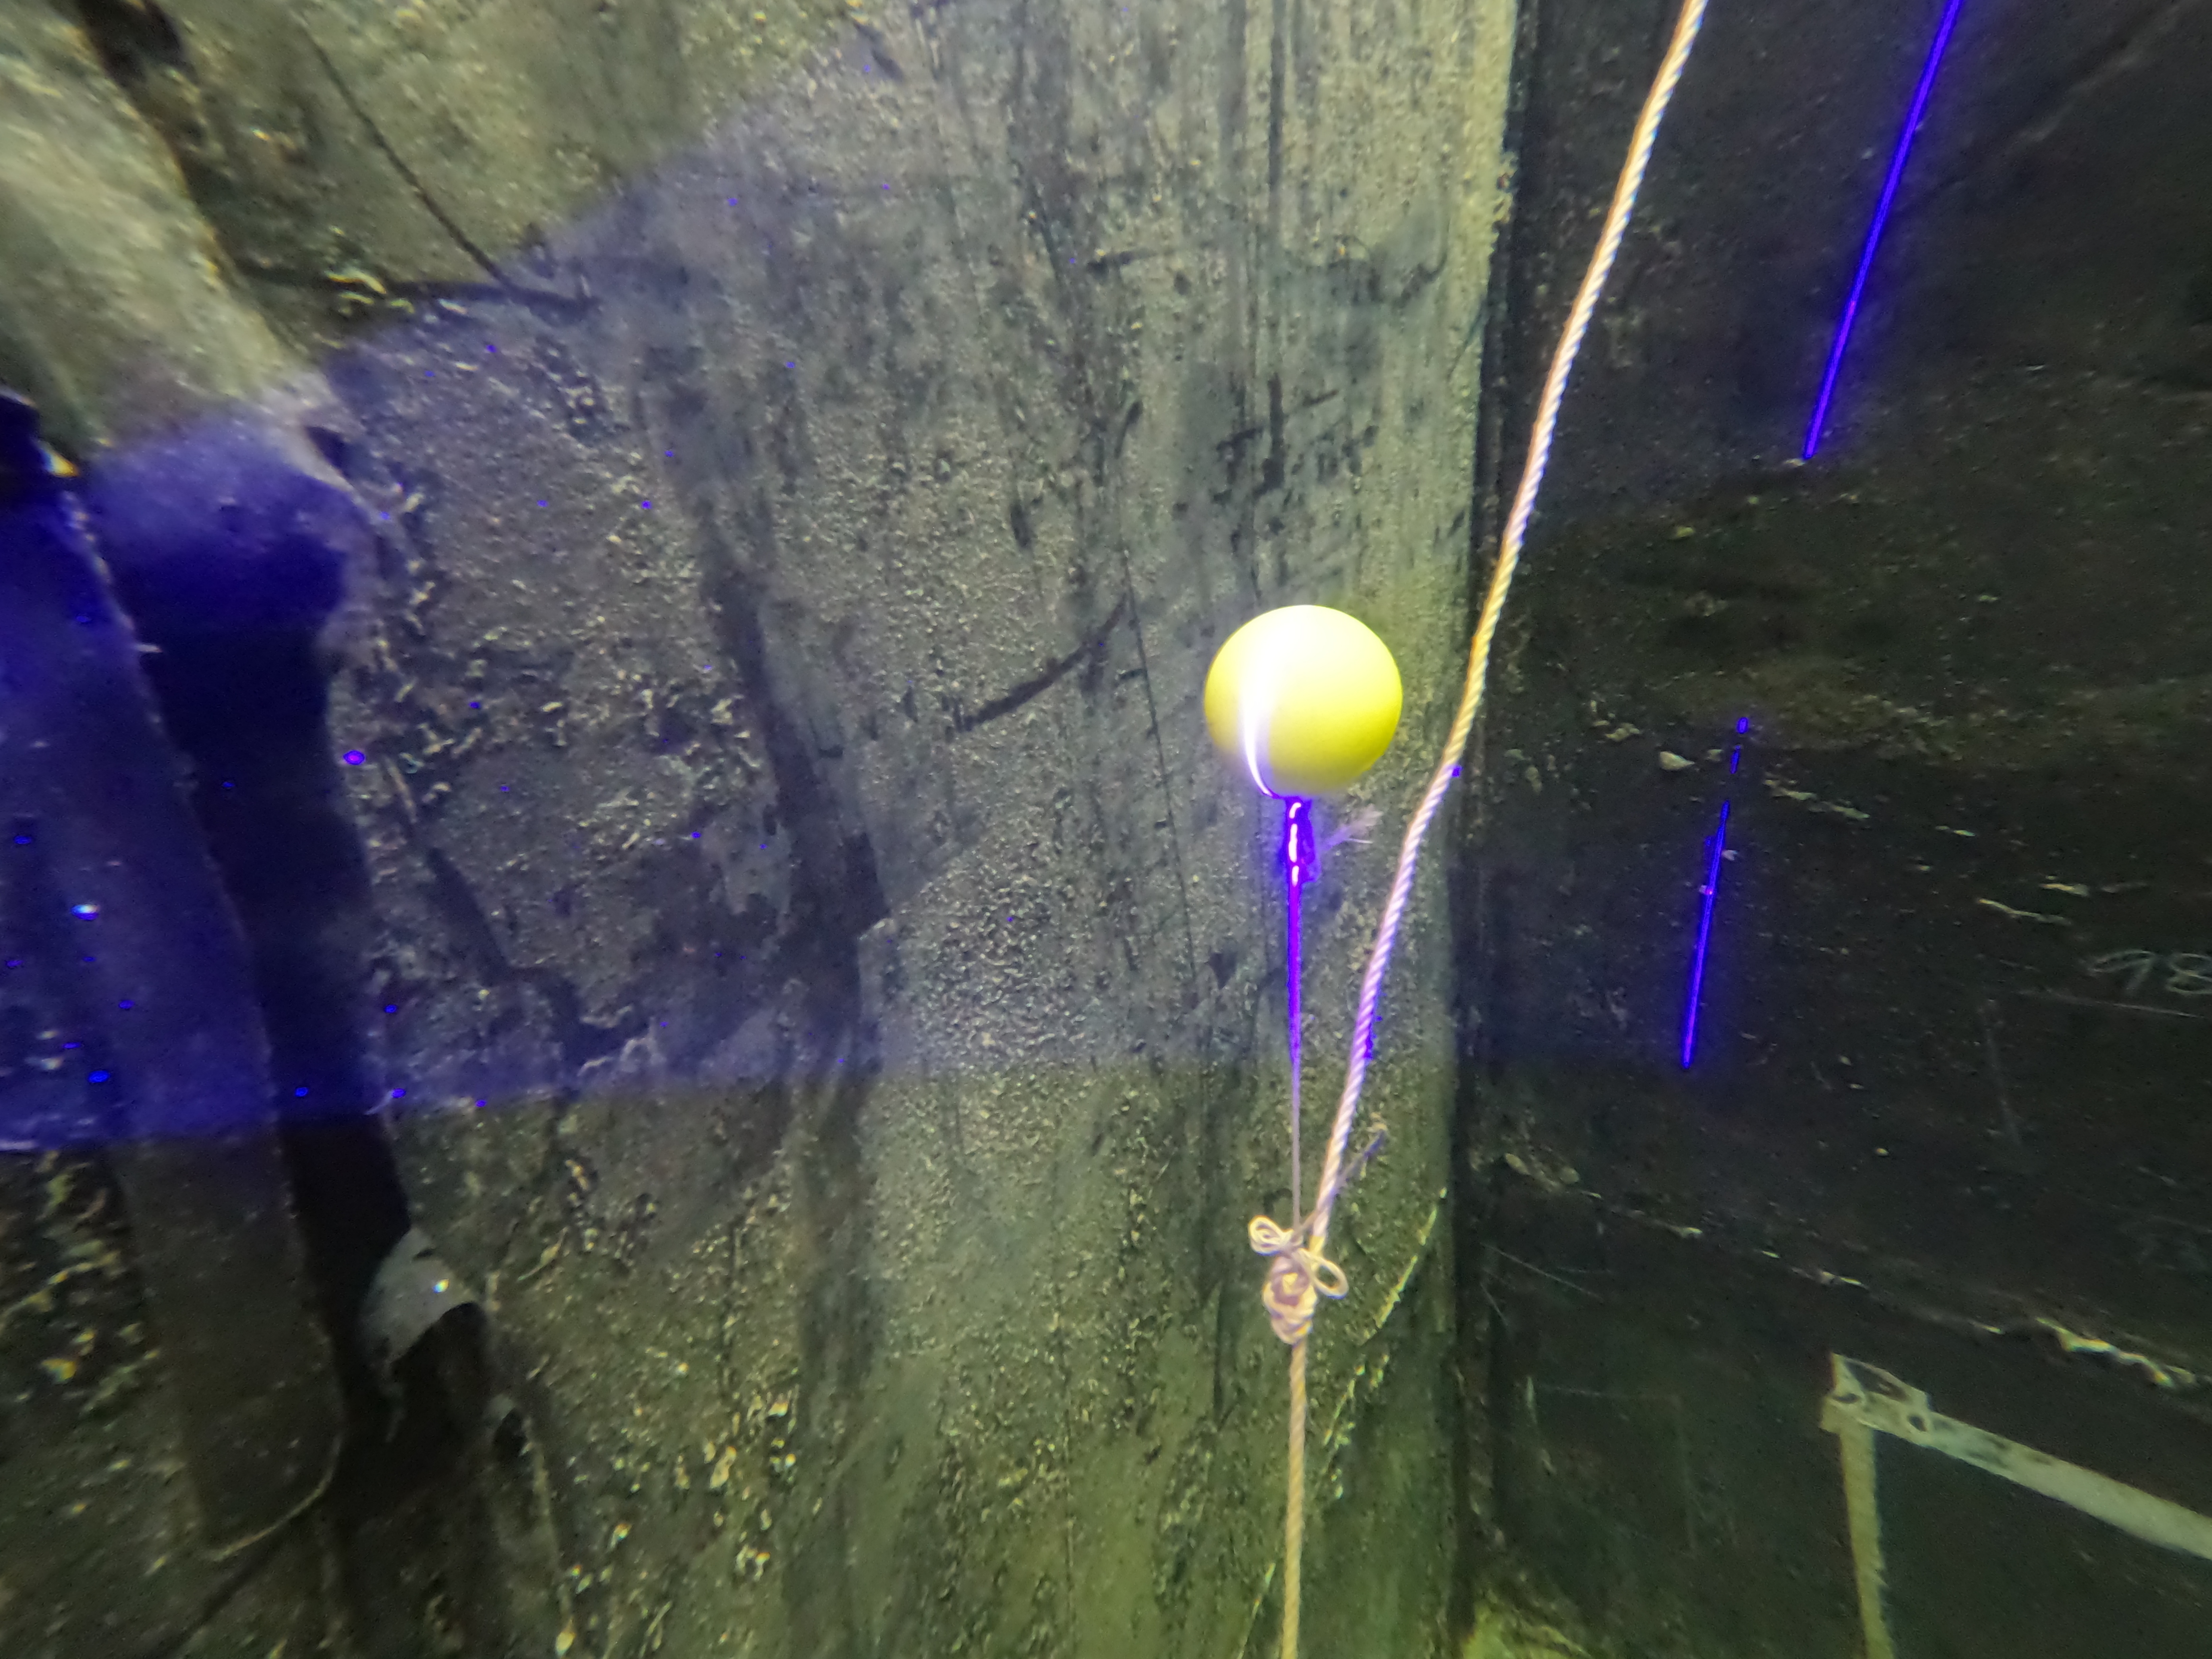

Supplement: Supplementary file 1960 [file G0034352.pdf › 5/G0034352.pdf]

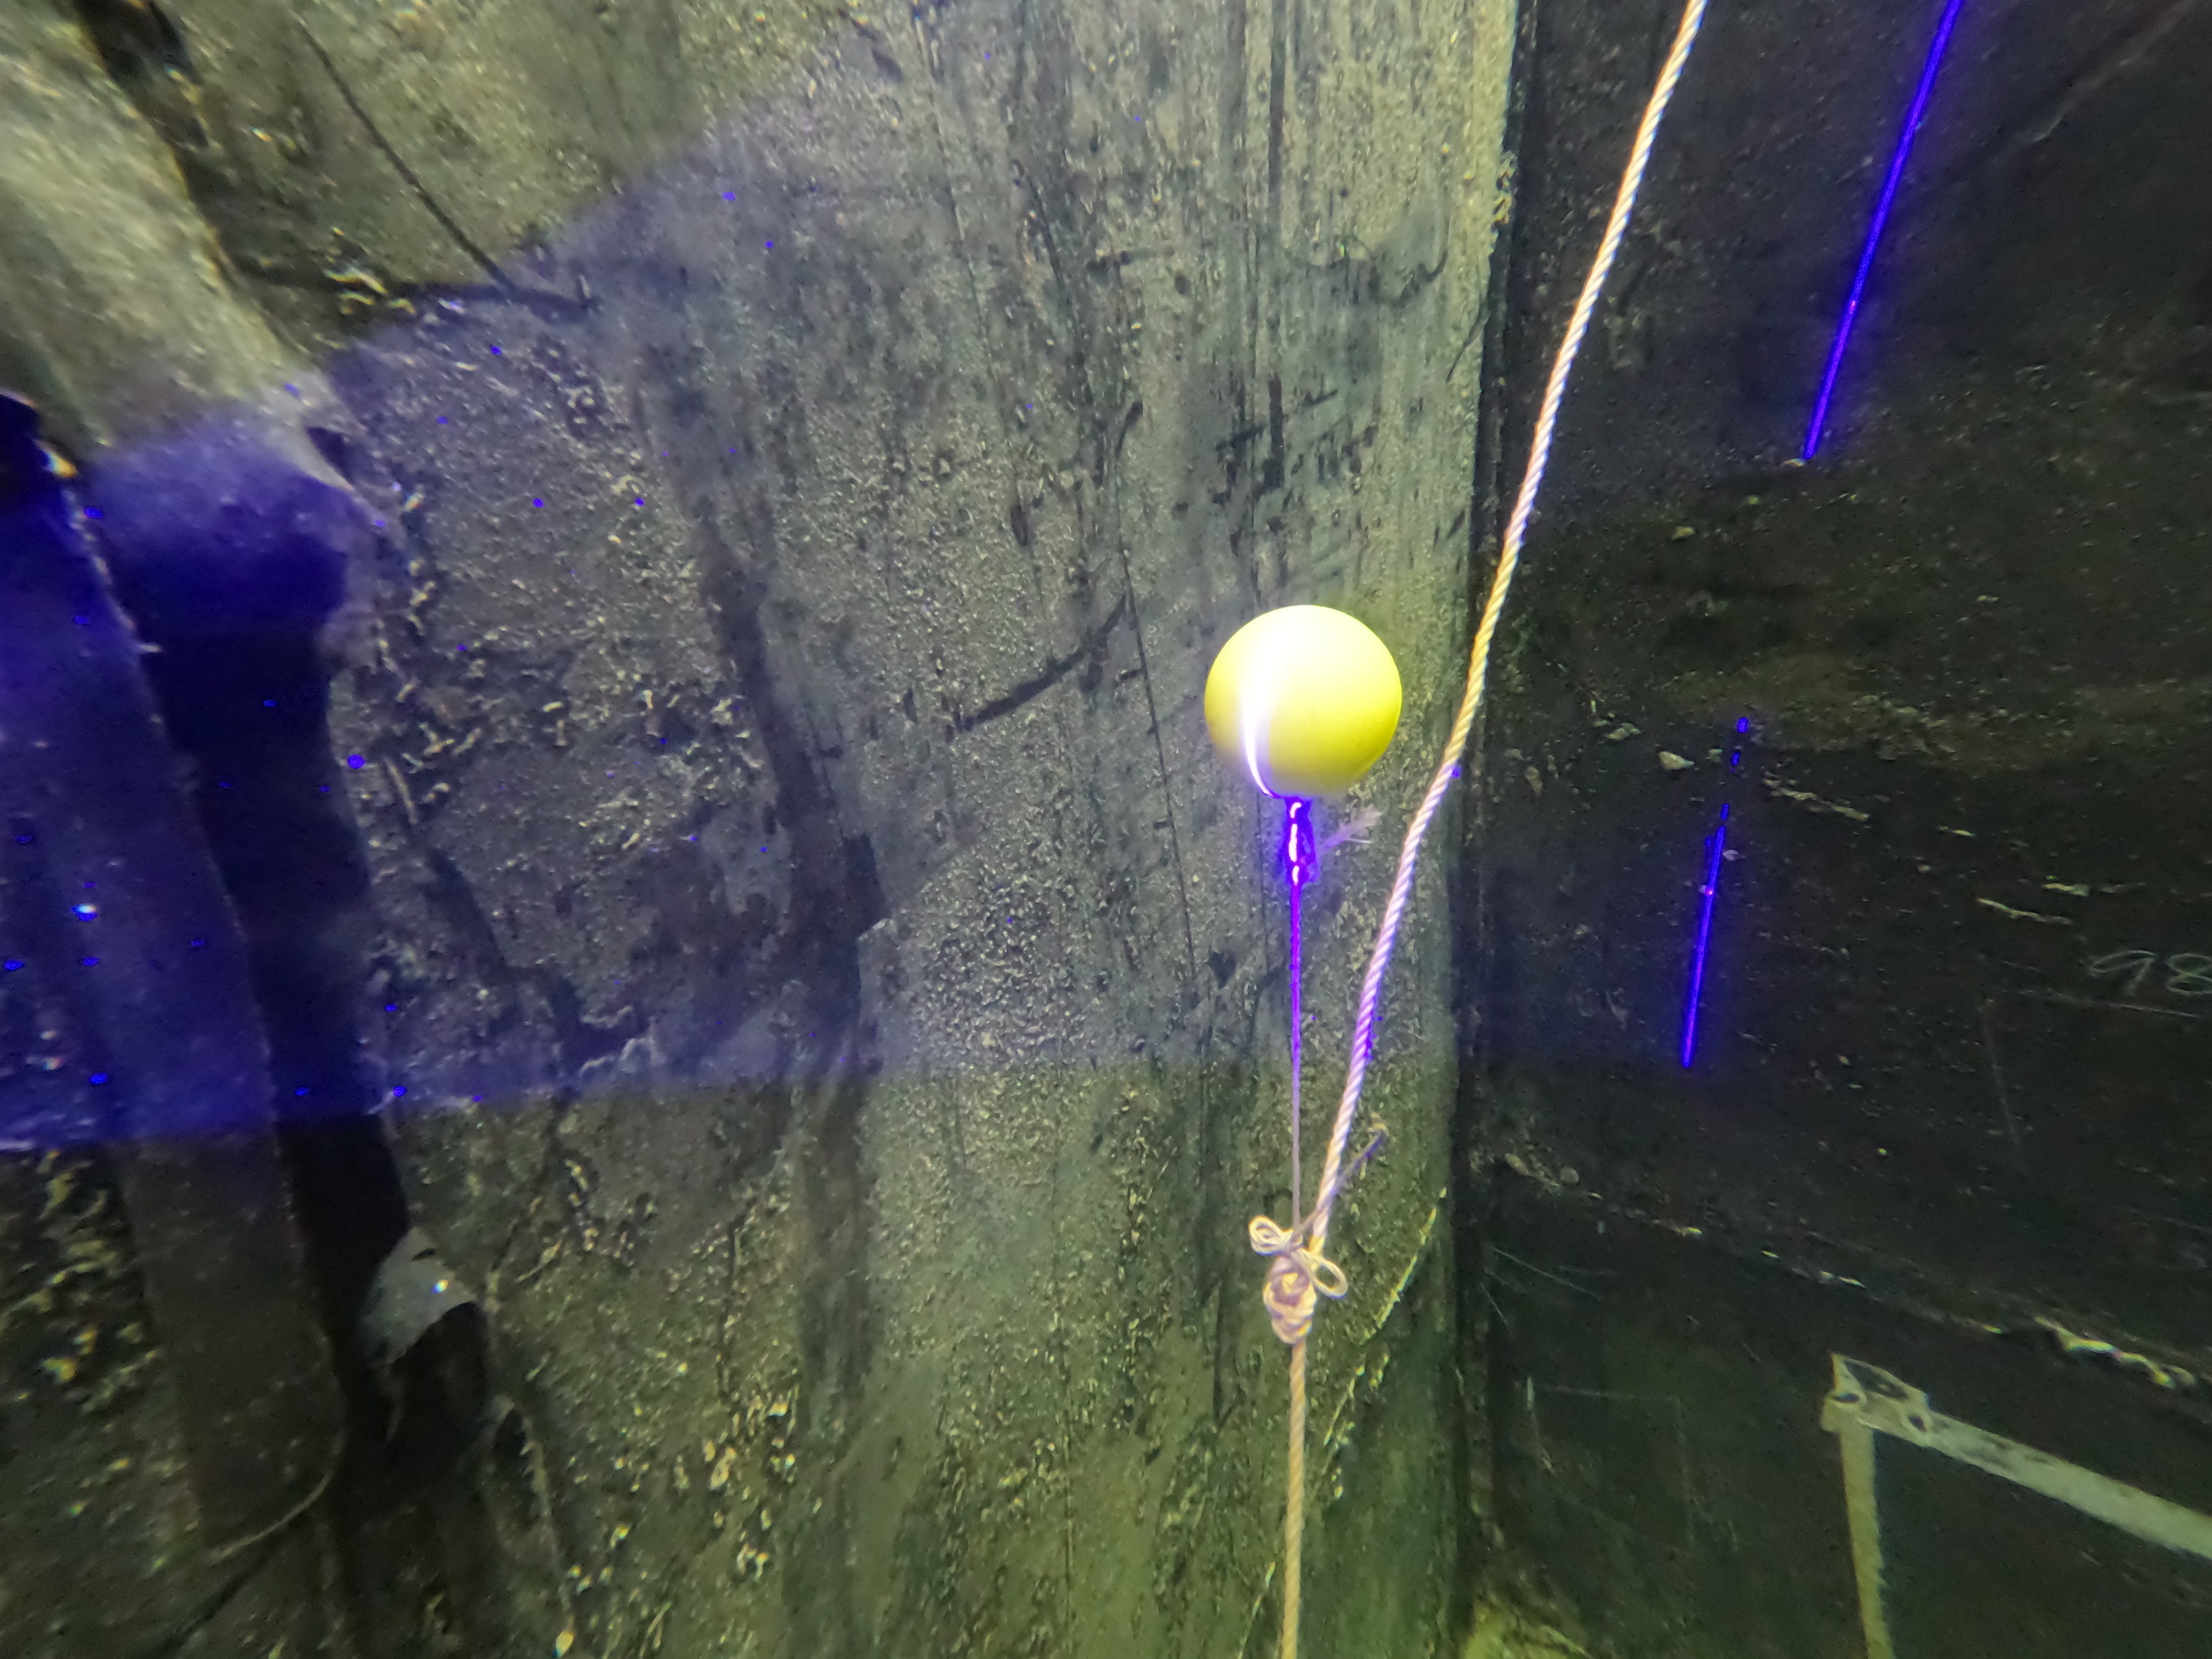

Supplement: Supplementary file 1961 [file G0034353.pdf › 5/G0034353.pdf]

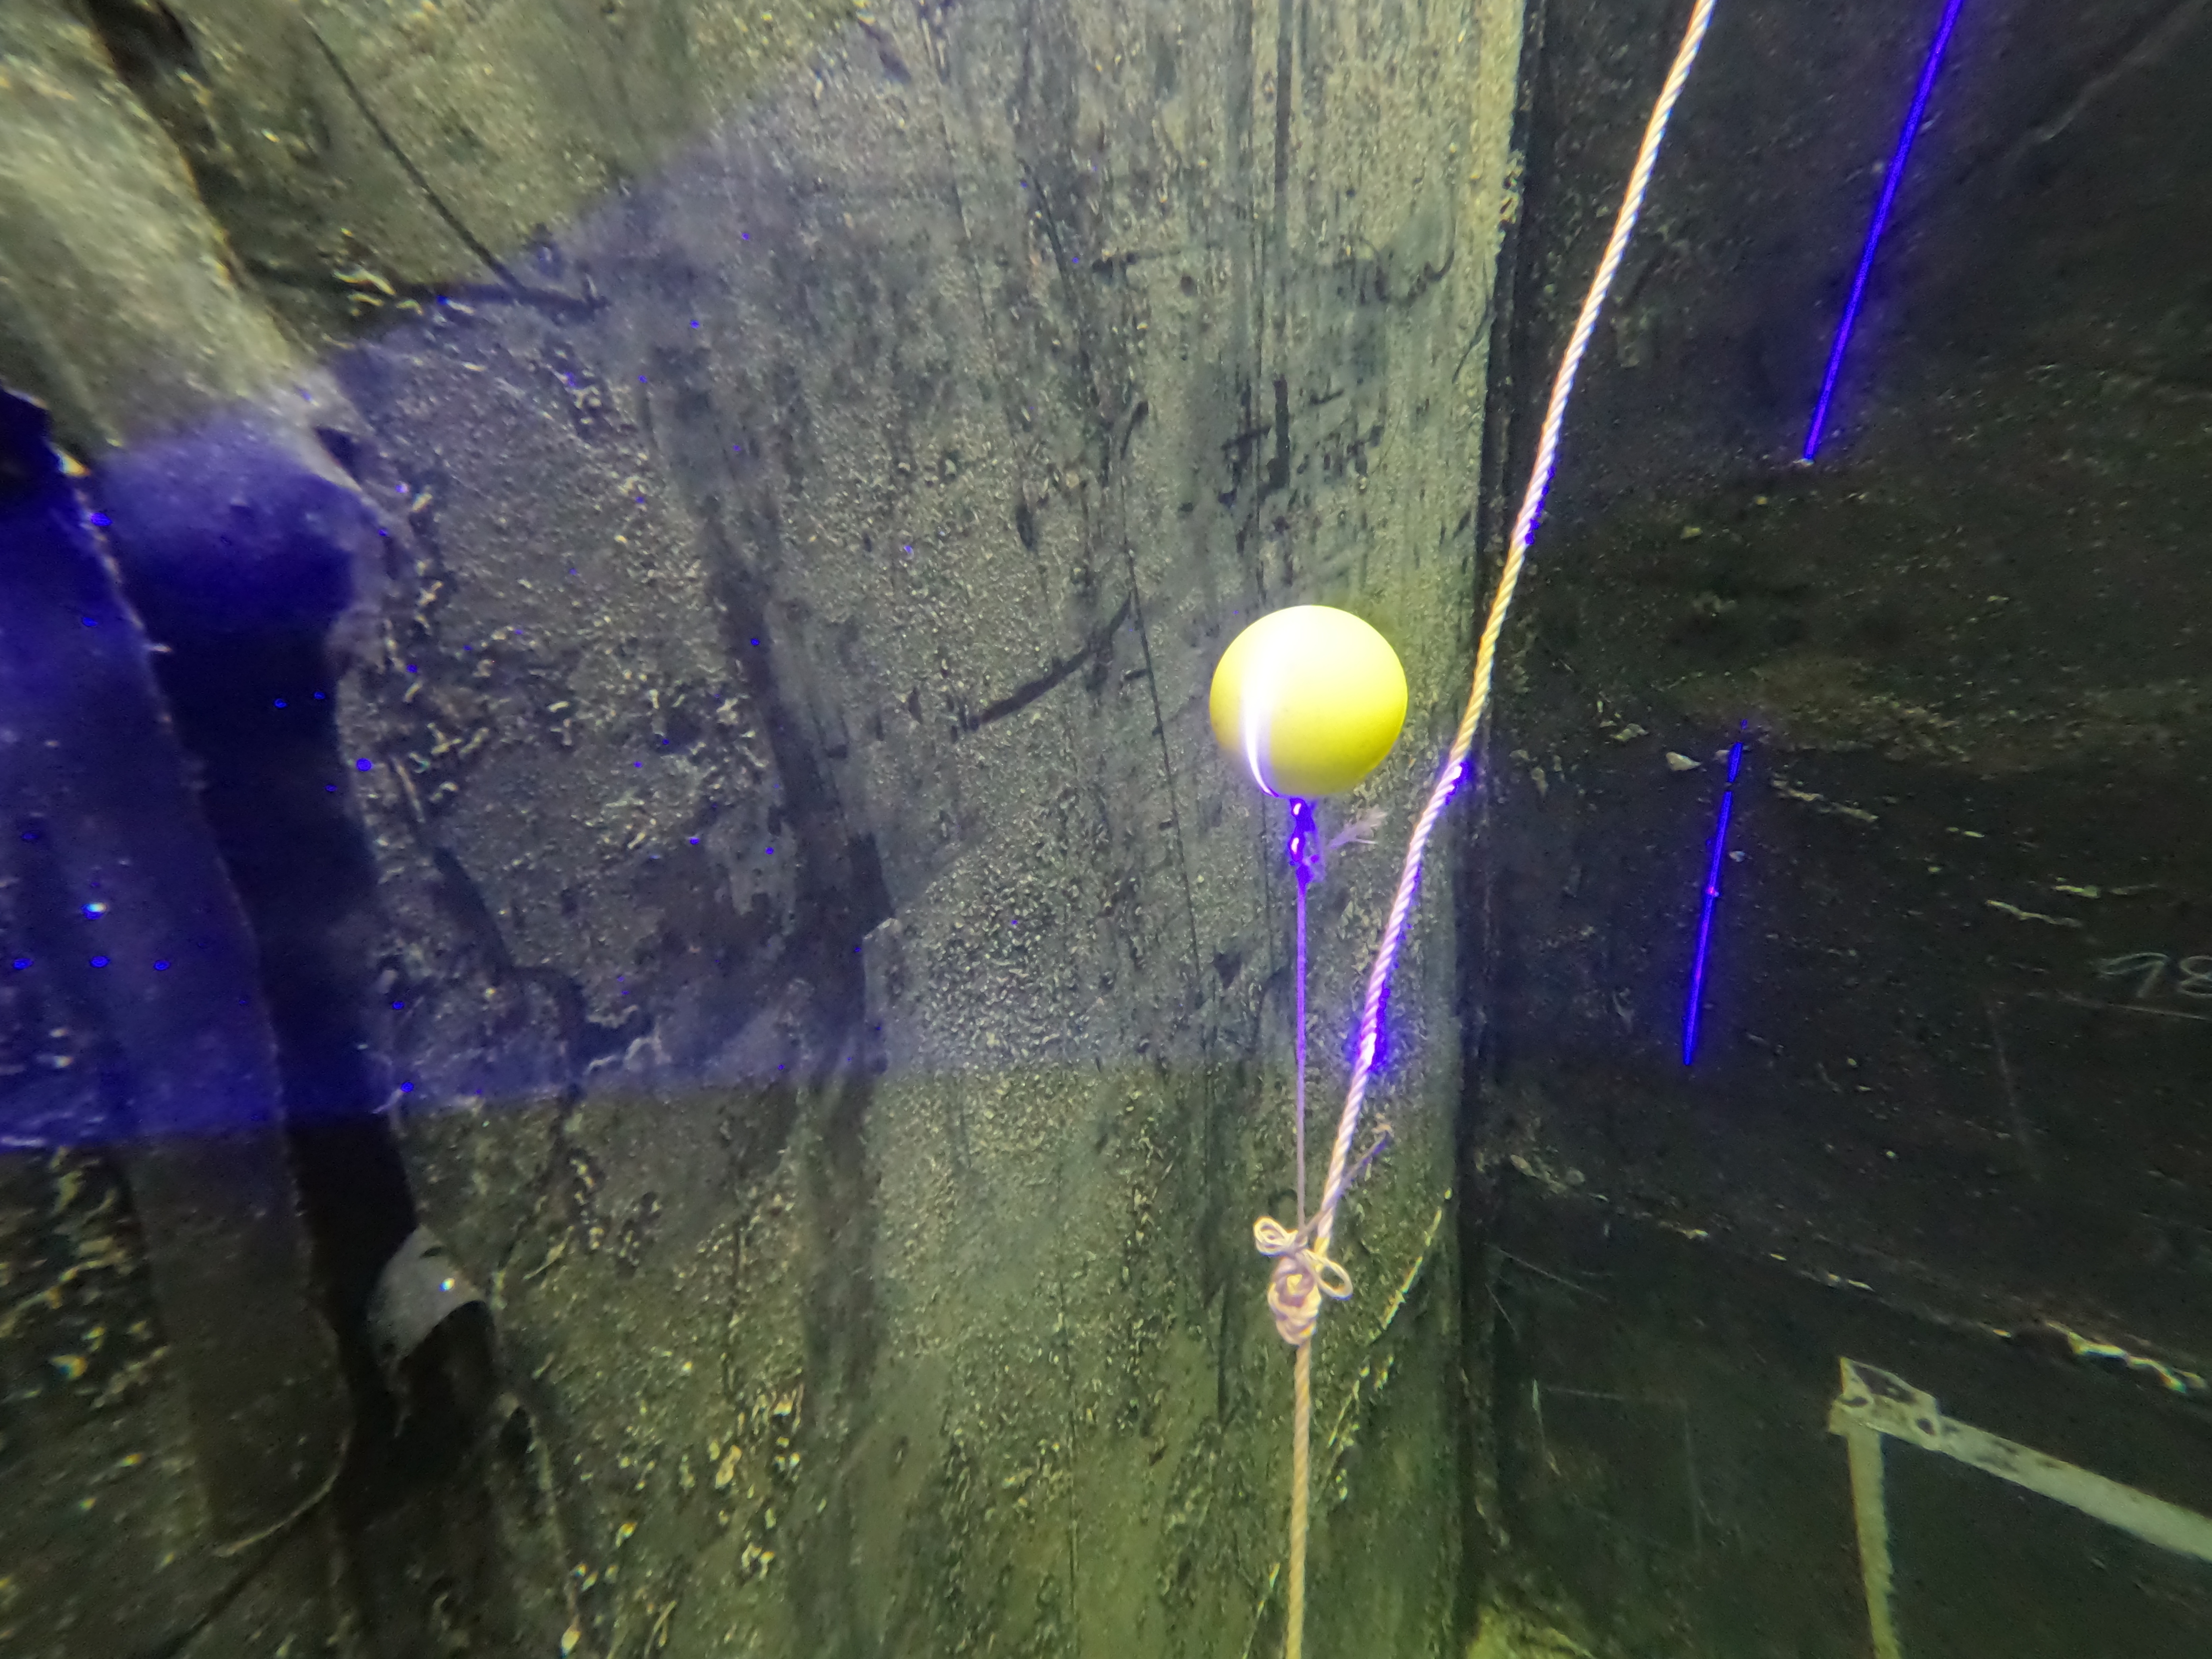

Supplement: Supplementary file 1962 [file G0034354.pdf › 5/G0034354.pdf]

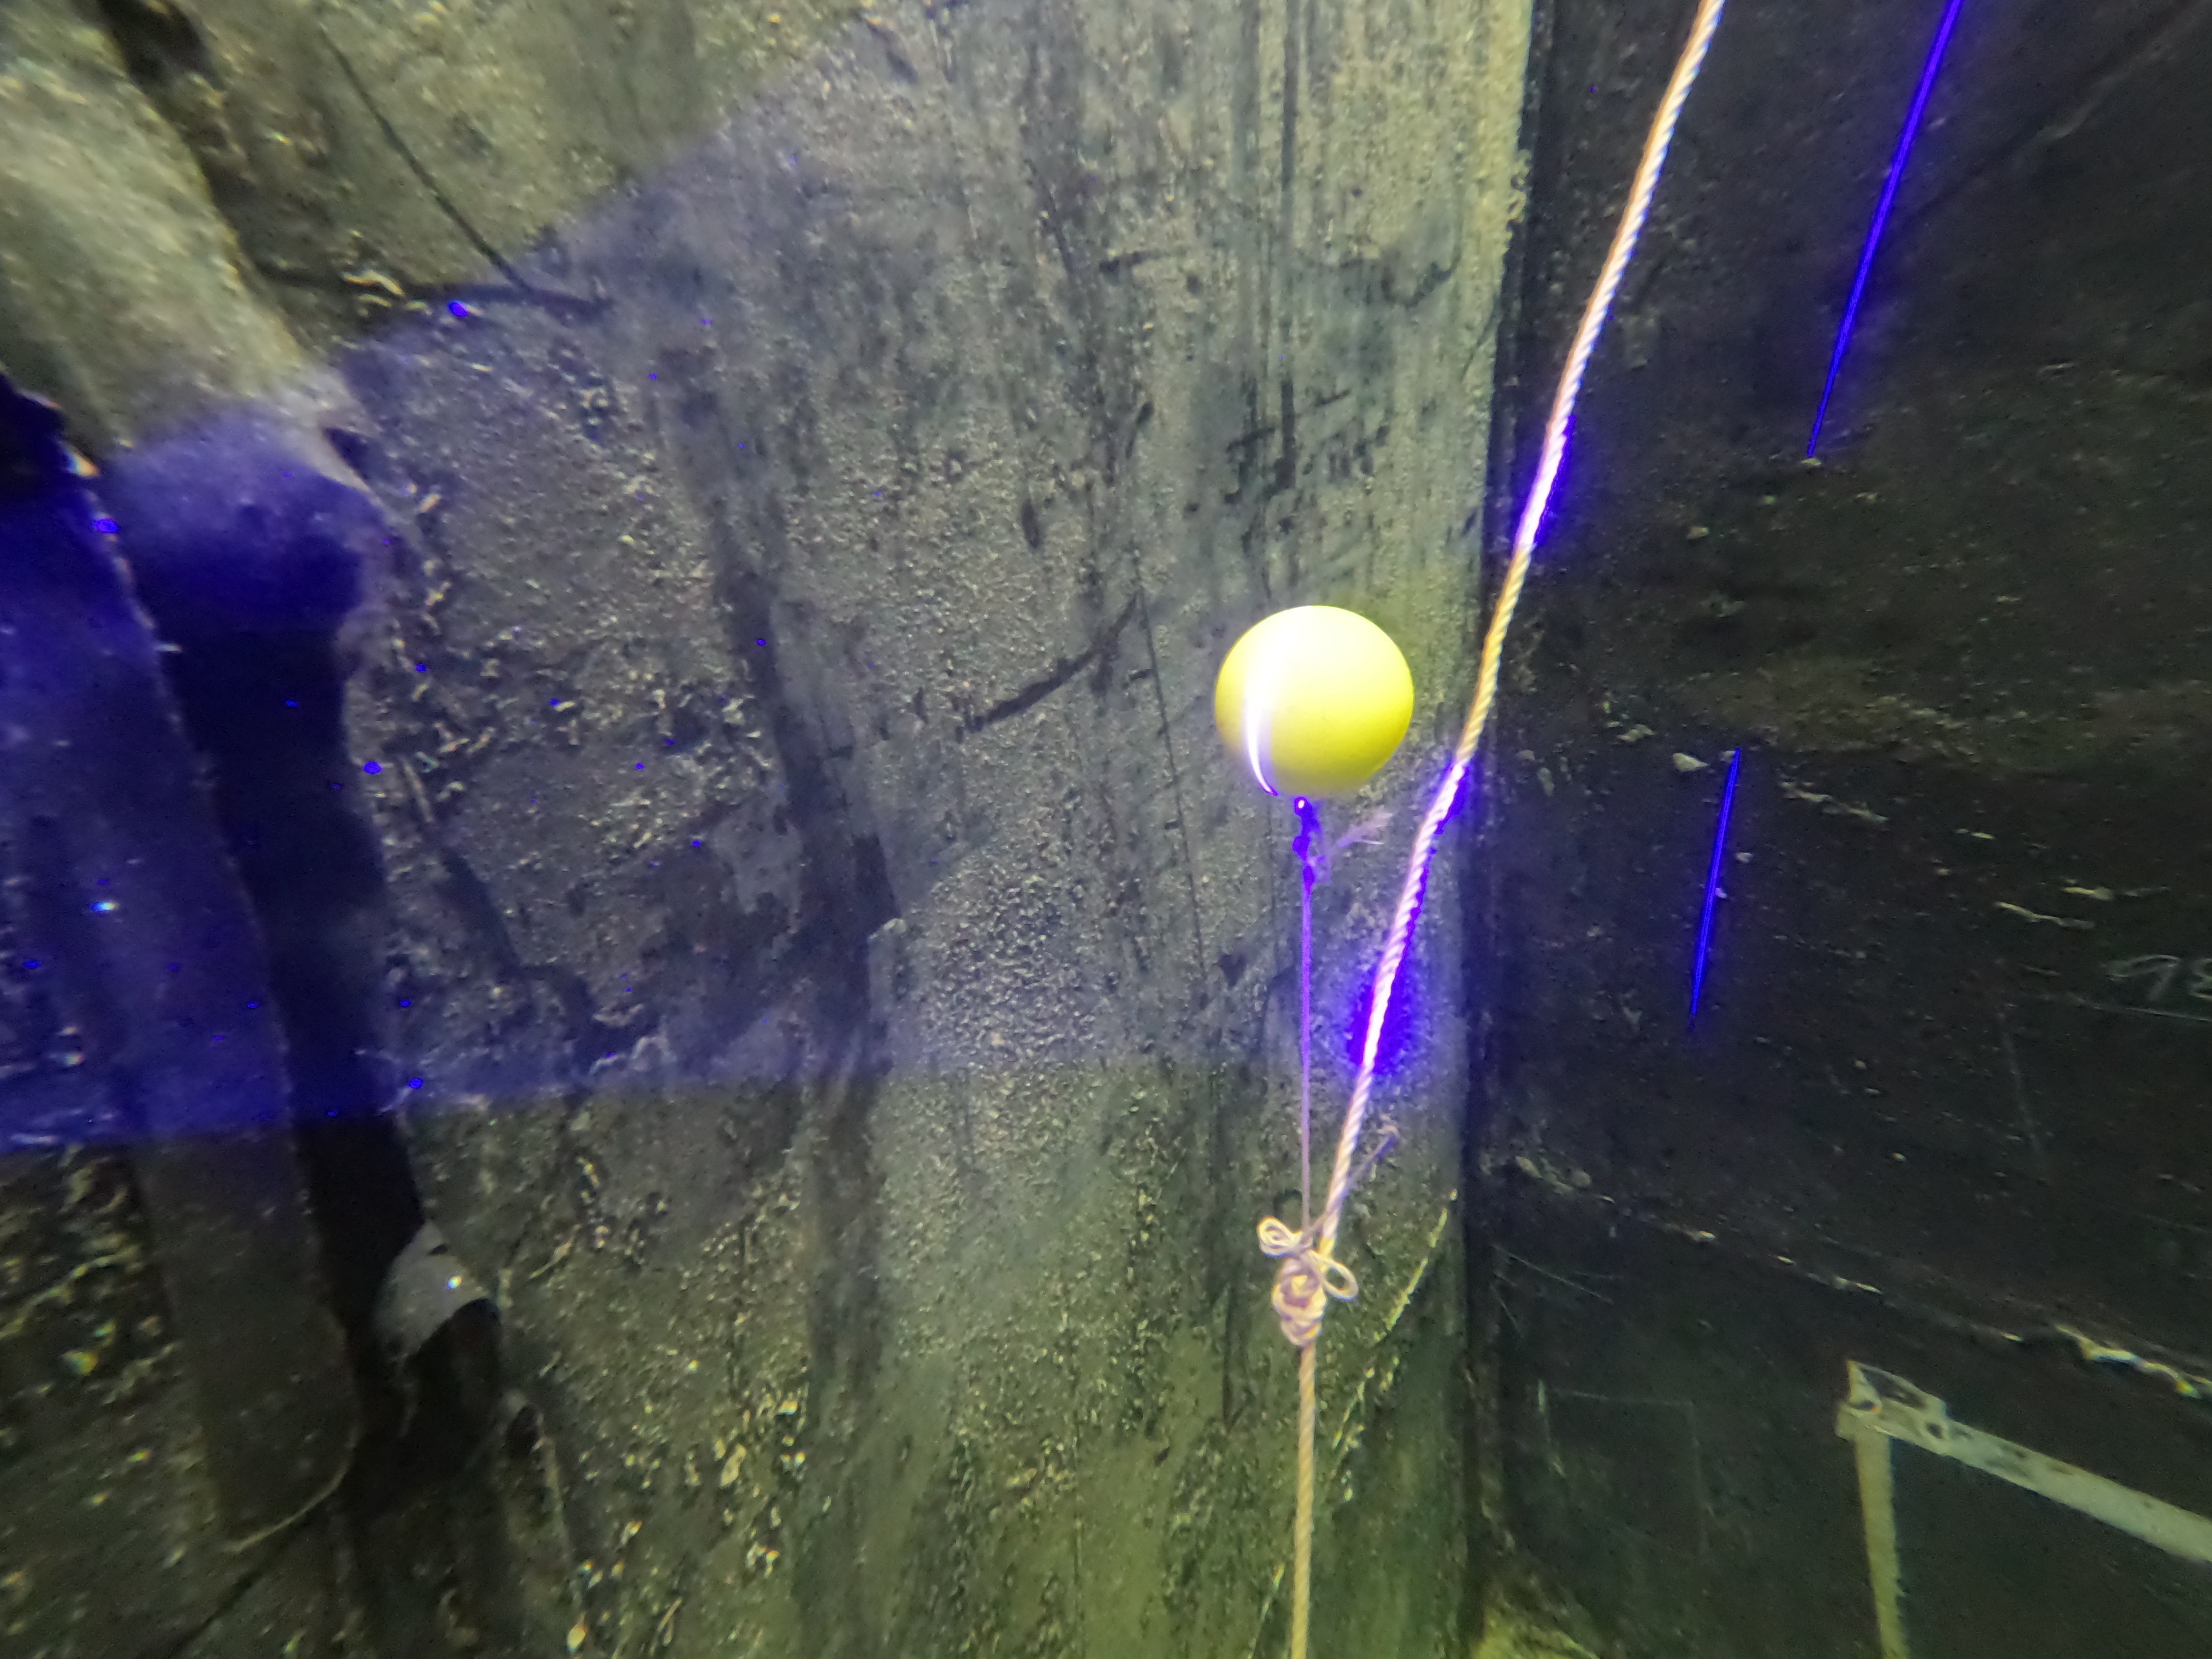

Supplement: Supplementary file 1963 [file G0034355.pdf › 5/G0034355.pdf]

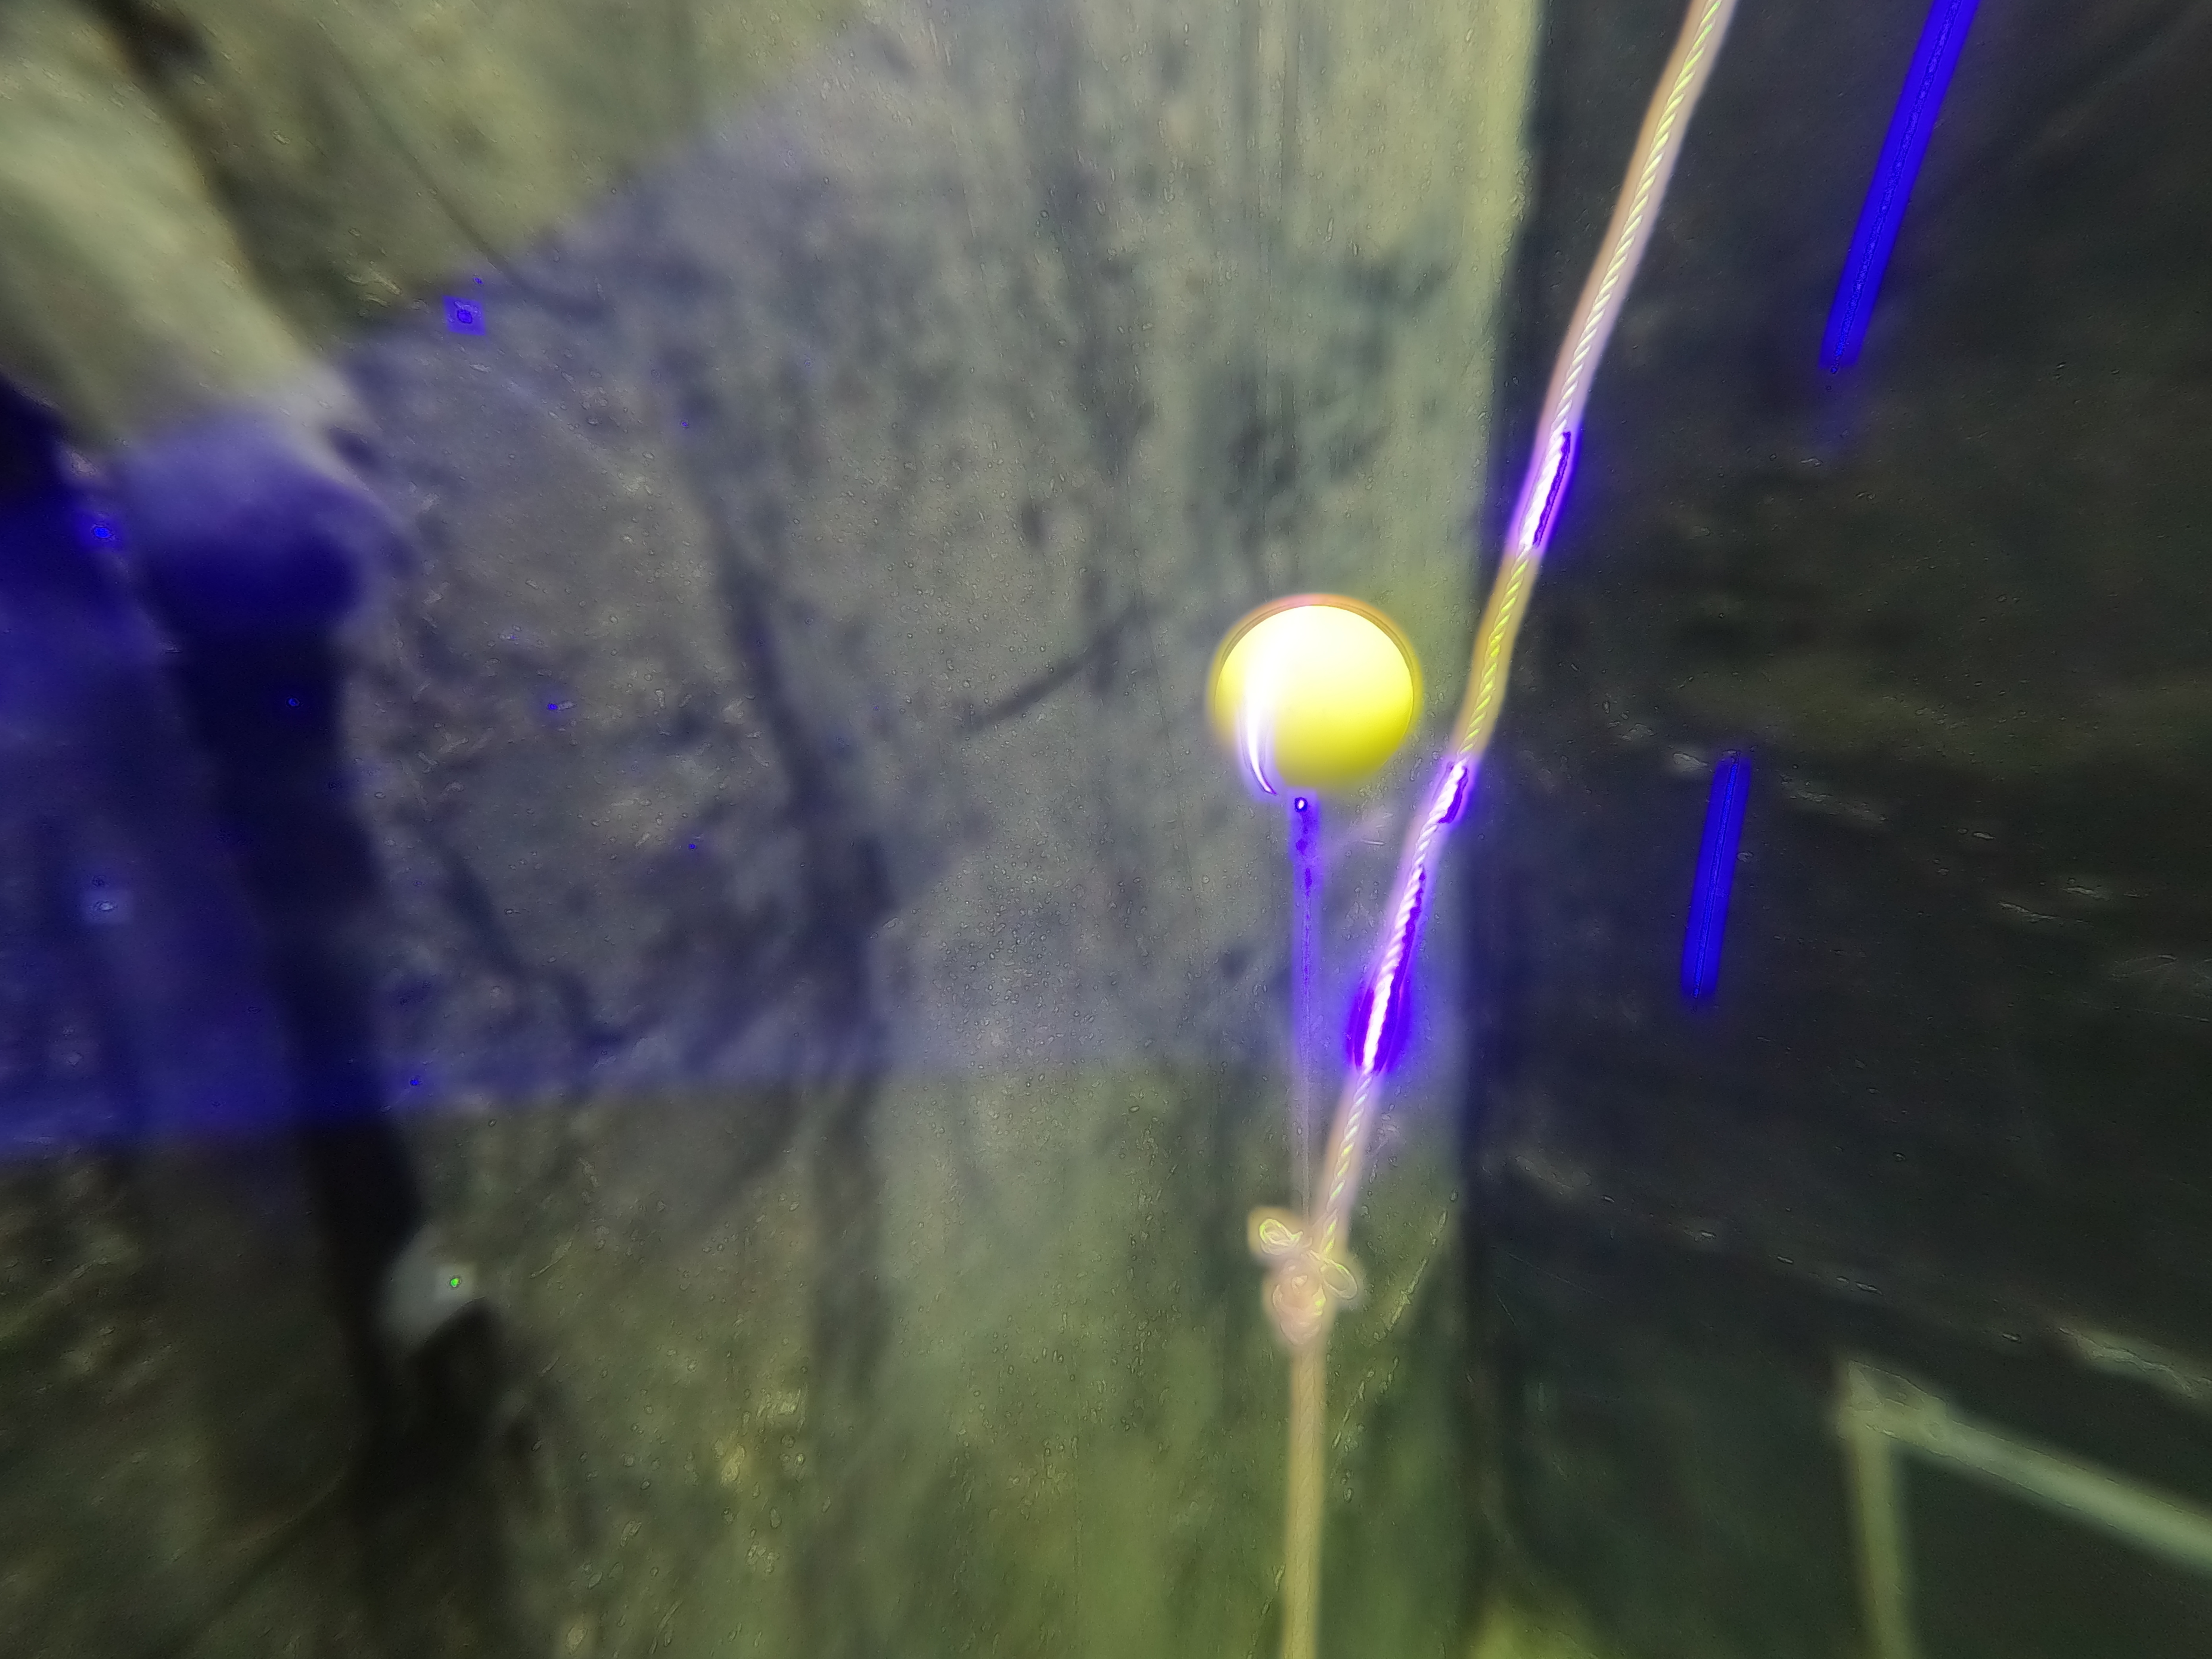

Supplement: Supplementary file 1964 [file G0034356.pdf › 5/G0034356.pdf]

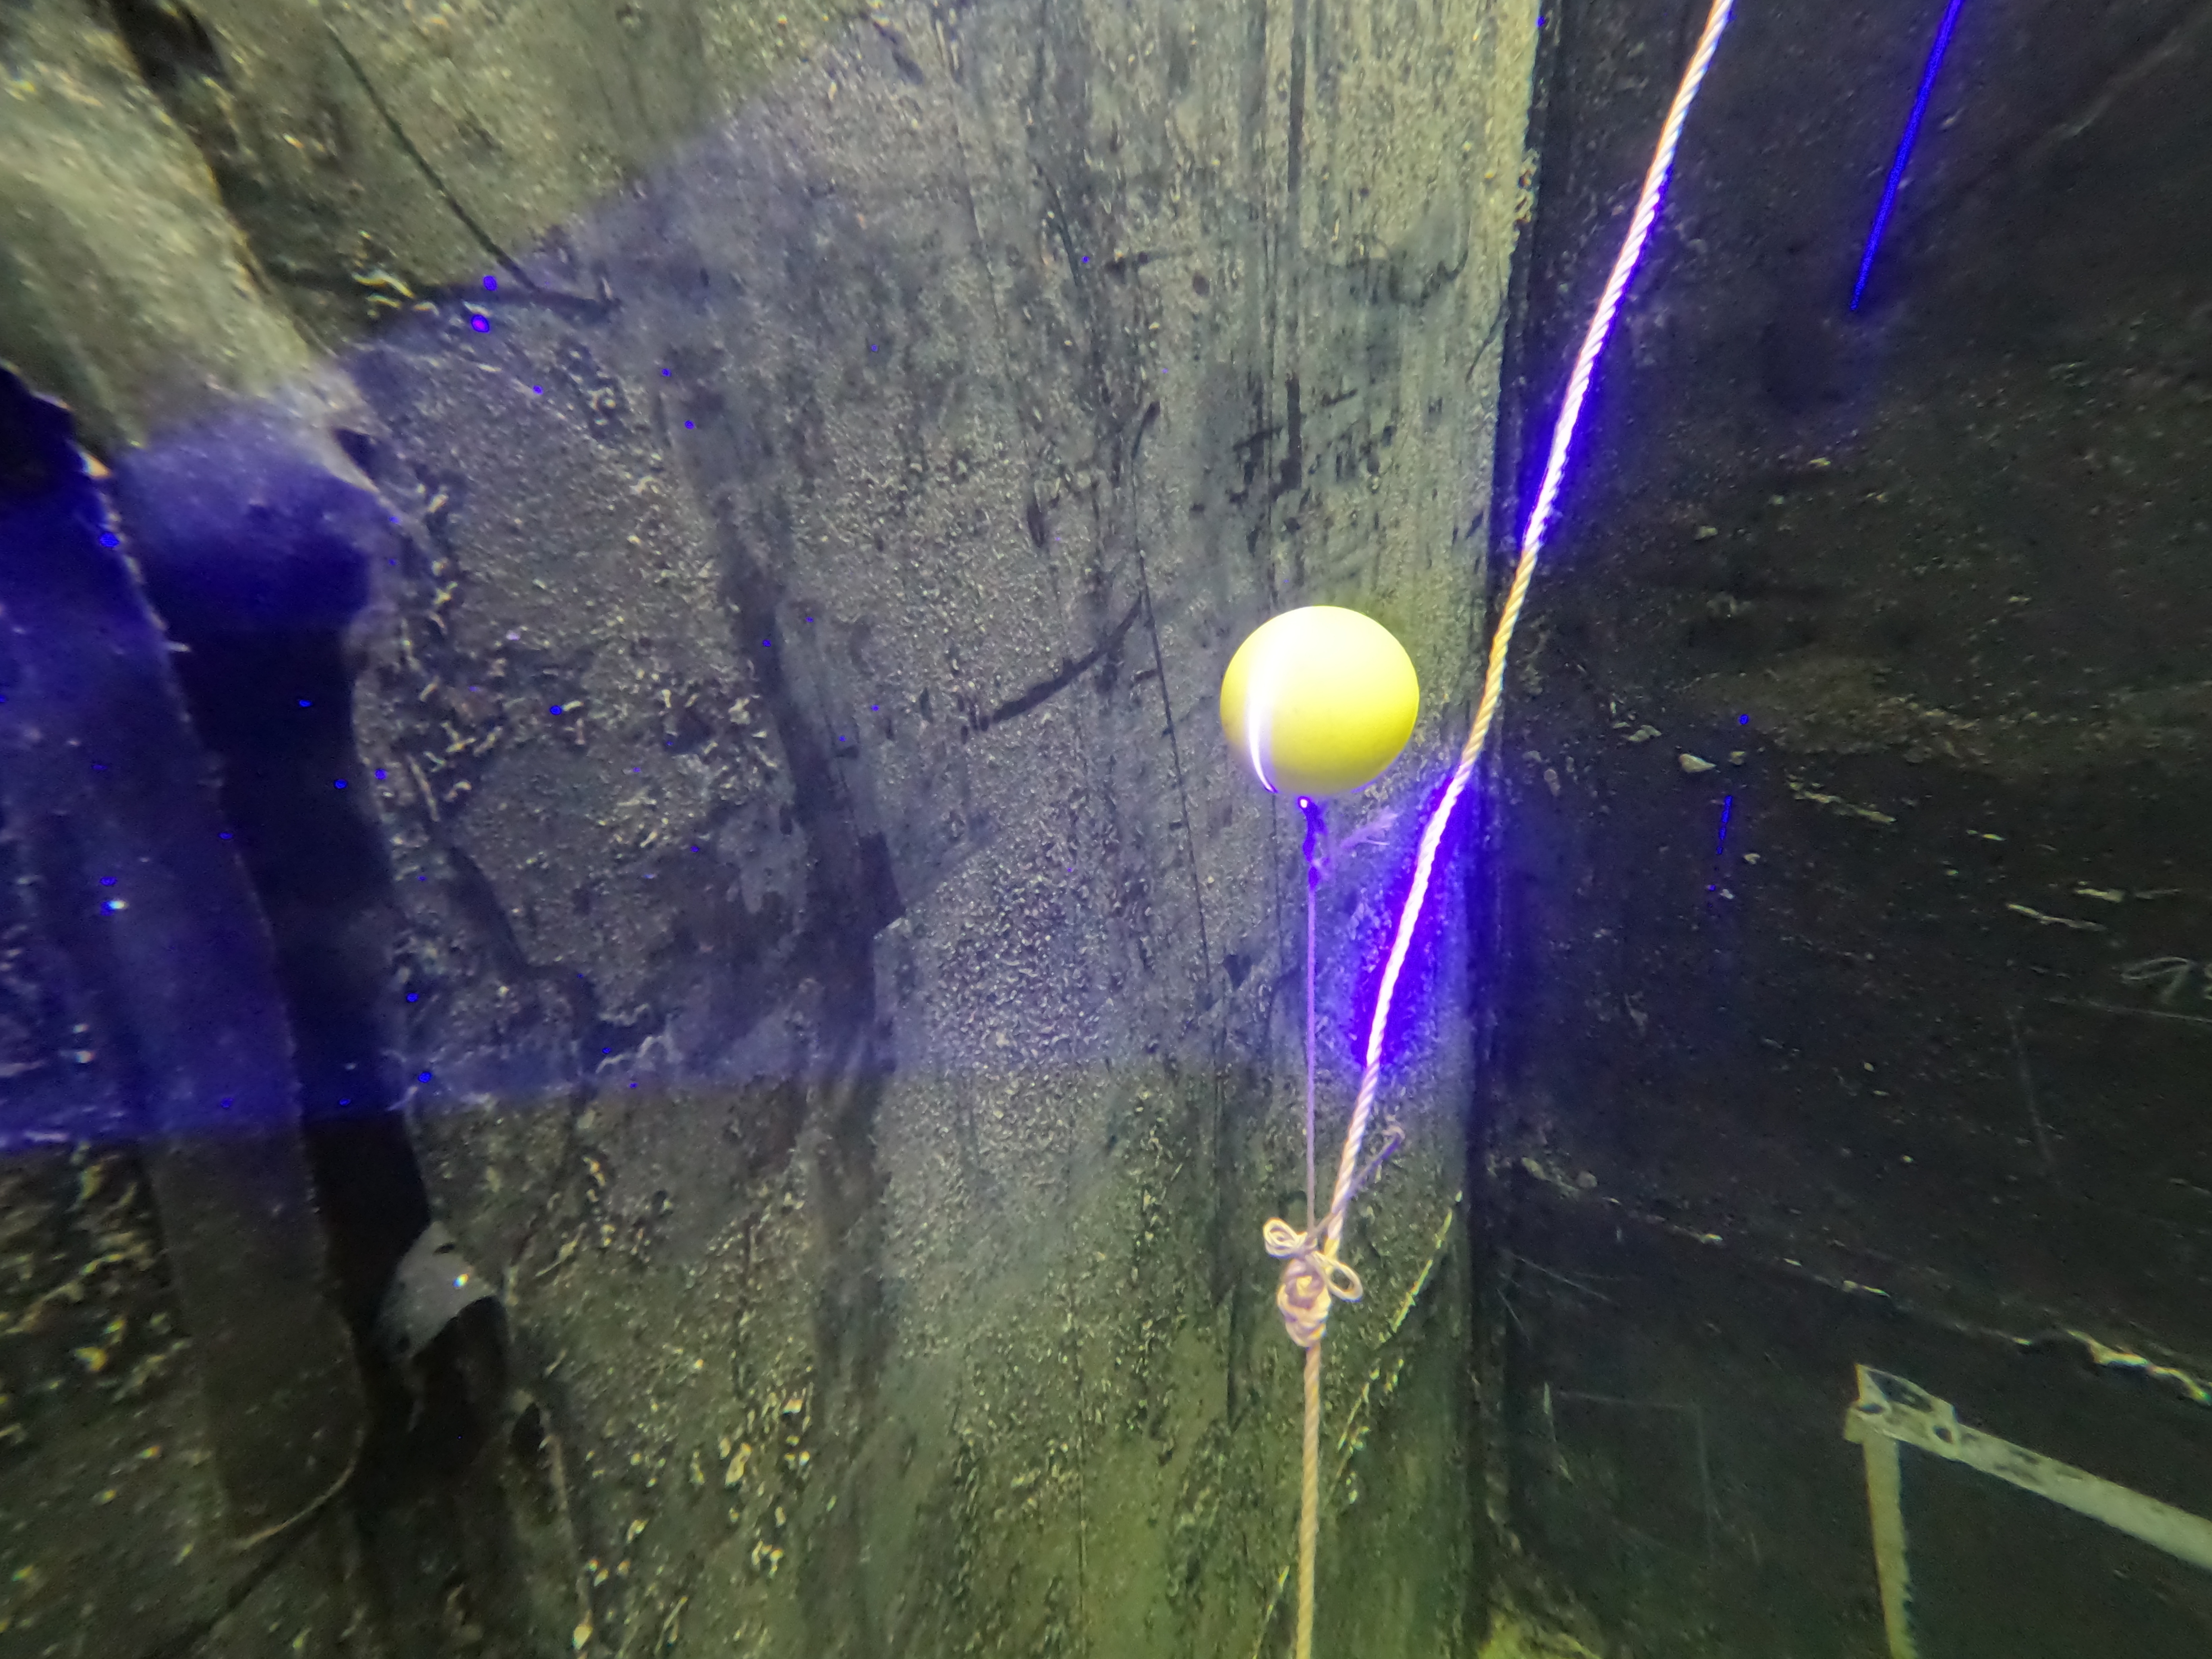

Supplement: Supplementary file 1965 [file G0034357.pdf › 5/G0034357.pdf]

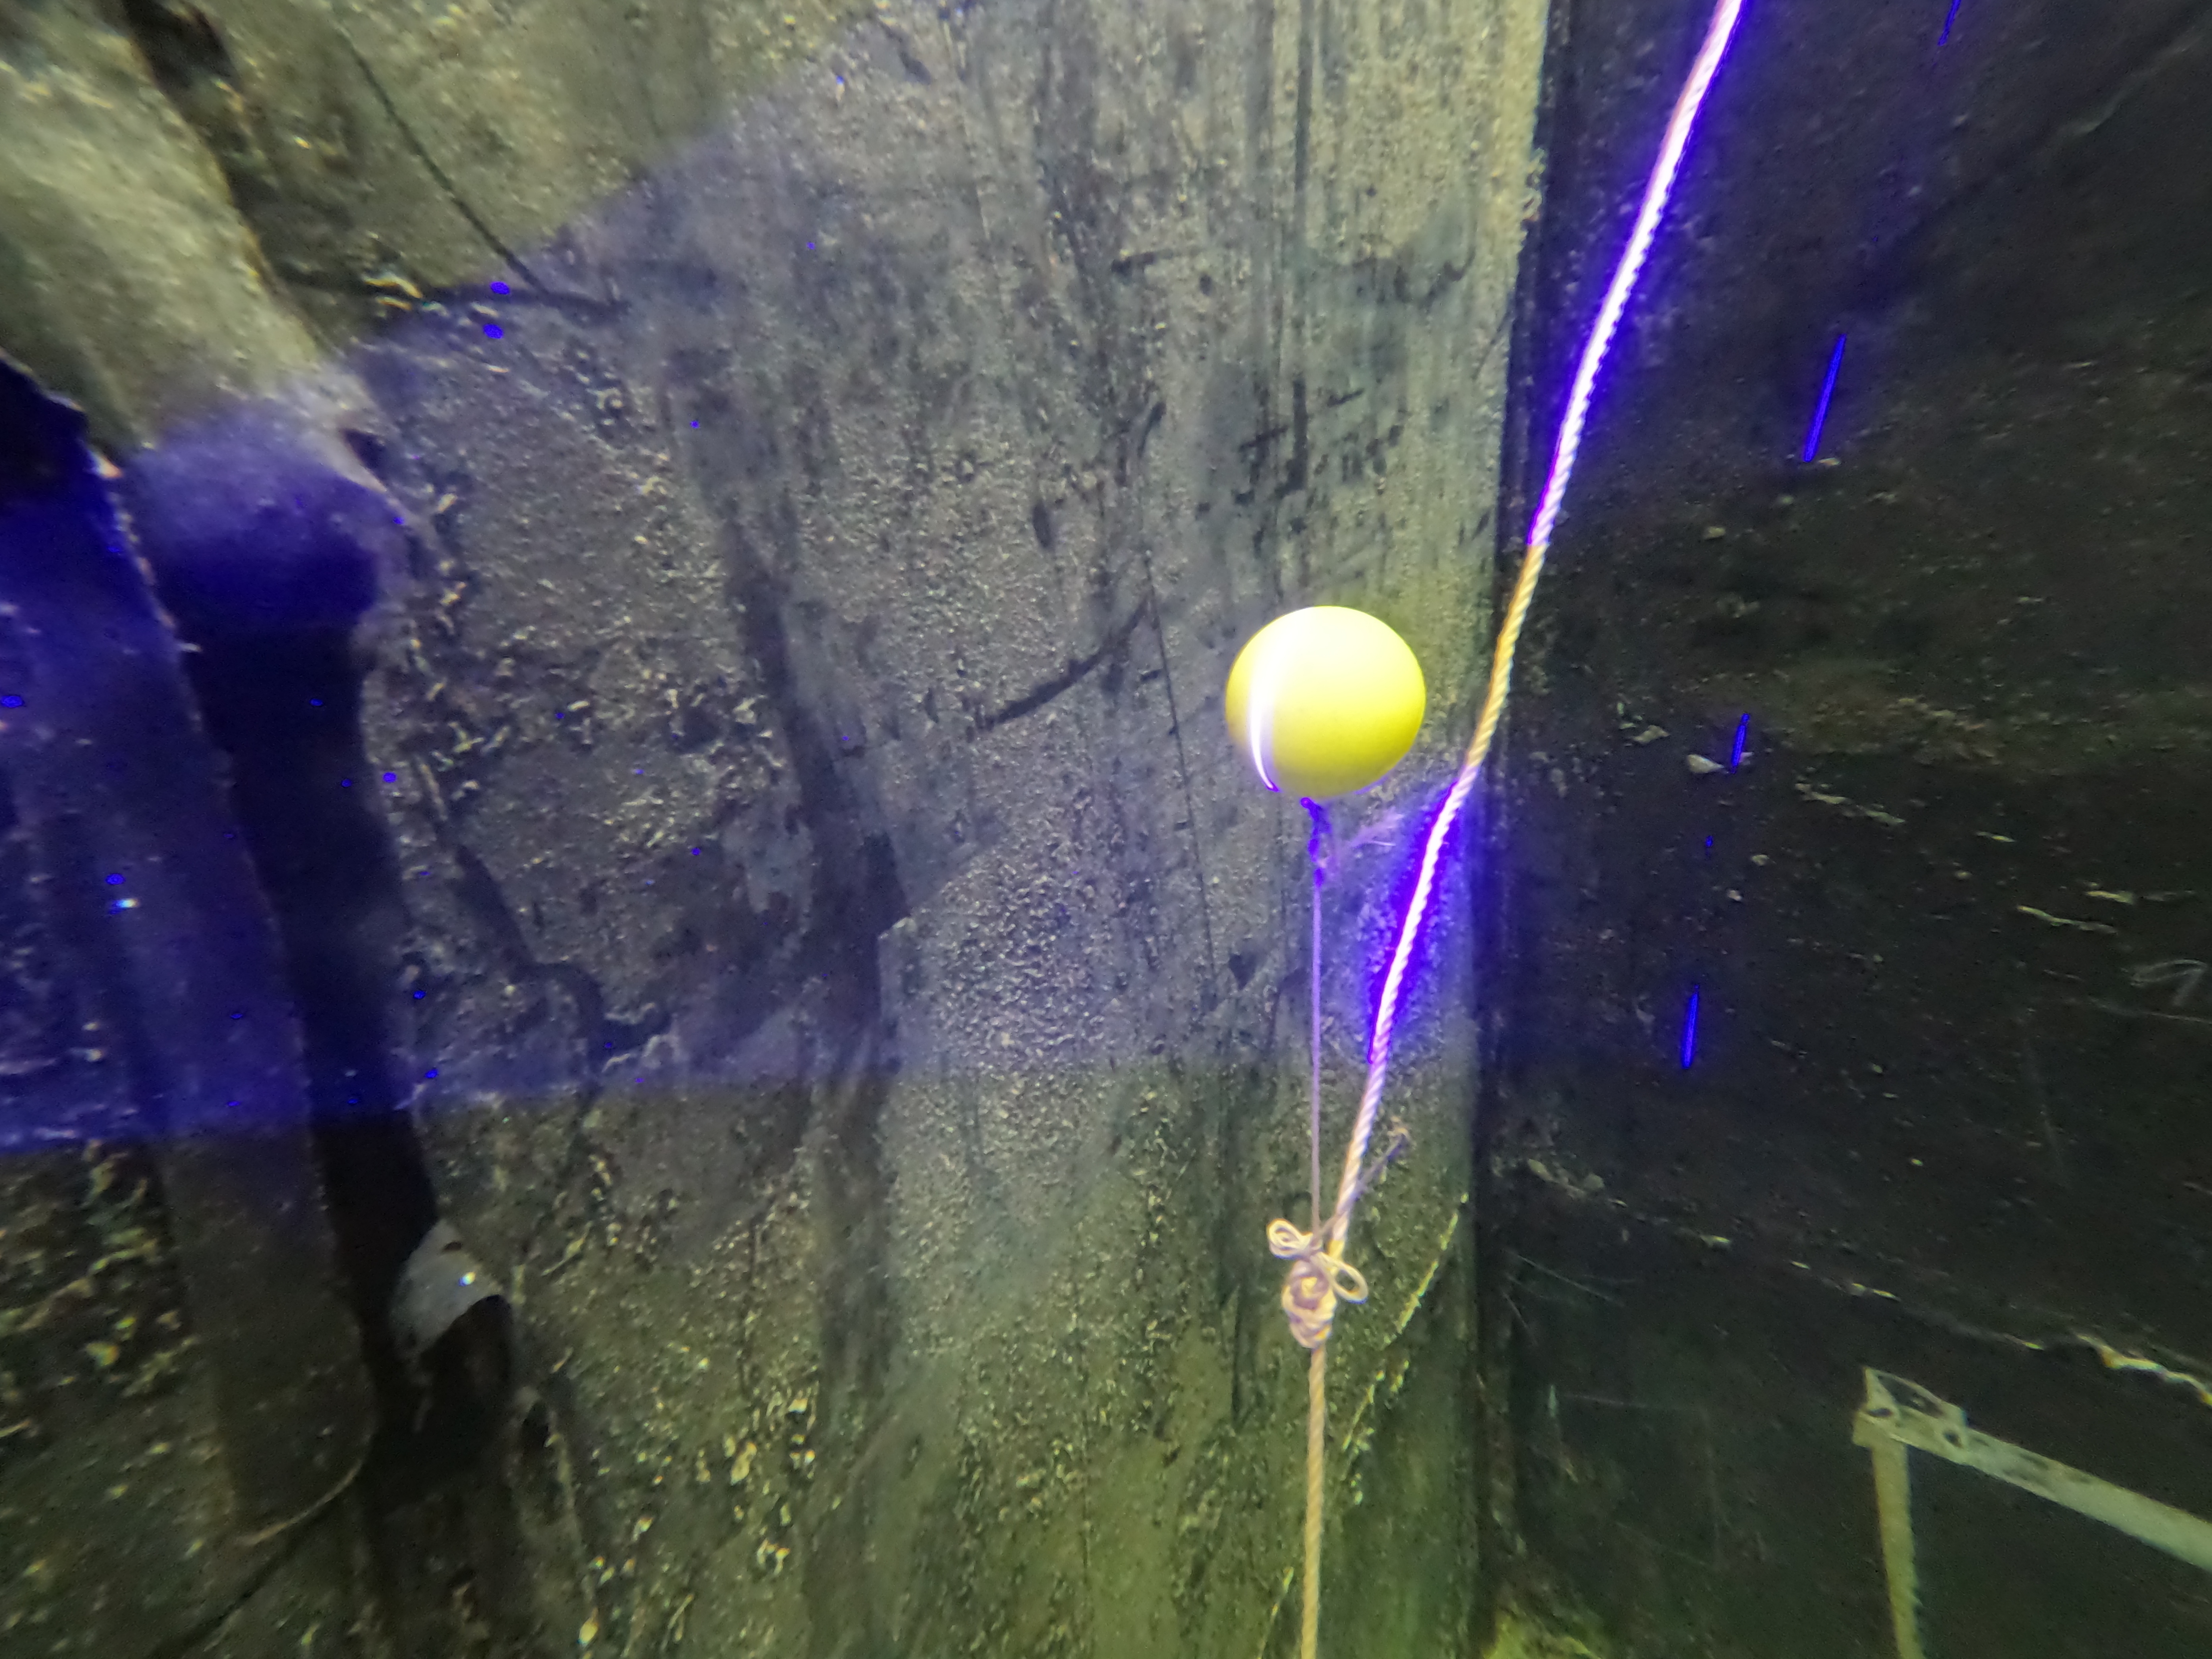

Supplement: Supplementary file 1966 [file G0034358.pdf › 5/G0034358.pdf]

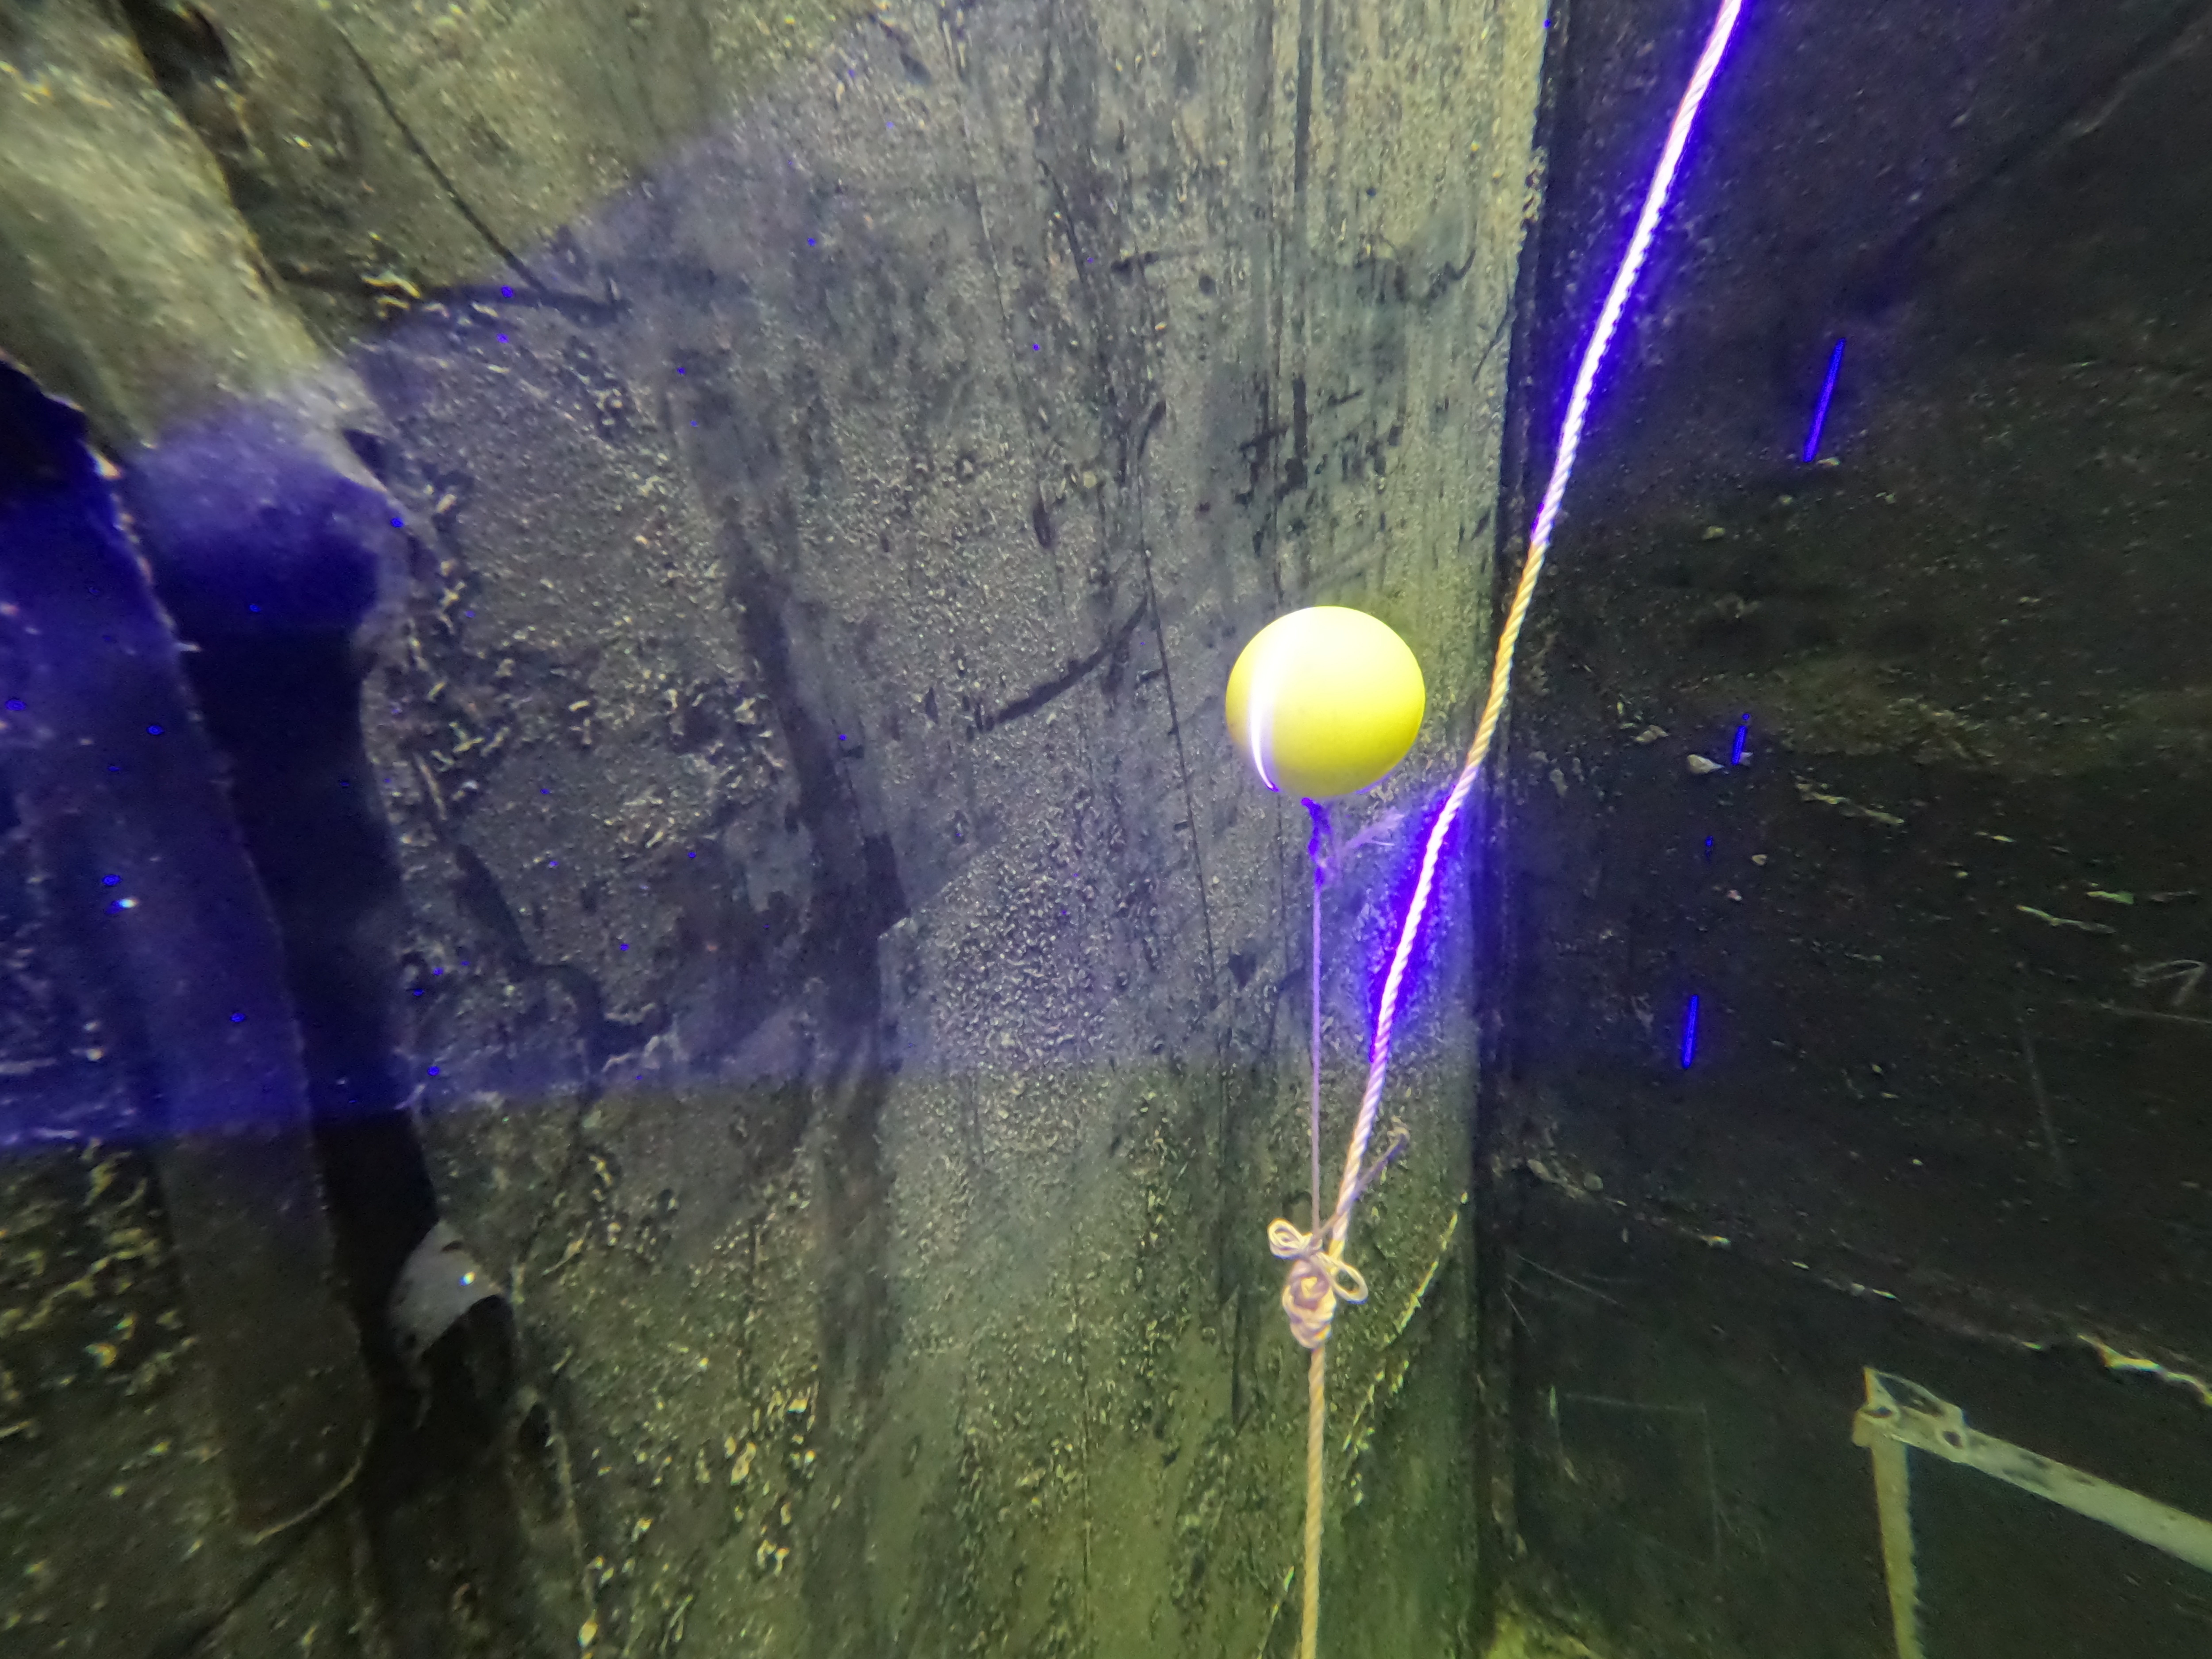

Supplement: Supplementary file 1967 [file G0034359.pdf › 5/G0034359.pdf]

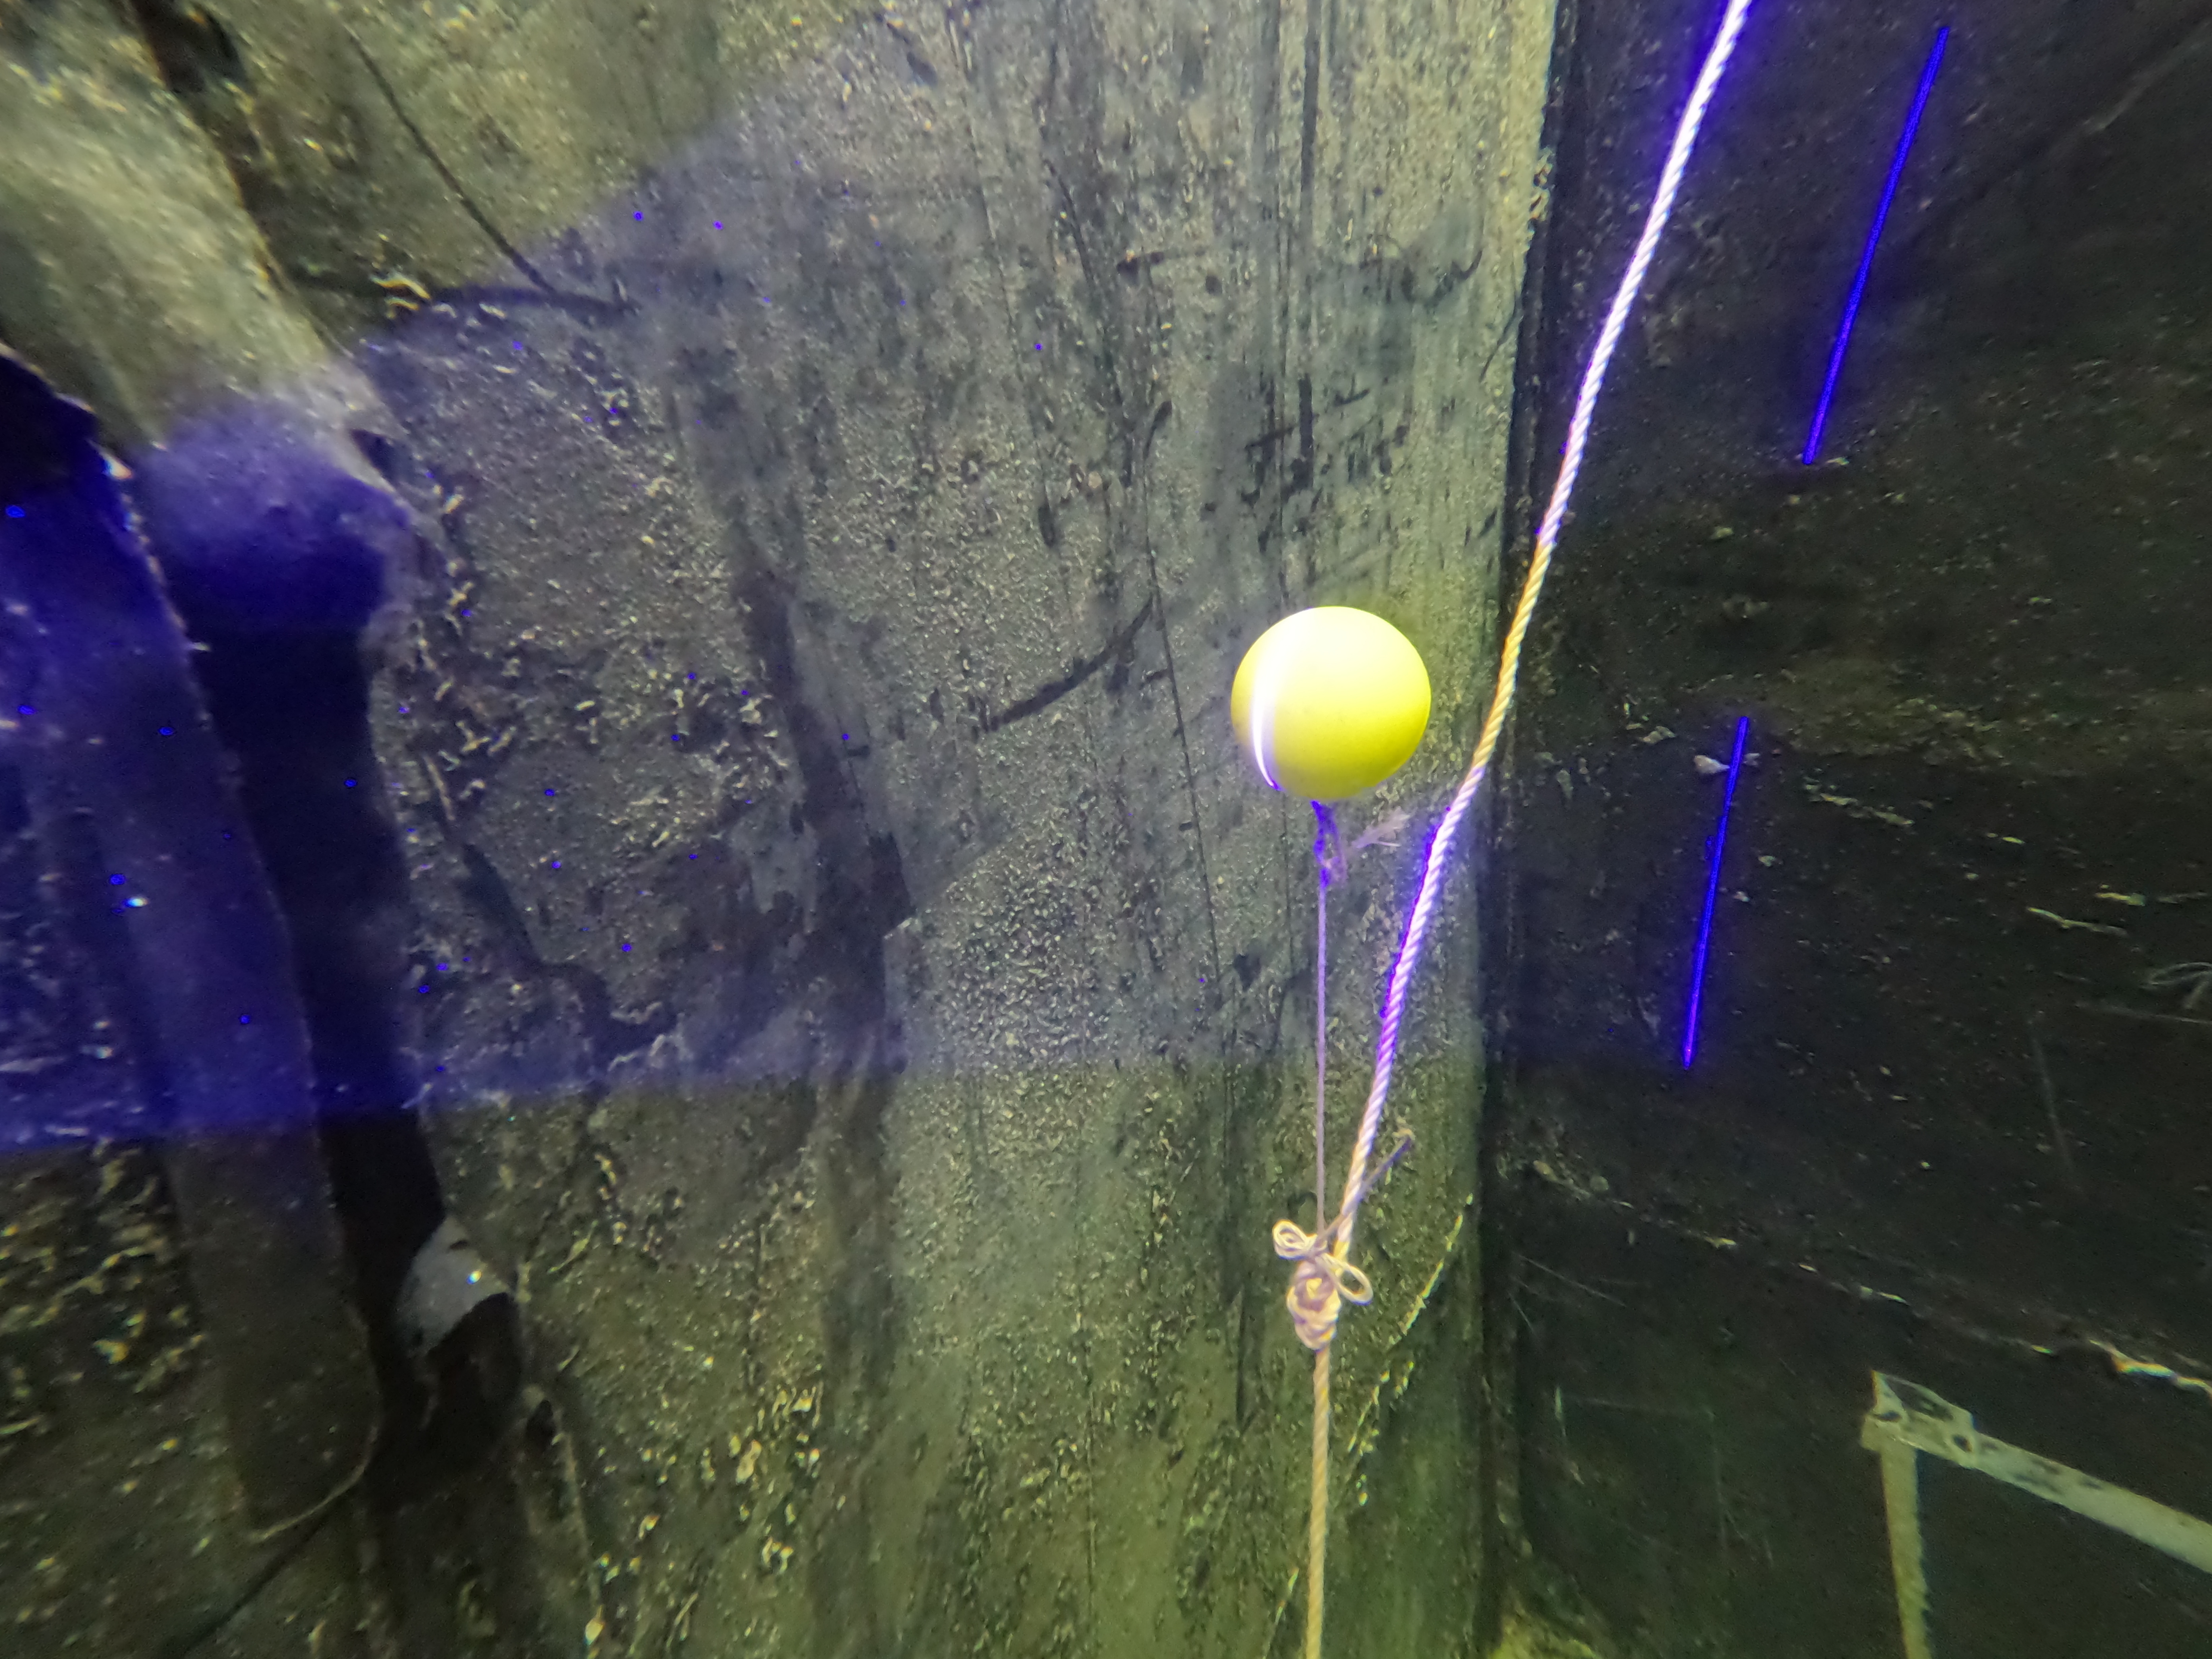

Supplement: Supplementary file 1968 [file G0034360.pdf › 5/G0034360.pdf]

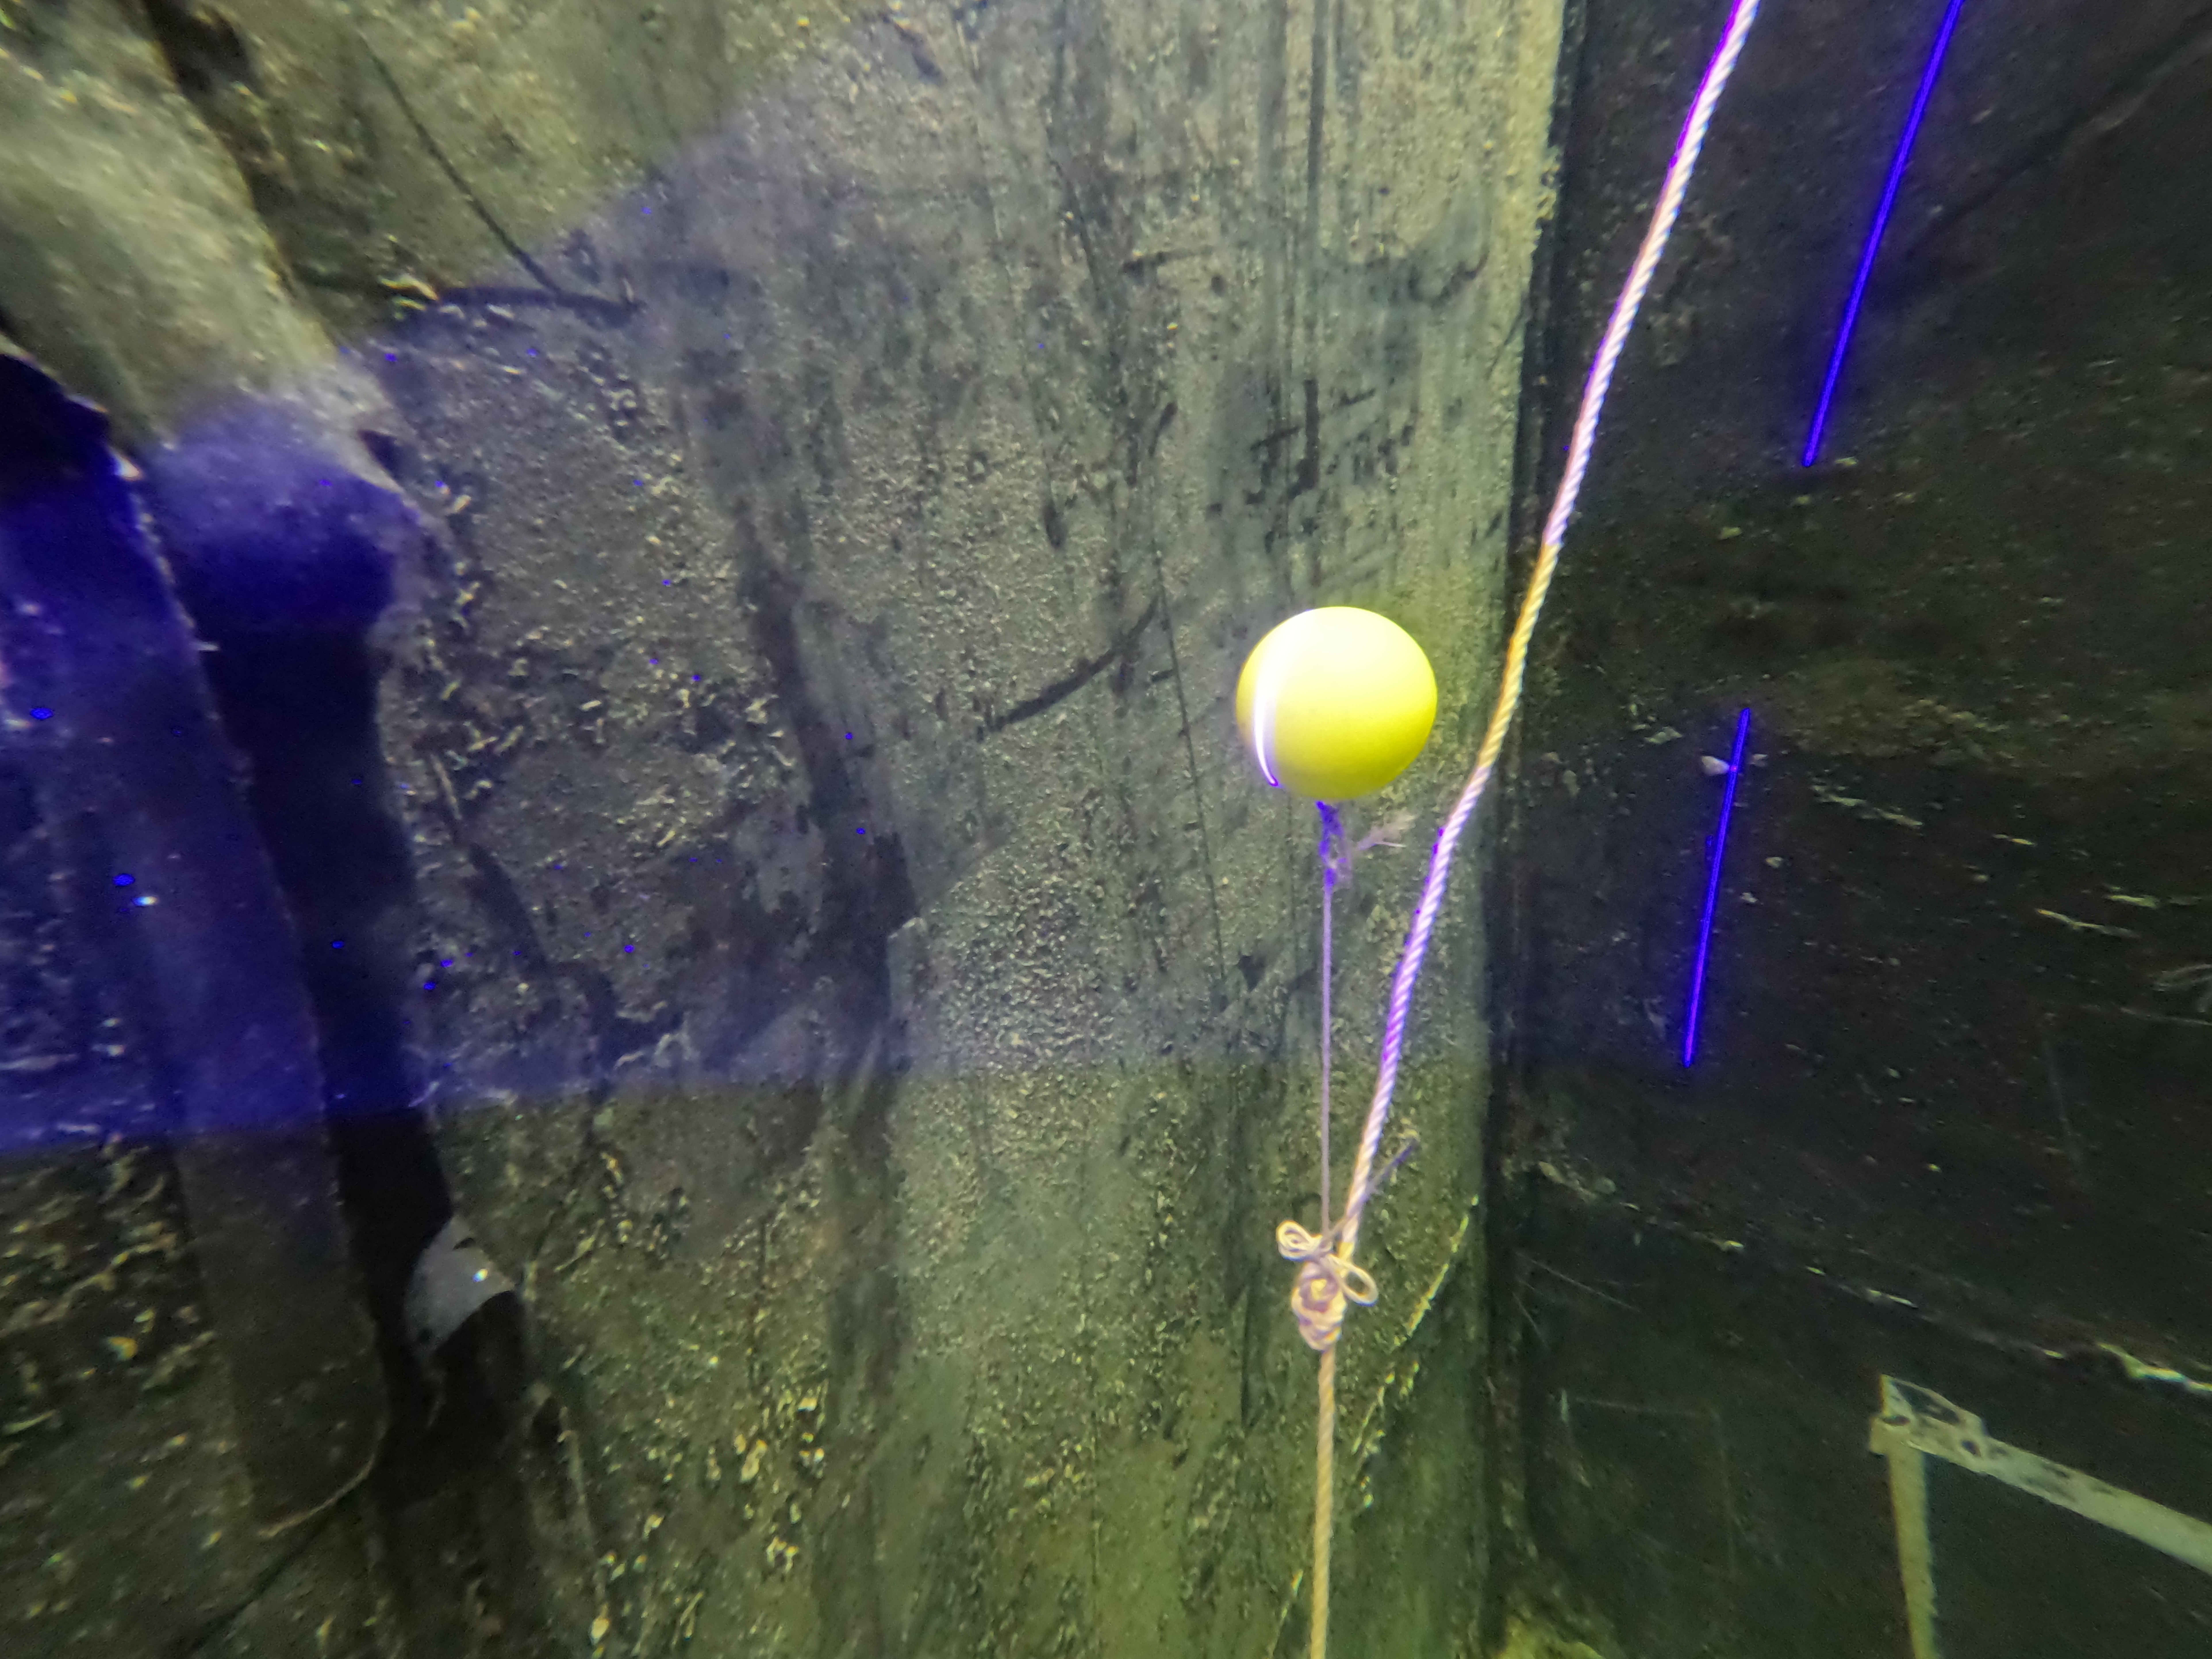

Supplement: Supplementary file 1969 [file G0034361.pdf › 5/G0034361.pdf]

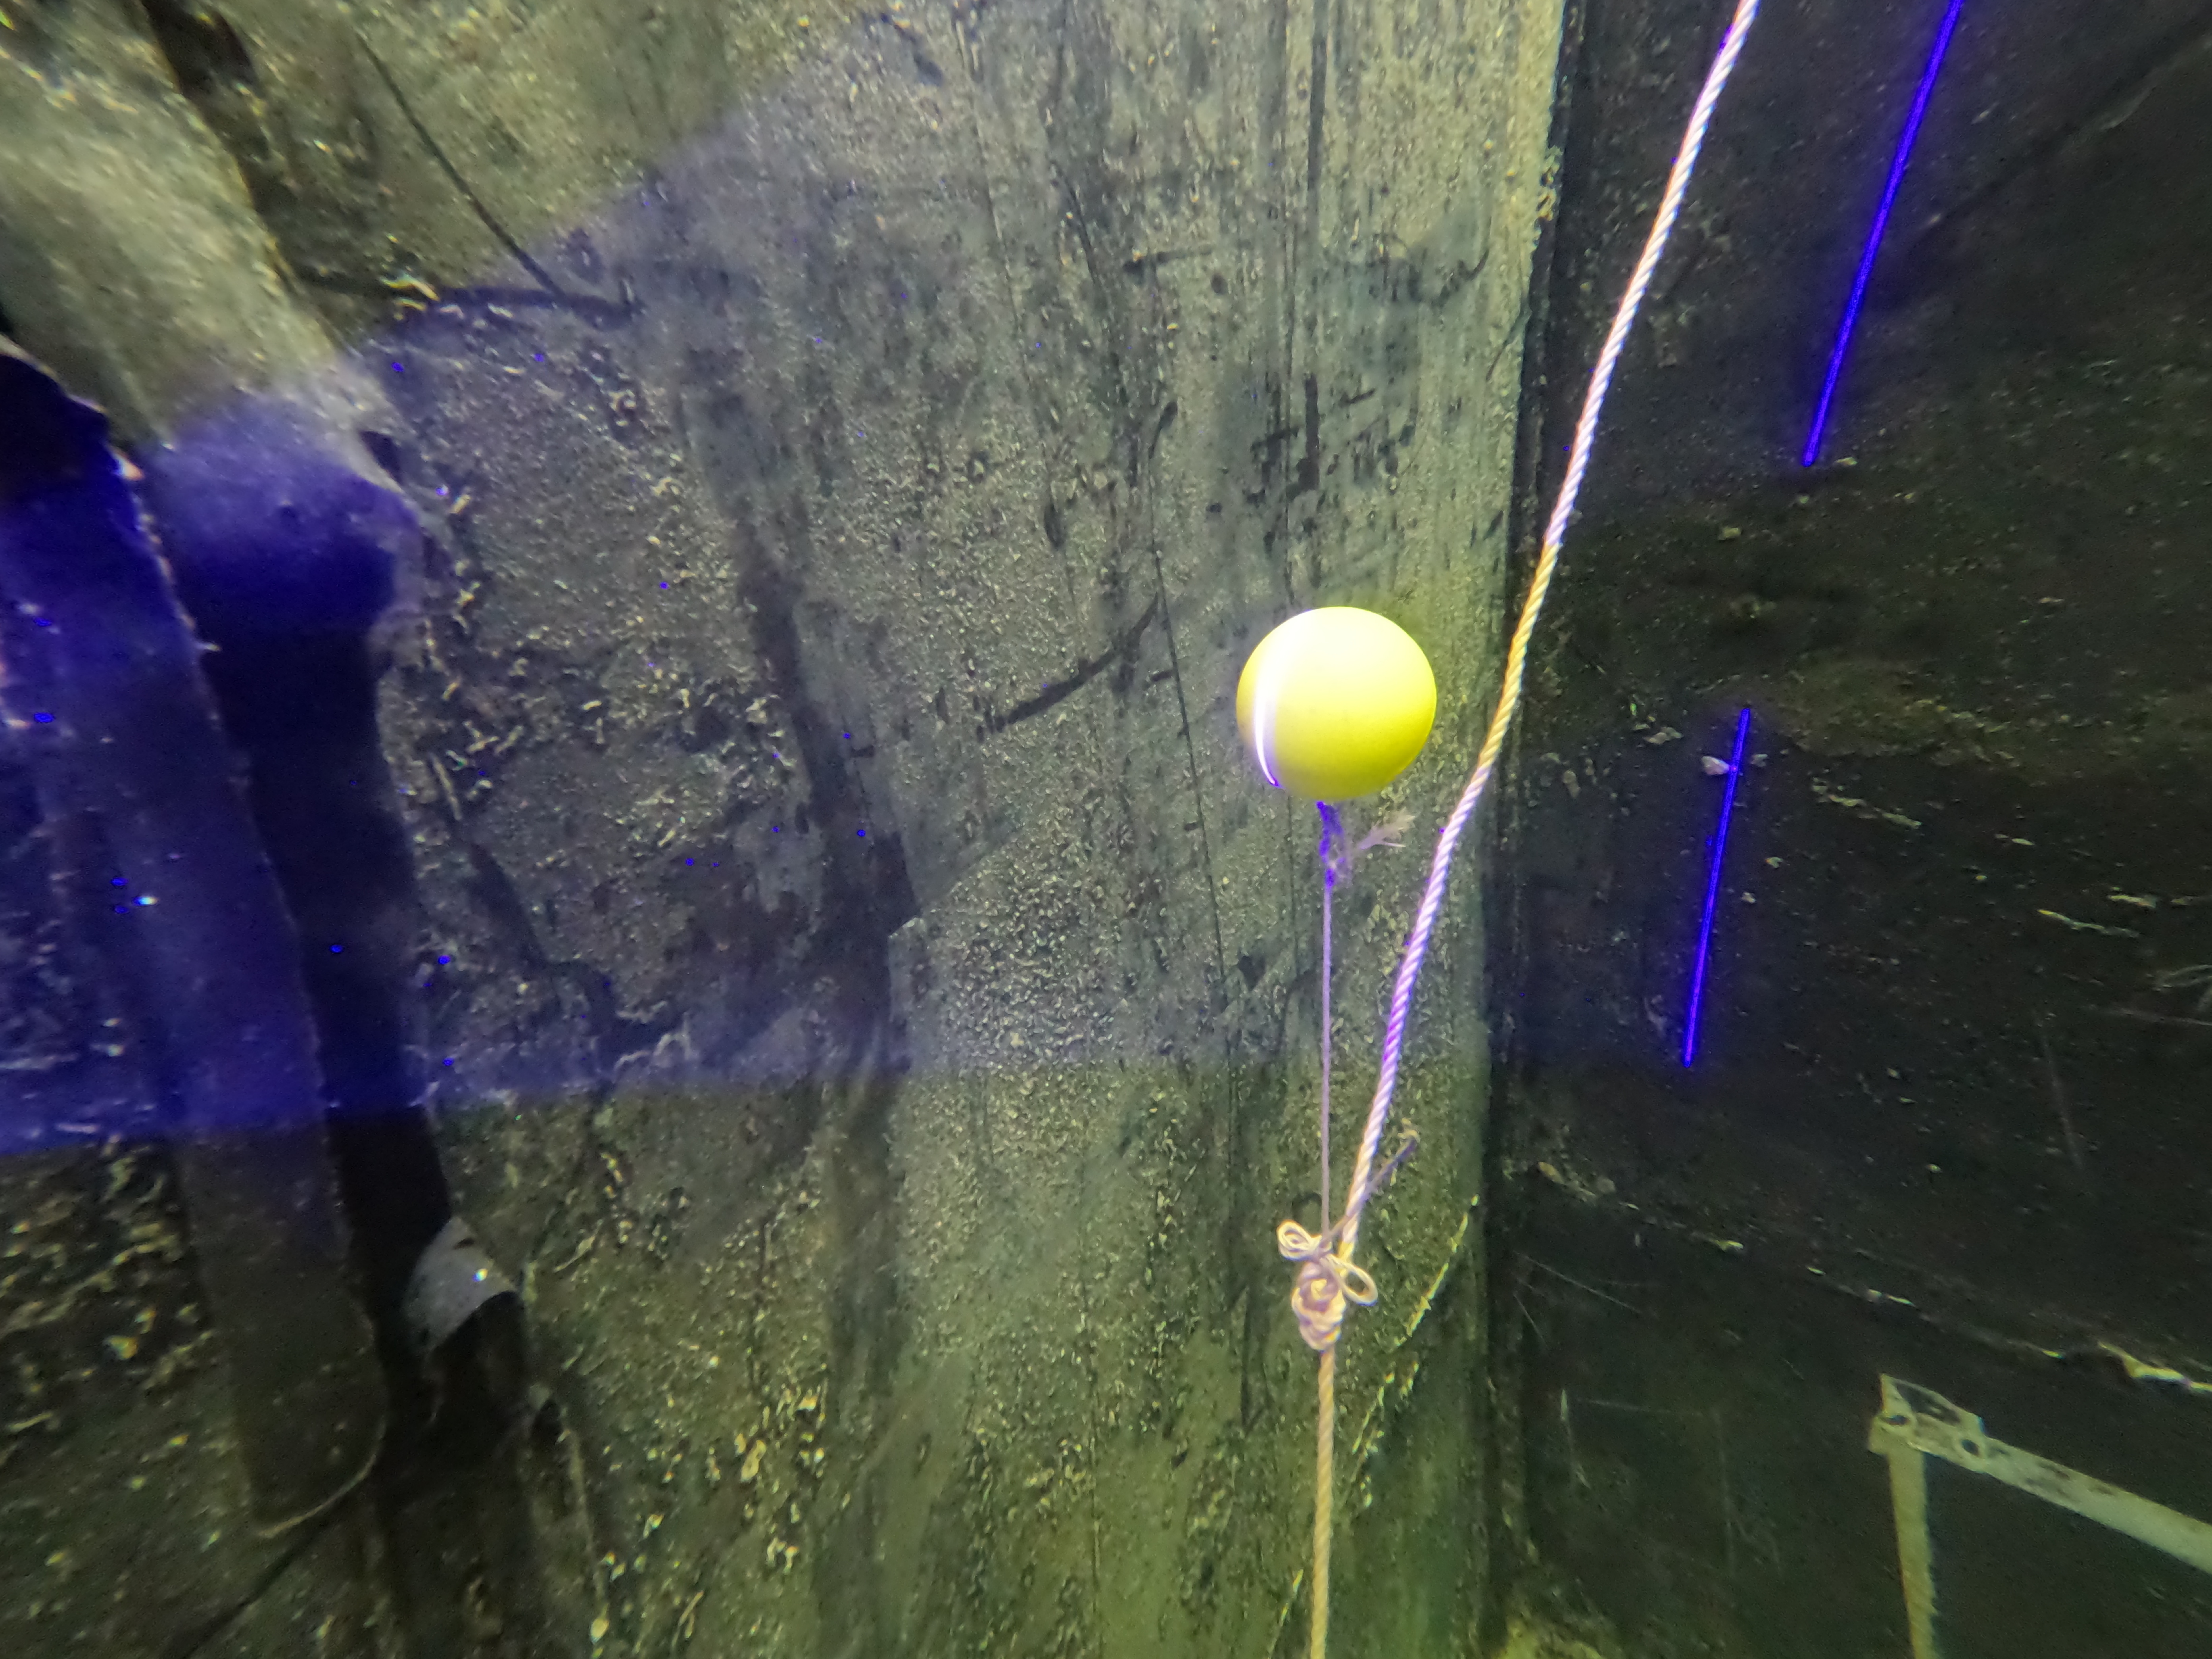

Supplement: Supplementary file 1970 [file G0034362.pdf › 5/G0034362.pdf]

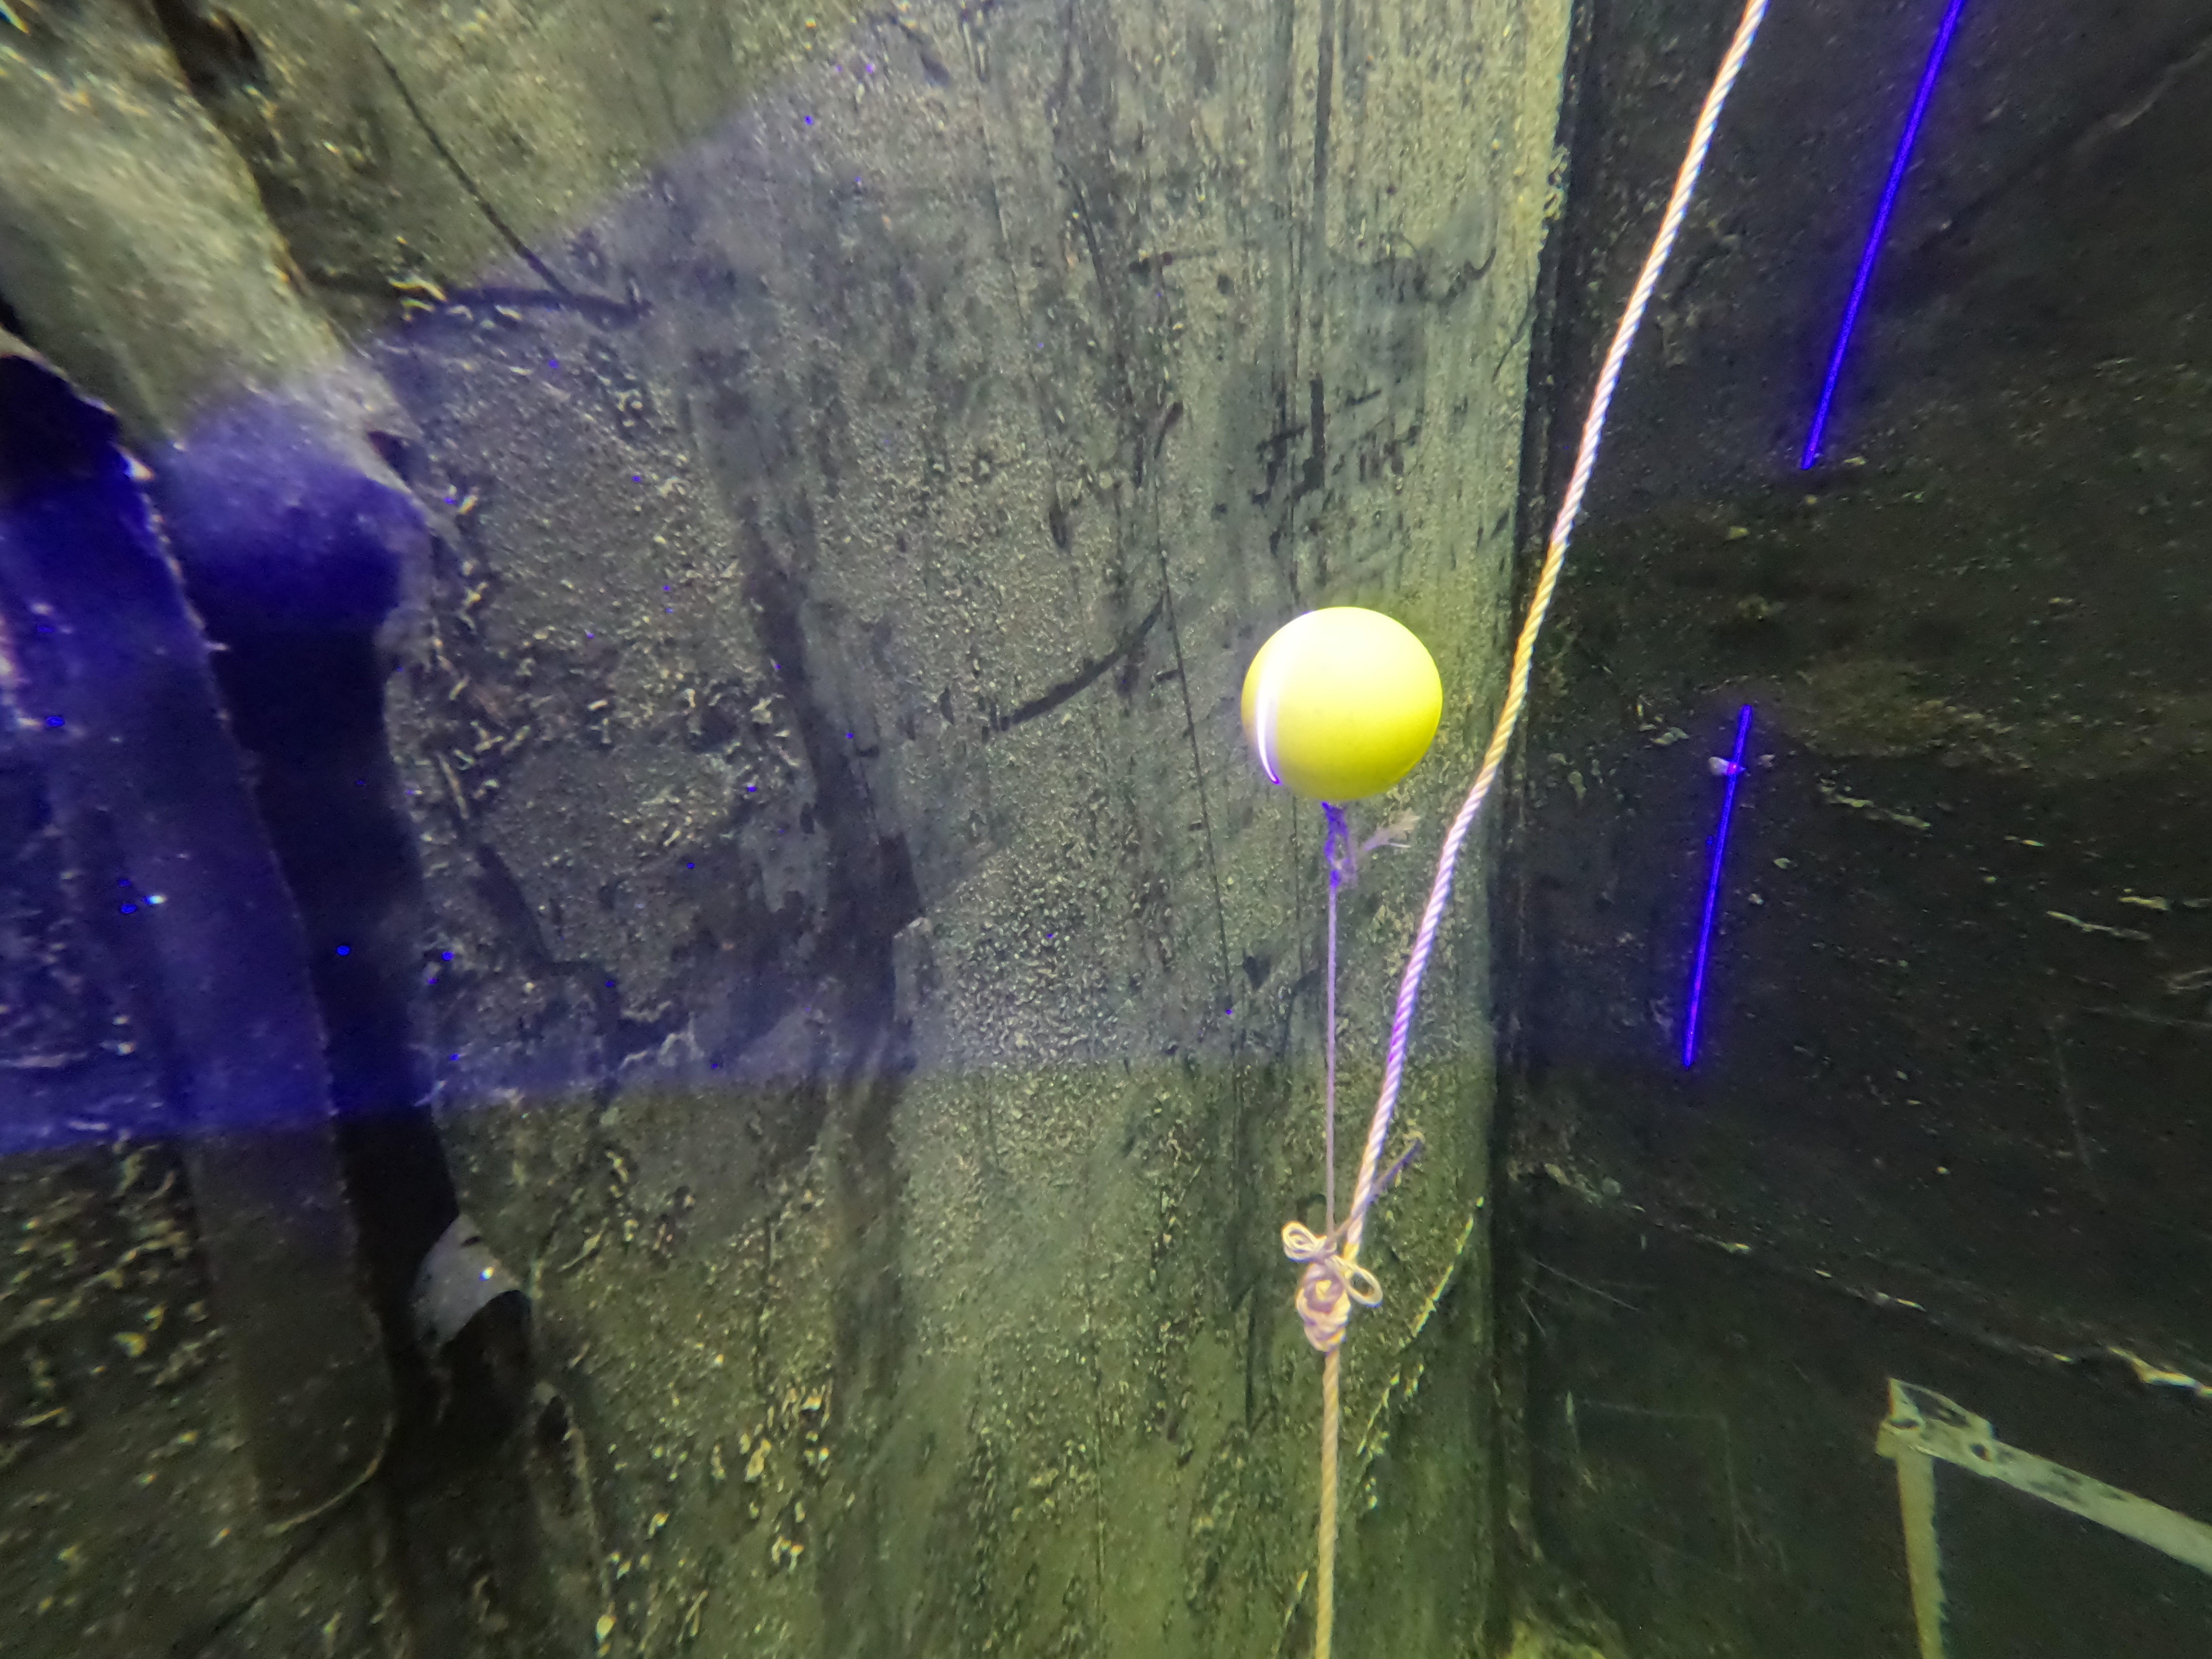

Supplement: Supplementary file 1971 [file G0034363.pdf › 5/G0034363.pdf]

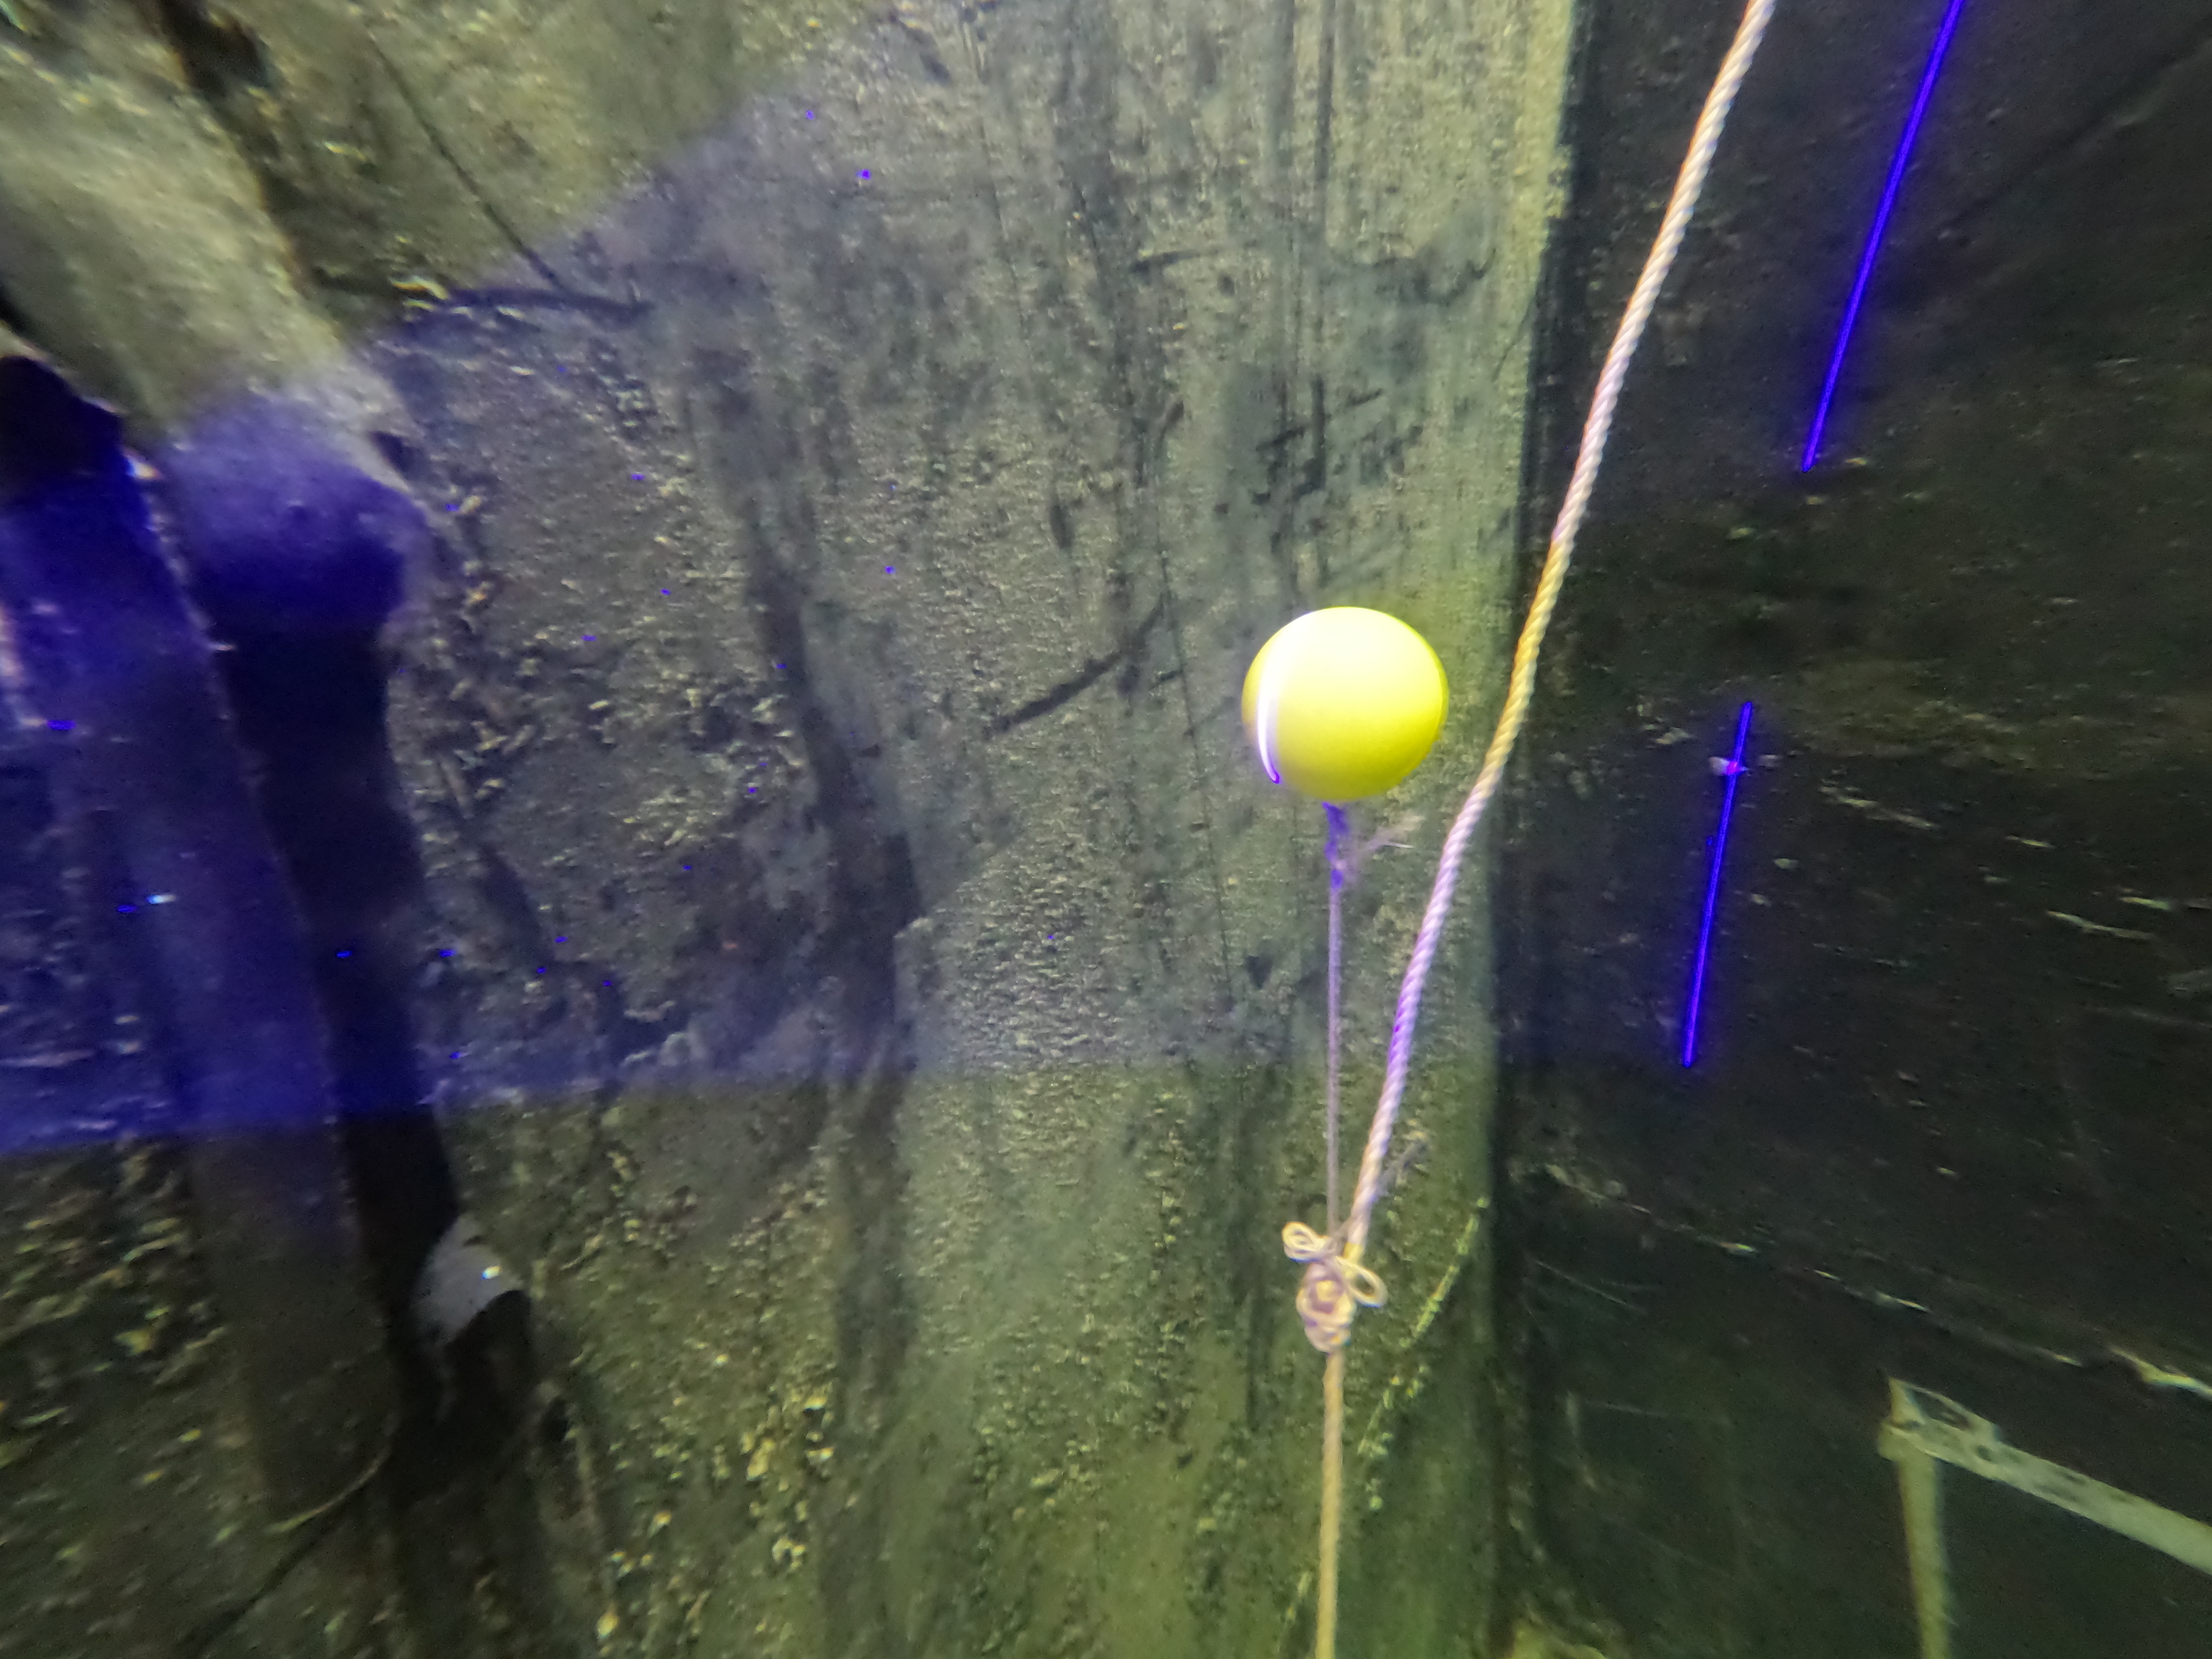

Supplement: Supplementary file 1972 [file G0034364.pdf › 5/G0034364.pdf]

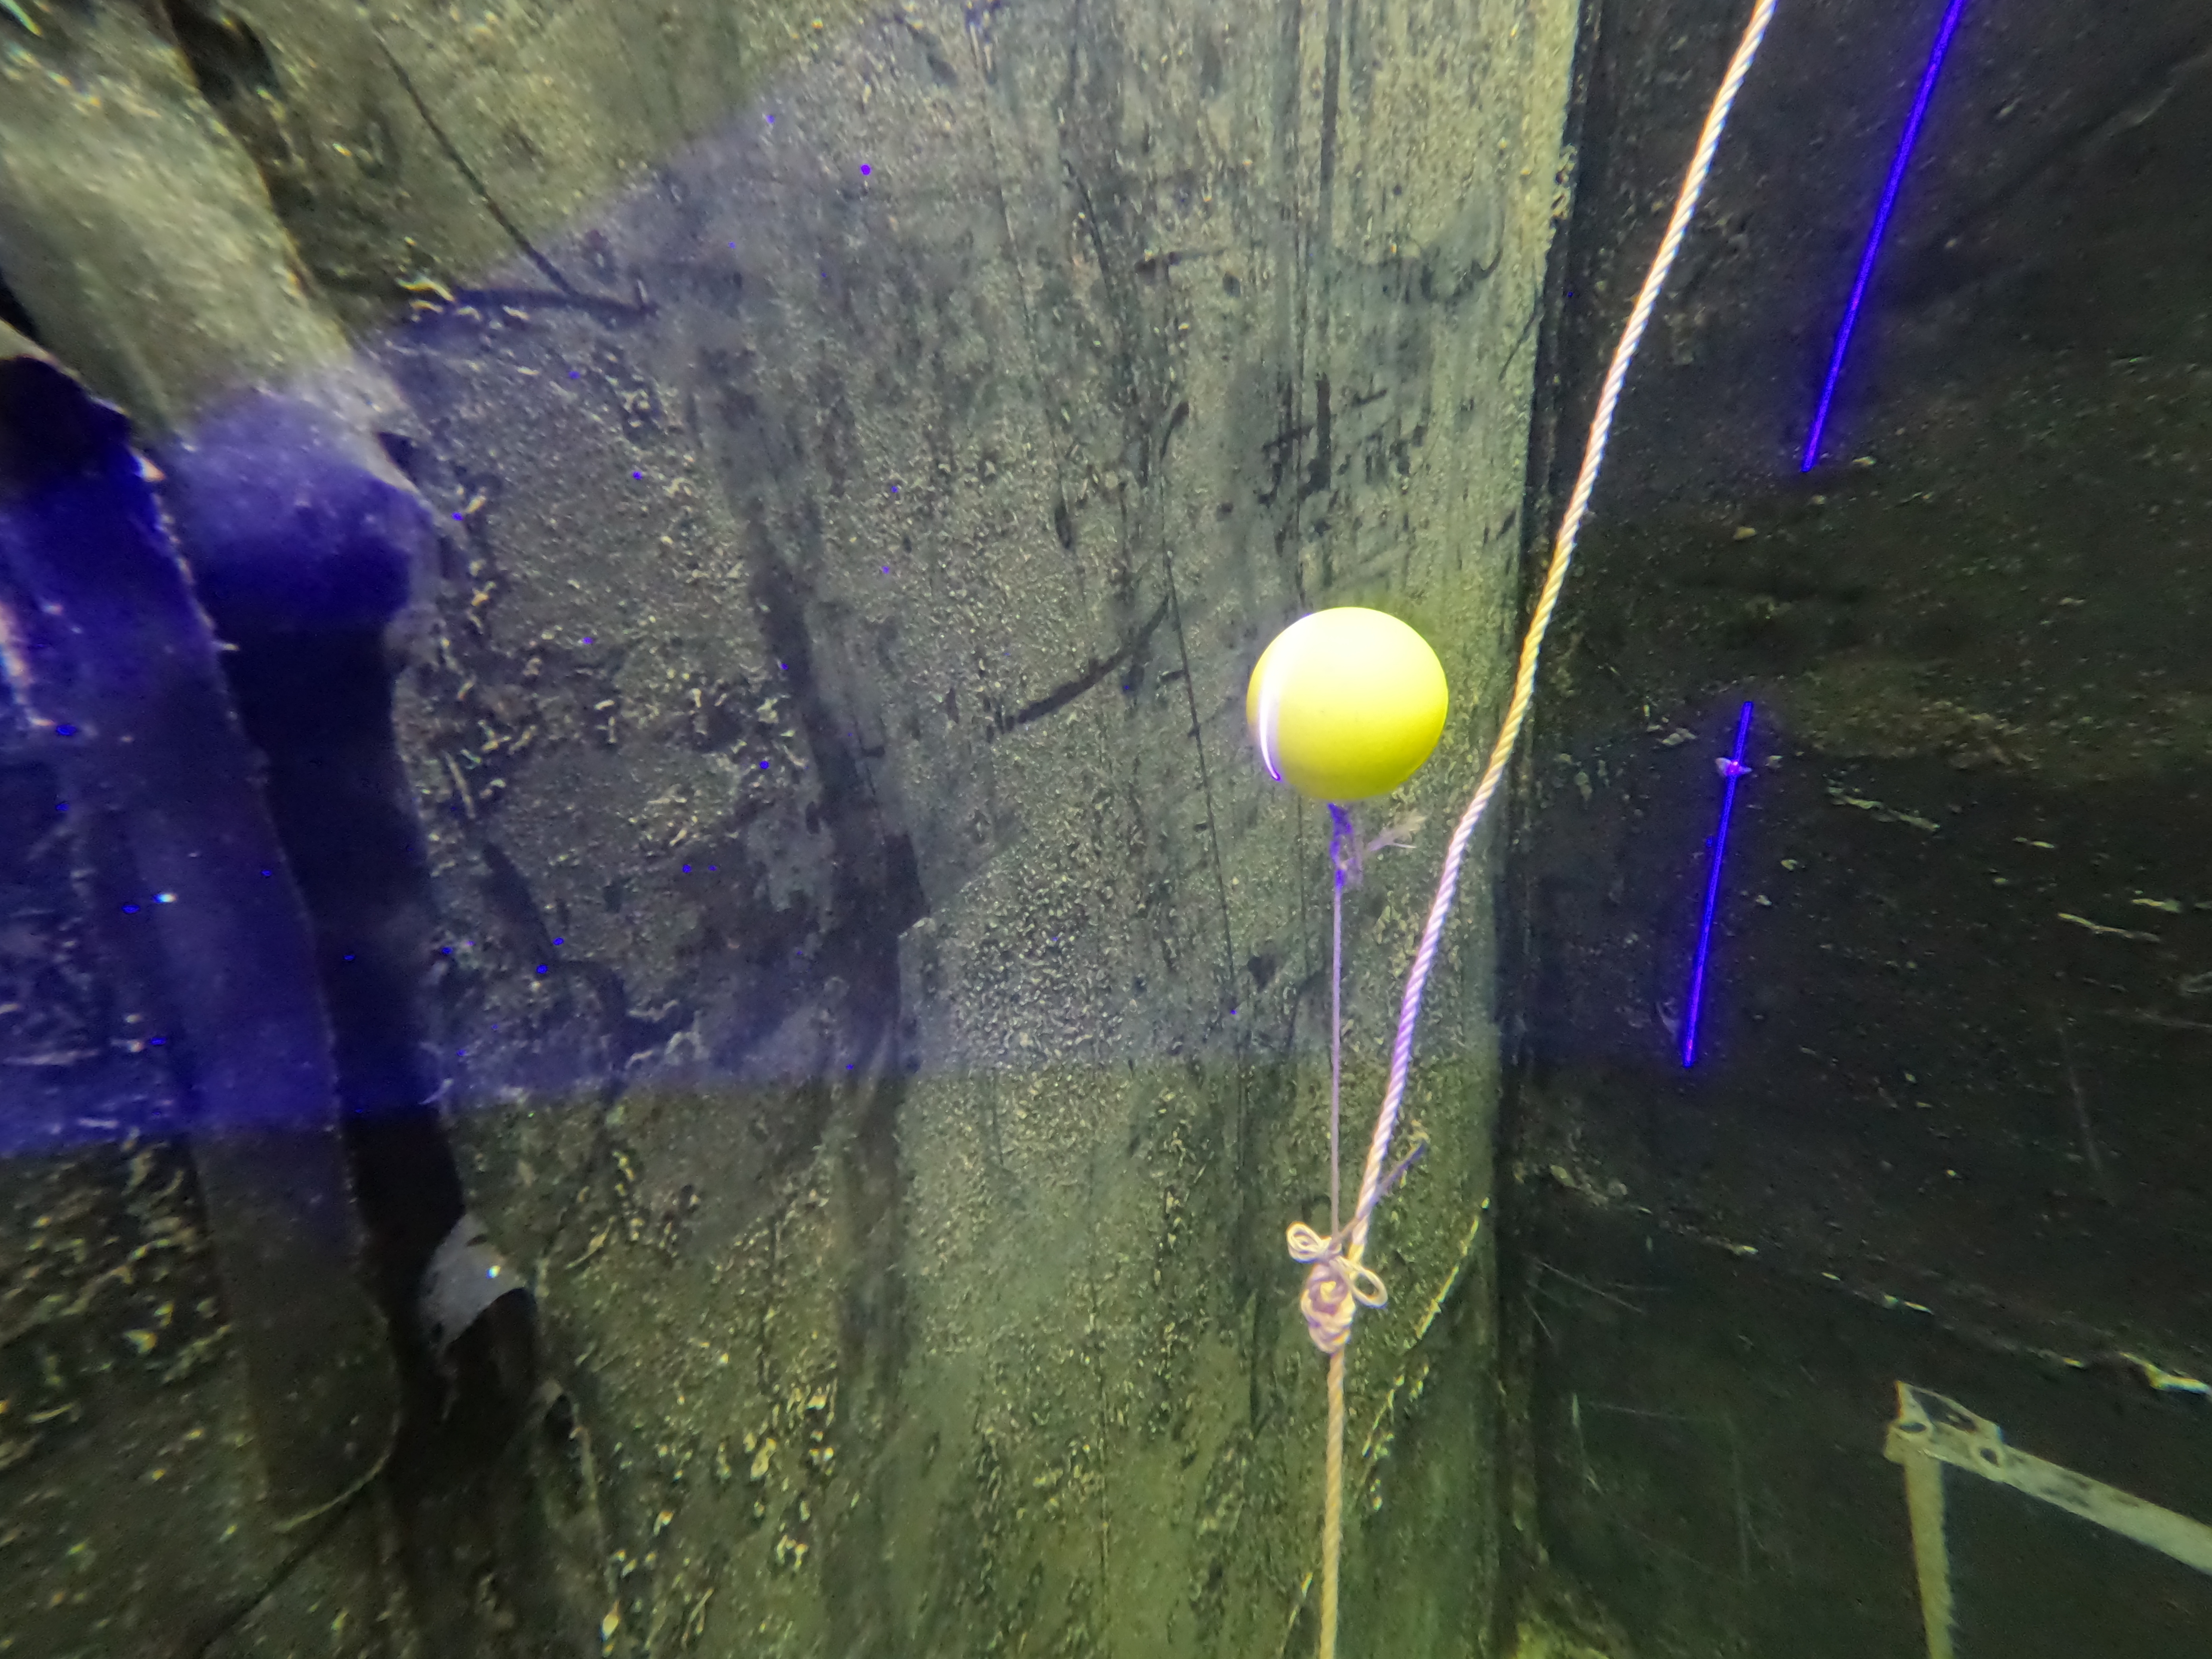

Supplement: Supplementary file 1973 [file G0034365.pdf › 5/G0034365.pdf]

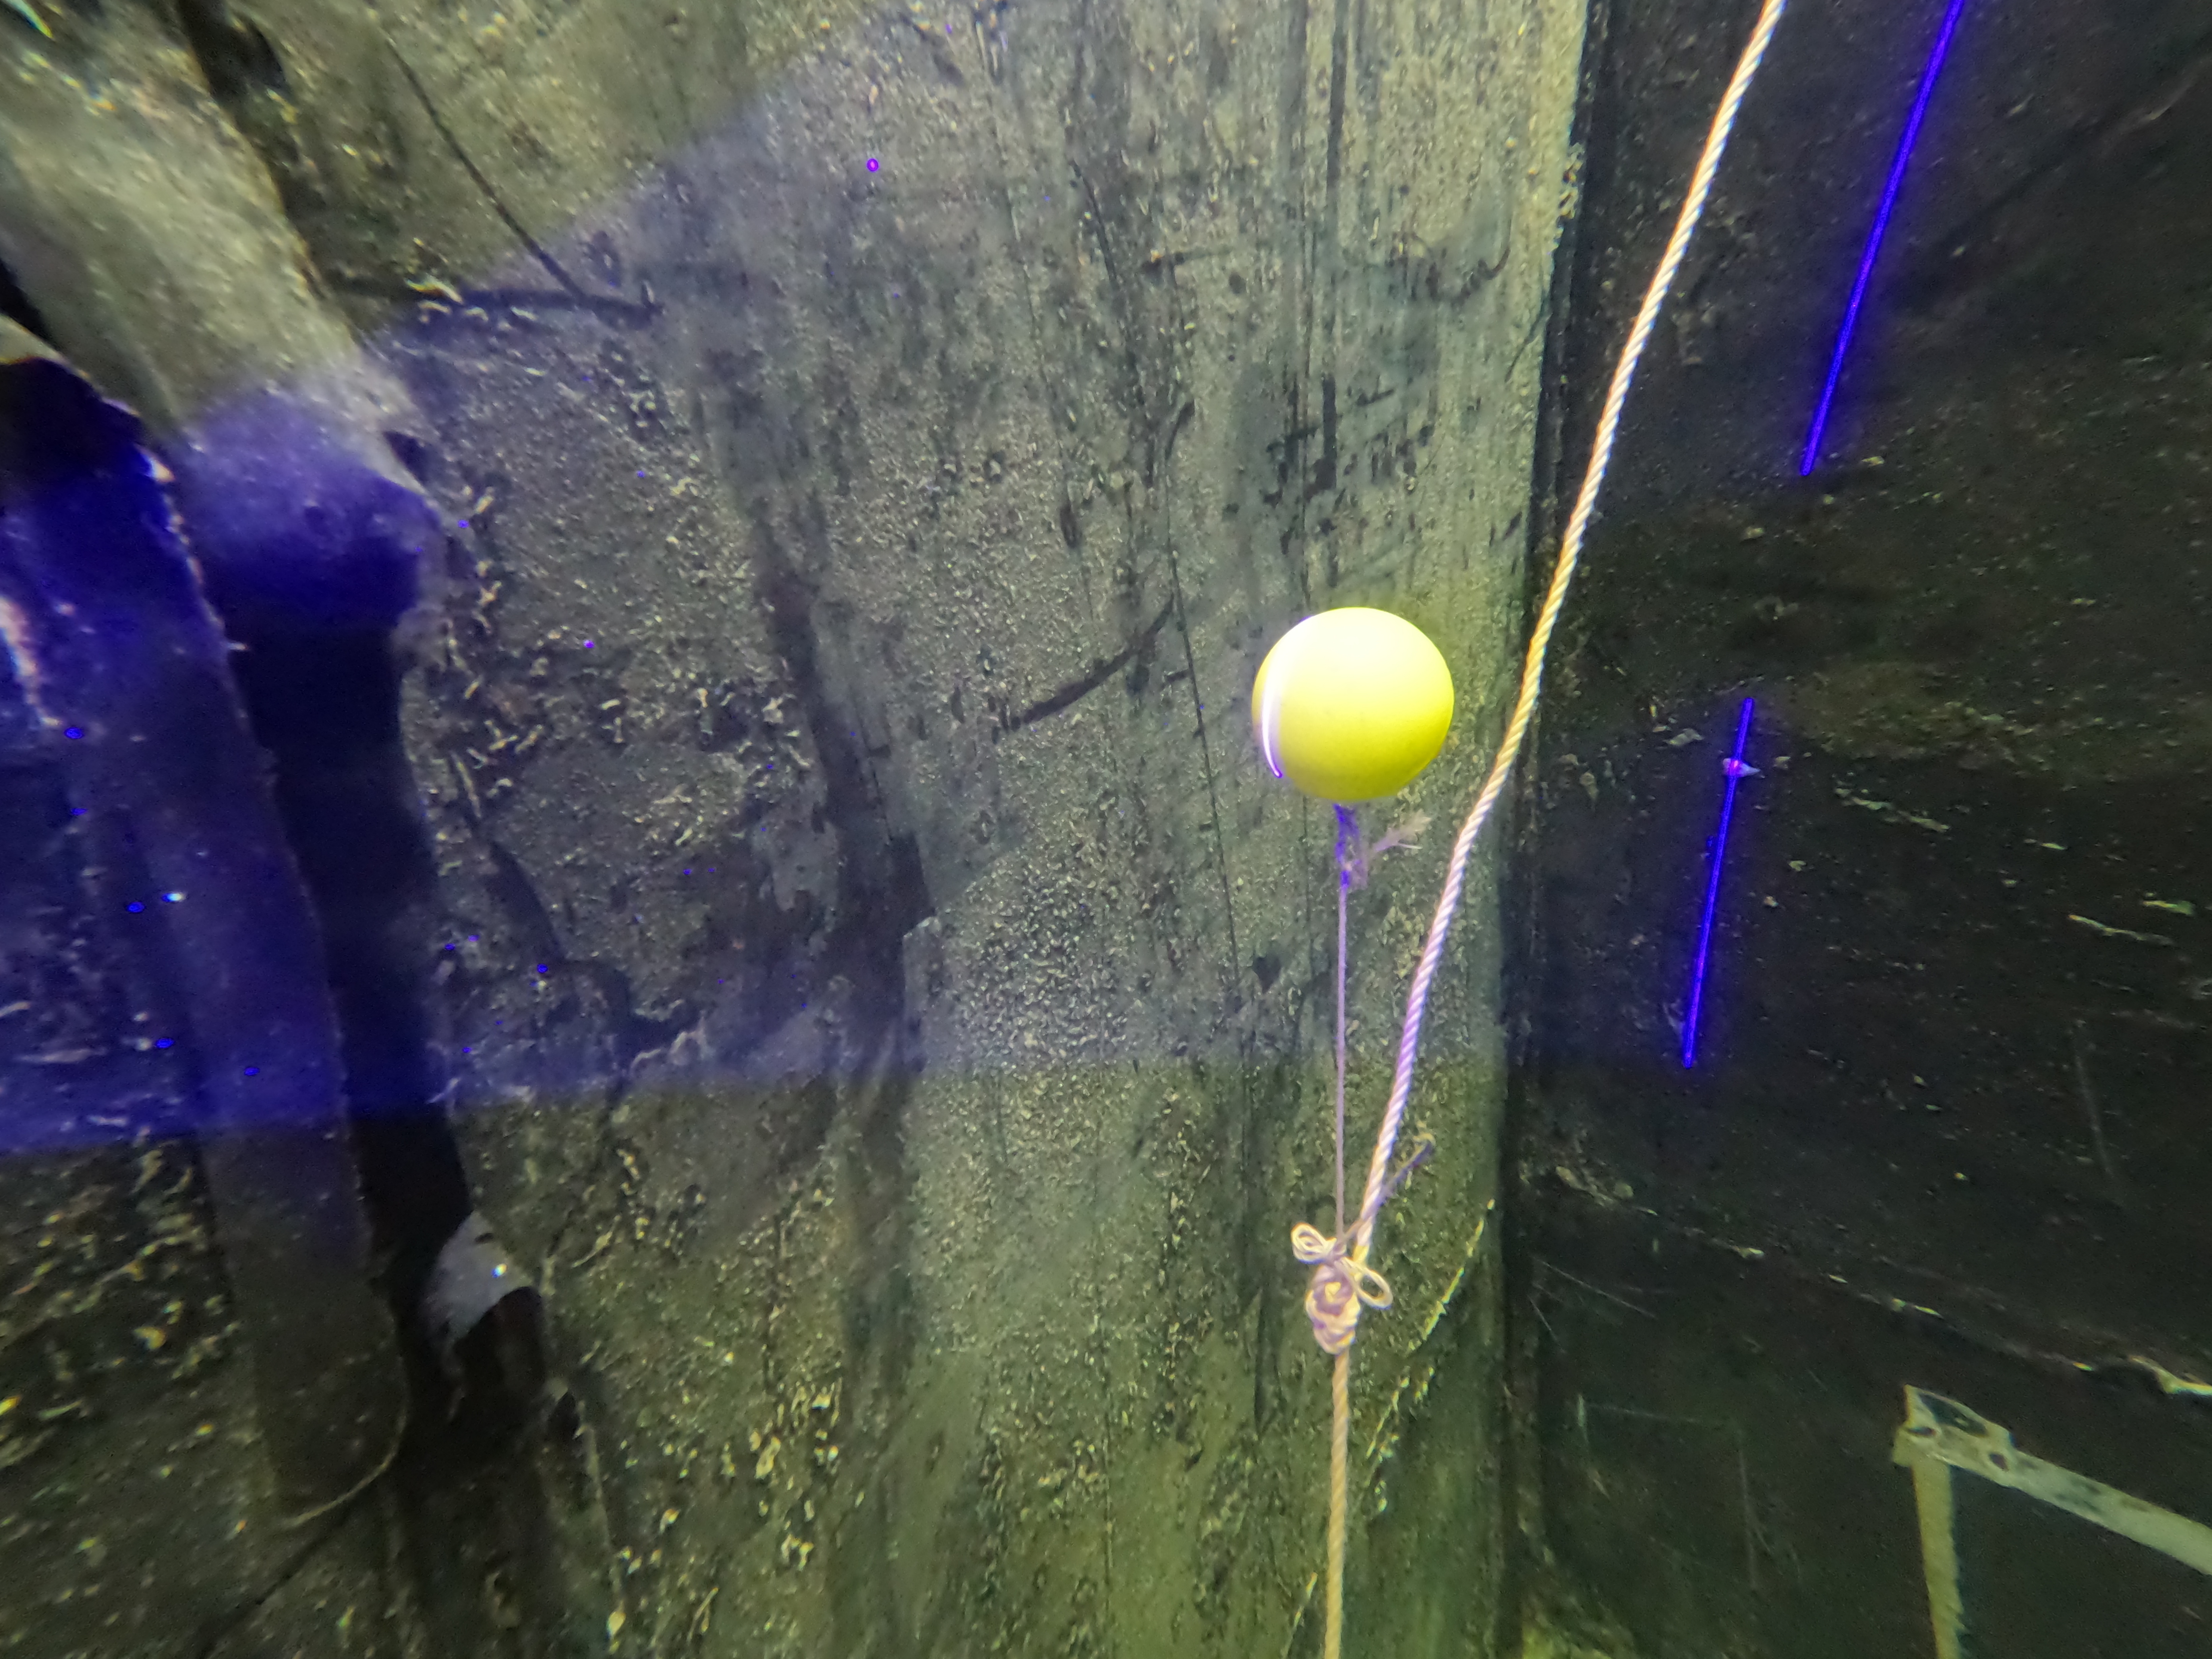

Supplement: Supplementary file 1974 [file G0034366.pdf › 5/G0034366.pdf]

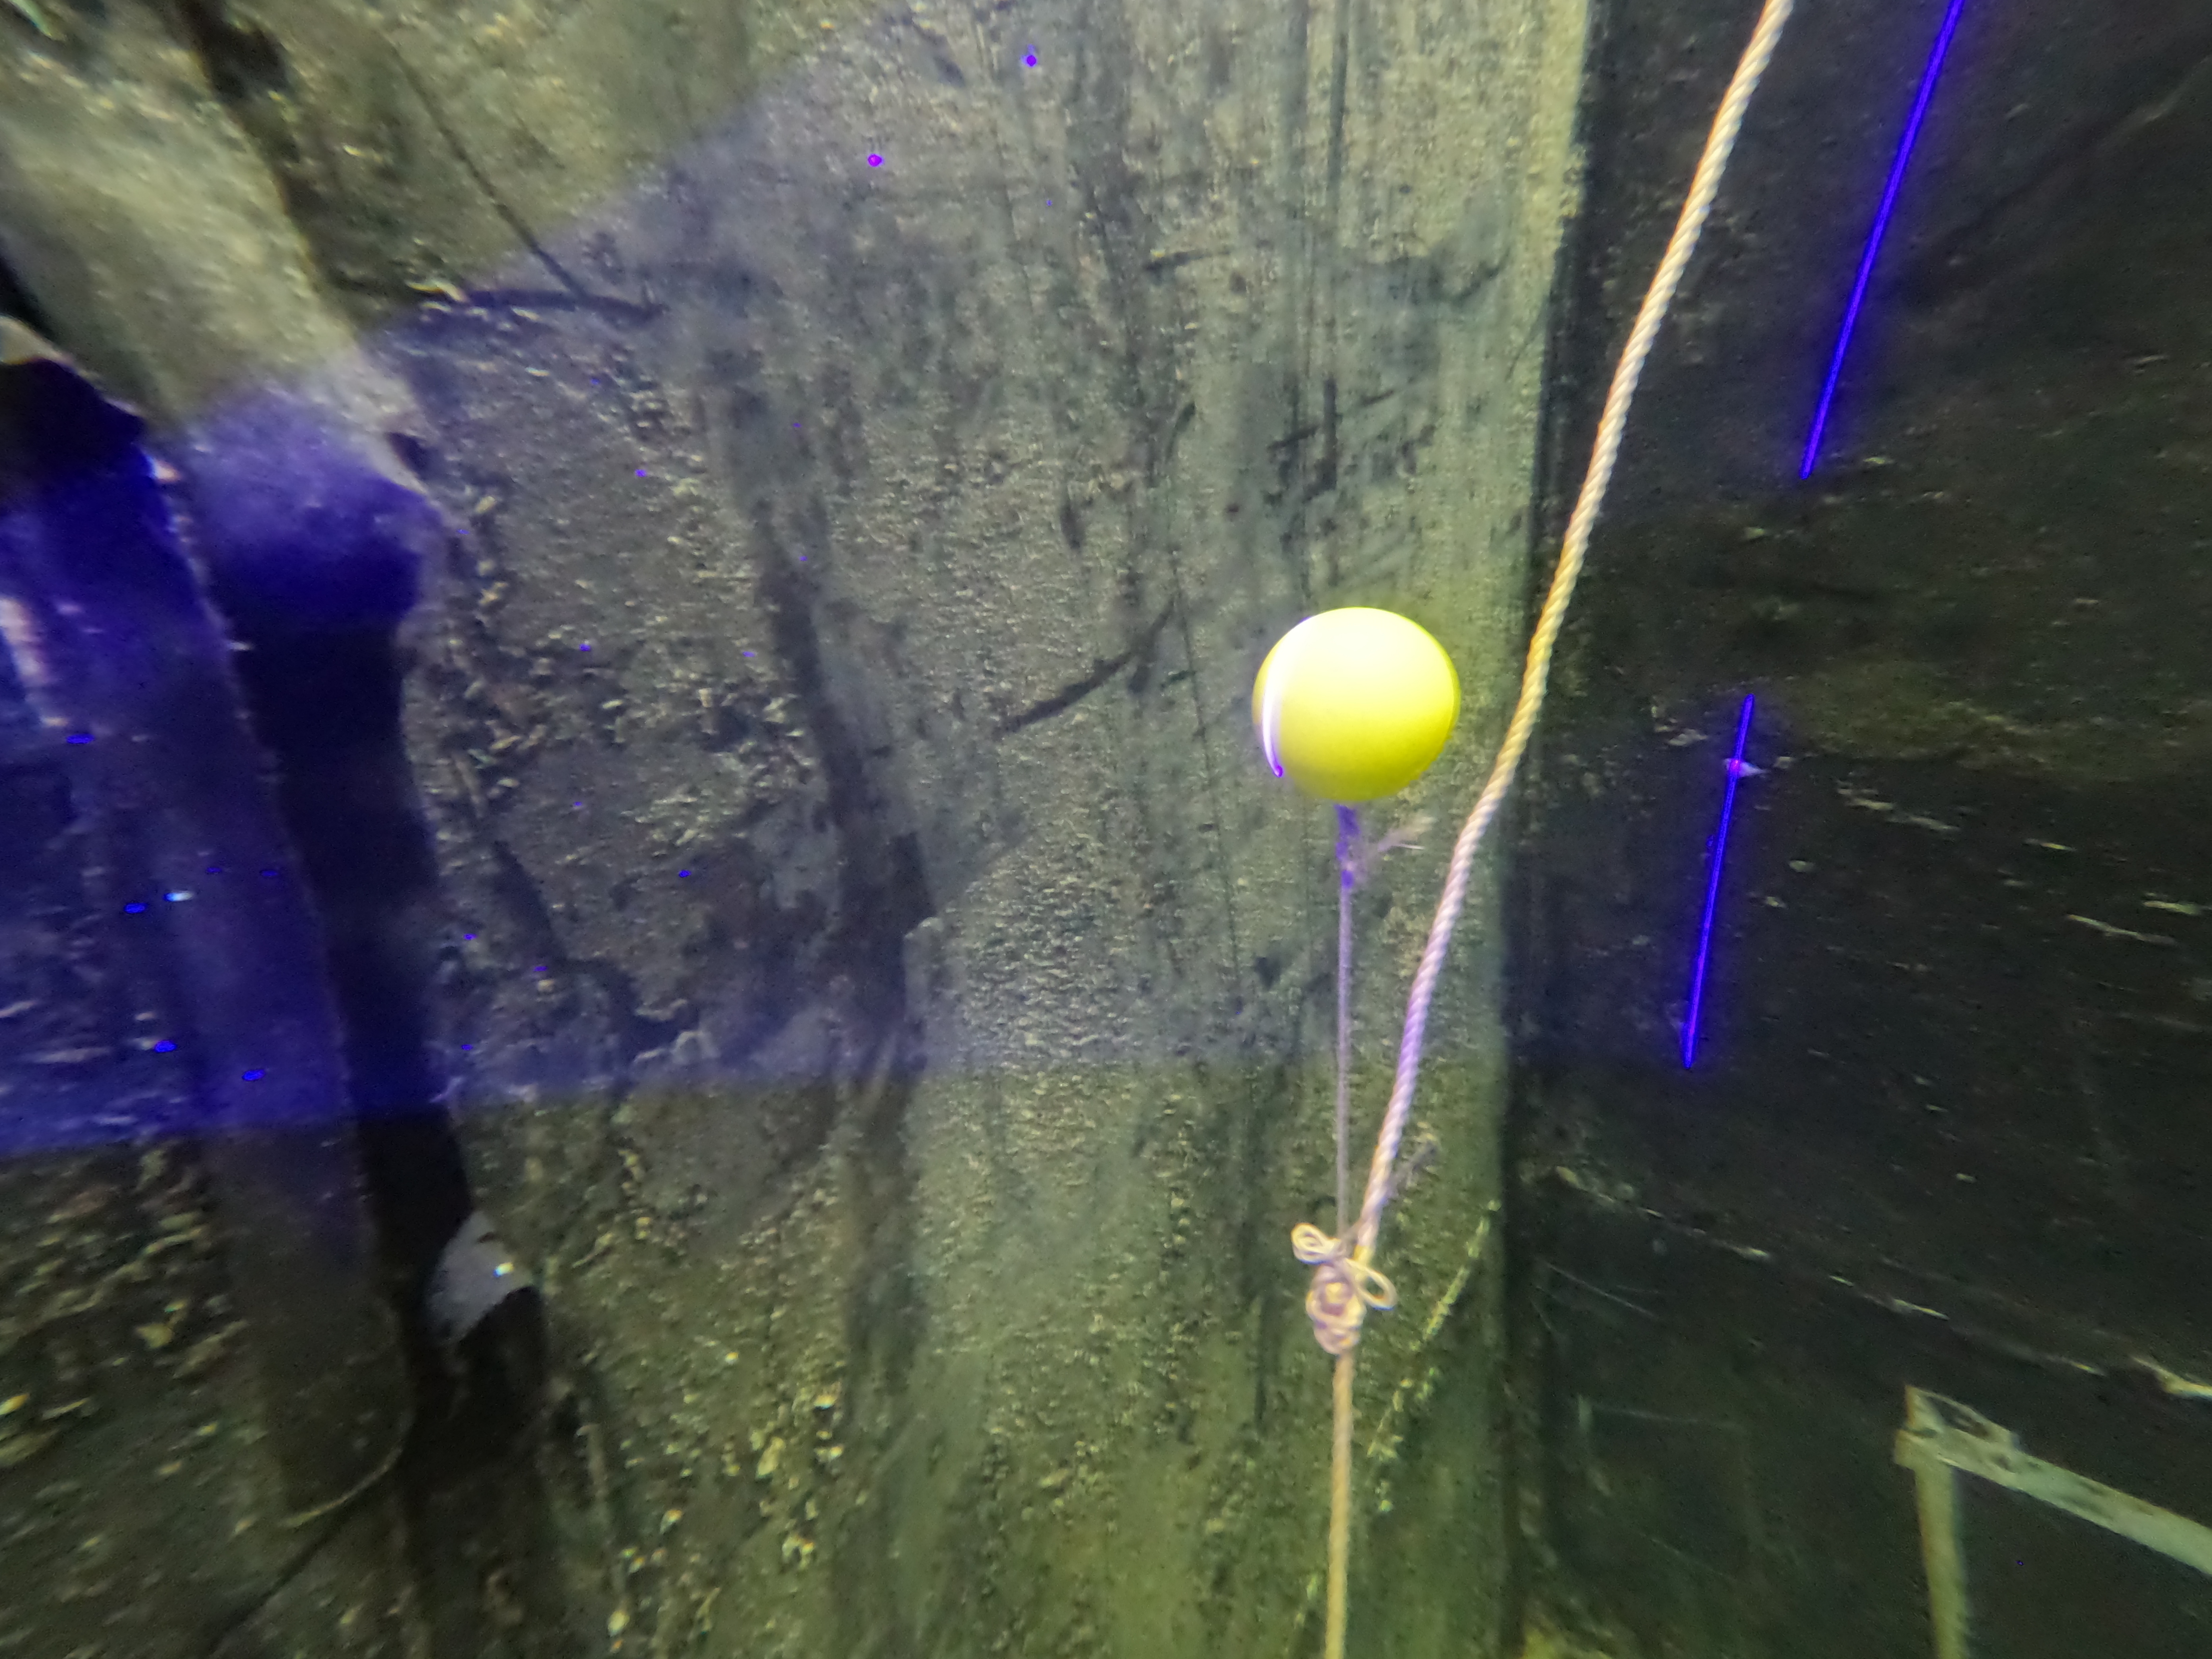

Supplement: Supplementary file 1975 [file G0034367.pdf › 5/G0034367.pdf]

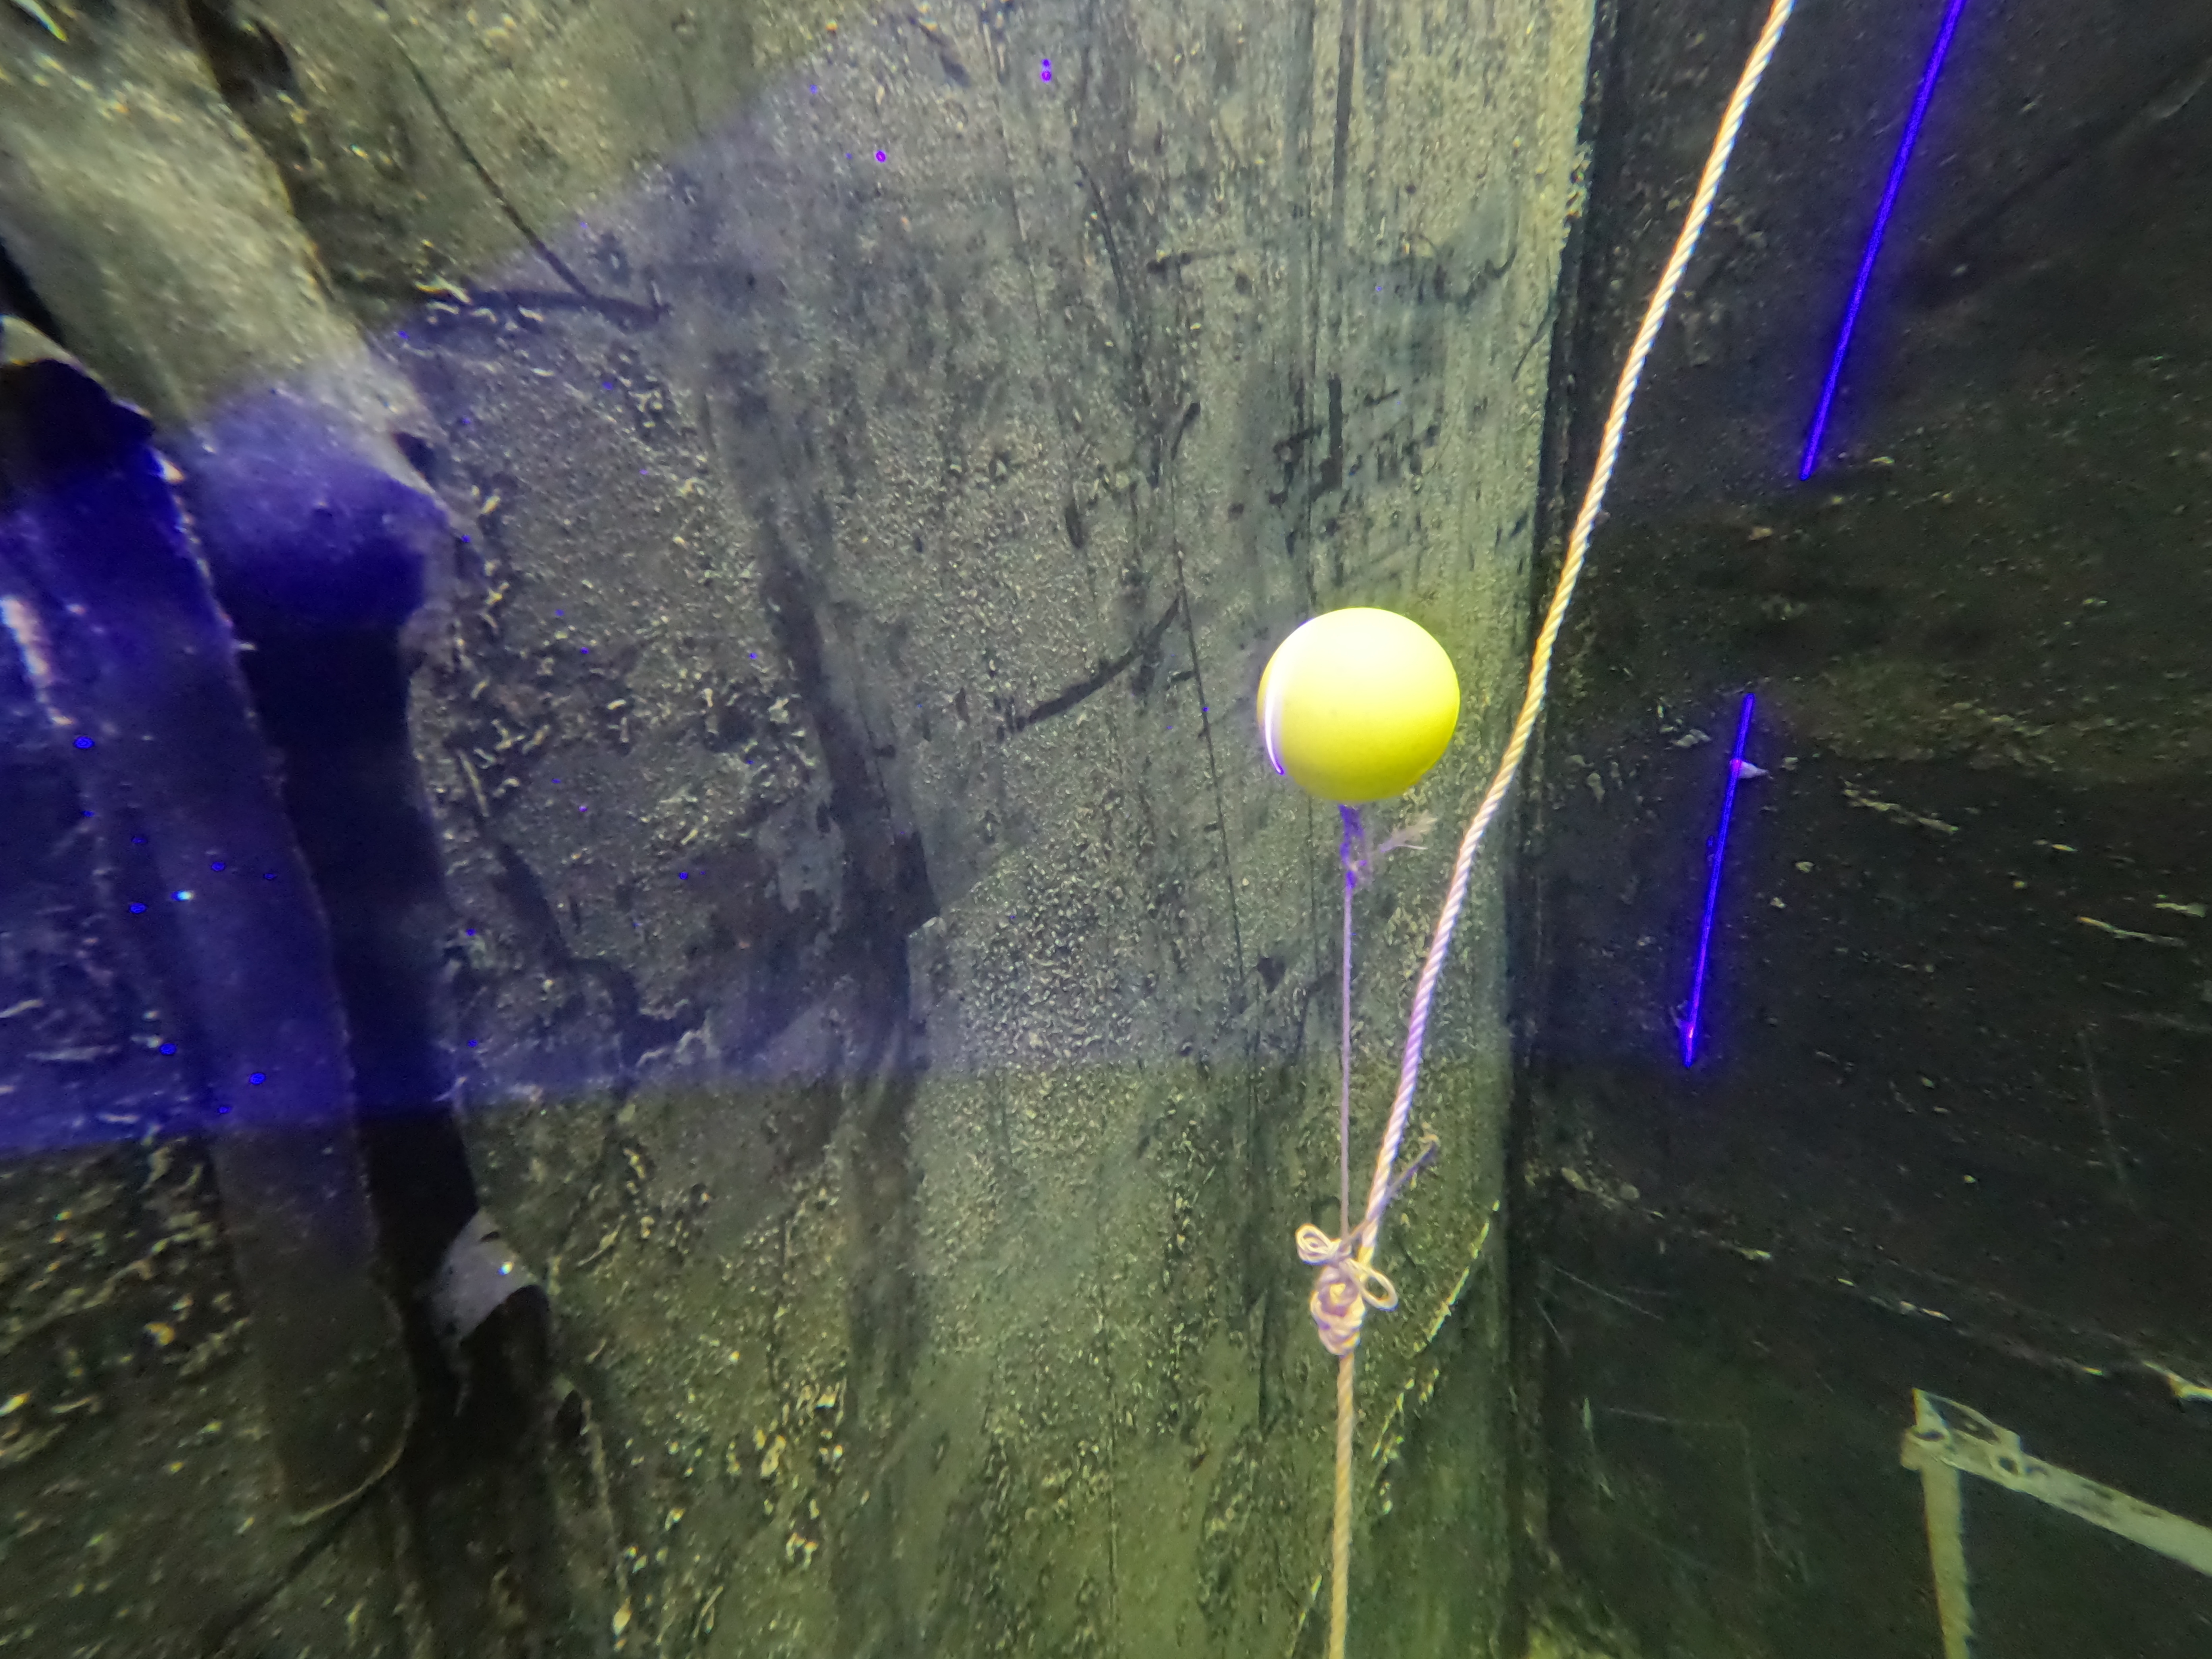

Supplement: Supplementary file 1976 [file G0034368.pdf › 5/G0034368.pdf]

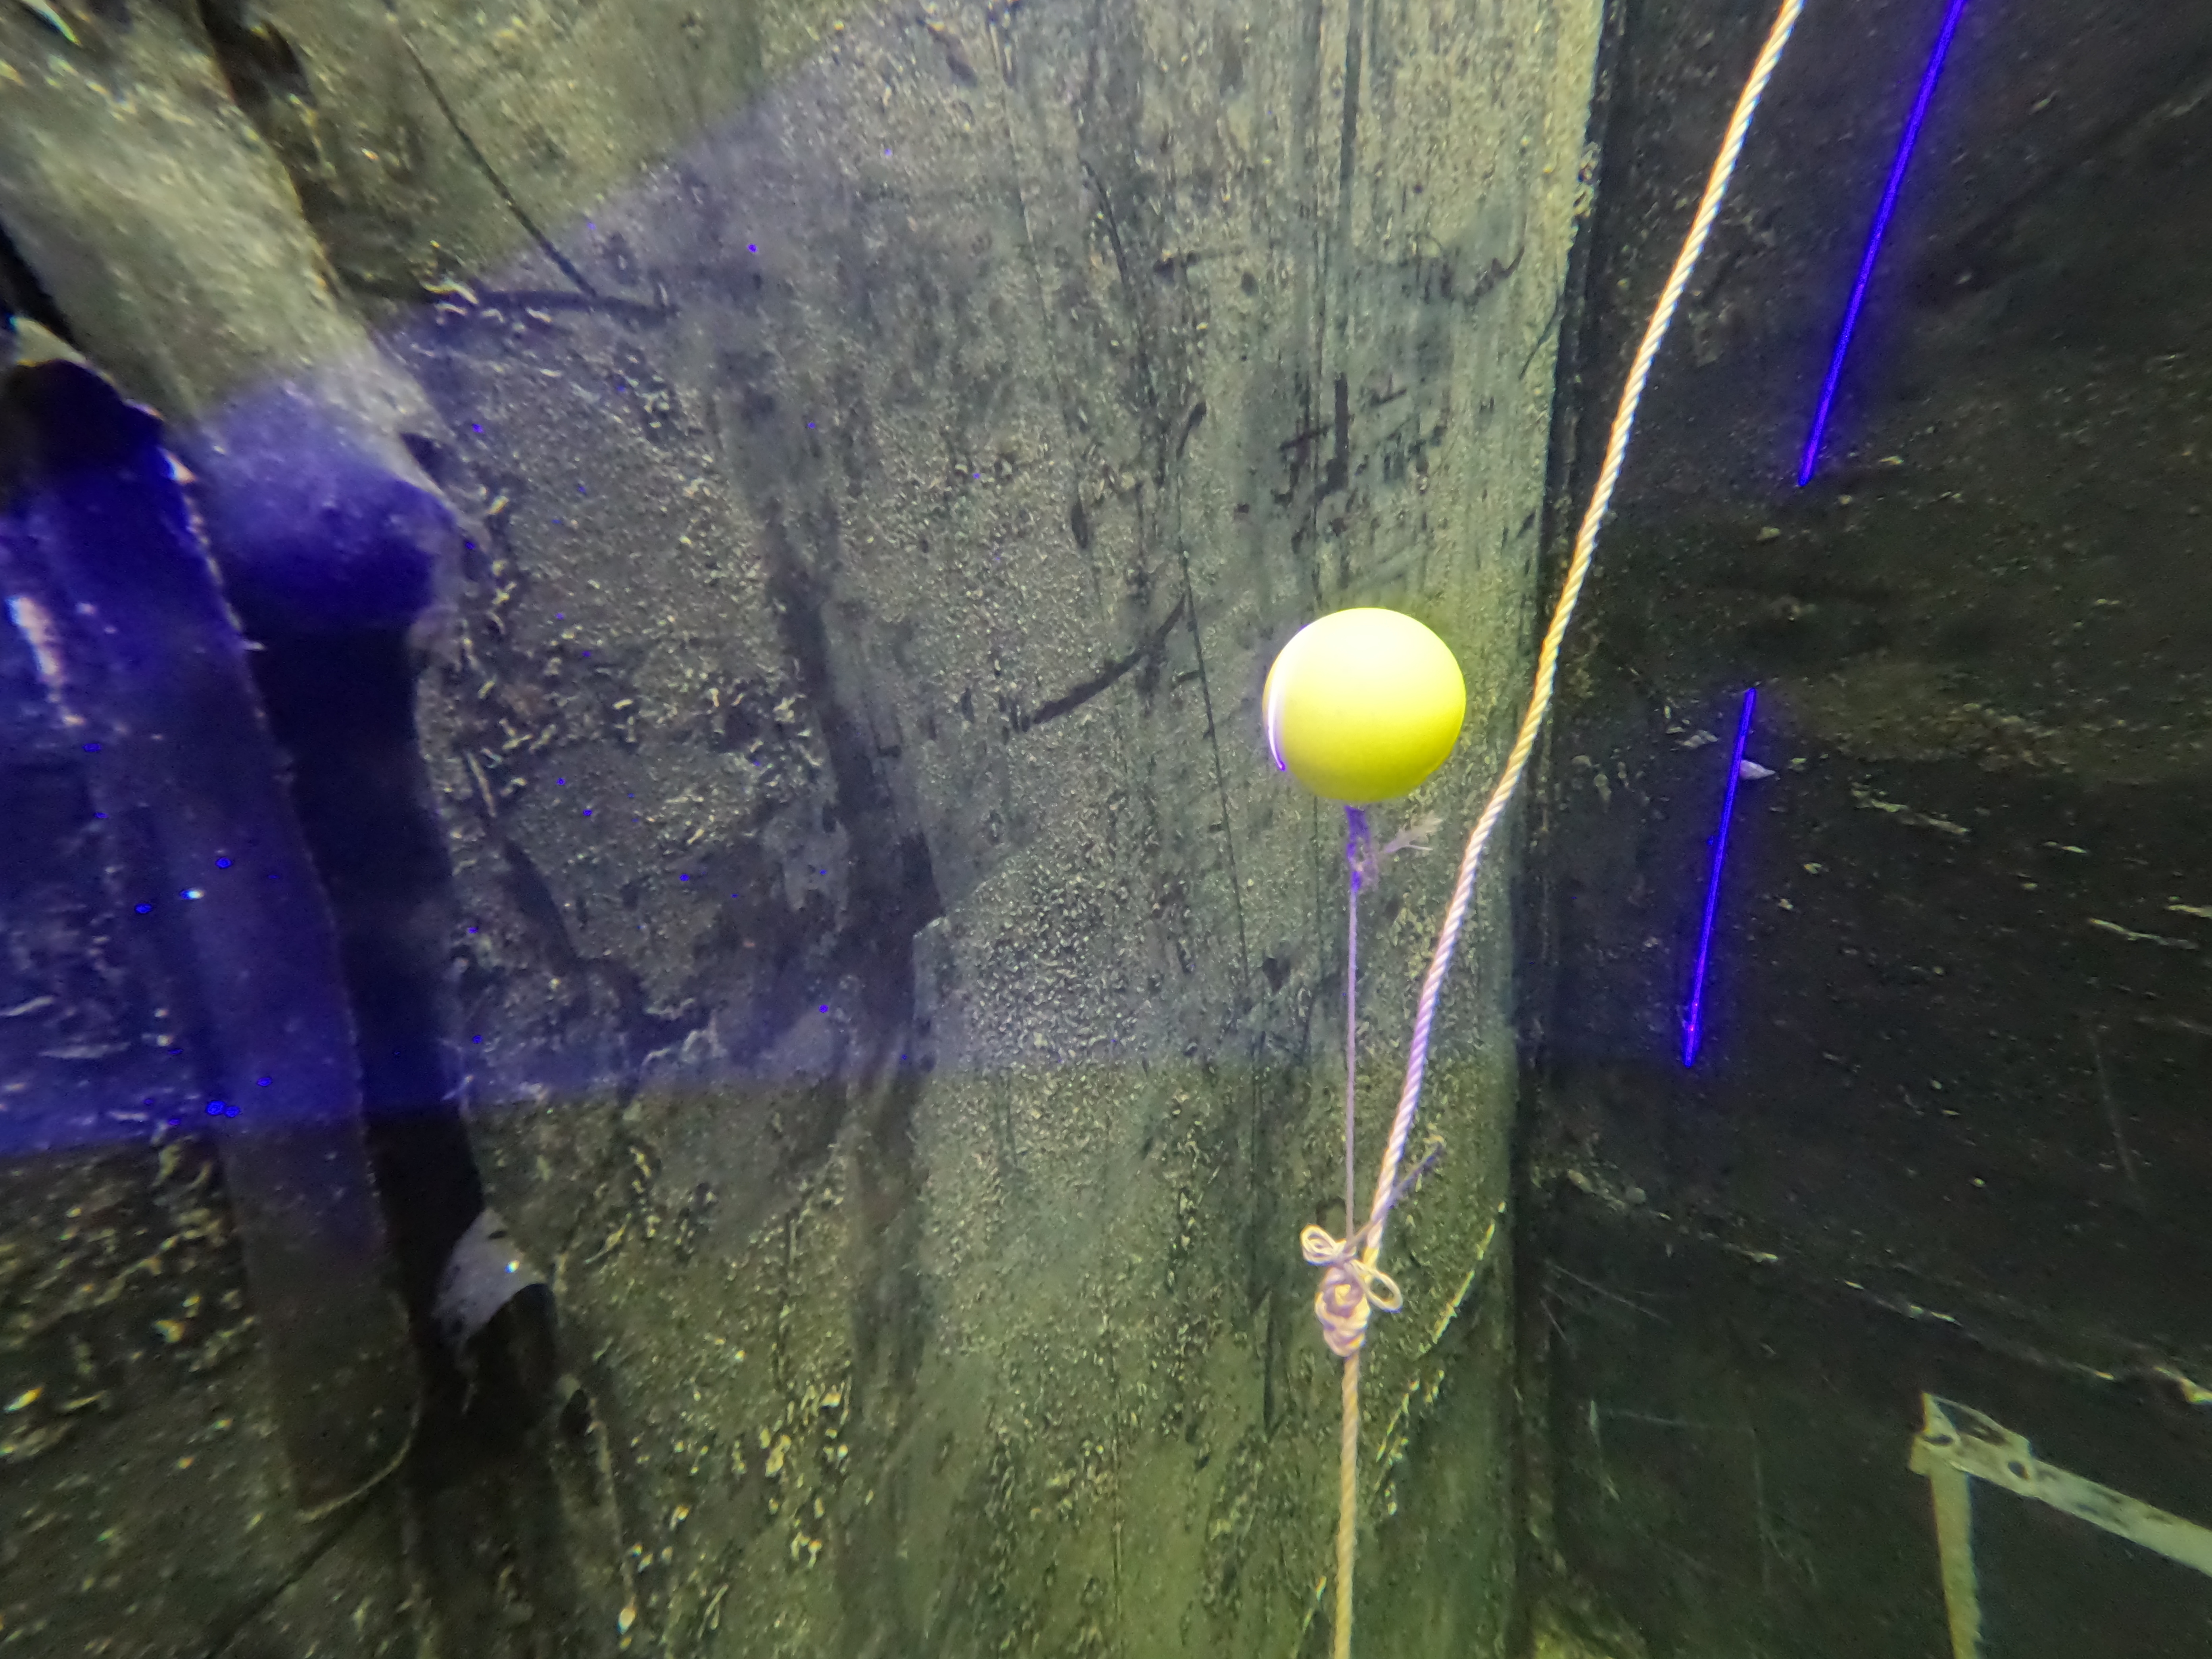

Supplement: Supplementary file 1977 [file G0034369.pdf › 5/G0034369.pdf]

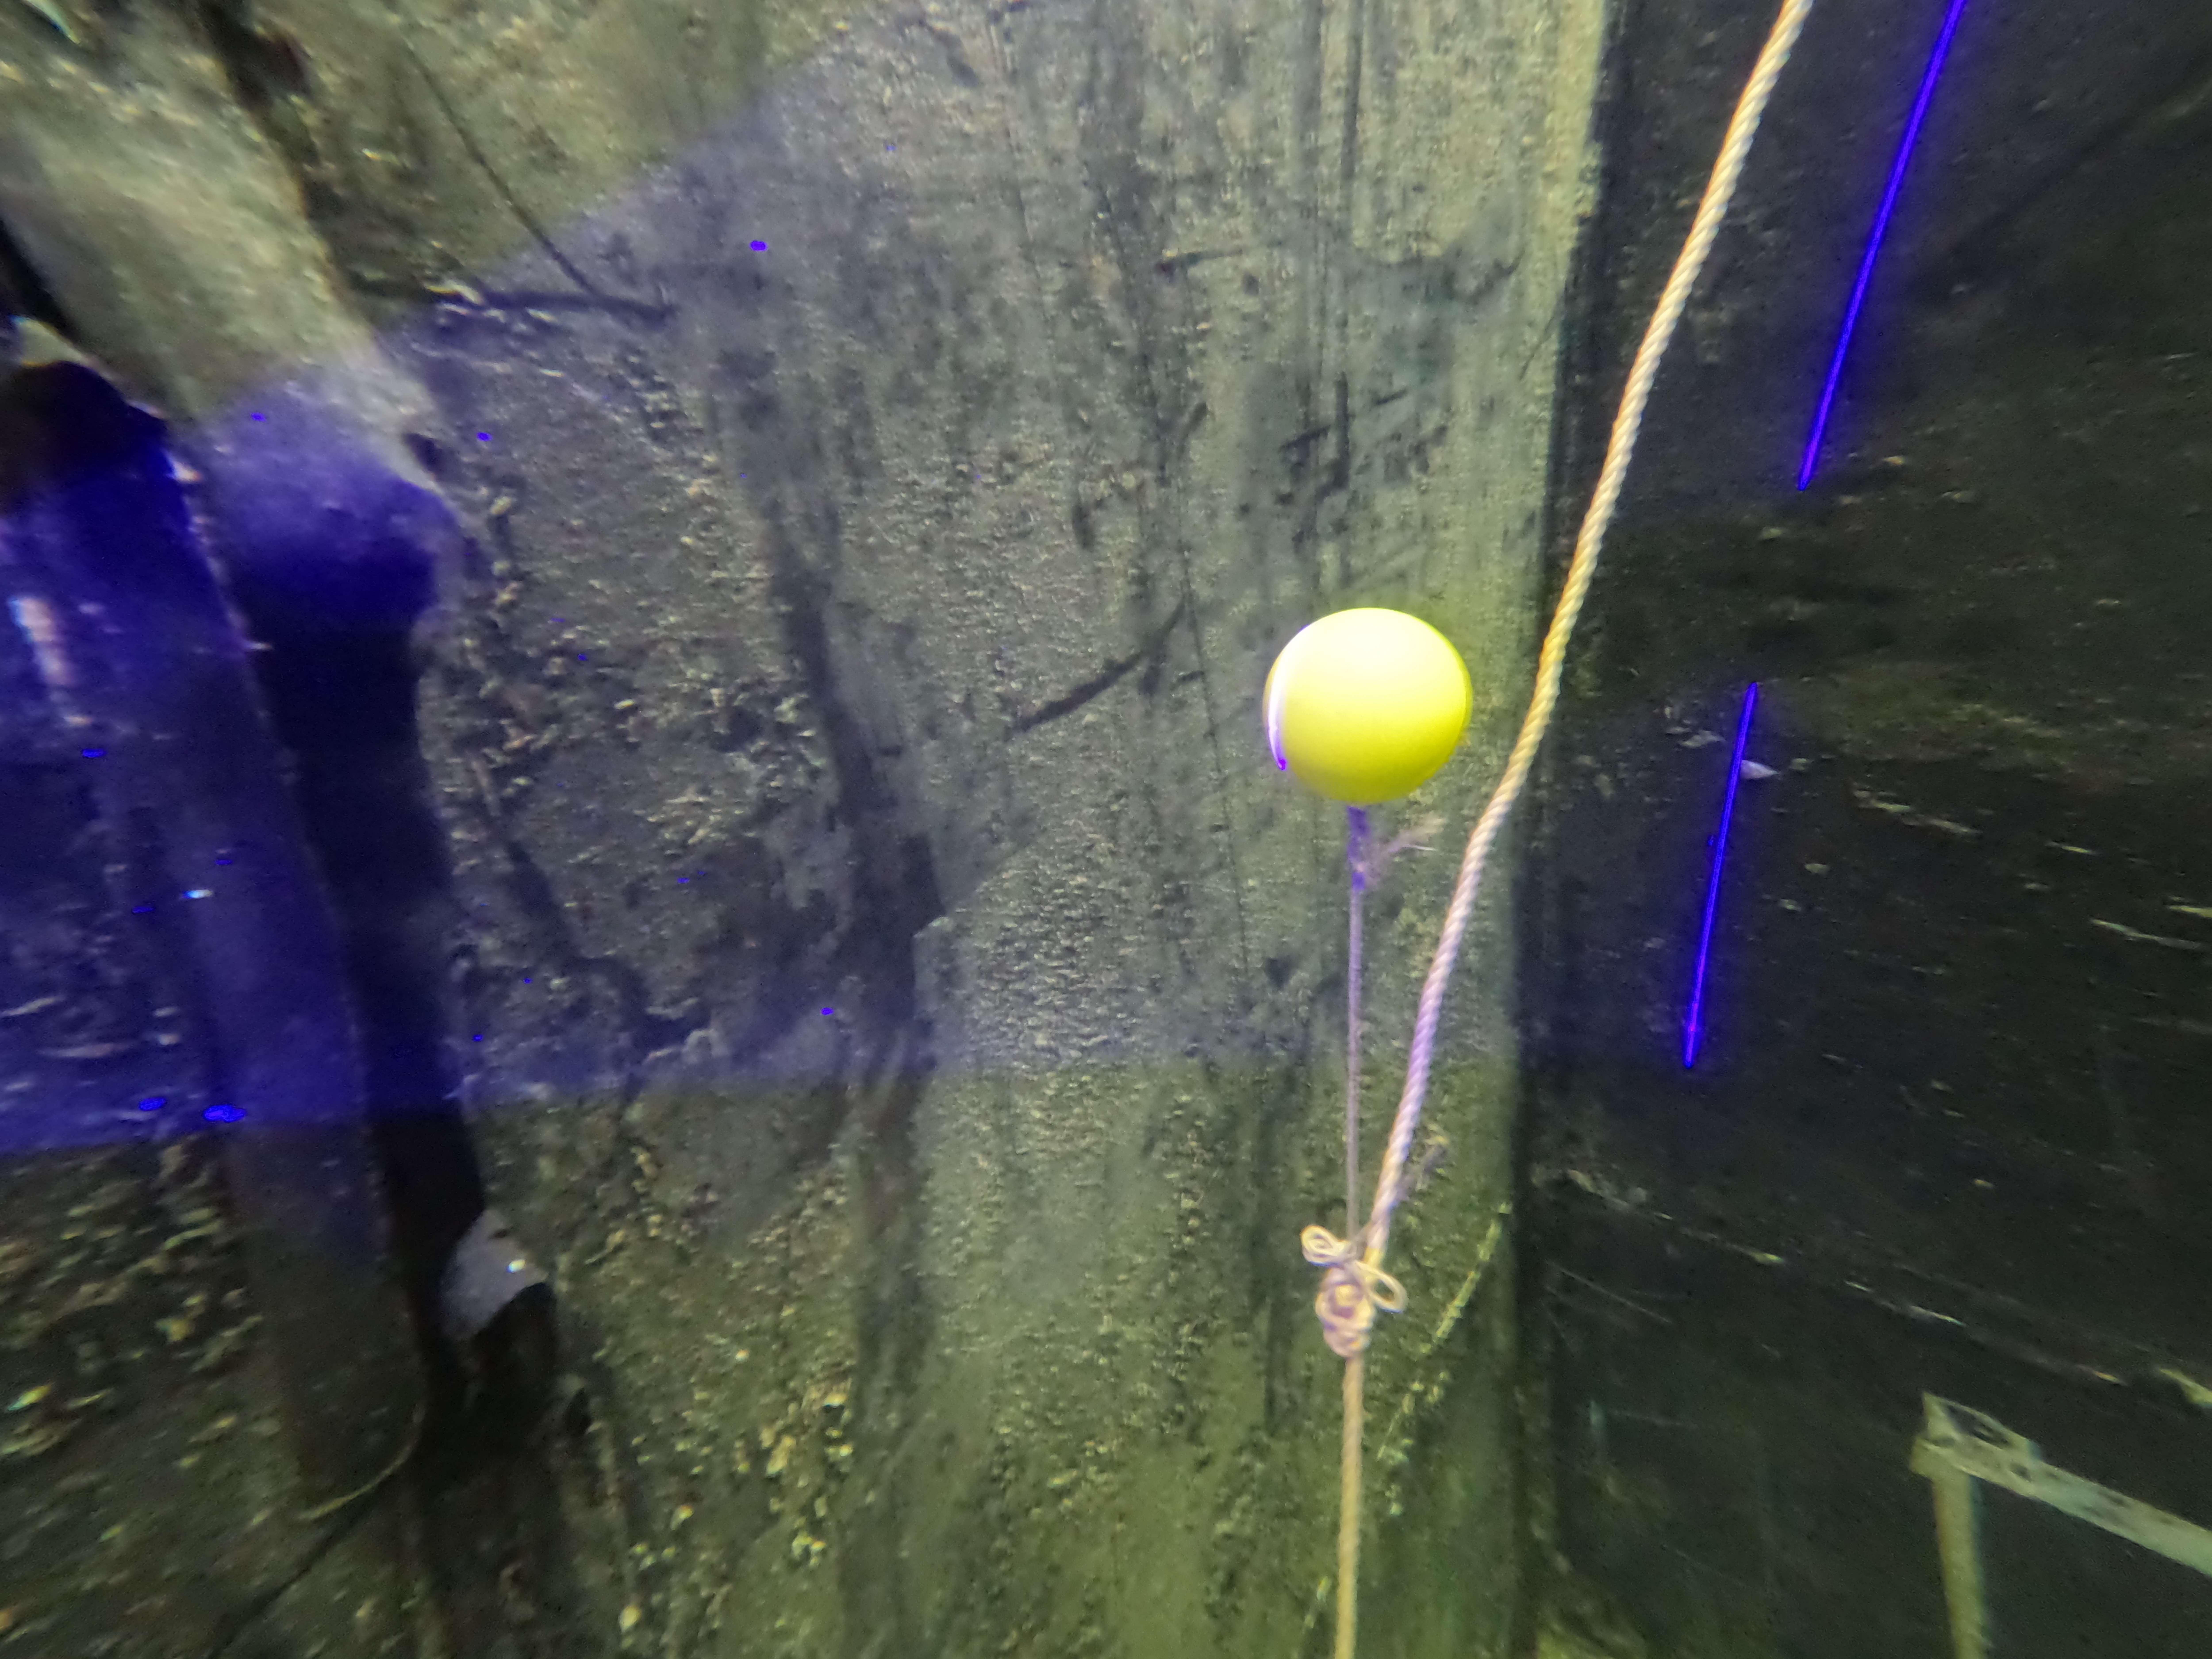

Supplement: Supplementary file 1978 [file G0034370.pdf › 5/G0034370.pdf]

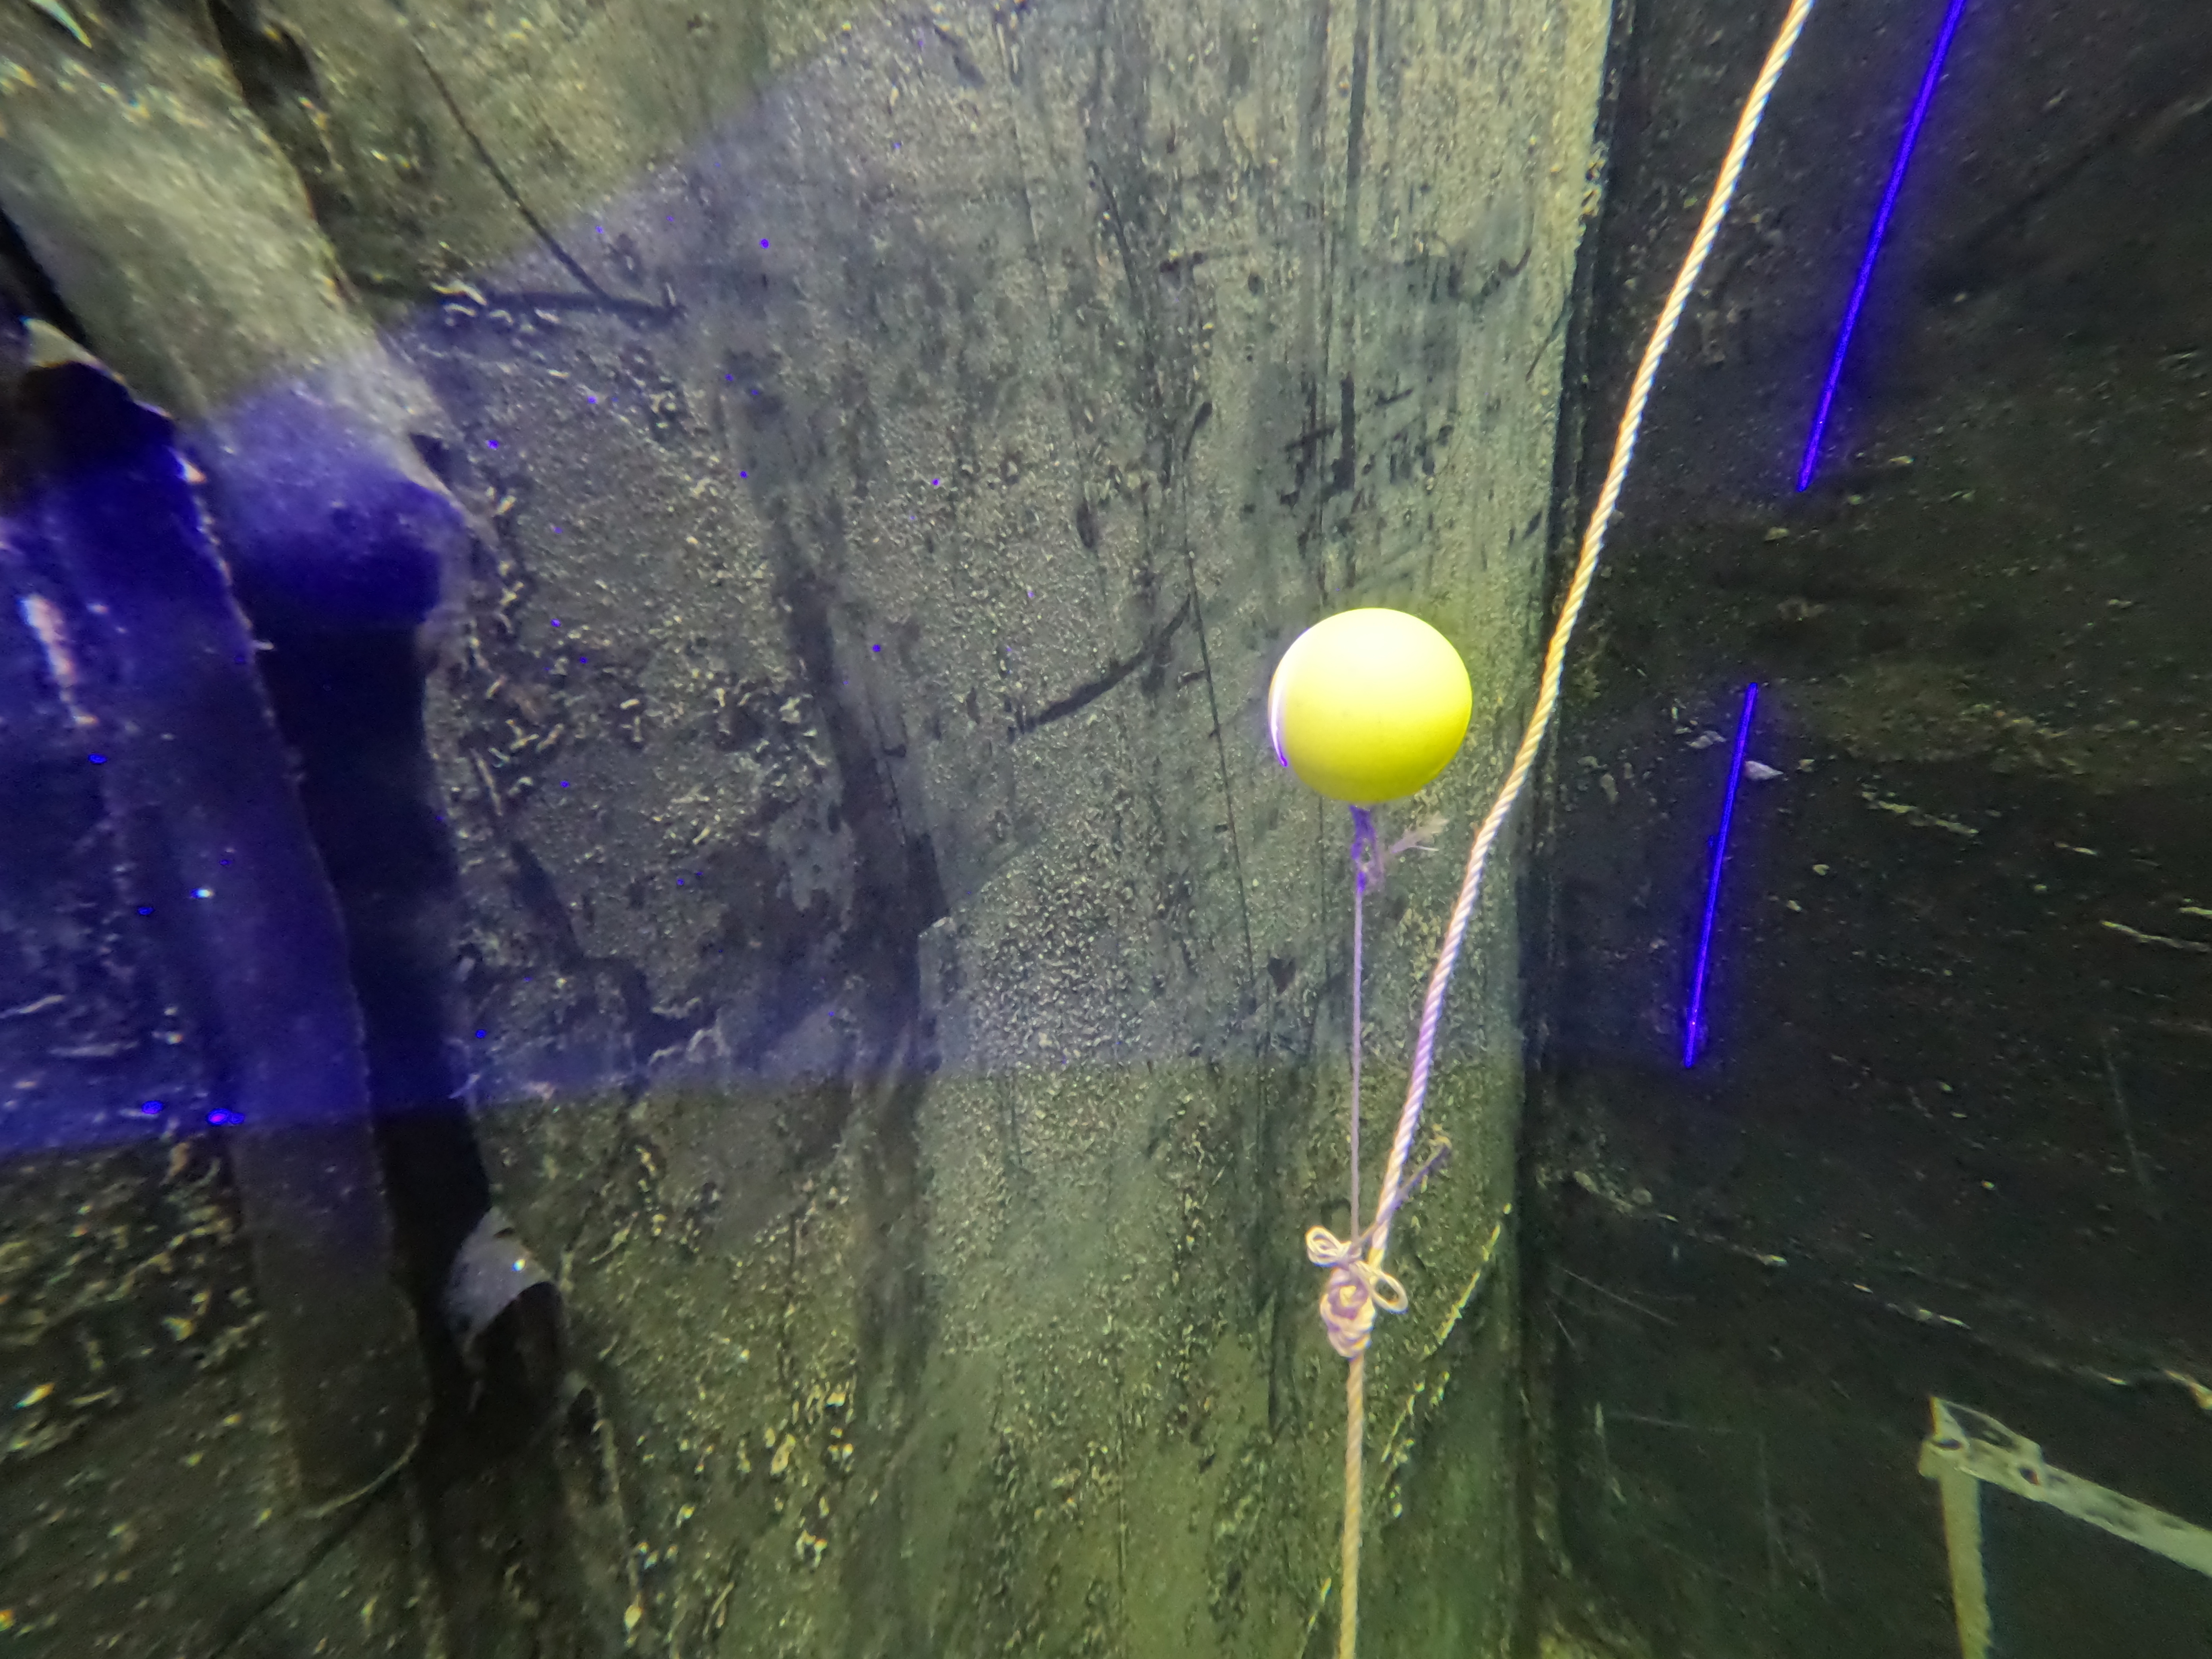

Supplement: Supplementary file 1979 [file G0034371.pdf › 5/G0034371.pdf]

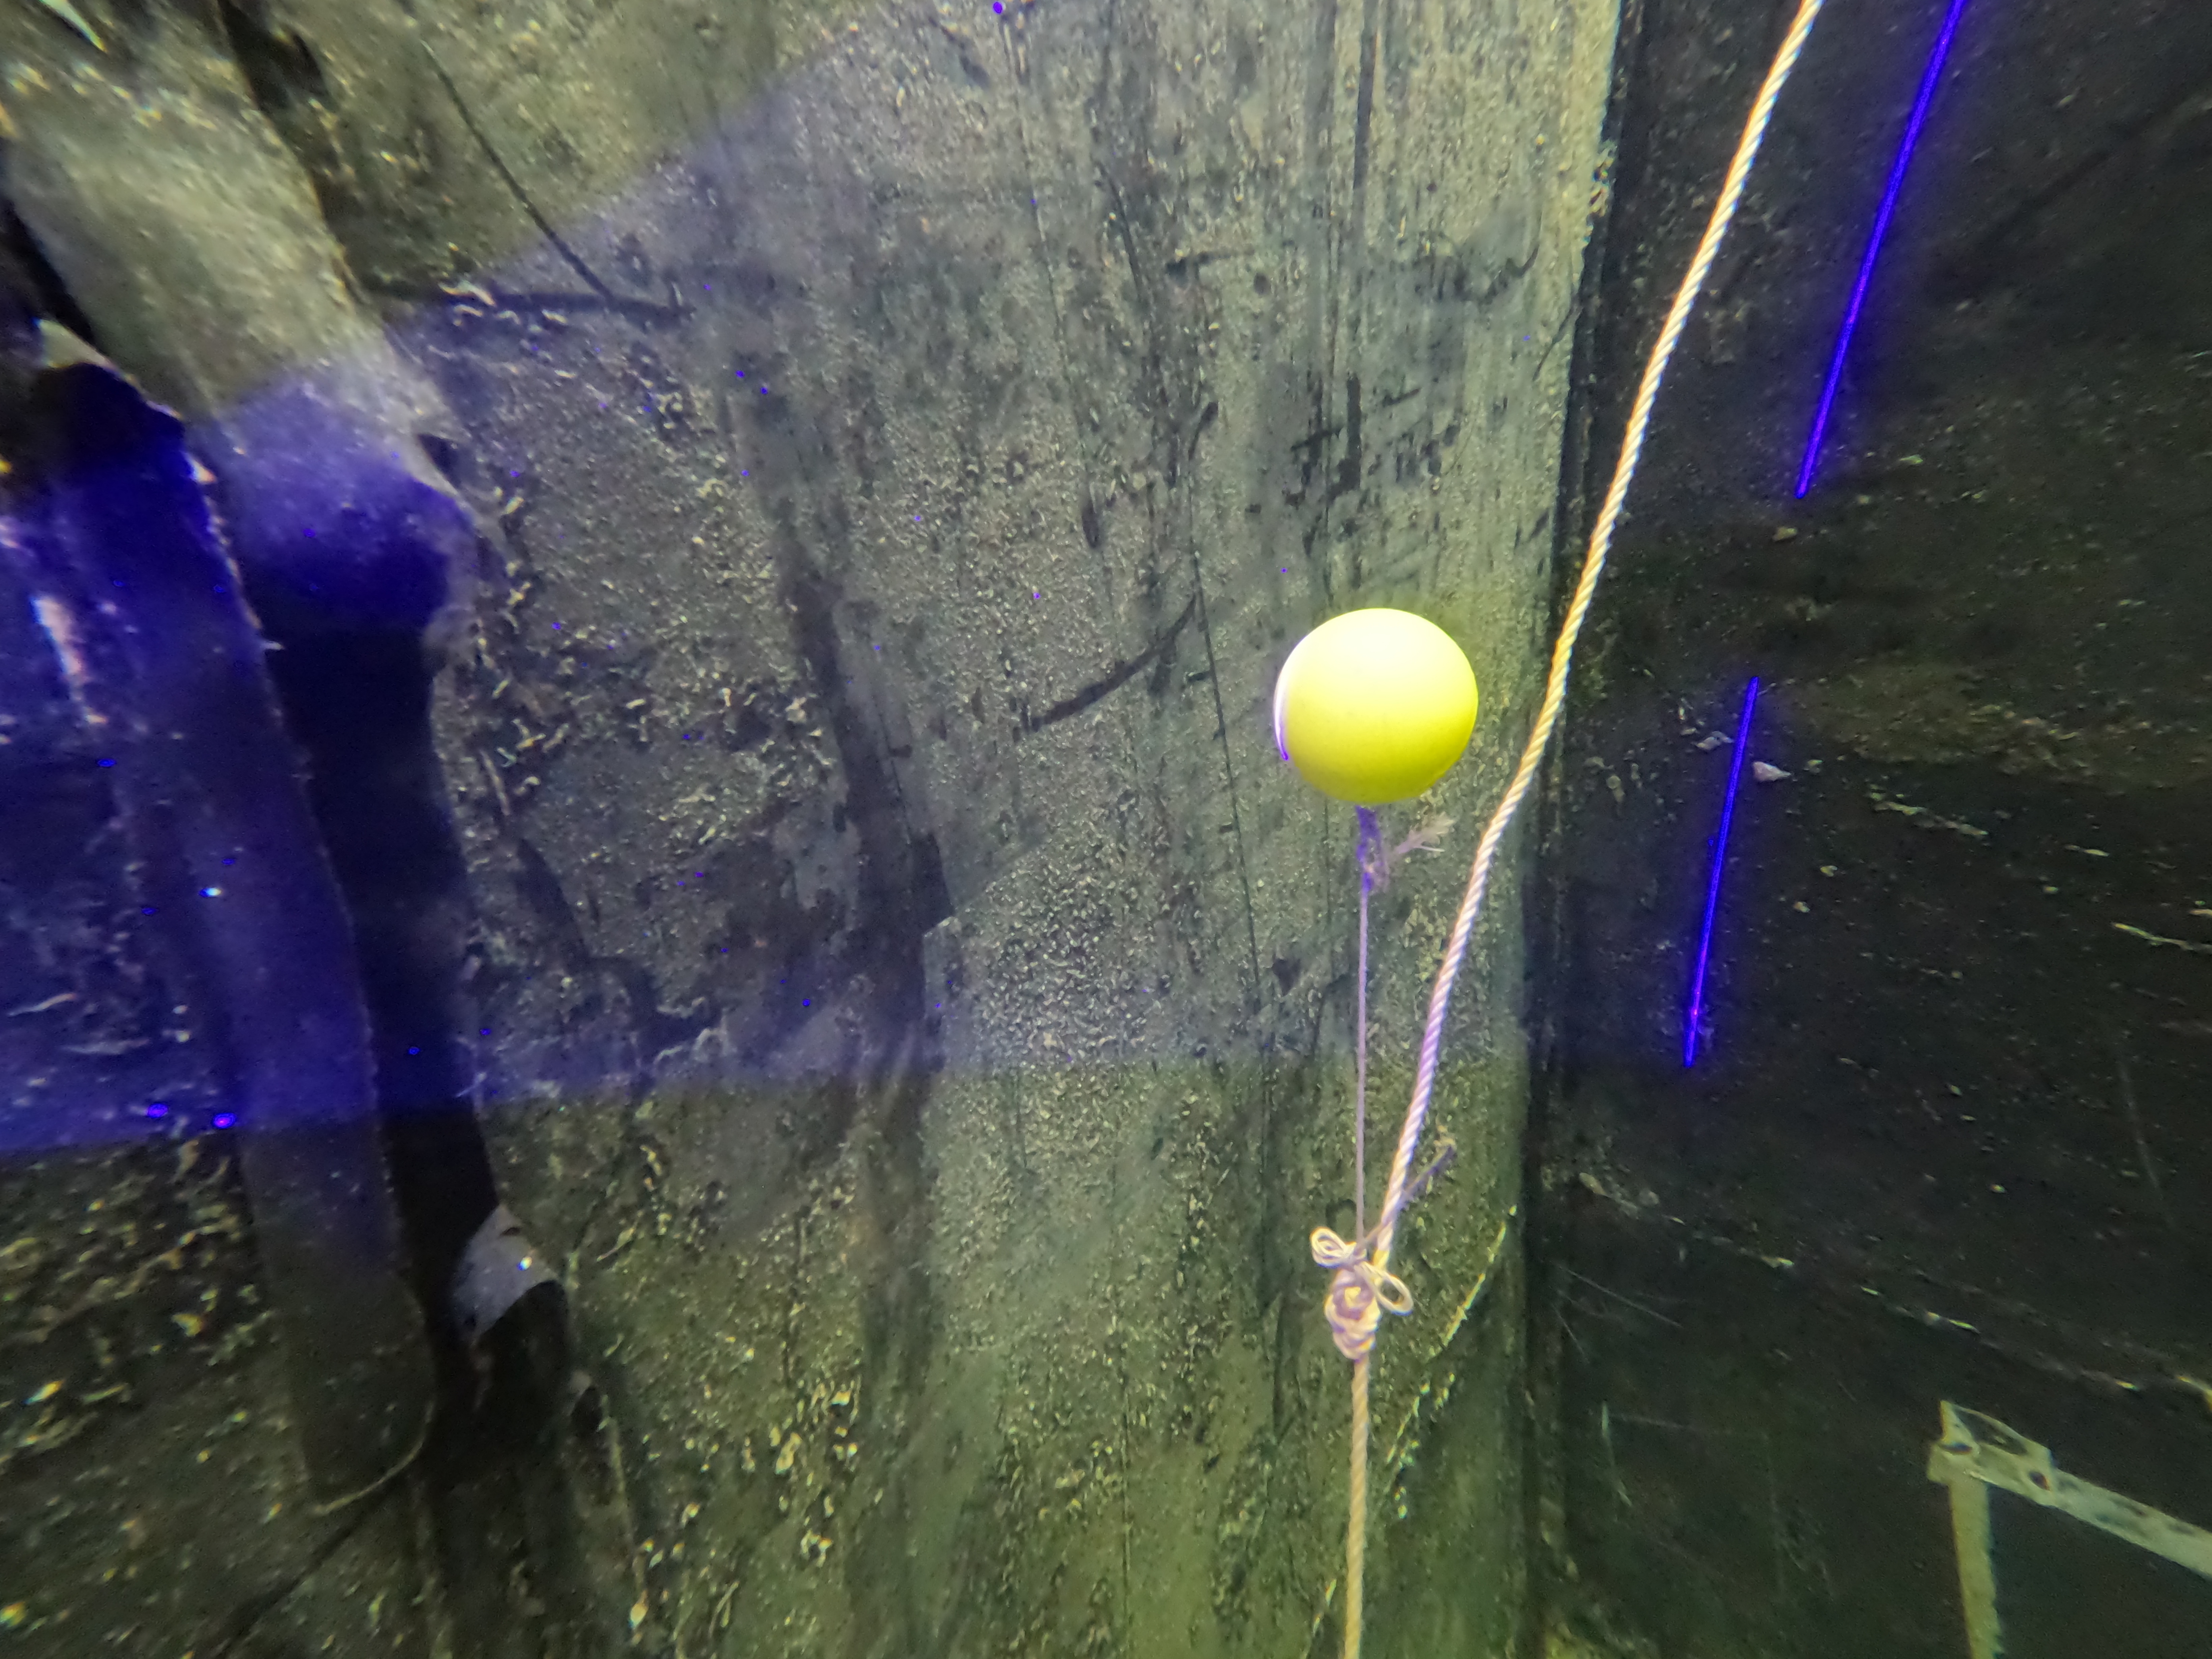

Supplement: Supplementary file 1980 [file G0034372.pdf › 5/G0034372.pdf]

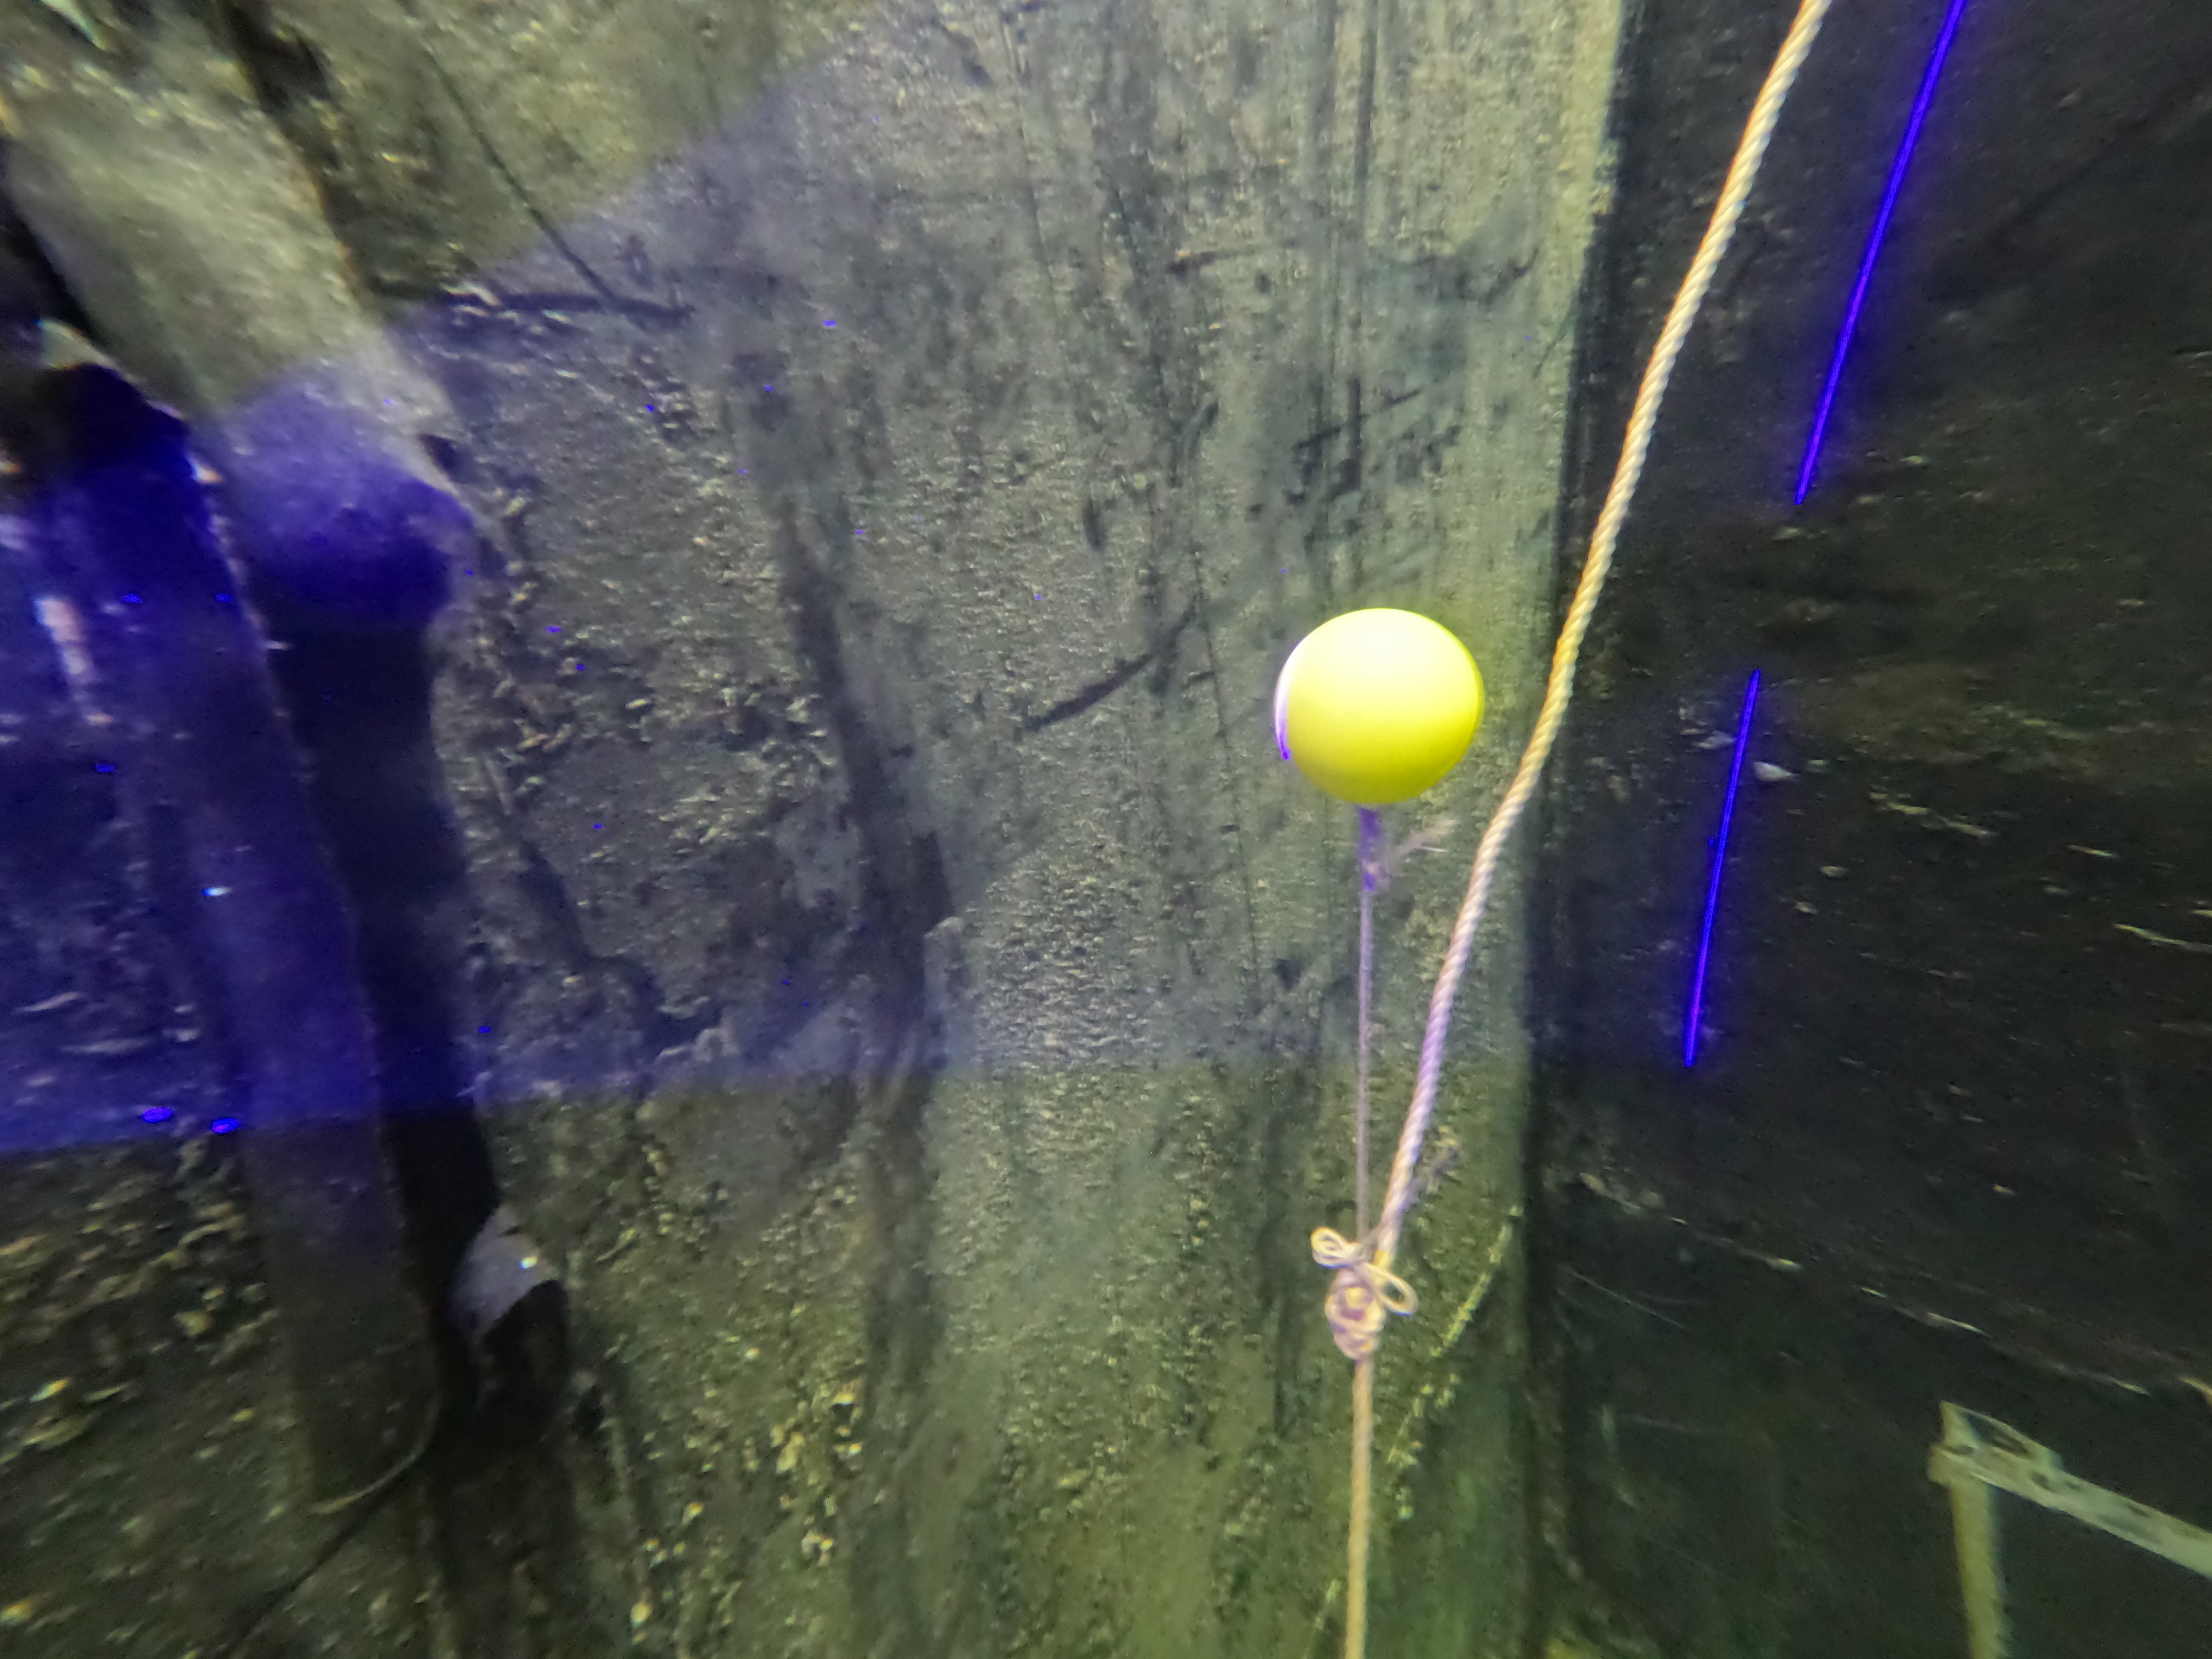

Supplement: Supplementary file 1981 [file G0034373.pdf › 5/G0034373.pdf]

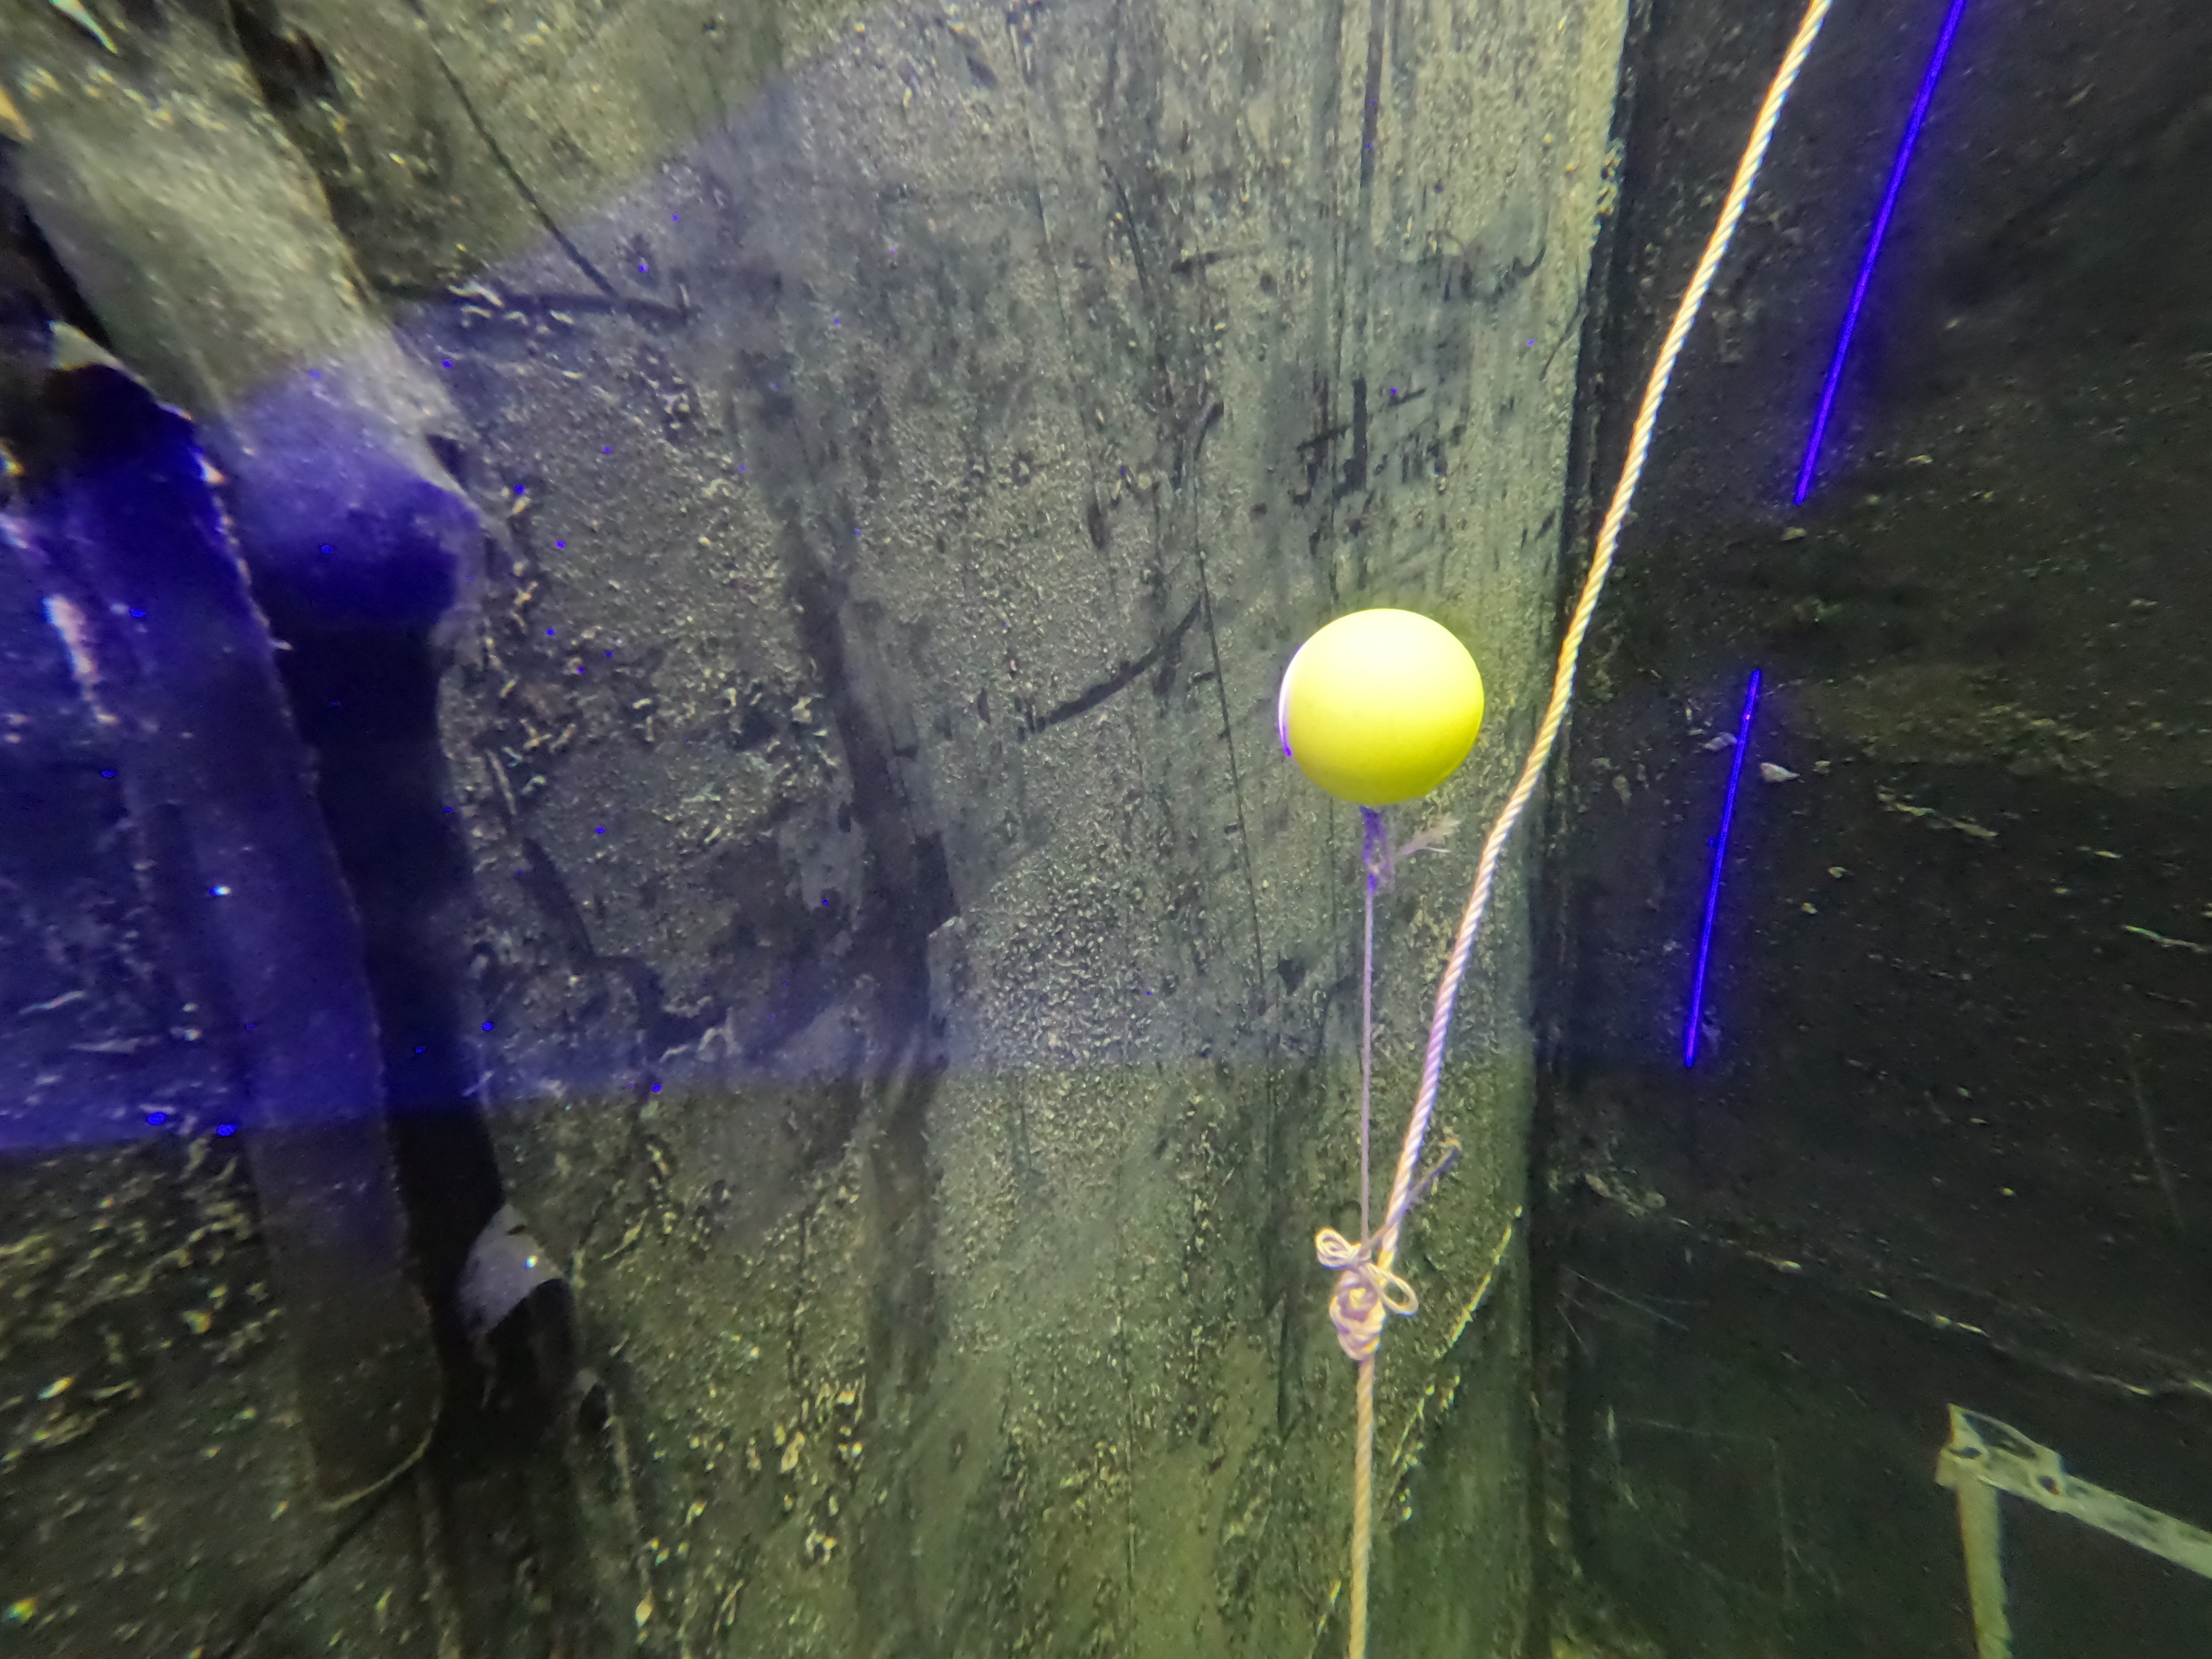

Supplement: Supplementary file 1982 [file G0034374.pdf › 5/G0034374.pdf]

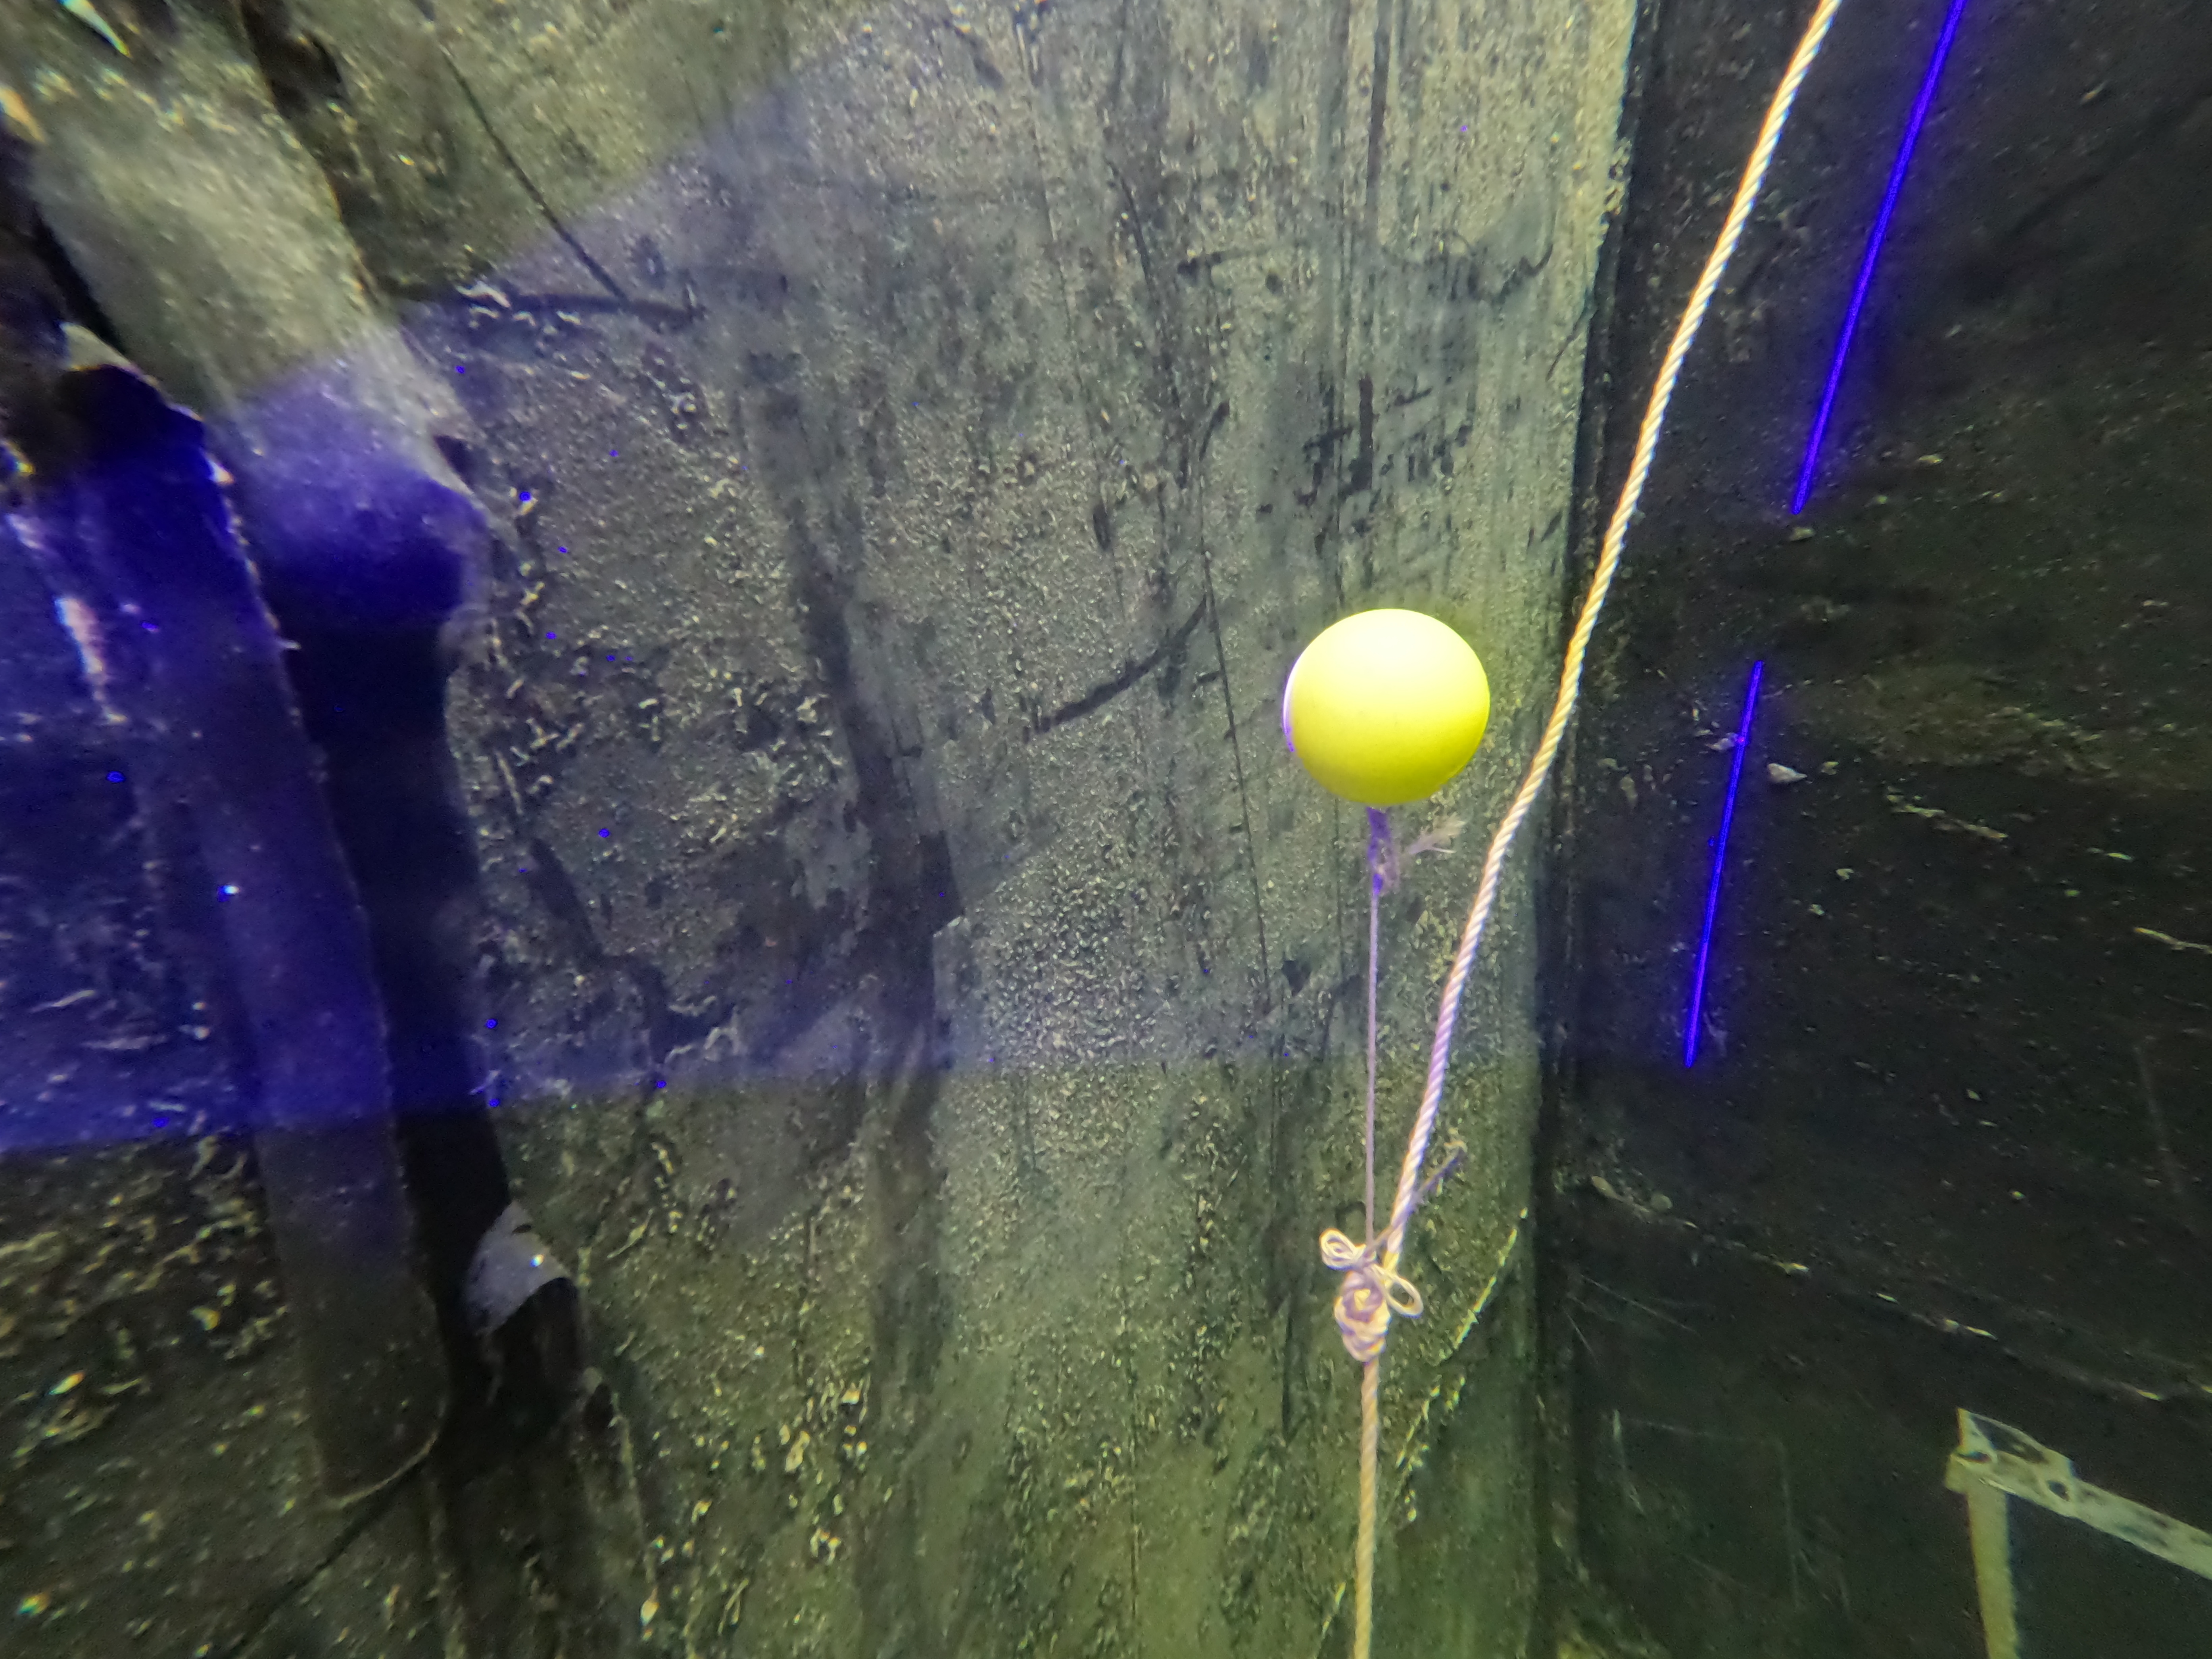

Supplement: Supplementary file 1983 [file G0034375.pdf › 5/G0034375.pdf]

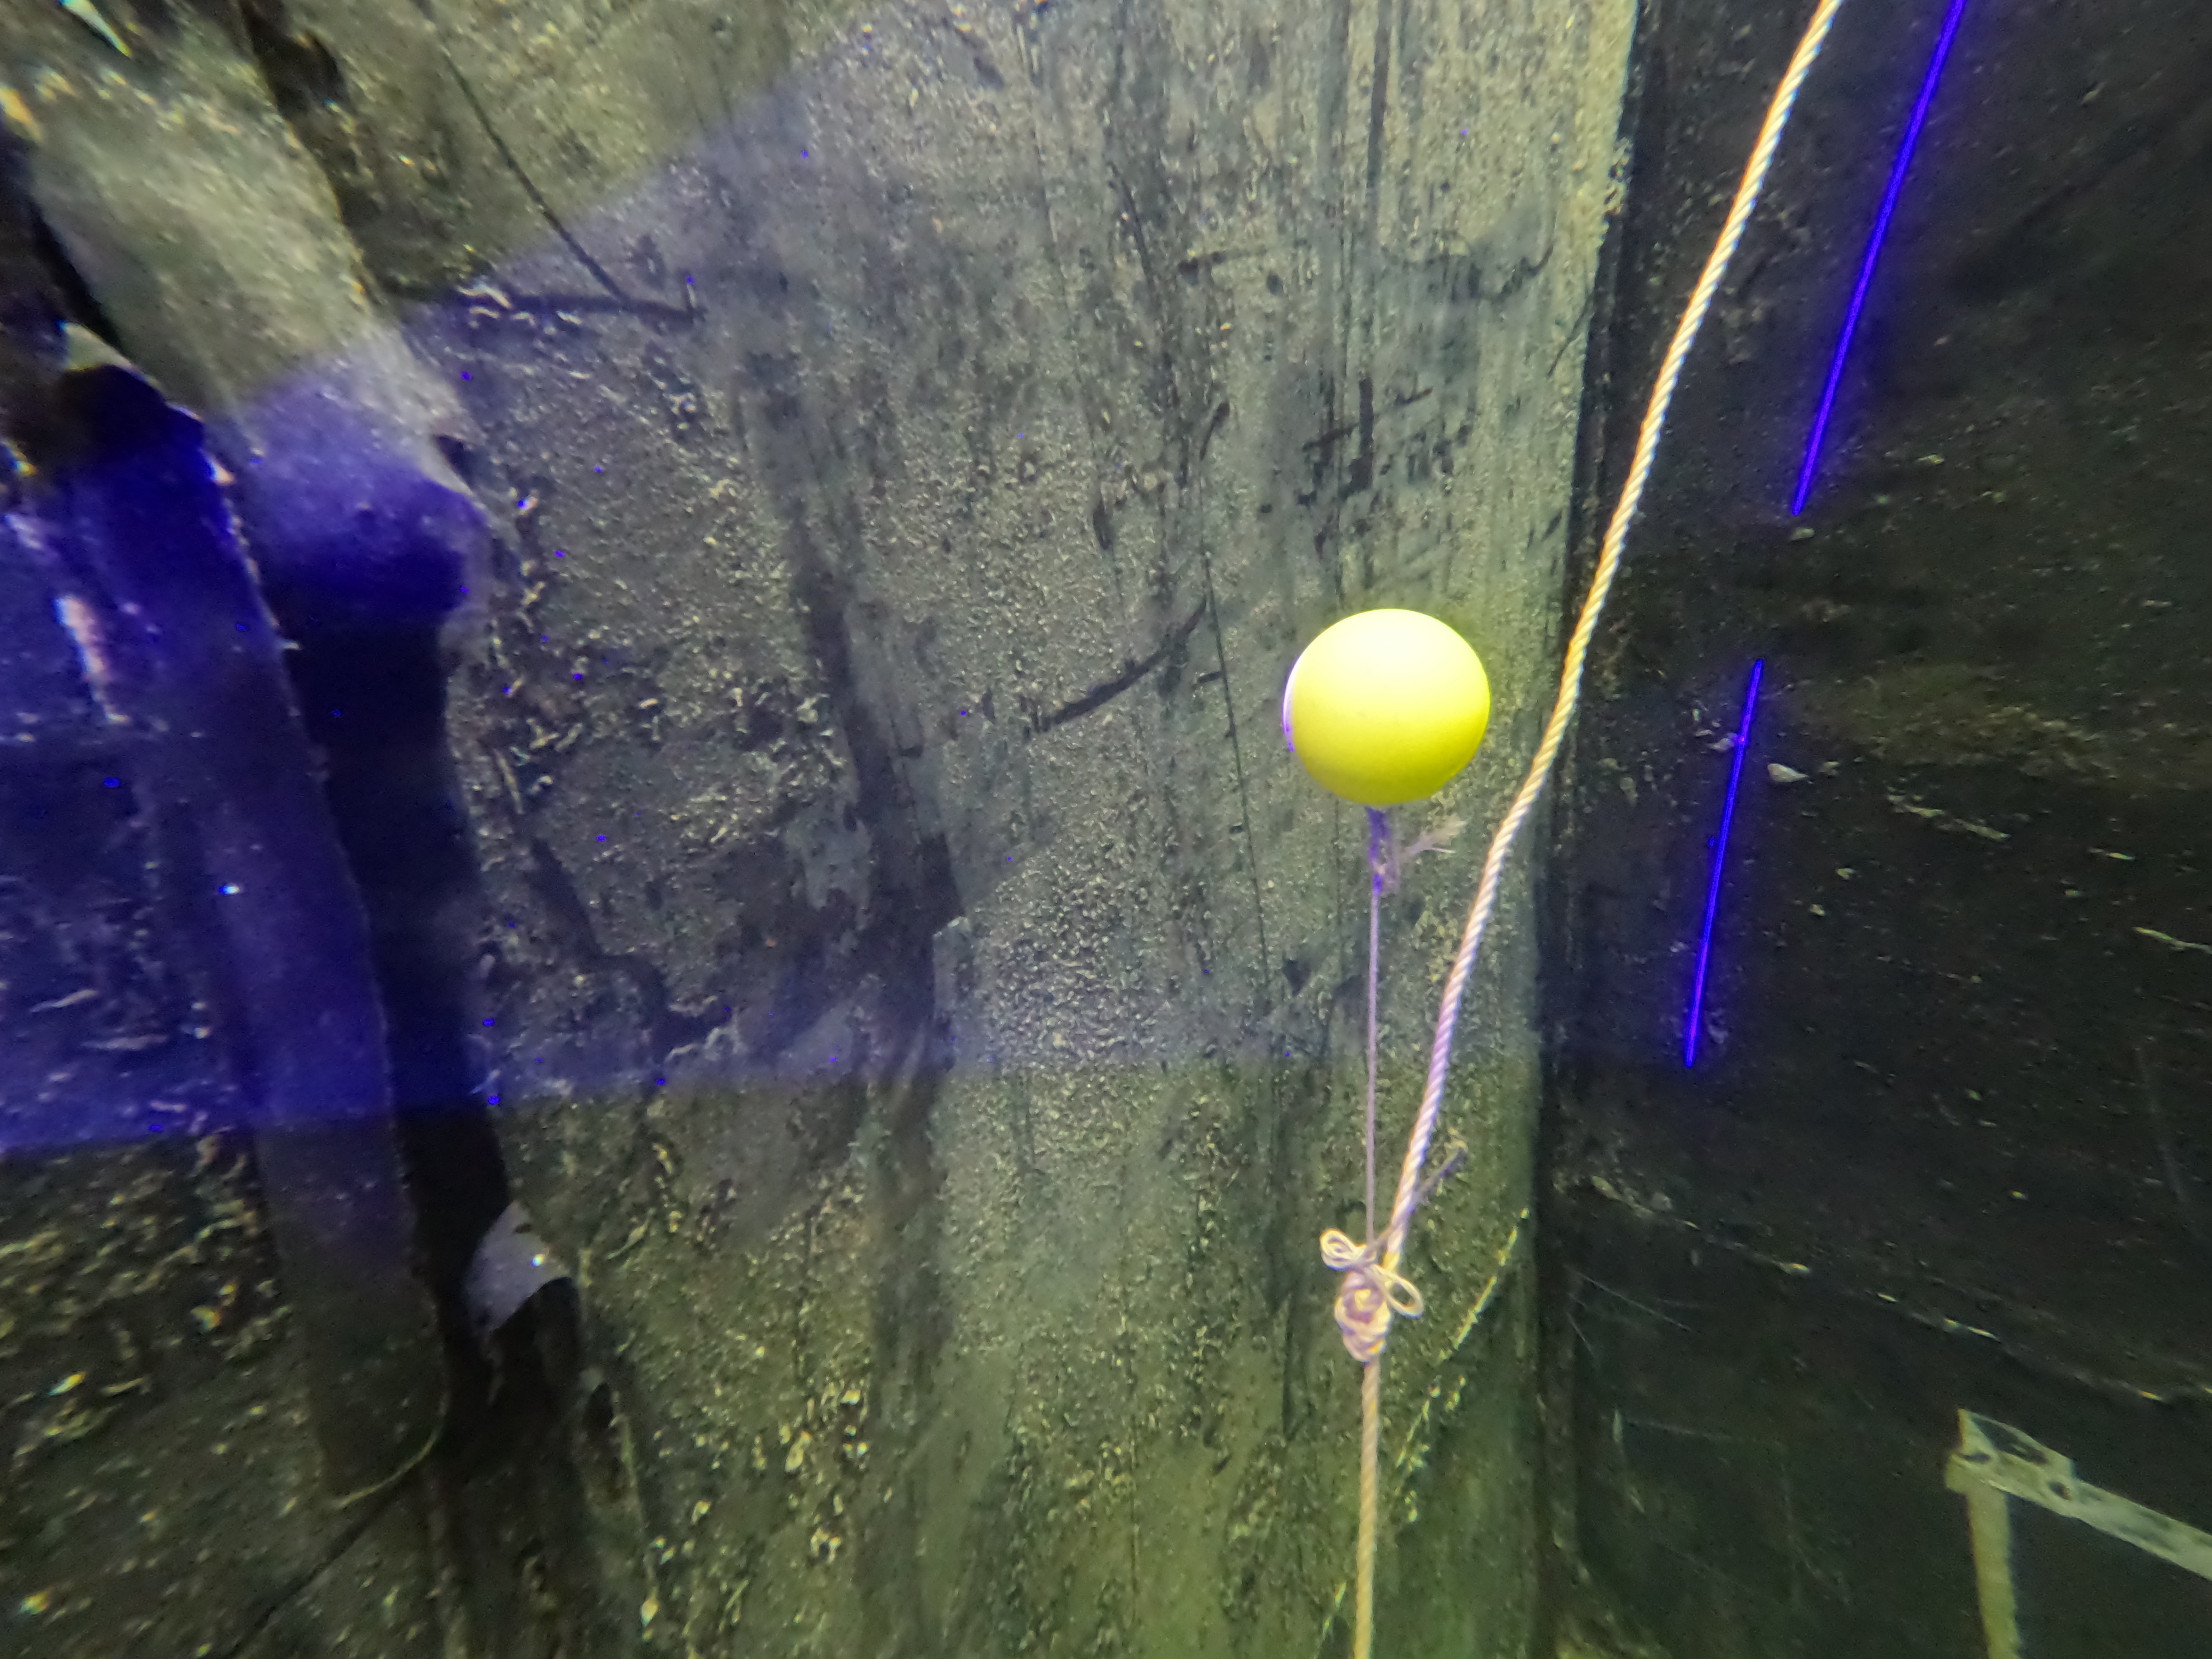

Supplement: Supplementary file 1984 [file G0034376.pdf › 5/G0034376.pdf]

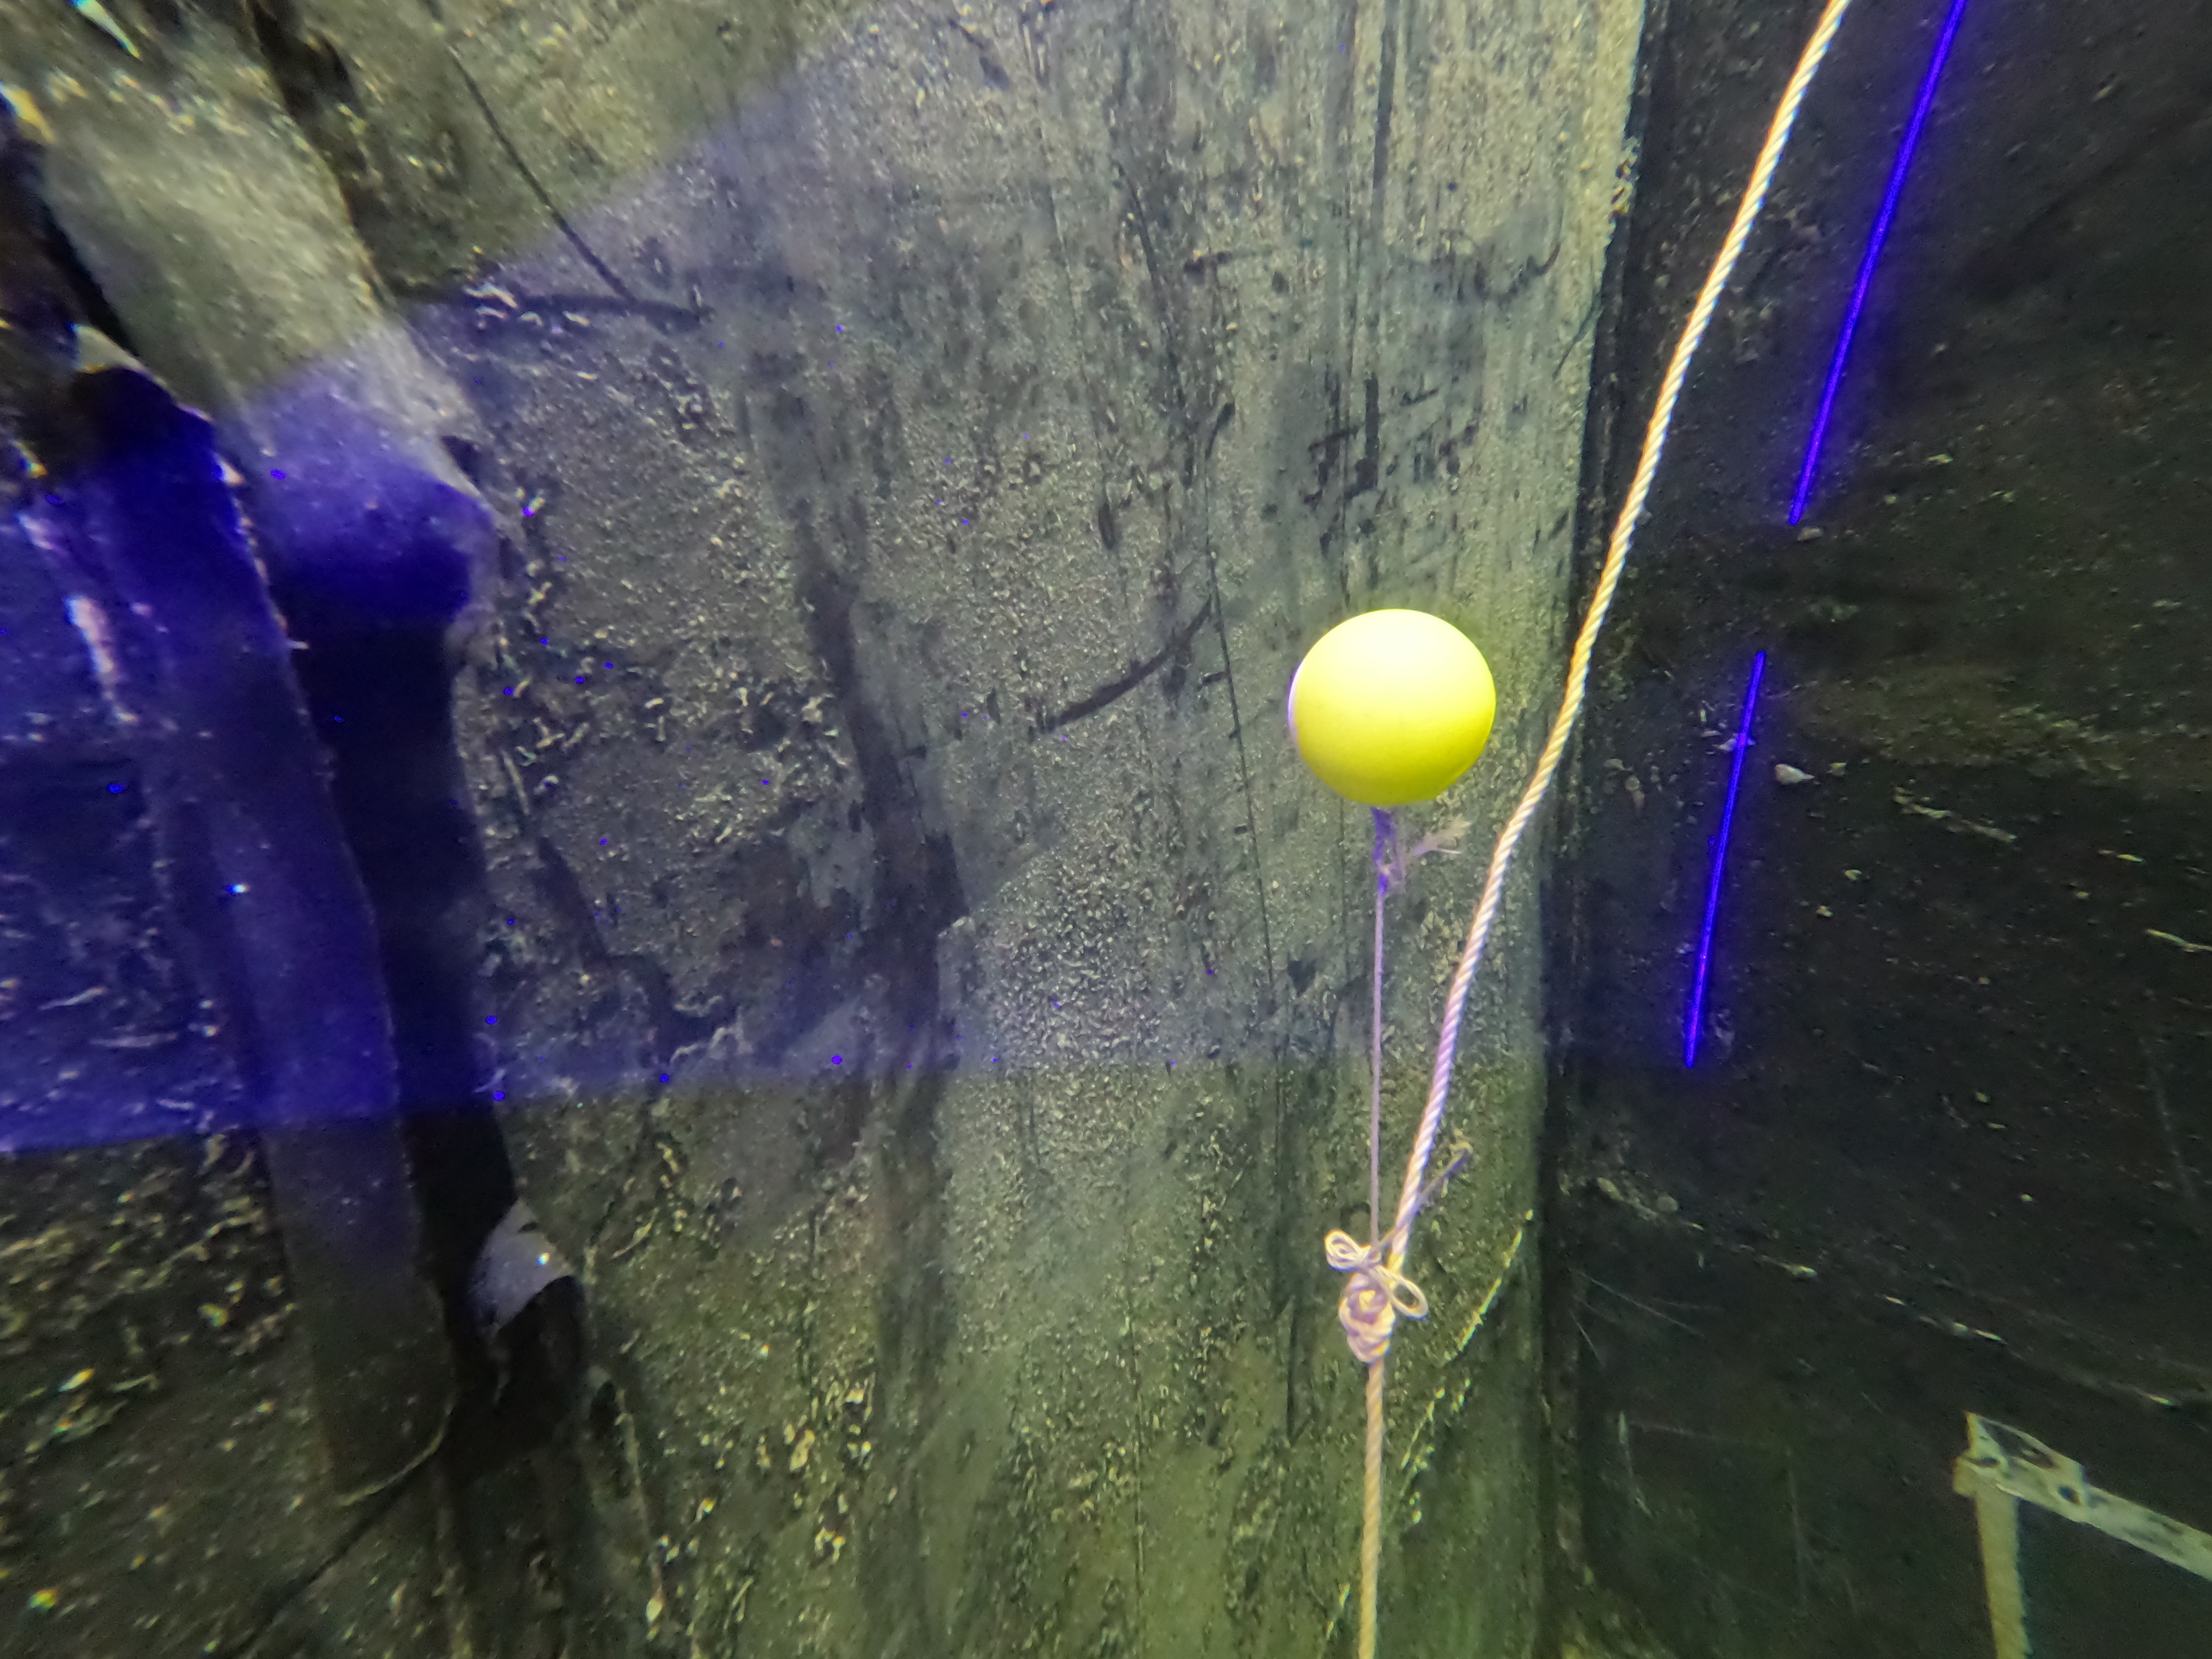

Supplement: Supplementary file 1985 [file G0034377.pdf › 5/G0034377.pdf]

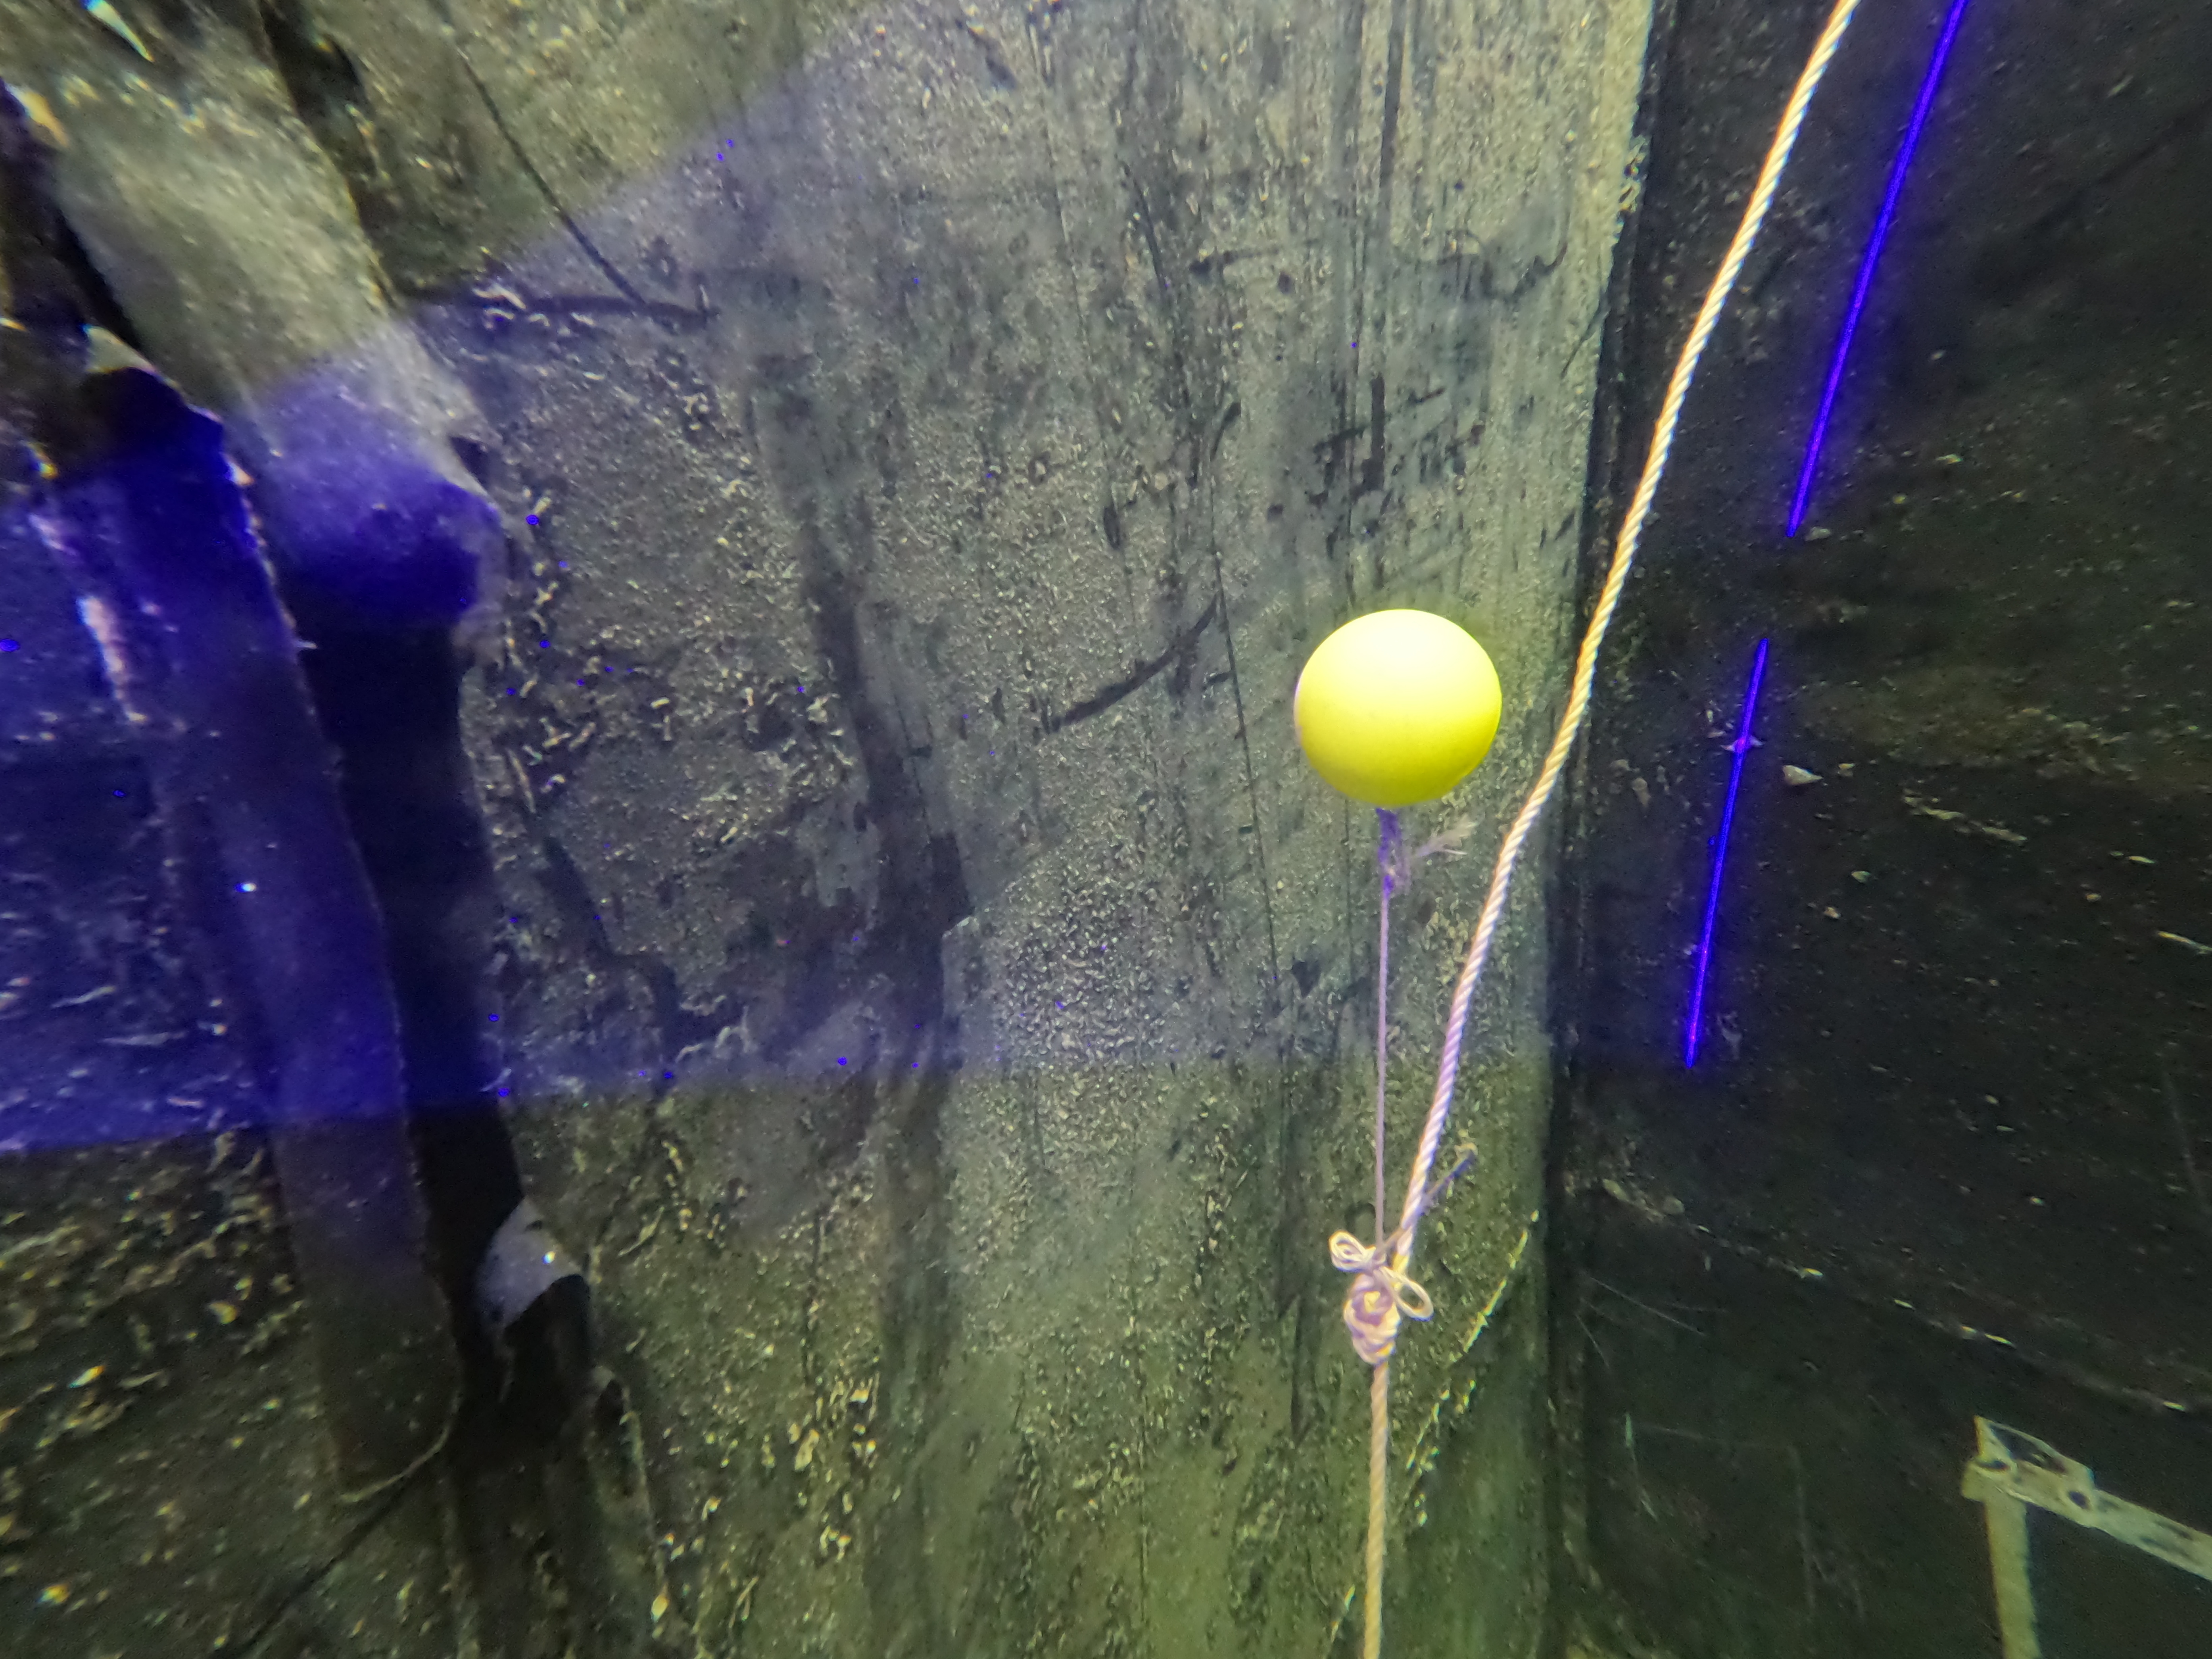

Supplement: Supplementary file 1986 [file G0034378.pdf › 5/G0034378.pdf]

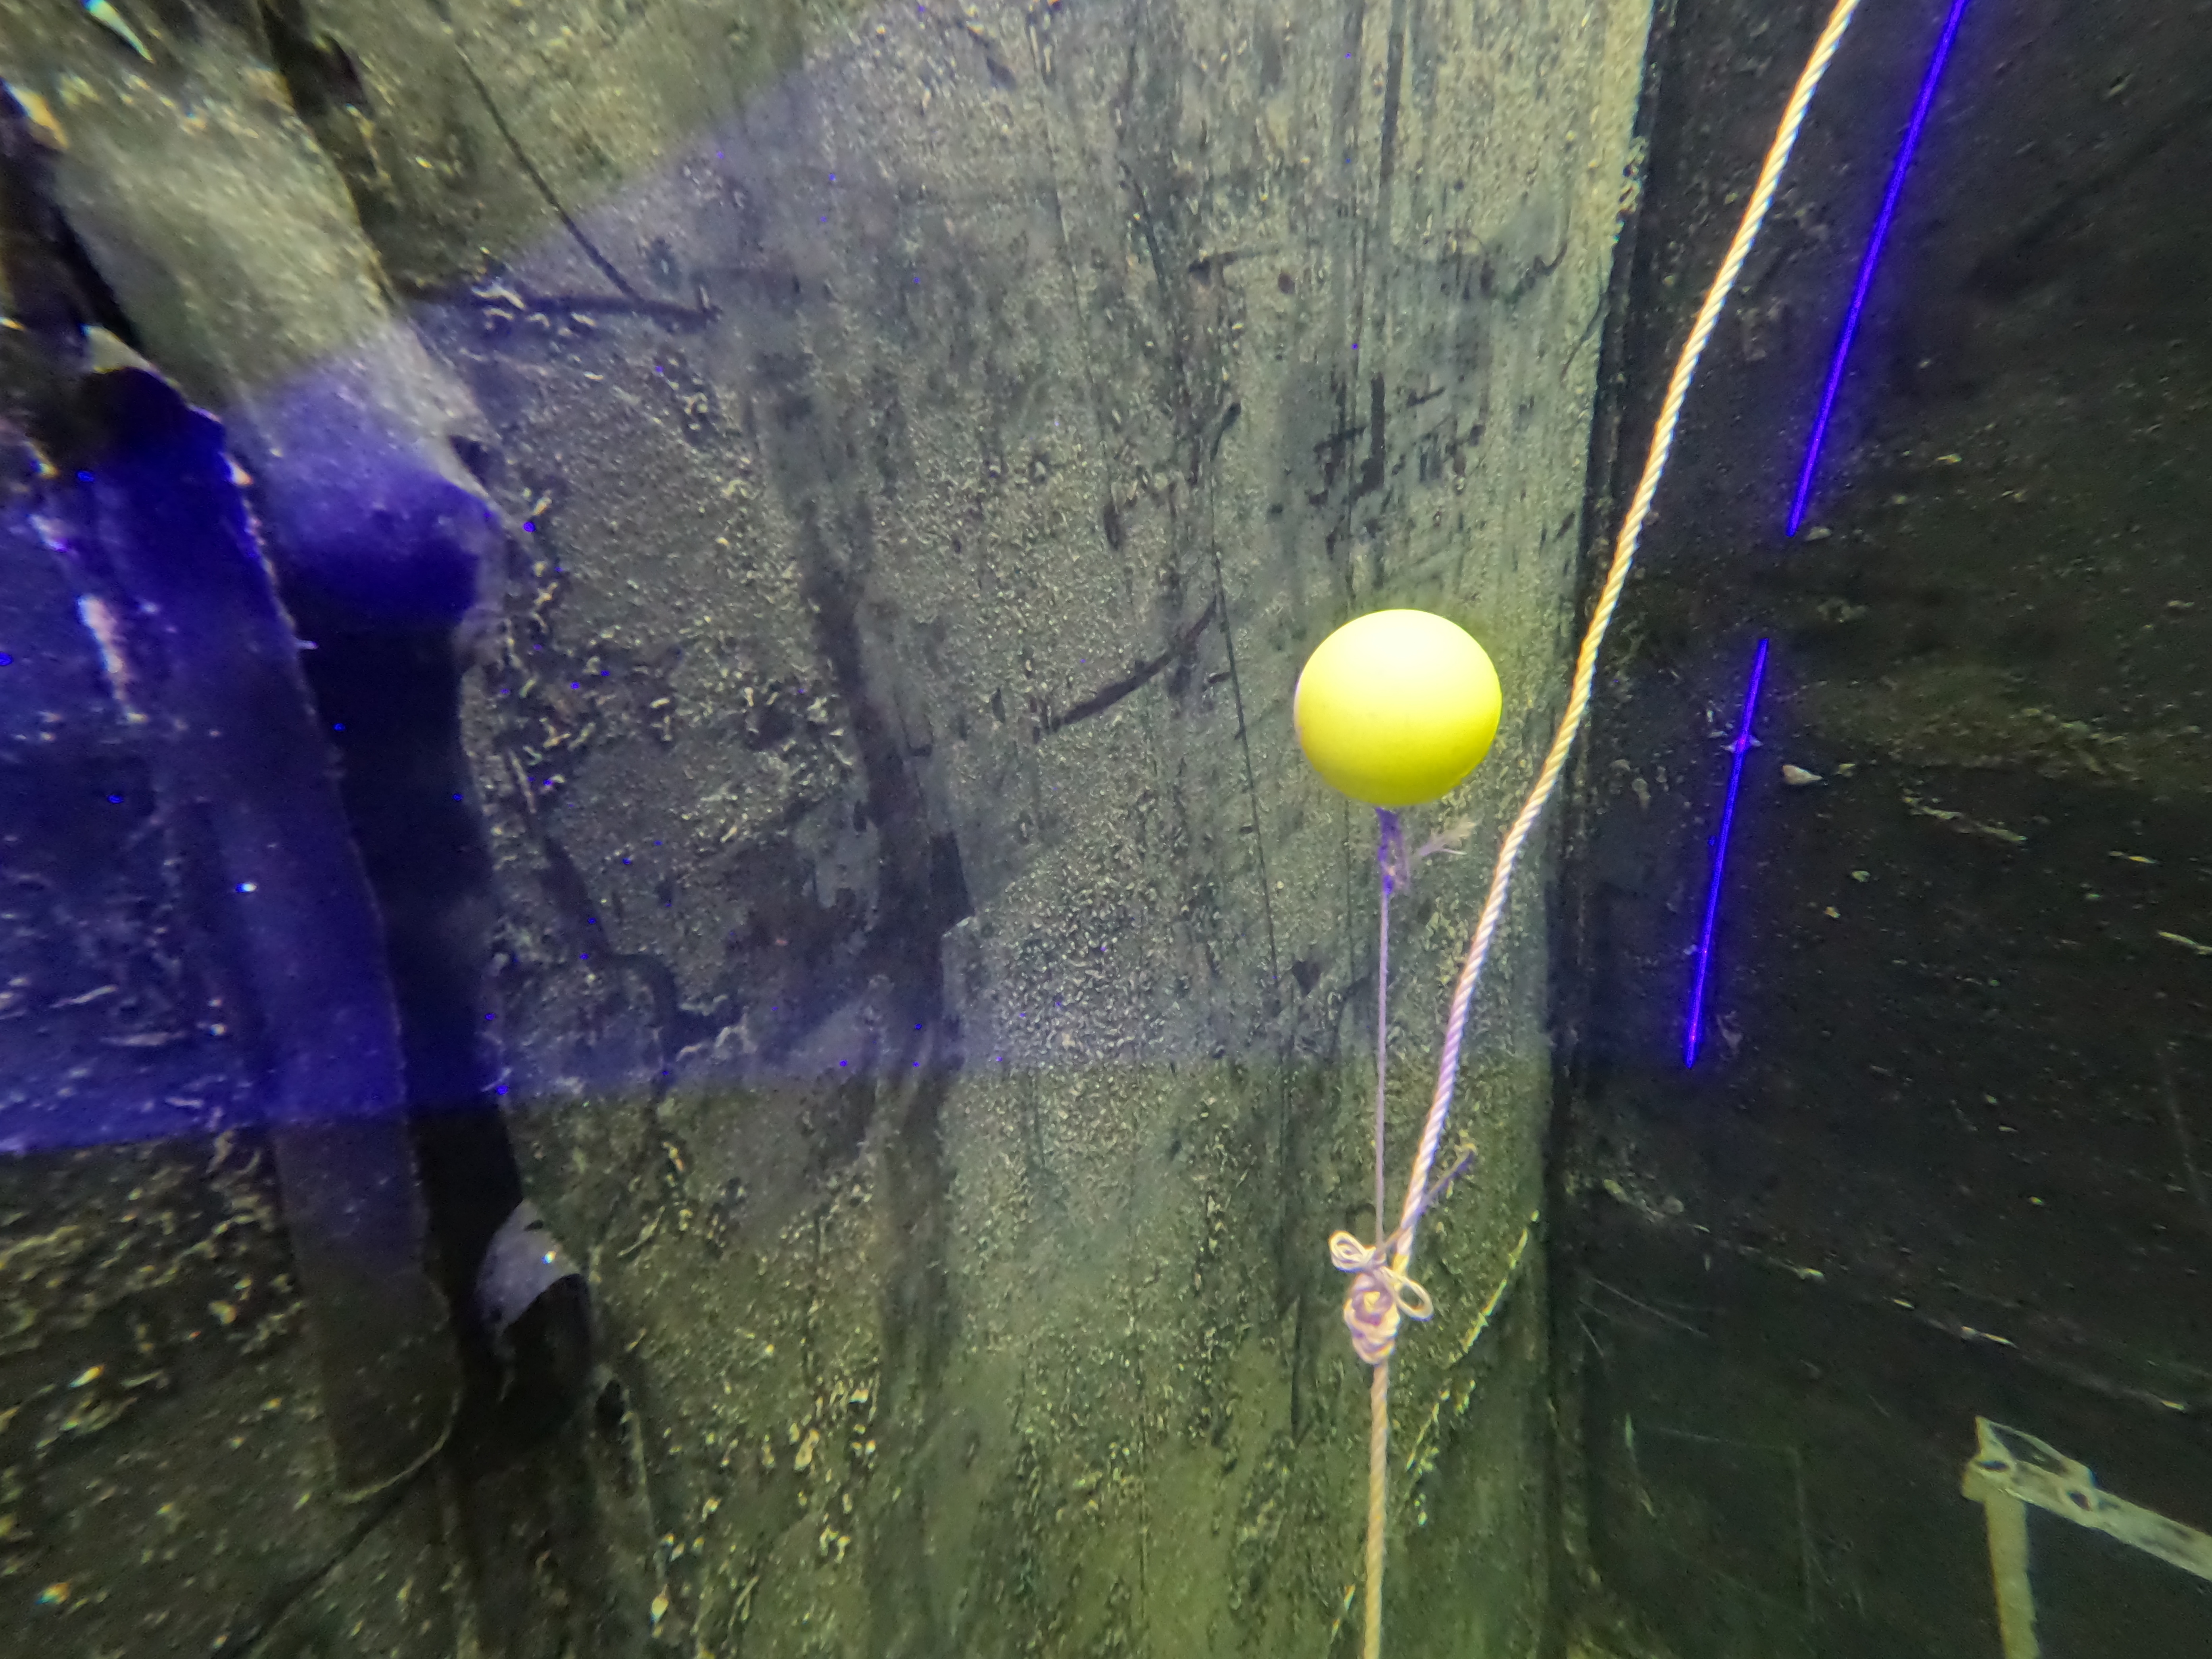

Supplement: Supplementary file 1987 [file G0034379.pdf › 5/G0034379.pdf]

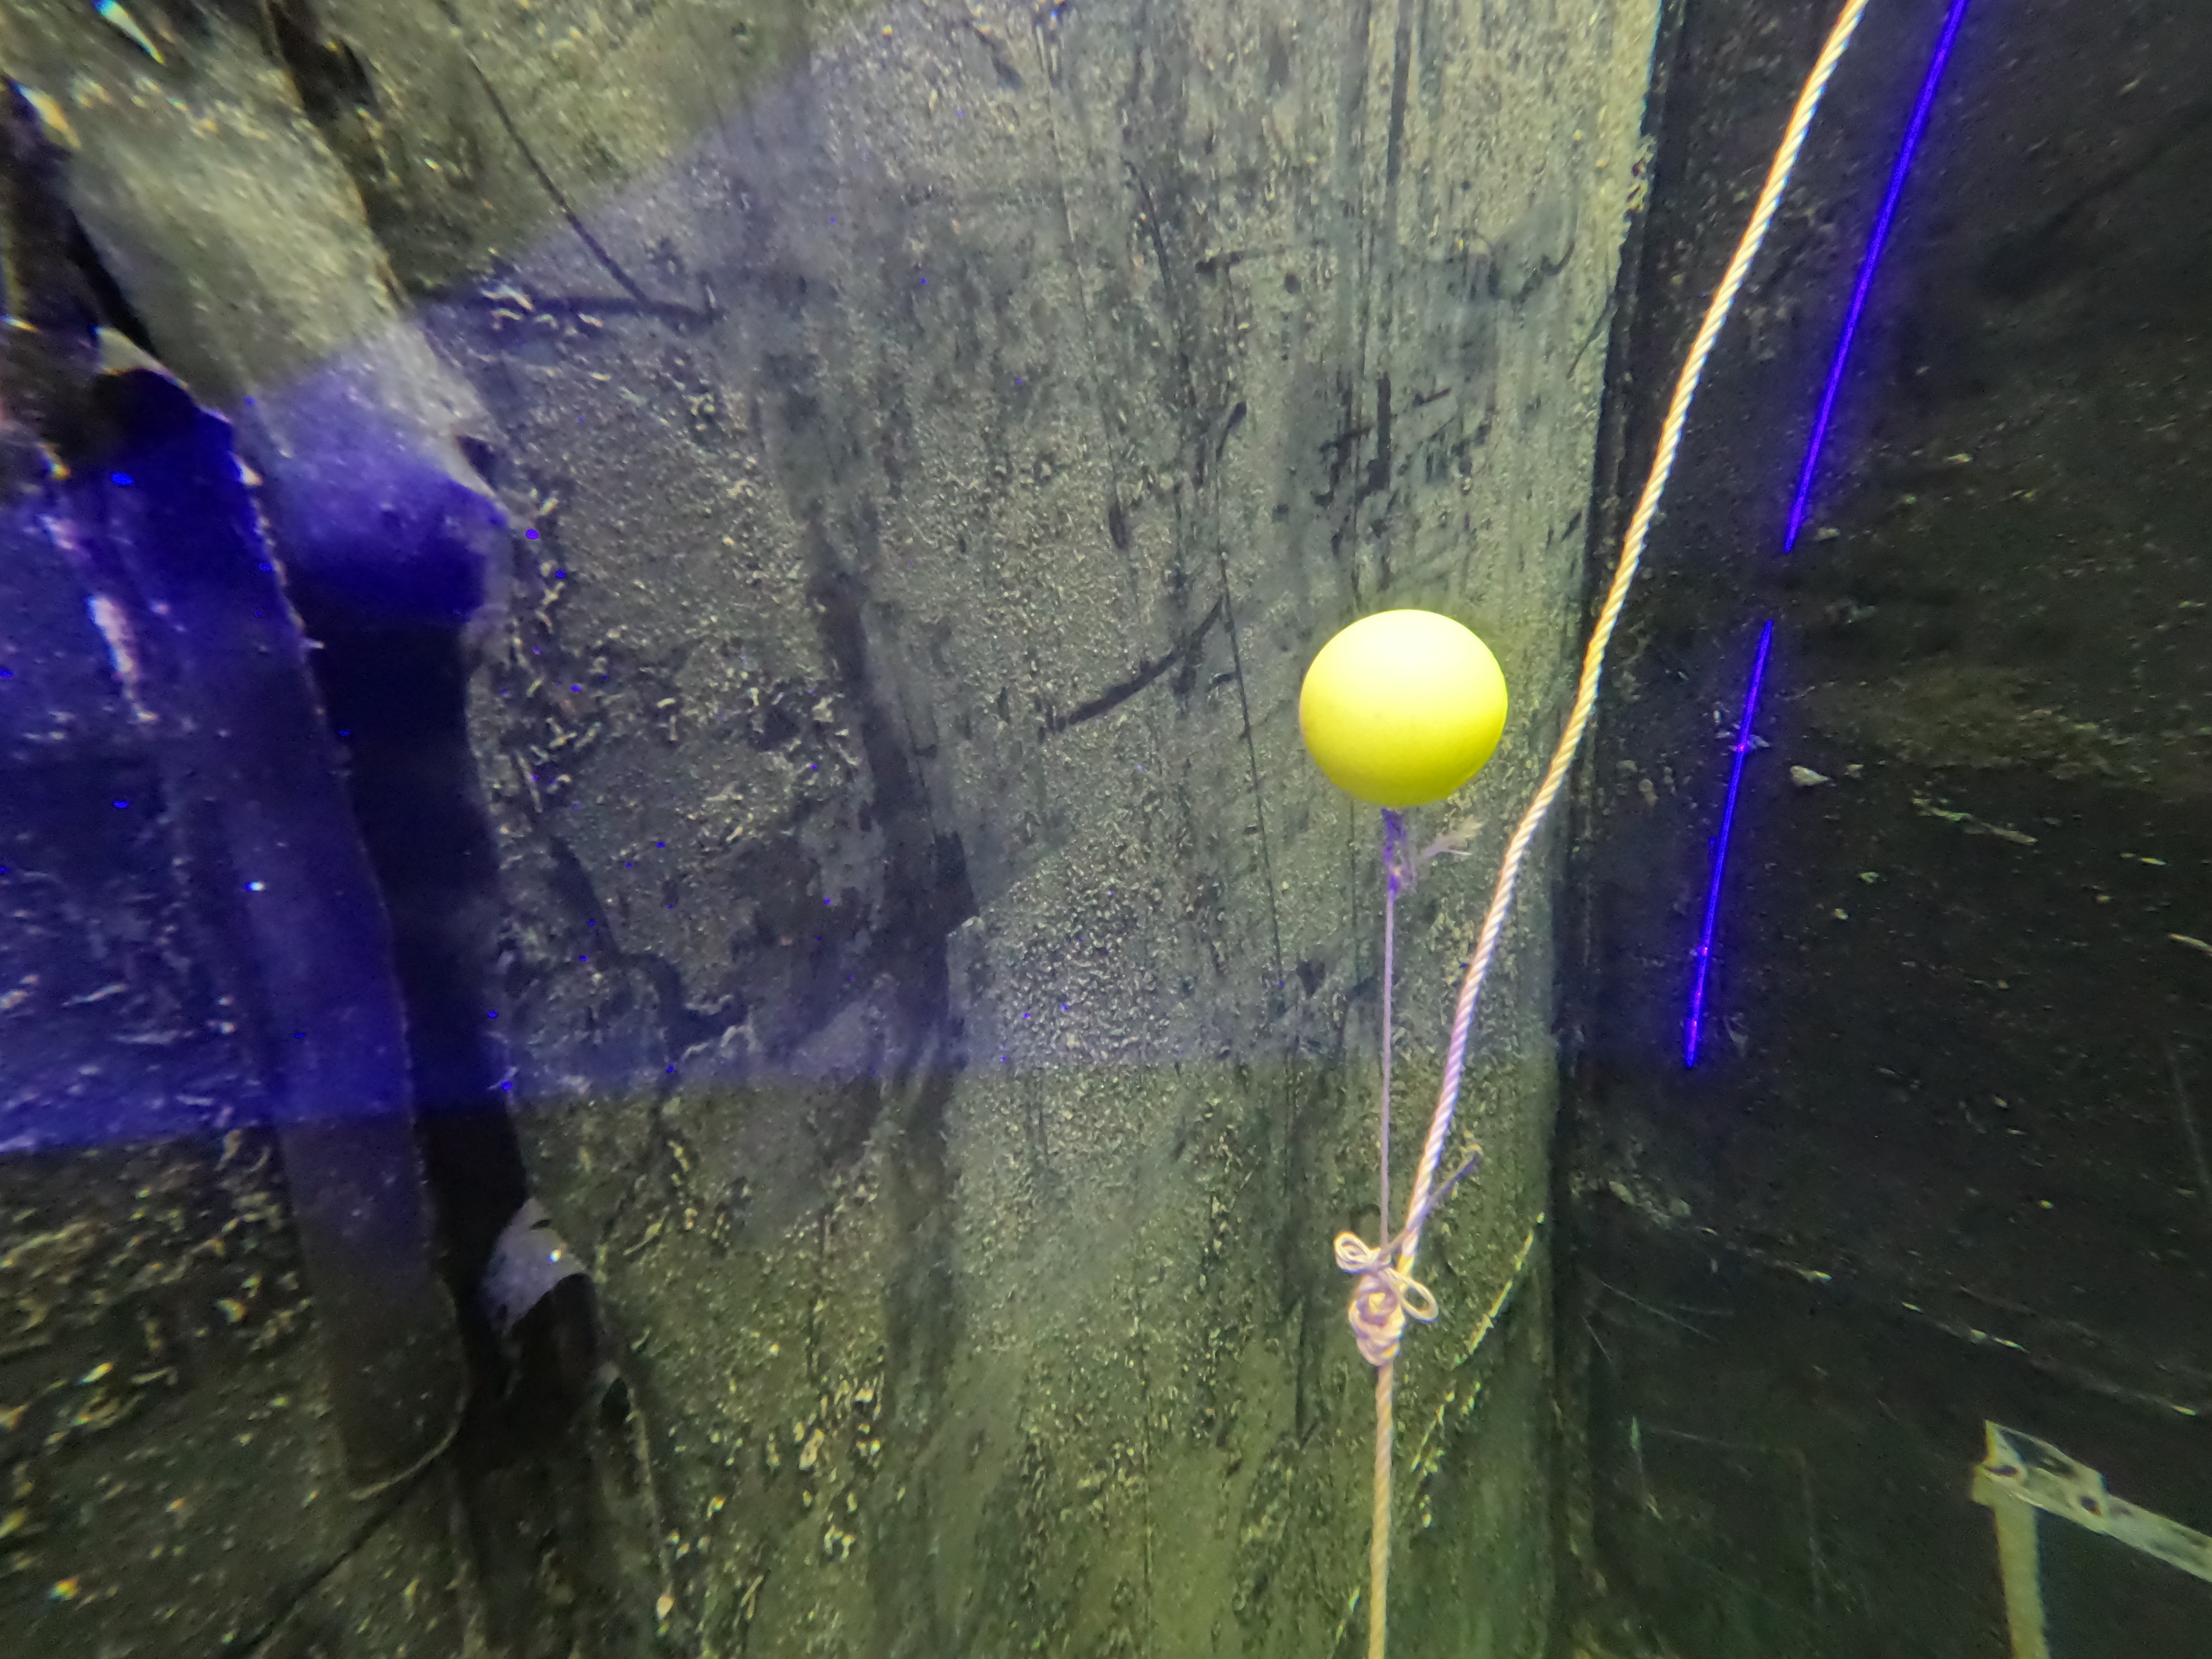

Supplement: Supplementary file 1988 [file G0034380.pdf › 5/G0034380.pdf]

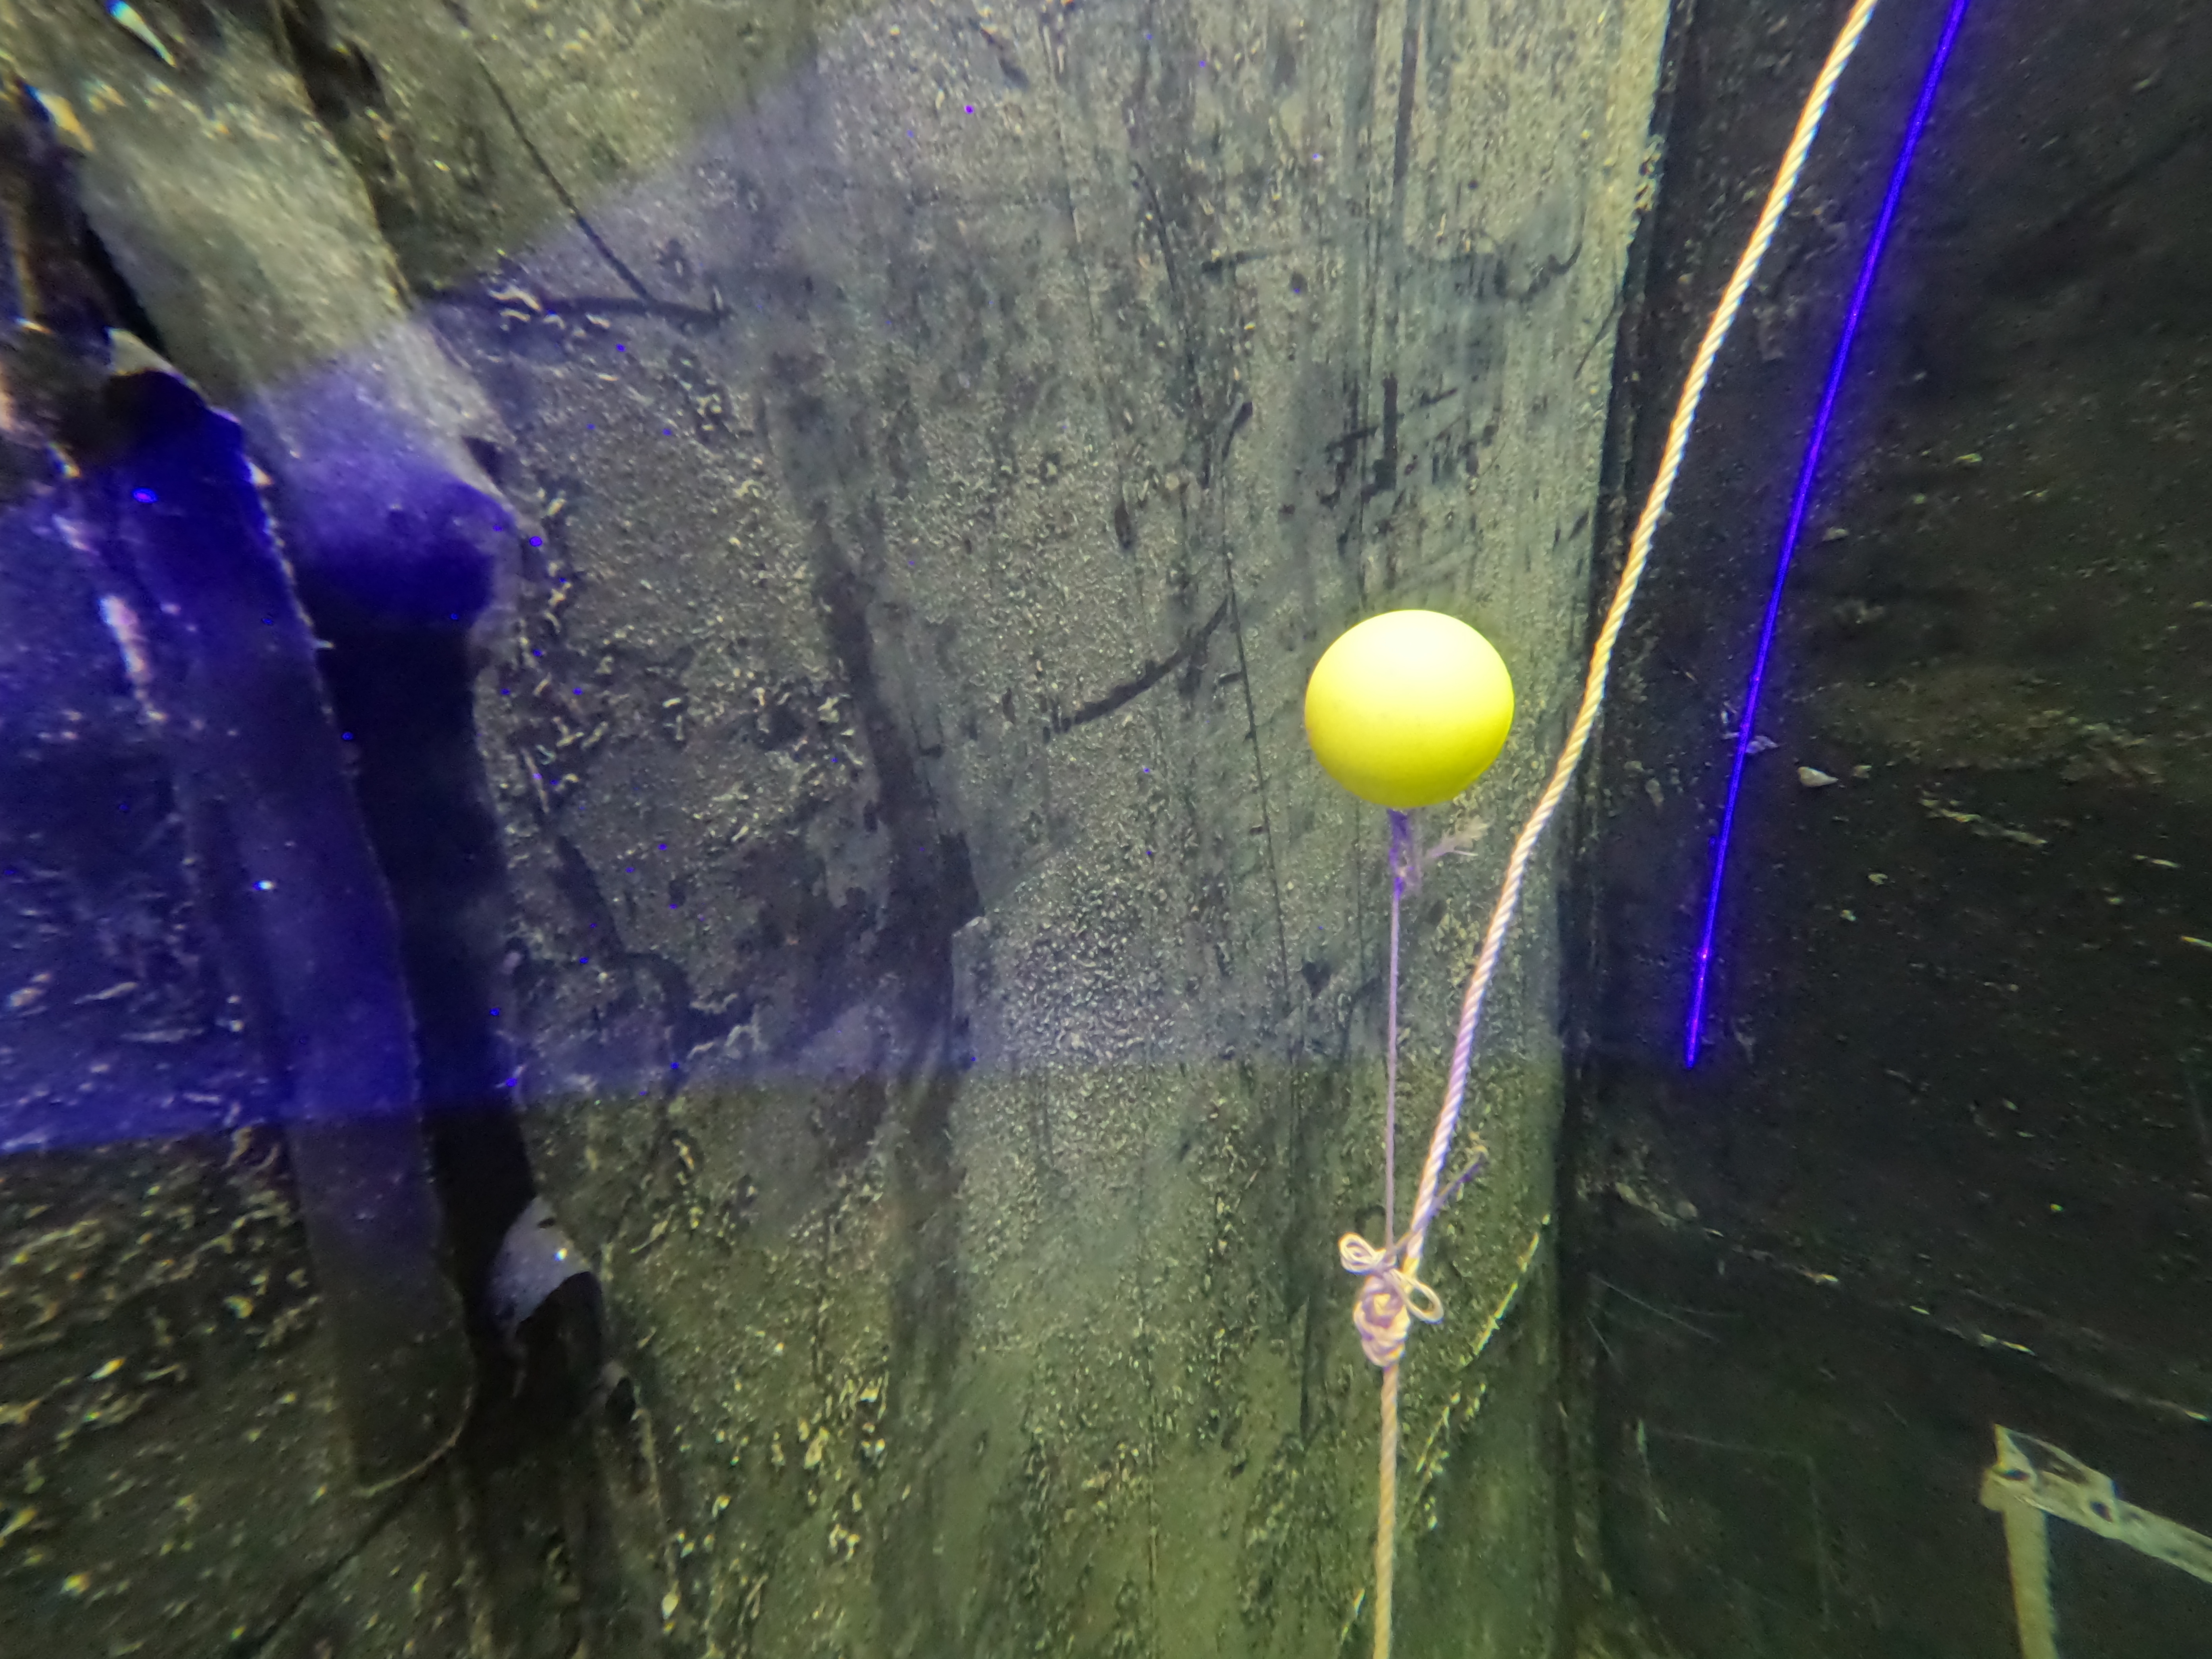

Supplement: Supplementary file 1989 [file G0034381.pdf › 5/G0034381.pdf]

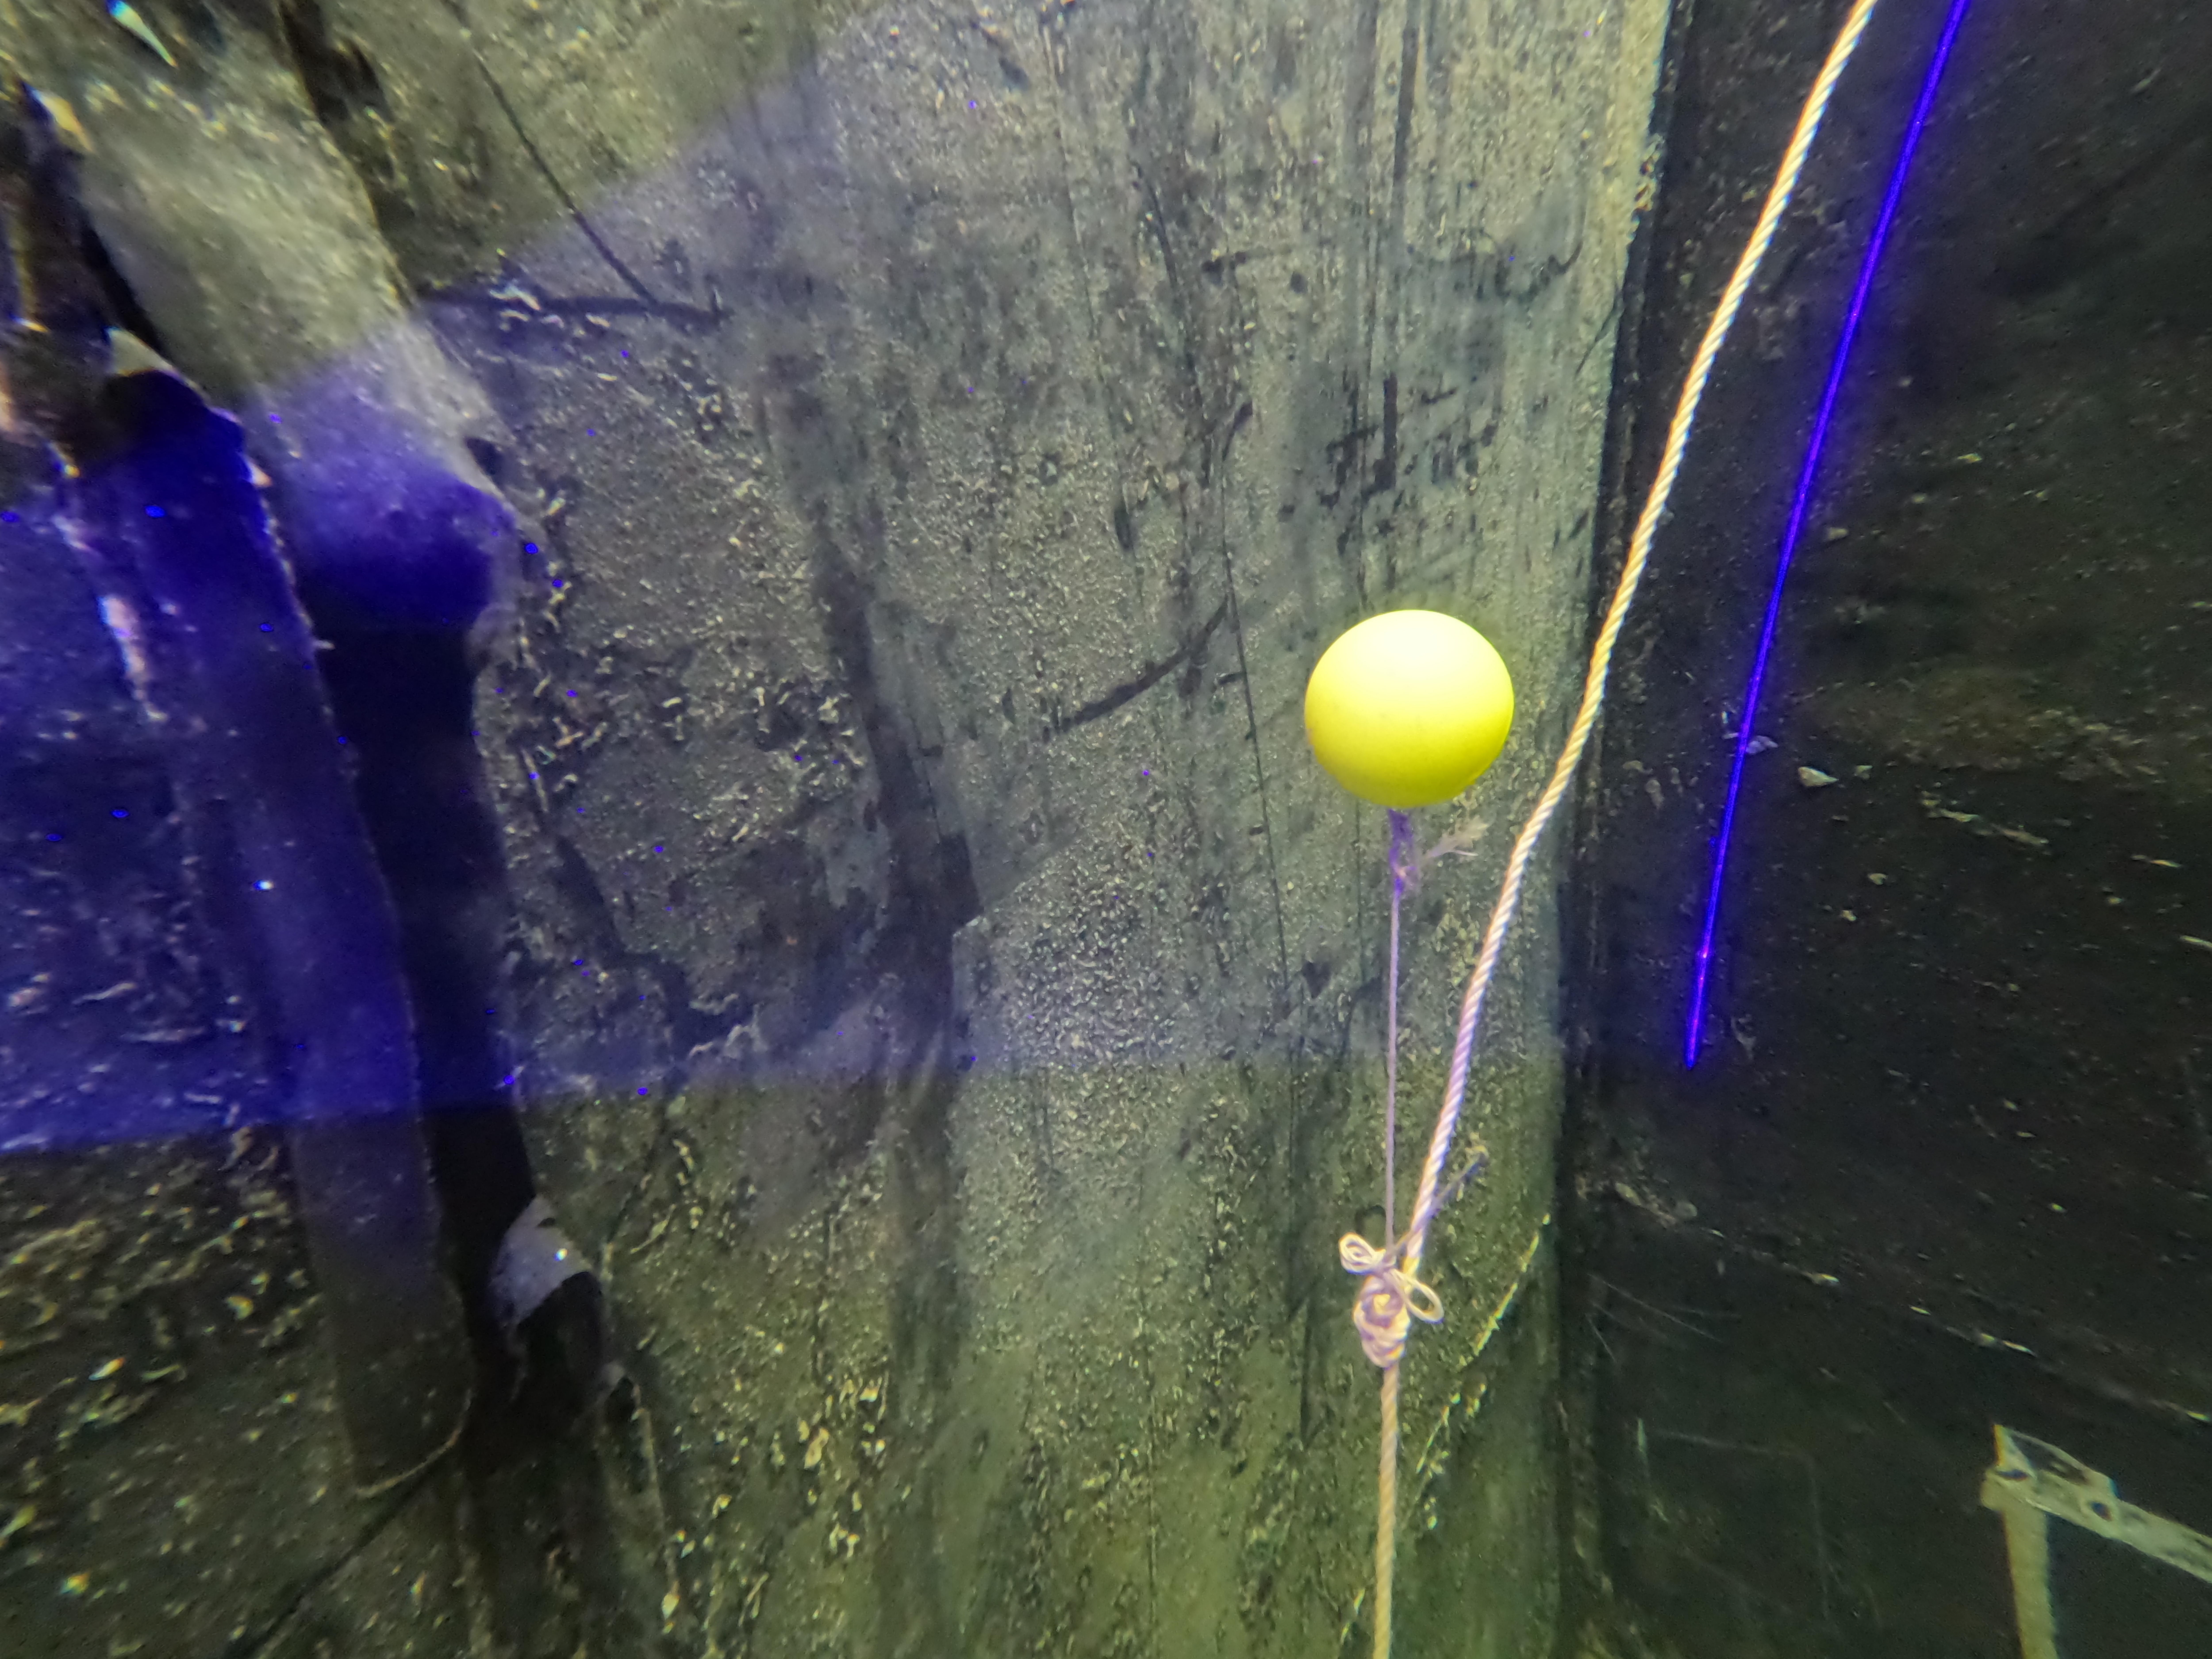

Supplement: Supplementary file 1990 [file G0034382.pdf › 5/G0034382.pdf]
