# Supplementary figures and images for: 3D reconstruction of shallow sea environment using direct system calibration and faint laser line extraction (part 20 of 35)
Source: Research Square preprint supplement (doi:10.21203/rs.3.rs-5262658/v1), 2024-12-02

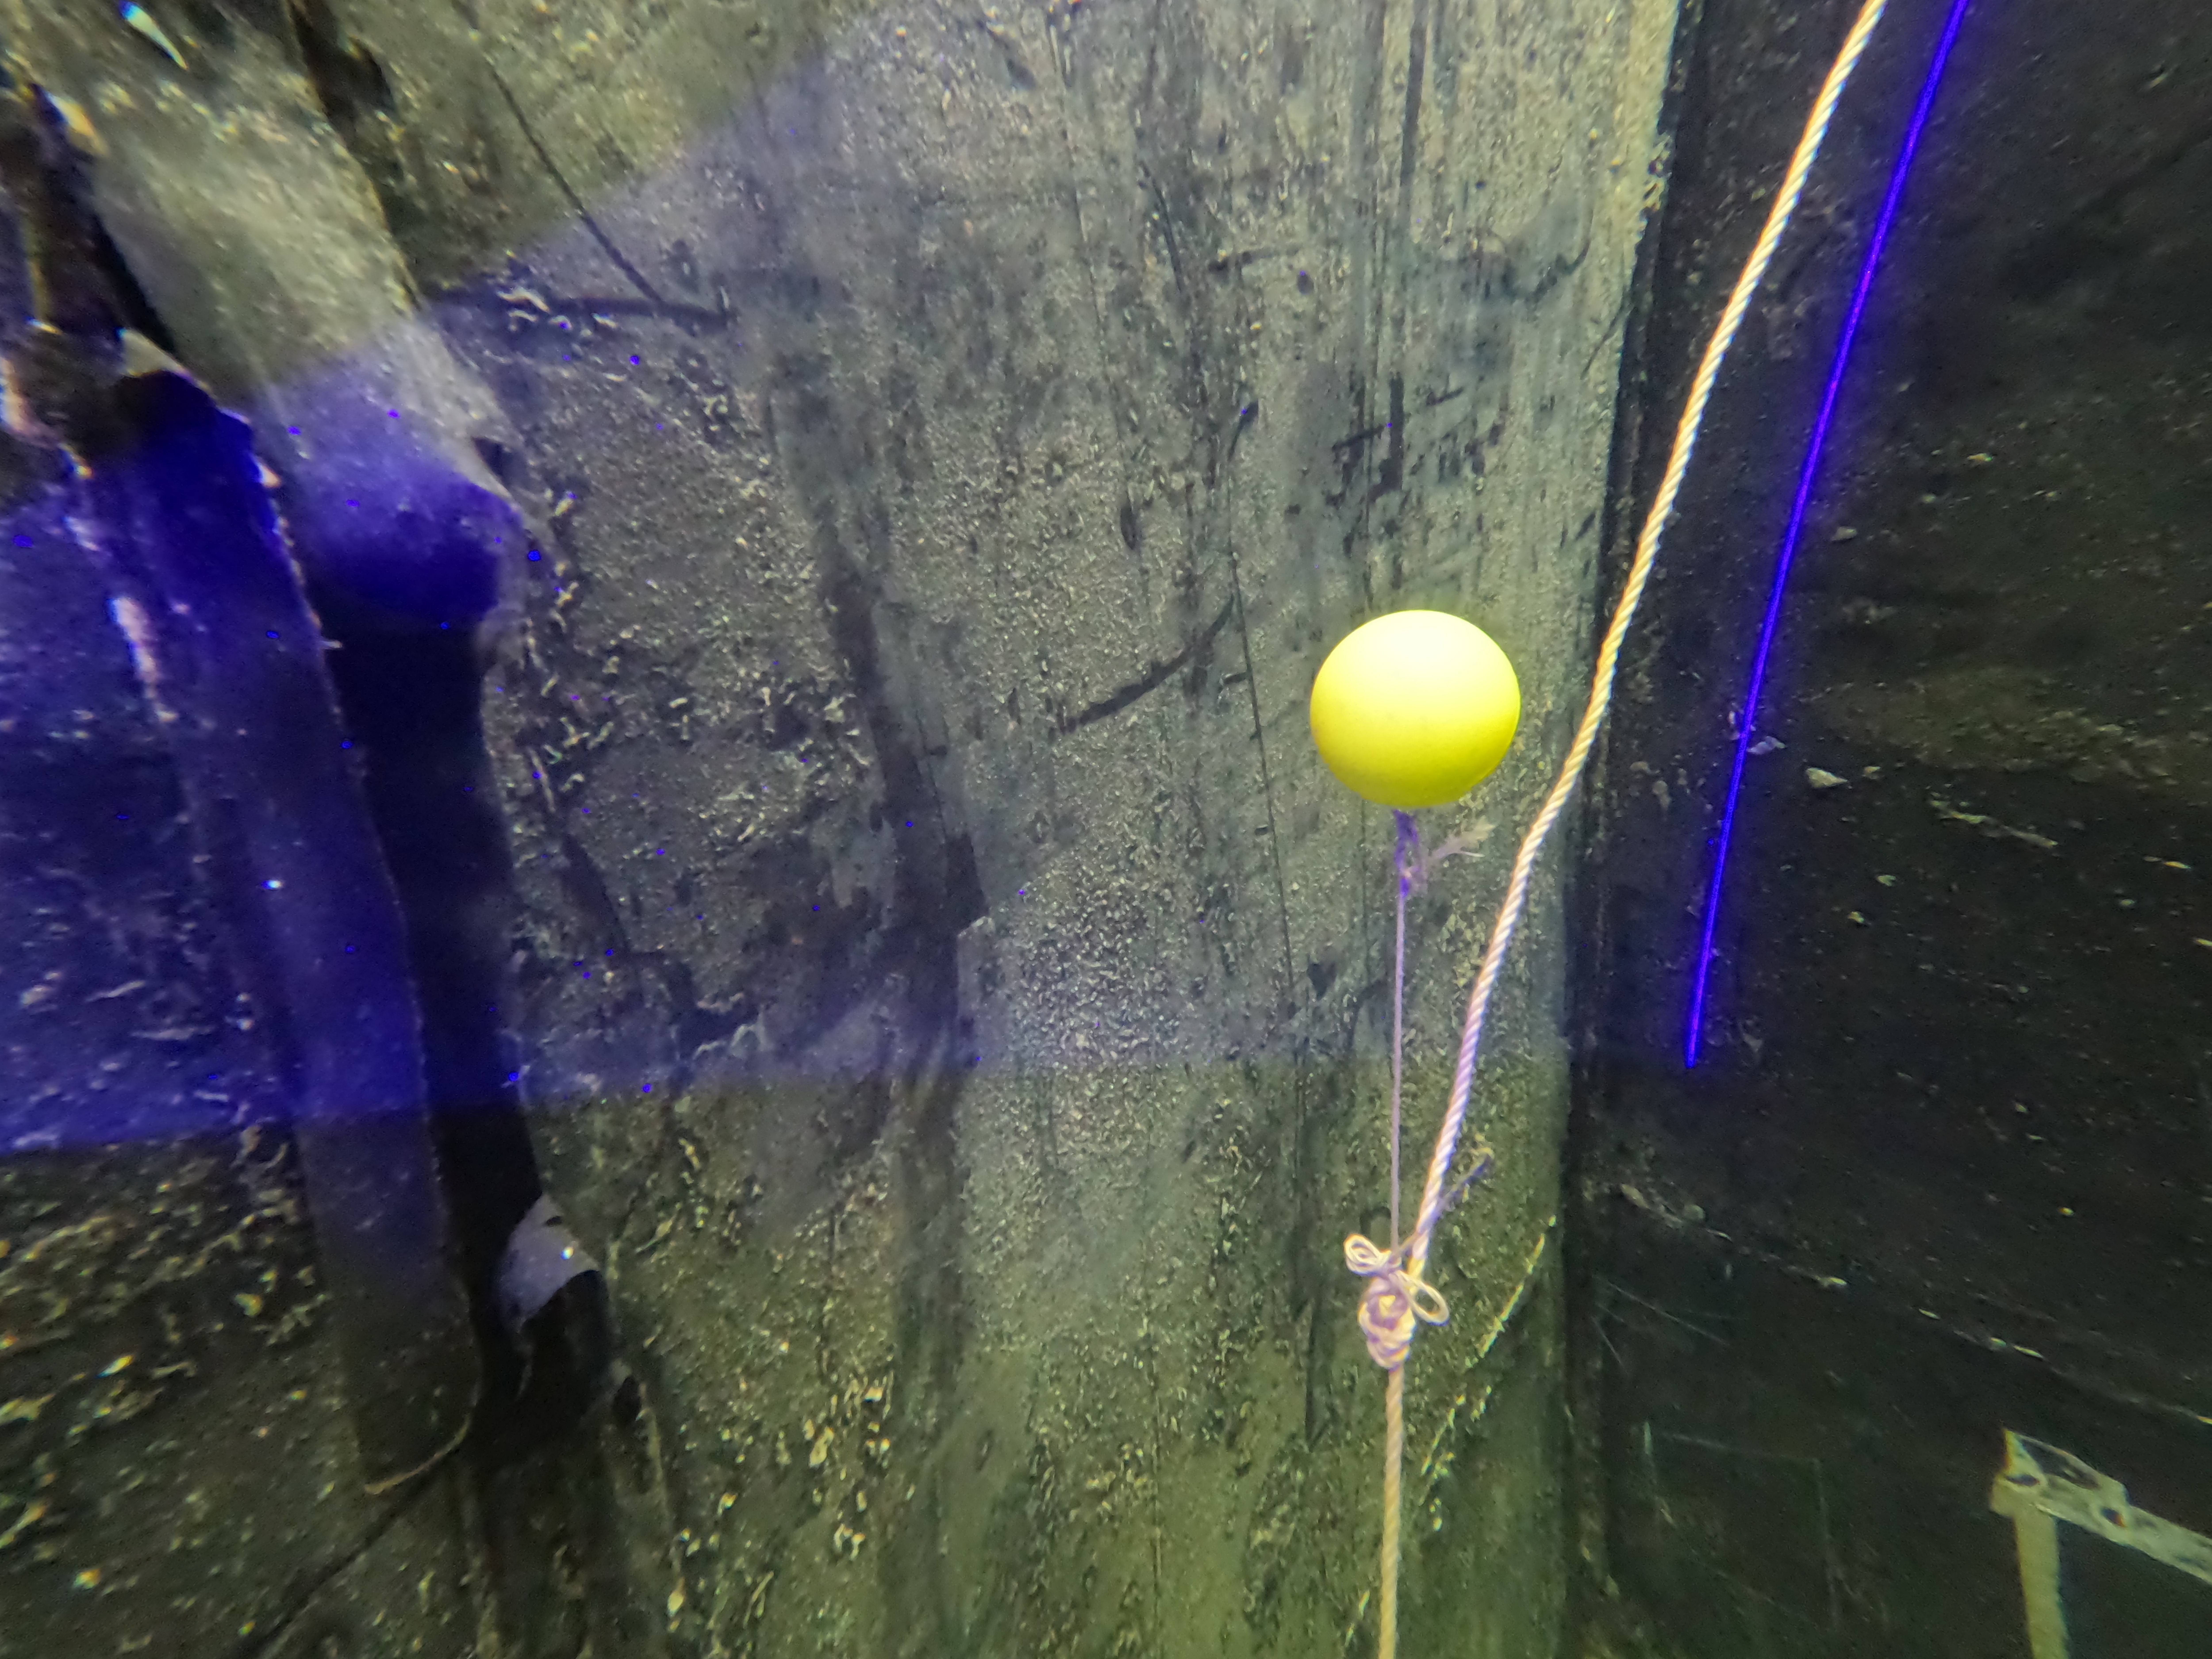

Supplement: Supplementary file 1991 [file G0034383.pdf › 5/G0034383.pdf]

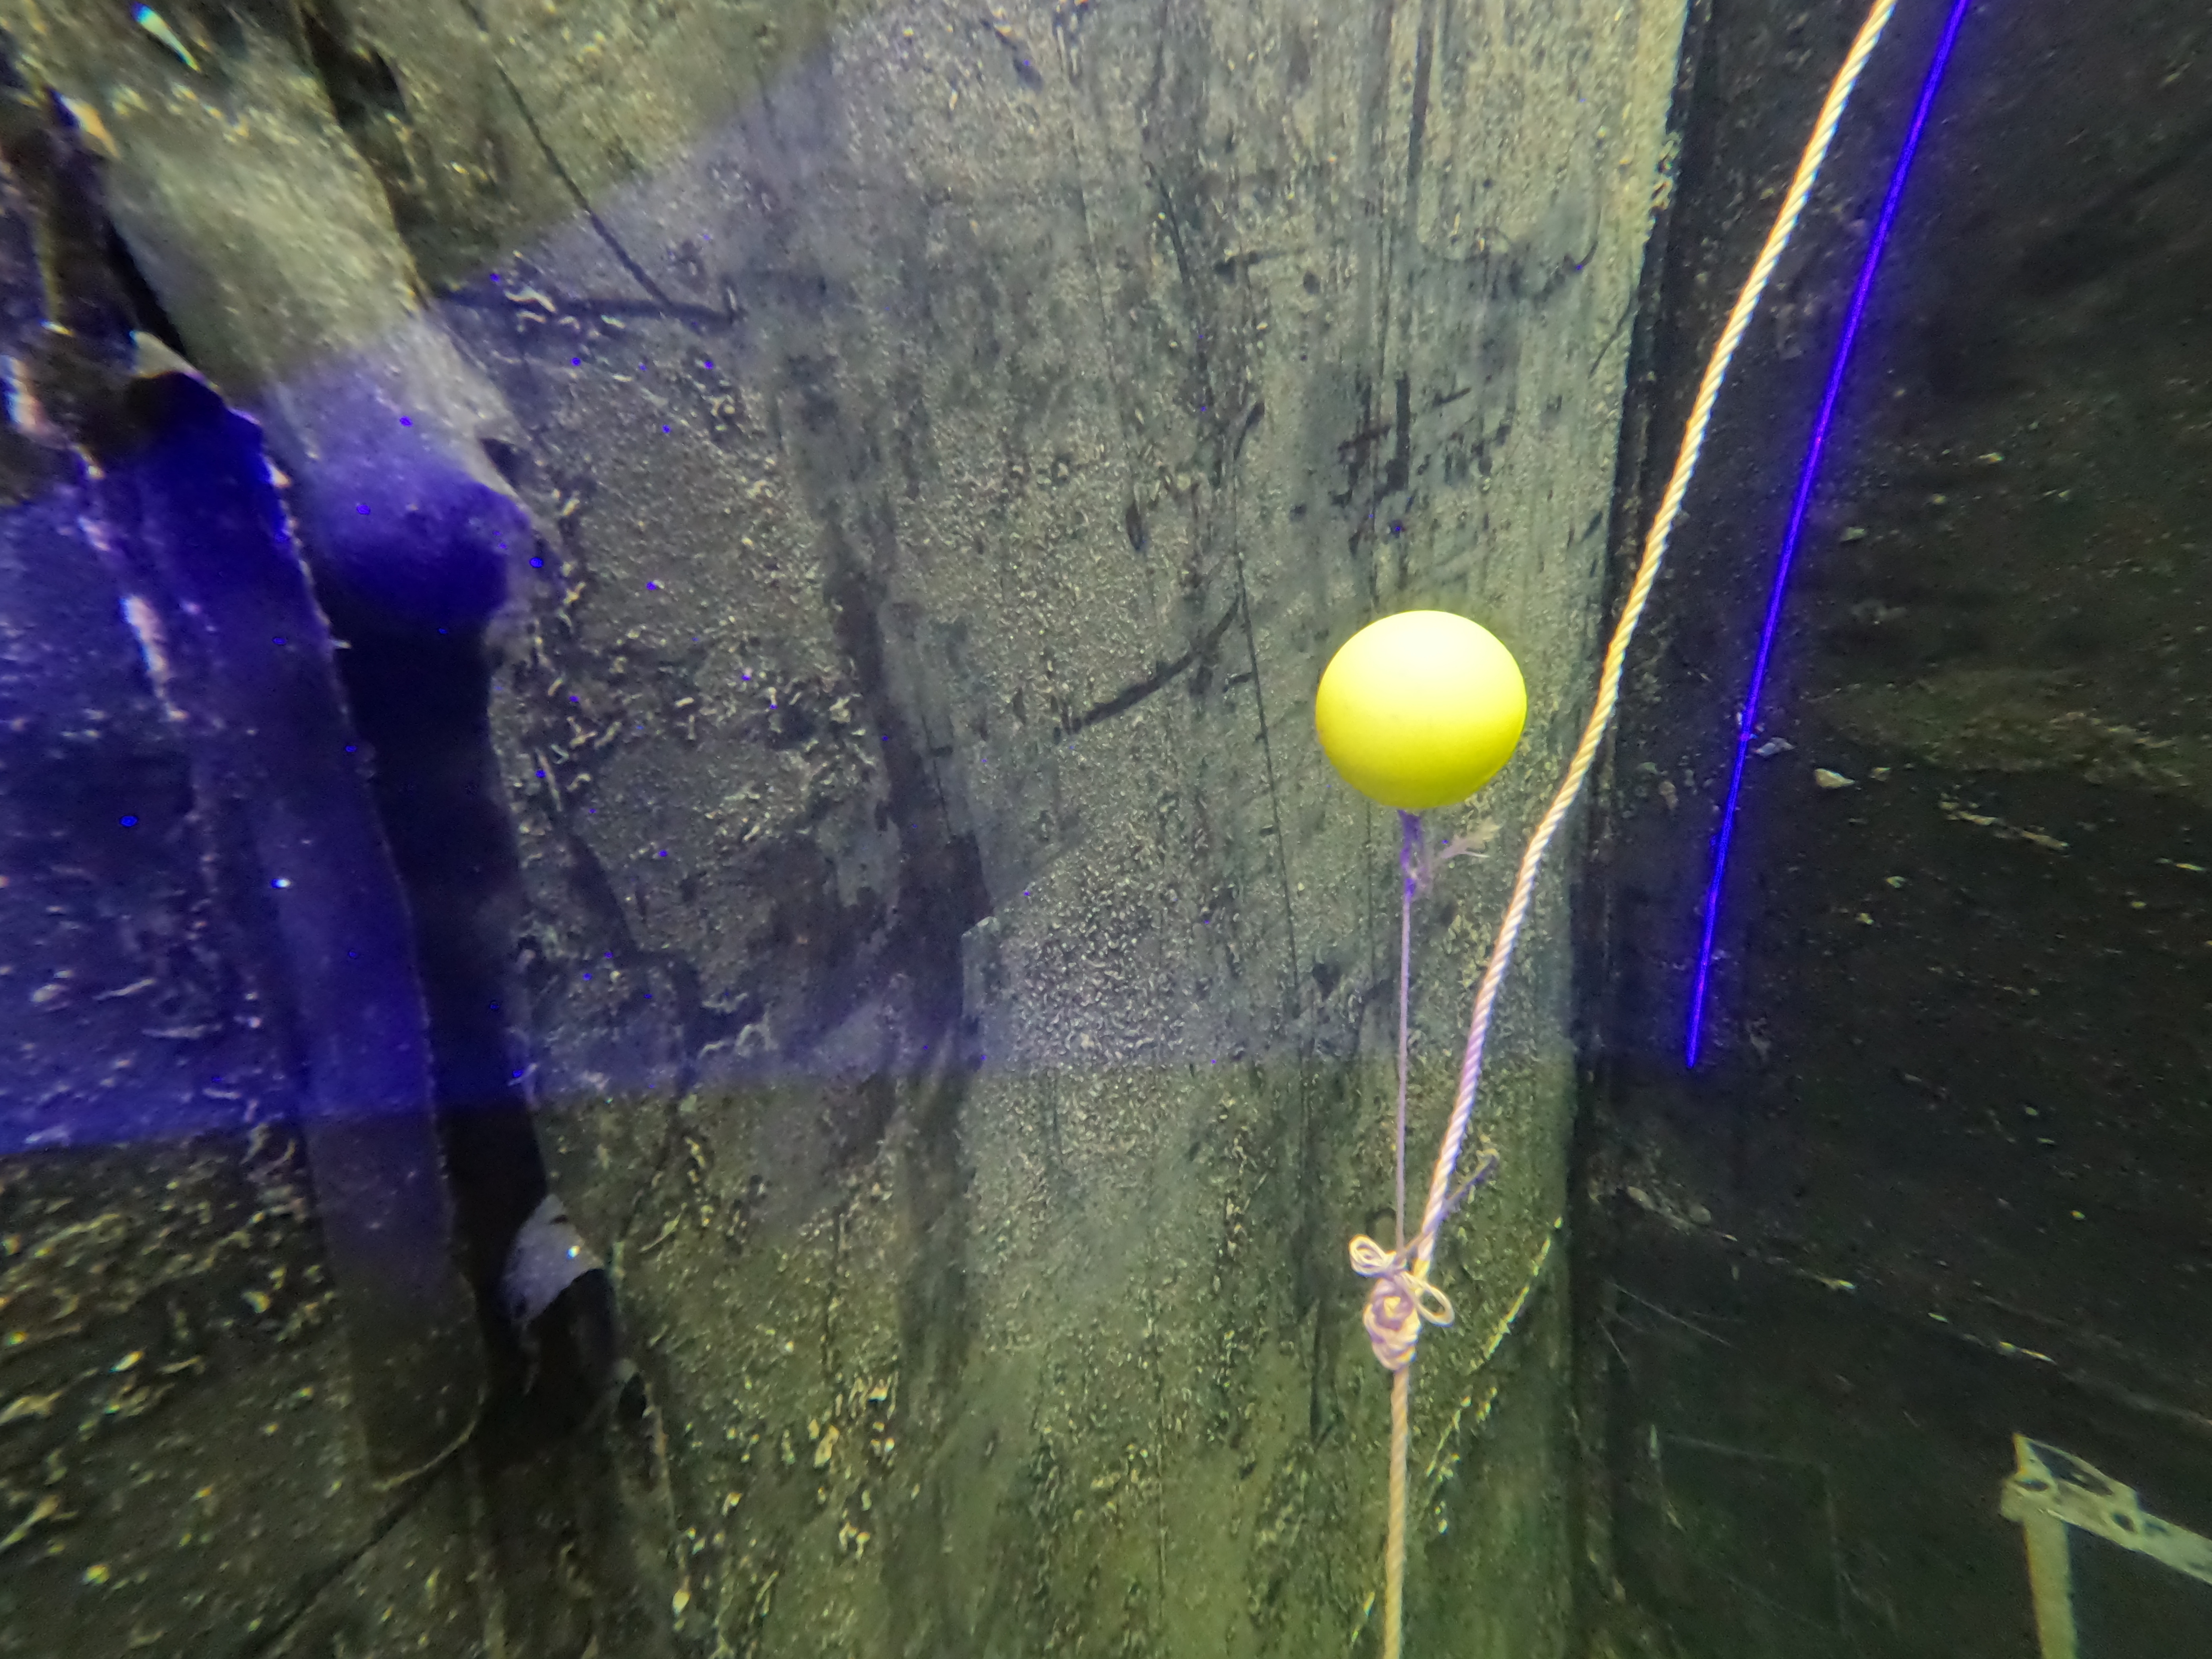

Supplement: Supplementary file 1992 [file G0034384.pdf › 5/G0034384.pdf]

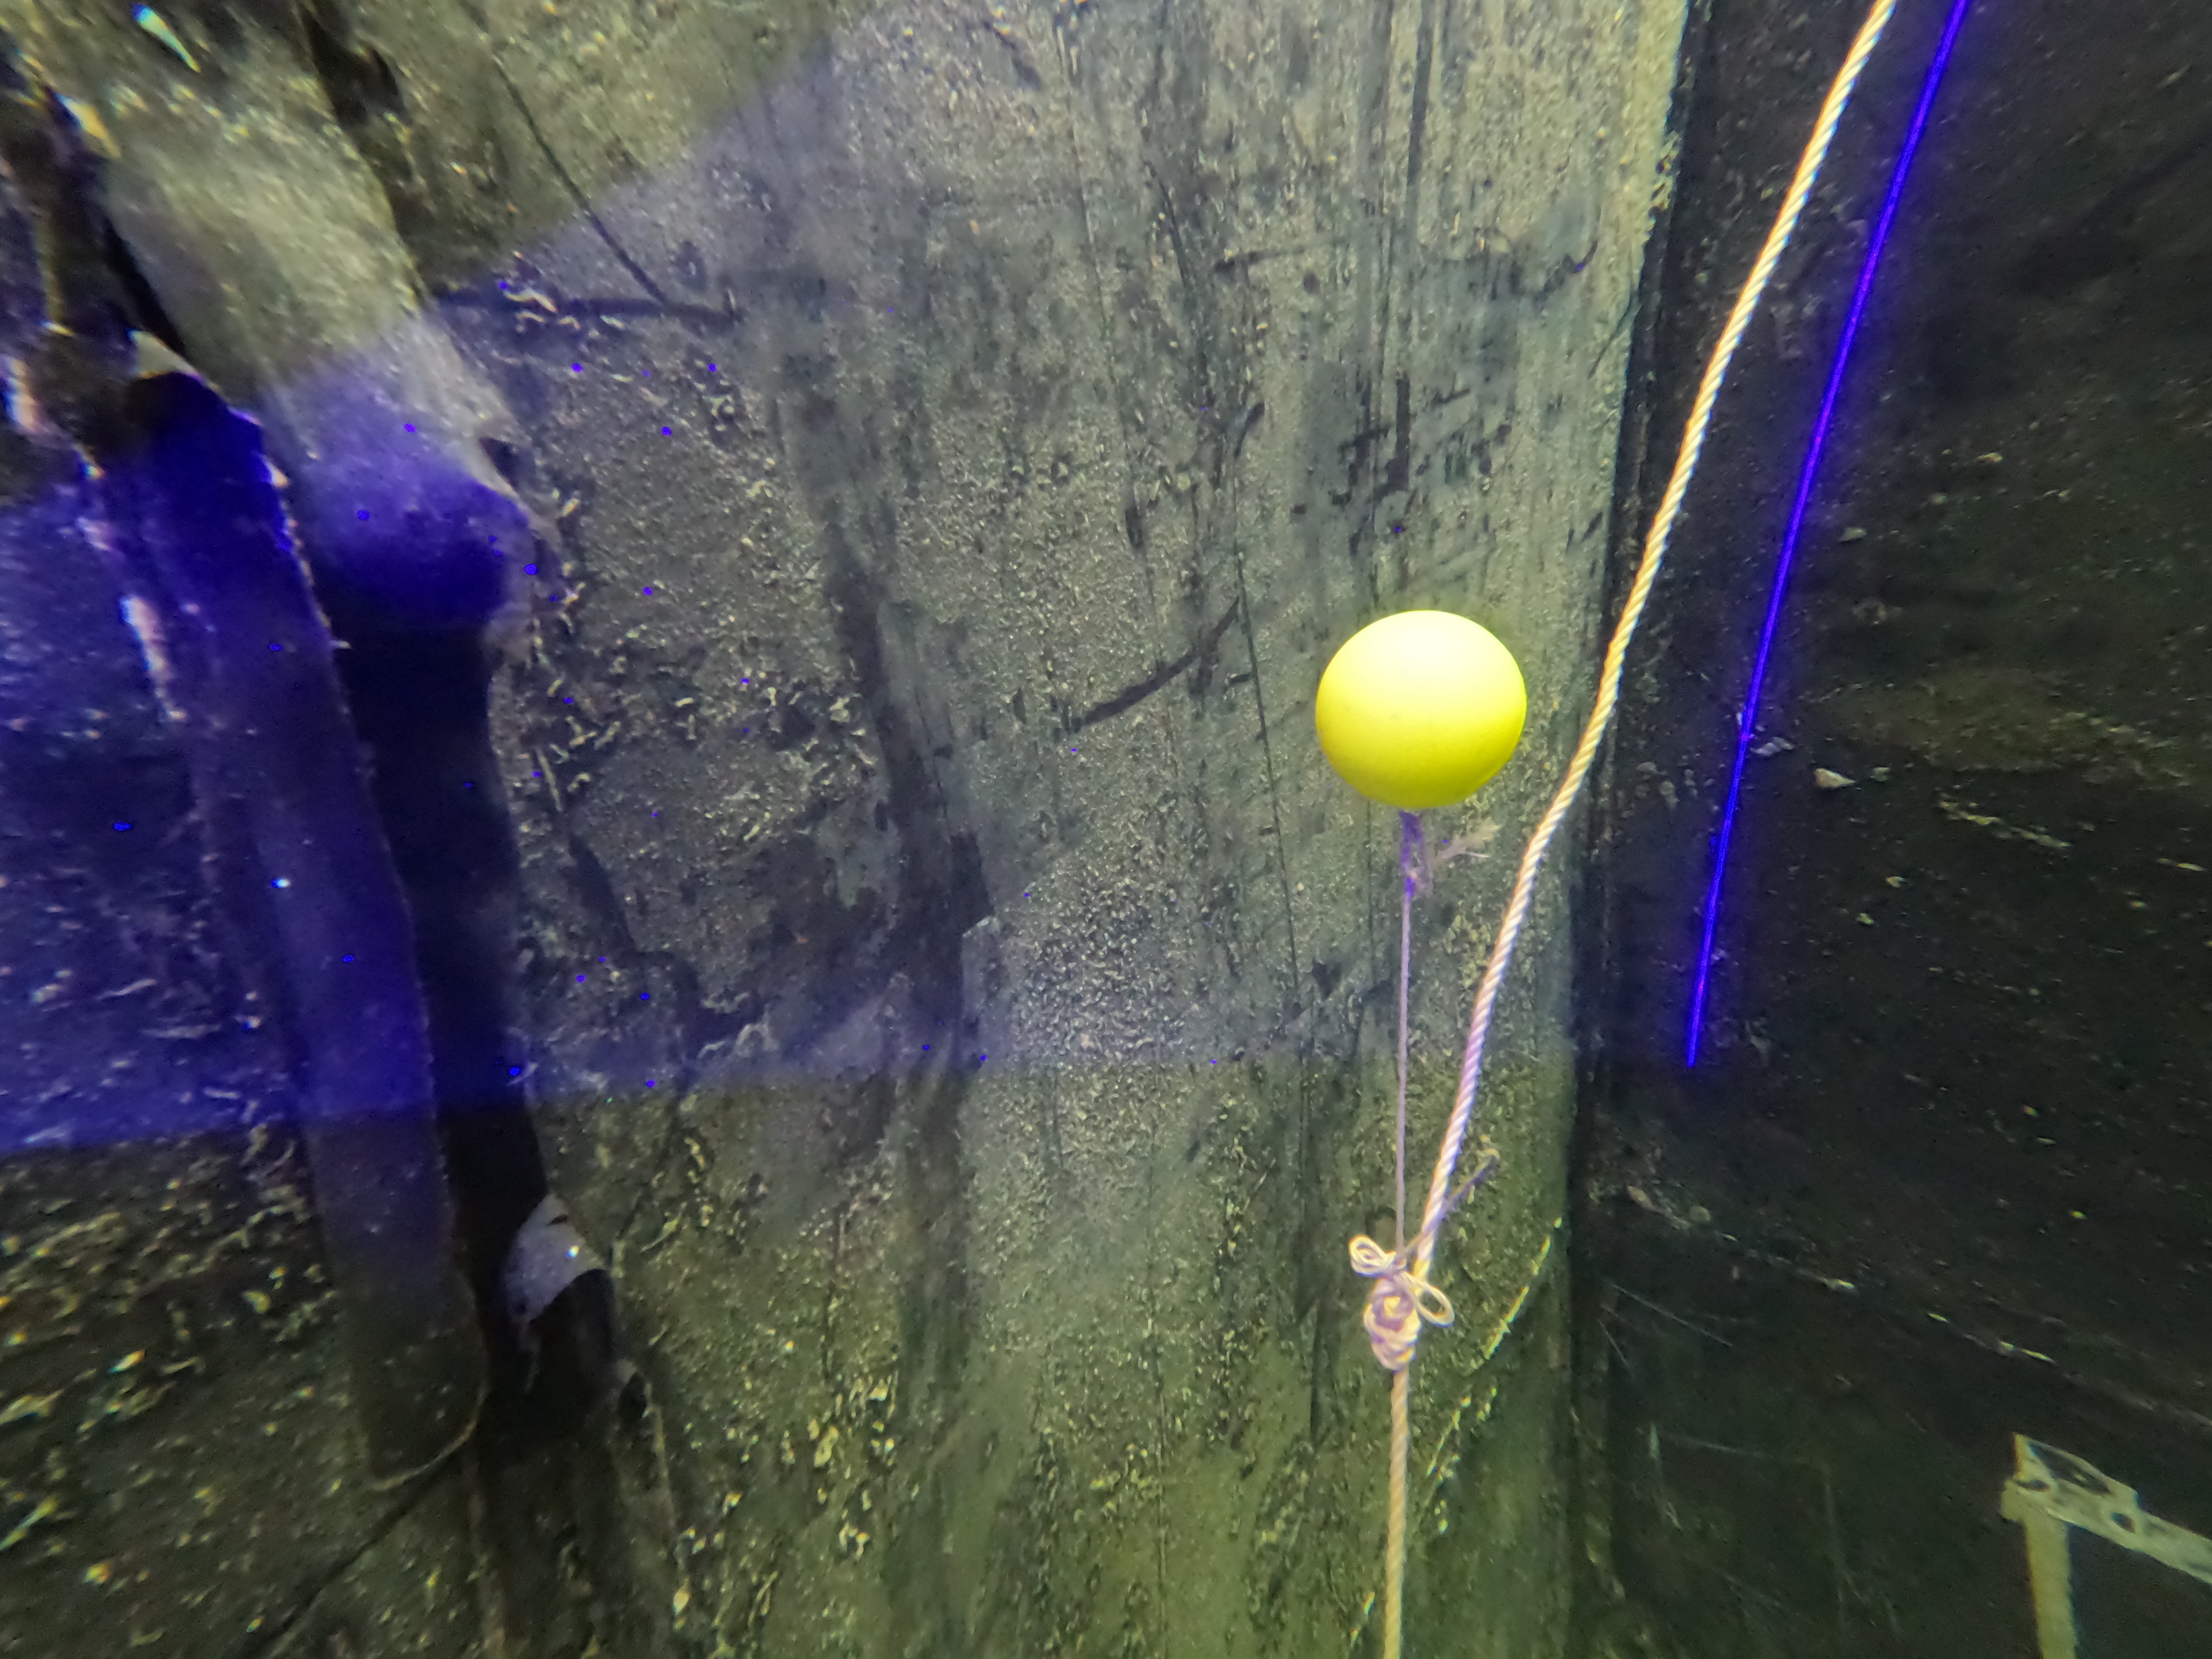

Supplement: Supplementary file 1993 [file G0034385.pdf › 5/G0034385.pdf]

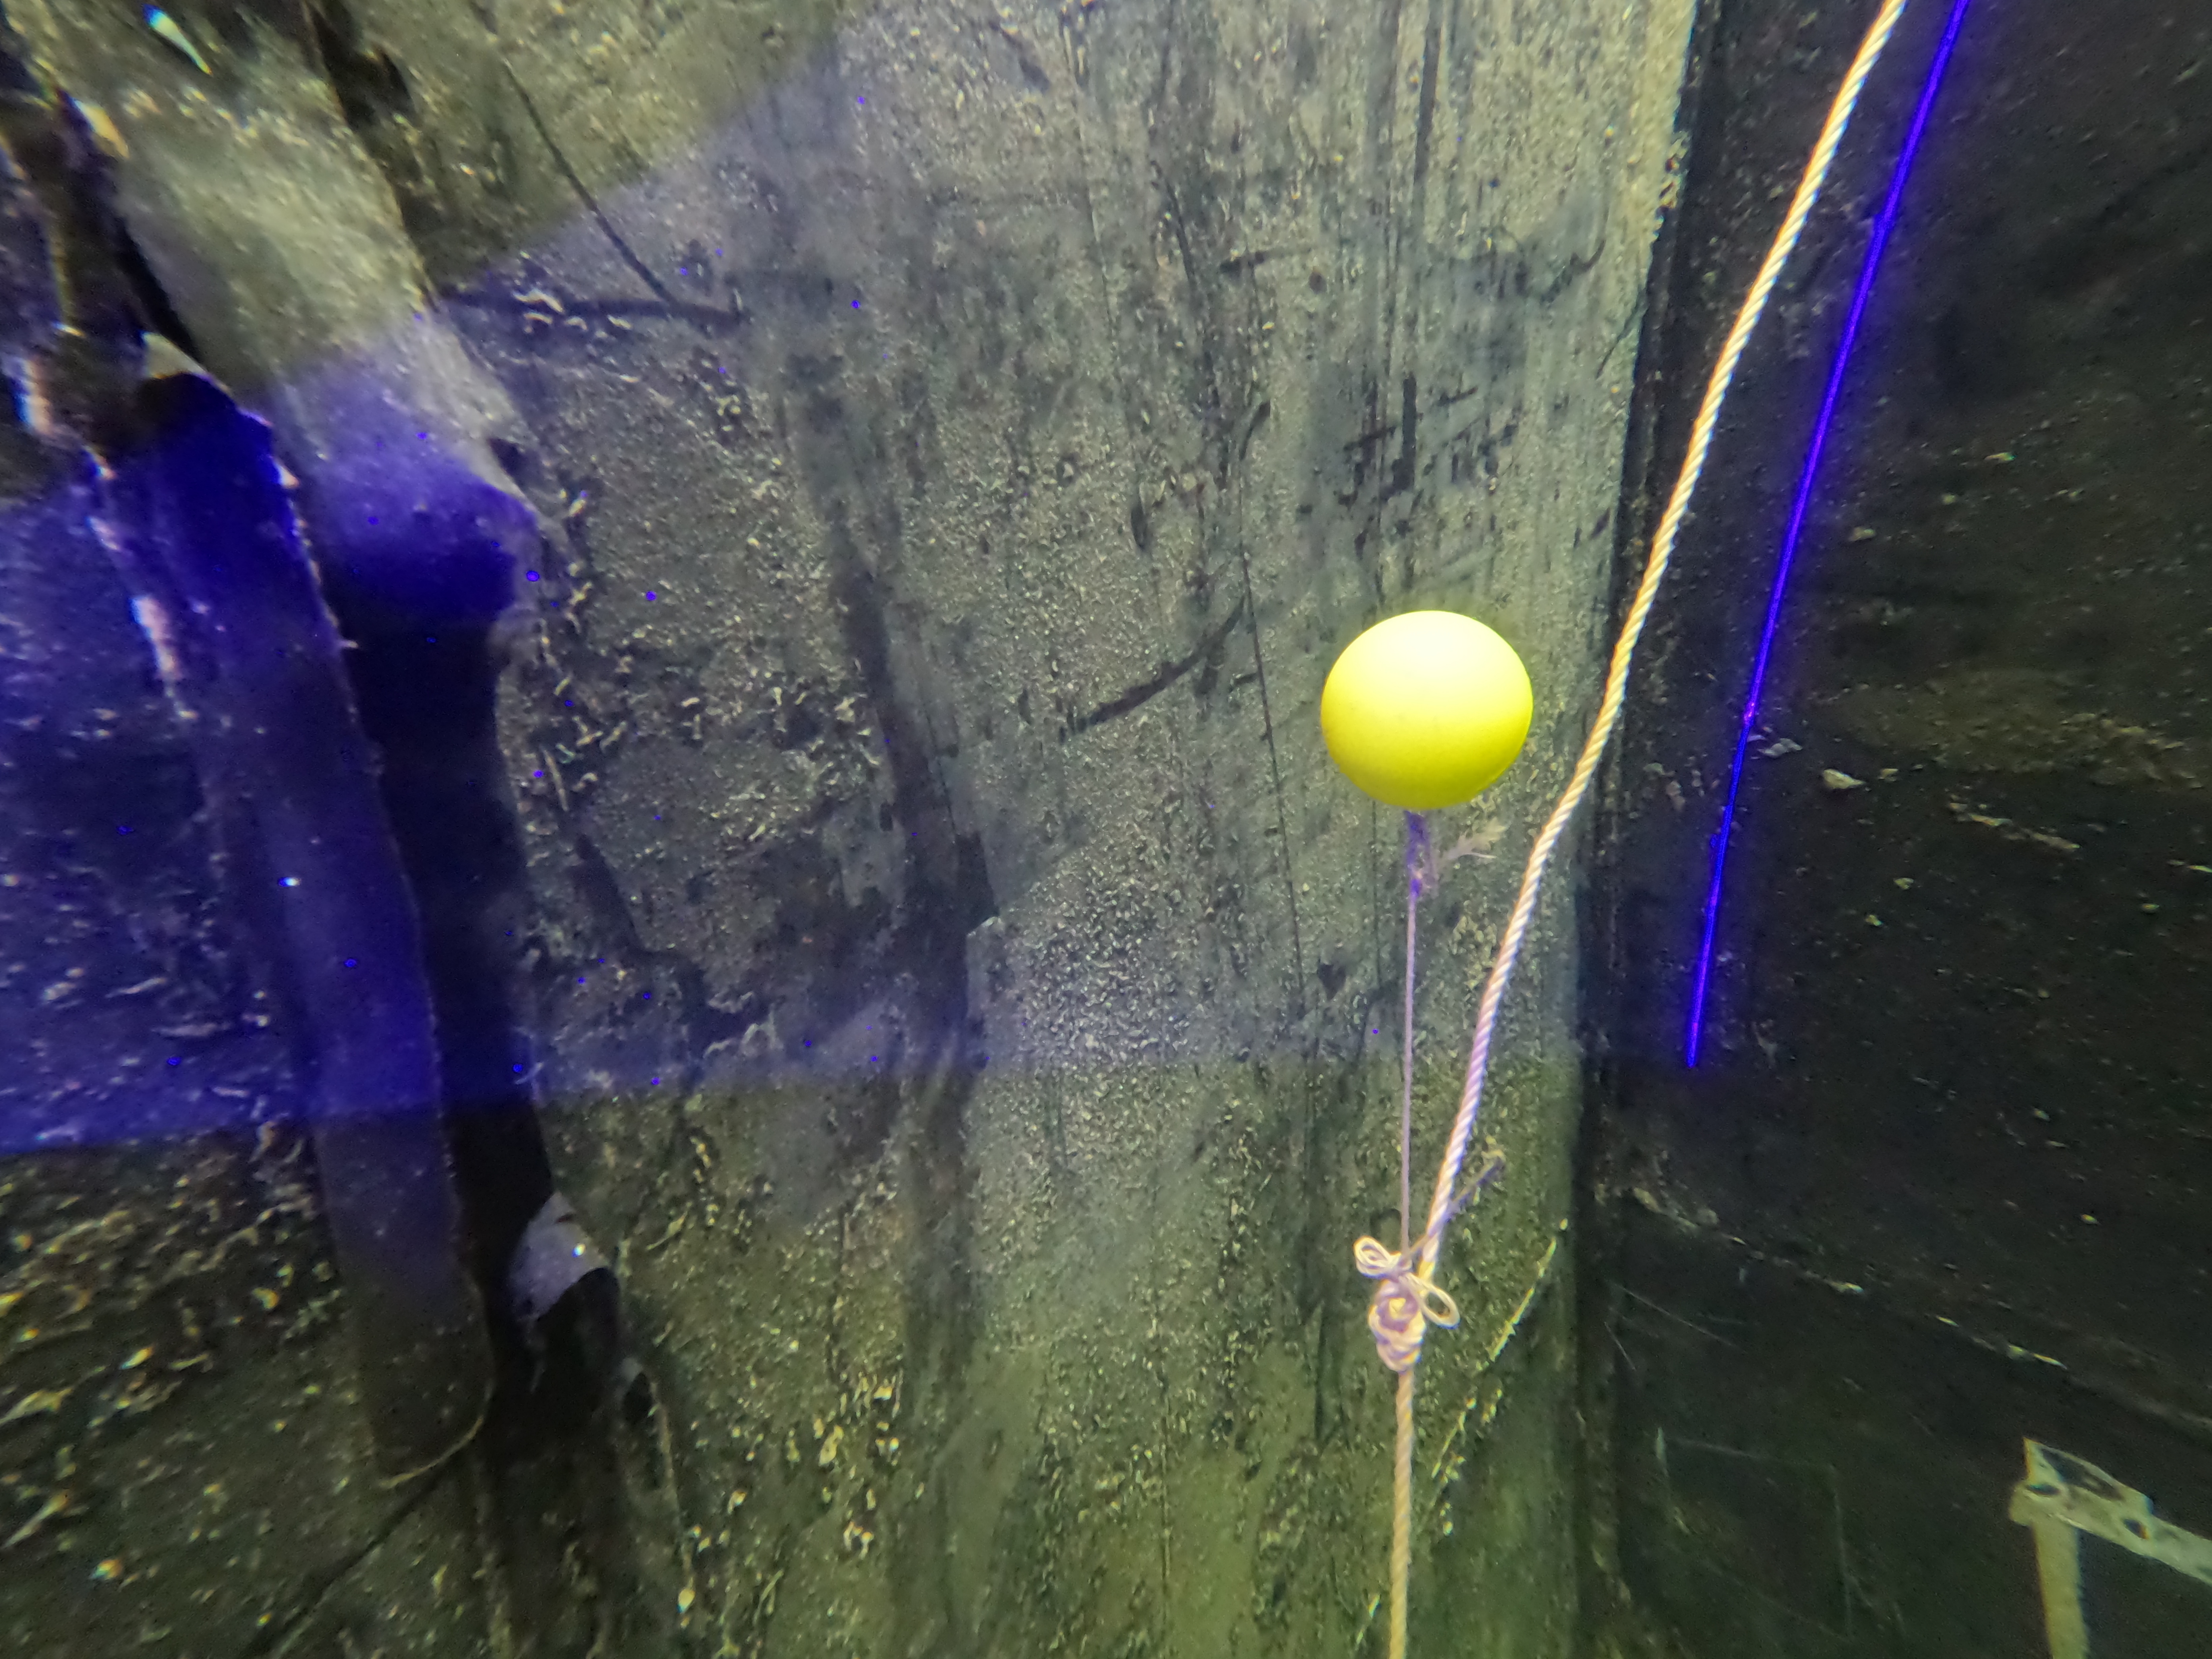

Supplement: Supplementary file 1994 [file G0034386.pdf › 5/G0034386.pdf]

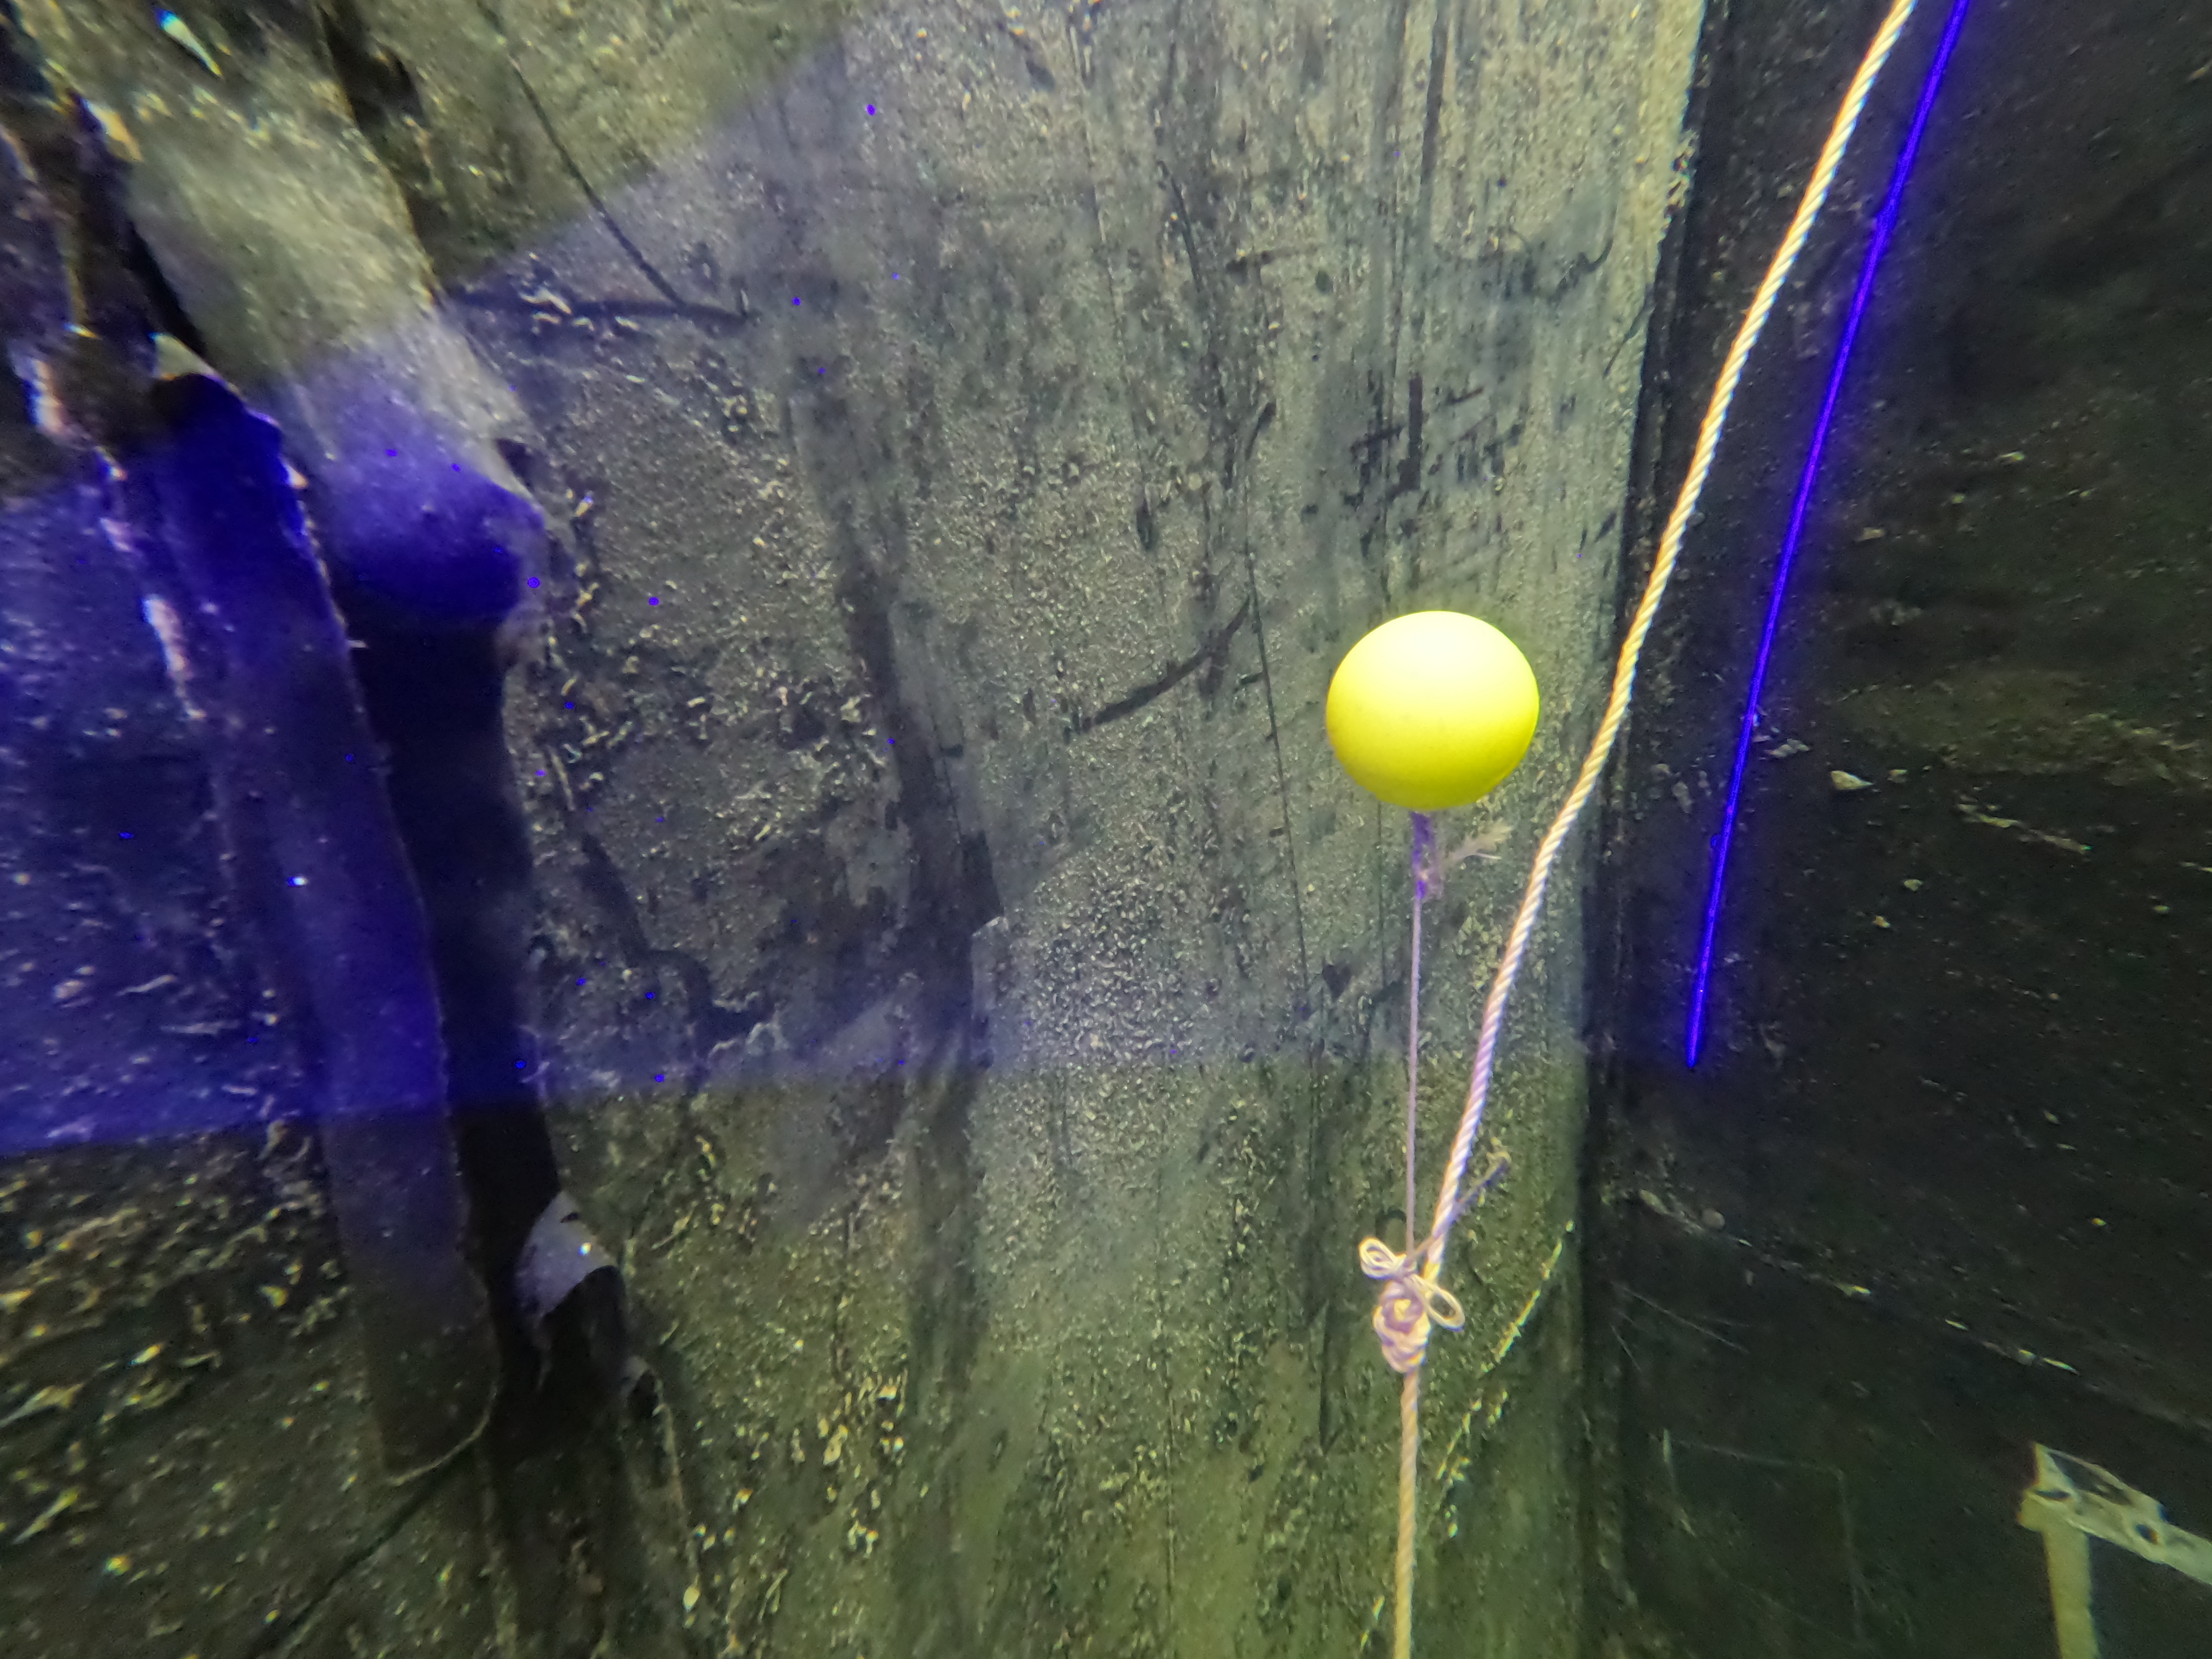

Supplement: Supplementary file 1995 [file G0034387.pdf › 5/G0034387.pdf]

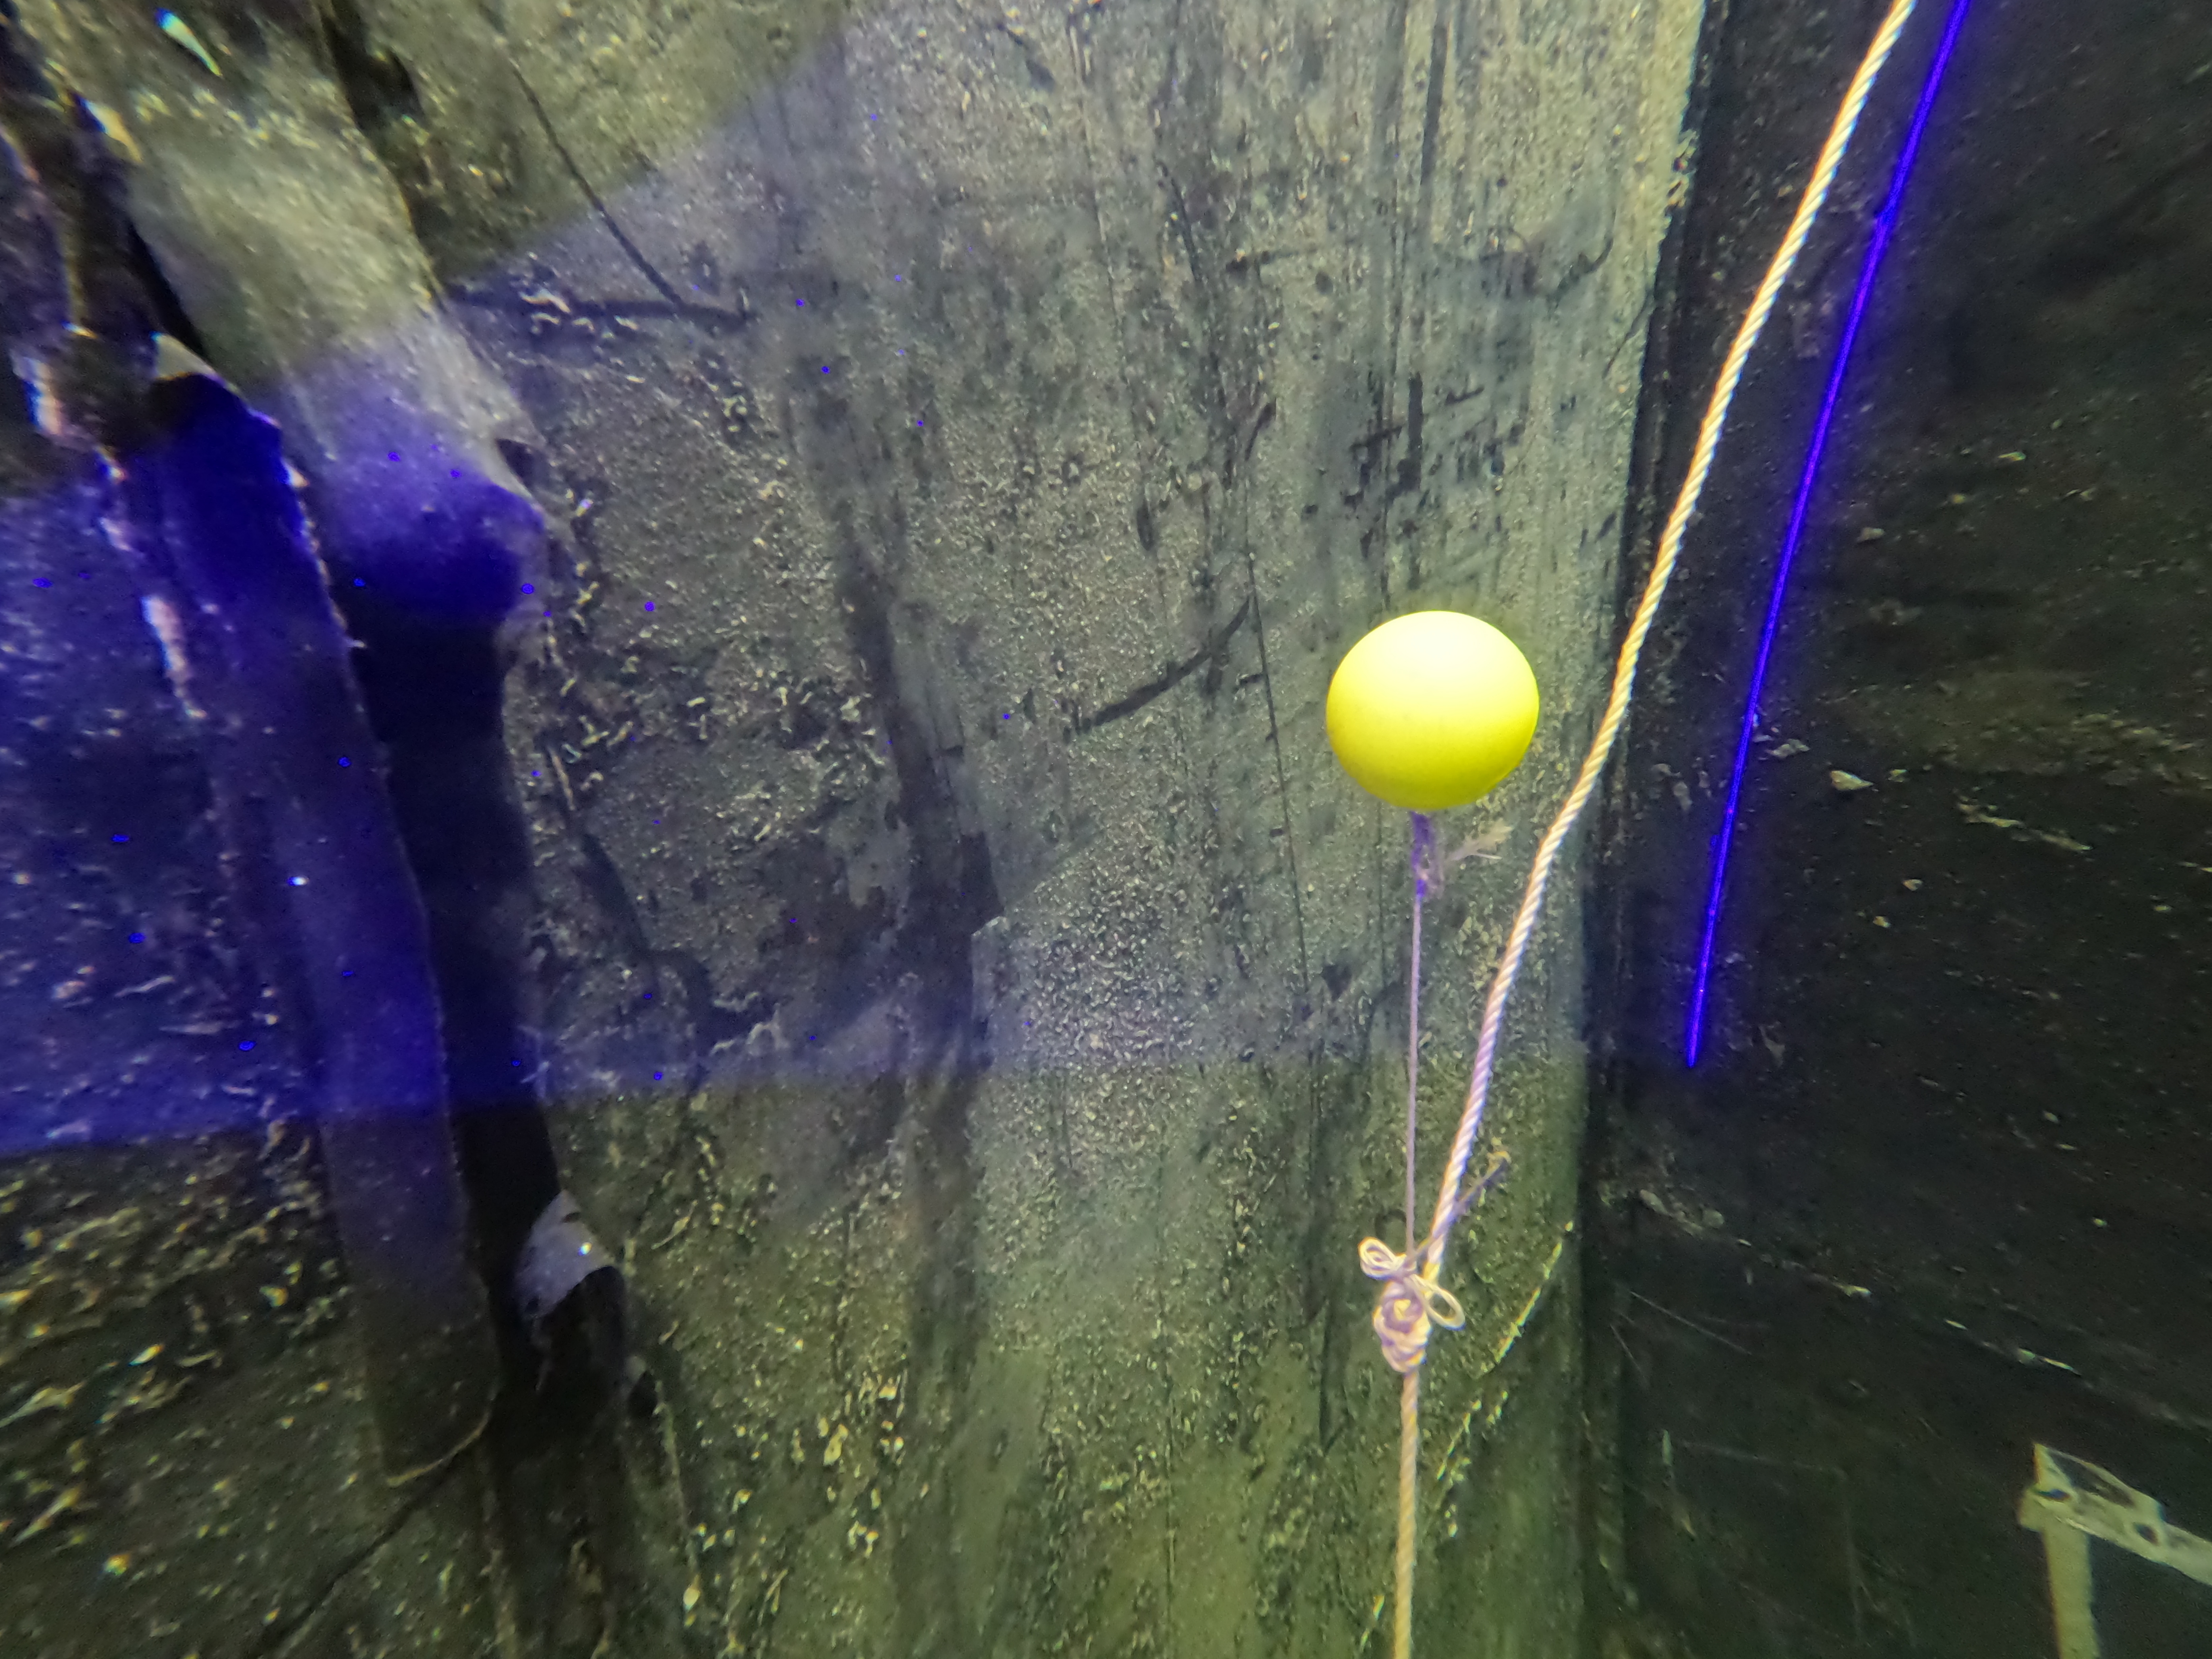

Supplement: Supplementary file 1996 [file G0034388.pdf › 5/G0034388.pdf]

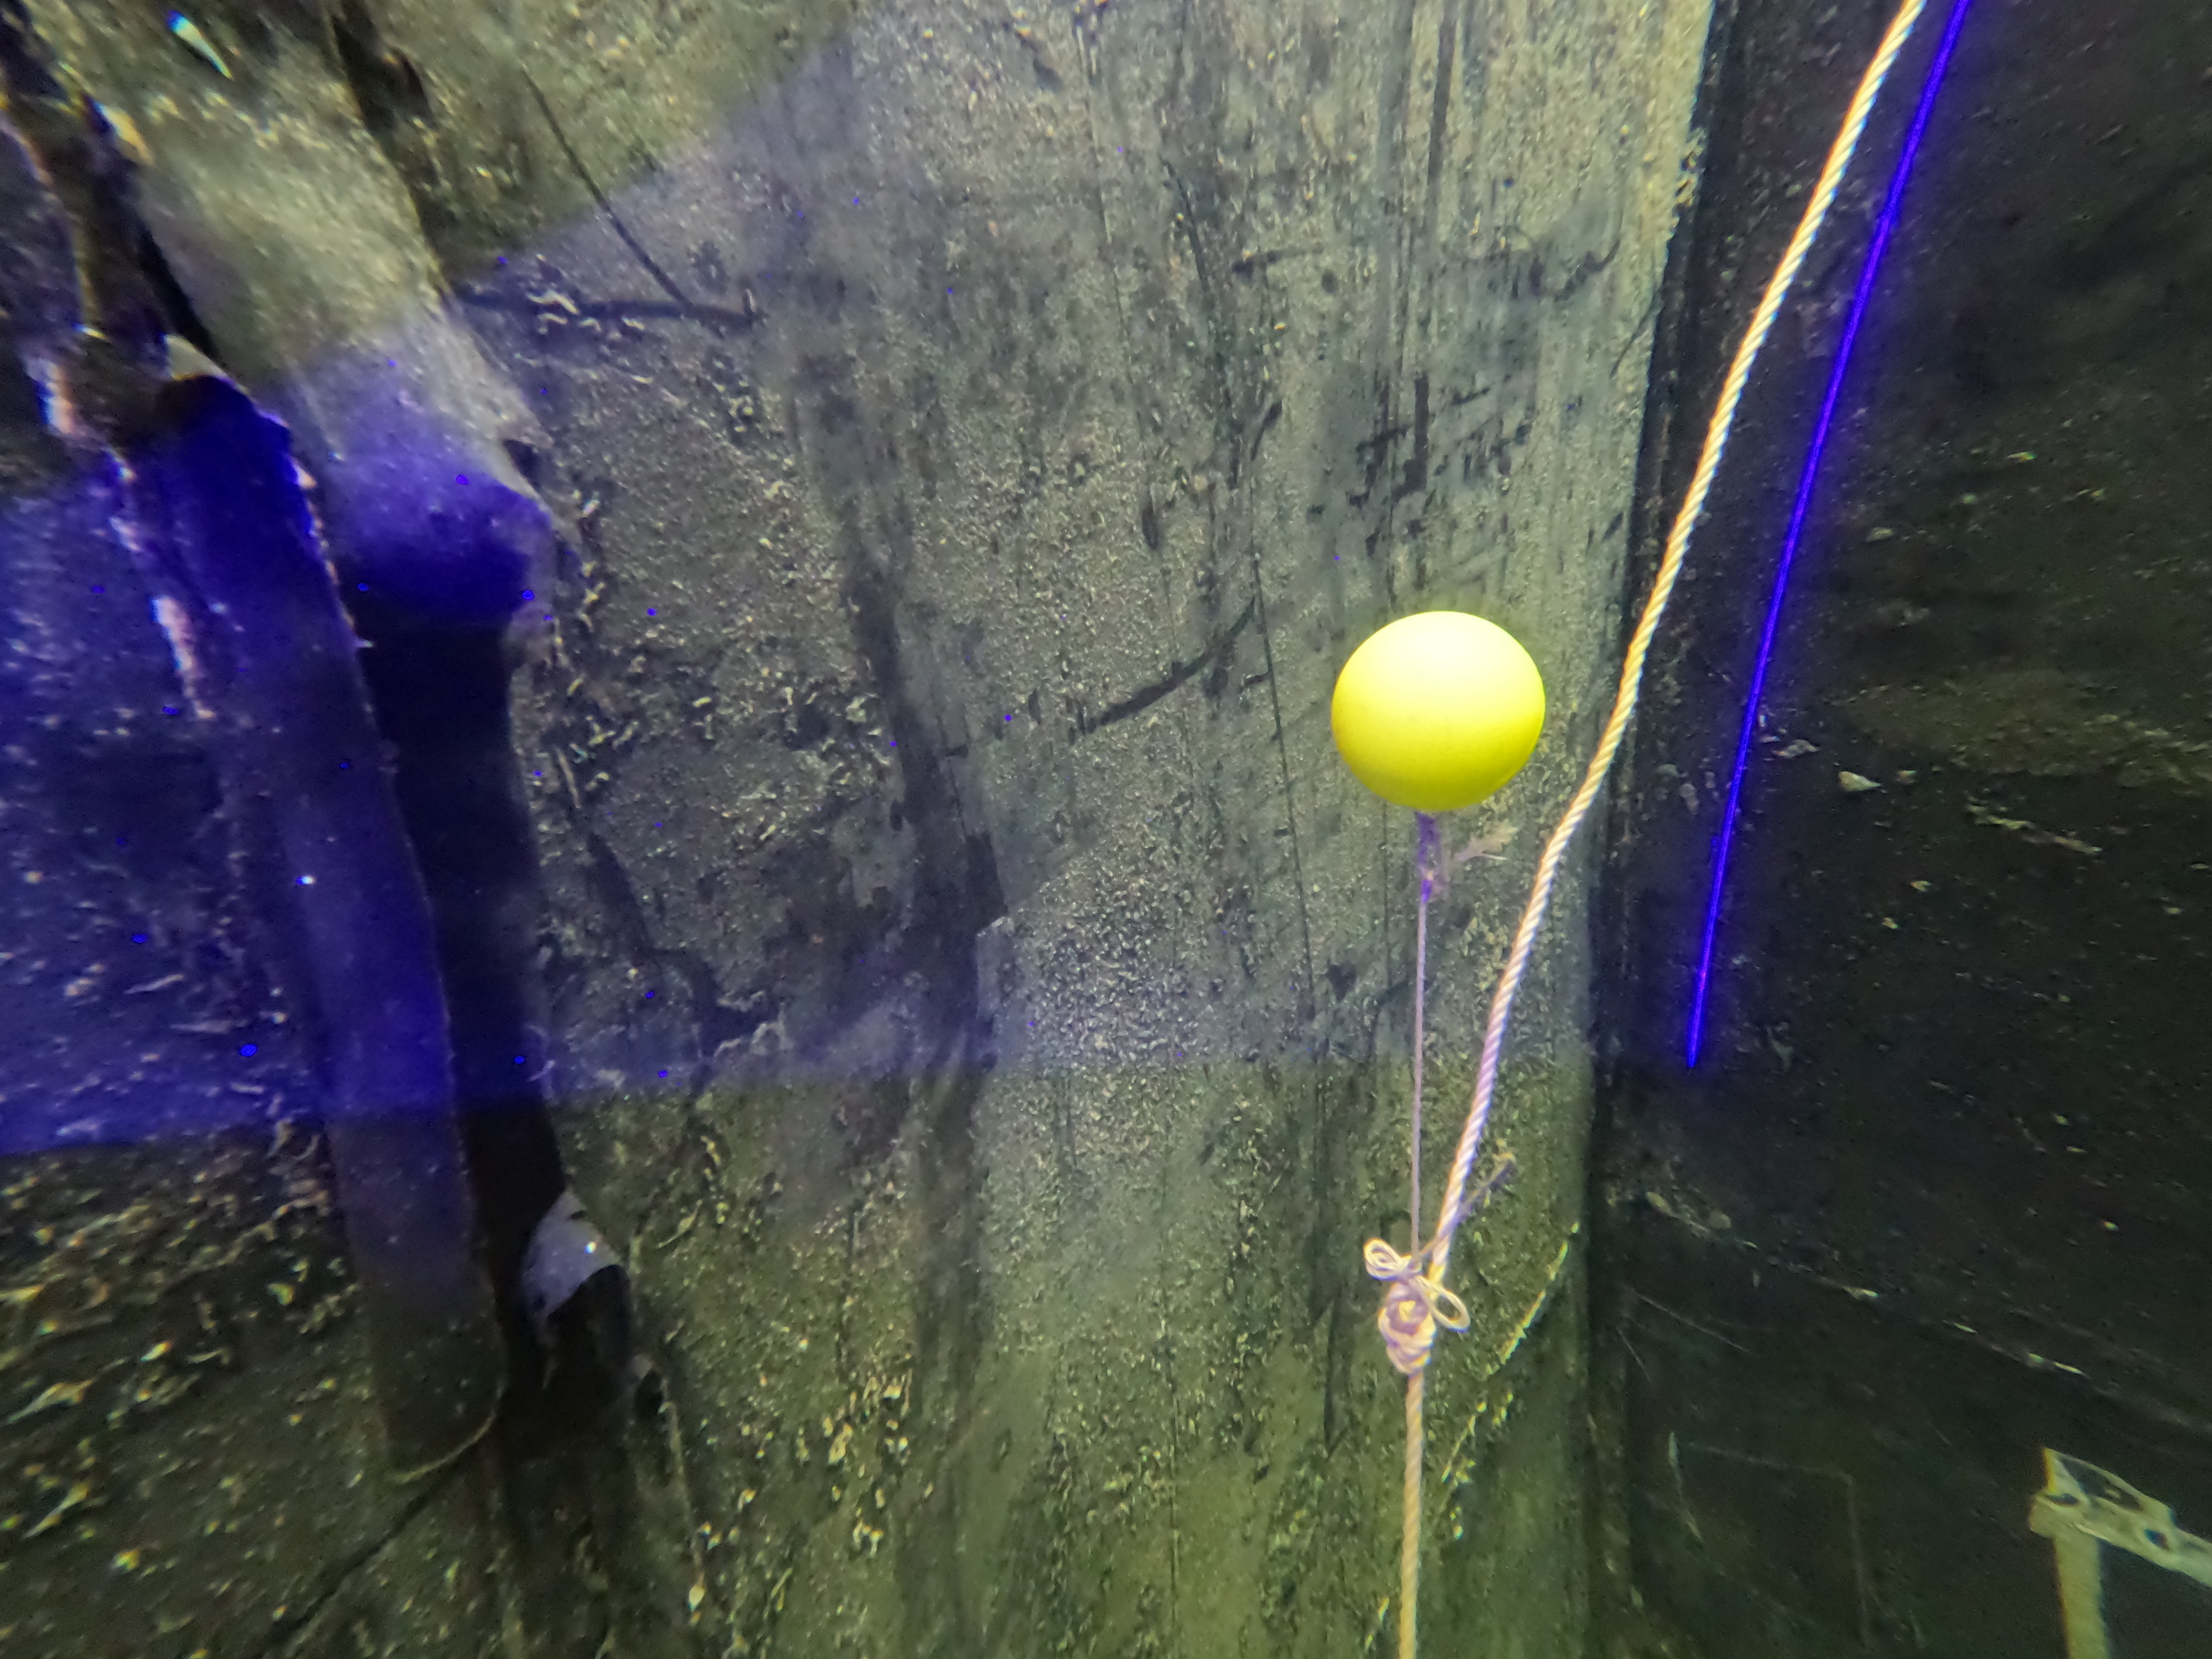

Supplement: Supplementary file 1997 [file G0034389.pdf › 5/G0034389.pdf]

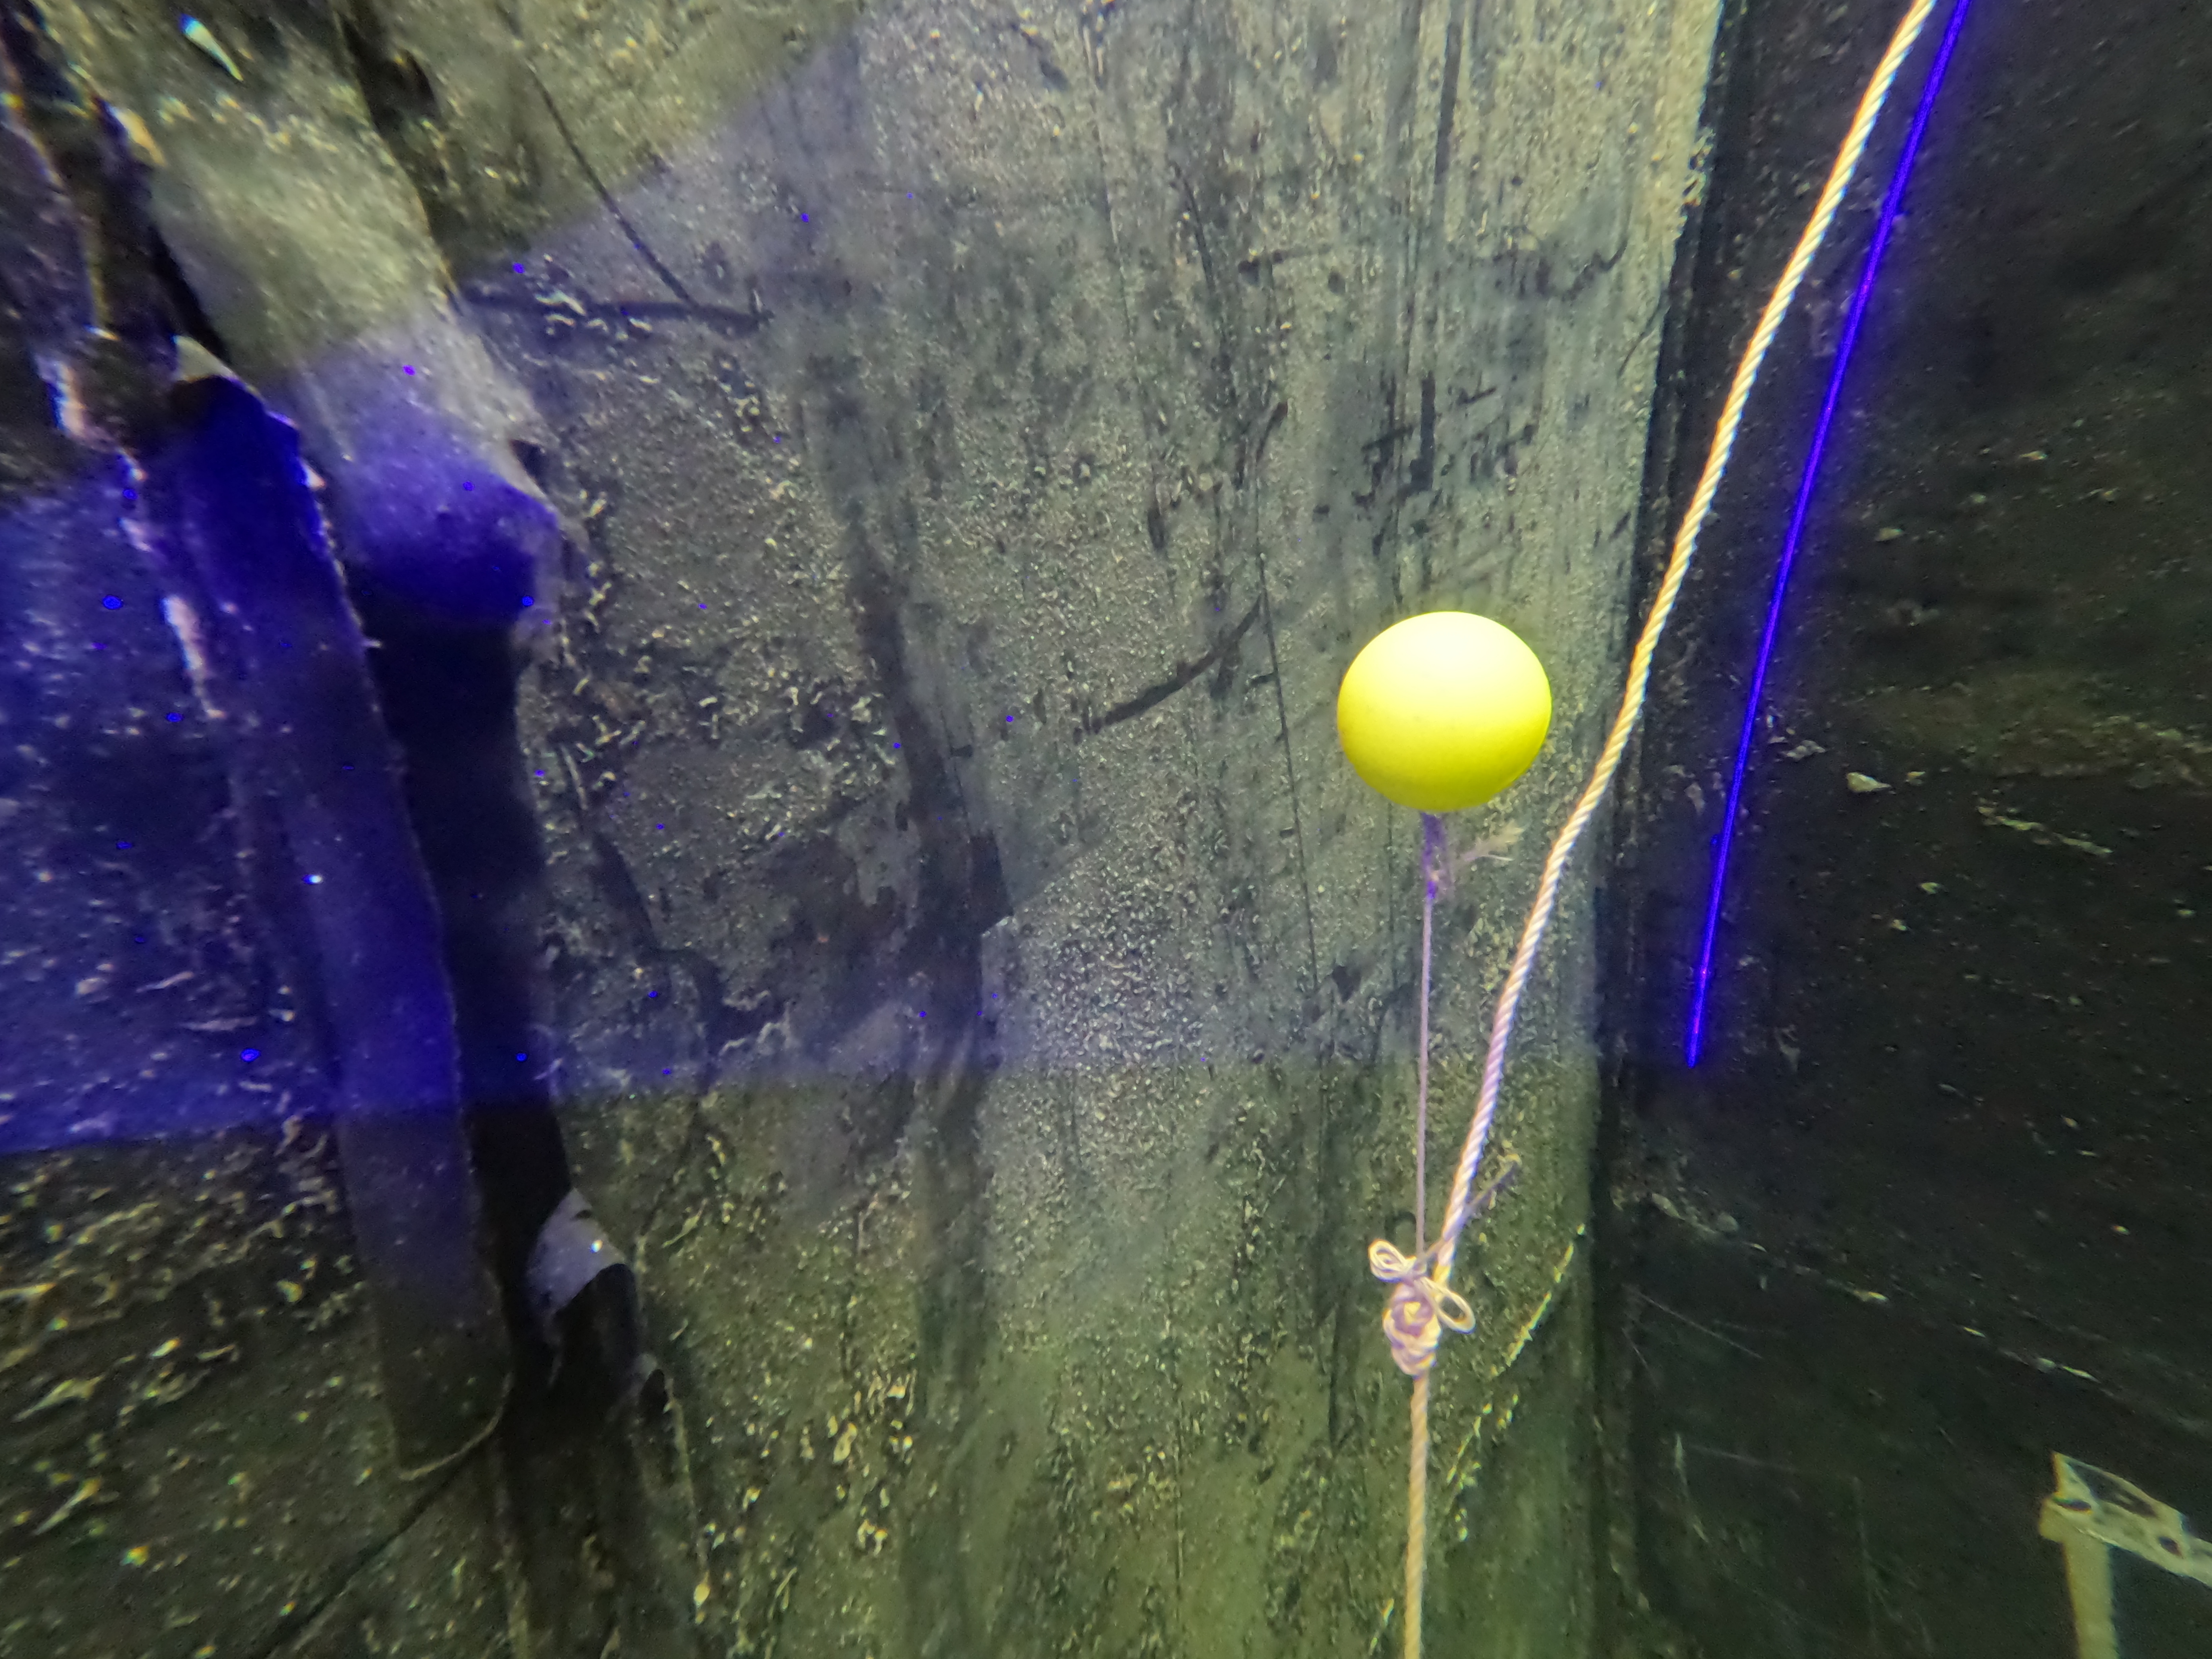

Supplement: Supplementary file 1998 [file G0034390.pdf › 5/G0034390.pdf]

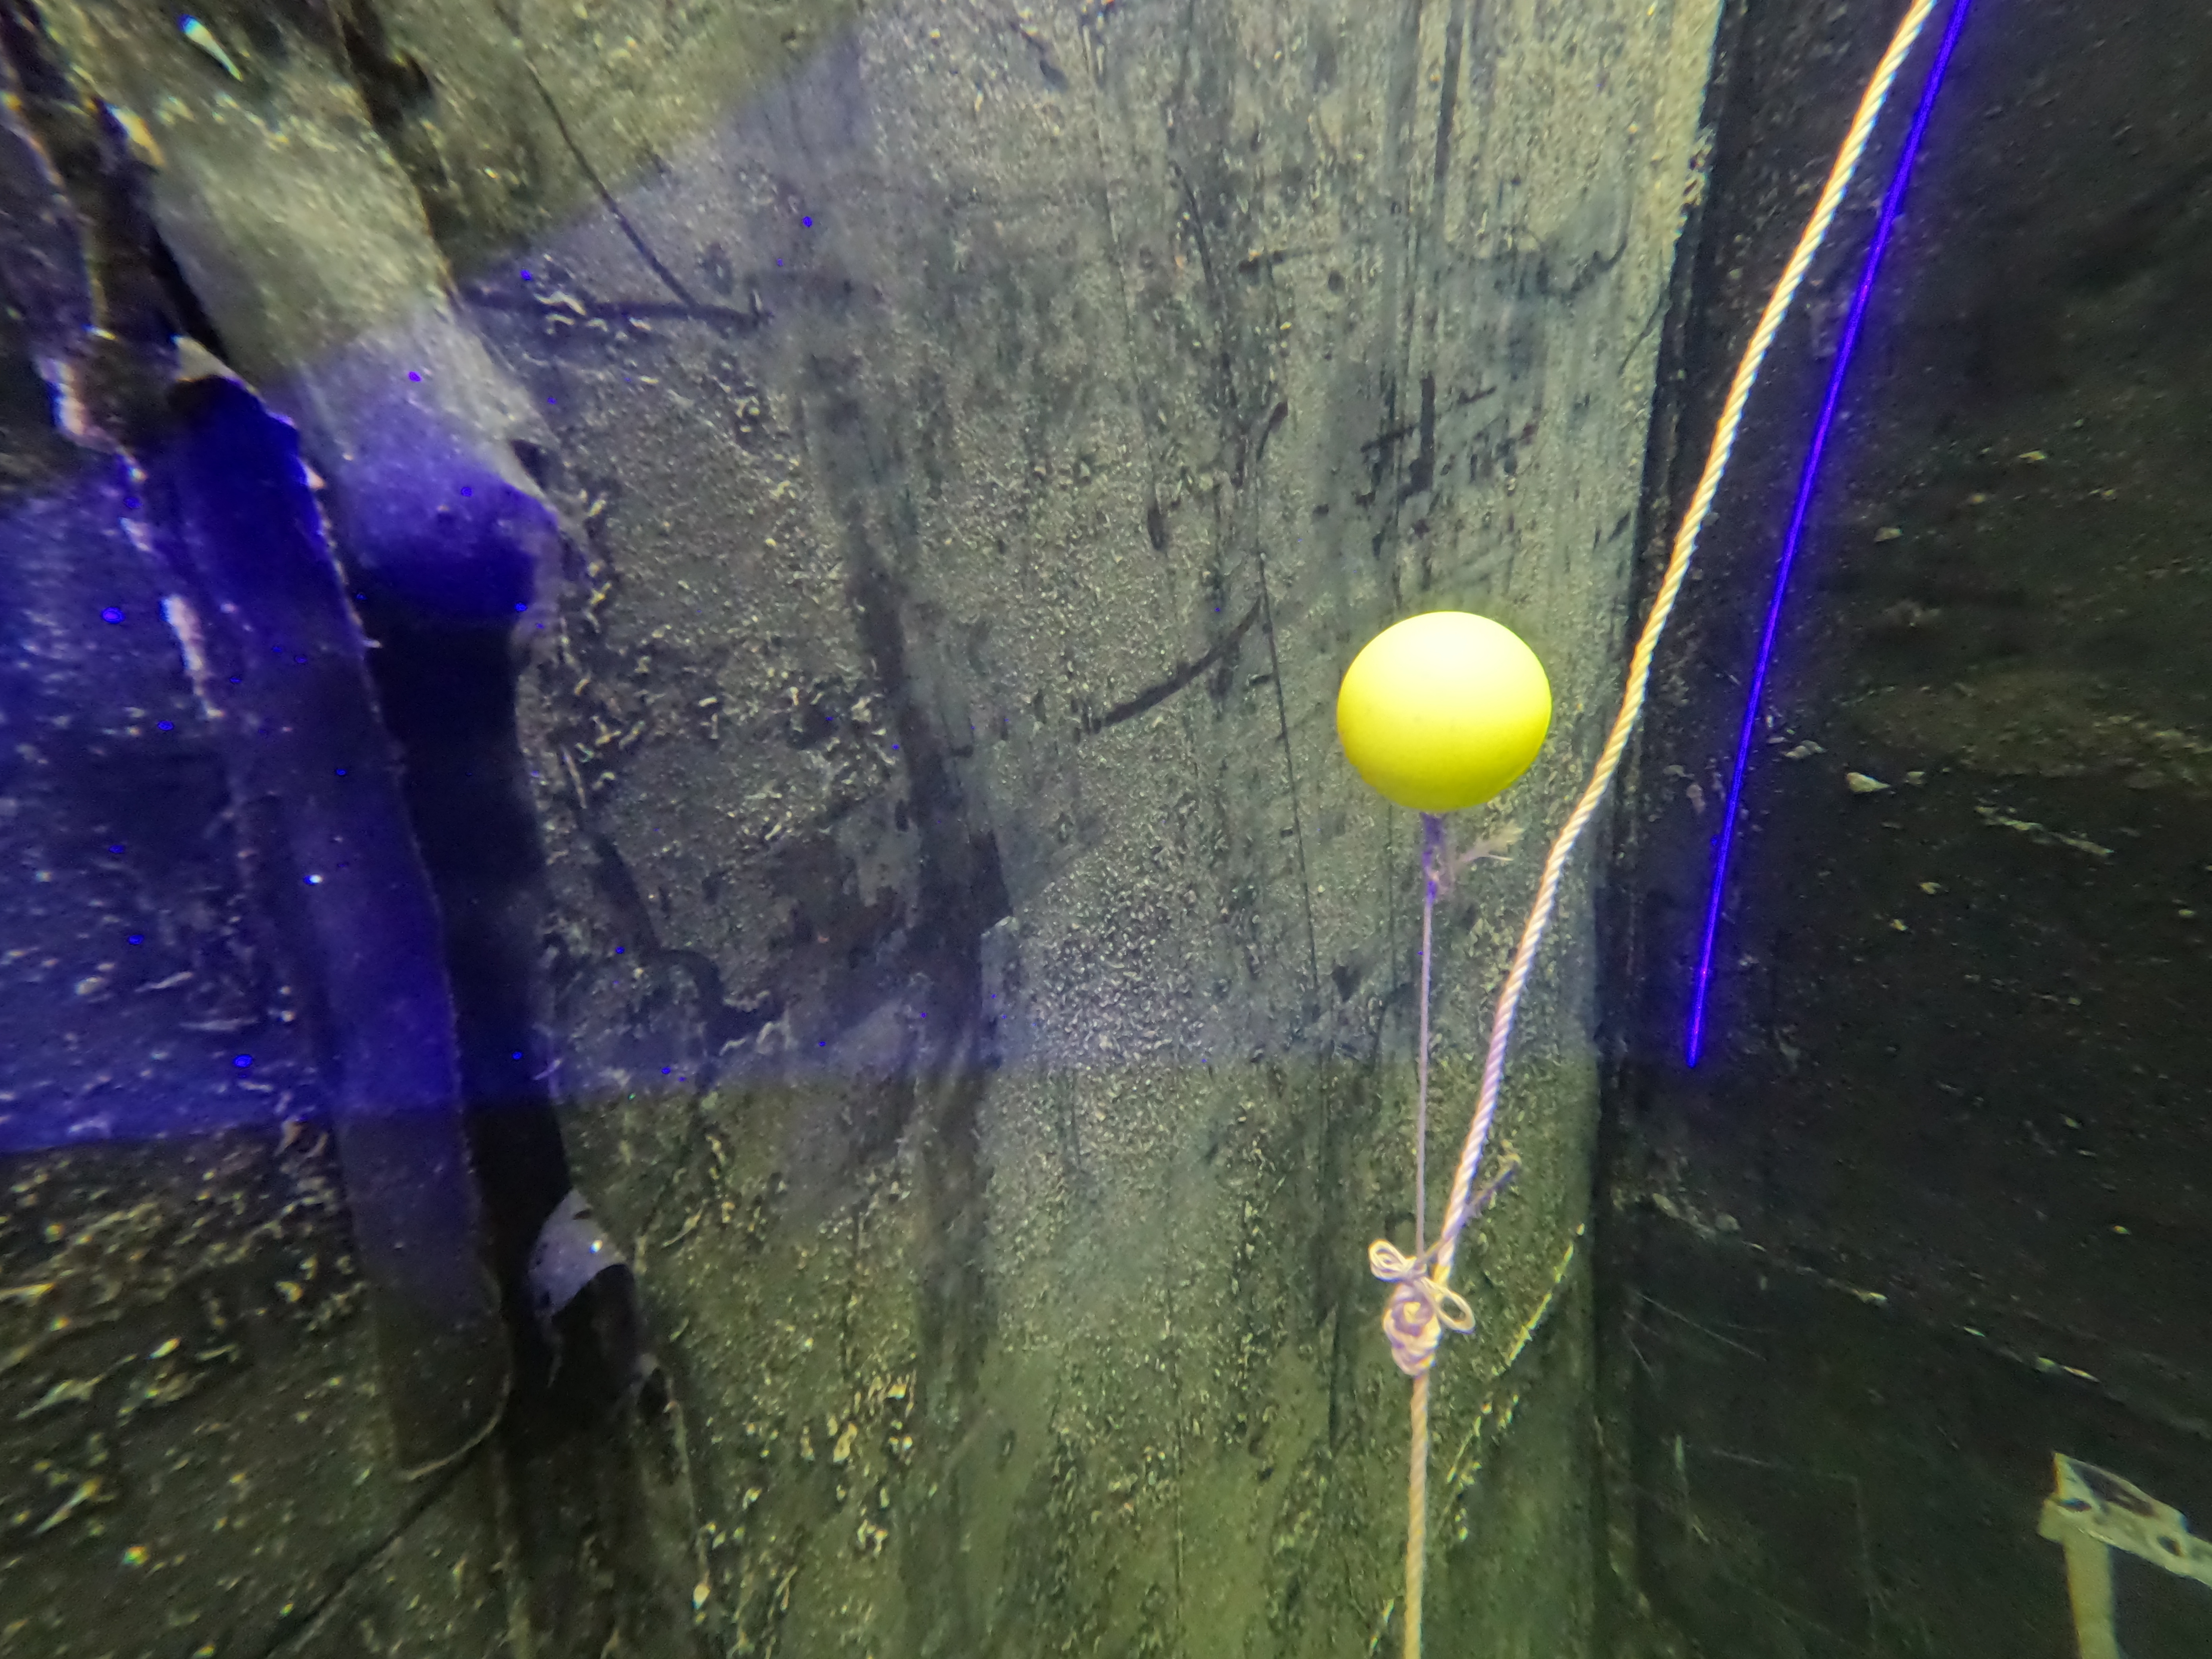

Supplement: Supplementary file 1999 [file G0034391.pdf › 5/G0034391.pdf]

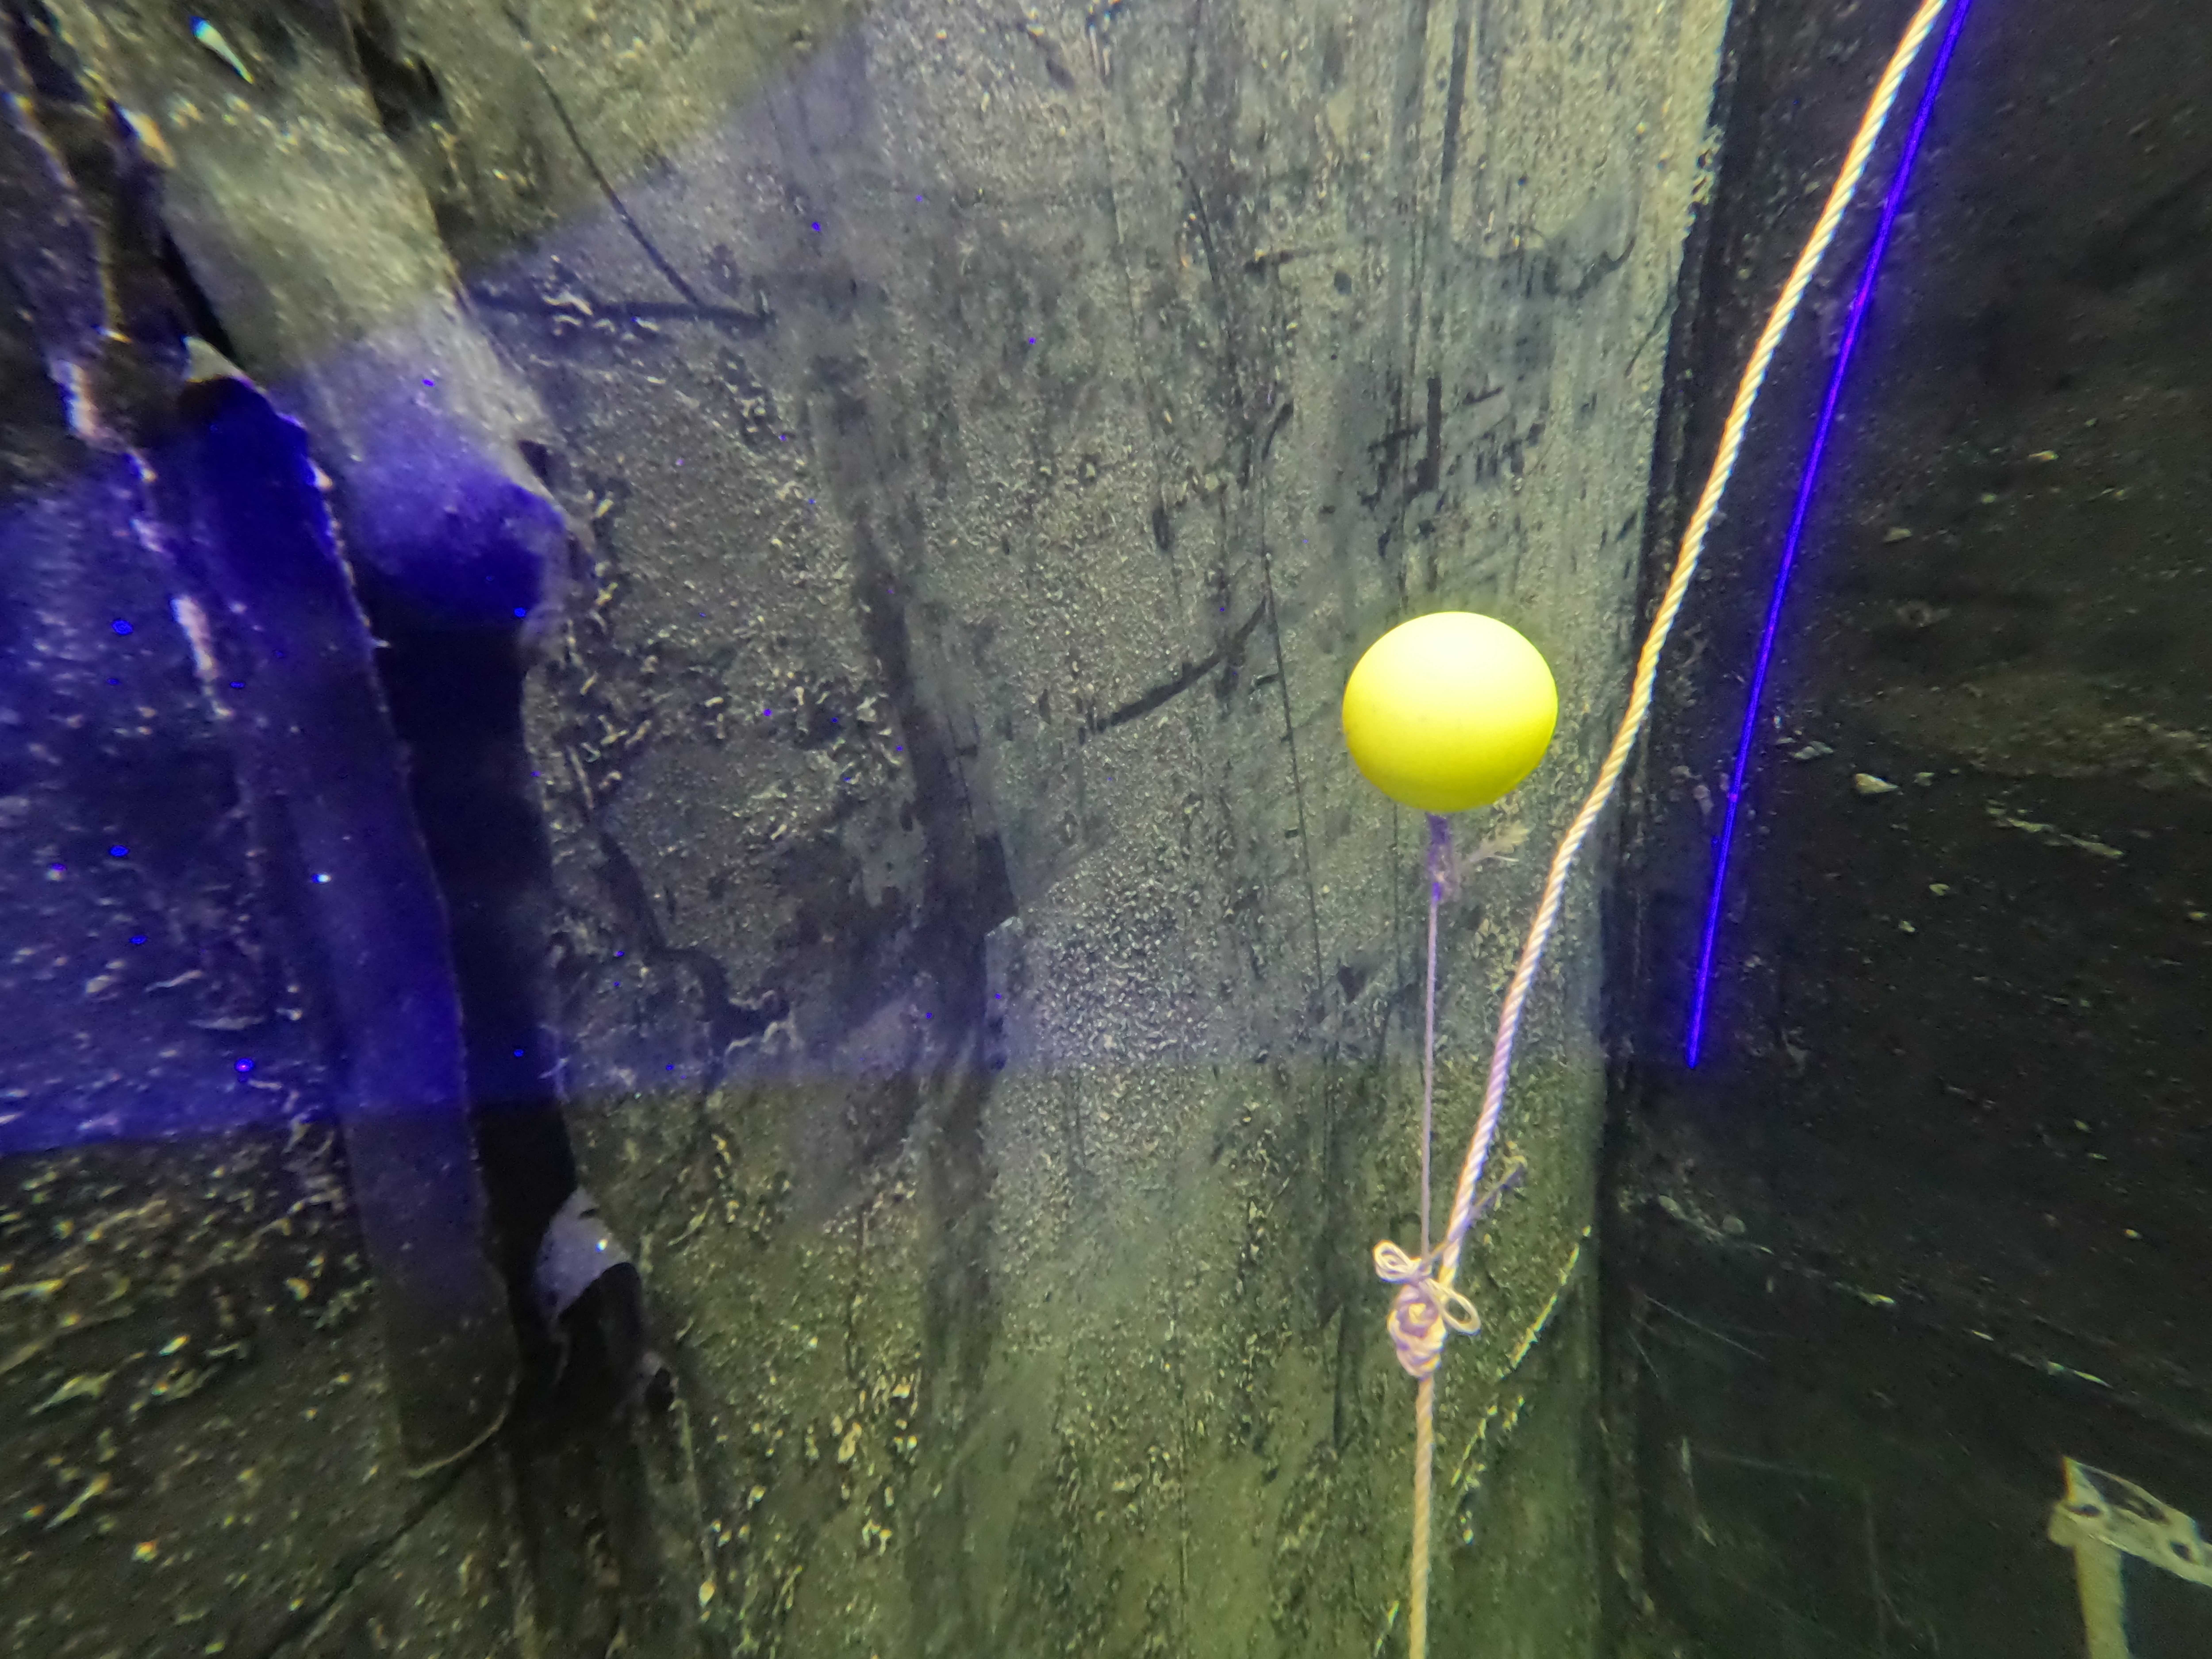

Supplement: Supplementary file 2000 [file G0034392.pdf › 5/G0034392.pdf]

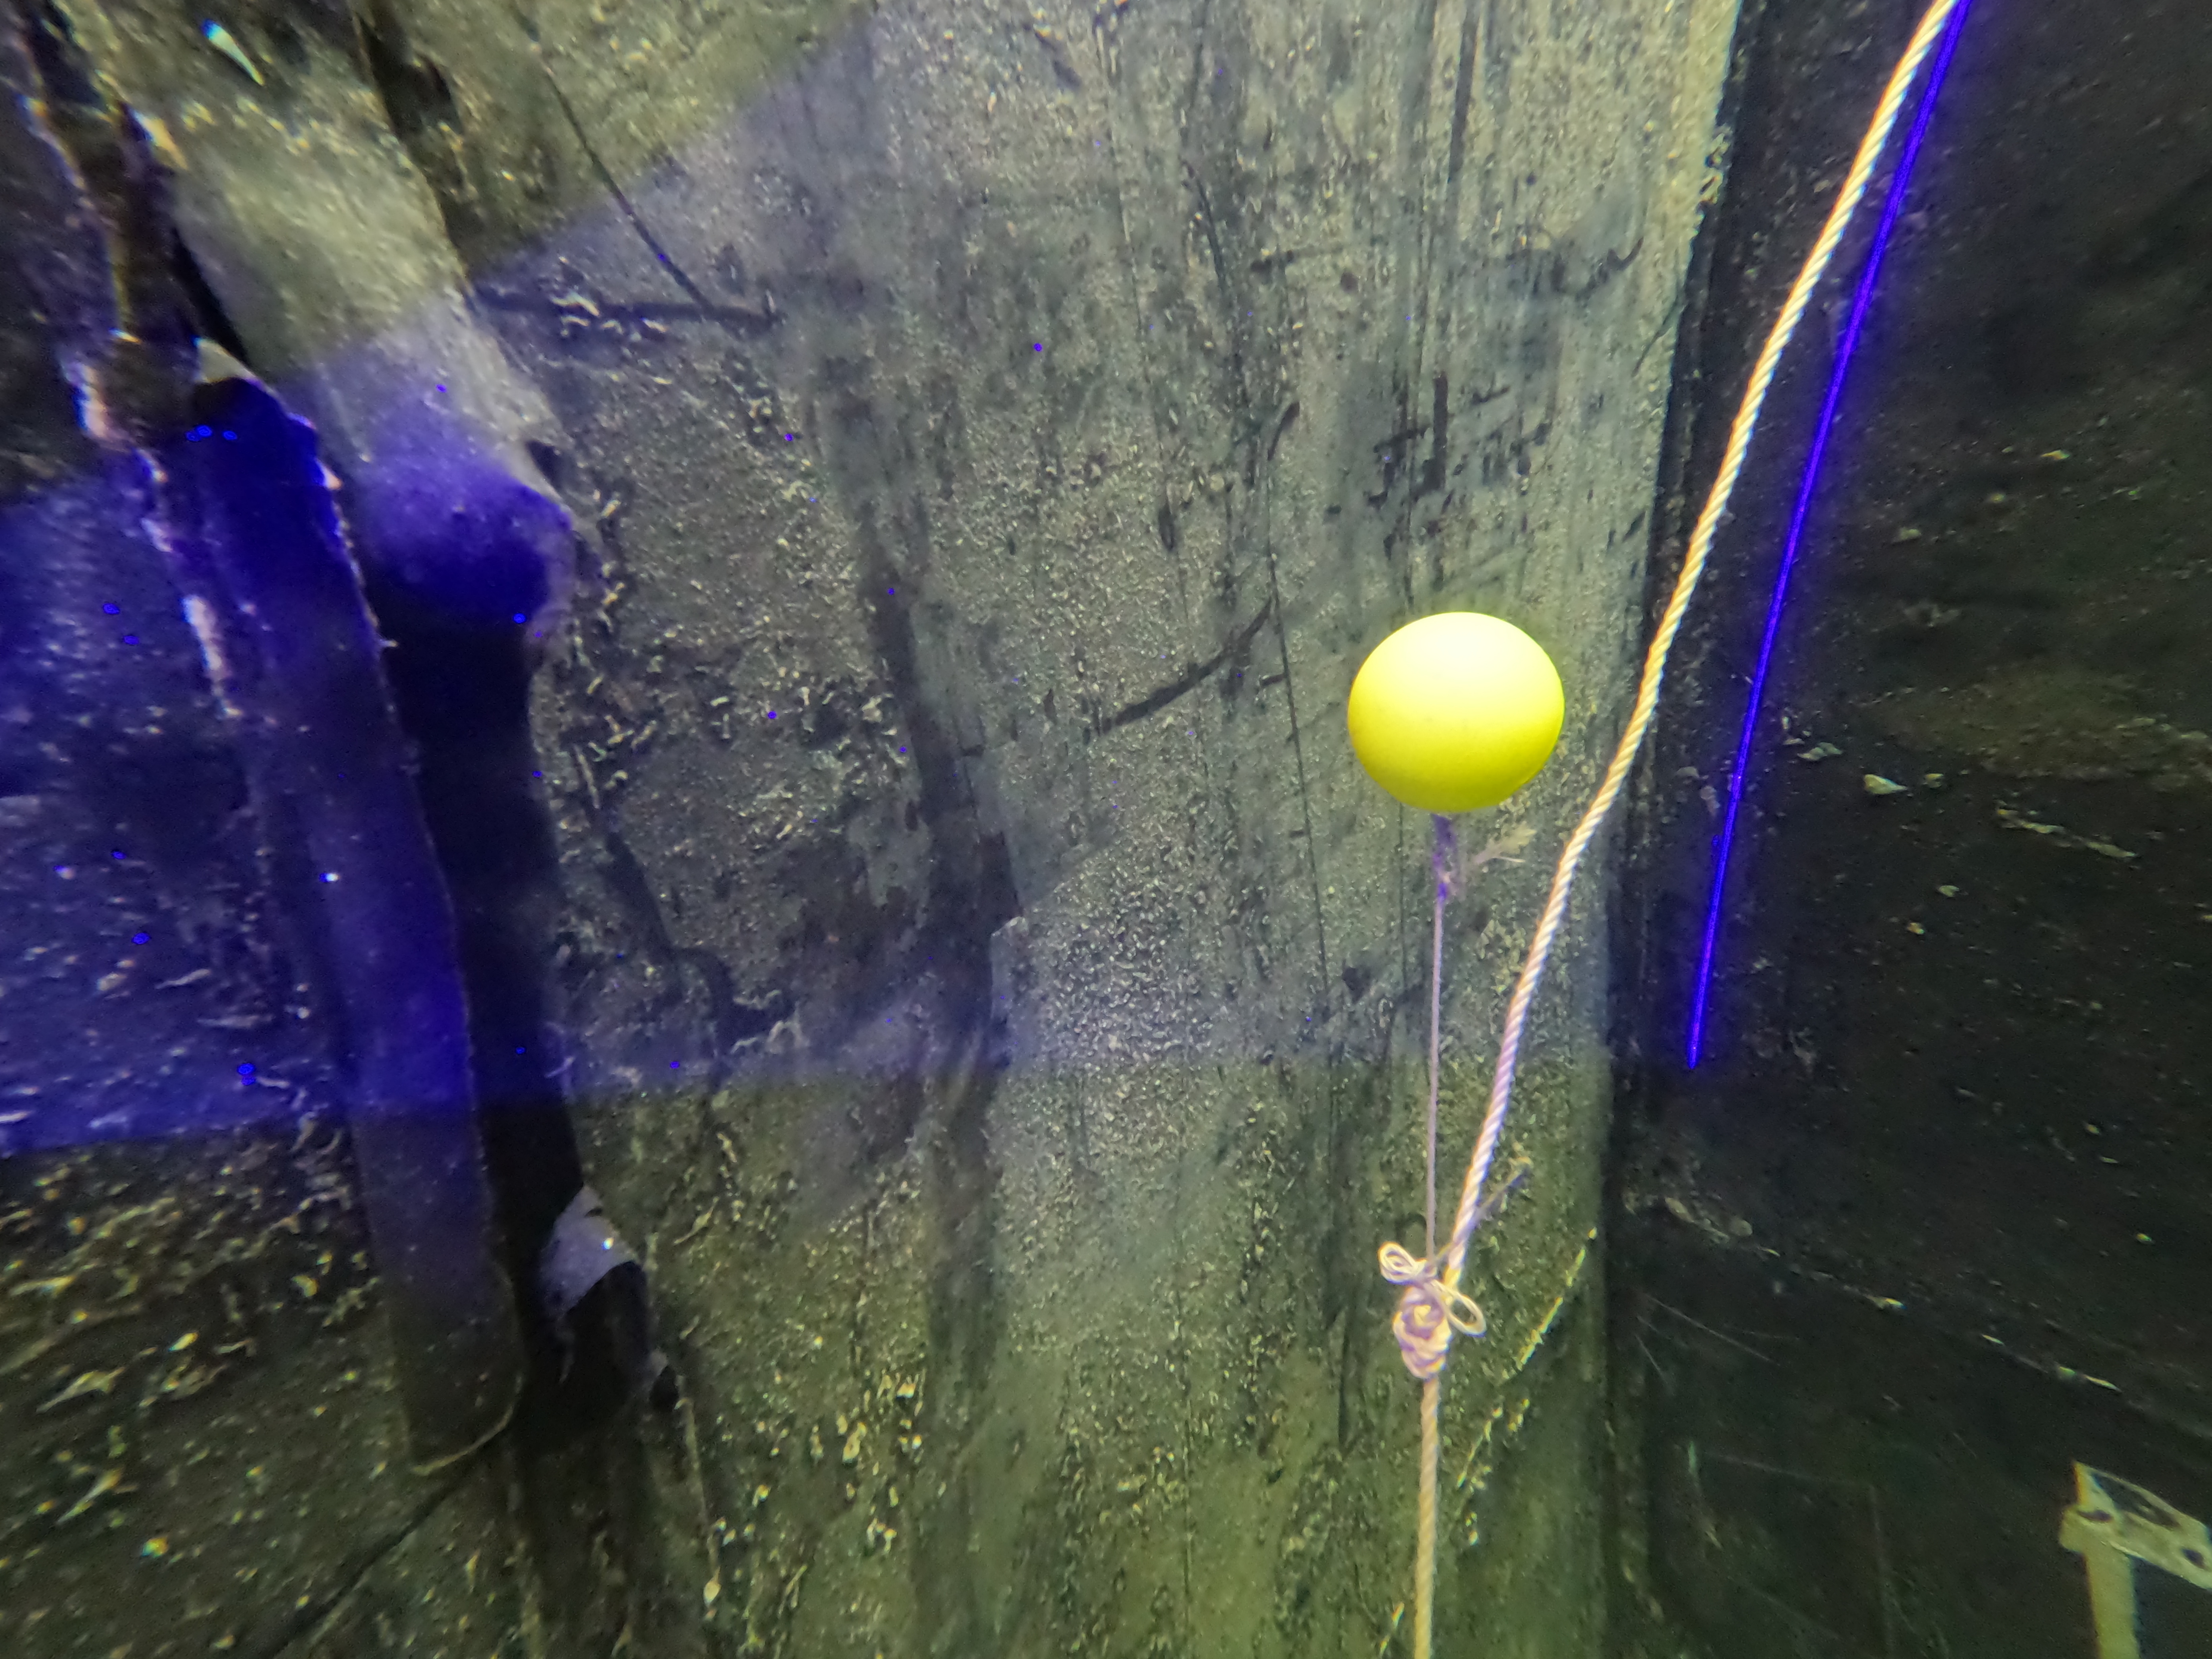

Supplement: Supplementary file 2001 [file G0034393.pdf › 5/G0034393.pdf]

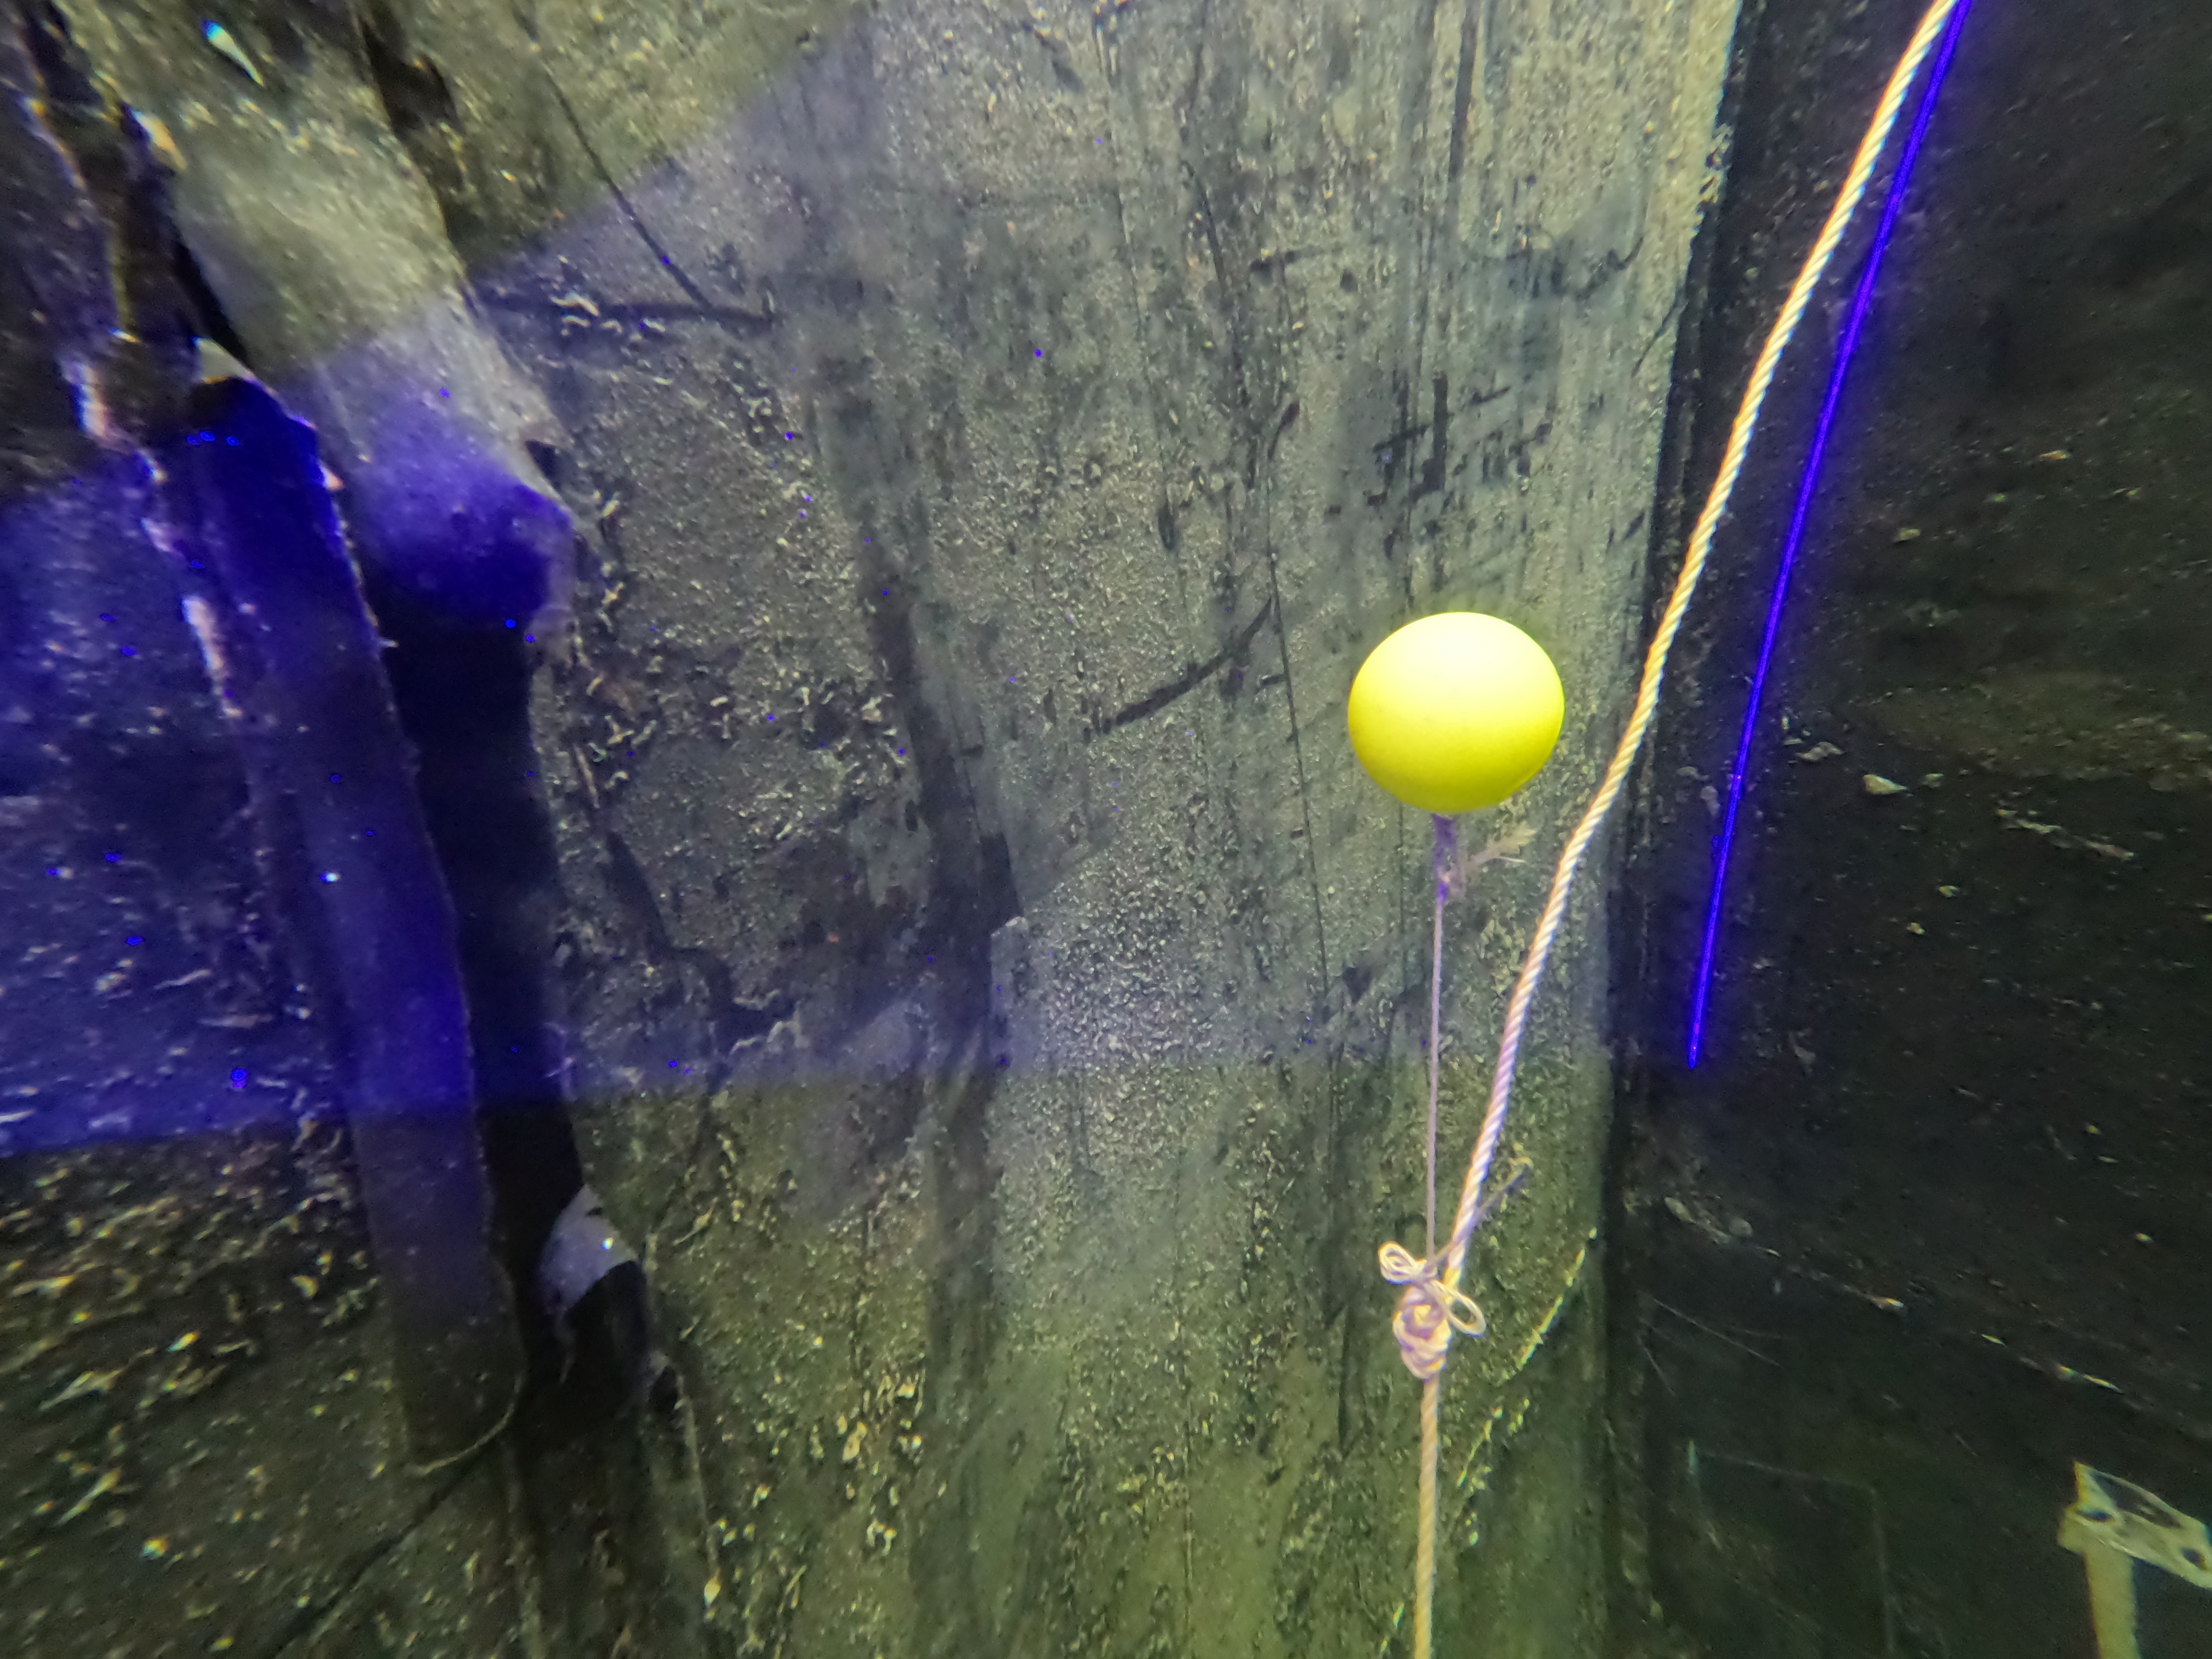

Supplement: Supplementary file 2002 [file G0034394.pdf › 5/G0034394.pdf]

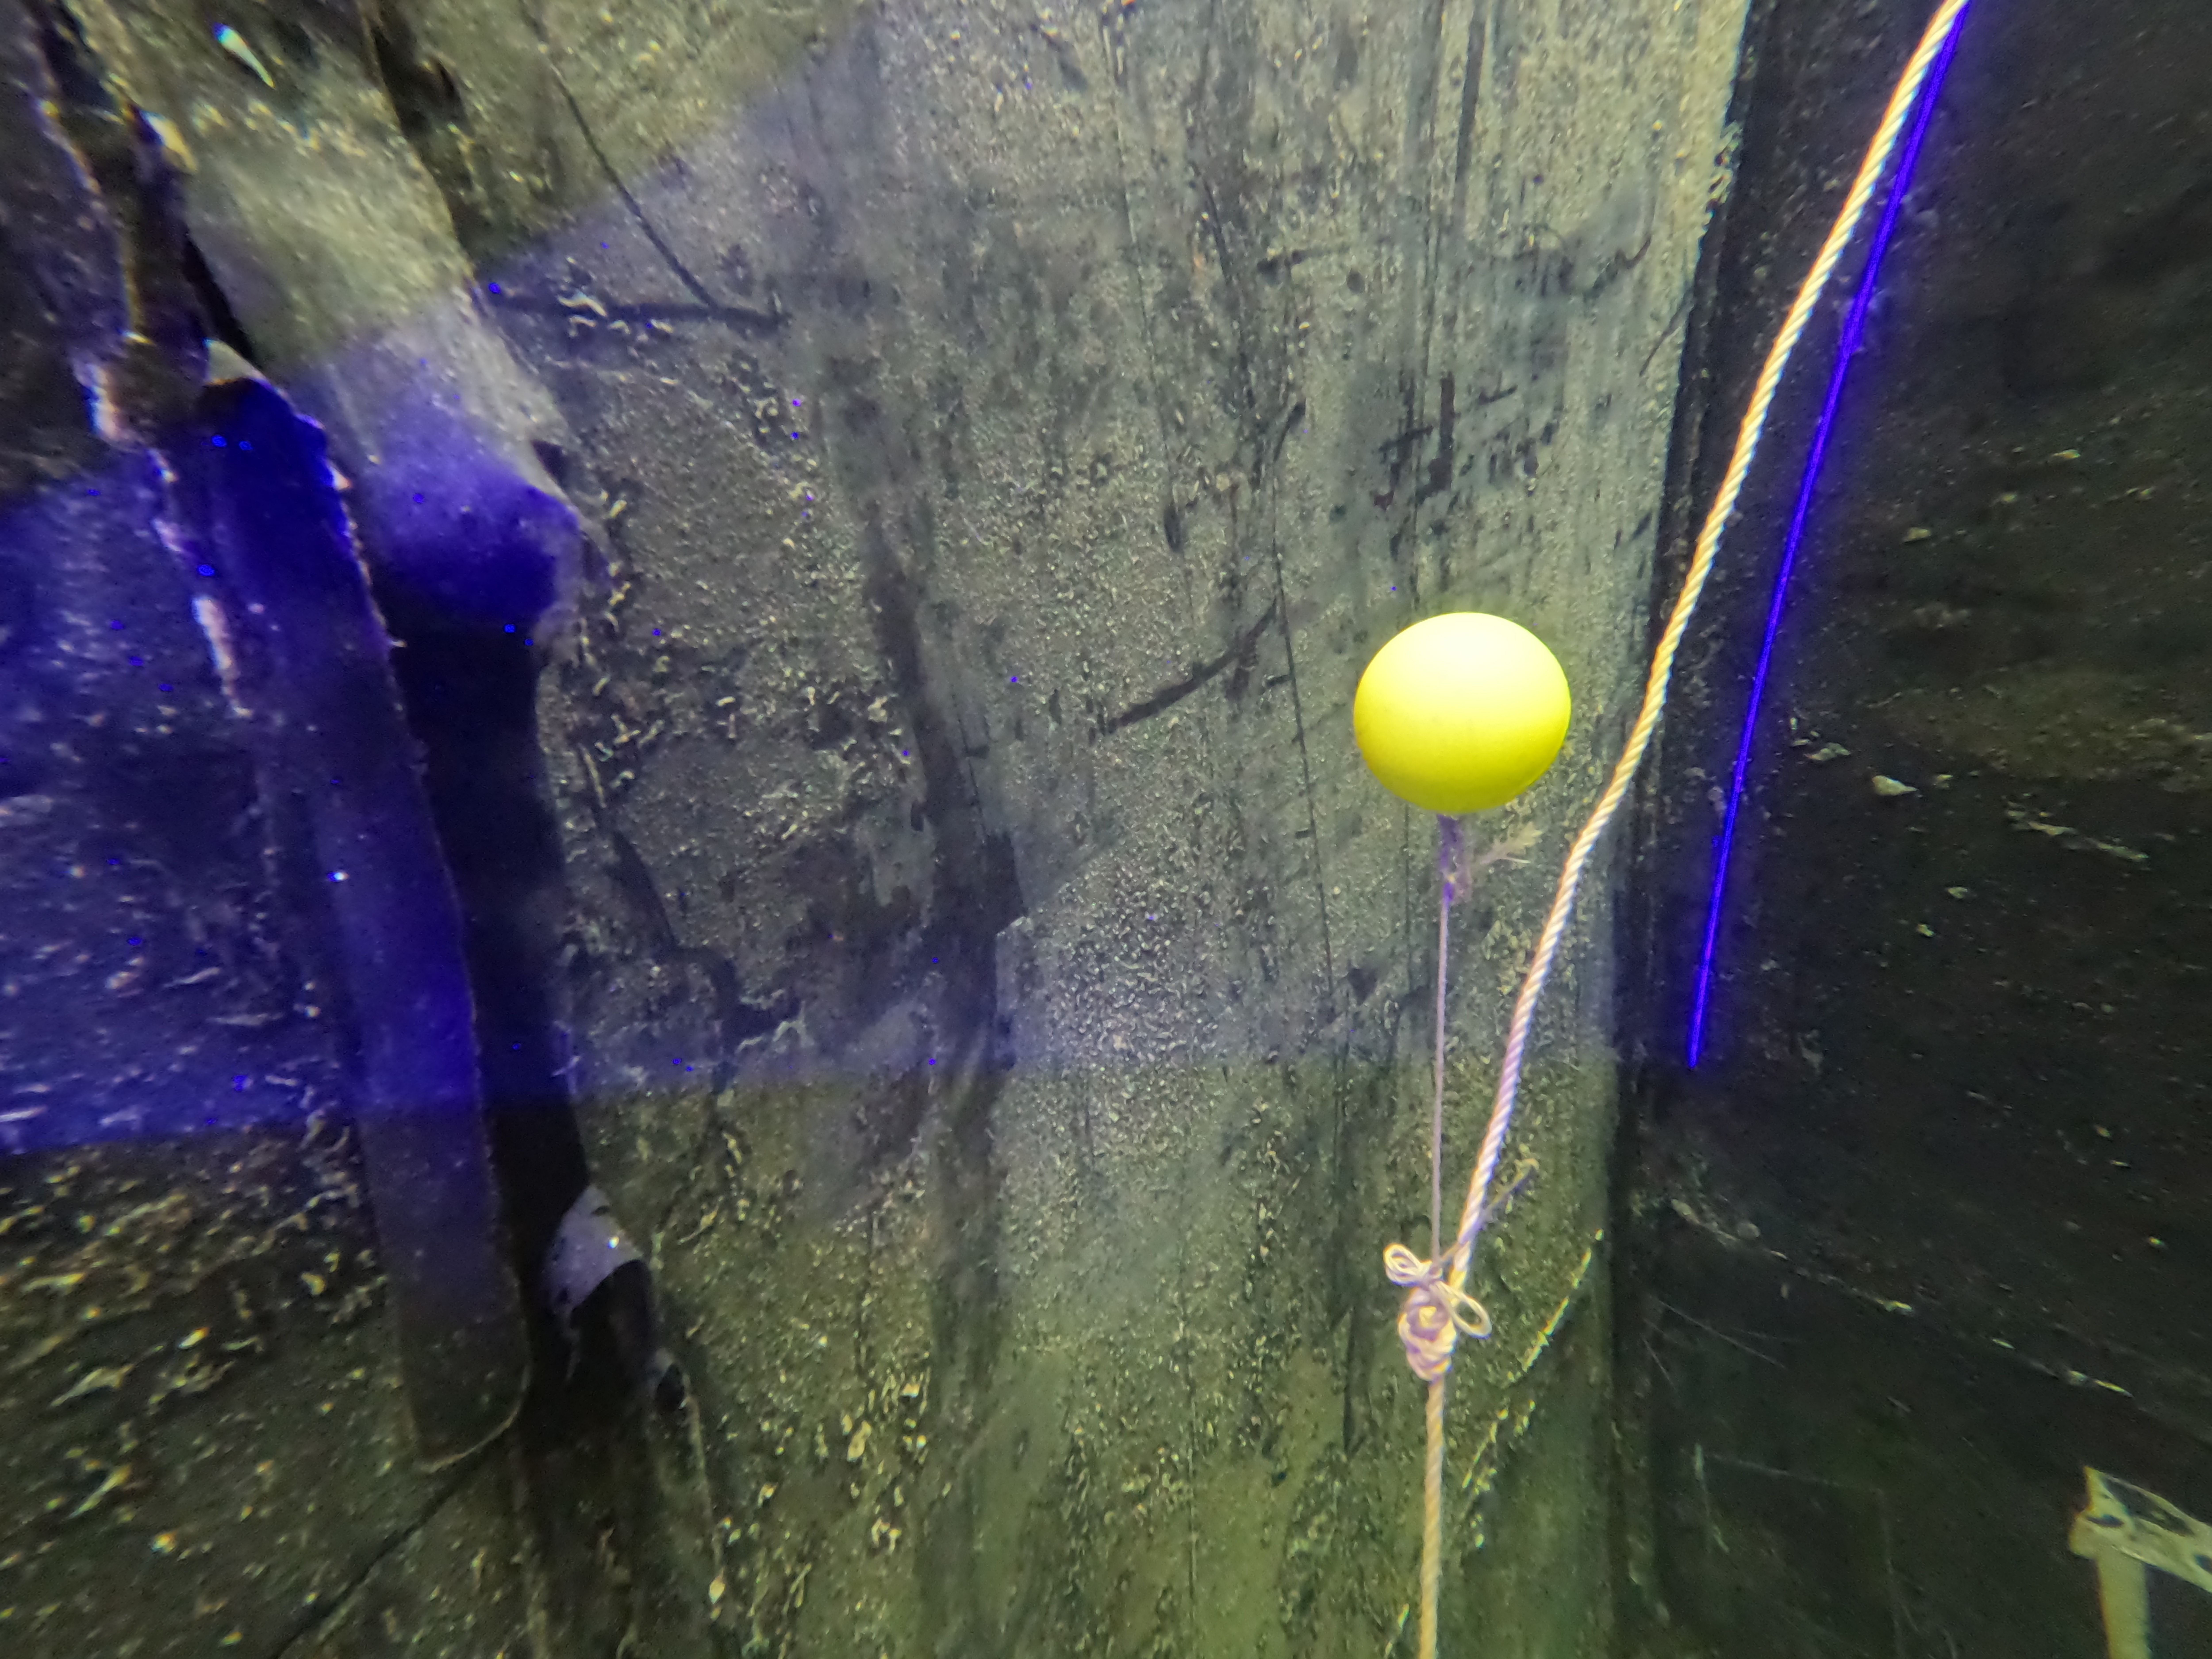

Supplement: Supplementary file 2003 [file G0034395.pdf › 5/G0034395.pdf]

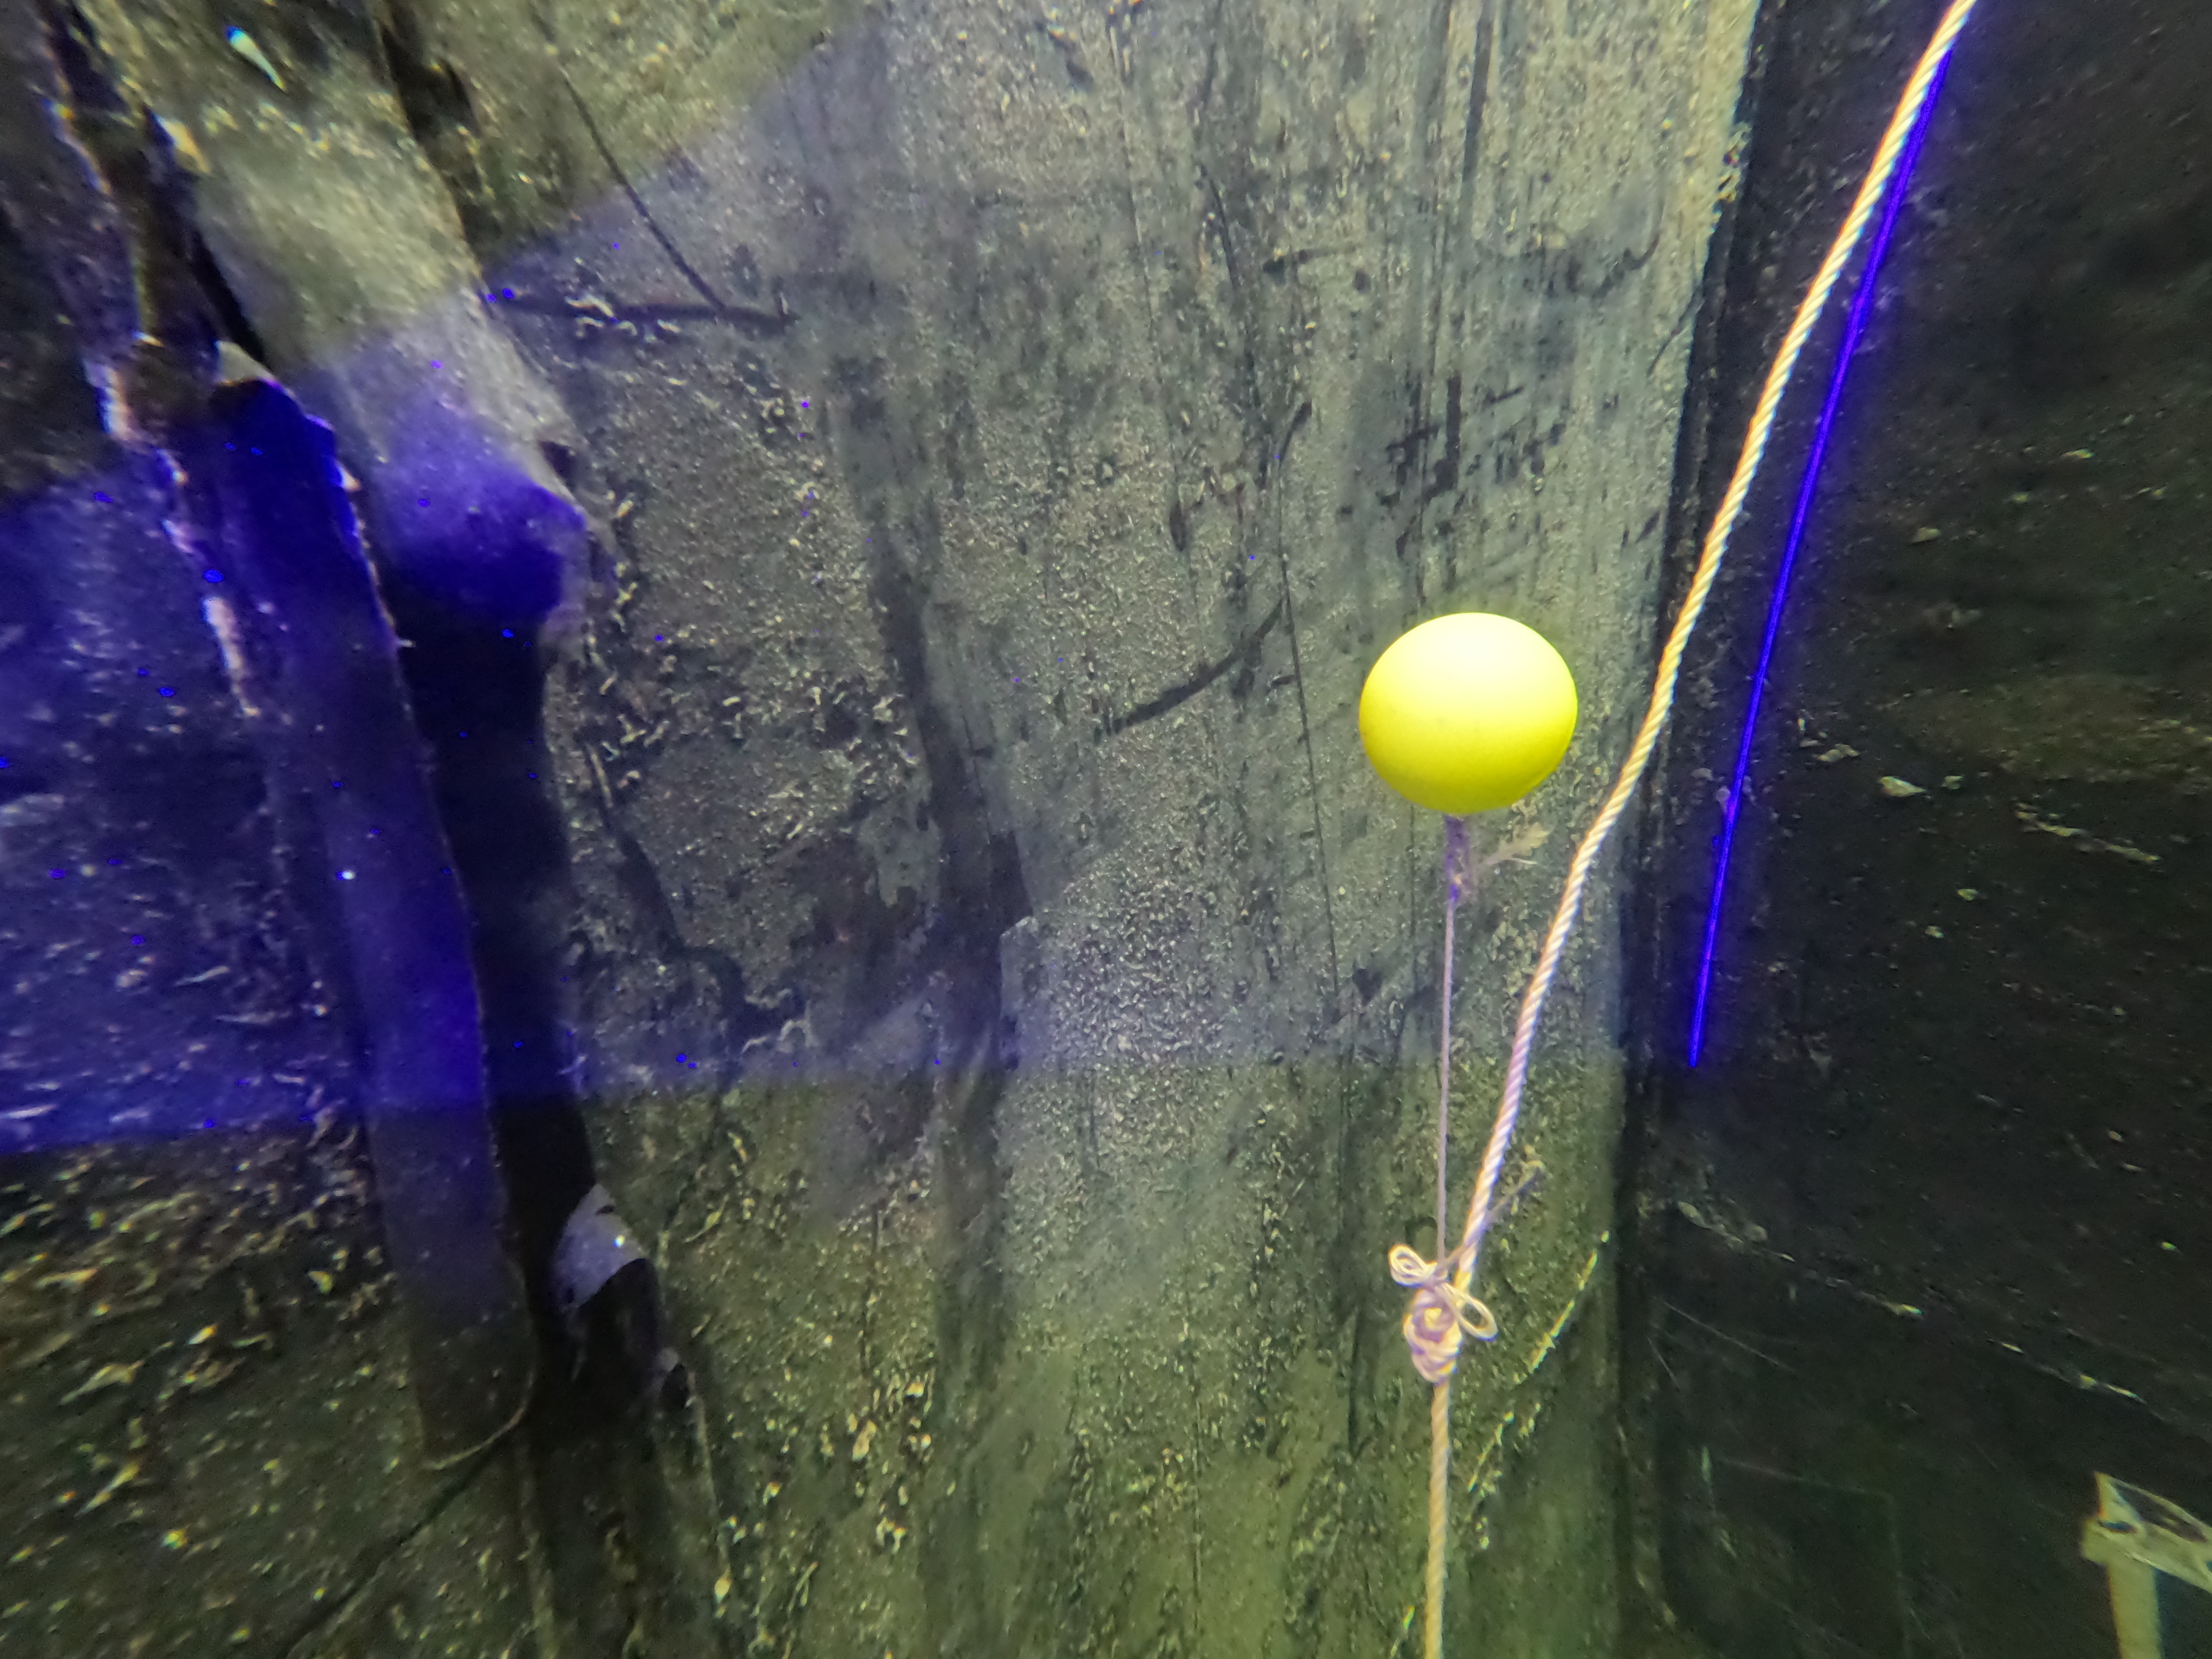

Supplement: Supplementary file 2004 [file G0034396.pdf › 5/G0034396.pdf]

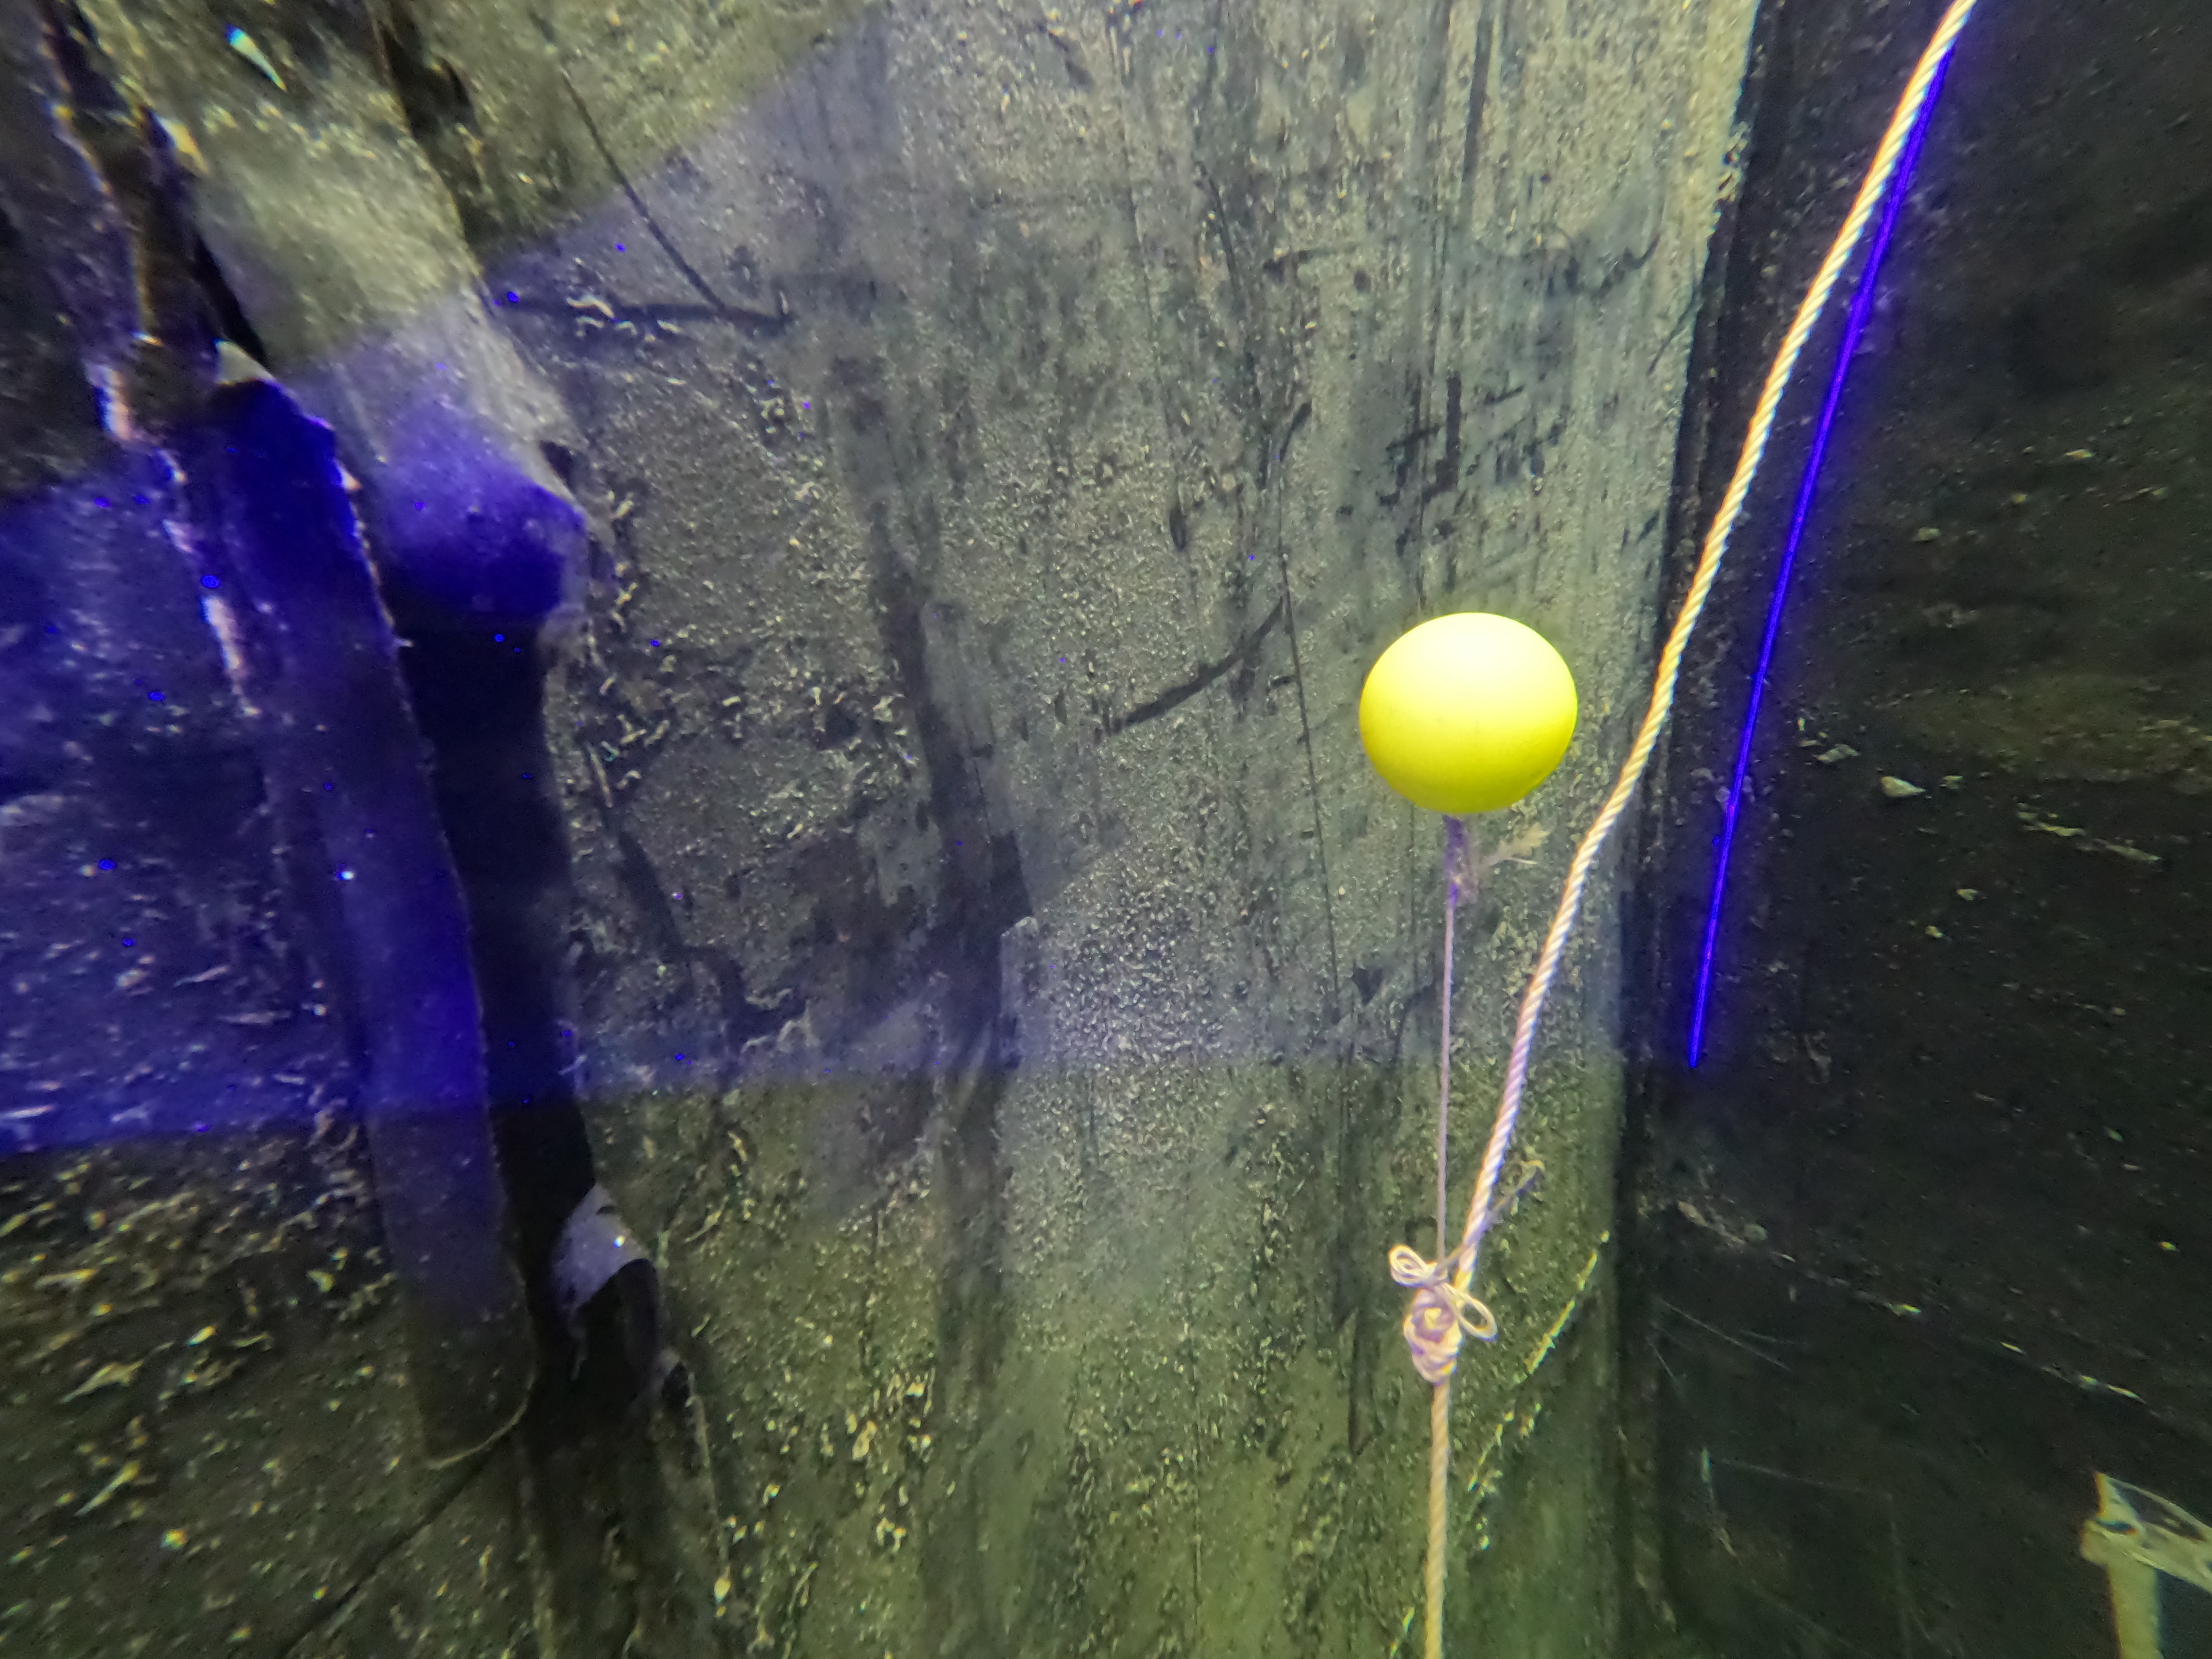

Supplement: Supplementary file 2005 [file G0034397.pdf › 5/G0034397.pdf]

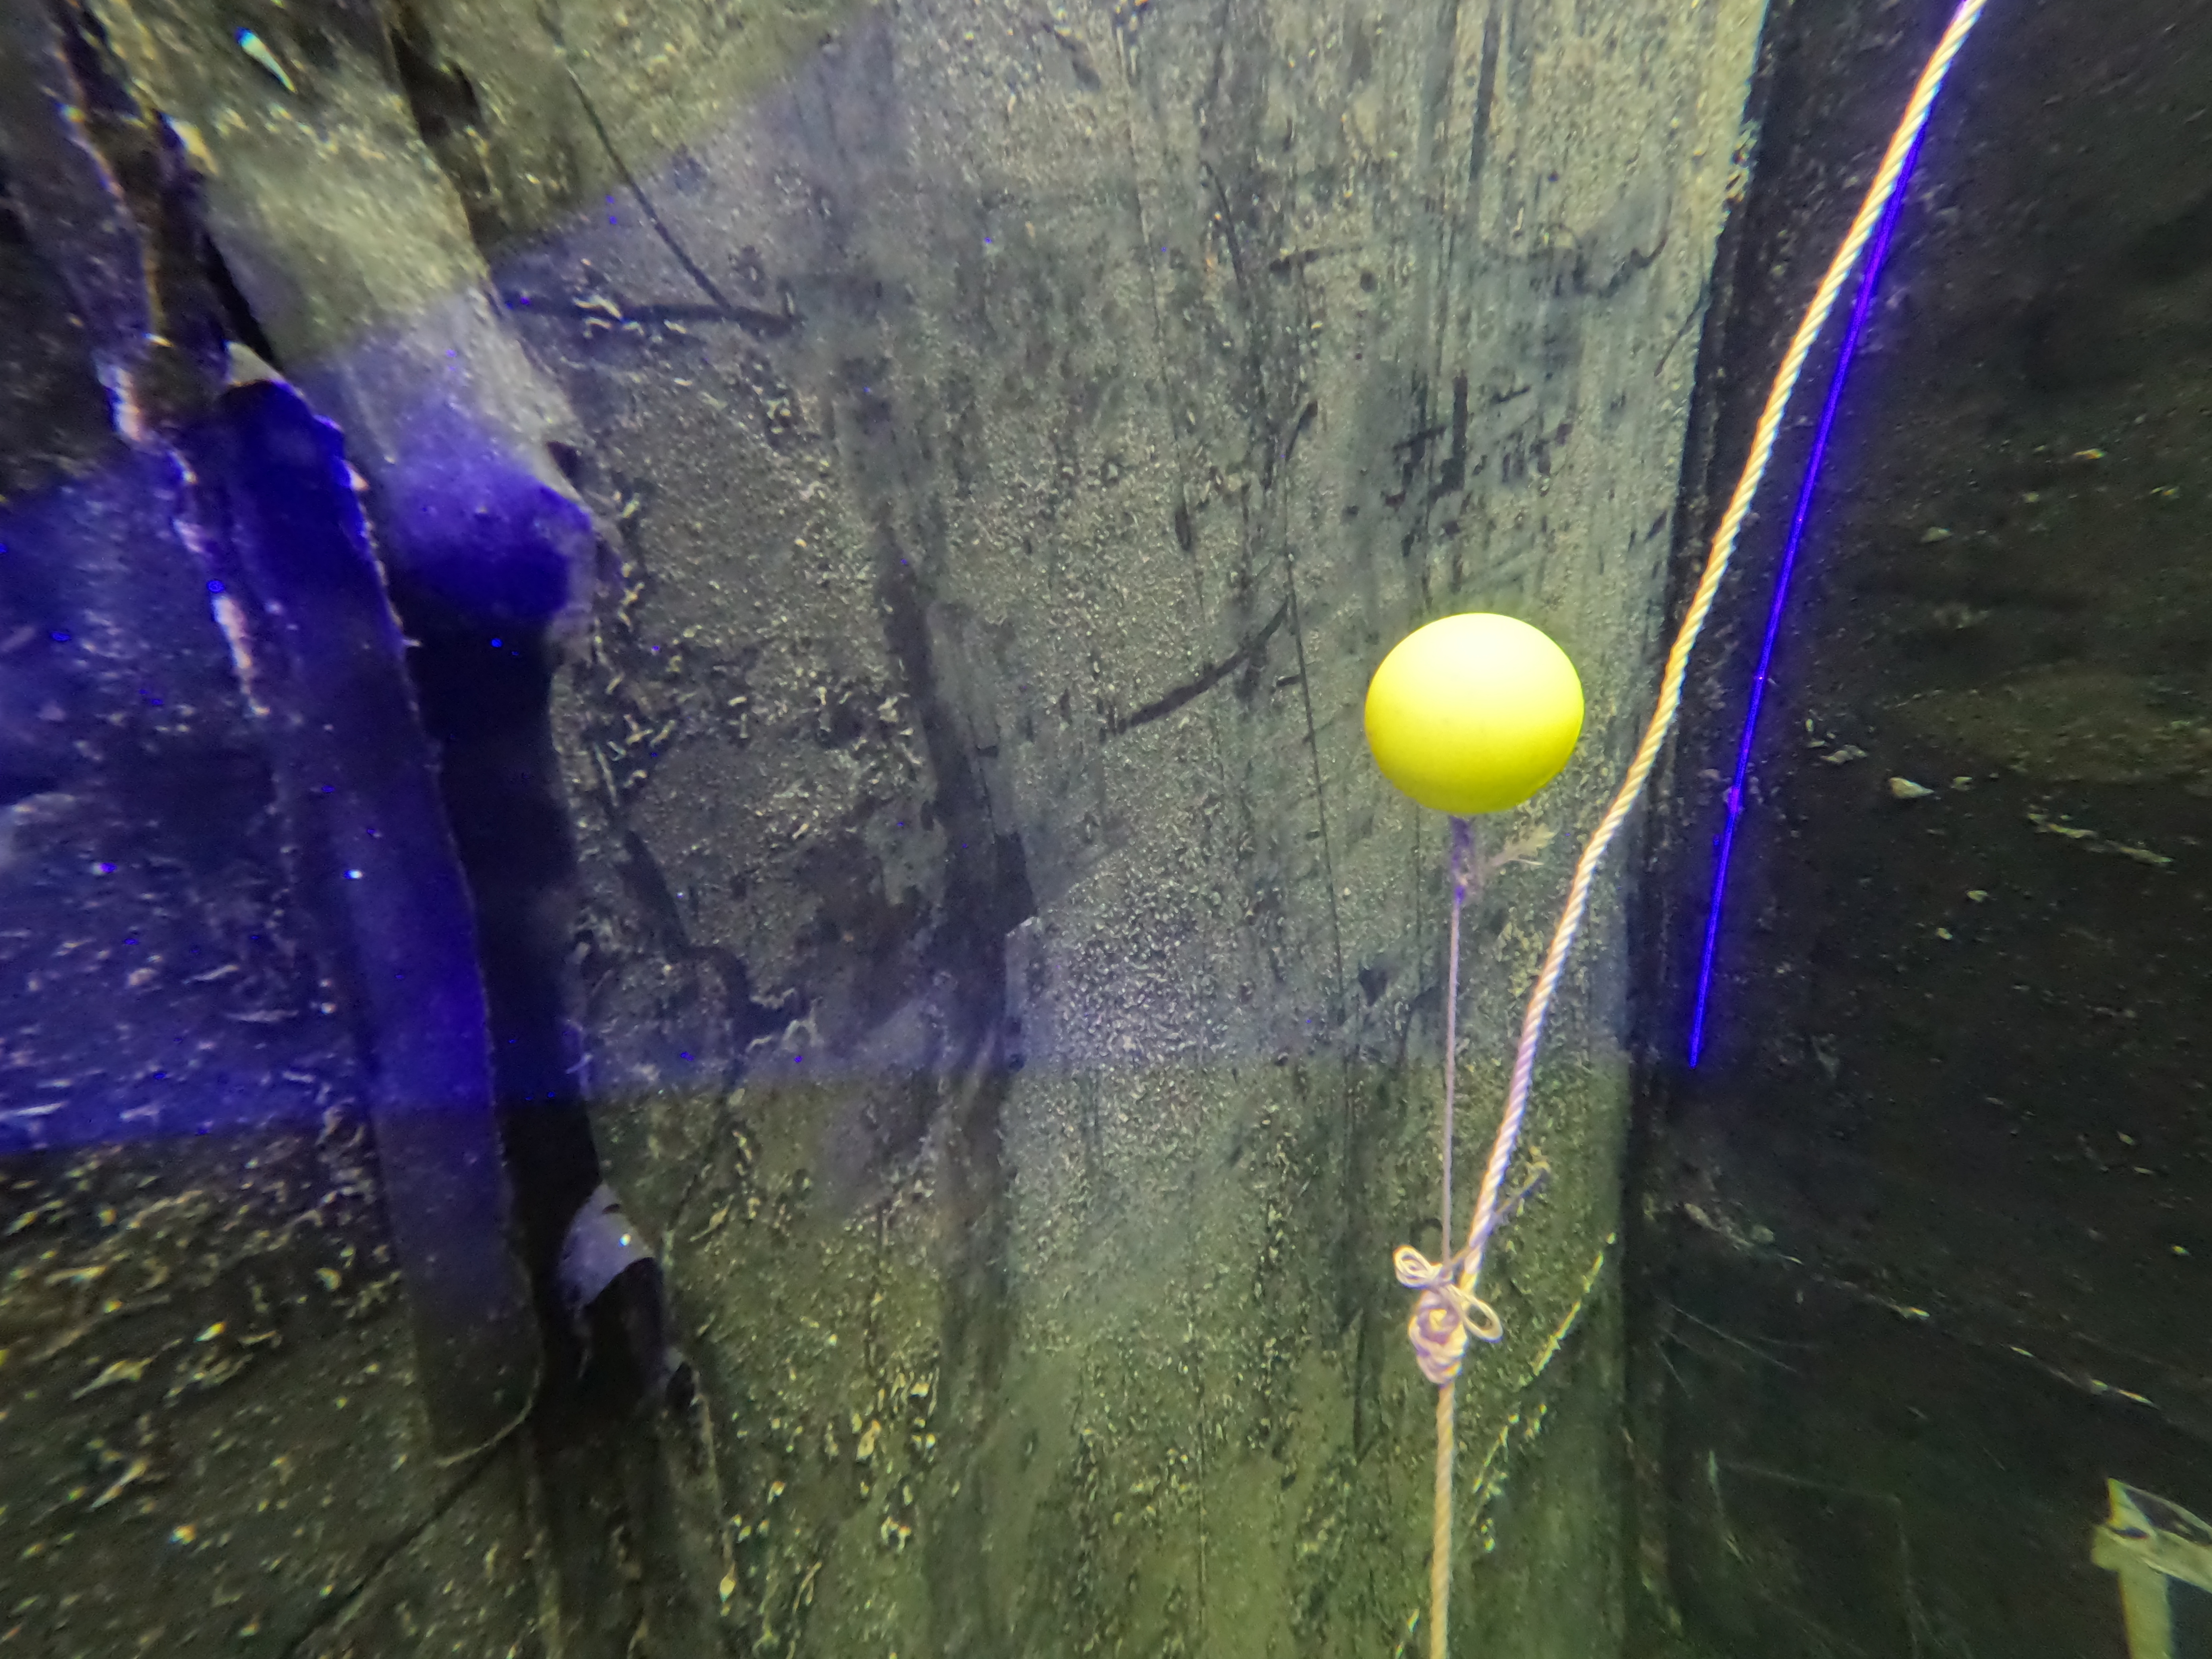

Supplement: Supplementary file 2006 [file G0034398.pdf › 5/G0034398.pdf]

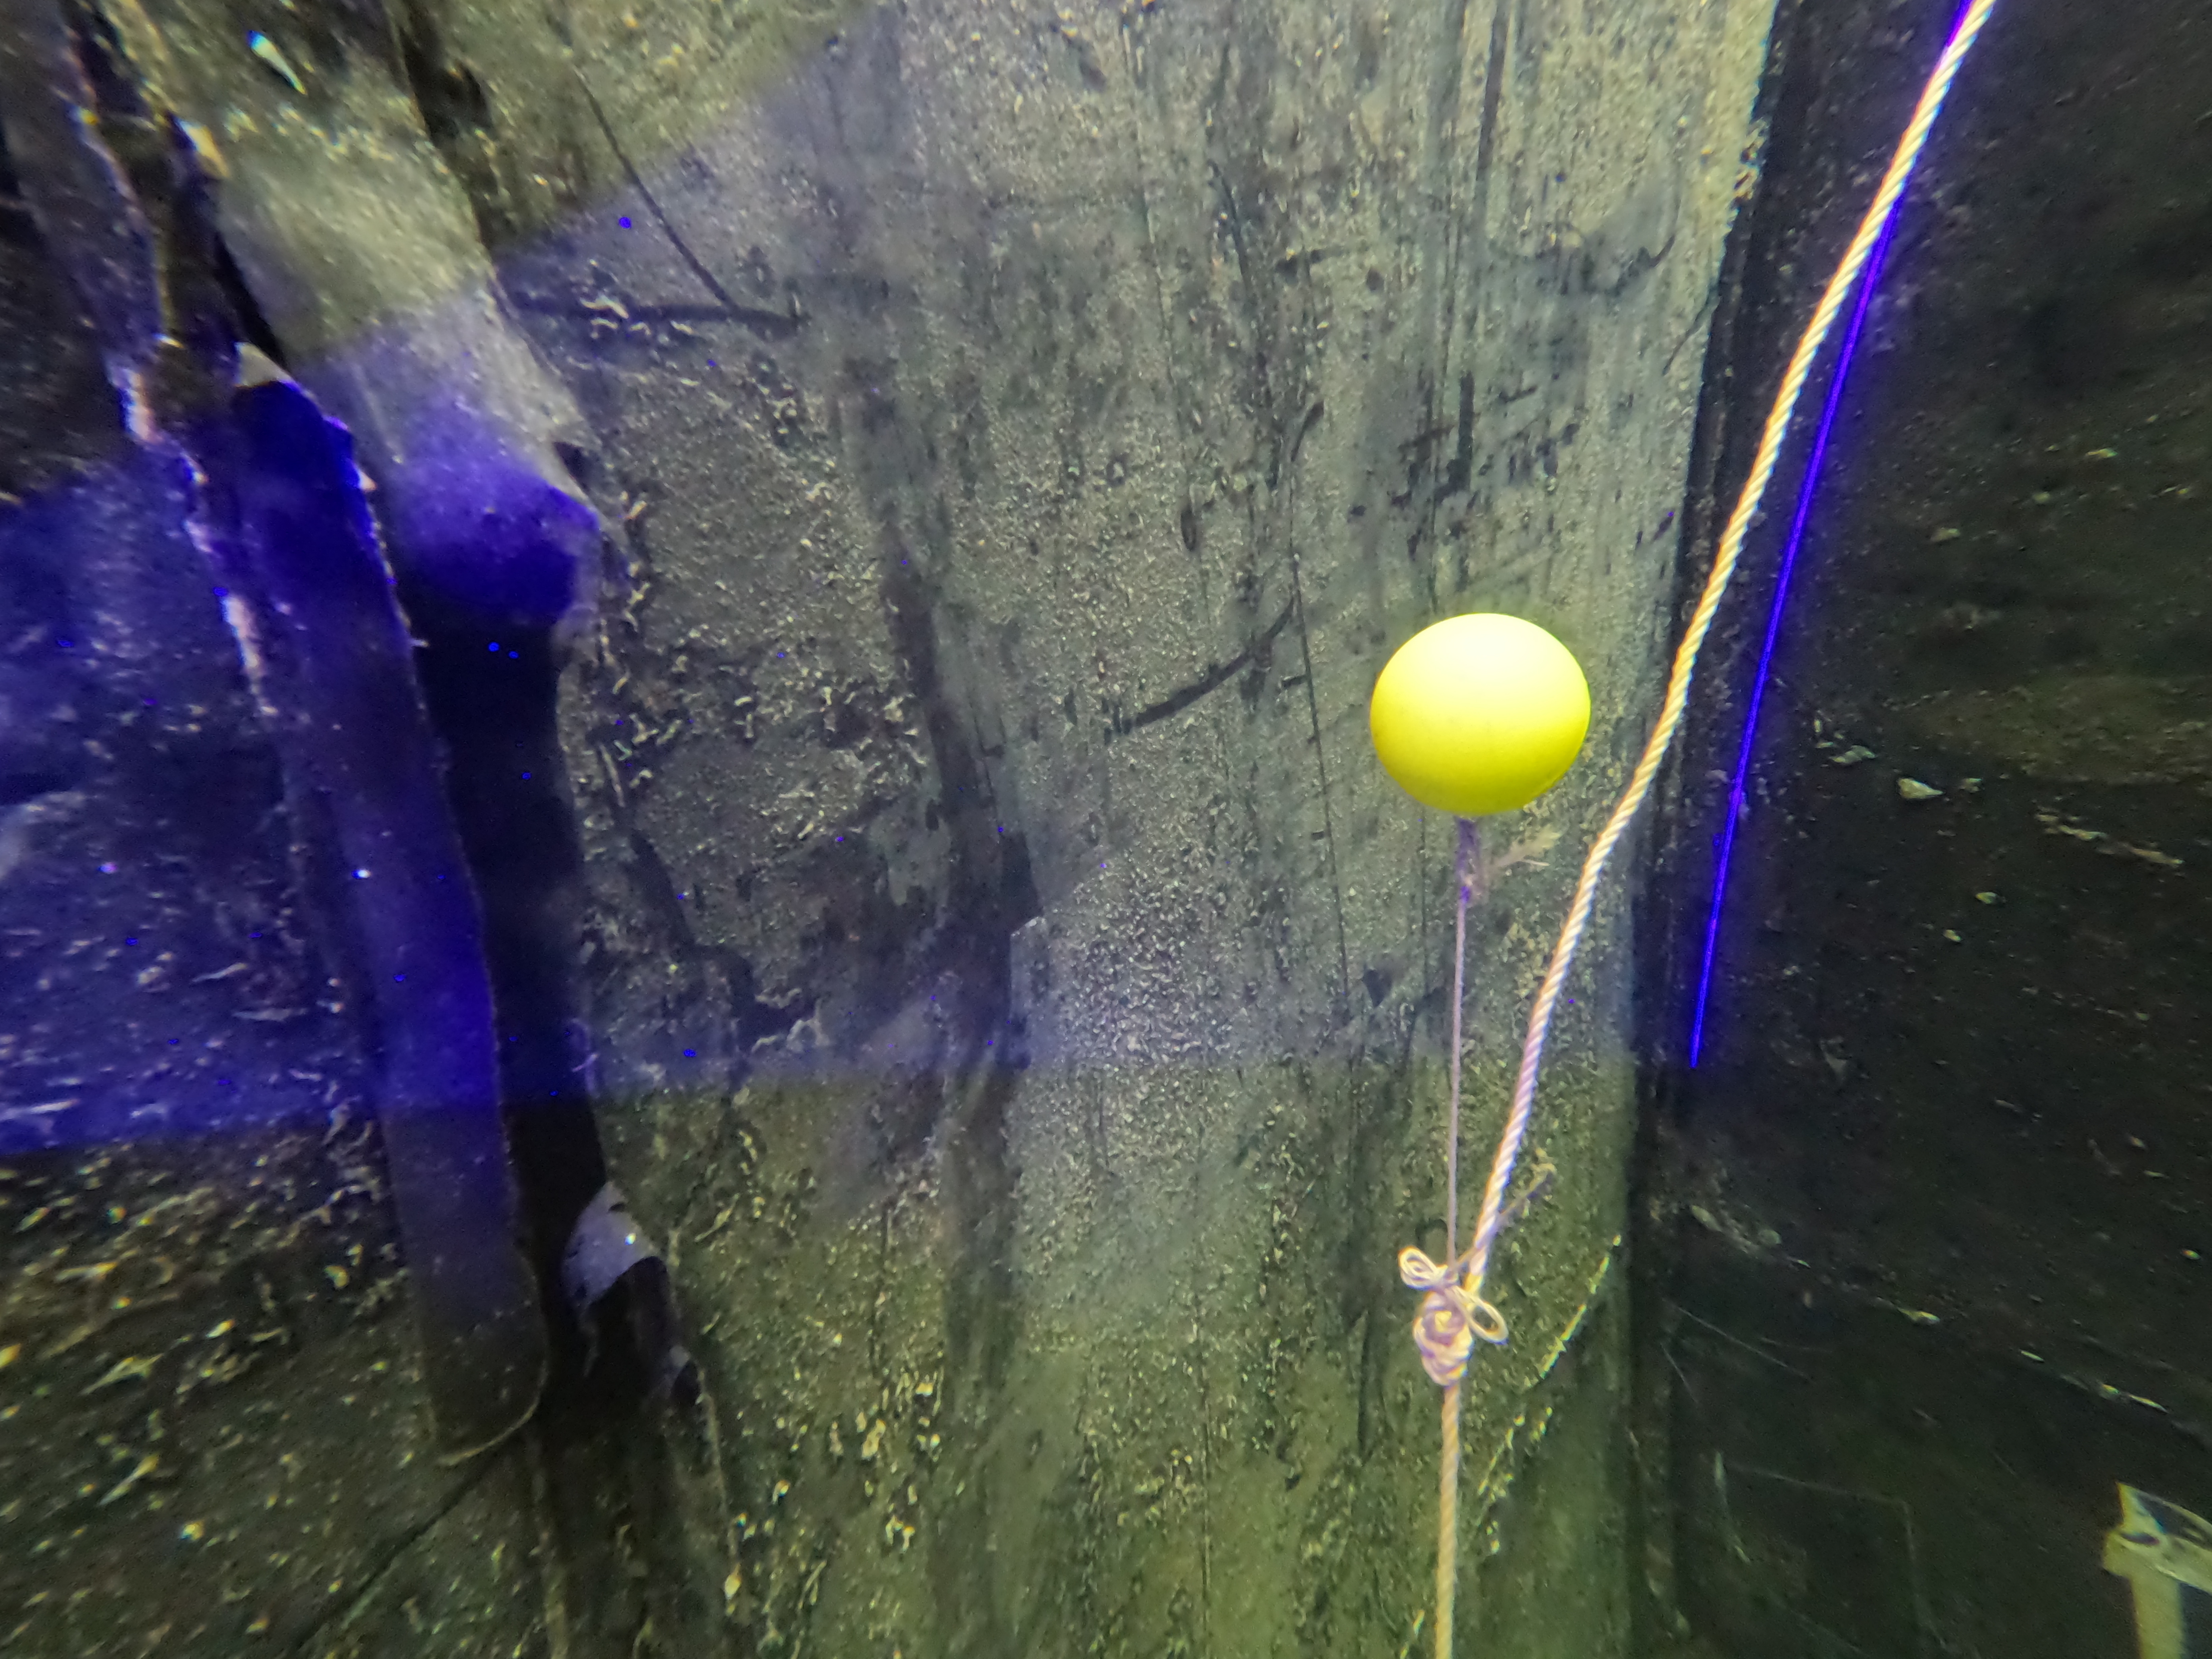

Supplement: Supplementary file 2007 [file G0034399.pdf › 5/G0034399.pdf]

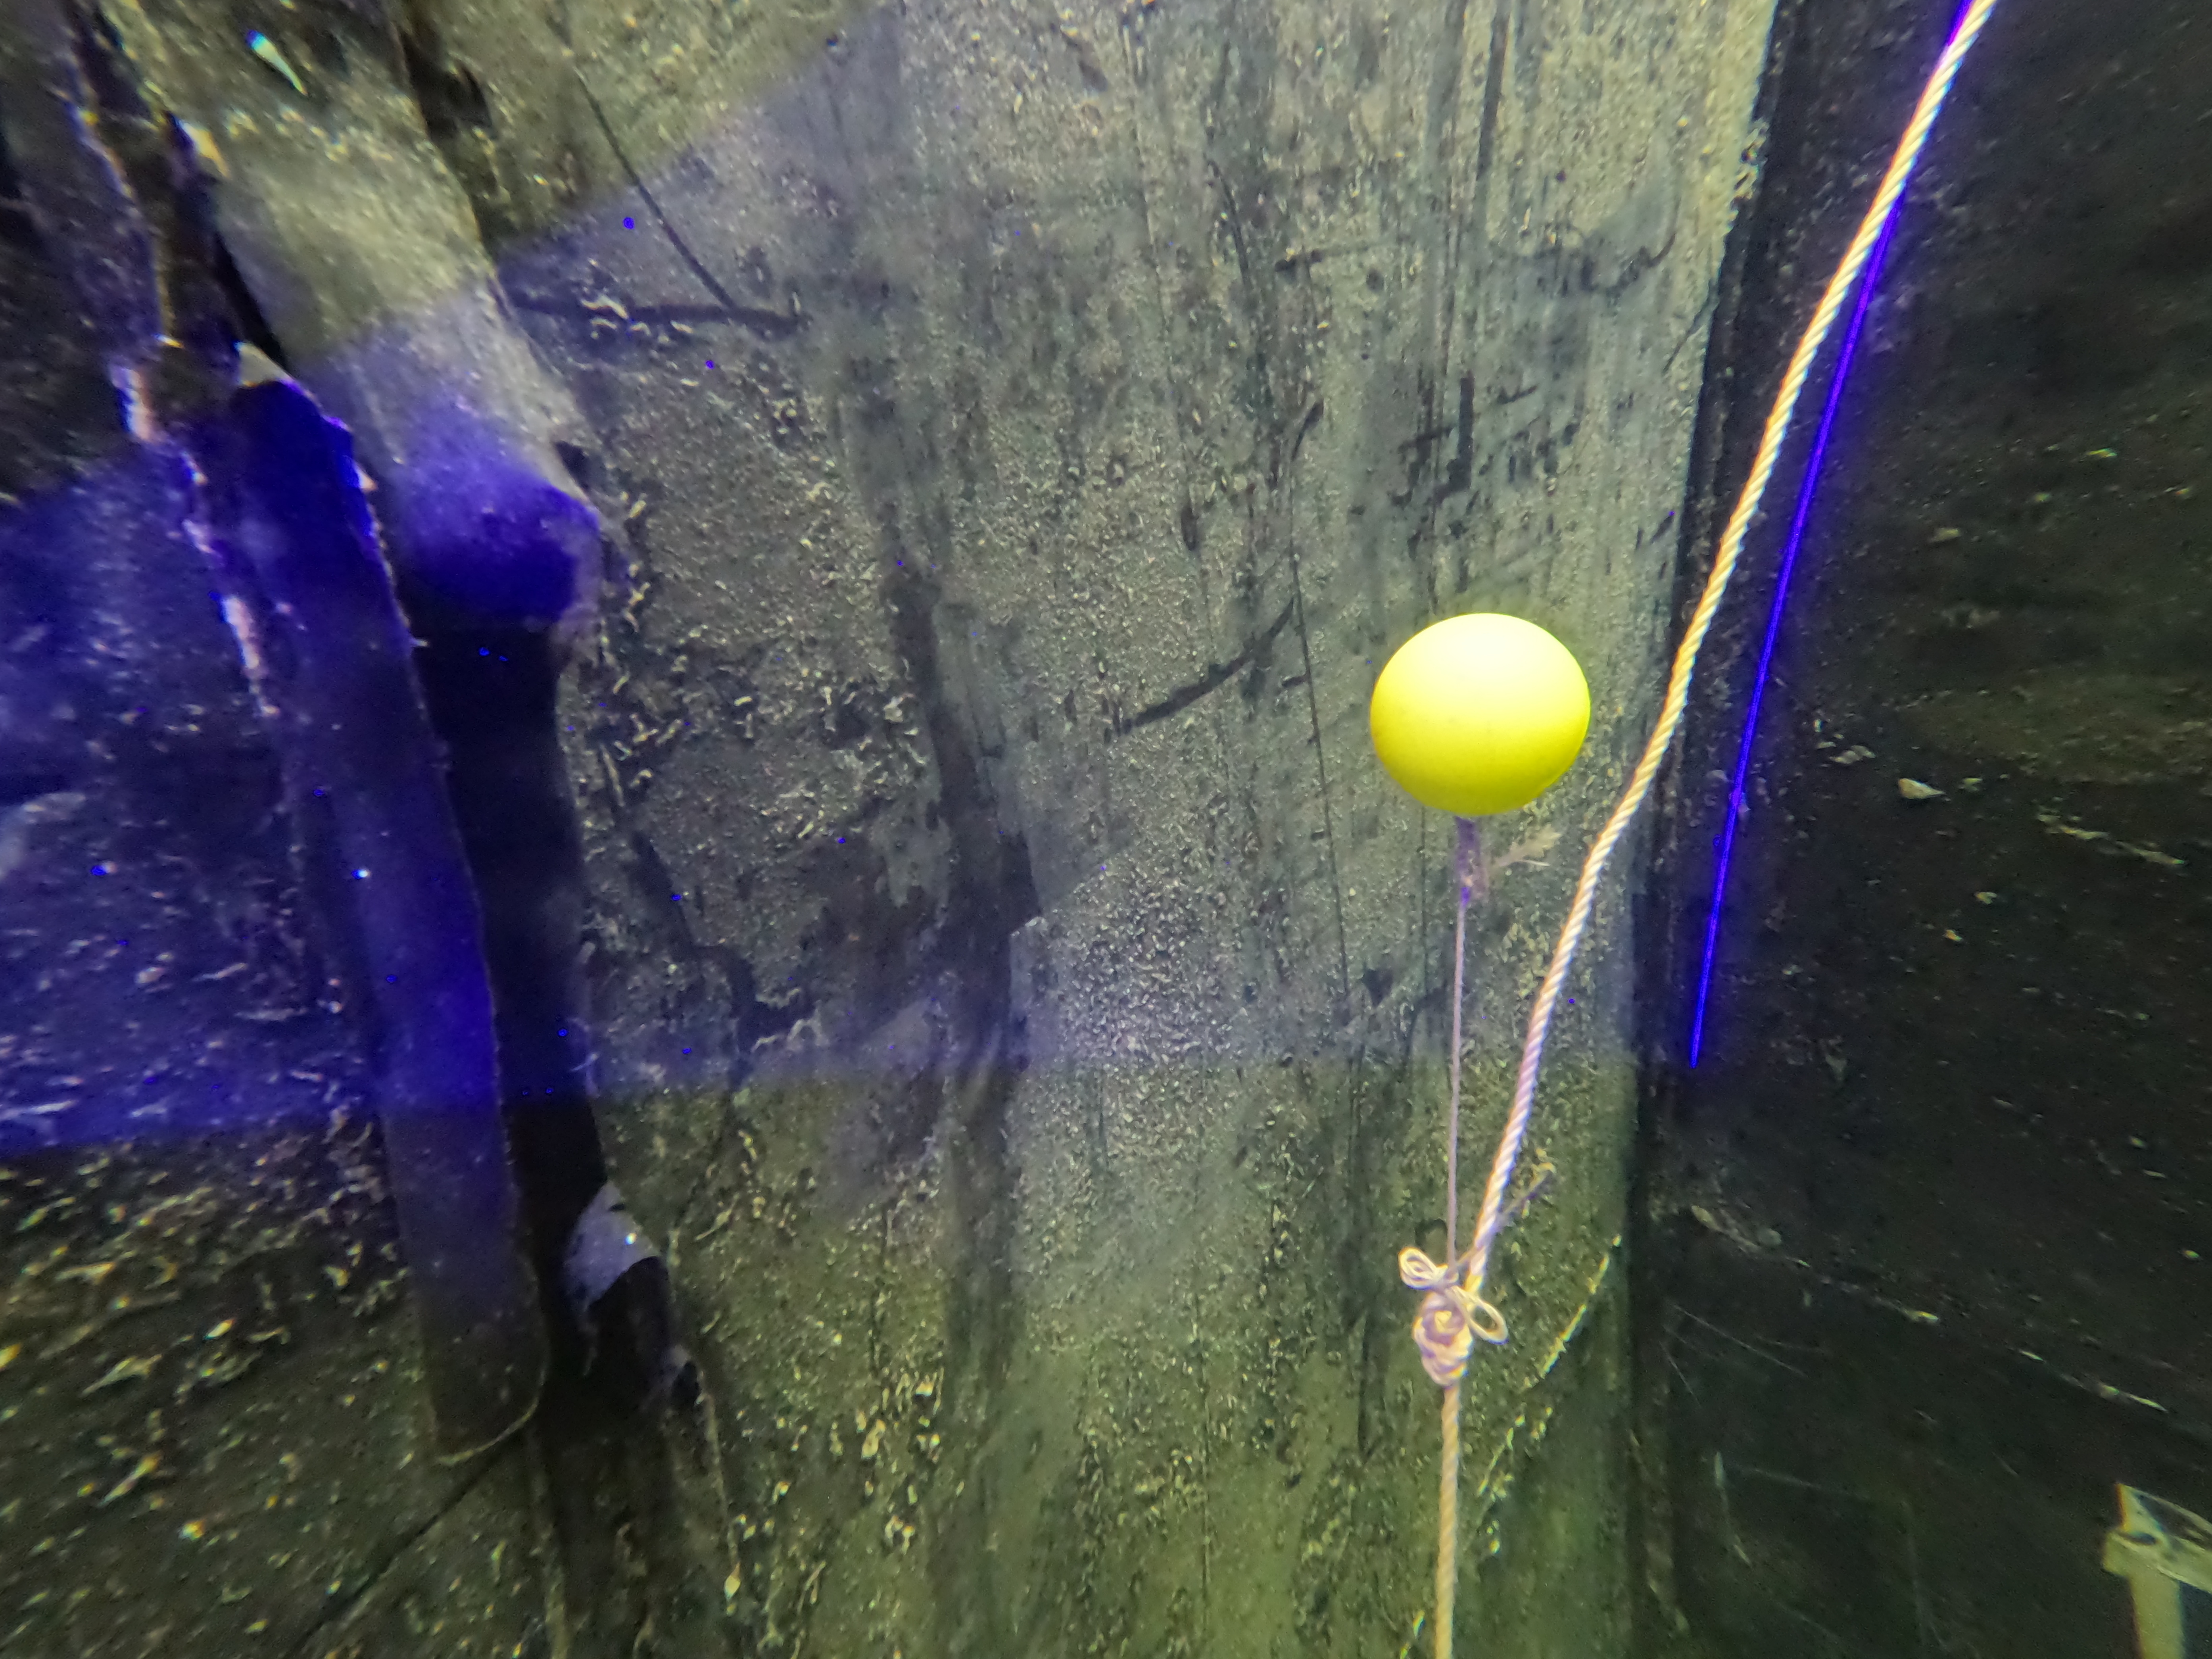

Supplement: Supplementary file 2008 [file G0034400.pdf › 5/G0034400.pdf]

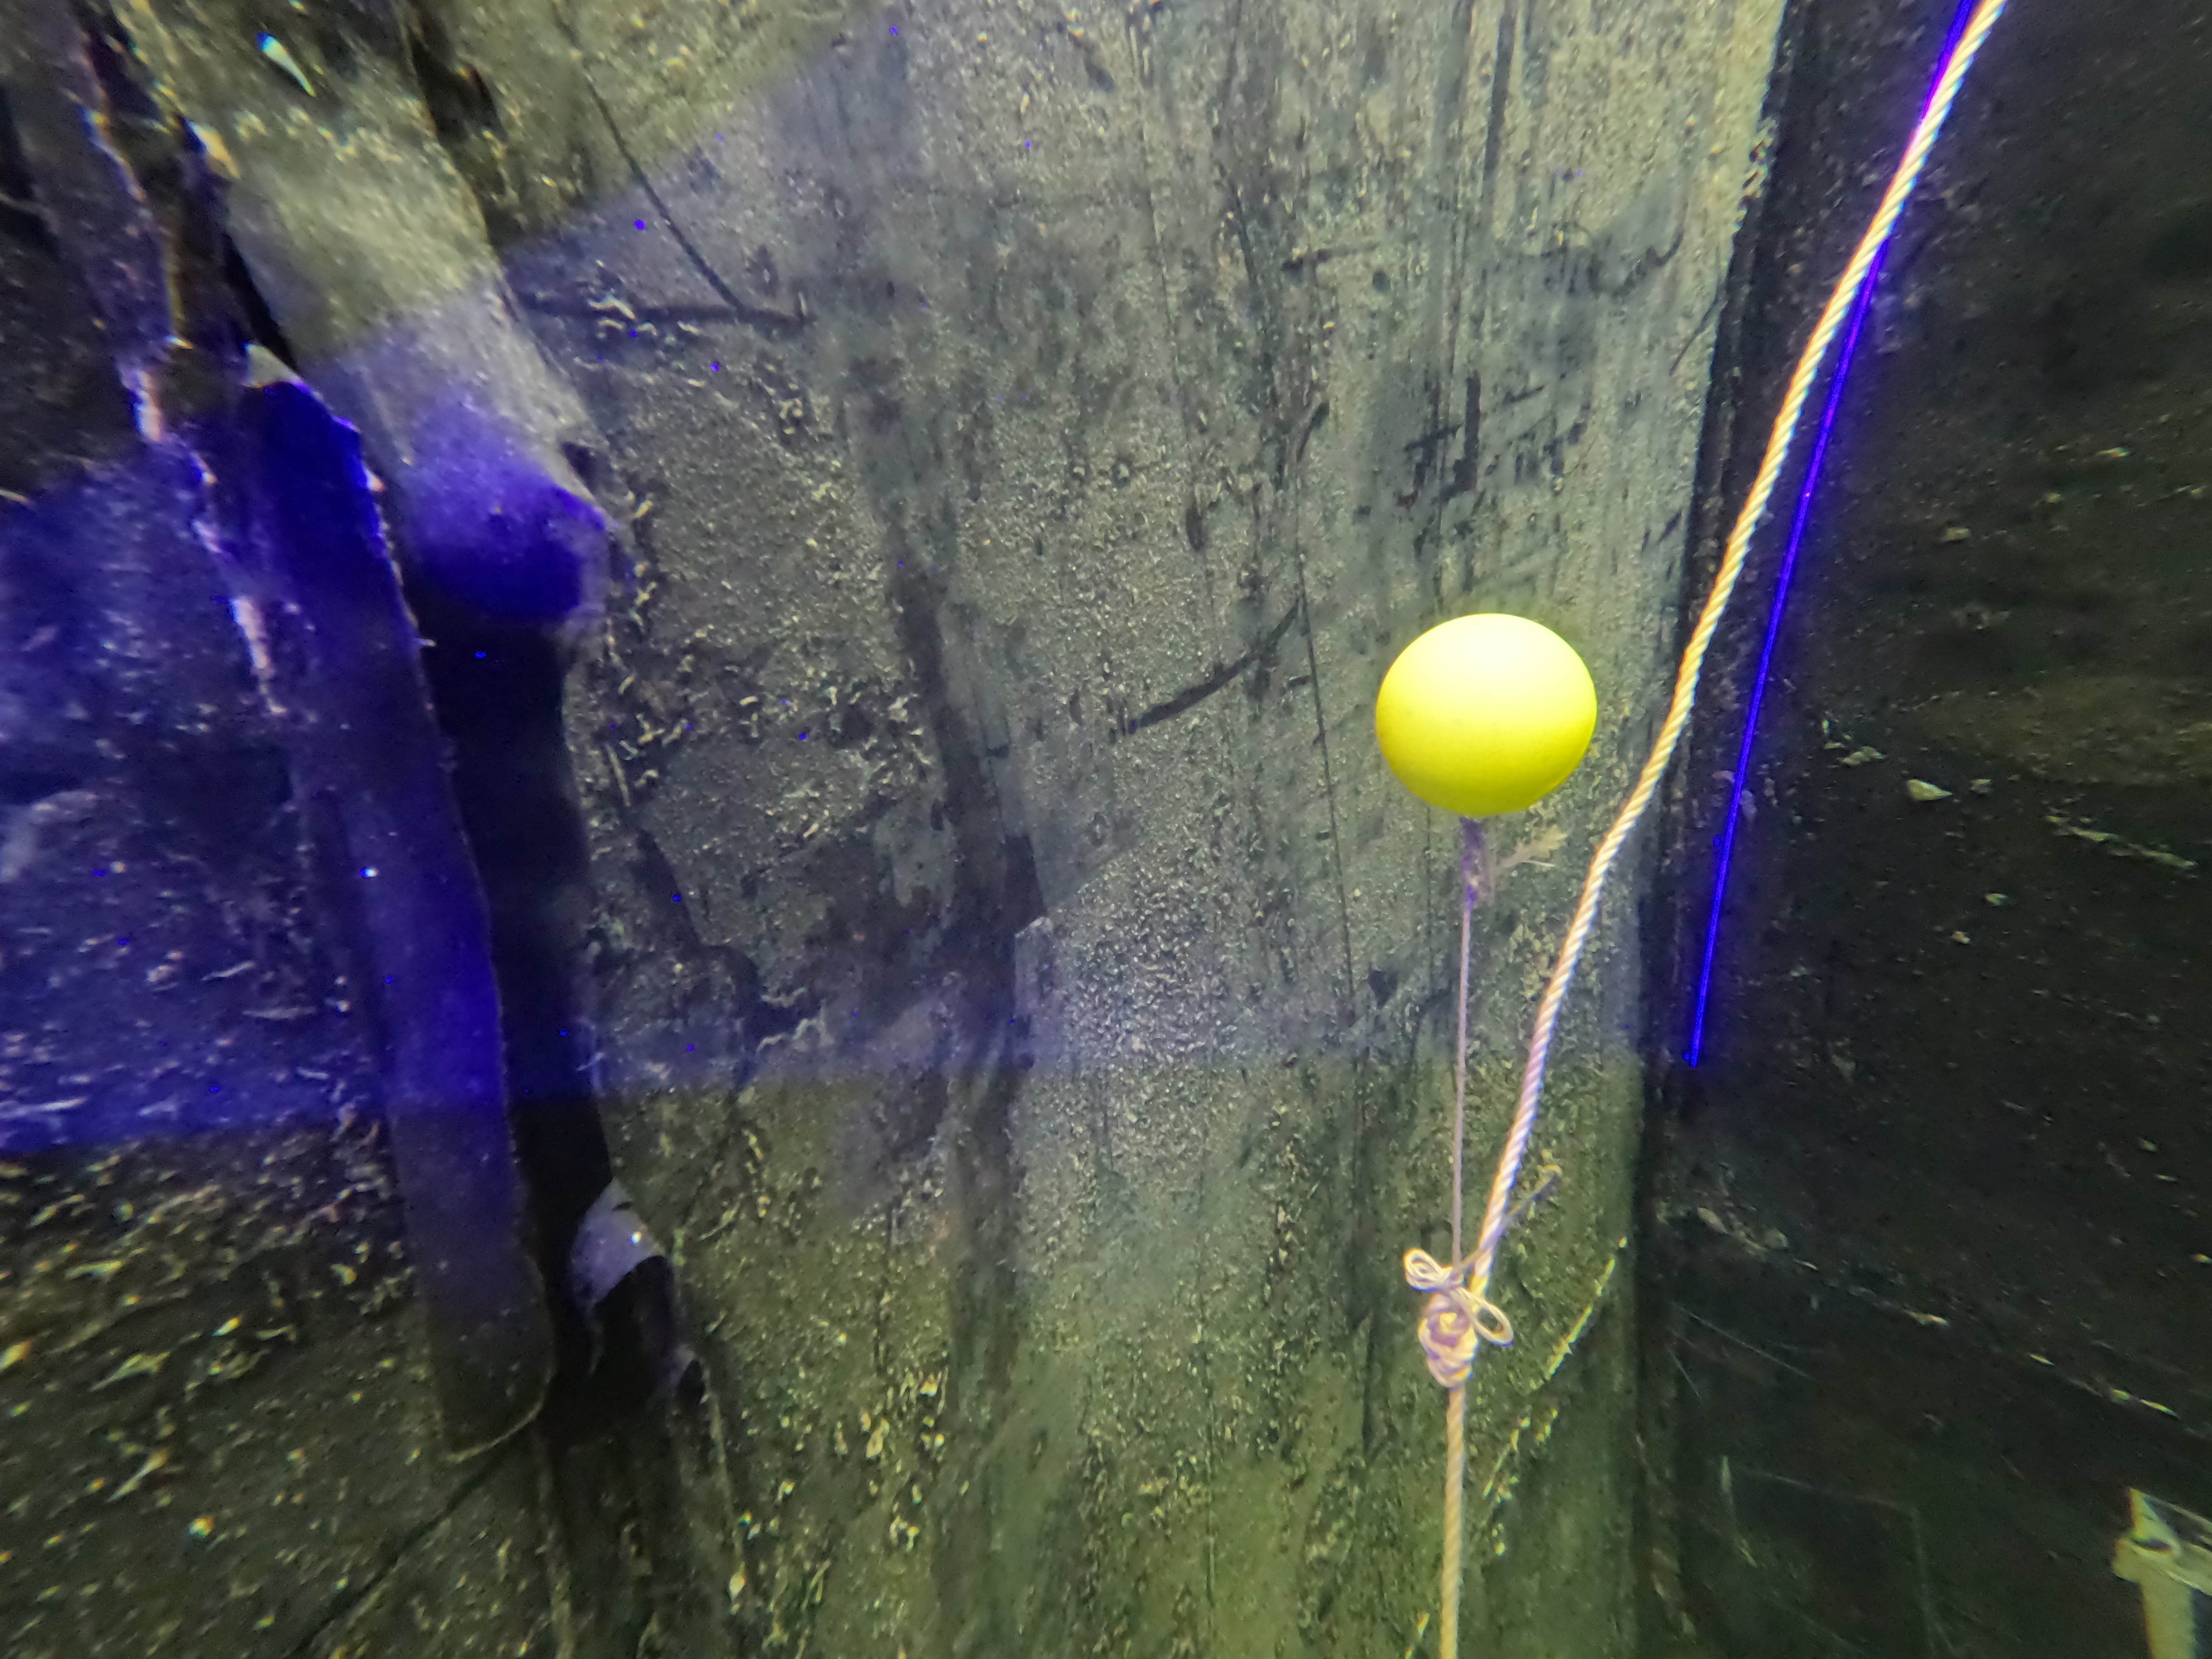

Supplement: Supplementary file 2009 [file G0034401.pdf › 5/G0034401.pdf]

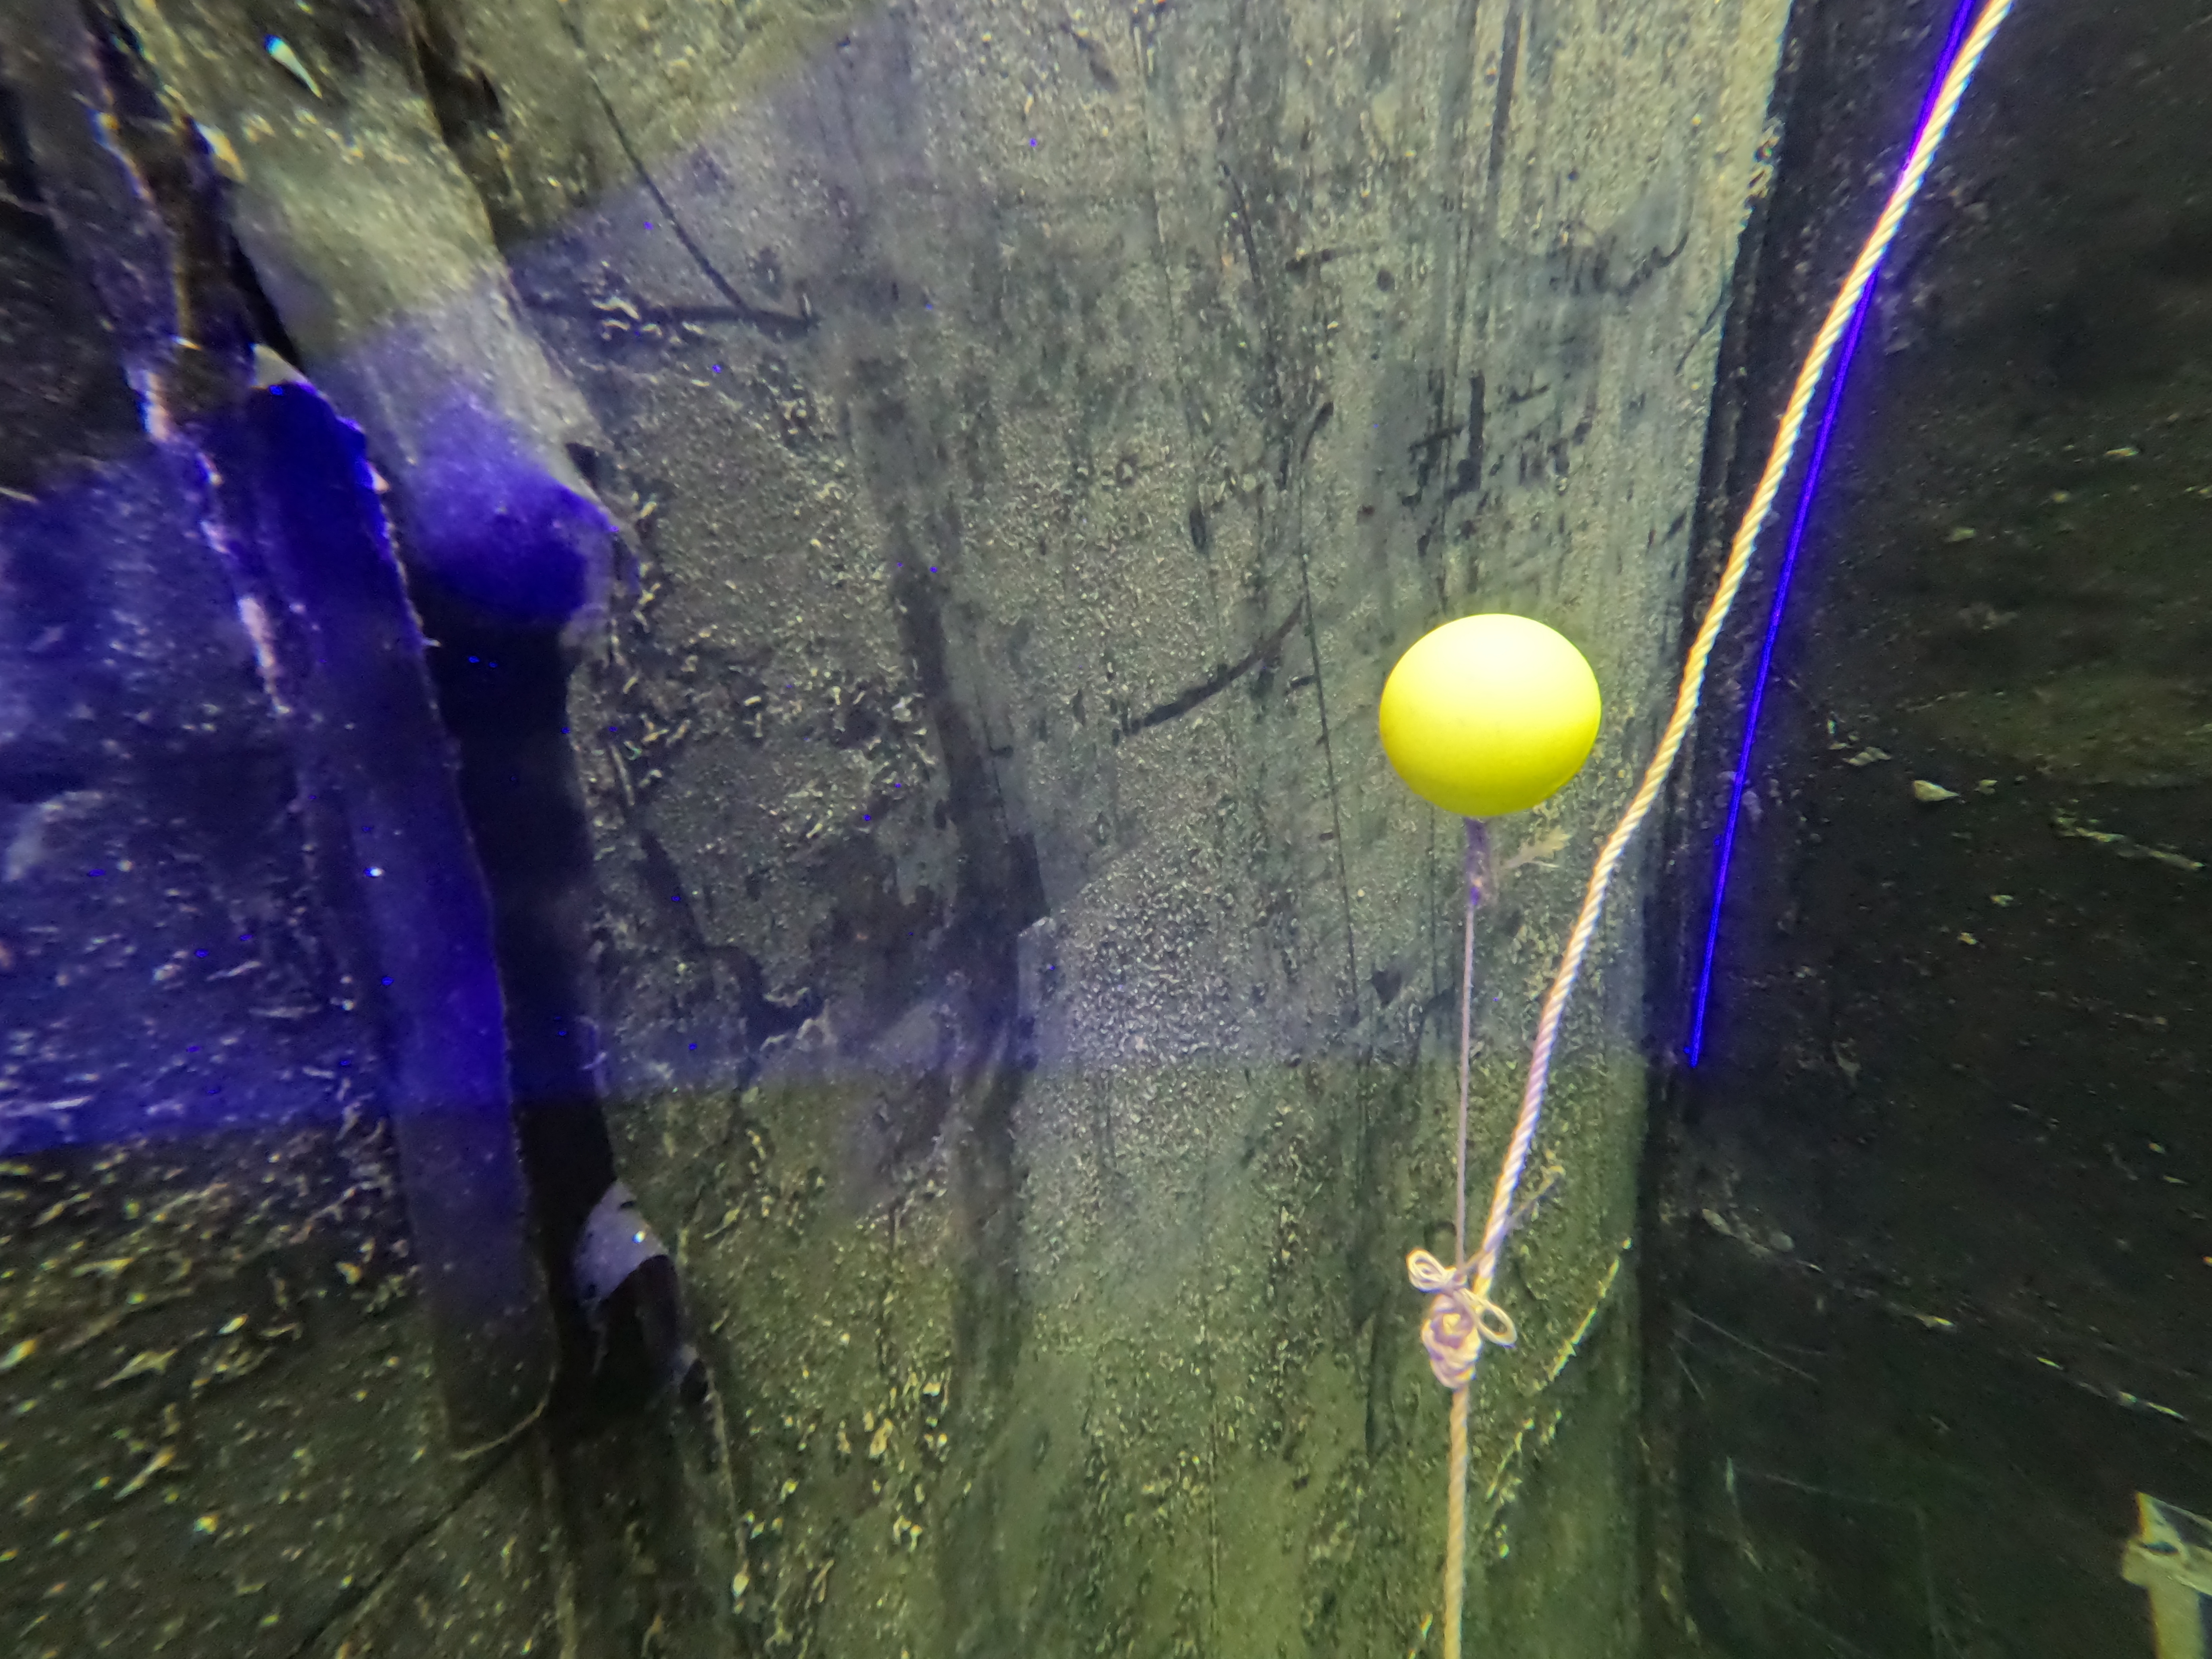

Supplement: Supplementary file 2010 [file G0034402.pdf › 5/G0034402.pdf]

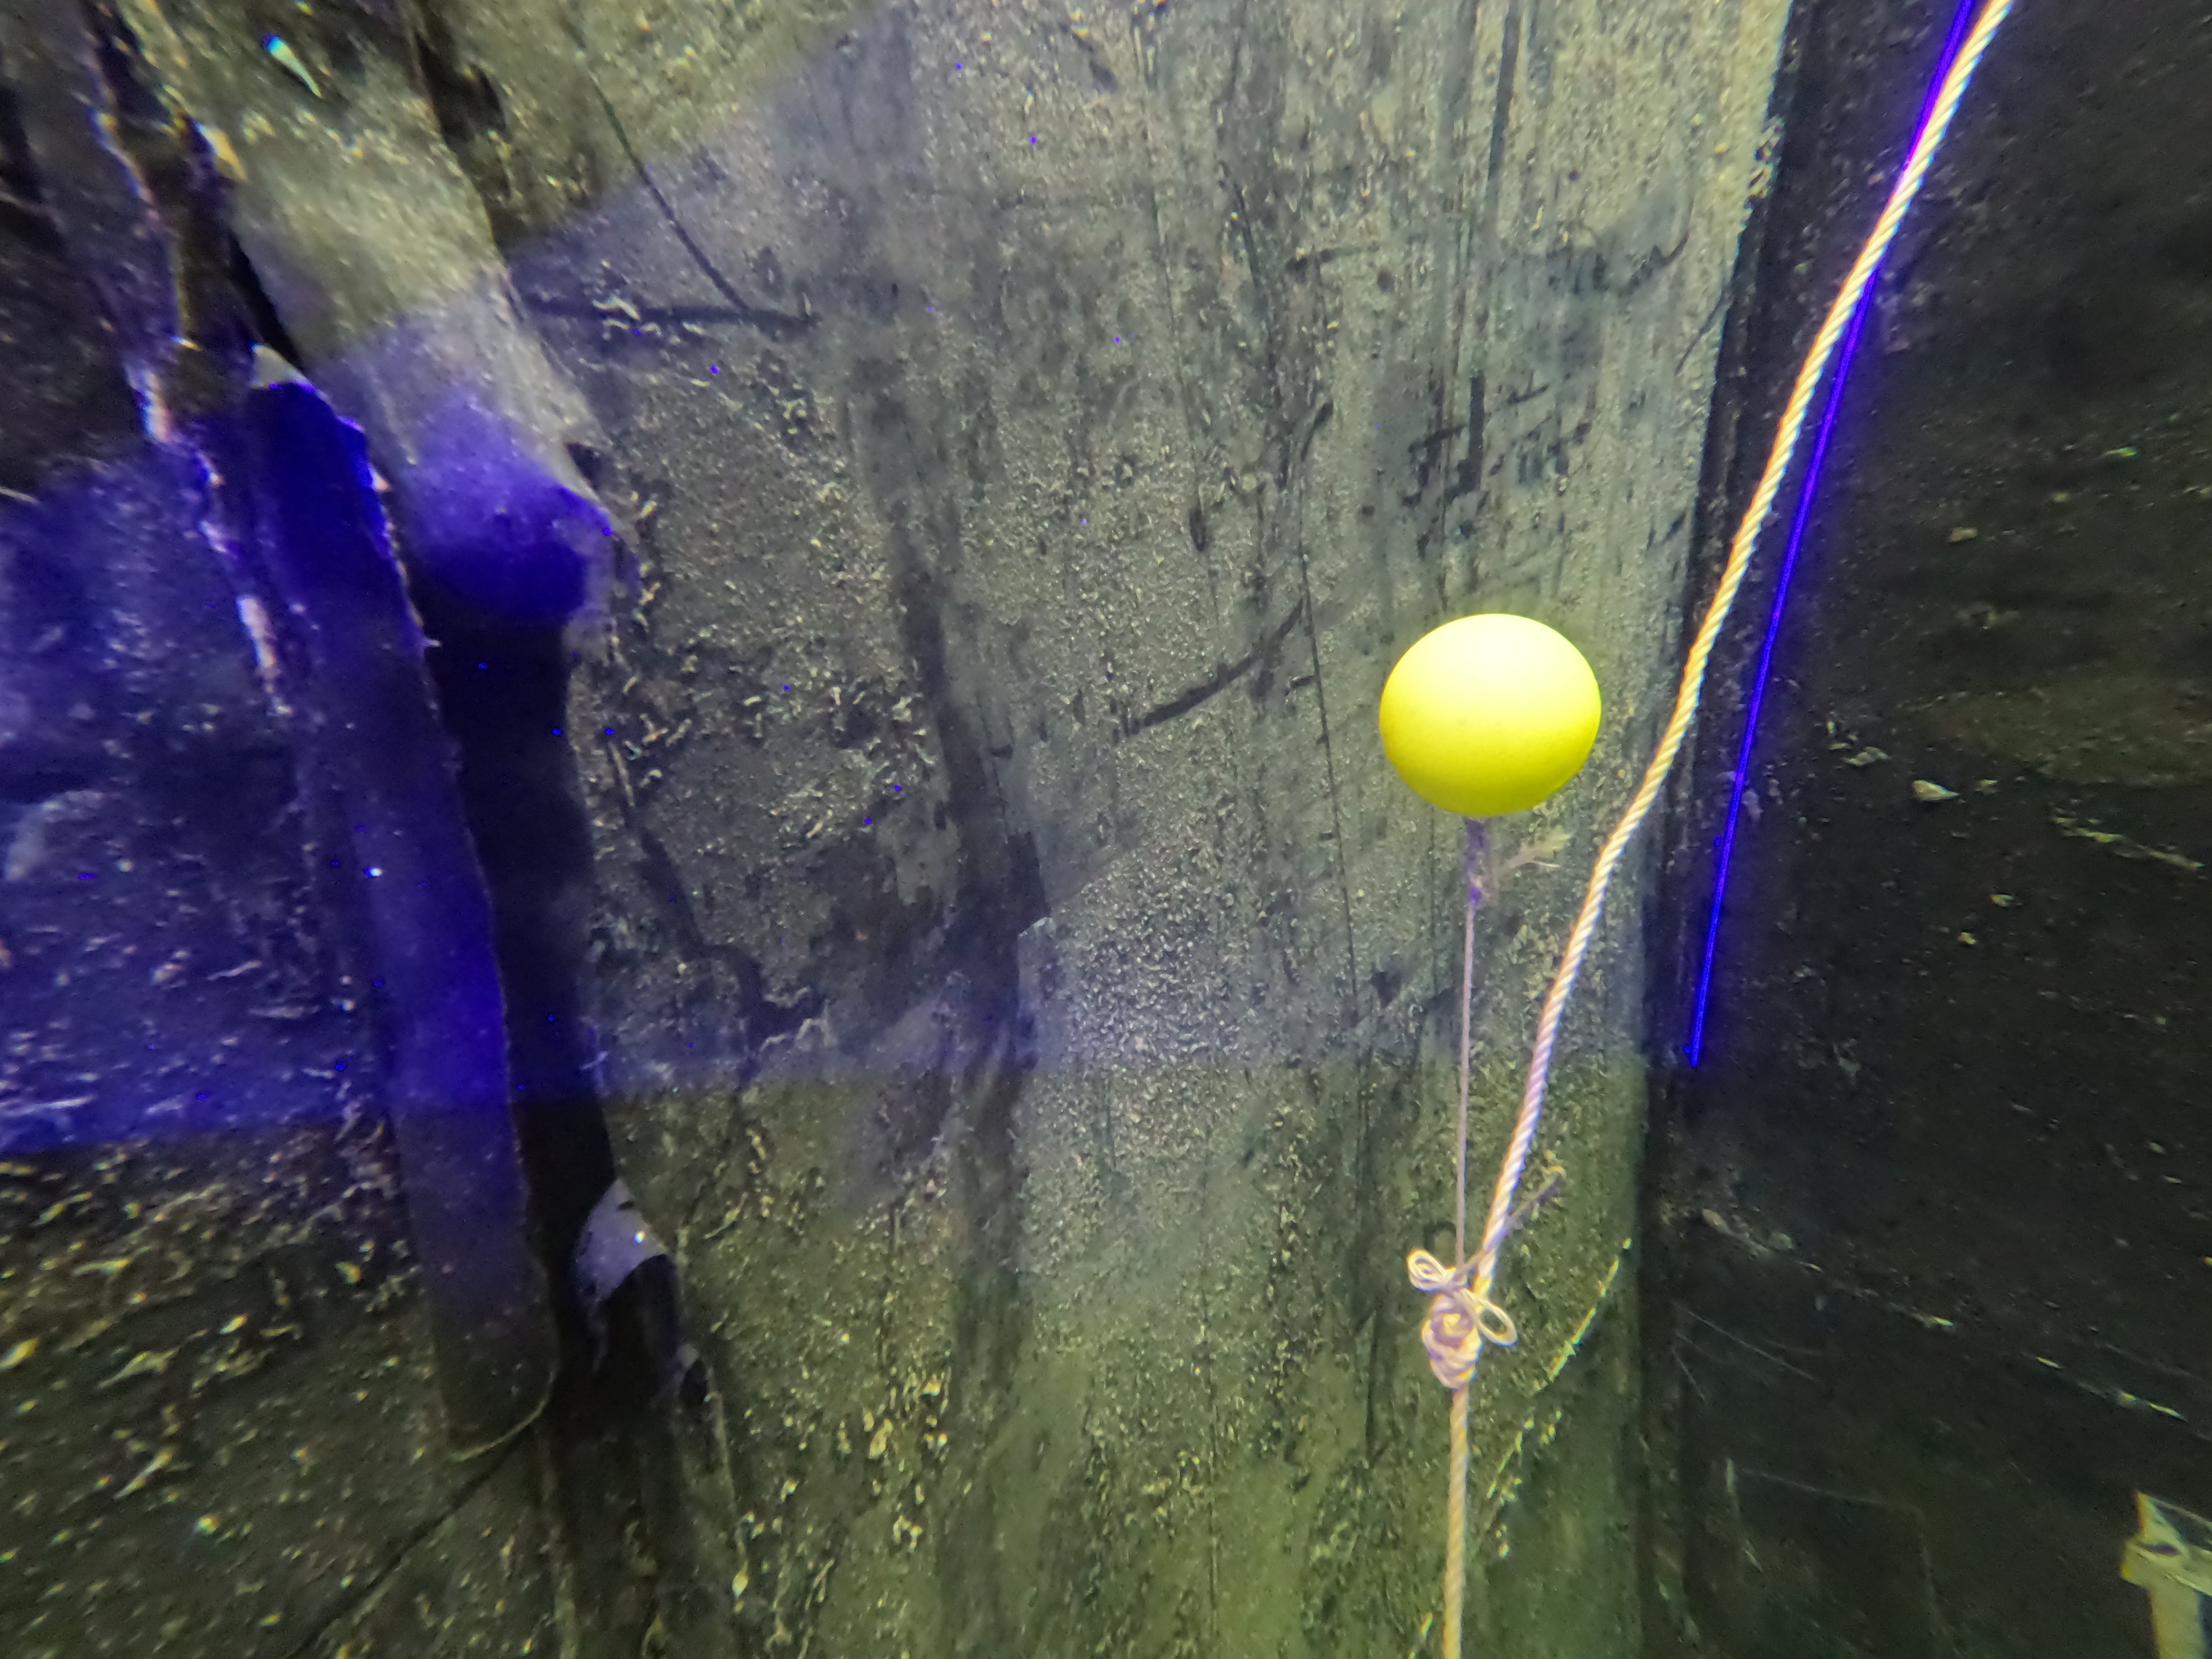

Supplement: Supplementary file 2011 [file G0034403.pdf › 5/G0034403.pdf]

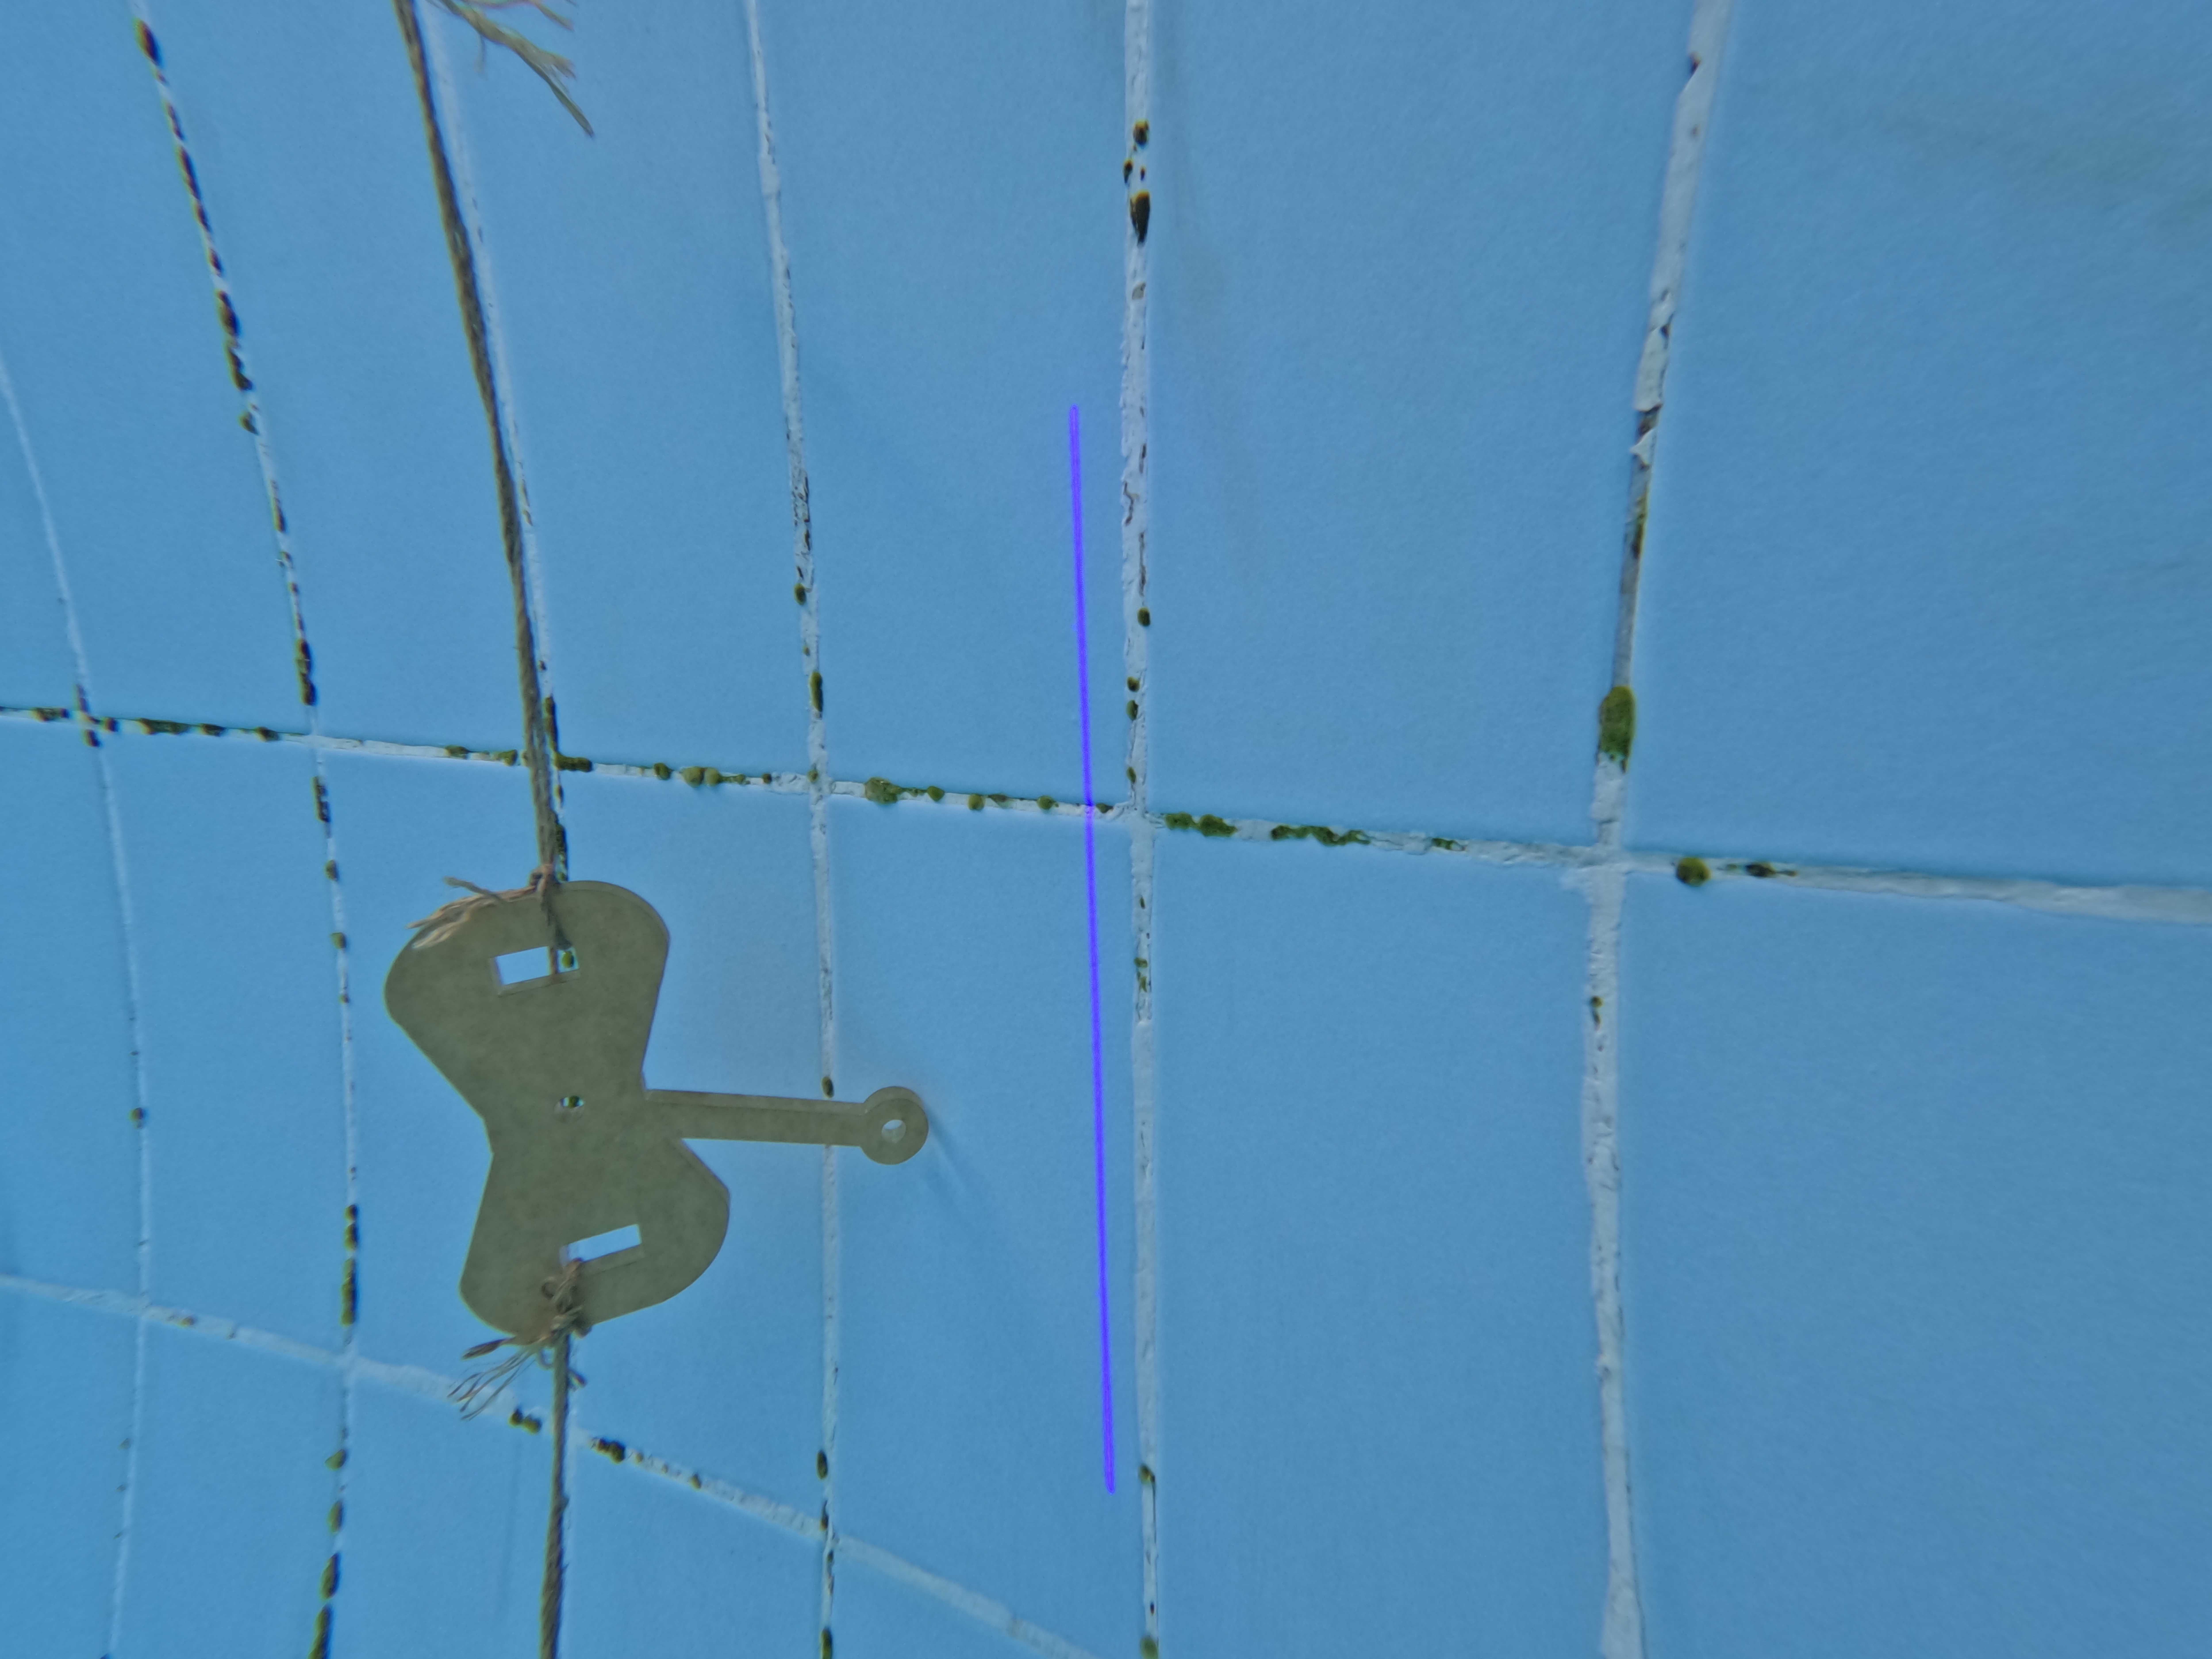

Supplement: Supplementary file 2012 [file G0050573.pdf › Level_3_2/G0050573.pdf]

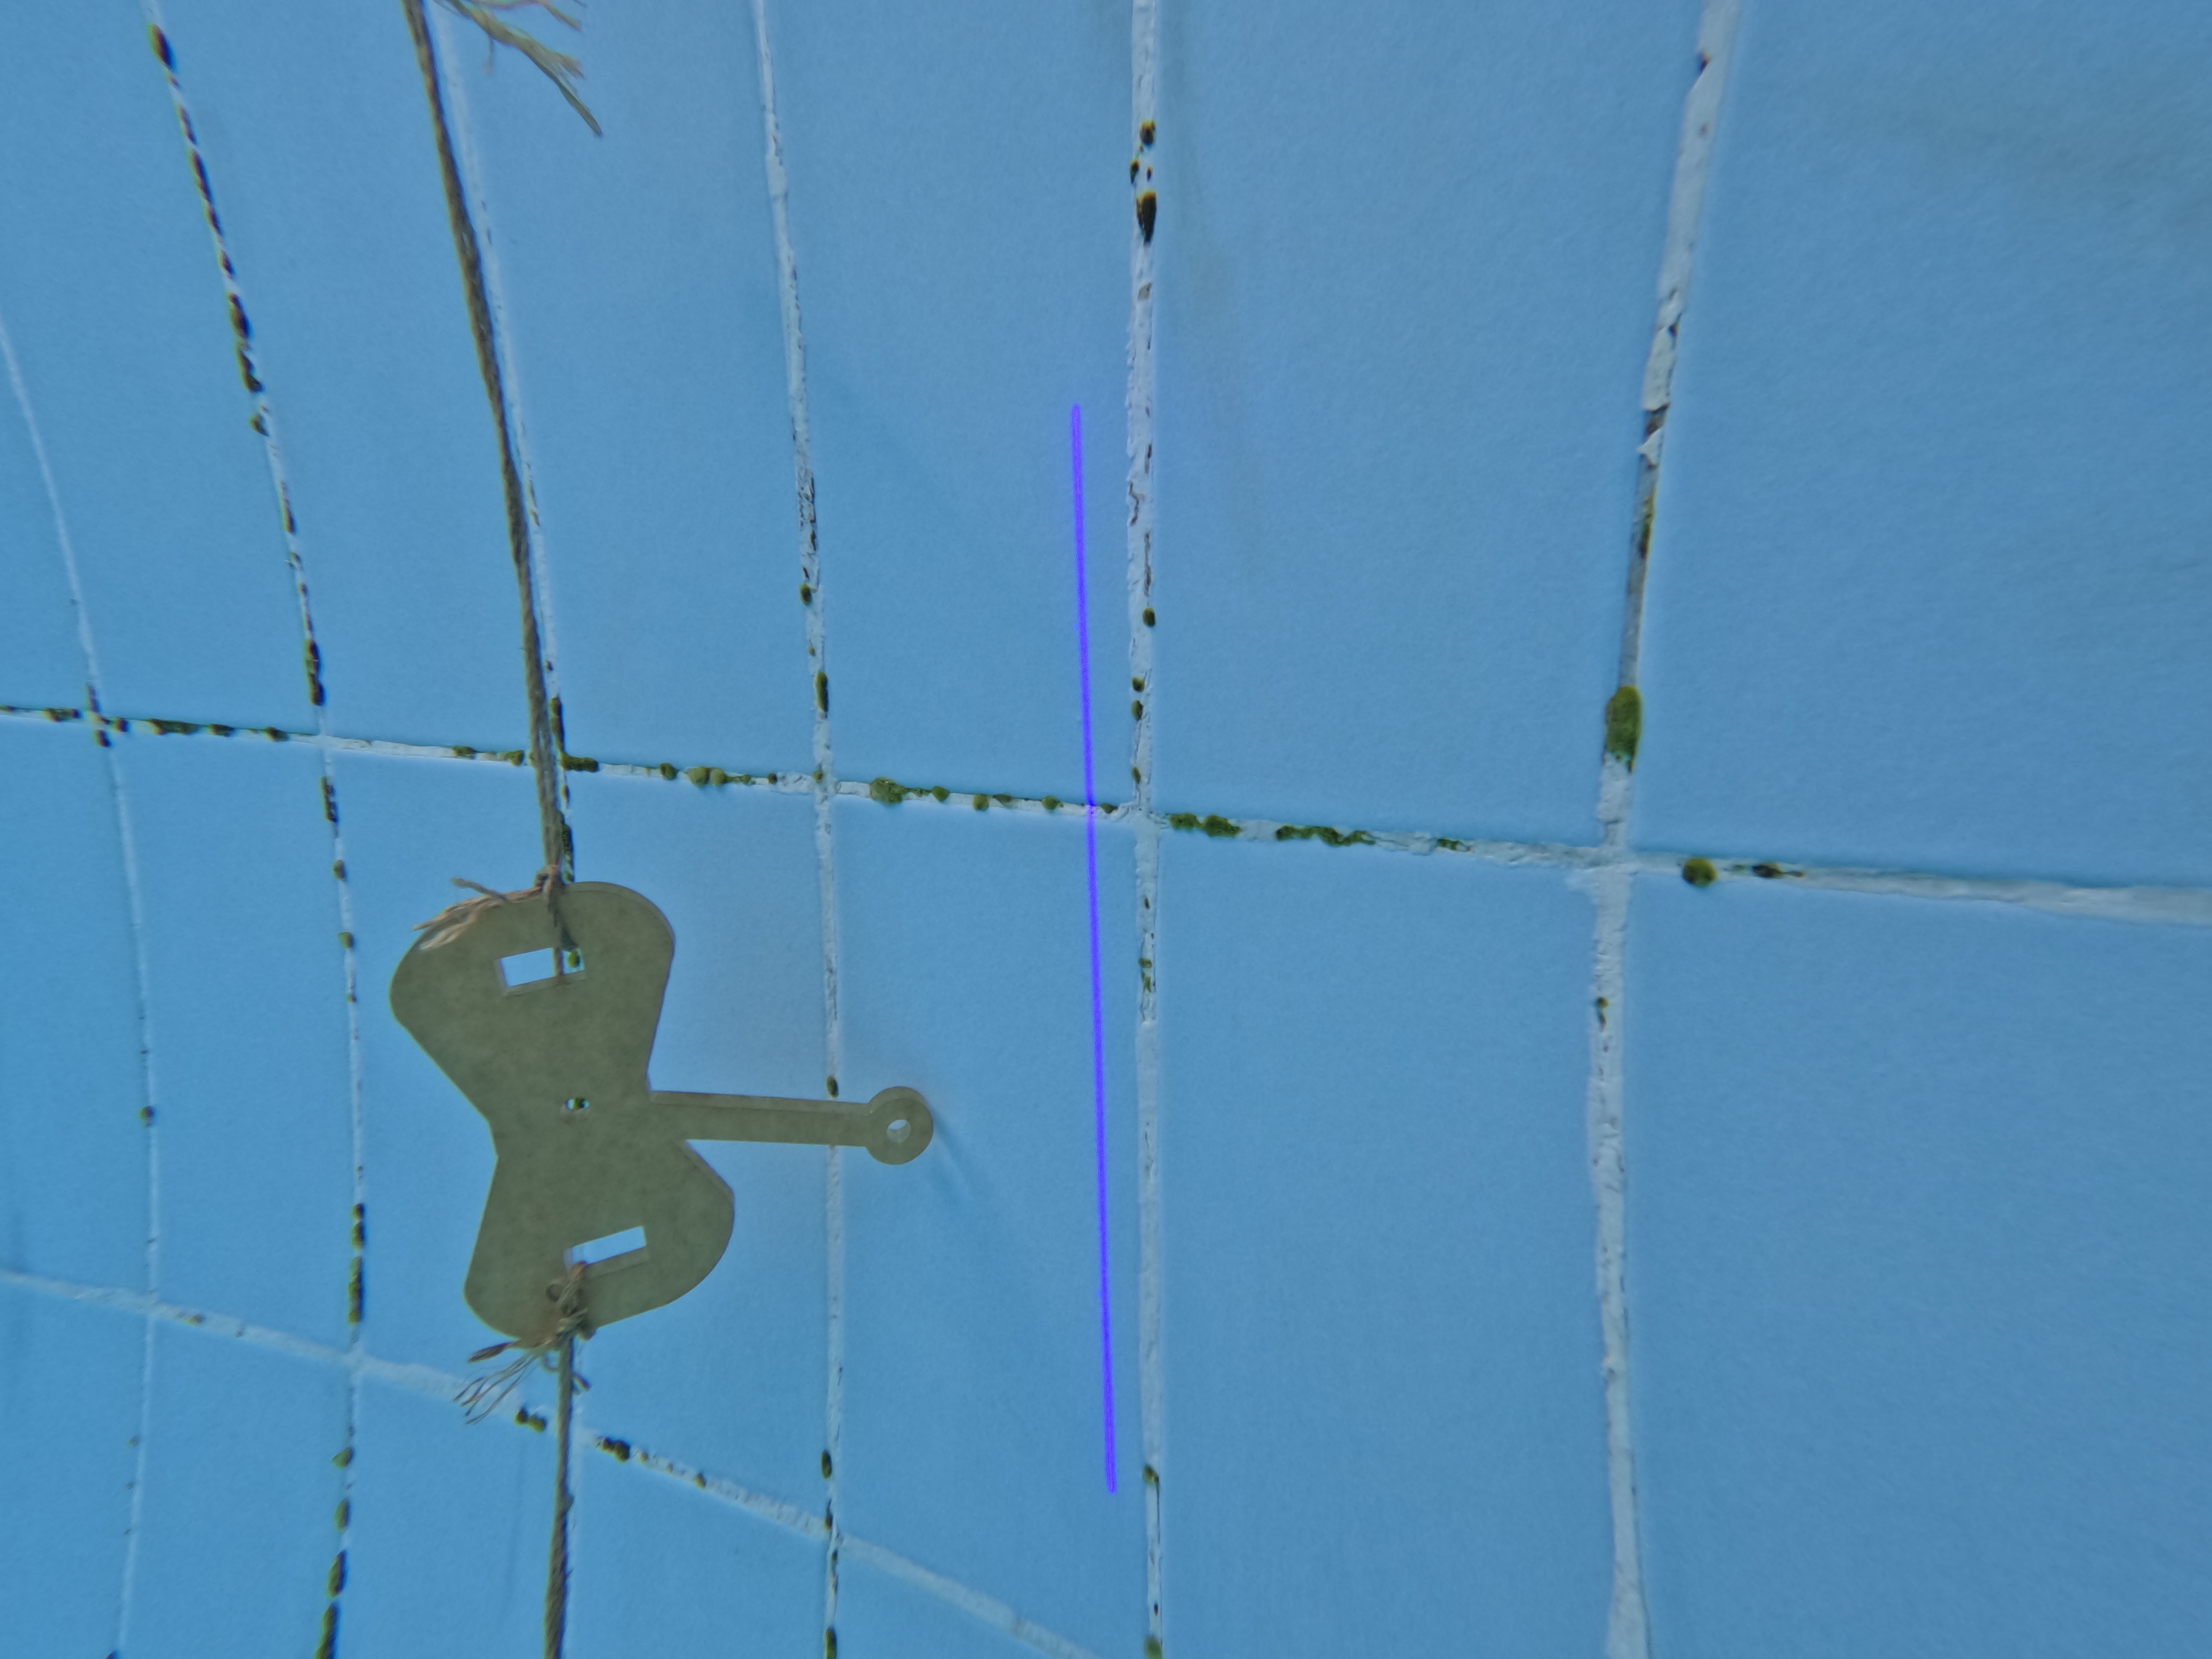

Supplement: Supplementary file 2013 [file G0050574.pdf › Level_3_2/G0050574.pdf]

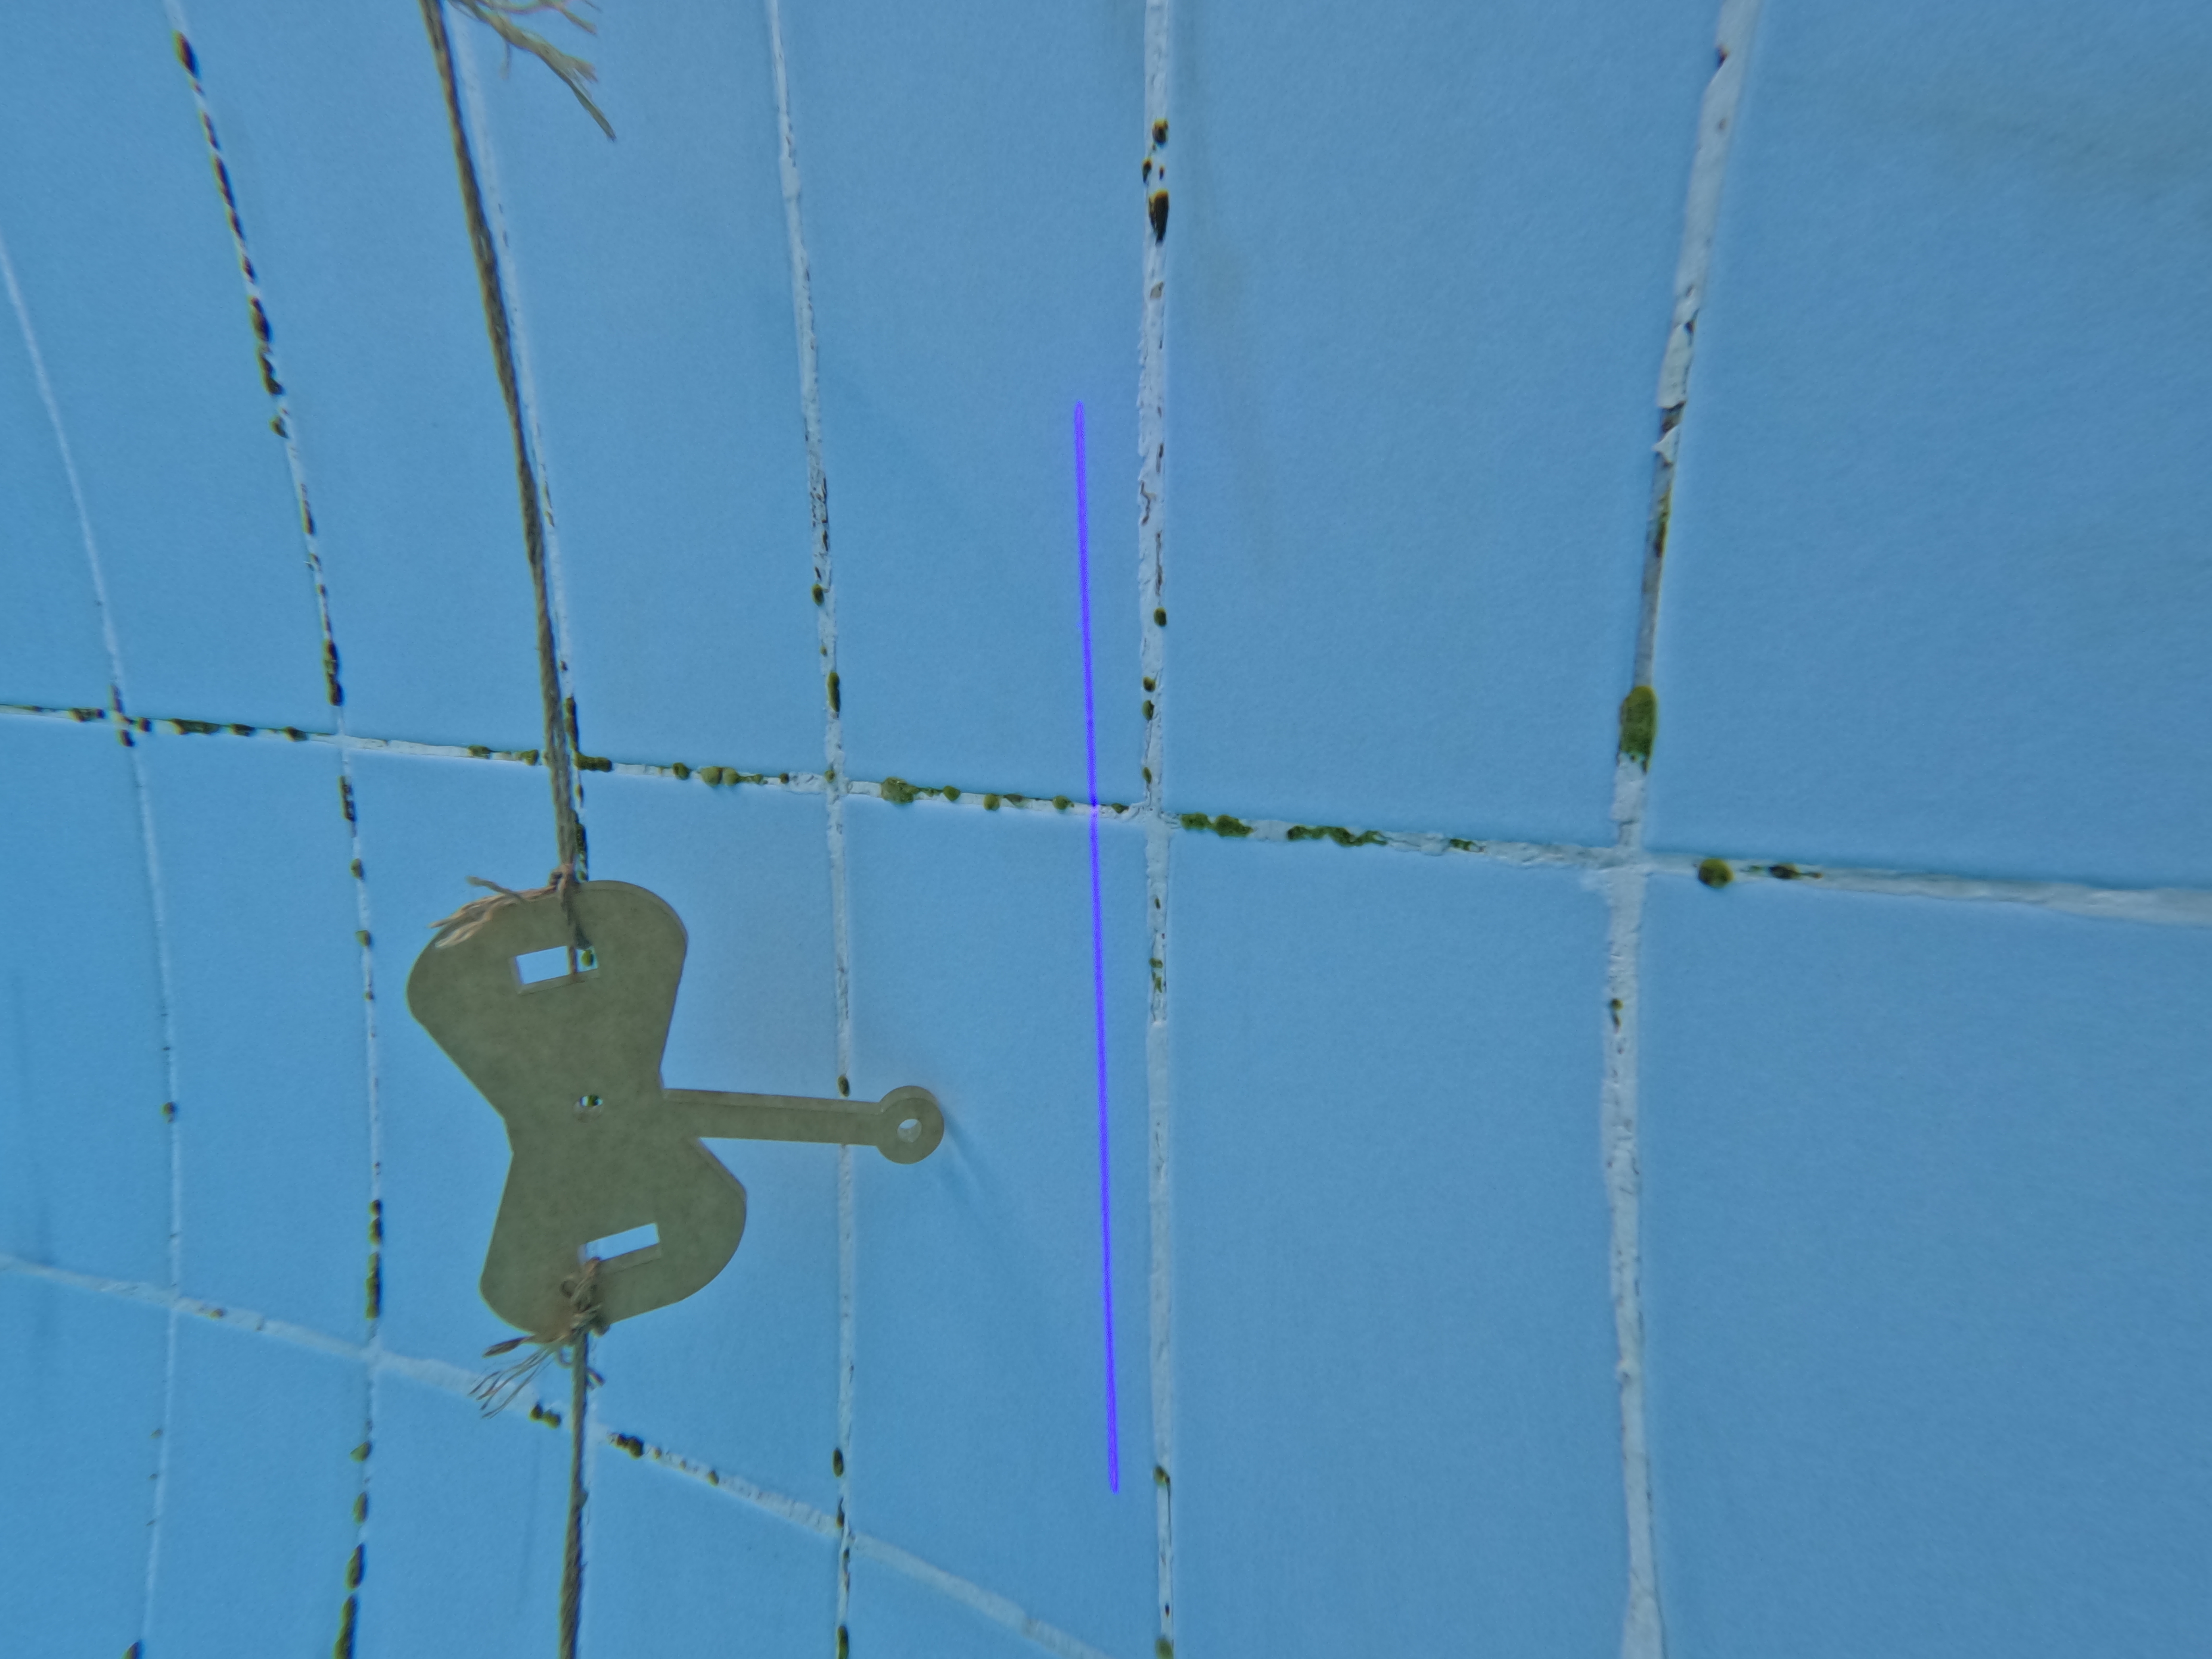

Supplement: Supplementary file 2014 [file G0050575.pdf › Level_3_2/G0050575.pdf]

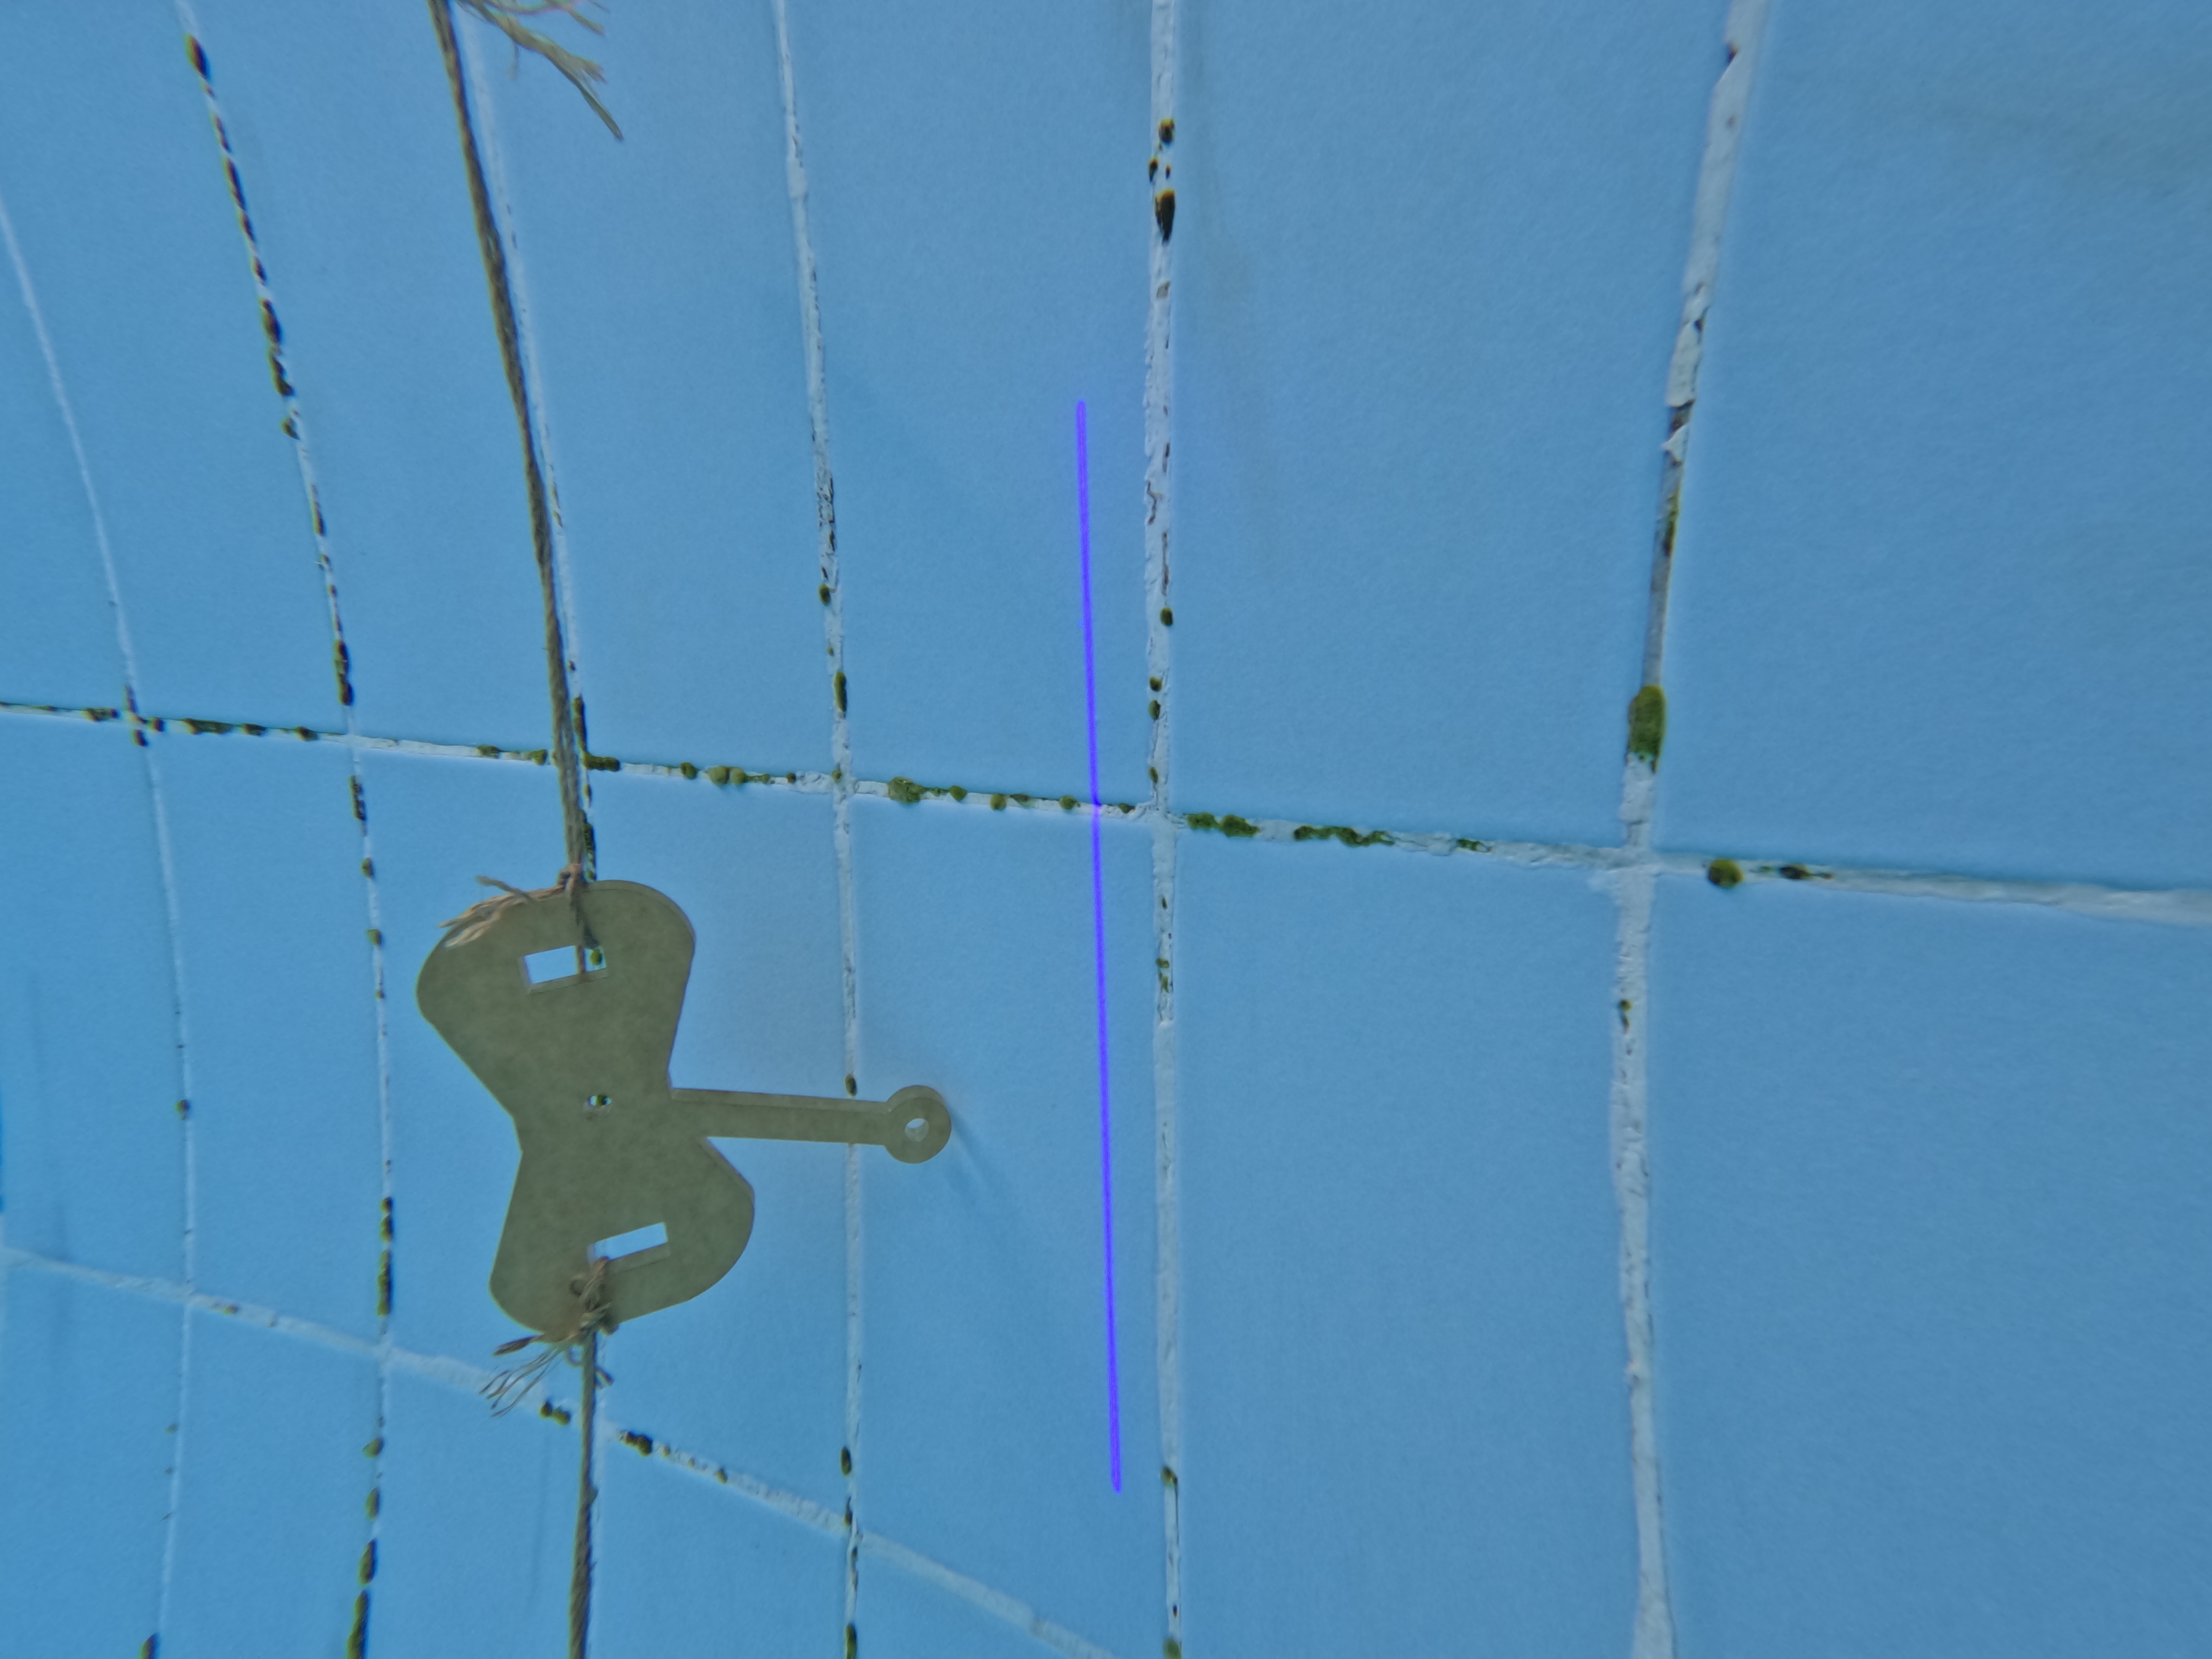

Supplement: Supplementary file 2015 [file G0050576.pdf › Level_3_2/G0050576.pdf]

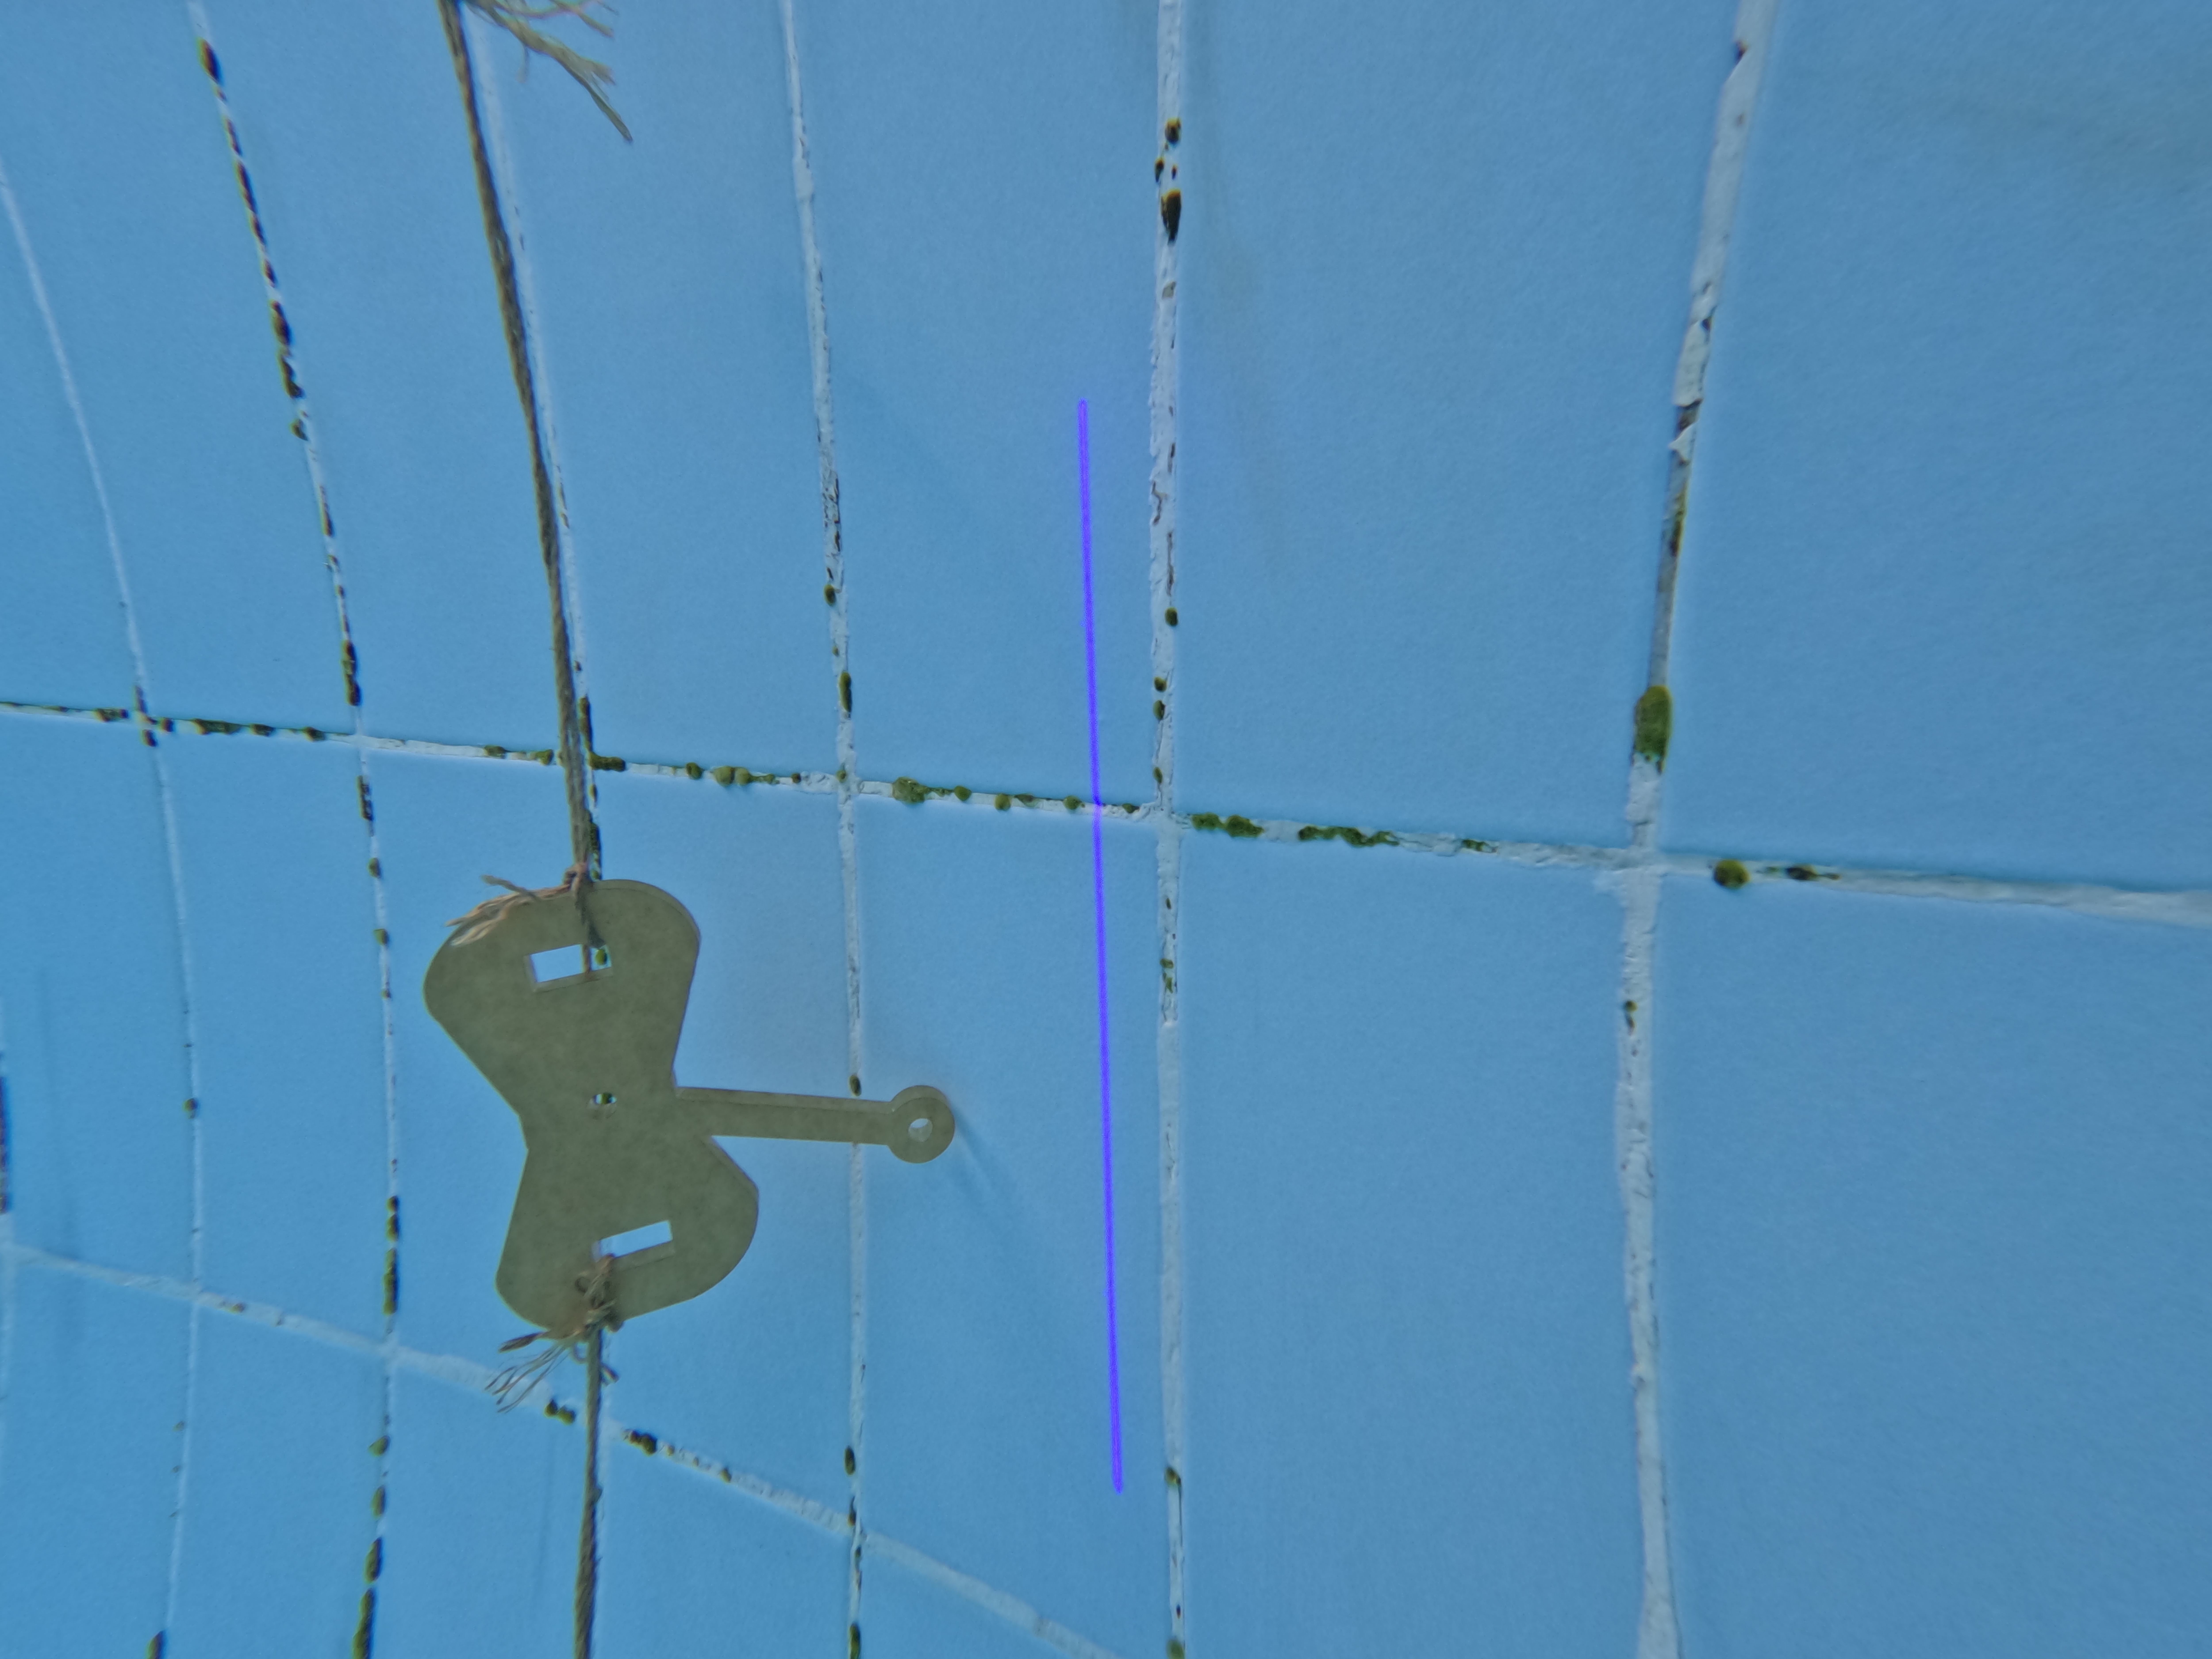

Supplement: Supplementary file 2016 [file G0050577.pdf › Level_3_2/G0050577.pdf]

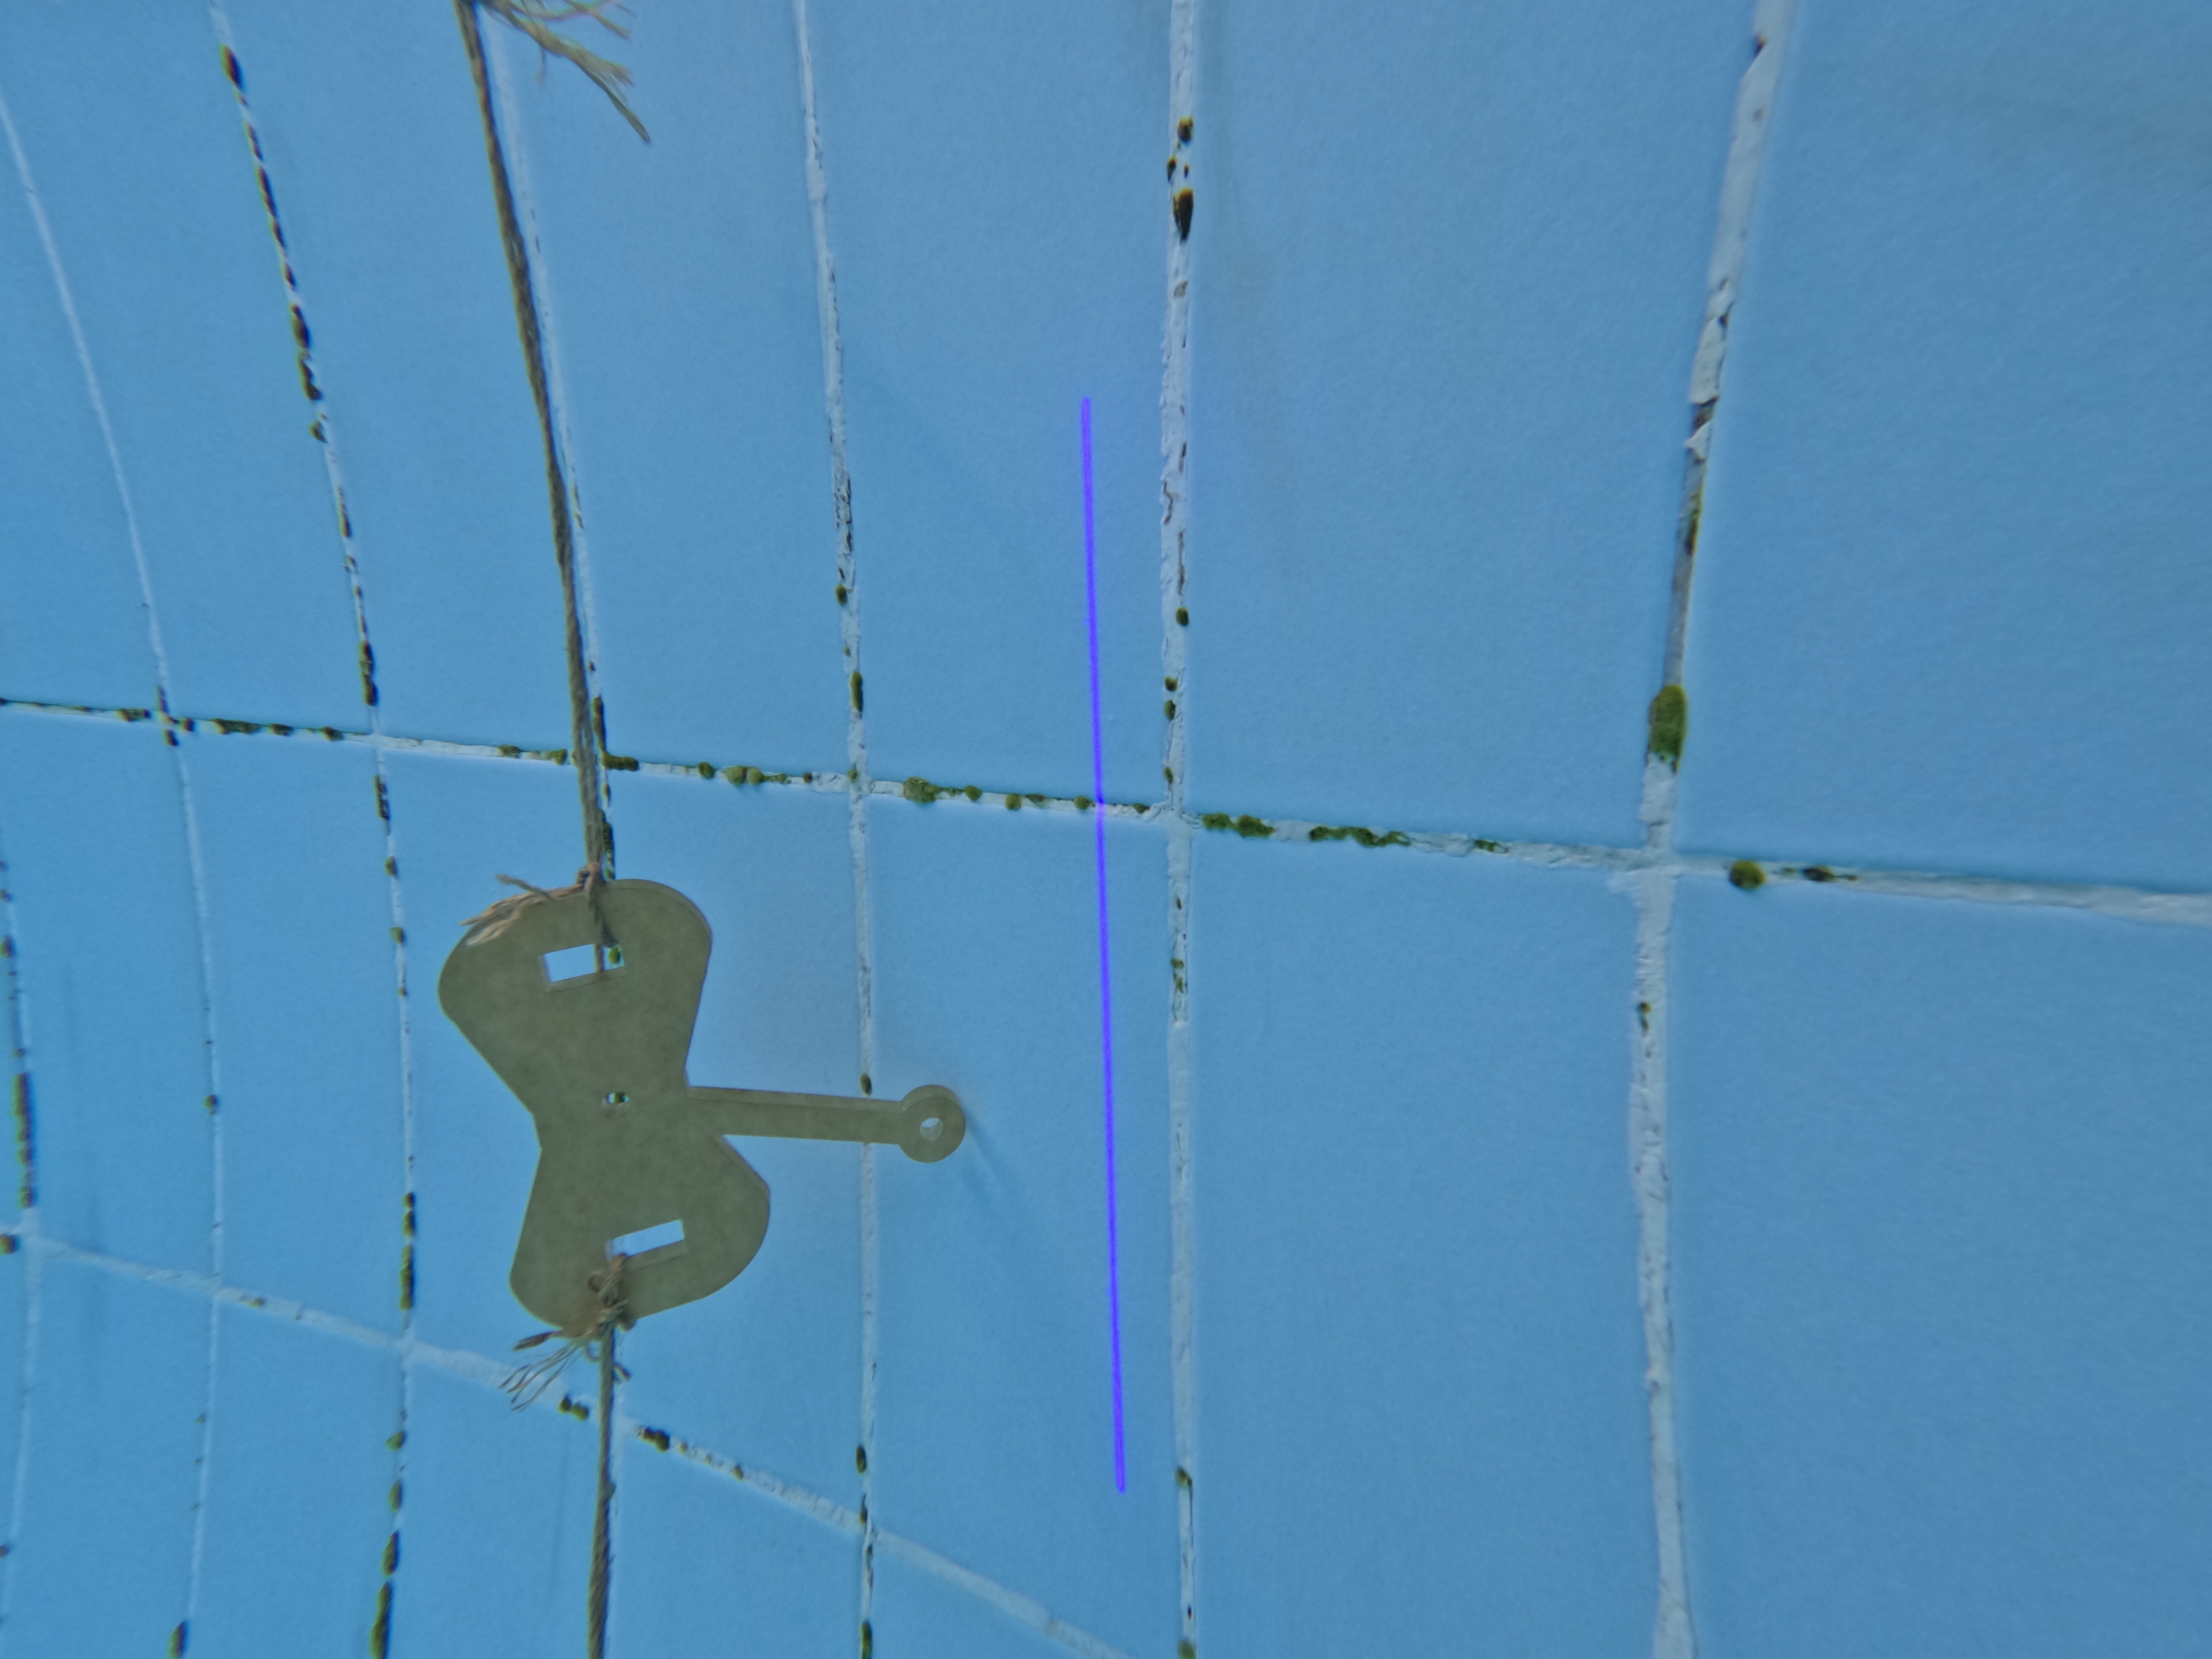

Supplement: Supplementary file 2017 [file G0050578.pdf › Level_3_2/G0050578.pdf]

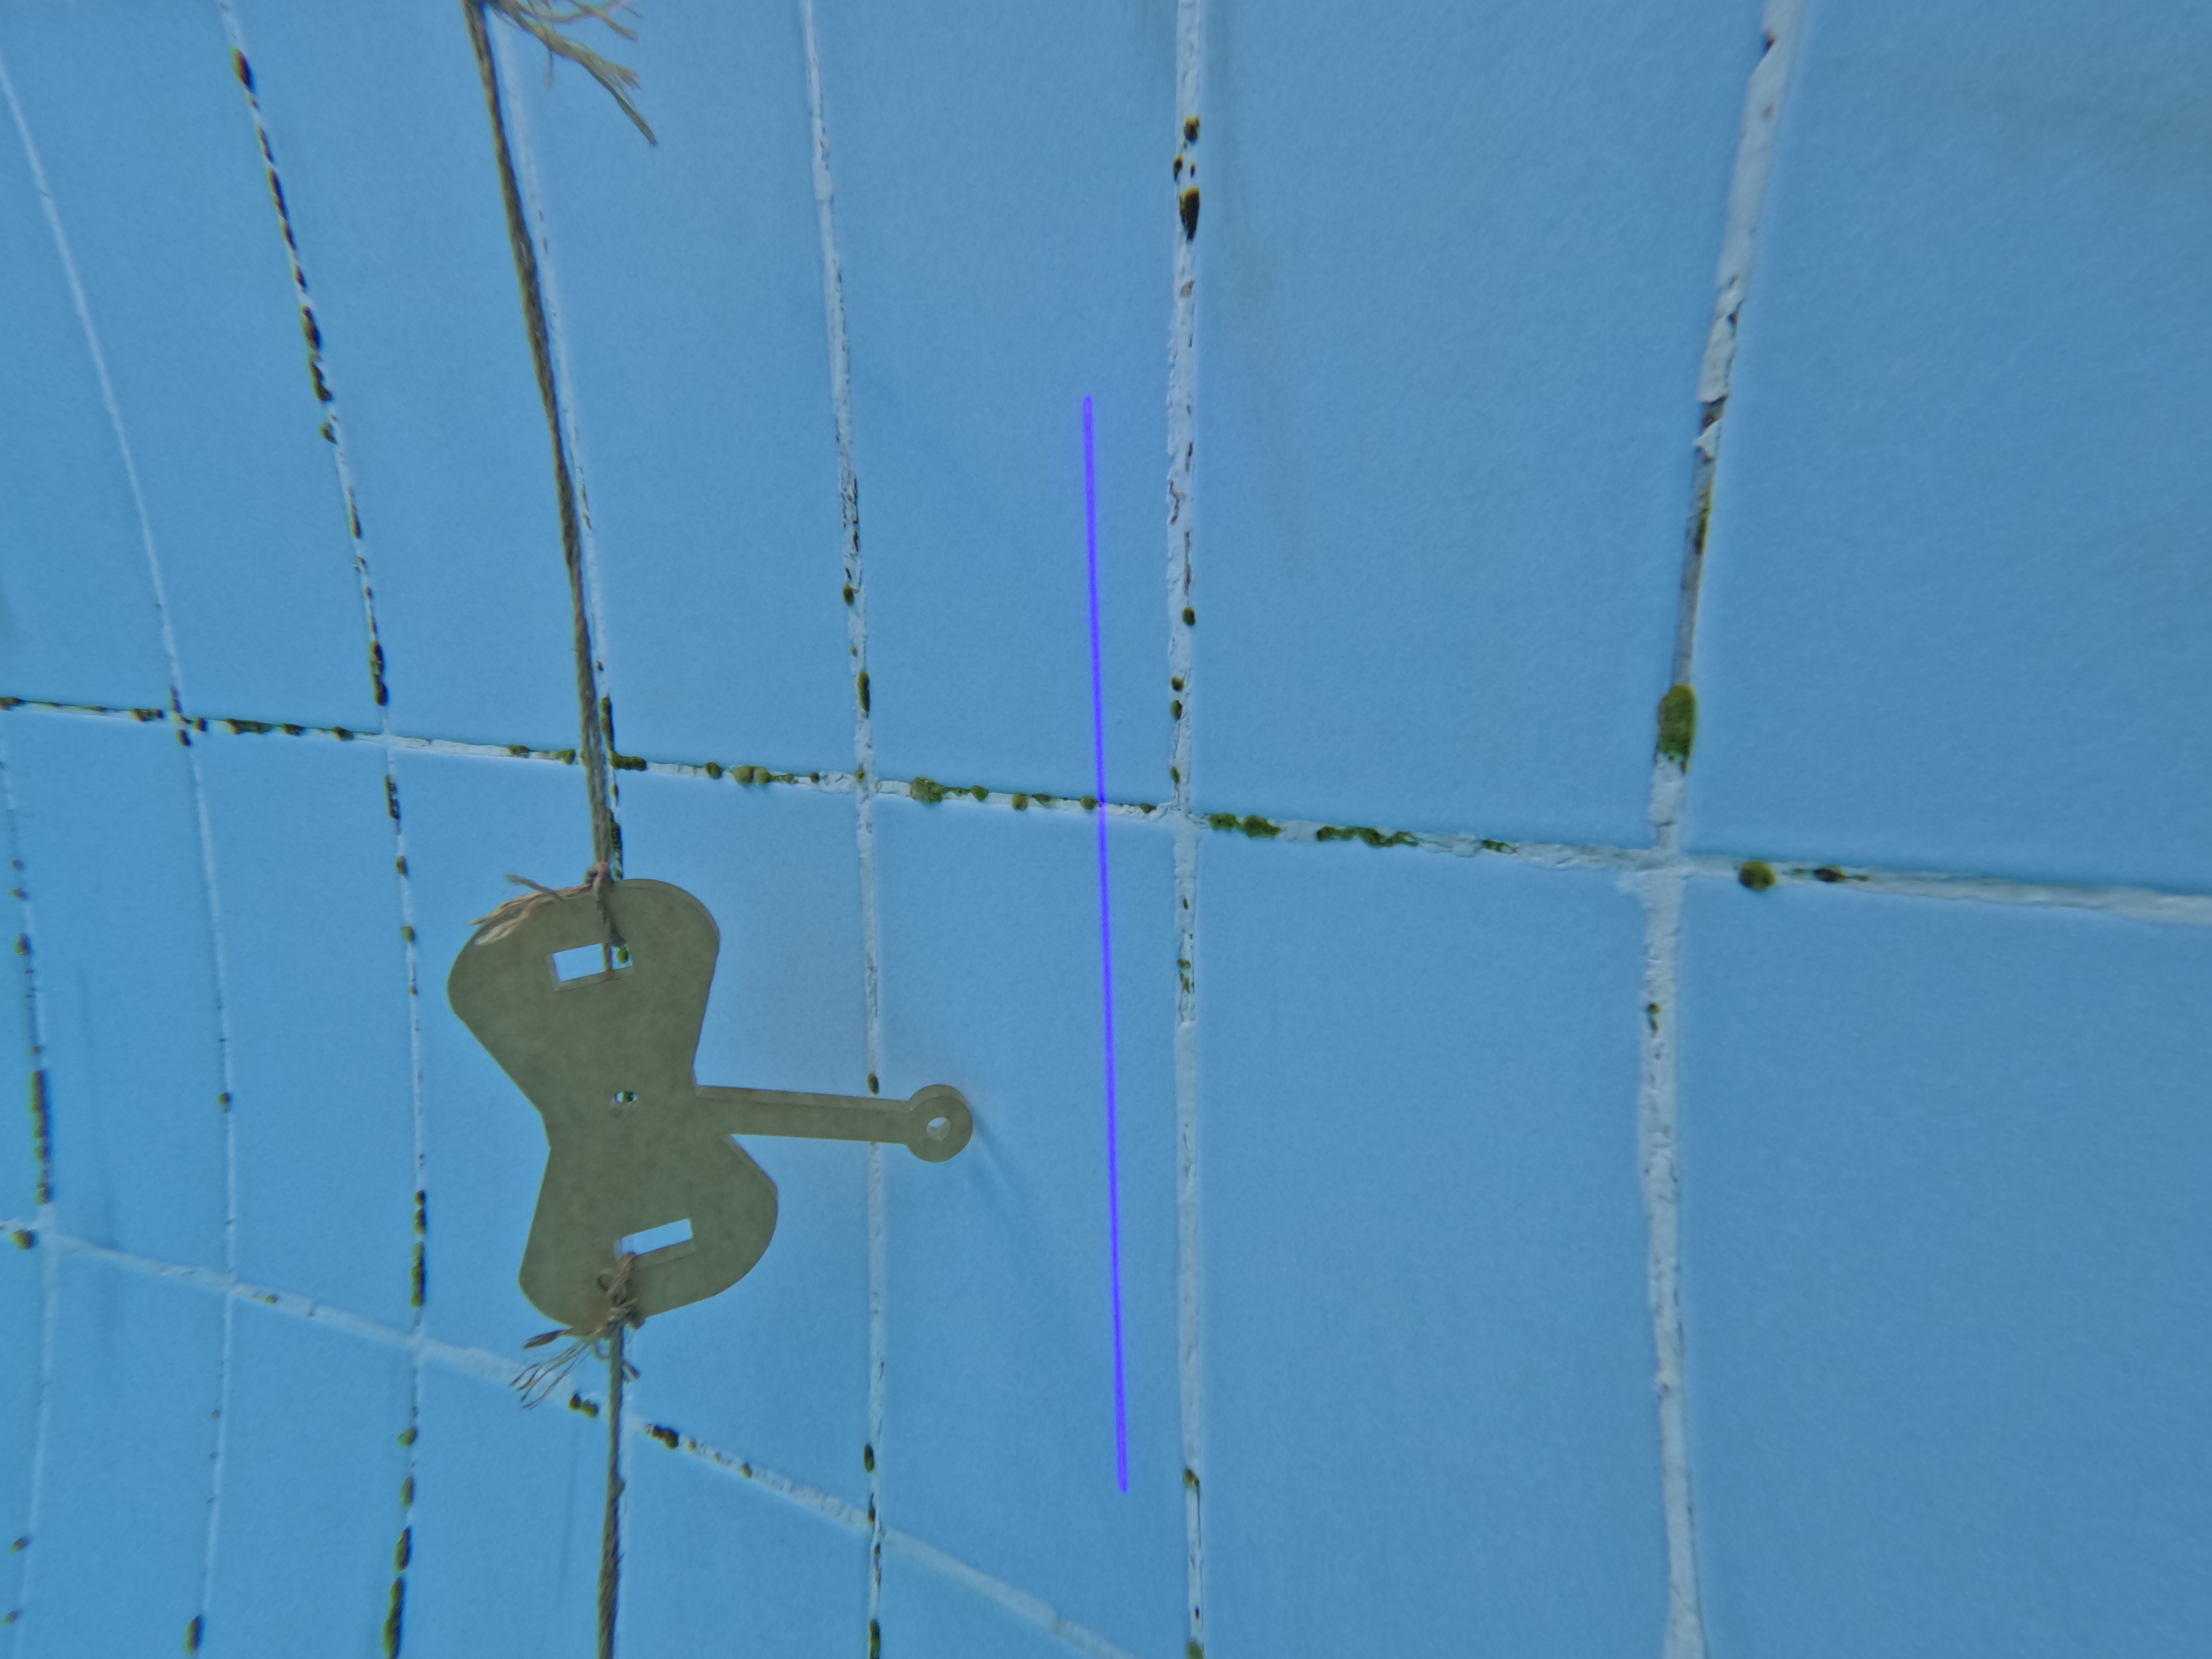

Supplement: Supplementary file 2018 [file G0050579.pdf › Level_3_2/G0050579.pdf]

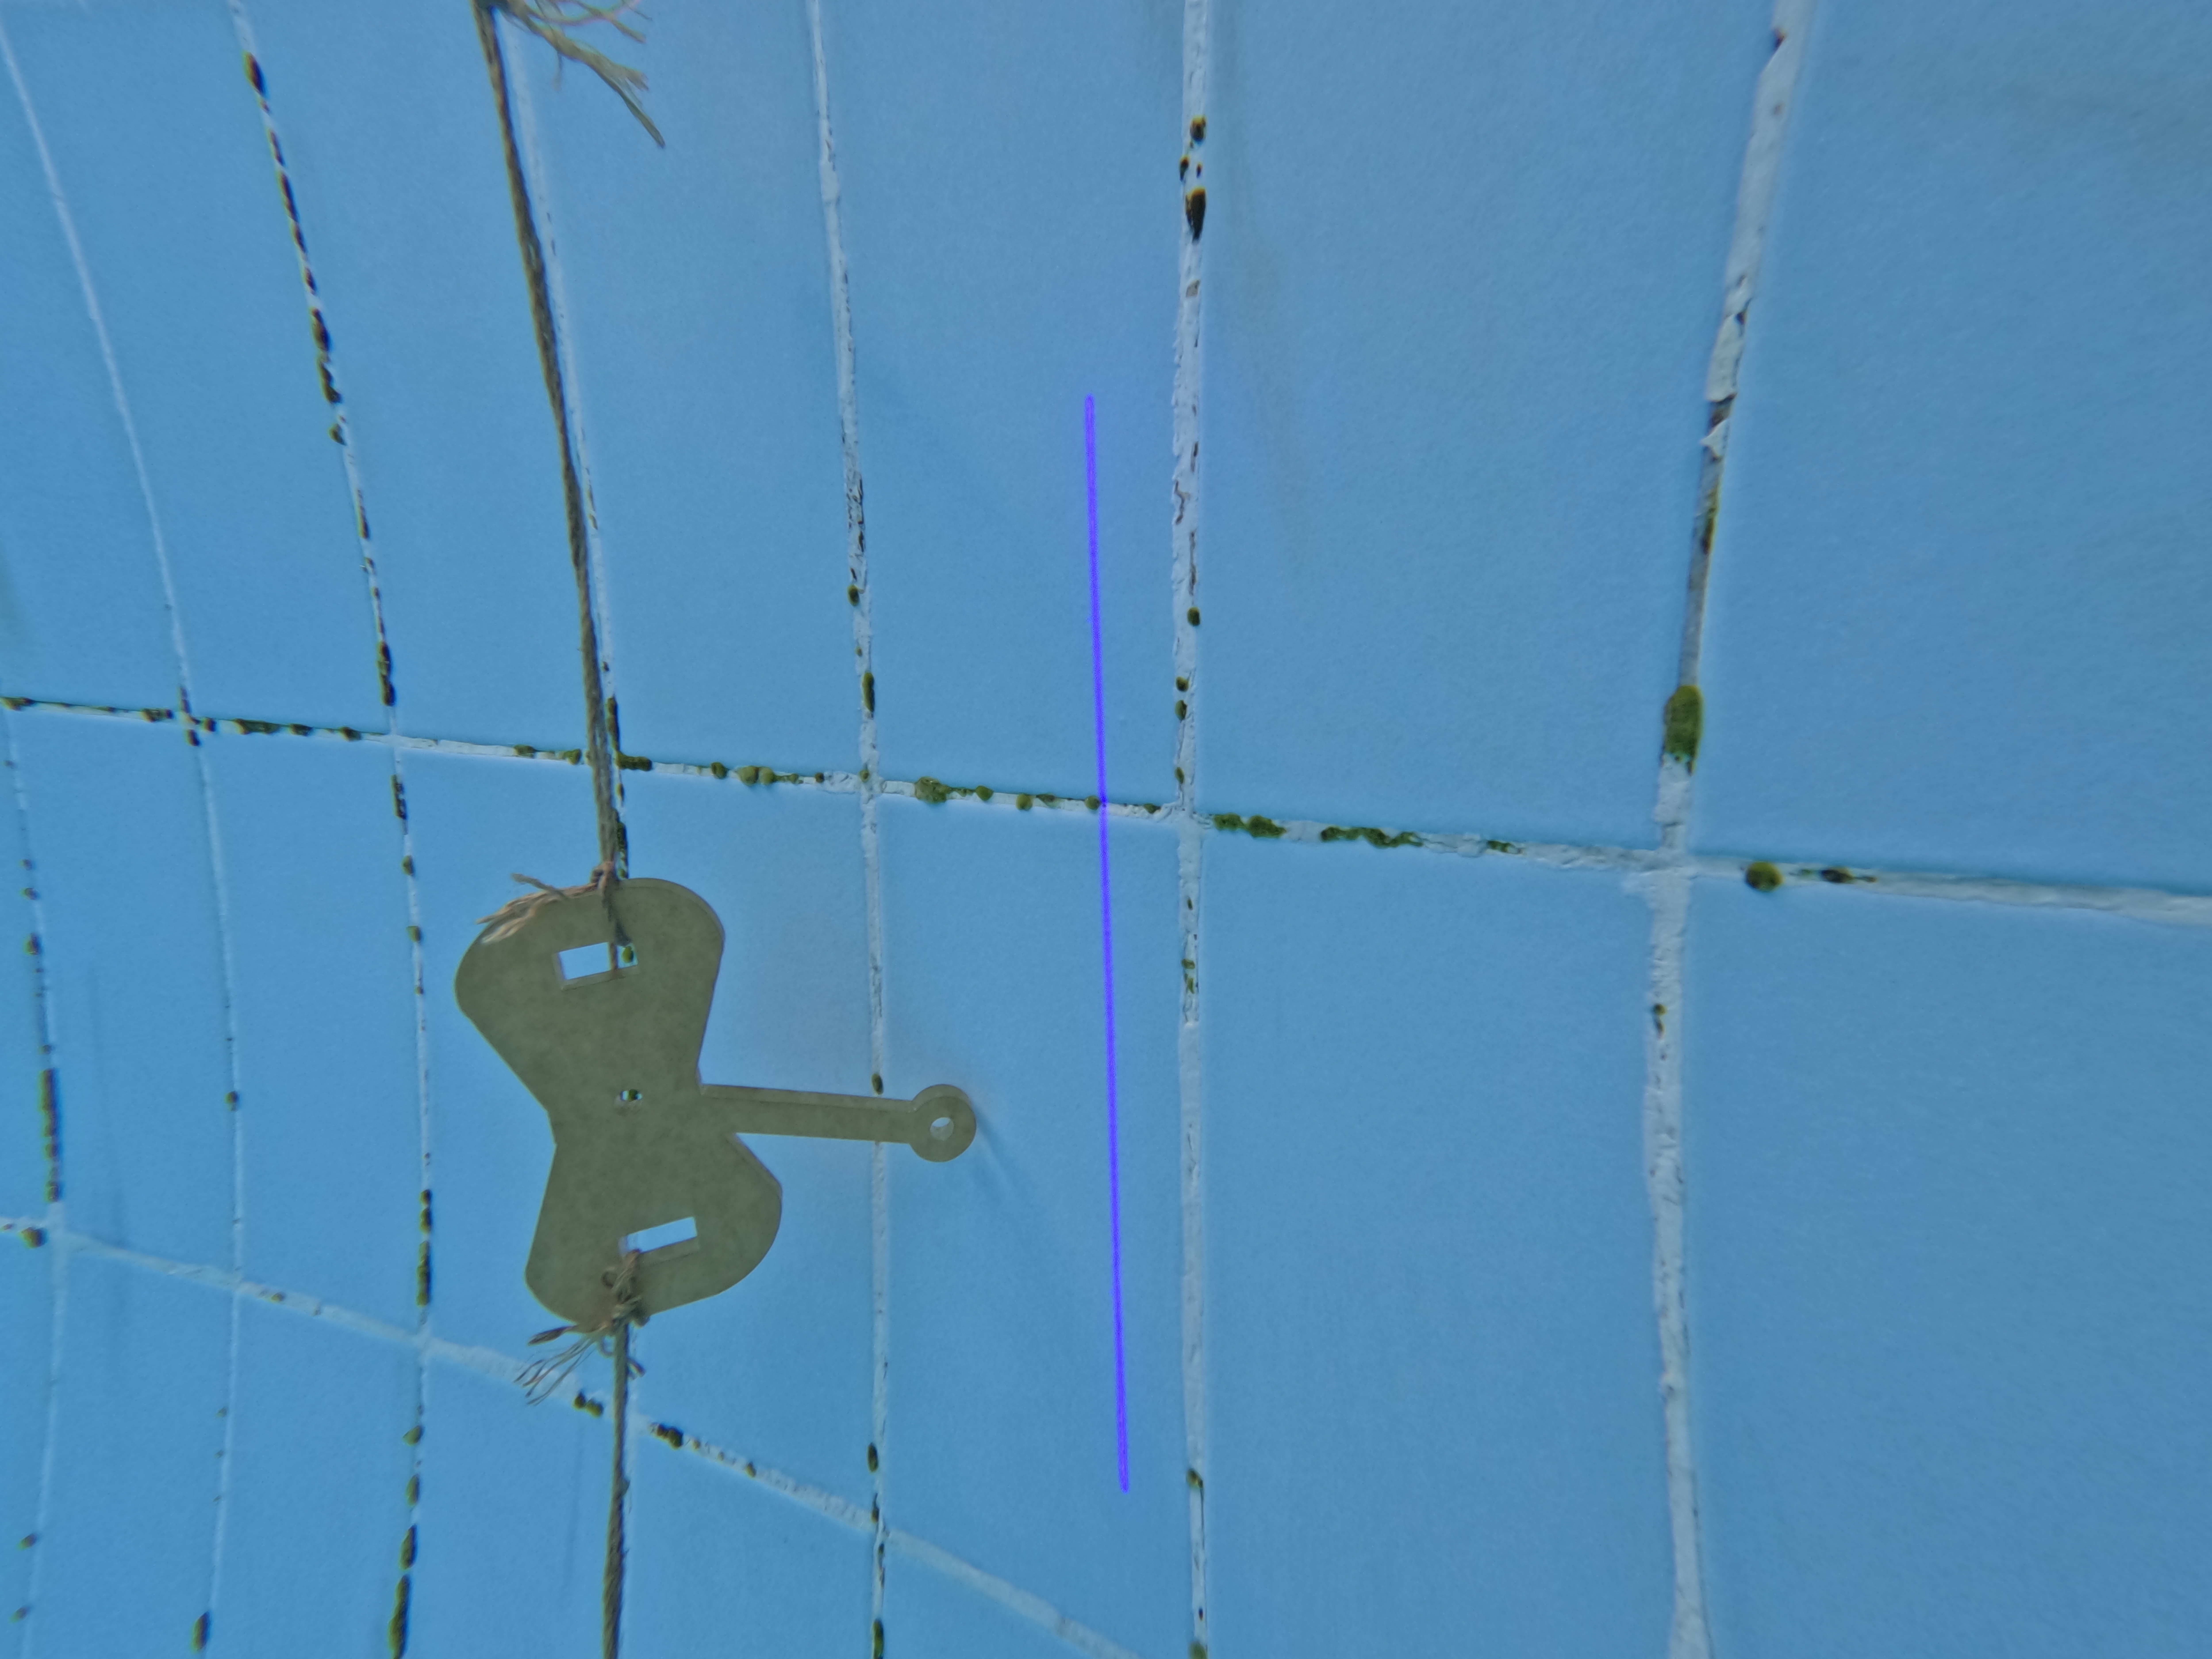

Supplement: Supplementary file 2019 [file G0050580.pdf › Level_3_2/G0050580.pdf]

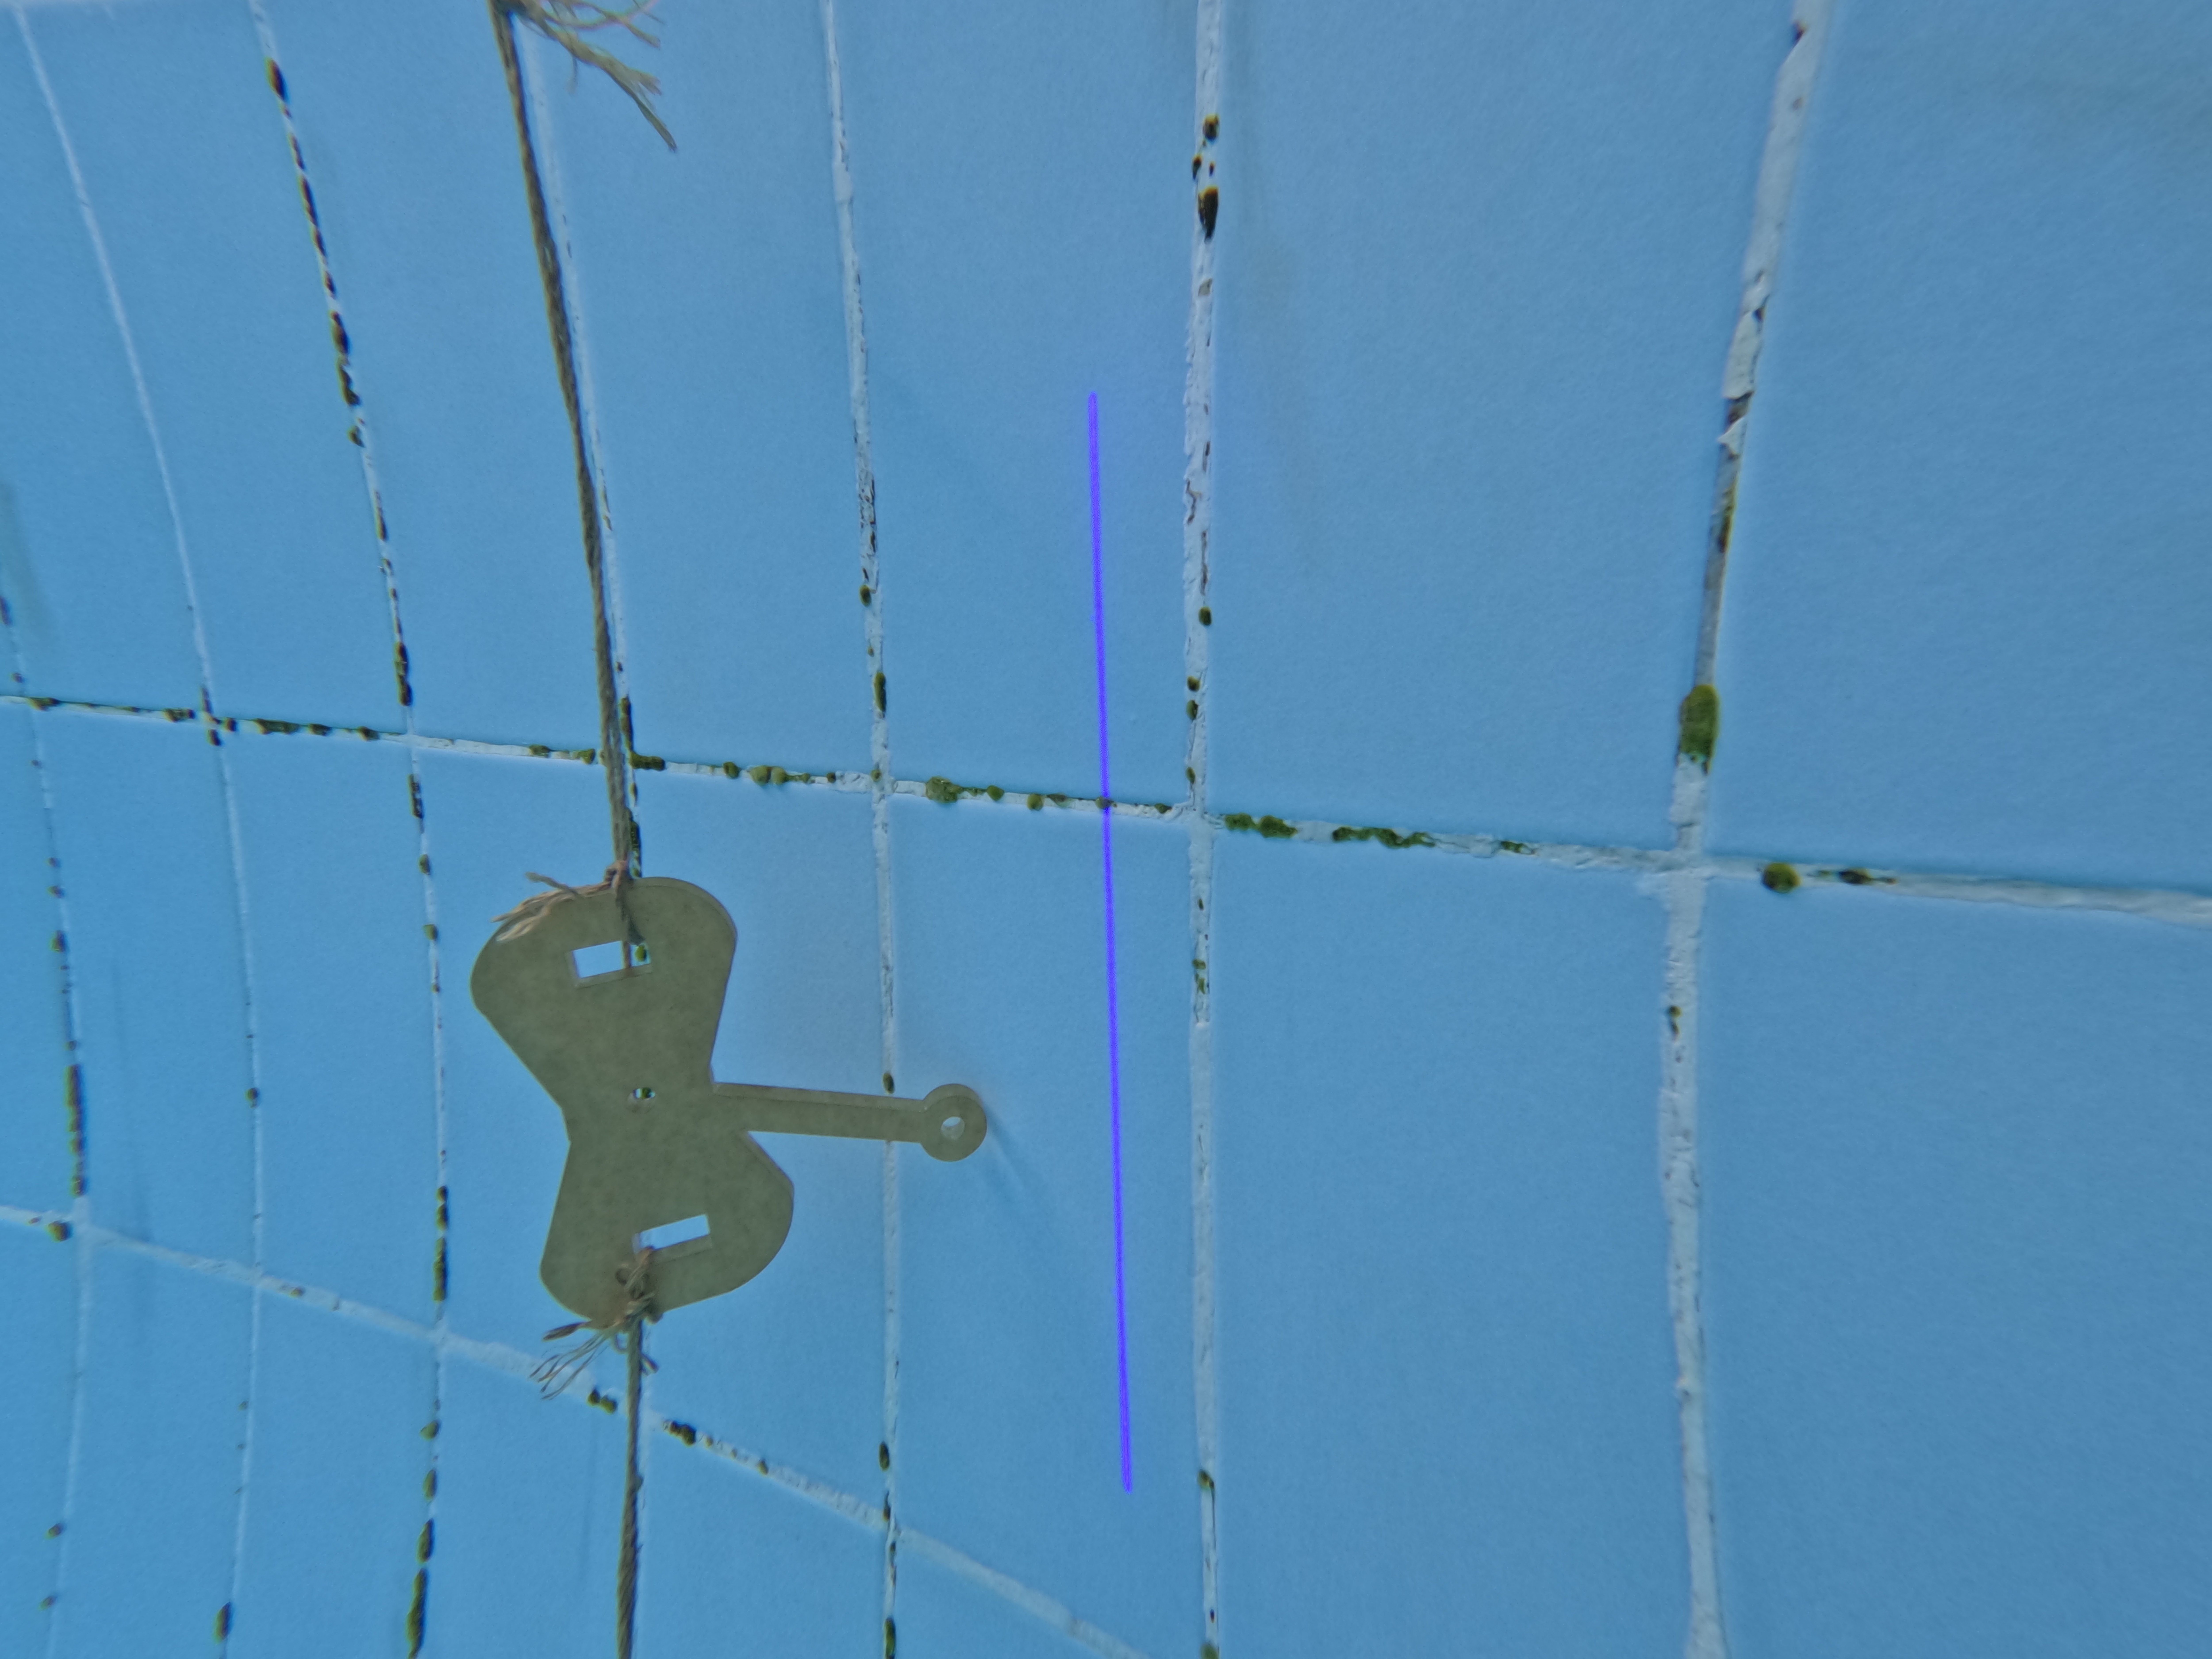

Supplement: Supplementary file 2020 [file G0050581.pdf › Level_3_2/G0050581.pdf]

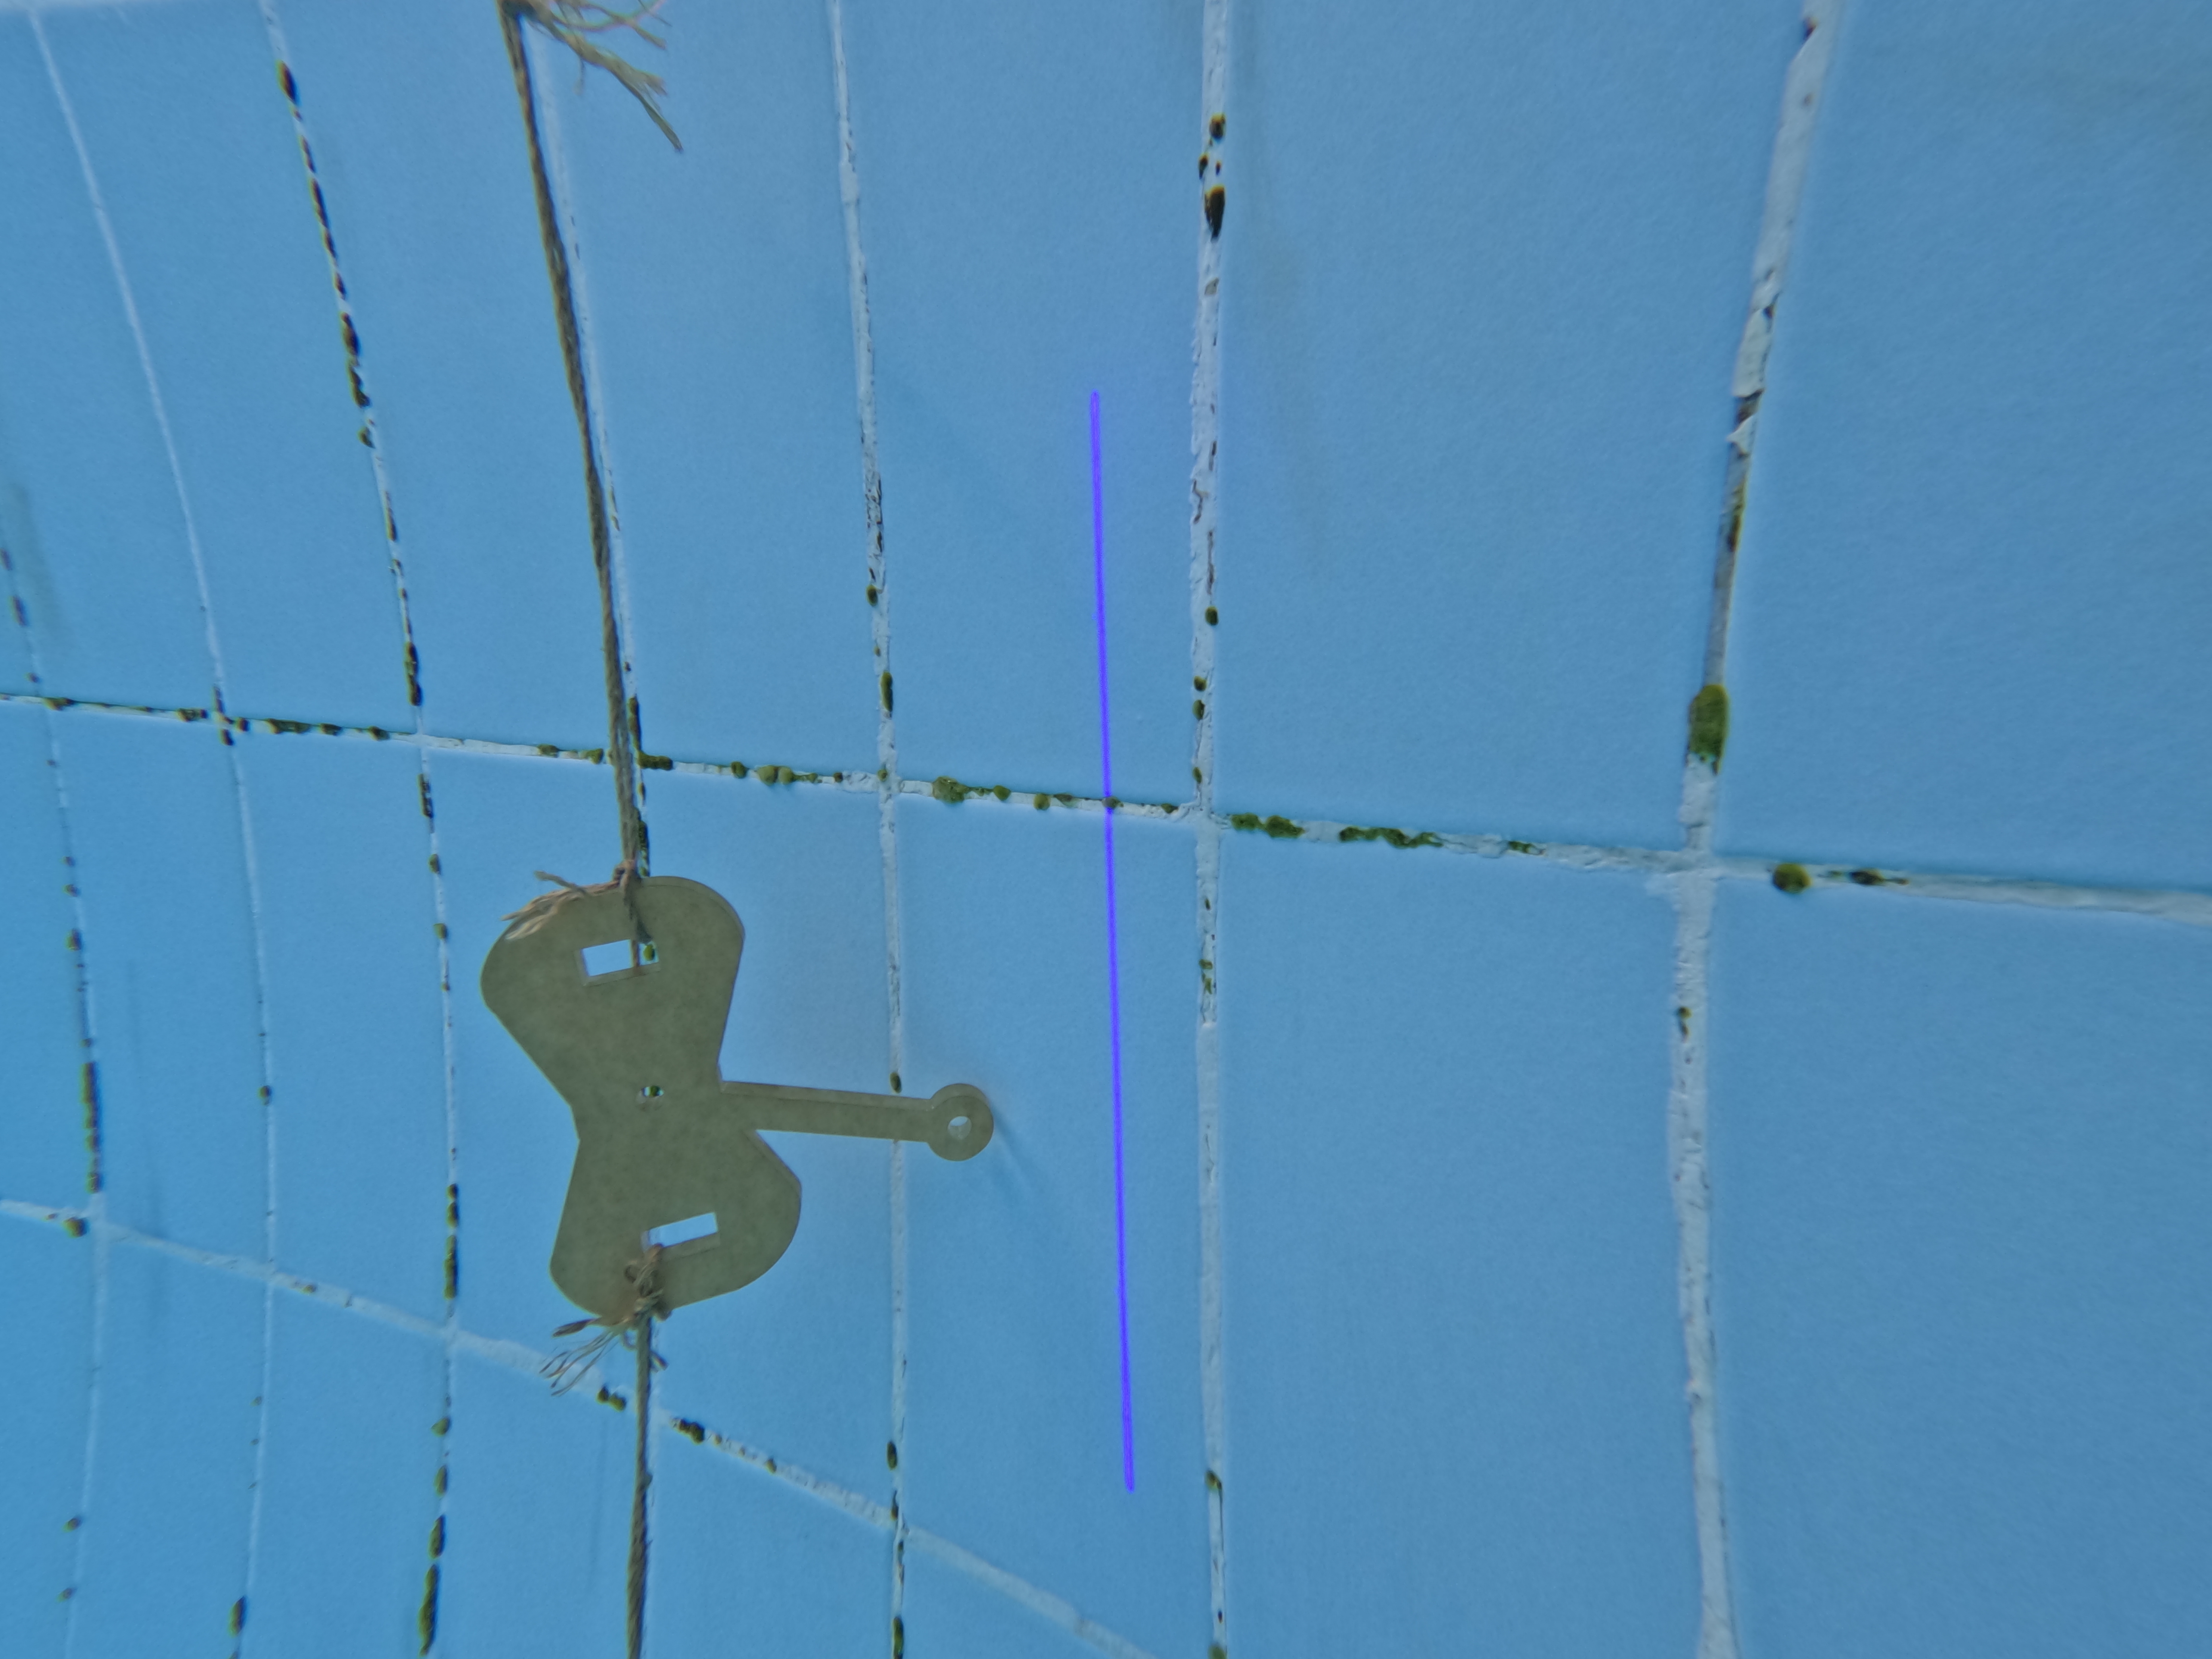

Supplement: Supplementary file 2021 [file G0050582.pdf › Level_3_2/G0050582.pdf]

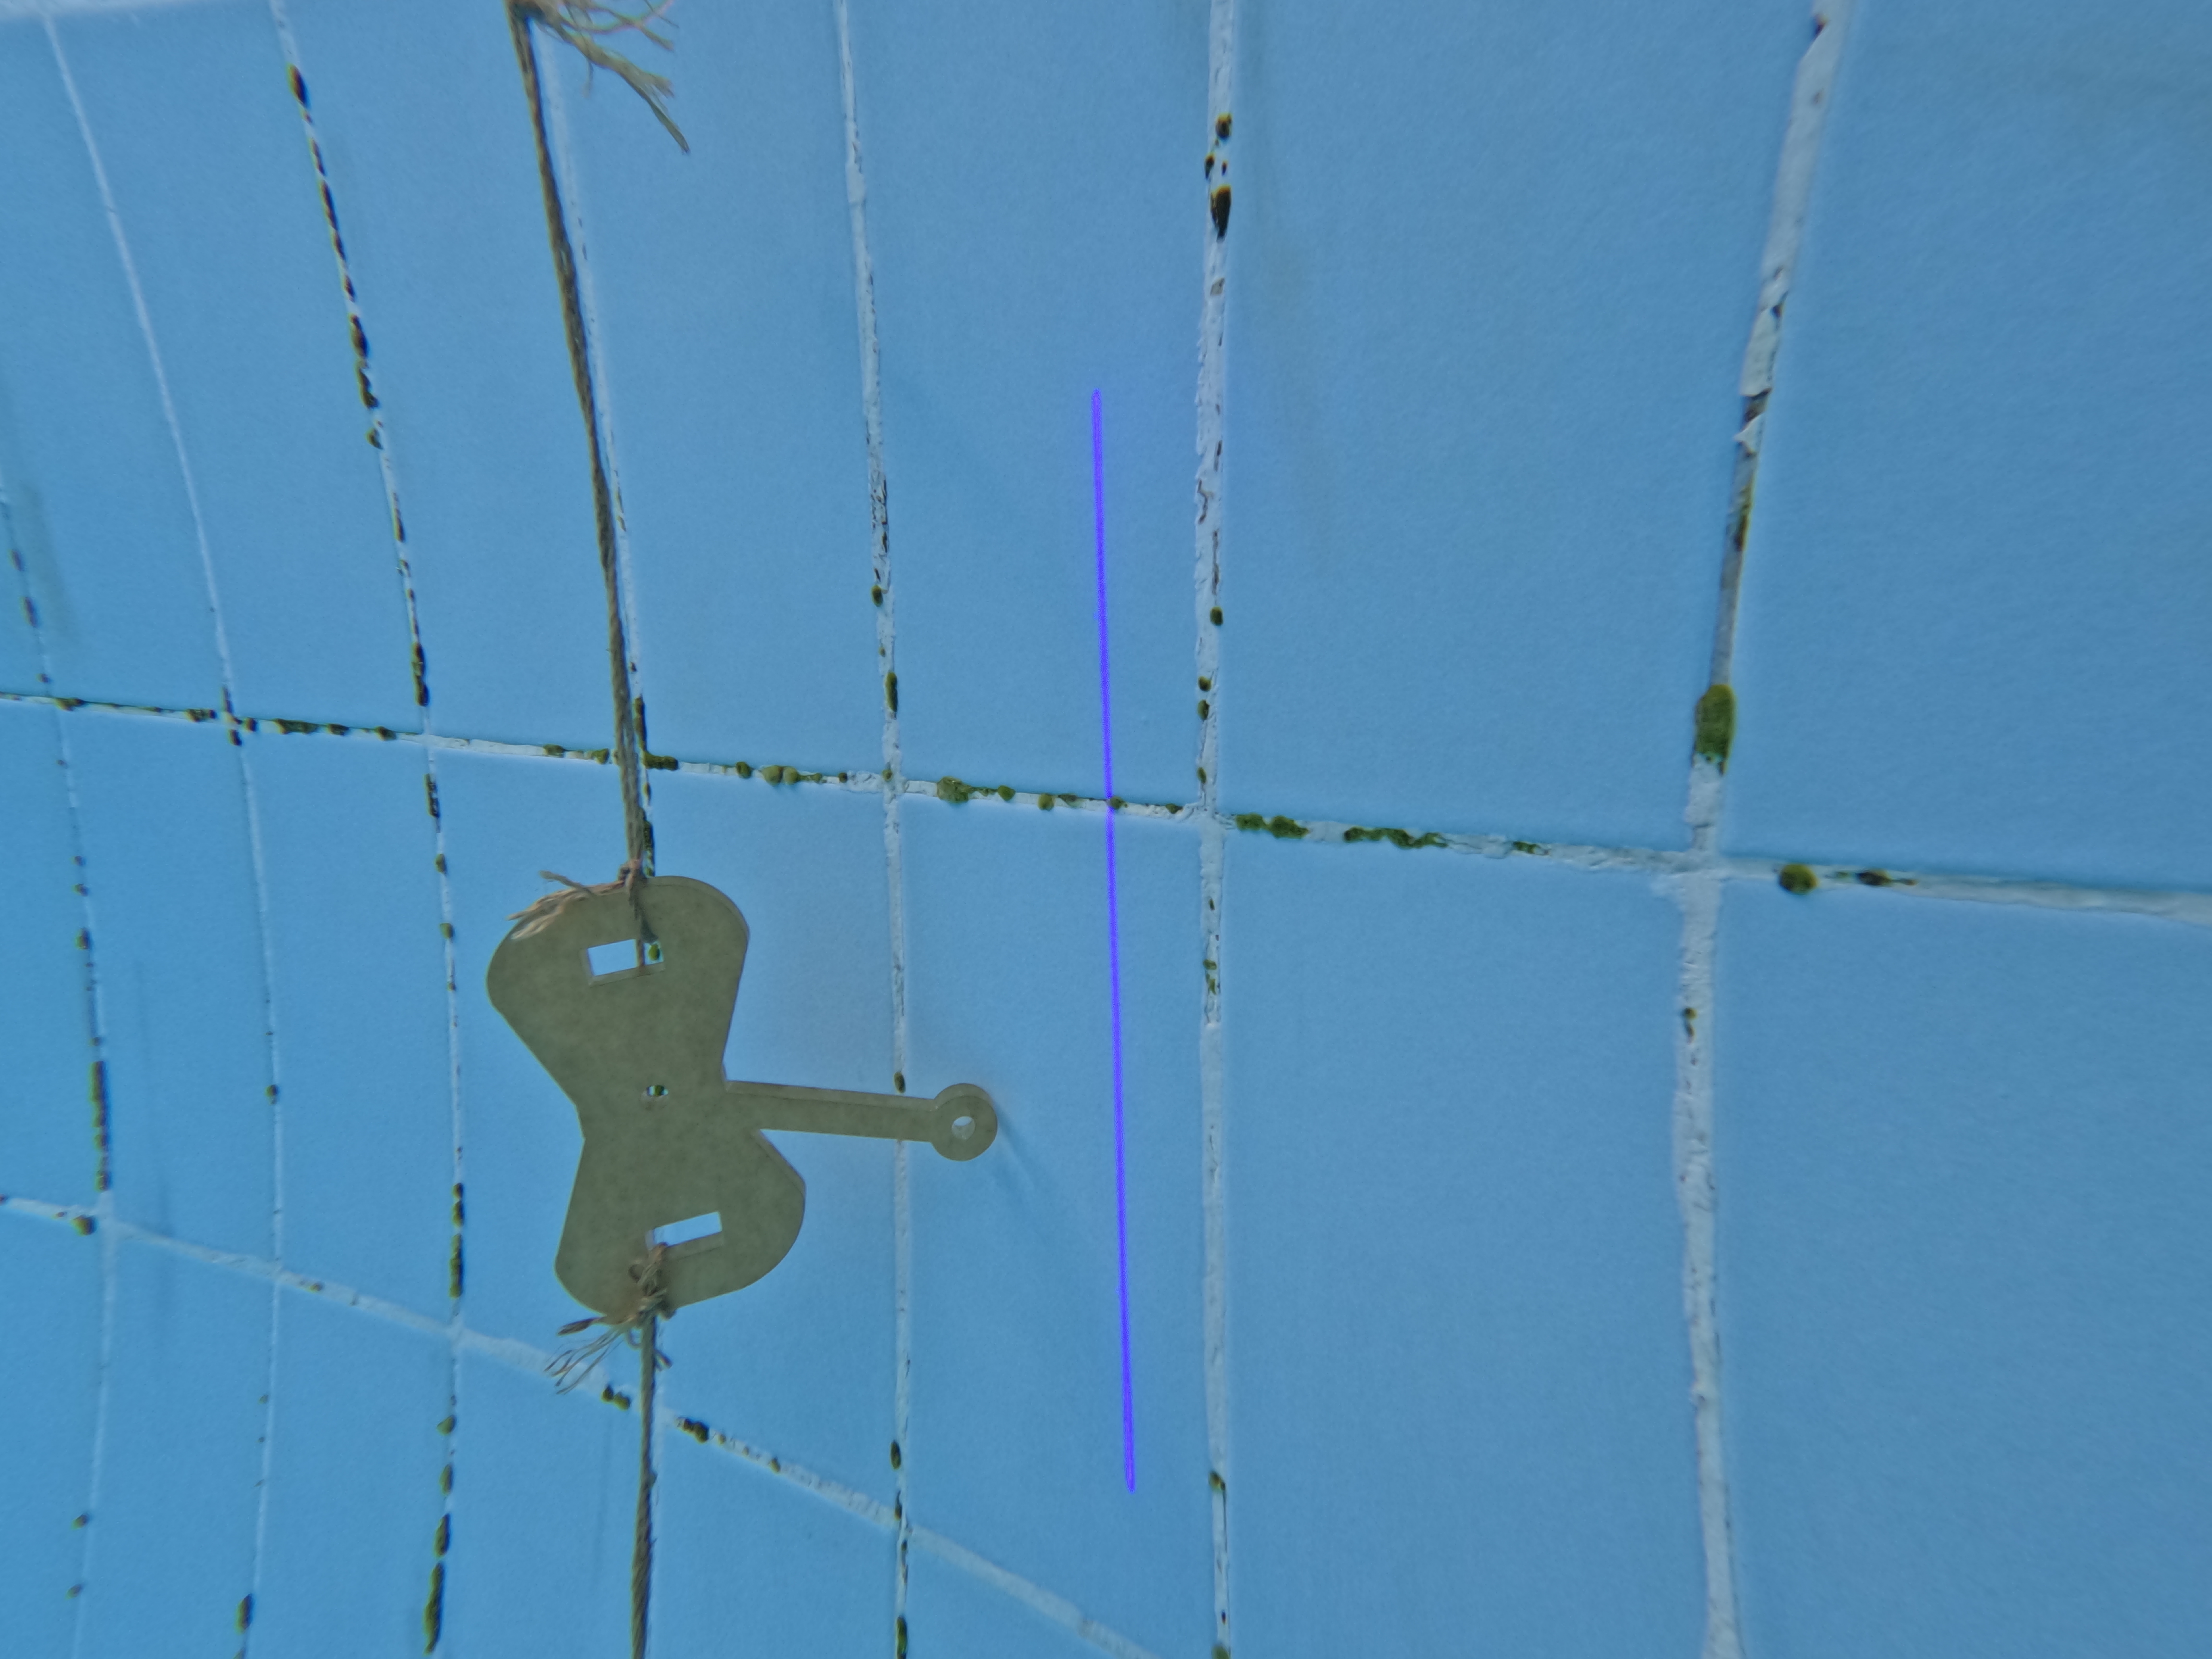

Supplement: Supplementary file 2022 [file G0050583.pdf › Level_3_2/G0050583.pdf]

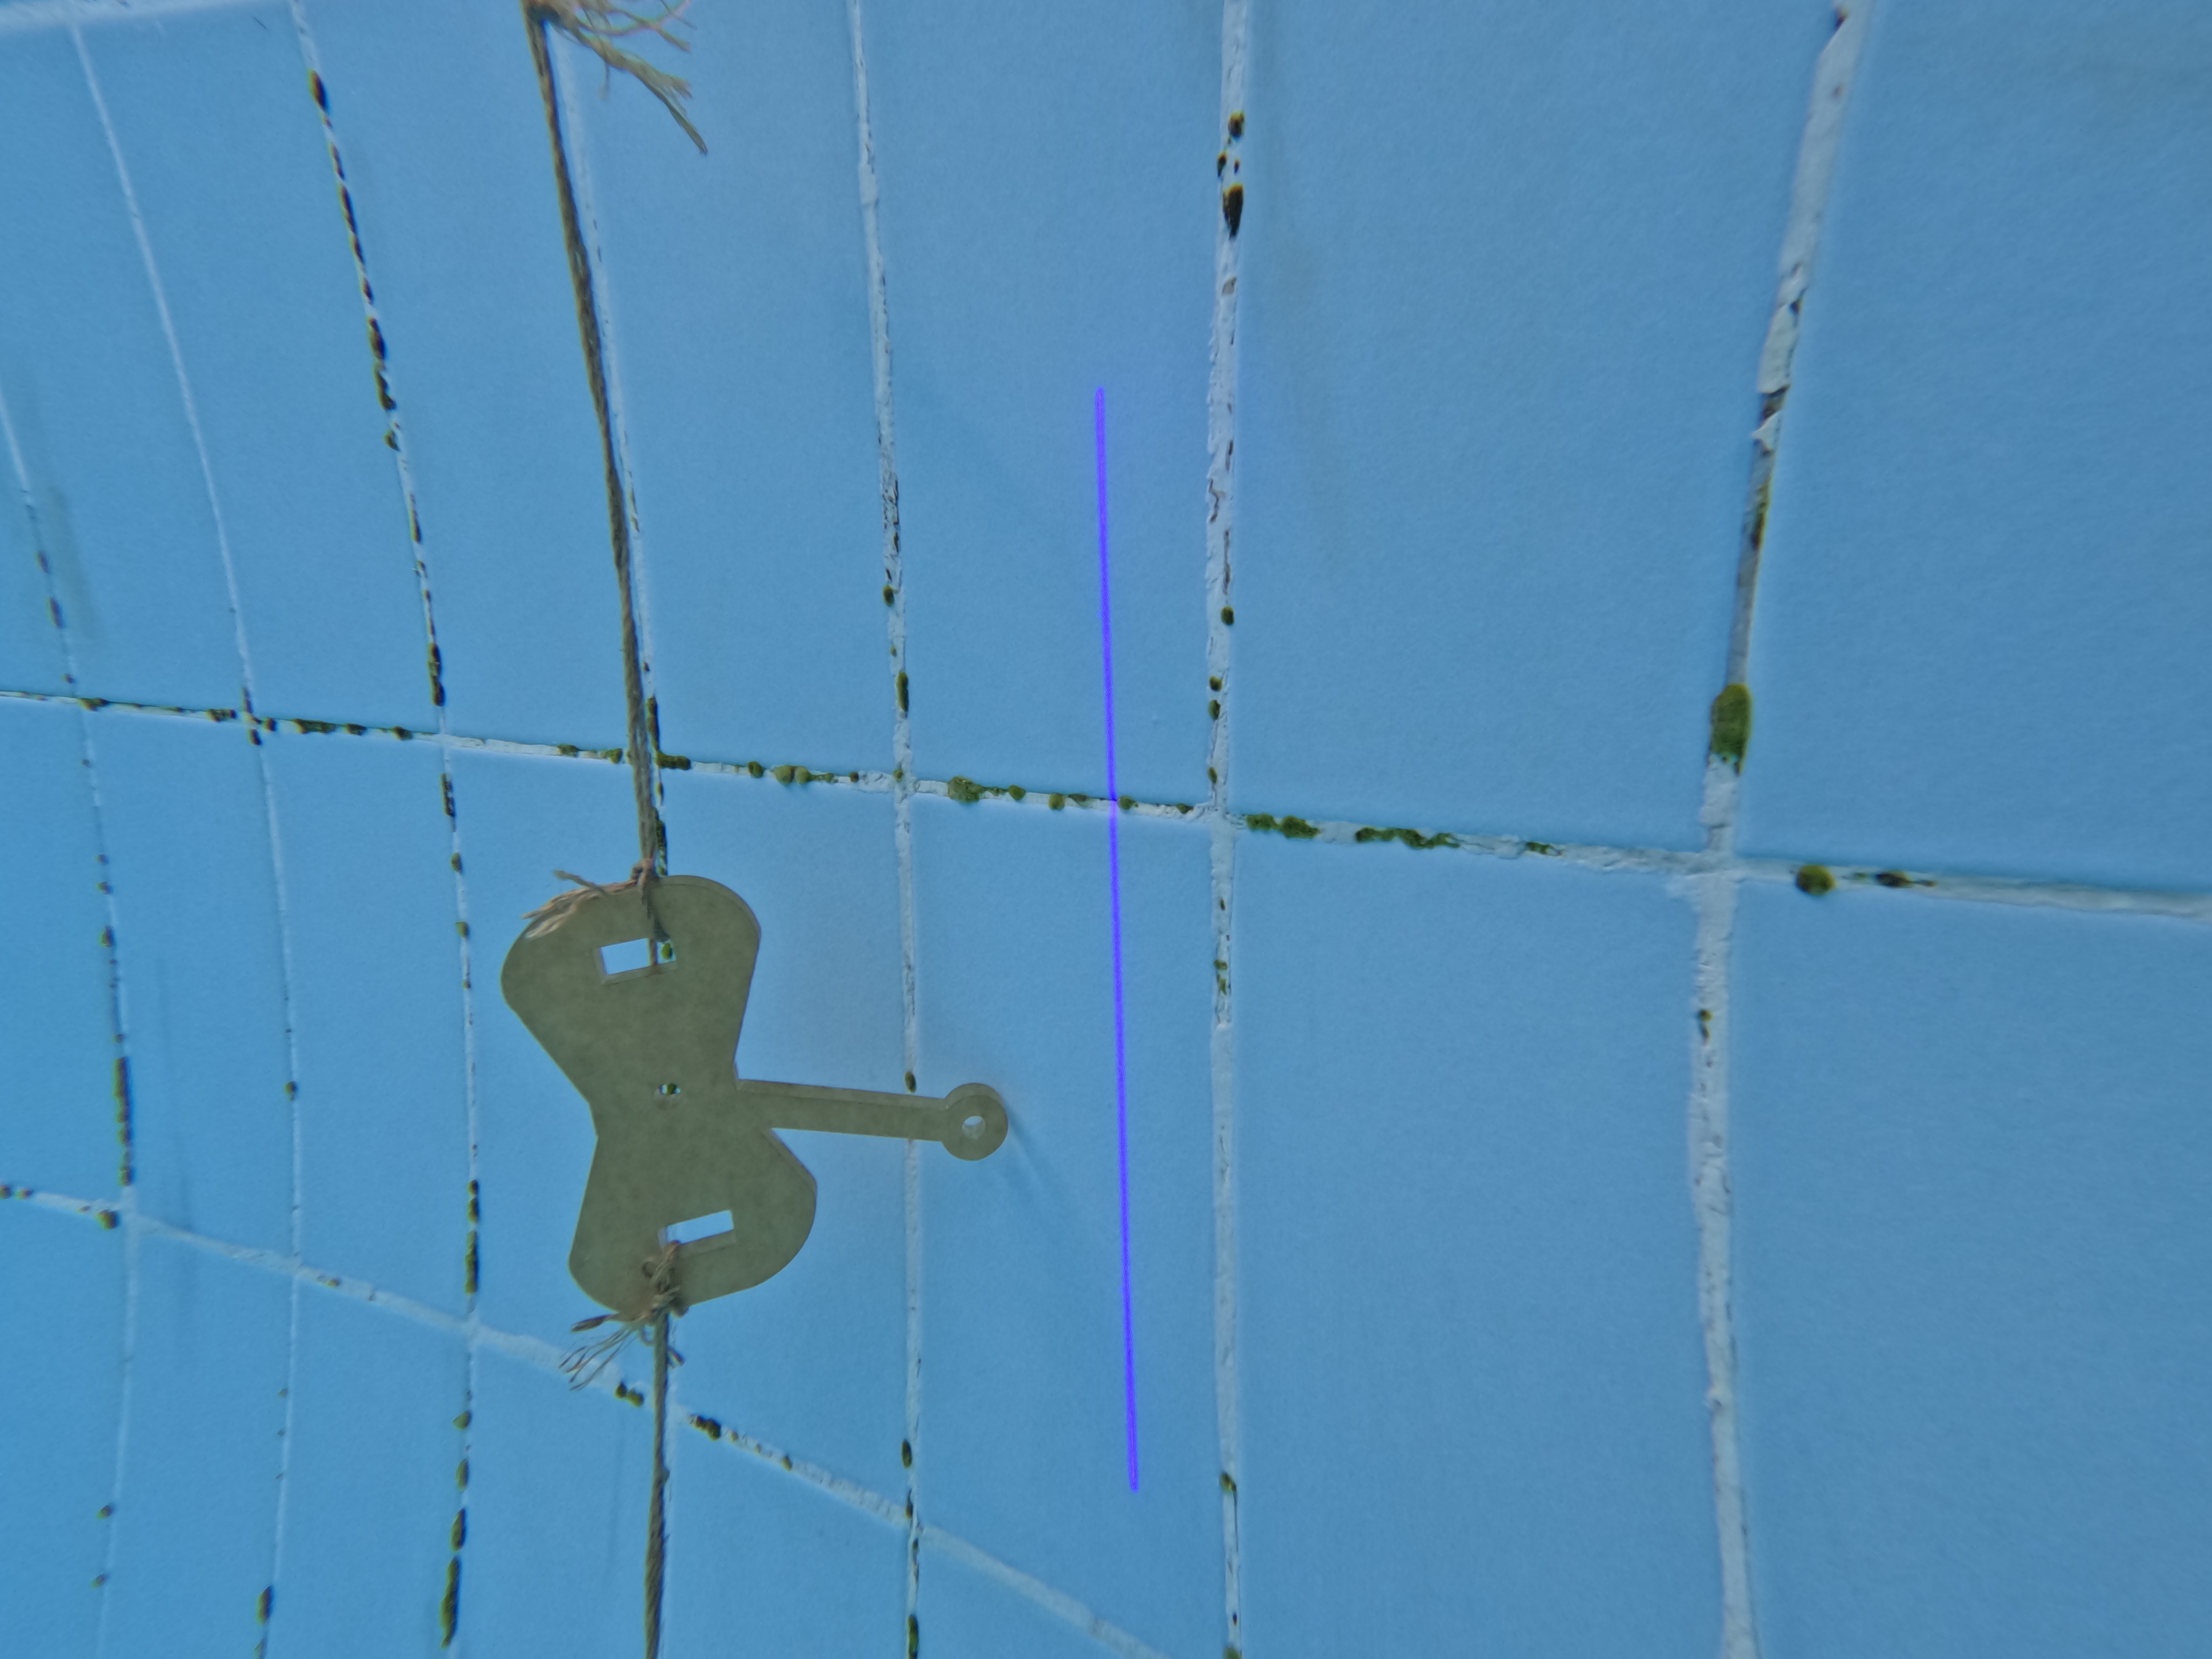

Supplement: Supplementary file 2023 [file G0050584.pdf › Level_3_2/G0050584.pdf]

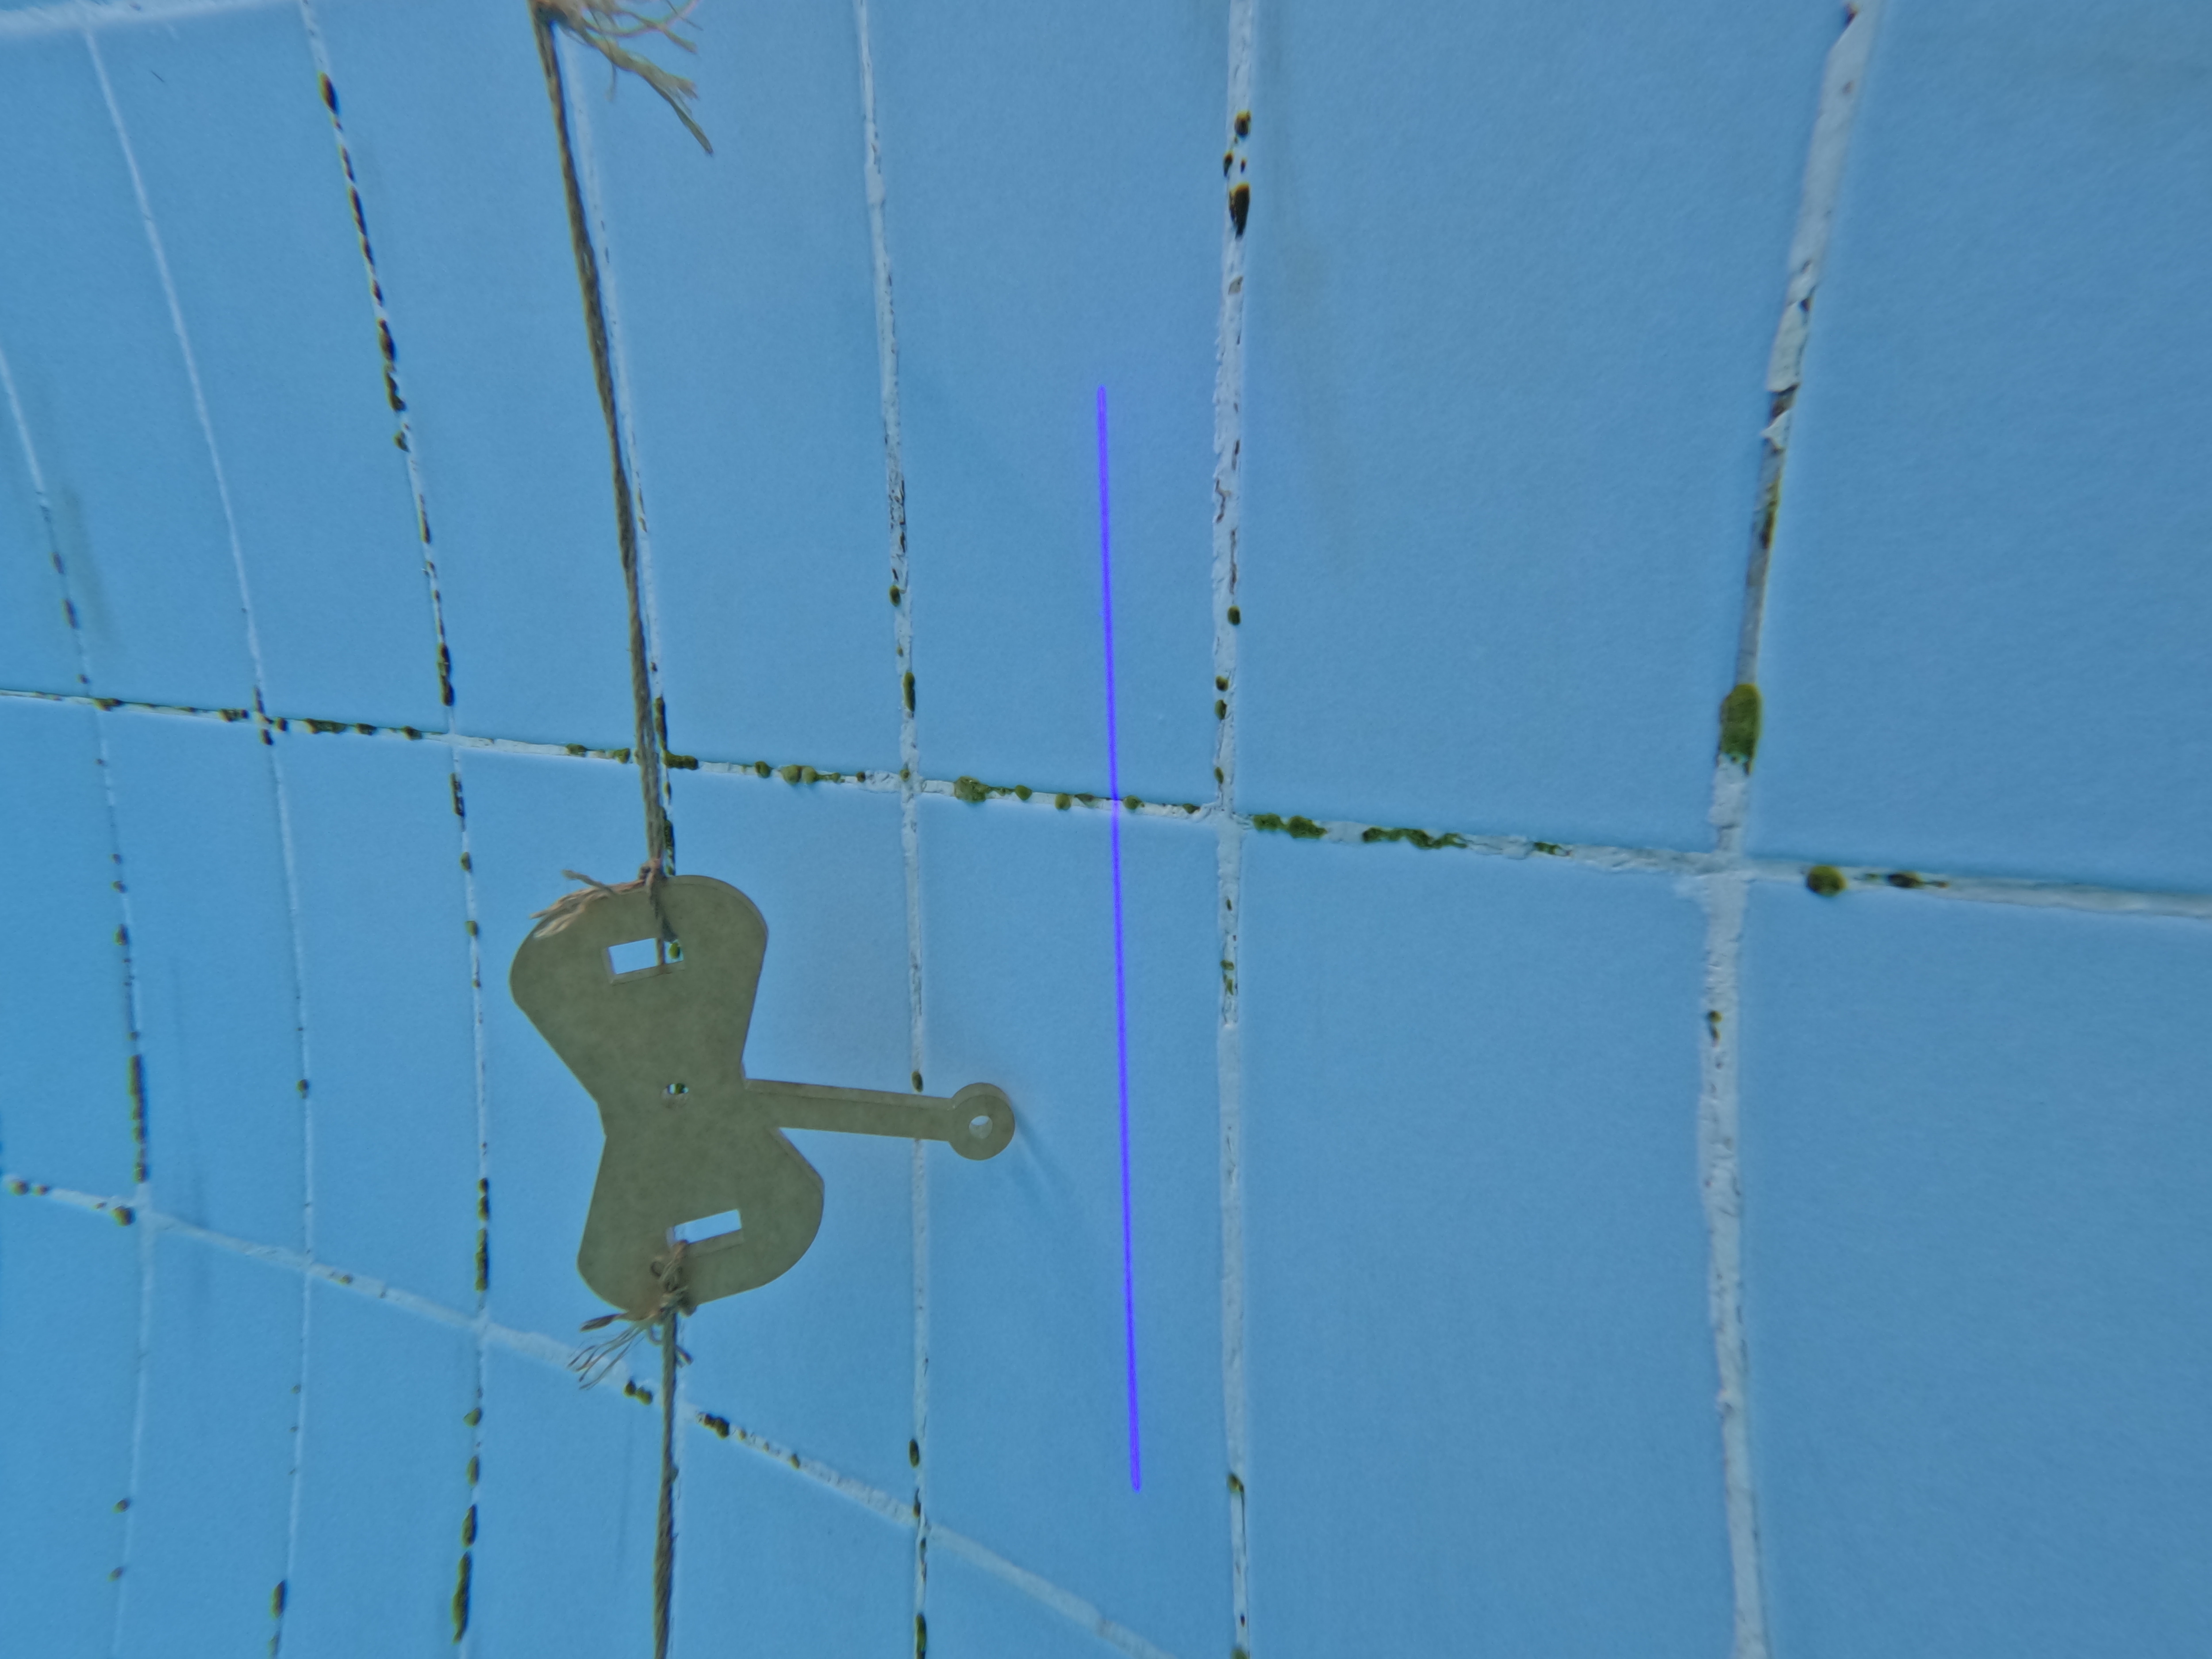

Supplement: Supplementary file 2024 [file G0050585.pdf › Level_3_2/G0050585.pdf]

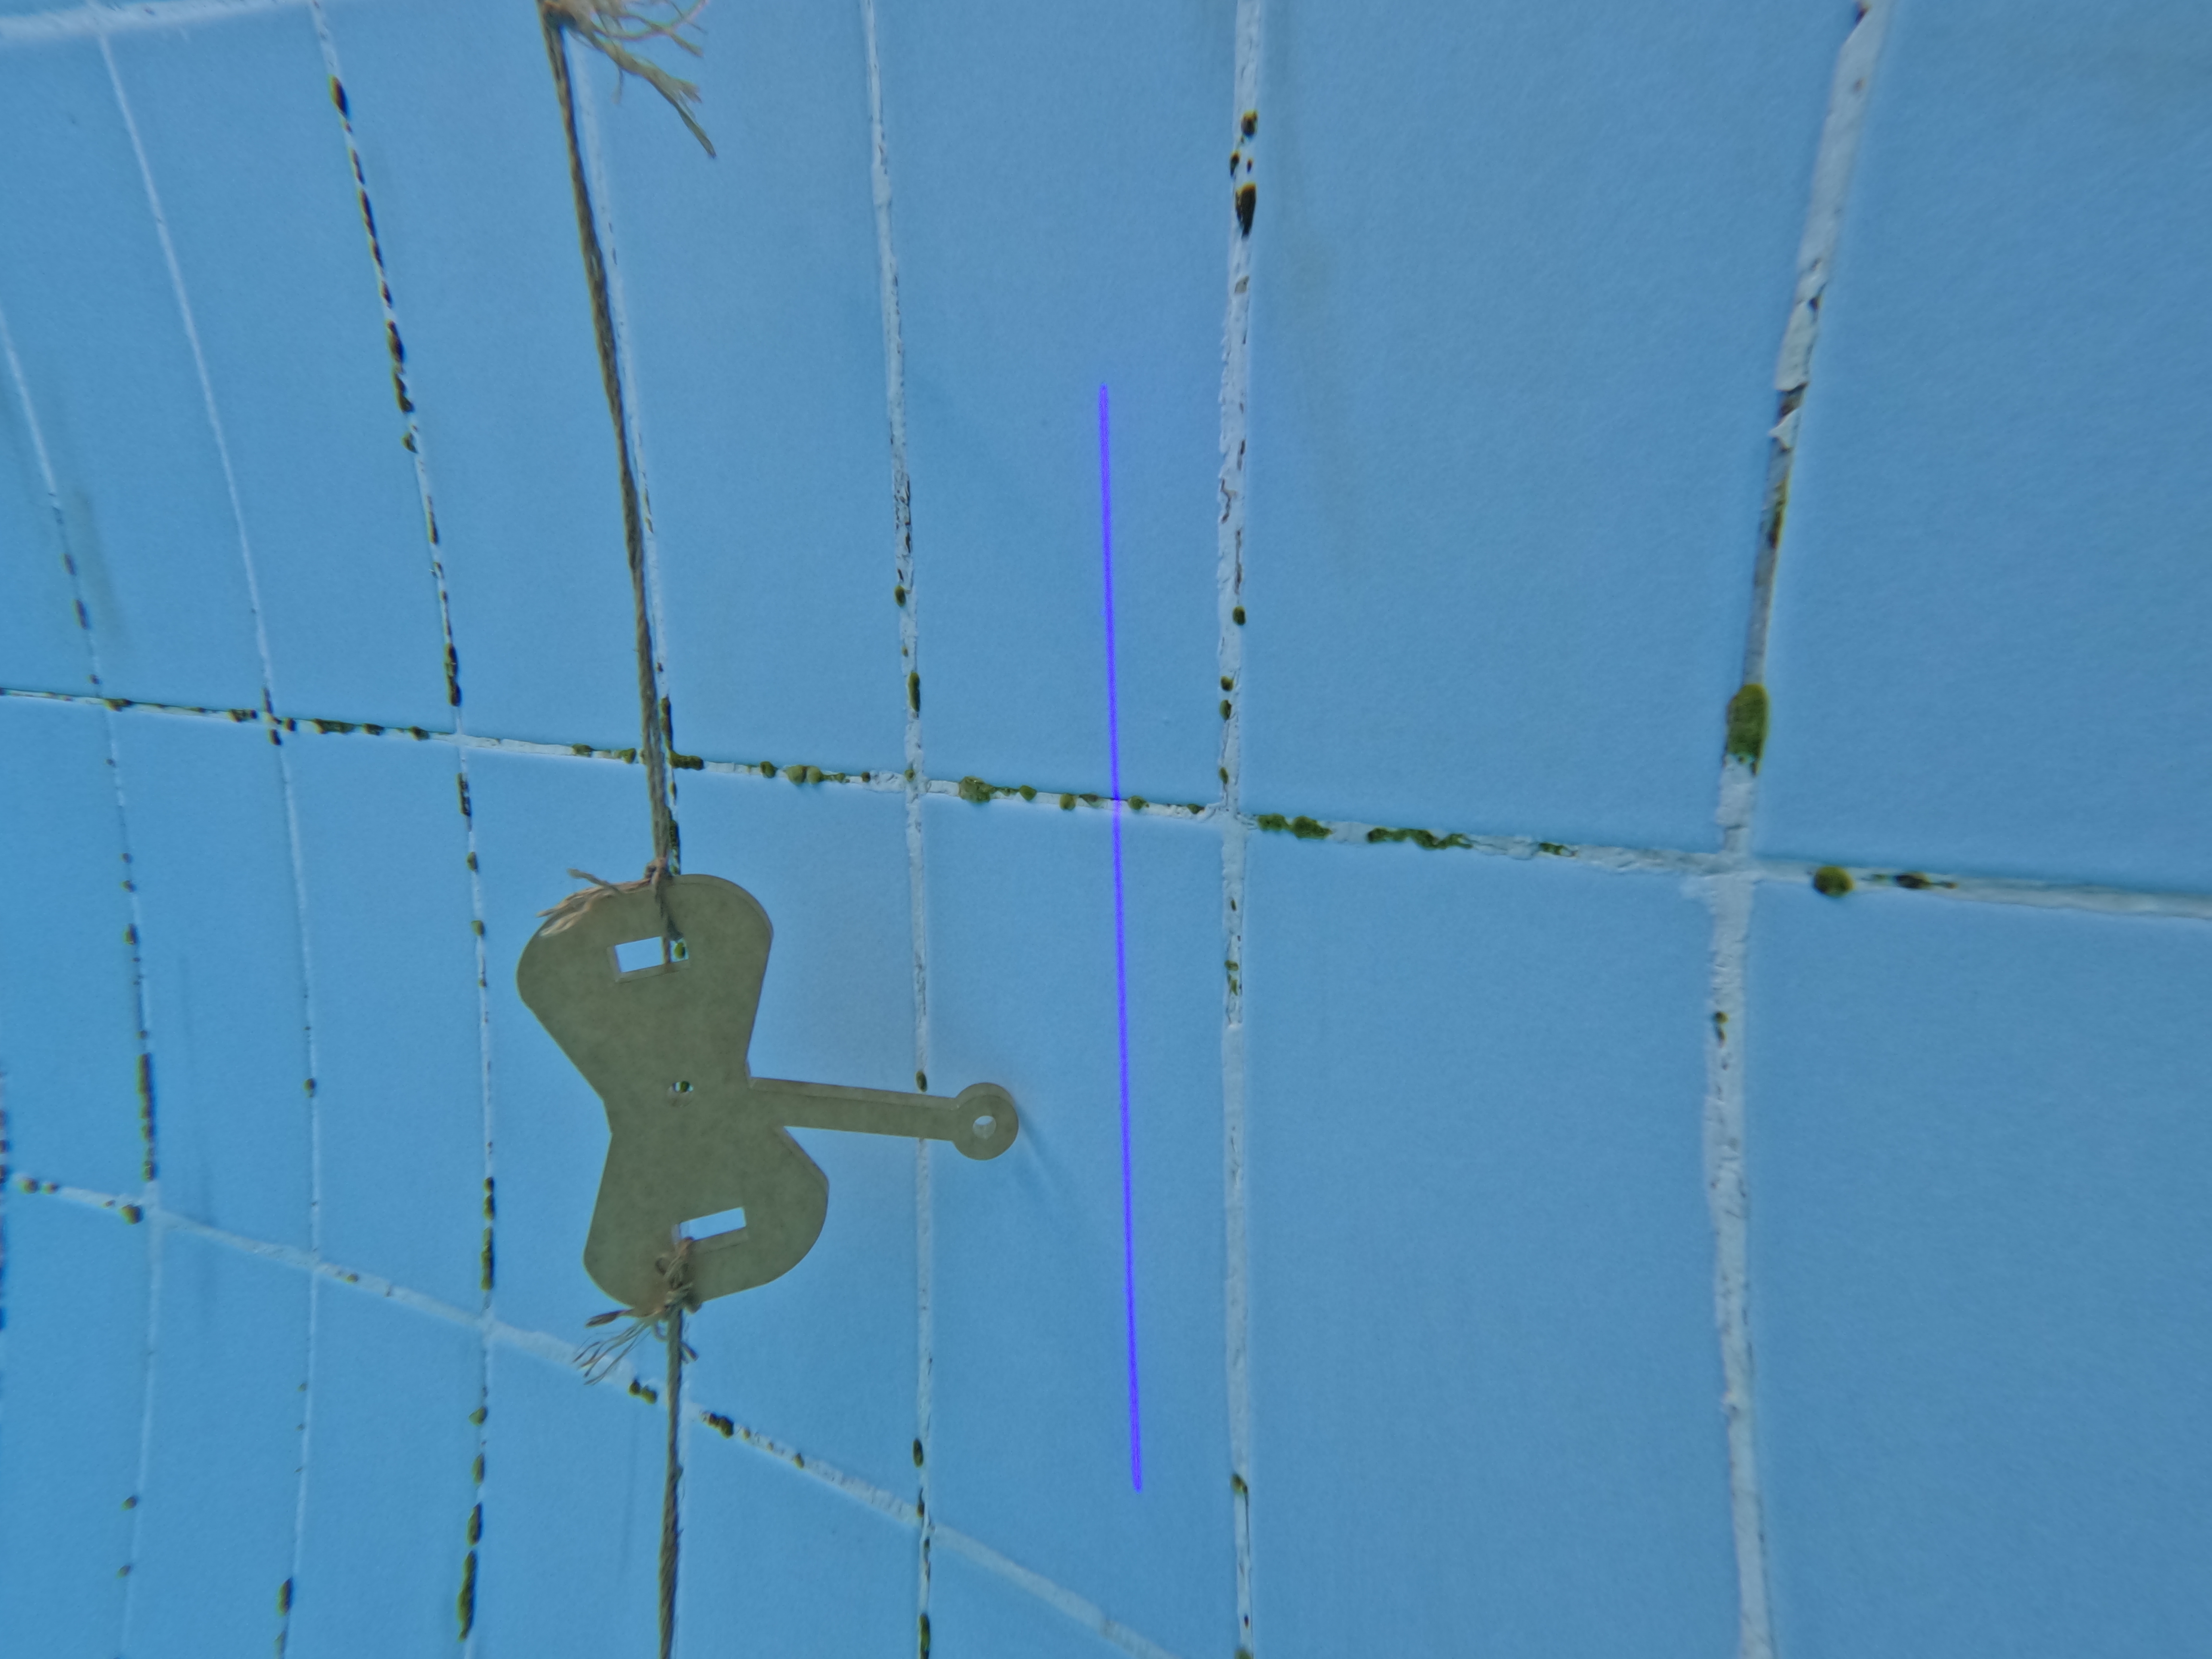

Supplement: Supplementary file 2025 [file G0050586.pdf › Level_3_2/G0050586.pdf]

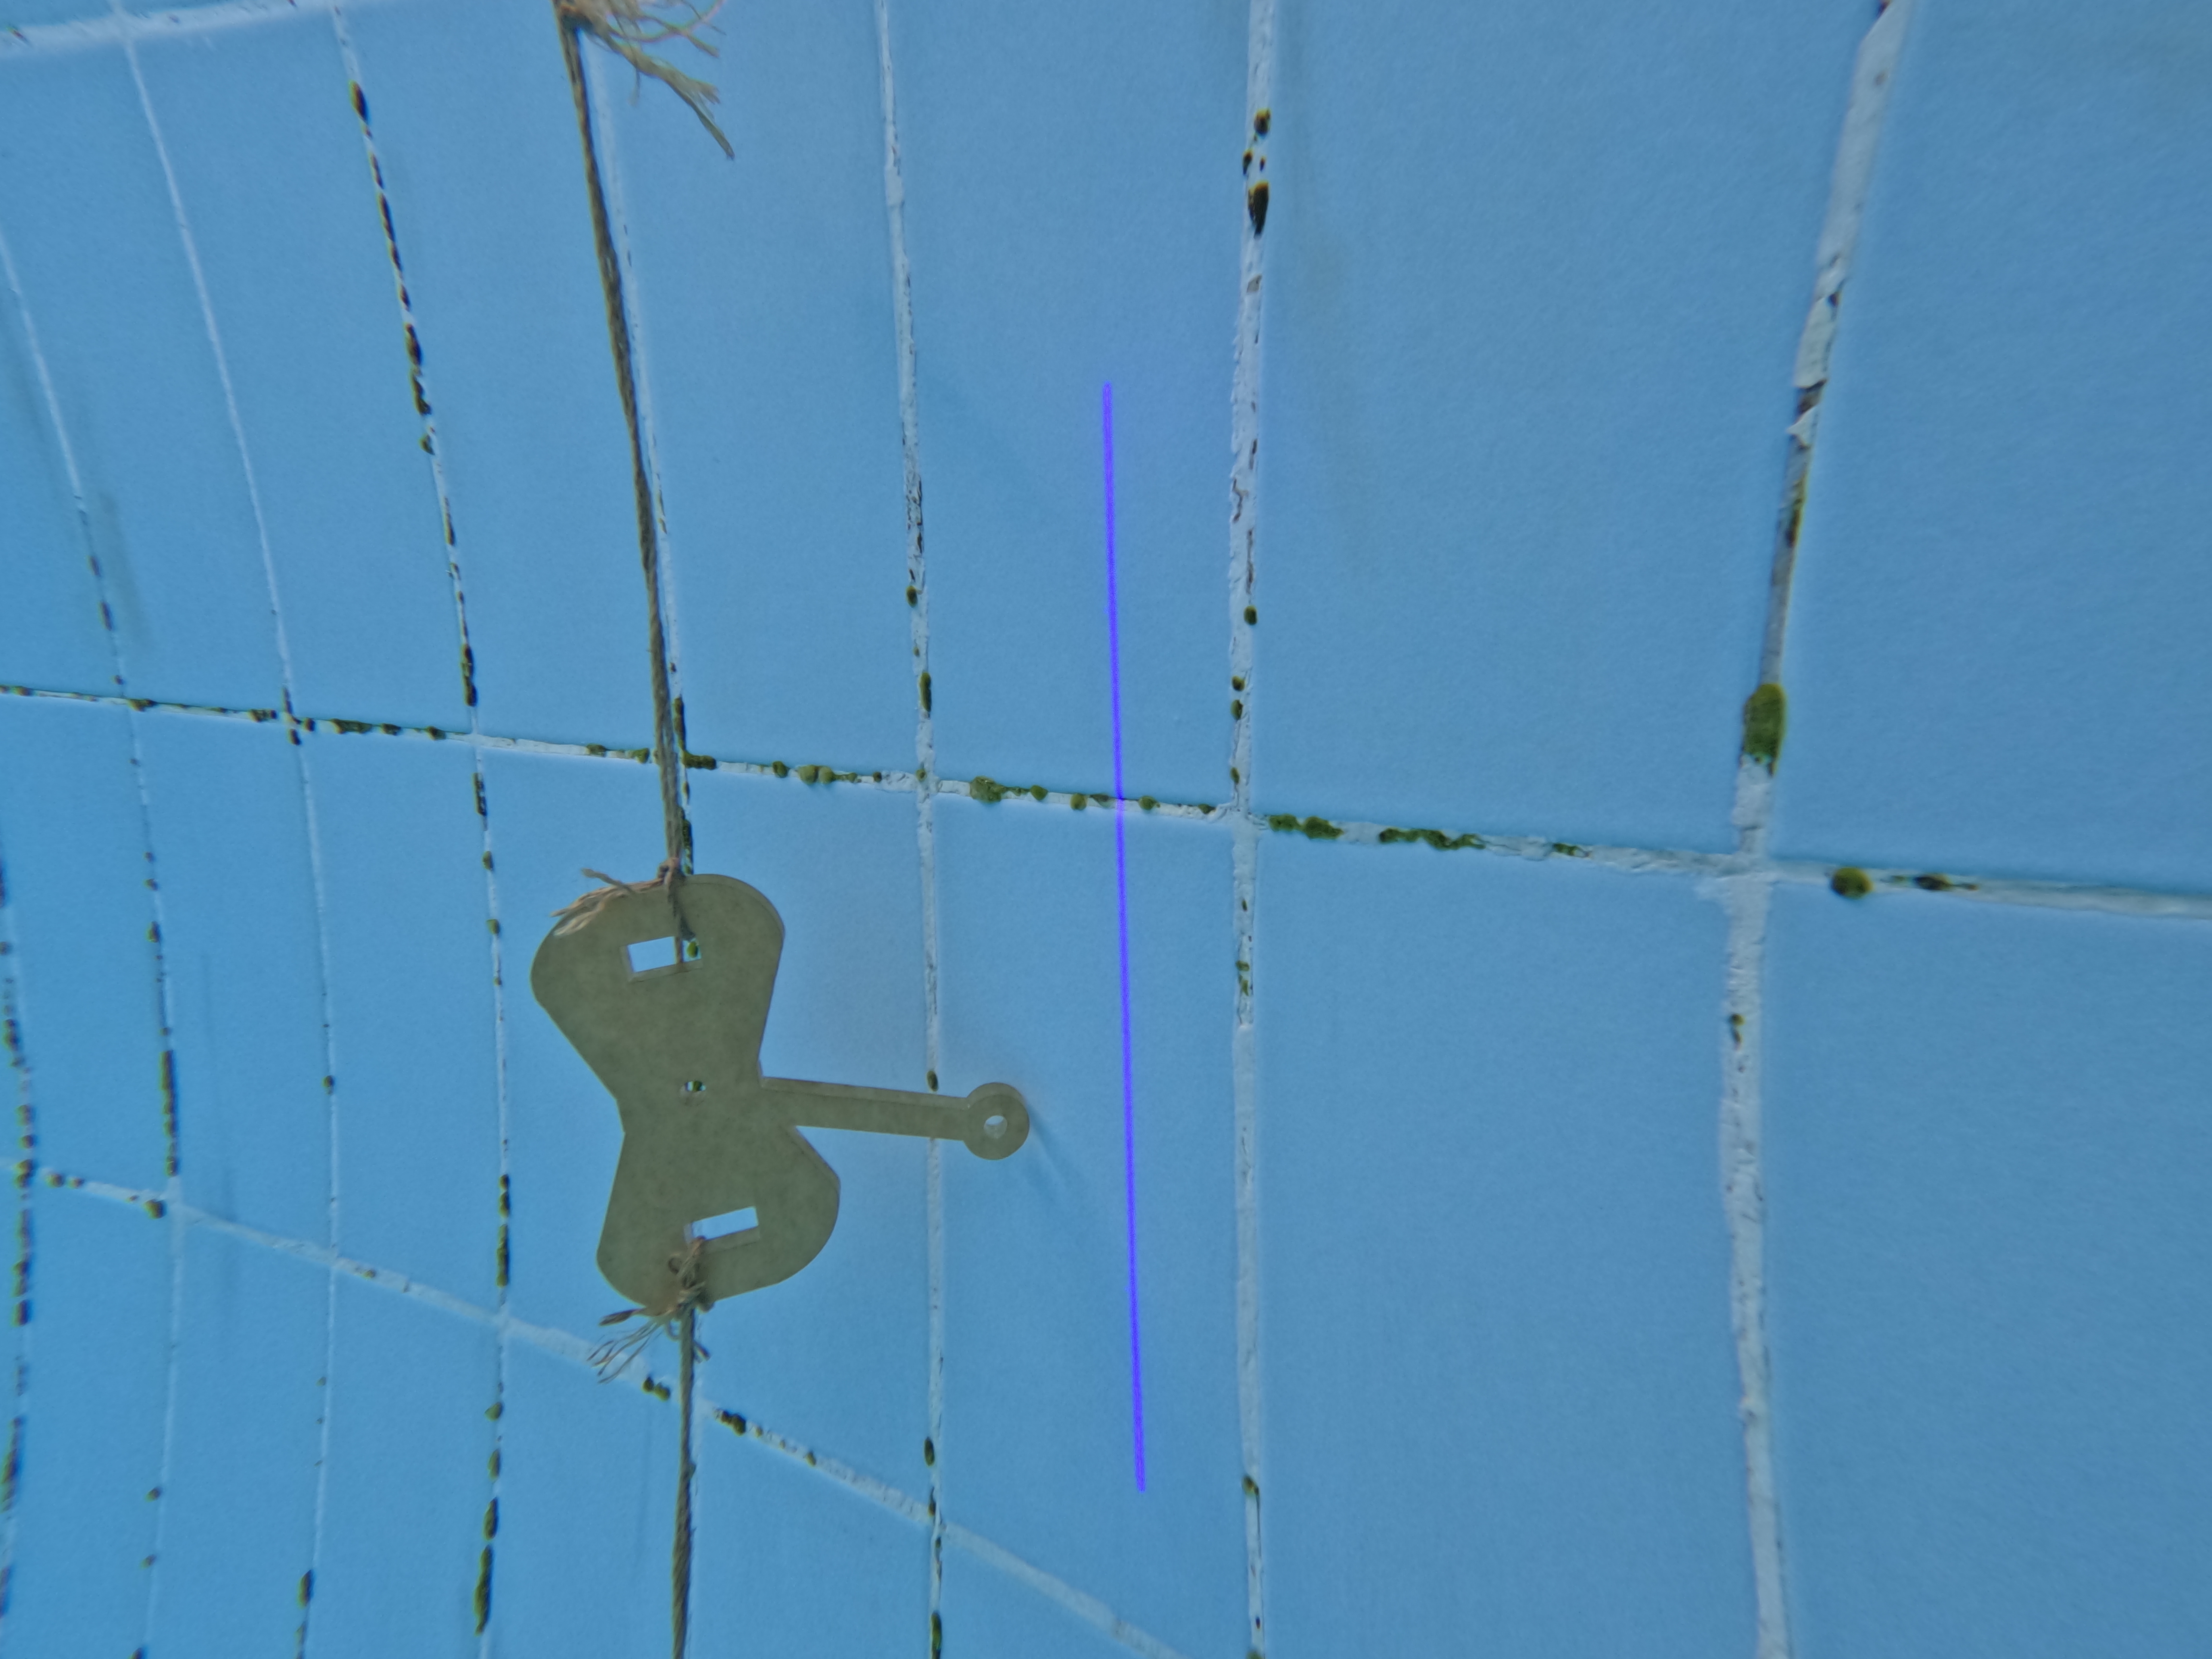

Supplement: Supplementary file 2026 [file G0050587.pdf › Level_3_2/G0050587.pdf]

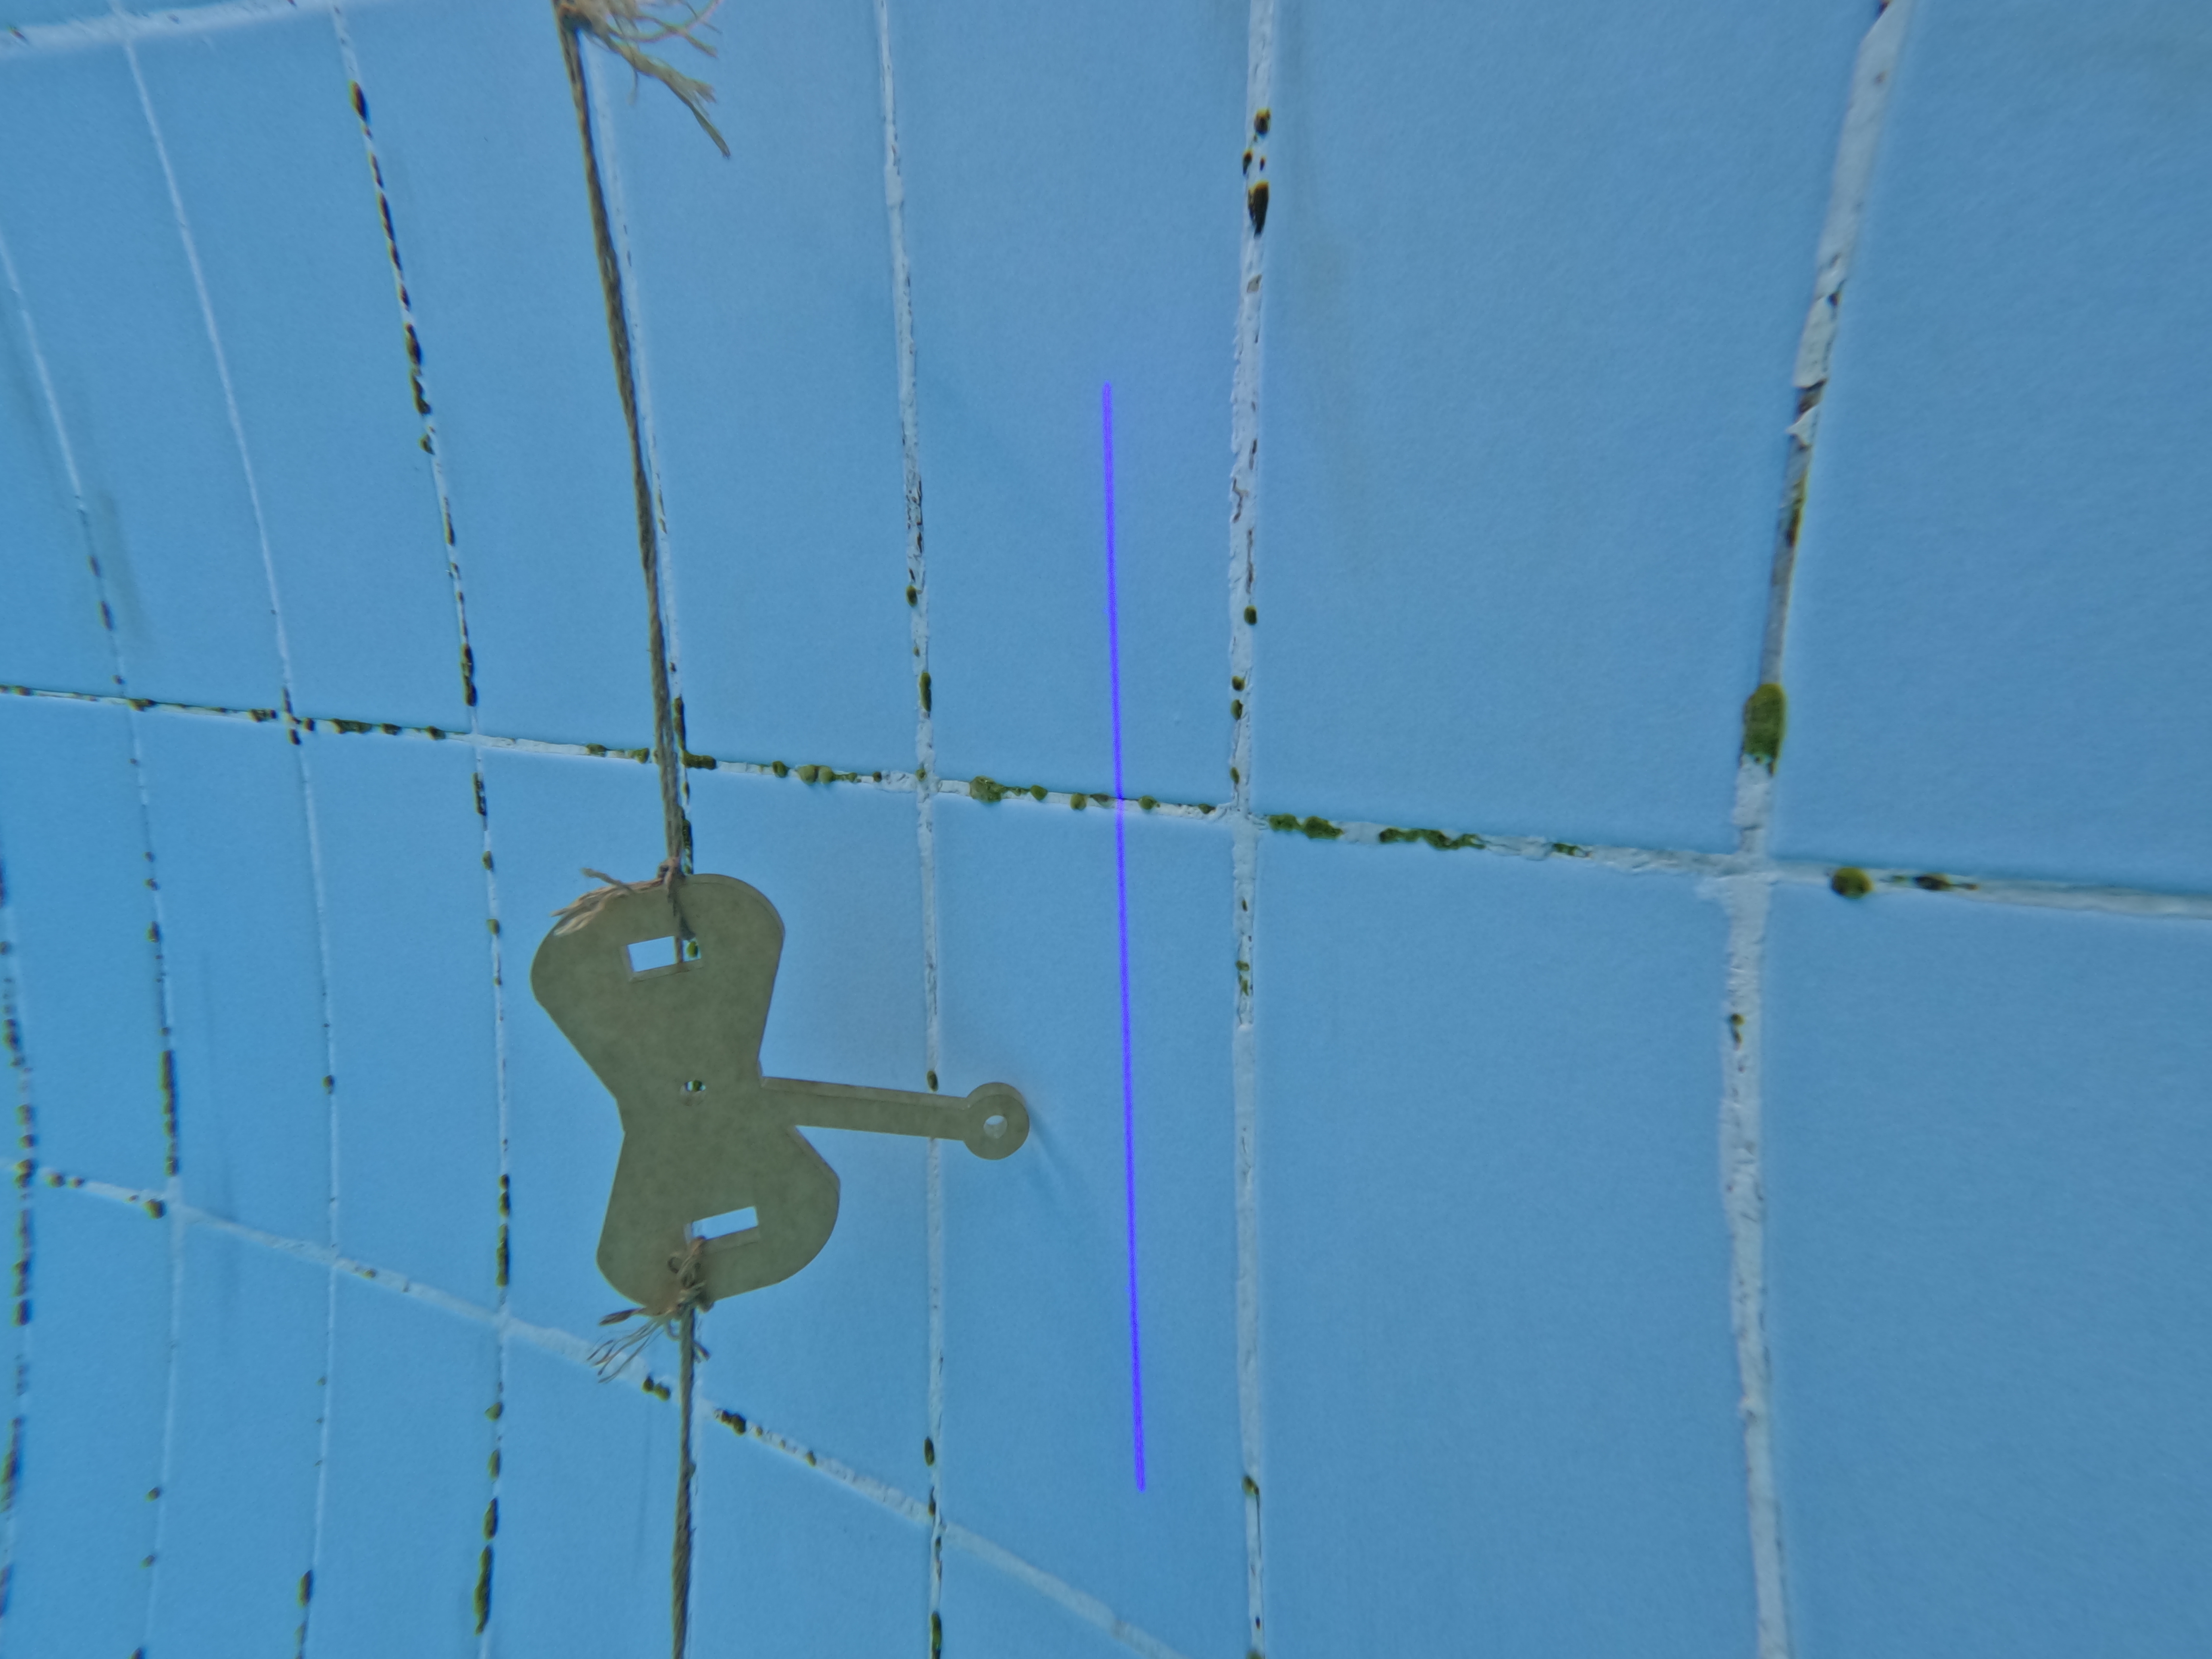

Supplement: Supplementary file 2027 [file G0050588.pdf › Level_3_2/G0050588.pdf]

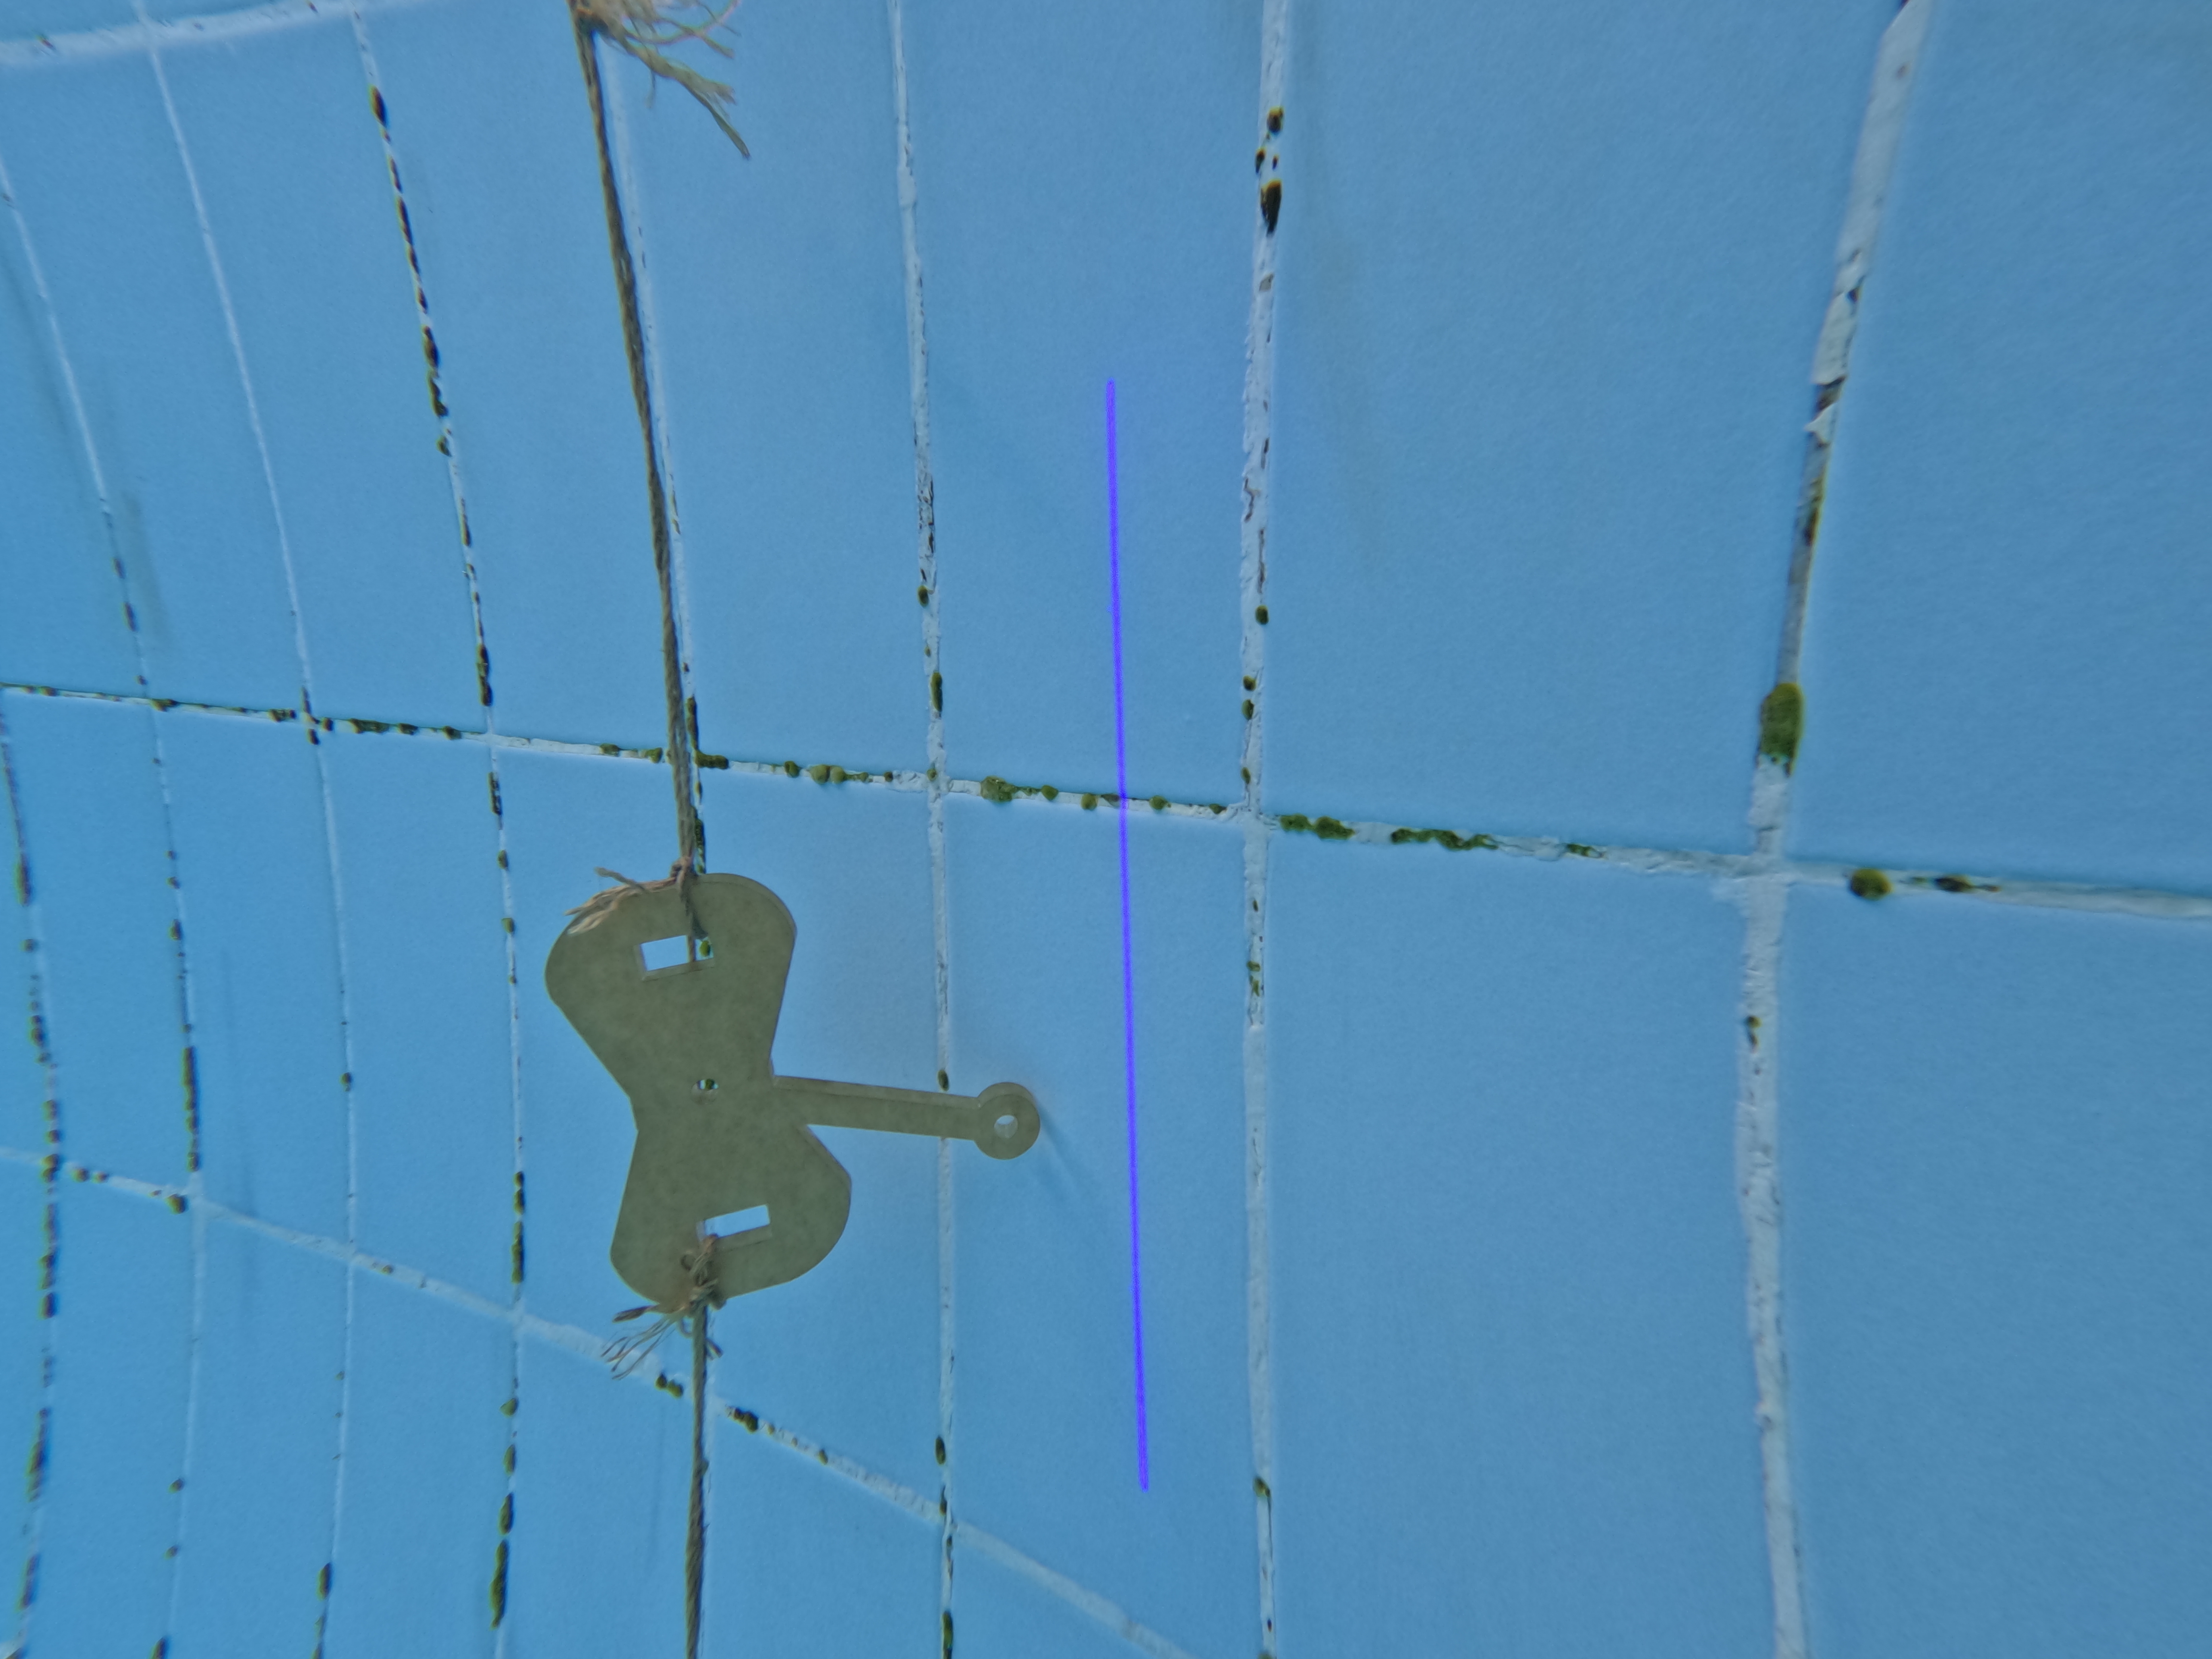

Supplement: Supplementary file 2028 [file G0050589.pdf › Level_3_2/G0050589.pdf]

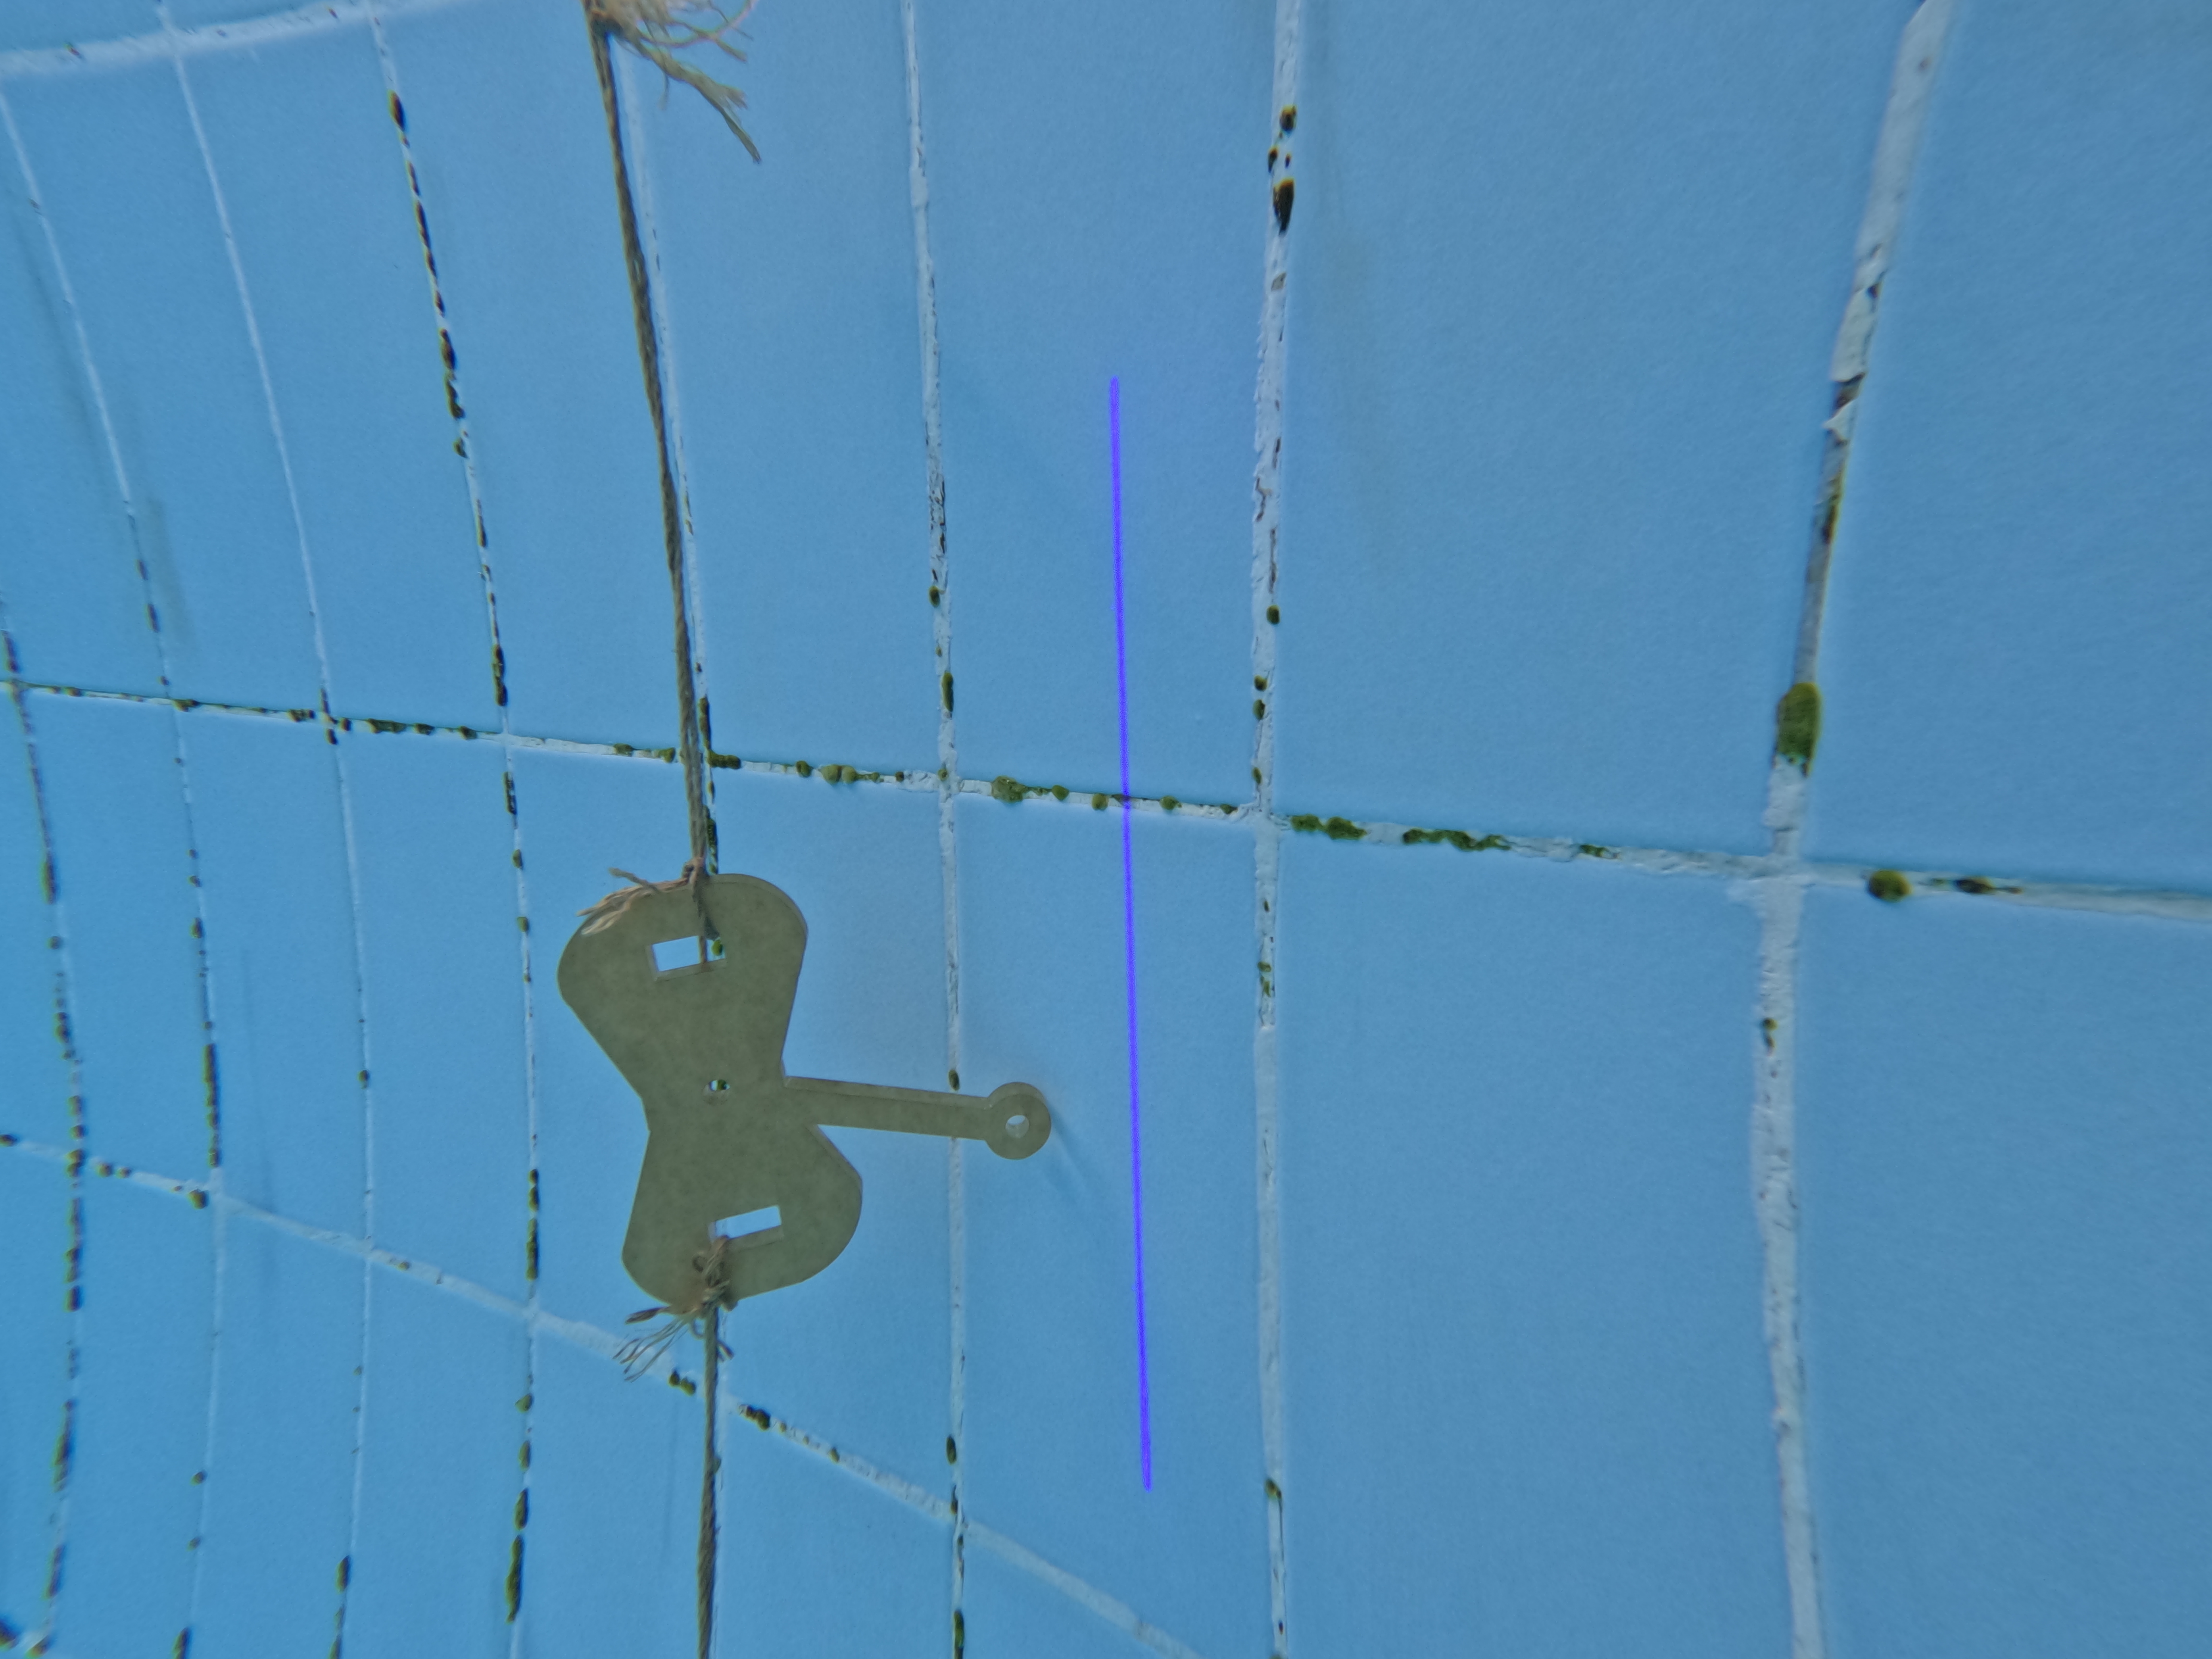

Supplement: Supplementary file 2029 [file G0050590.pdf › Level_3_2/G0050590.pdf]

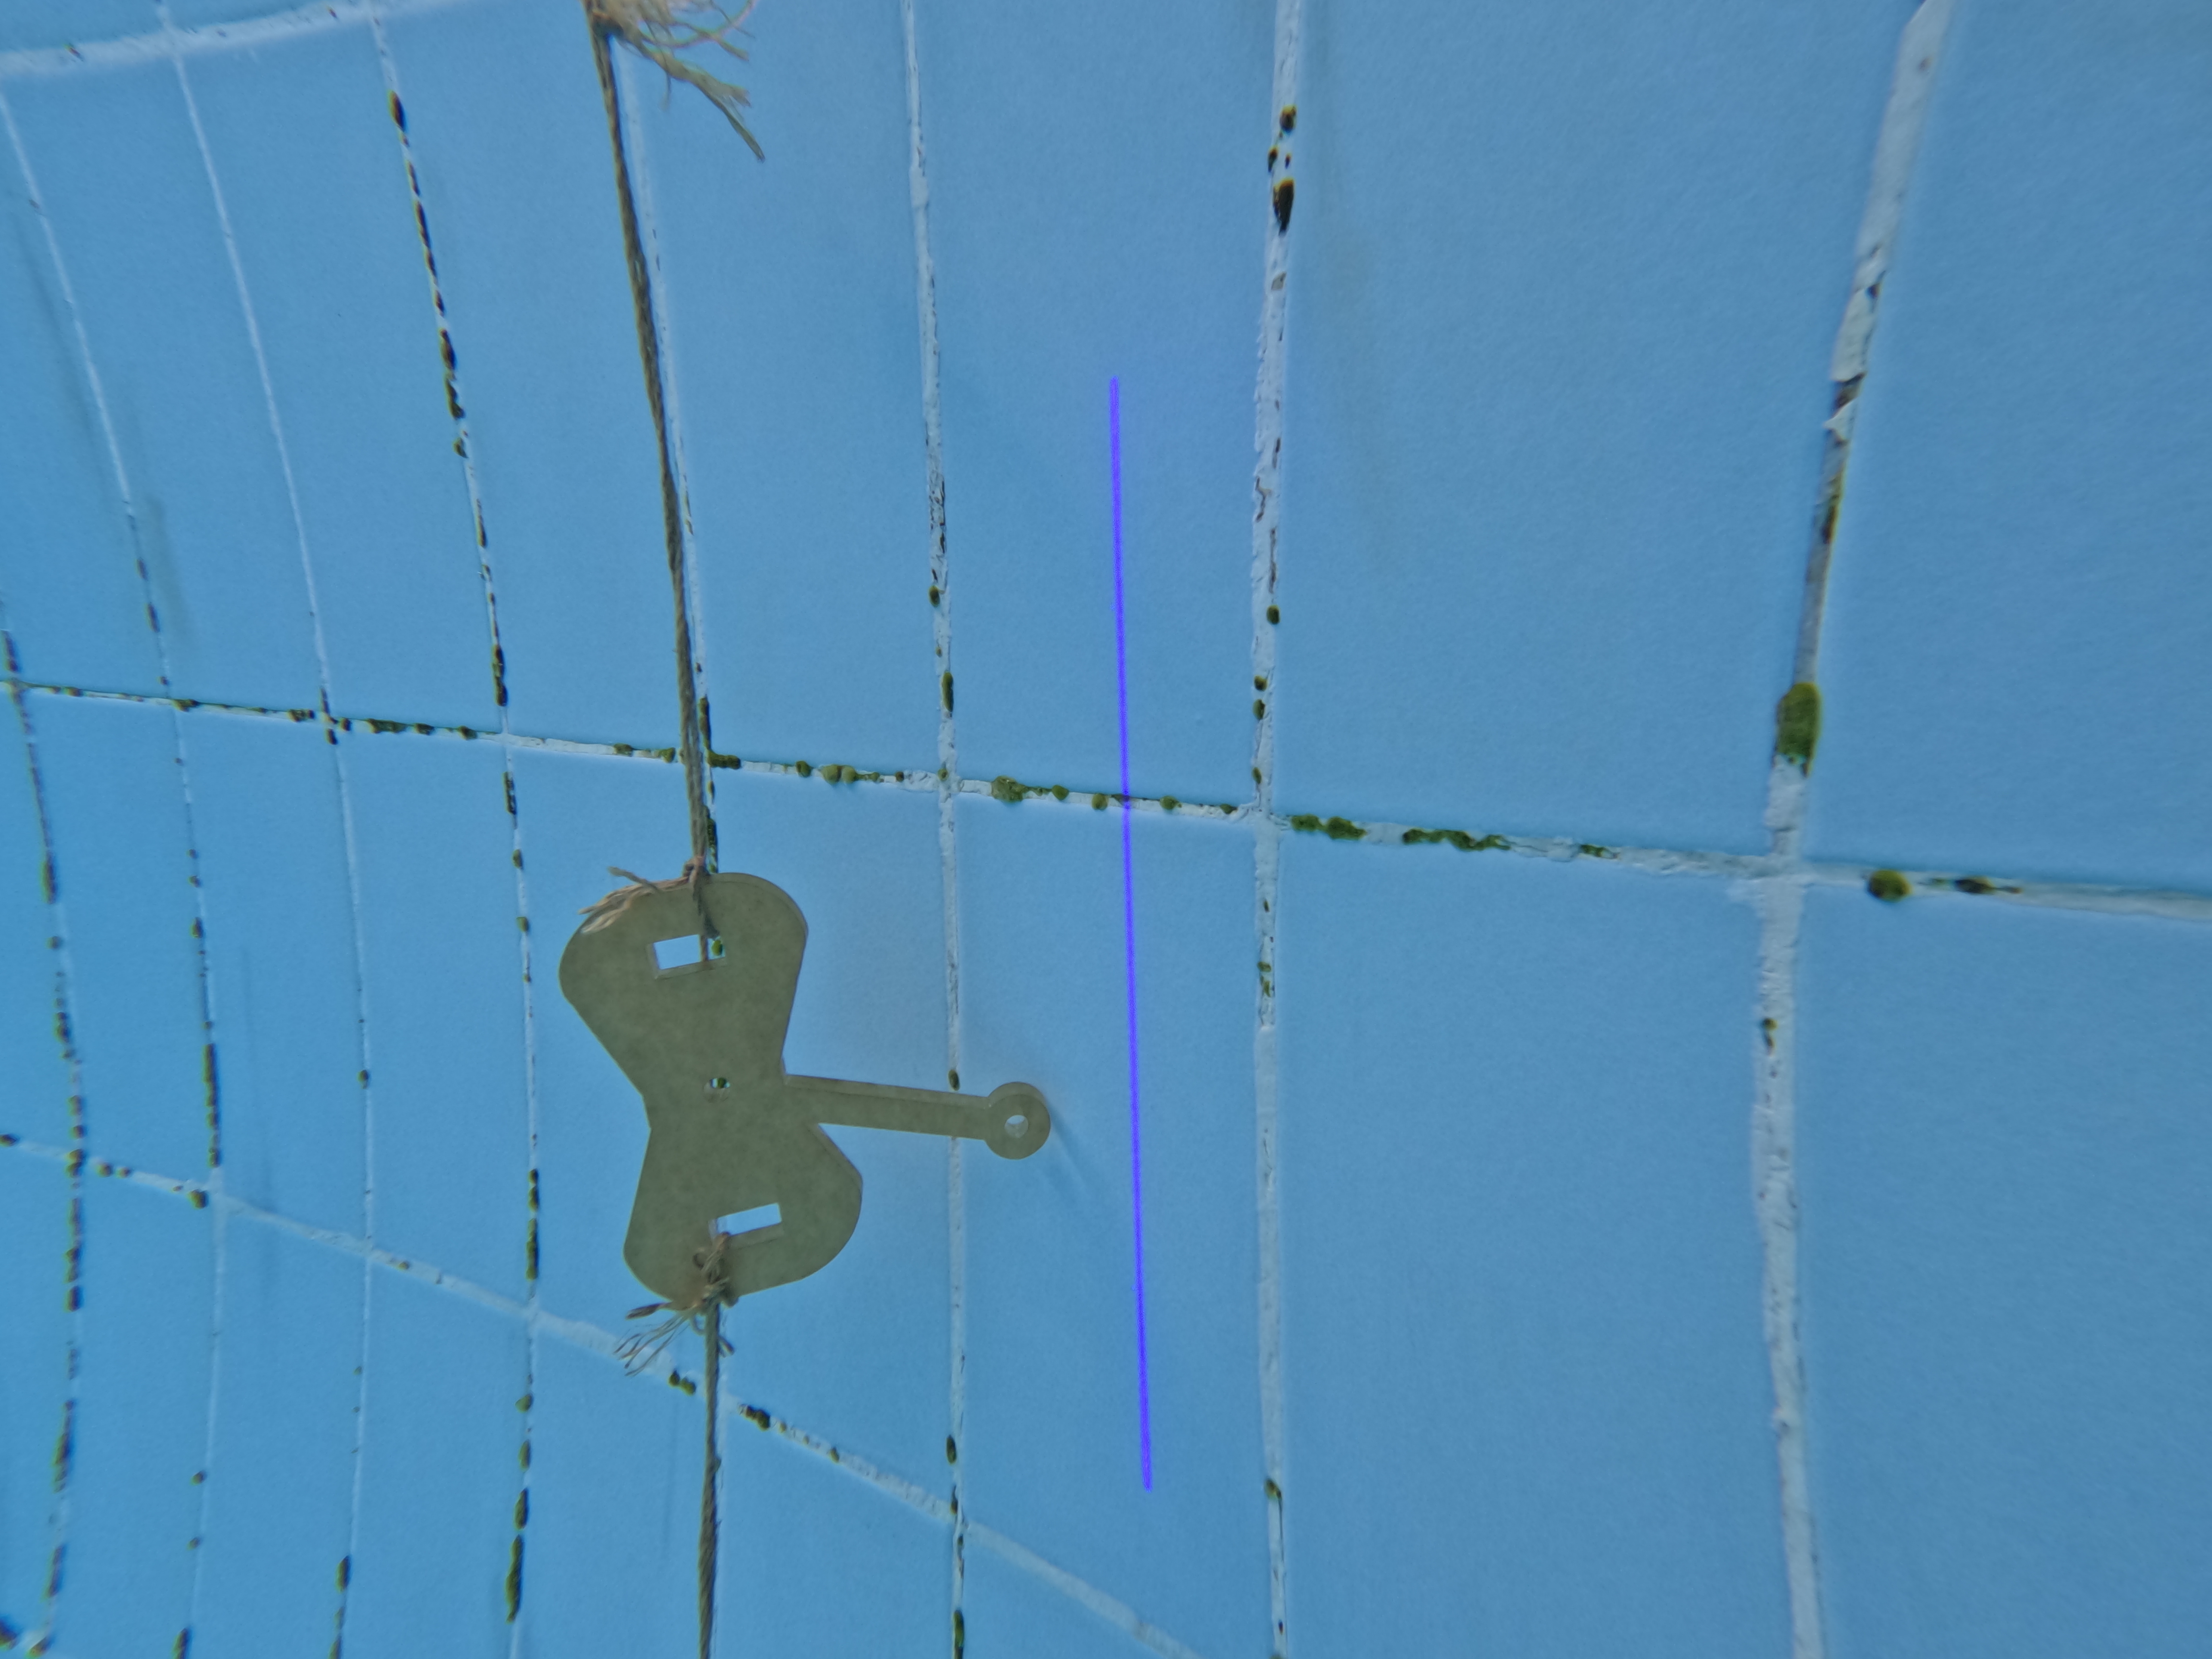

Supplement: Supplementary file 2030 [file G0050591.pdf › Level_3_2/G0050591.pdf]

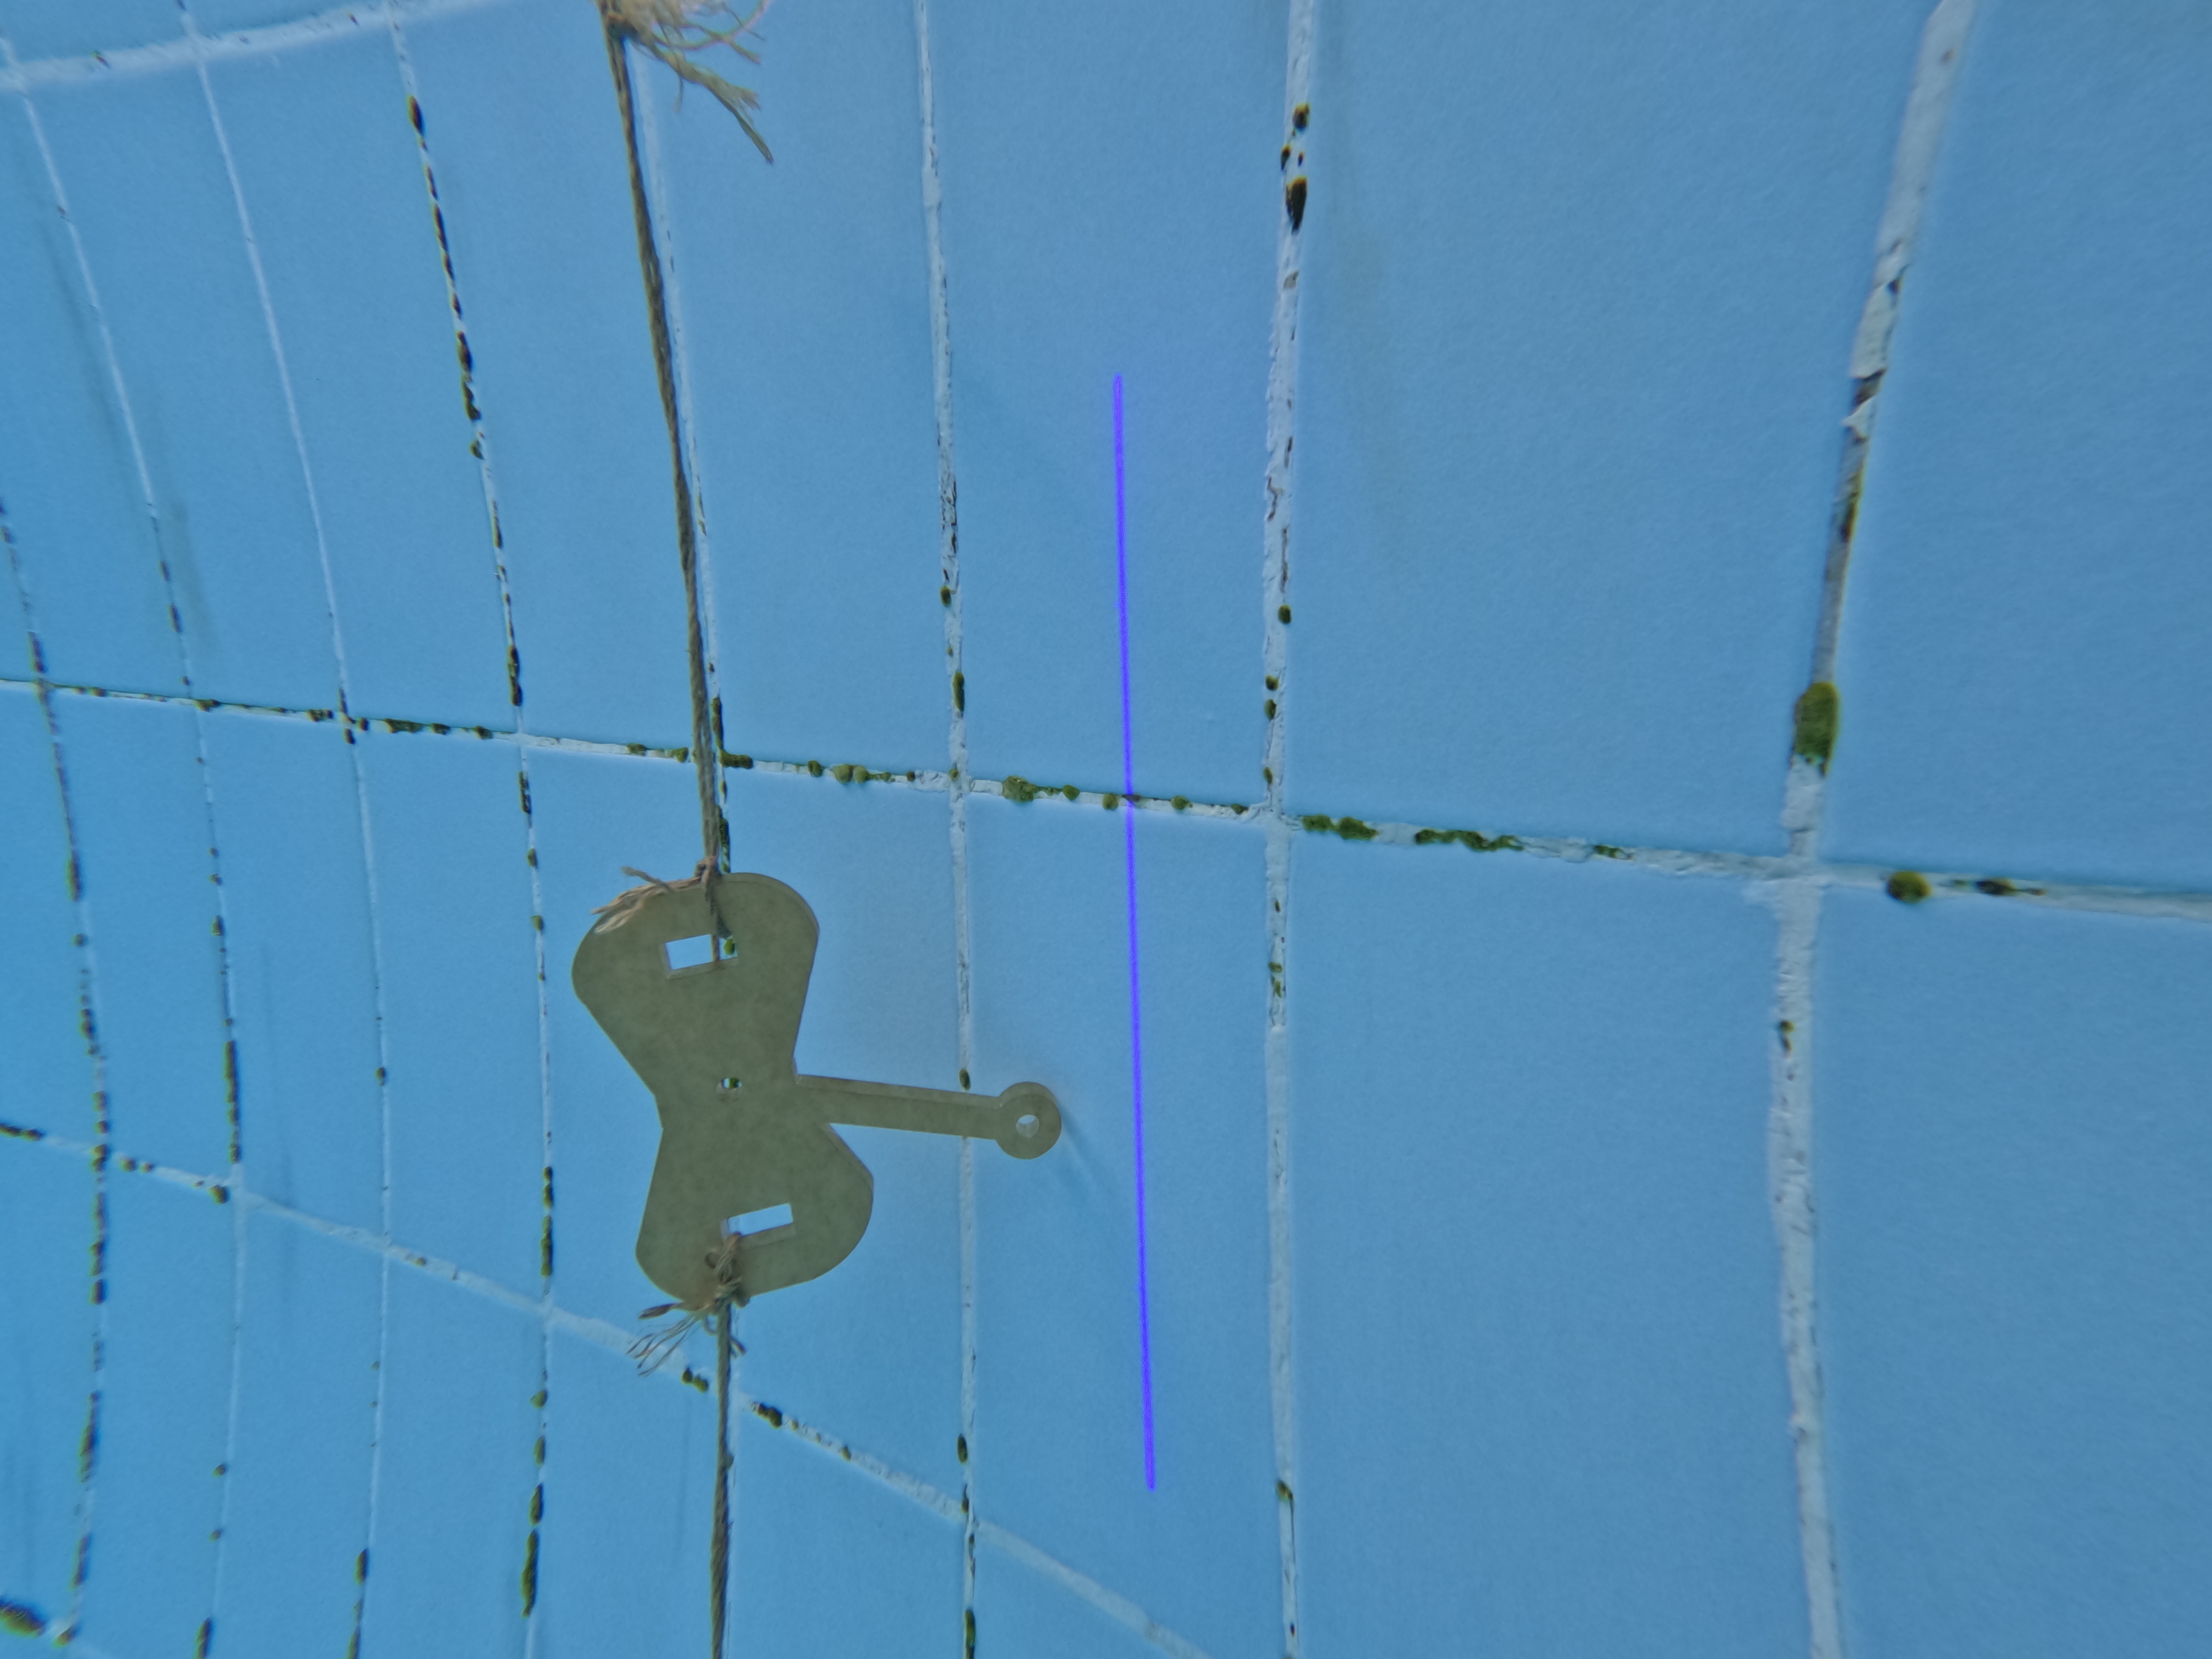

Supplement: Supplementary file 2031 [file G0050592.pdf › Level_3_2/G0050592.pdf]

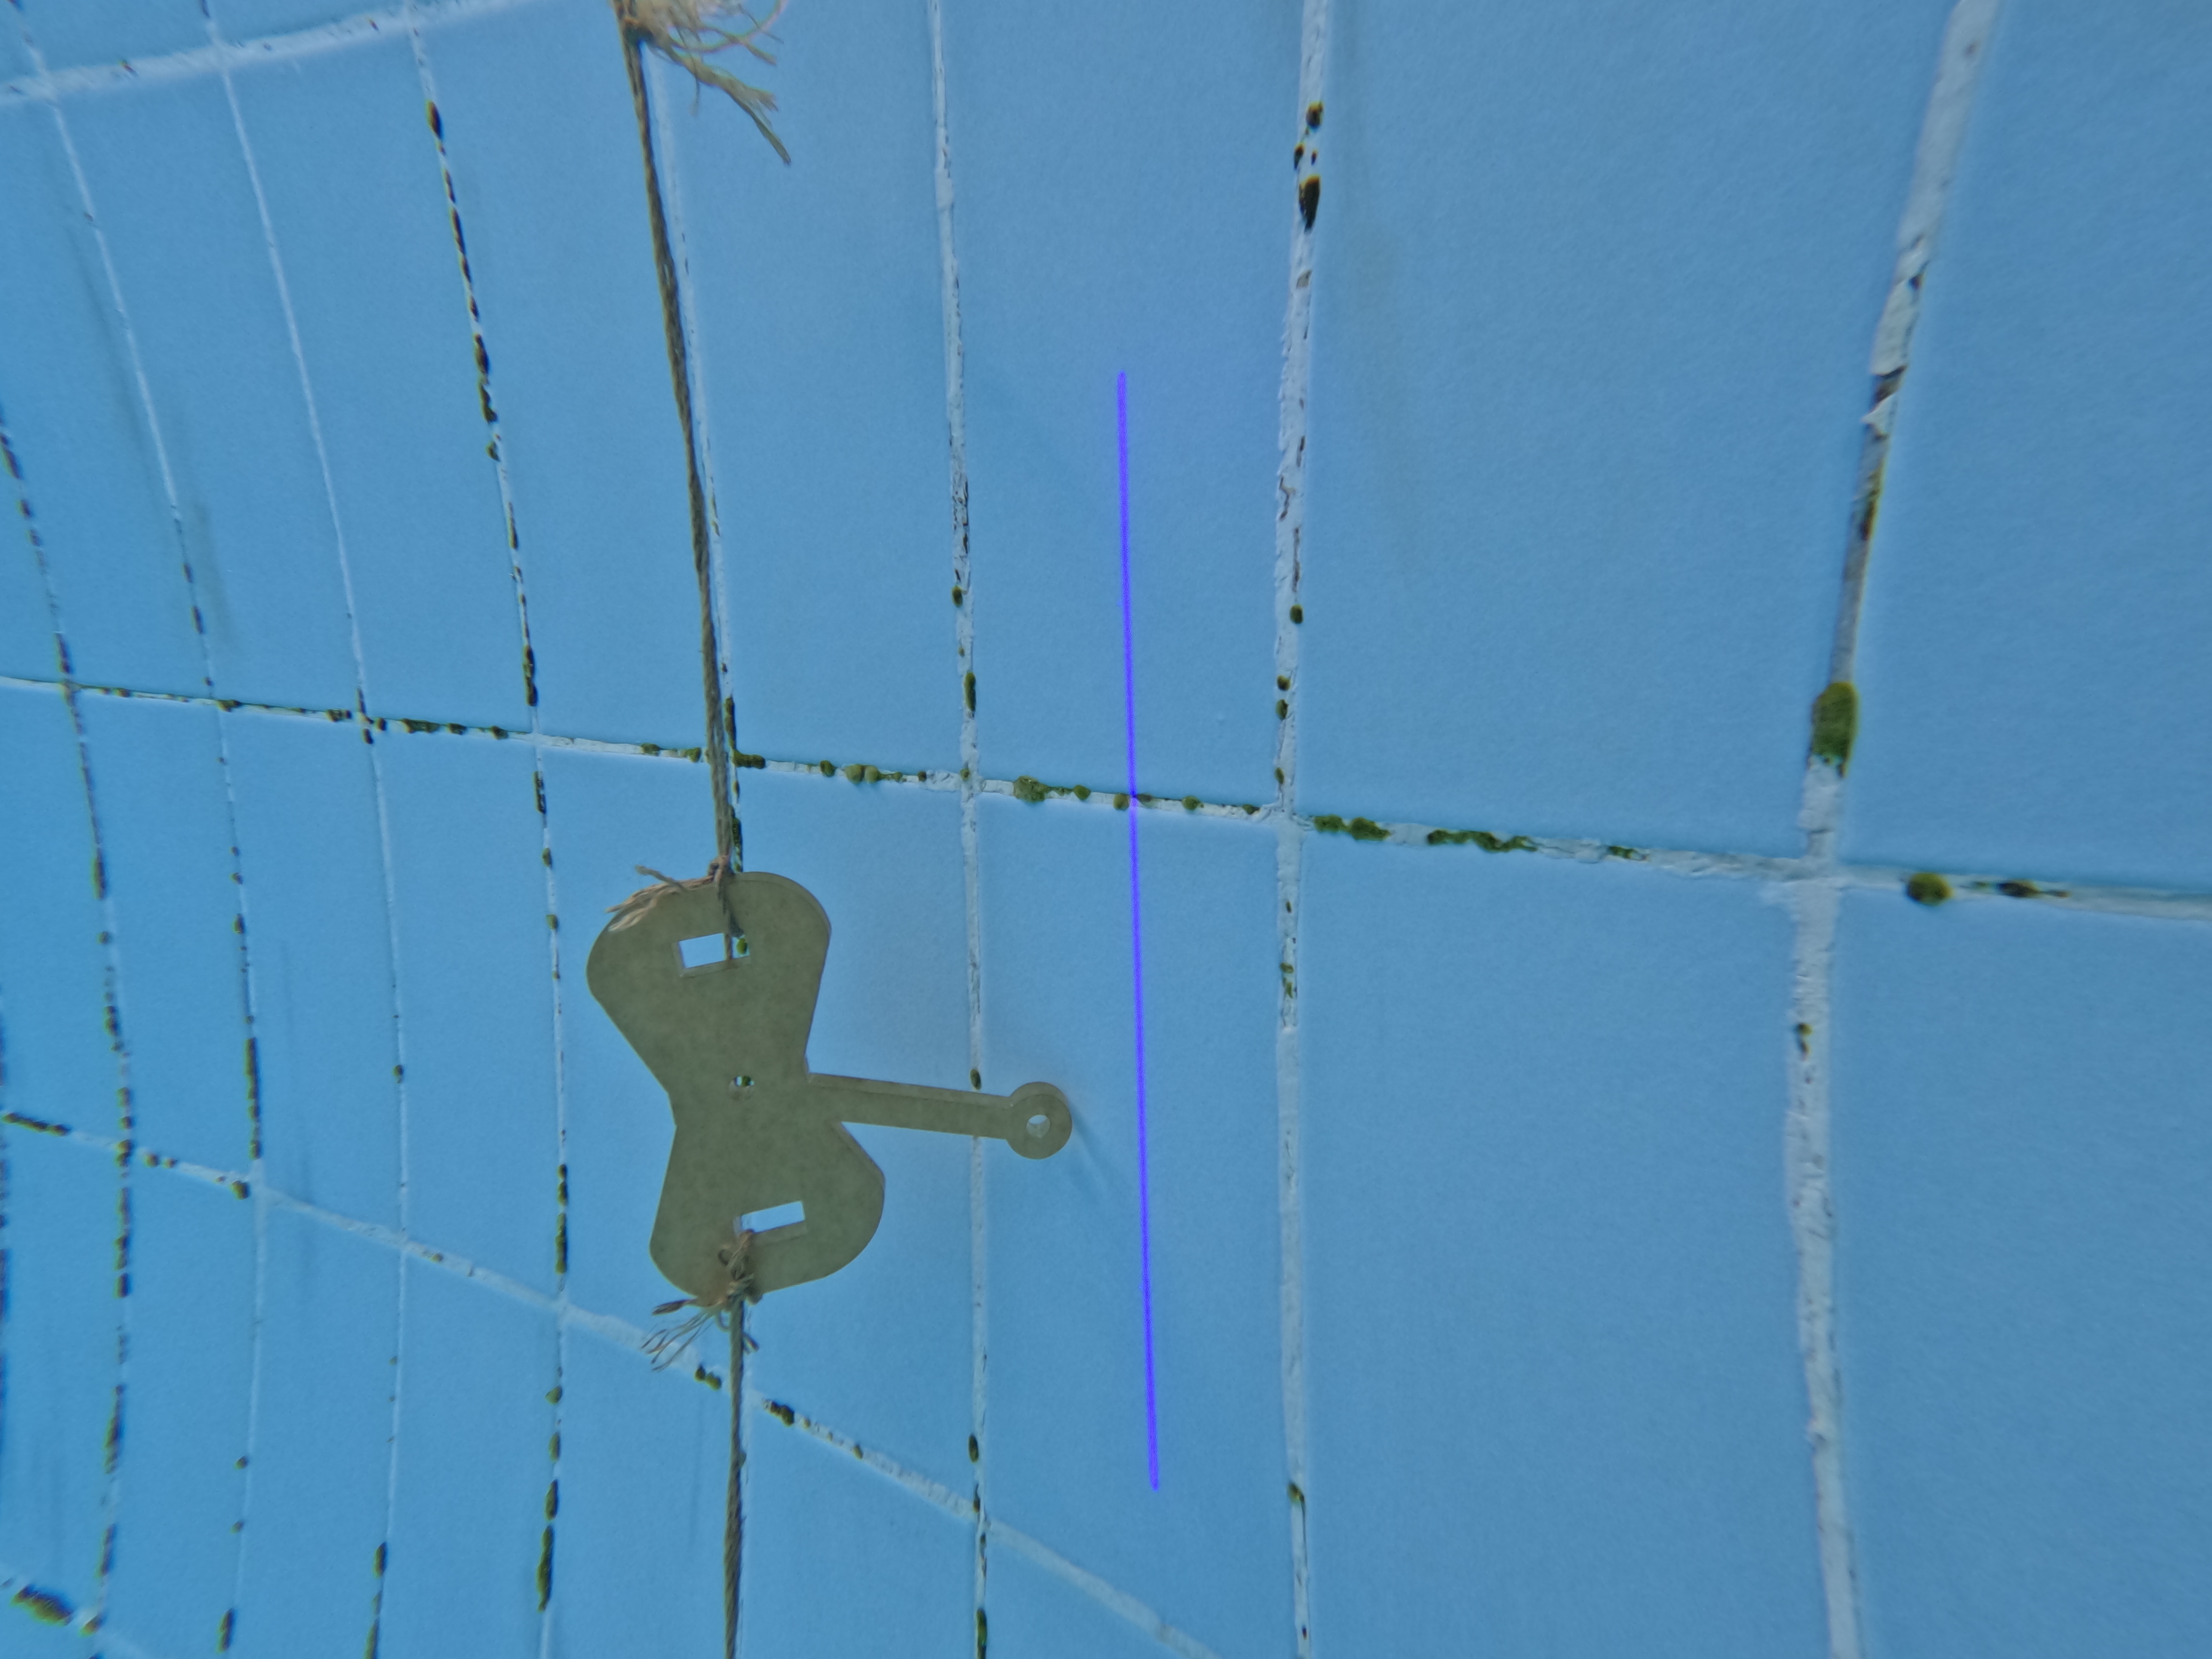

Supplement: Supplementary file 2032 [file G0050593.pdf › Level_3_2/G0050593.pdf]

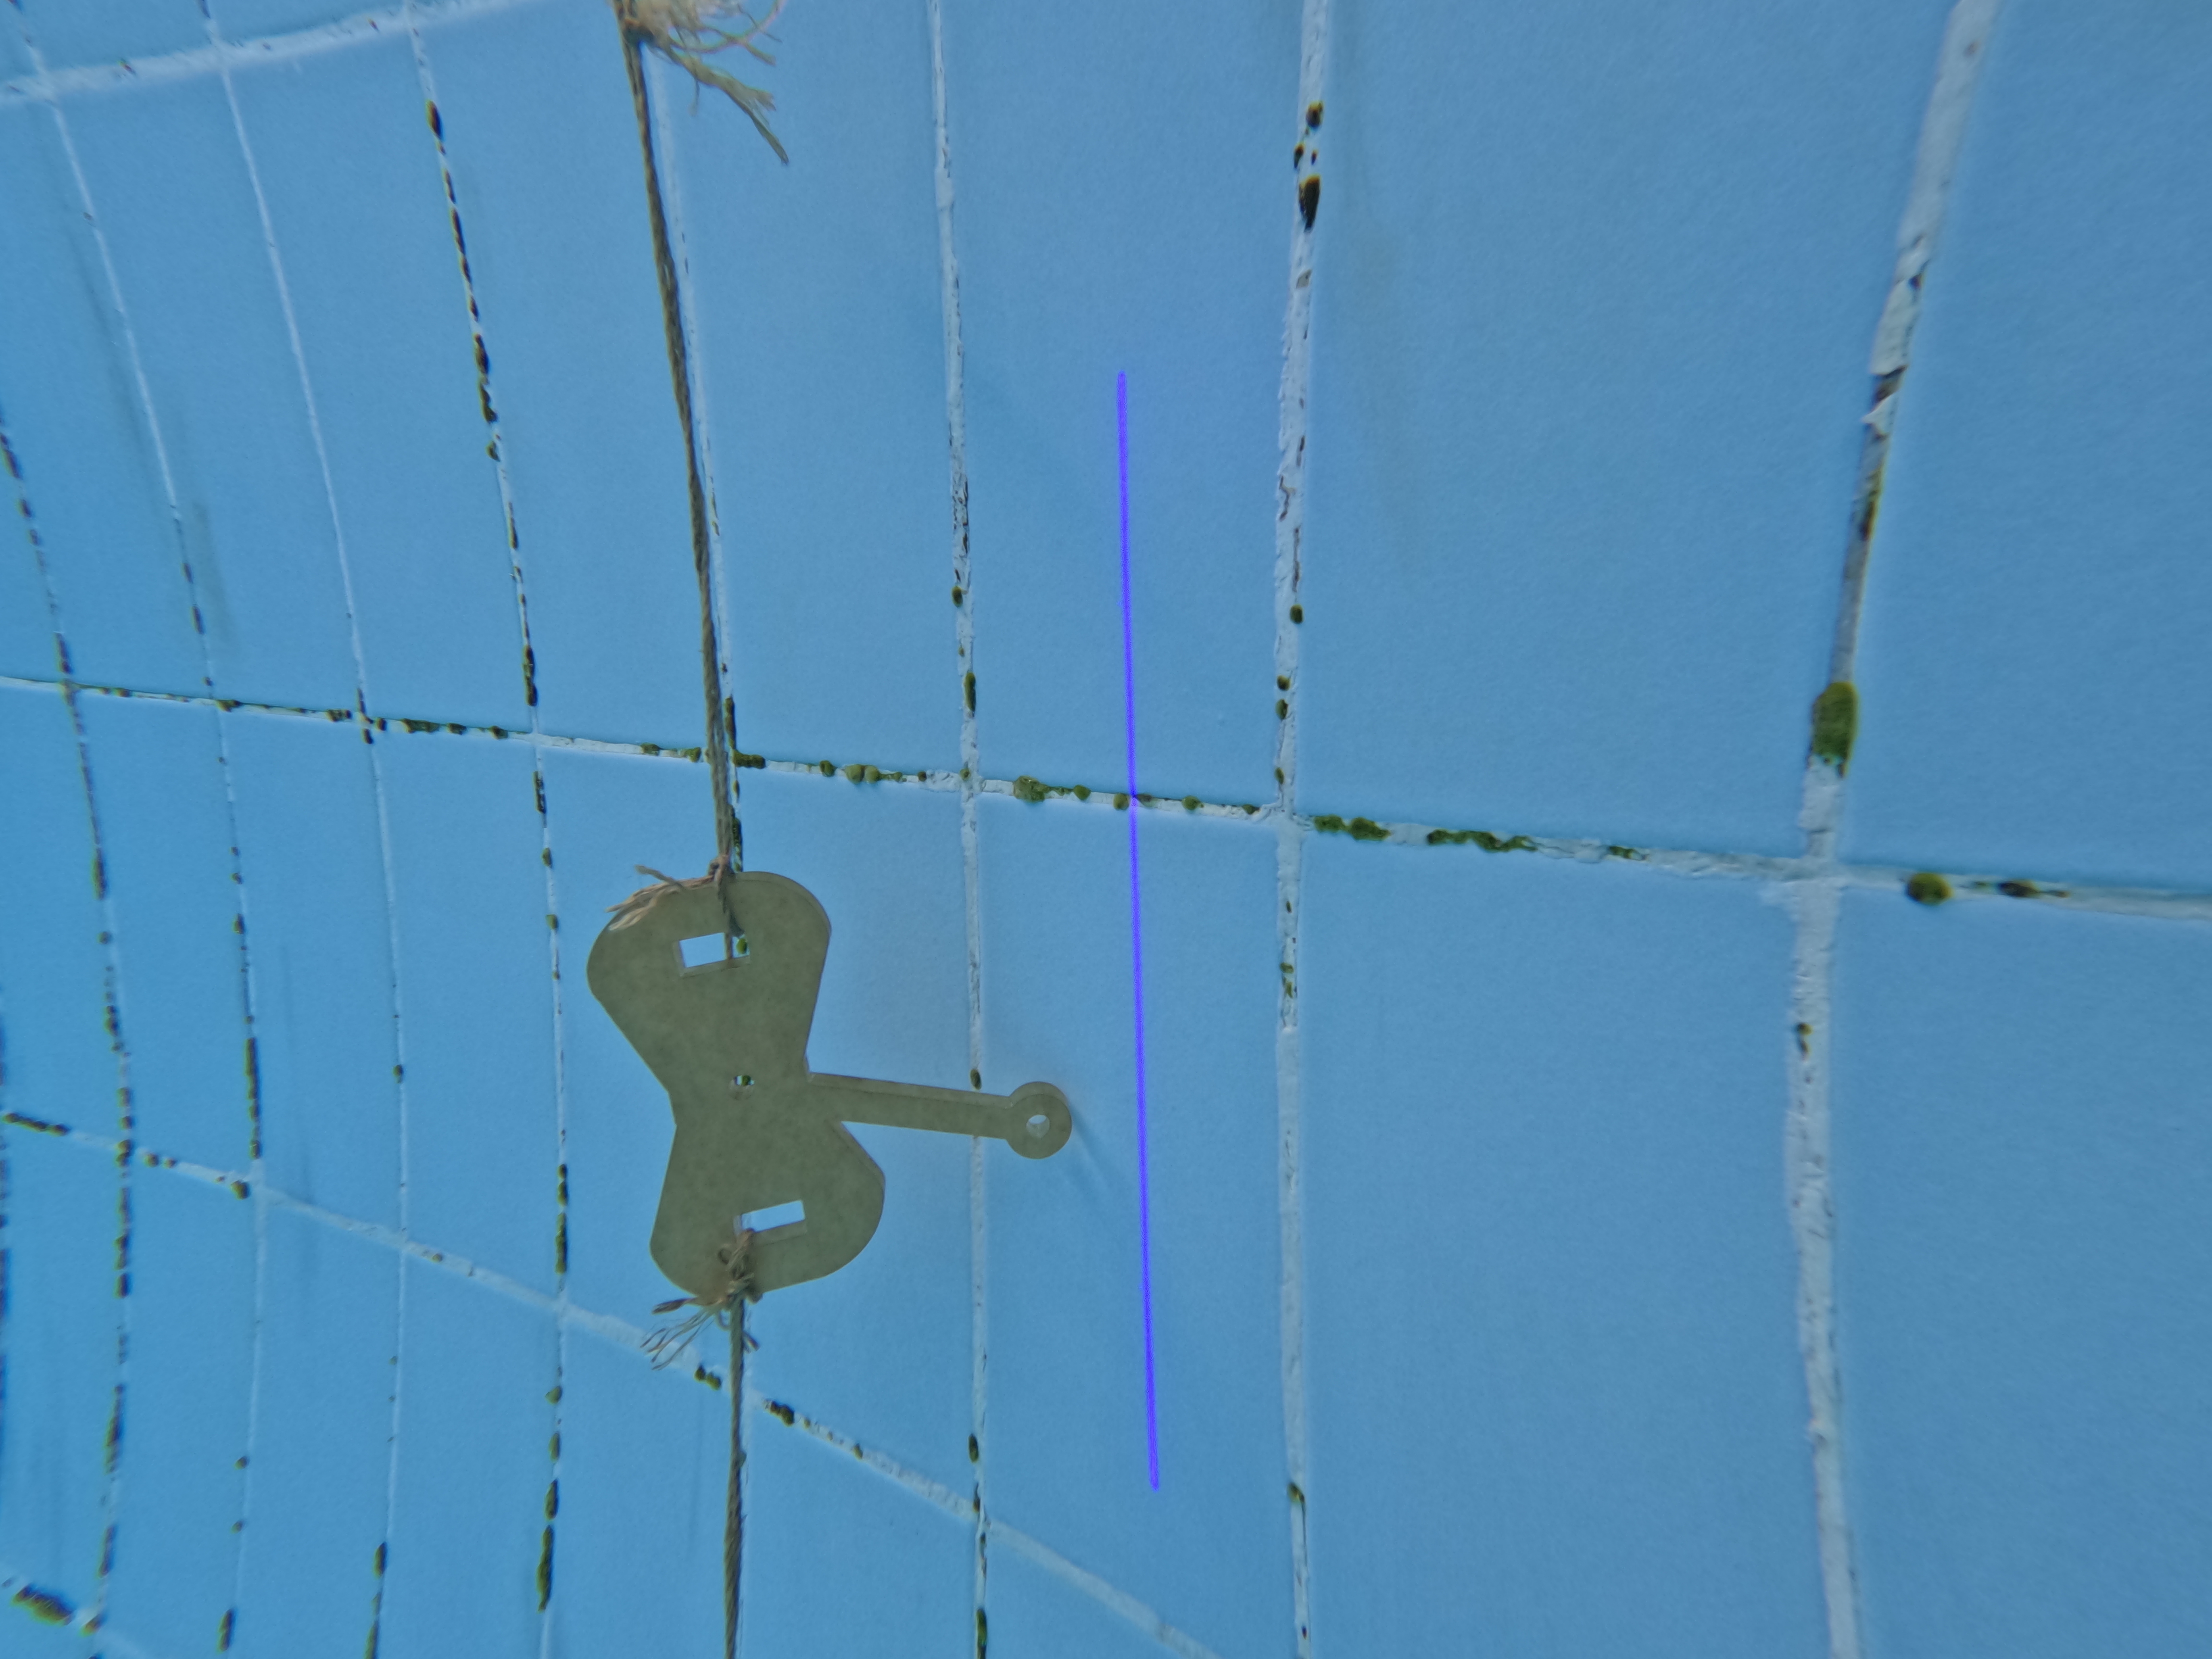

Supplement: Supplementary file 2033 [file G0050594.pdf › Level_3_2/G0050594.pdf]

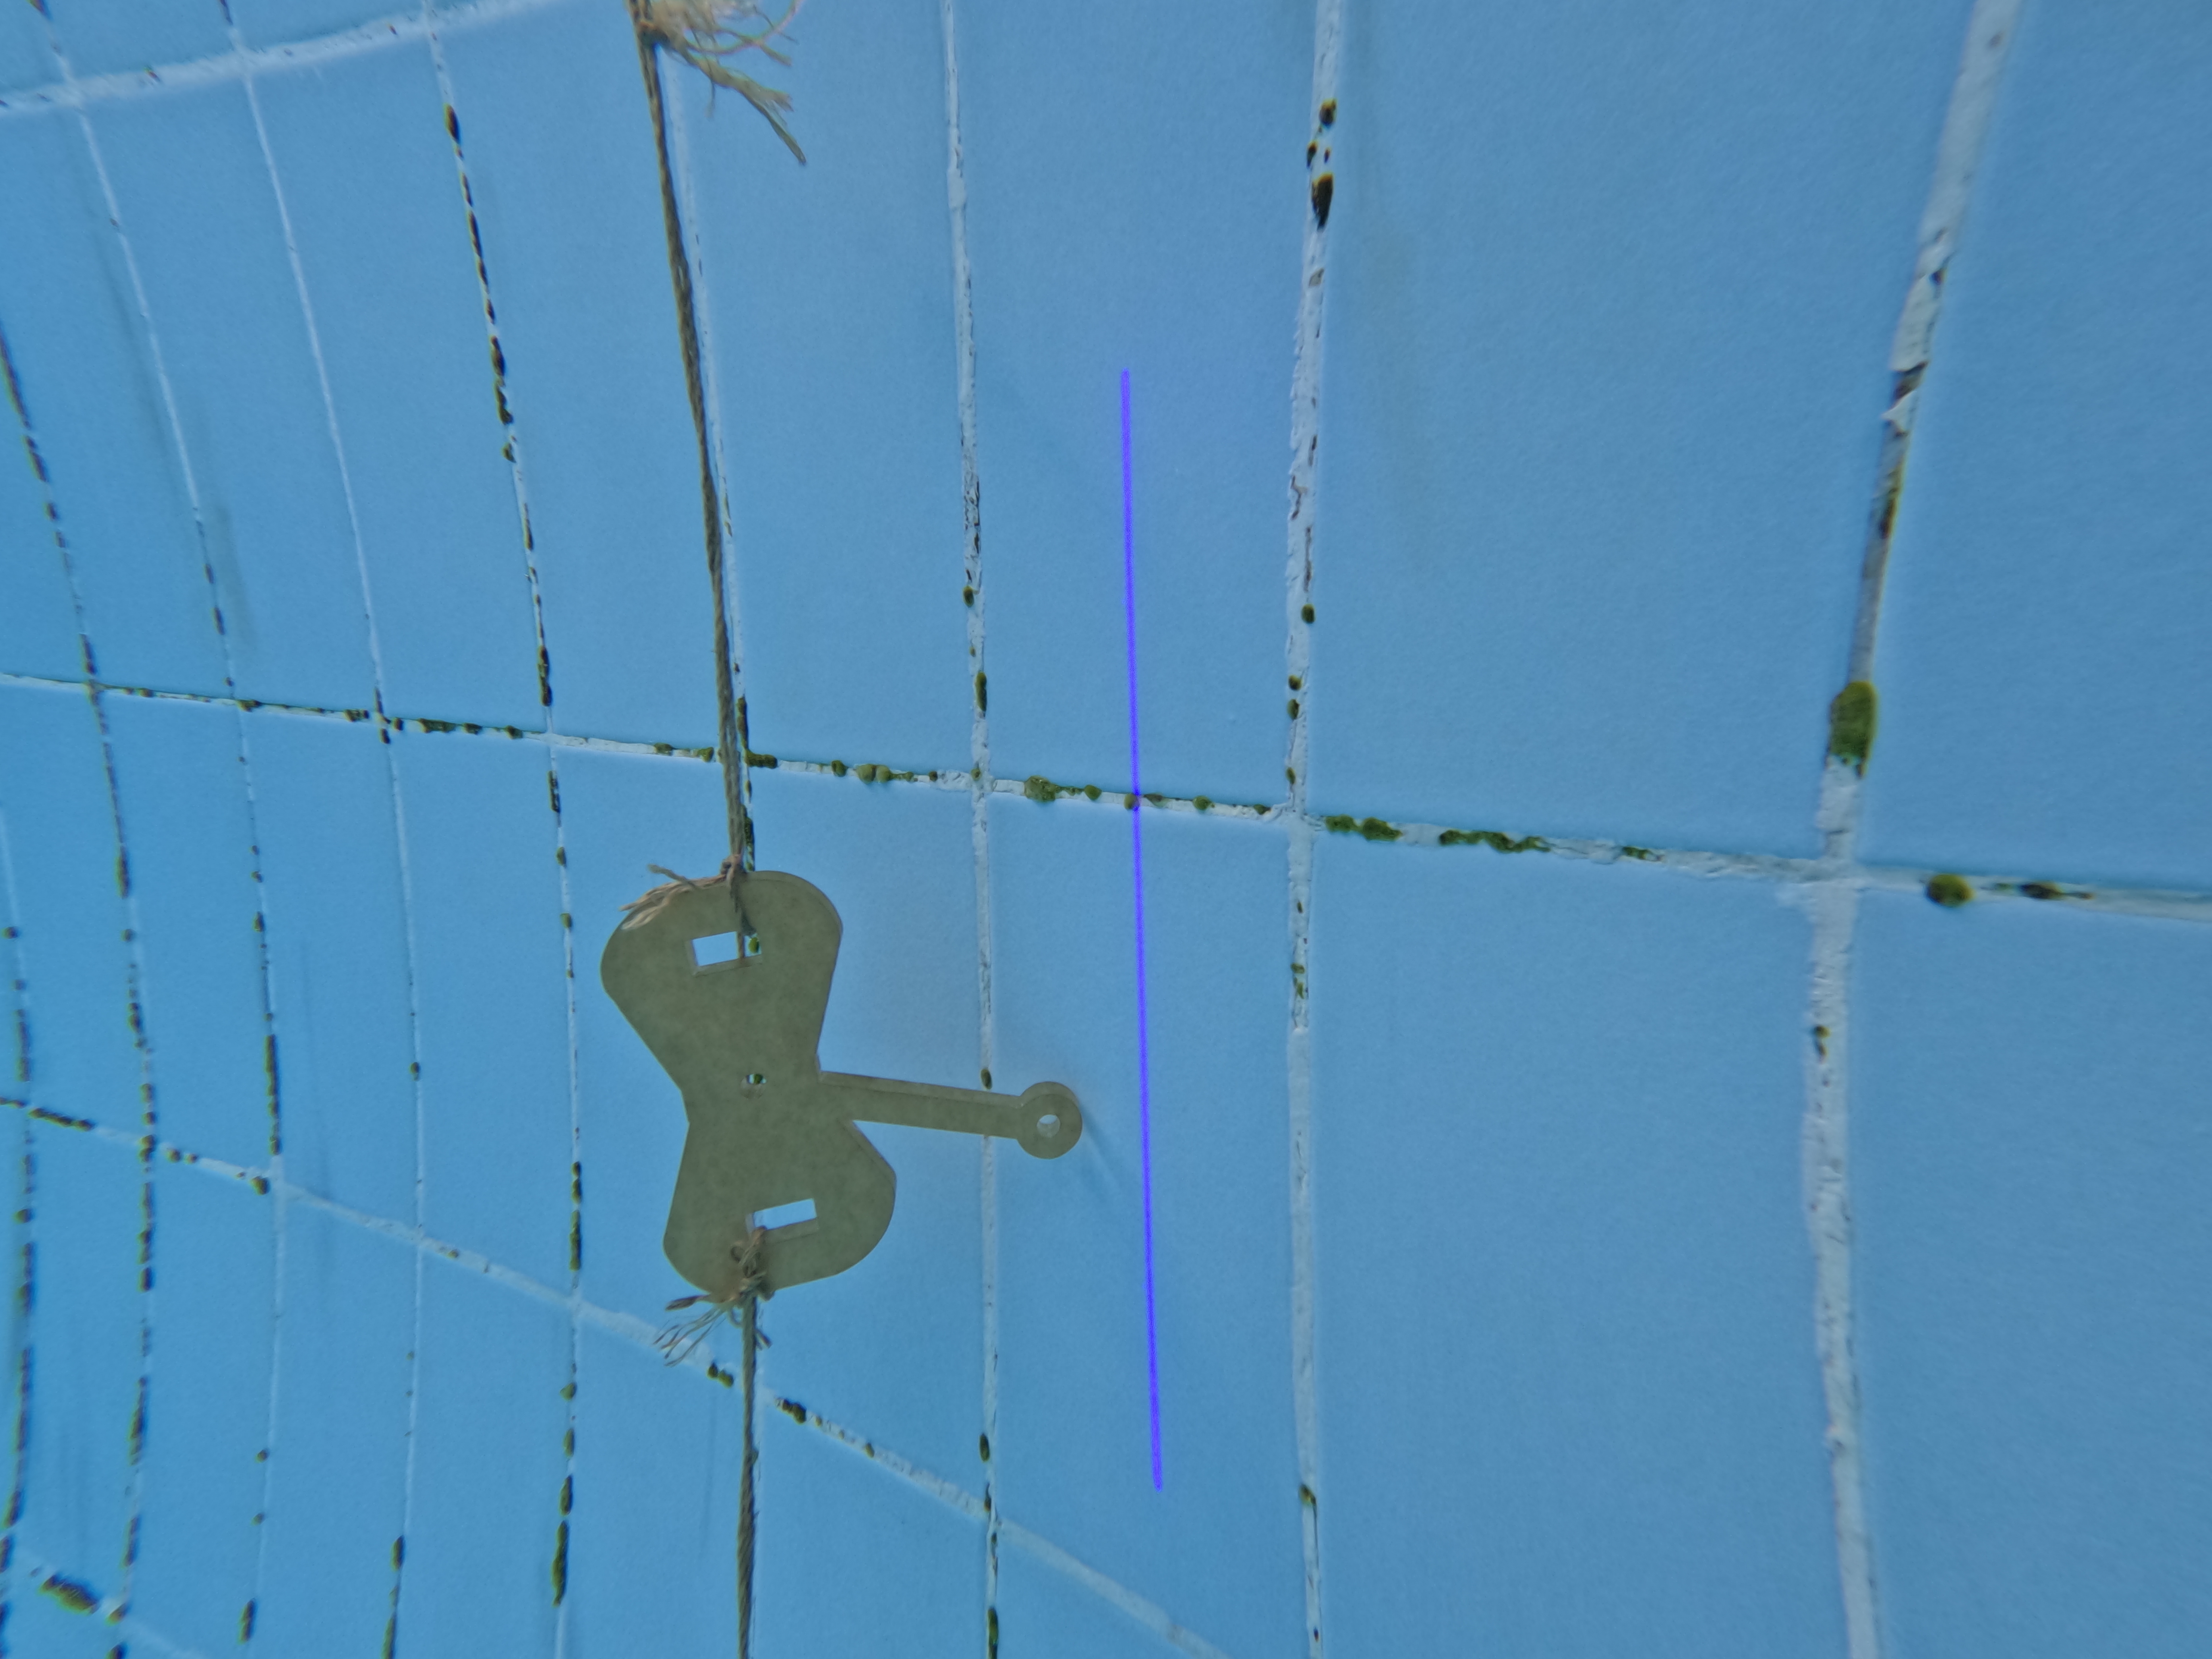

Supplement: Supplementary file 2034 [file G0050595.pdf › Level_3_2/G0050595.pdf]

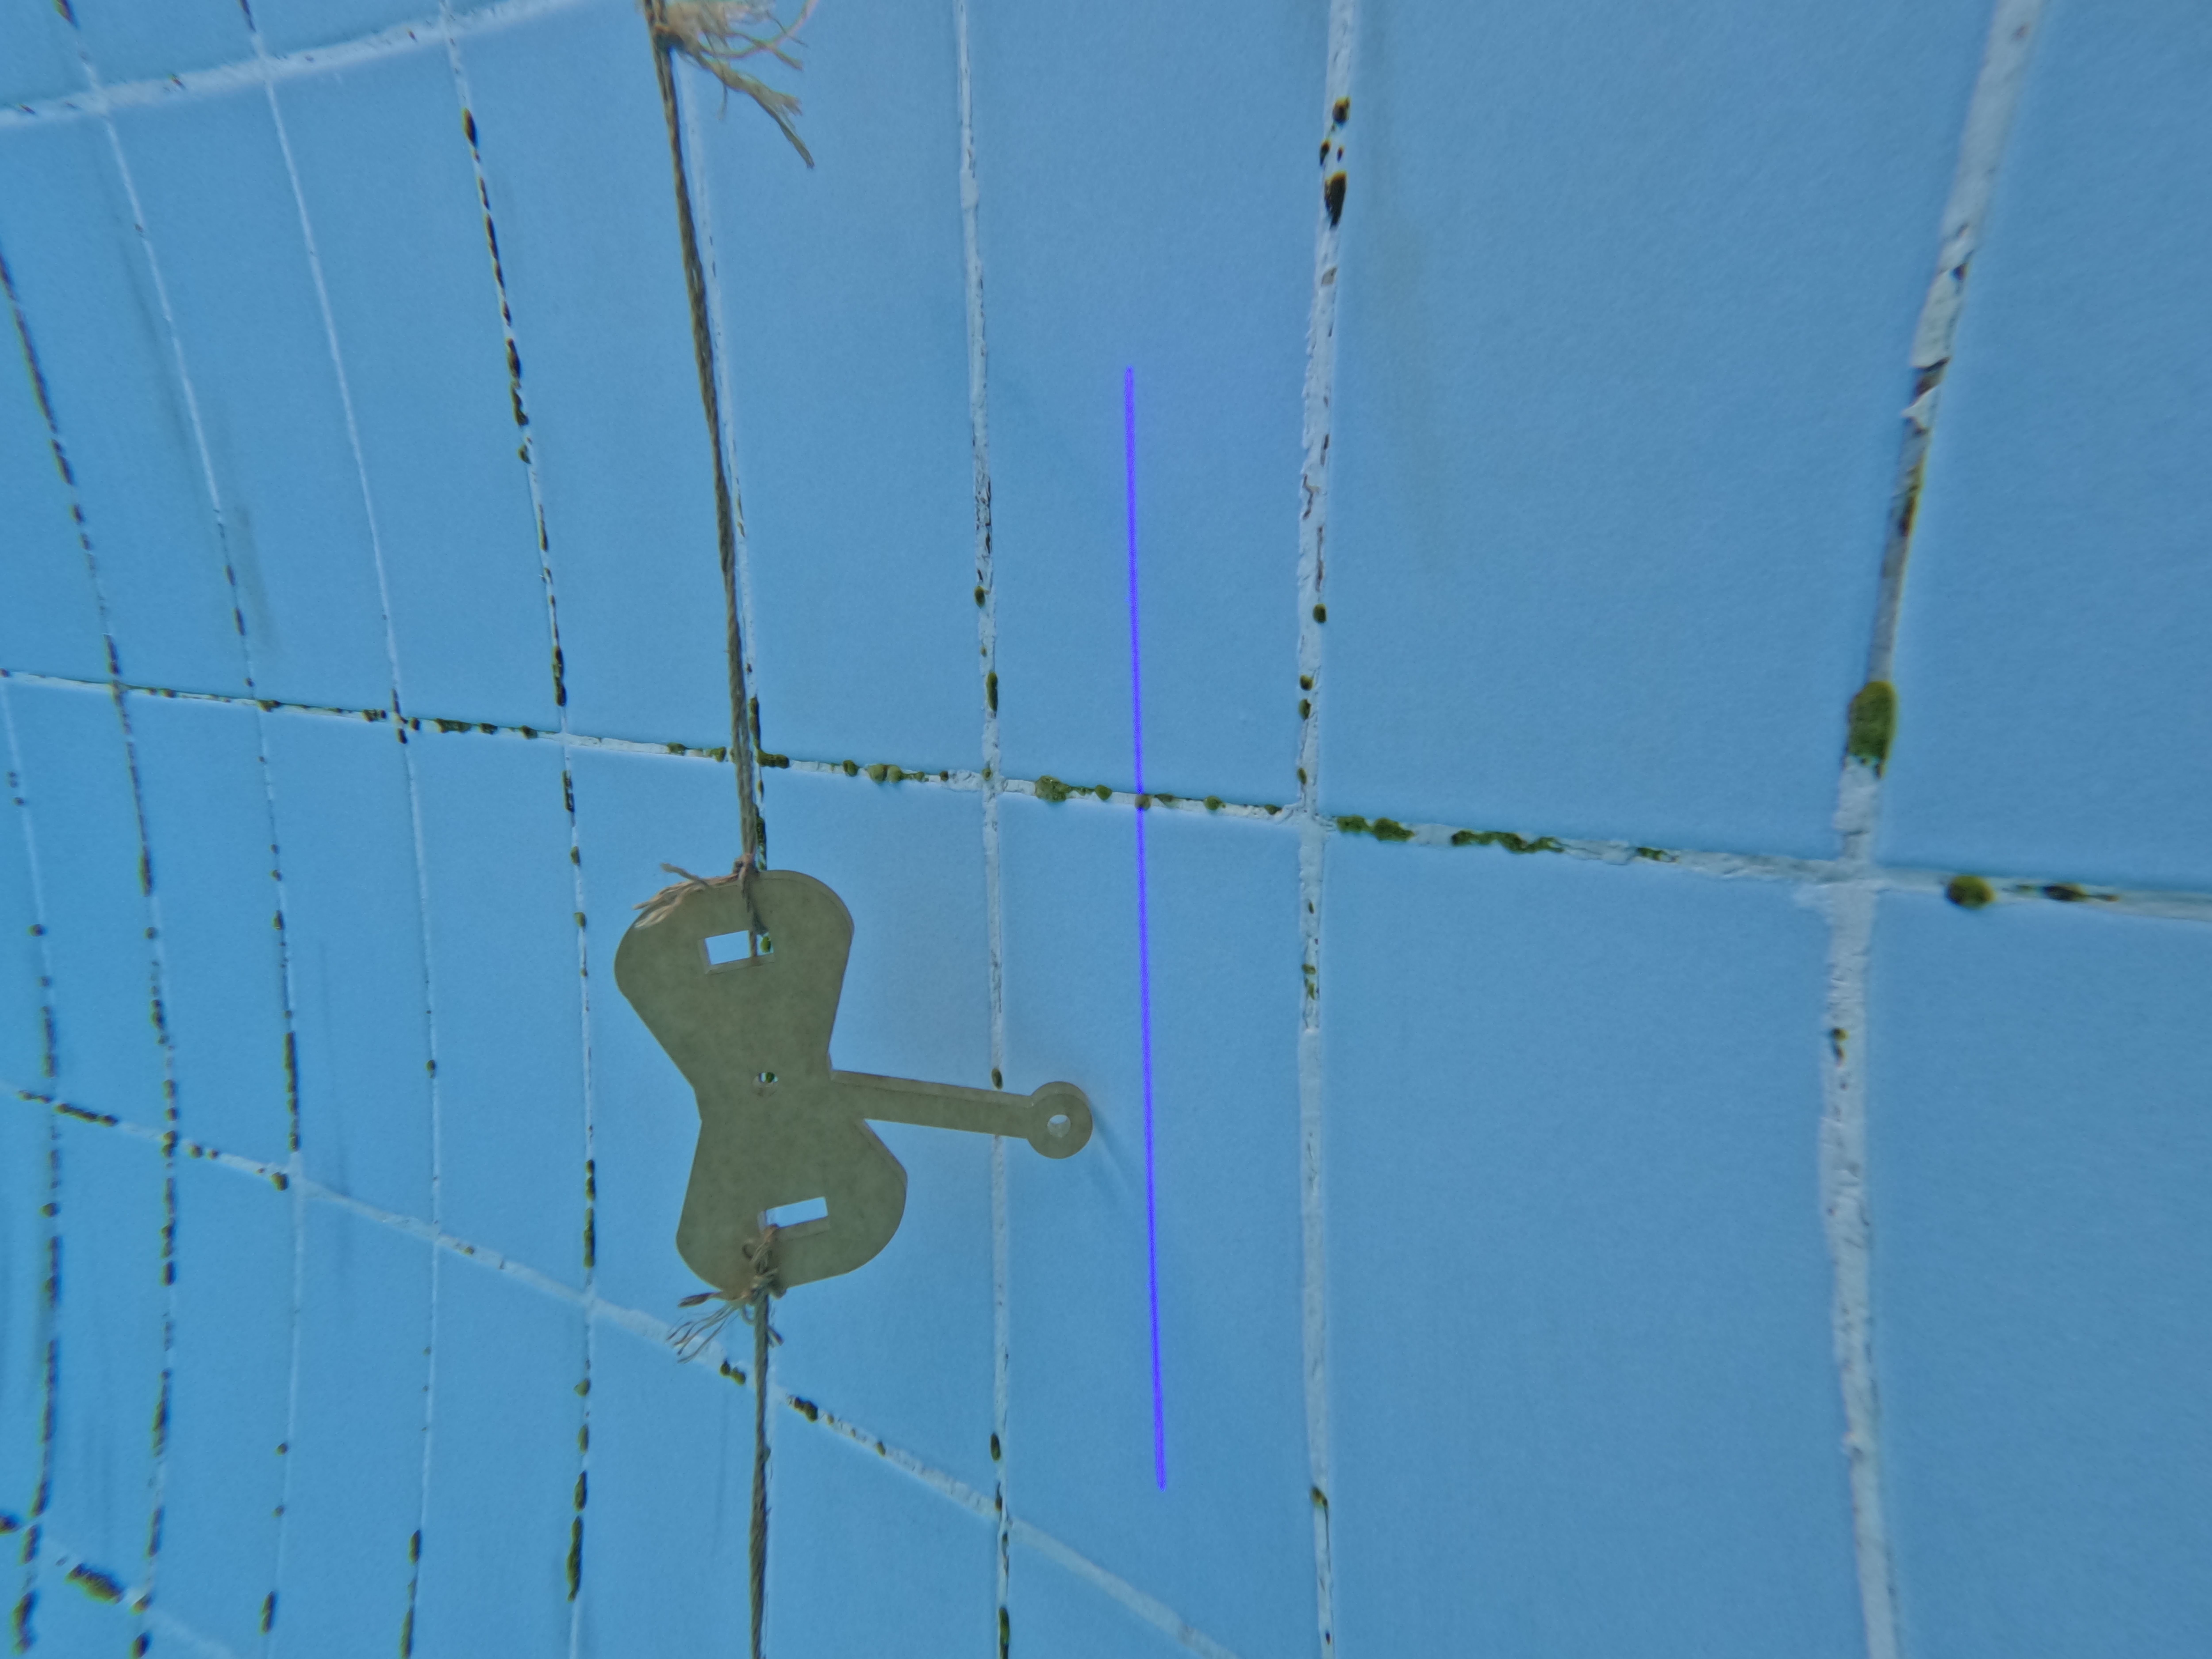

Supplement: Supplementary file 2035 [file G0050596.pdf › Level_3_2/G0050596.pdf]

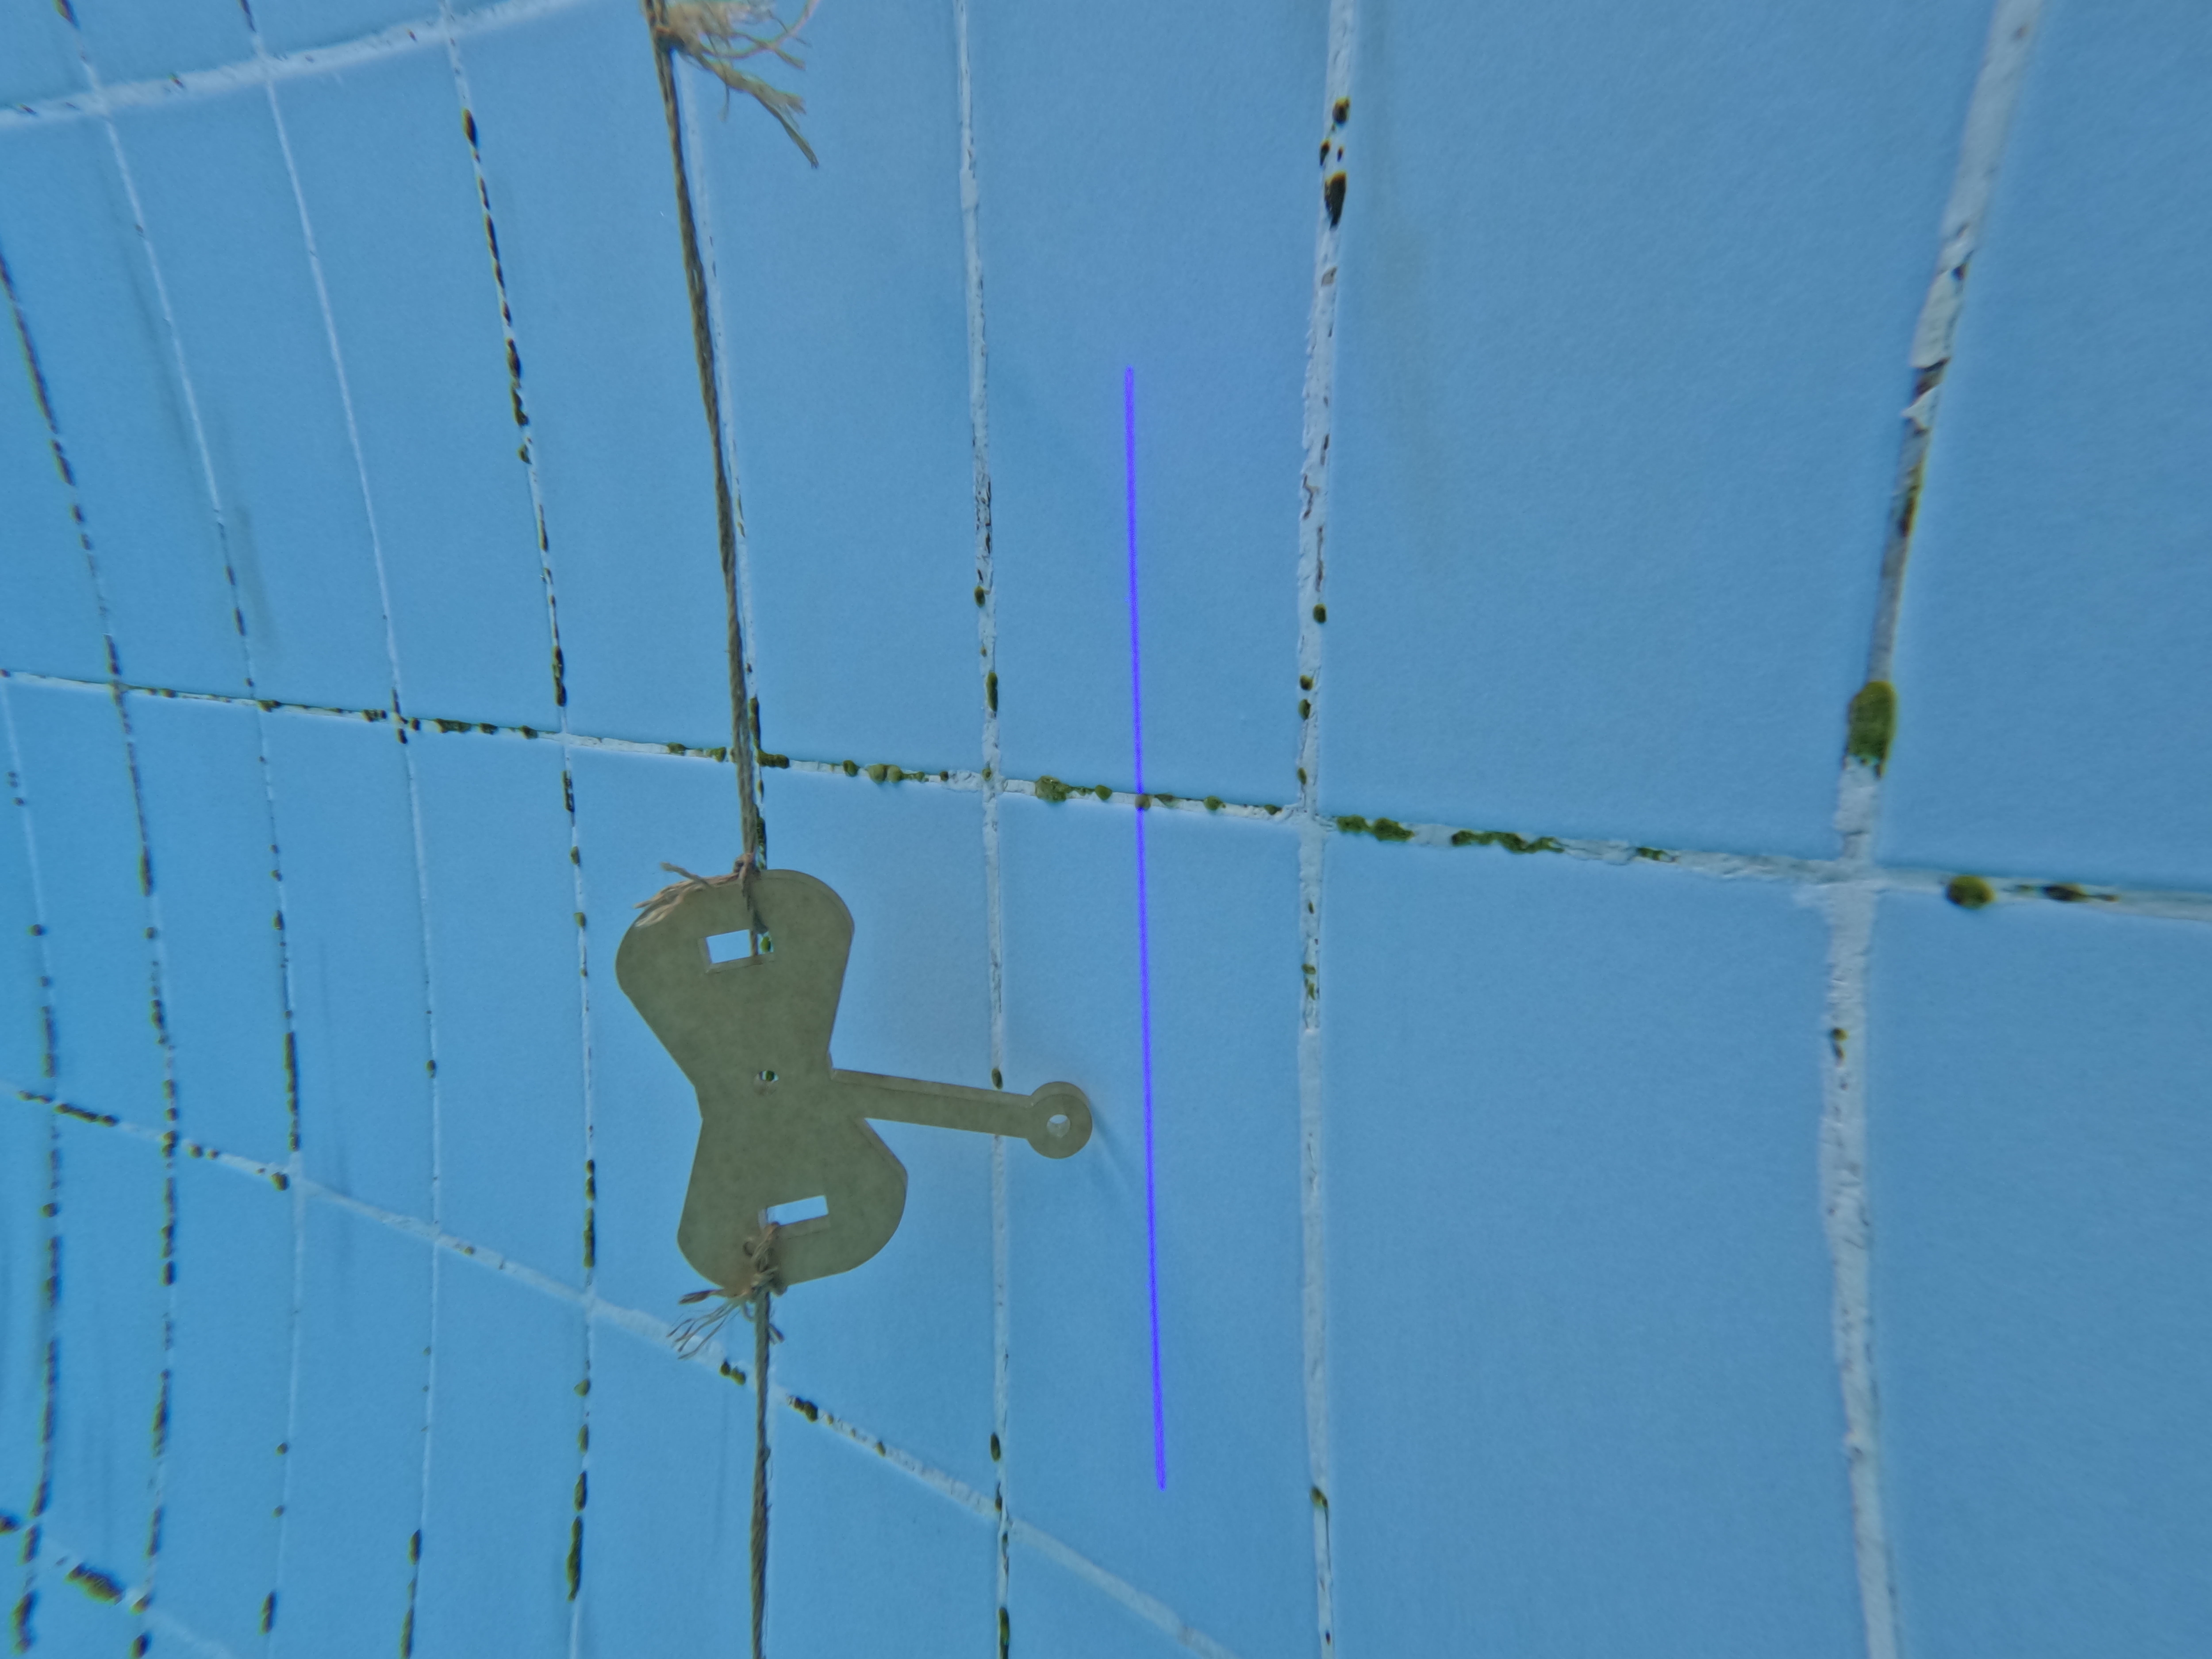

Supplement: Supplementary file 2036 [file G0050597.pdf › Level_3_2/G0050597.pdf]

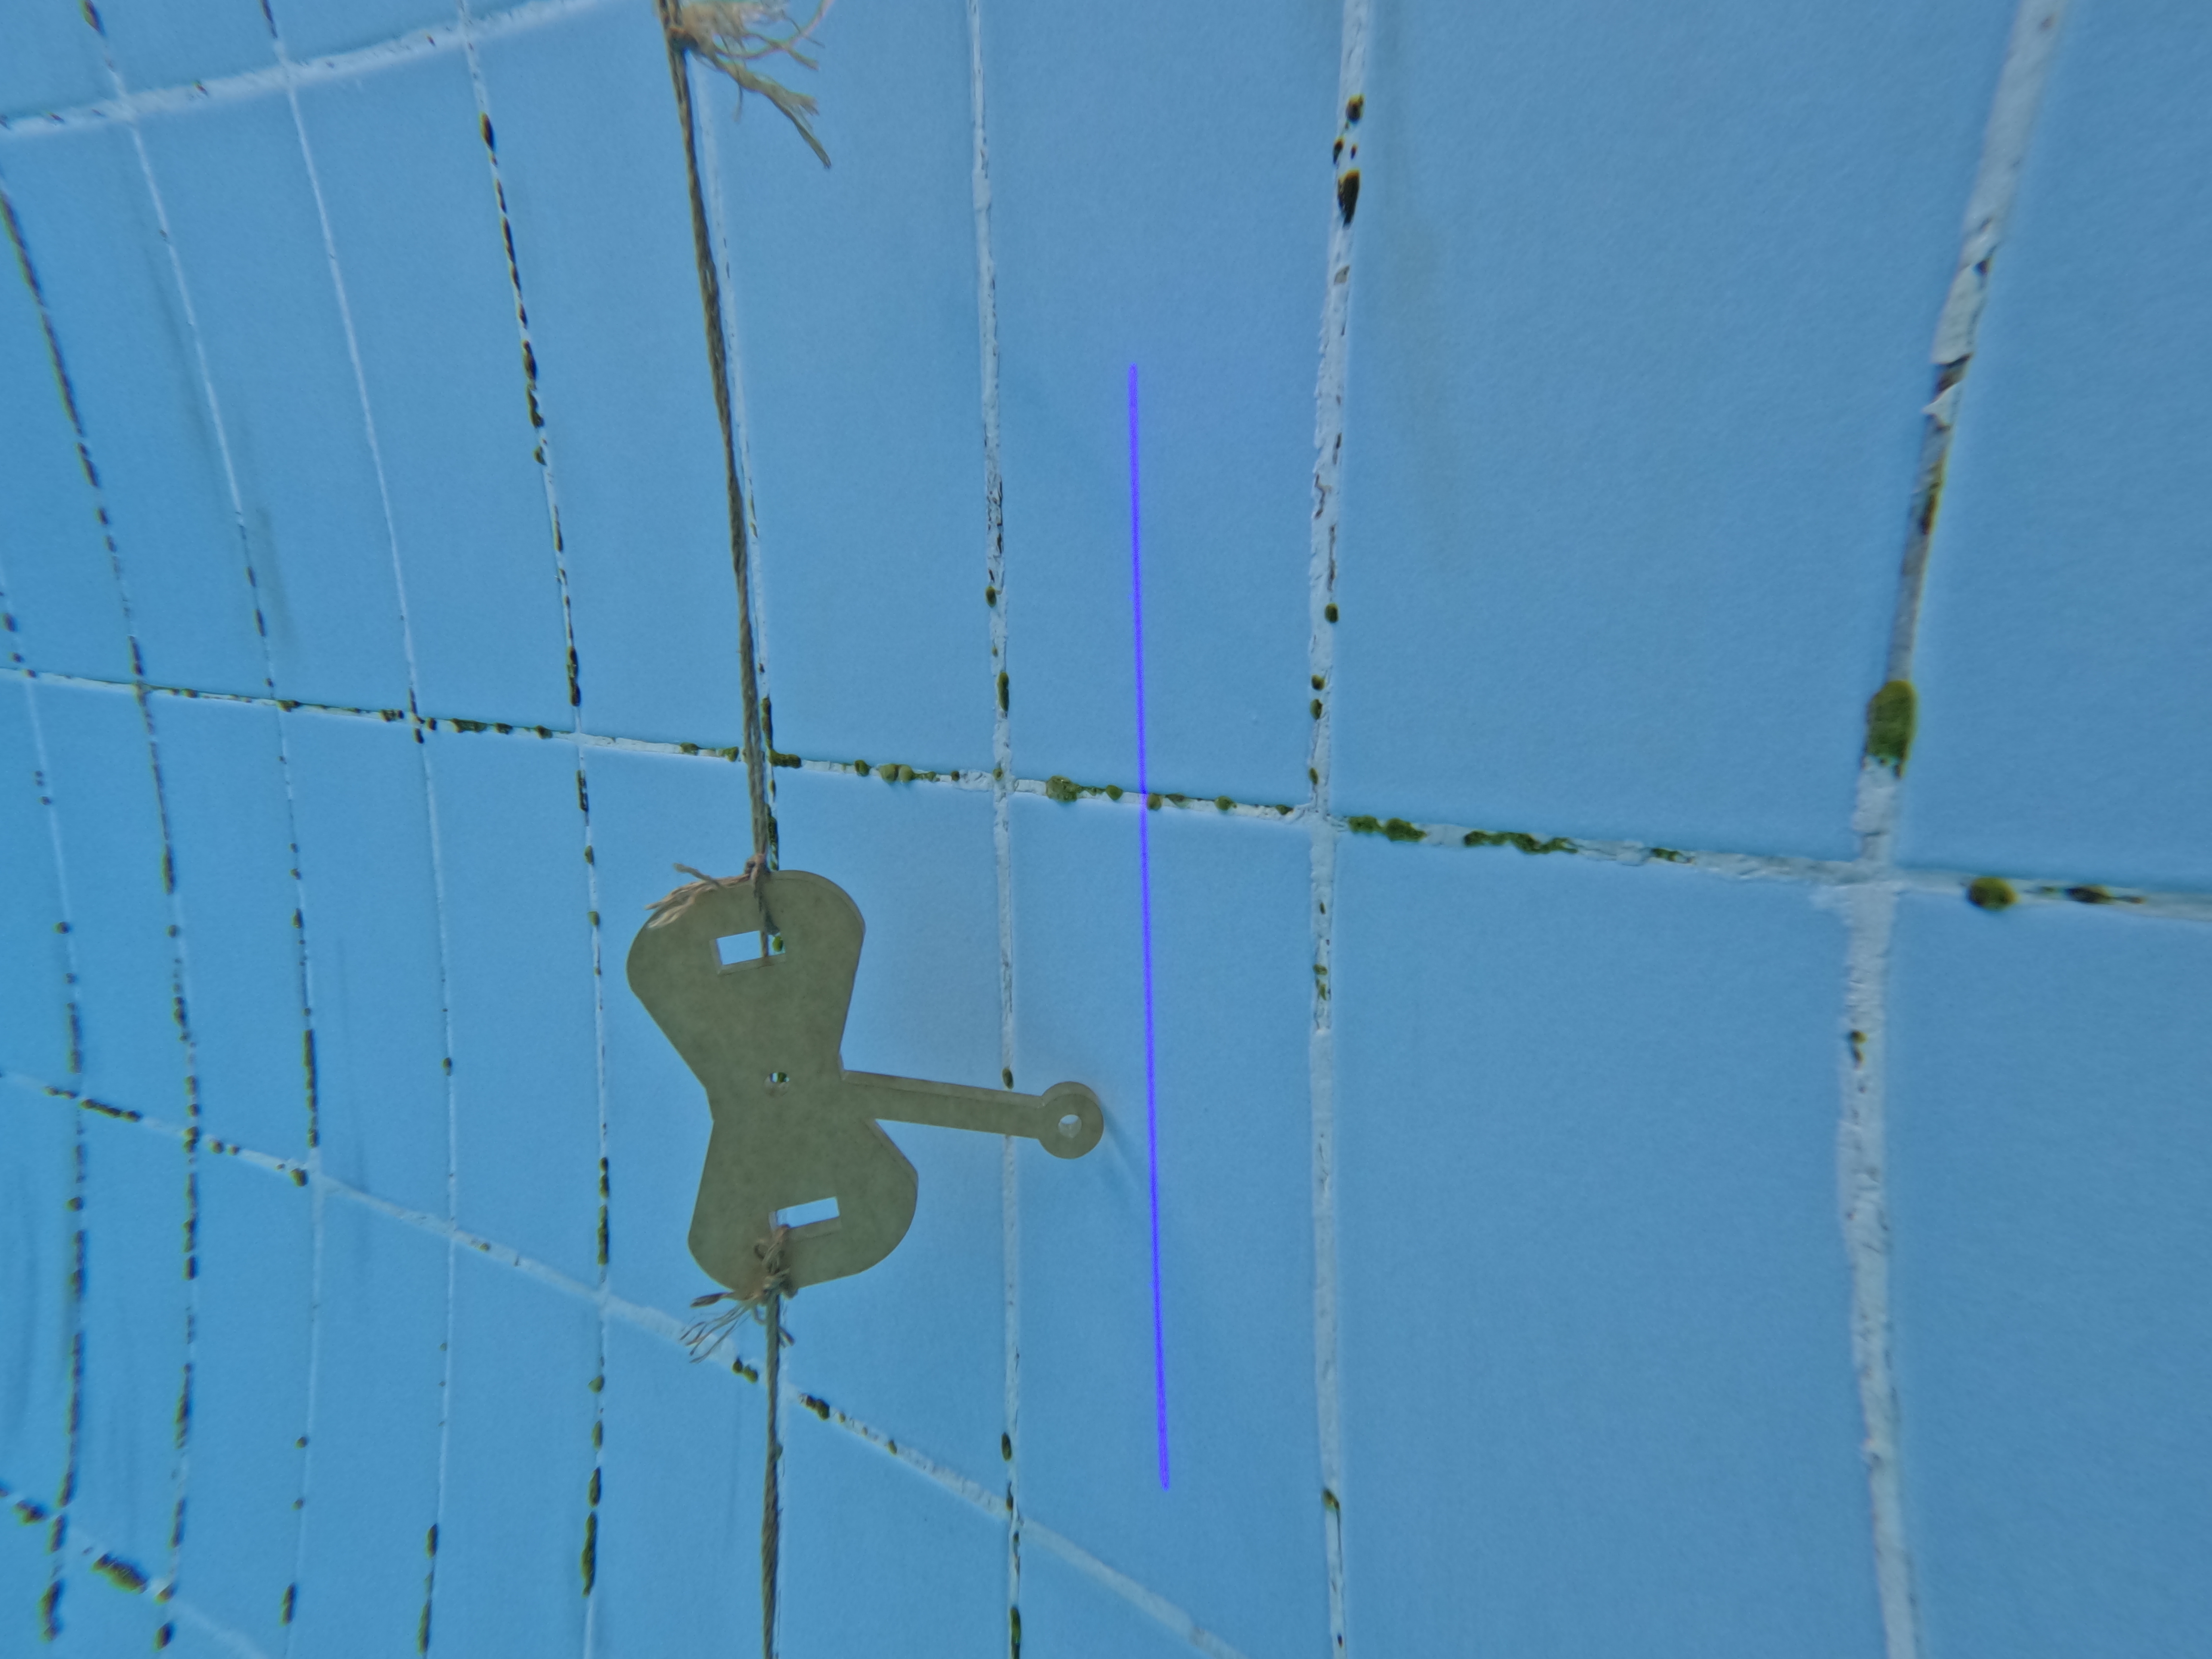

Supplement: Supplementary file 2037 [file G0050598.pdf › Level_3_2/G0050598.pdf]

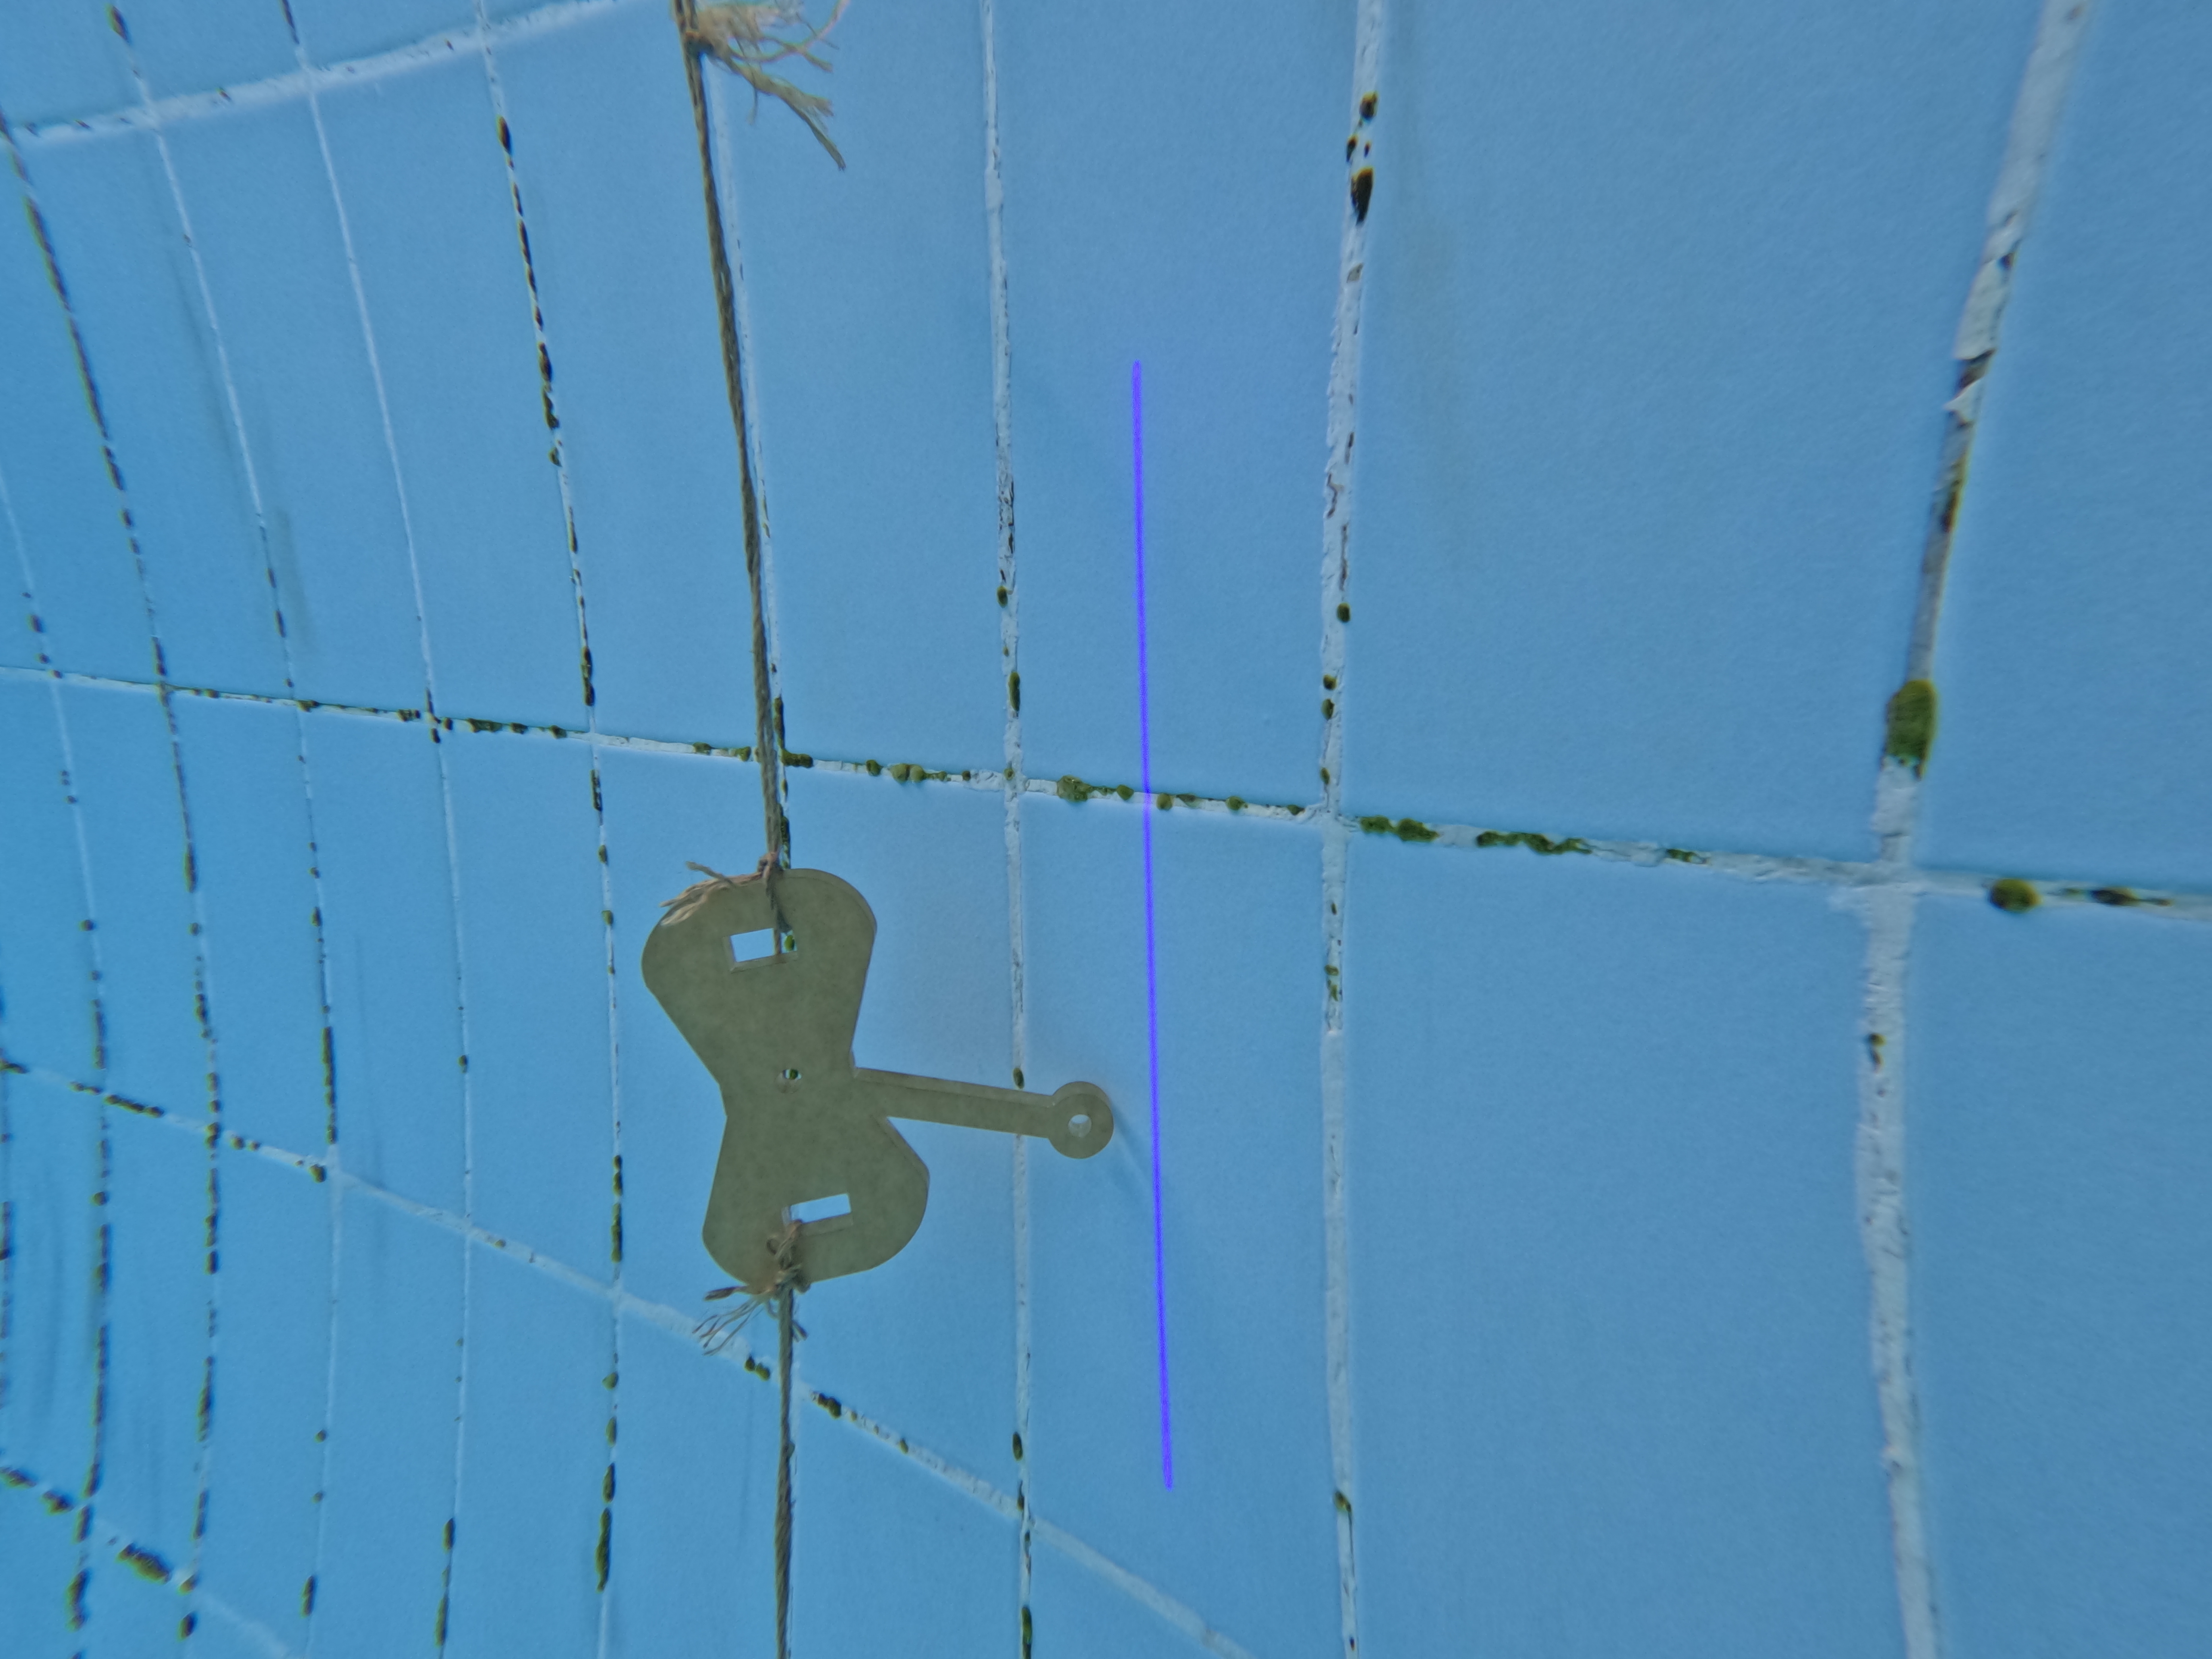

Supplement: Supplementary file 2038 [file G0050599.pdf › Level_3_2/G0050599.pdf]

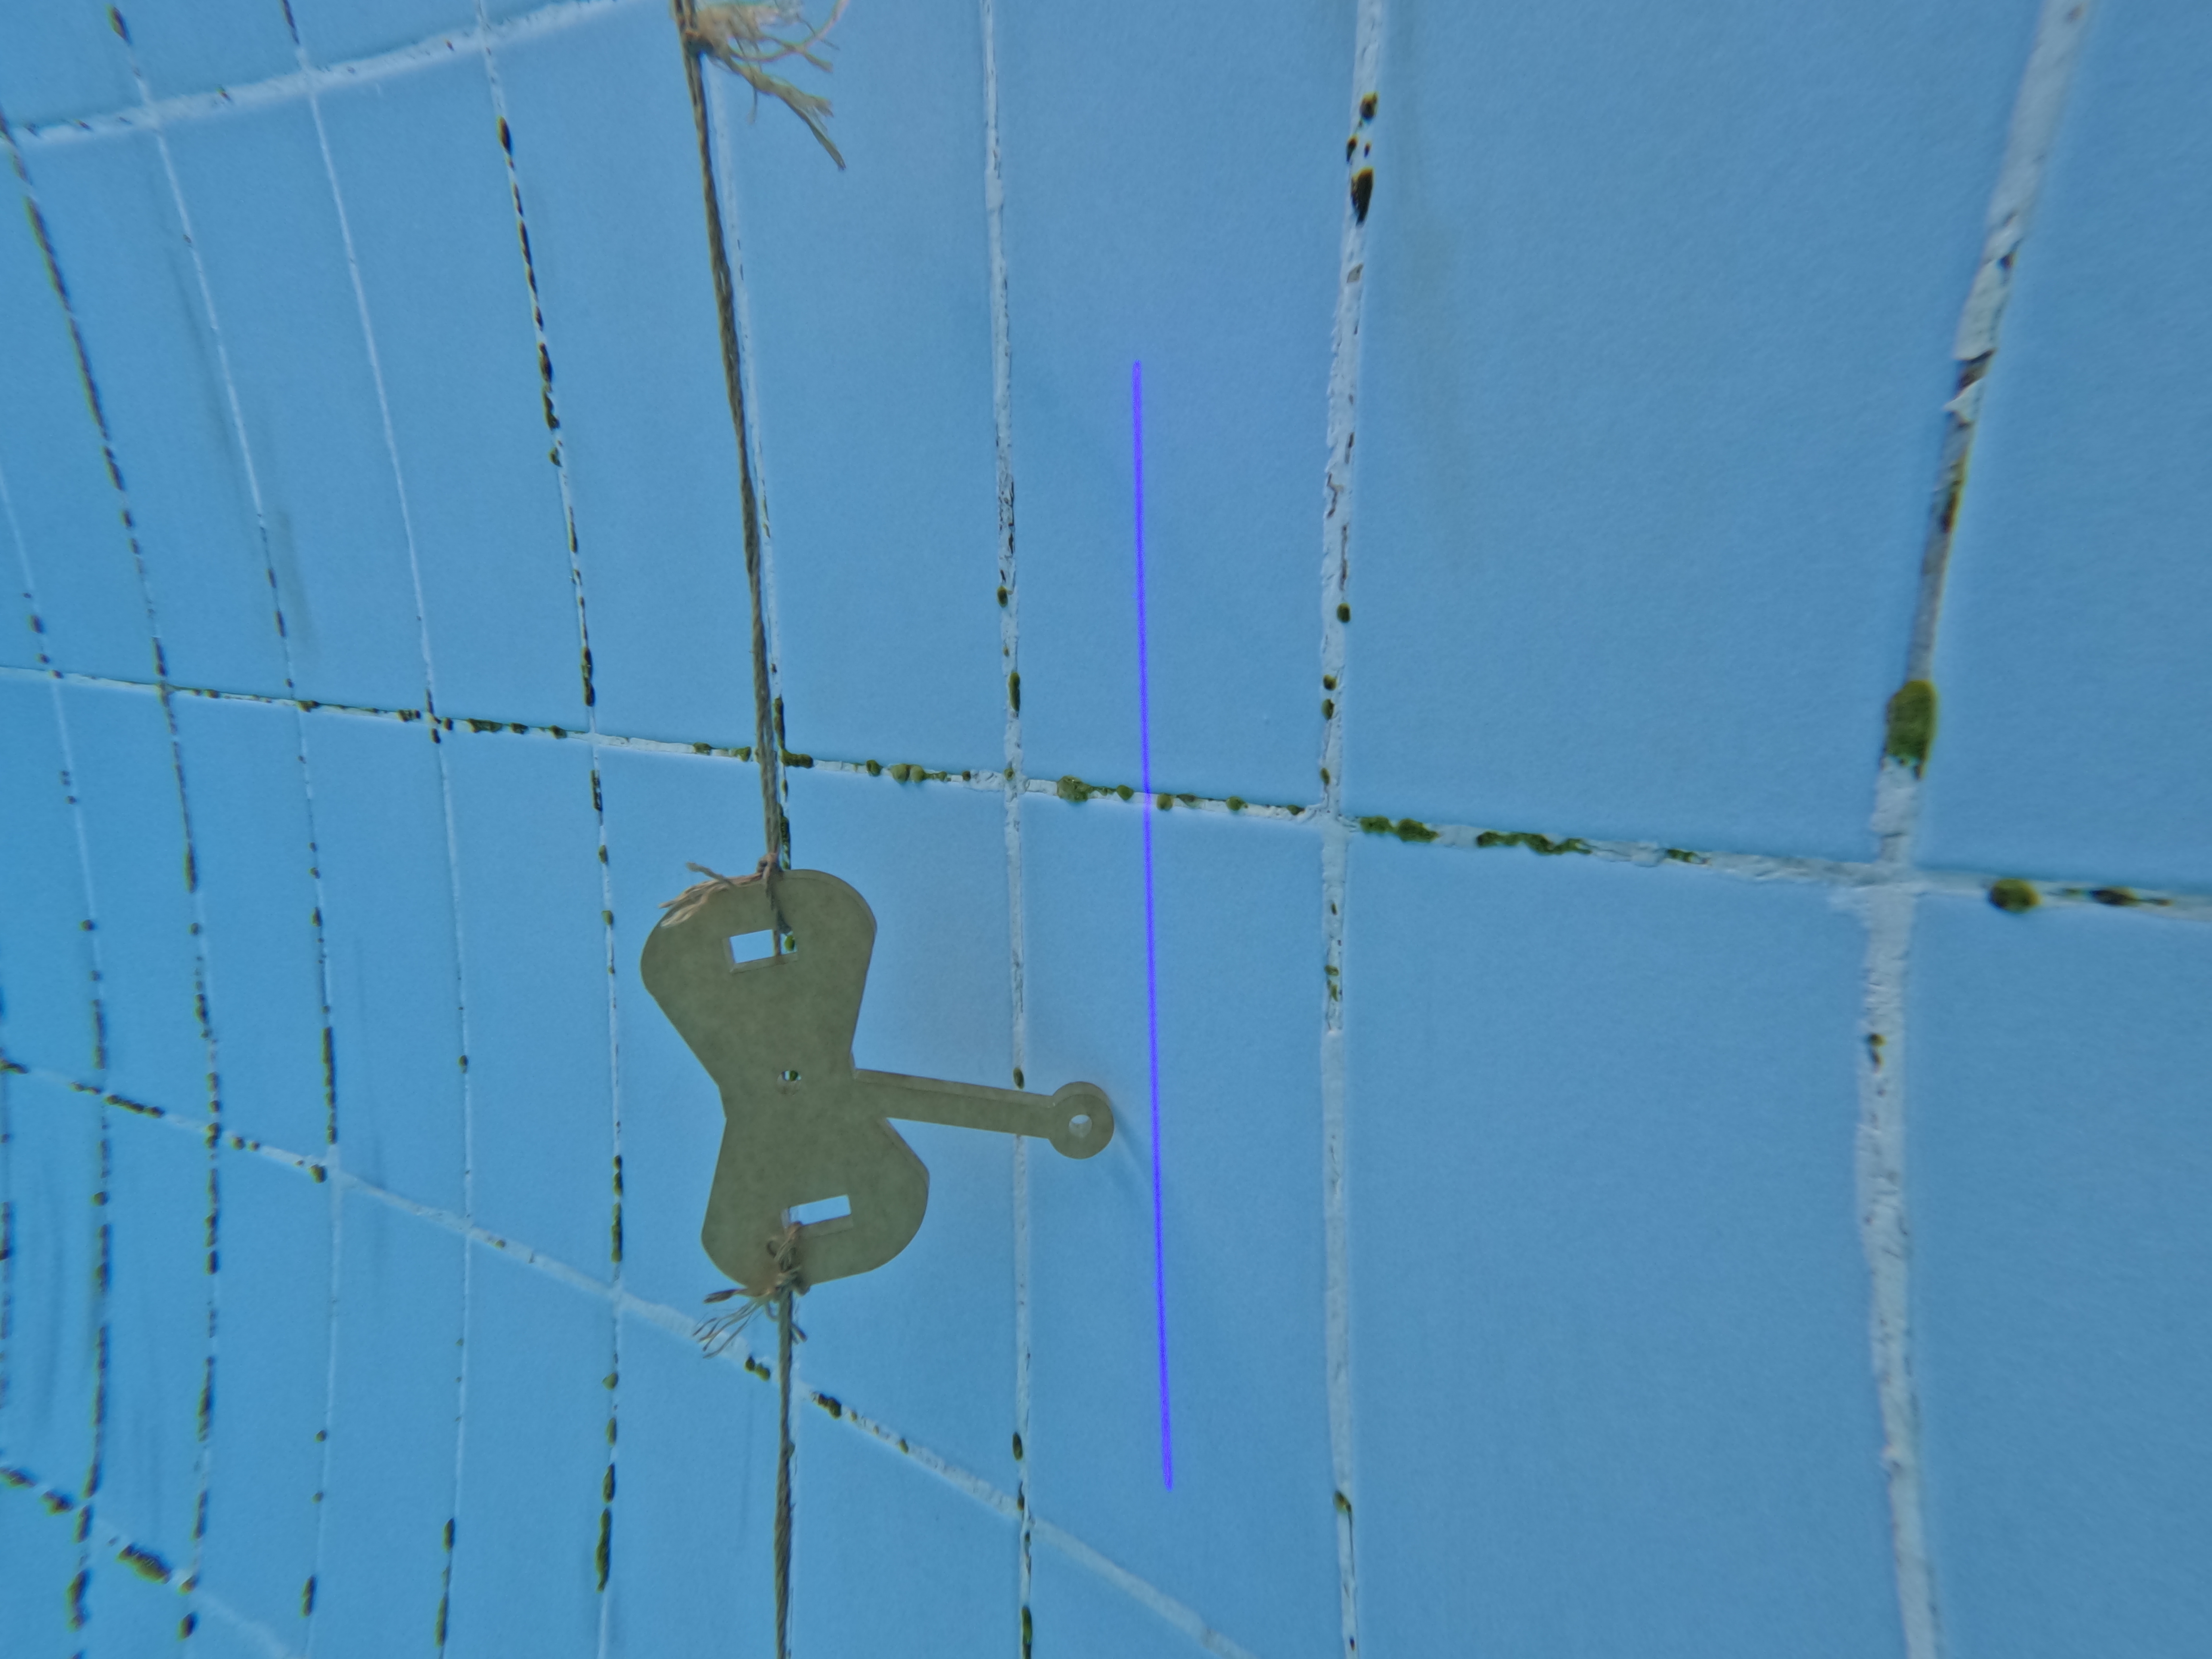

Supplement: Supplementary file 2039 [file G0050600.pdf › Level_3_2/G0050600.pdf]

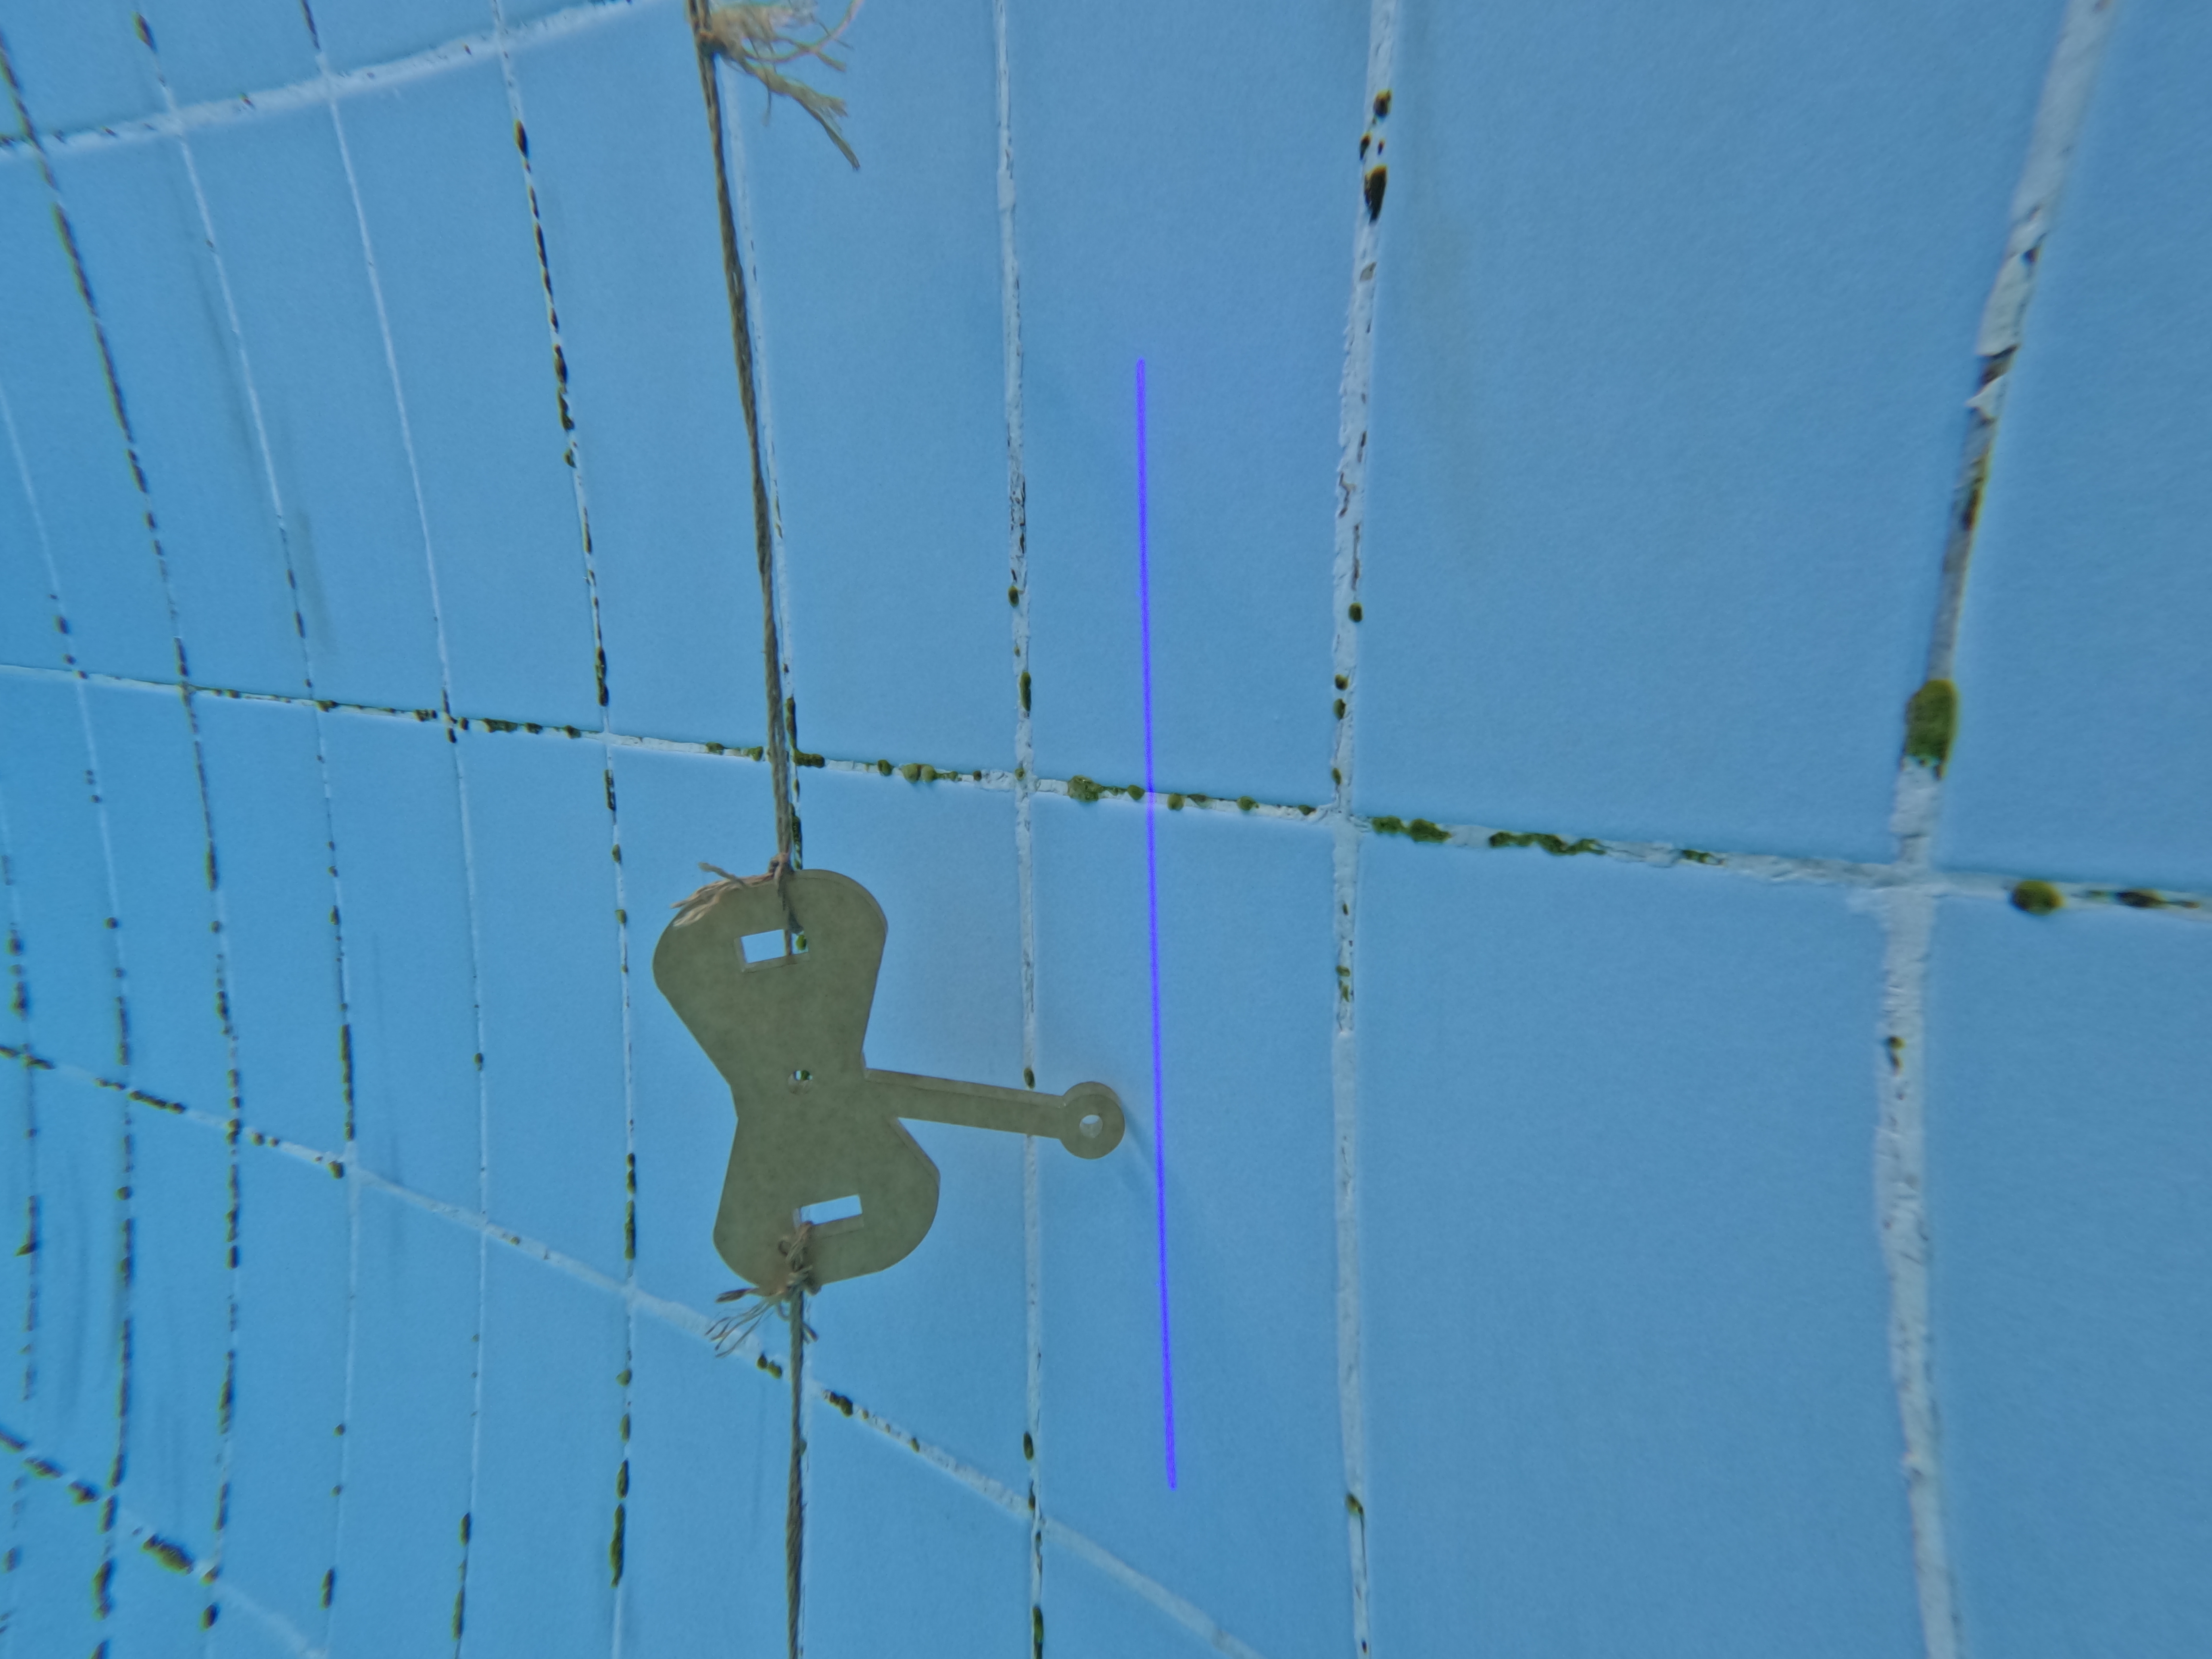

Supplement: Supplementary file 2040 [file G0050601.pdf › Level_3_2/G0050601.pdf]

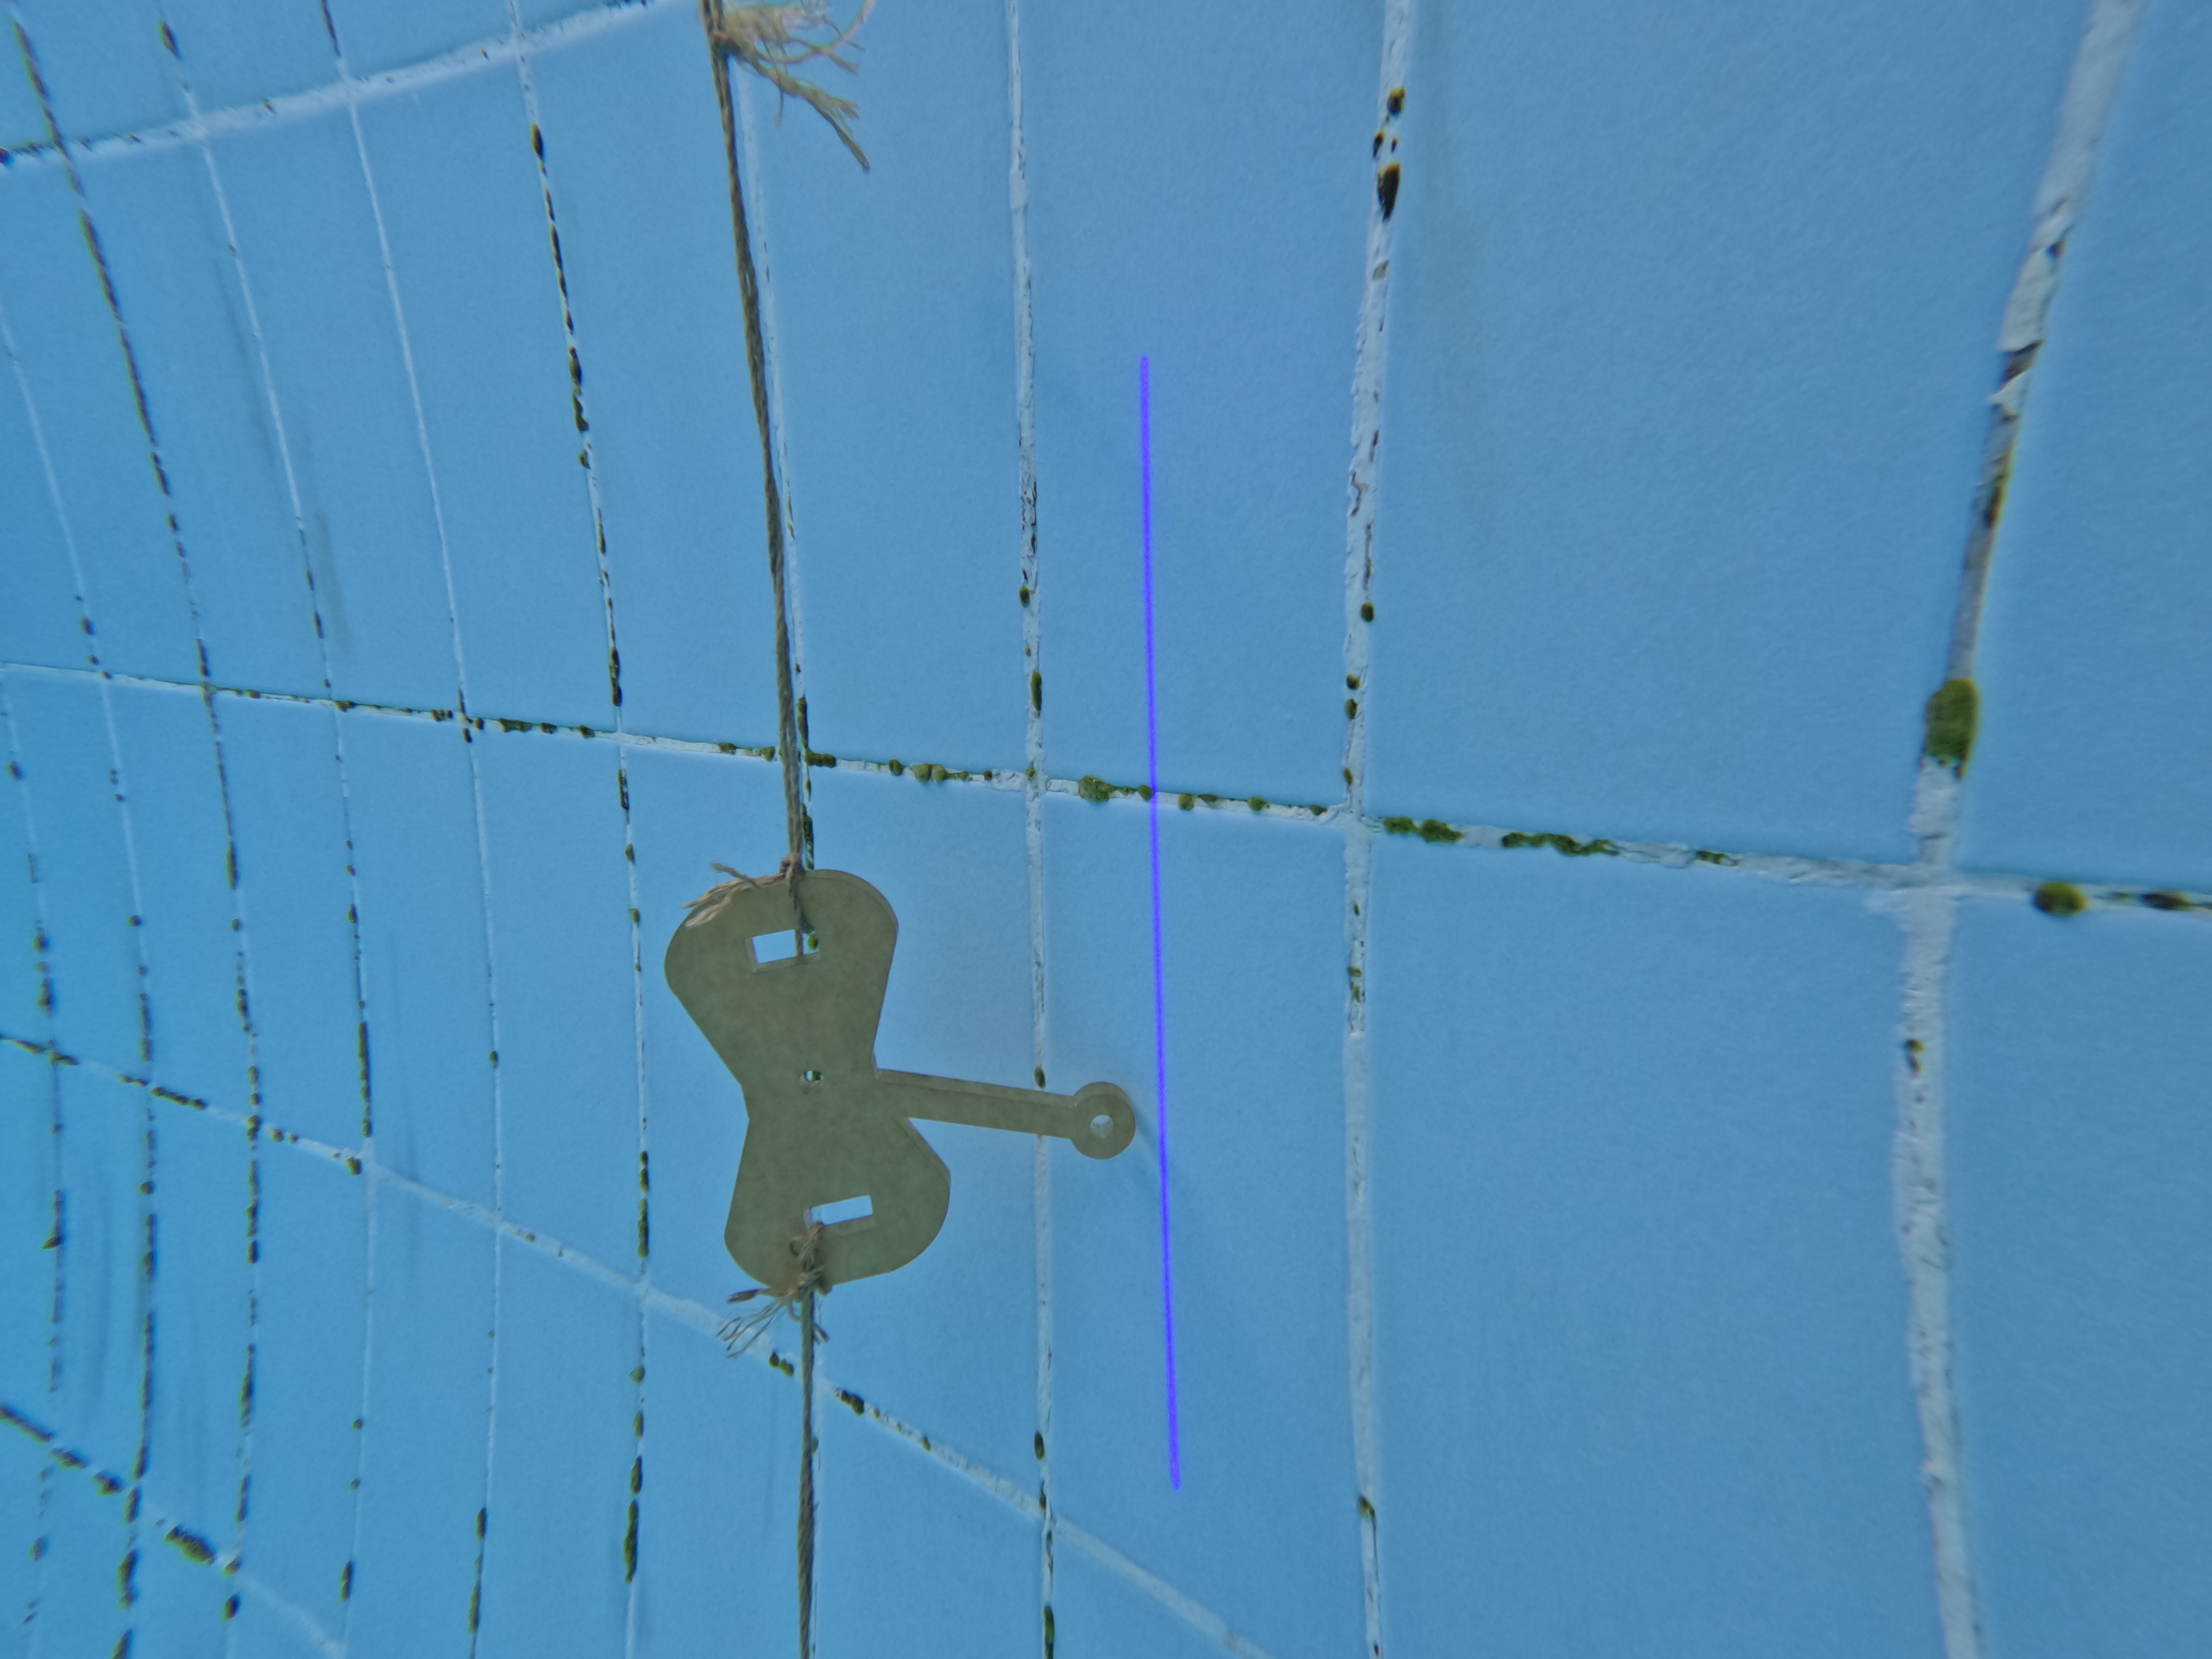

Supplement: Supplementary file 2041 [file G0050602.pdf › Level_3_2/G0050602.pdf]

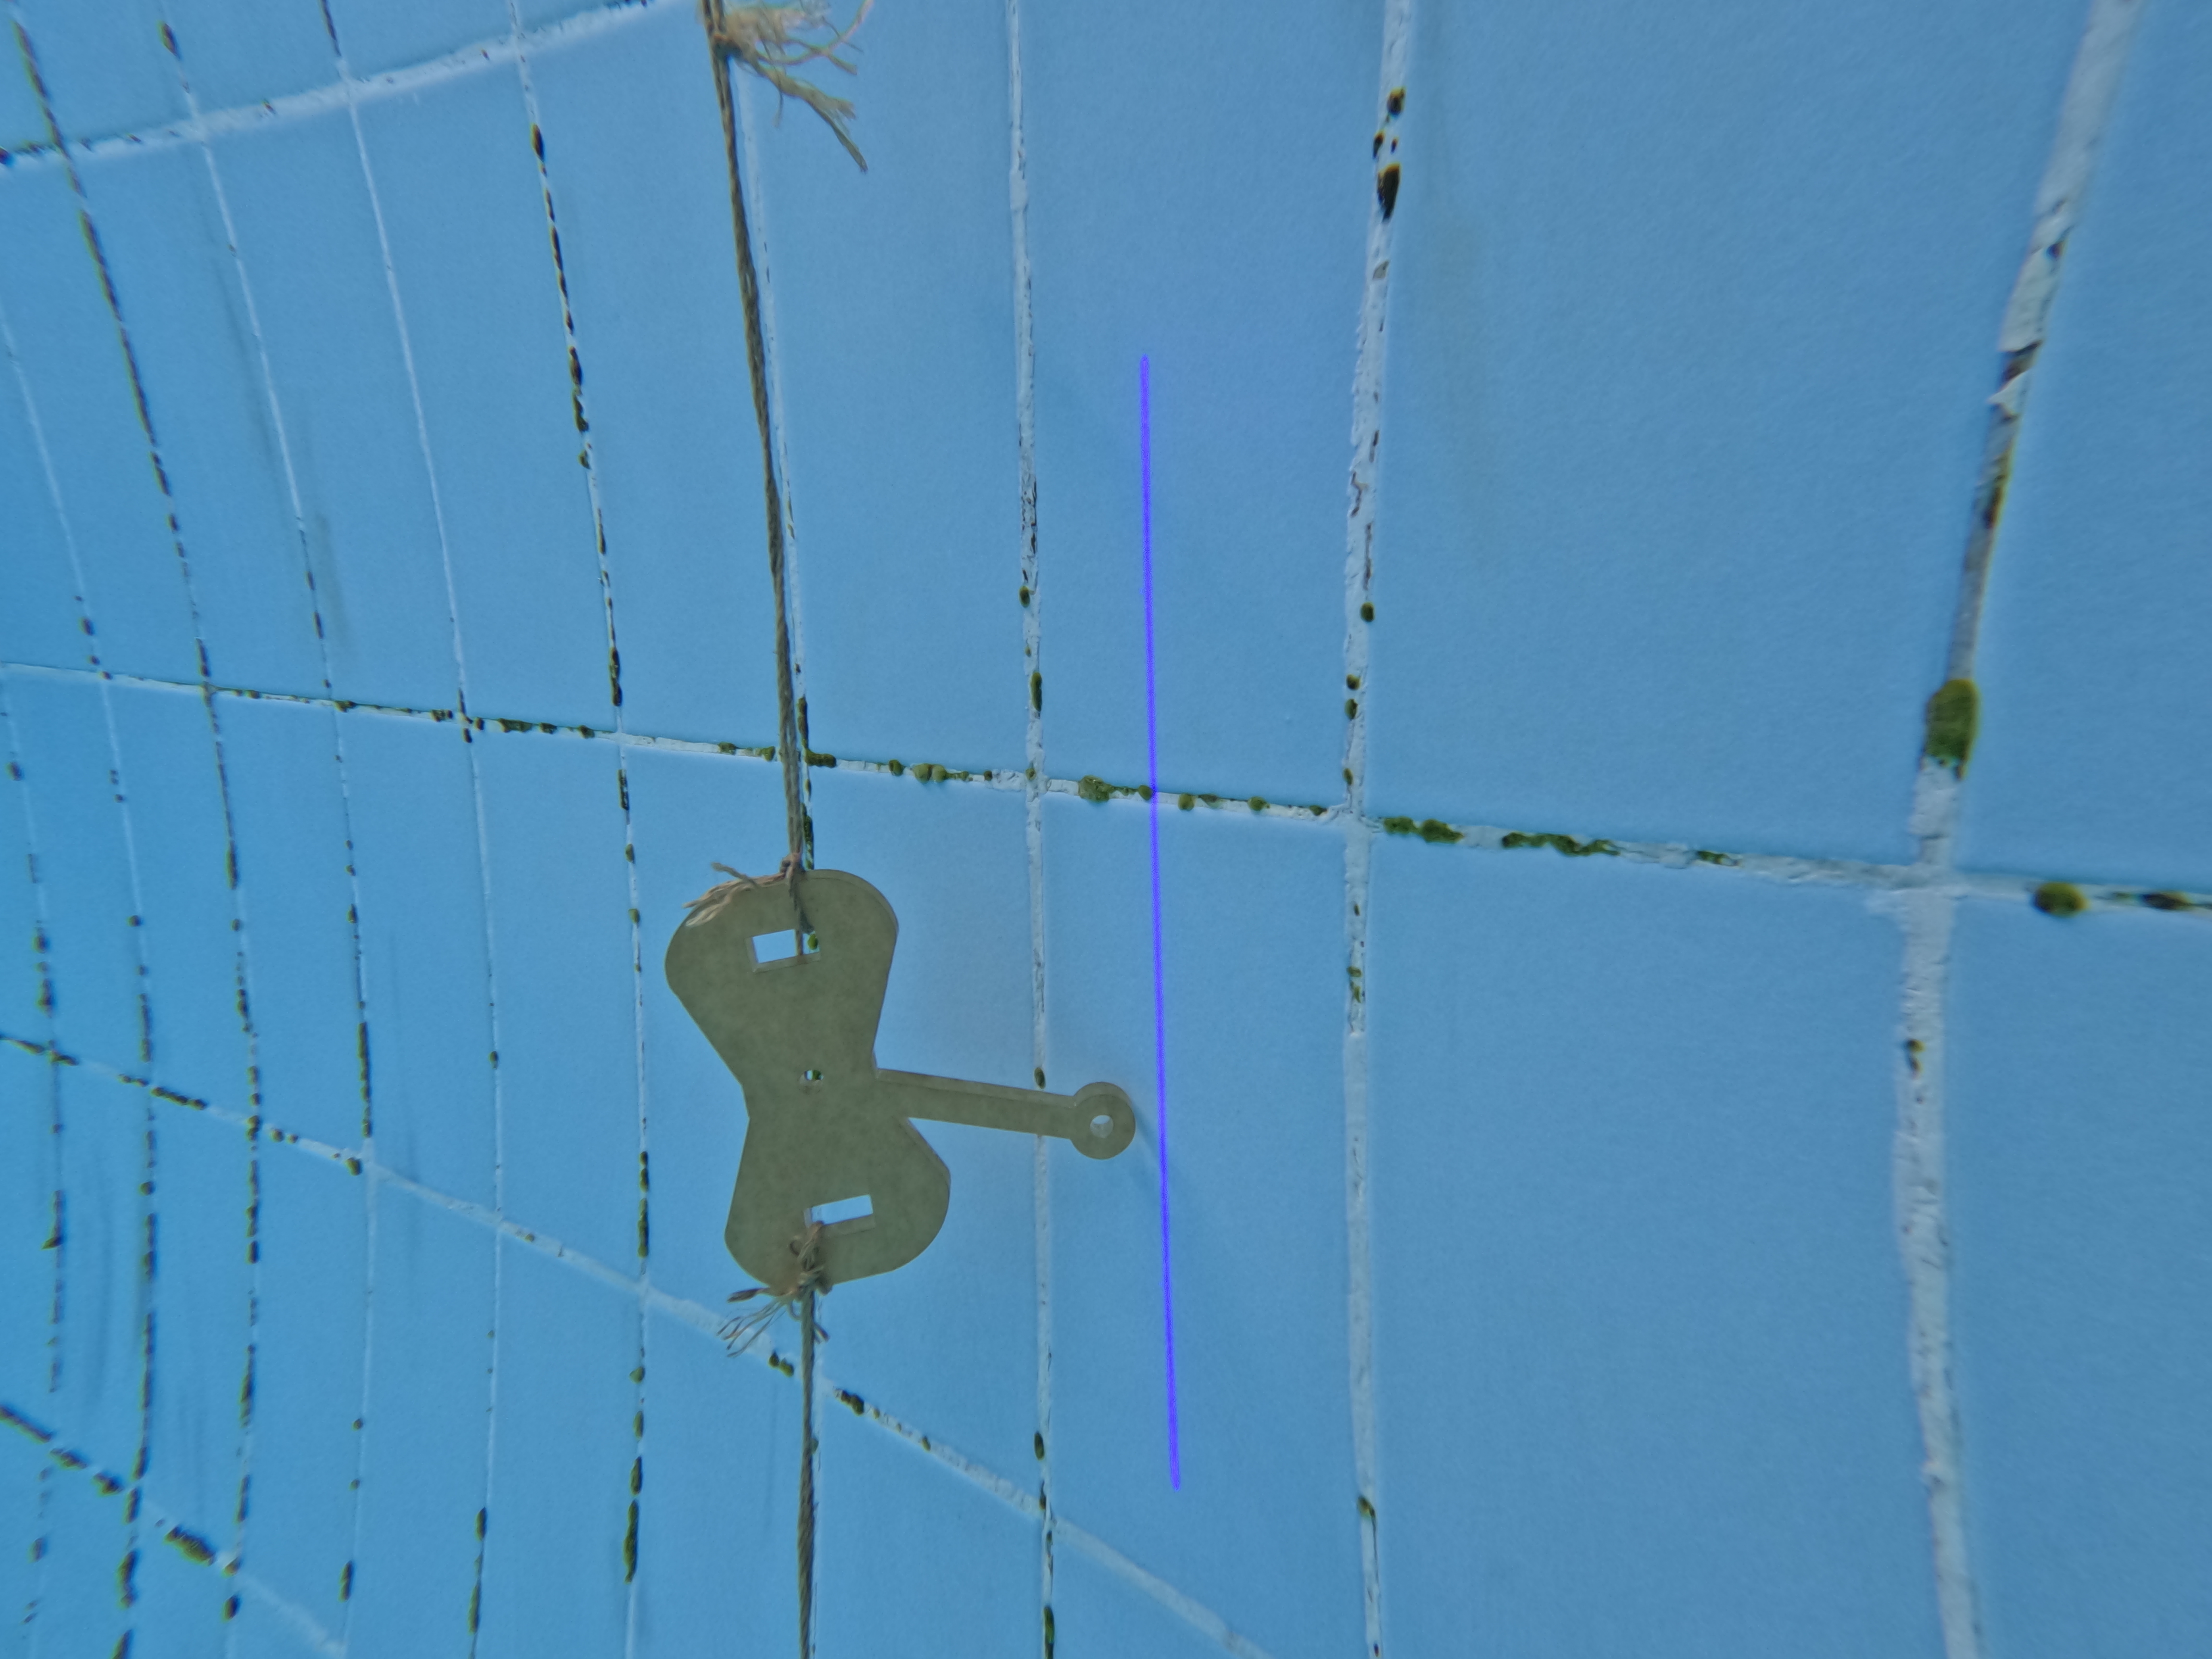

Supplement: Supplementary file 2042 [file G0050603.pdf › Level_3_2/G0050603.pdf]

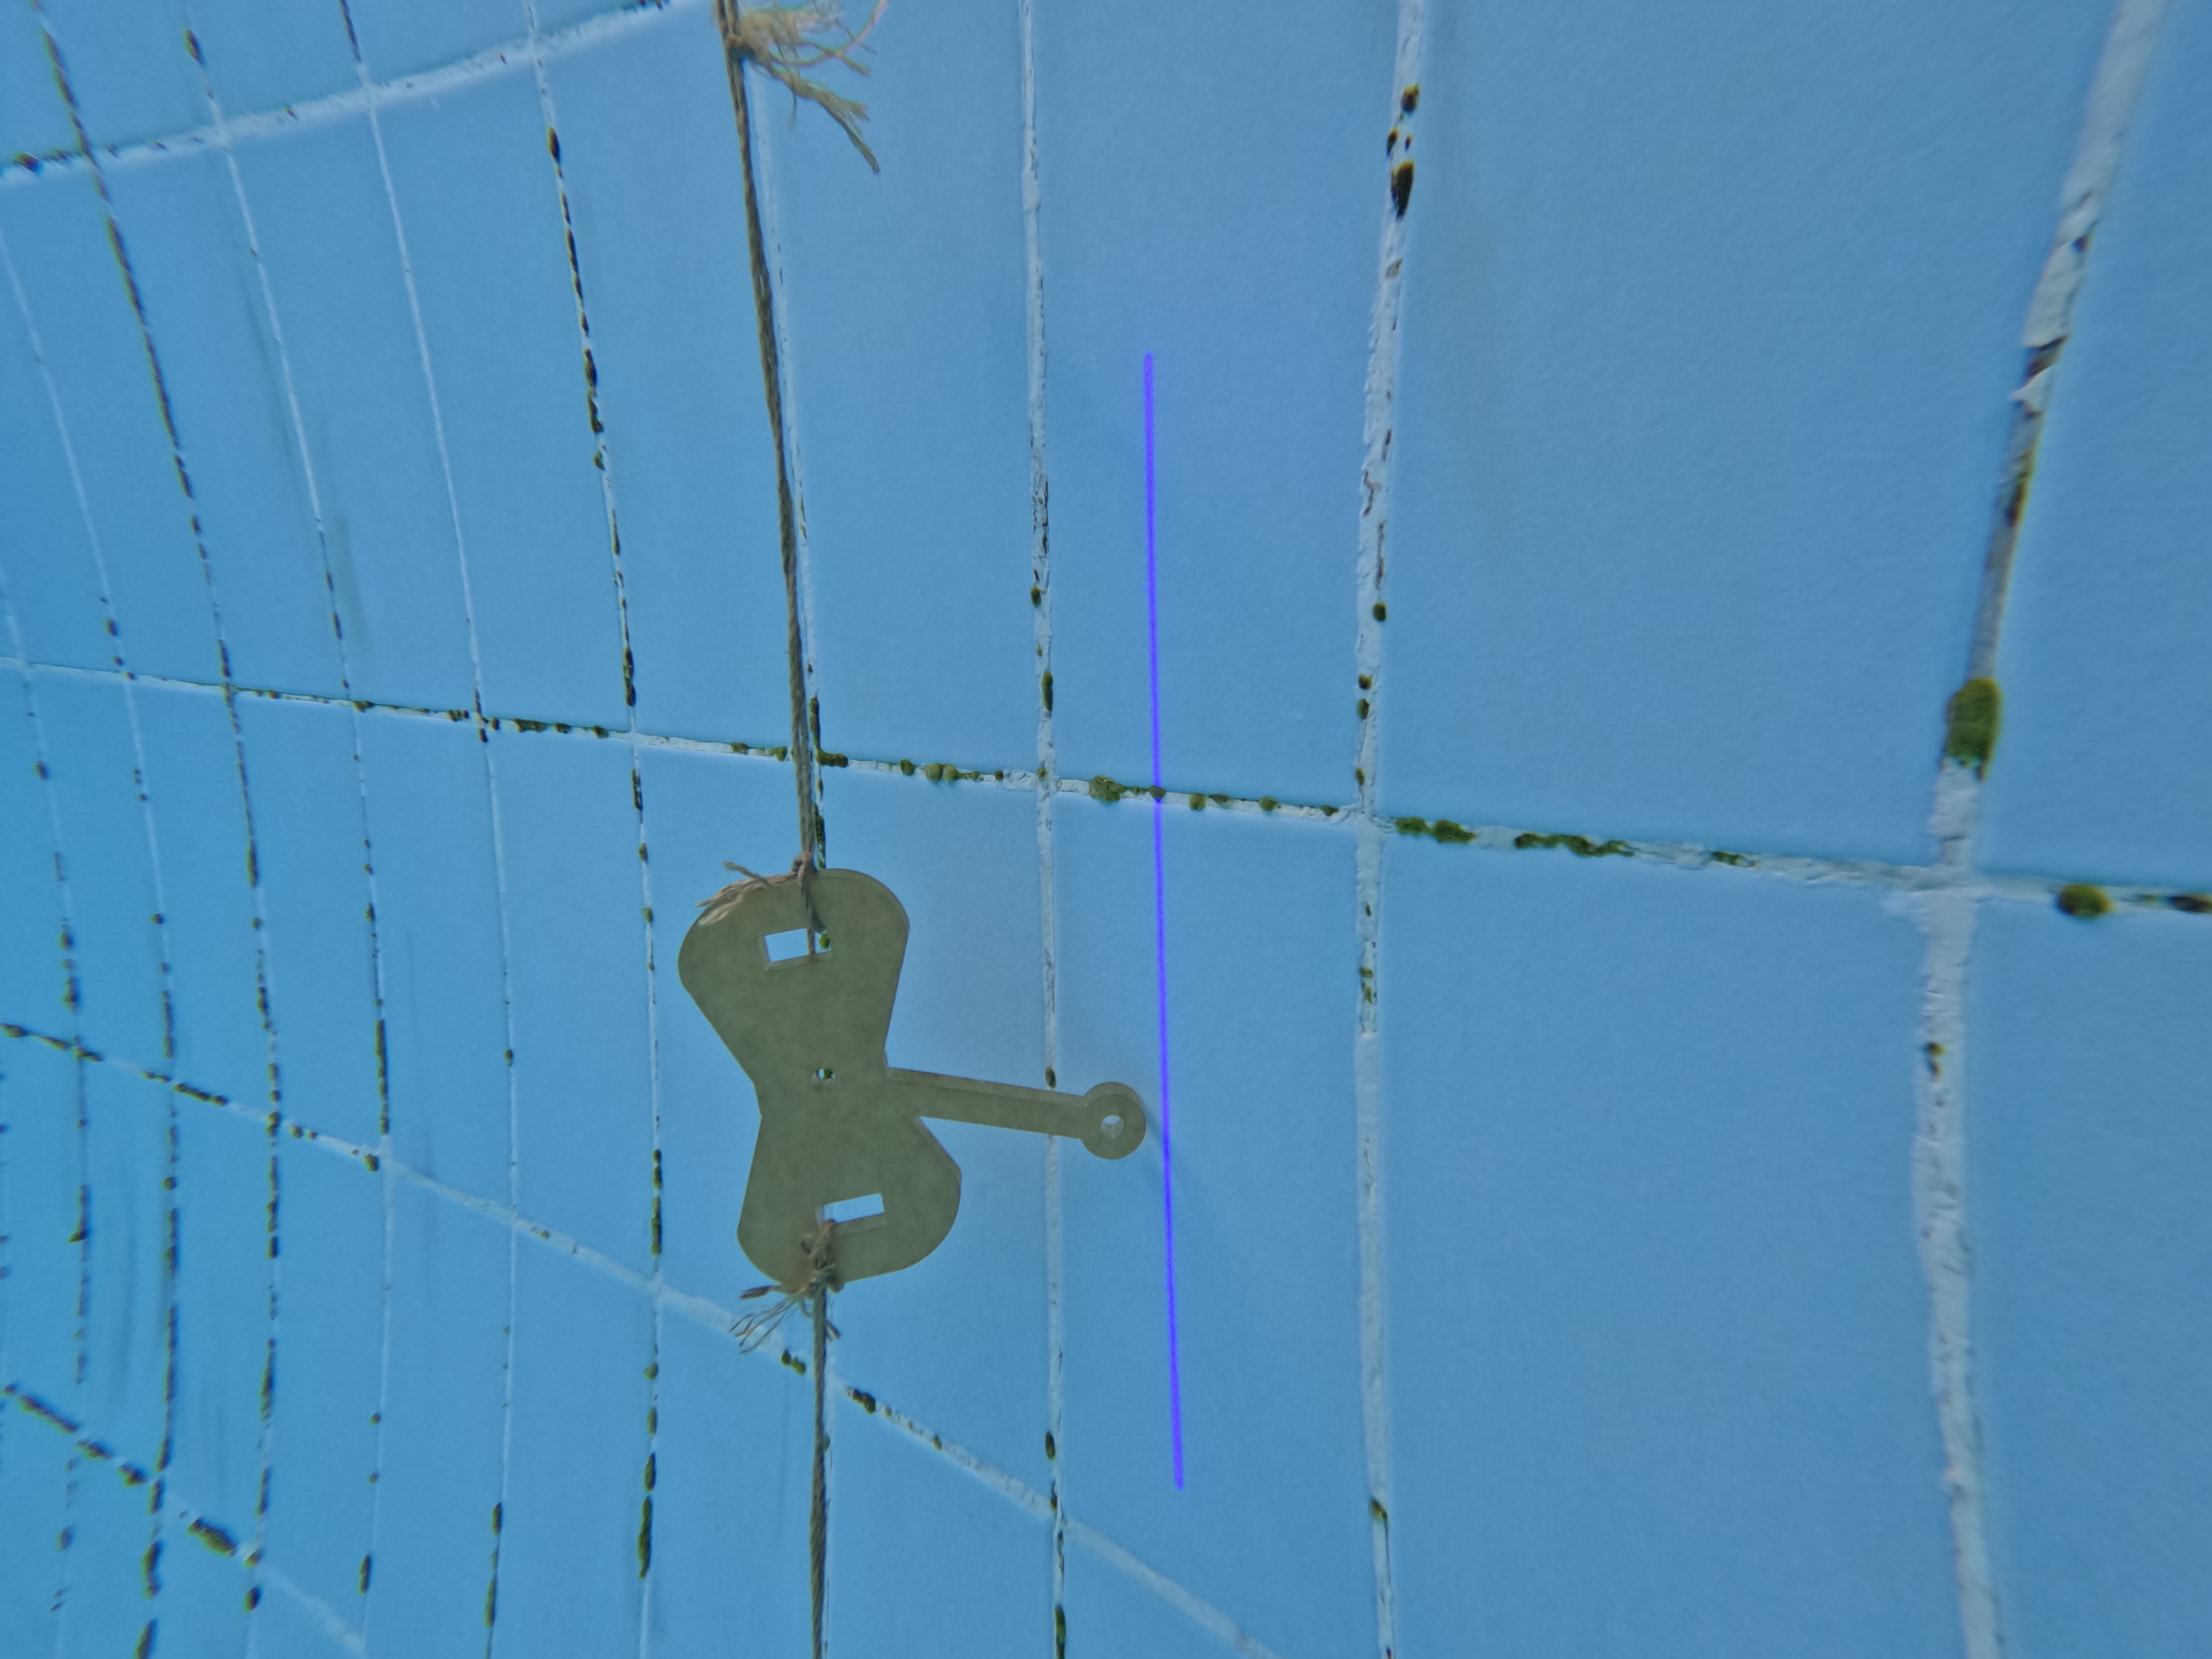

Supplement: Supplementary file 2043 [file G0050604.pdf › Level_3_2/G0050604.pdf]

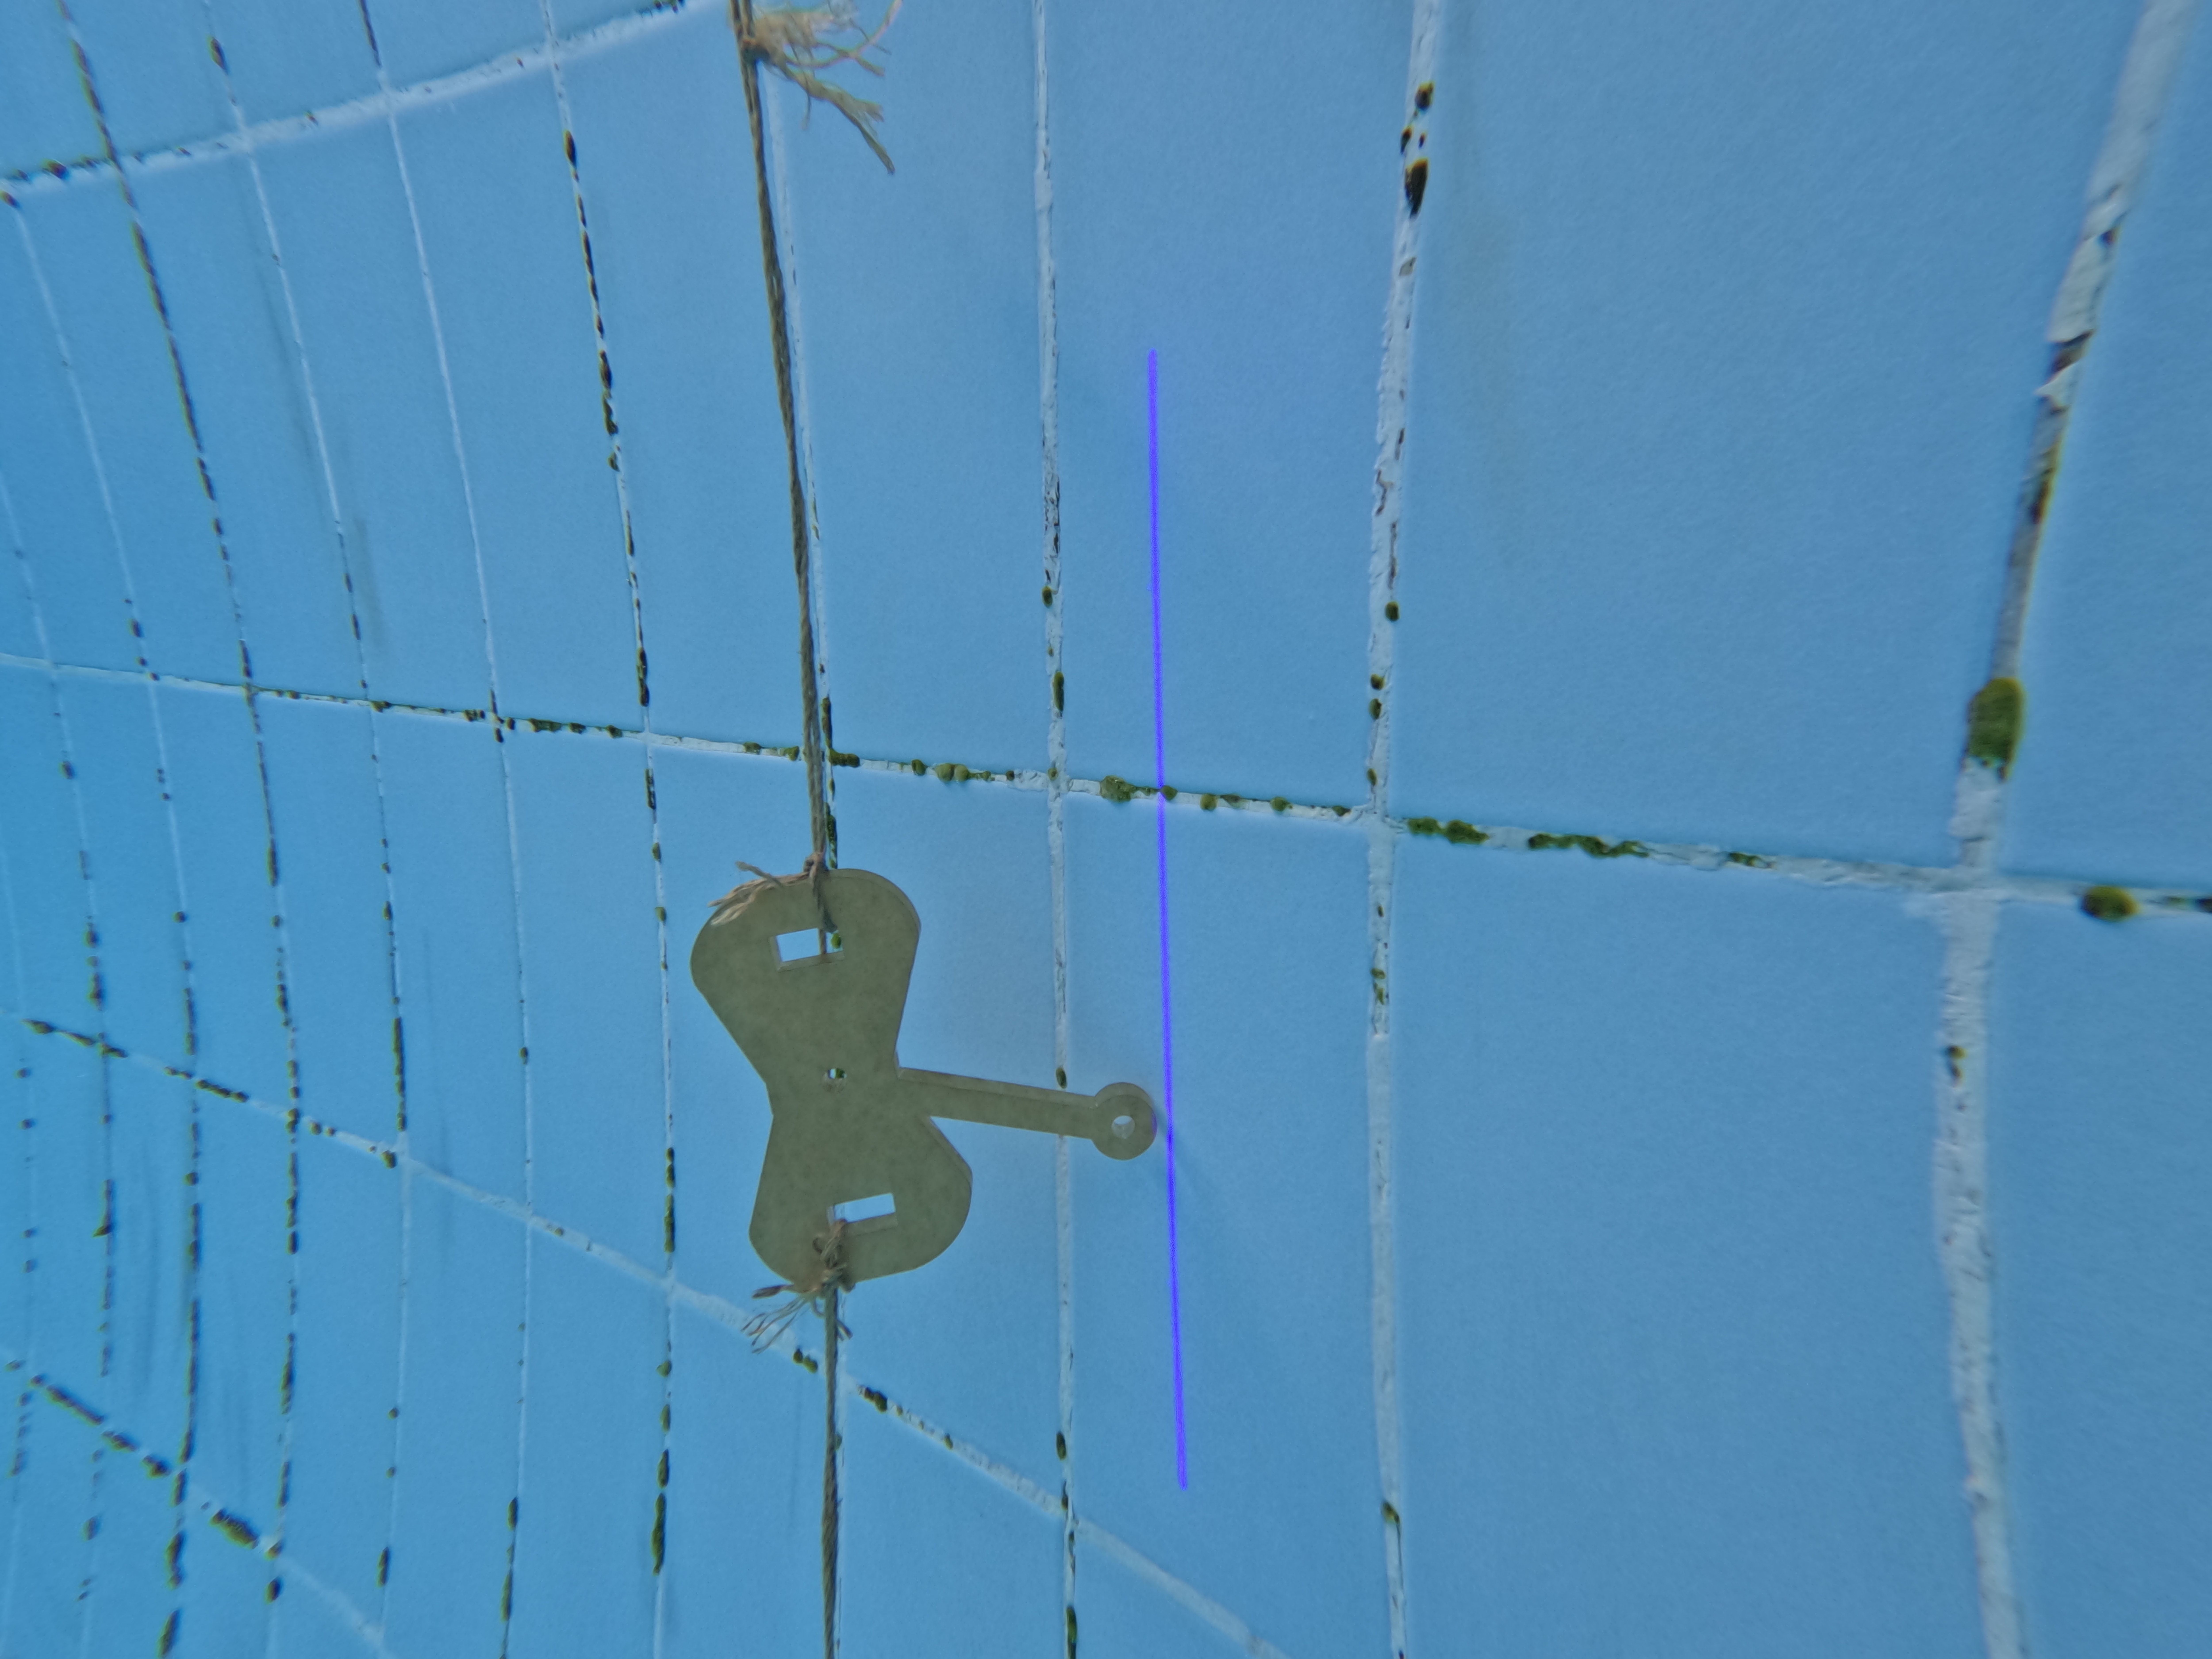

Supplement: Supplementary file 2044 [file G0050605.pdf › Level_3_2/G0050605.pdf]

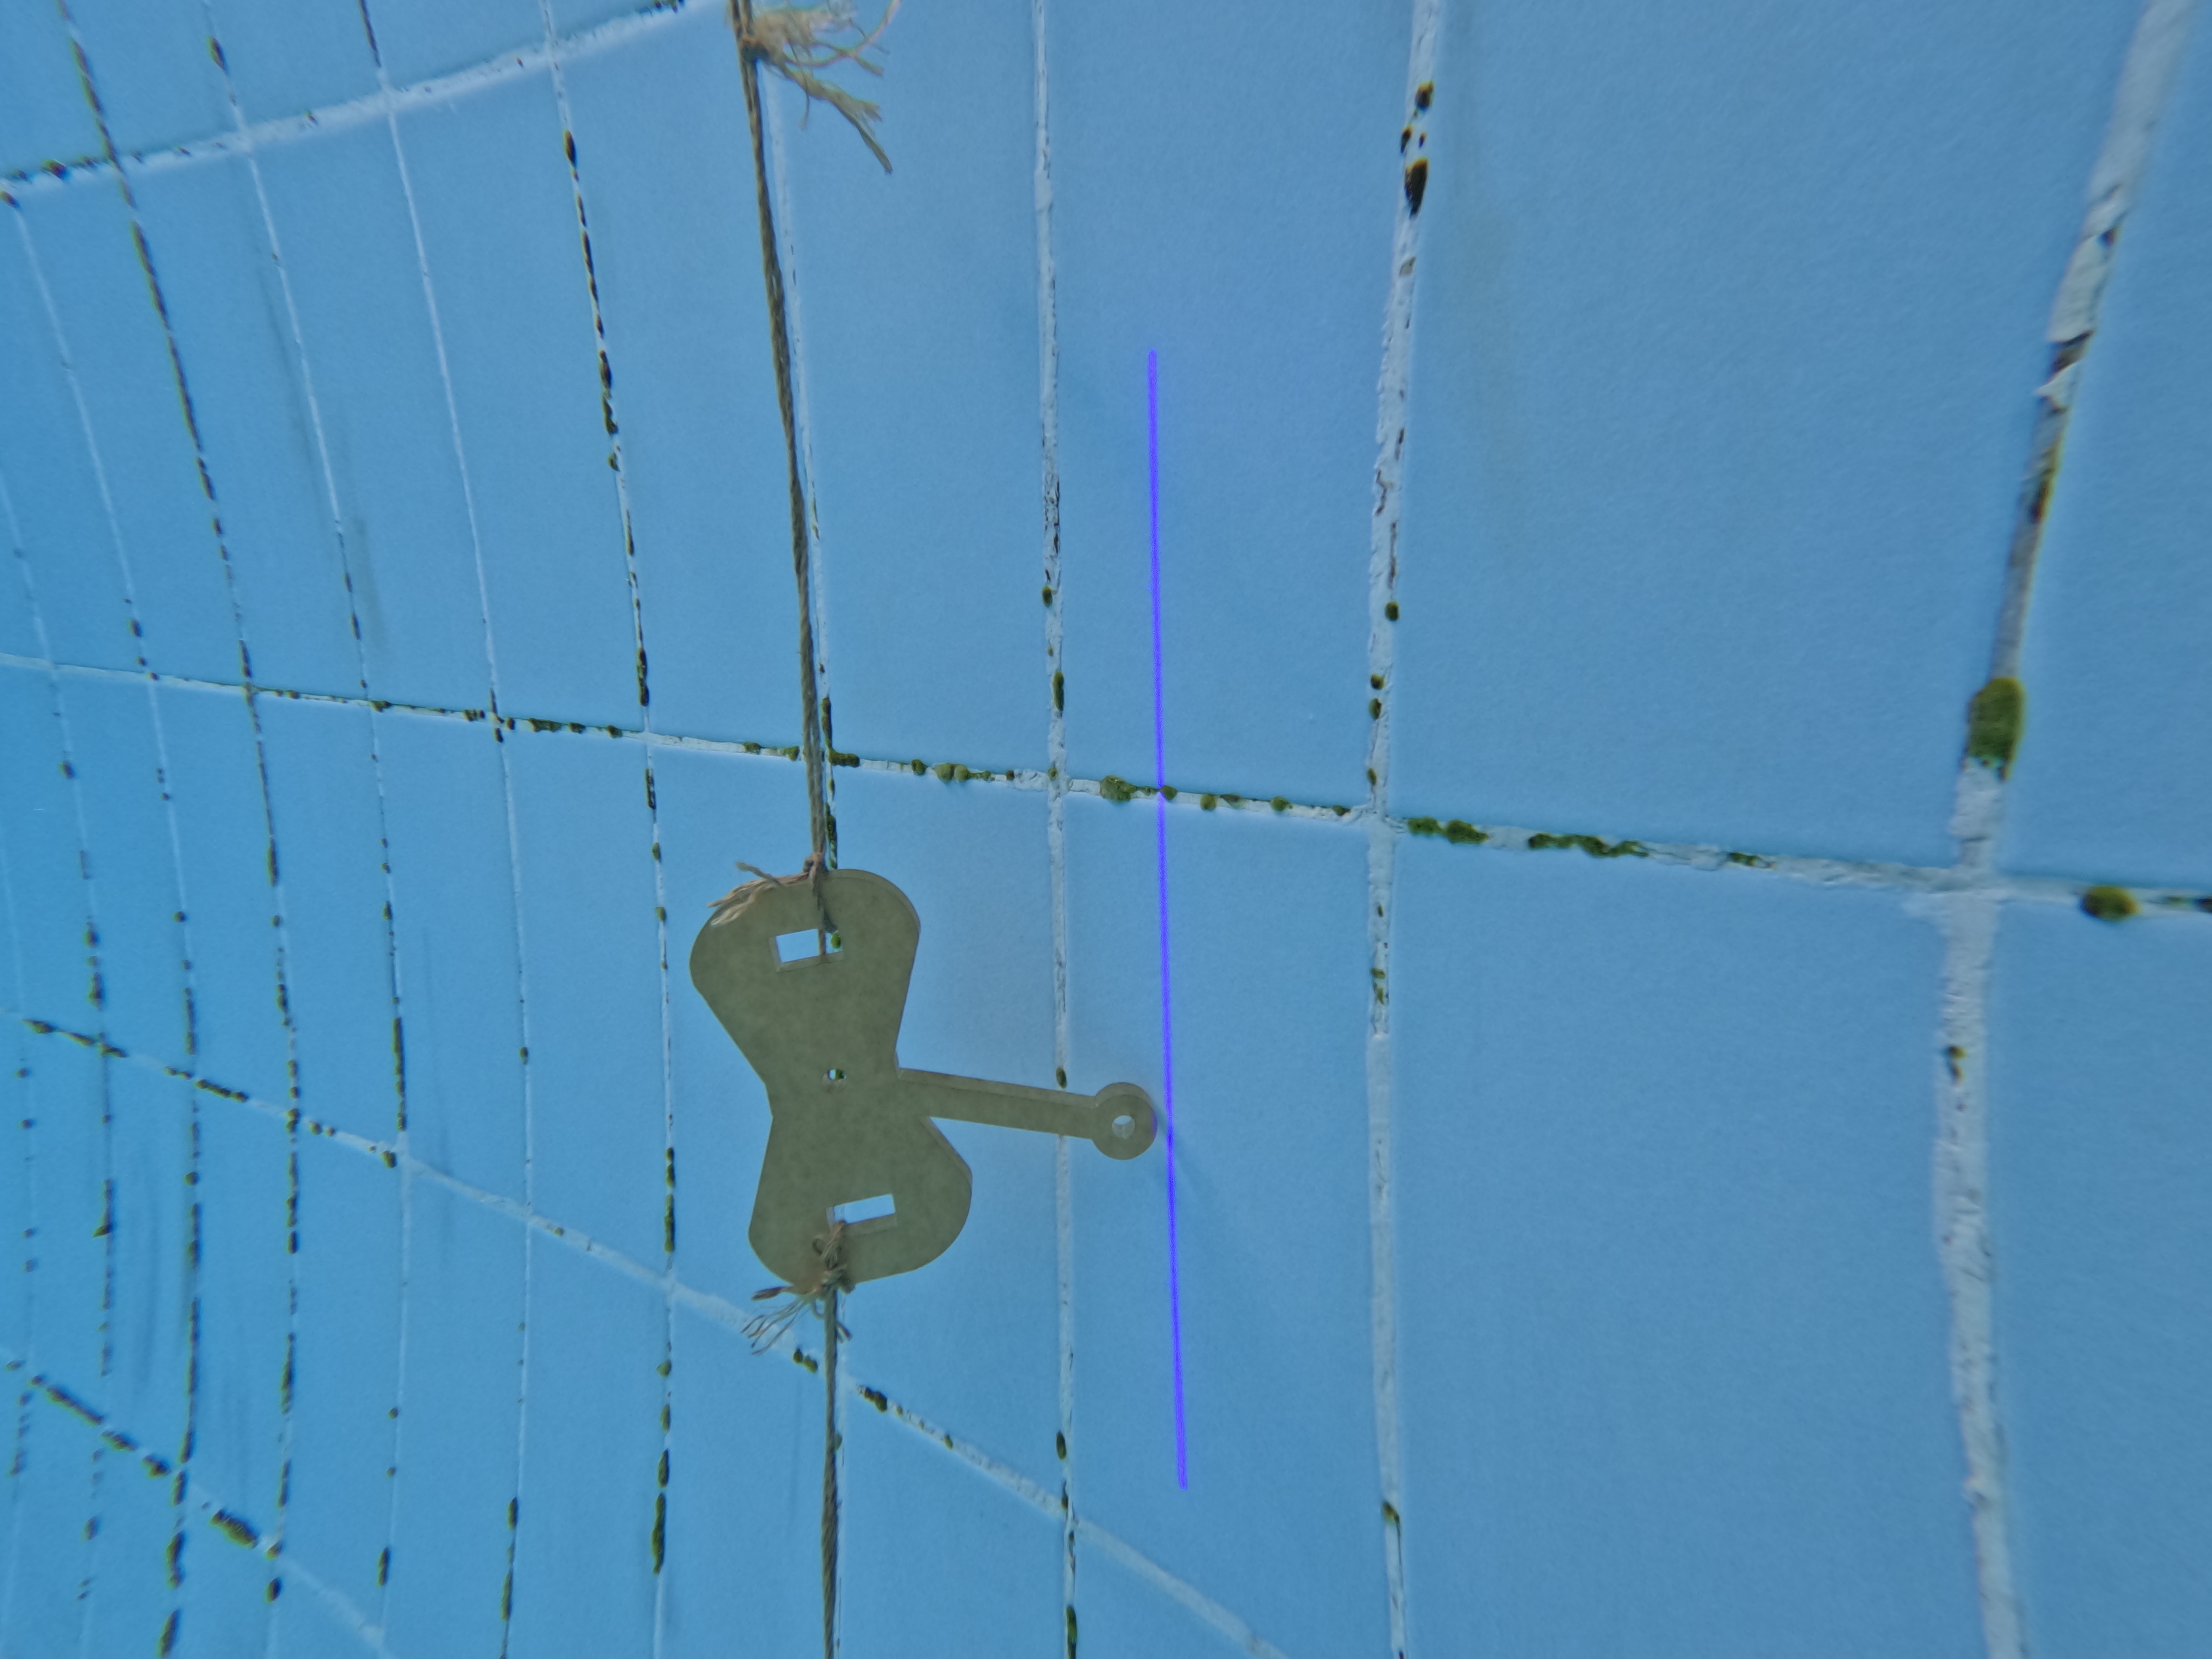

Supplement: Supplementary file 2045 [file G0050606.pdf › Level_3_2/G0050606.pdf]

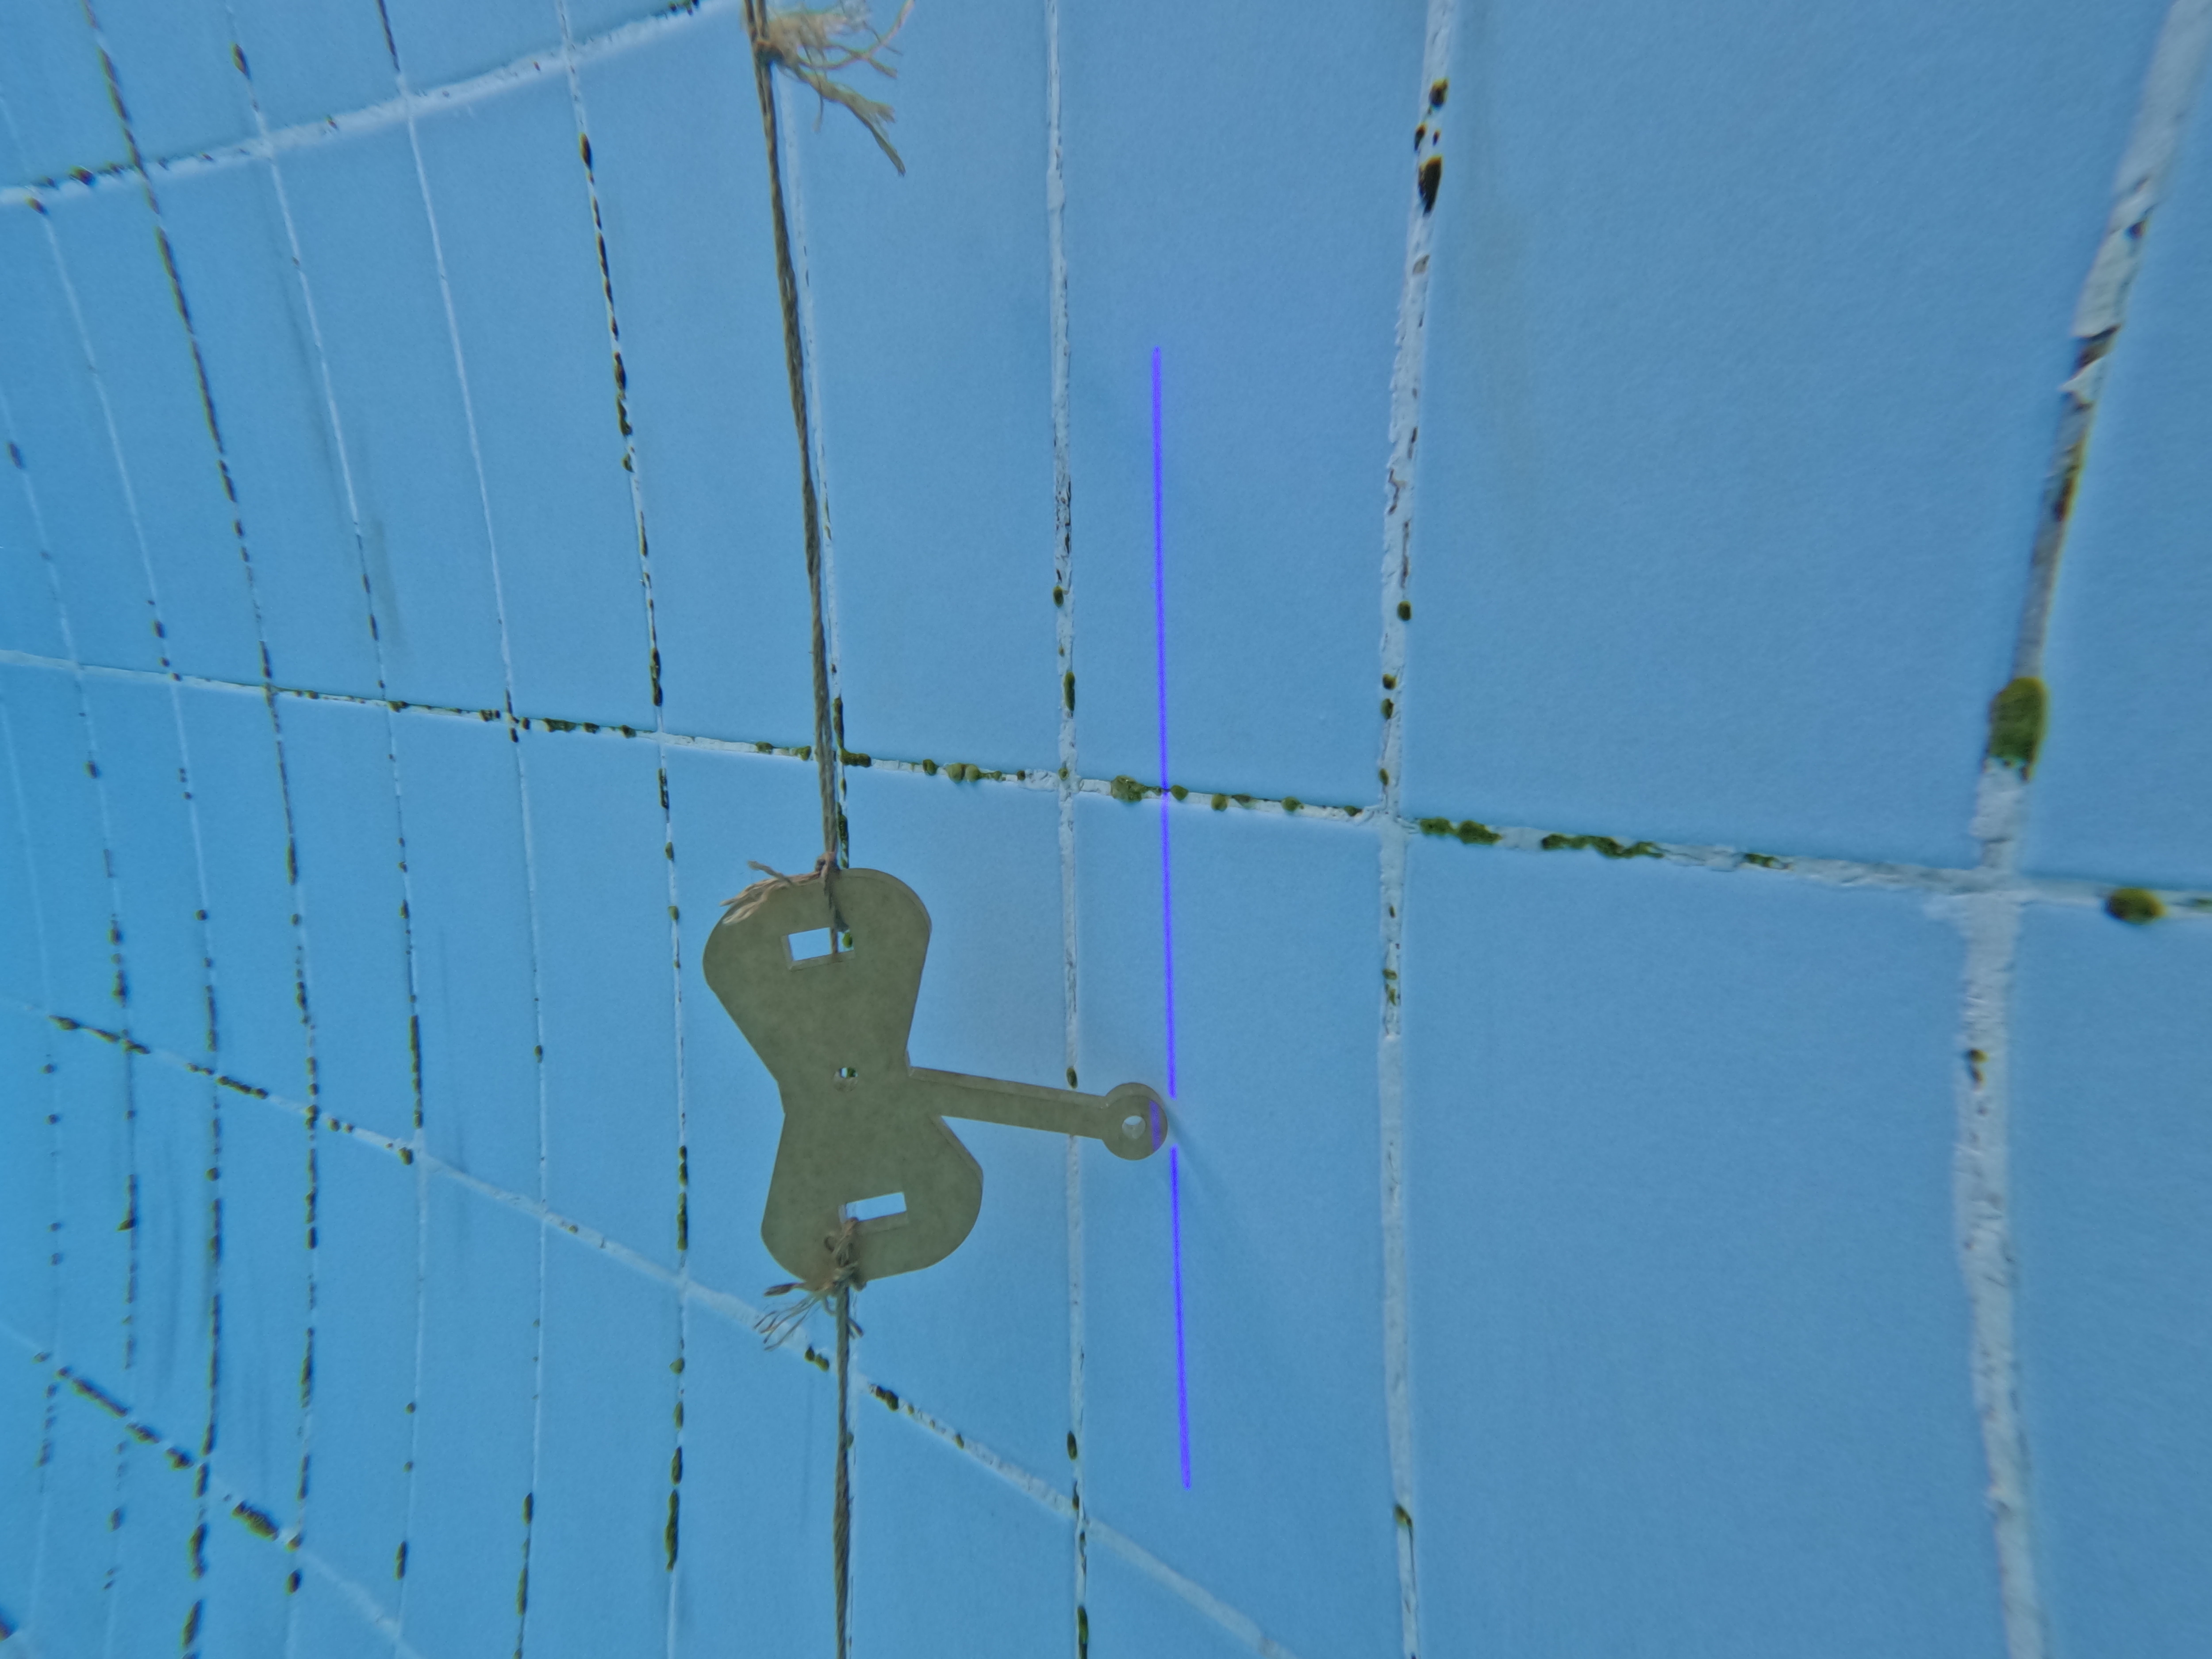

Supplement: Supplementary file 2046 [file G0050607.pdf › Level_3_2/G0050607.pdf]

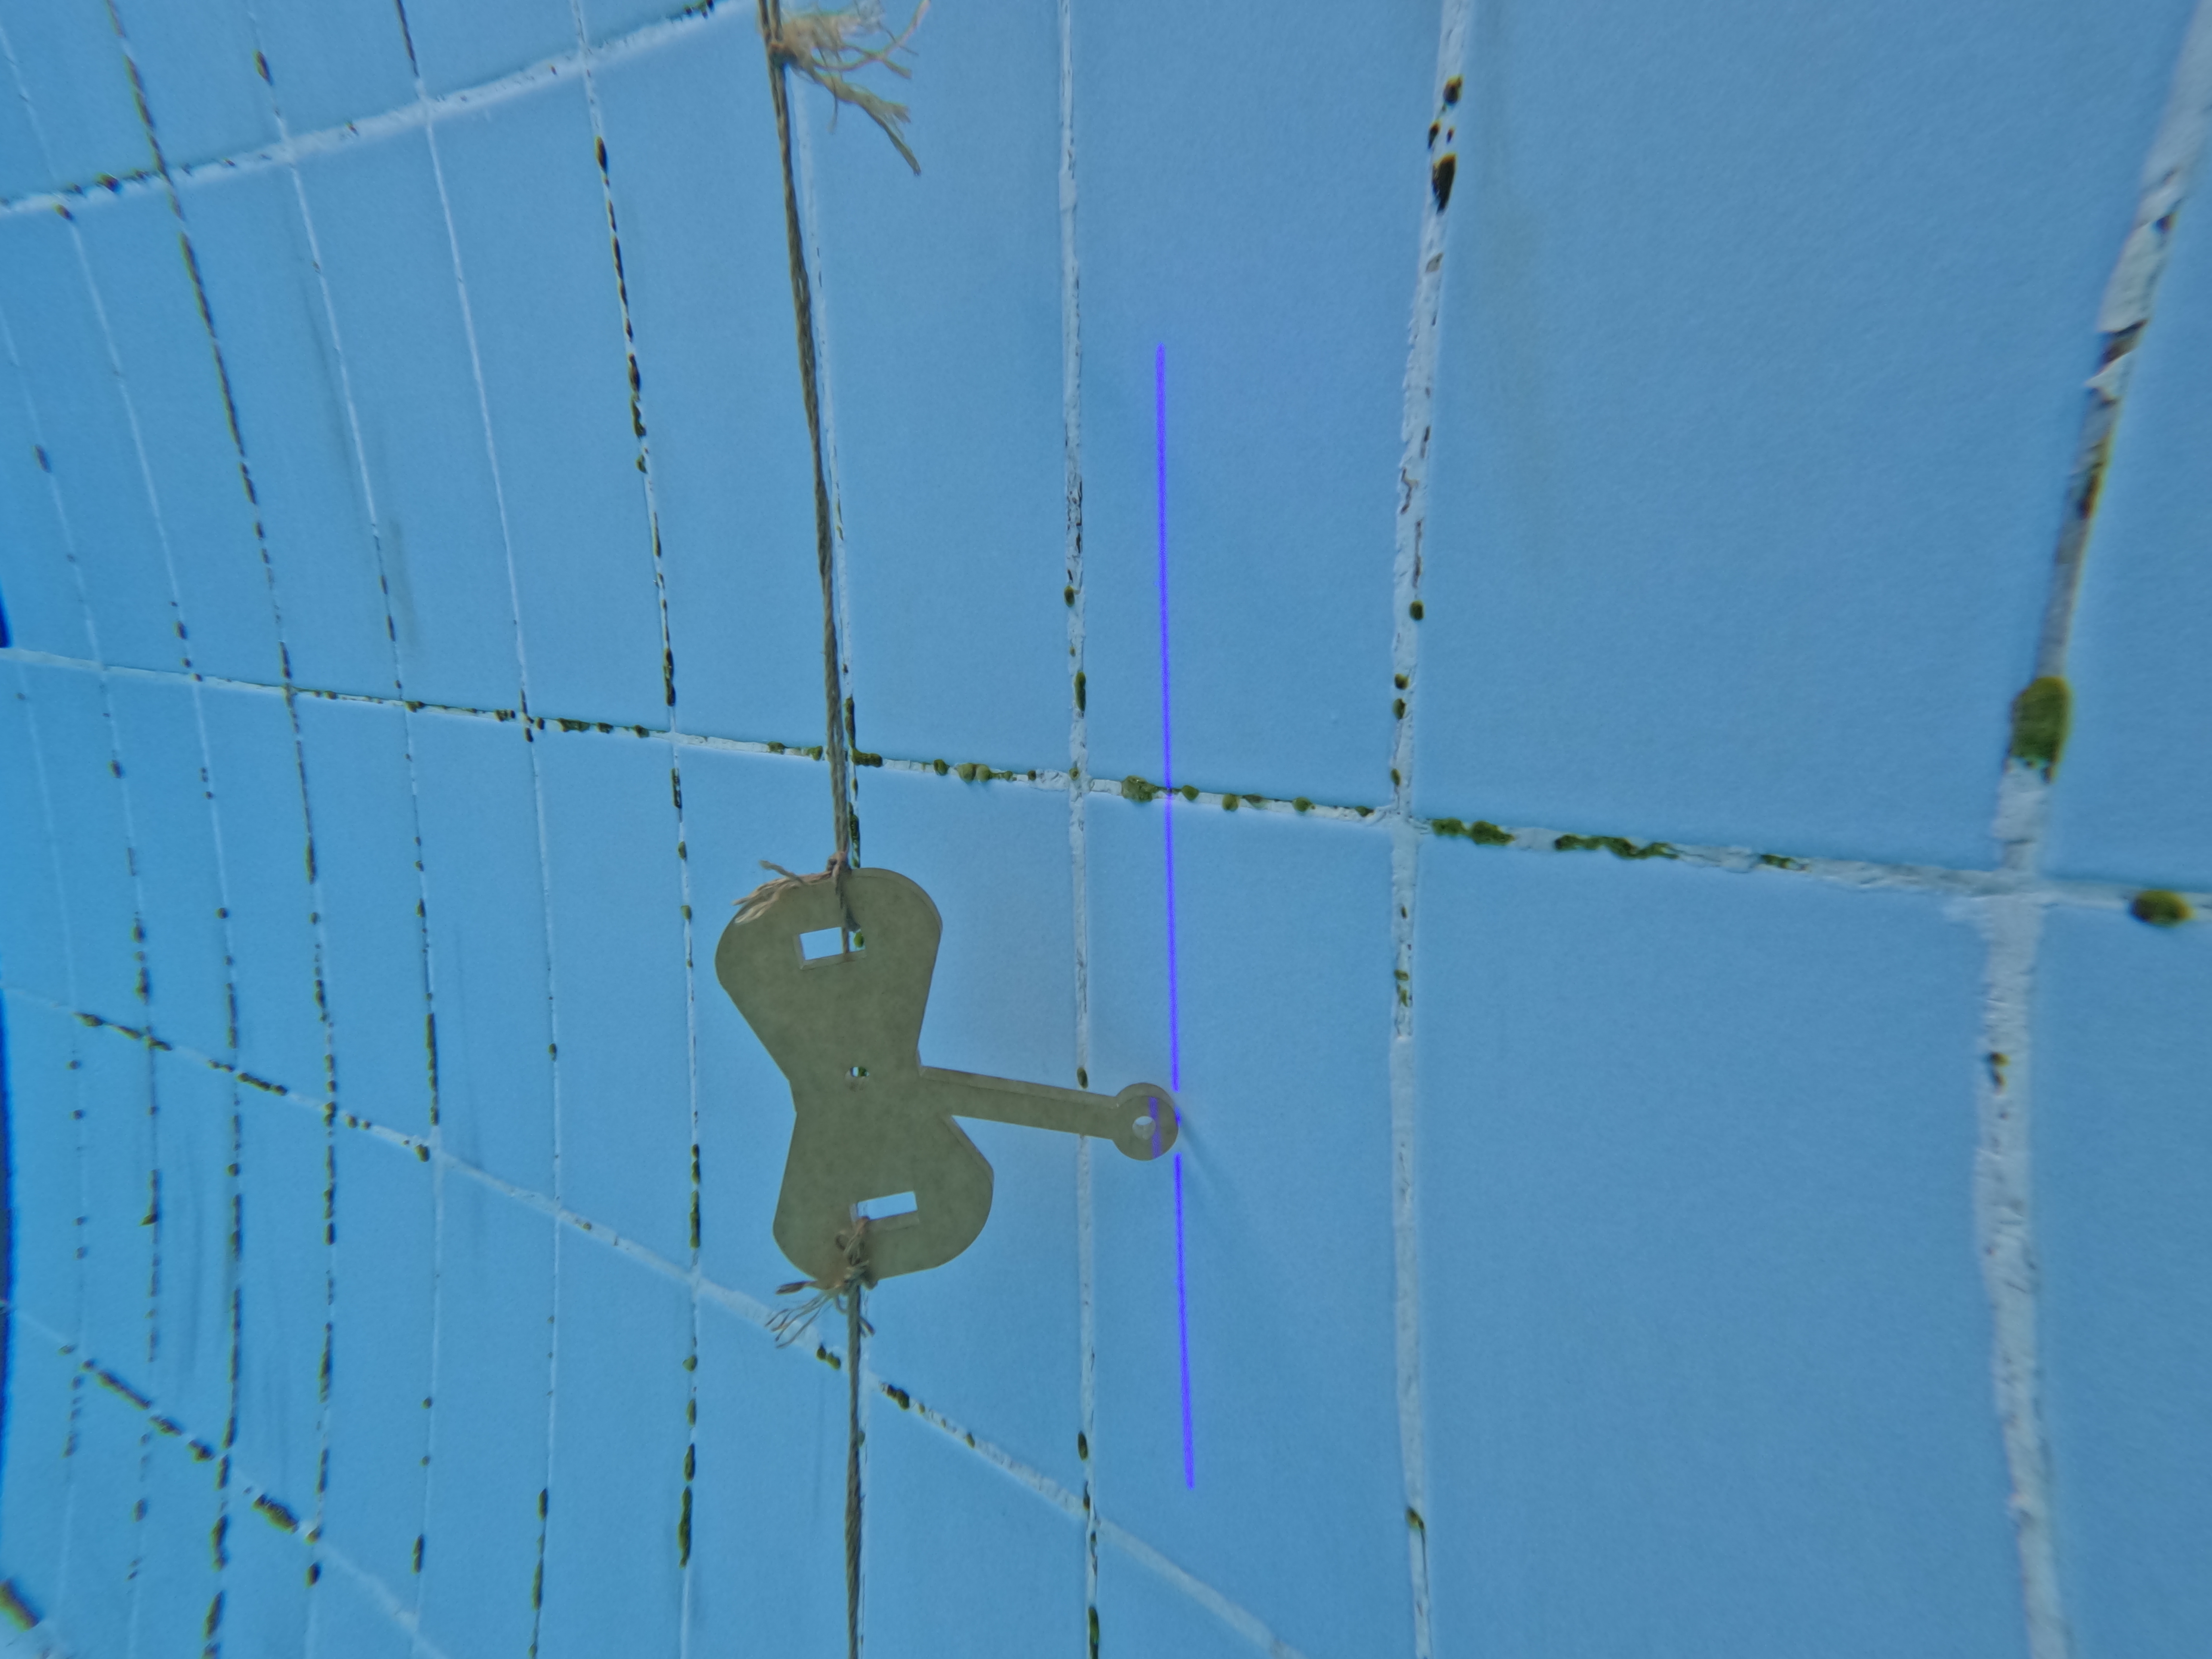

Supplement: Supplementary file 2047 [file G0050608.pdf › Level_3_2/G0050608.pdf]

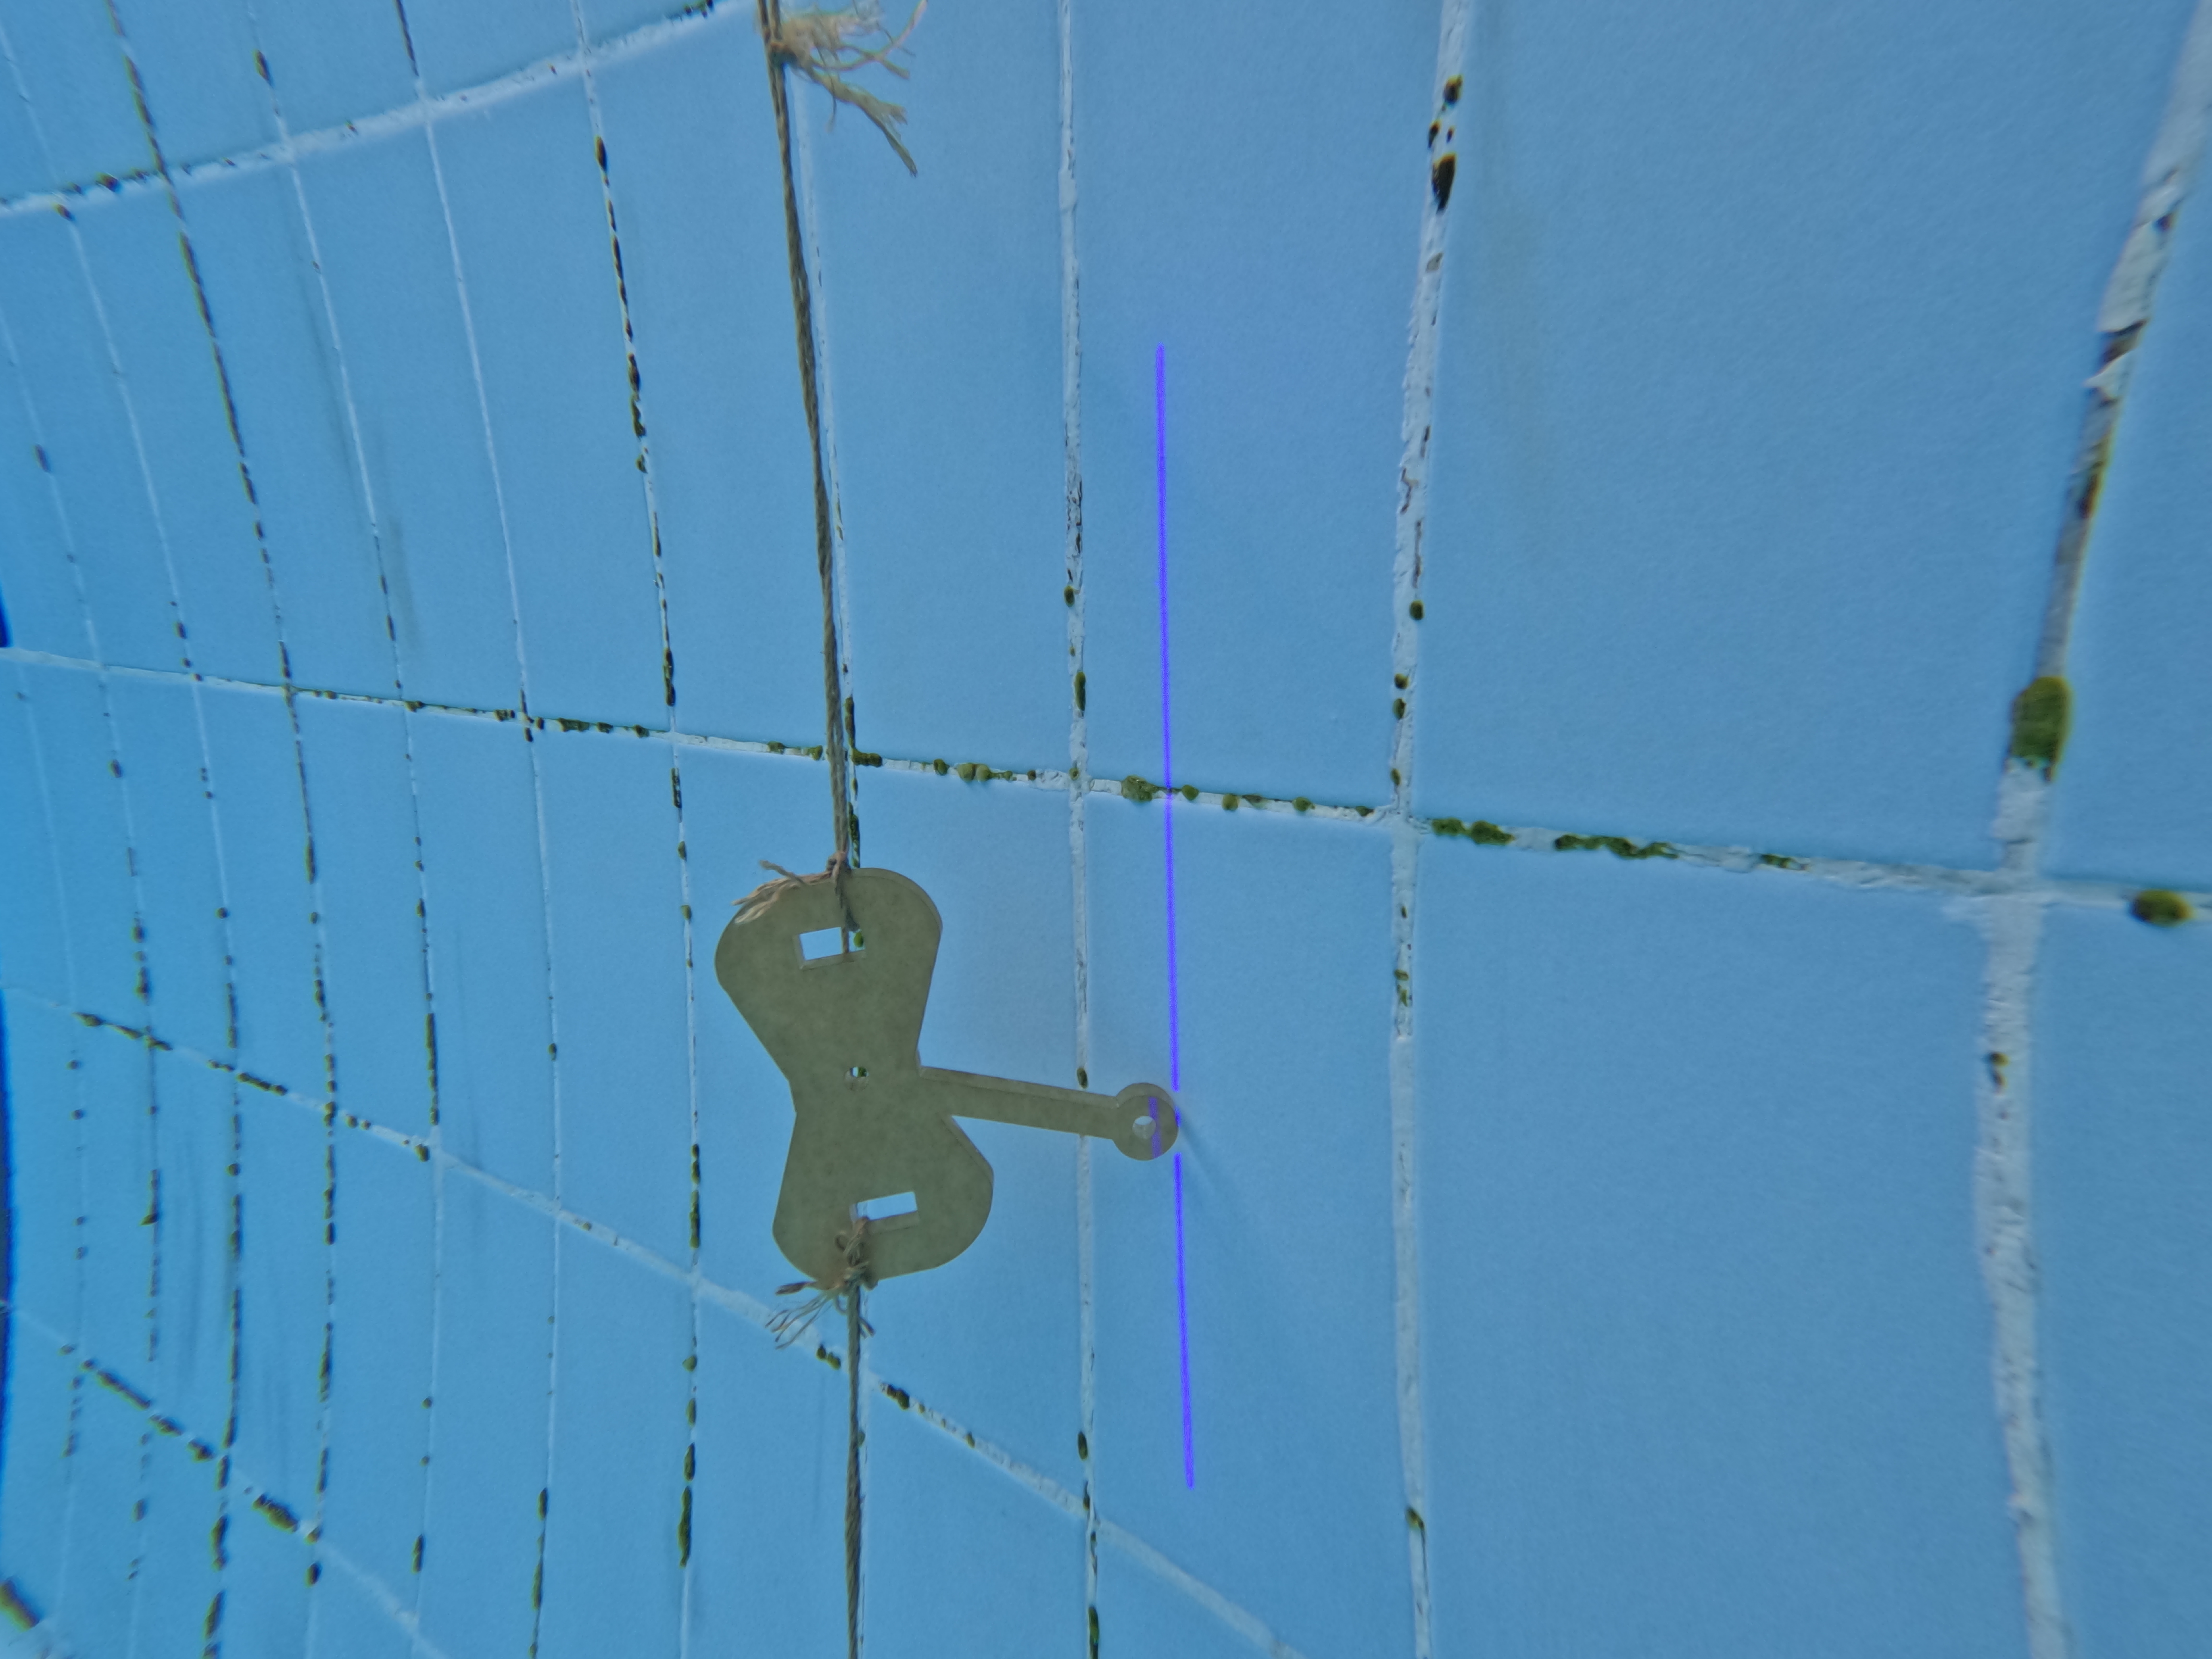

Supplement: Supplementary file 2048 [file G0050609.pdf › Level_3_2/G0050609.pdf]

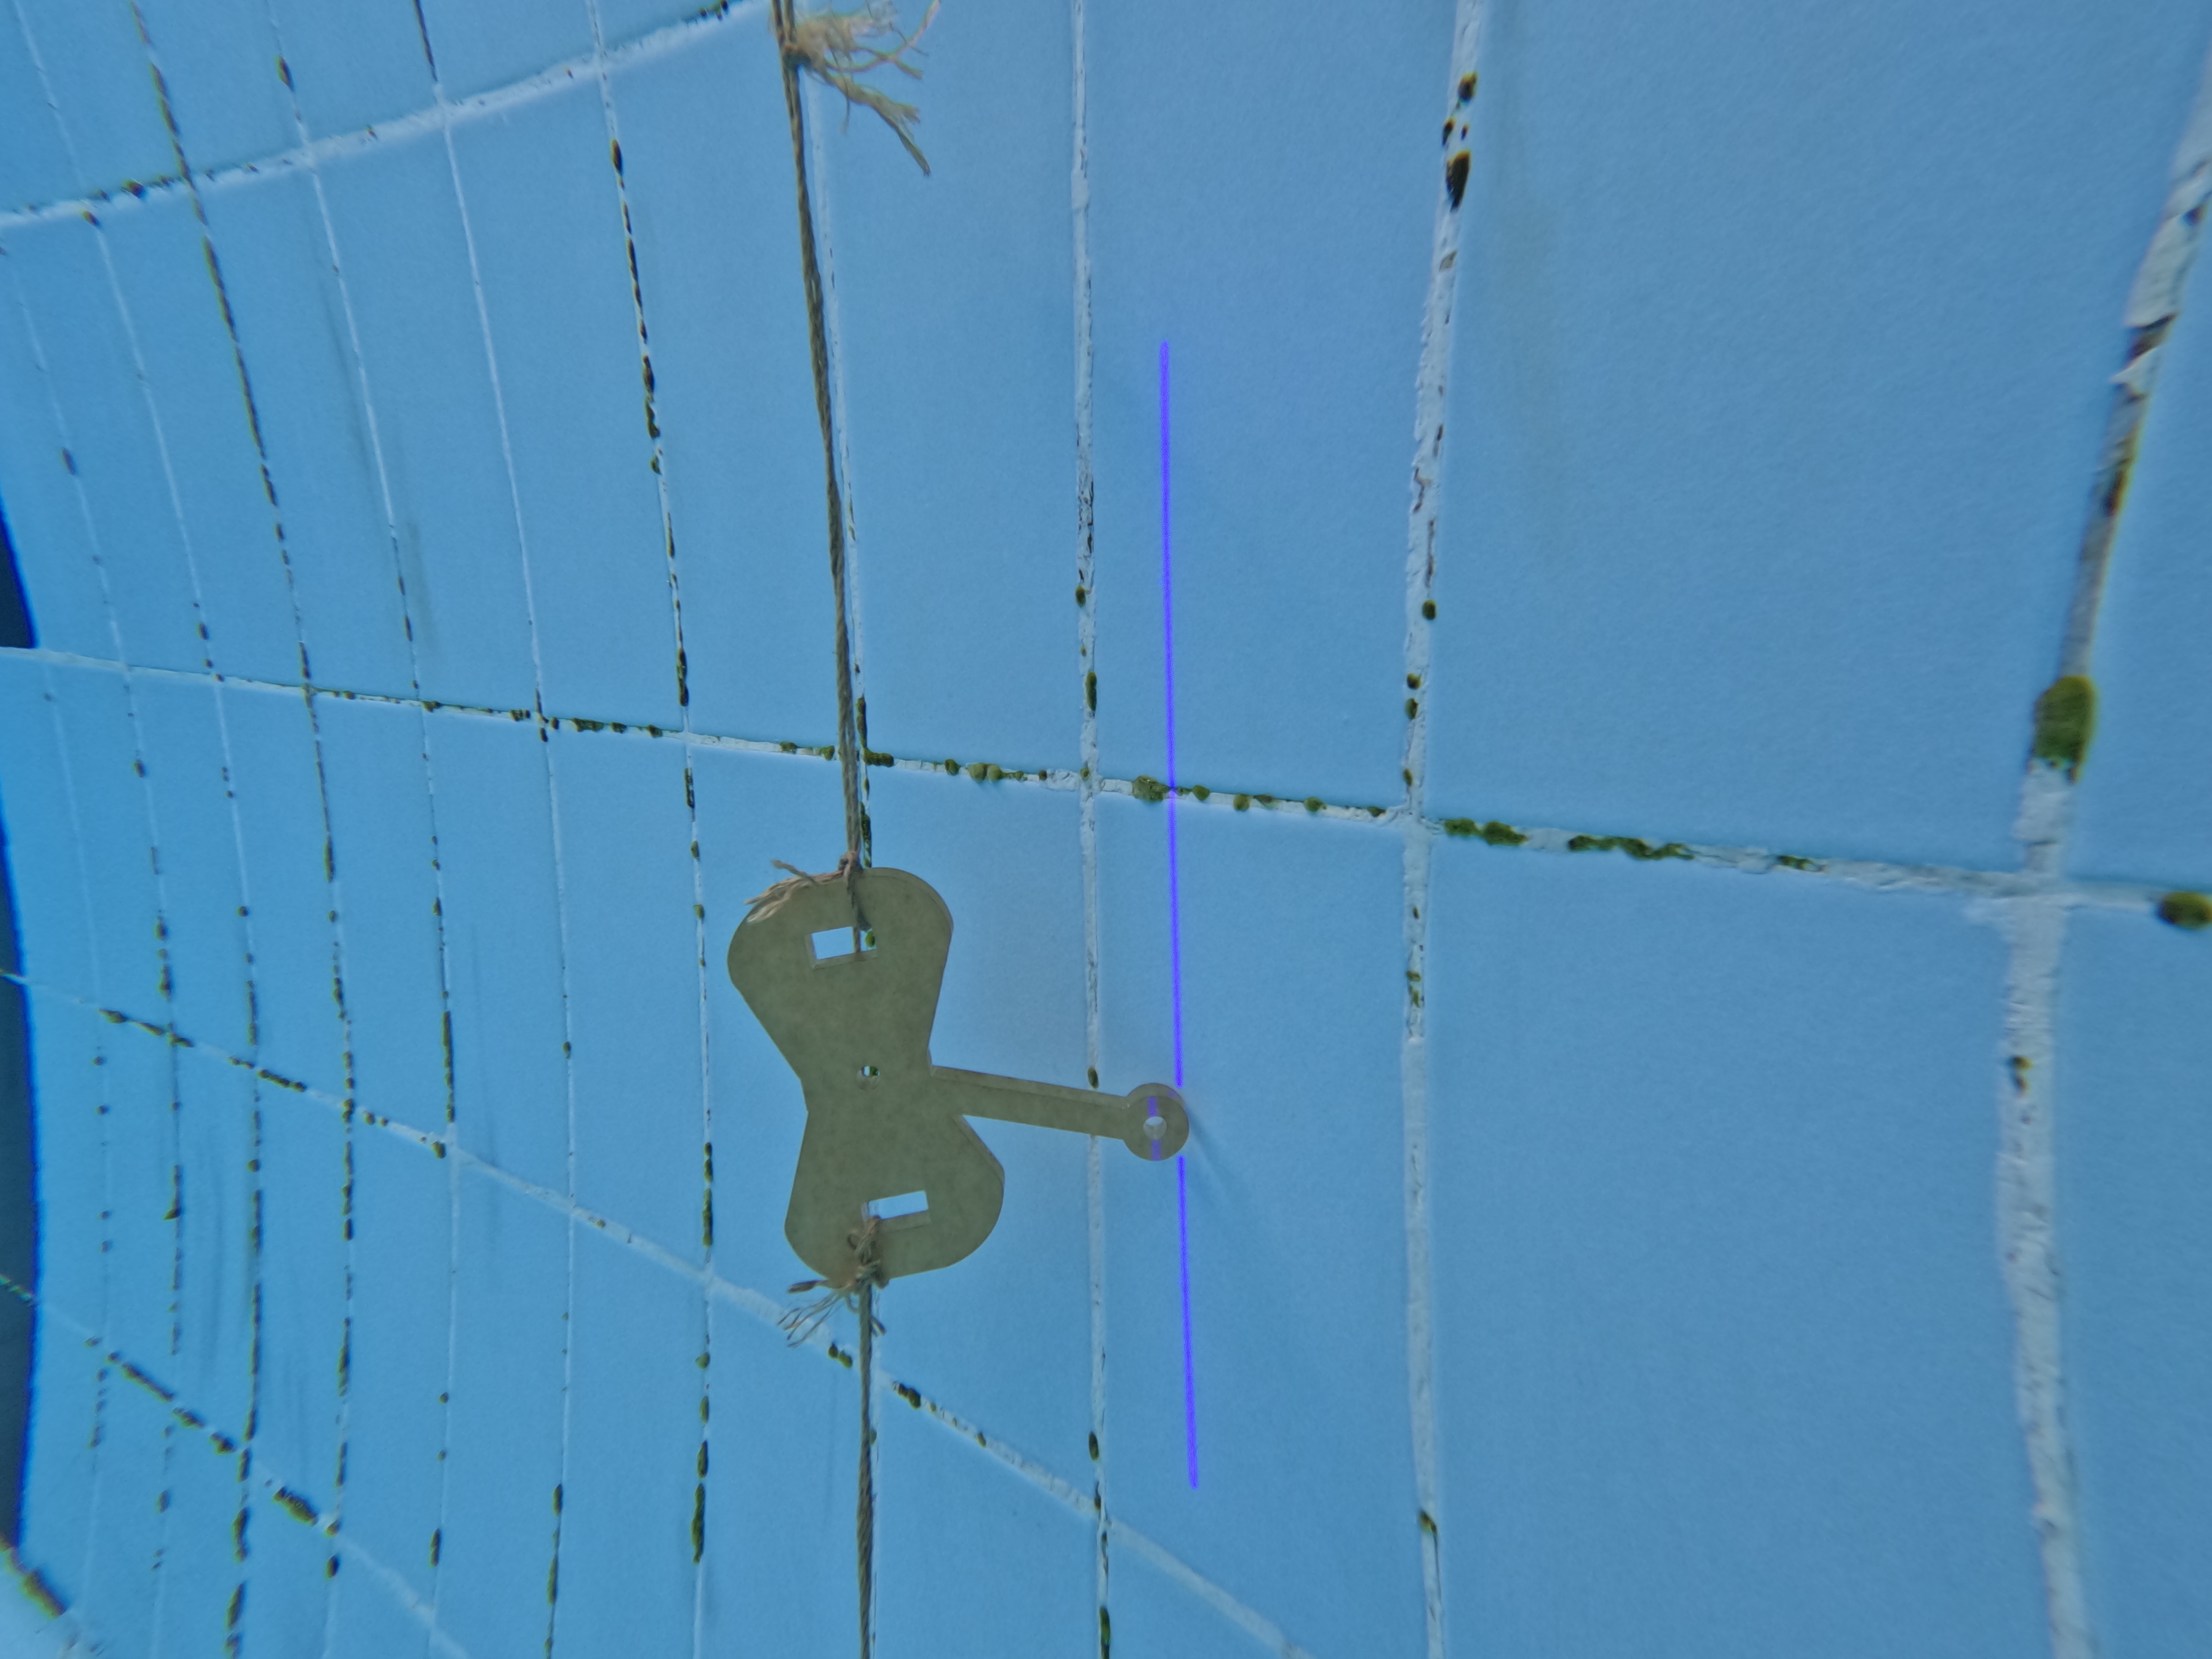

Supplement: Supplementary file 2049 [file G0050610.pdf › Level_3_2/G0050610.pdf]

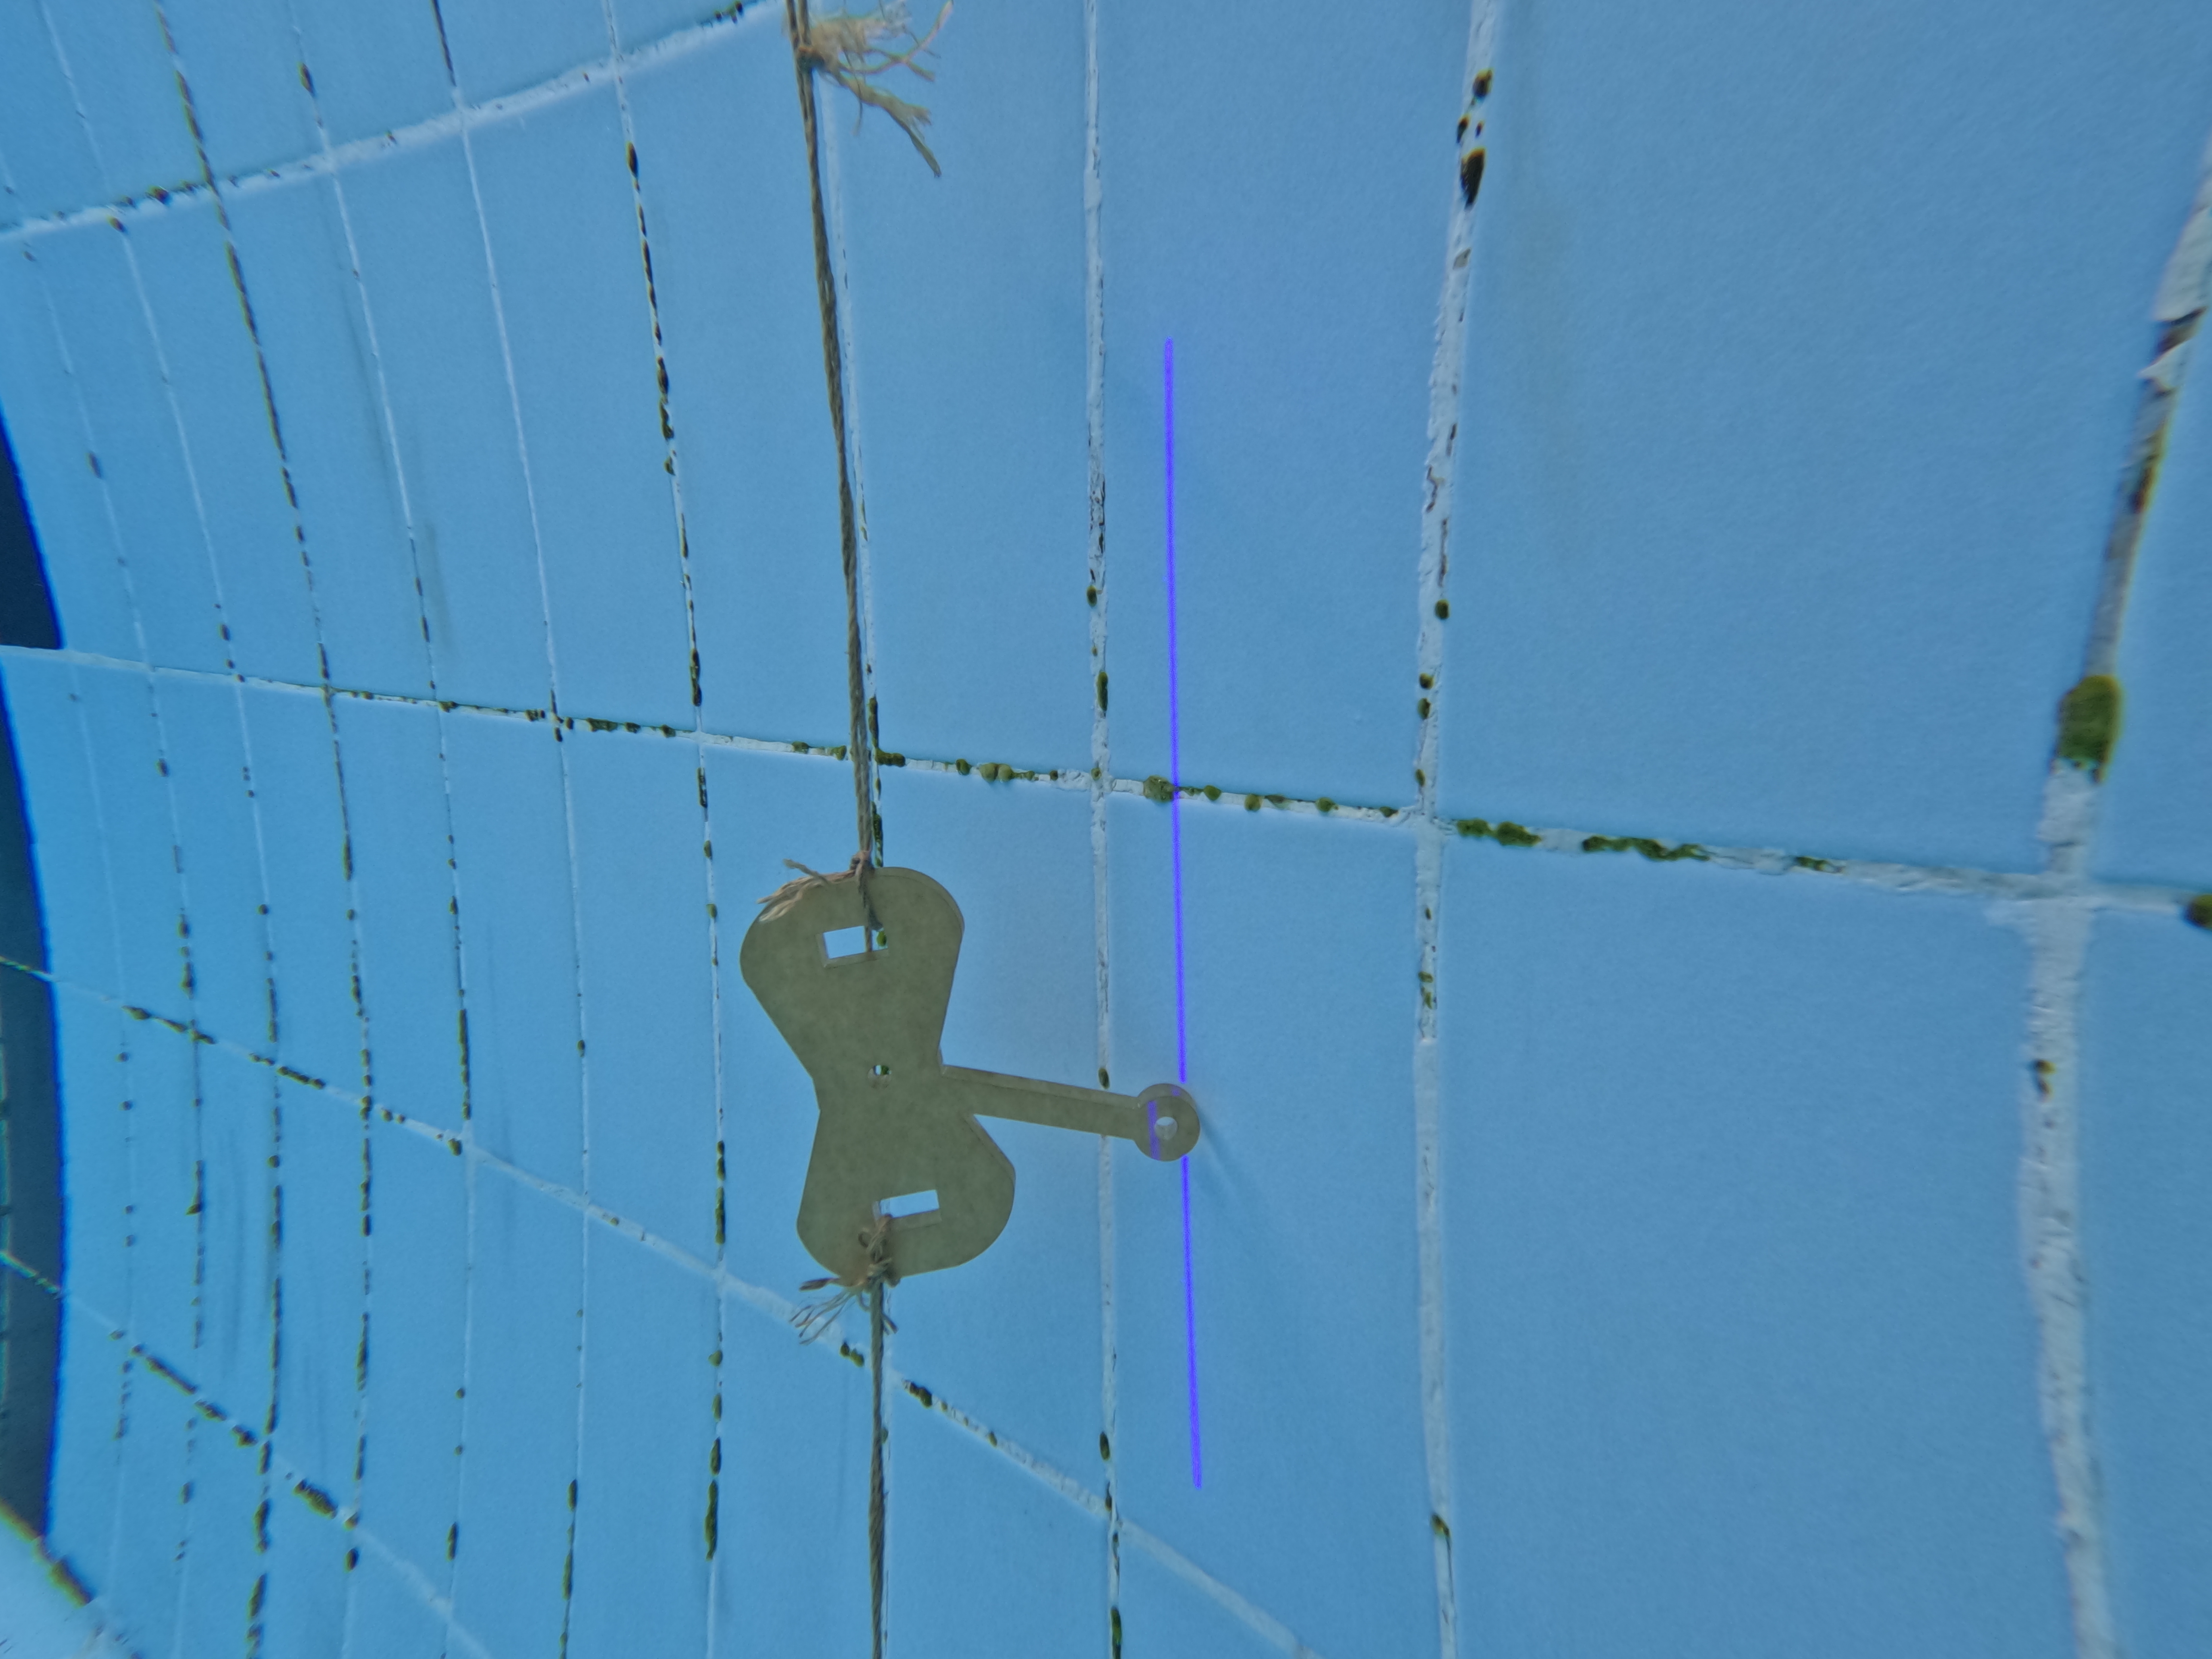

Supplement: Supplementary file 2050 [file G0050611.pdf › Level_3_2/G0050611.pdf]

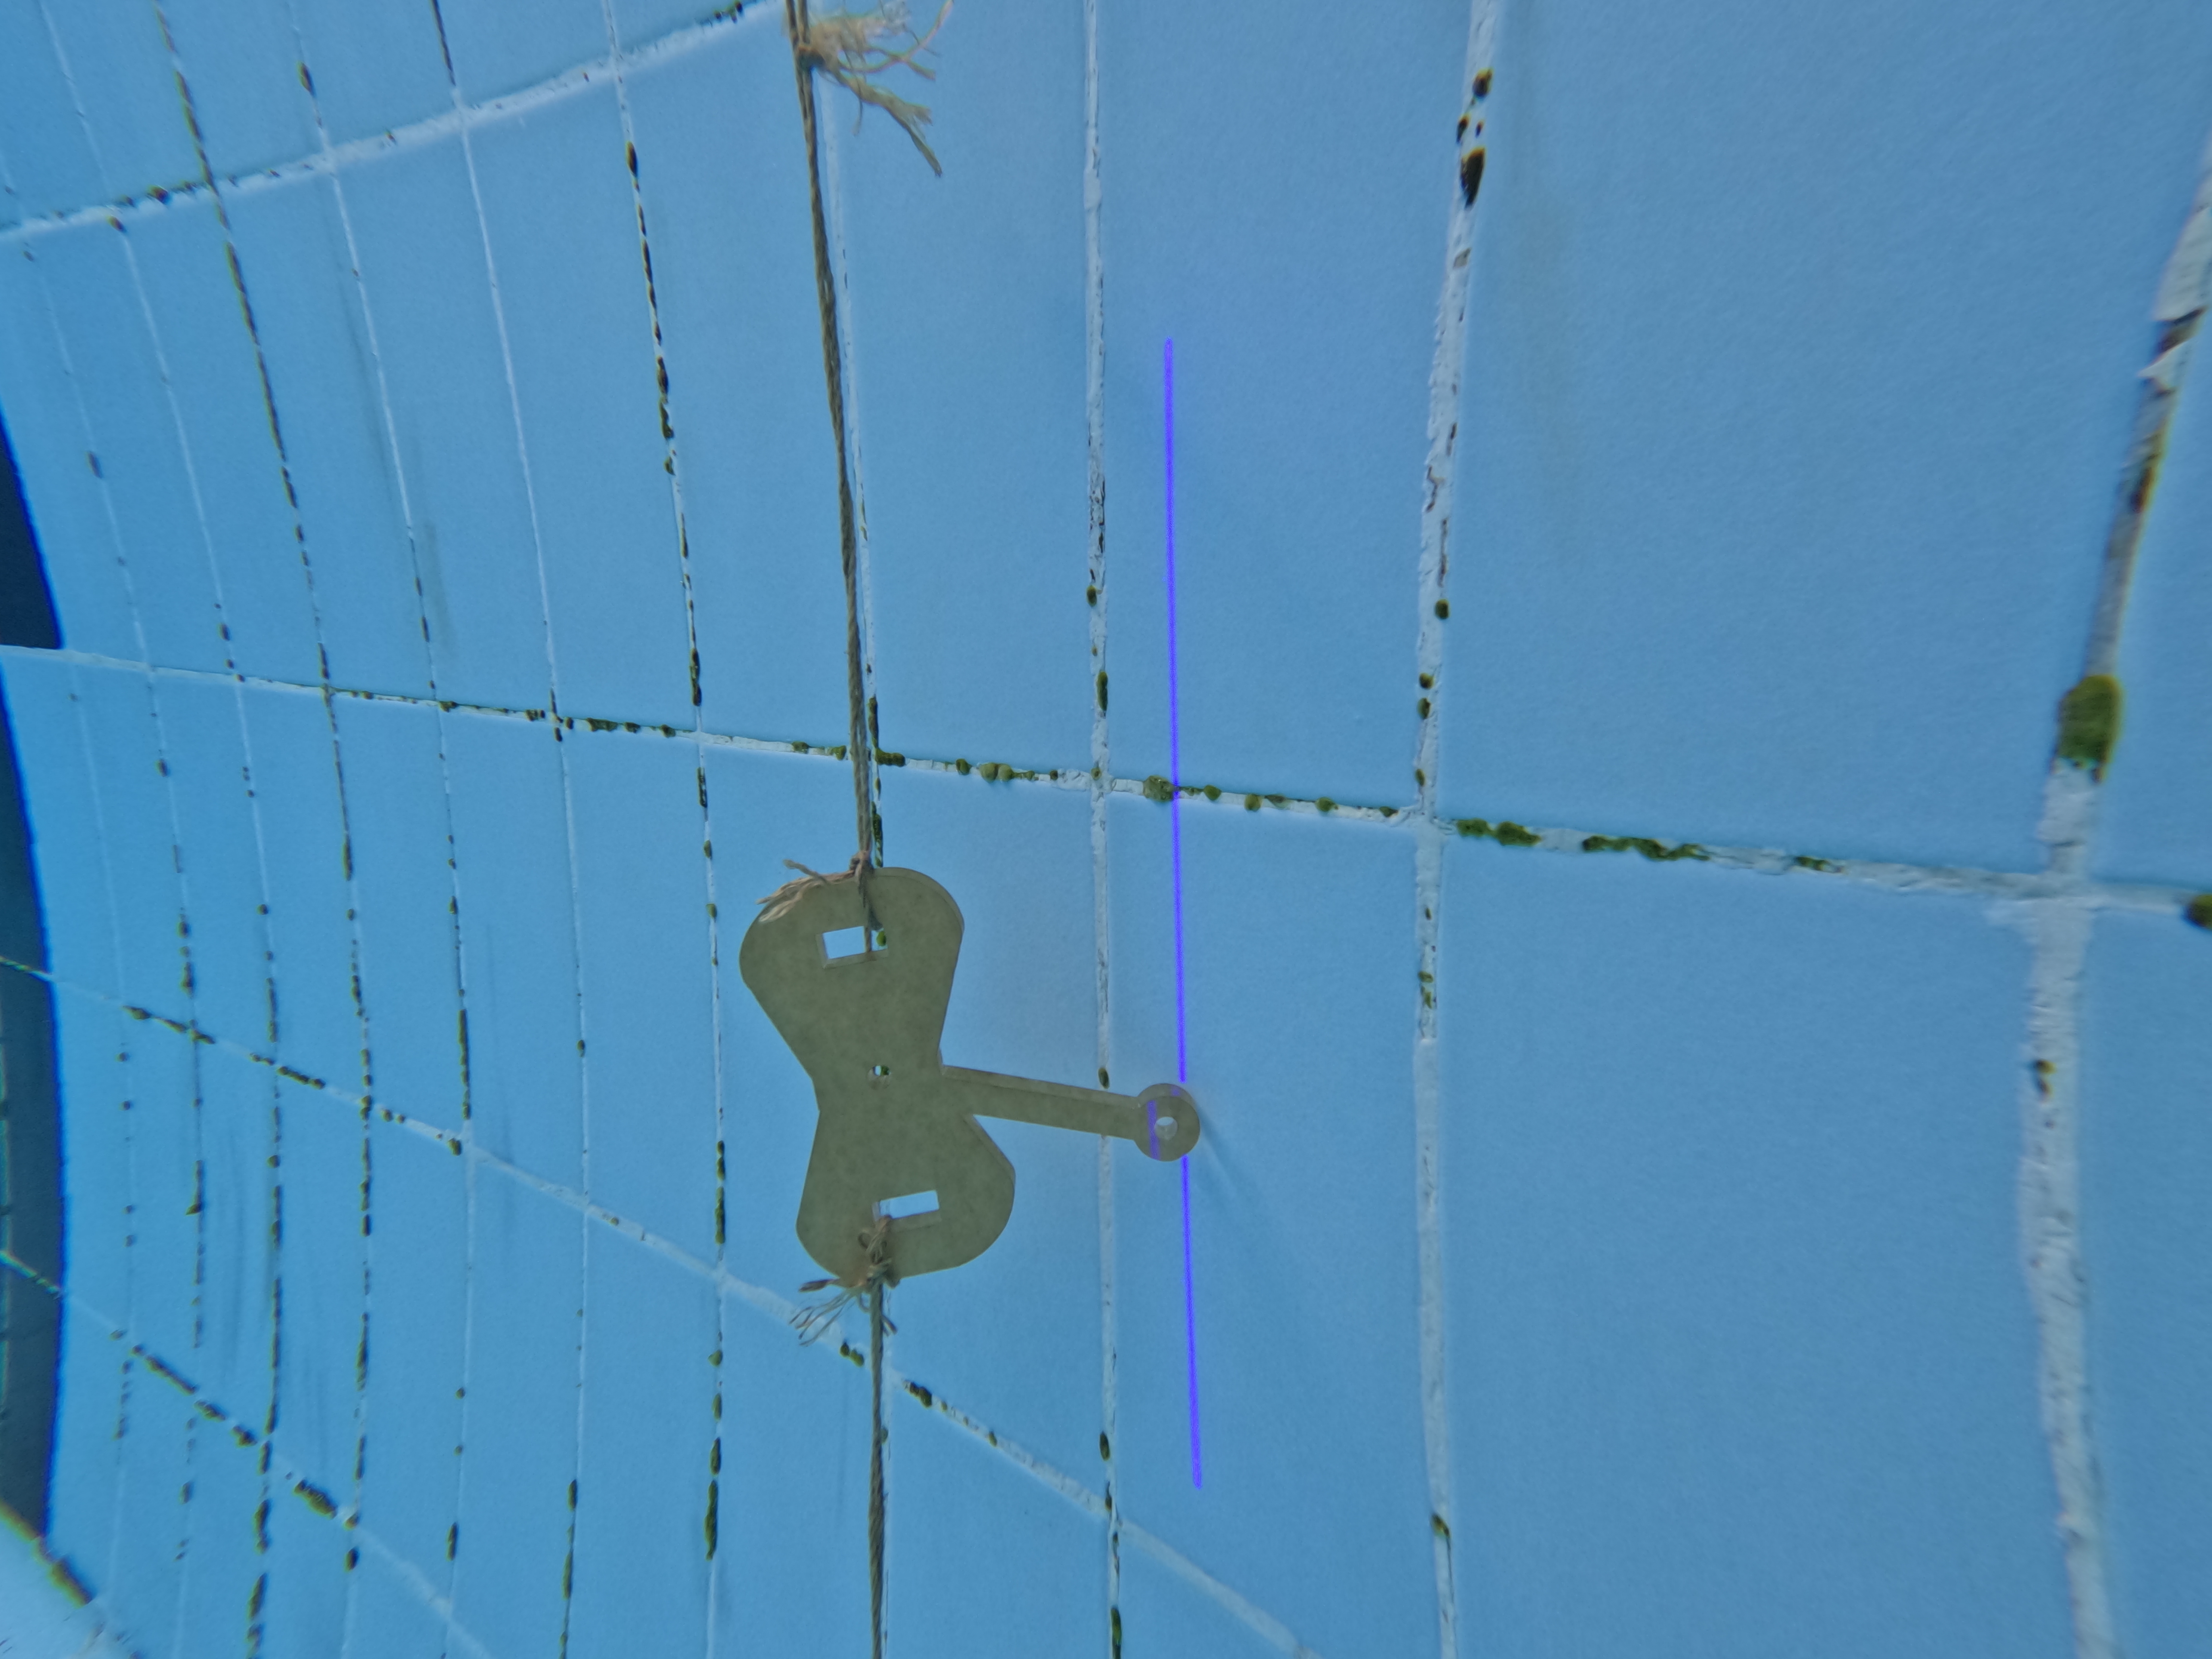

Supplement: Supplementary file 2051 [file G0050612.pdf › Level_3_2/G0050612.pdf]

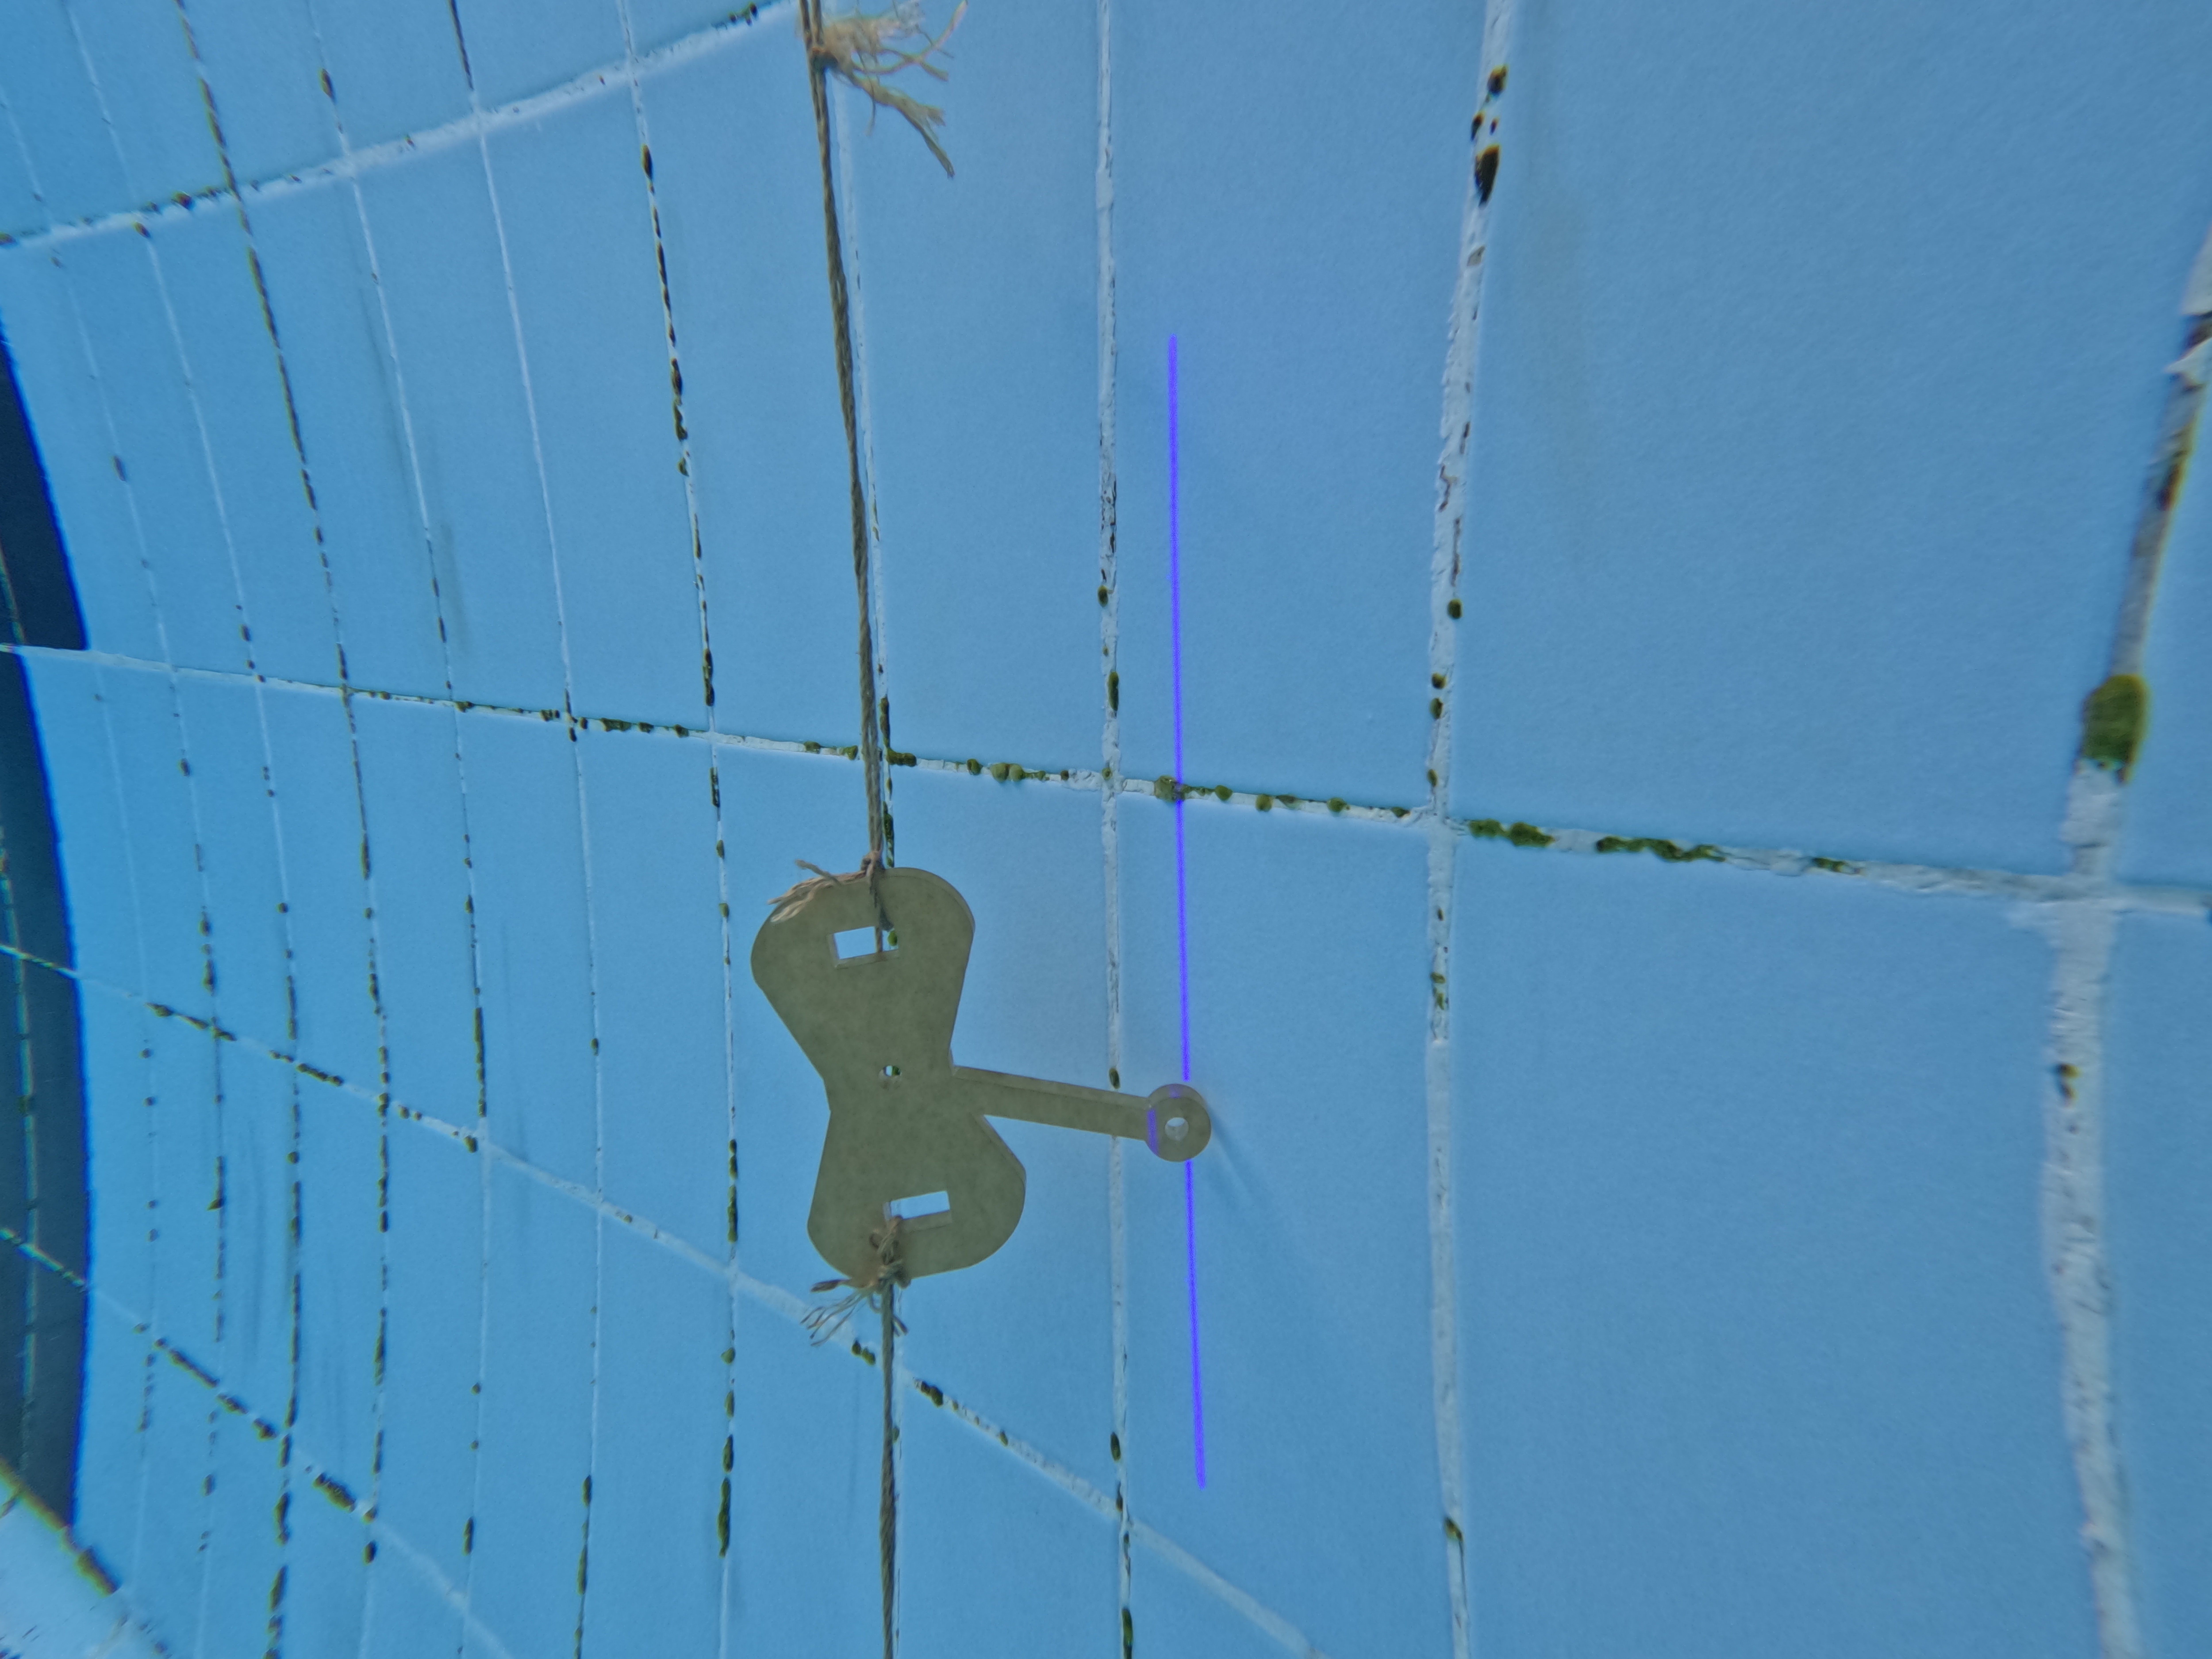

Supplement: Supplementary file 2052 [file G0050613.pdf › Level_3_2/G0050613.pdf]

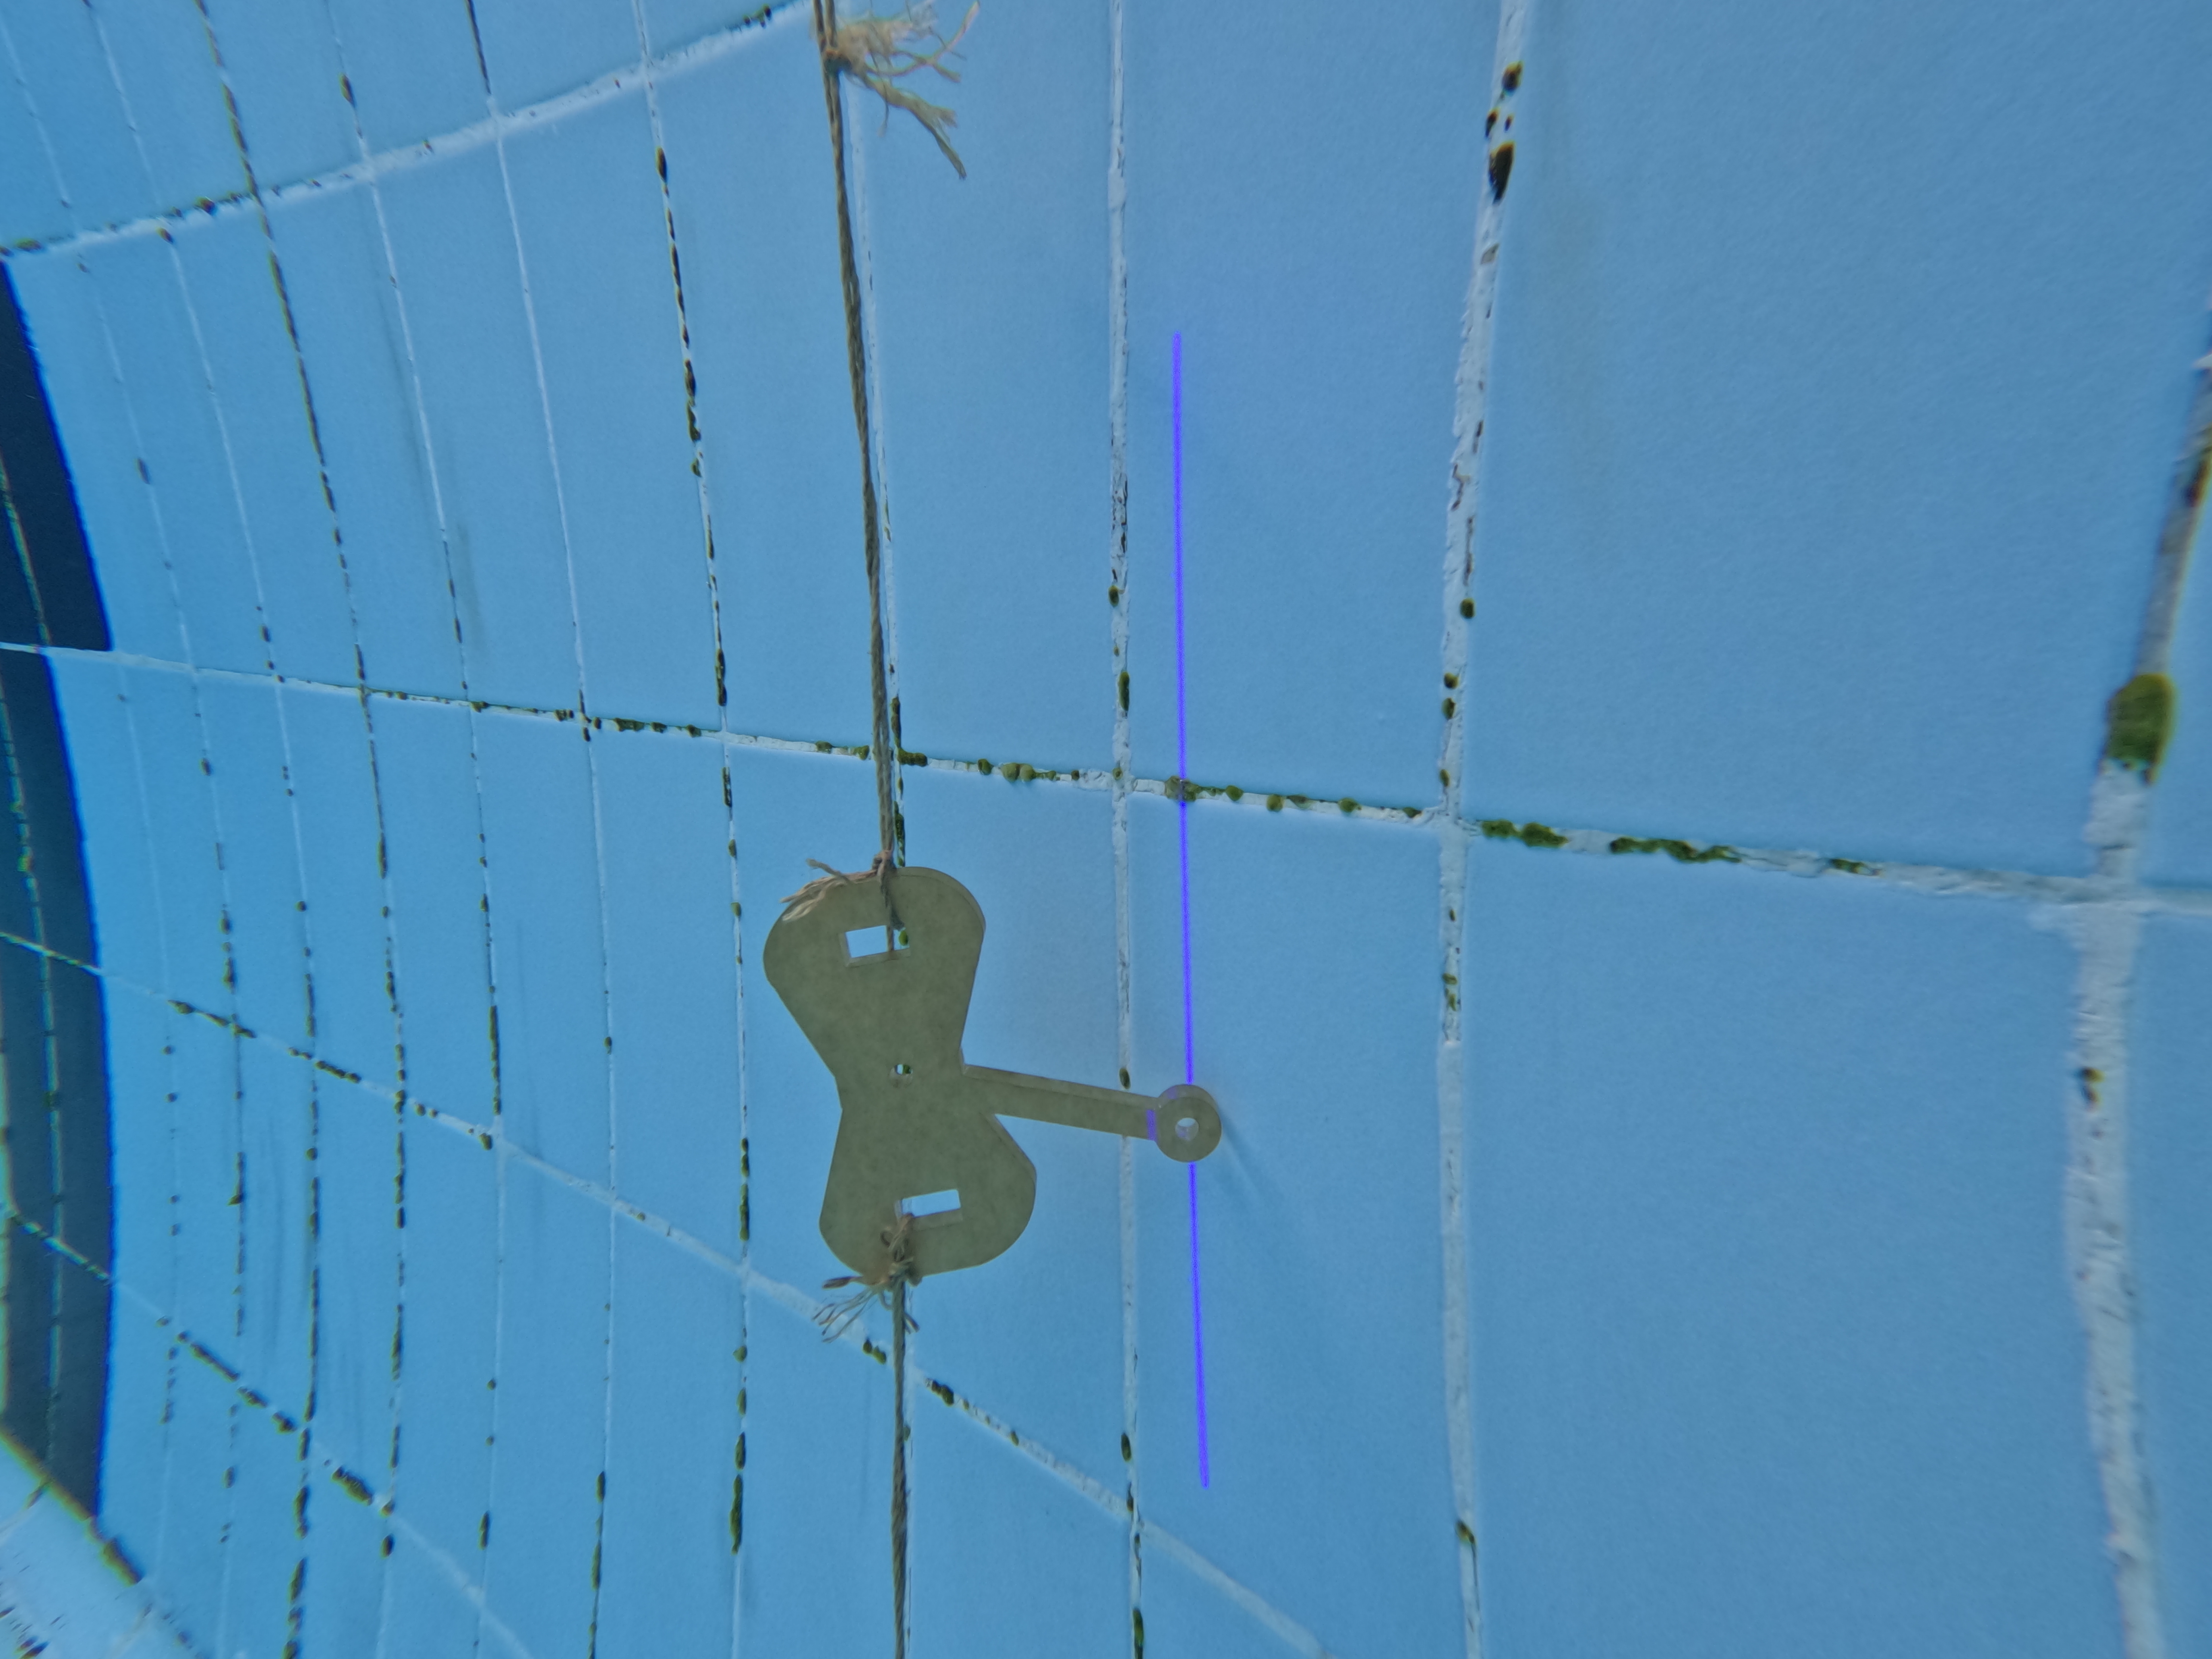

Supplement: Supplementary file 2053 [file G0050614.pdf › Level_3_2/G0050614.pdf]

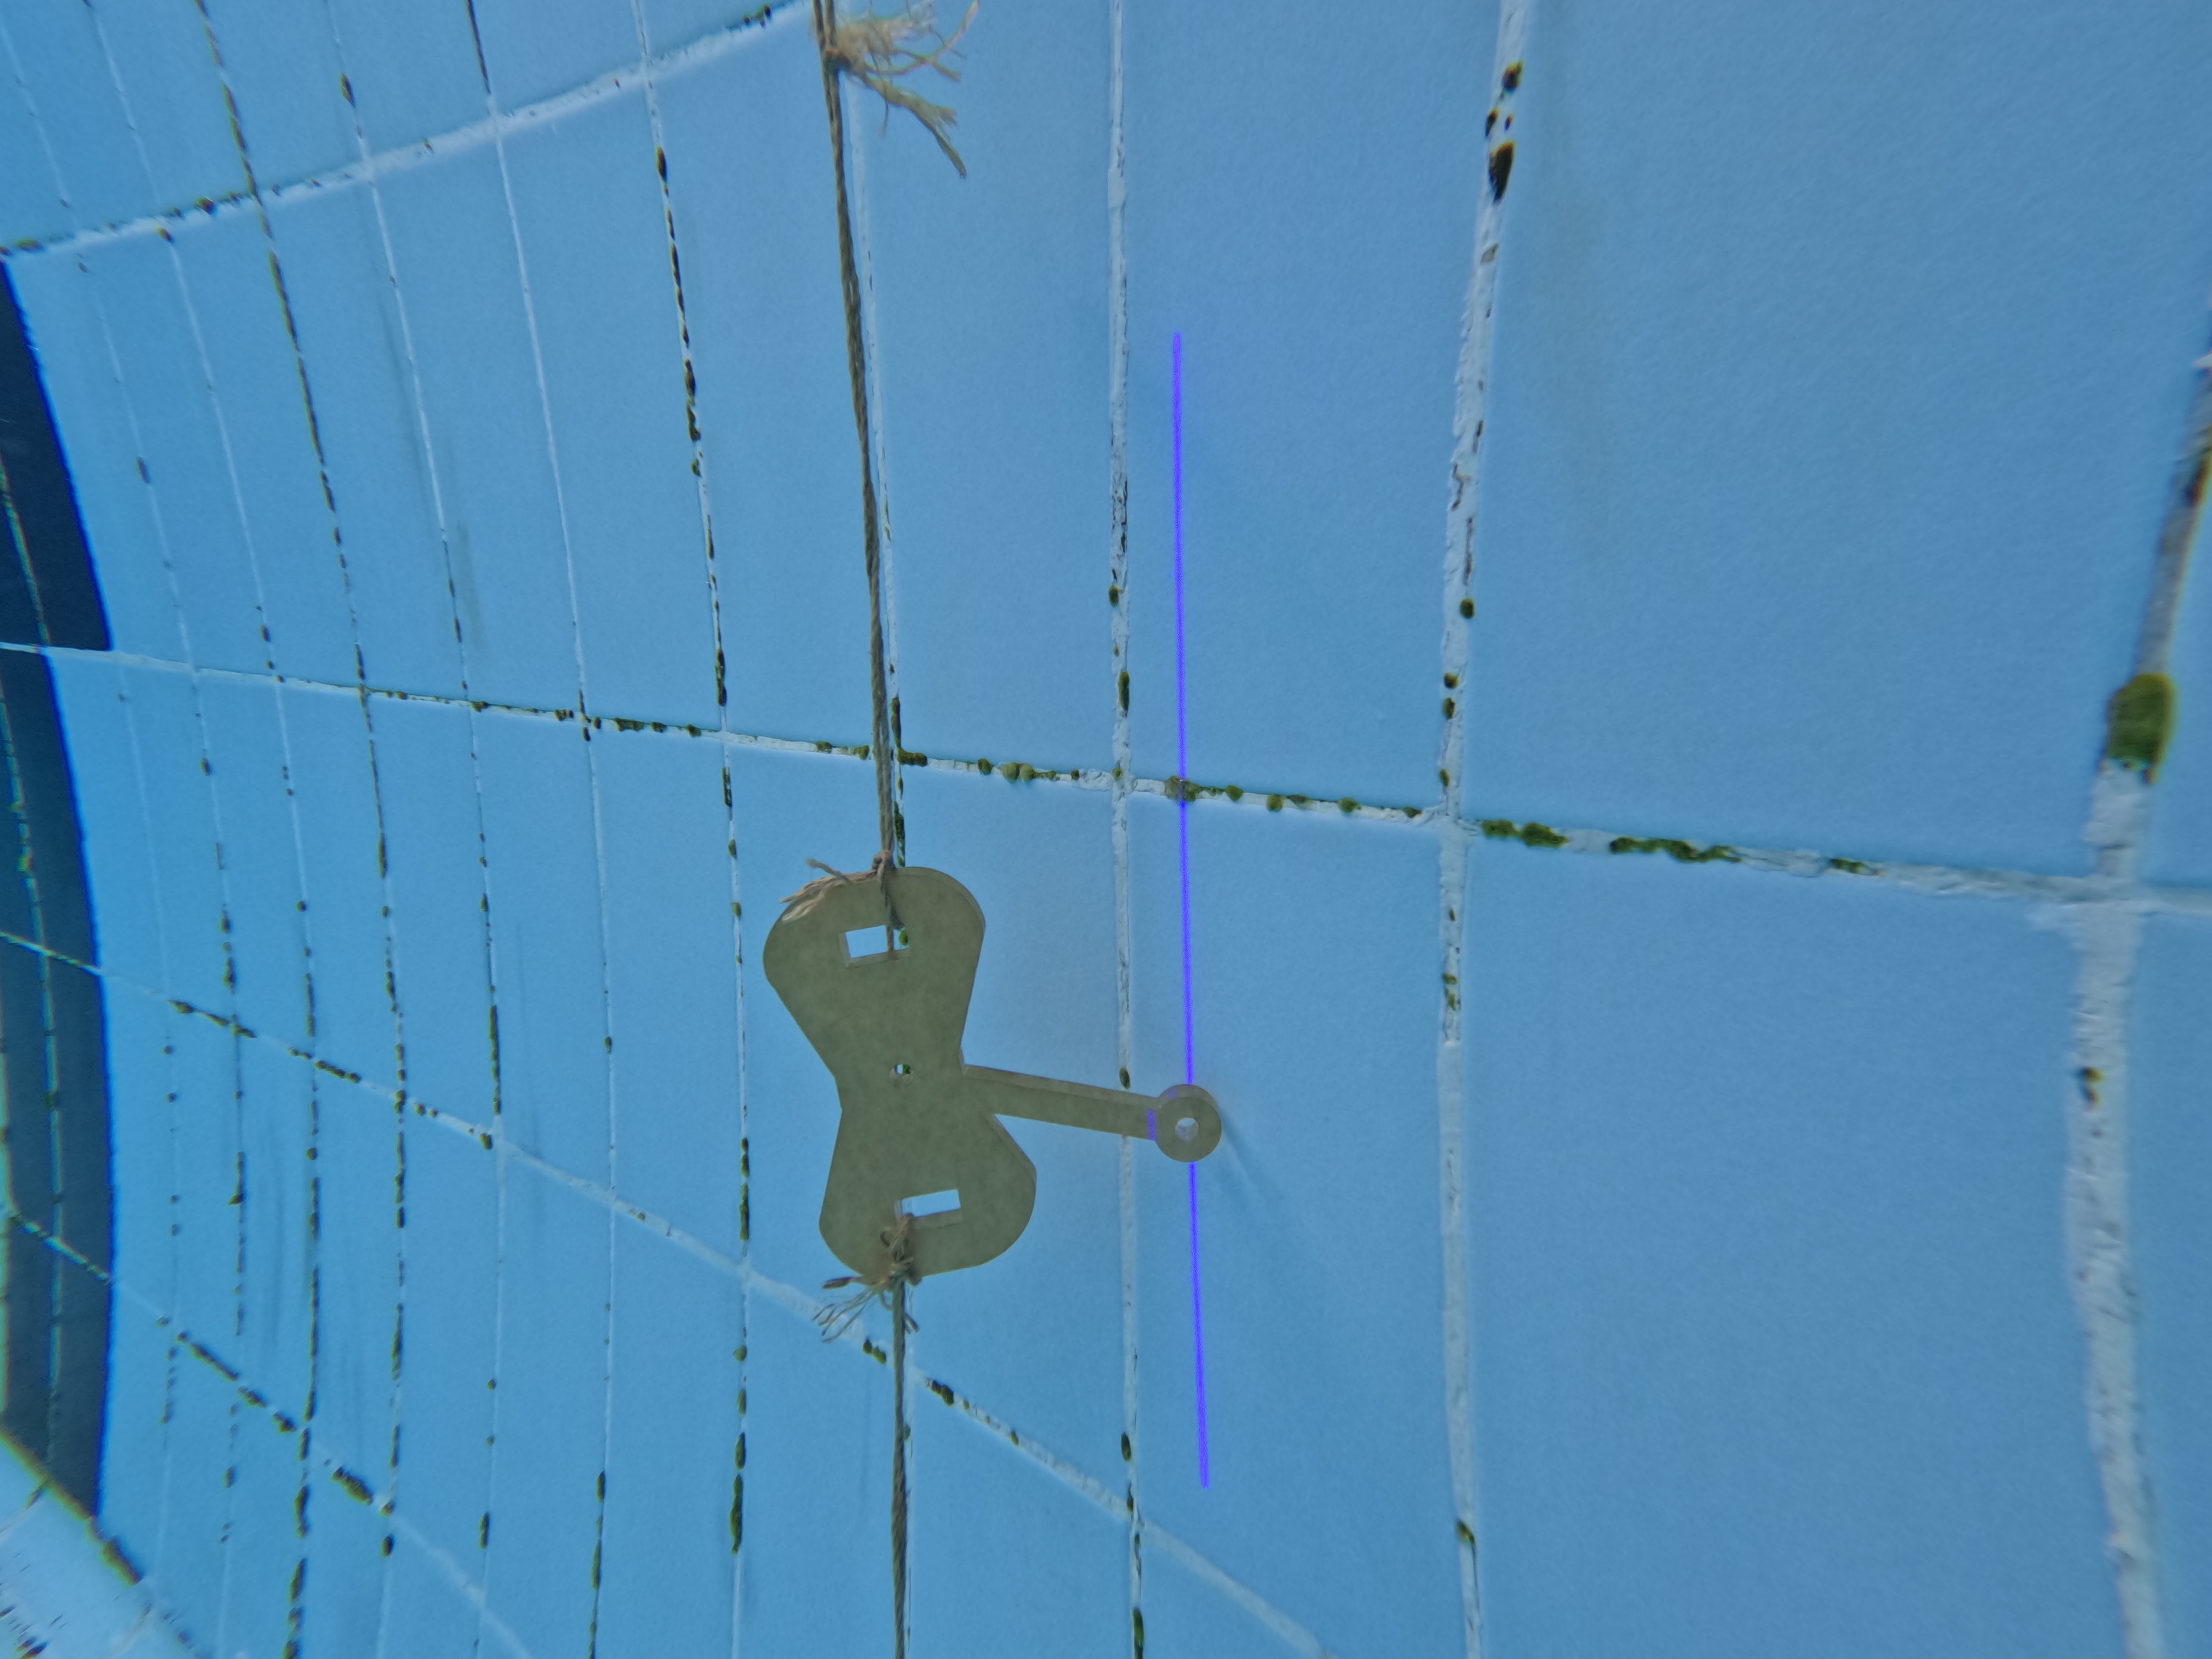

Supplement: Supplementary file 2054 [file G0050615.pdf › Level_3_2/G0050615.pdf]

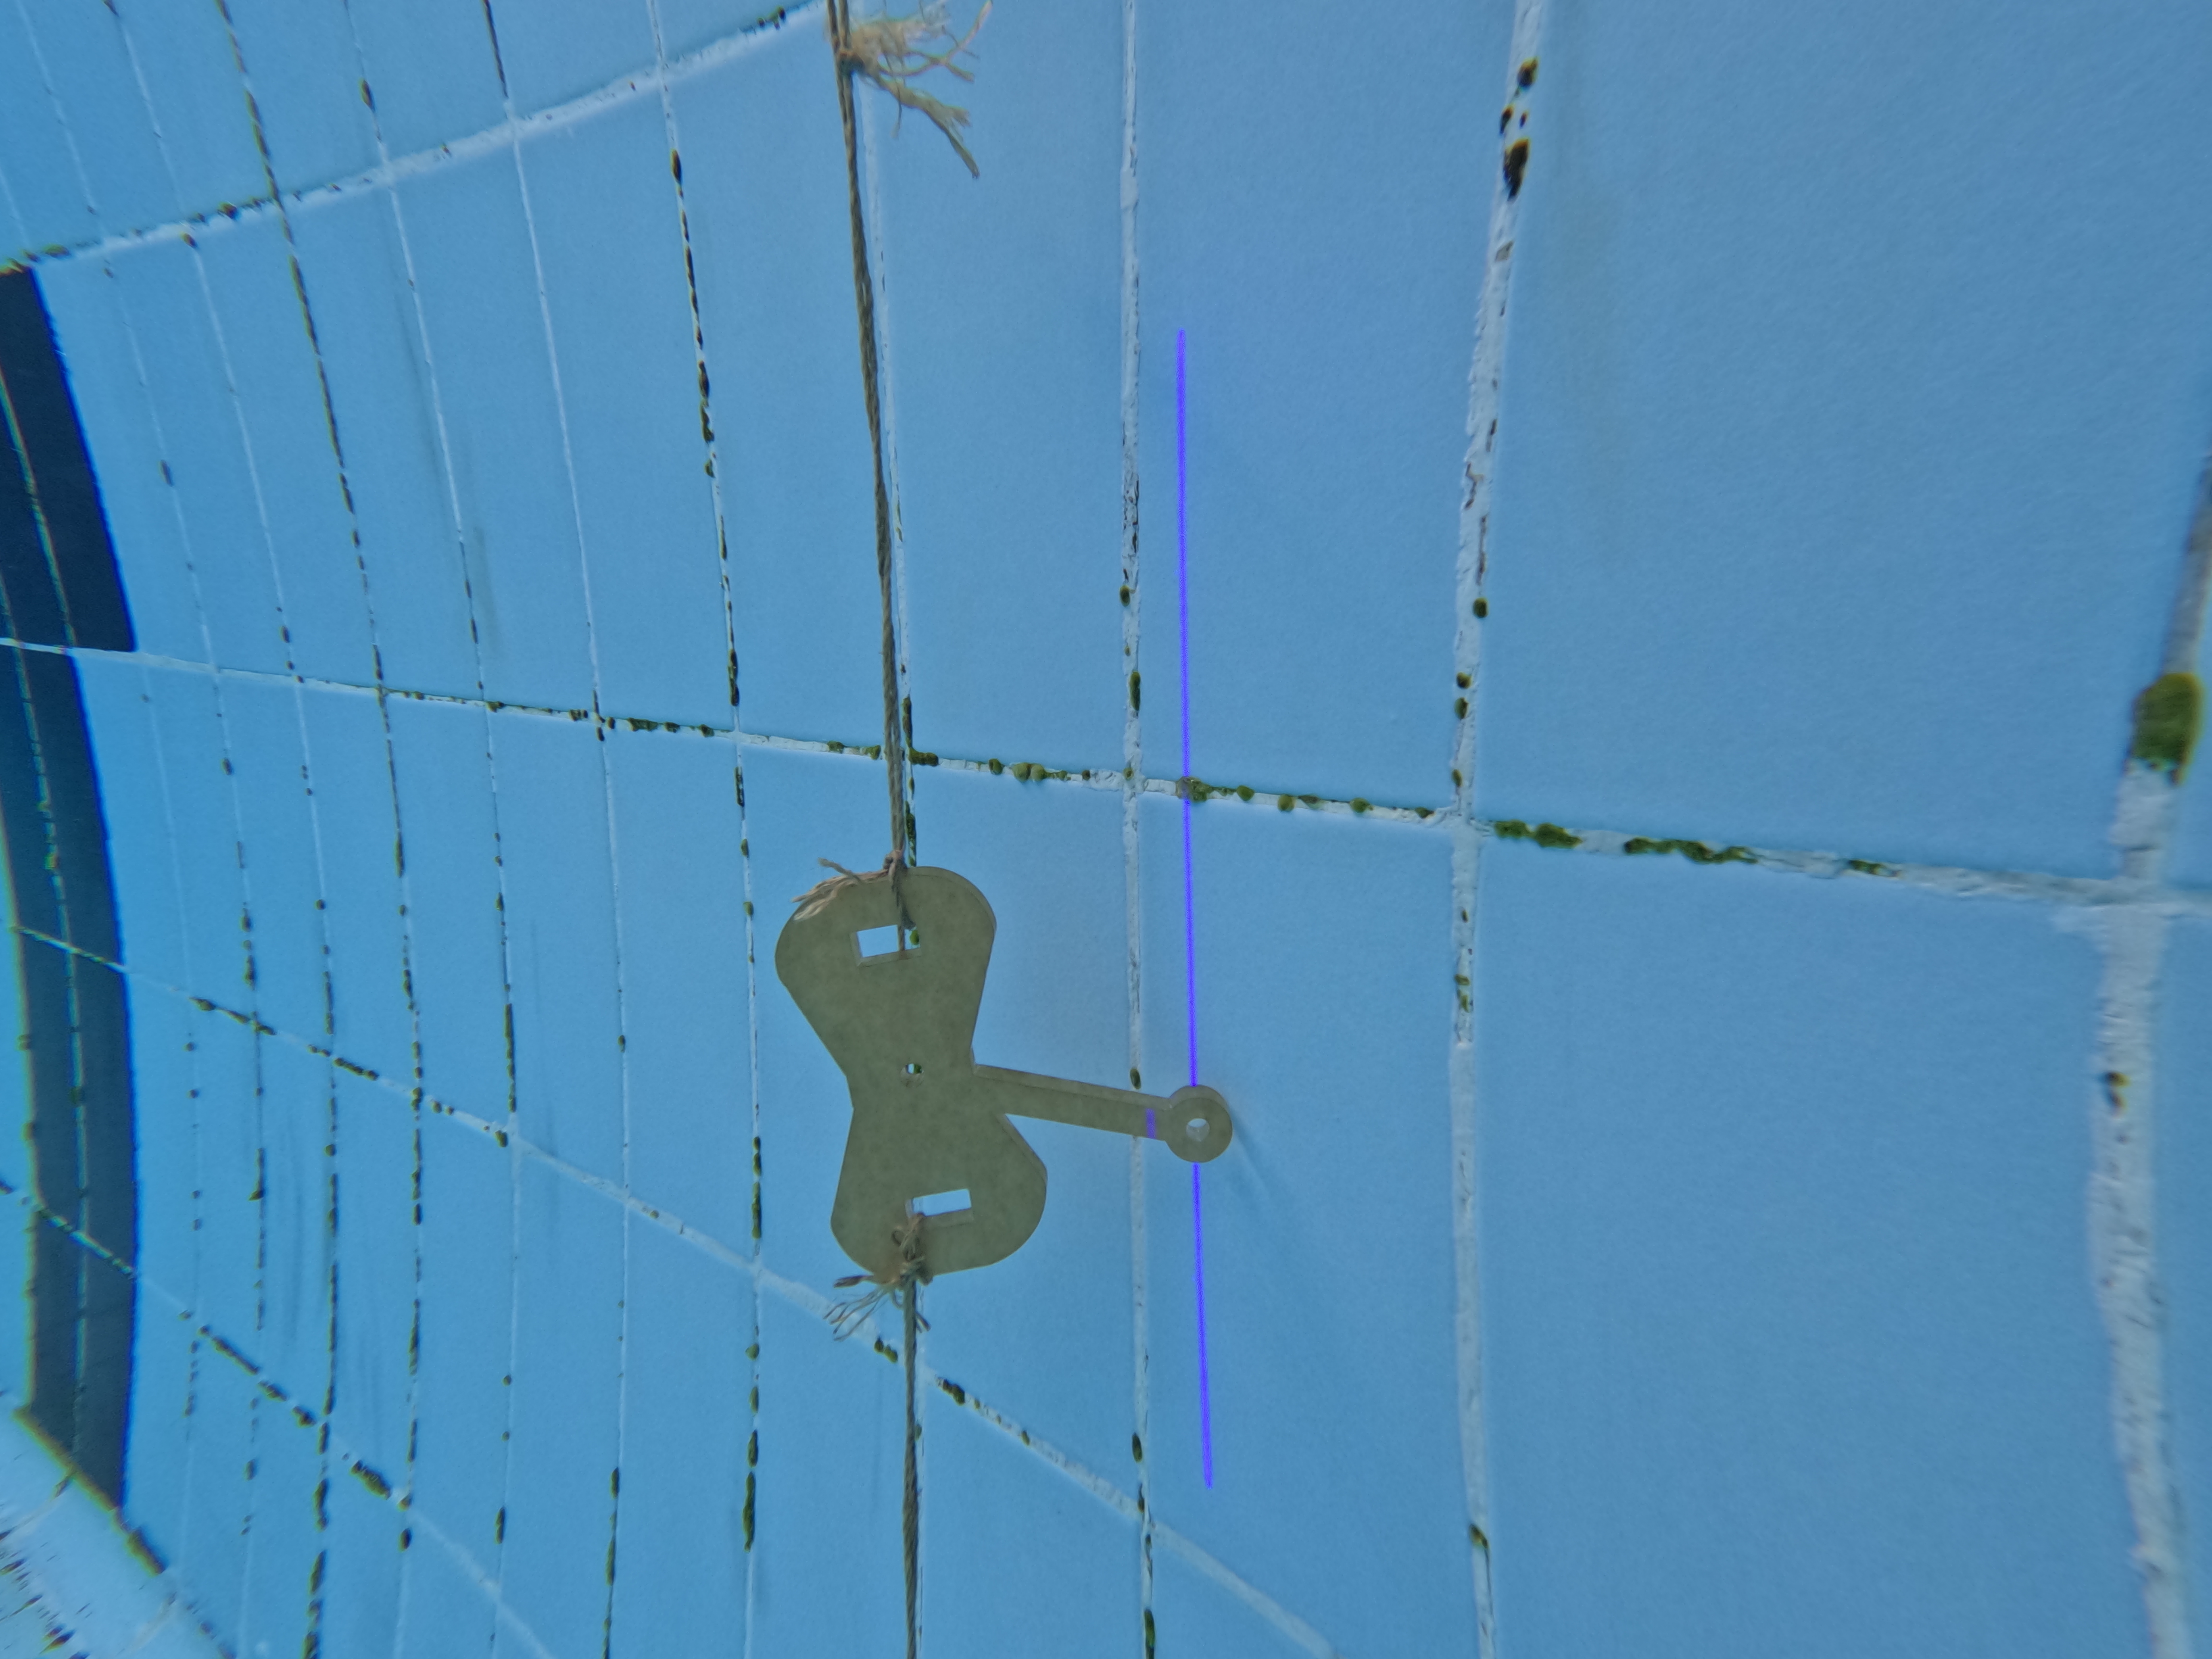

Supplement: Supplementary file 2055 [file G0050616.pdf › Level_3_2/G0050616.pdf]

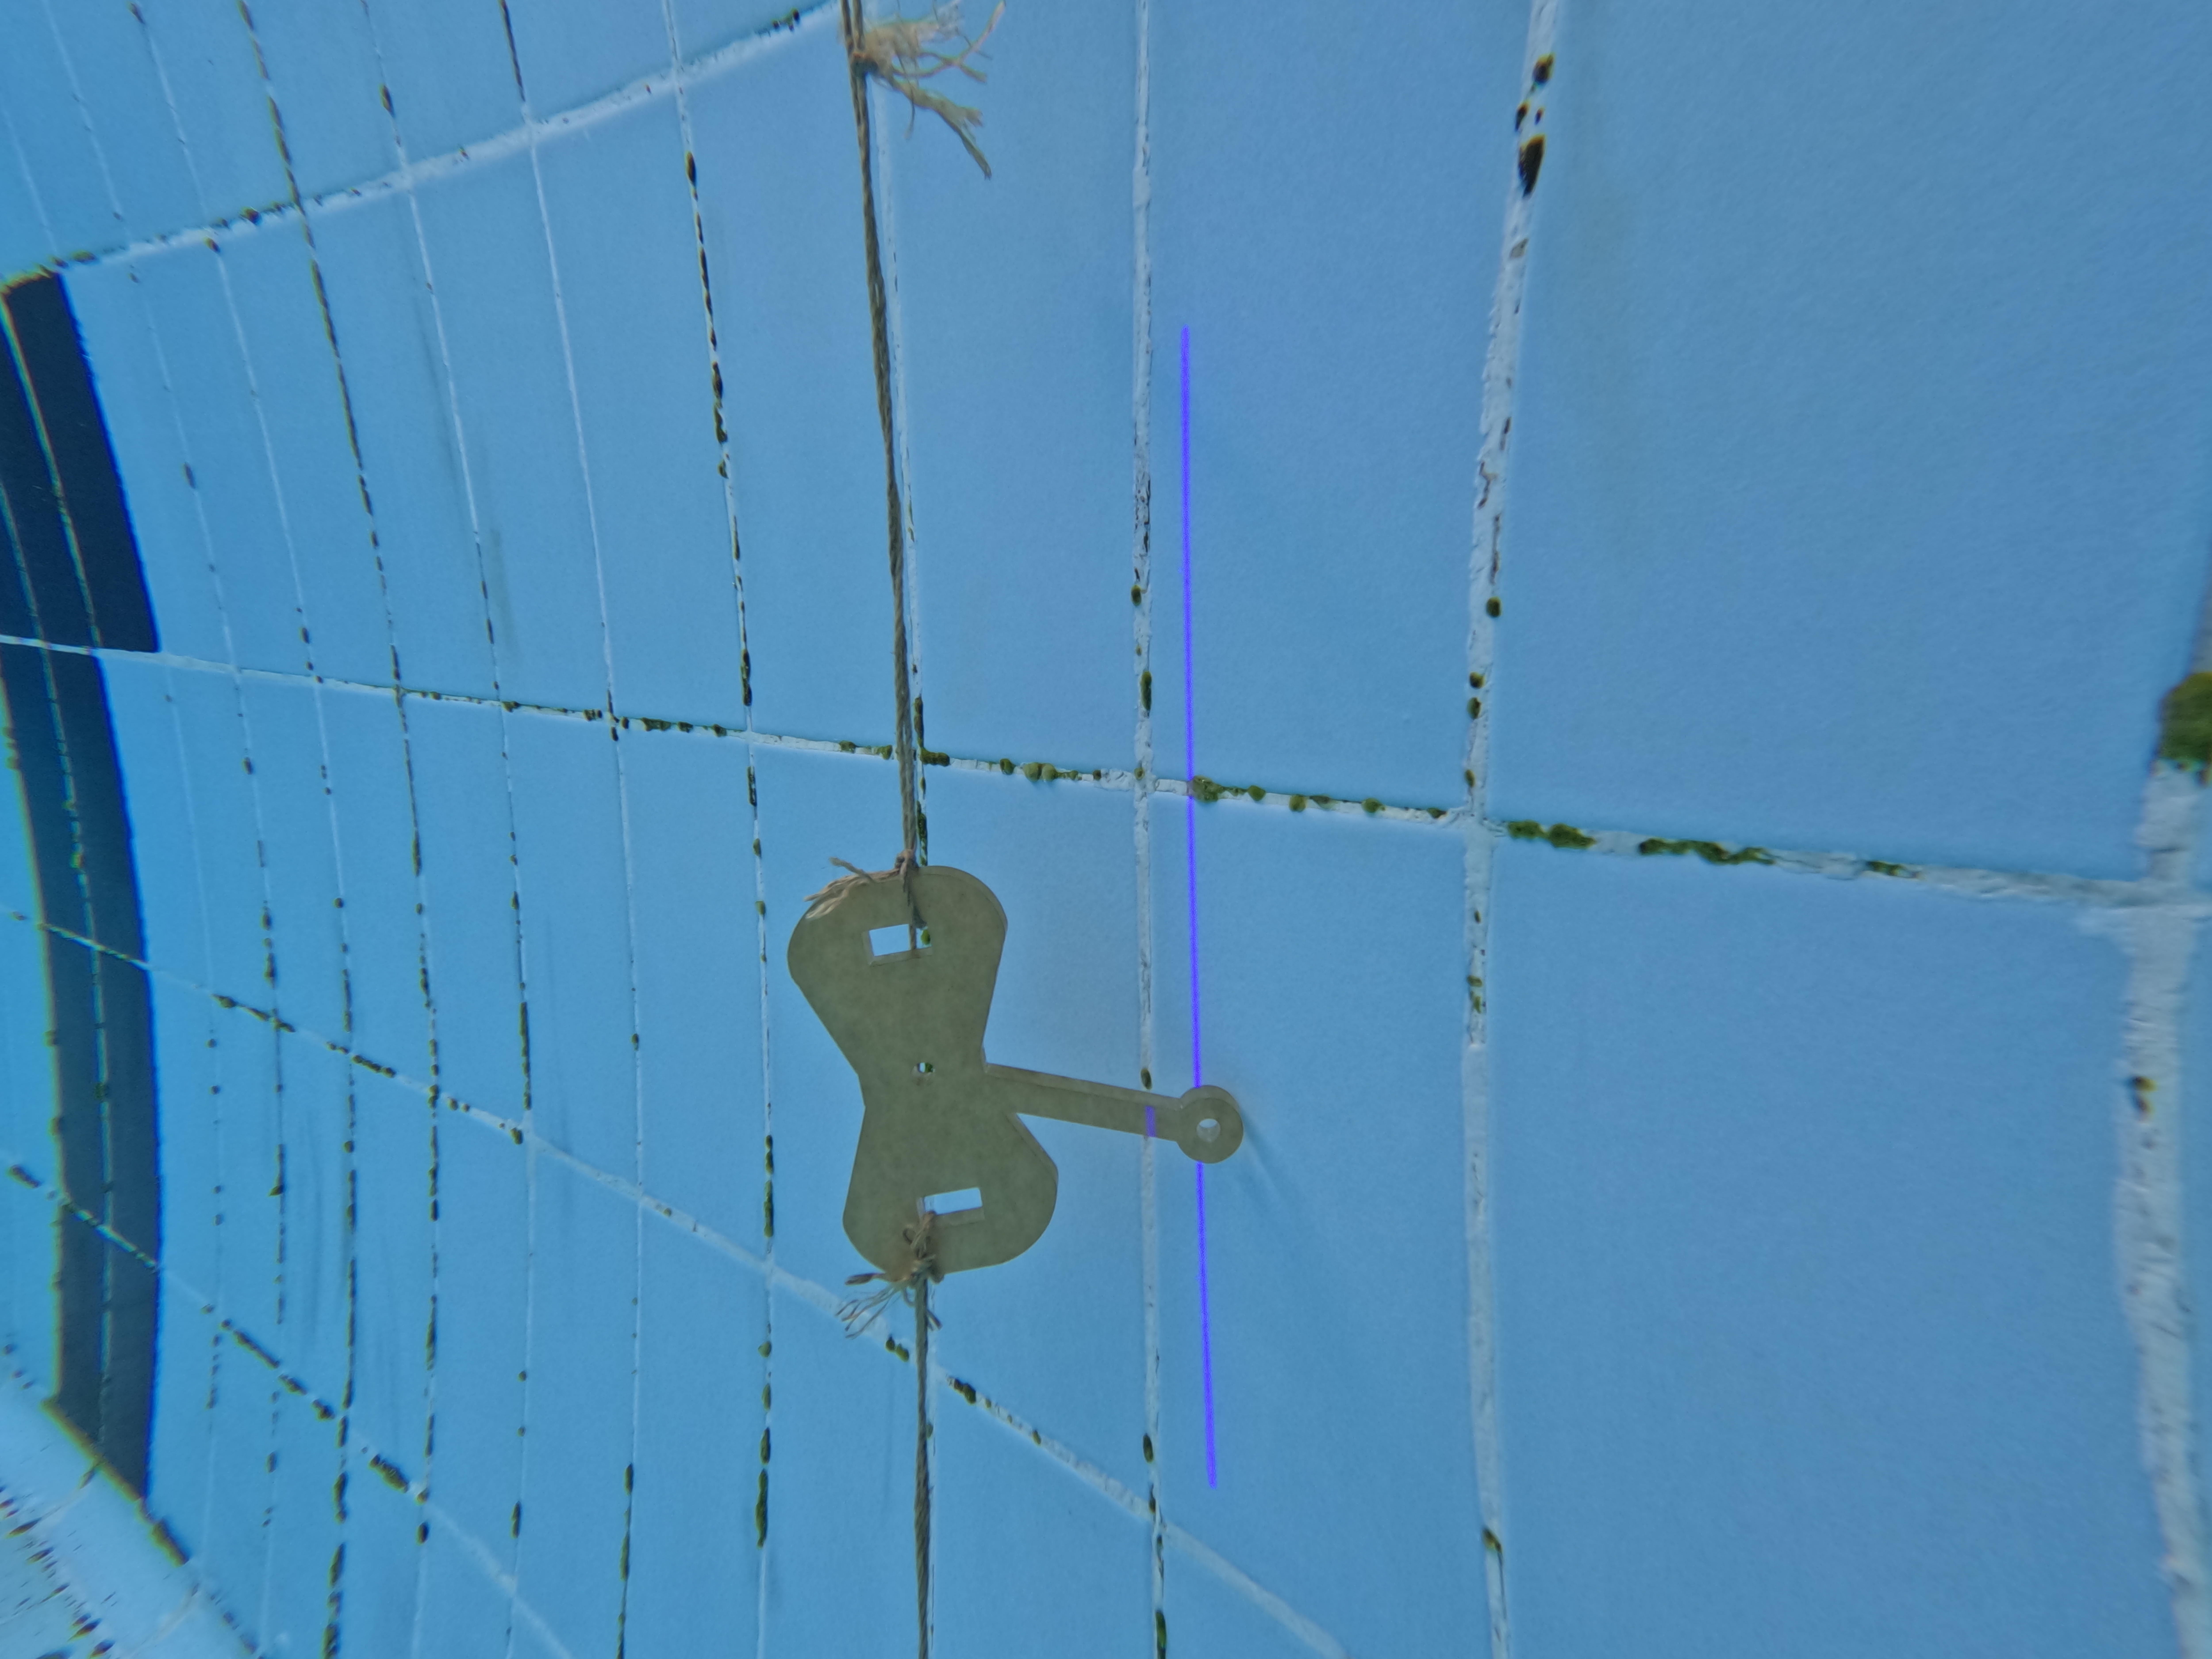

Supplement: Supplementary file 2056 [file G0050617.pdf › Level_3_2/G0050617.pdf]

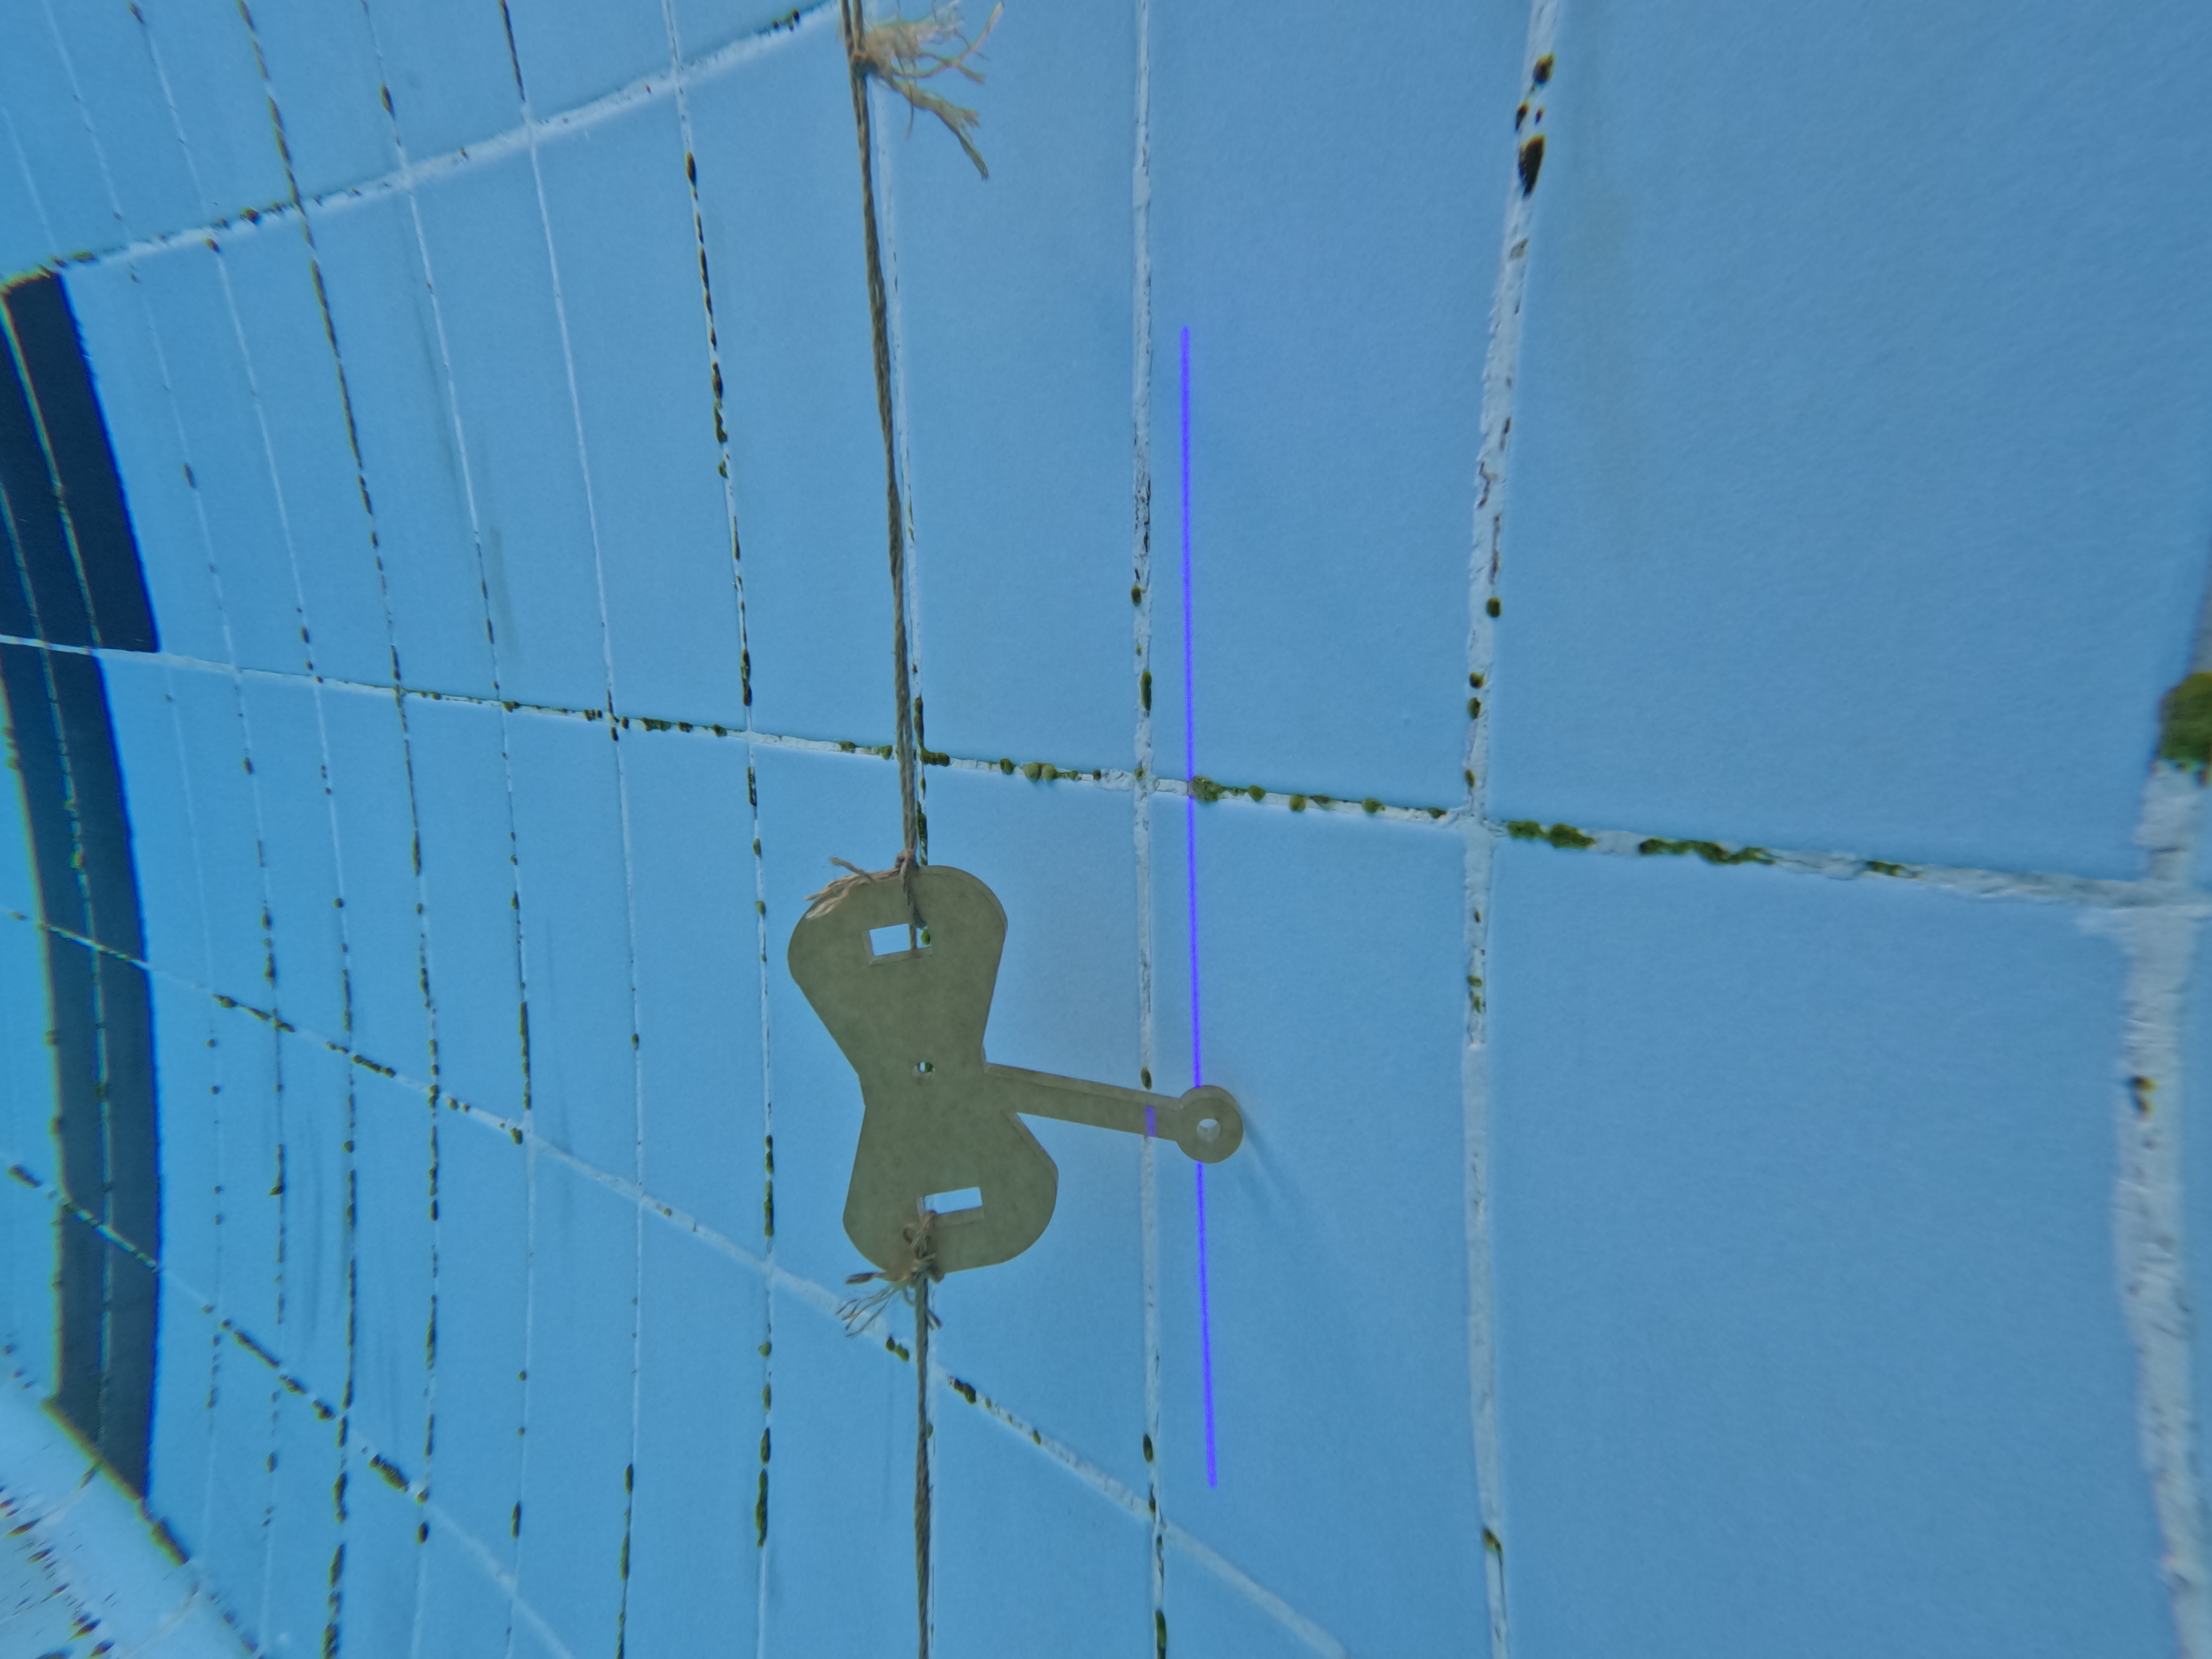

Supplement: Supplementary file 2057 [file G0050618.pdf › Level_3_2/G0050618.pdf]

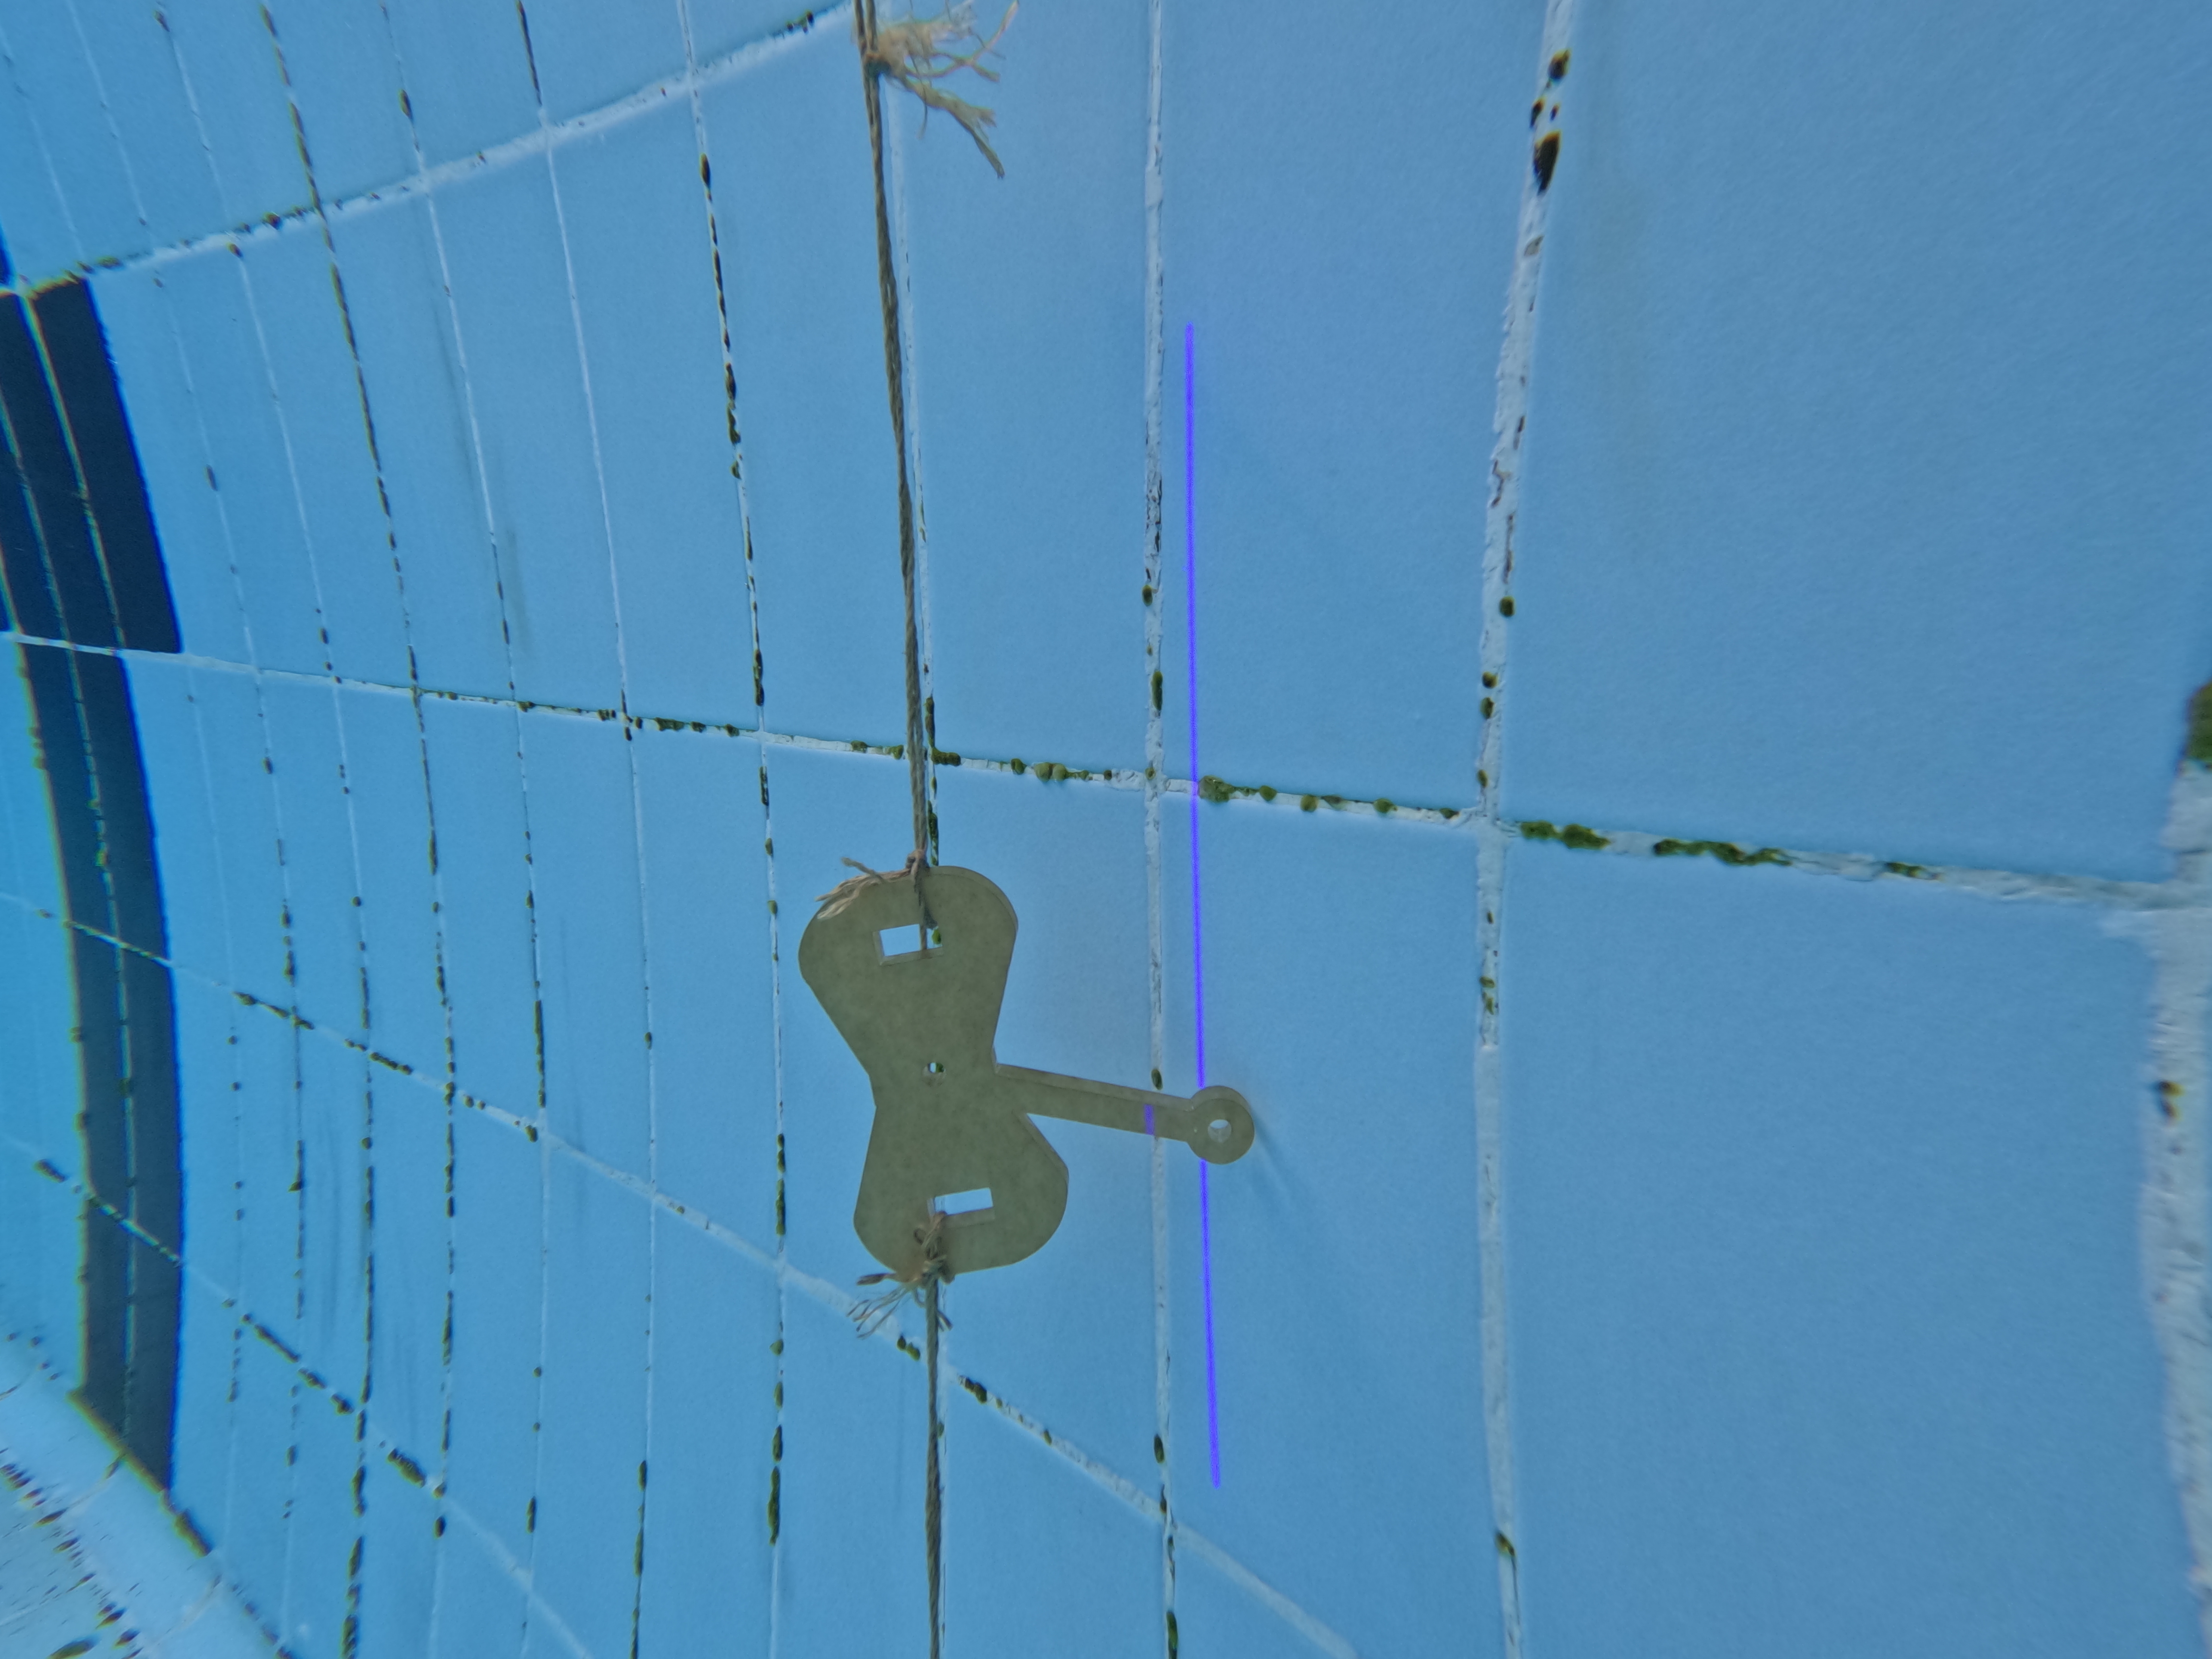

Supplement: Supplementary file 2058 [file G0050619.pdf › Level_3_2/G0050619.pdf]

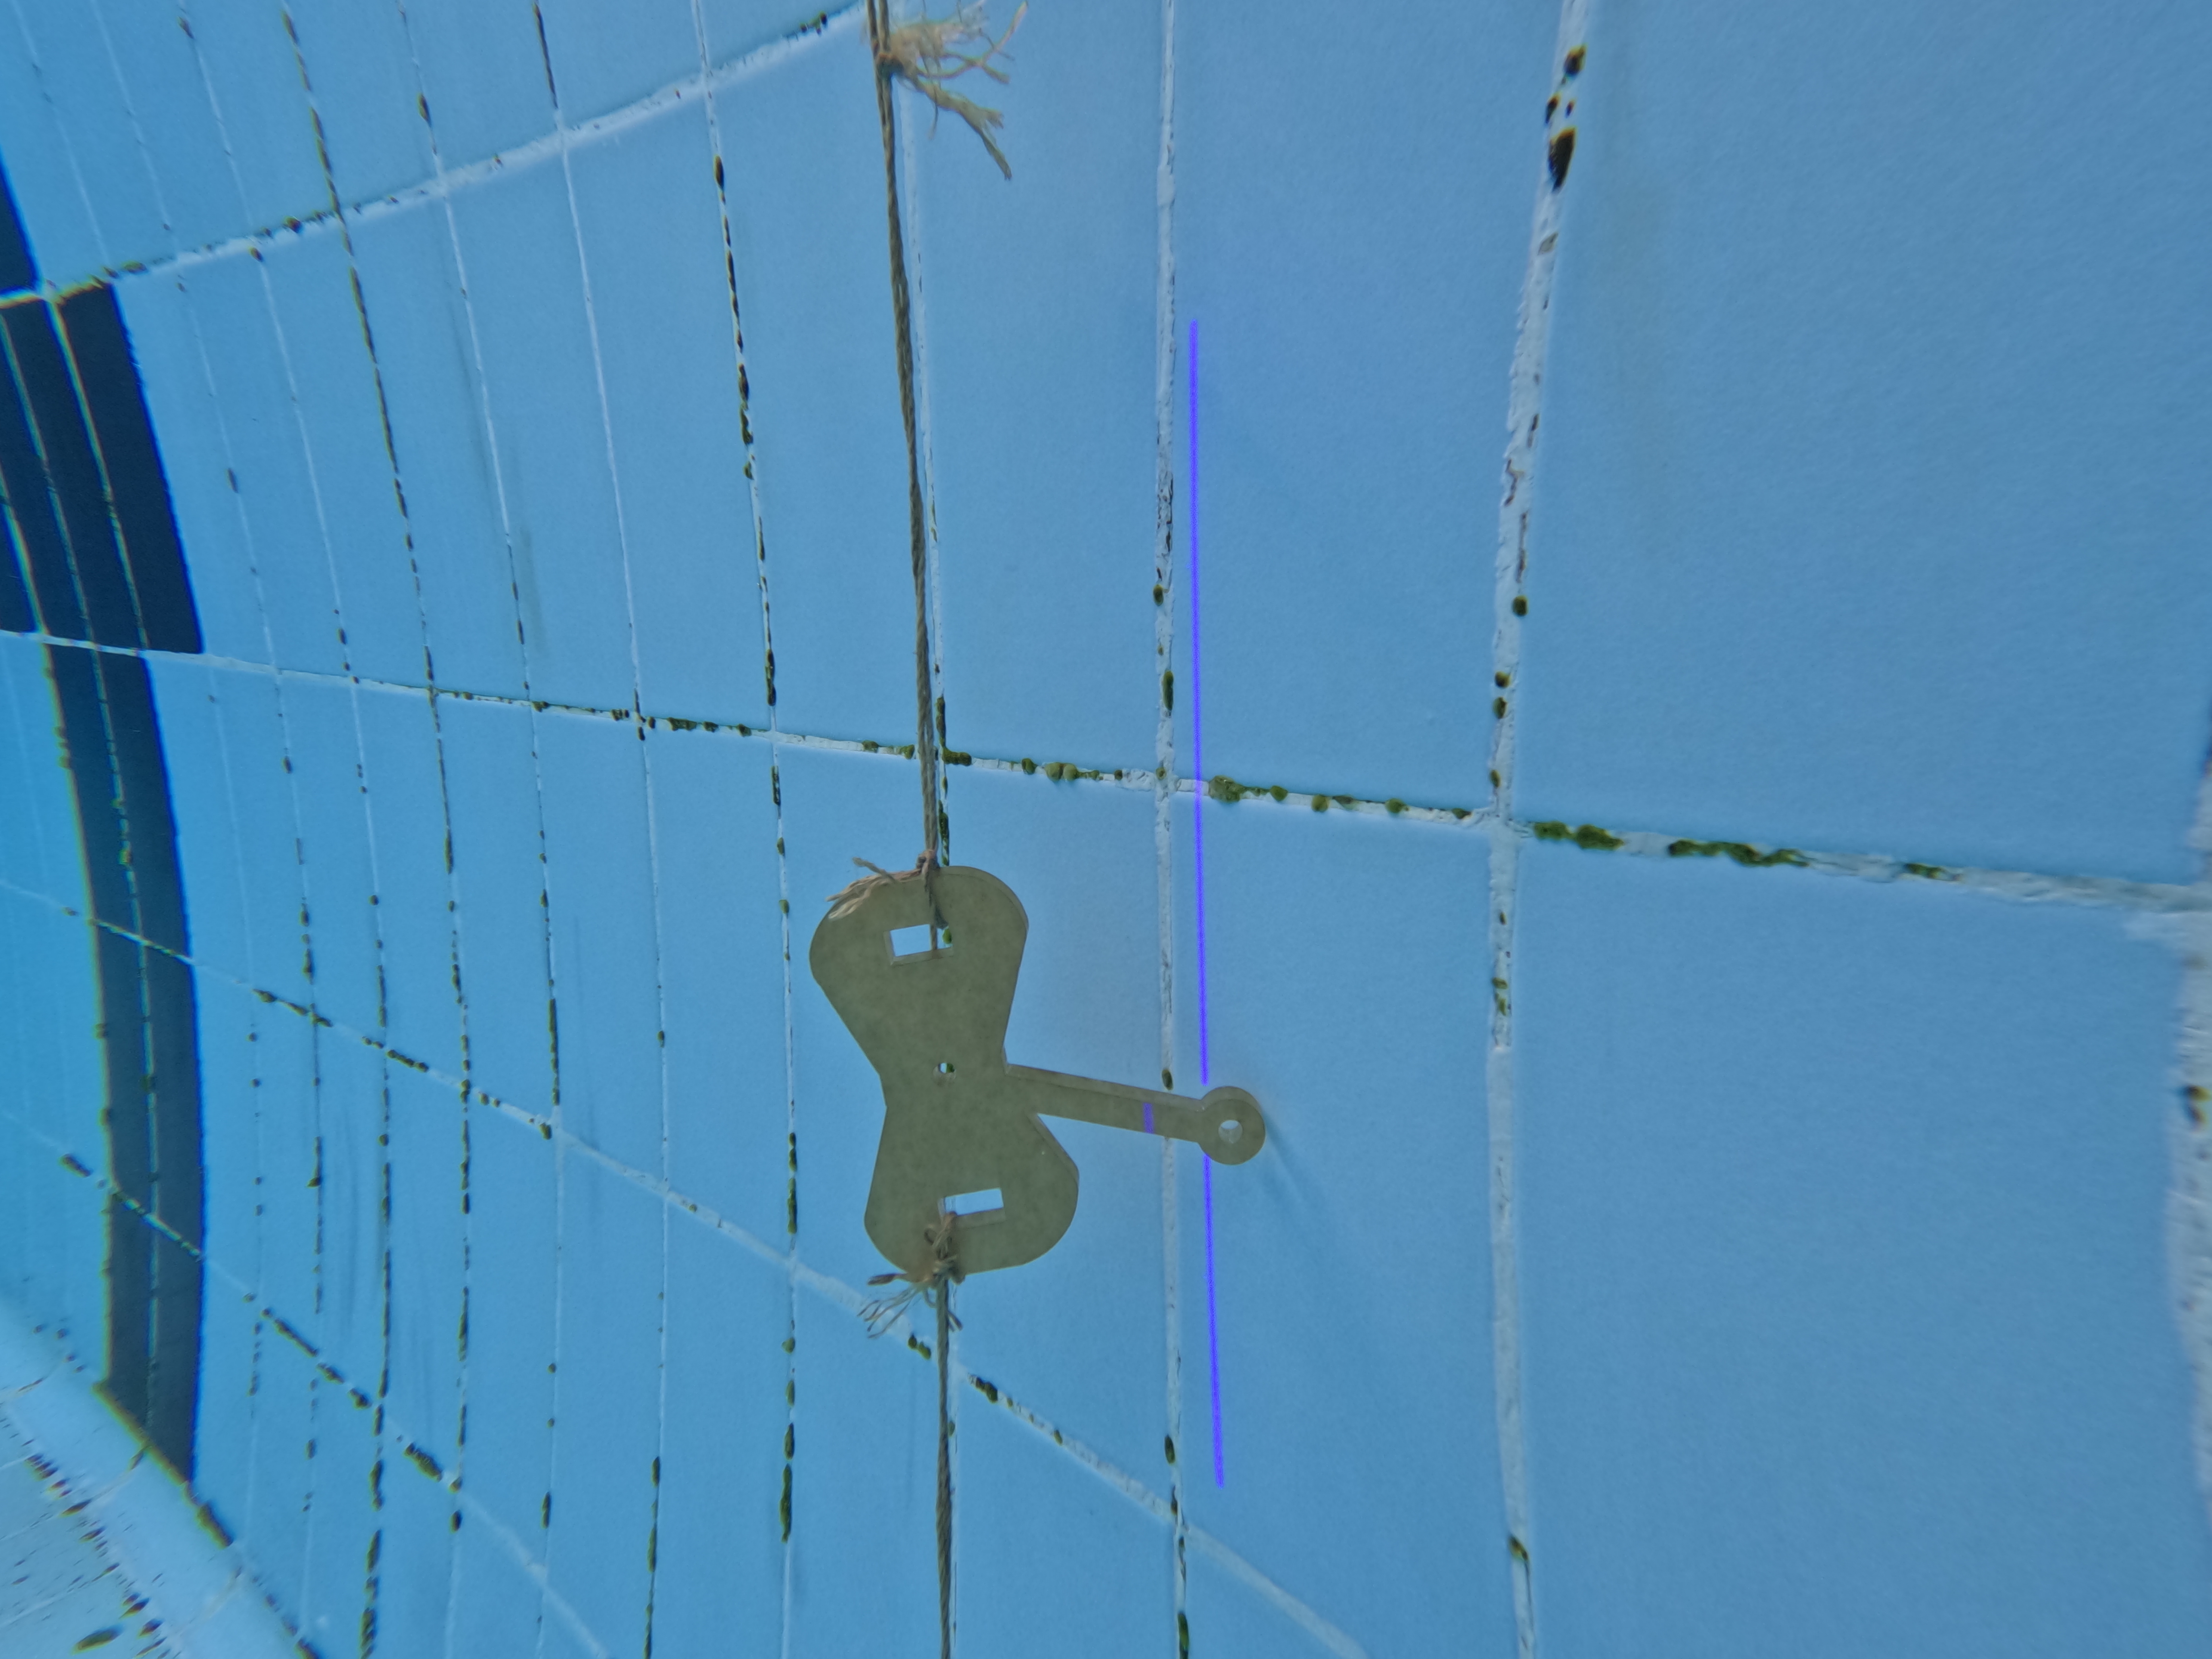

Supplement: Supplementary file 2059 [file G0050620.pdf › Level_3_2/G0050620.pdf]

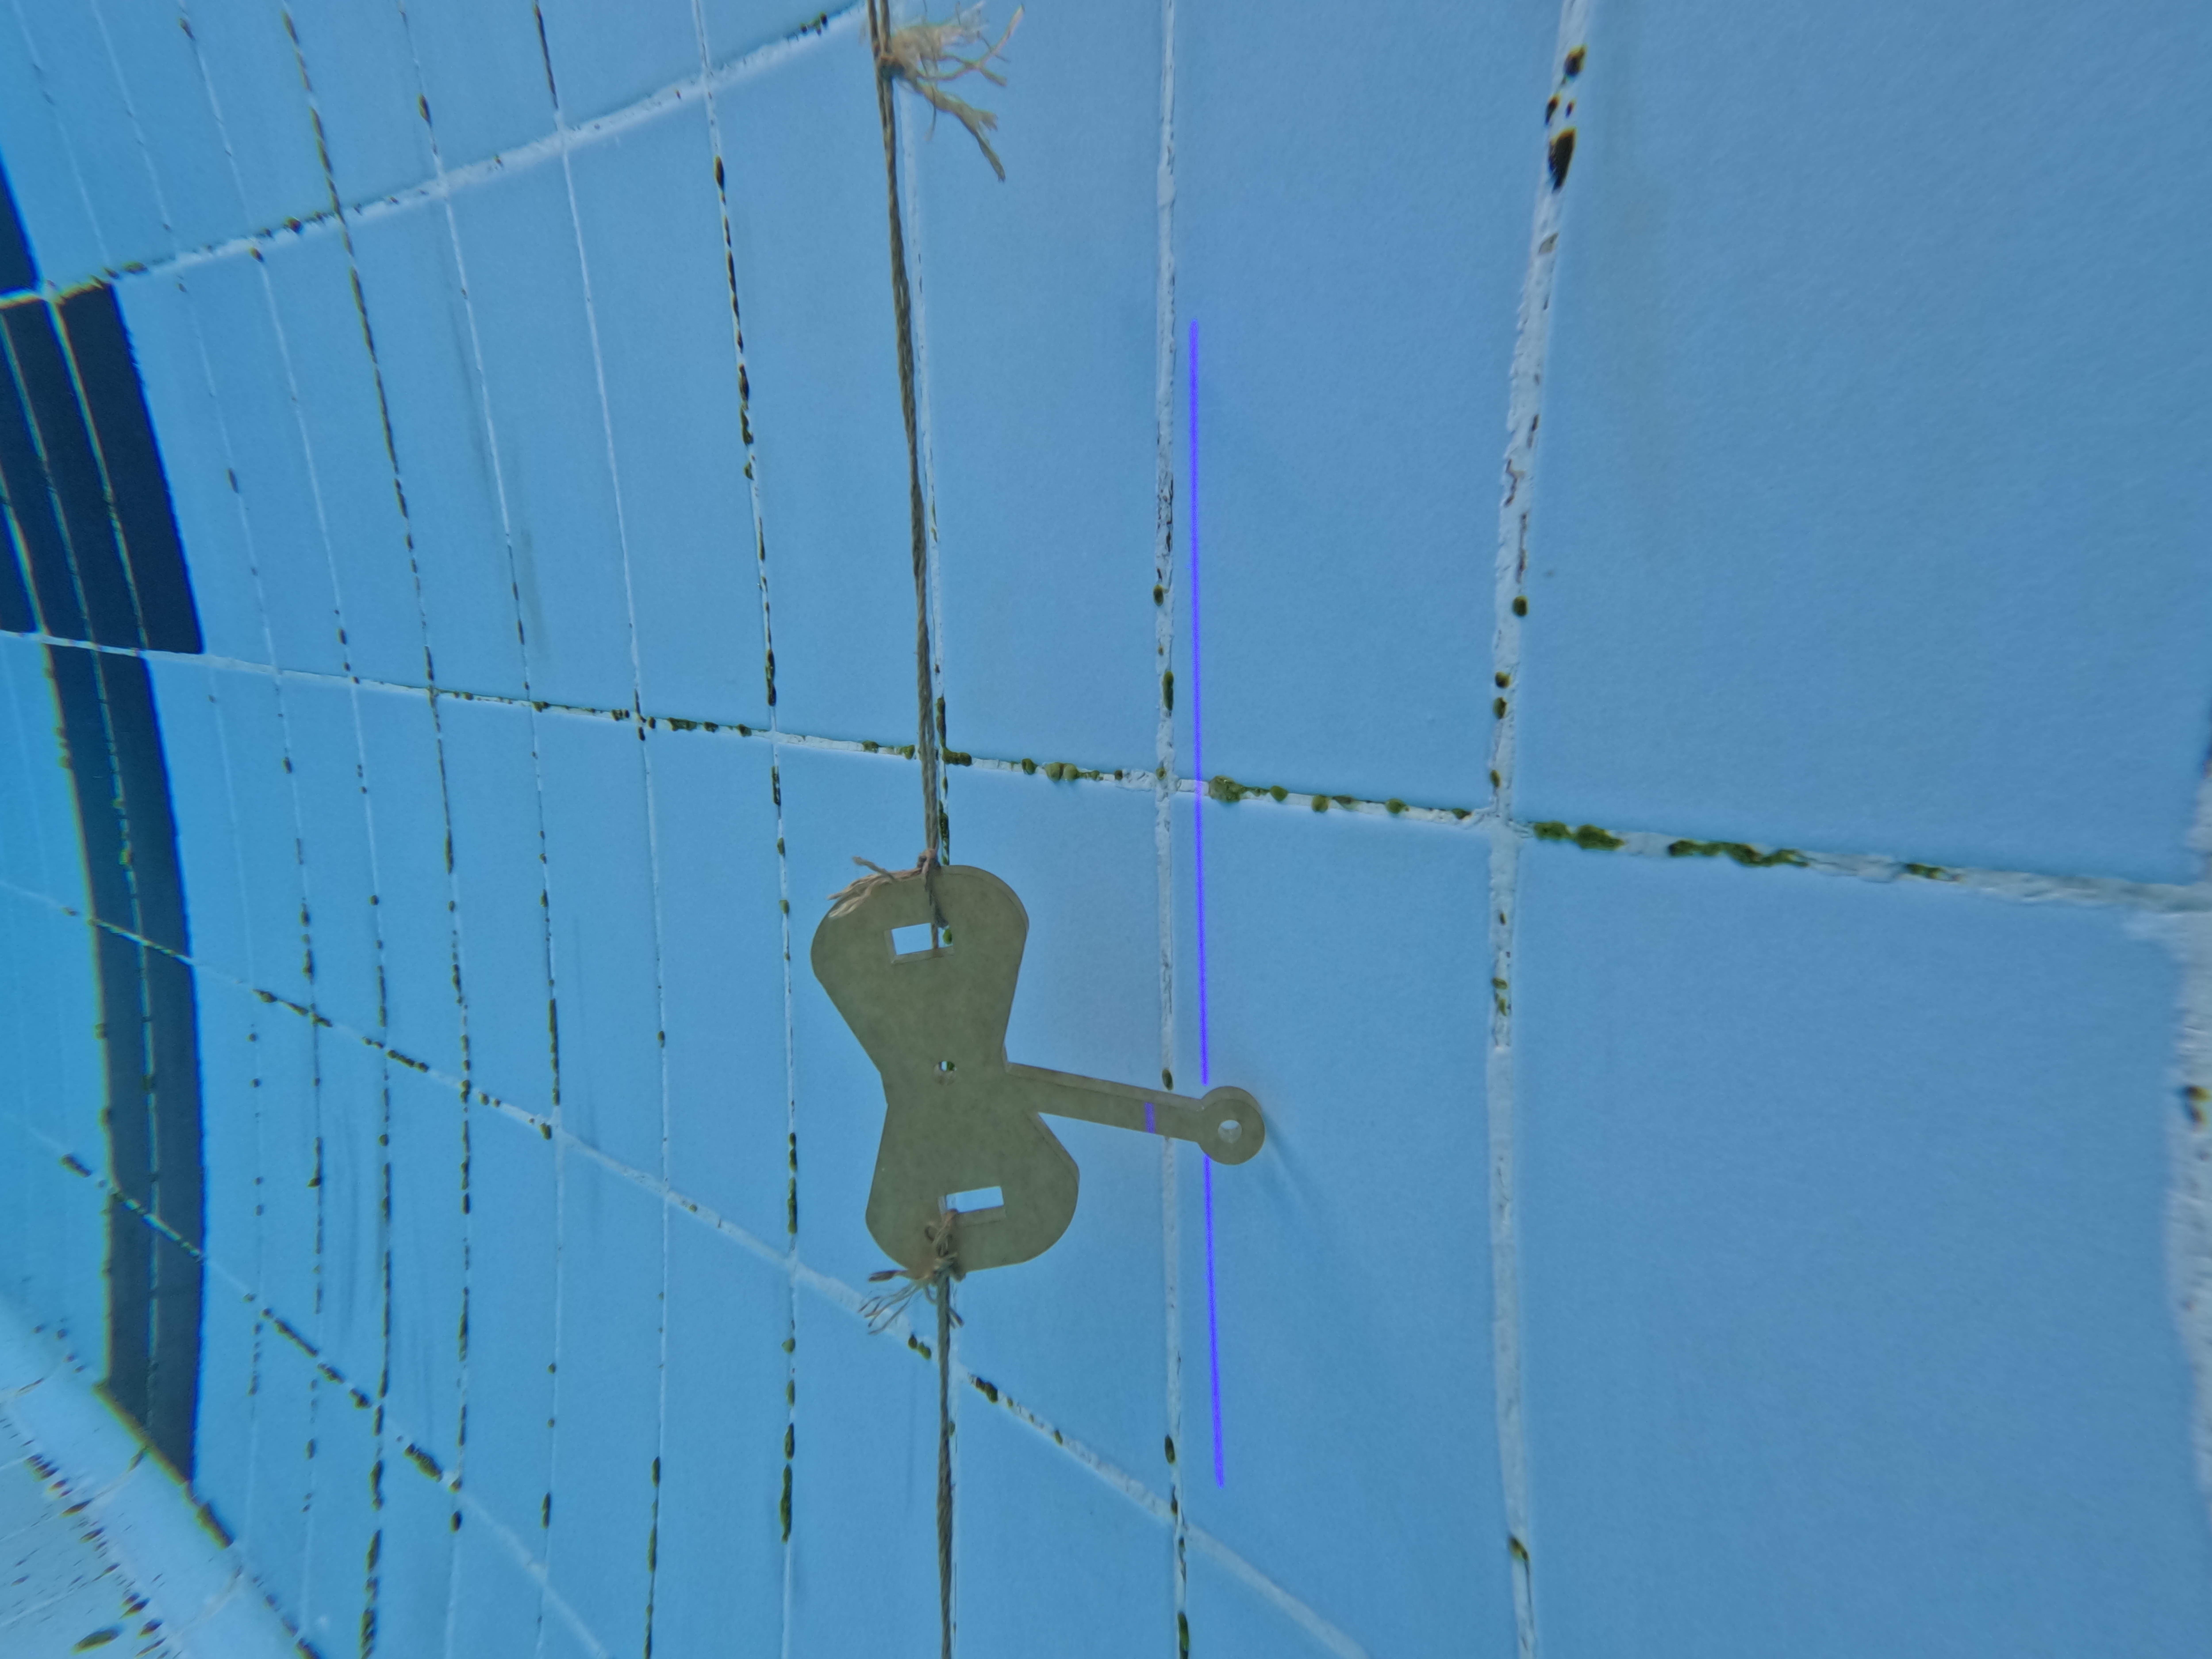

Supplement: Supplementary file 2060 [file G0050621.pdf › Level_3_2/G0050621.pdf]

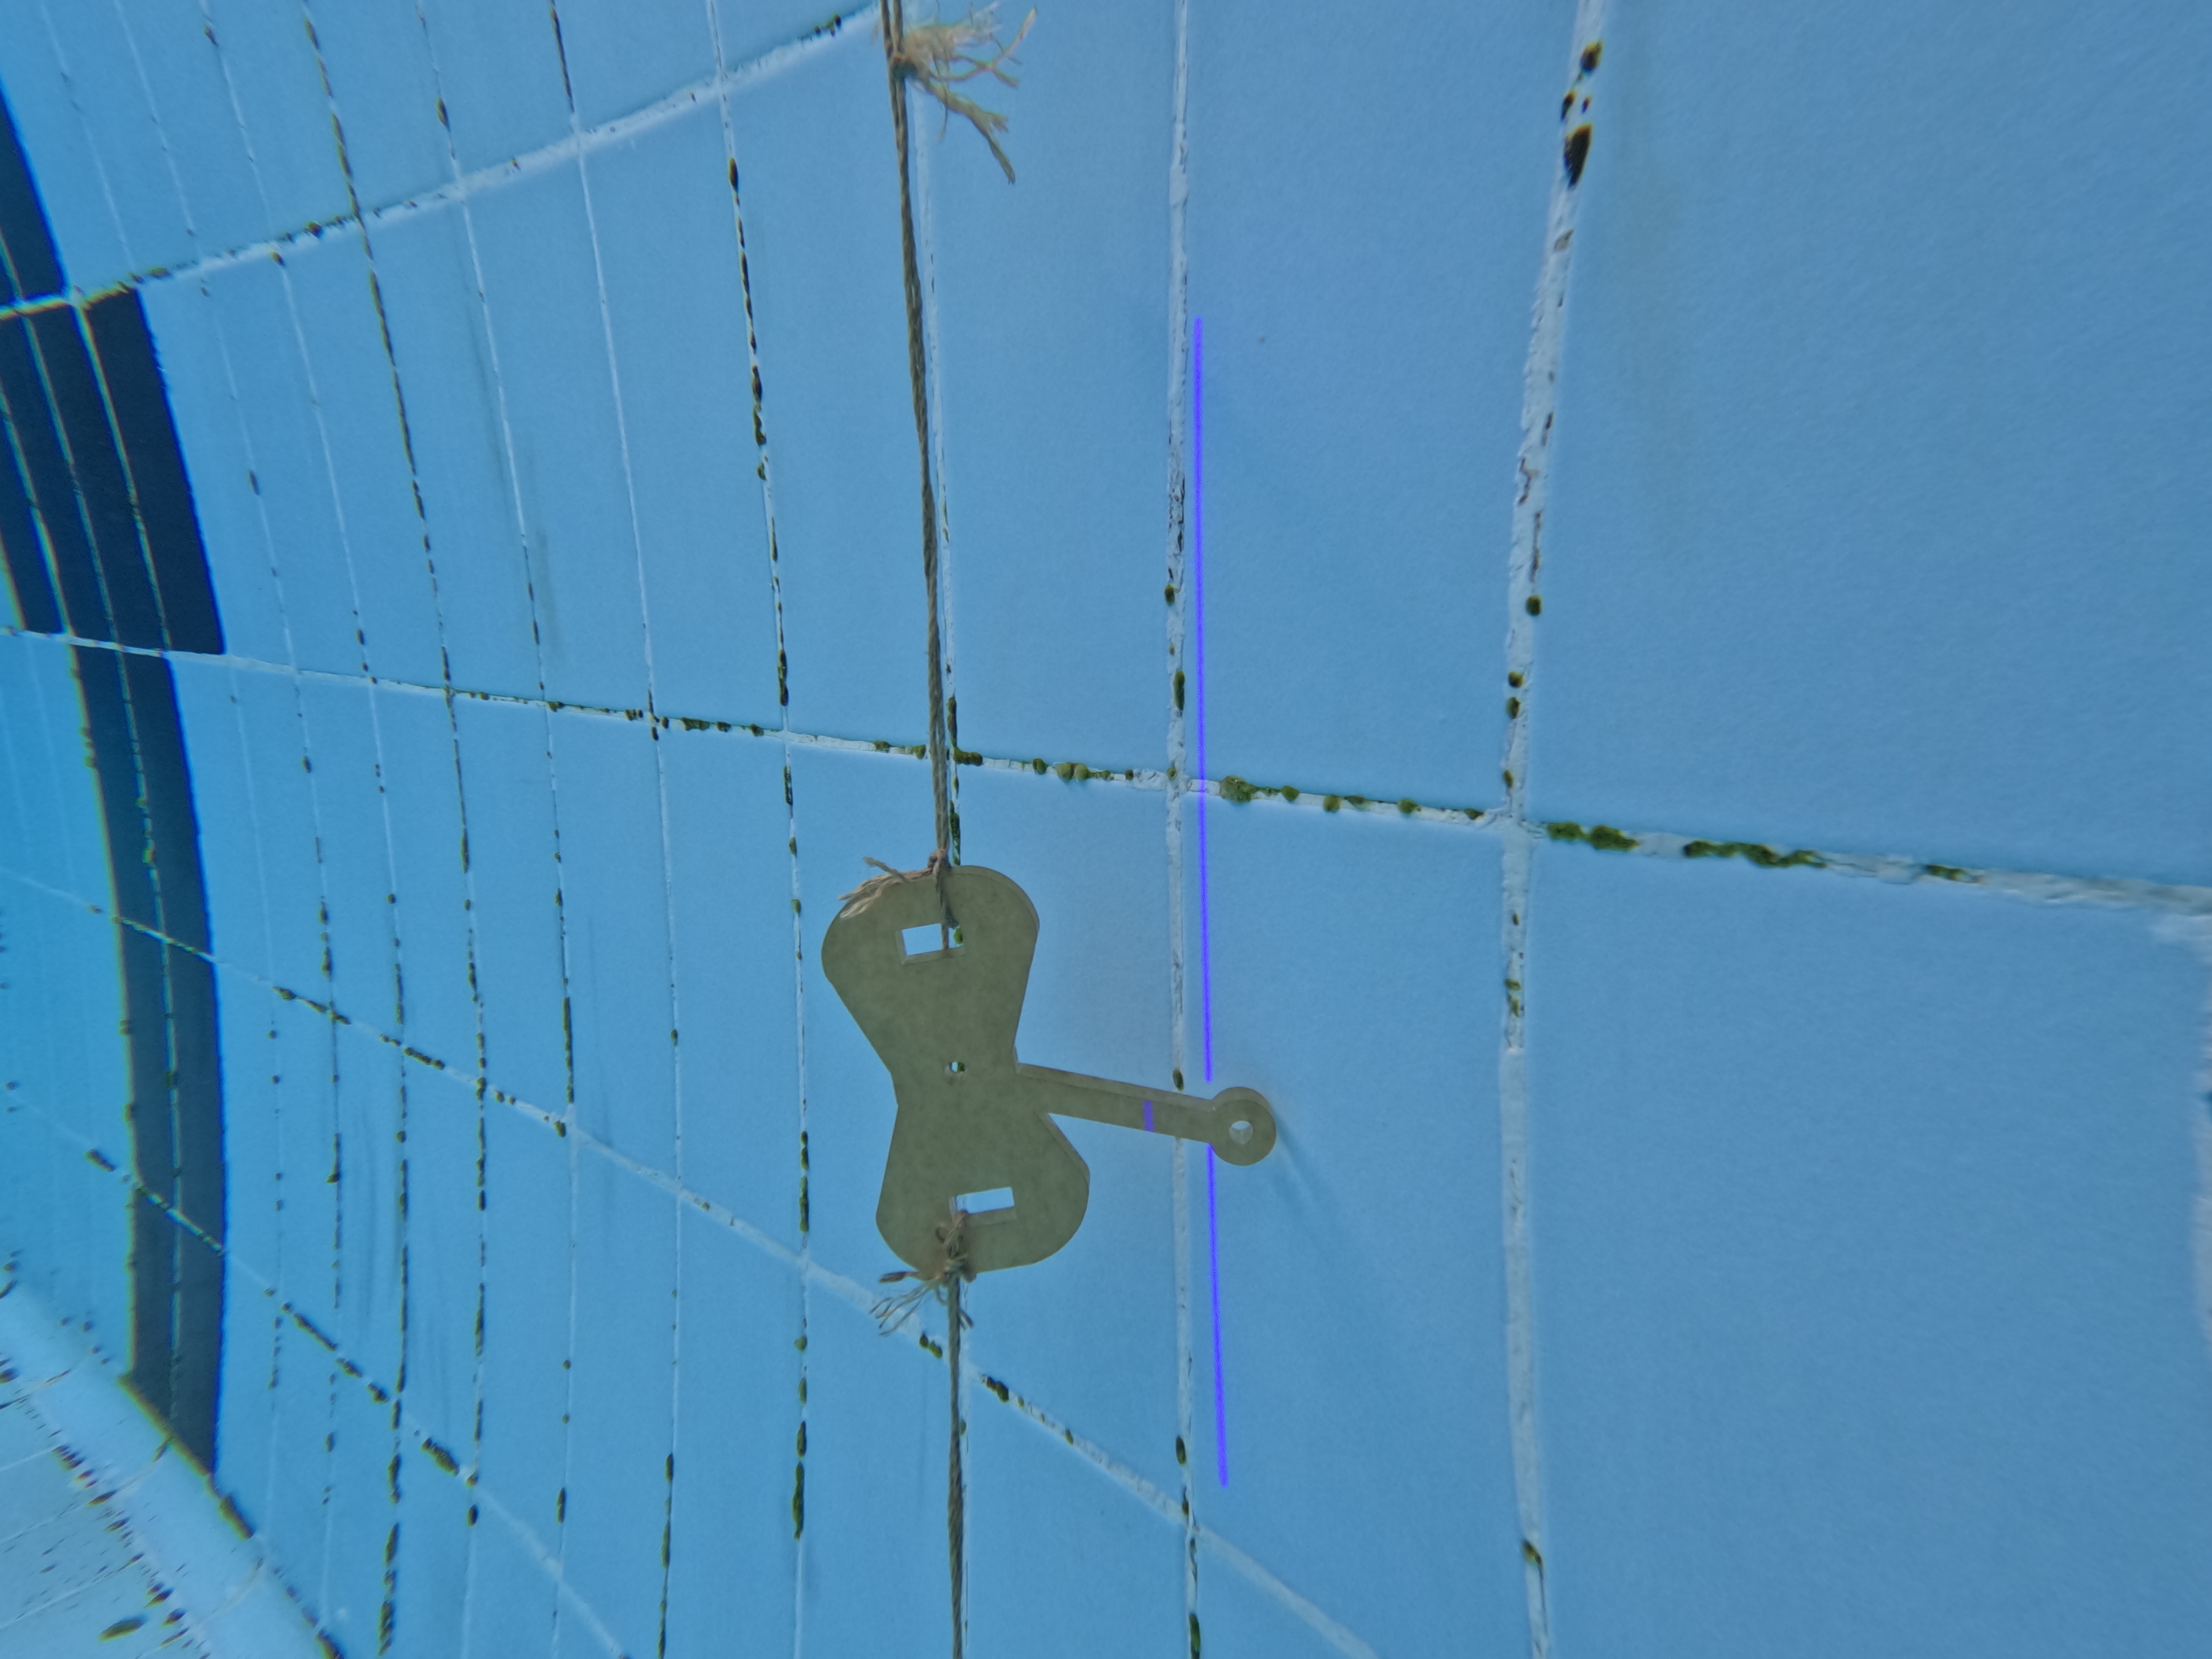

Supplement: Supplementary file 2061 [file G0050622.pdf › Level_3_2/G0050622.pdf]

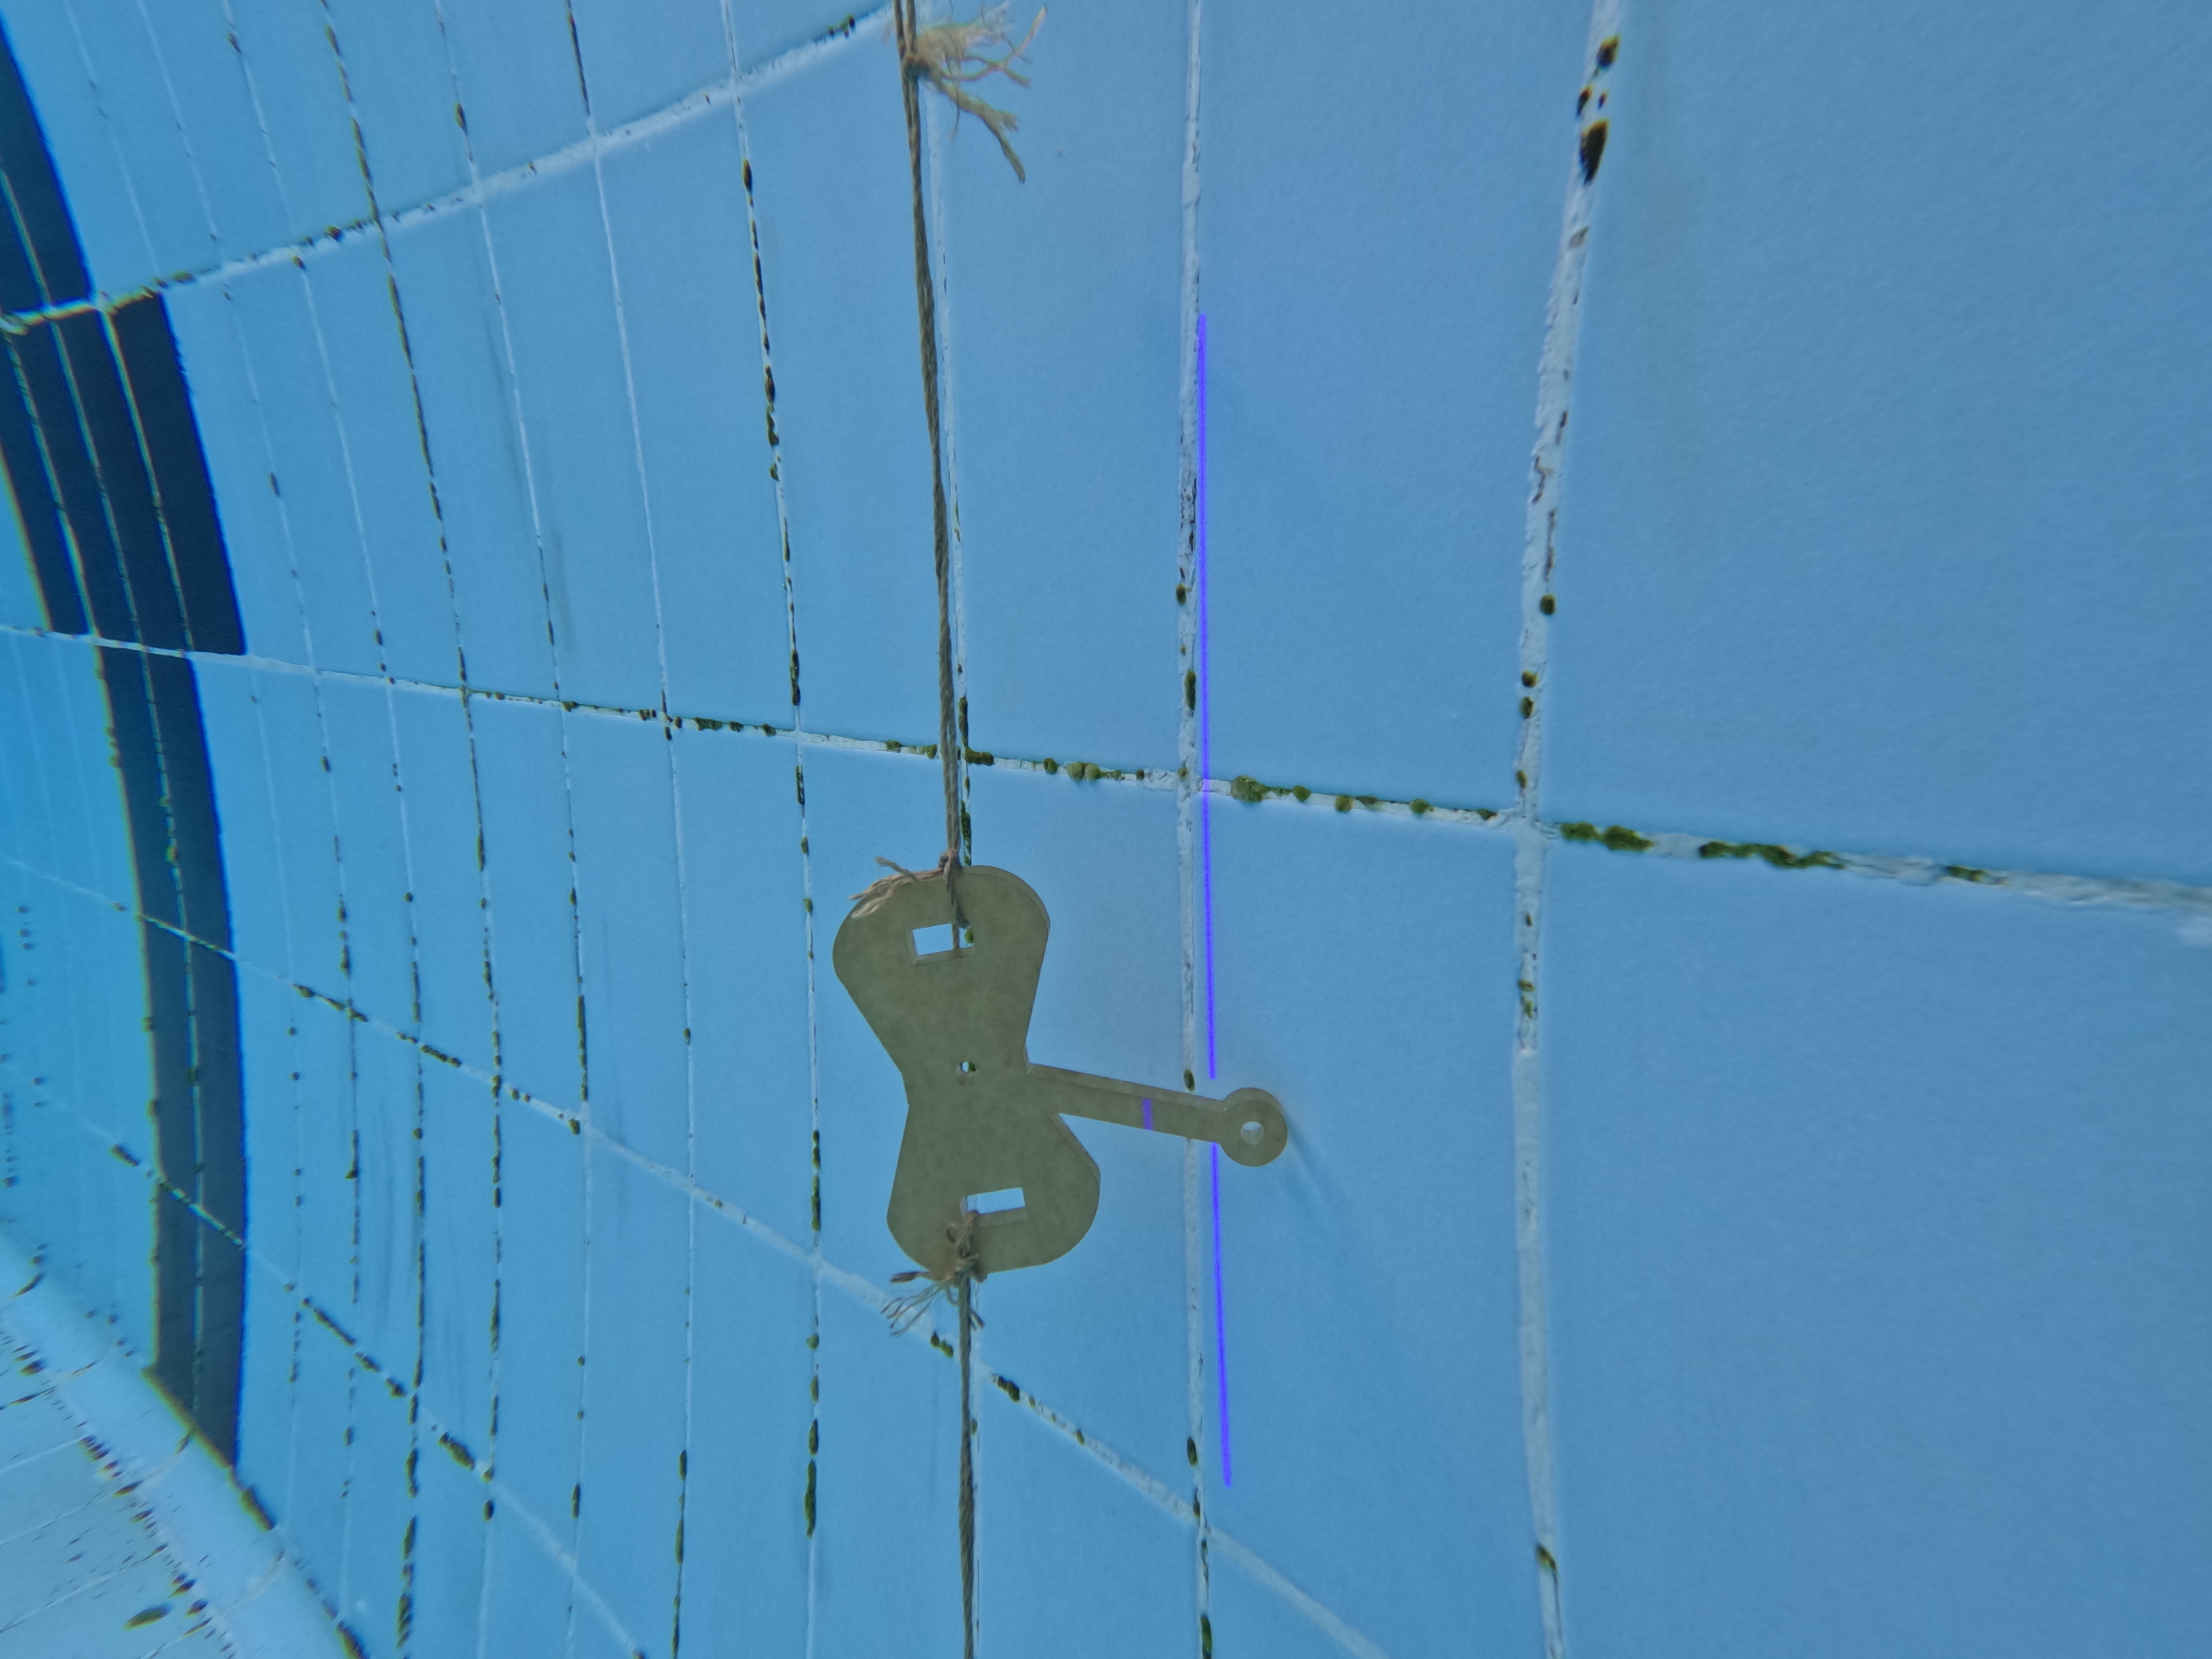

Supplement: Supplementary file 2062 [file G0050623.pdf › Level_3_2/G0050623.pdf]

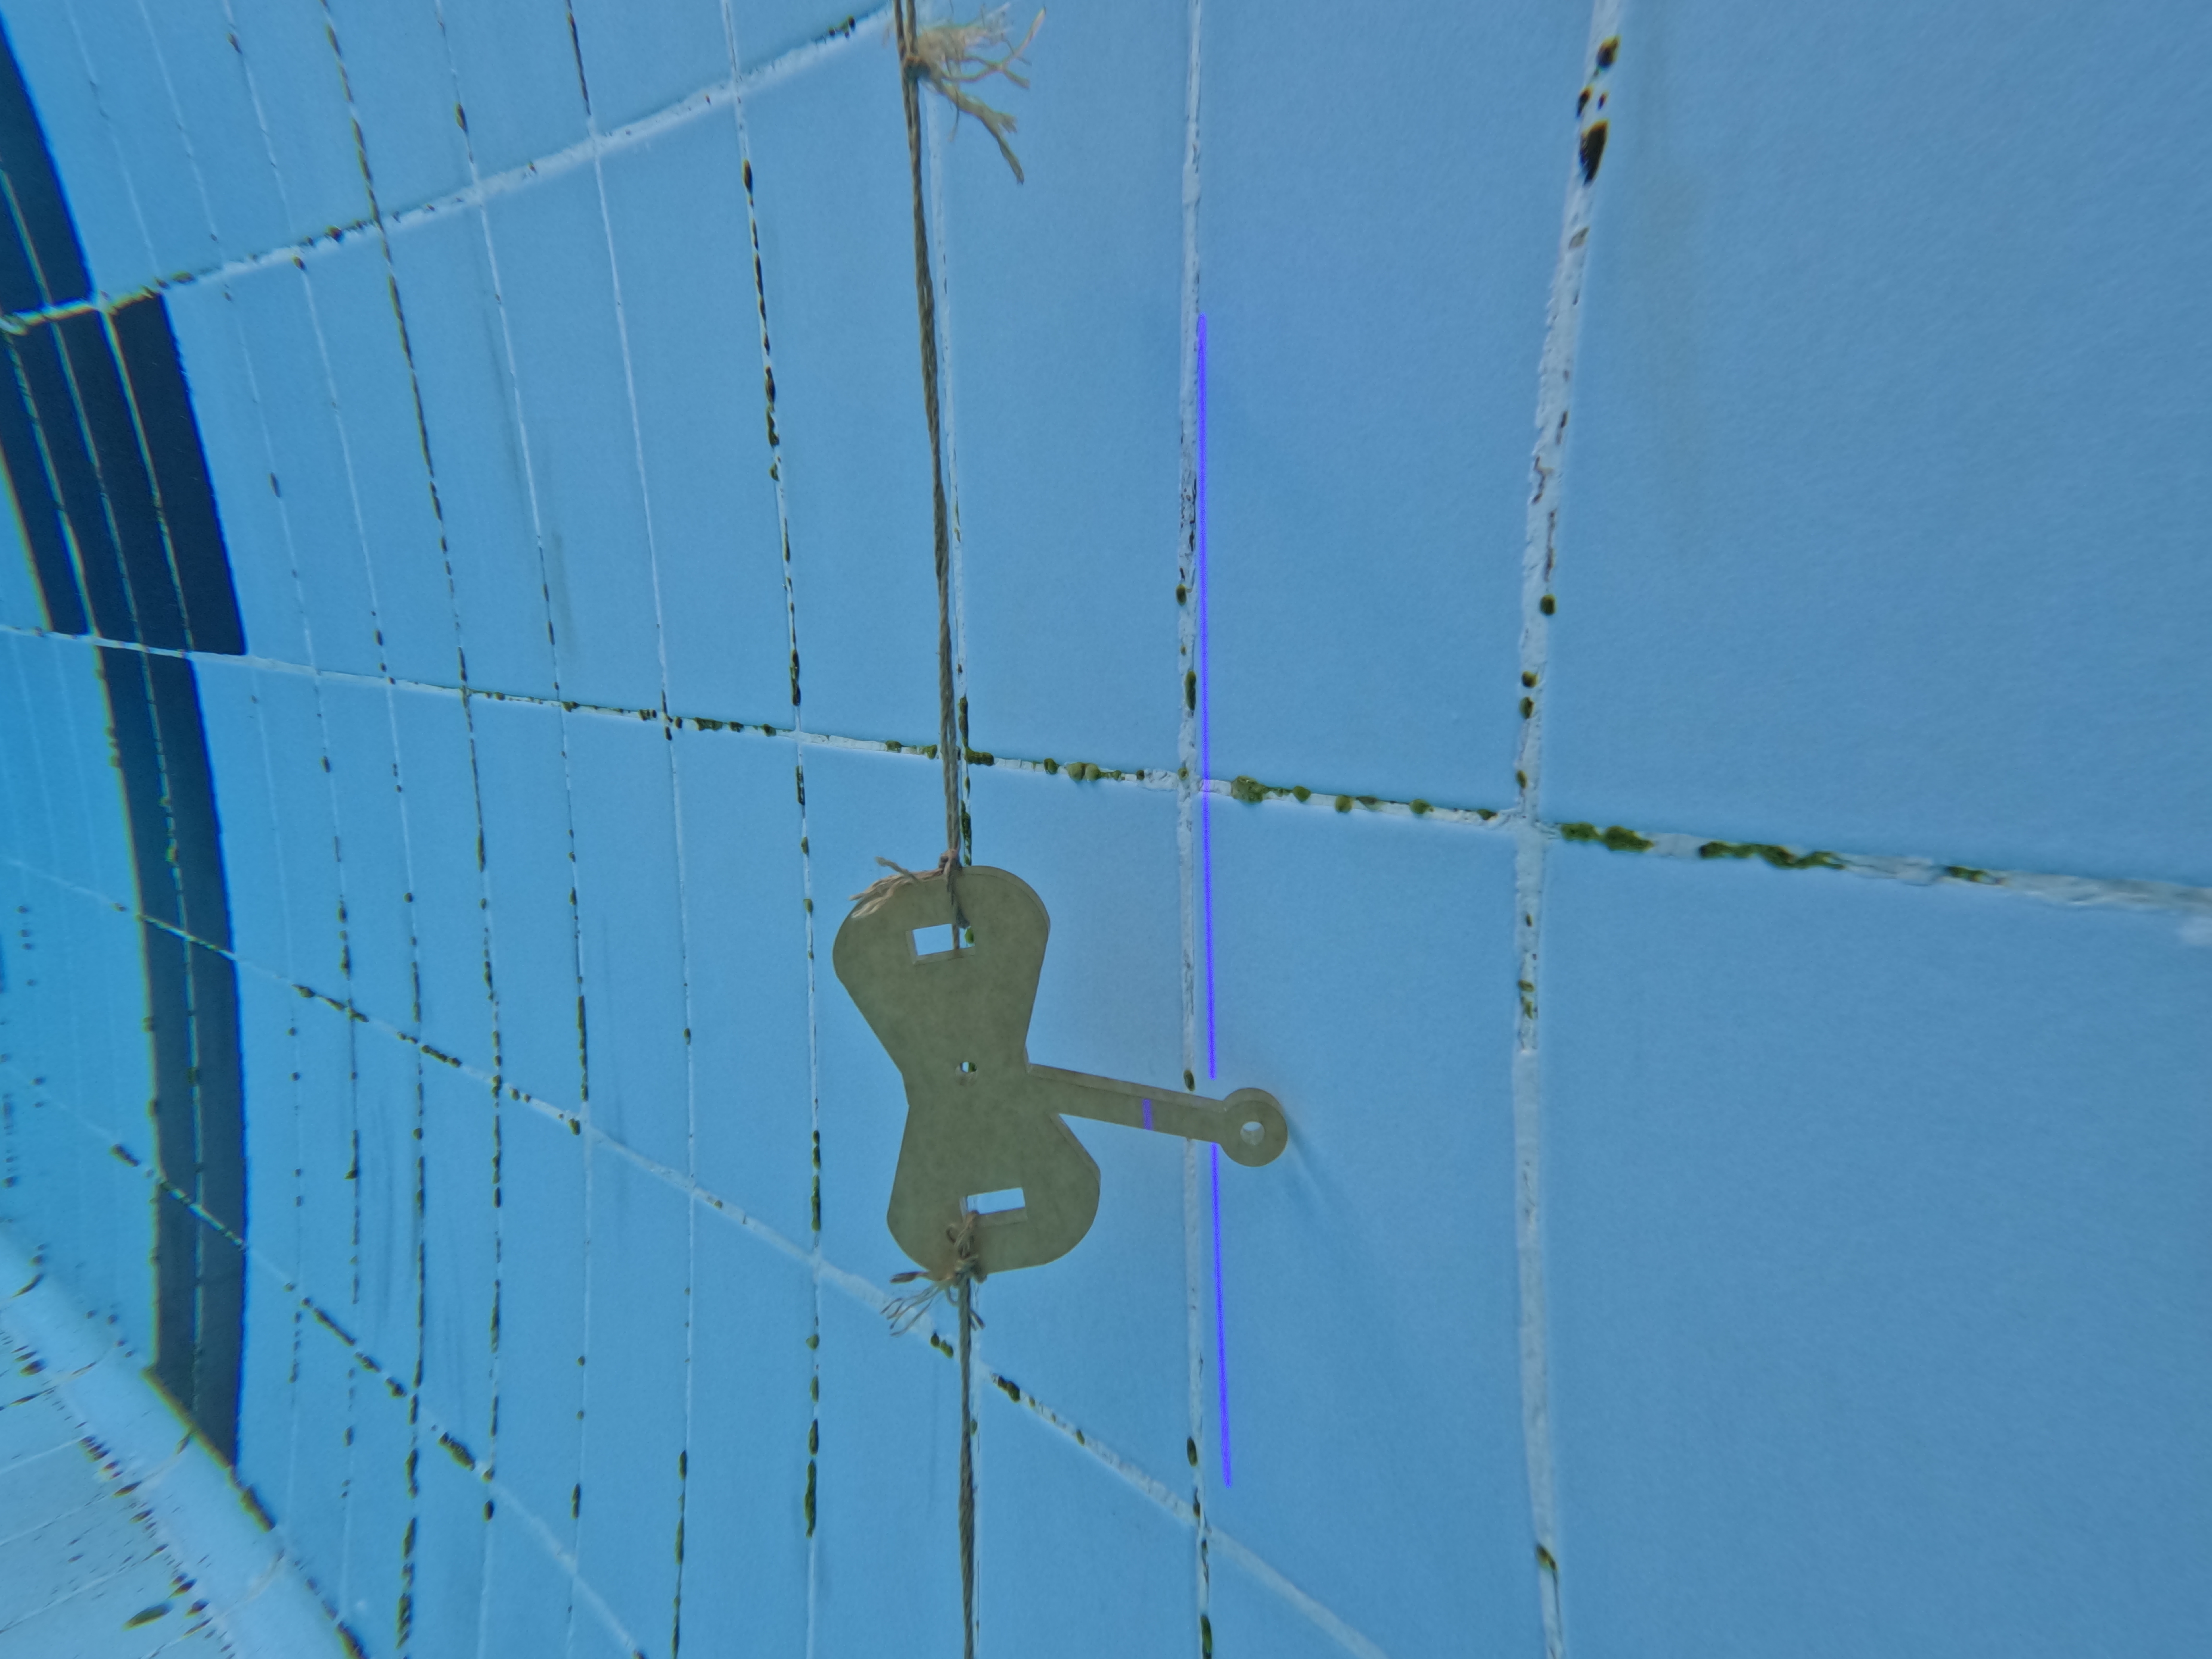

Supplement: Supplementary file 2063 [file G0050624.pdf › Level_3_2/G0050624.pdf]

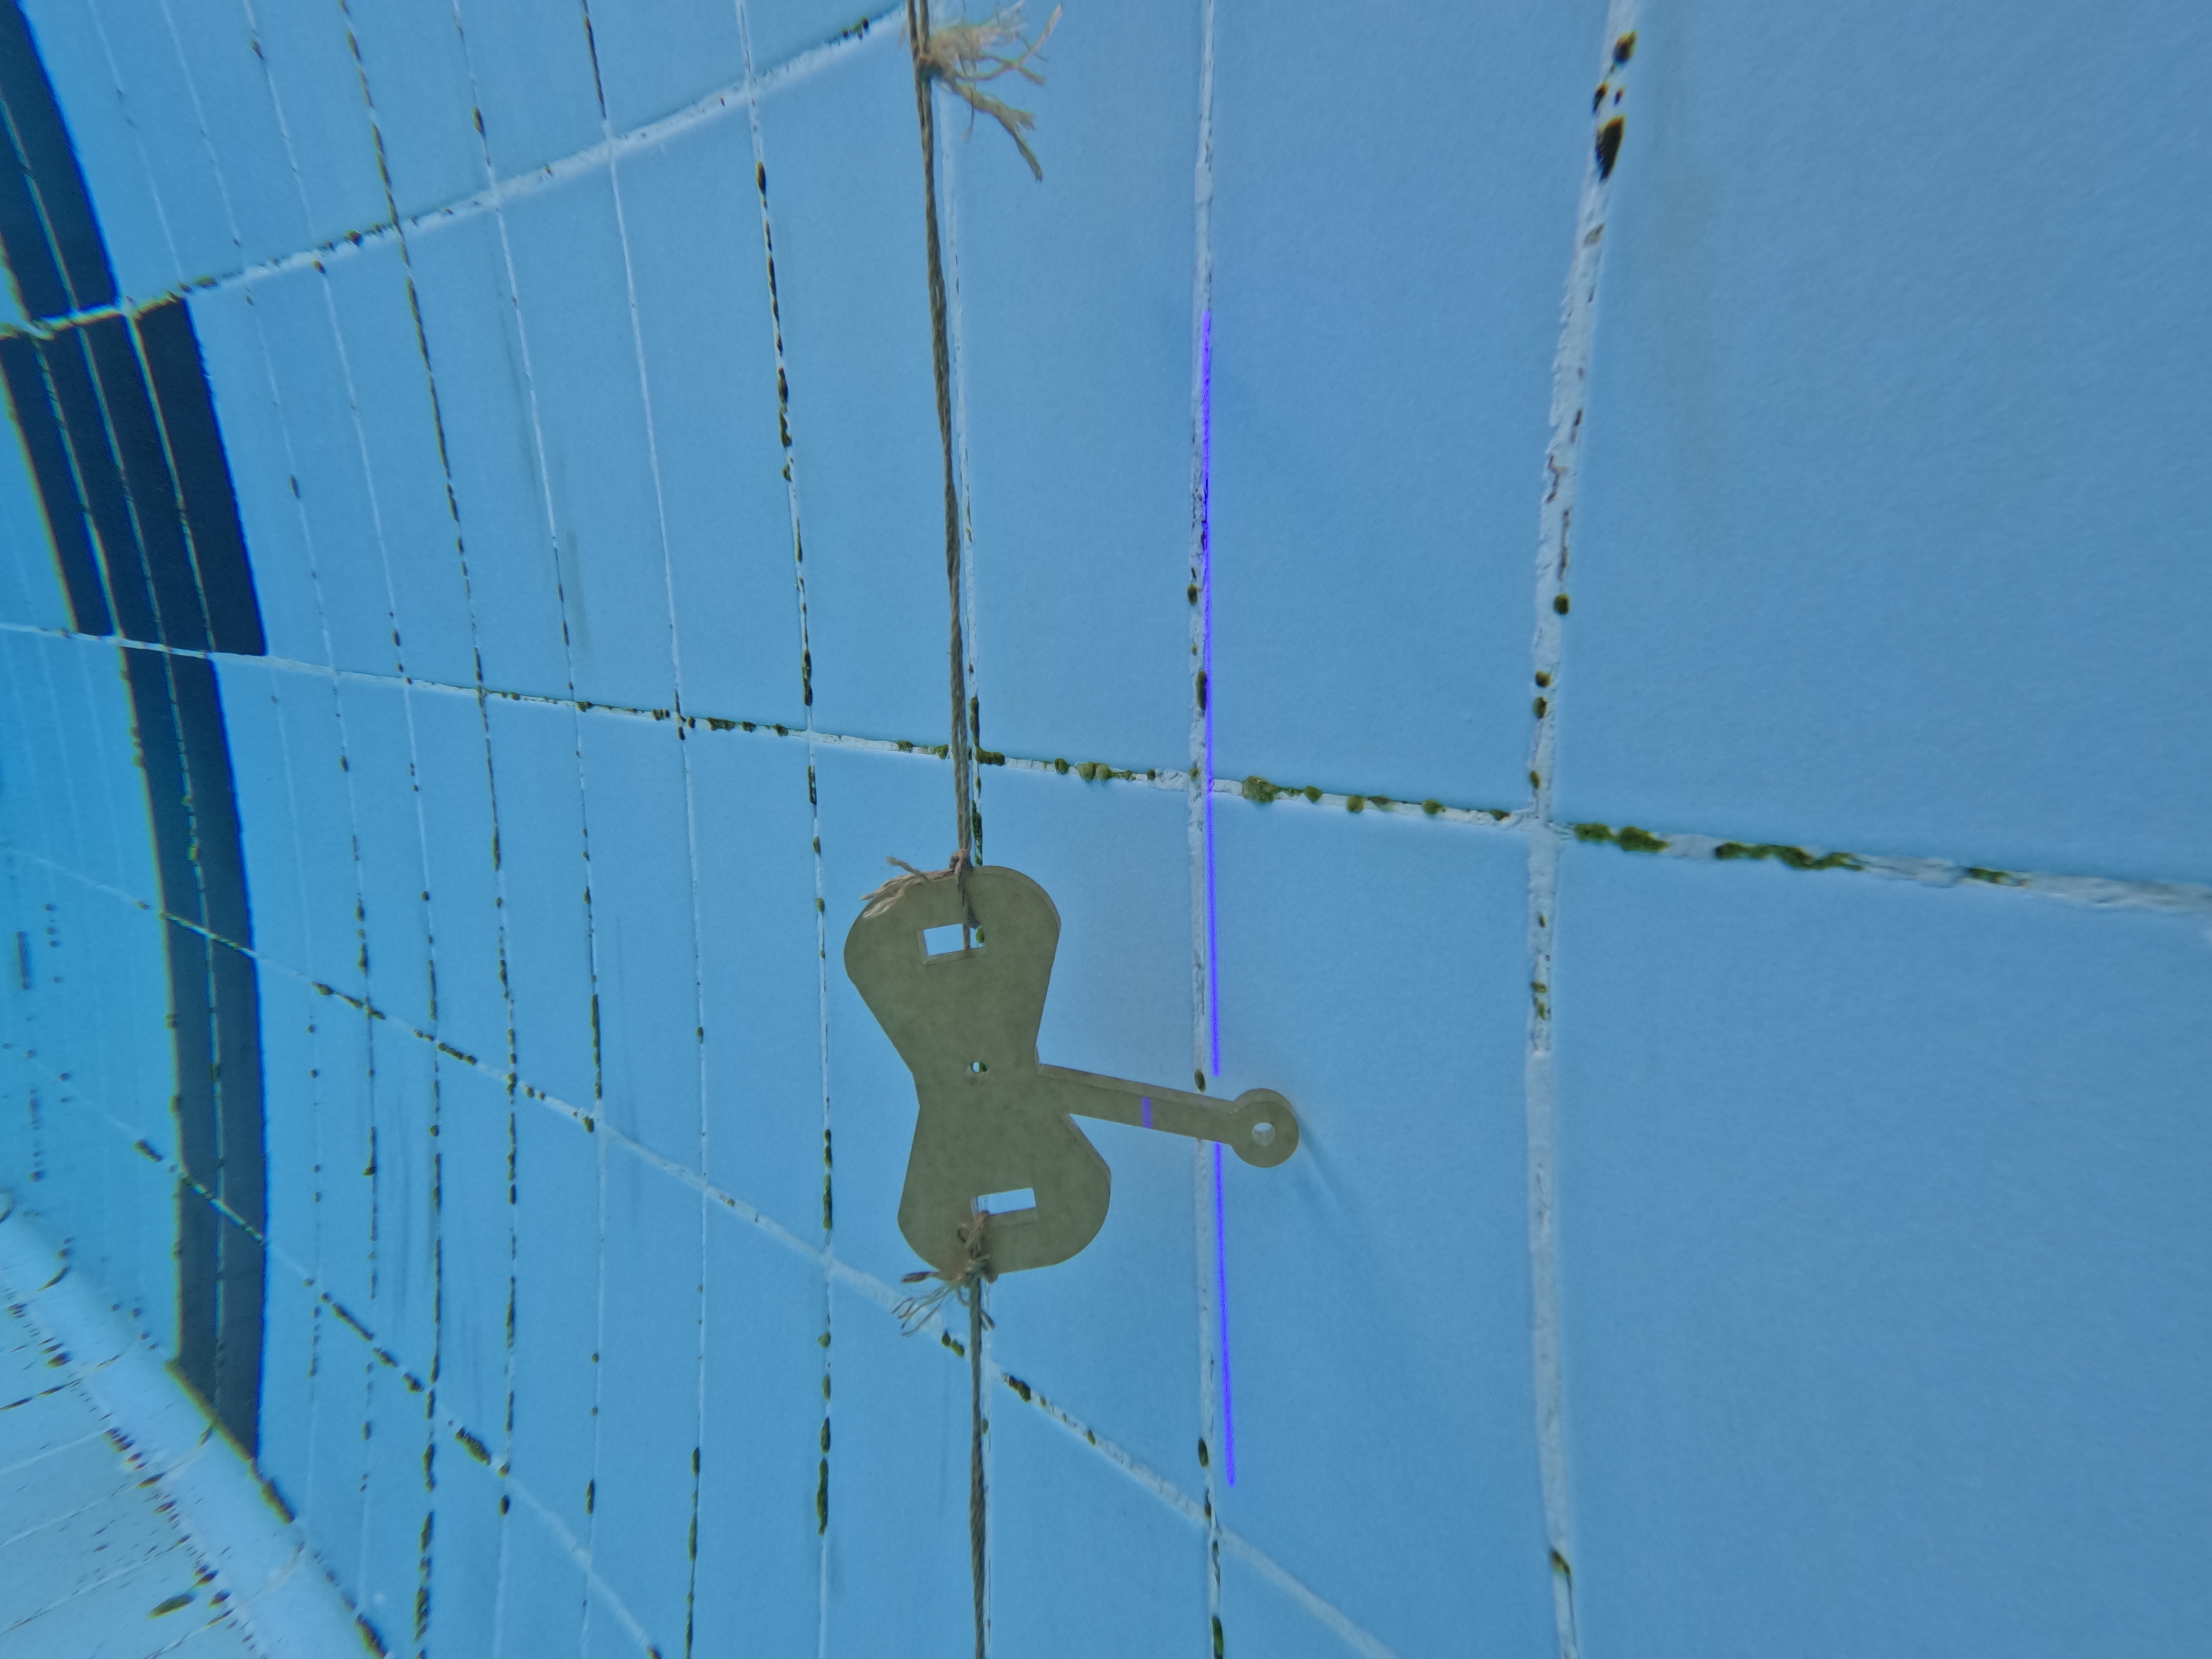

Supplement: Supplementary file 2064 [file G0050625.pdf › Level_3_2/G0050625.pdf]

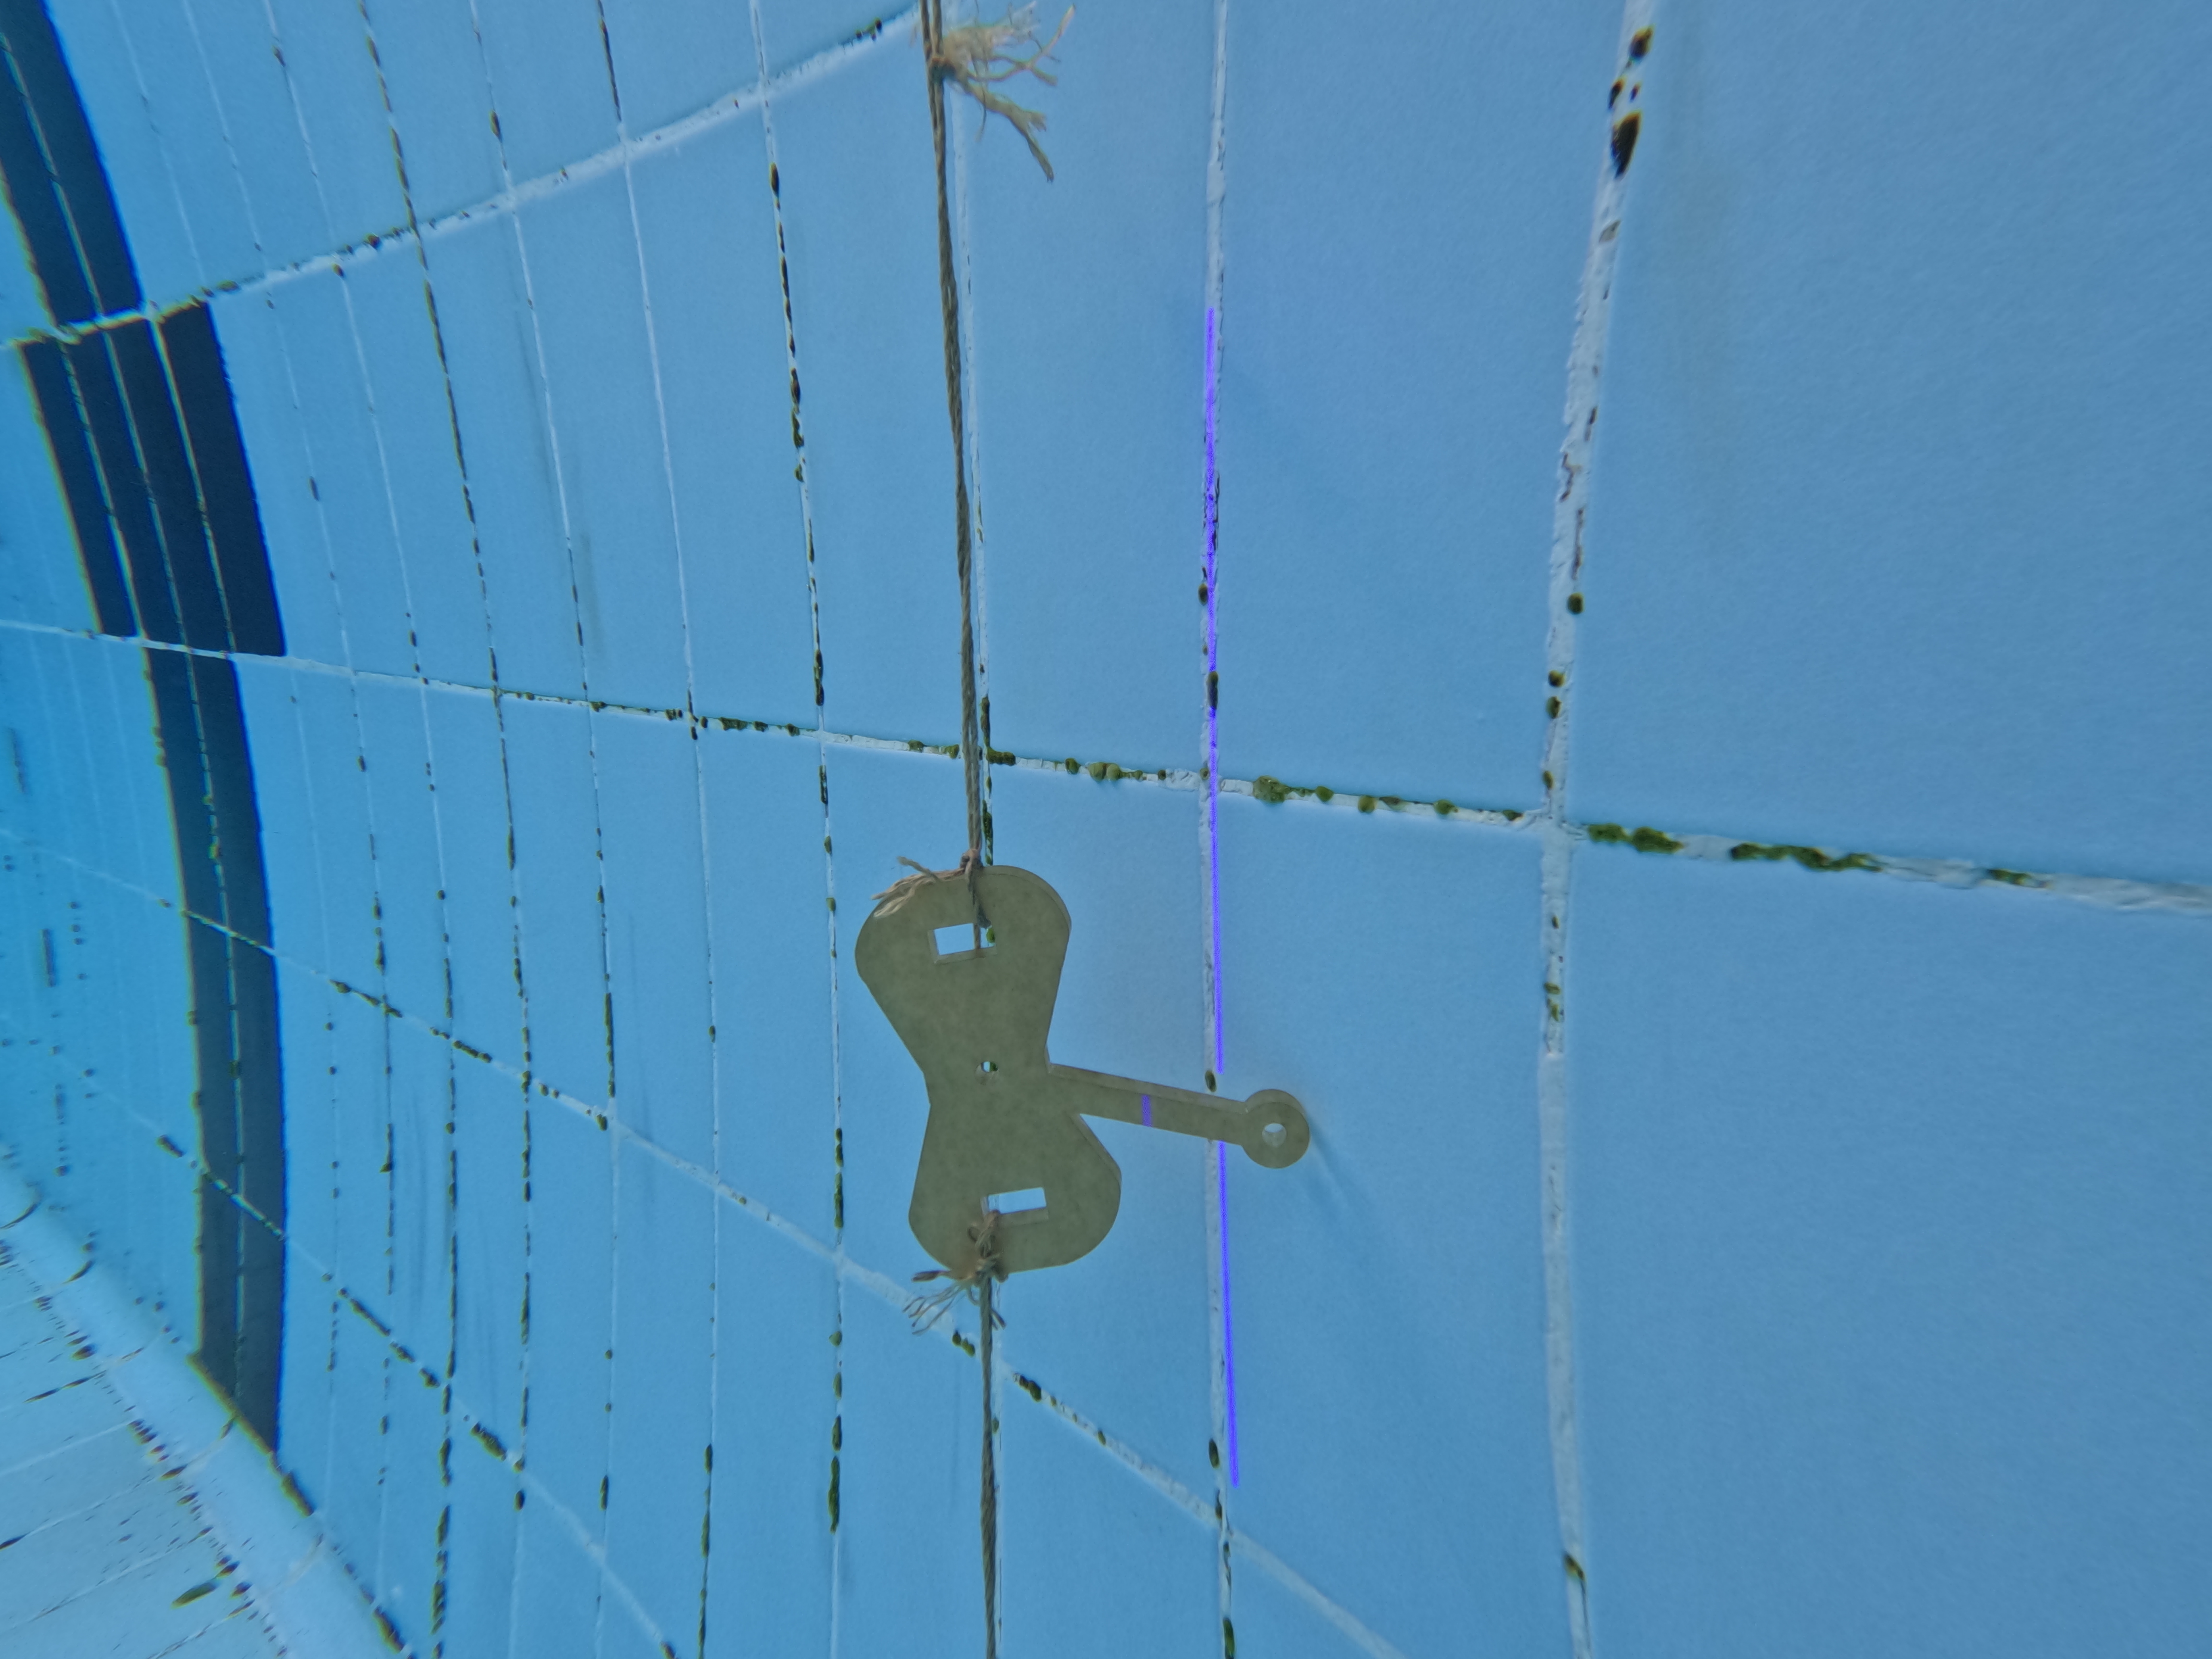

Supplement: Supplementary file 2065 [file G0050626.pdf › Level_3_2/G0050626.pdf]

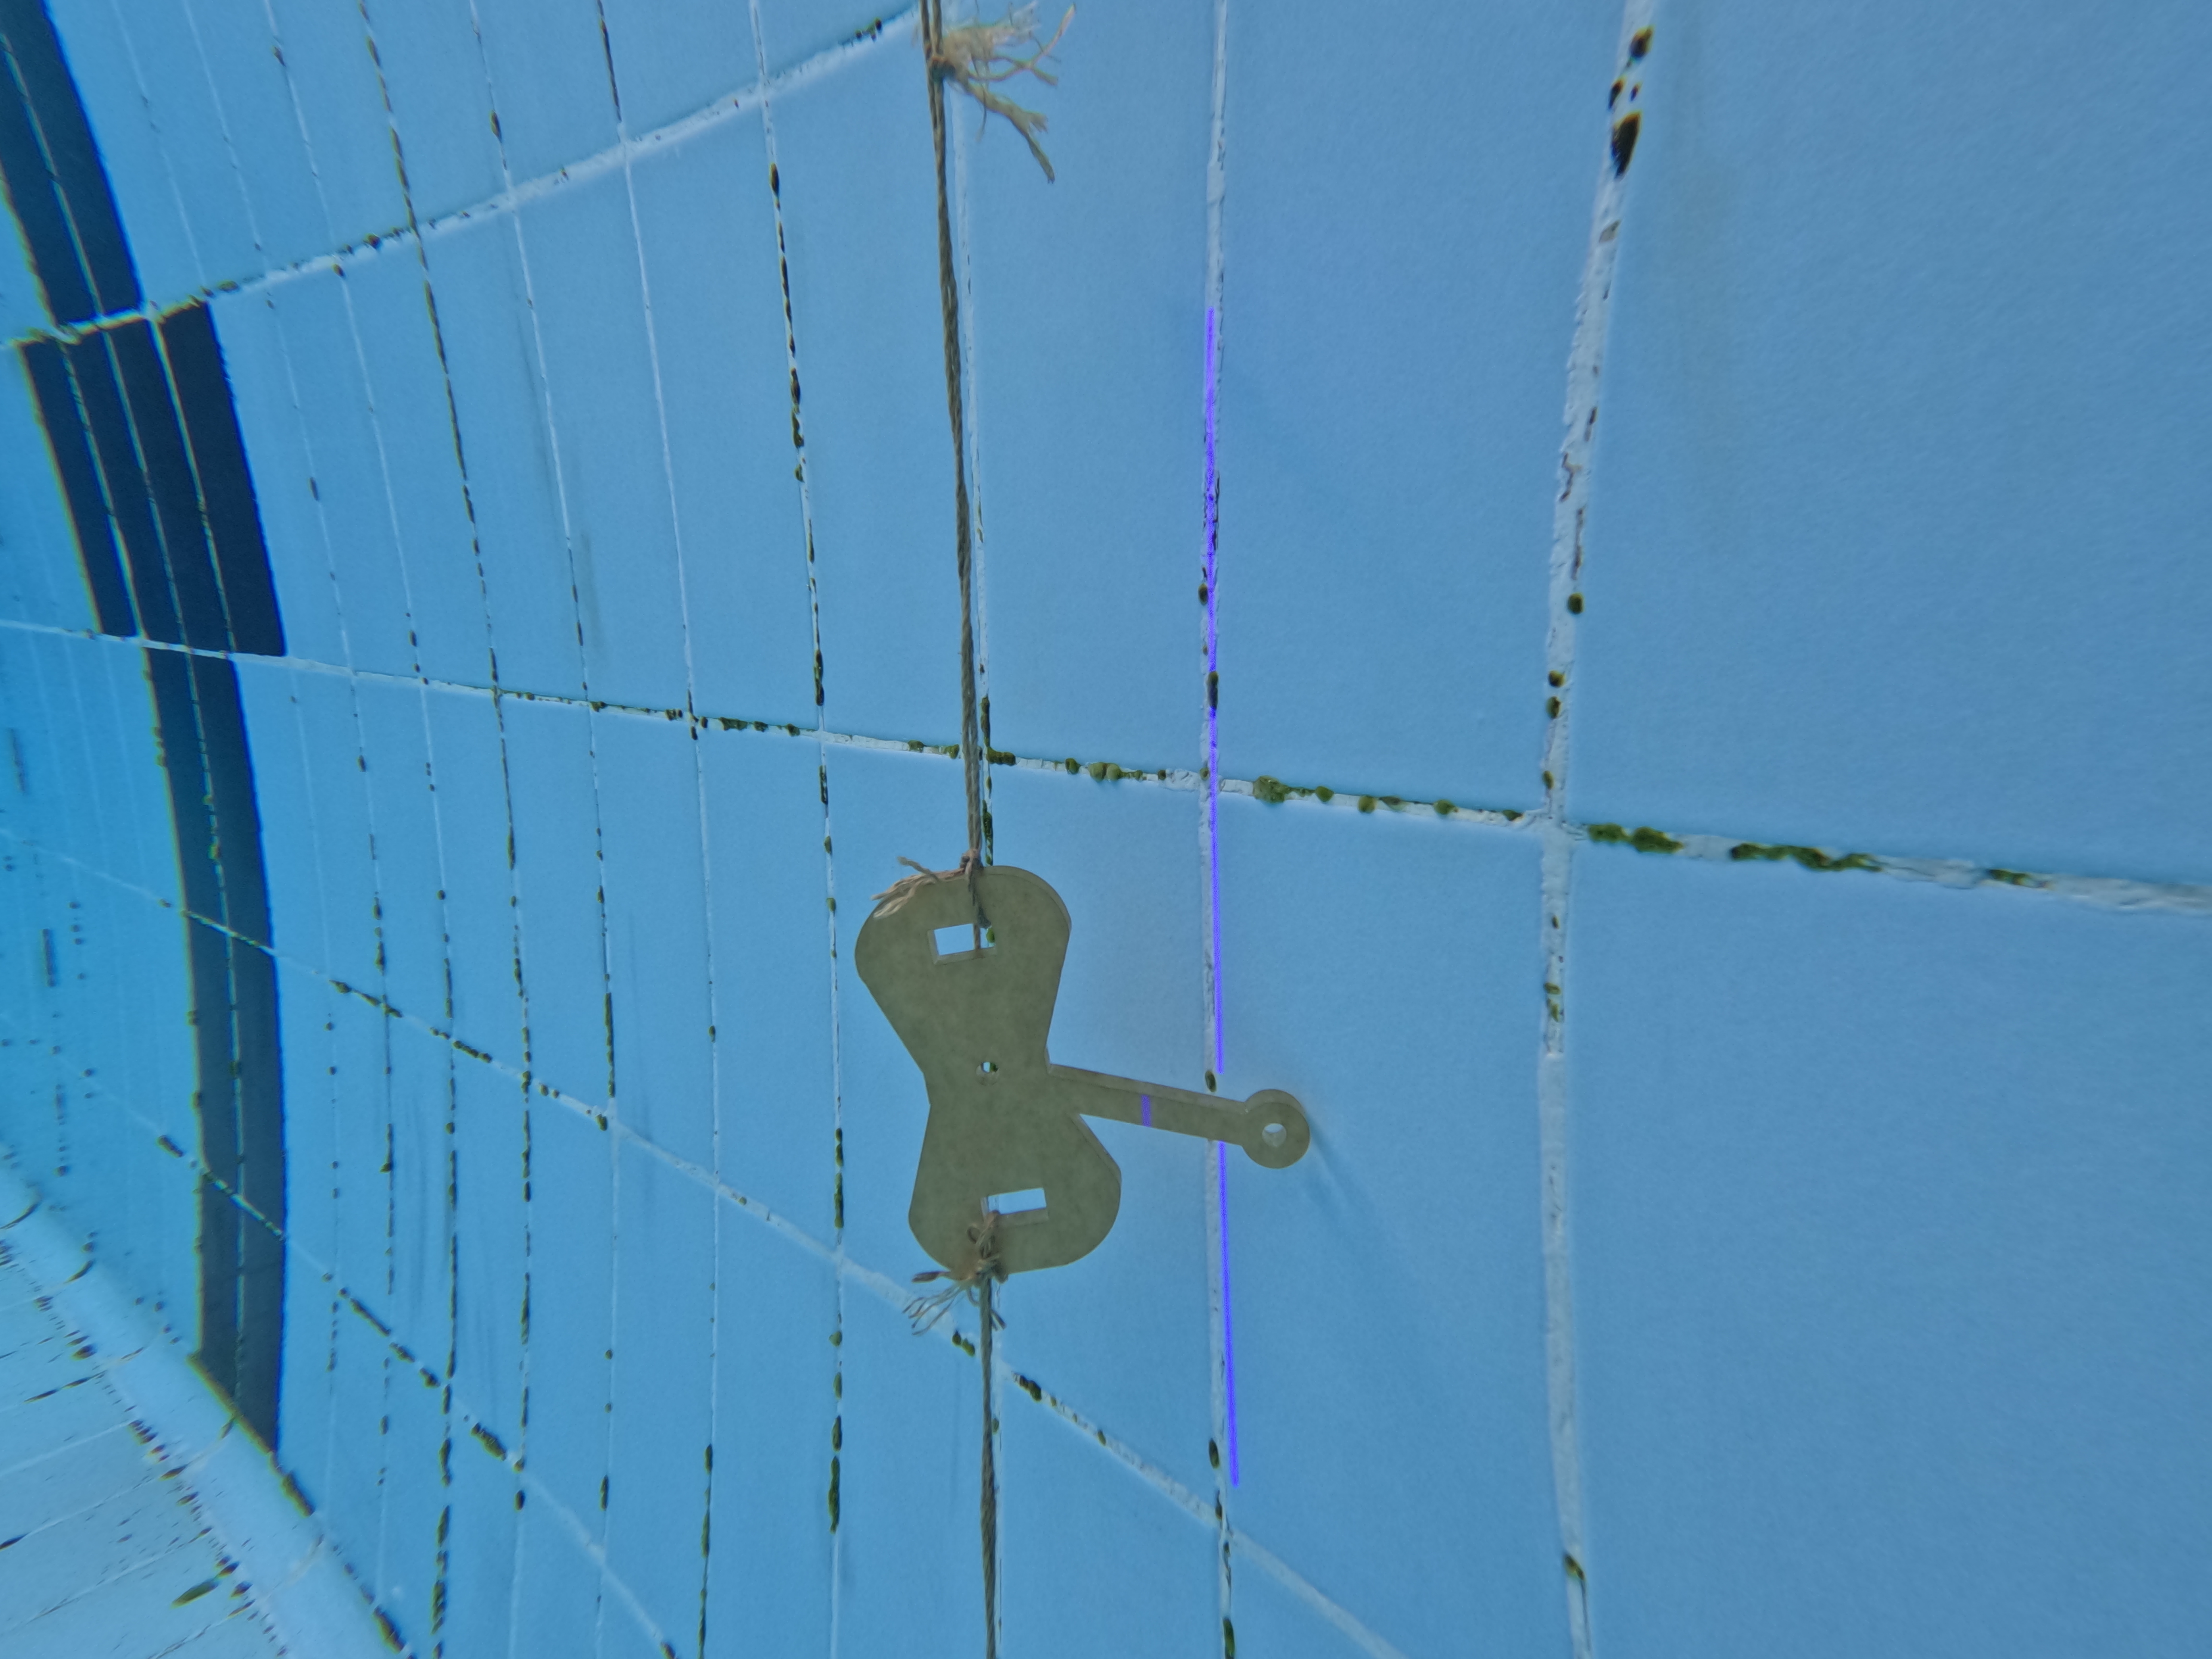

Supplement: Supplementary file 2066 [file G0050627.pdf › Level_3_2/G0050627.pdf]

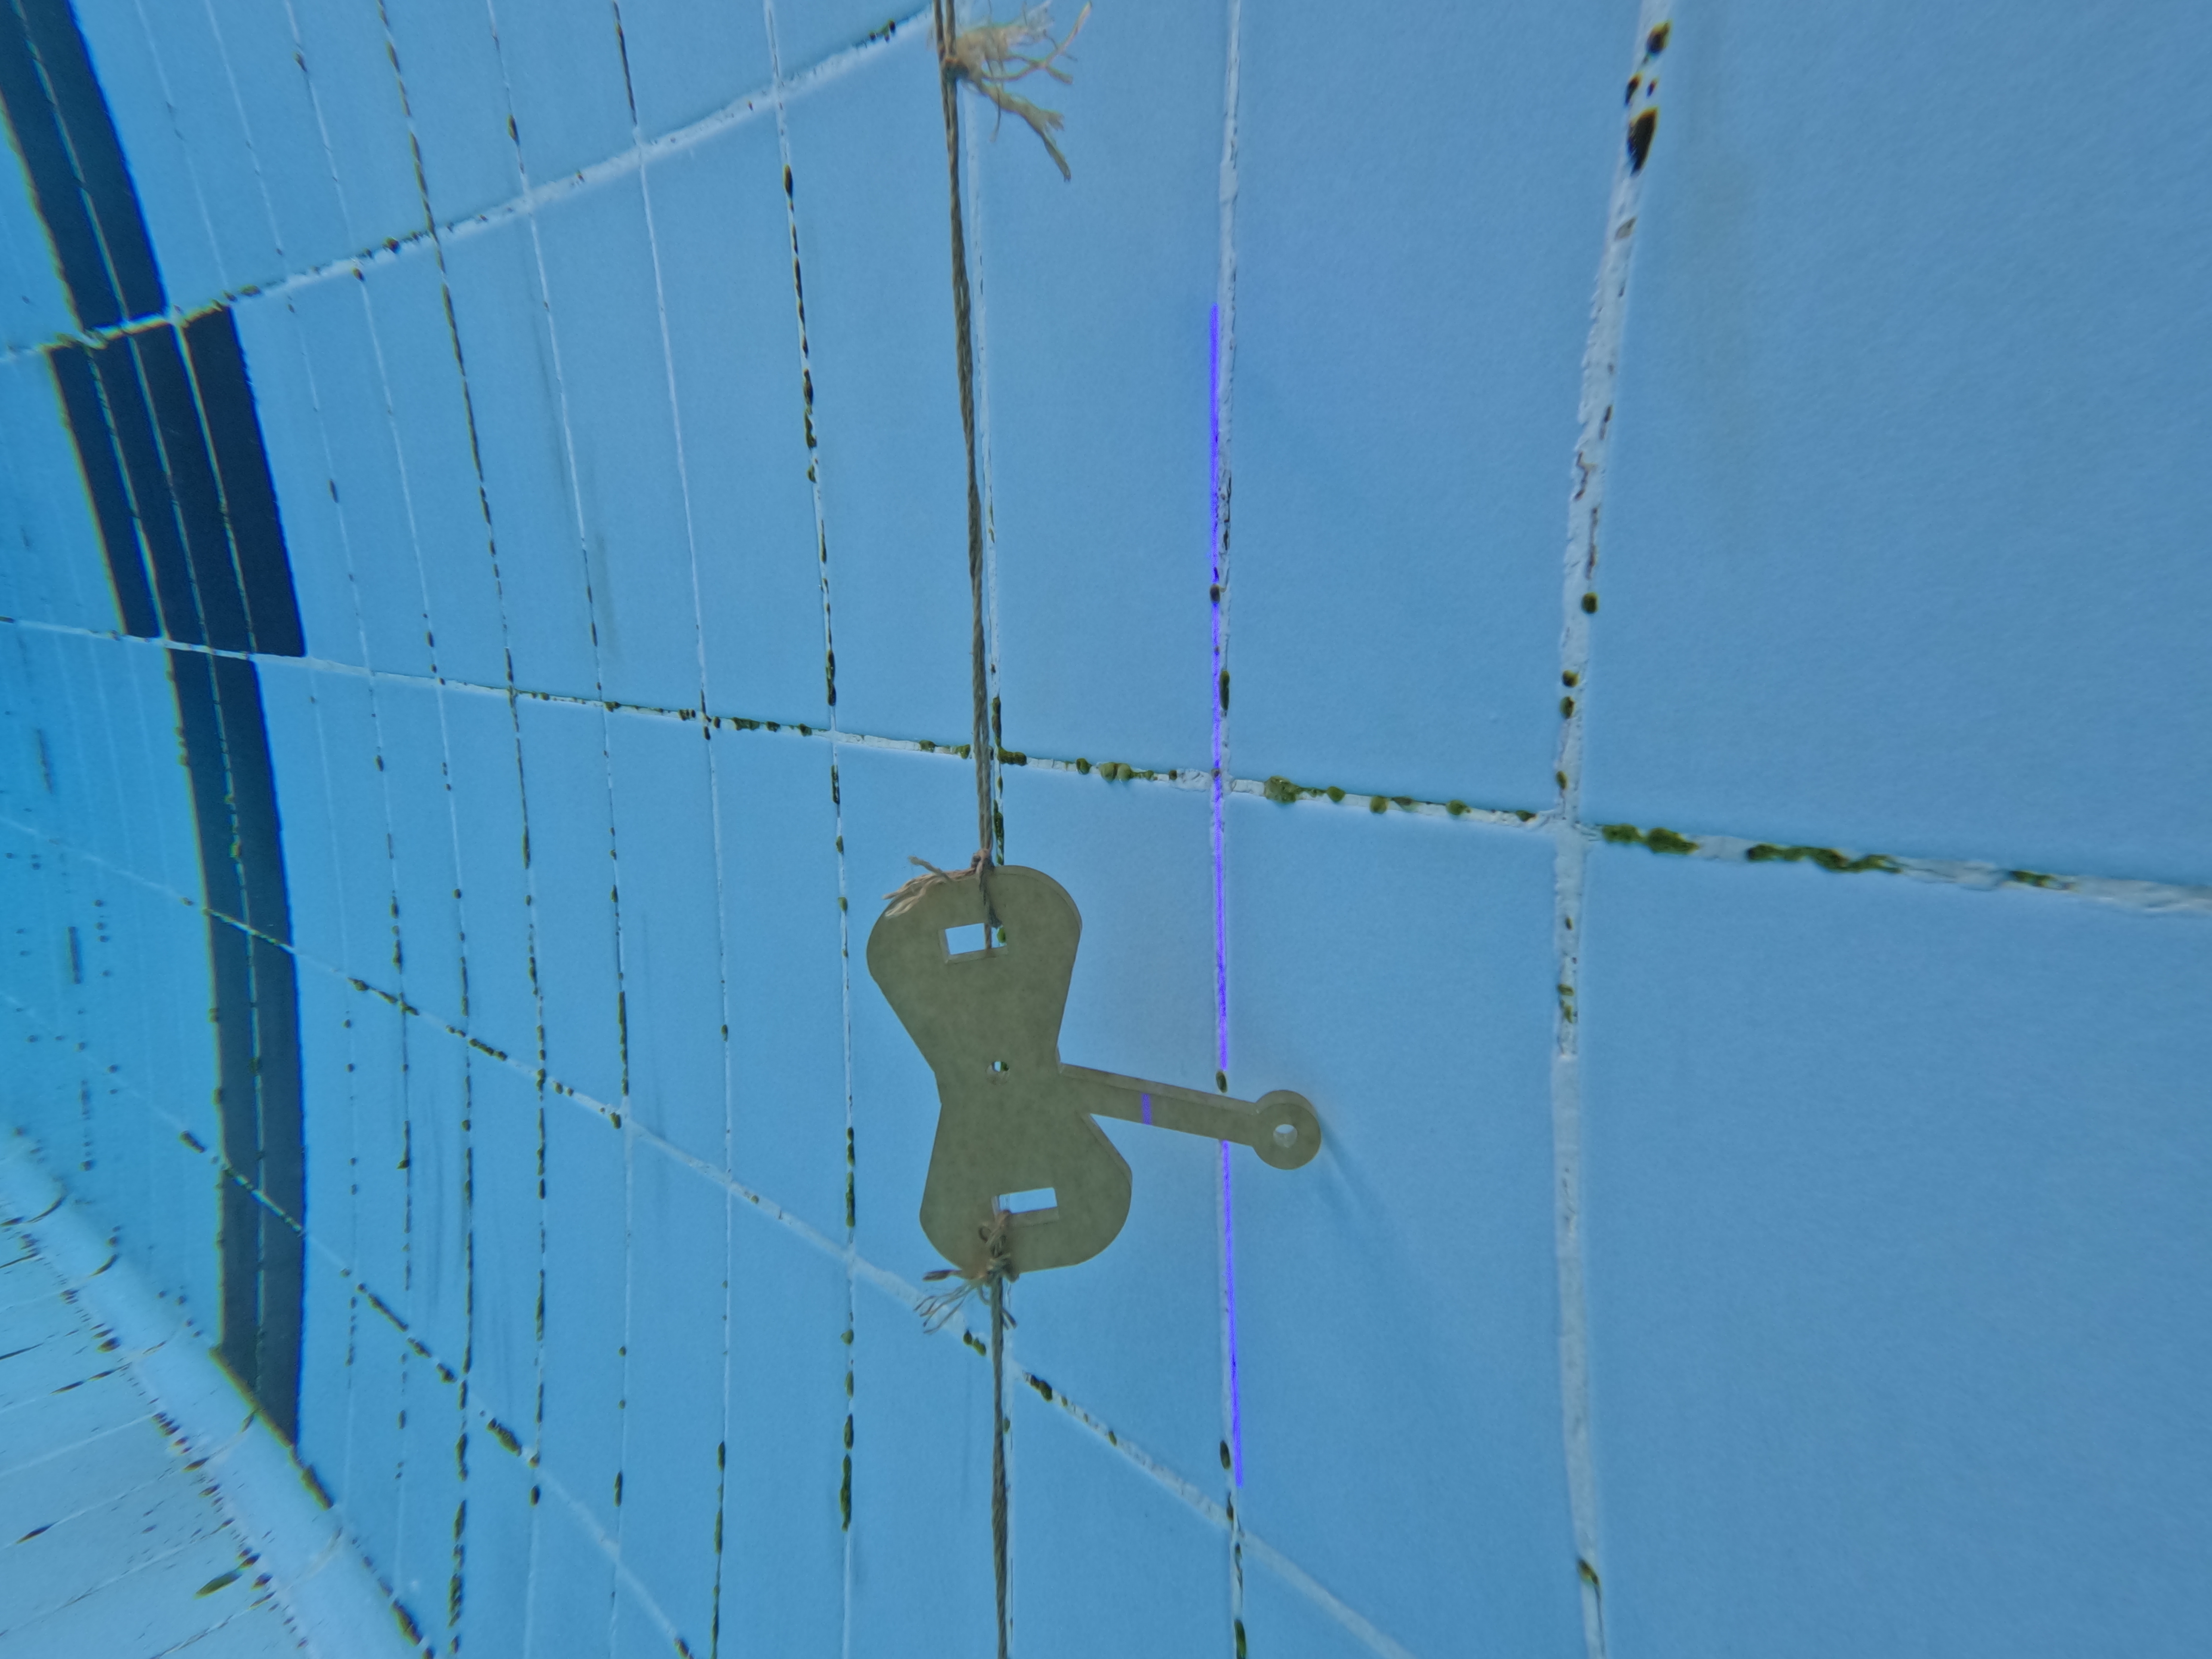

Supplement: Supplementary file 2067 [file G0050628.pdf › Level_3_2/G0050628.pdf]

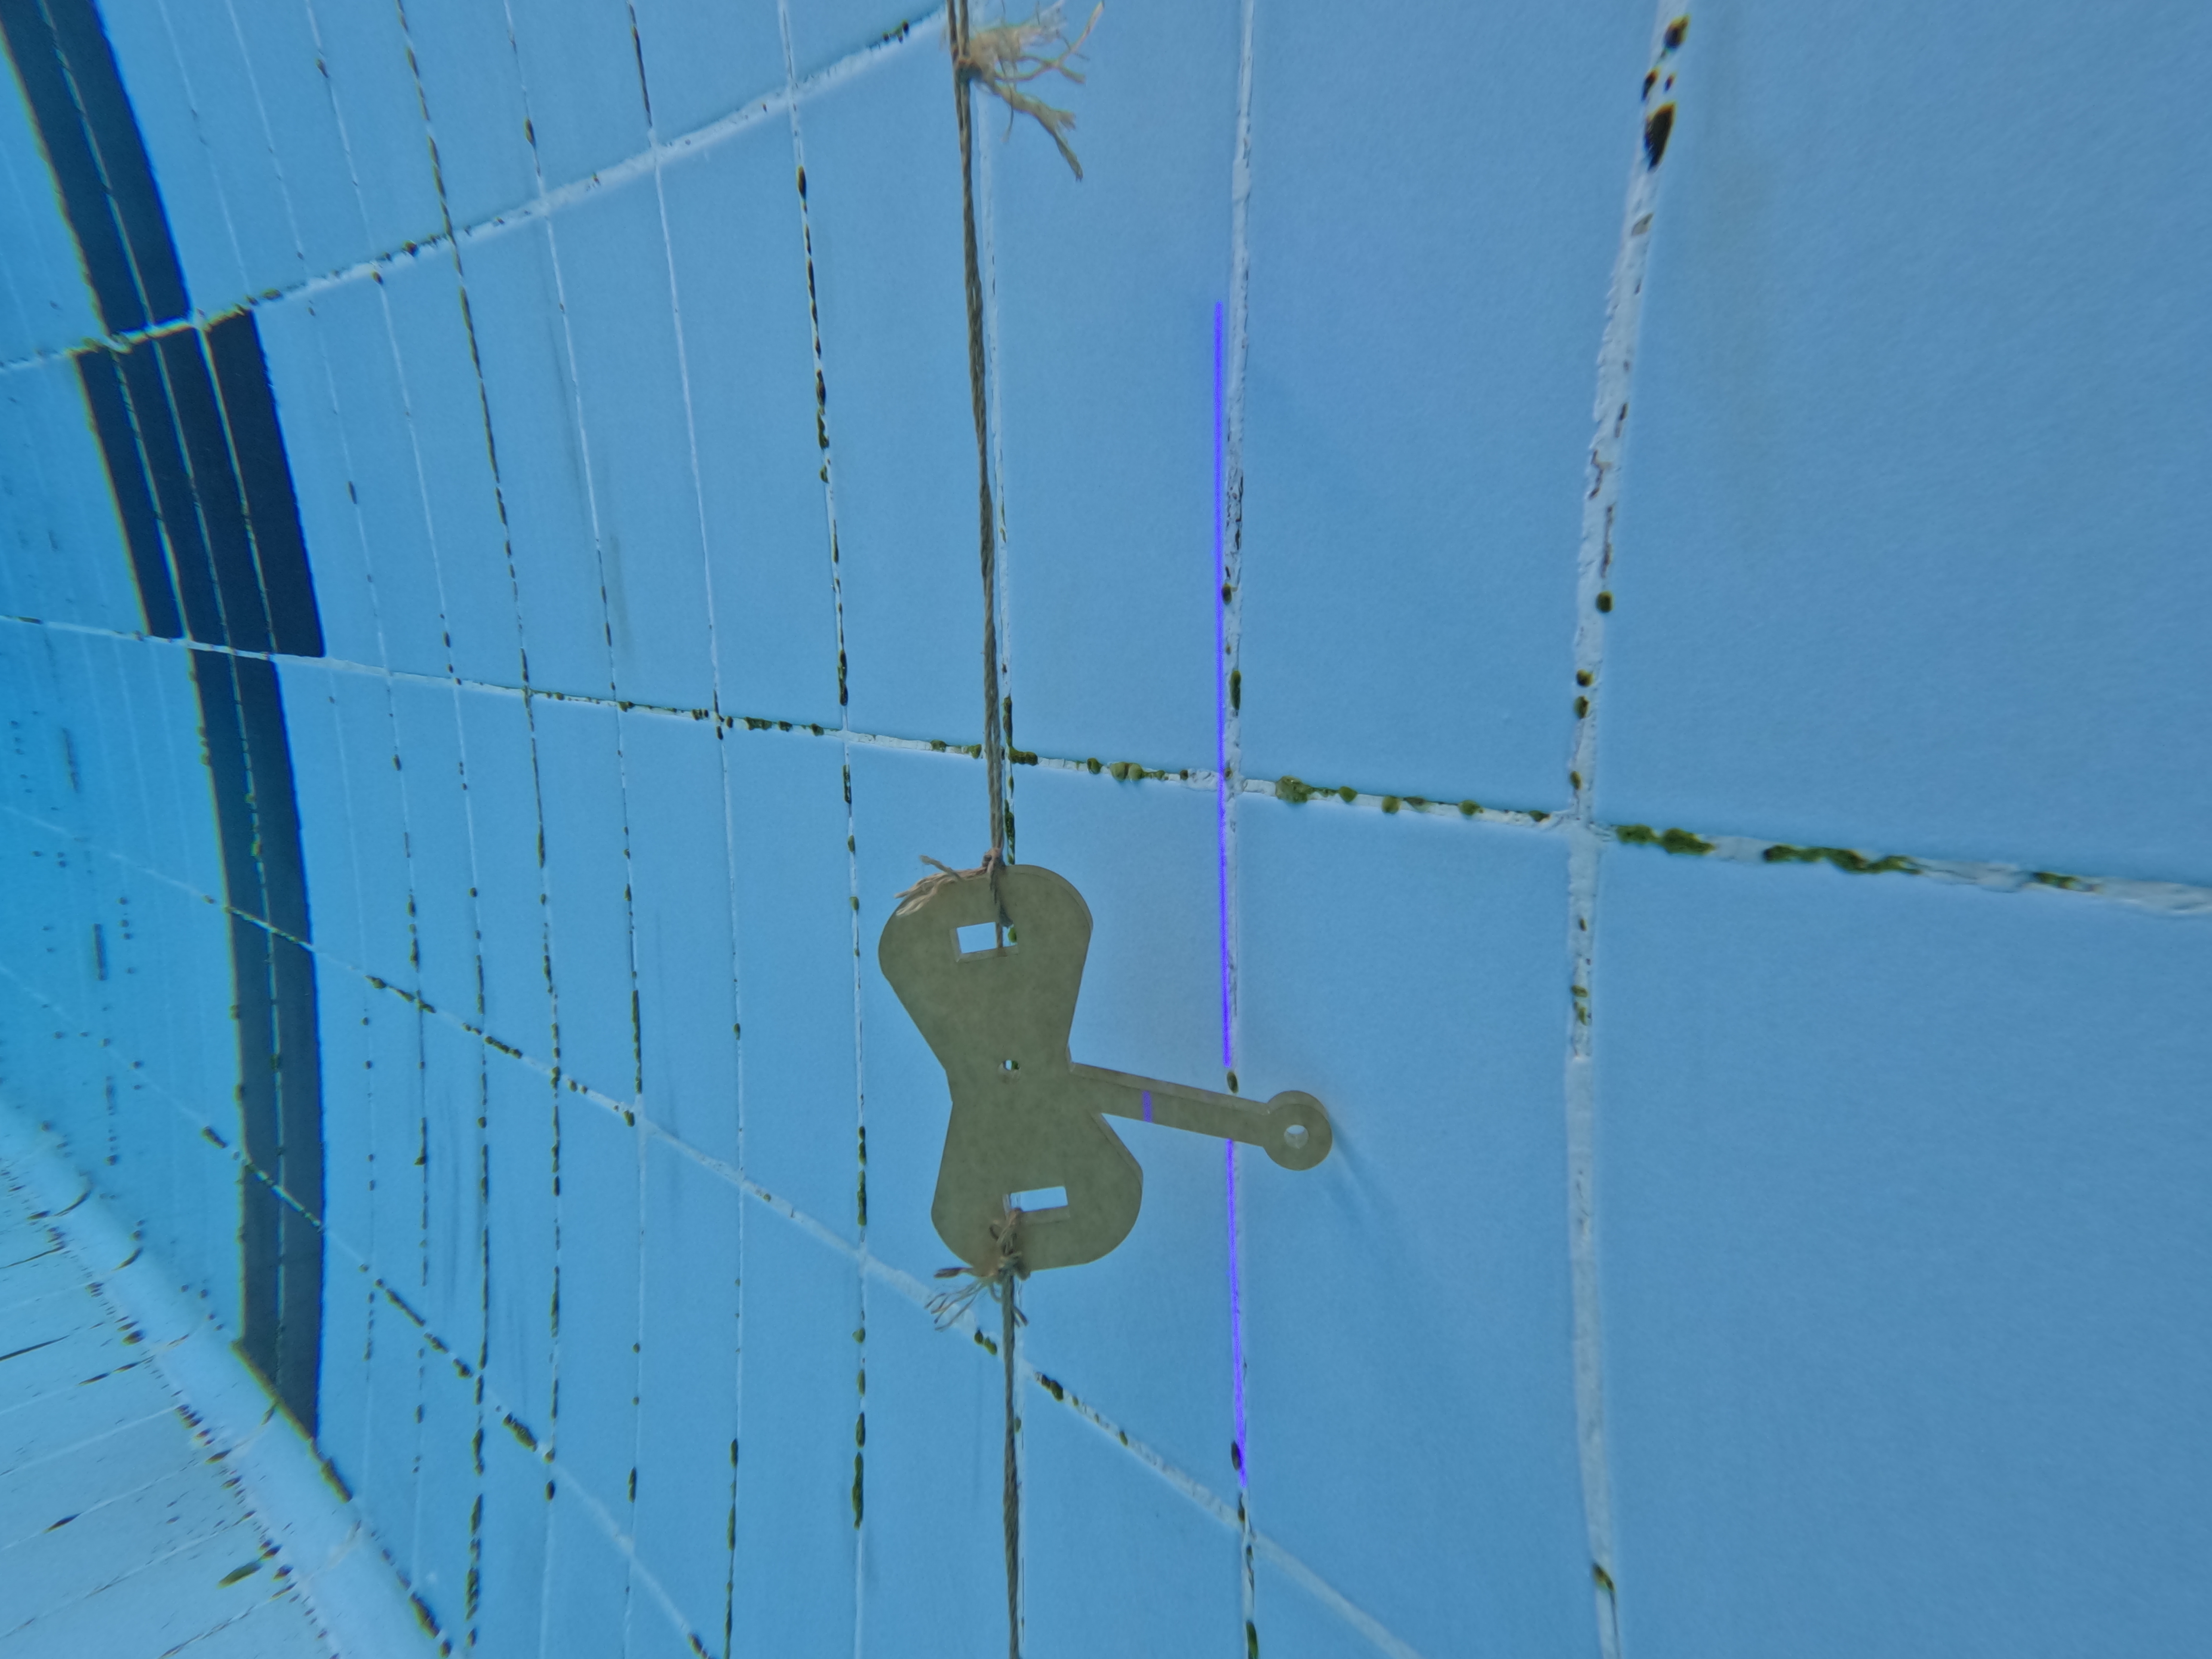

Supplement: Supplementary file 2068 [file G0050629.pdf › Level_3_2/G0050629.pdf]

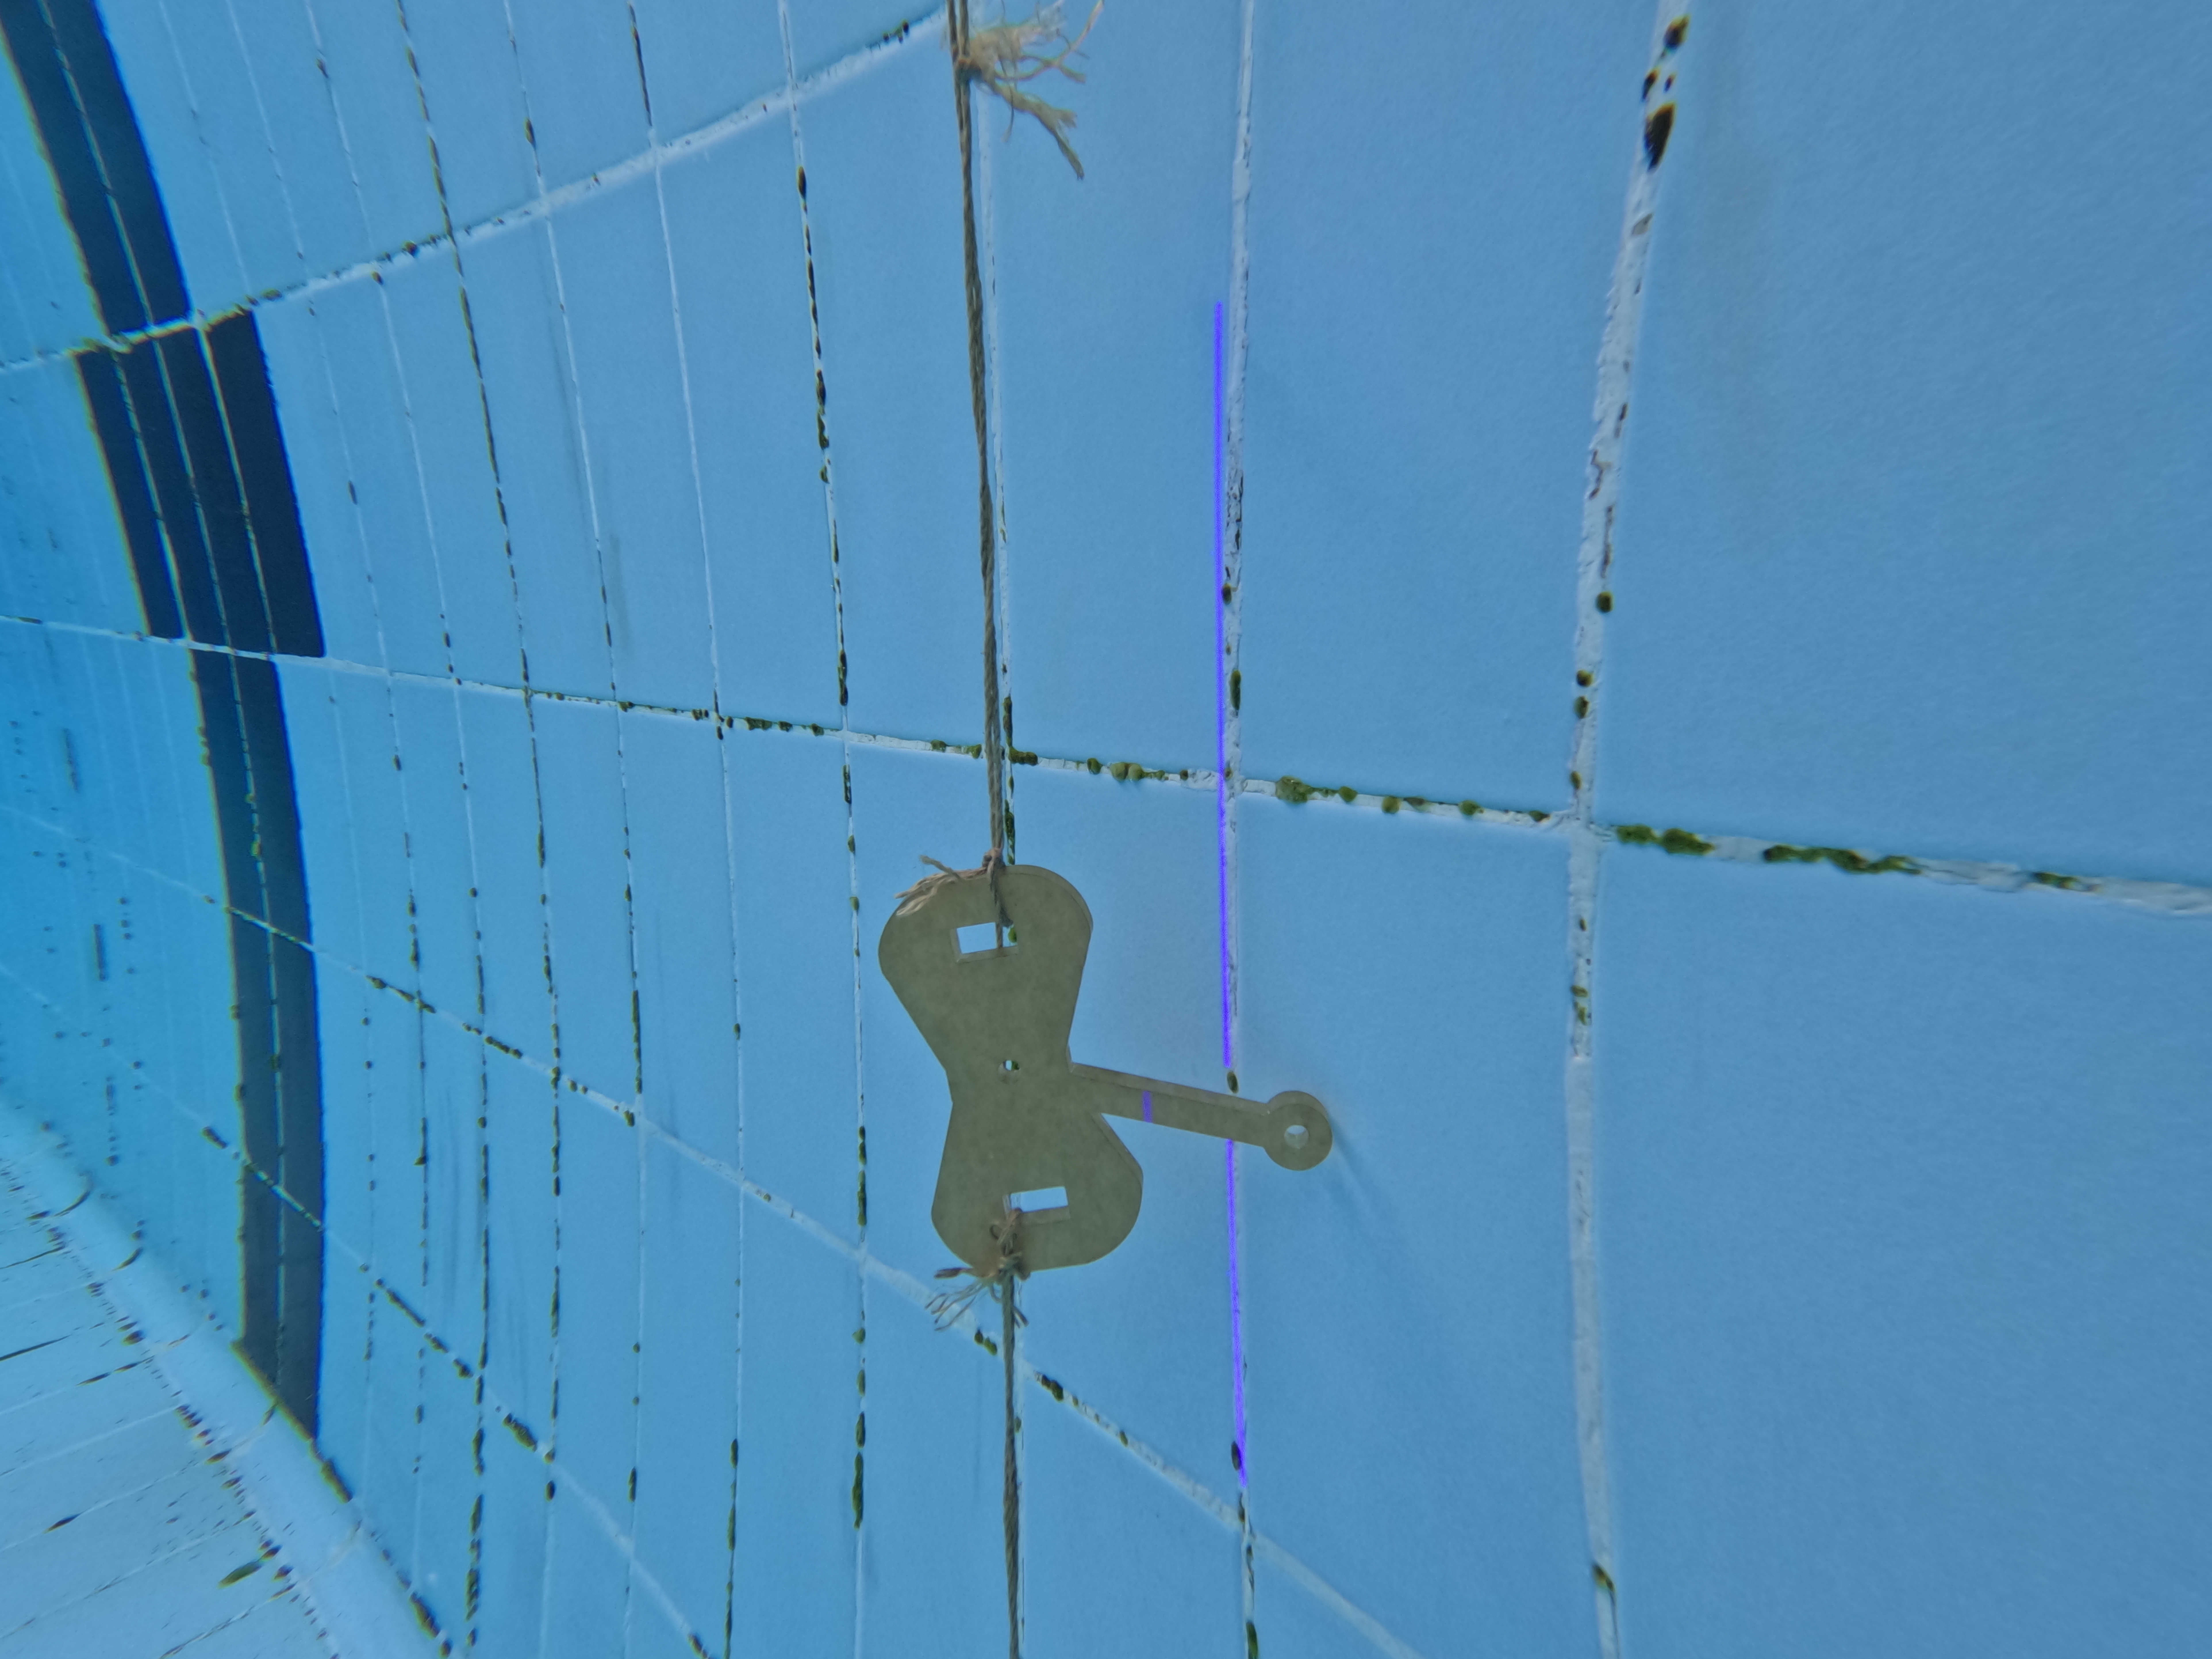

Supplement: Supplementary file 2069 [file G0050630.pdf › Level_3_2/G0050630.pdf]

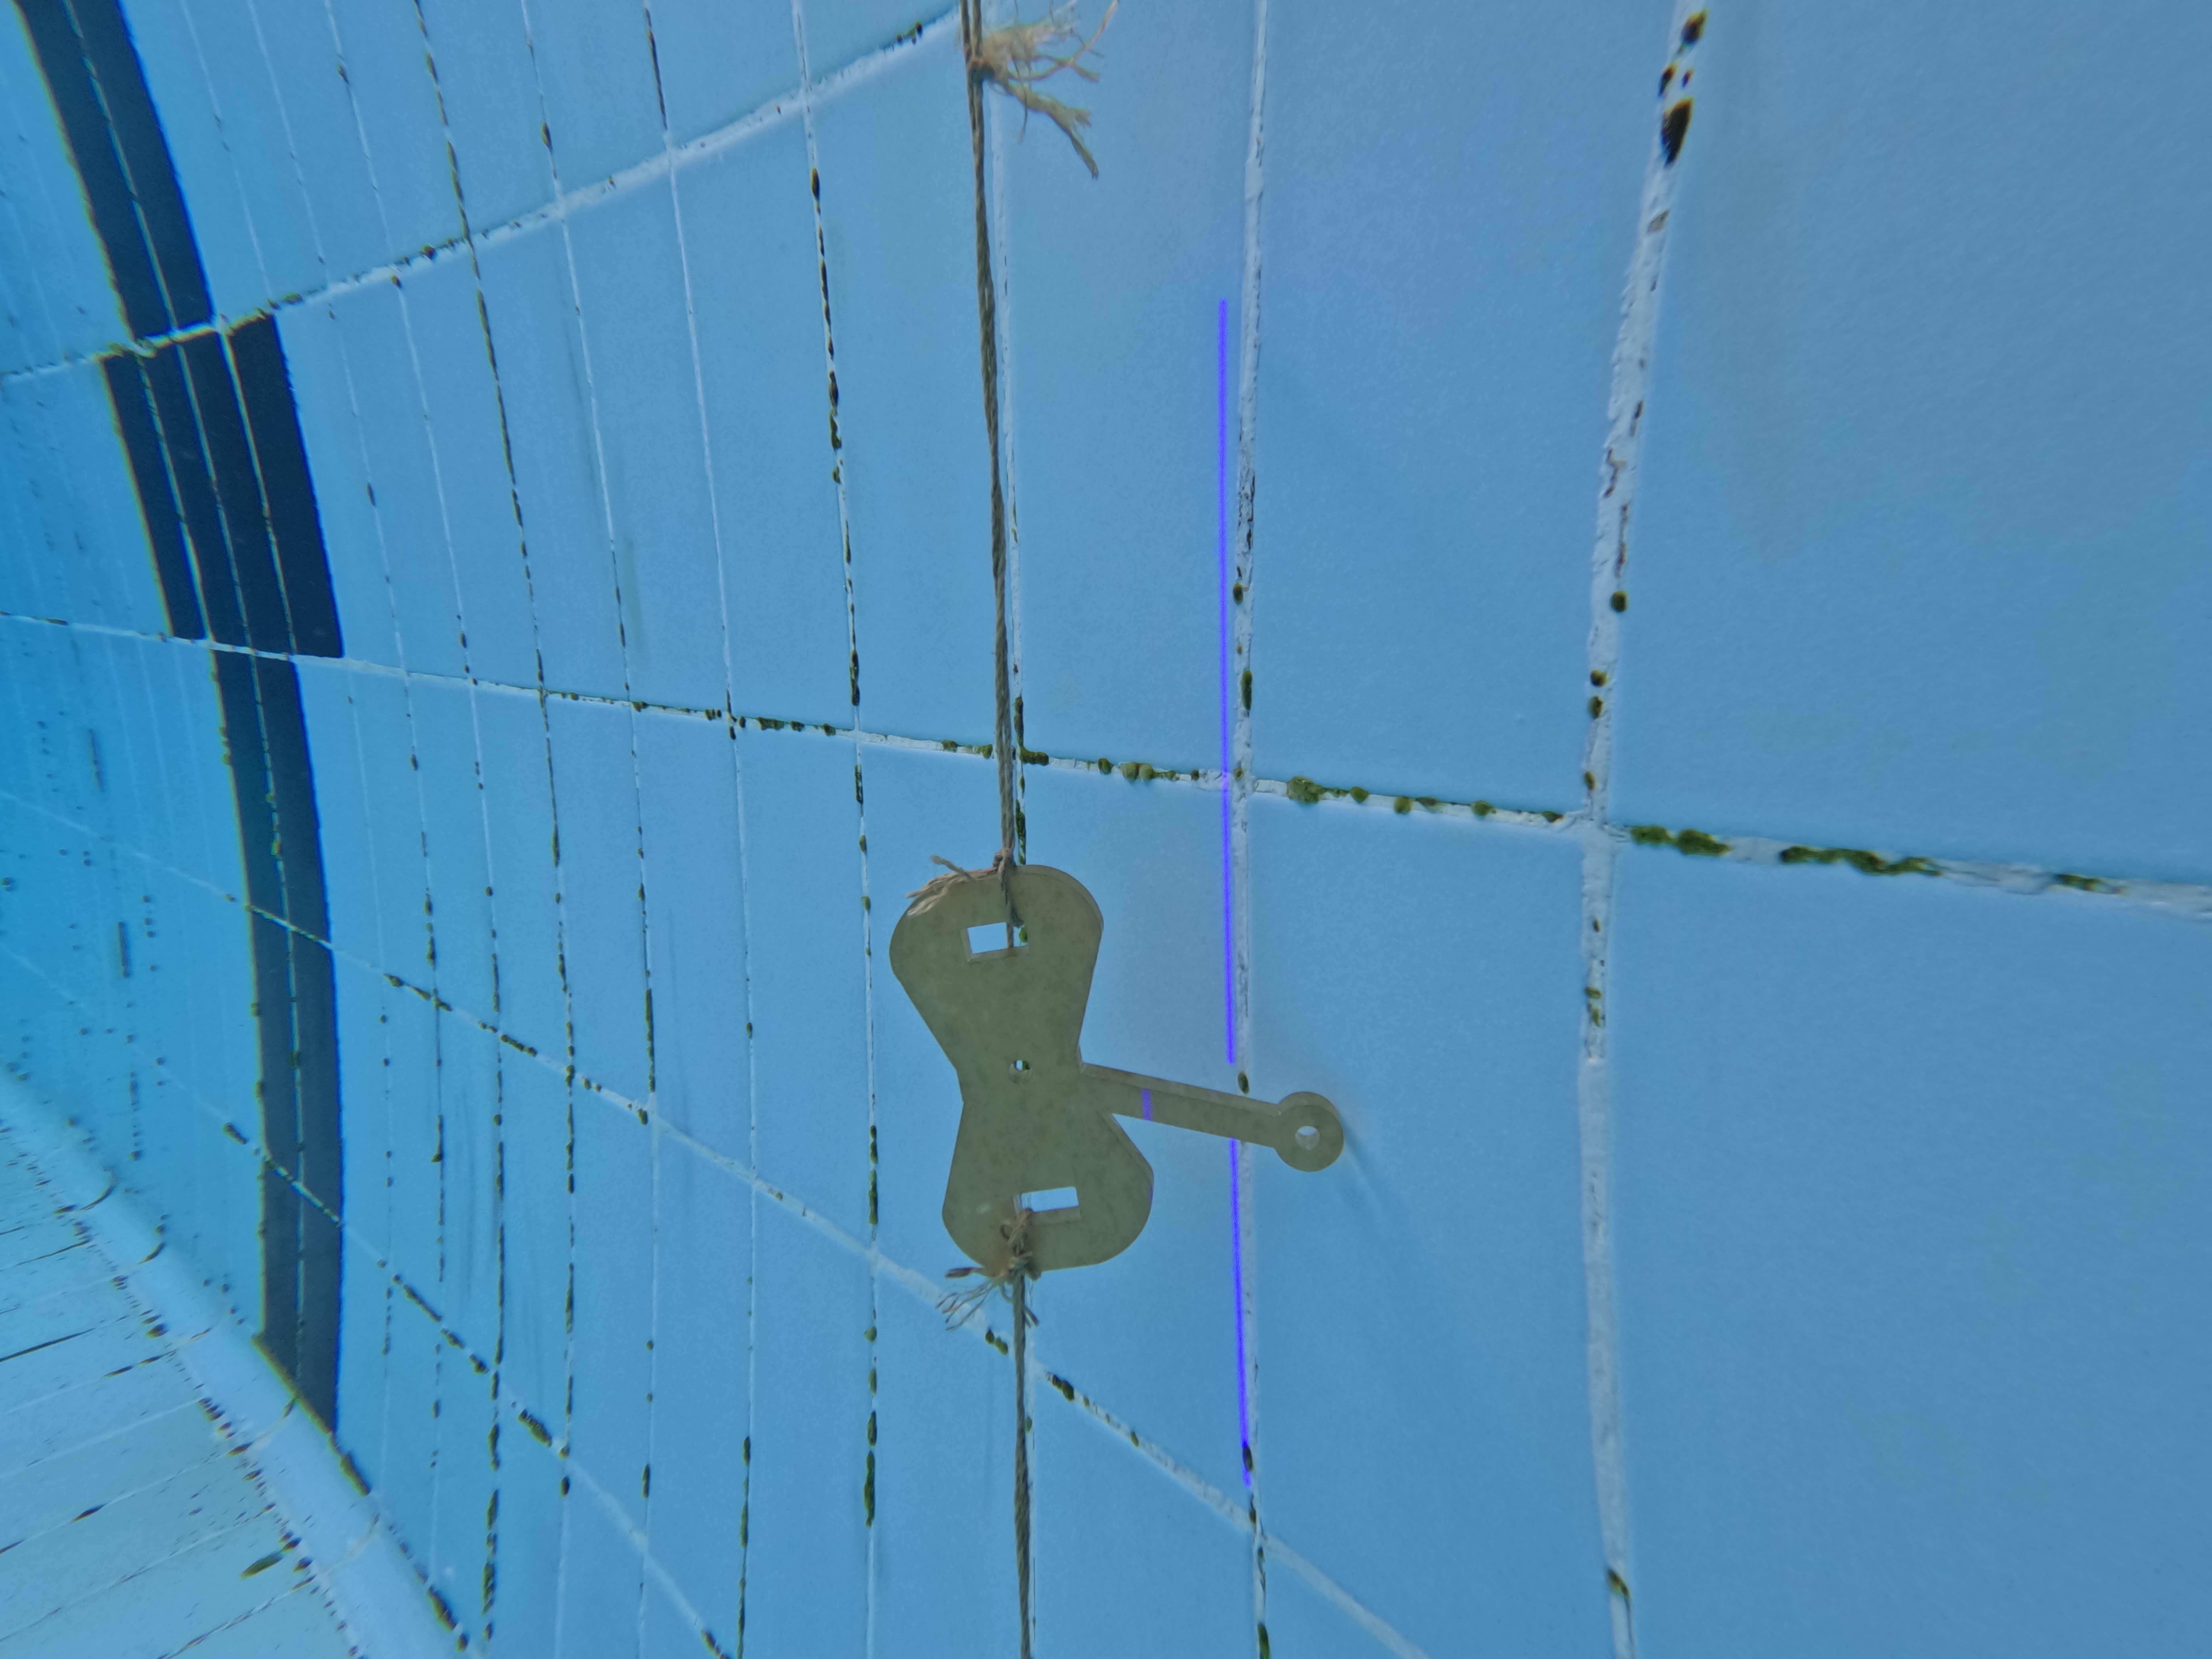

Supplement: Supplementary file 2070 [file G0050631.pdf › Level_3_2/G0050631.pdf]

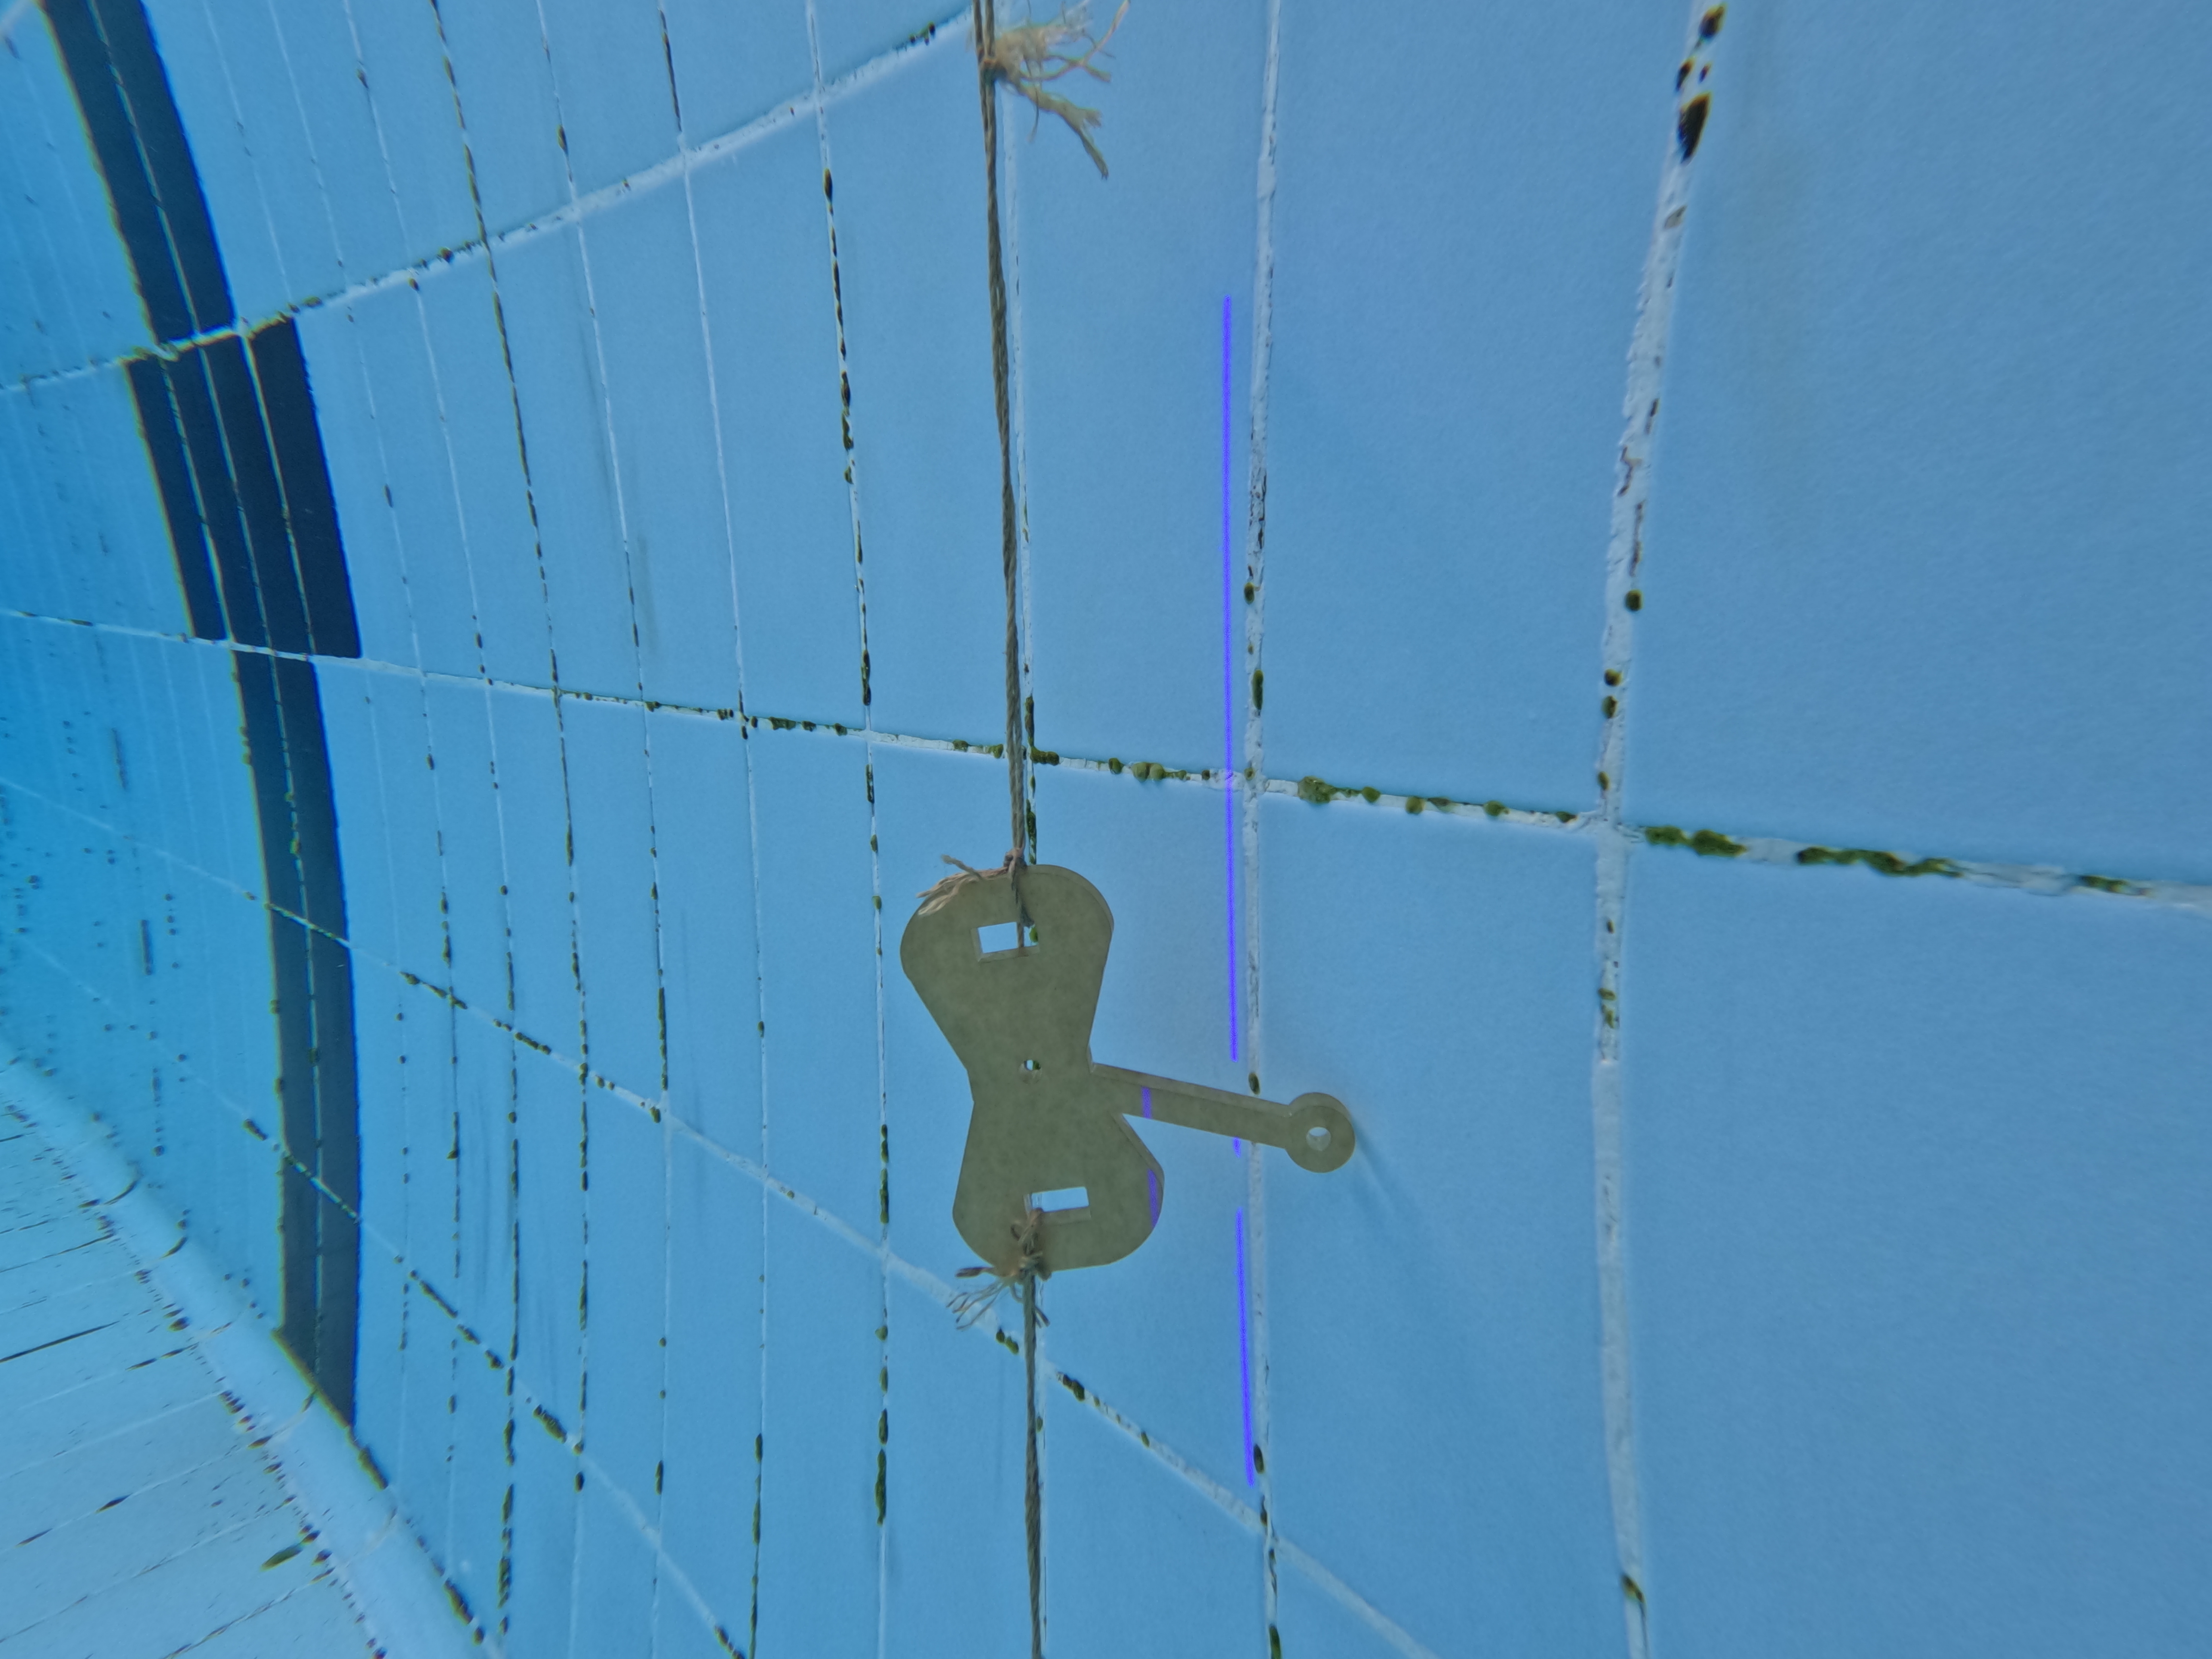

Supplement: Supplementary file 2071 [file G0050632.pdf › Level_3_2/G0050632.pdf]

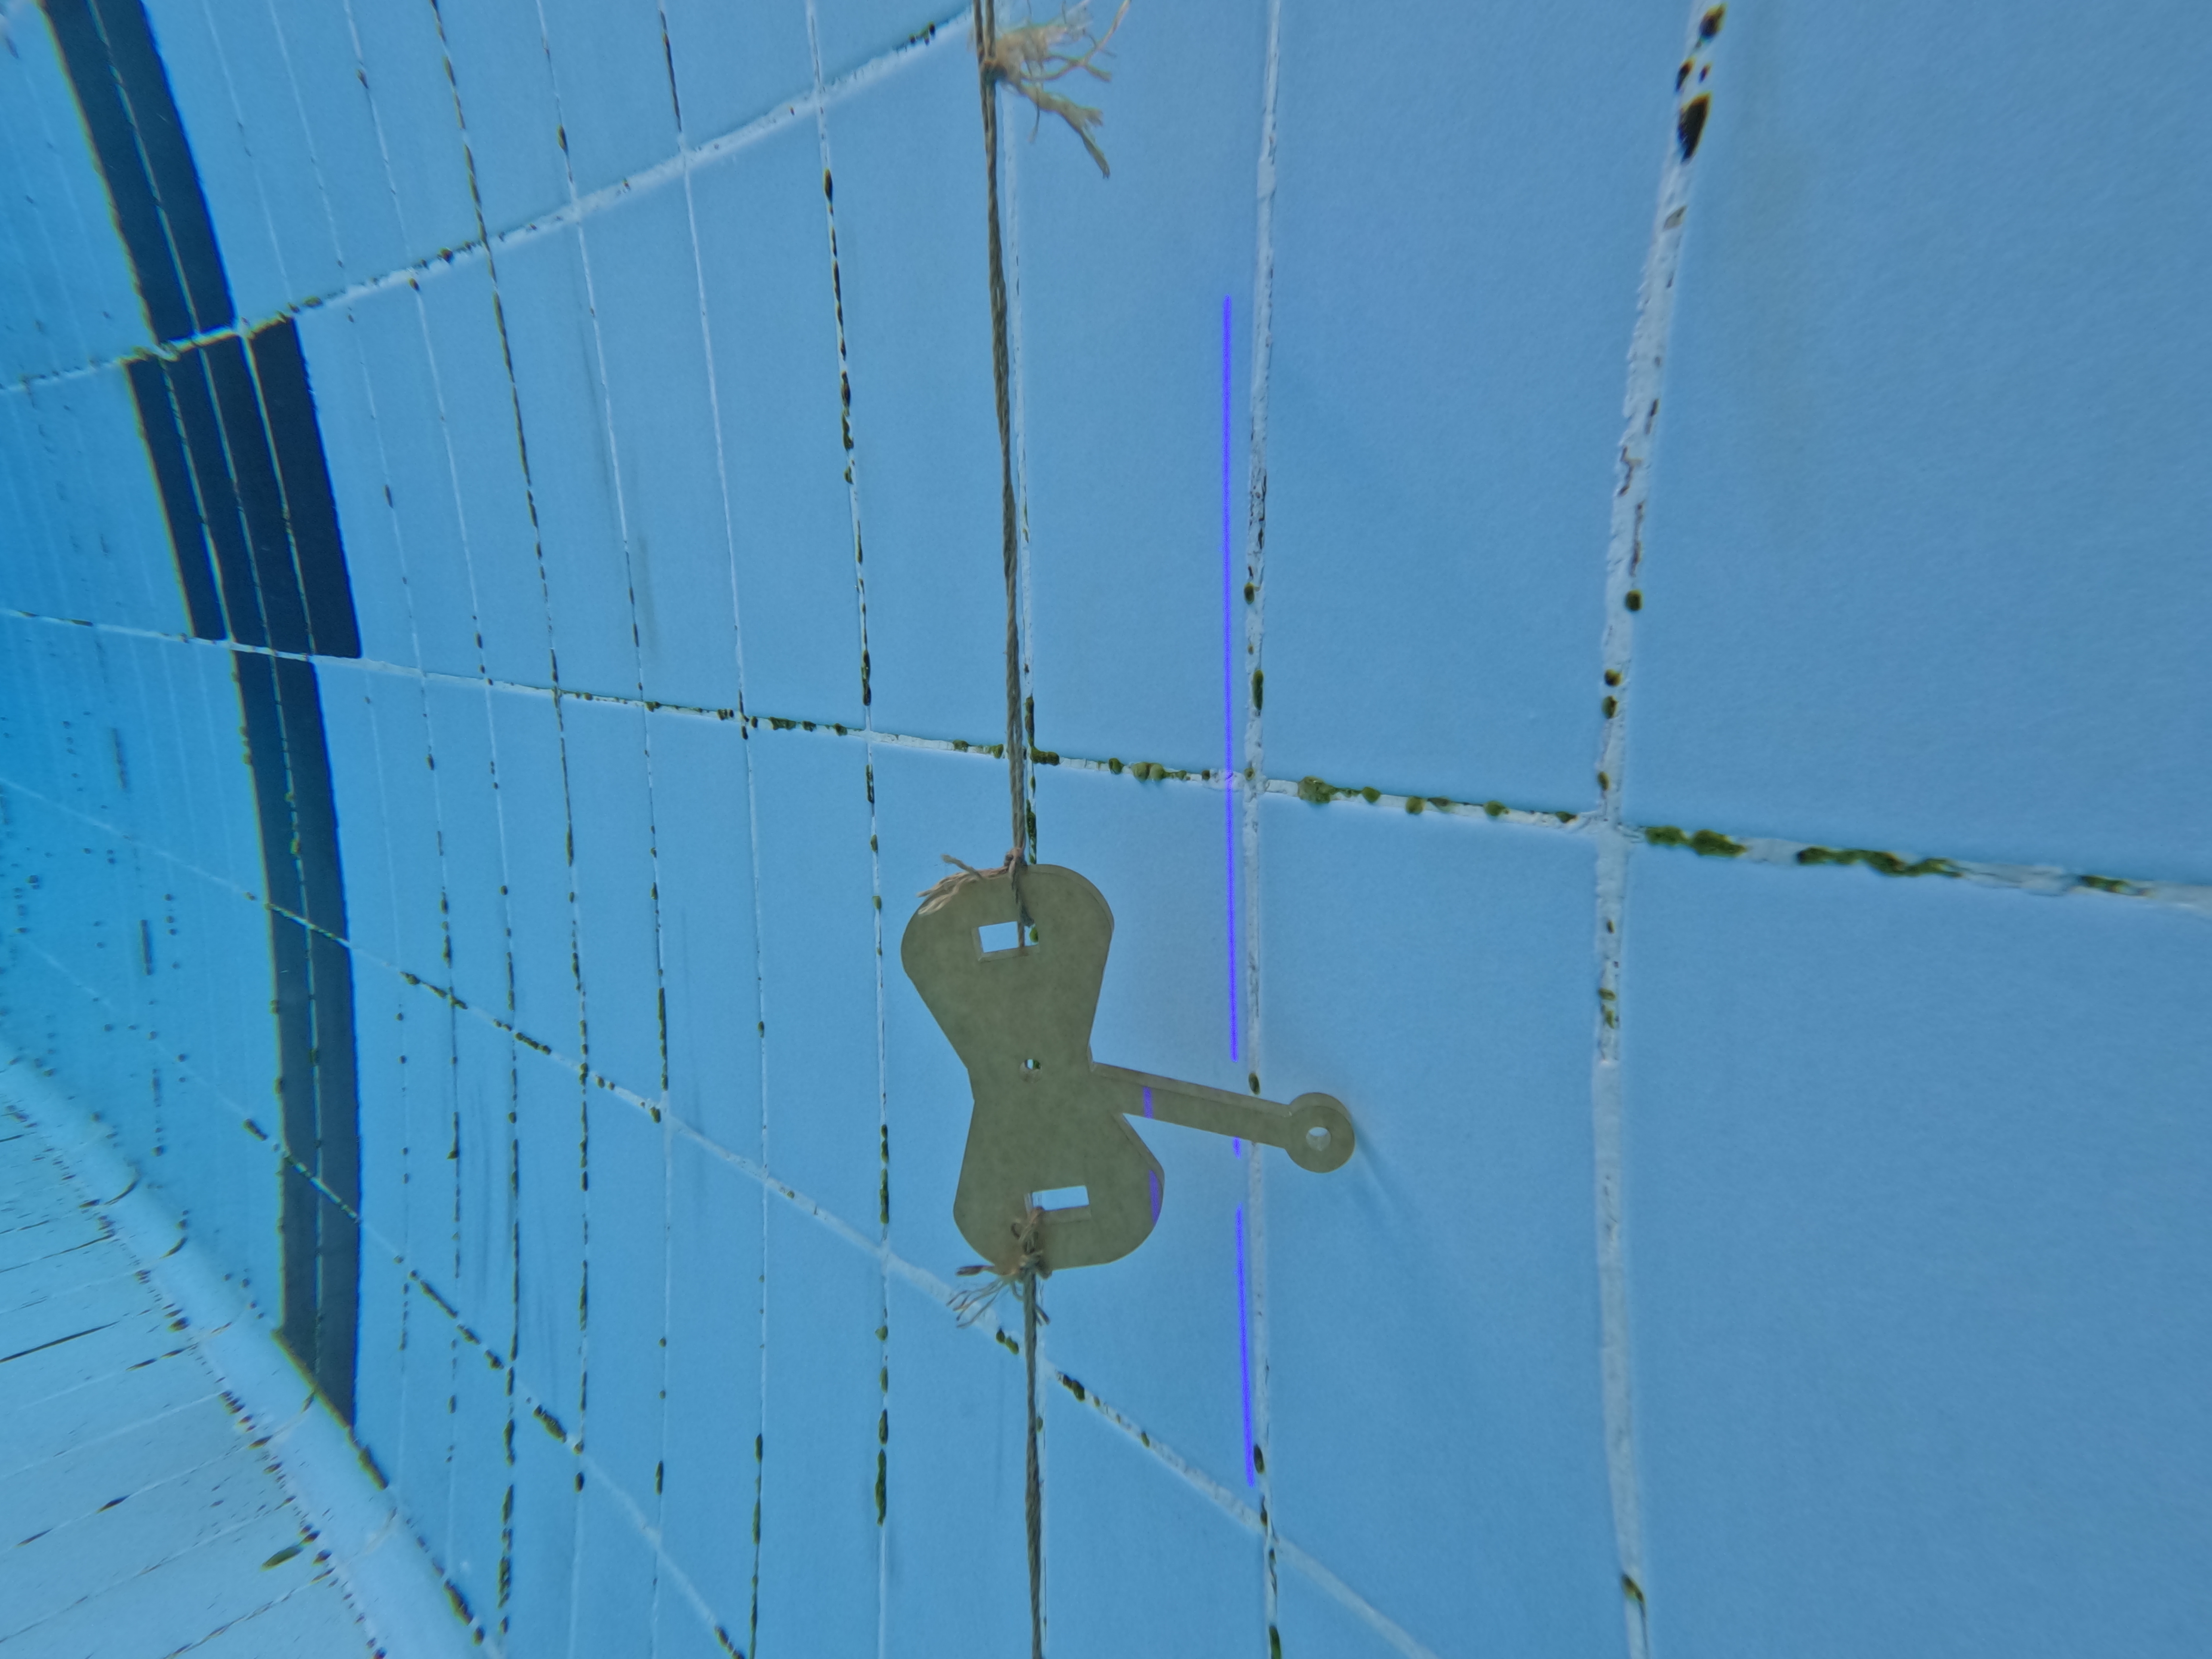

Supplement: Supplementary file 2072 [file G0050633.pdf › Level_3_2/G0050633.pdf]

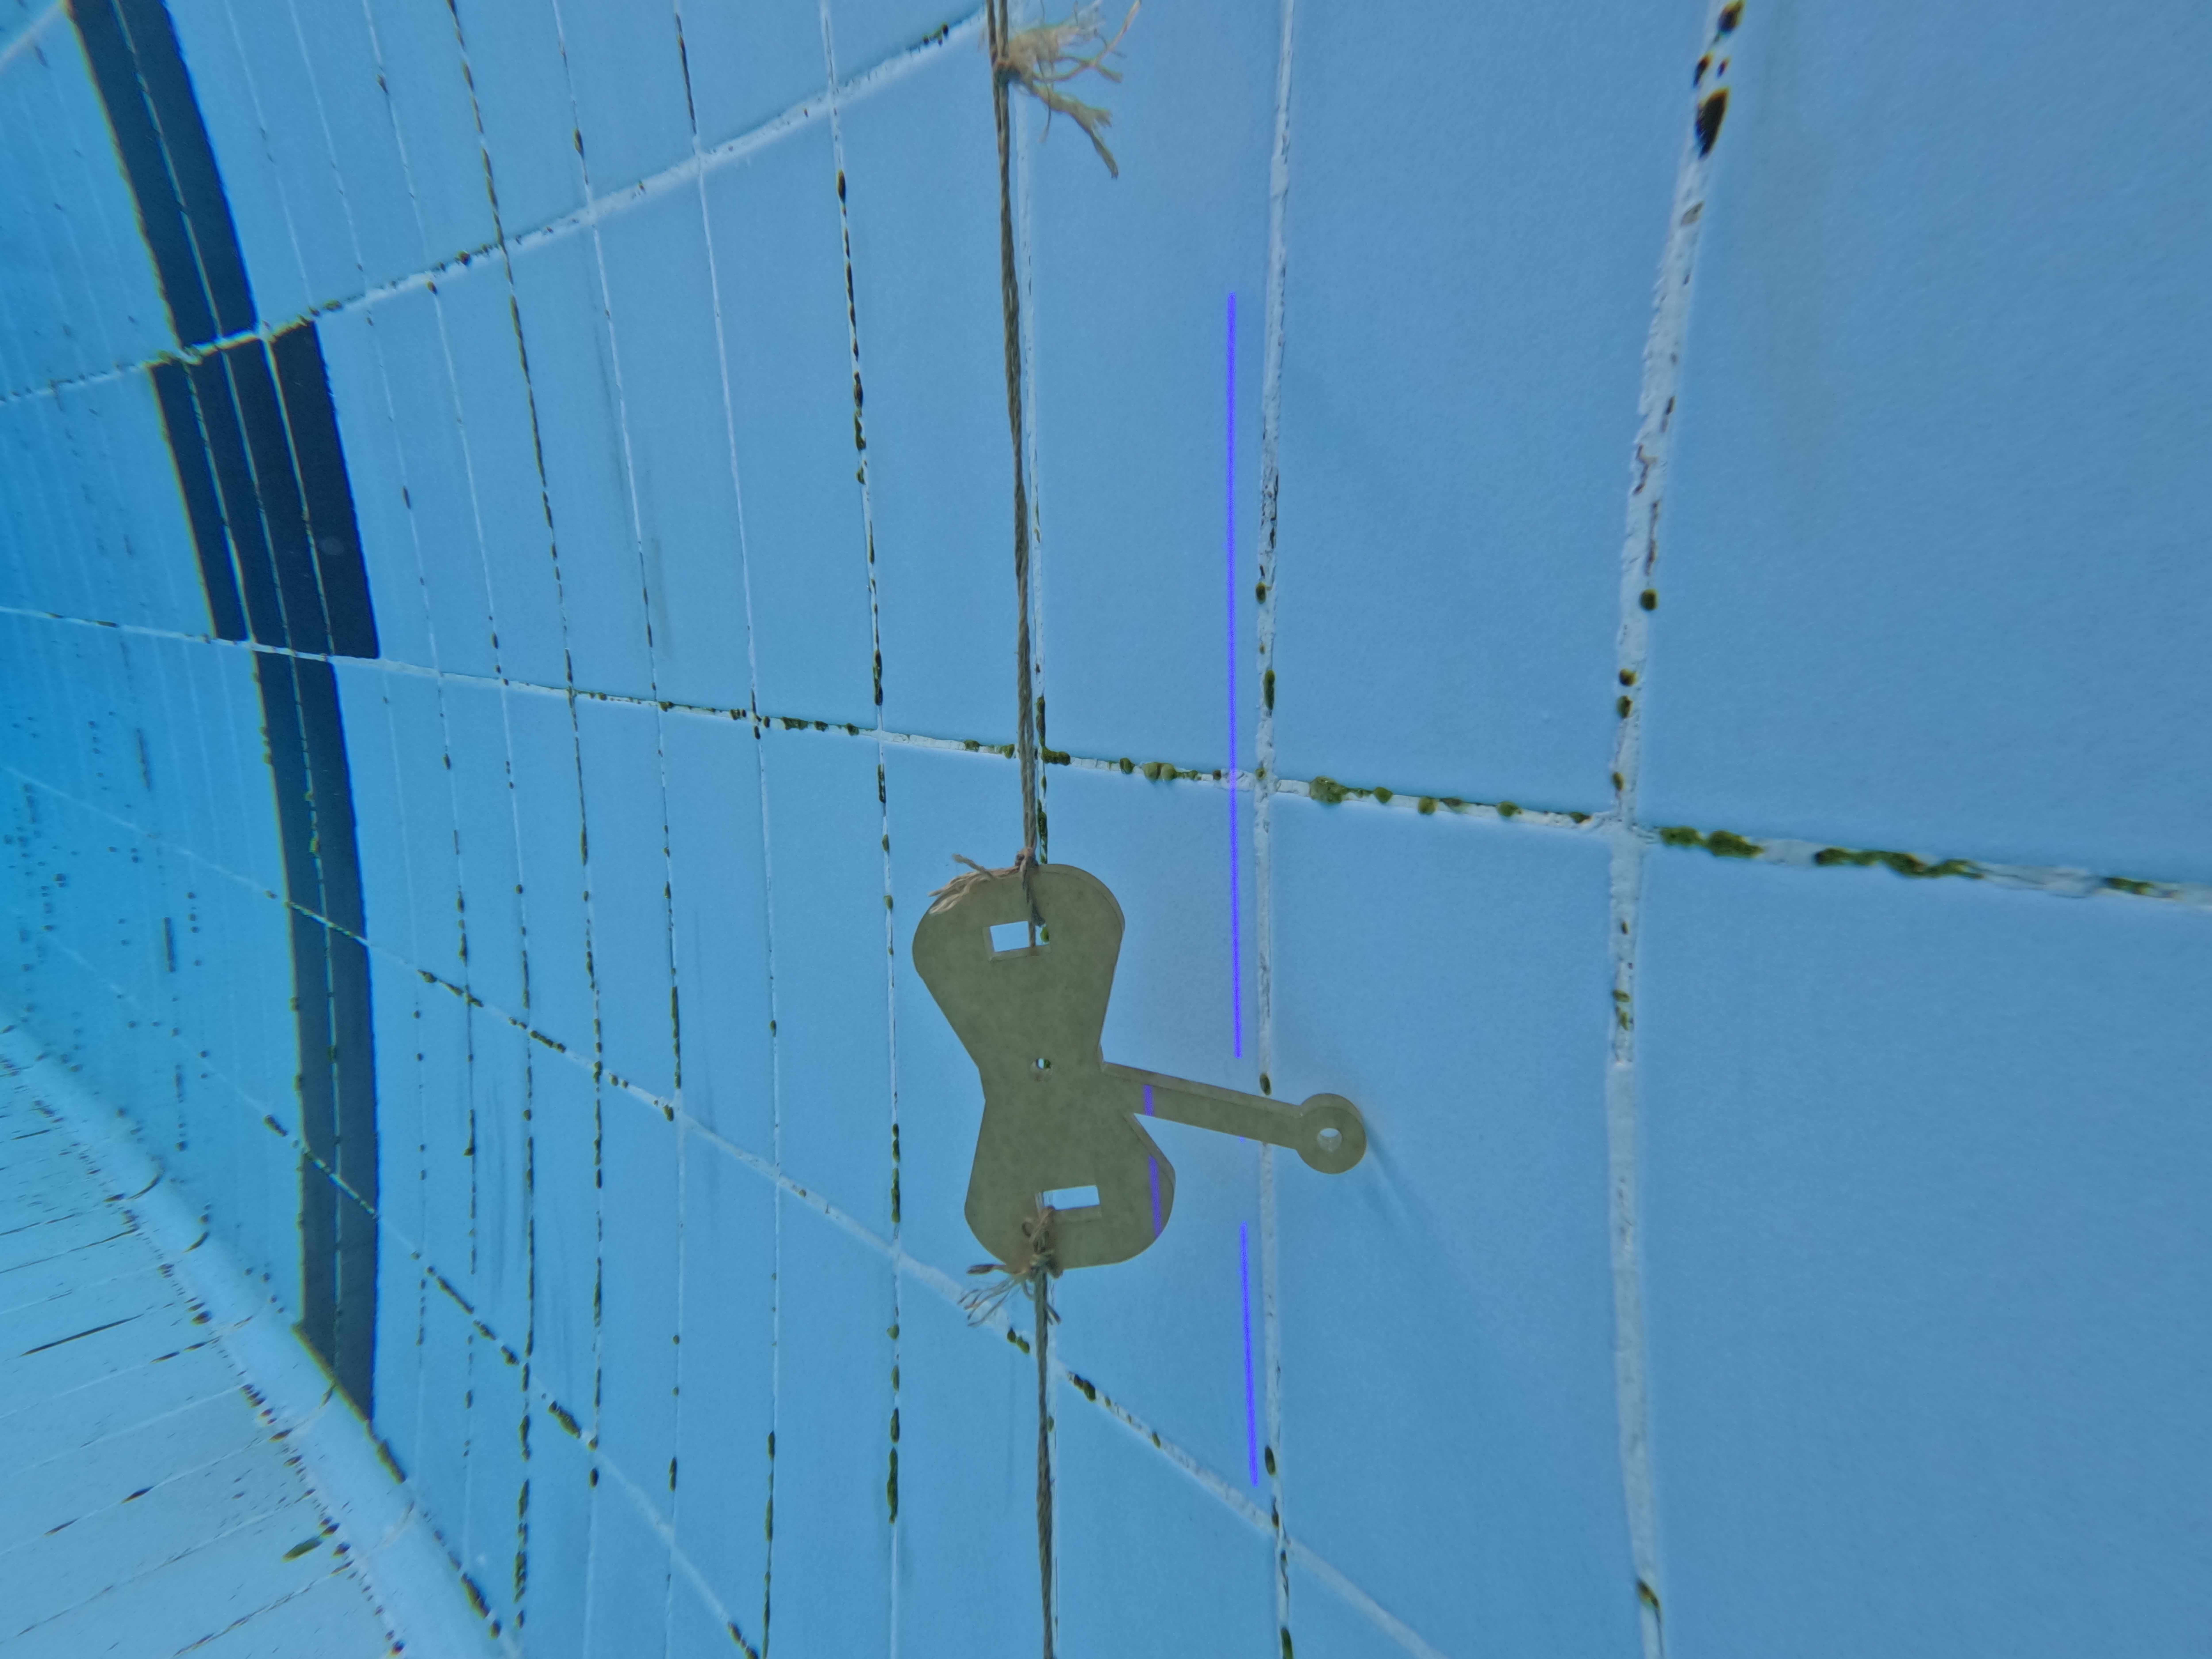

Supplement: Supplementary file 2073 [file G0050634.pdf › Level_3_2/G0050634.pdf]

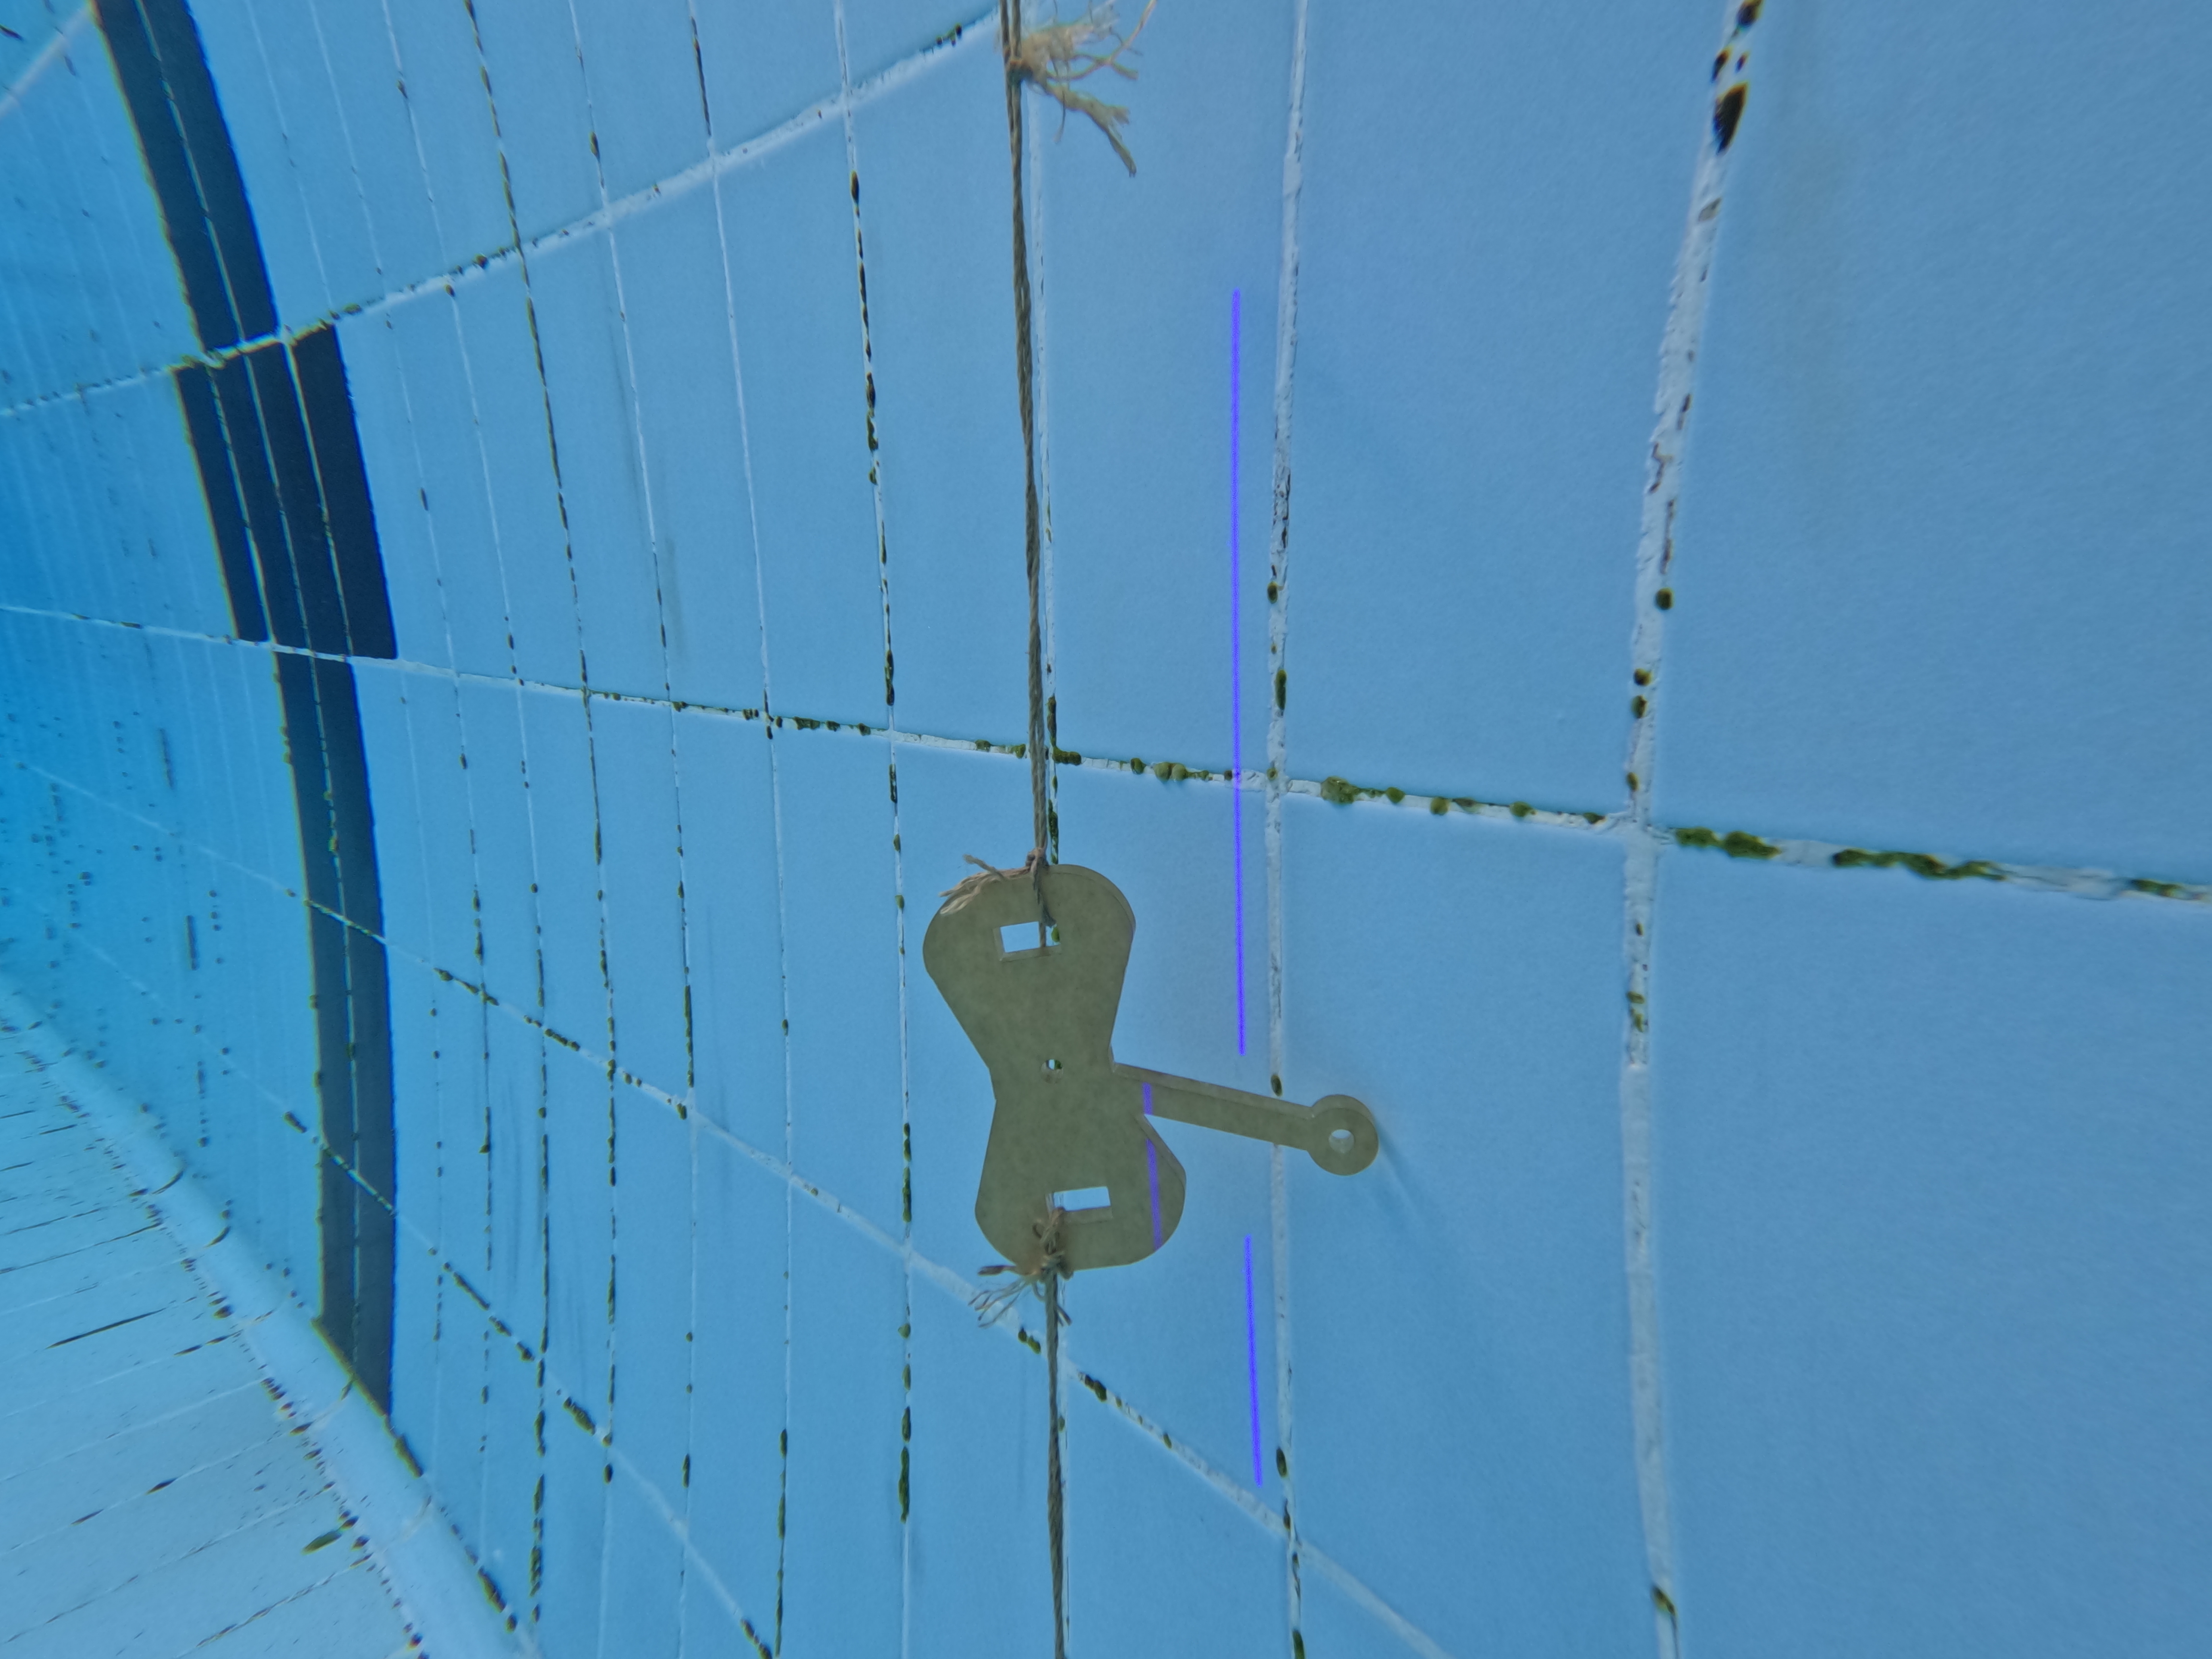

Supplement: Supplementary file 2074 [file G0050635.pdf › Level_3_2/G0050635.pdf]

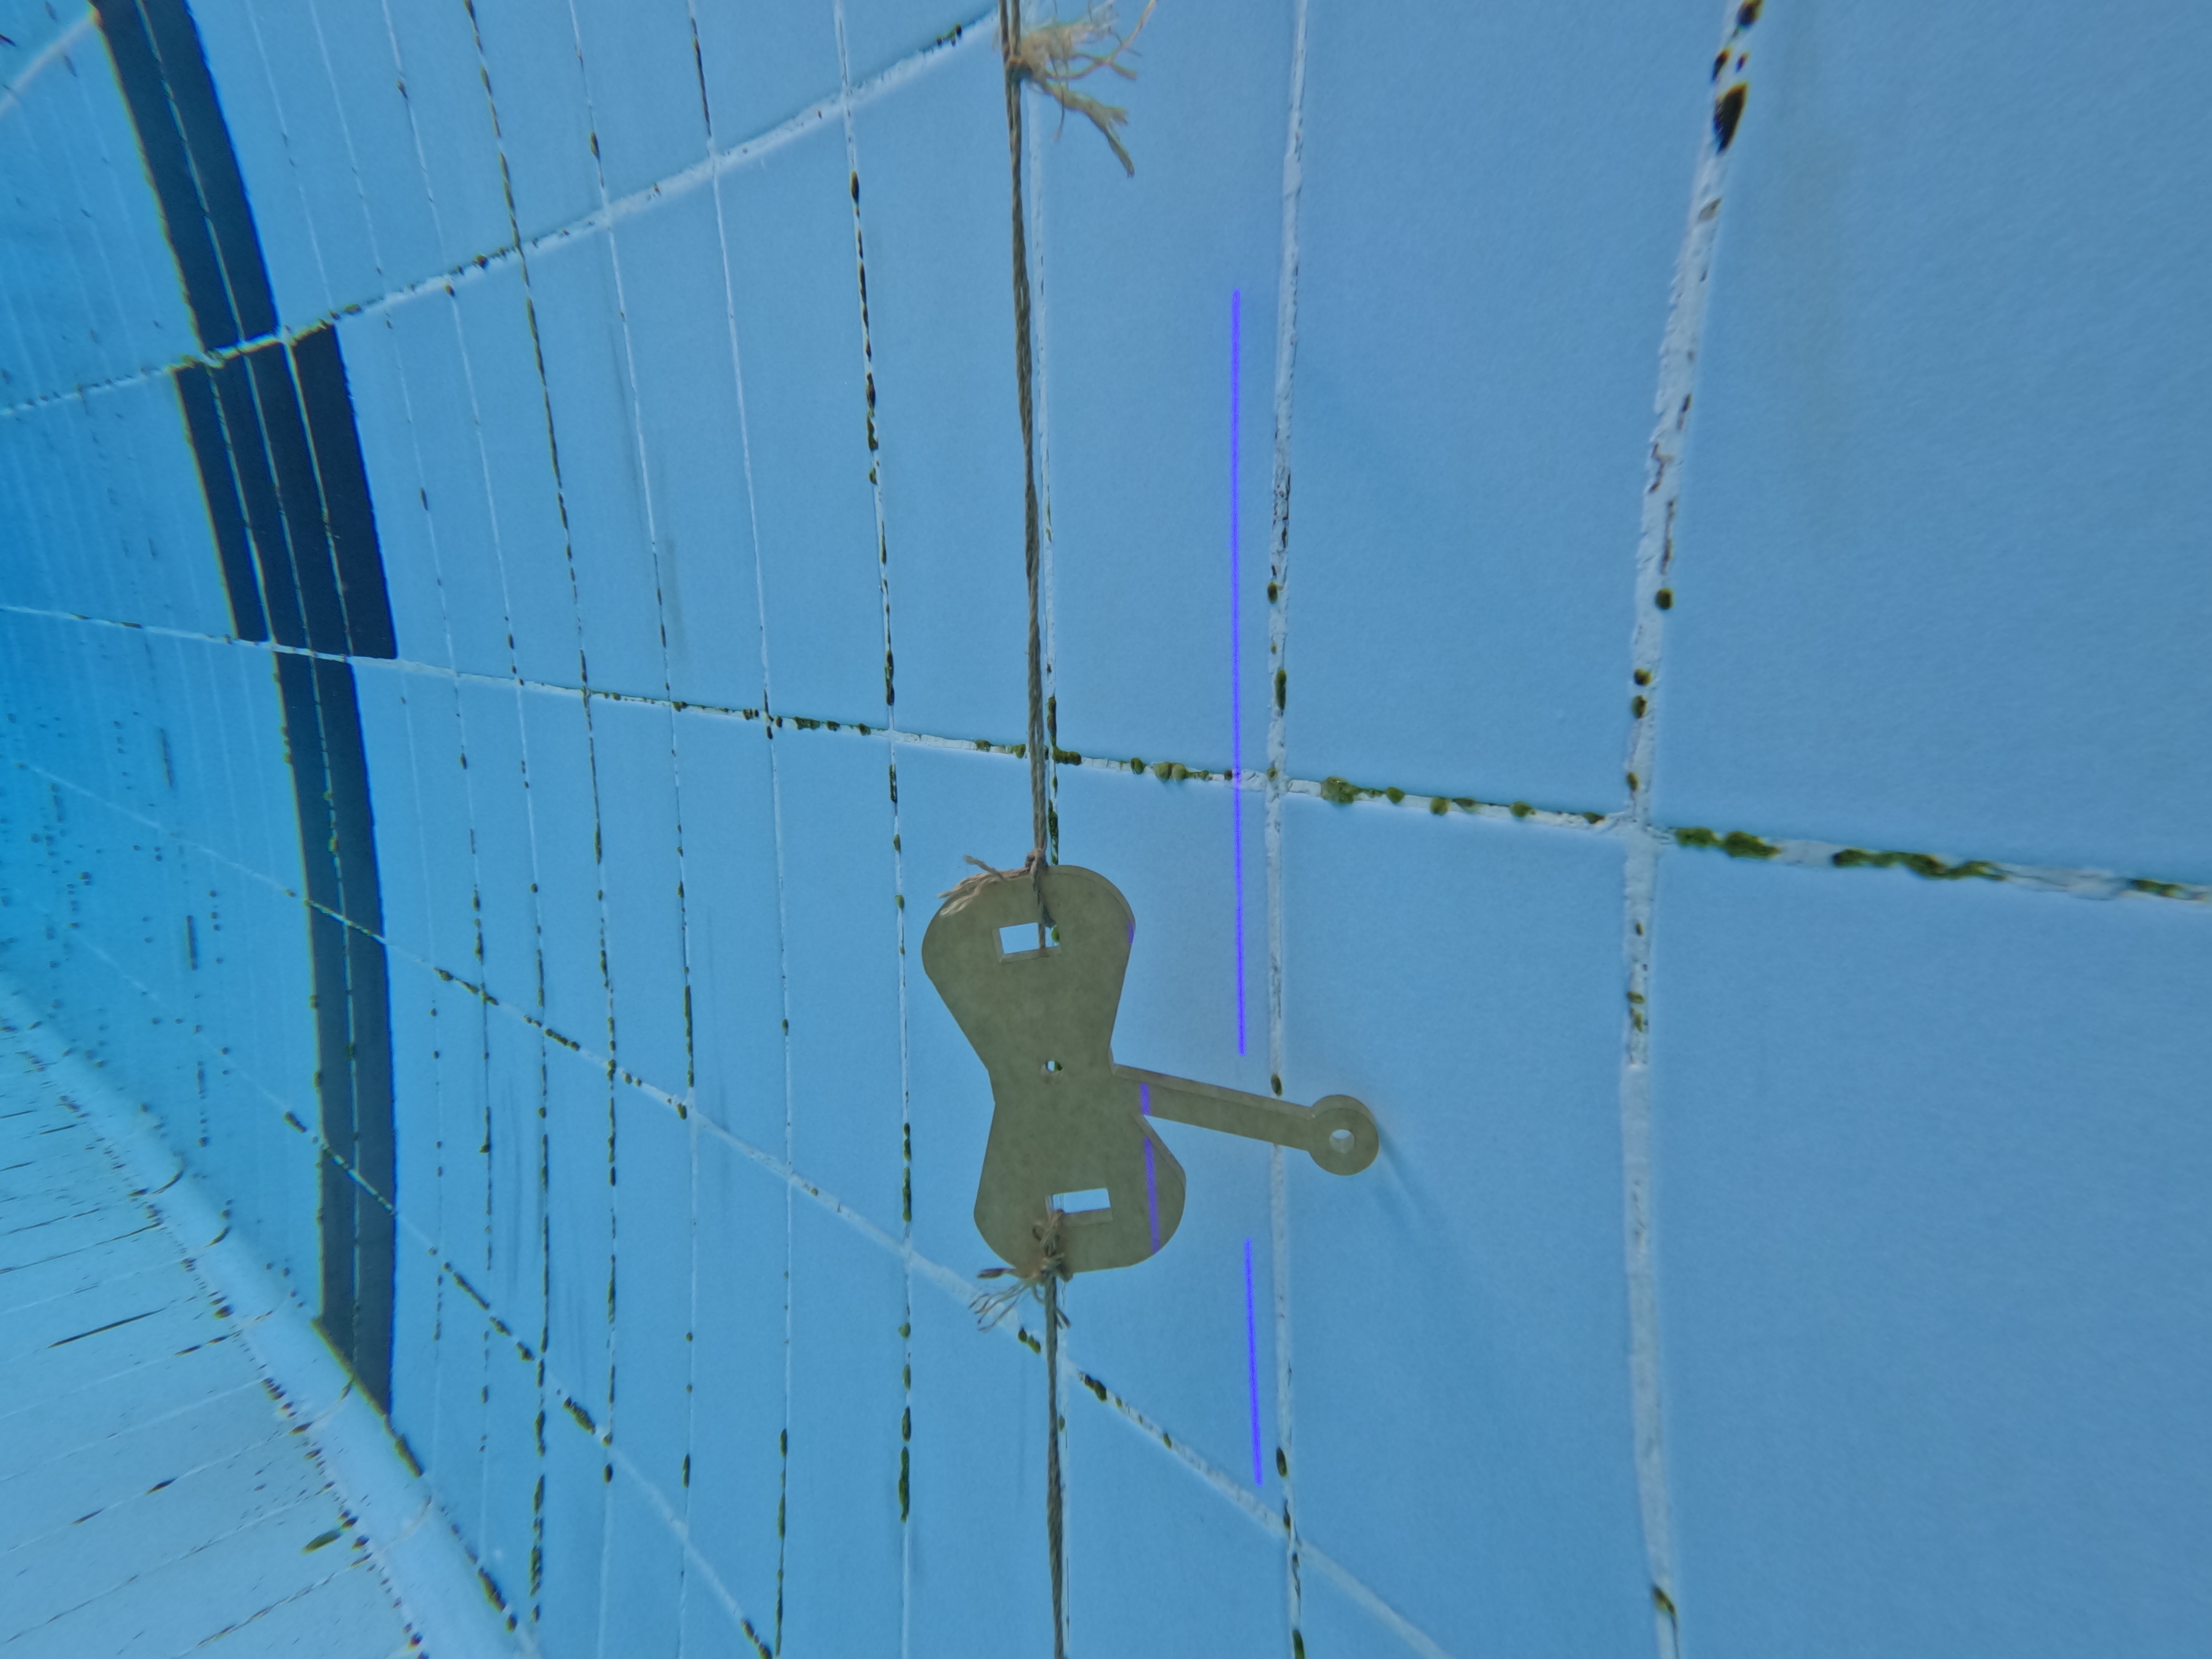

Supplement: Supplementary file 2075 [file G0050636.pdf › Level_3_2/G0050636.pdf]

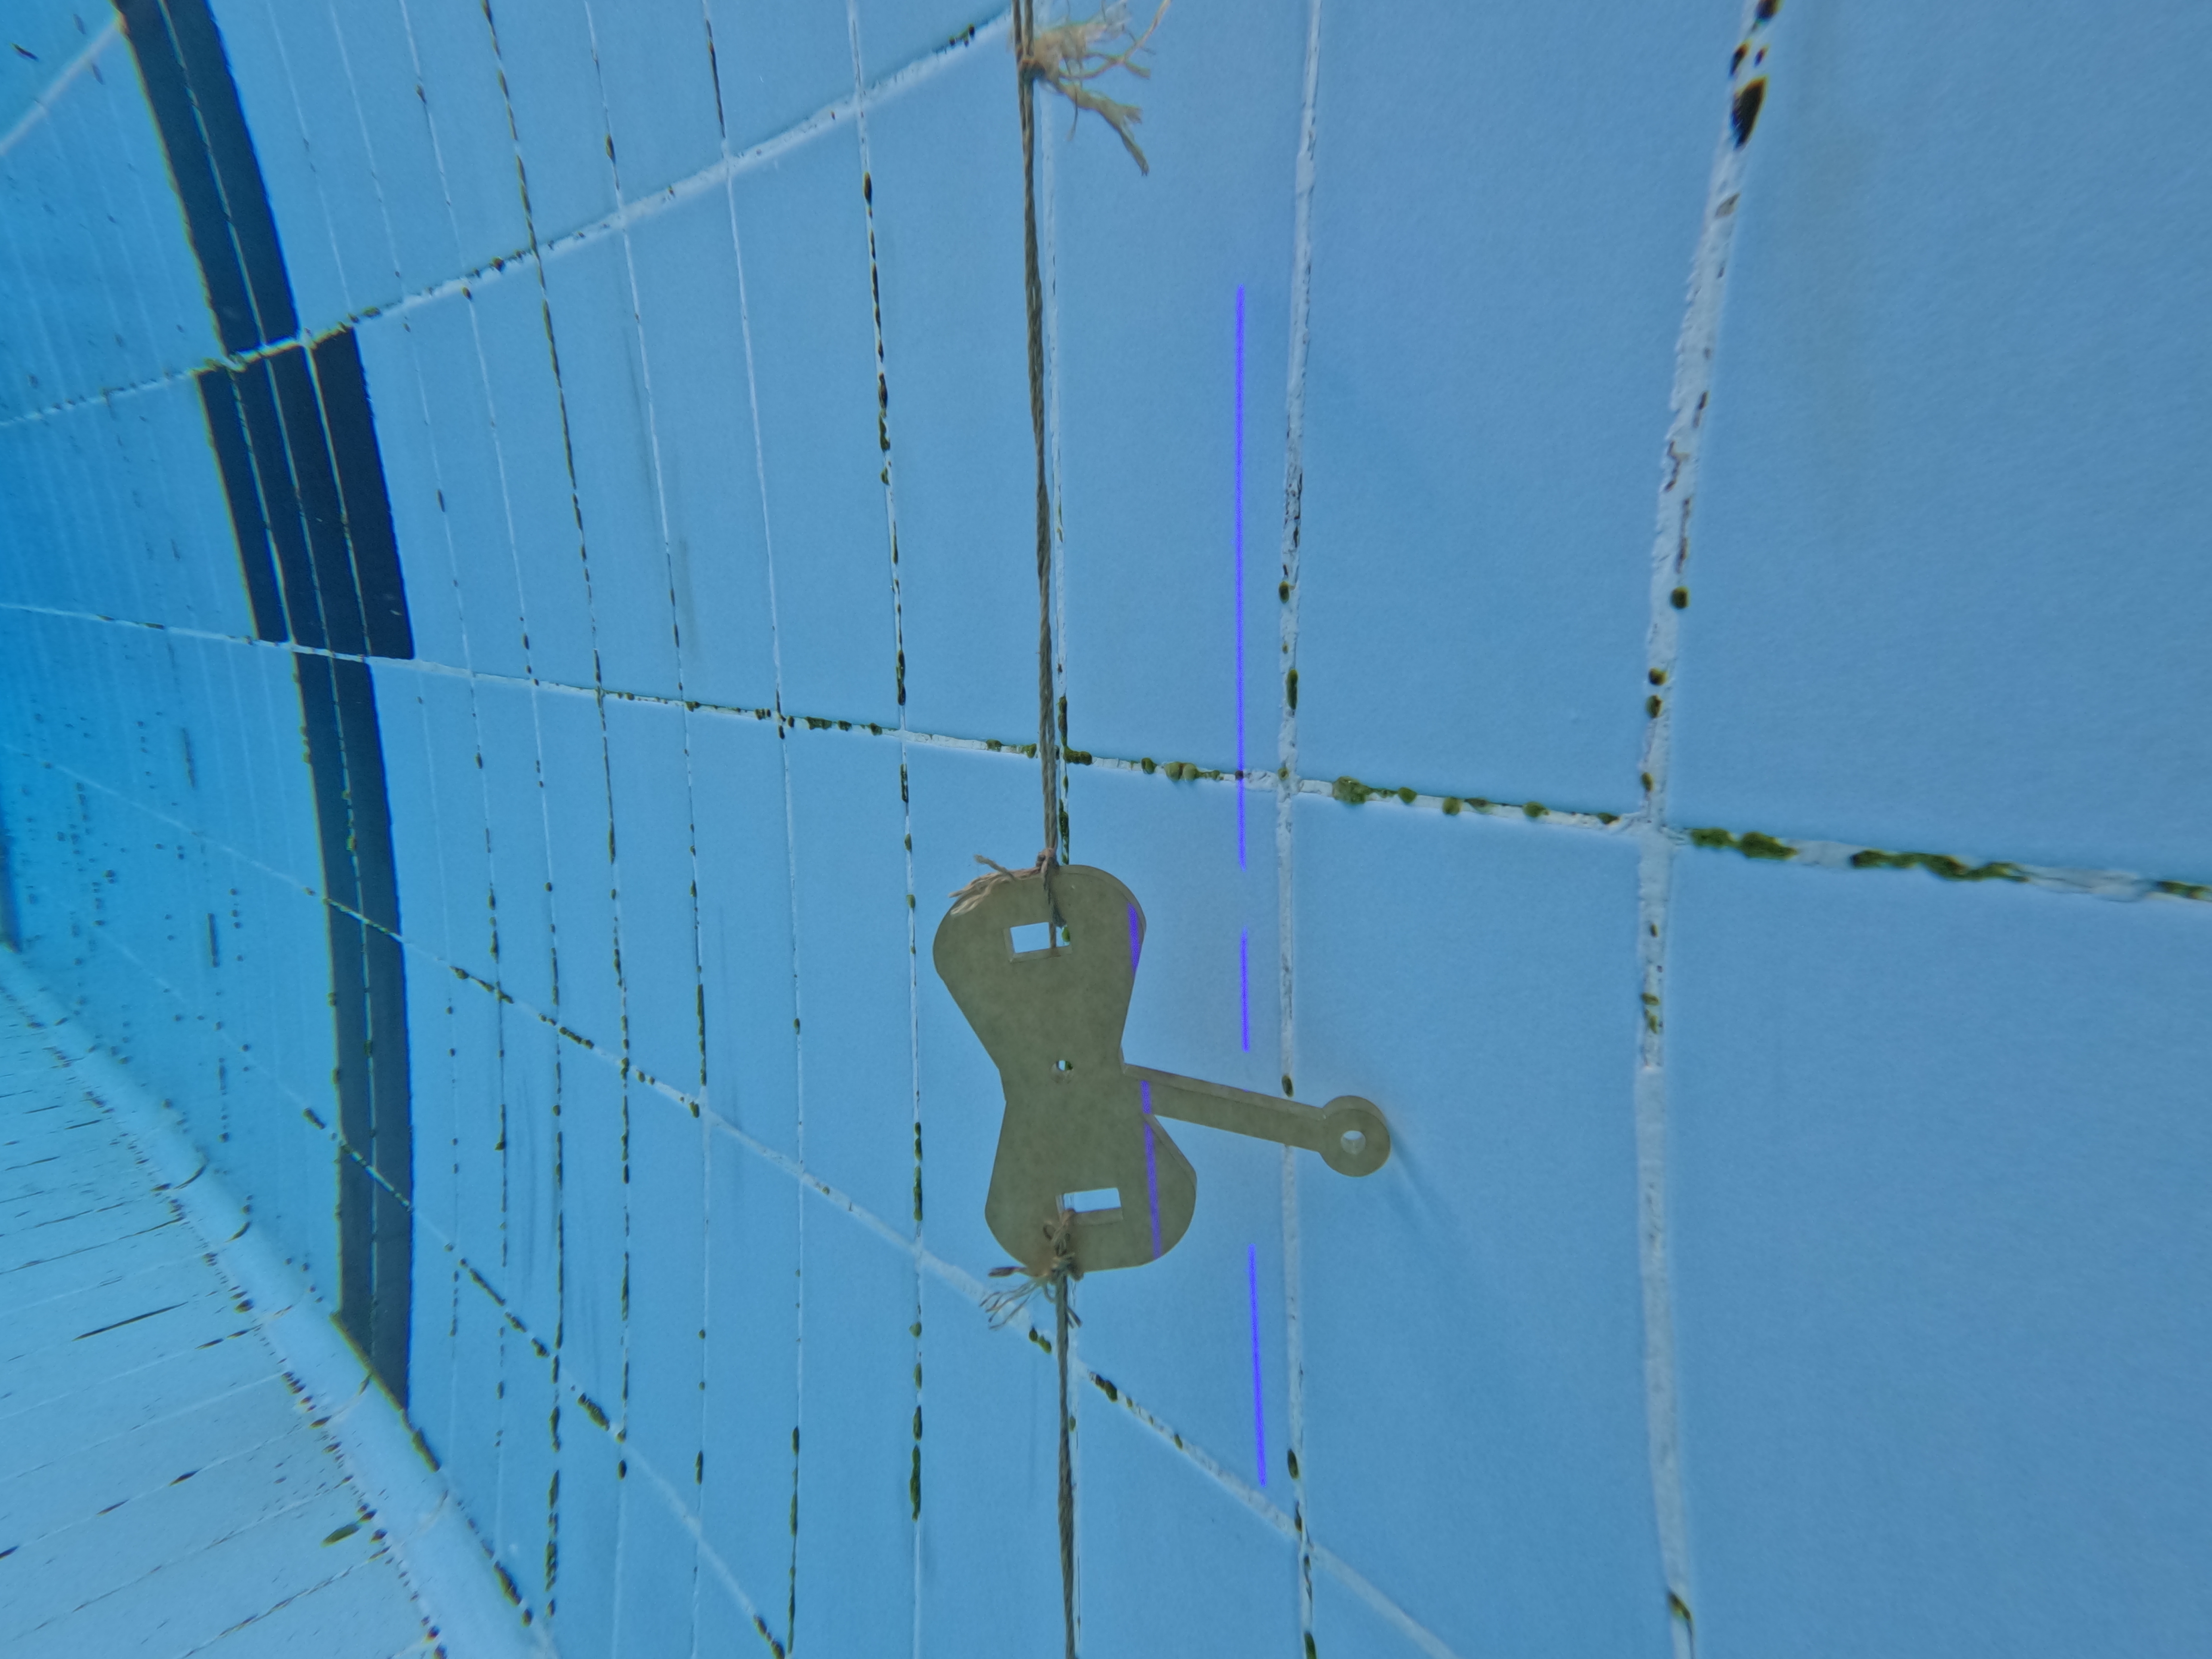

Supplement: Supplementary file 2076 [file G0050637.pdf › Level_3_2/G0050637.pdf]

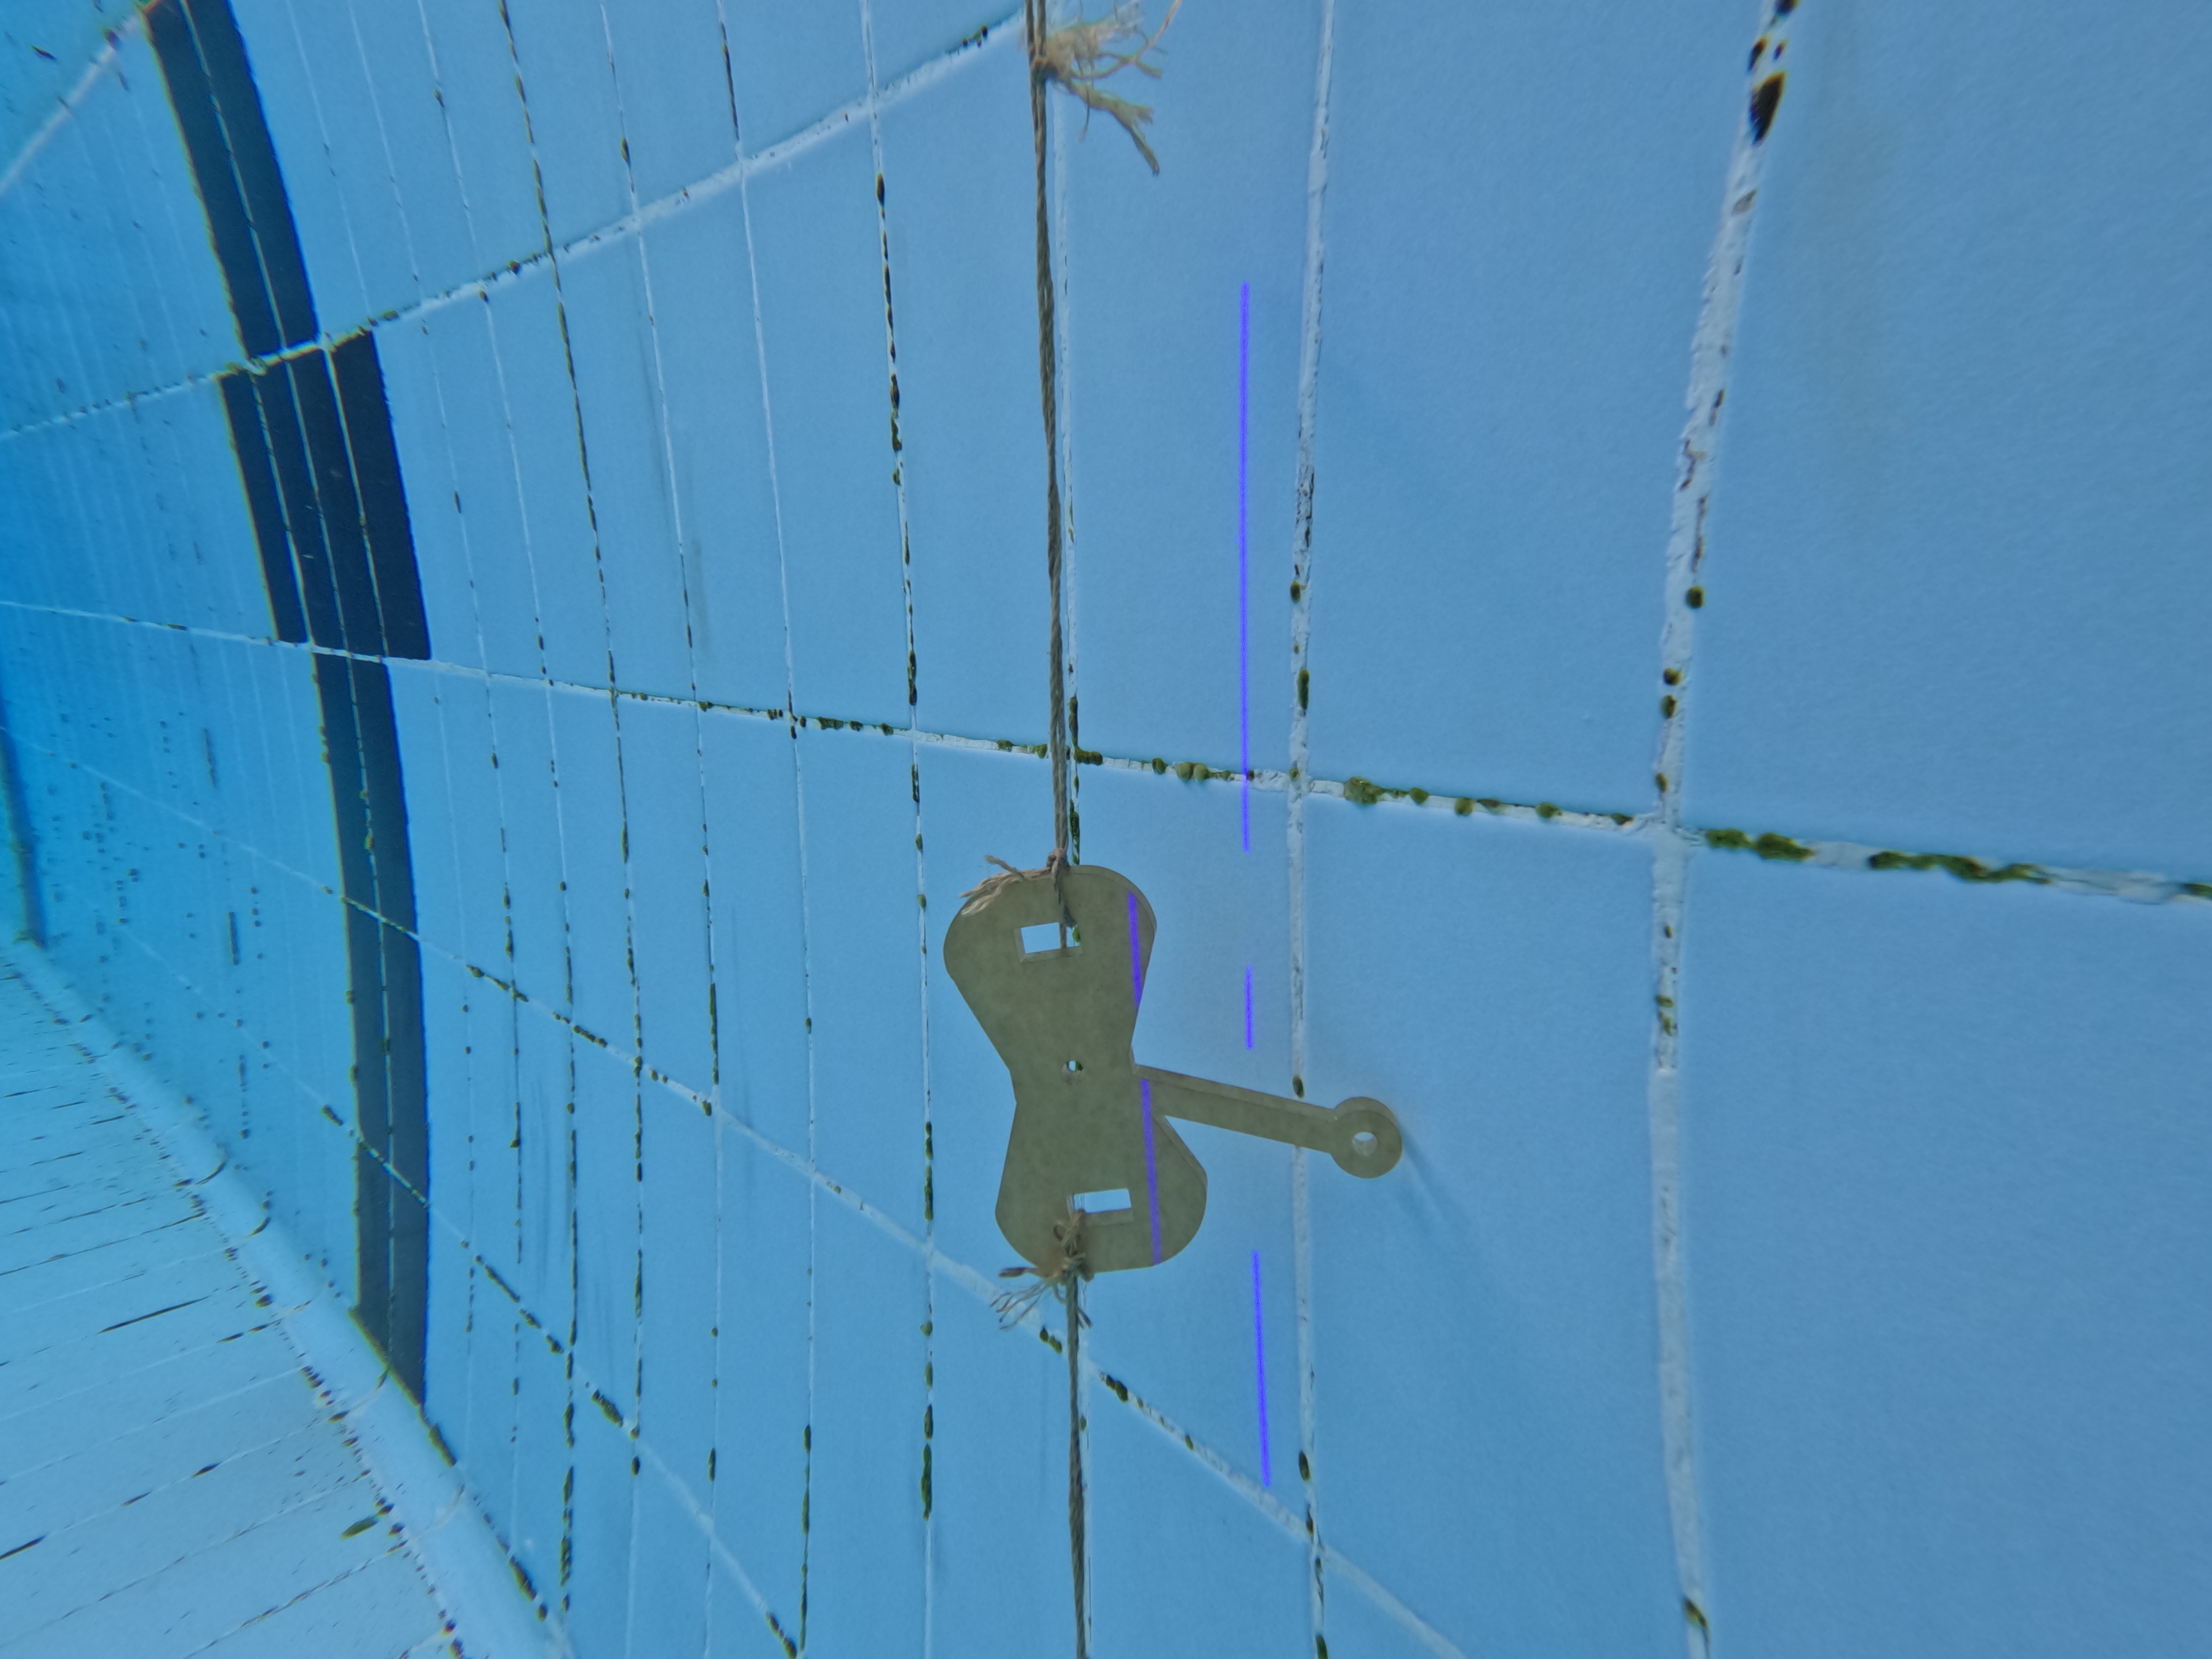

Supplement: Supplementary file 2077 [file G0050638.pdf › Level_3_2/G0050638.pdf]

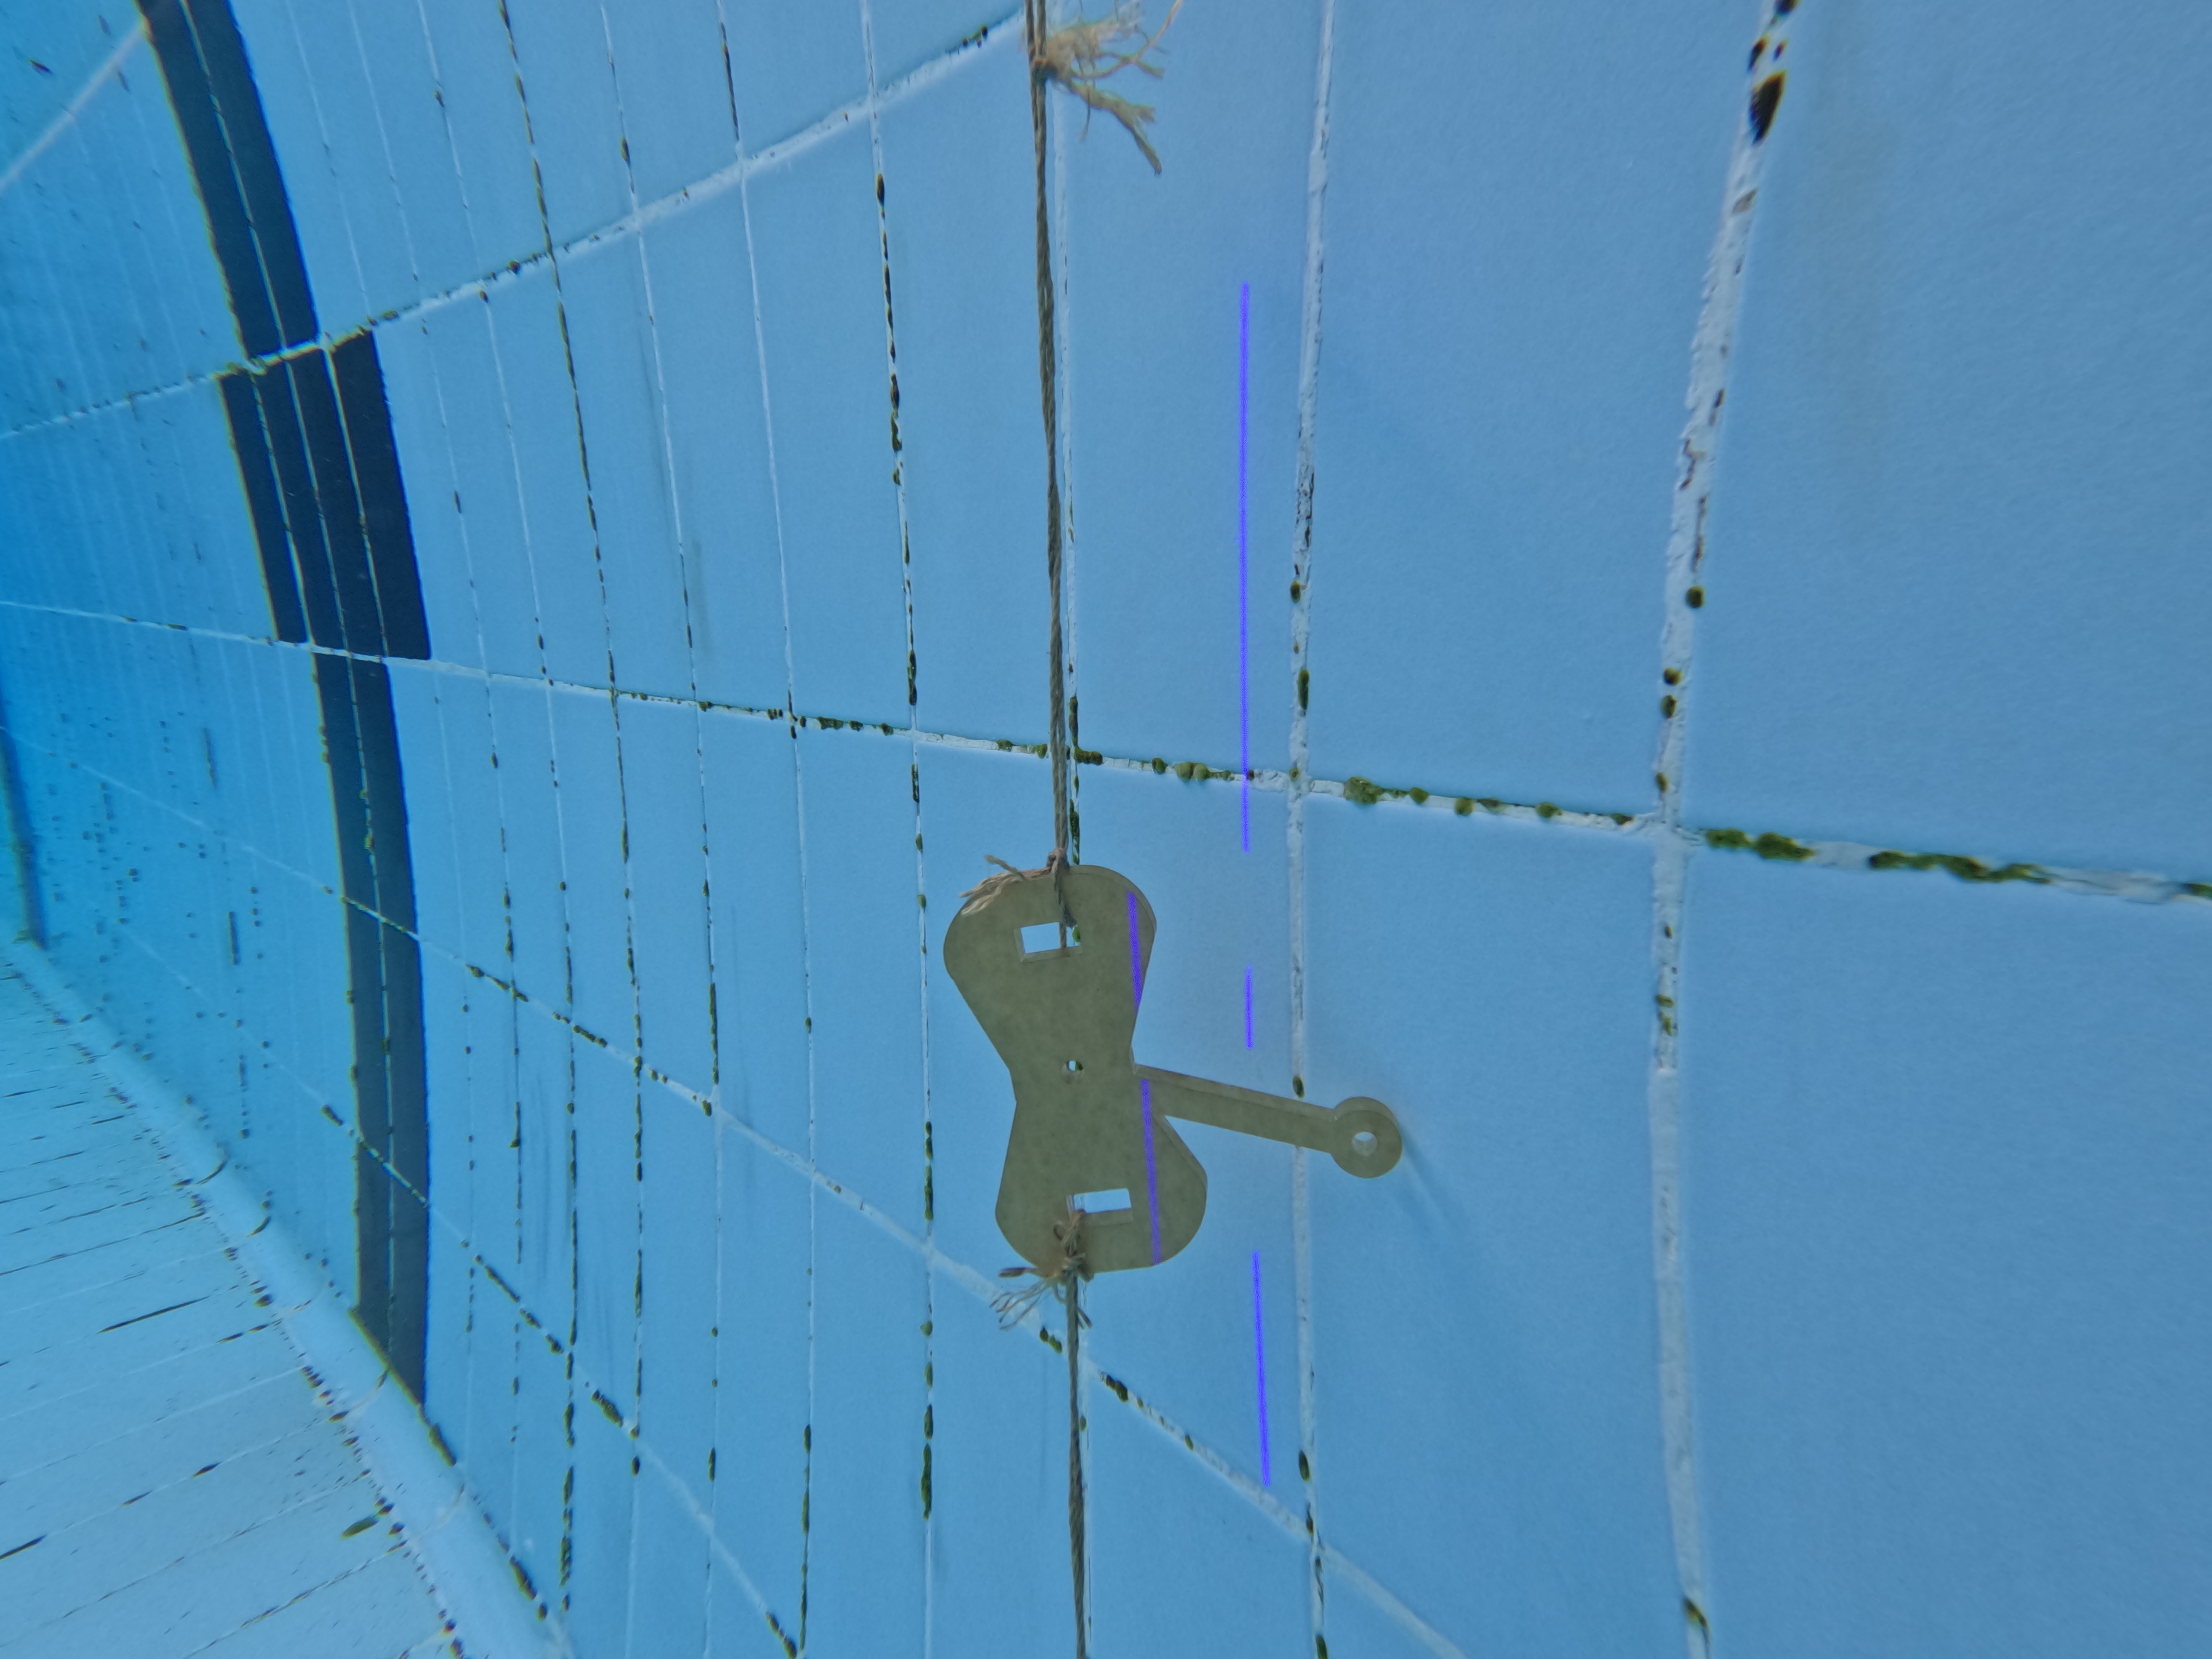

Supplement: Supplementary file 2078 [file G0050639.pdf › Level_3_2/G0050639.pdf]

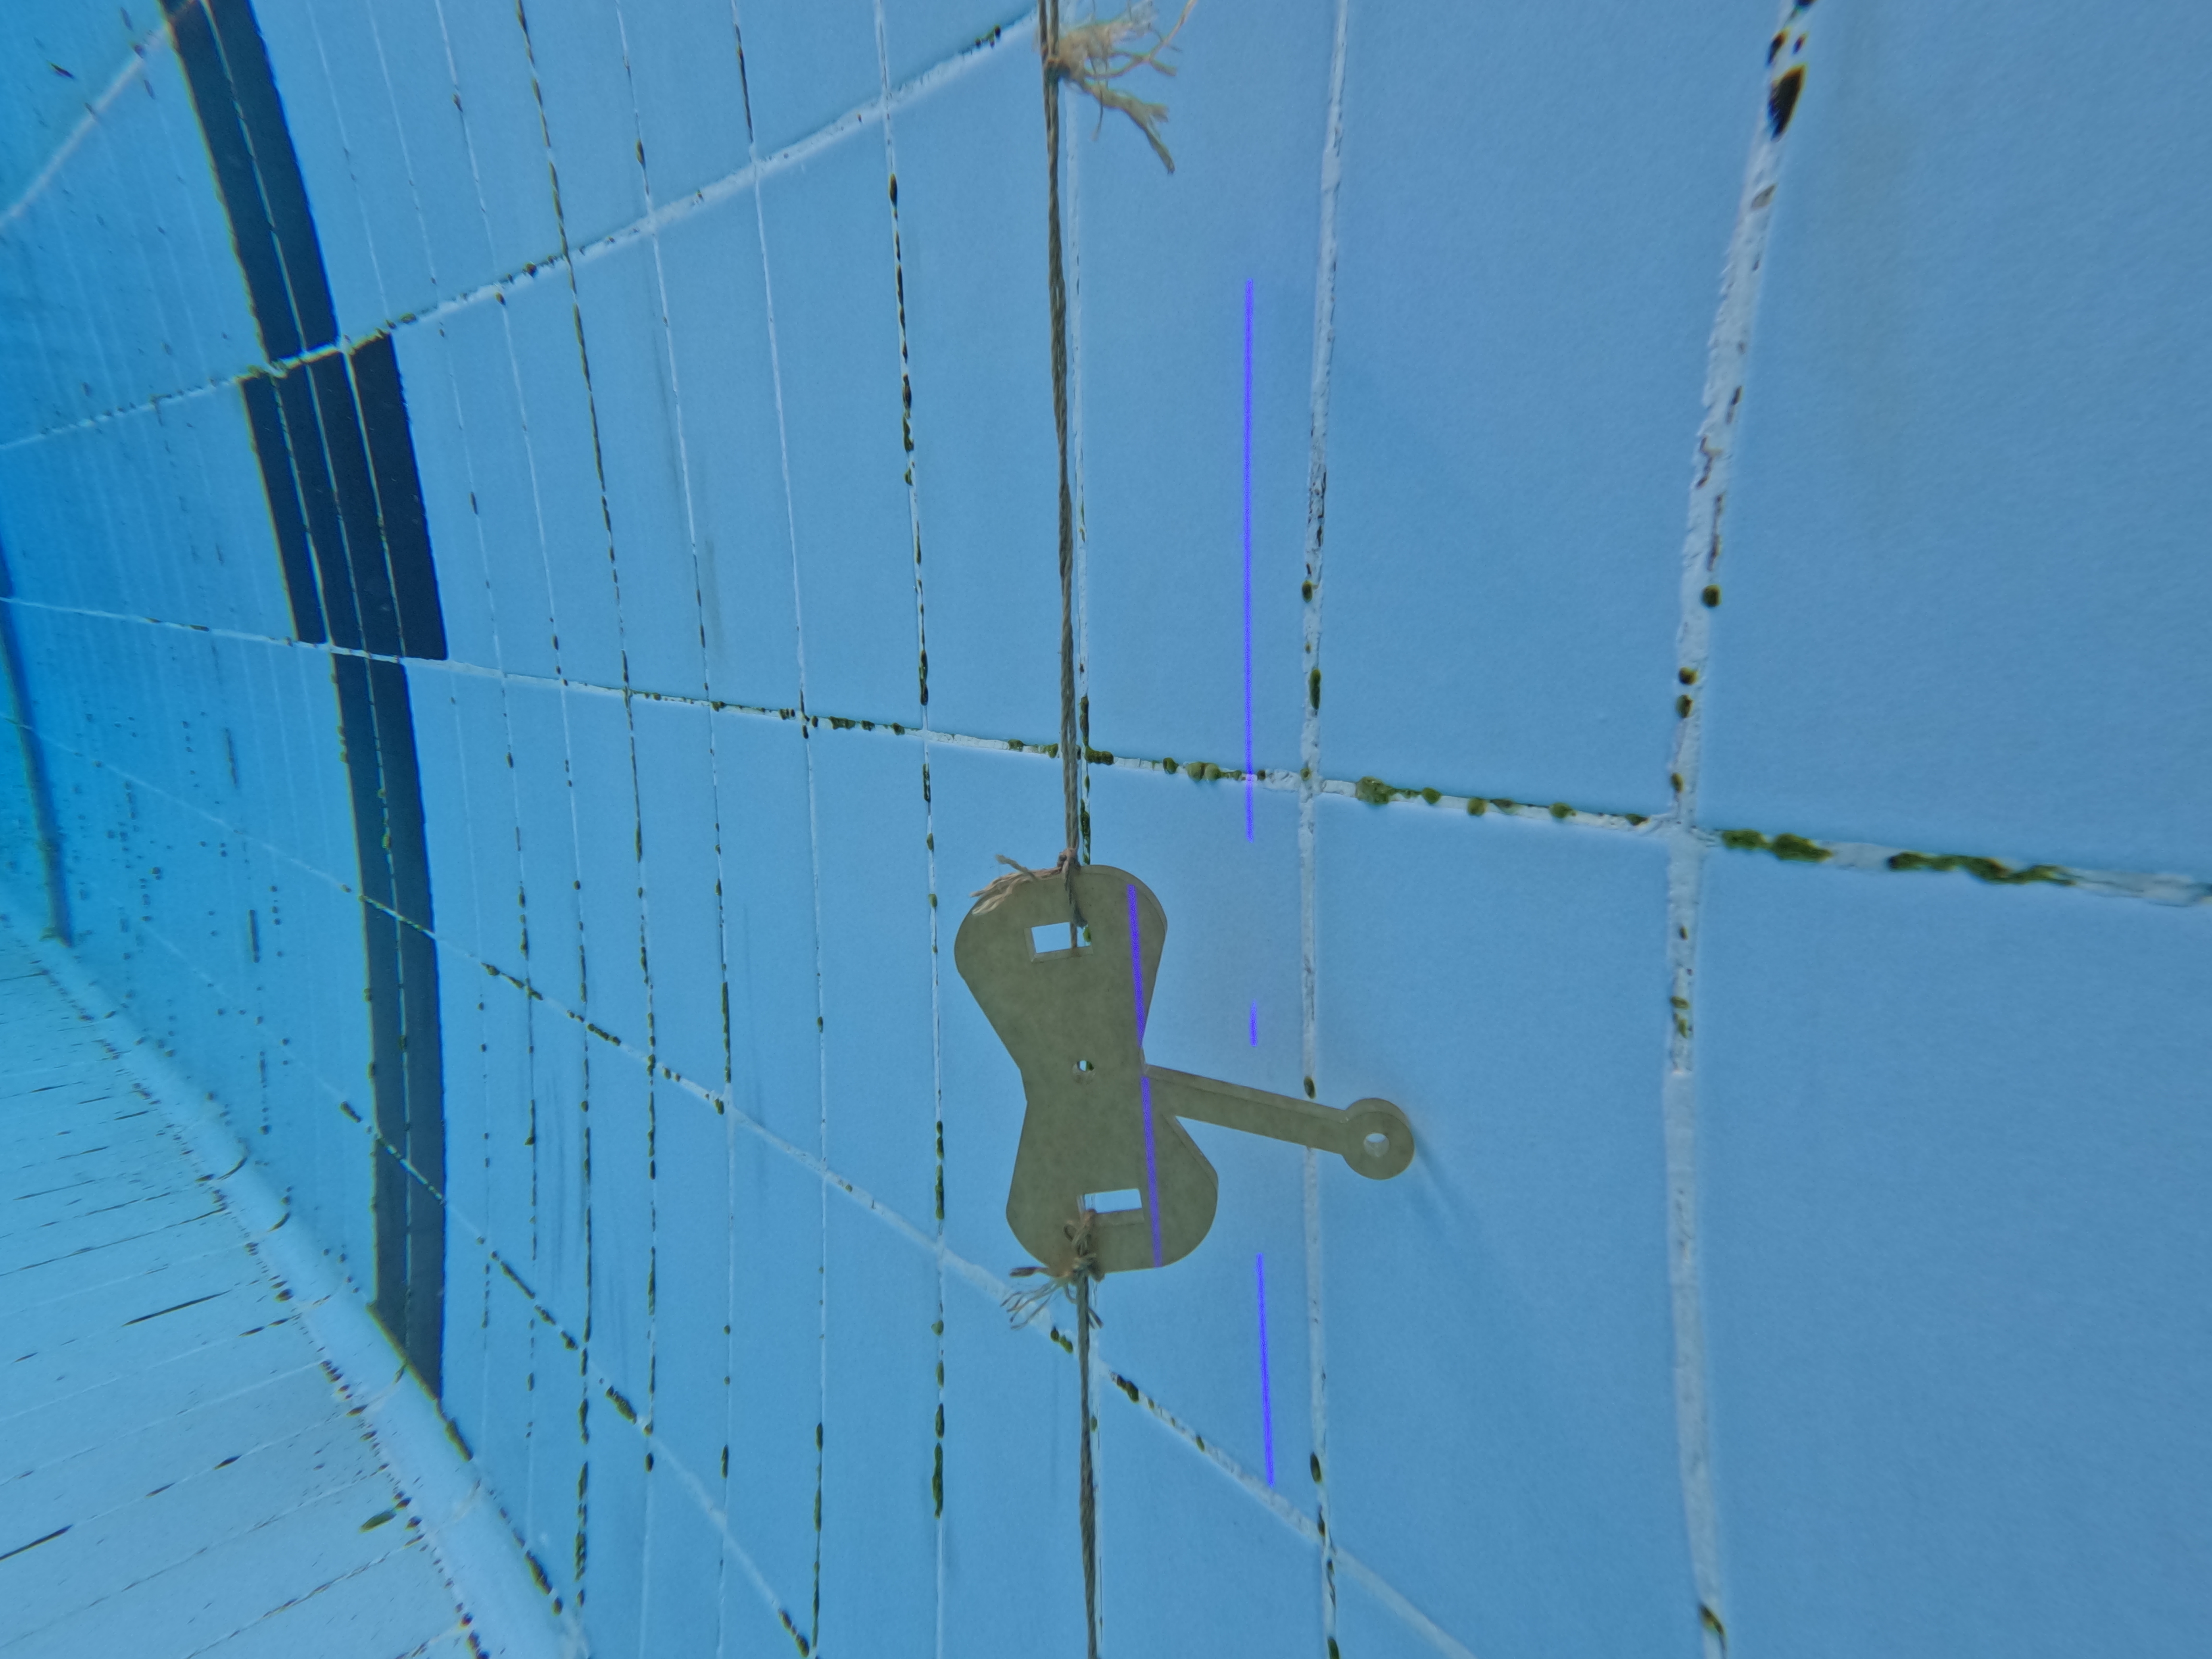

Supplement: Supplementary file 2079 [file G0050640.pdf › Level_3_2/G0050640.pdf]

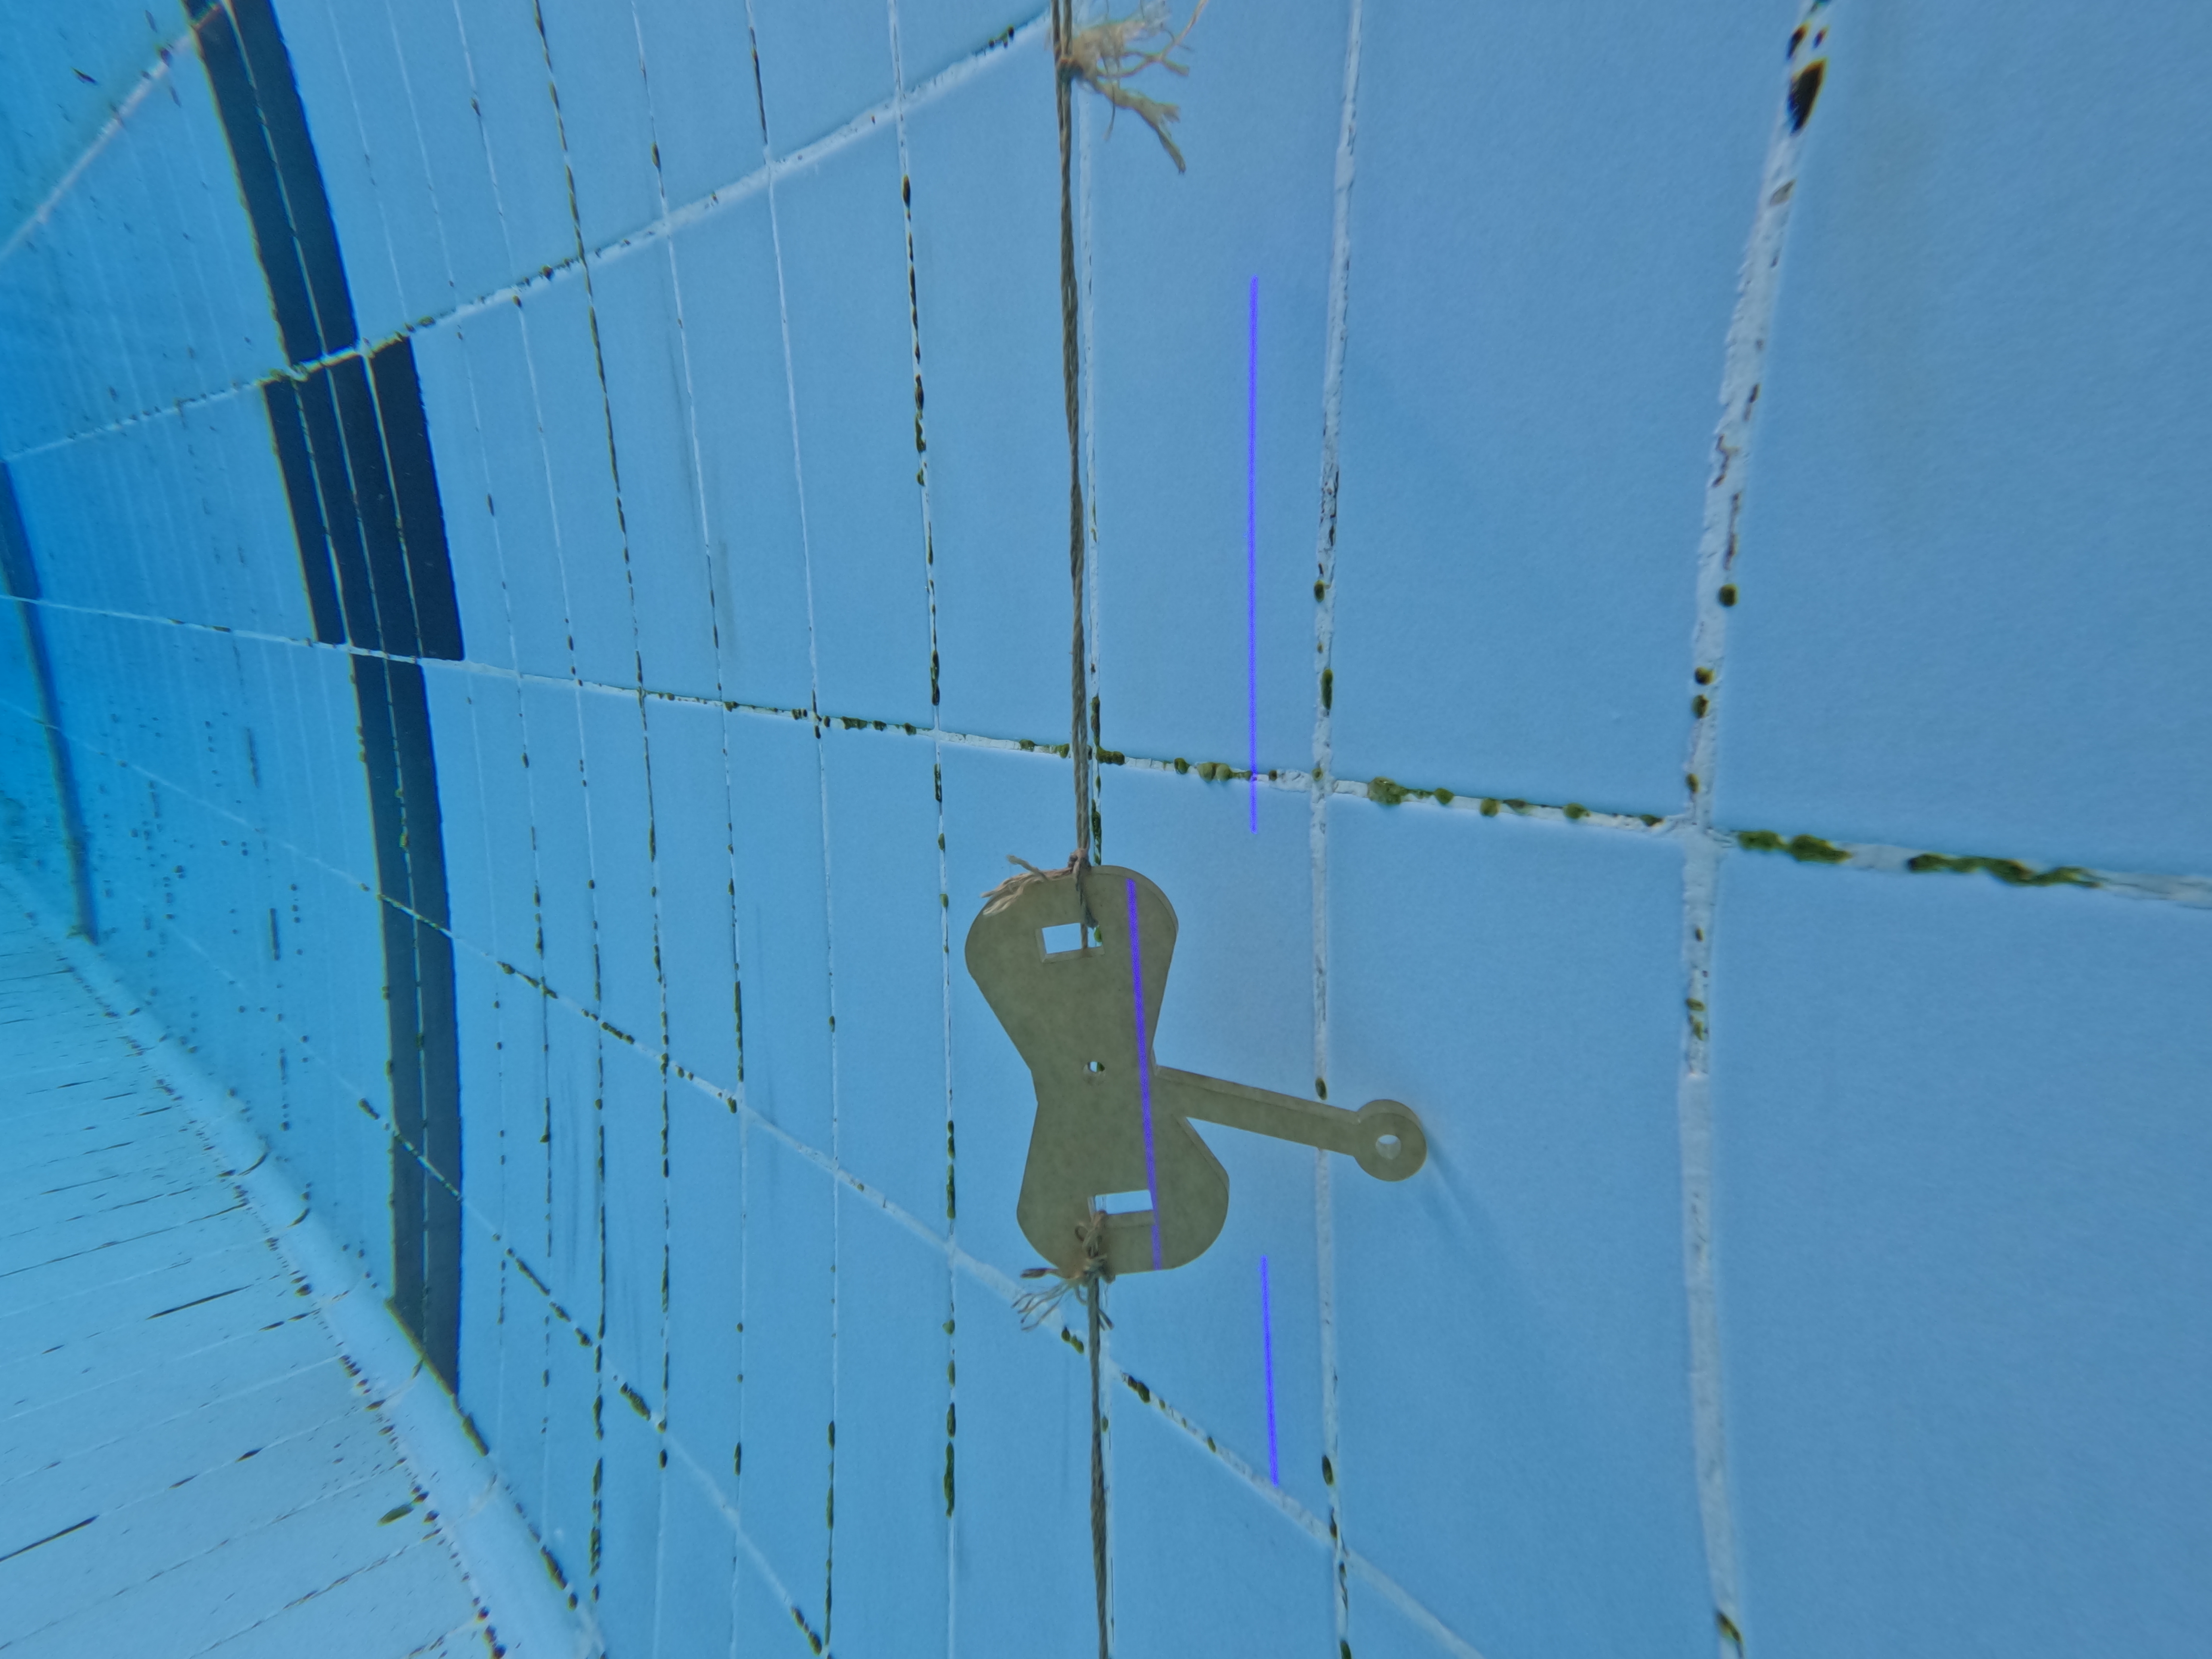

Supplement: Supplementary file 2080 [file G0050641.pdf › Level_3_2/G0050641.pdf]

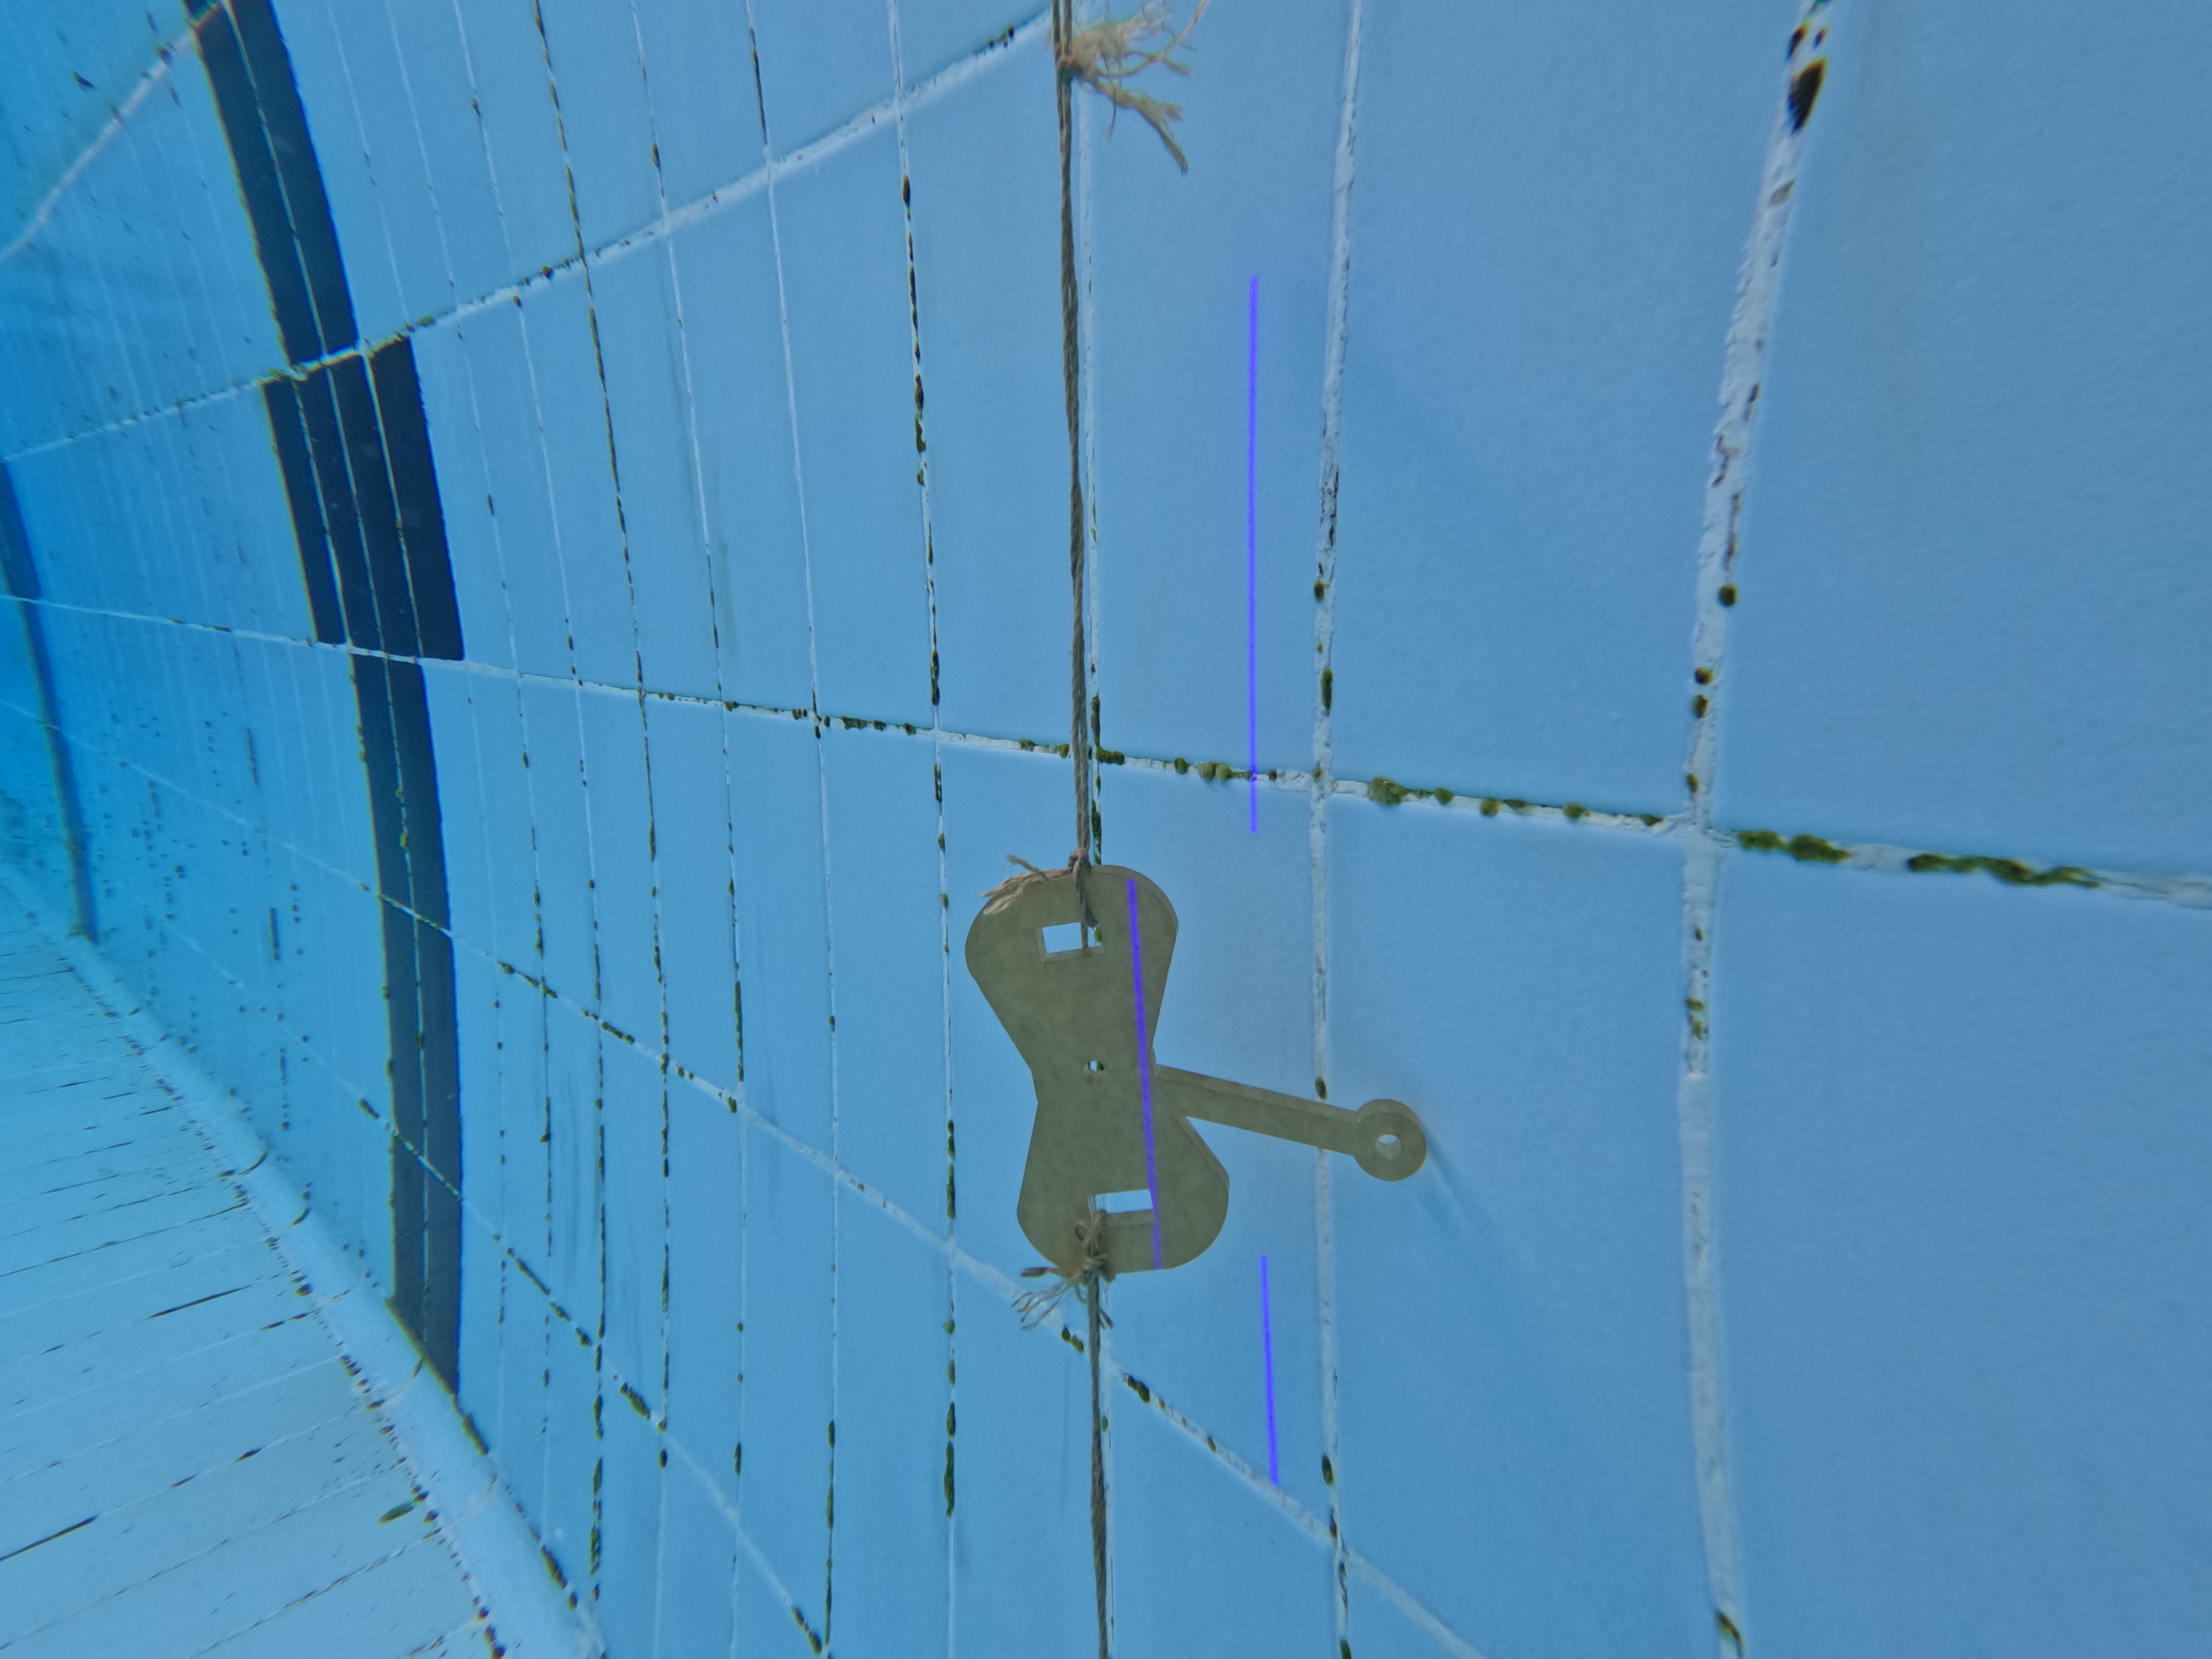

Supplement: Supplementary file 2081 [file G0050642.pdf › Level_3_2/G0050642.pdf]

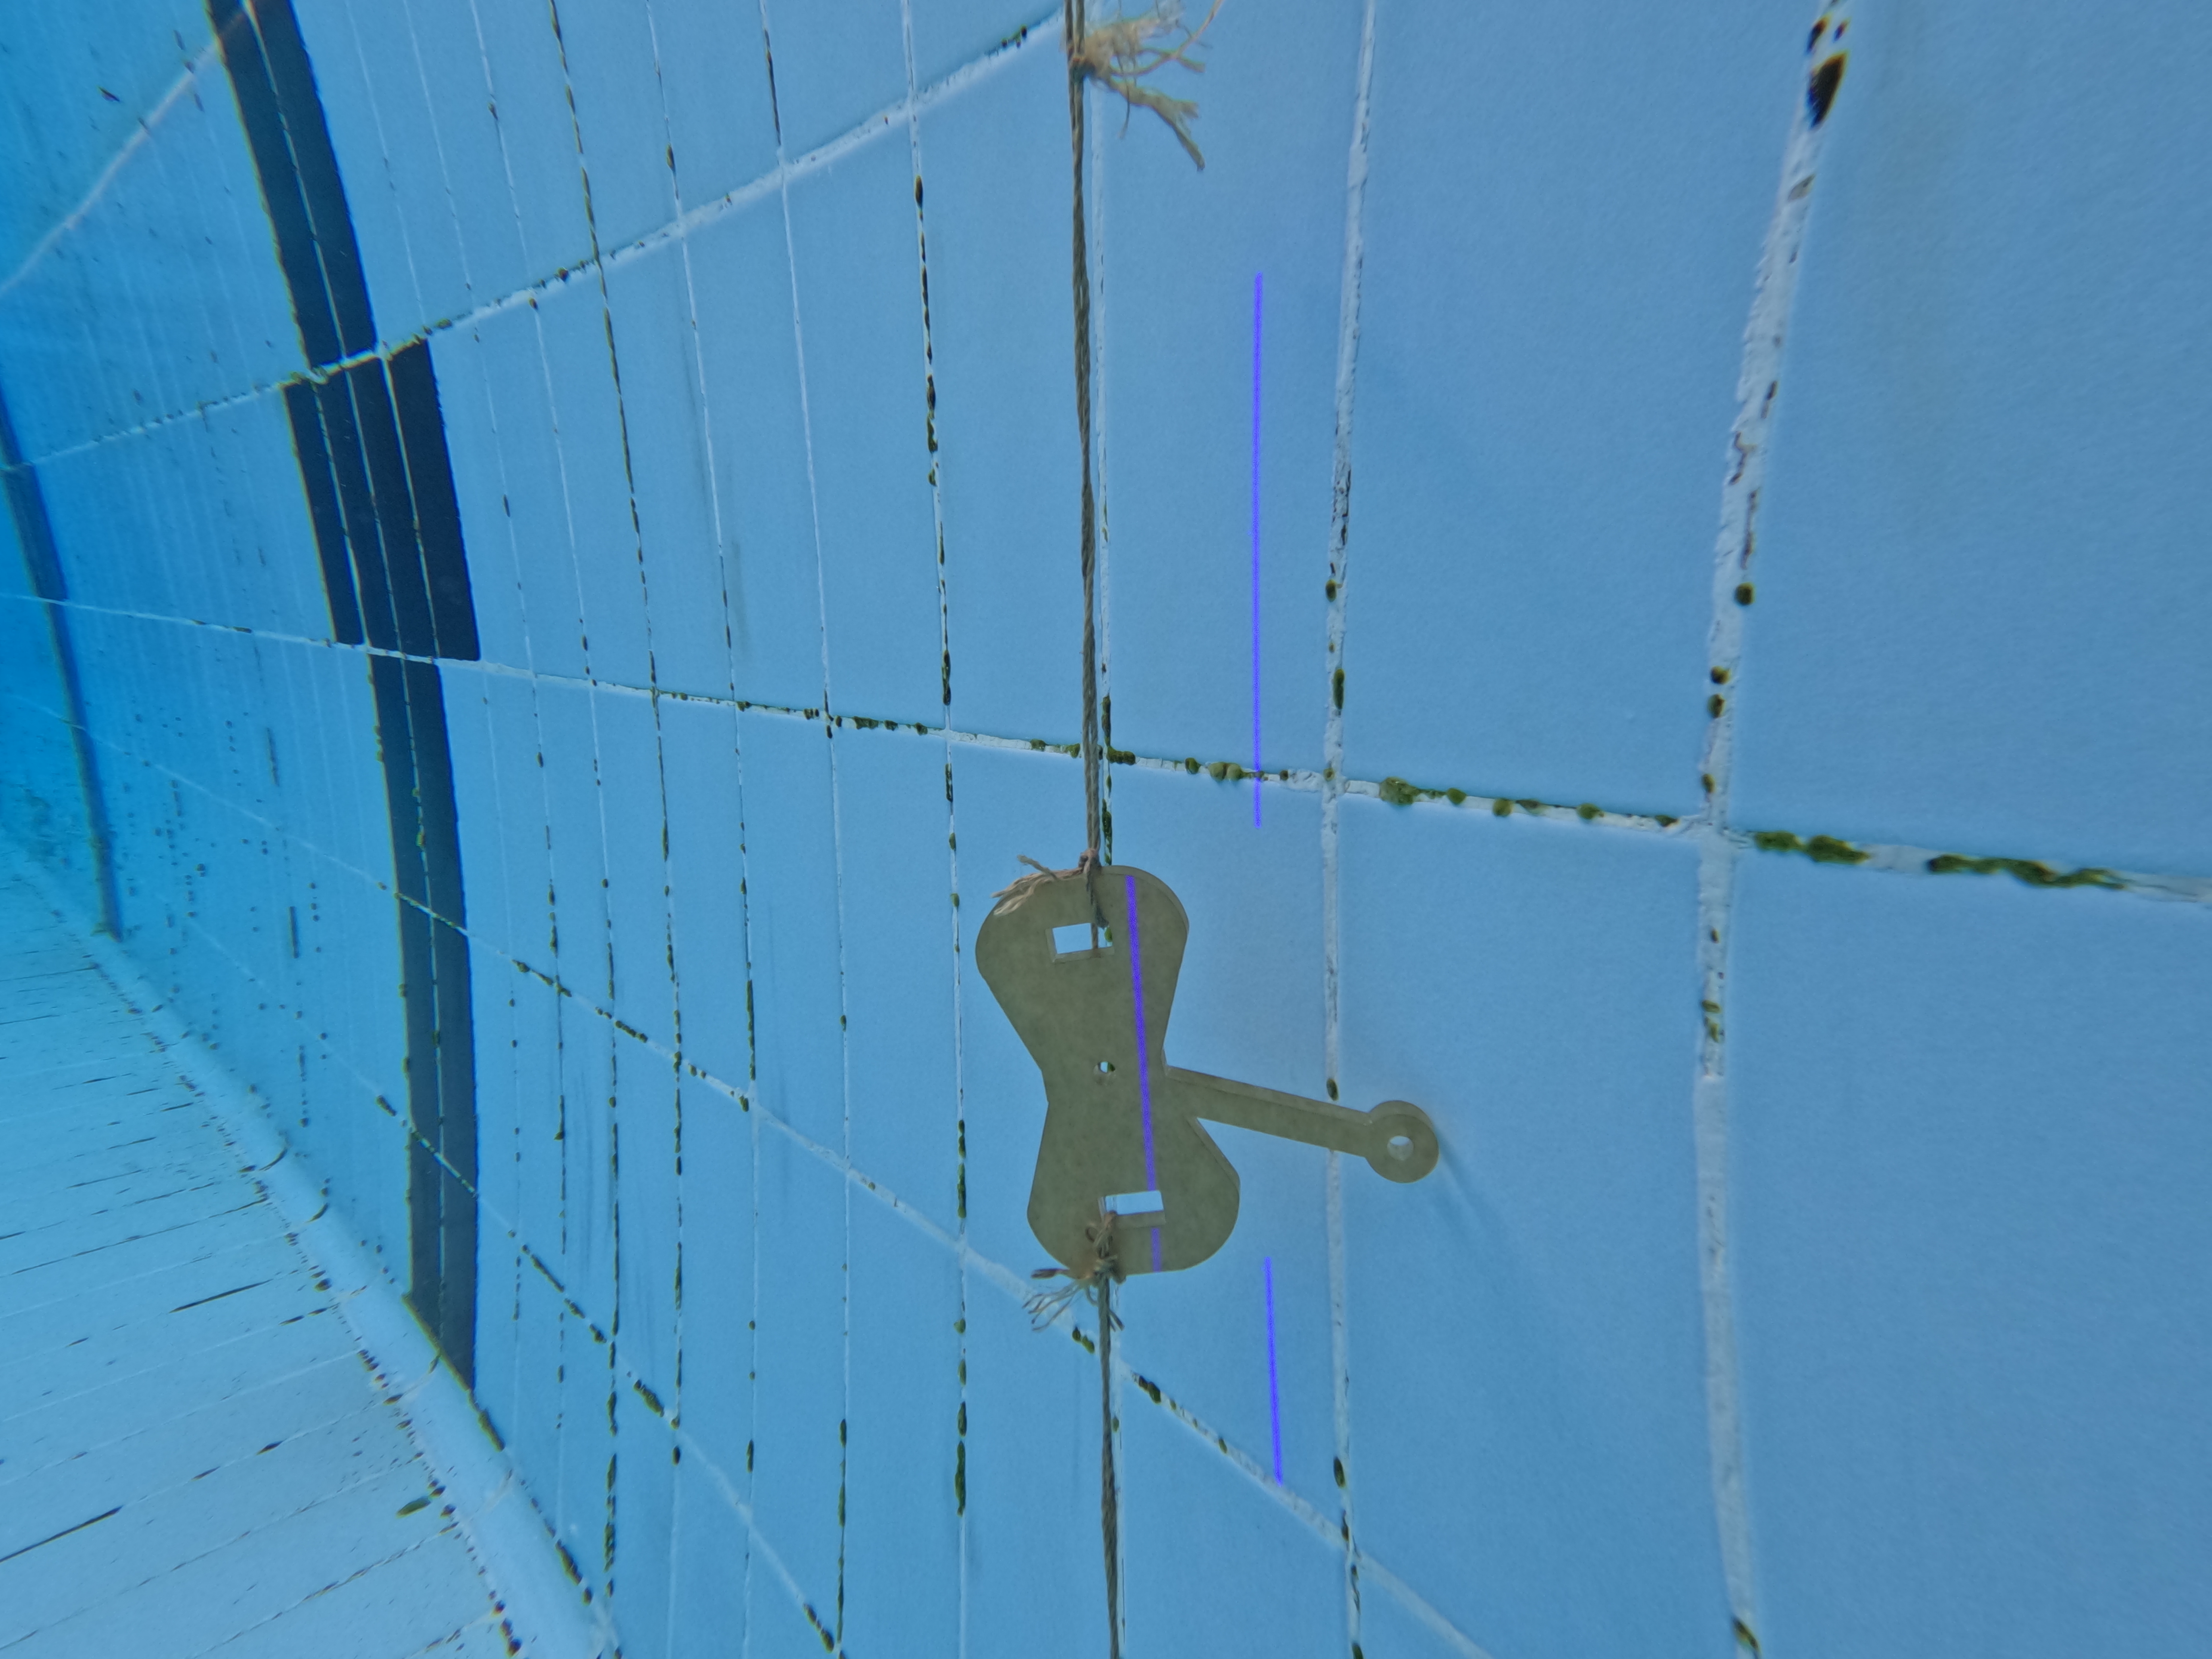

Supplement: Supplementary file 2082 [file G0050643.pdf › Level_3_2/G0050643.pdf]

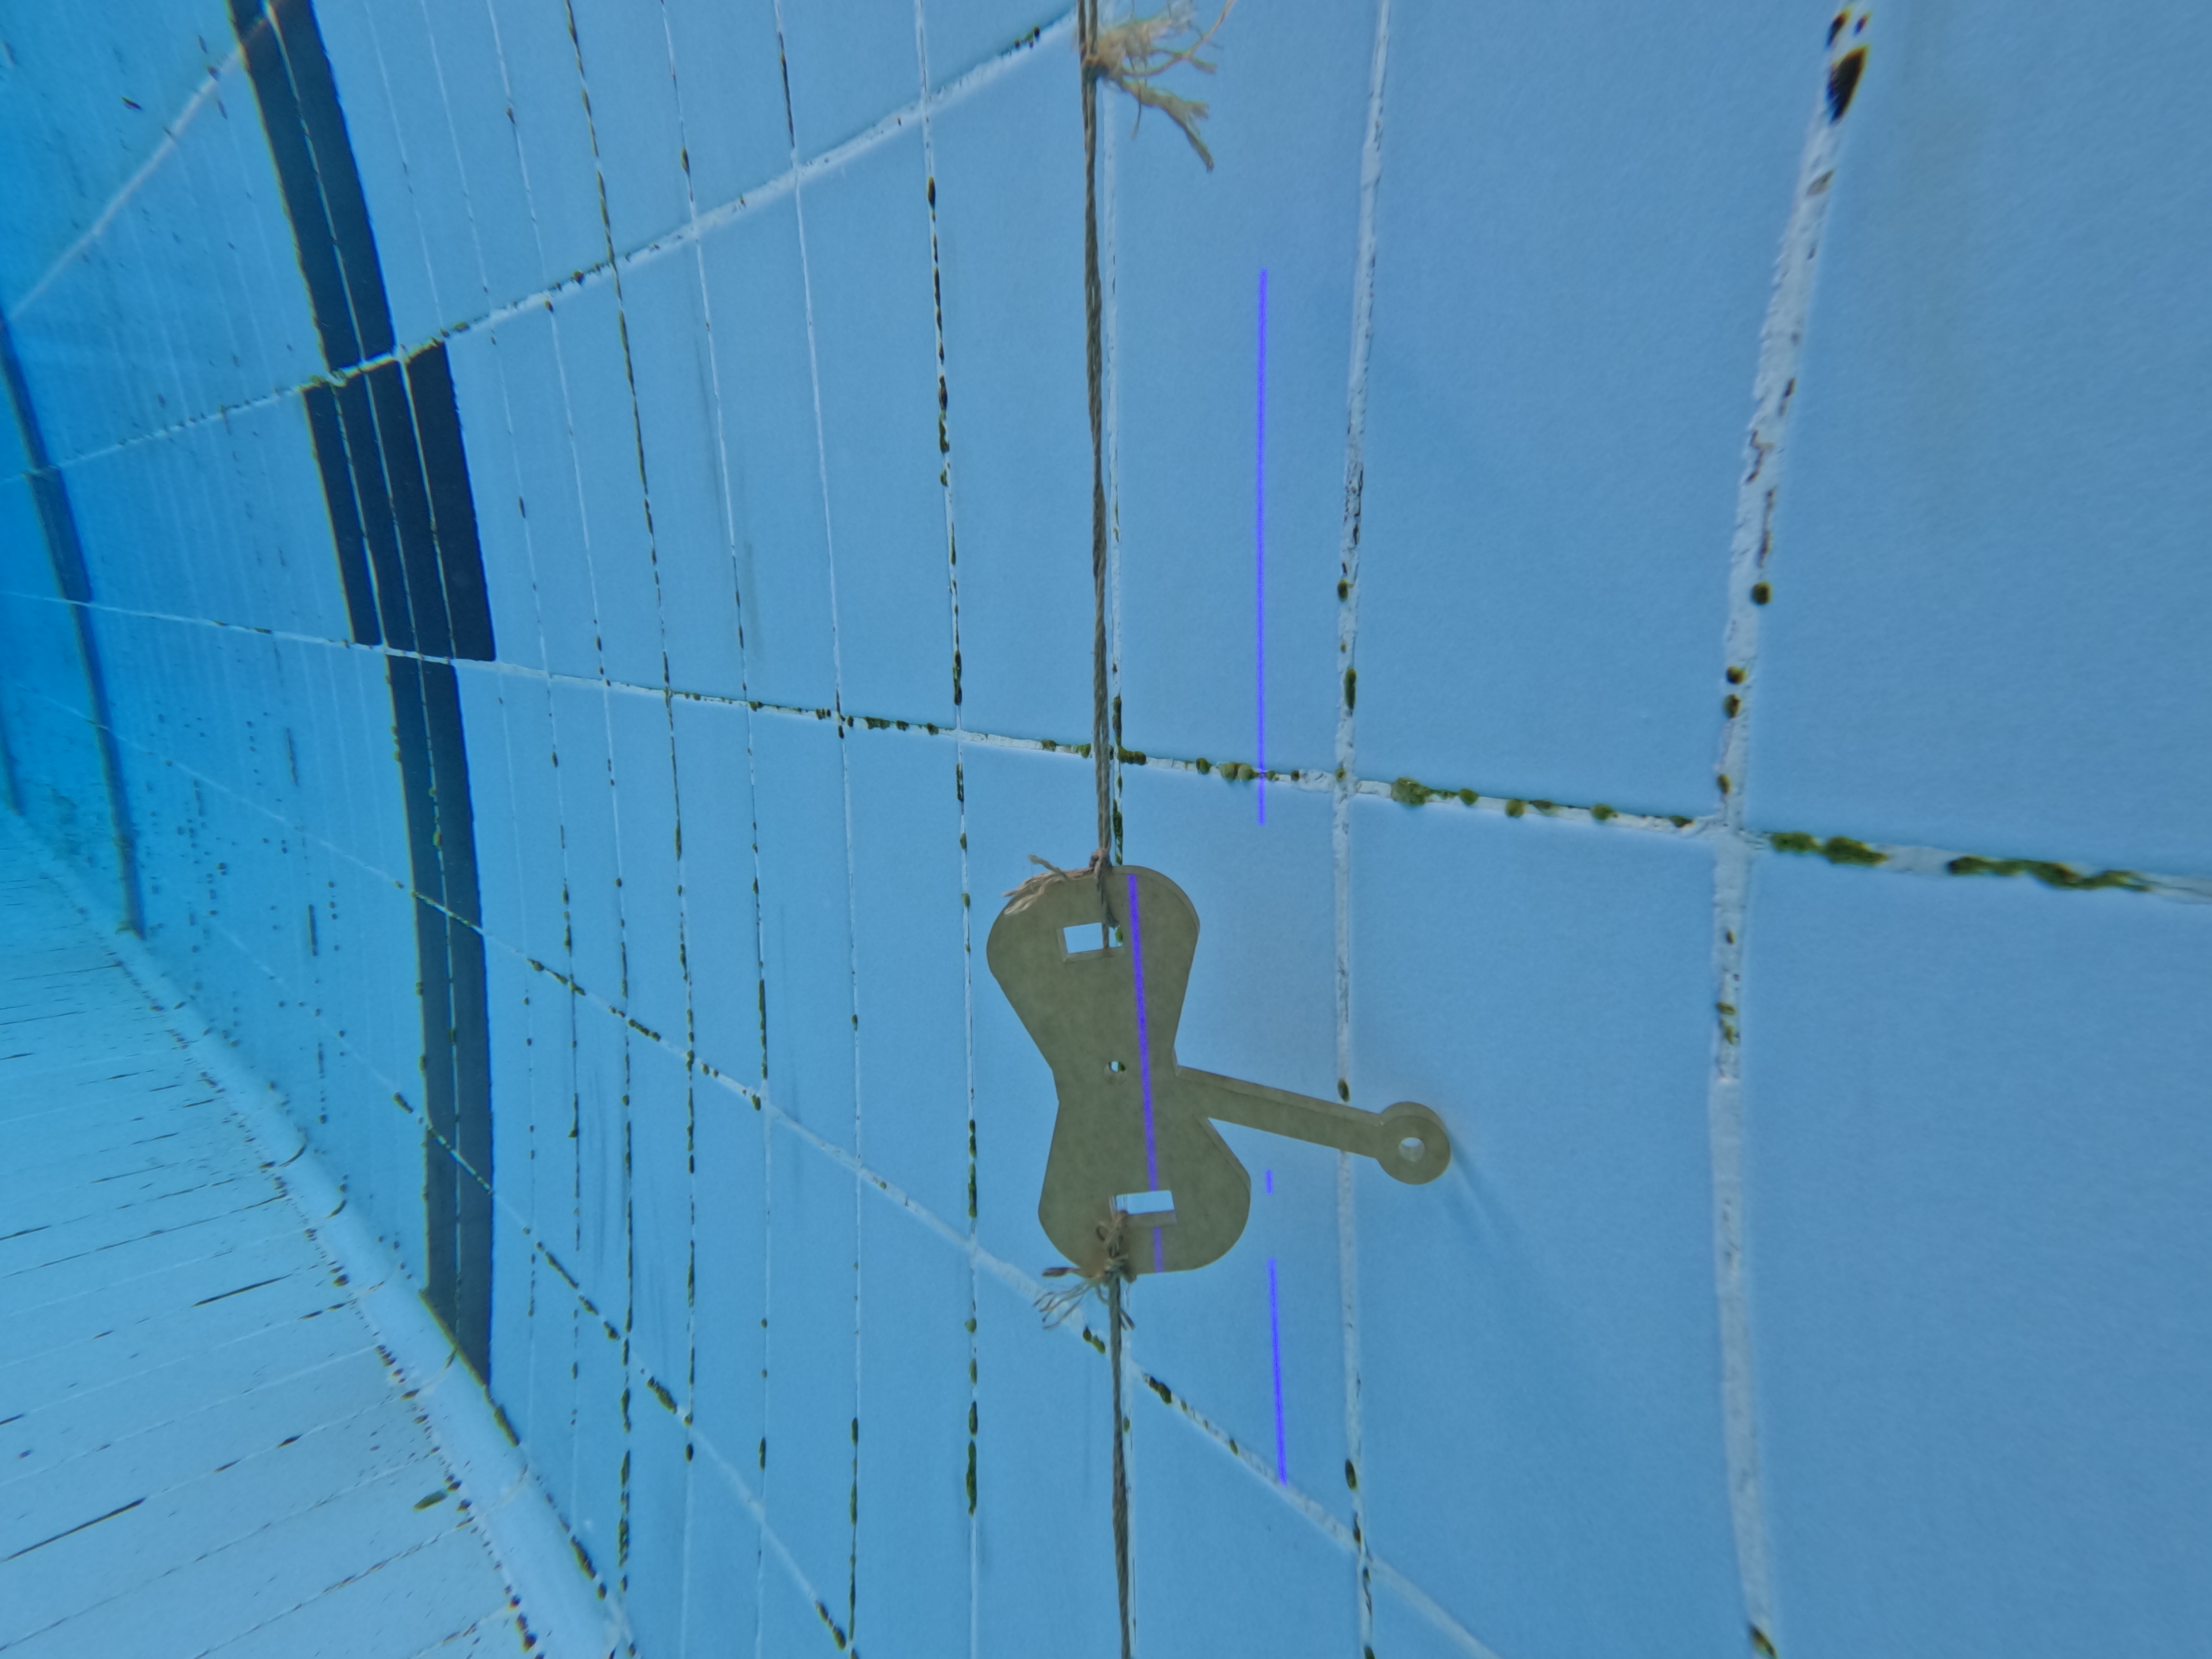

Supplement: Supplementary file 2083 [file G0050644.pdf › Level_3_2/G0050644.pdf]

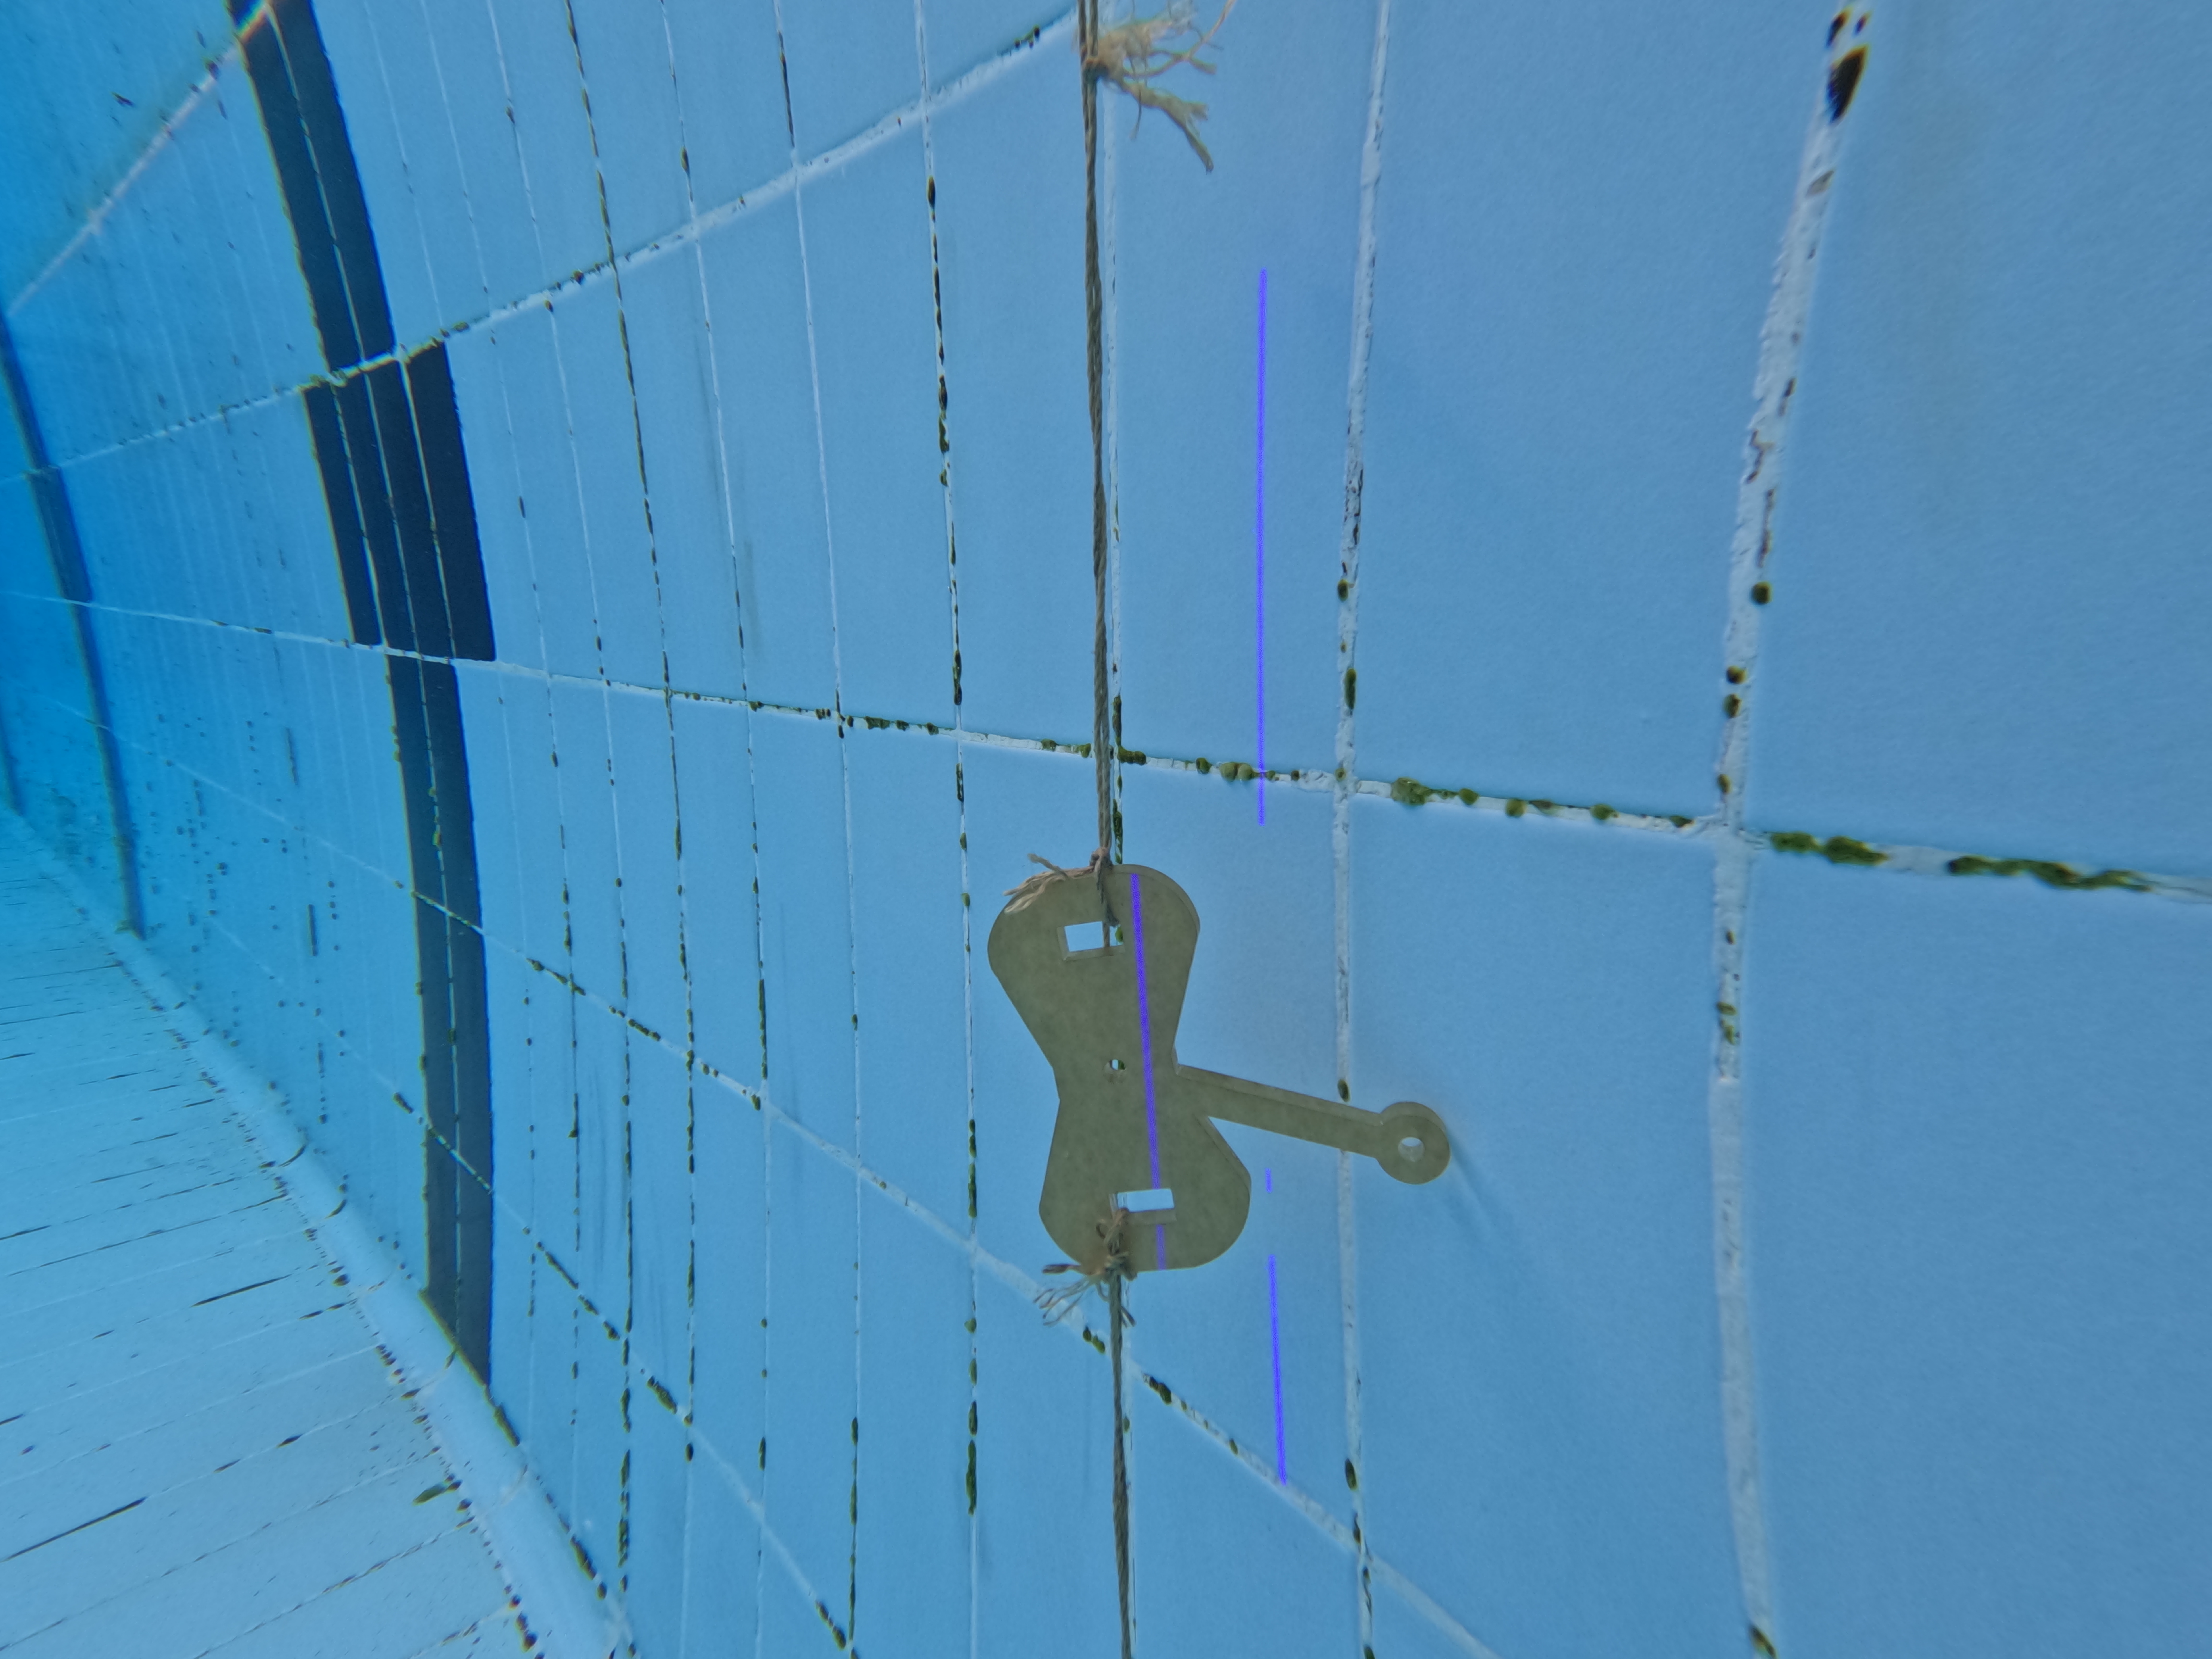

Supplement: Supplementary file 2084 [file G0050645.pdf › Level_3_2/G0050645.pdf]

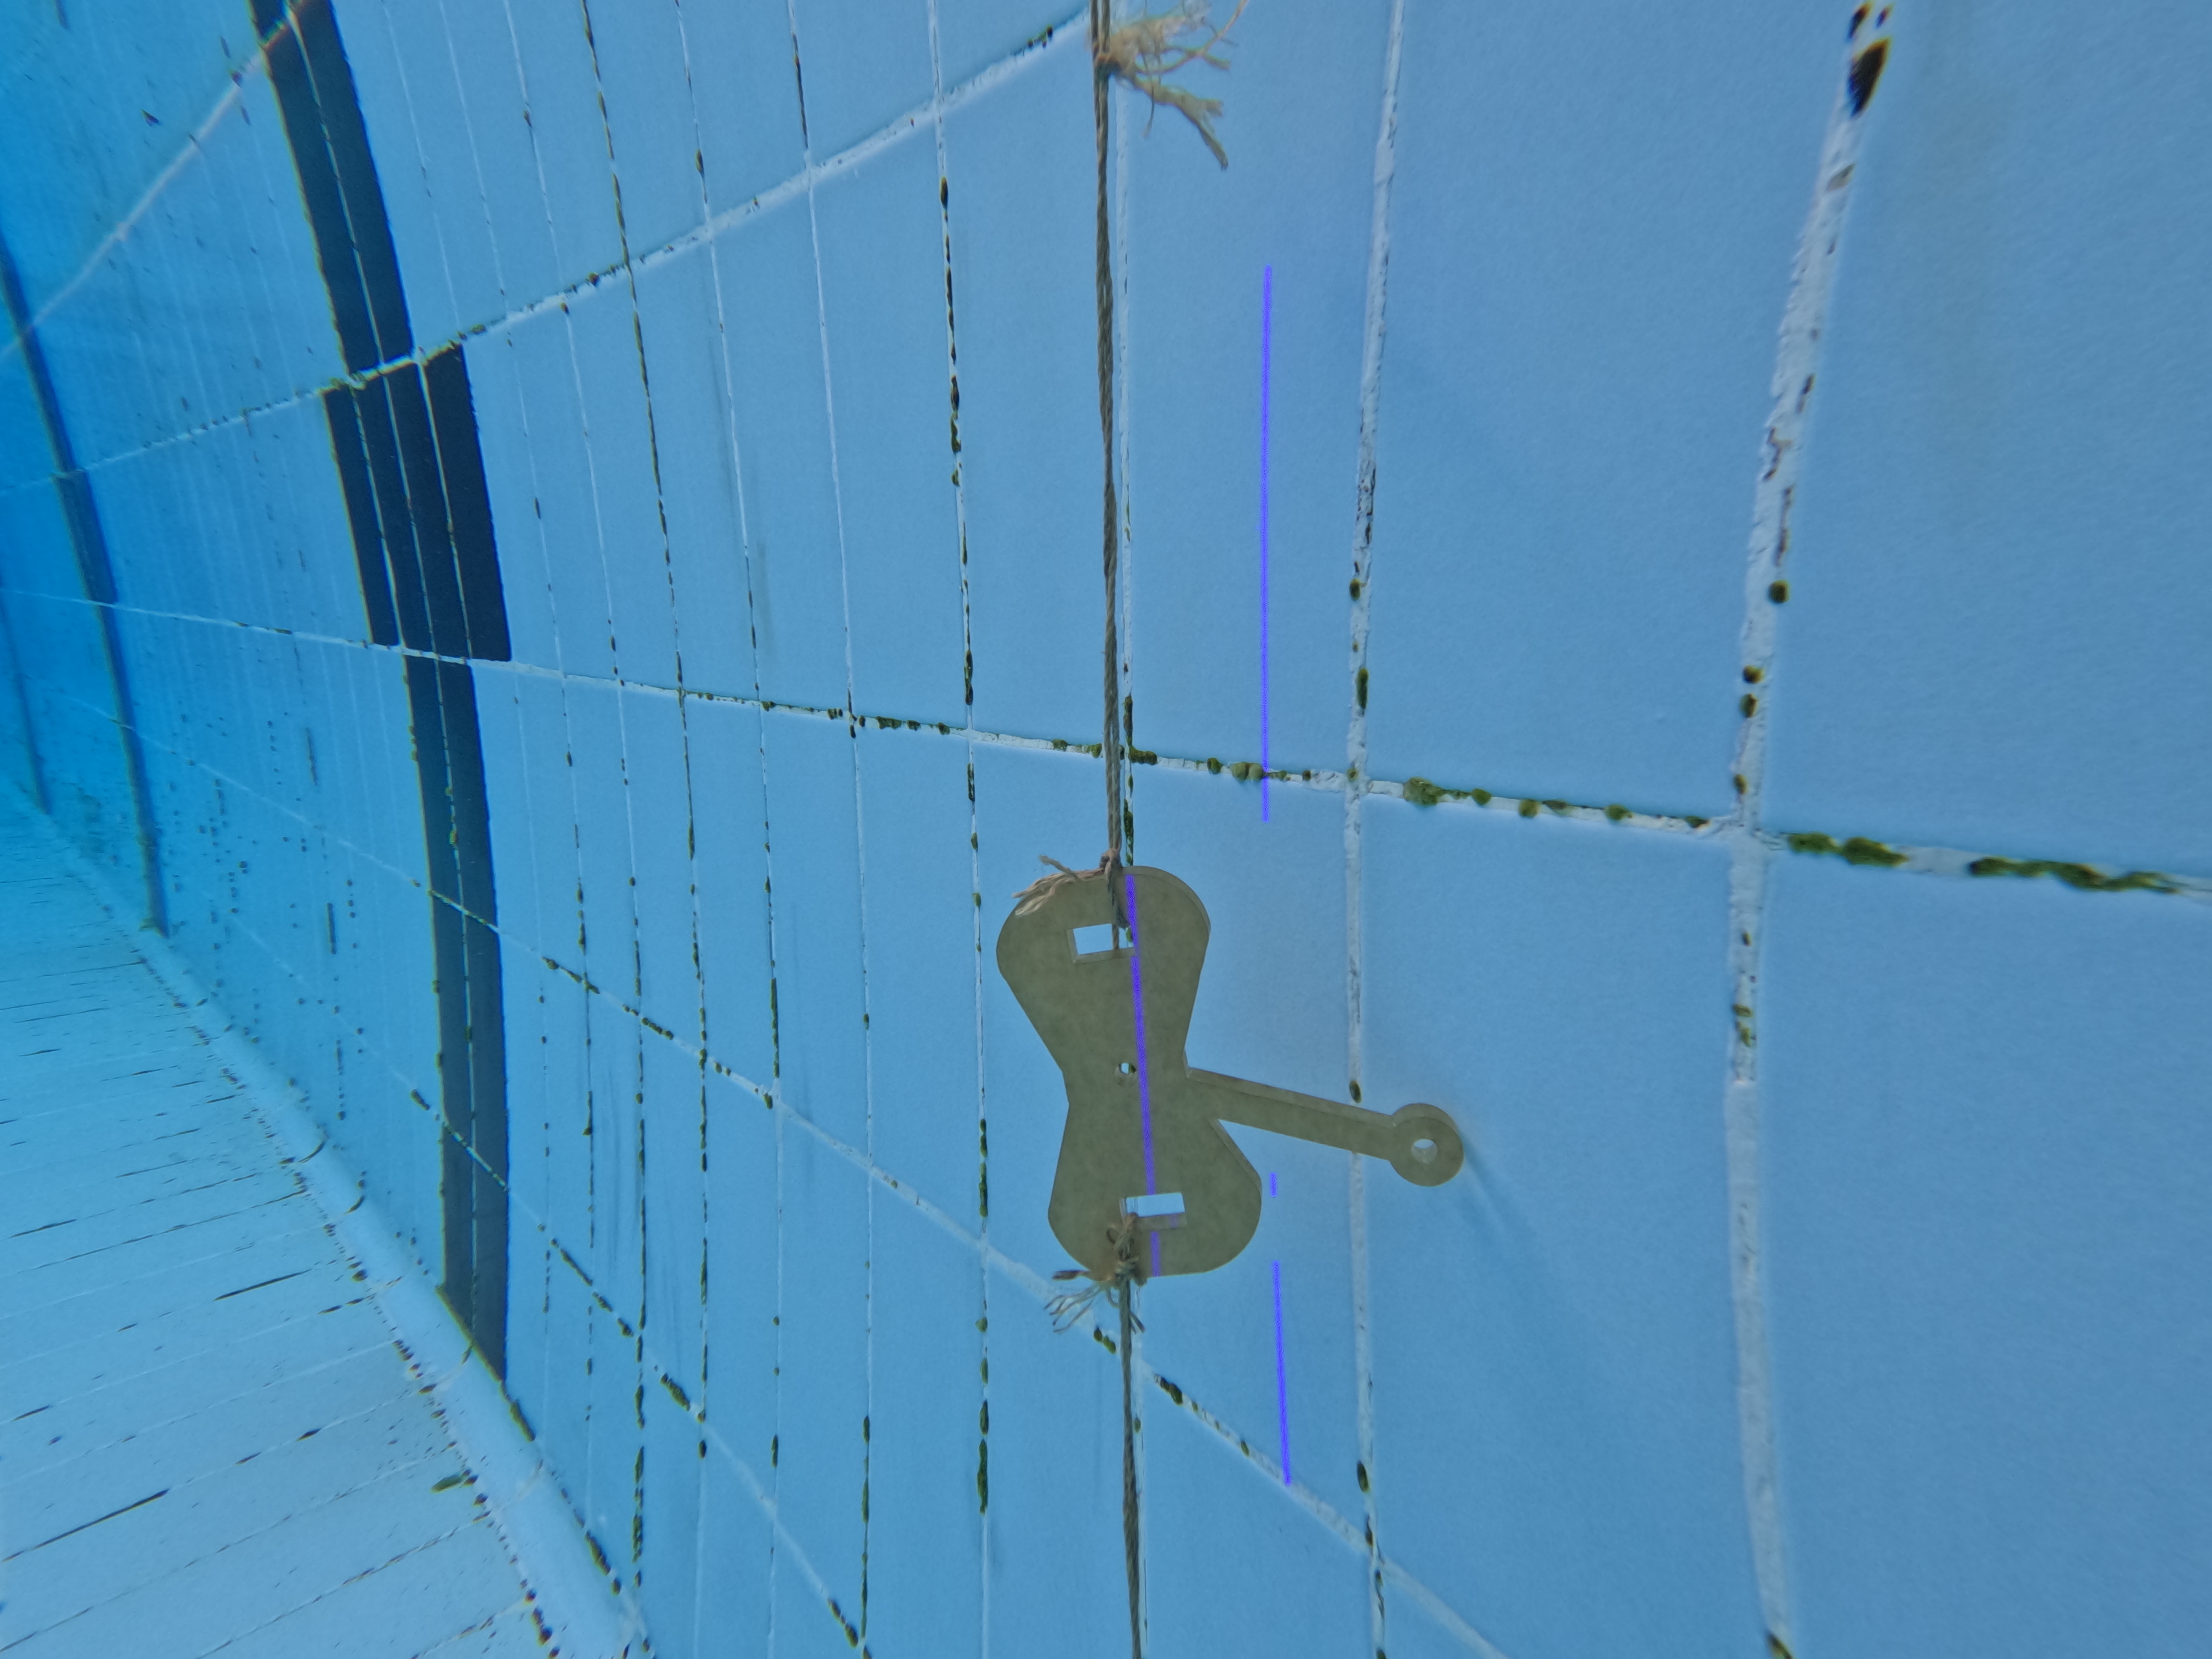

Supplement: Supplementary file 2085 [file G0050646.pdf › Level_3_2/G0050646.pdf]

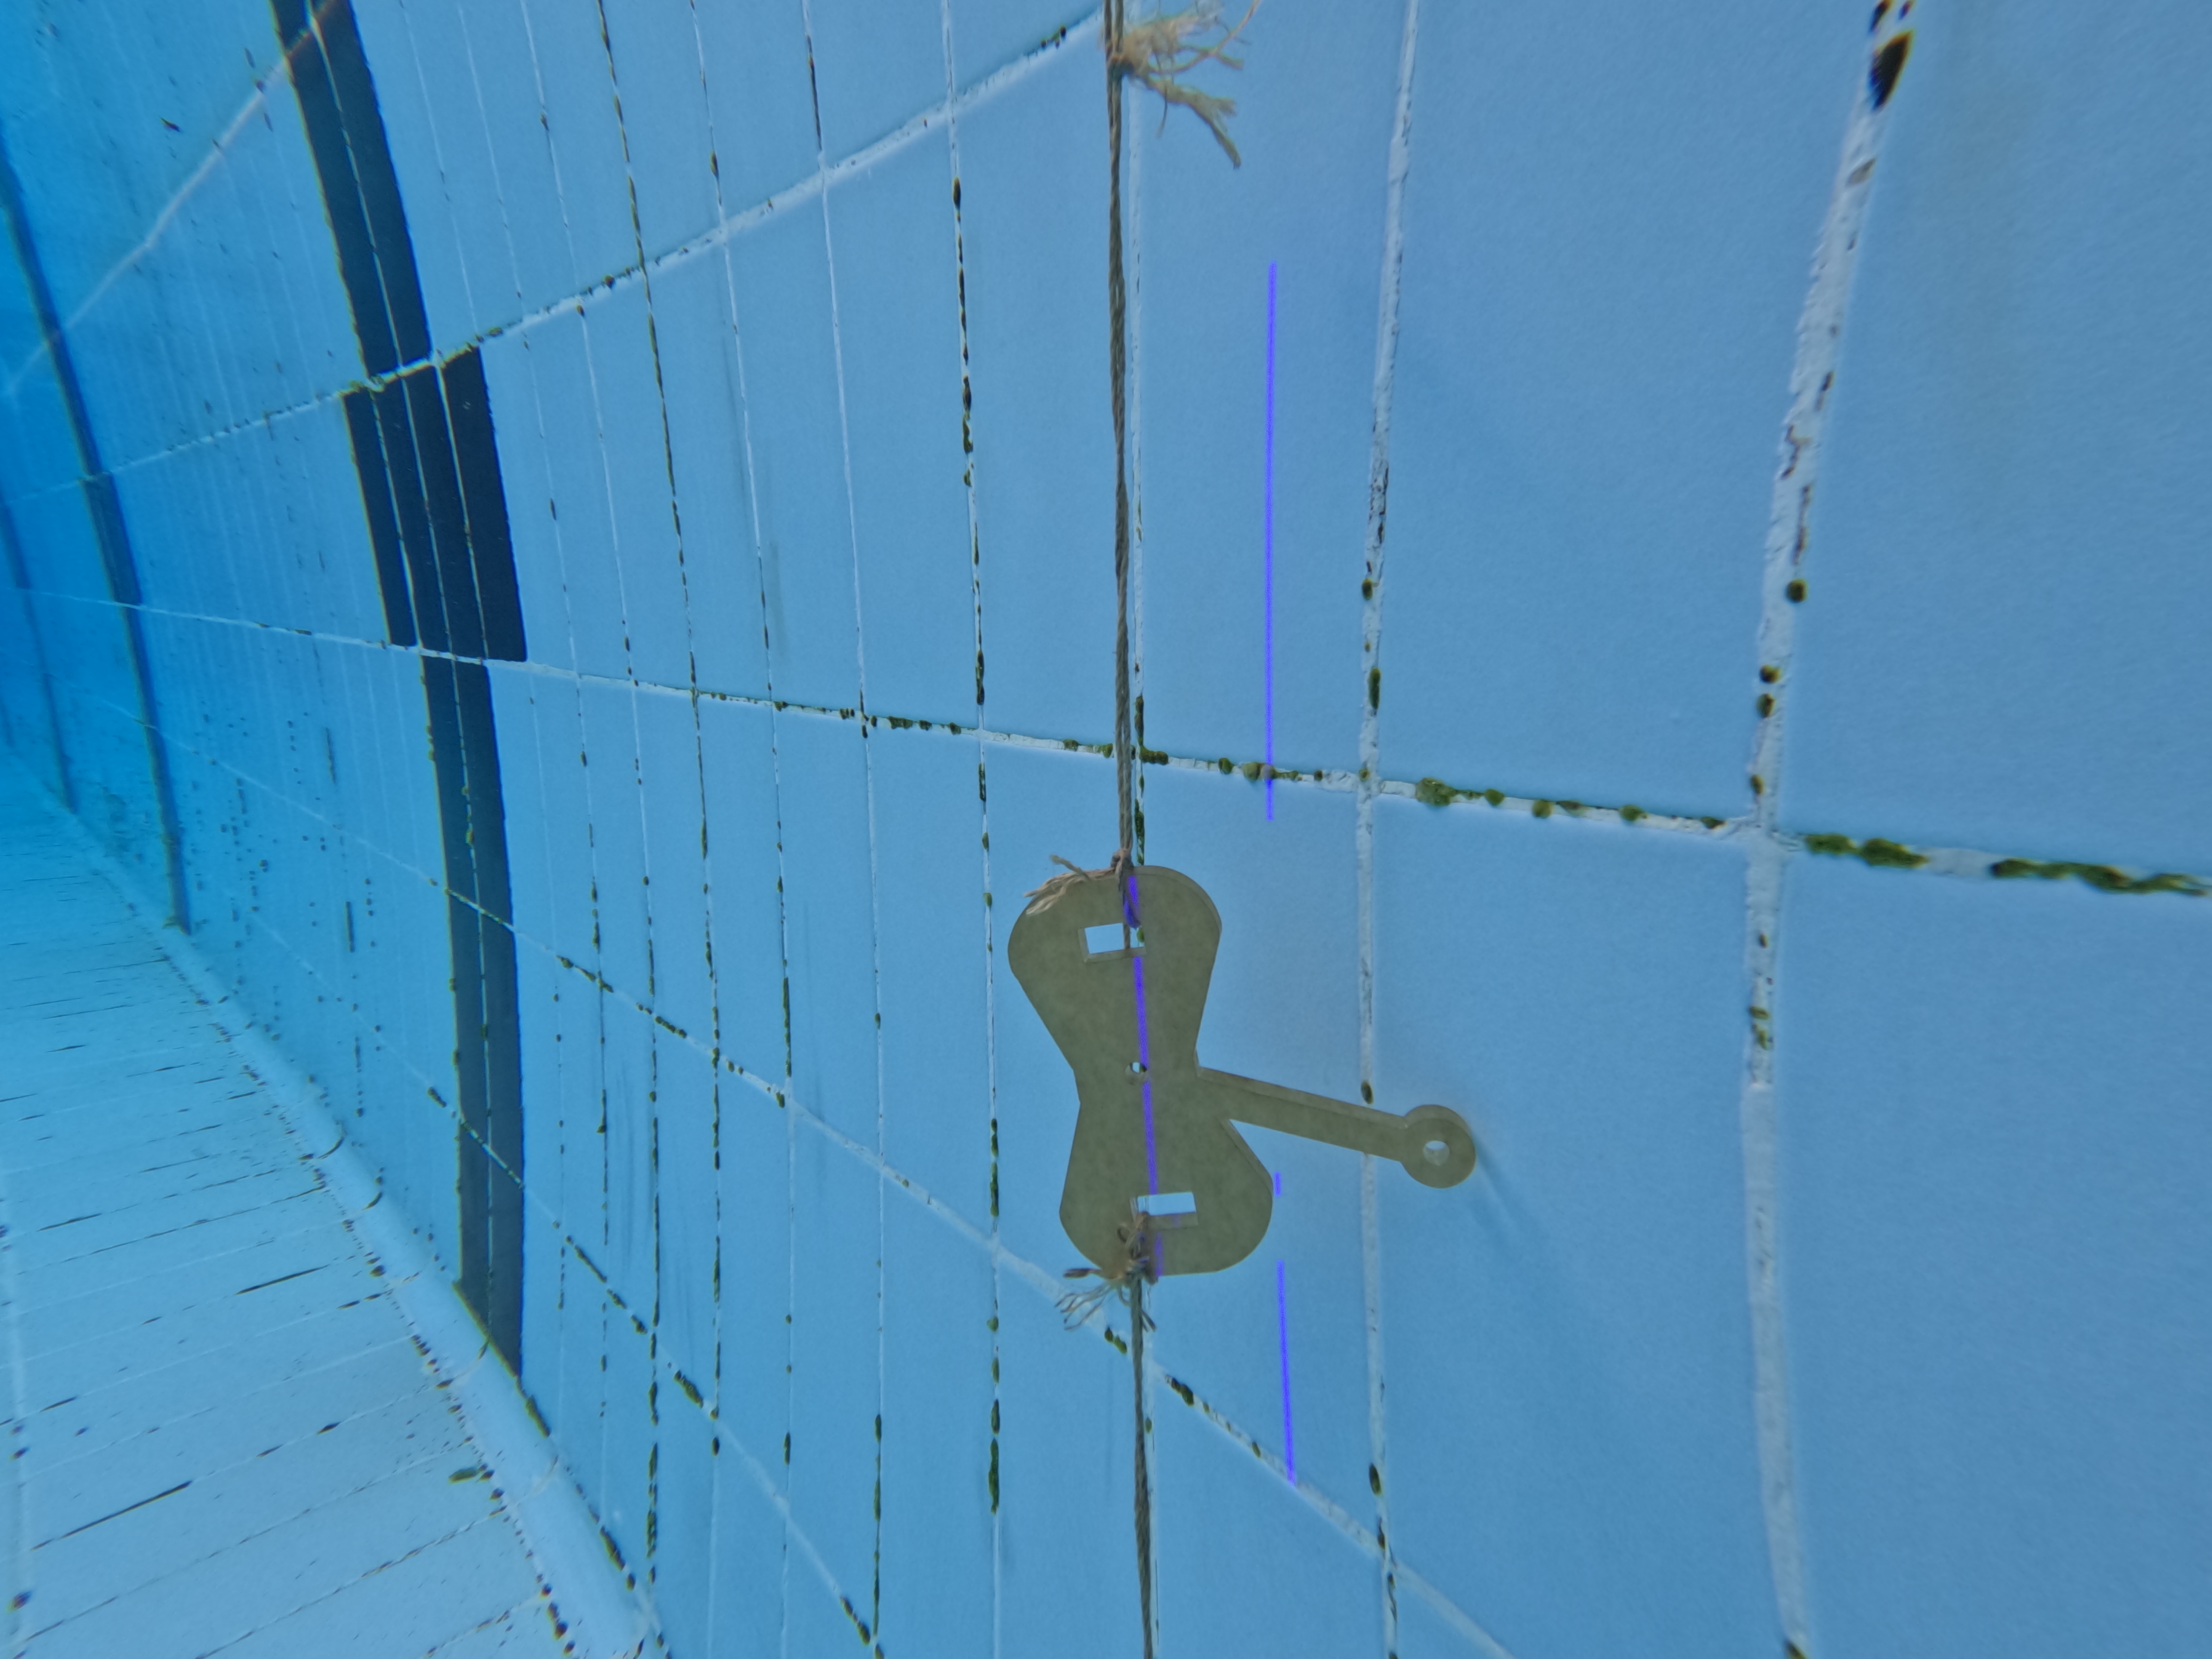

Supplement: Supplementary file 2086 [file G0050647.pdf › Level_3_2/G0050647.pdf]

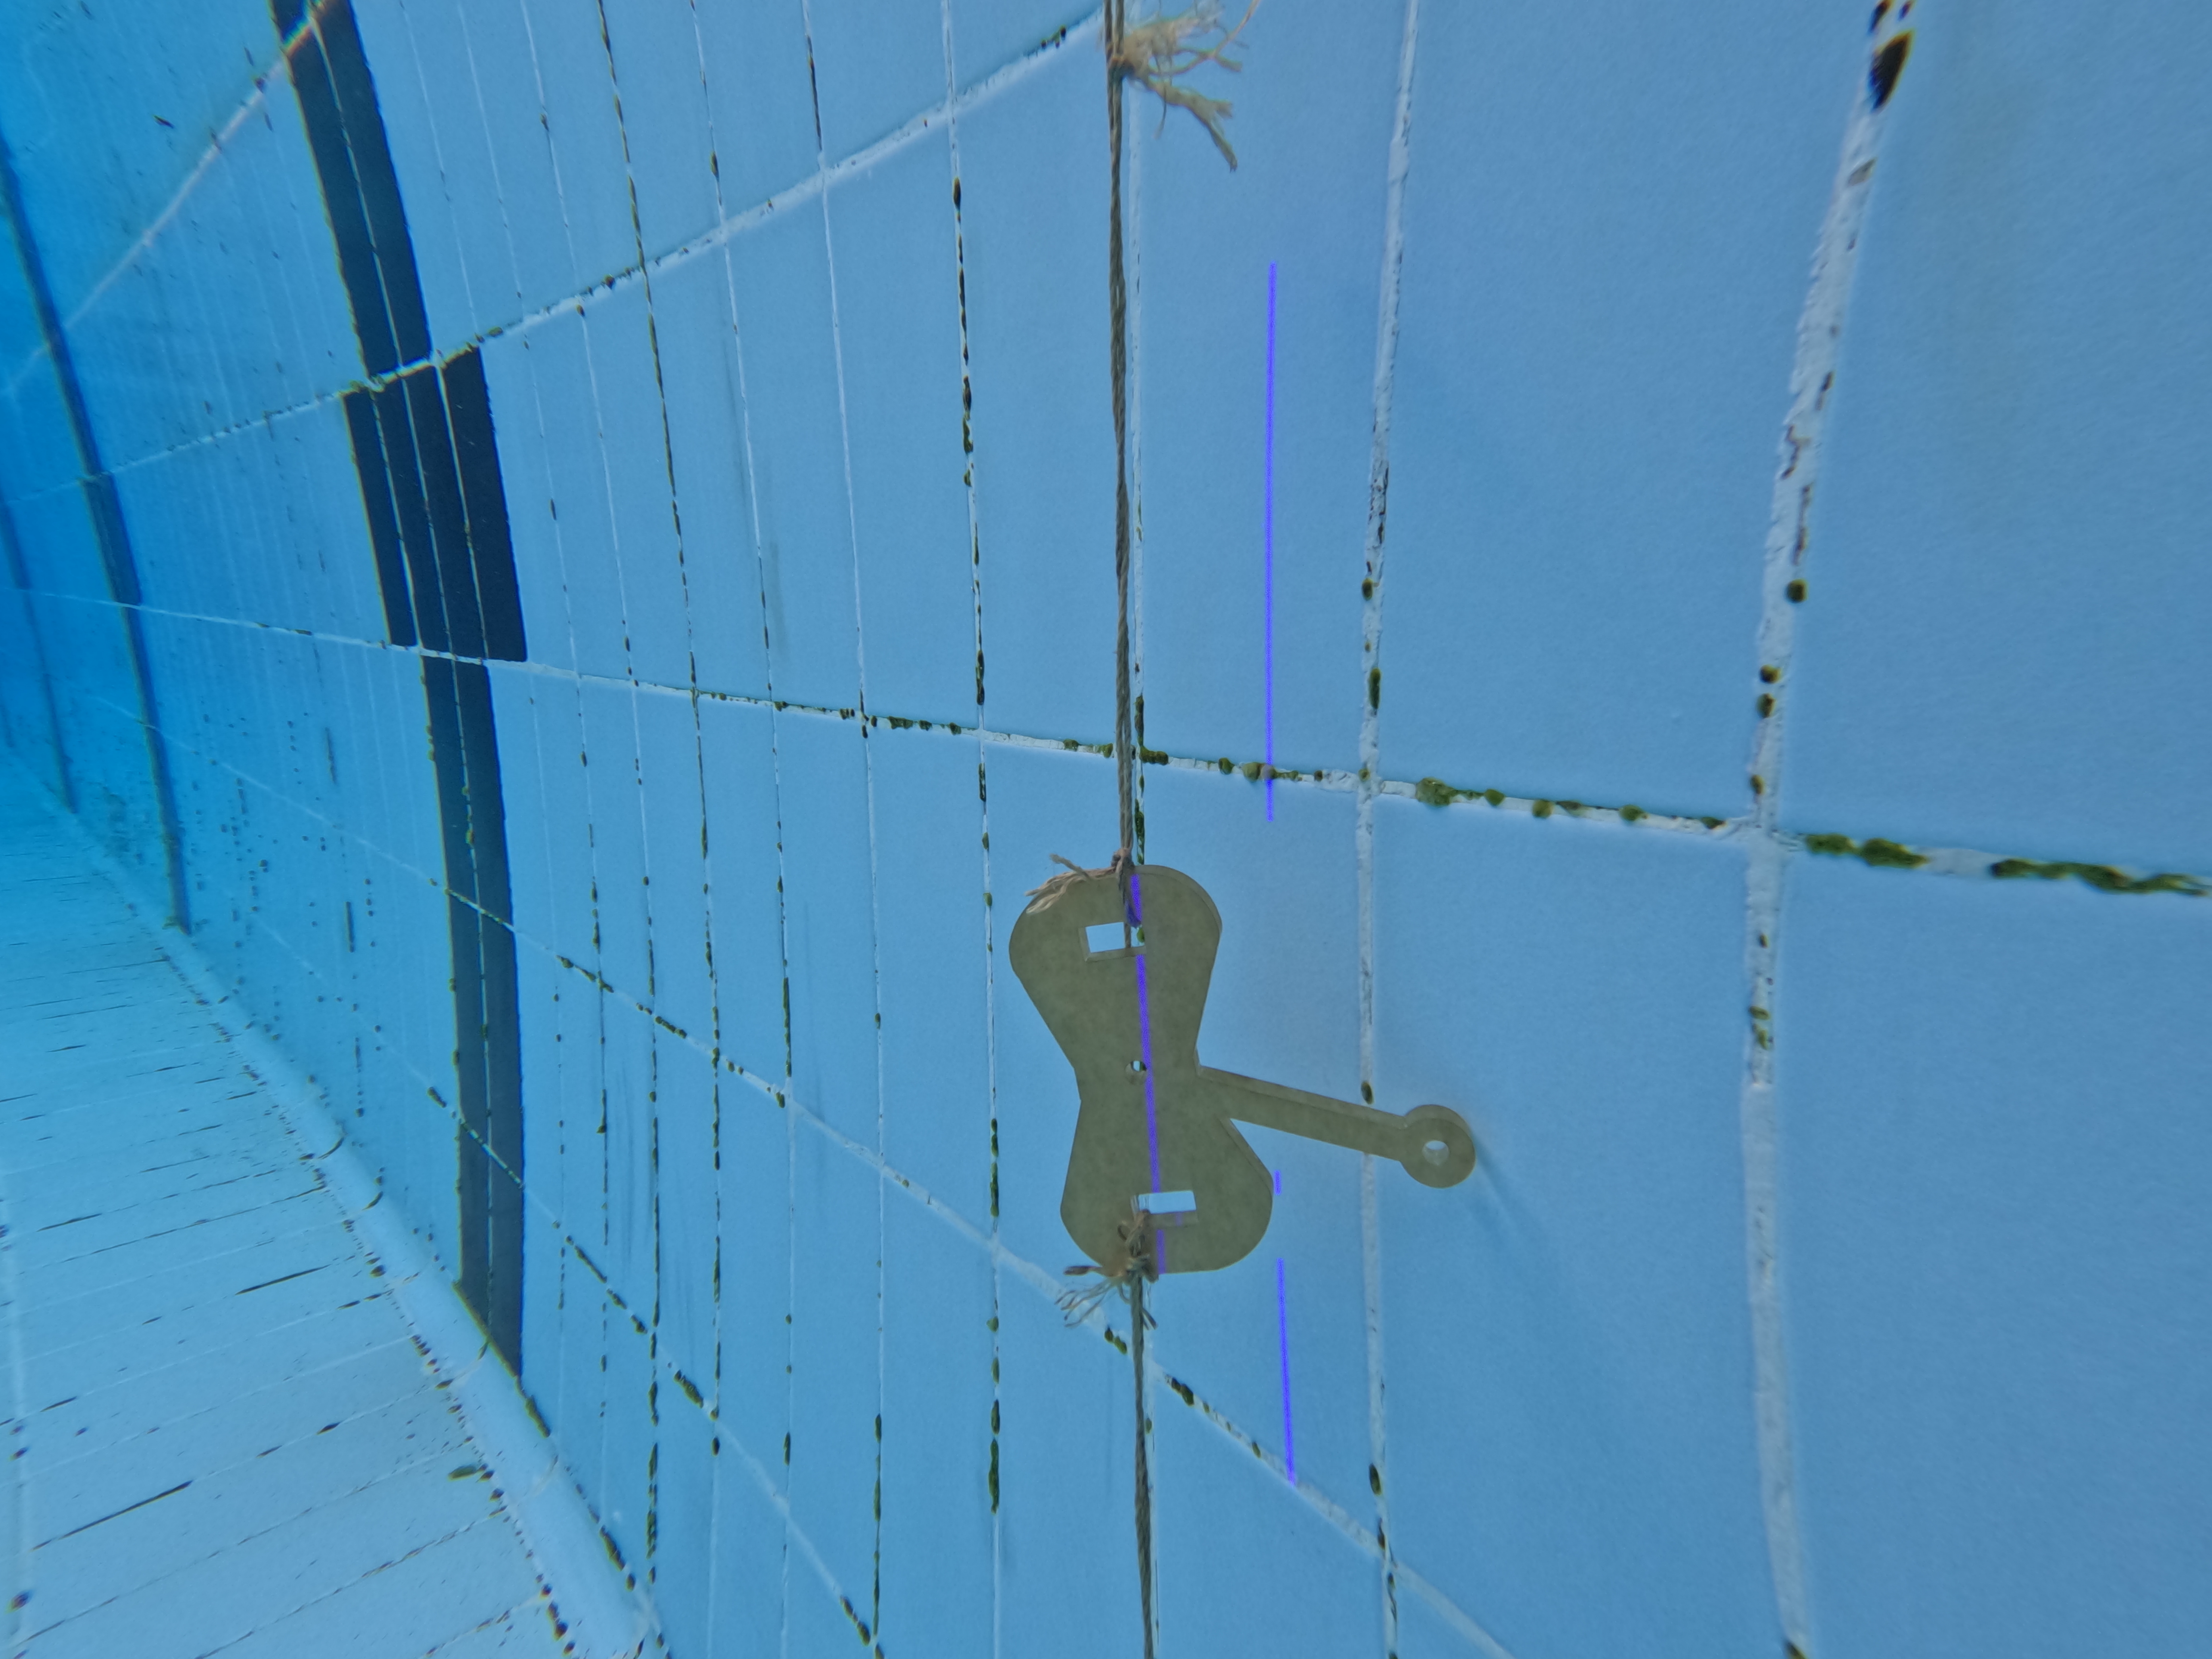

Supplement: Supplementary file 2087 [file G0050648.pdf › Level_3_2/G0050648.pdf]

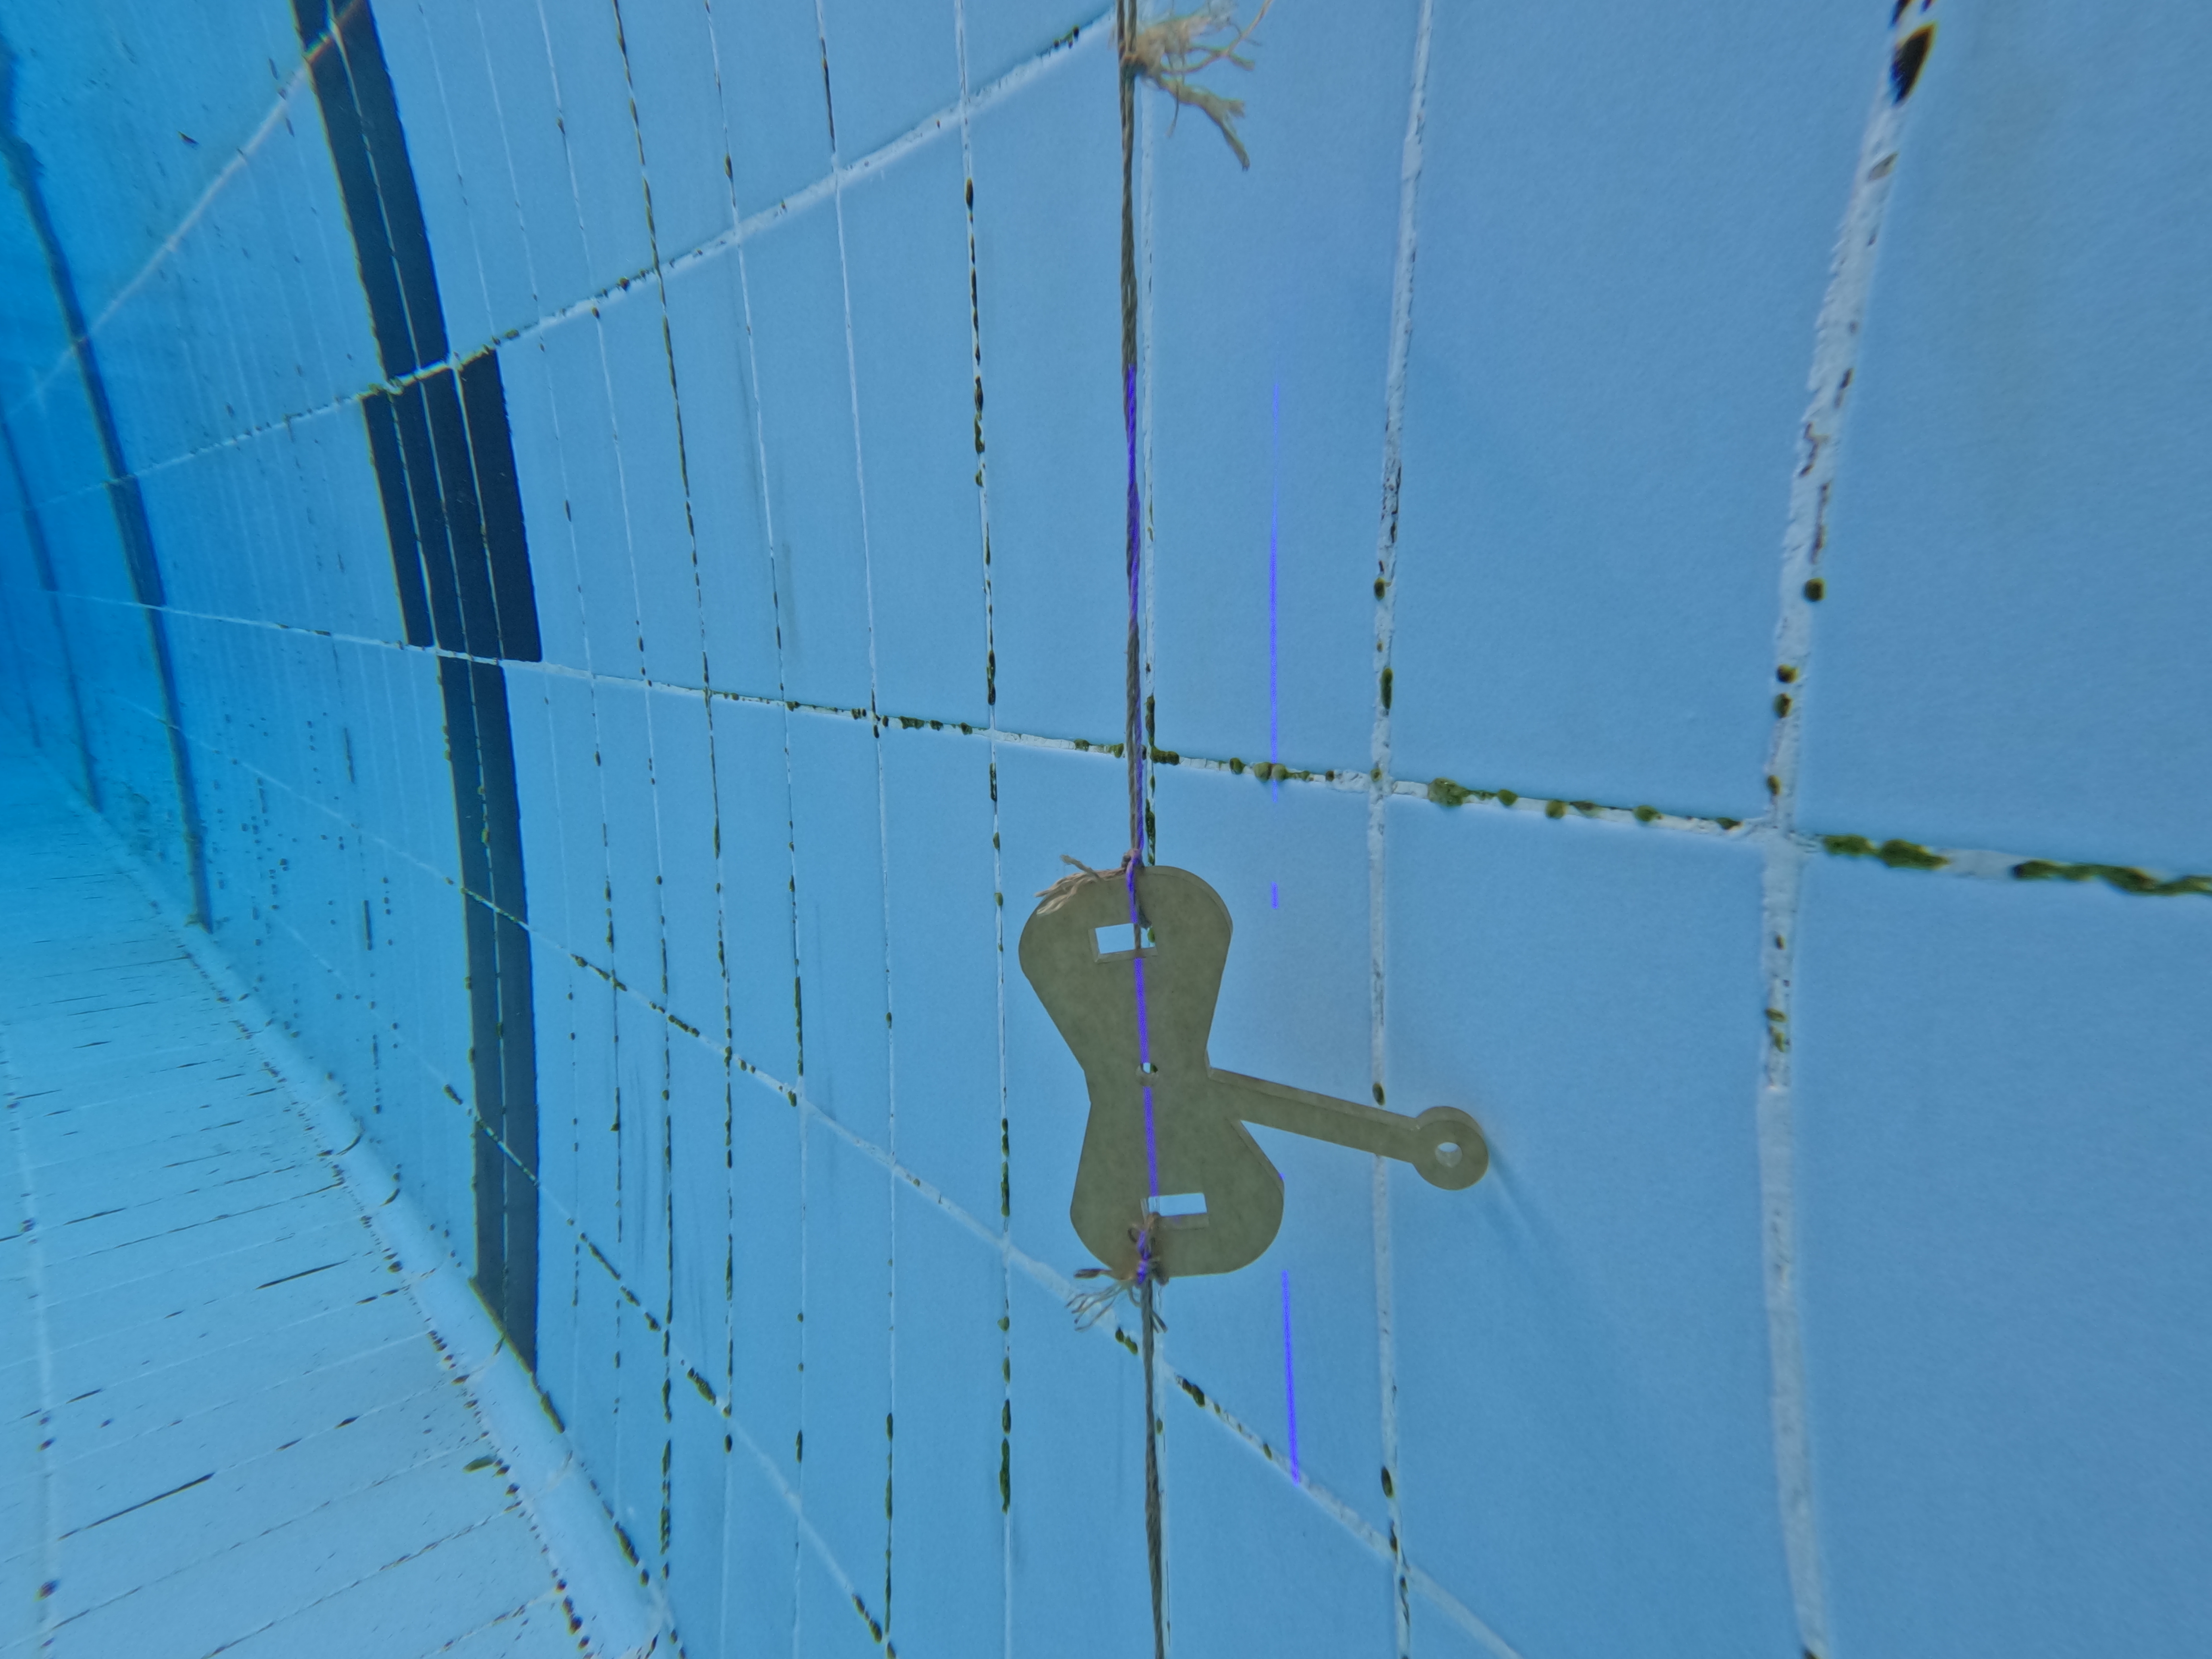

Supplement: Supplementary file 2088 [file G0050649.pdf › Level_3_2/G0050649.pdf]

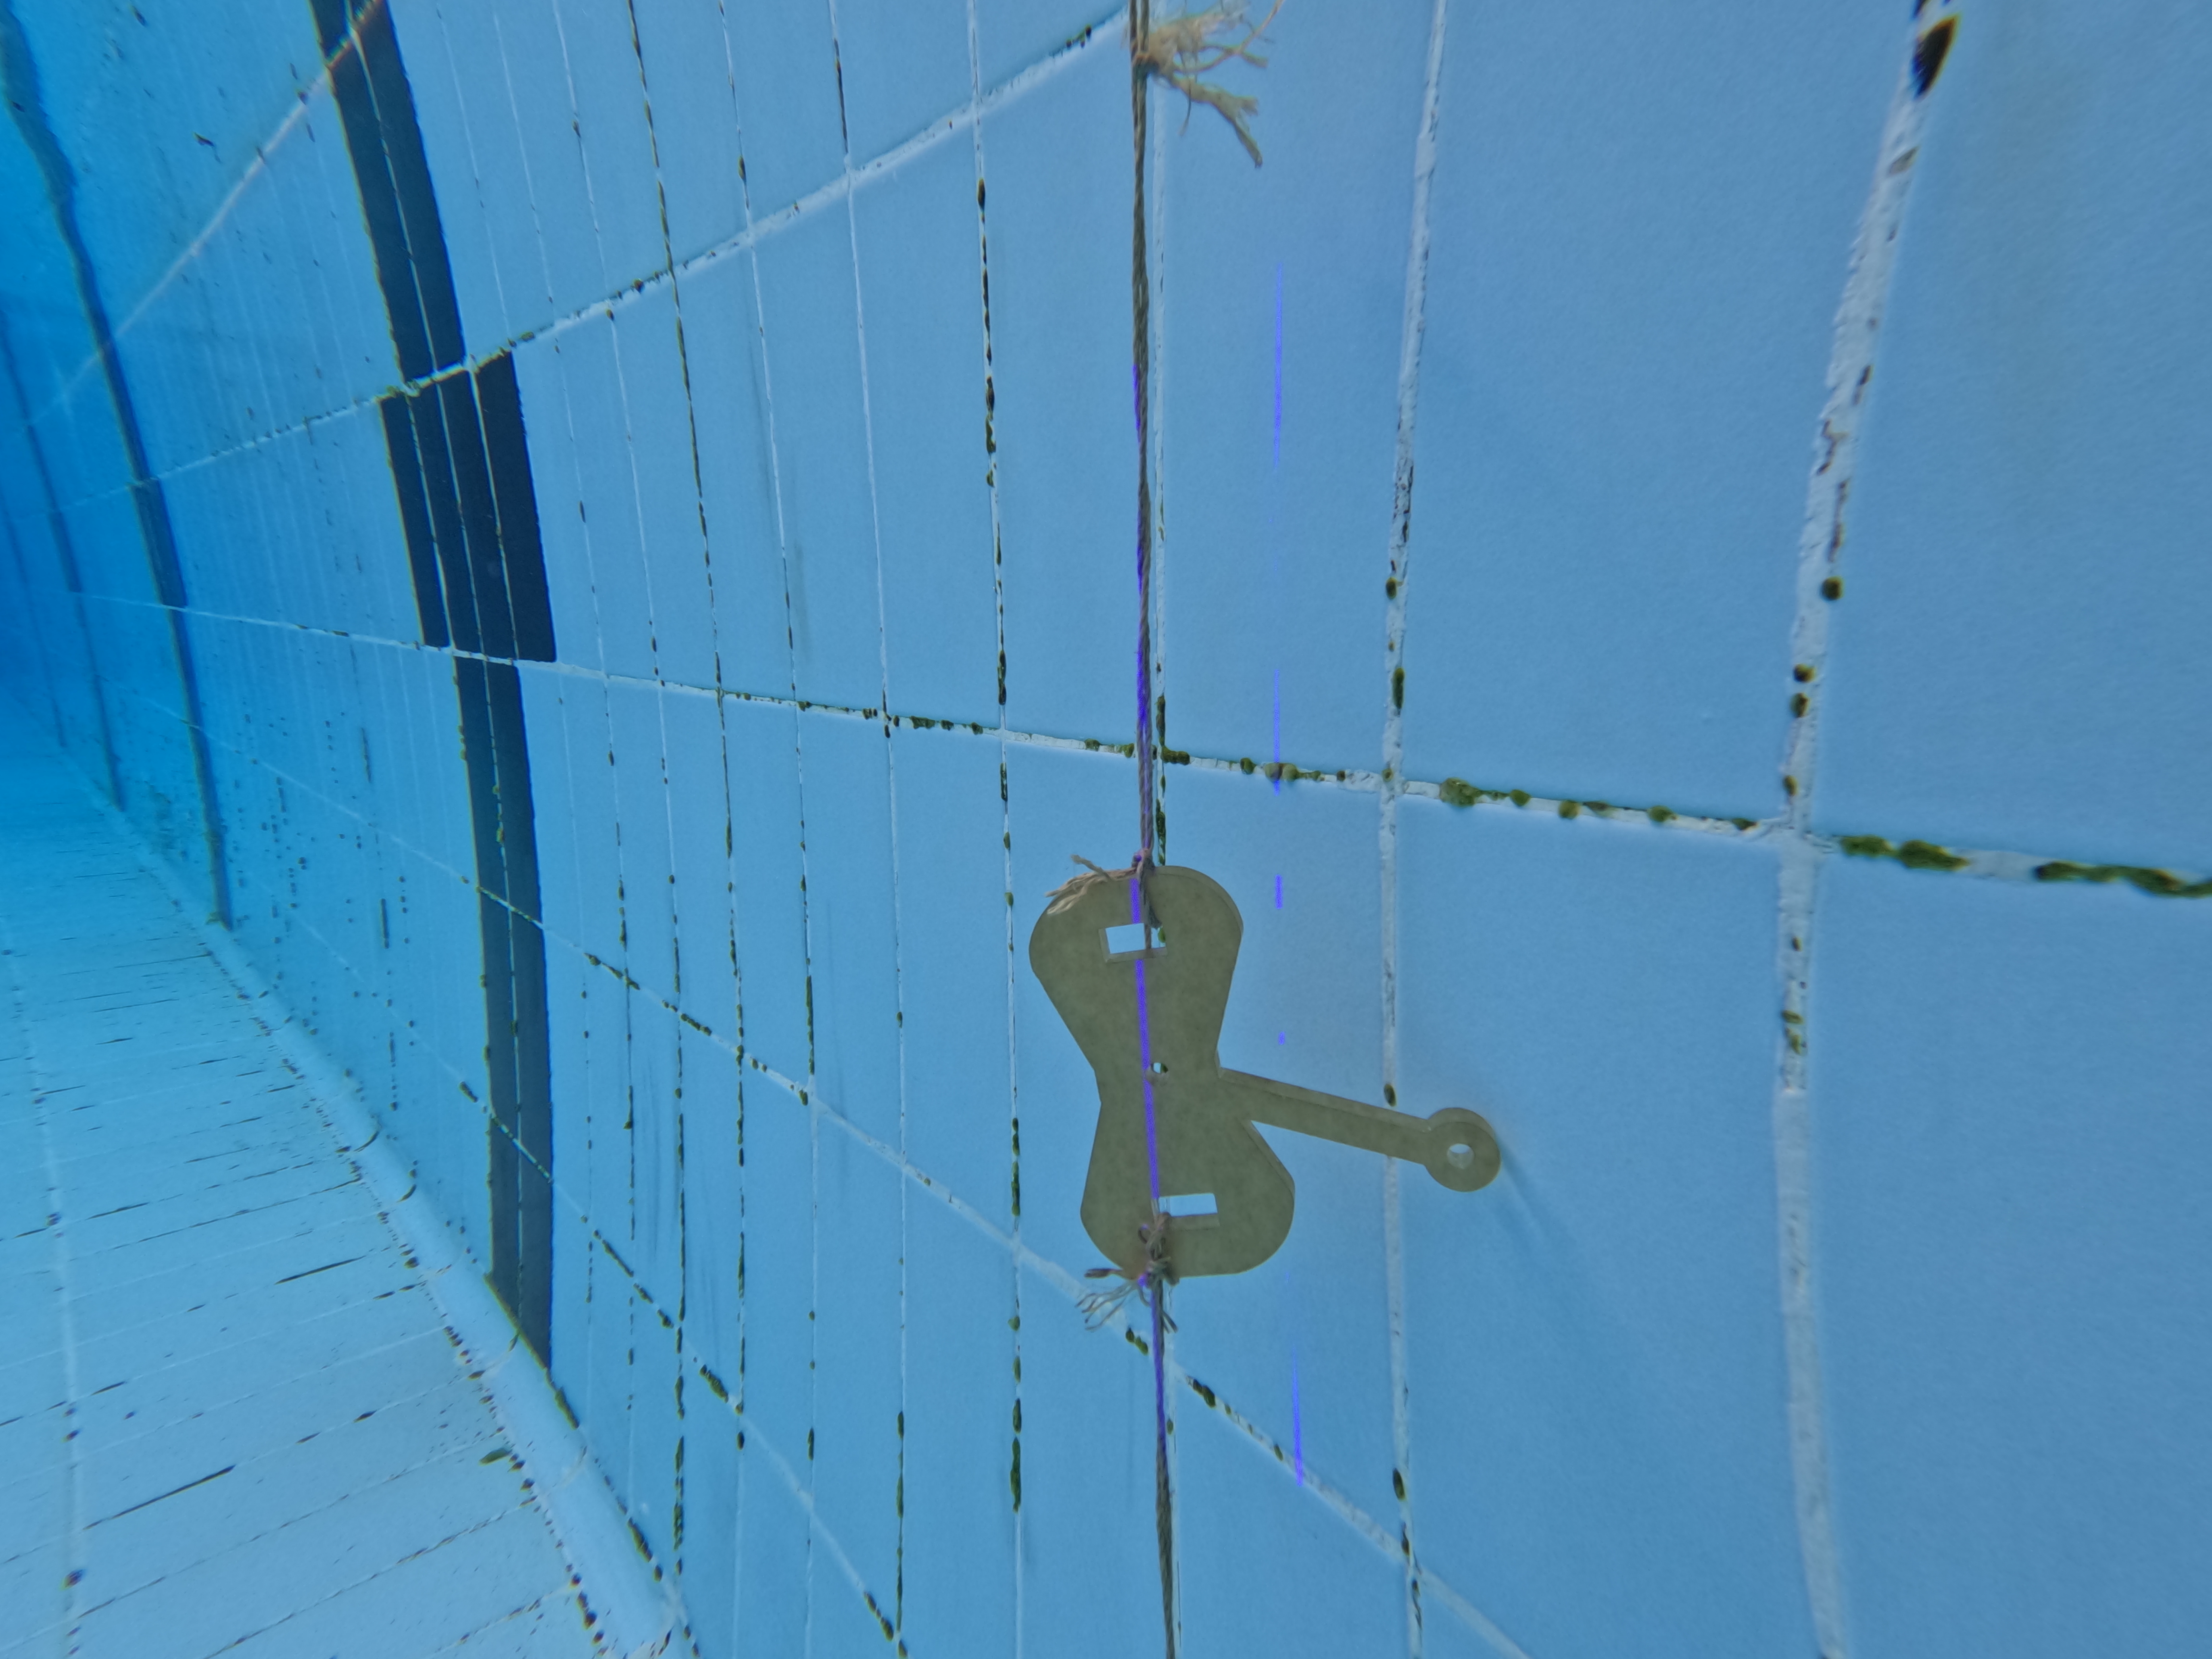

Supplement: Supplementary file 2089 [file G0050650.pdf › Level_3_2/G0050650.pdf]

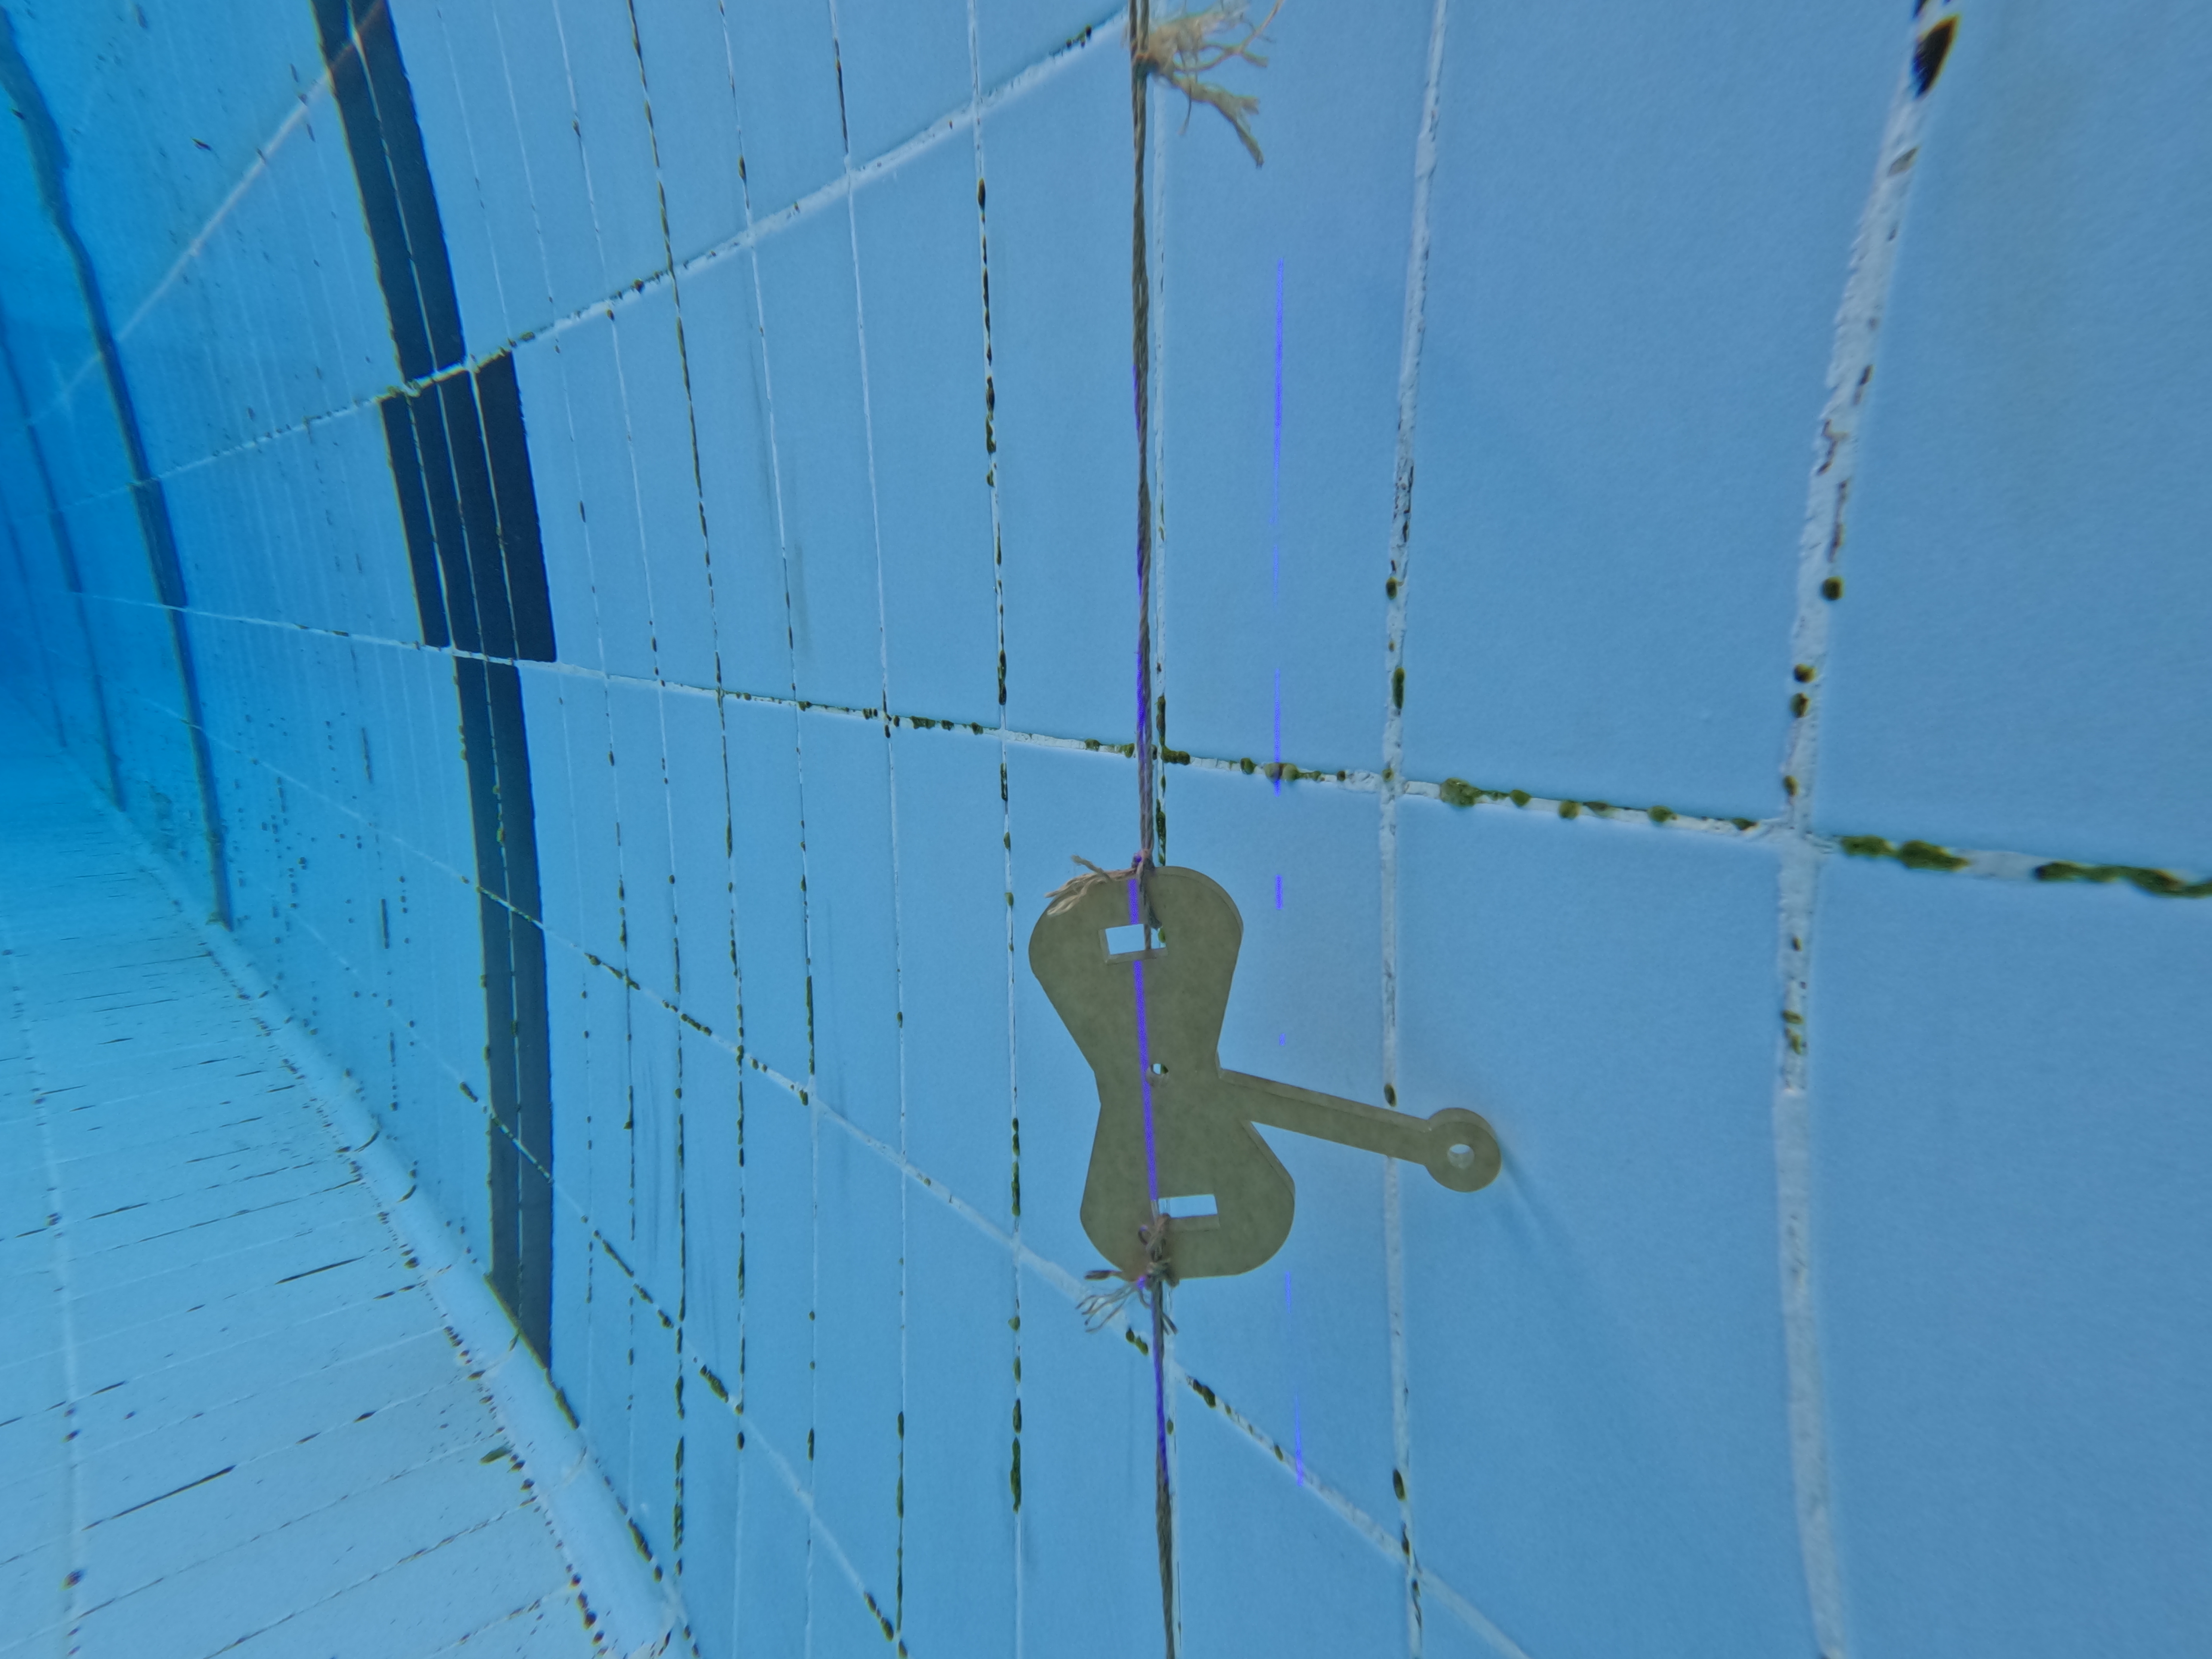

Supplement: Supplementary file 2090 [file G0050651.pdf › Level_3_2/G0050651.pdf]
