# Supplementary figures and images for: 3D reconstruction of shallow sea environment using direct system calibration and faint laser line extraction (part 21 of 35)
Source: Research Square preprint supplement (doi:10.21203/rs.3.rs-5262658/v1), 2024-12-02

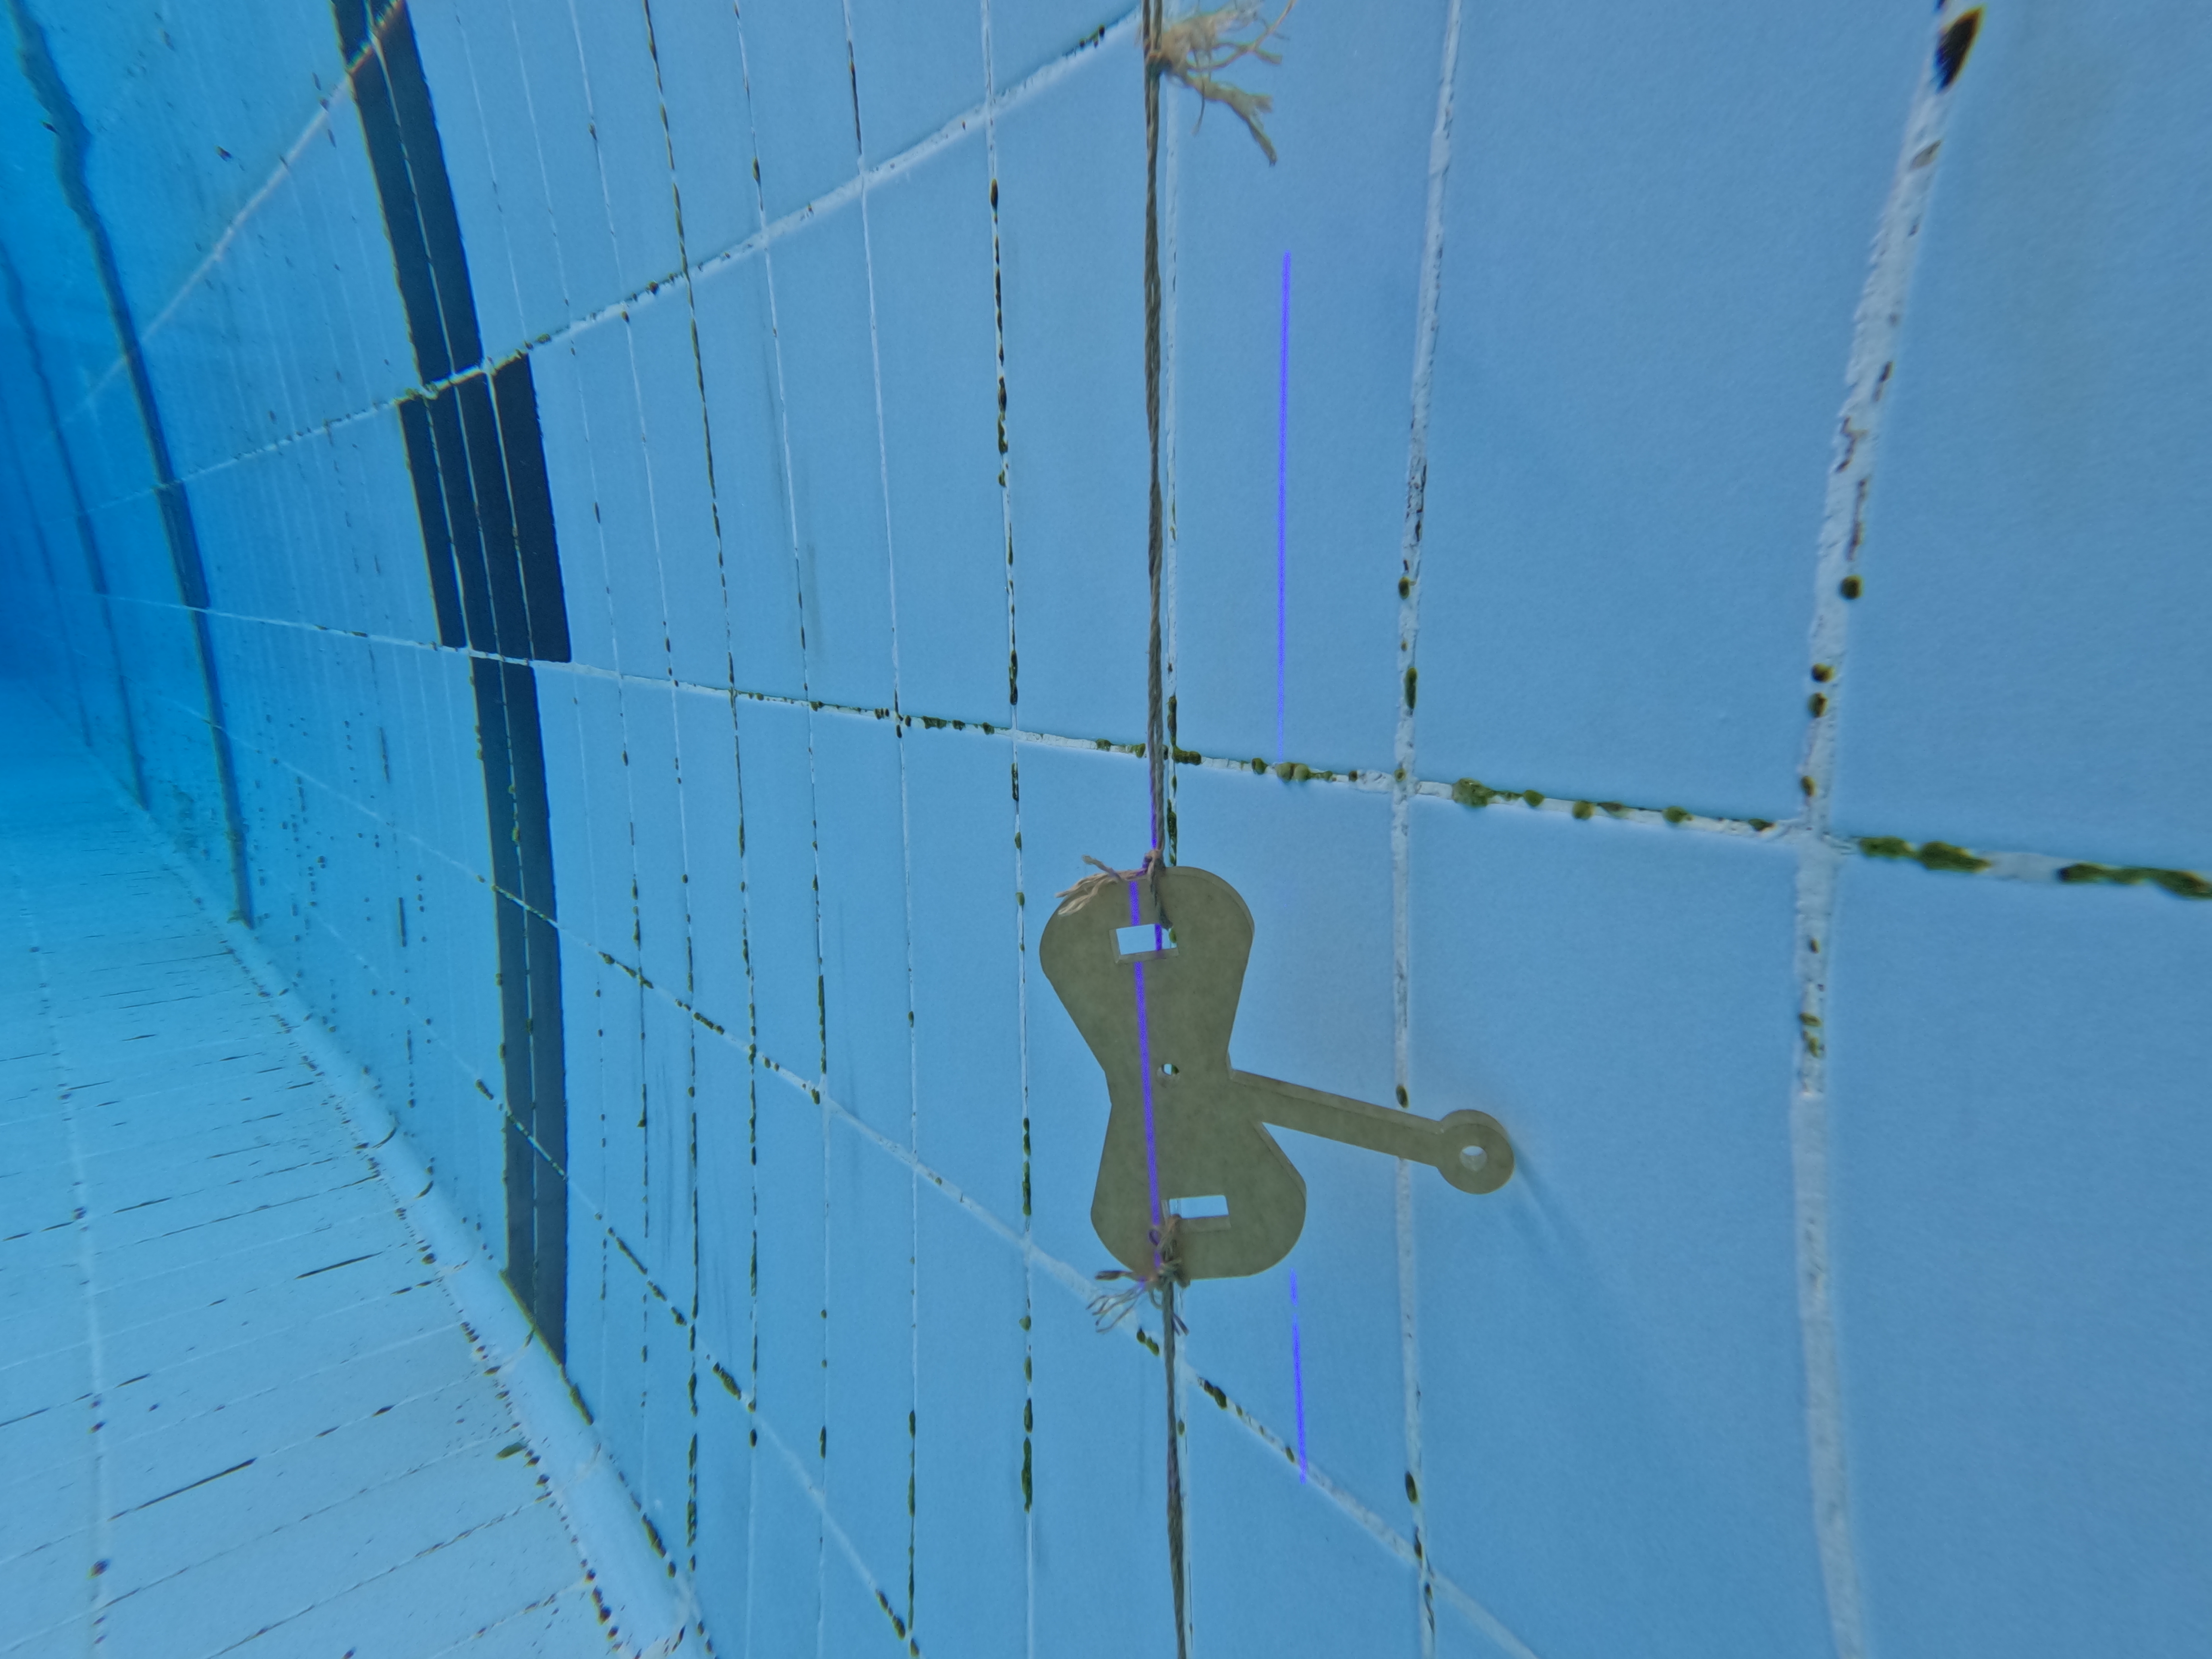

Supplement: Supplementary file 2091 [file G0050652.pdf › Level_3_2/G0050652.pdf]

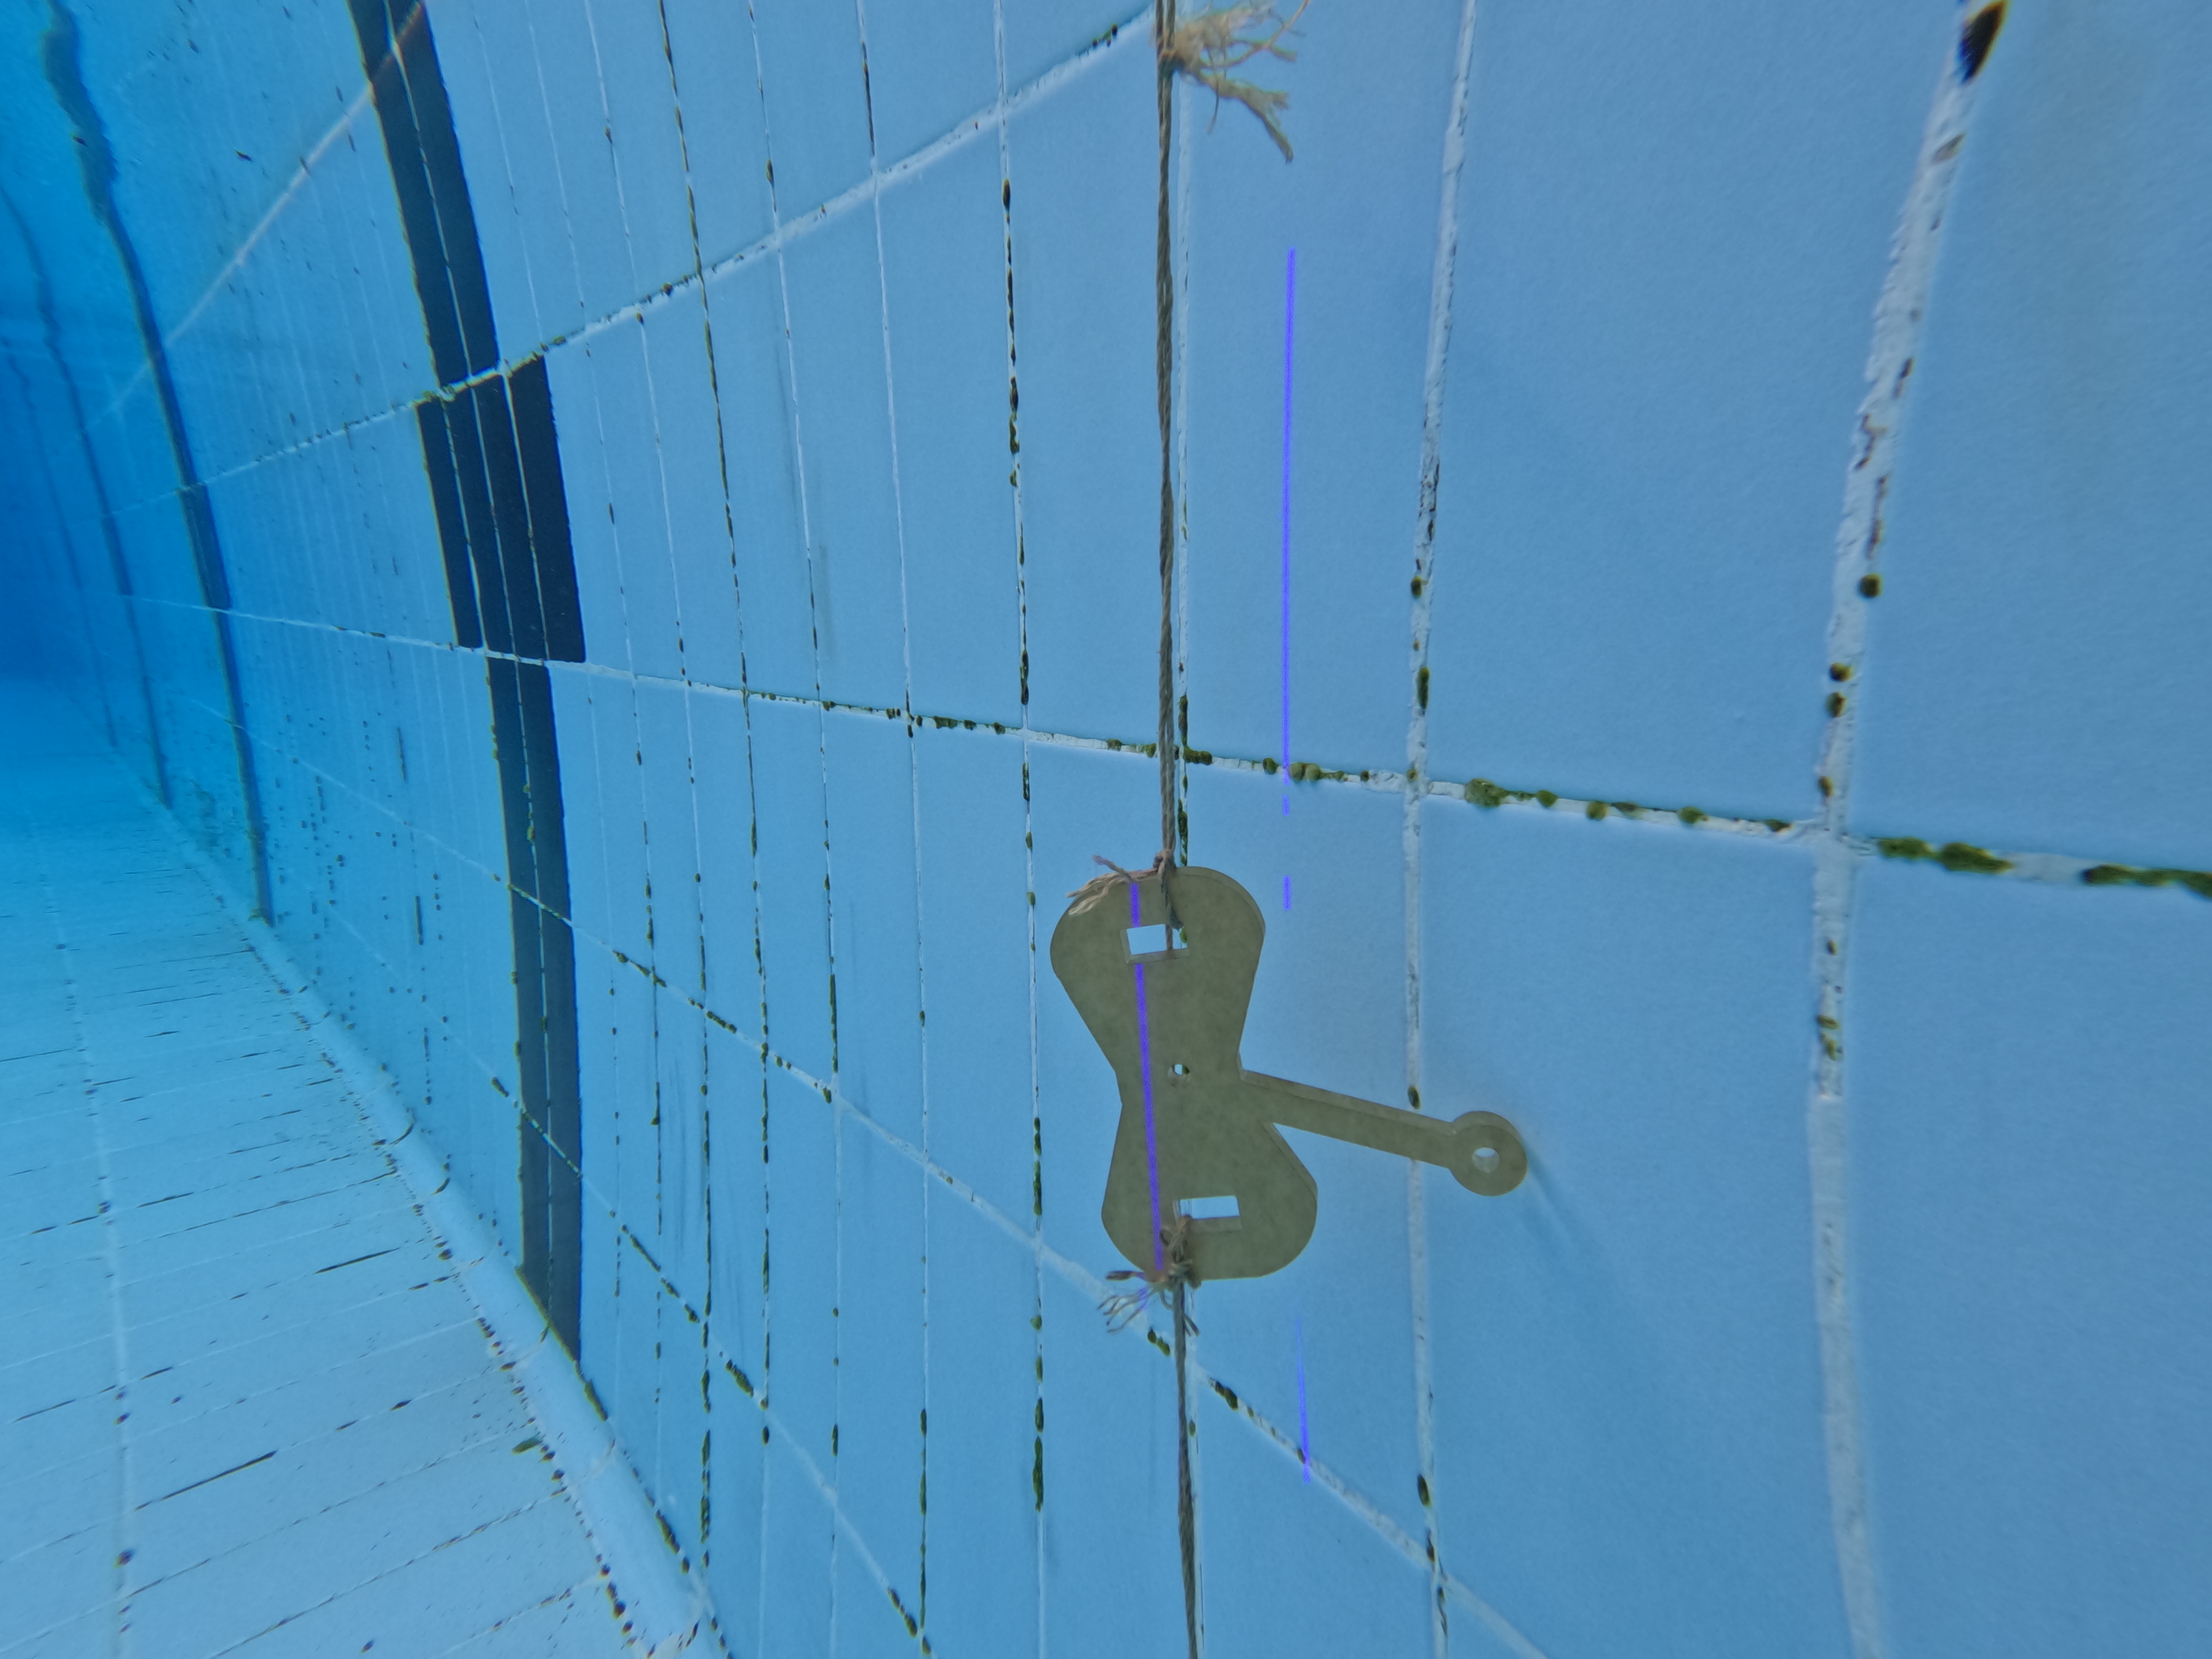

Supplement: Supplementary file 2092 [file G0050653.pdf › Level_3_2/G0050653.pdf]

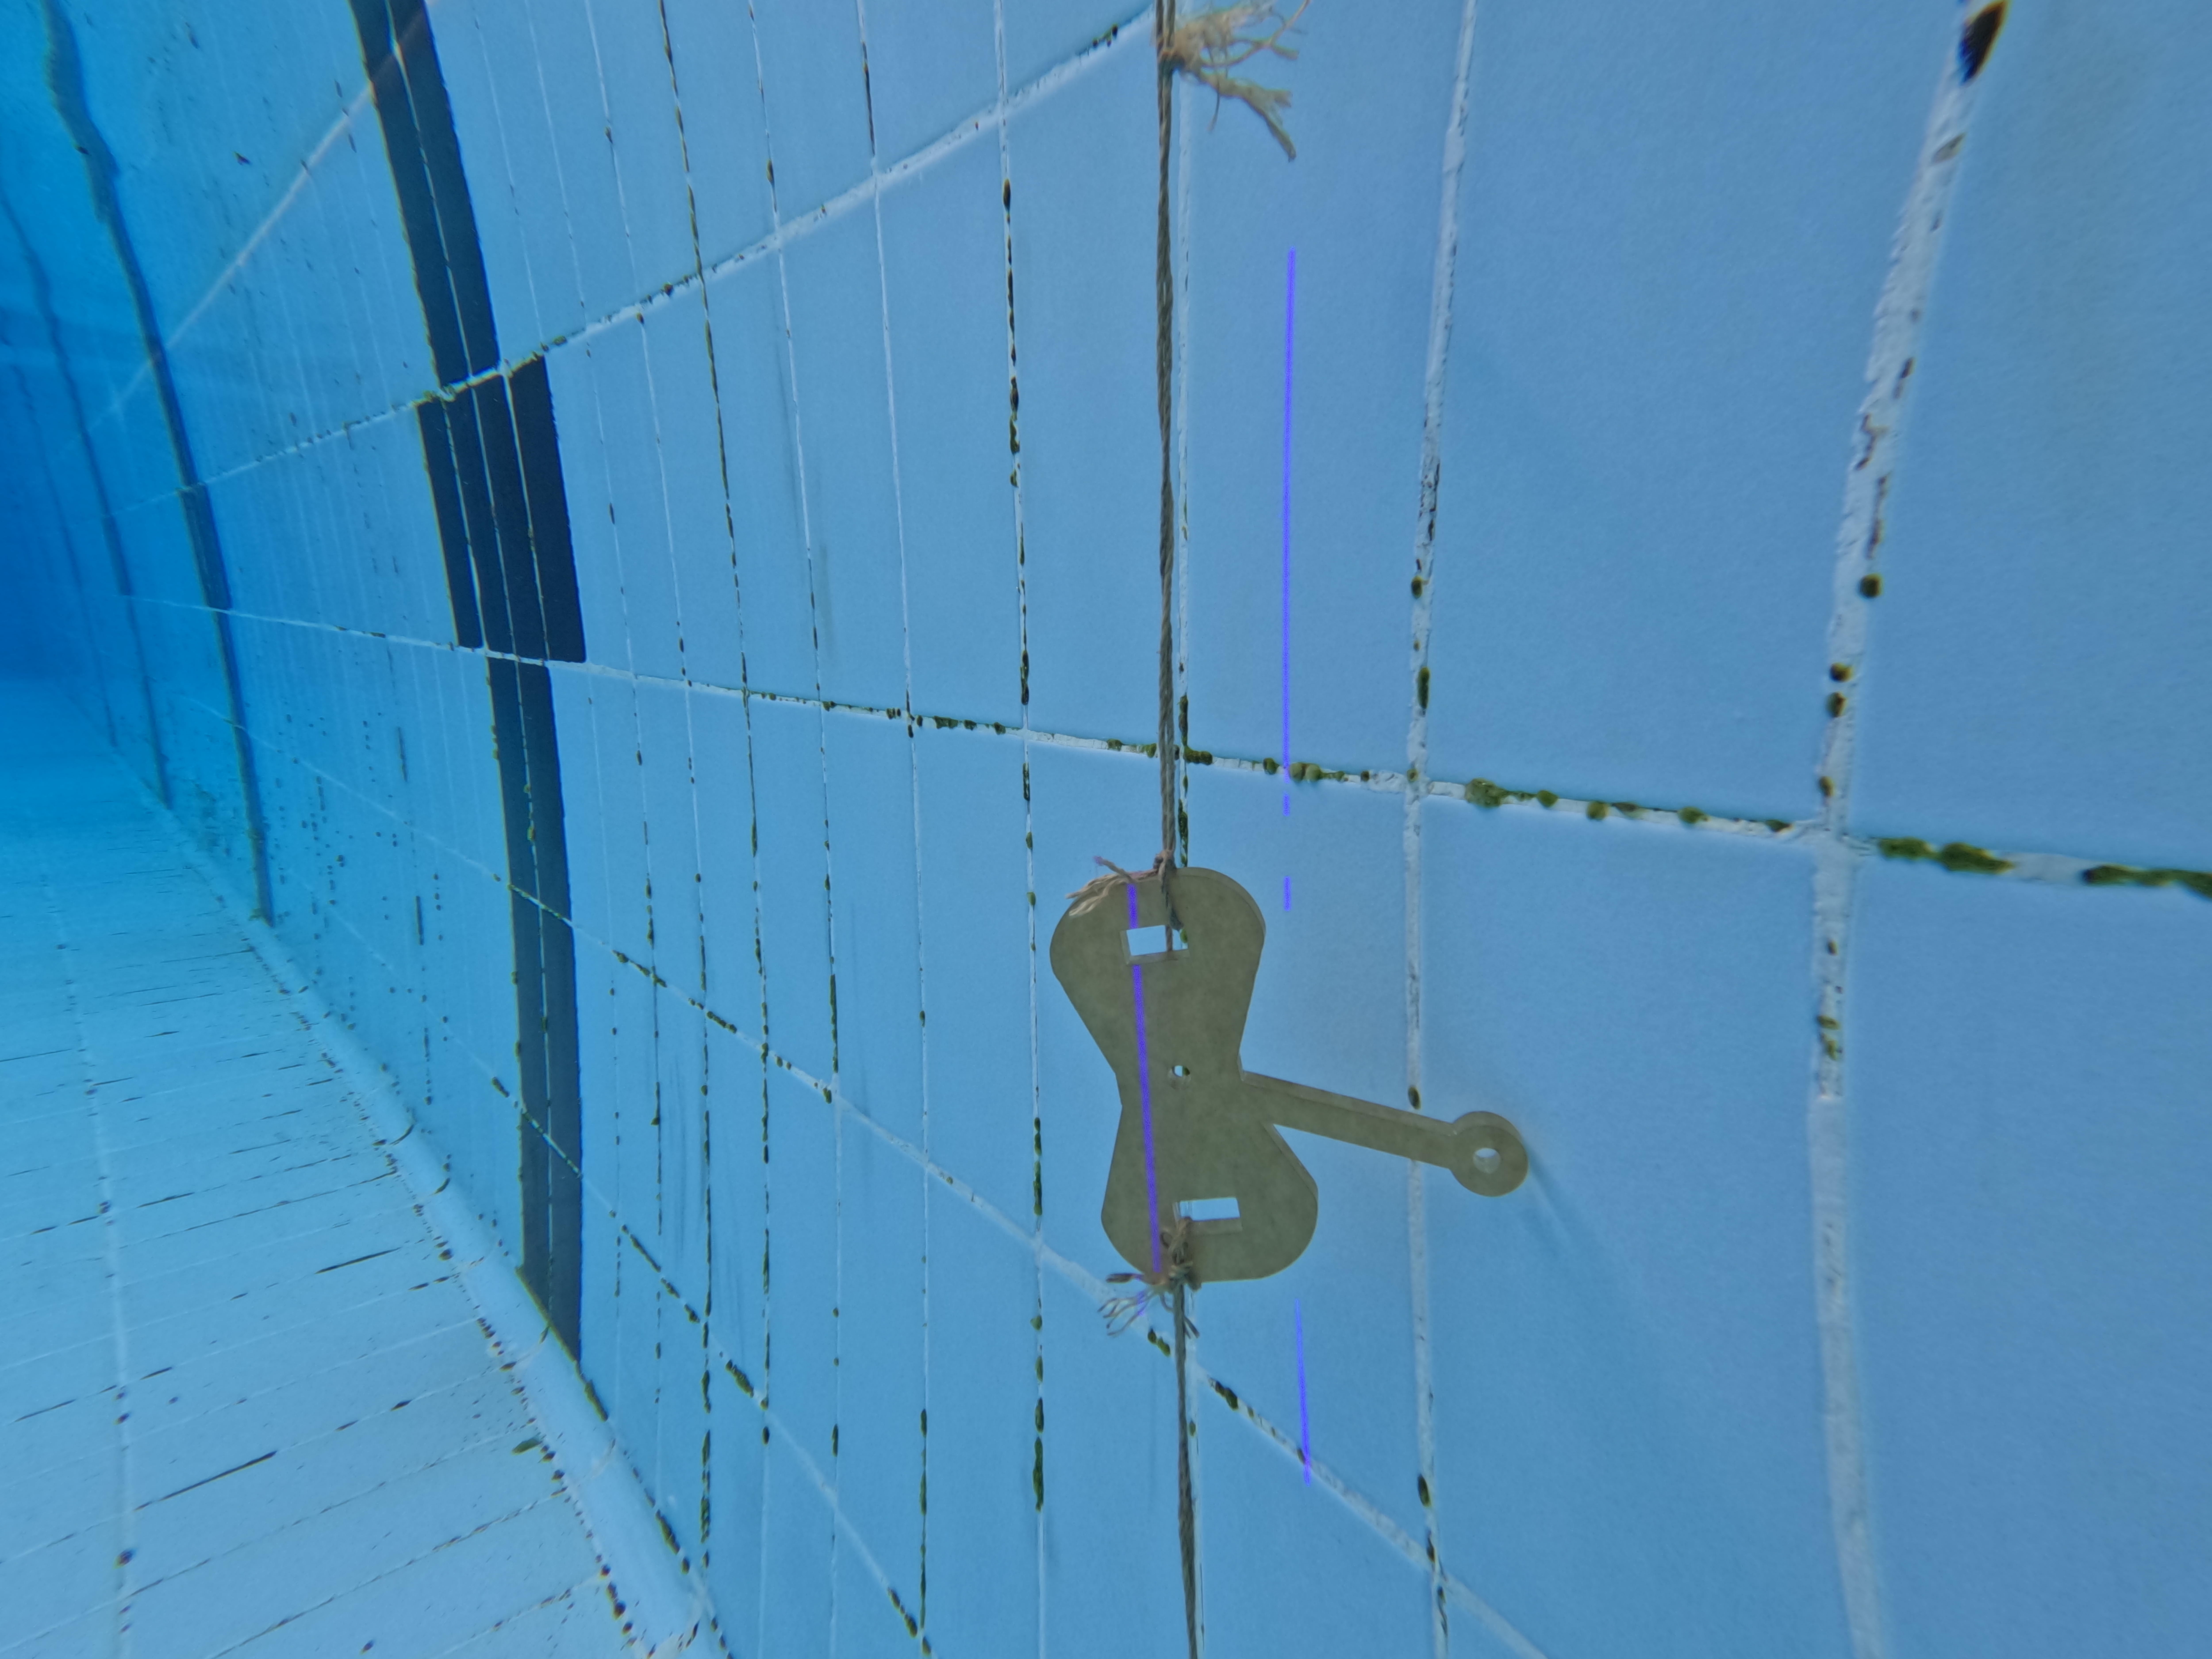

Supplement: Supplementary file 2093 [file G0050654.pdf › Level_3_2/G0050654.pdf]

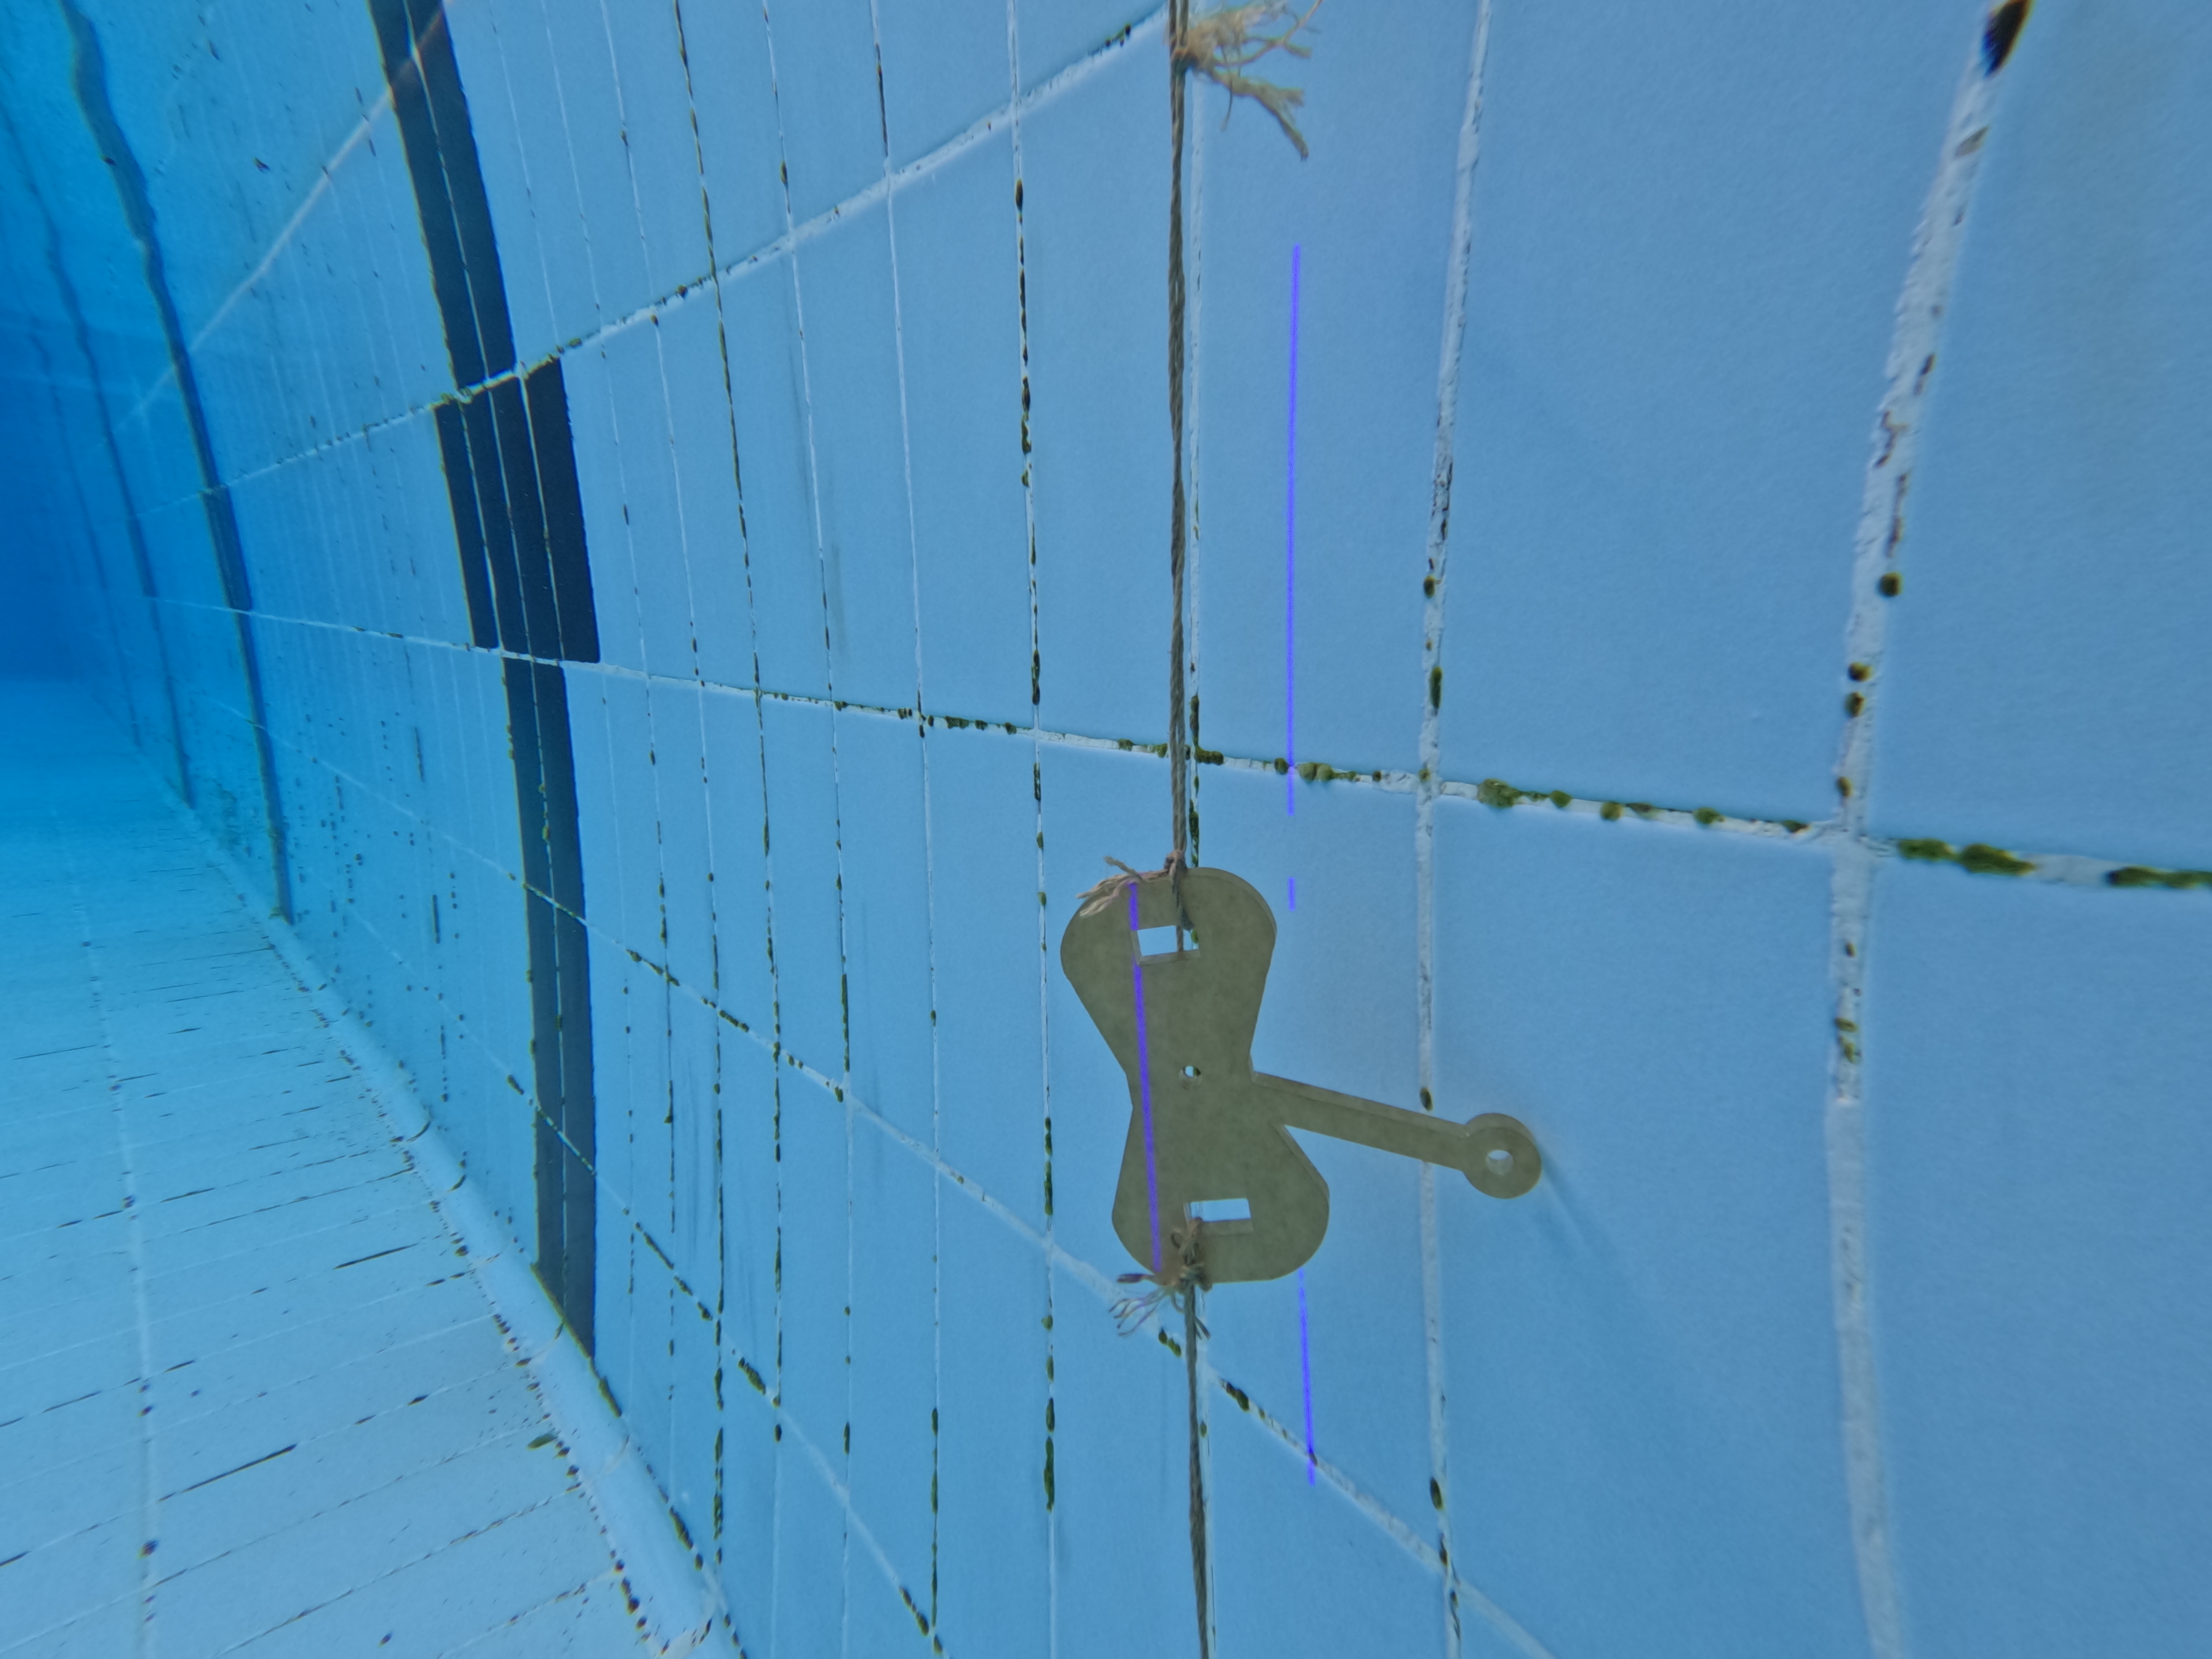

Supplement: Supplementary file 2094 [file G0050655.pdf › Level_3_2/G0050655.pdf]

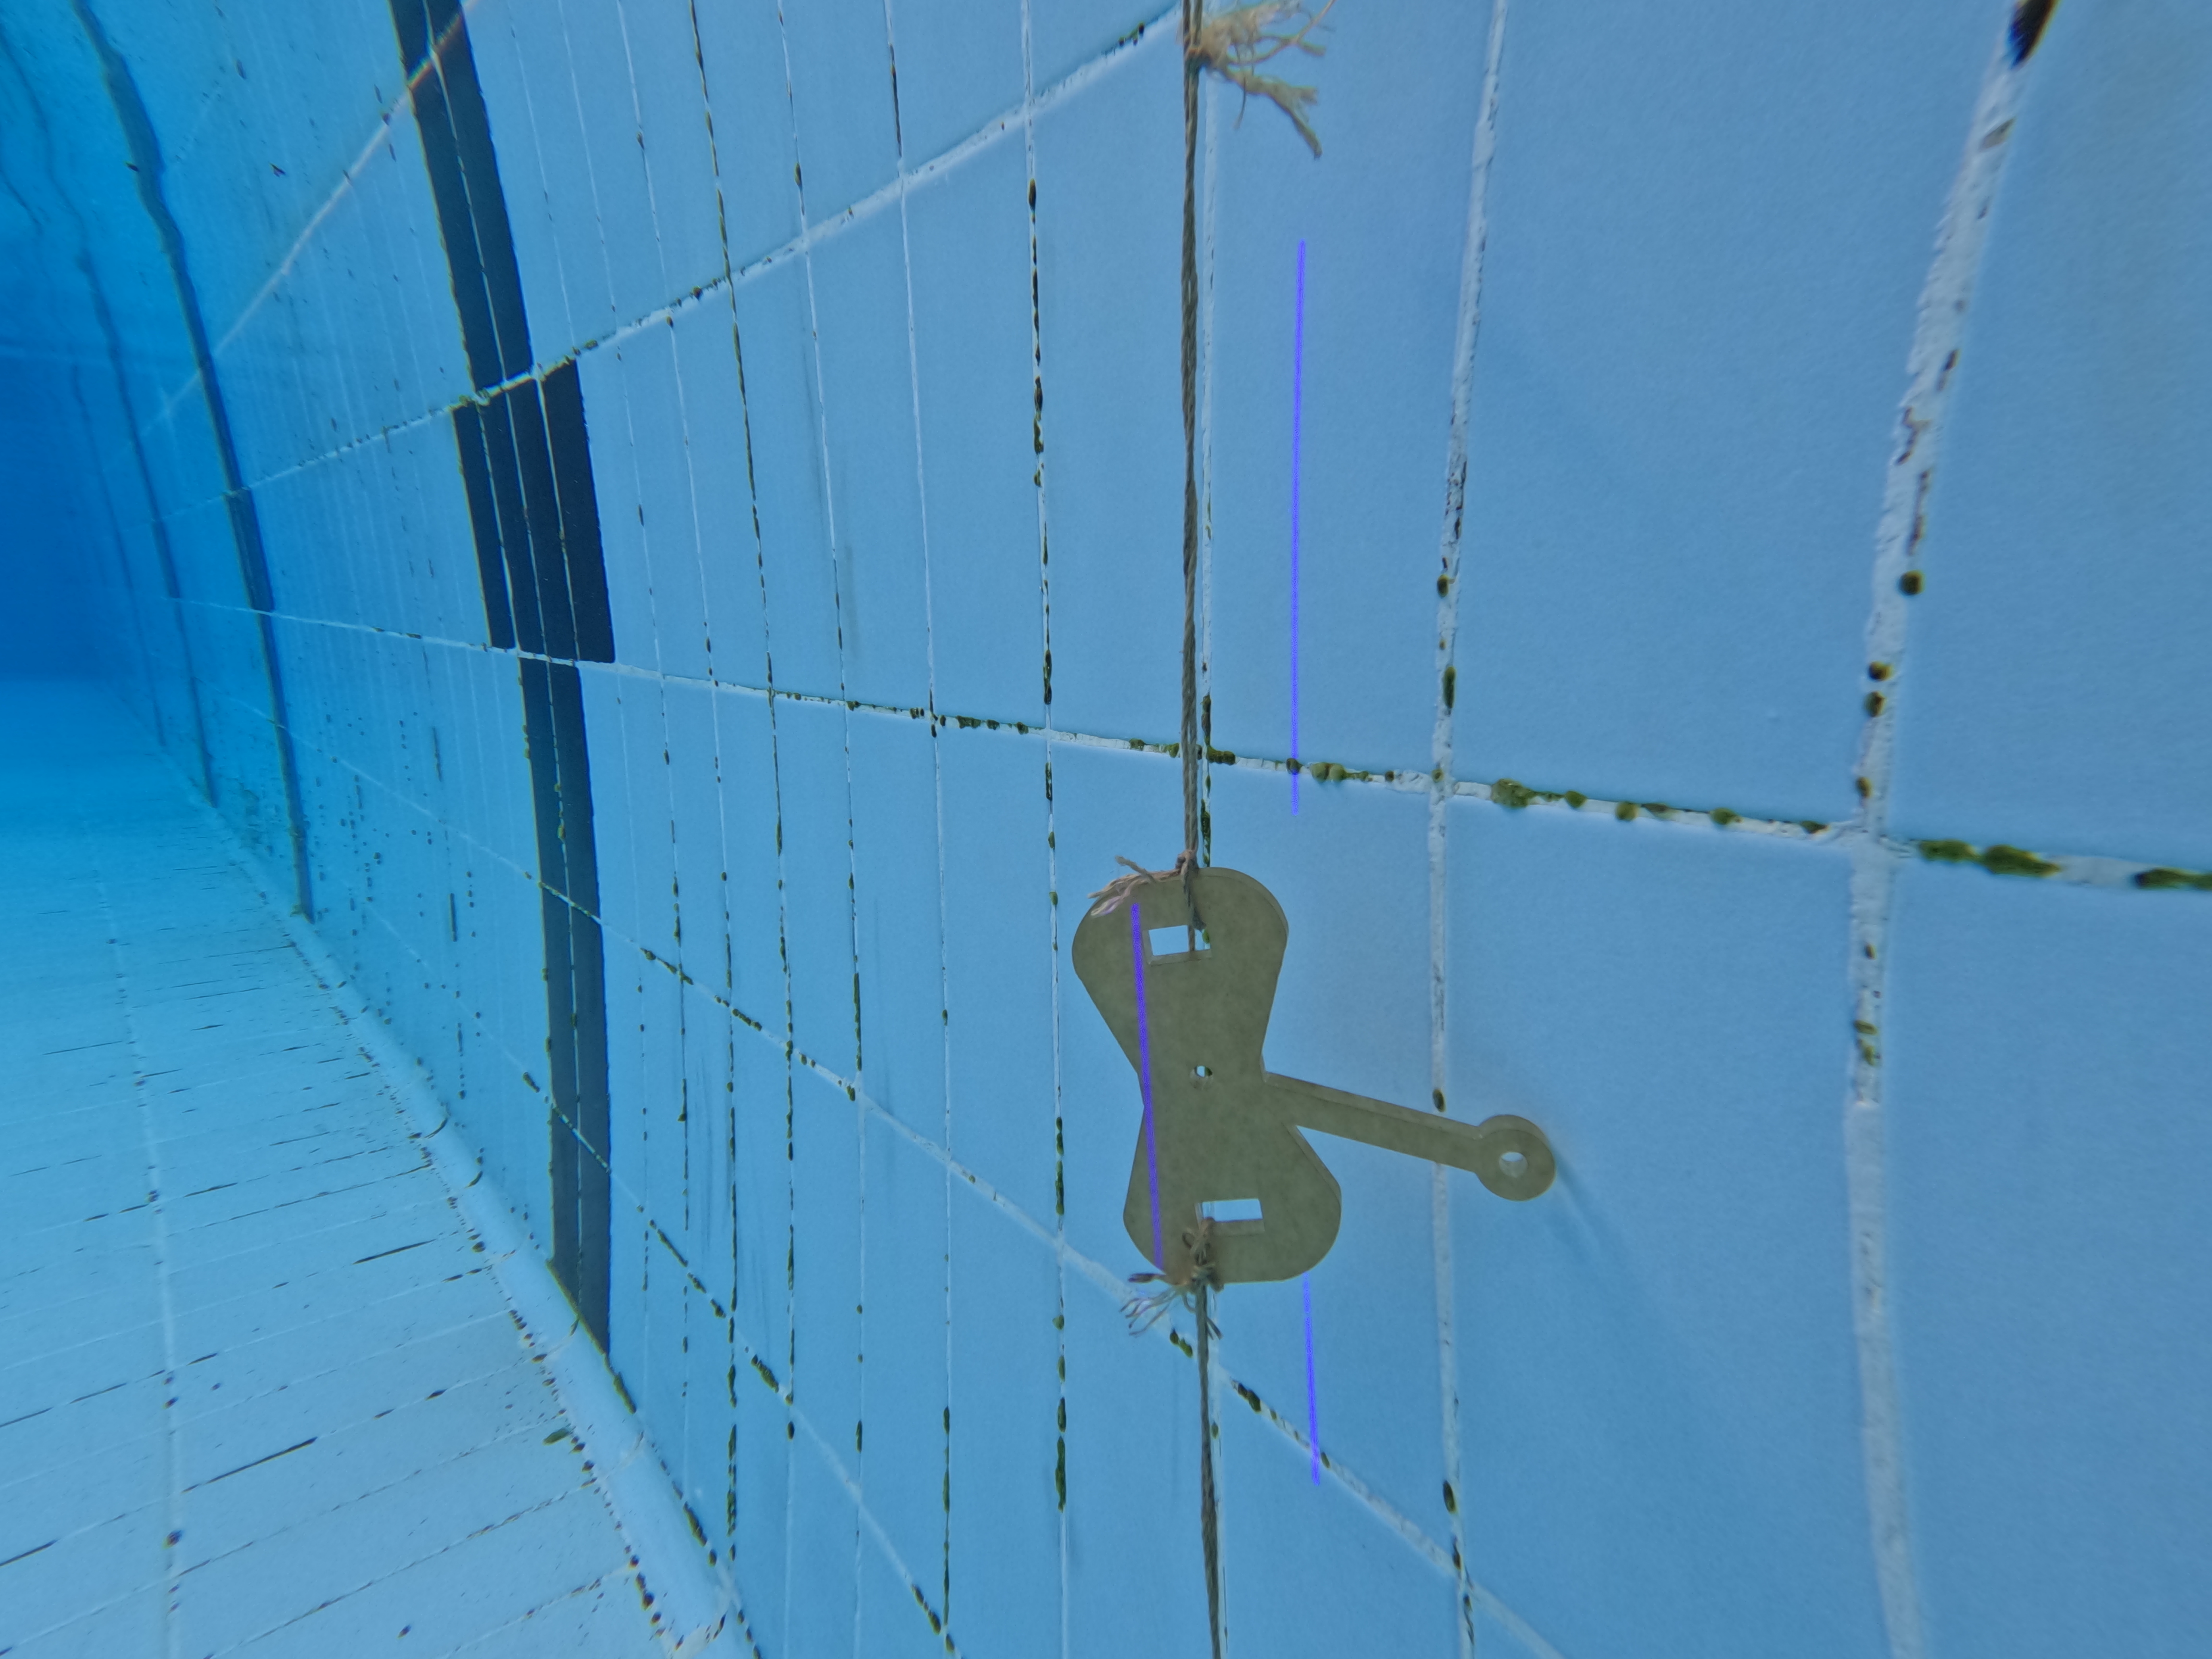

Supplement: Supplementary file 2095 [file G0050656.pdf › Level_3_2/G0050656.pdf]

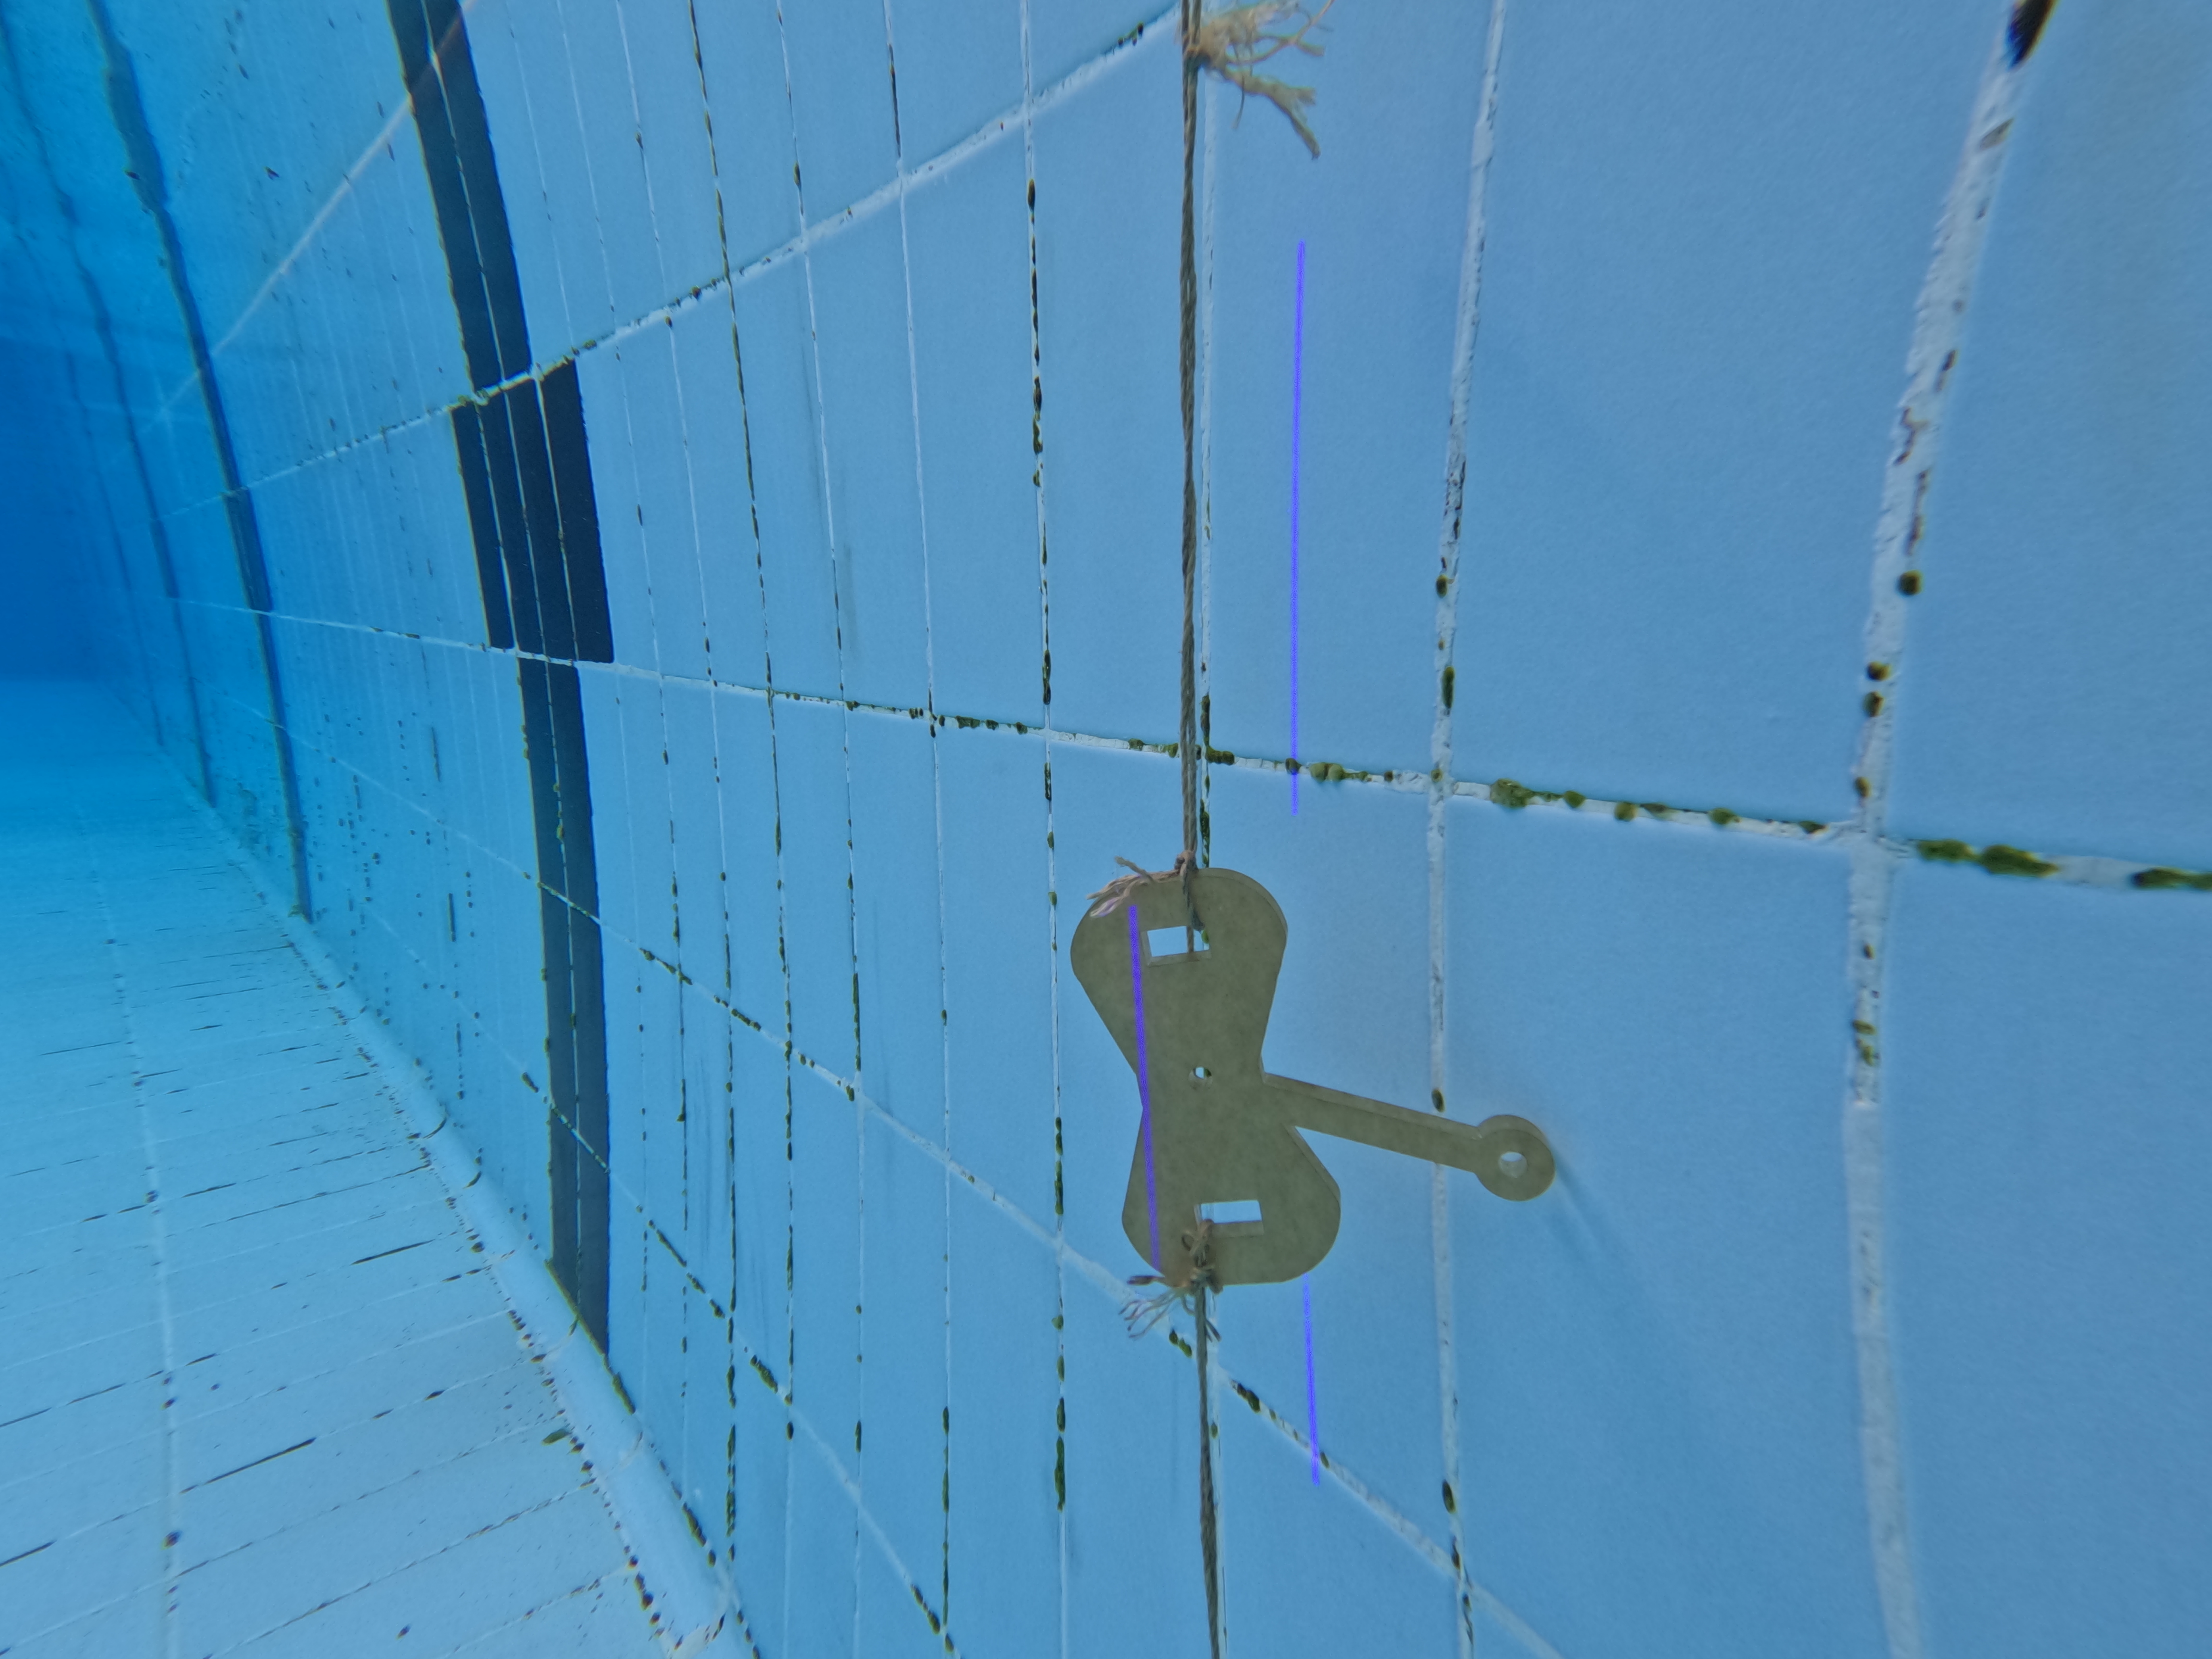

Supplement: Supplementary file 2096 [file G0050657.pdf › Level_3_2/G0050657.pdf]

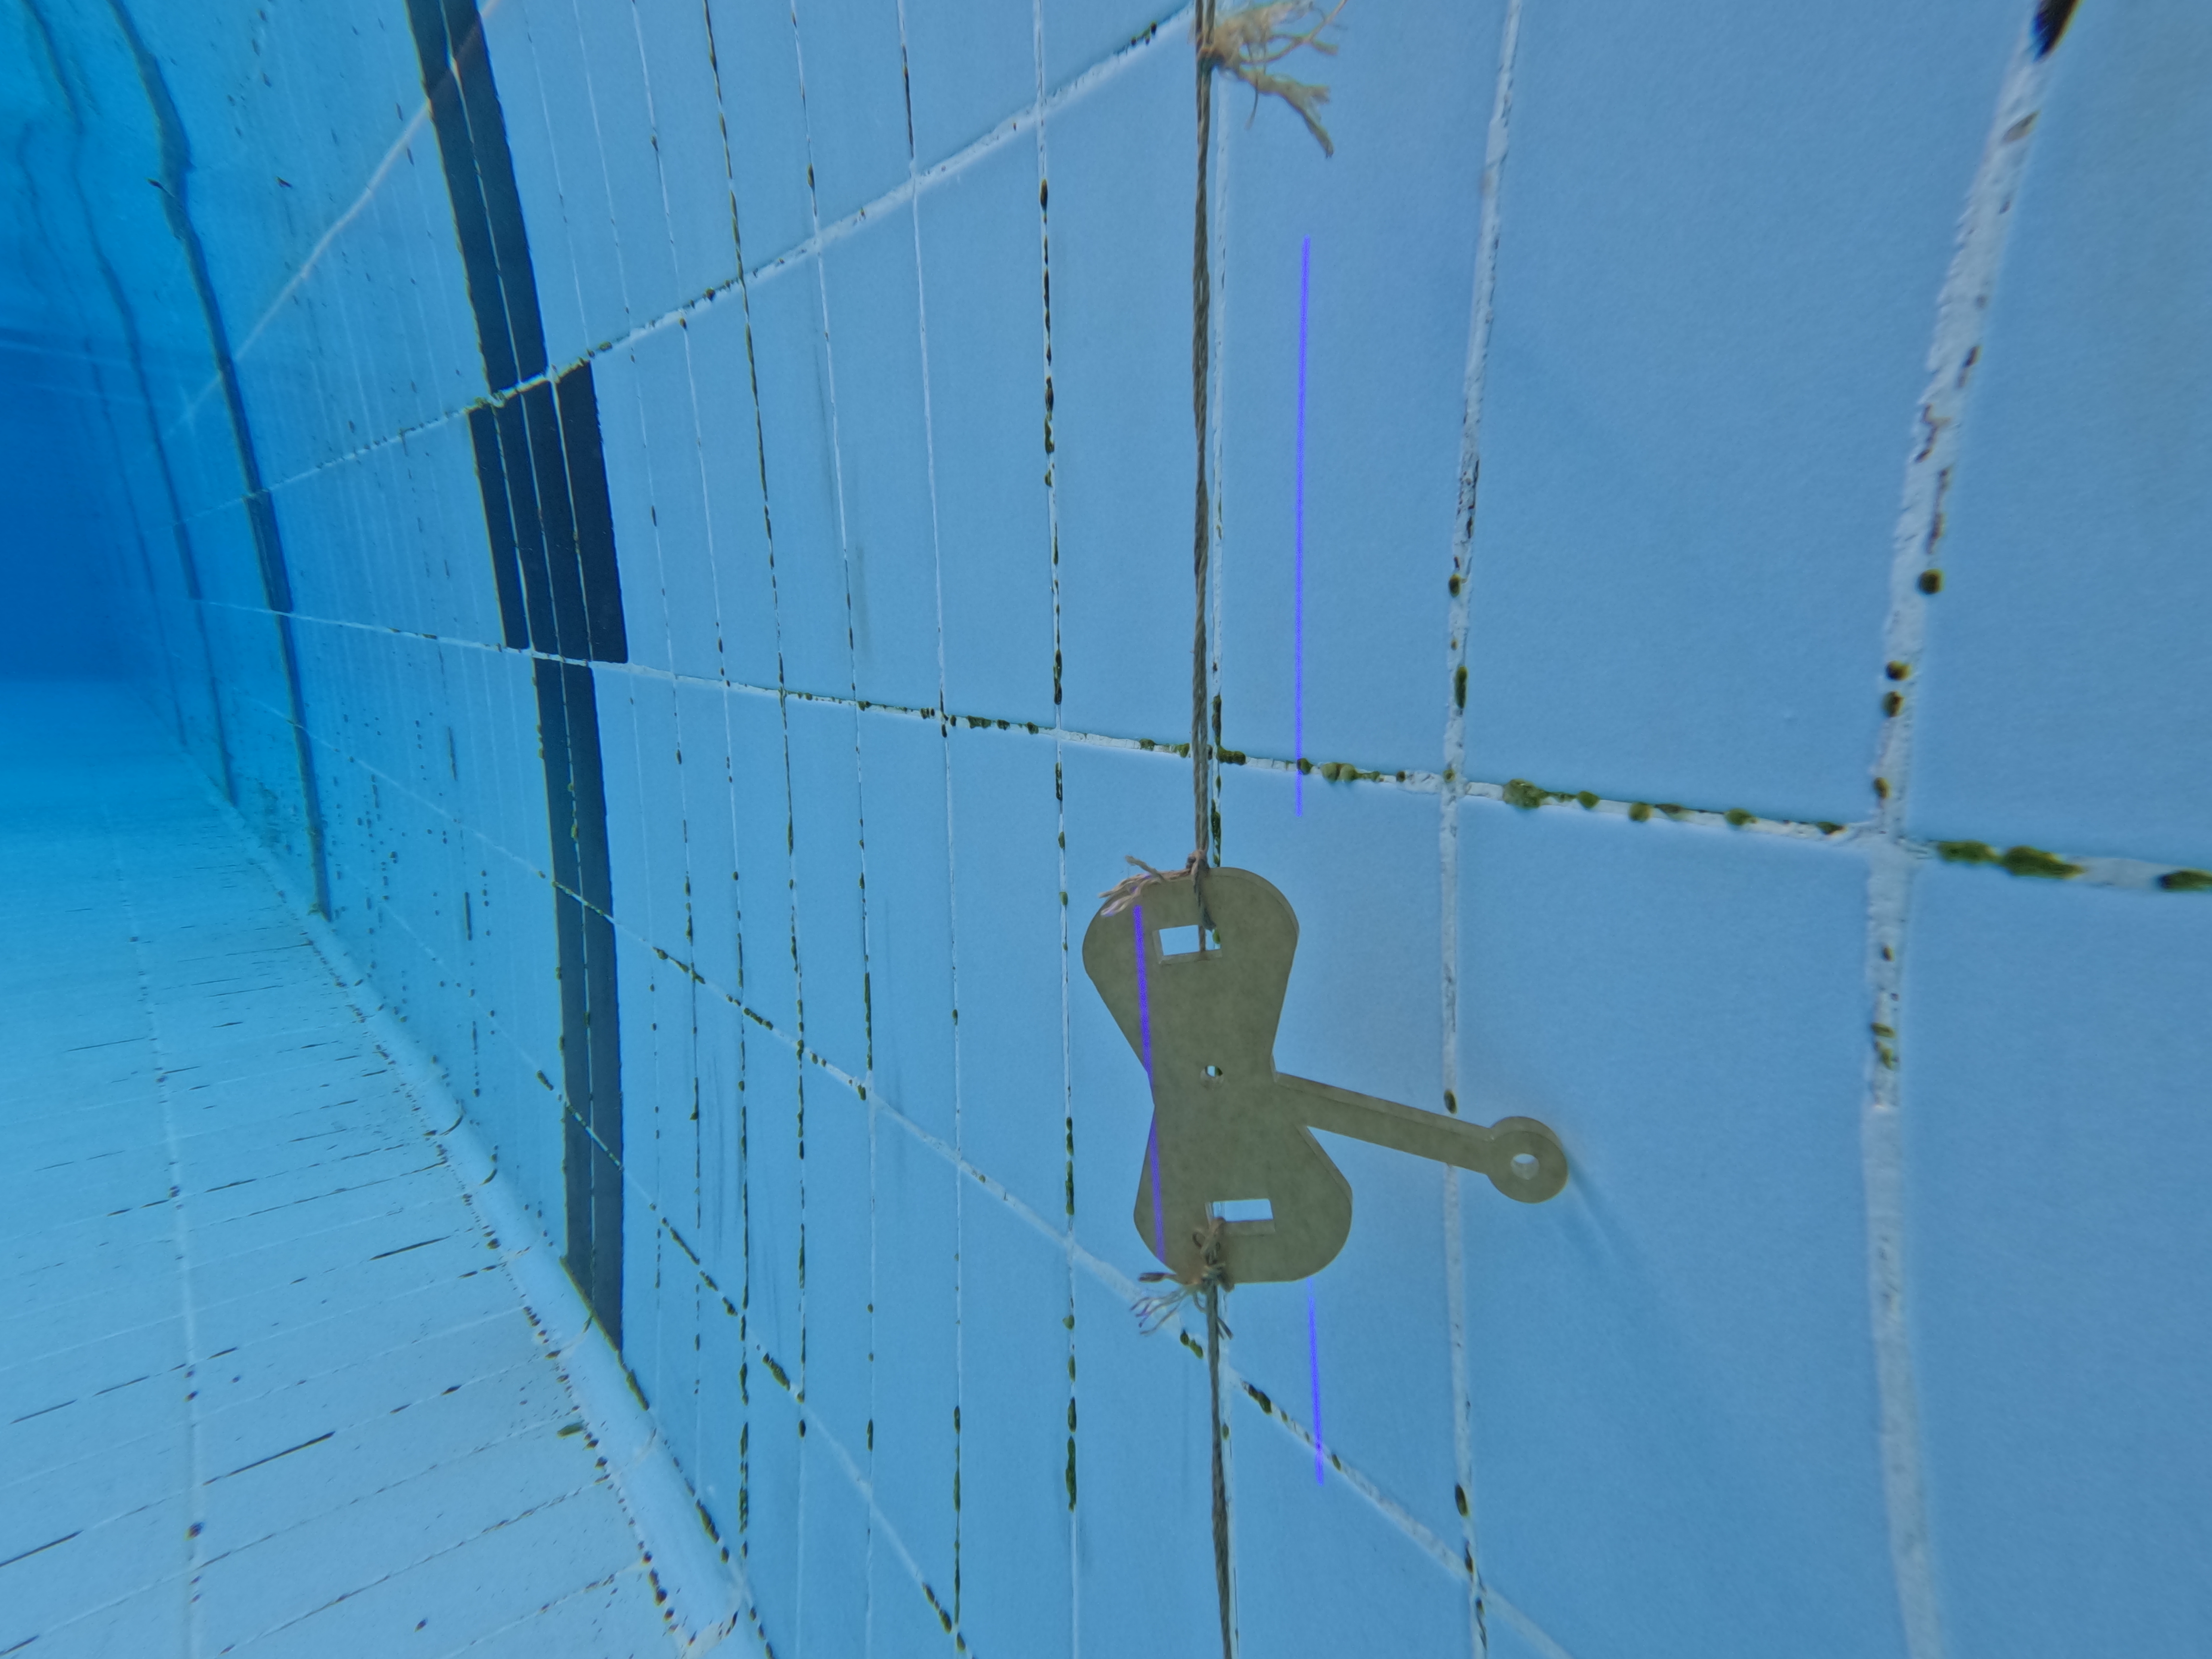

Supplement: Supplementary file 2097 [file G0050658.pdf › Level_3_2/G0050658.pdf]

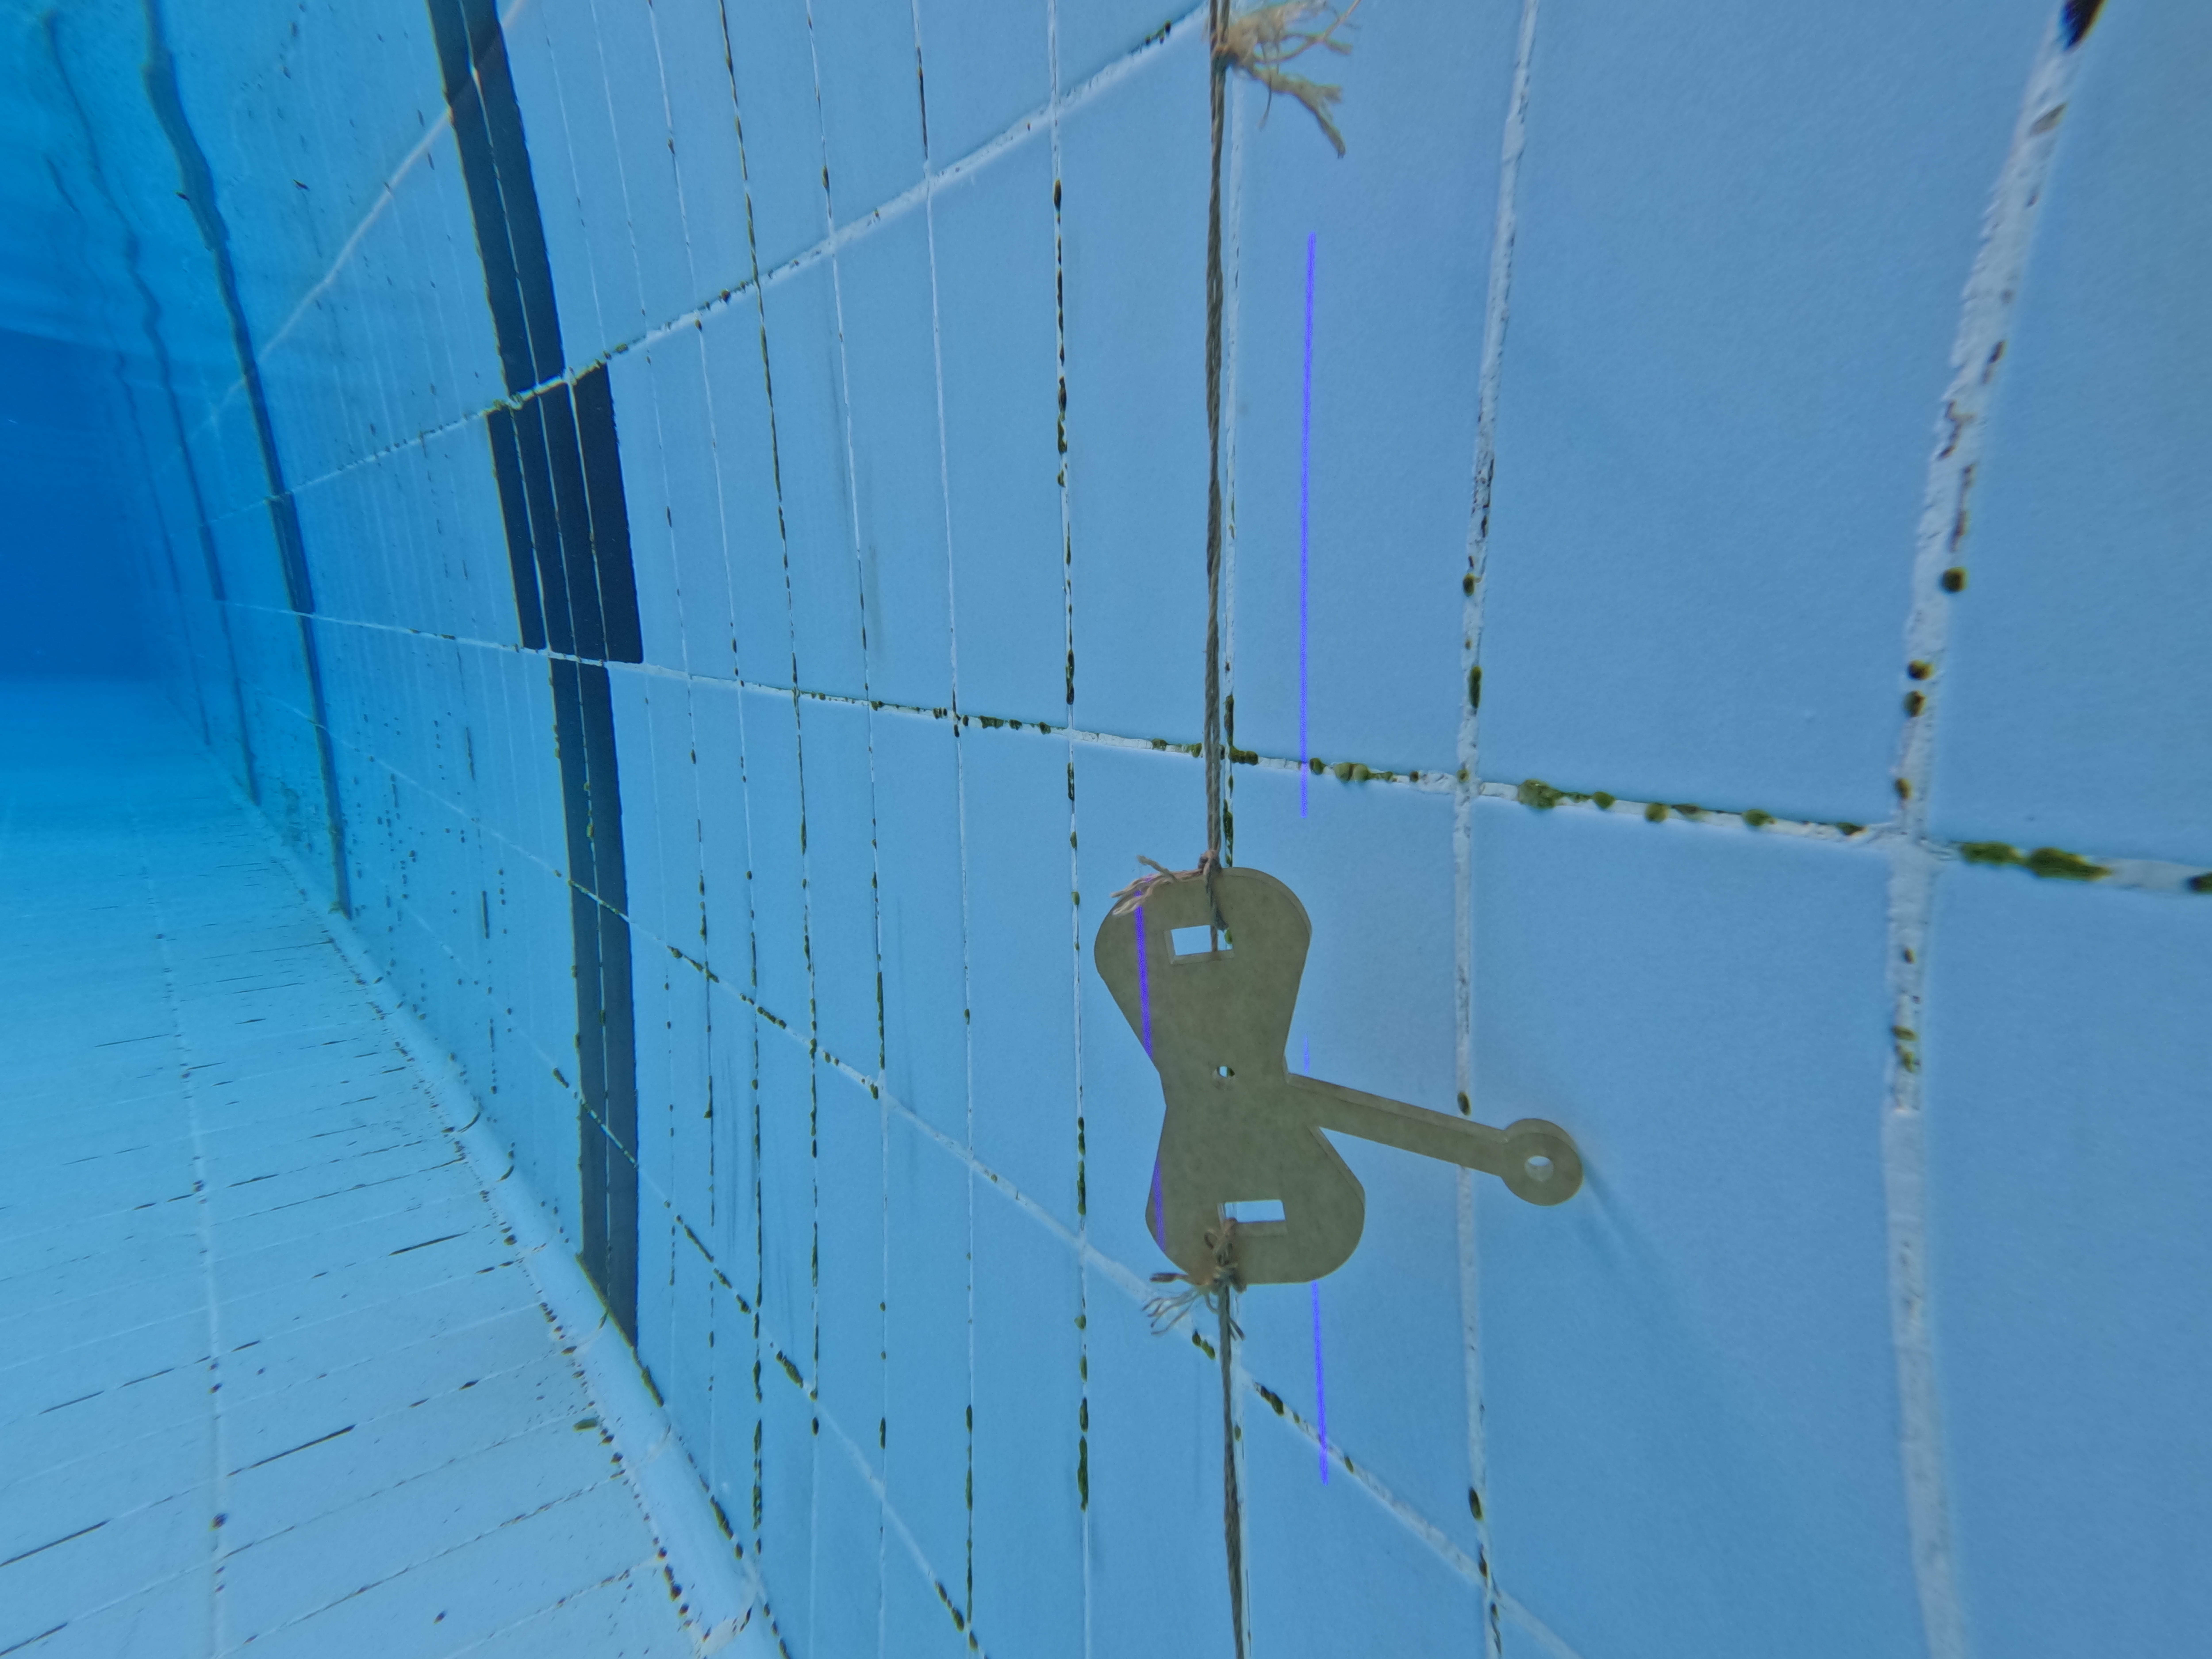

Supplement: Supplementary file 2098 [file G0050659.pdf › Level_3_2/G0050659.pdf]

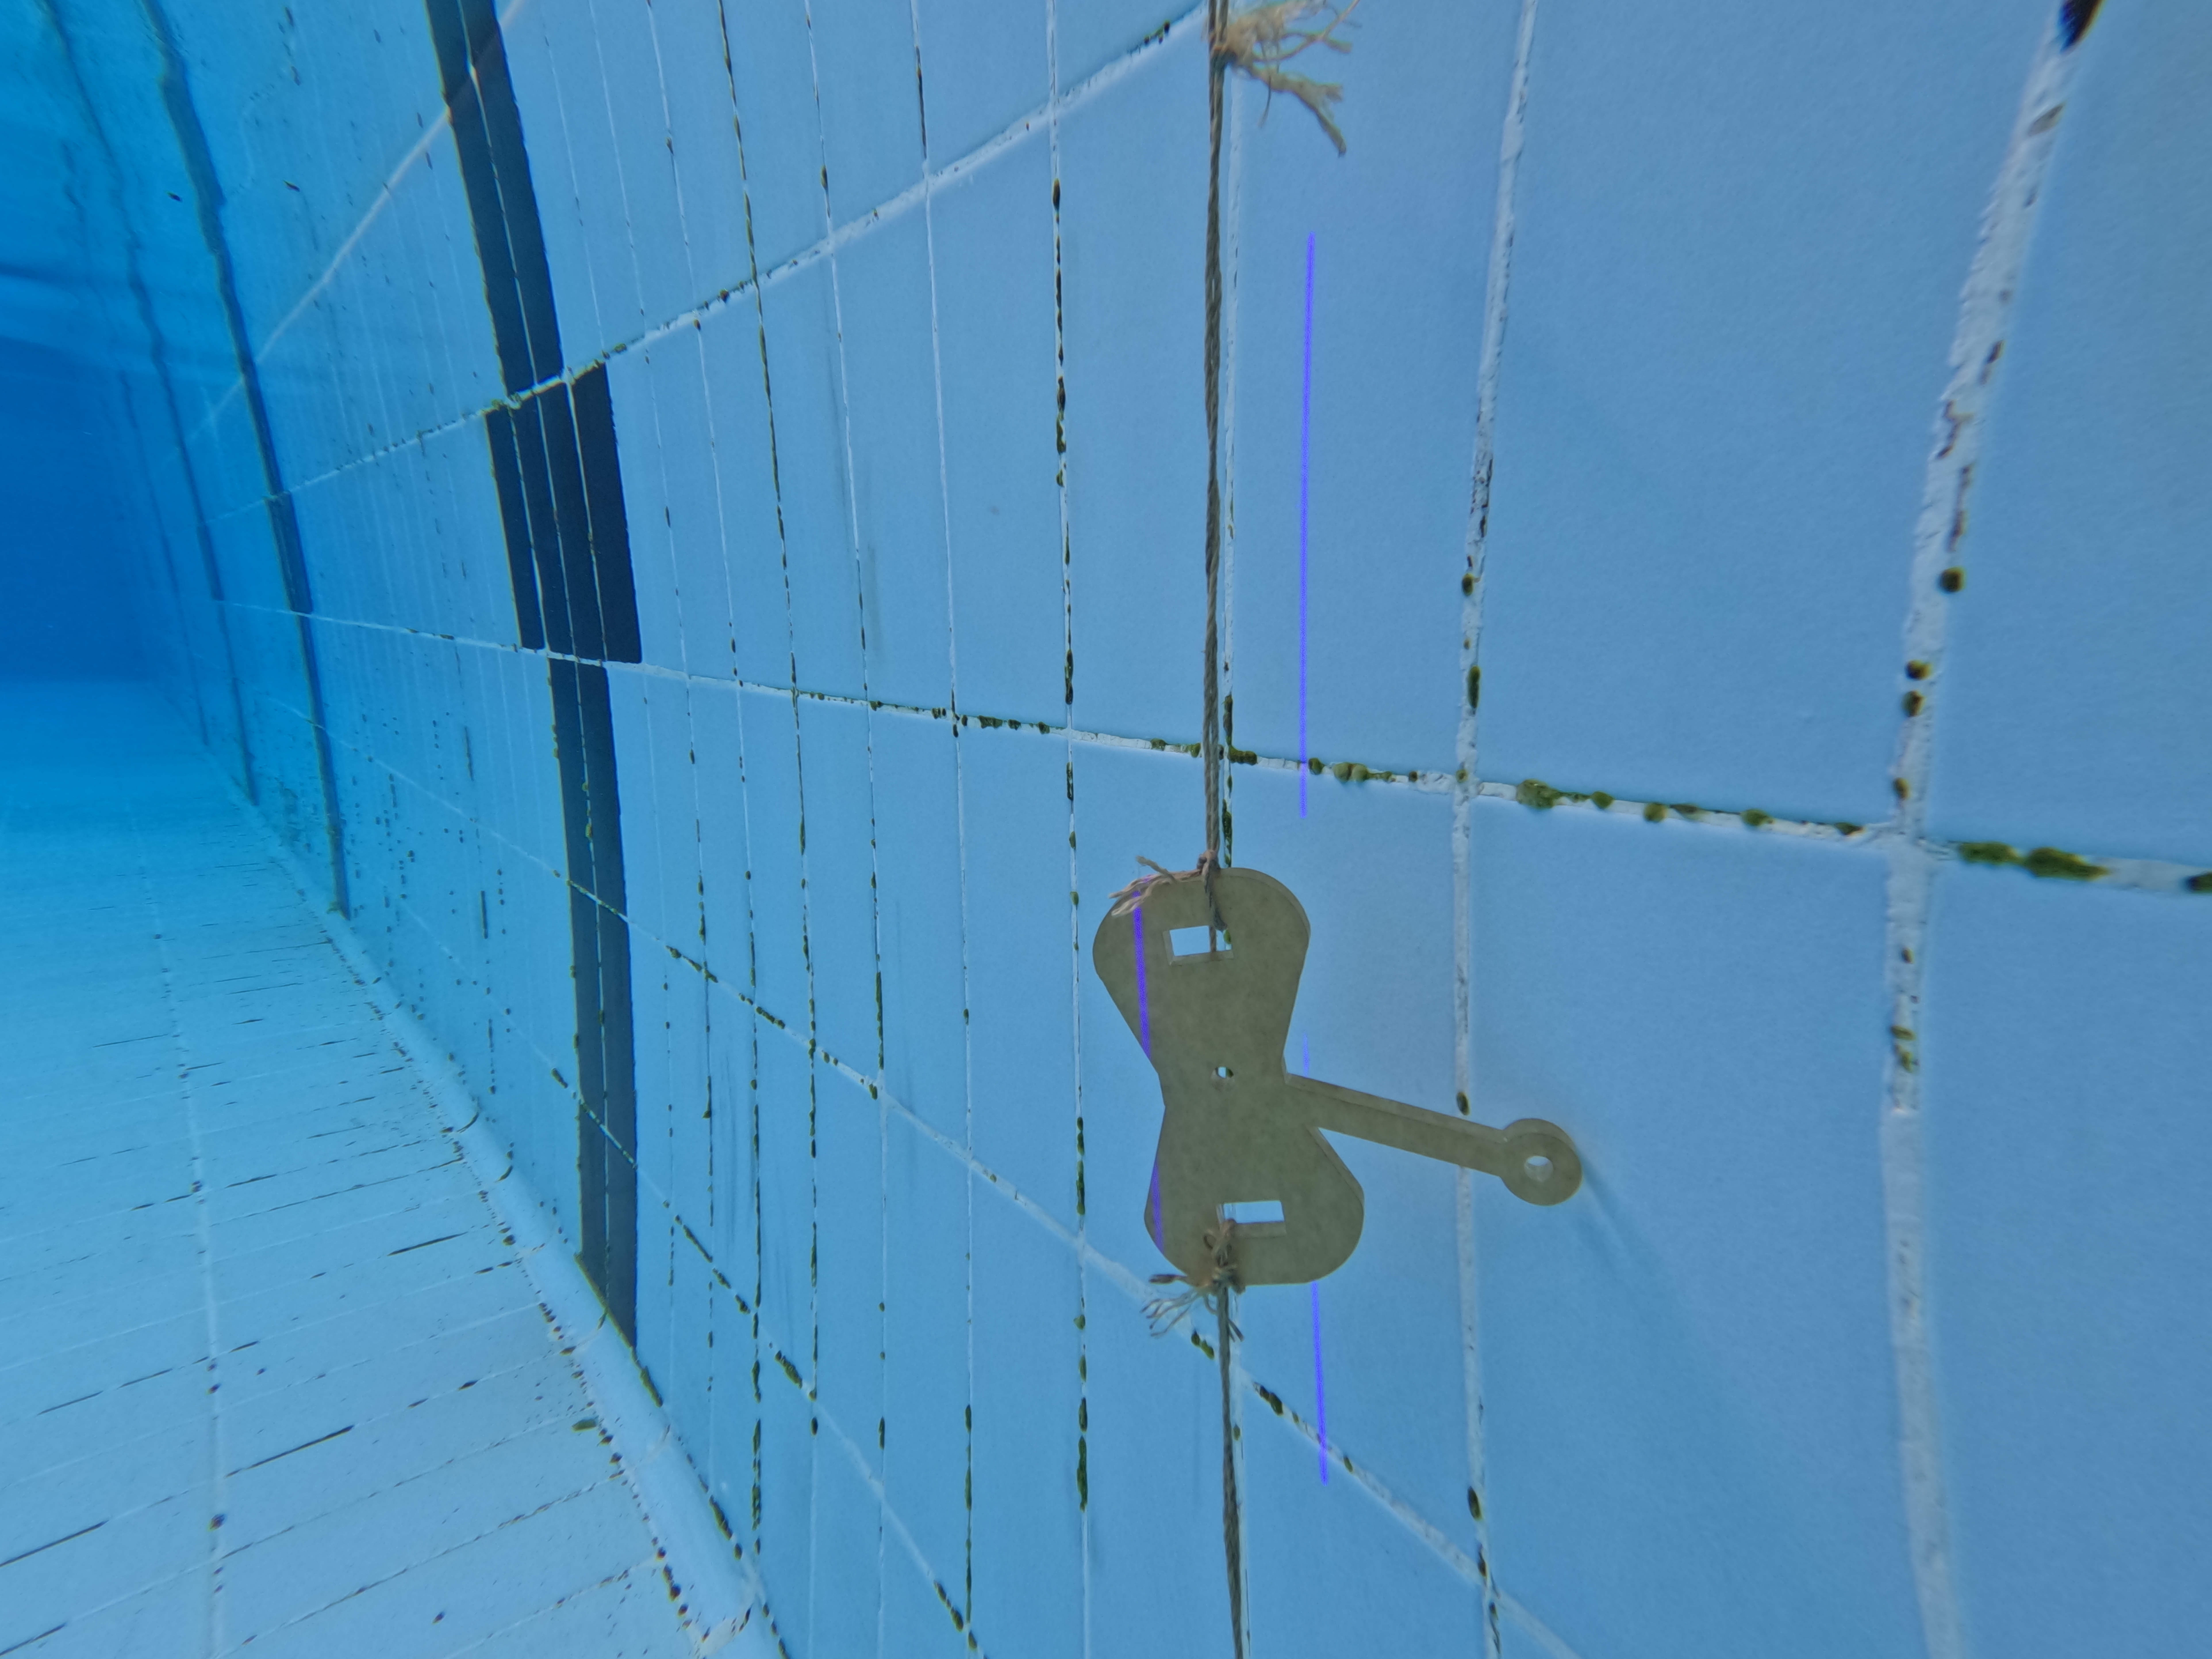

Supplement: Supplementary file 2099 [file G0050660.pdf › Level_3_2/G0050660.pdf]

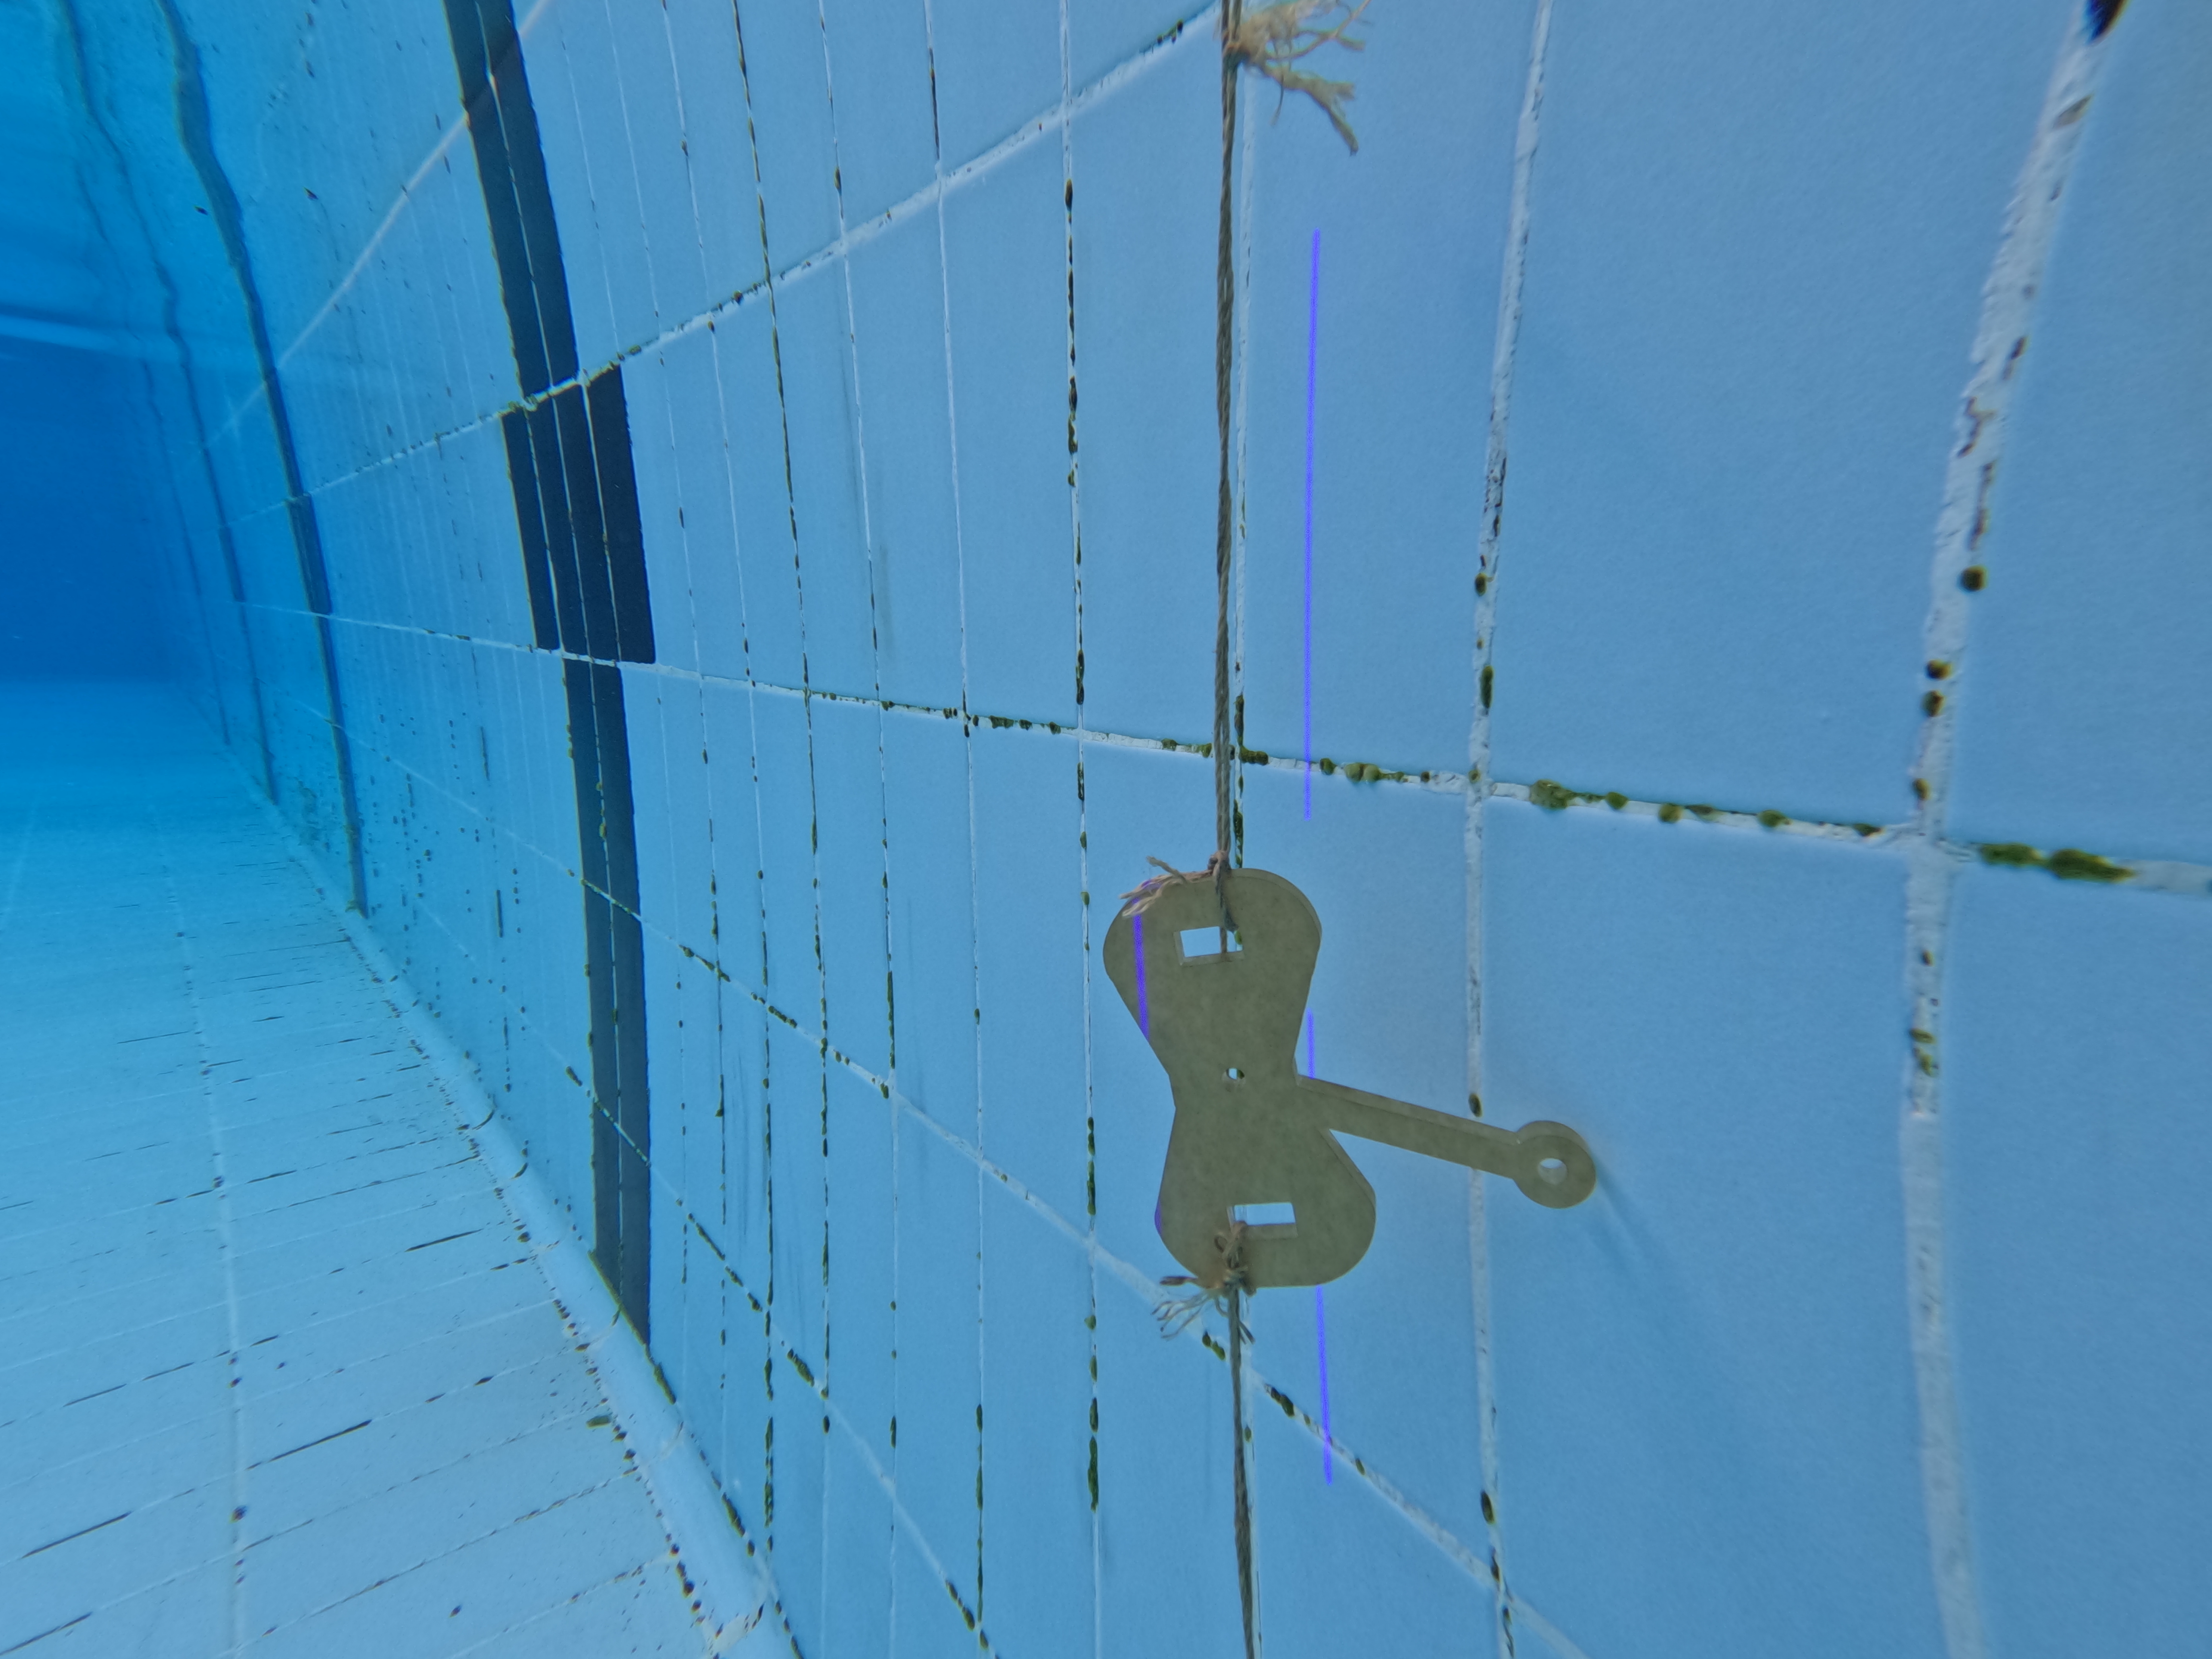

Supplement: Supplementary file 2100 [file G0050661.pdf › Level_3_2/G0050661.pdf]

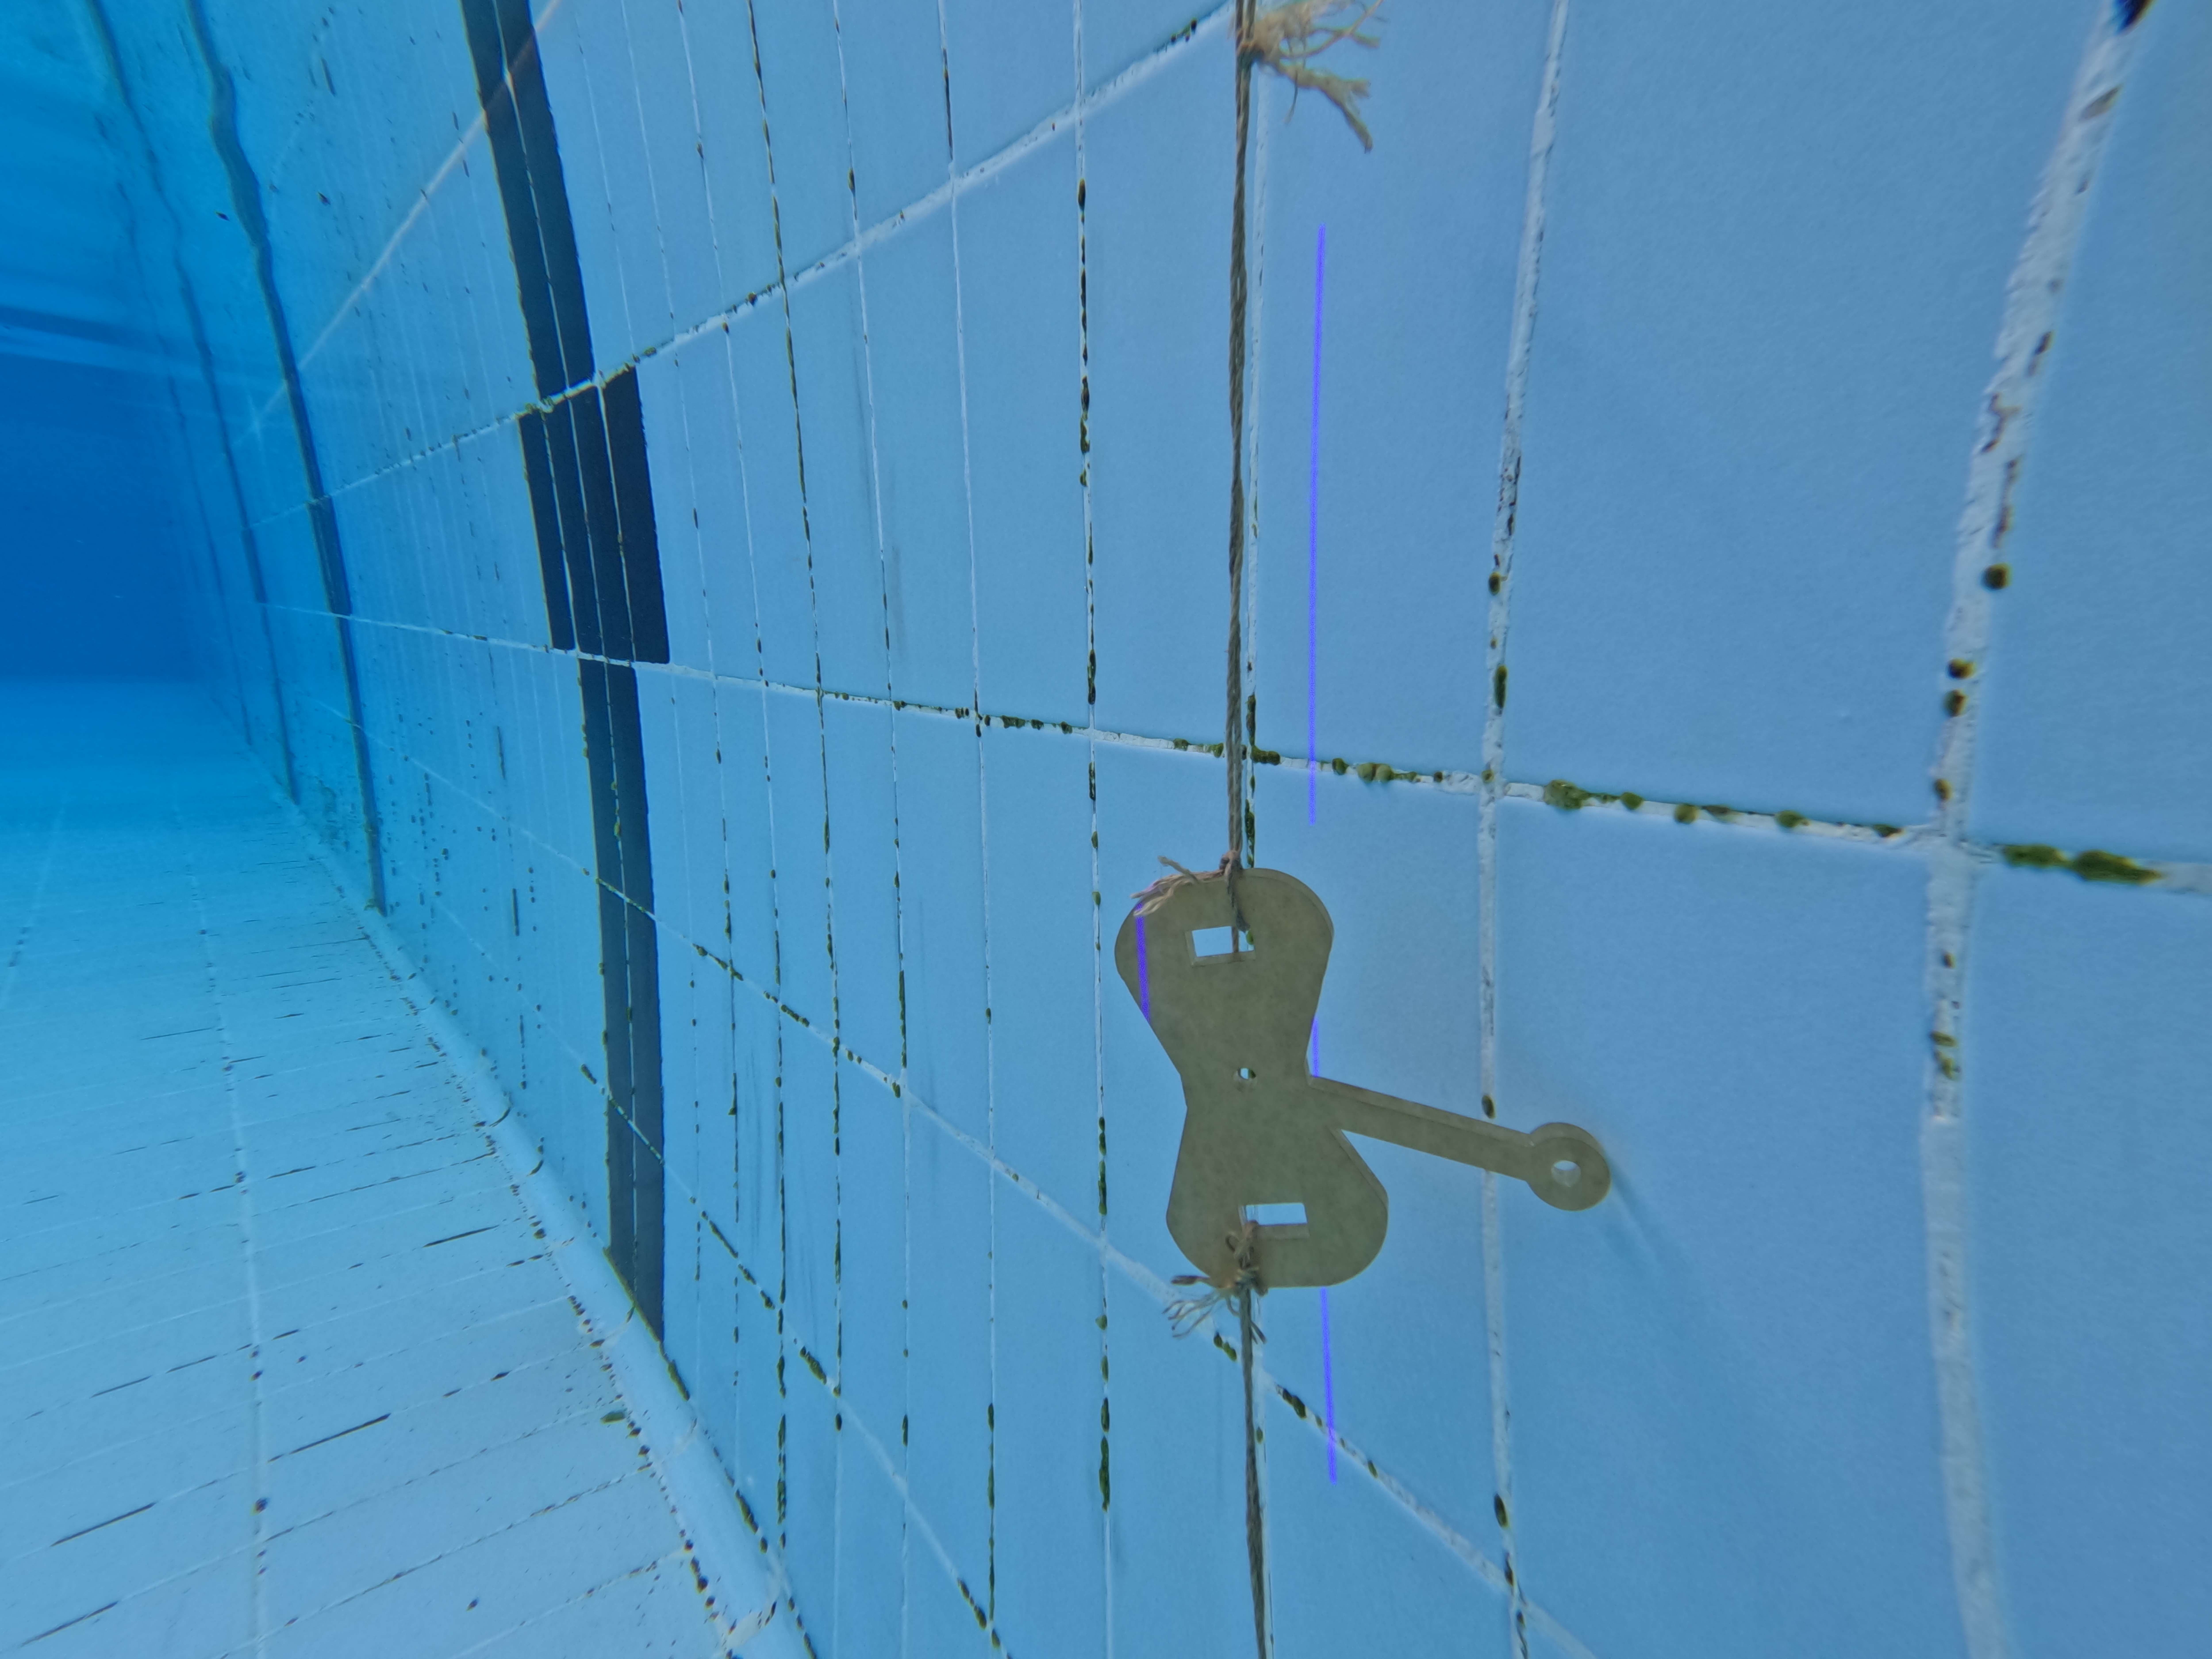

Supplement: Supplementary file 2101 [file G0050662.pdf › Level_3_2/G0050662.pdf]

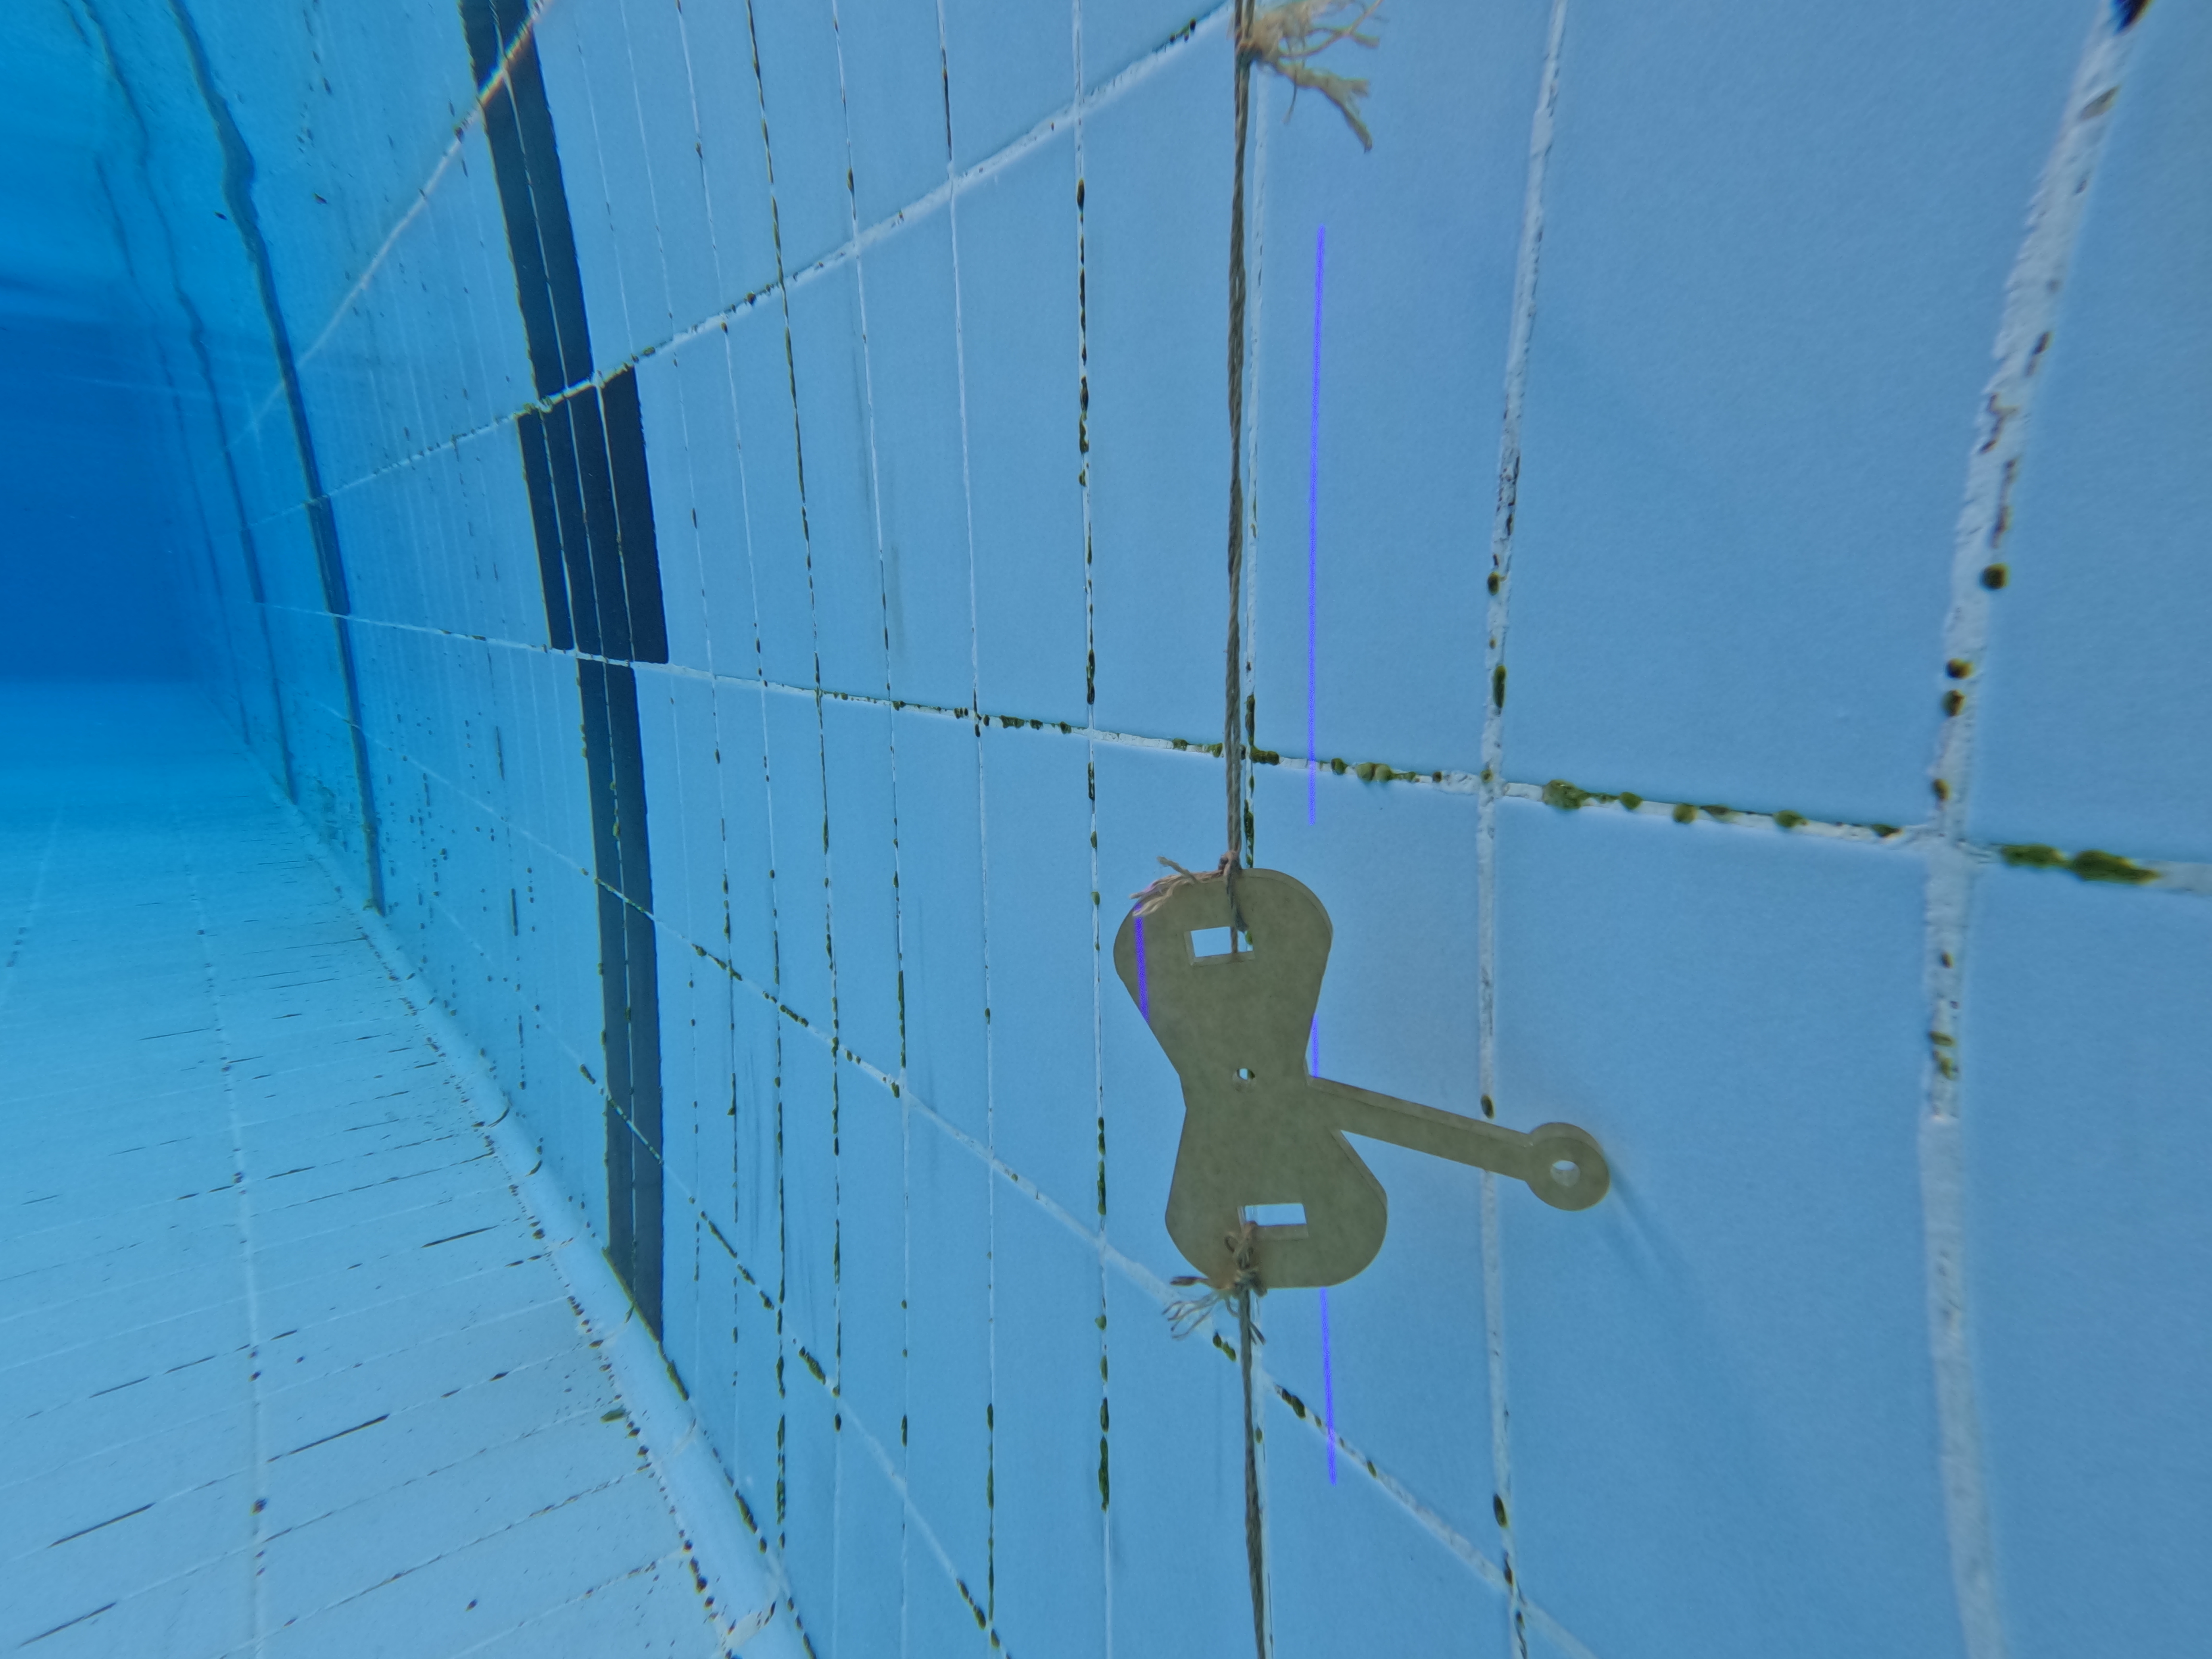

Supplement: Supplementary file 2102 [file G0050663.pdf › Level_3_2/G0050663.pdf]

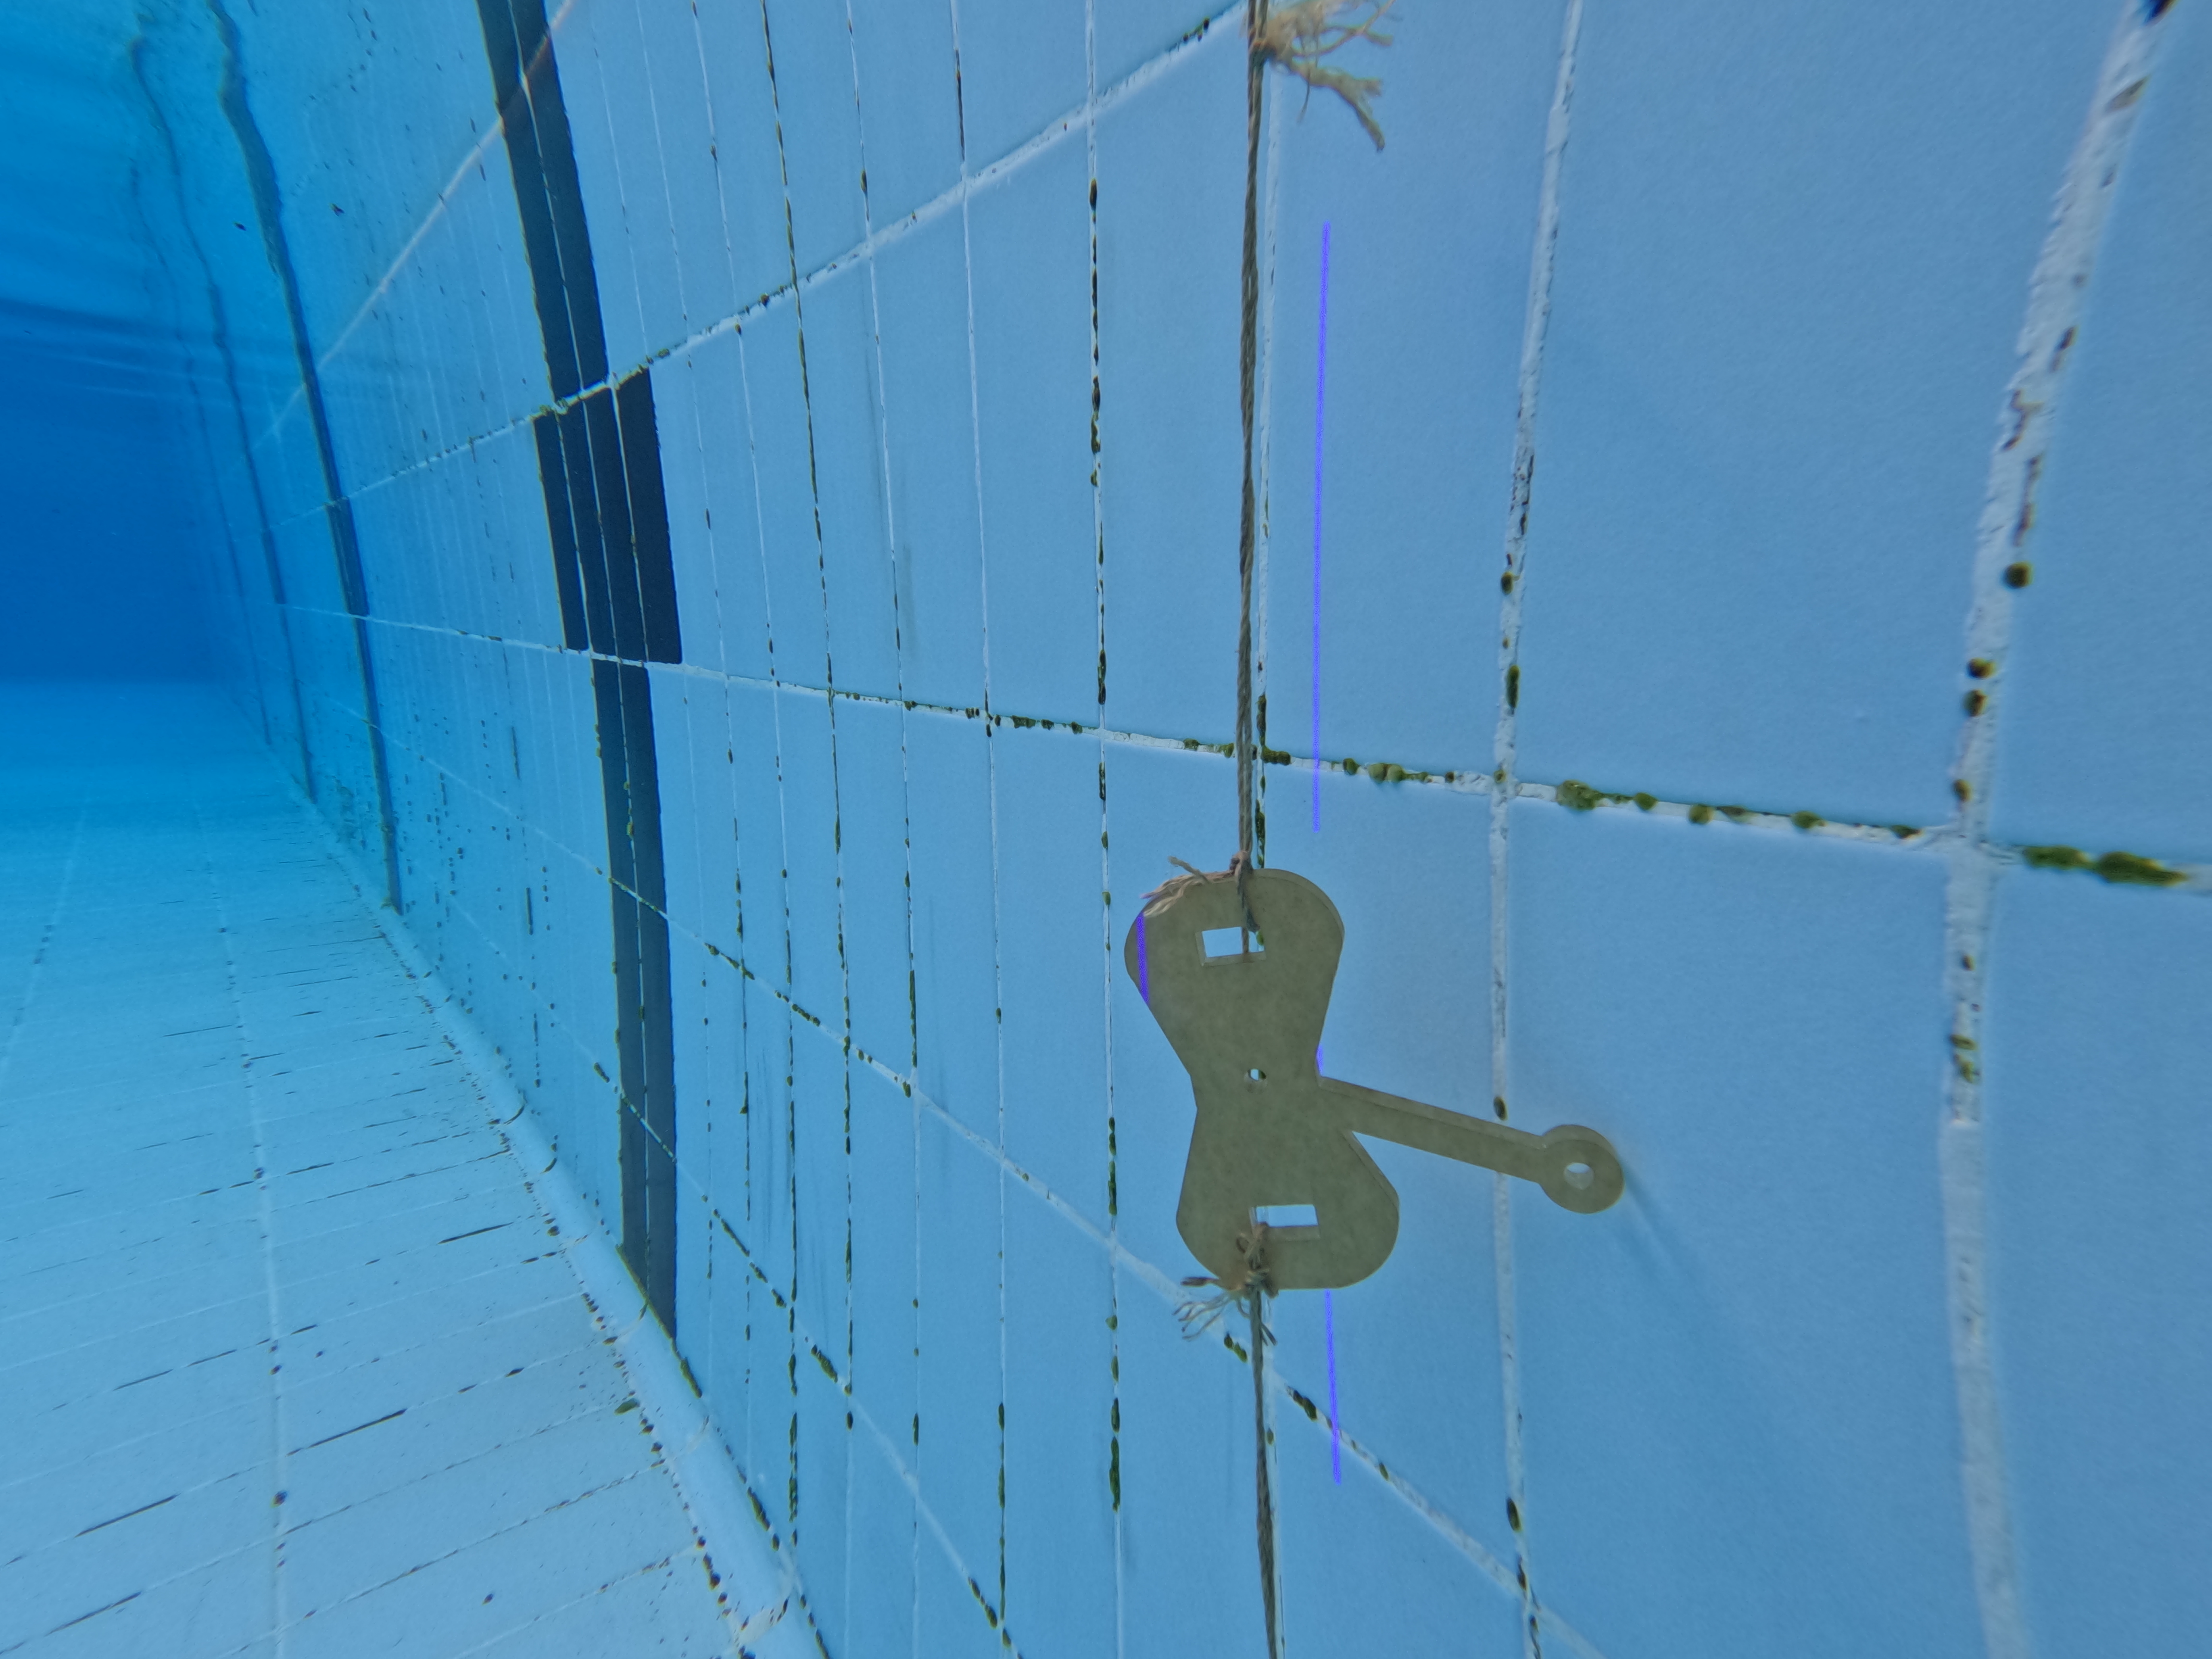

Supplement: Supplementary file 2103 [file G0050664.pdf › Level_3_2/G0050664.pdf]

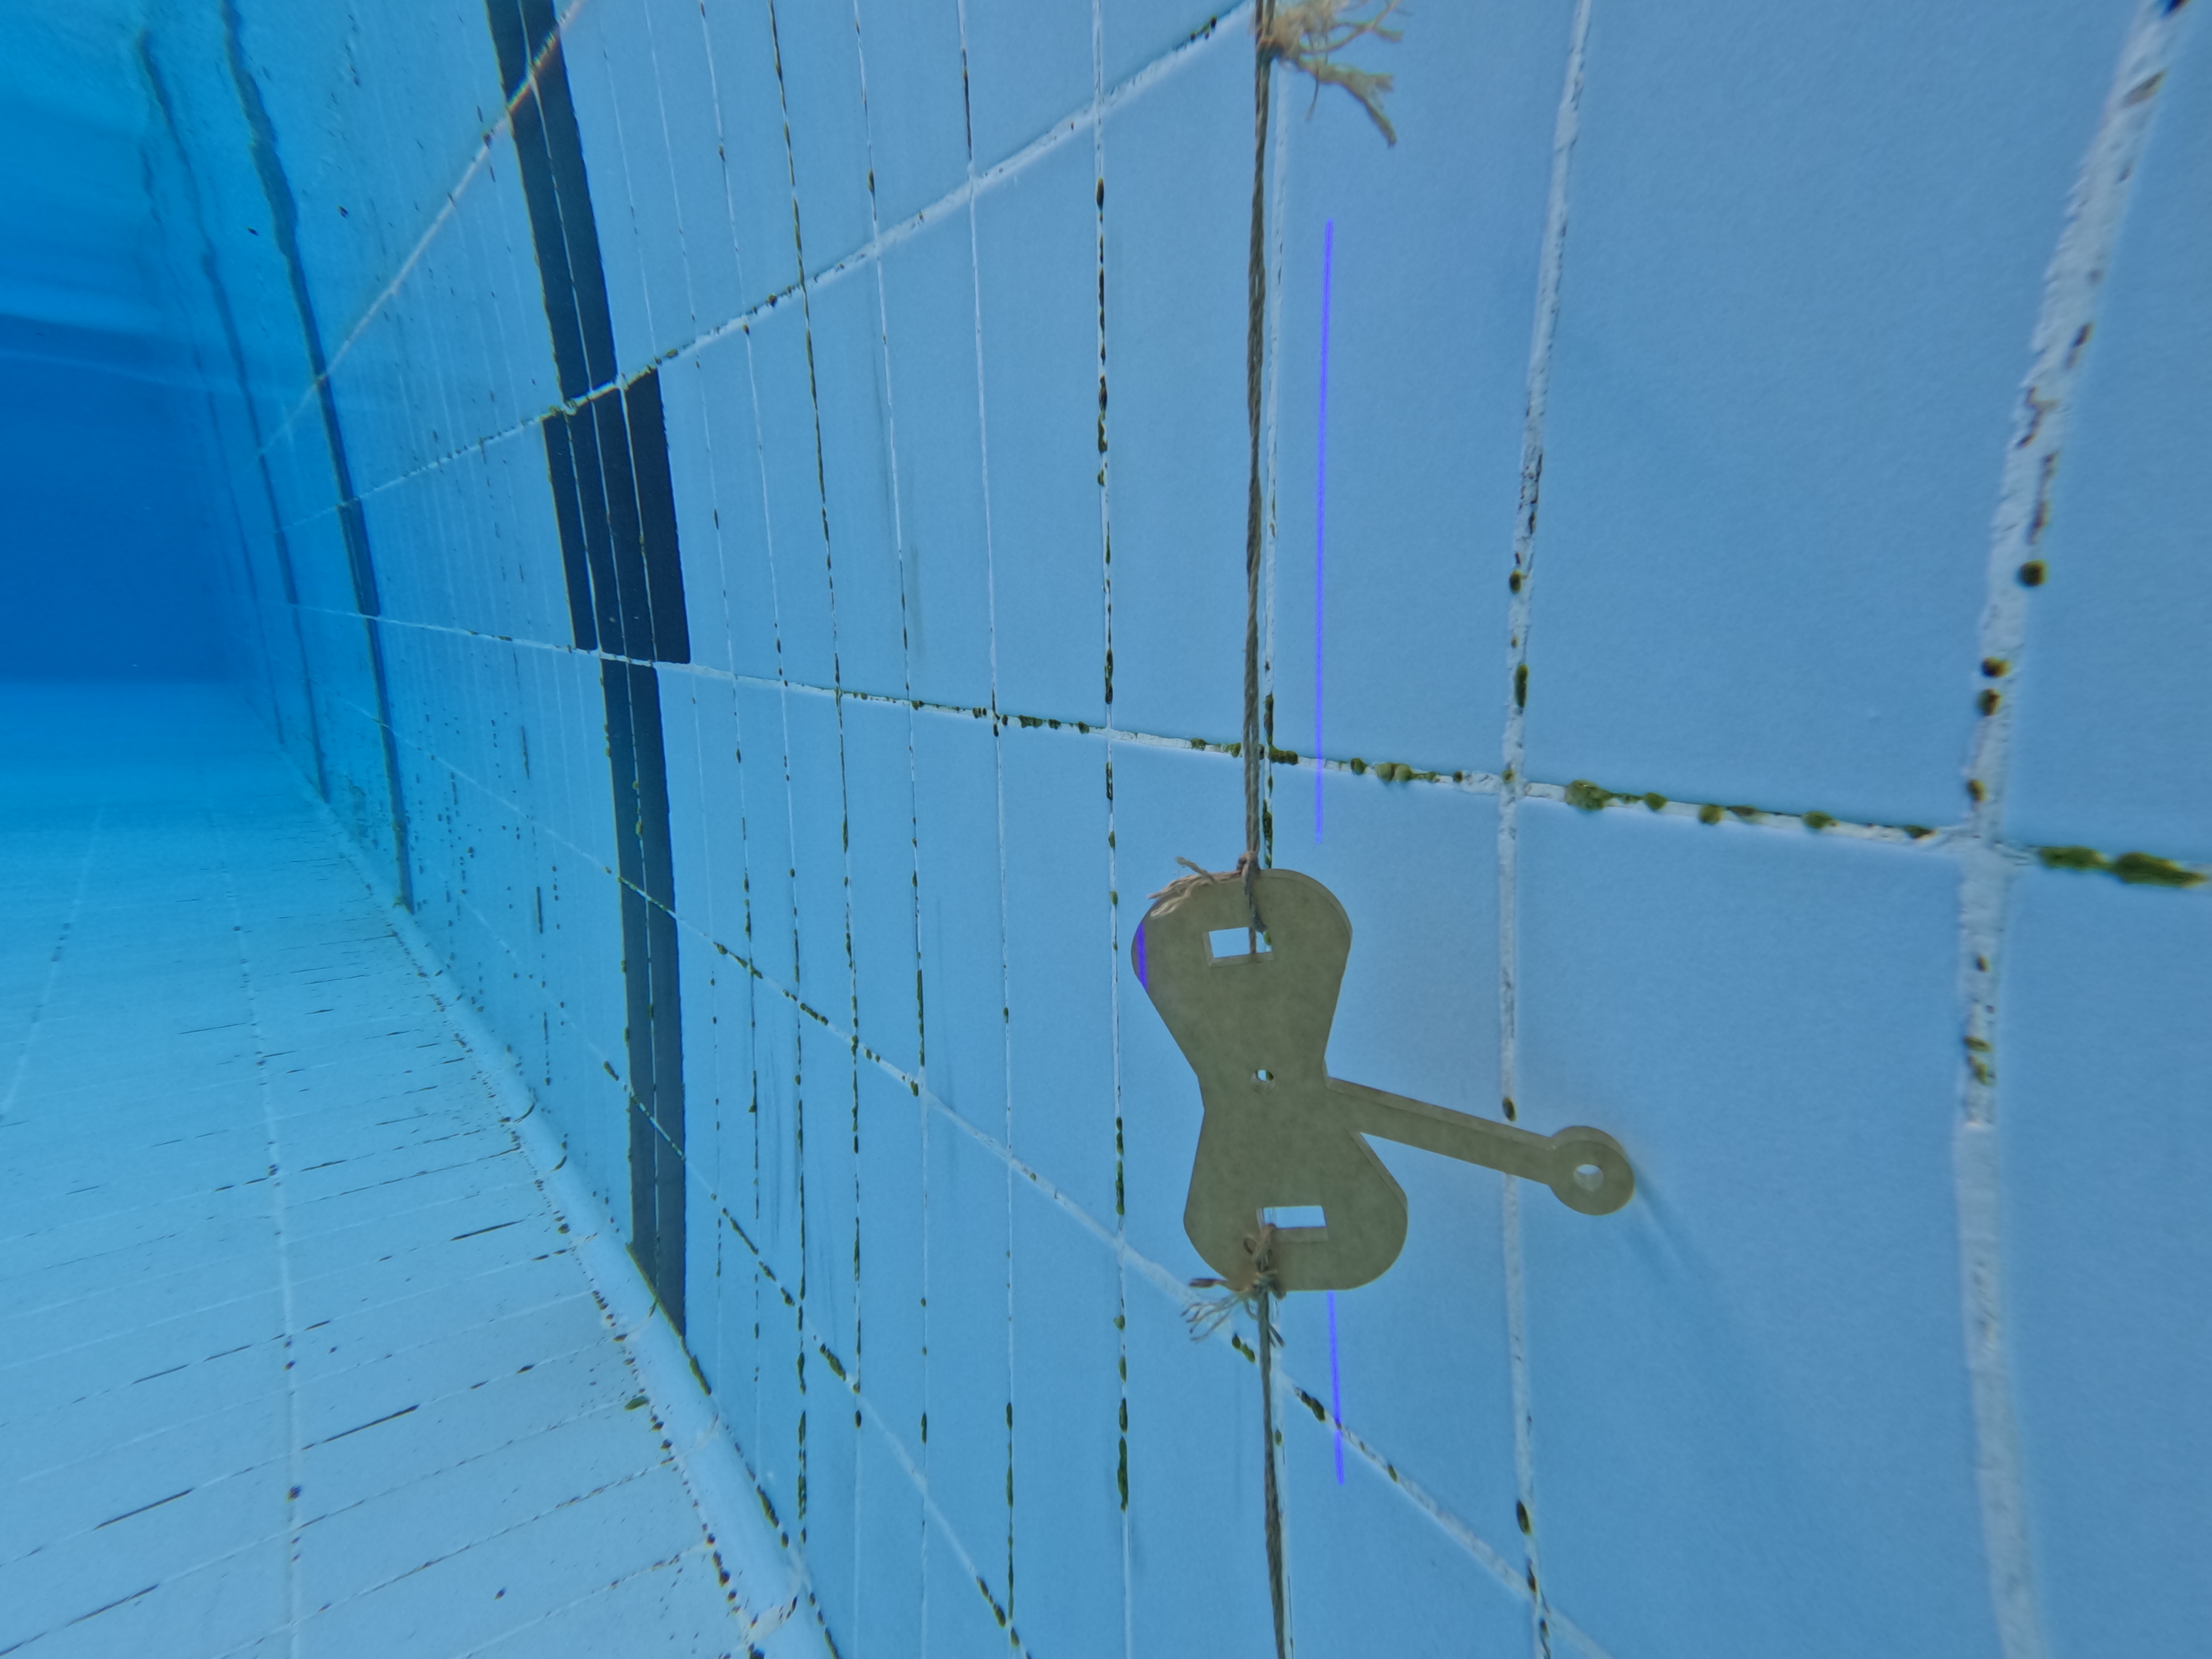

Supplement: Supplementary file 2104 [file G0050665.pdf › Level_3_2/G0050665.pdf]

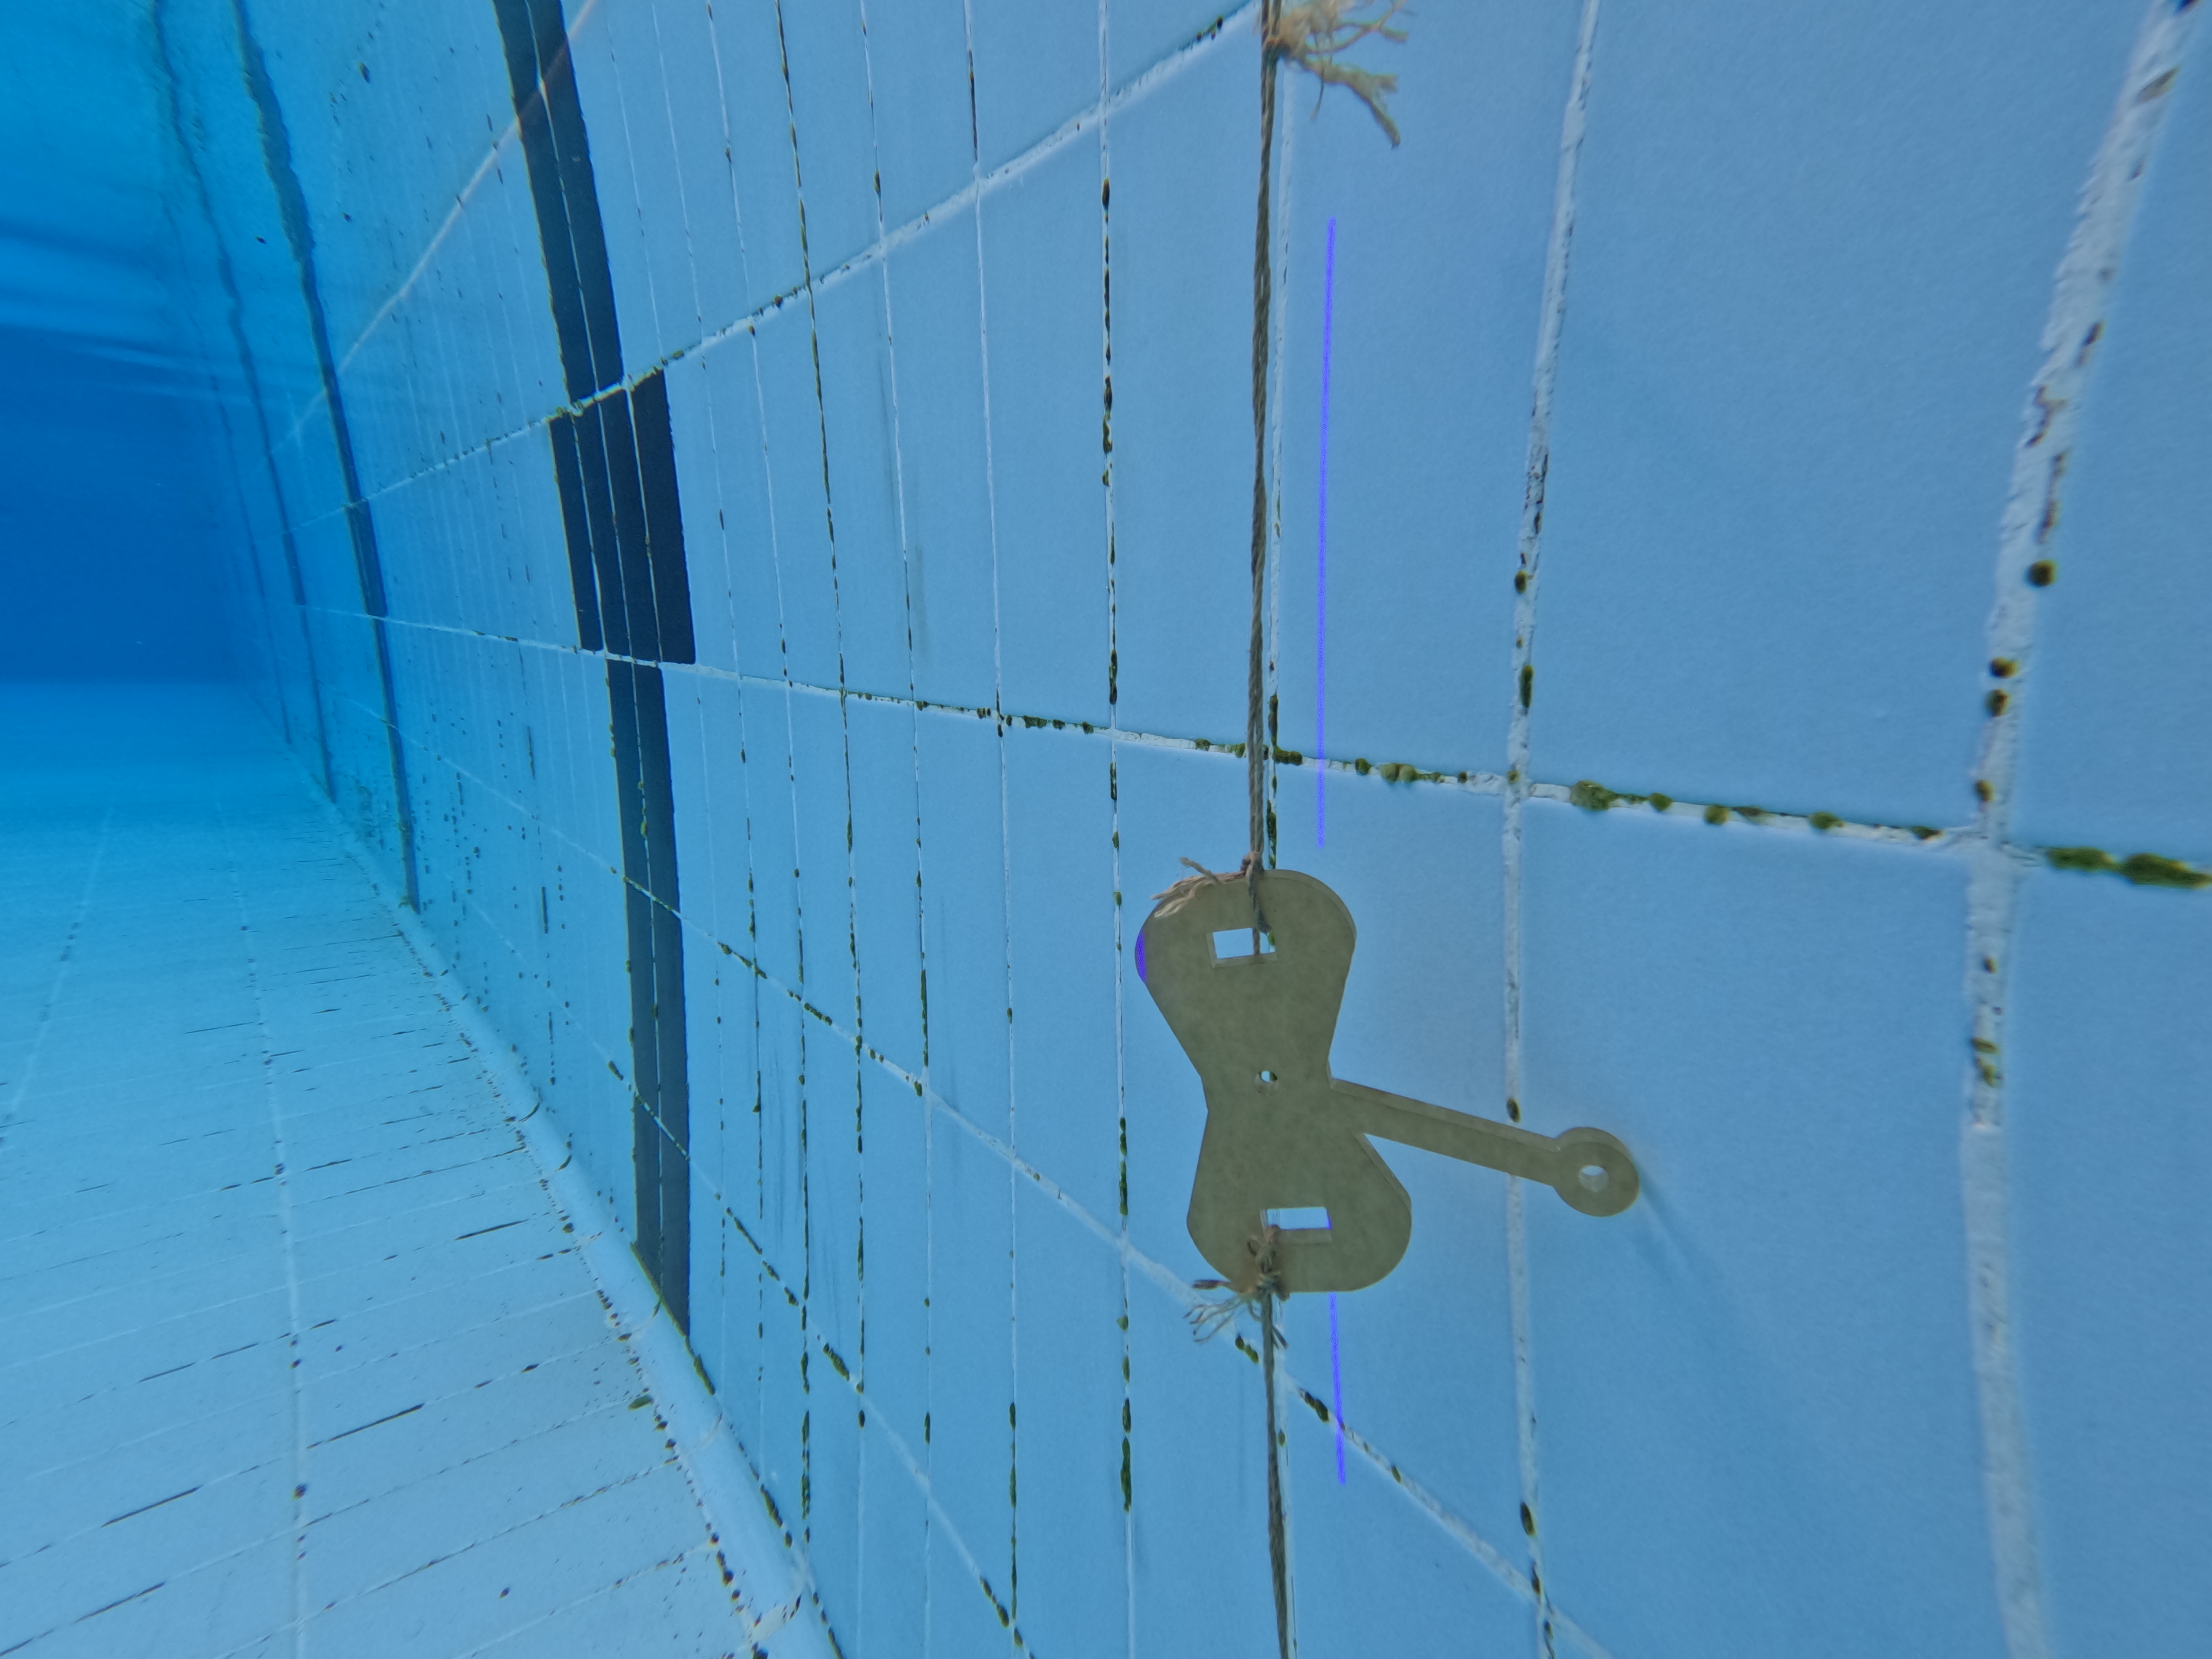

Supplement: Supplementary file 2105 [file G0050666.pdf › Level_3_2/G0050666.pdf]

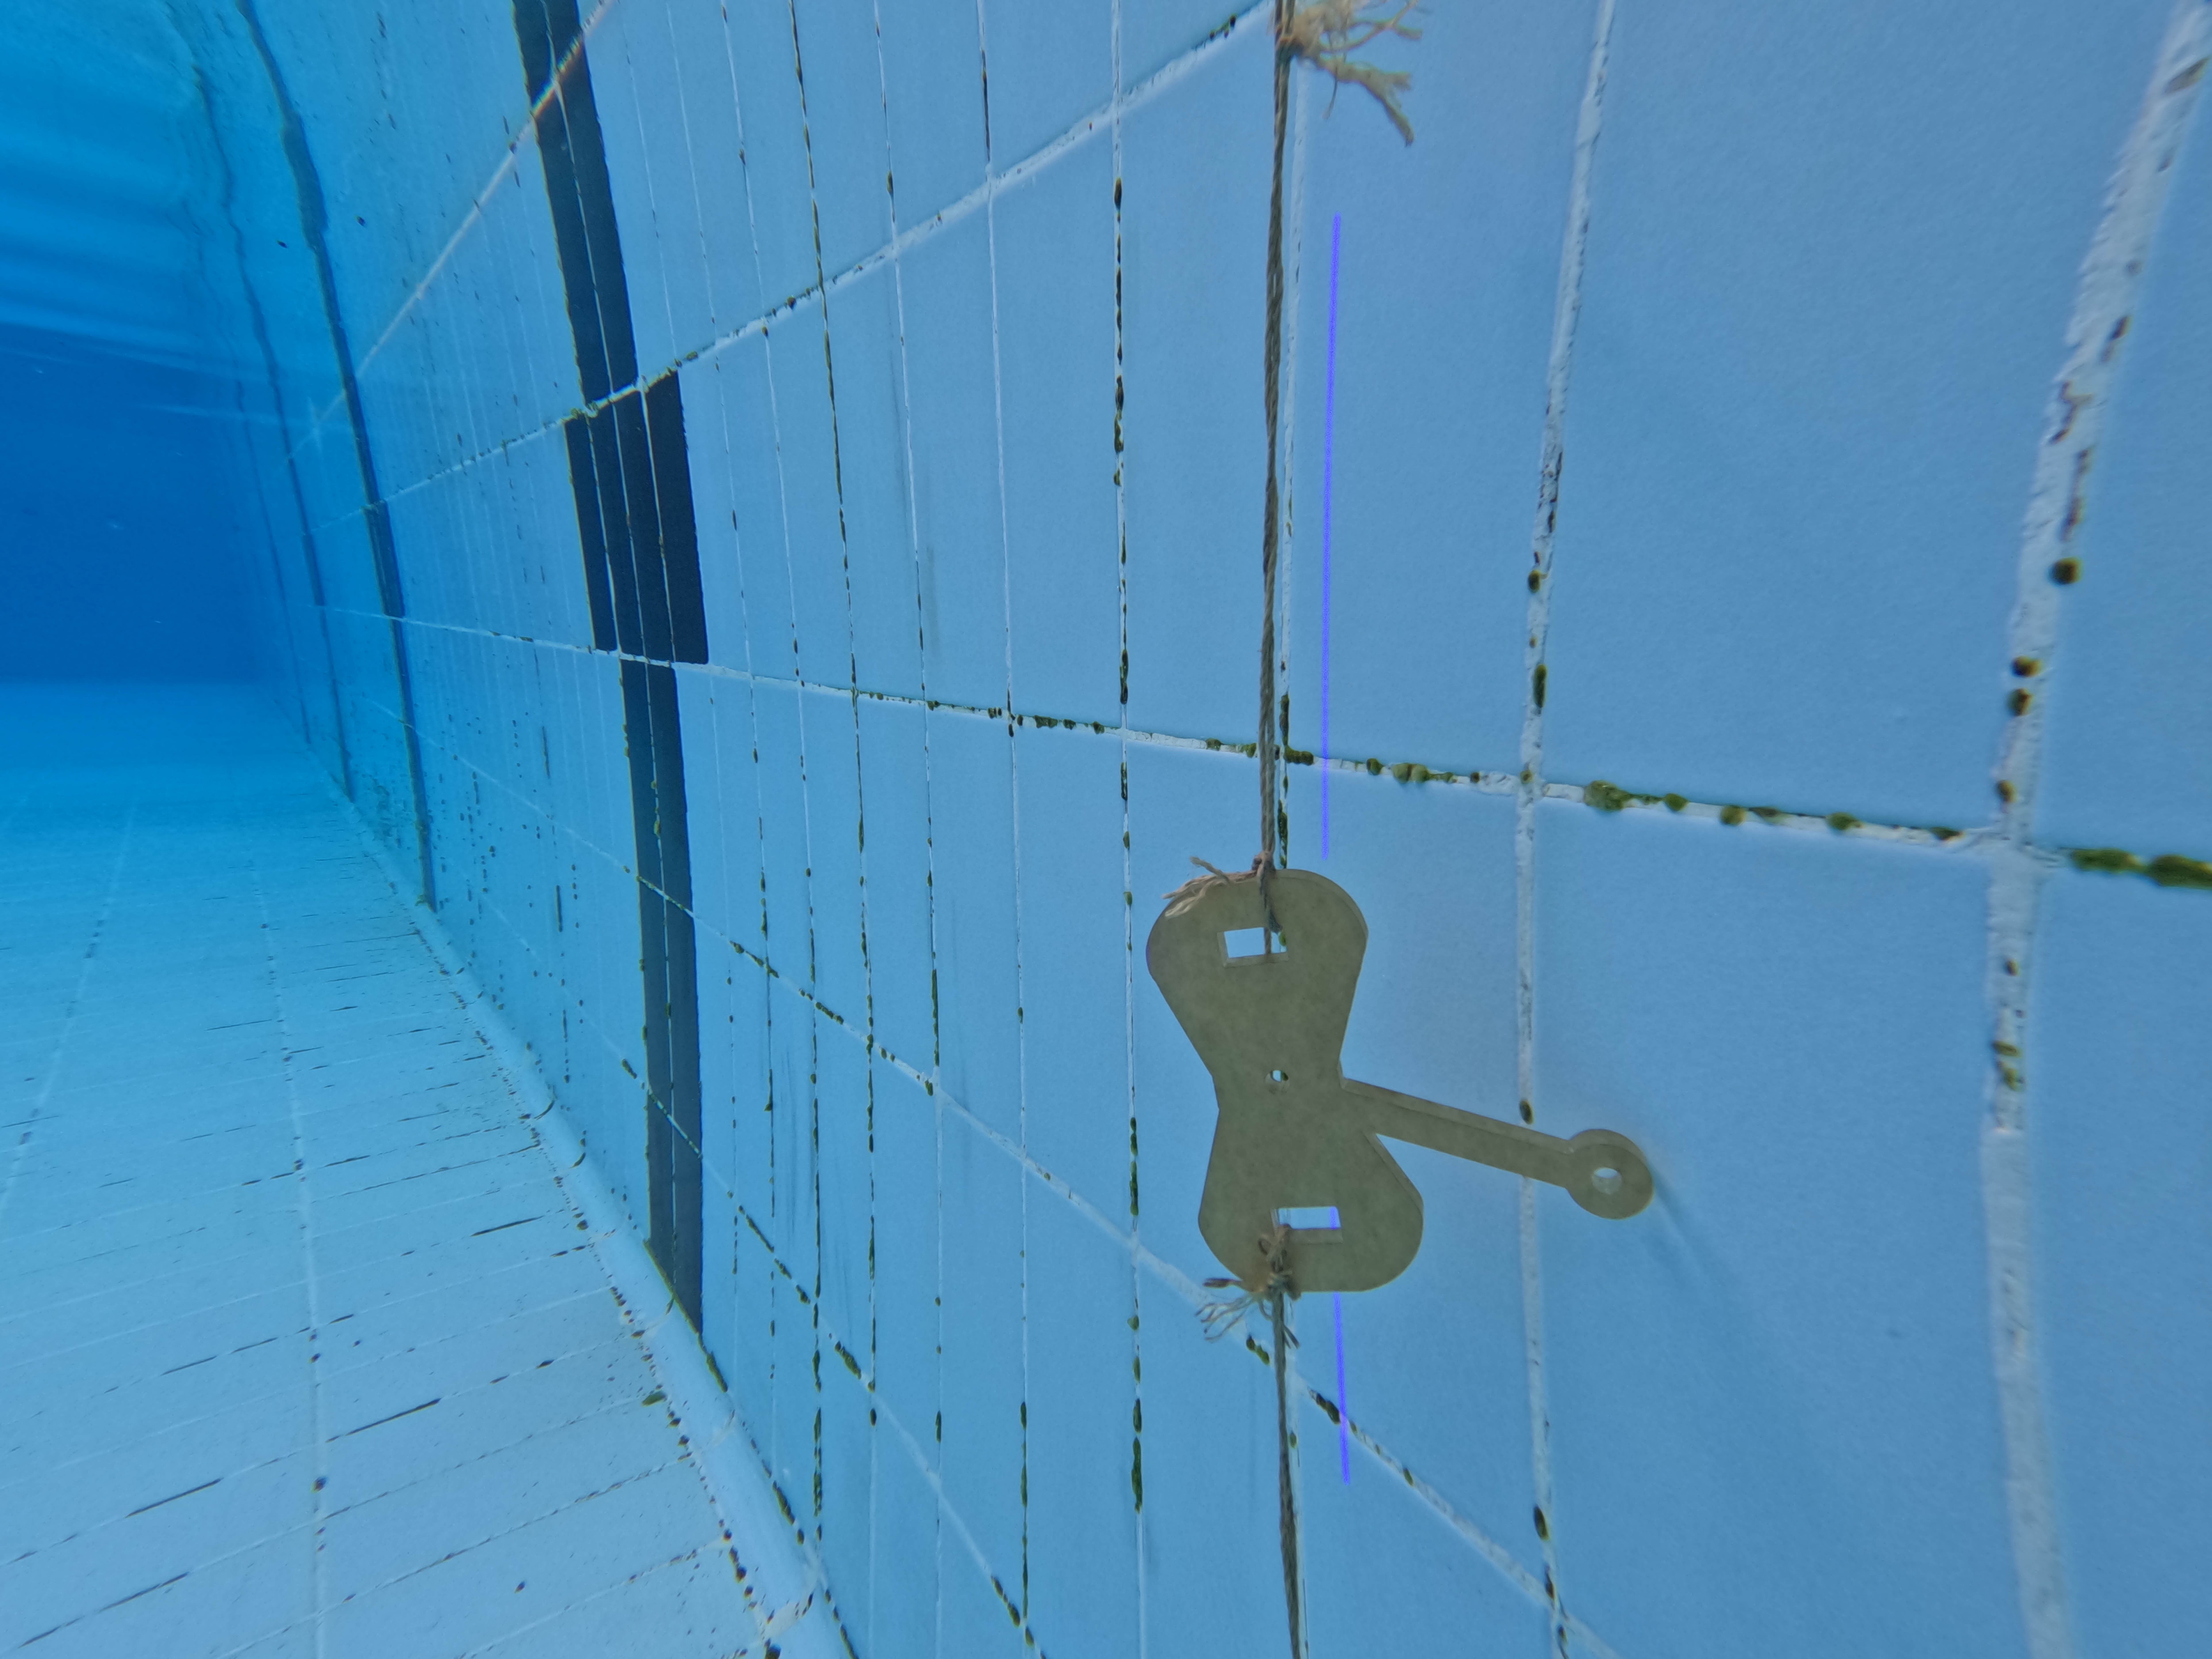

Supplement: Supplementary file 2106 [file G0050667.pdf › Level_3_2/G0050667.pdf]

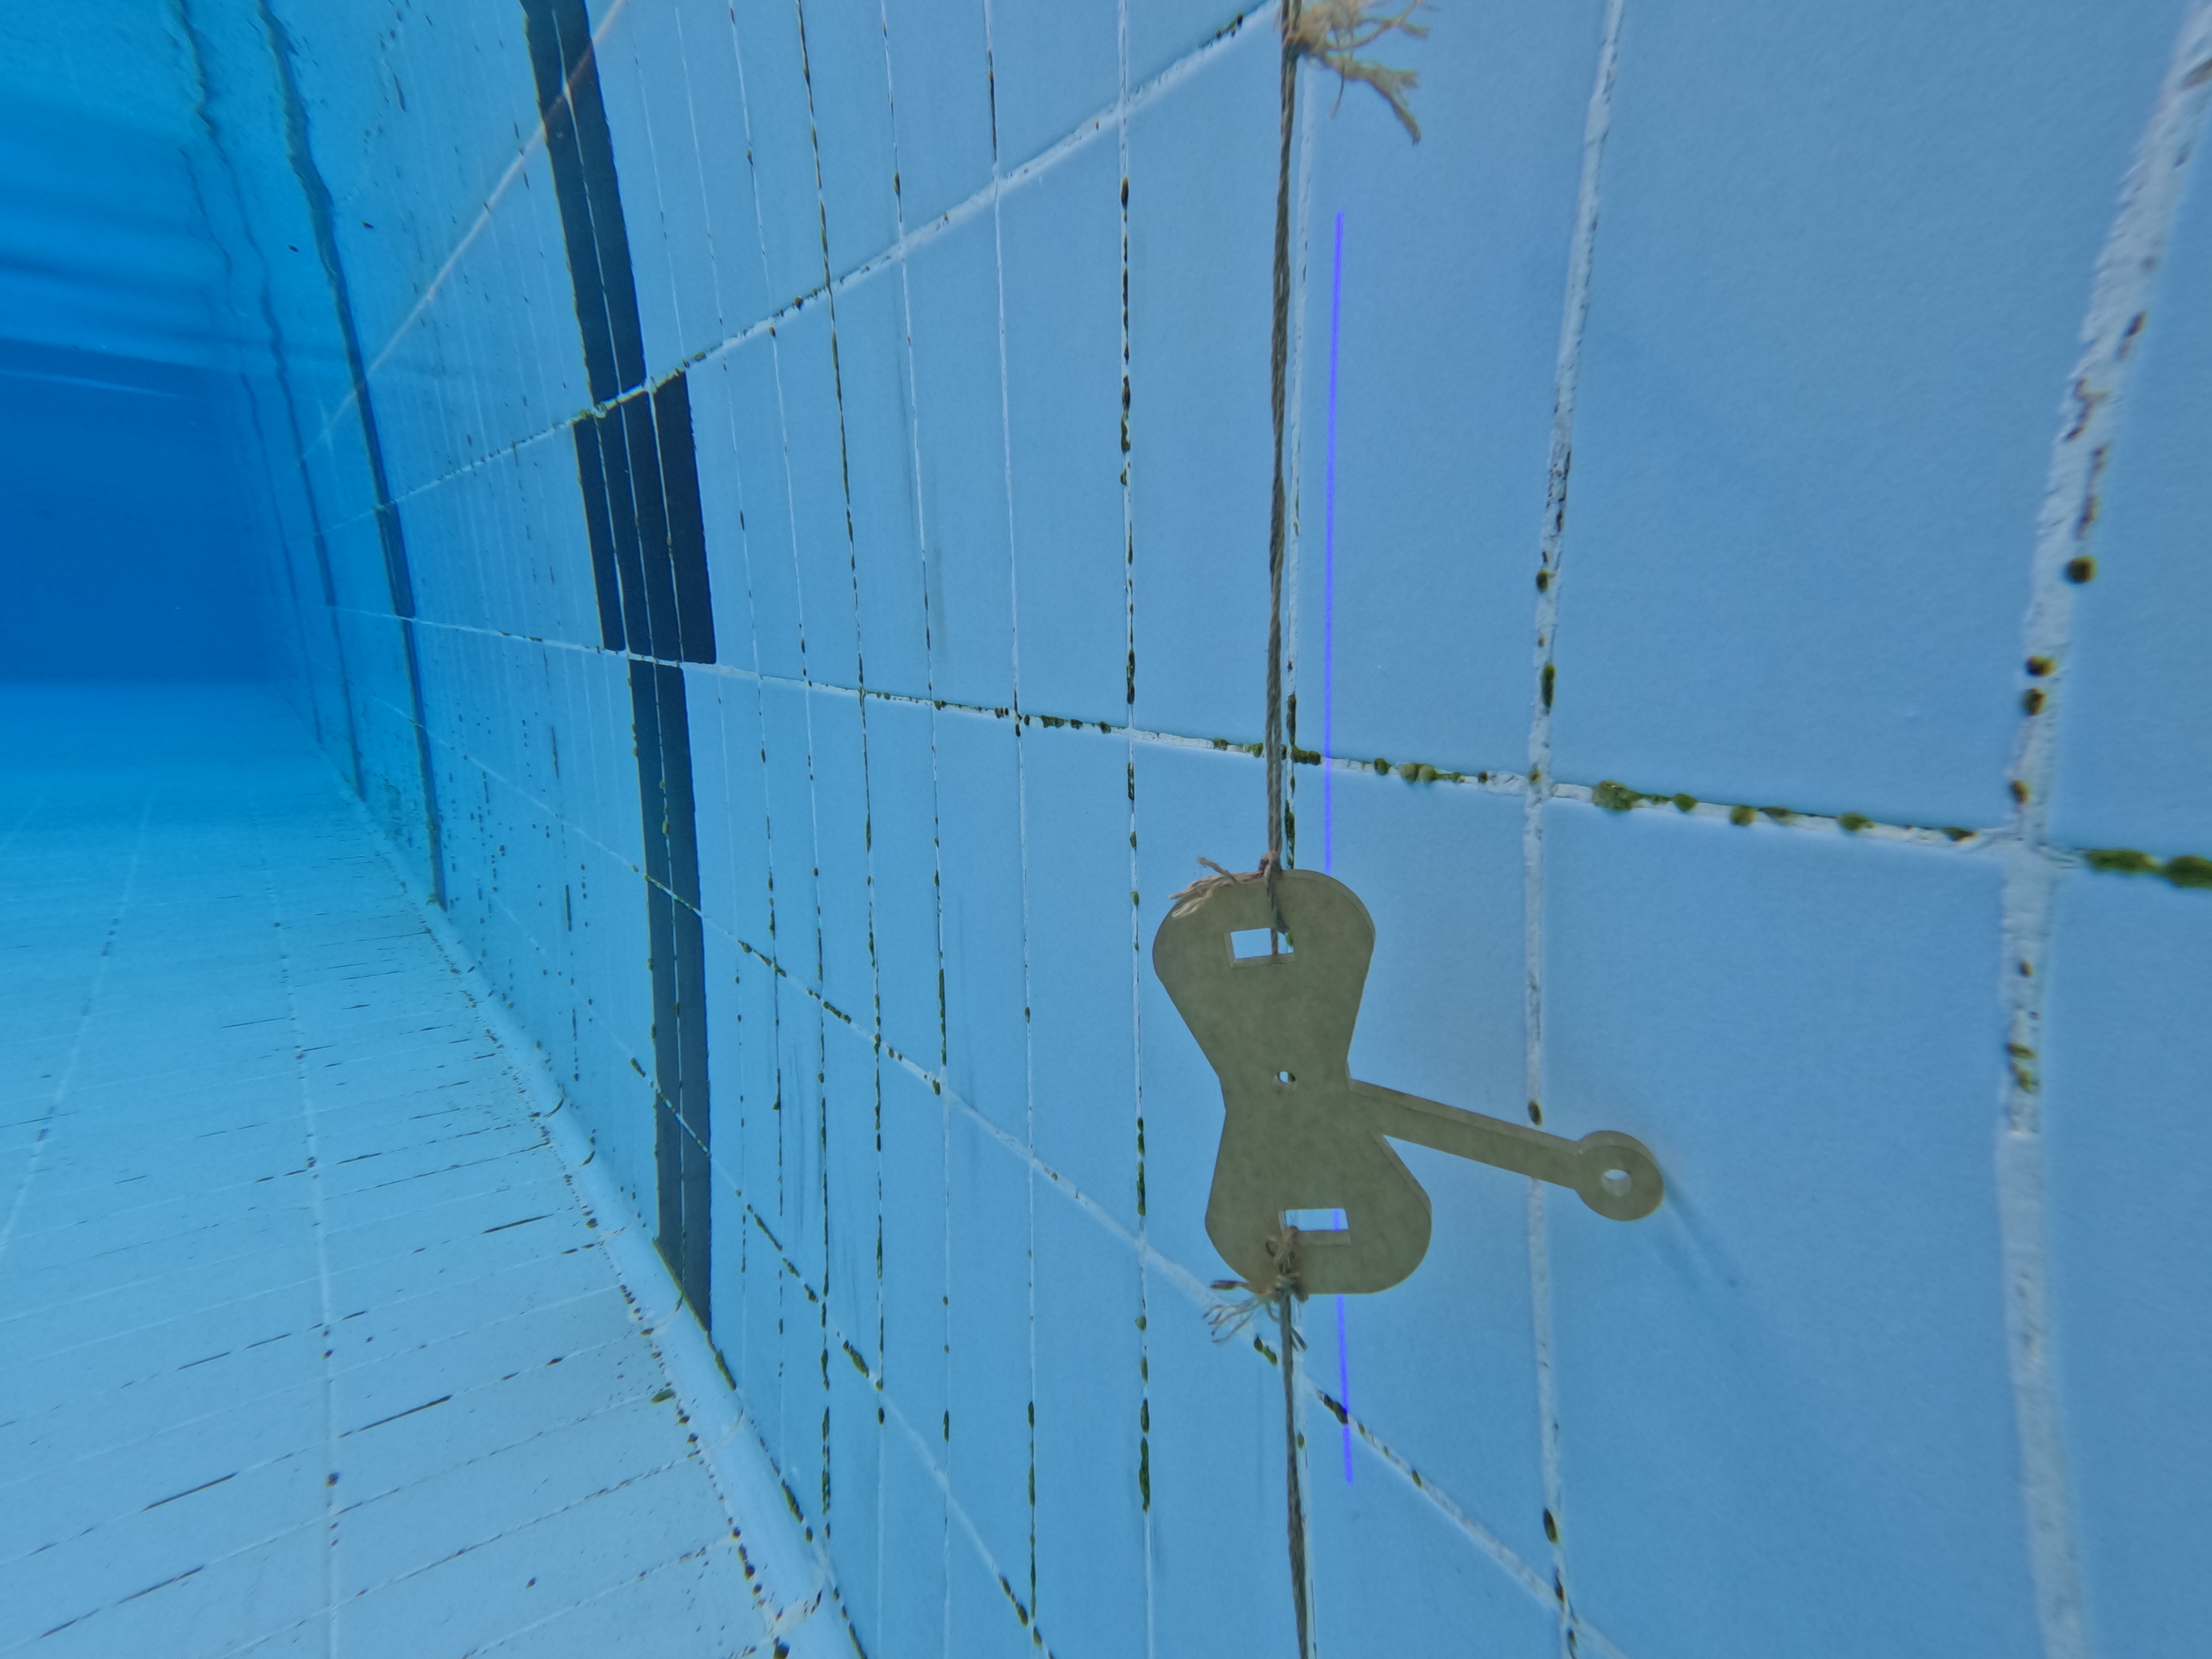

Supplement: Supplementary file 2107 [file G0050668.pdf › Level_3_2/G0050668.pdf]

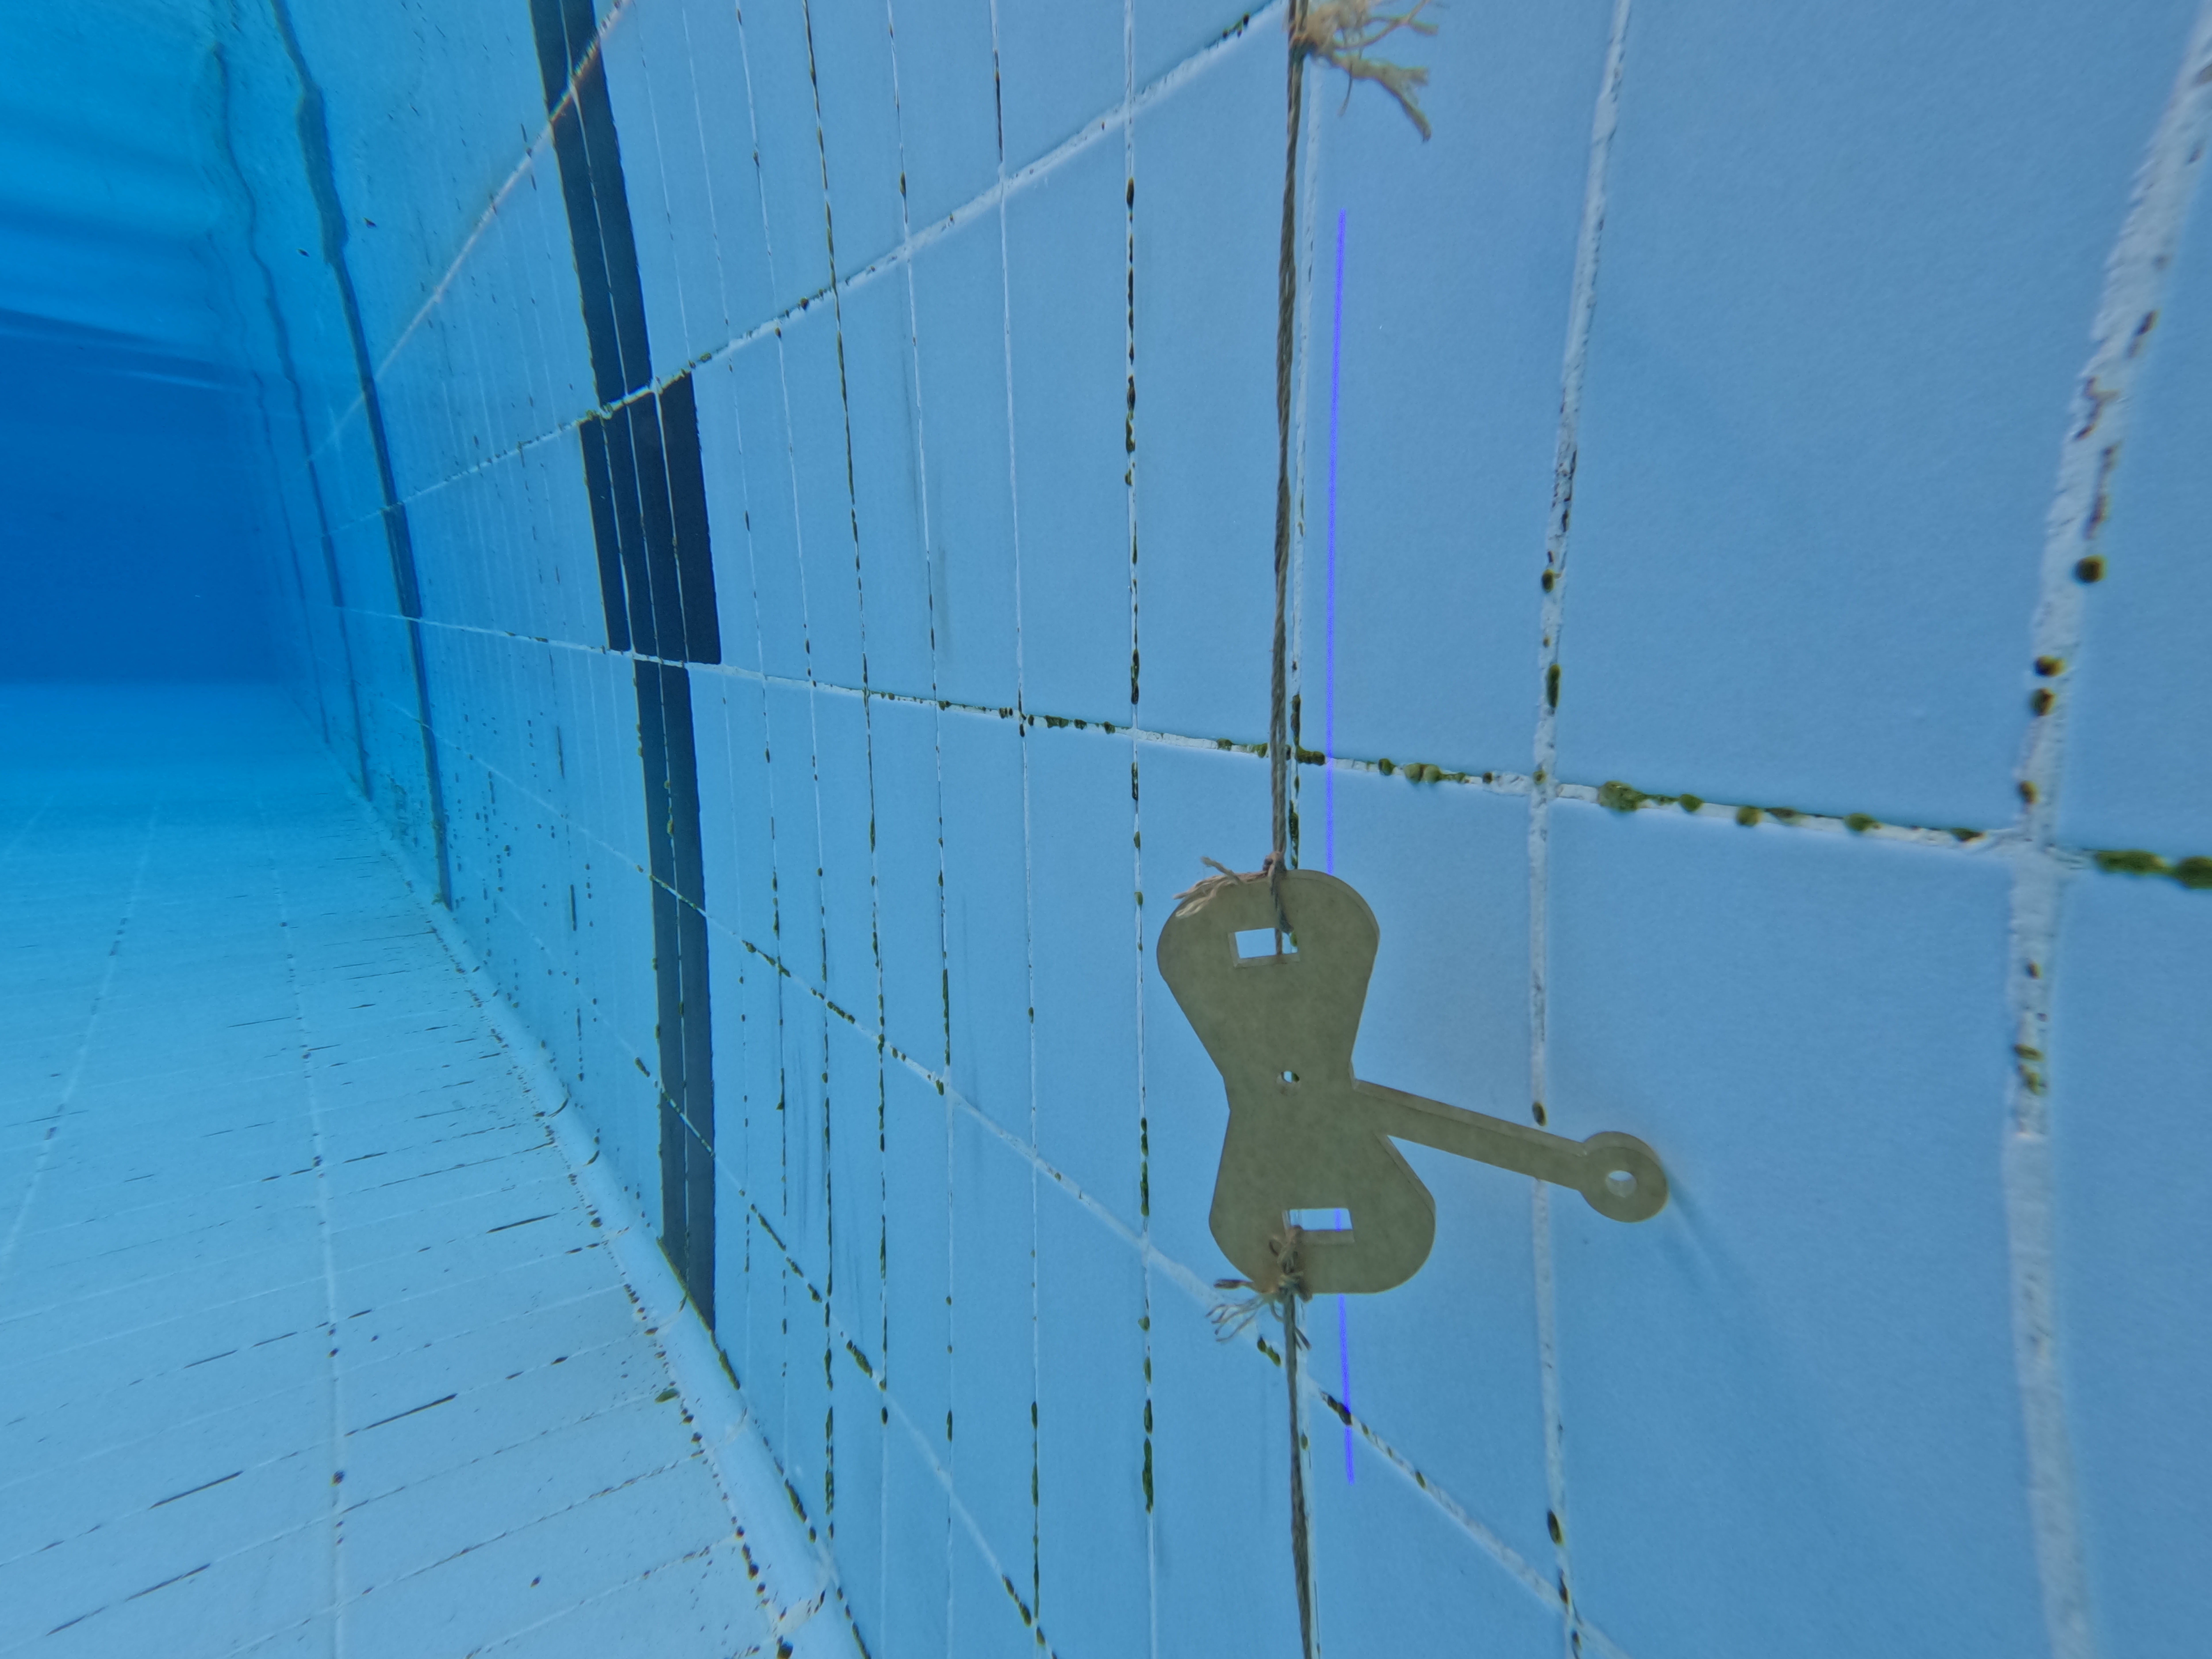

Supplement: Supplementary file 2108 [file G0050669.pdf › Level_3_2/G0050669.pdf]

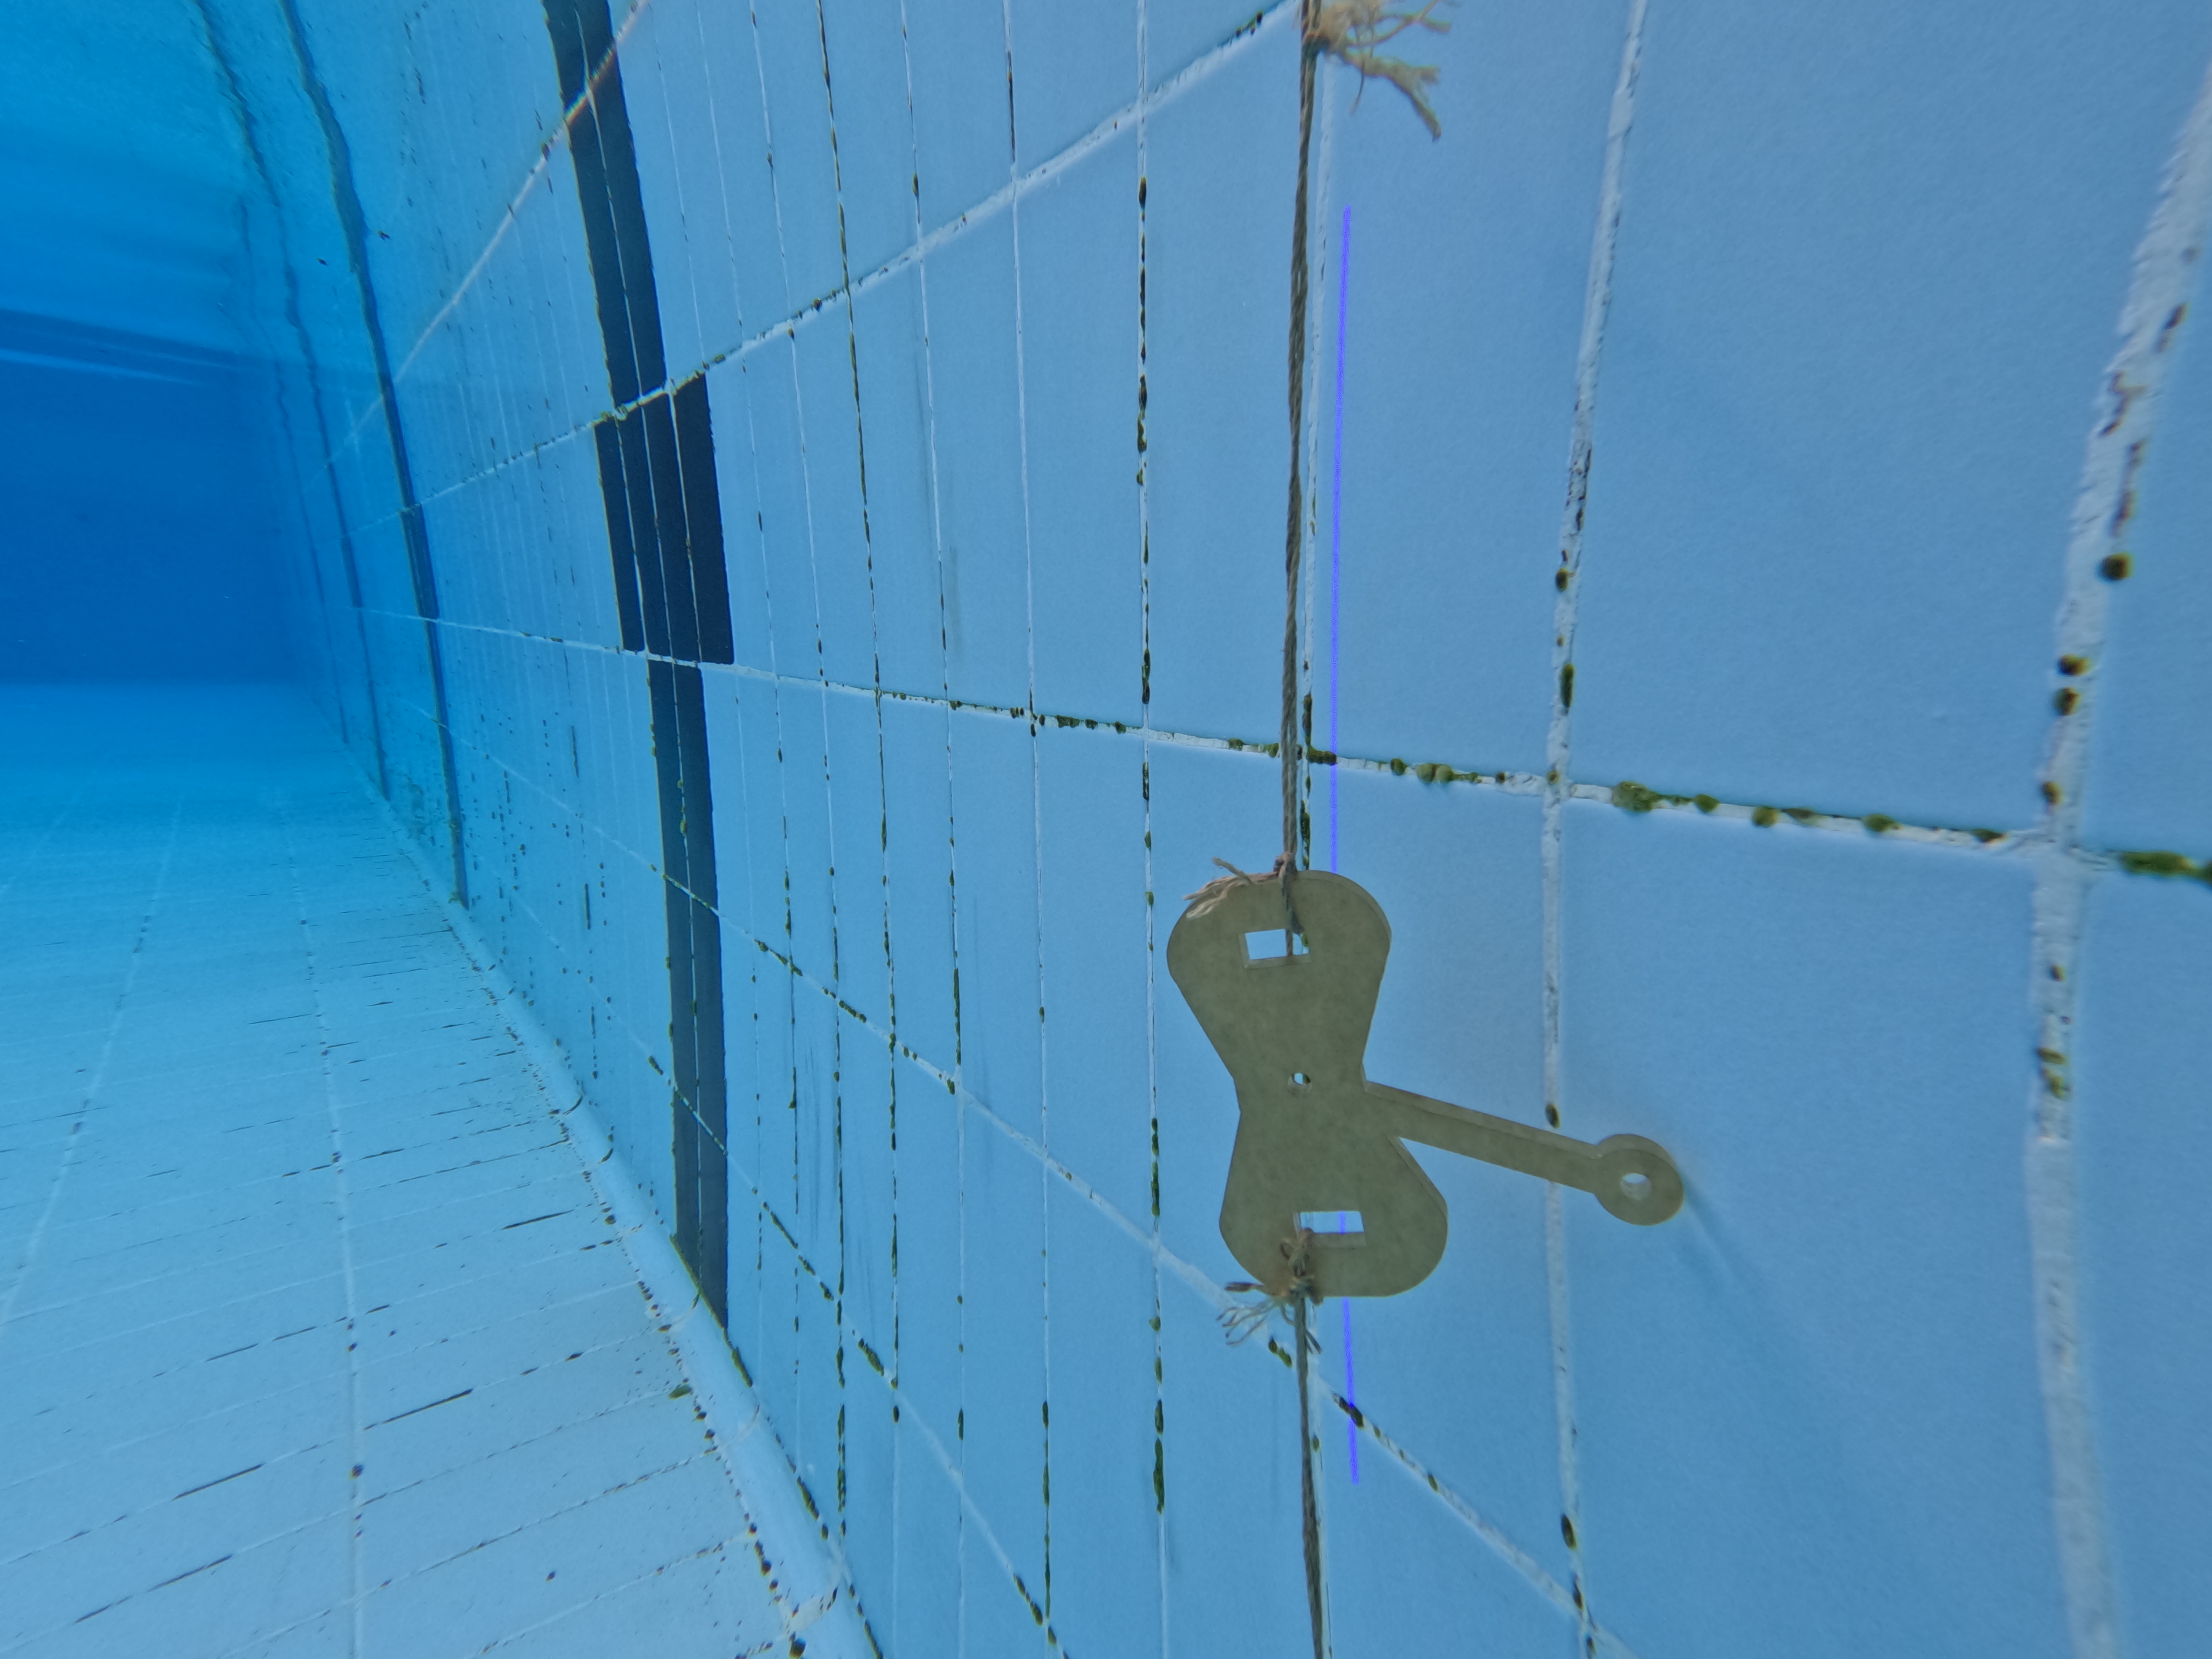

Supplement: Supplementary file 2109 [file G0050670.pdf › Level_3_2/G0050670.pdf]

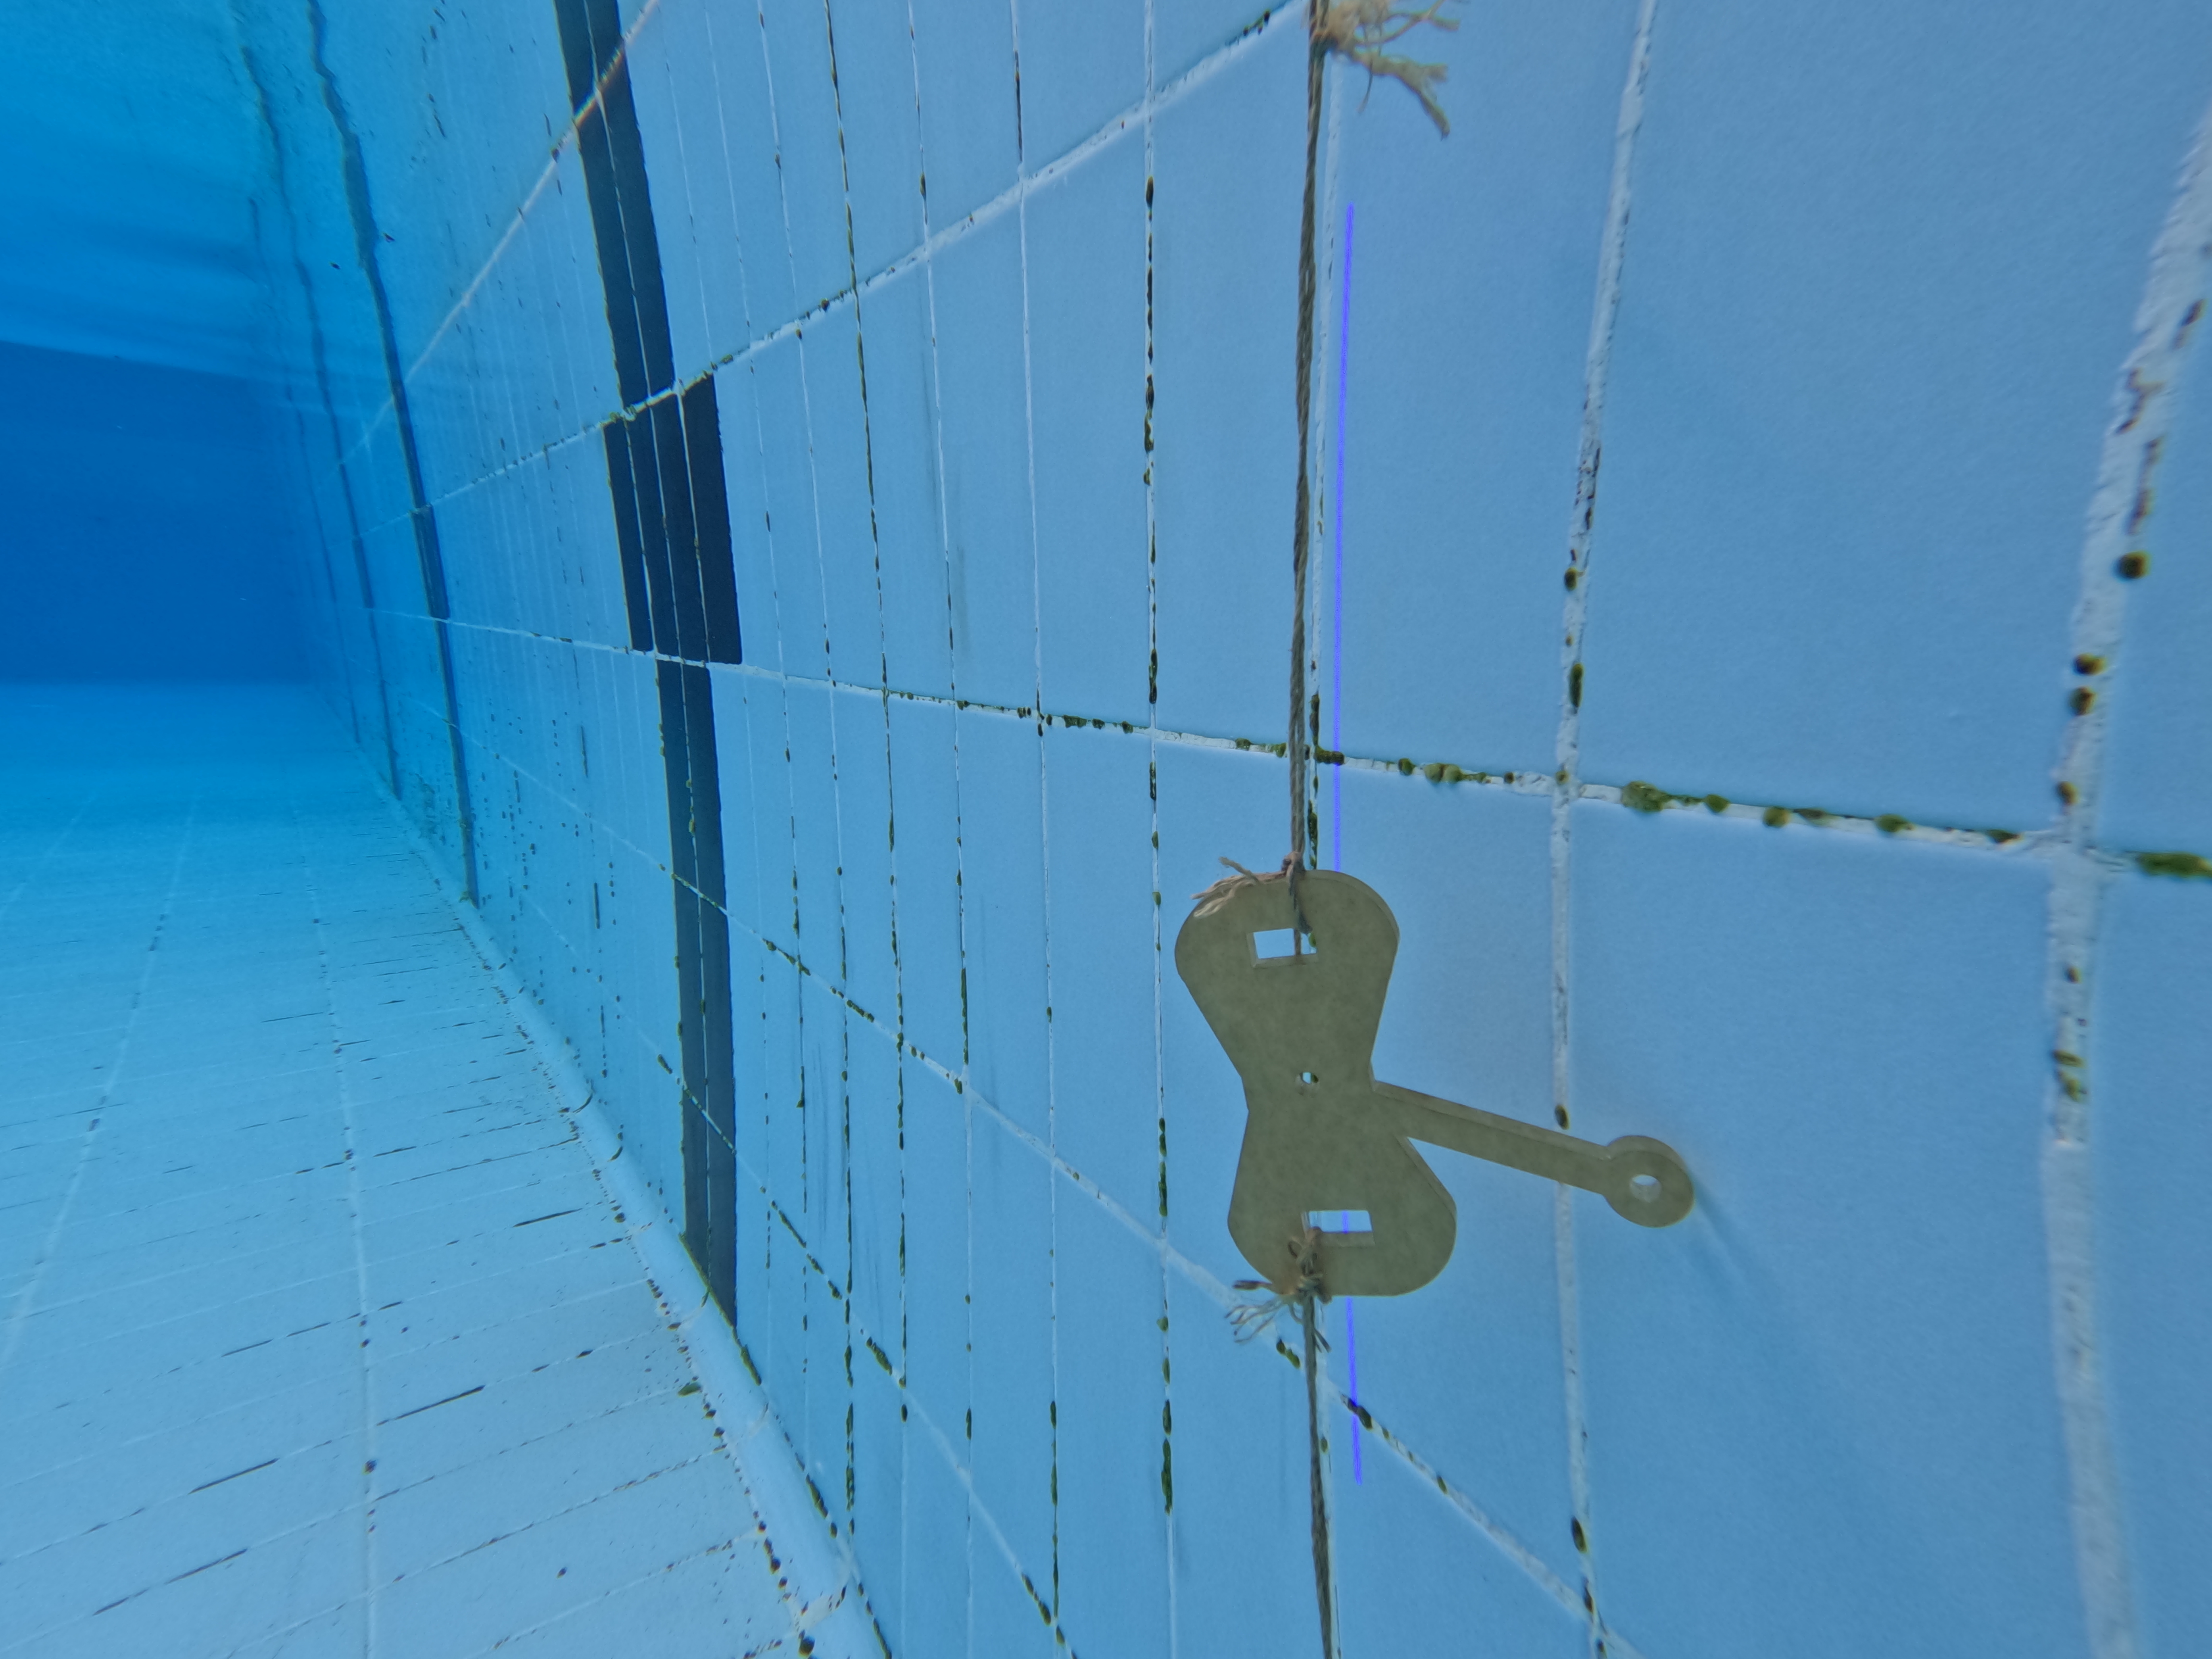

Supplement: Supplementary file 2110 [file G0050671.pdf › Level_3_2/G0050671.pdf]

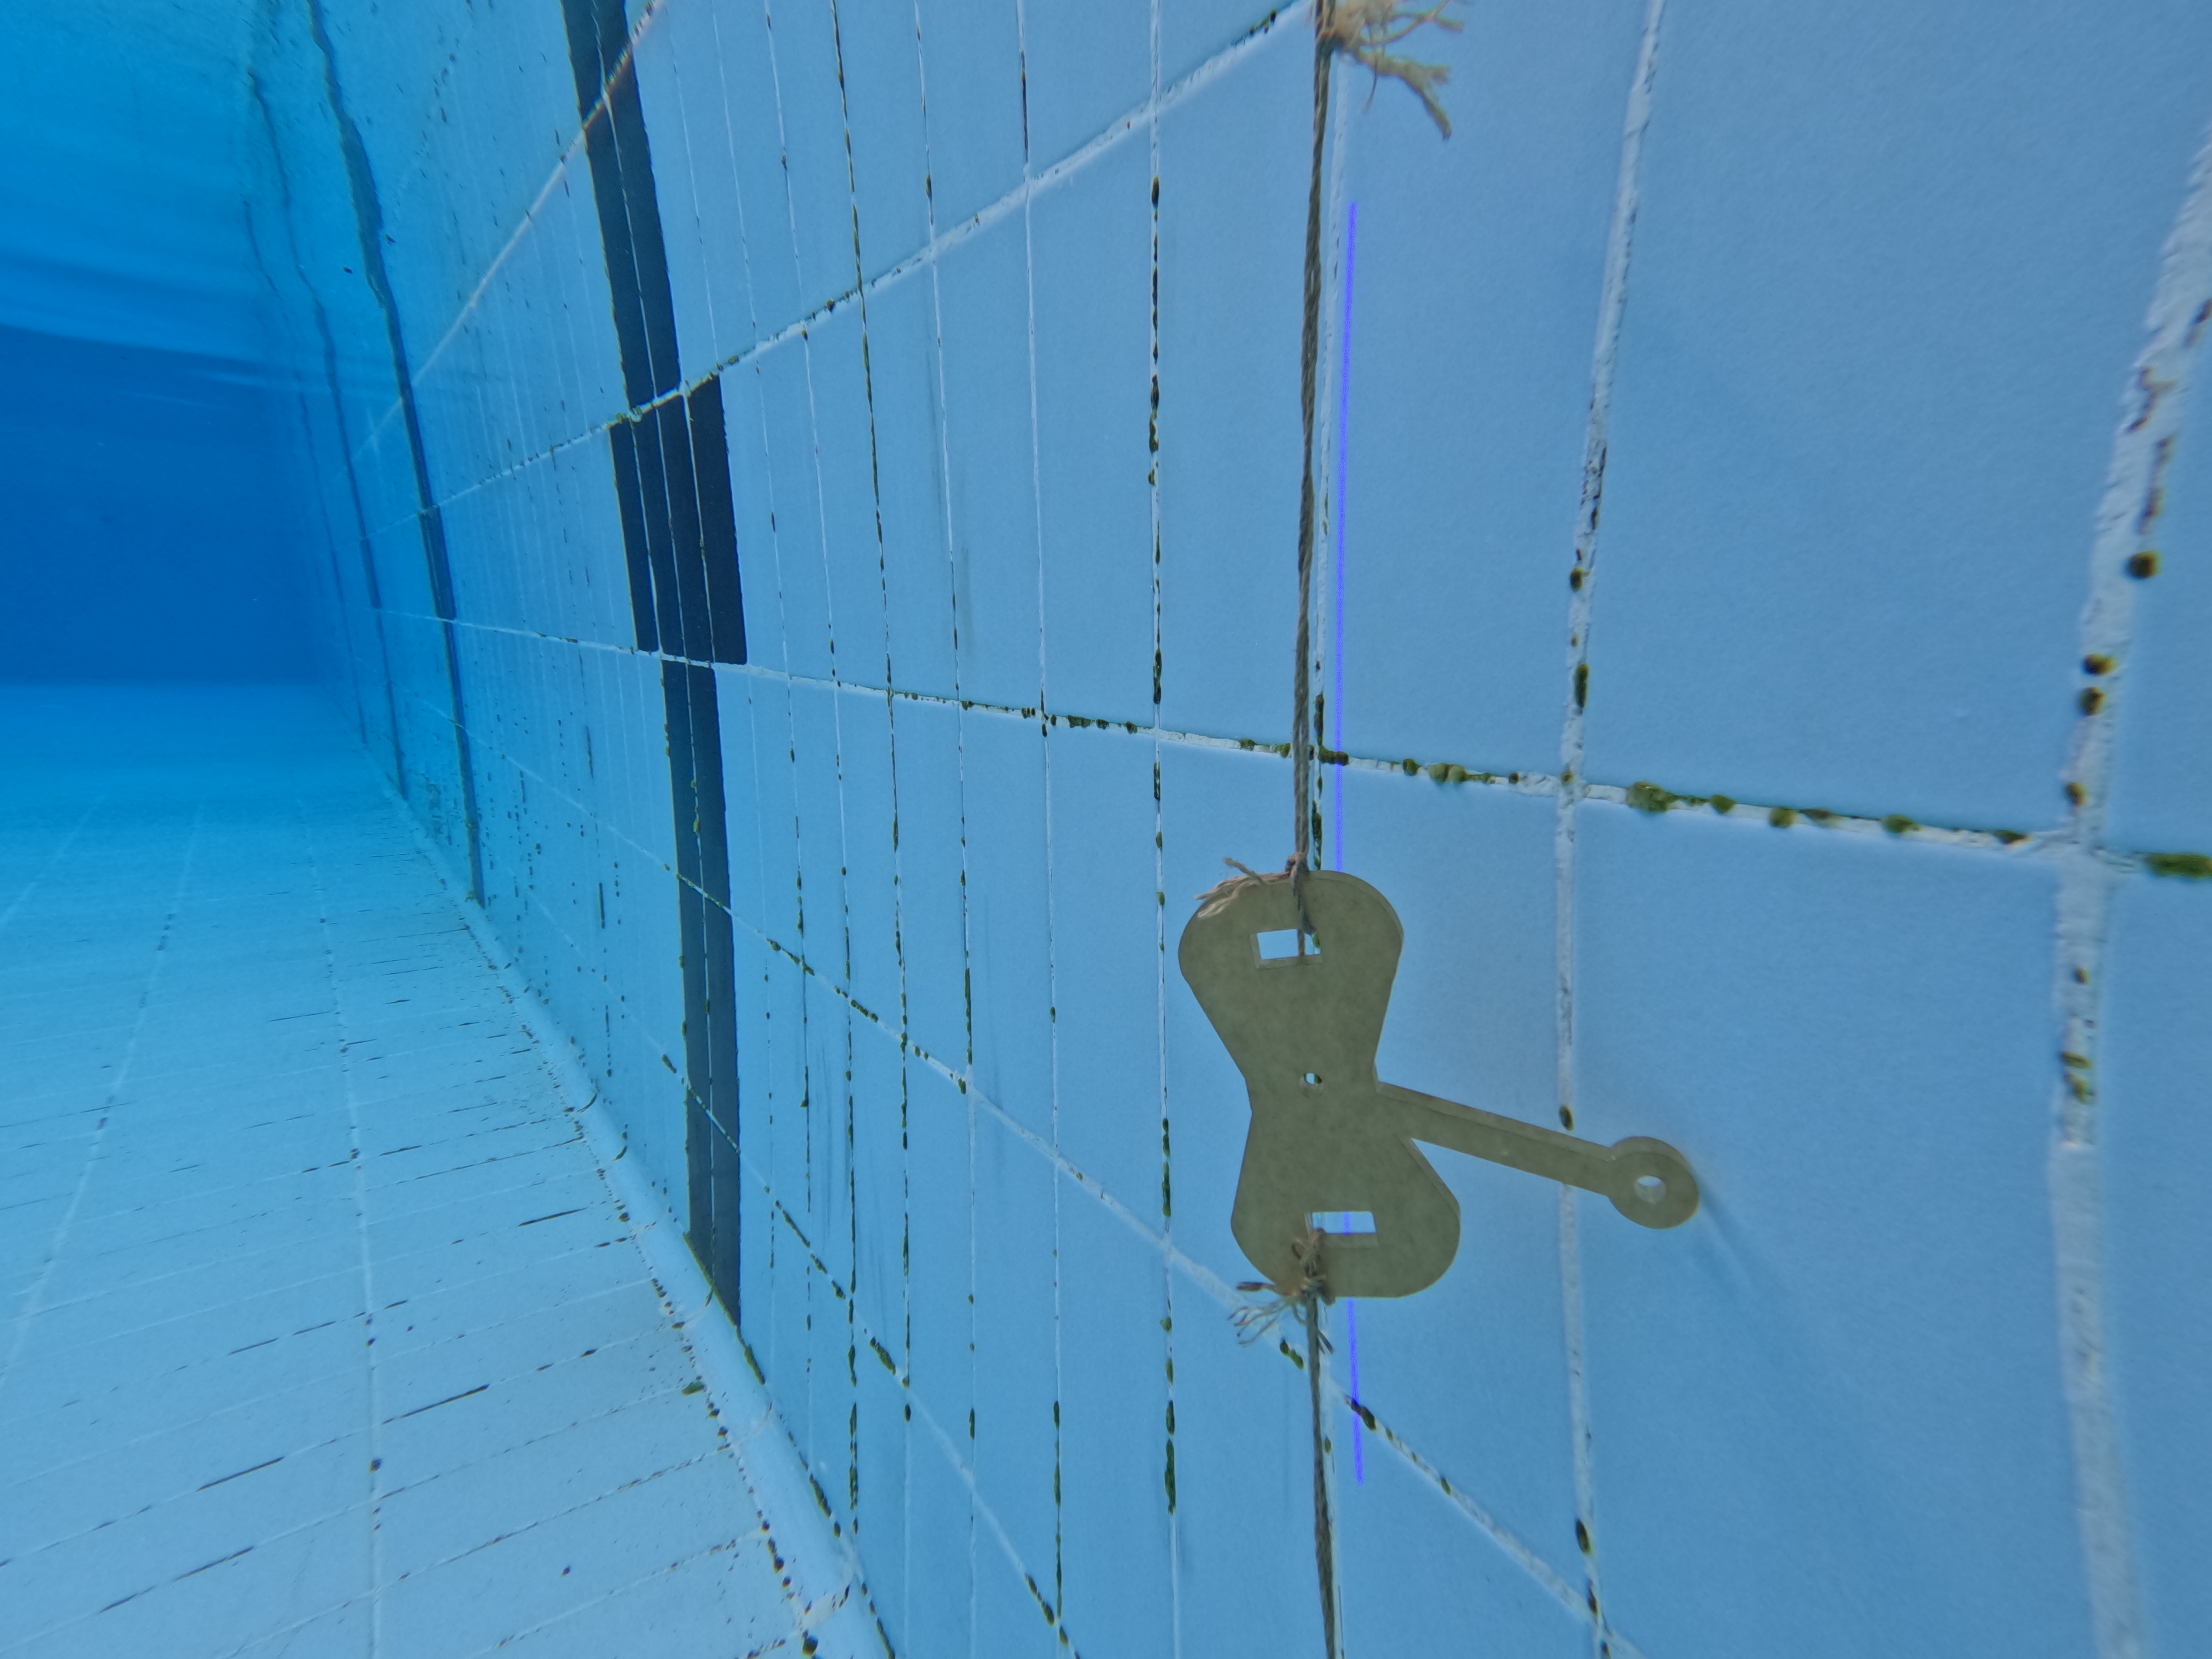

Supplement: Supplementary file 2111 [file G0050672.pdf › Level_3_2/G0050672.pdf]

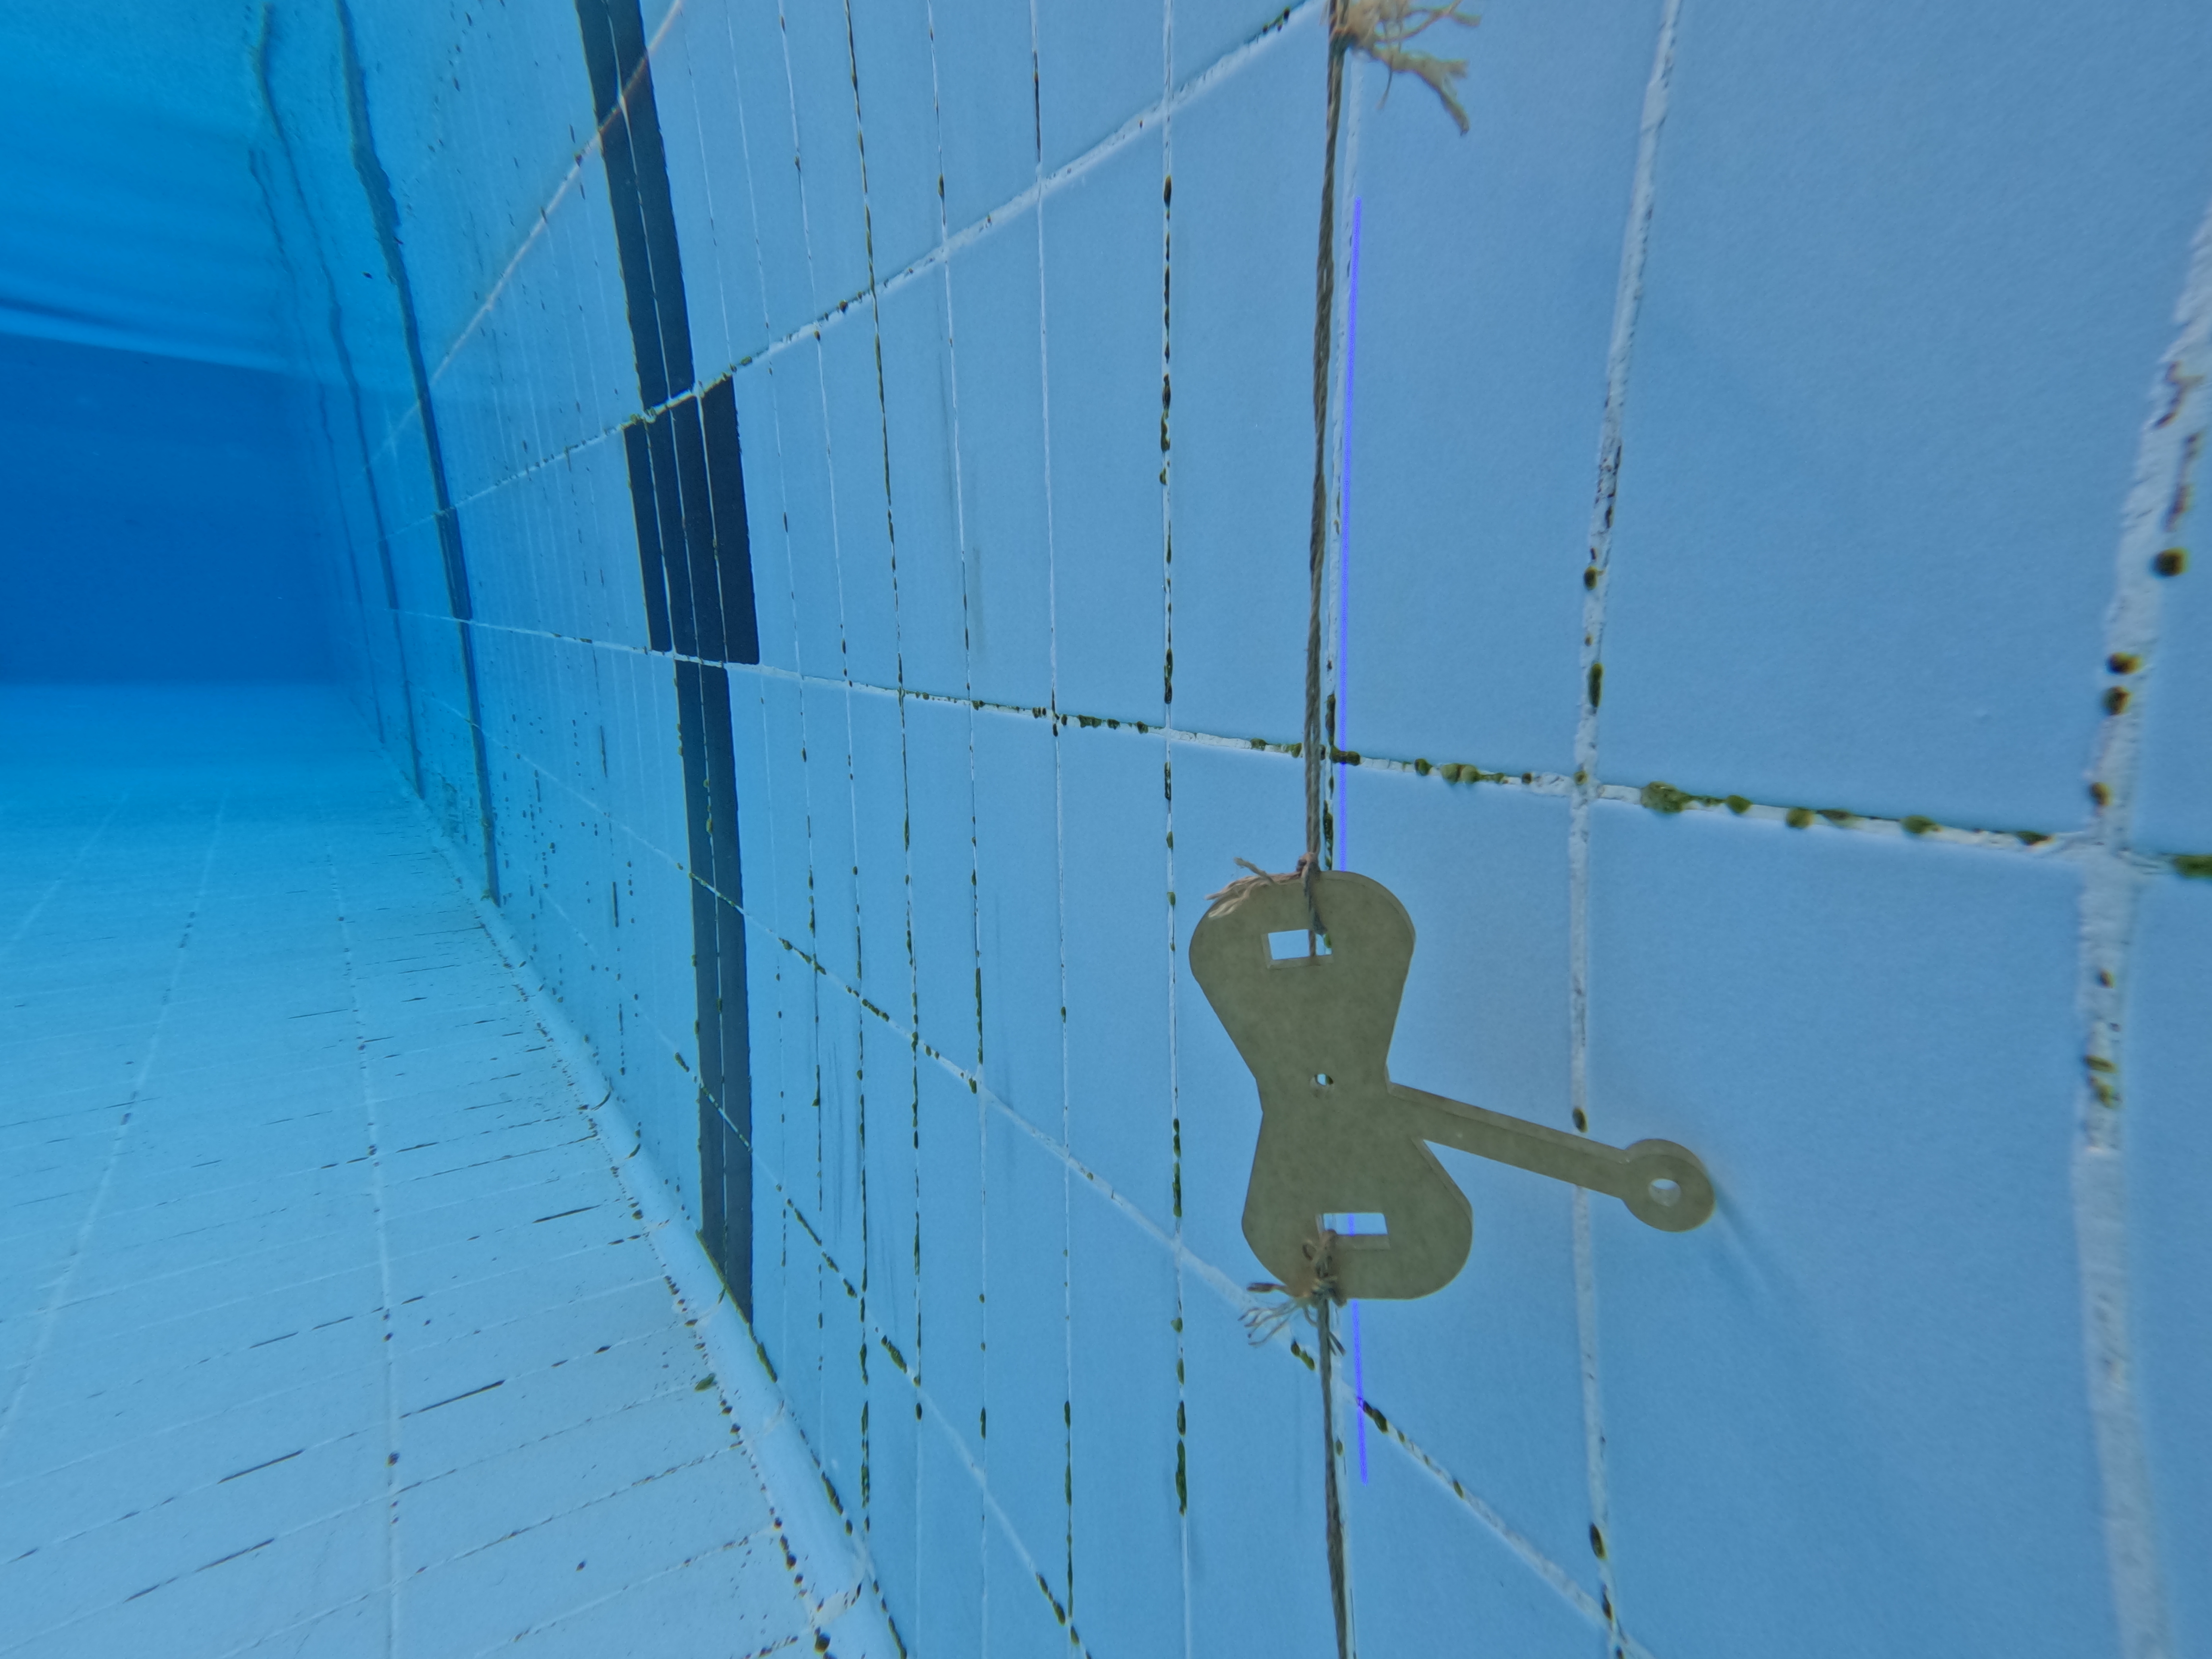

Supplement: Supplementary file 2112 [file G0050673.pdf › Level_3_2/G0050673.pdf]

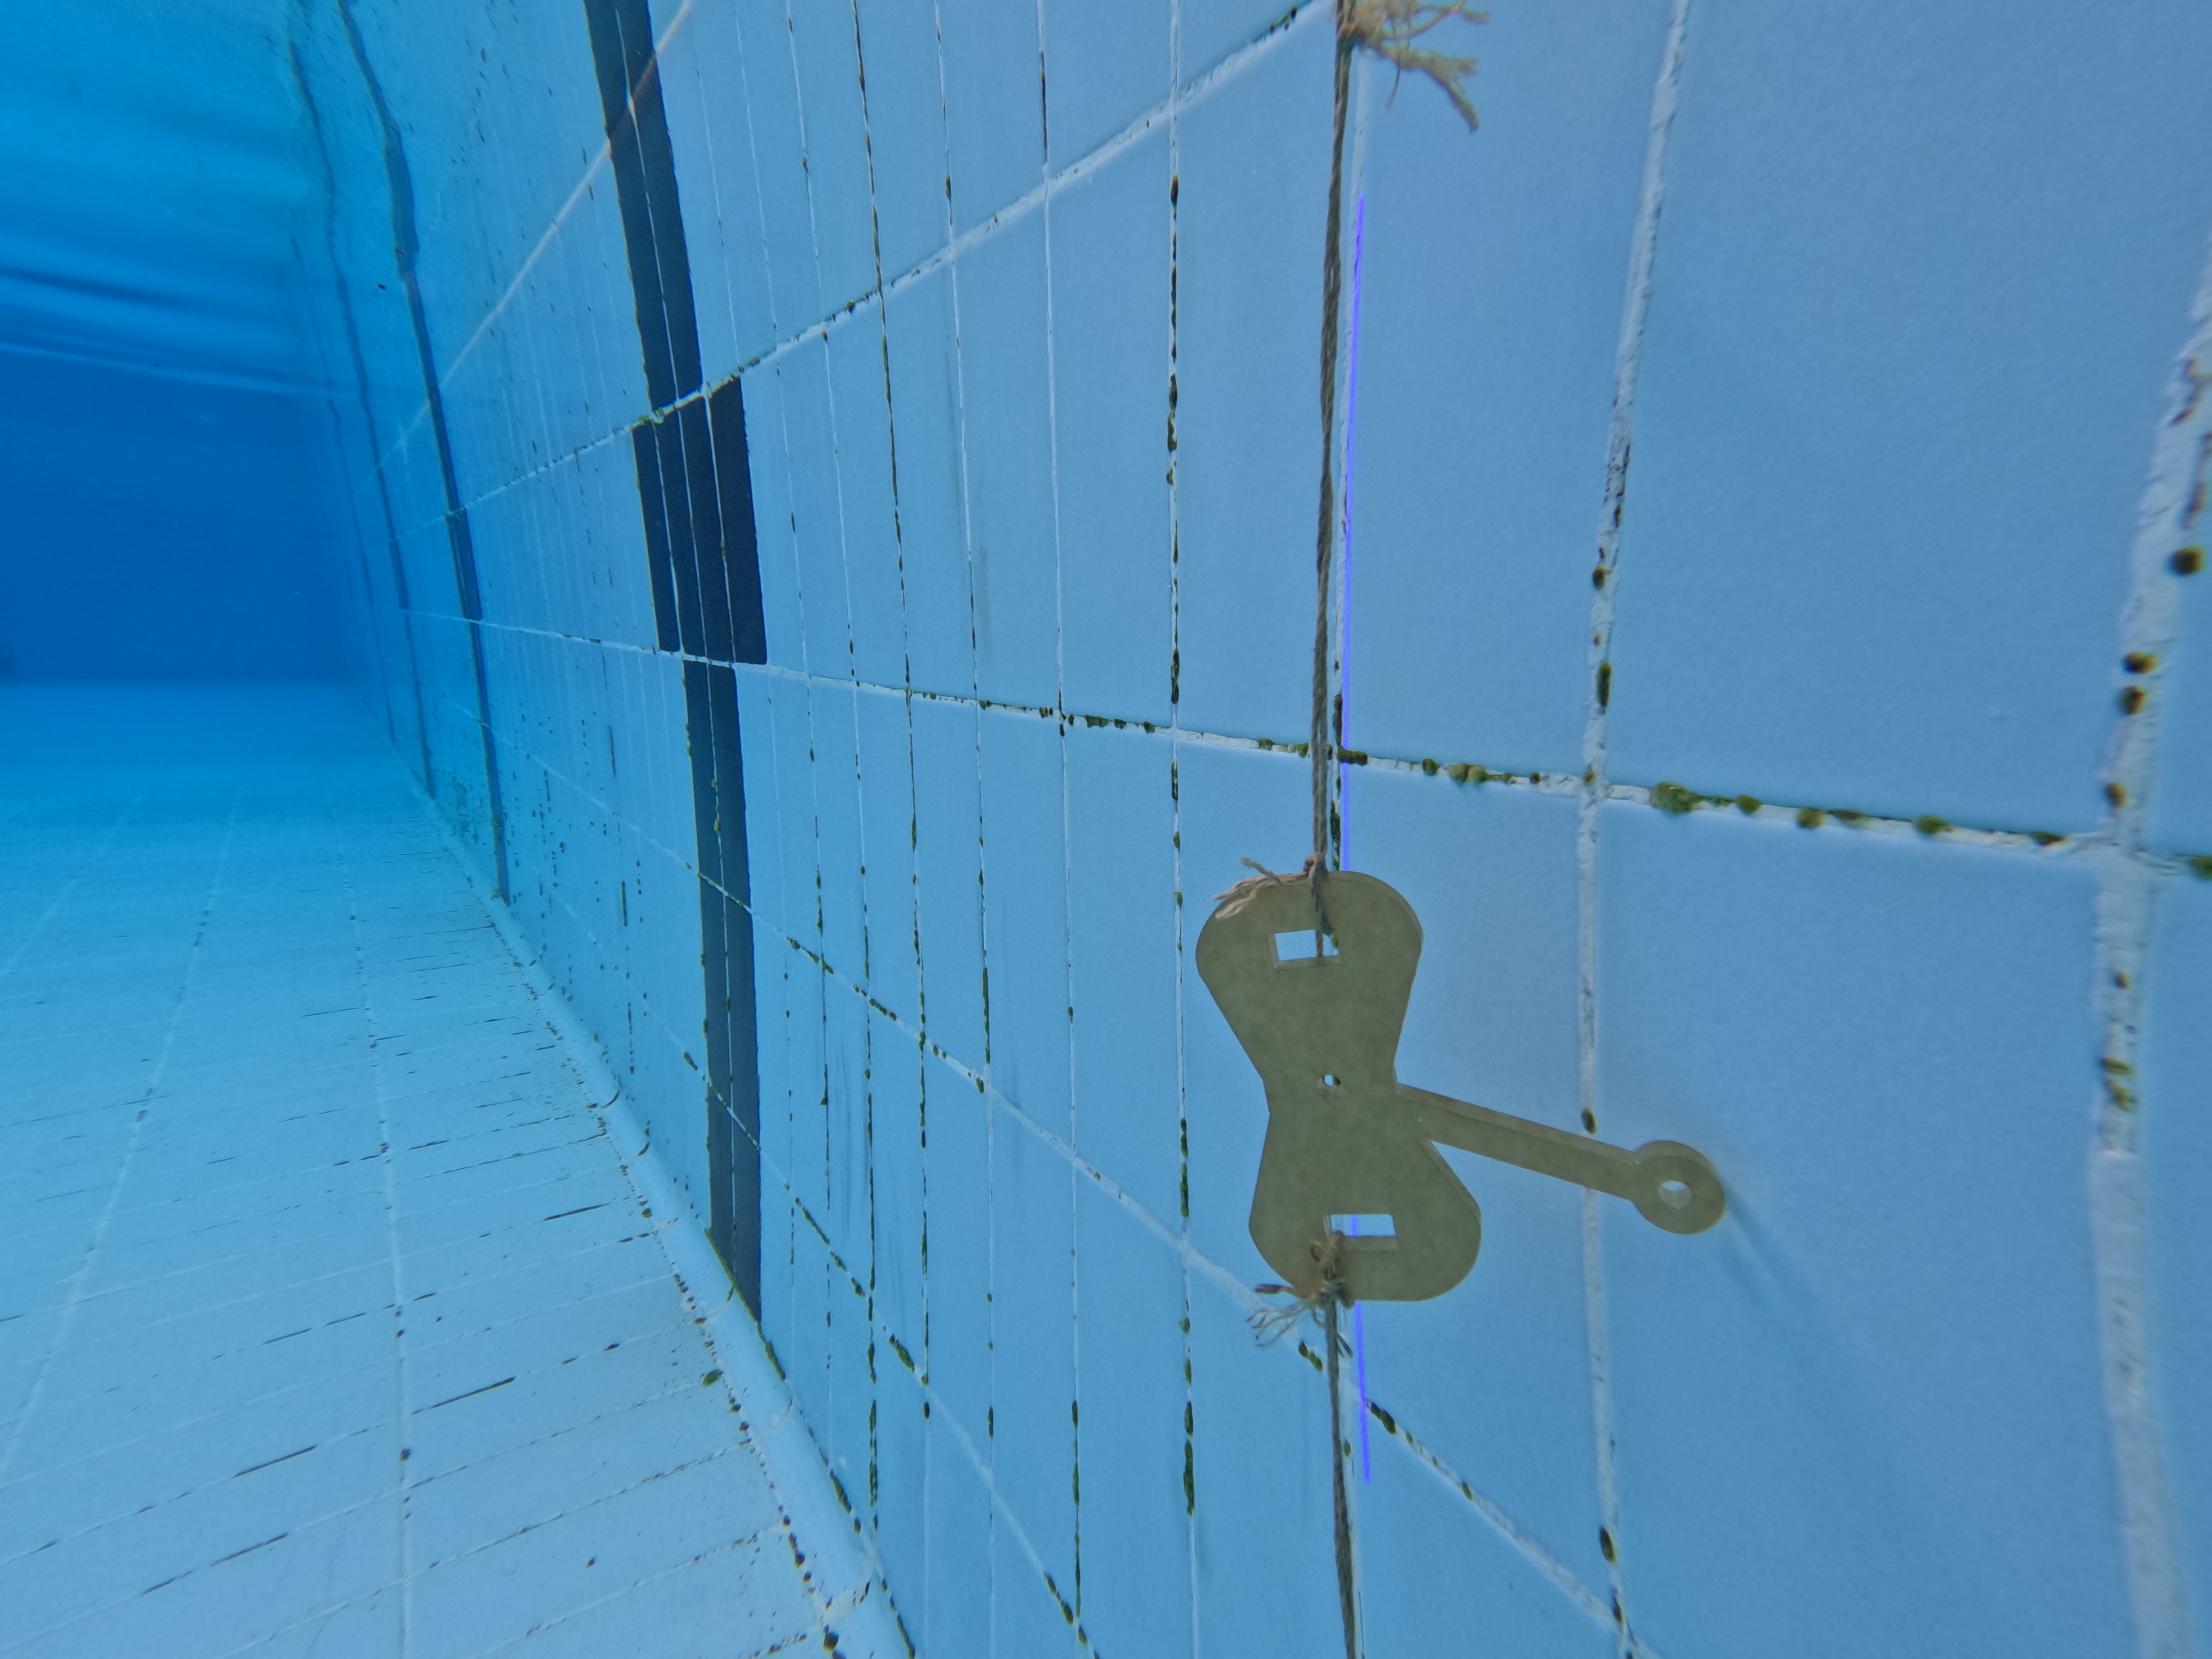

Supplement: Supplementary file 2113 [file G0050674.pdf › Level_3_2/G0050674.pdf]

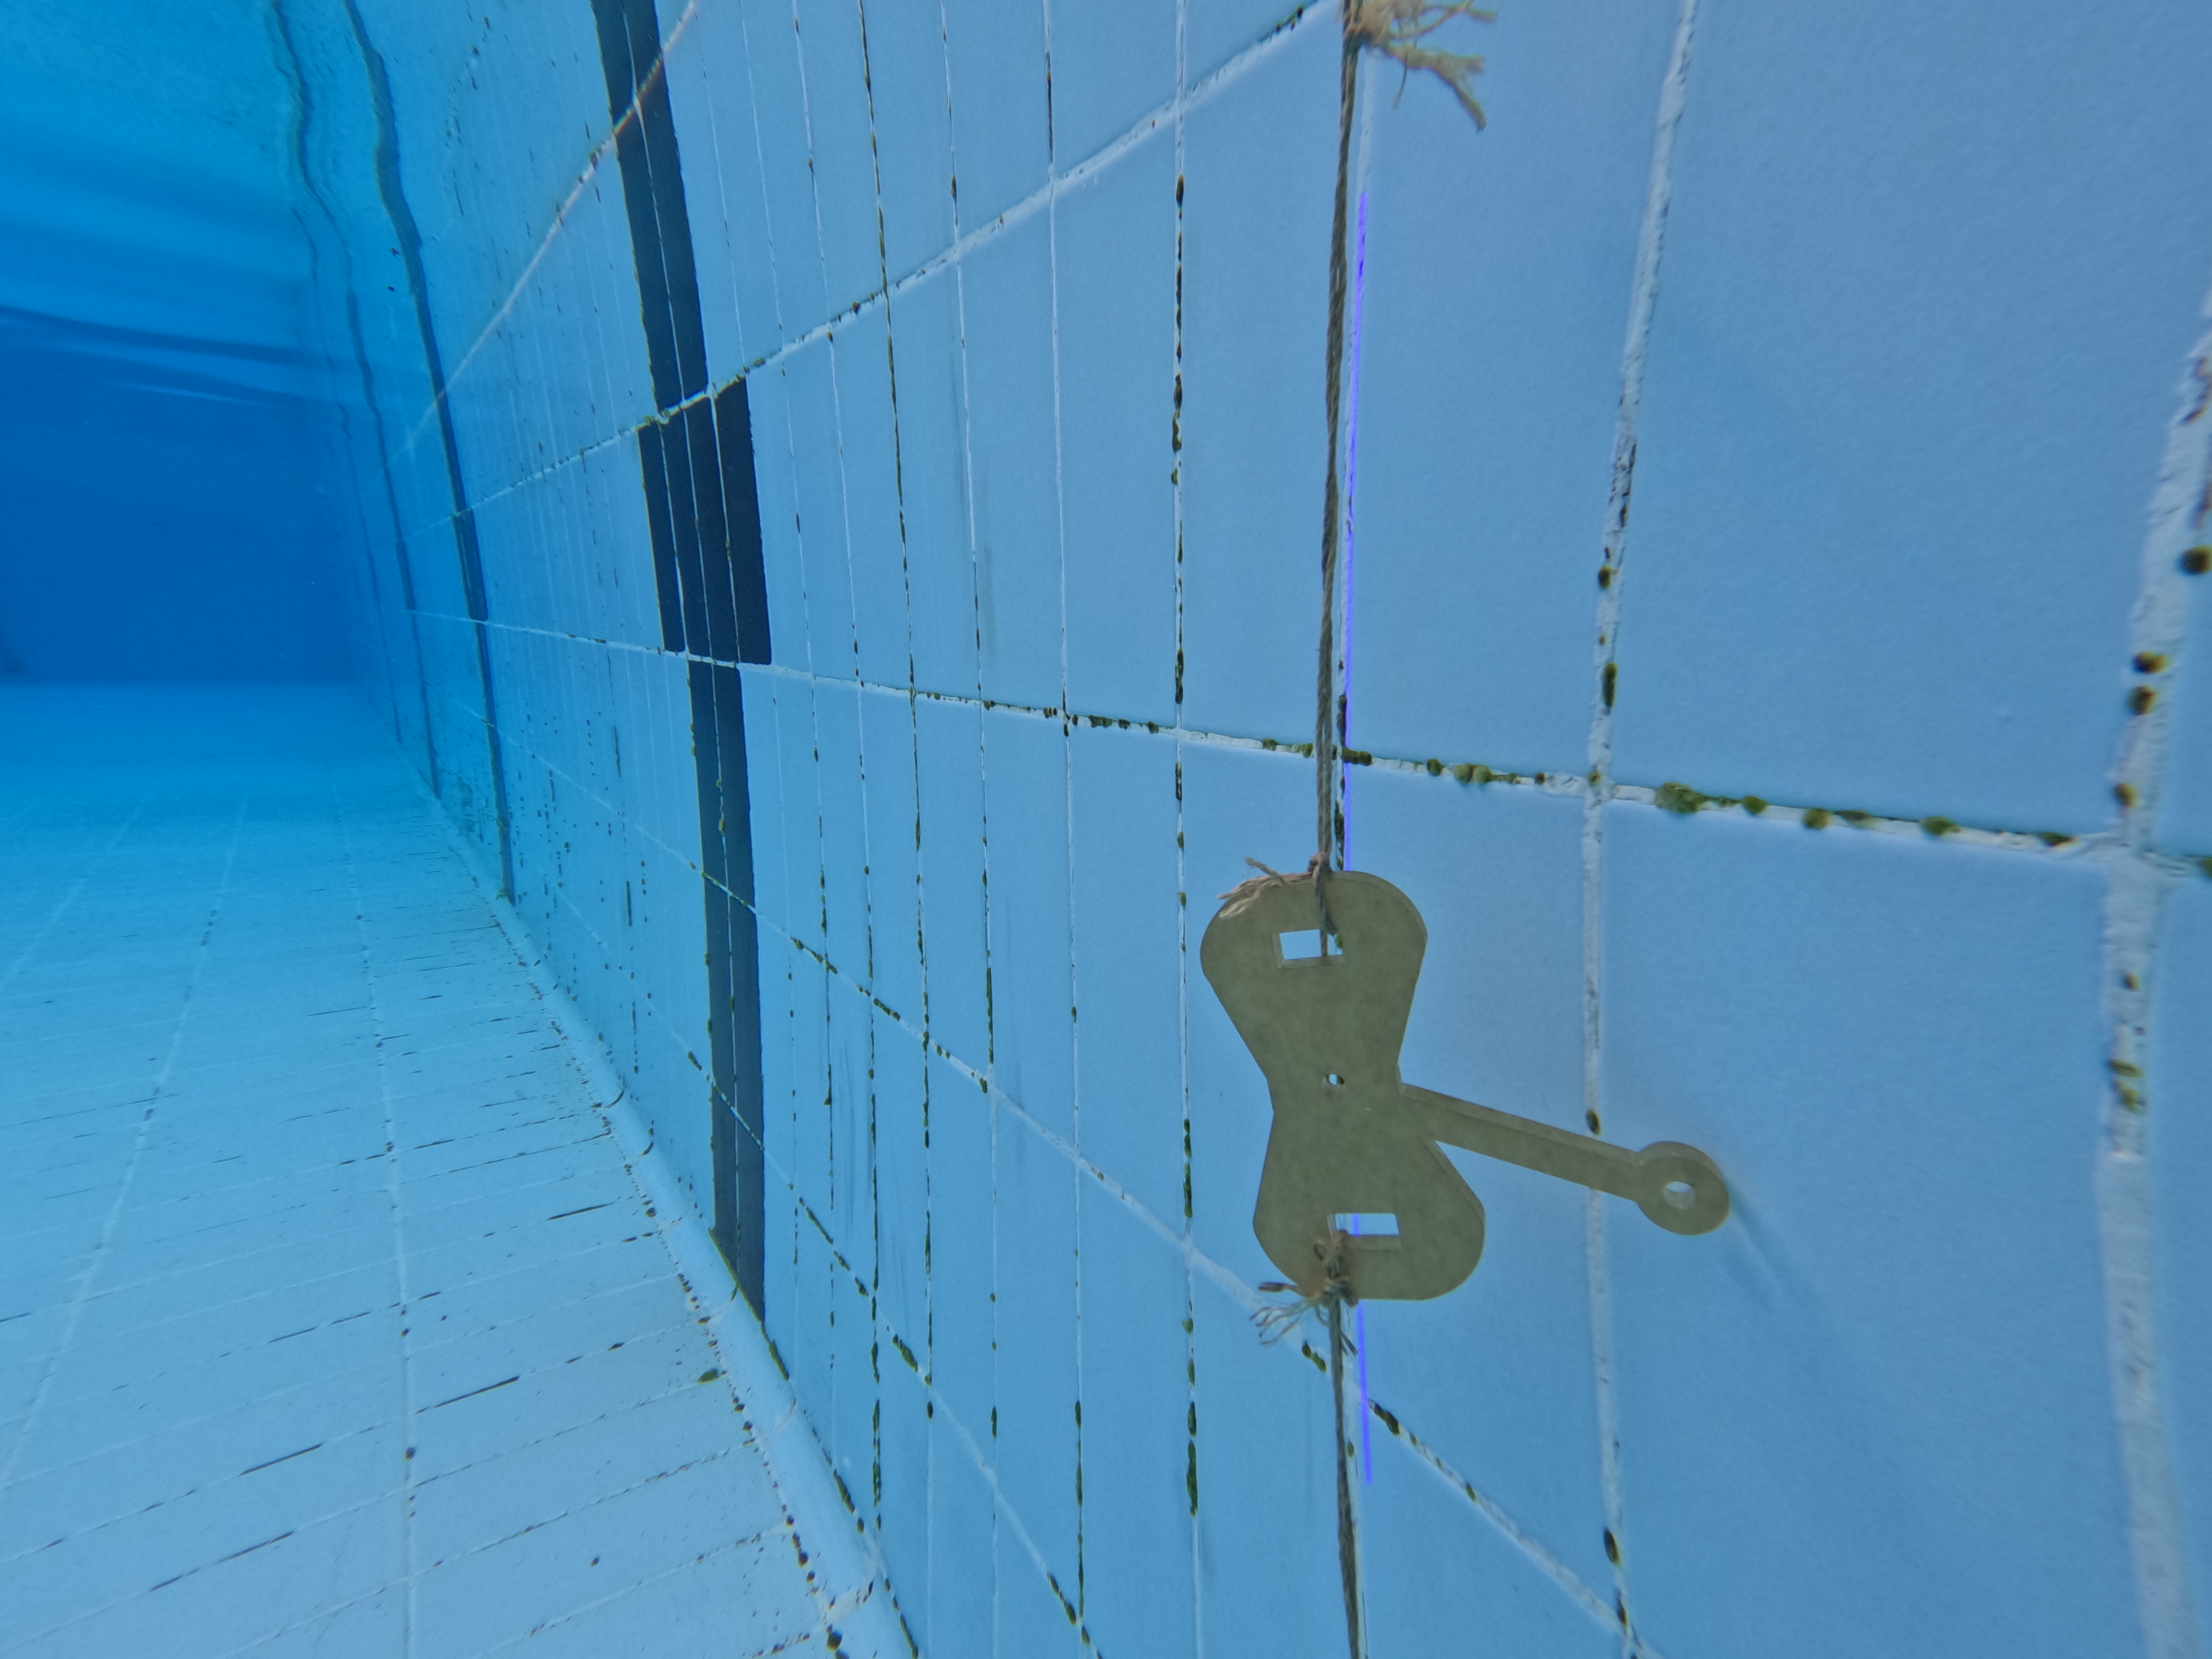

Supplement: Supplementary file 2114 [file G0050675.pdf › Level_3_2/G0050675.pdf]

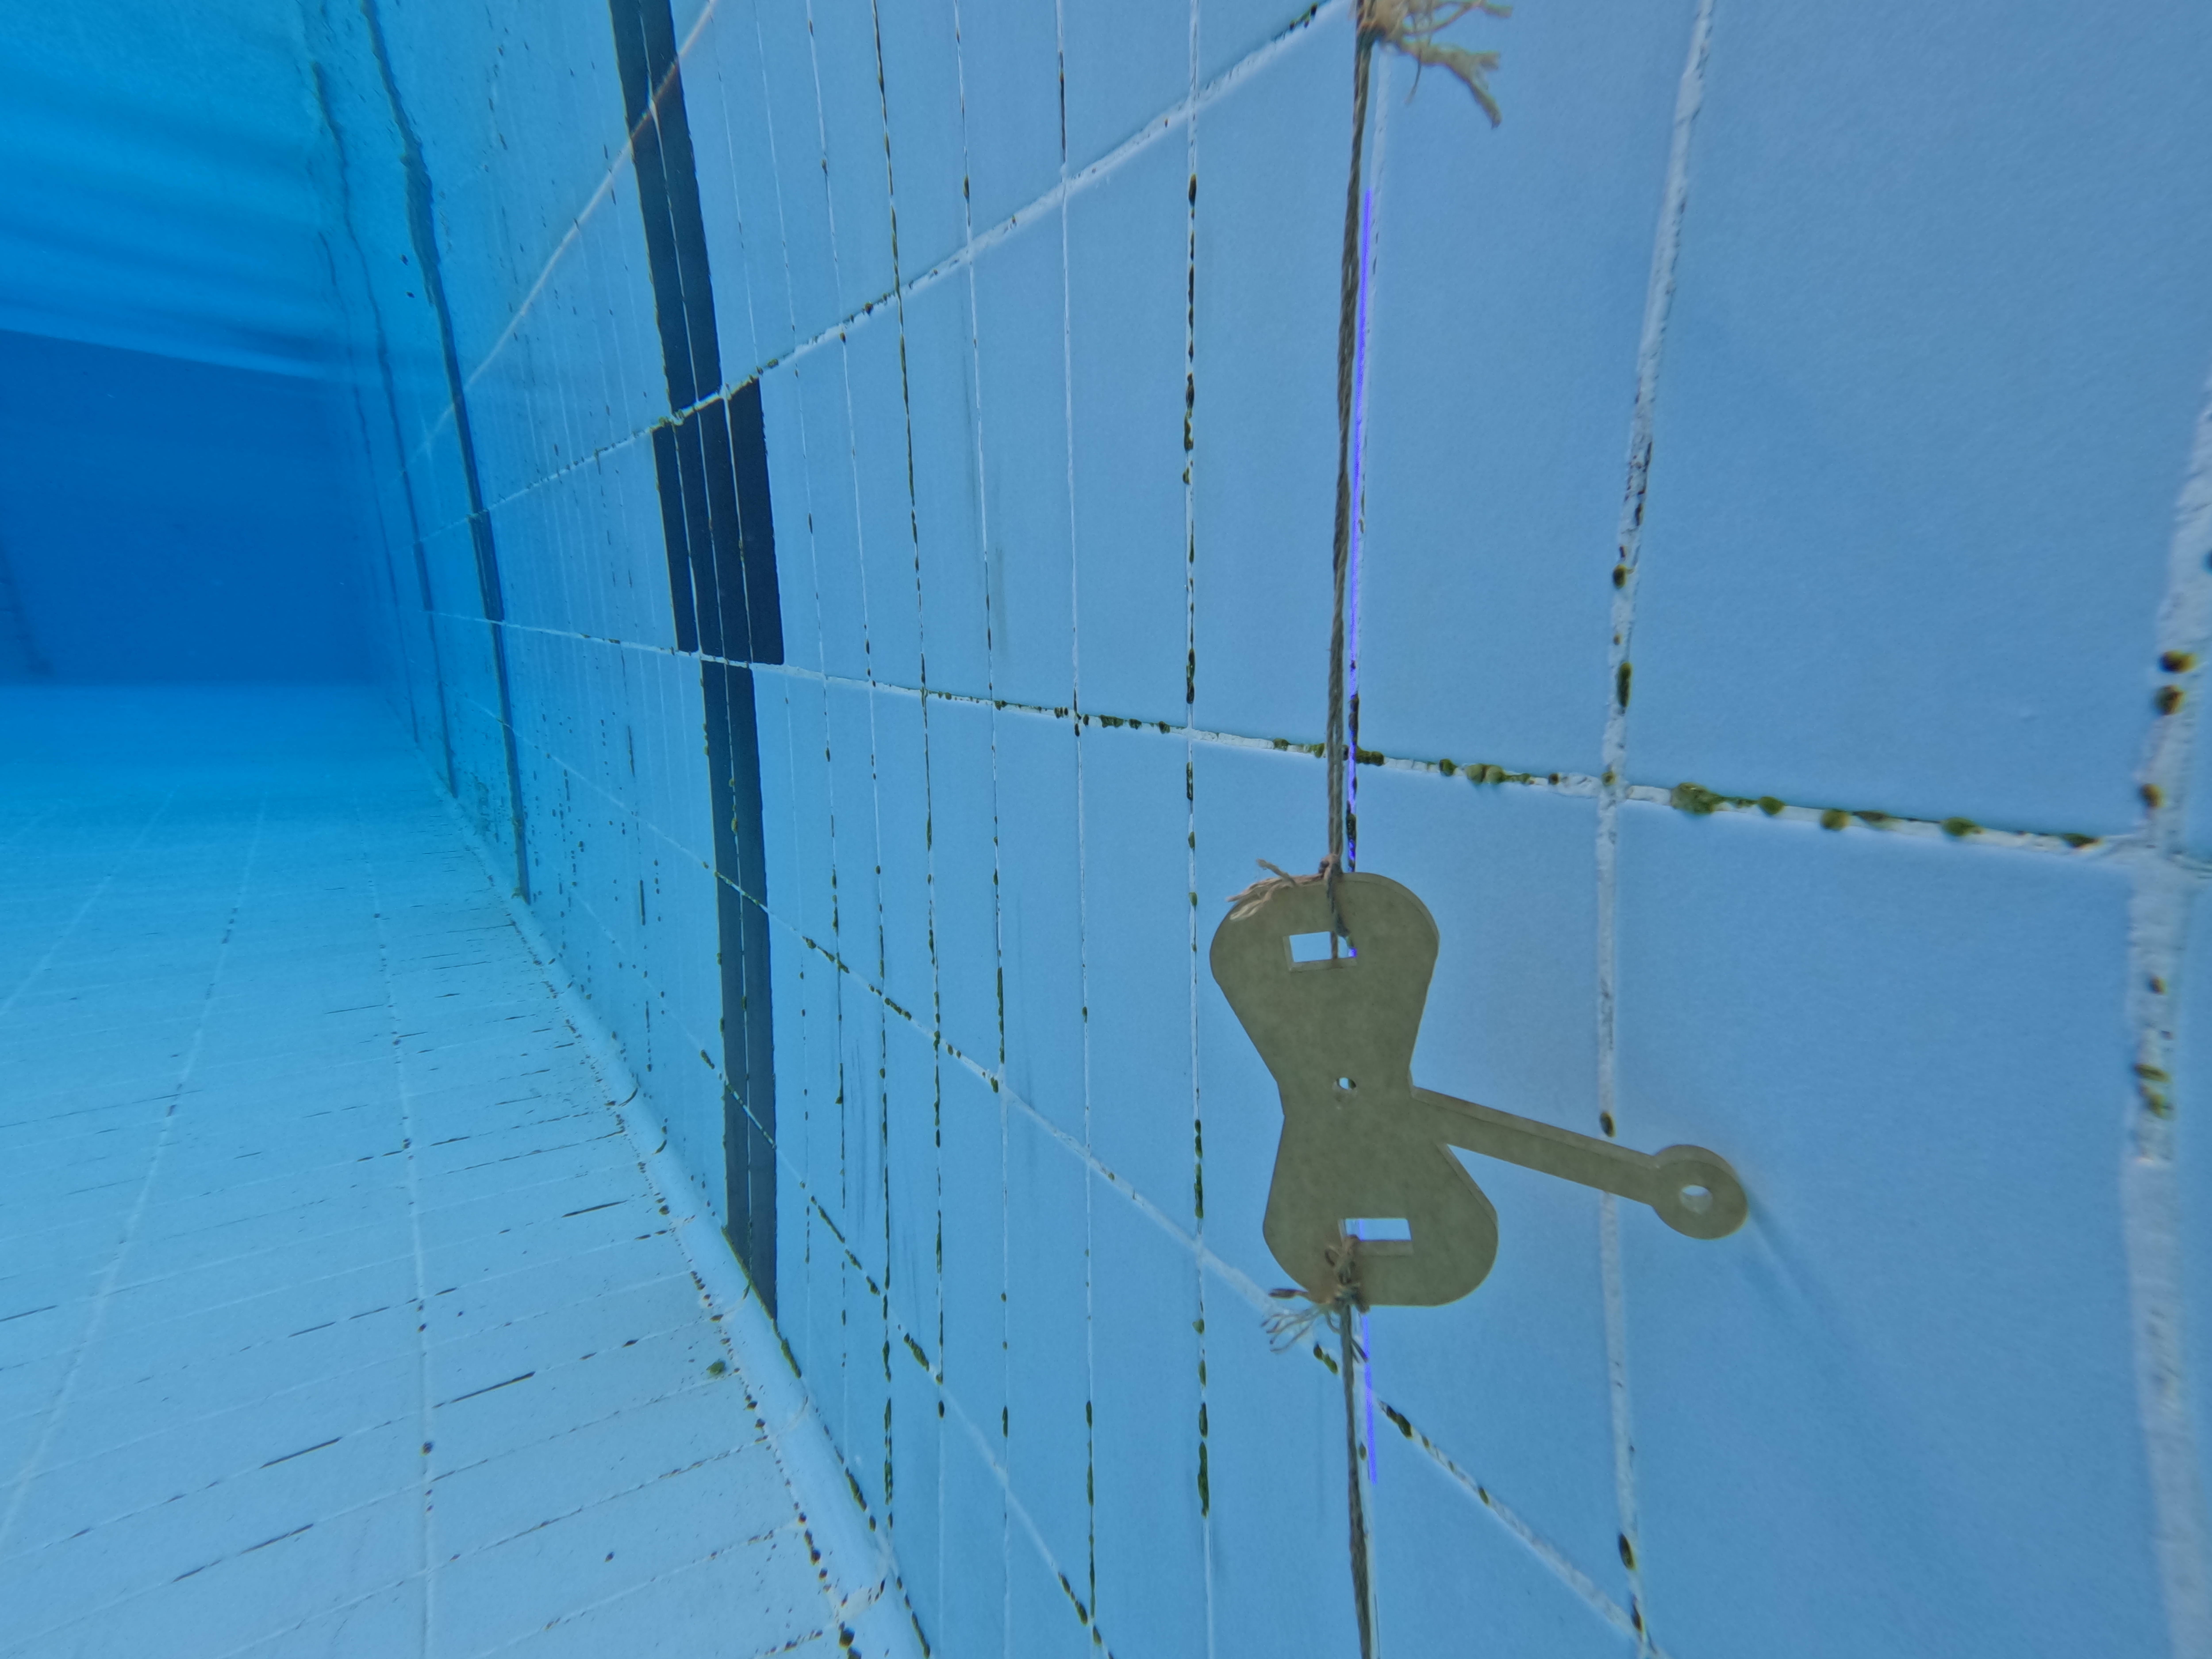

Supplement: Supplementary file 2115 [file G0050676.pdf › Level_3_2/G0050676.pdf]

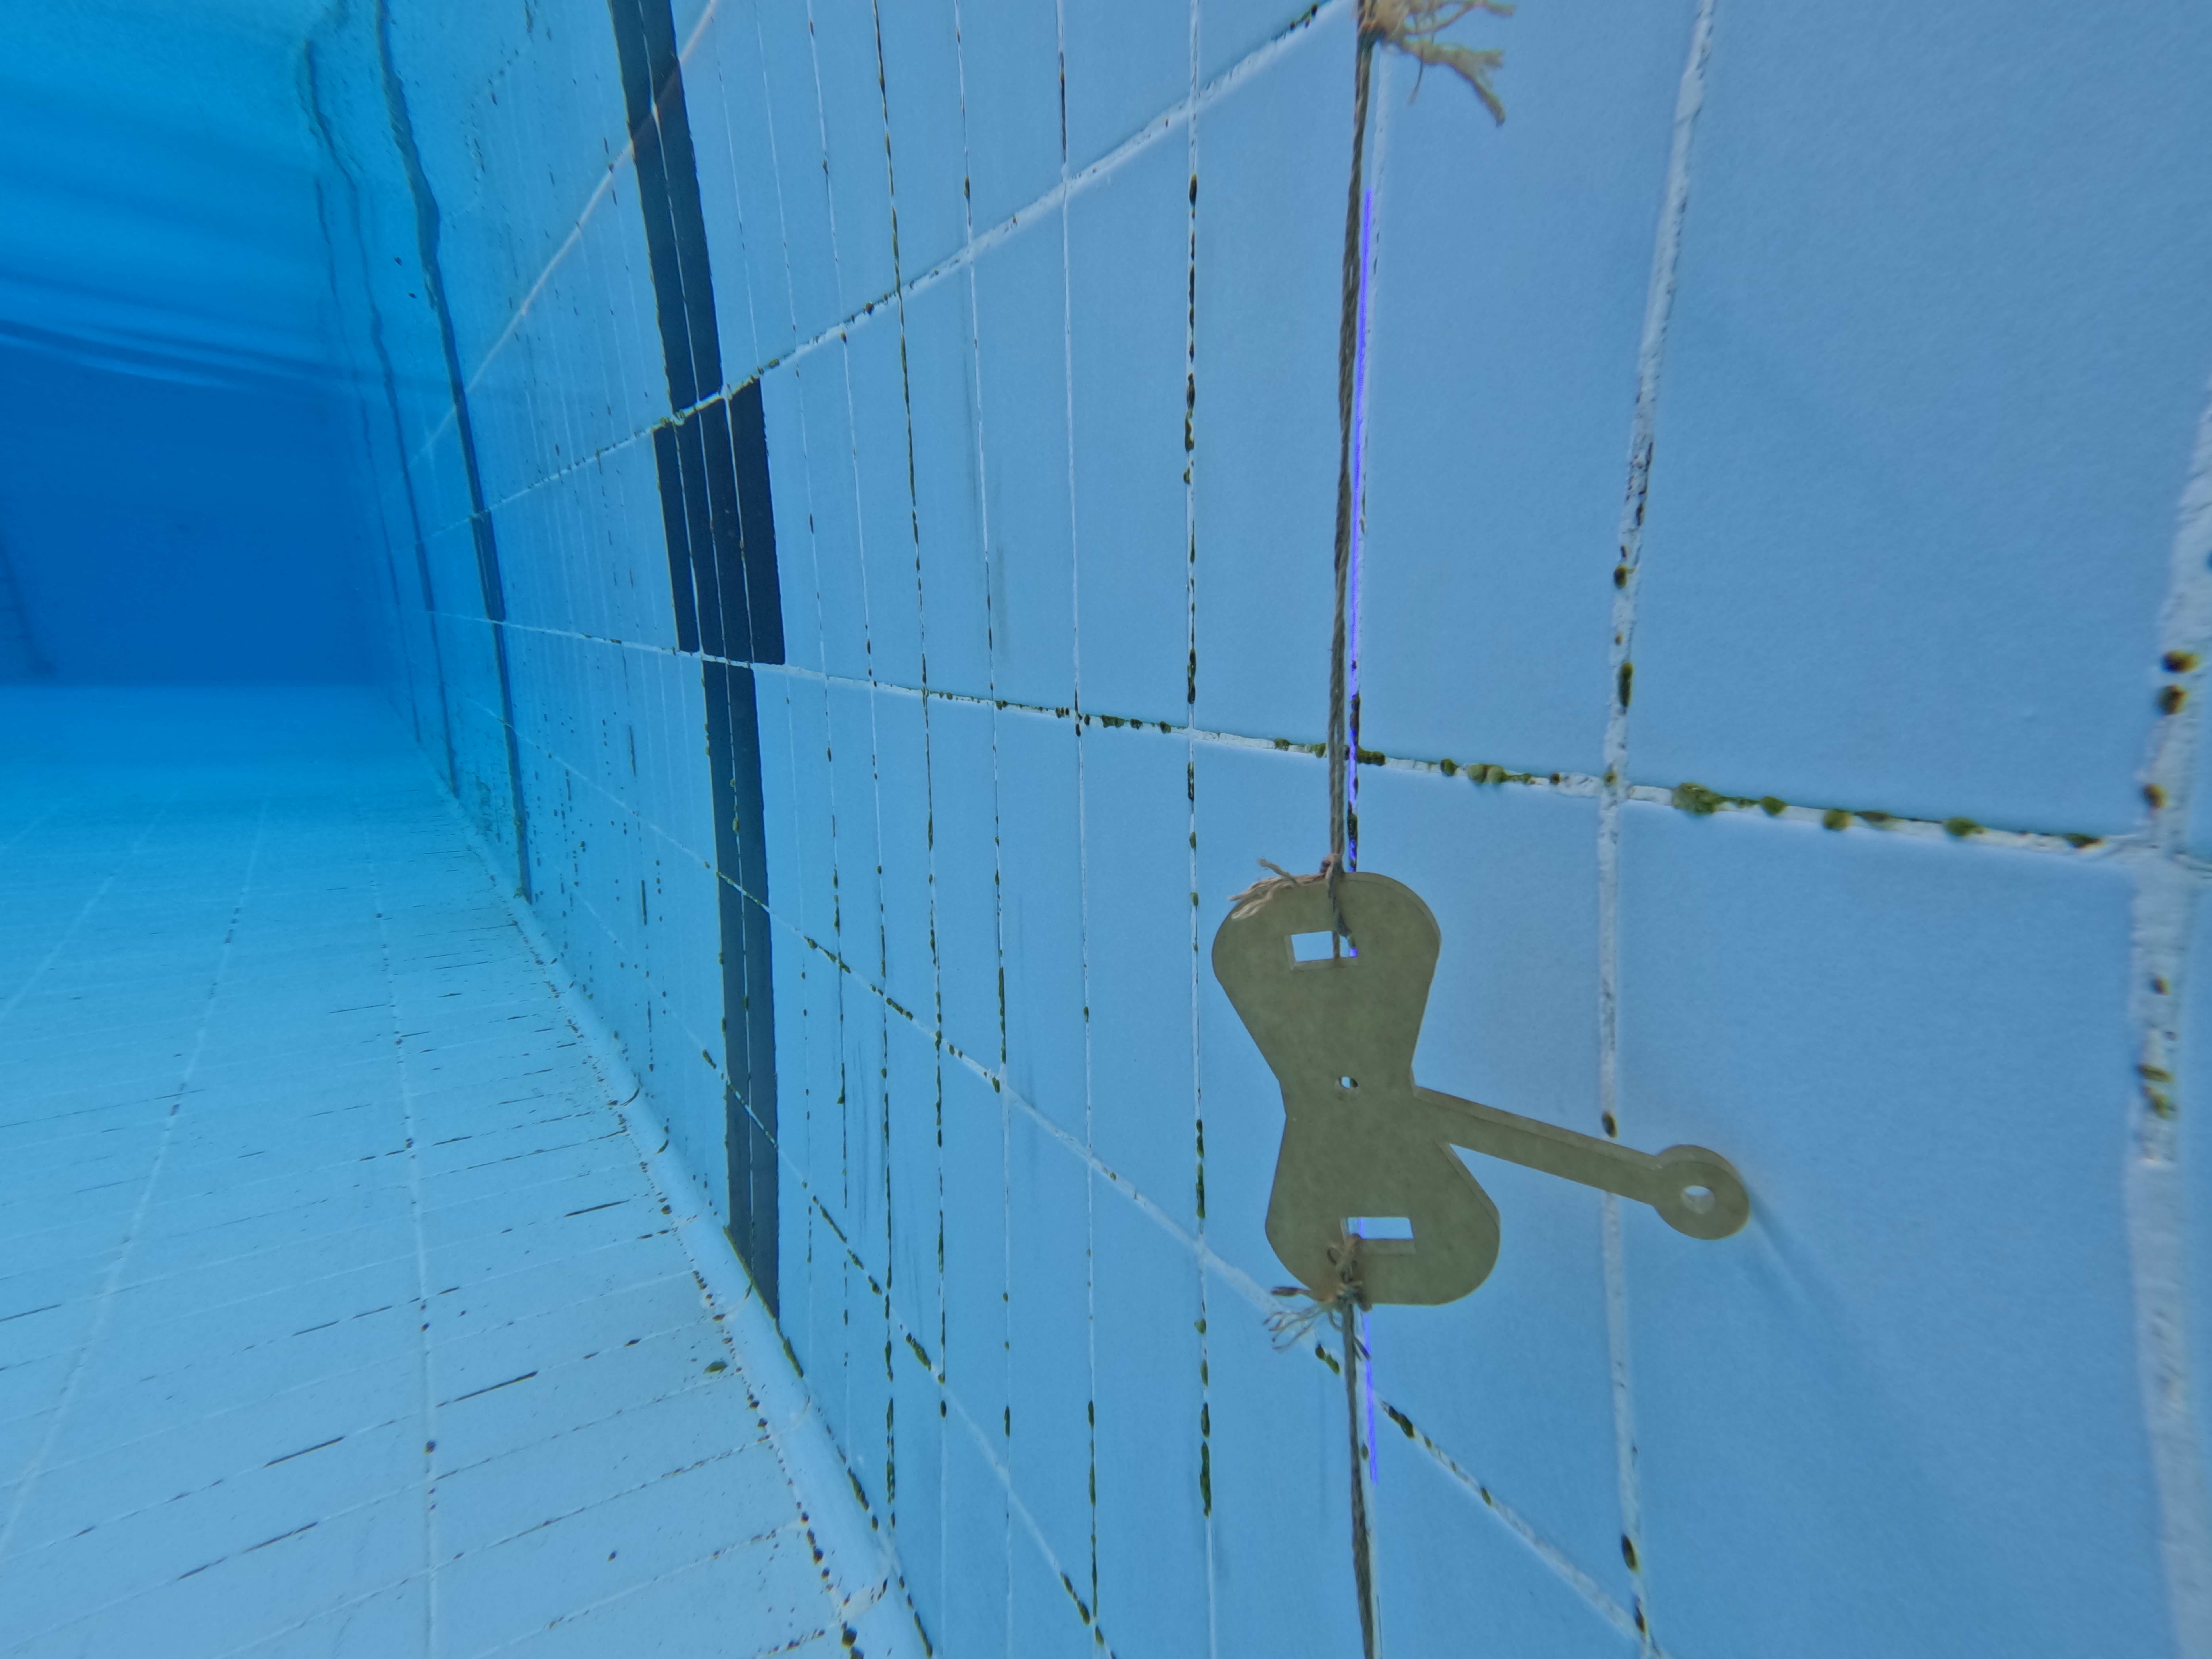

Supplement: Supplementary file 2116 [file G0050677.pdf › Level_3_2/G0050677.pdf]

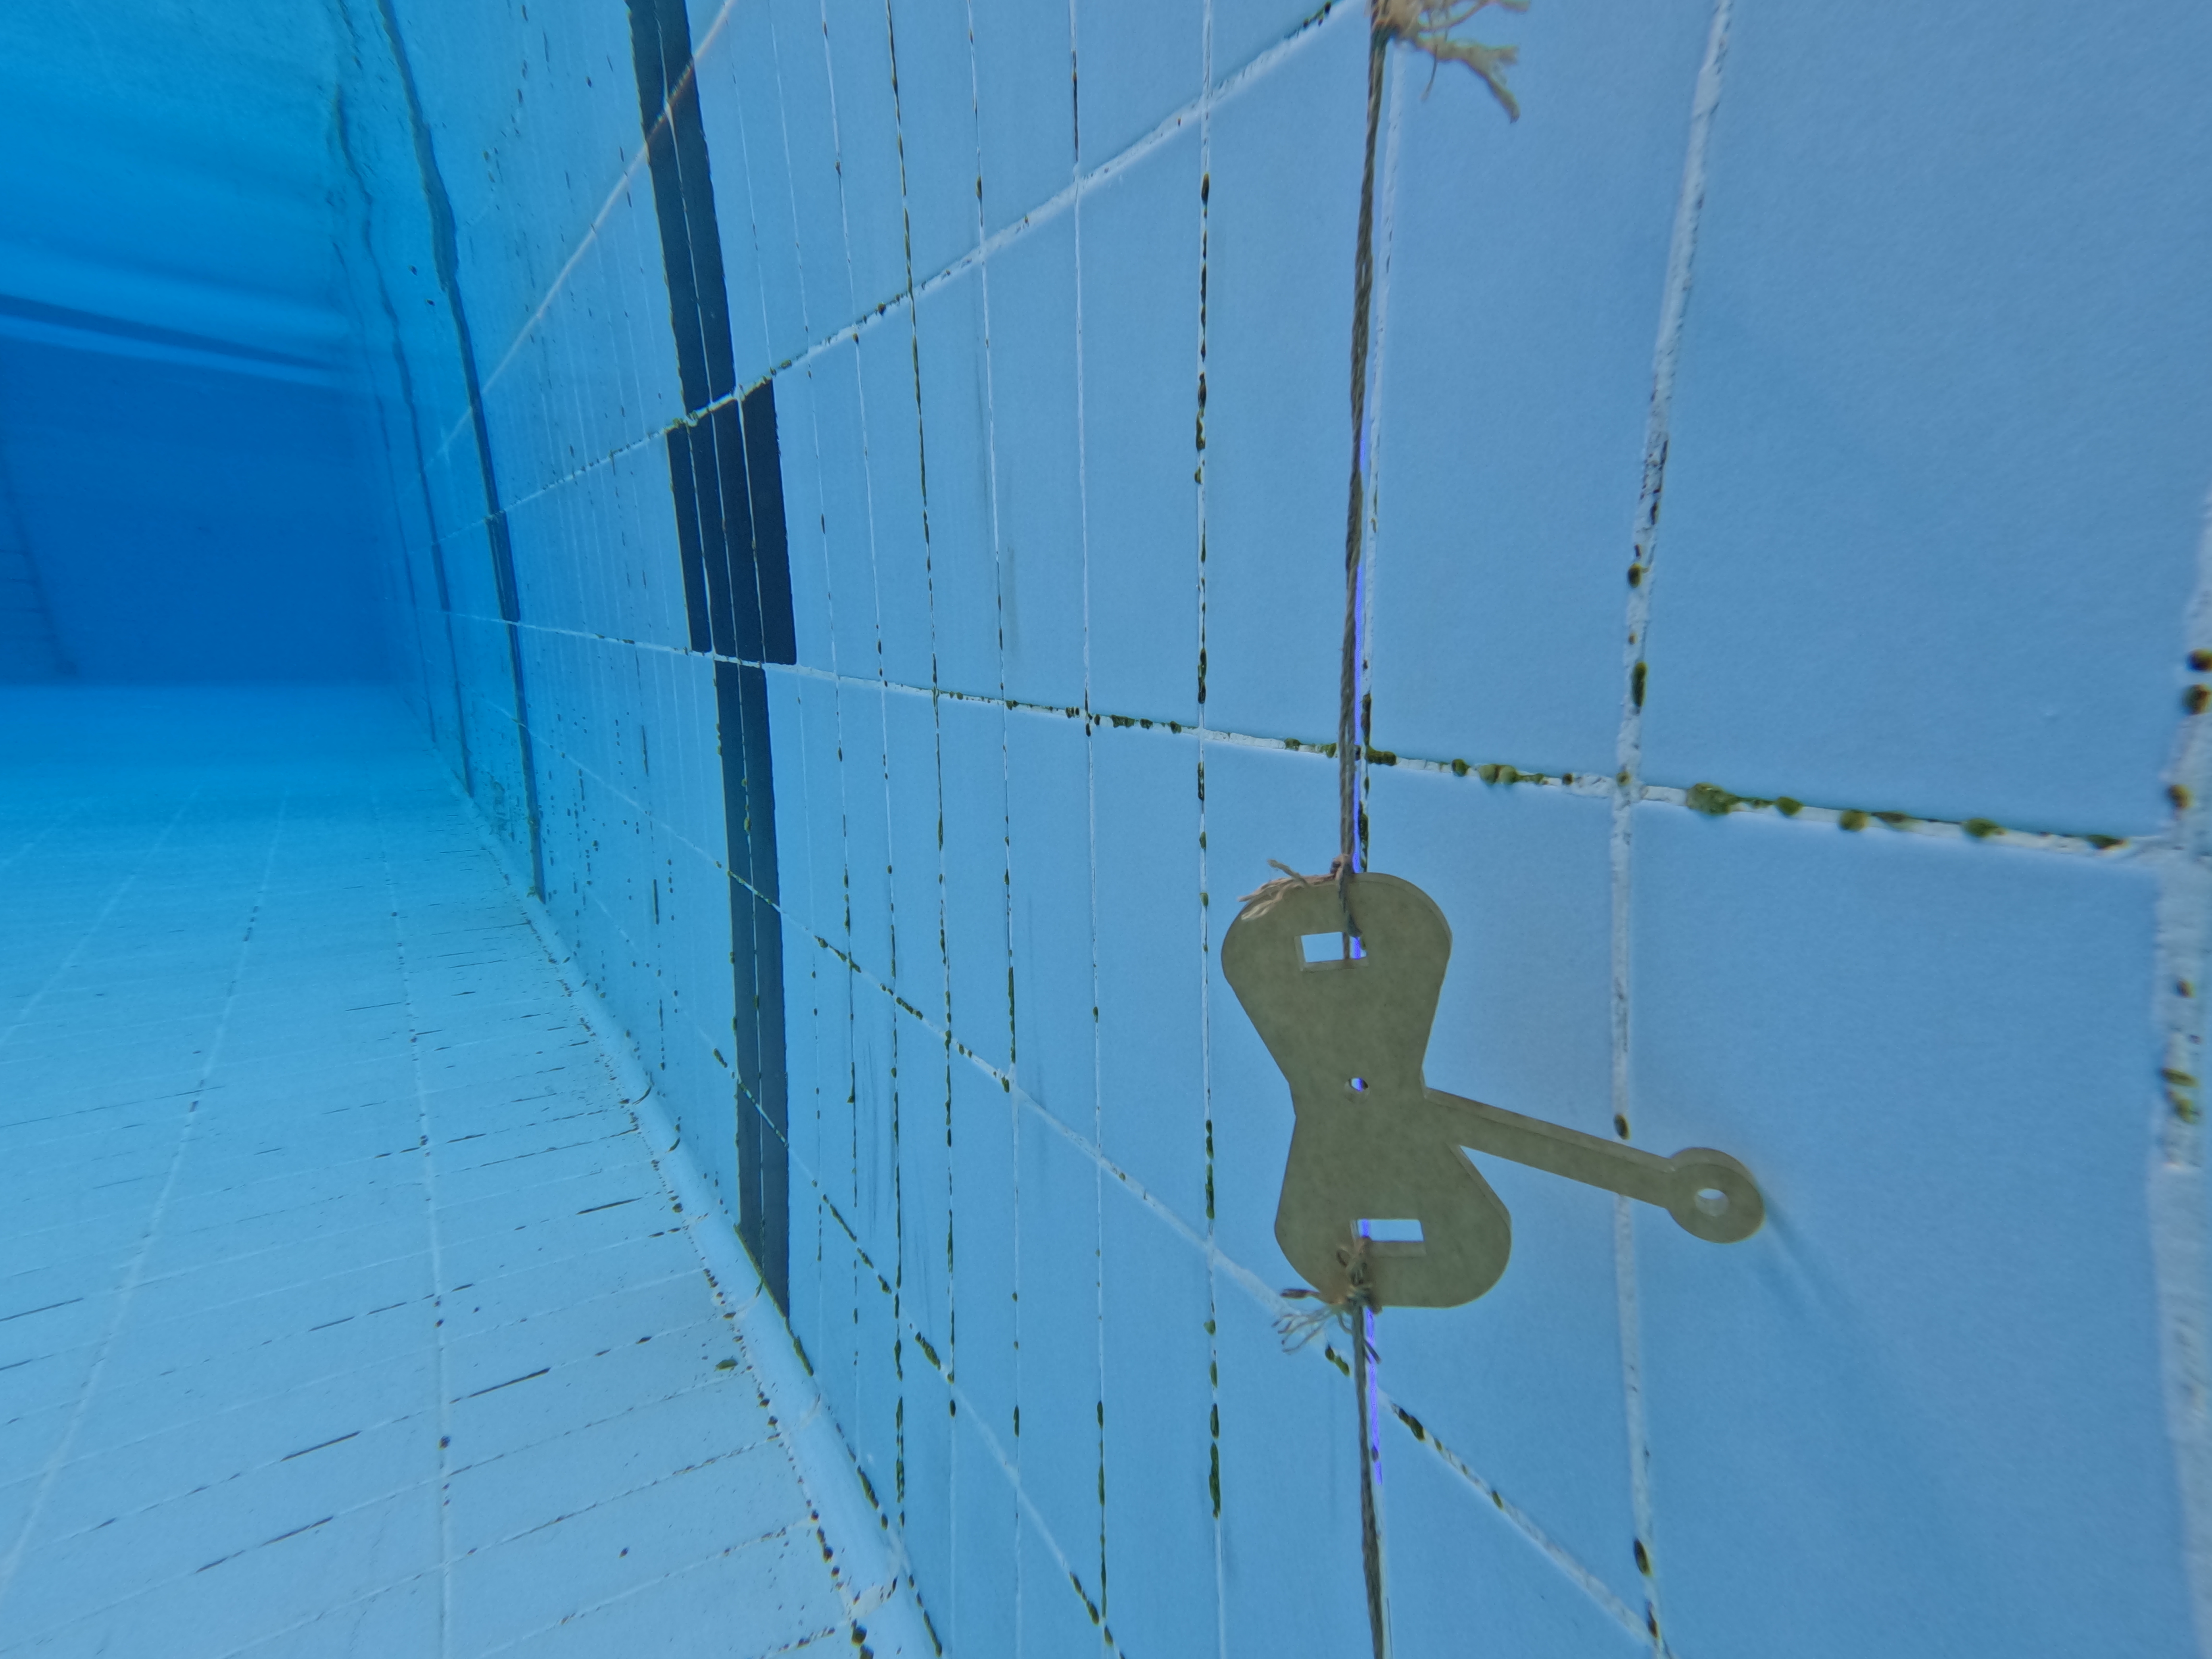

Supplement: Supplementary file 2117 [file G0050678.pdf › Level_3_2/G0050678.pdf]

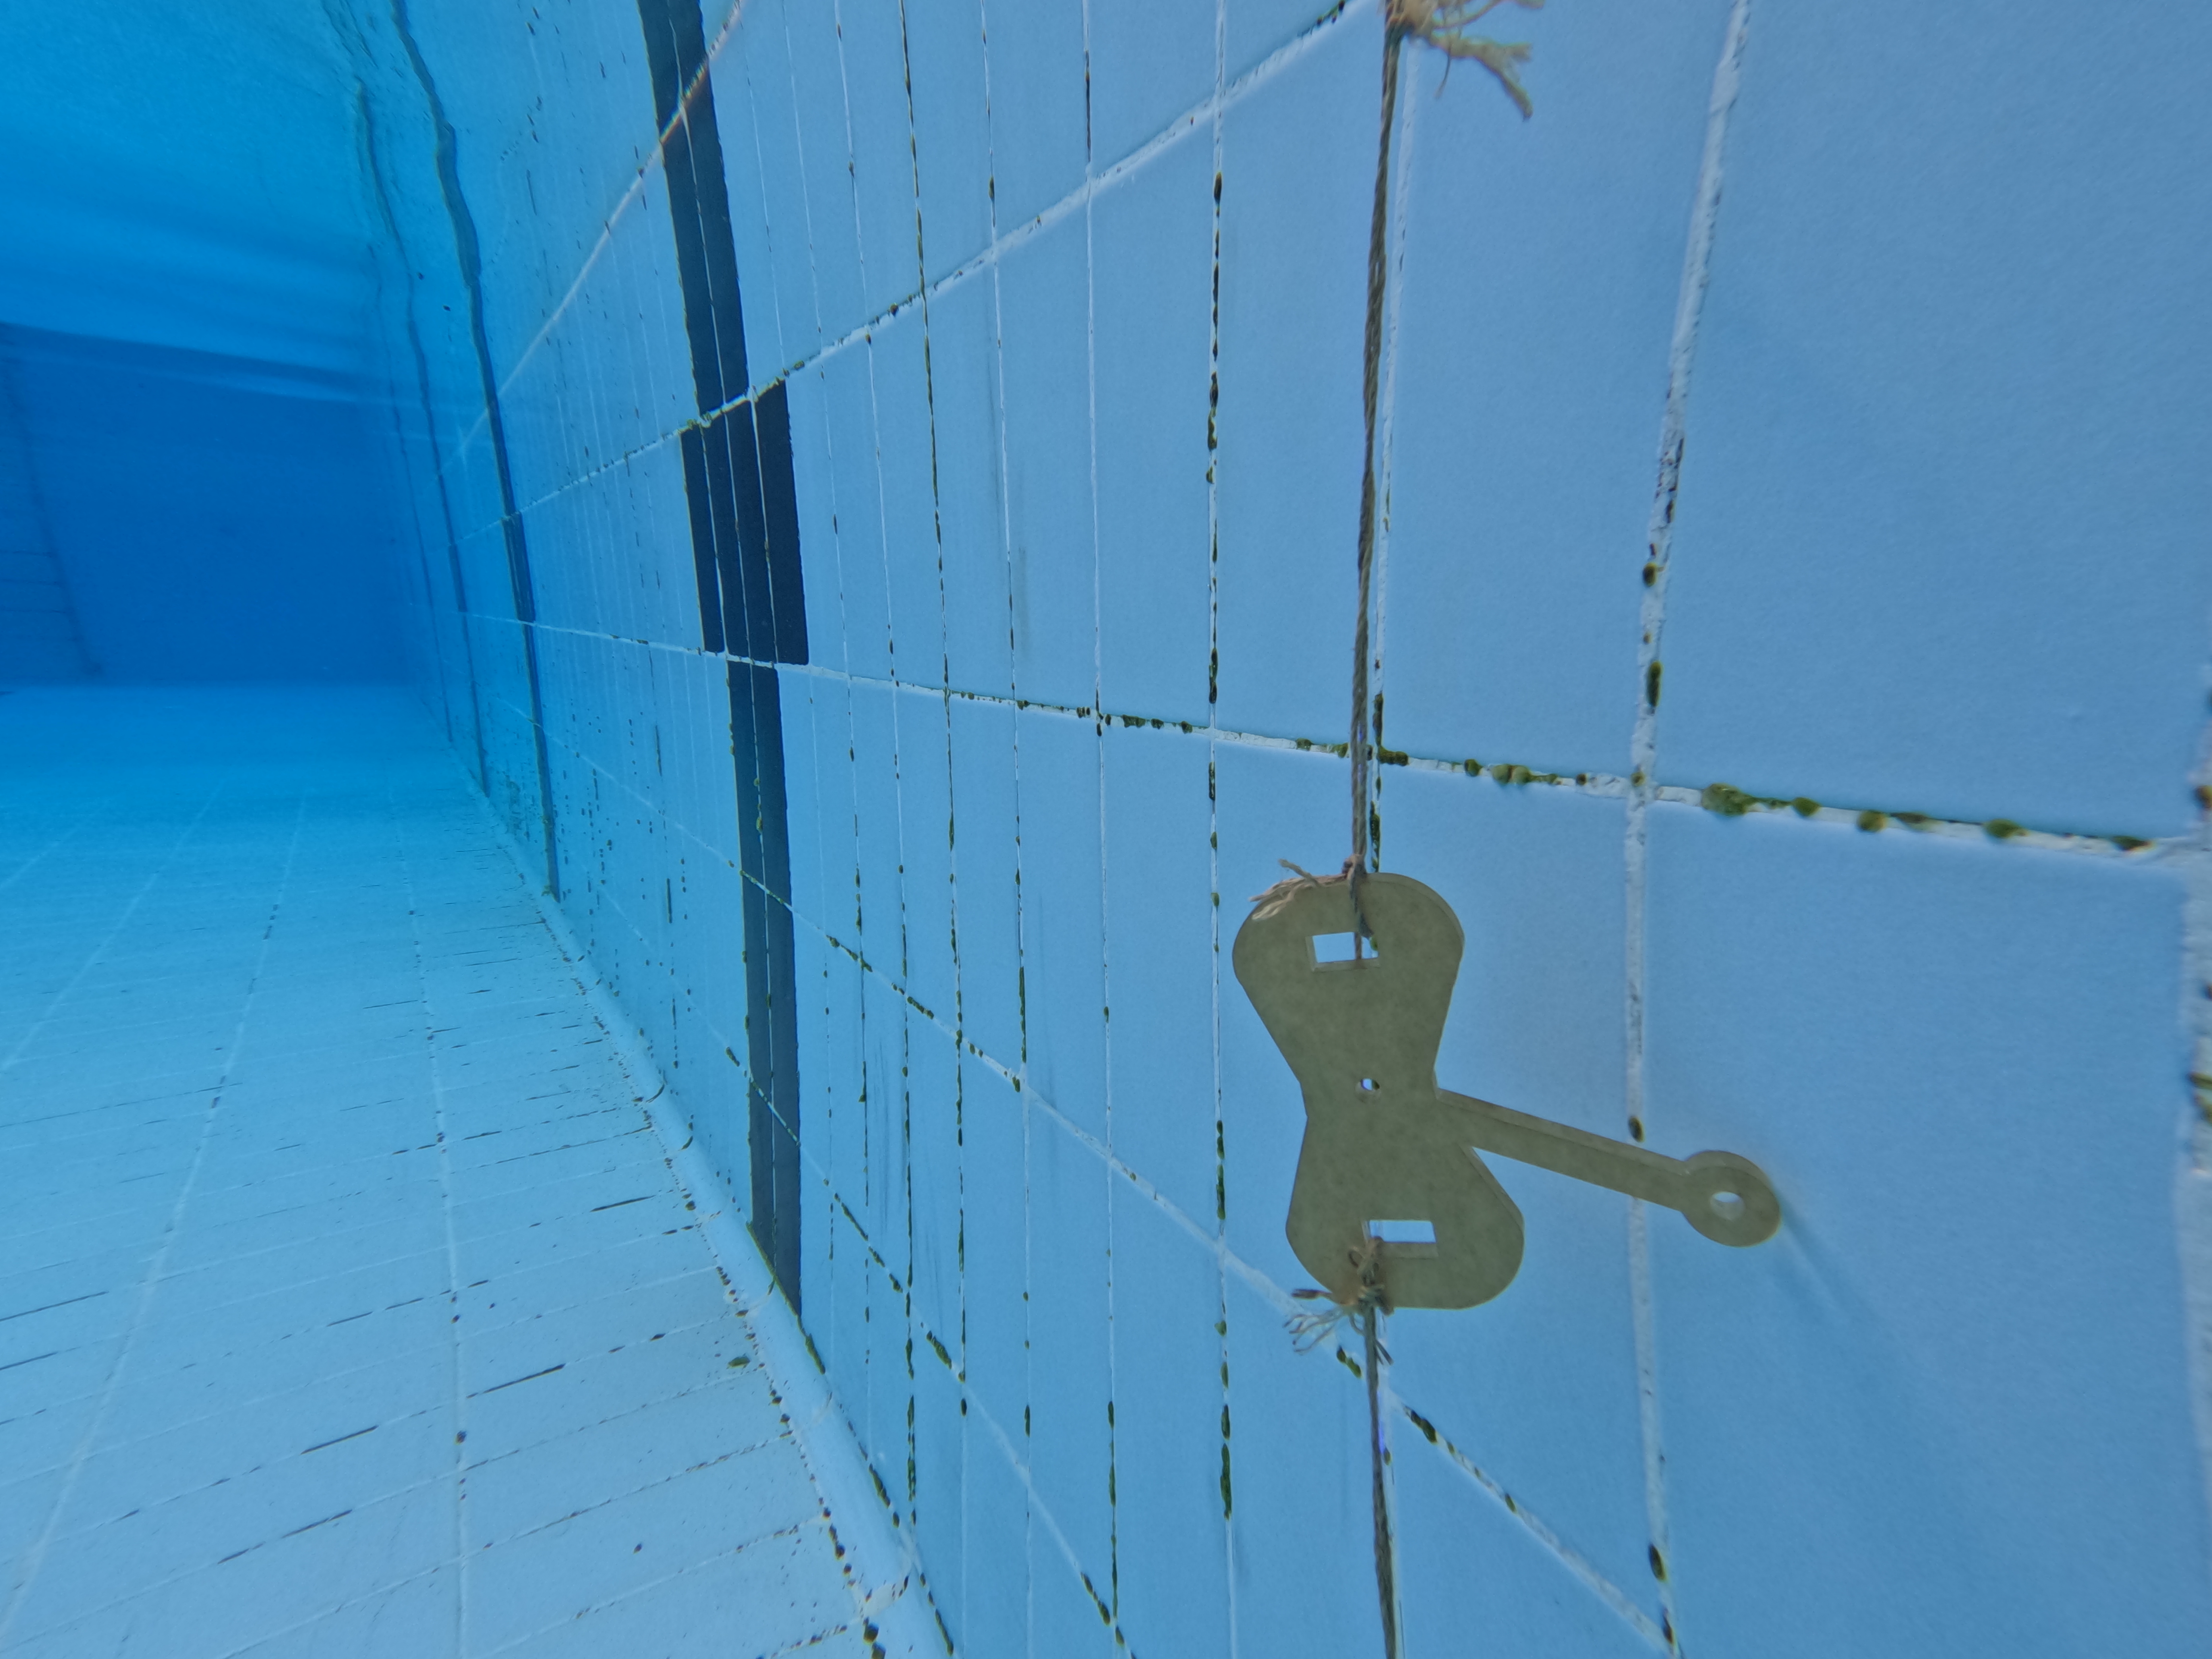

Supplement: Supplementary file 2118 [file G0050679.pdf › Level_3_2/G0050679.pdf]

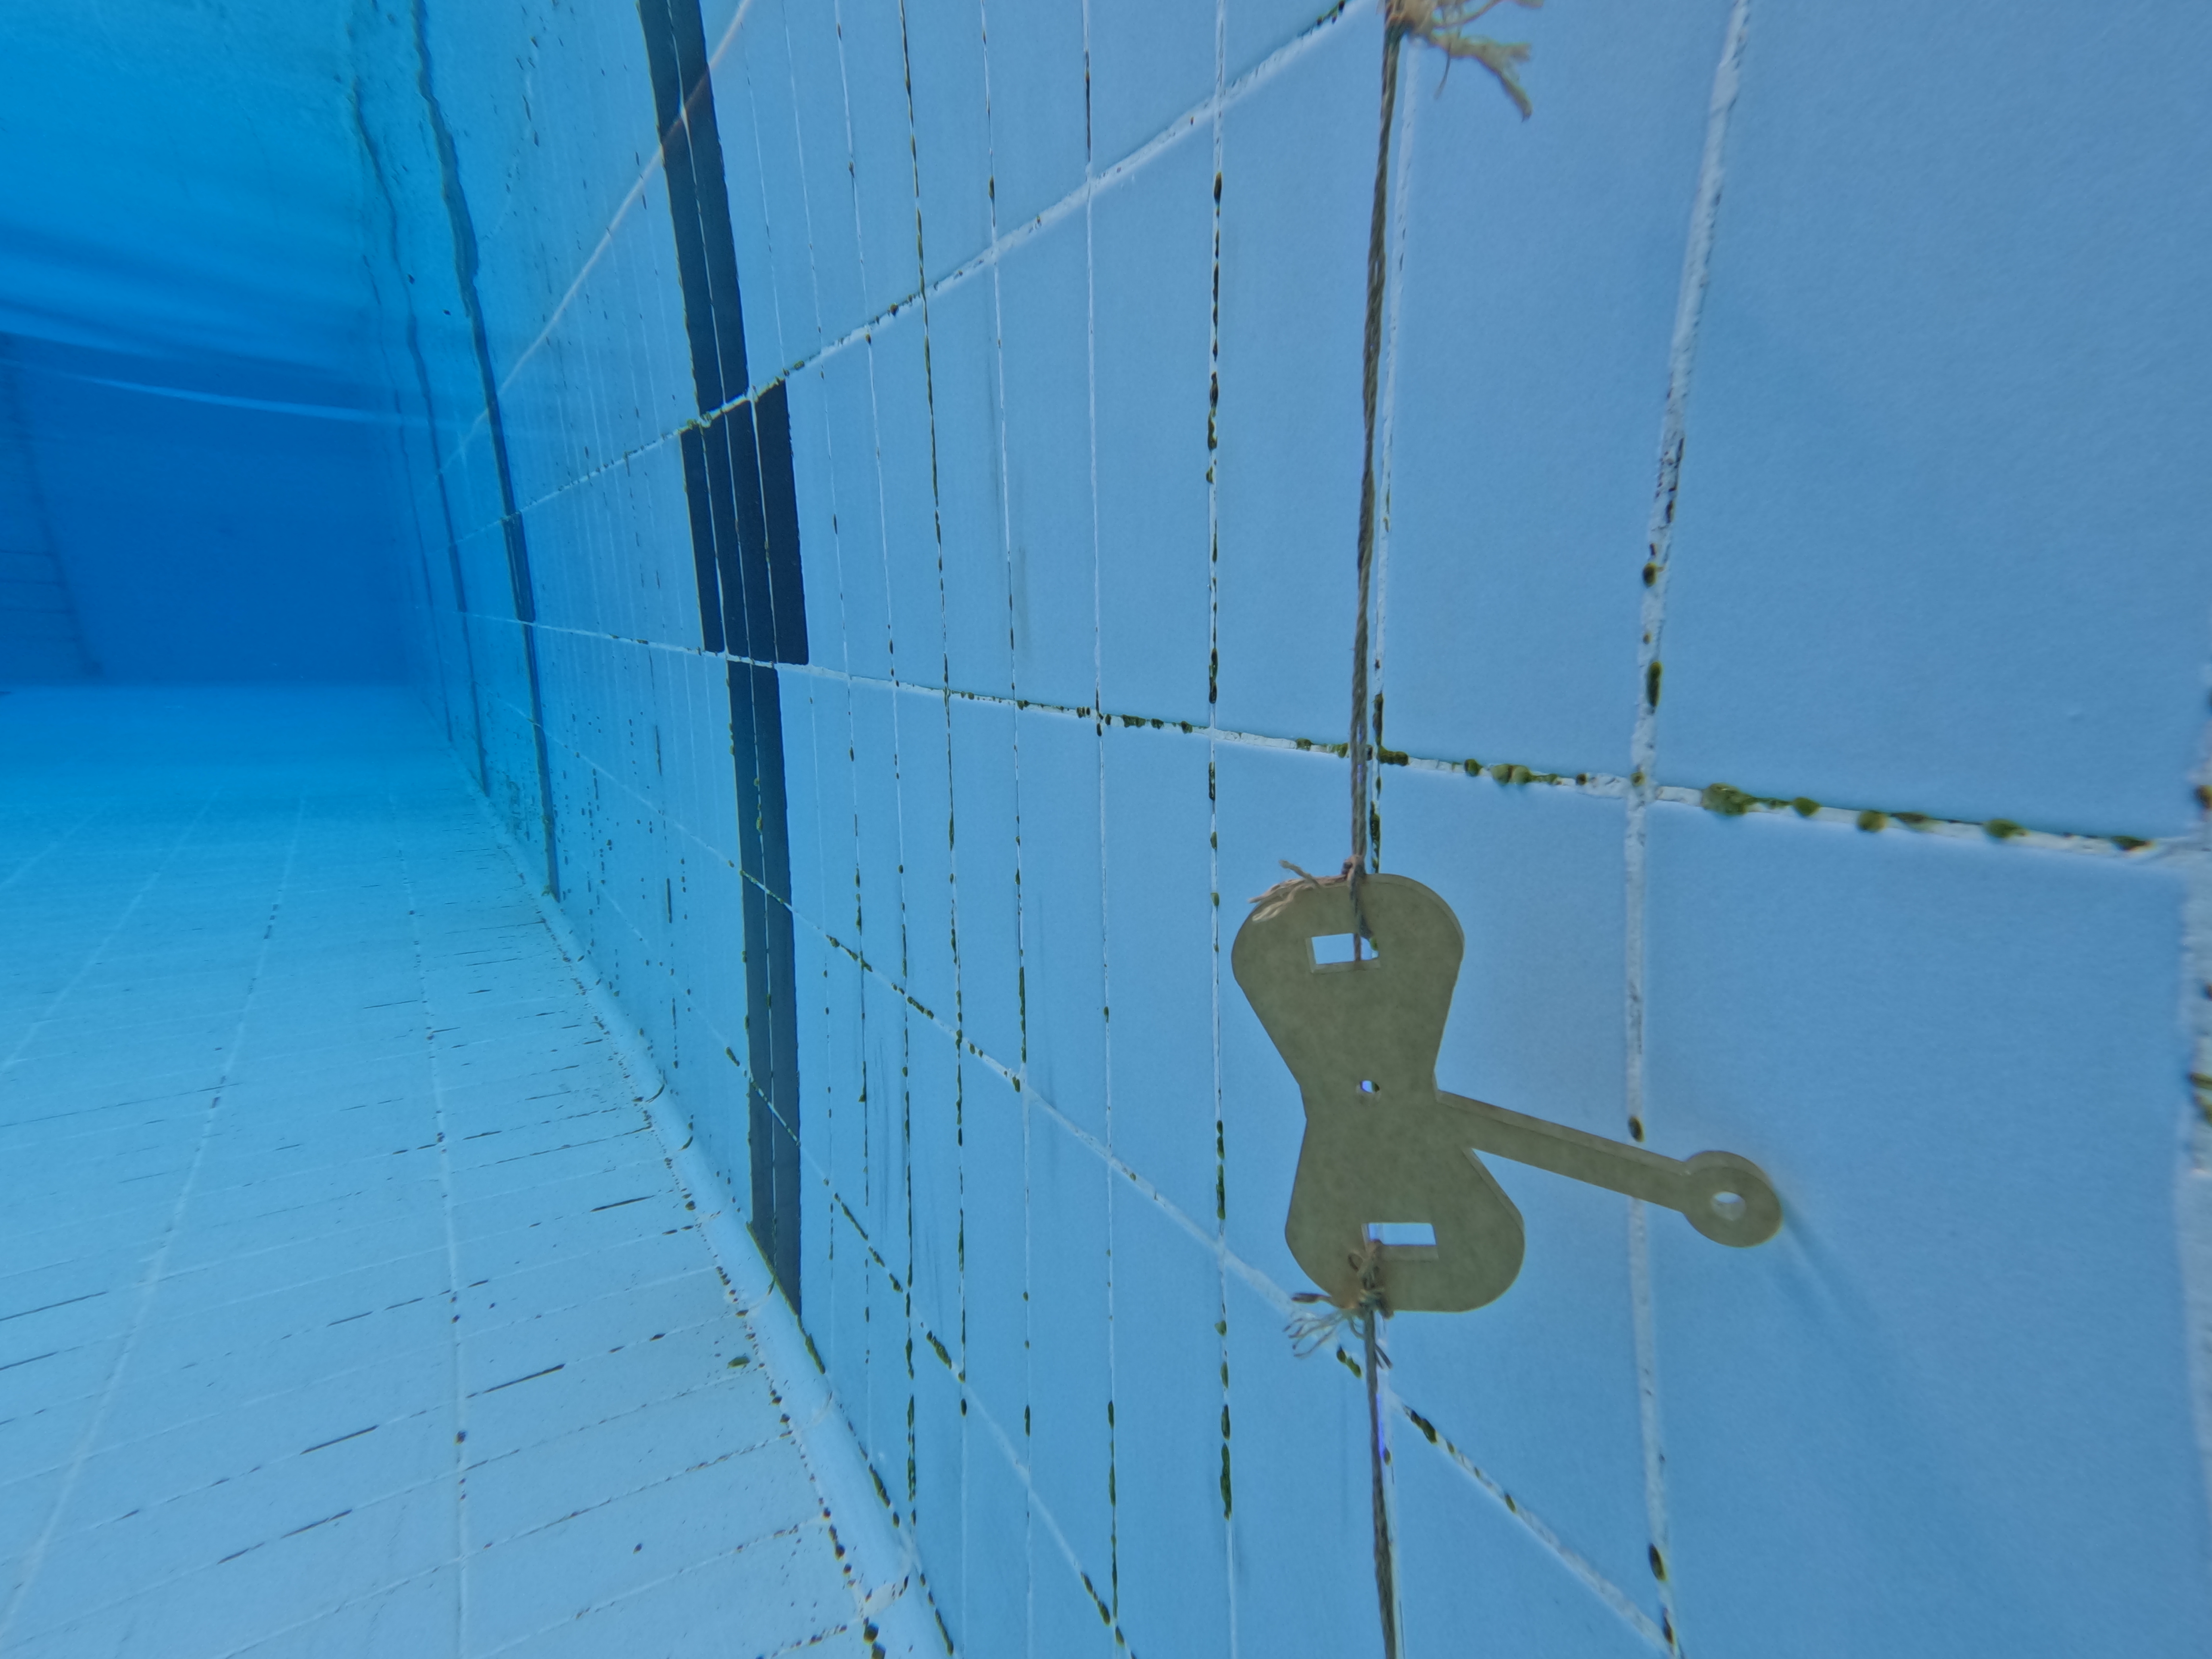

Supplement: Supplementary file 2119 [file G0050680.pdf › Level_3_2/G0050680.pdf]

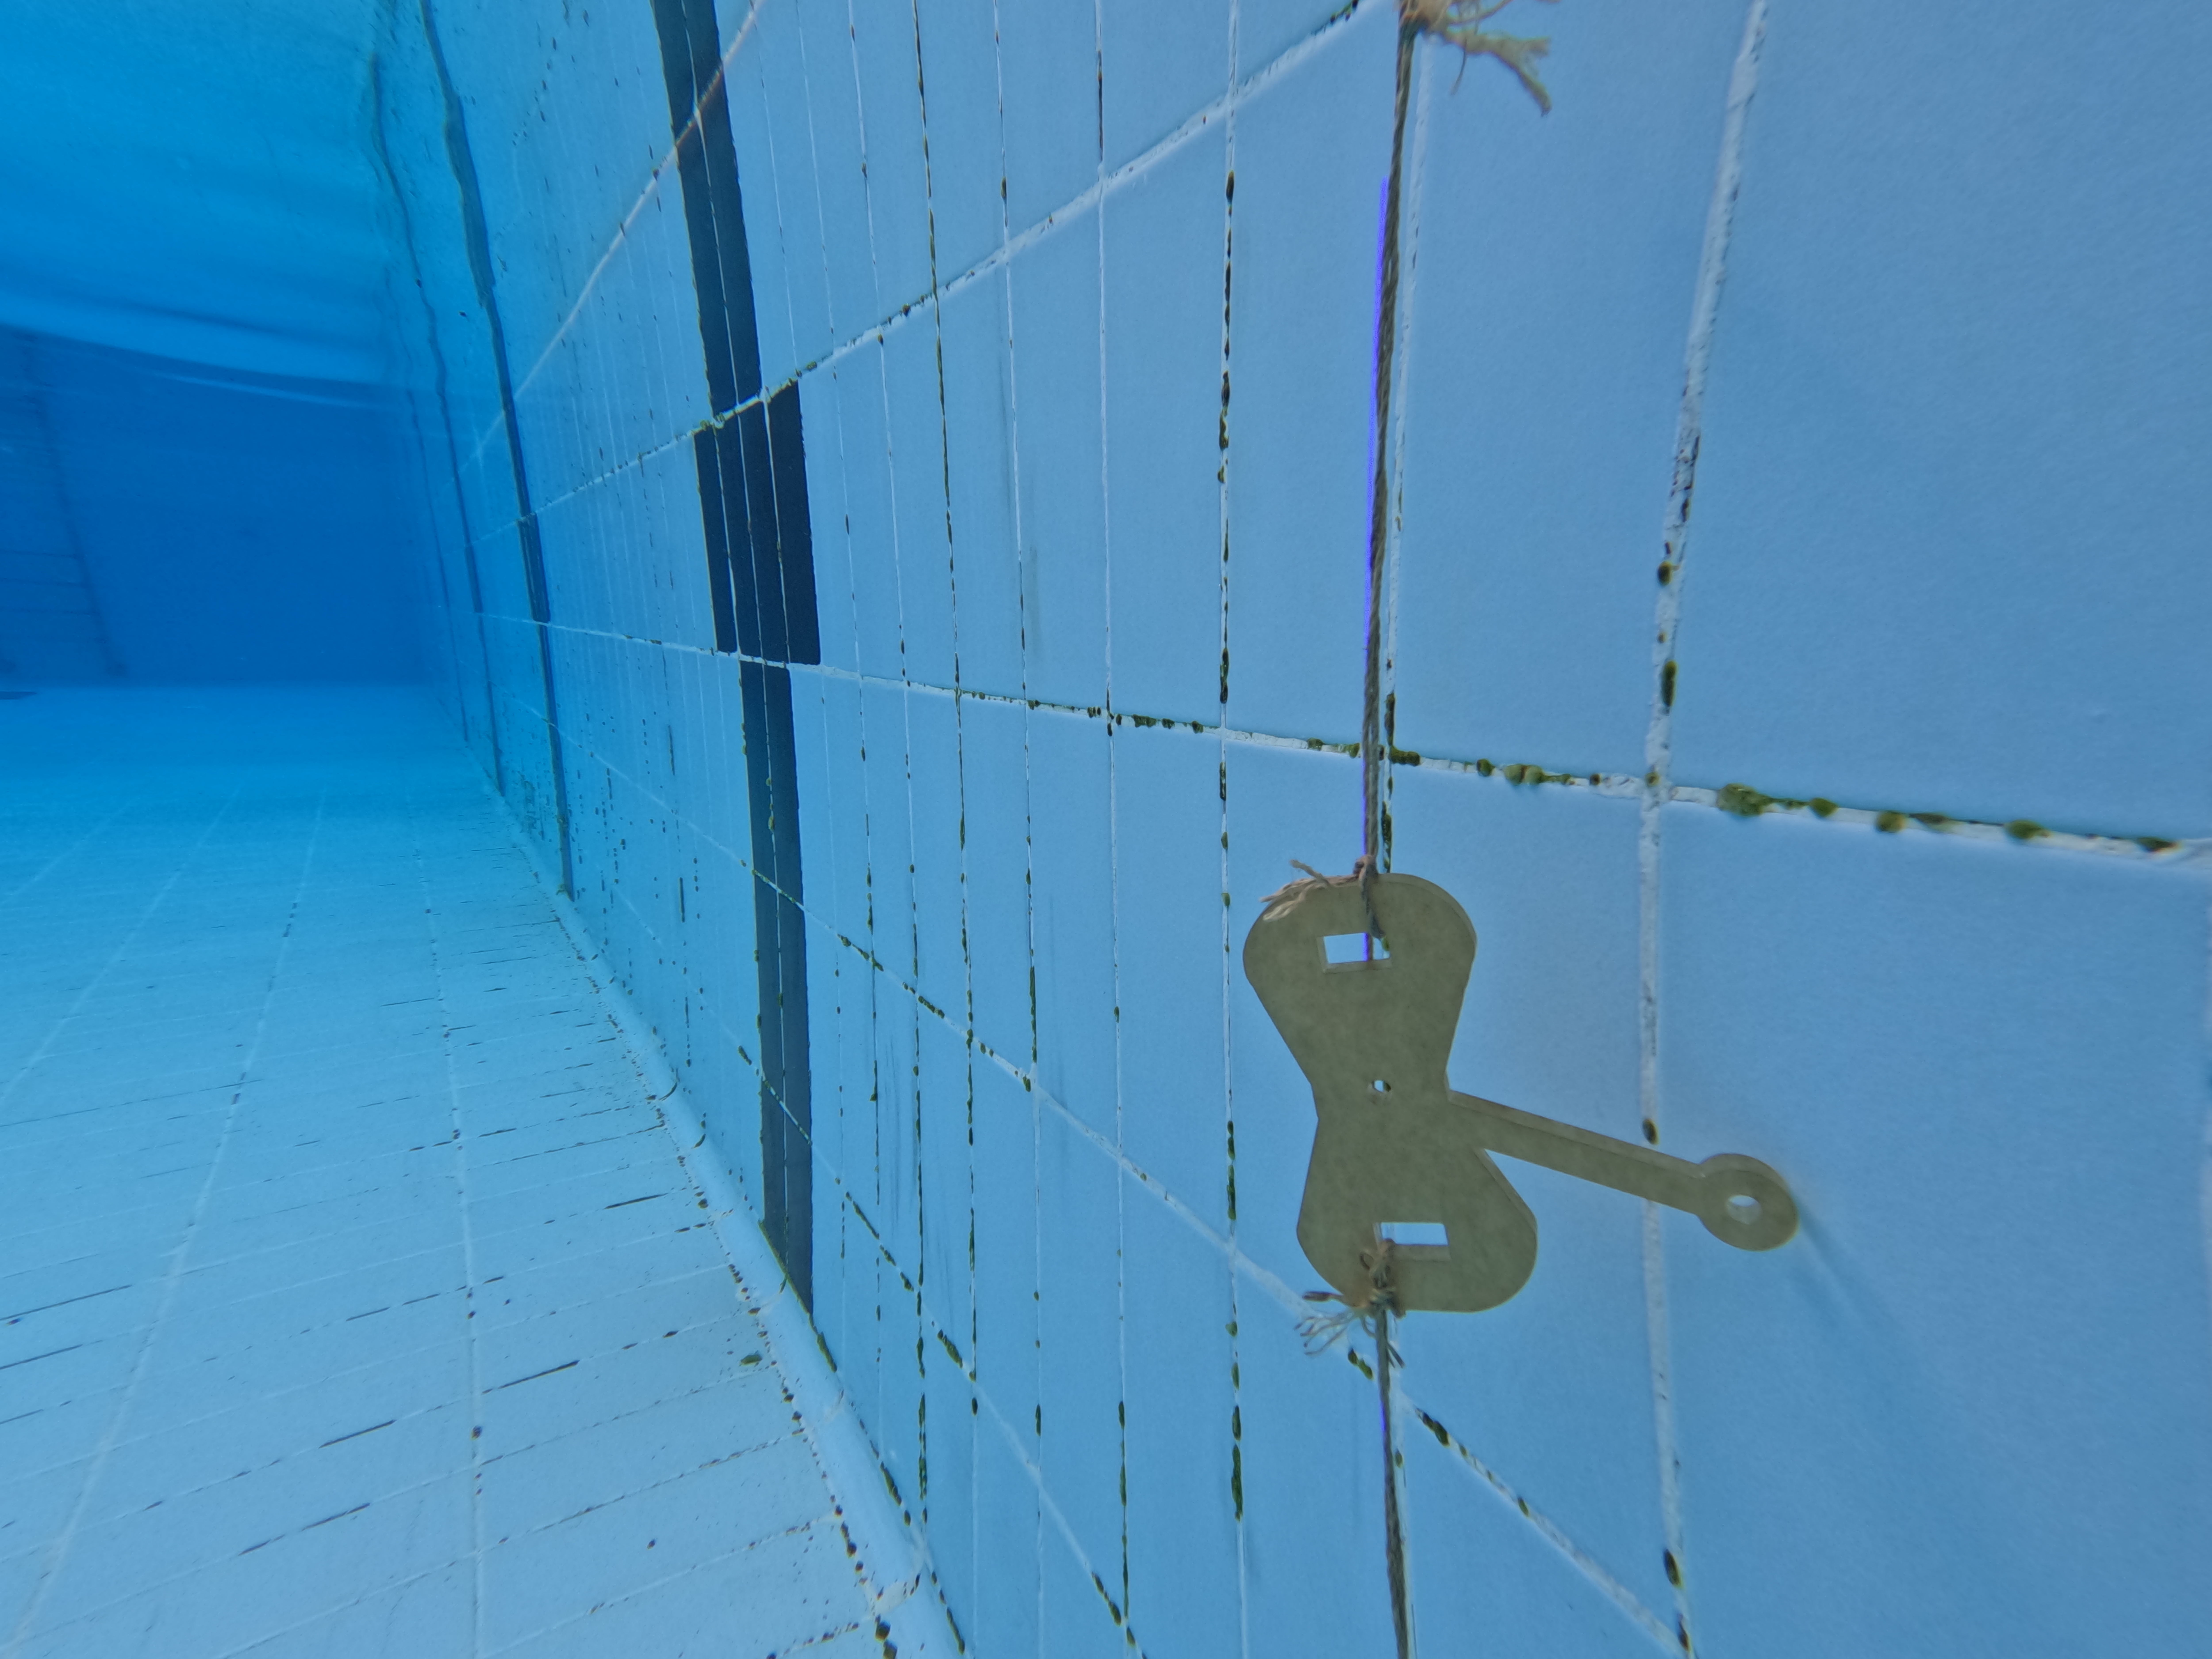

Supplement: Supplementary file 2120 [file G0050681.pdf › Level_3_2/G0050681.pdf]

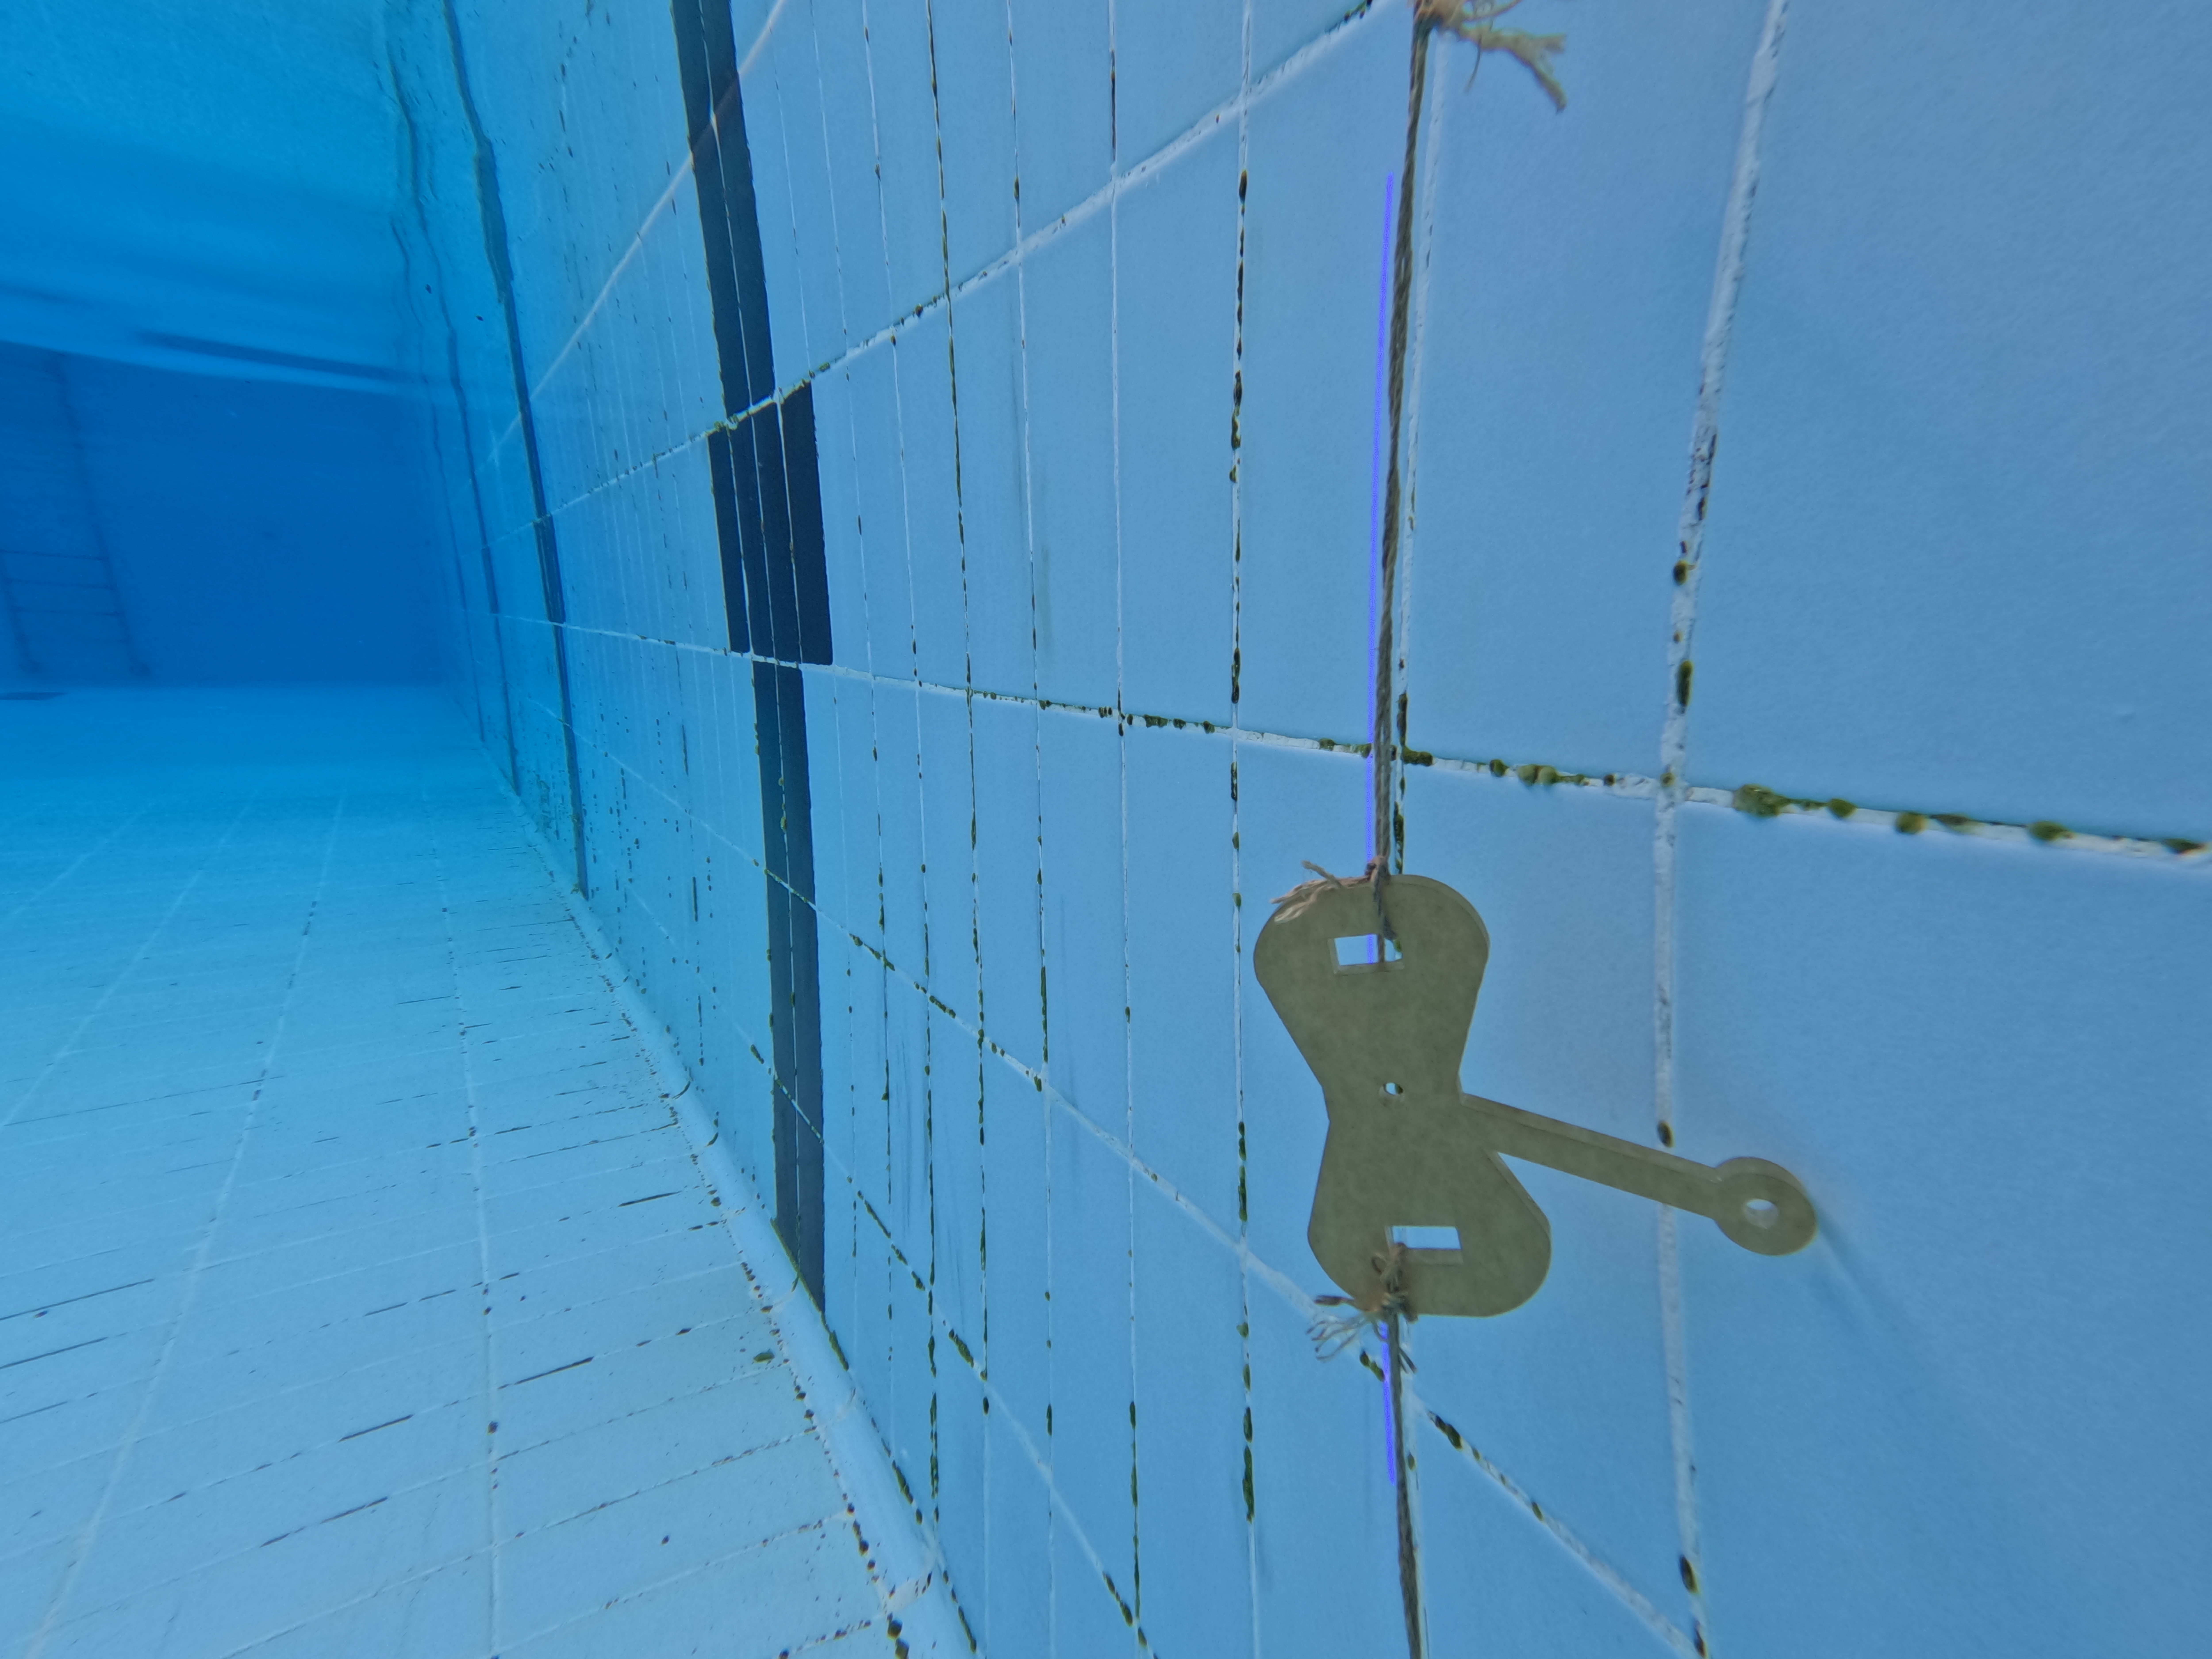

Supplement: Supplementary file 2121 [file G0050682.pdf › Level_3_2/G0050682.pdf]

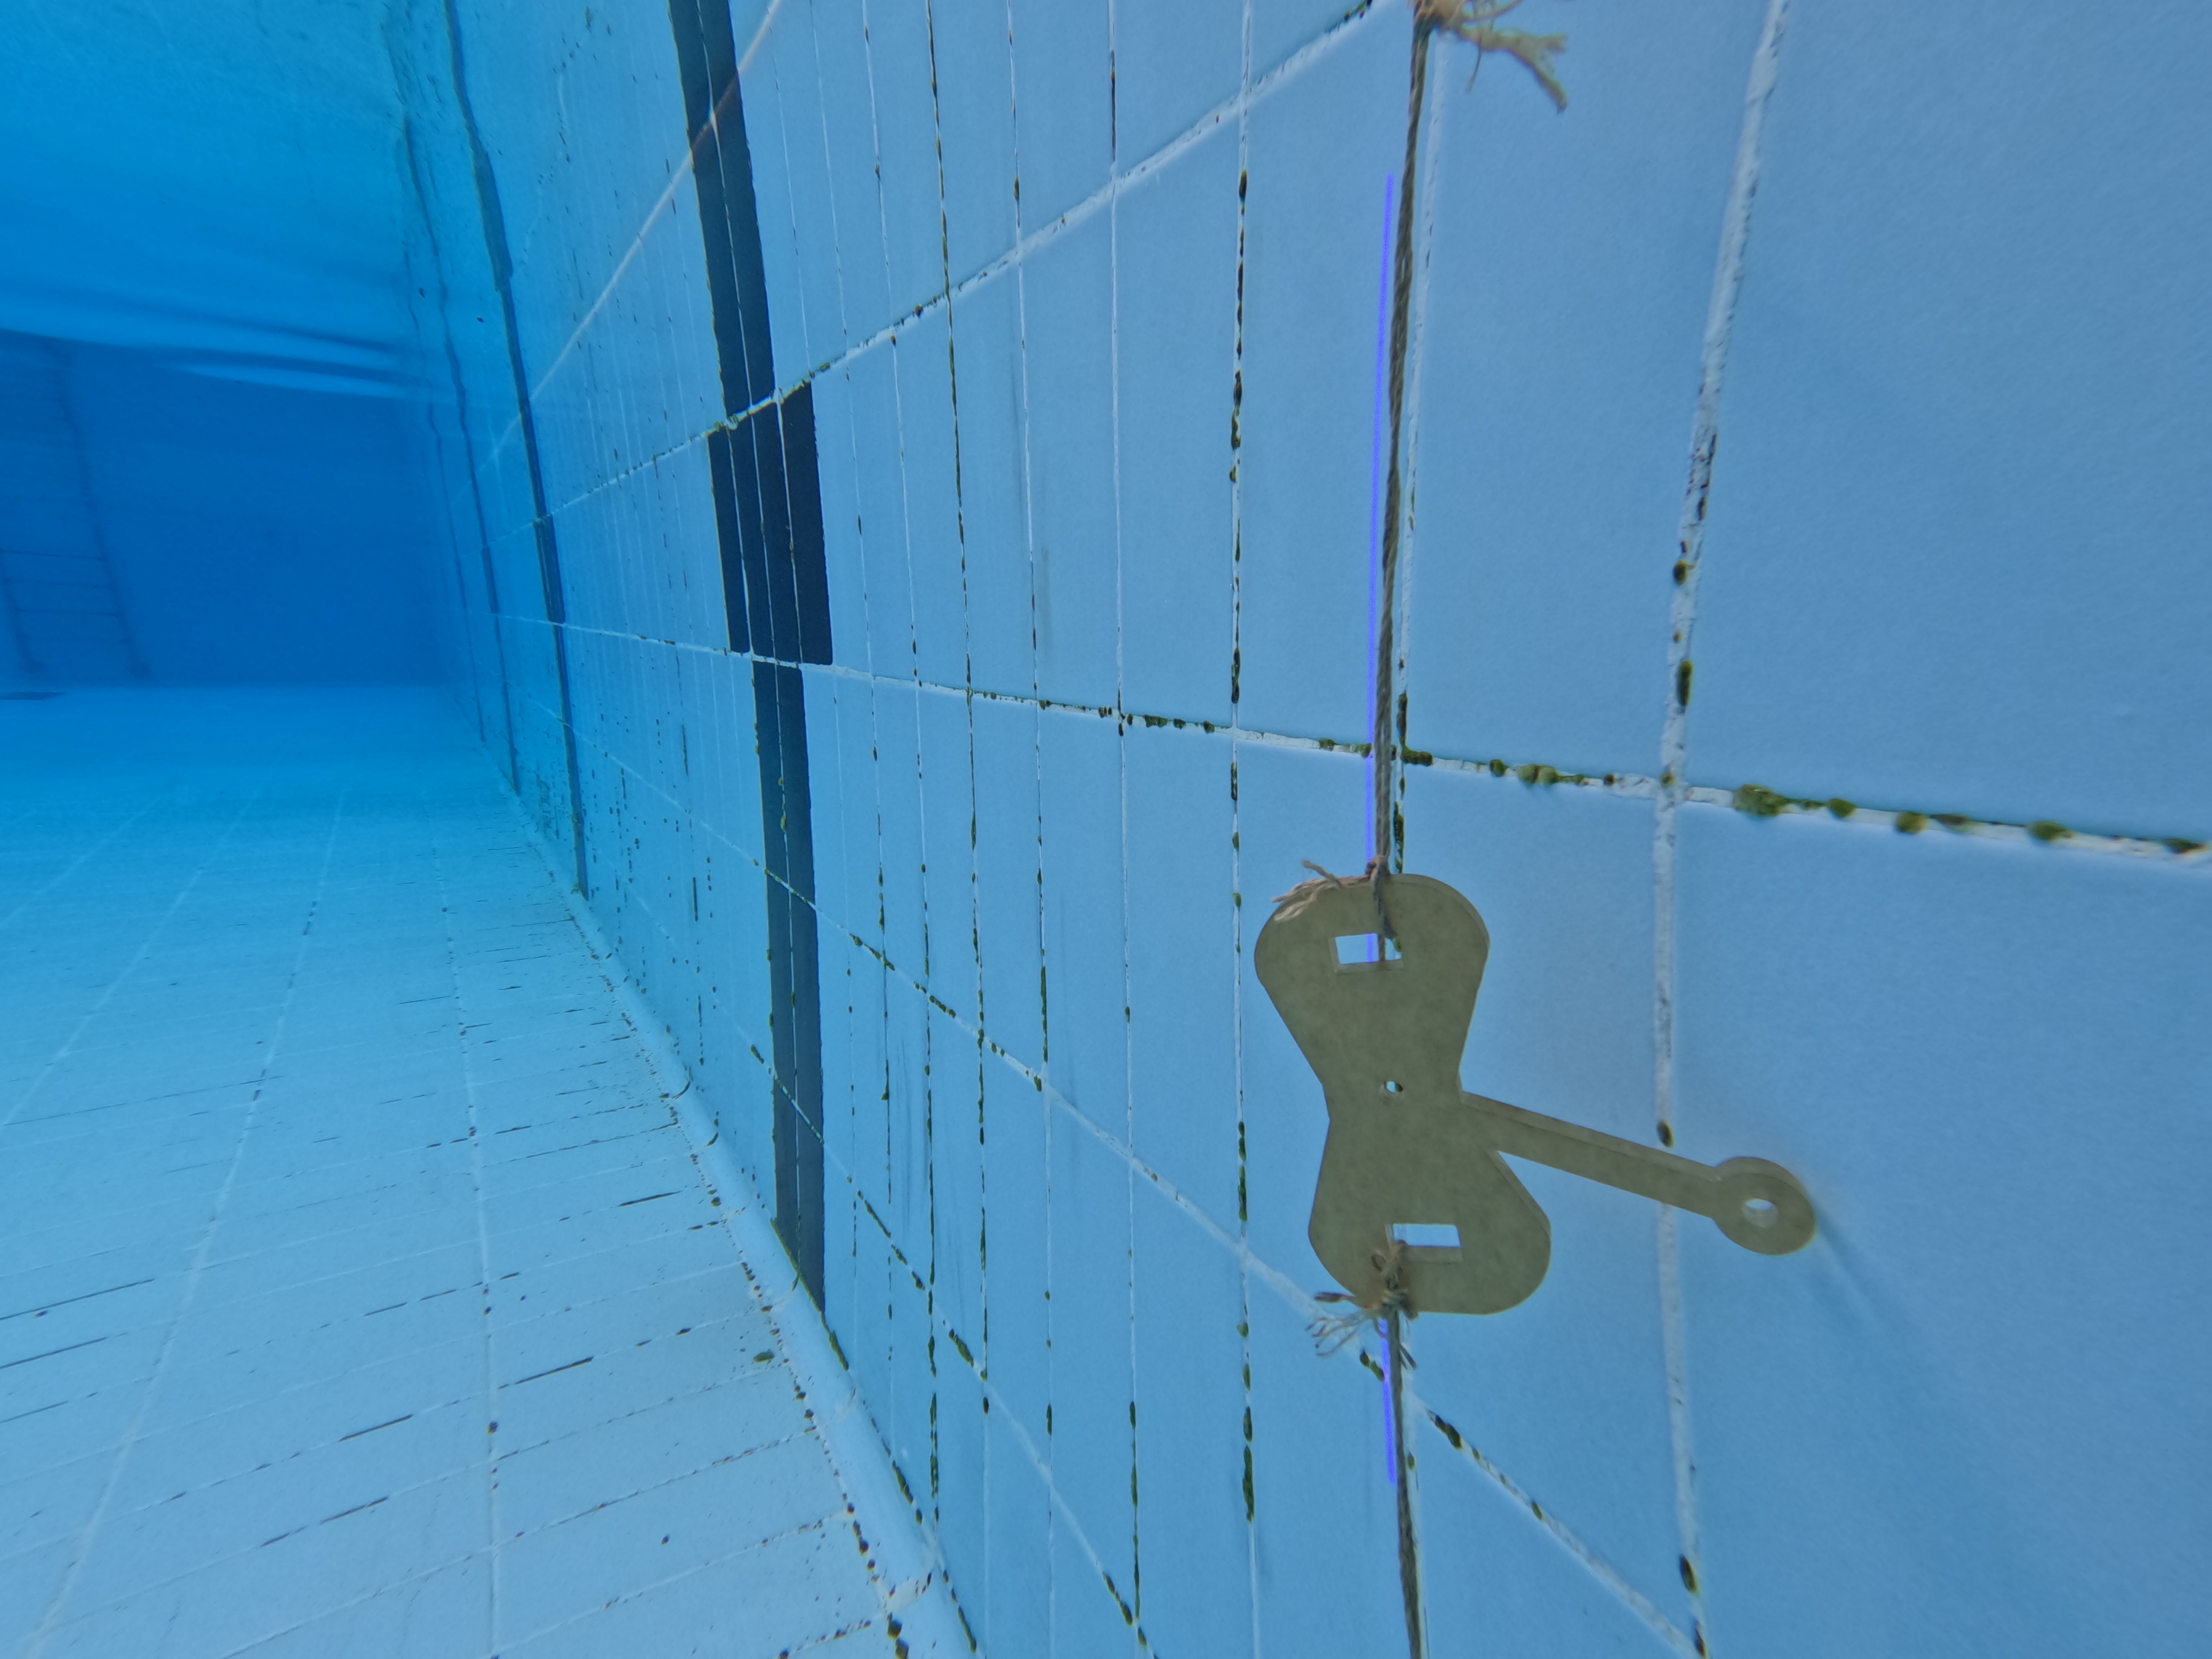

Supplement: Supplementary file 2122 [file G0050683.pdf › Level_3_2/G0050683.pdf]

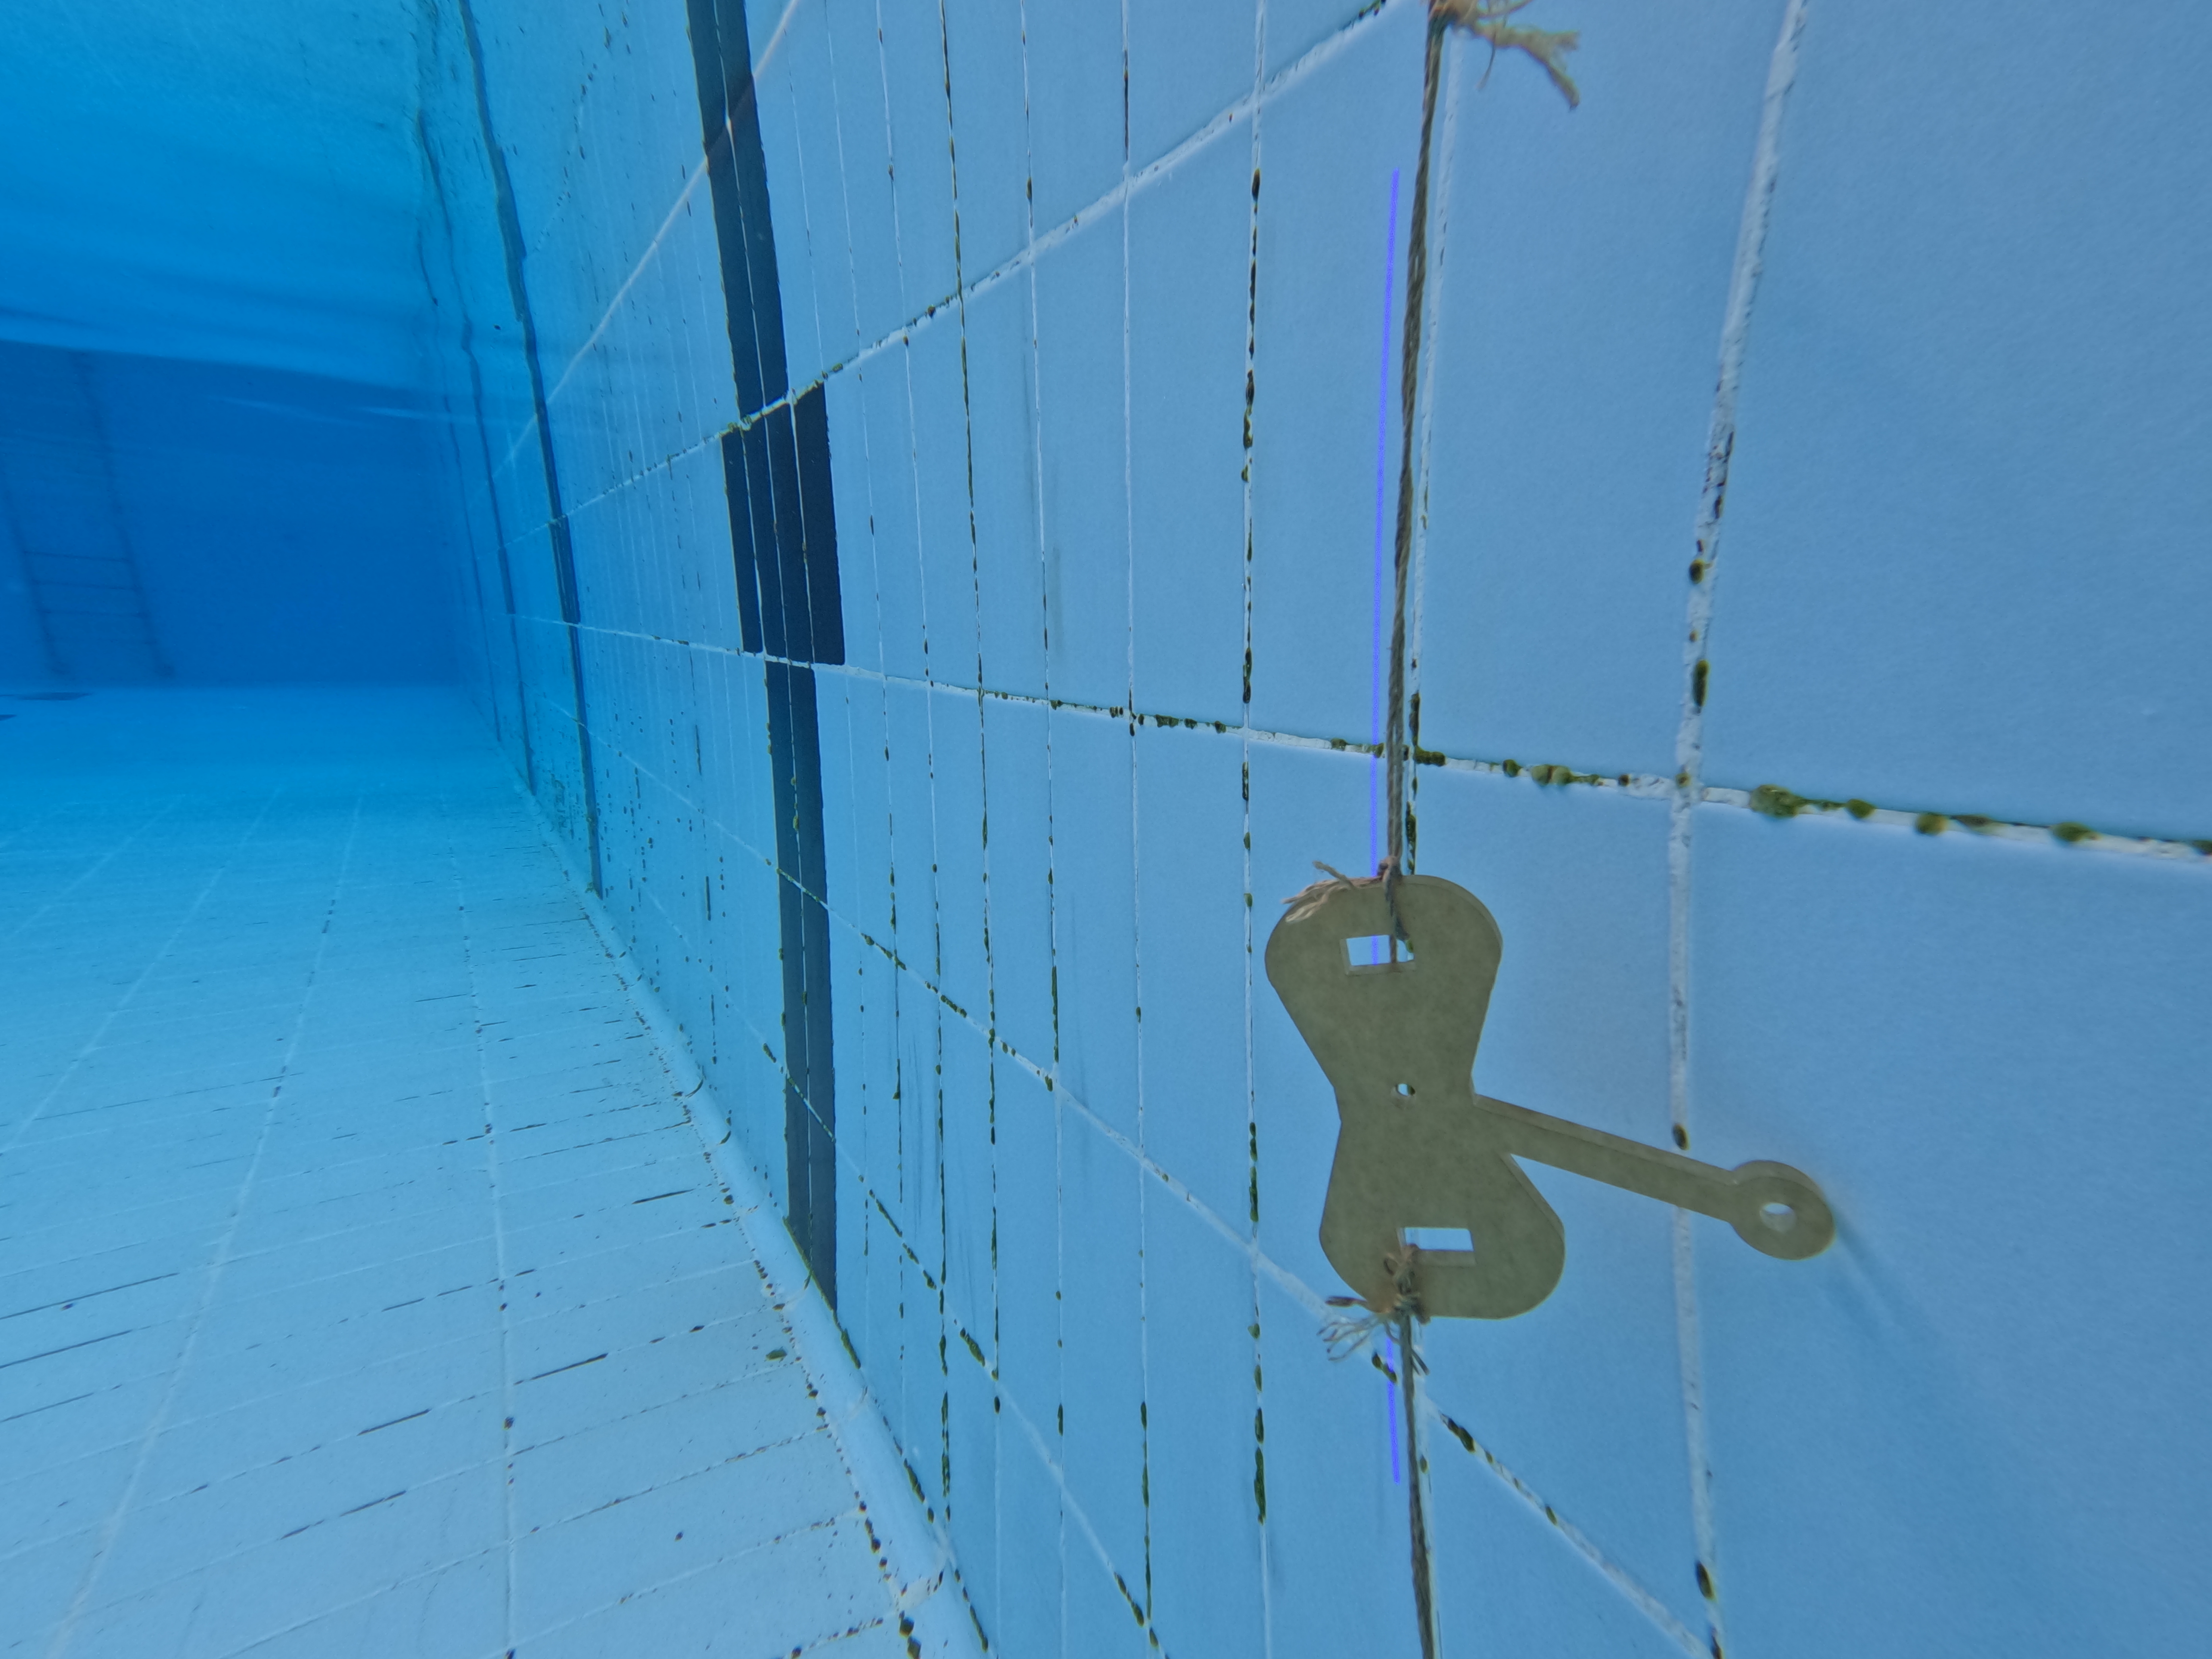

Supplement: Supplementary file 2123 [file G0050684.pdf › Level_3_2/G0050684.pdf]

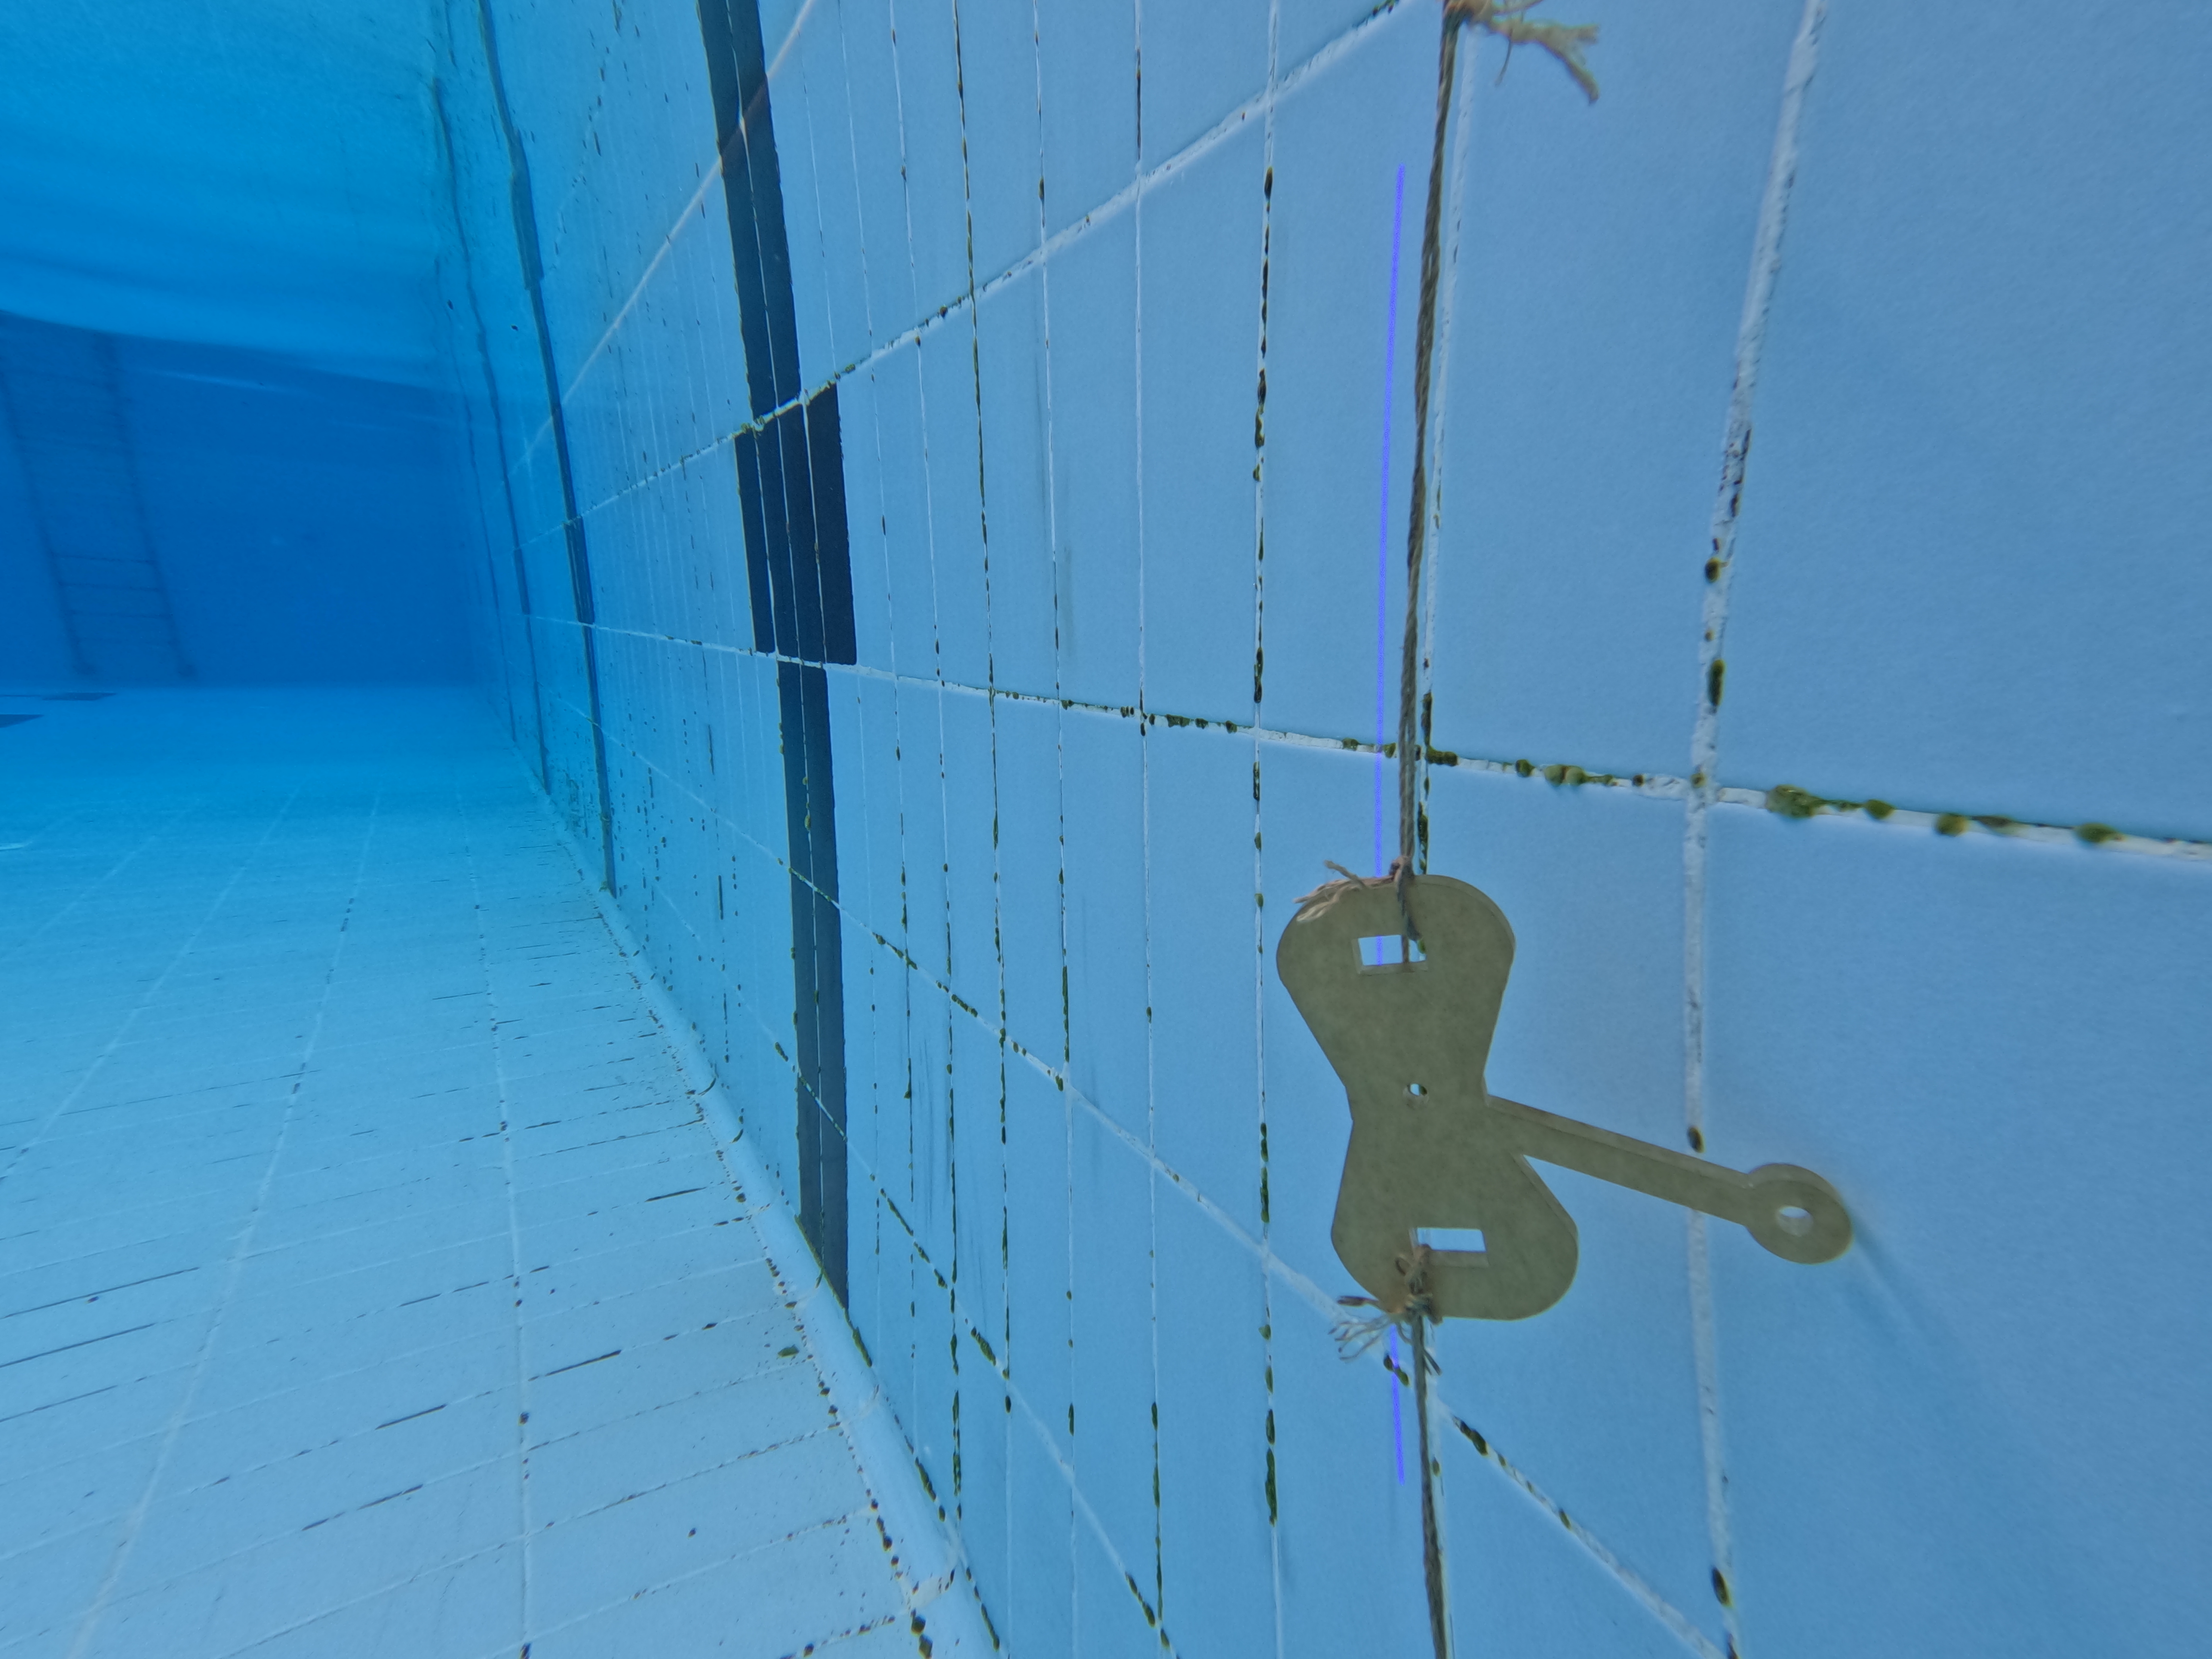

Supplement: Supplementary file 2124 [file G0050685.pdf › Level_3_2/G0050685.pdf]

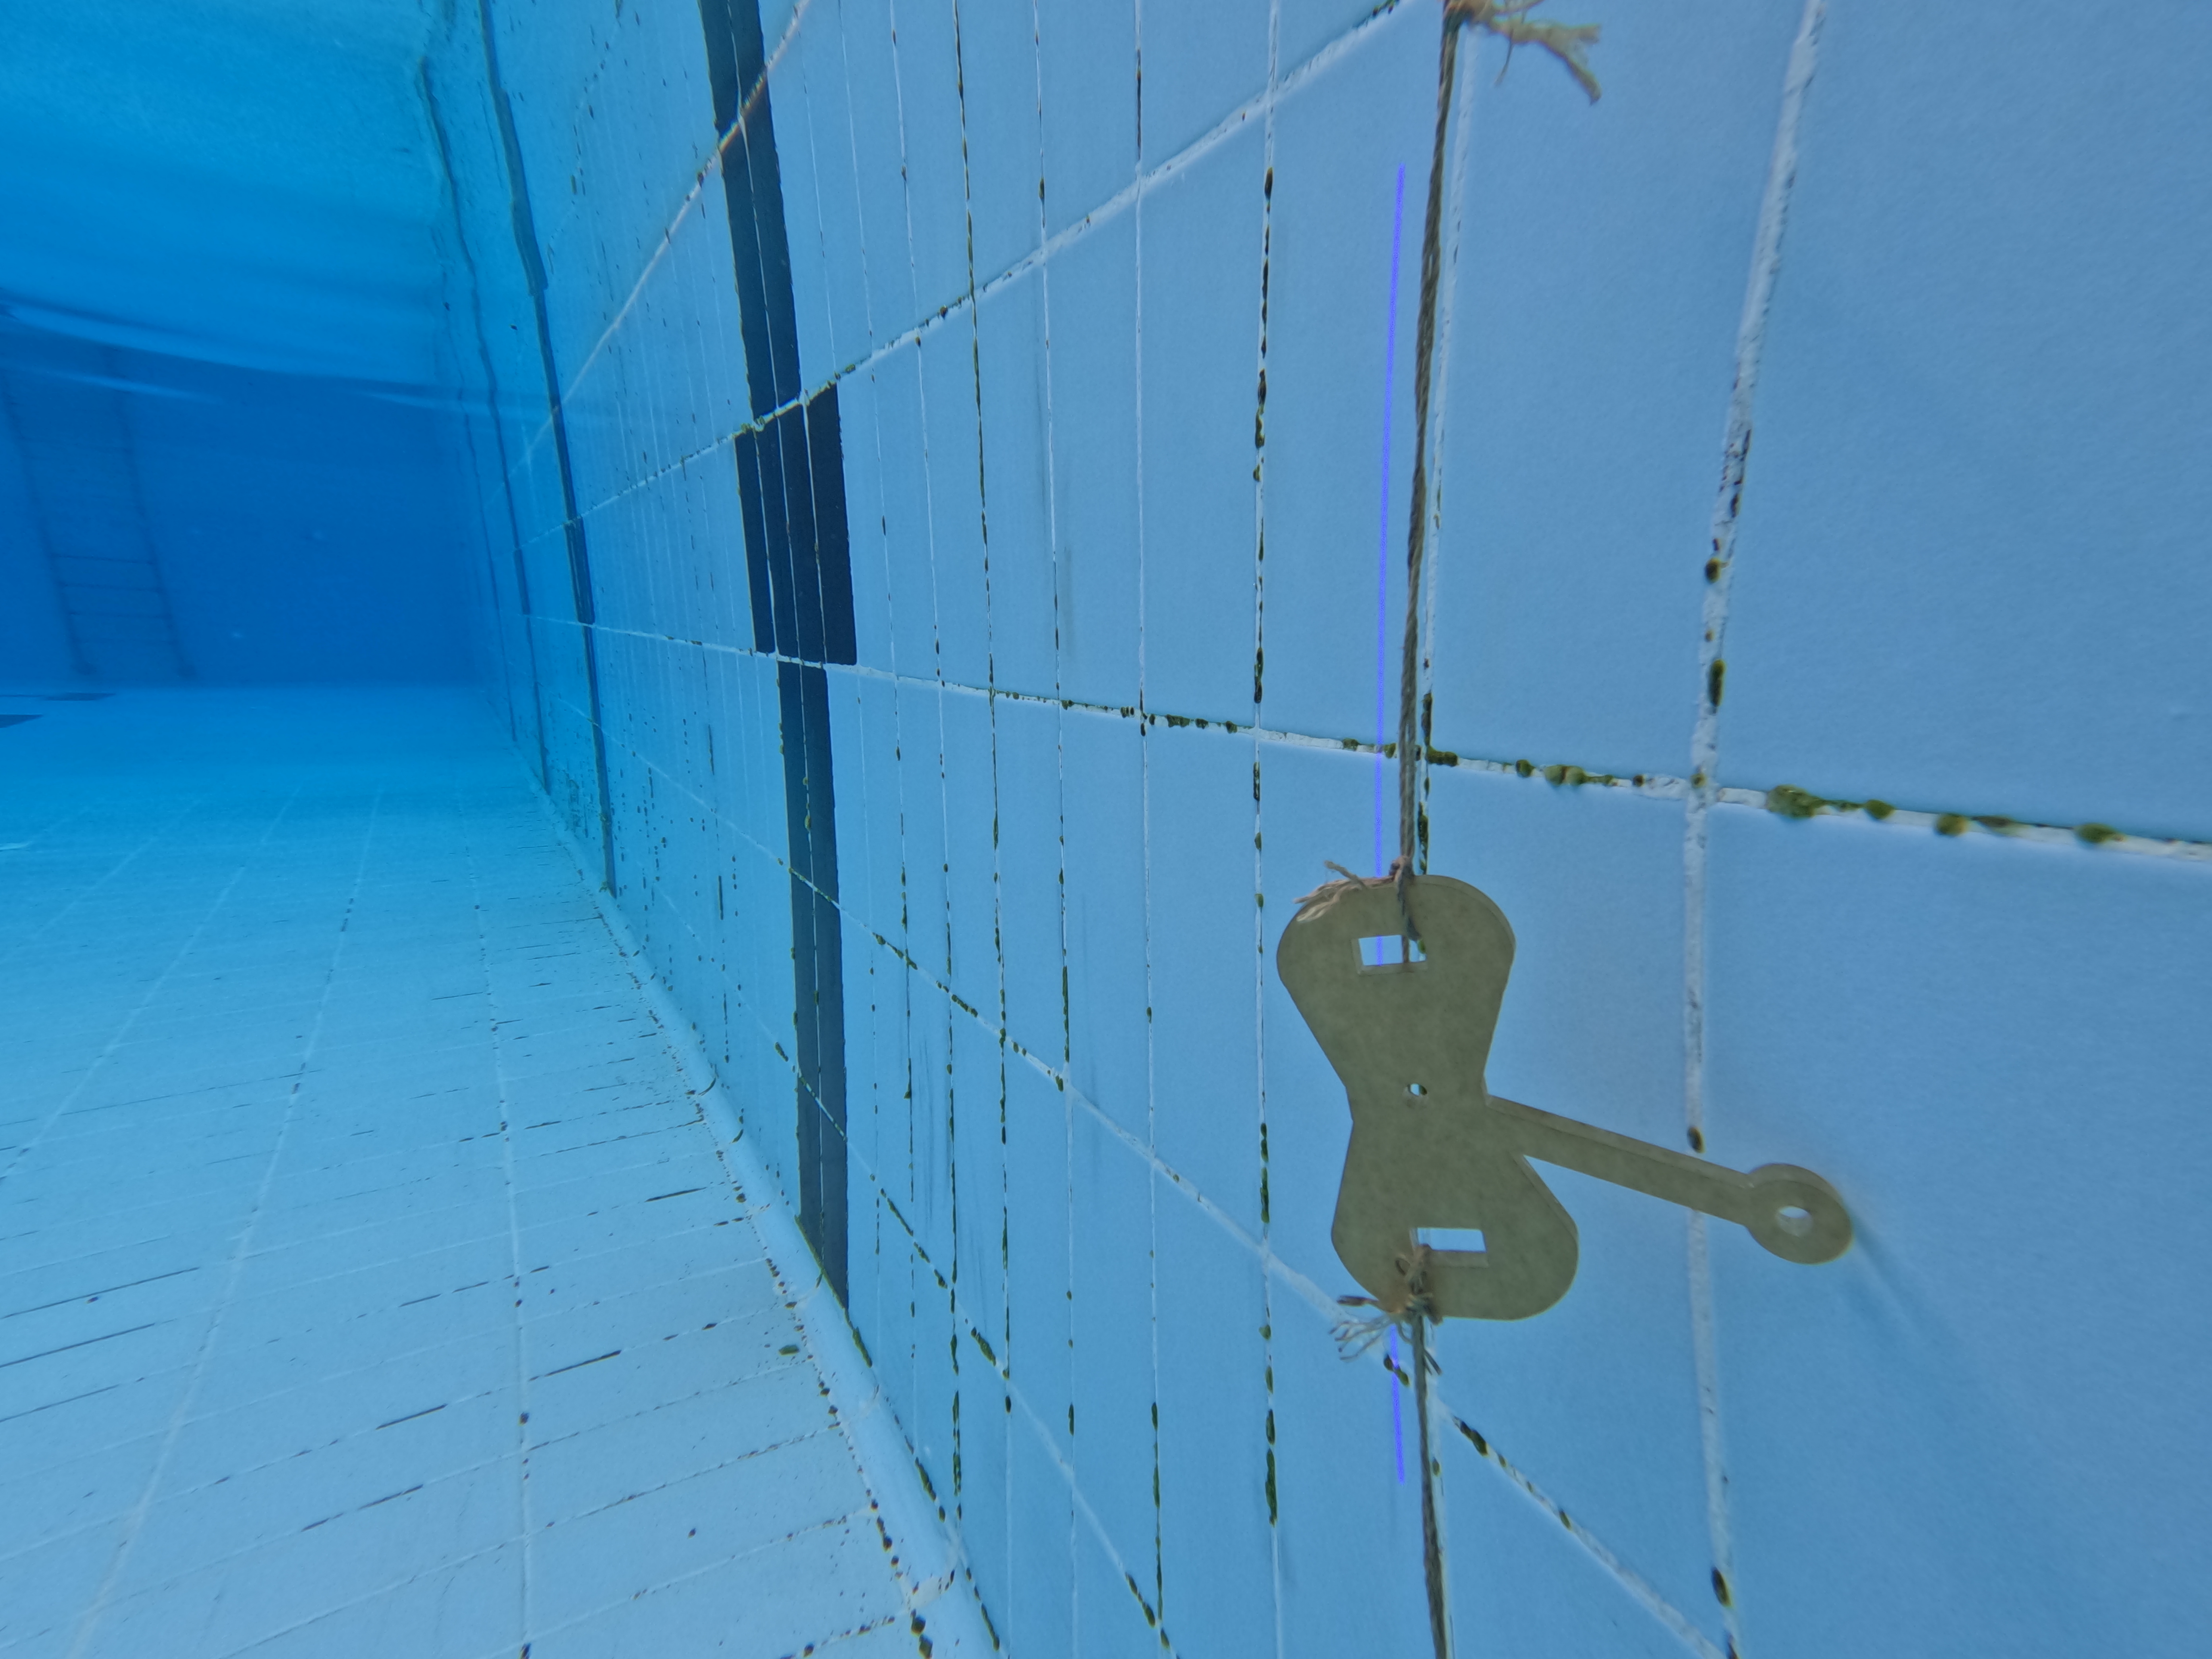

Supplement: Supplementary file 2125 [file G0050686.pdf › Level_3_2/G0050686.pdf]

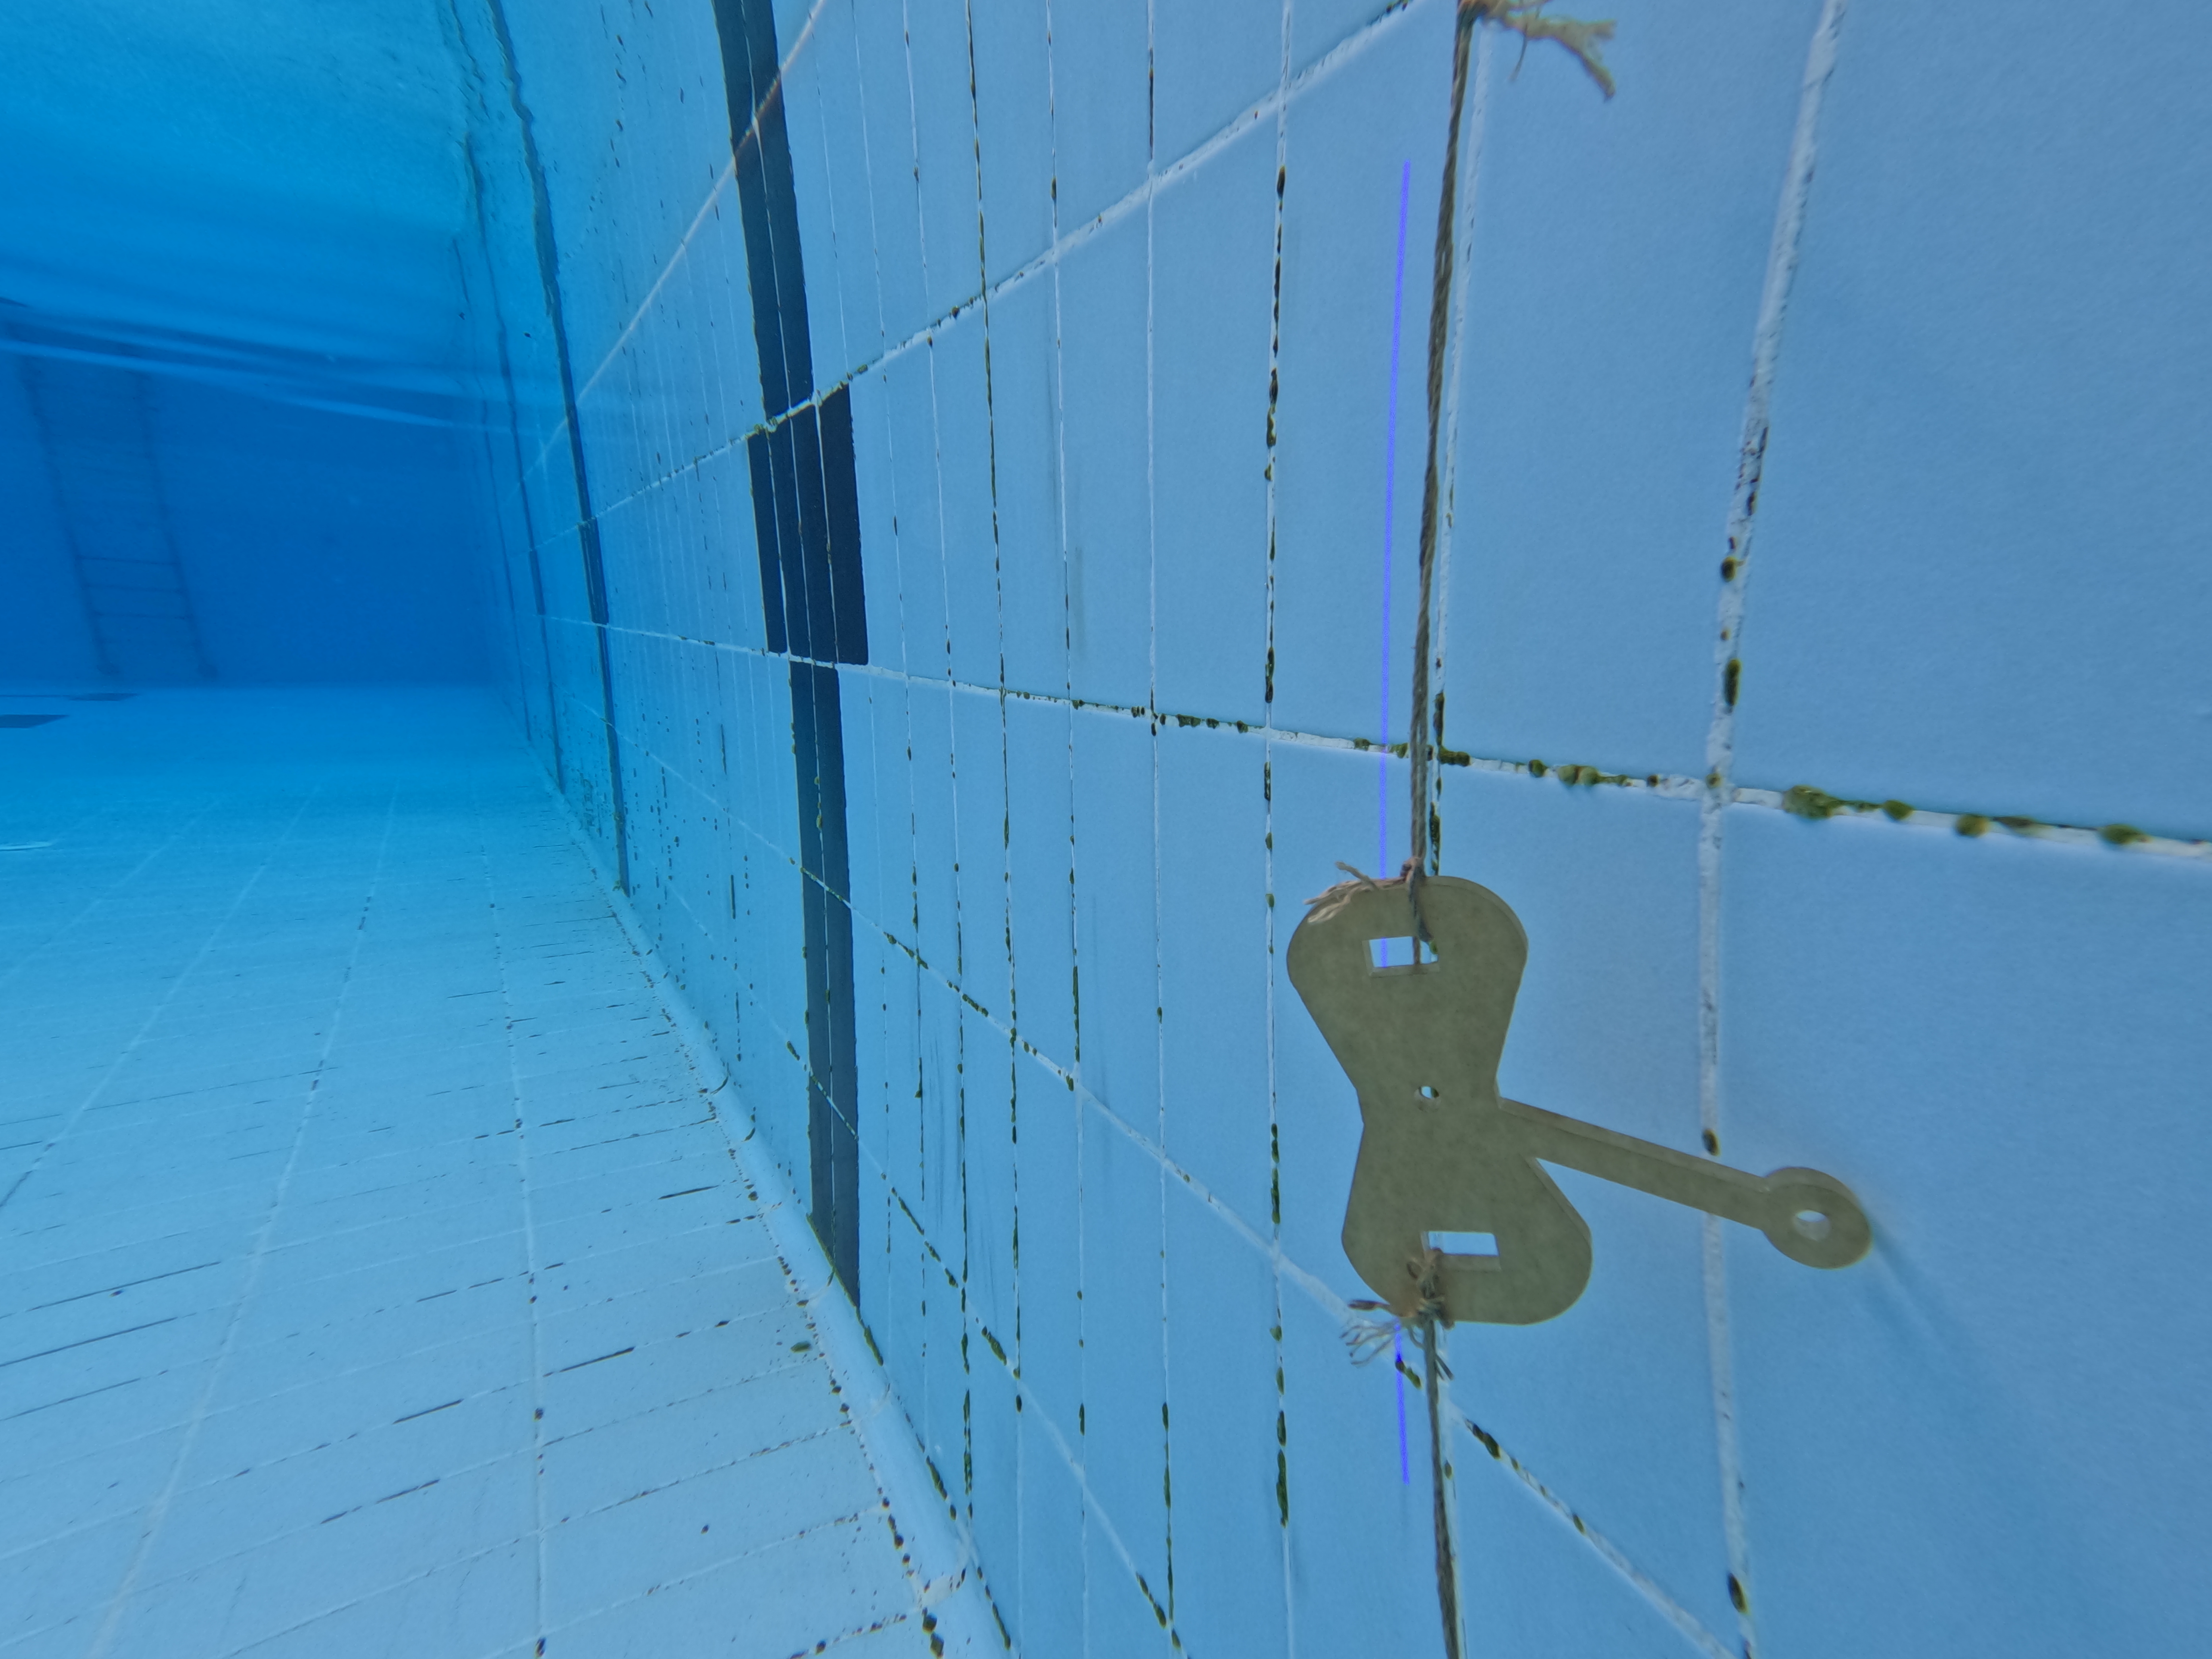

Supplement: Supplementary file 2126 [file G0050687.pdf › Level_3_2/G0050687.pdf]

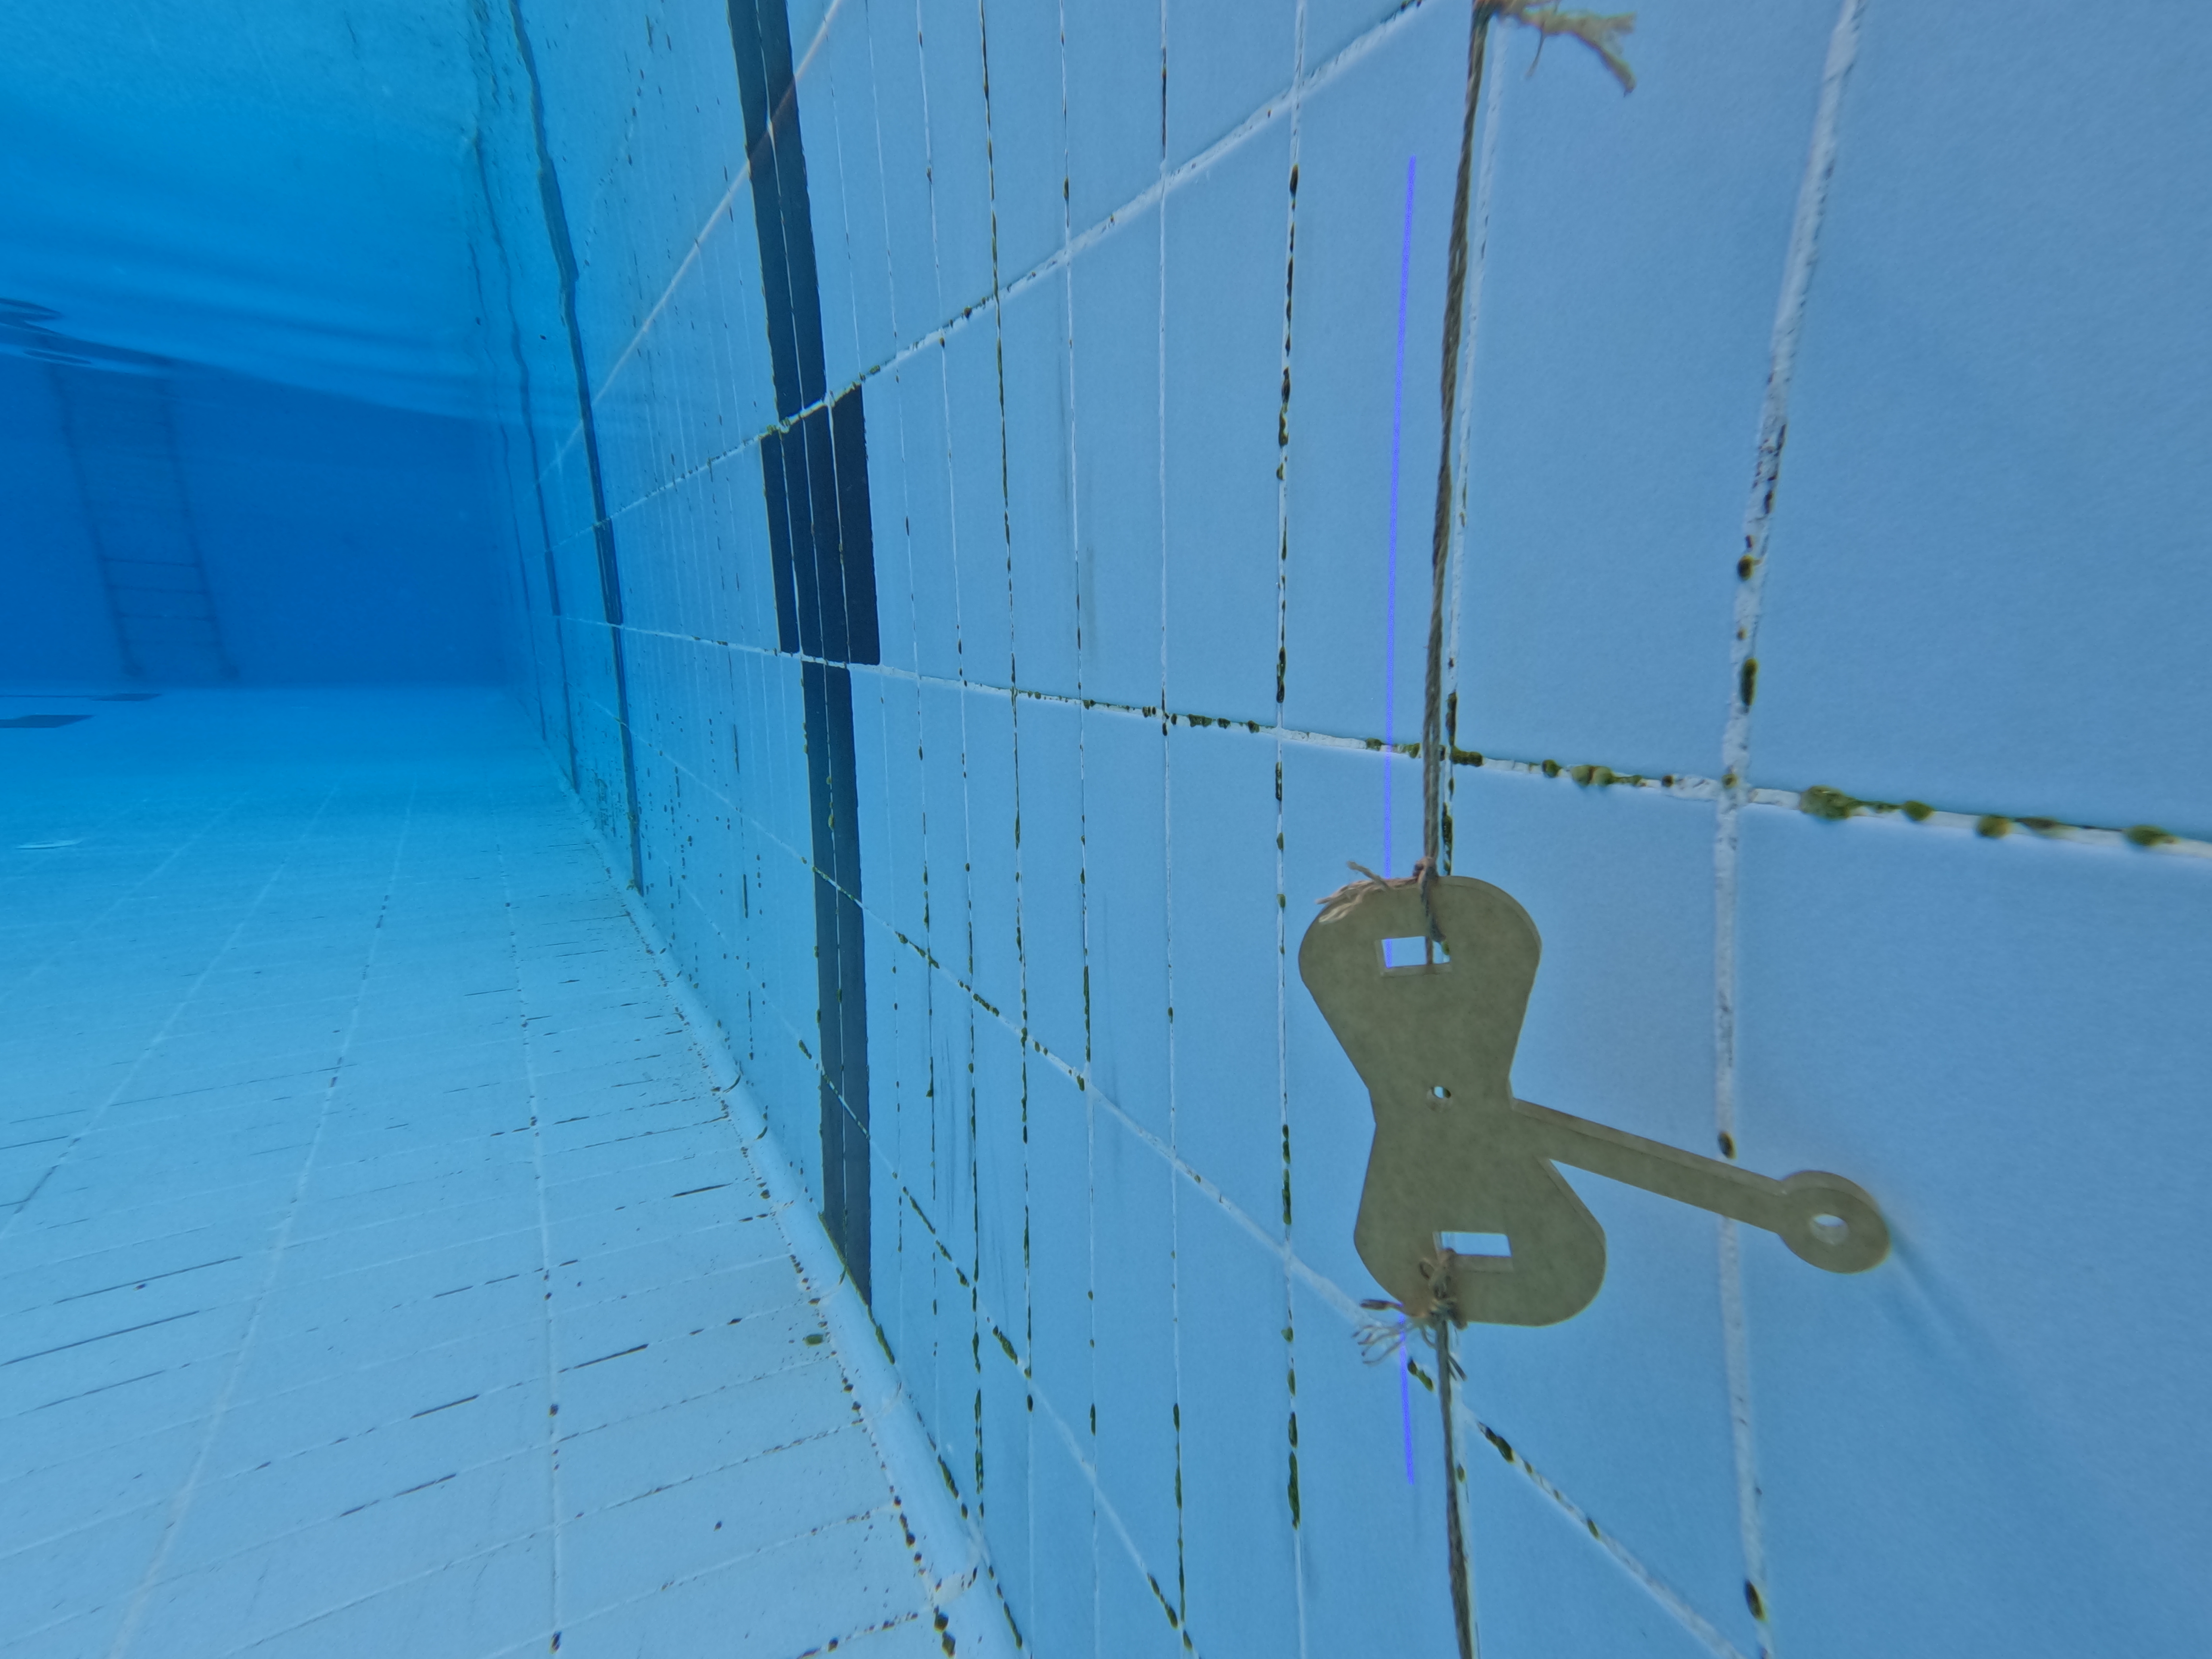

Supplement: Supplementary file 2127 [file G0050688.pdf › Level_3_2/G0050688.pdf]

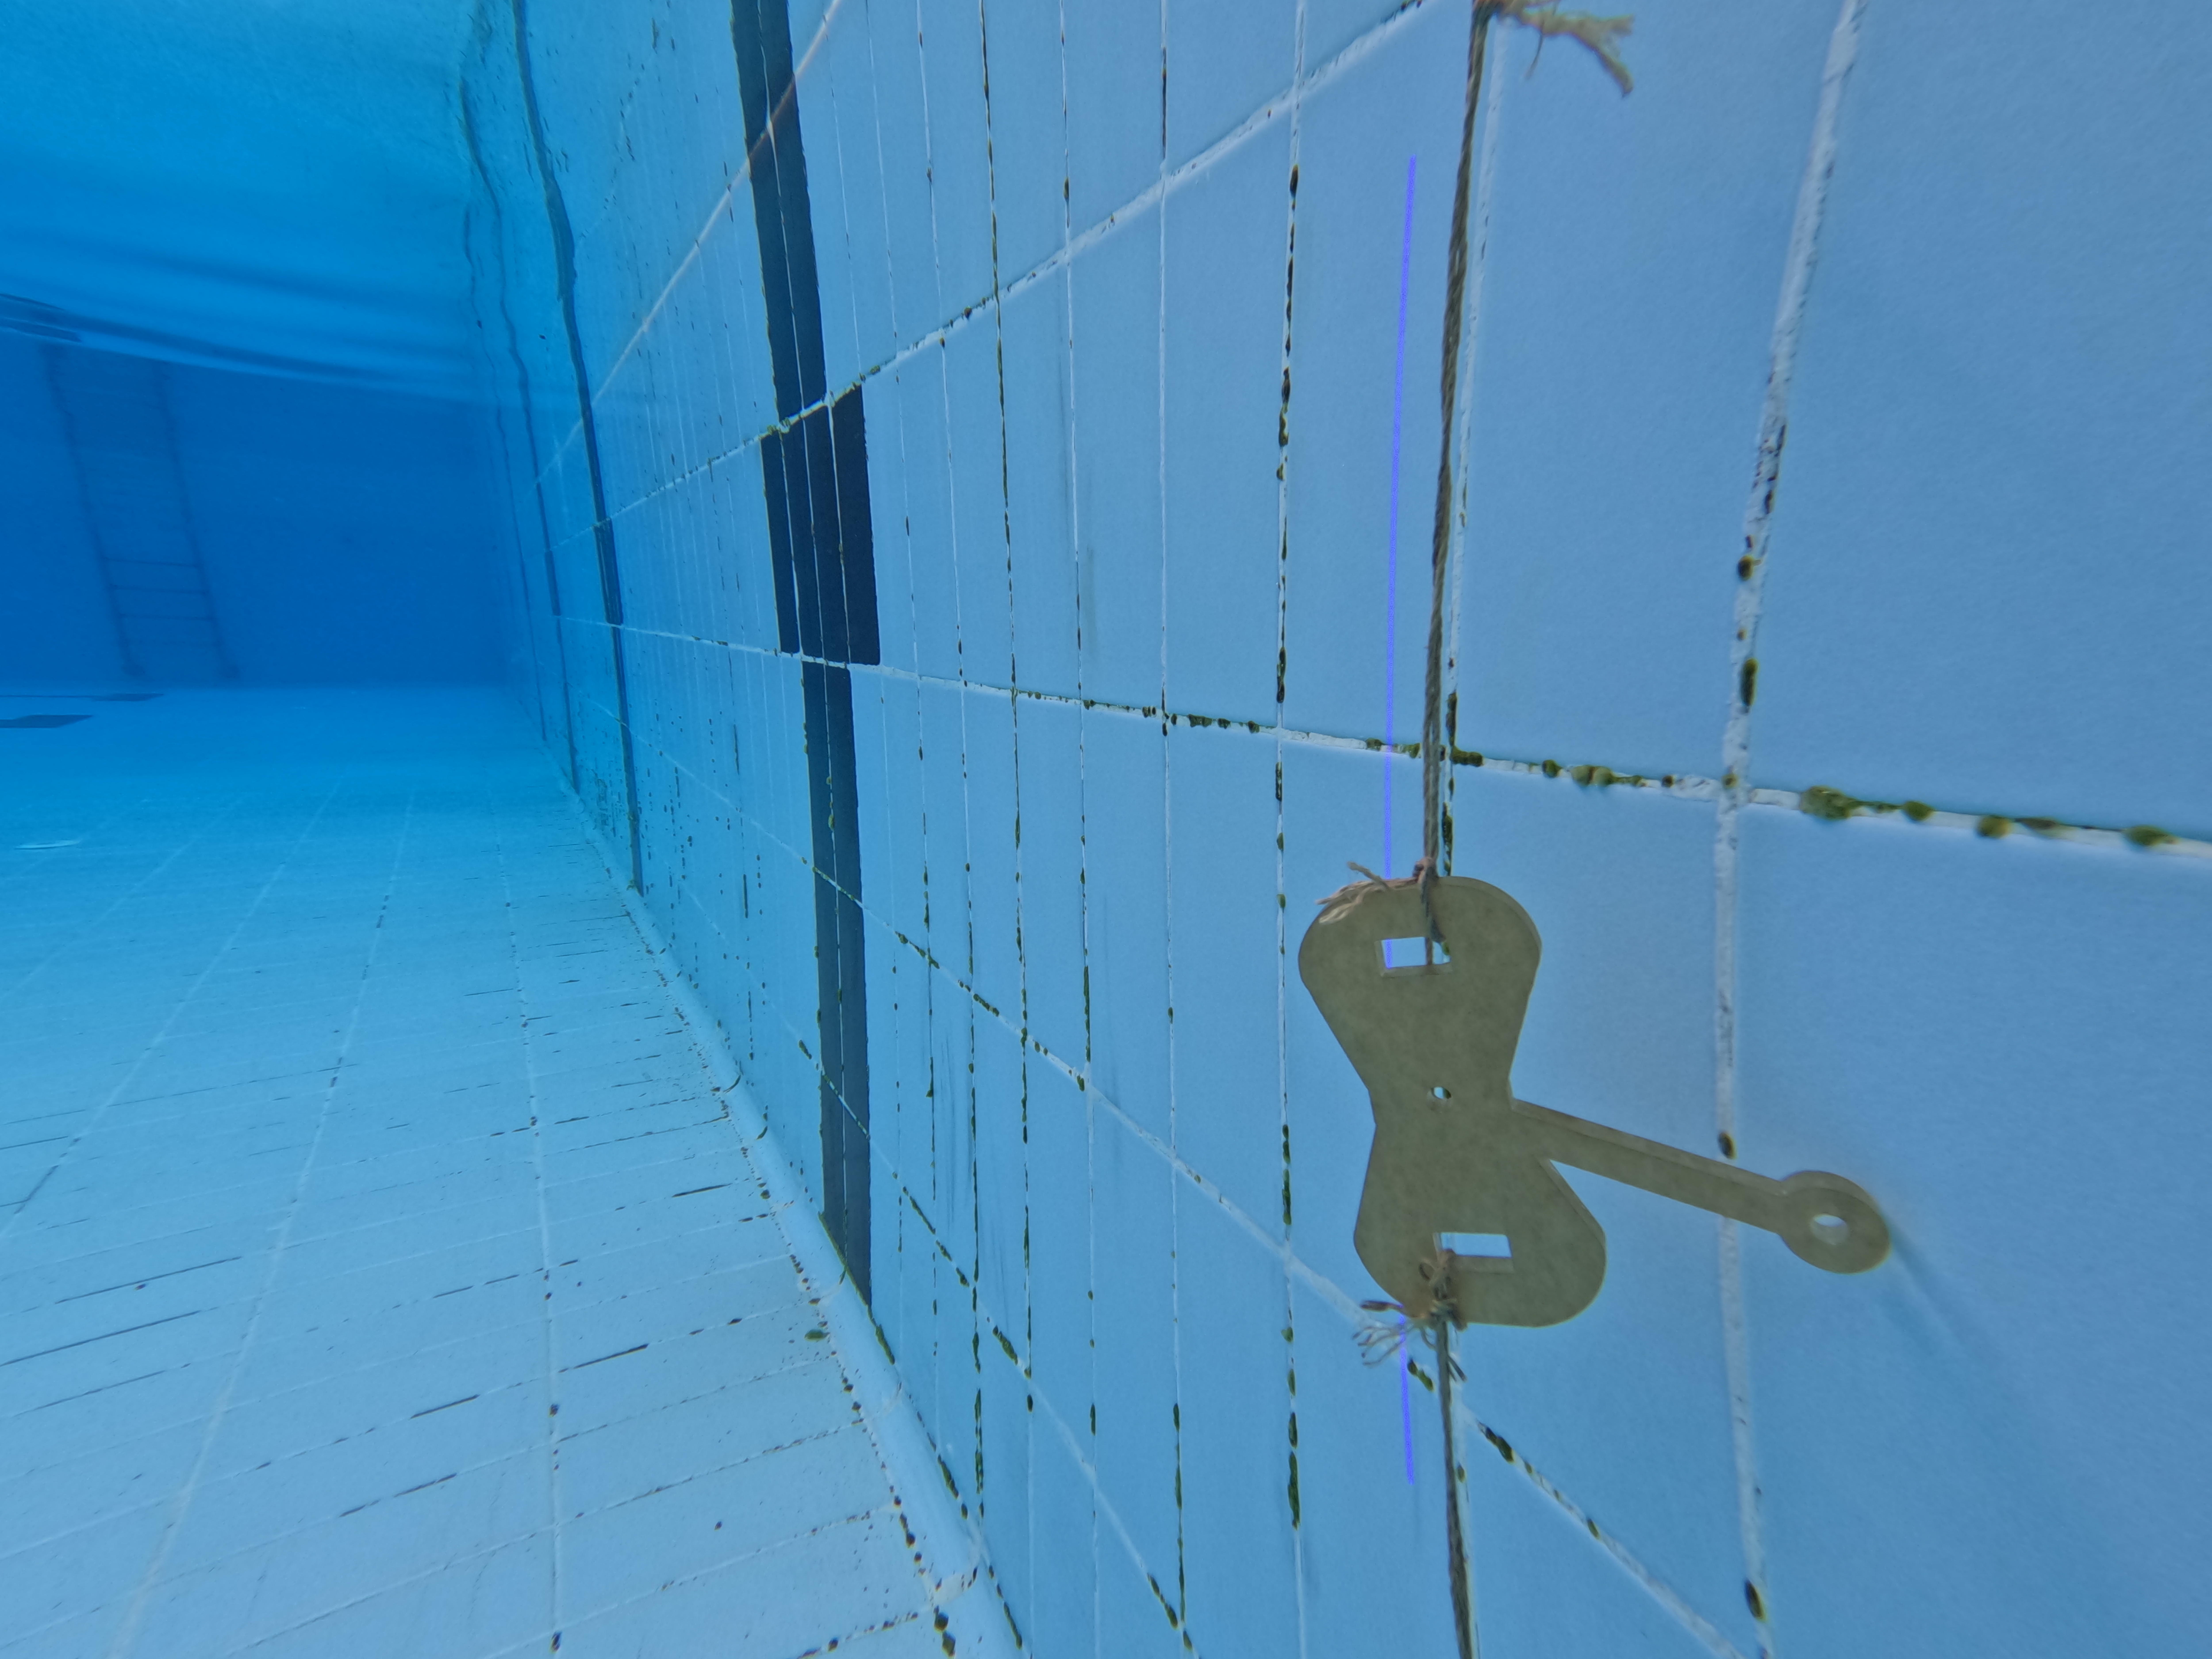

Supplement: Supplementary file 2128 [file G0050689.pdf › Level_3_2/G0050689.pdf]

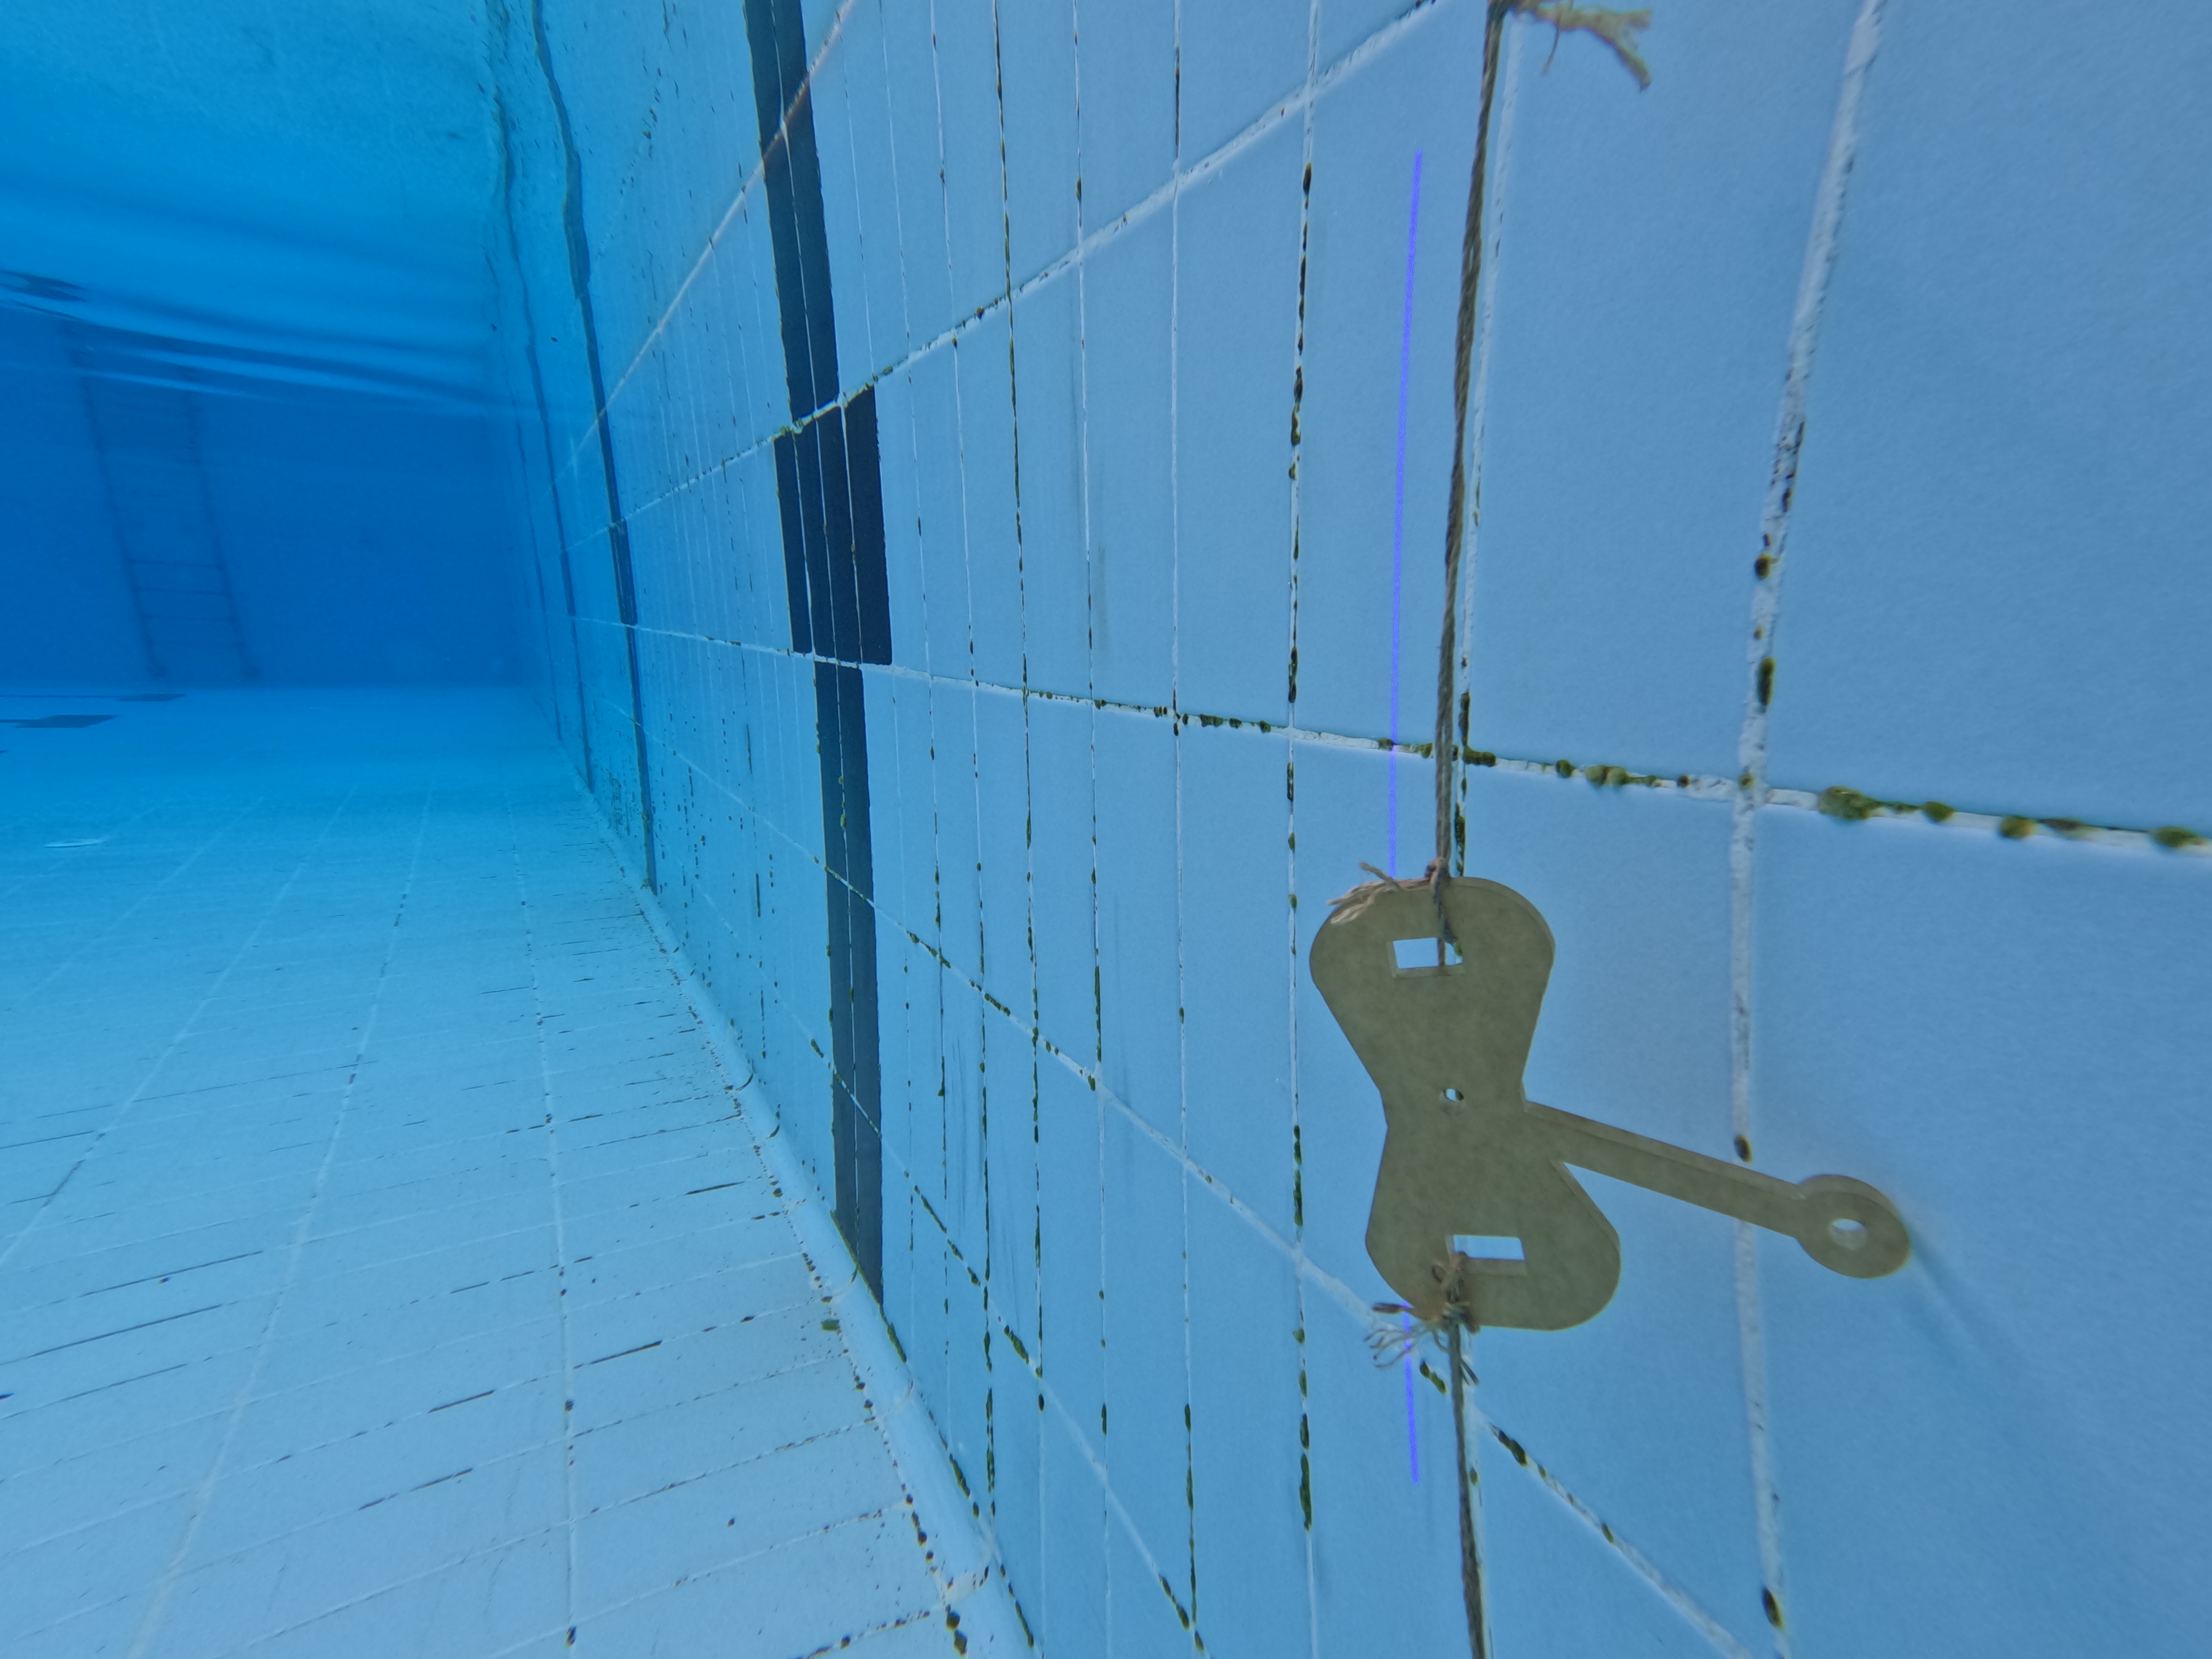

Supplement: Supplementary file 2129 [file G0050690.pdf › Level_3_2/G0050690.pdf]

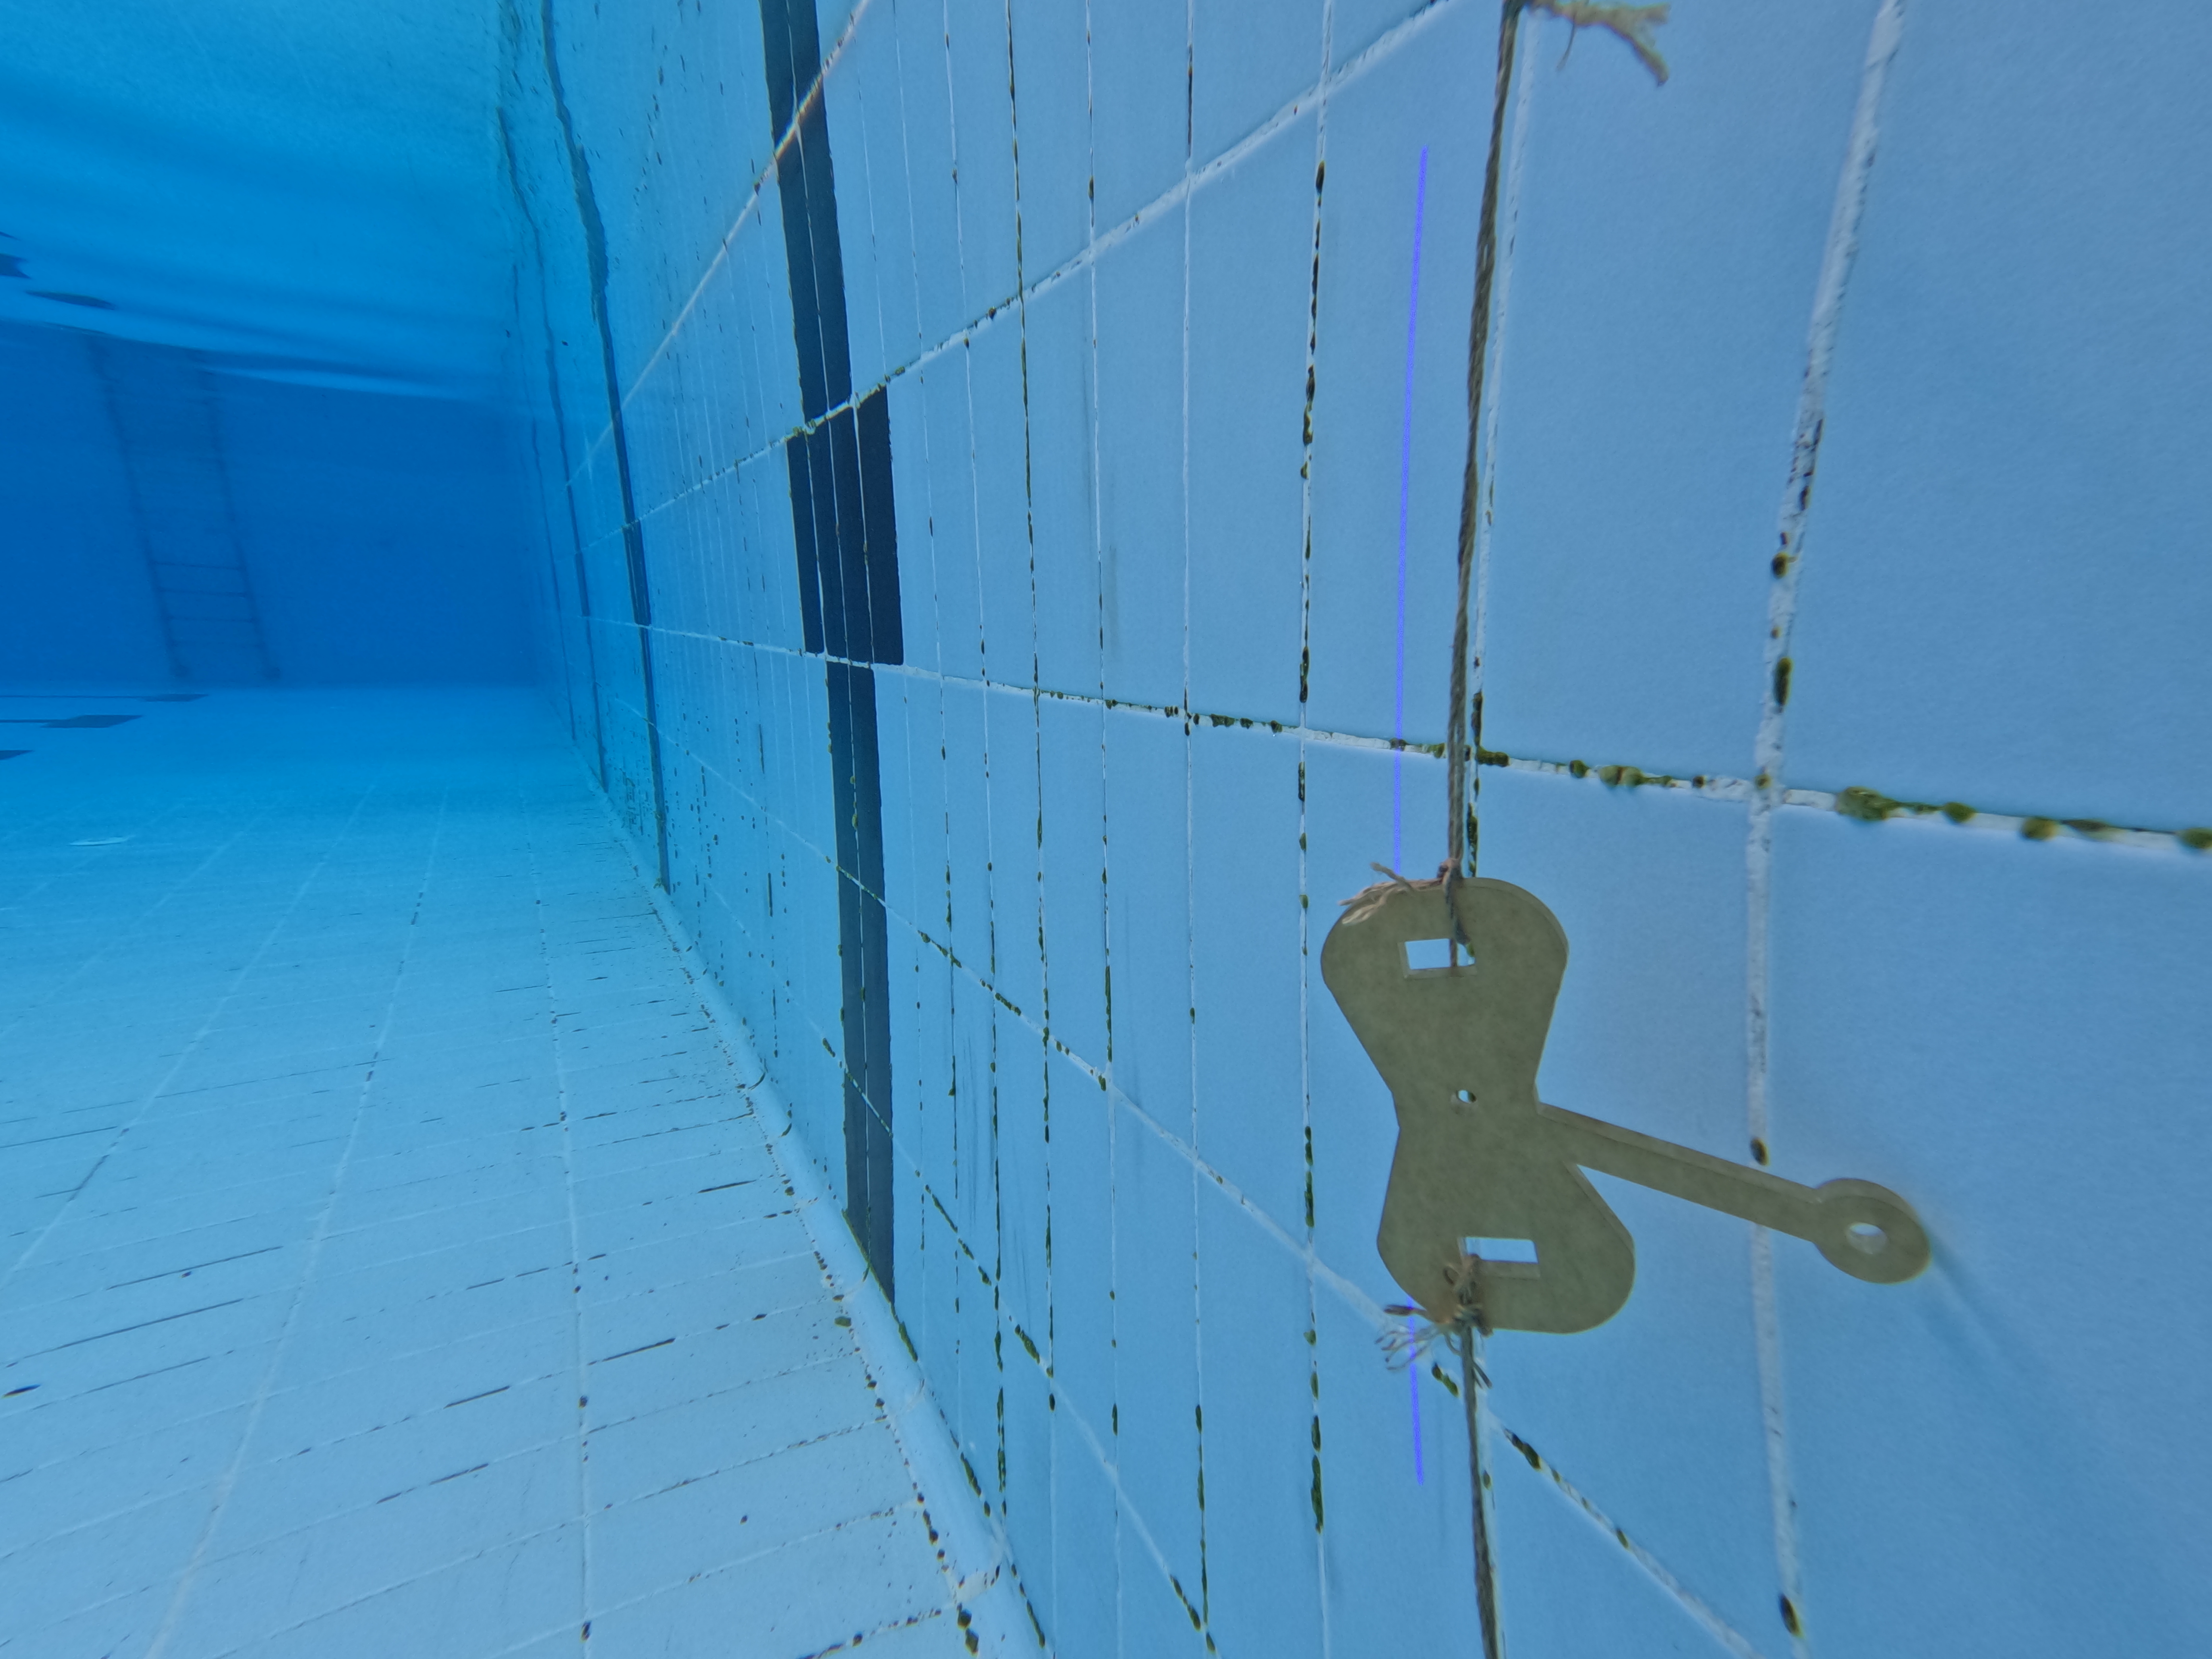

Supplement: Supplementary file 2130 [file G0050691.pdf › Level_3_2/G0050691.pdf]

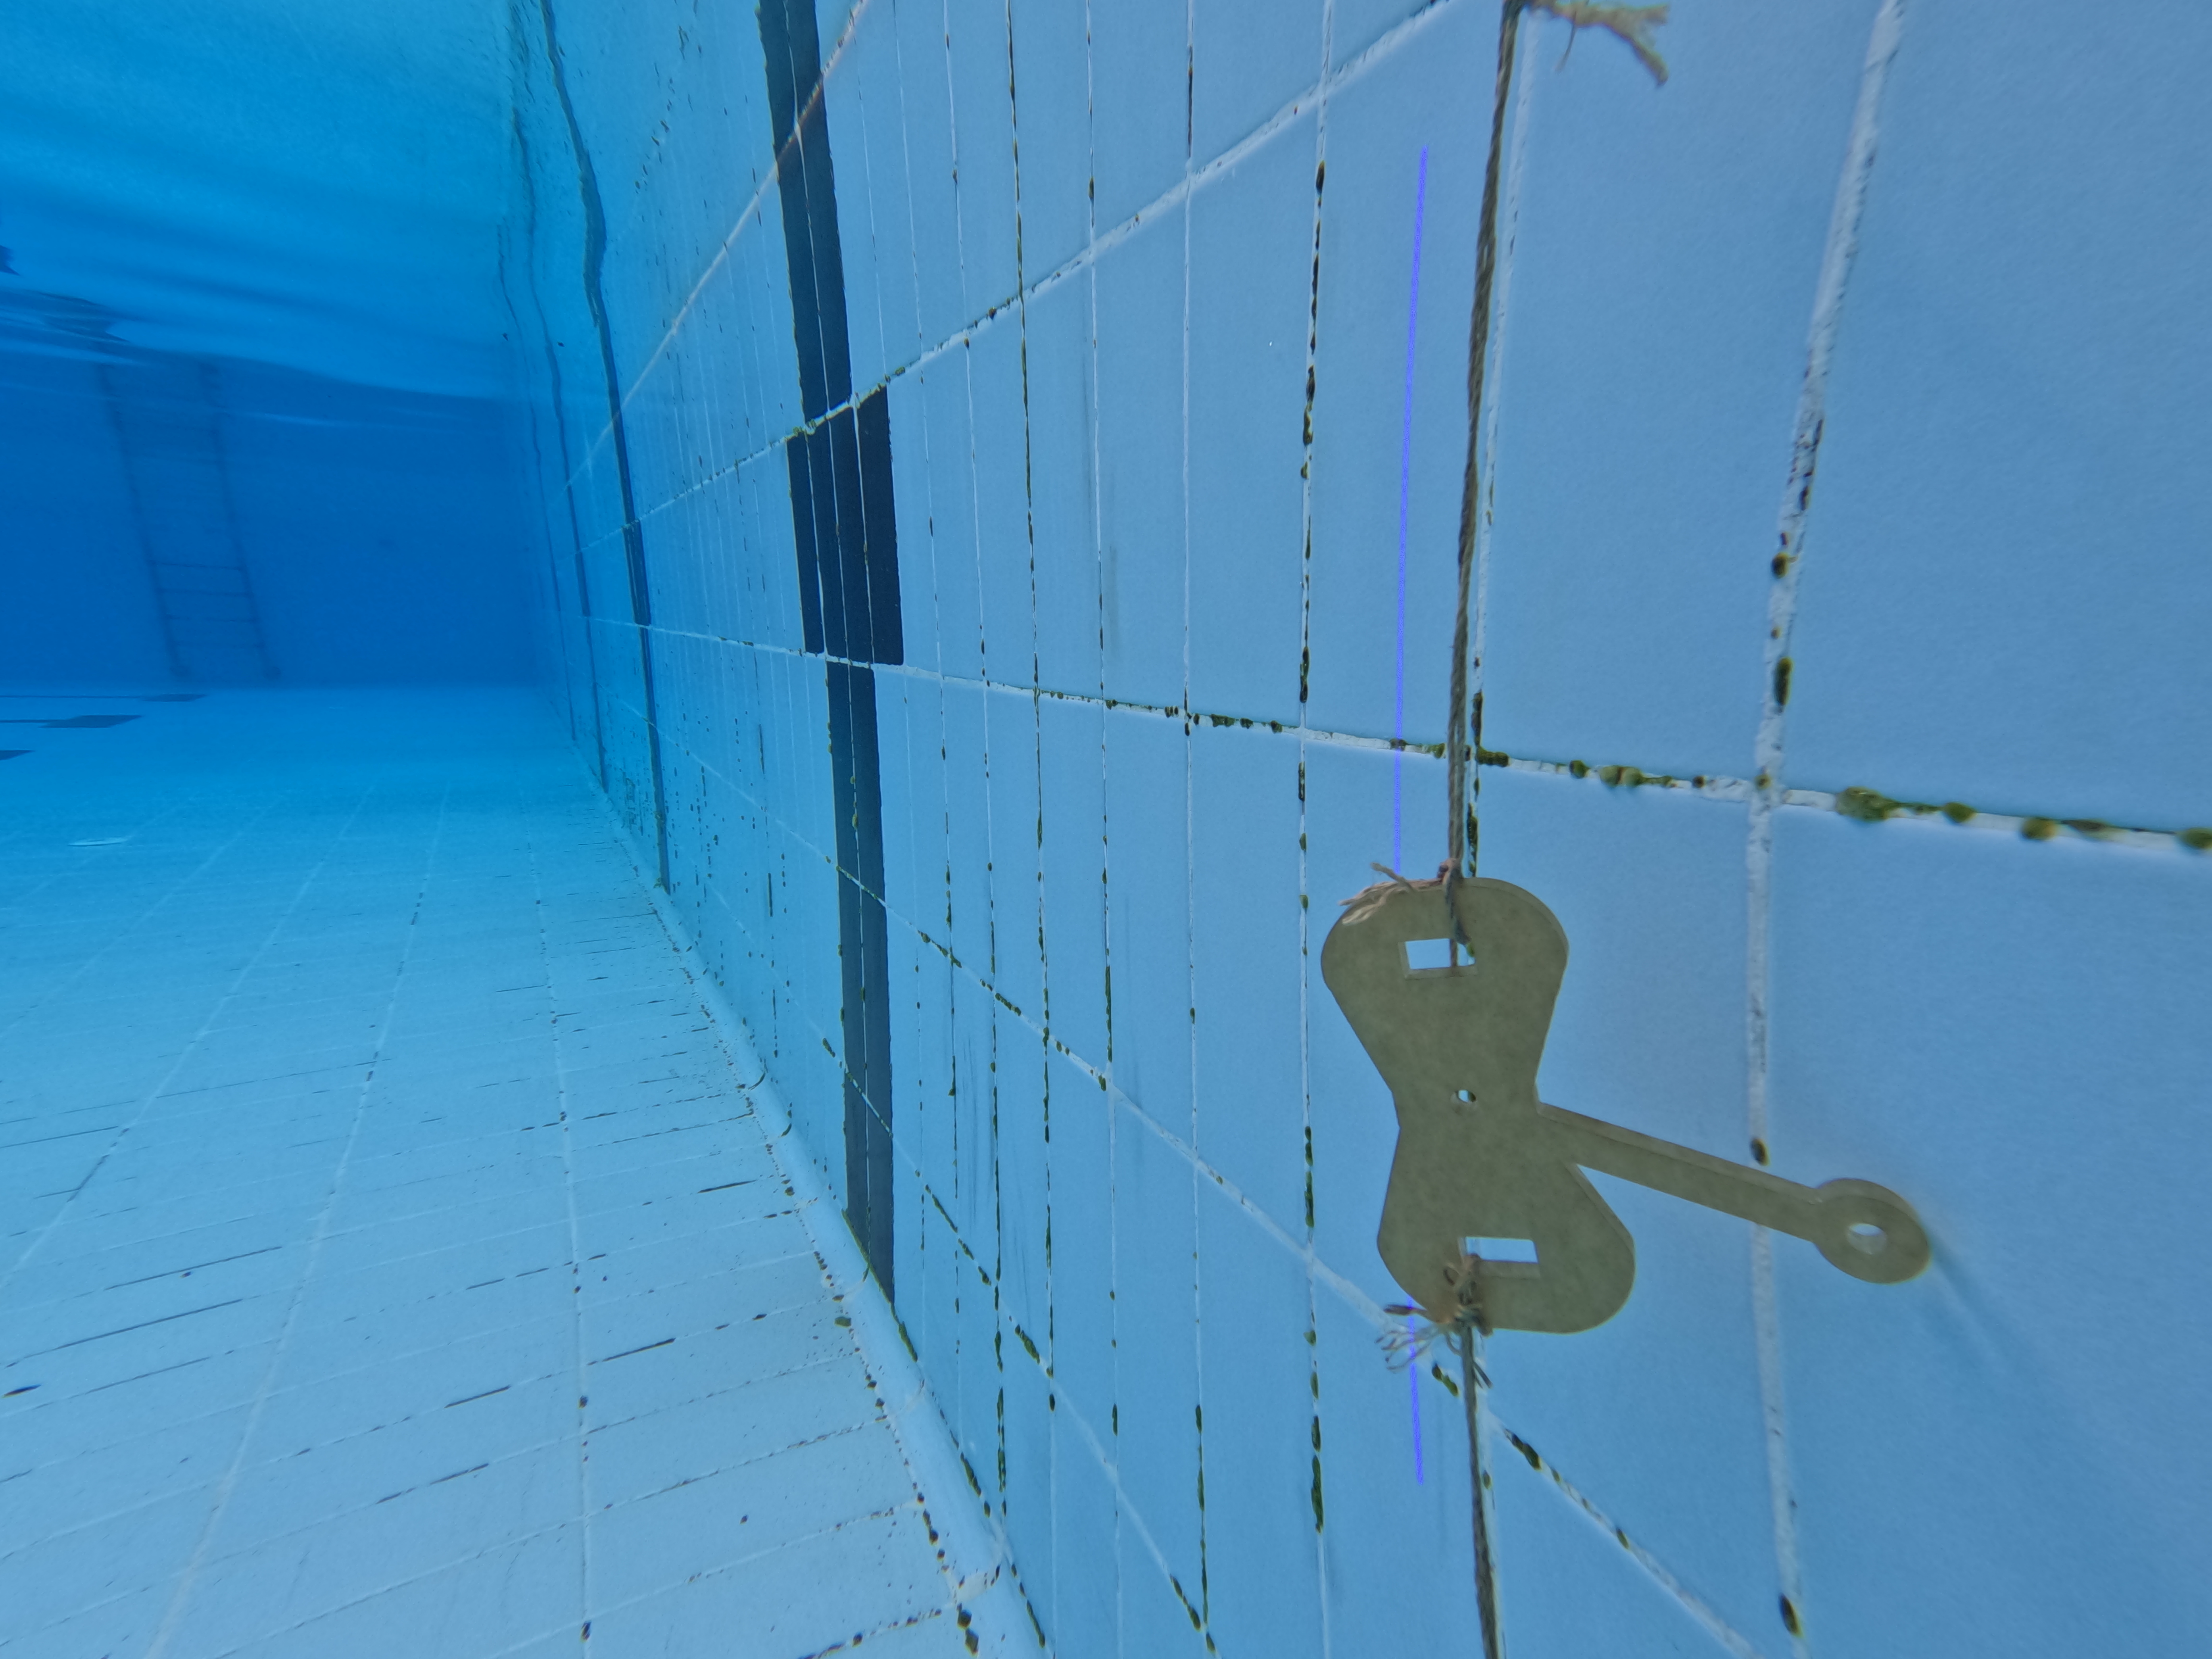

Supplement: Supplementary file 2131 [file G0050692.pdf › Level_3_2/G0050692.pdf]

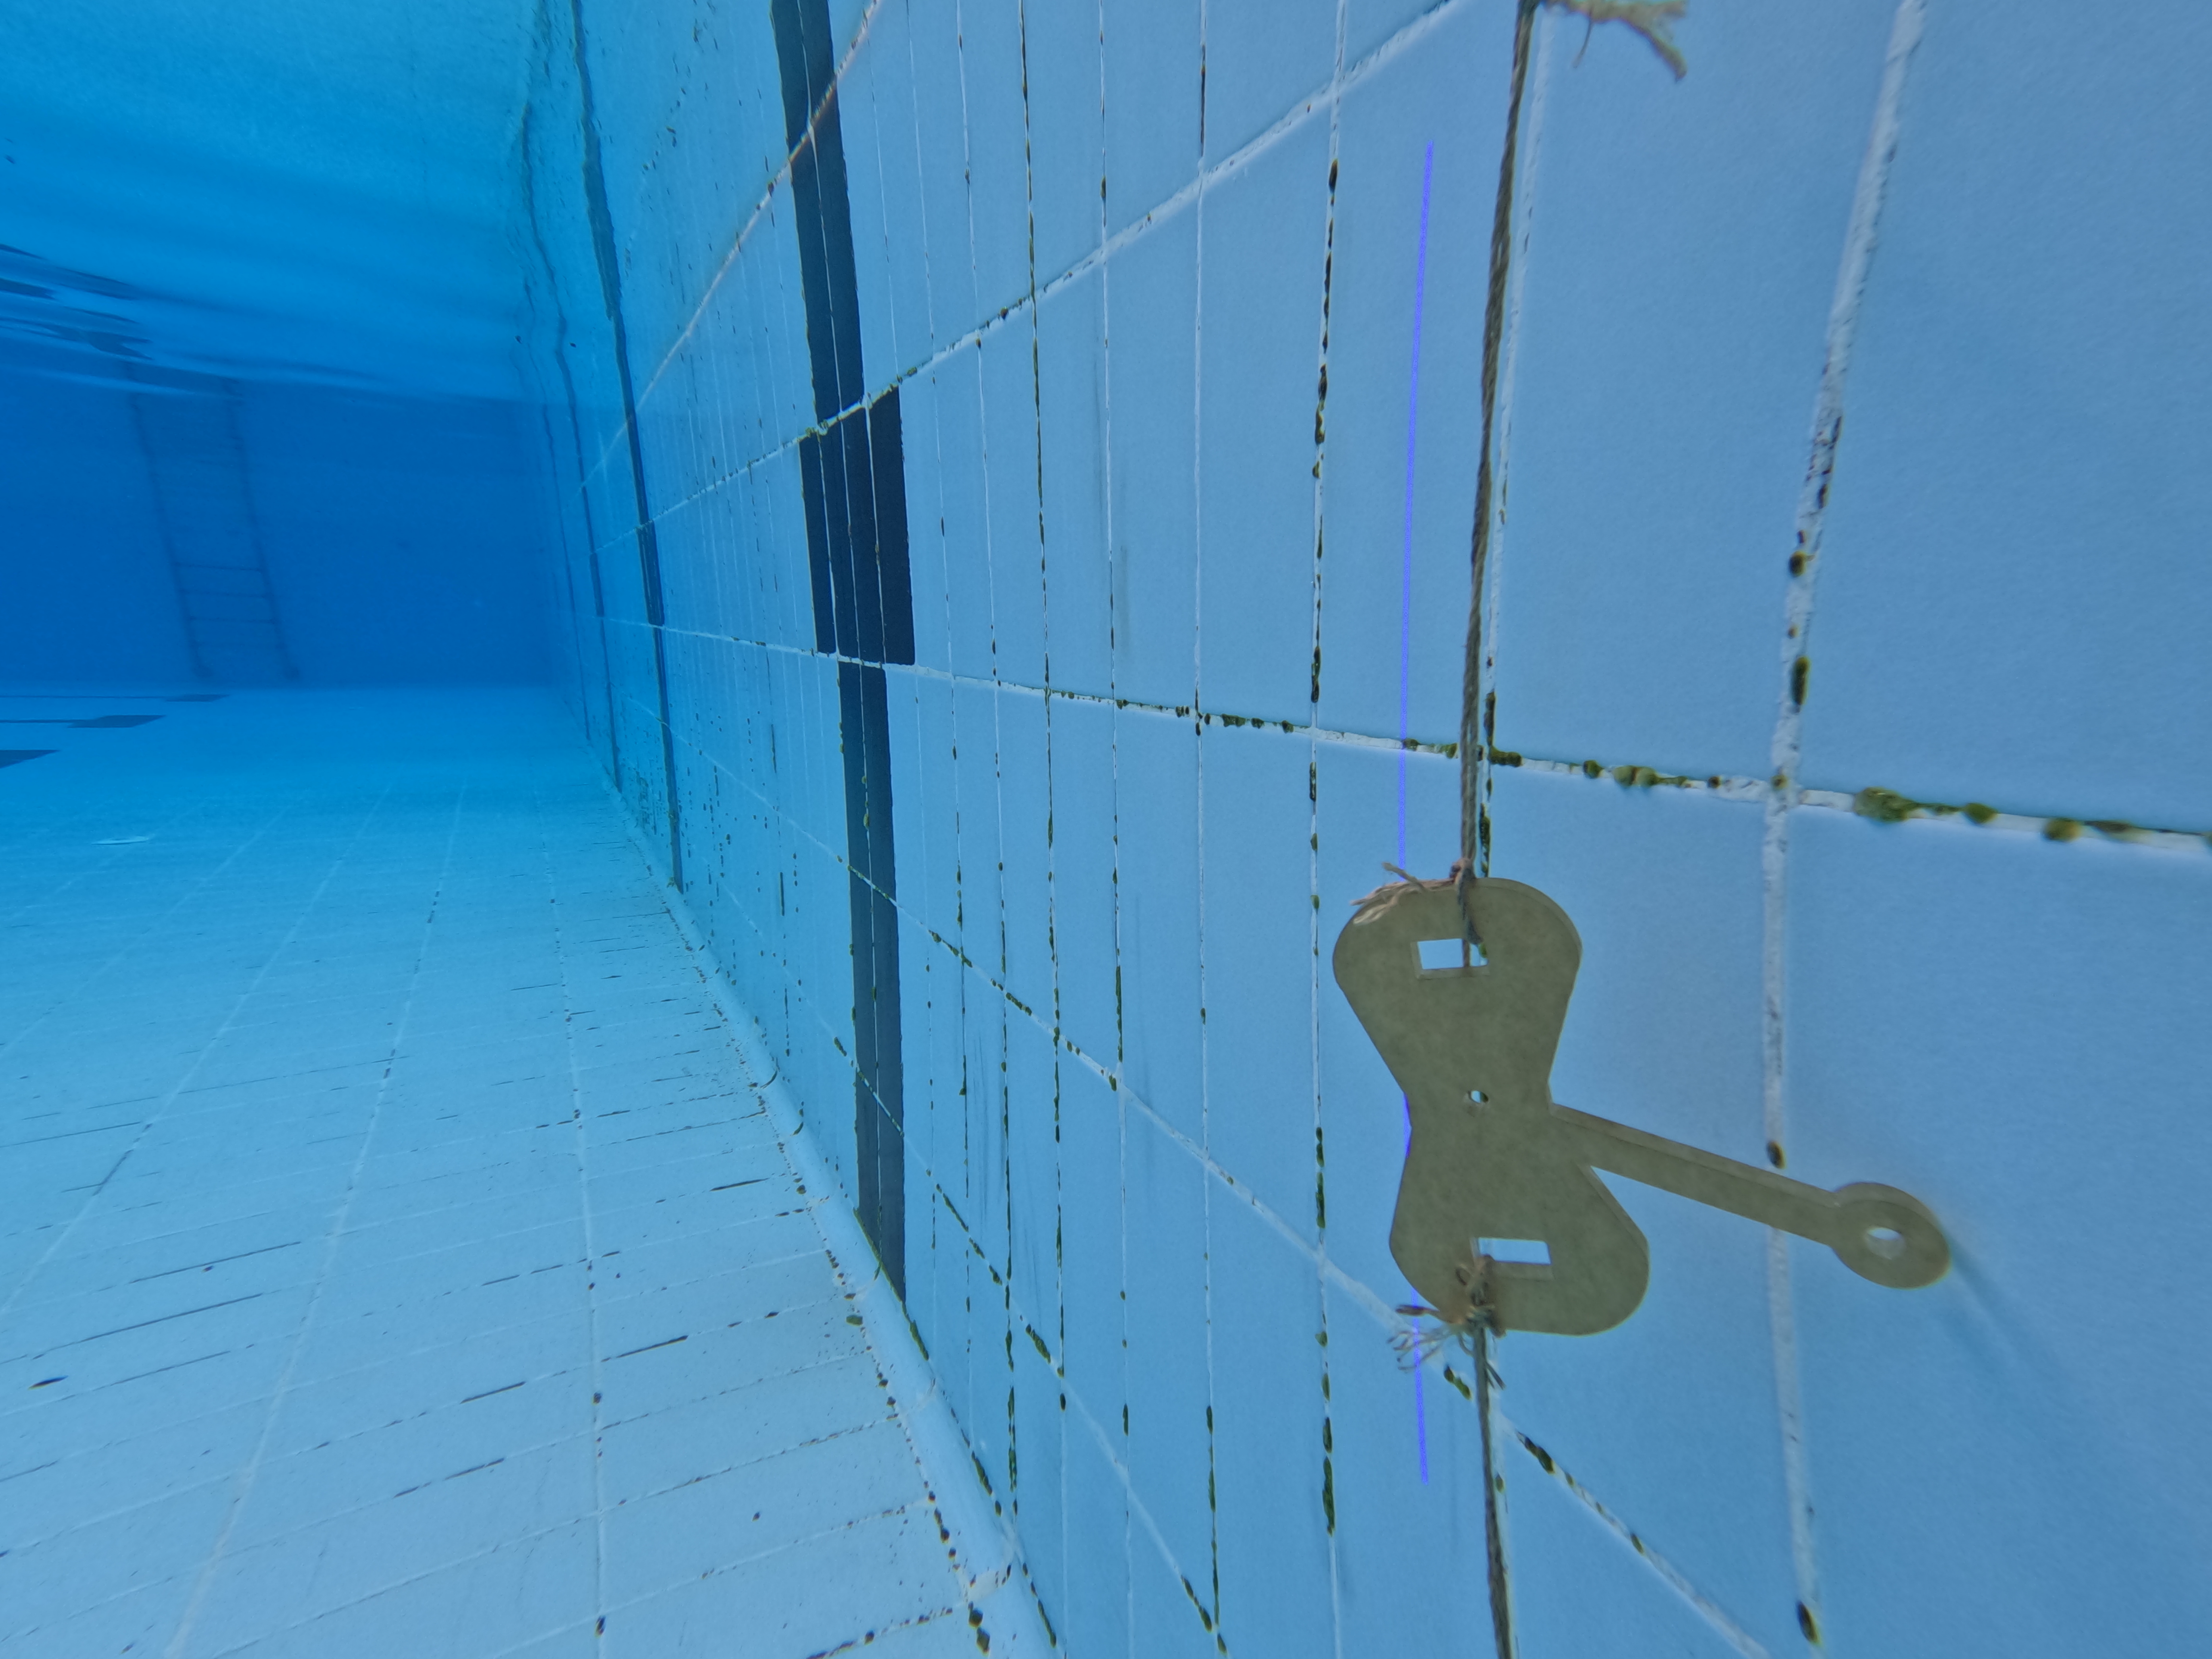

Supplement: Supplementary file 2132 [file G0050693.pdf › Level_3_2/G0050693.pdf]

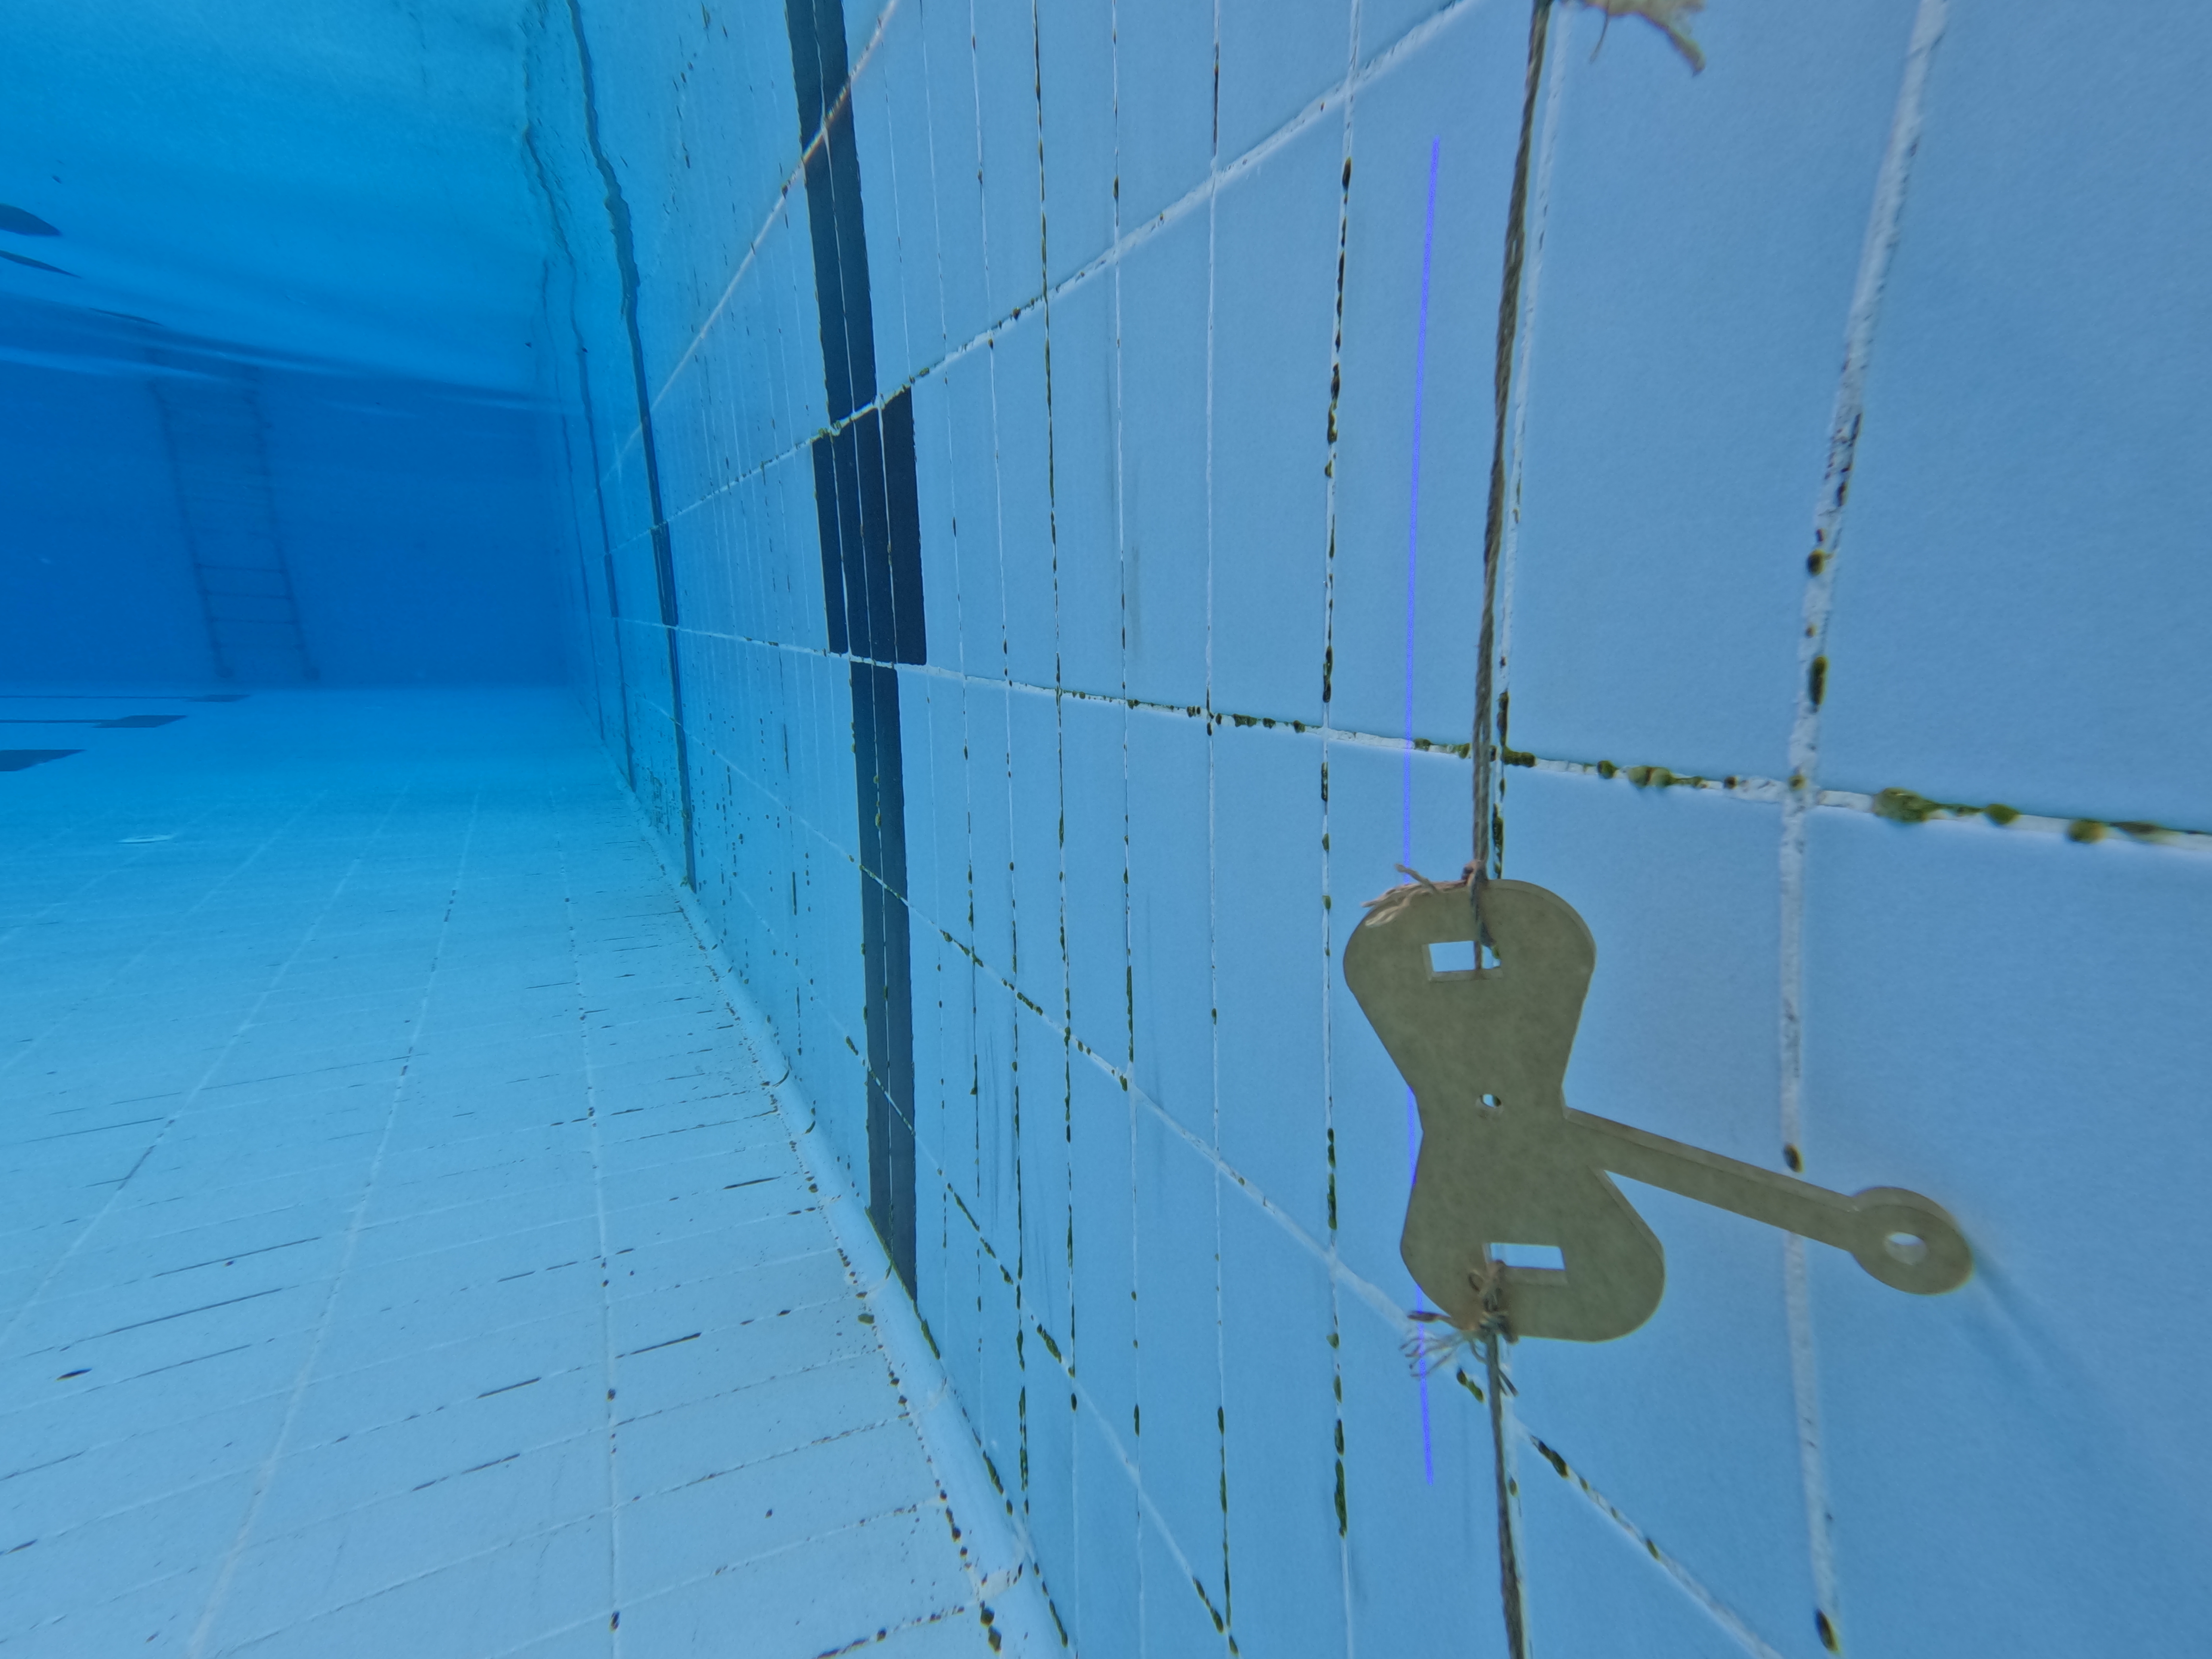

Supplement: Supplementary file 2133 [file G0050694.pdf › Level_3_2/G0050694.pdf]

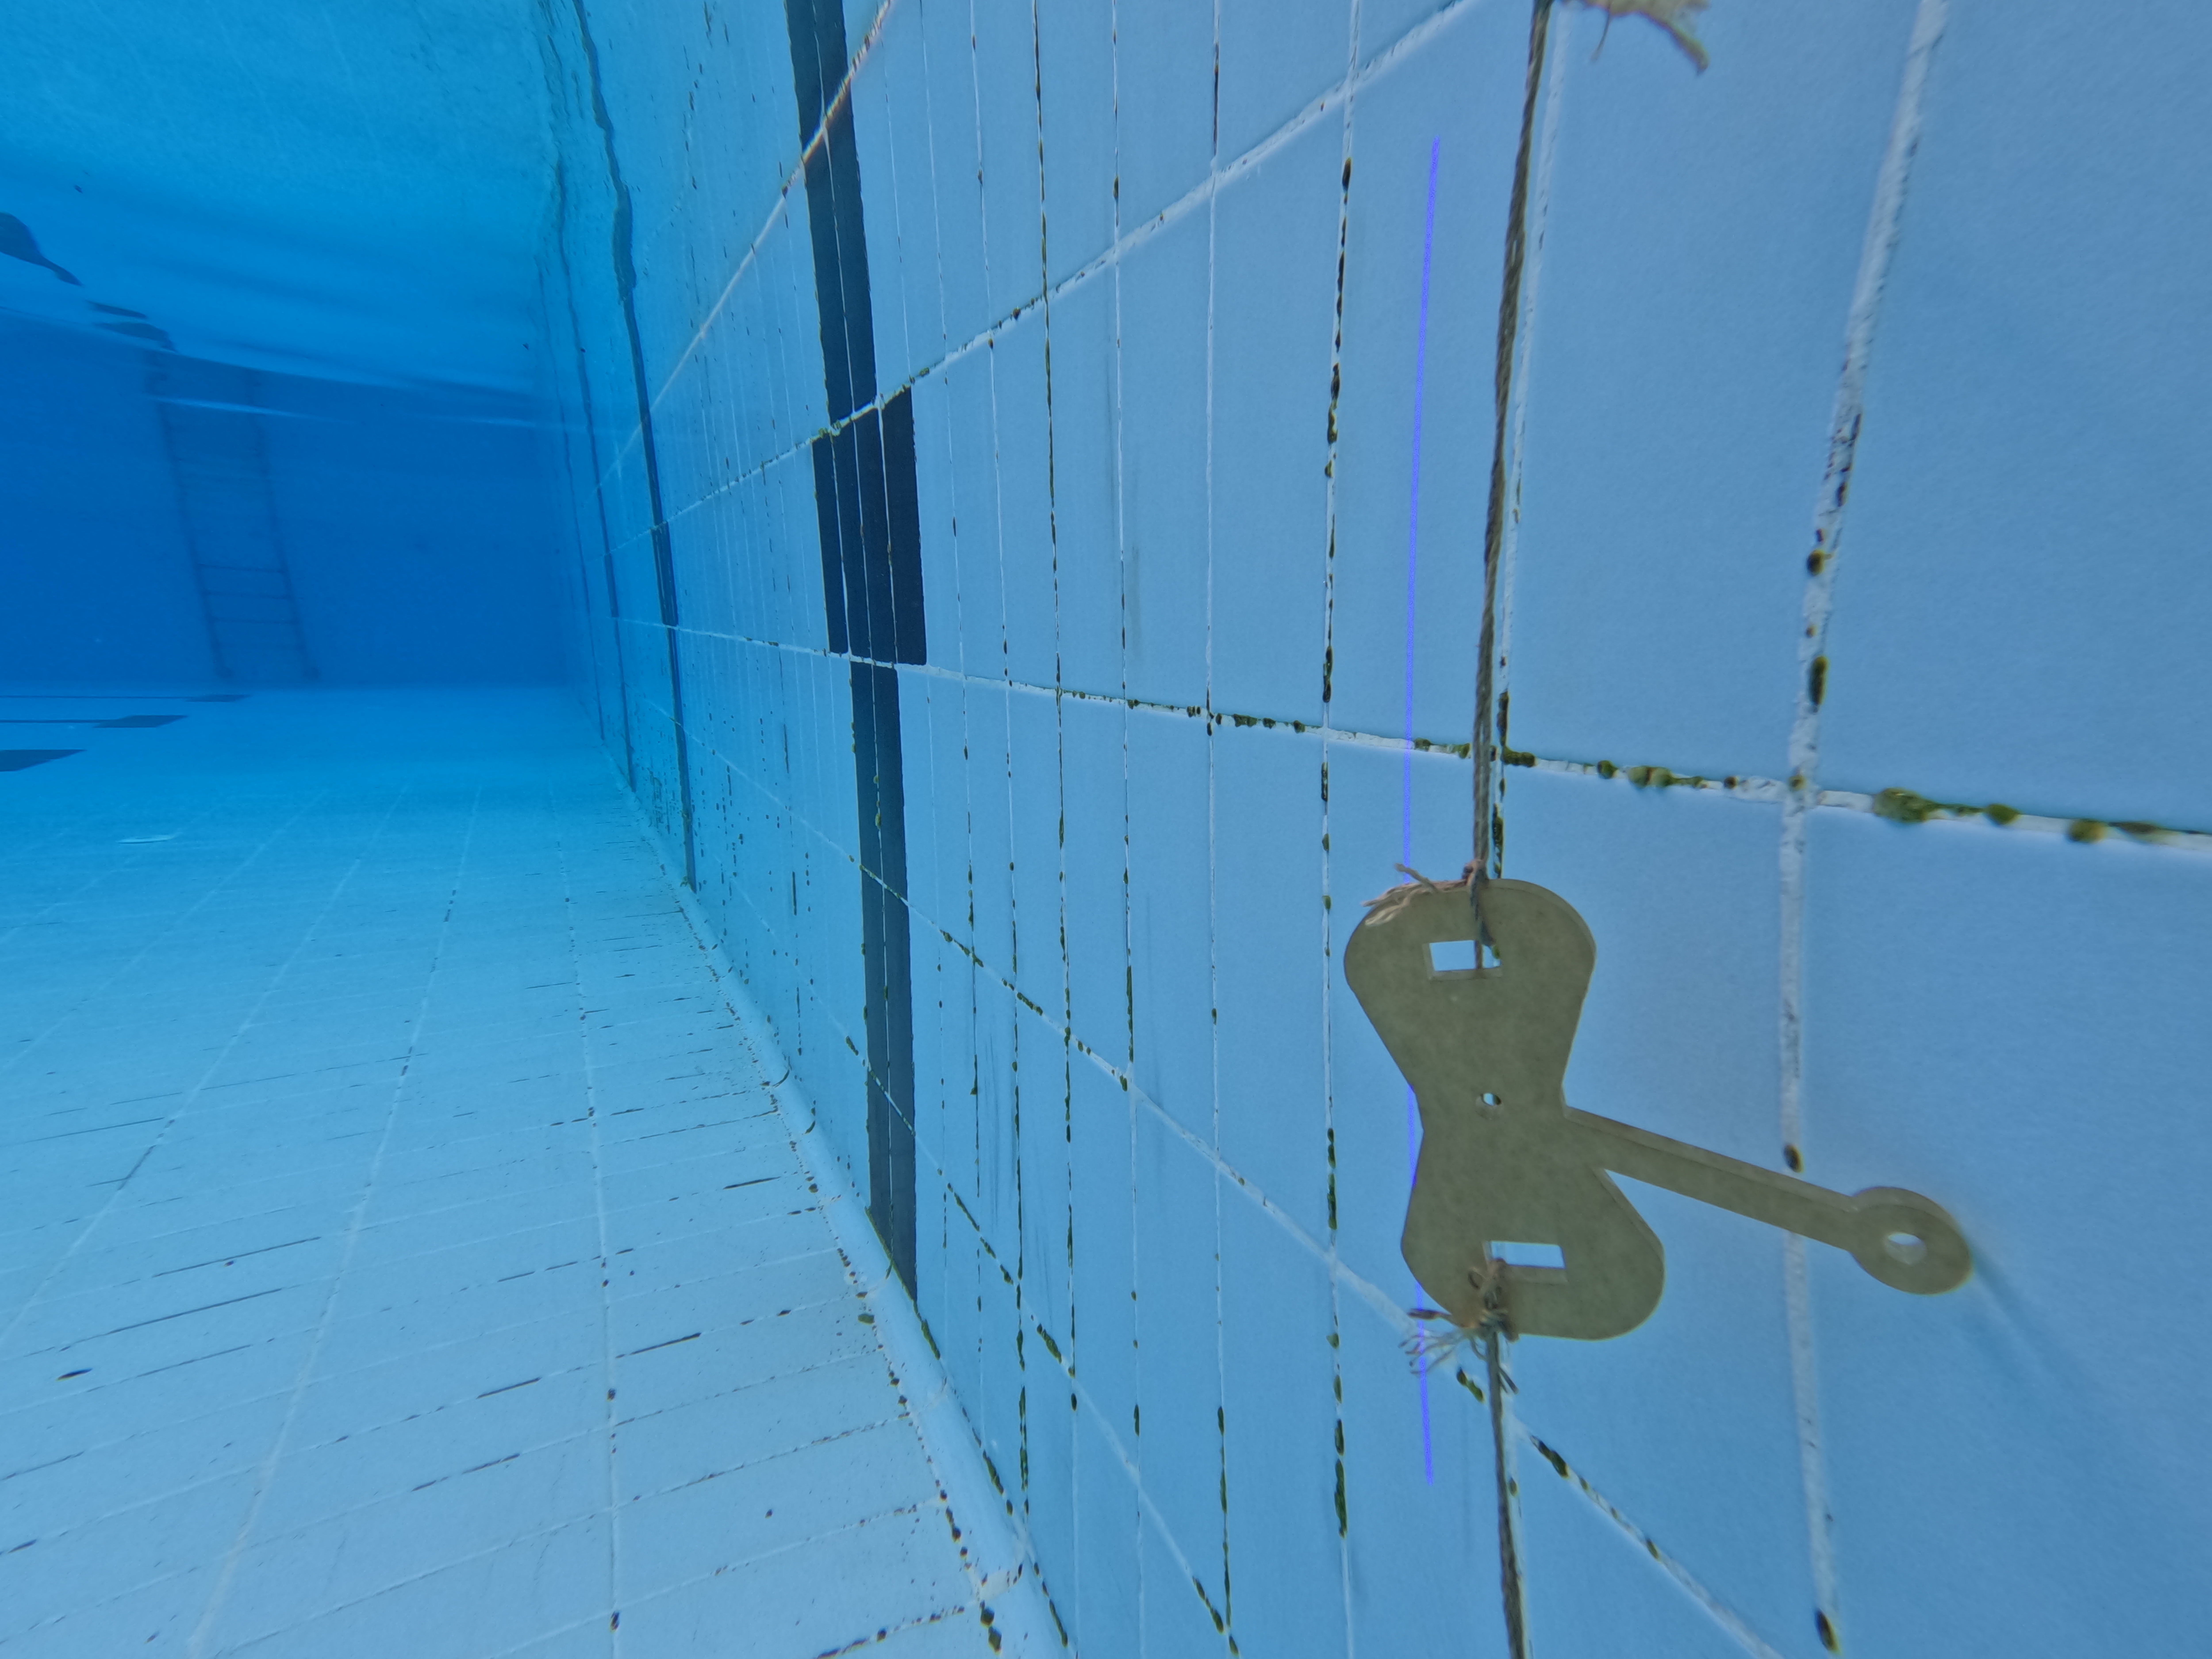

Supplement: Supplementary file 2134 [file G0050695.pdf › Level_3_2/G0050695.pdf]

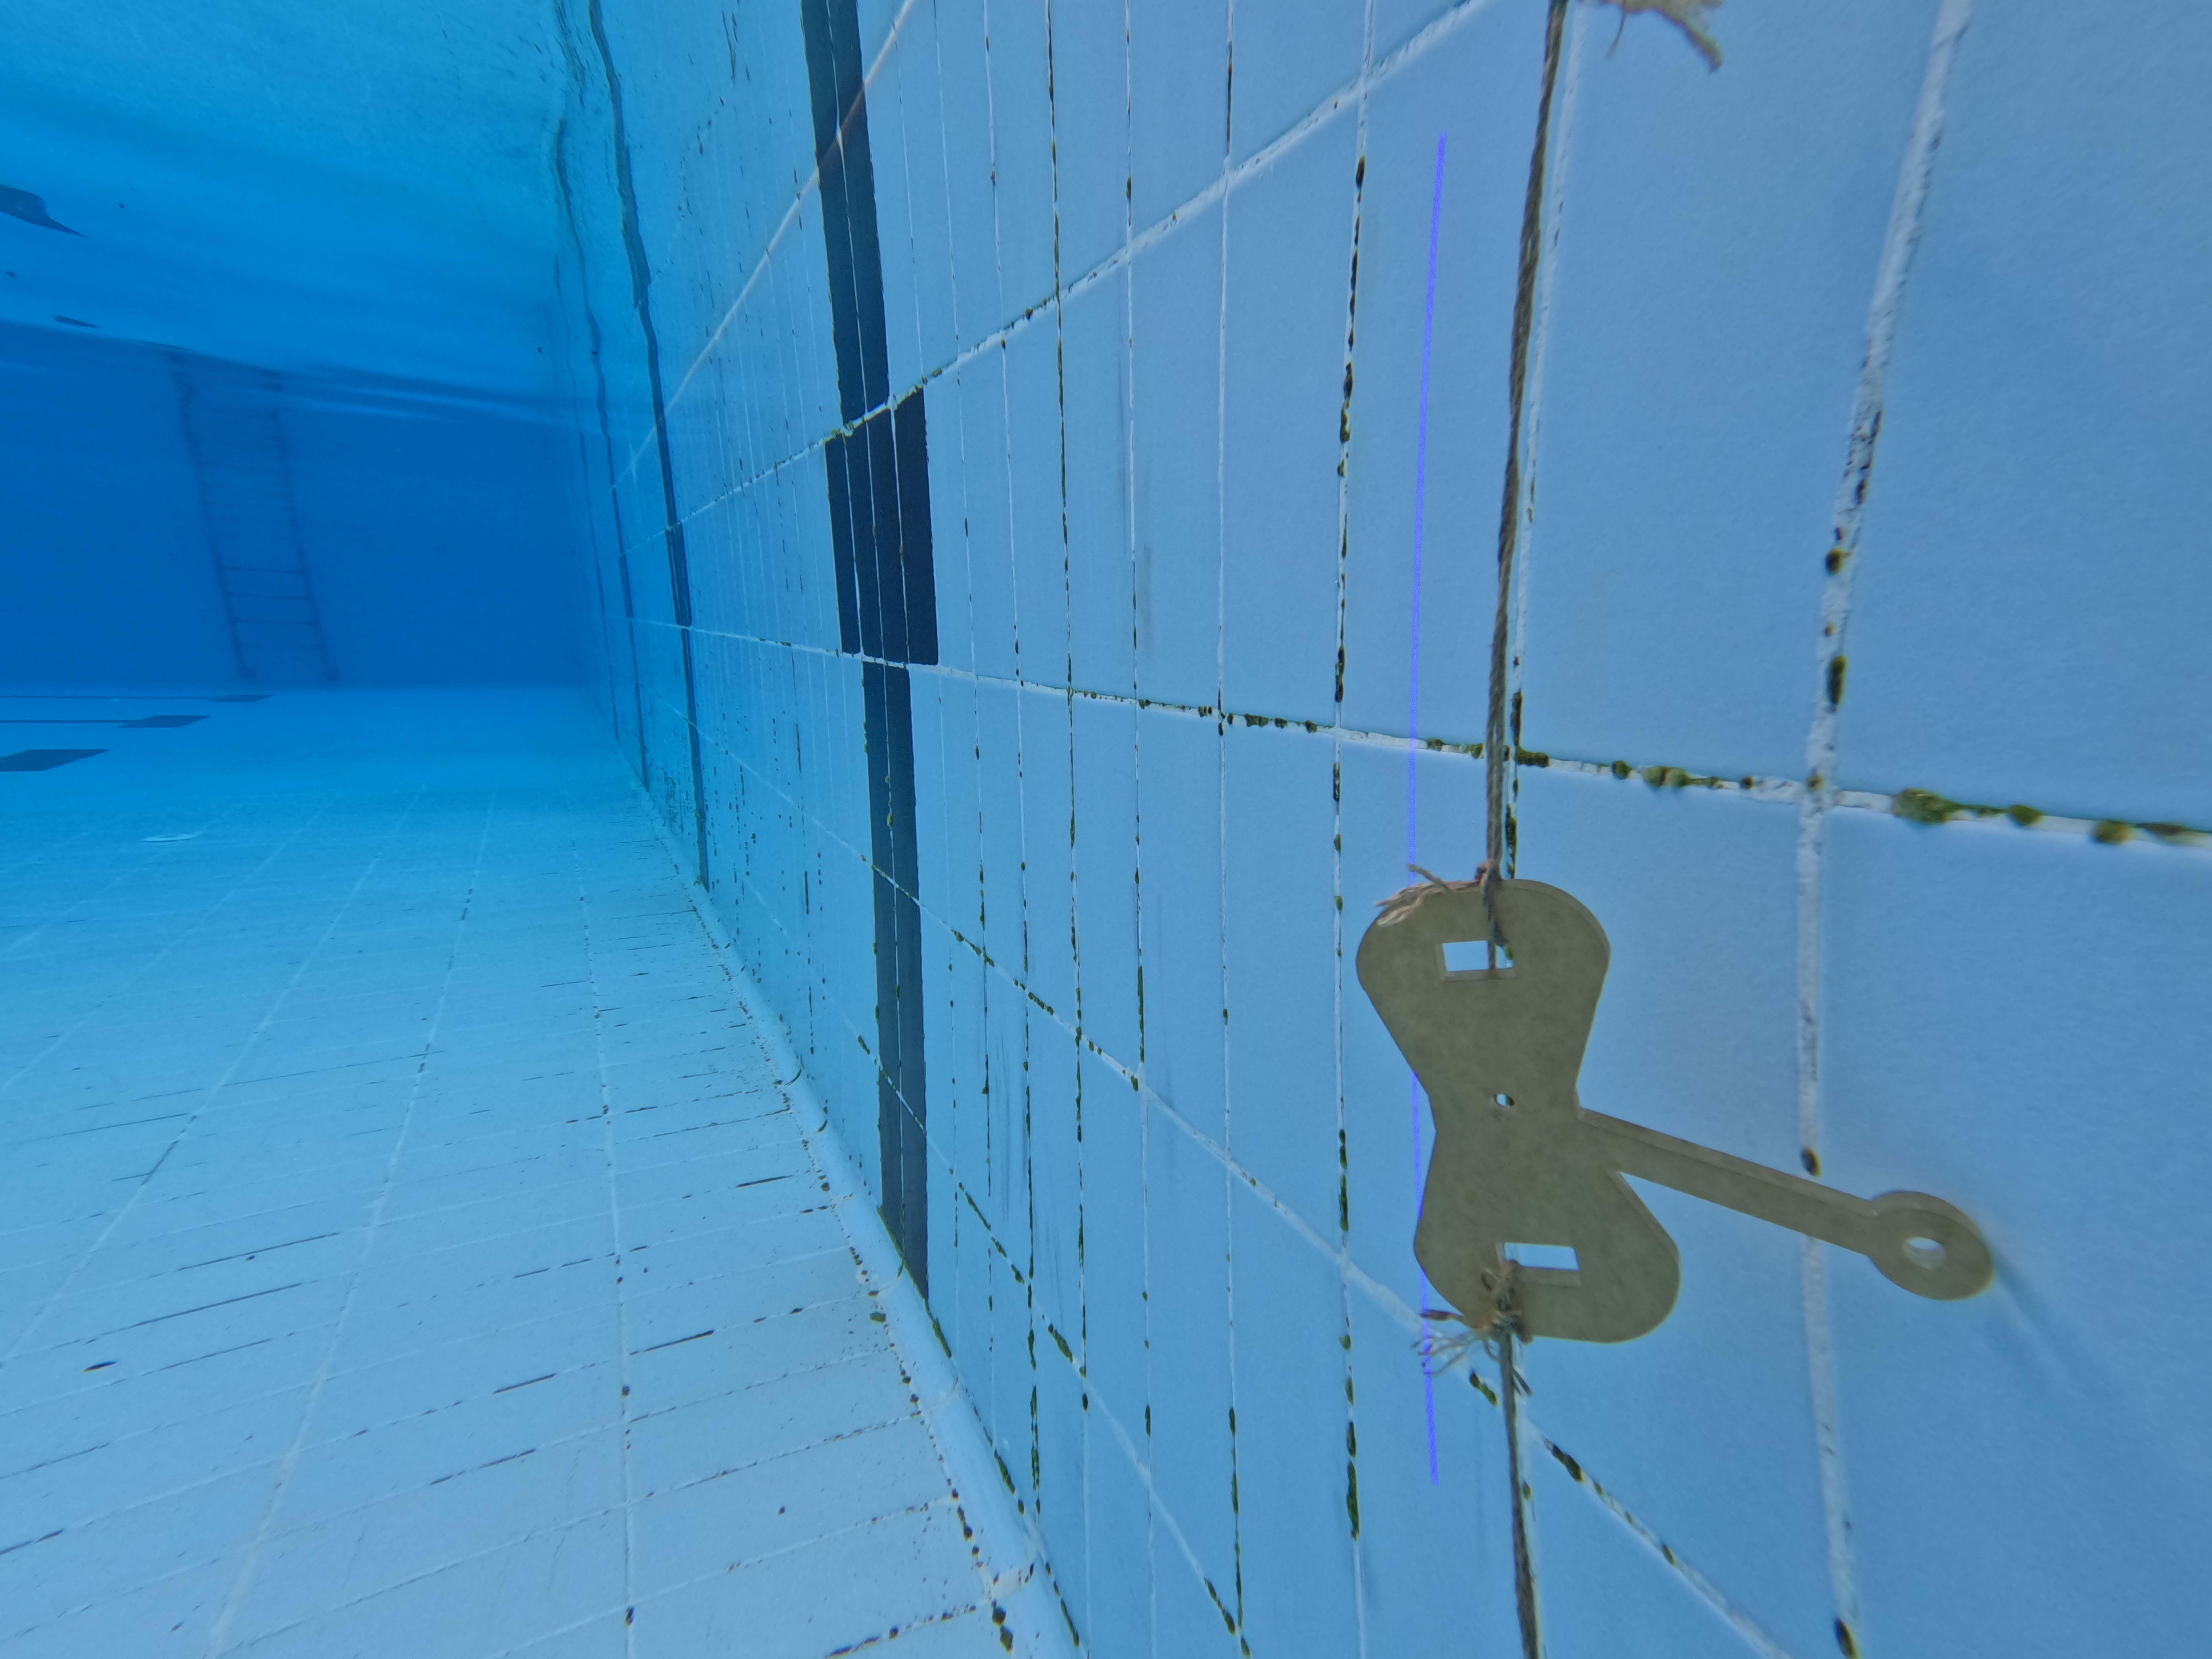

Supplement: Supplementary file 2135 [file G0050696.pdf › Level_3_2/G0050696.pdf]

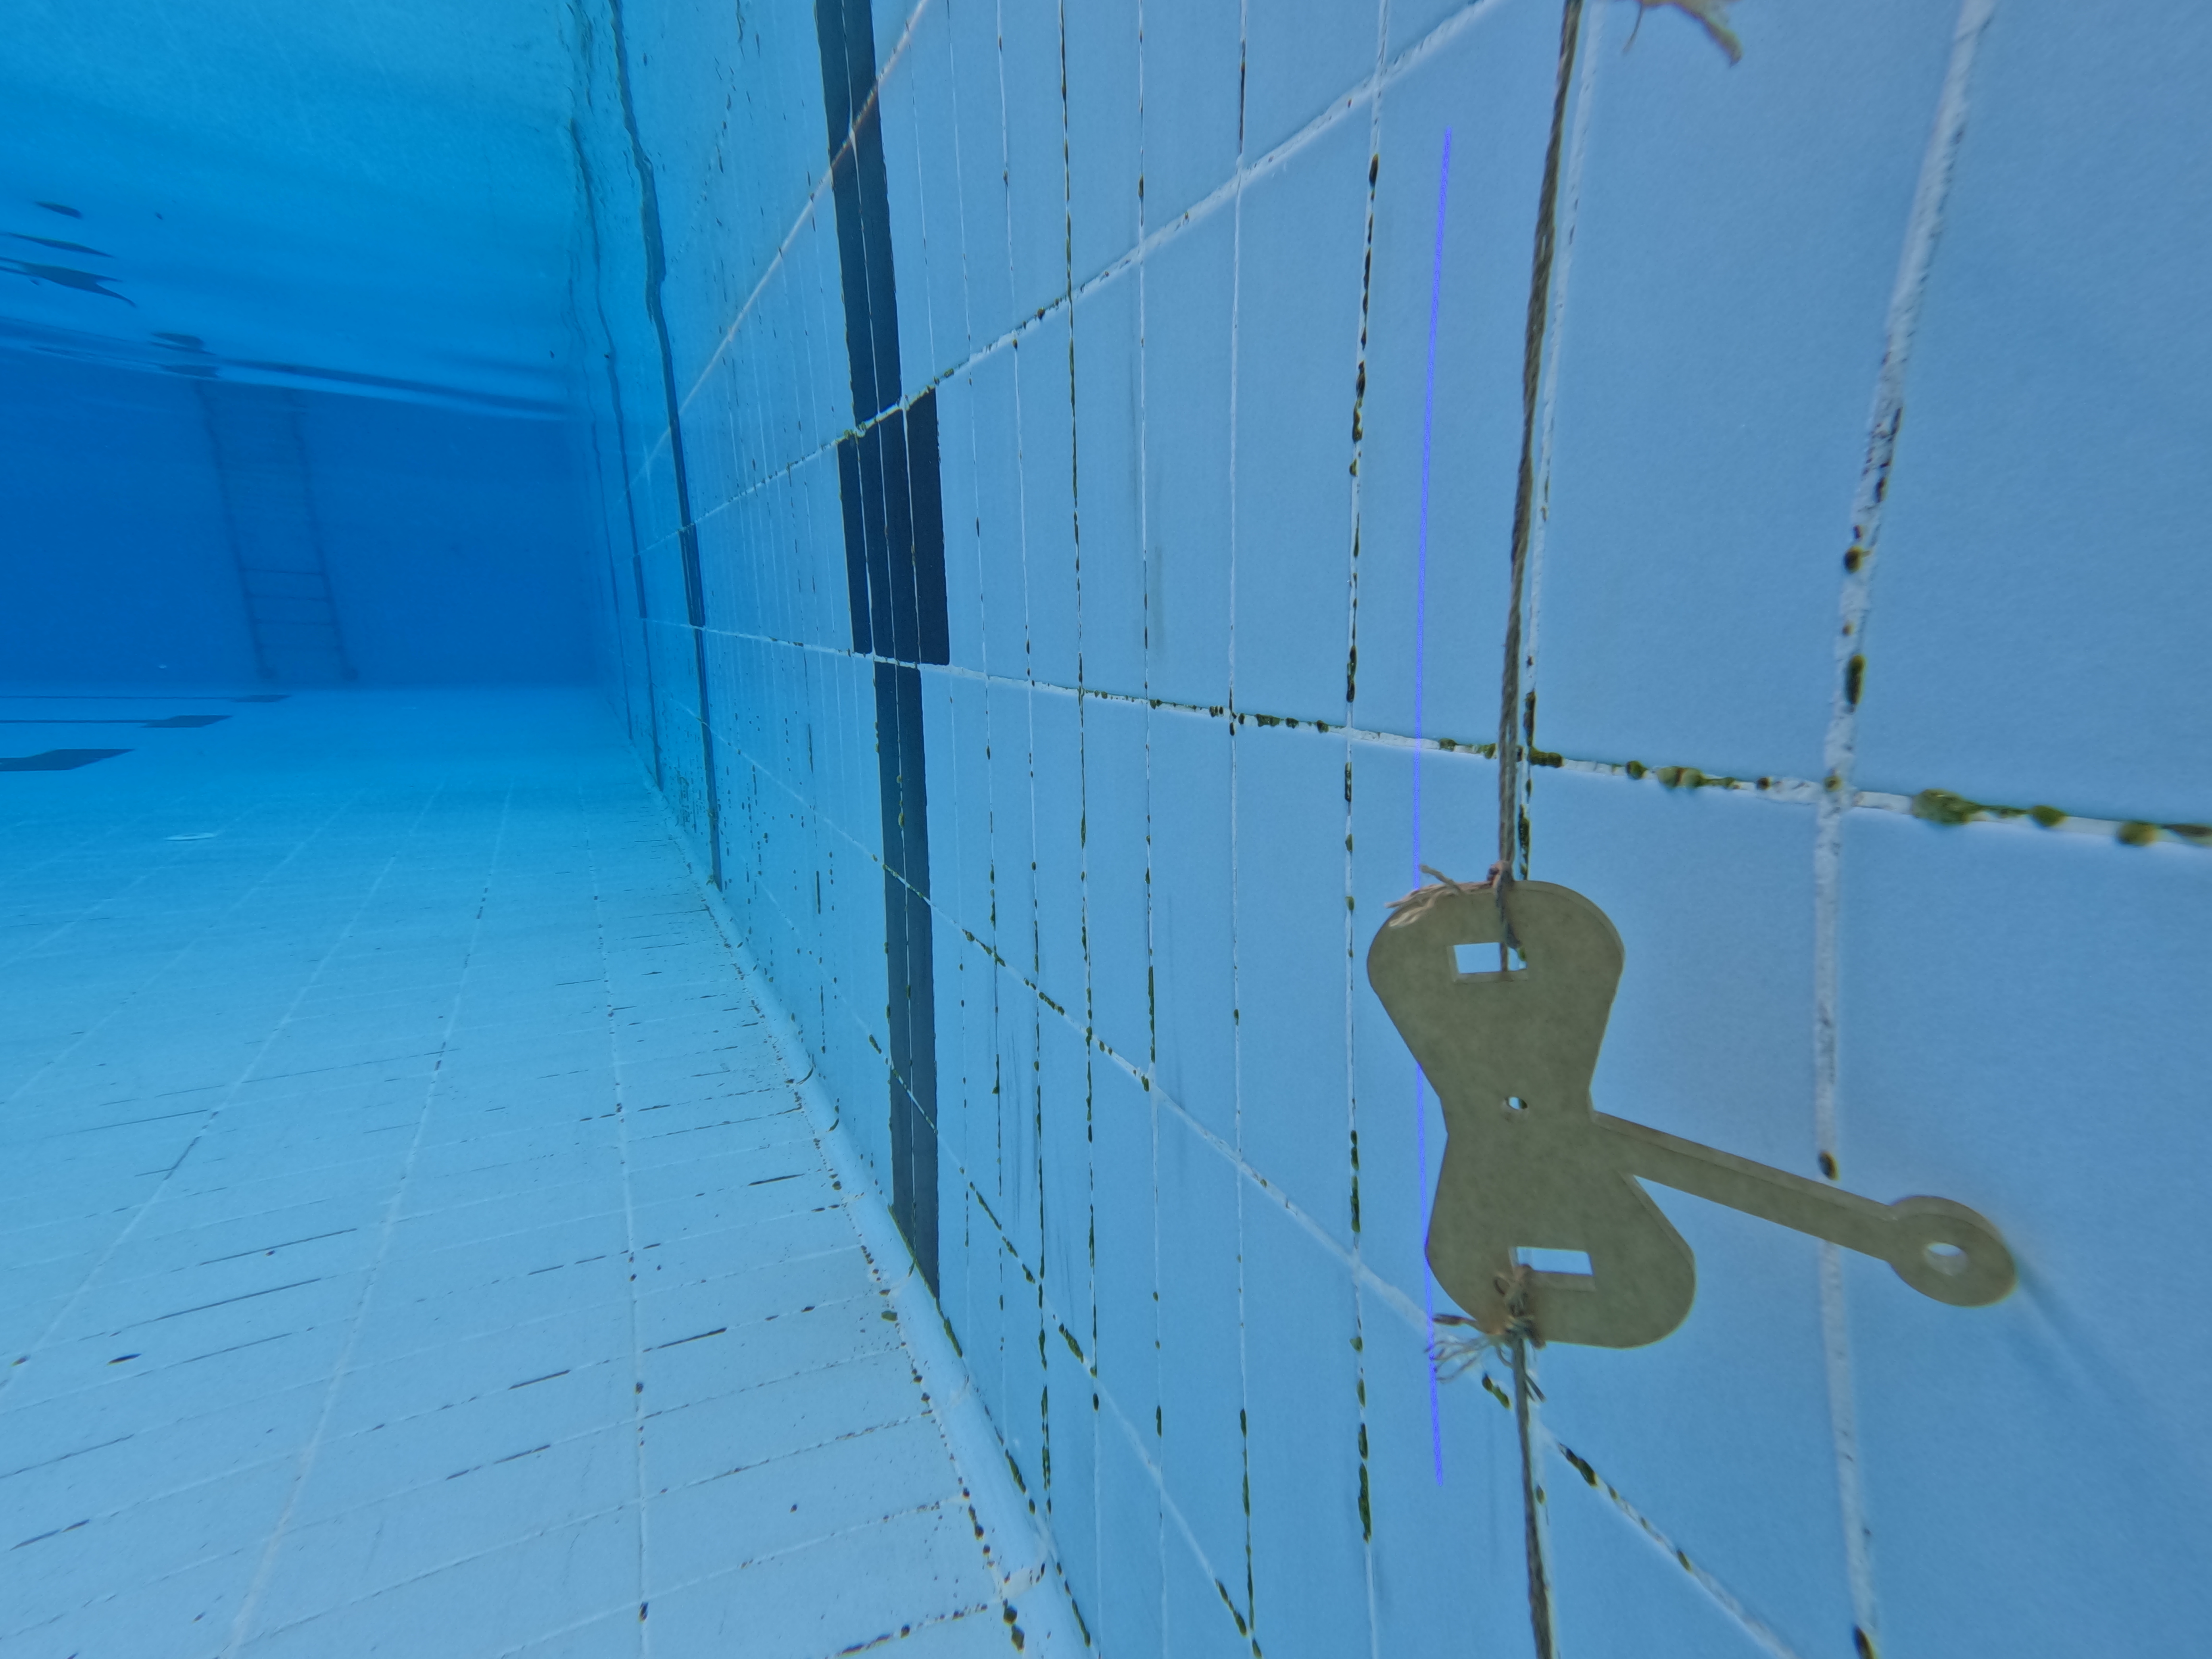

Supplement: Supplementary file 2136 [file G0050697.pdf › Level_3_2/G0050697.pdf]

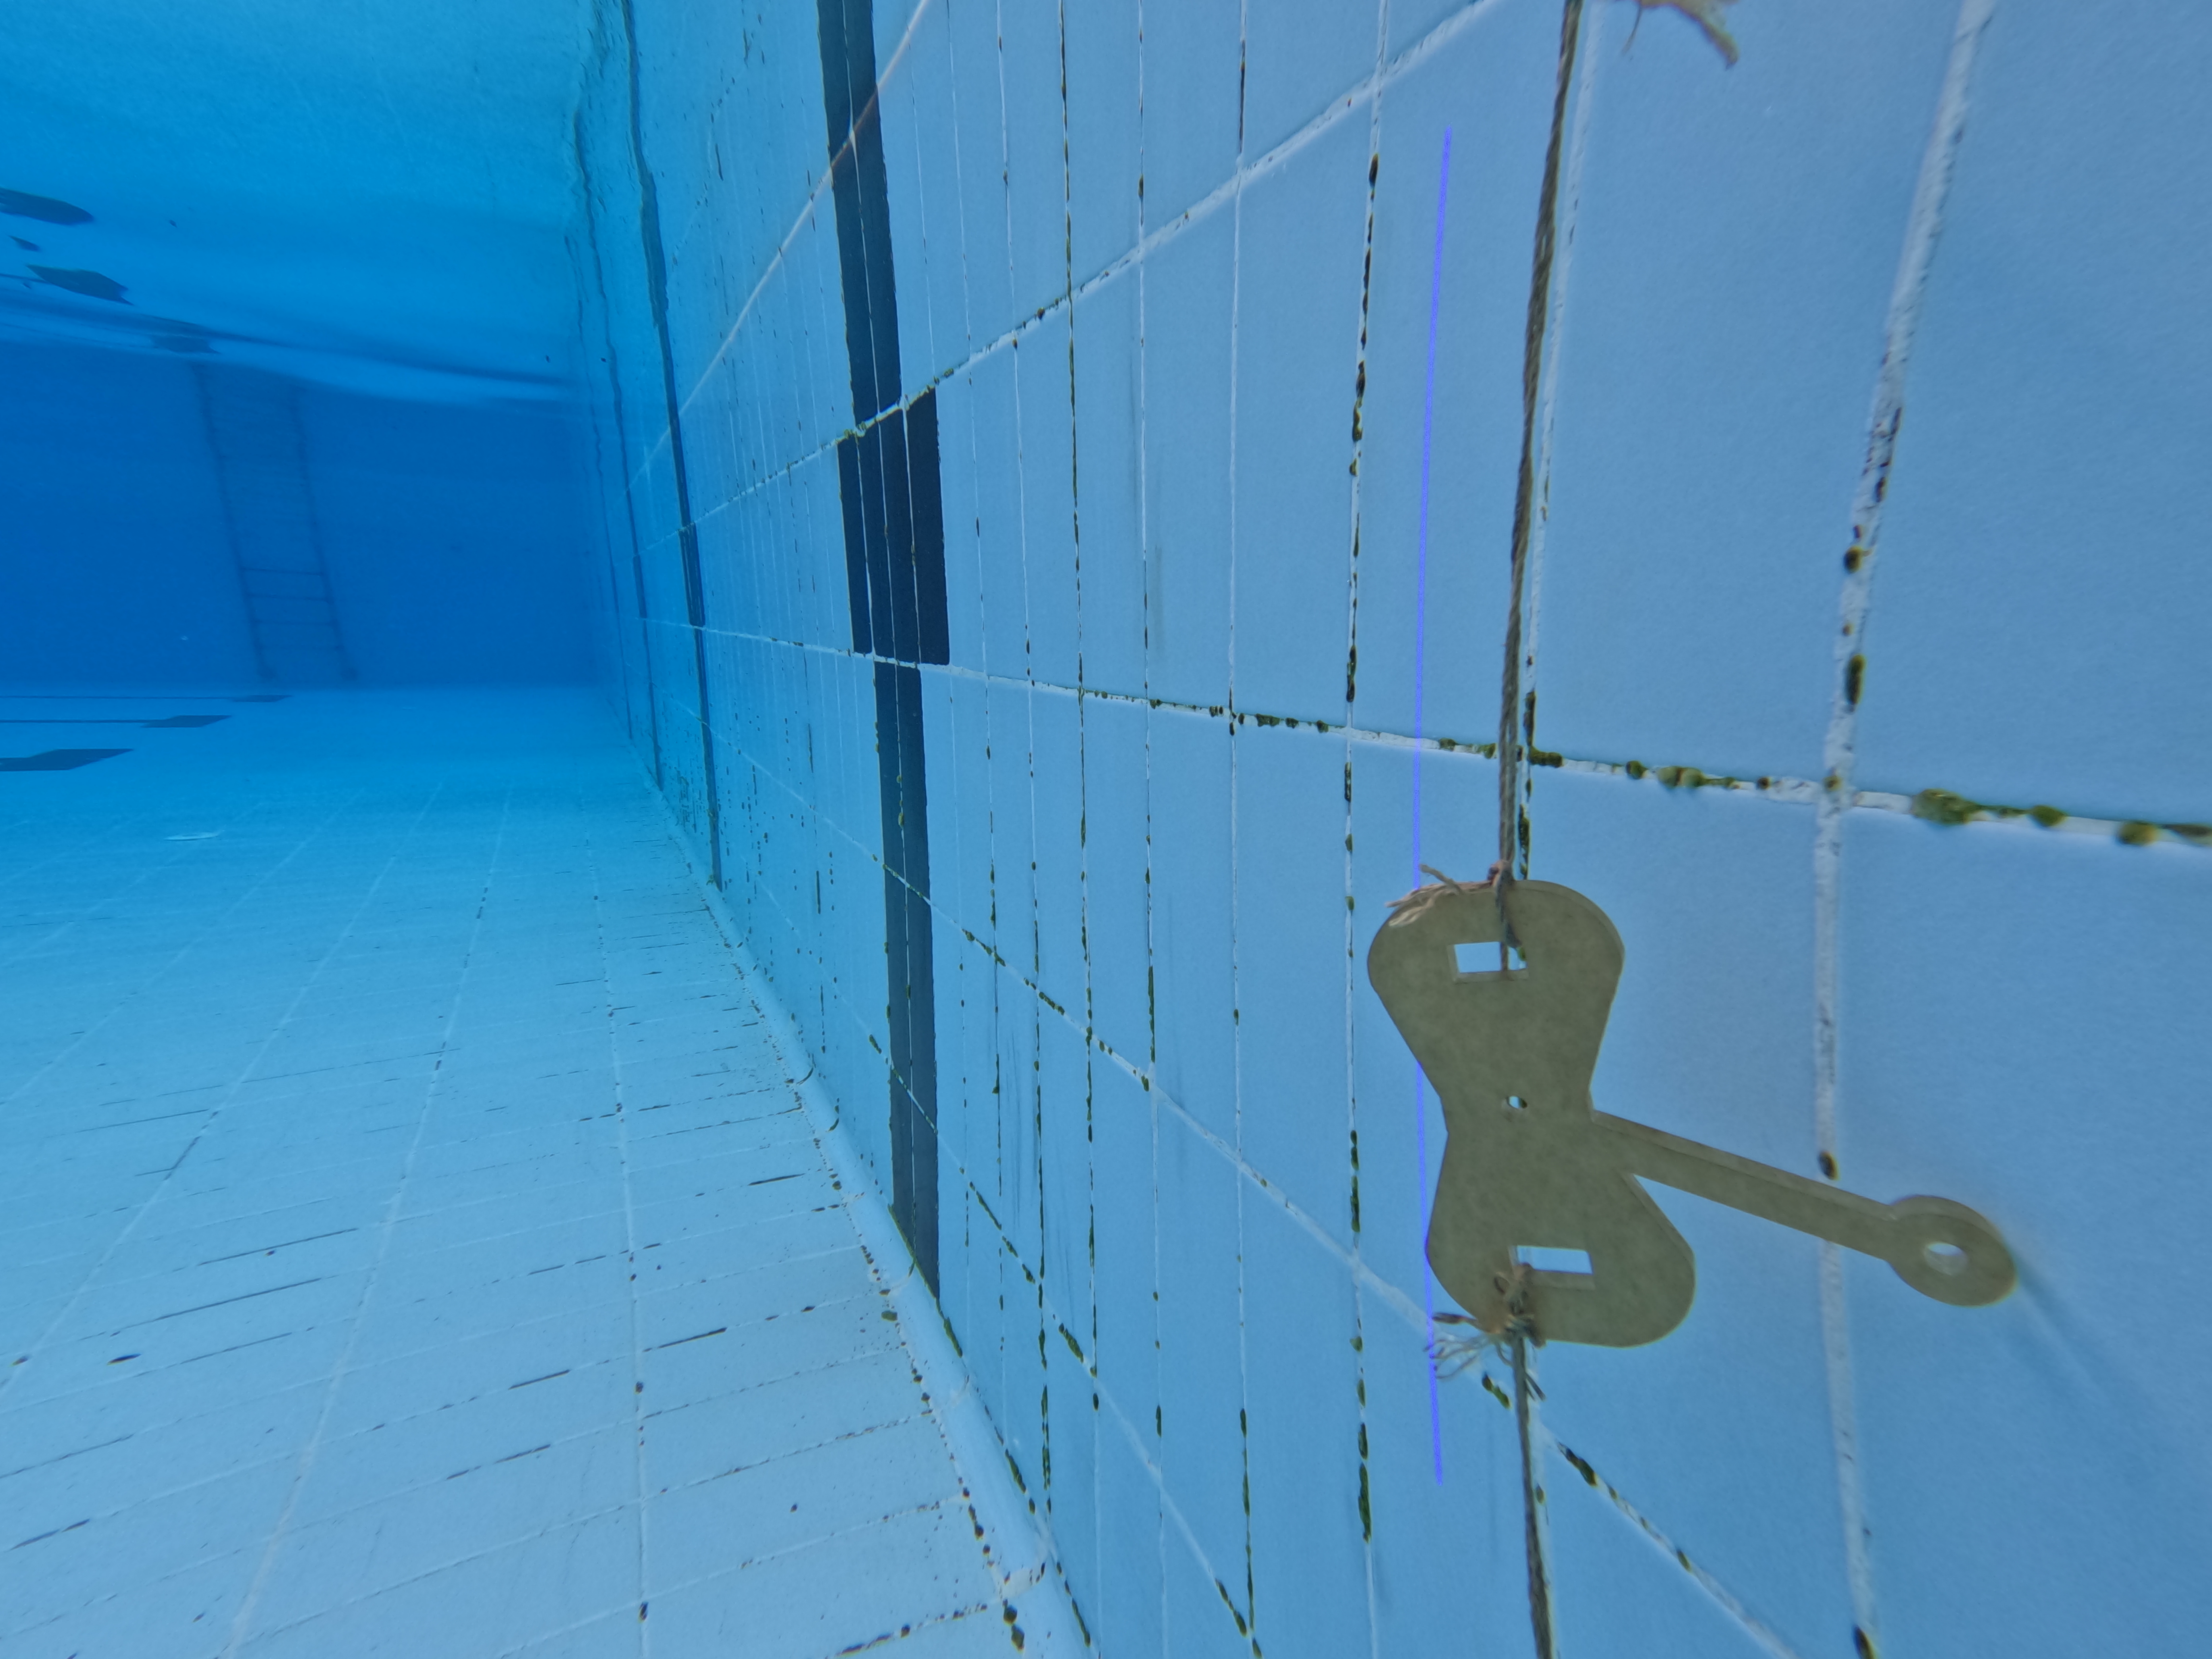

Supplement: Supplementary file 2137 [file G0050698.pdf › Level_3_2/G0050698.pdf]

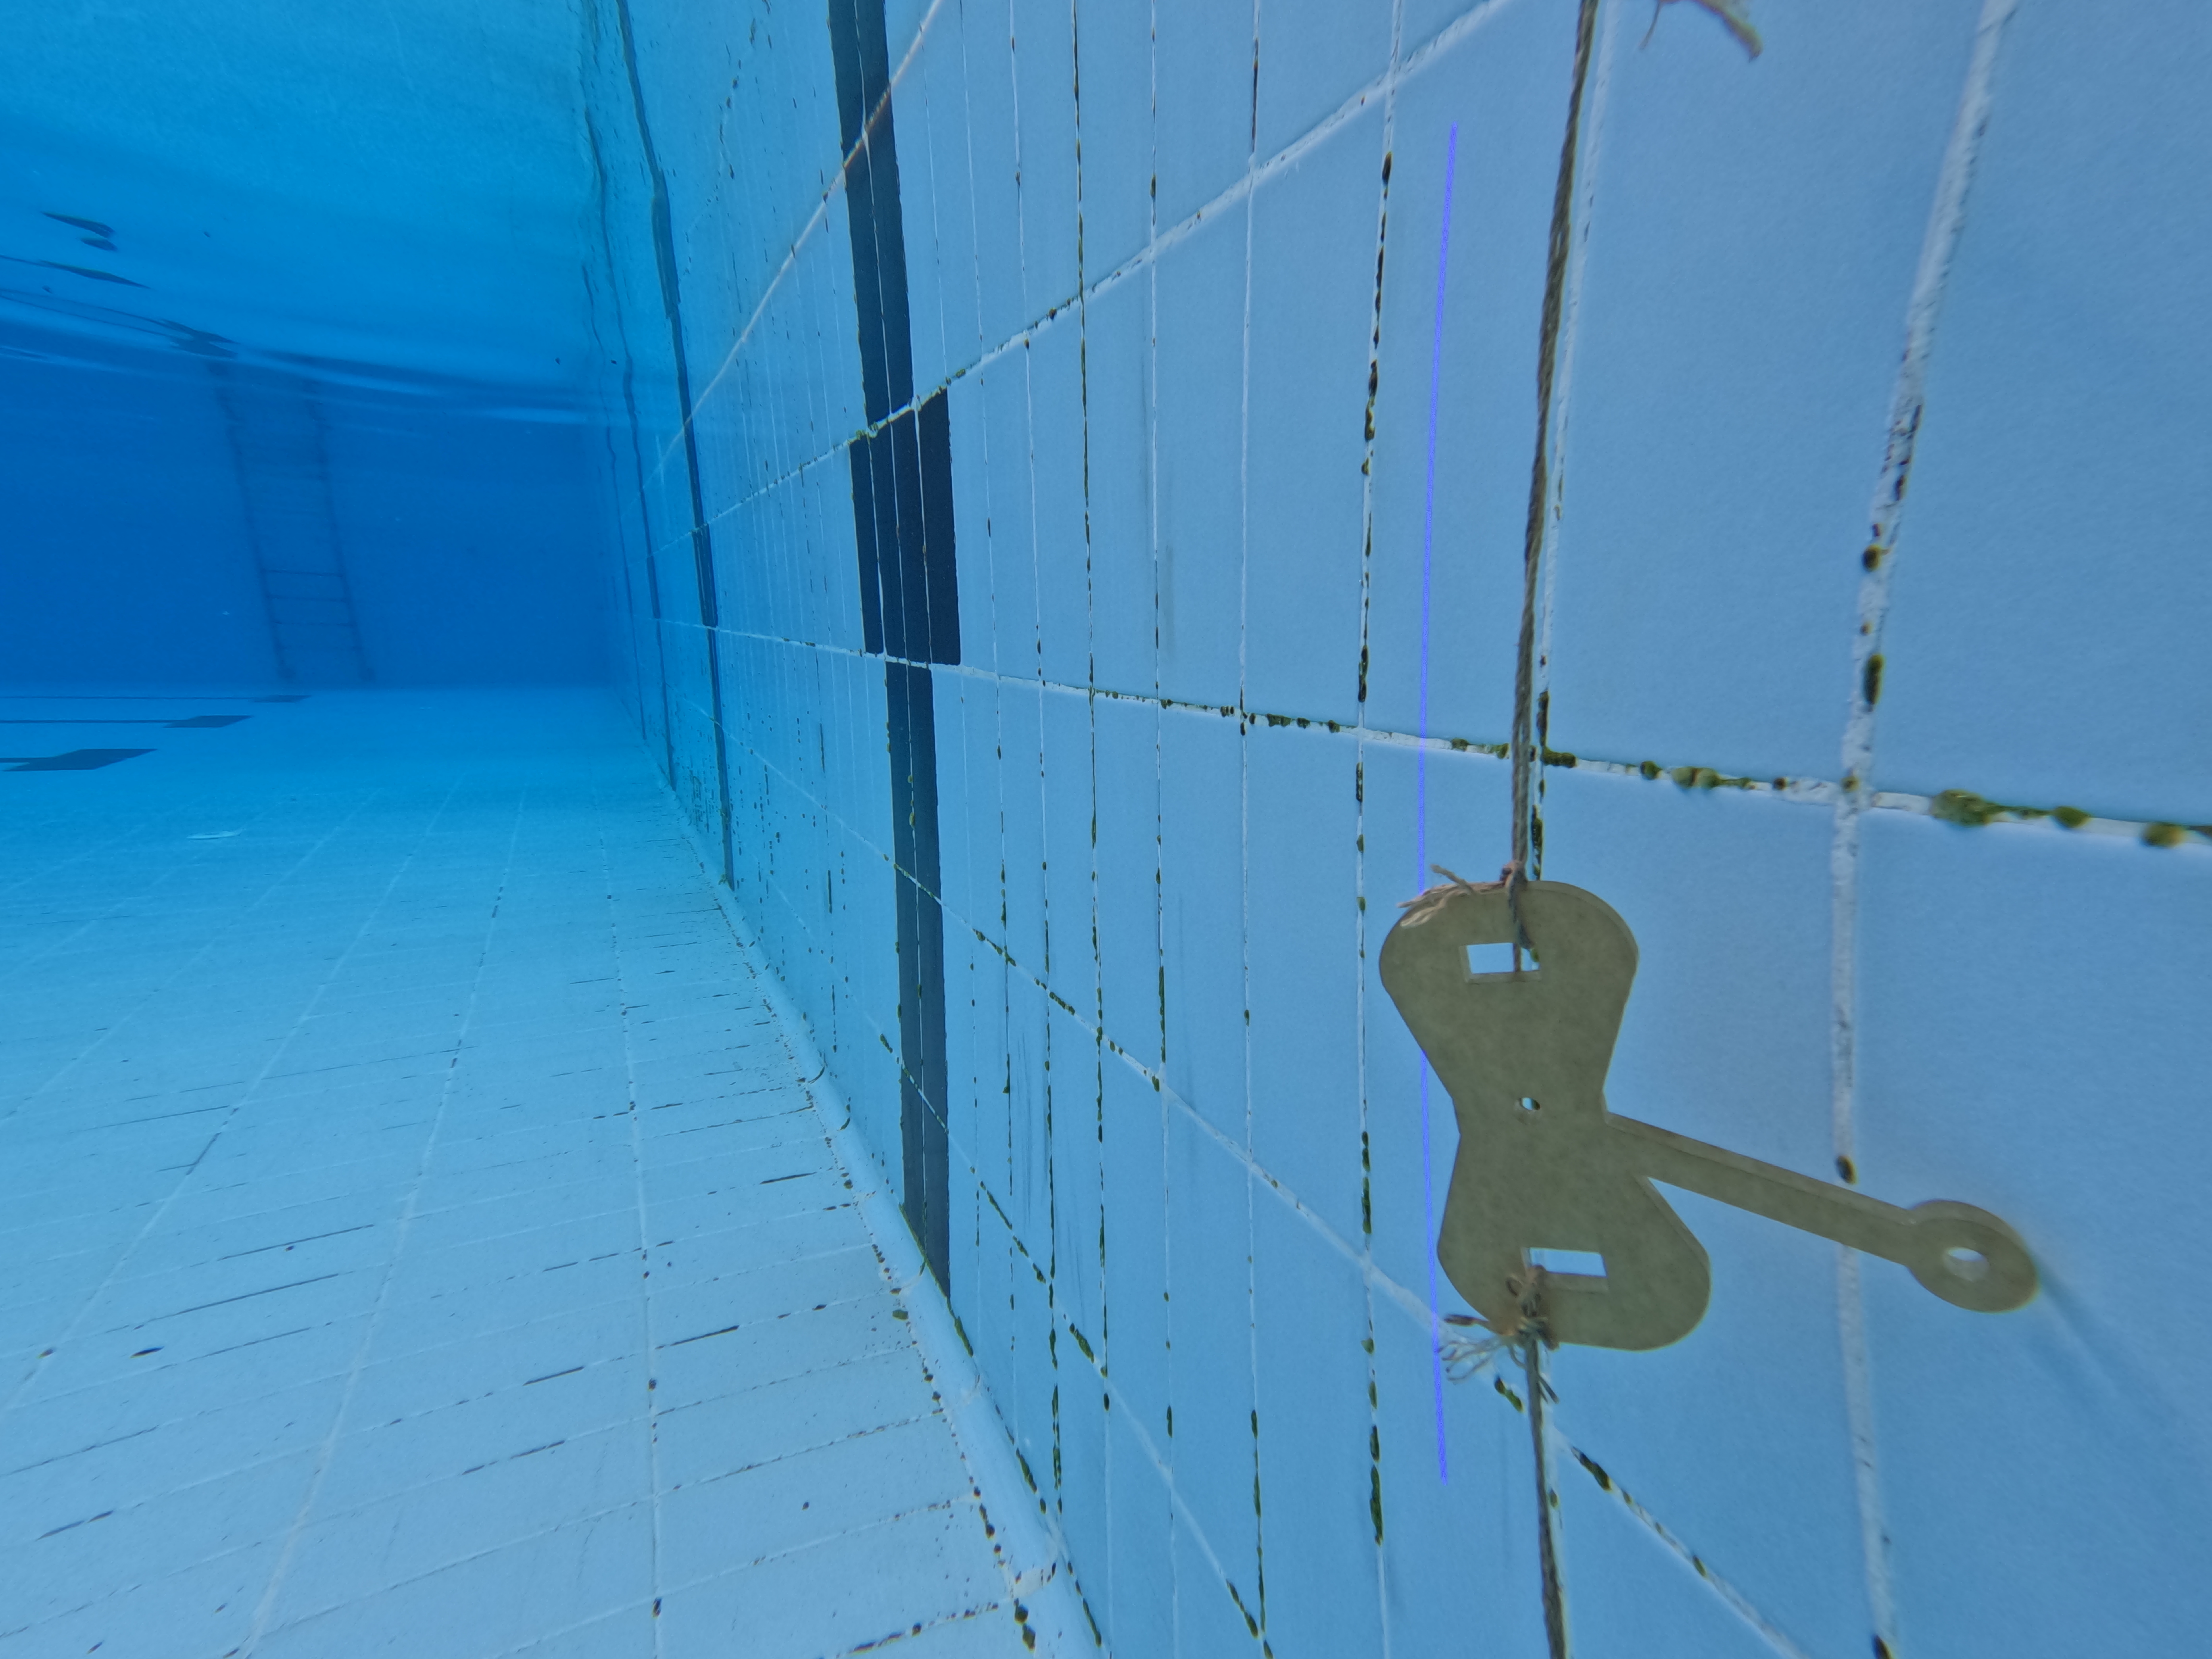

Supplement: Supplementary file 2138 [file G0050699.pdf › Level_3_2/G0050699.pdf]

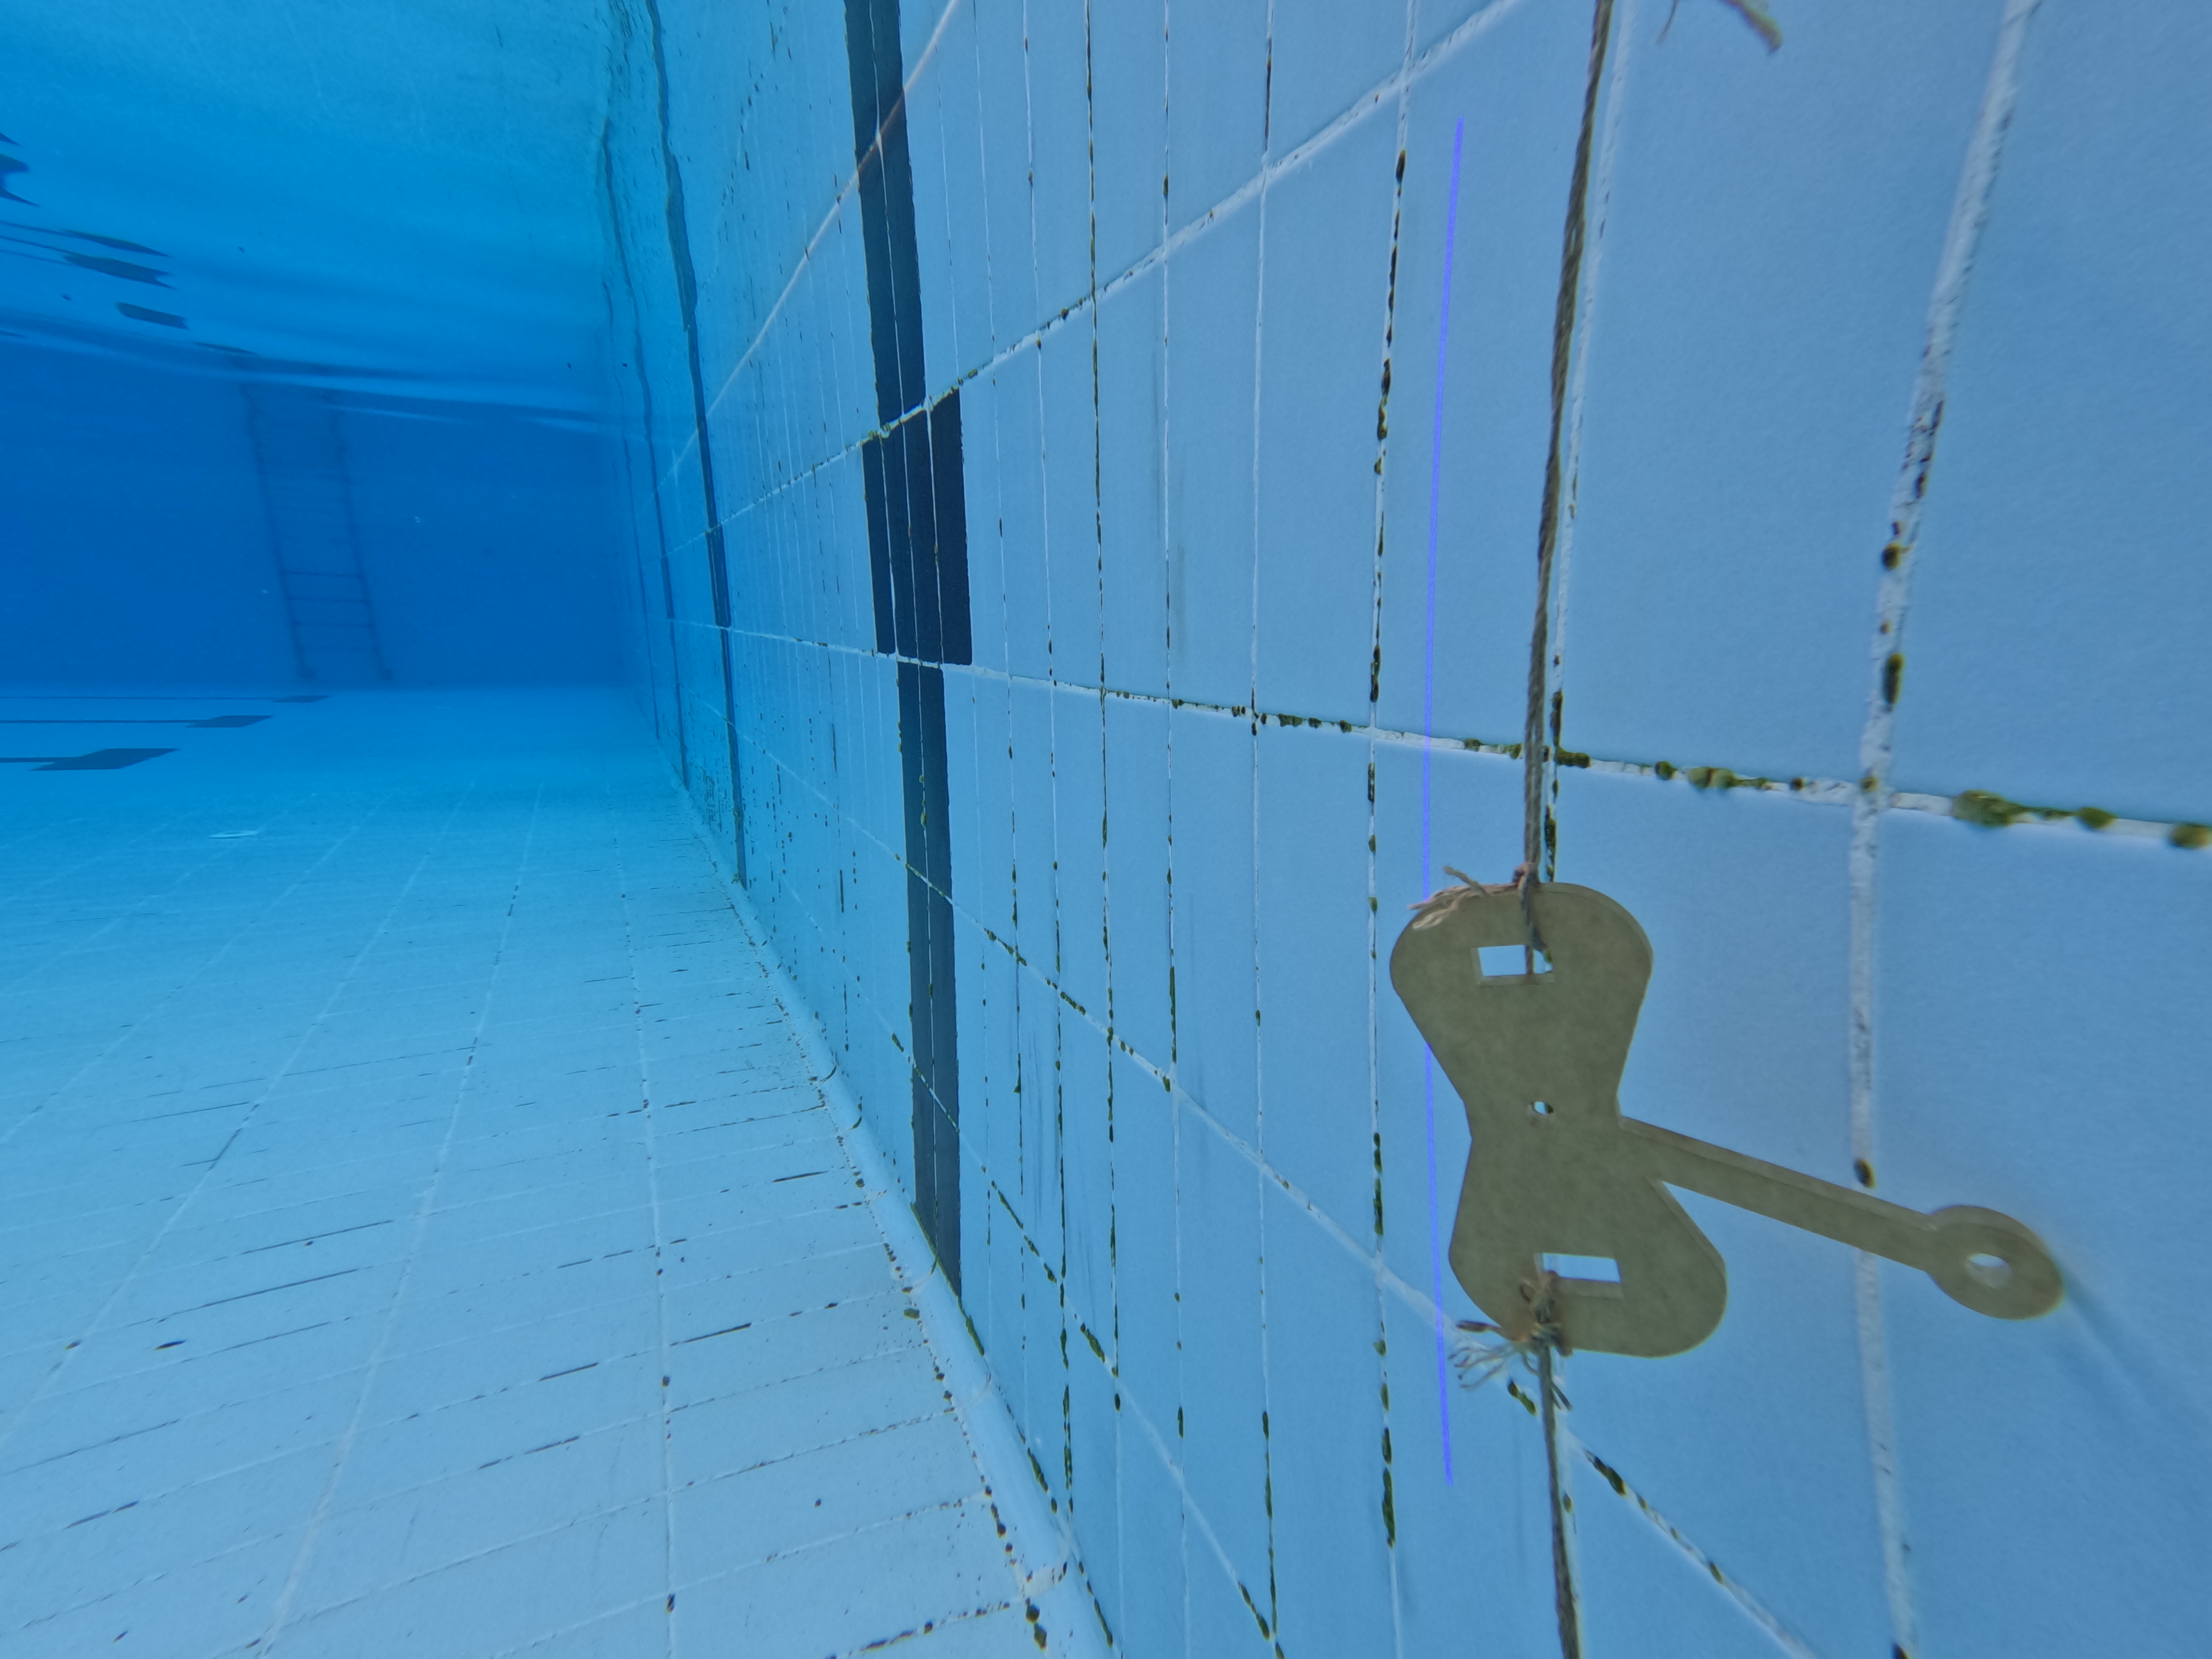

Supplement: Supplementary file 2139 [file G0050700.pdf › Level_3_2/G0050700.pdf]

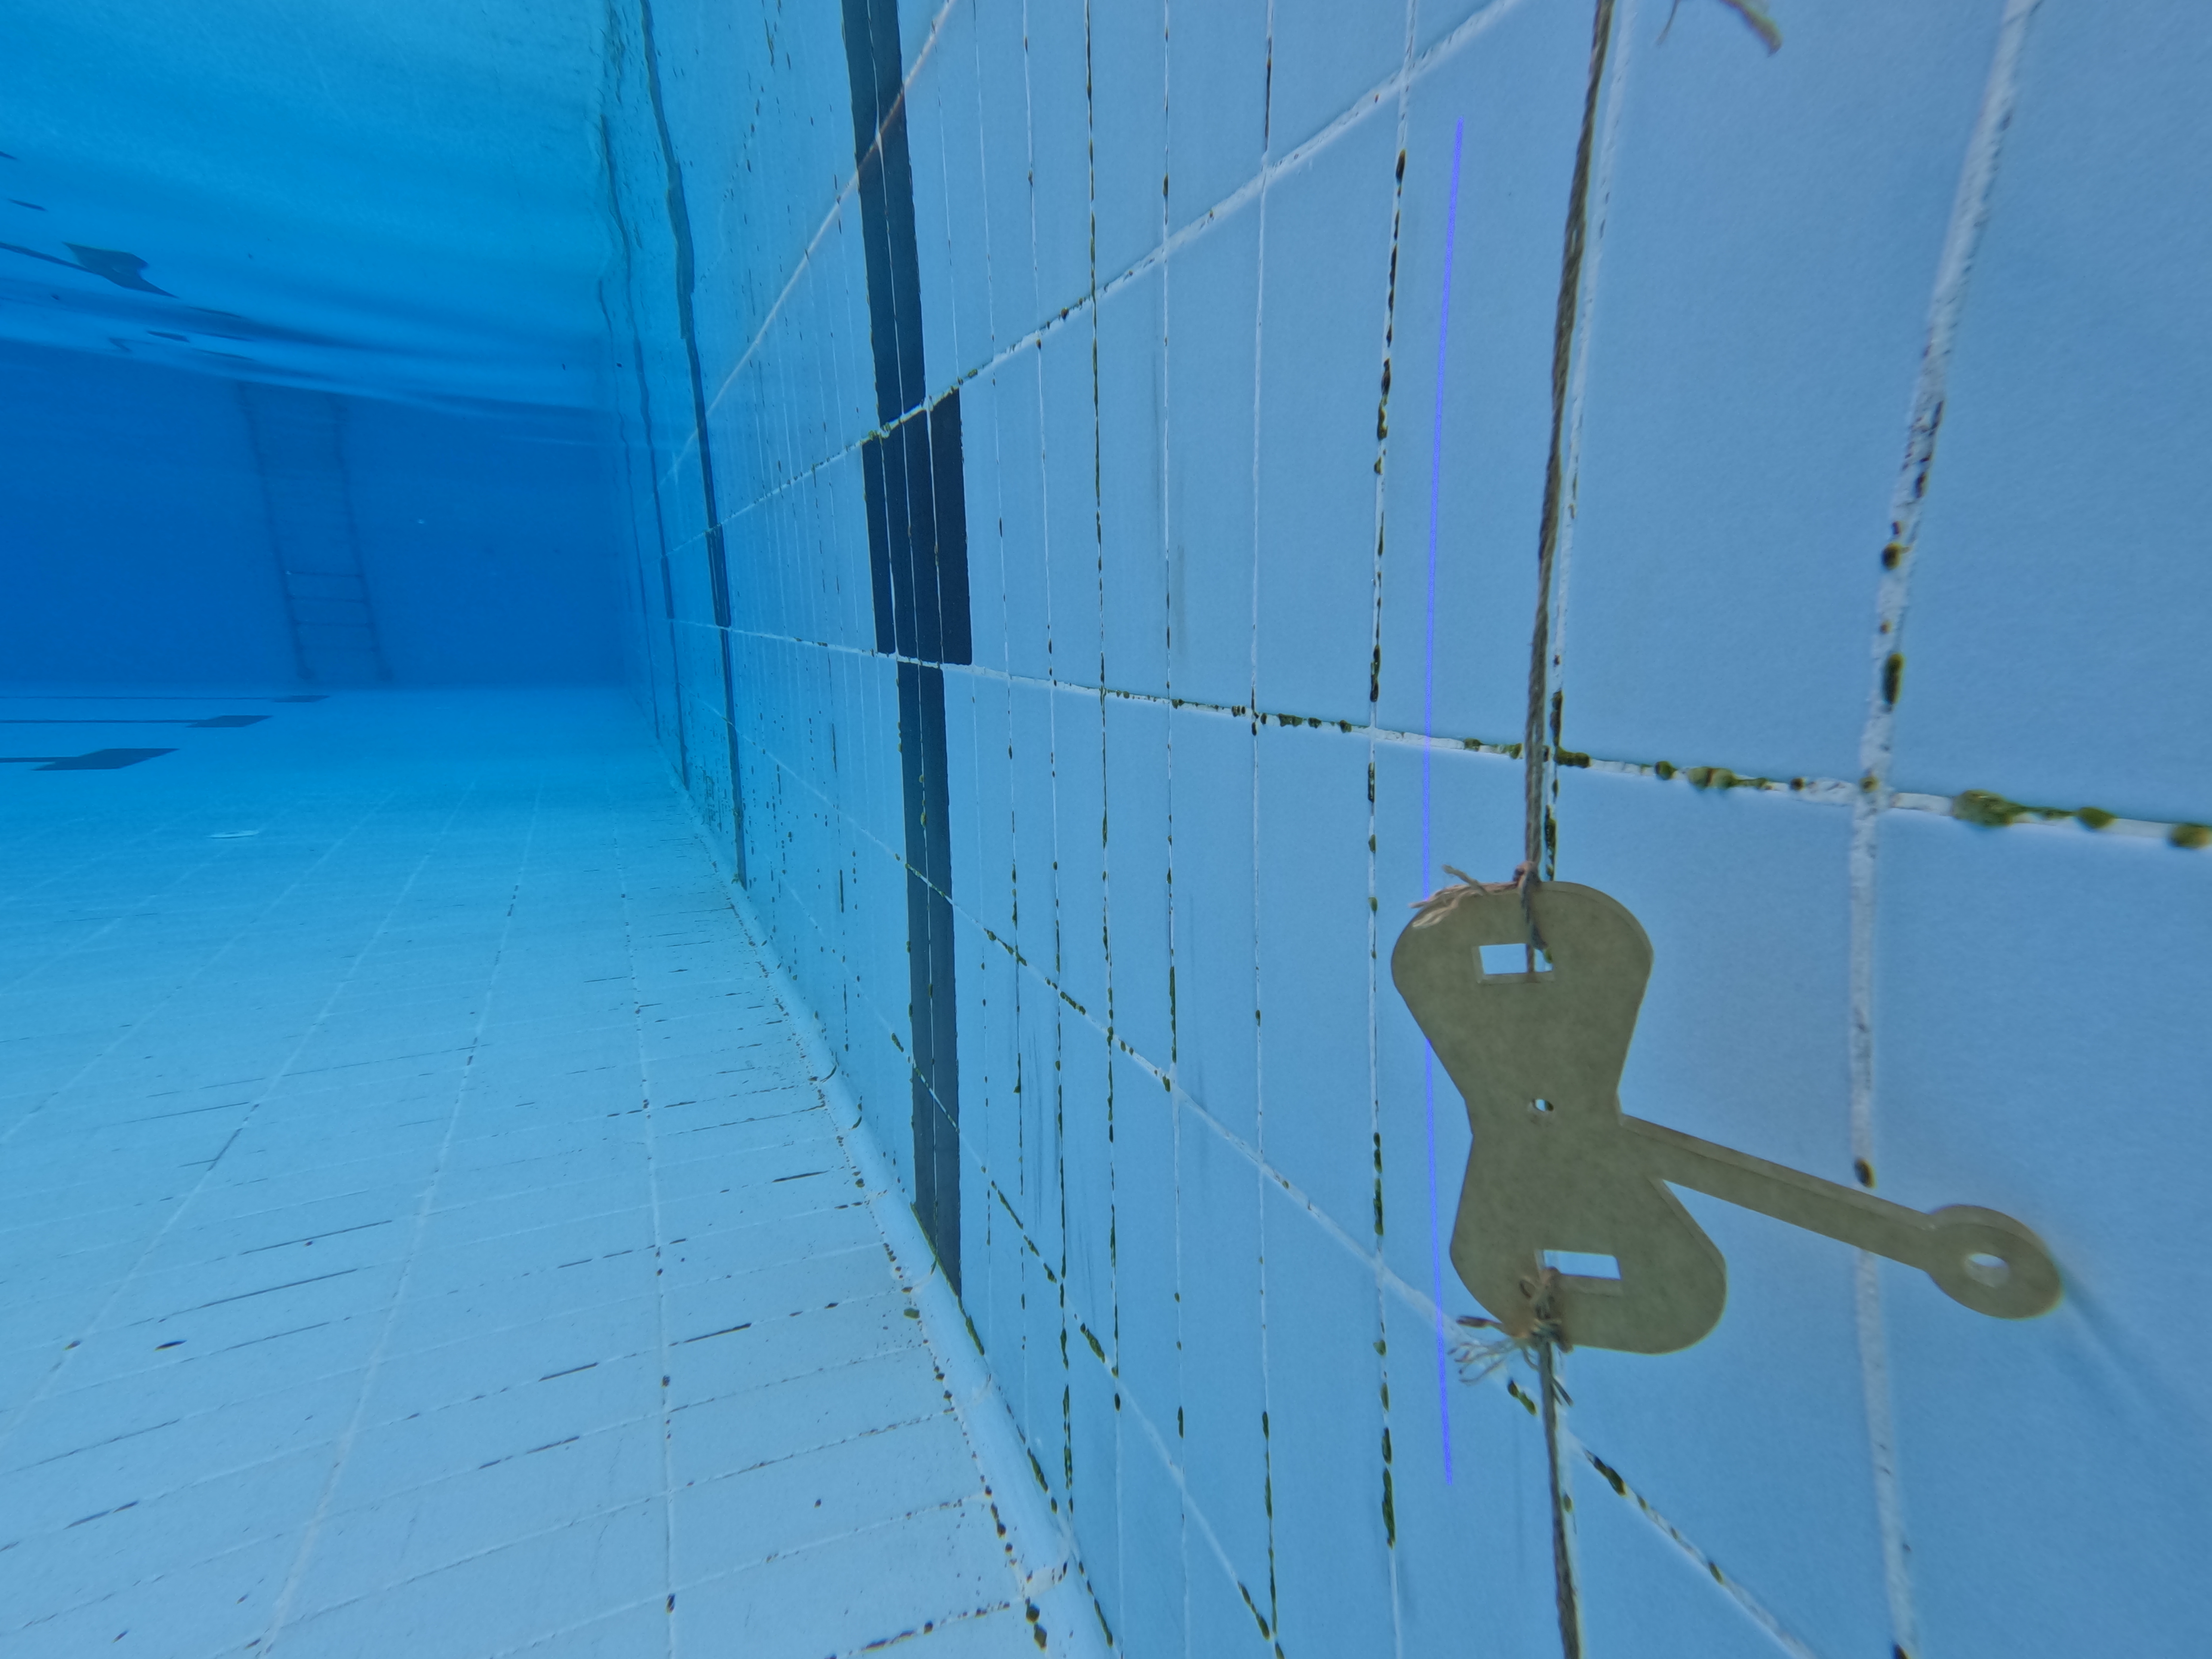

Supplement: Supplementary file 2140 [file G0050701.pdf › Level_3_2/G0050701.pdf]

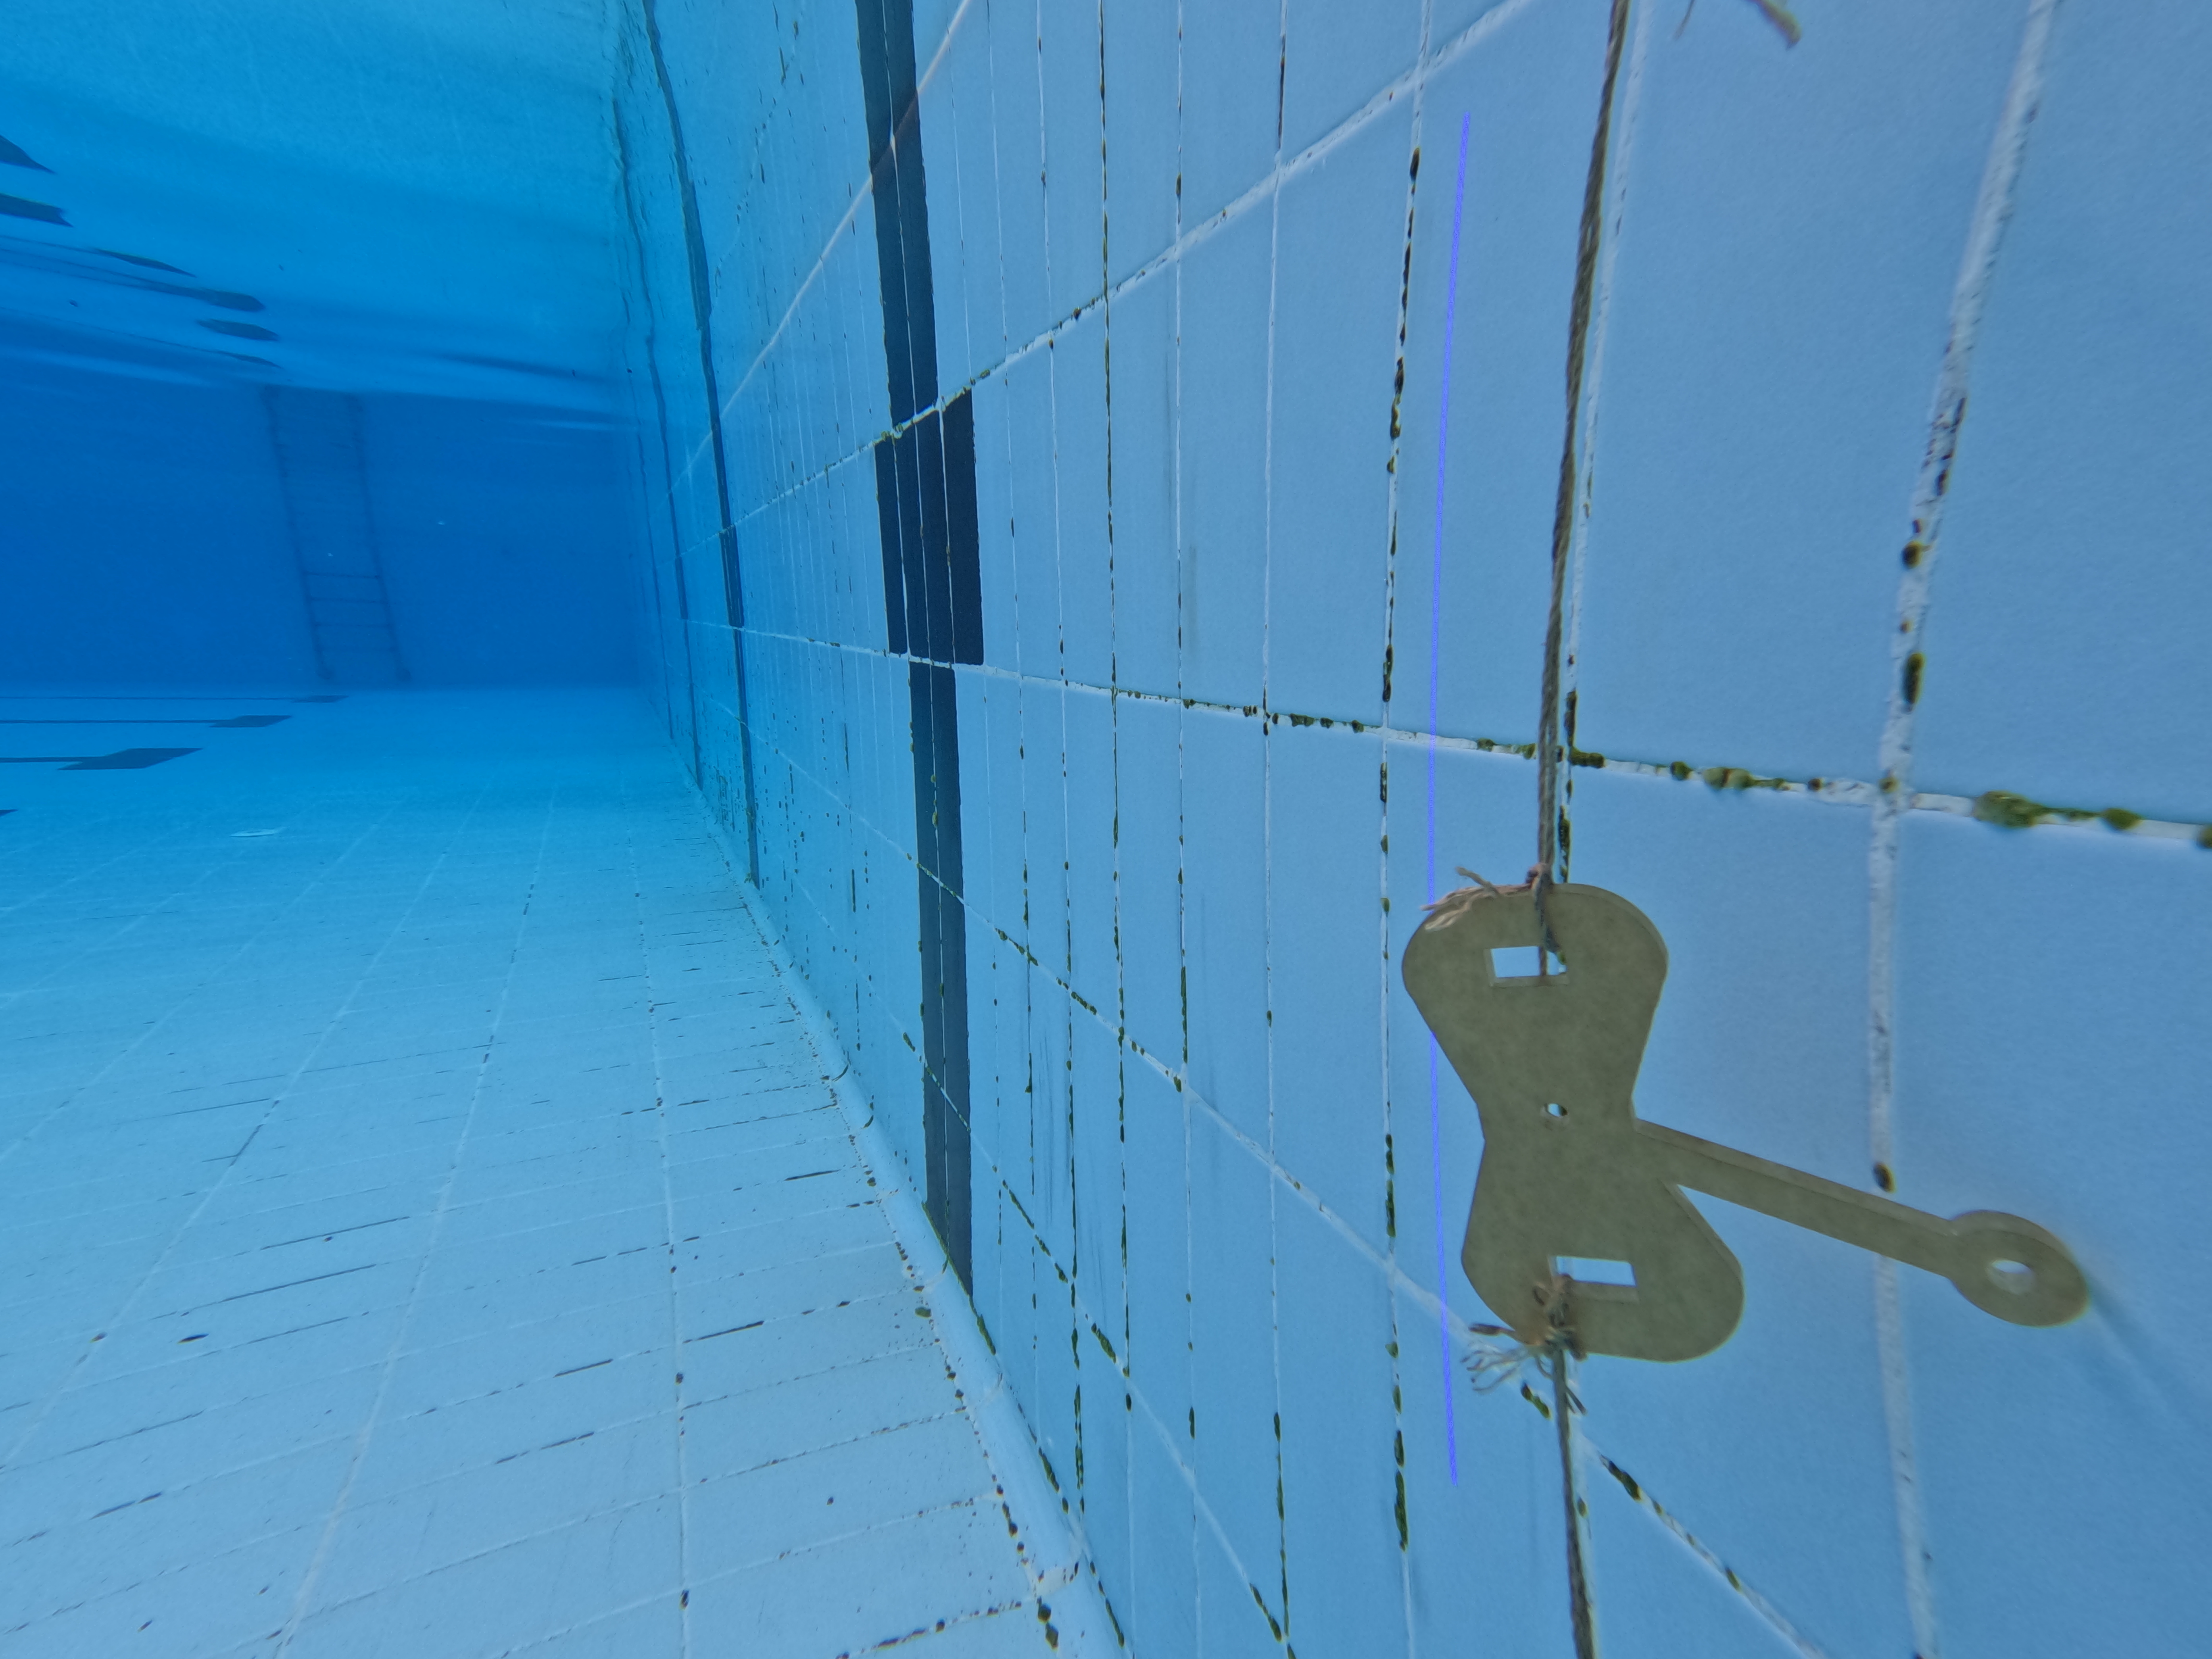

Supplement: Supplementary file 2141 [file G0050702.pdf › Level_3_2/G0050702.pdf]

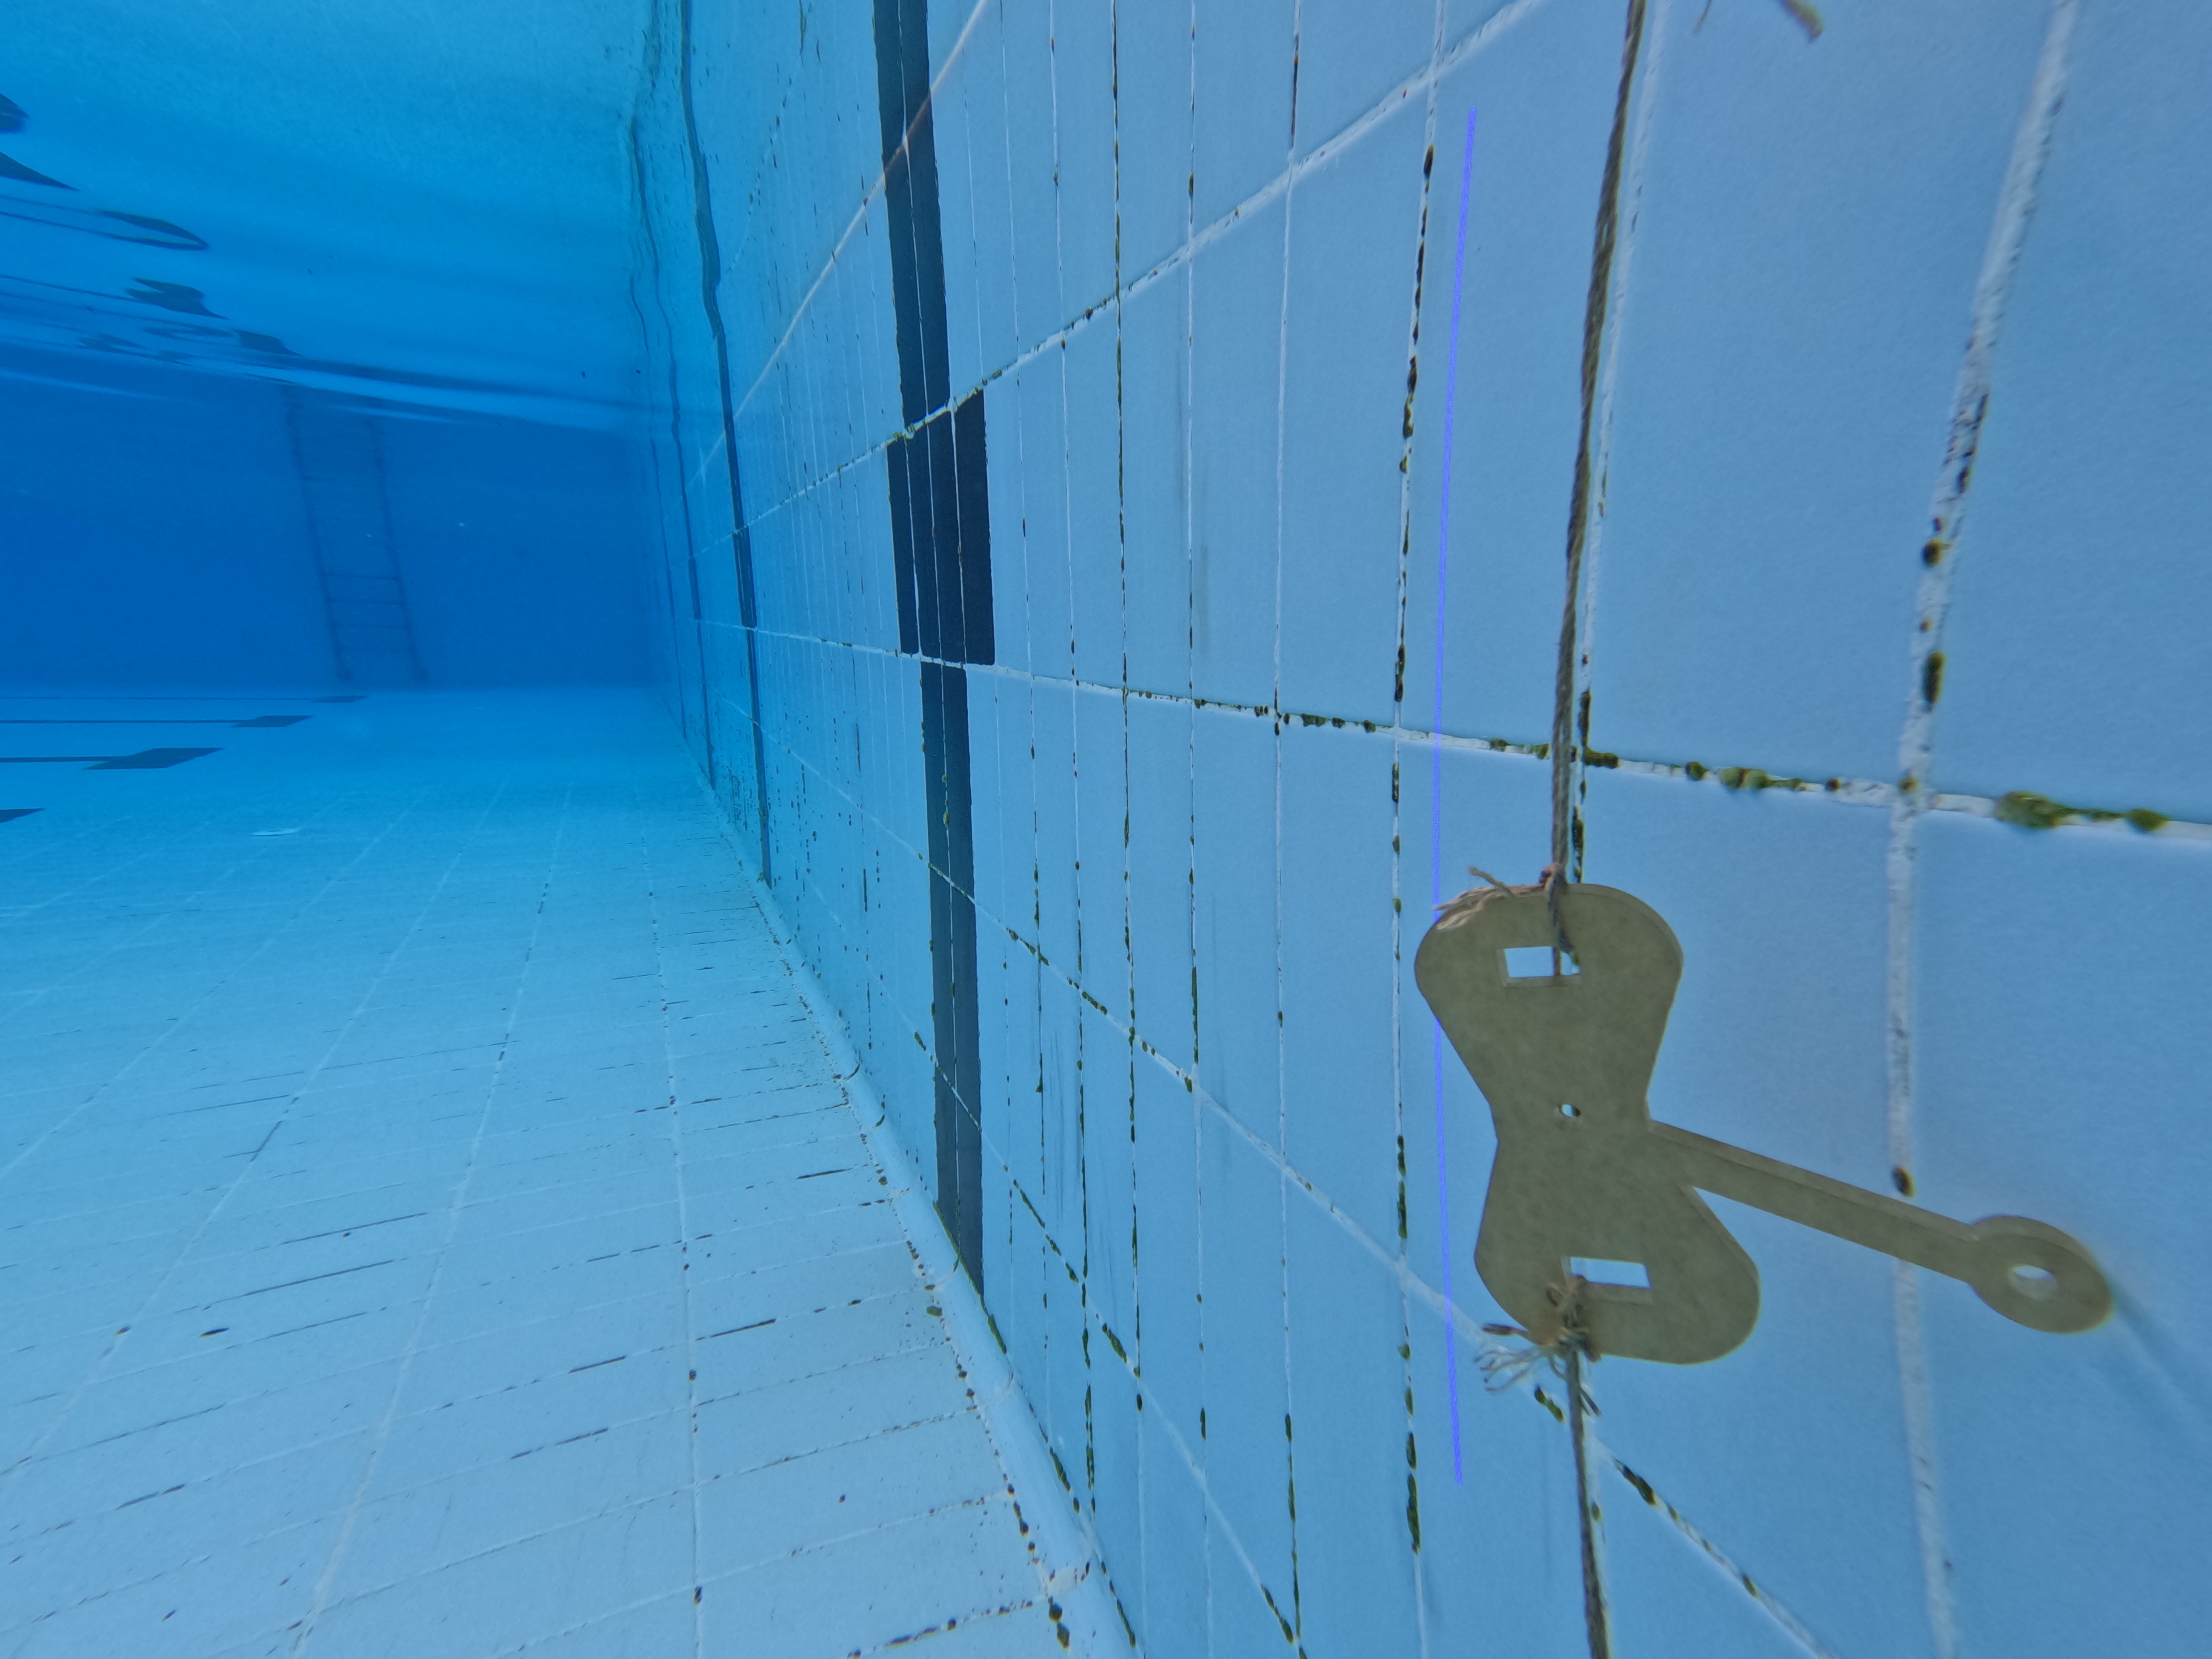

Supplement: Supplementary file 2142 [file G0050703.pdf › Level_3_2/G0050703.pdf]

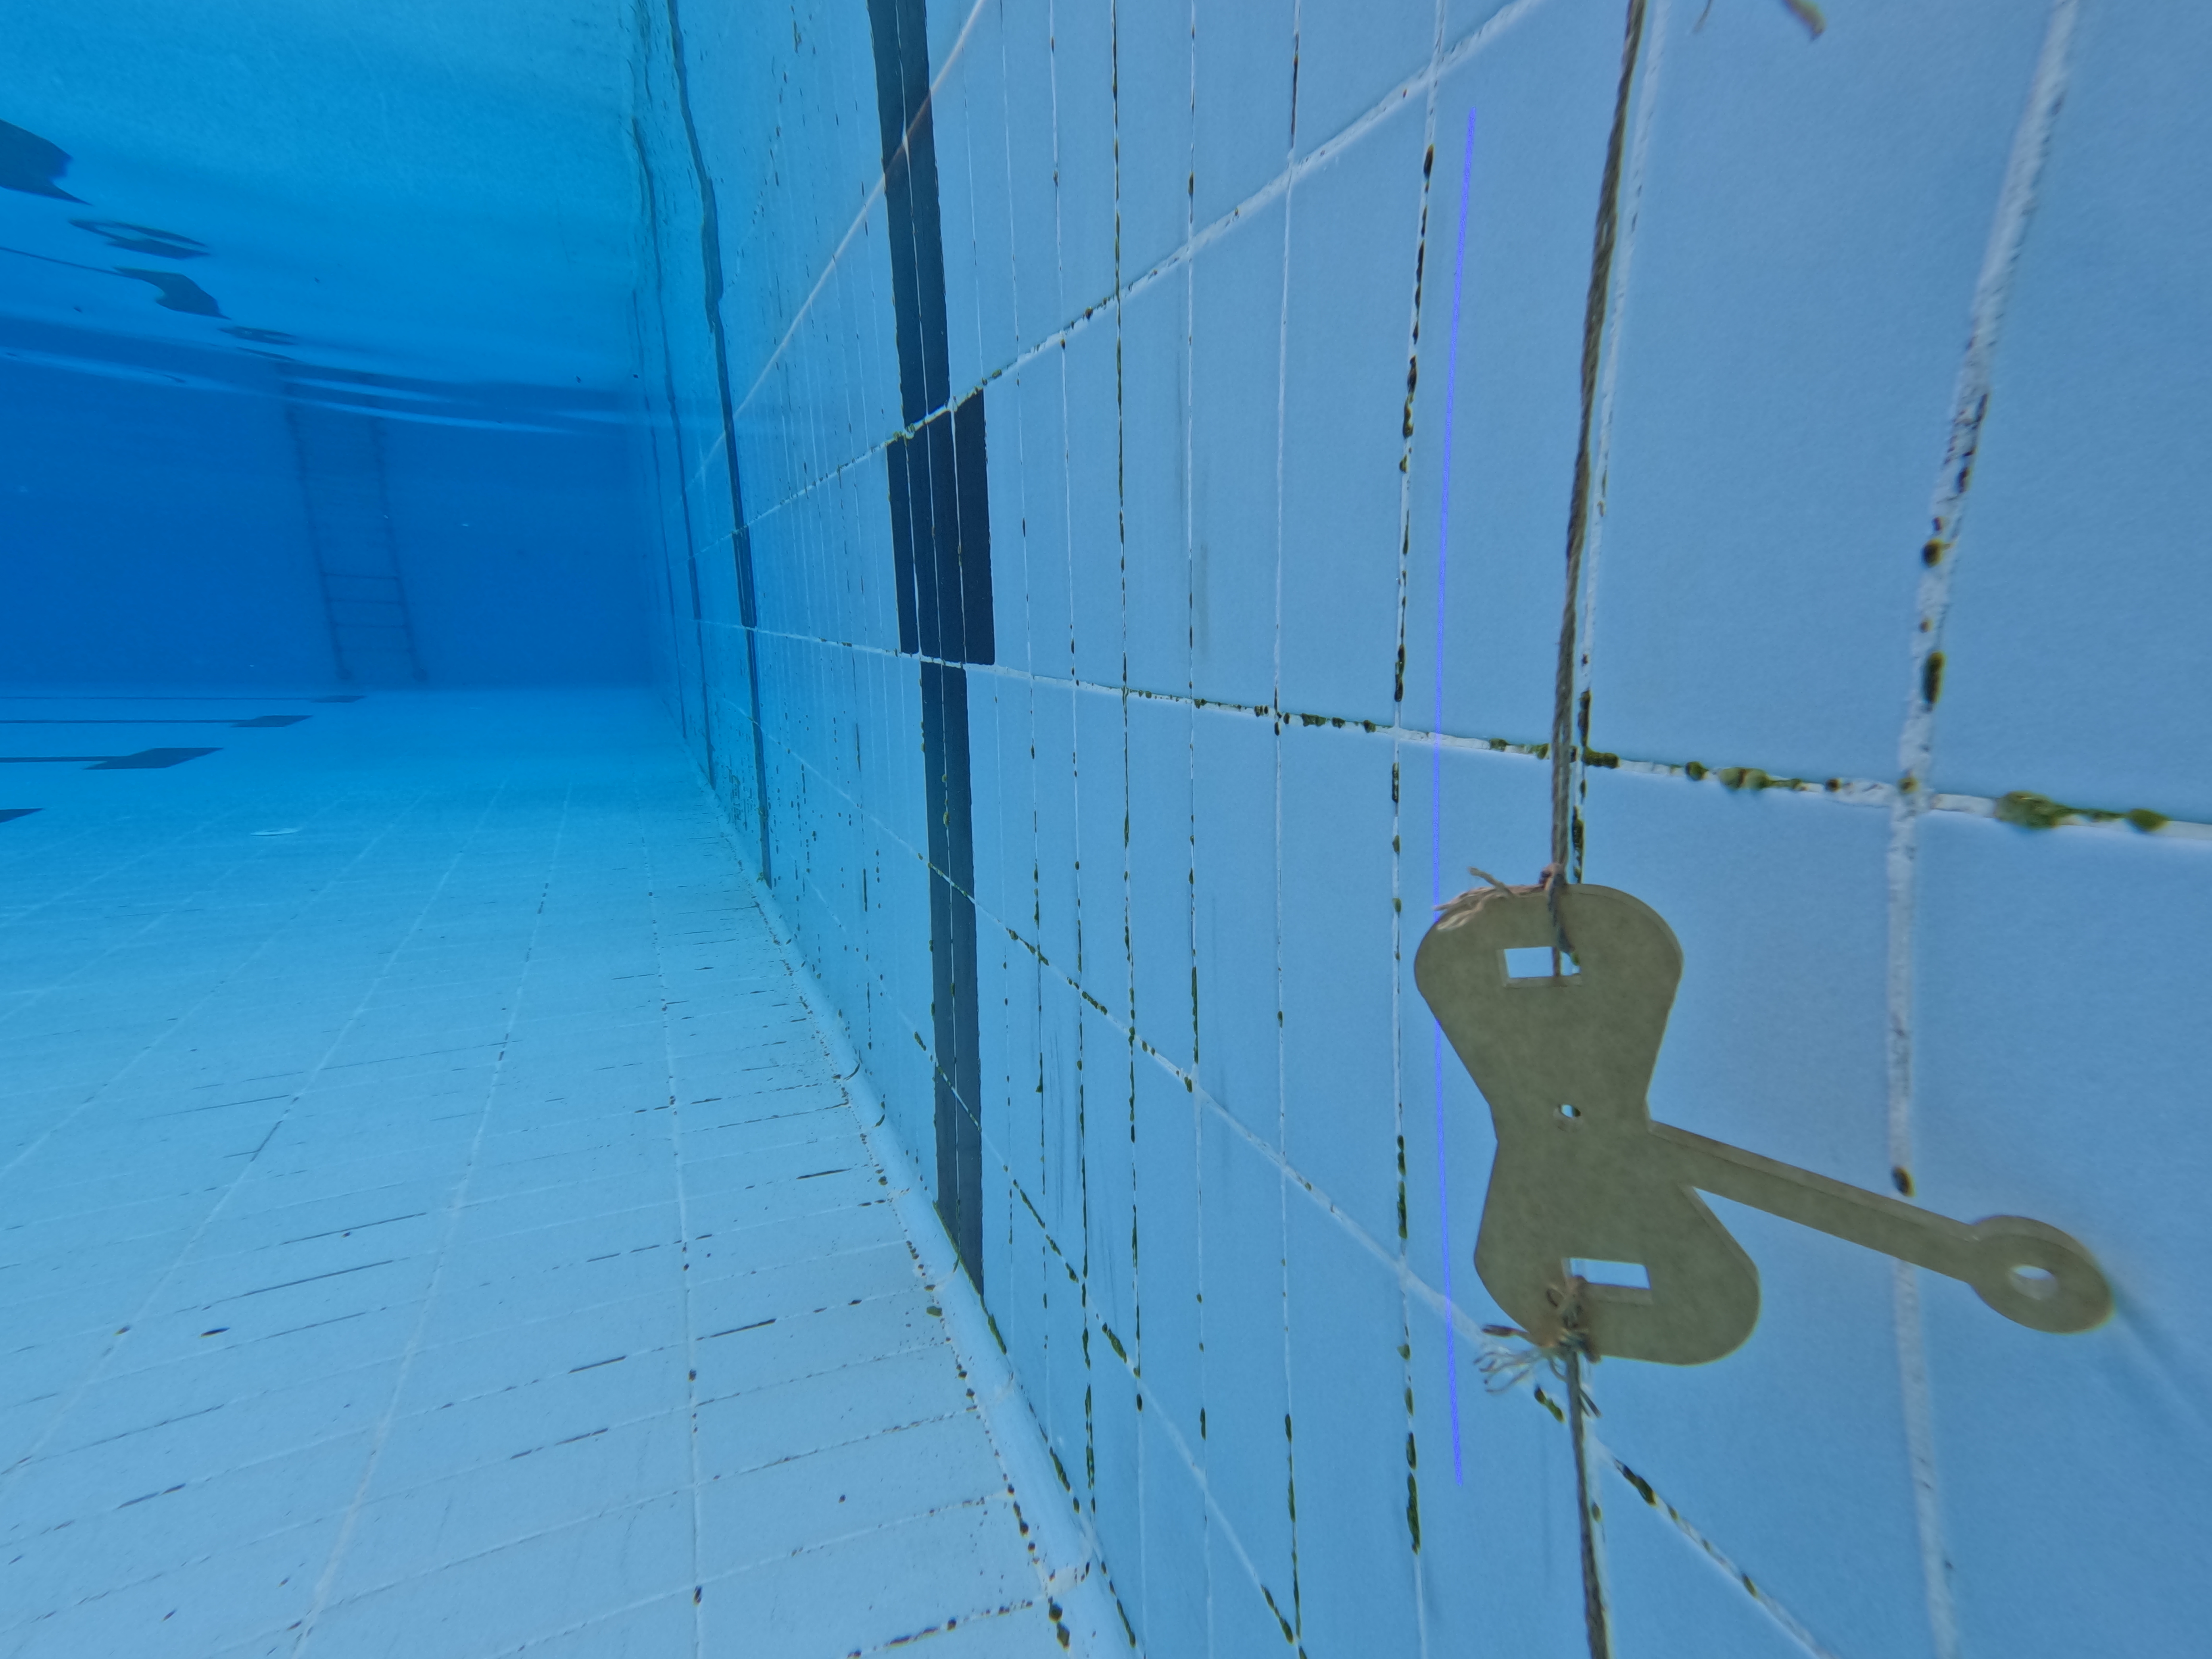

Supplement: Supplementary file 2143 [file G0050704.pdf › Level_3_2/G0050704.pdf]

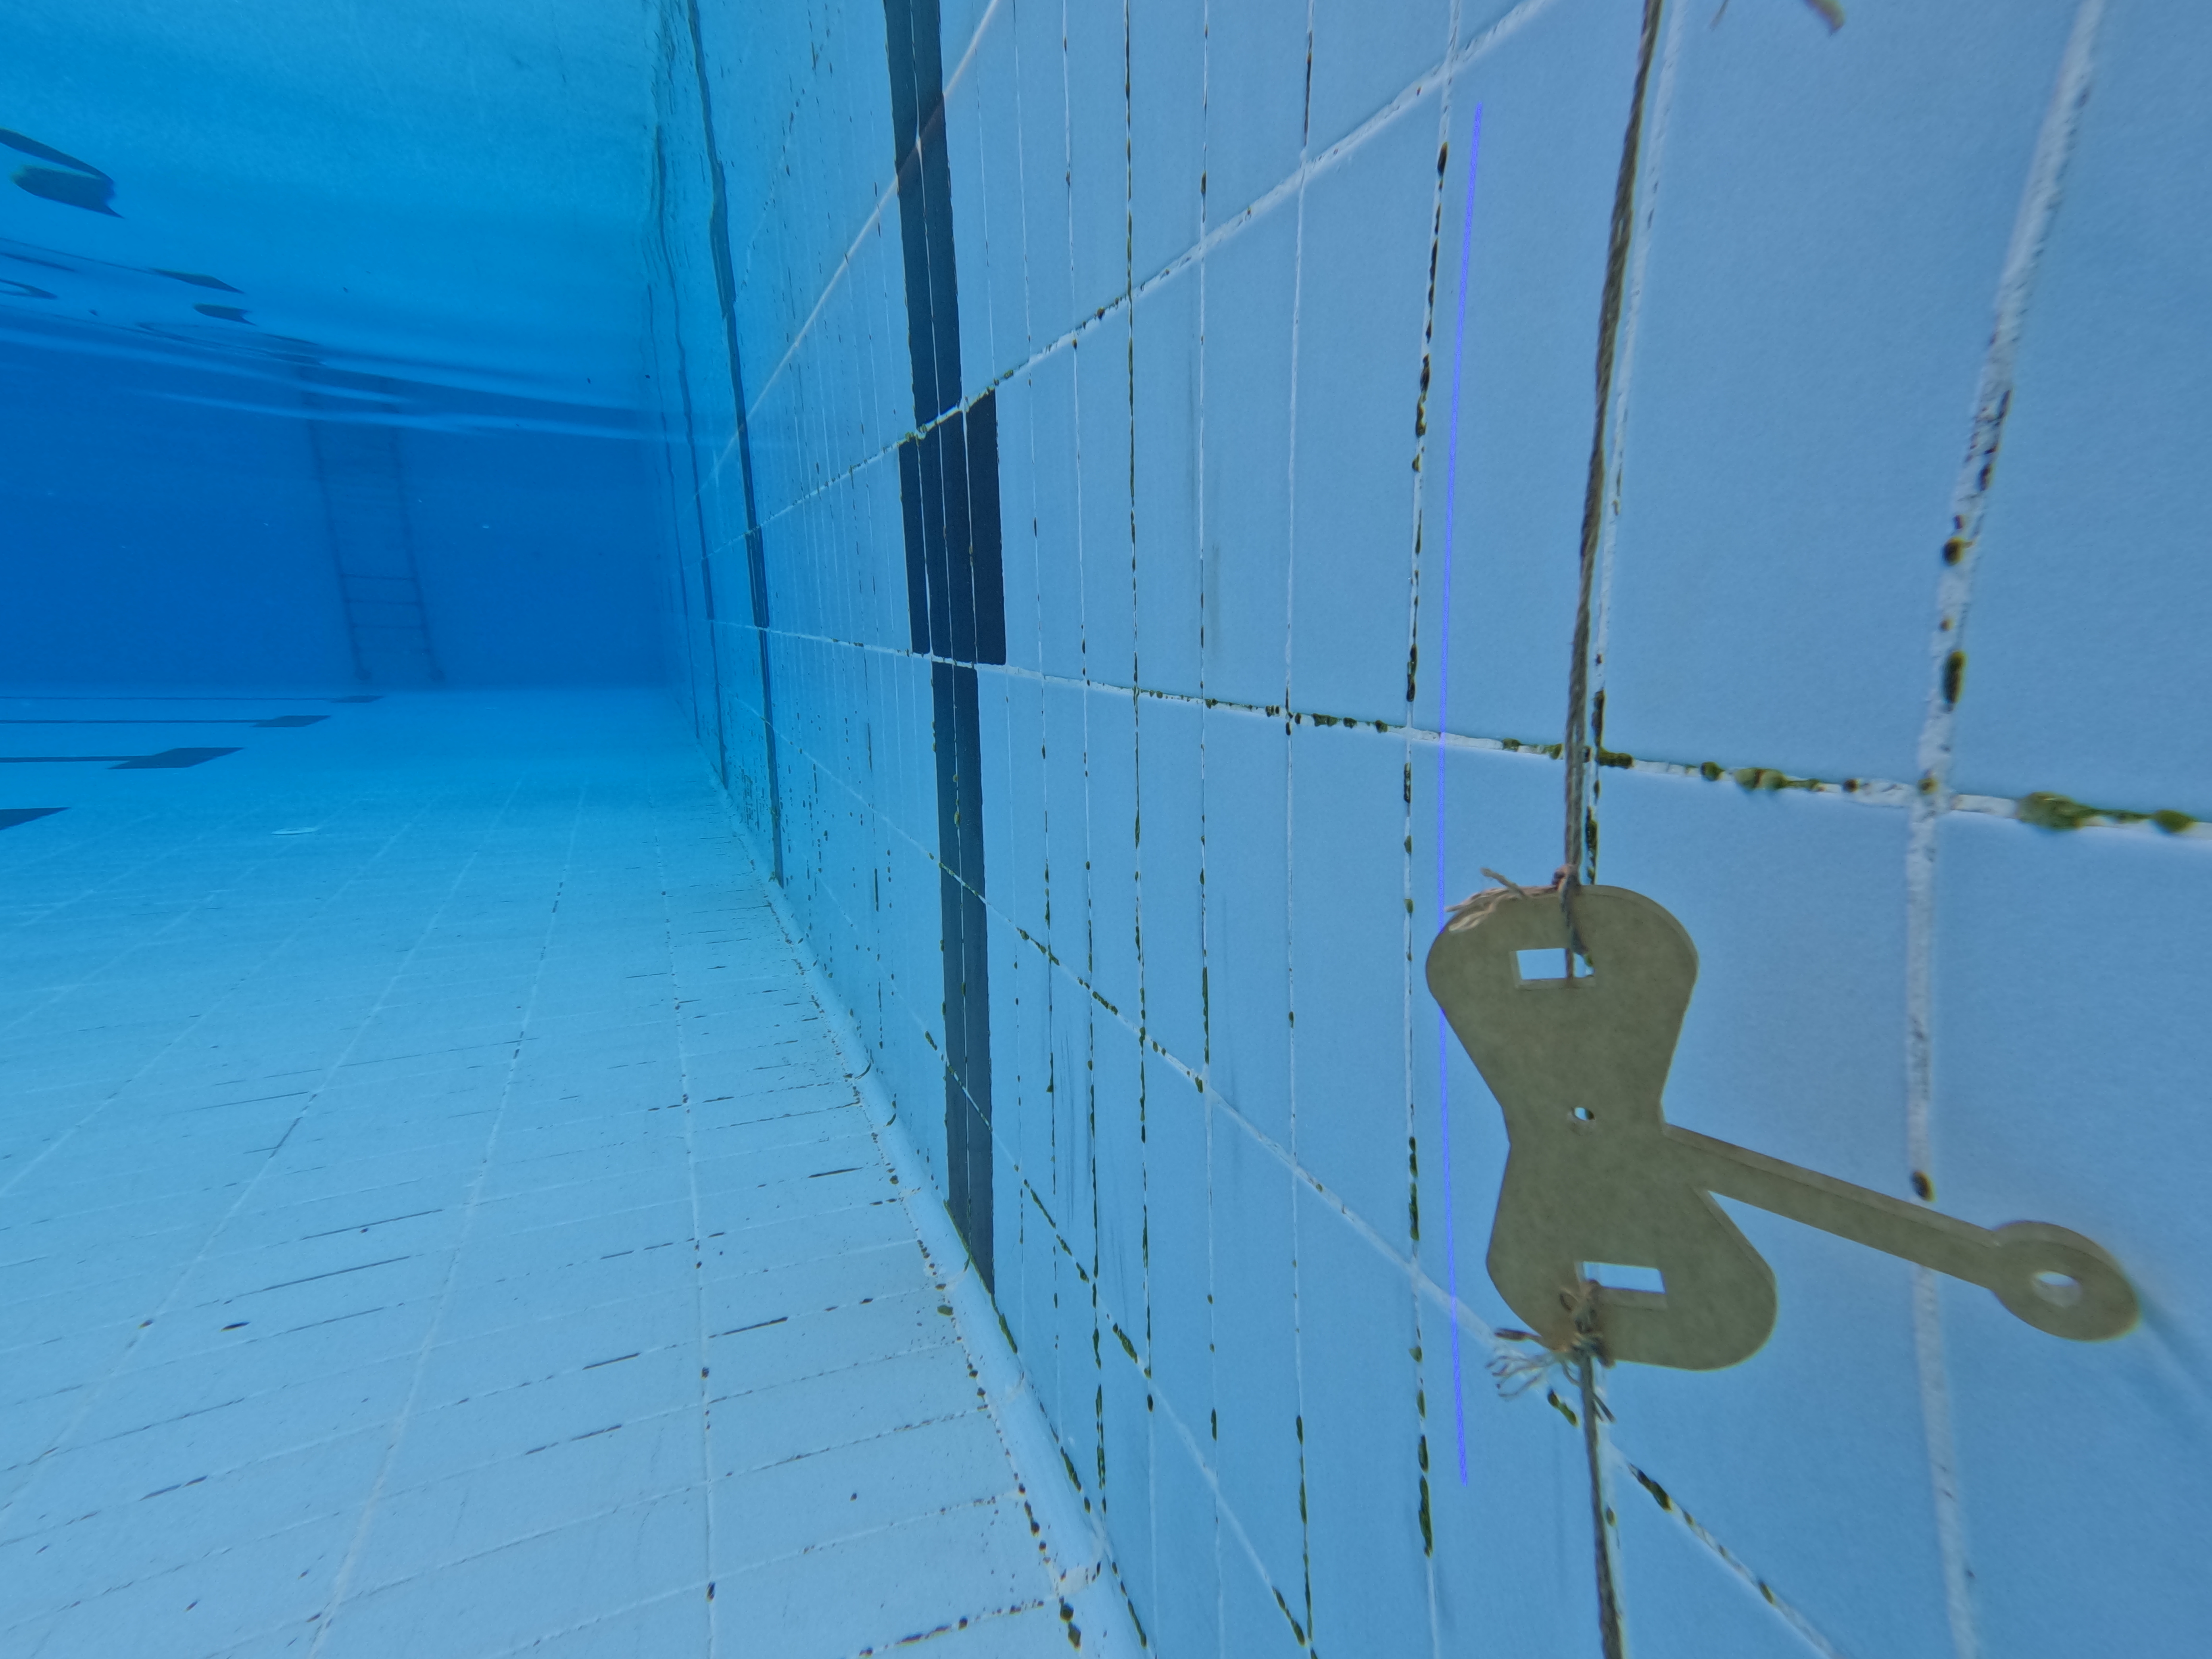

Supplement: Supplementary file 2144 [file G0050705.pdf › Level_3_2/G0050705.pdf]

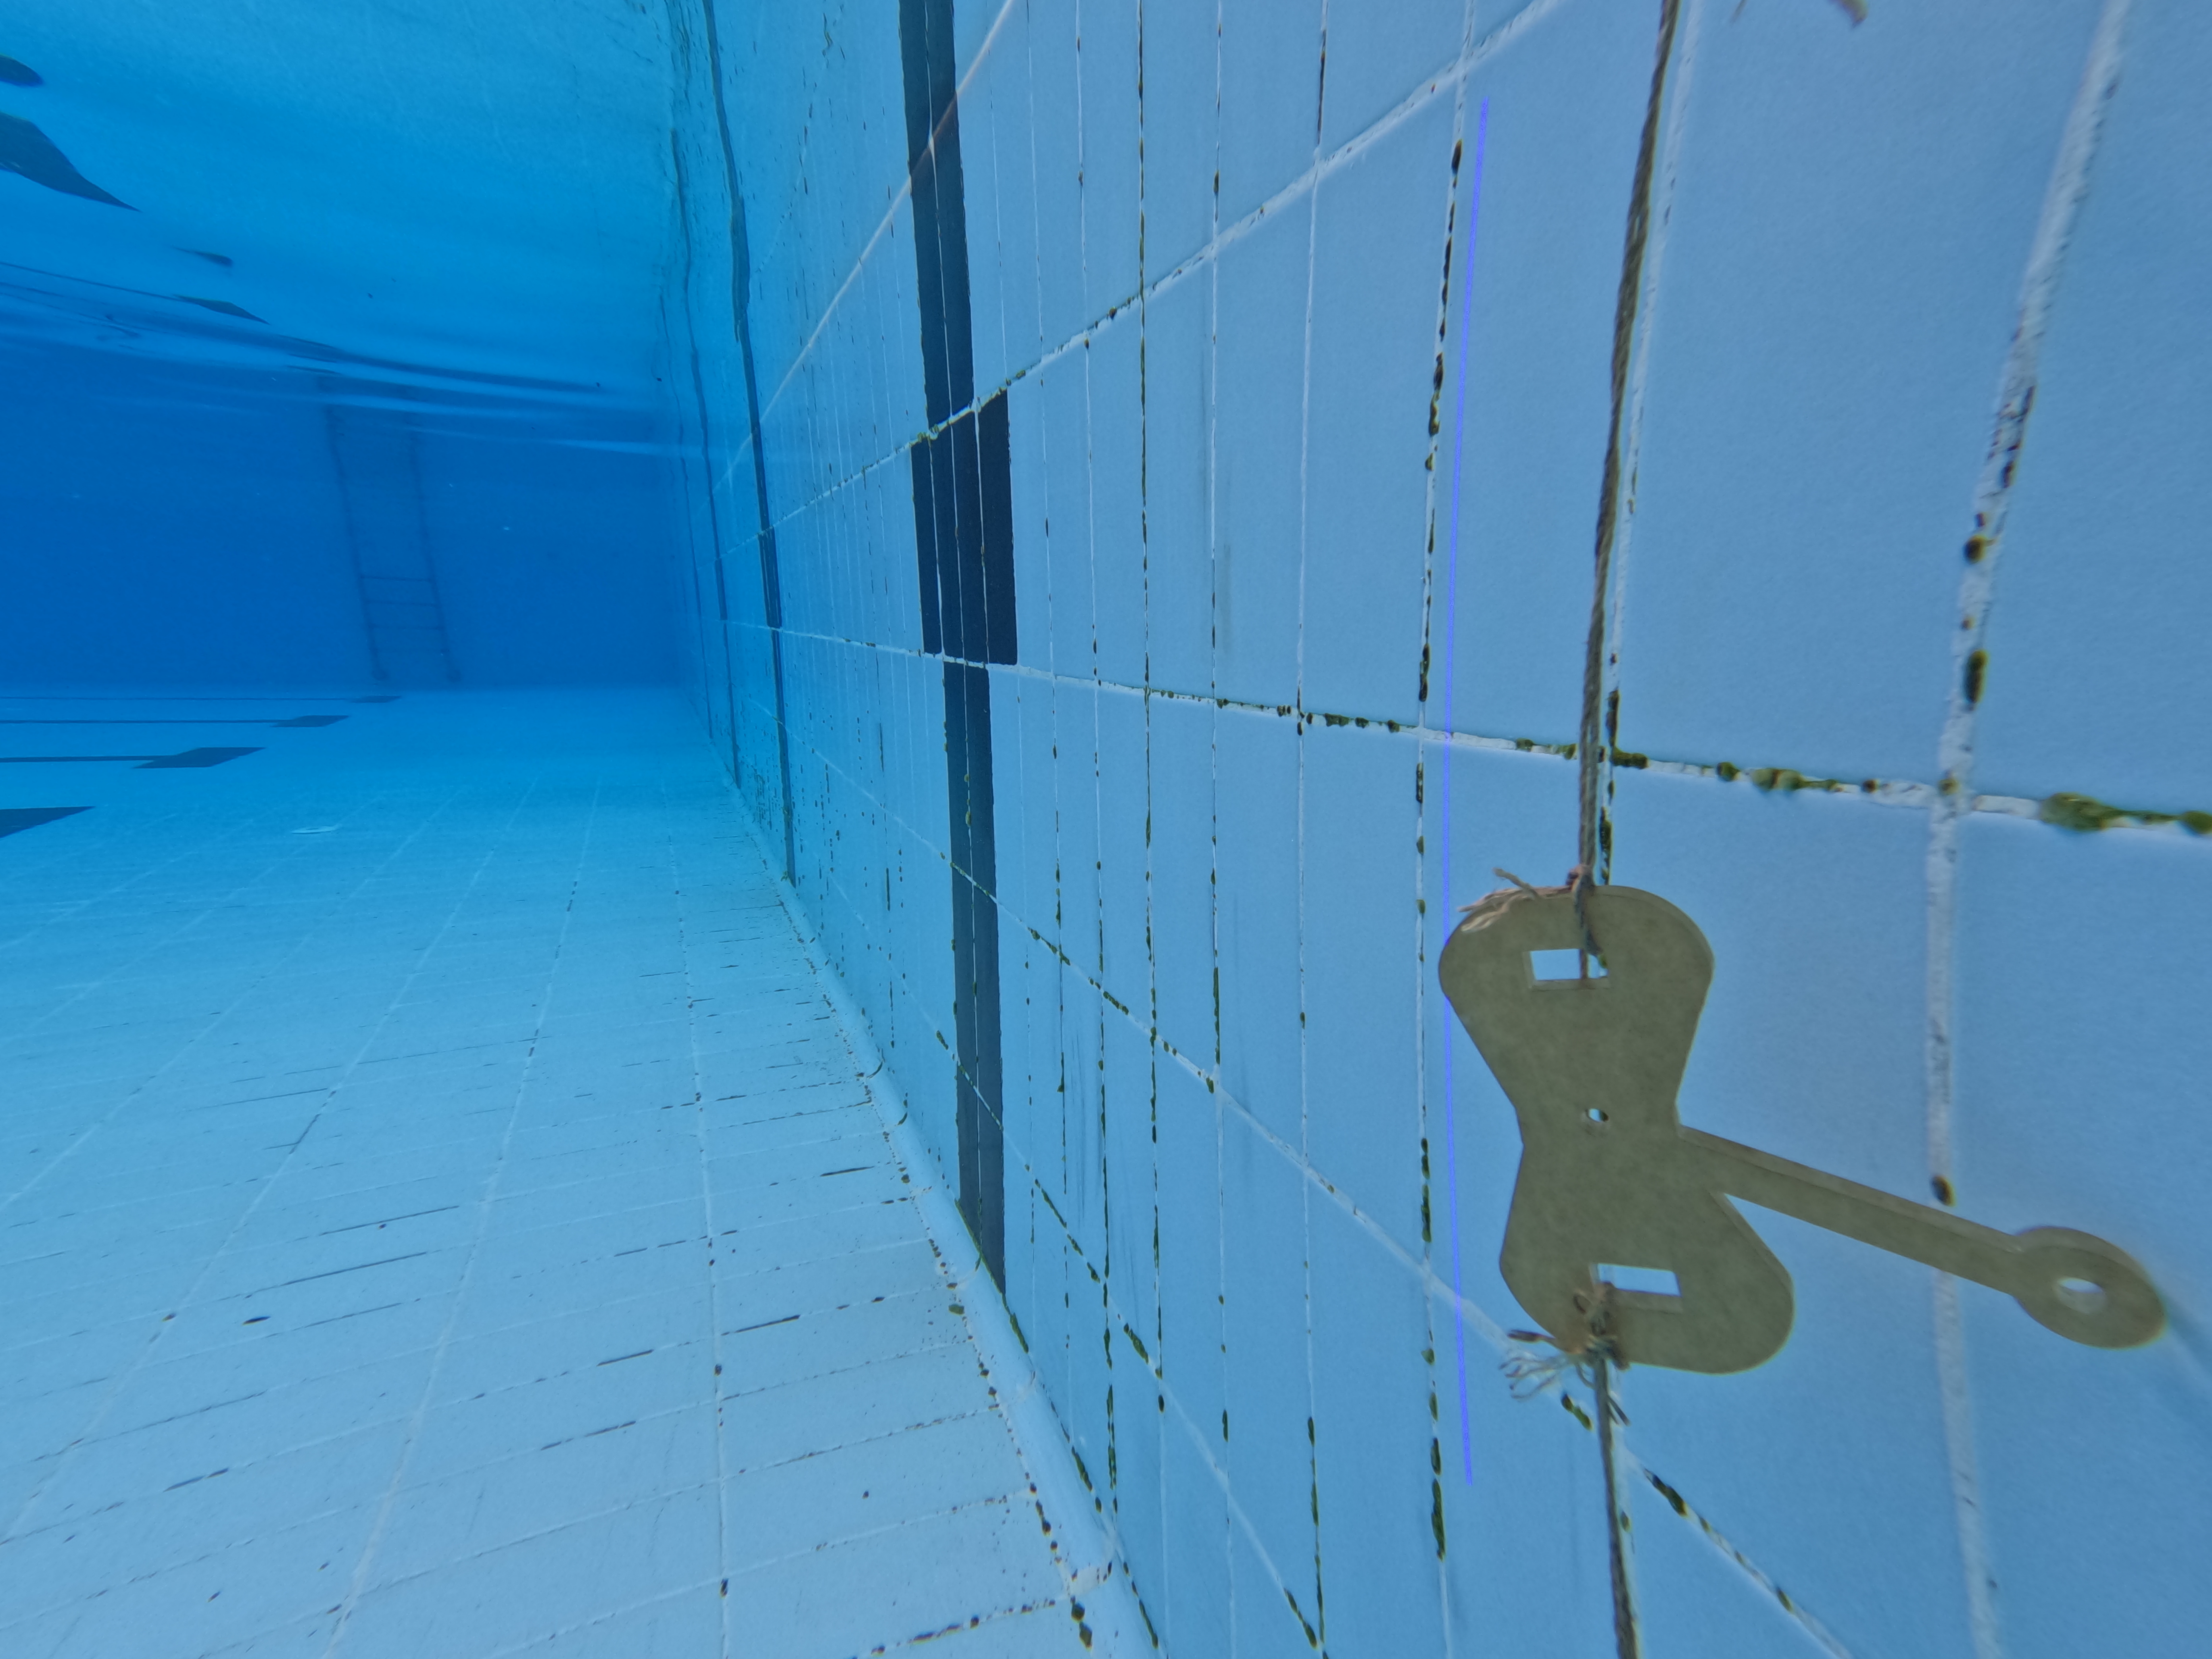

Supplement: Supplementary file 2145 [file G0050706.pdf › Level_3_2/G0050706.pdf]

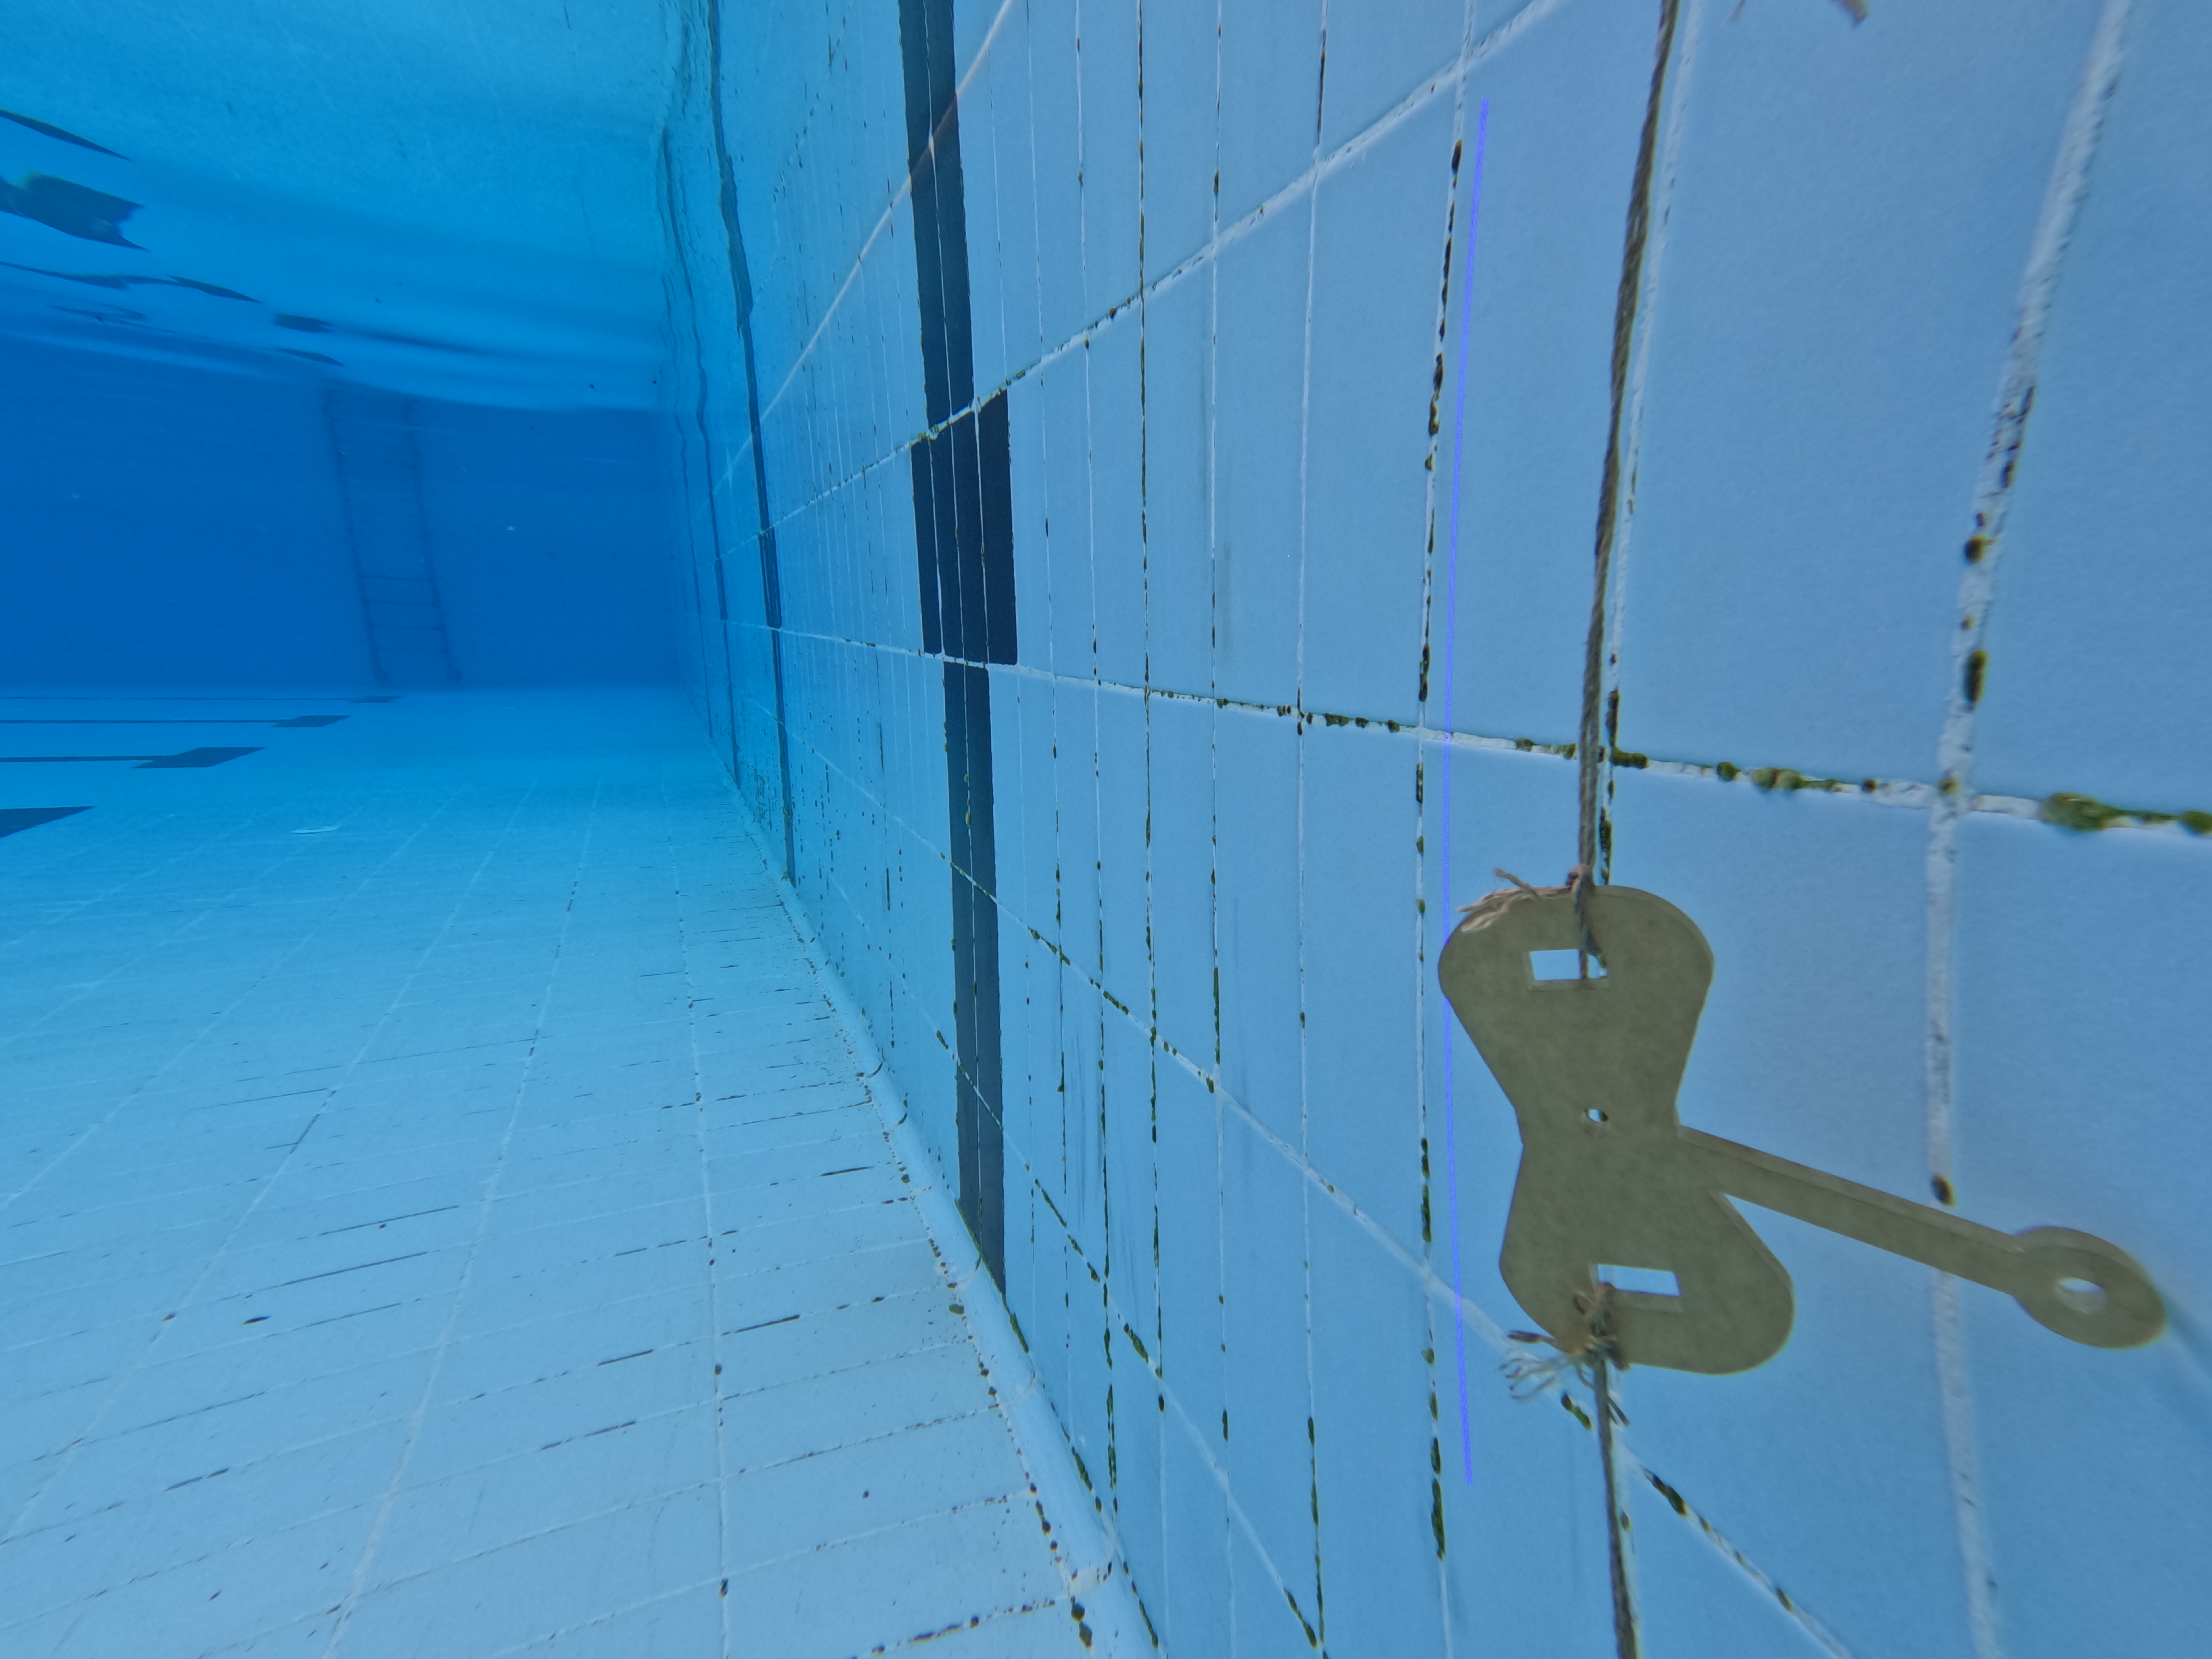

Supplement: Supplementary file 2146 [file G0050707.pdf › Level_3_2/G0050707.pdf]

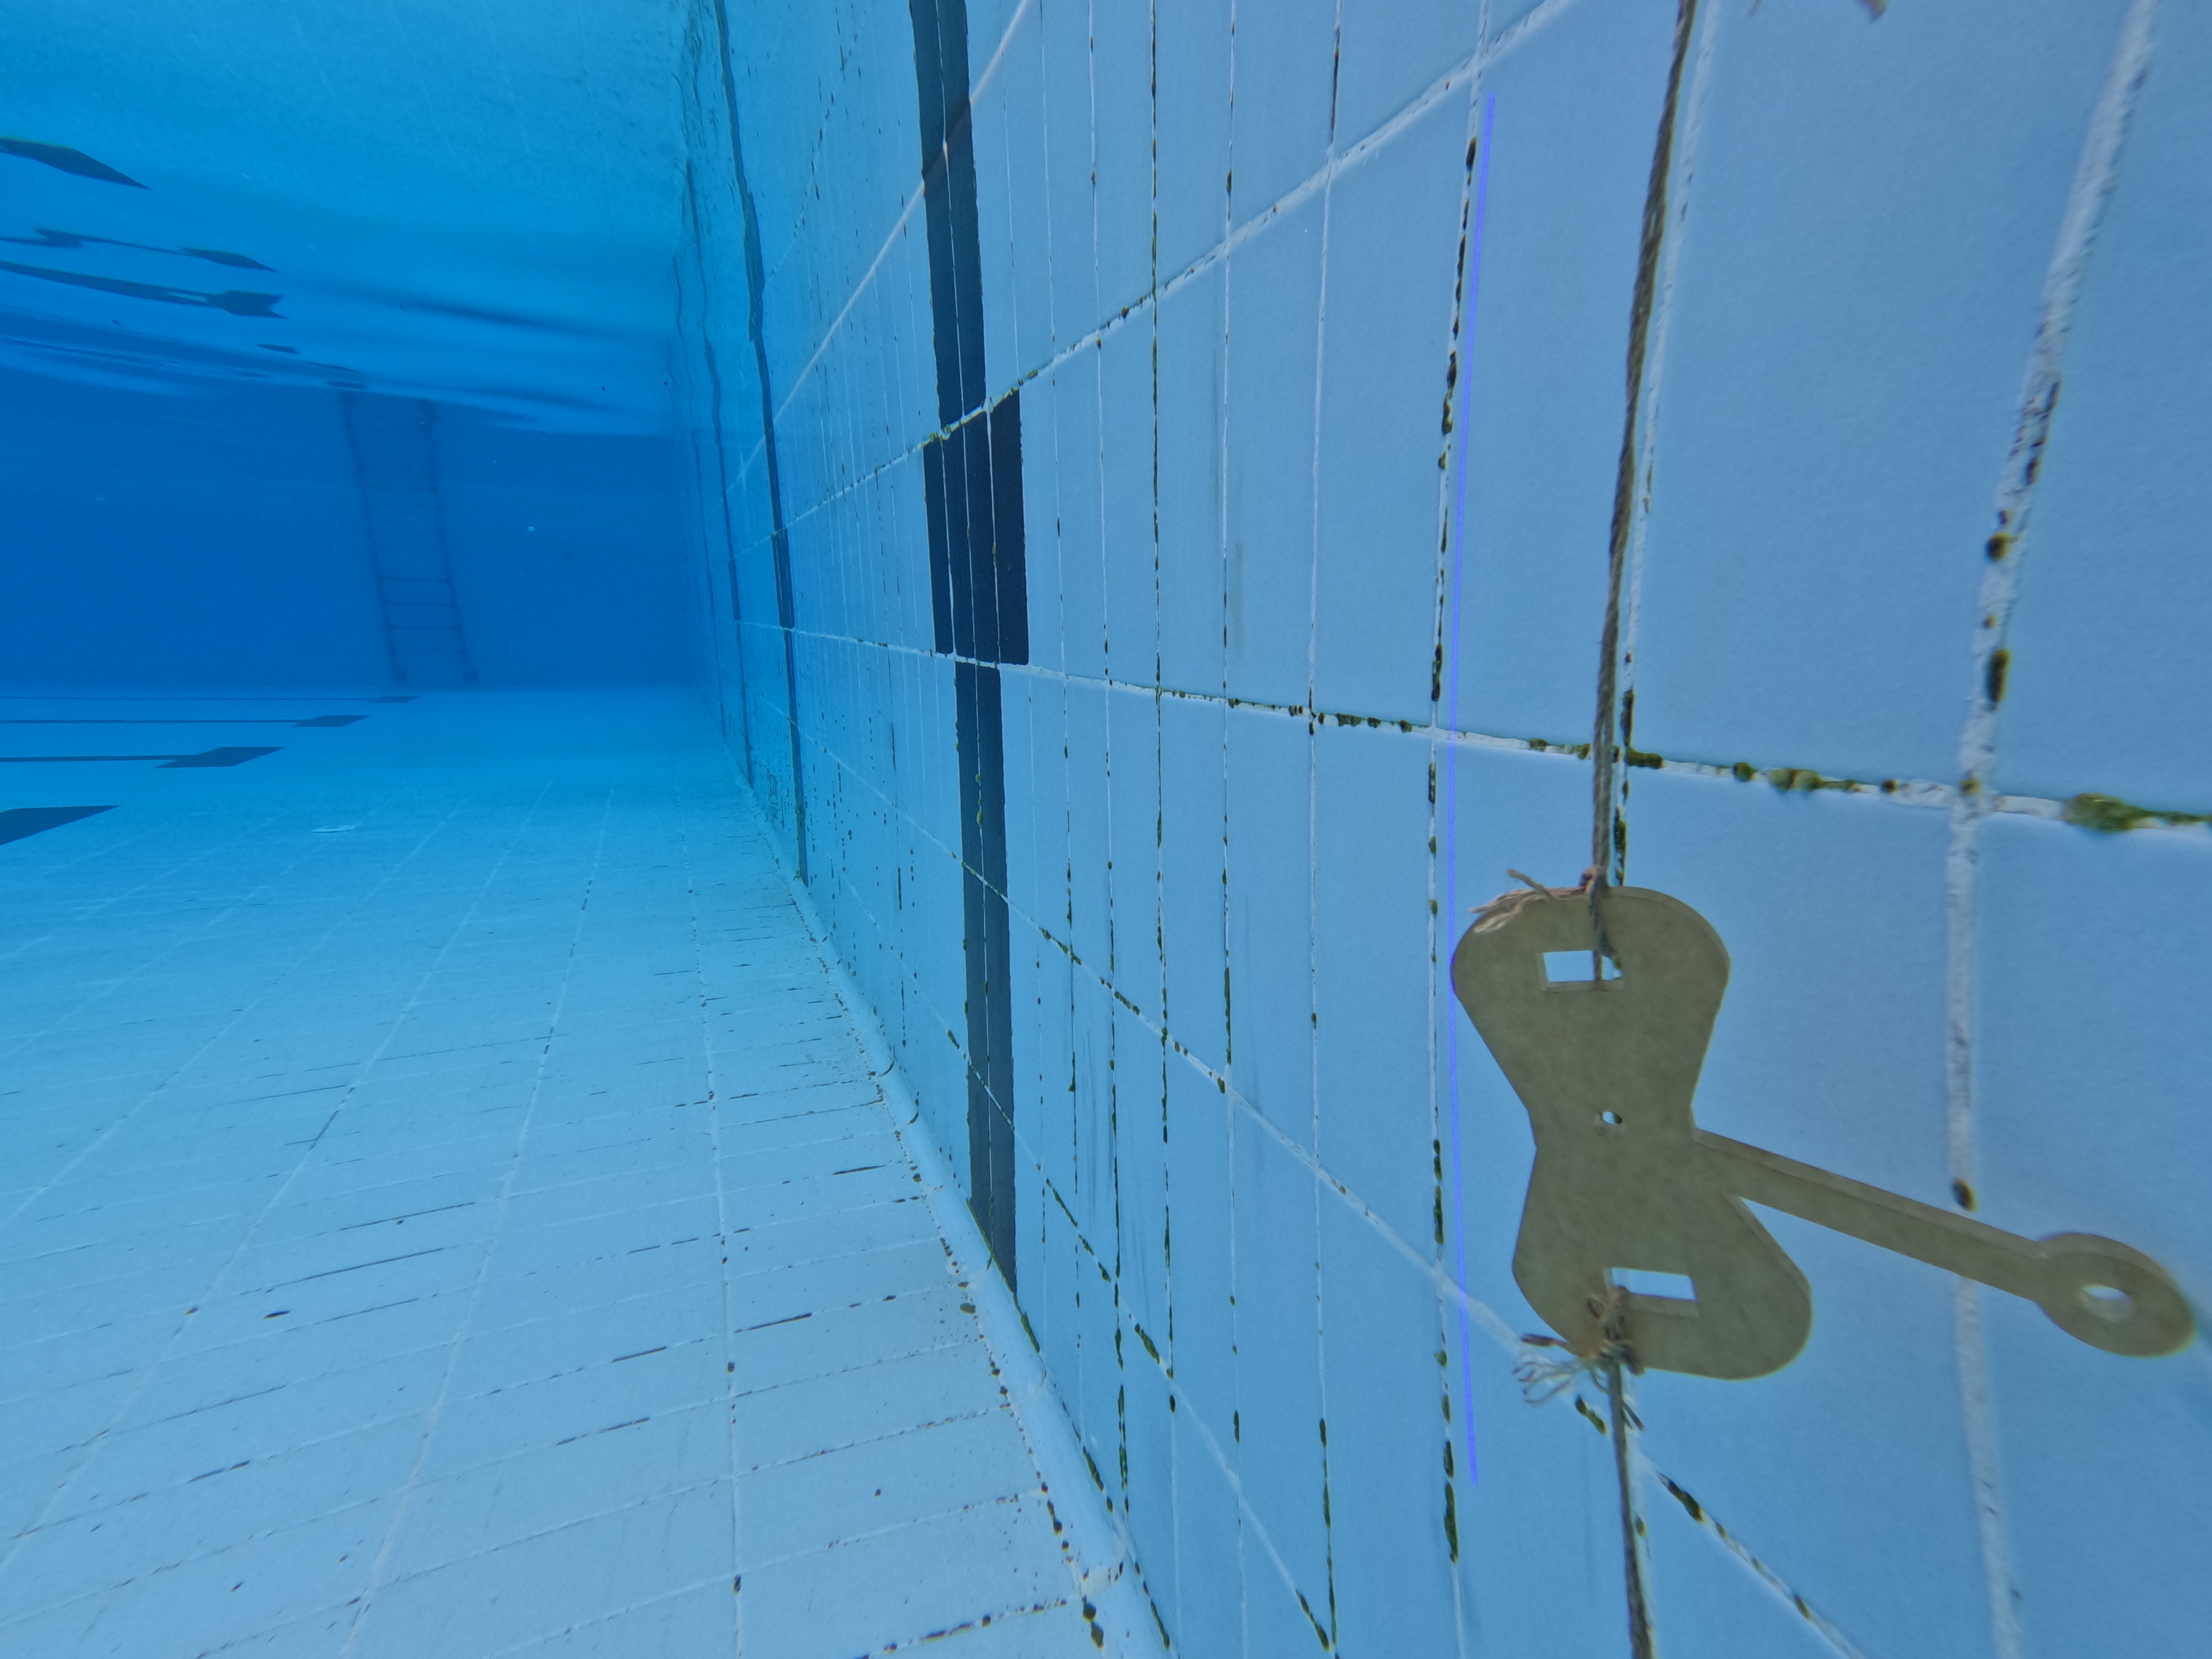

Supplement: Supplementary file 2147 [file G0050708.pdf › Level_3_2/G0050708.pdf]

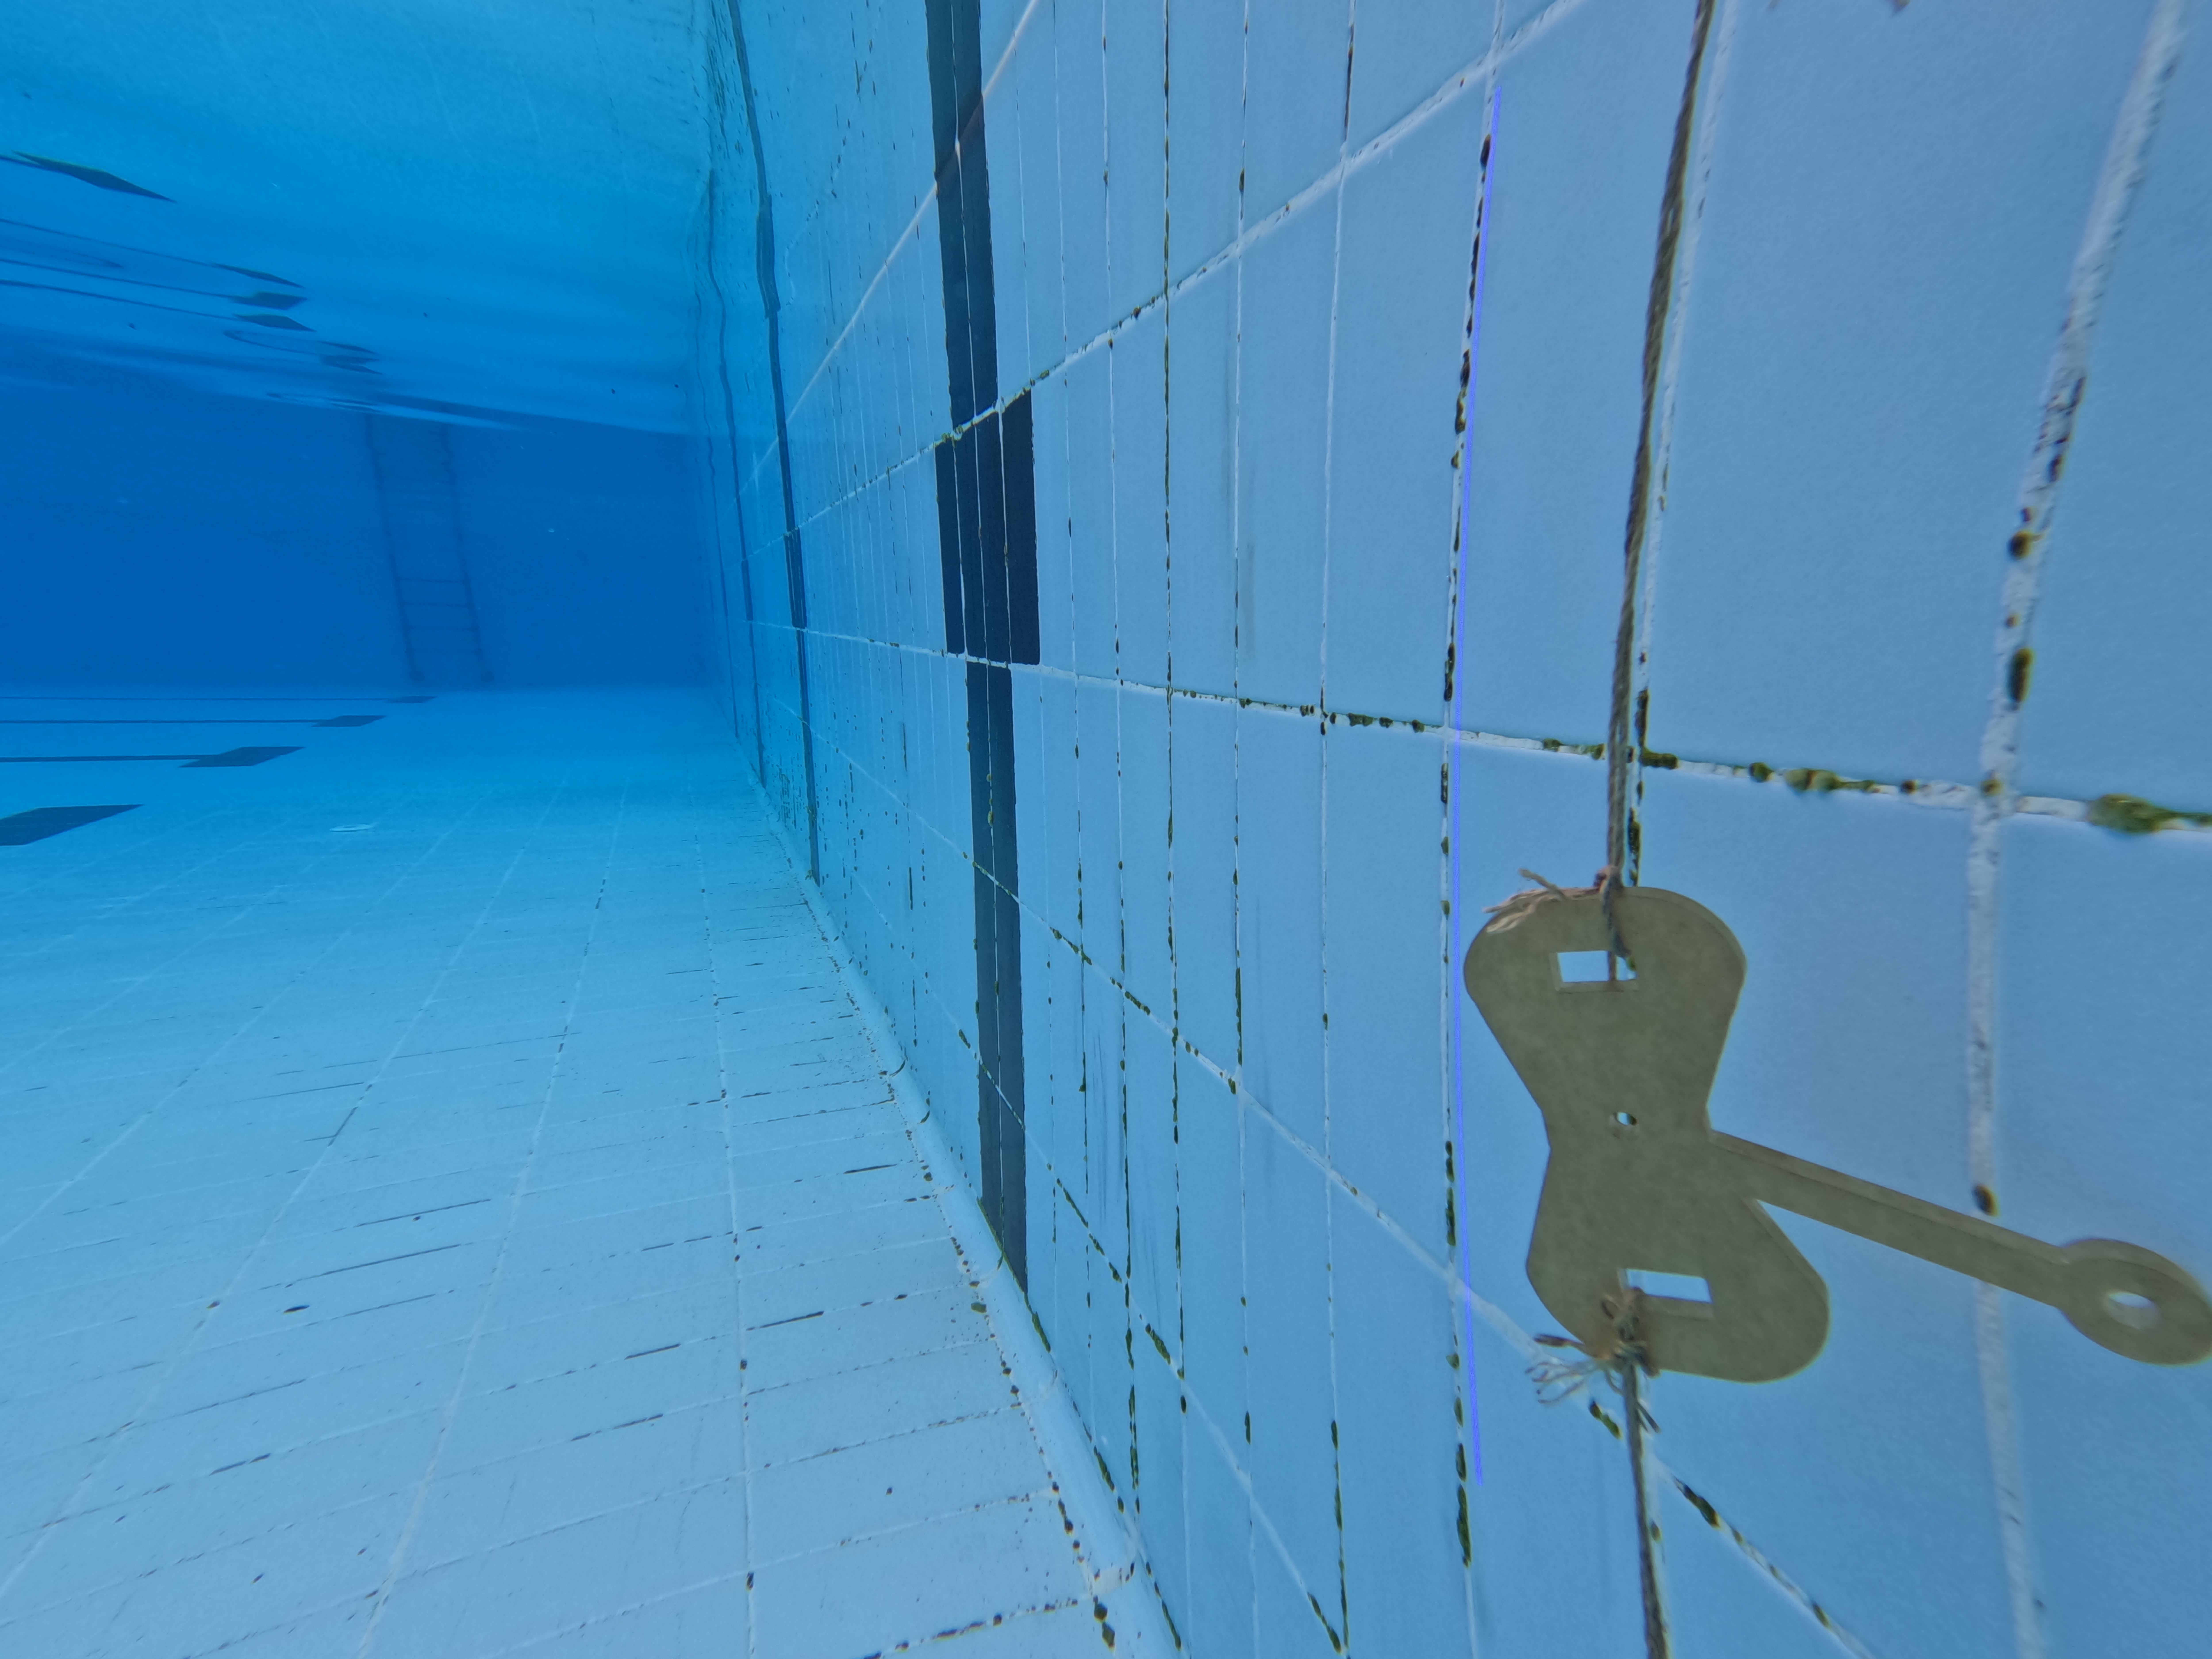

Supplement: Supplementary file 2148 [file G0050709.pdf › Level_3_2/G0050709.pdf]

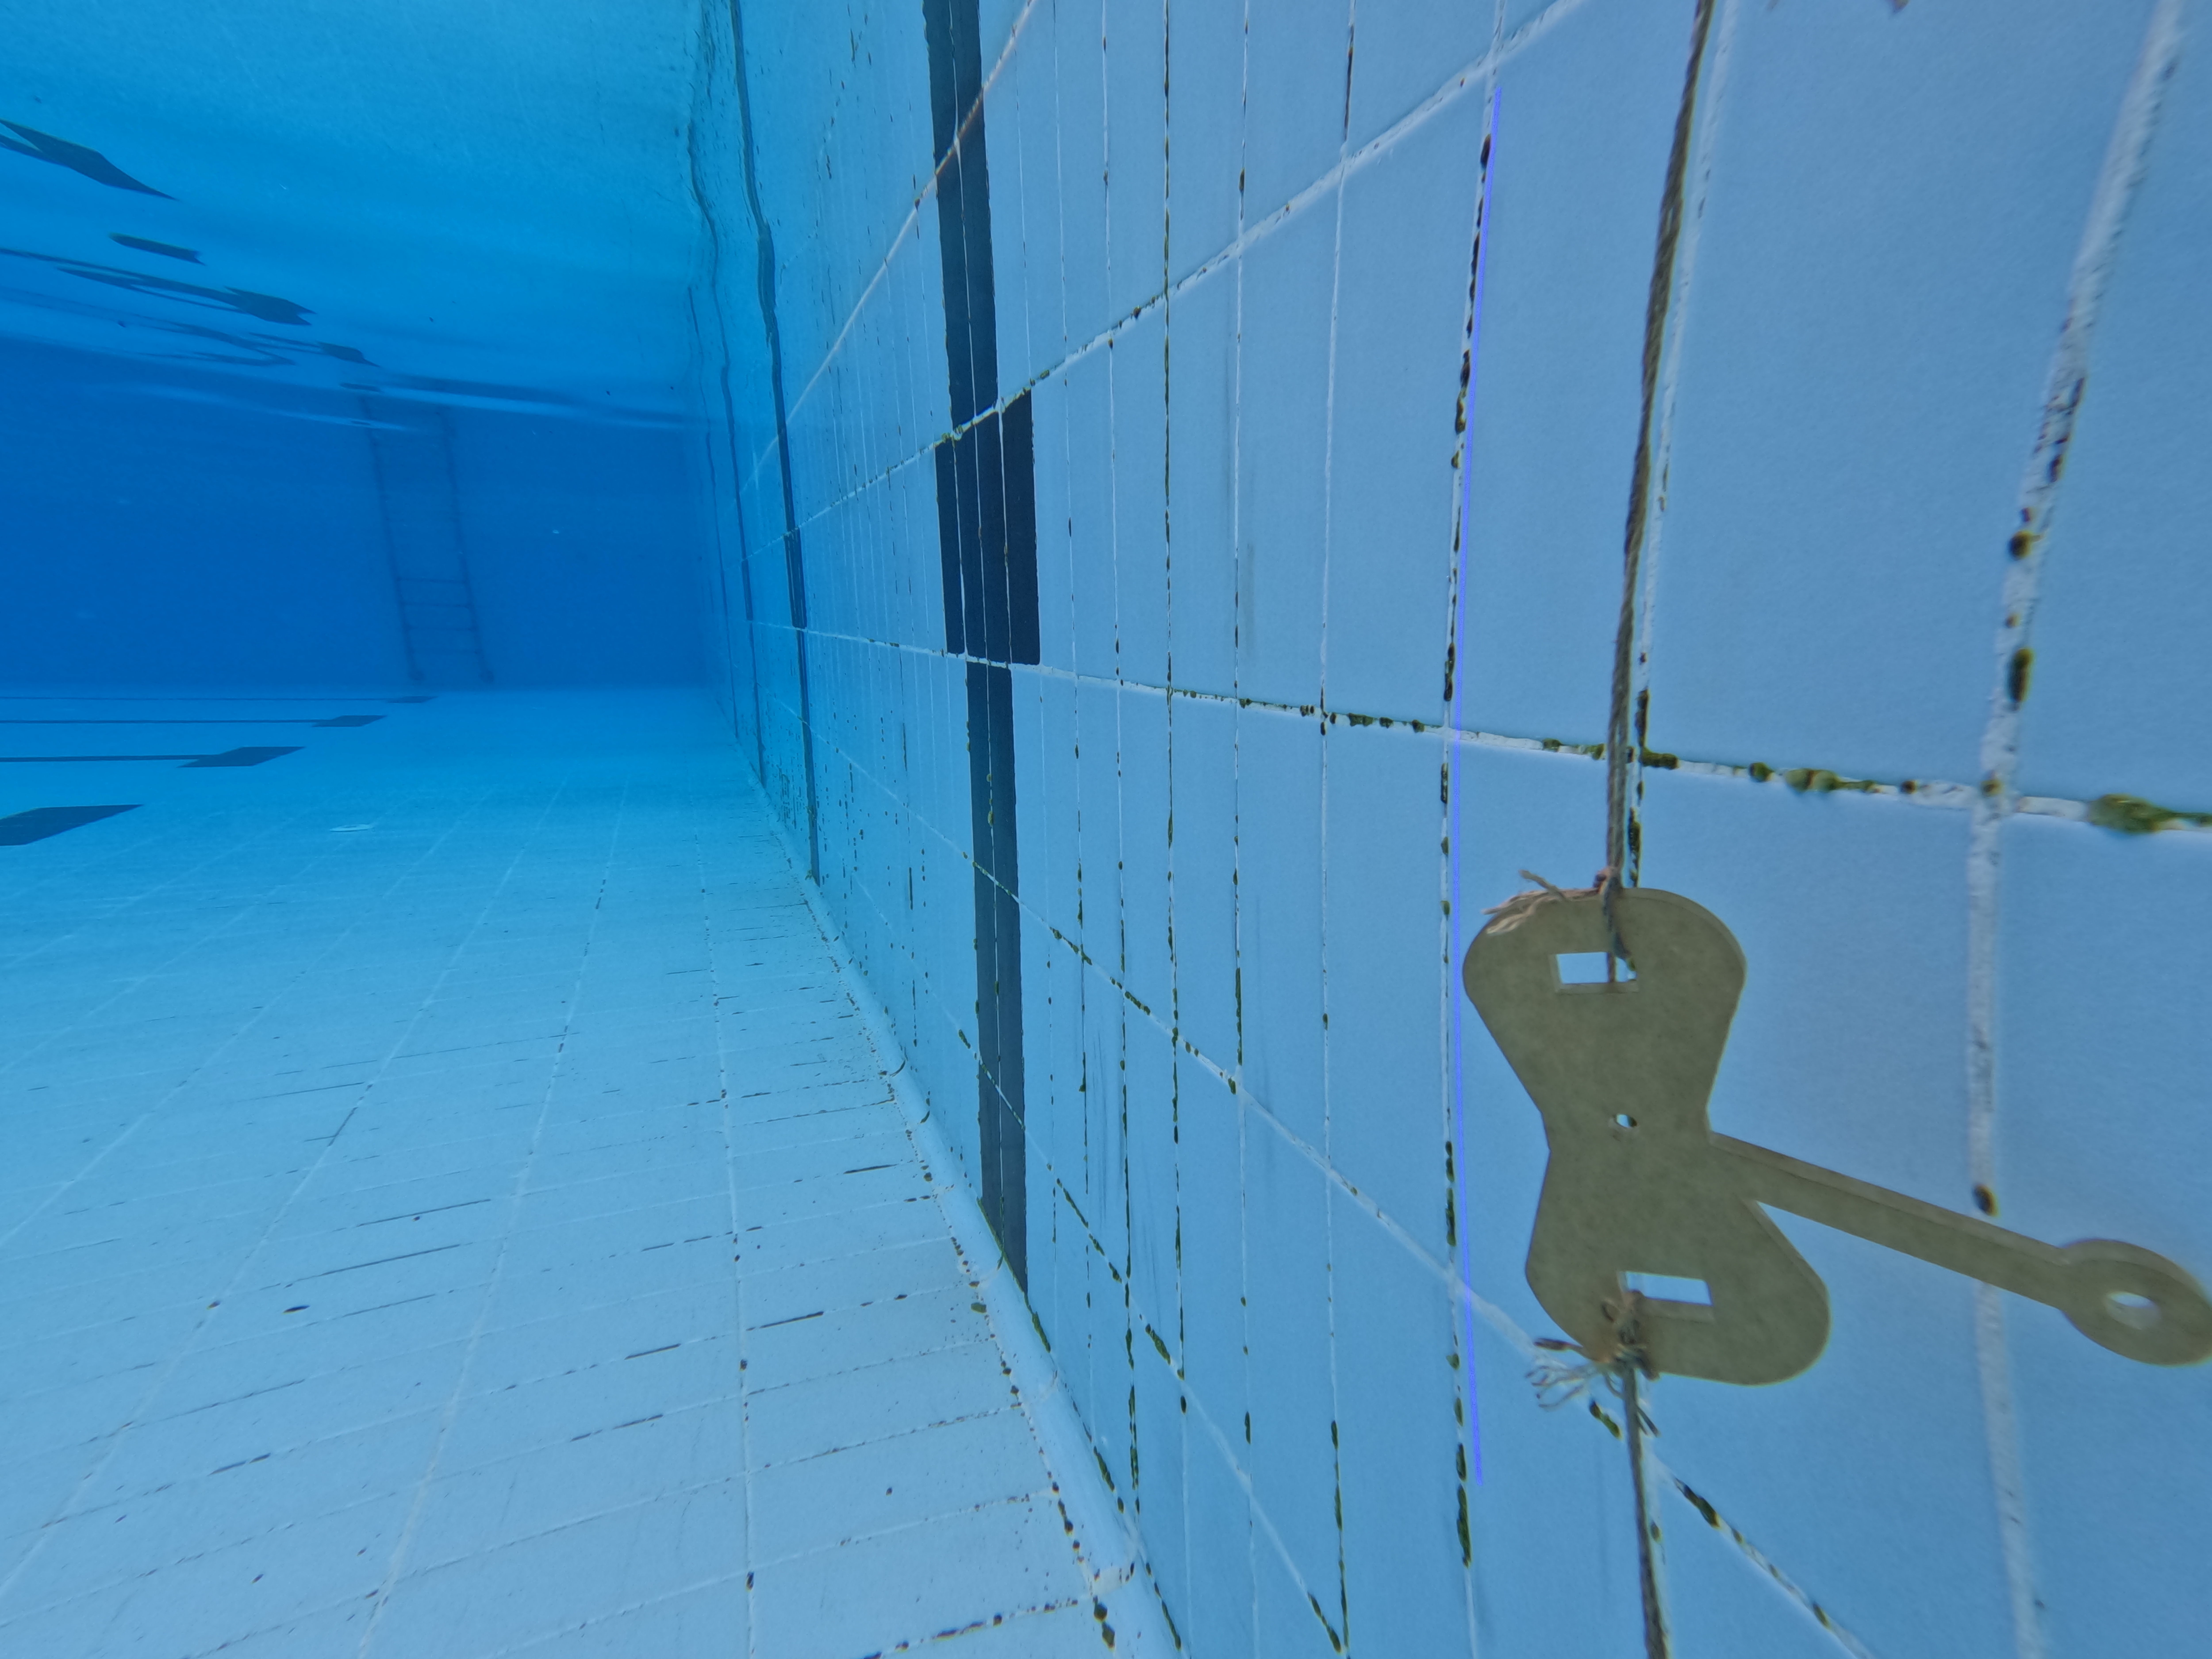

Supplement: Supplementary file 2149 [file G0050710.pdf › Level_3_2/G0050710.pdf]

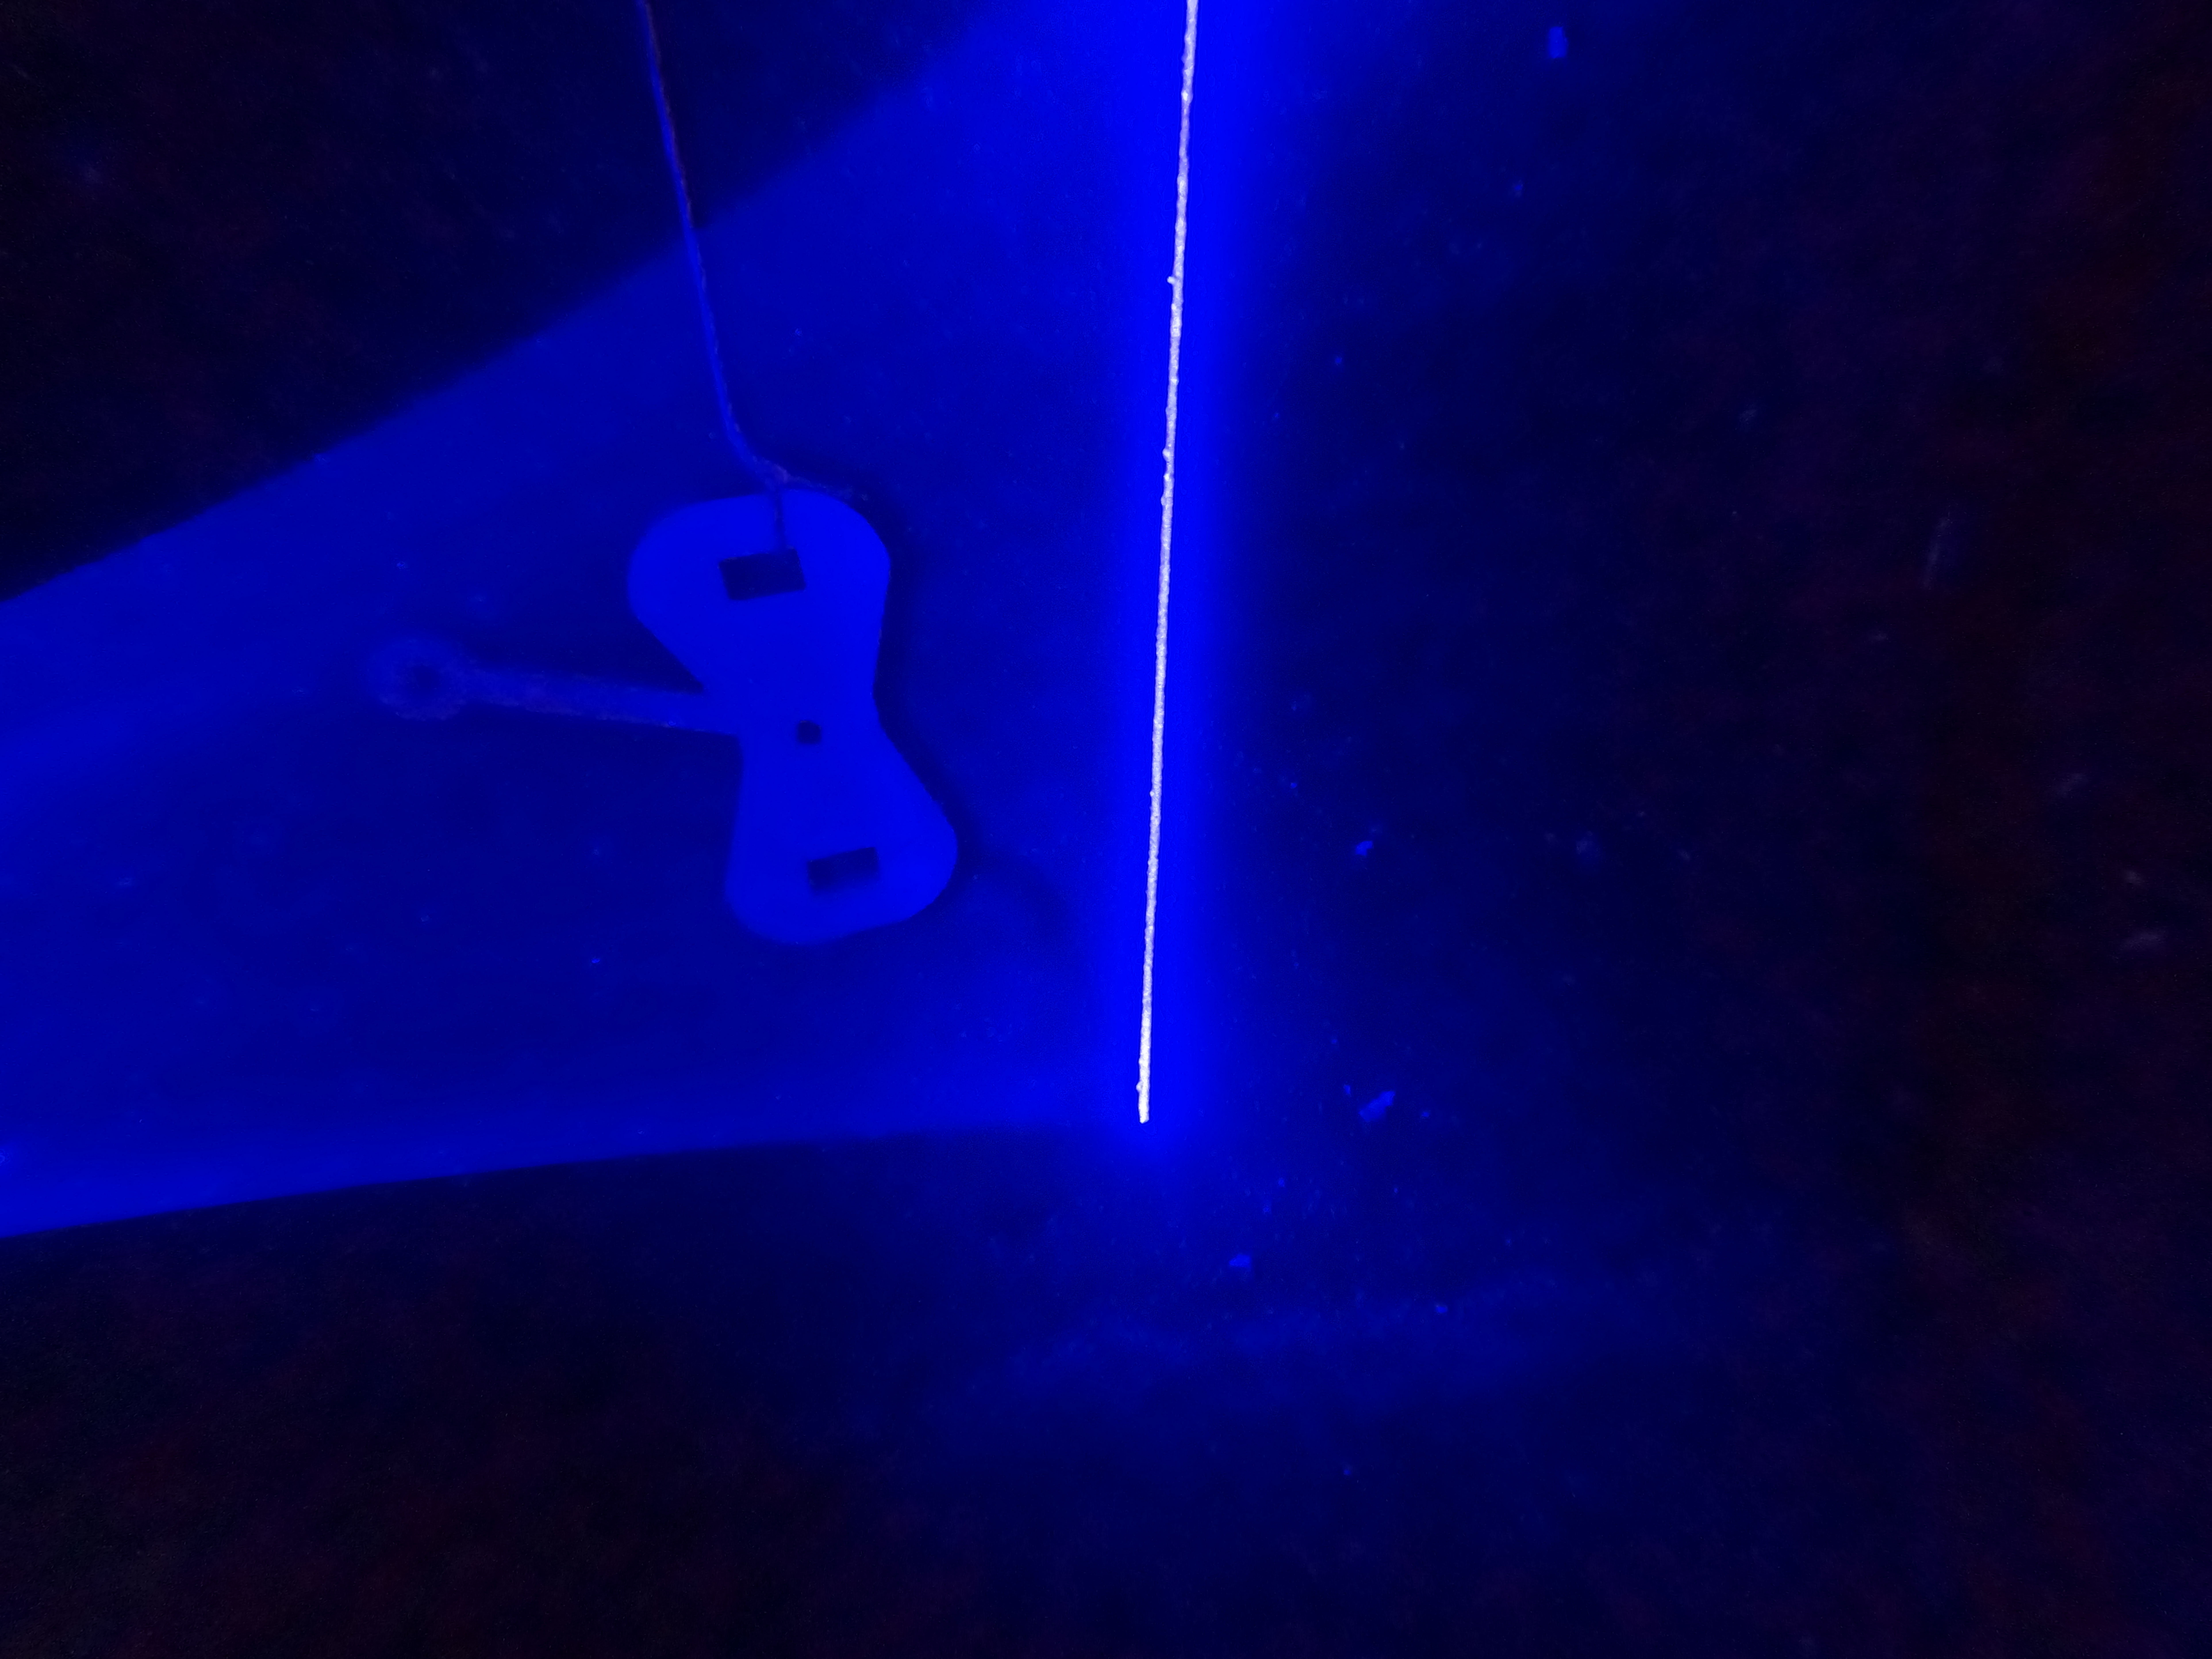

Supplement: Supplementary file 2150 [file G0016459.pdf › Level_1_2/G0016459.pdf]

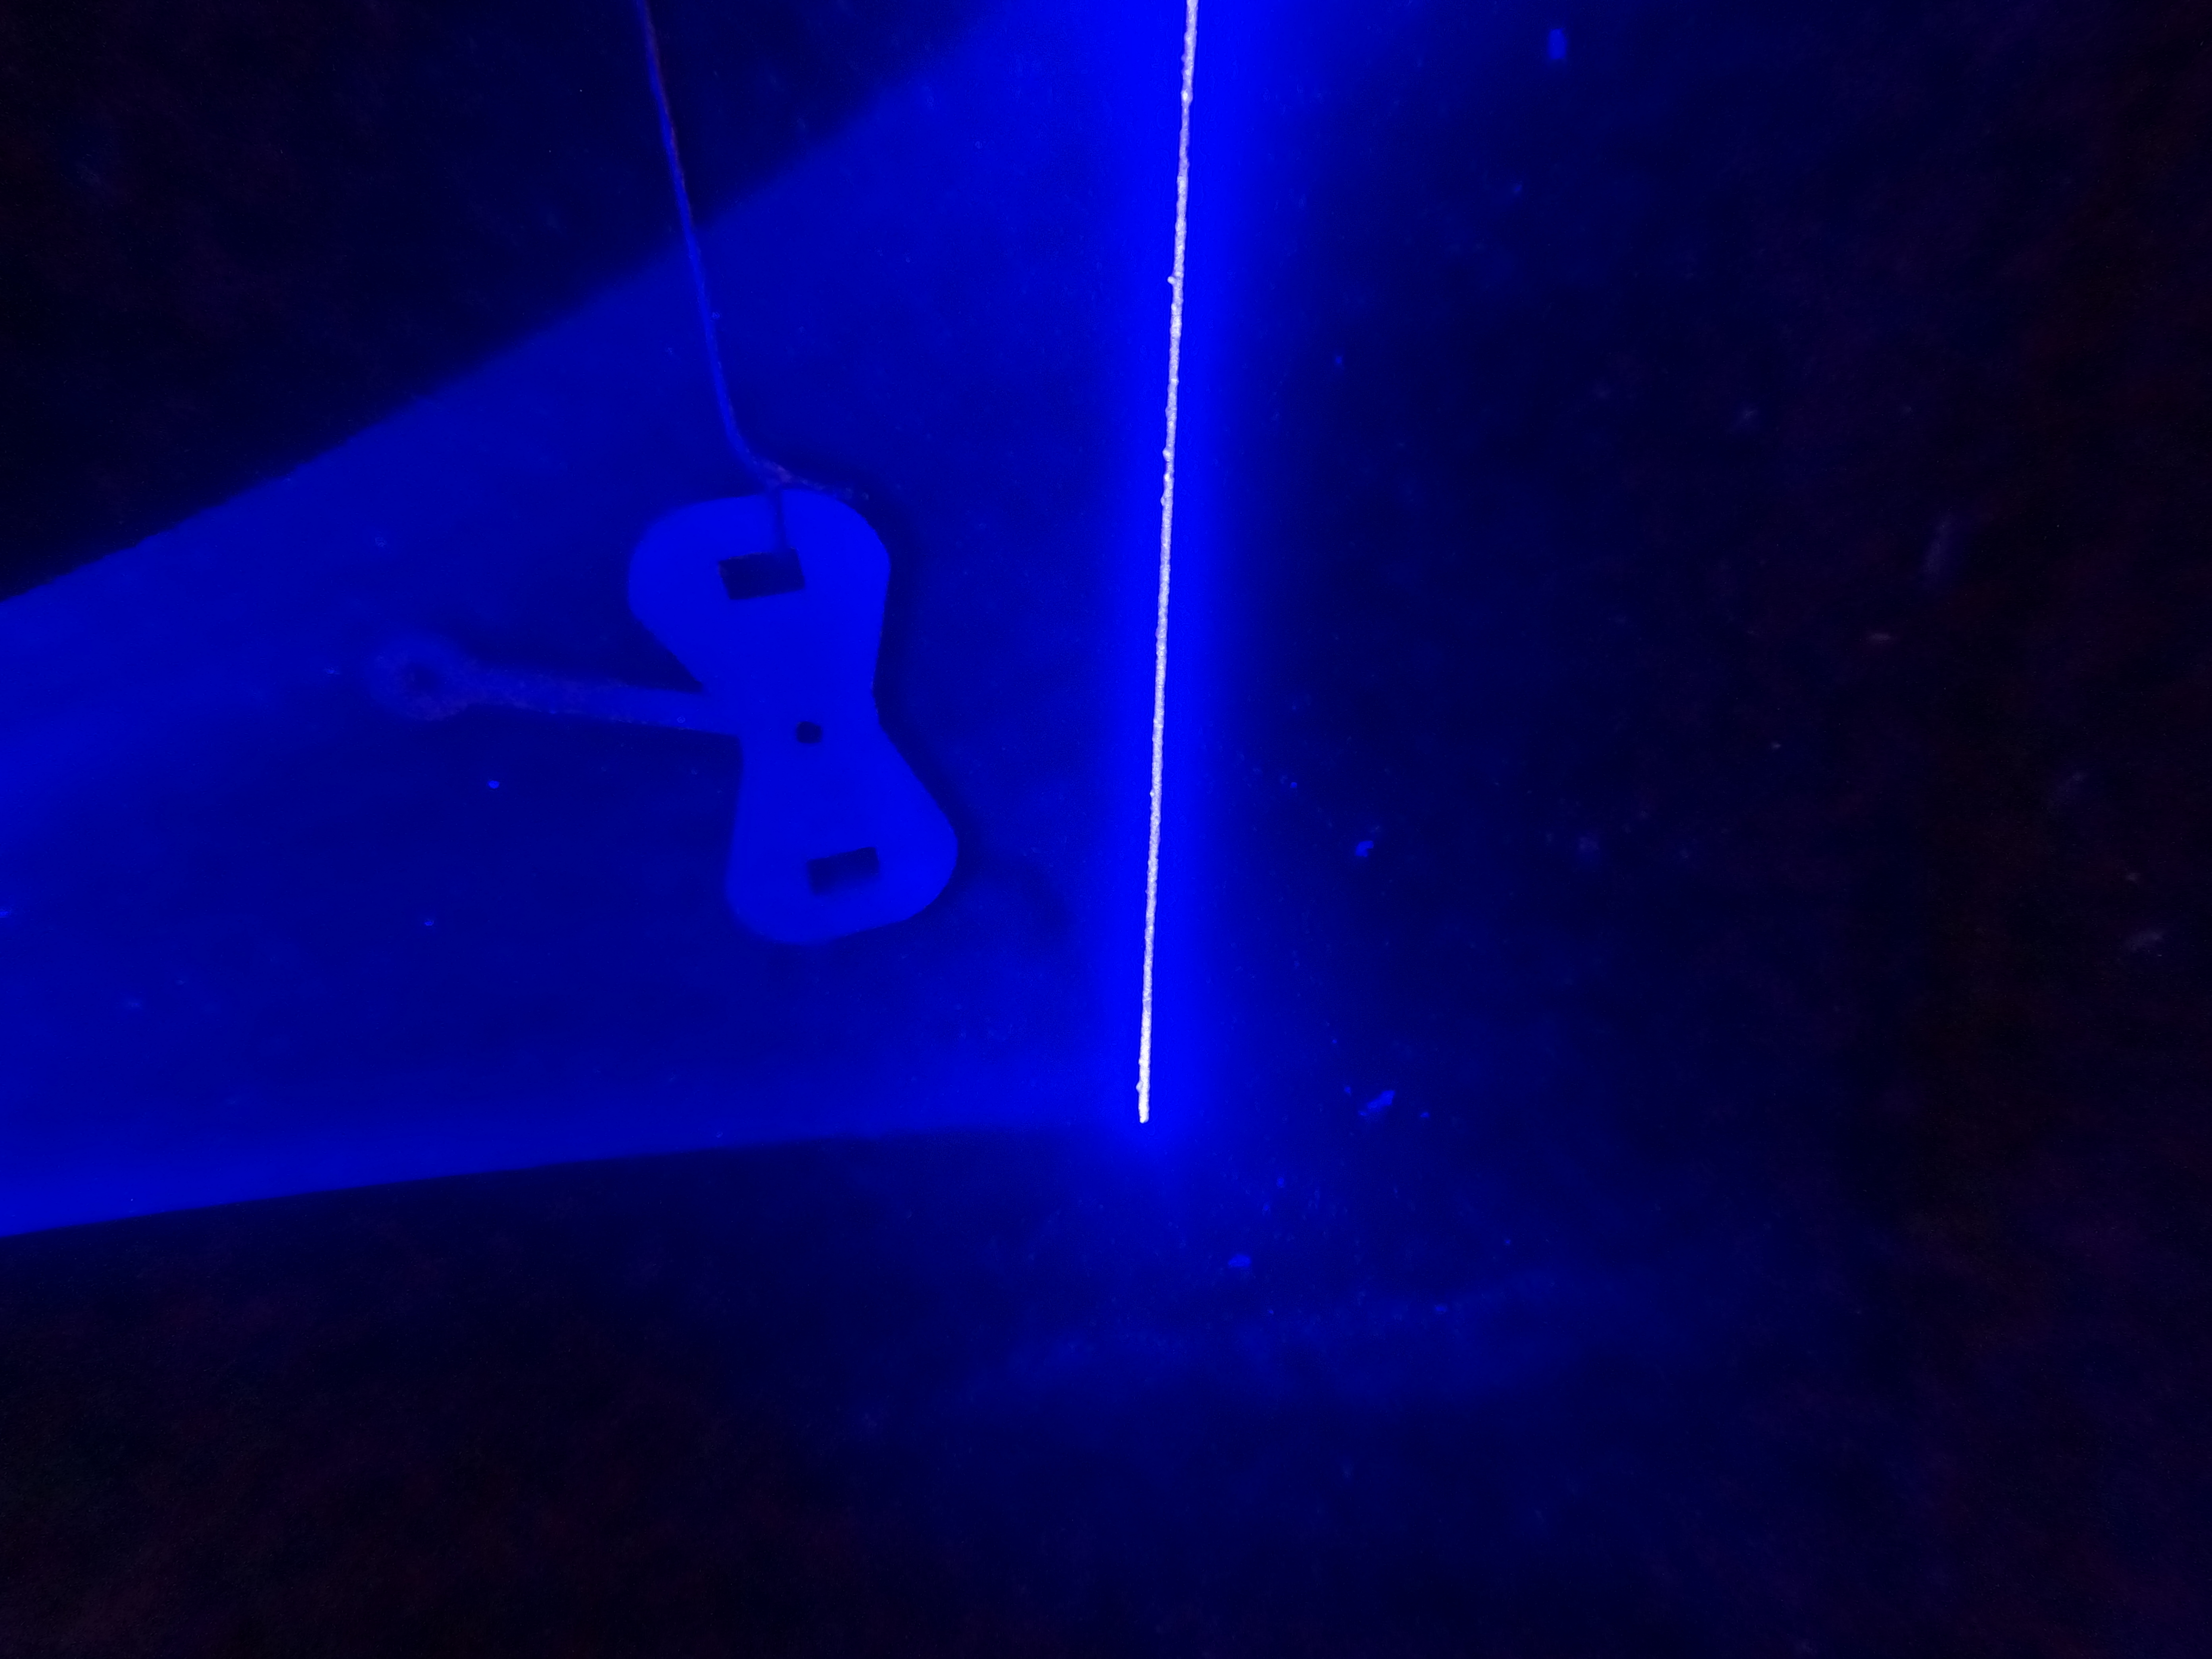

Supplement: Supplementary file 2151 [file G0016460.pdf › Level_1_2/G0016460.pdf]

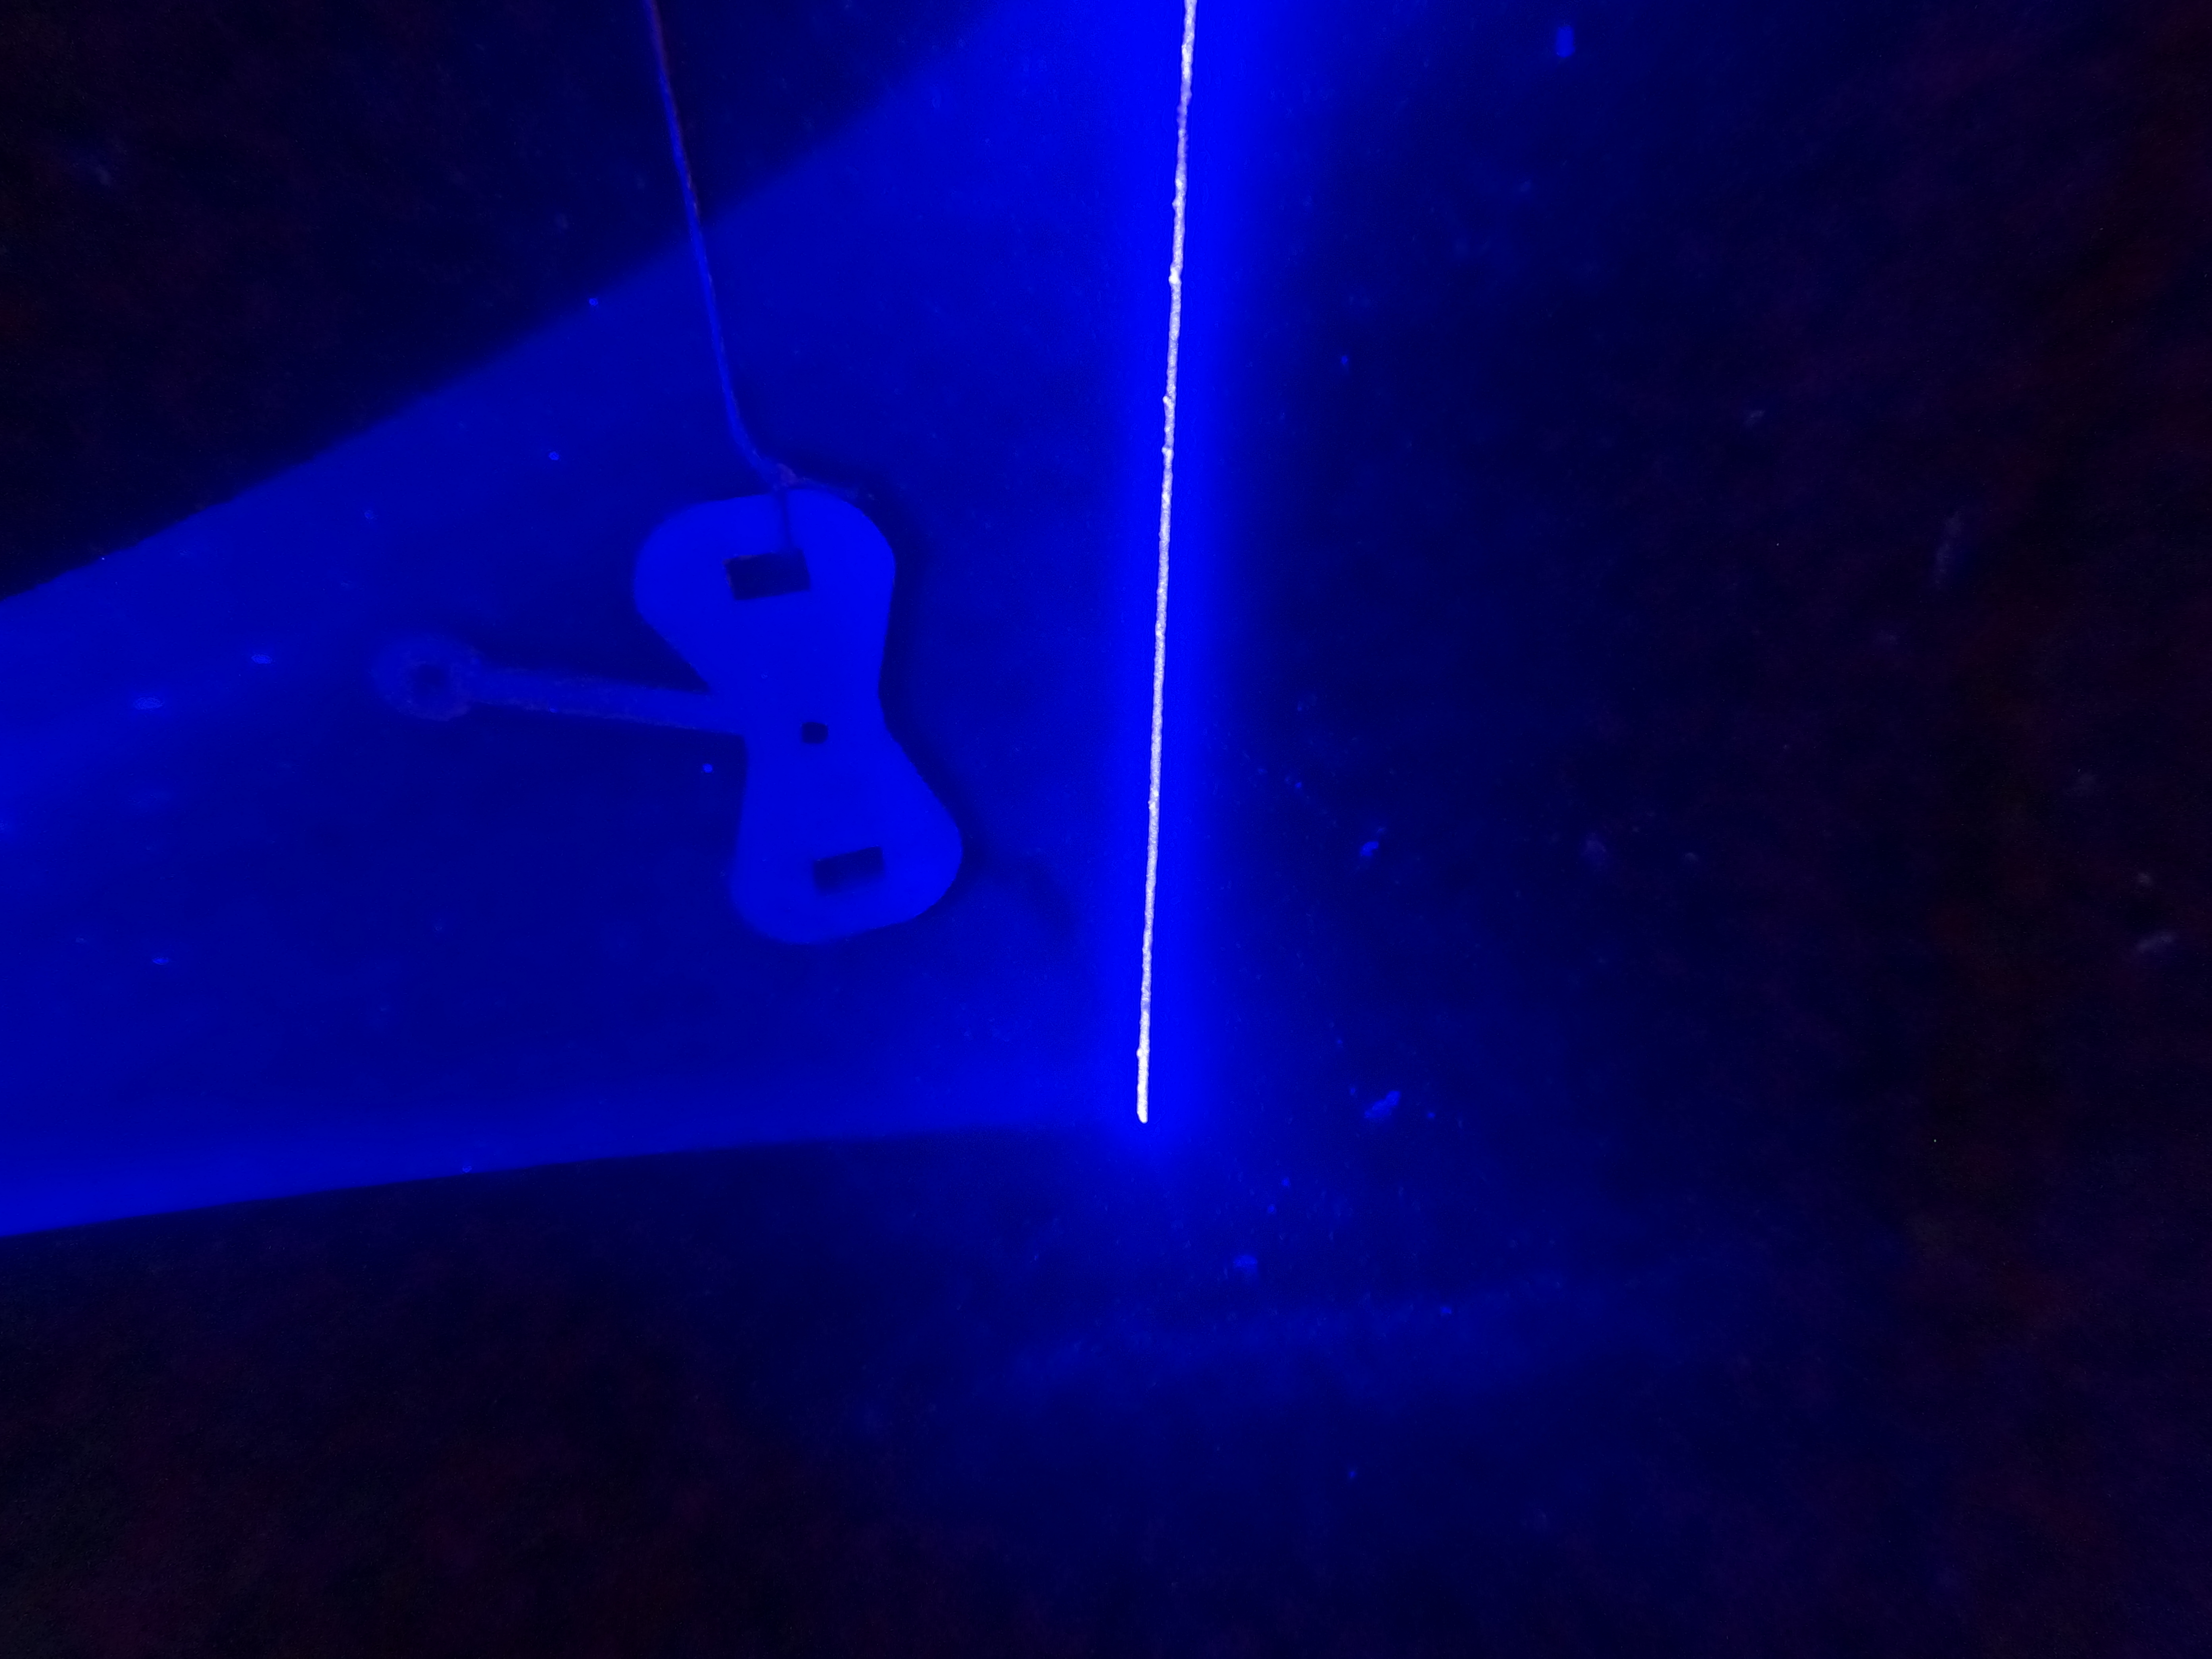

Supplement: Supplementary file 2152 [file G0016461.pdf › Level_1_2/G0016461.pdf]

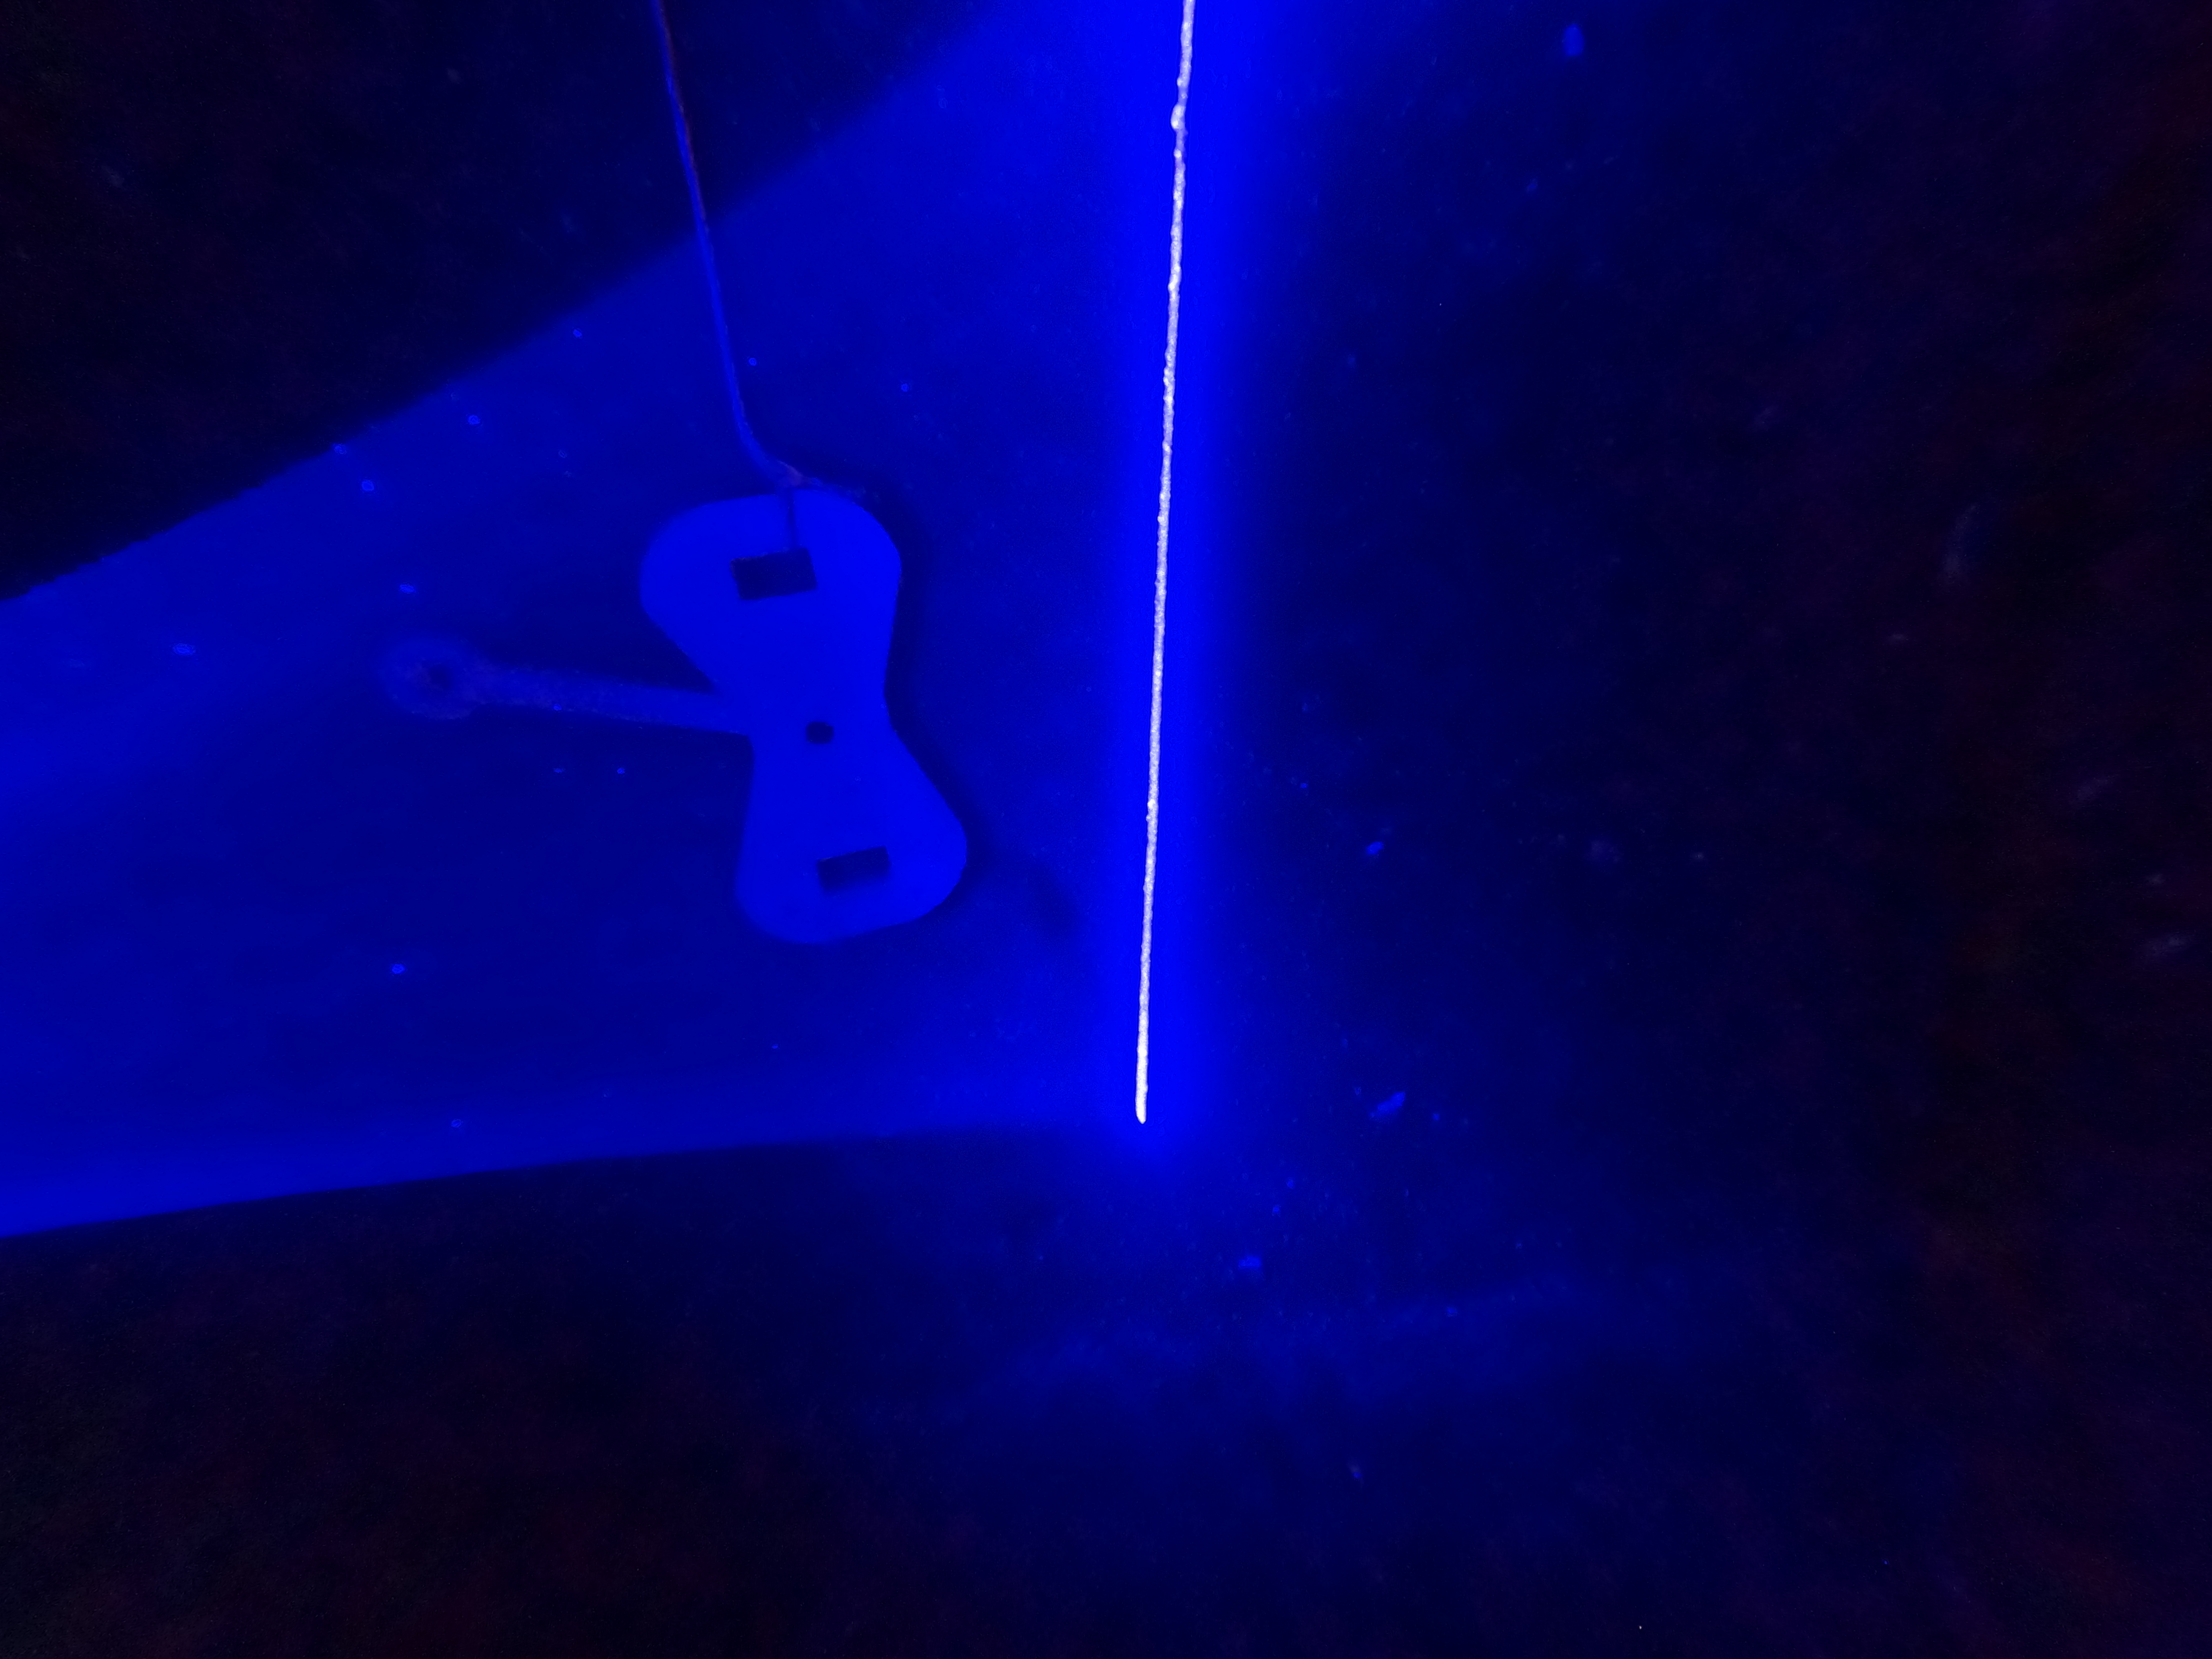

Supplement: Supplementary file 2153 [file G0016462.pdf › Level_1_2/G0016462.pdf]

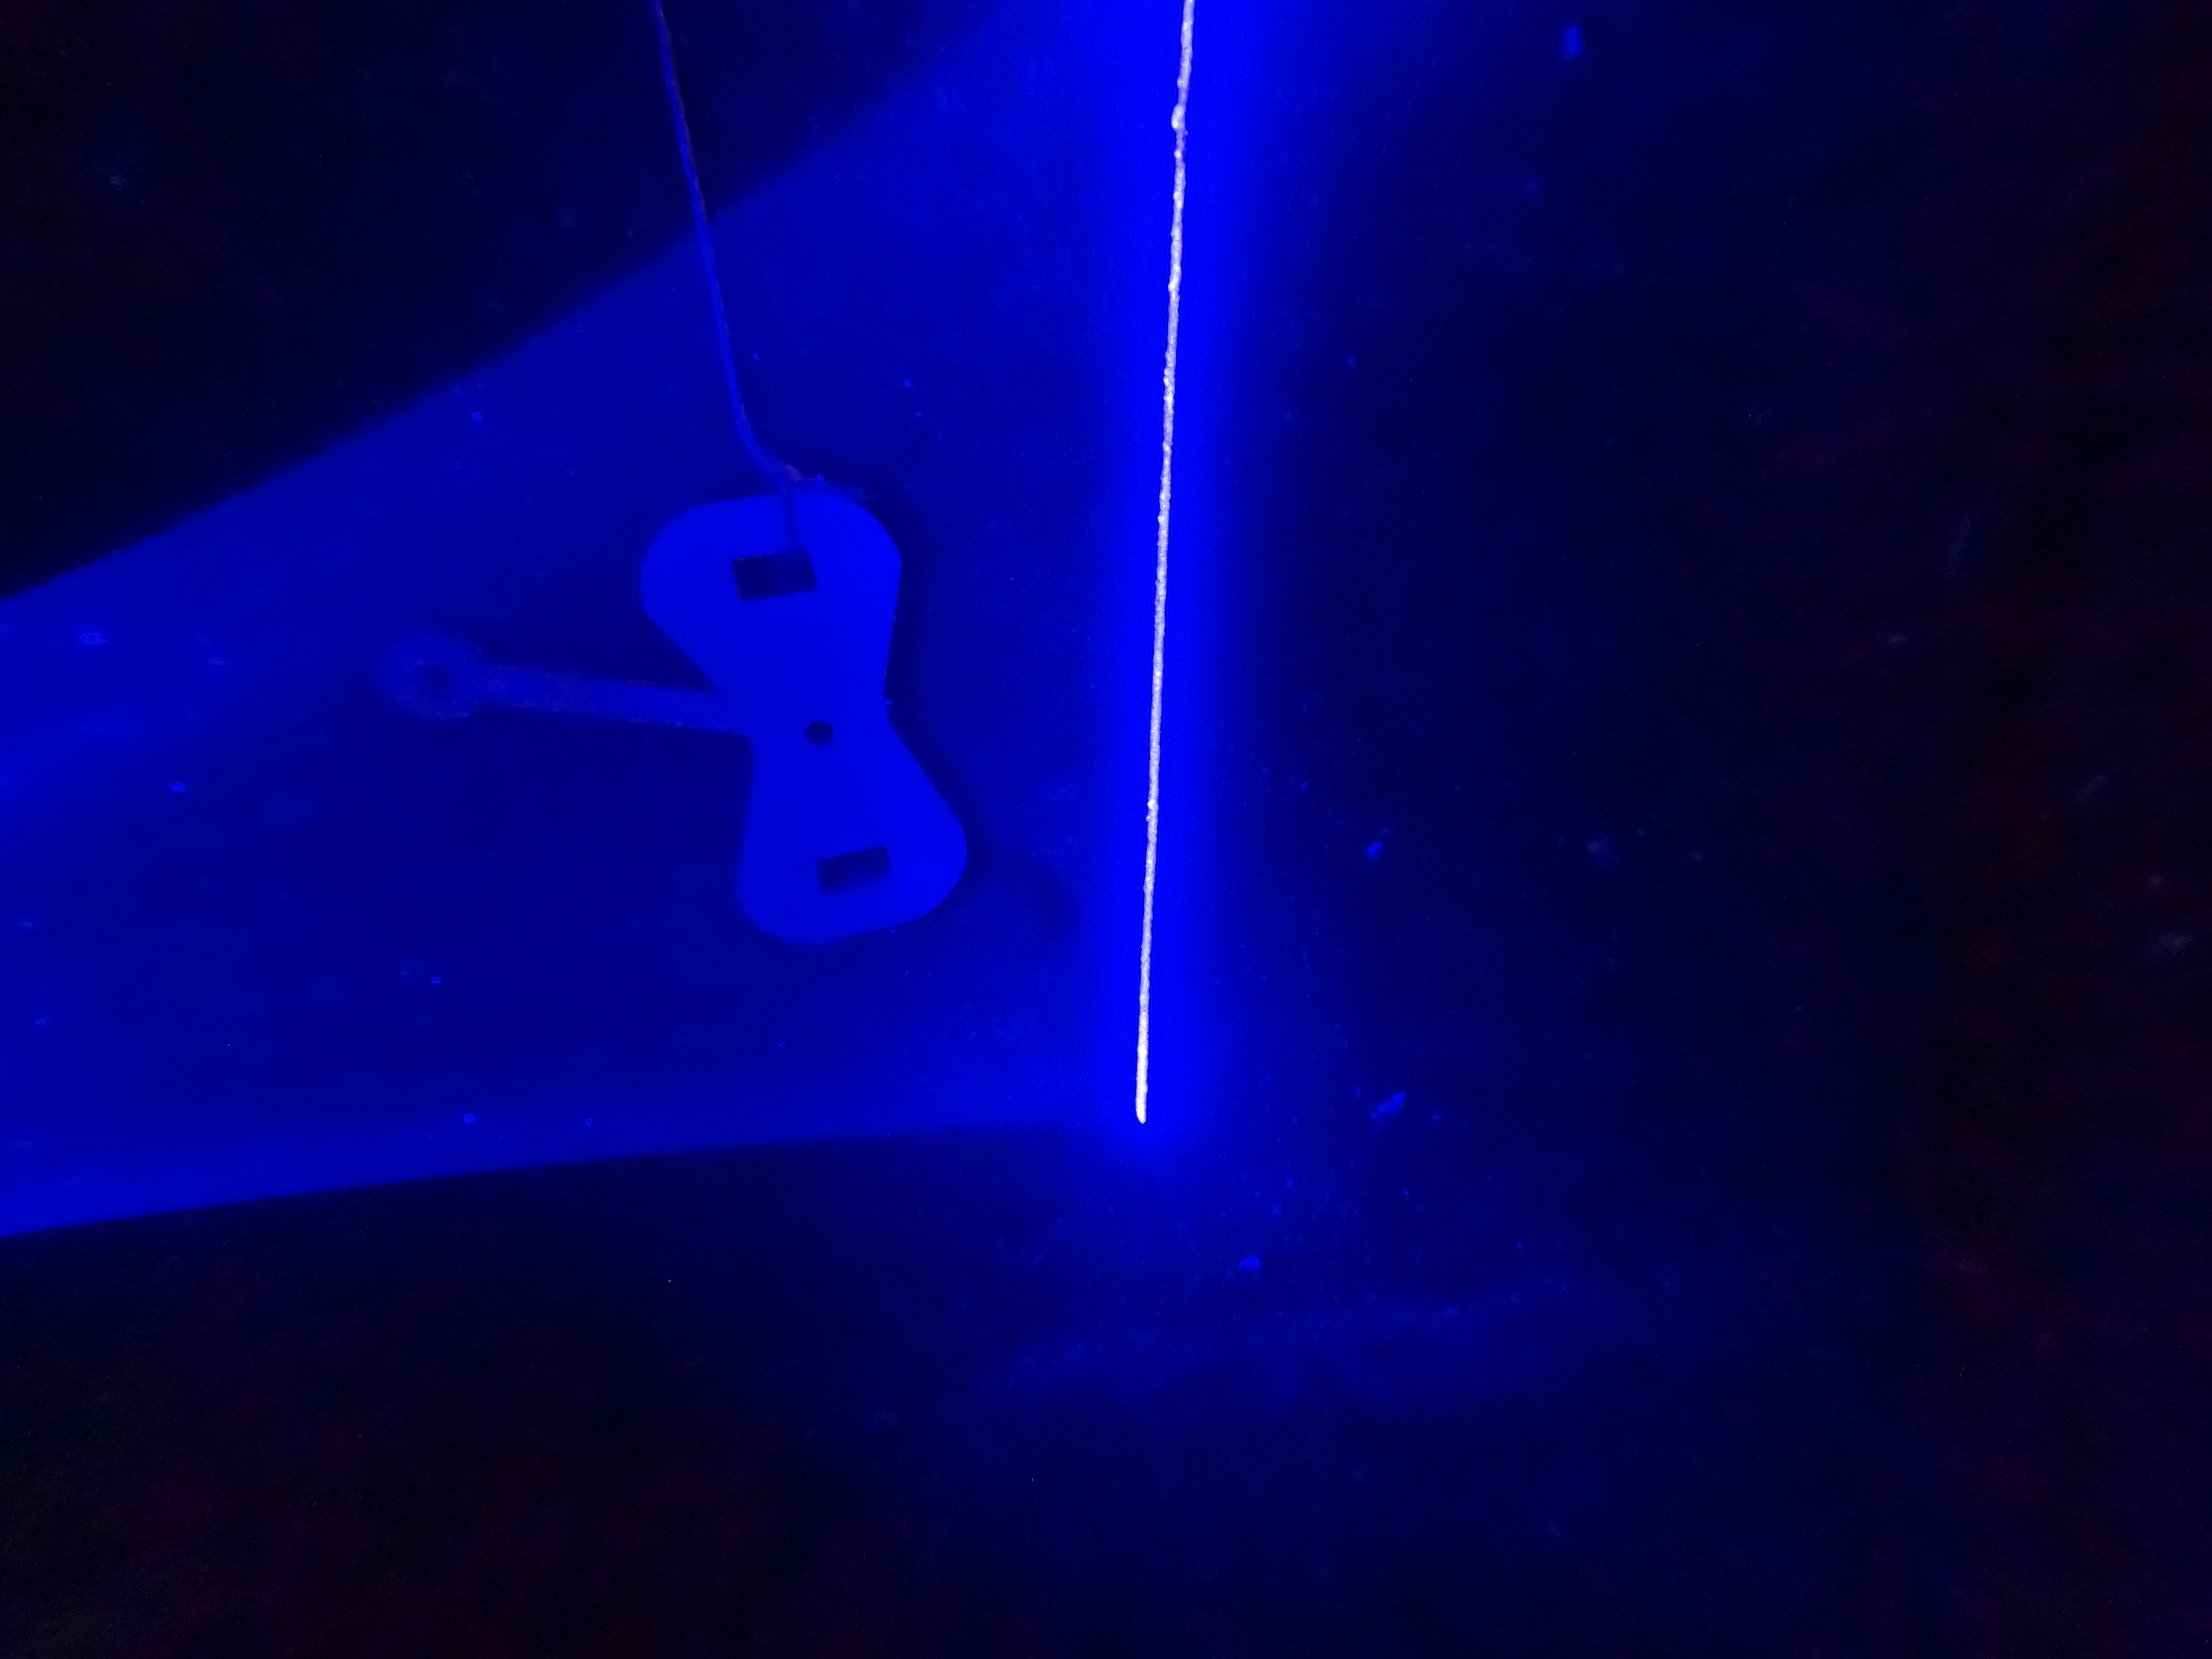

Supplement: Supplementary file 2154 [file G0016463.pdf › Level_1_2/G0016463.pdf]

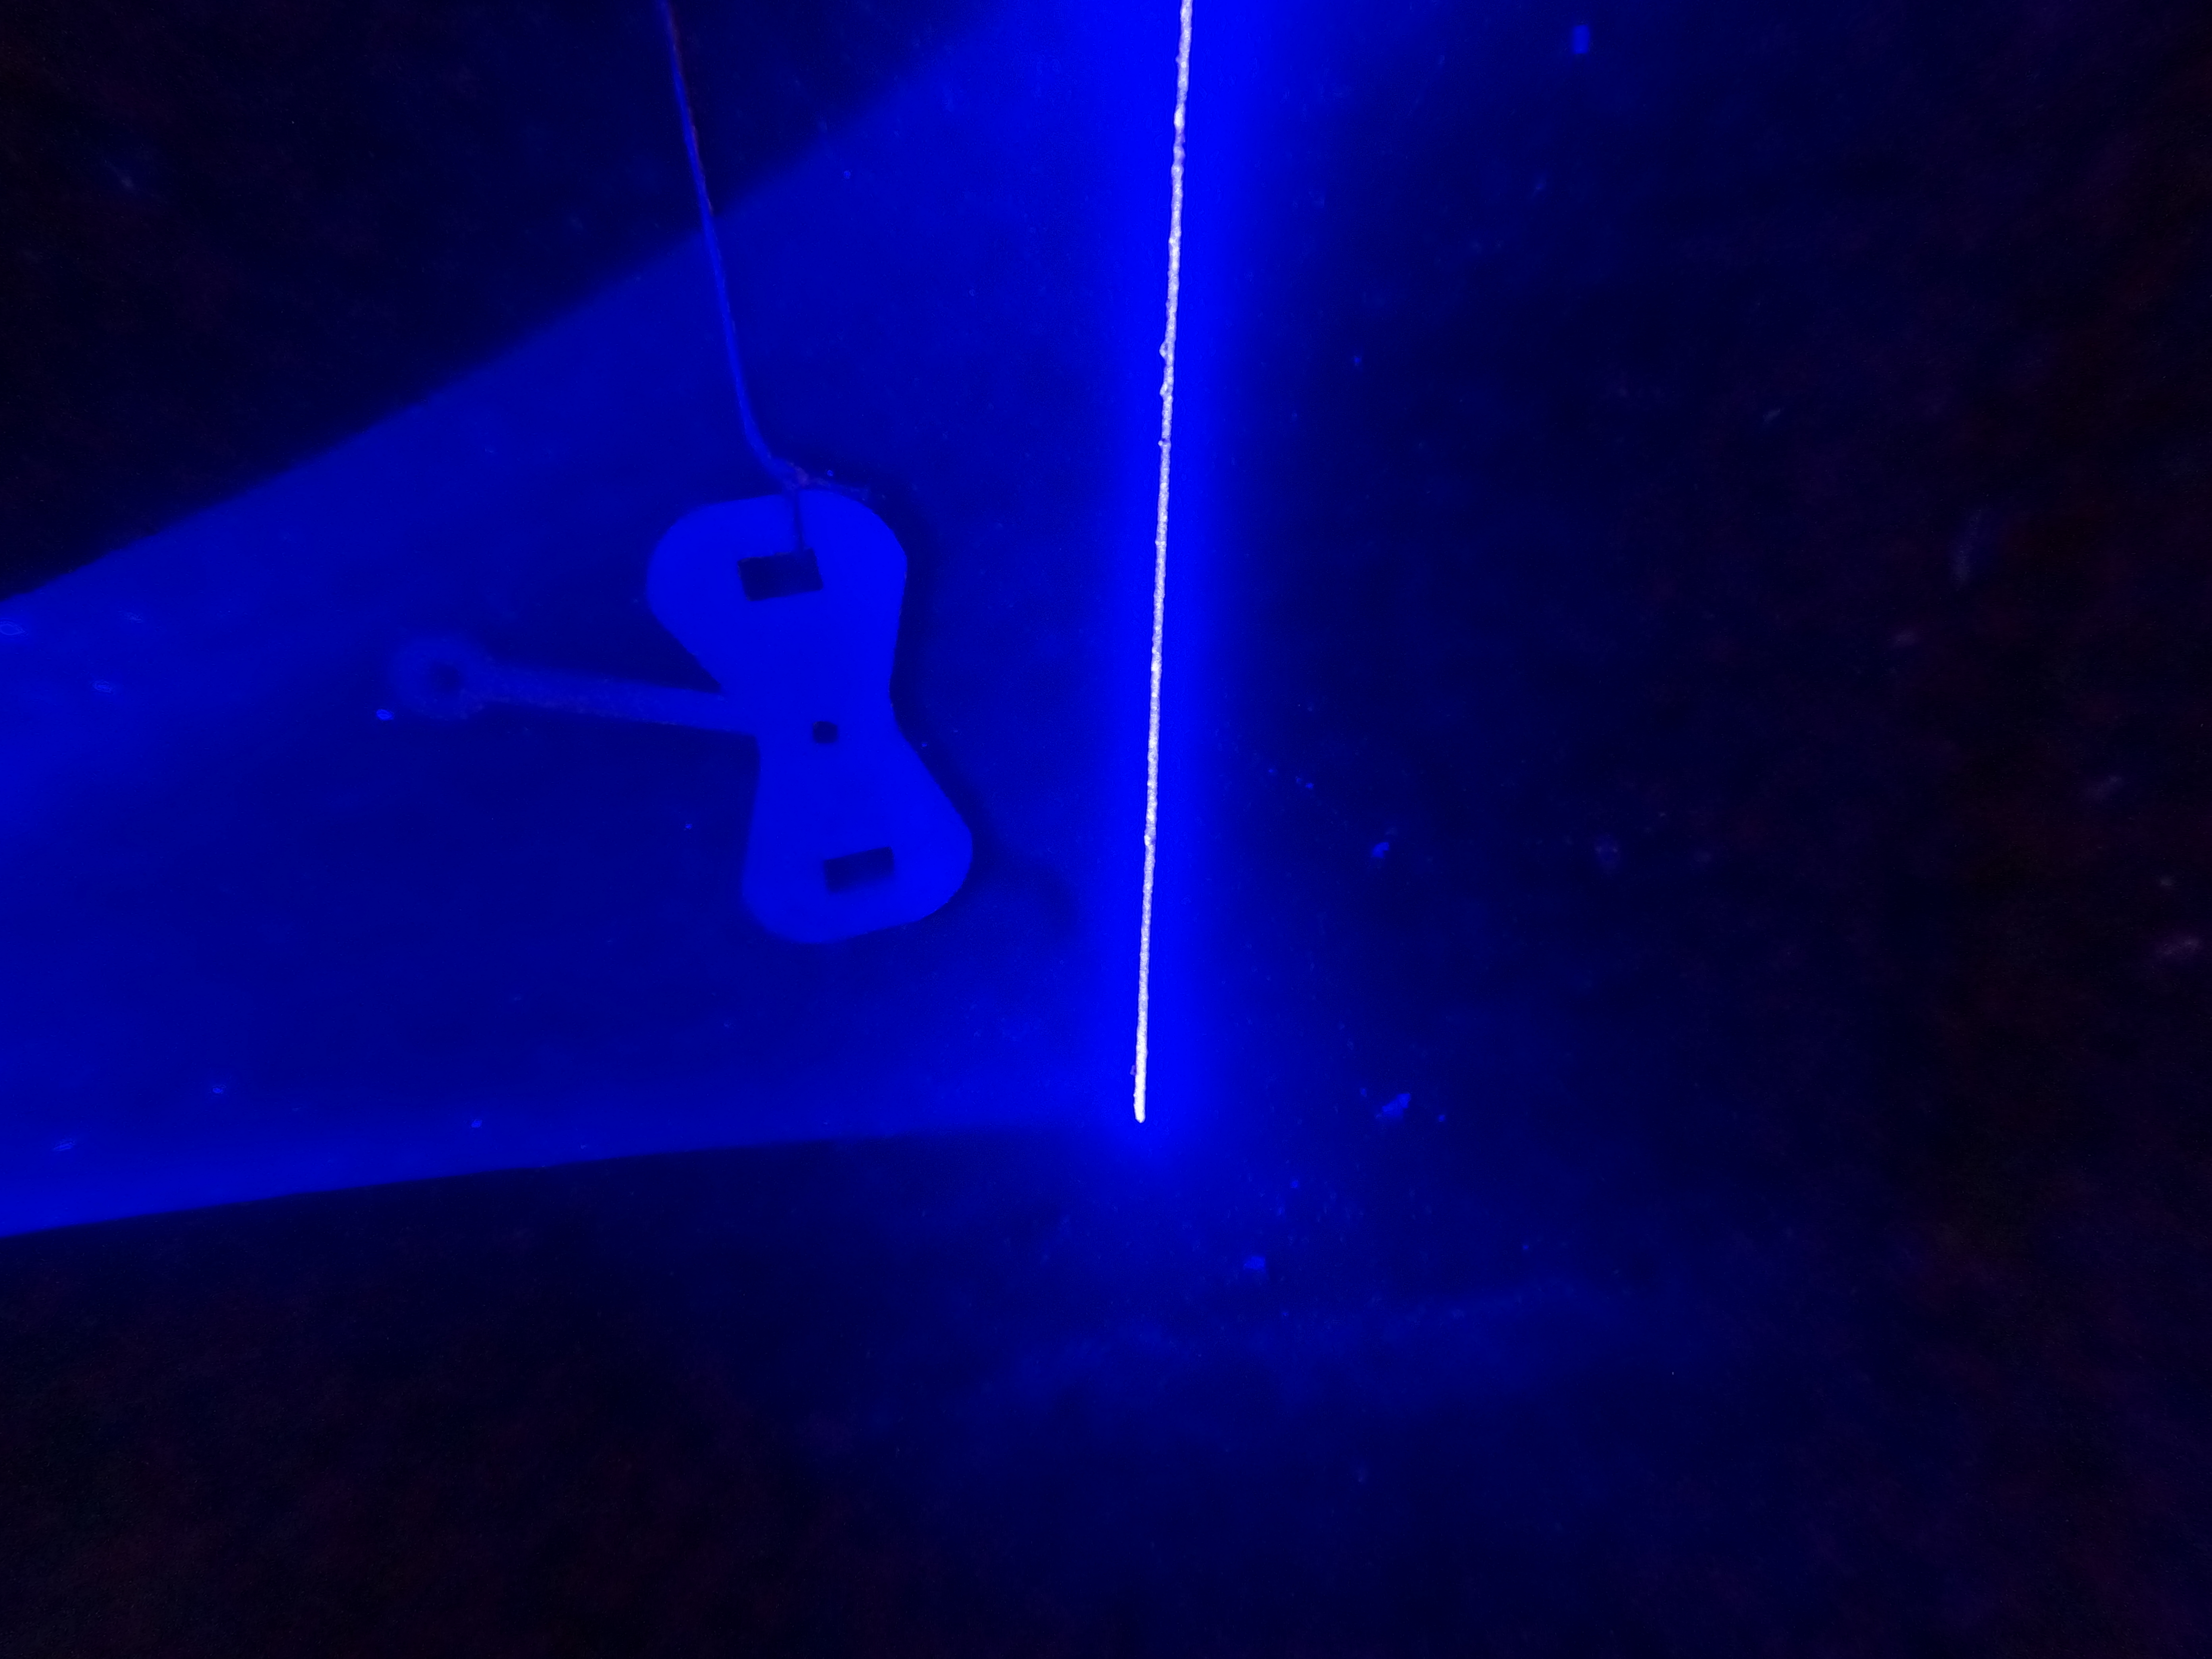

Supplement: Supplementary file 2155 [file G0016464.pdf › Level_1_2/G0016464.pdf]

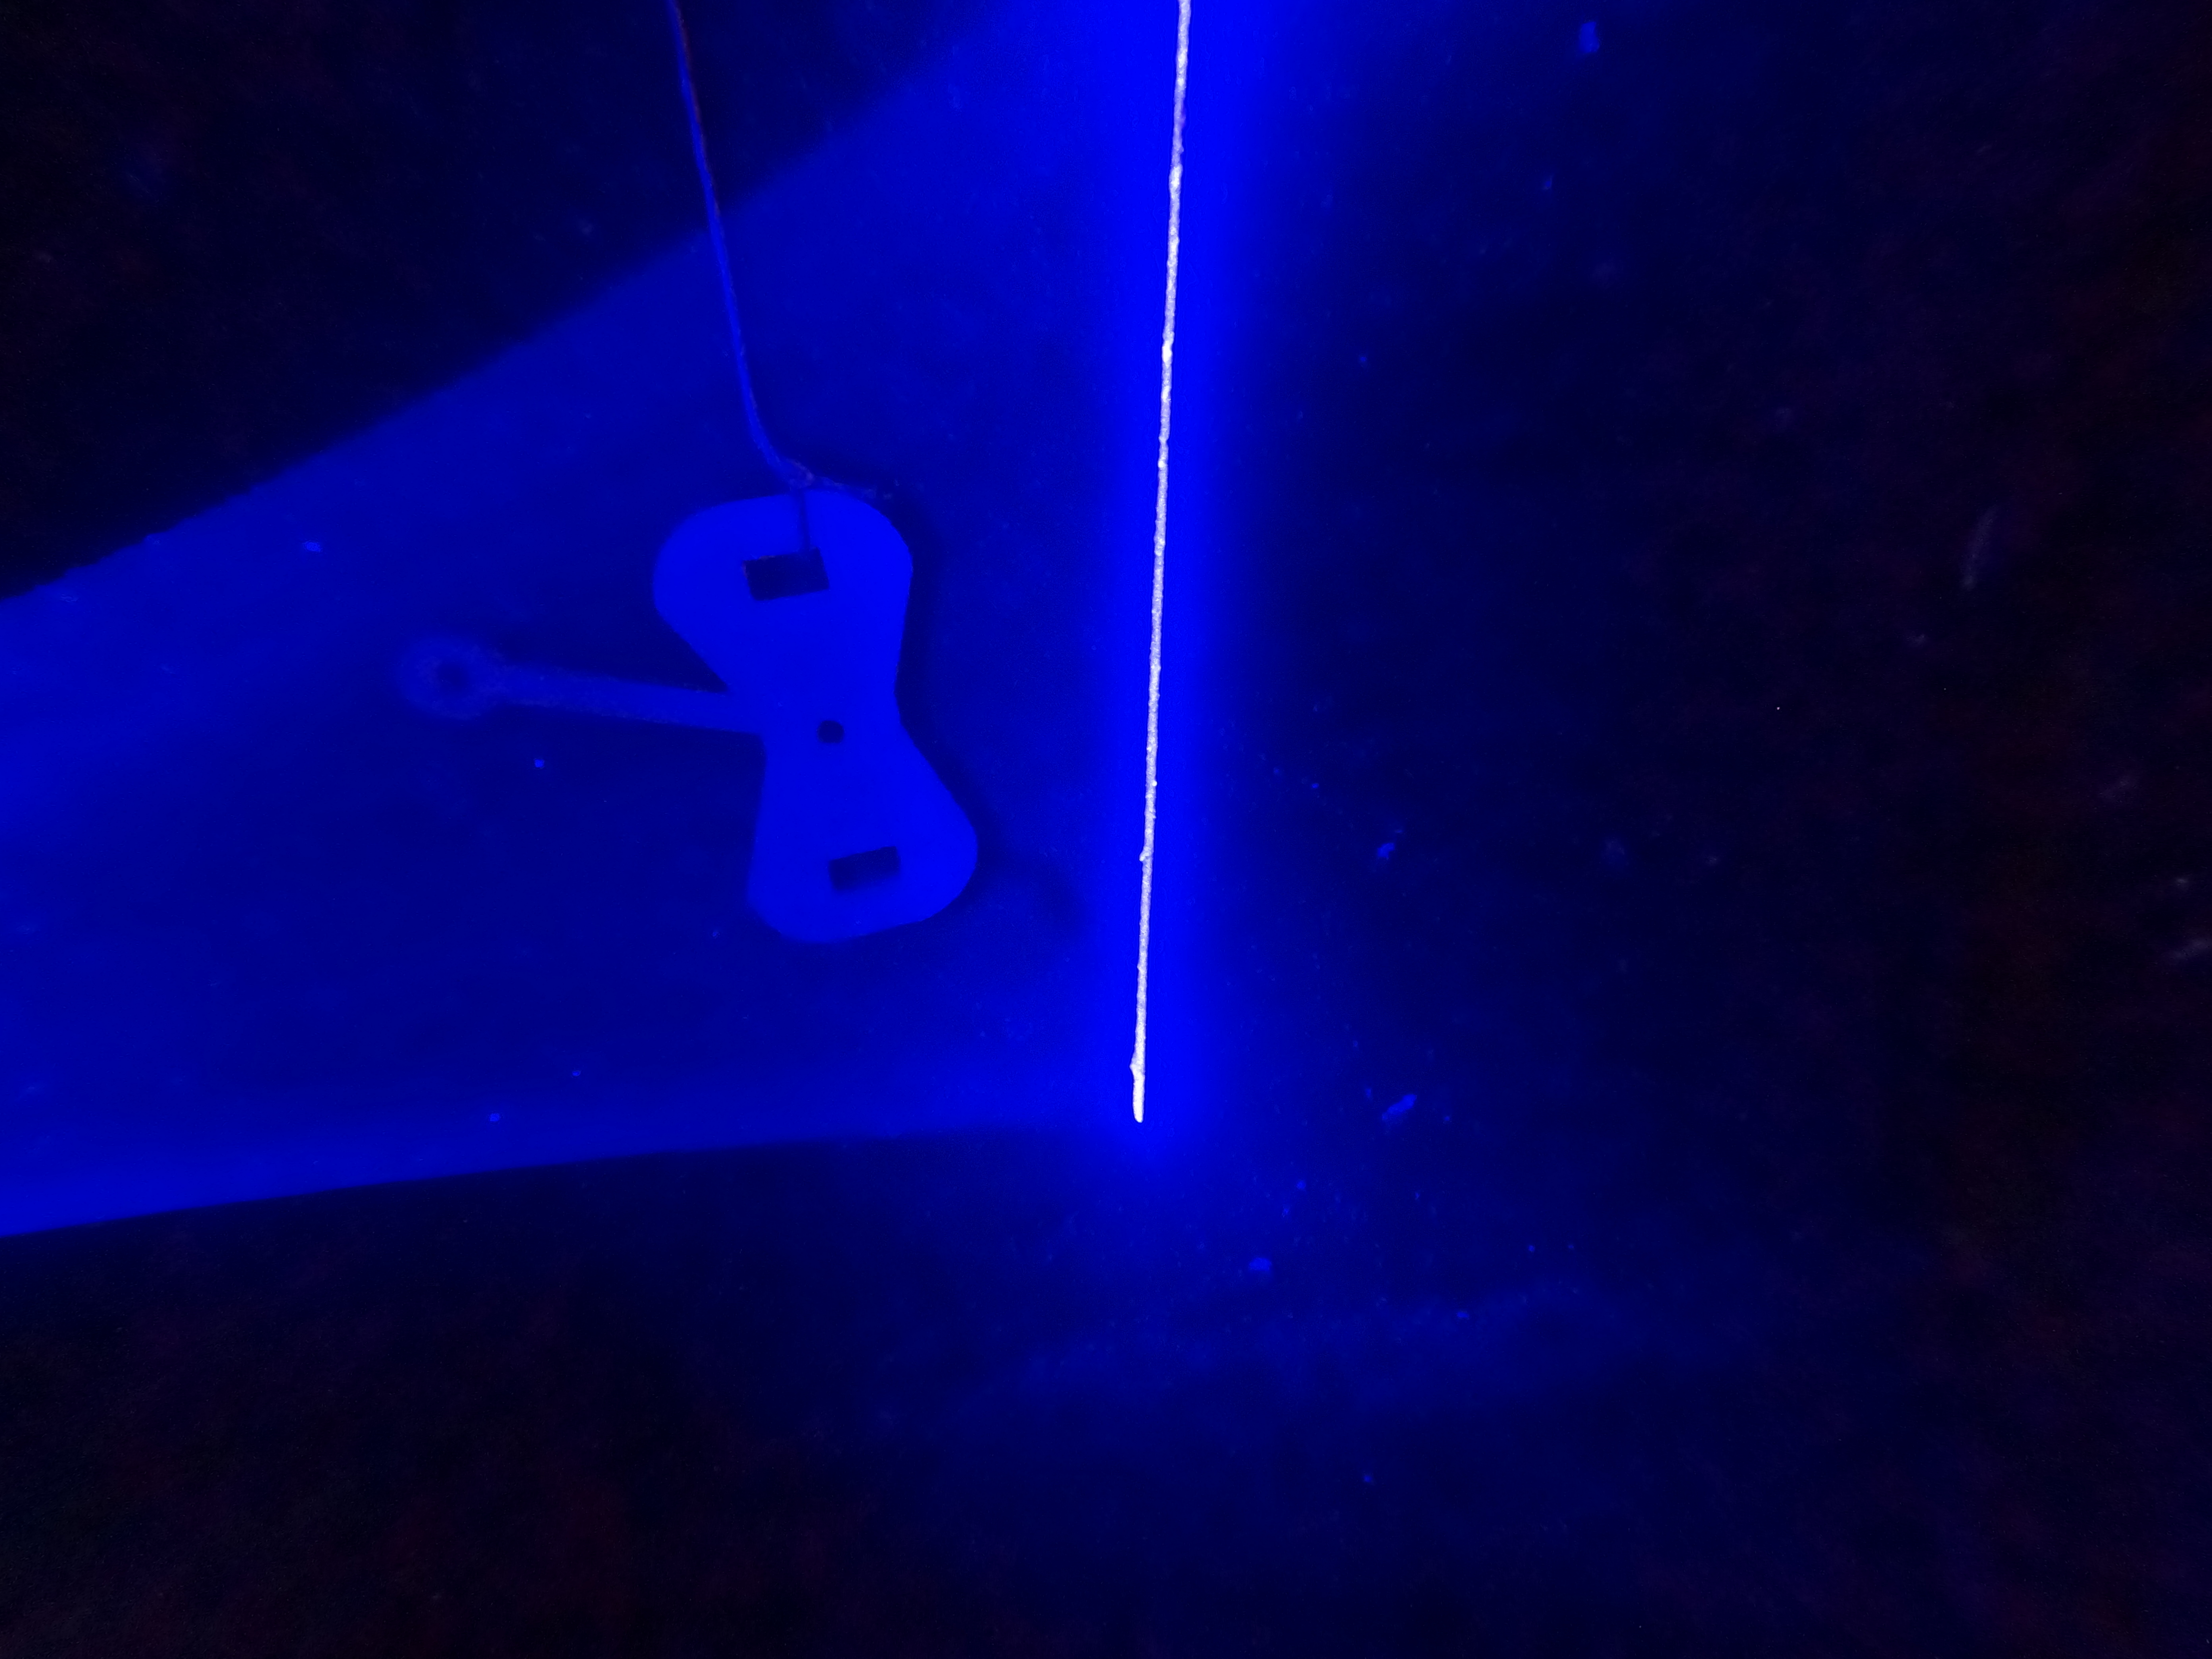

Supplement: Supplementary file 2156 [file G0016465.pdf › Level_1_2/G0016465.pdf]

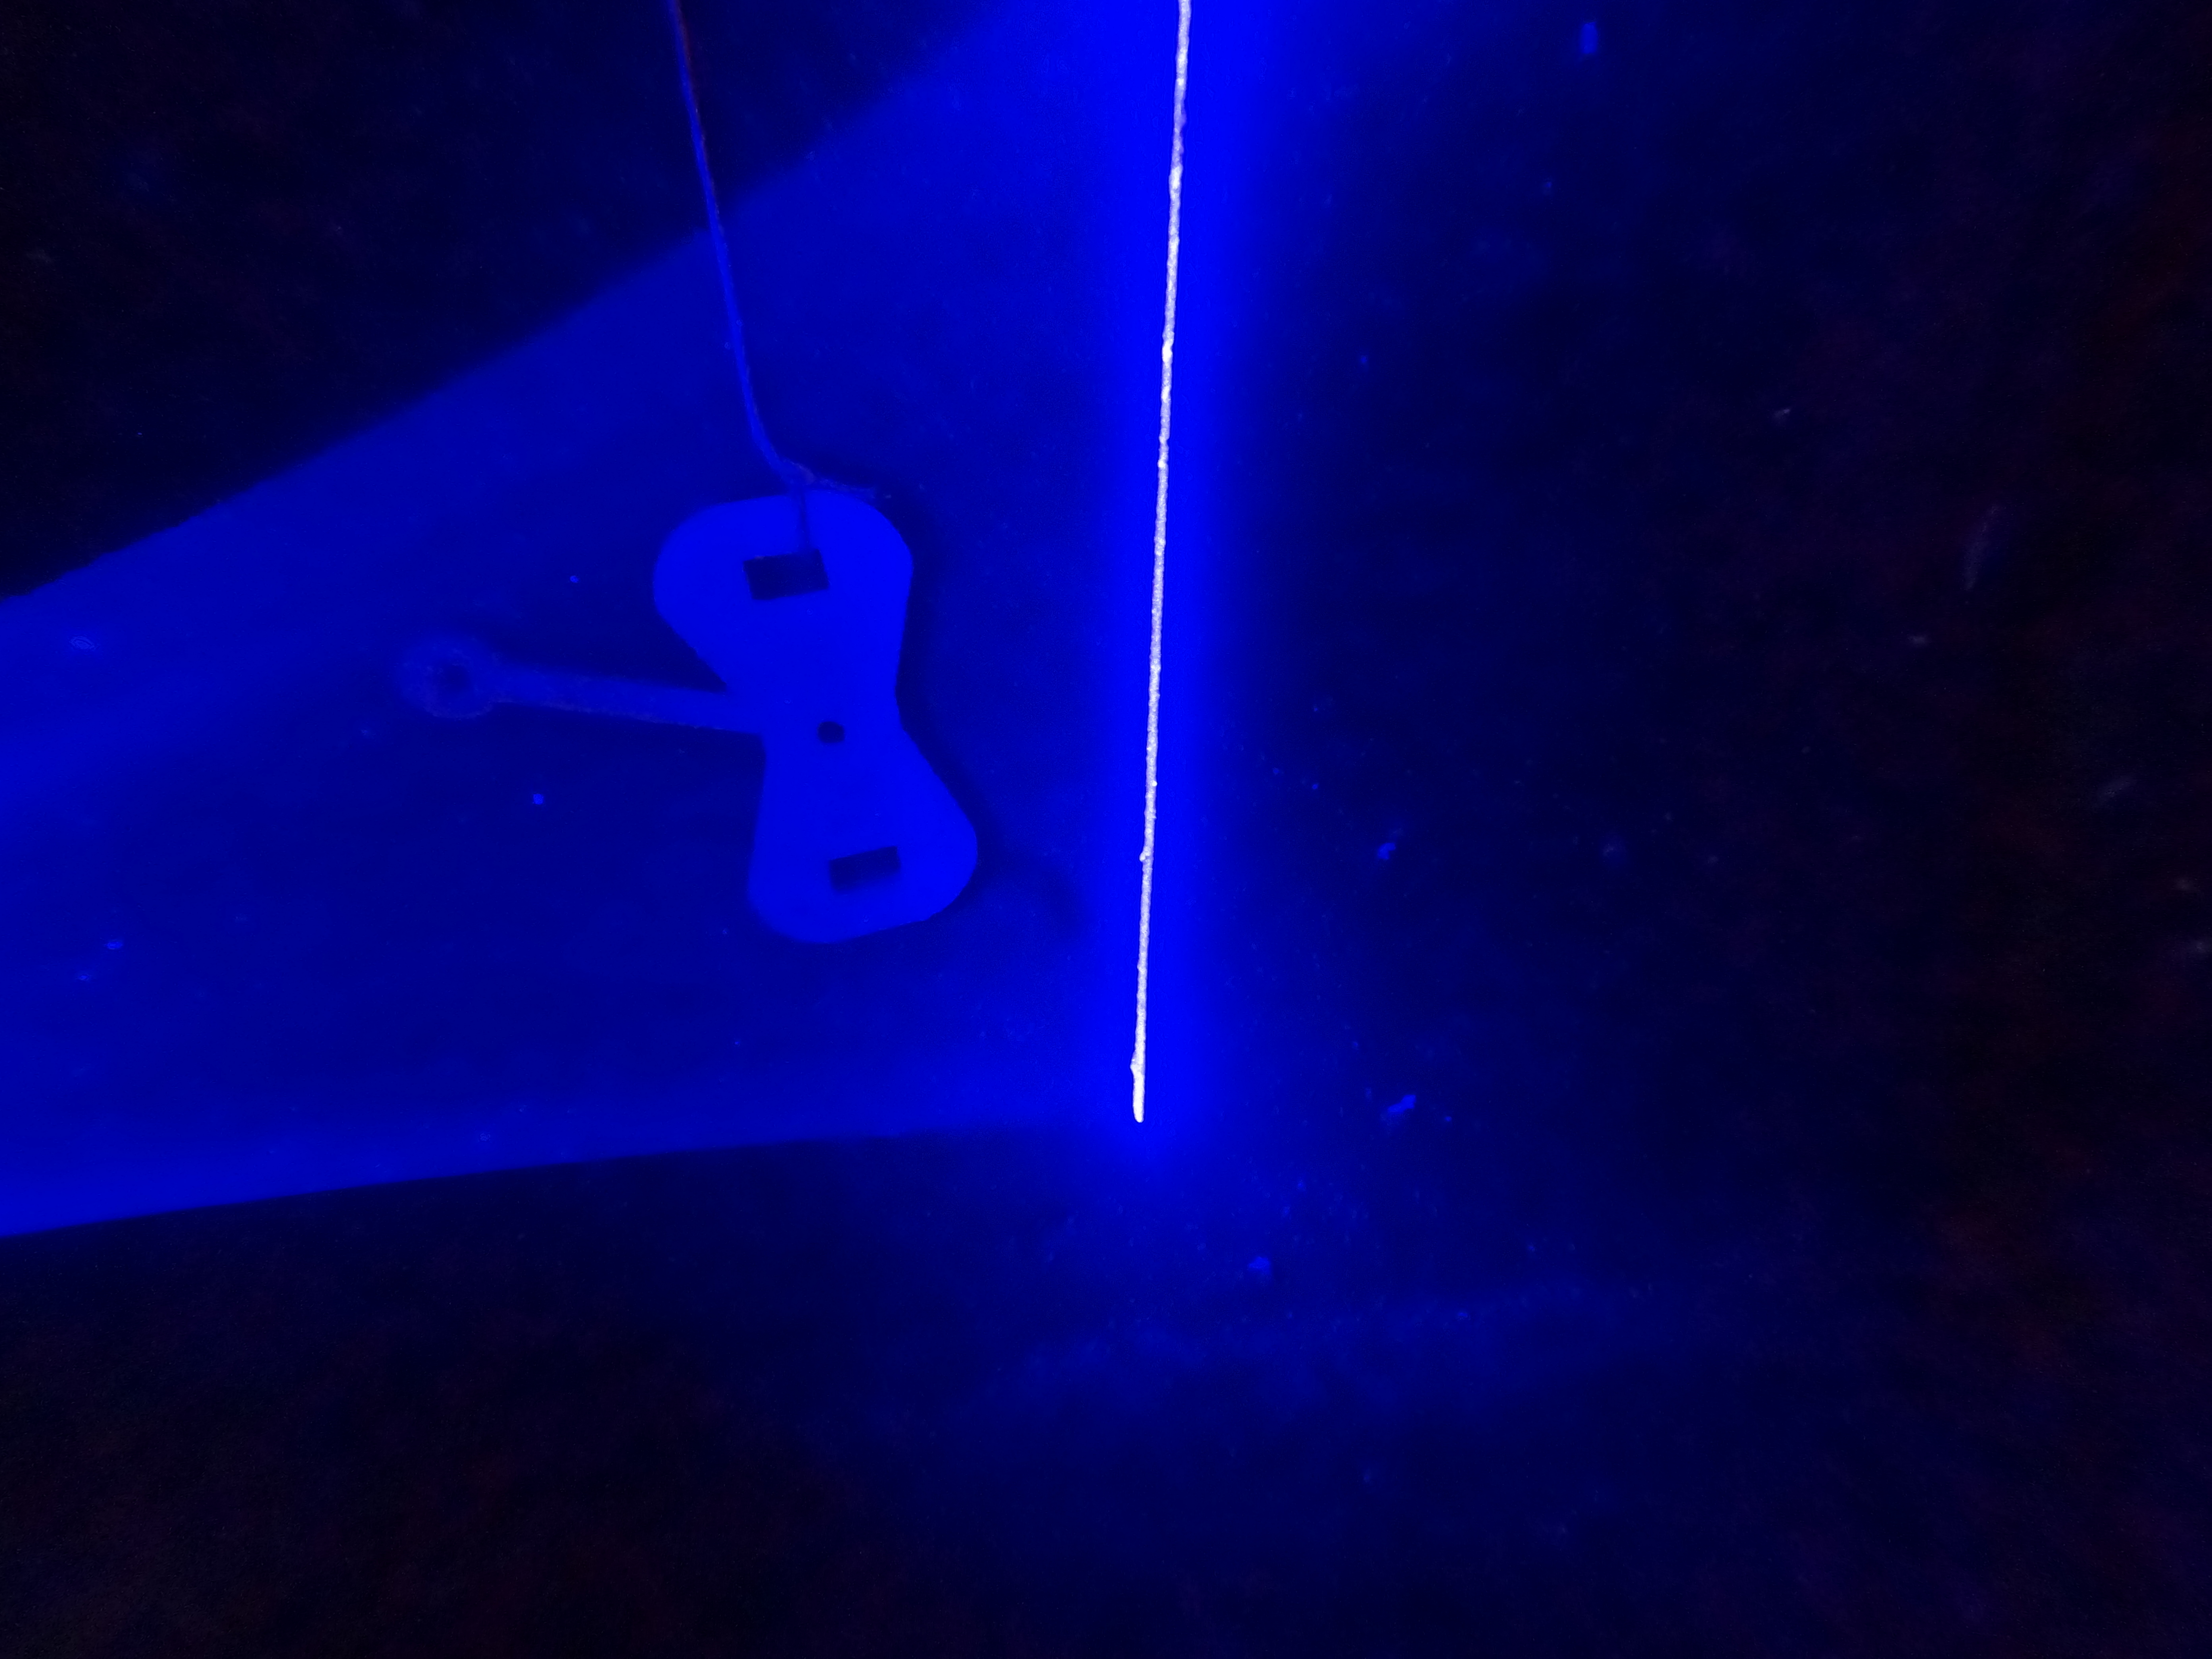

Supplement: Supplementary file 2157 [file G0016466.pdf › Level_1_2/G0016466.pdf]

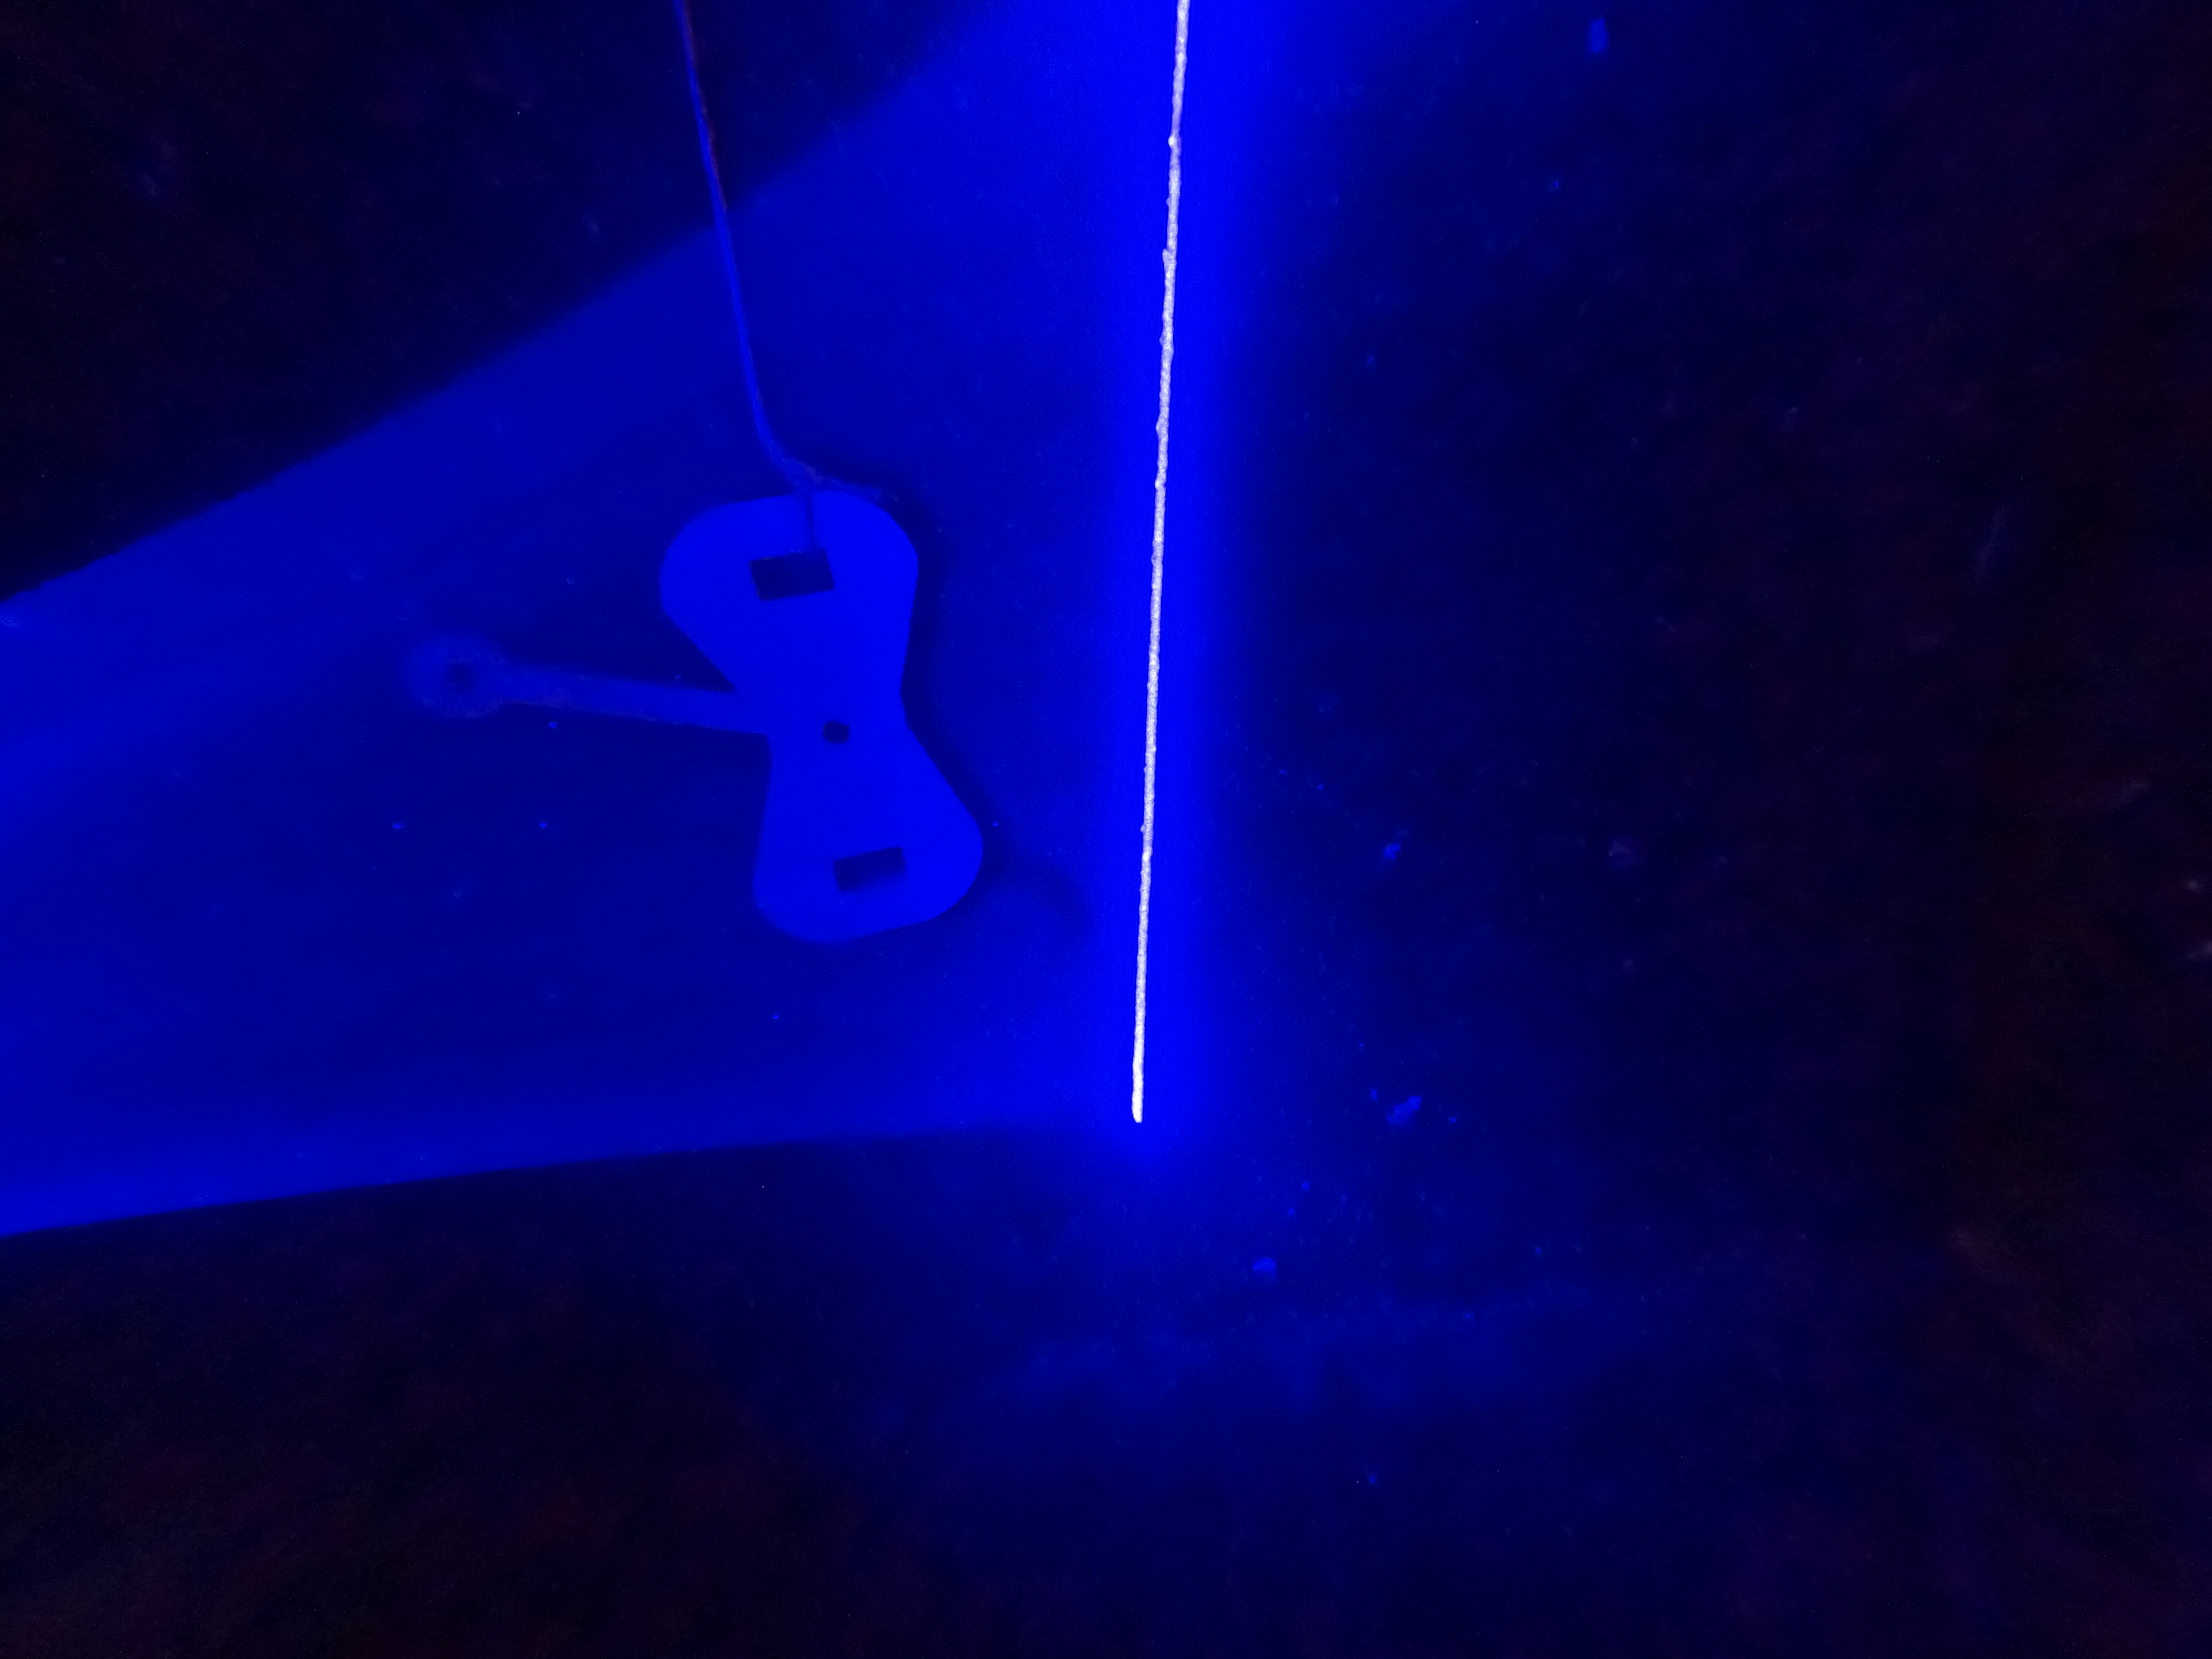

Supplement: Supplementary file 2158 [file G0016467.pdf › Level_1_2/G0016467.pdf]

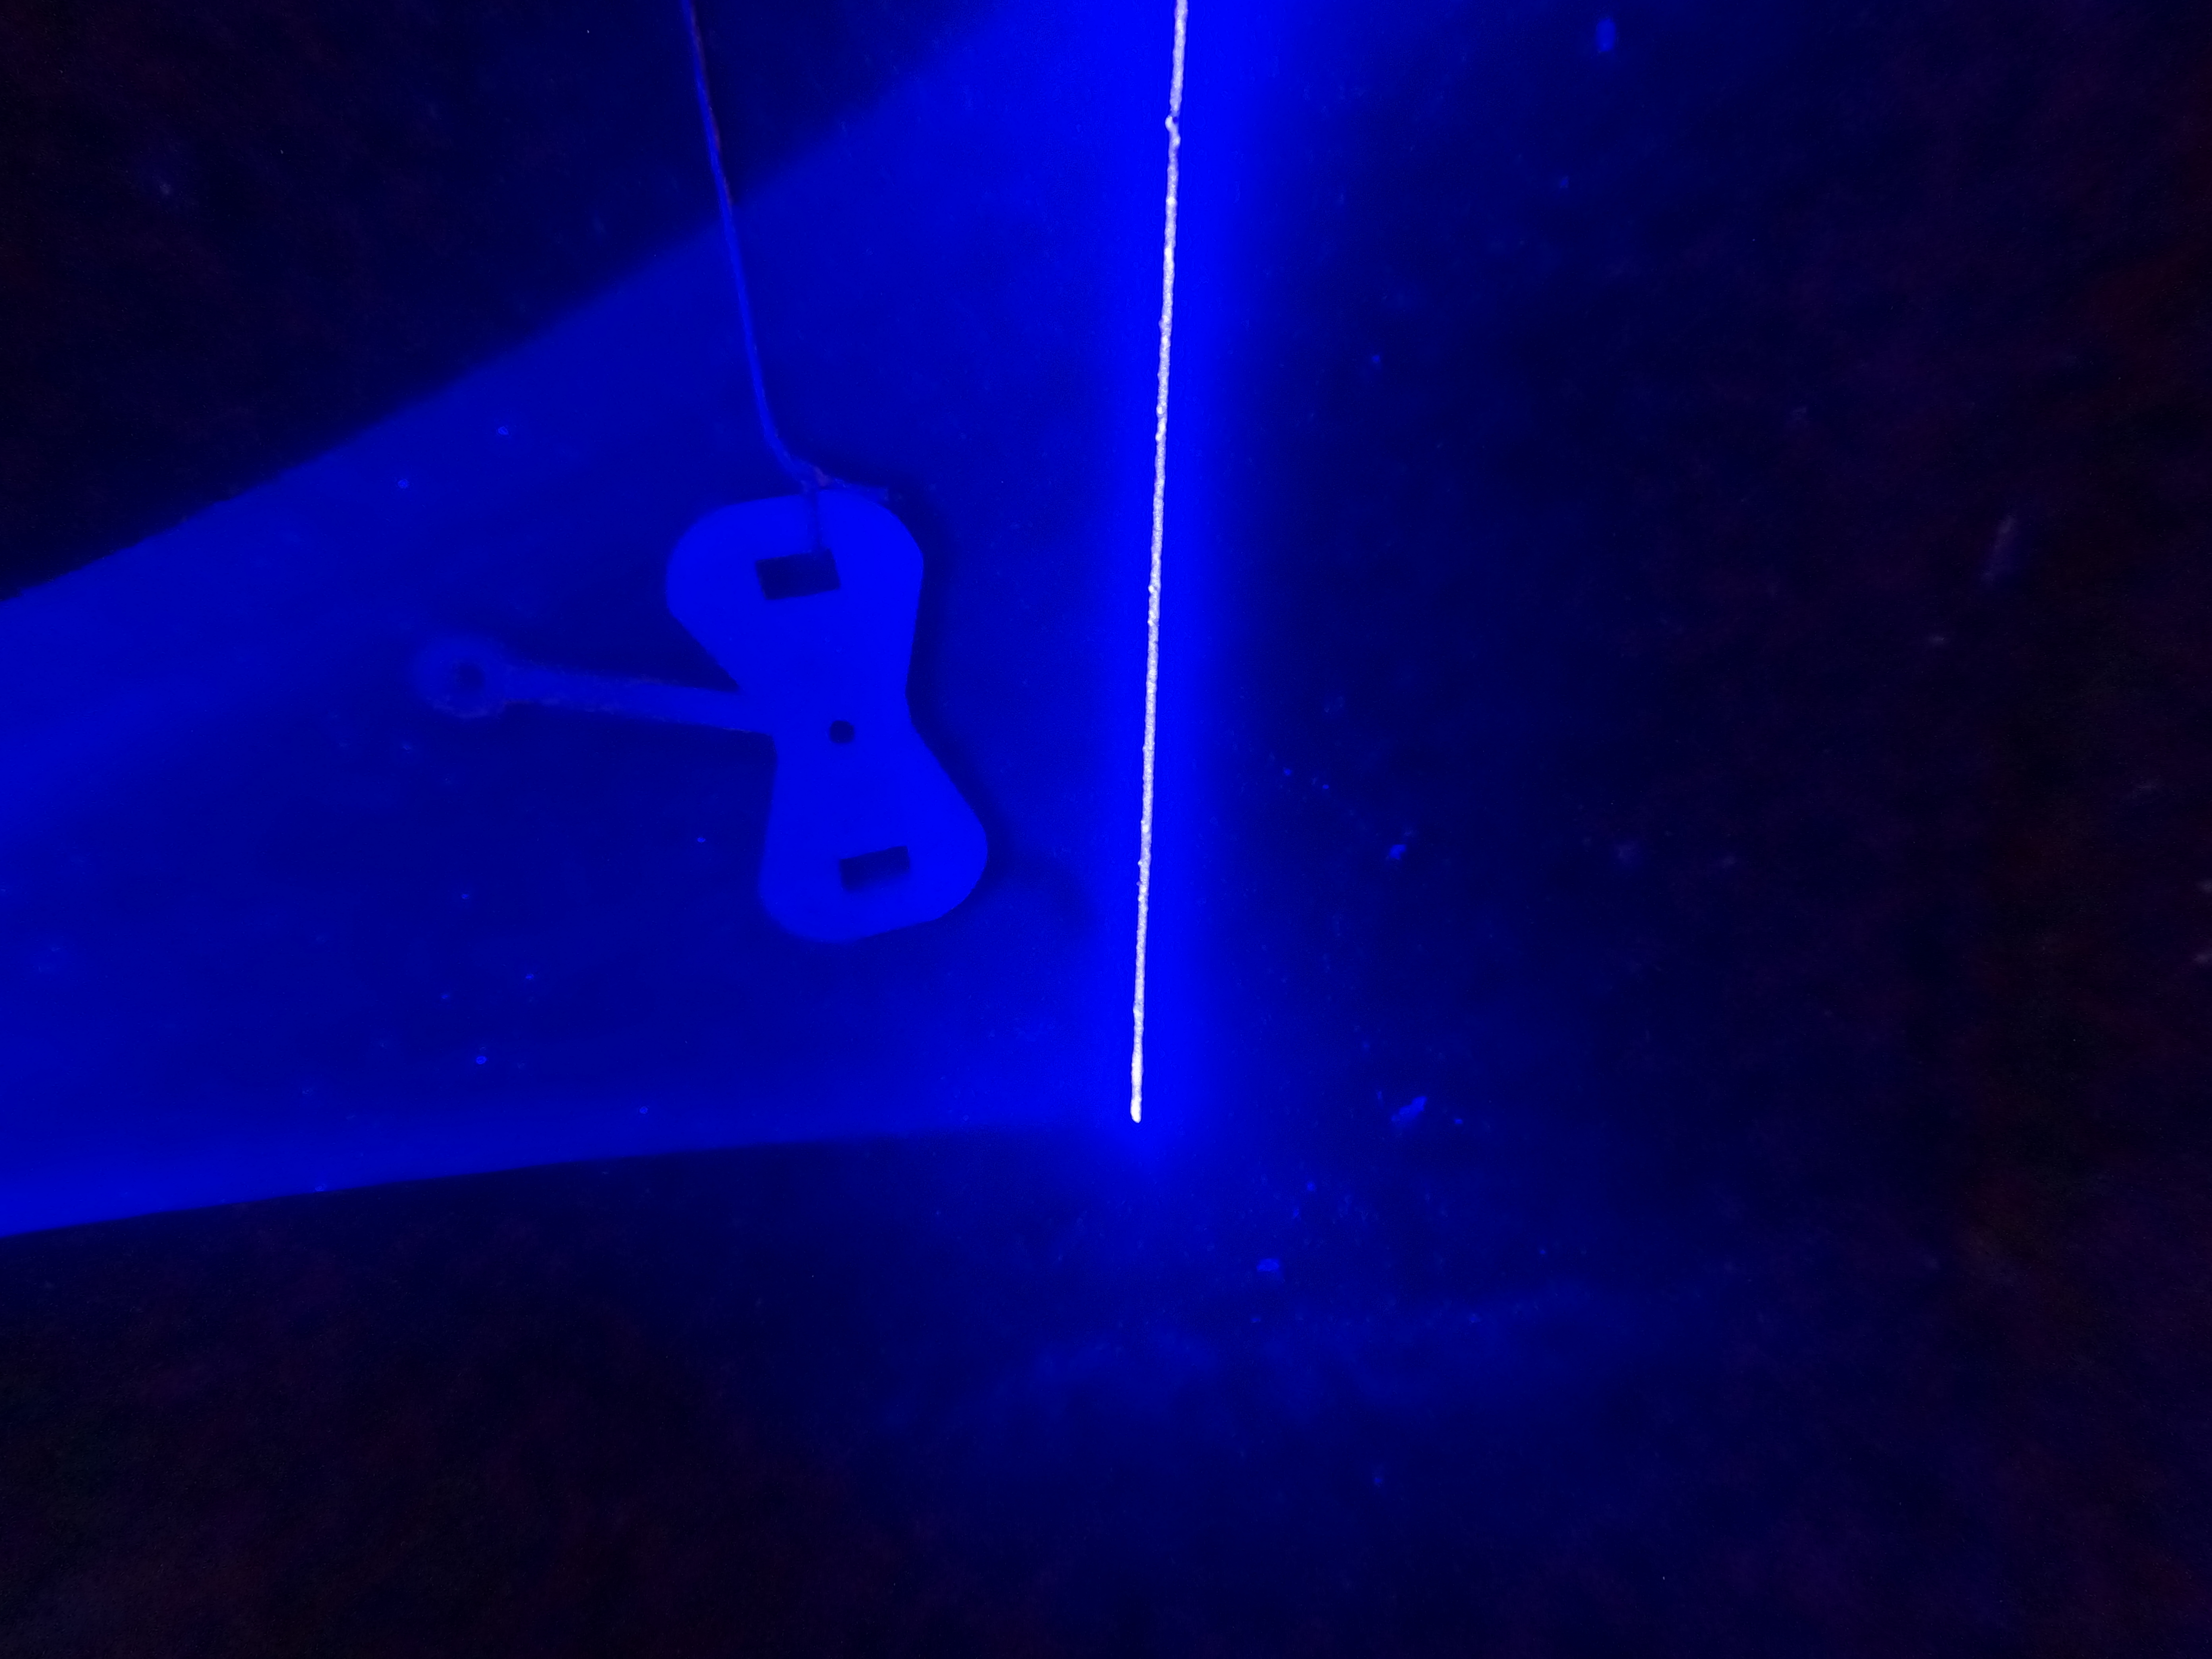

Supplement: Supplementary file 2159 [file G0016468.pdf › Level_1_2/G0016468.pdf]

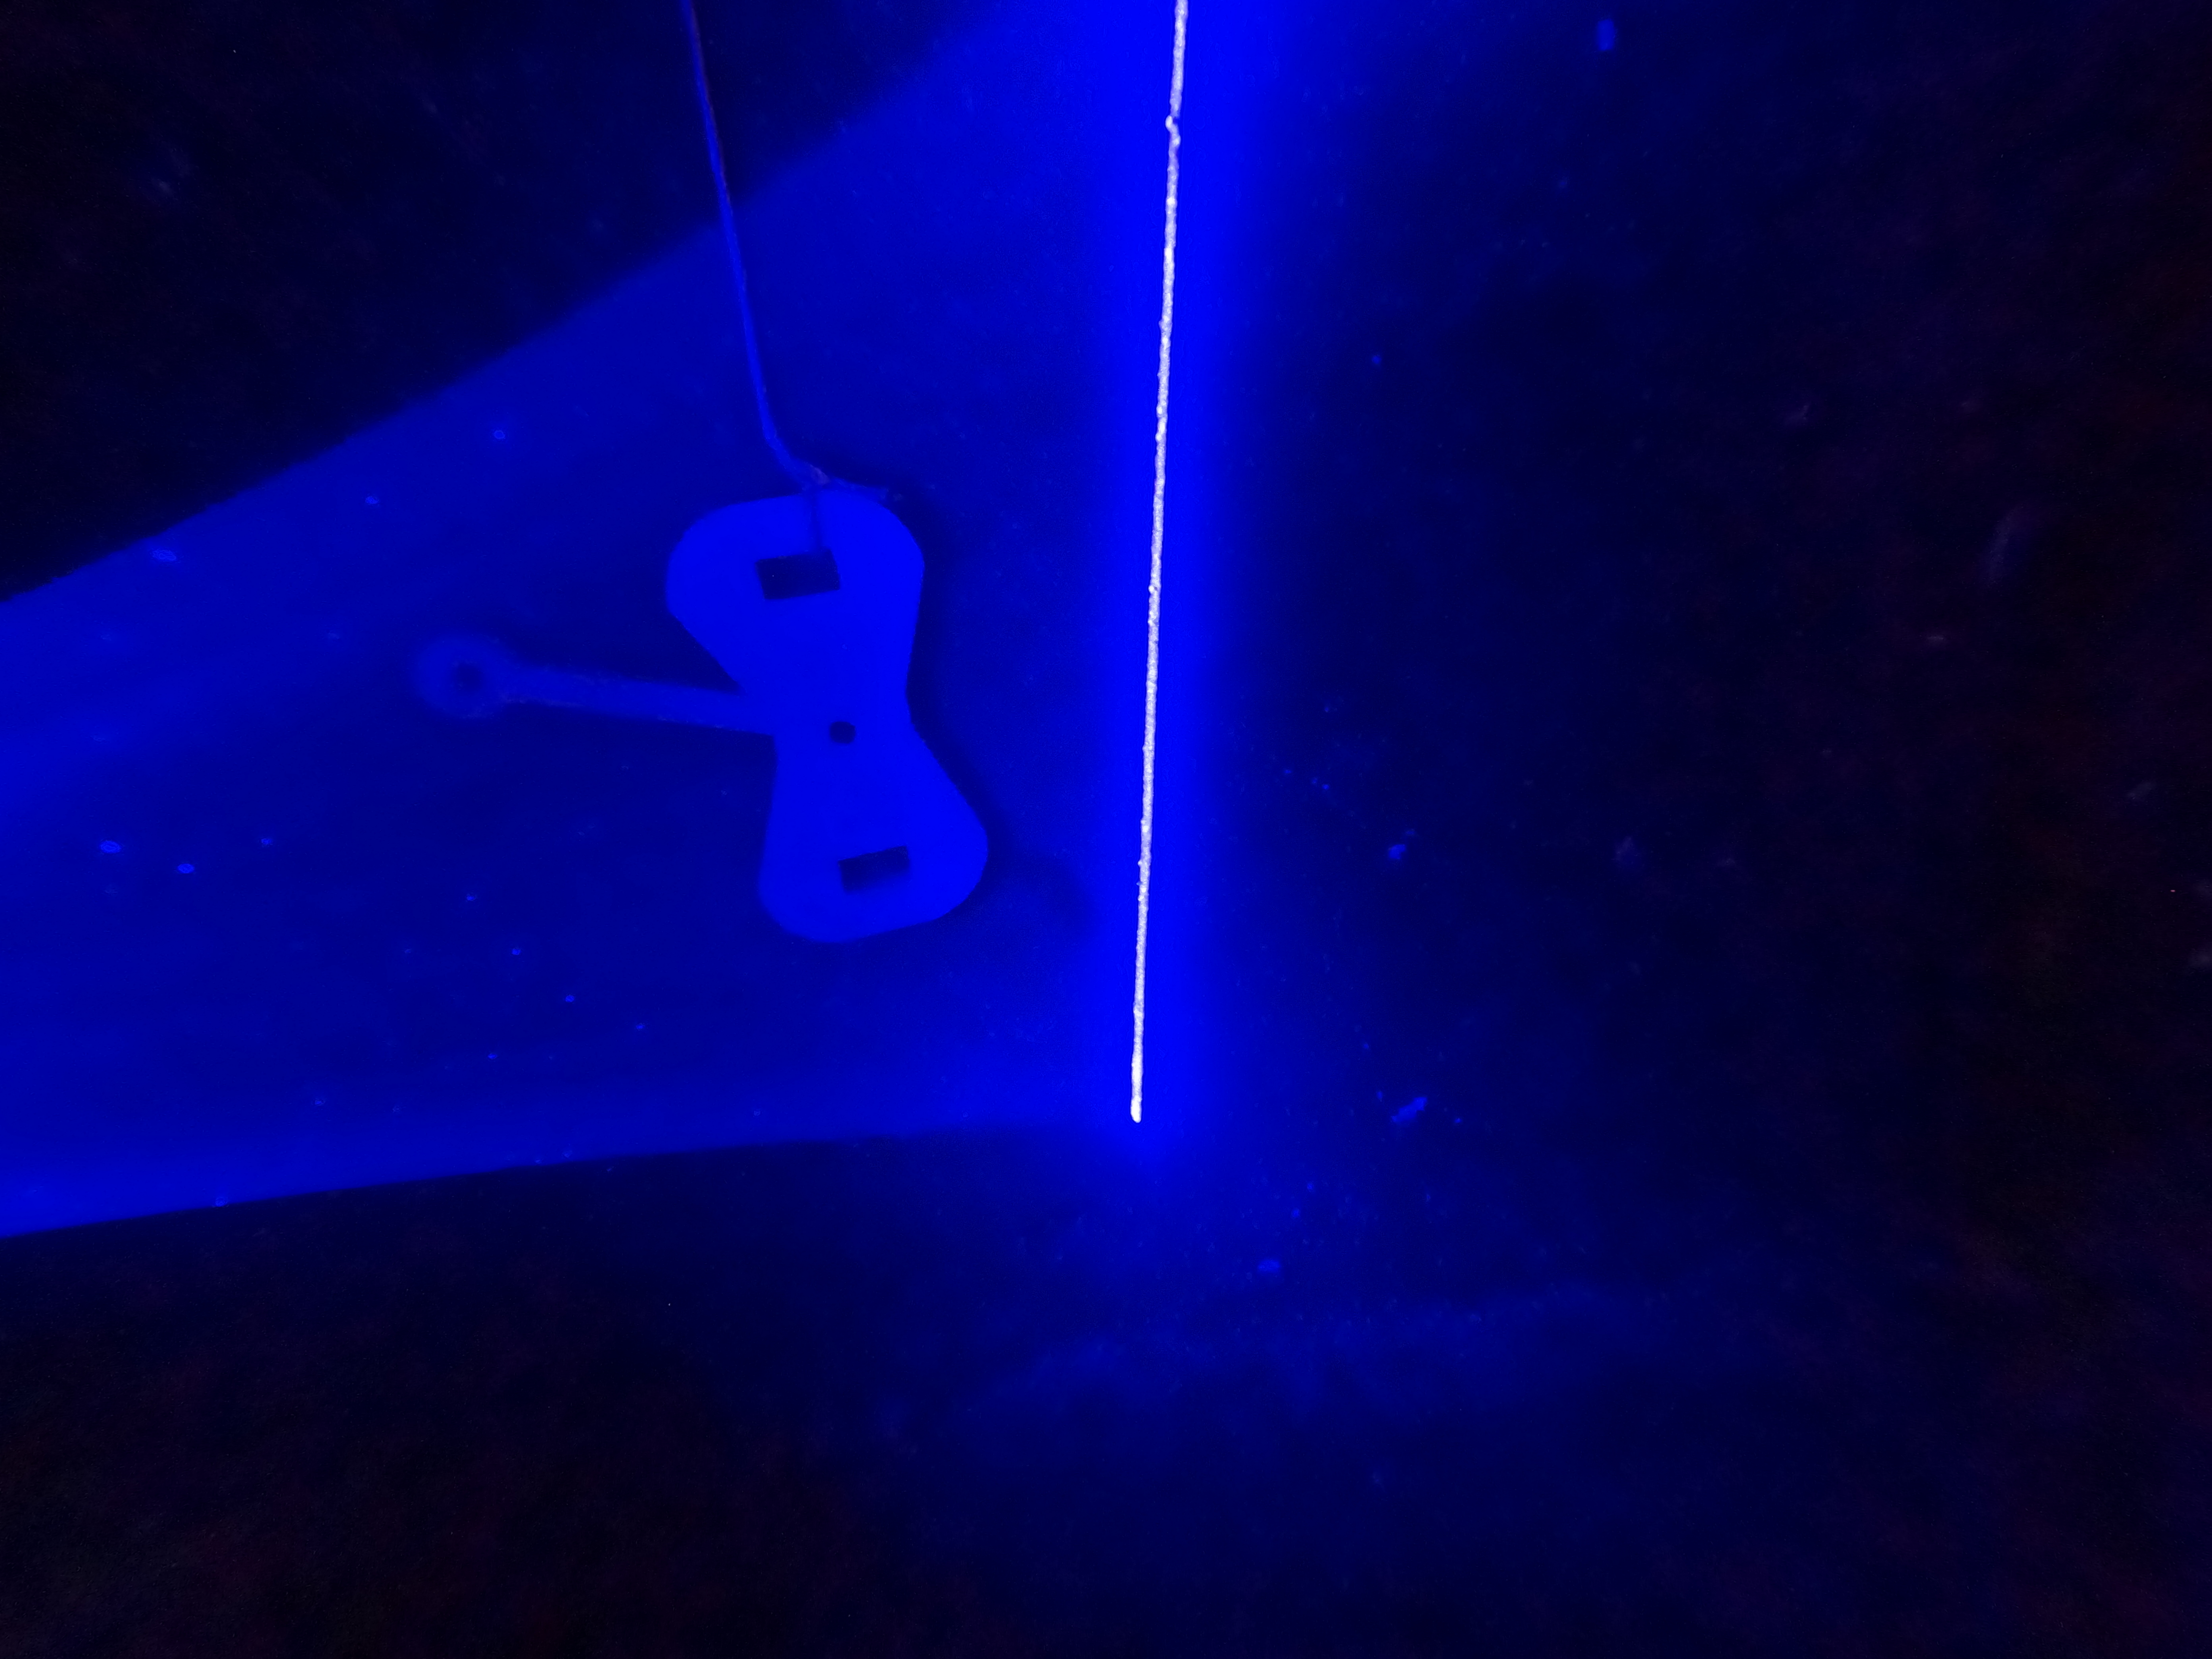

Supplement: Supplementary file 2160 [file G0016469.pdf › Level_1_2/G0016469.pdf]

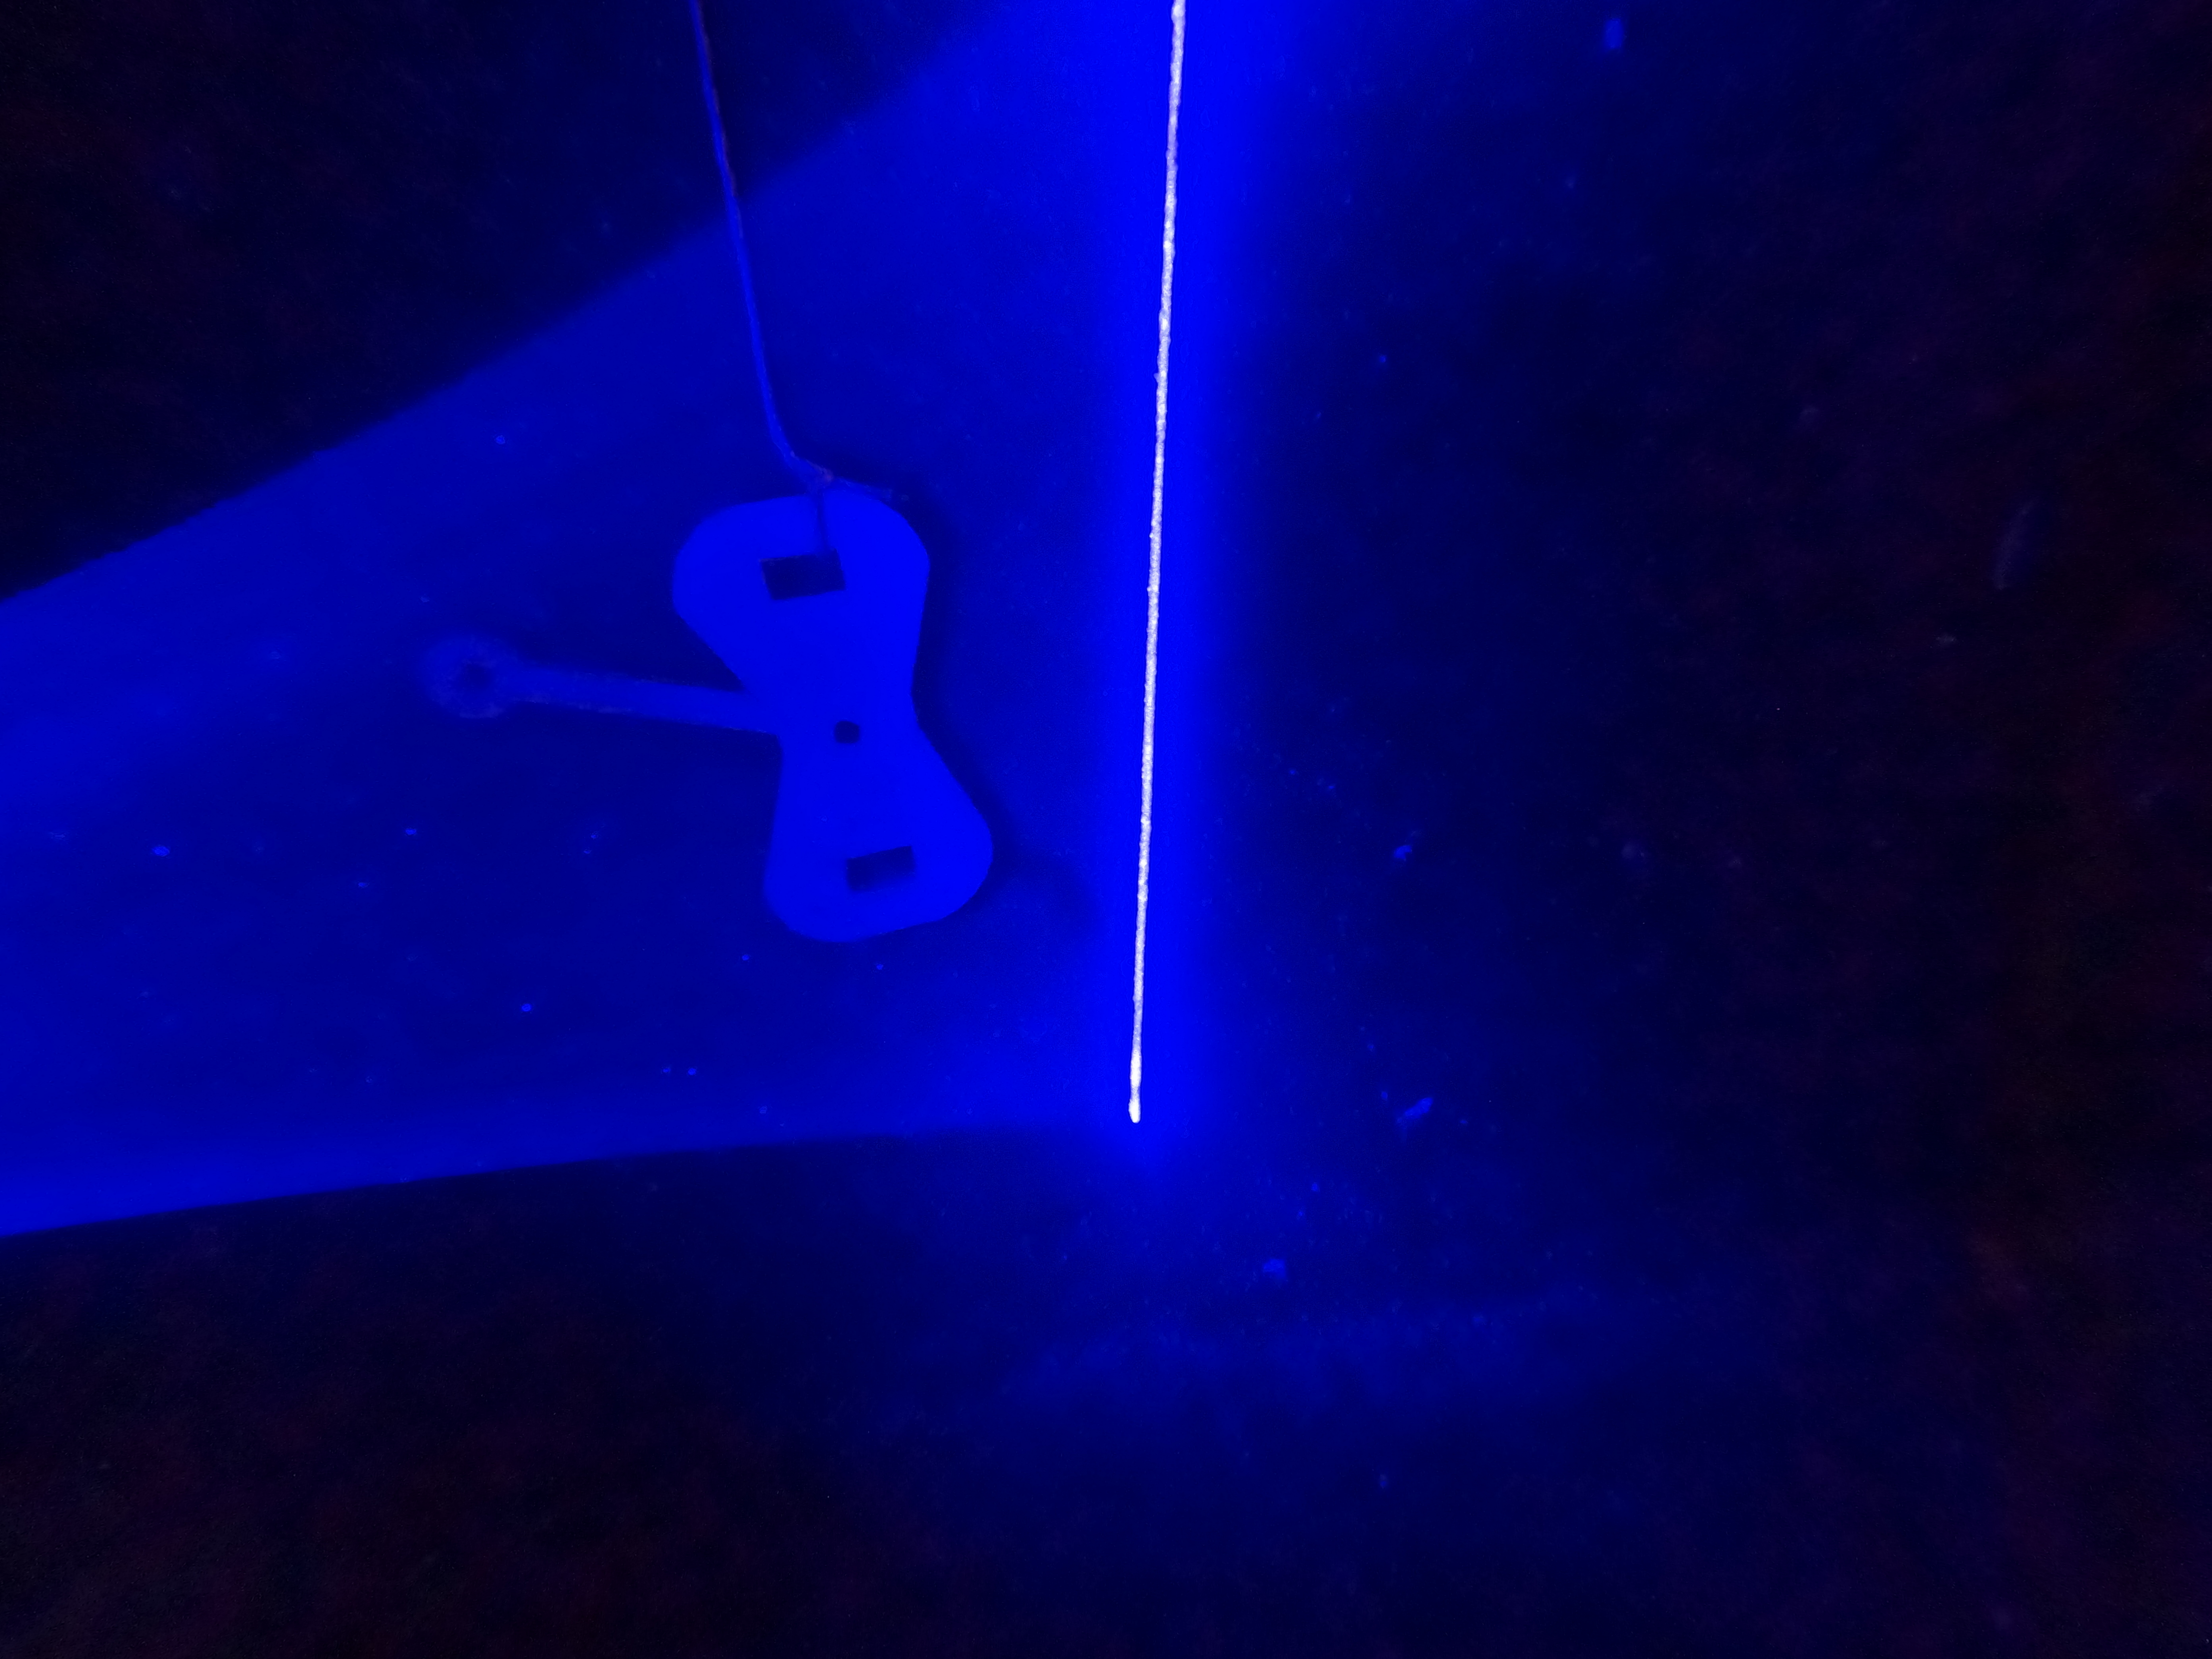

Supplement: Supplementary file 2161 [file G0016470.pdf › Level_1_2/G0016470.pdf]

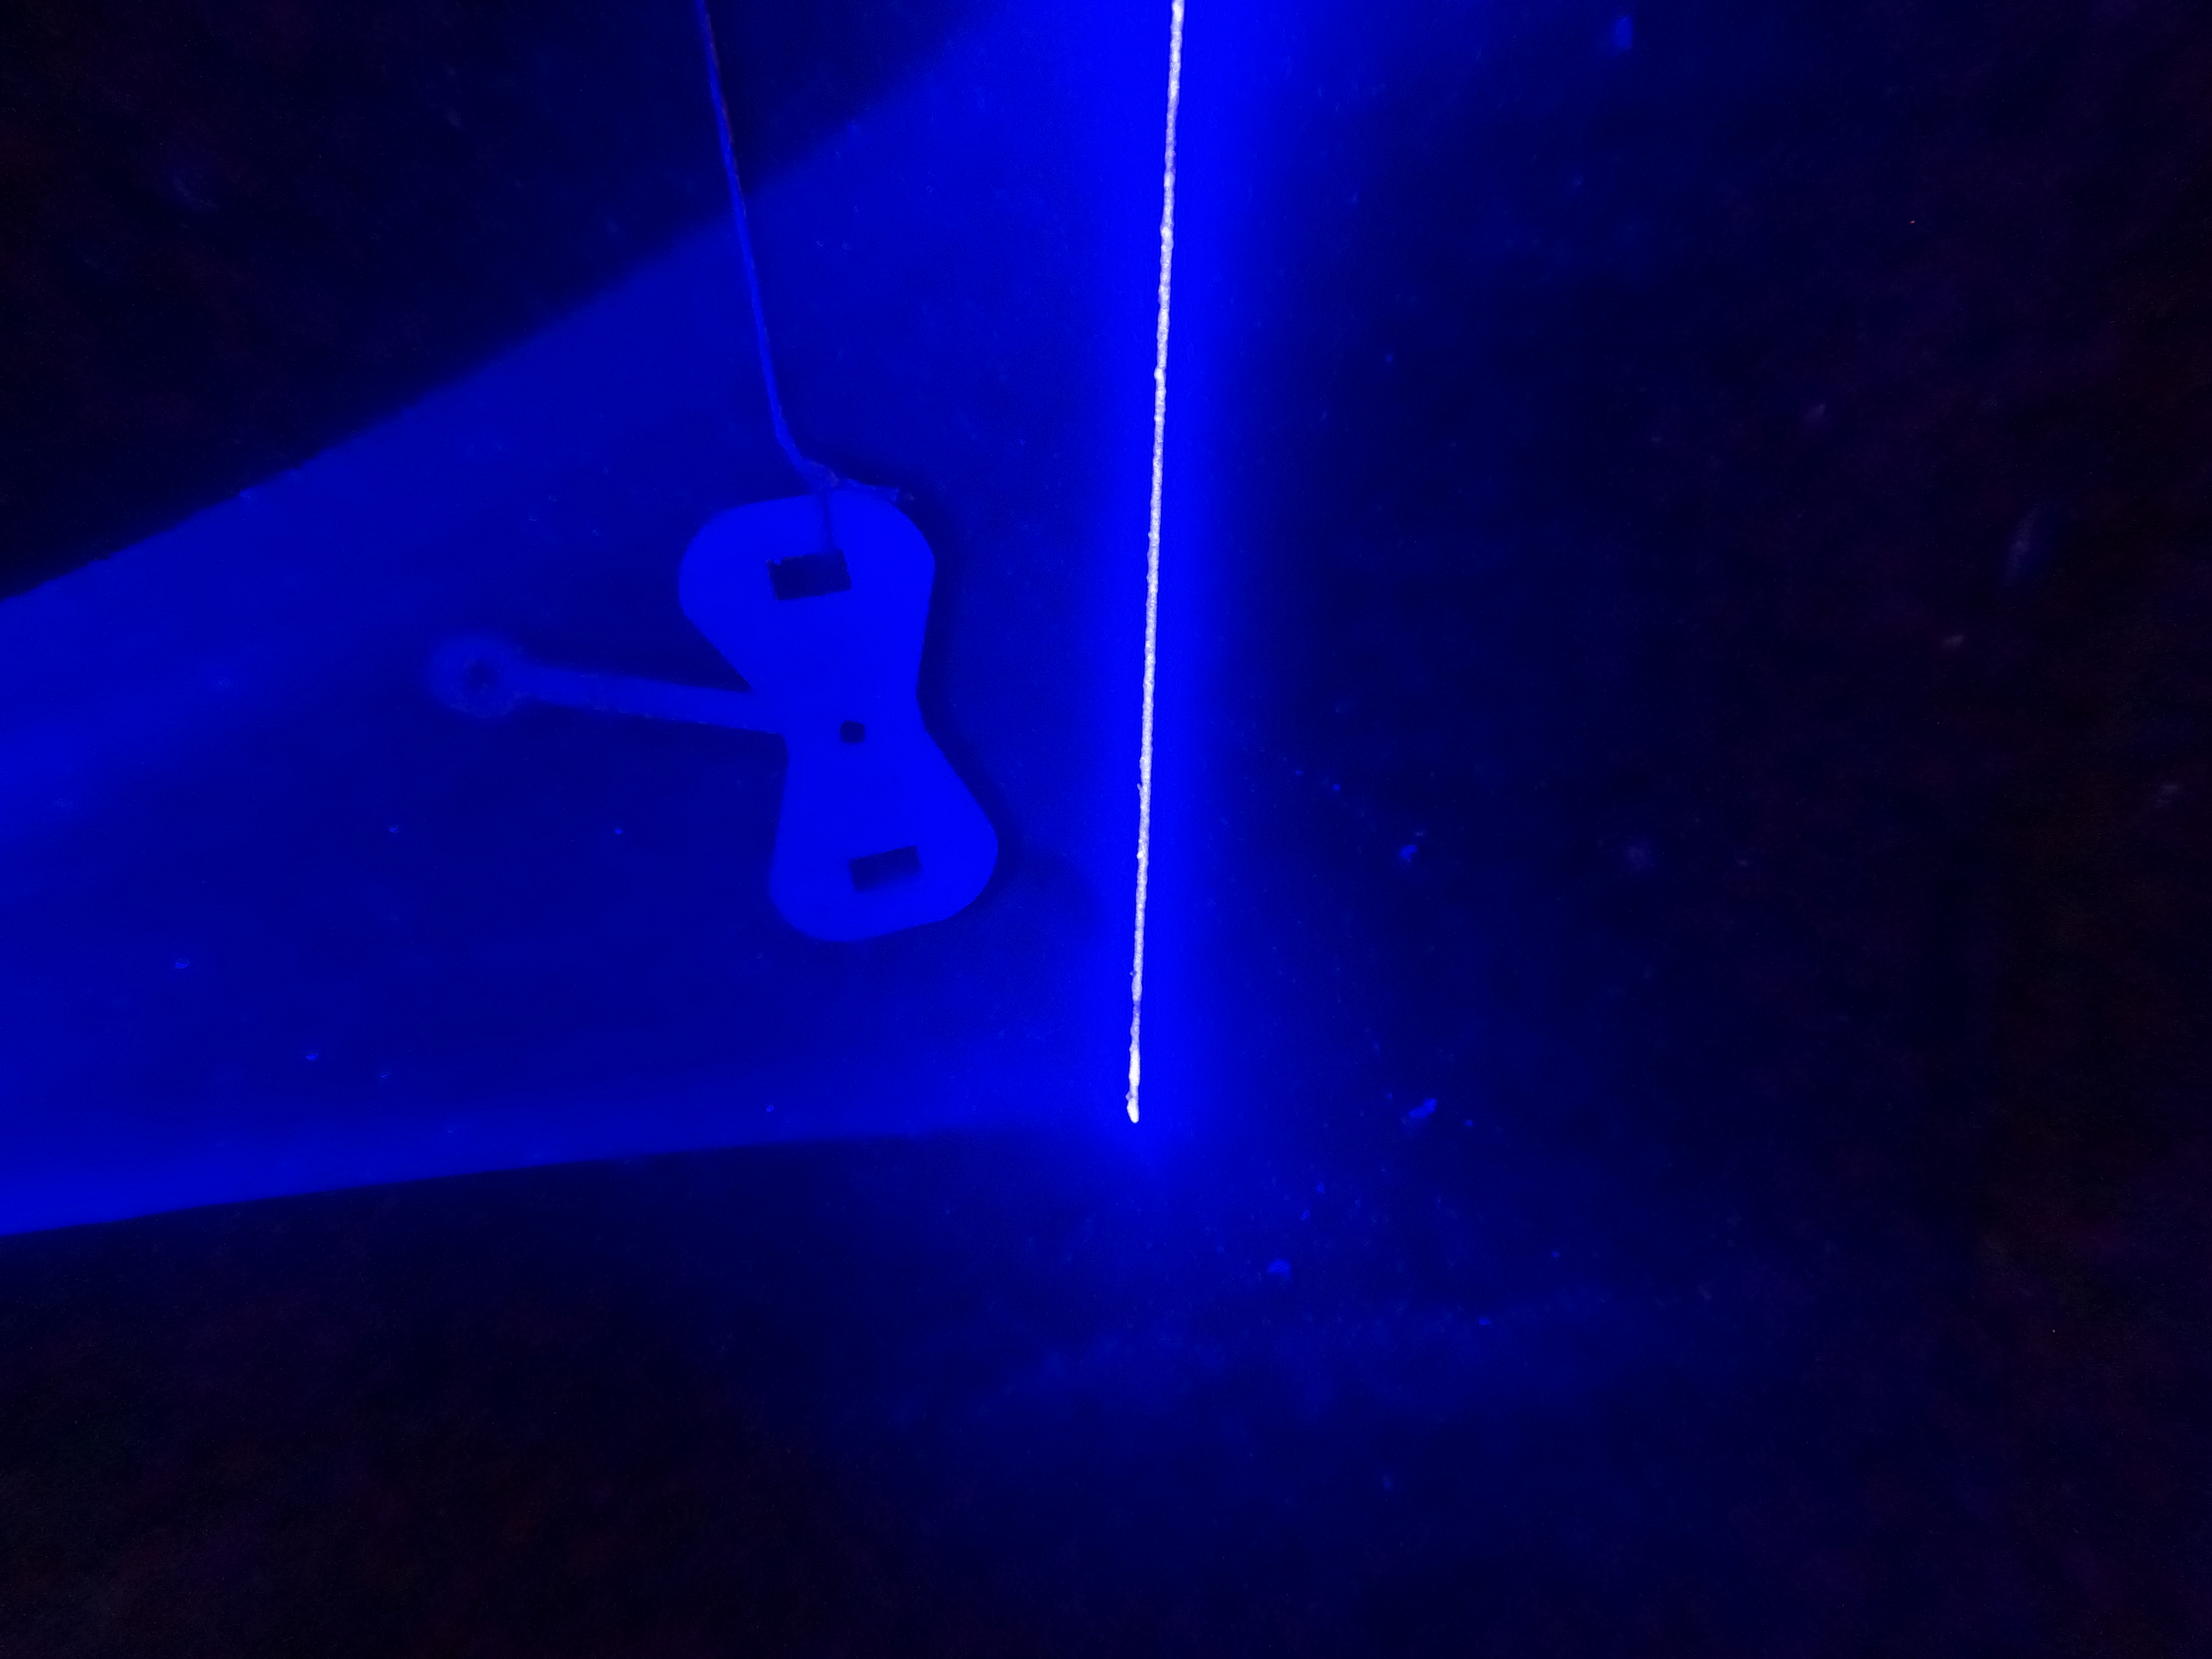

Supplement: Supplementary file 2162 [file G0016471.pdf › Level_1_2/G0016471.pdf]

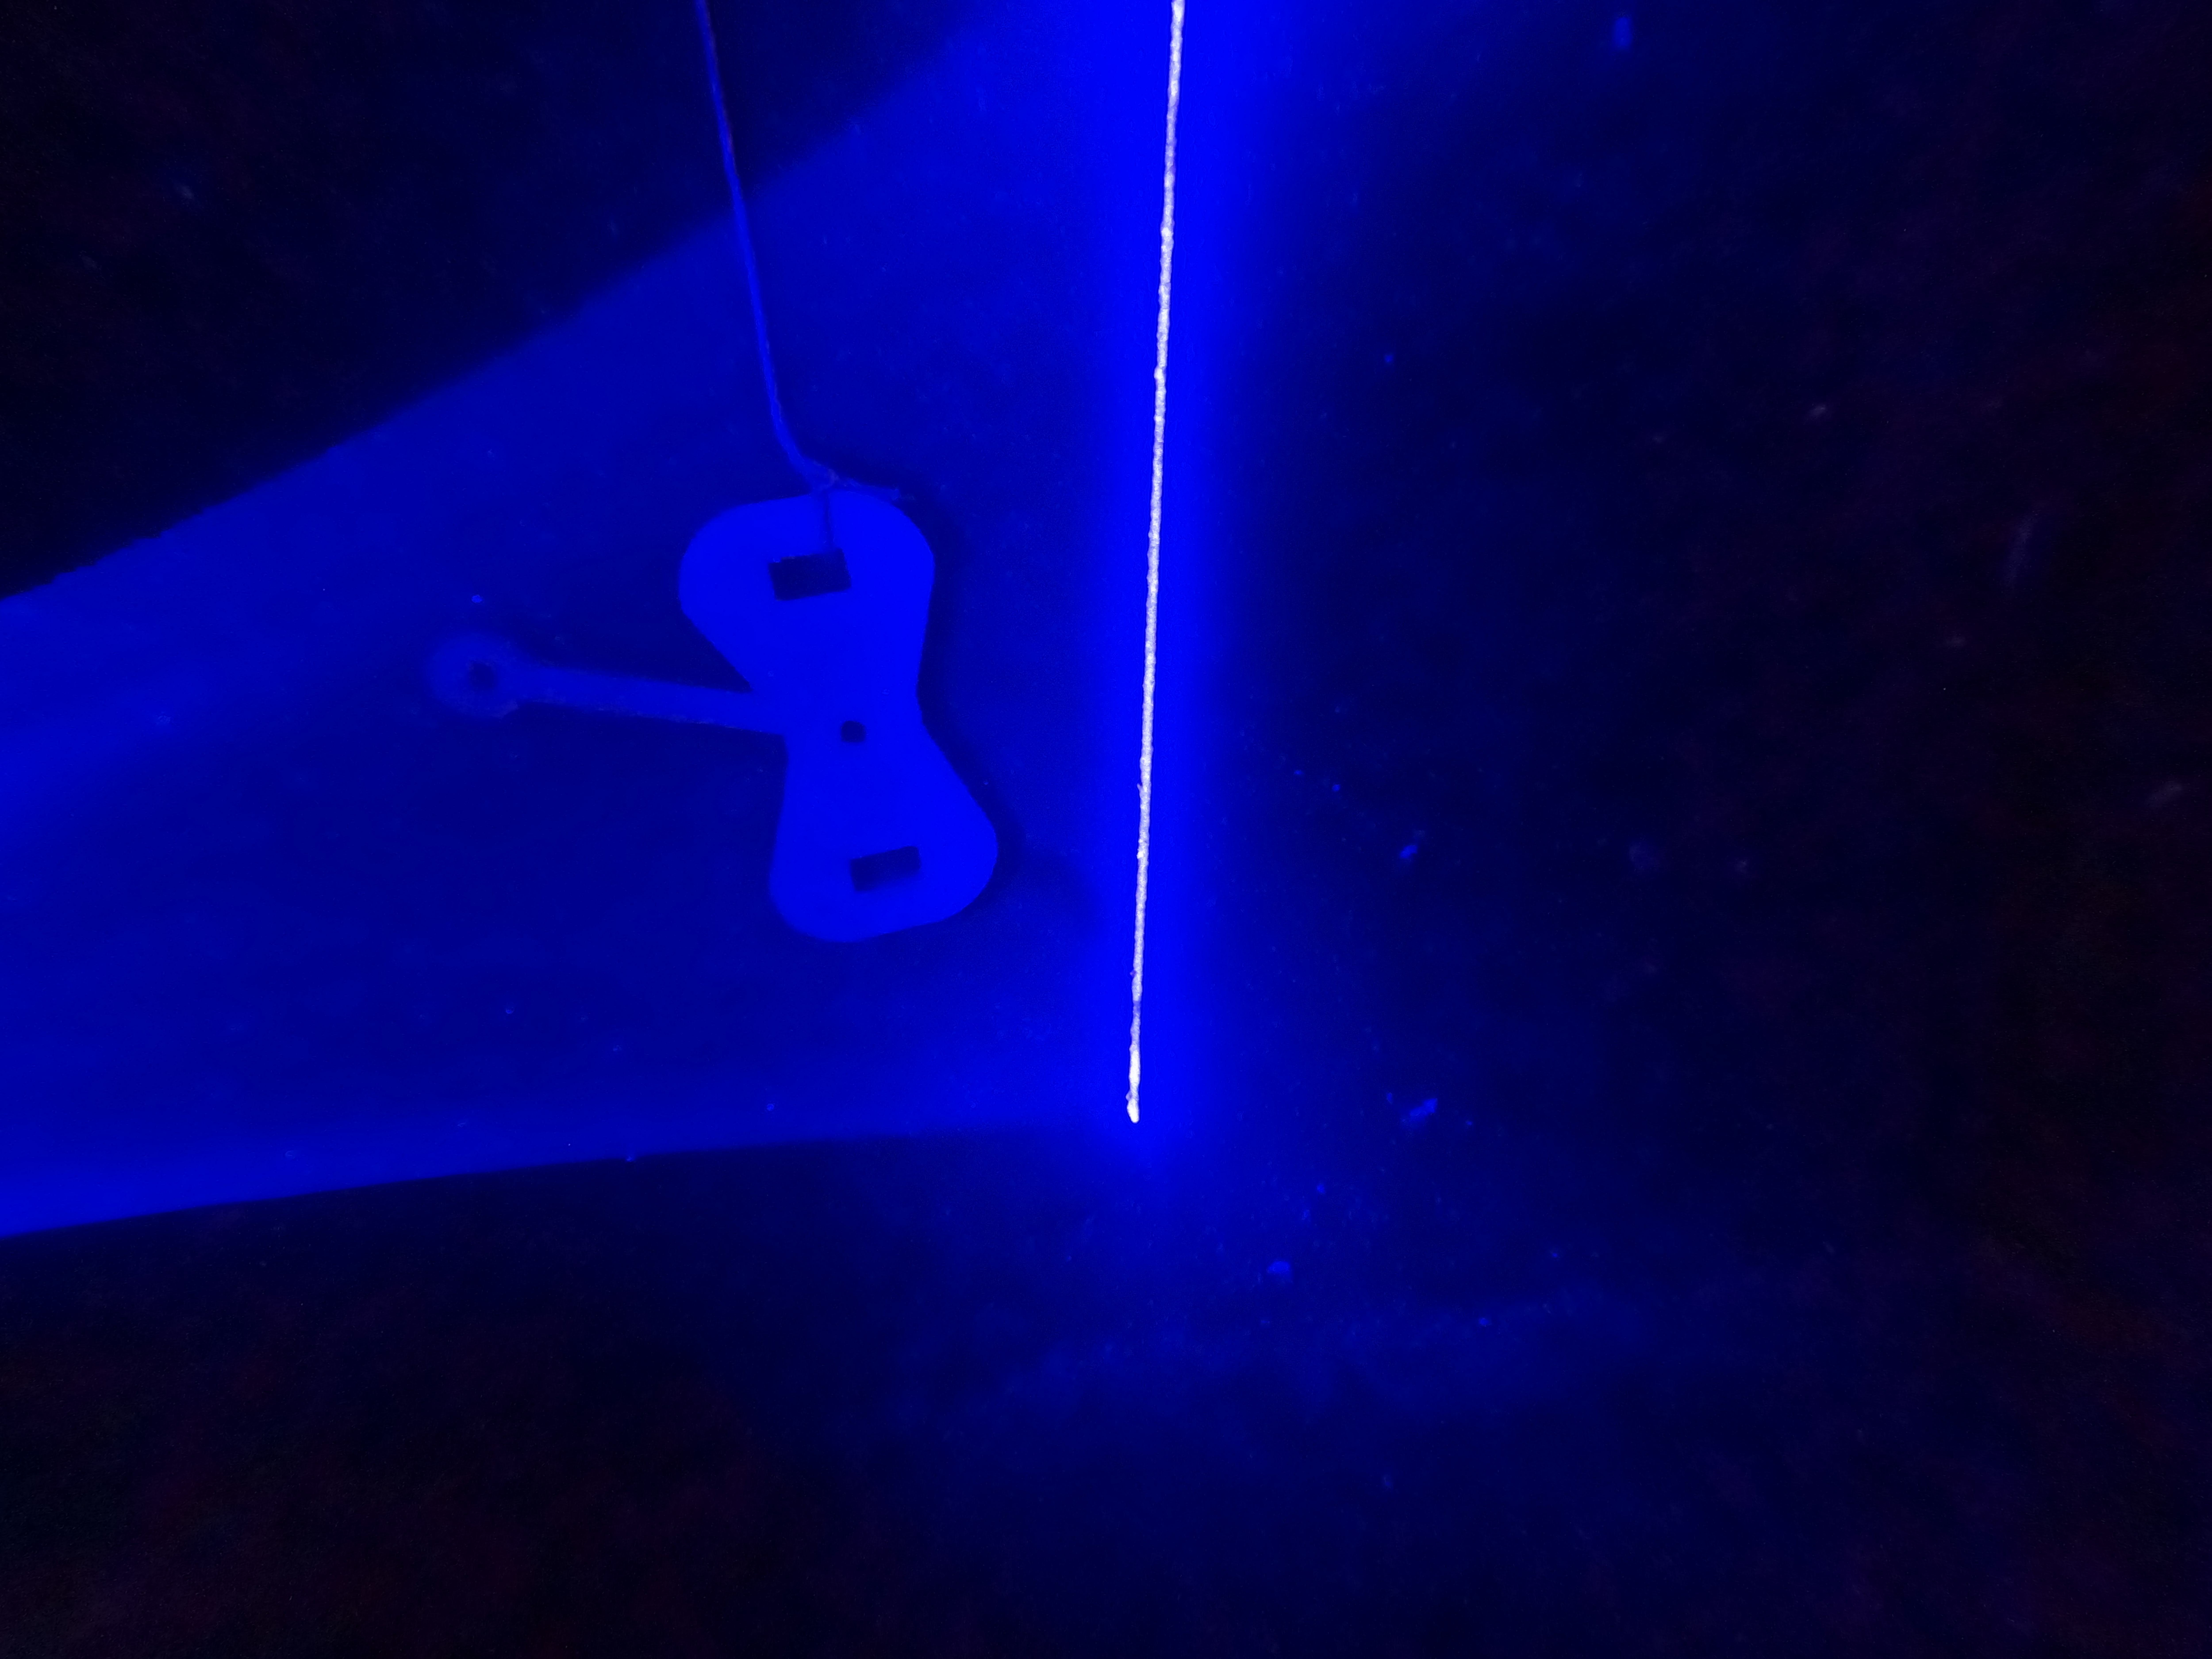

Supplement: Supplementary file 2163 [file G0016472.pdf › Level_1_2/G0016472.pdf]

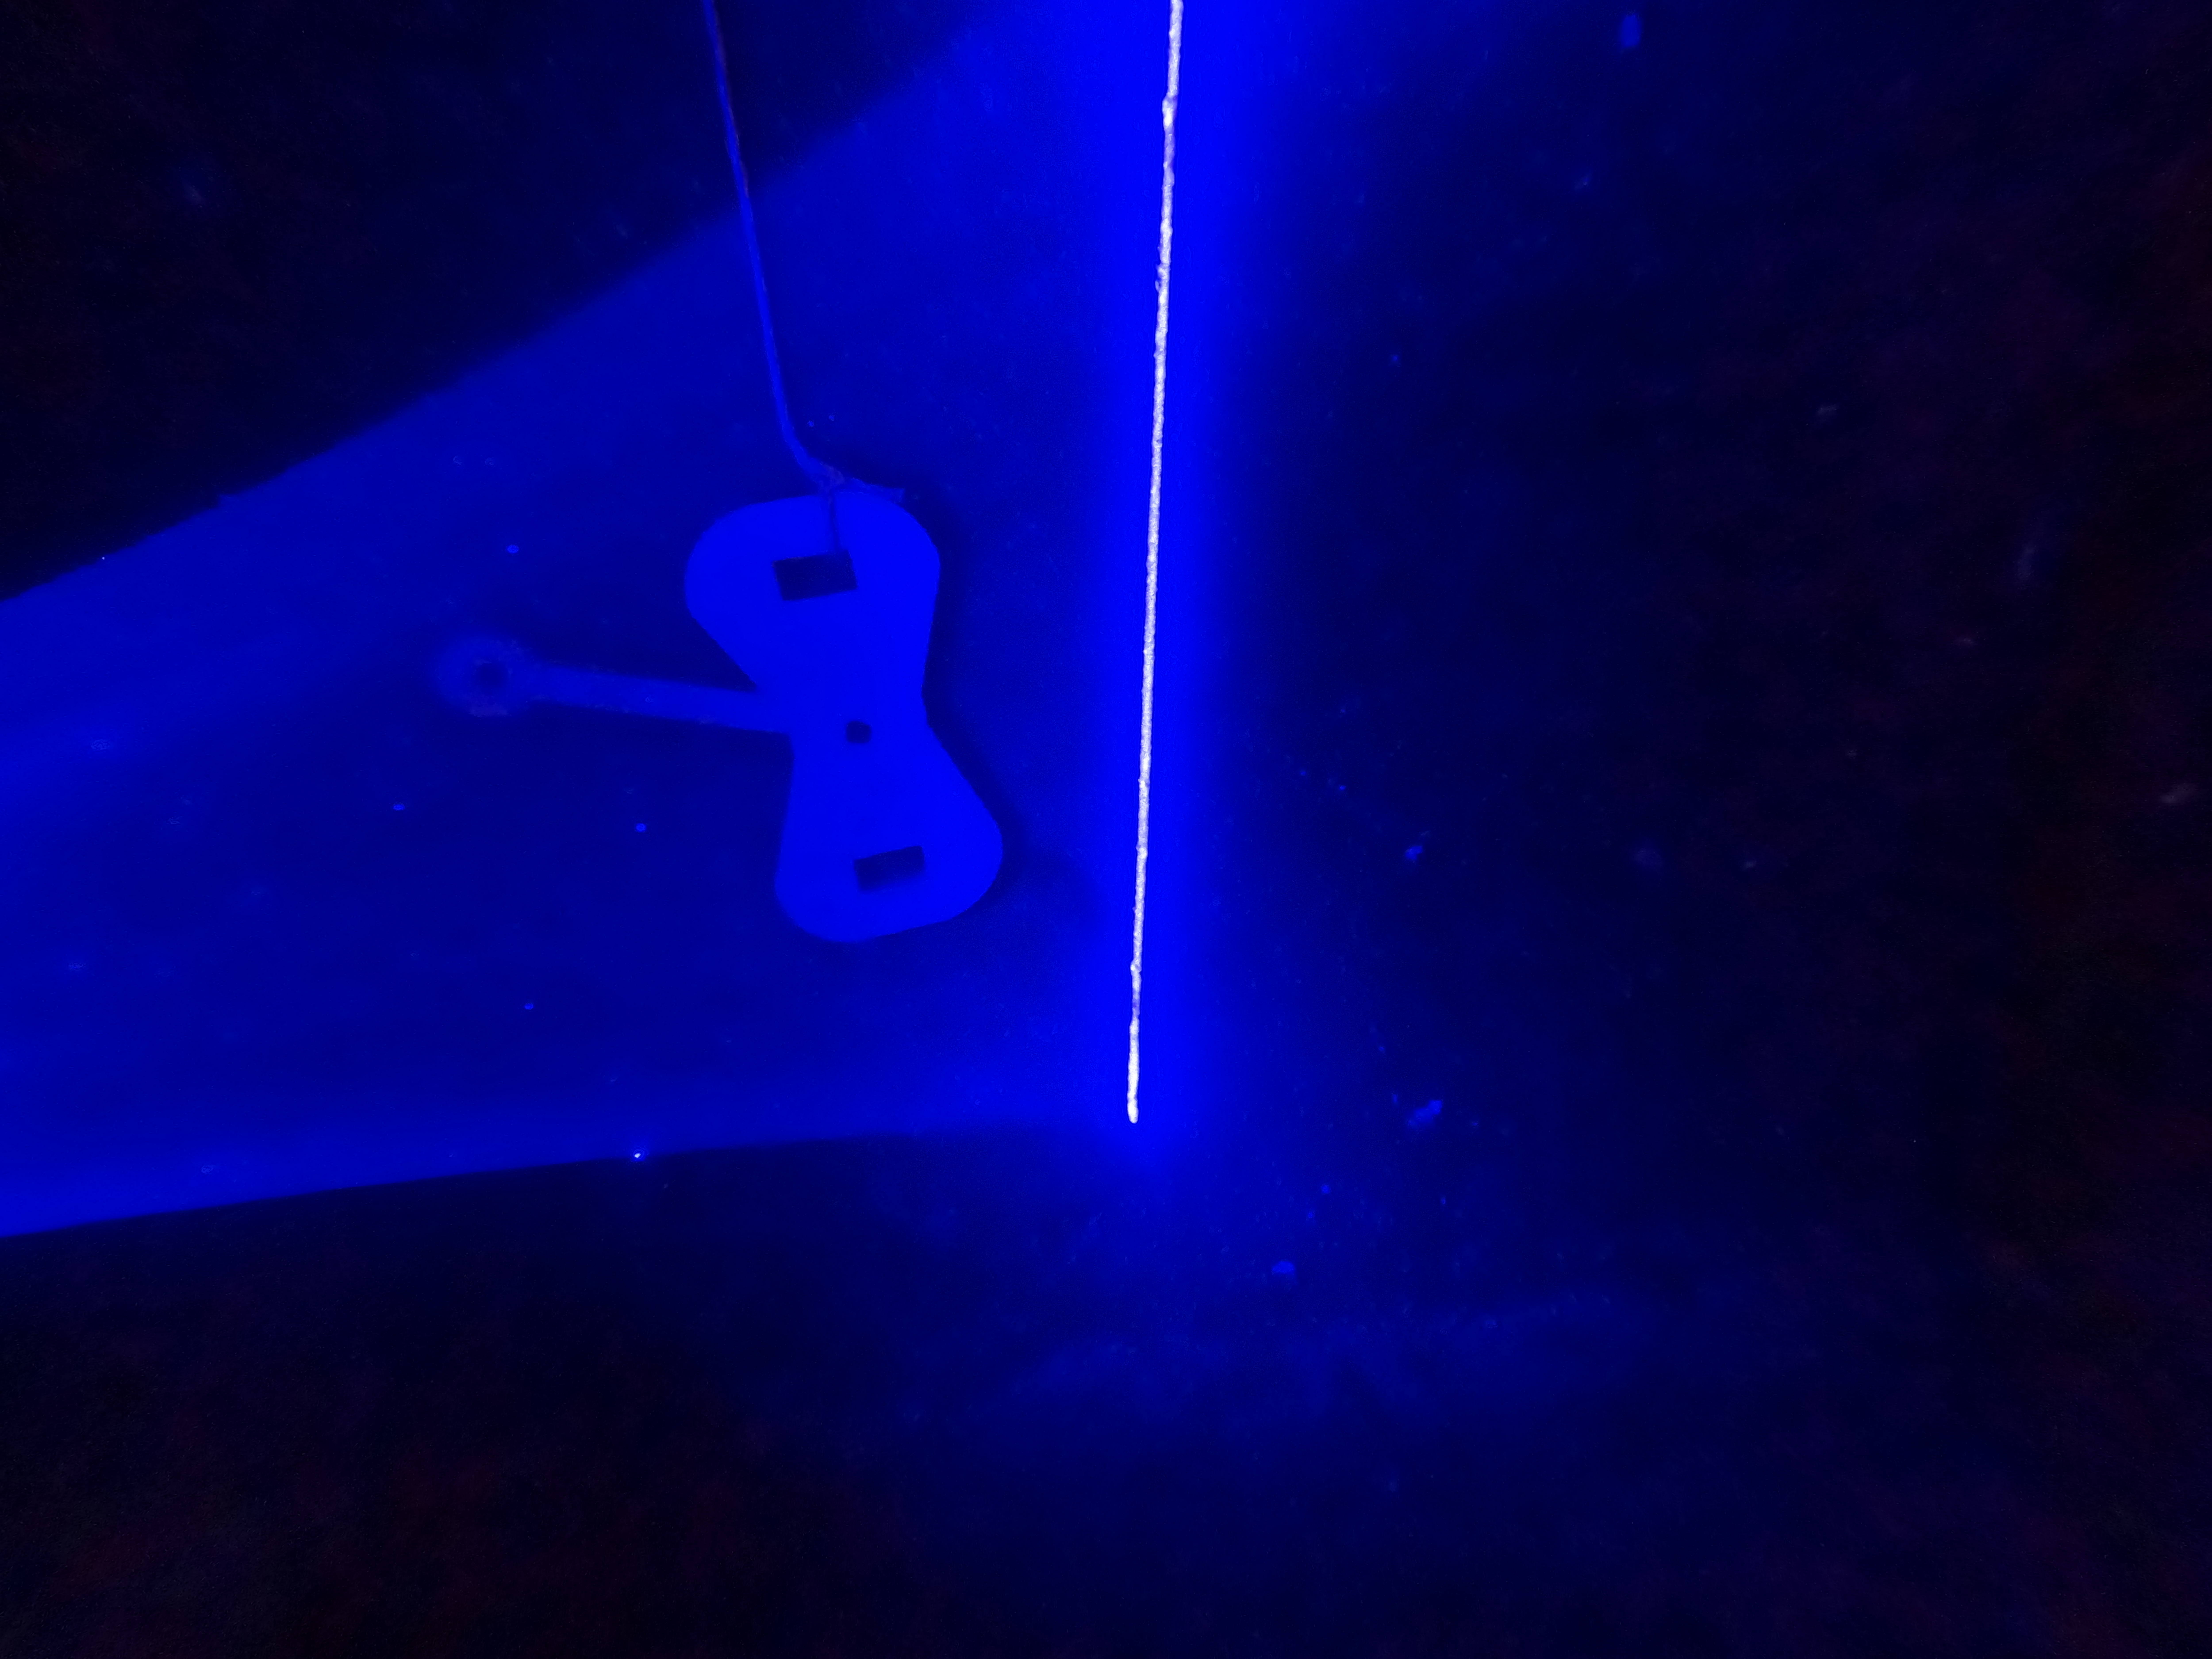

Supplement: Supplementary file 2164 [file G0016473.pdf › Level_1_2/G0016473.pdf]

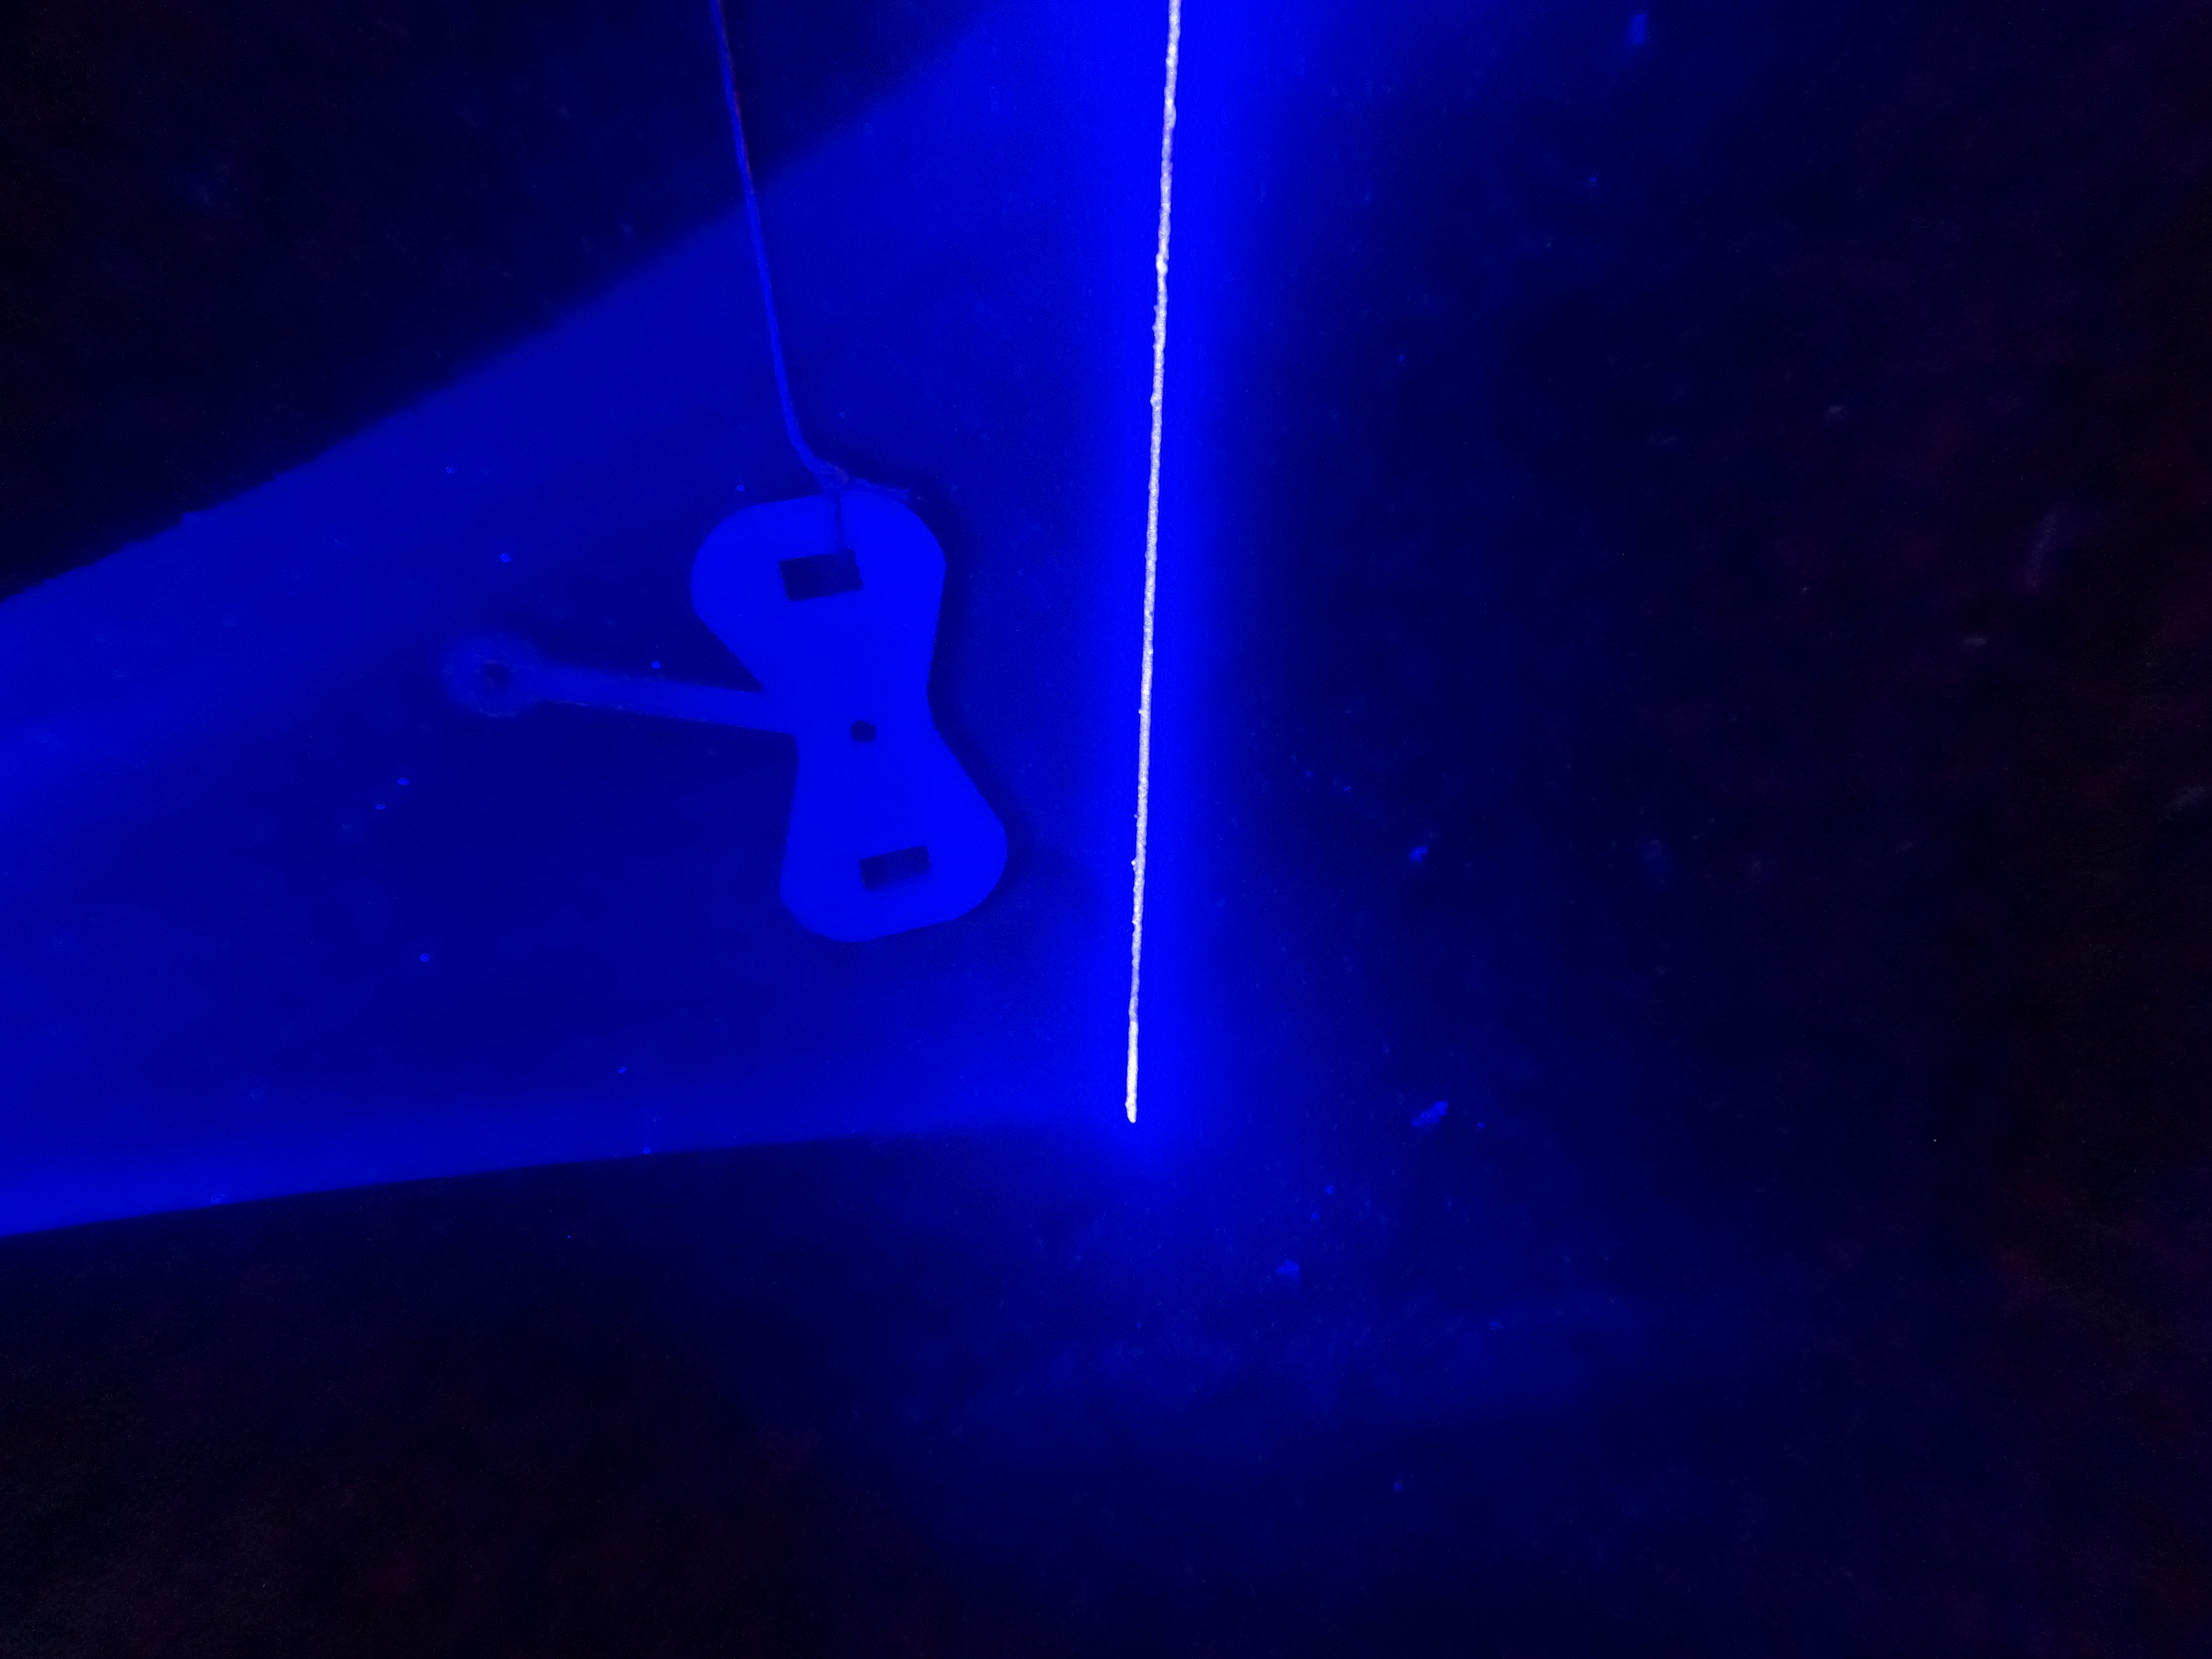

Supplement: Supplementary file 2165 [file G0016474.pdf › Level_1_2/G0016474.pdf]

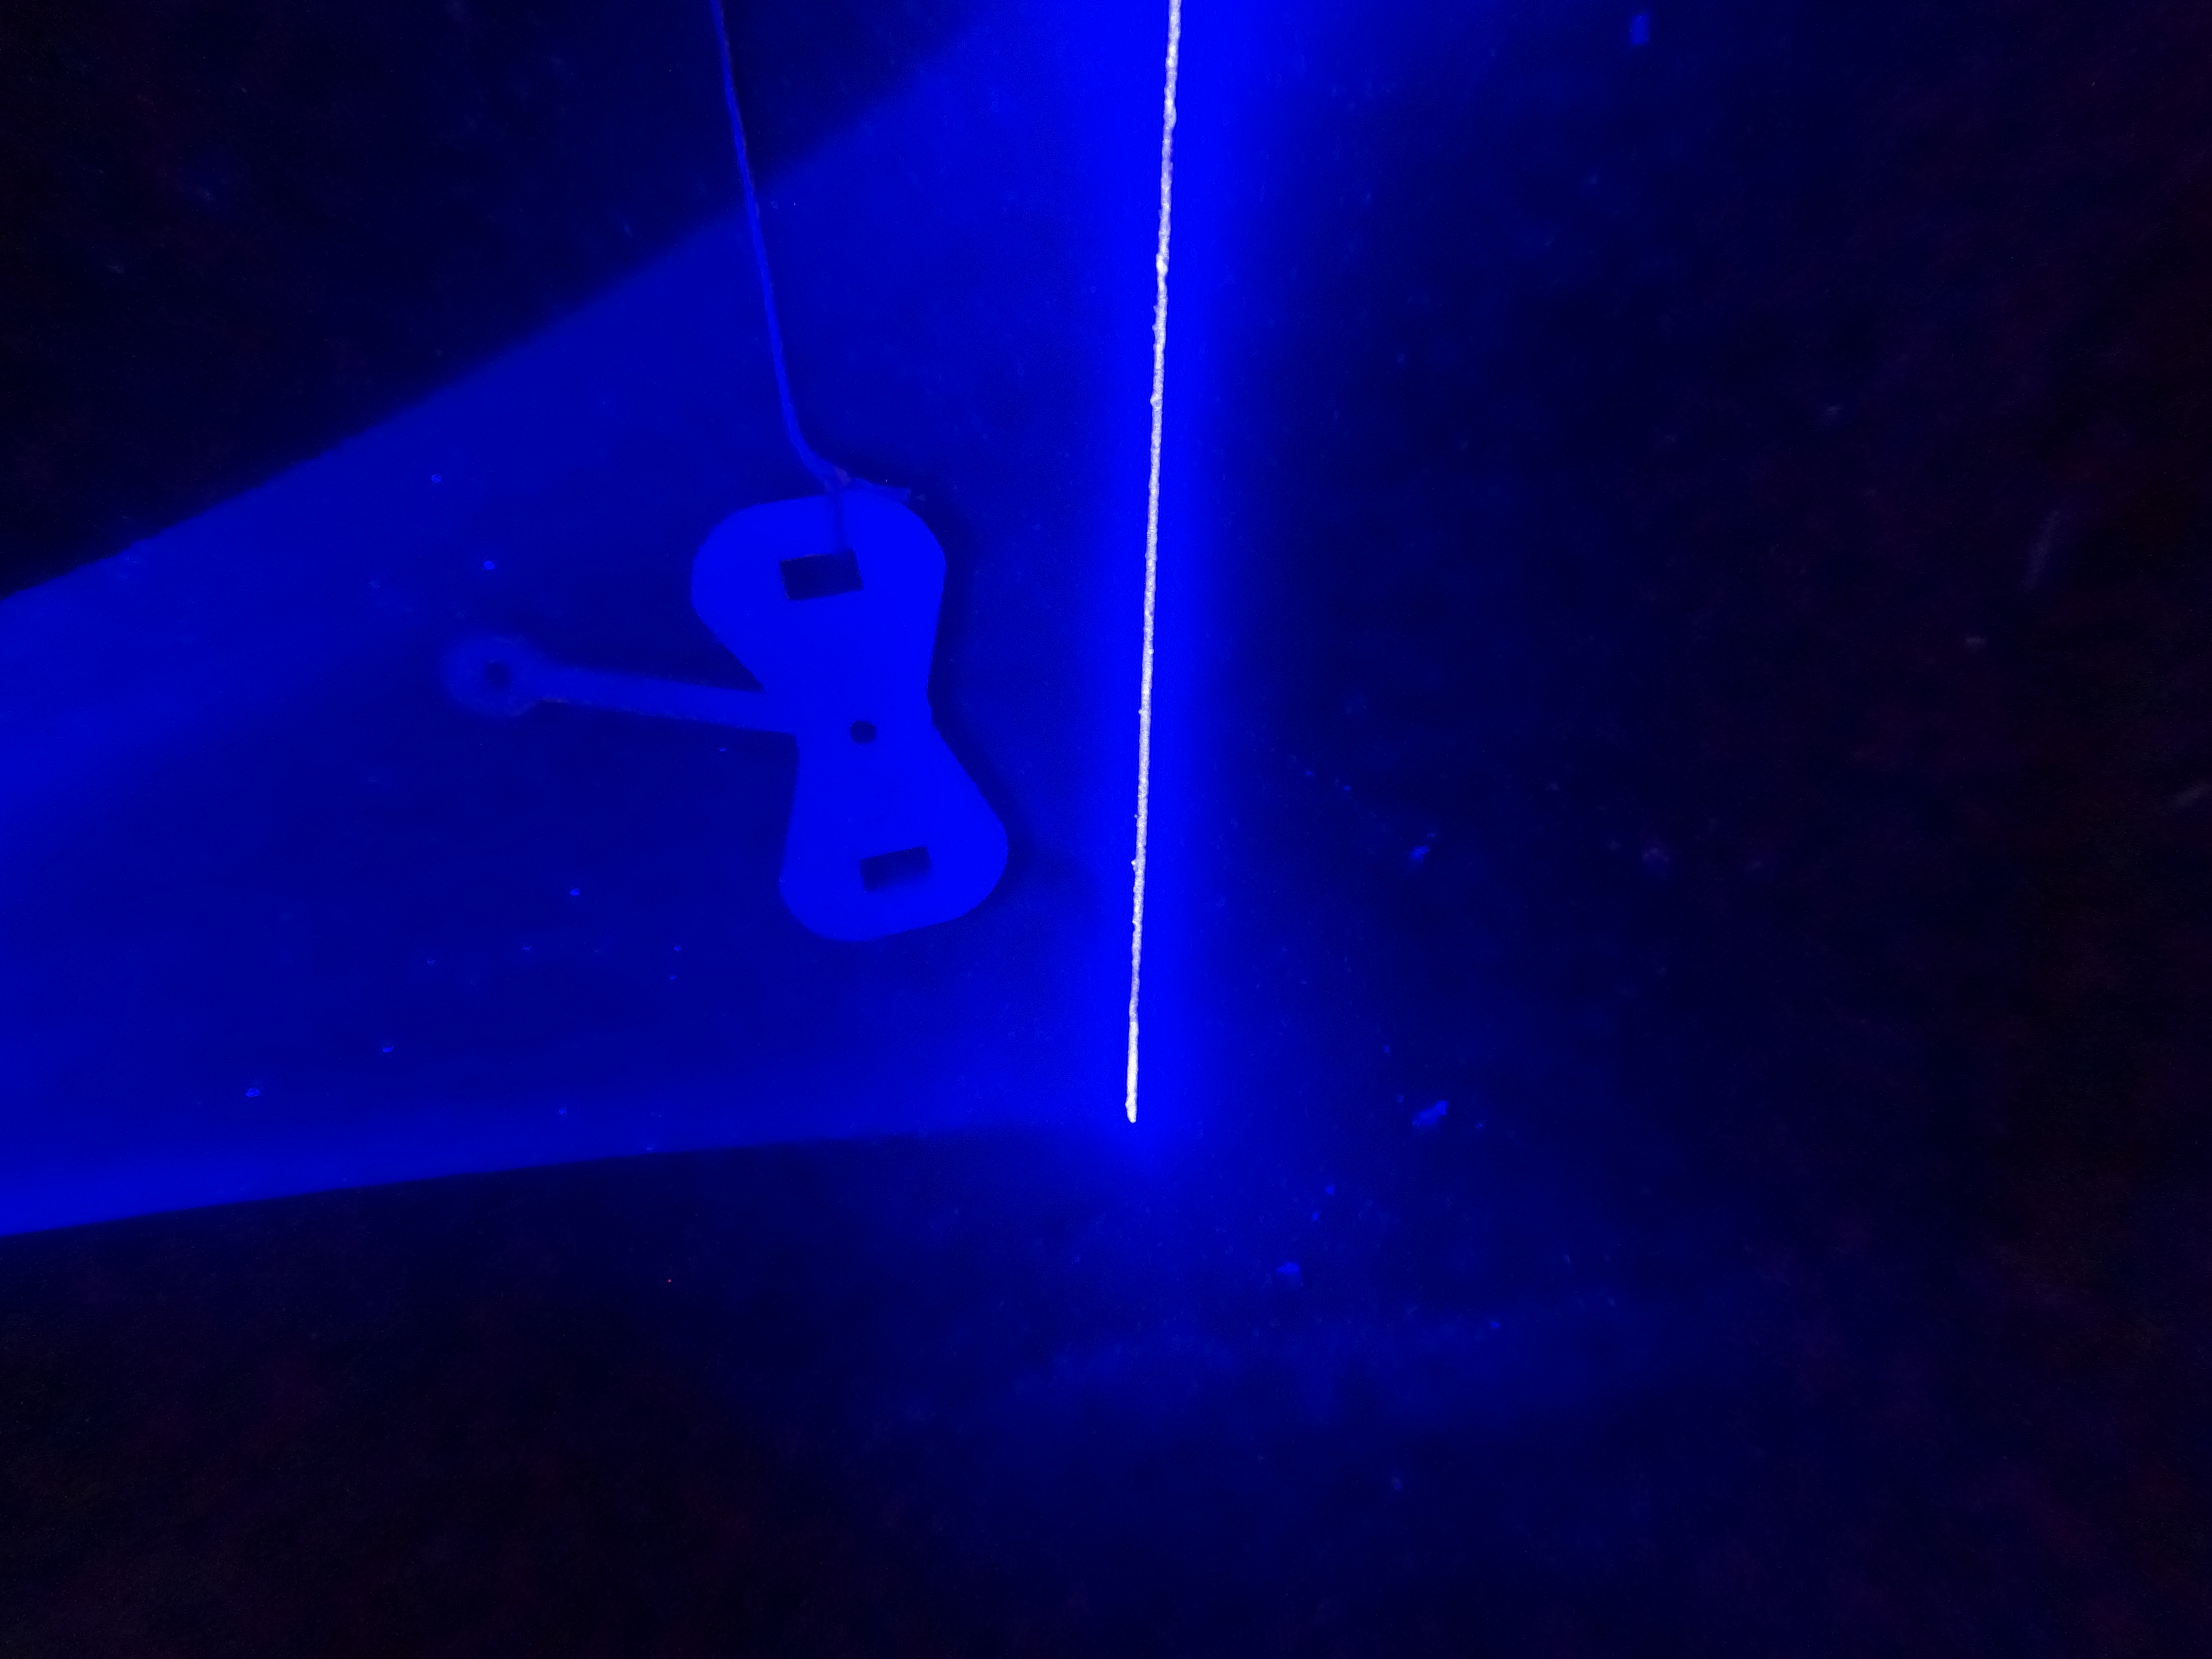

Supplement: Supplementary file 2166 [file G0016475.pdf › Level_1_2/G0016475.pdf]

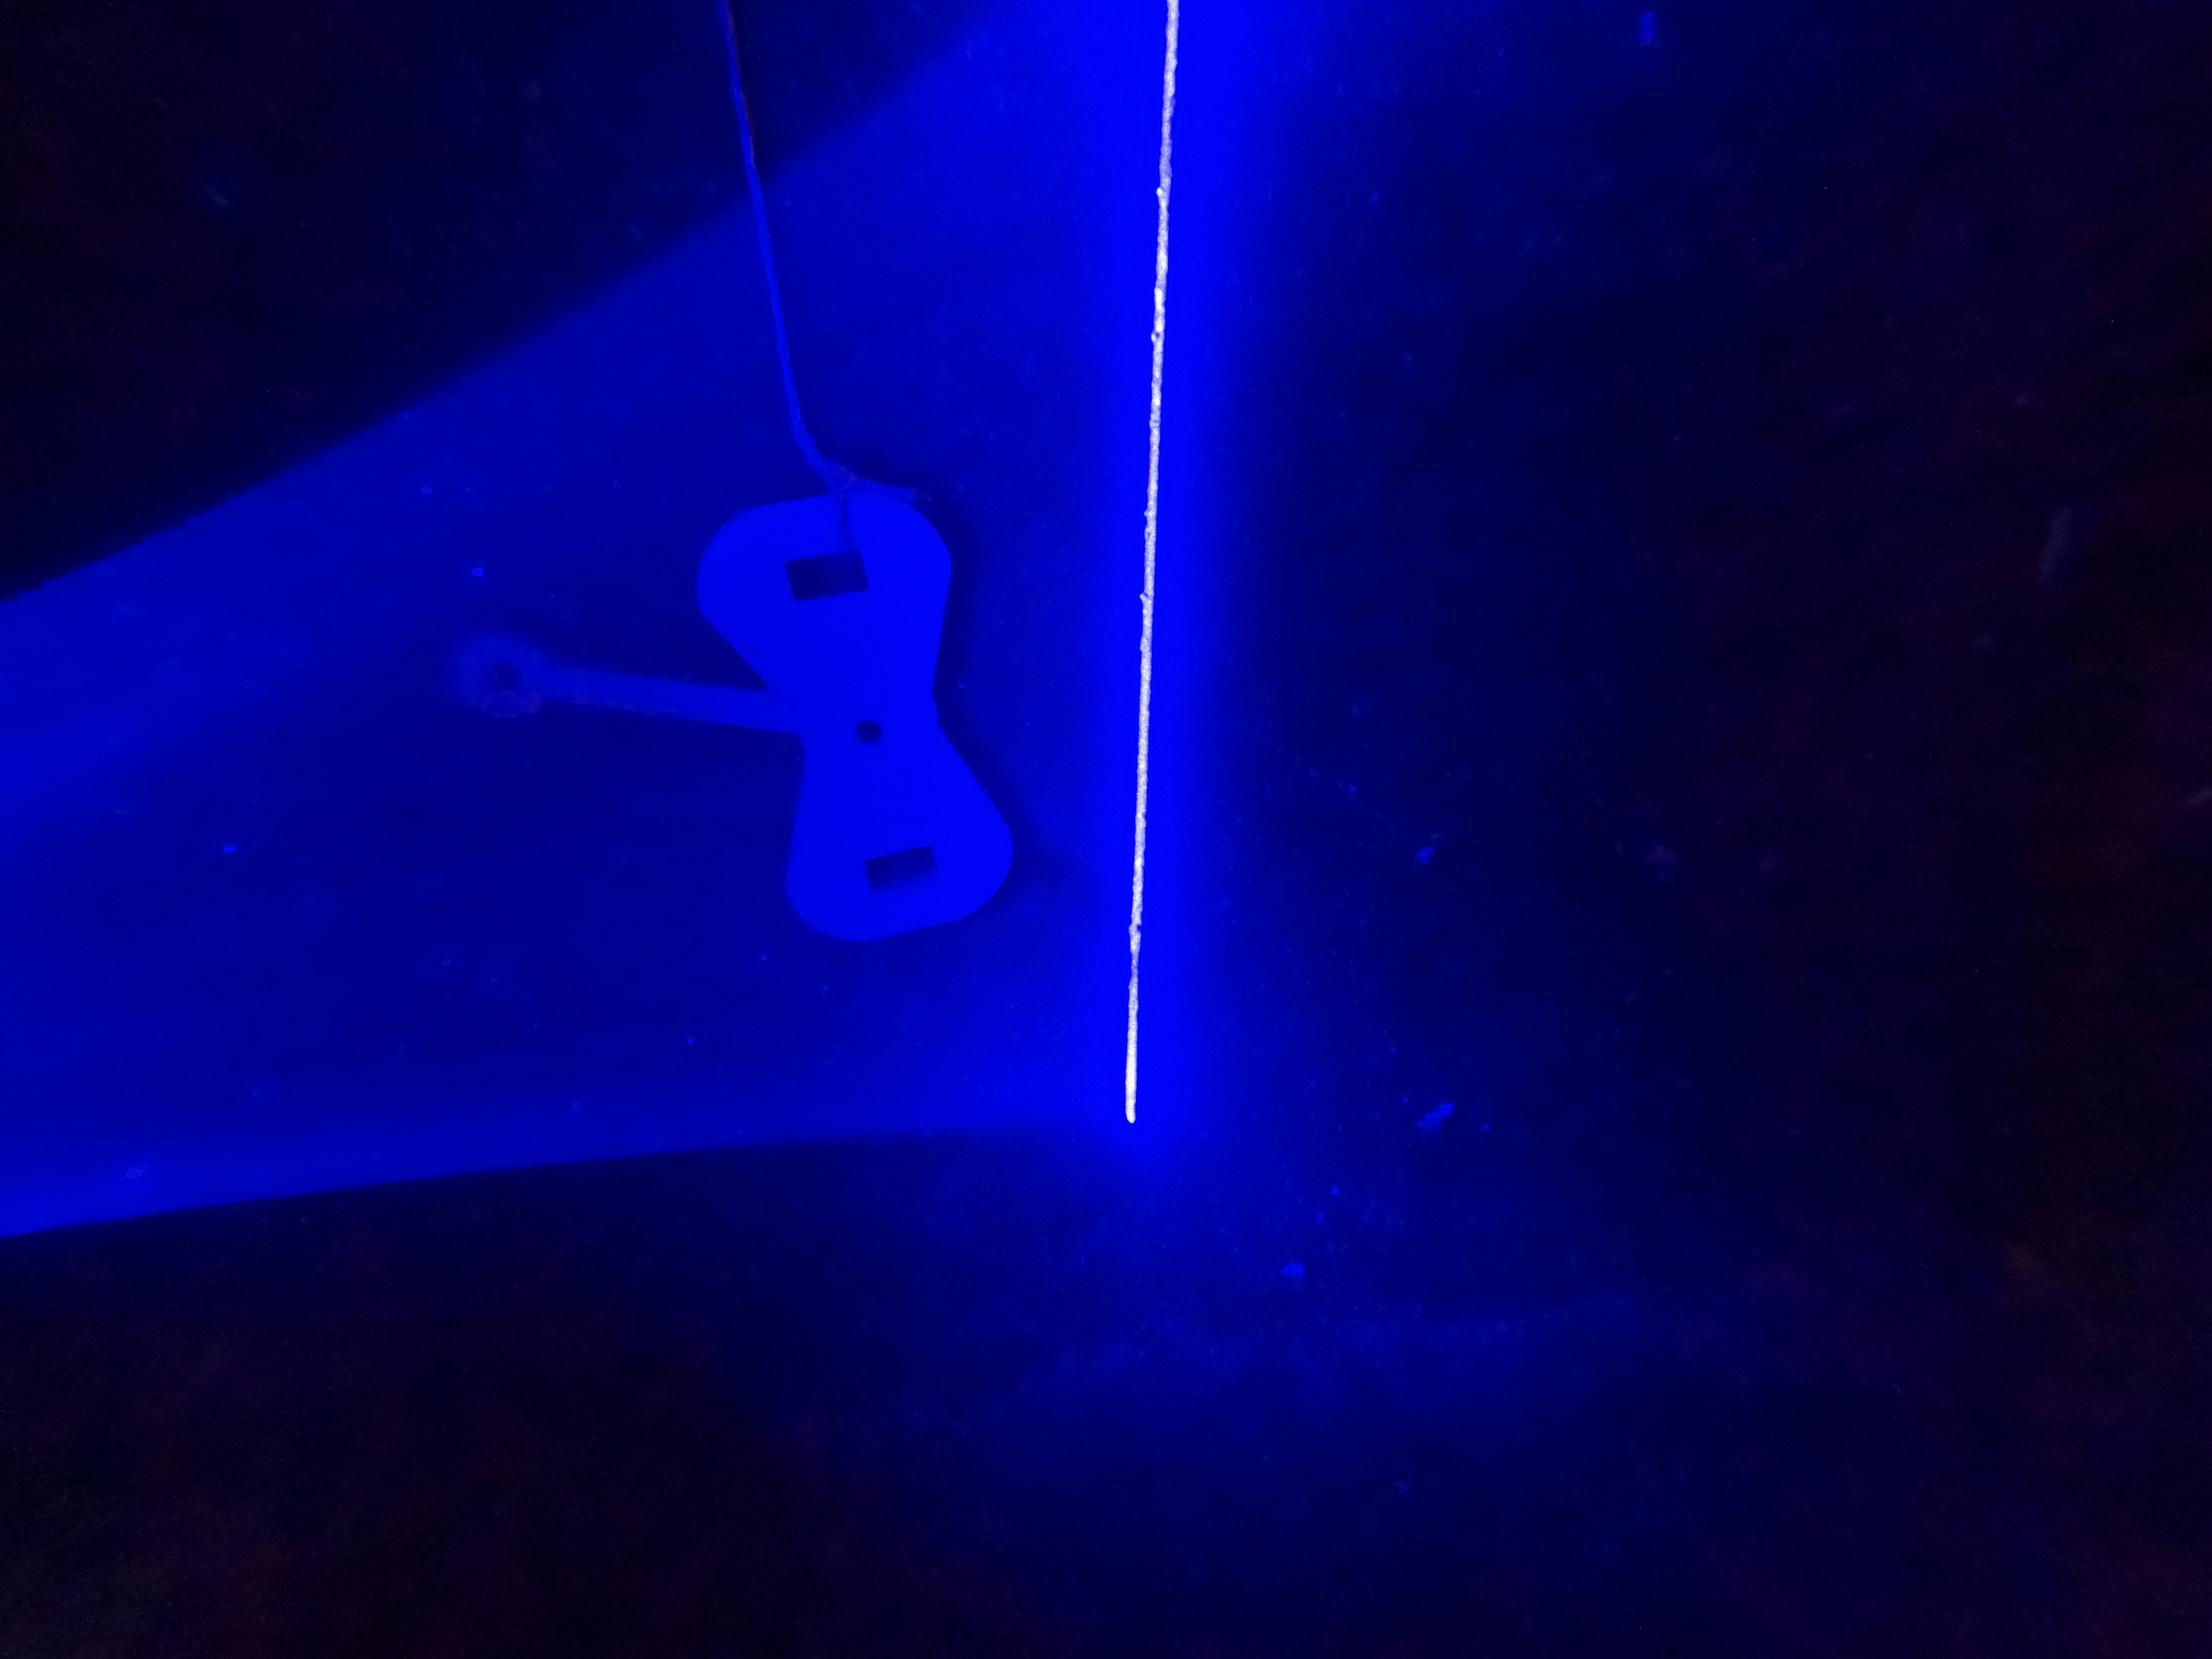

Supplement: Supplementary file 2167 [file G0016476.pdf › Level_1_2/G0016476.pdf]

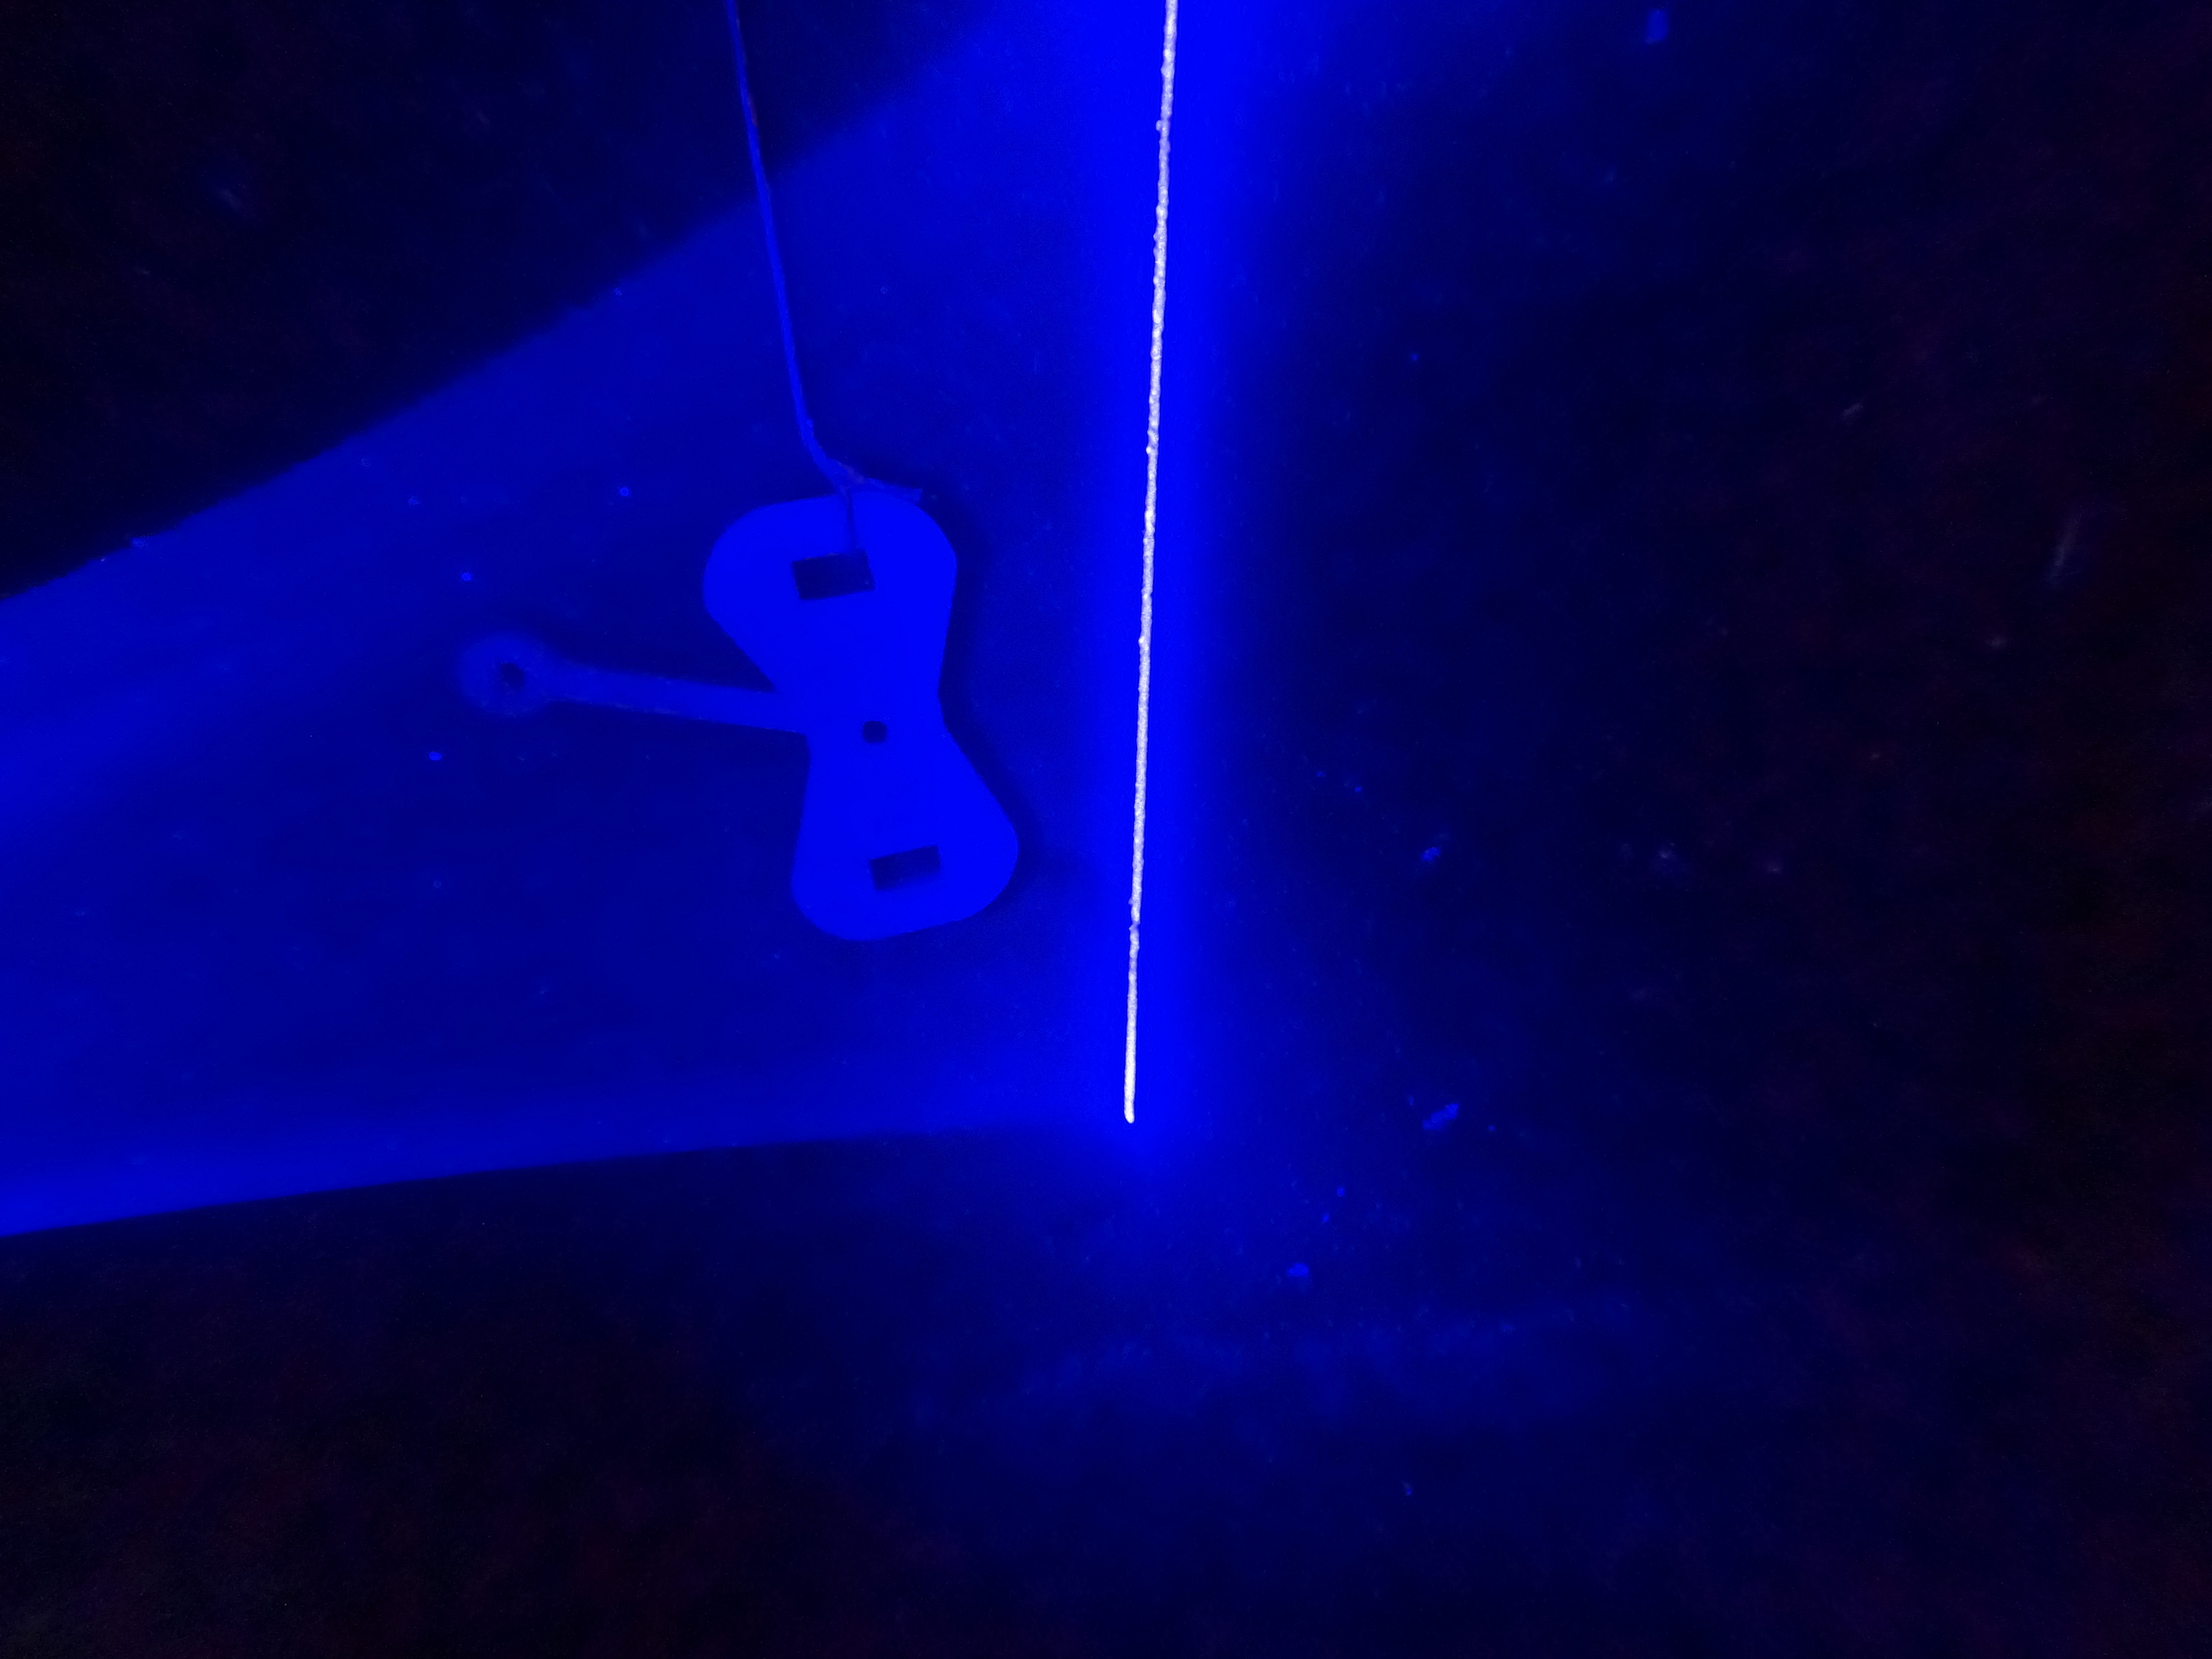

Supplement: Supplementary file 2168 [file G0016477.pdf › Level_1_2/G0016477.pdf]

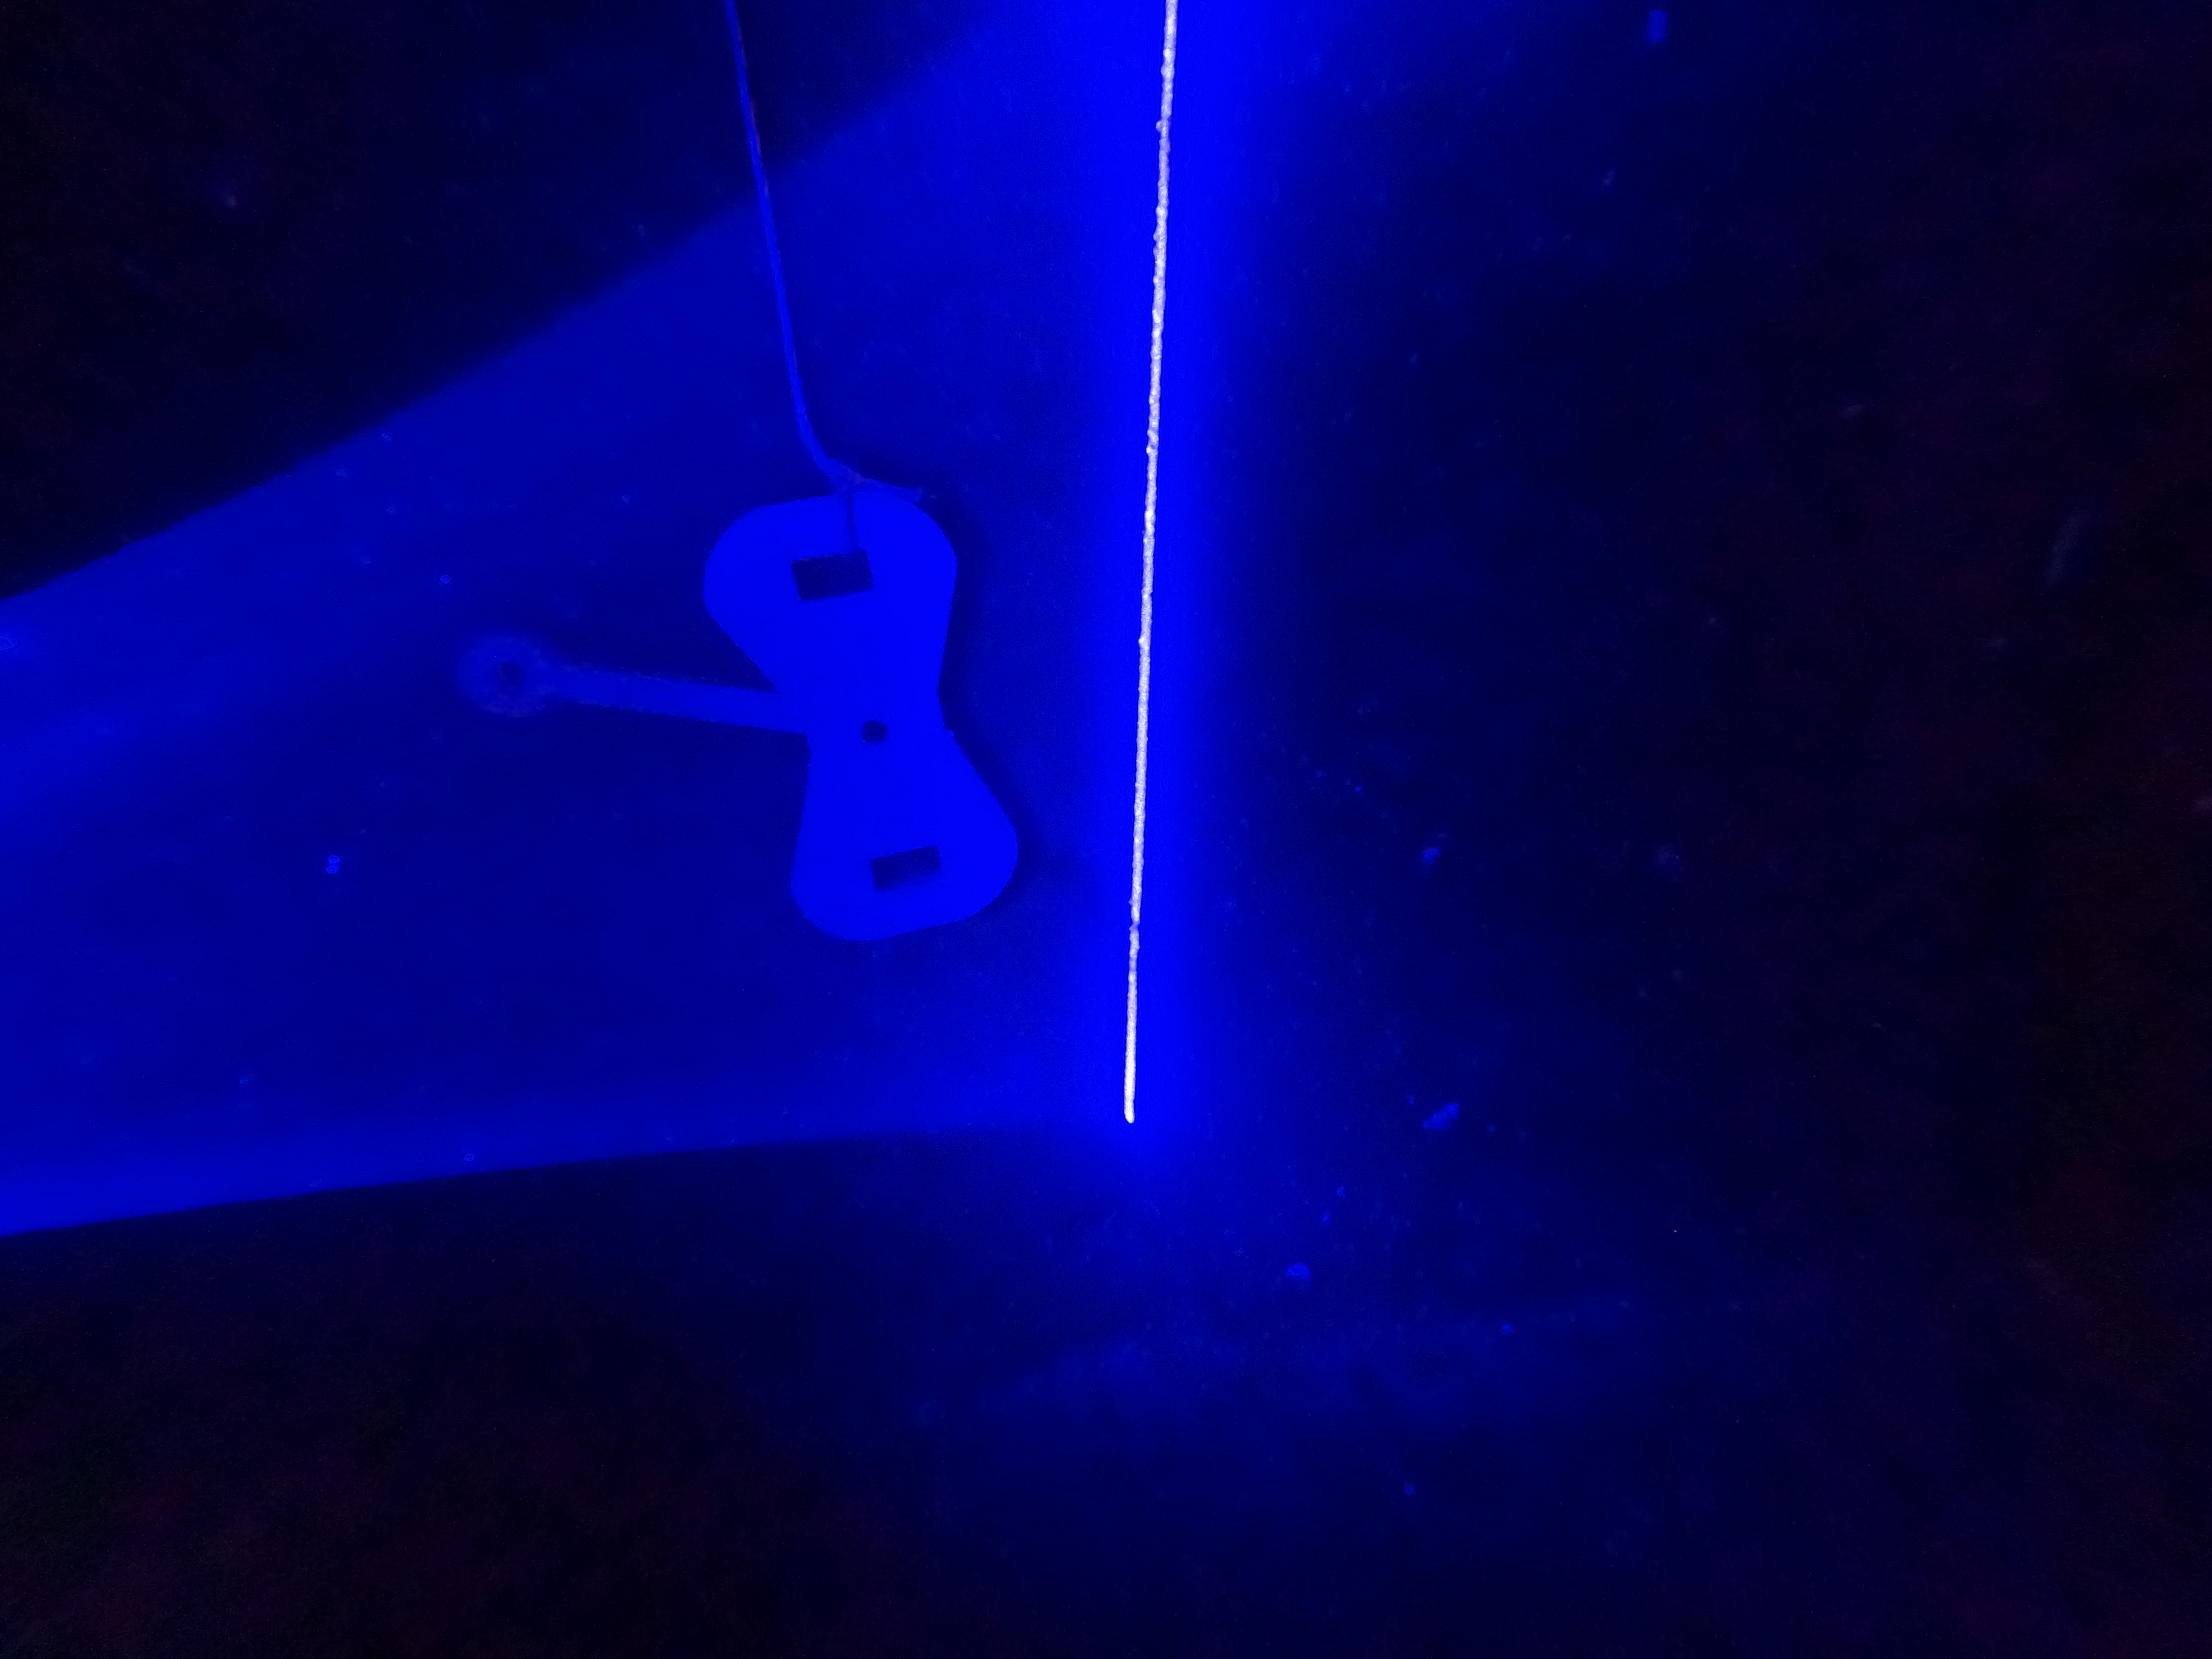

Supplement: Supplementary file 2169 [file G0016478.pdf › Level_1_2/G0016478.pdf]

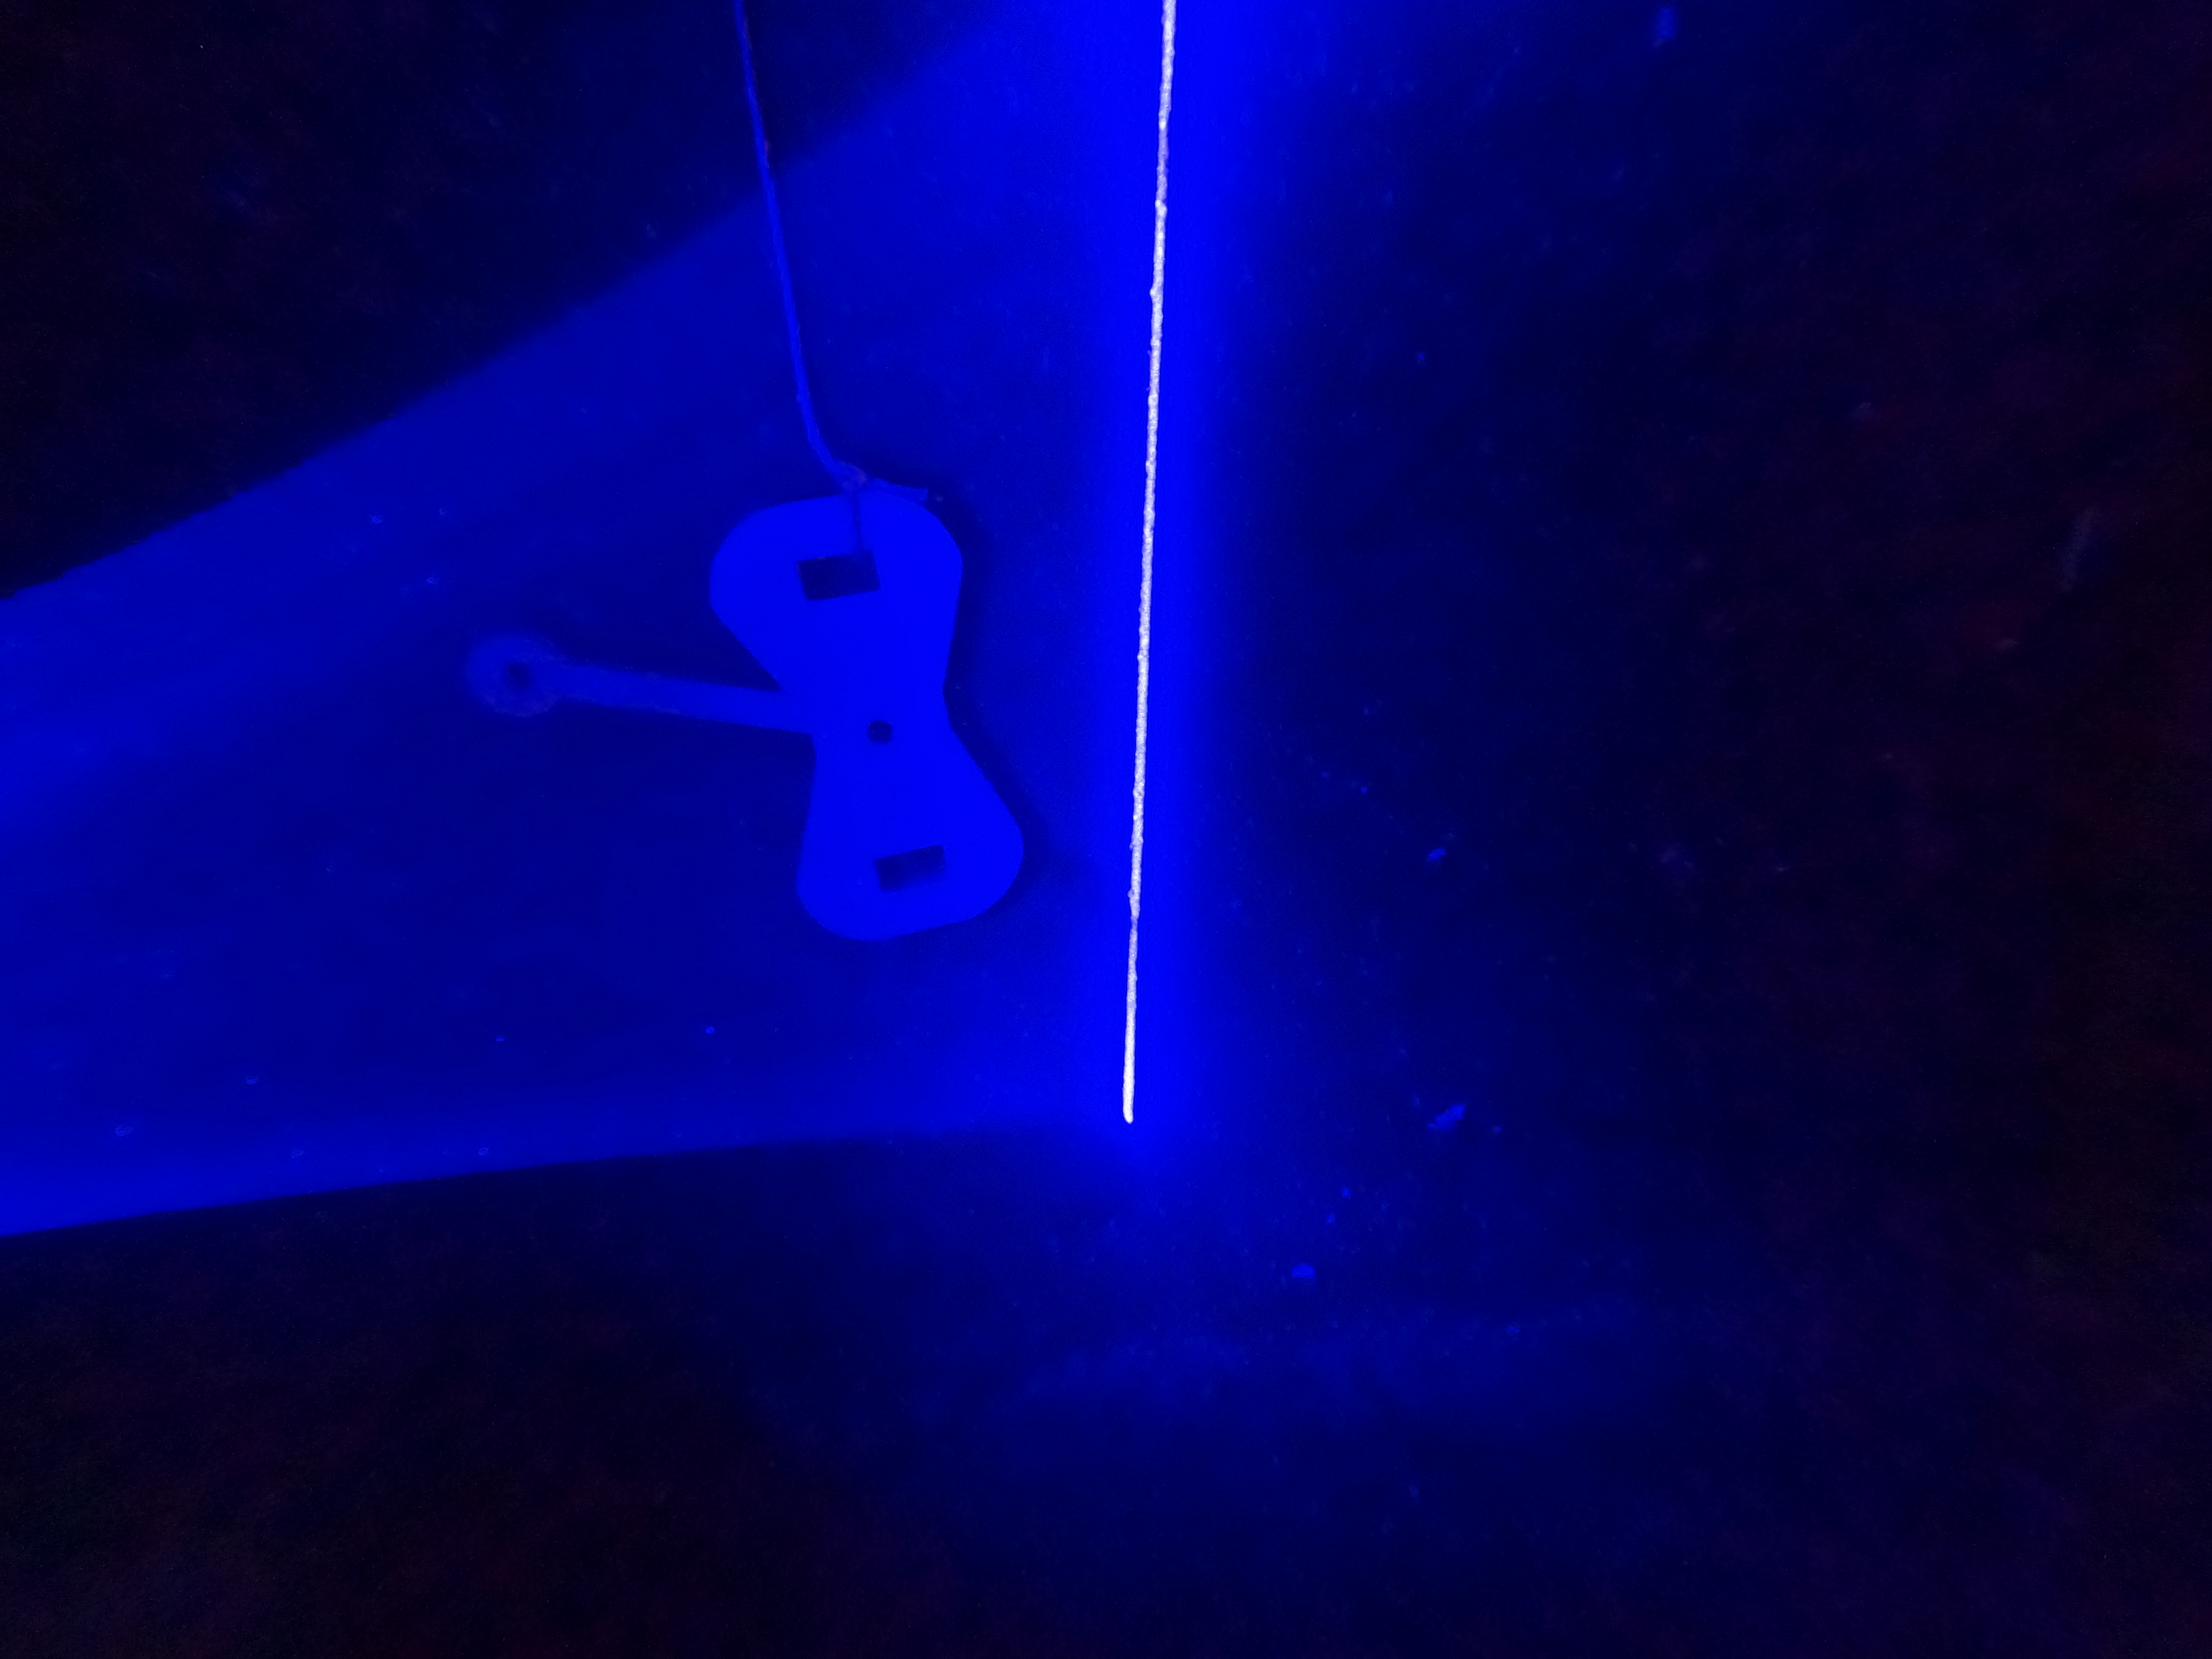

Supplement: Supplementary file 2170 [file G0016479.pdf › Level_1_2/G0016479.pdf]

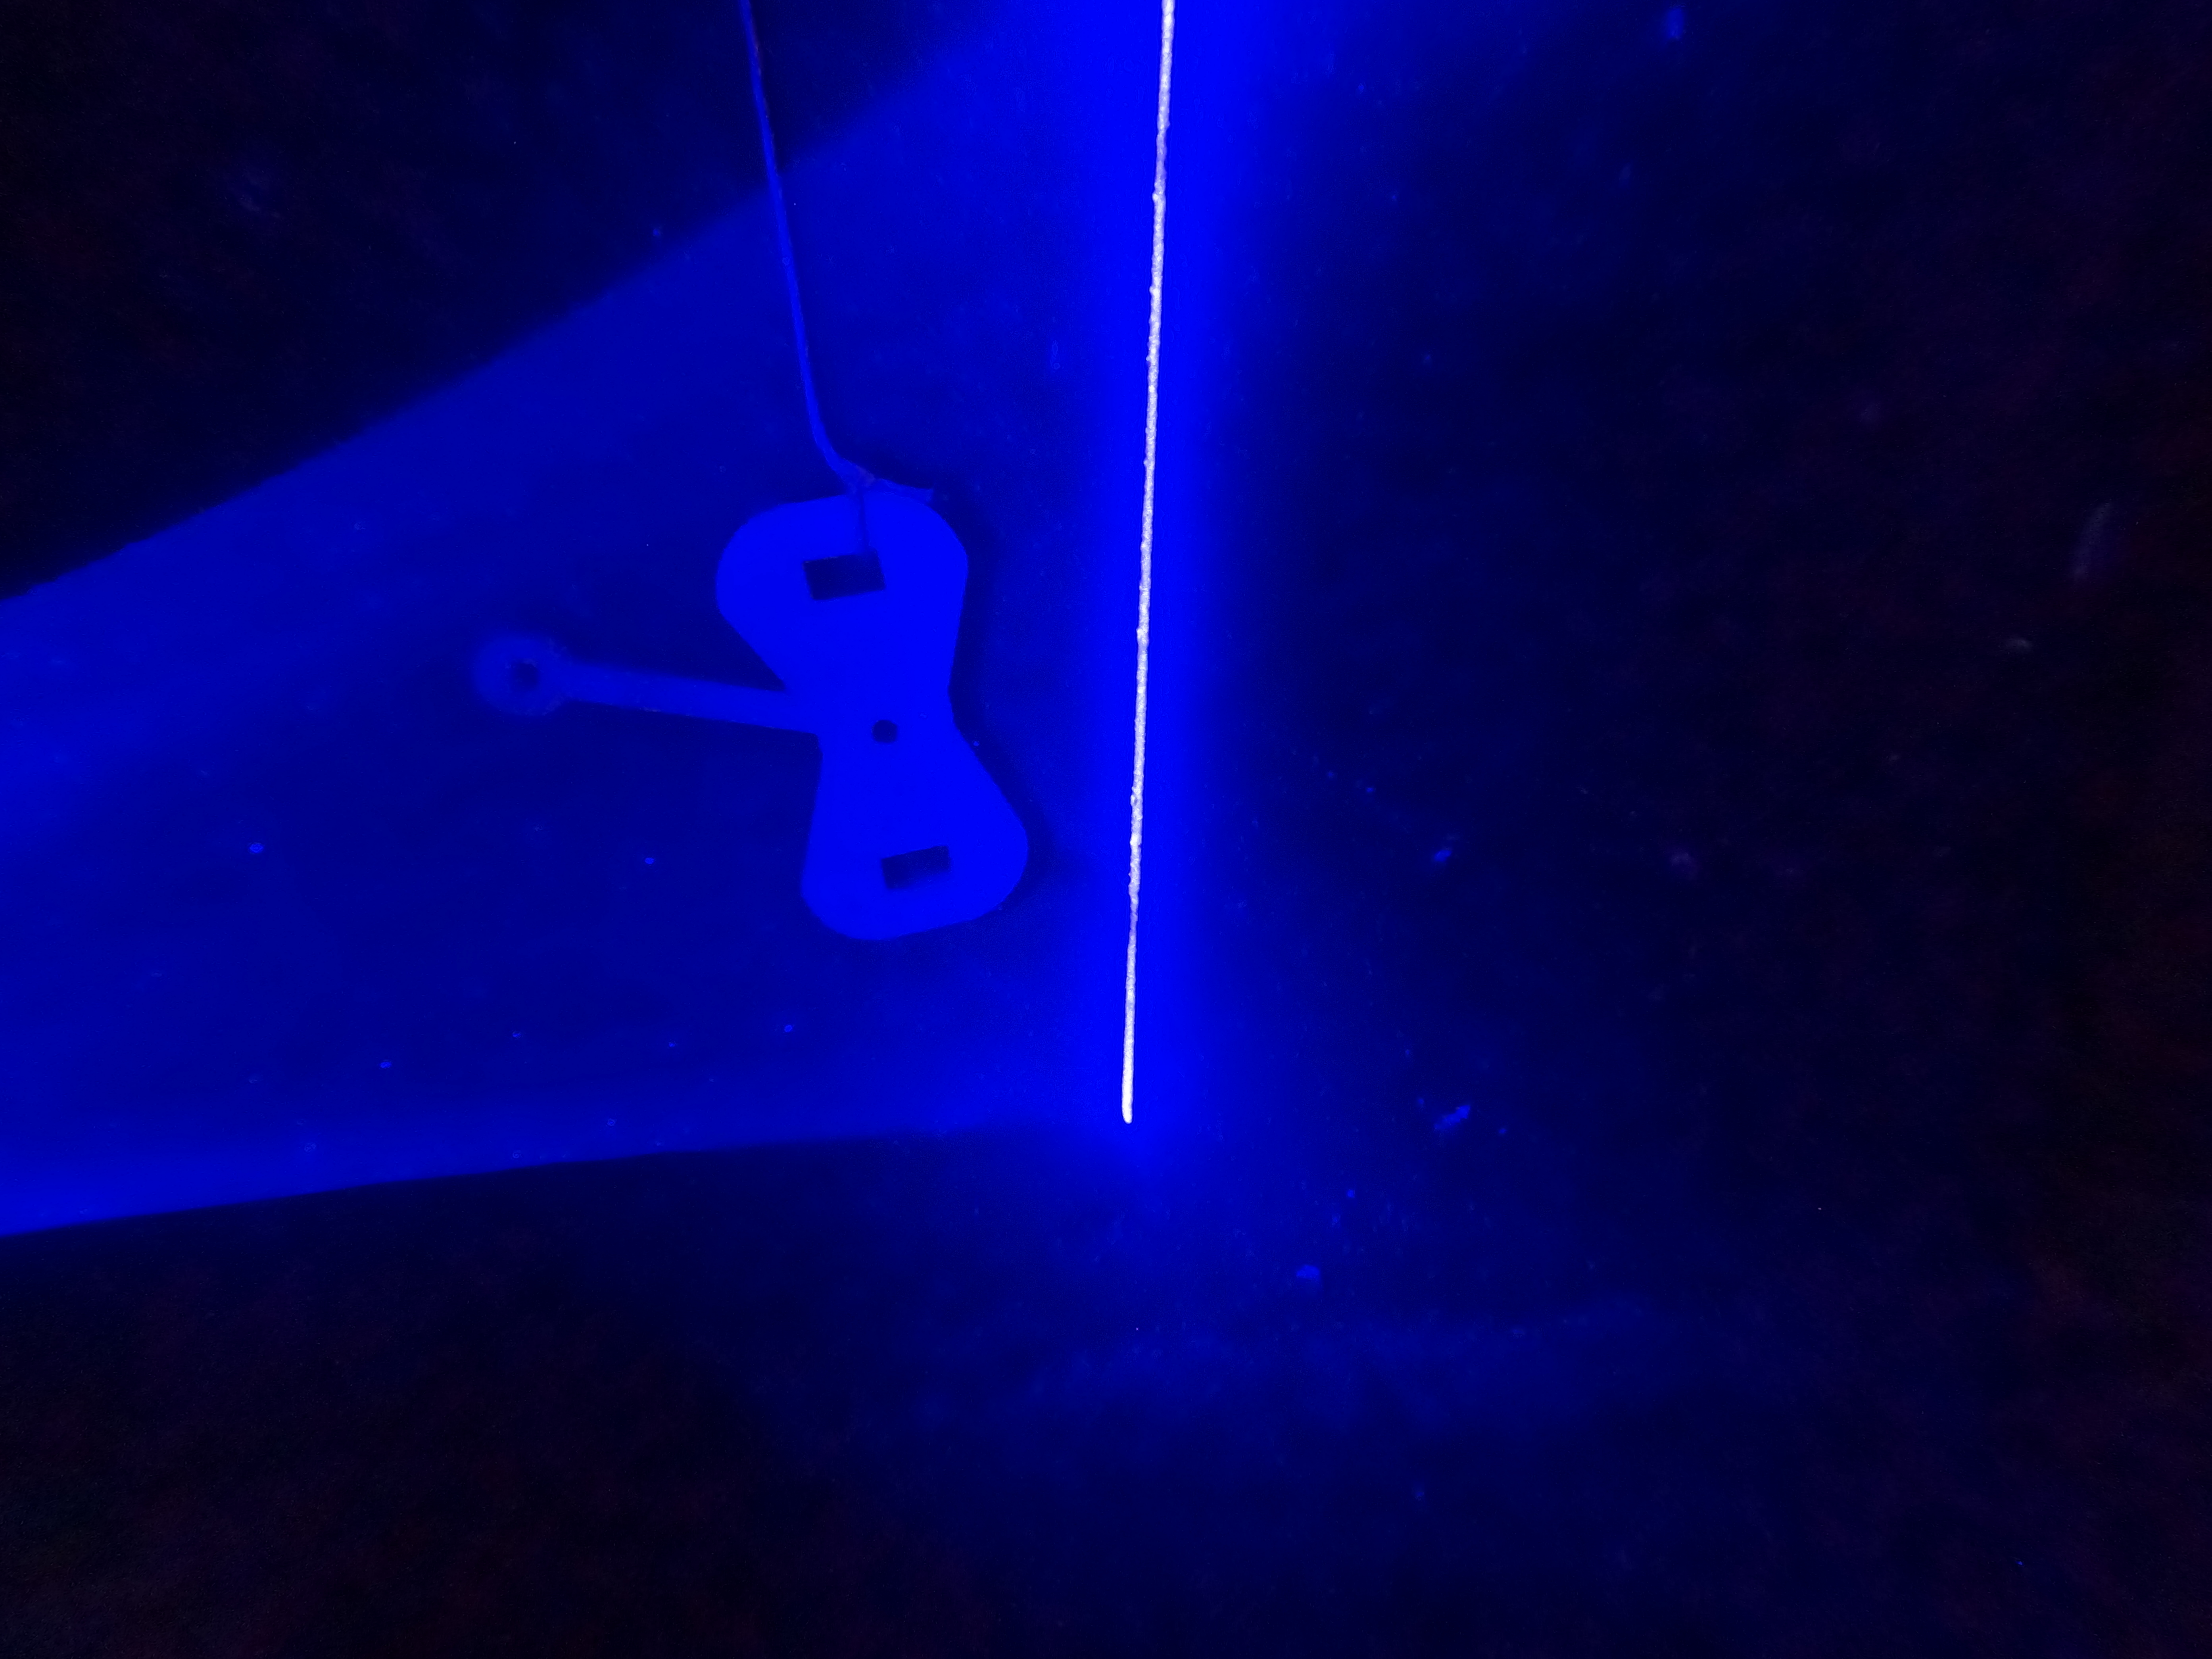

Supplement: Supplementary file 2171 [file G0016480.pdf › Level_1_2/G0016480.pdf]

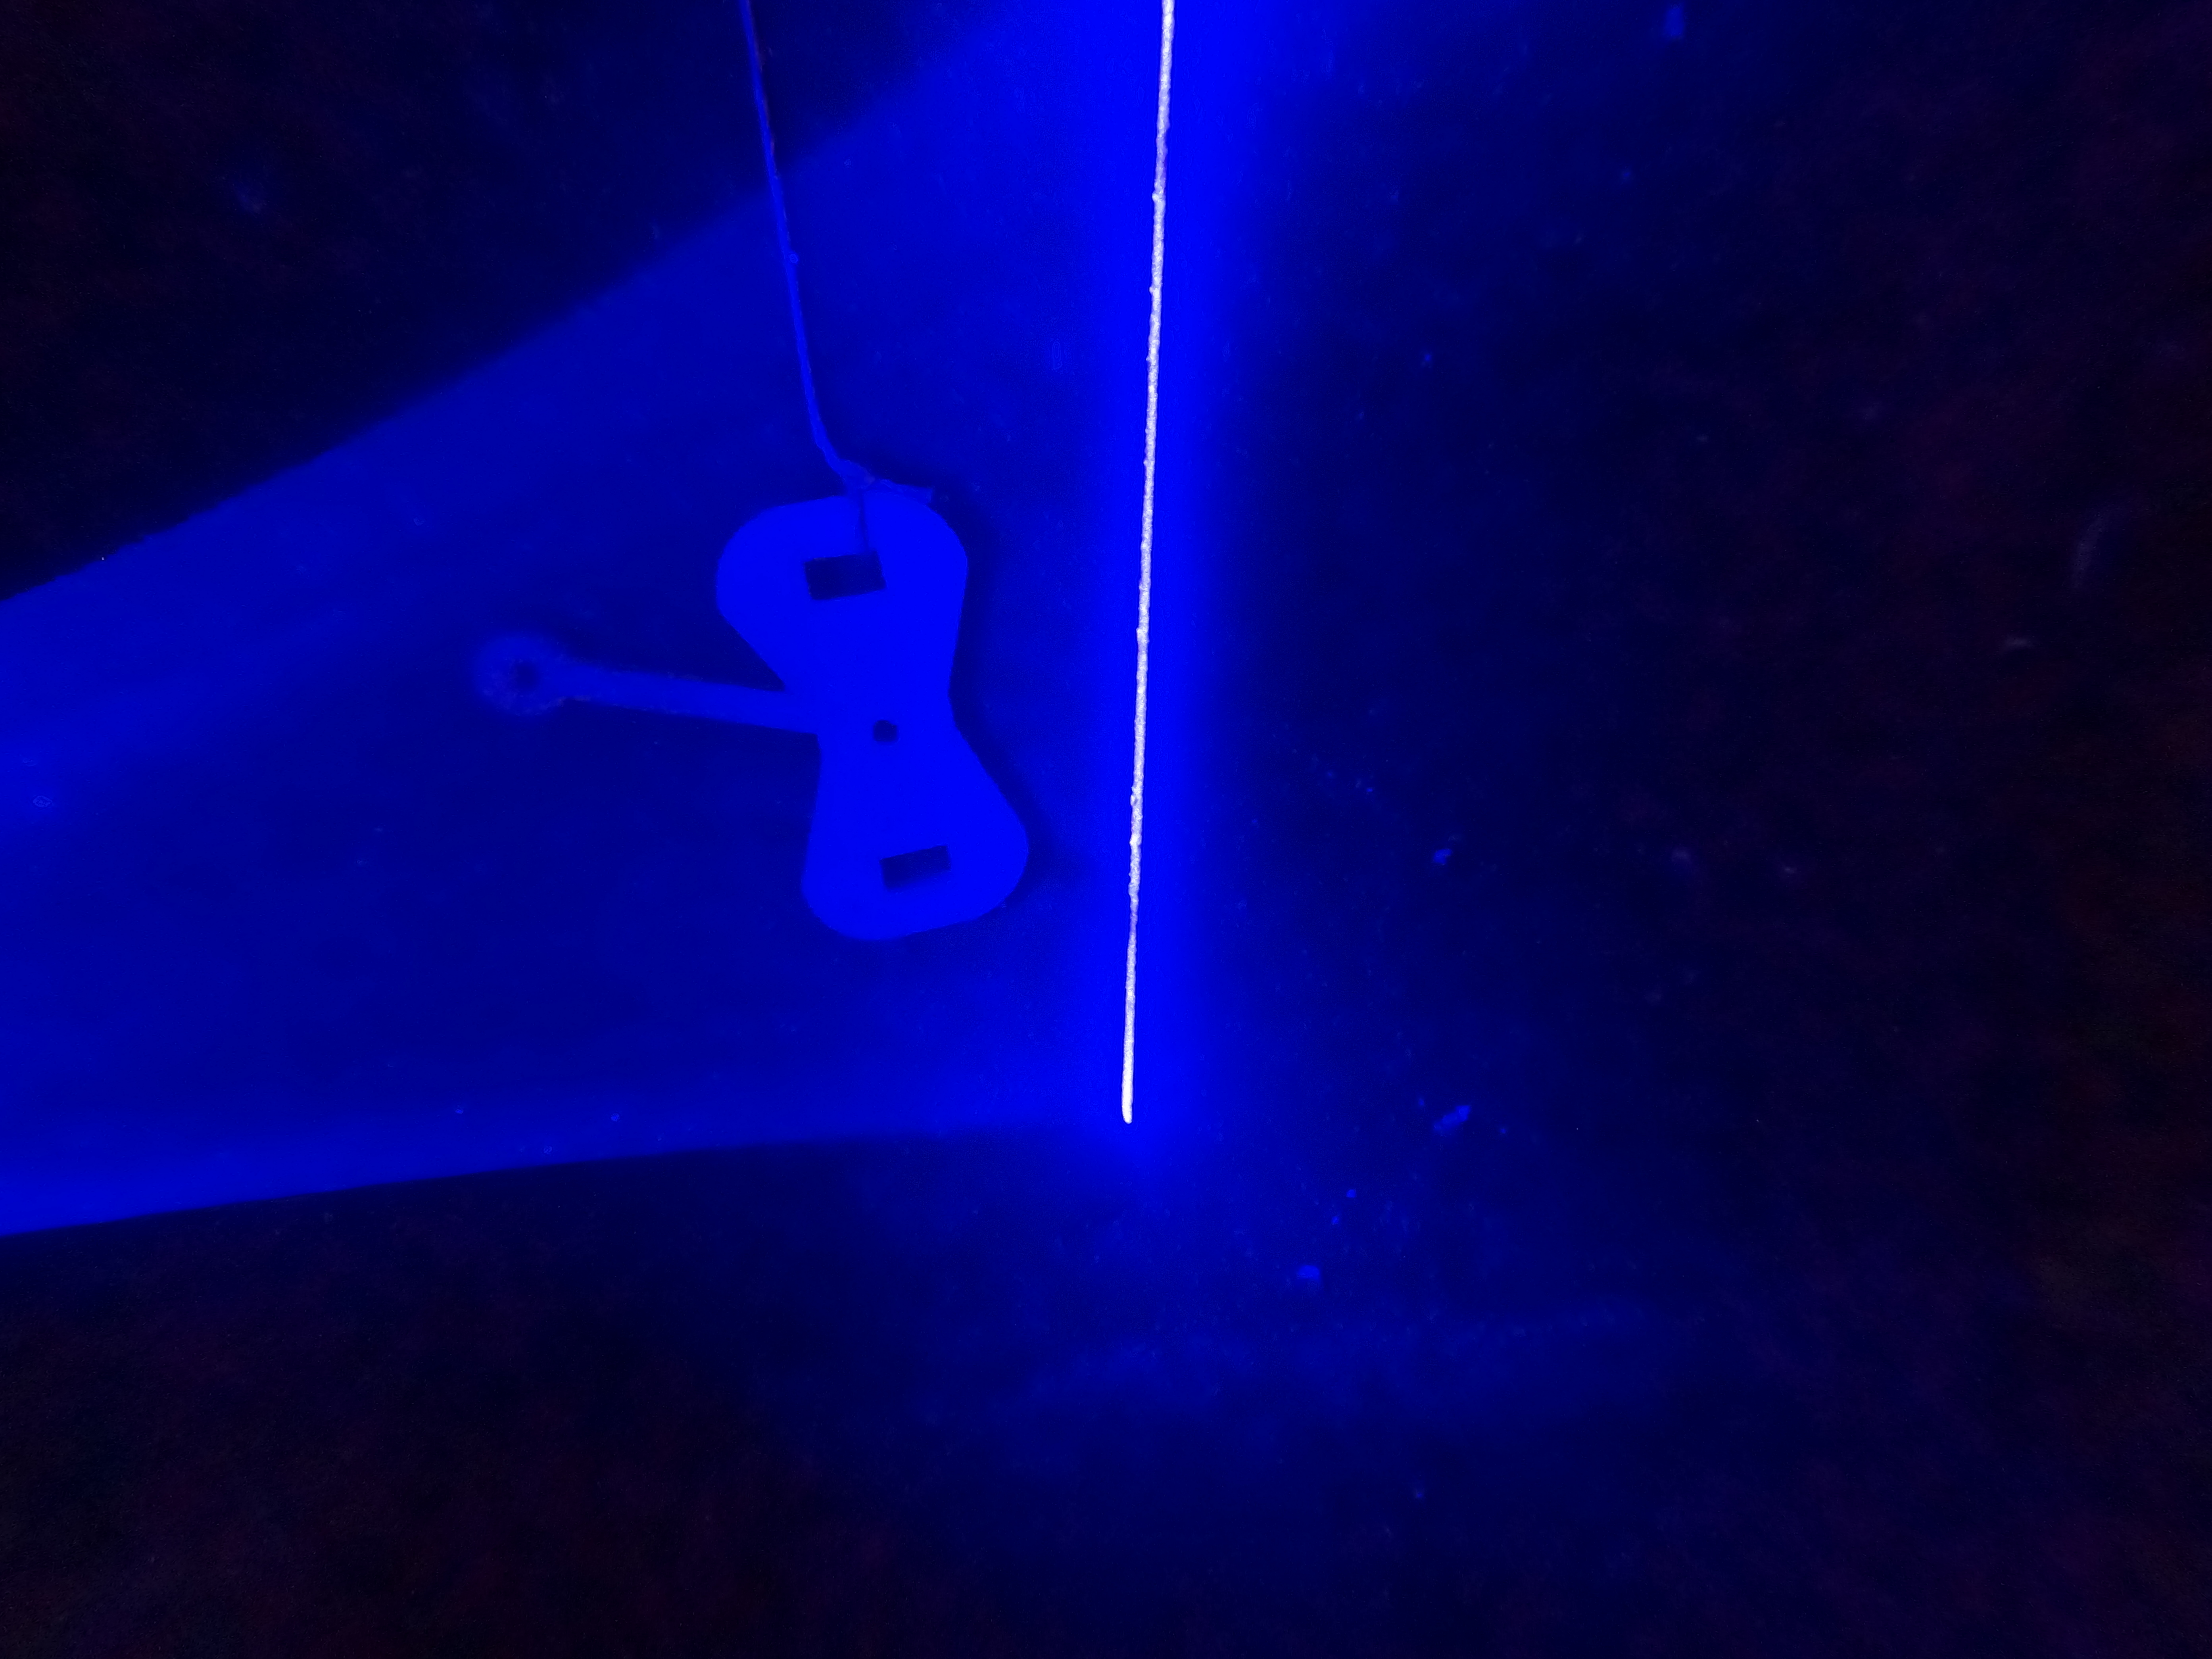

Supplement: Supplementary file 2172 [file G0016481.pdf › Level_1_2/G0016481.pdf]

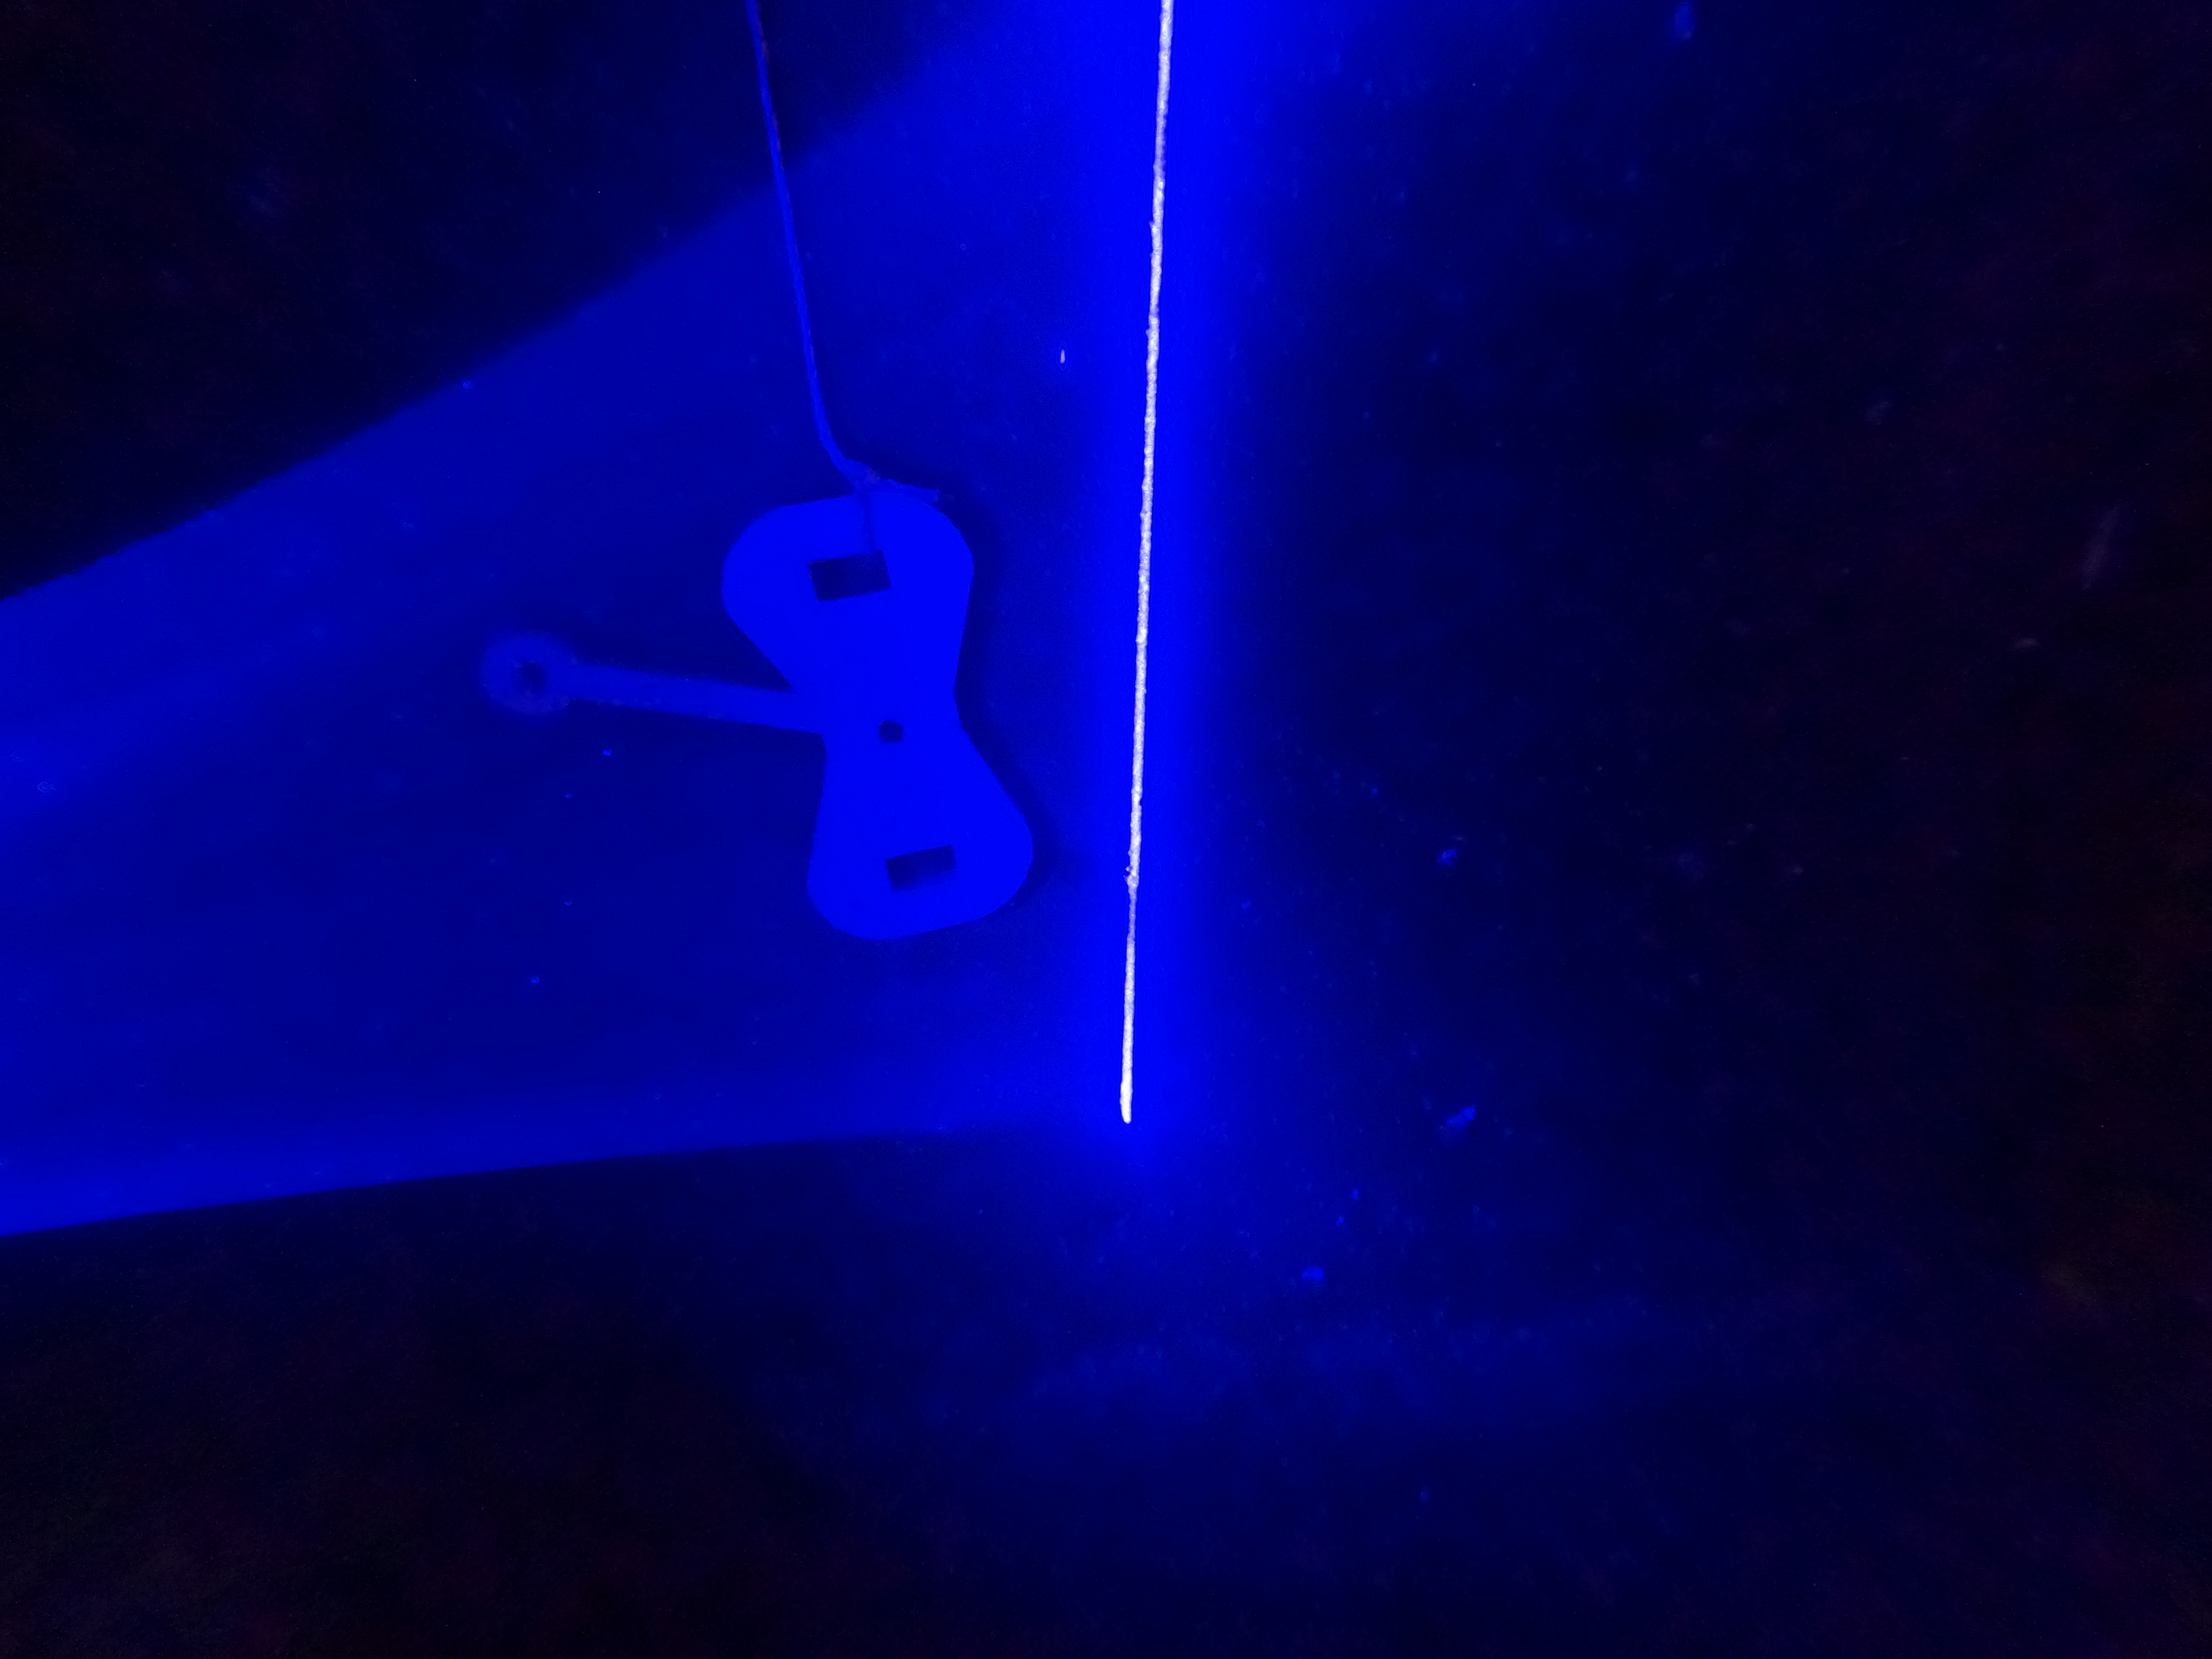

Supplement: Supplementary file 2173 [file G0016482.pdf › Level_1_2/G0016482.pdf]

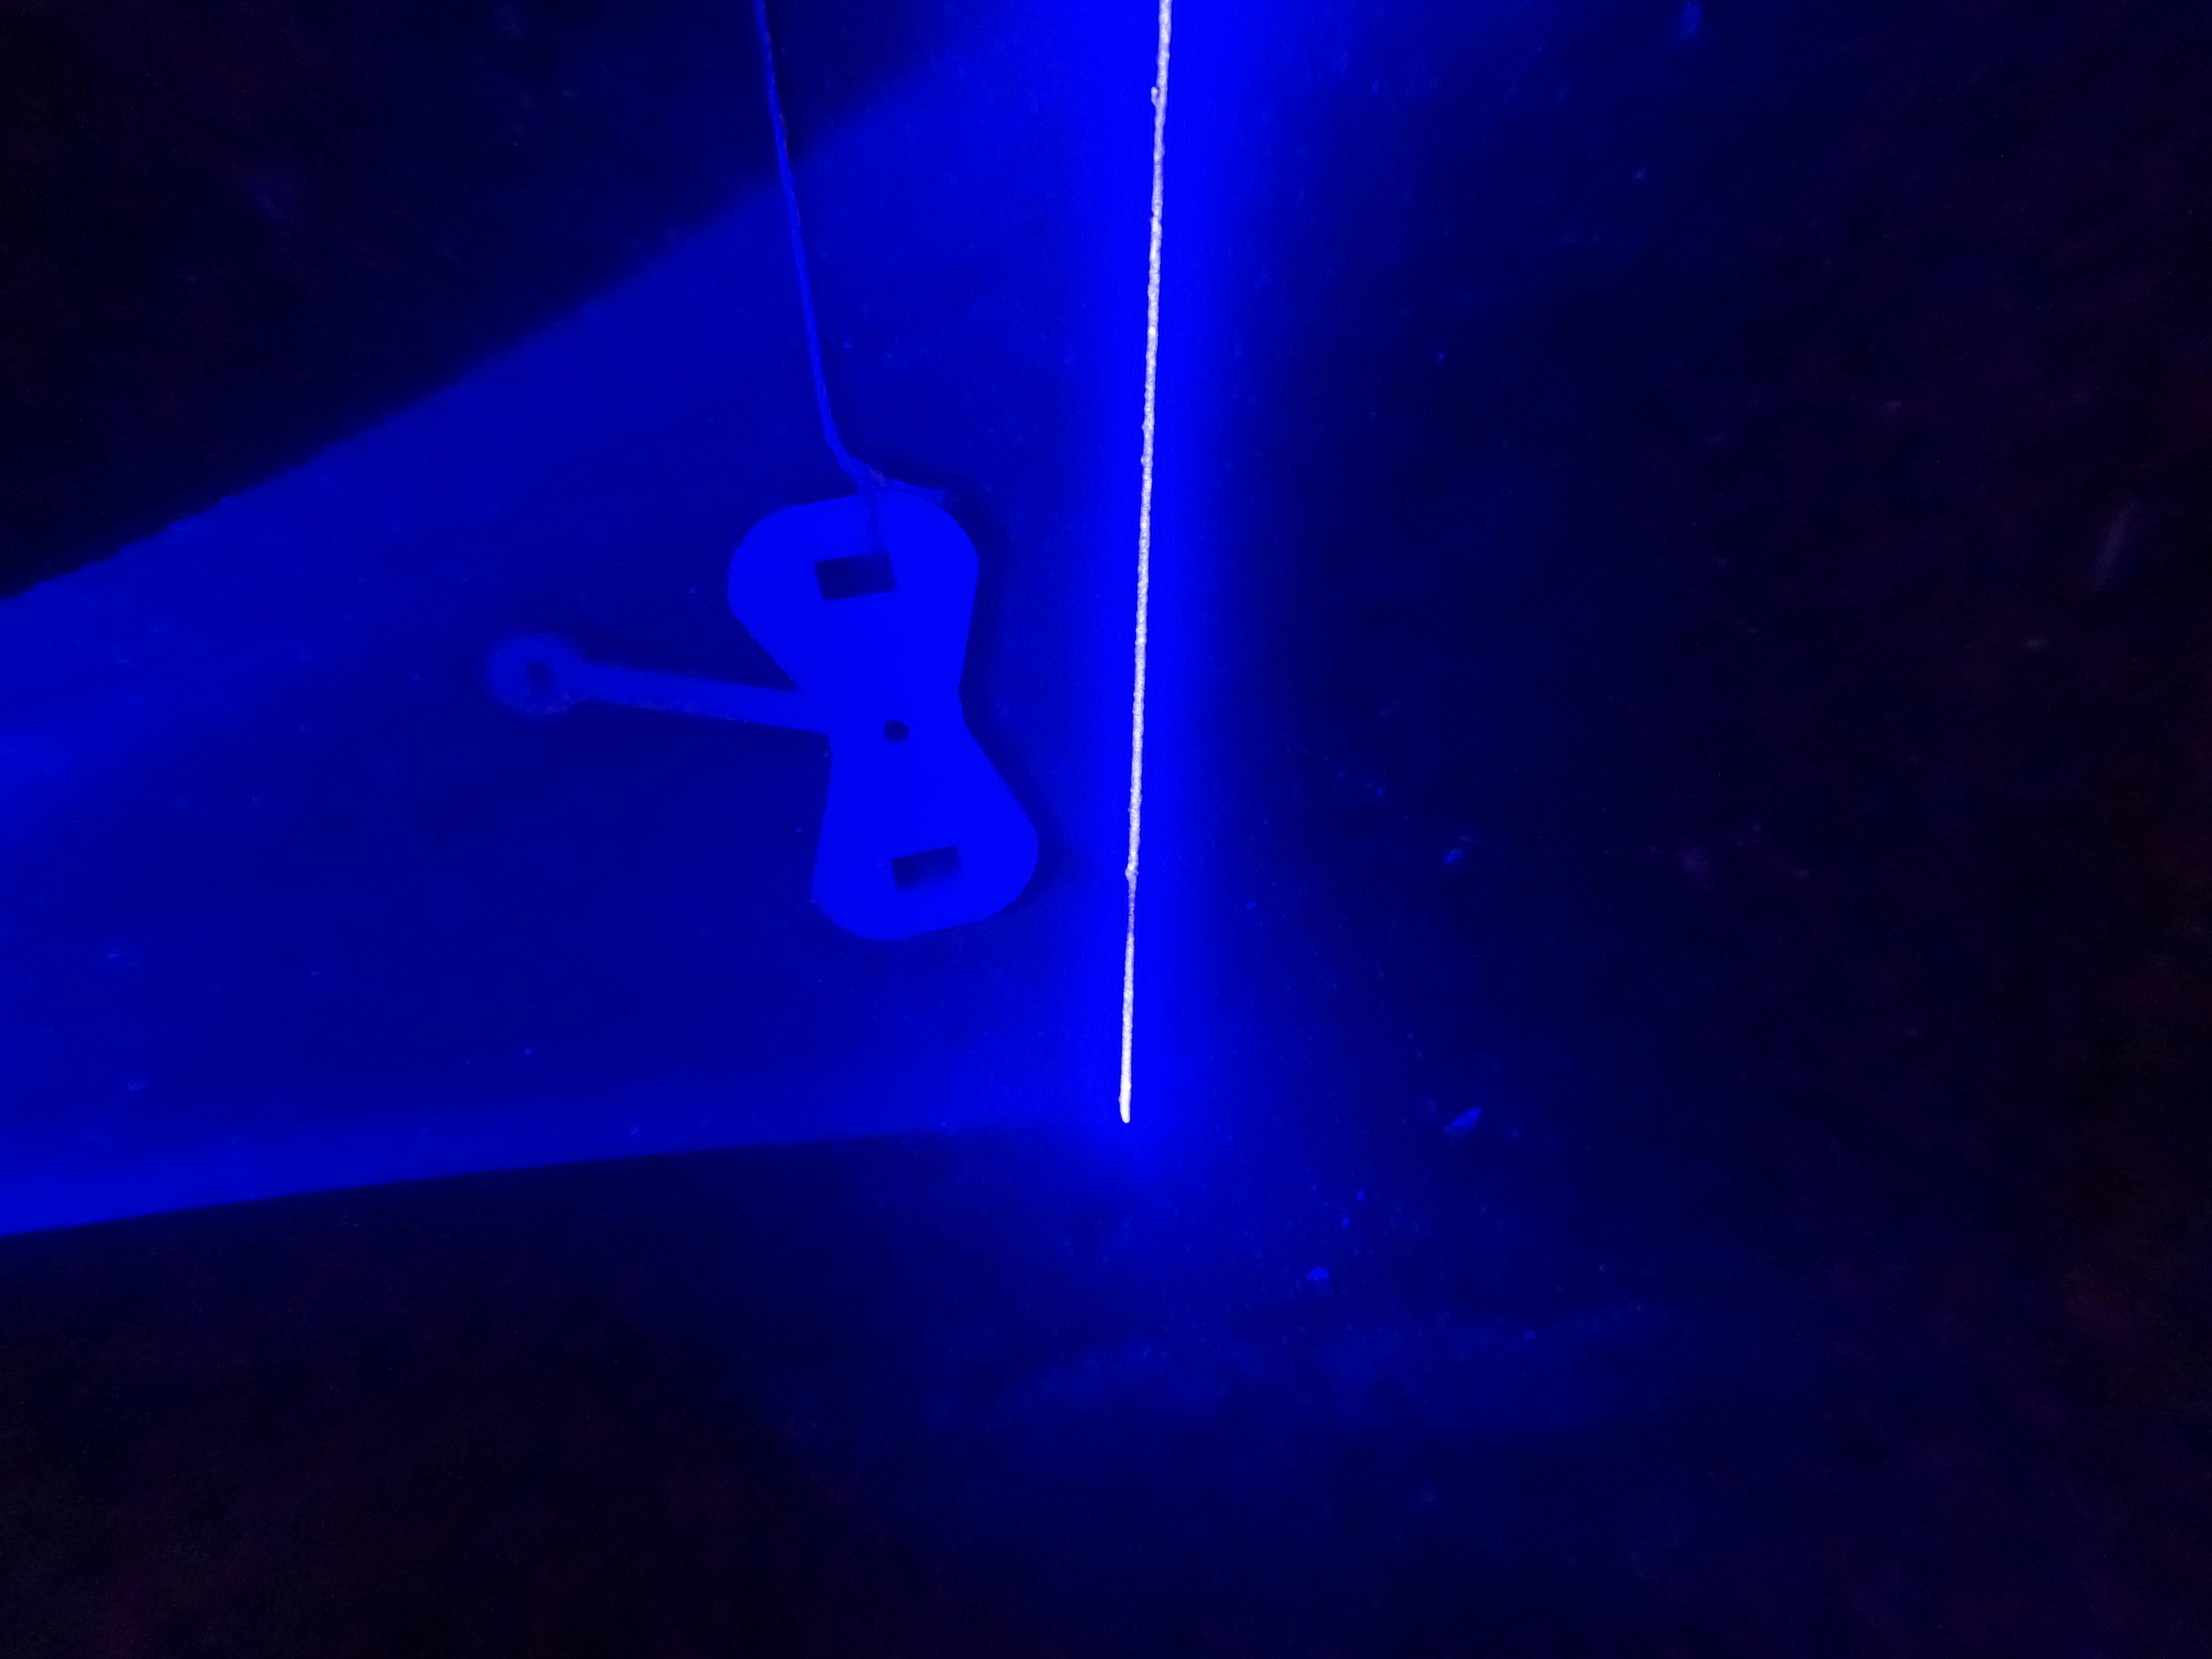

Supplement: Supplementary file 2174 [file G0016483.pdf › Level_1_2/G0016483.pdf]

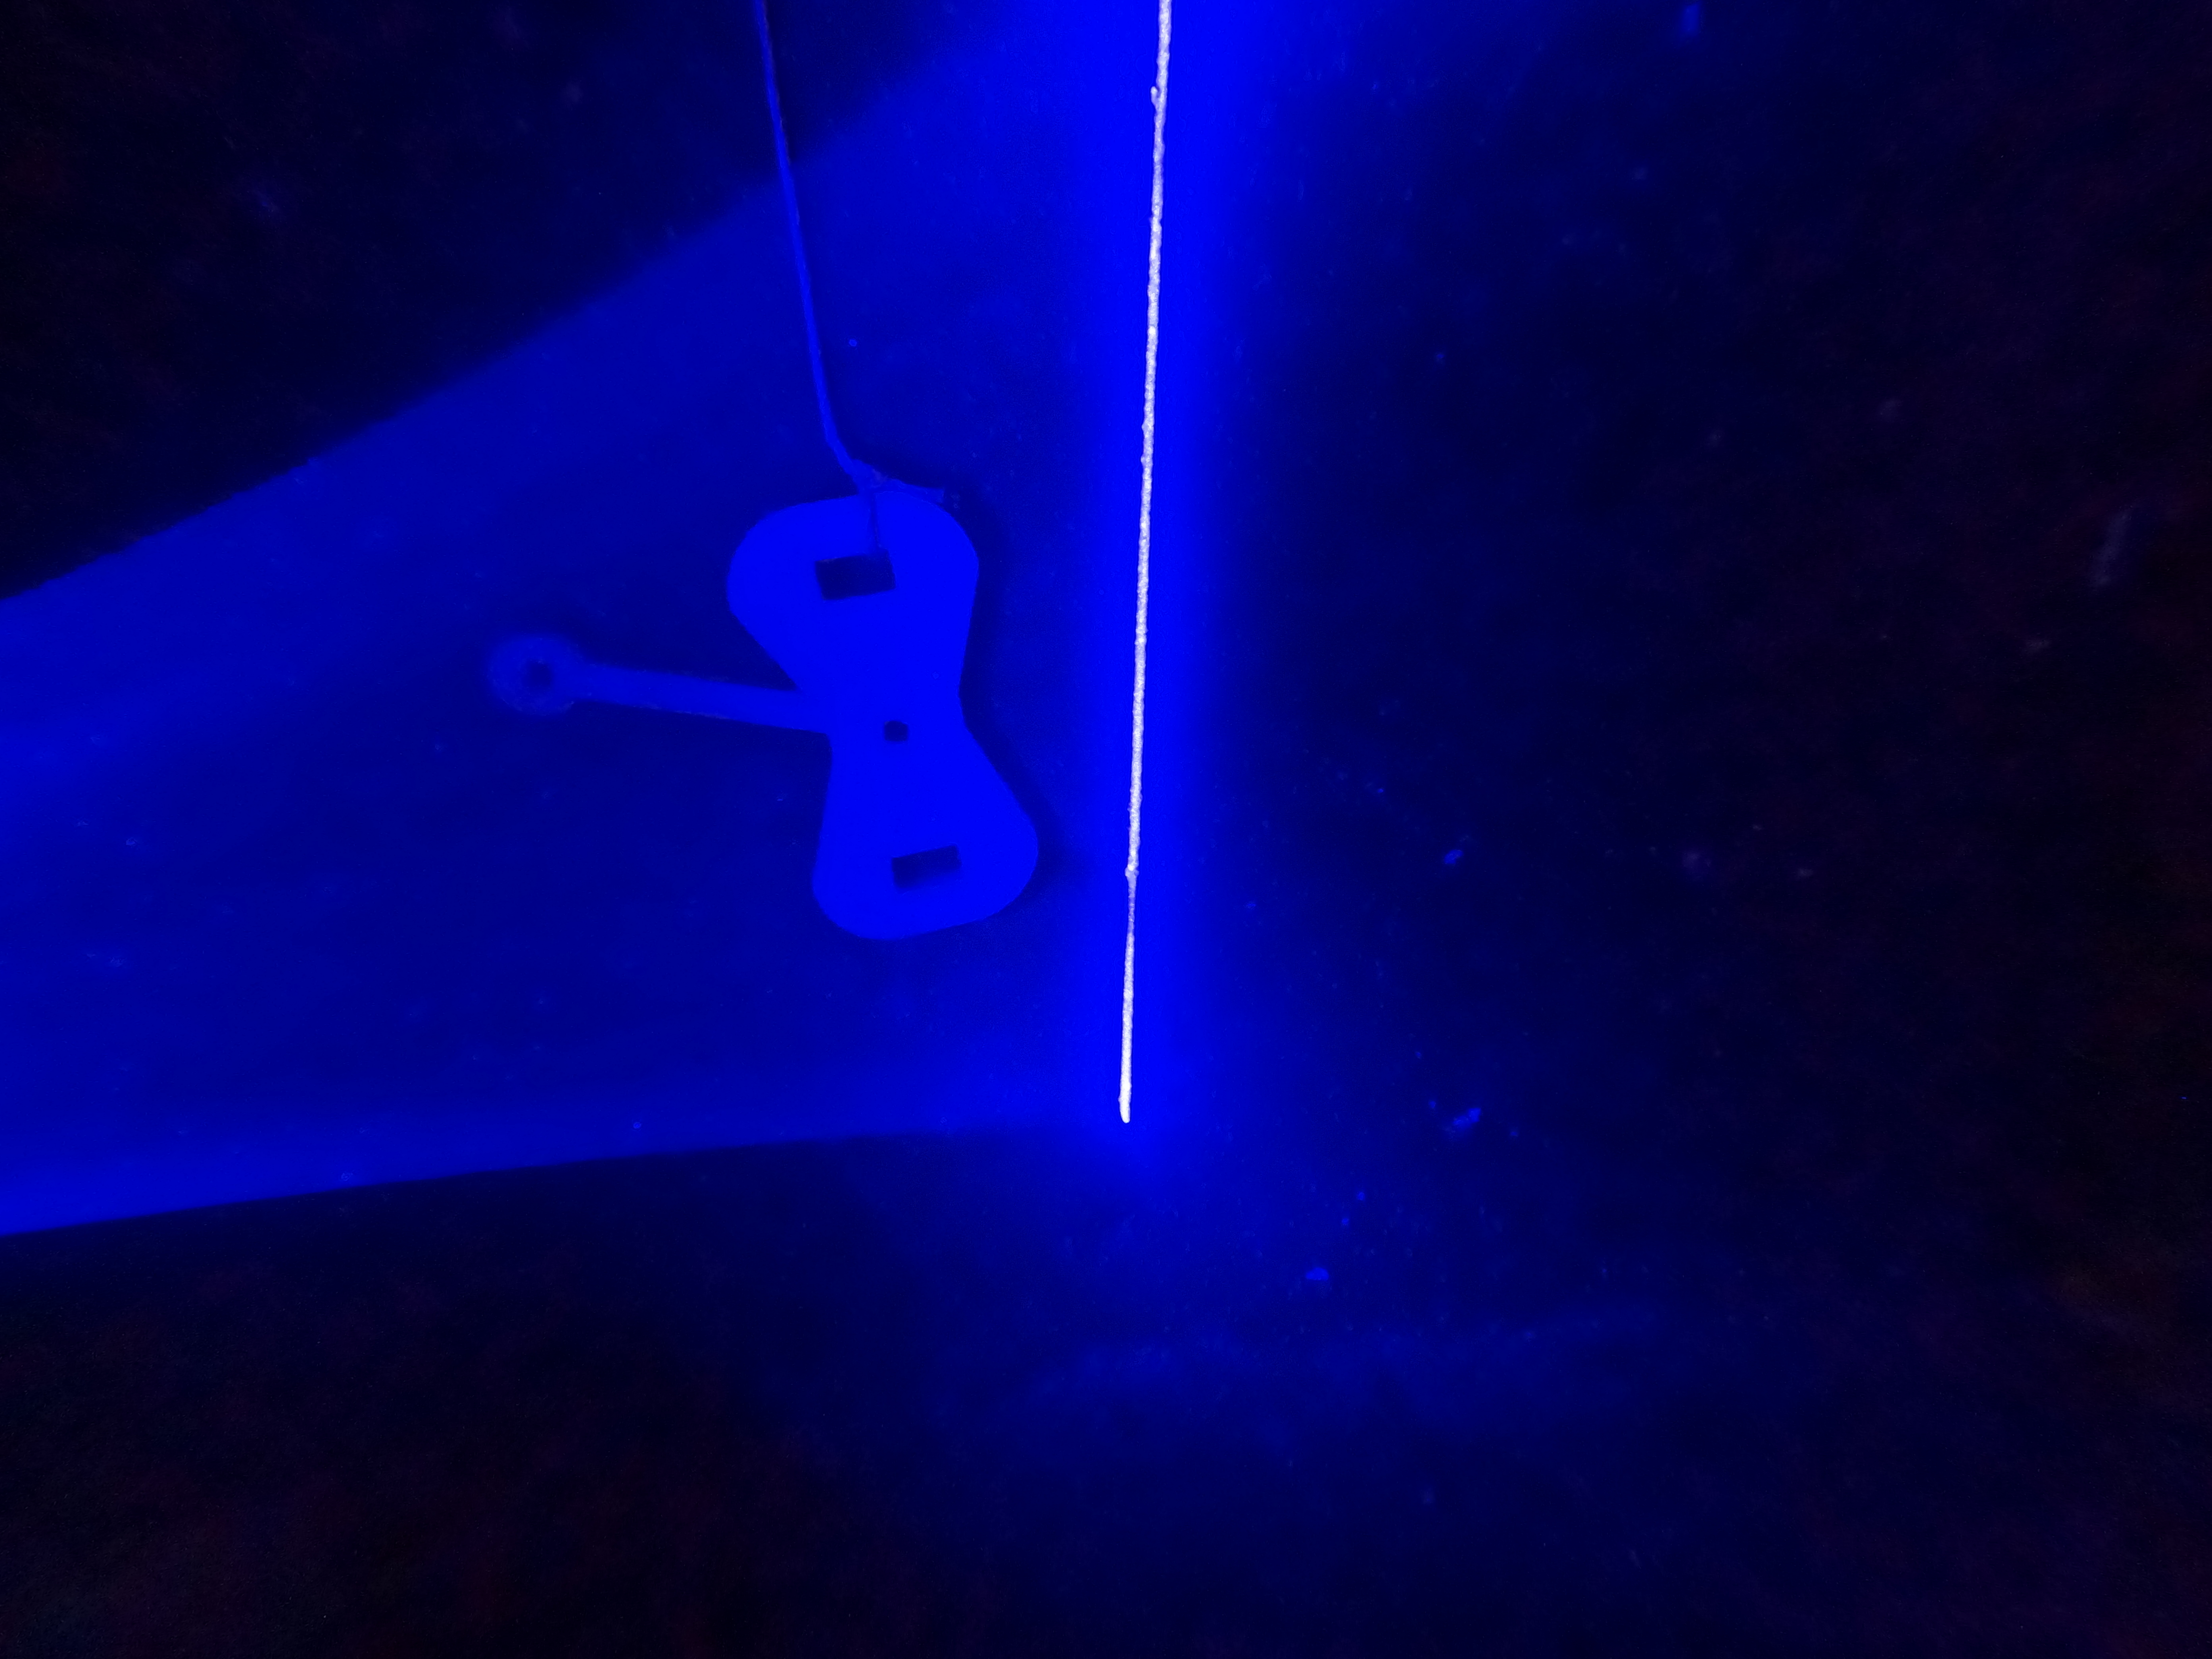

Supplement: Supplementary file 2175 [file G0016484.pdf › Level_1_2/G0016484.pdf]

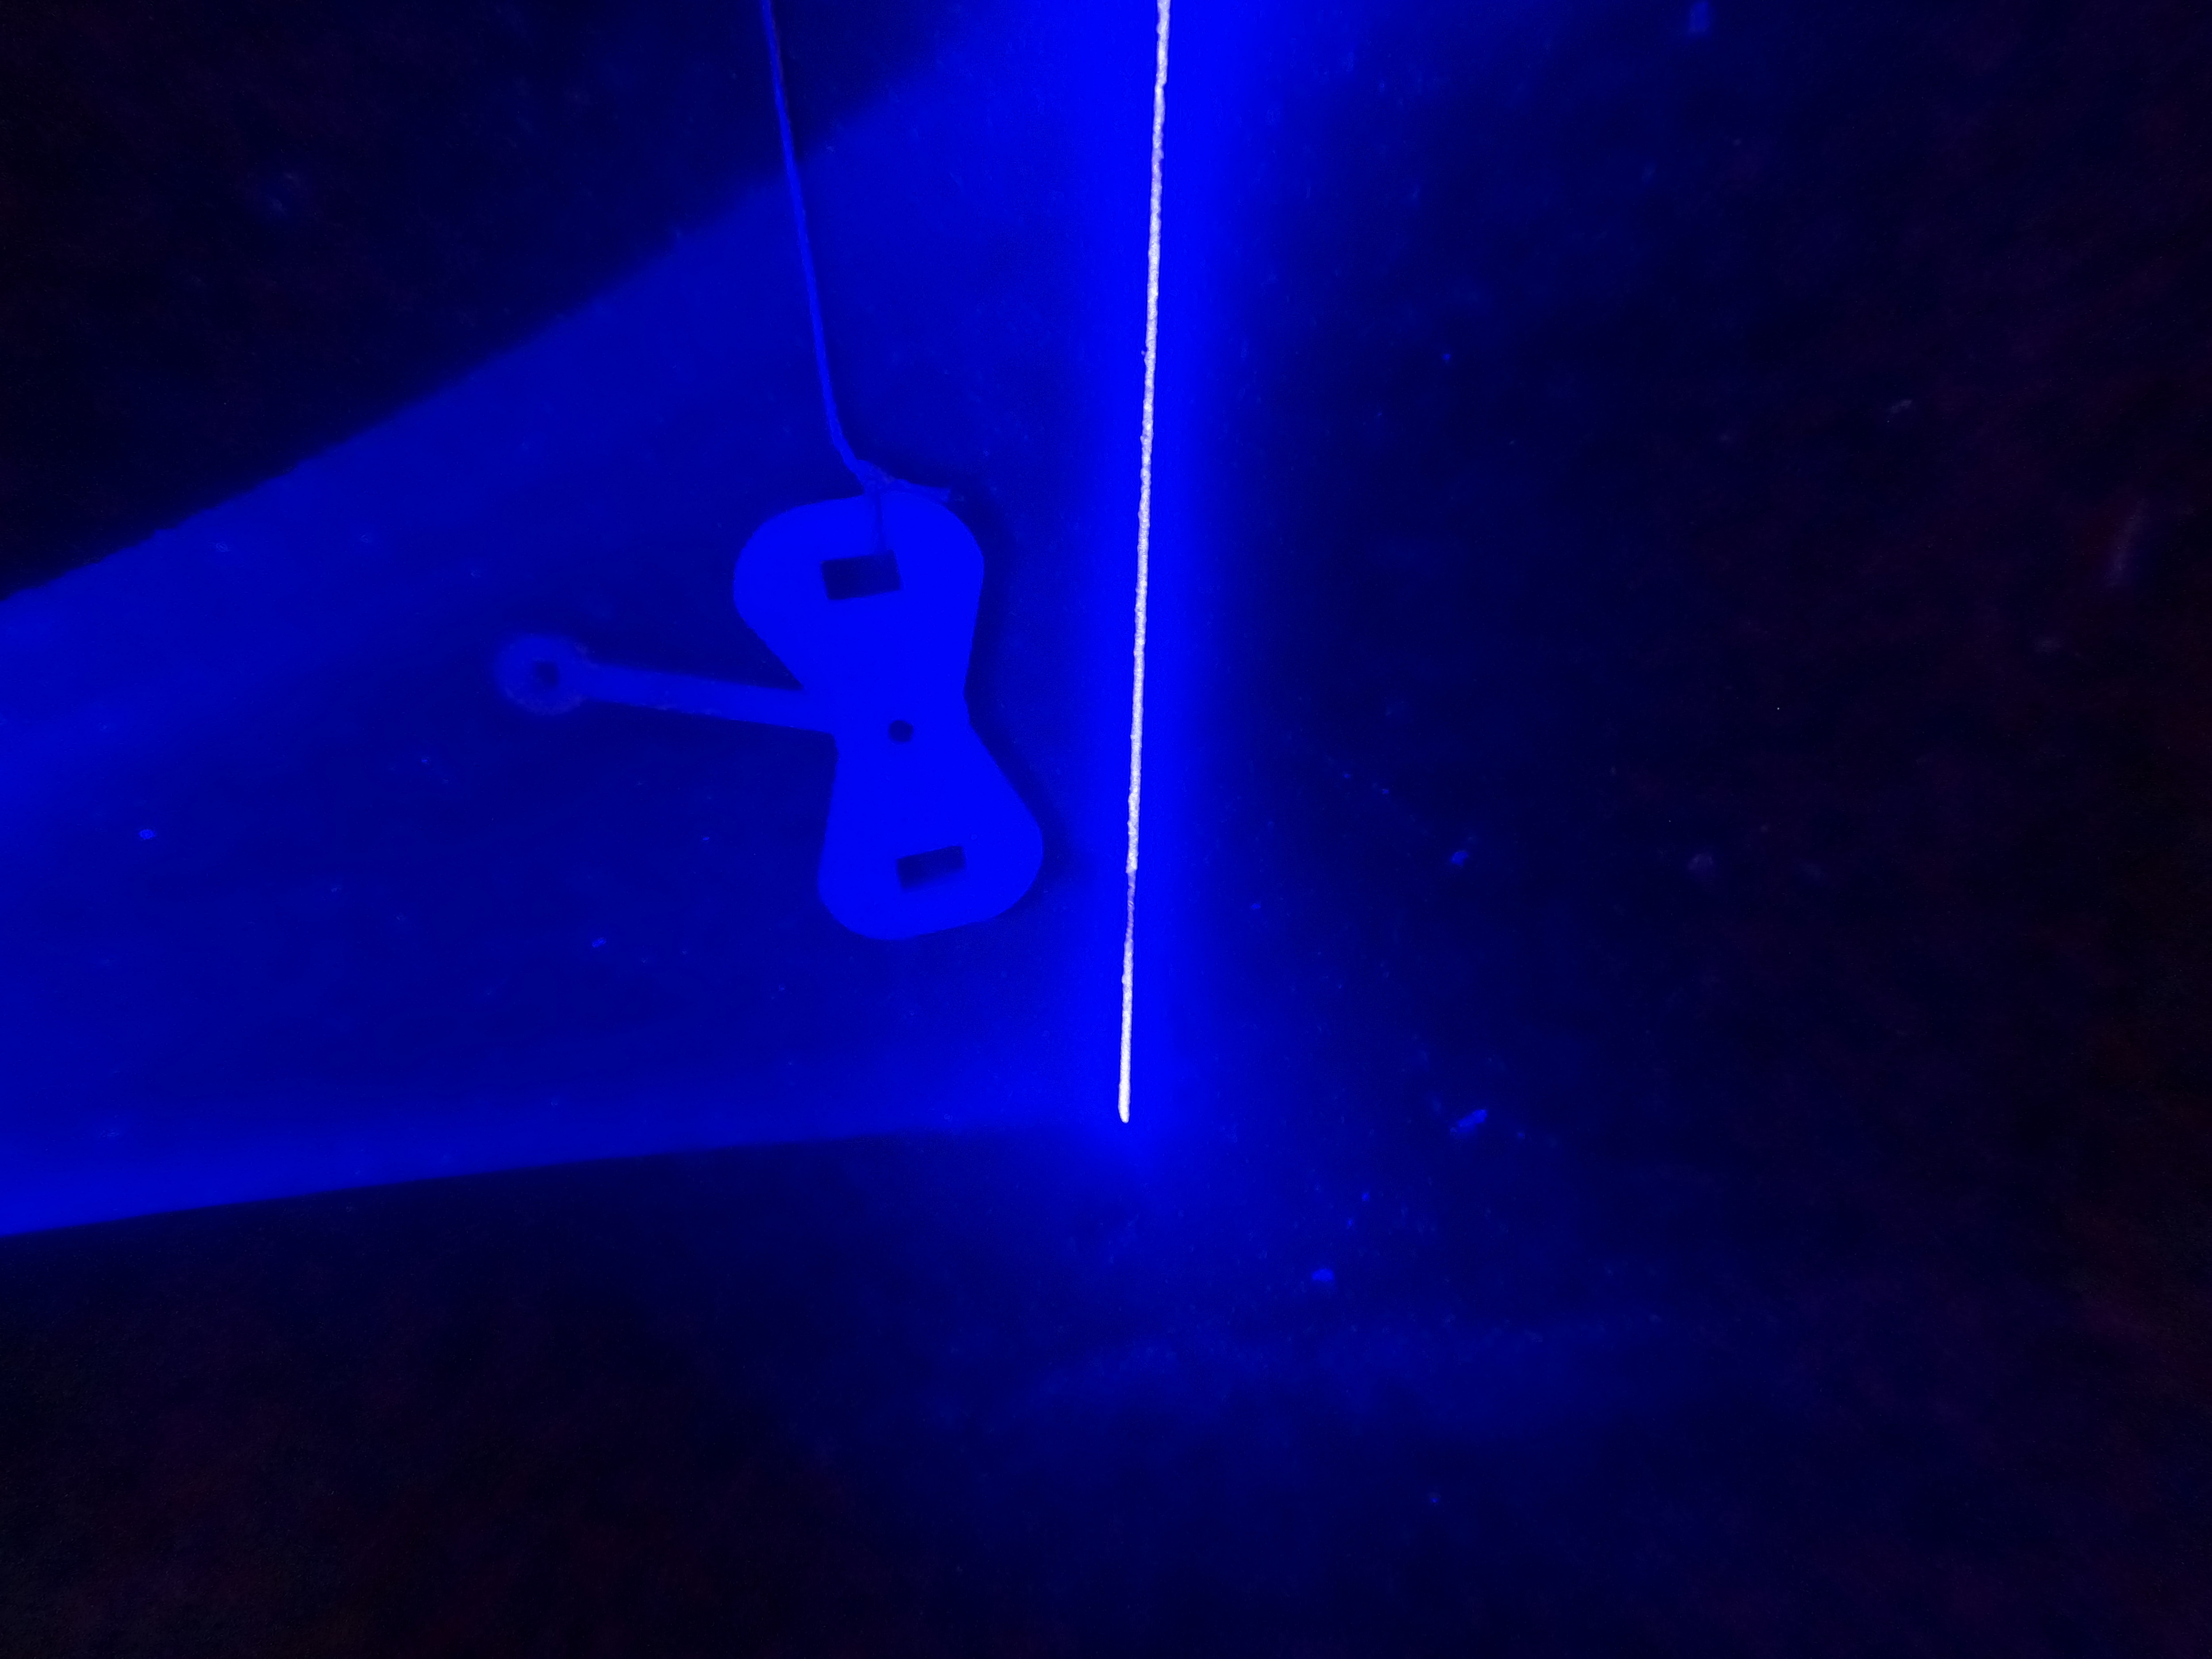

Supplement: Supplementary file 2176 [file G0016485.pdf › Level_1_2/G0016485.pdf]

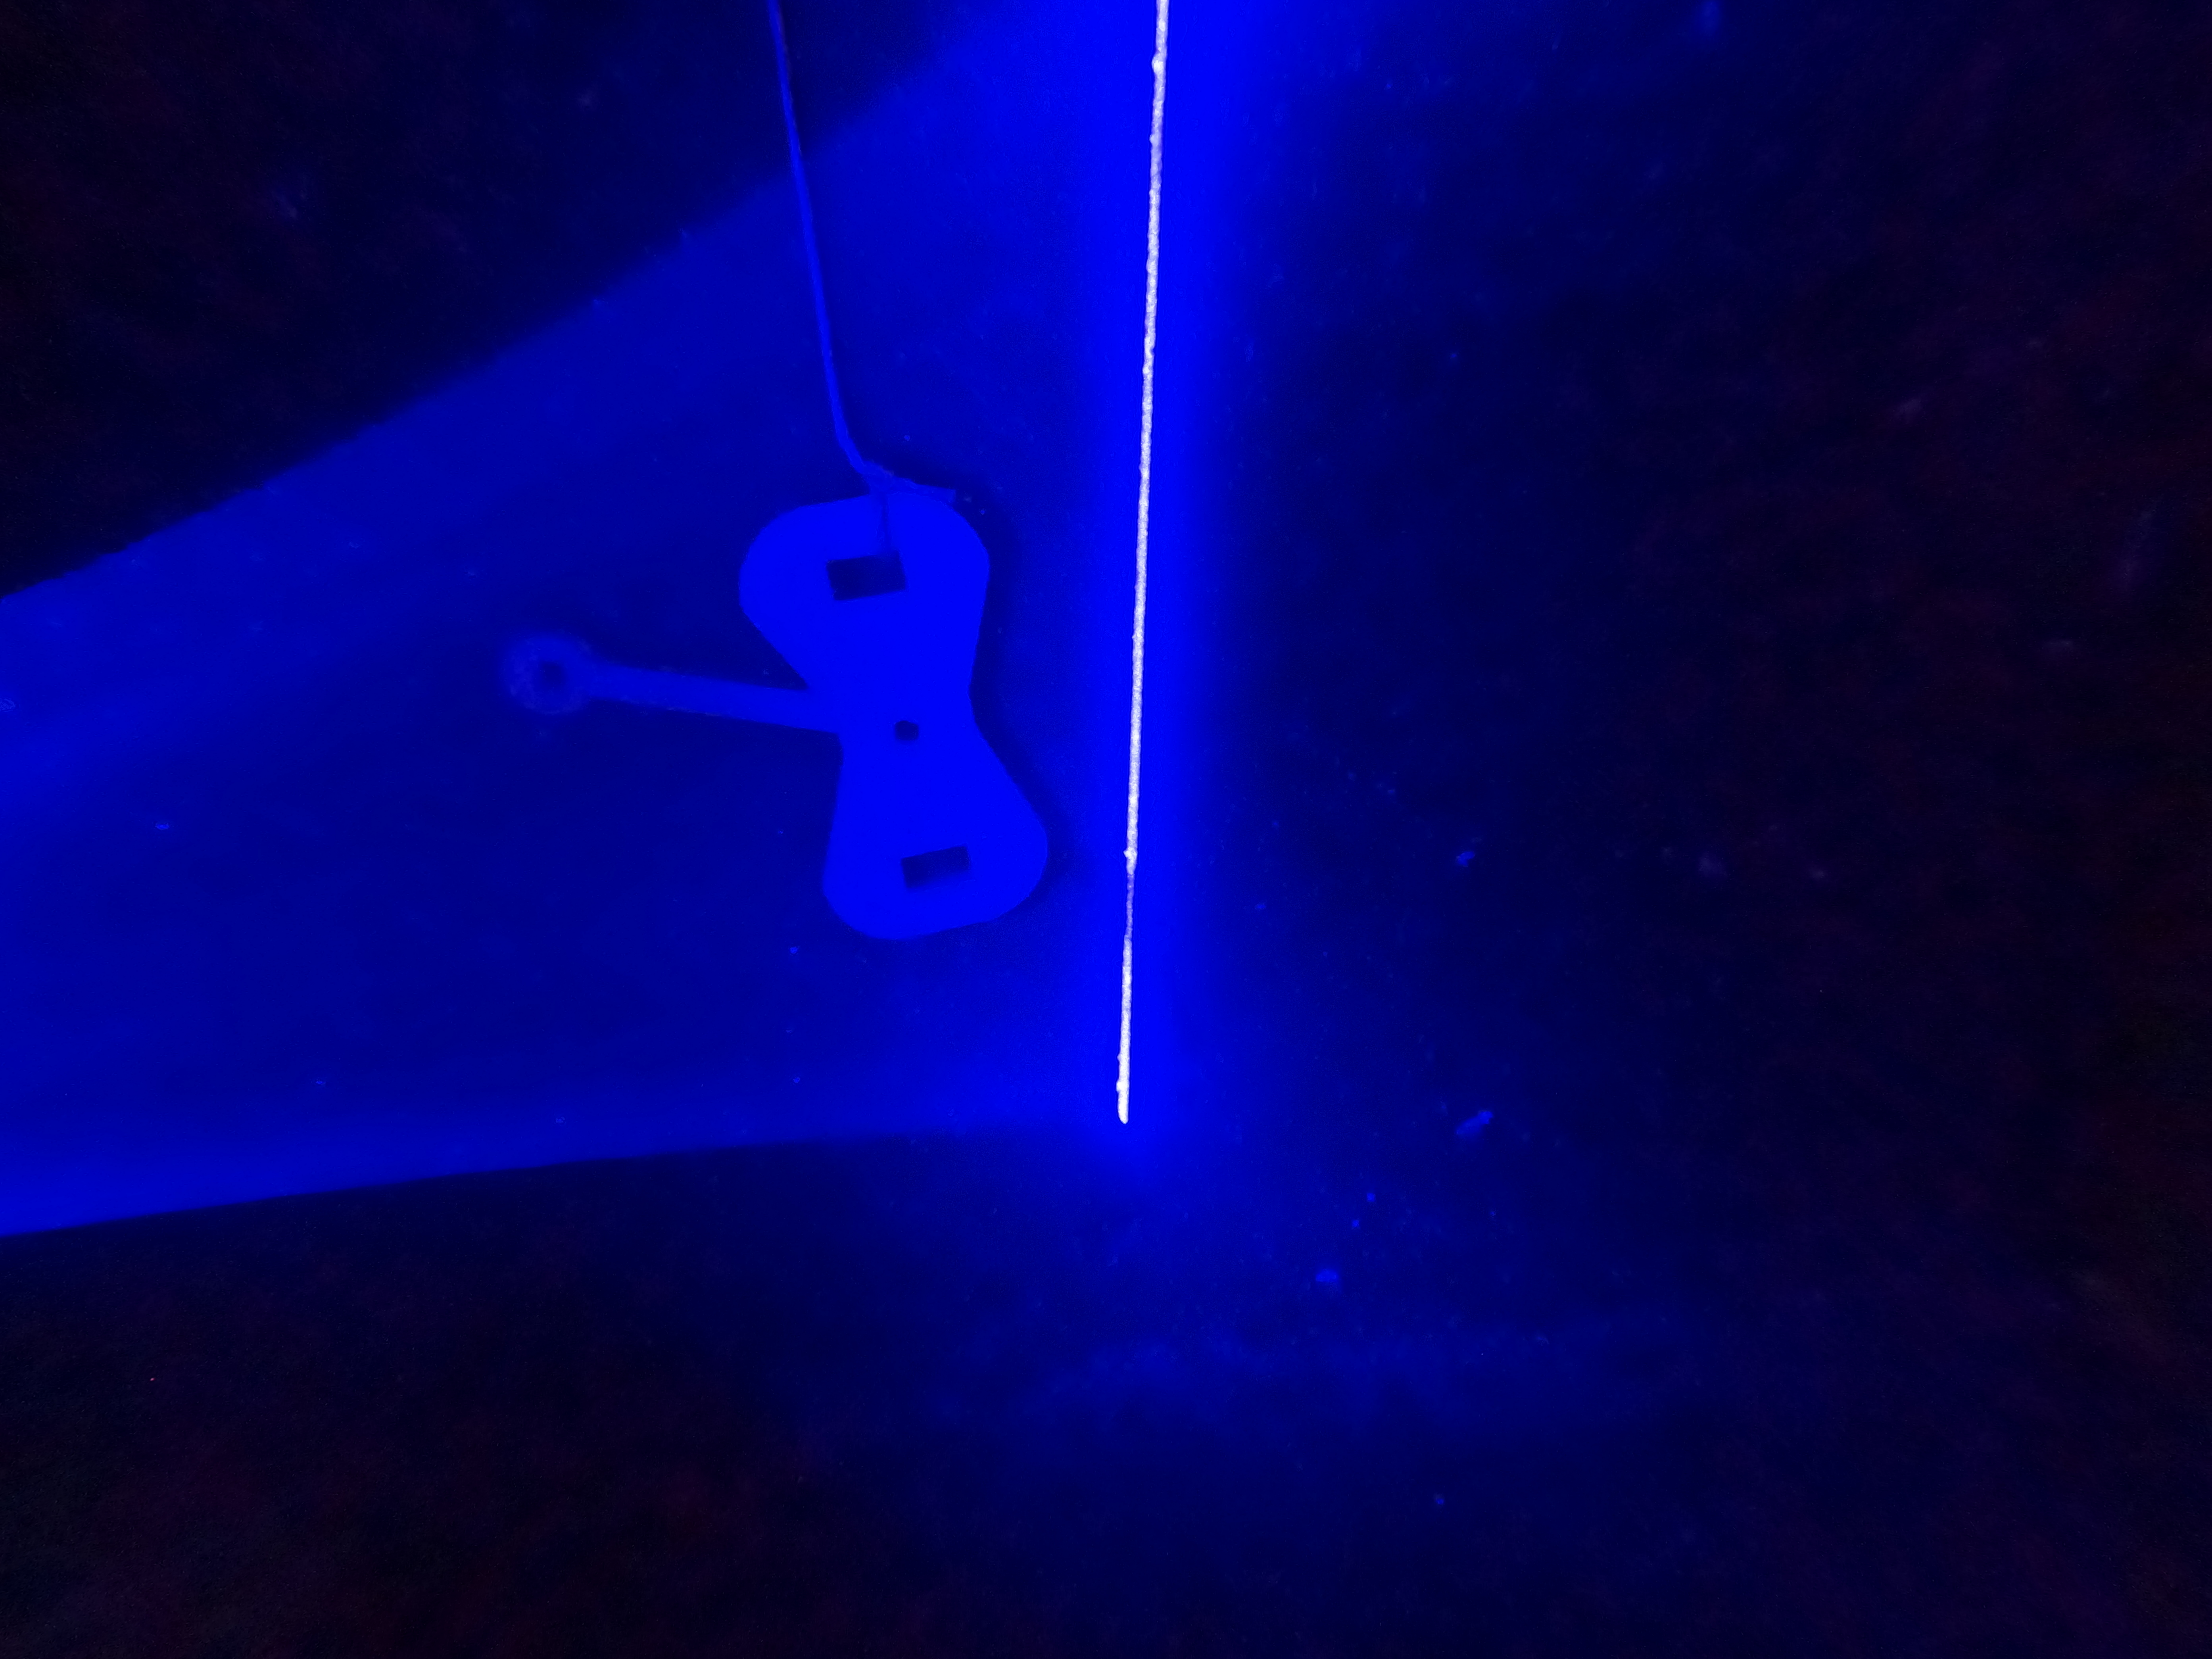

Supplement: Supplementary file 2177 [file G0016486.pdf › Level_1_2/G0016486.pdf]

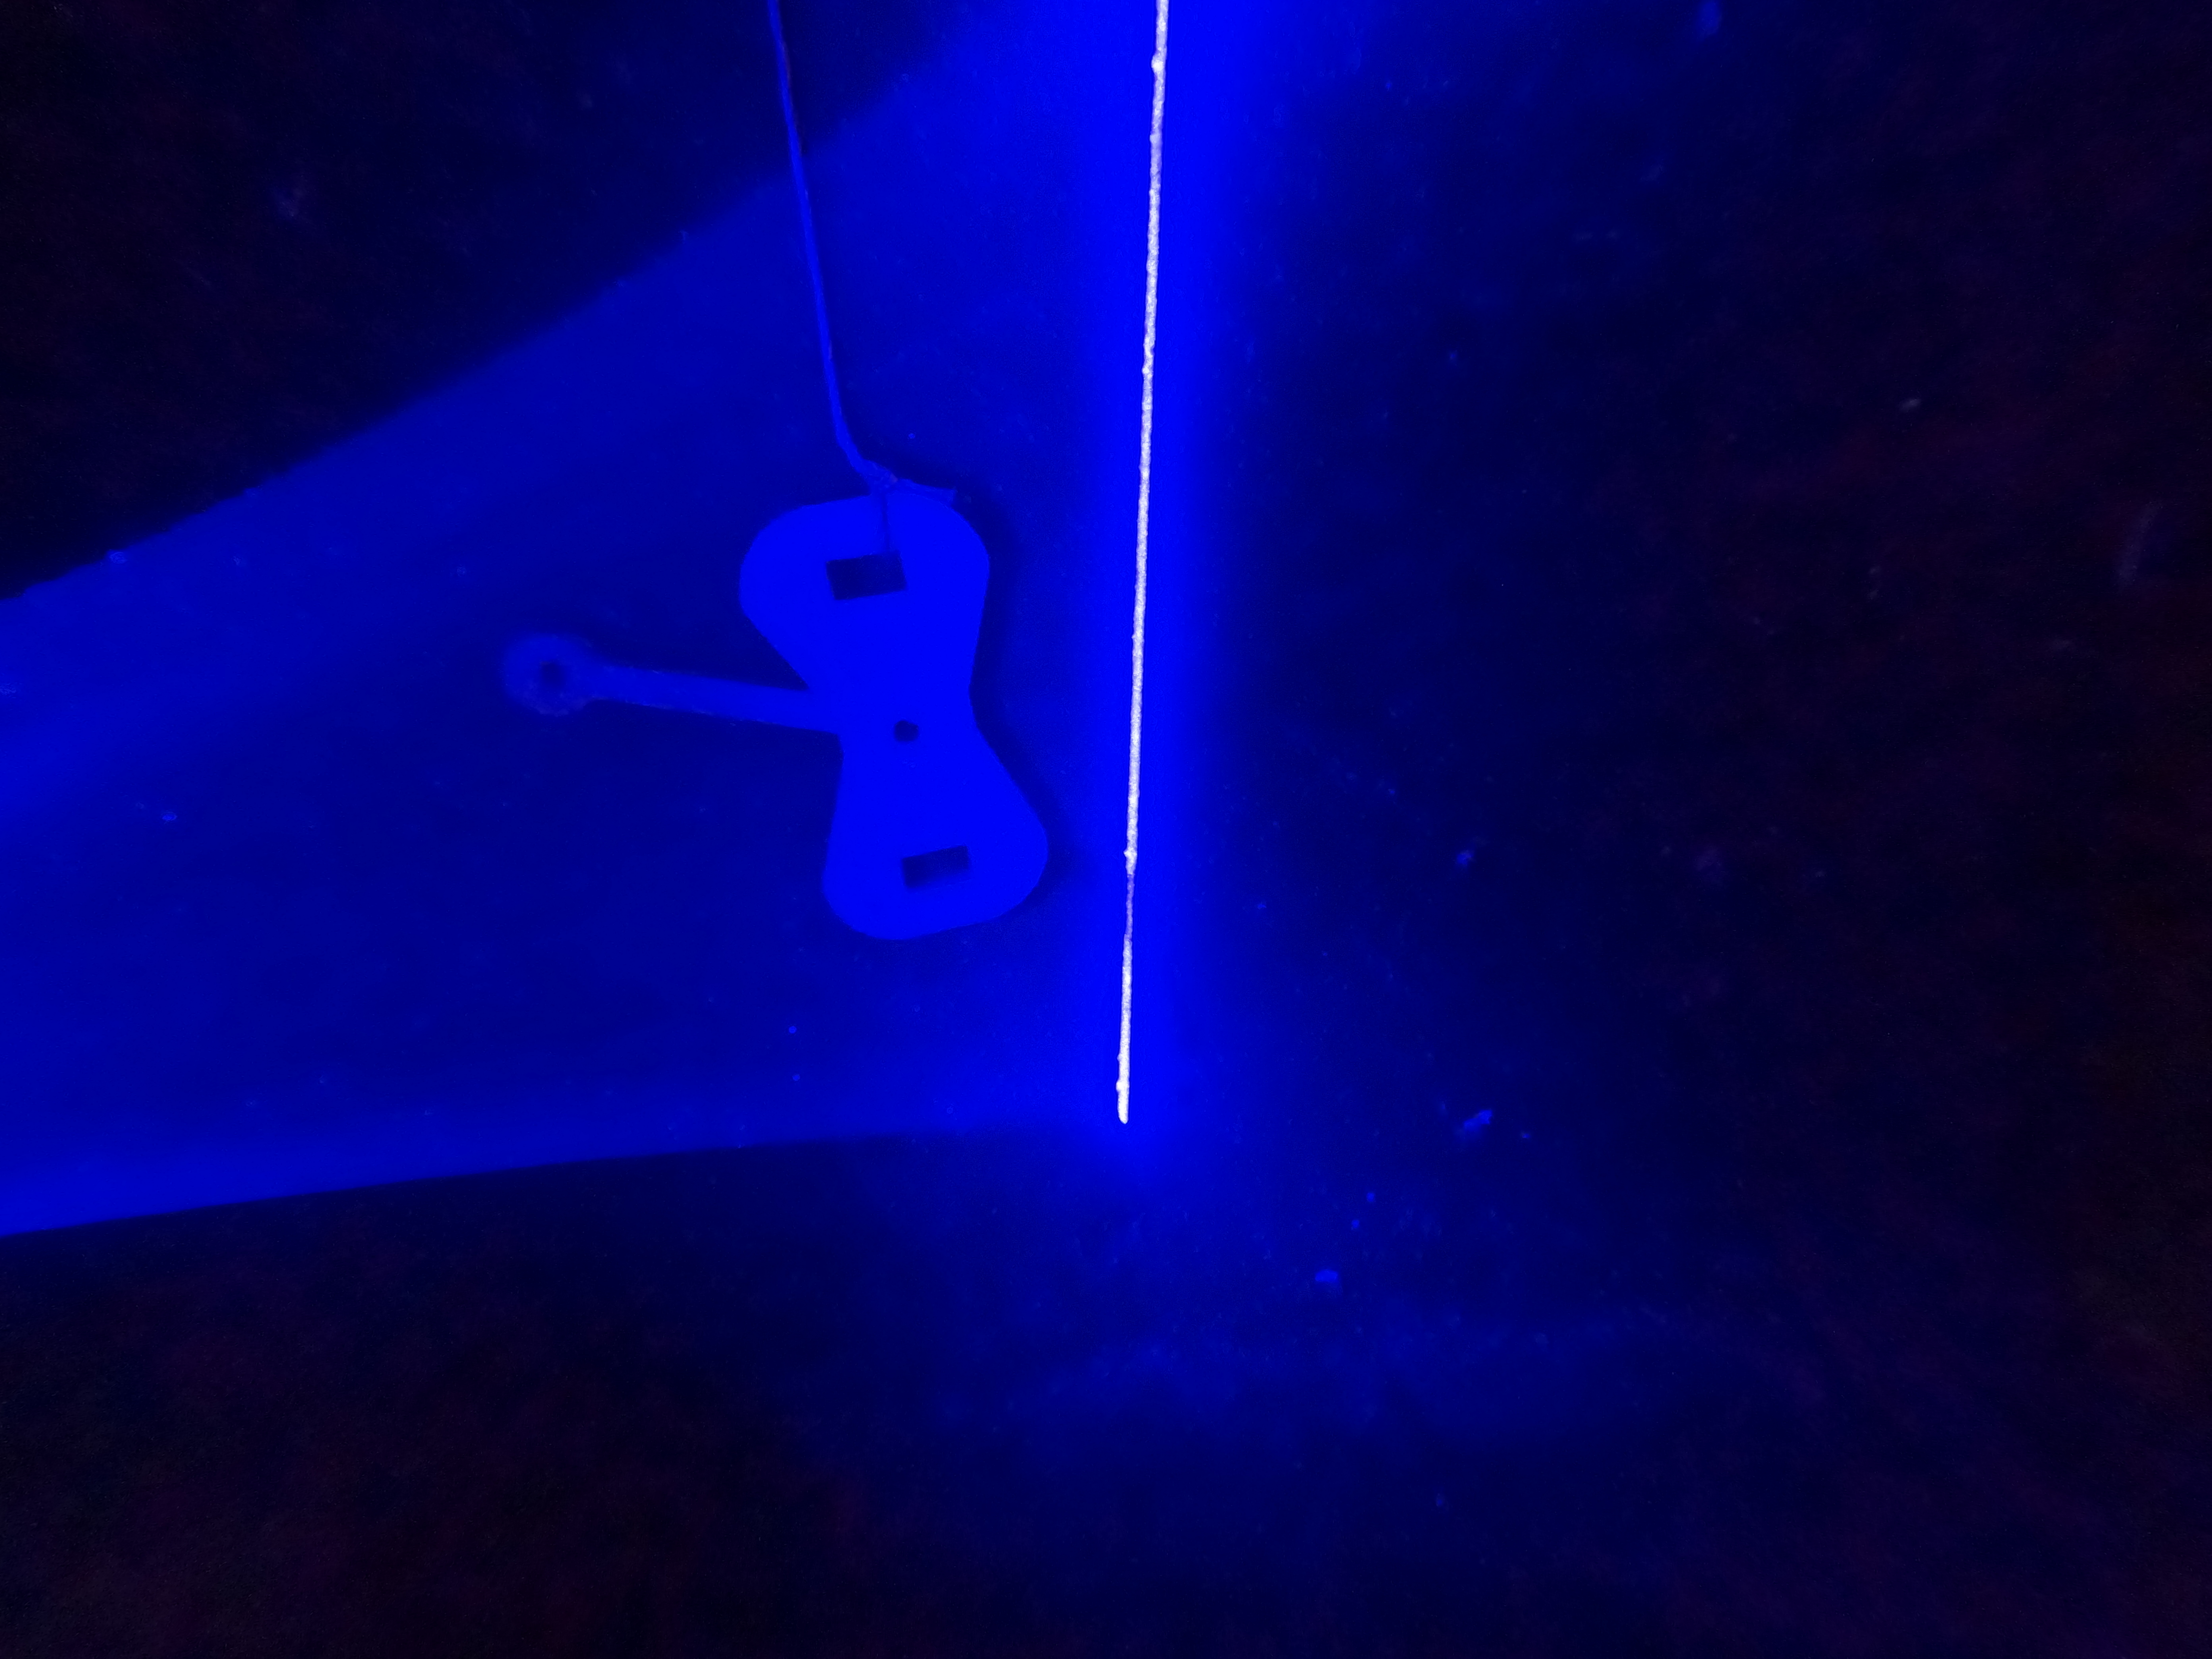

Supplement: Supplementary file 2178 [file G0016487.pdf › Level_1_2/G0016487.pdf]

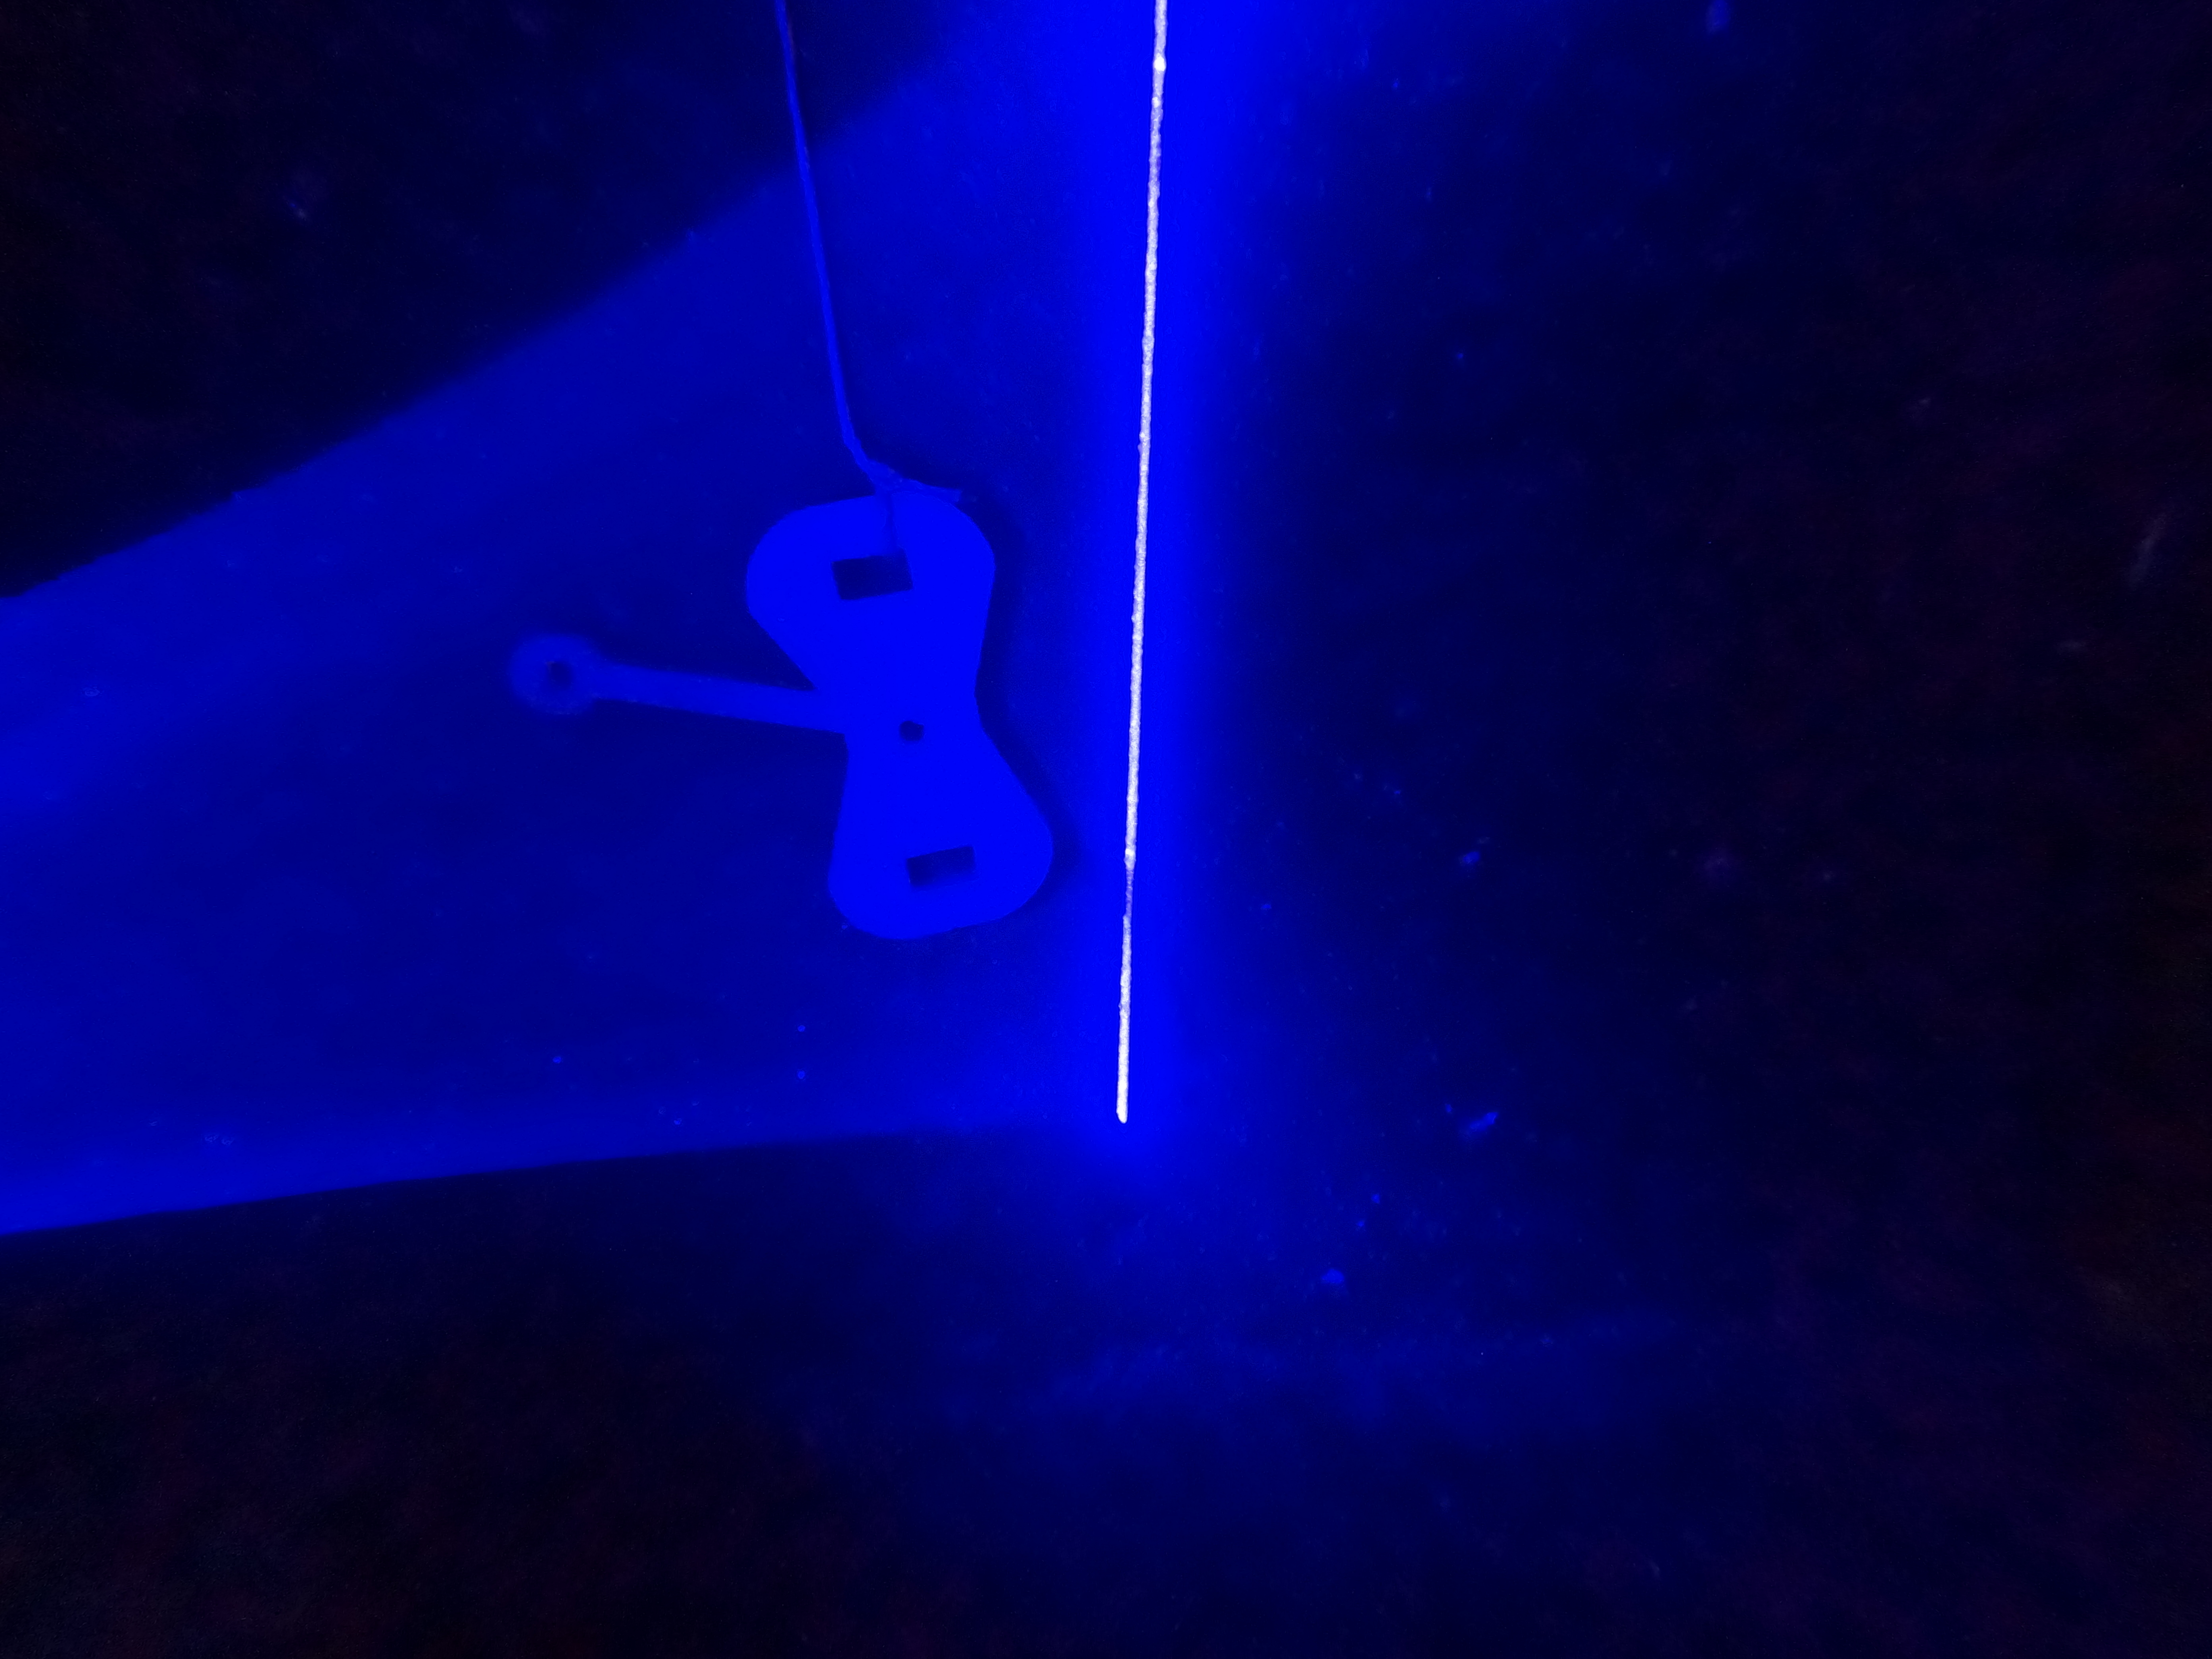

Supplement: Supplementary file 2179 [file G0016488.pdf › Level_1_2/G0016488.pdf]

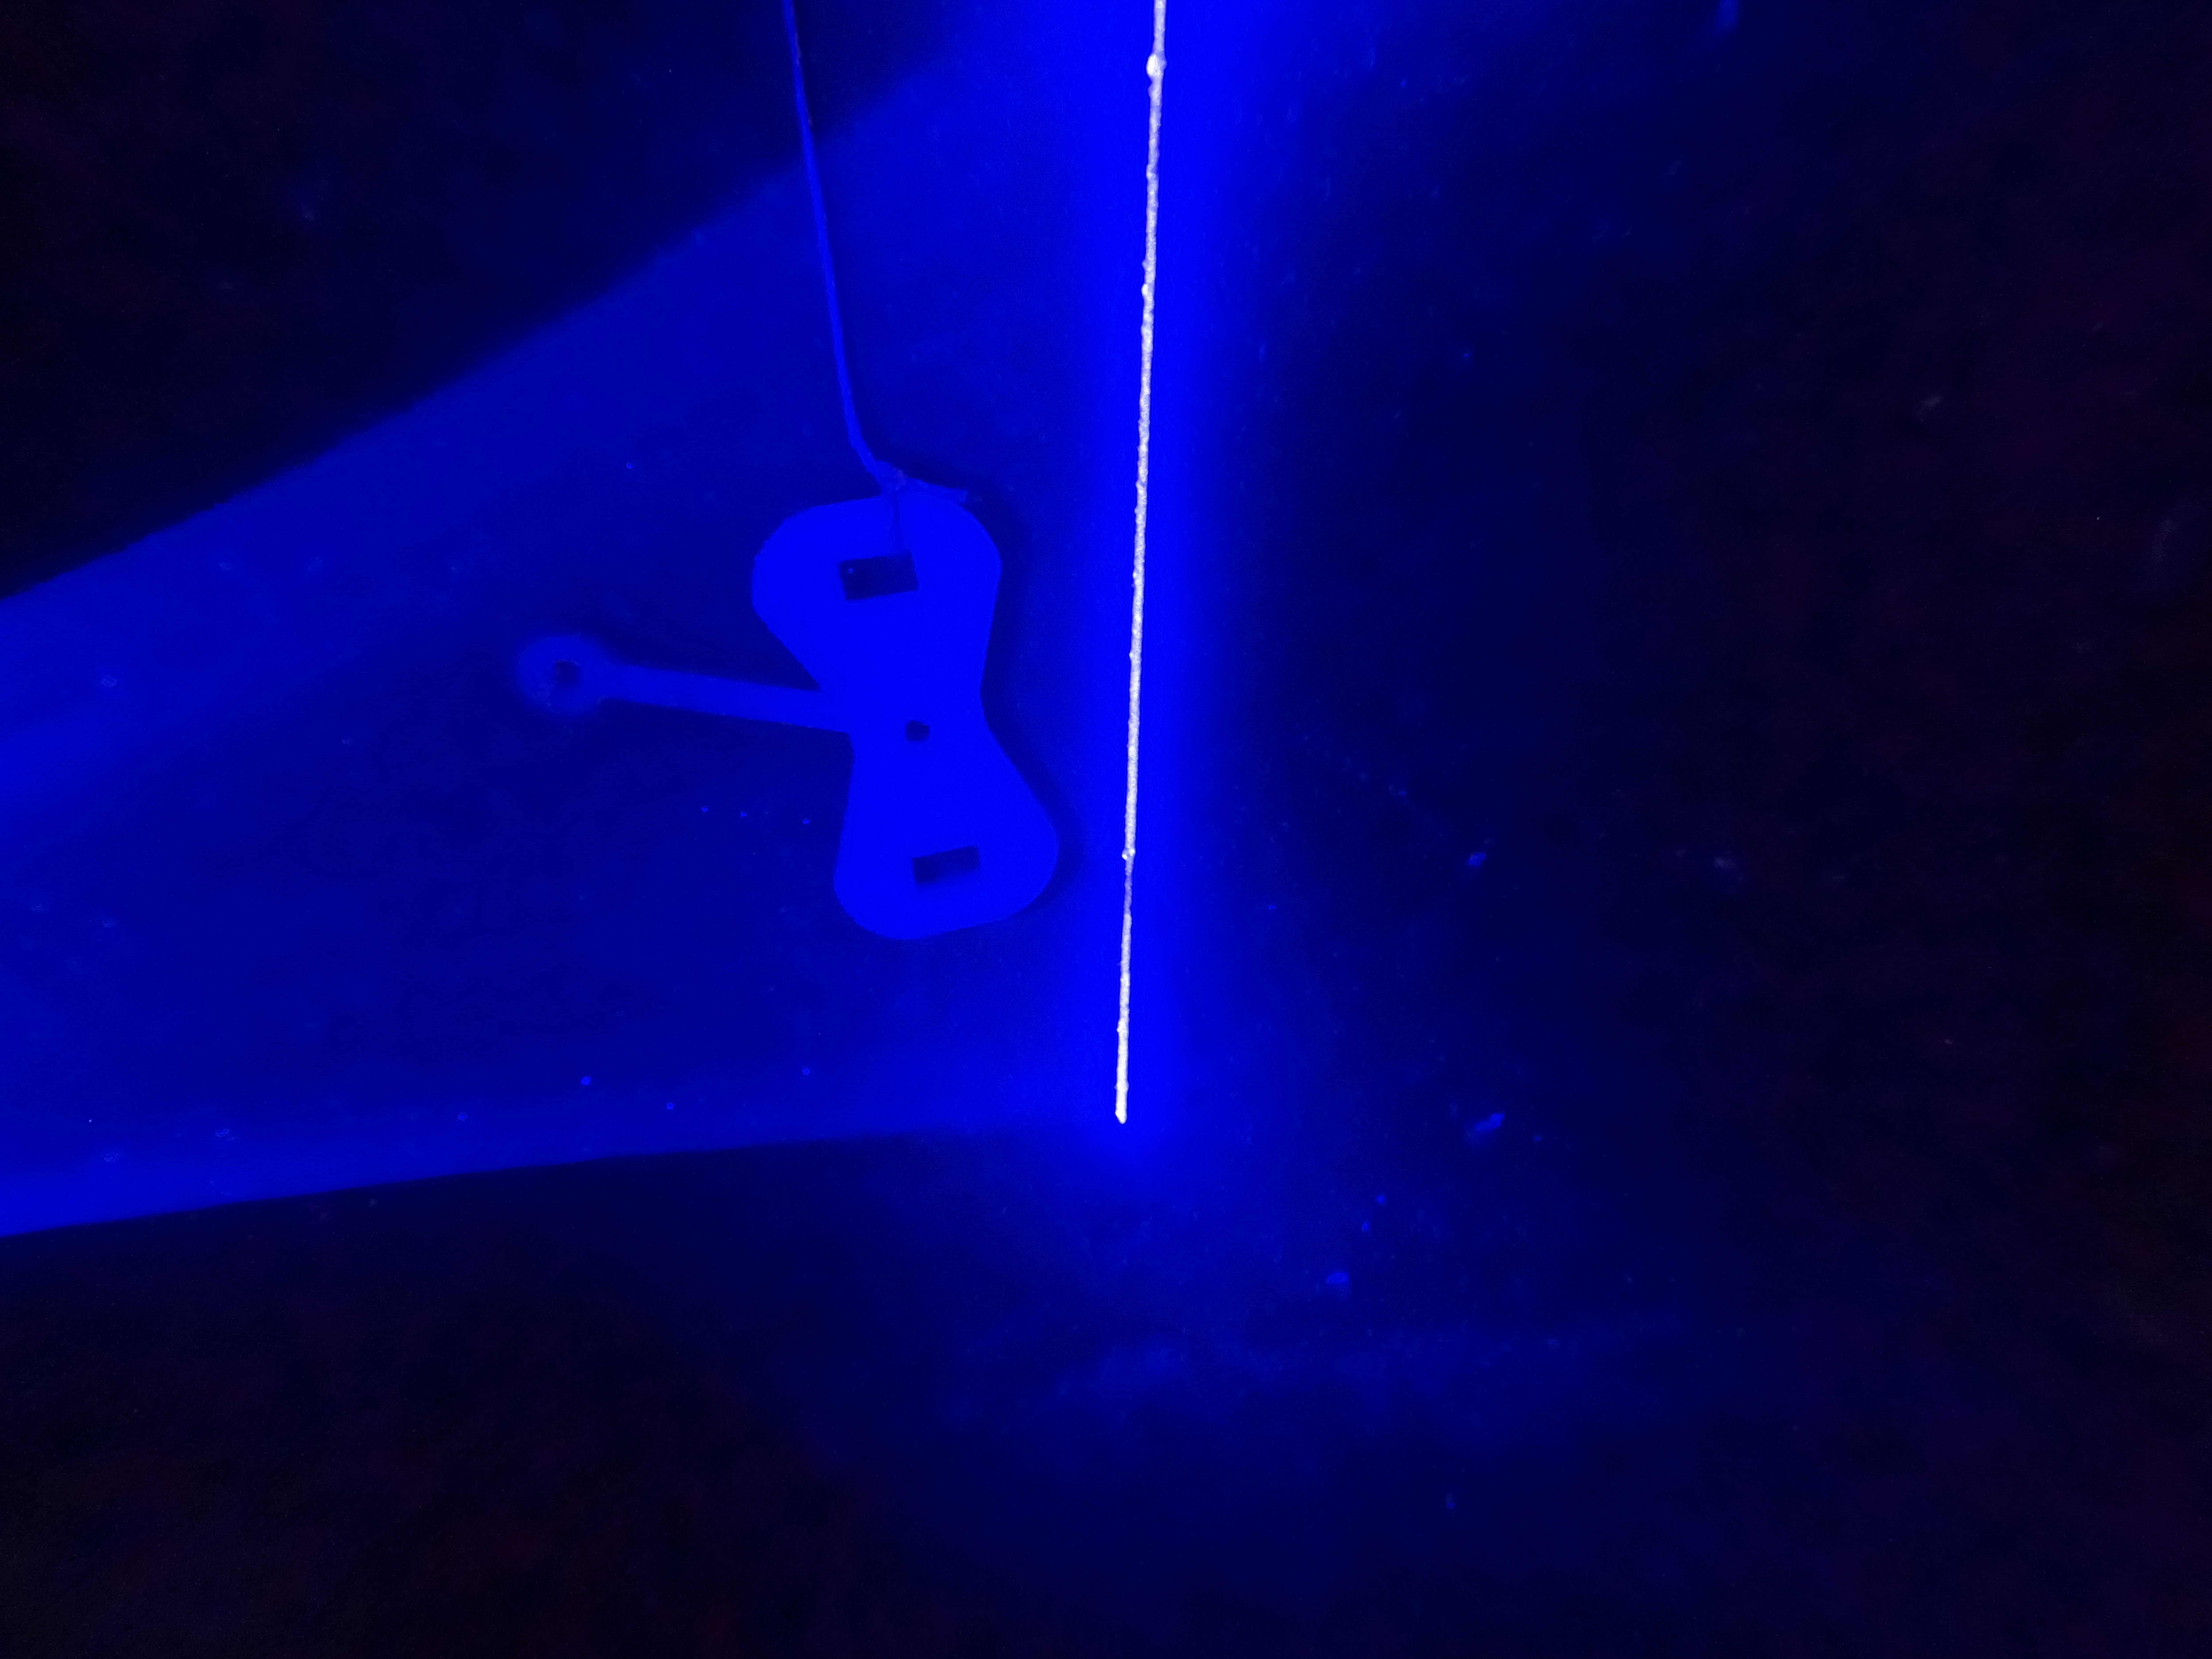

Supplement: Supplementary file 2180 [file G0016489.pdf › Level_1_2/G0016489.pdf]

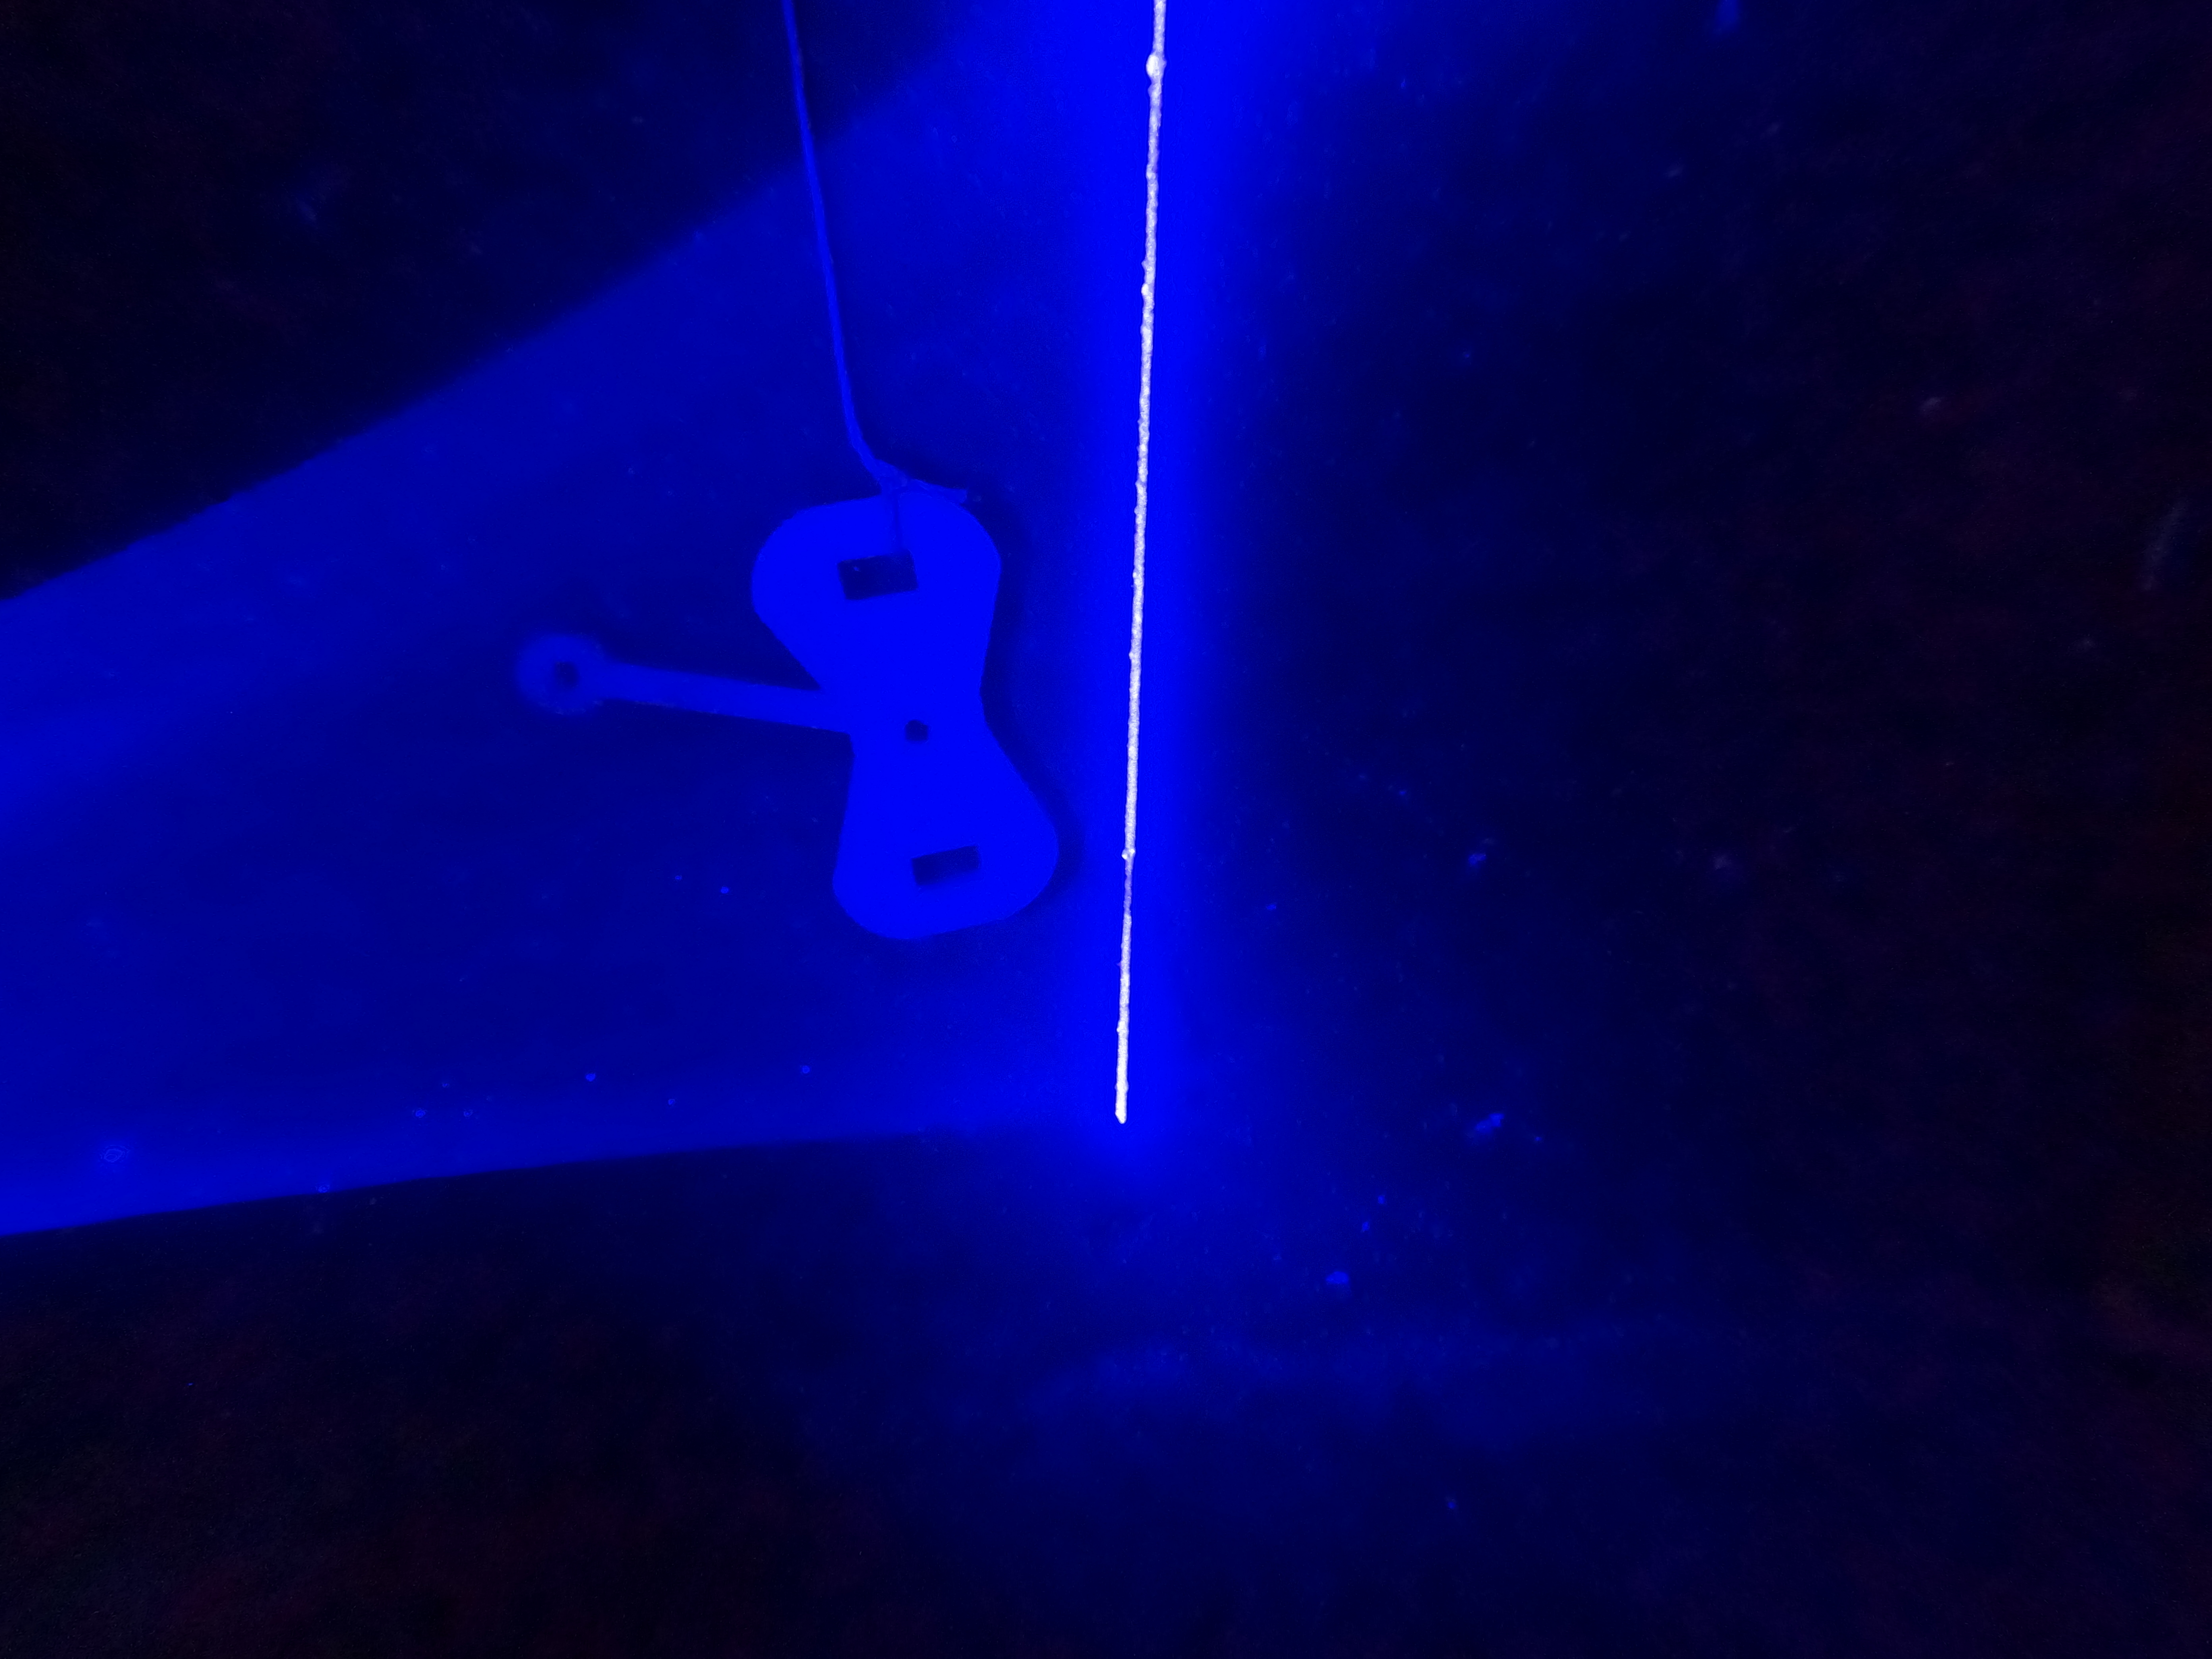

Supplement: Supplementary file 2181 [file G0016490.pdf › Level_1_2/G0016490.pdf]

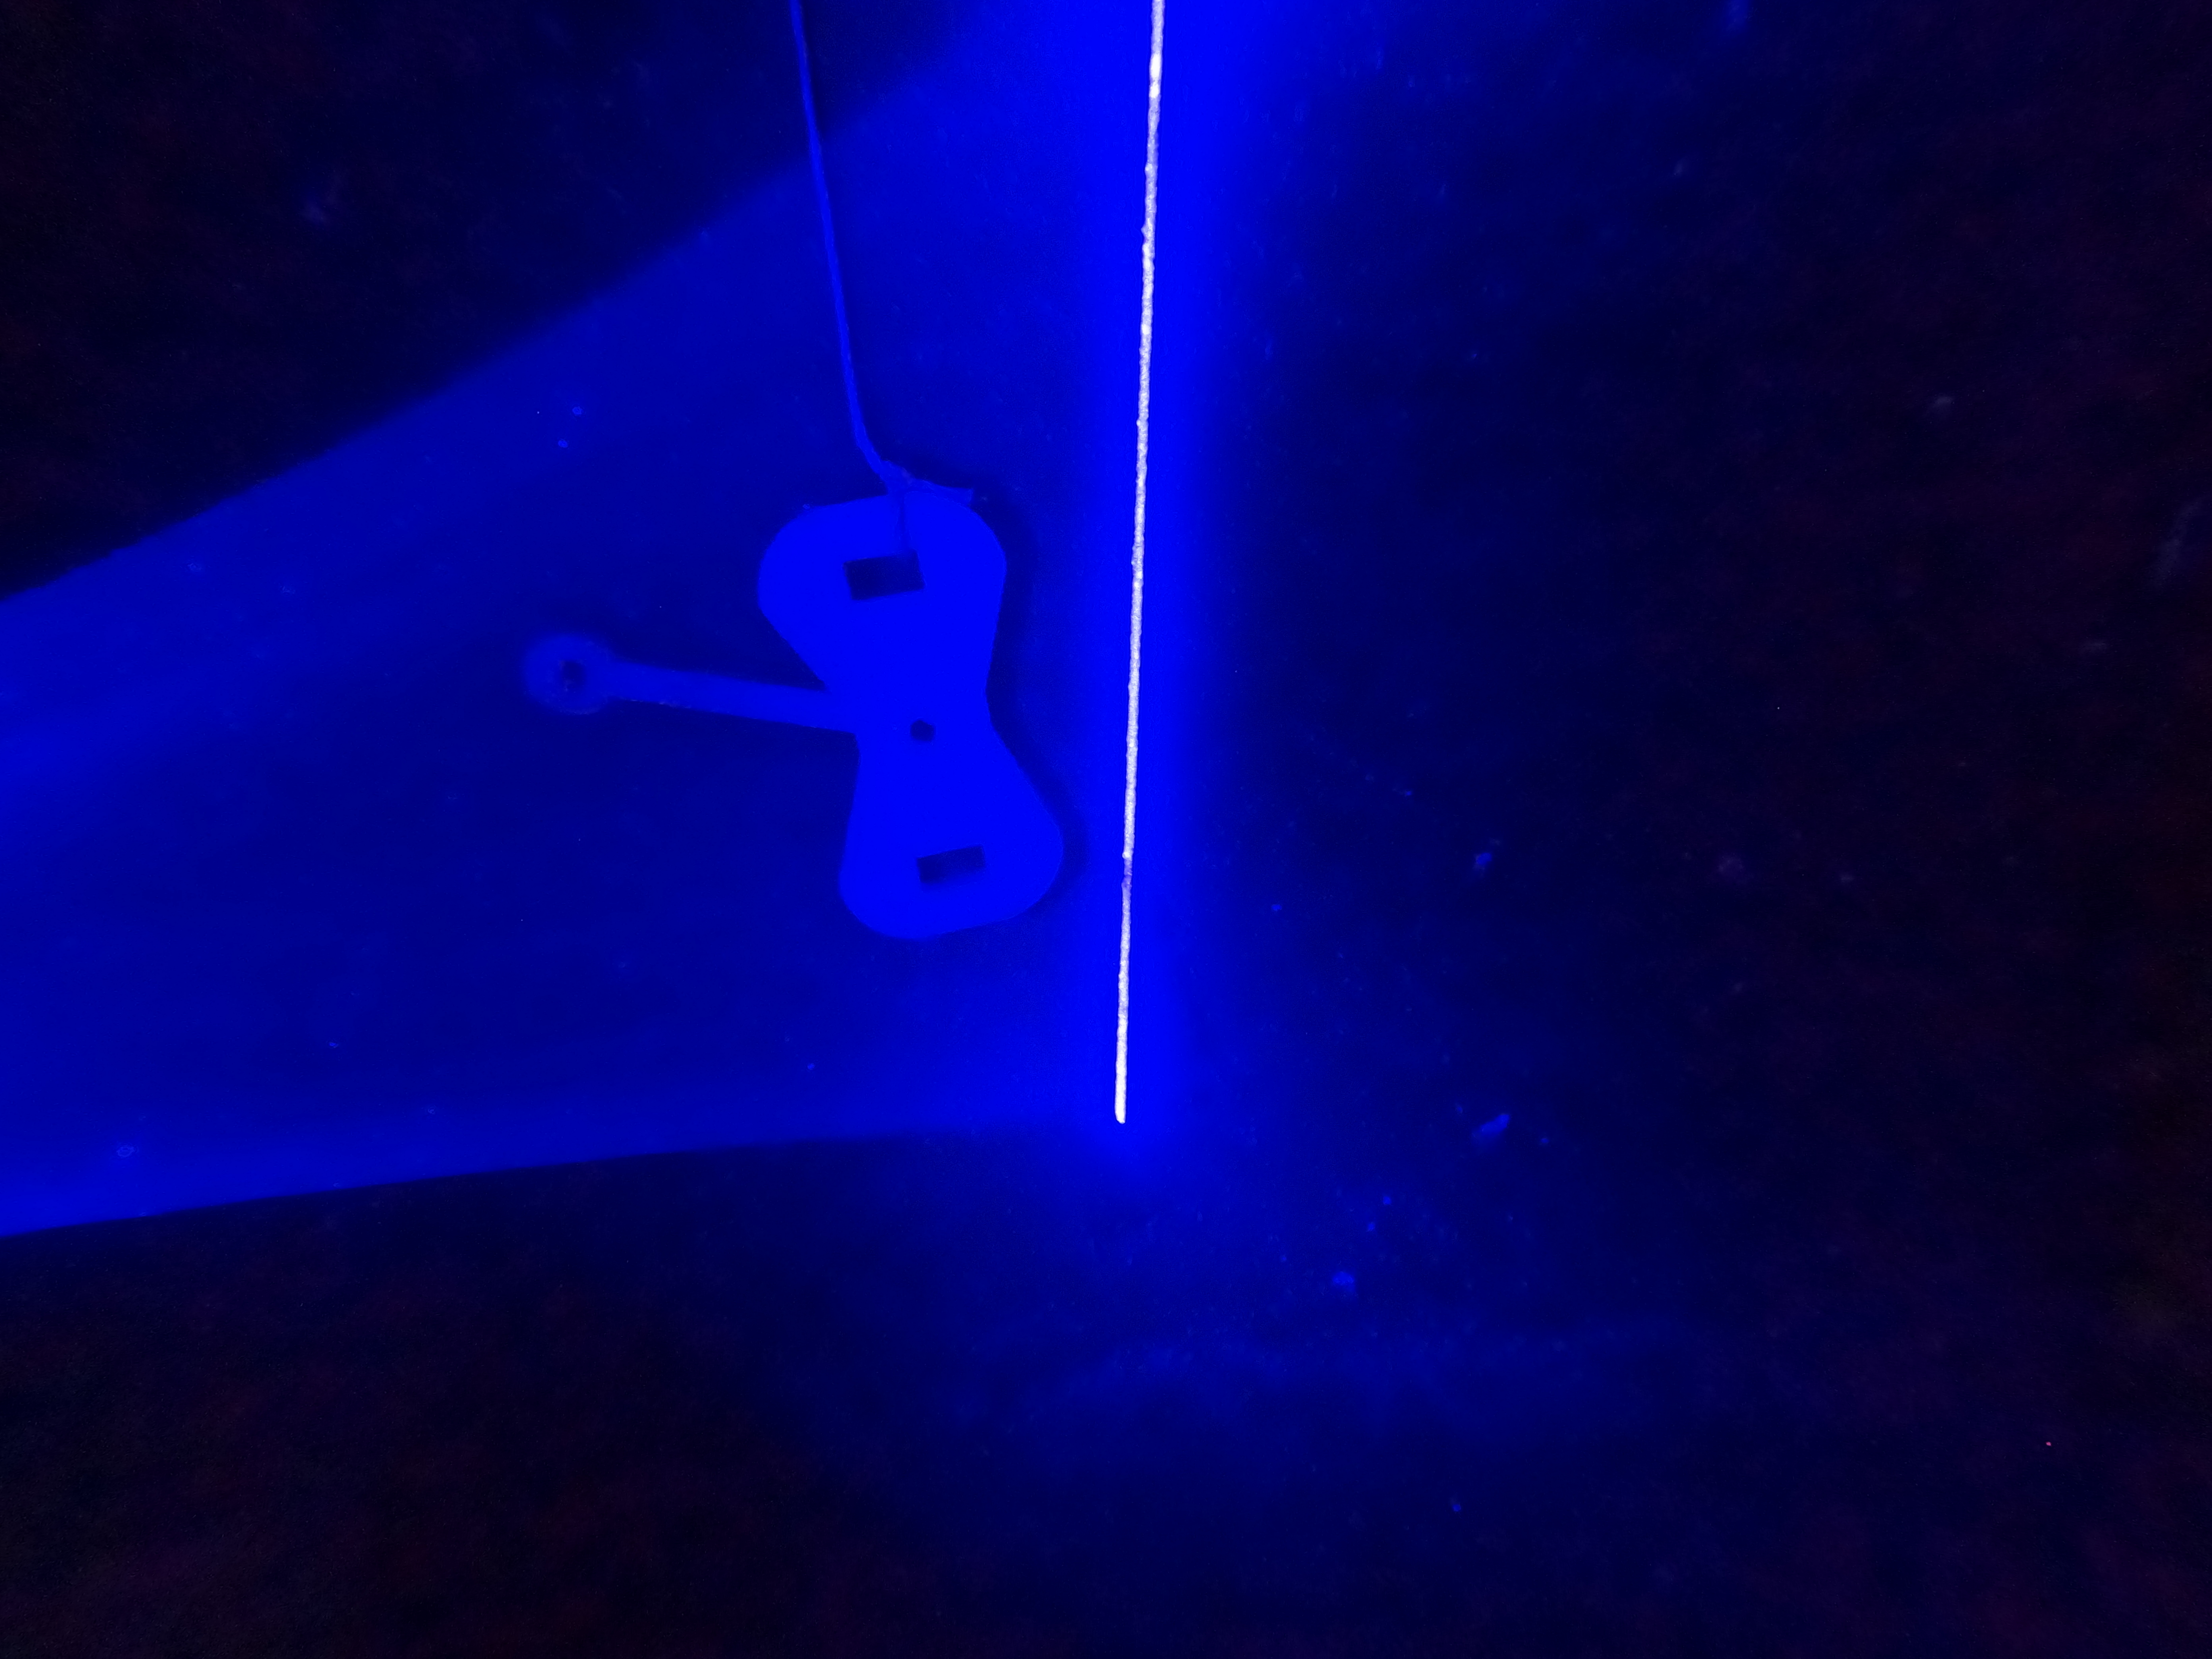

Supplement: Supplementary file 2182 [file G0016491.pdf › Level_1_2/G0016491.pdf]

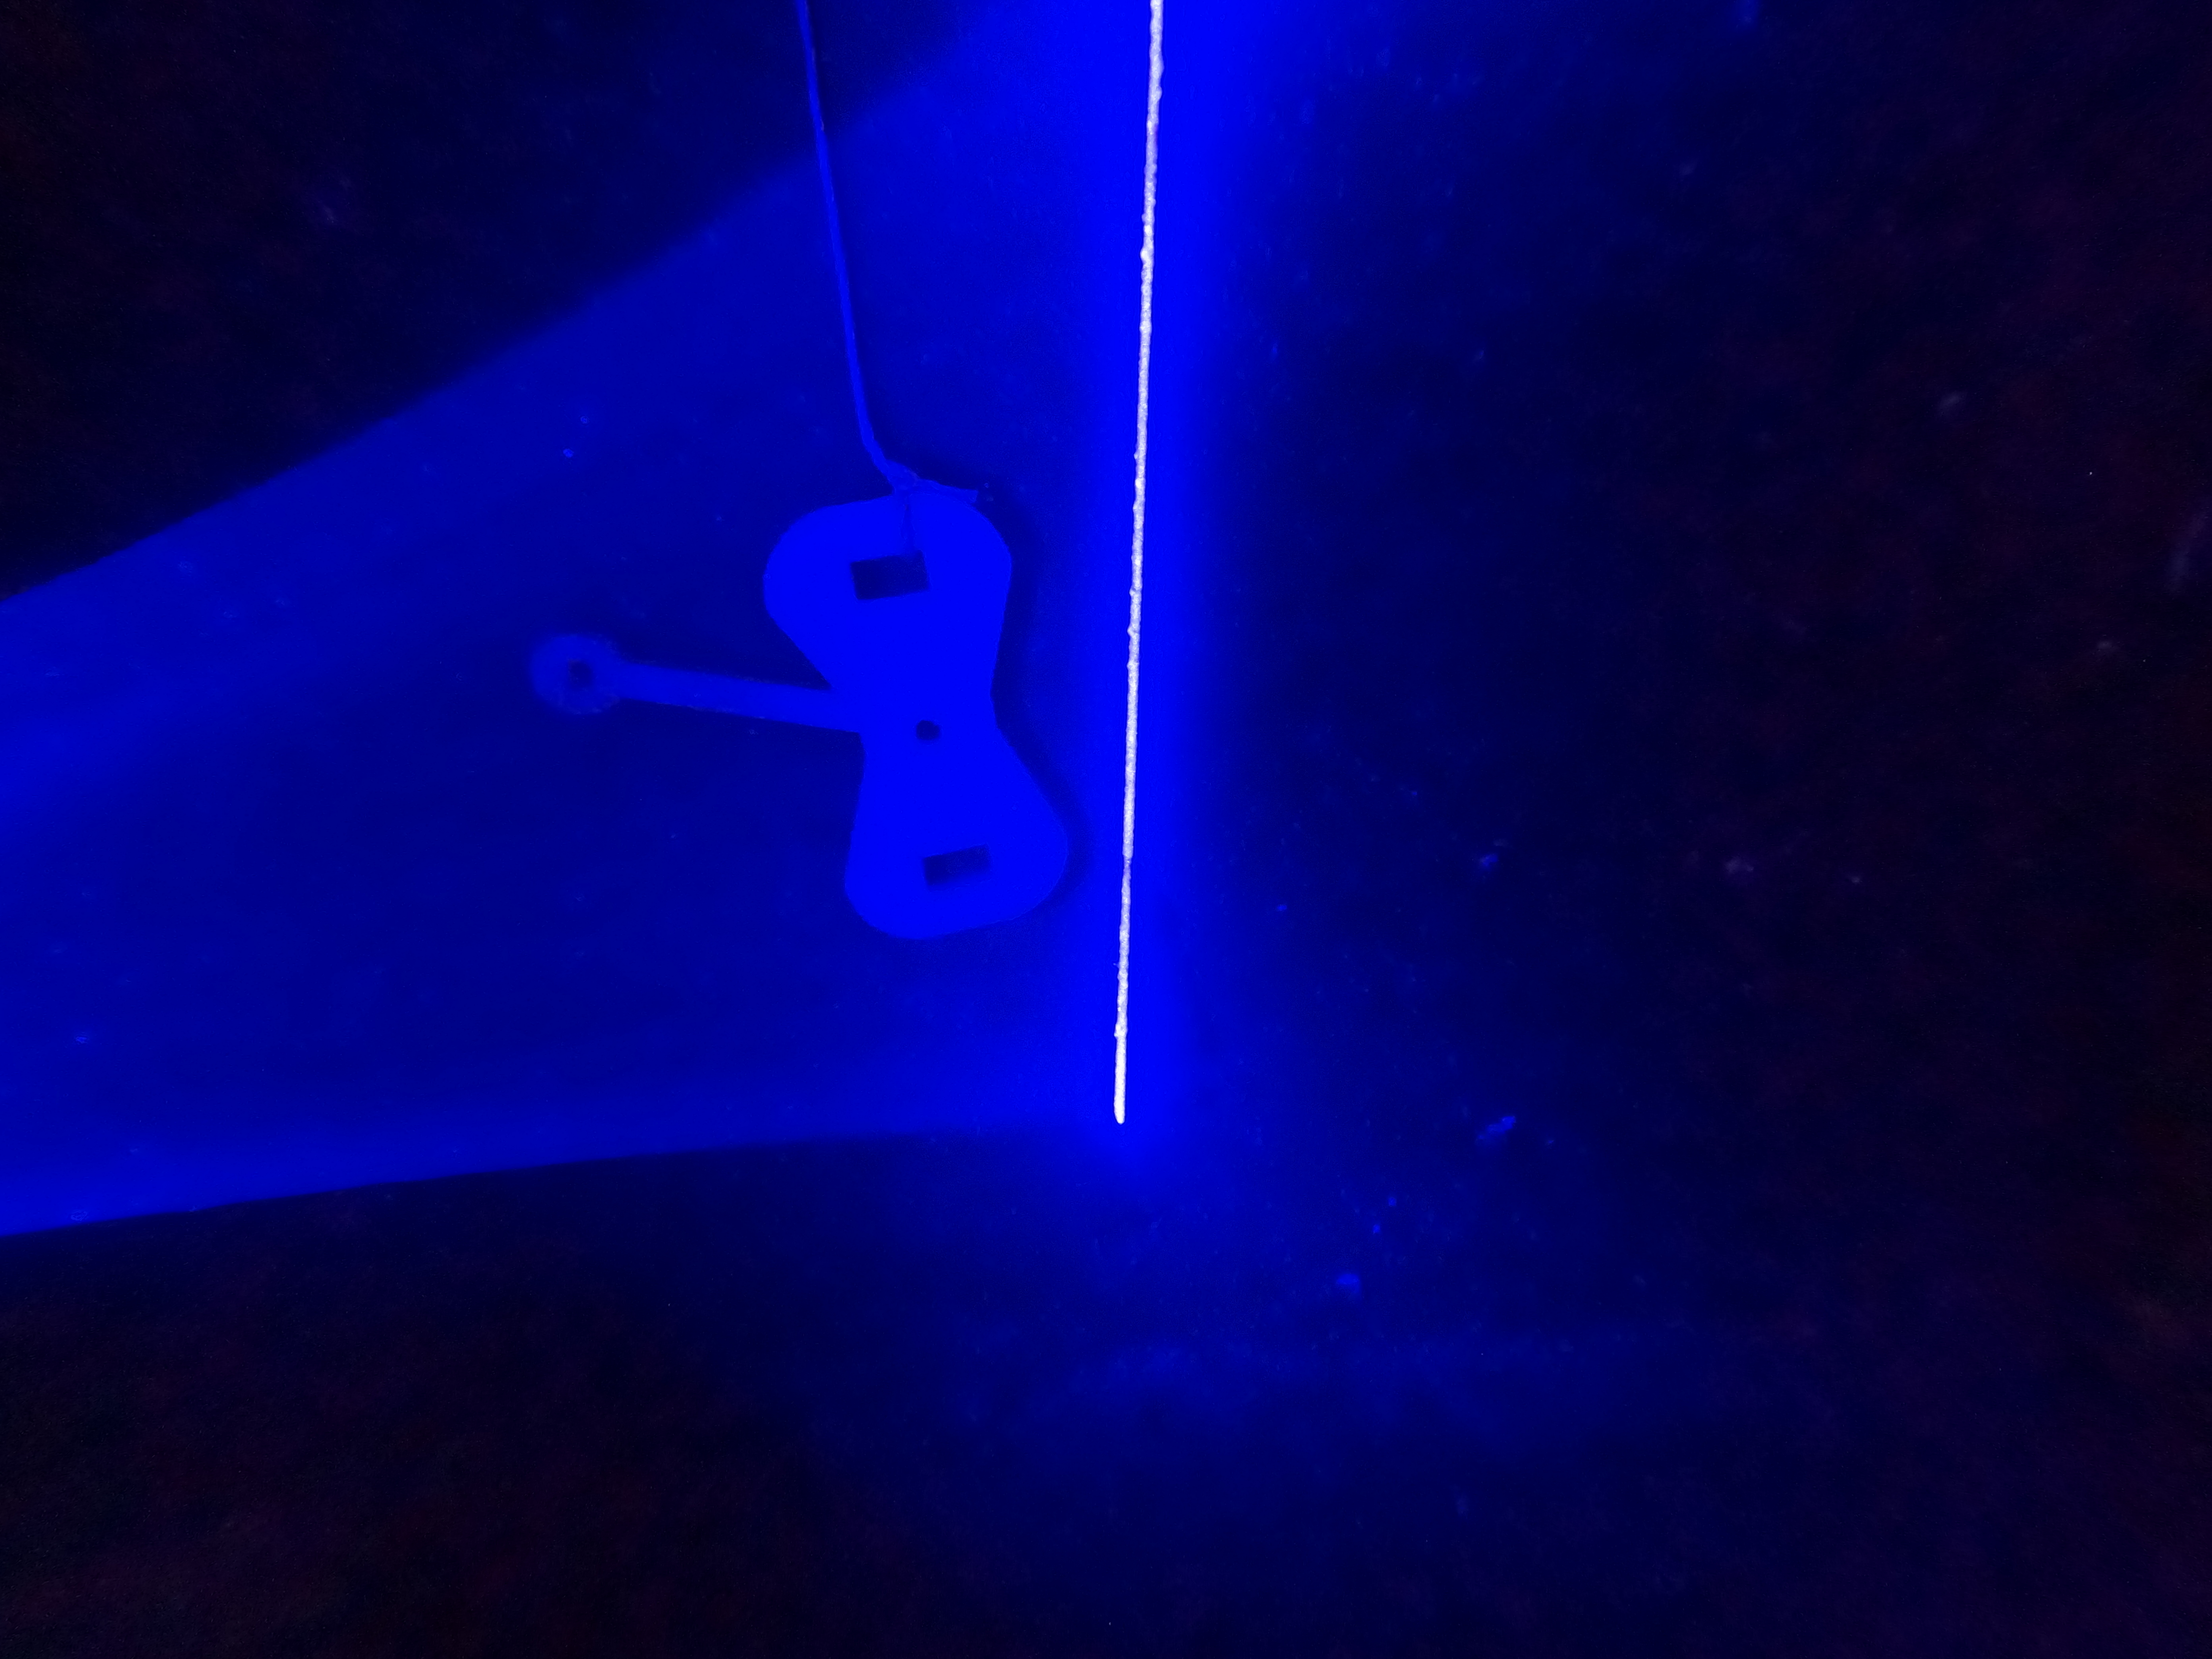

Supplement: Supplementary file 2183 [file G0016492.pdf › Level_1_2/G0016492.pdf]

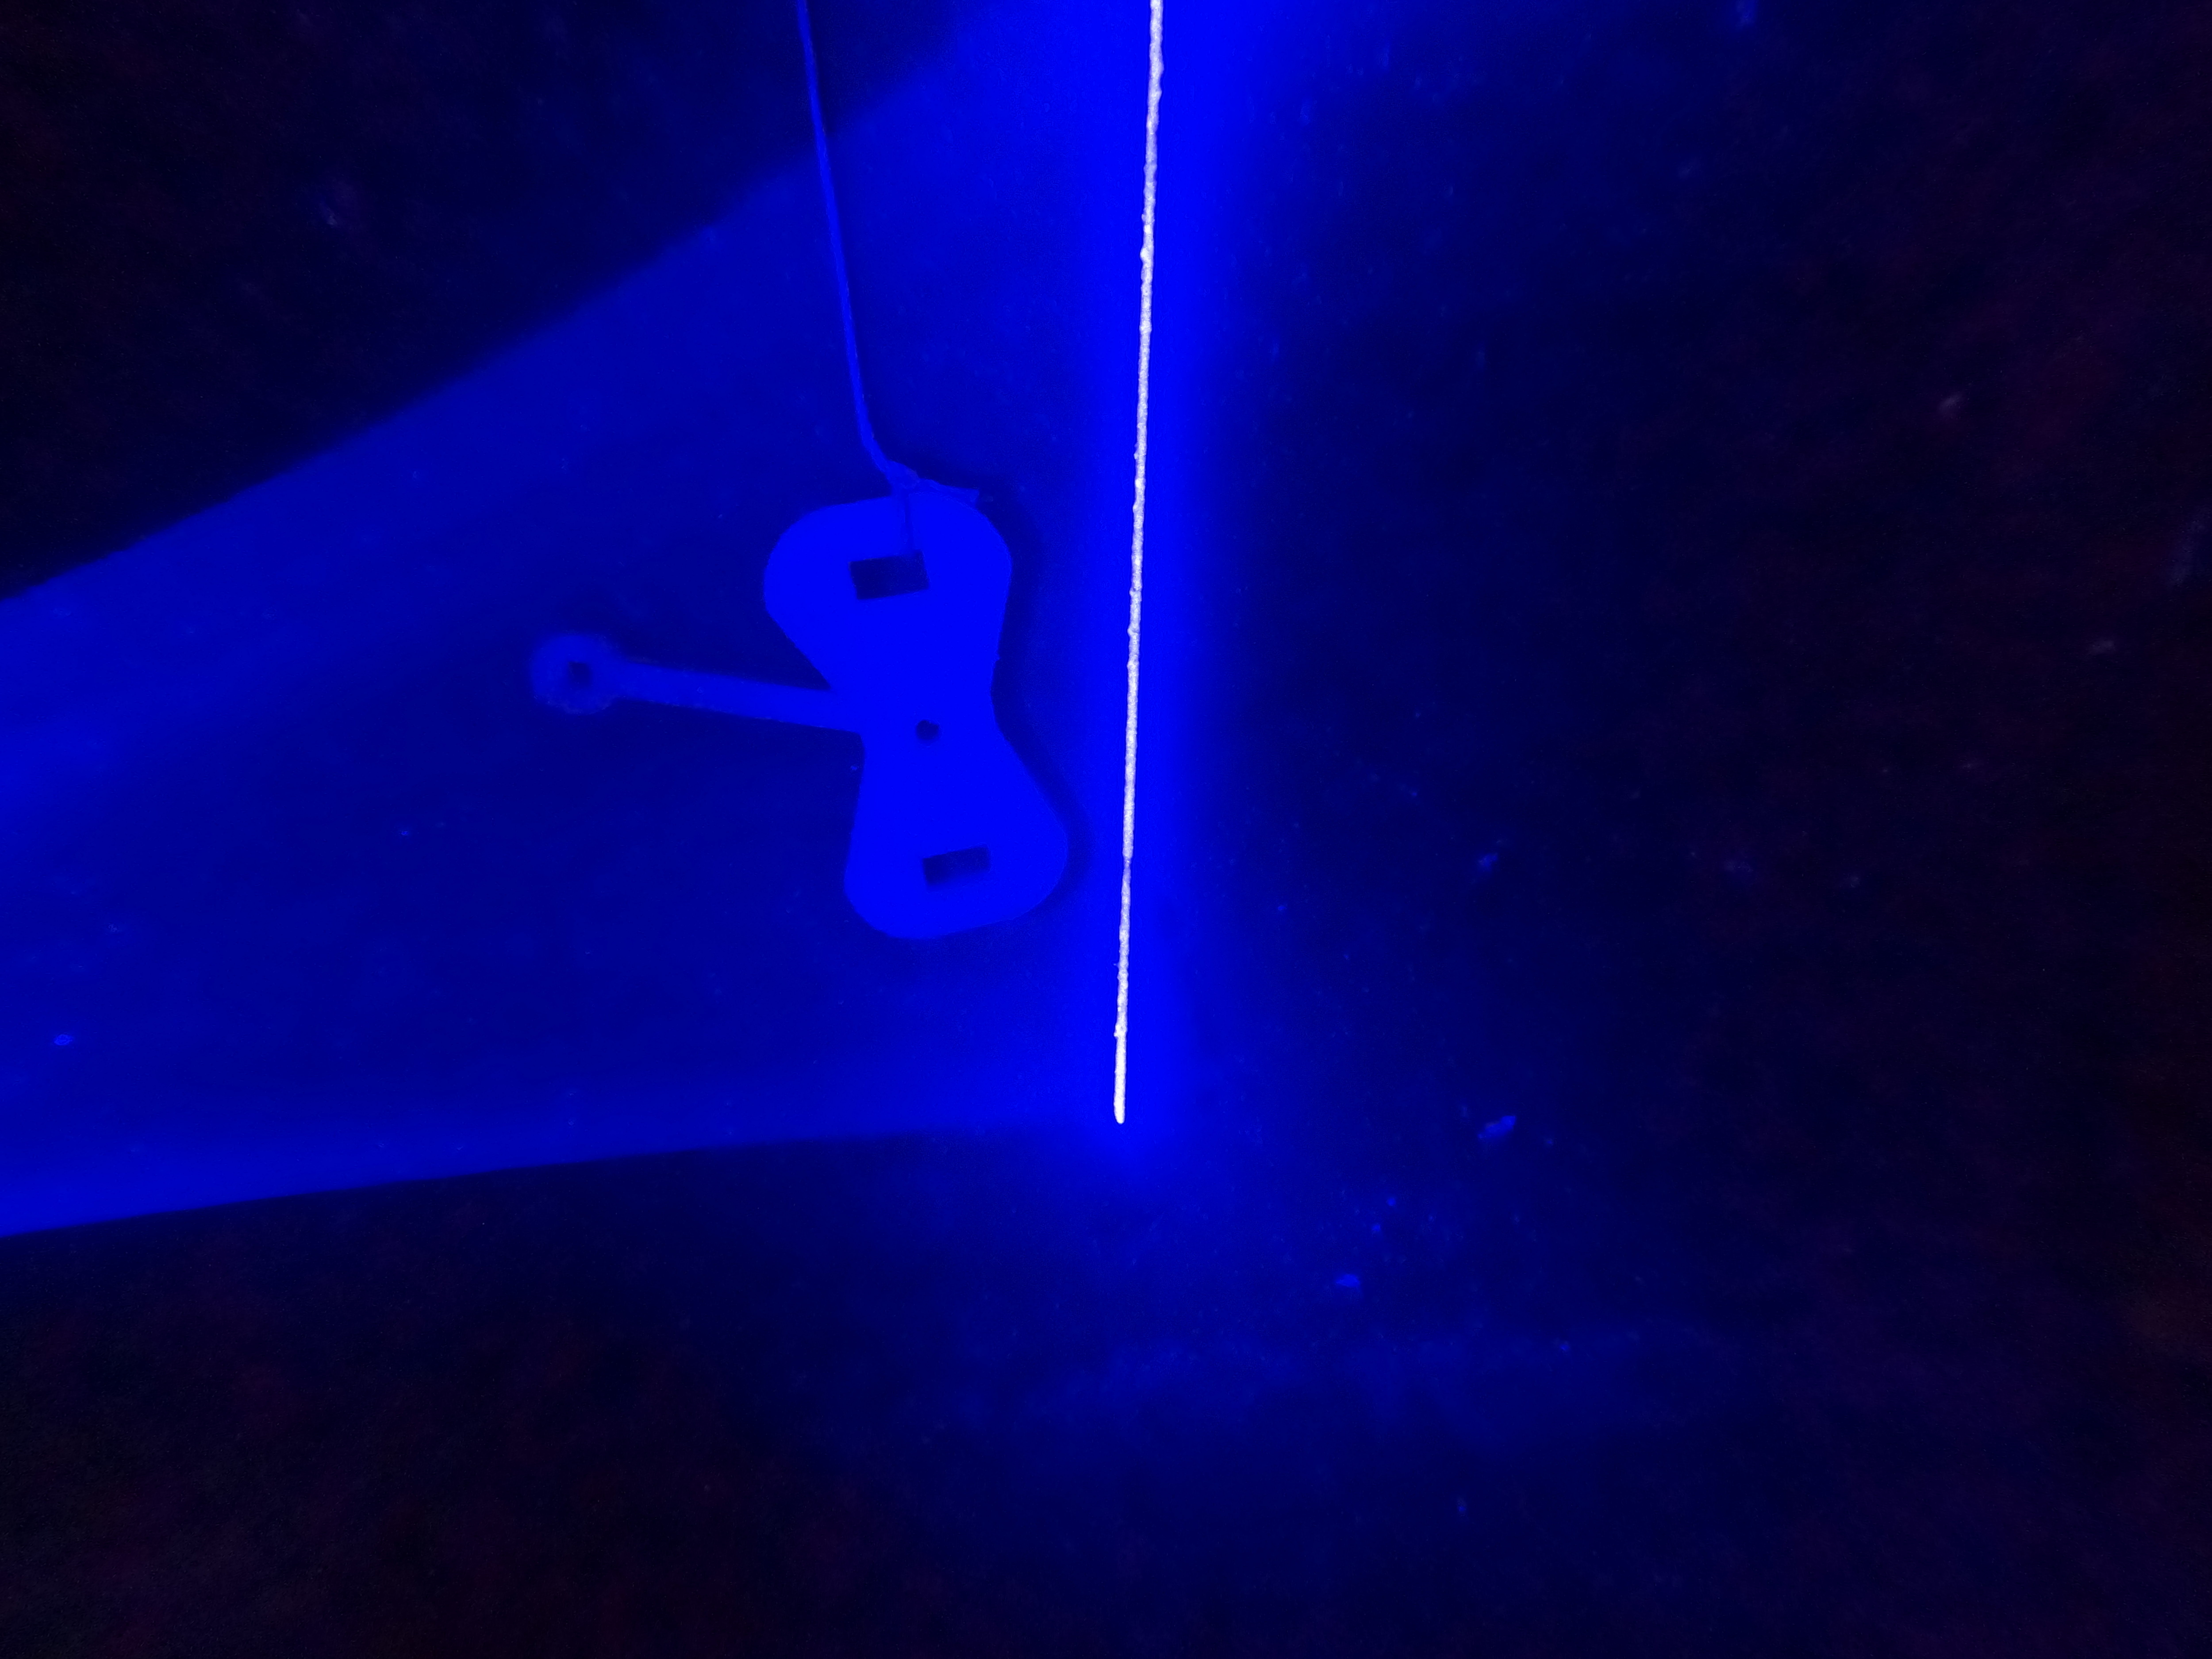

Supplement: Supplementary file 2184 [file G0016493.pdf › Level_1_2/G0016493.pdf]

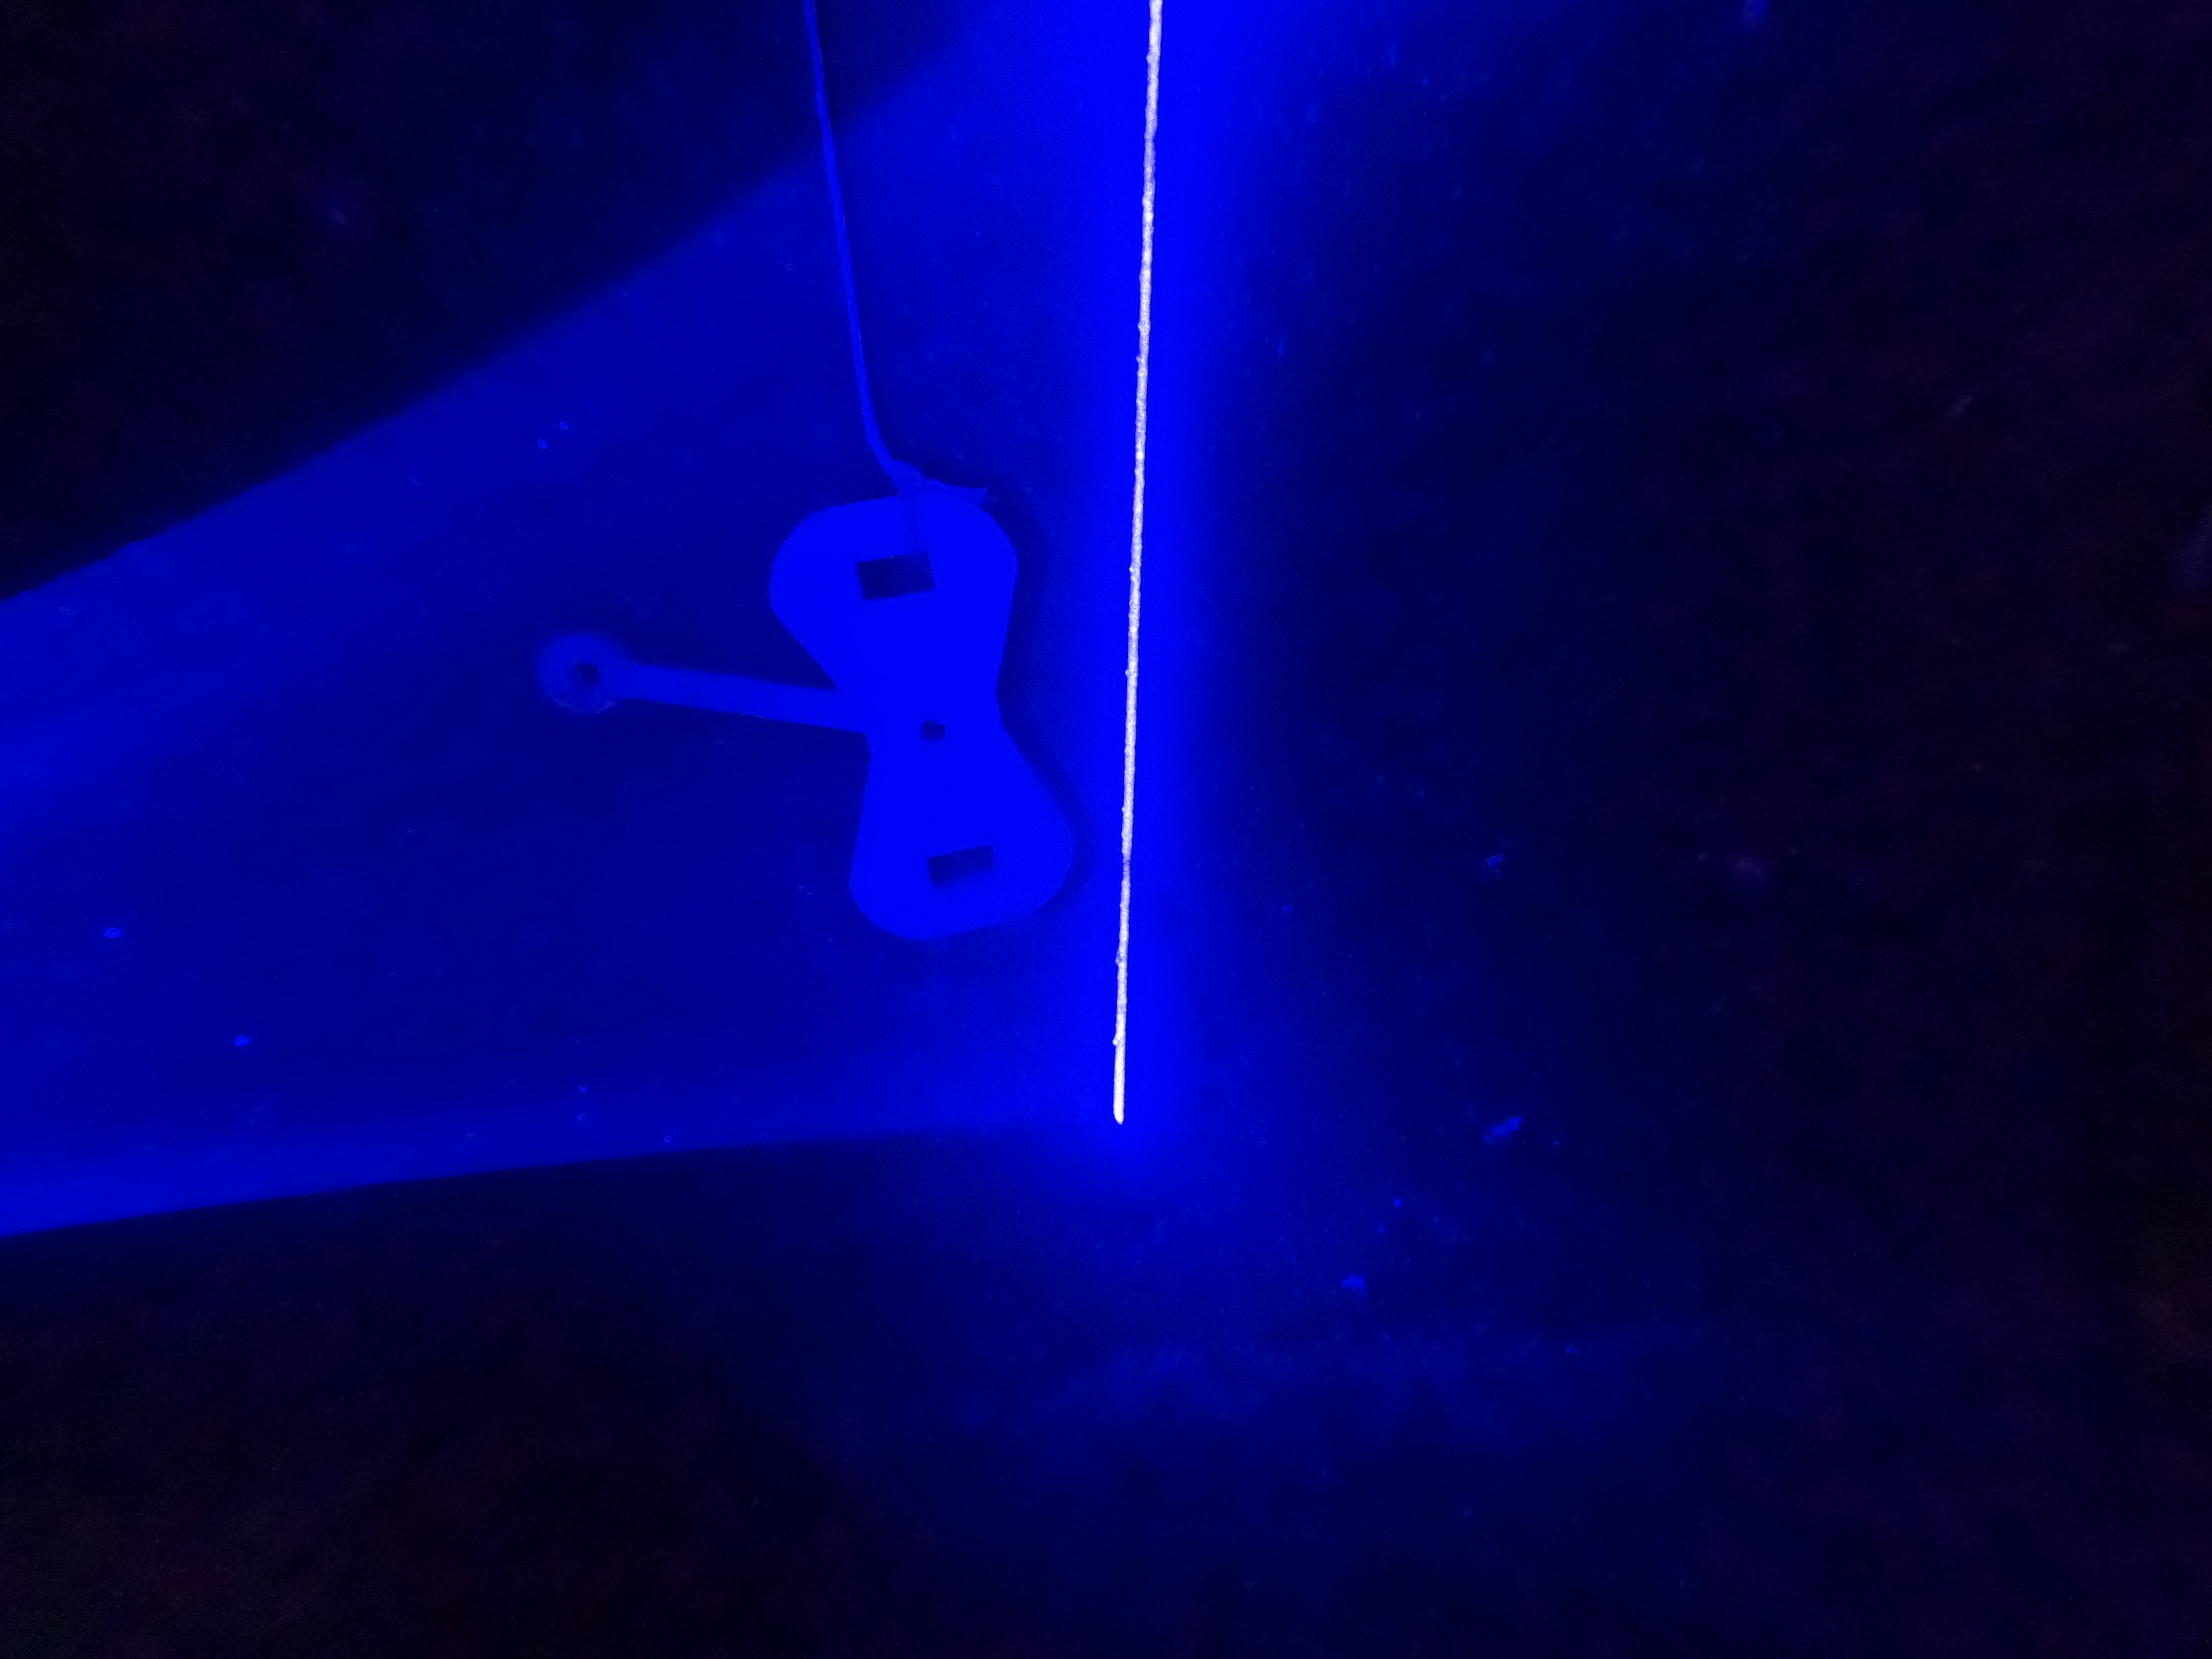

Supplement: Supplementary file 2185 [file G0016494.pdf › Level_1_2/G0016494.pdf]

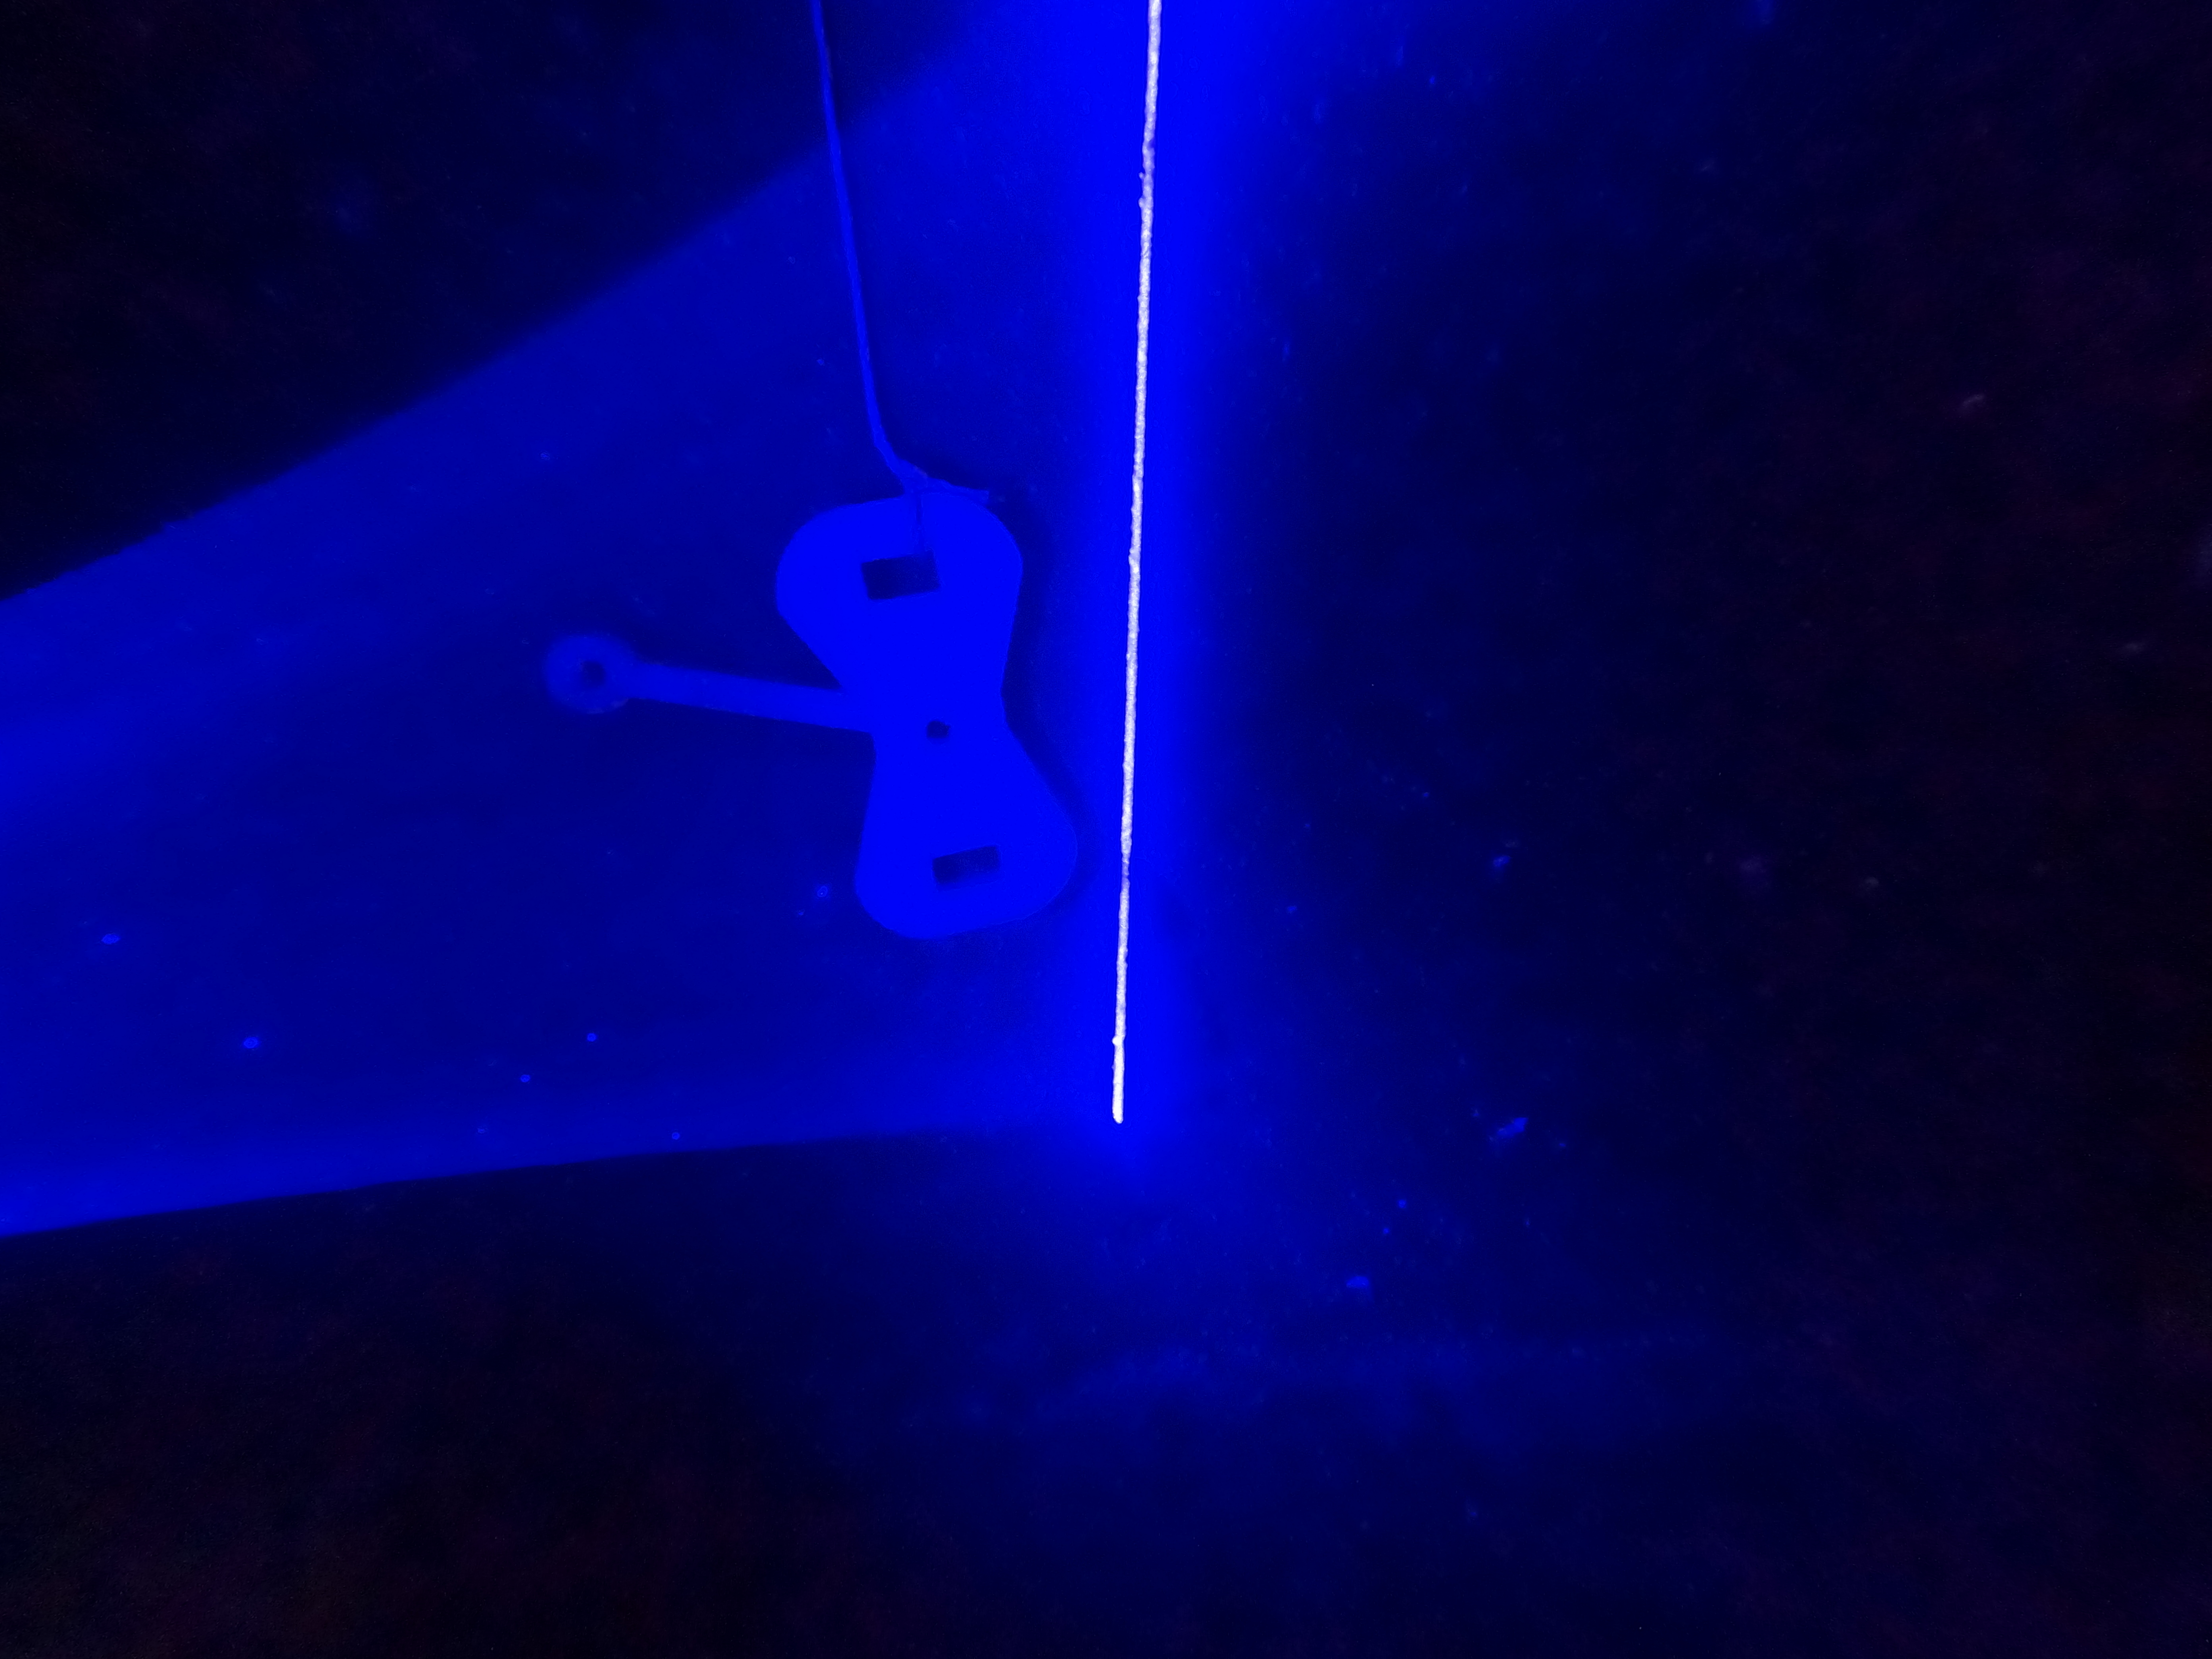

Supplement: Supplementary file 2186 [file G0016495.pdf › Level_1_2/G0016495.pdf]

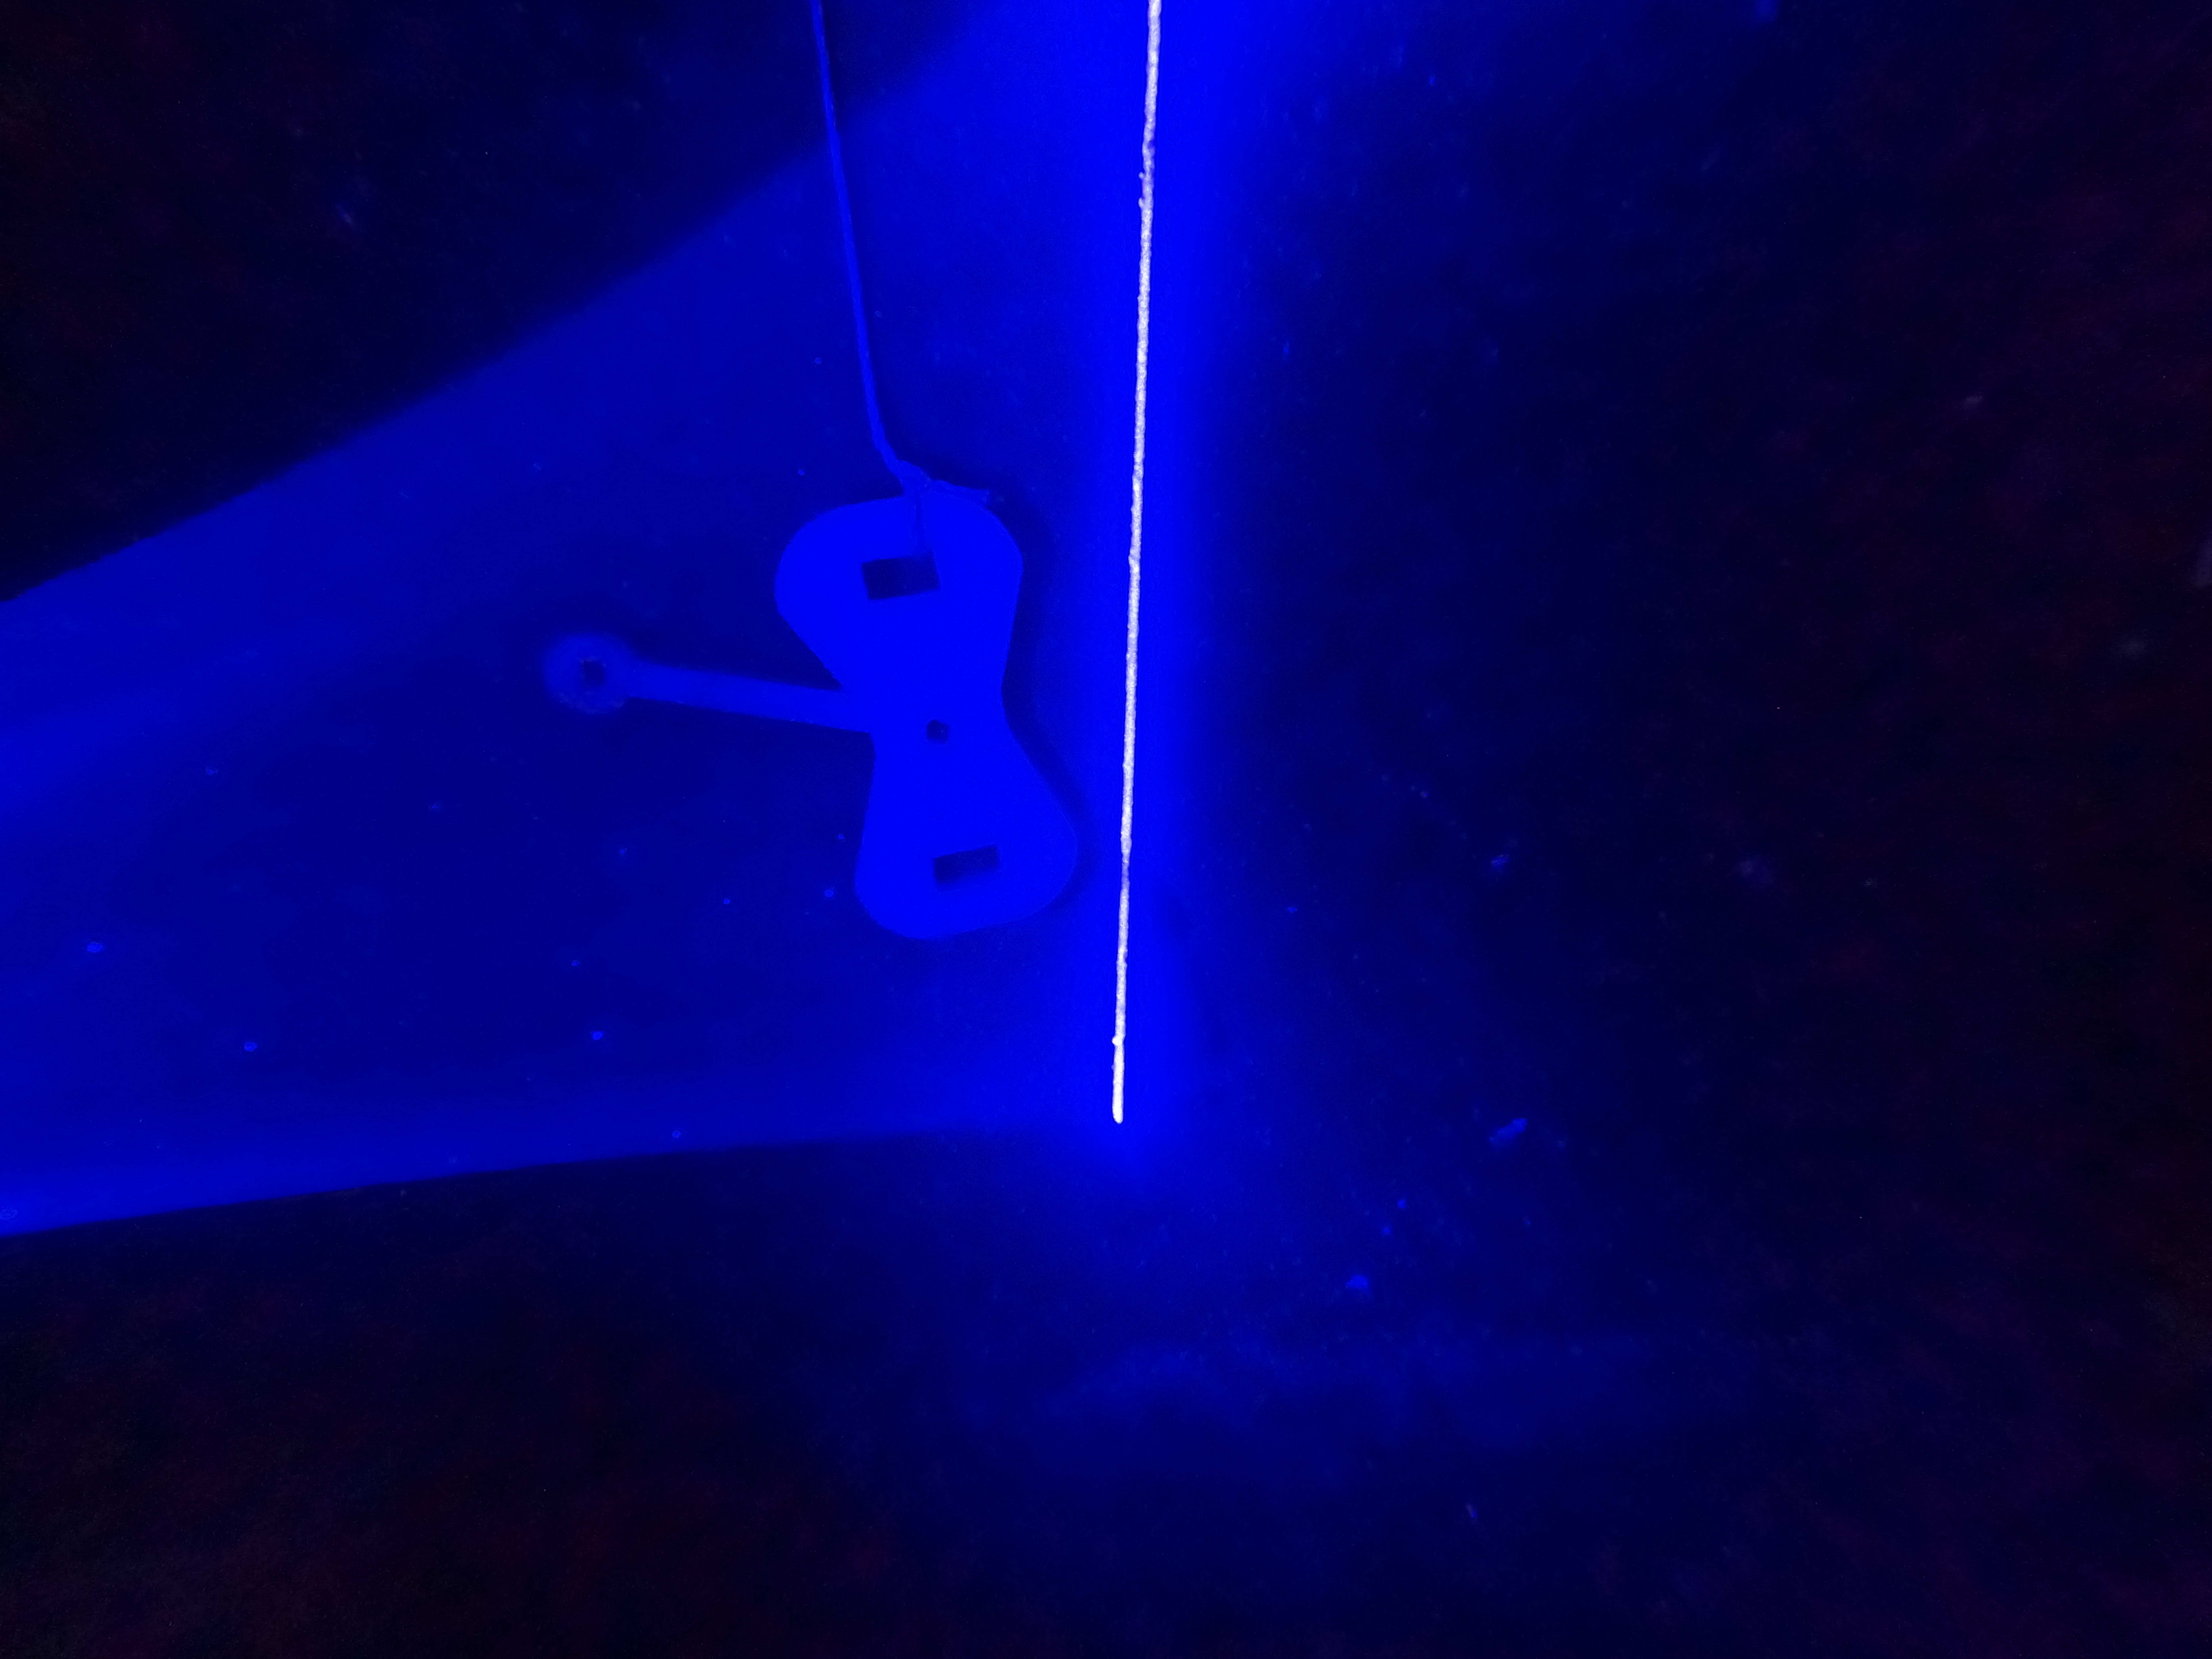

Supplement: Supplementary file 2187 [file G0016496.pdf › Level_1_2/G0016496.pdf]

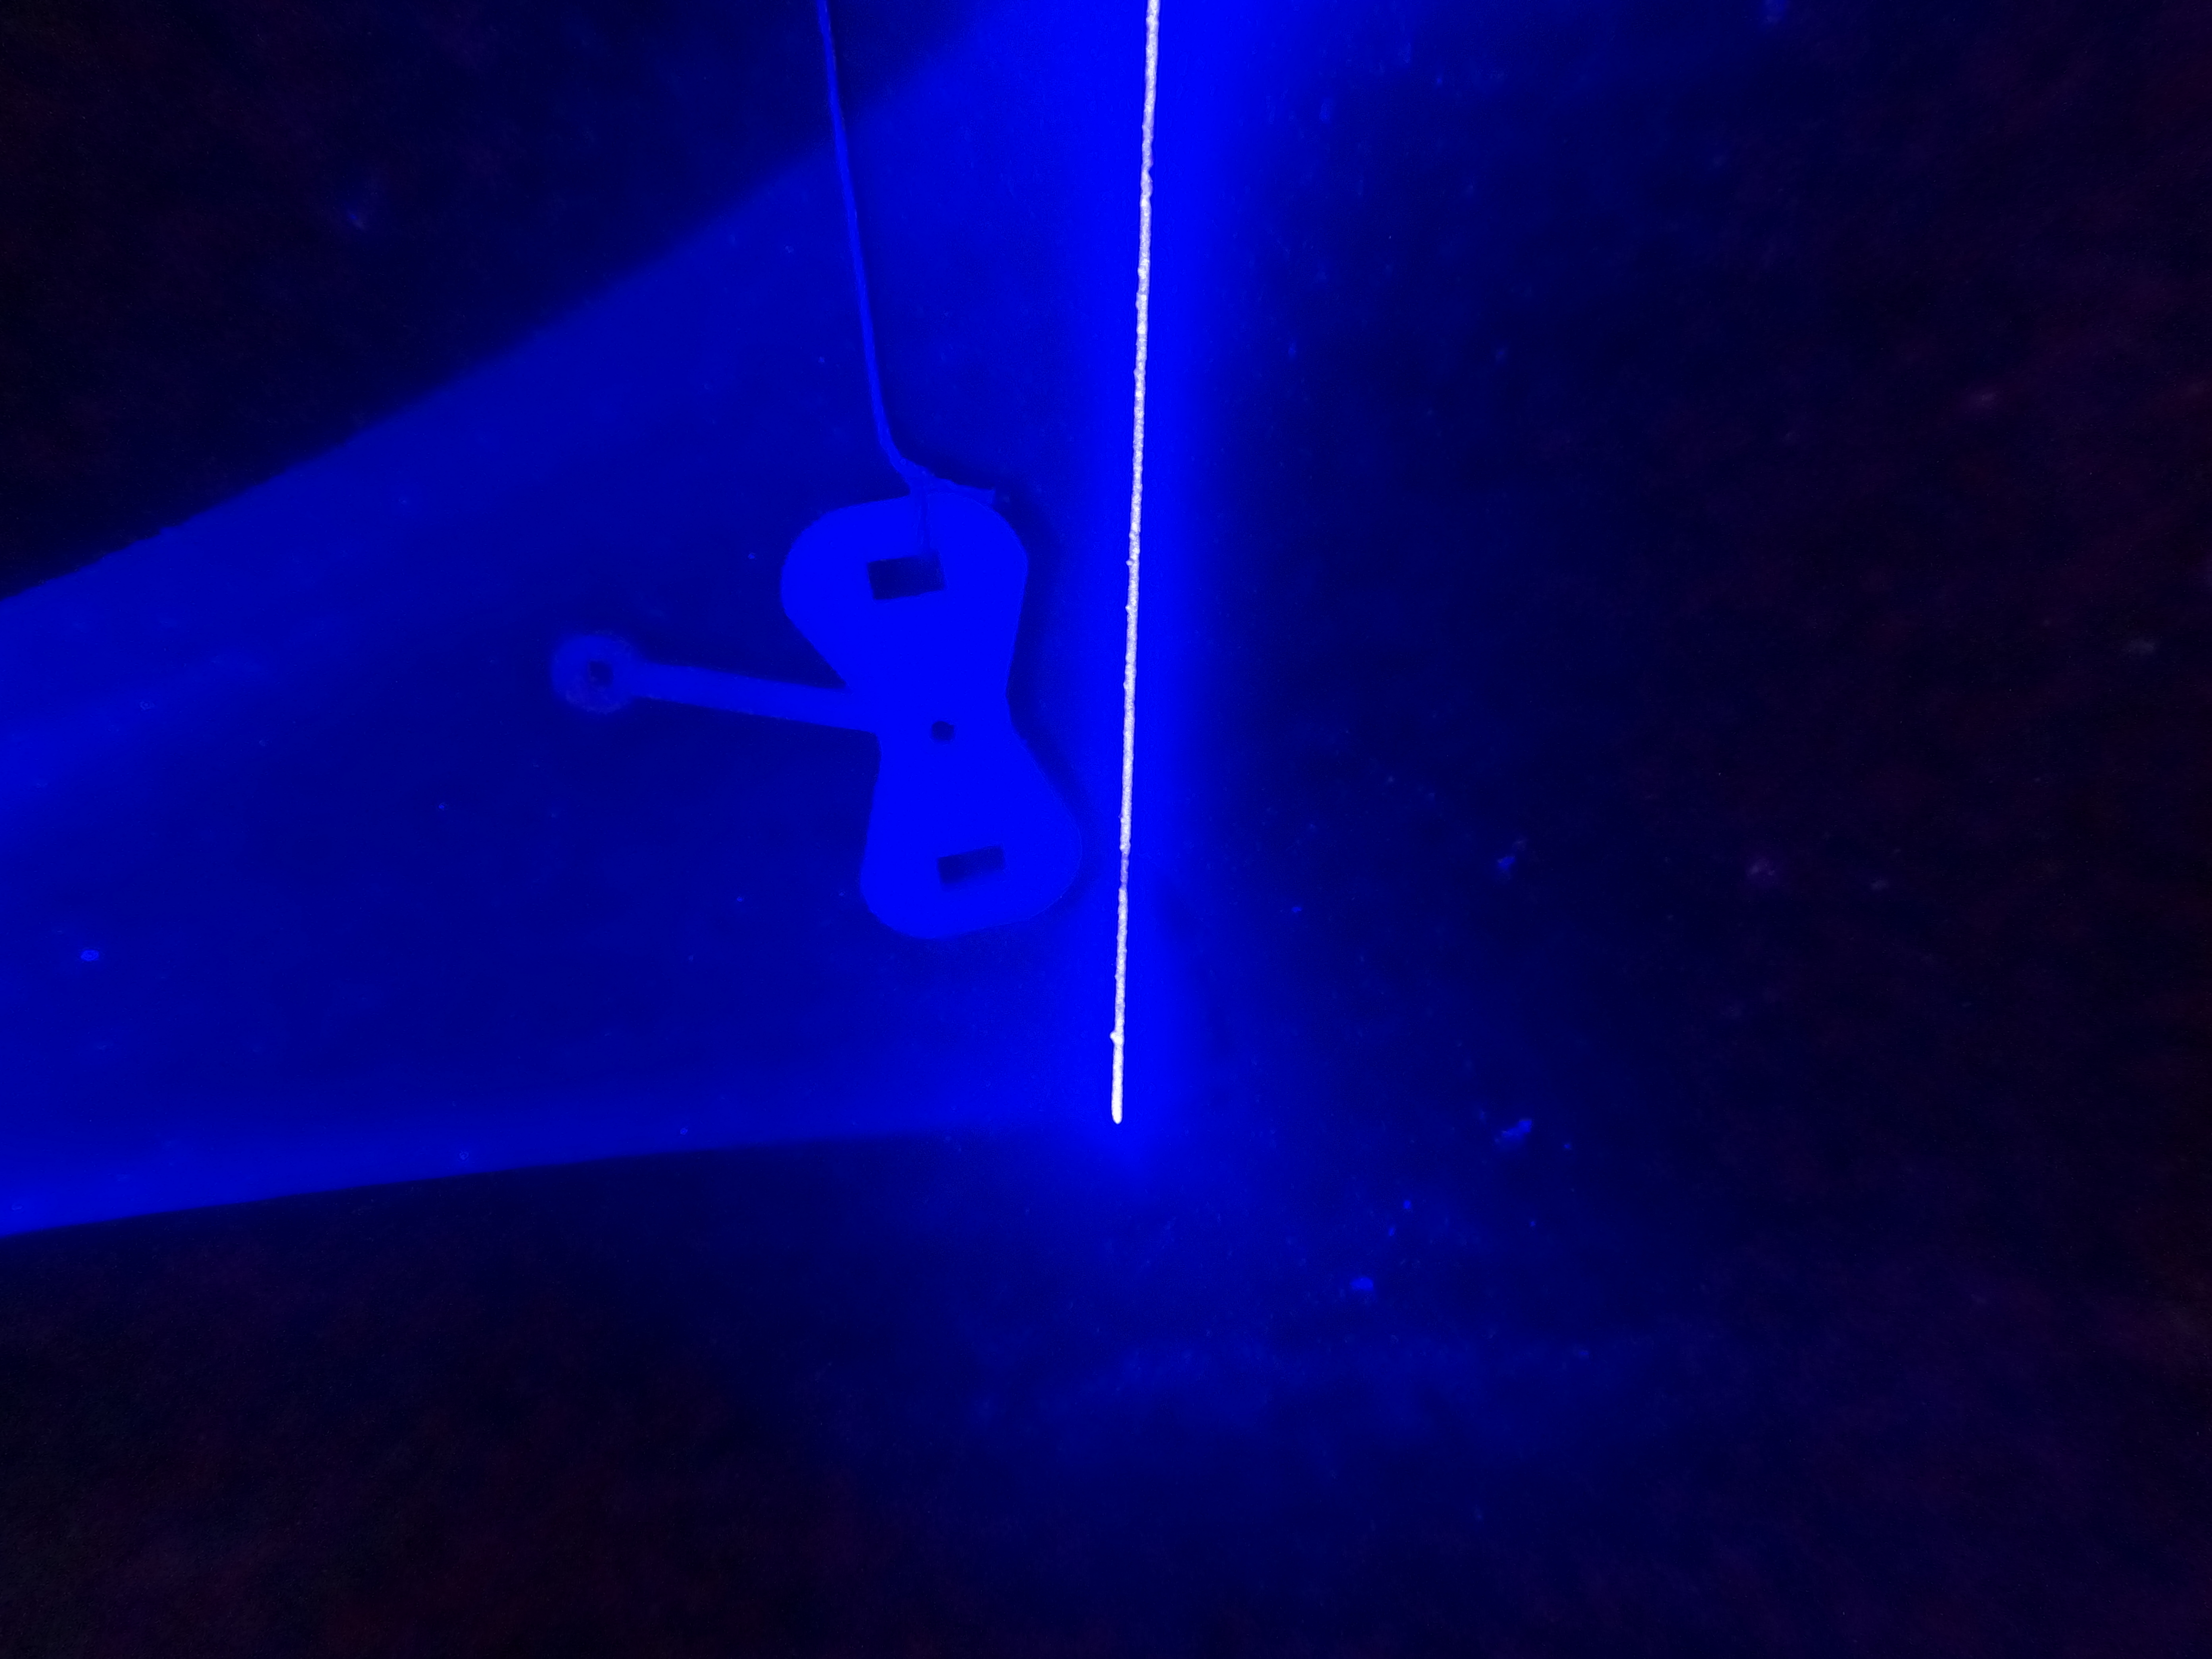

Supplement: Supplementary file 2188 [file G0016497.pdf › Level_1_2/G0016497.pdf]

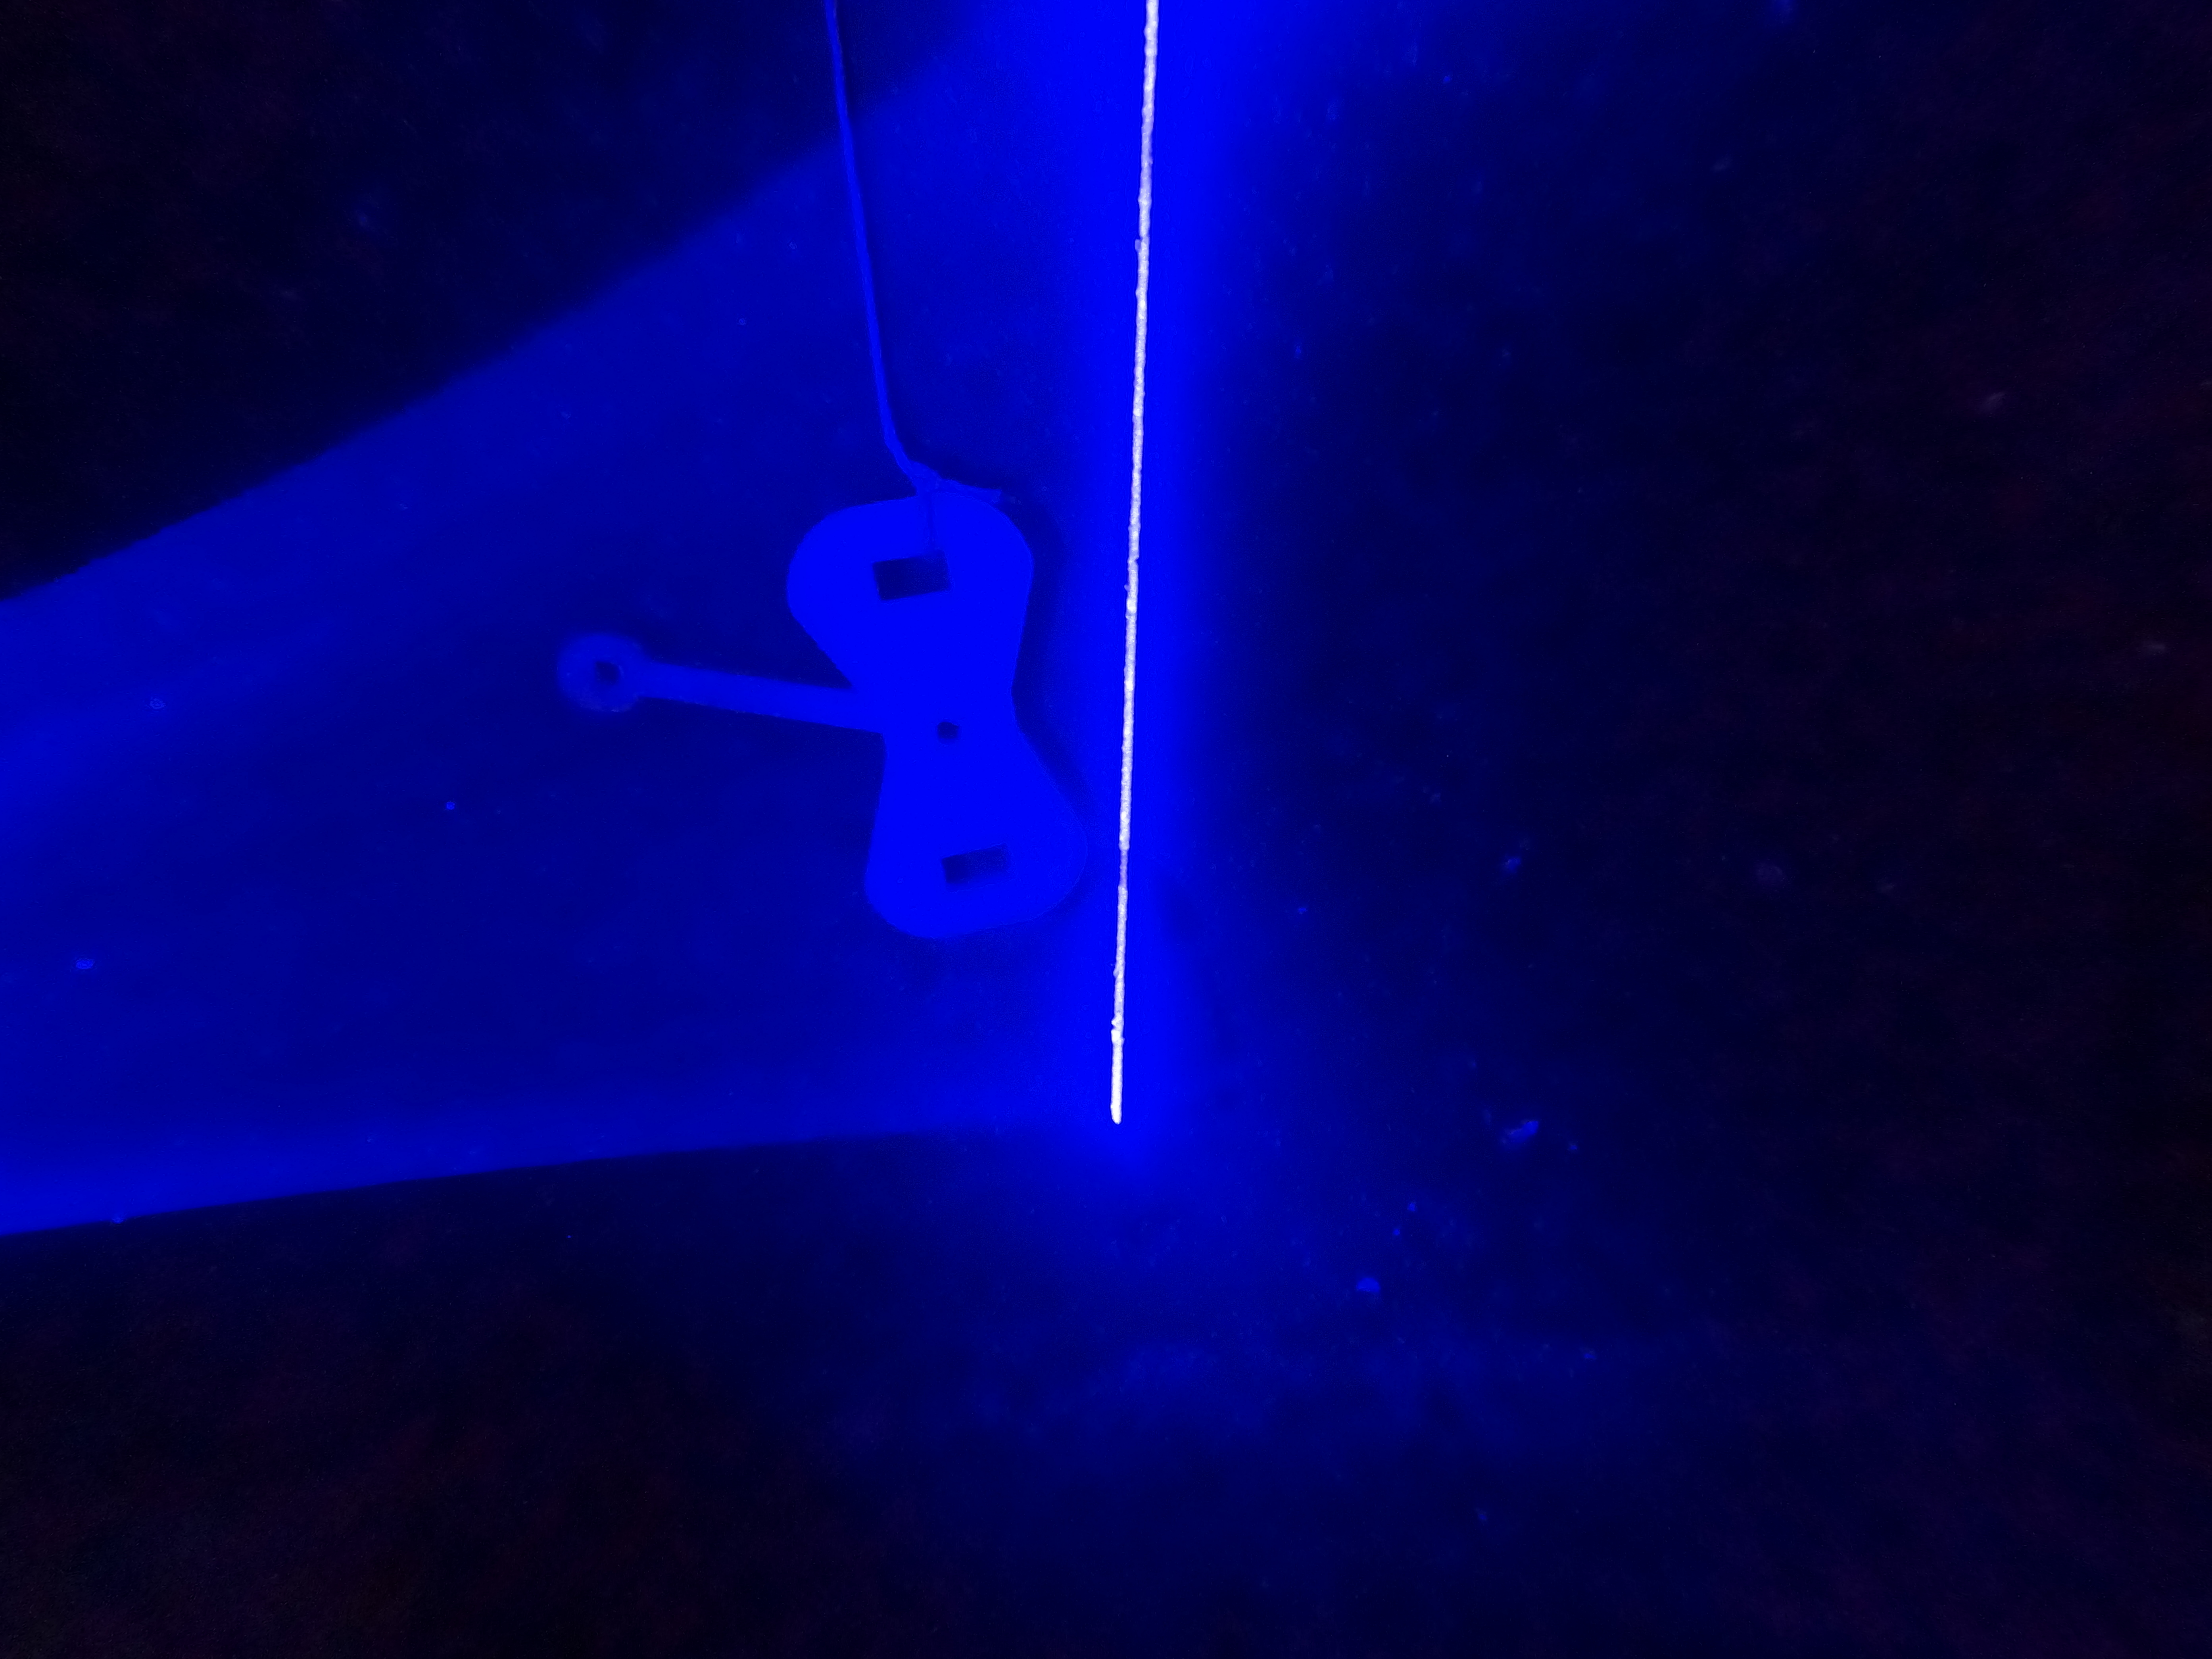

Supplement: Supplementary file 2189 [file G0016498.pdf › Level_1_2/G0016498.pdf]

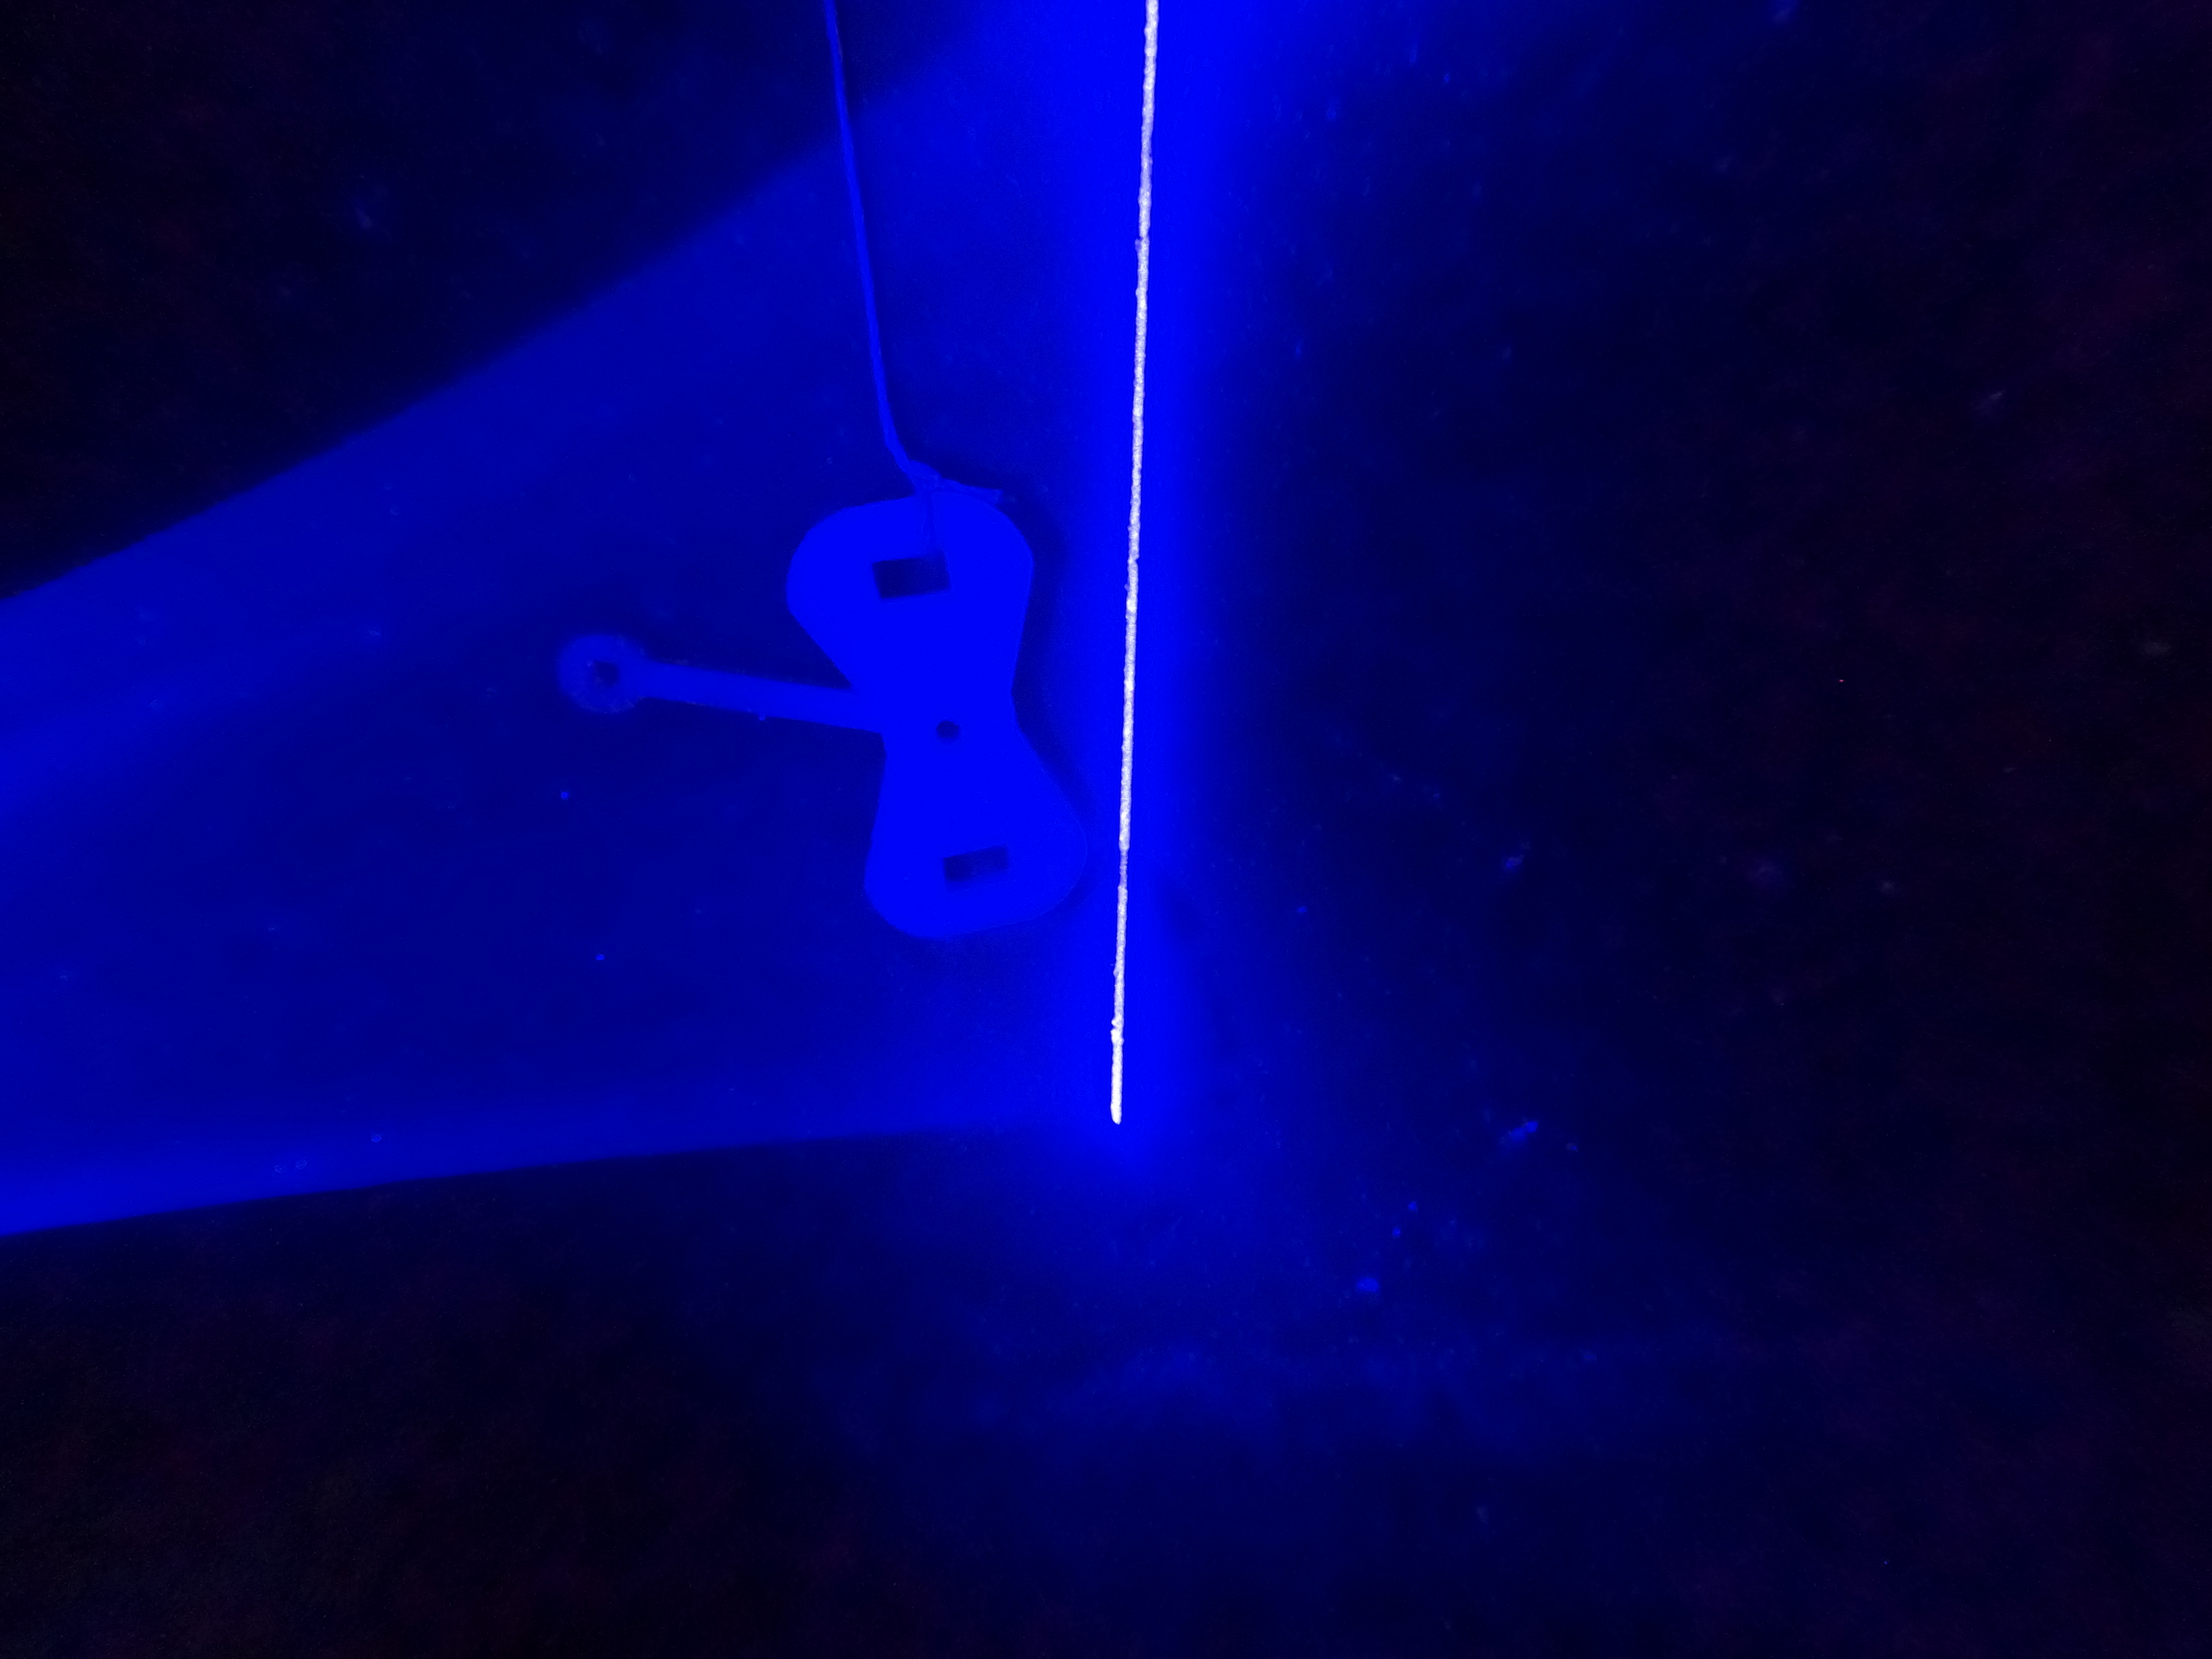

Supplement: Supplementary file 2190 [file G0016499.pdf › Level_1_2/G0016499.pdf]
