# Supplementary figures and images for: 3D reconstruction of shallow sea environment using direct system calibration and faint laser line extraction (part 22 of 35)
Source: Research Square preprint supplement (doi:10.21203/rs.3.rs-5262658/v1), 2024-12-02

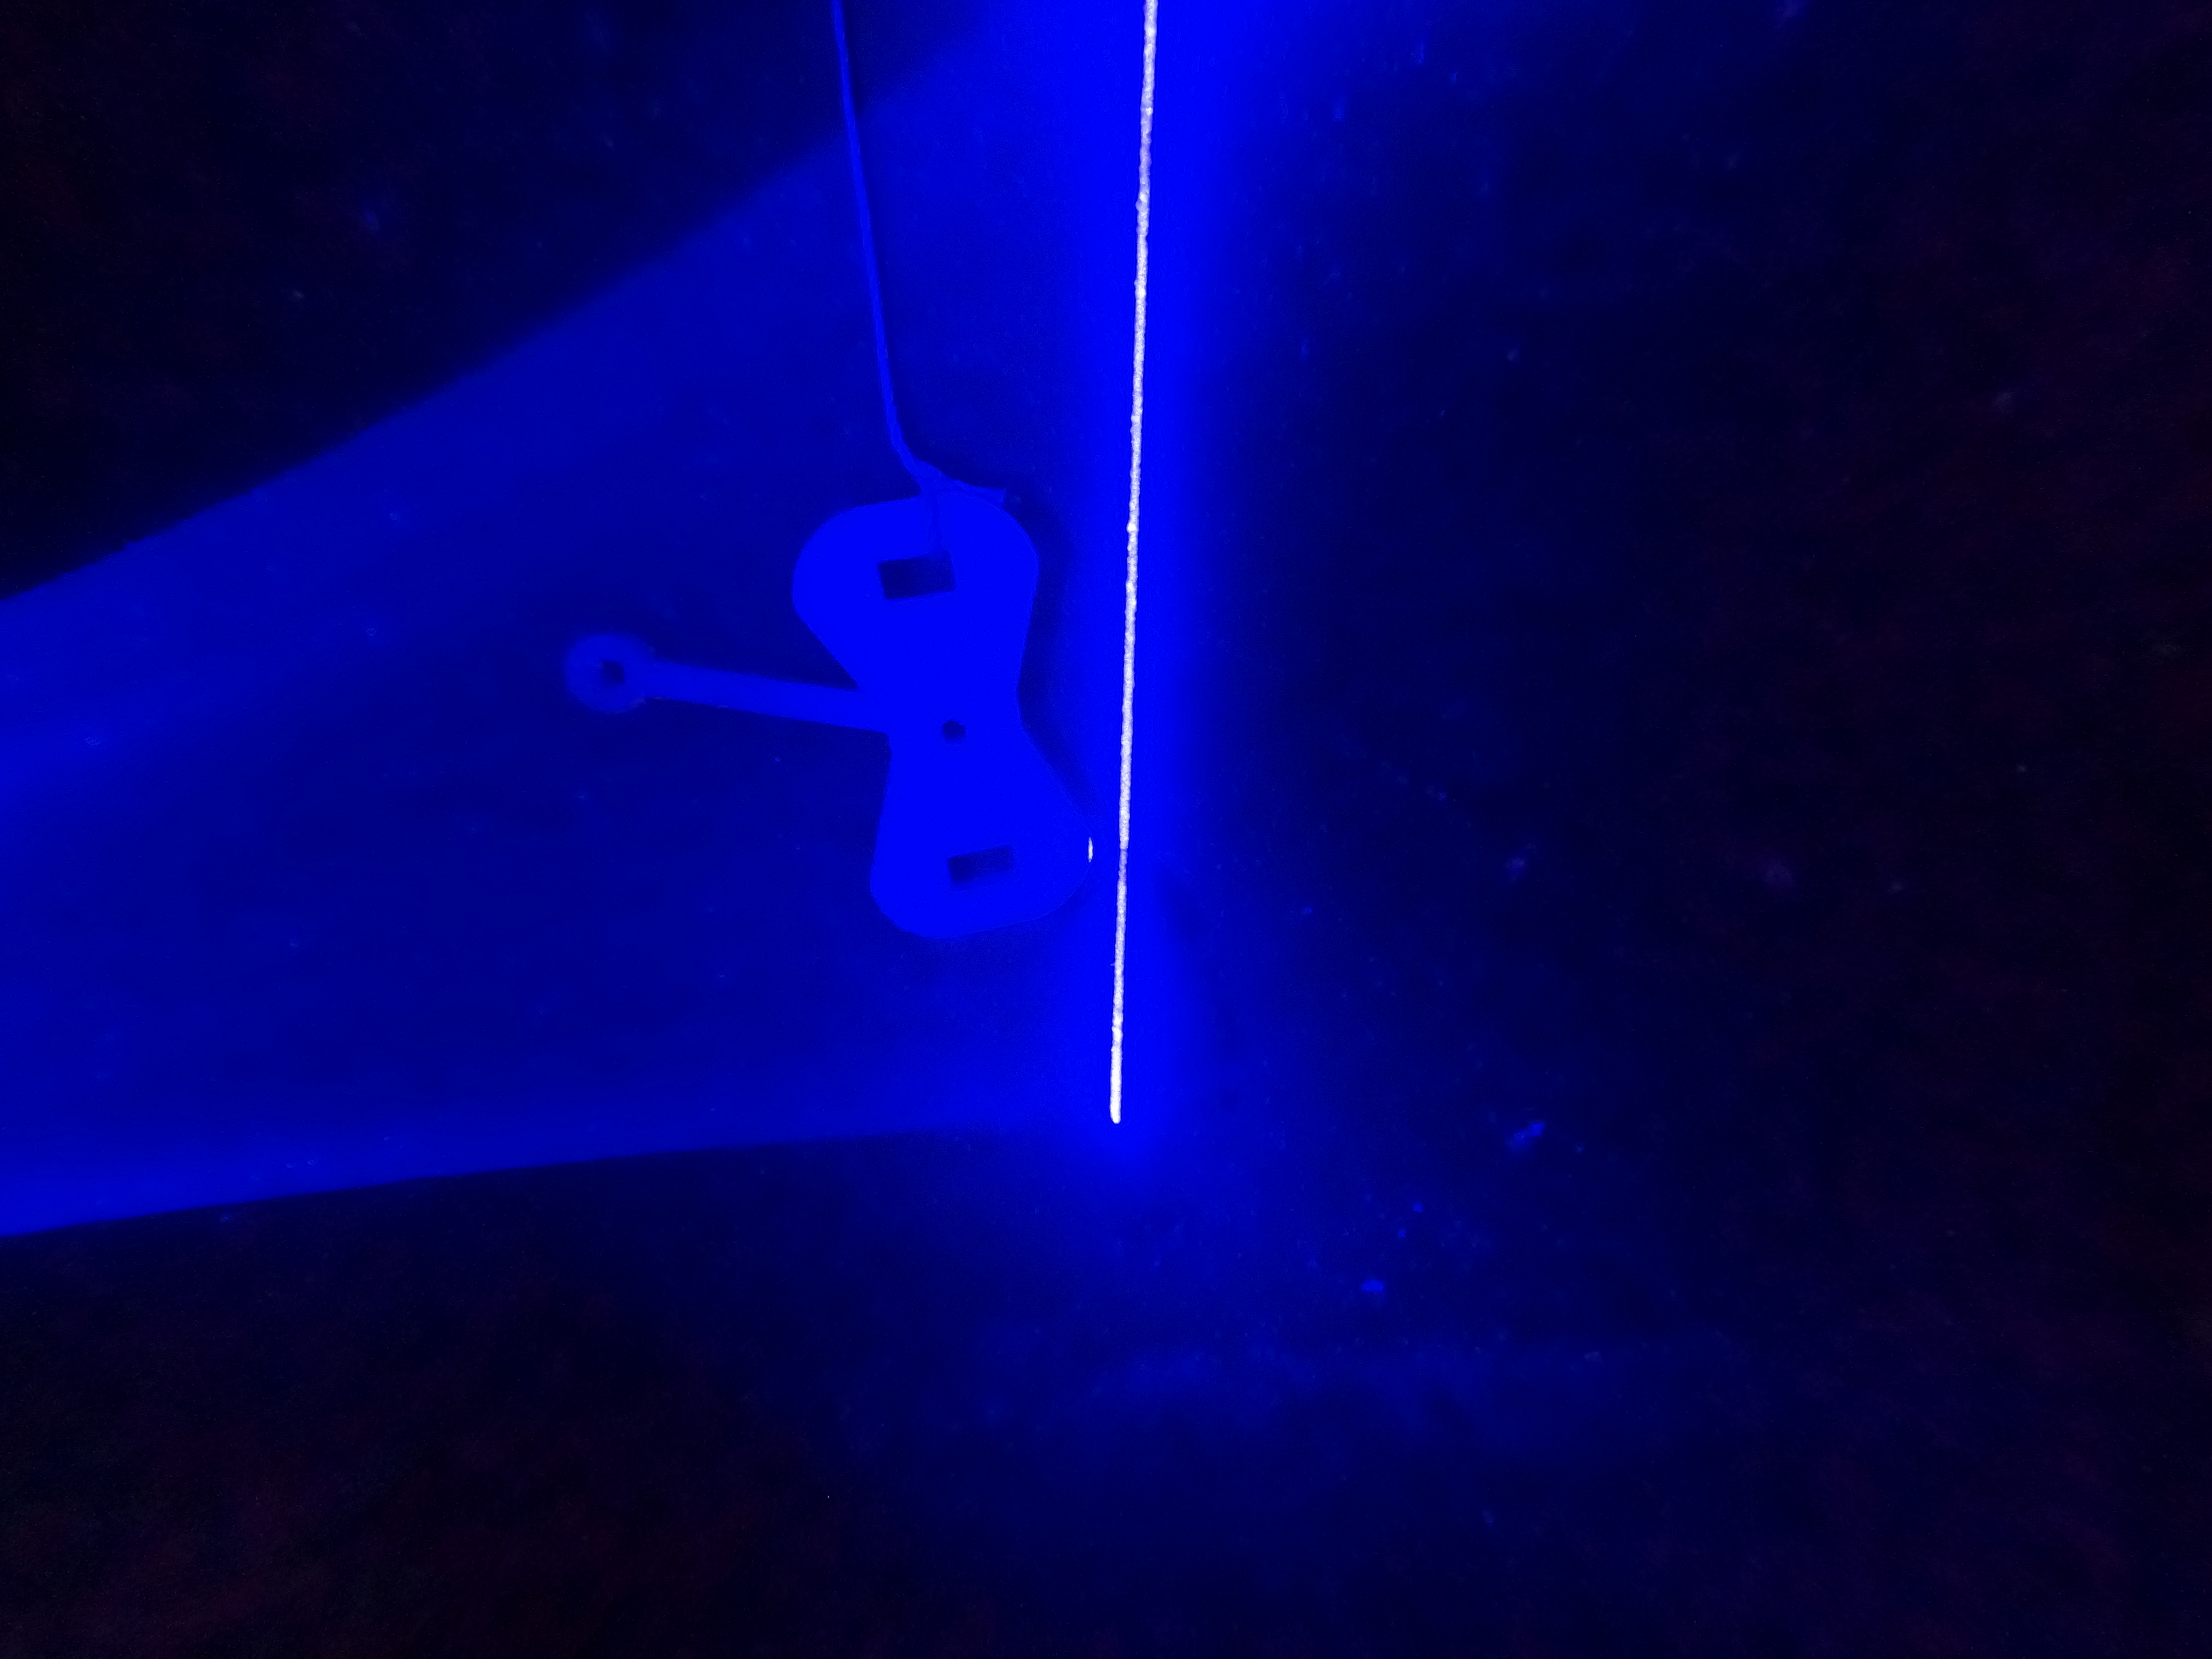

Supplement: Supplementary file 2191 [file G0016500.pdf › Level_1_2/G0016500.pdf]

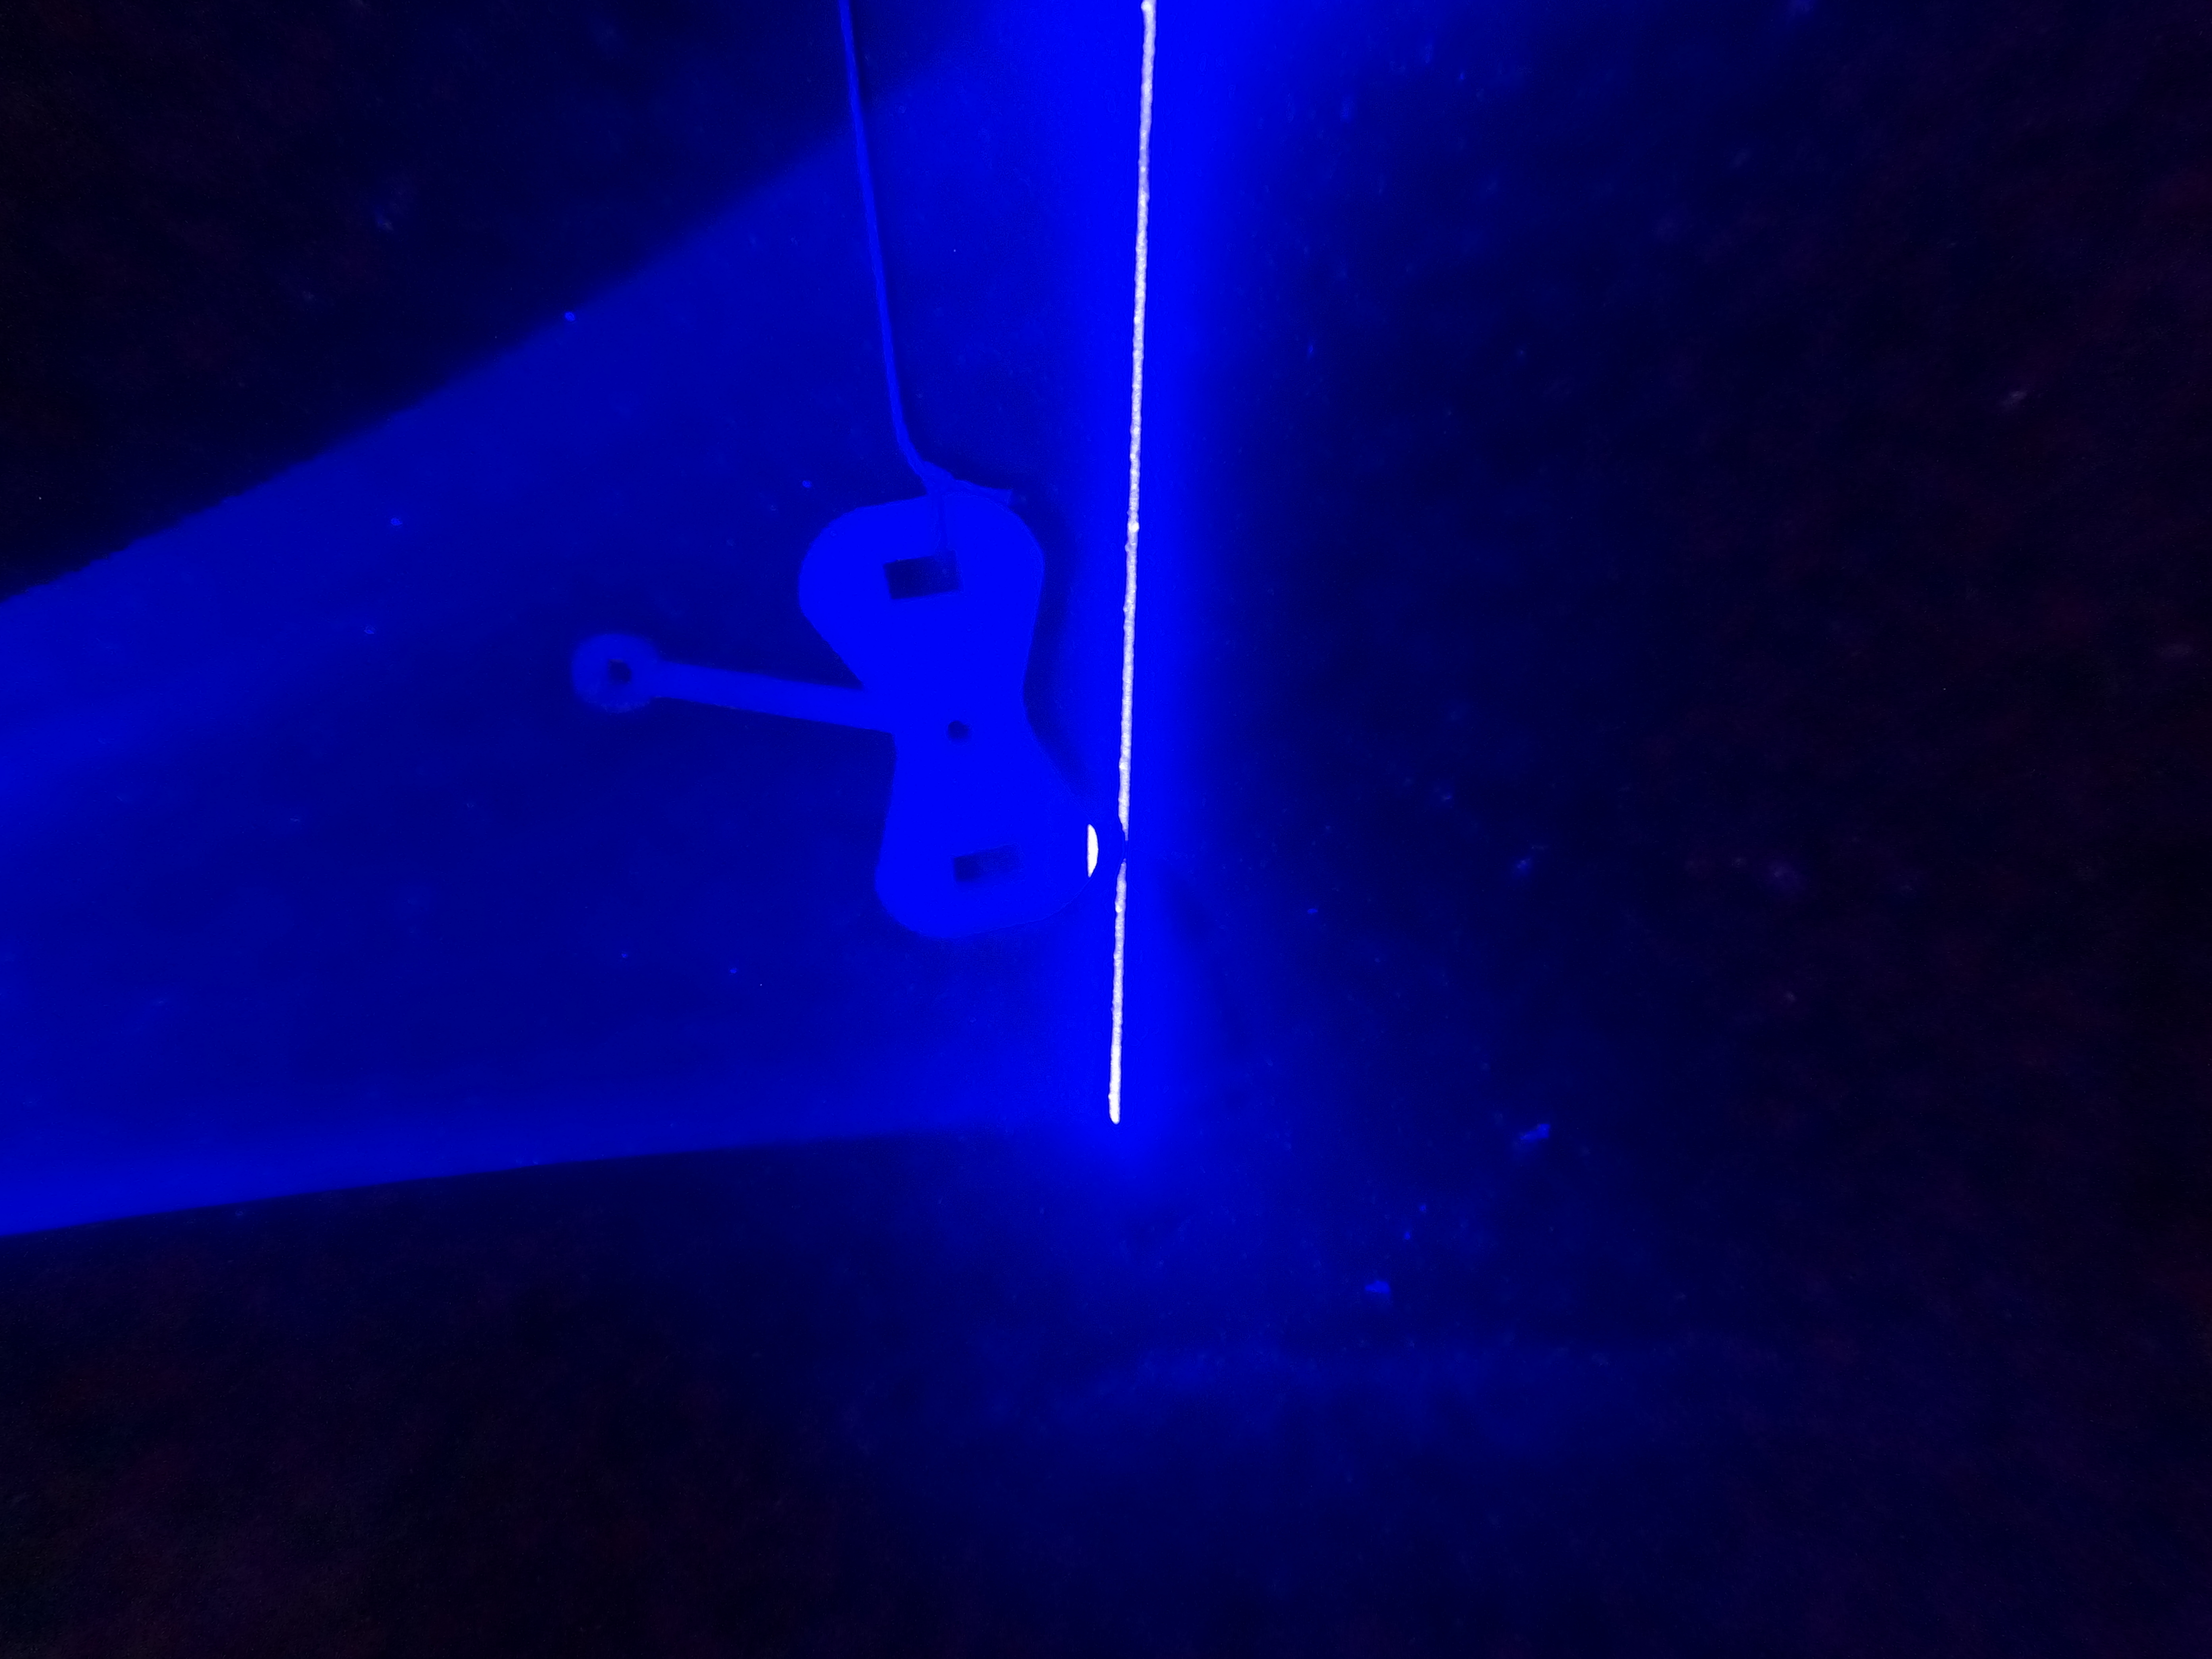

Supplement: Supplementary file 2192 [file G0016501.pdf › Level_1_2/G0016501.pdf]

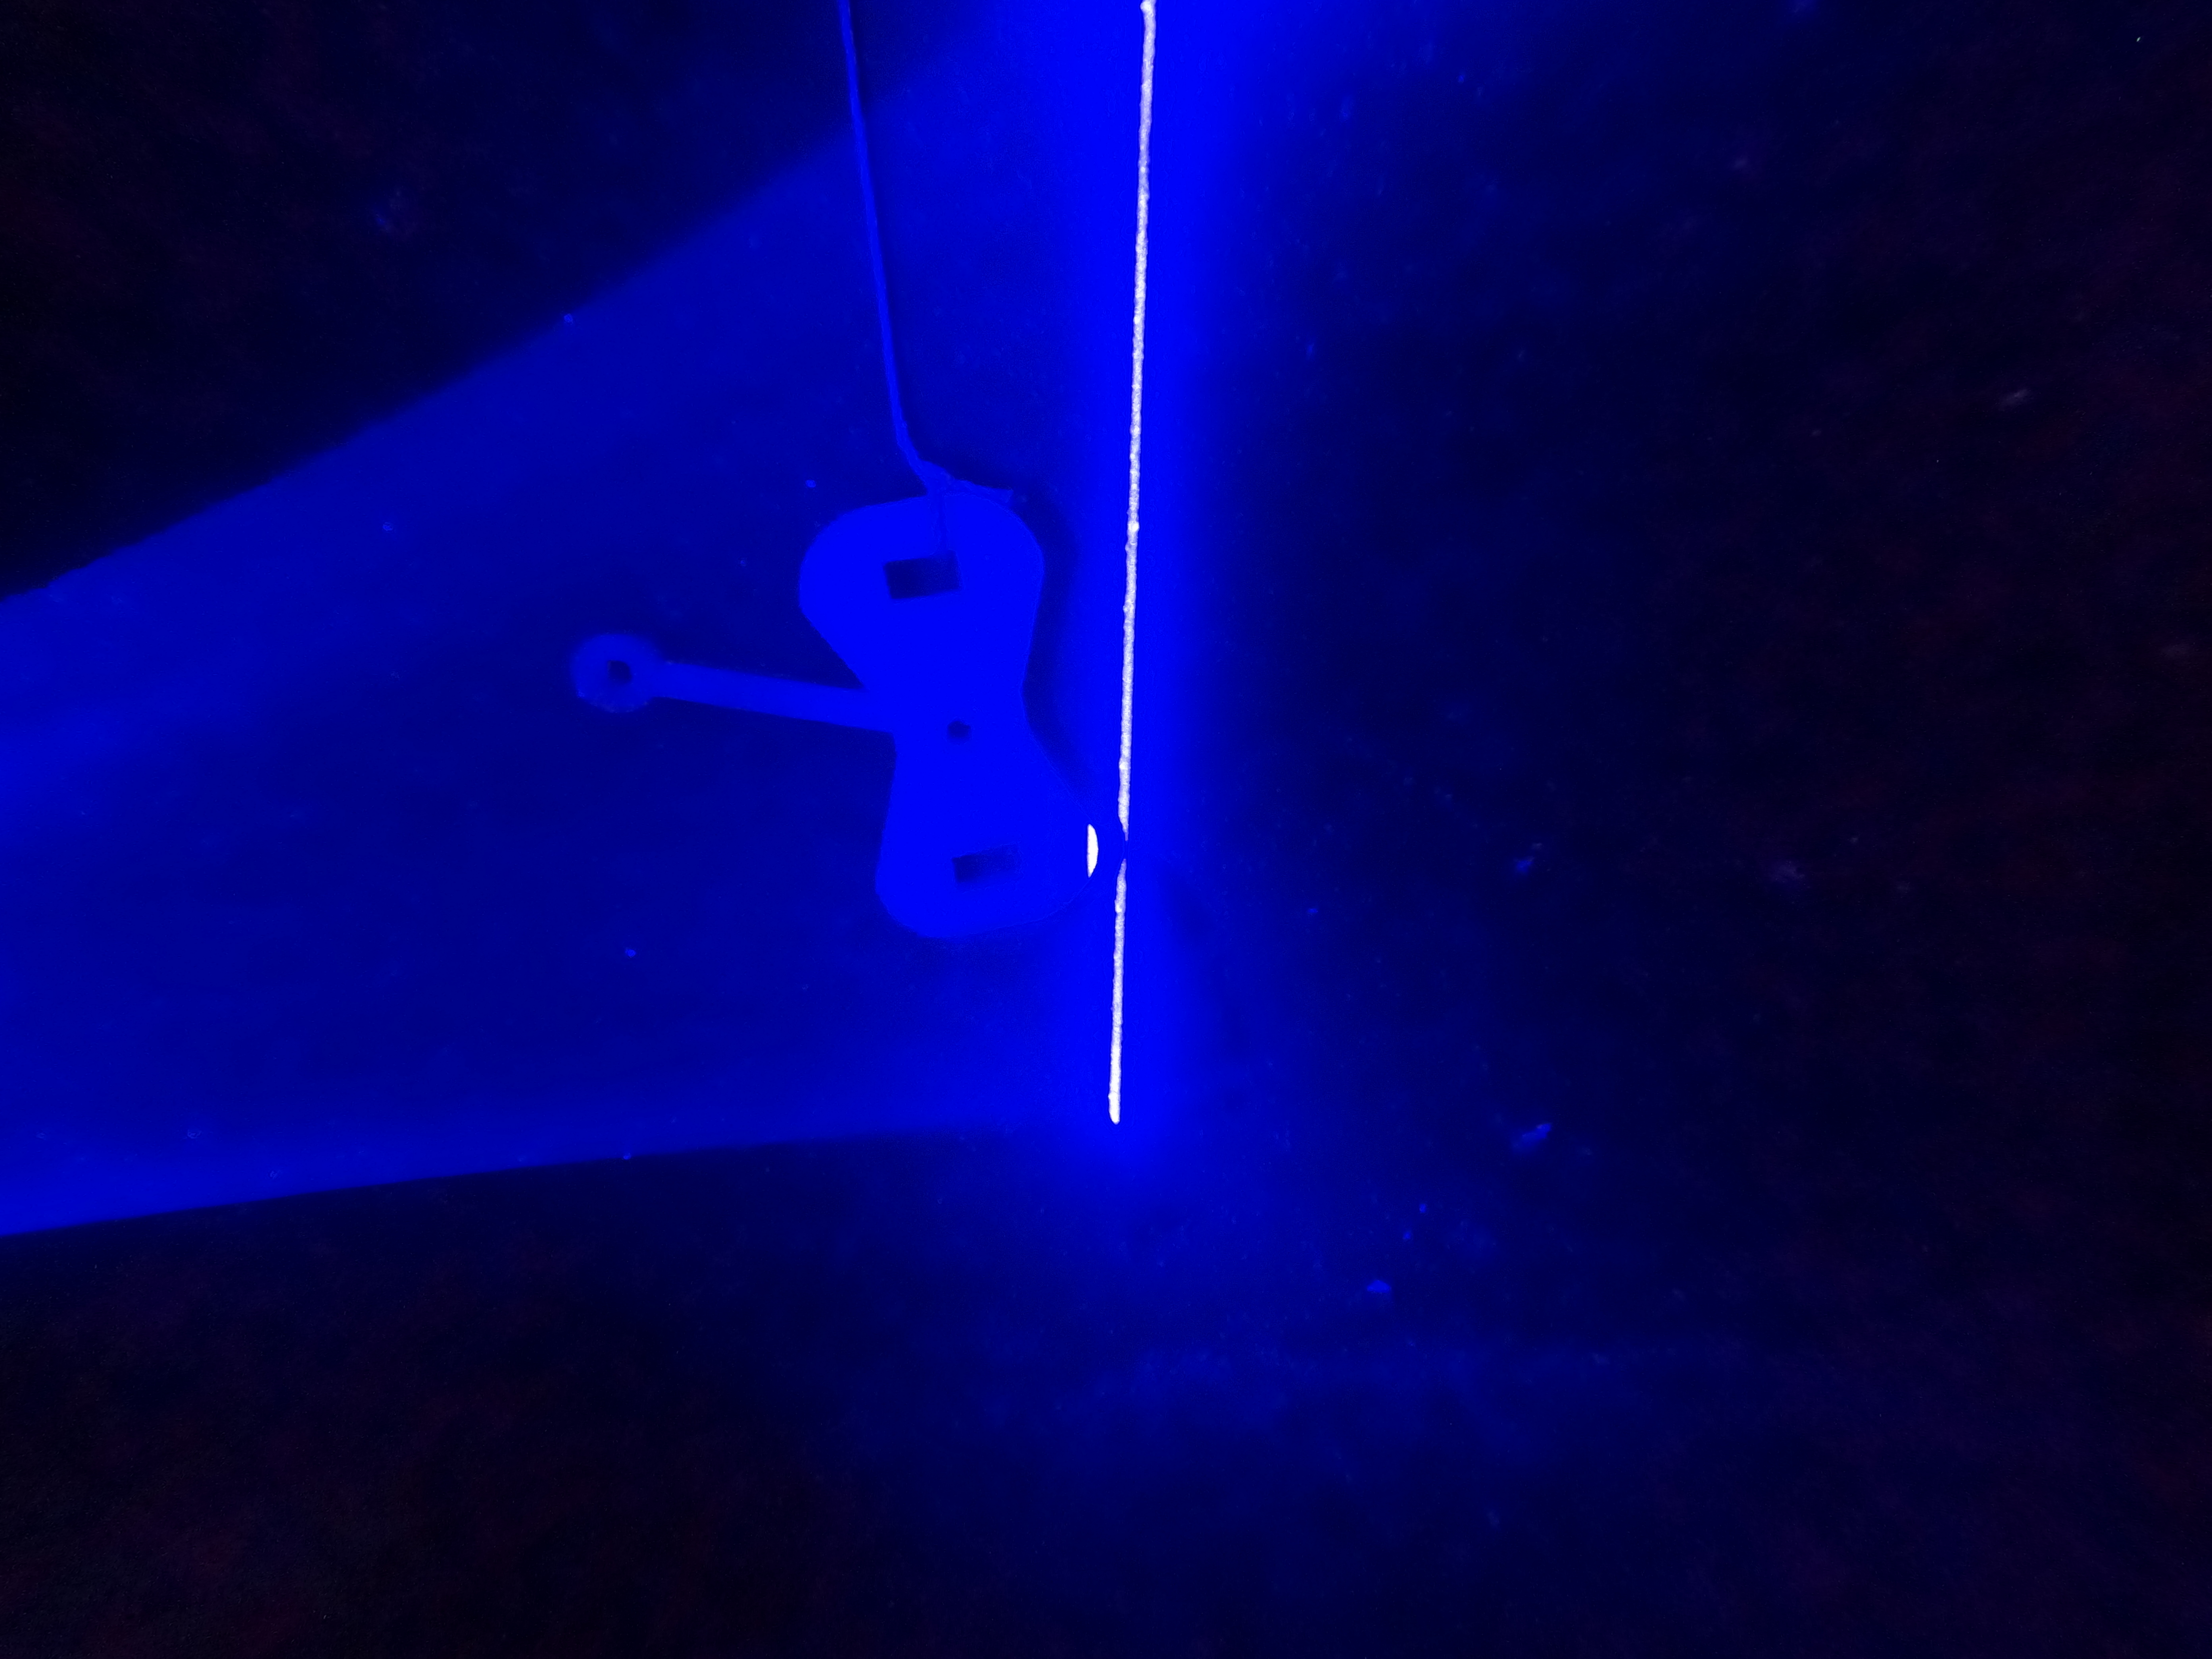

Supplement: Supplementary file 2193 [file G0016502.pdf › Level_1_2/G0016502.pdf]

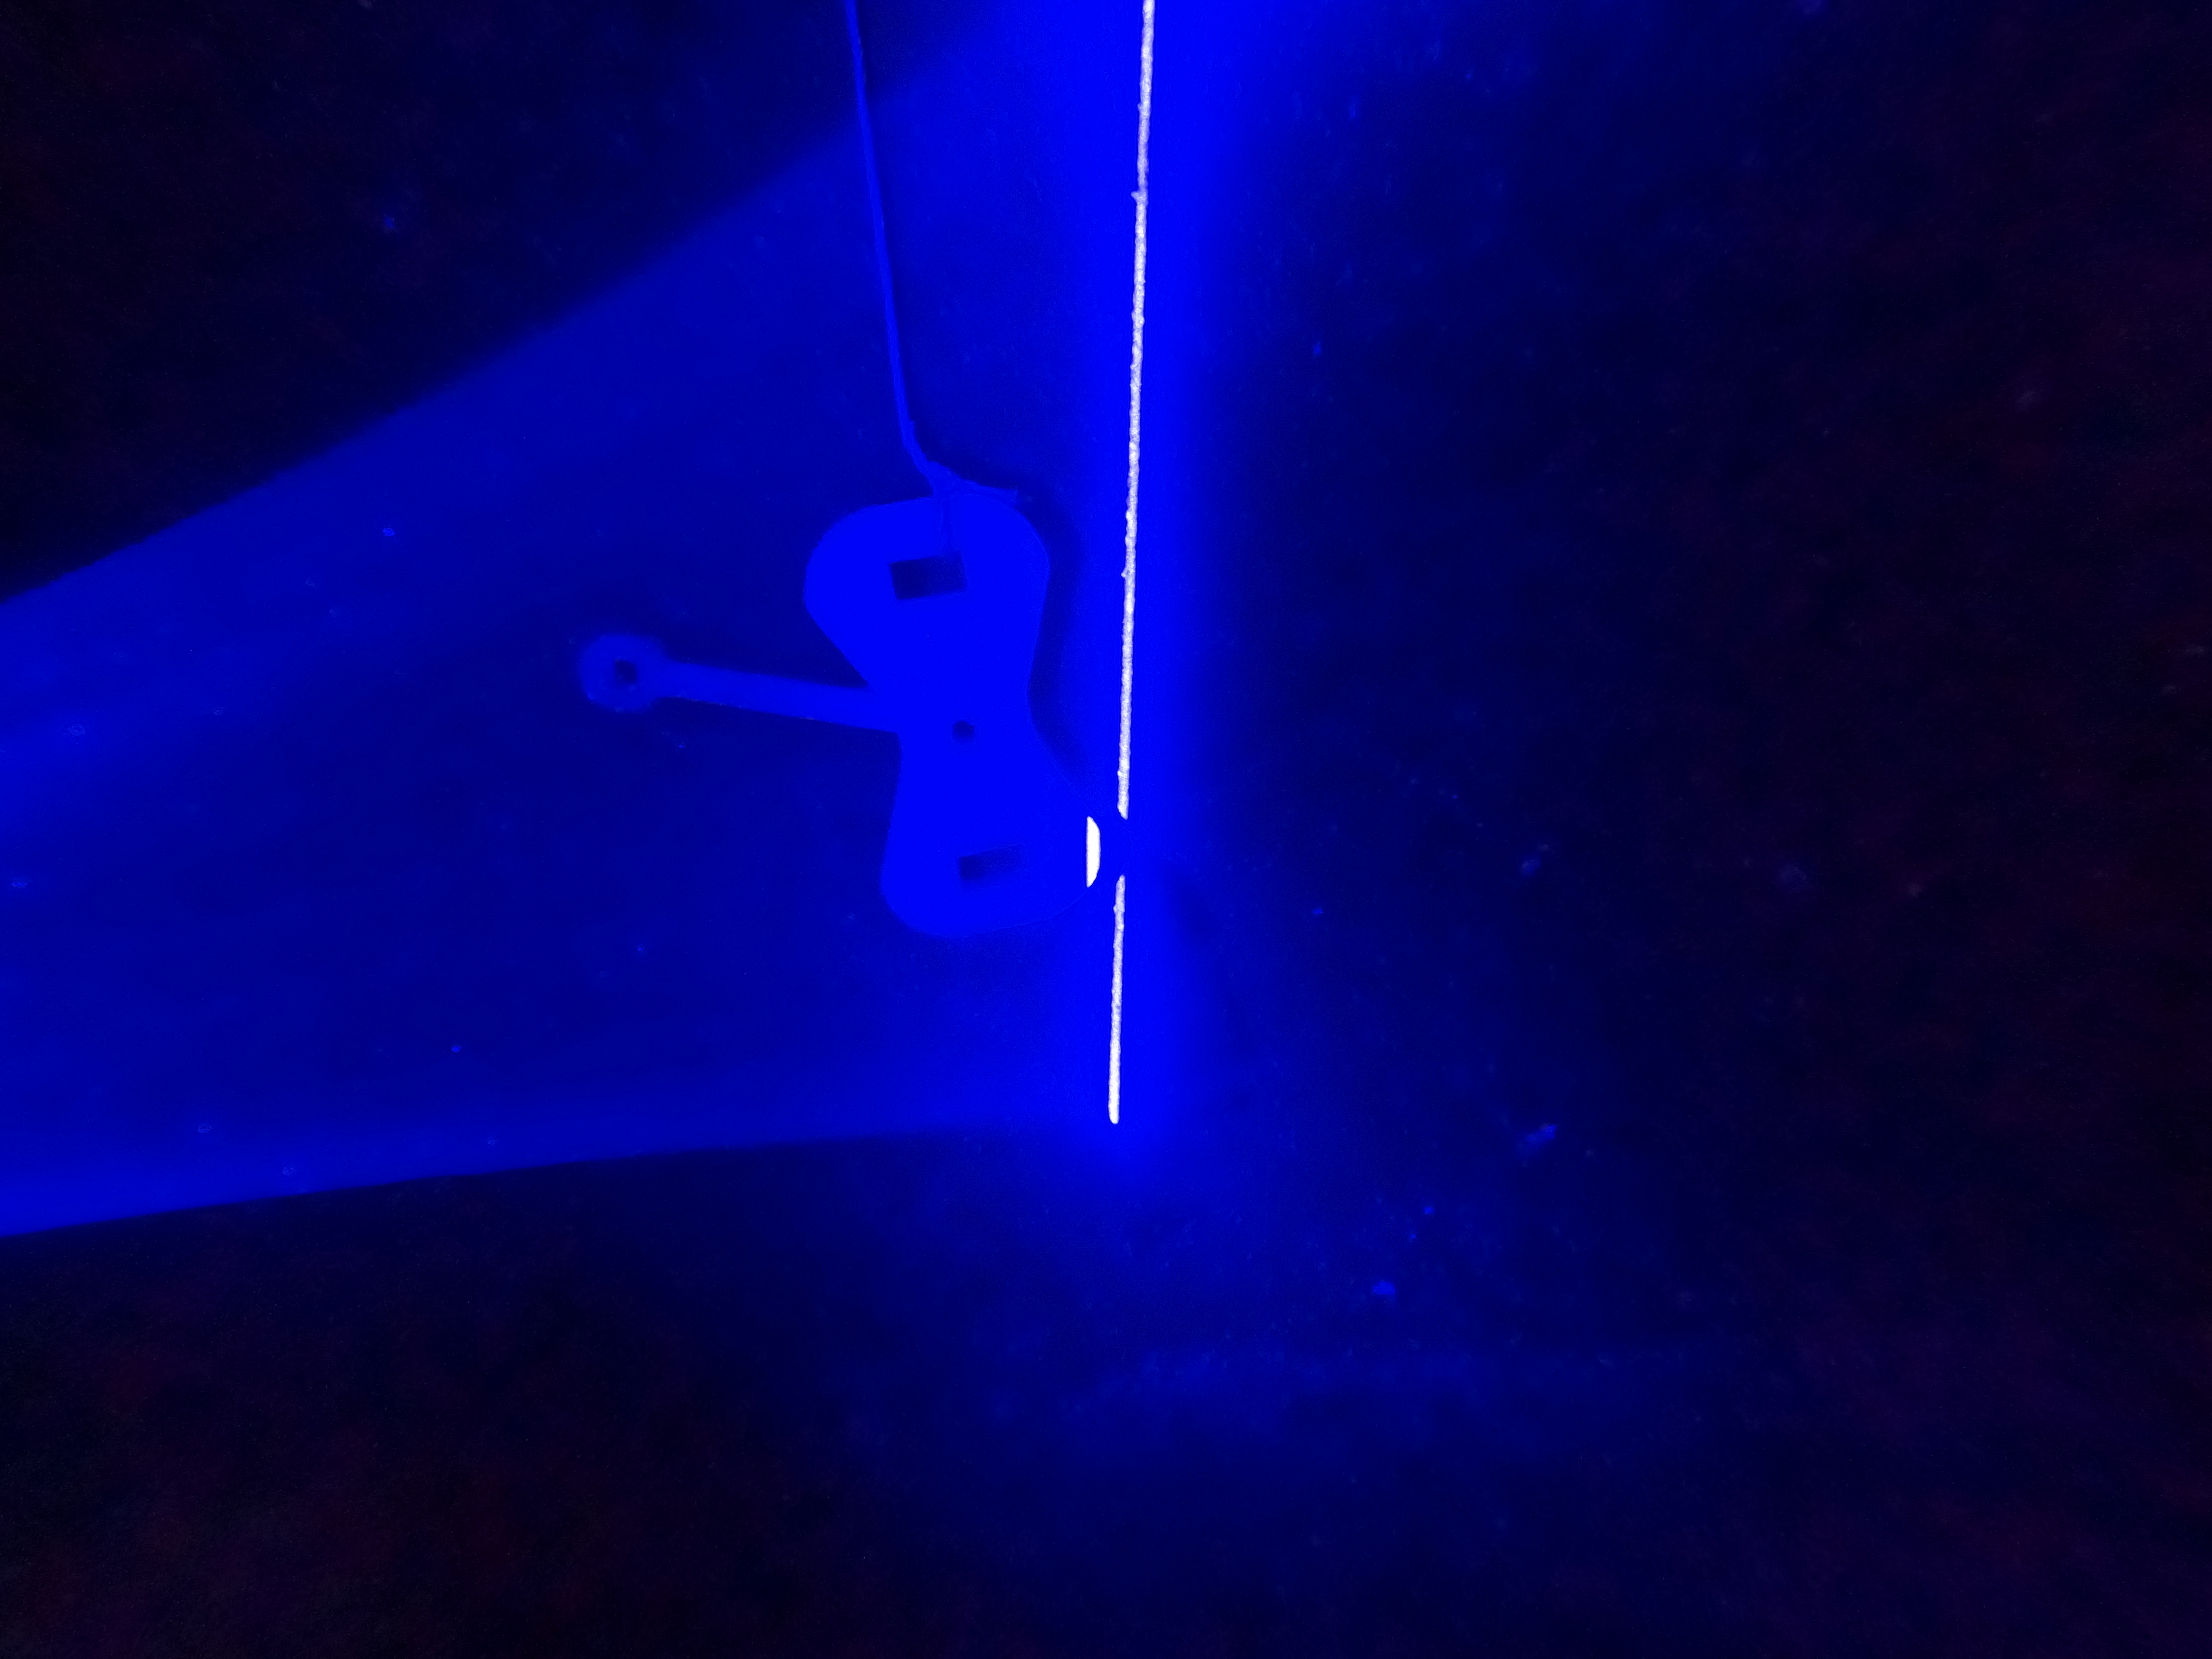

Supplement: Supplementary file 2194 [file G0016503.pdf › Level_1_2/G0016503.pdf]

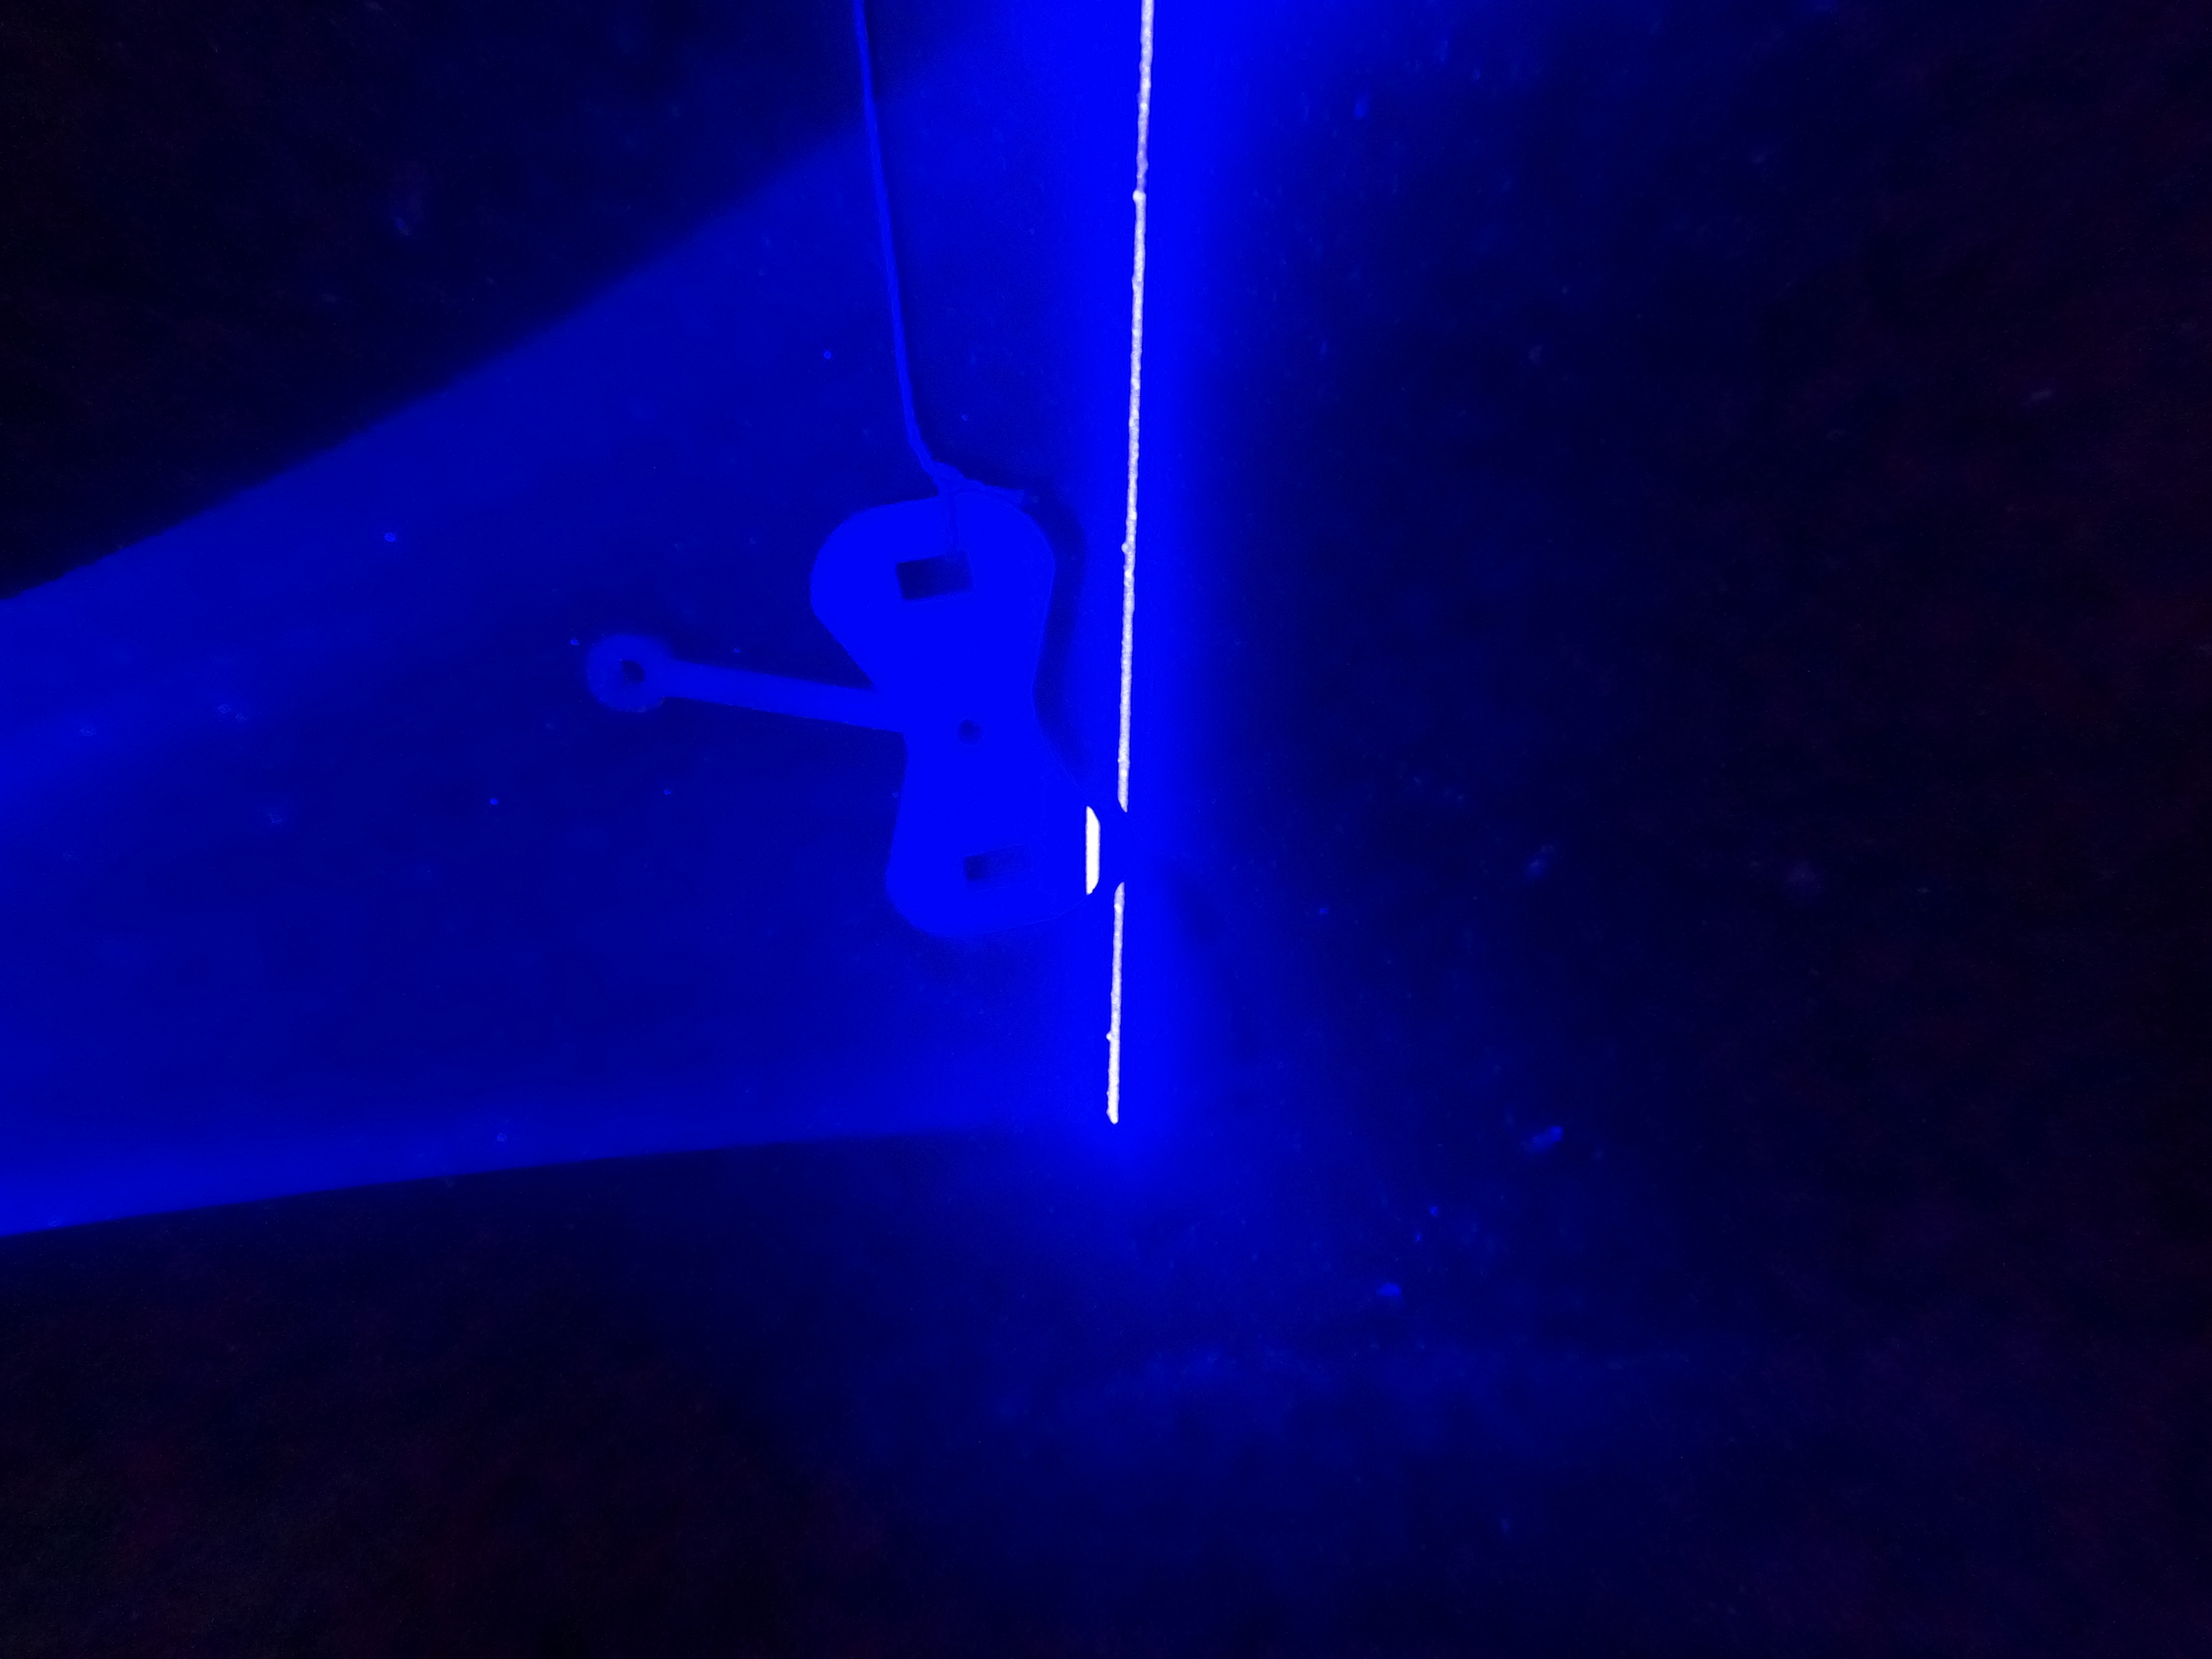

Supplement: Supplementary file 2195 [file G0016504.pdf › Level_1_2/G0016504.pdf]

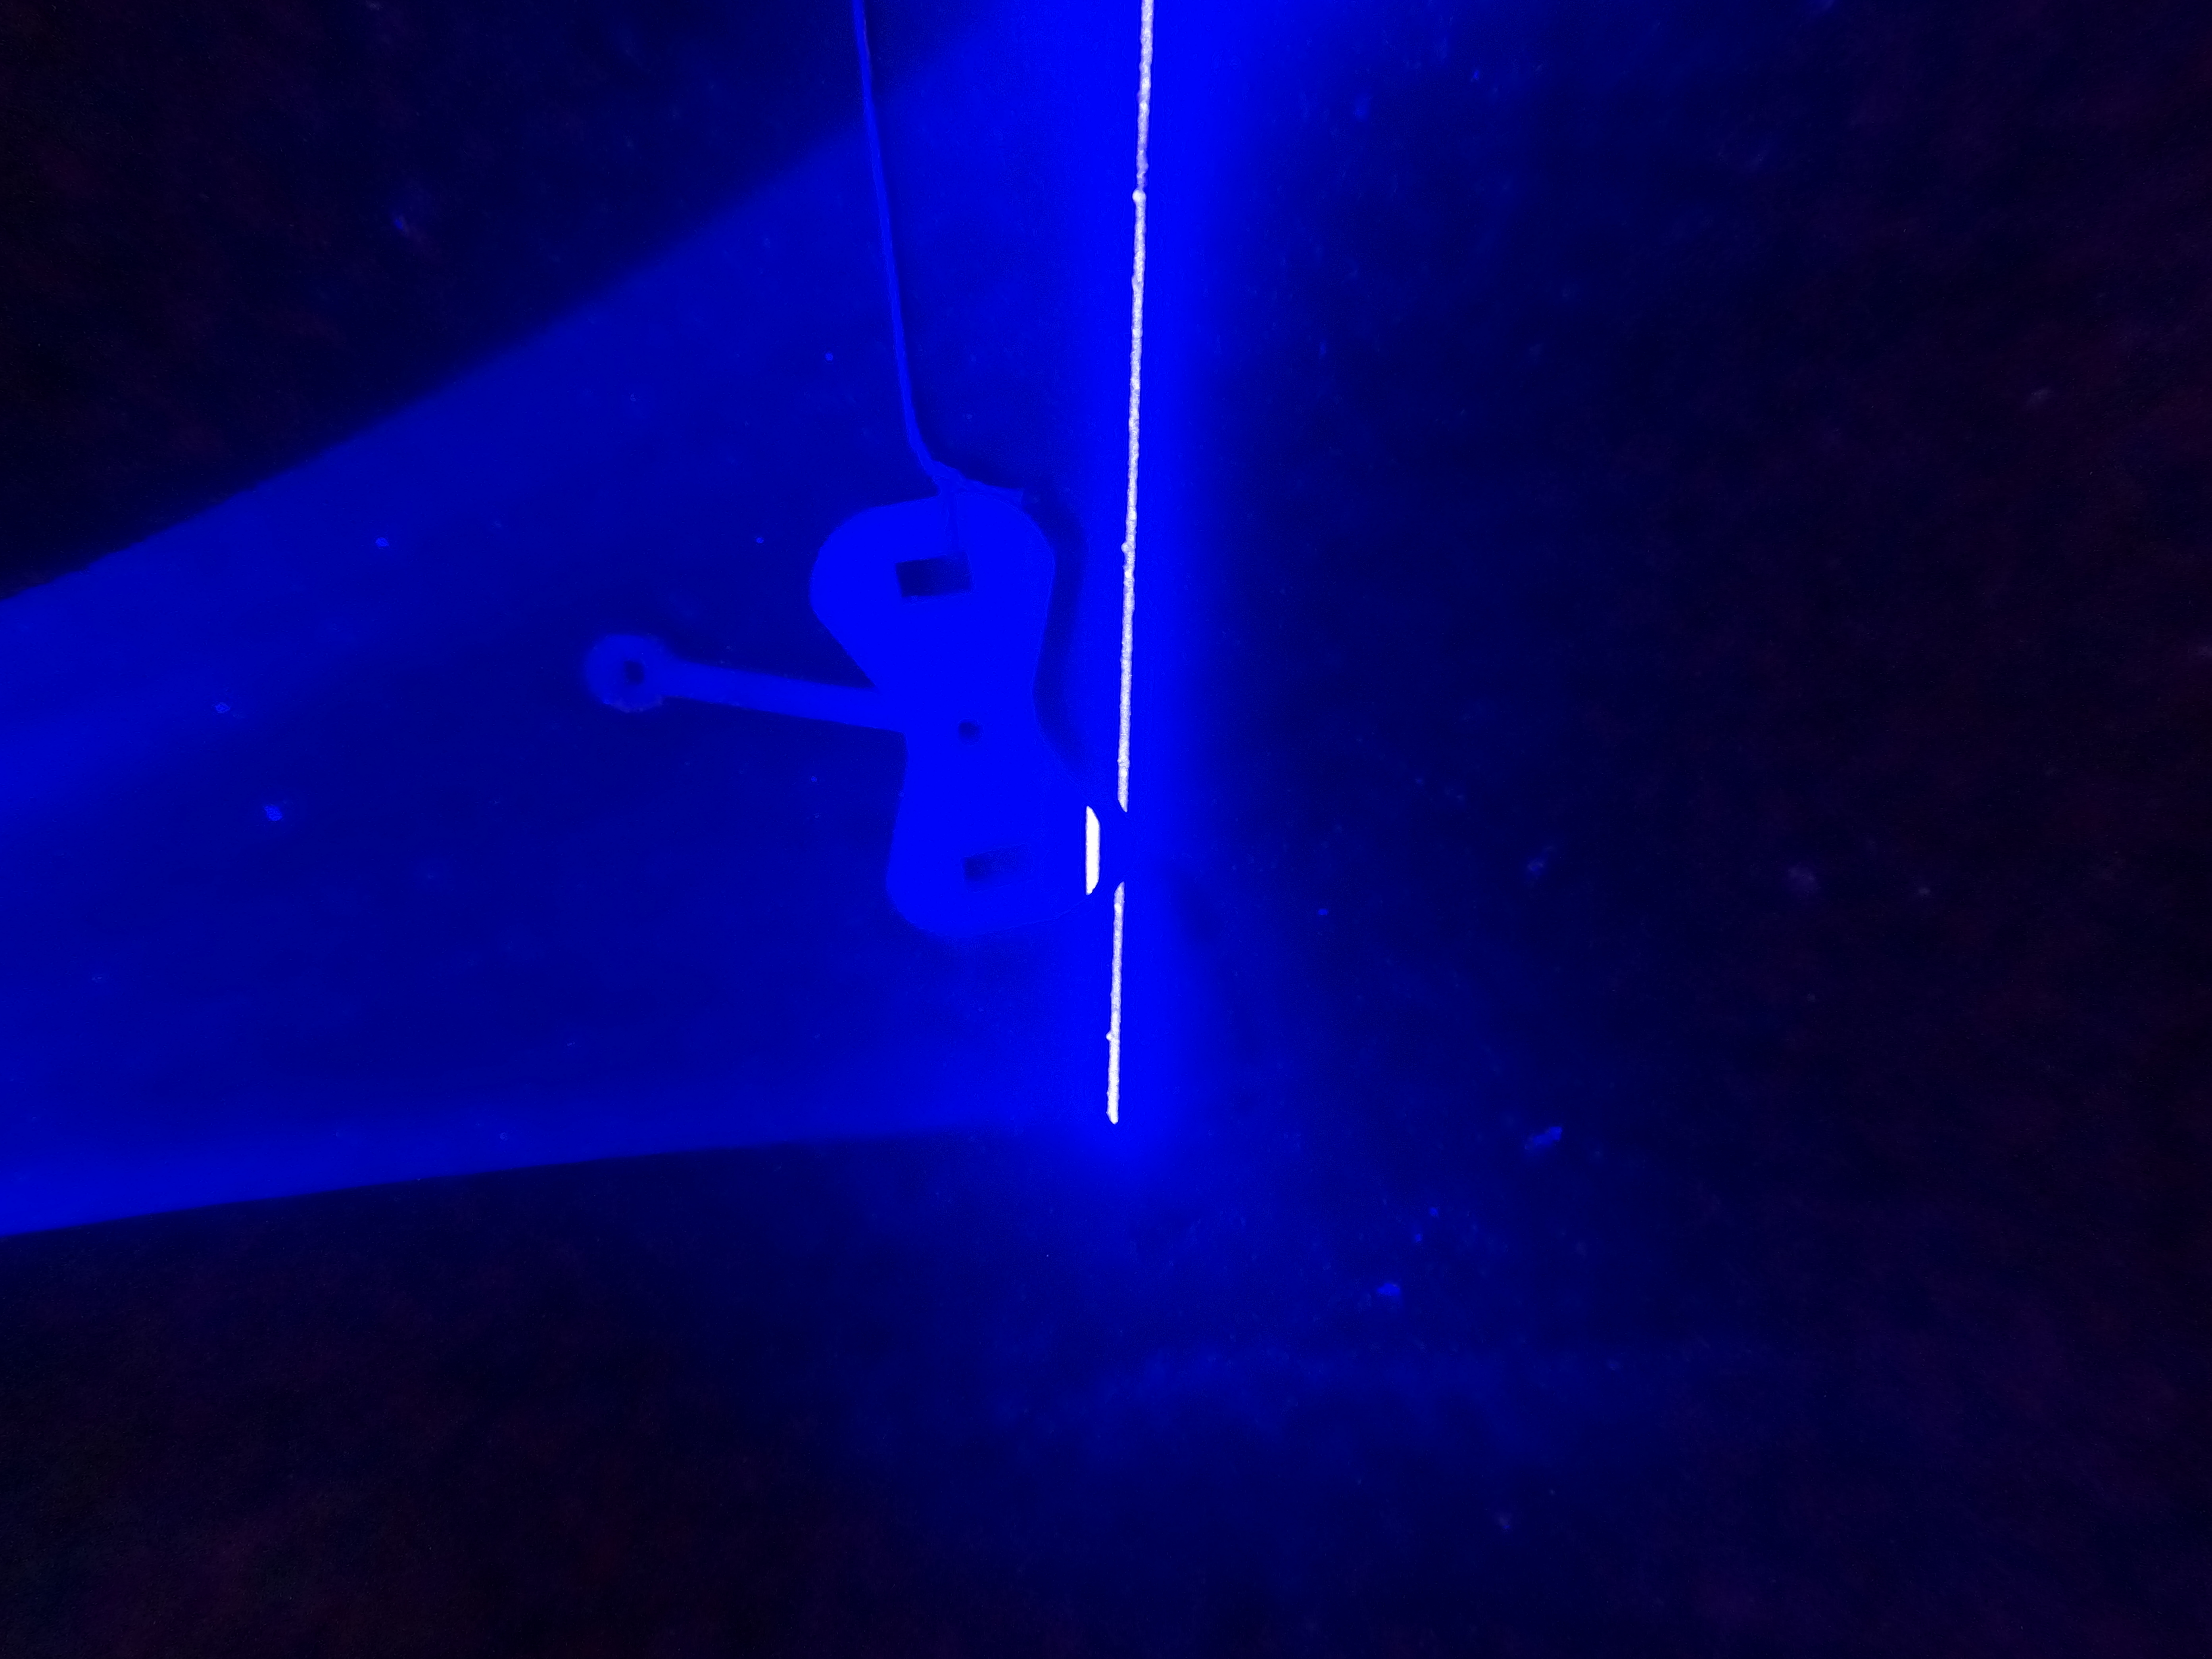

Supplement: Supplementary file 2196 [file G0016505.pdf › Level_1_2/G0016505.pdf]

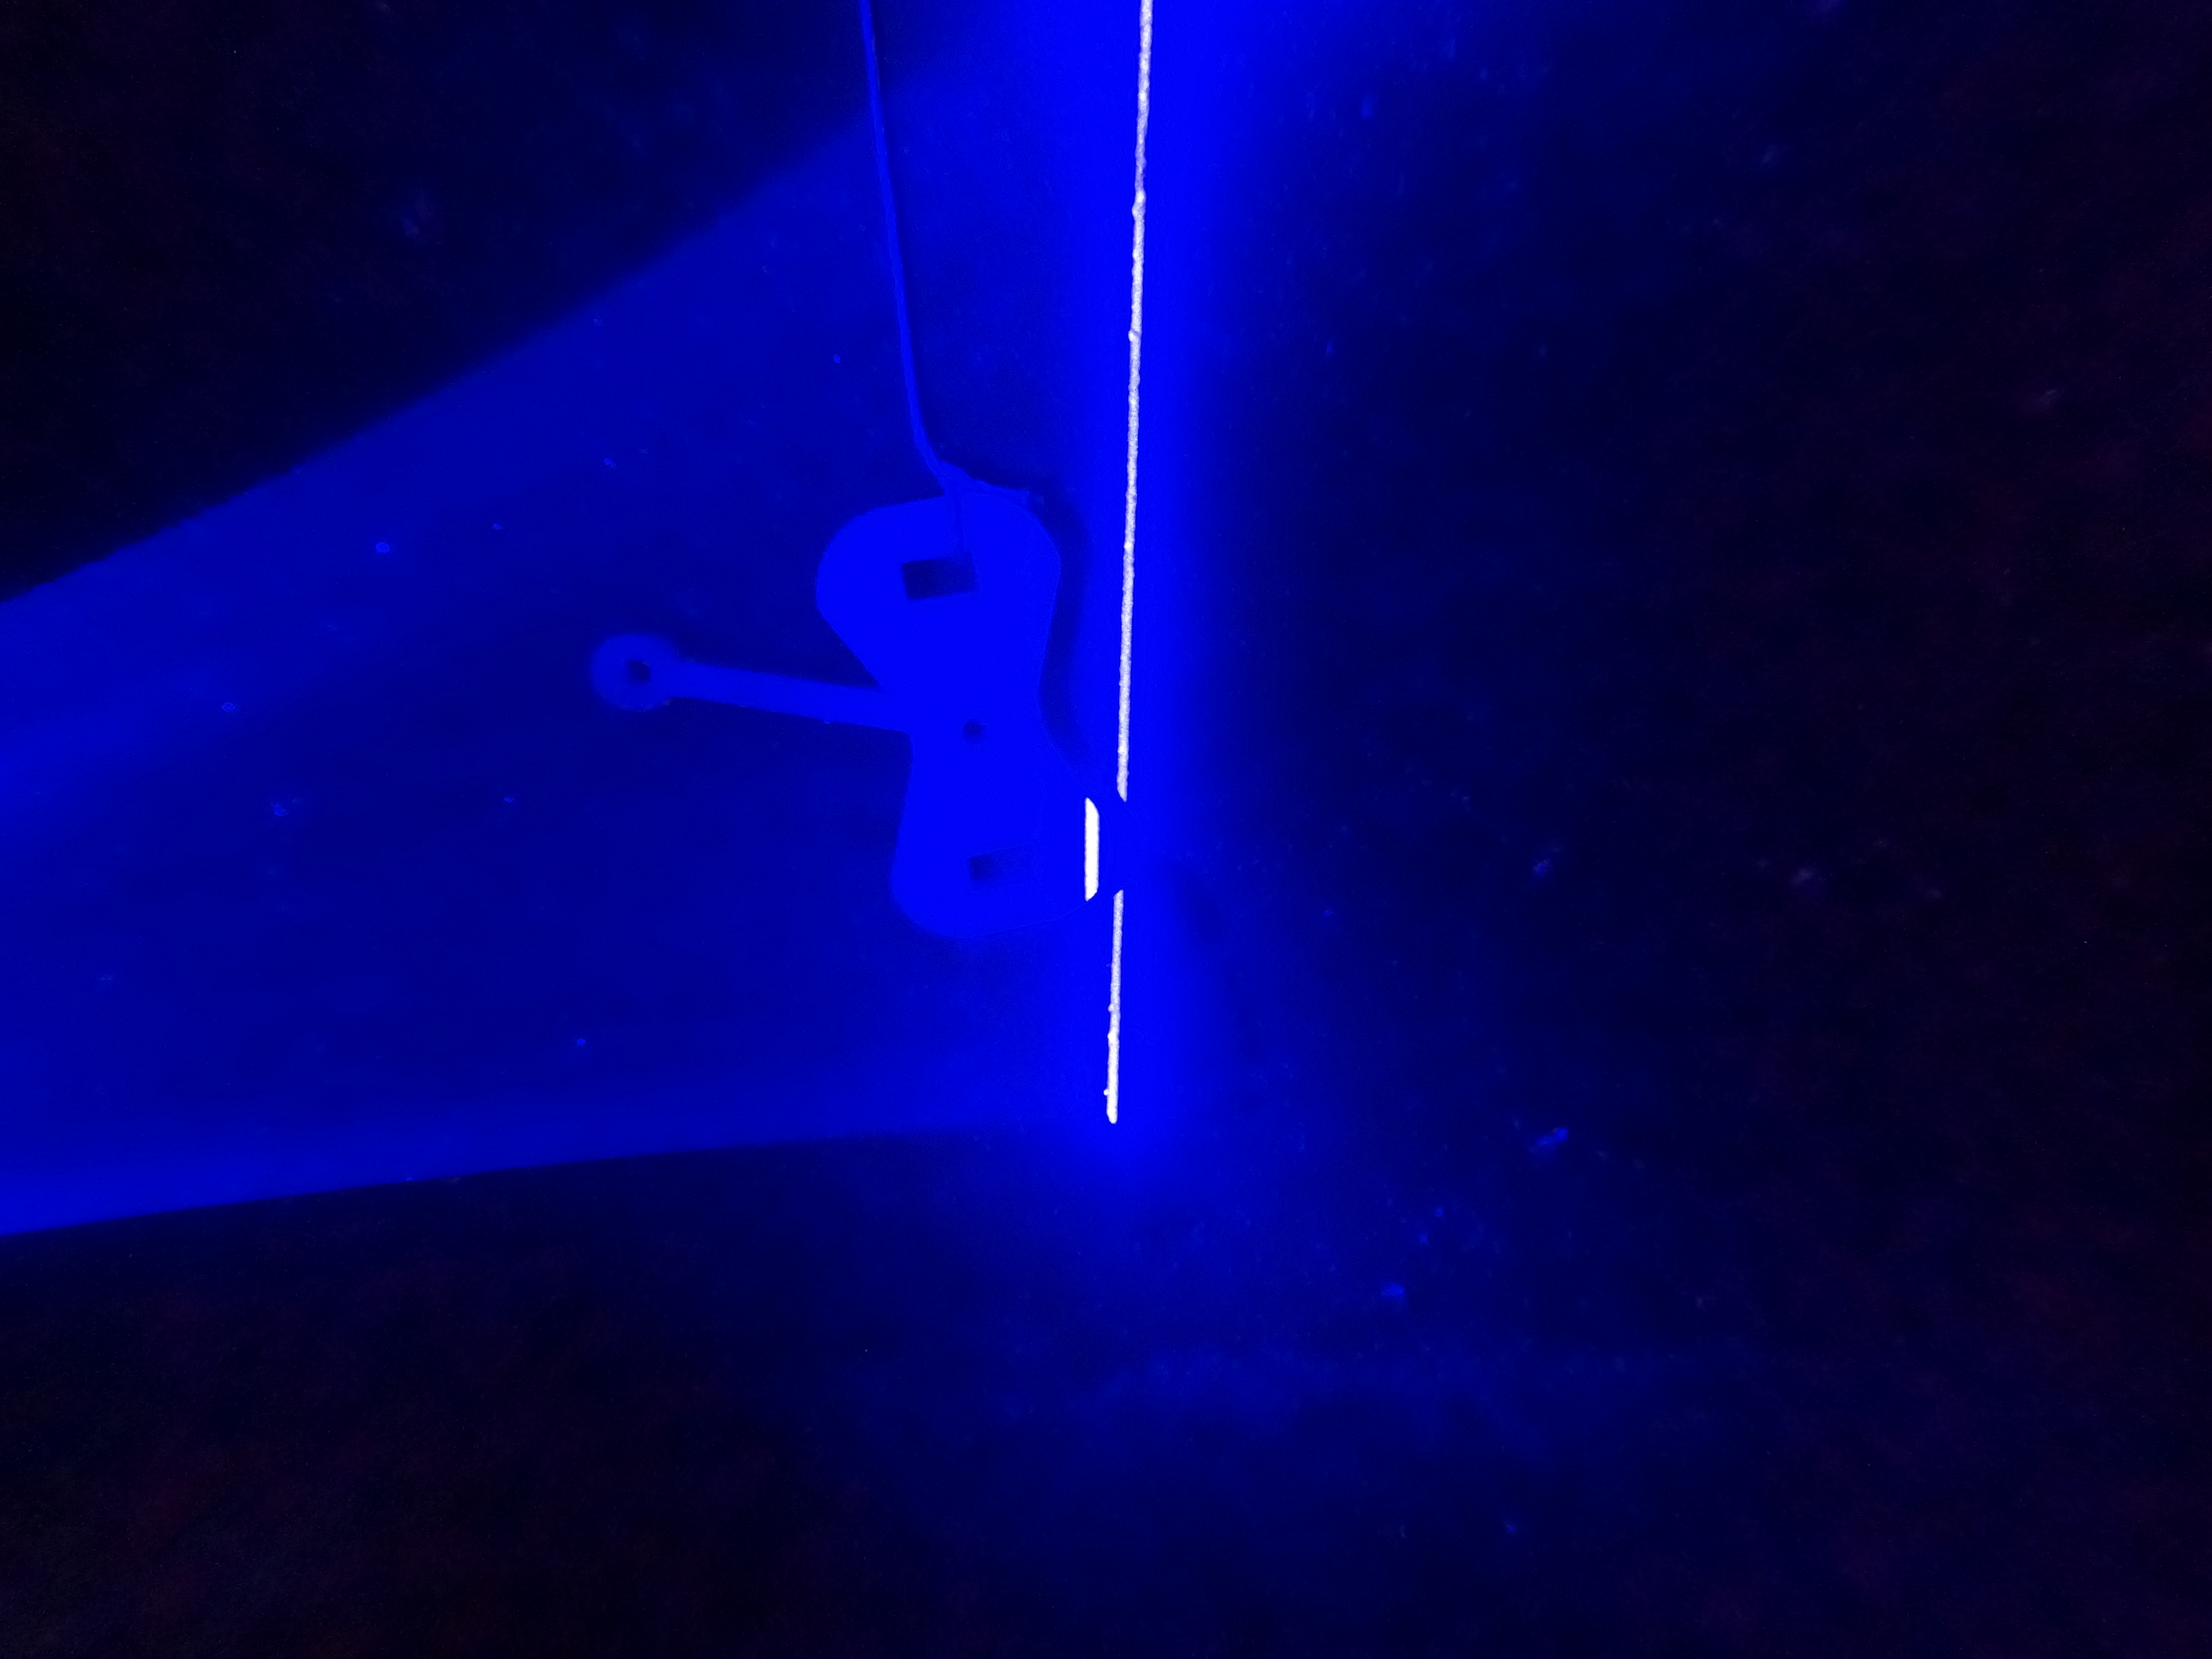

Supplement: Supplementary file 2197 [file G0016506.pdf › Level_1_2/G0016506.pdf]

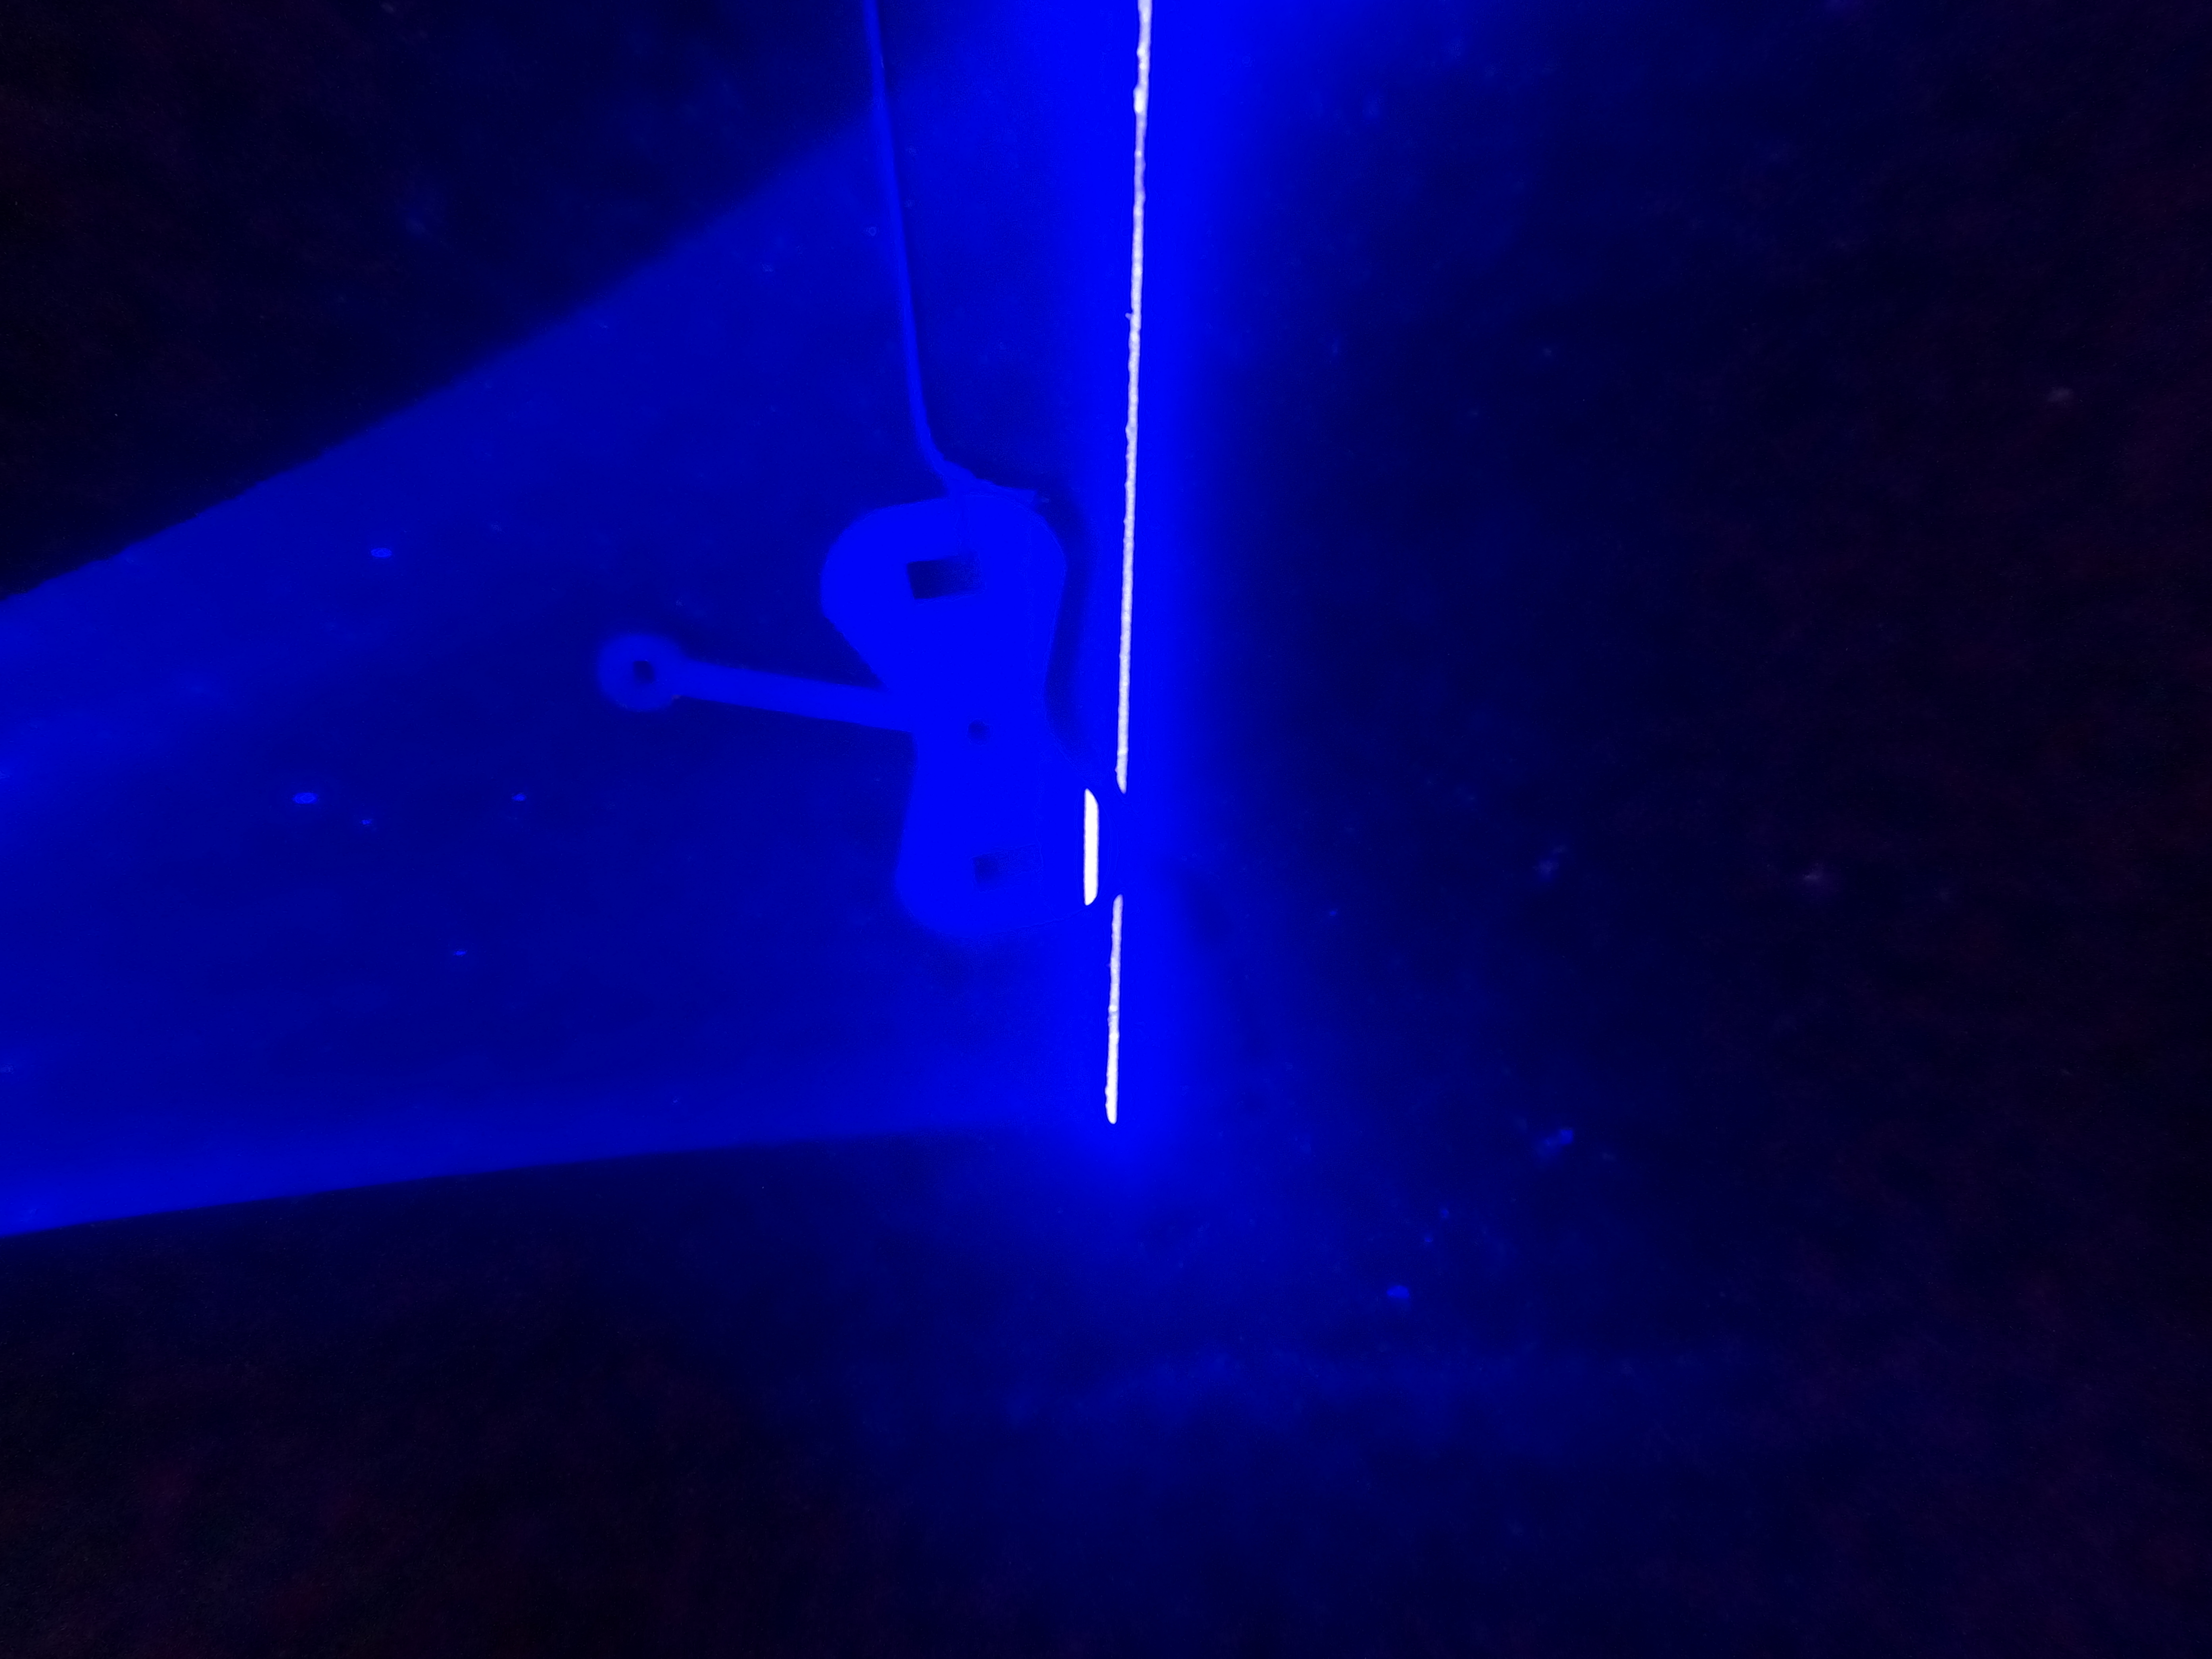

Supplement: Supplementary file 2198 [file G0016507.pdf › Level_1_2/G0016507.pdf]

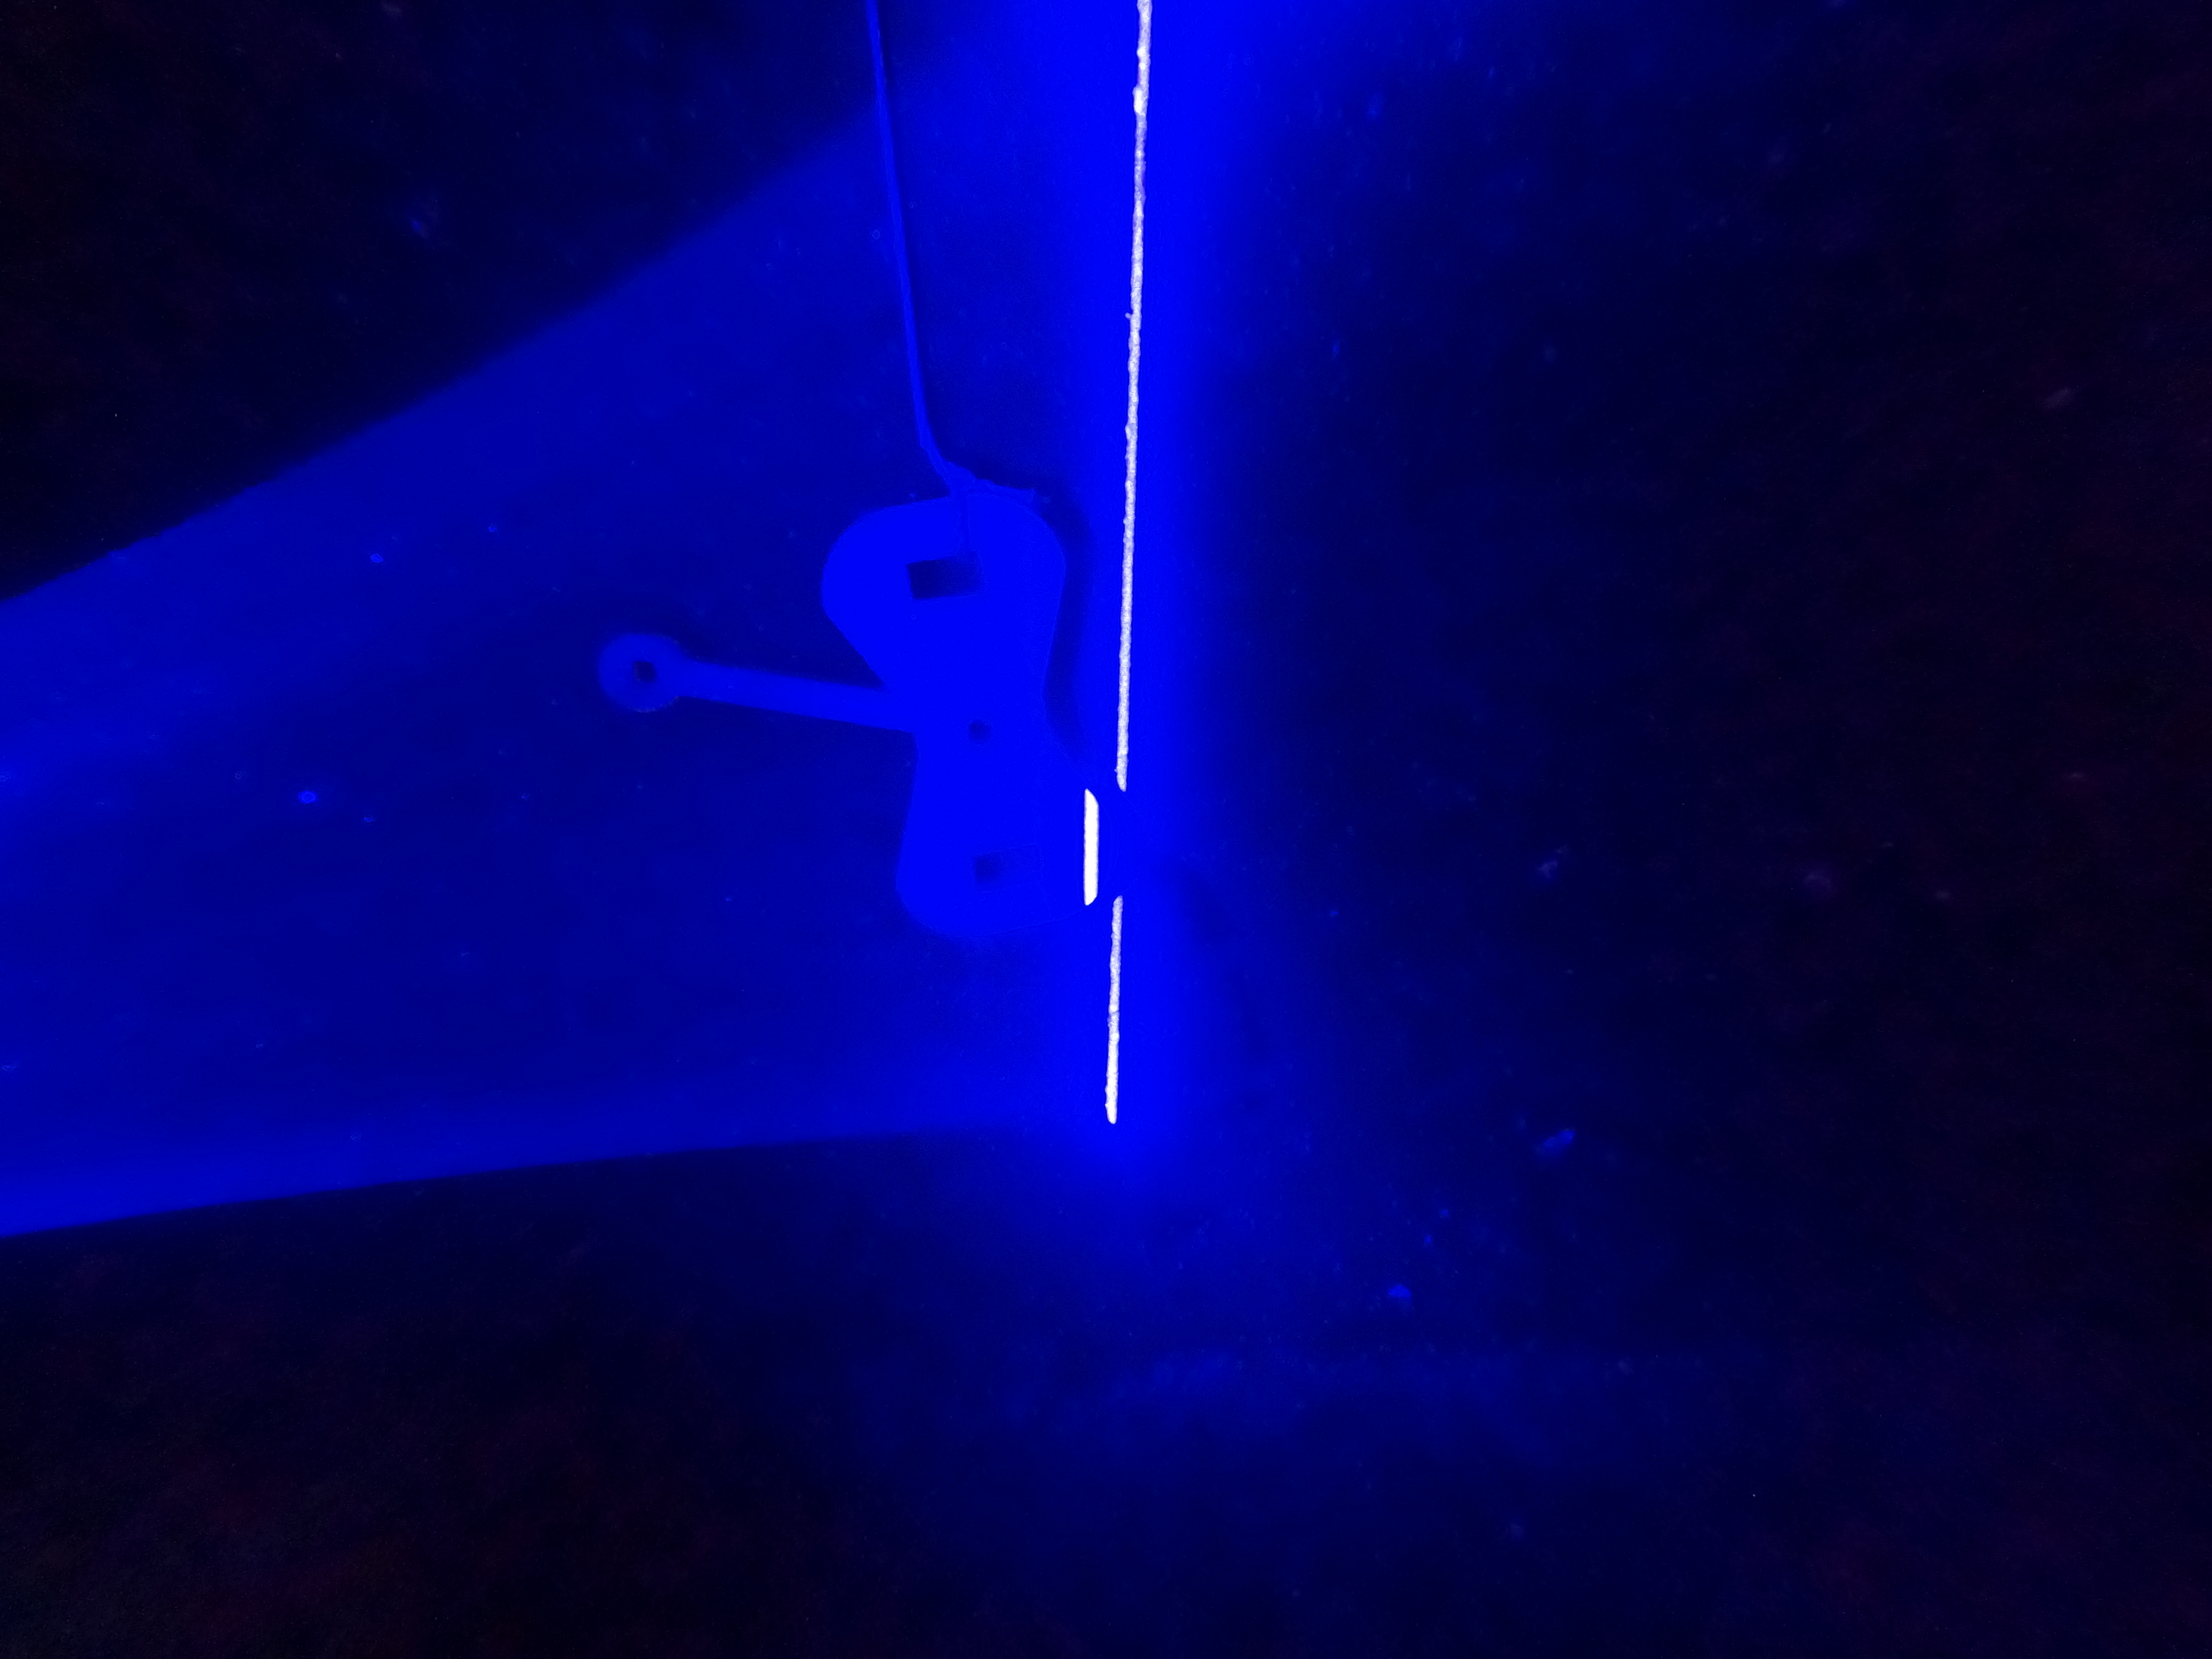

Supplement: Supplementary file 2199 [file G0016508.pdf › Level_1_2/G0016508.pdf]

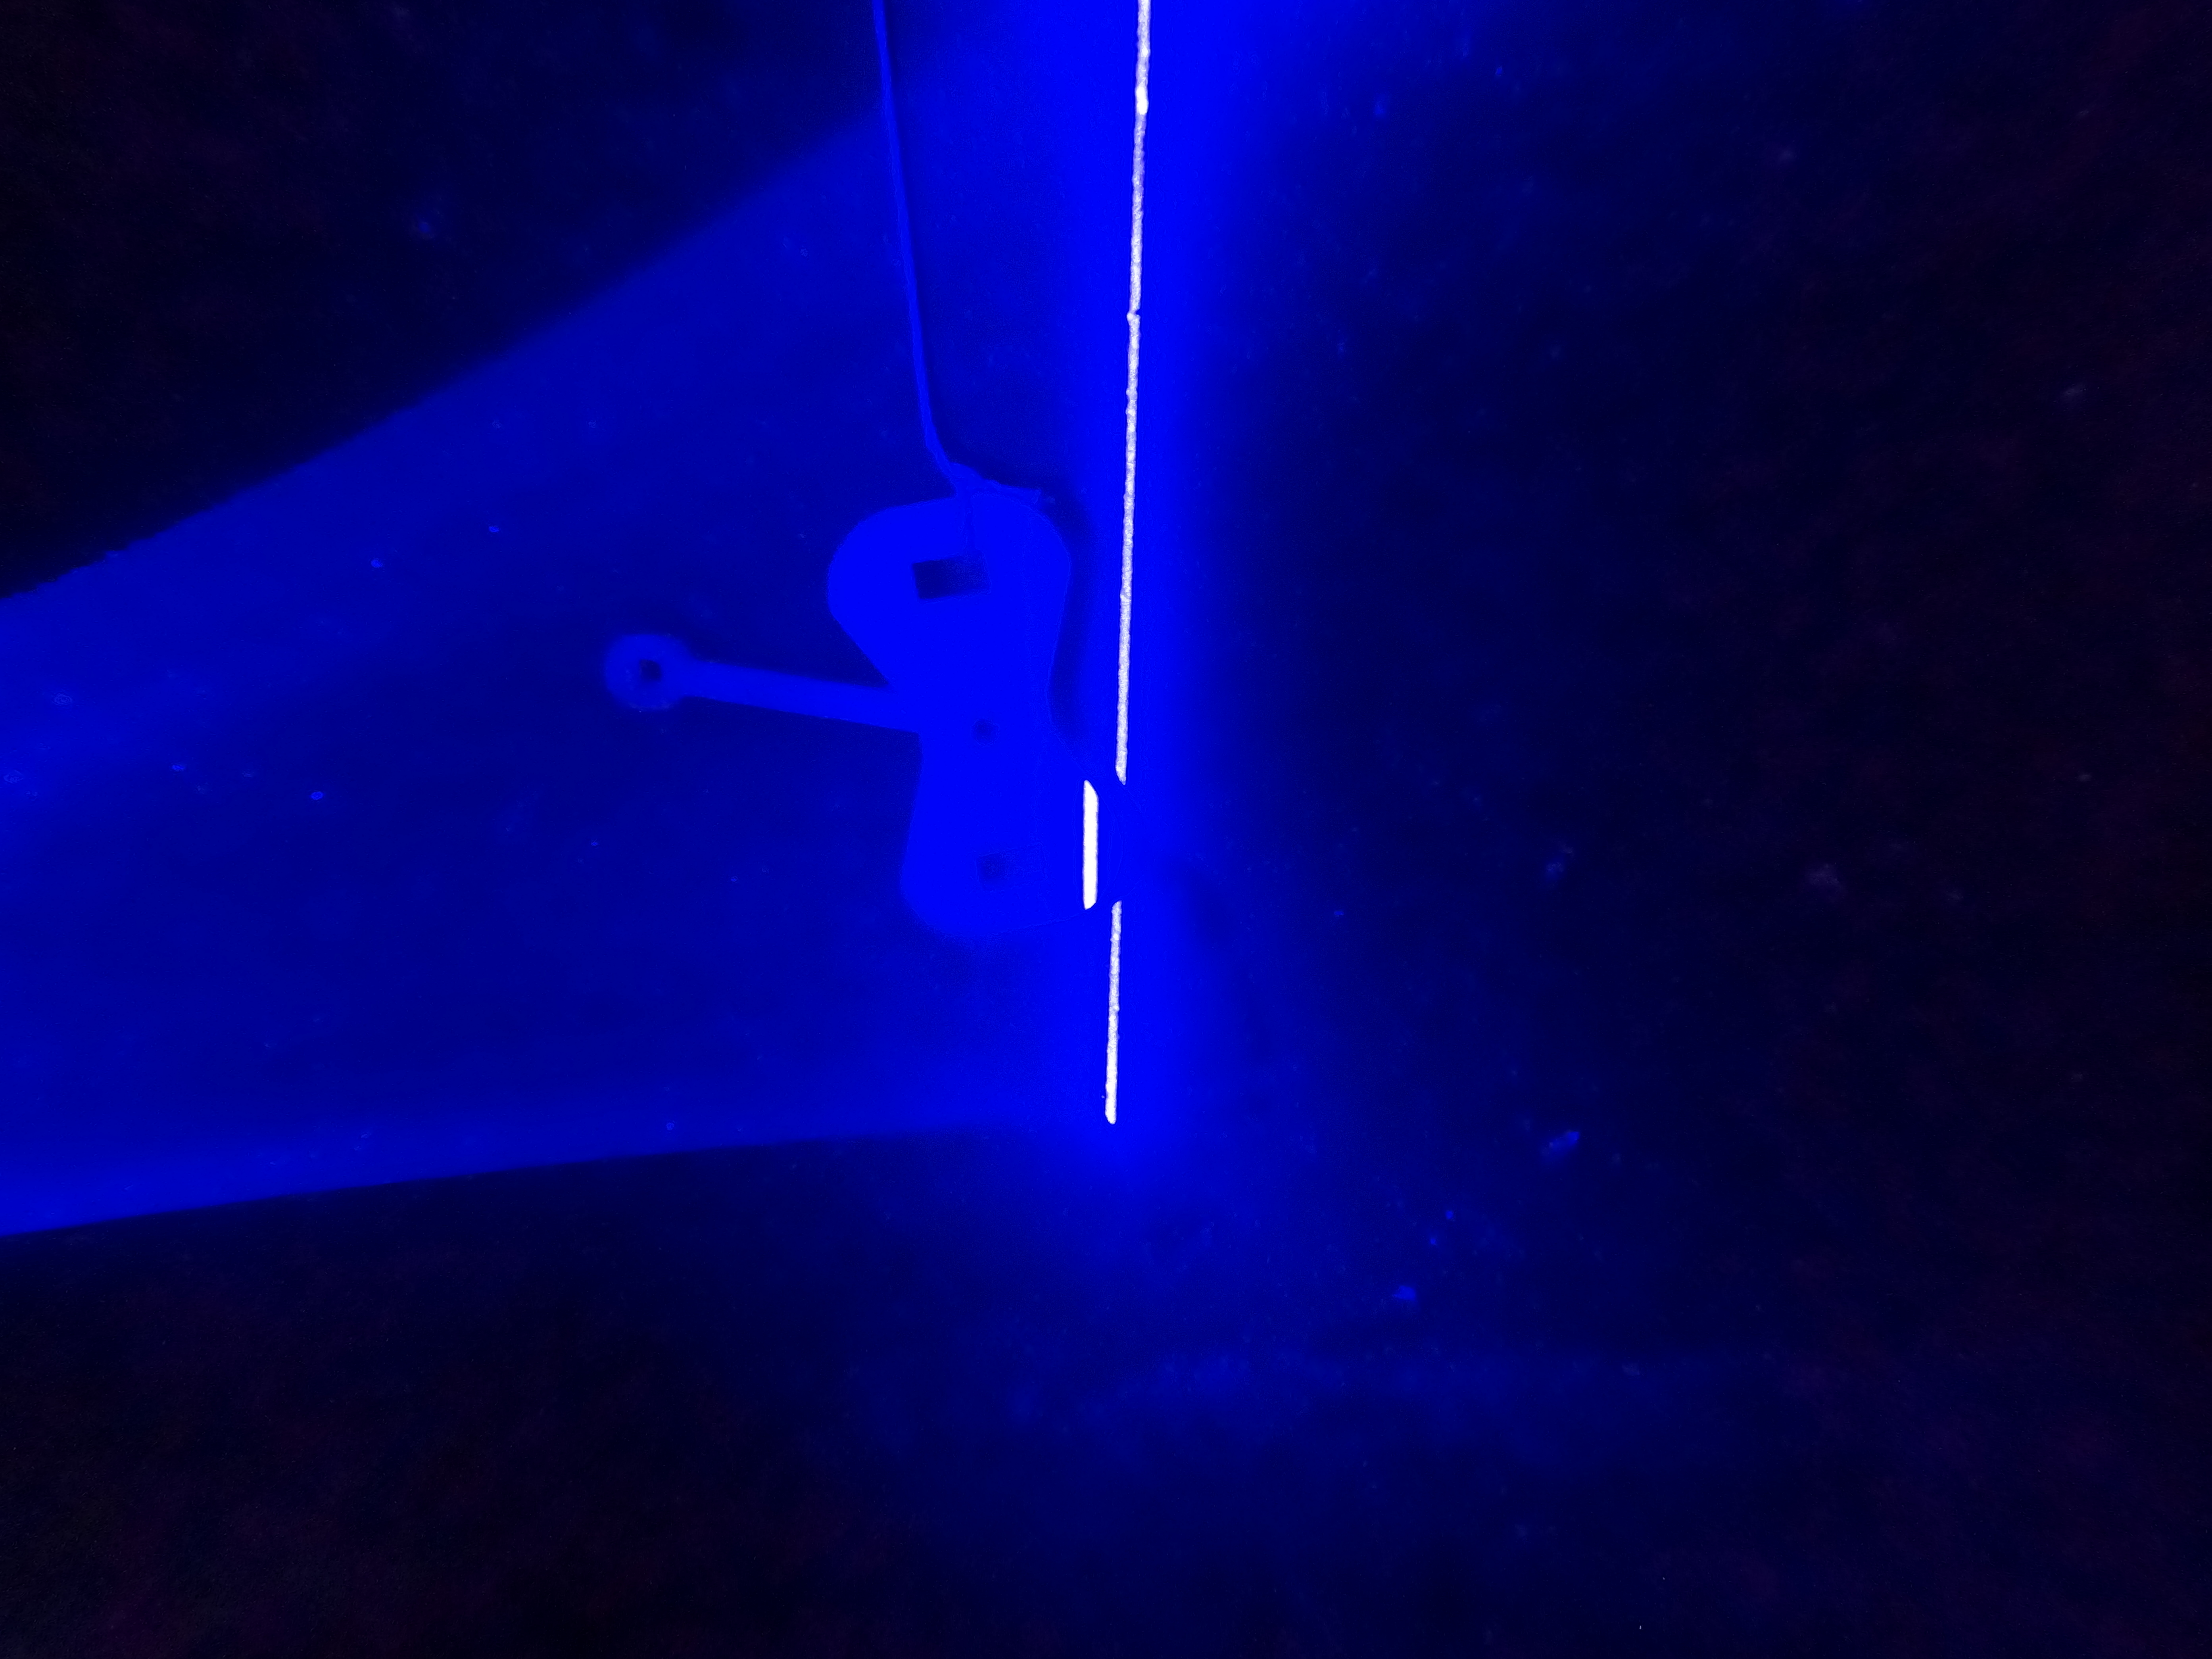

Supplement: Supplementary file 2200 [file G0016509.pdf › Level_1_2/G0016509.pdf]

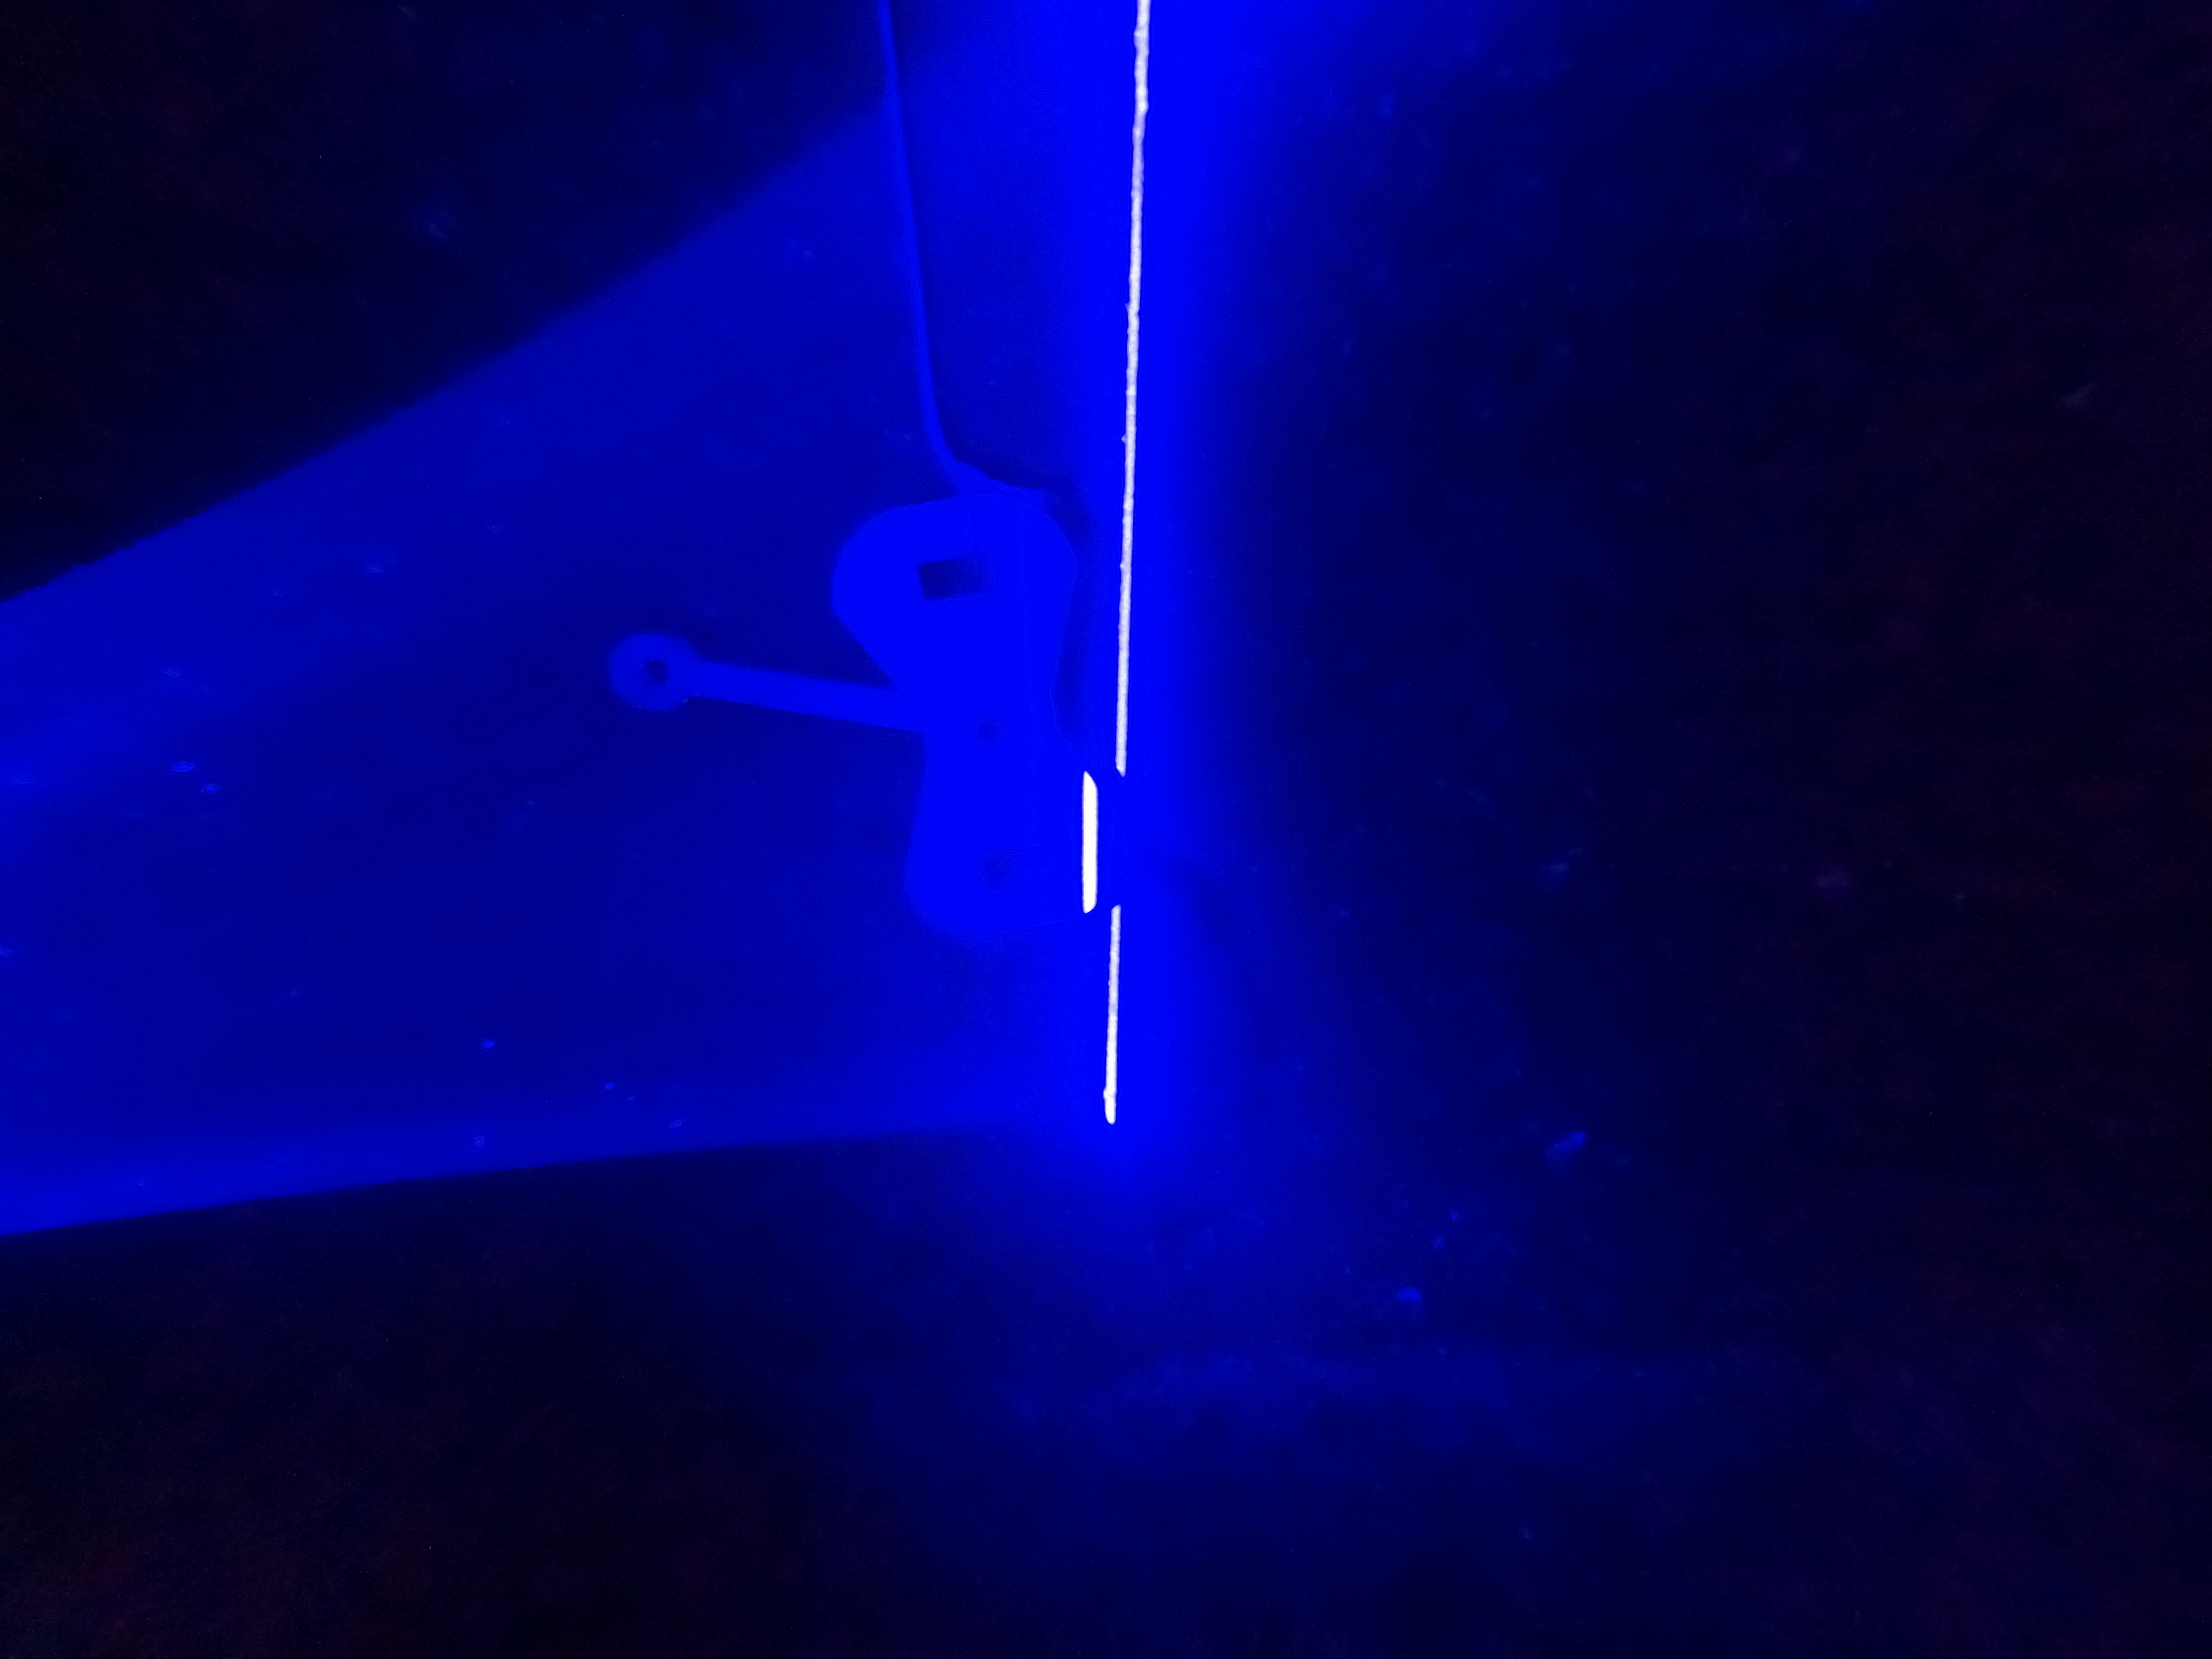

Supplement: Supplementary file 2201 [file G0016510.pdf › Level_1_2/G0016510.pdf]

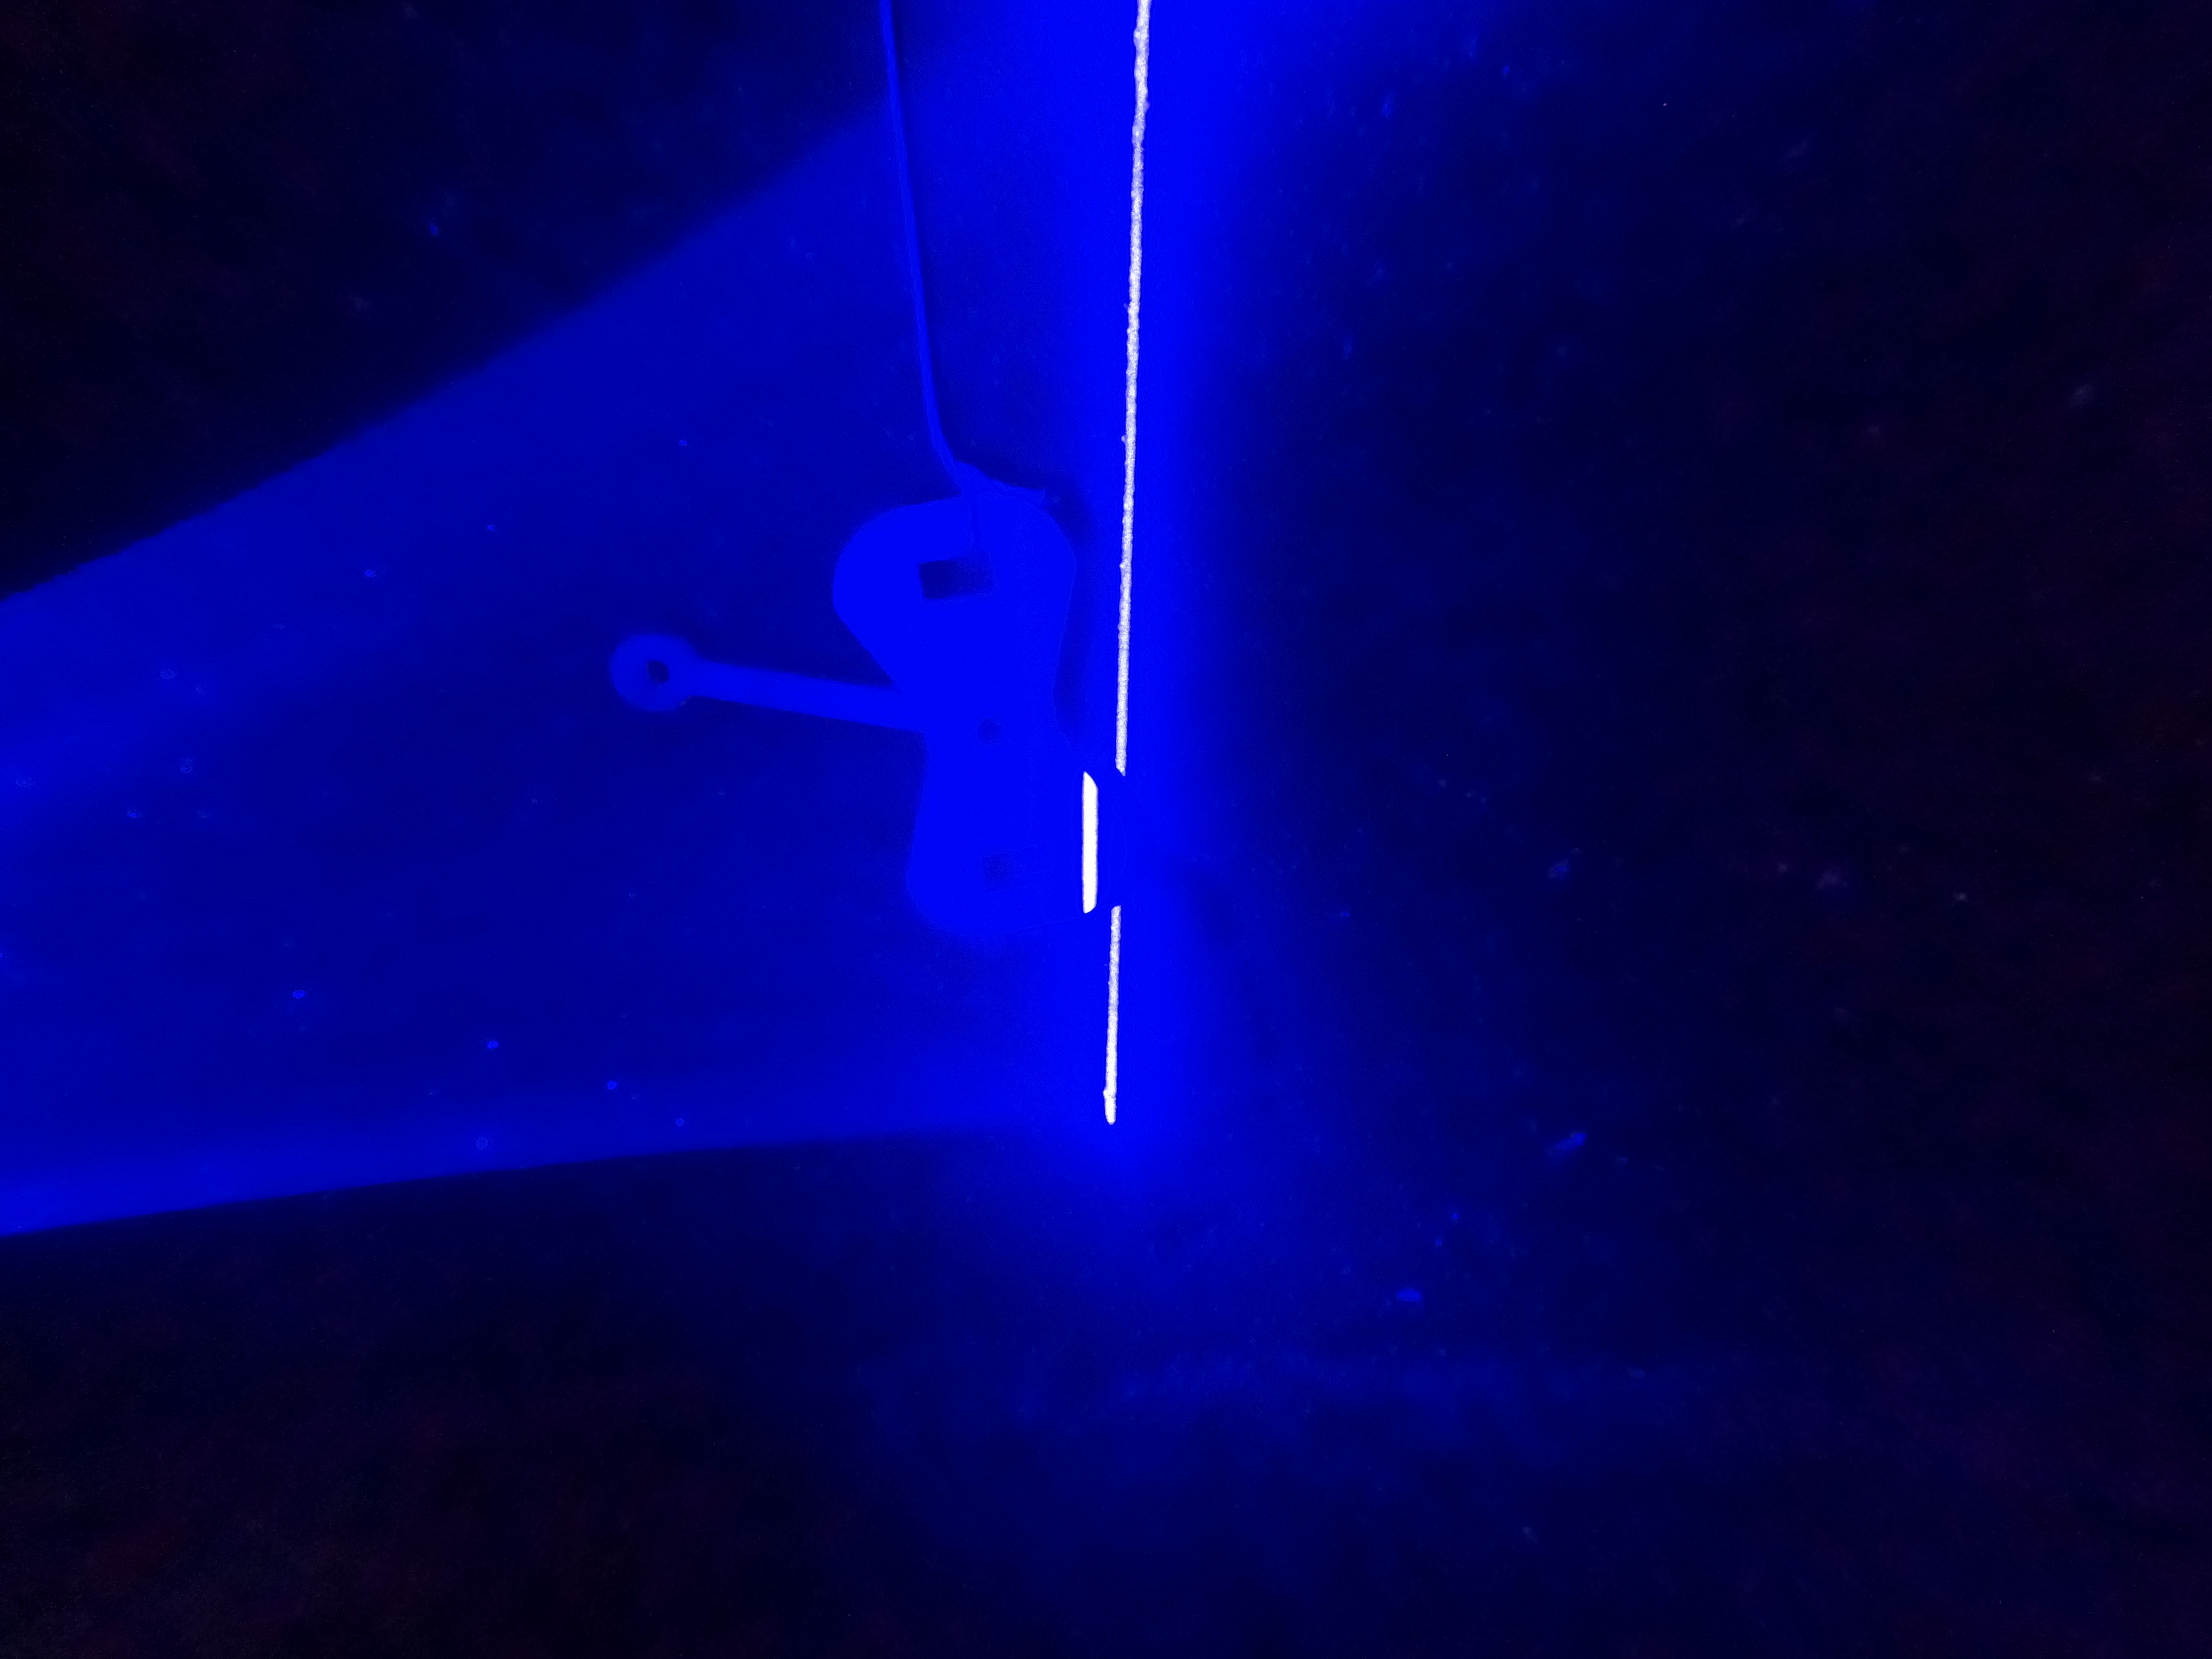

Supplement: Supplementary file 2202 [file G0016511.pdf › Level_1_2/G0016511.pdf]

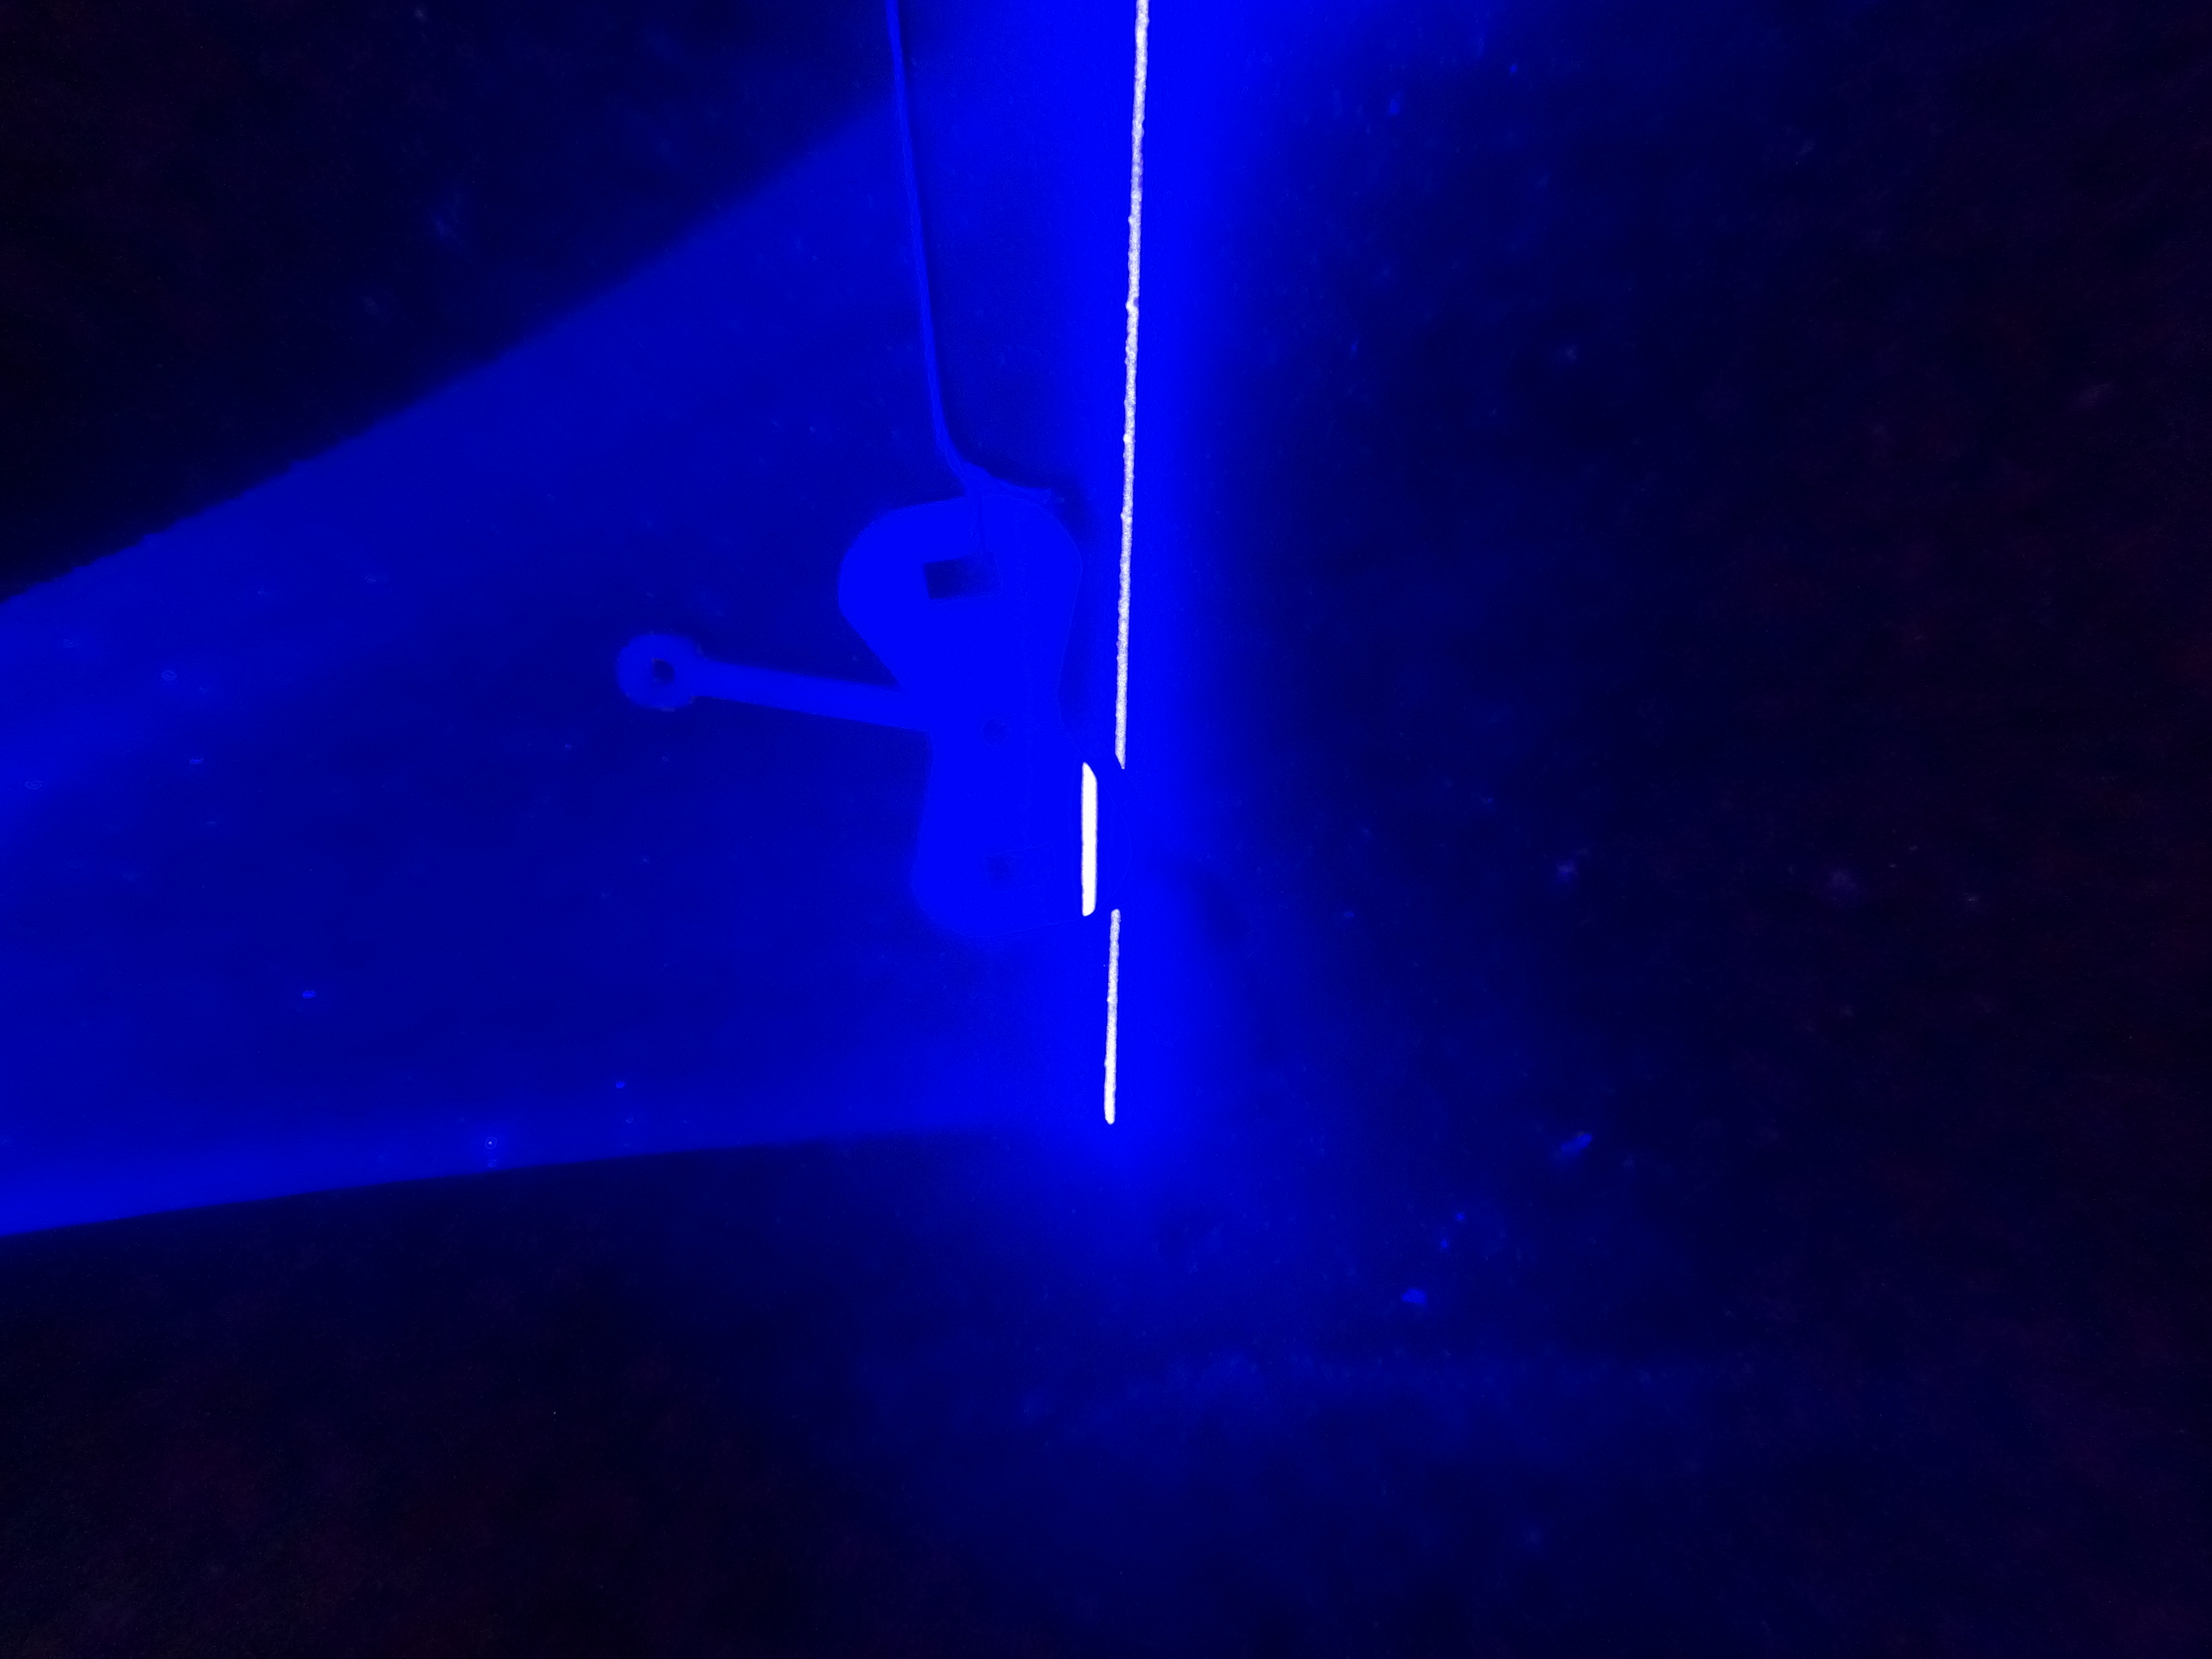

Supplement: Supplementary file 2203 [file G0016512.pdf › Level_1_2/G0016512.pdf]

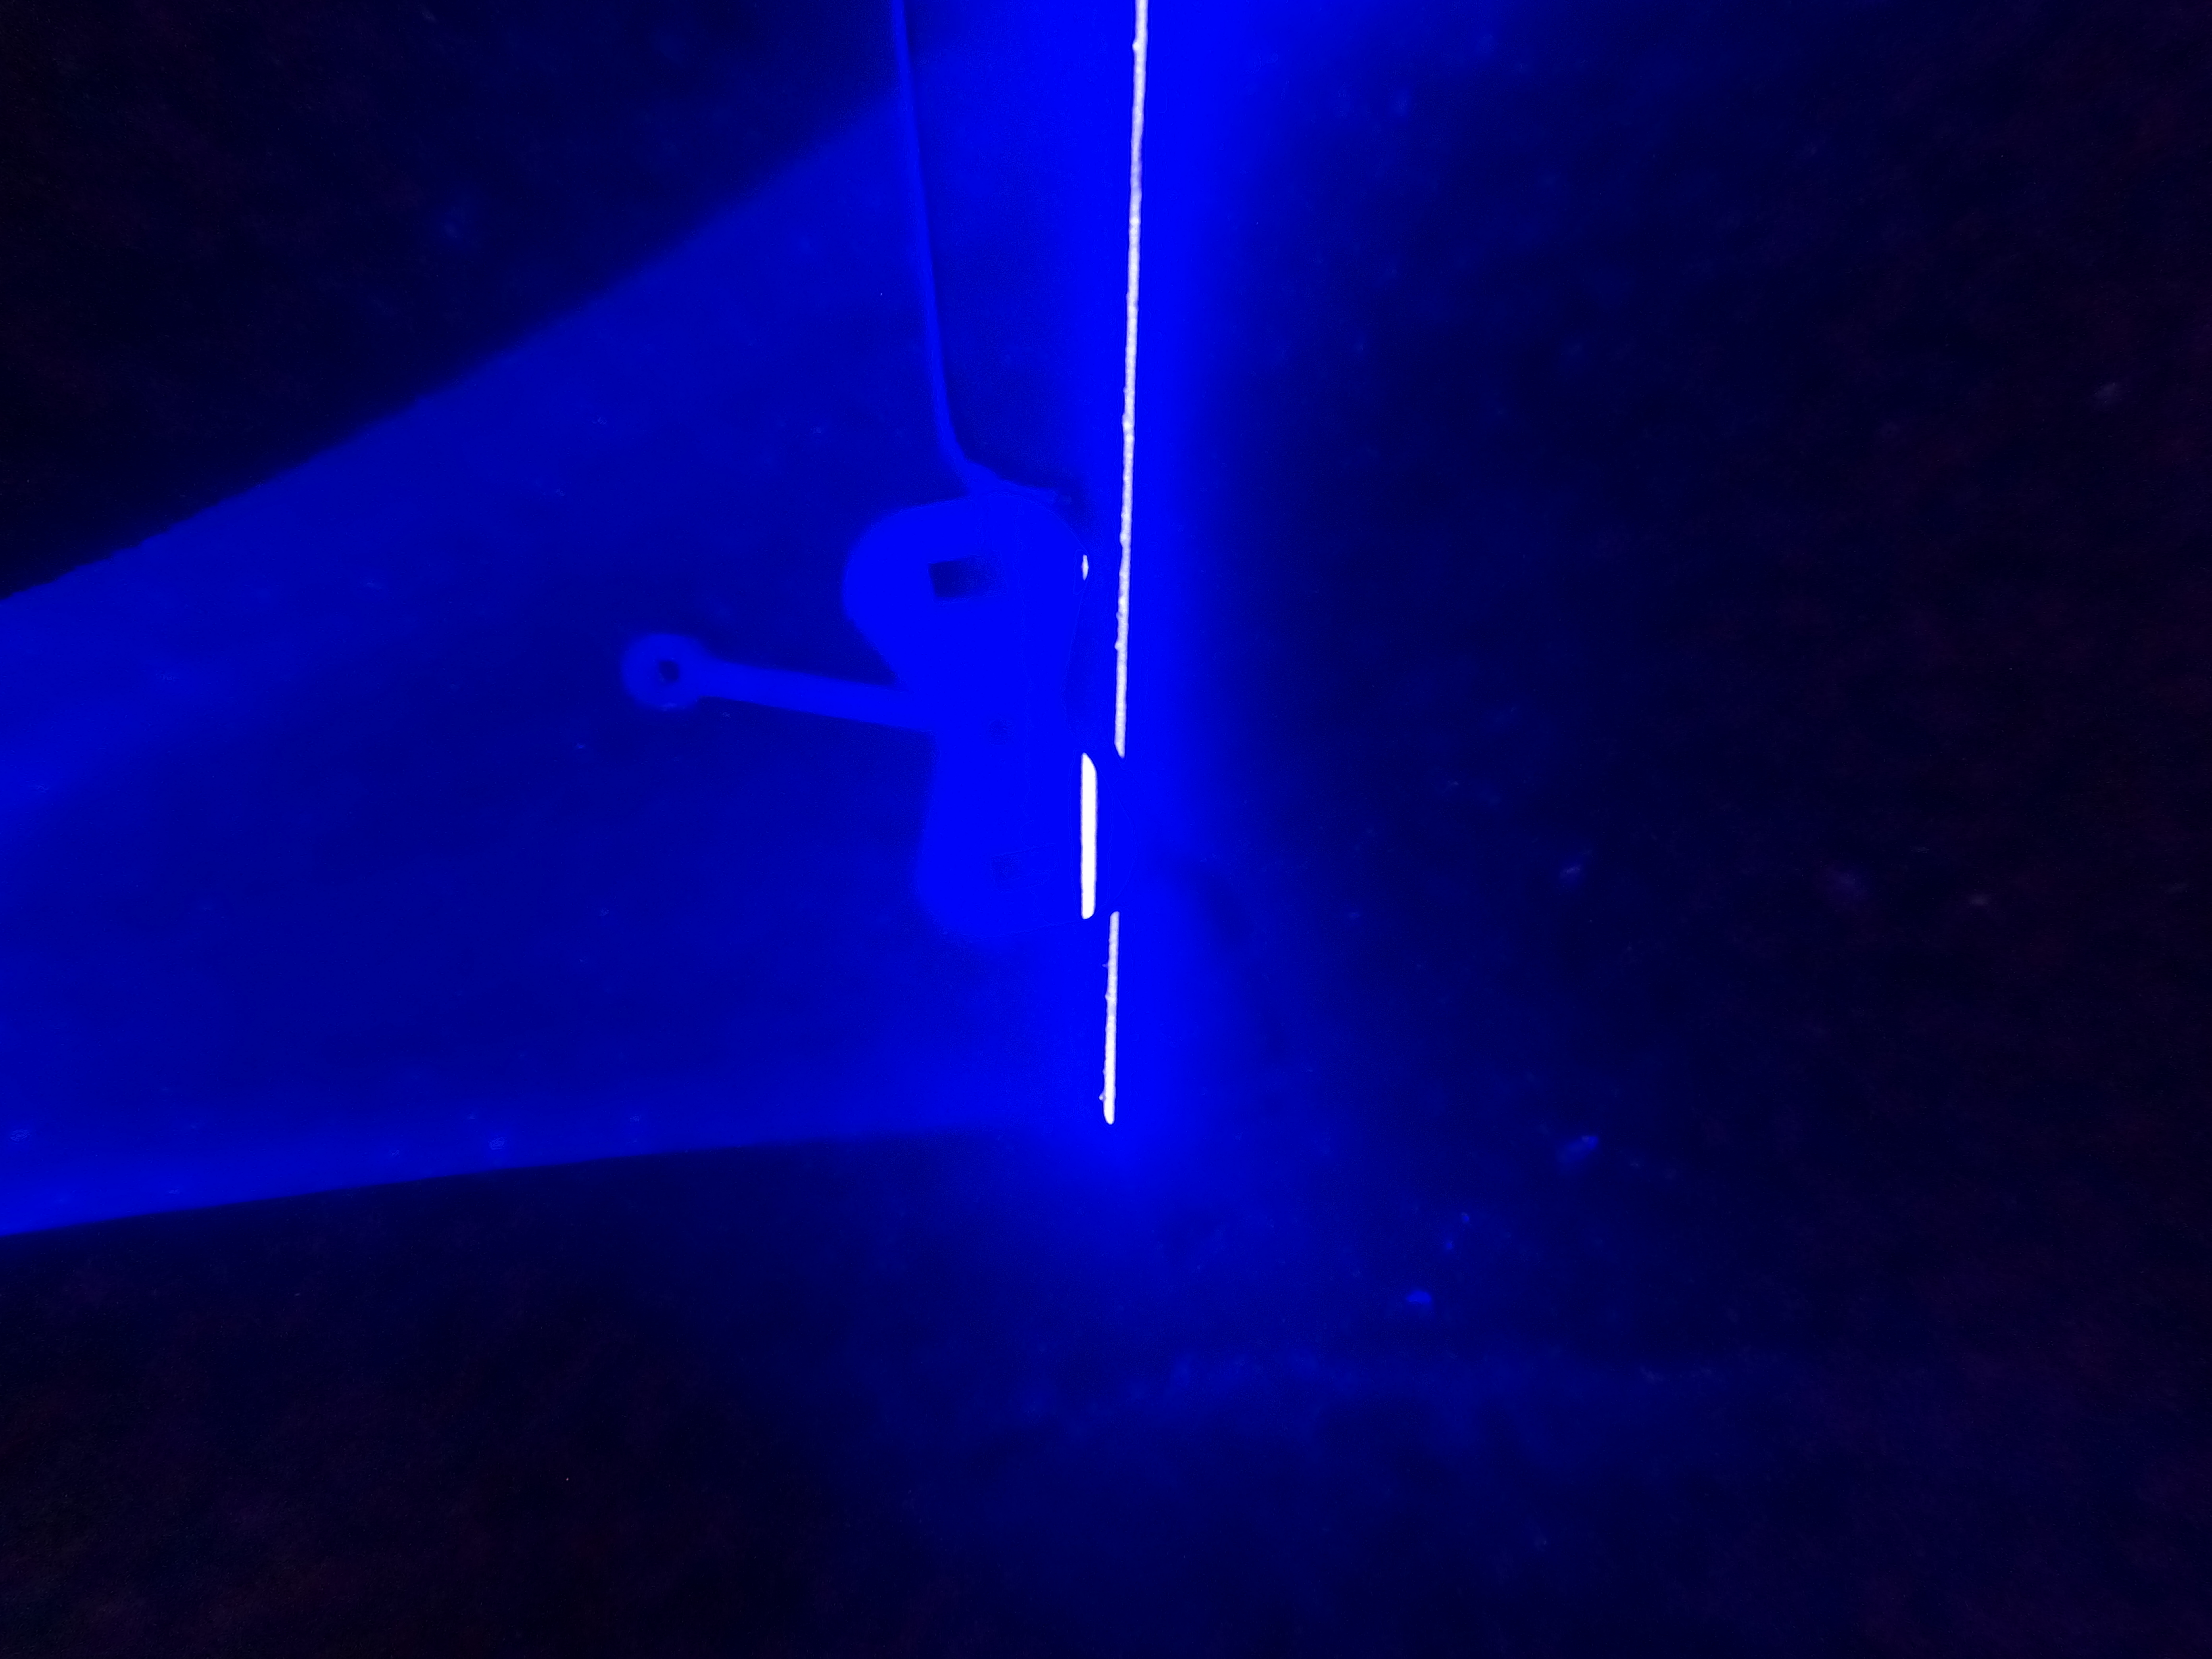

Supplement: Supplementary file 2204 [file G0016513.pdf › Level_1_2/G0016513.pdf]

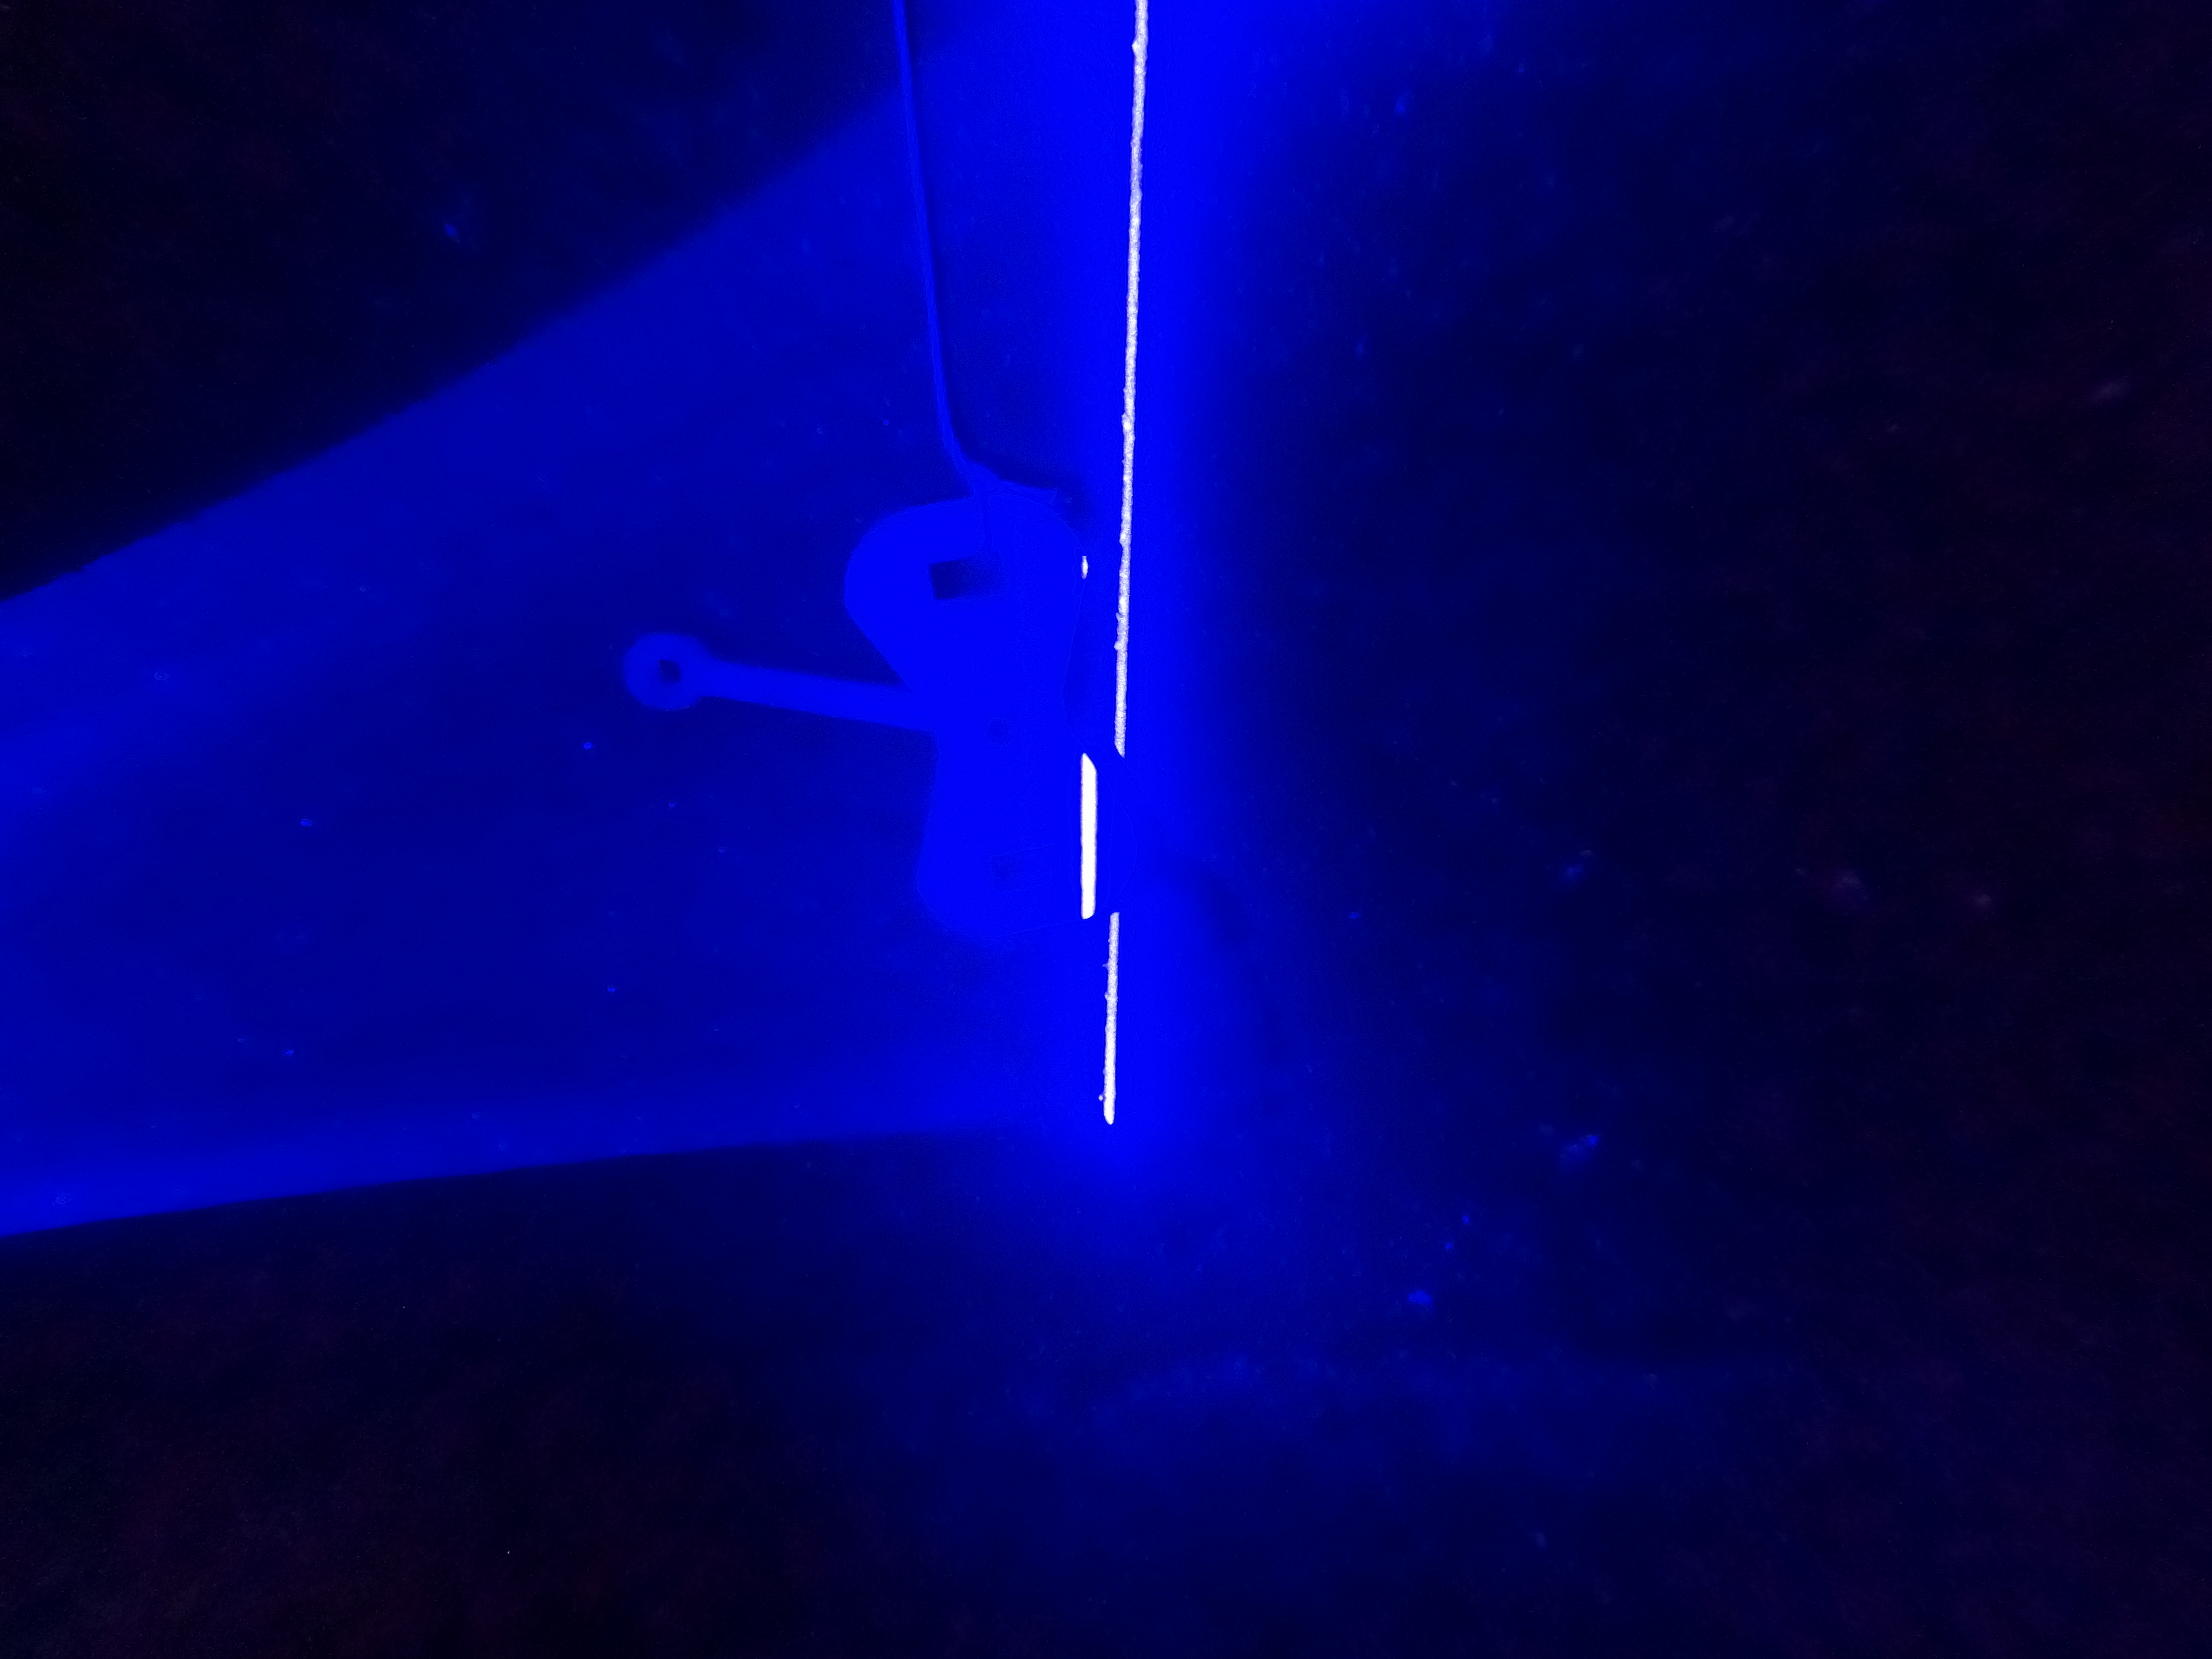

Supplement: Supplementary file 2205 [file G0016514.pdf › Level_1_2/G0016514.pdf]

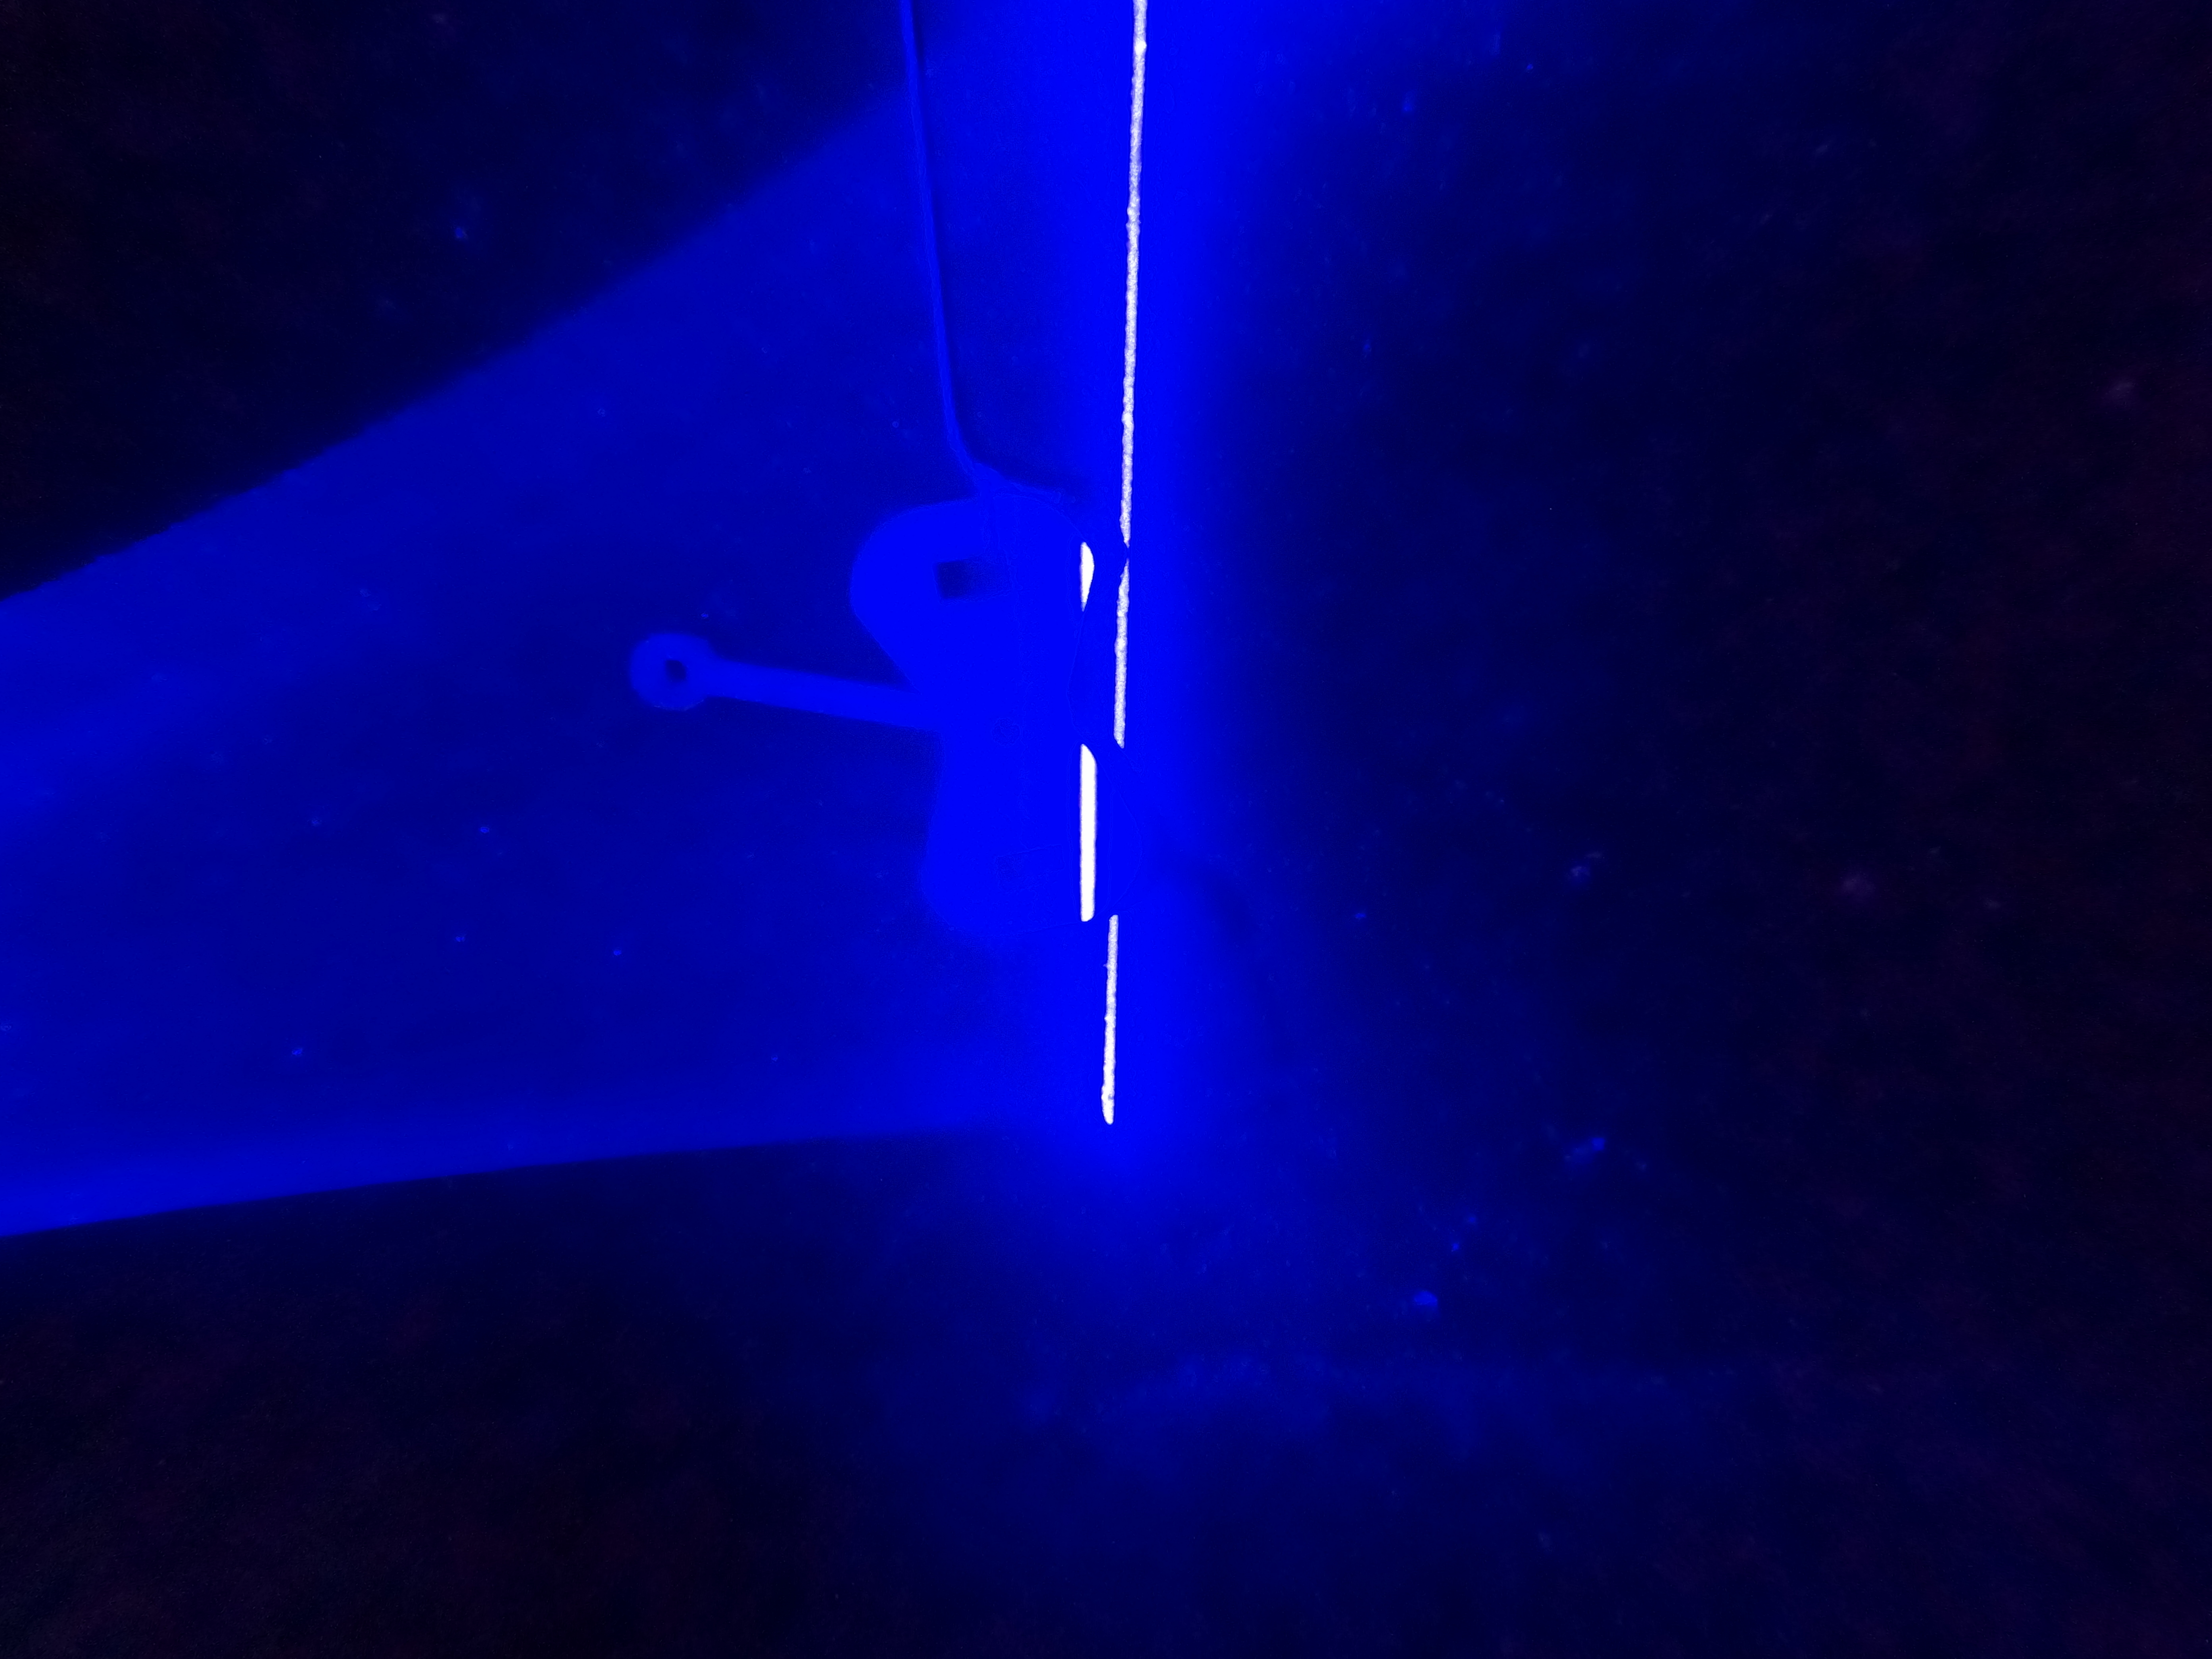

Supplement: Supplementary file 2206 [file G0016515.pdf › Level_1_2/G0016515.pdf]

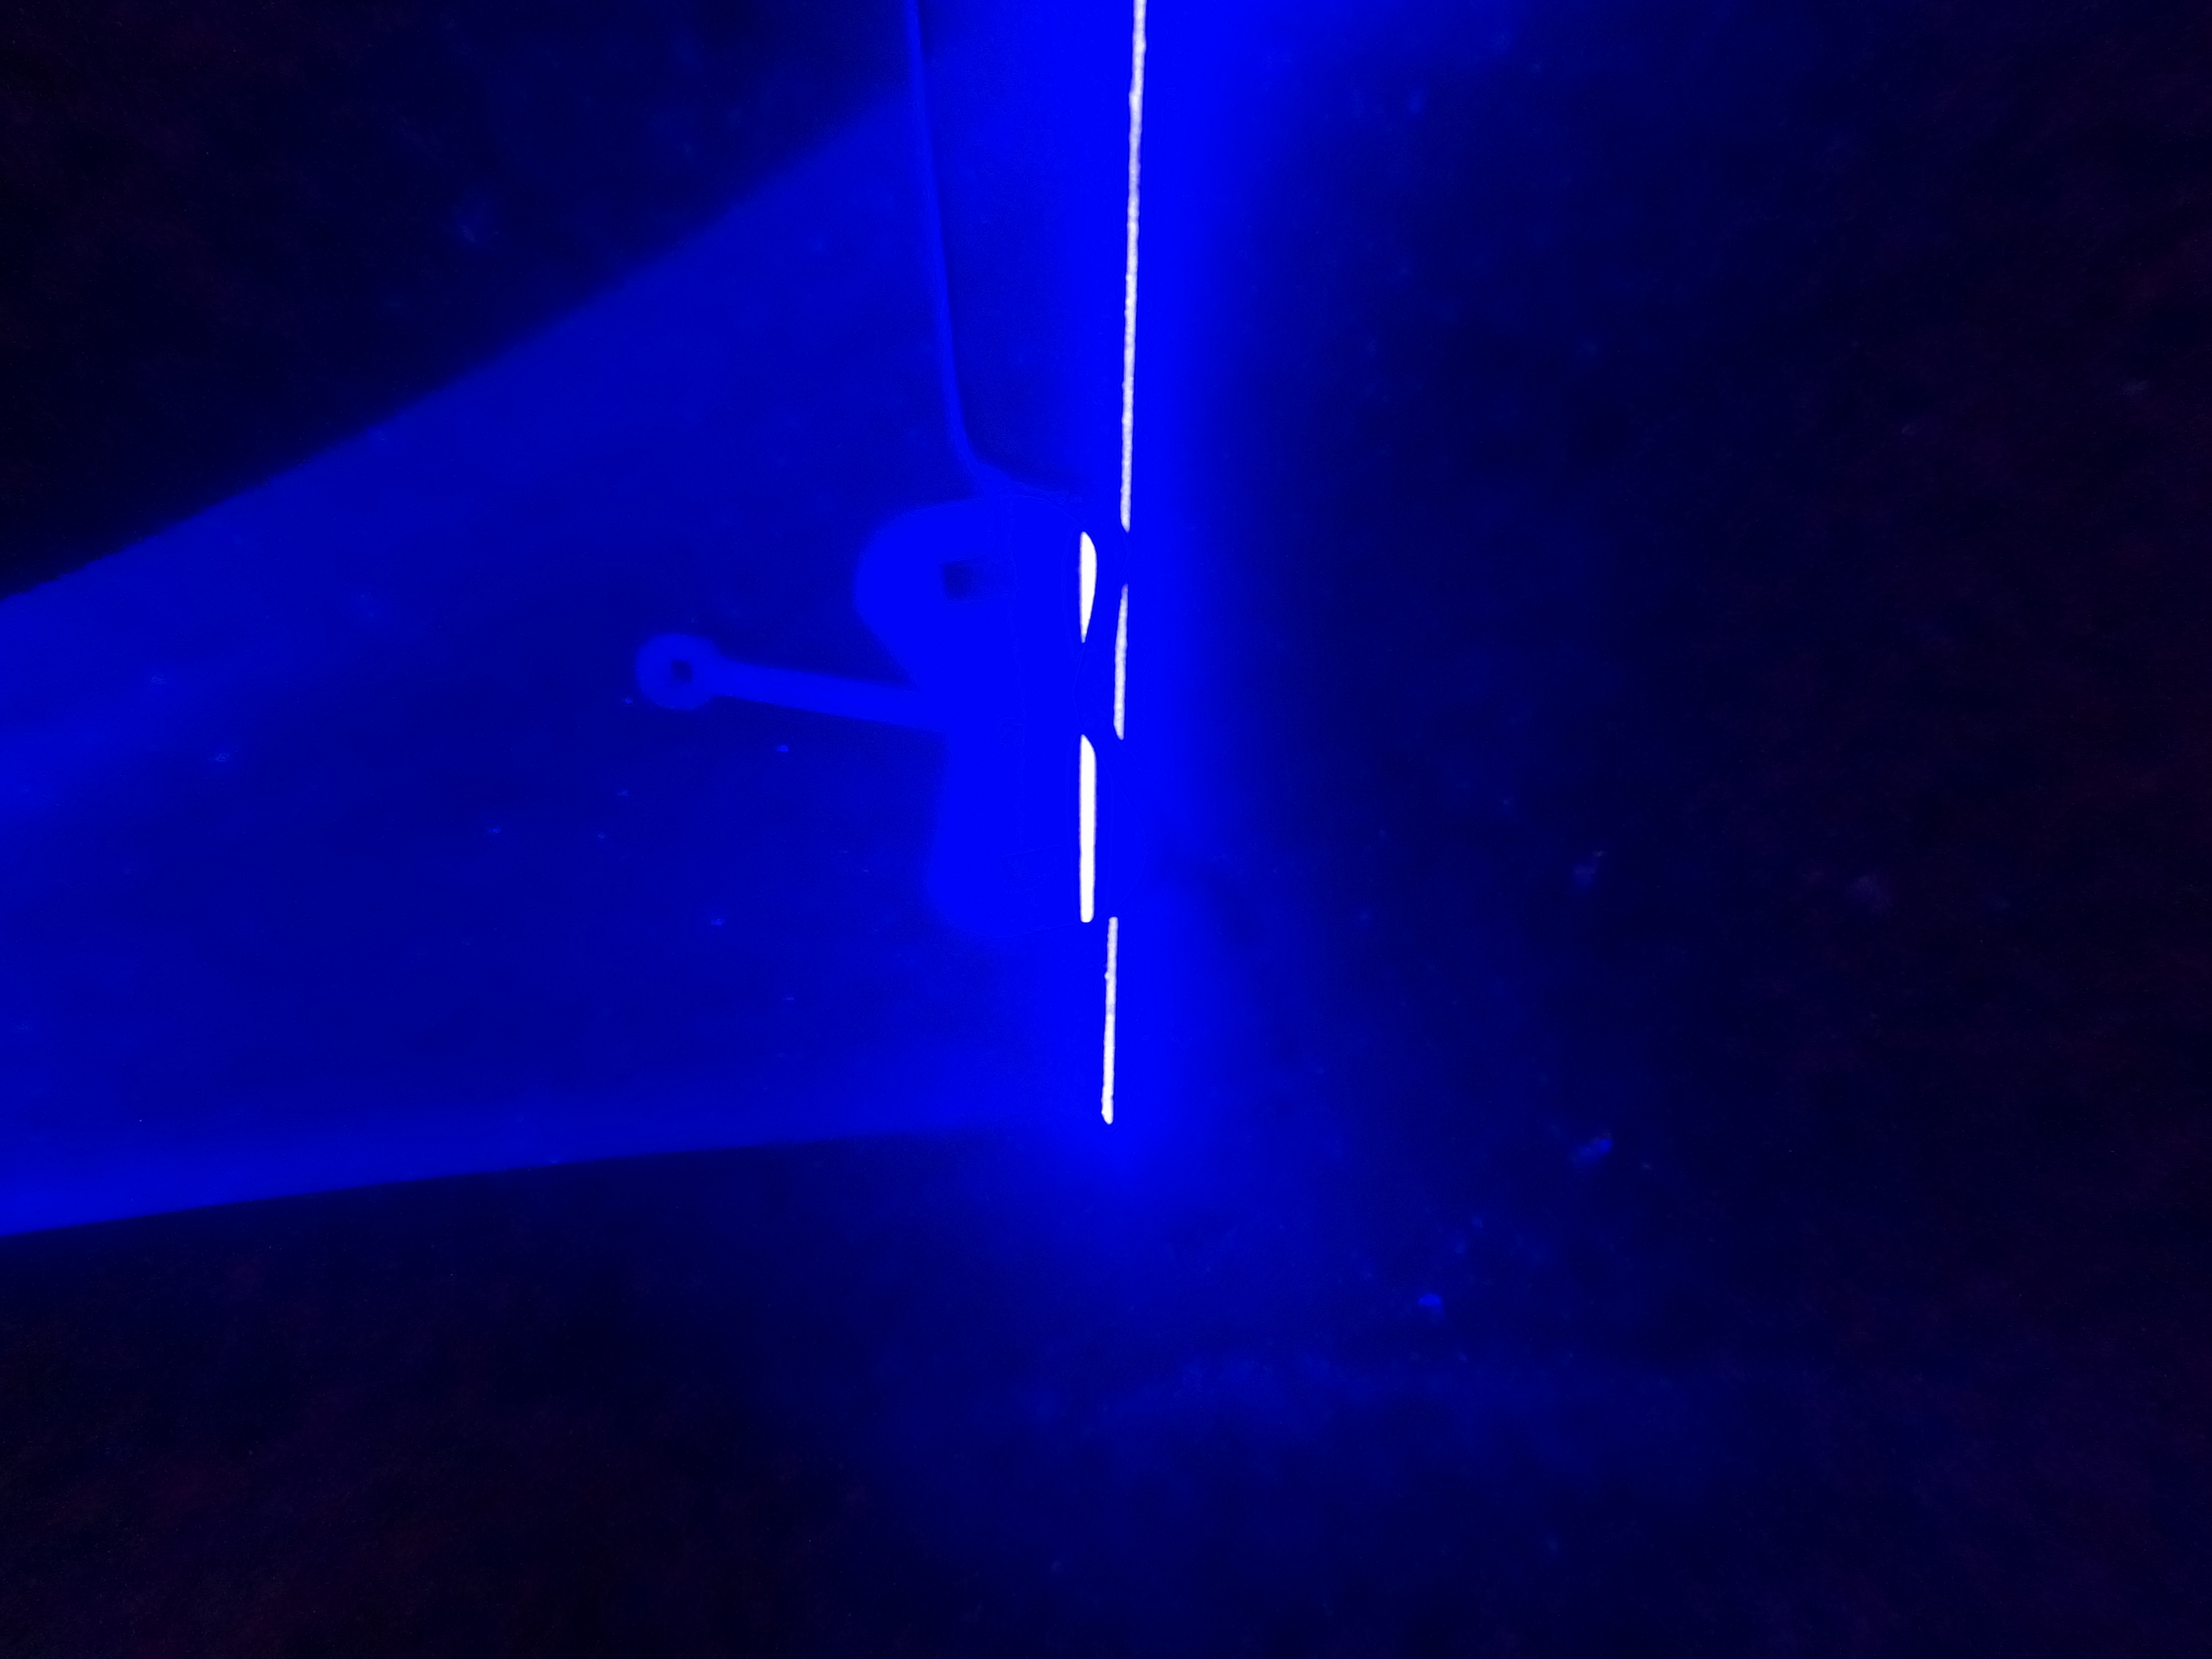

Supplement: Supplementary file 2207 [file G0016516.pdf › Level_1_2/G0016516.pdf]

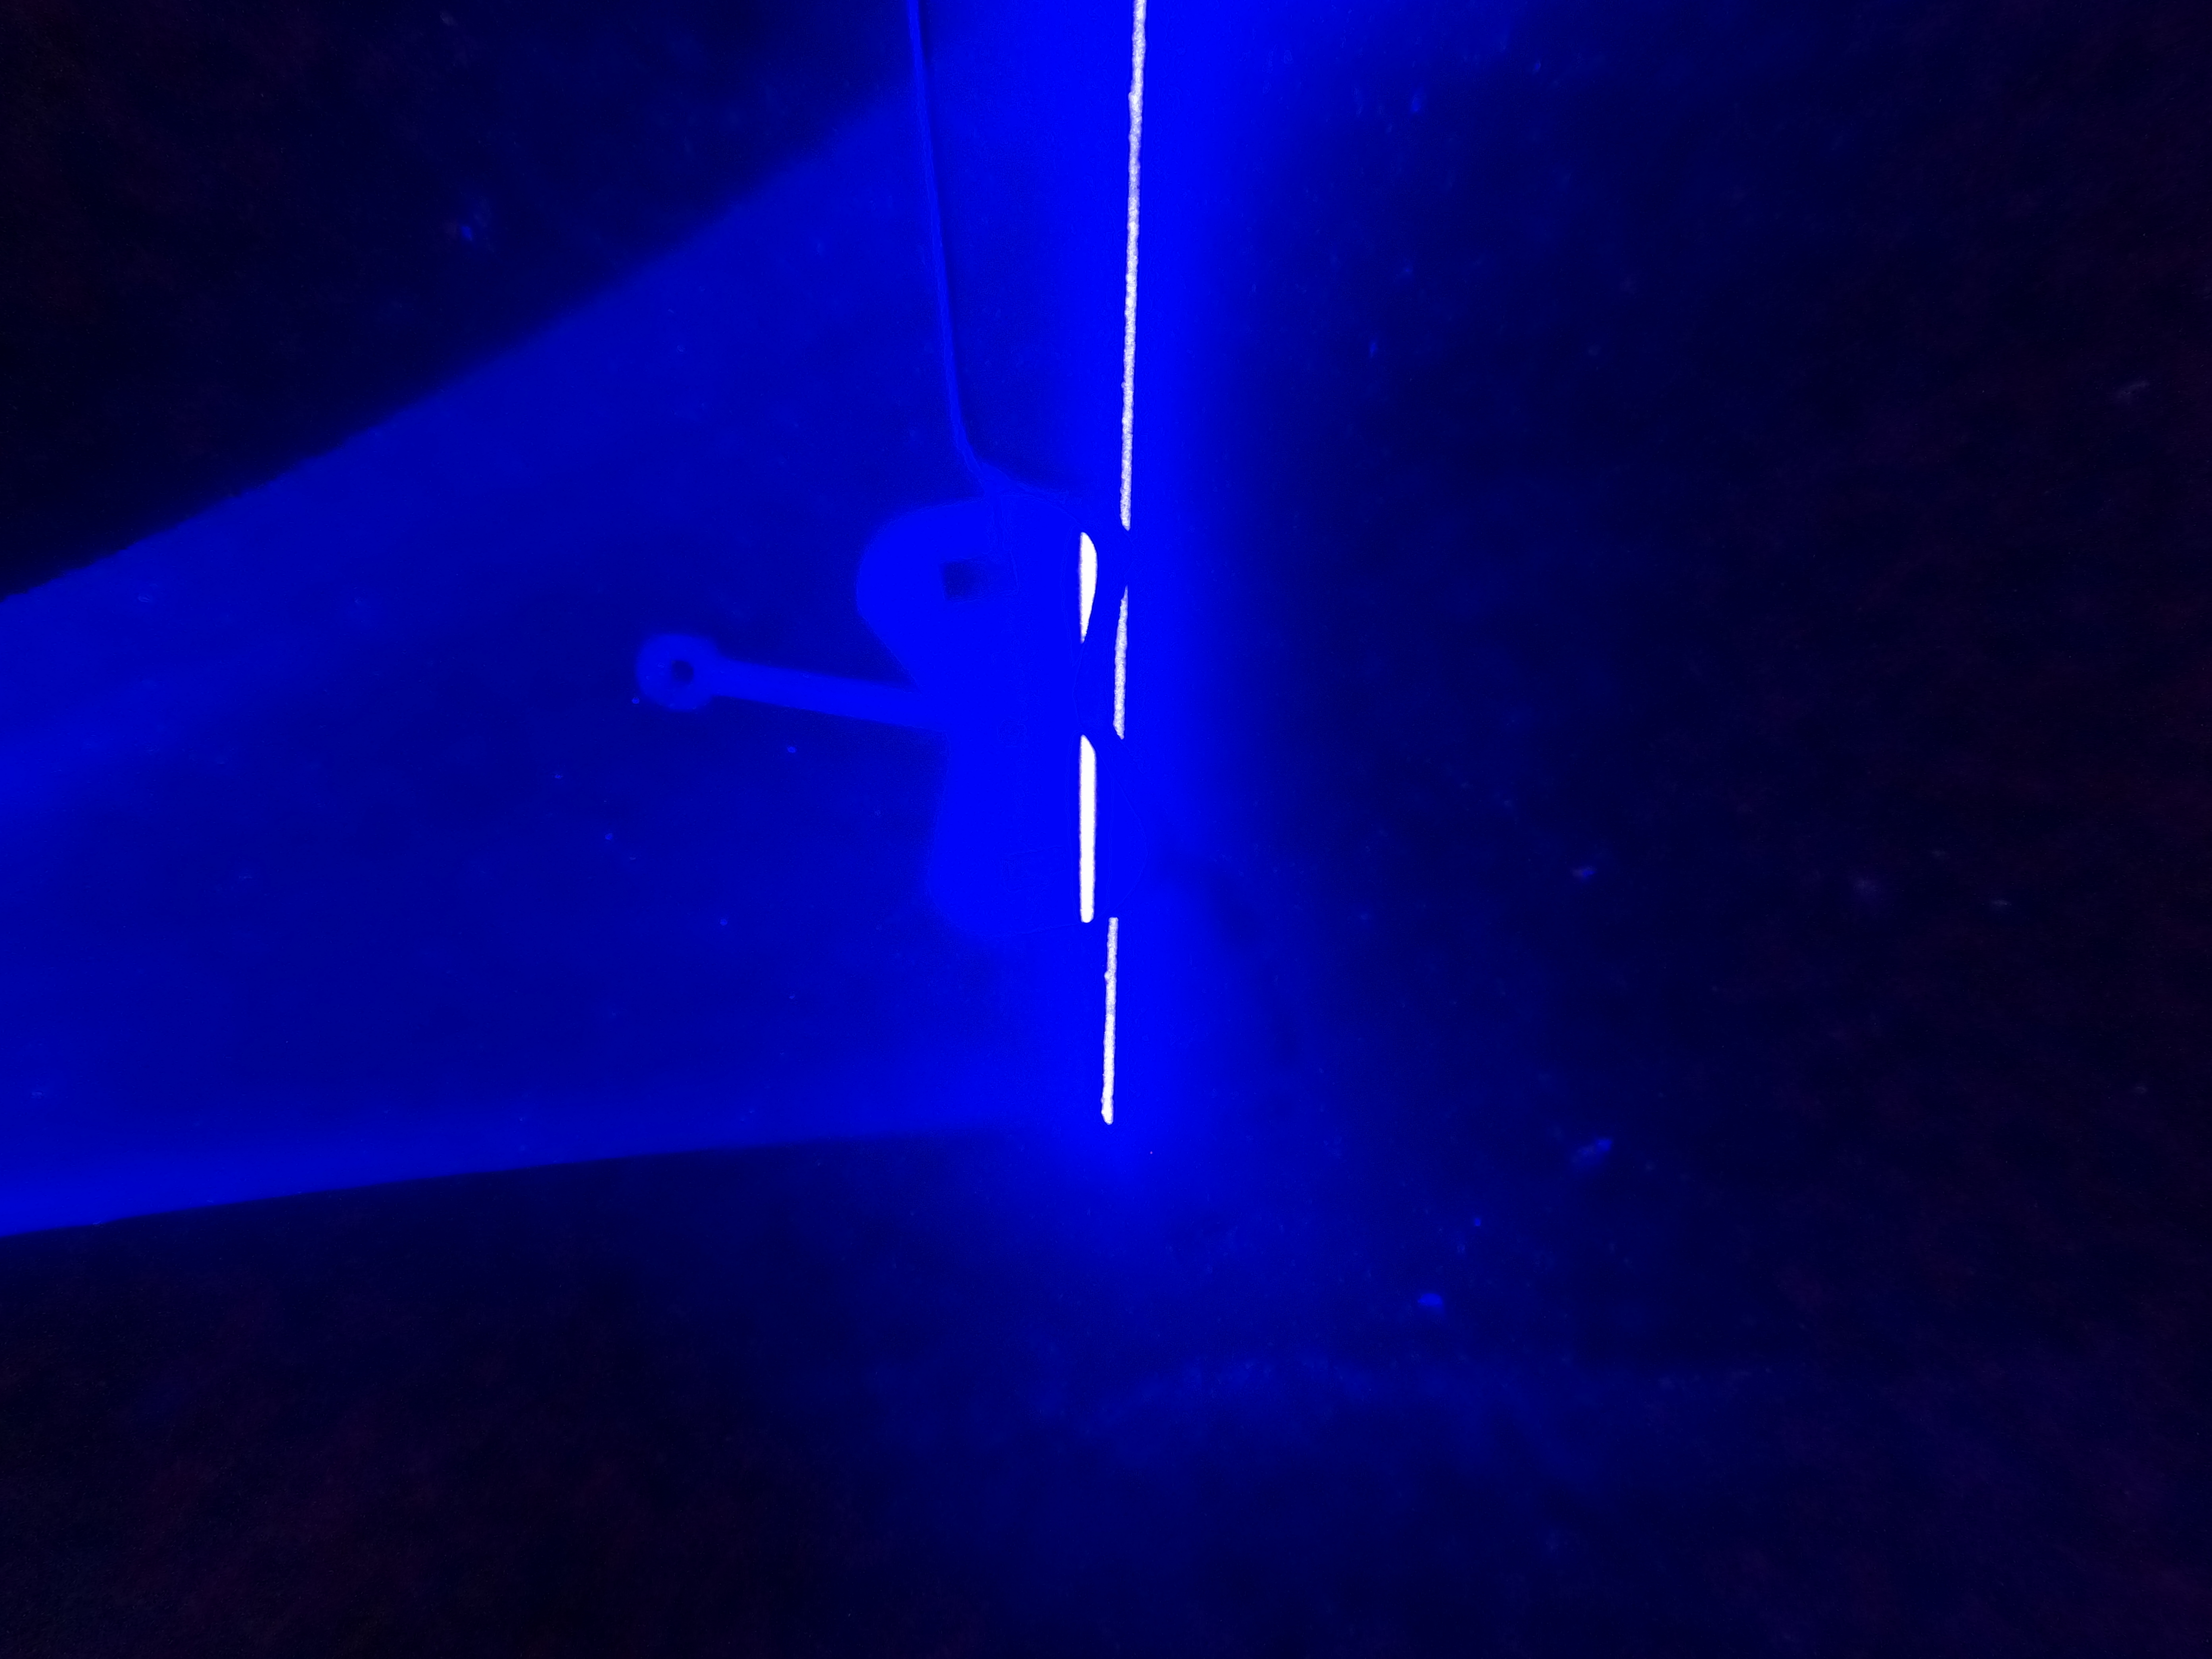

Supplement: Supplementary file 2208 [file G0016517.pdf › Level_1_2/G0016517.pdf]

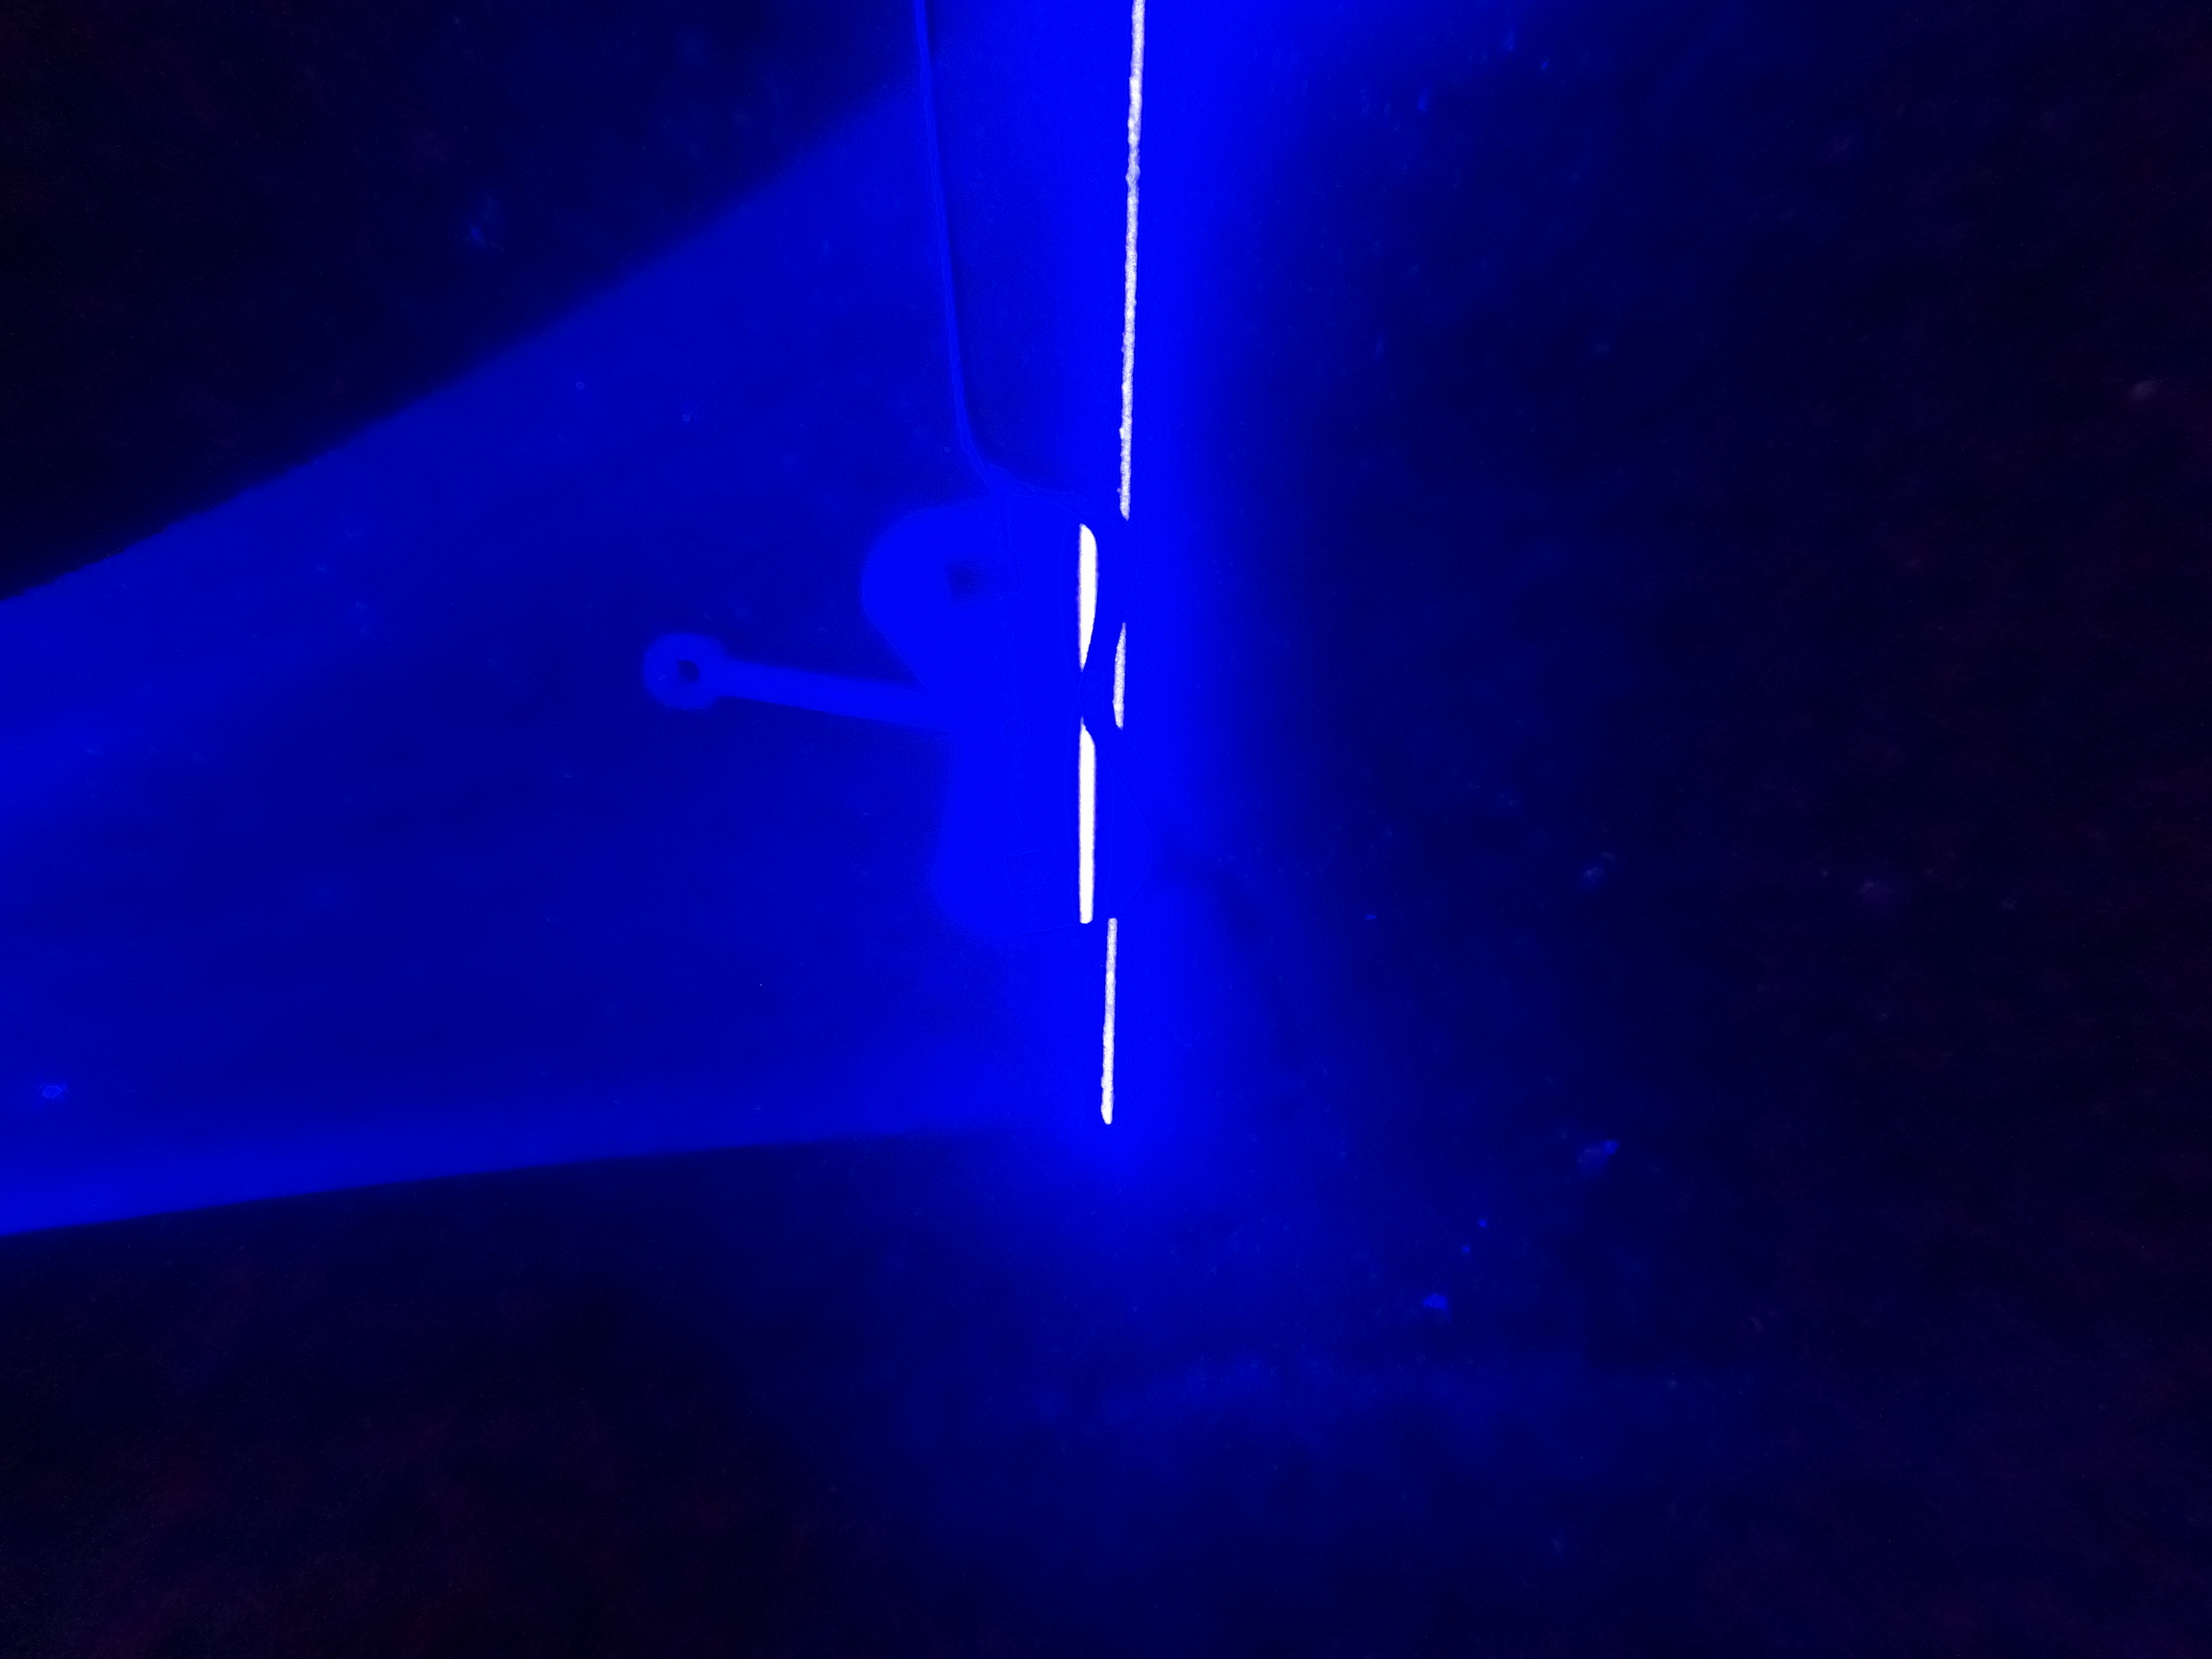

Supplement: Supplementary file 2209 [file G0016518.pdf › Level_1_2/G0016518.pdf]

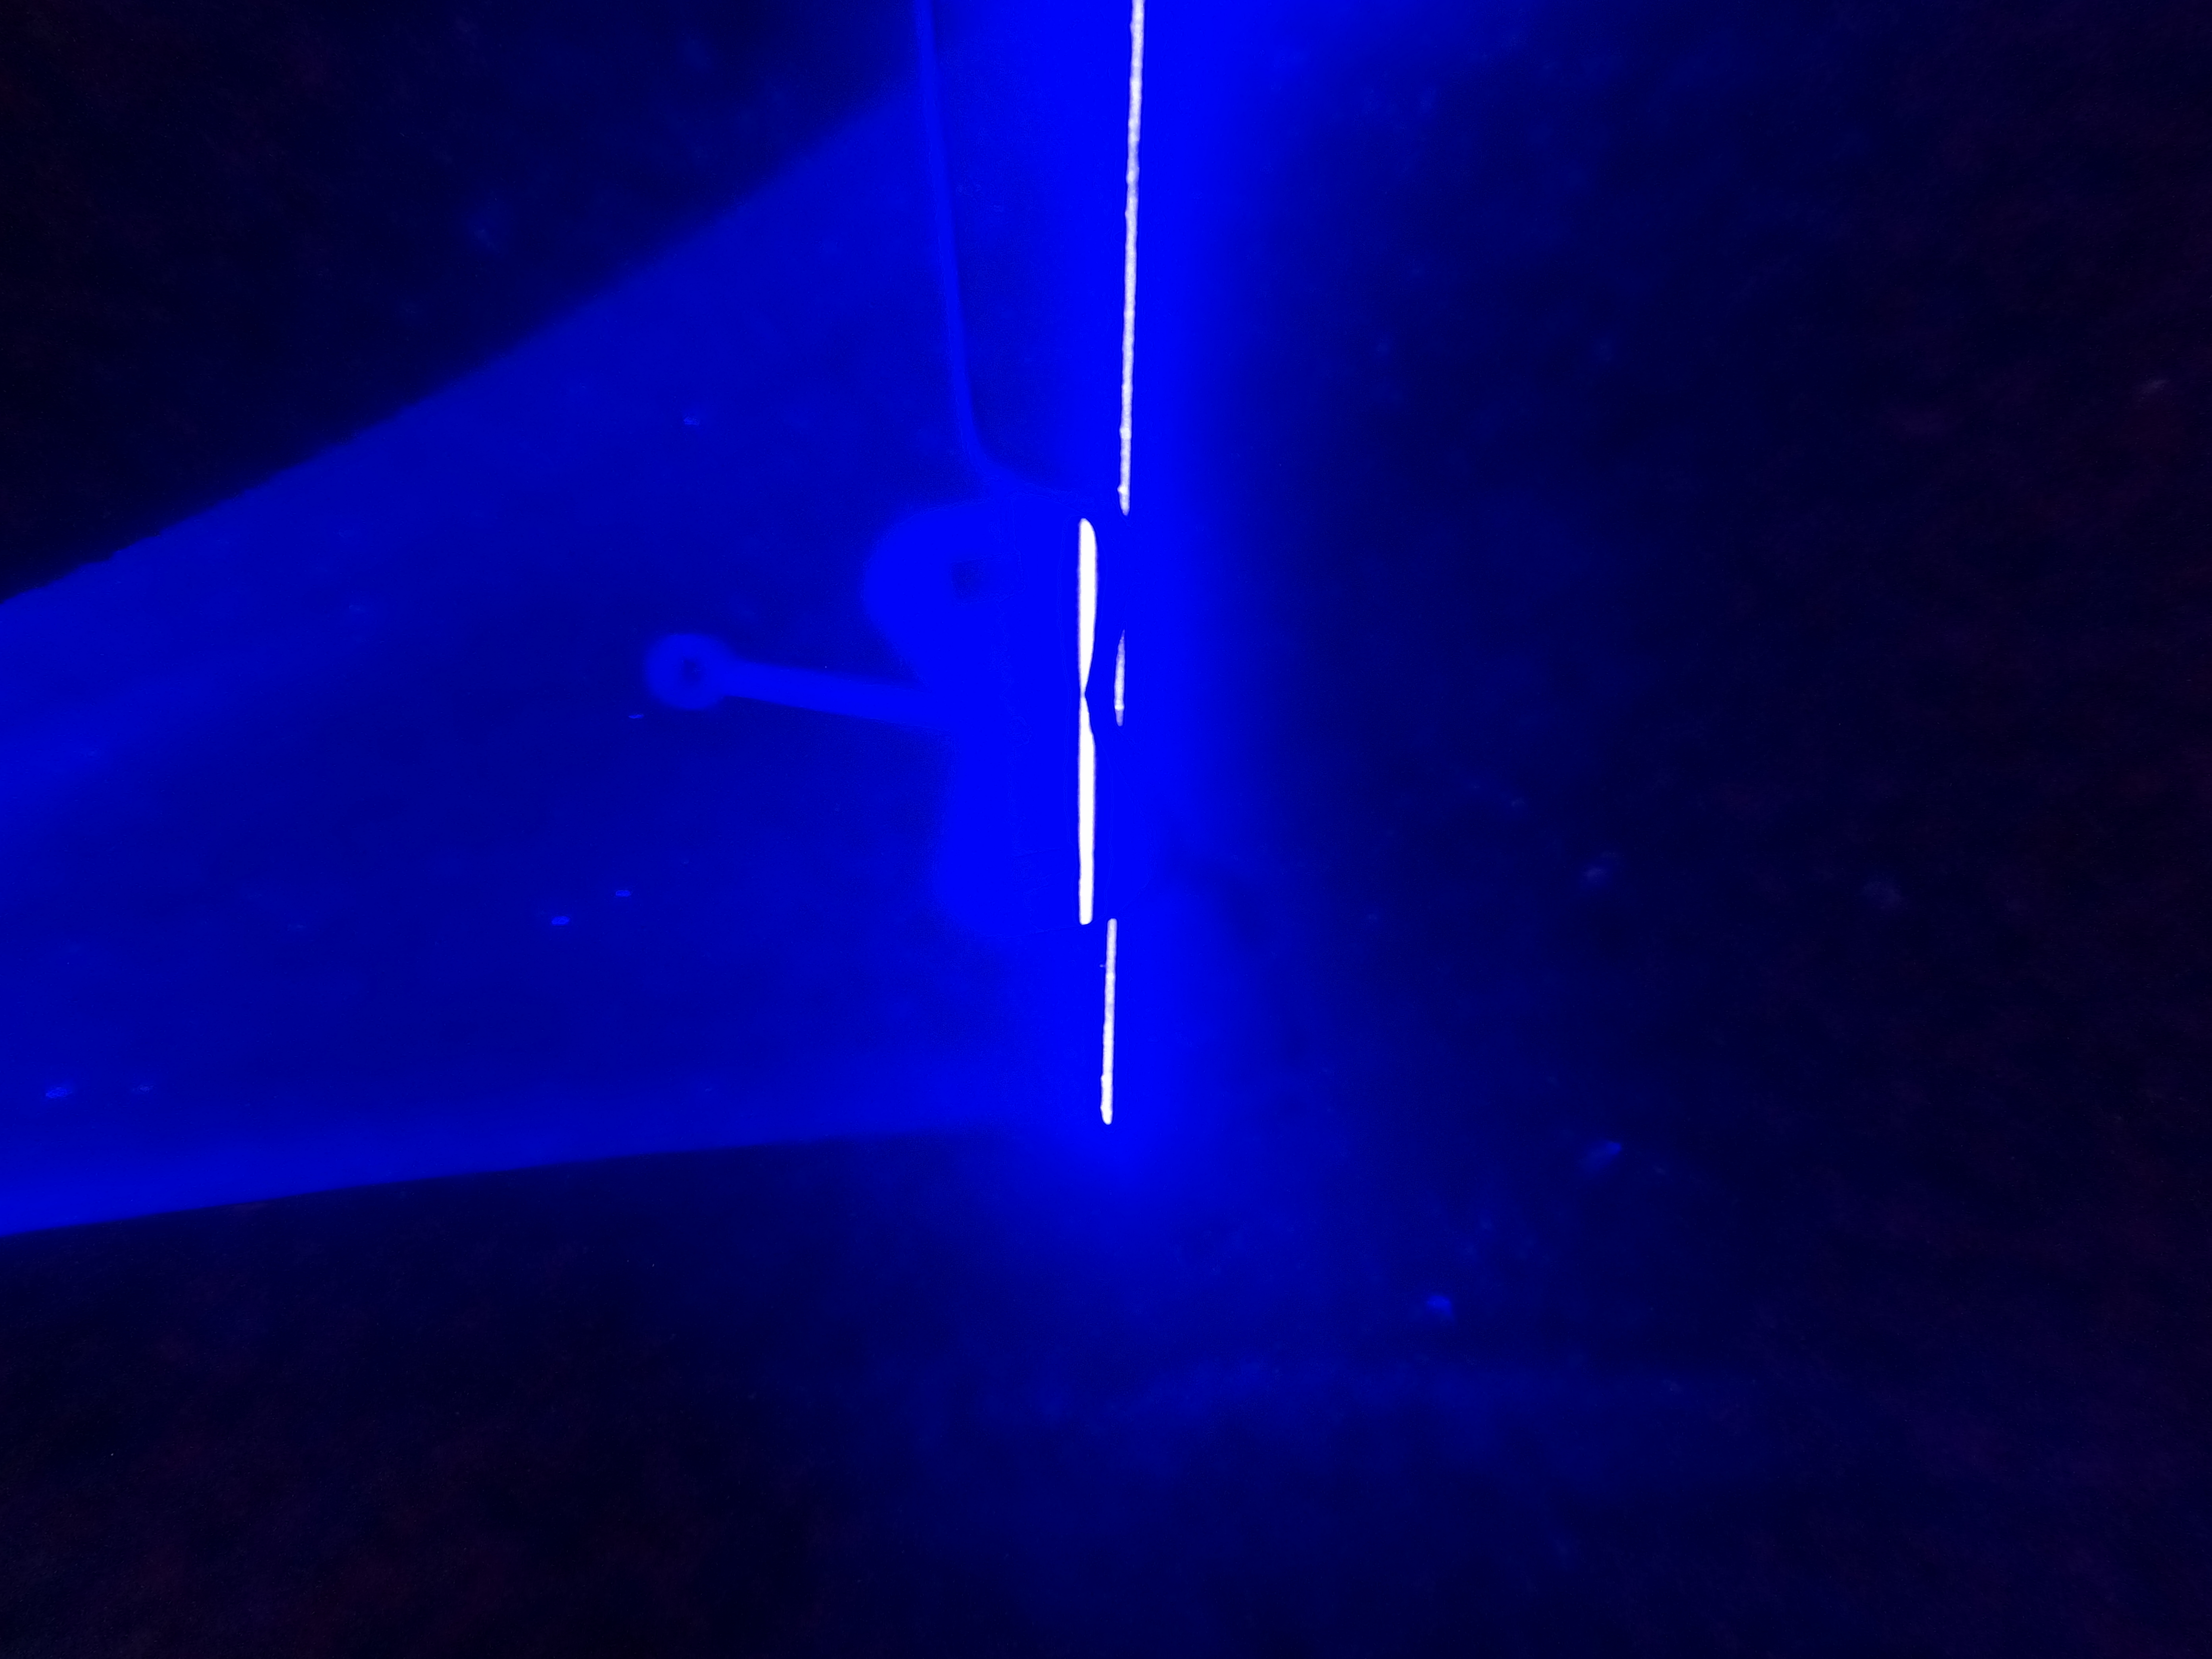

Supplement: Supplementary file 2210 [file G0016519.pdf › Level_1_2/G0016519.pdf]

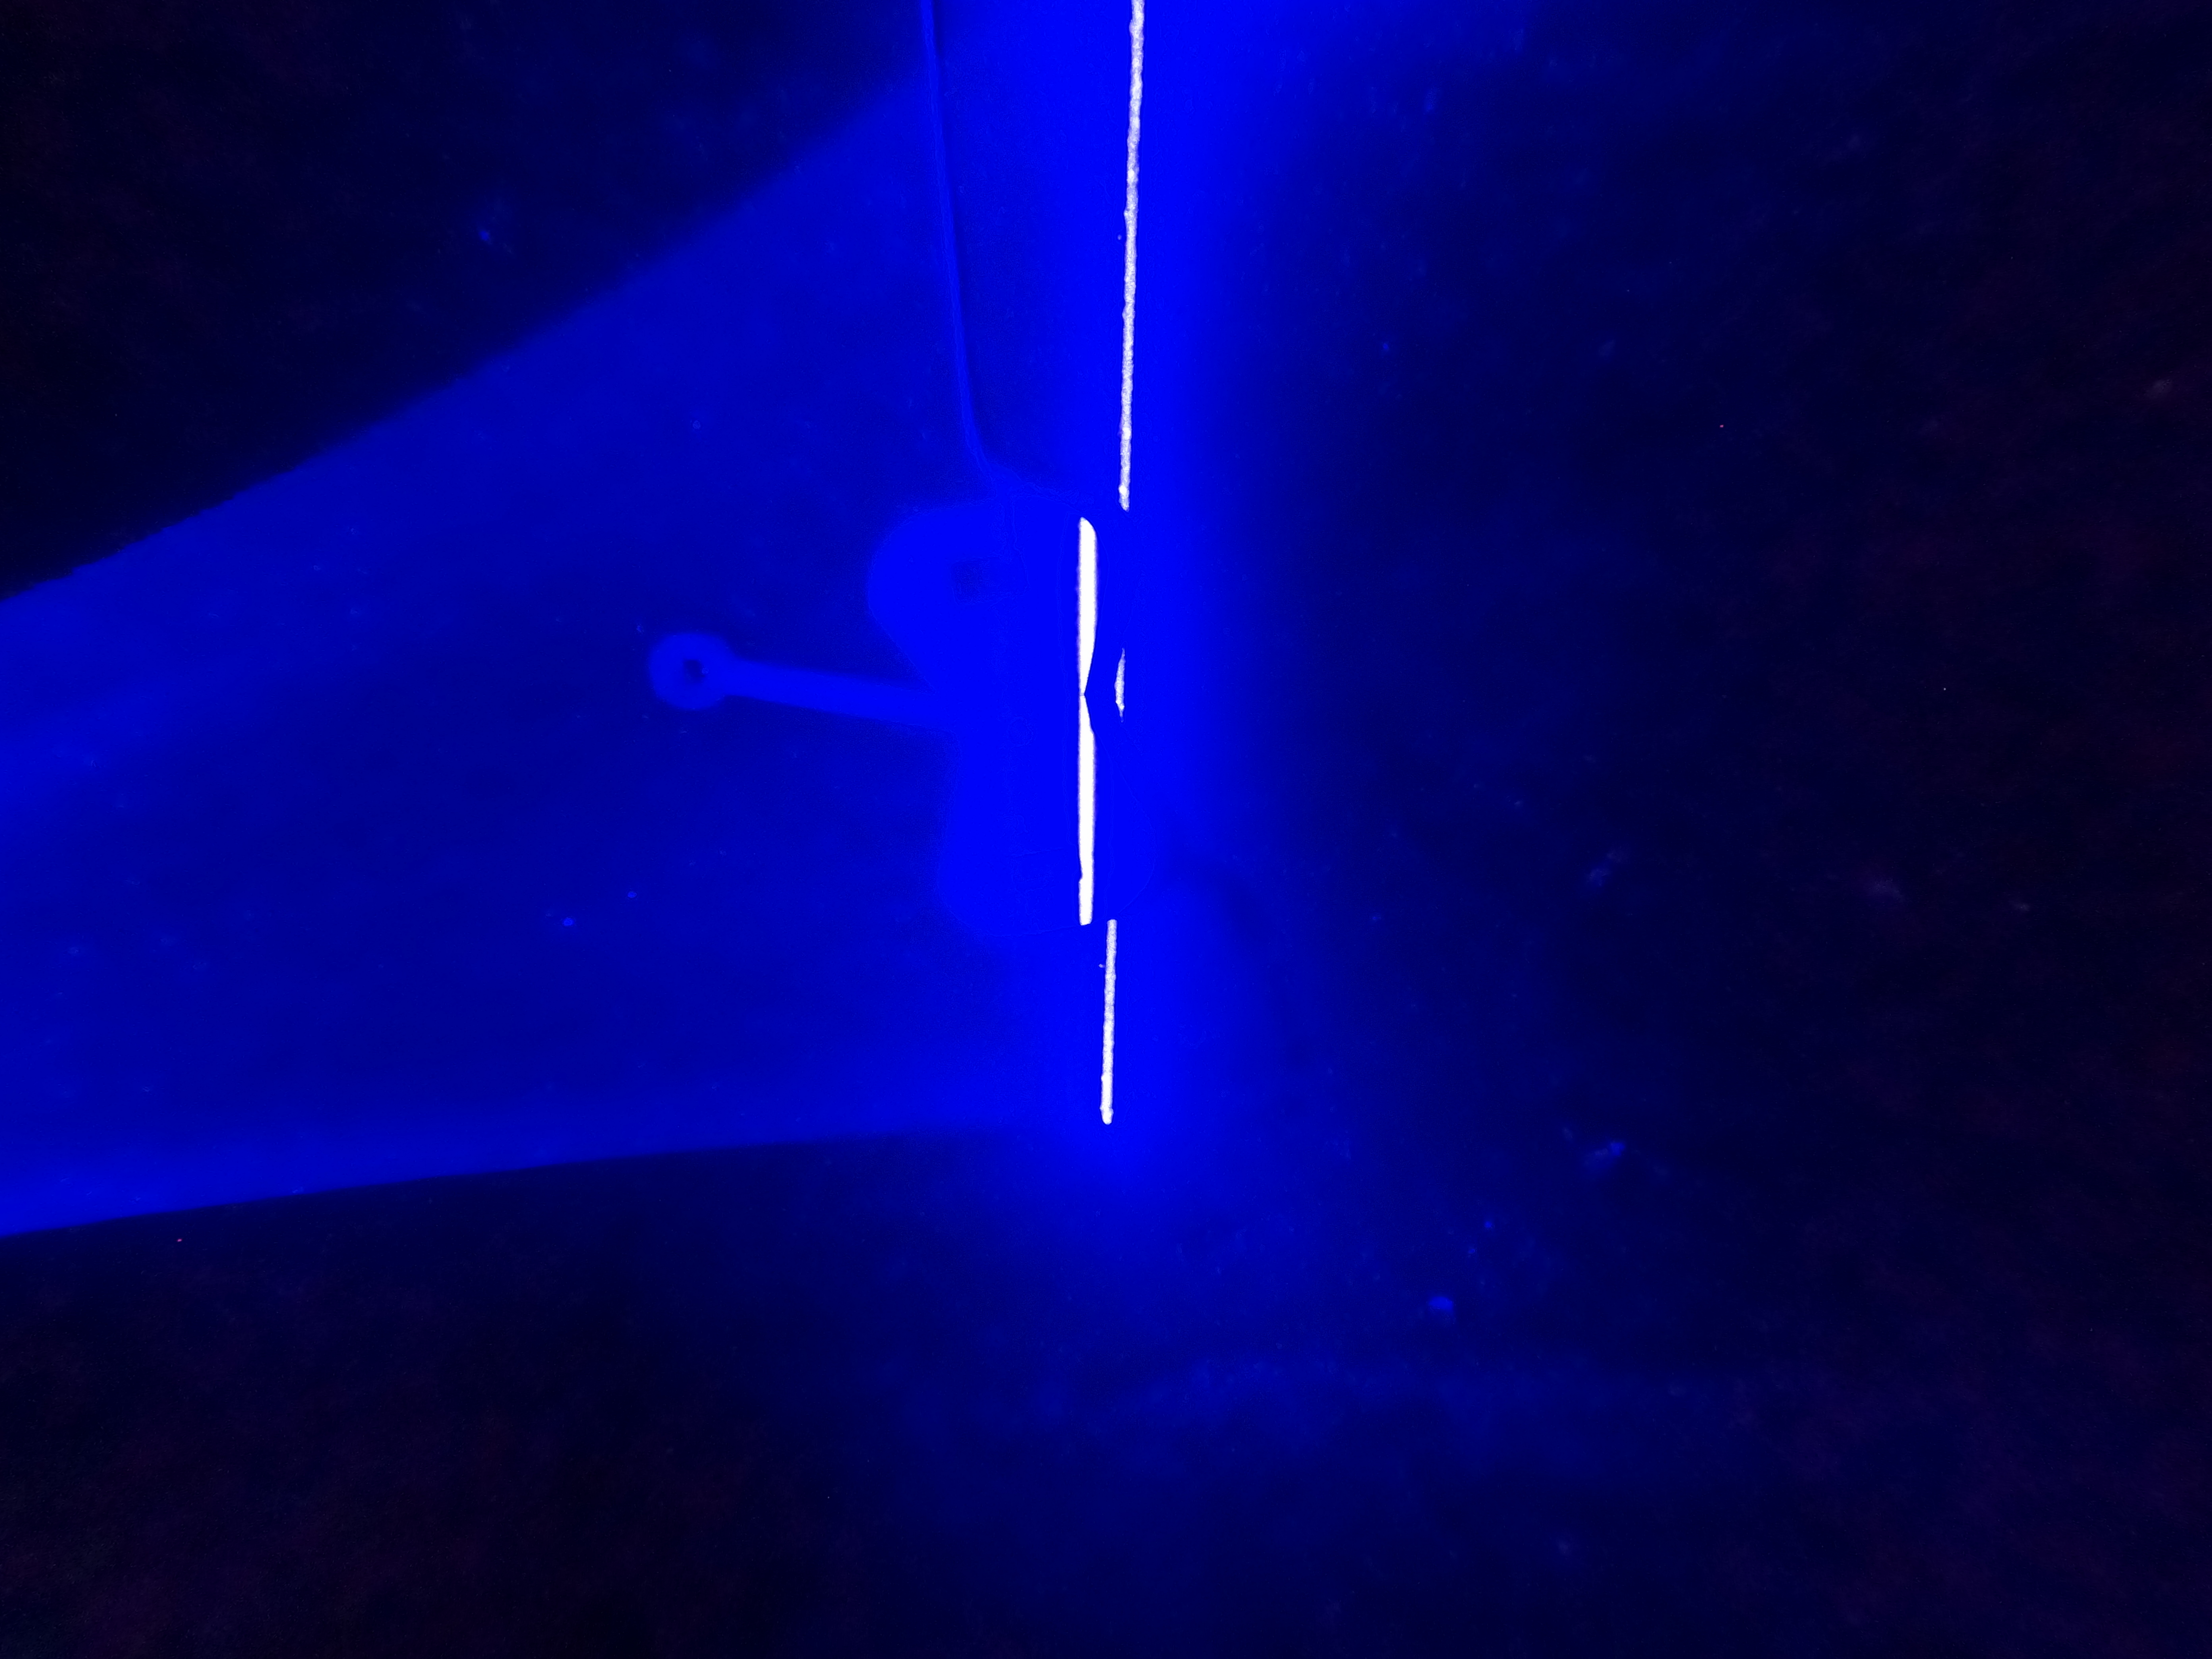

Supplement: Supplementary file 2211 [file G0016520.pdf › Level_1_2/G0016520.pdf]

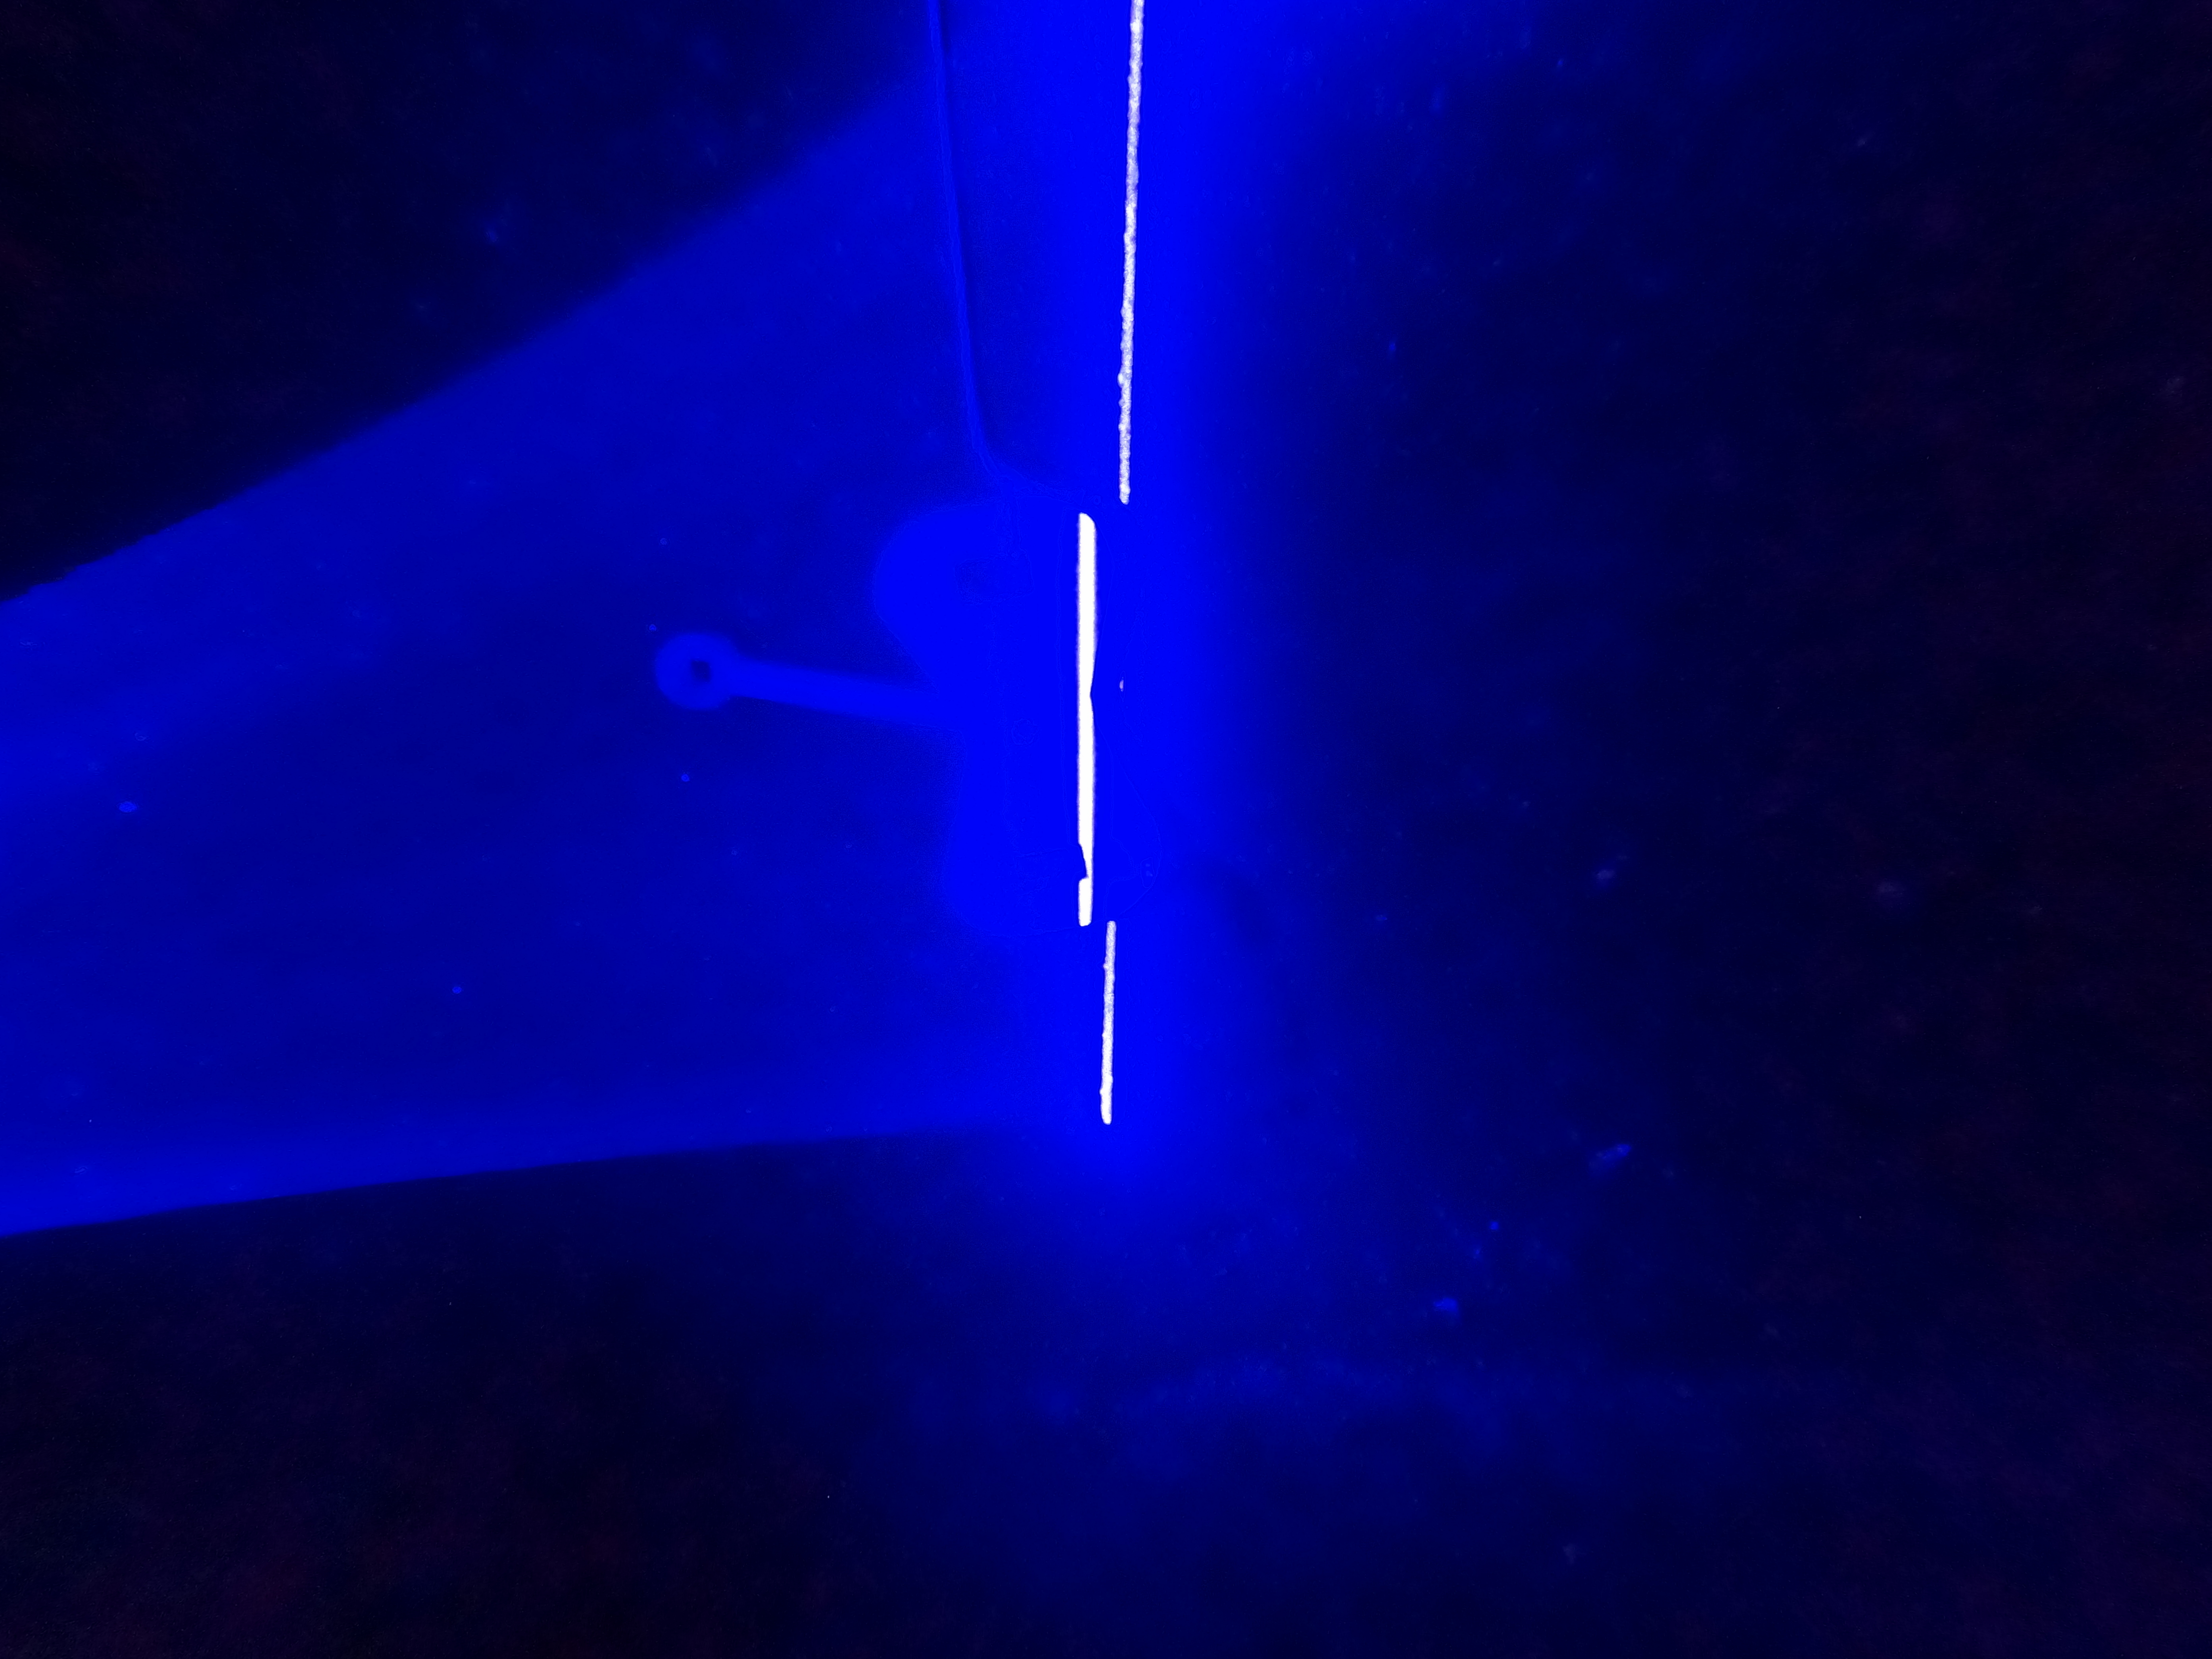

Supplement: Supplementary file 2212 [file G0016521.pdf › Level_1_2/G0016521.pdf]

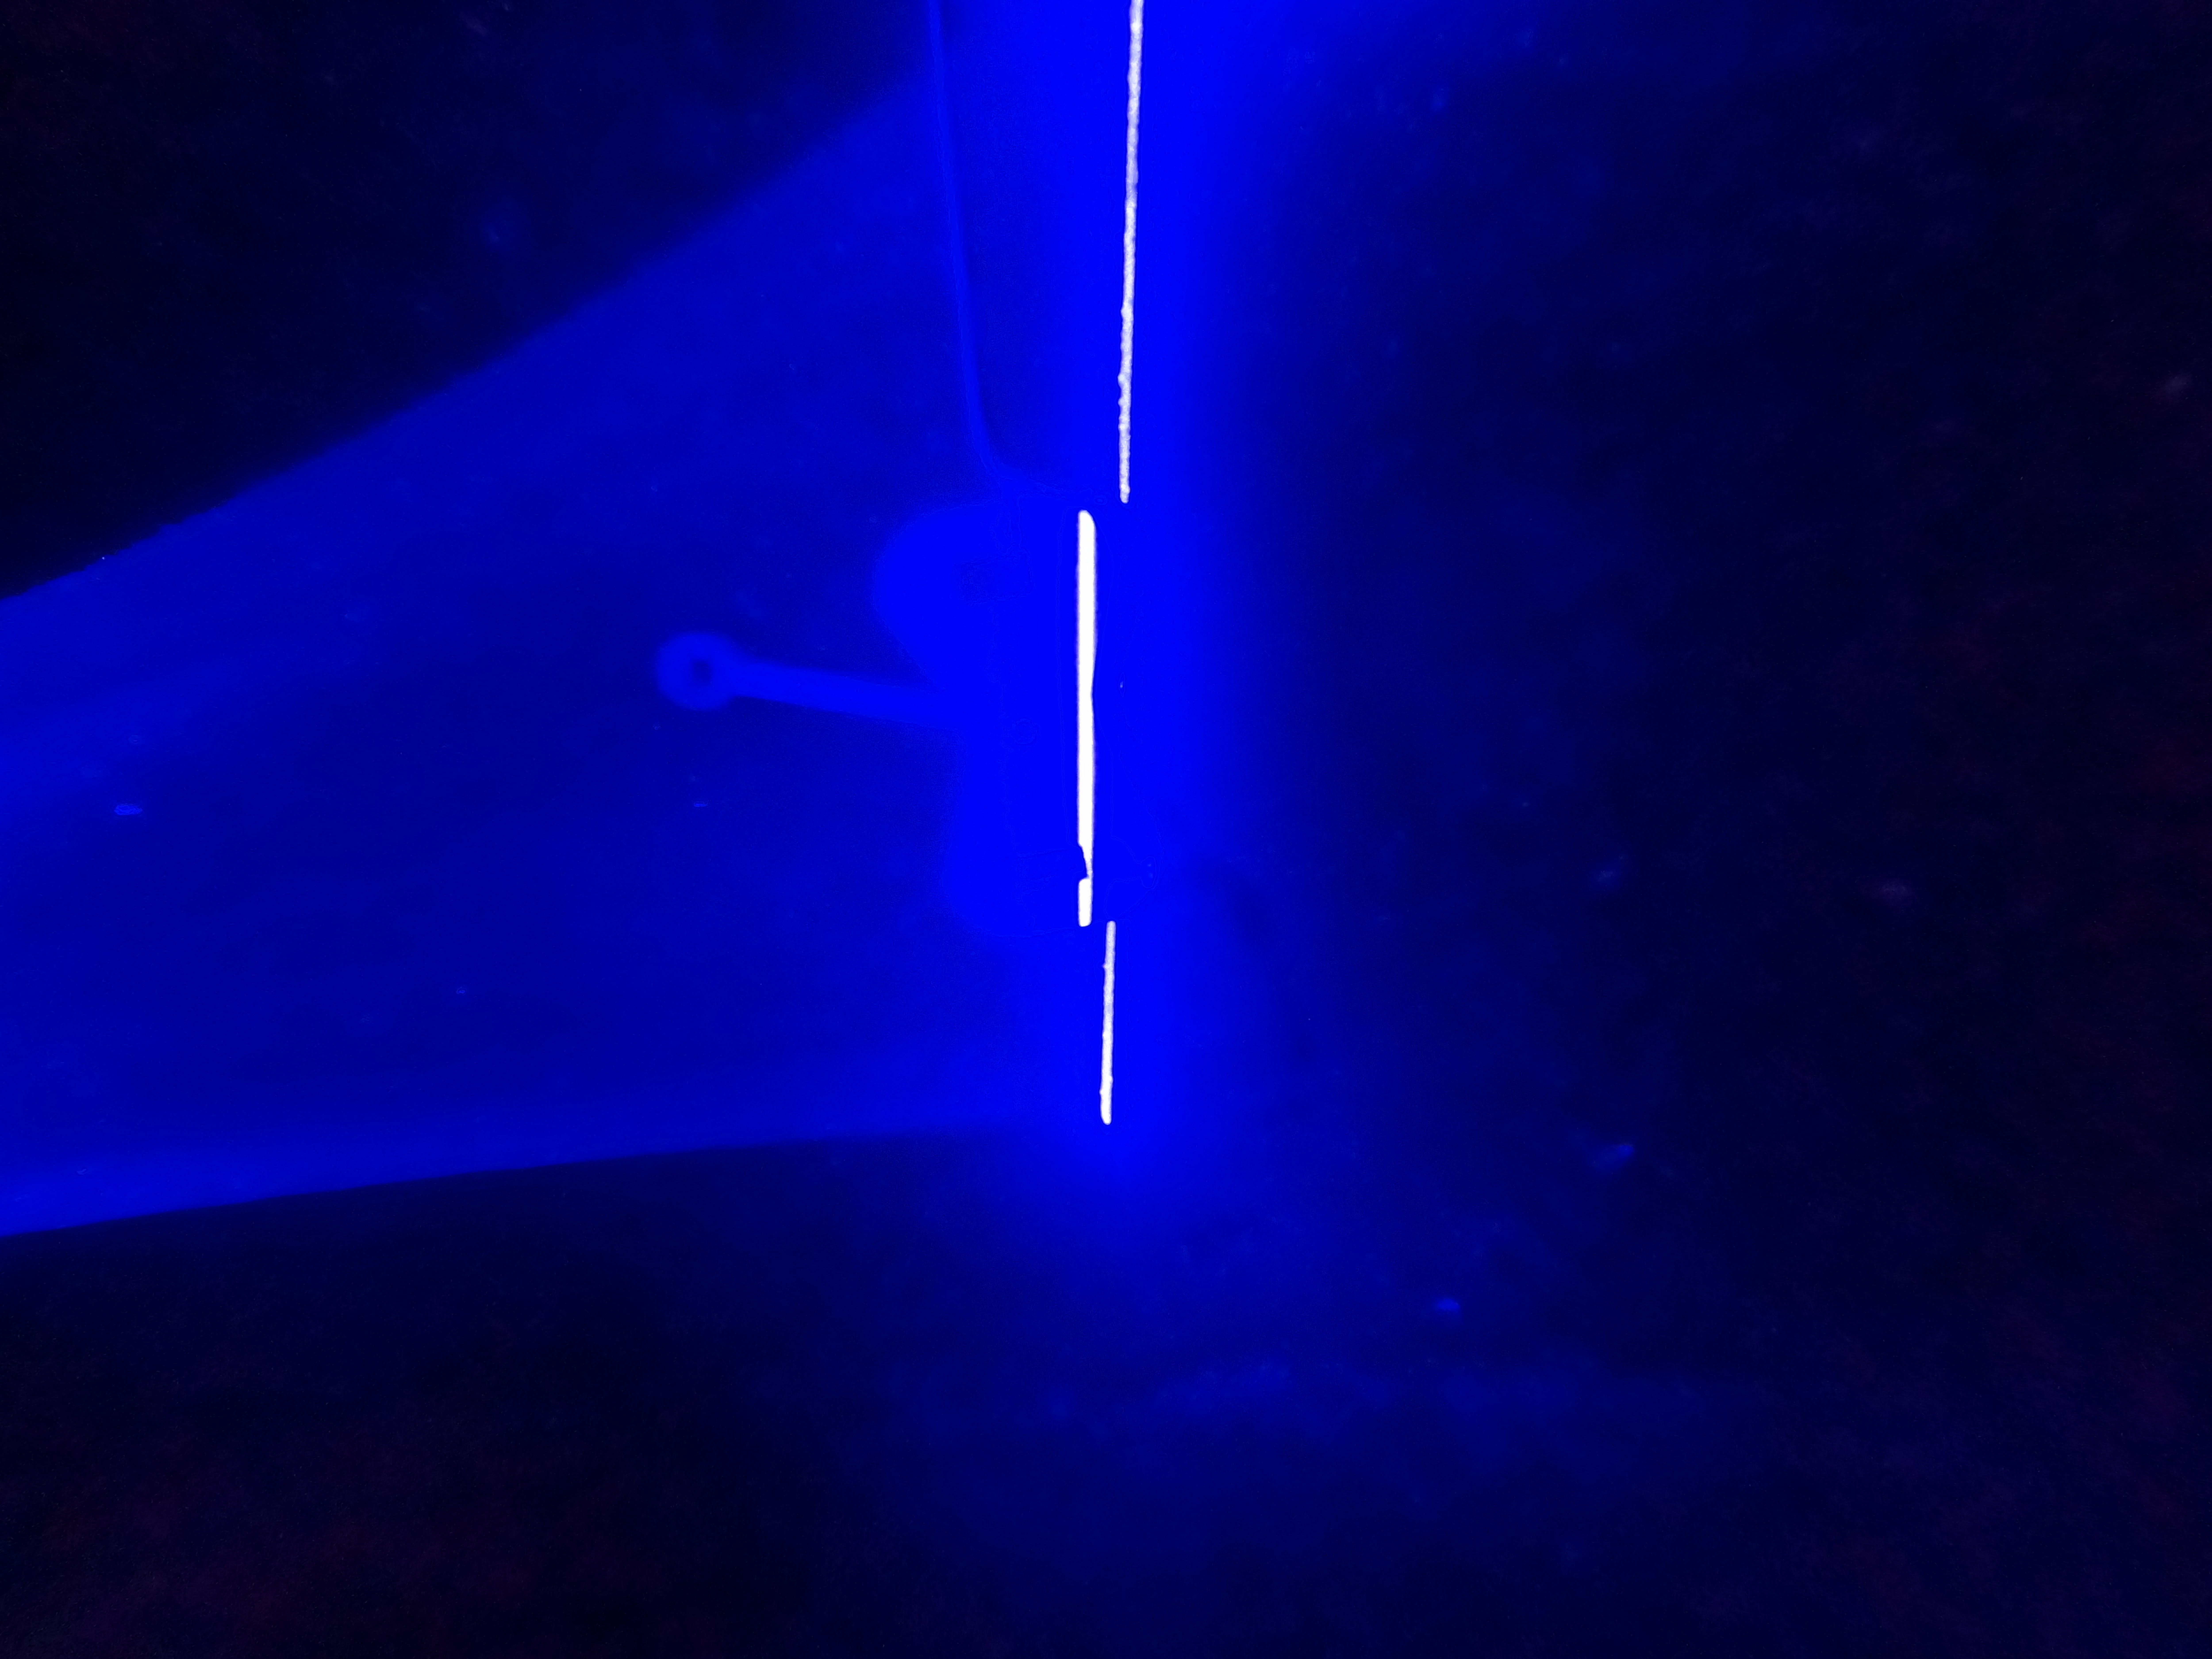

Supplement: Supplementary file 2213 [file G0016522.pdf › Level_1_2/G0016522.pdf]

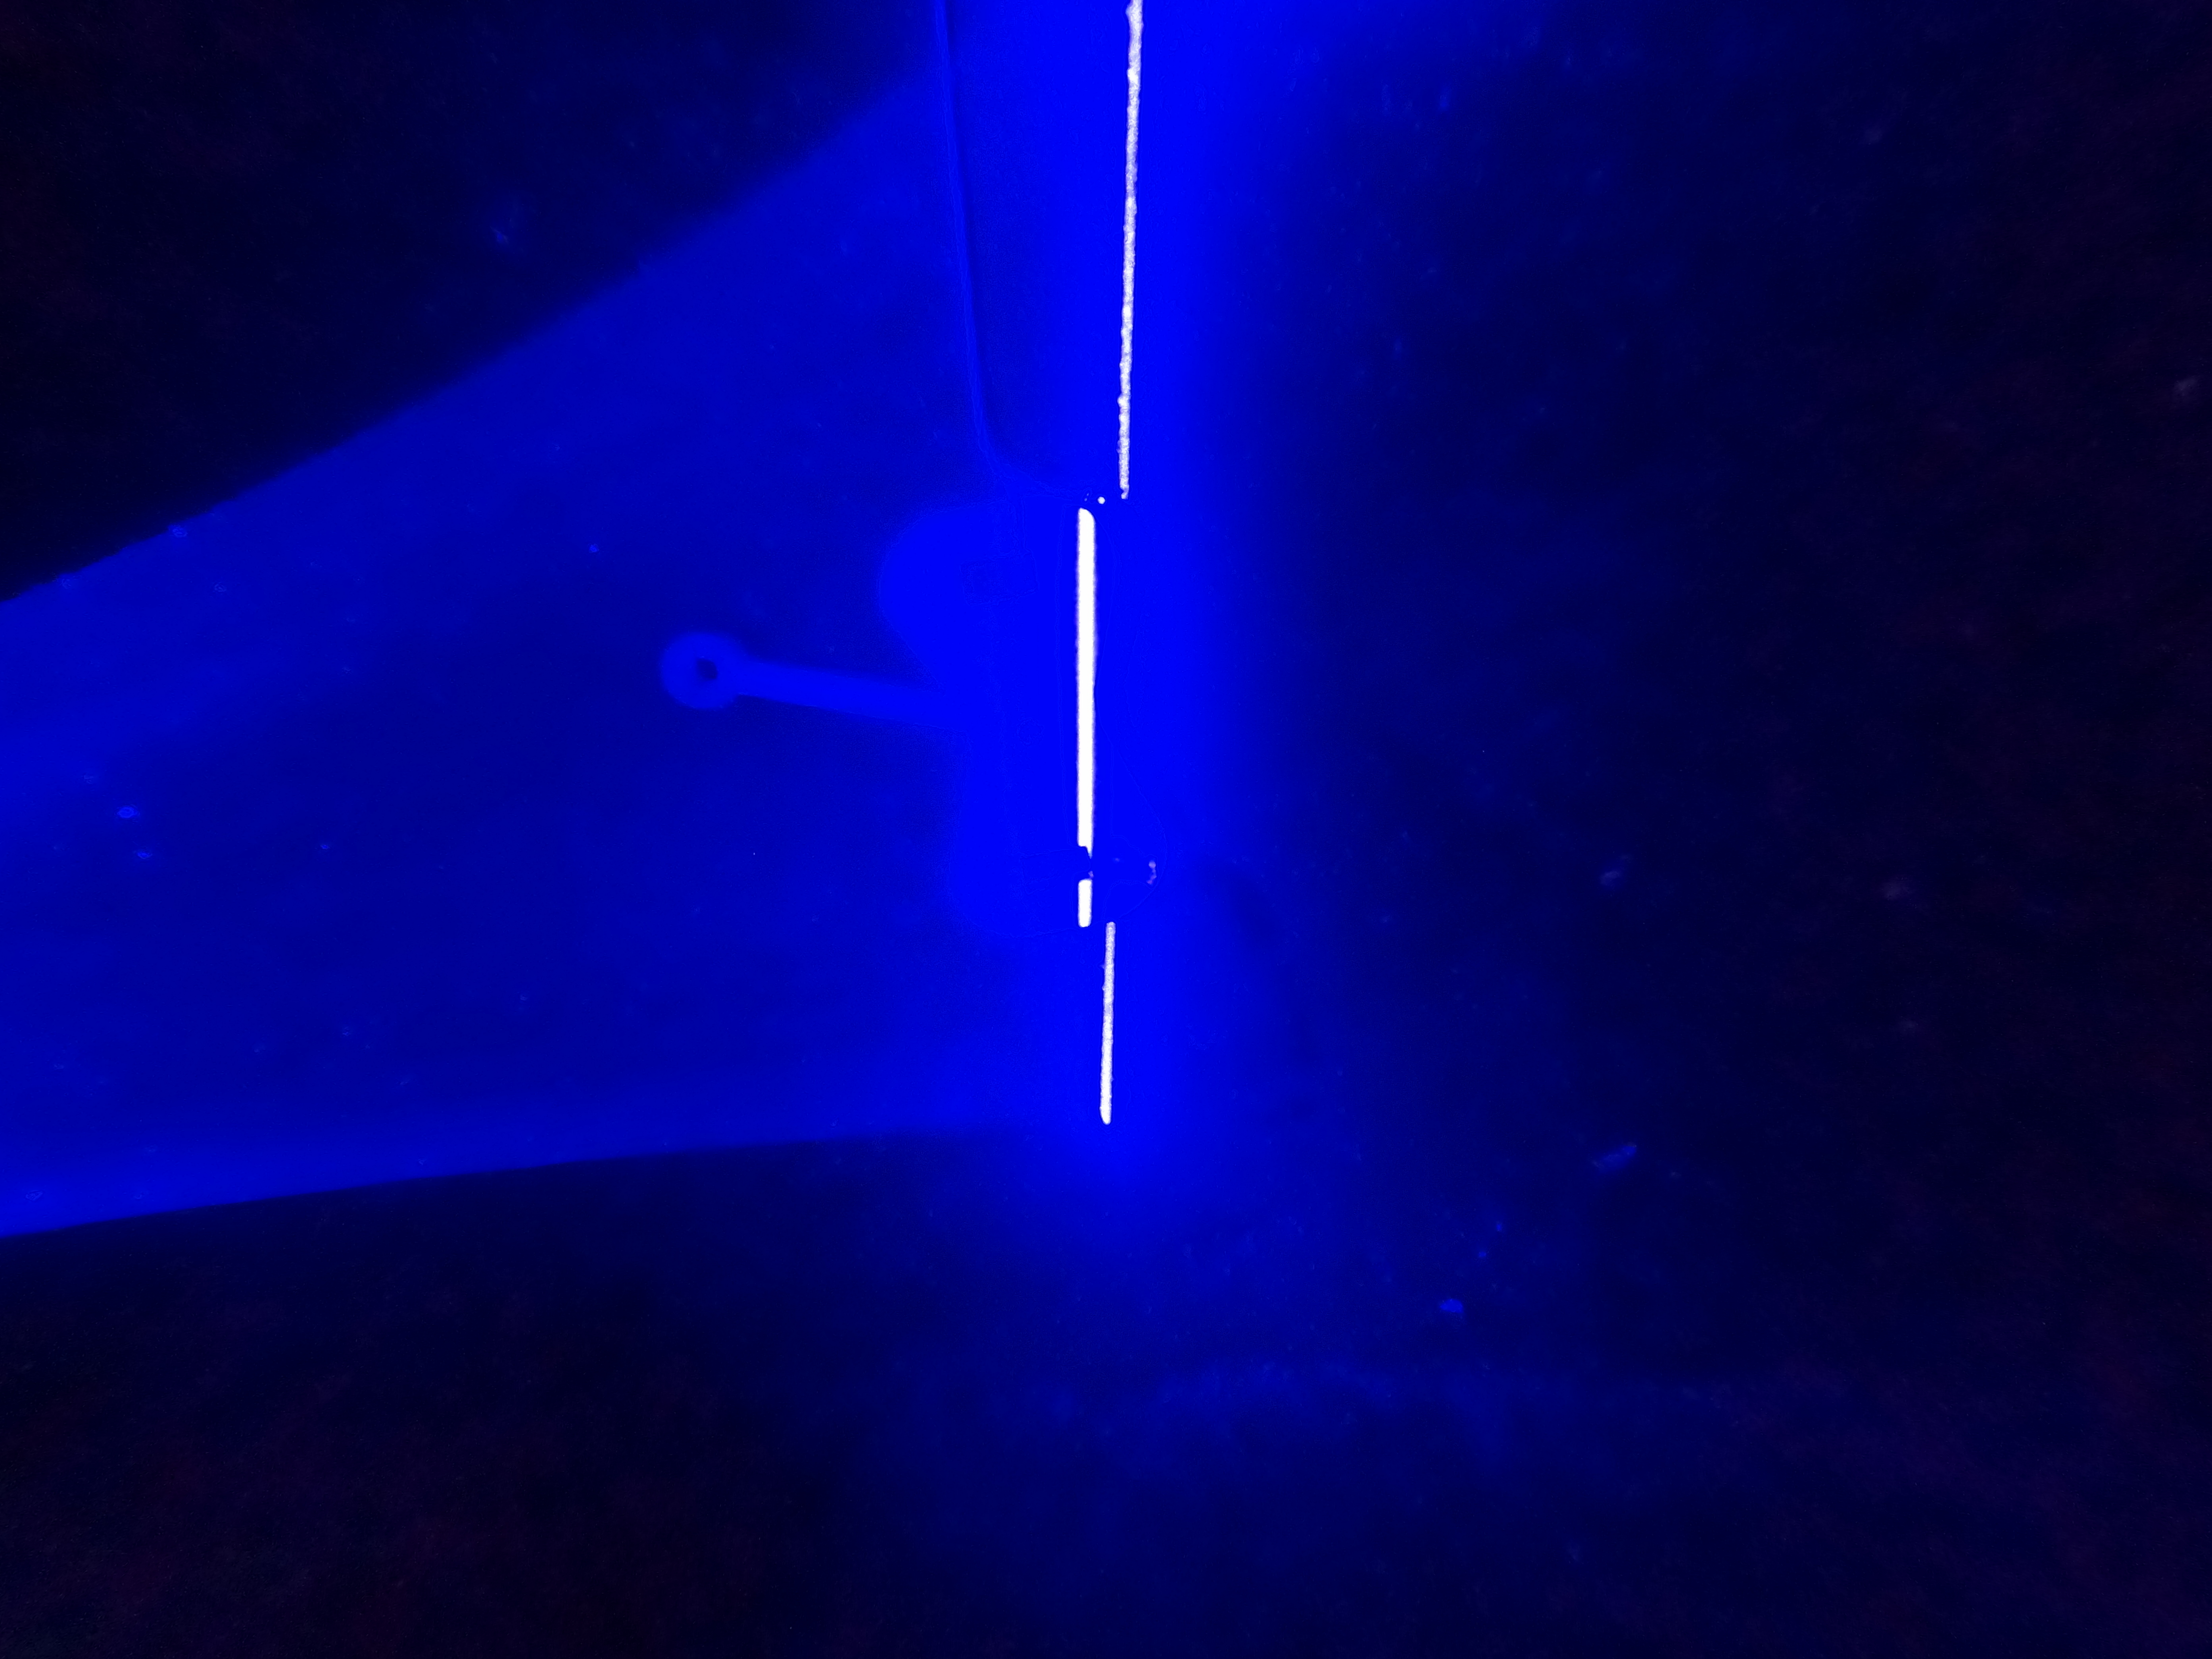

Supplement: Supplementary file 2214 [file G0016523.pdf › Level_1_2/G0016523.pdf]

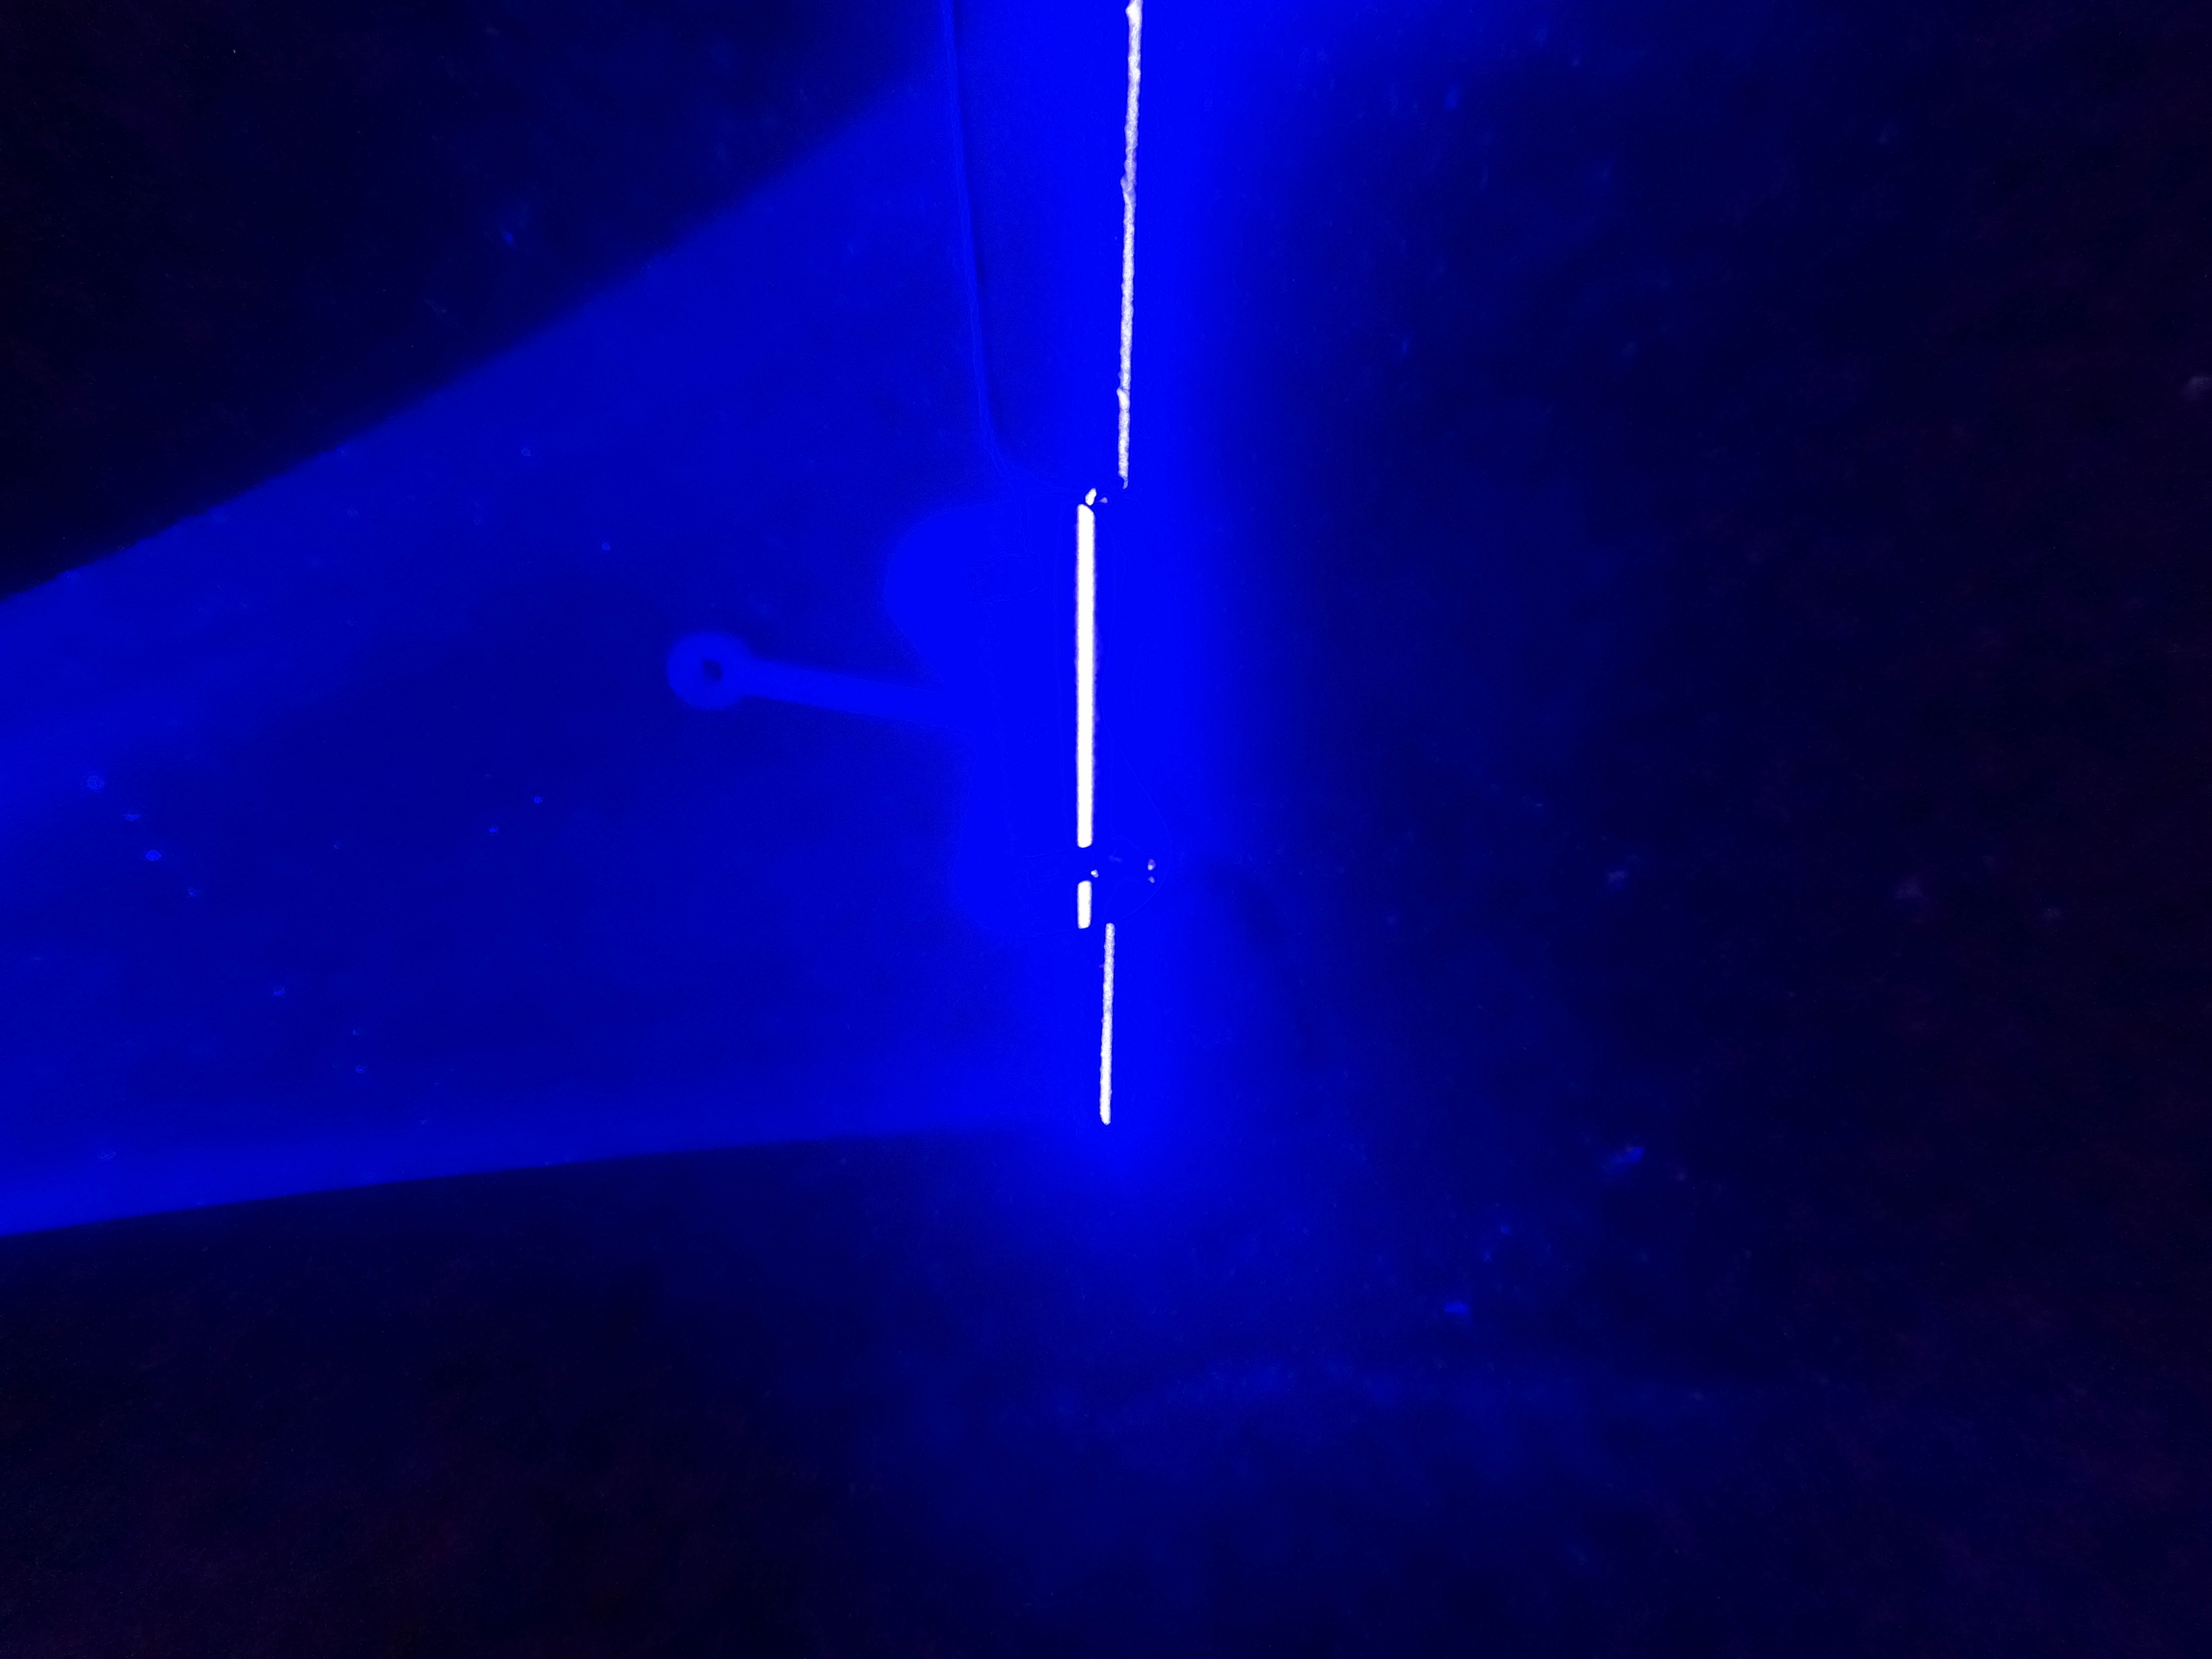

Supplement: Supplementary file 2215 [file G0016524.pdf › Level_1_2/G0016524.pdf]

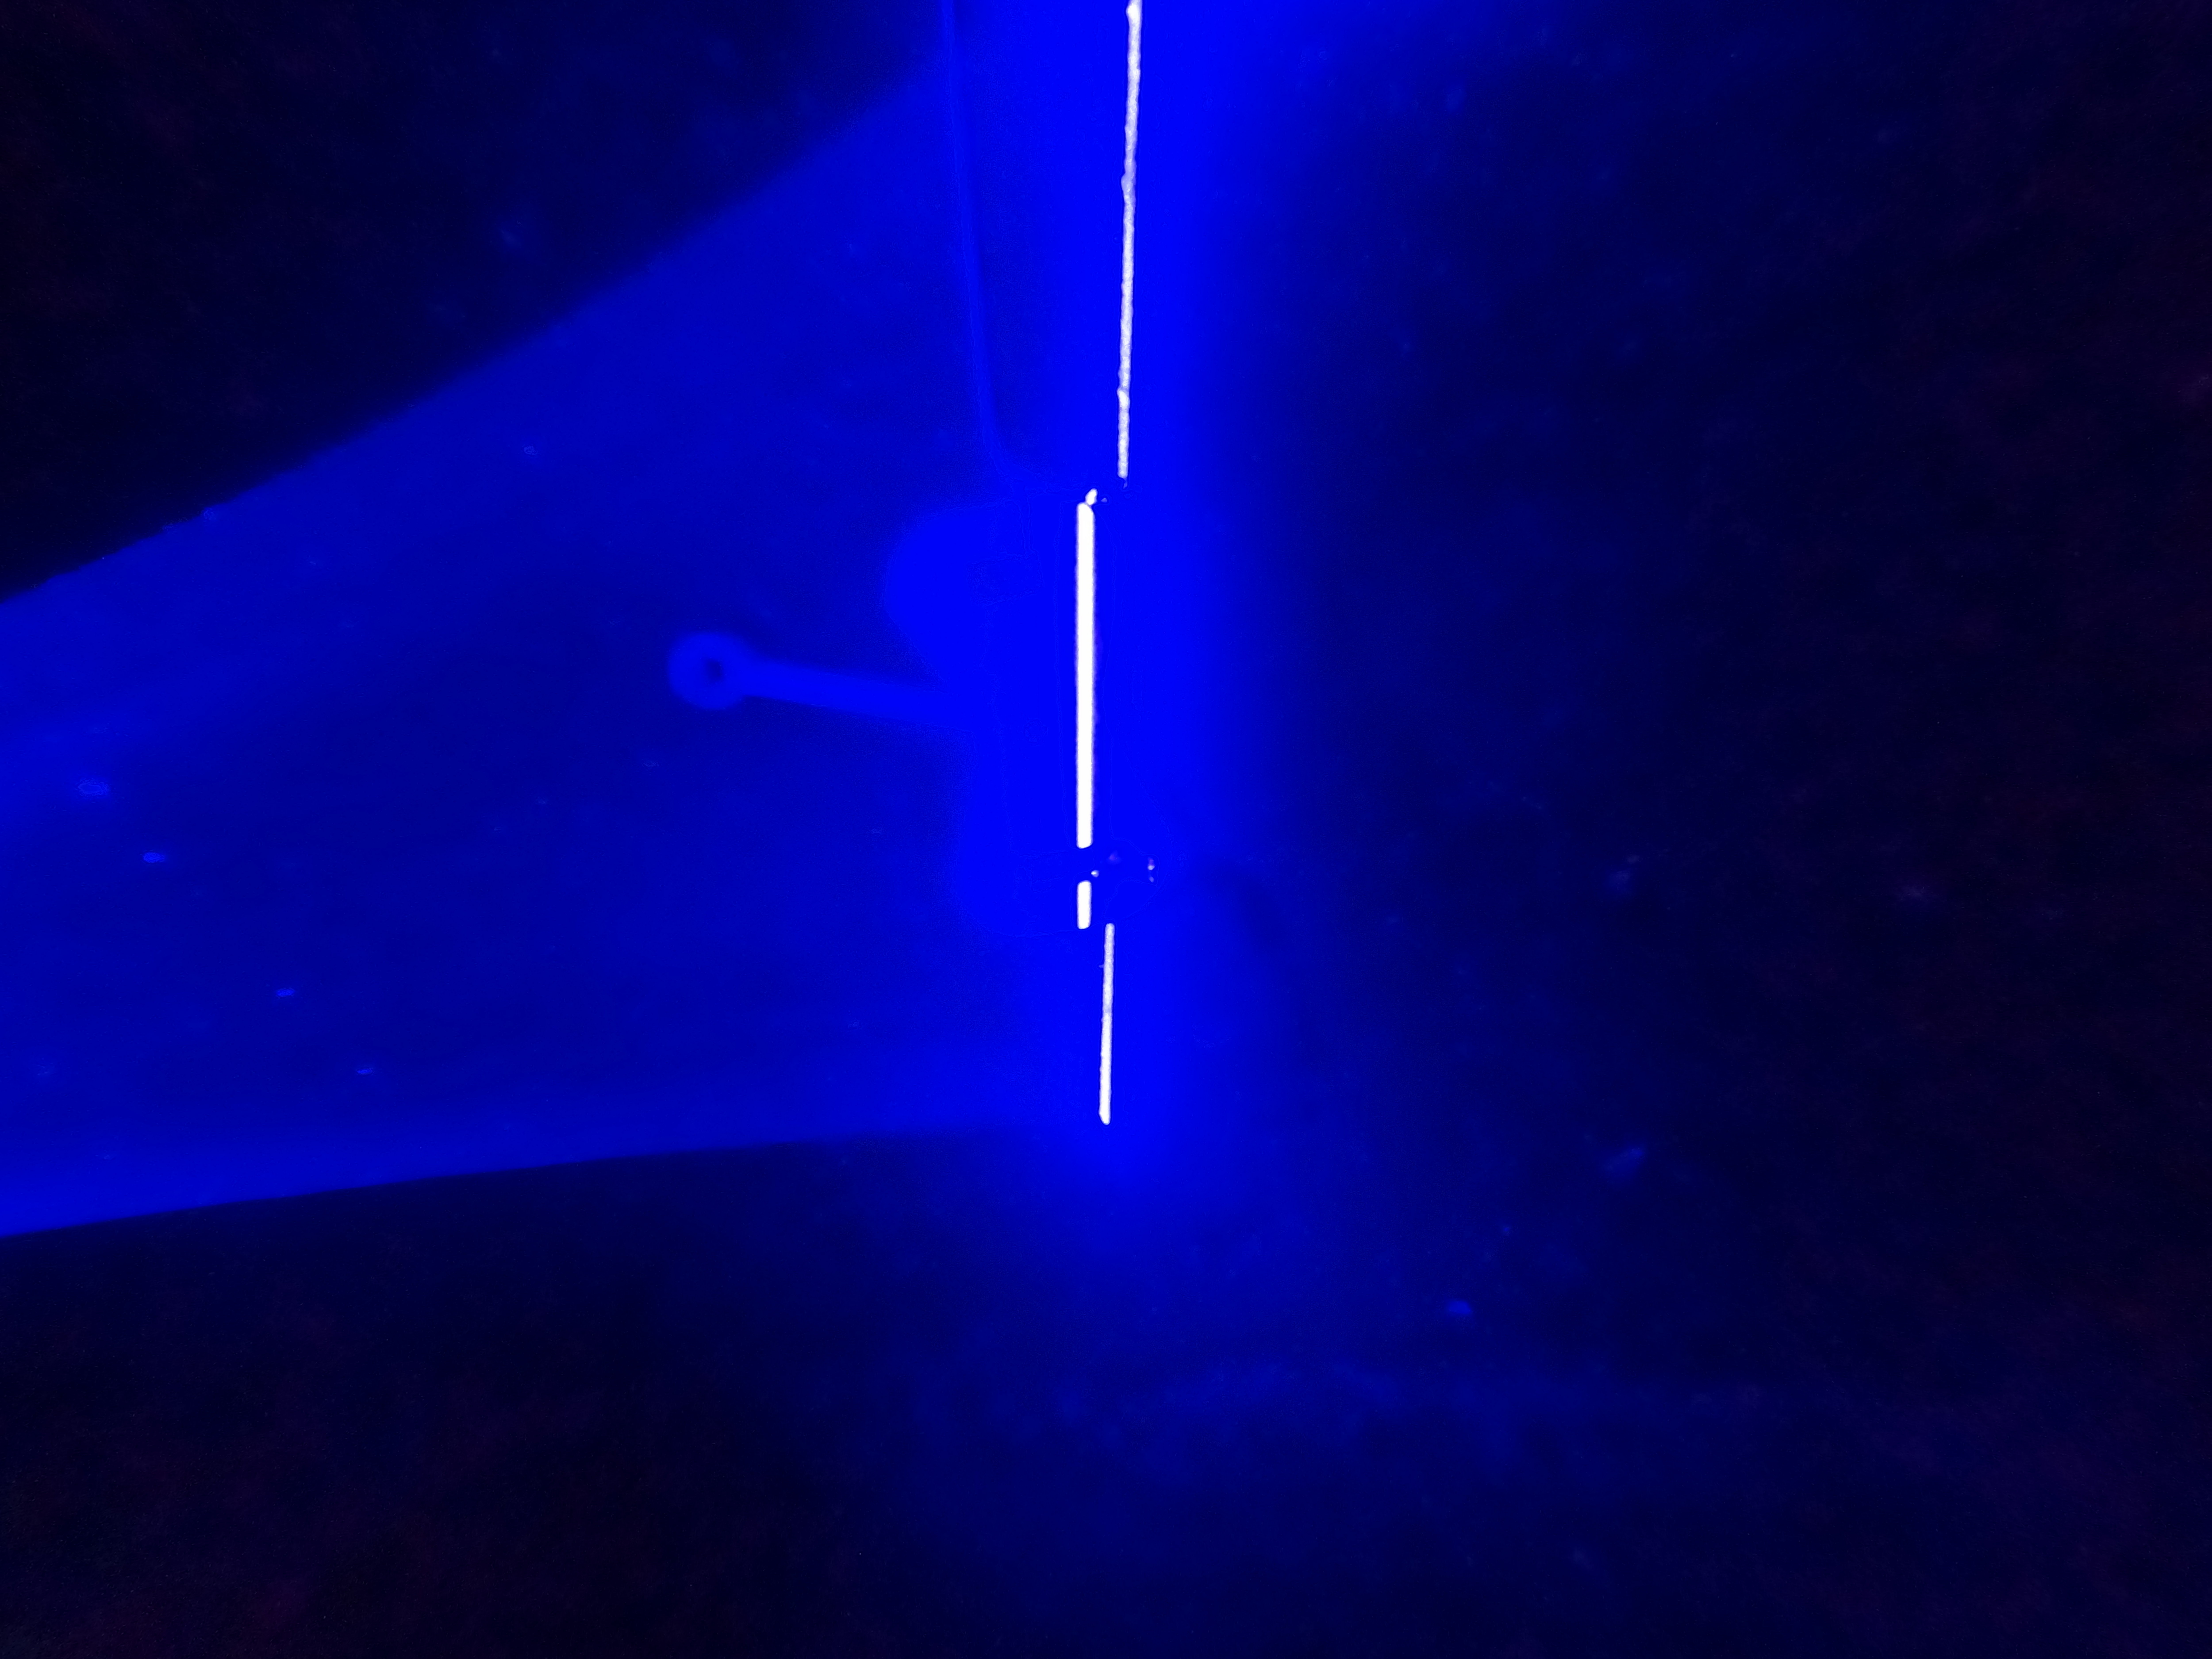

Supplement: Supplementary file 2216 [file G0016525.pdf › Level_1_2/G0016525.pdf]

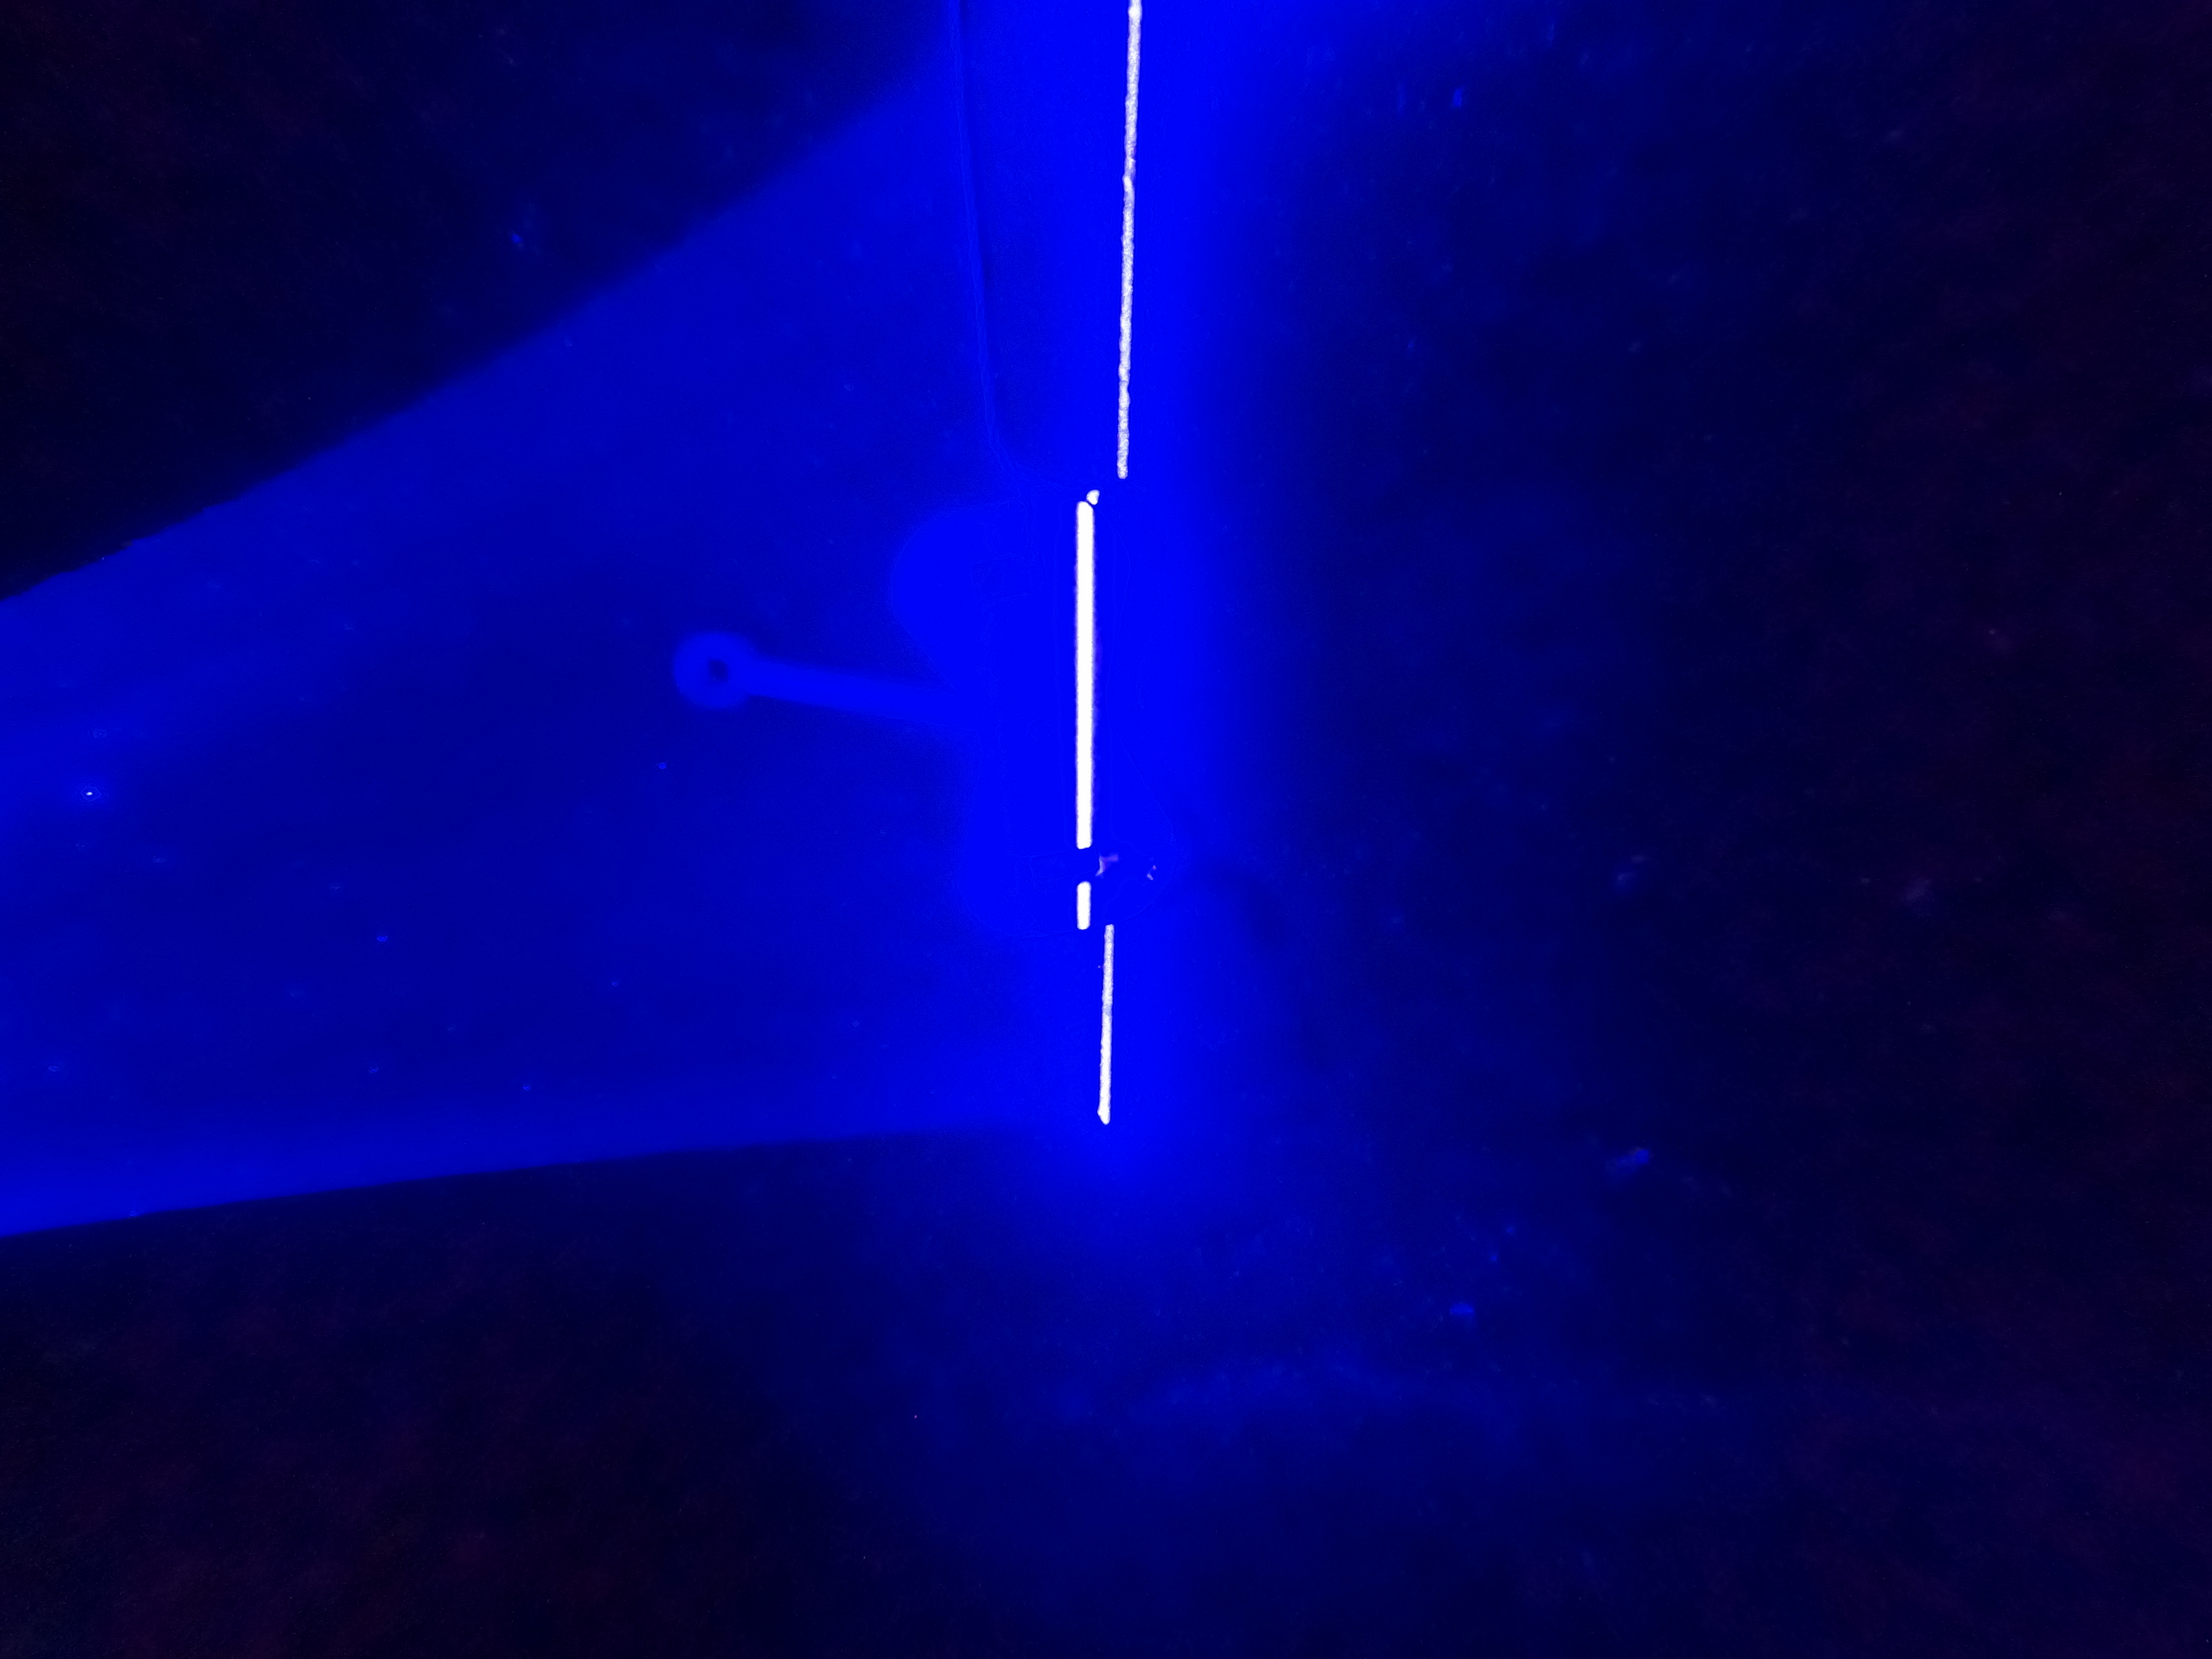

Supplement: Supplementary file 2217 [file G0016526.pdf › Level_1_2/G0016526.pdf]

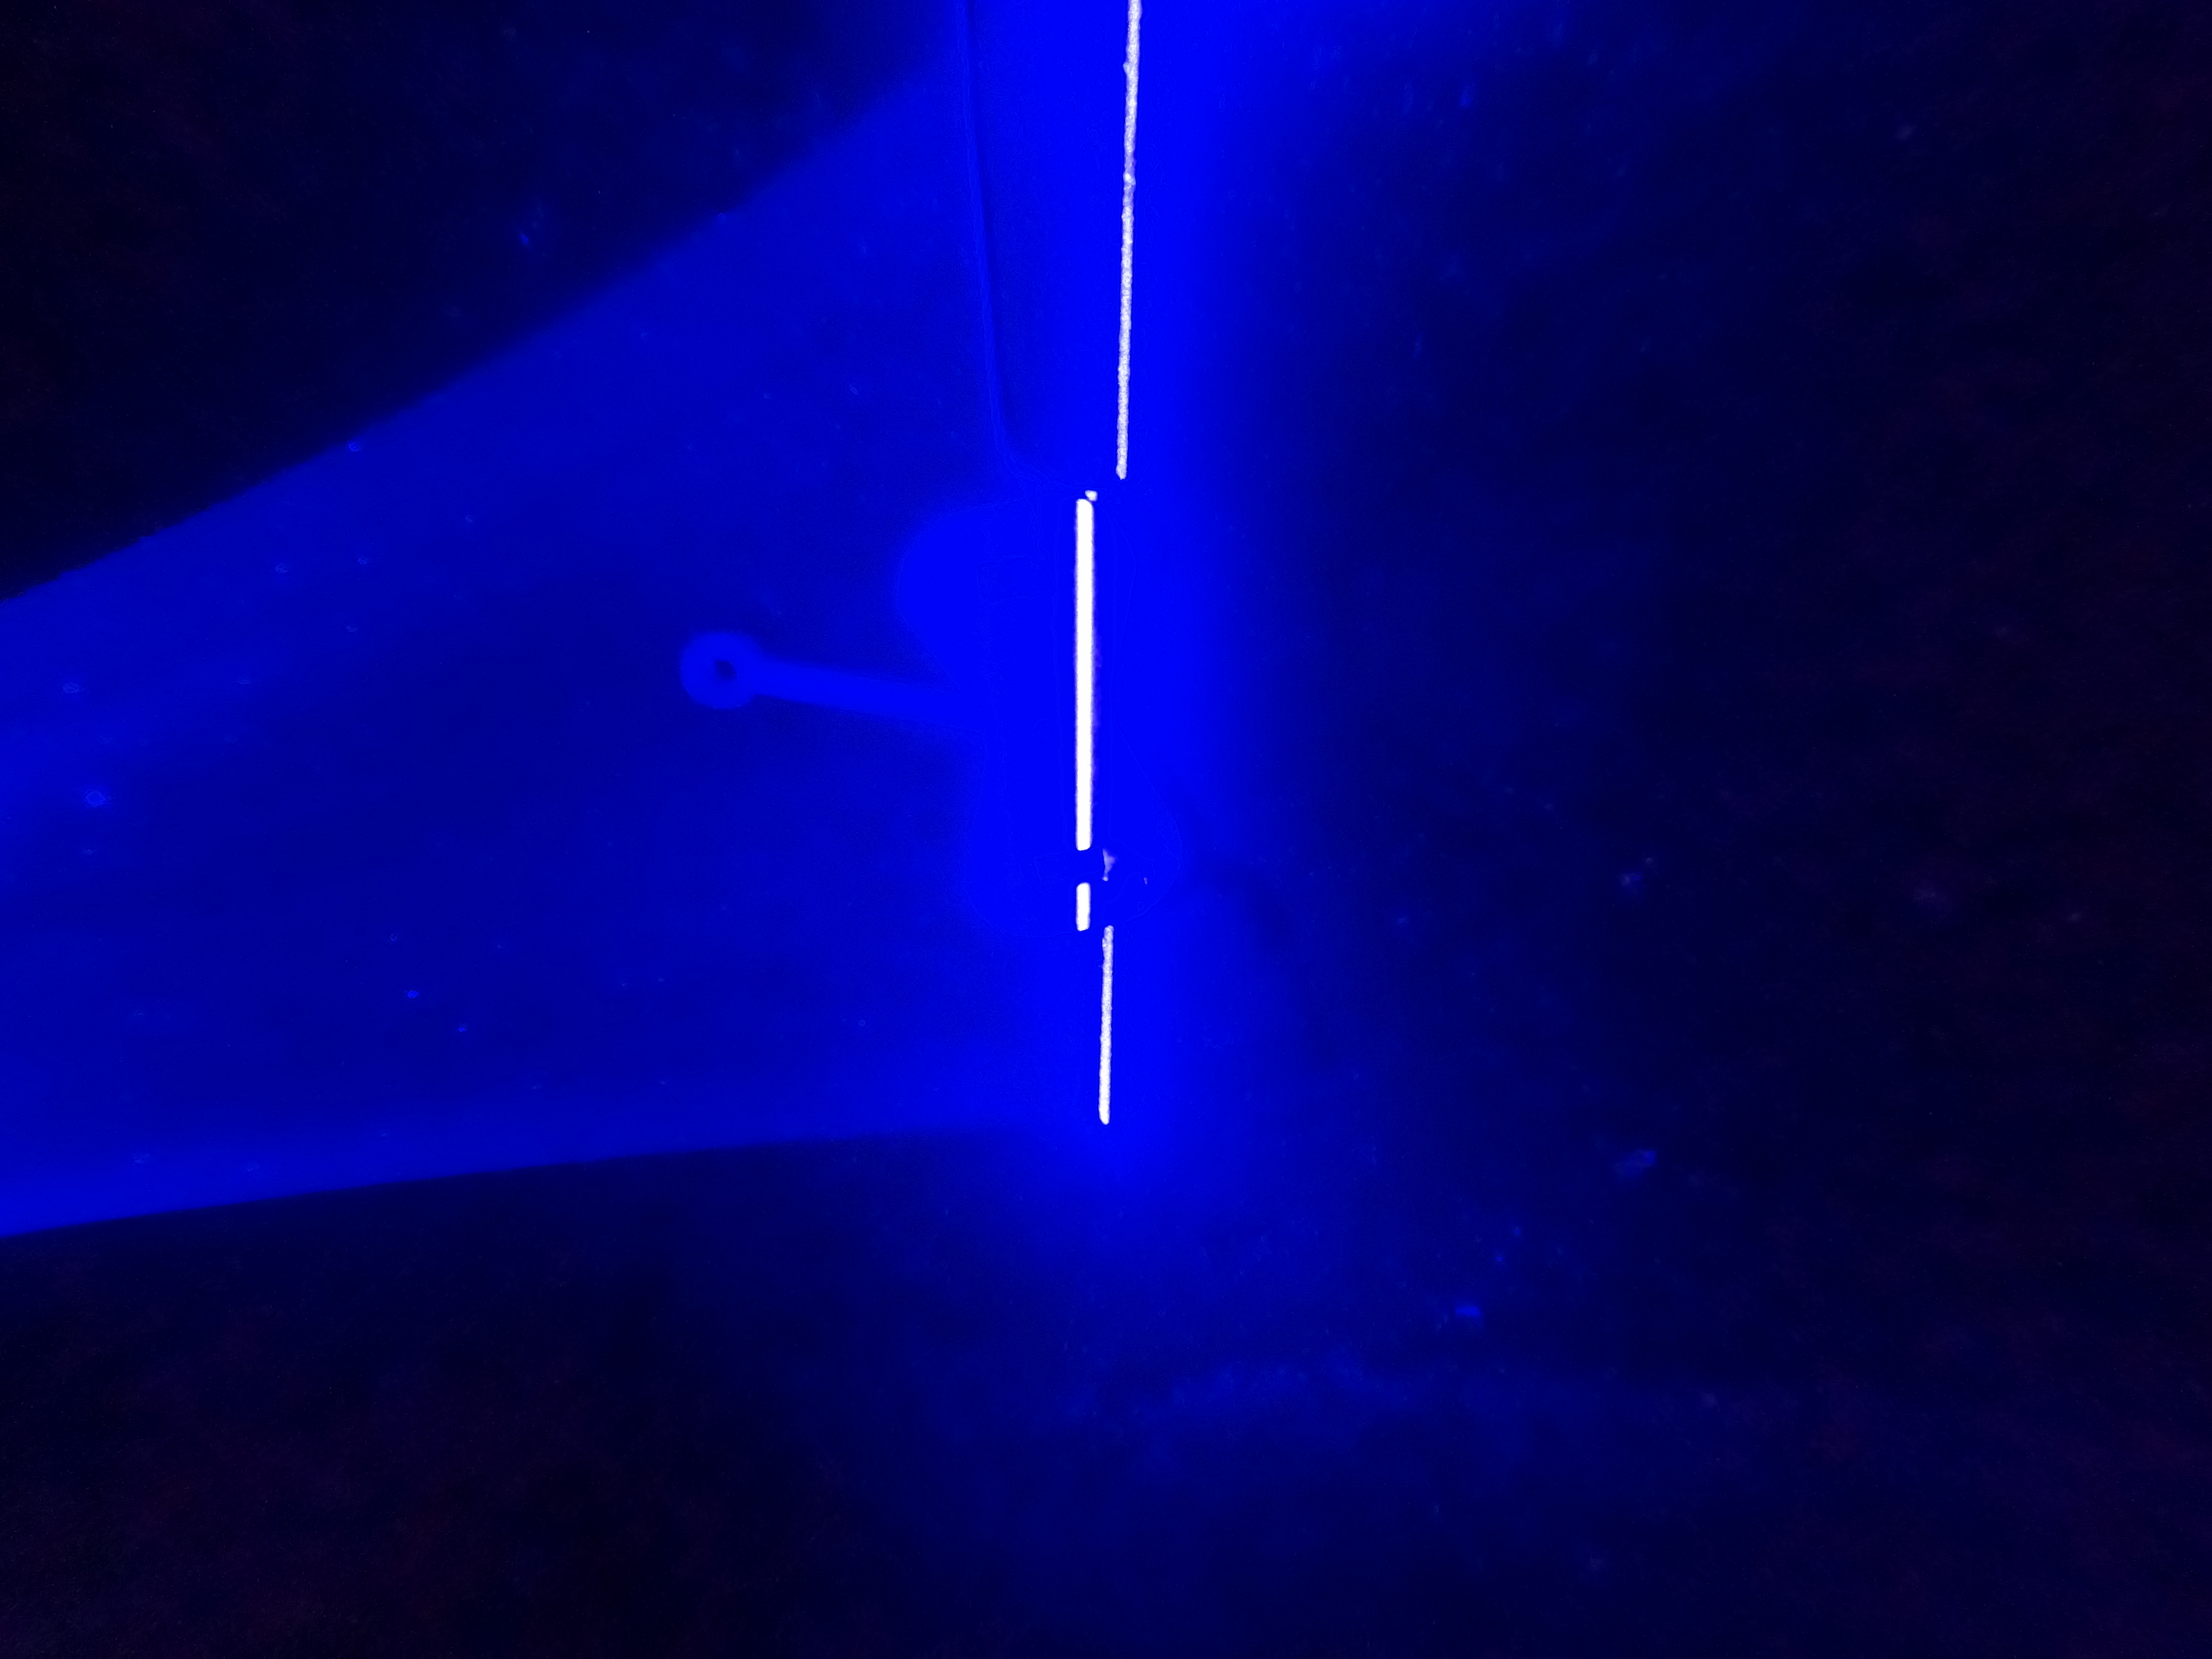

Supplement: Supplementary file 2218 [file G0016527.pdf › Level_1_2/G0016527.pdf]

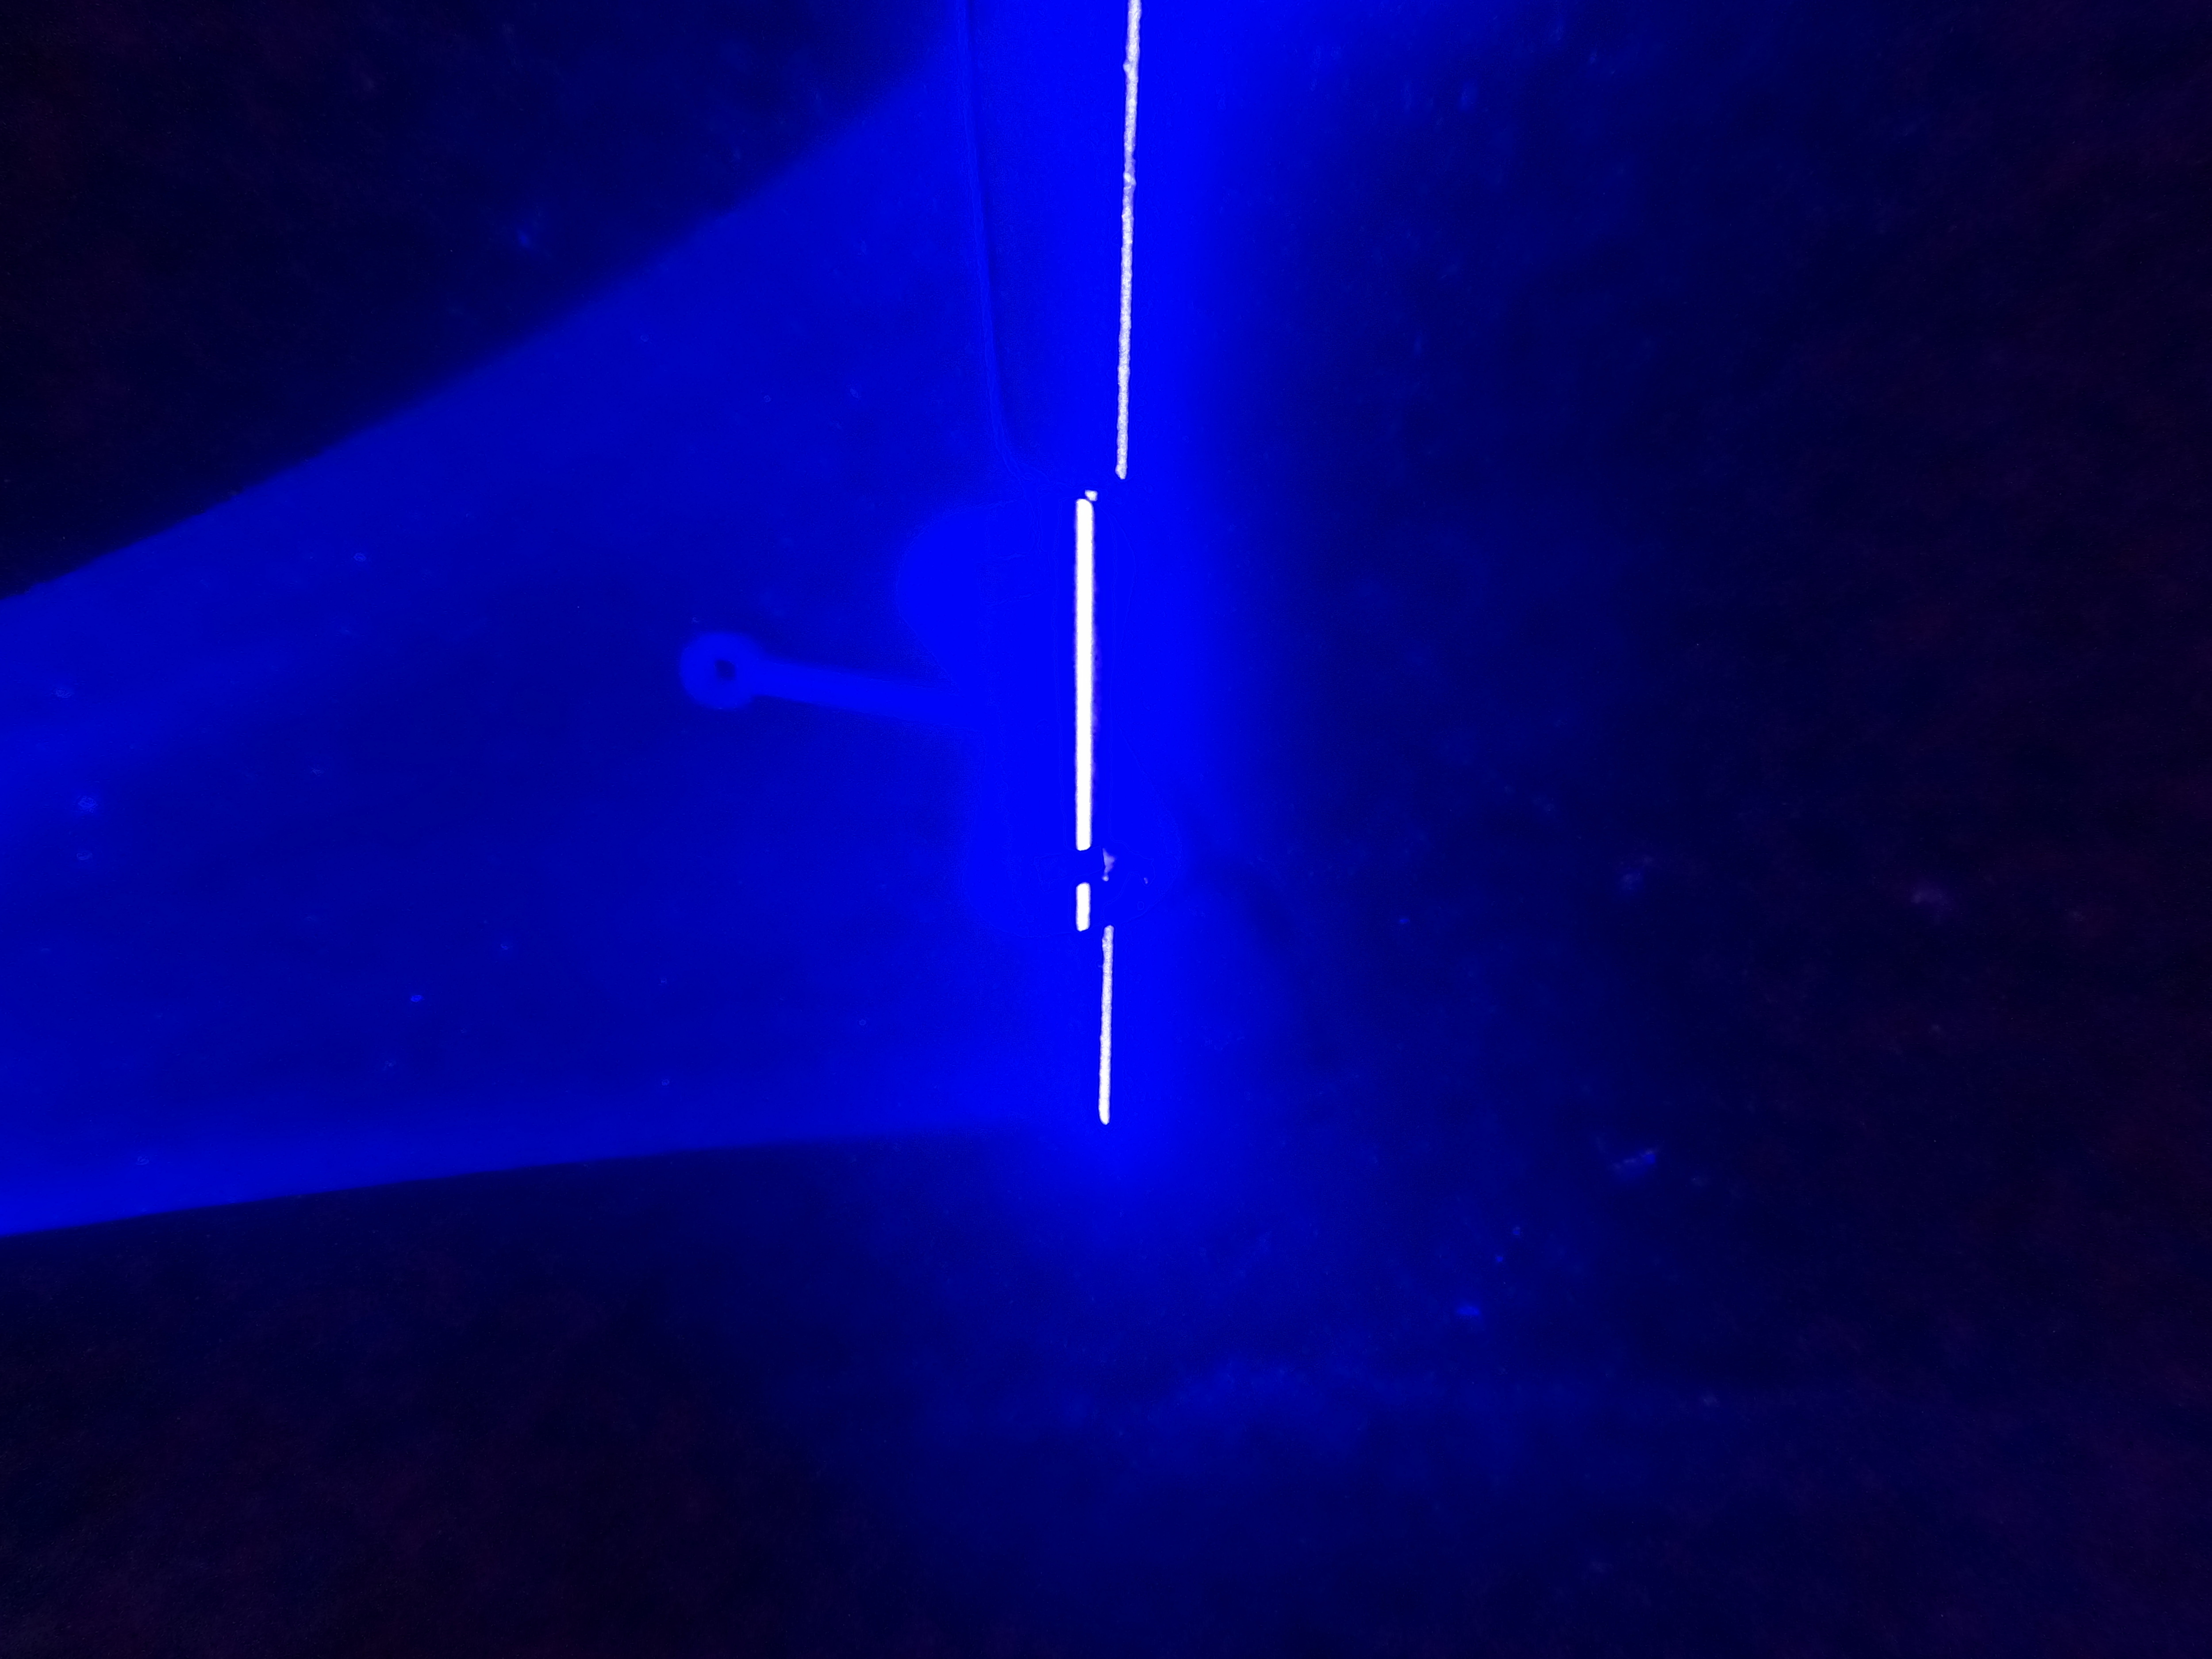

Supplement: Supplementary file 2219 [file G0016528.pdf › Level_1_2/G0016528.pdf]

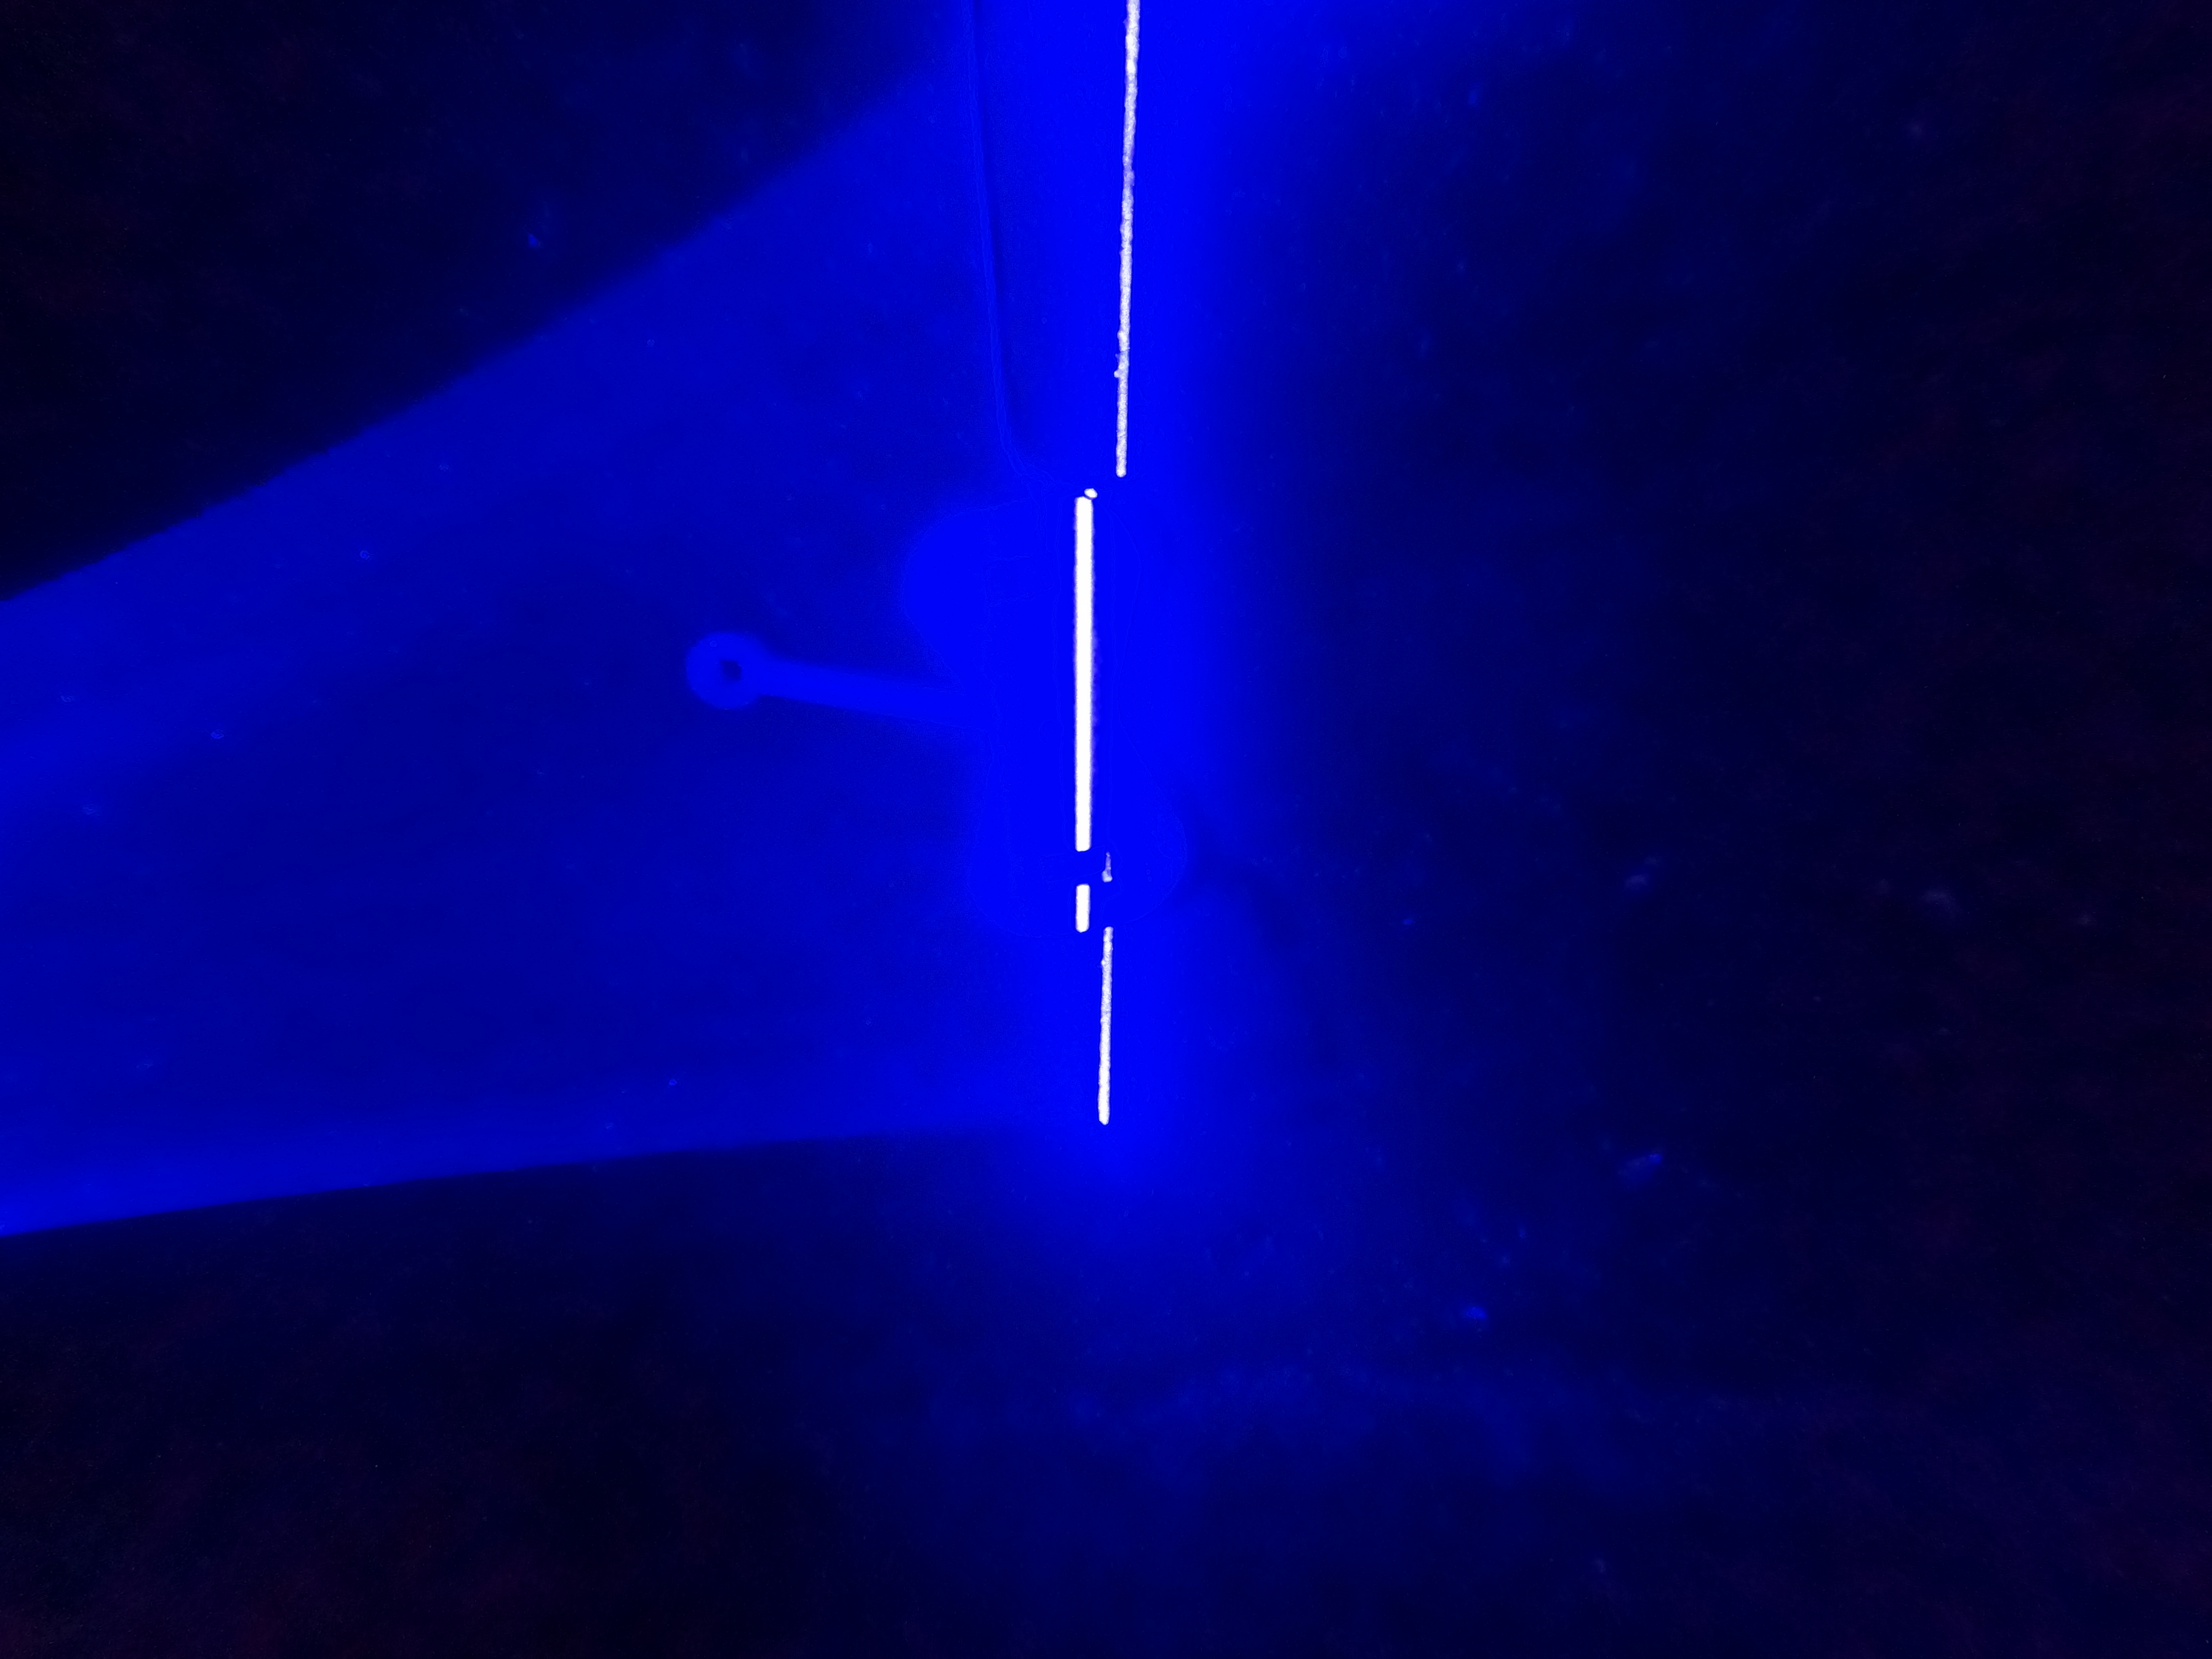

Supplement: Supplementary file 2220 [file G0016529.pdf › Level_1_2/G0016529.pdf]

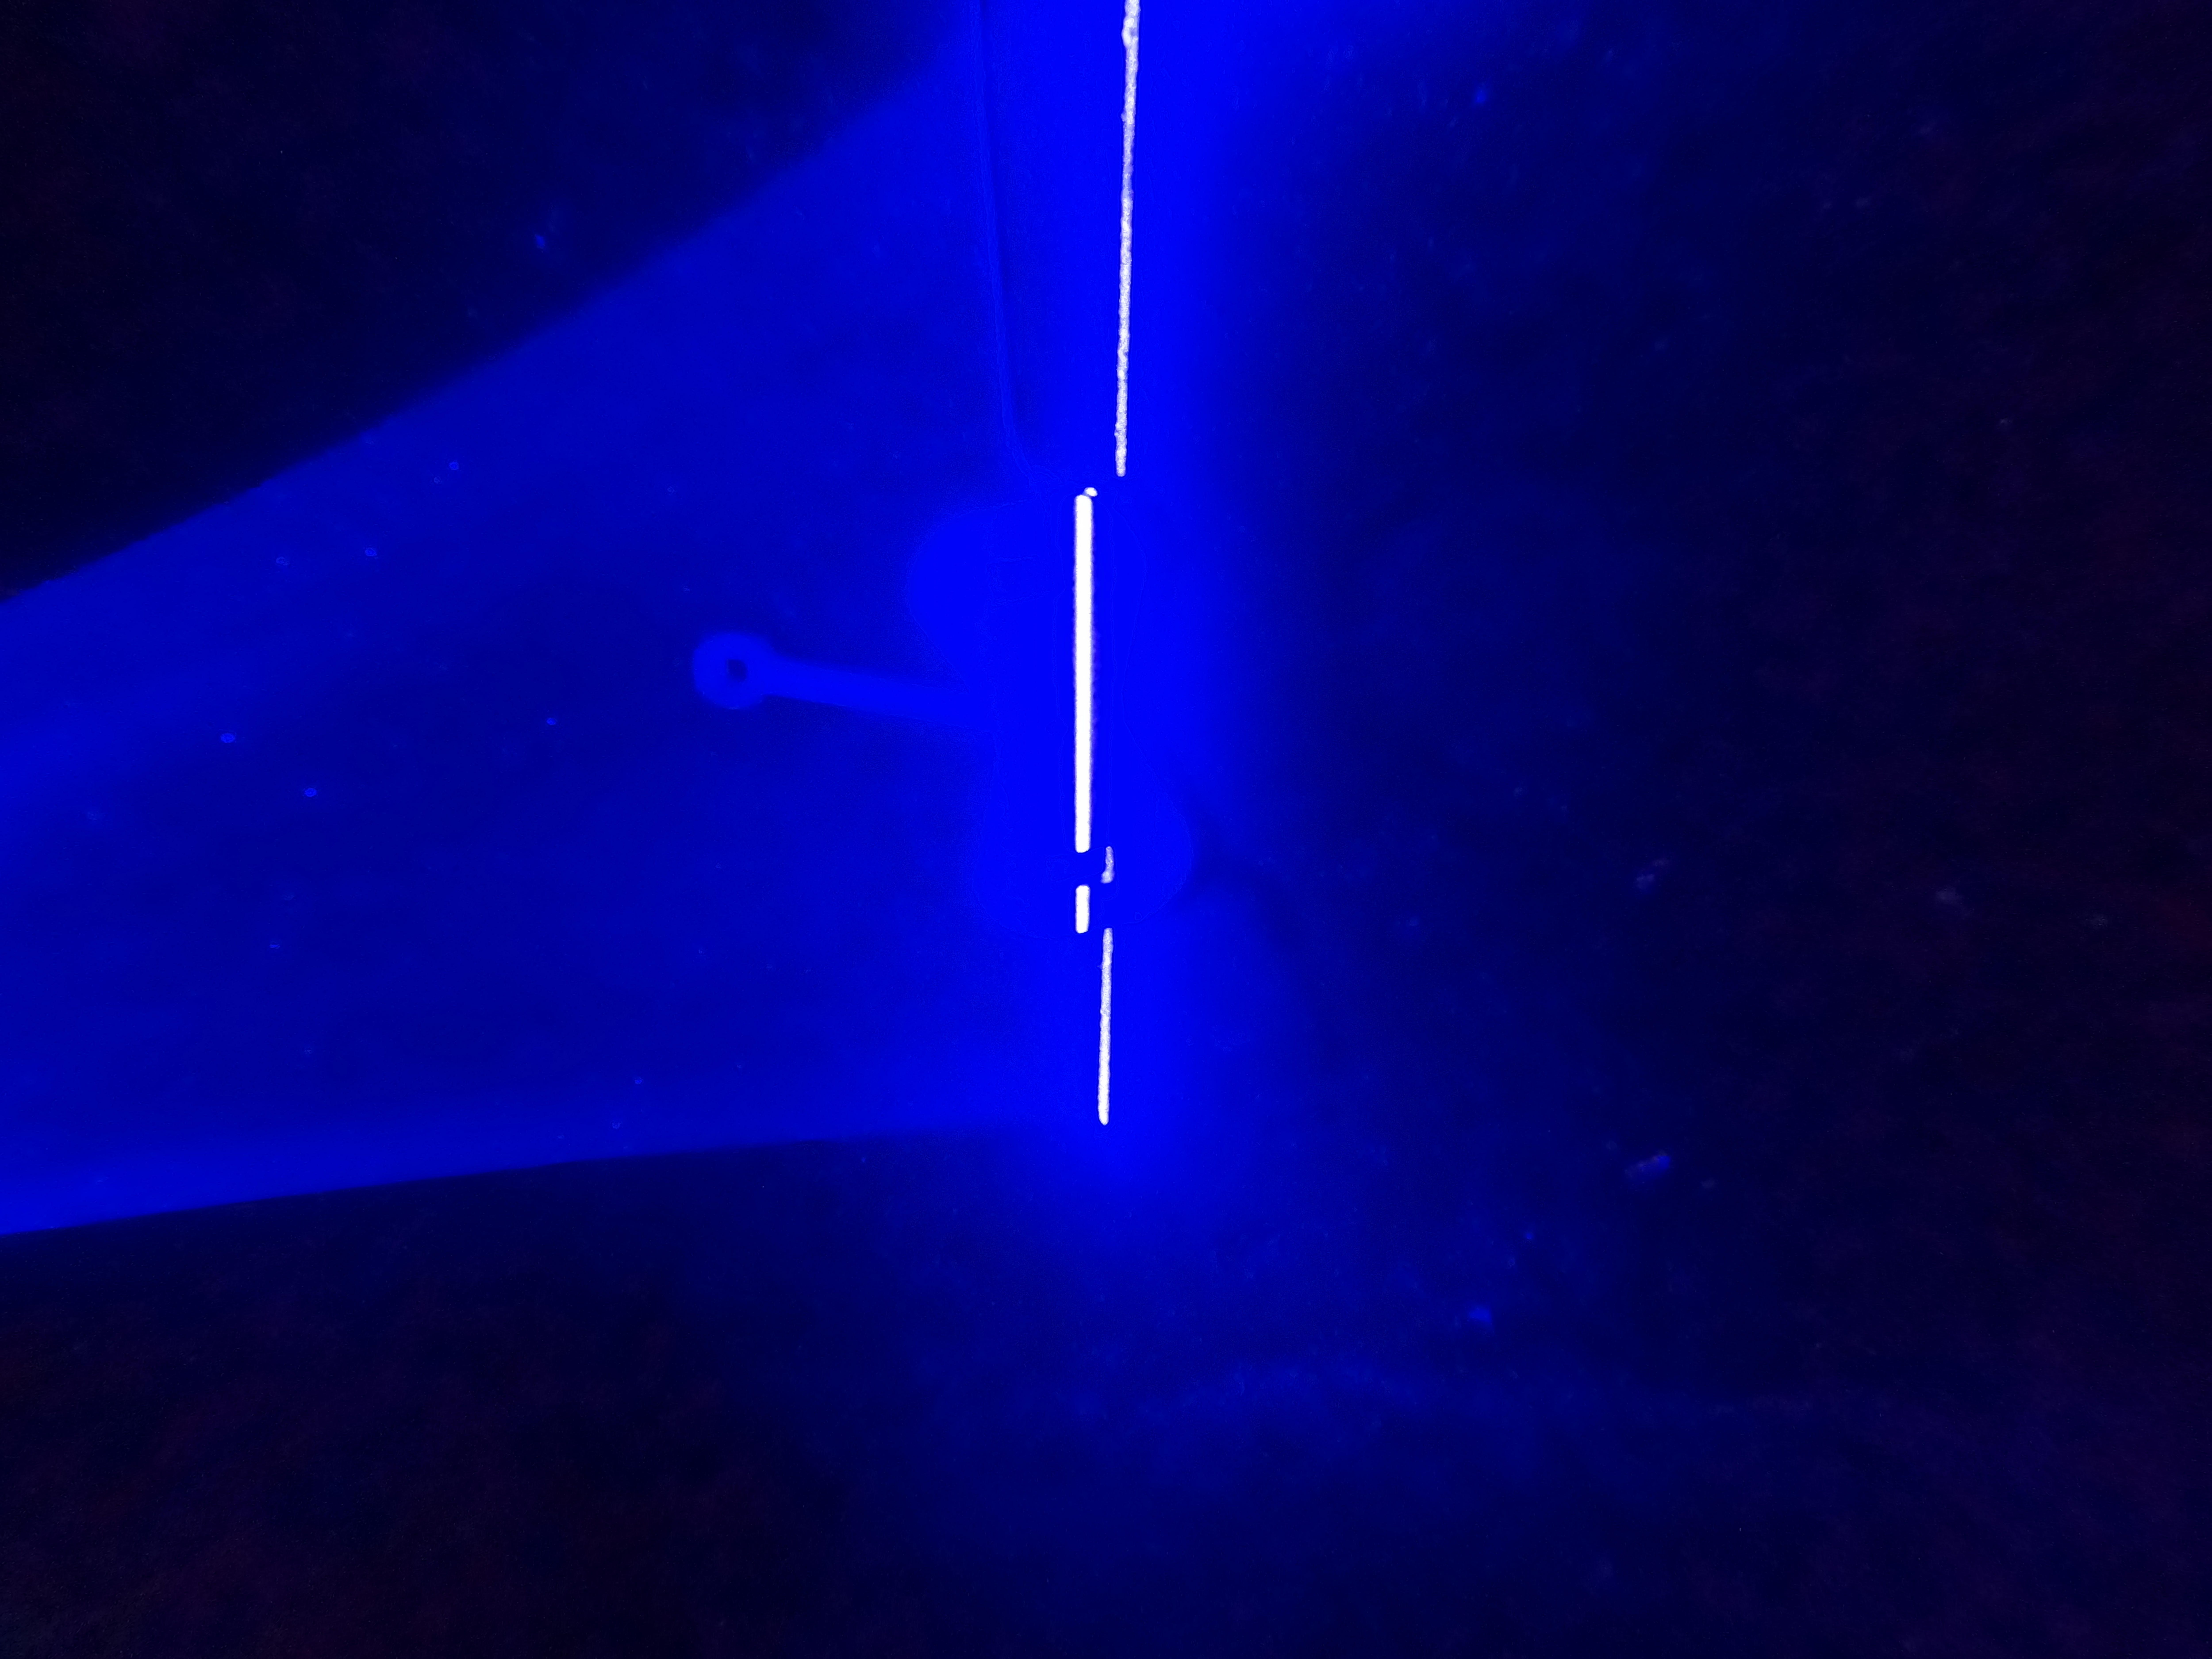

Supplement: Supplementary file 2221 [file G0016530.pdf › Level_1_2/G0016530.pdf]

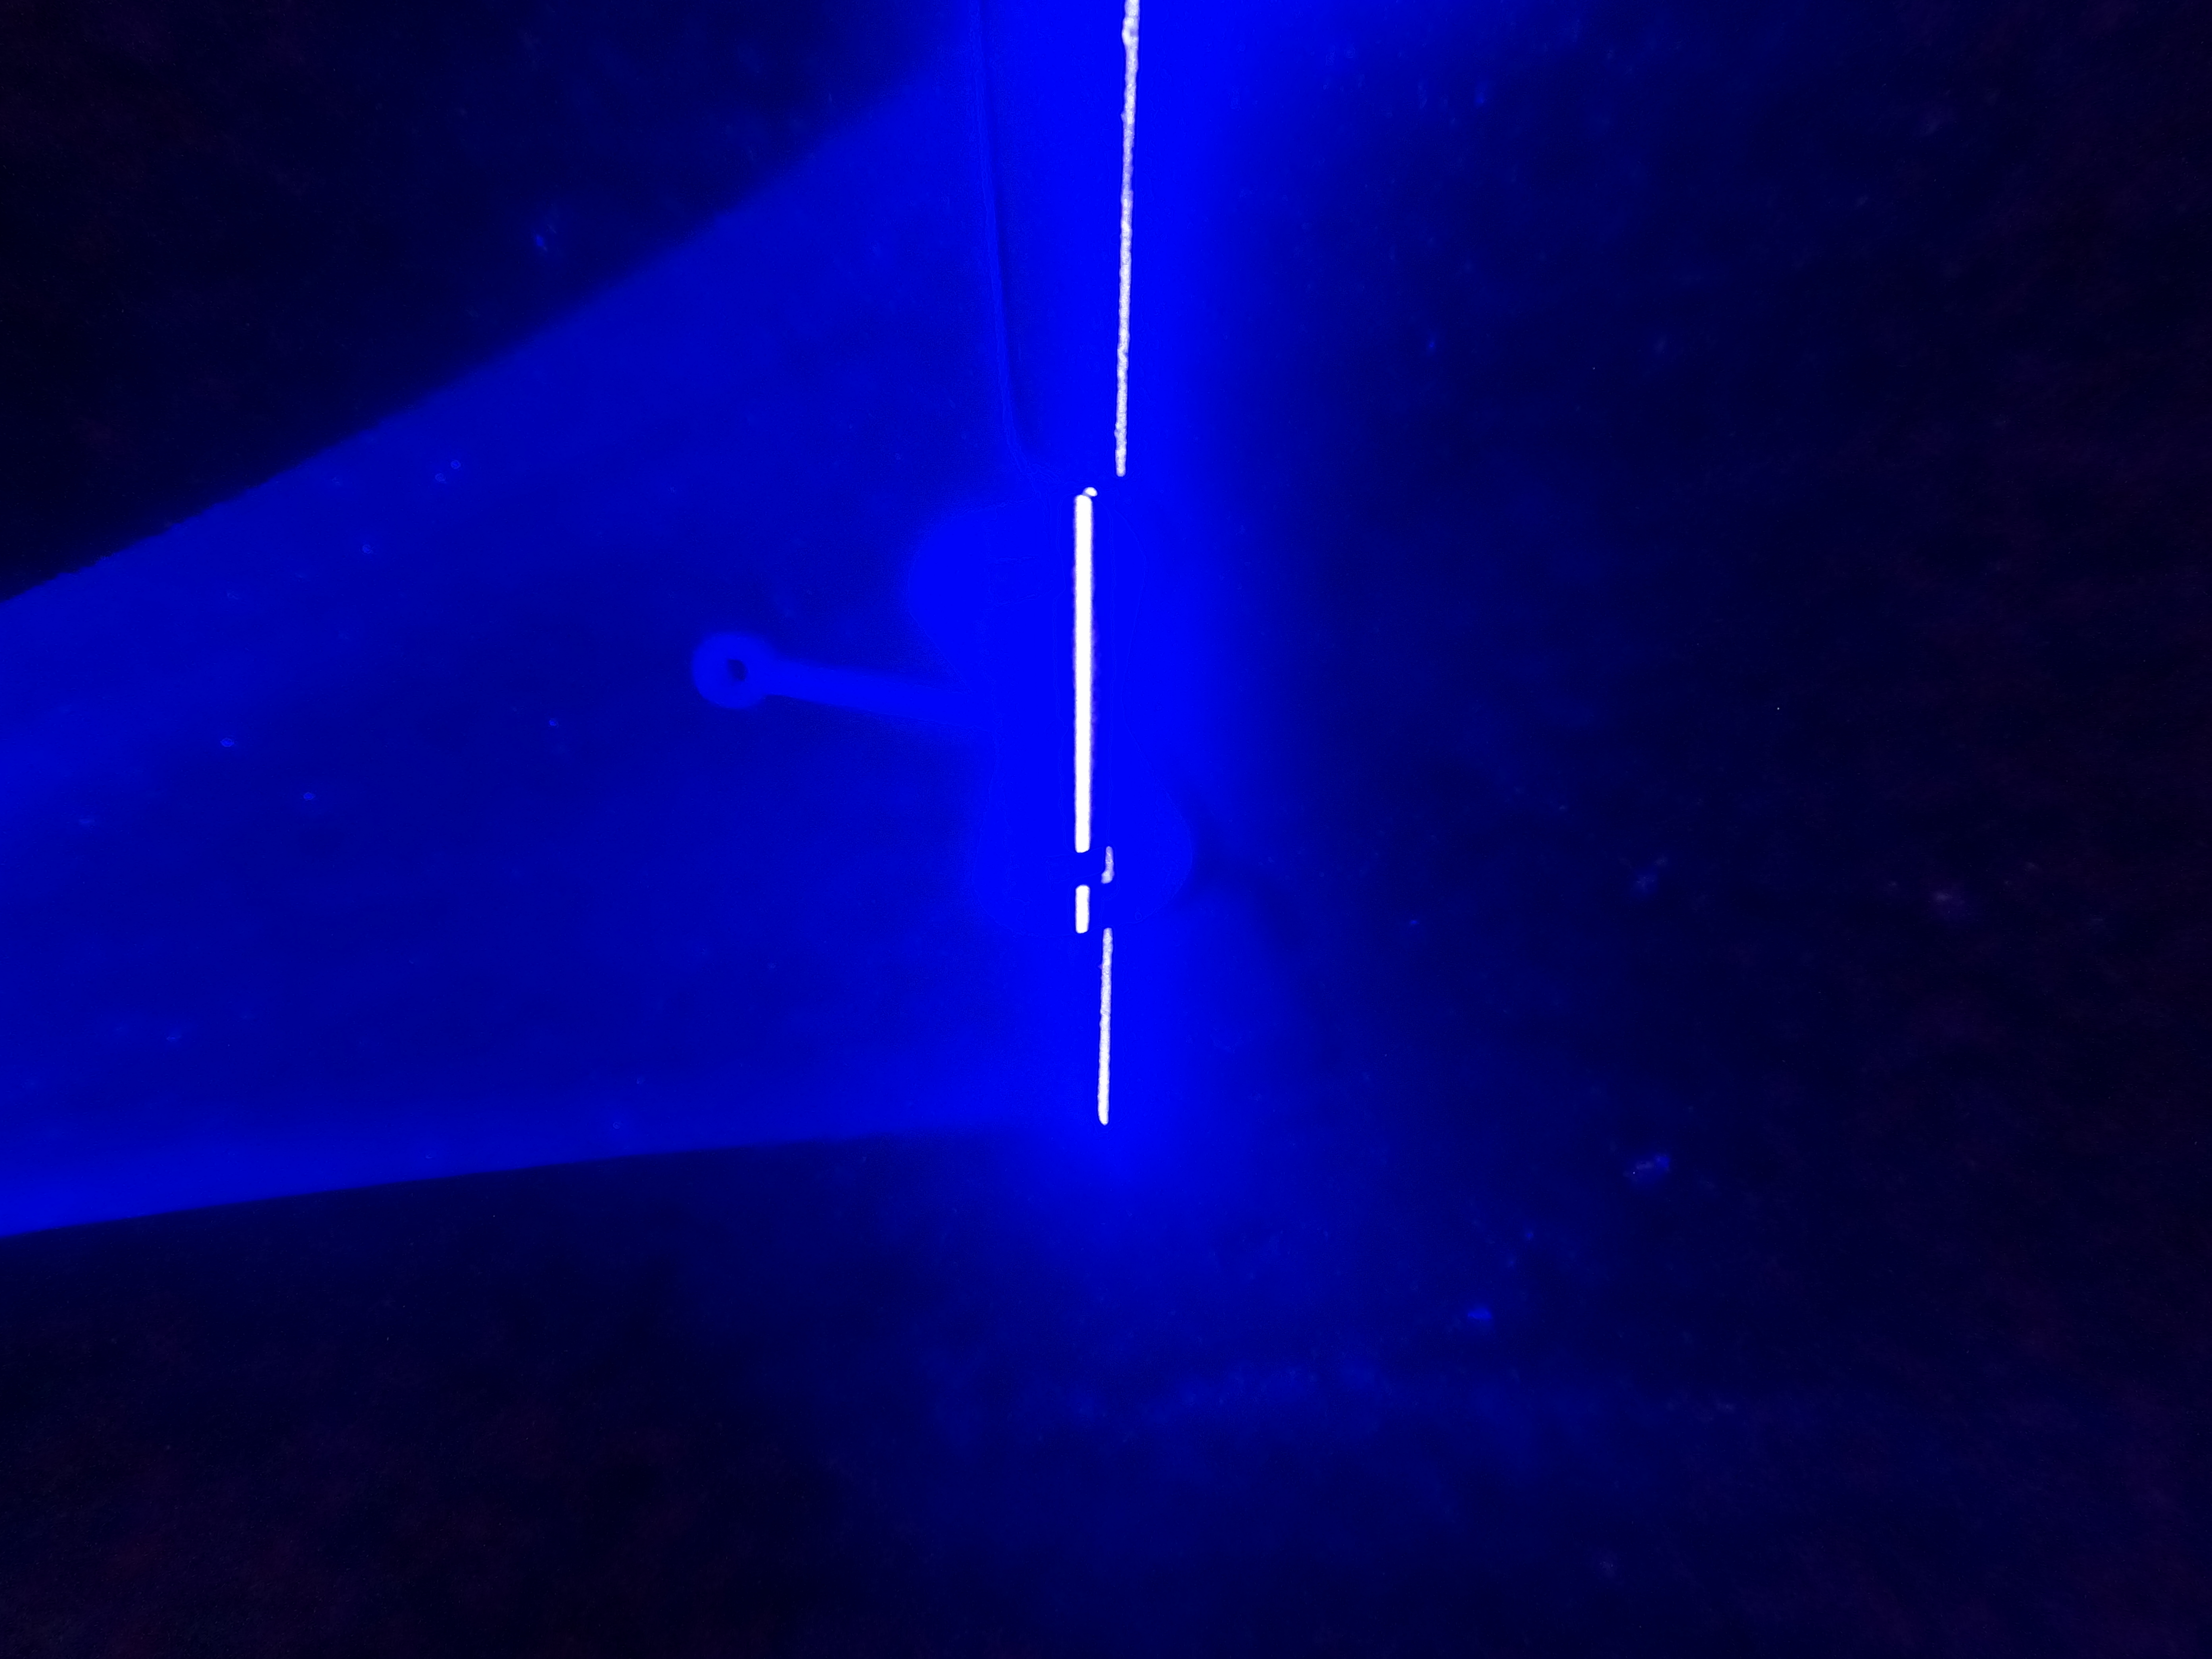

Supplement: Supplementary file 2222 [file G0016531.pdf › Level_1_2/G0016531.pdf]

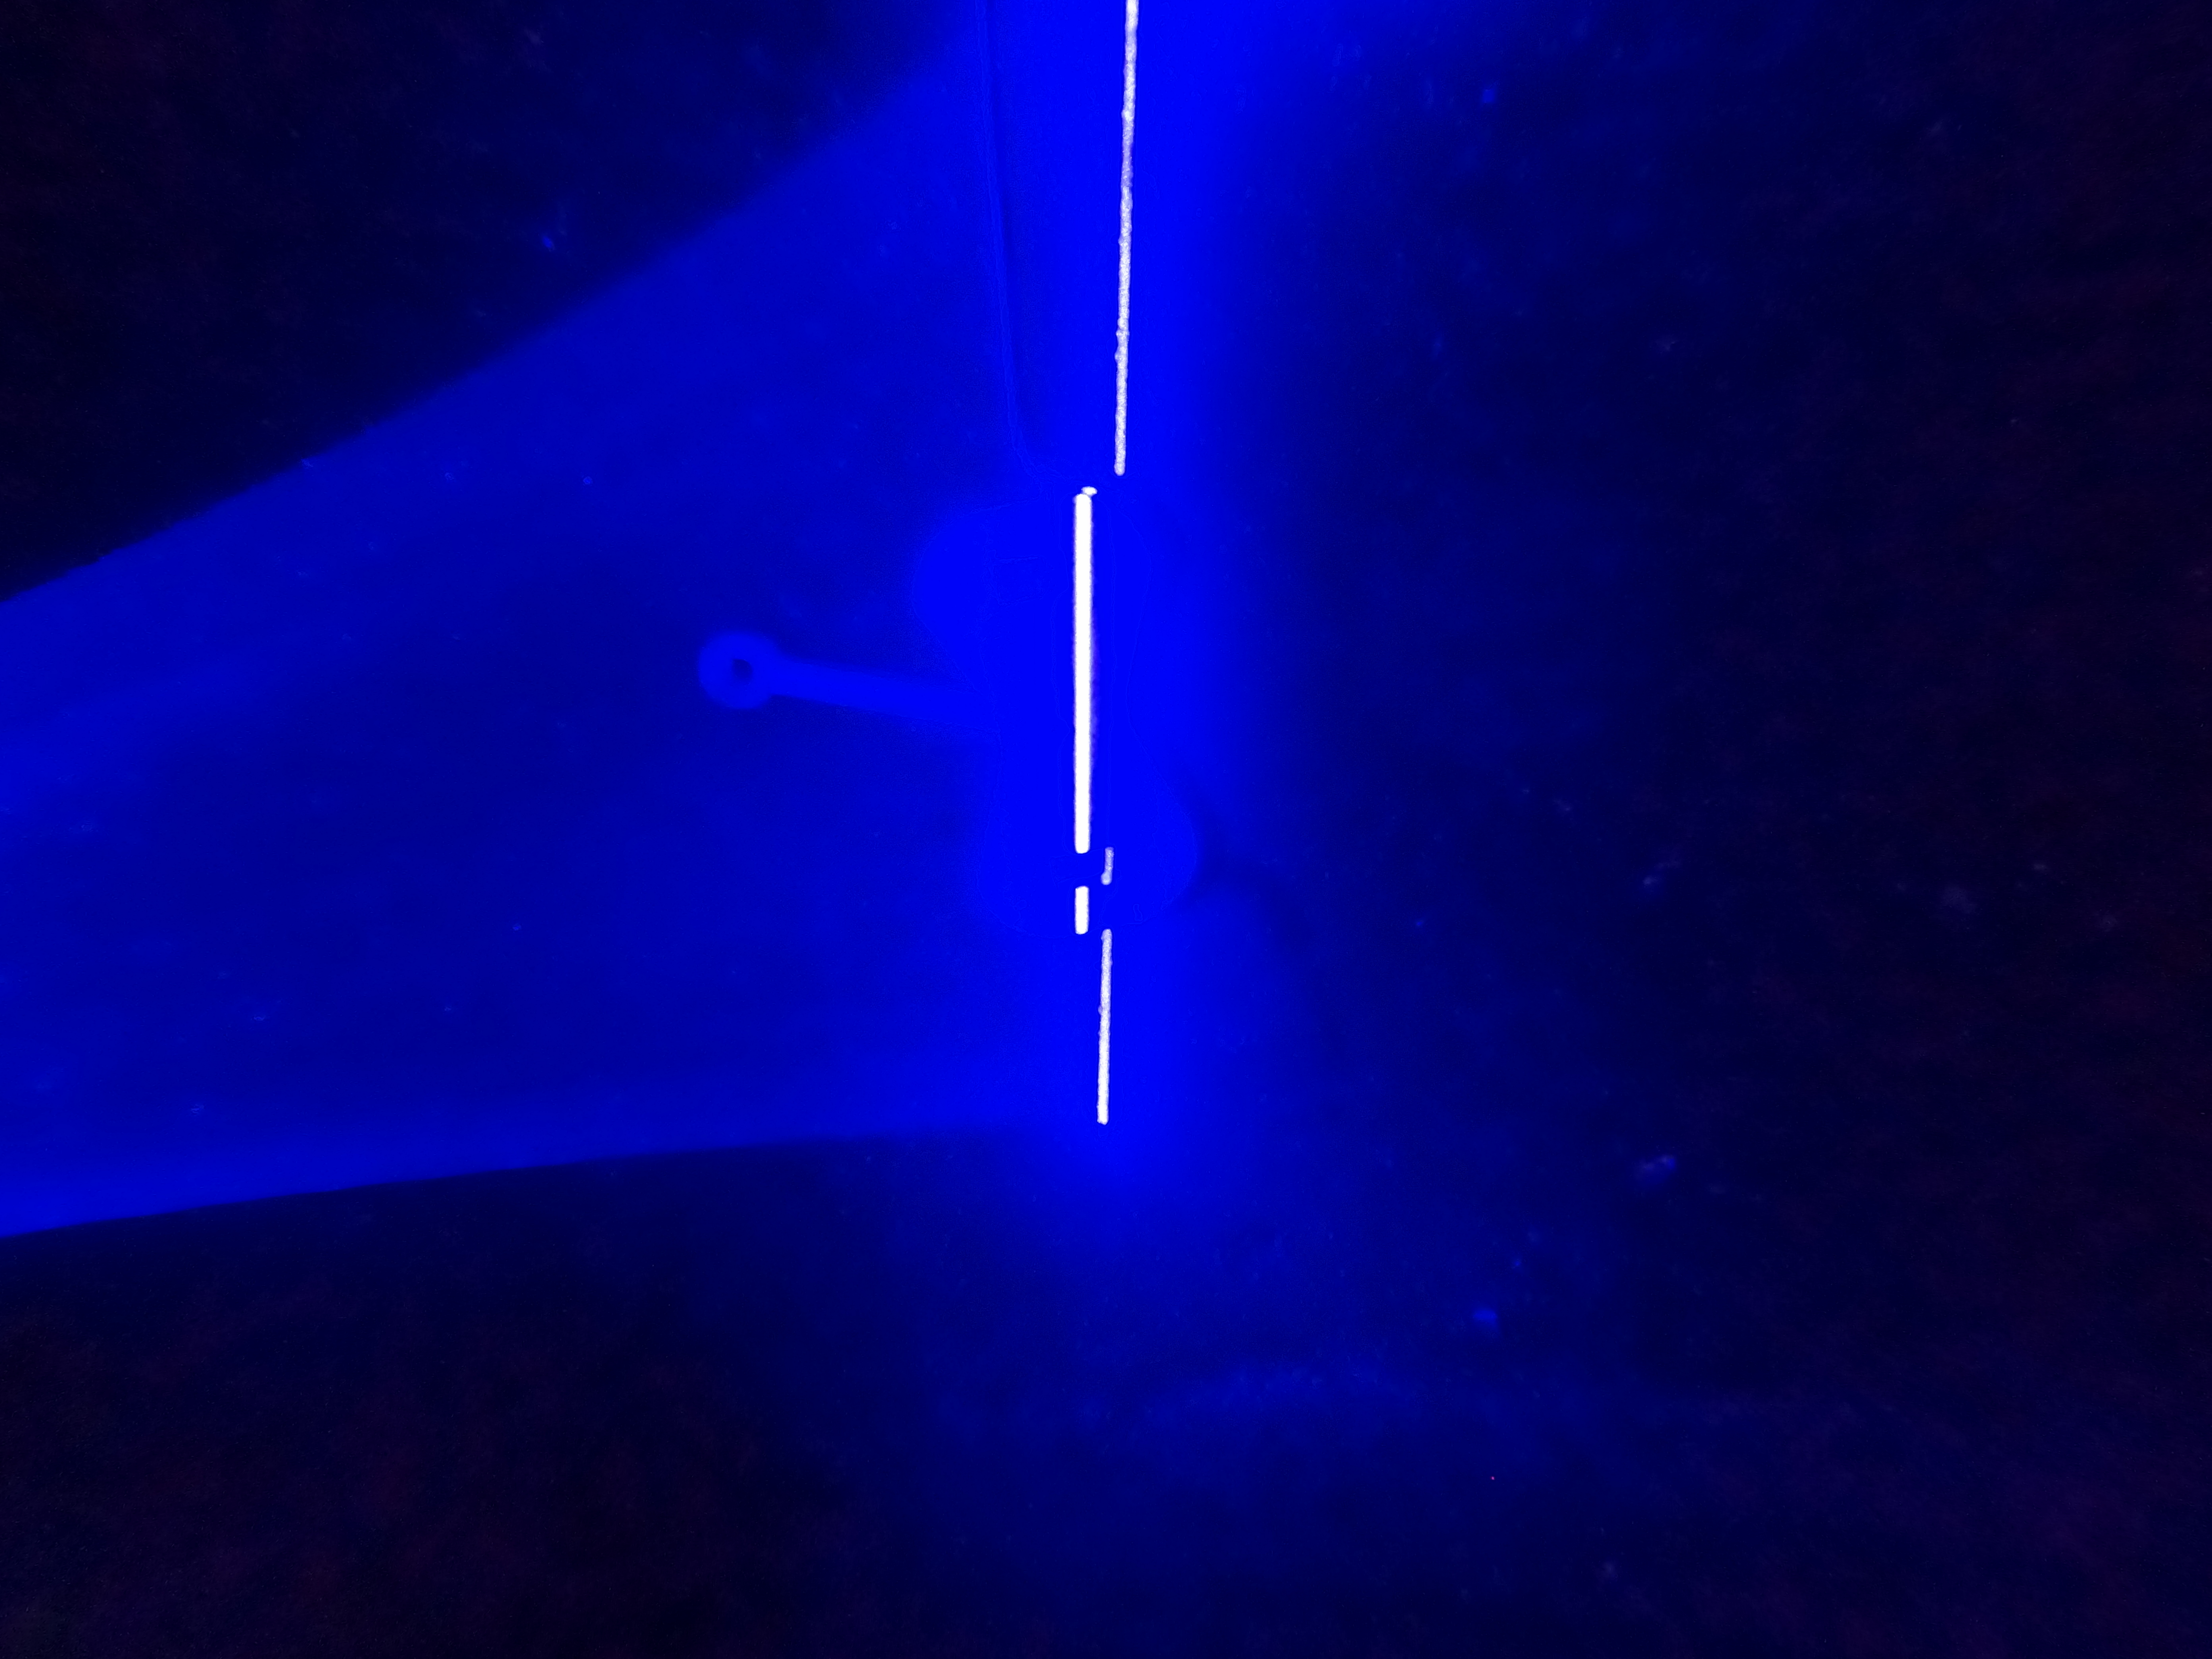

Supplement: Supplementary file 2223 [file G0016532.pdf › Level_1_2/G0016532.pdf]

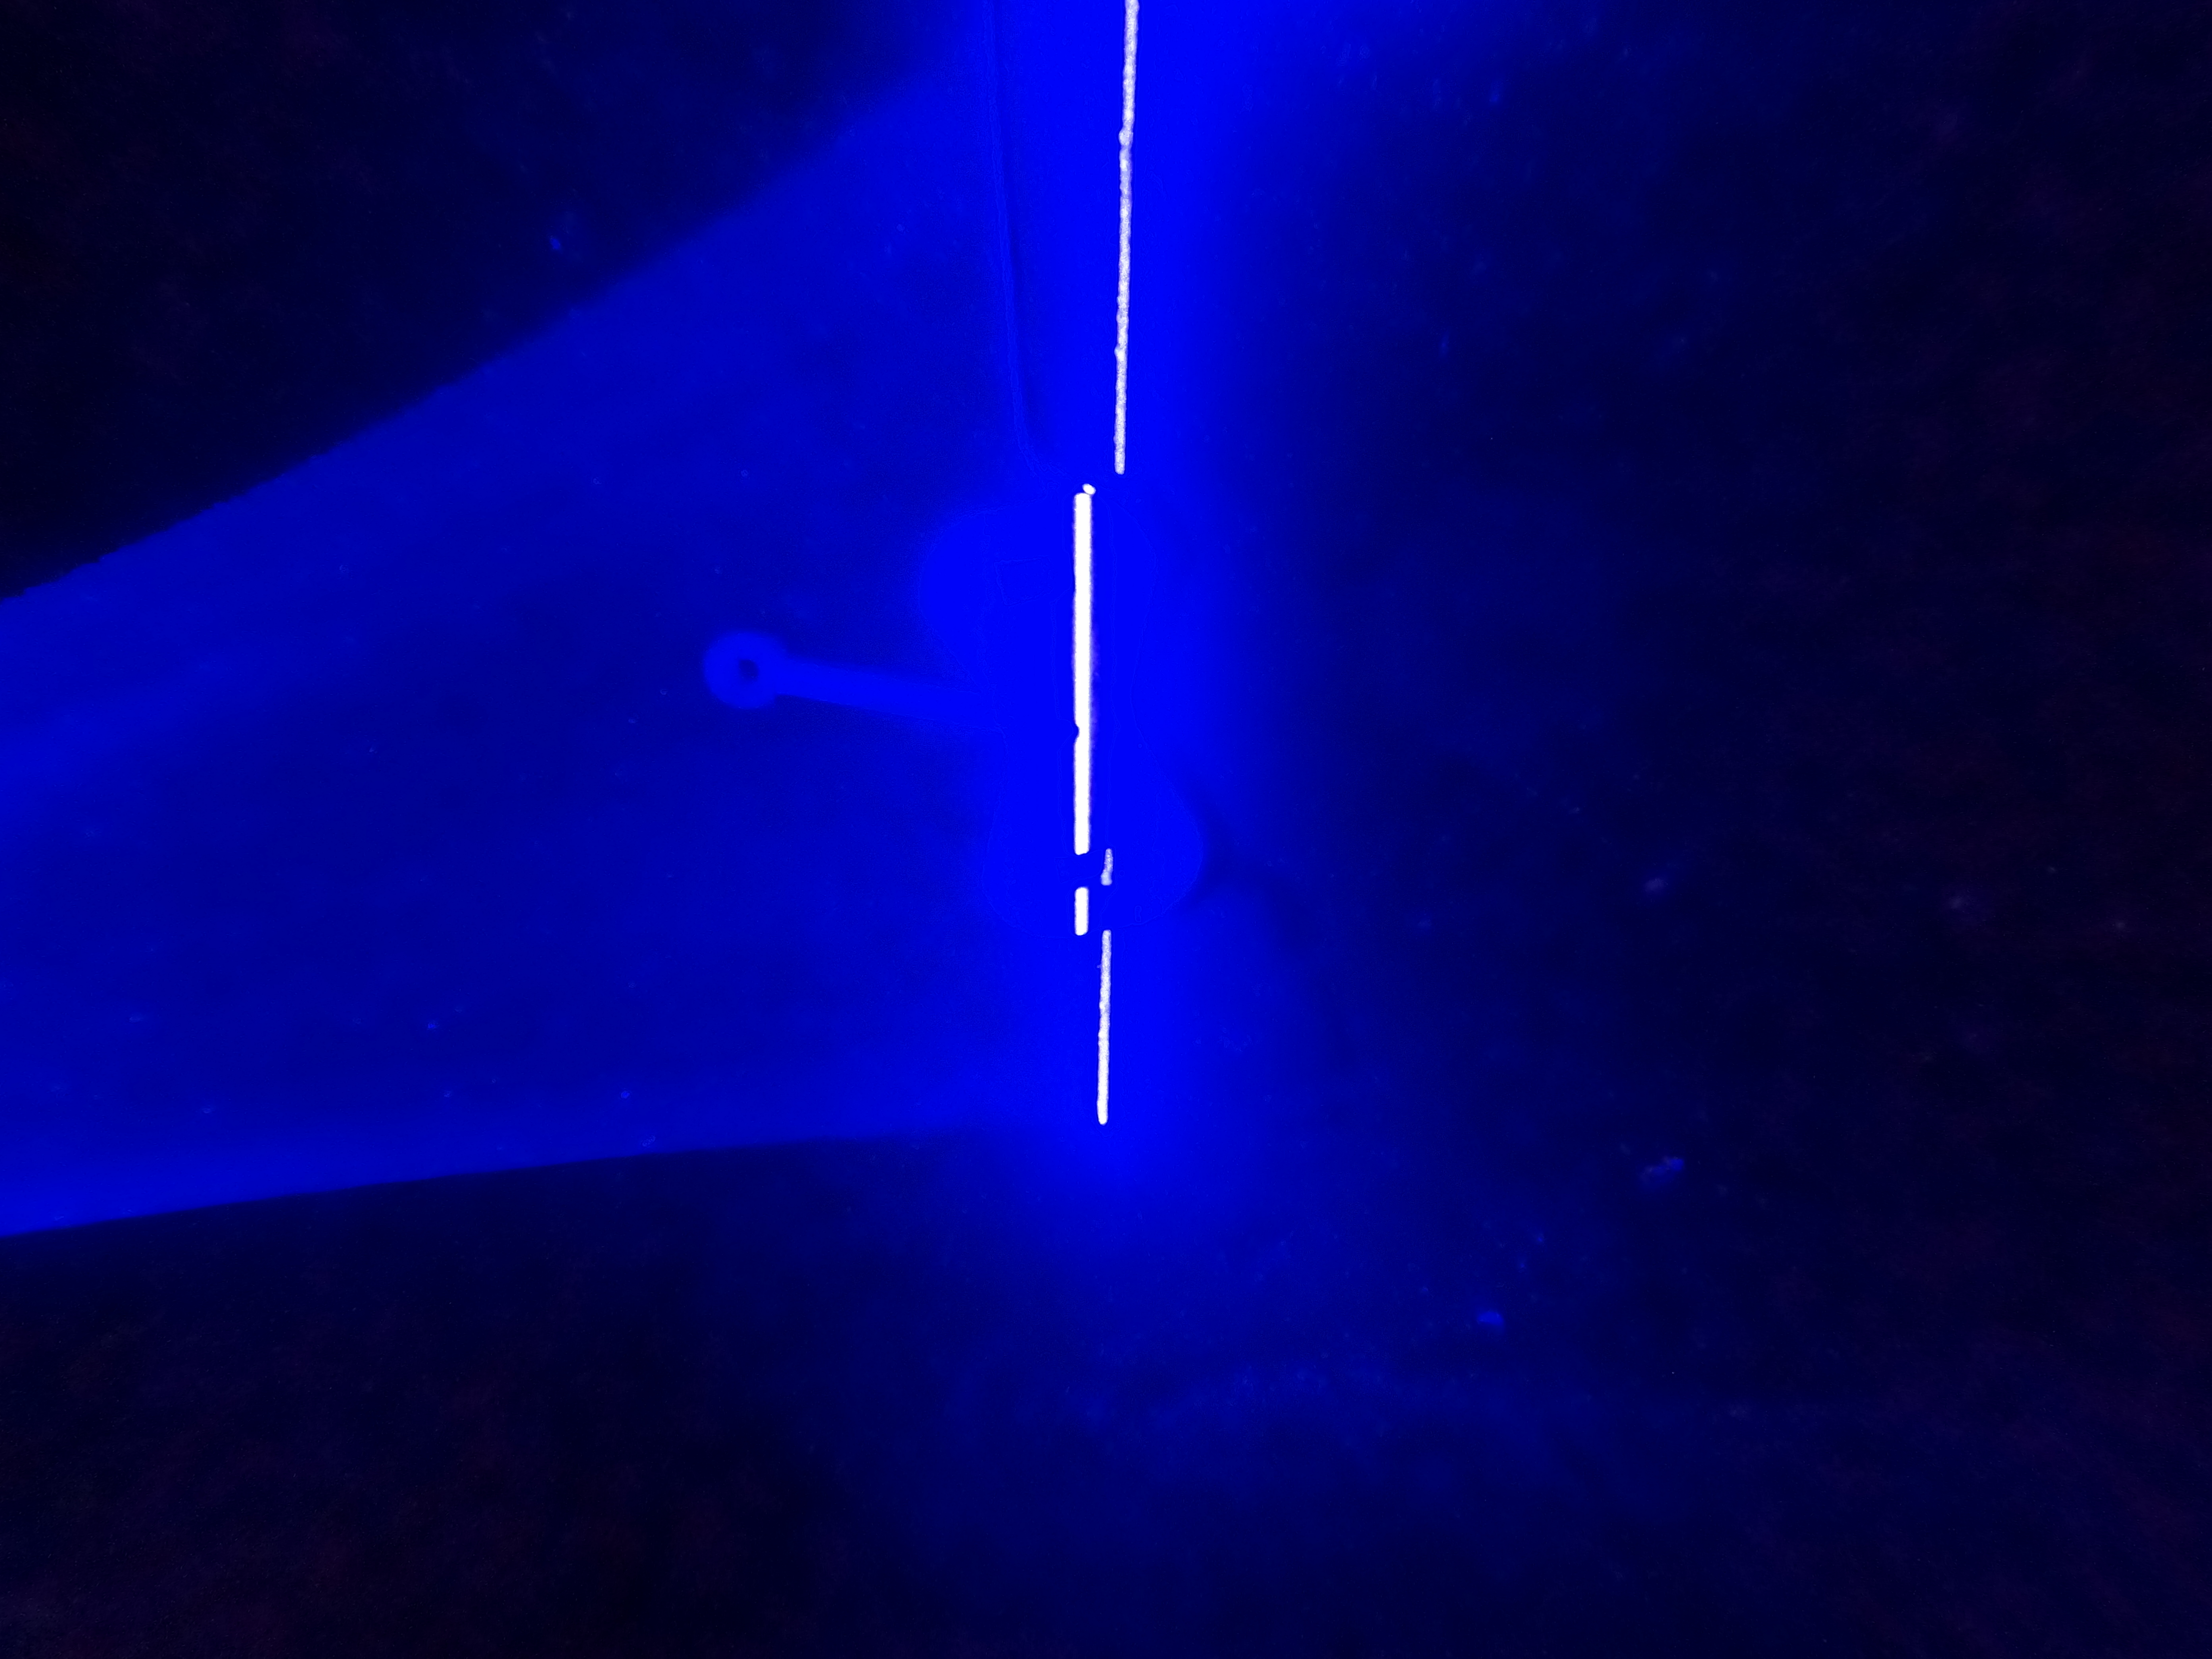

Supplement: Supplementary file 2224 [file G0016533.pdf › Level_1_2/G0016533.pdf]

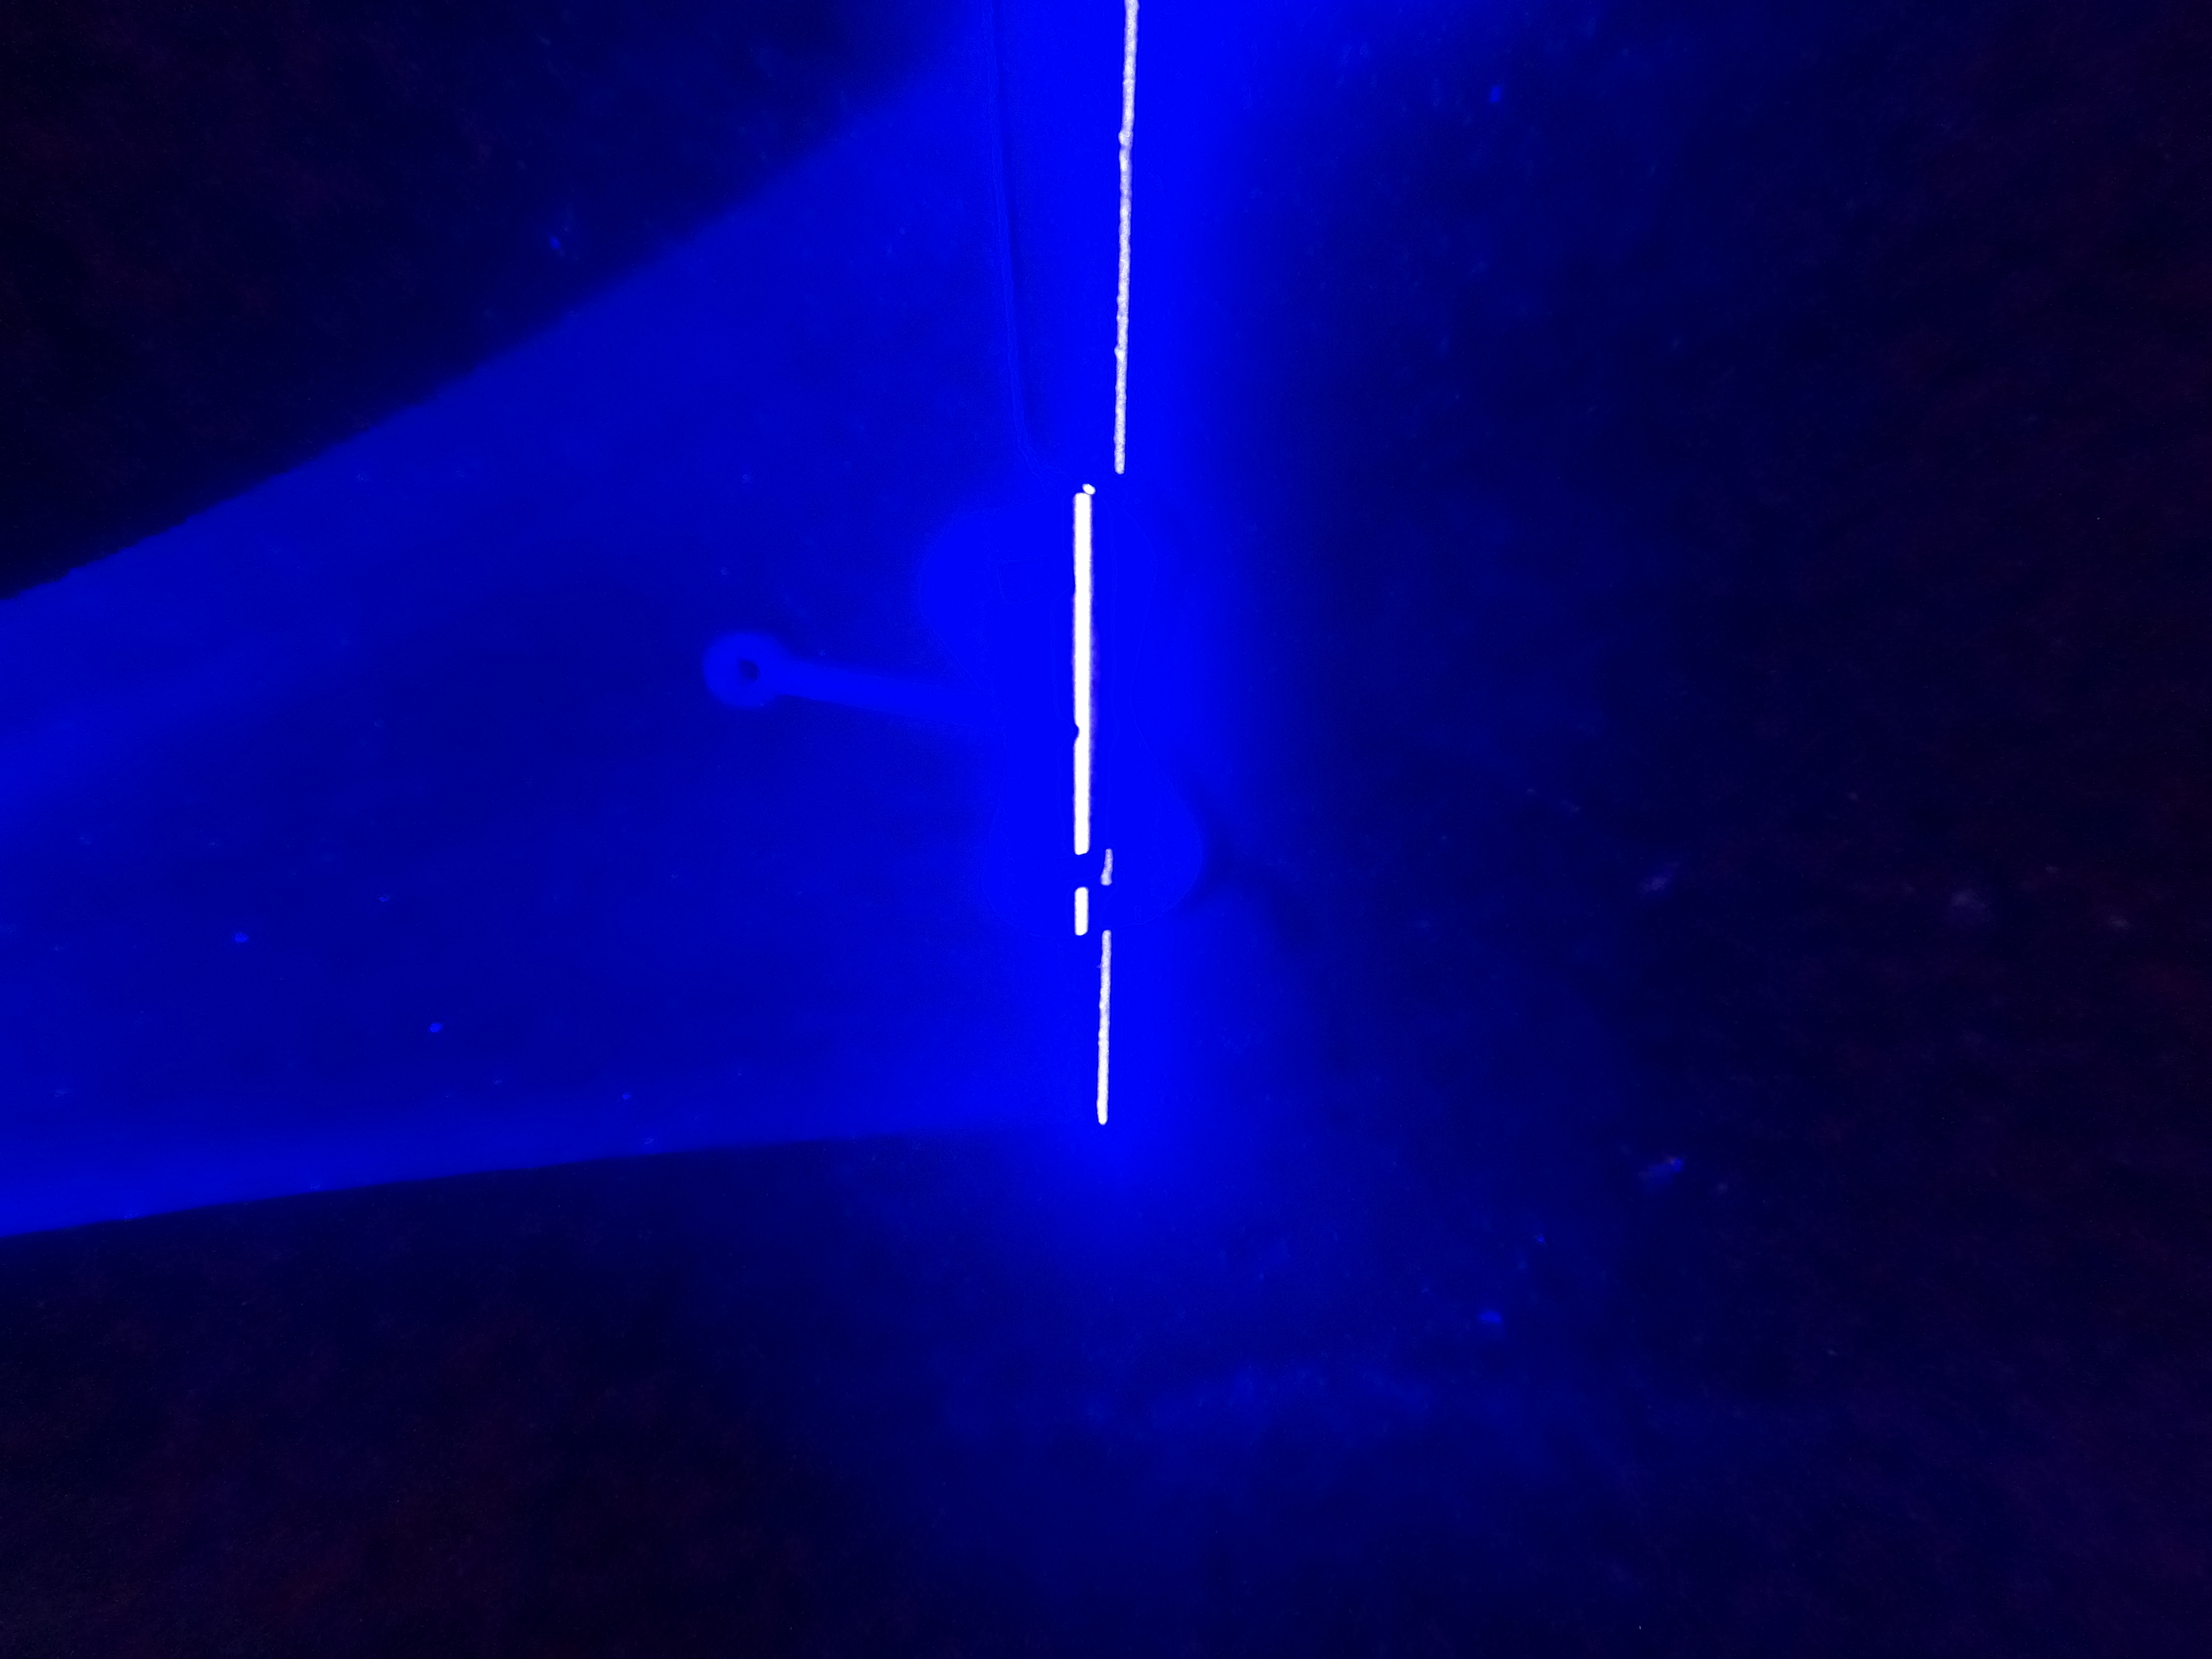

Supplement: Supplementary file 2225 [file G0016534.pdf › Level_1_2/G0016534.pdf]

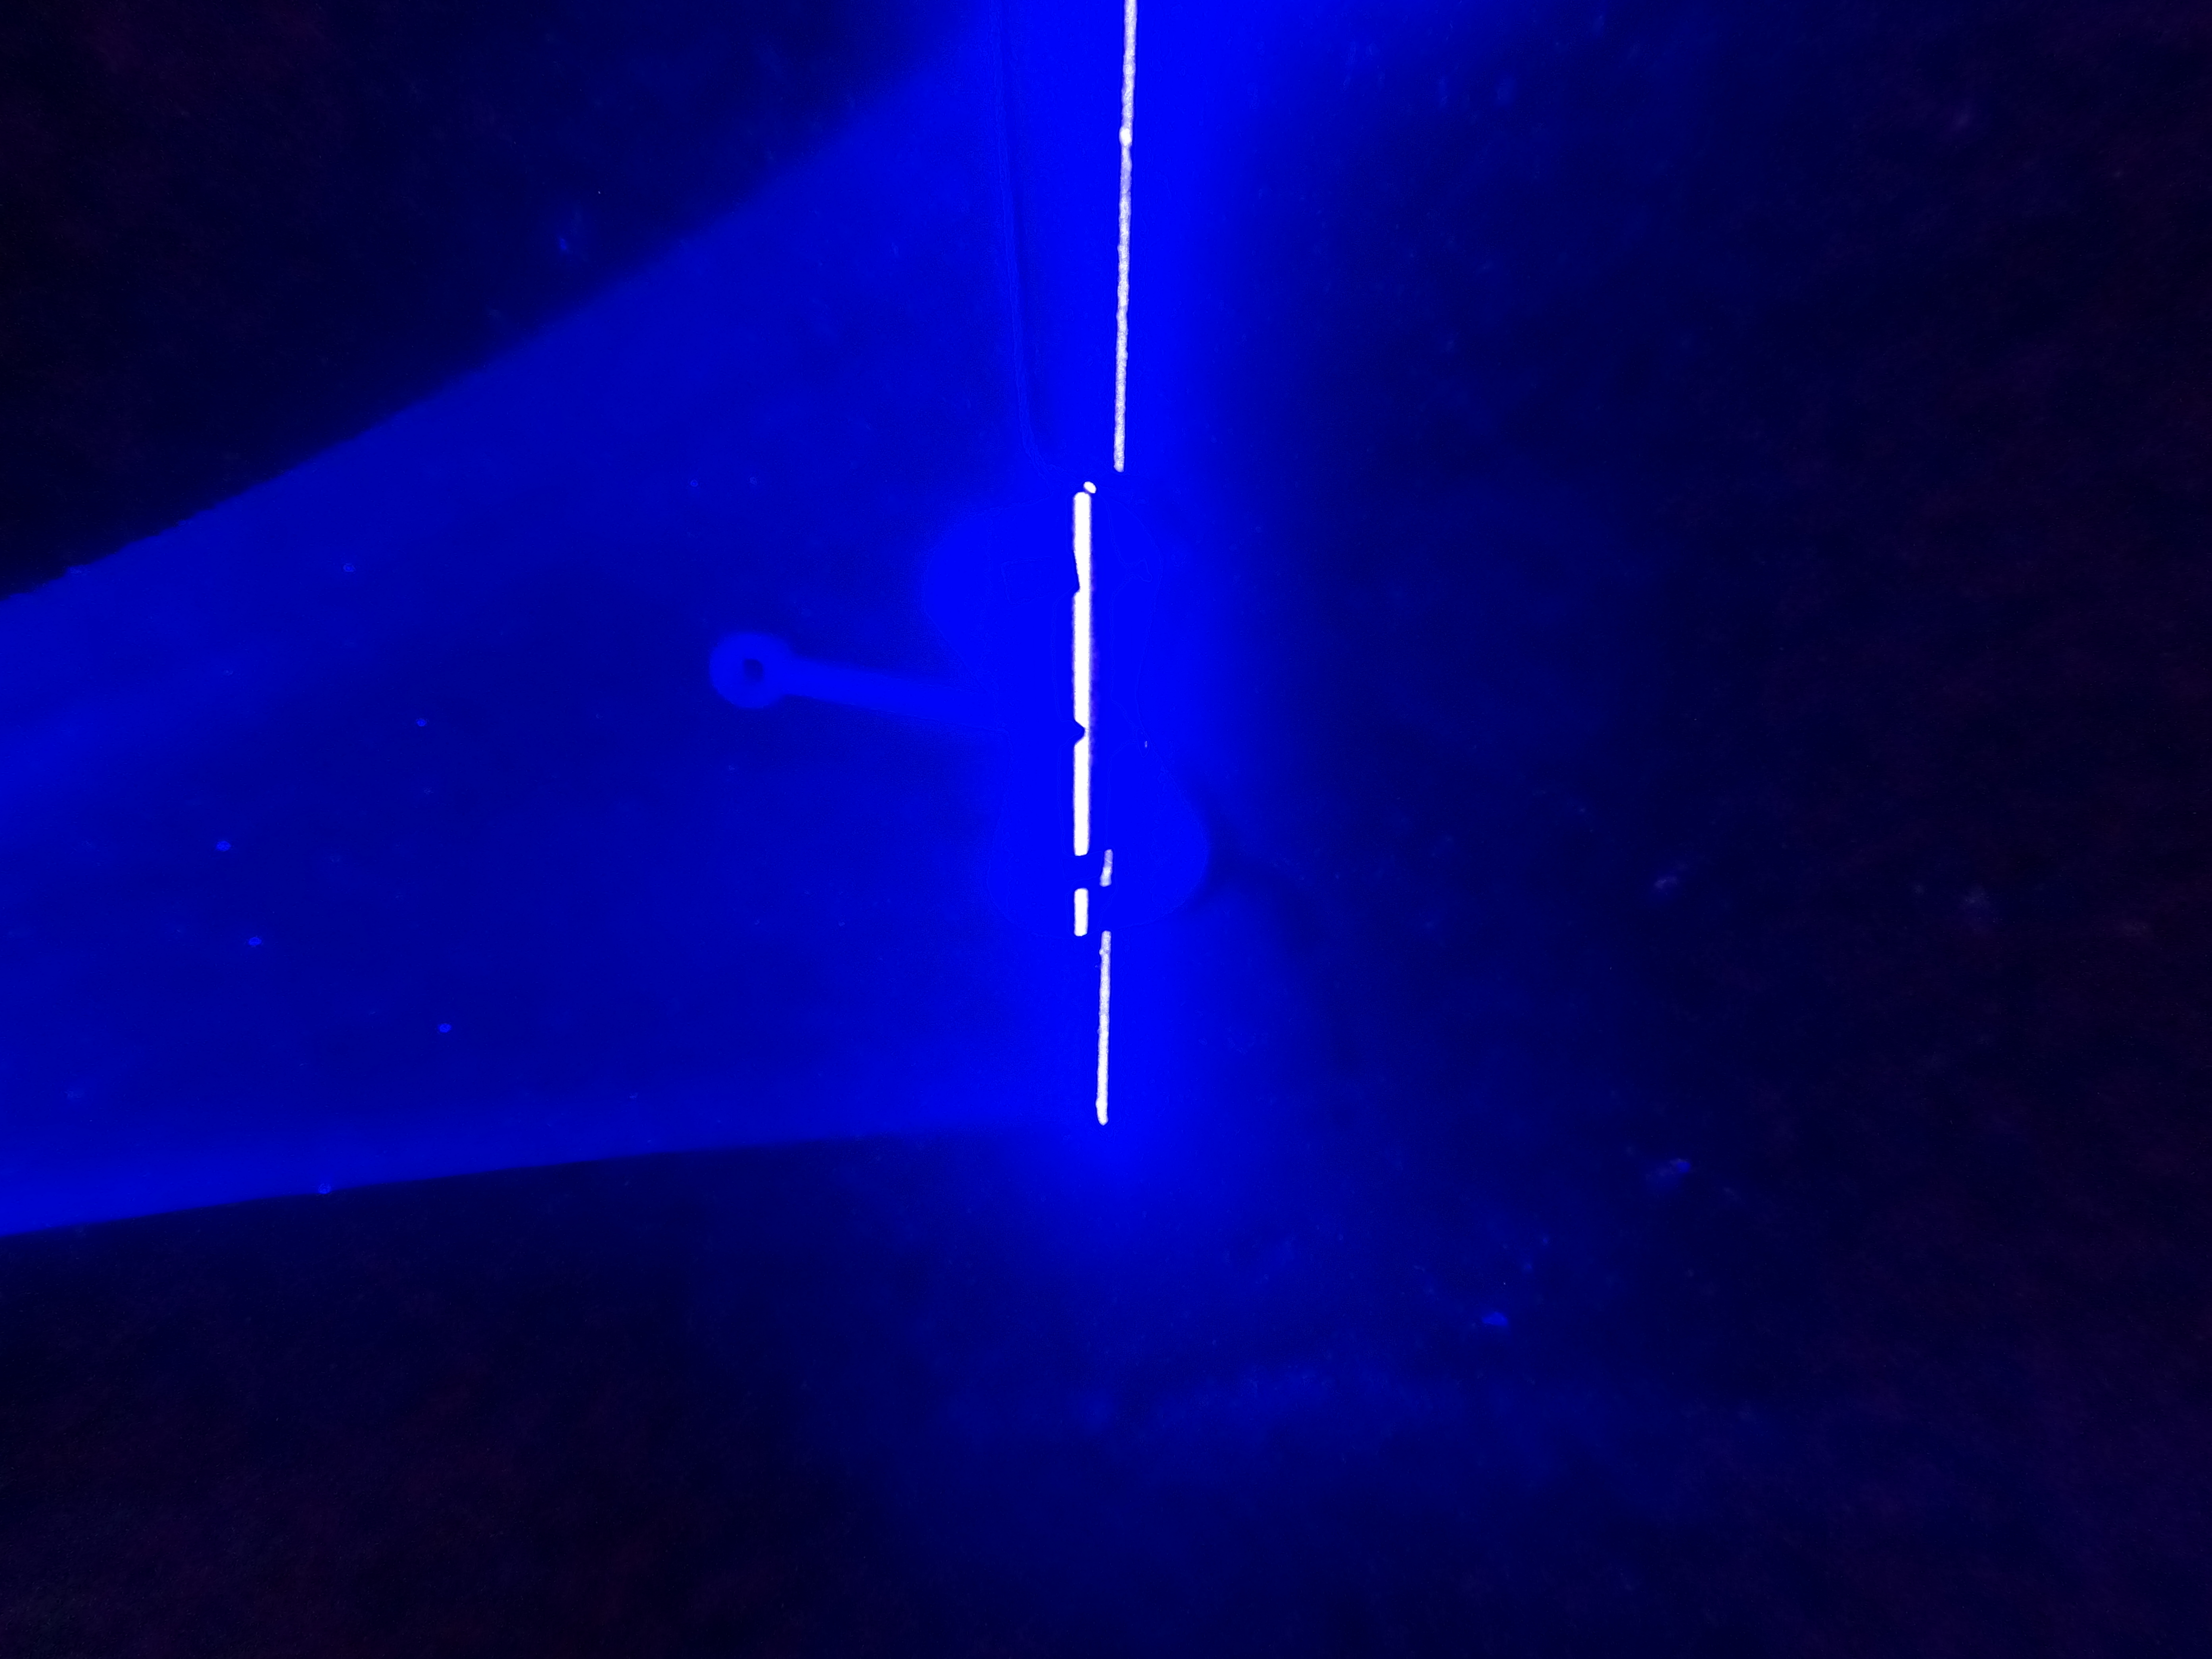

Supplement: Supplementary file 2226 [file G0016535.pdf › Level_1_2/G0016535.pdf]

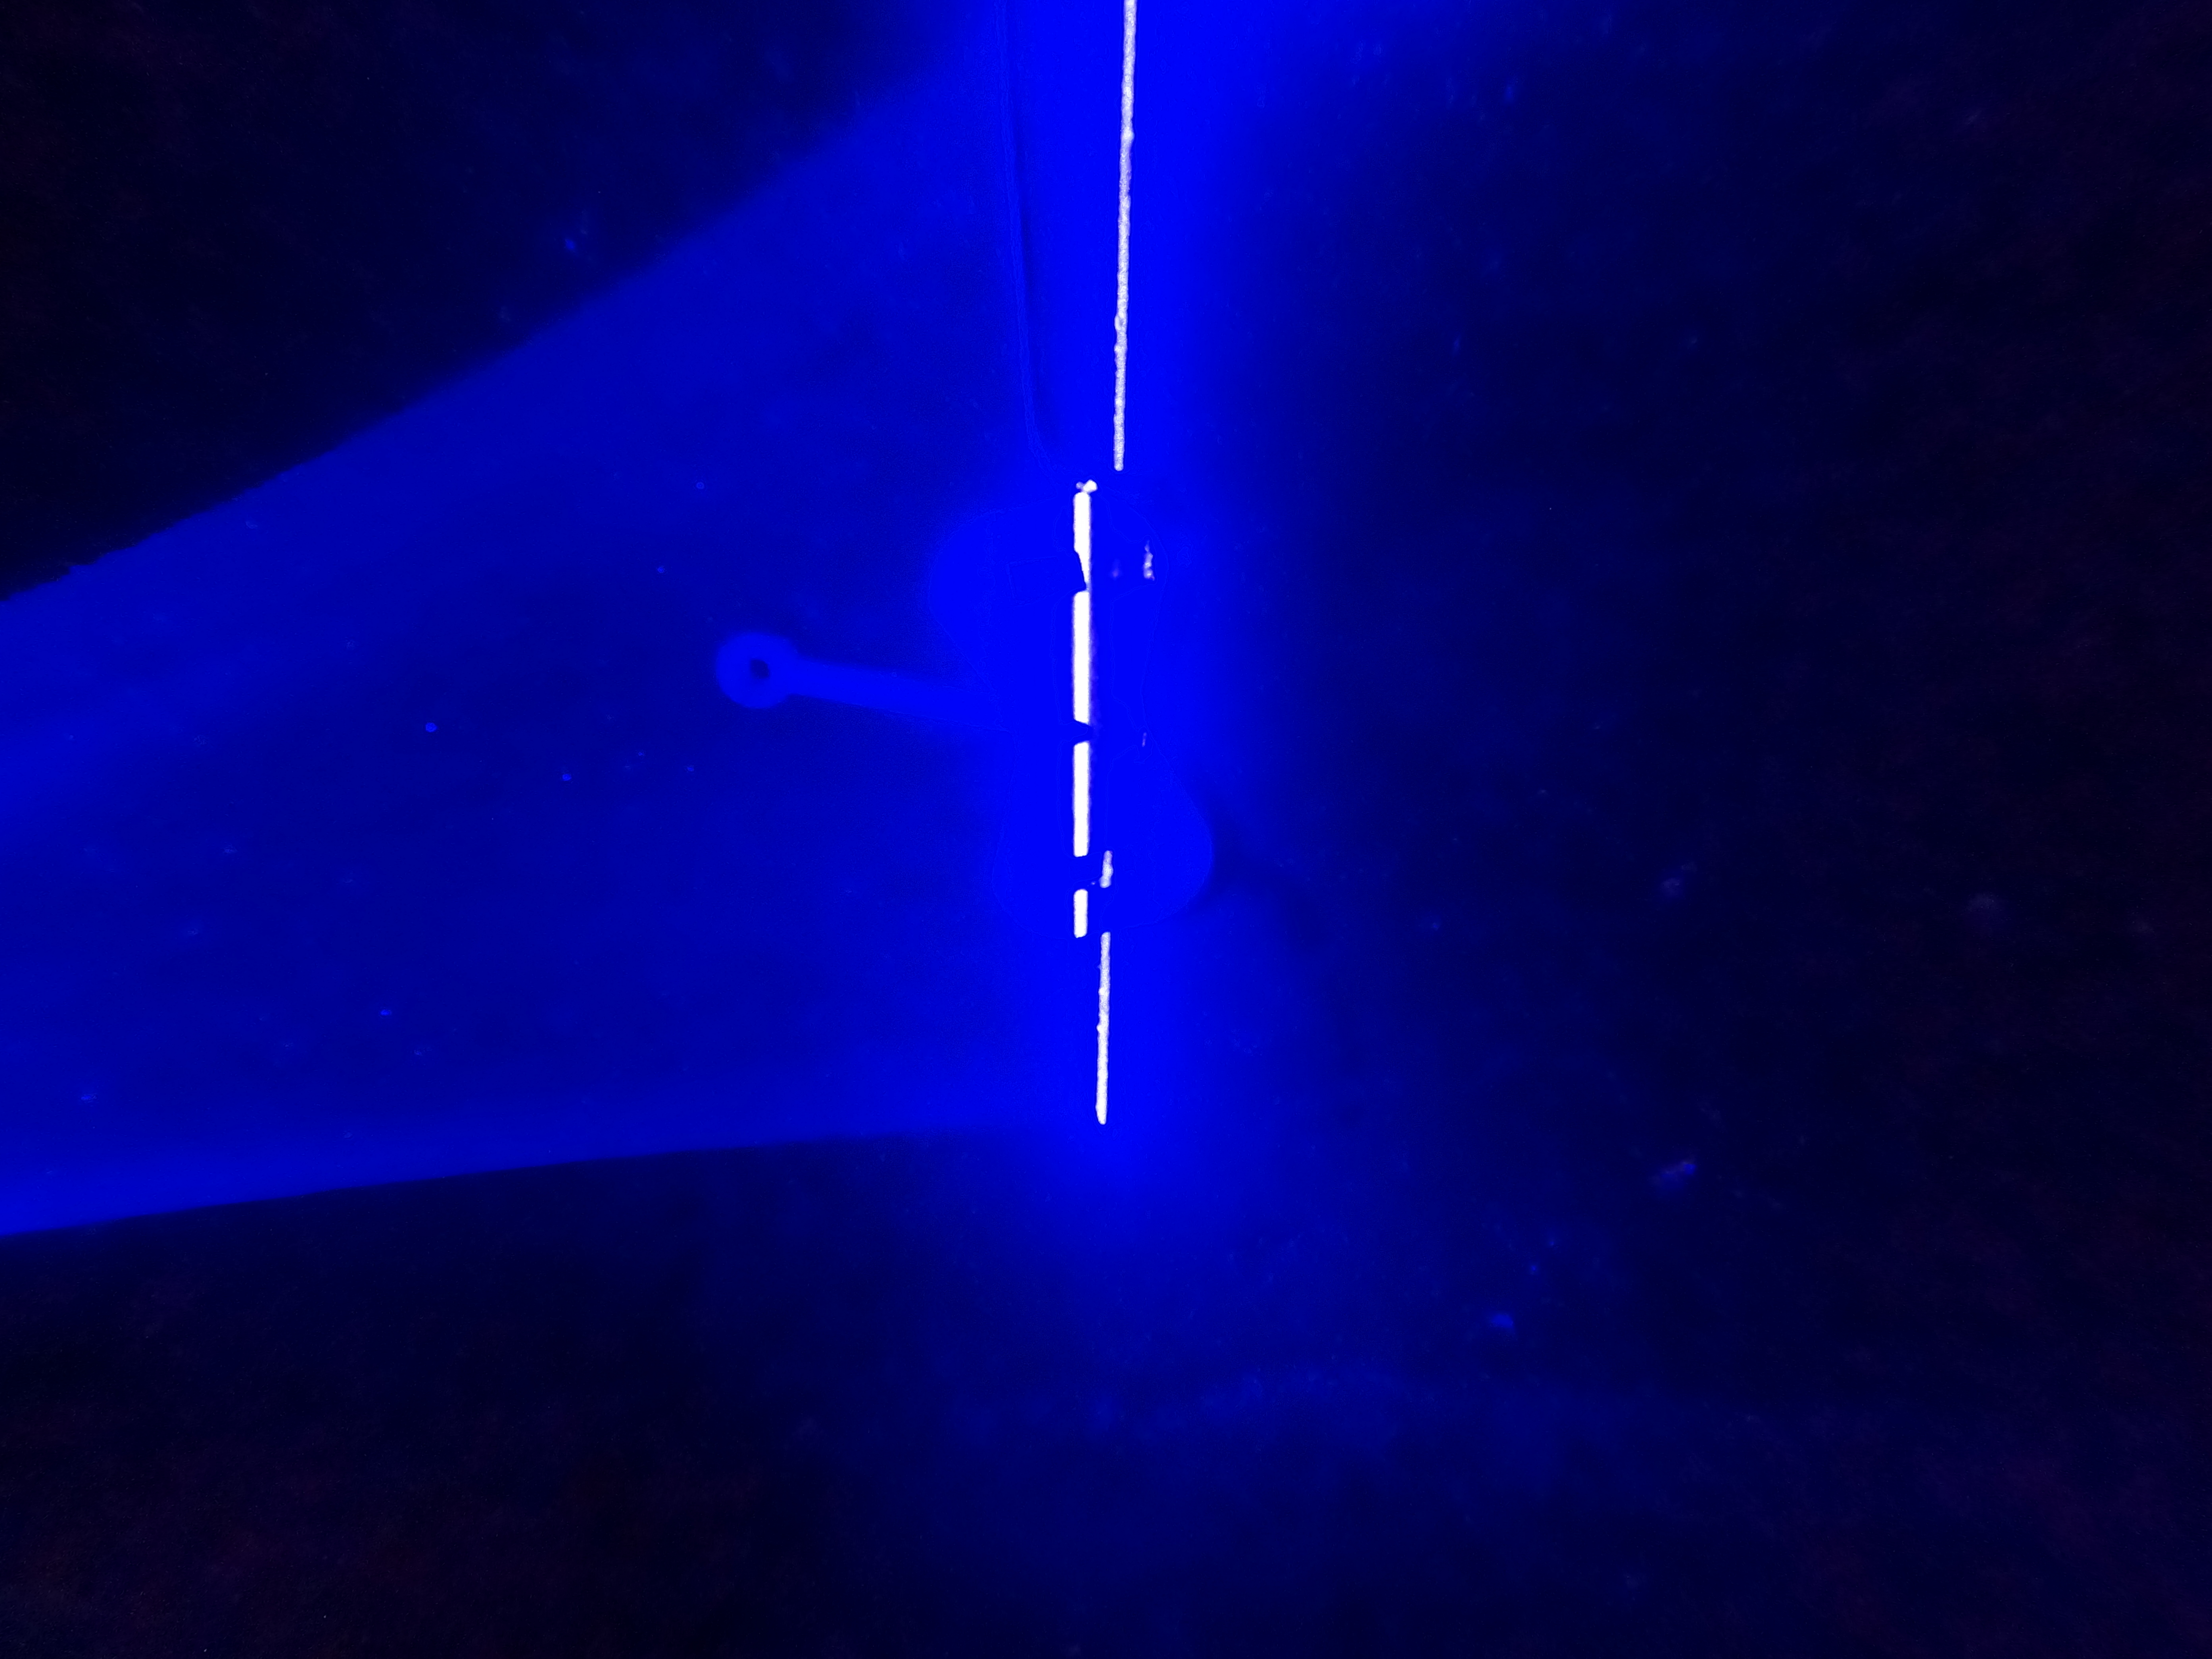

Supplement: Supplementary file 2227 [file G0016536.pdf › Level_1_2/G0016536.pdf]

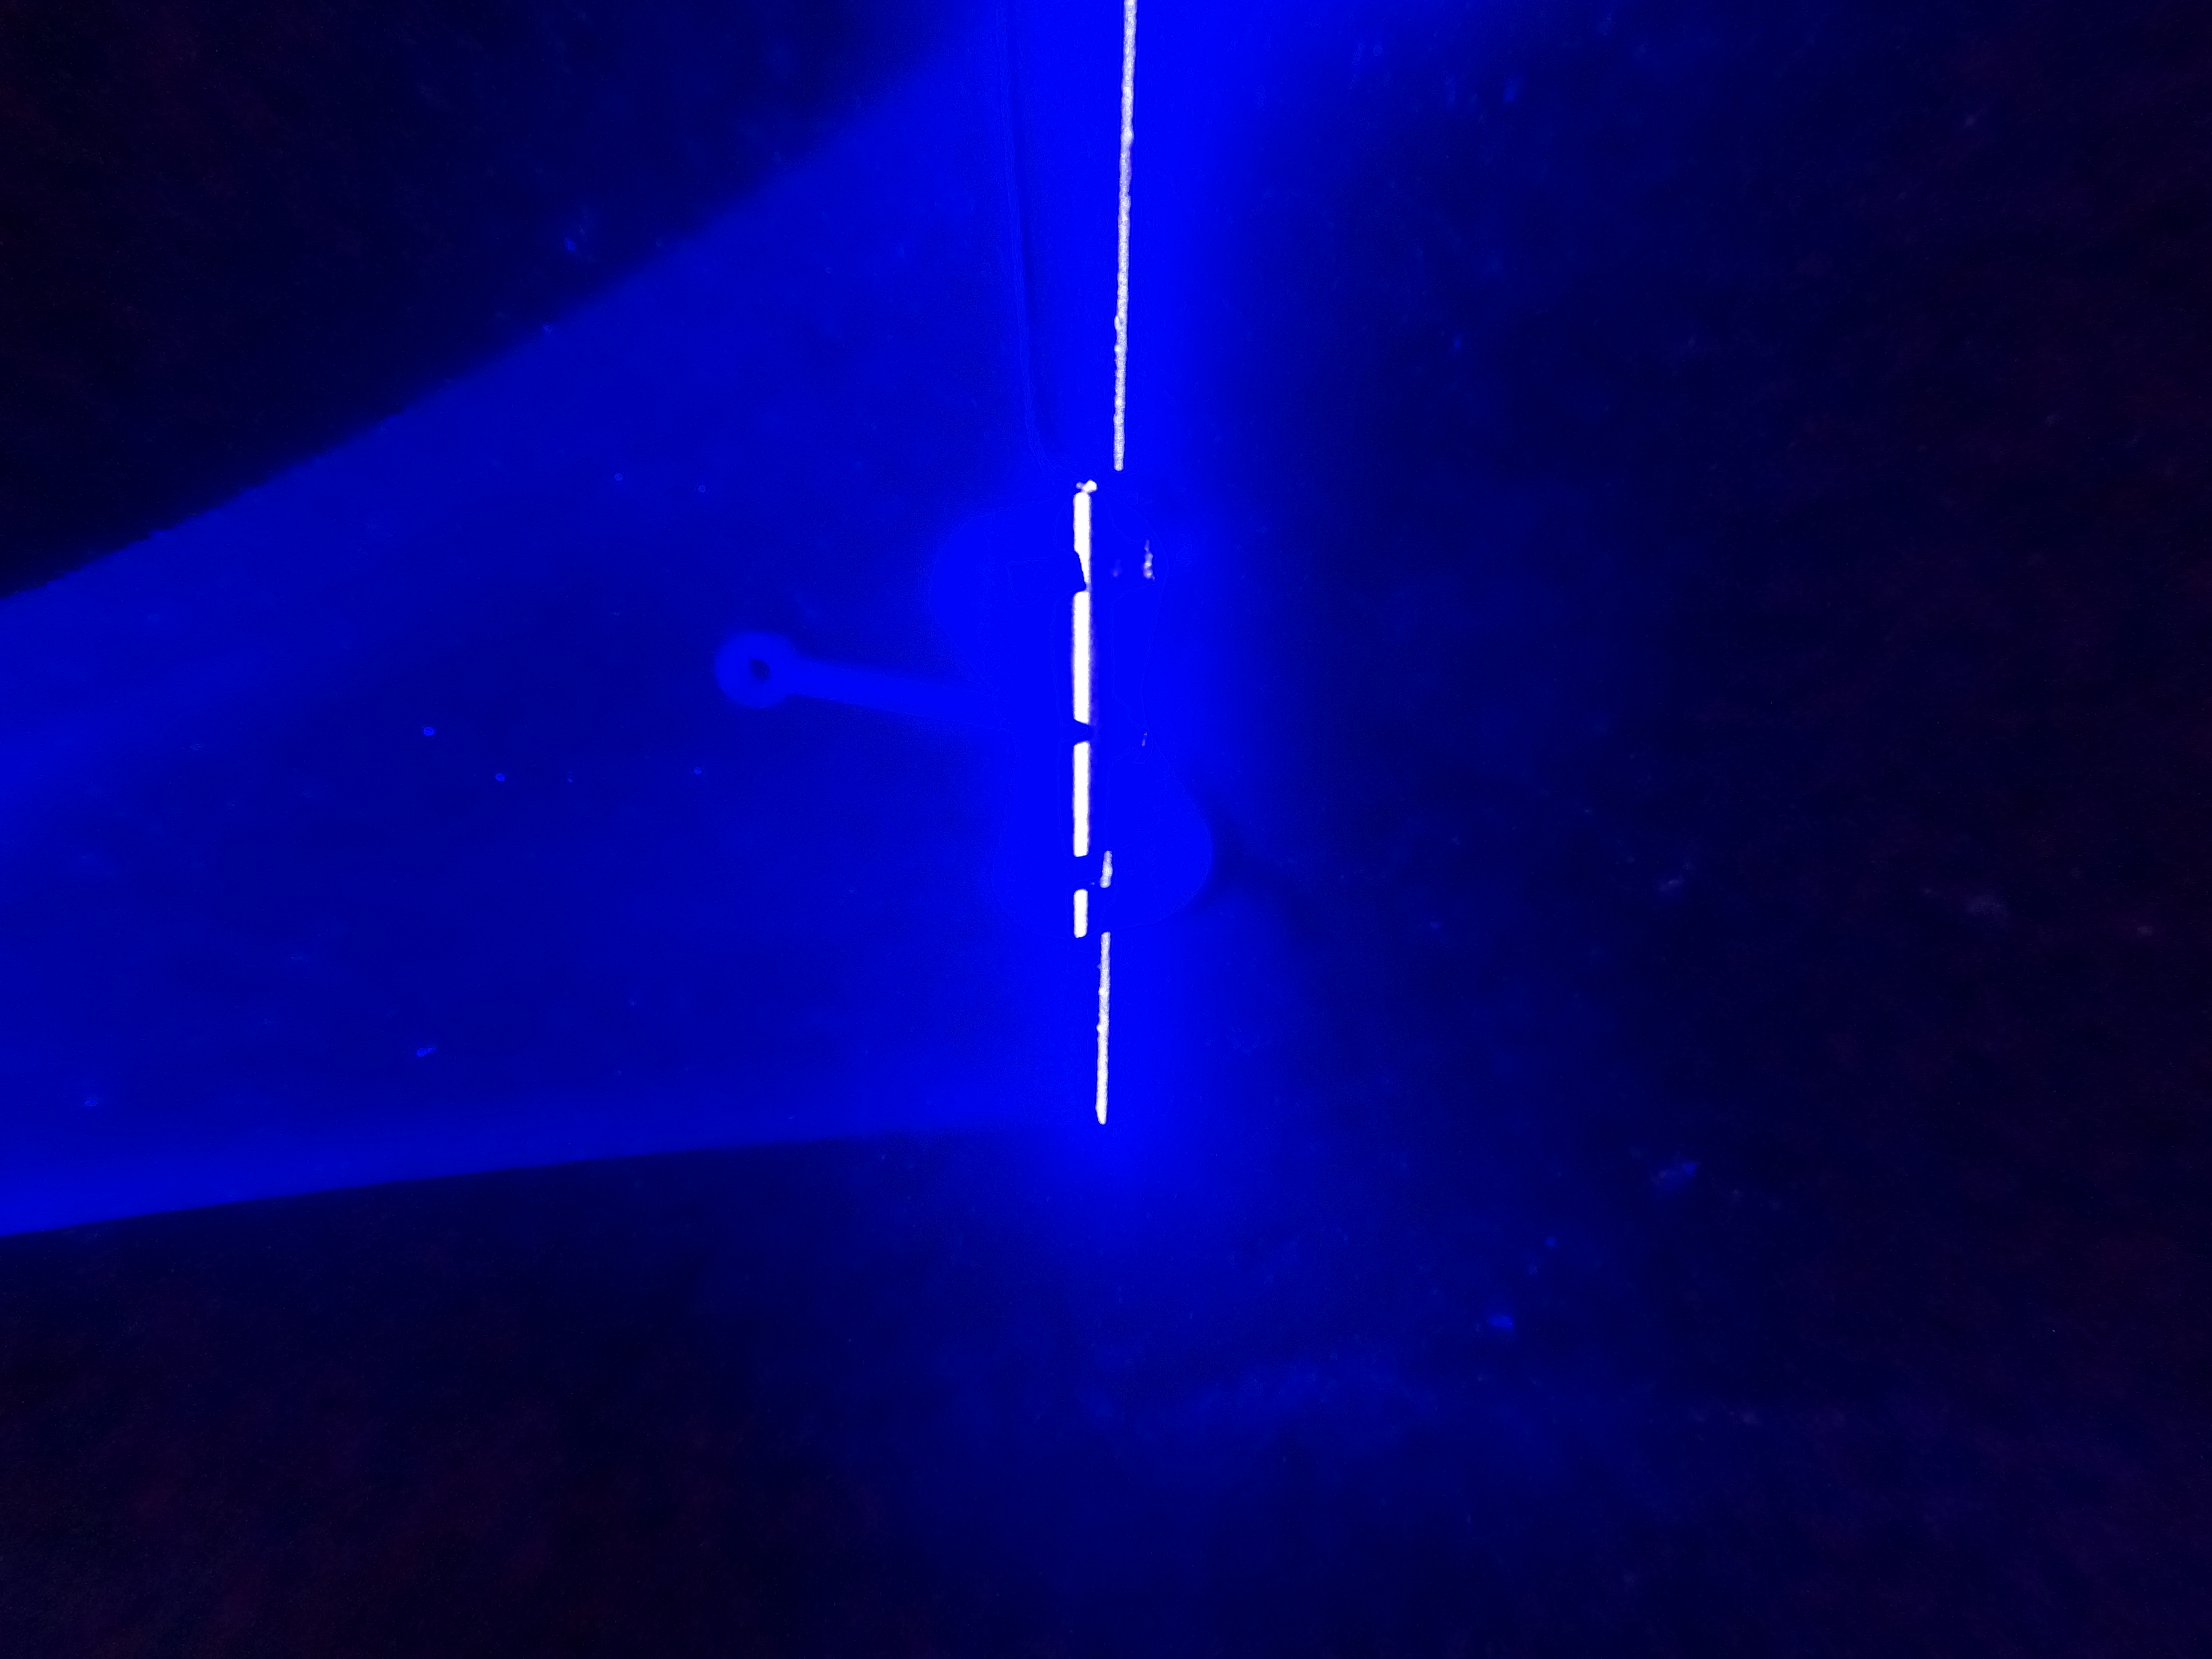

Supplement: Supplementary file 2228 [file G0016537.pdf › Level_1_2/G0016537.pdf]

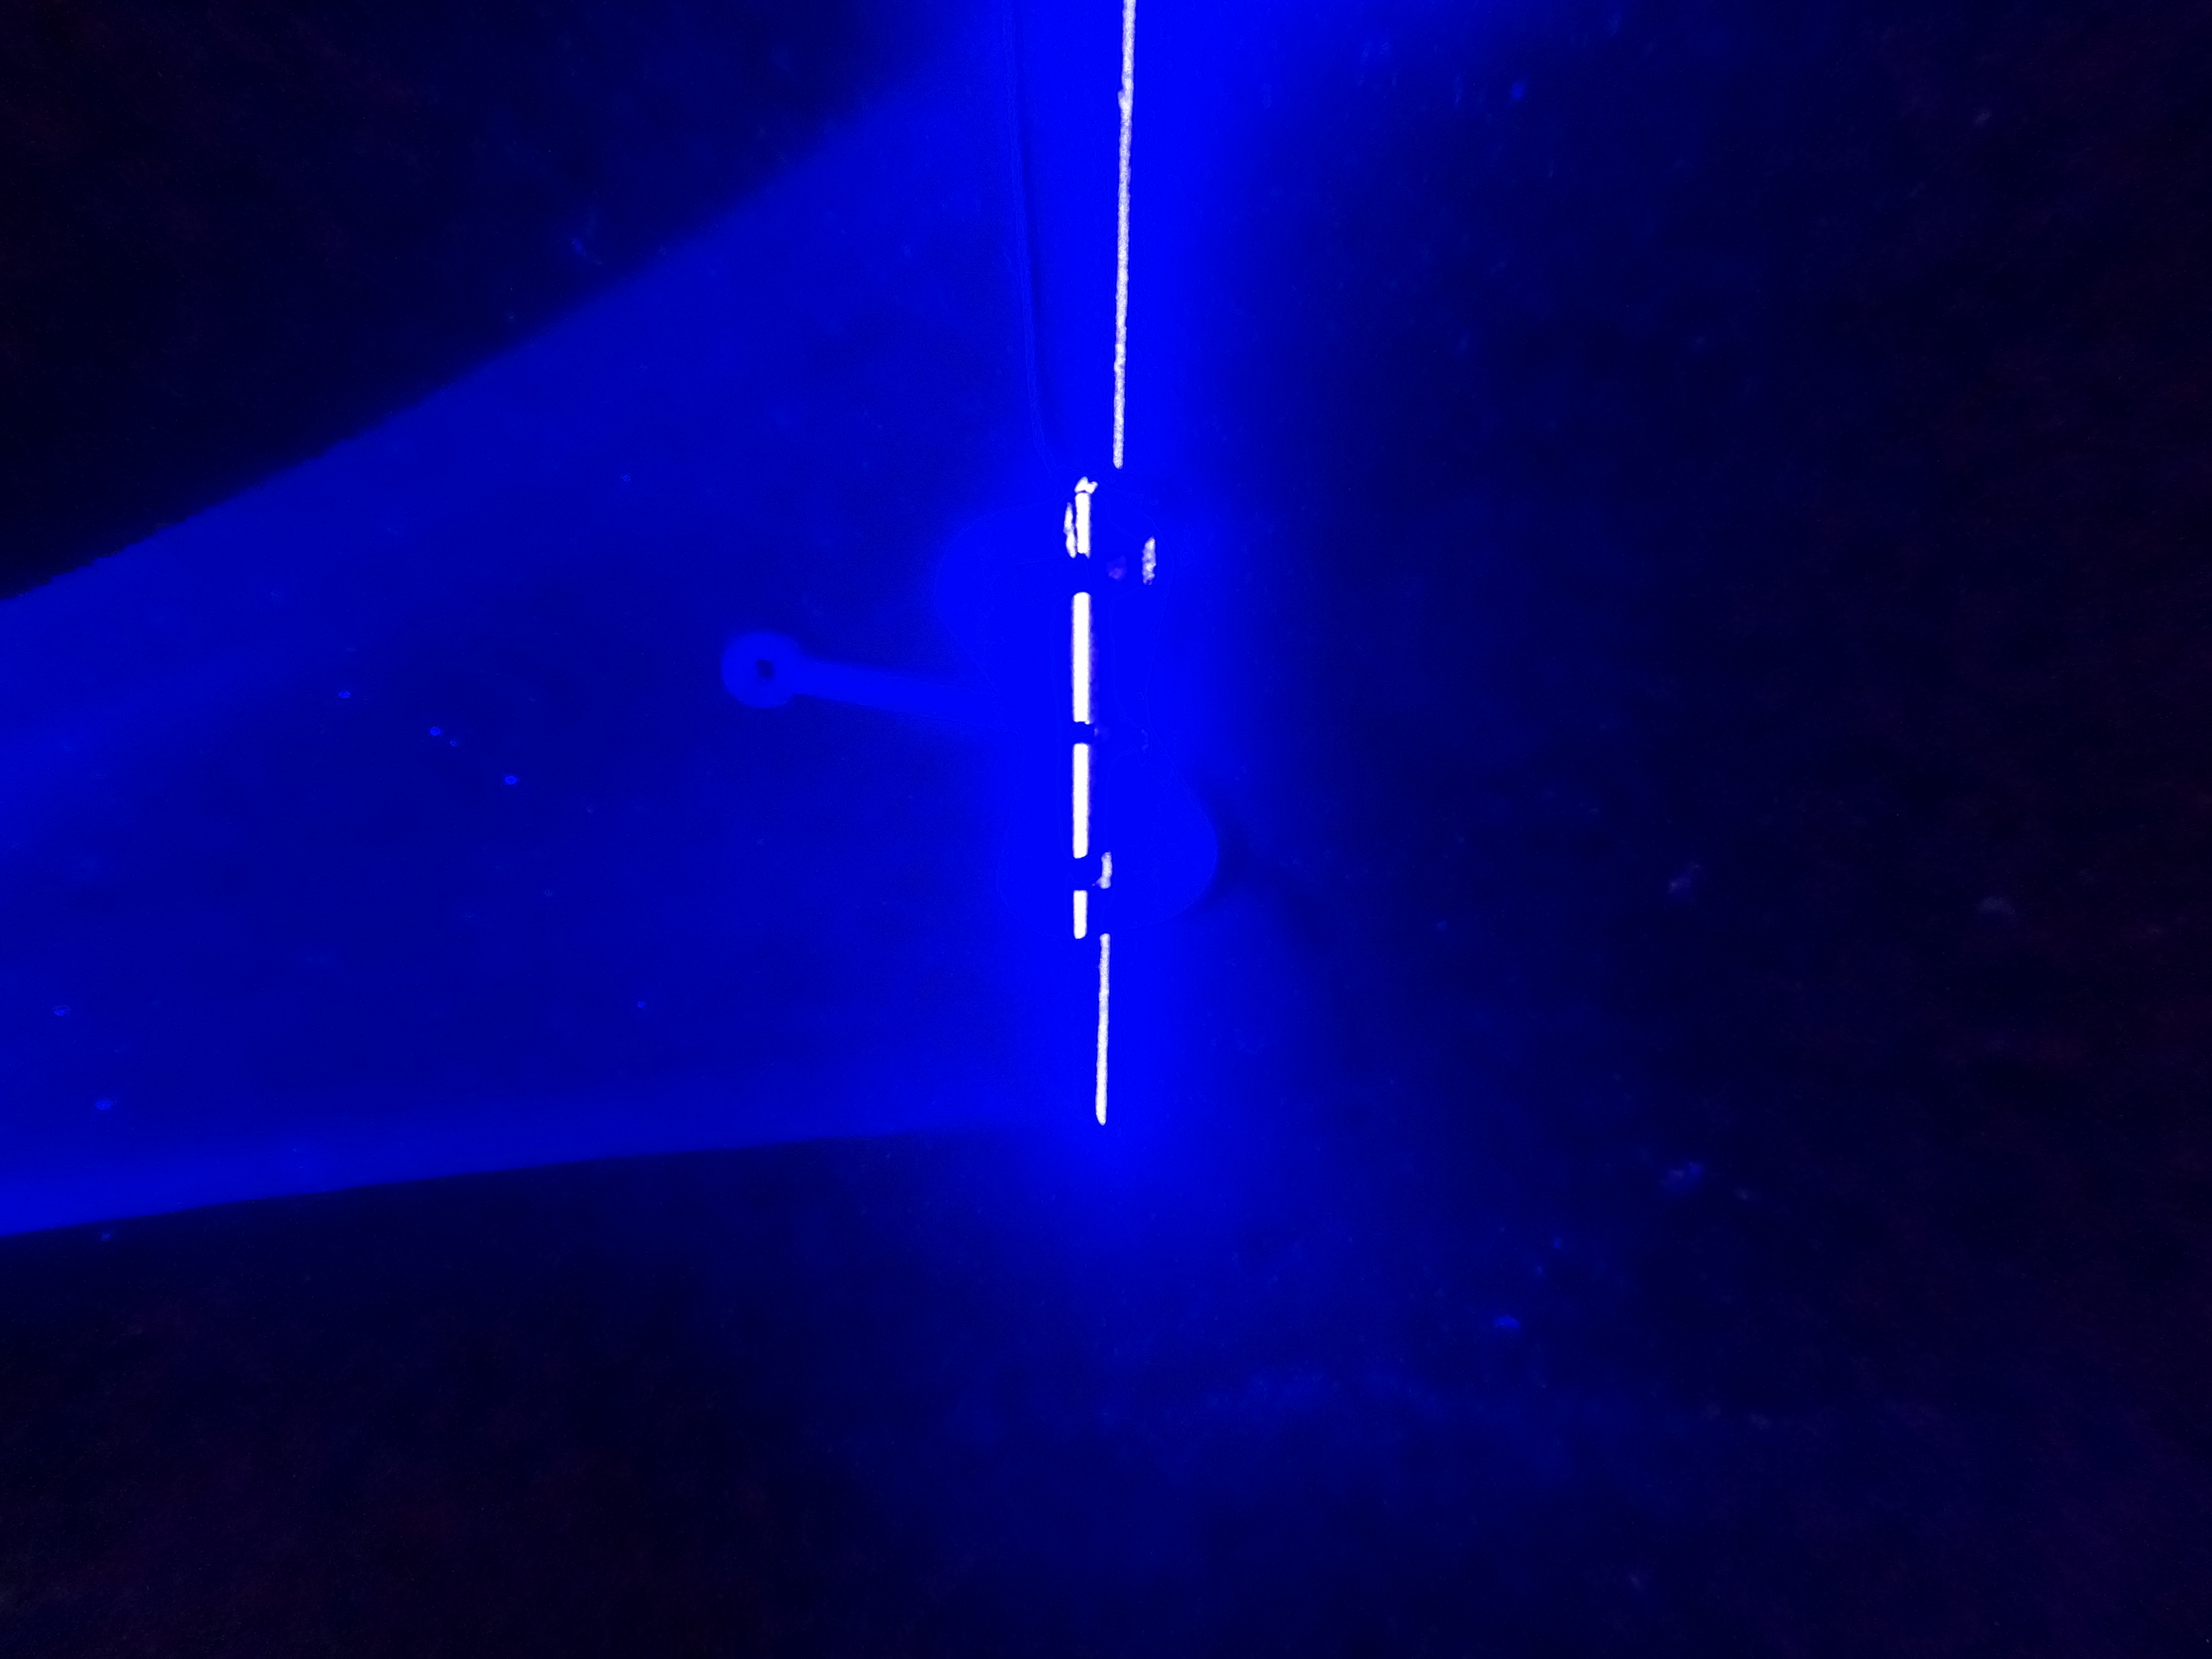

Supplement: Supplementary file 2229 [file G0016538.pdf › Level_1_2/G0016538.pdf]

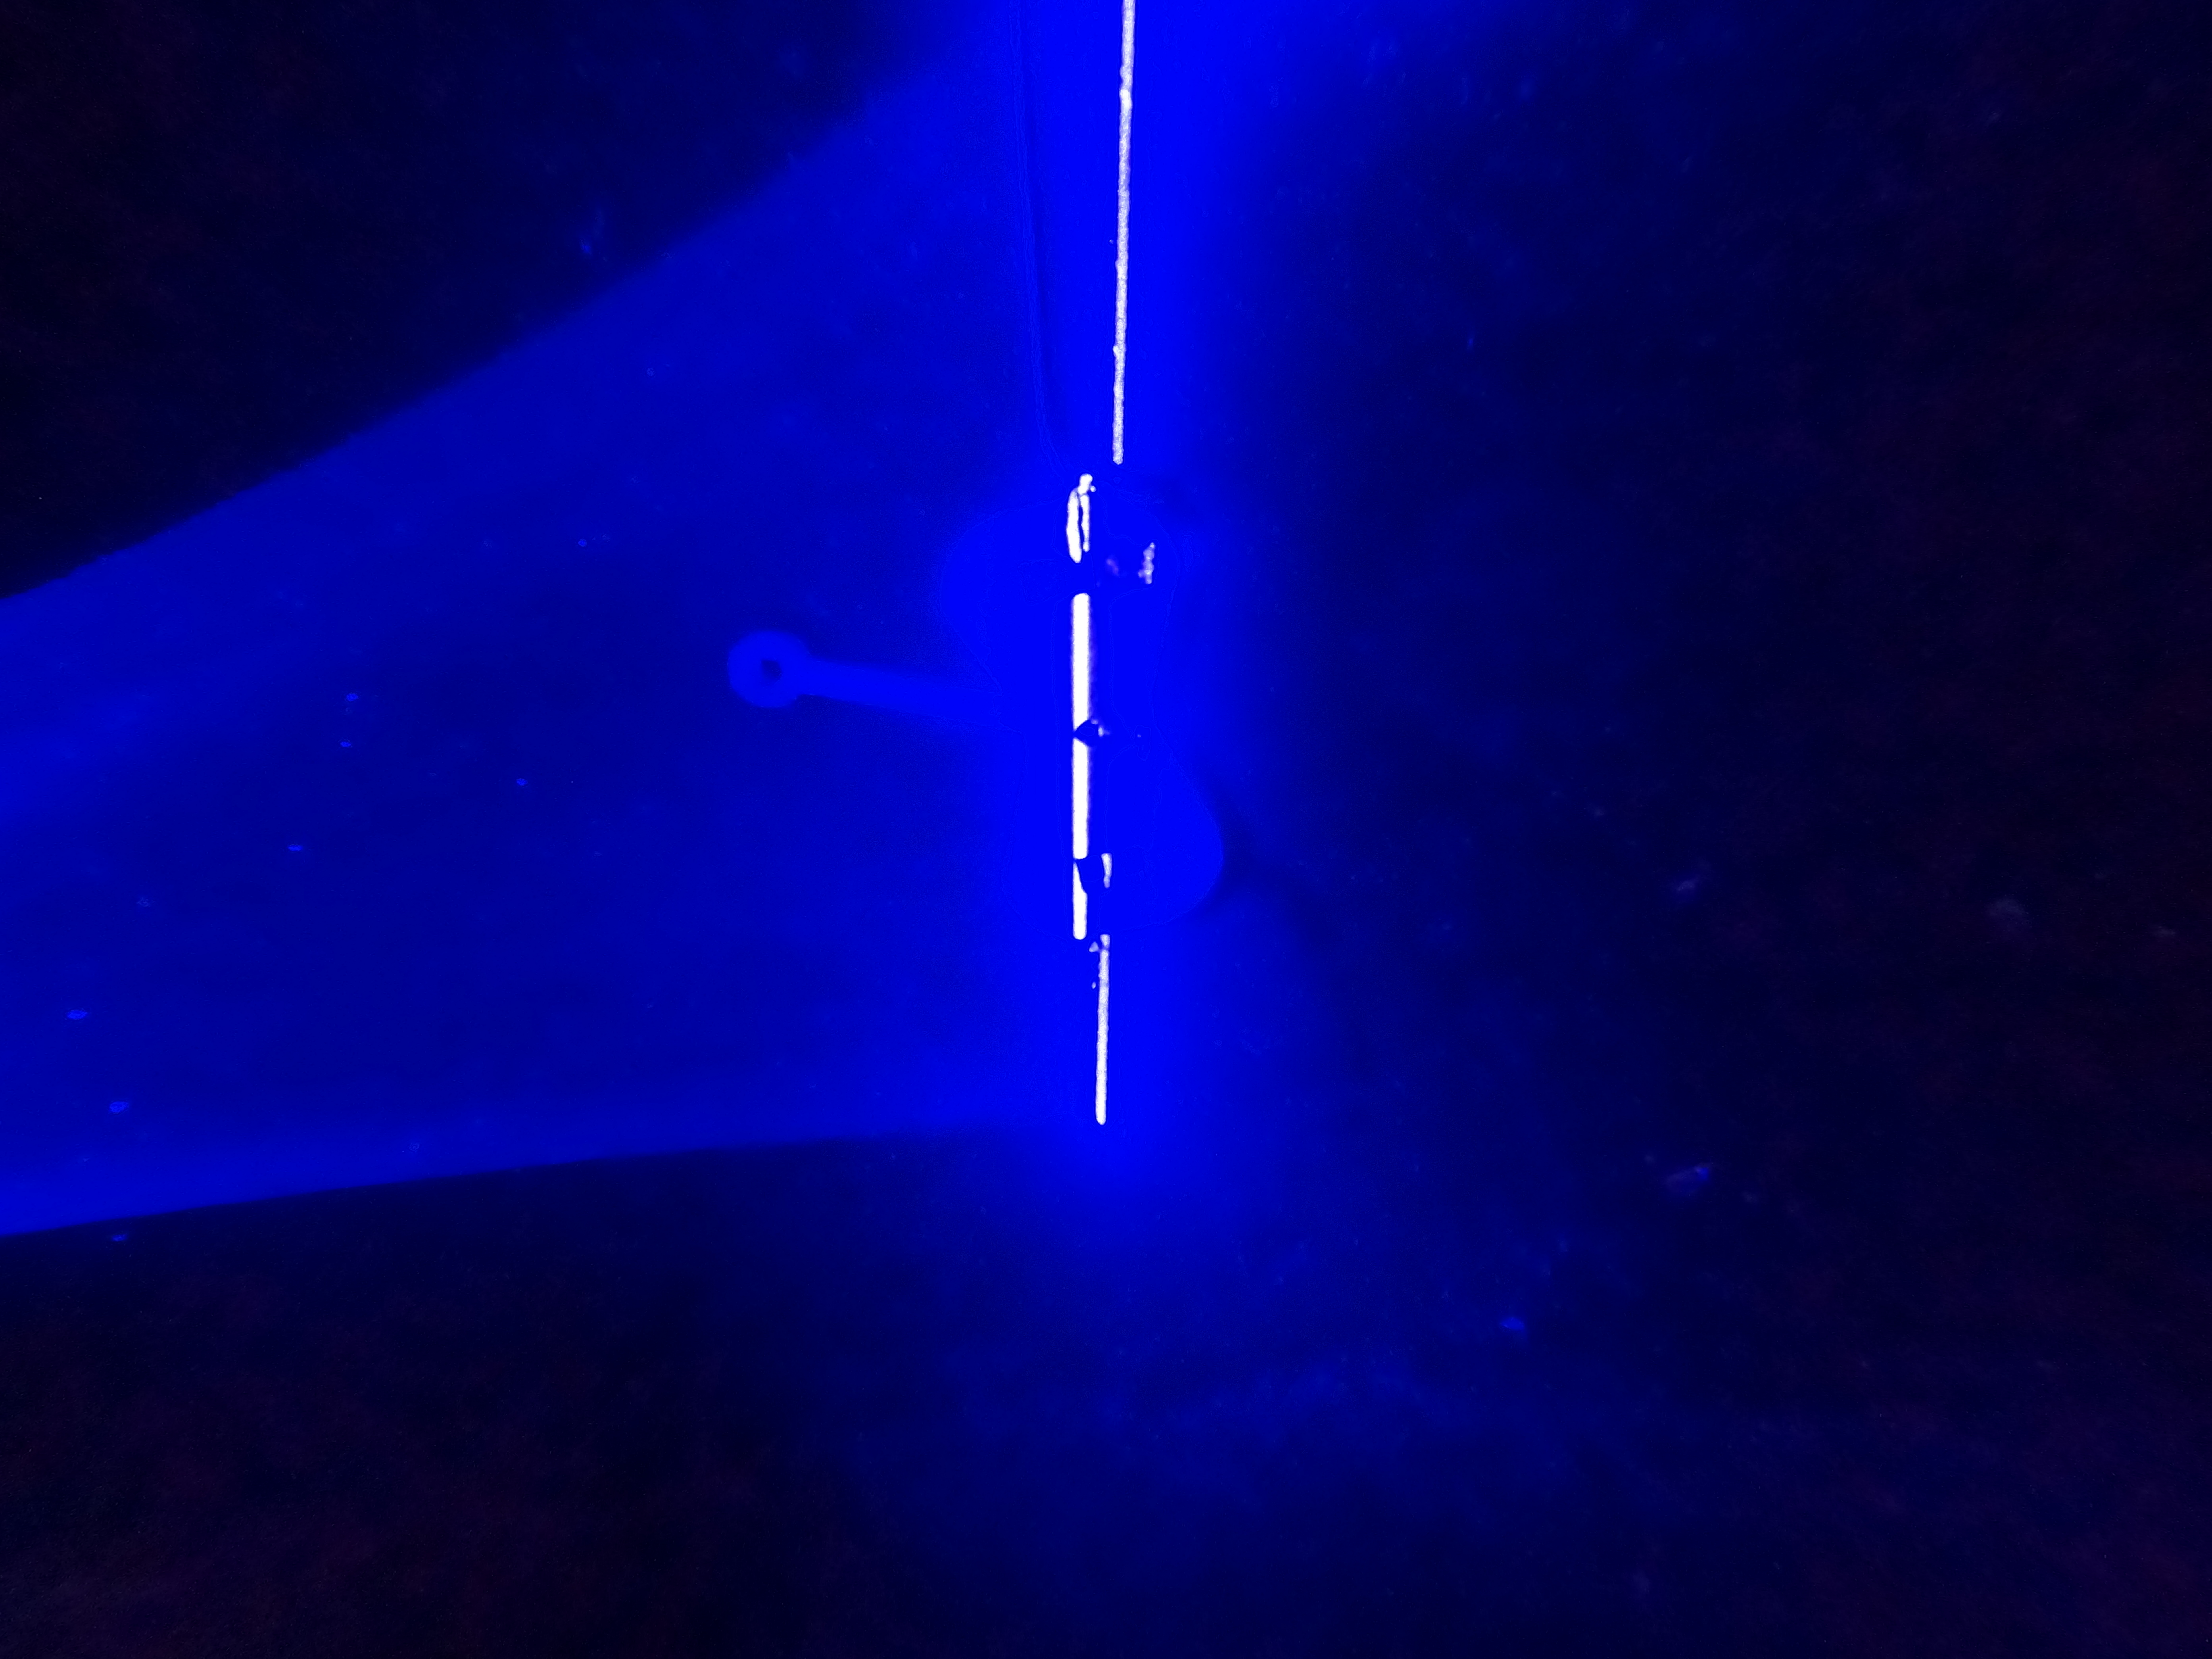

Supplement: Supplementary file 2230 [file G0016539.pdf › Level_1_2/G0016539.pdf]

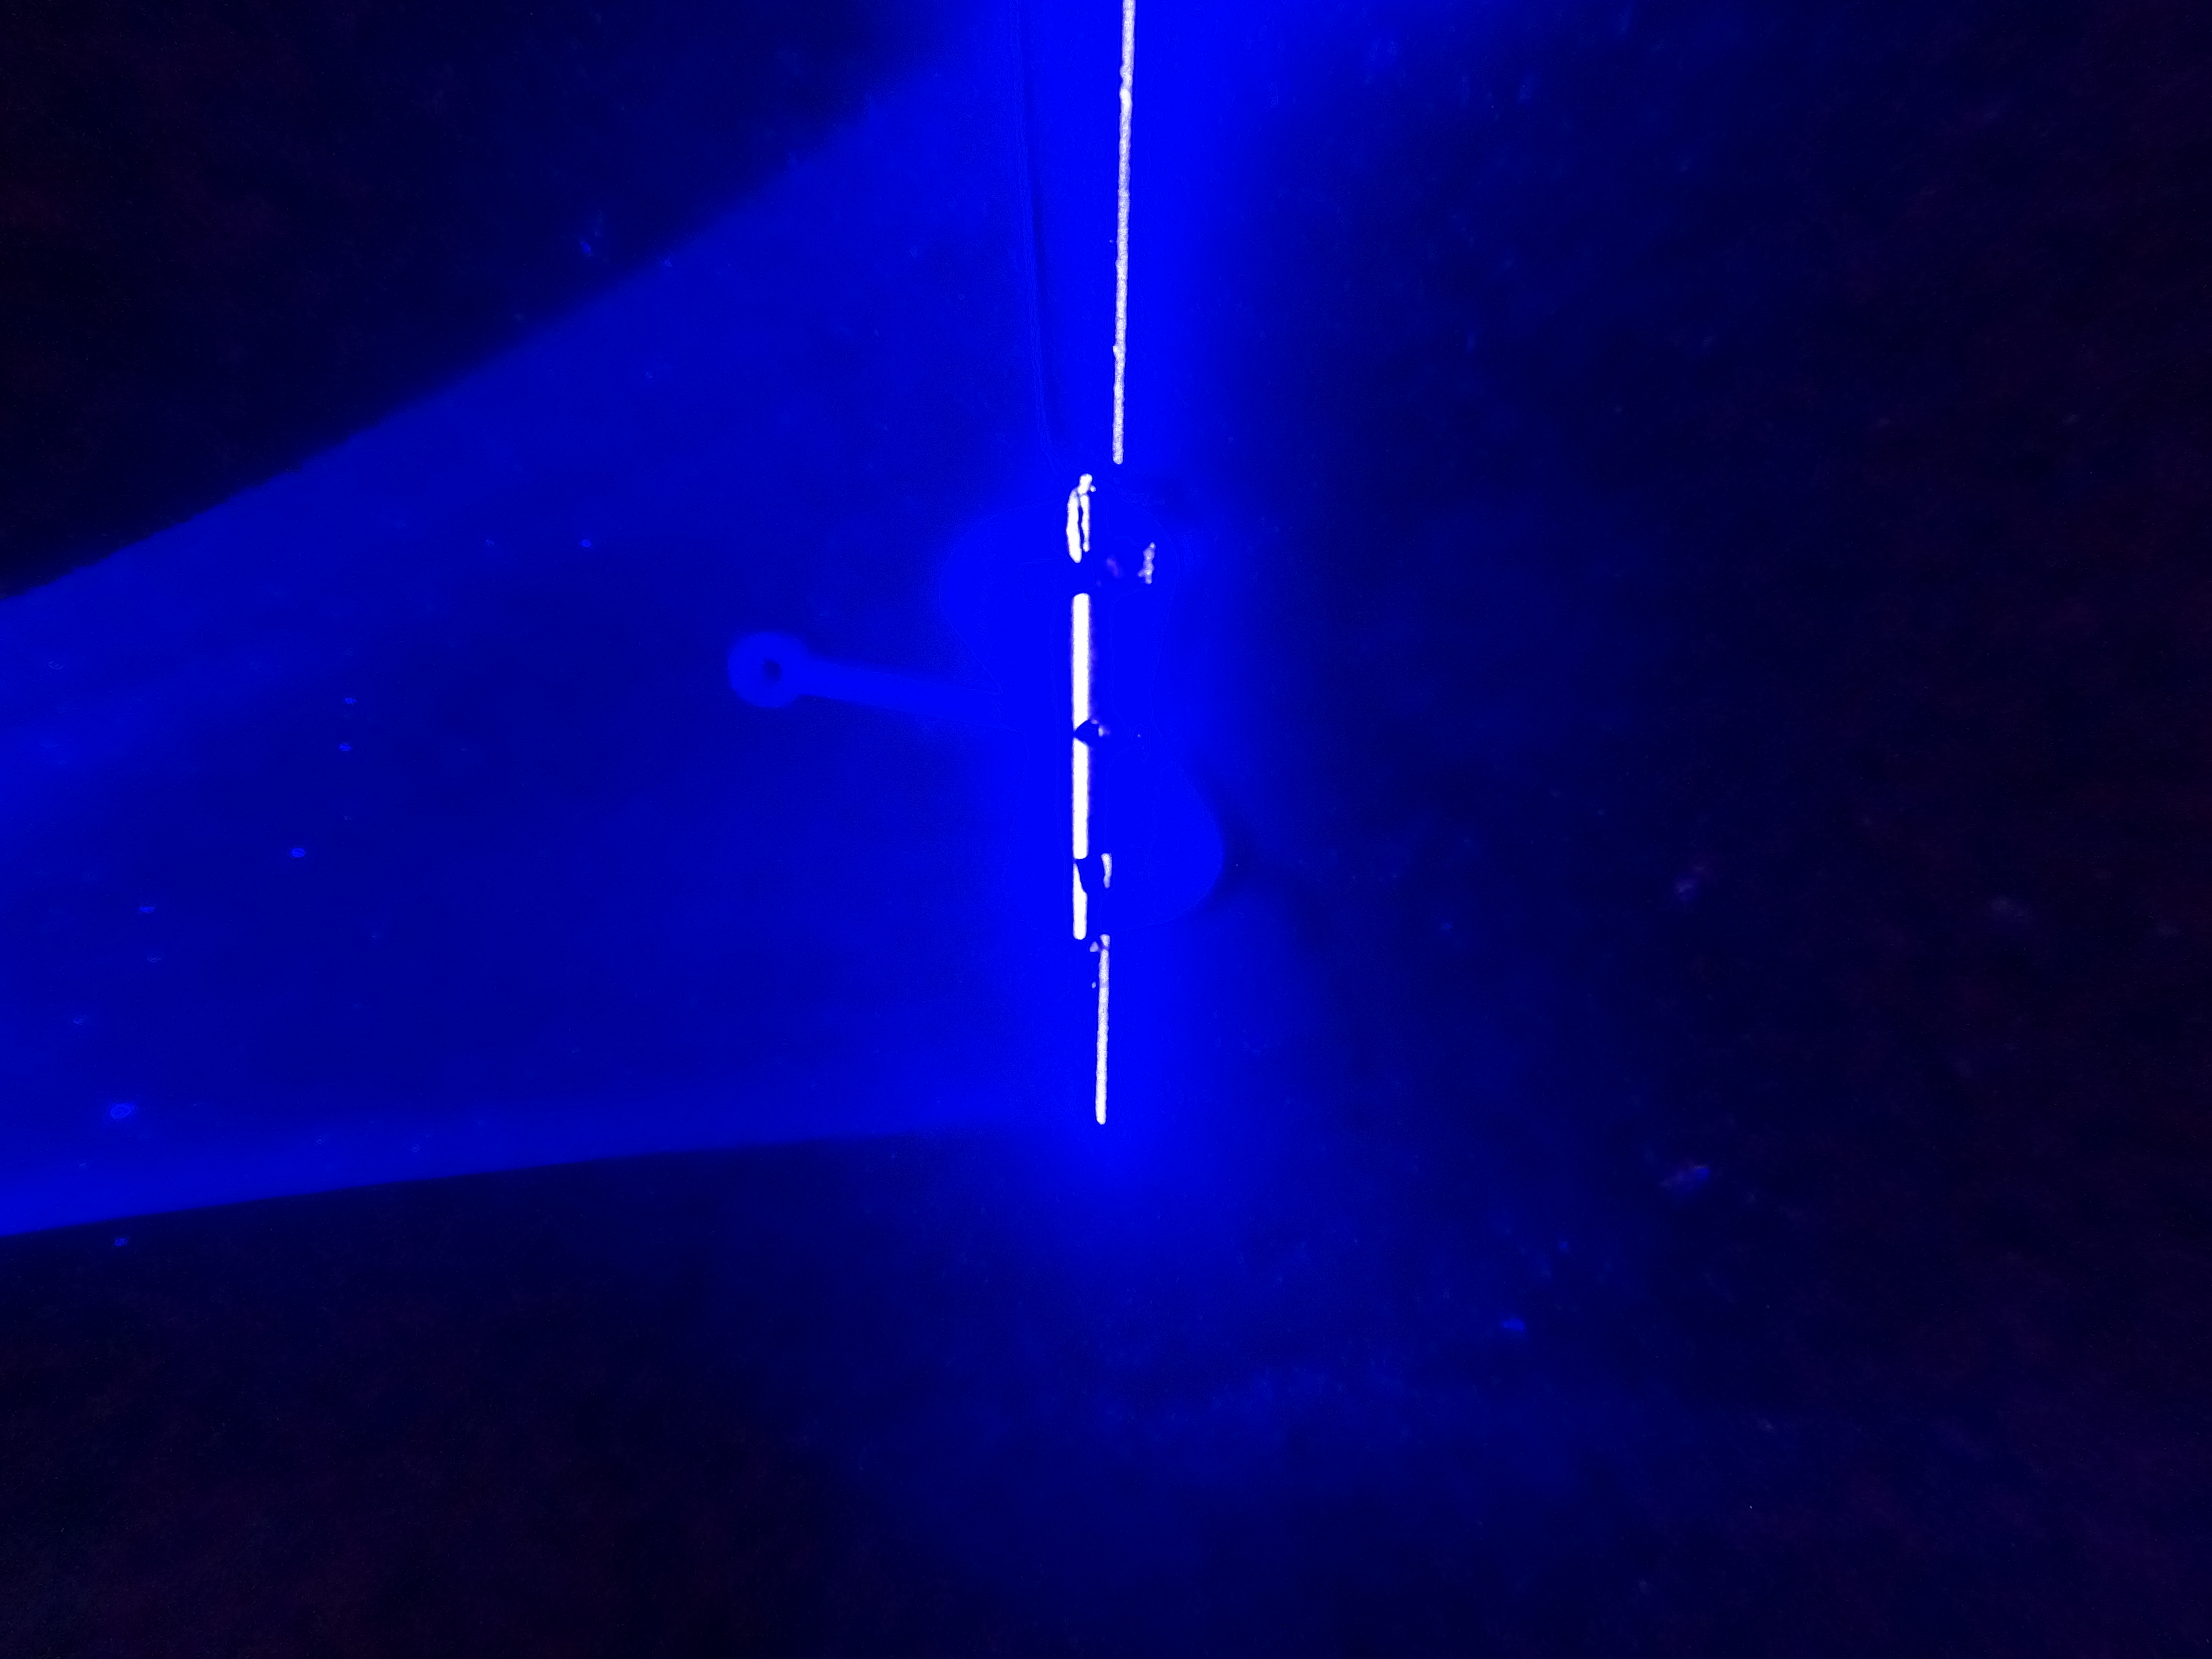

Supplement: Supplementary file 2231 [file G0016540.pdf › Level_1_2/G0016540.pdf]

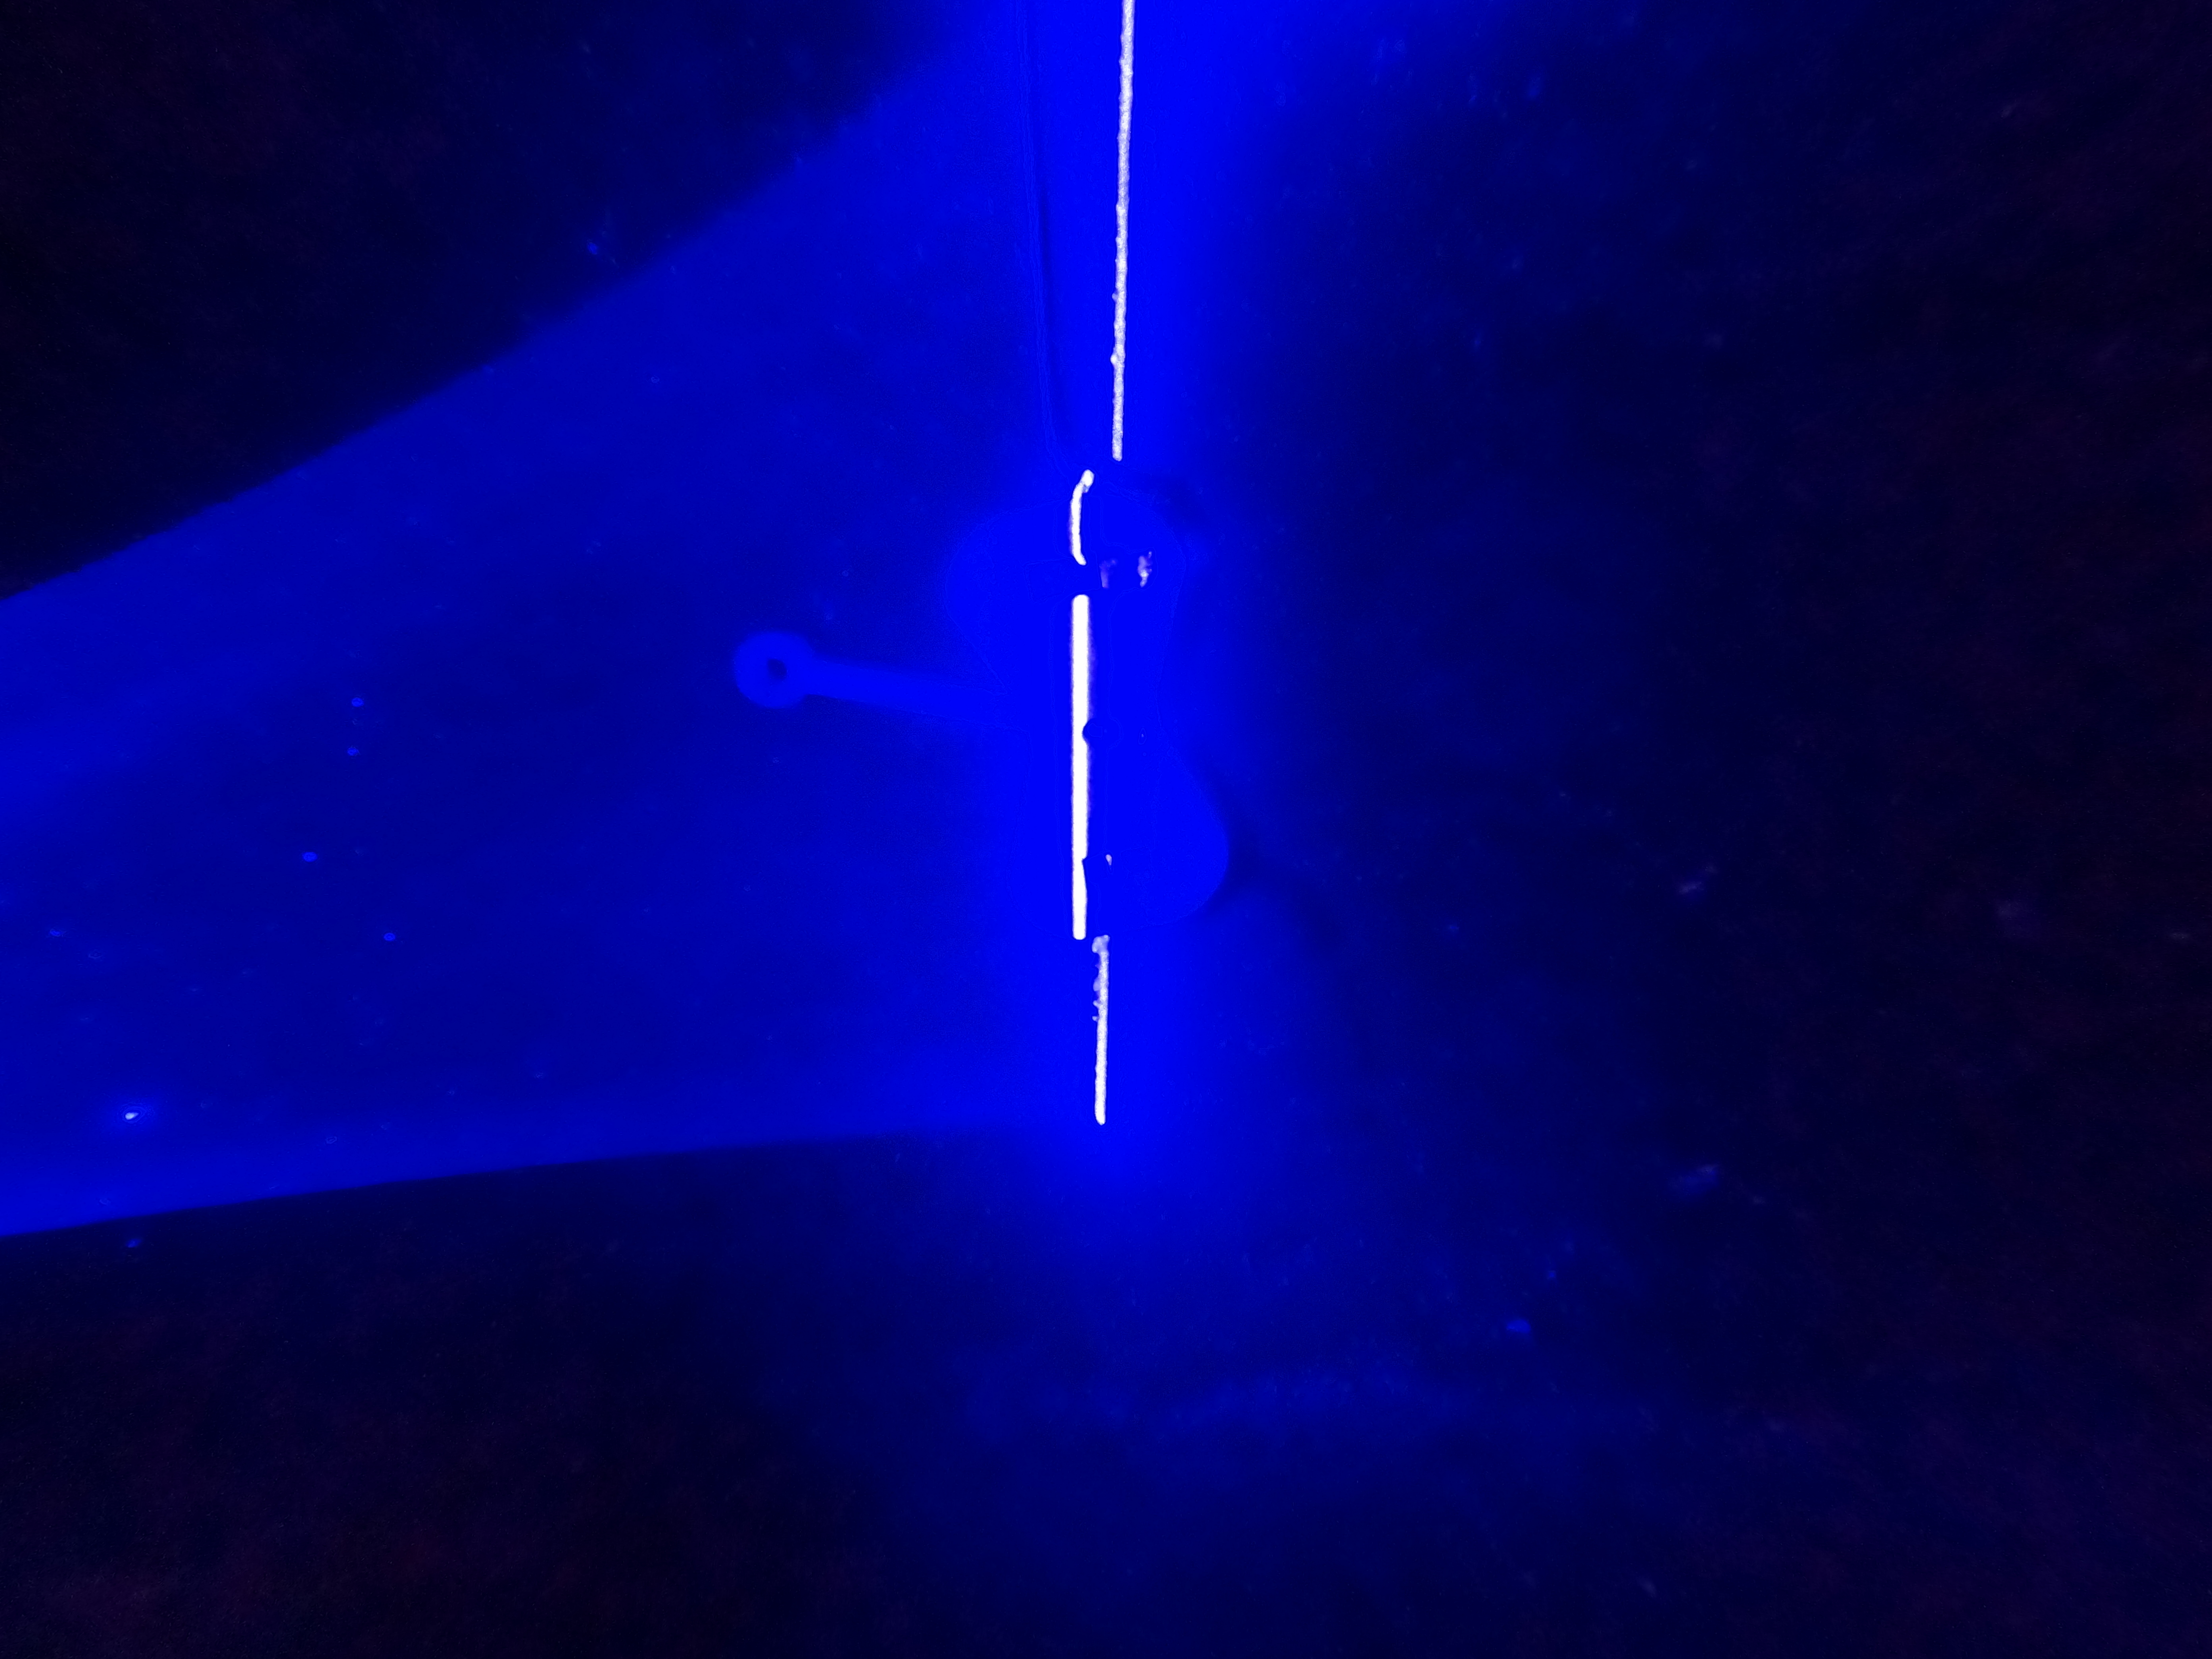

Supplement: Supplementary file 2232 [file G0016541.pdf › Level_1_2/G0016541.pdf]

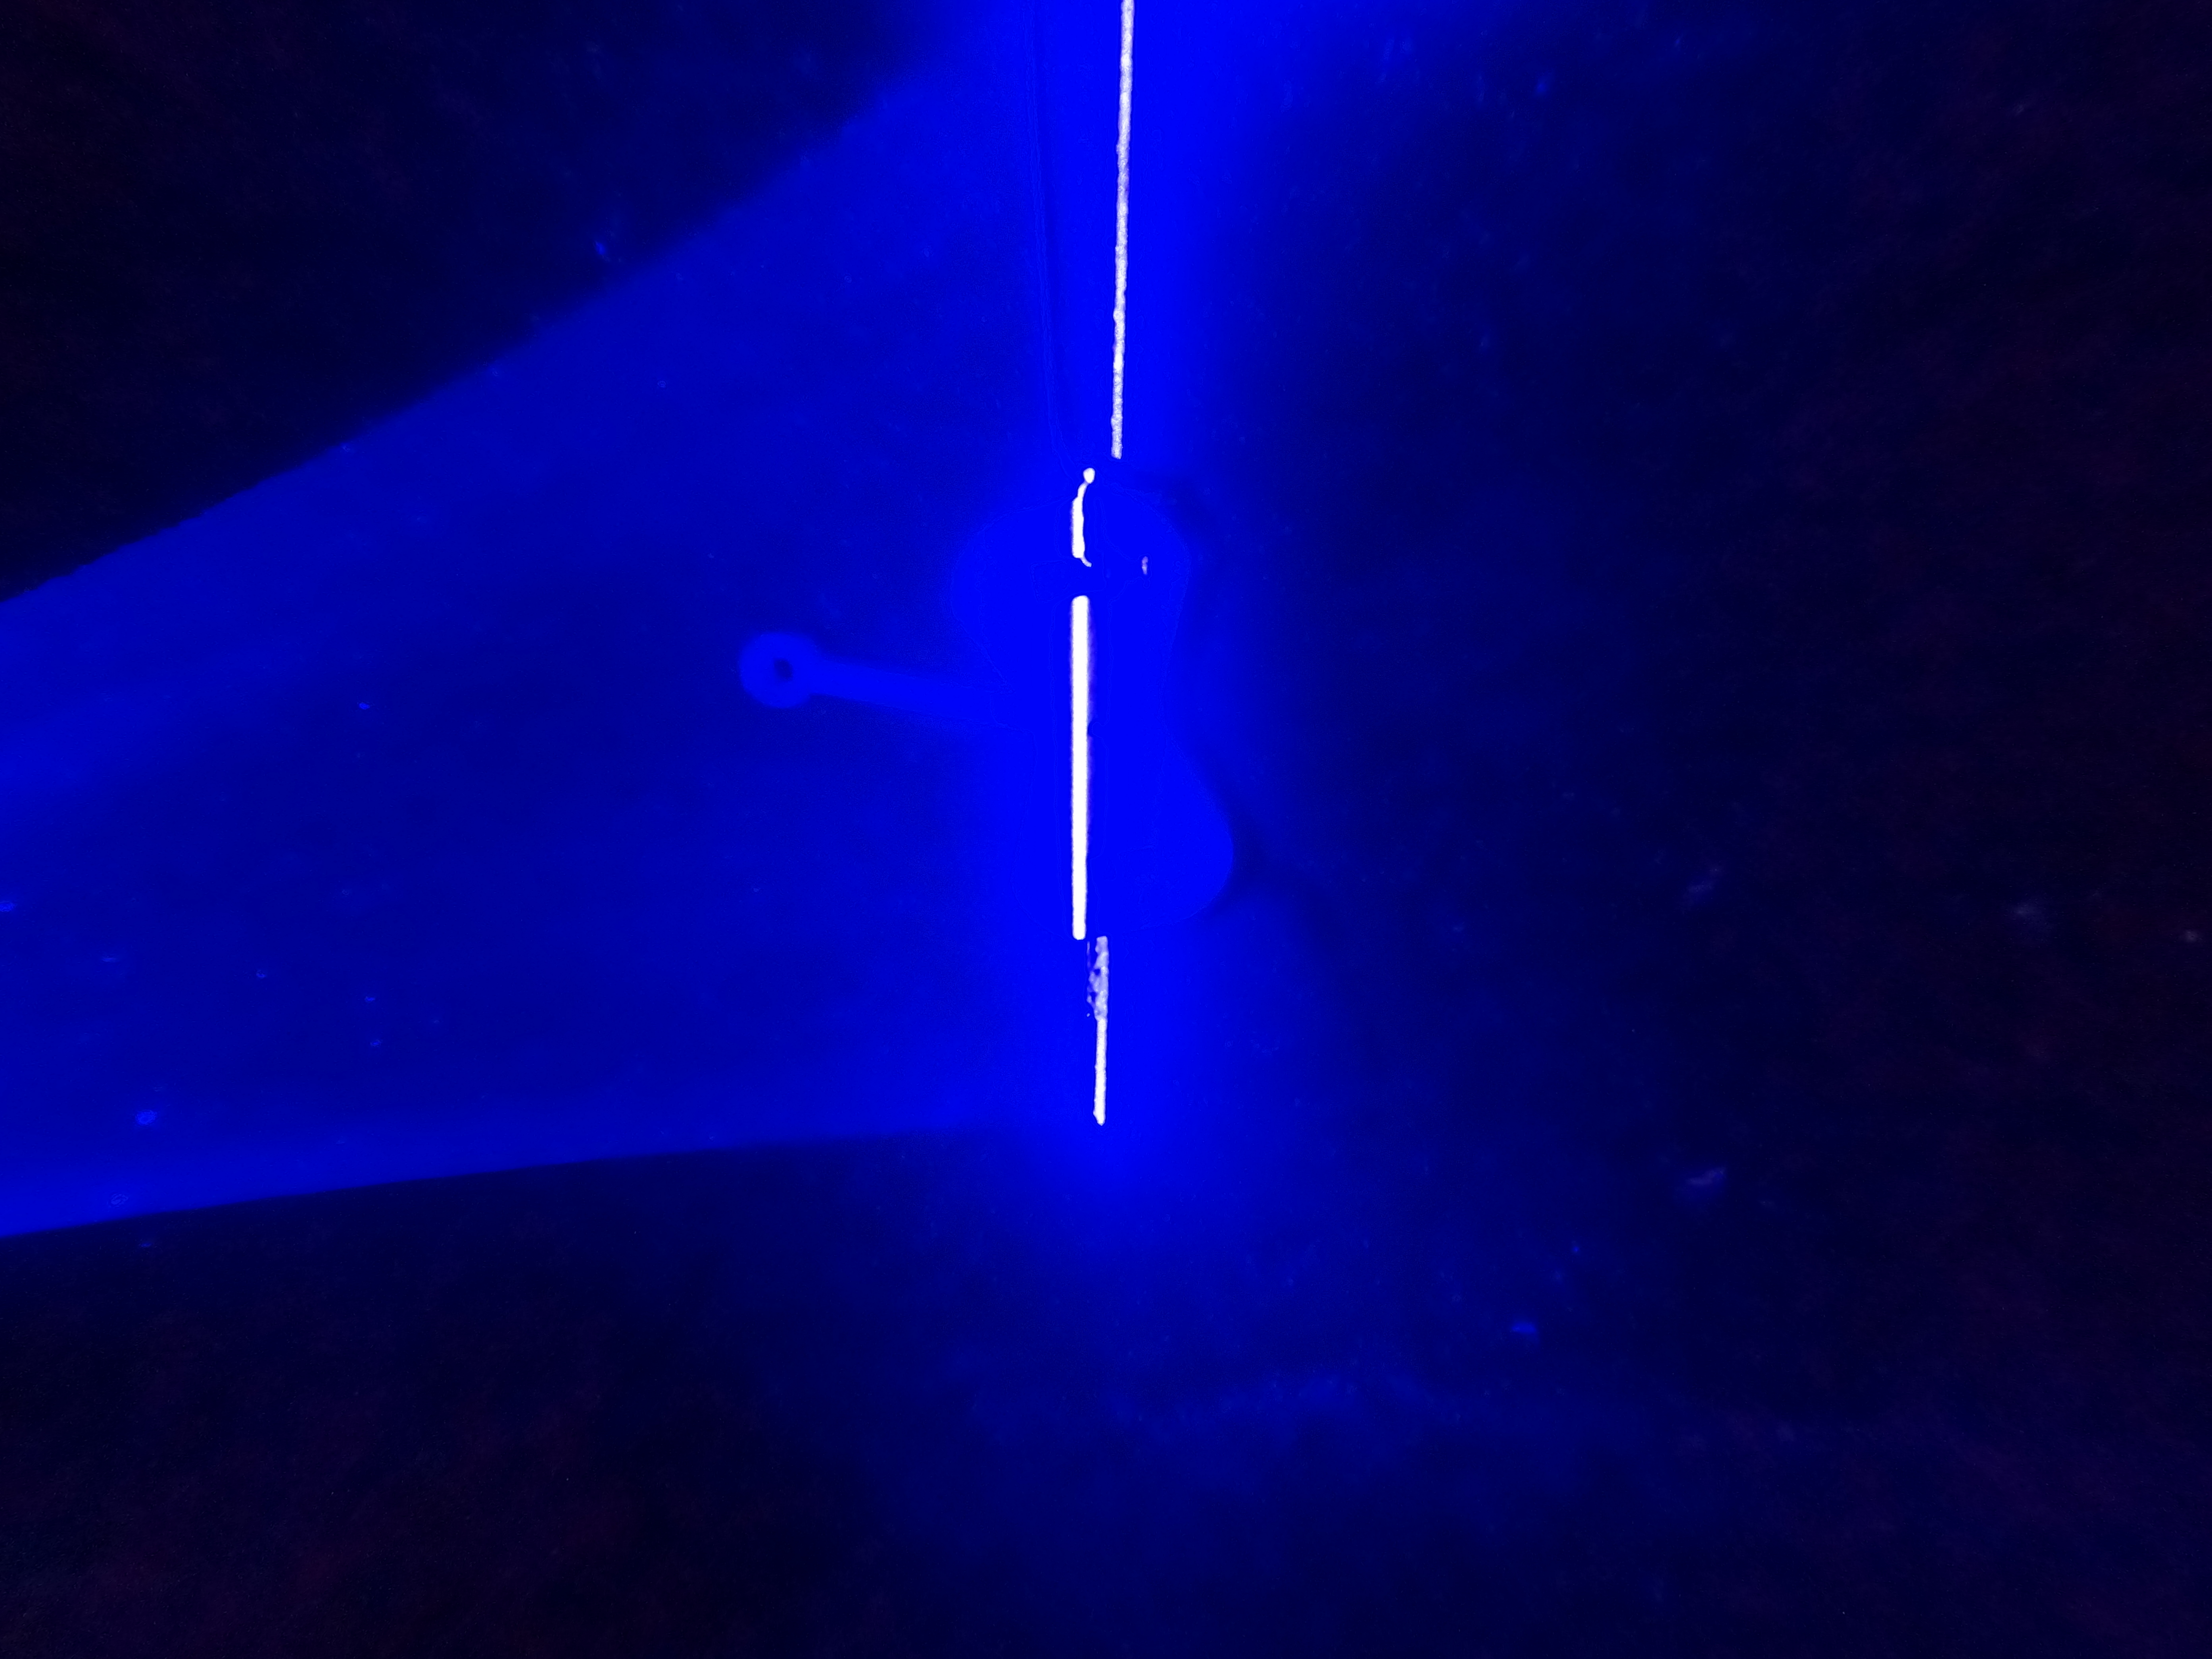

Supplement: Supplementary file 2233 [file G0016542.pdf › Level_1_2/G0016542.pdf]

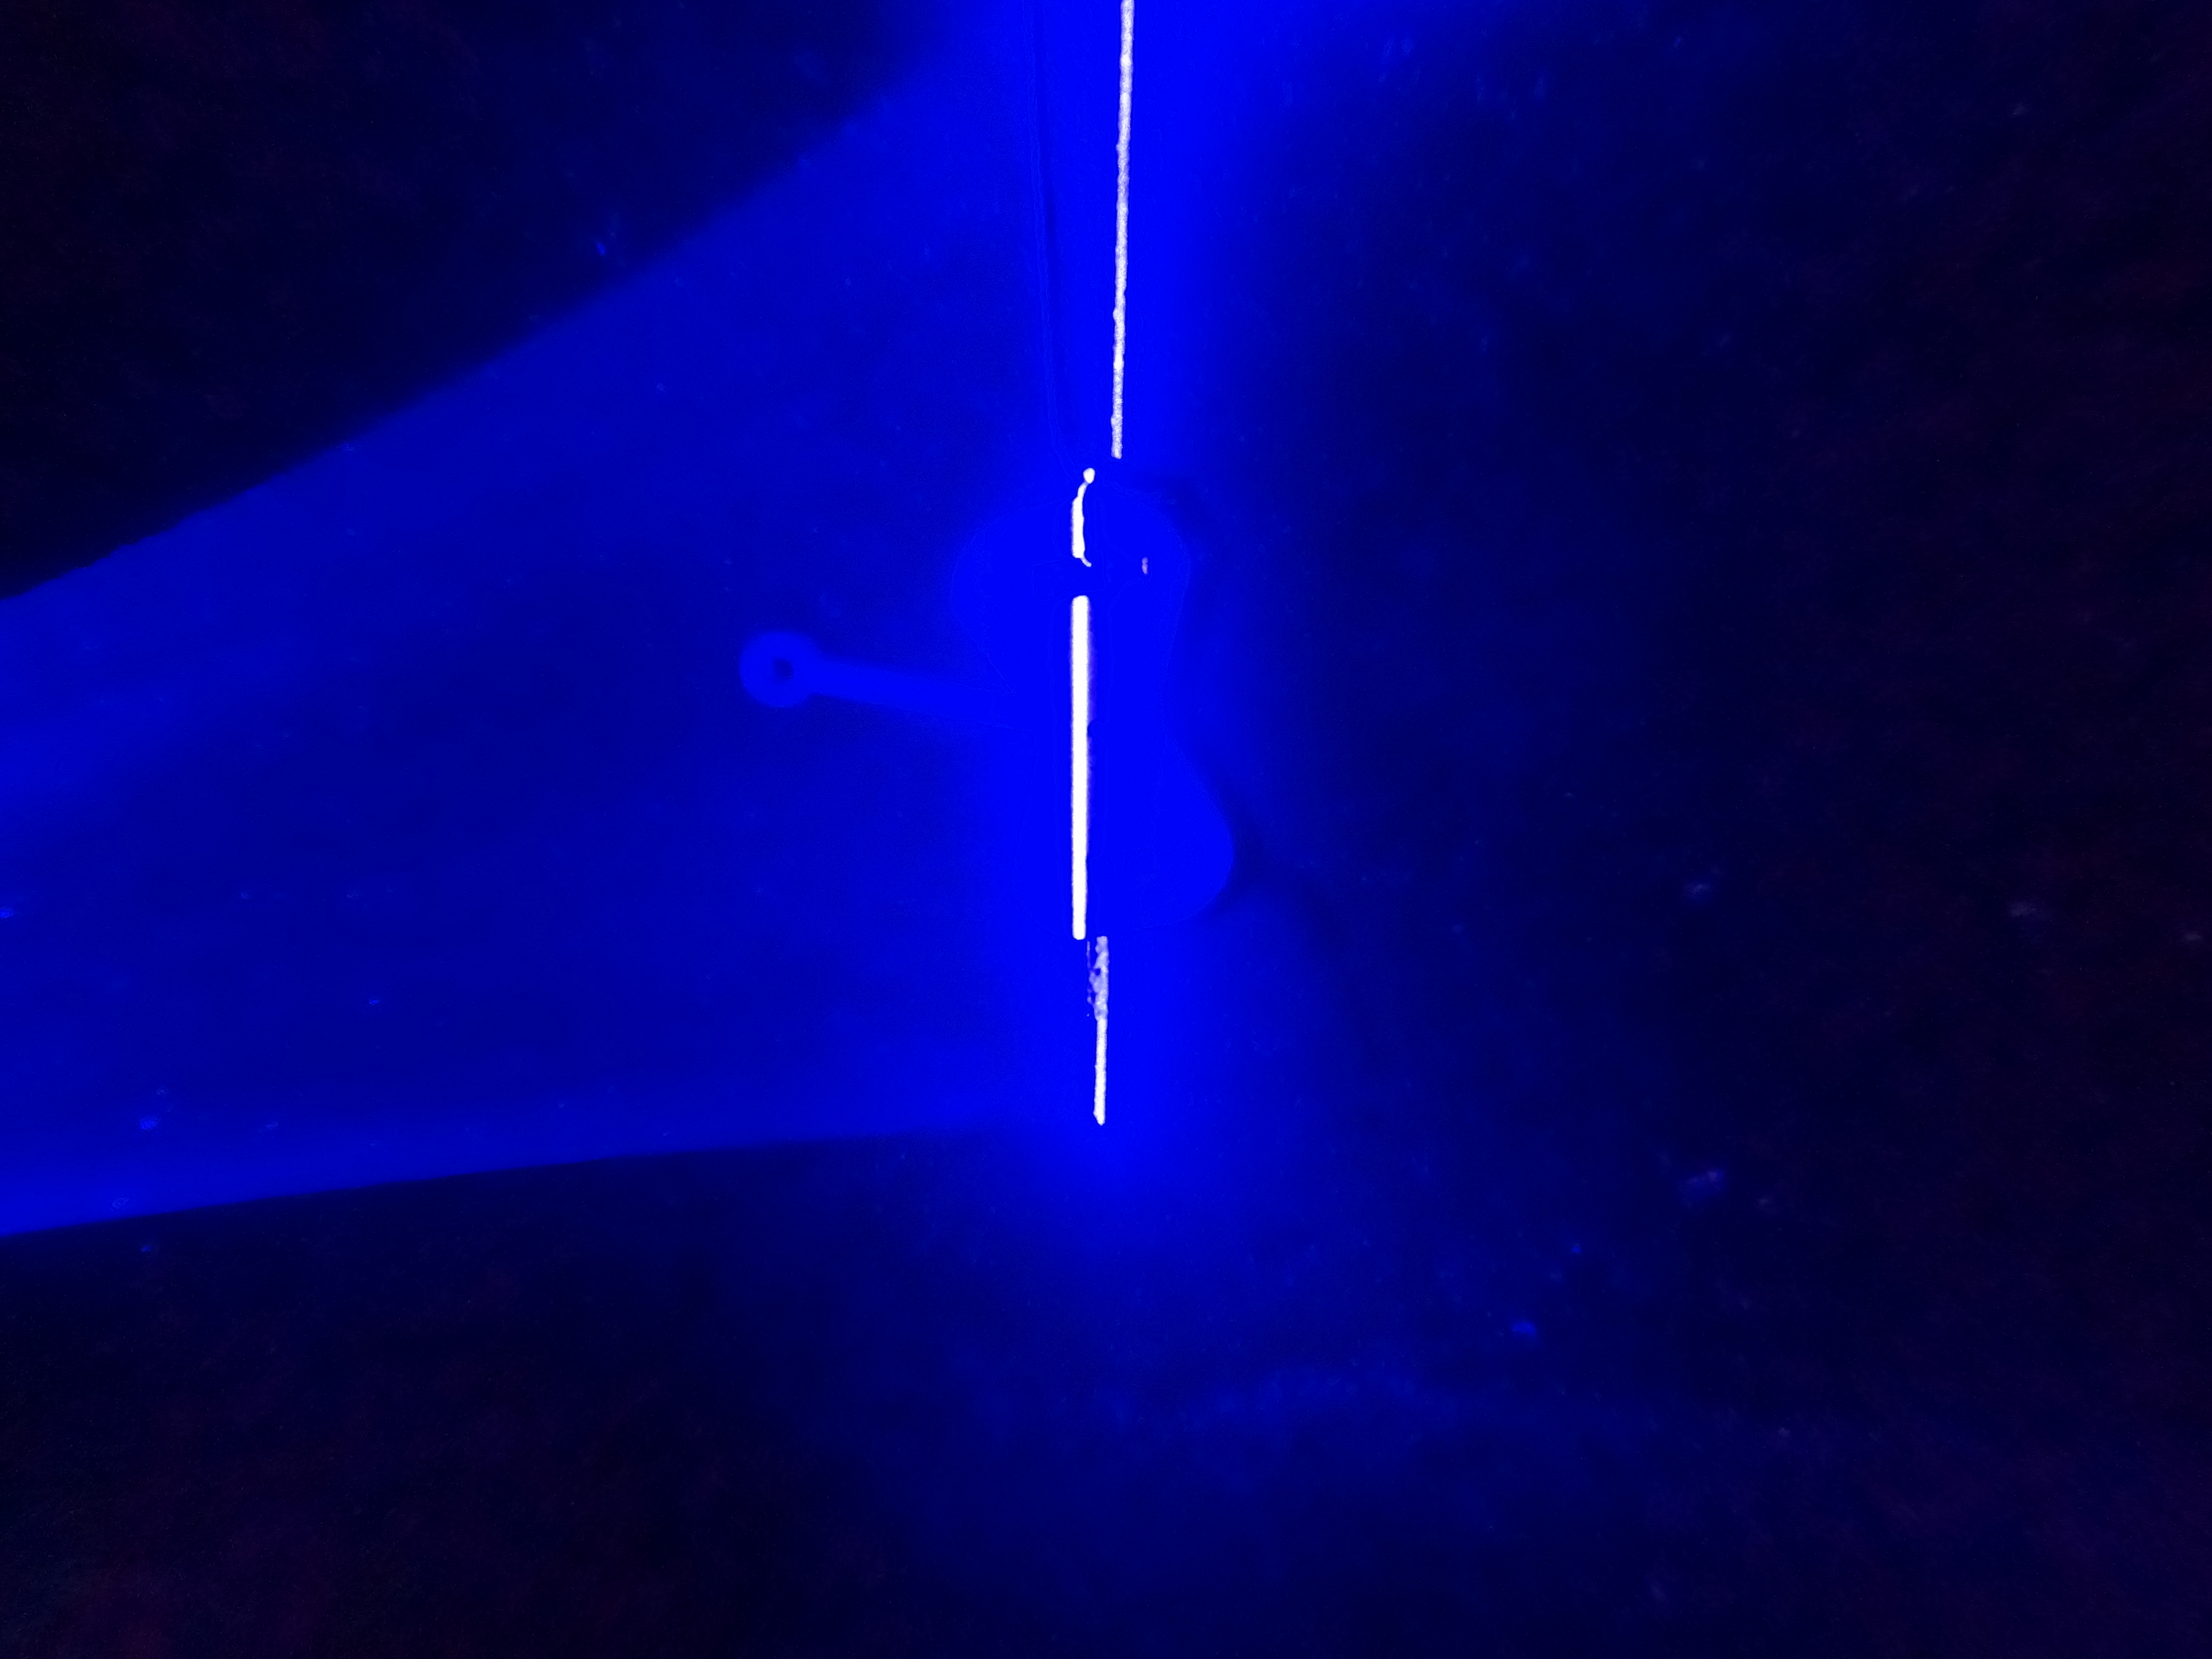

Supplement: Supplementary file 2234 [file G0016543.pdf › Level_1_2/G0016543.pdf]

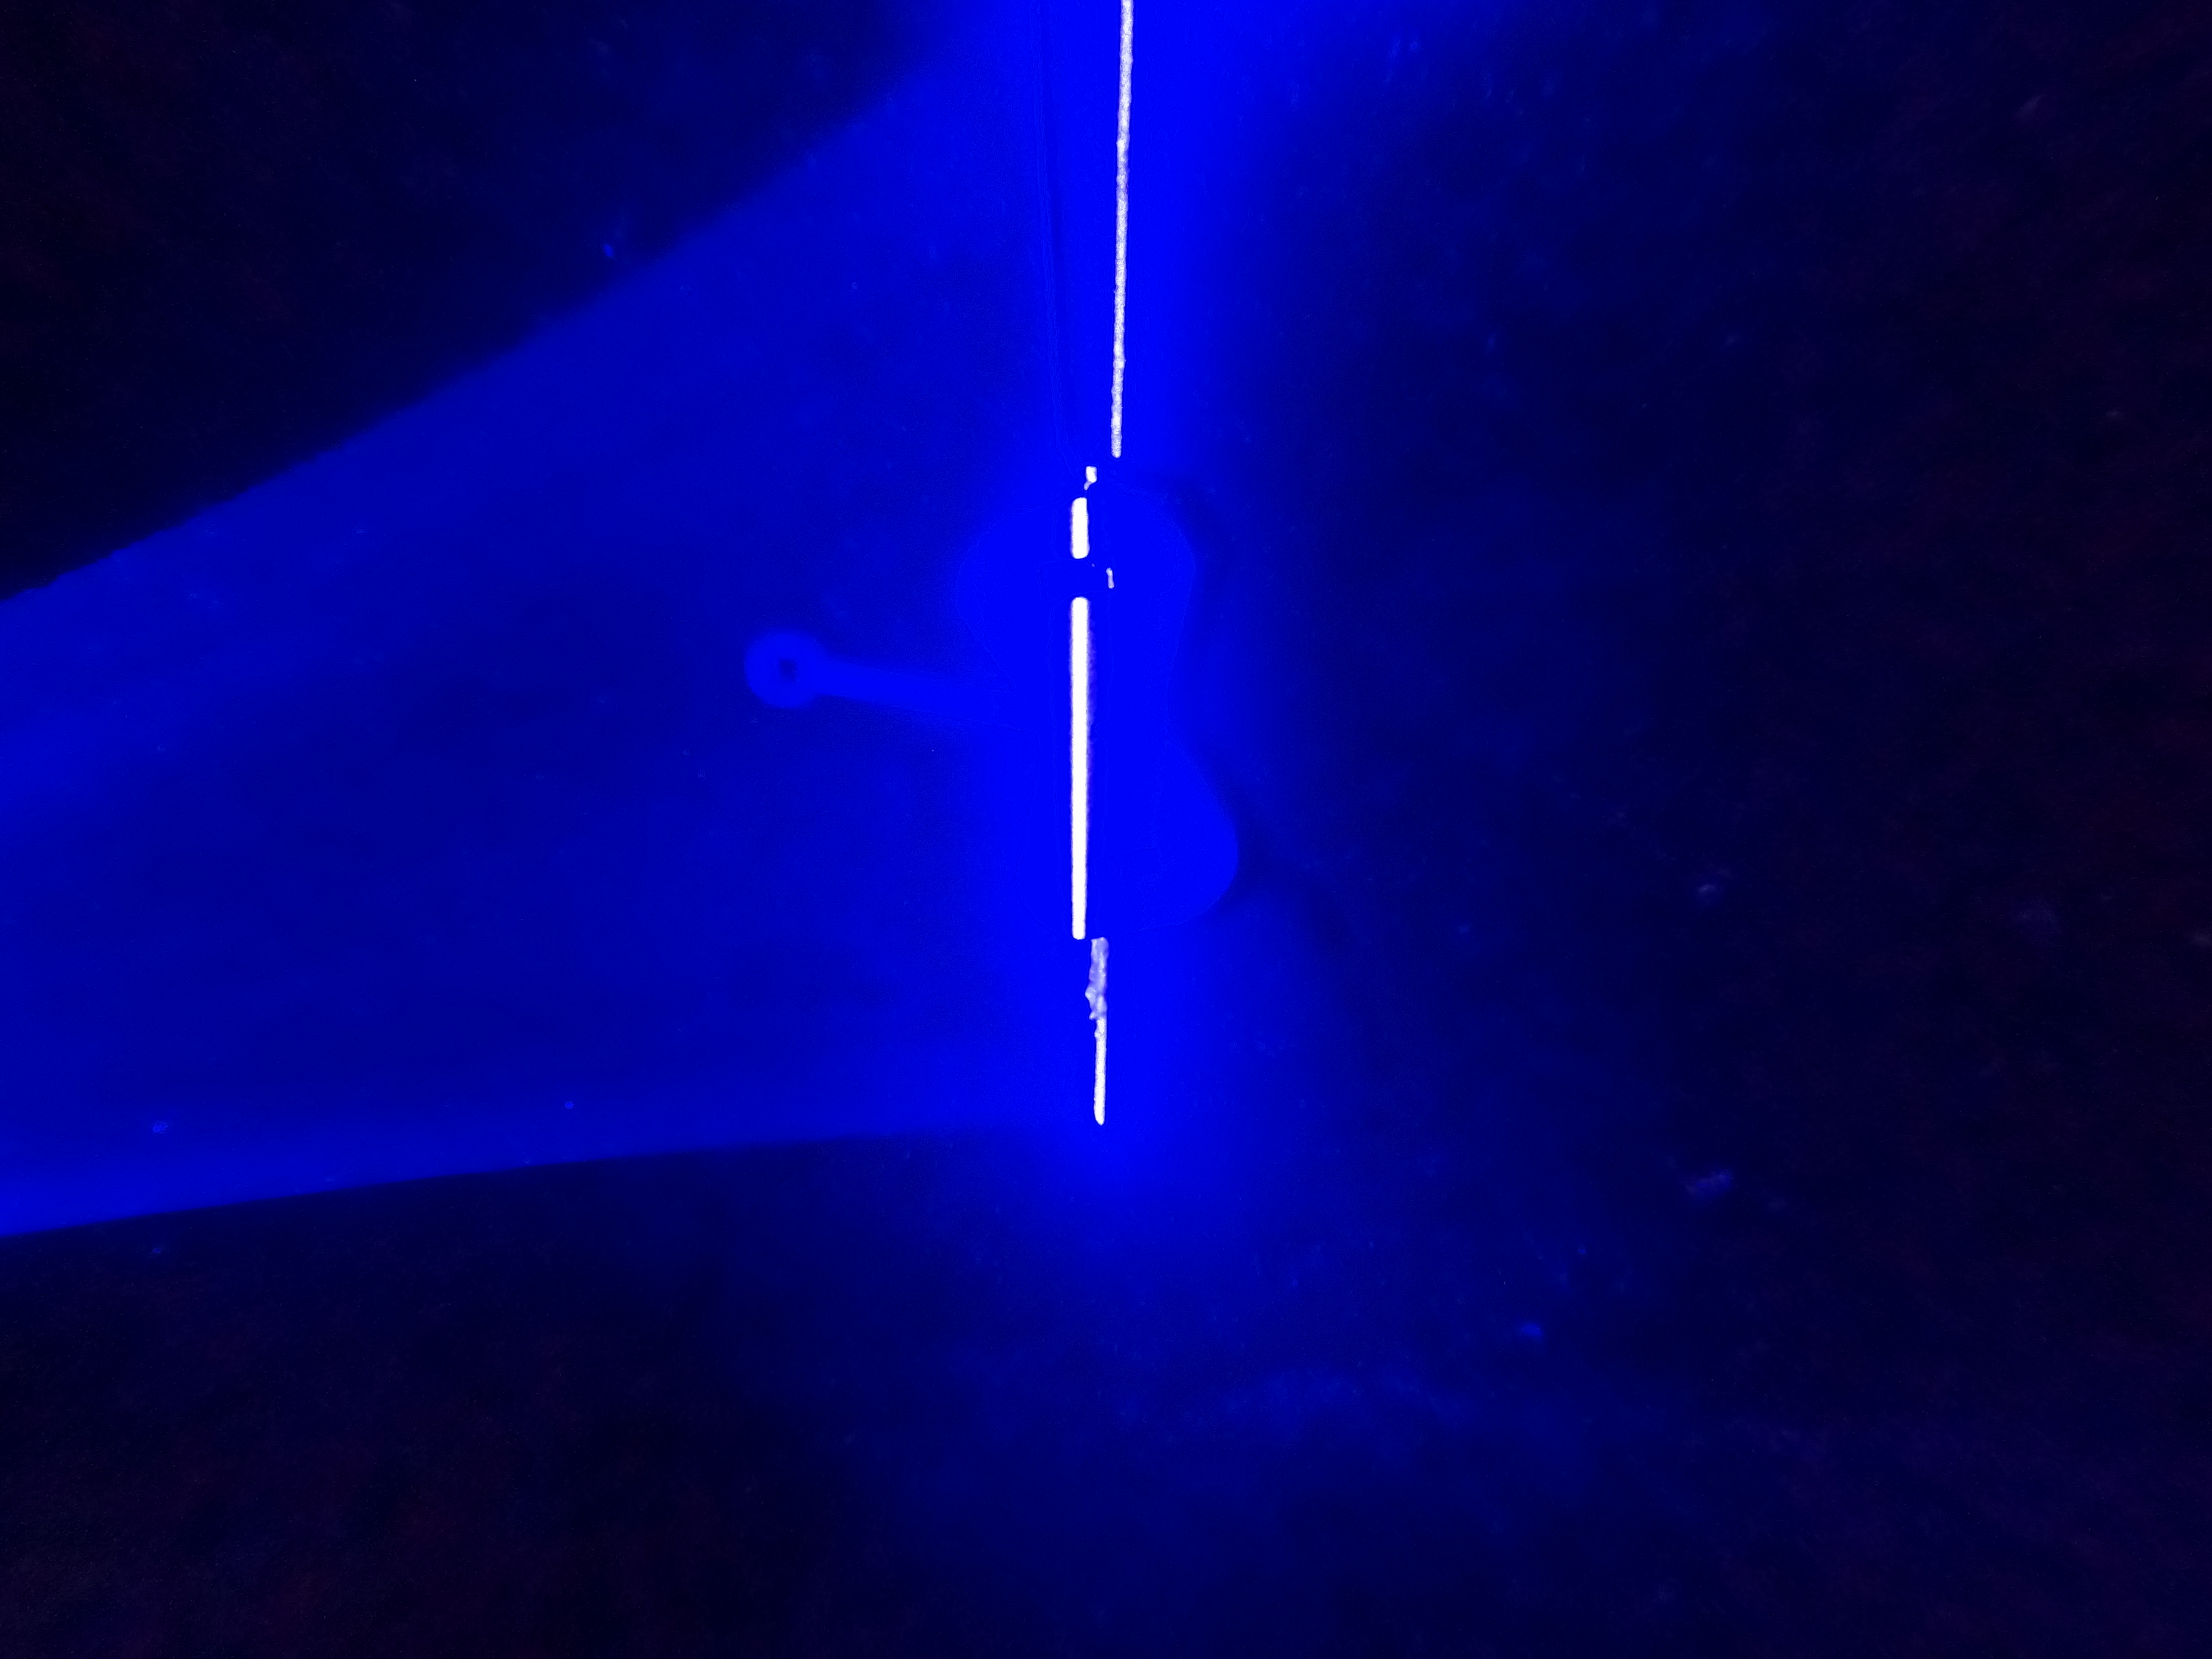

Supplement: Supplementary file 2235 [file G0016544.pdf › Level_1_2/G0016544.pdf]

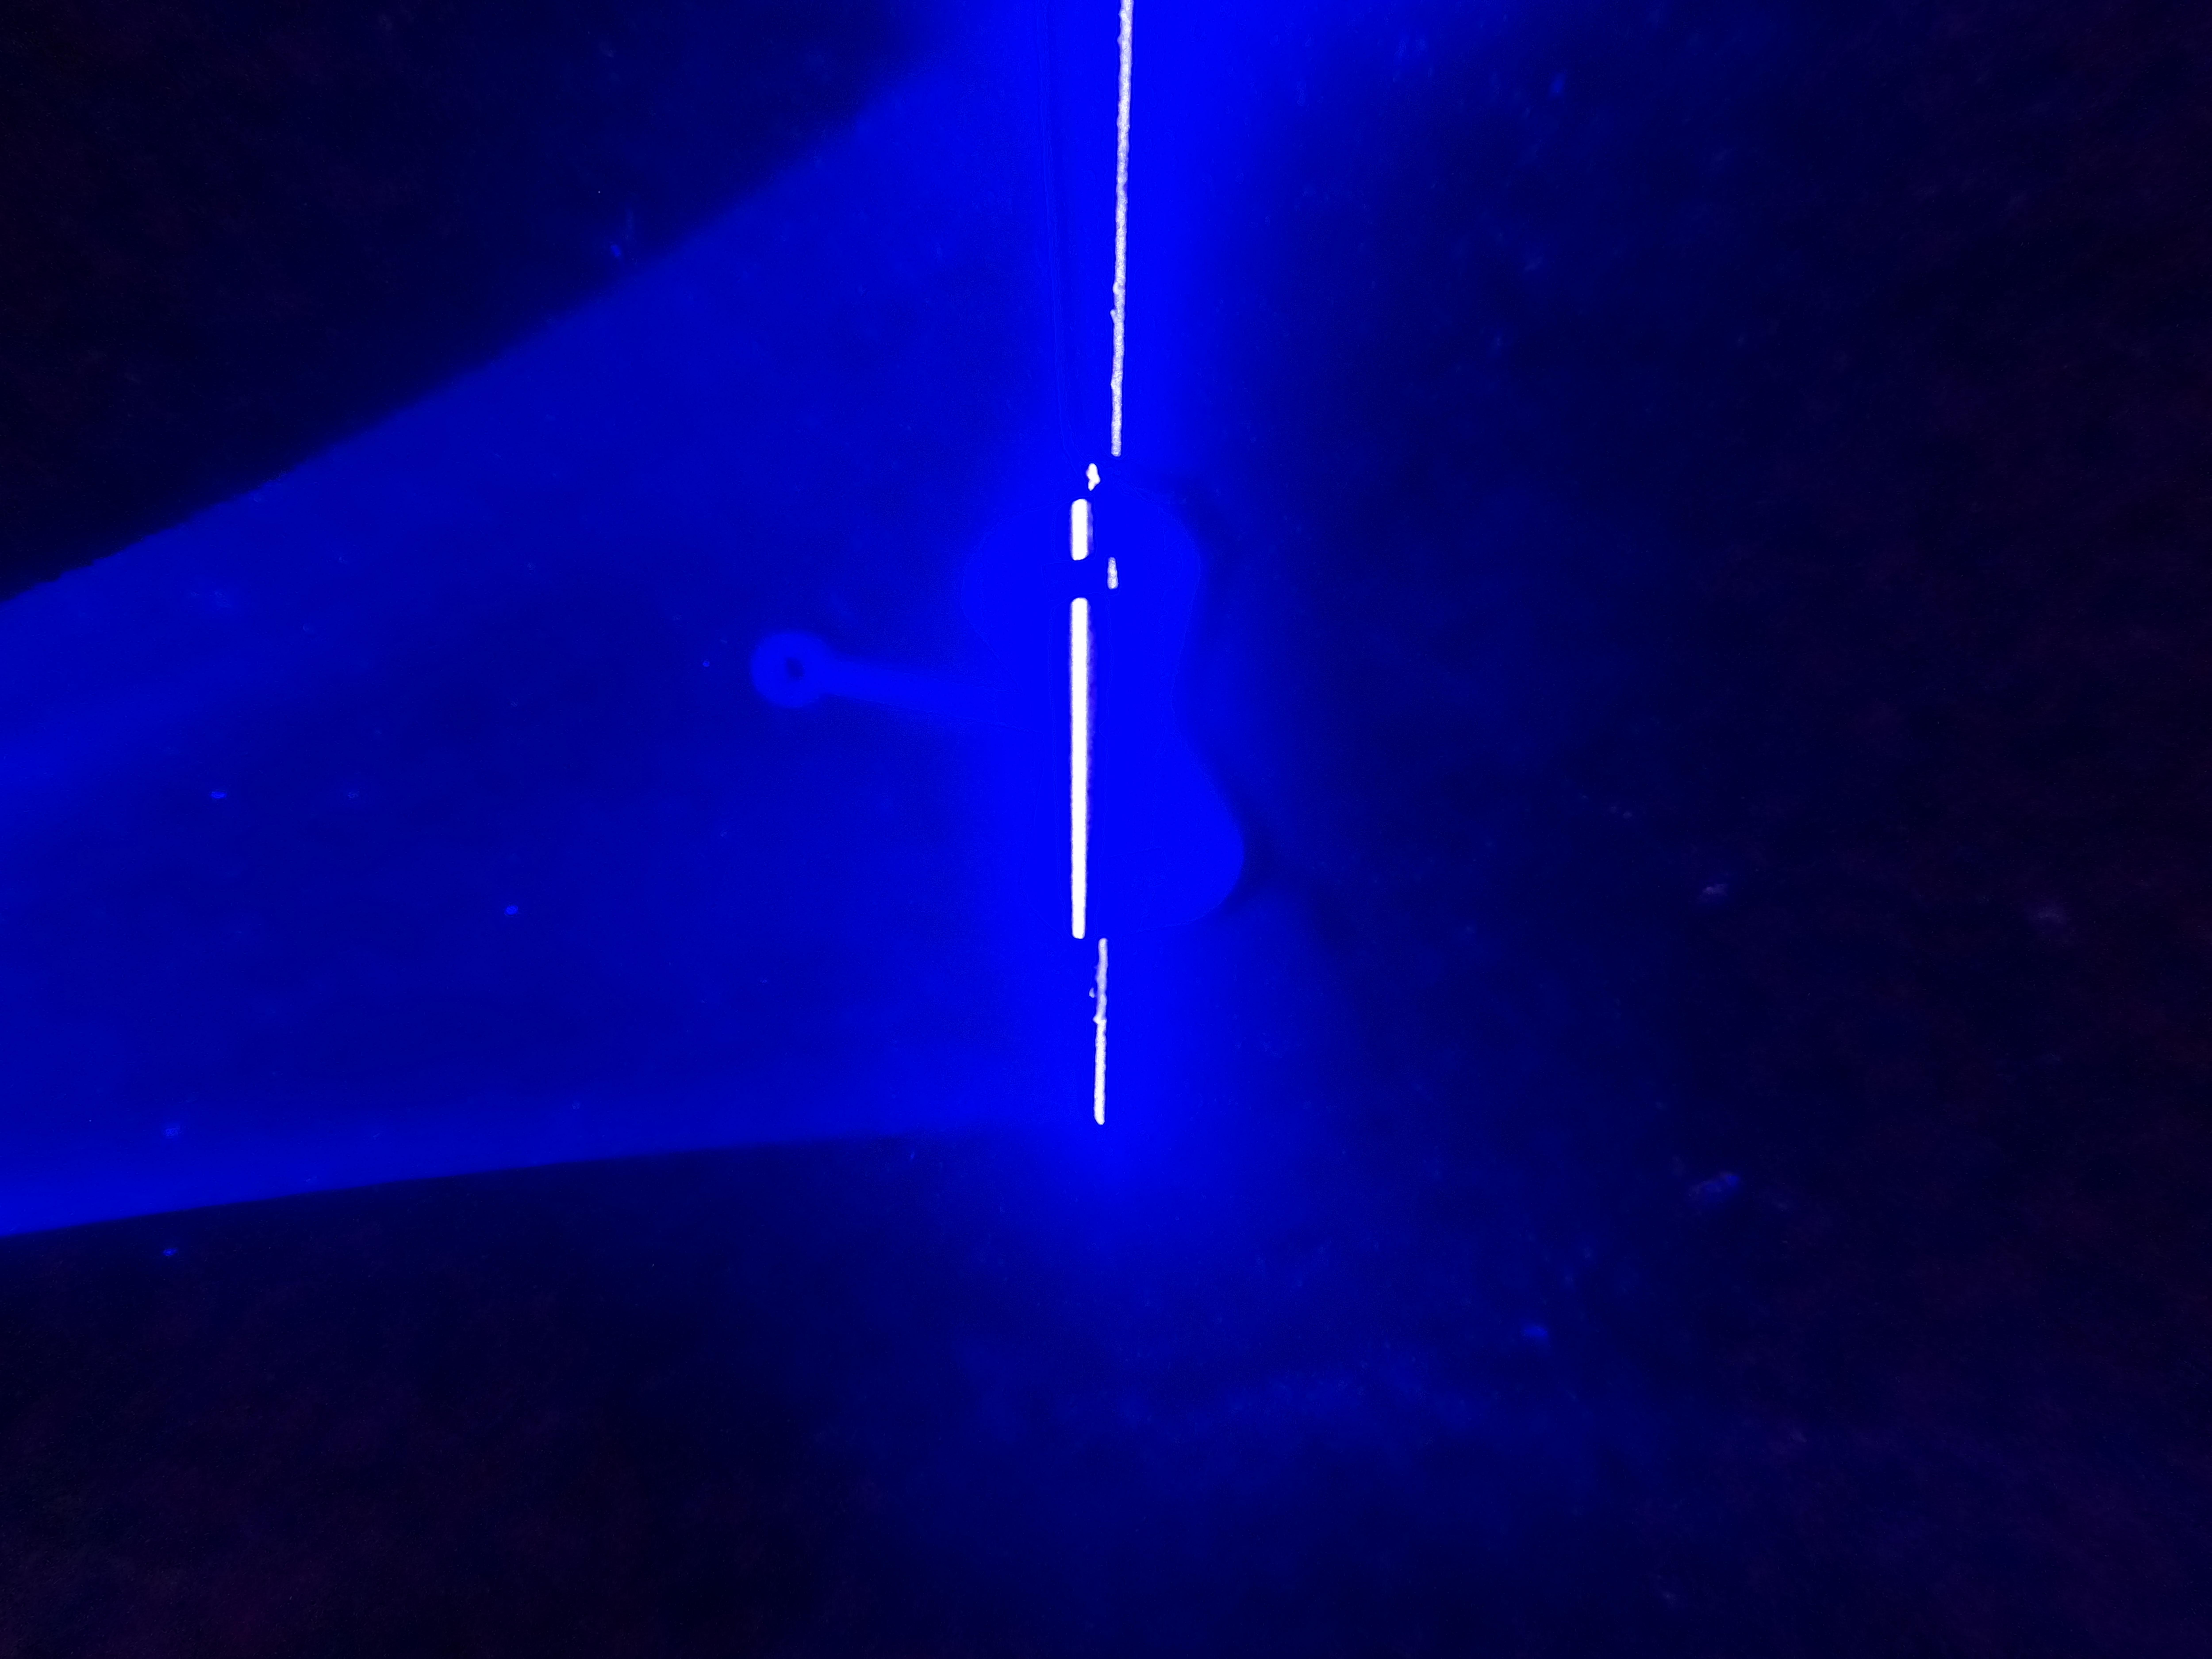

Supplement: Supplementary file 2236 [file G0016545.pdf › Level_1_2/G0016545.pdf]

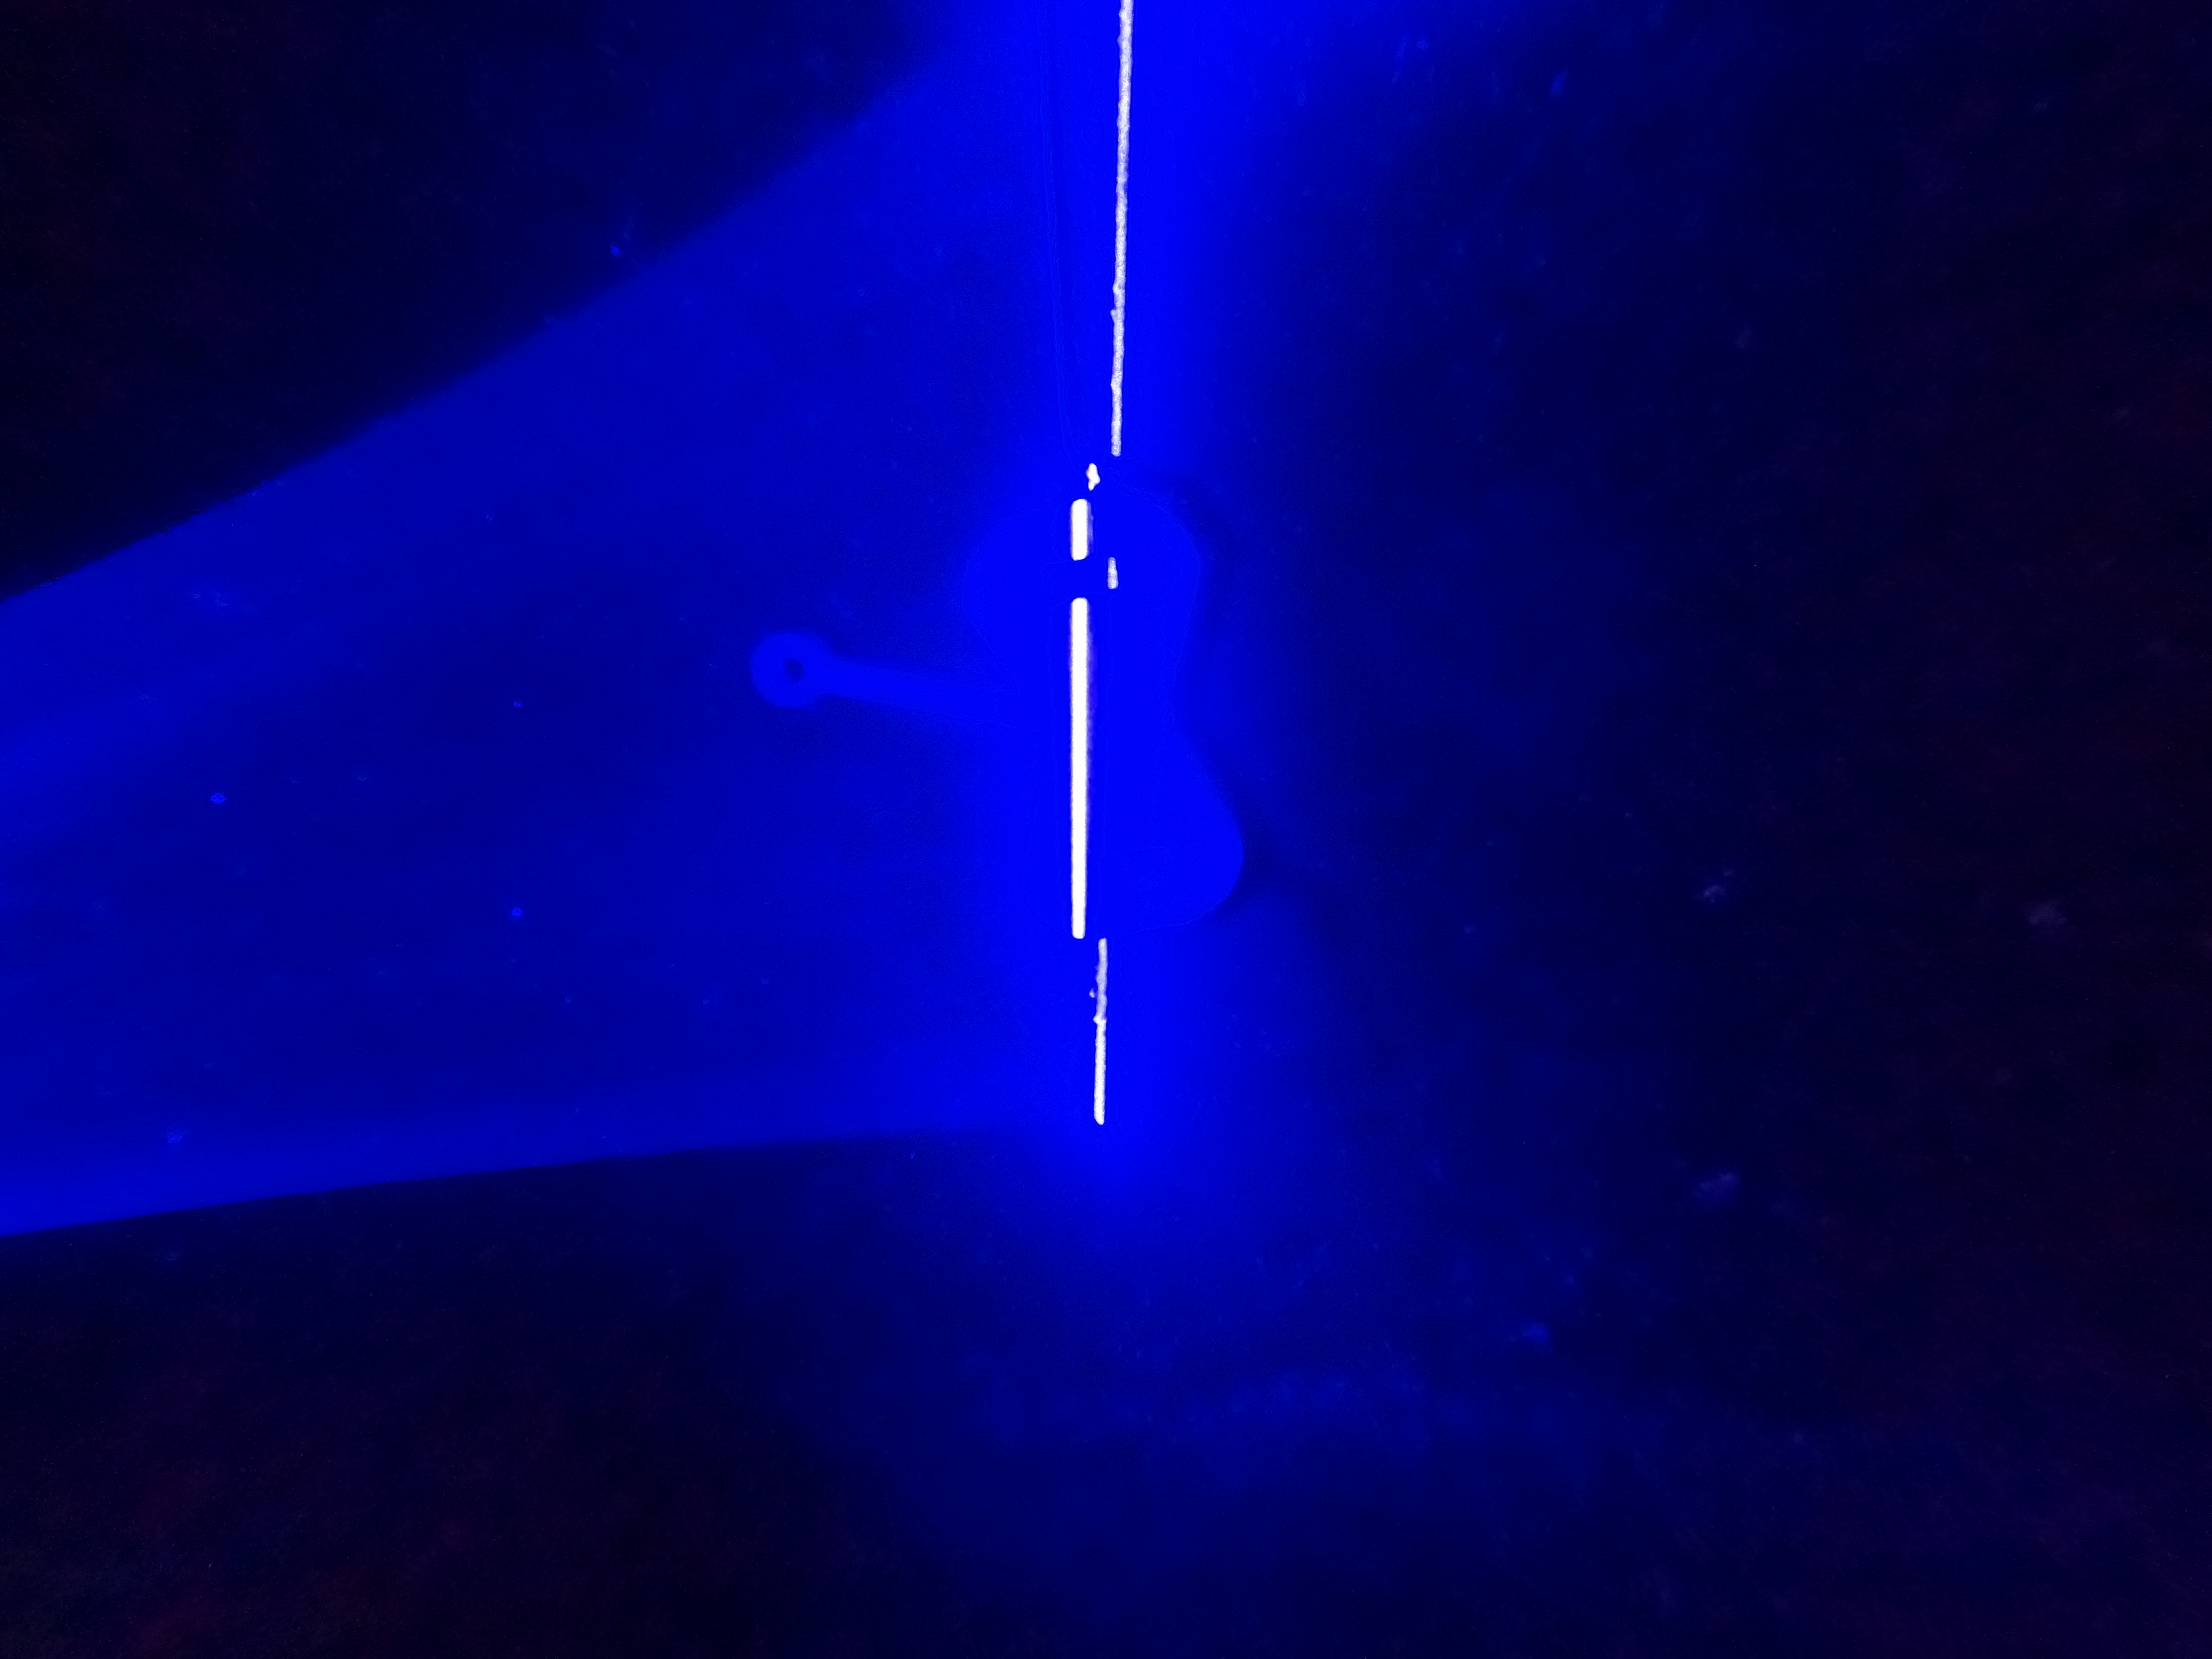

Supplement: Supplementary file 2237 [file G0016546.pdf › Level_1_2/G0016546.pdf]

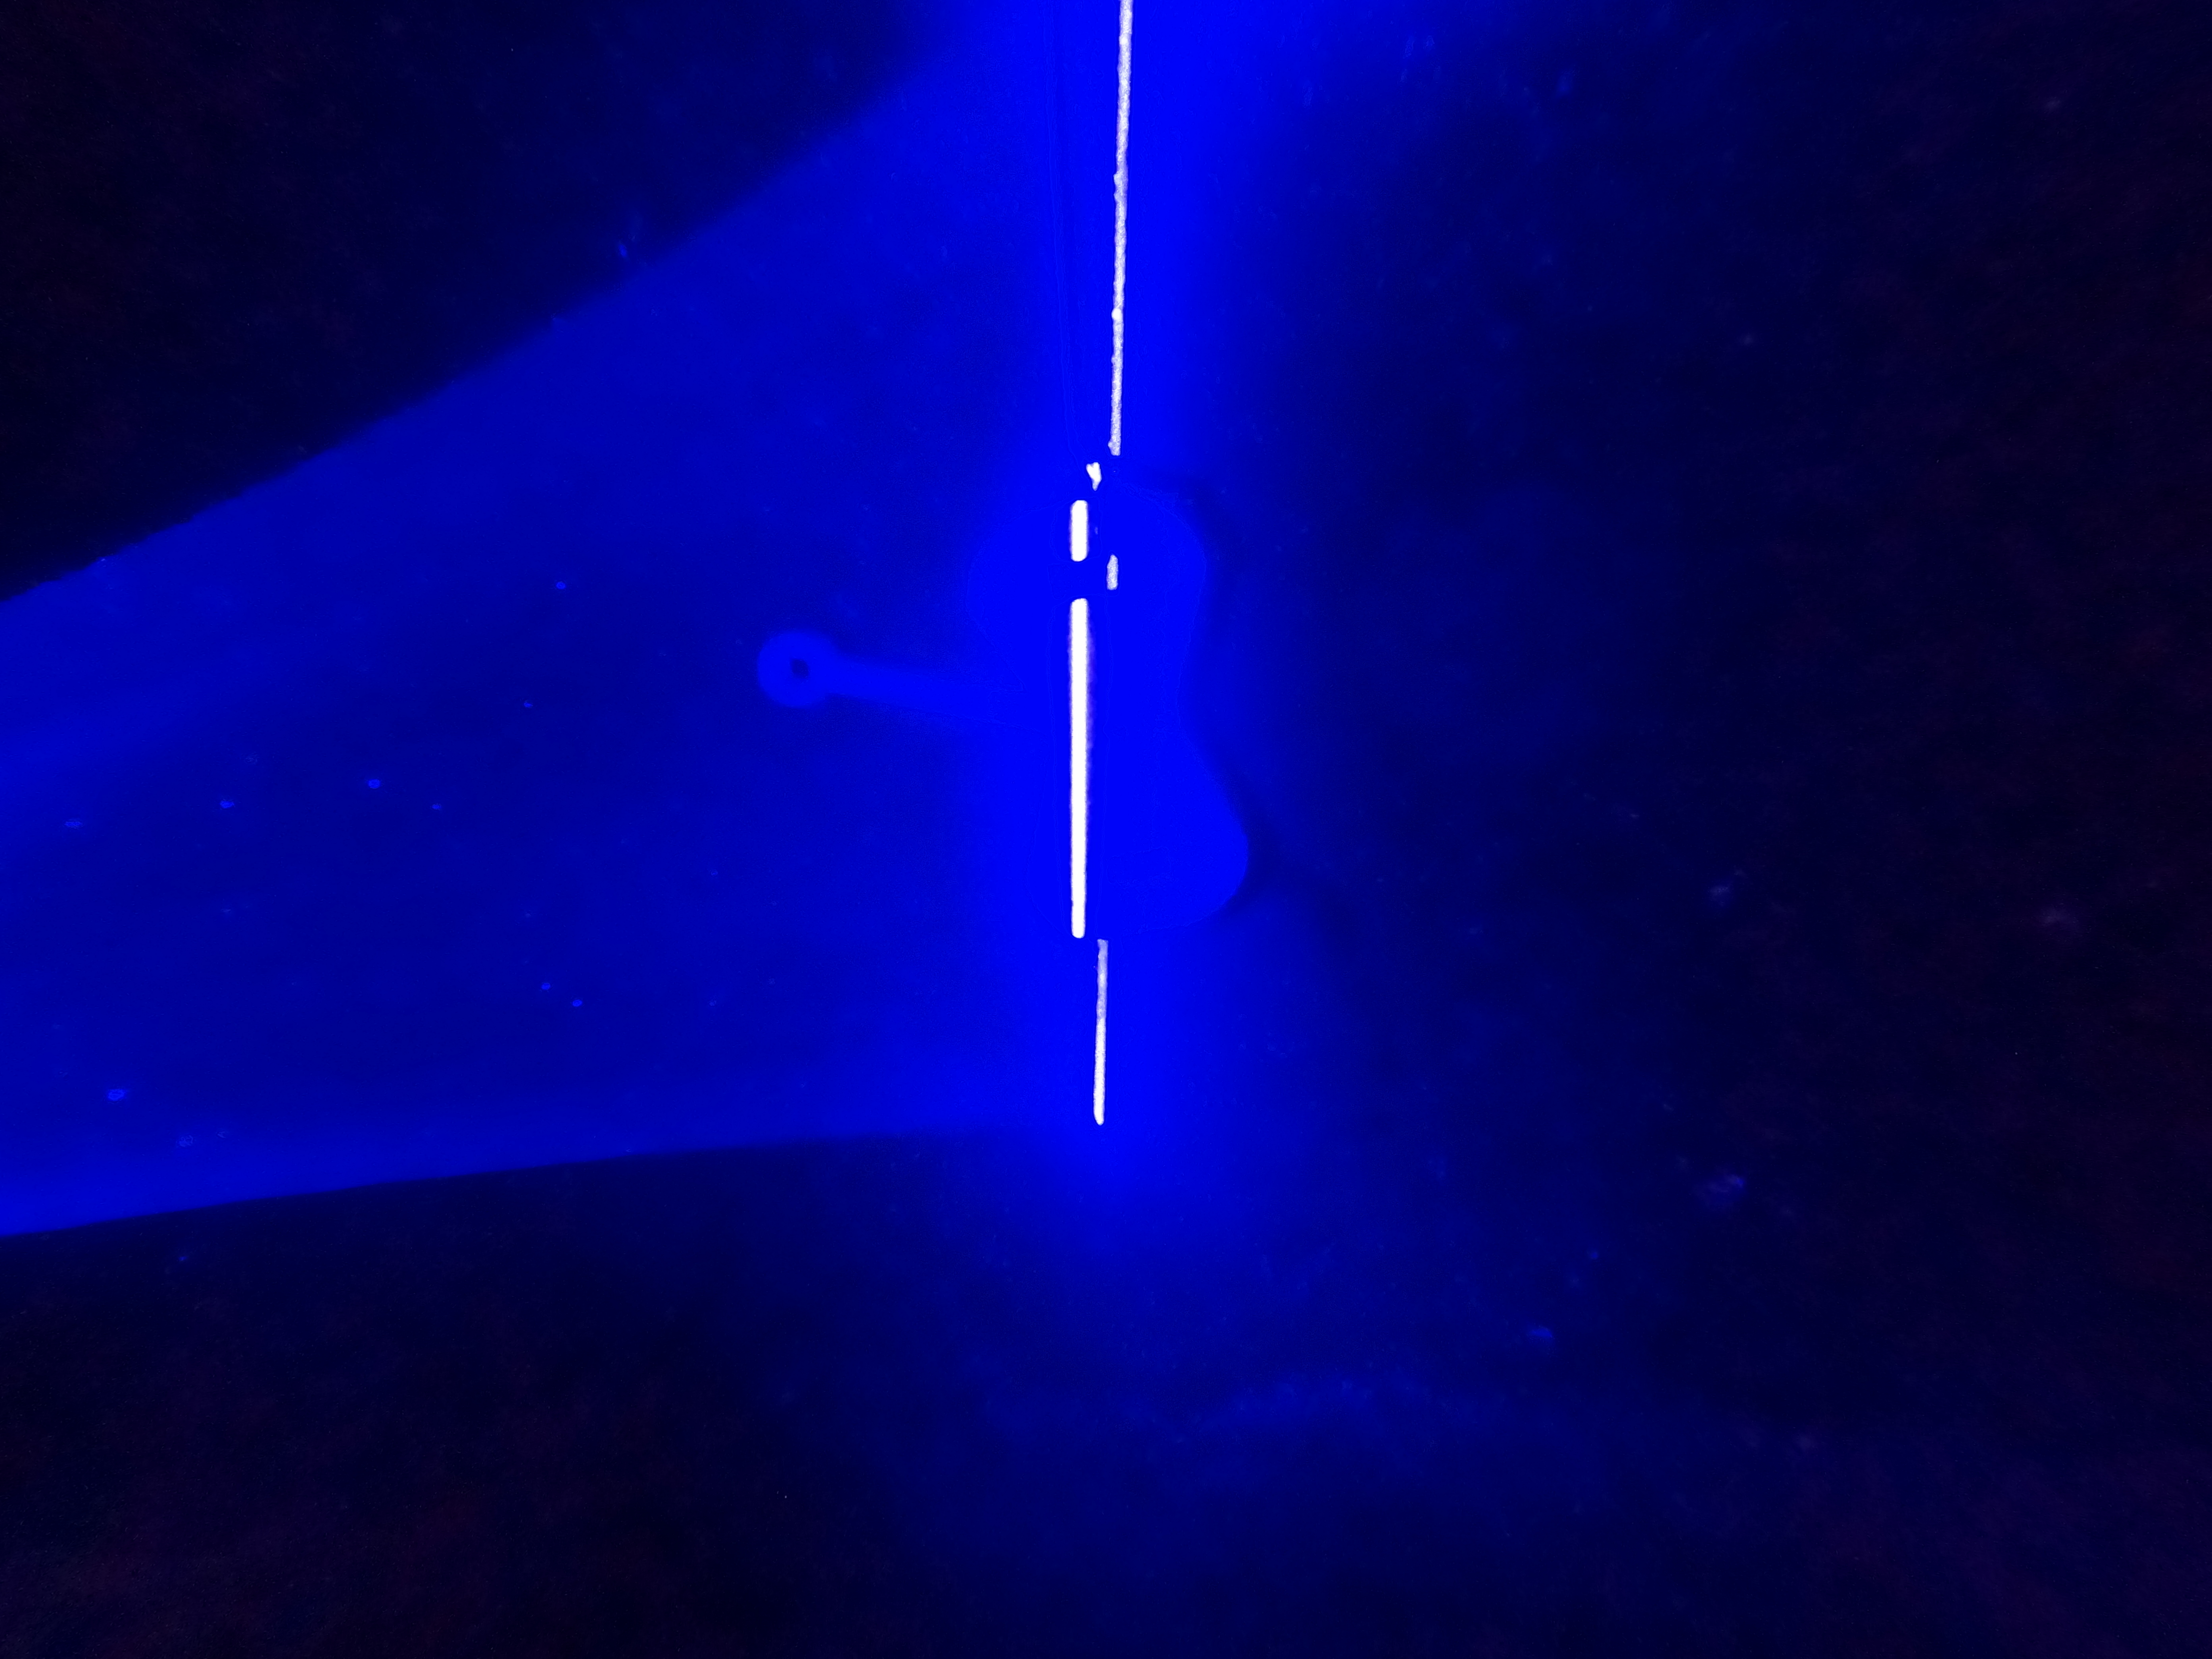

Supplement: Supplementary file 2238 [file G0016547.pdf › Level_1_2/G0016547.pdf]

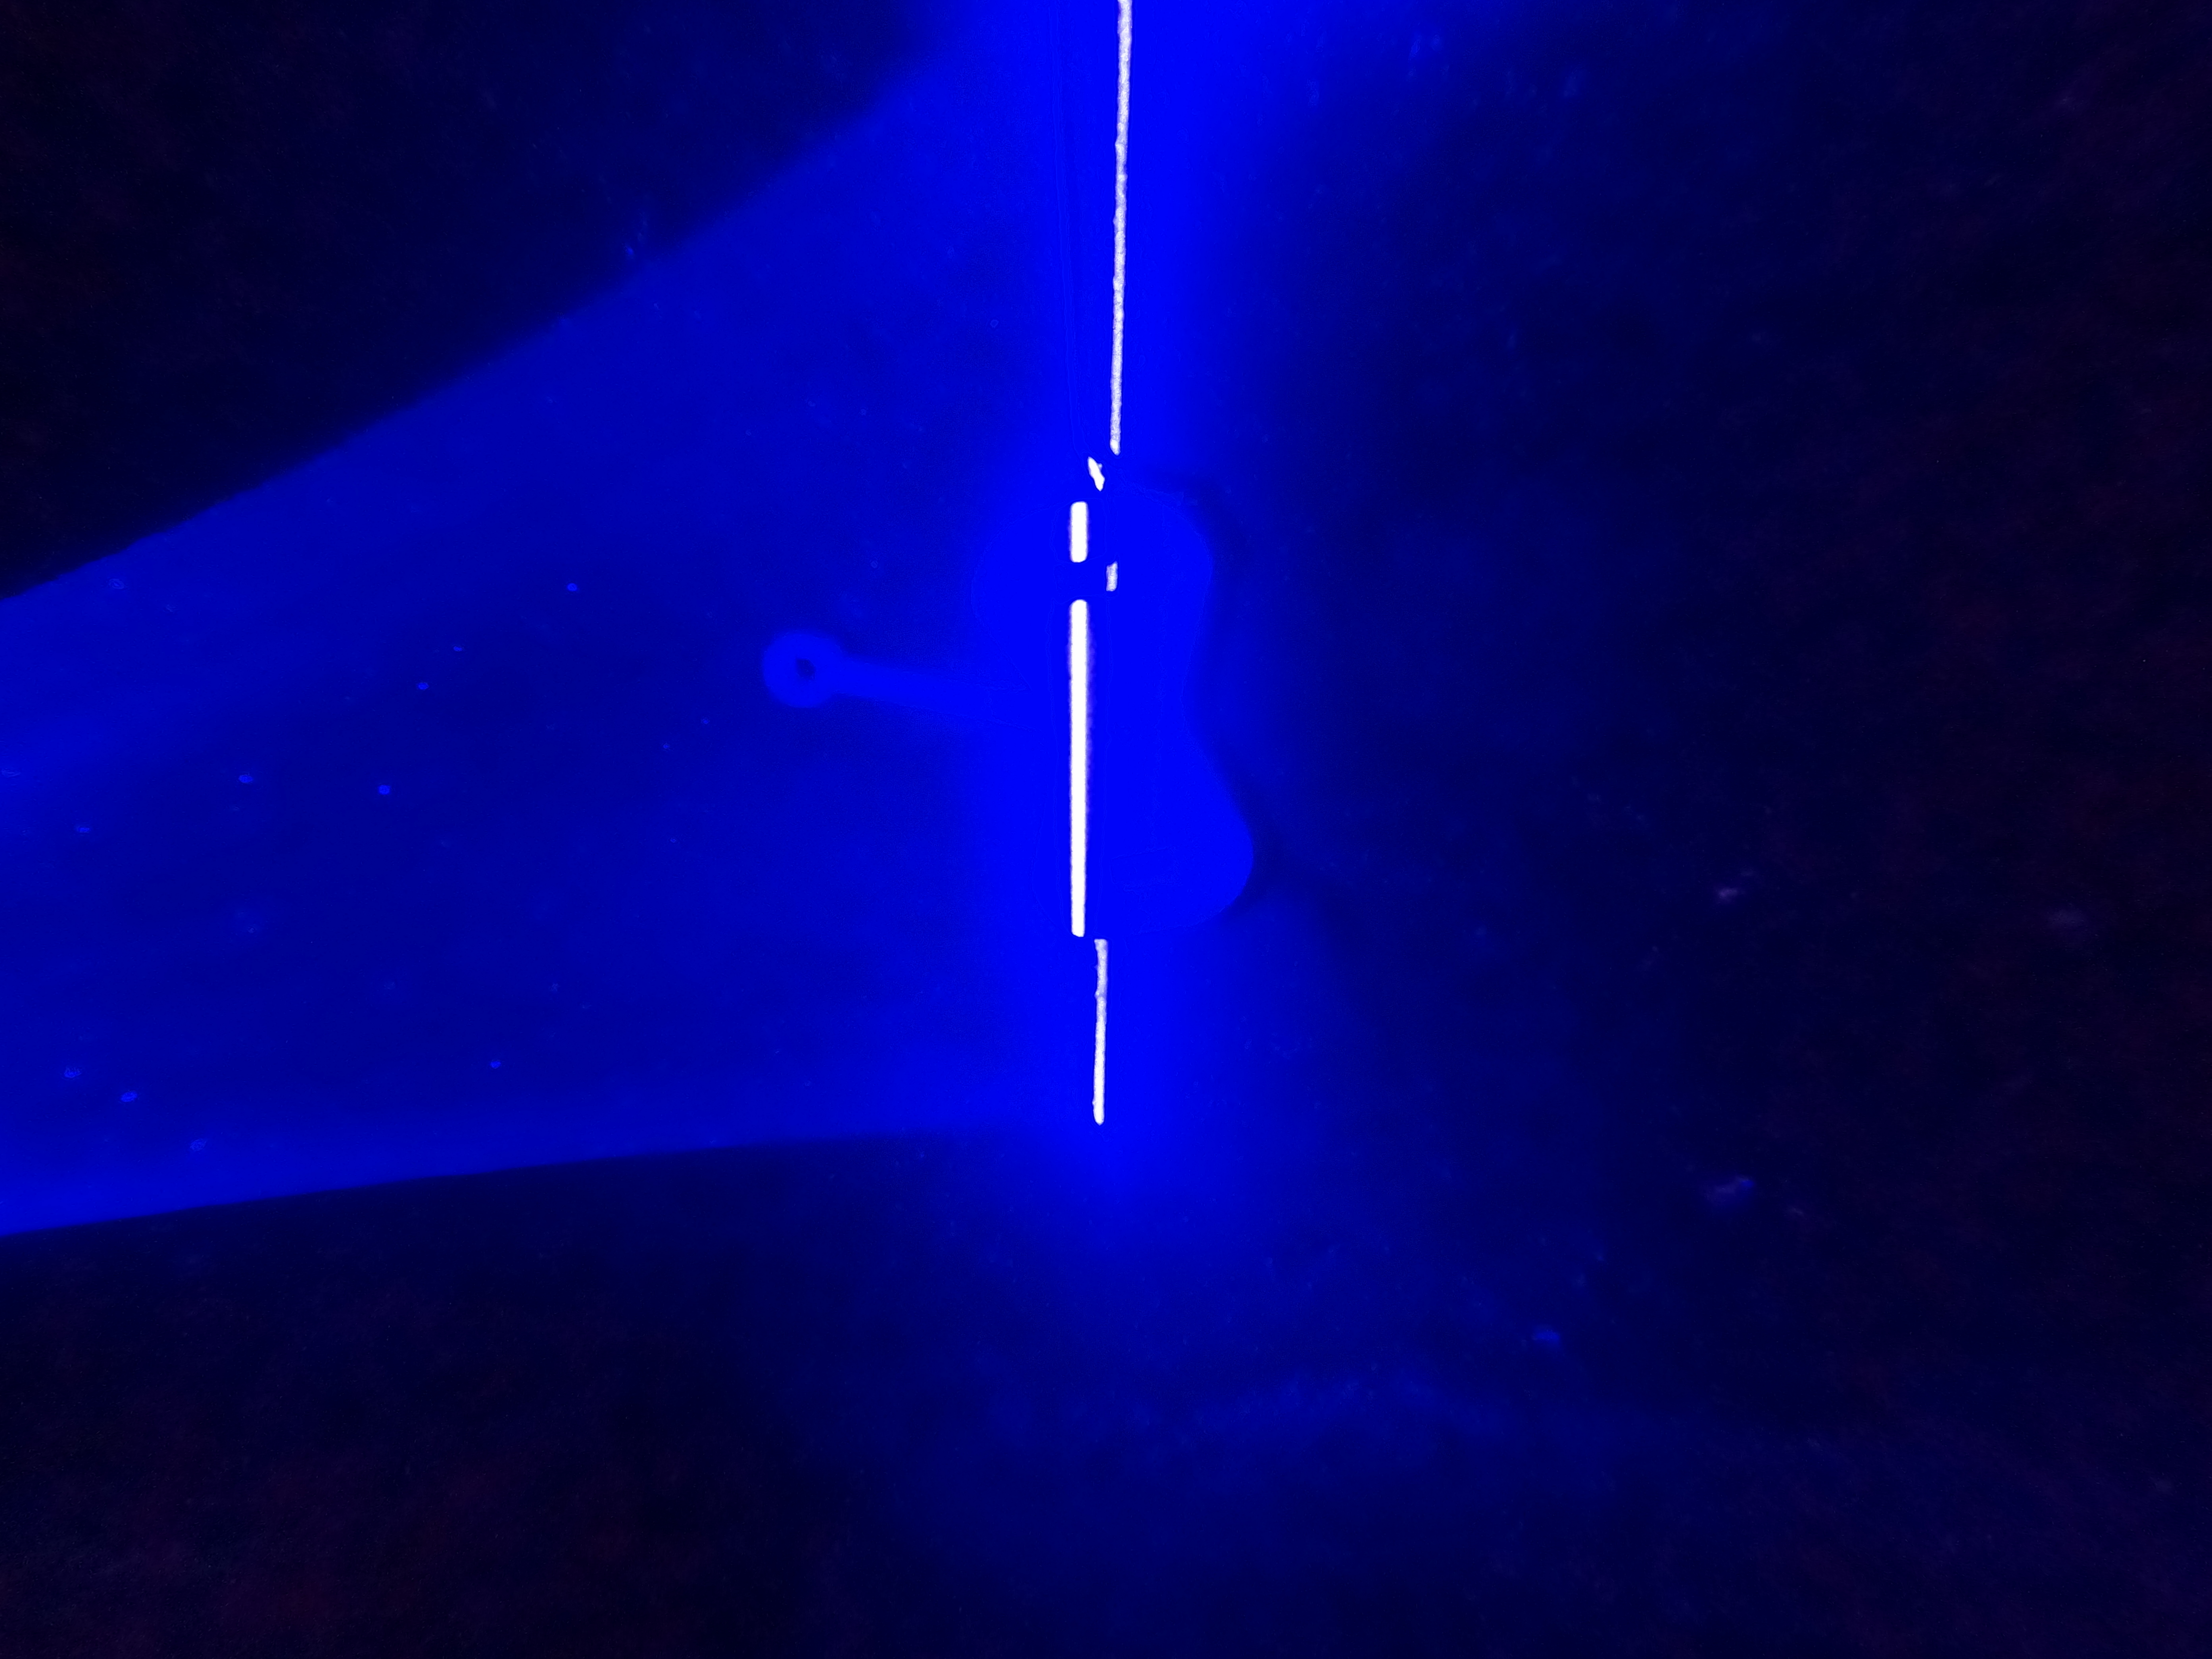

Supplement: Supplementary file 2239 [file G0016548.pdf › Level_1_2/G0016548.pdf]

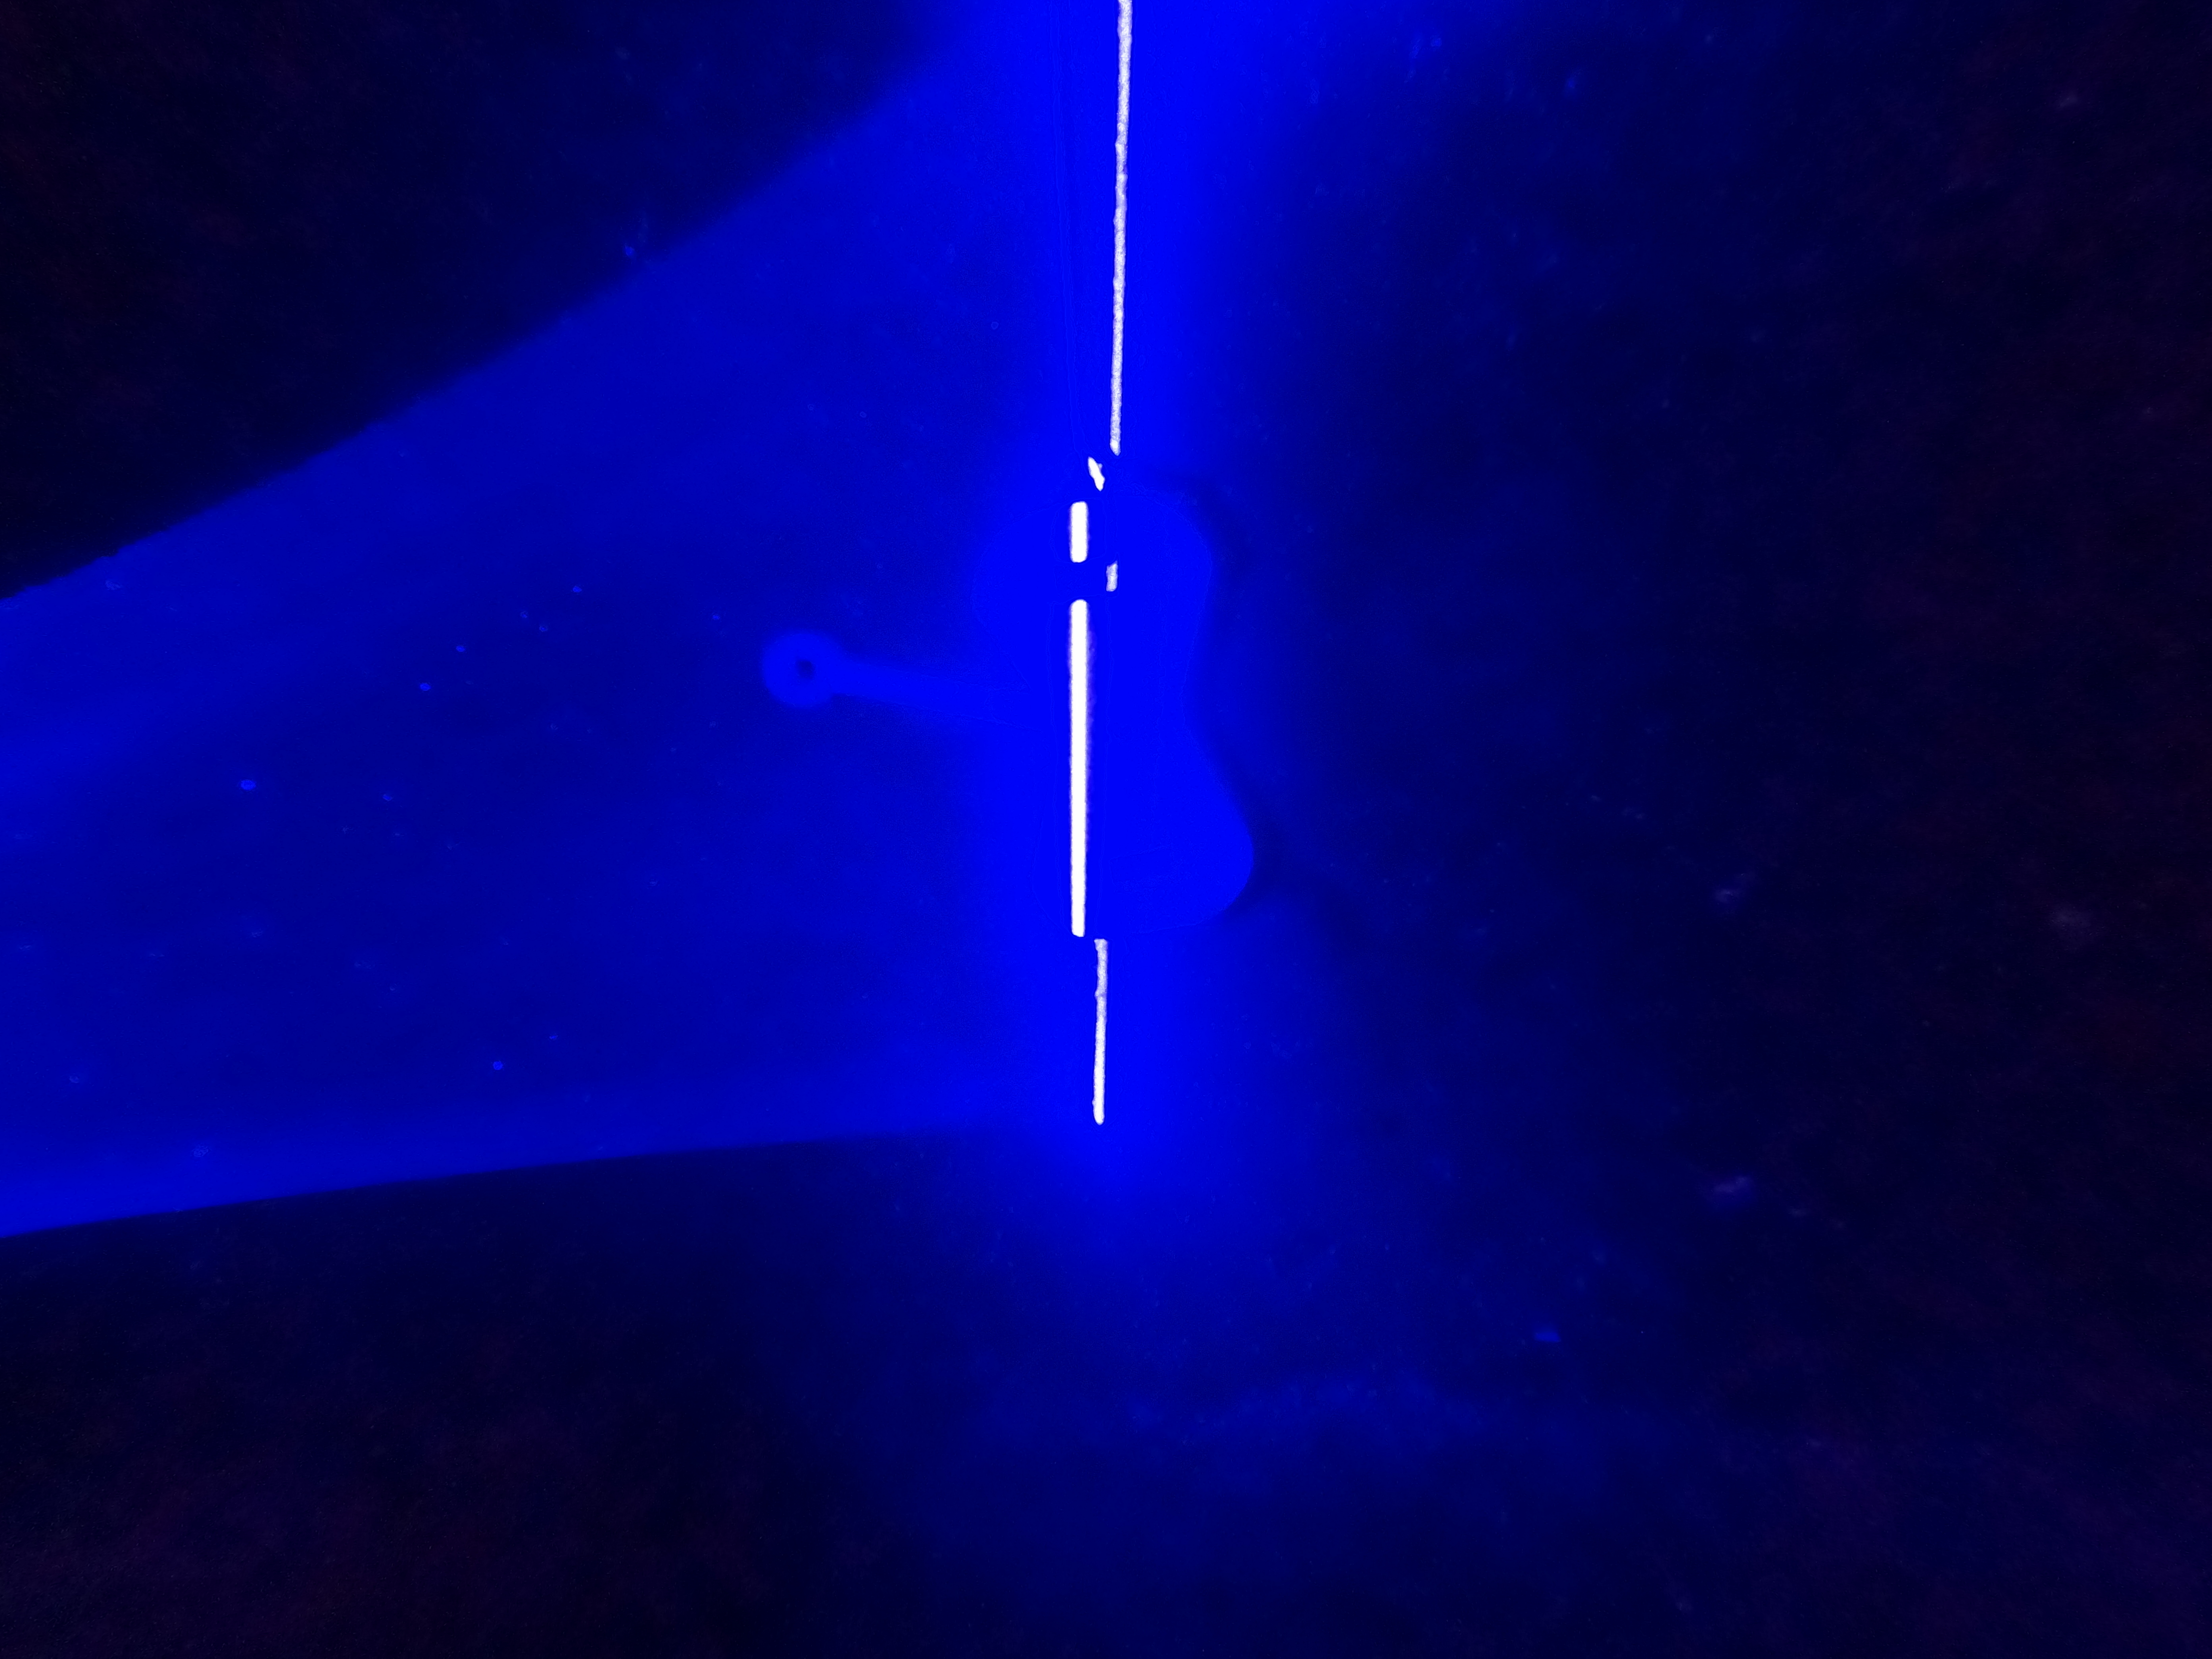

Supplement: Supplementary file 2240 [file G0016549.pdf › Level_1_2/G0016549.pdf]

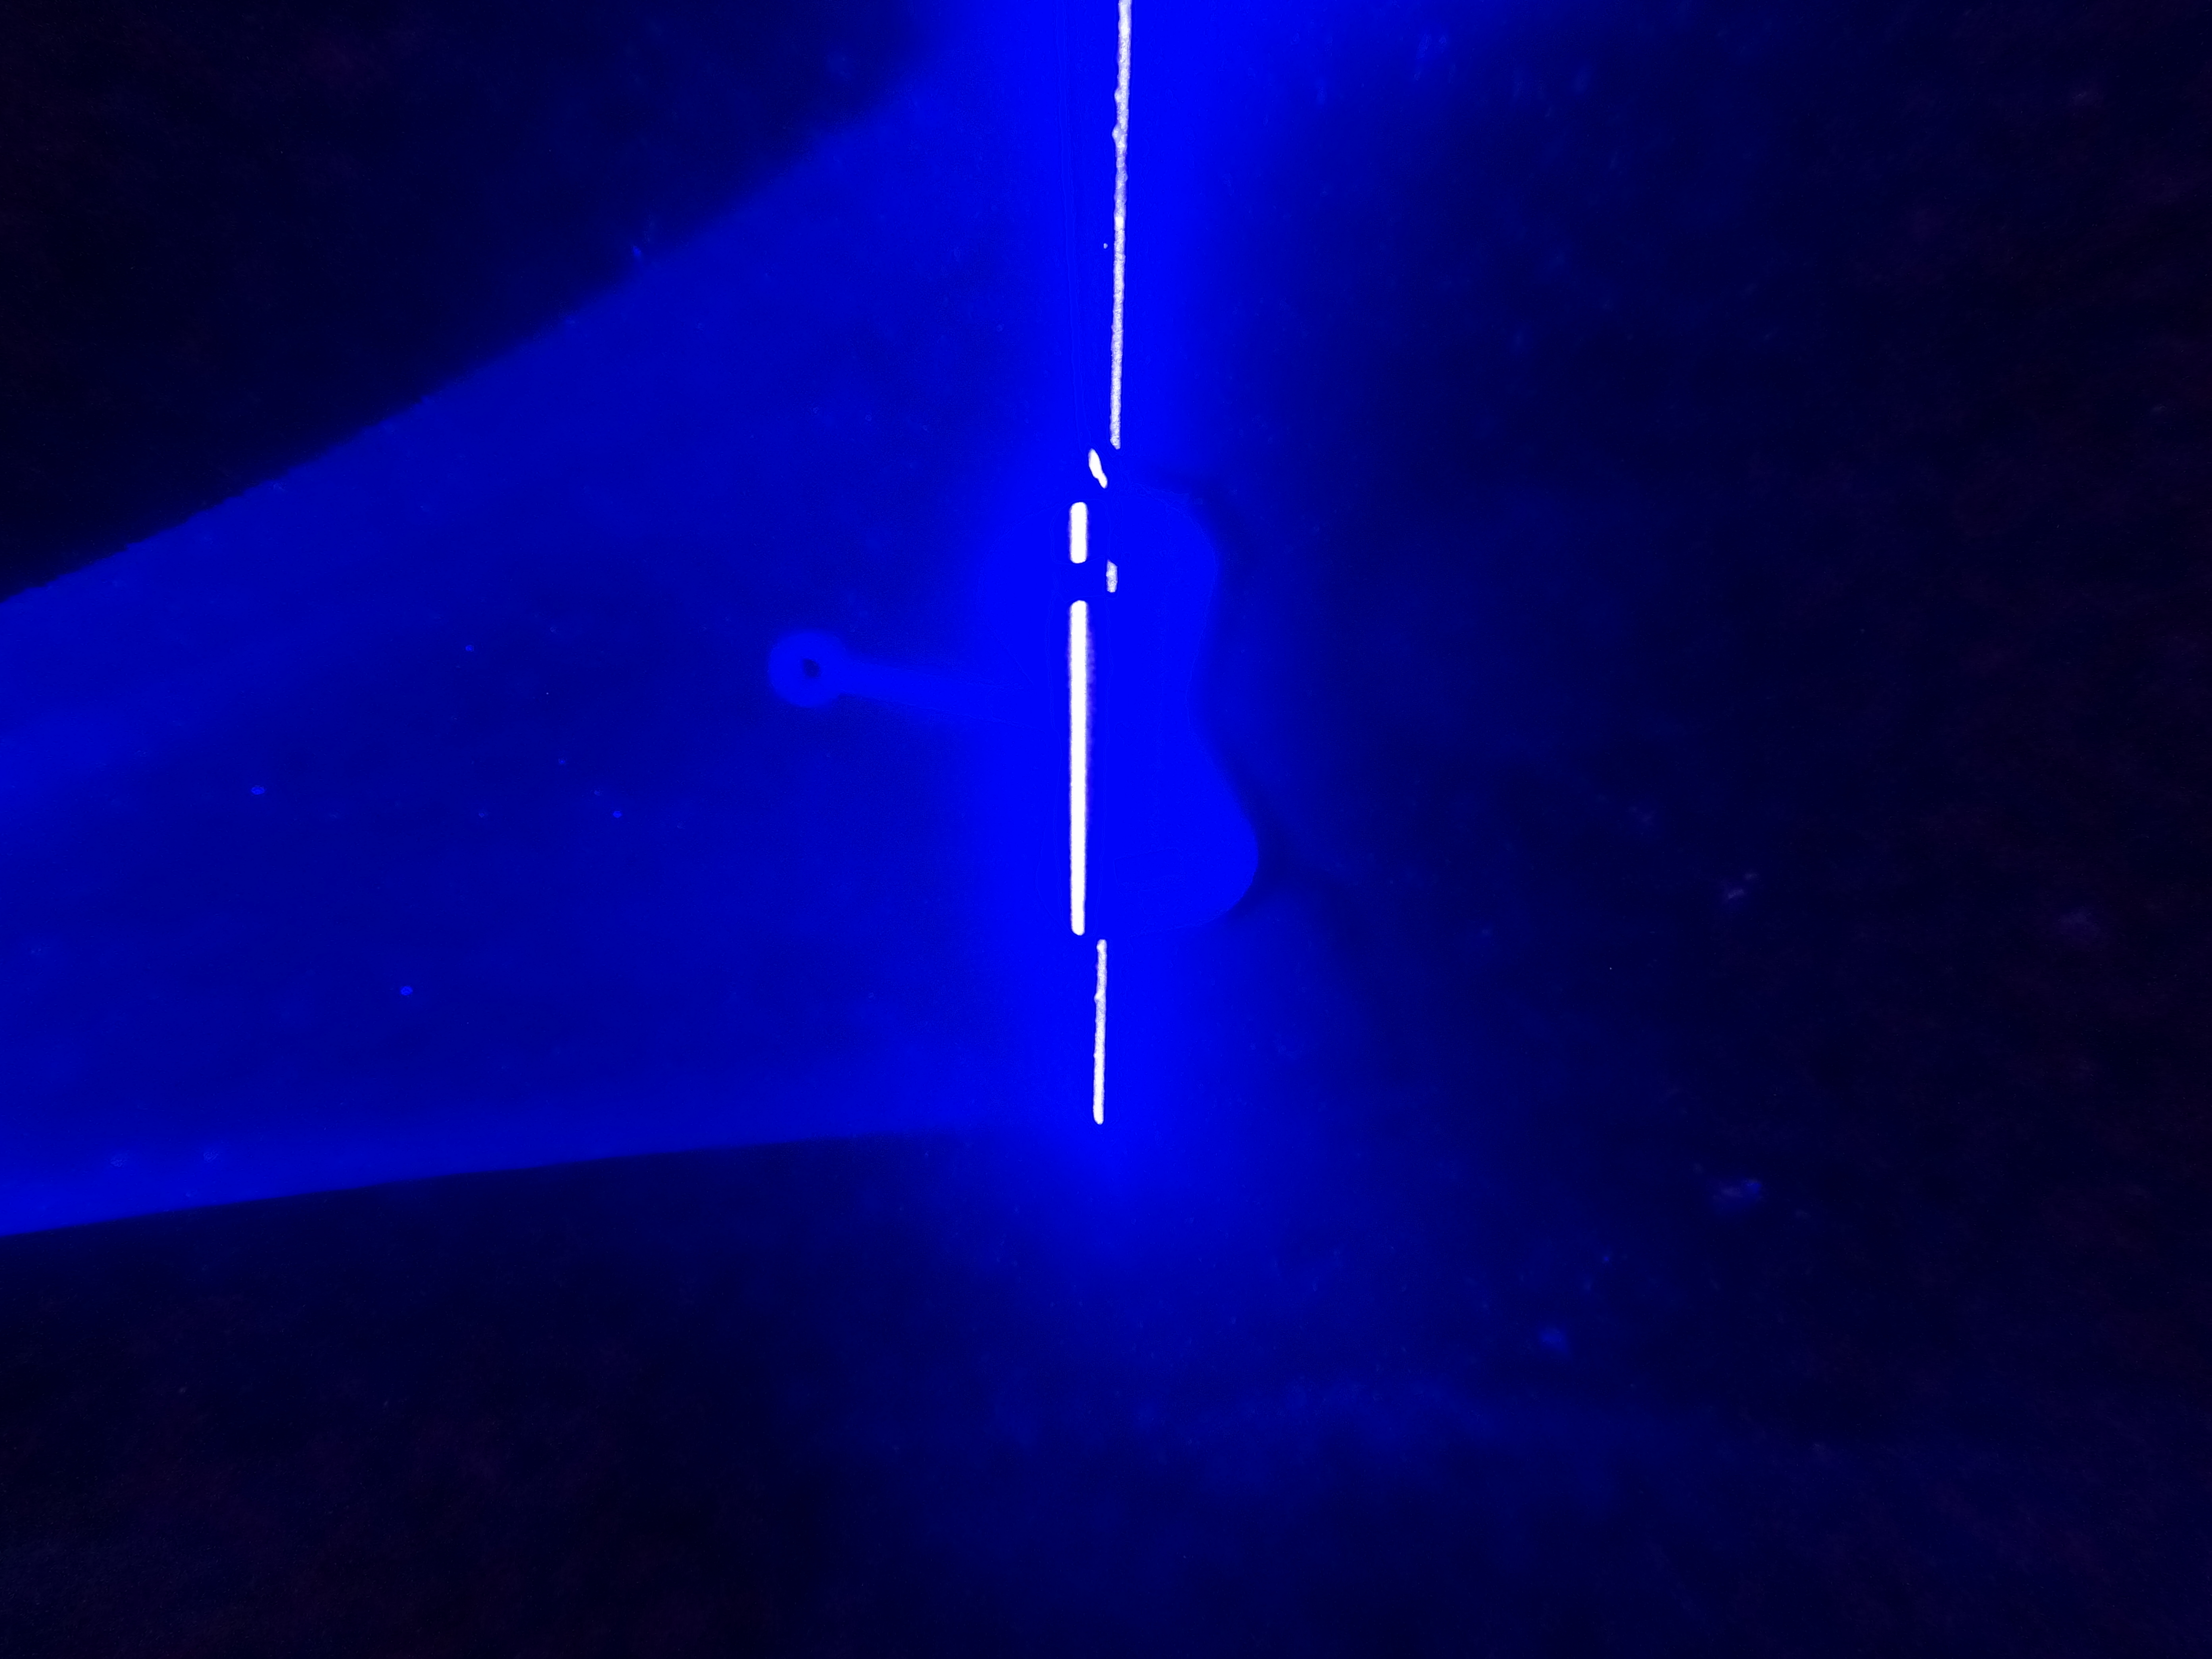

Supplement: Supplementary file 2241 [file G0016550.pdf › Level_1_2/G0016550.pdf]

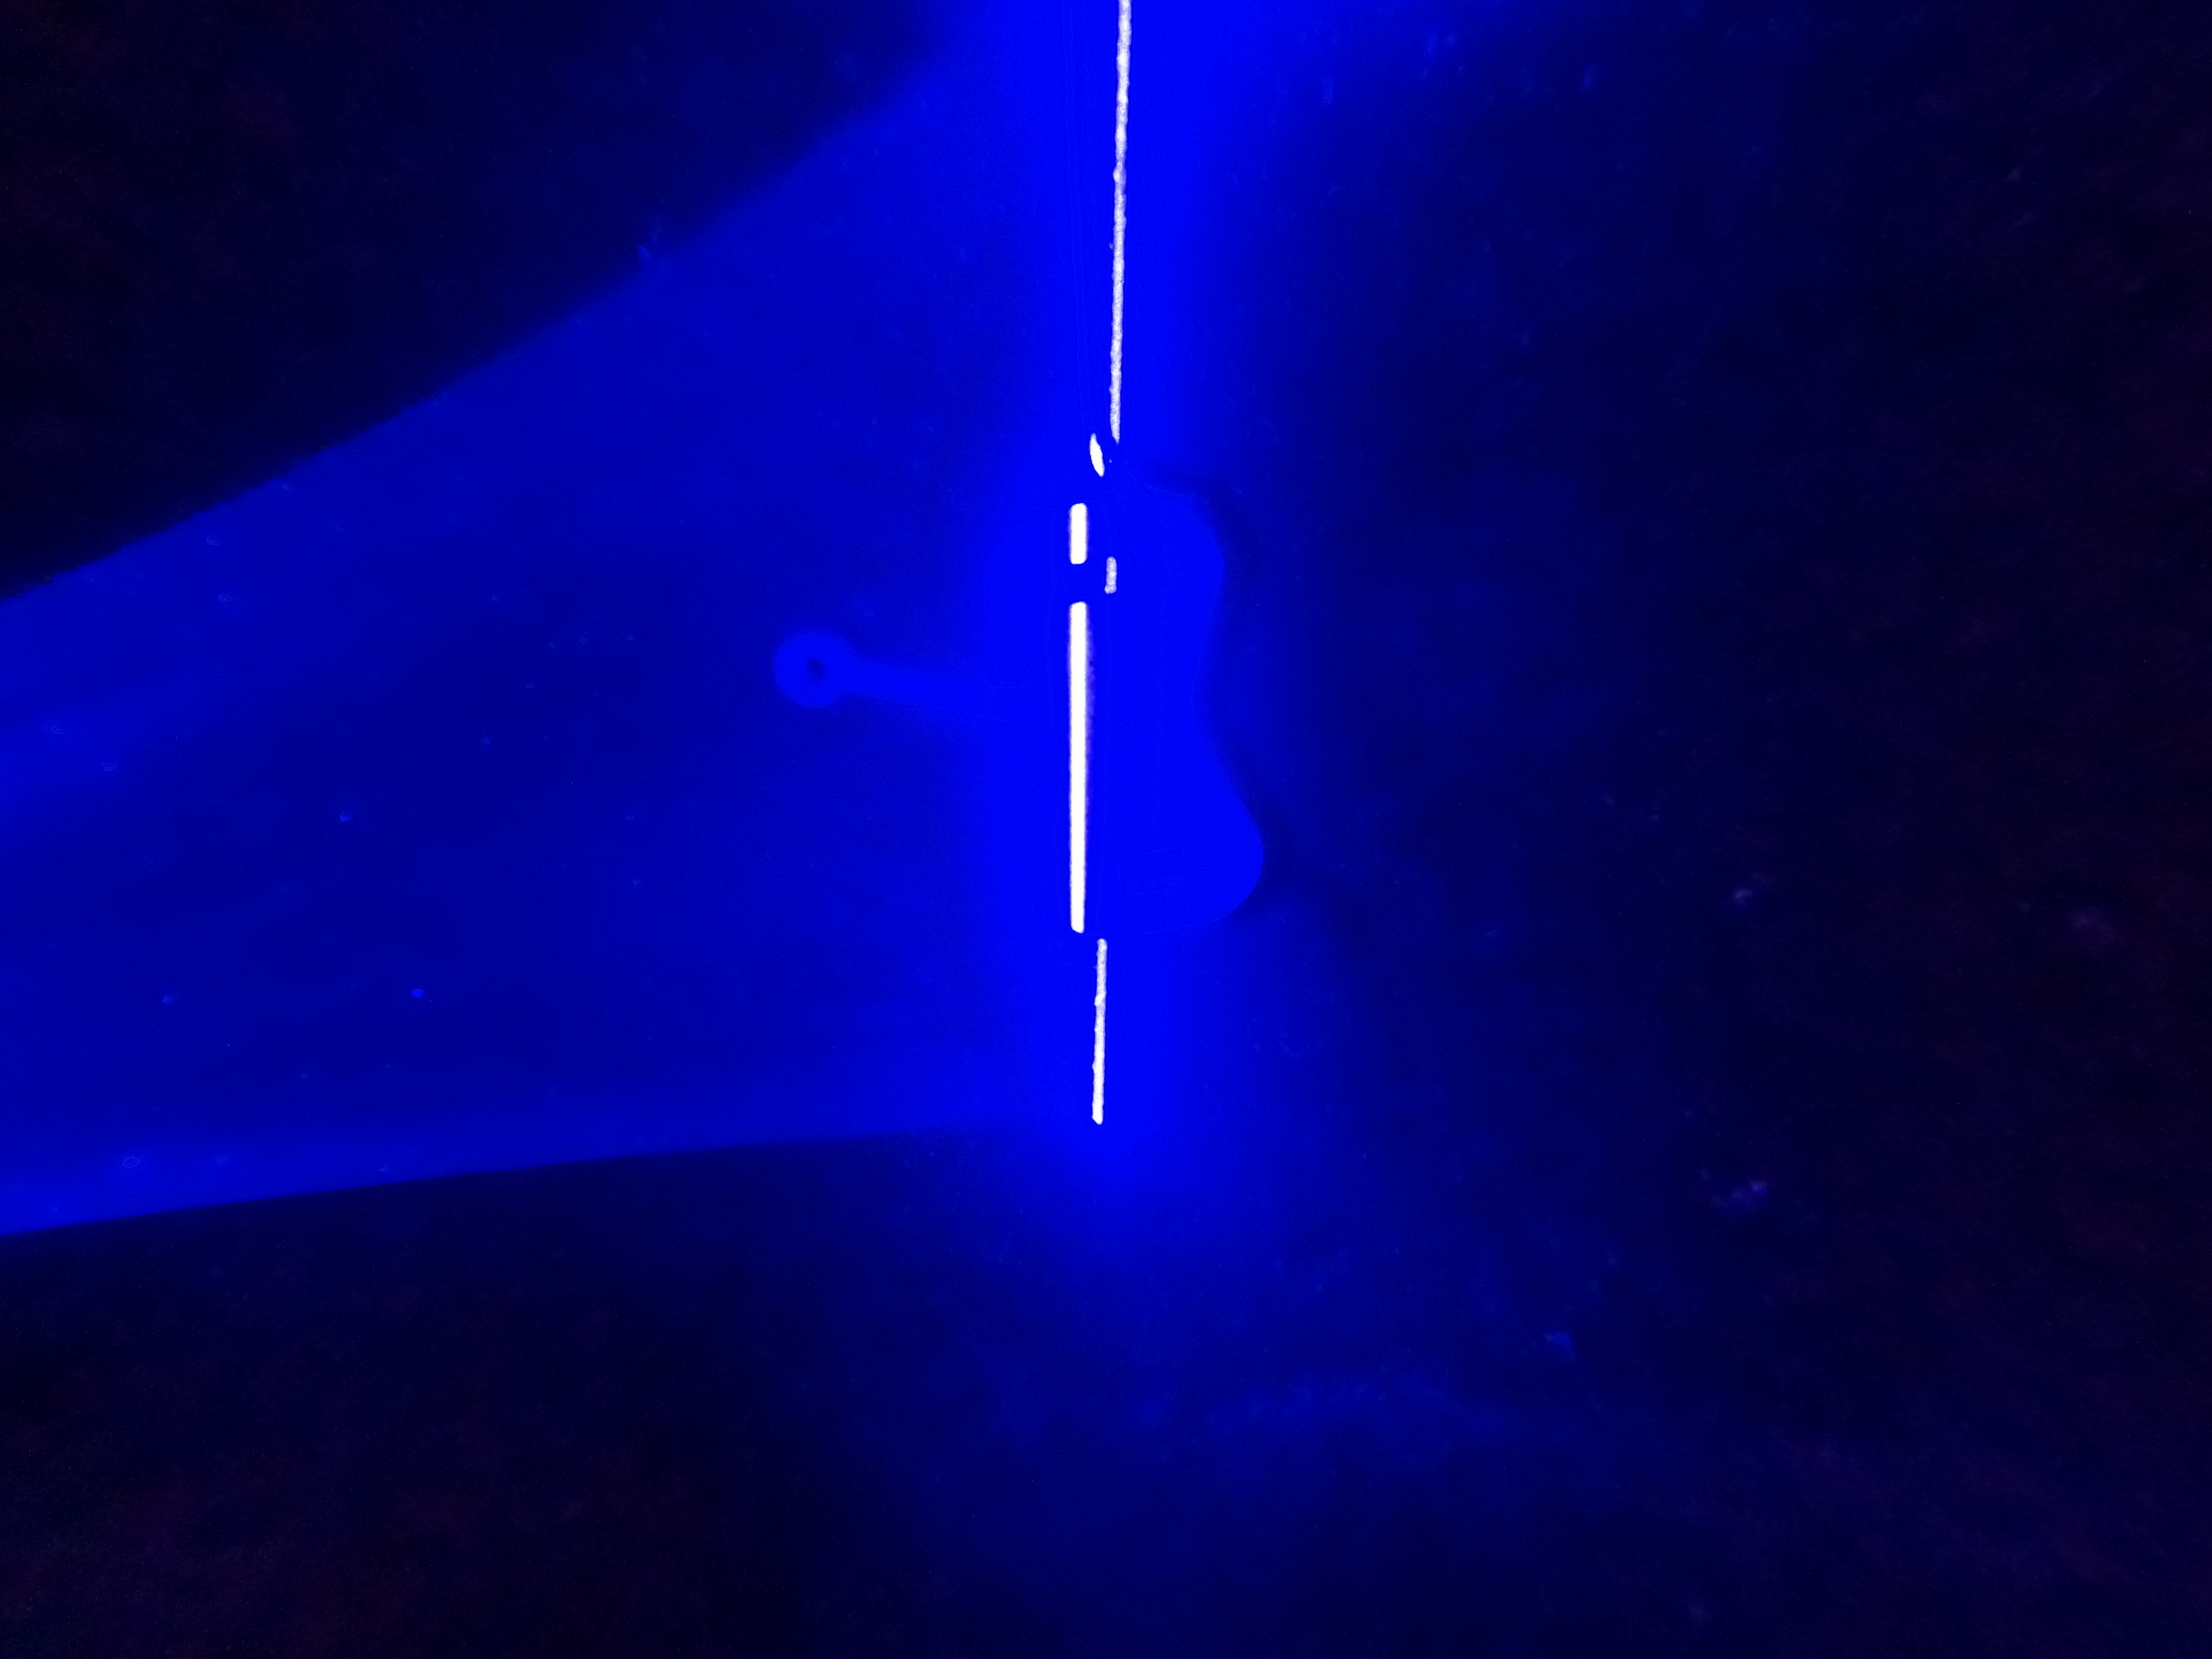

Supplement: Supplementary file 2242 [file G0016551.pdf › Level_1_2/G0016551.pdf]

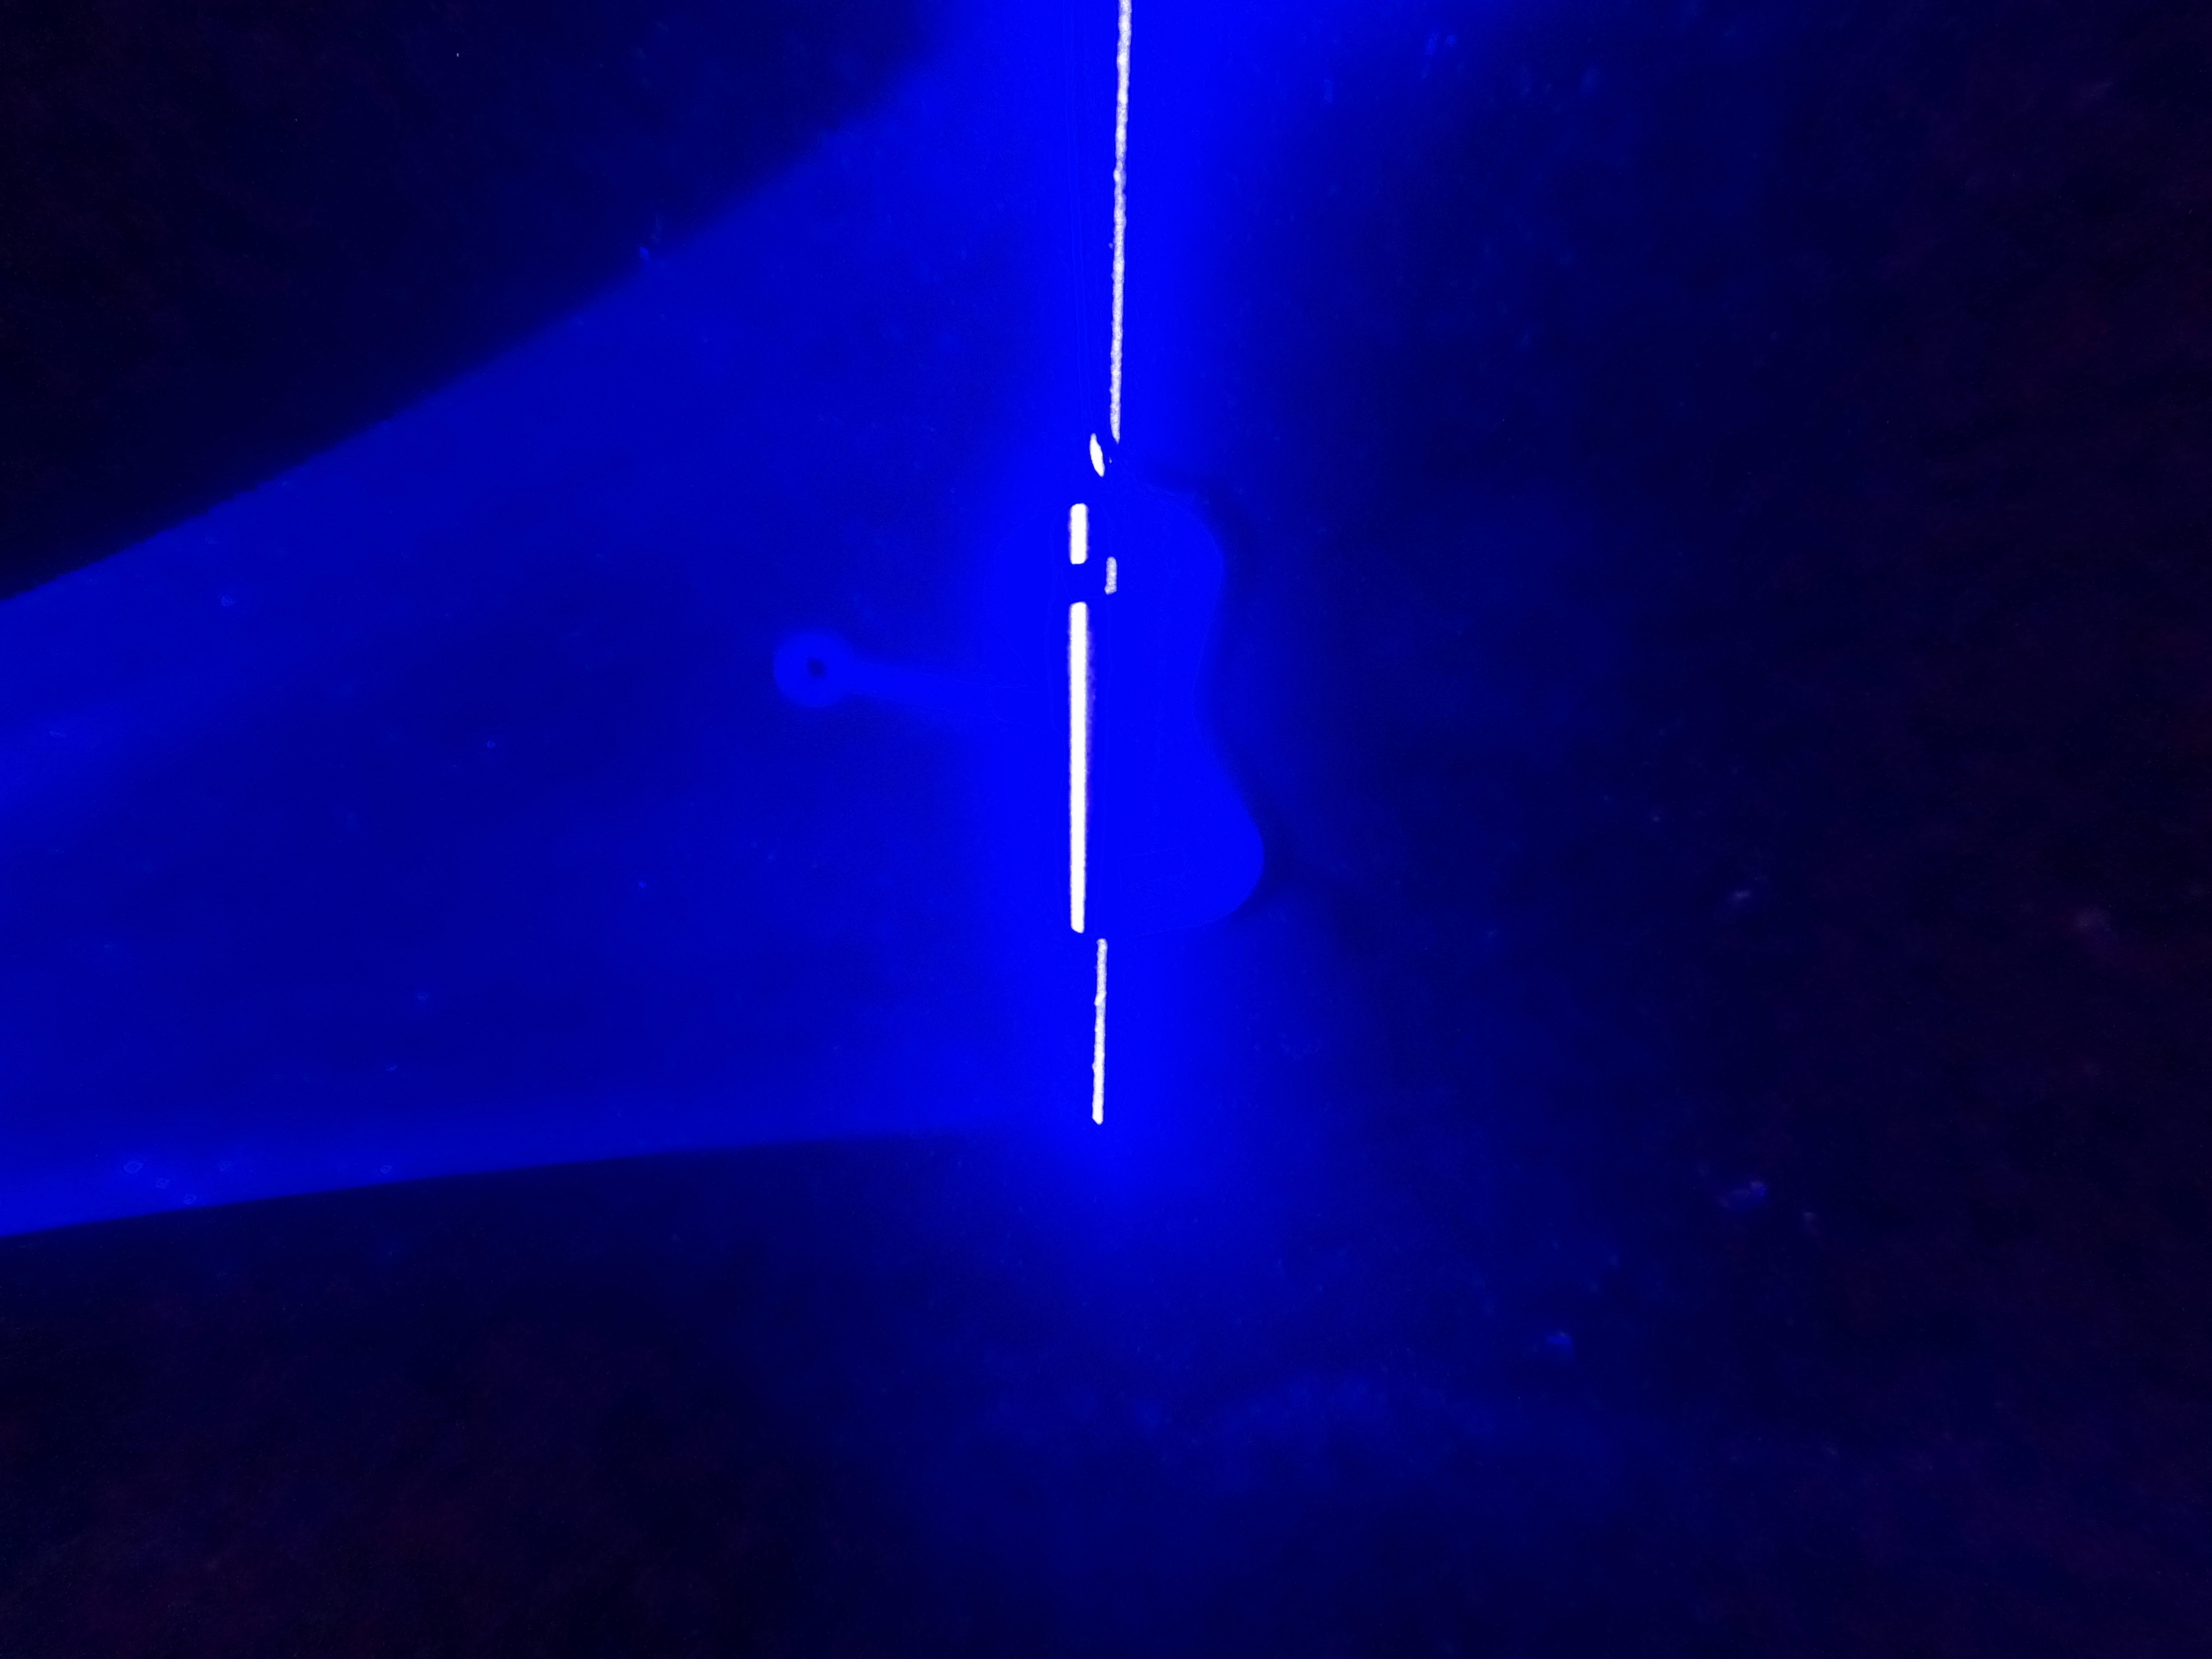

Supplement: Supplementary file 2243 [file G0016552.pdf › Level_1_2/G0016552.pdf]

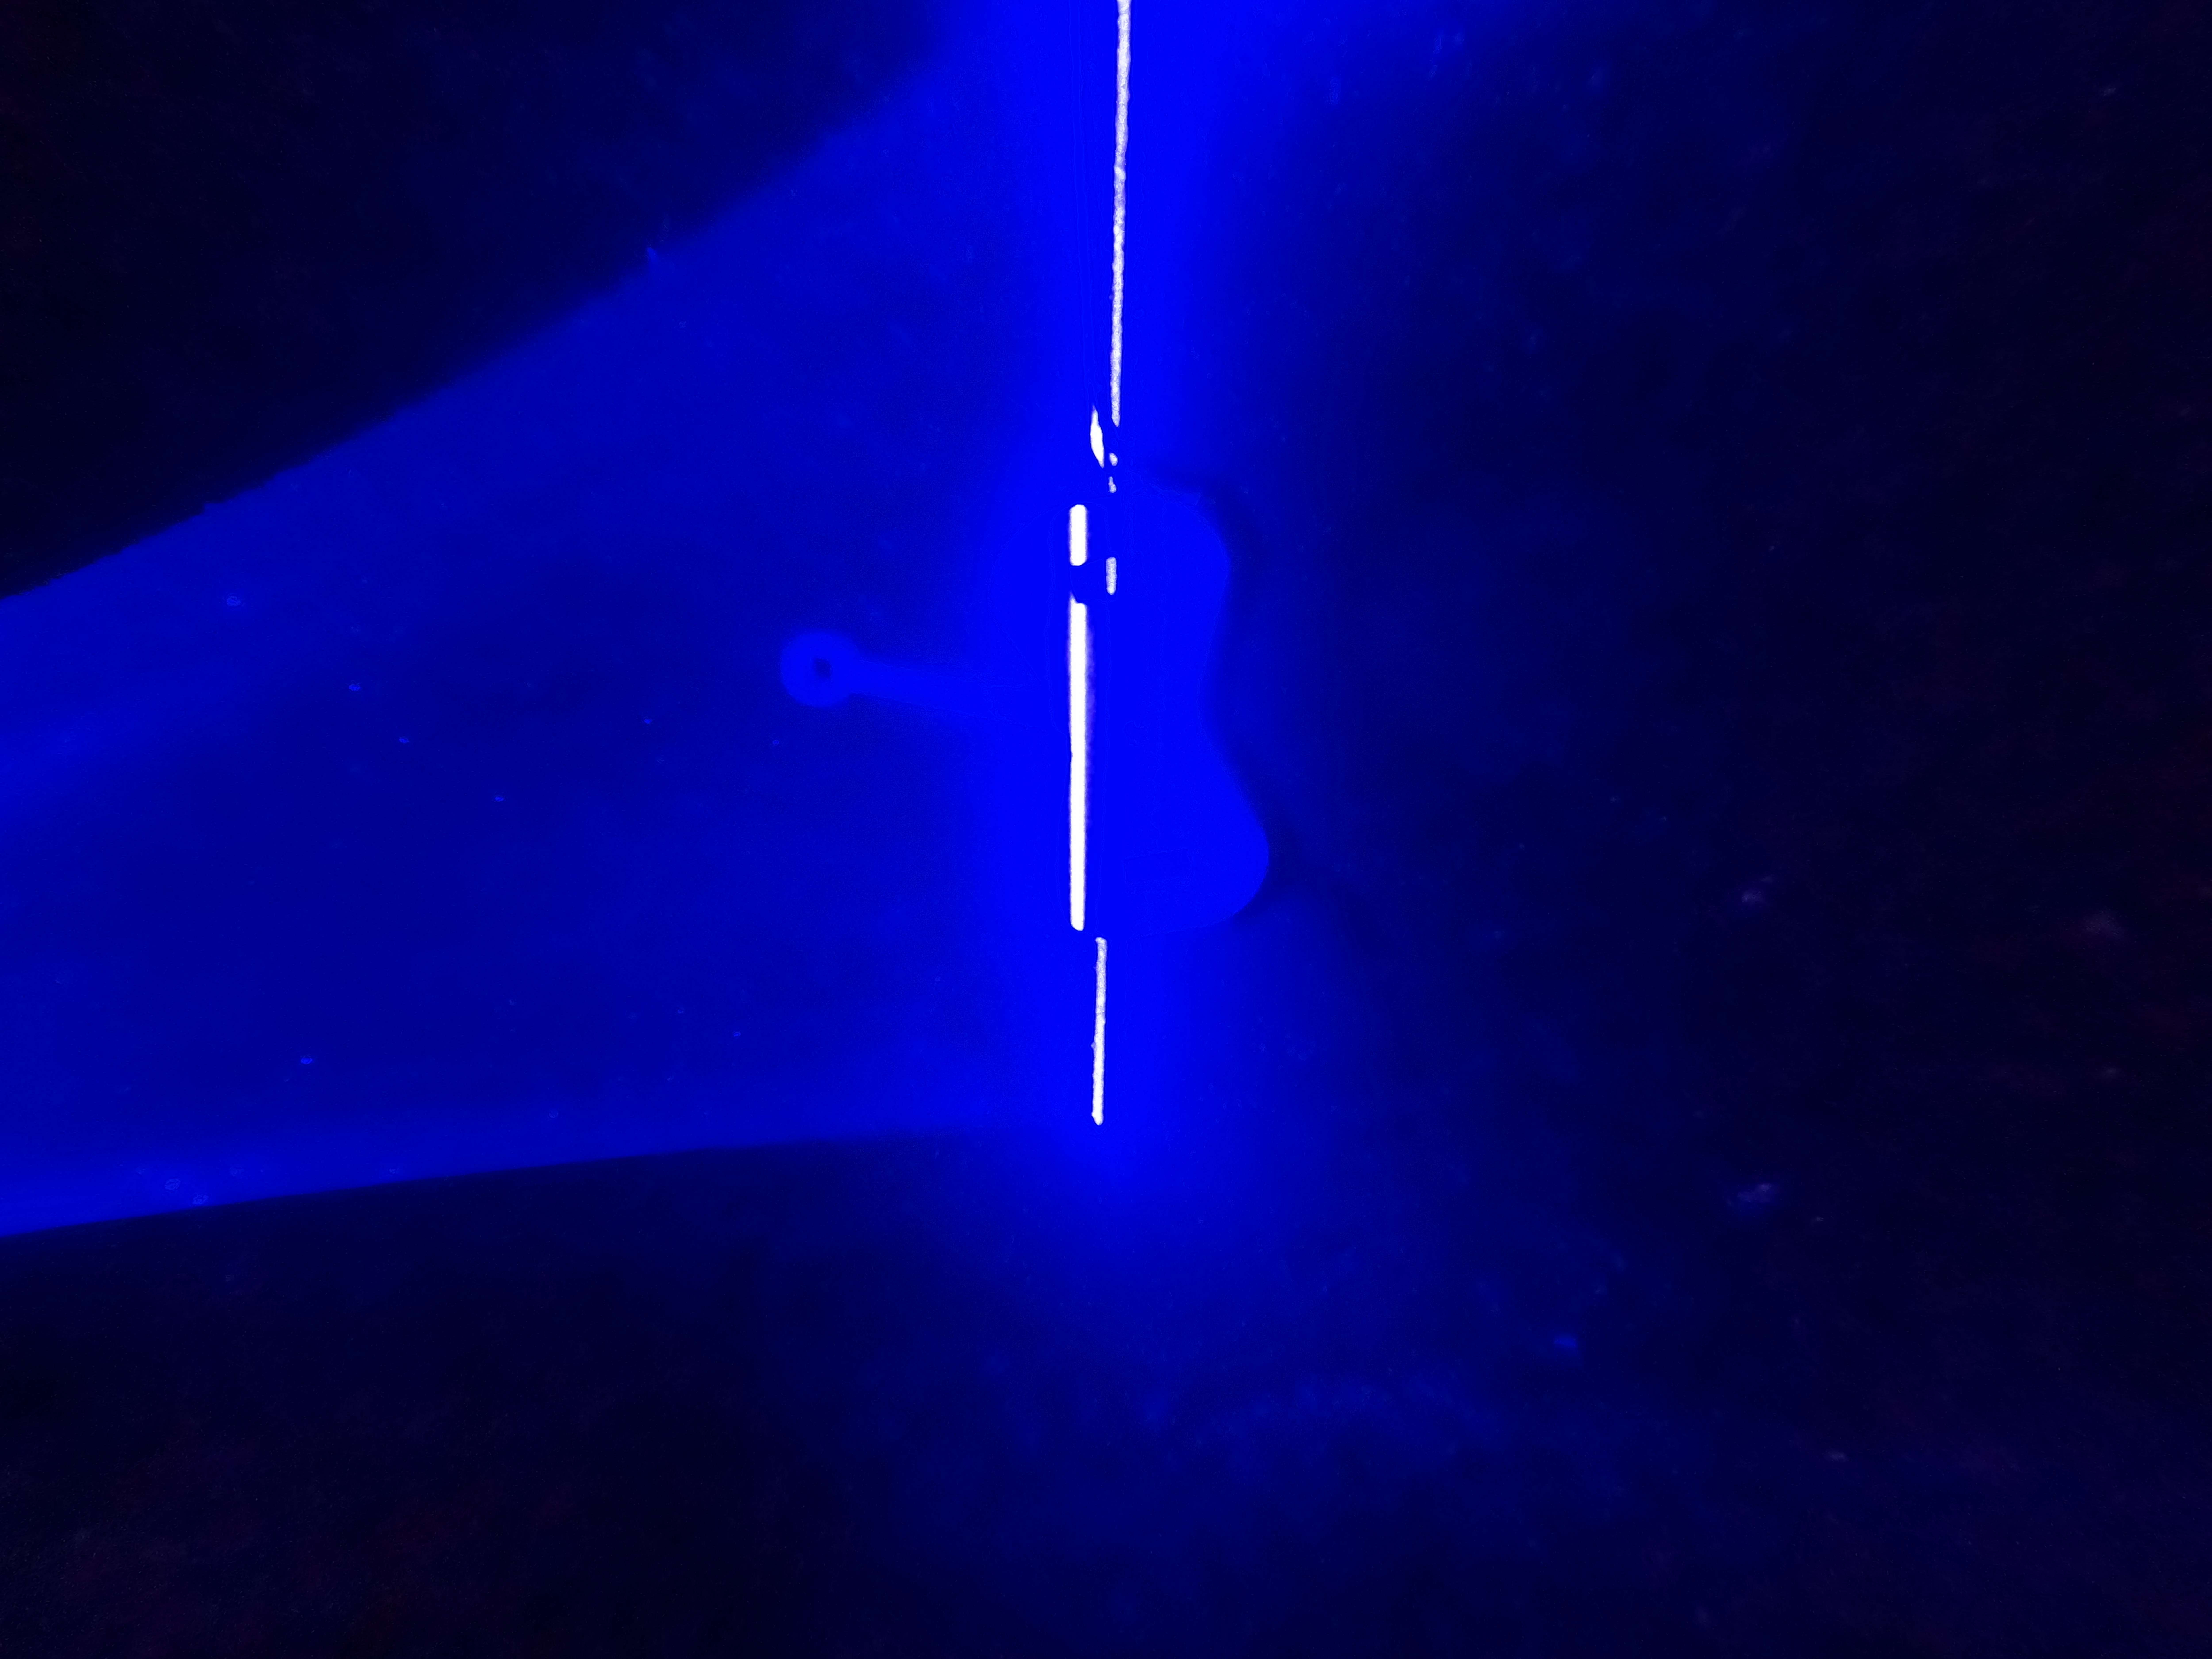

Supplement: Supplementary file 2244 [file G0016553.pdf › Level_1_2/G0016553.pdf]

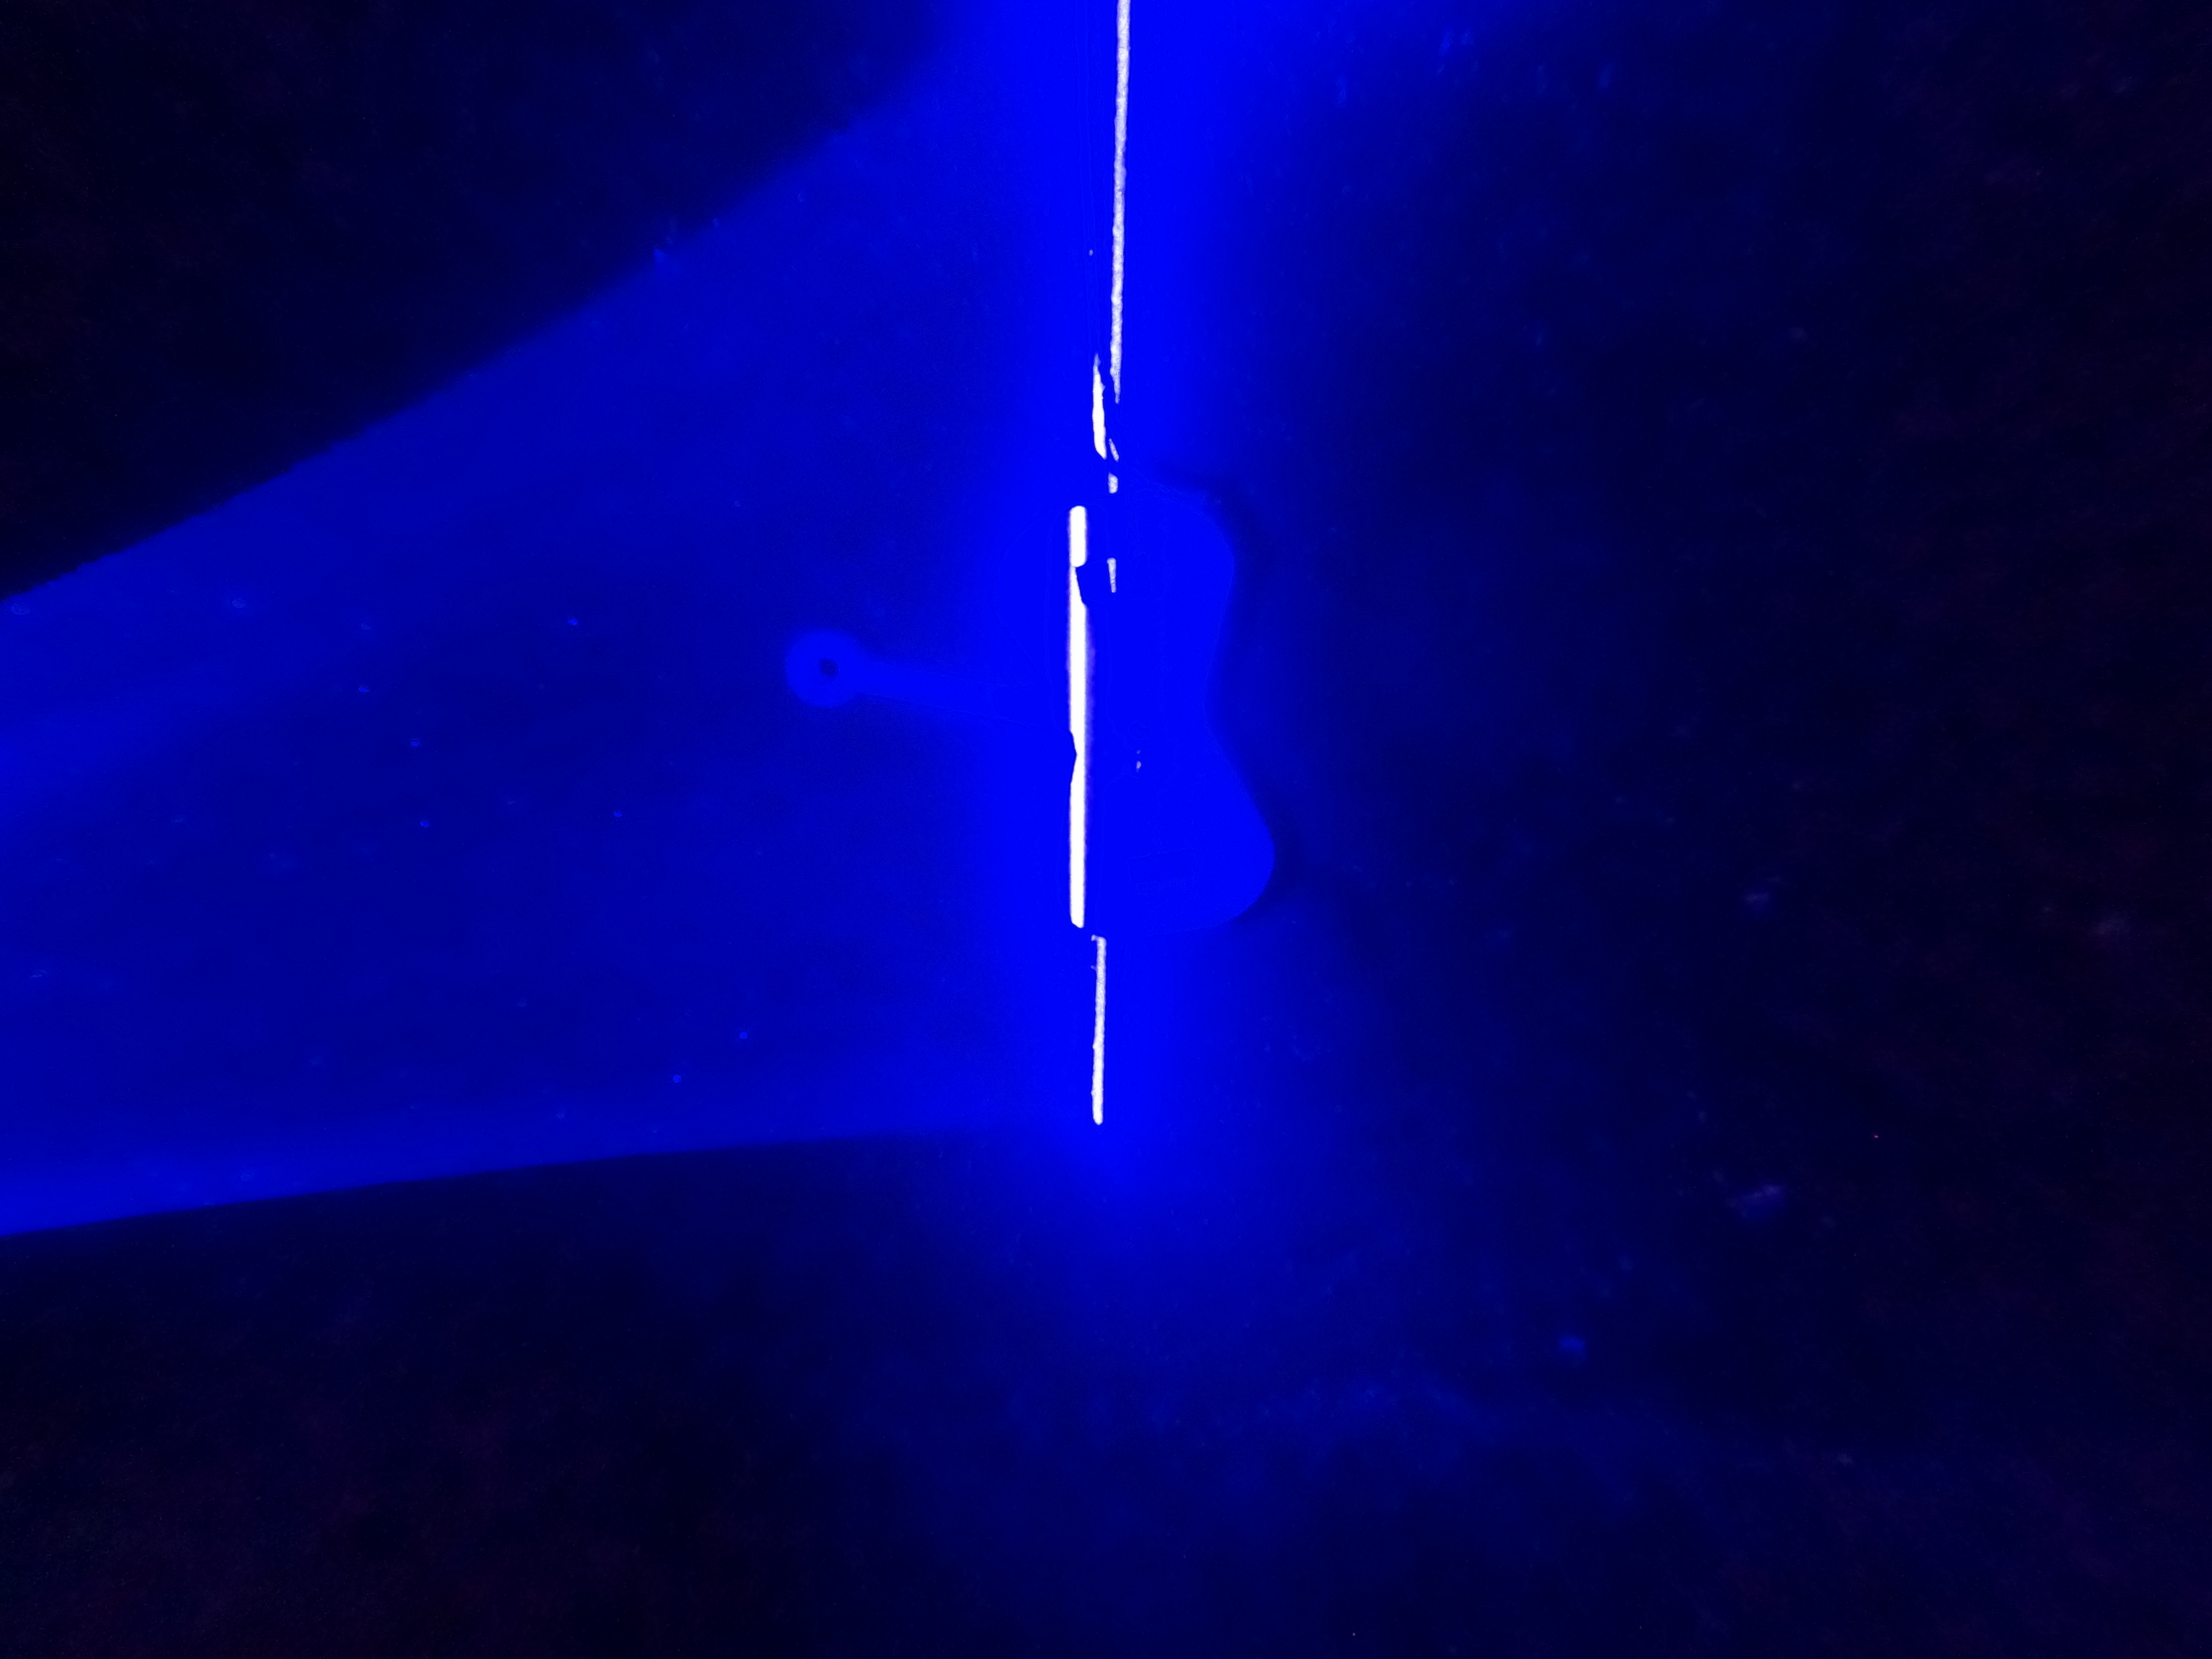

Supplement: Supplementary file 2245 [file G0016554.pdf › Level_1_2/G0016554.pdf]

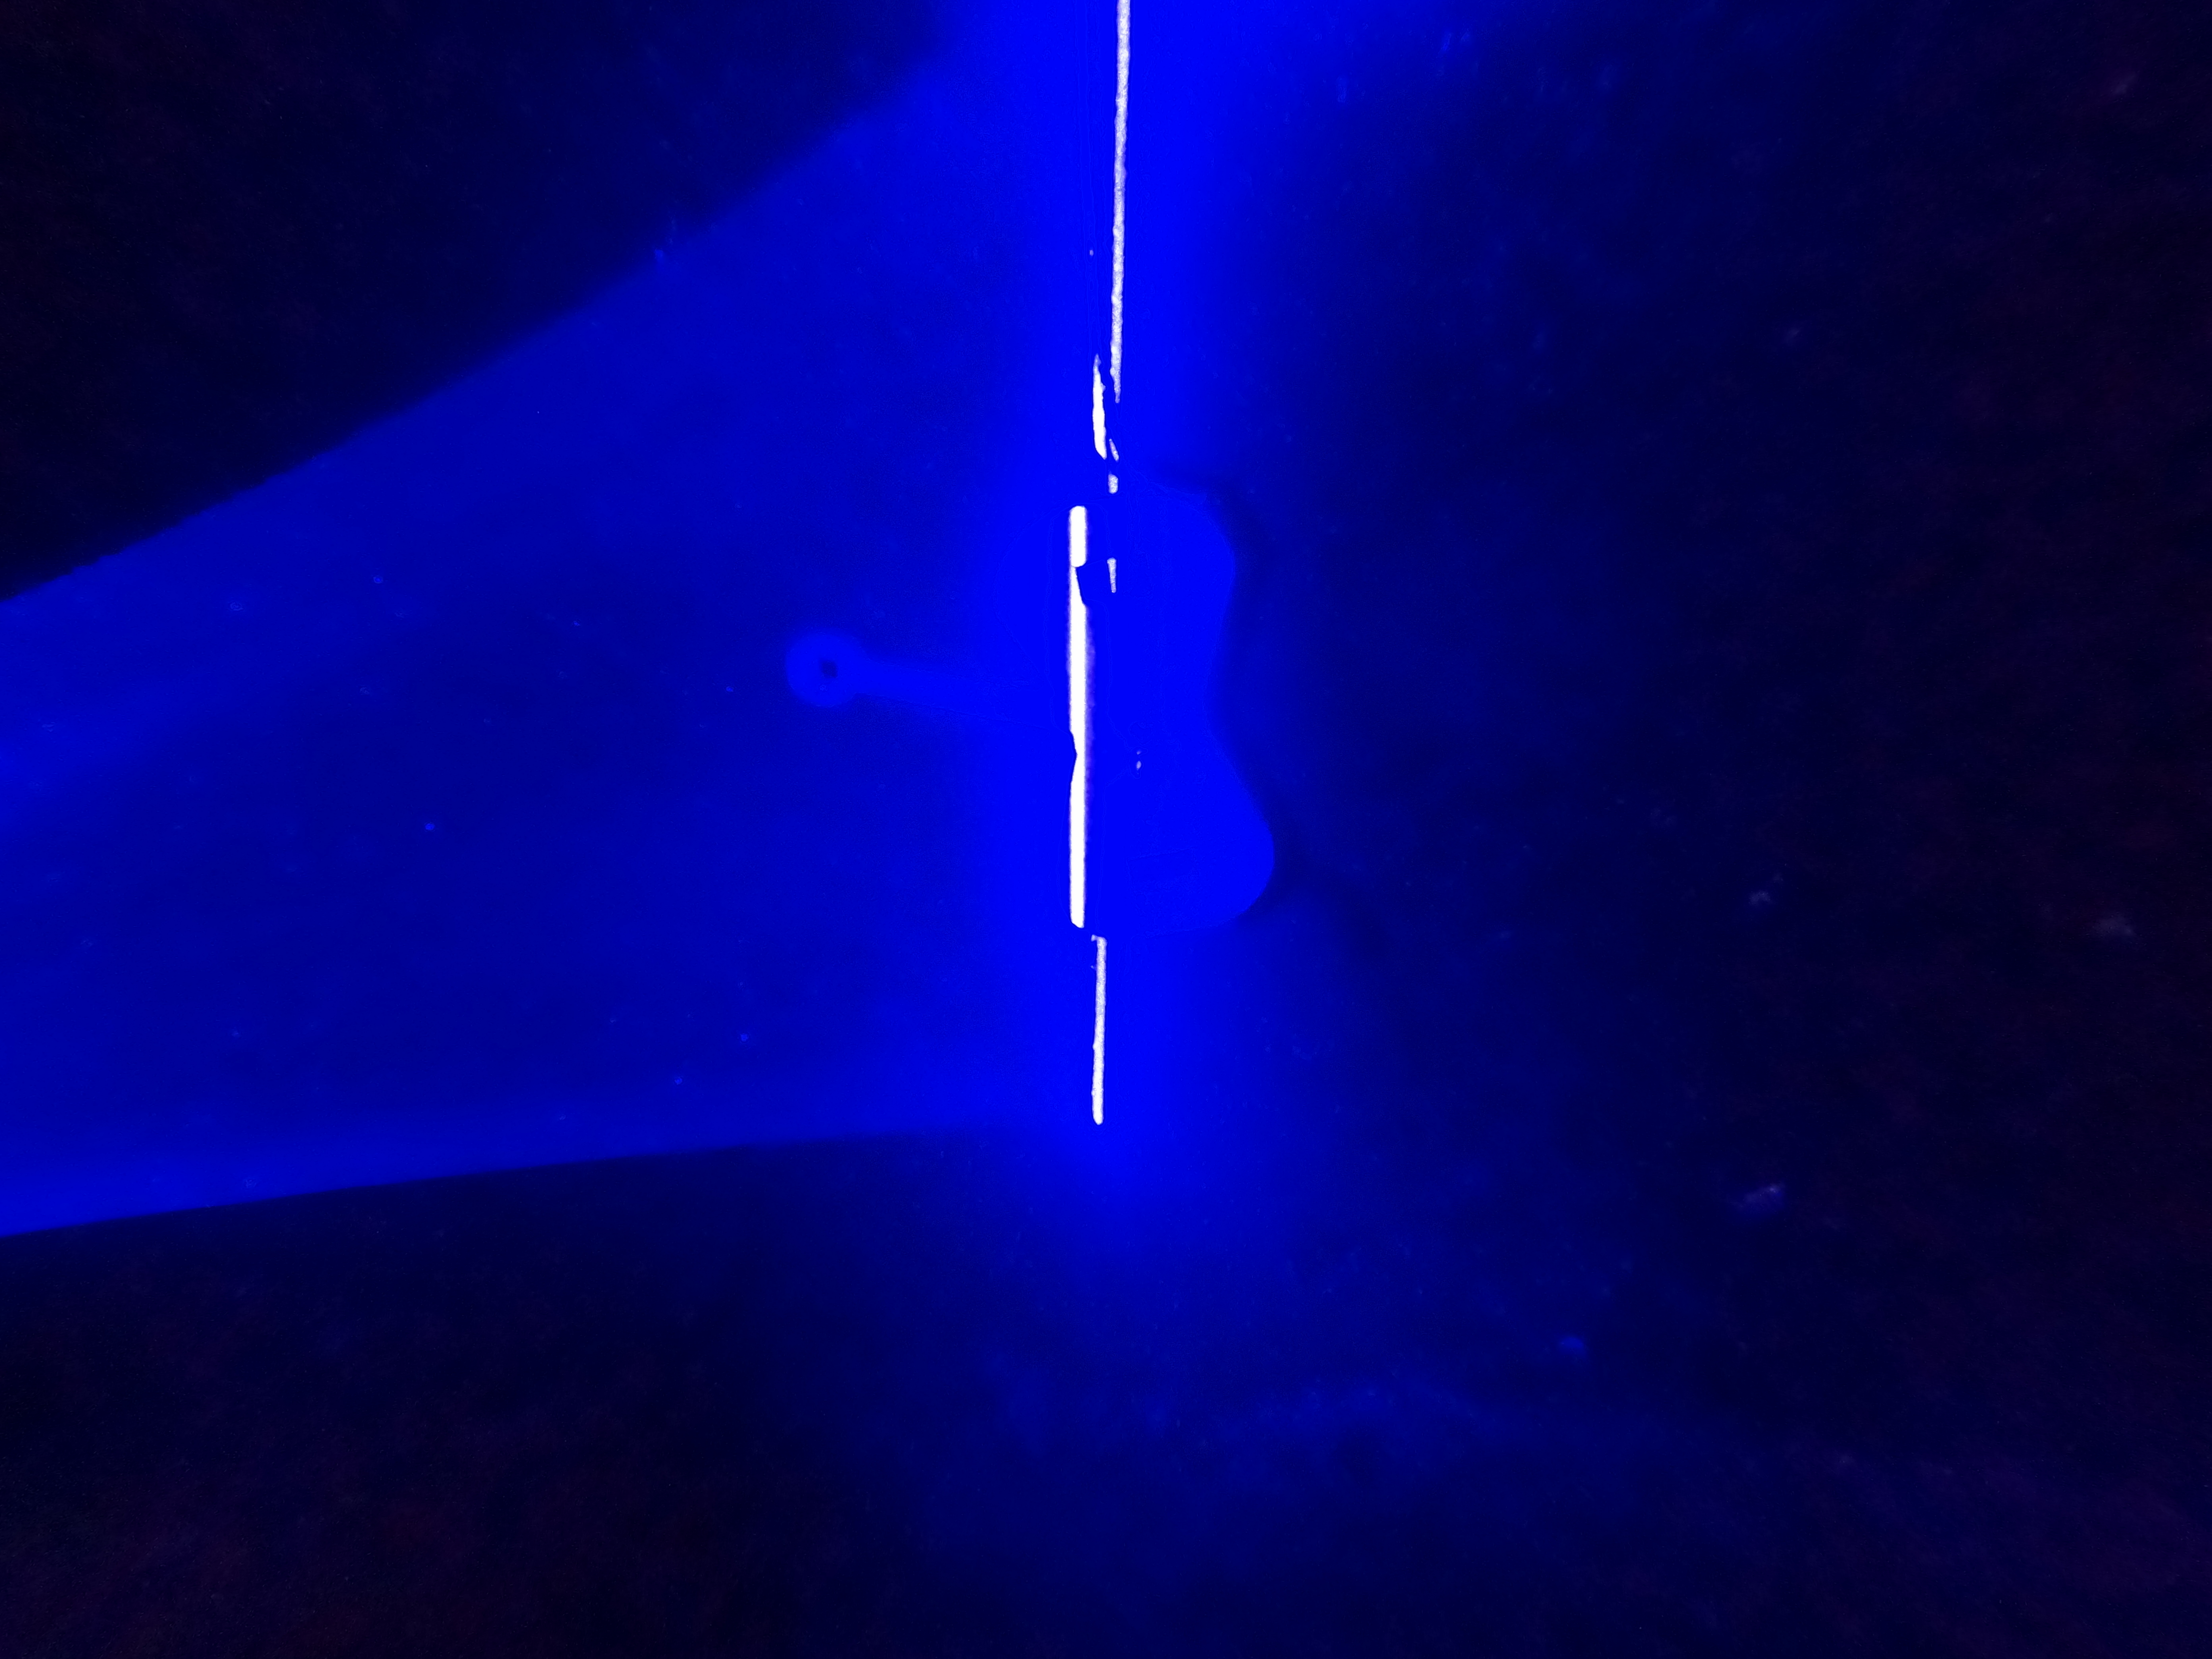

Supplement: Supplementary file 2246 [file G0016555.pdf › Level_1_2/G0016555.pdf]

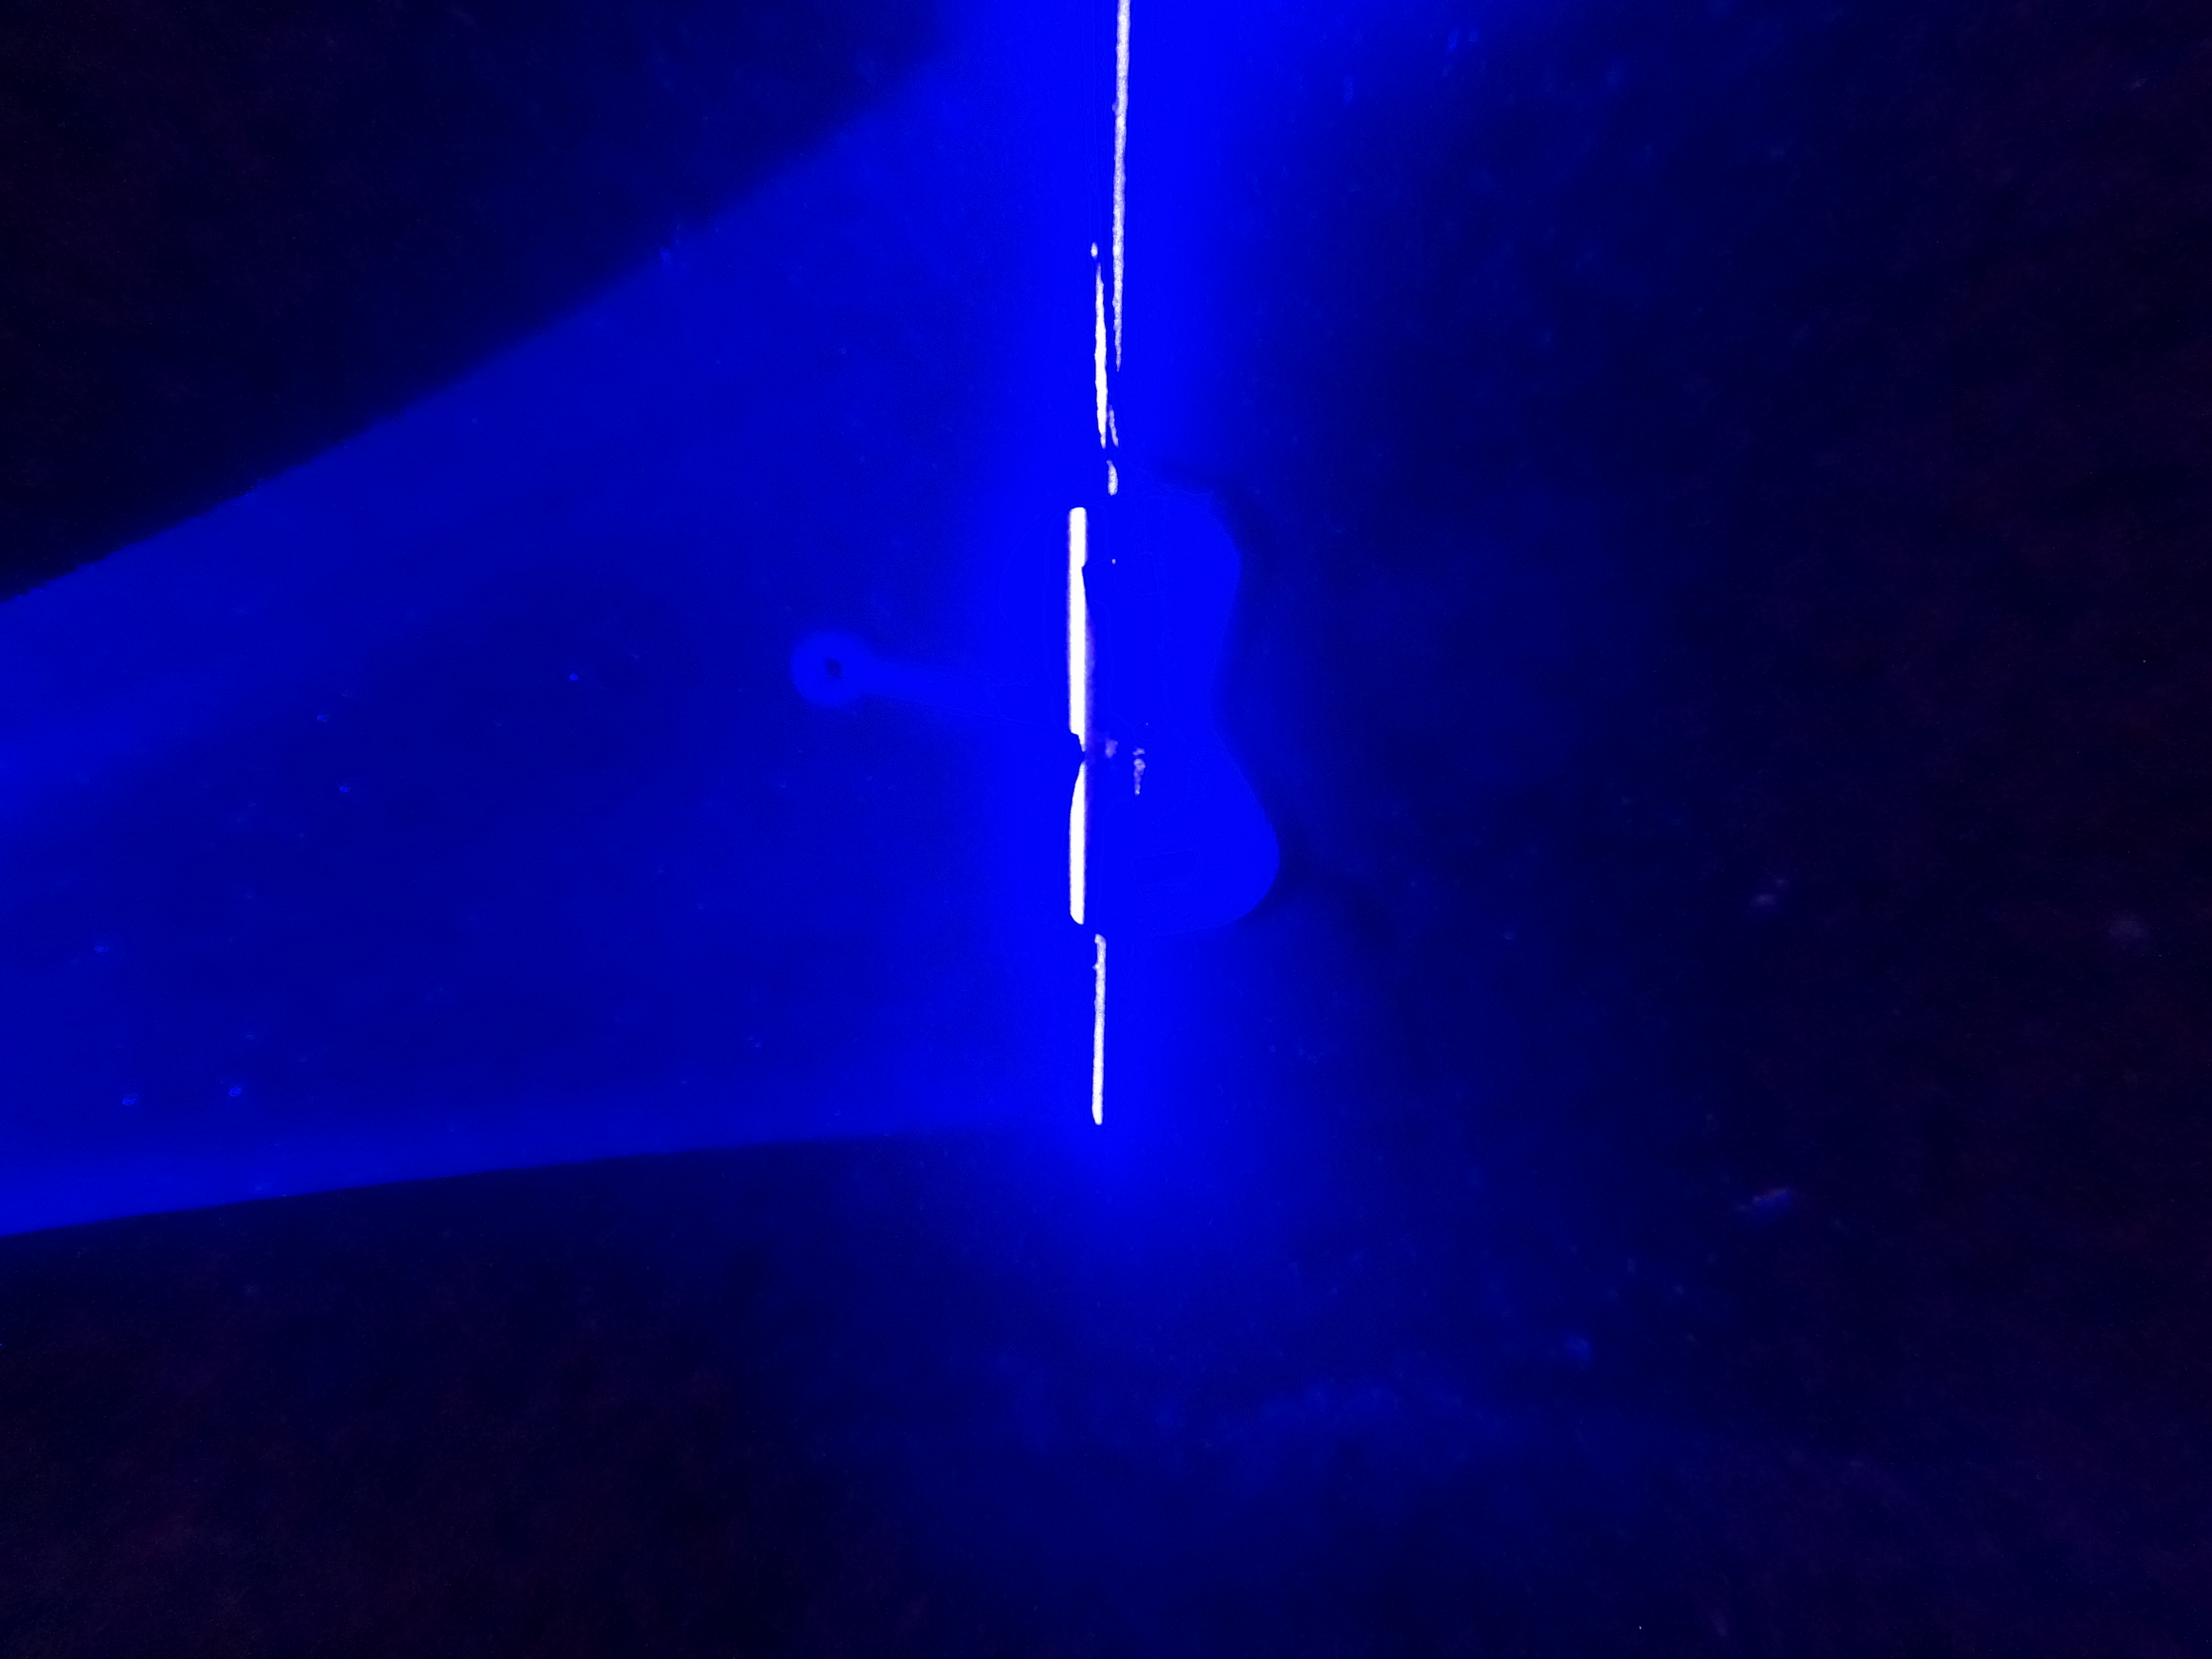

Supplement: Supplementary file 2247 [file G0016556.pdf › Level_1_2/G0016556.pdf]

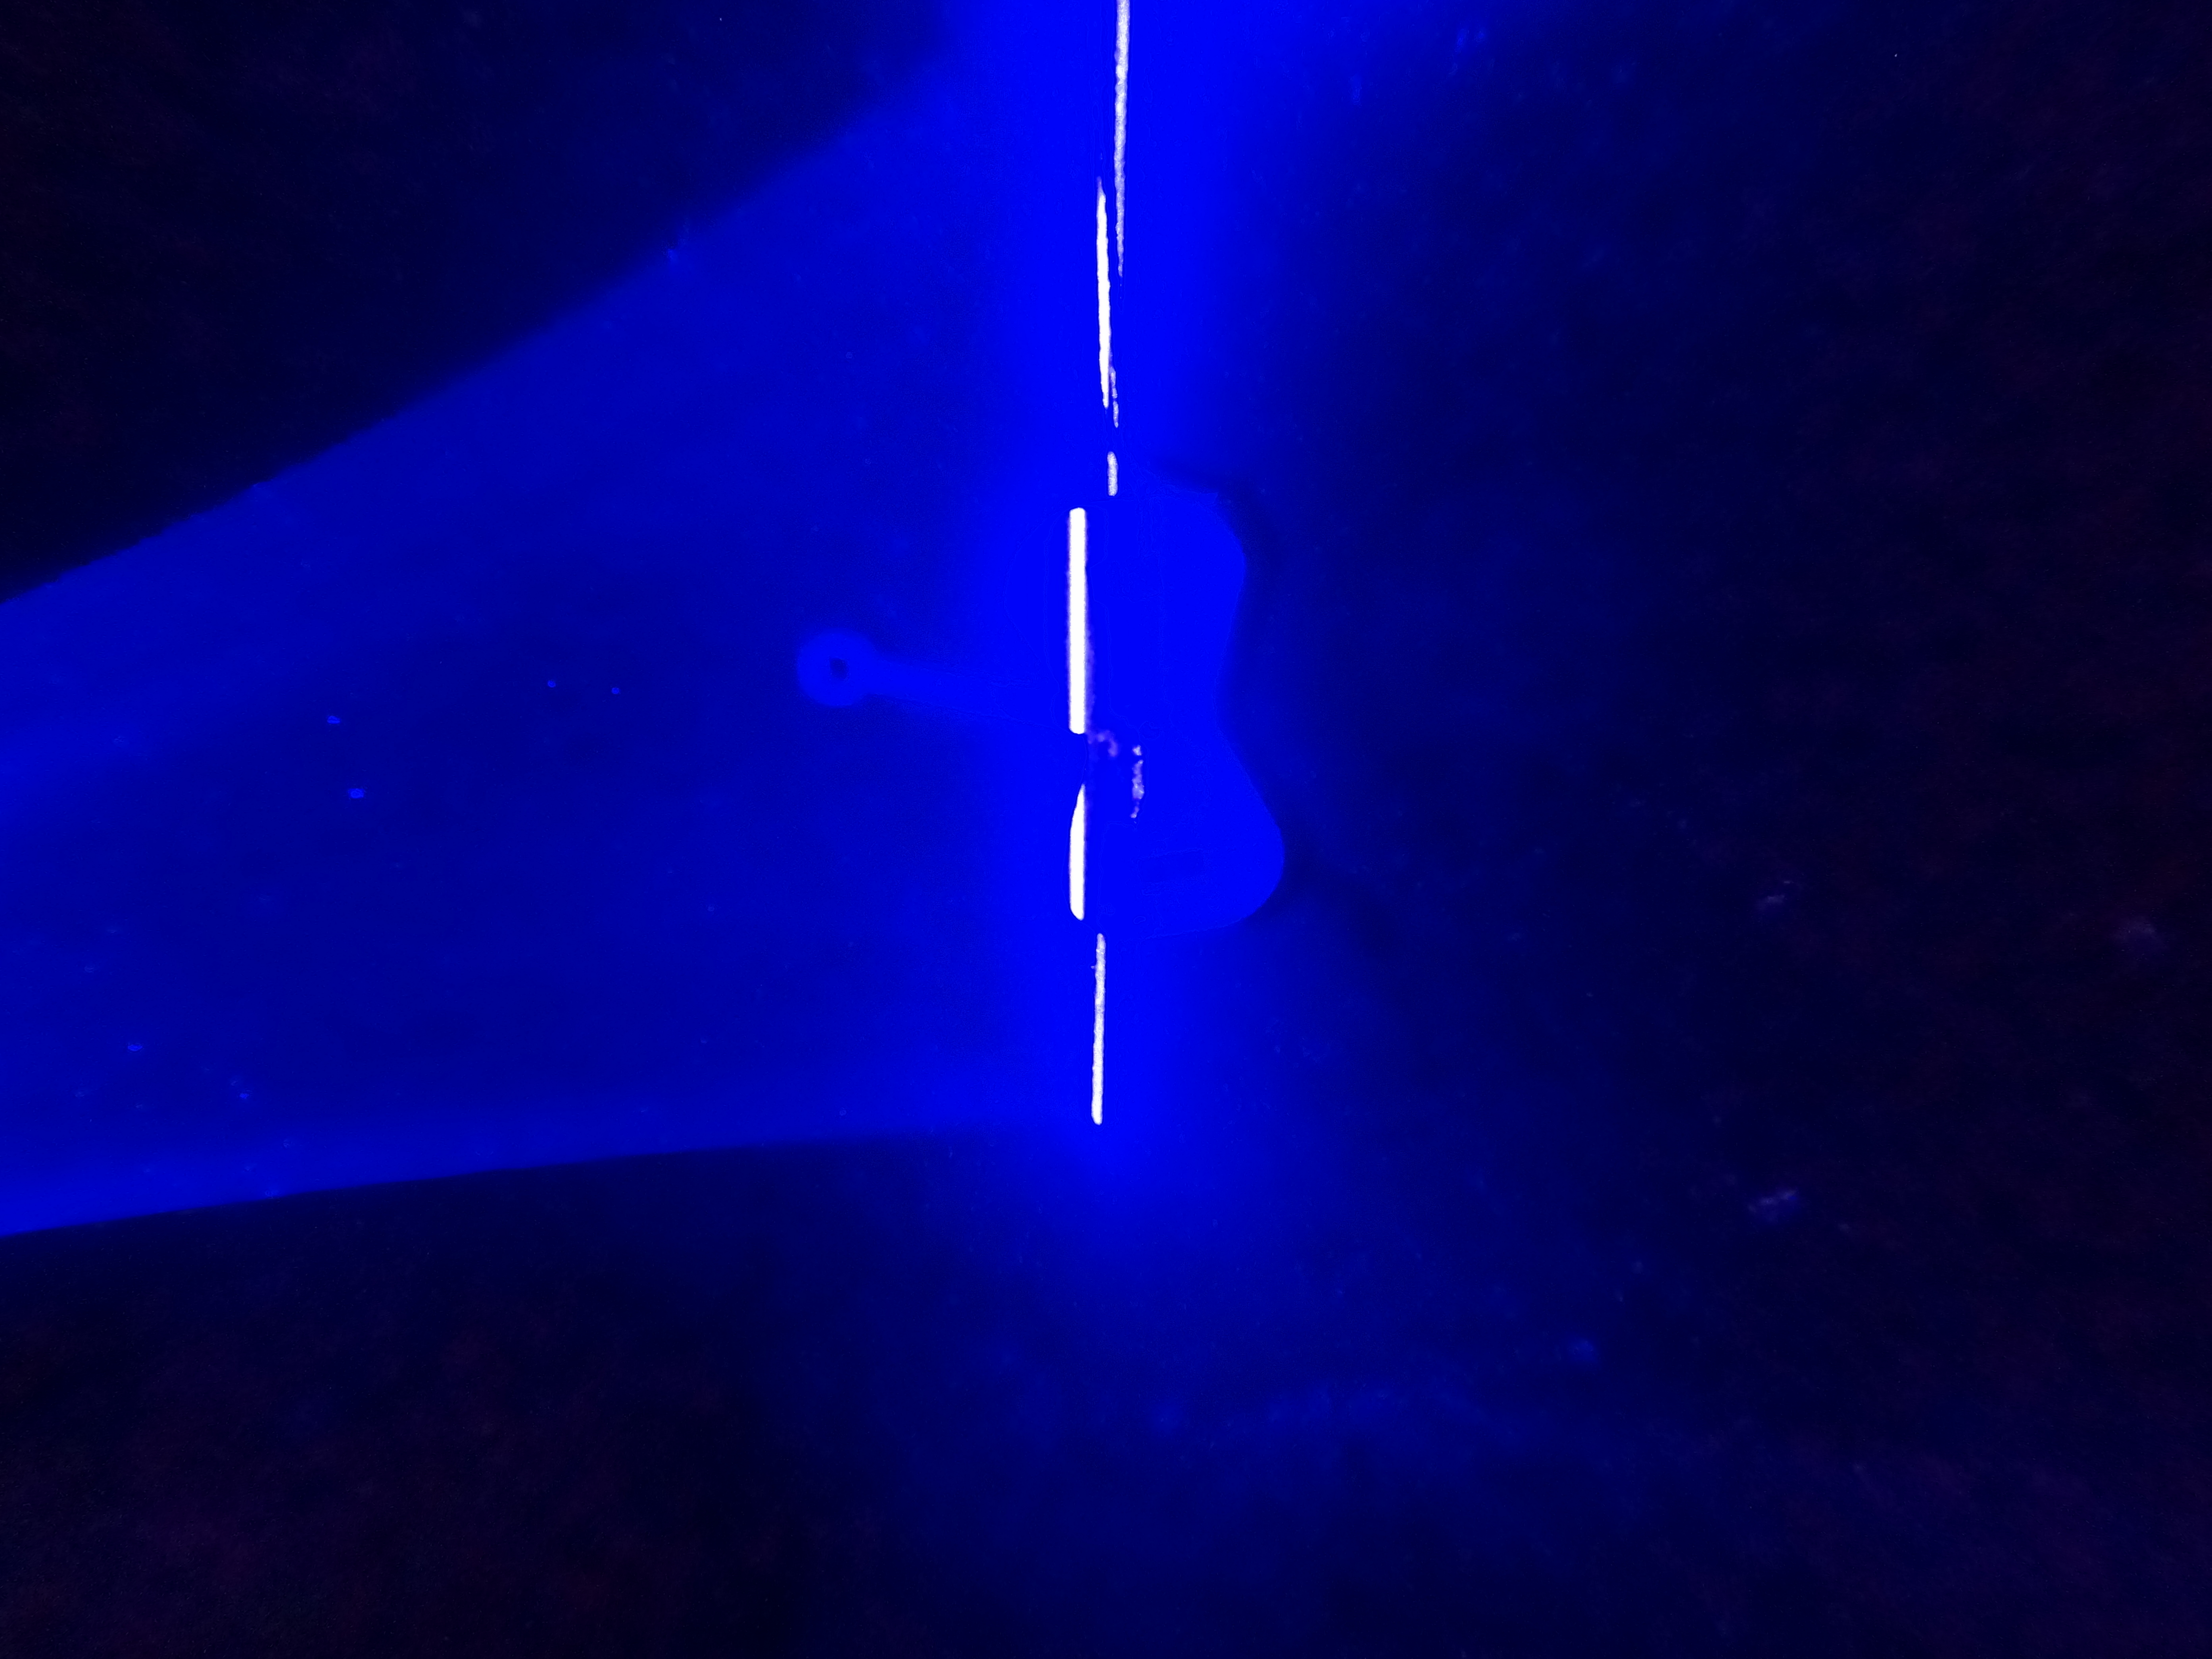

Supplement: Supplementary file 2248 [file G0016557.pdf › Level_1_2/G0016557.pdf]

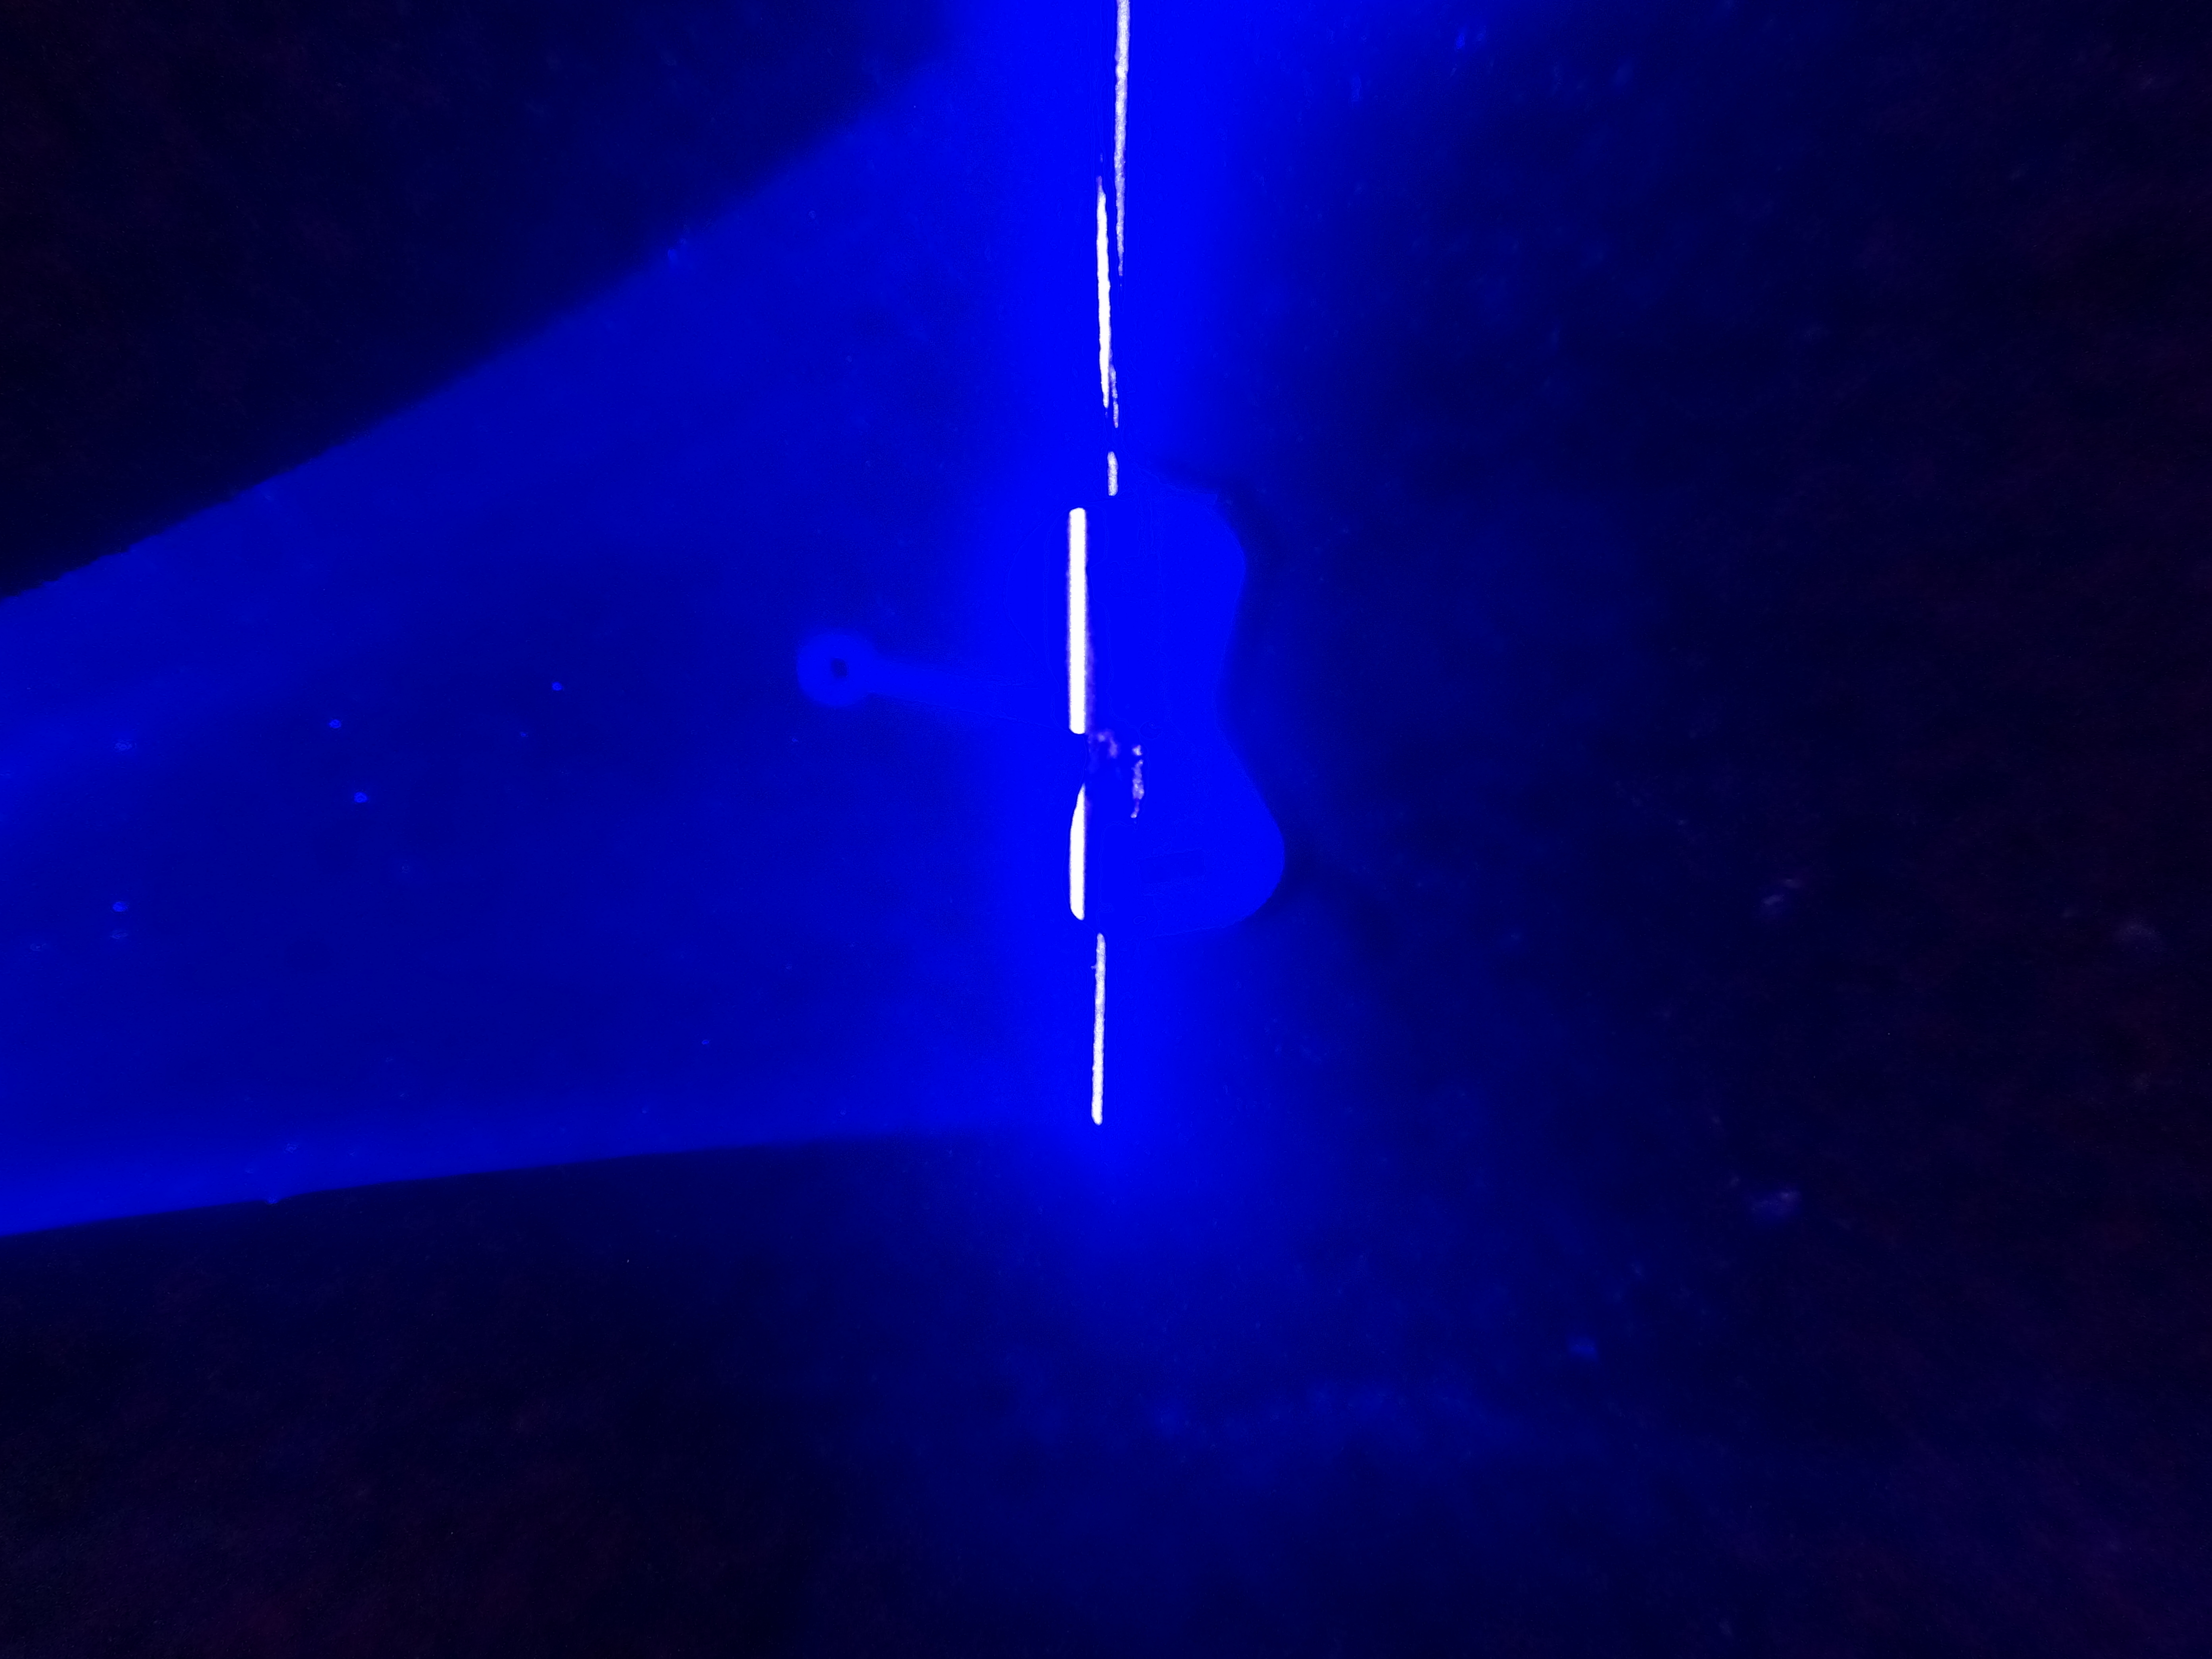

Supplement: Supplementary file 2249 [file G0016558.pdf › Level_1_2/G0016558.pdf]

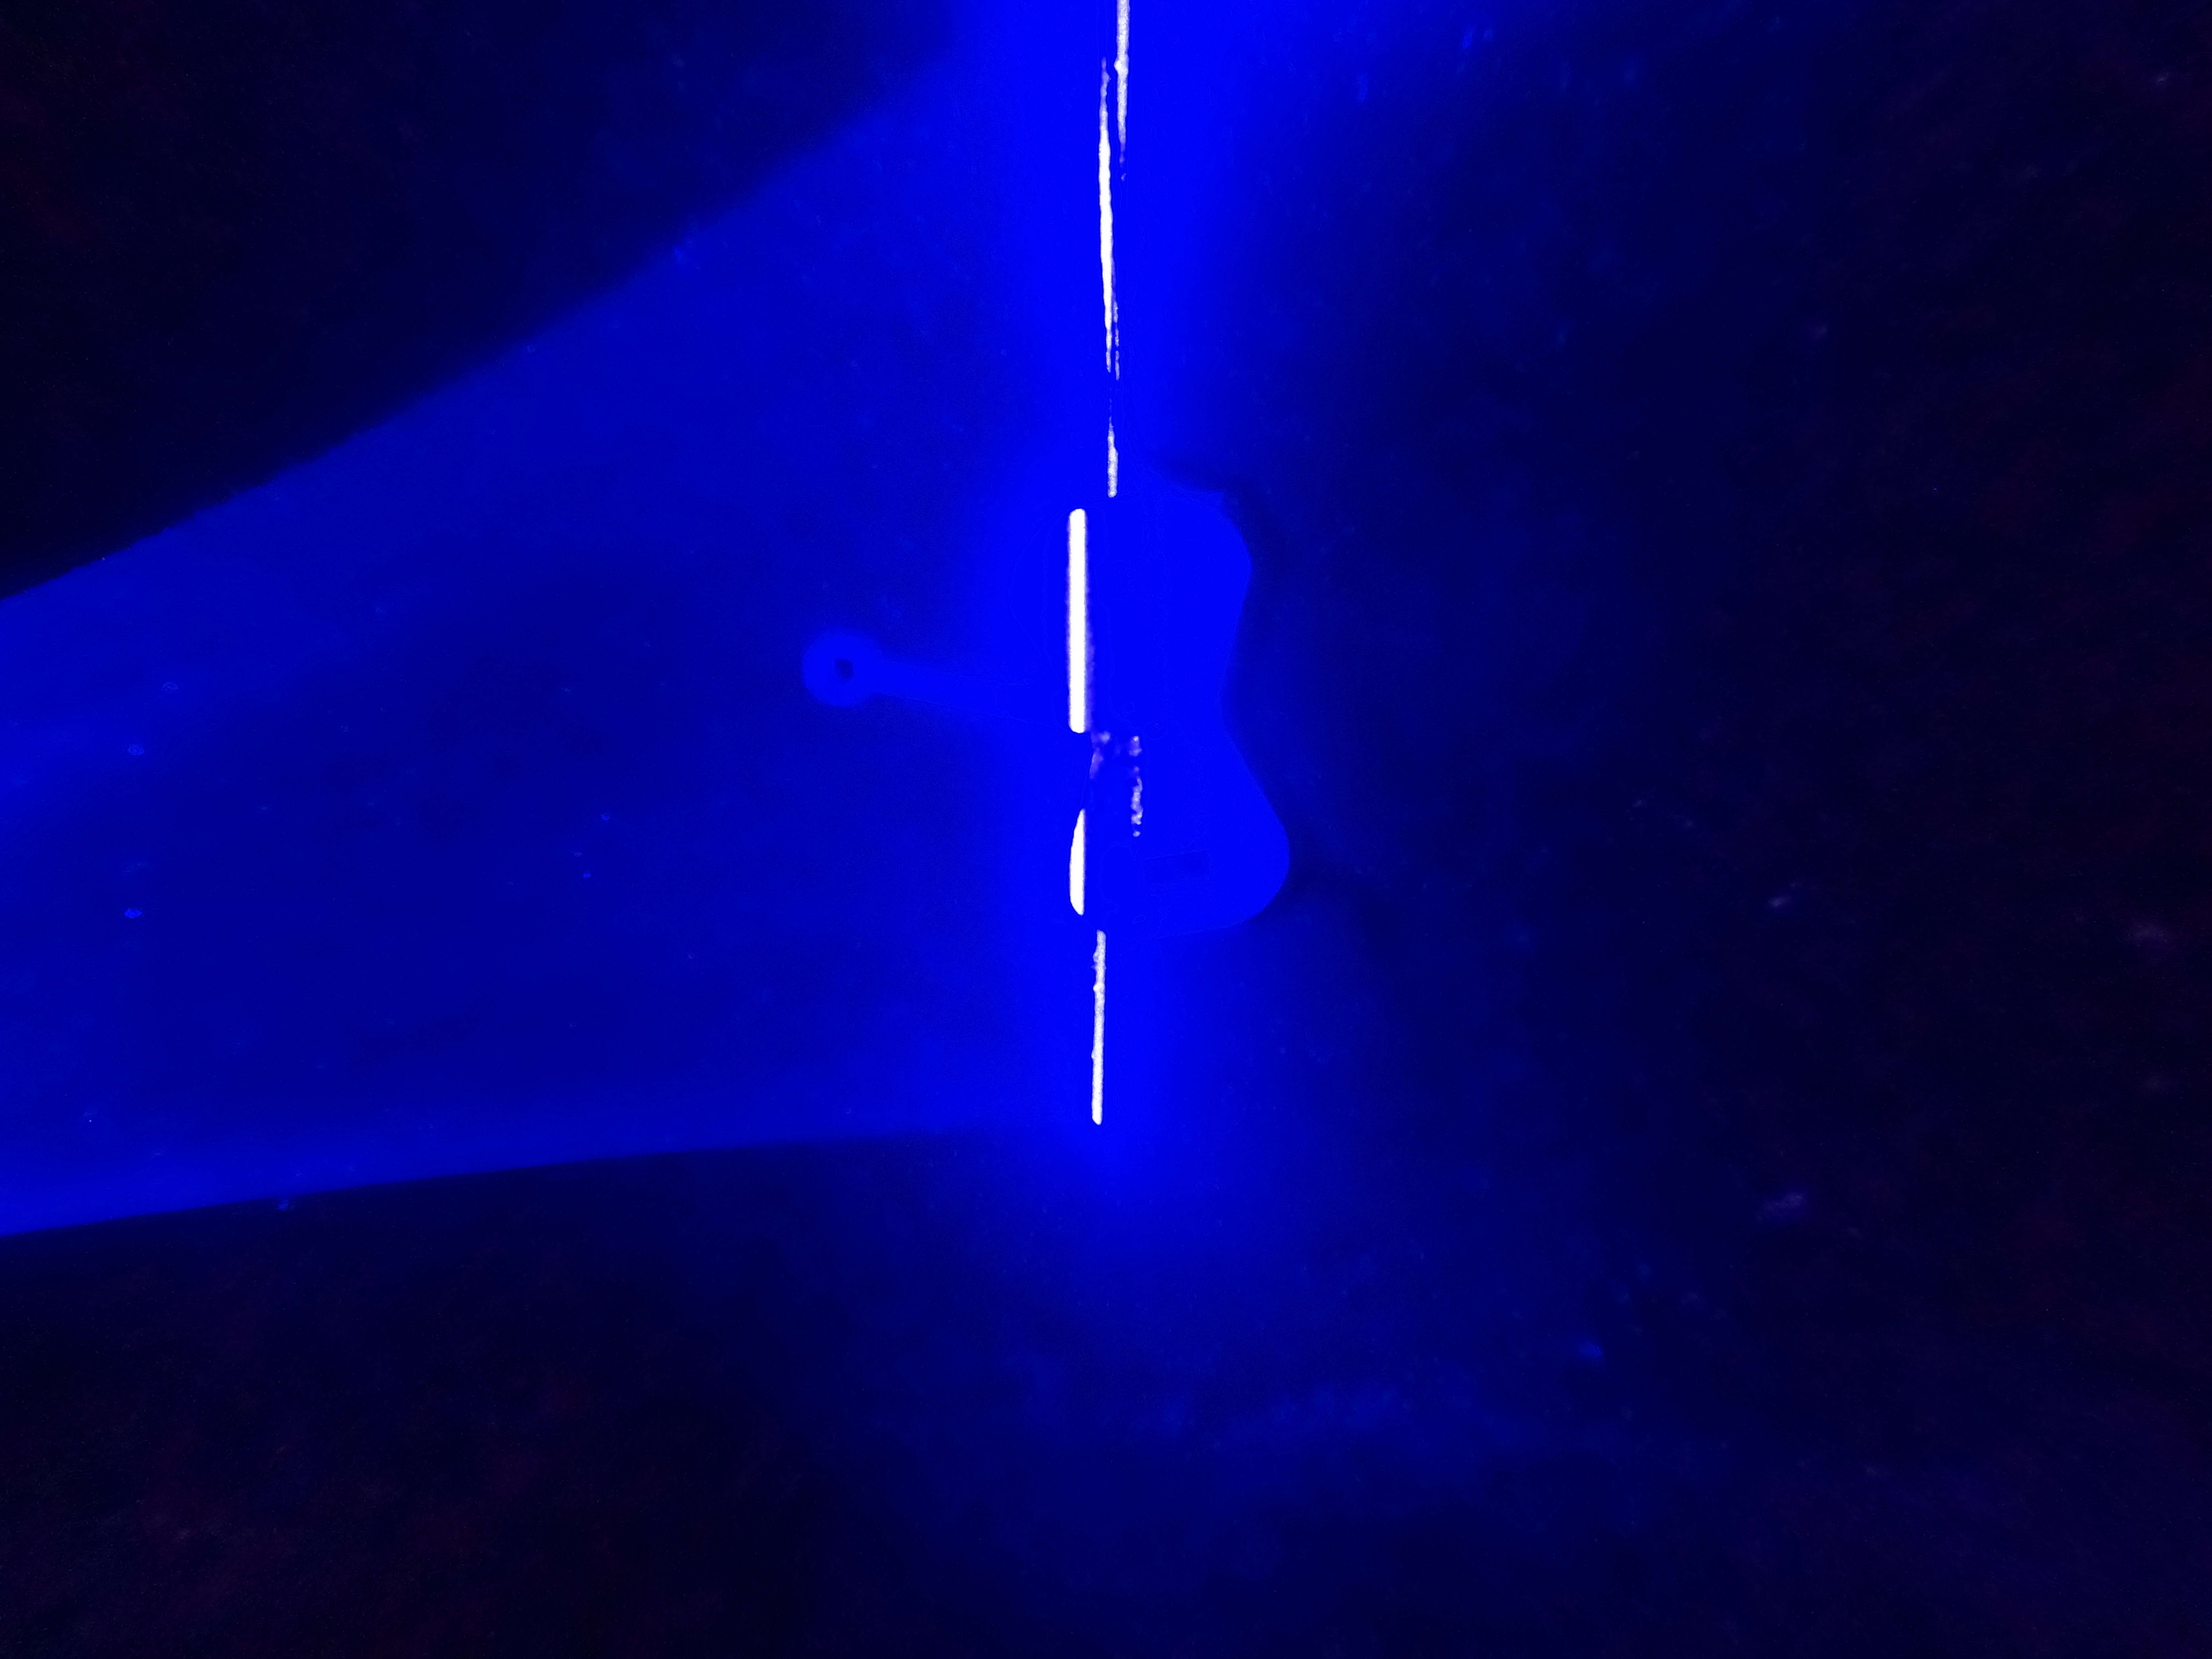

Supplement: Supplementary file 2250 [file G0016559.pdf › Level_1_2/G0016559.pdf]

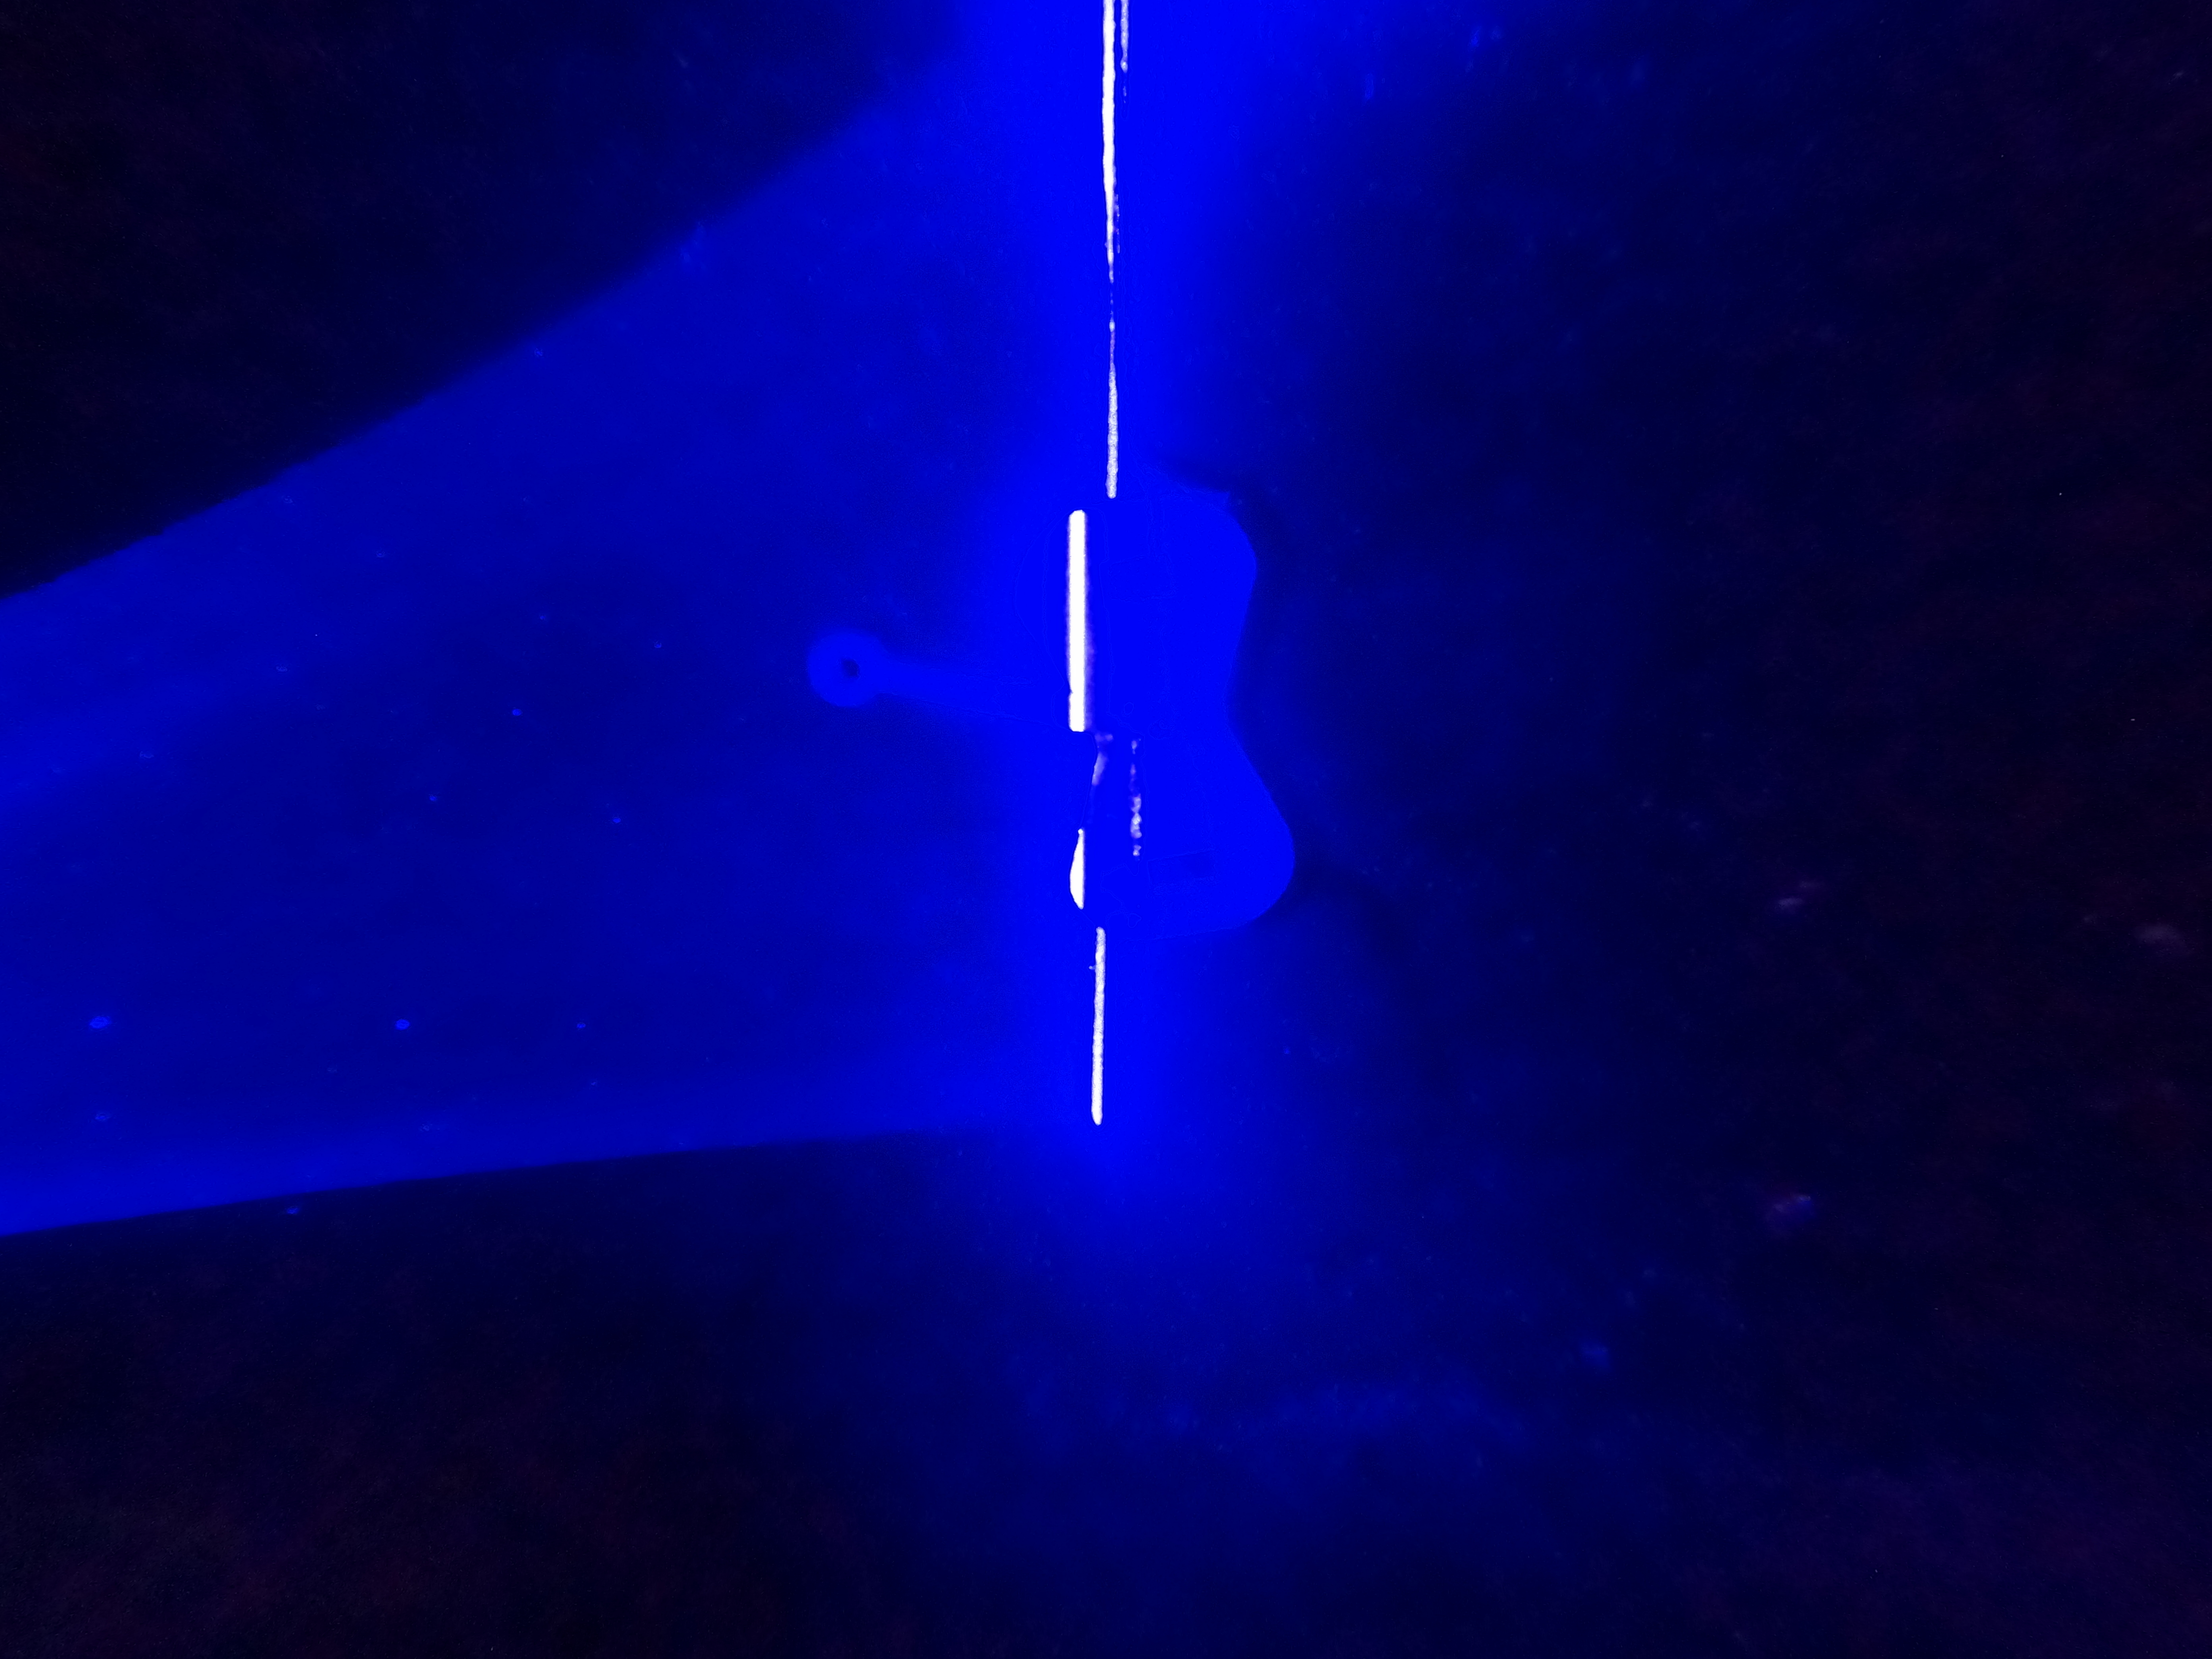

Supplement: Supplementary file 2251 [file G0016560.pdf › Level_1_2/G0016560.pdf]

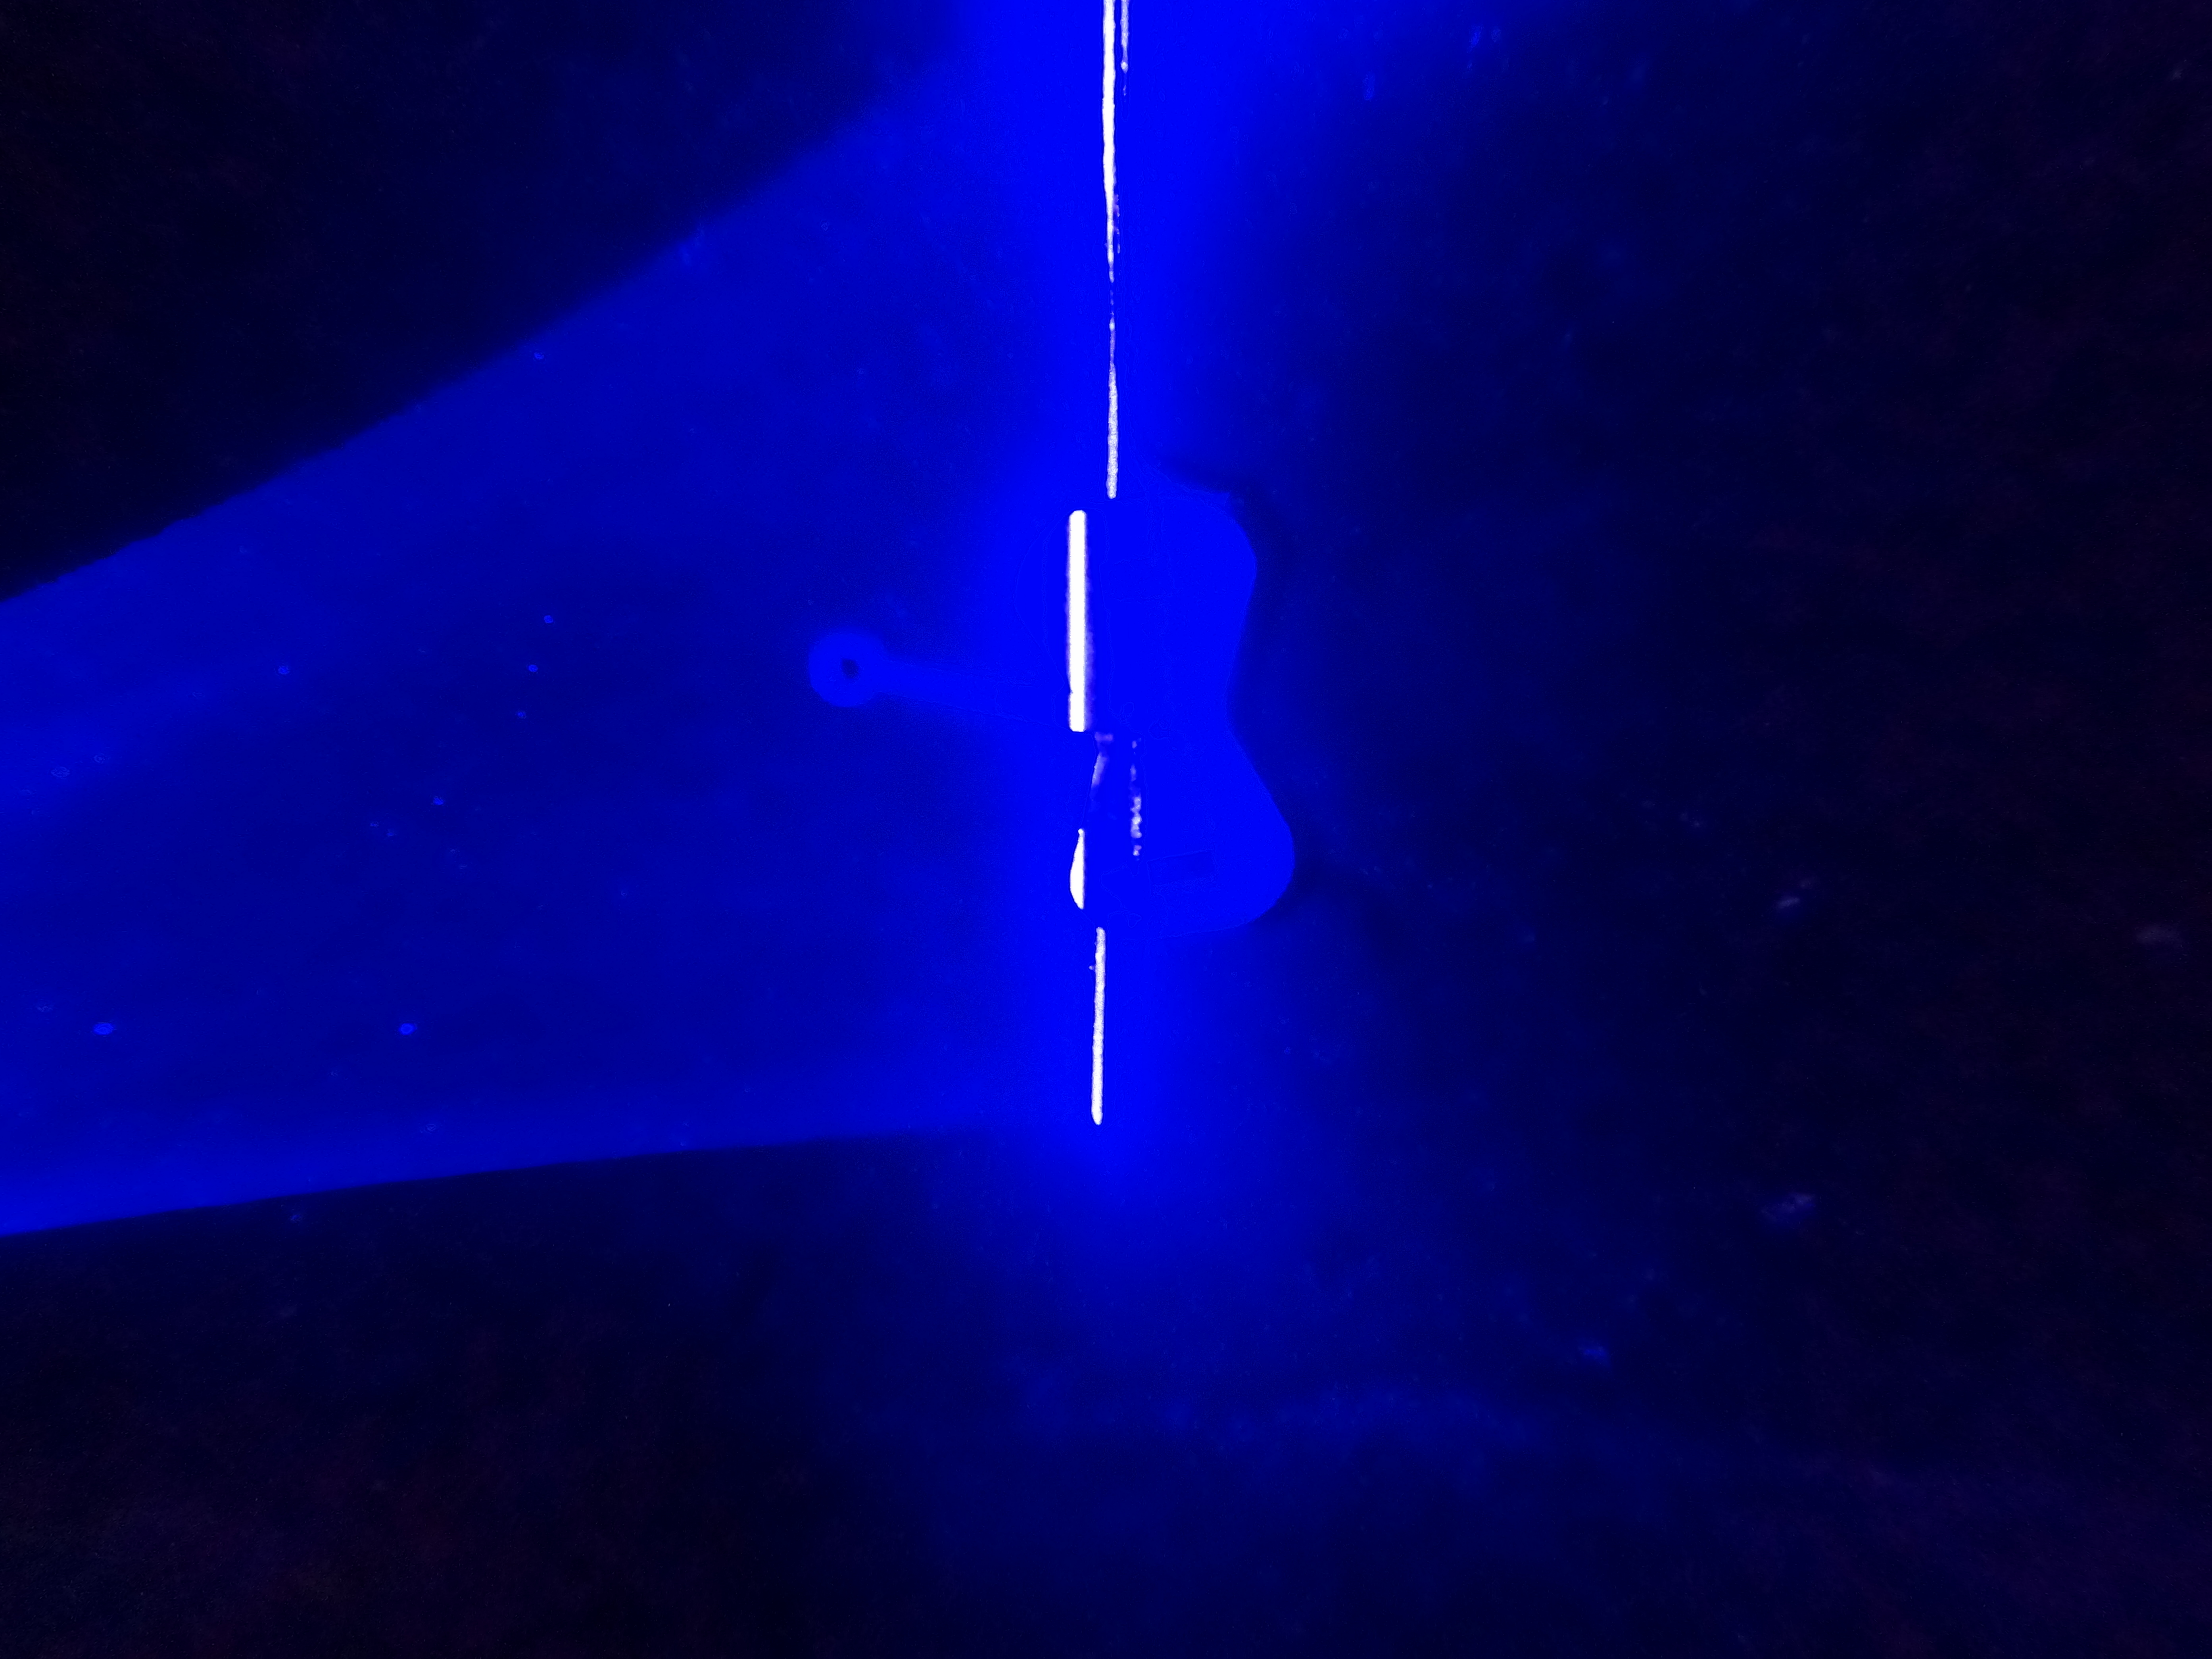

Supplement: Supplementary file 2252 [file G0016561.pdf › Level_1_2/G0016561.pdf]

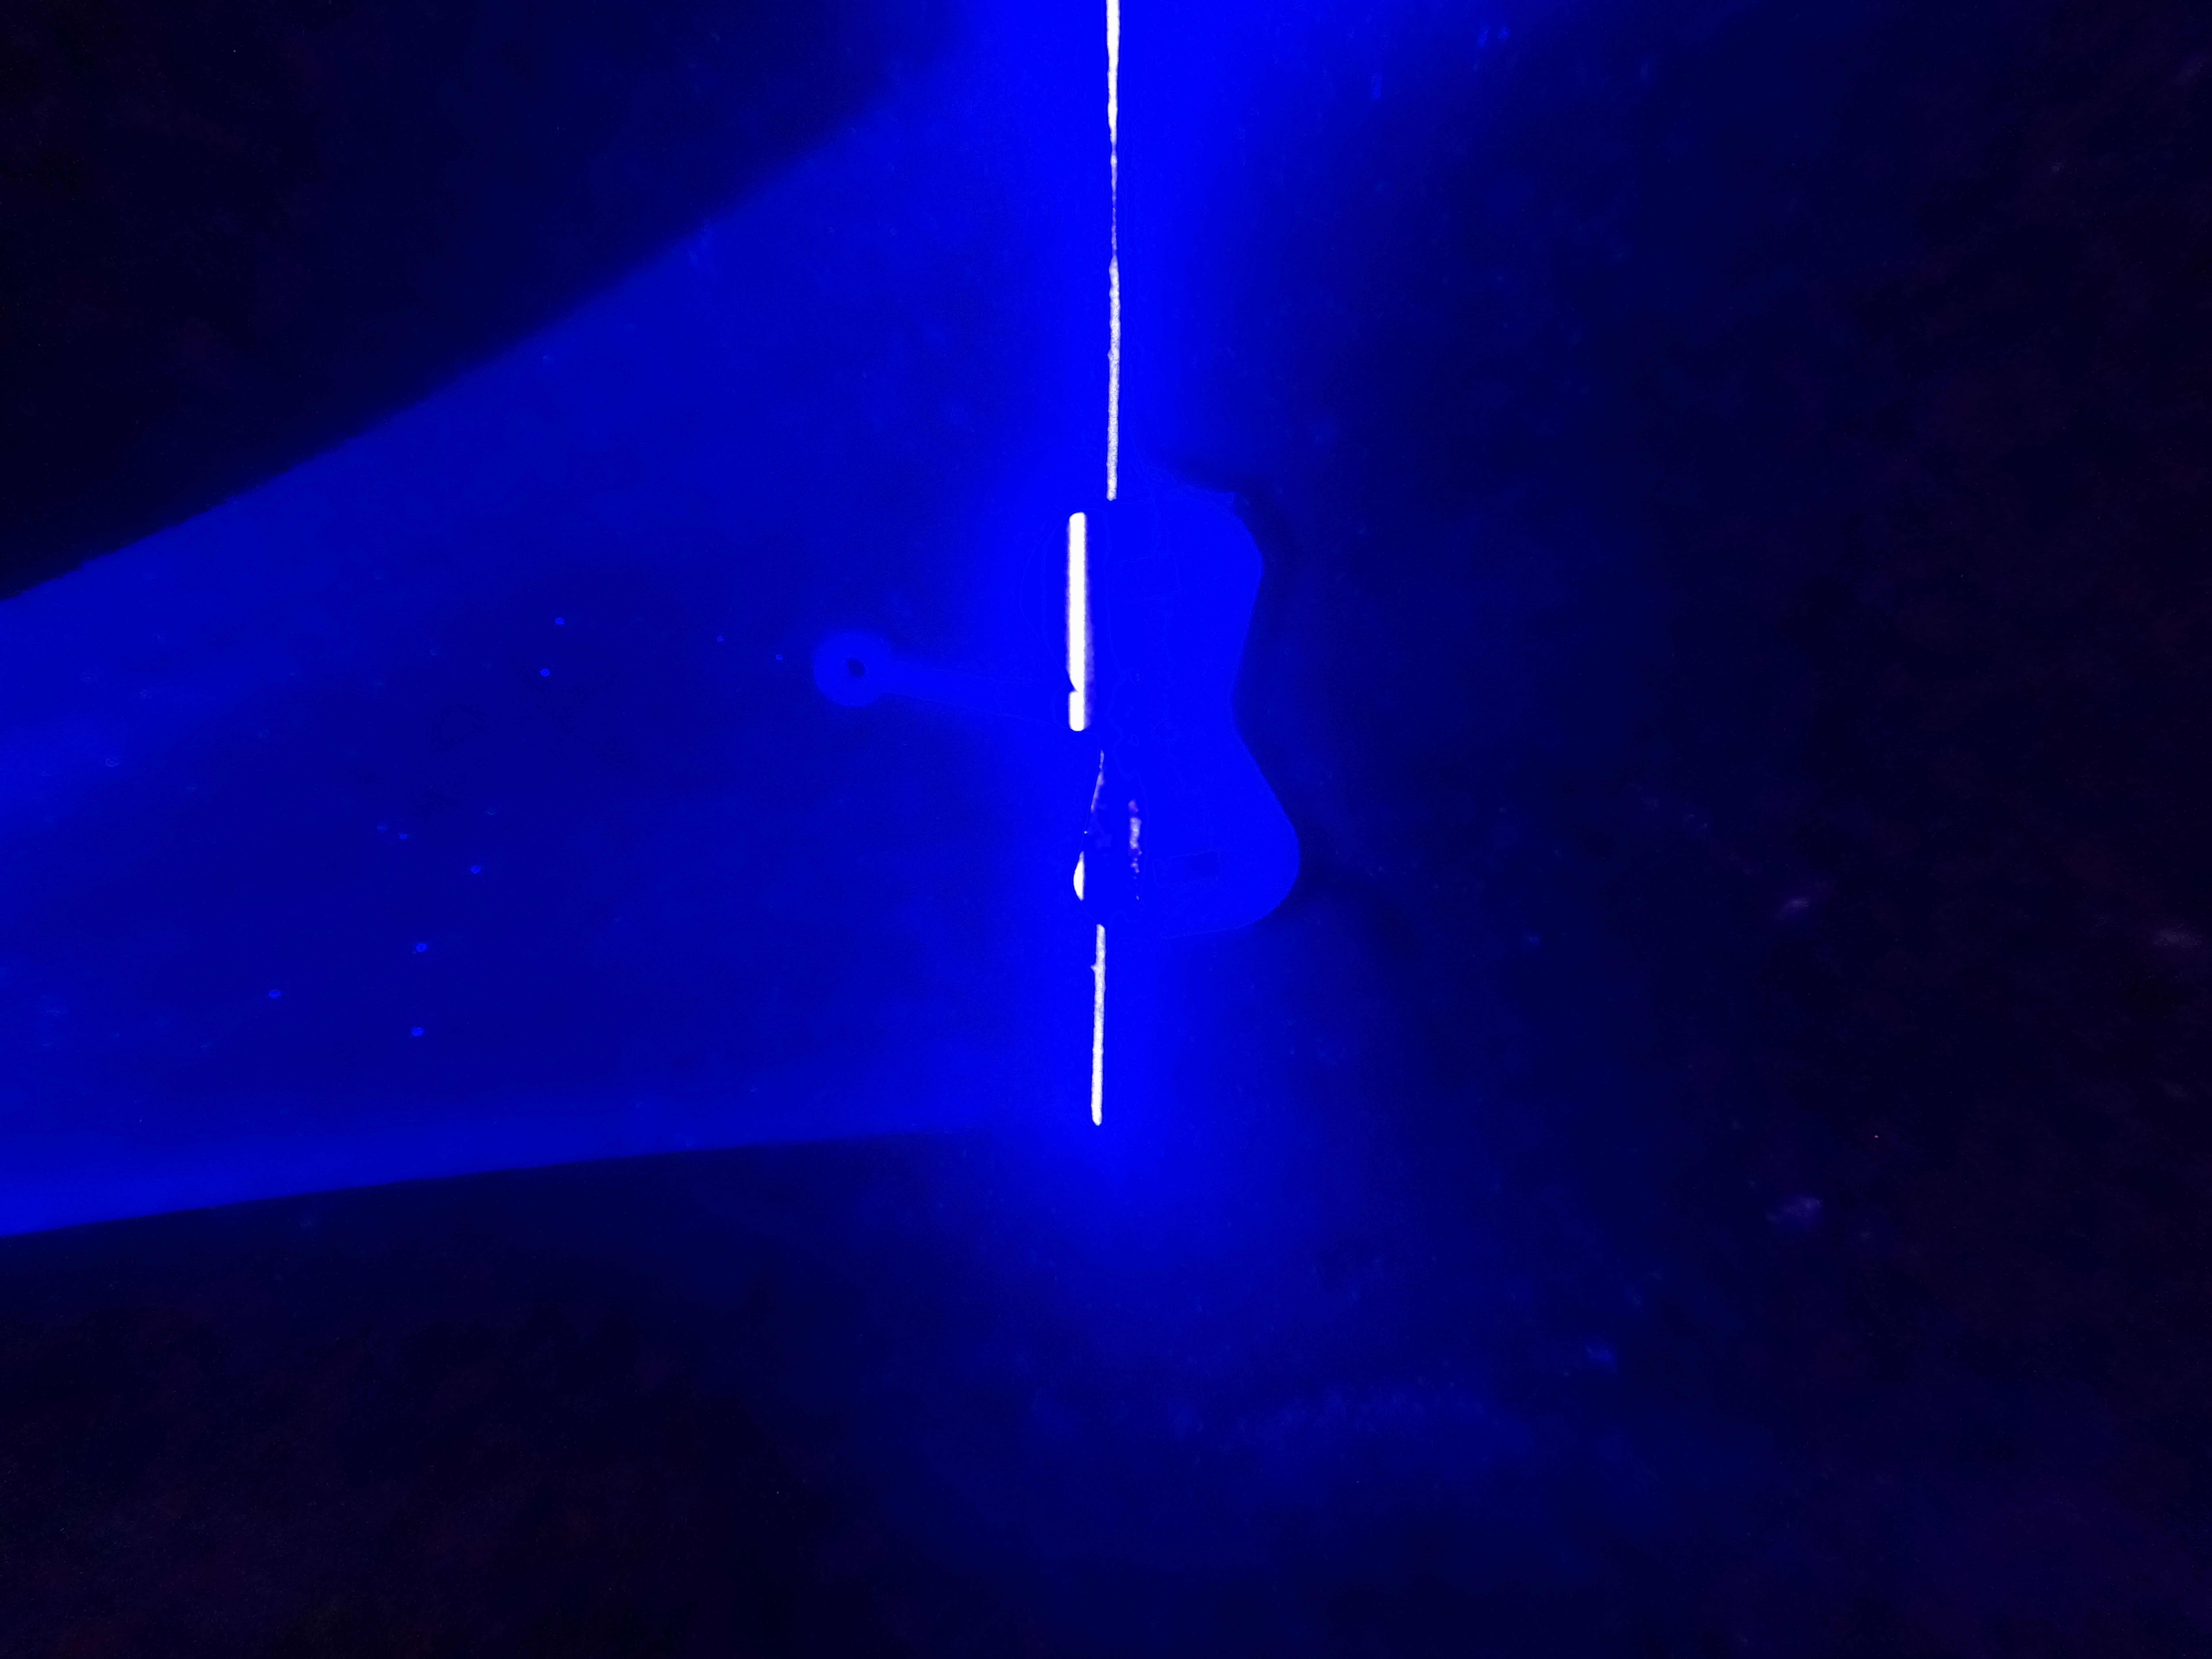

Supplement: Supplementary file 2253 [file G0016562.pdf › Level_1_2/G0016562.pdf]

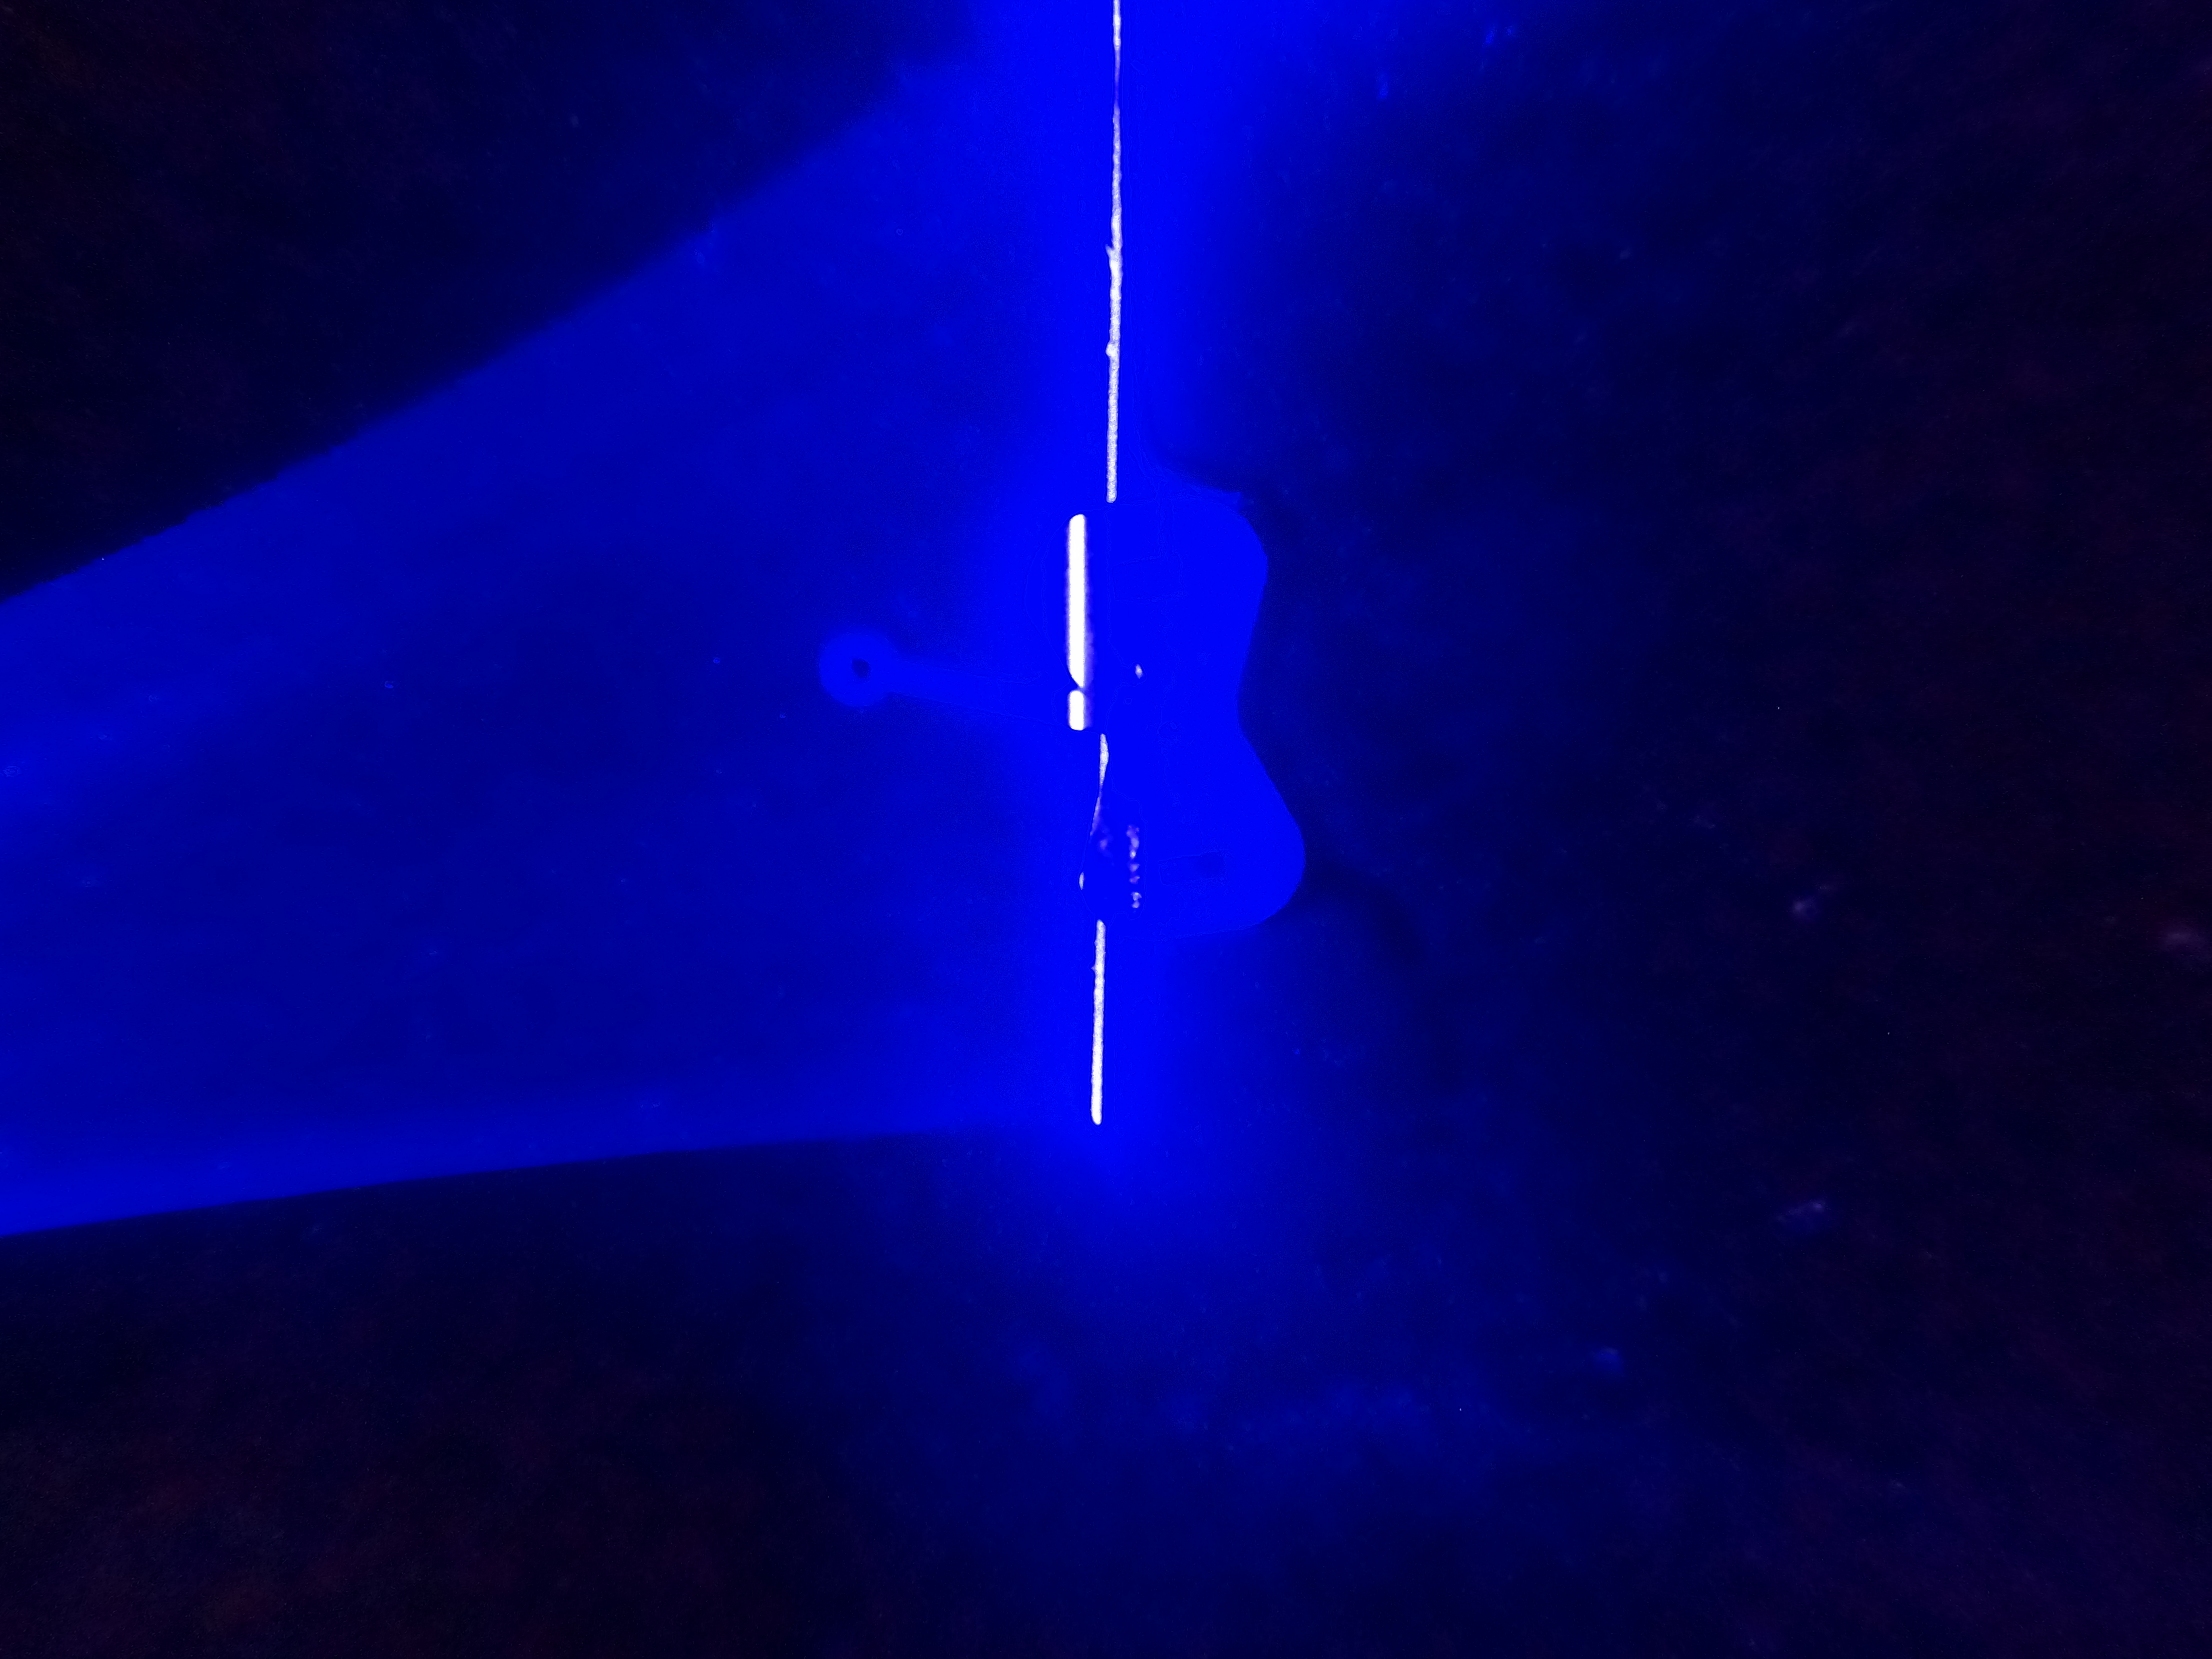

Supplement: Supplementary file 2254 [file G0016563.pdf › Level_1_2/G0016563.pdf]

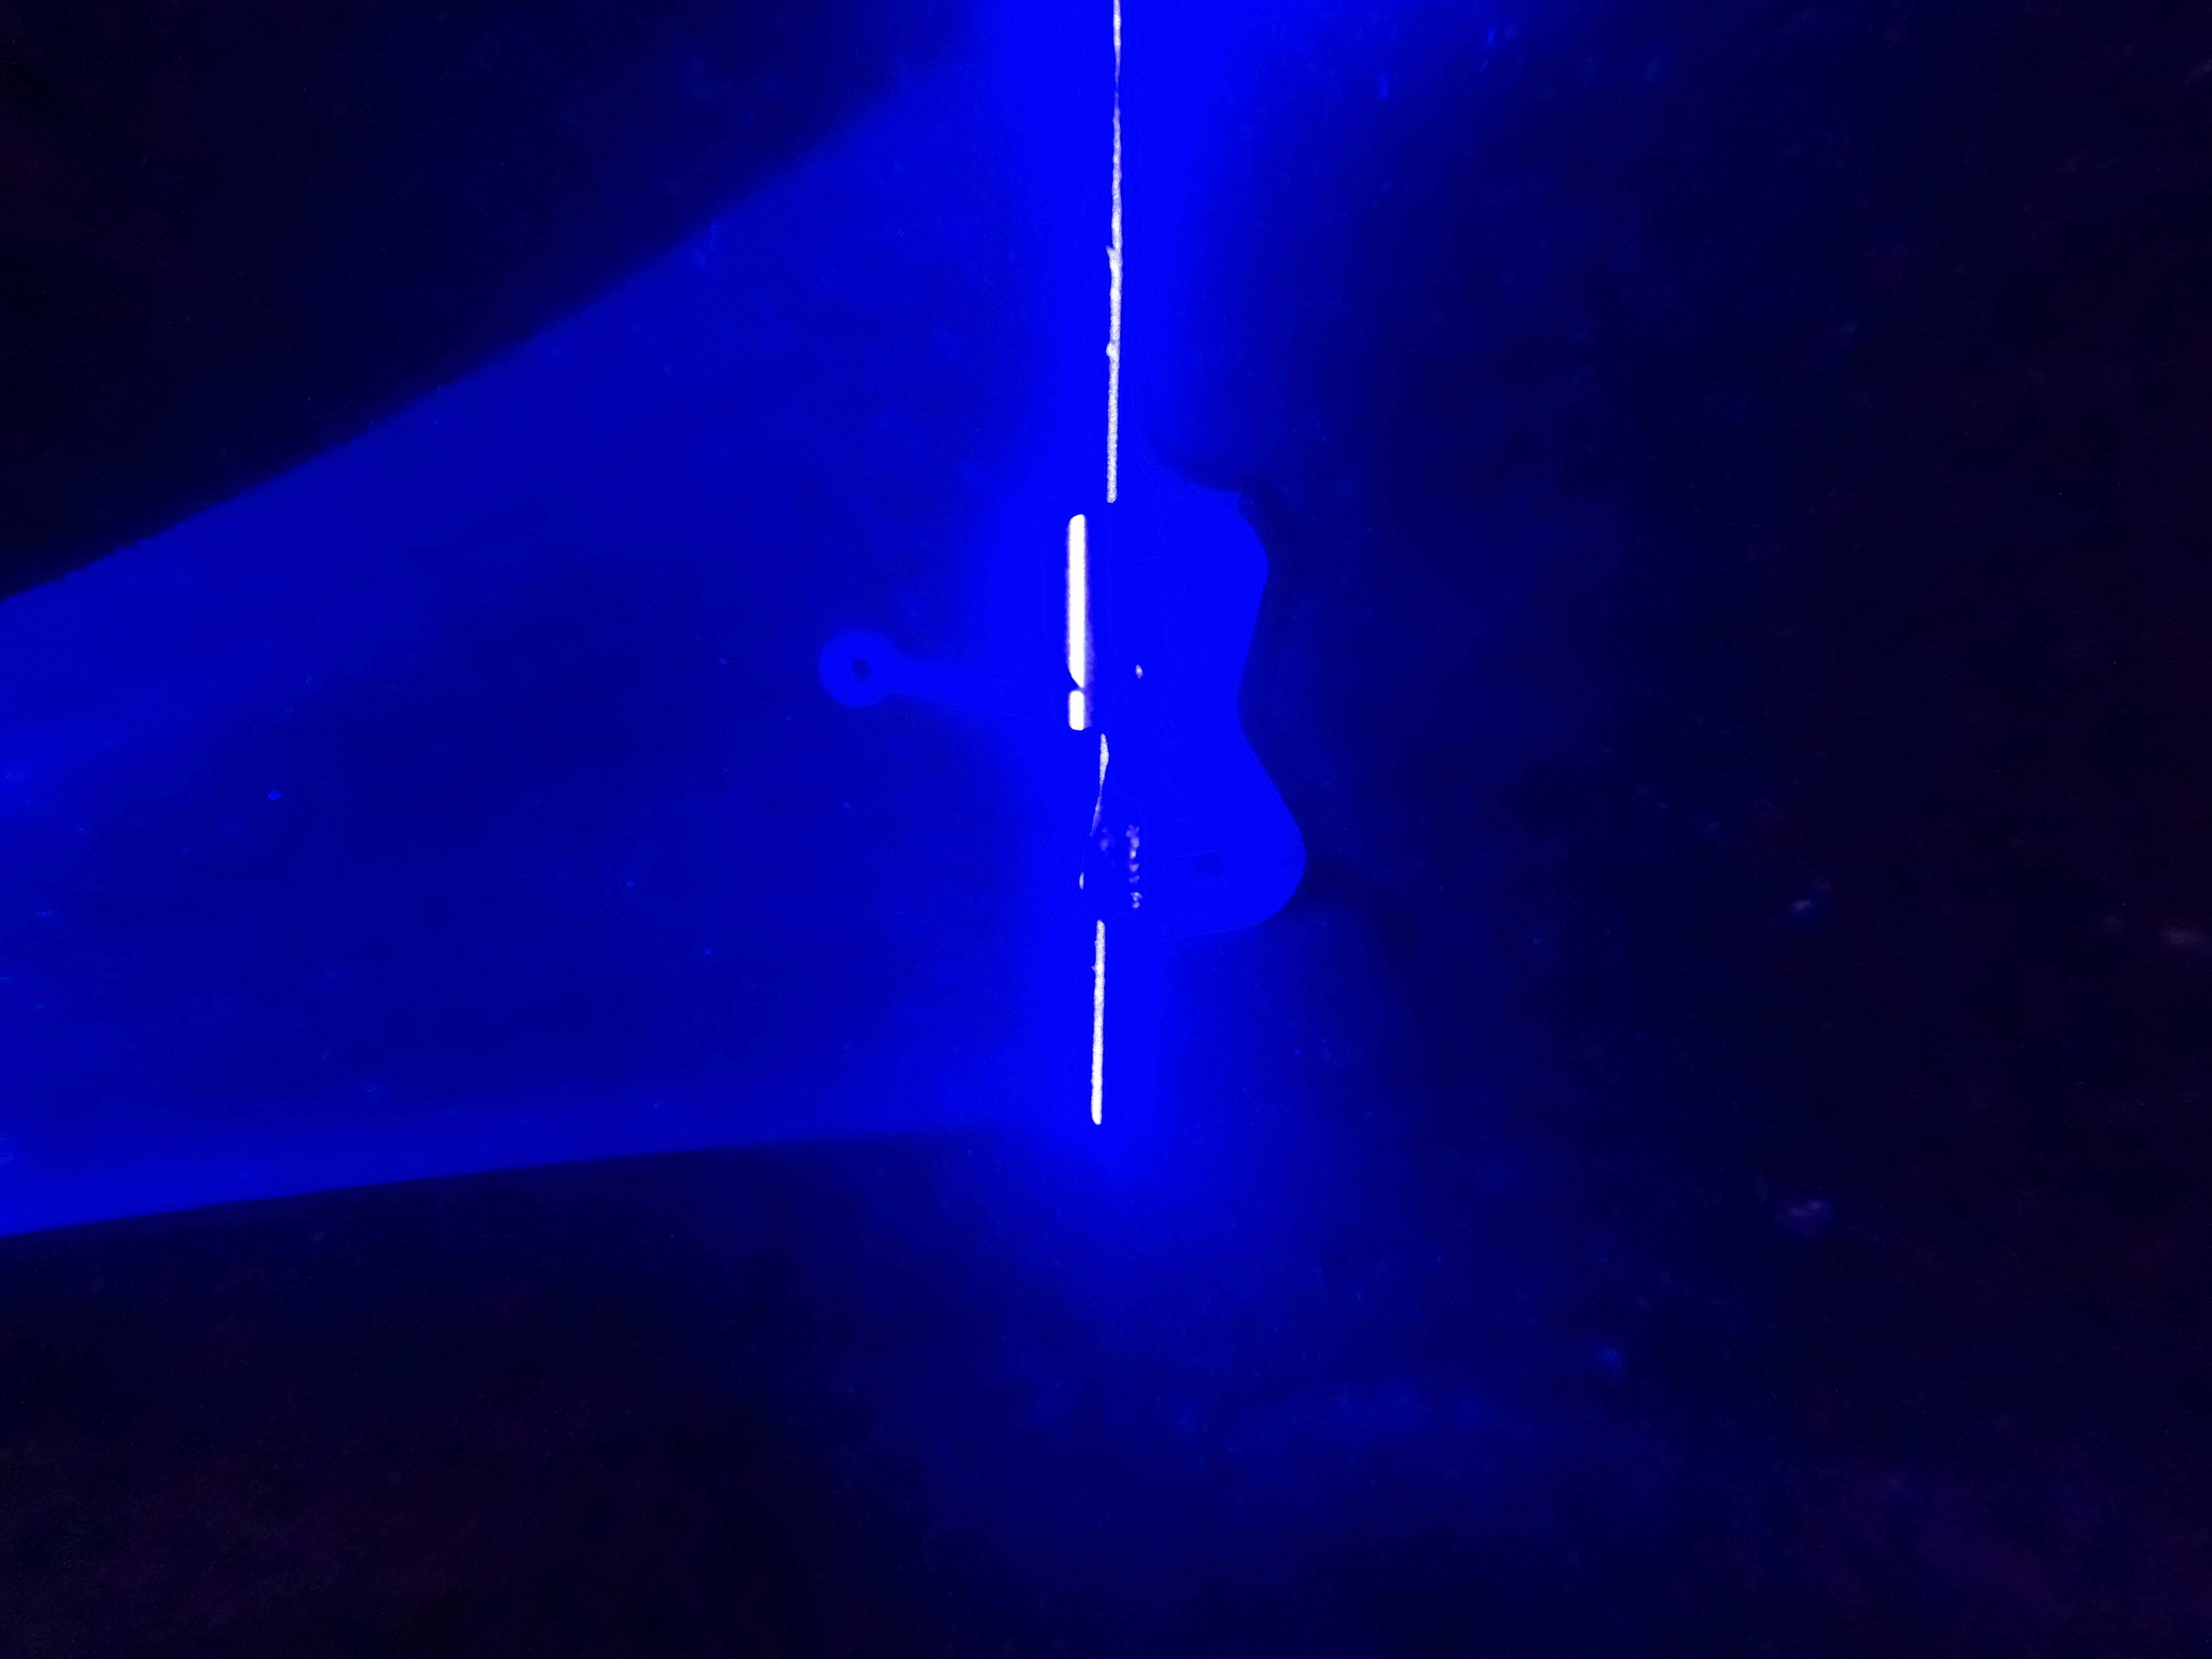

Supplement: Supplementary file 2255 [file G0016564.pdf › Level_1_2/G0016564.pdf]

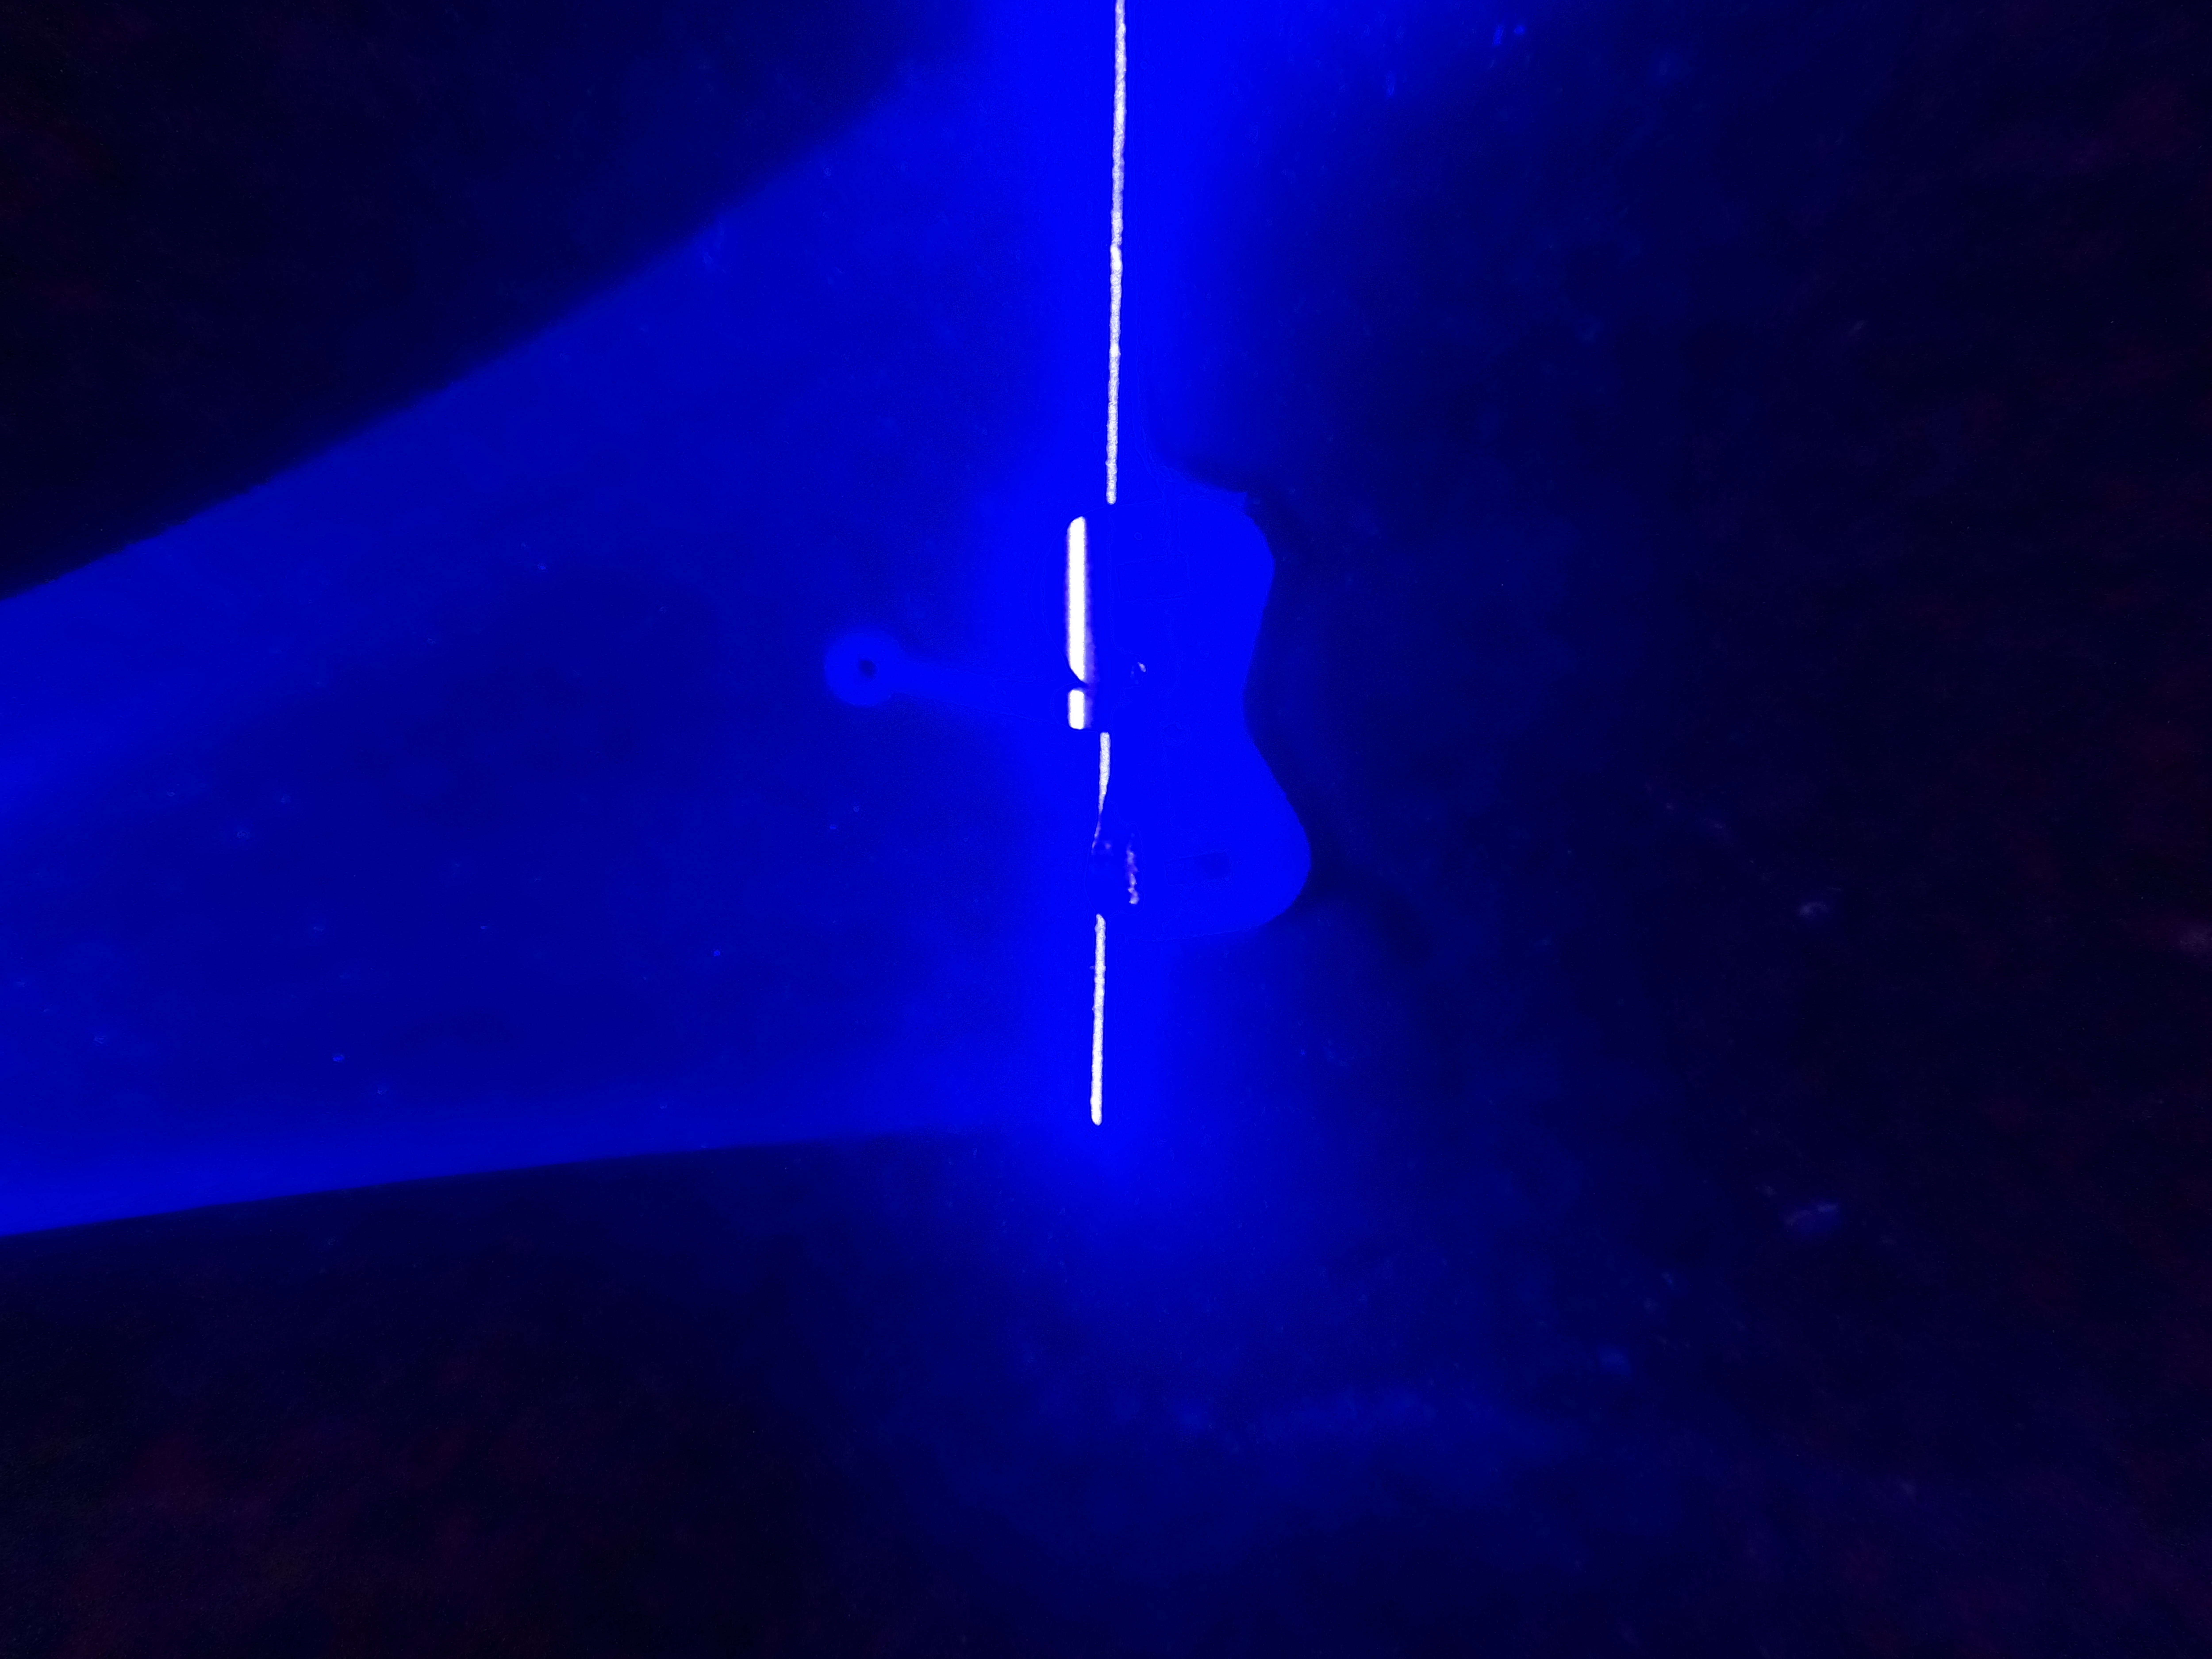

Supplement: Supplementary file 2256 [file G0016565.pdf › Level_1_2/G0016565.pdf]

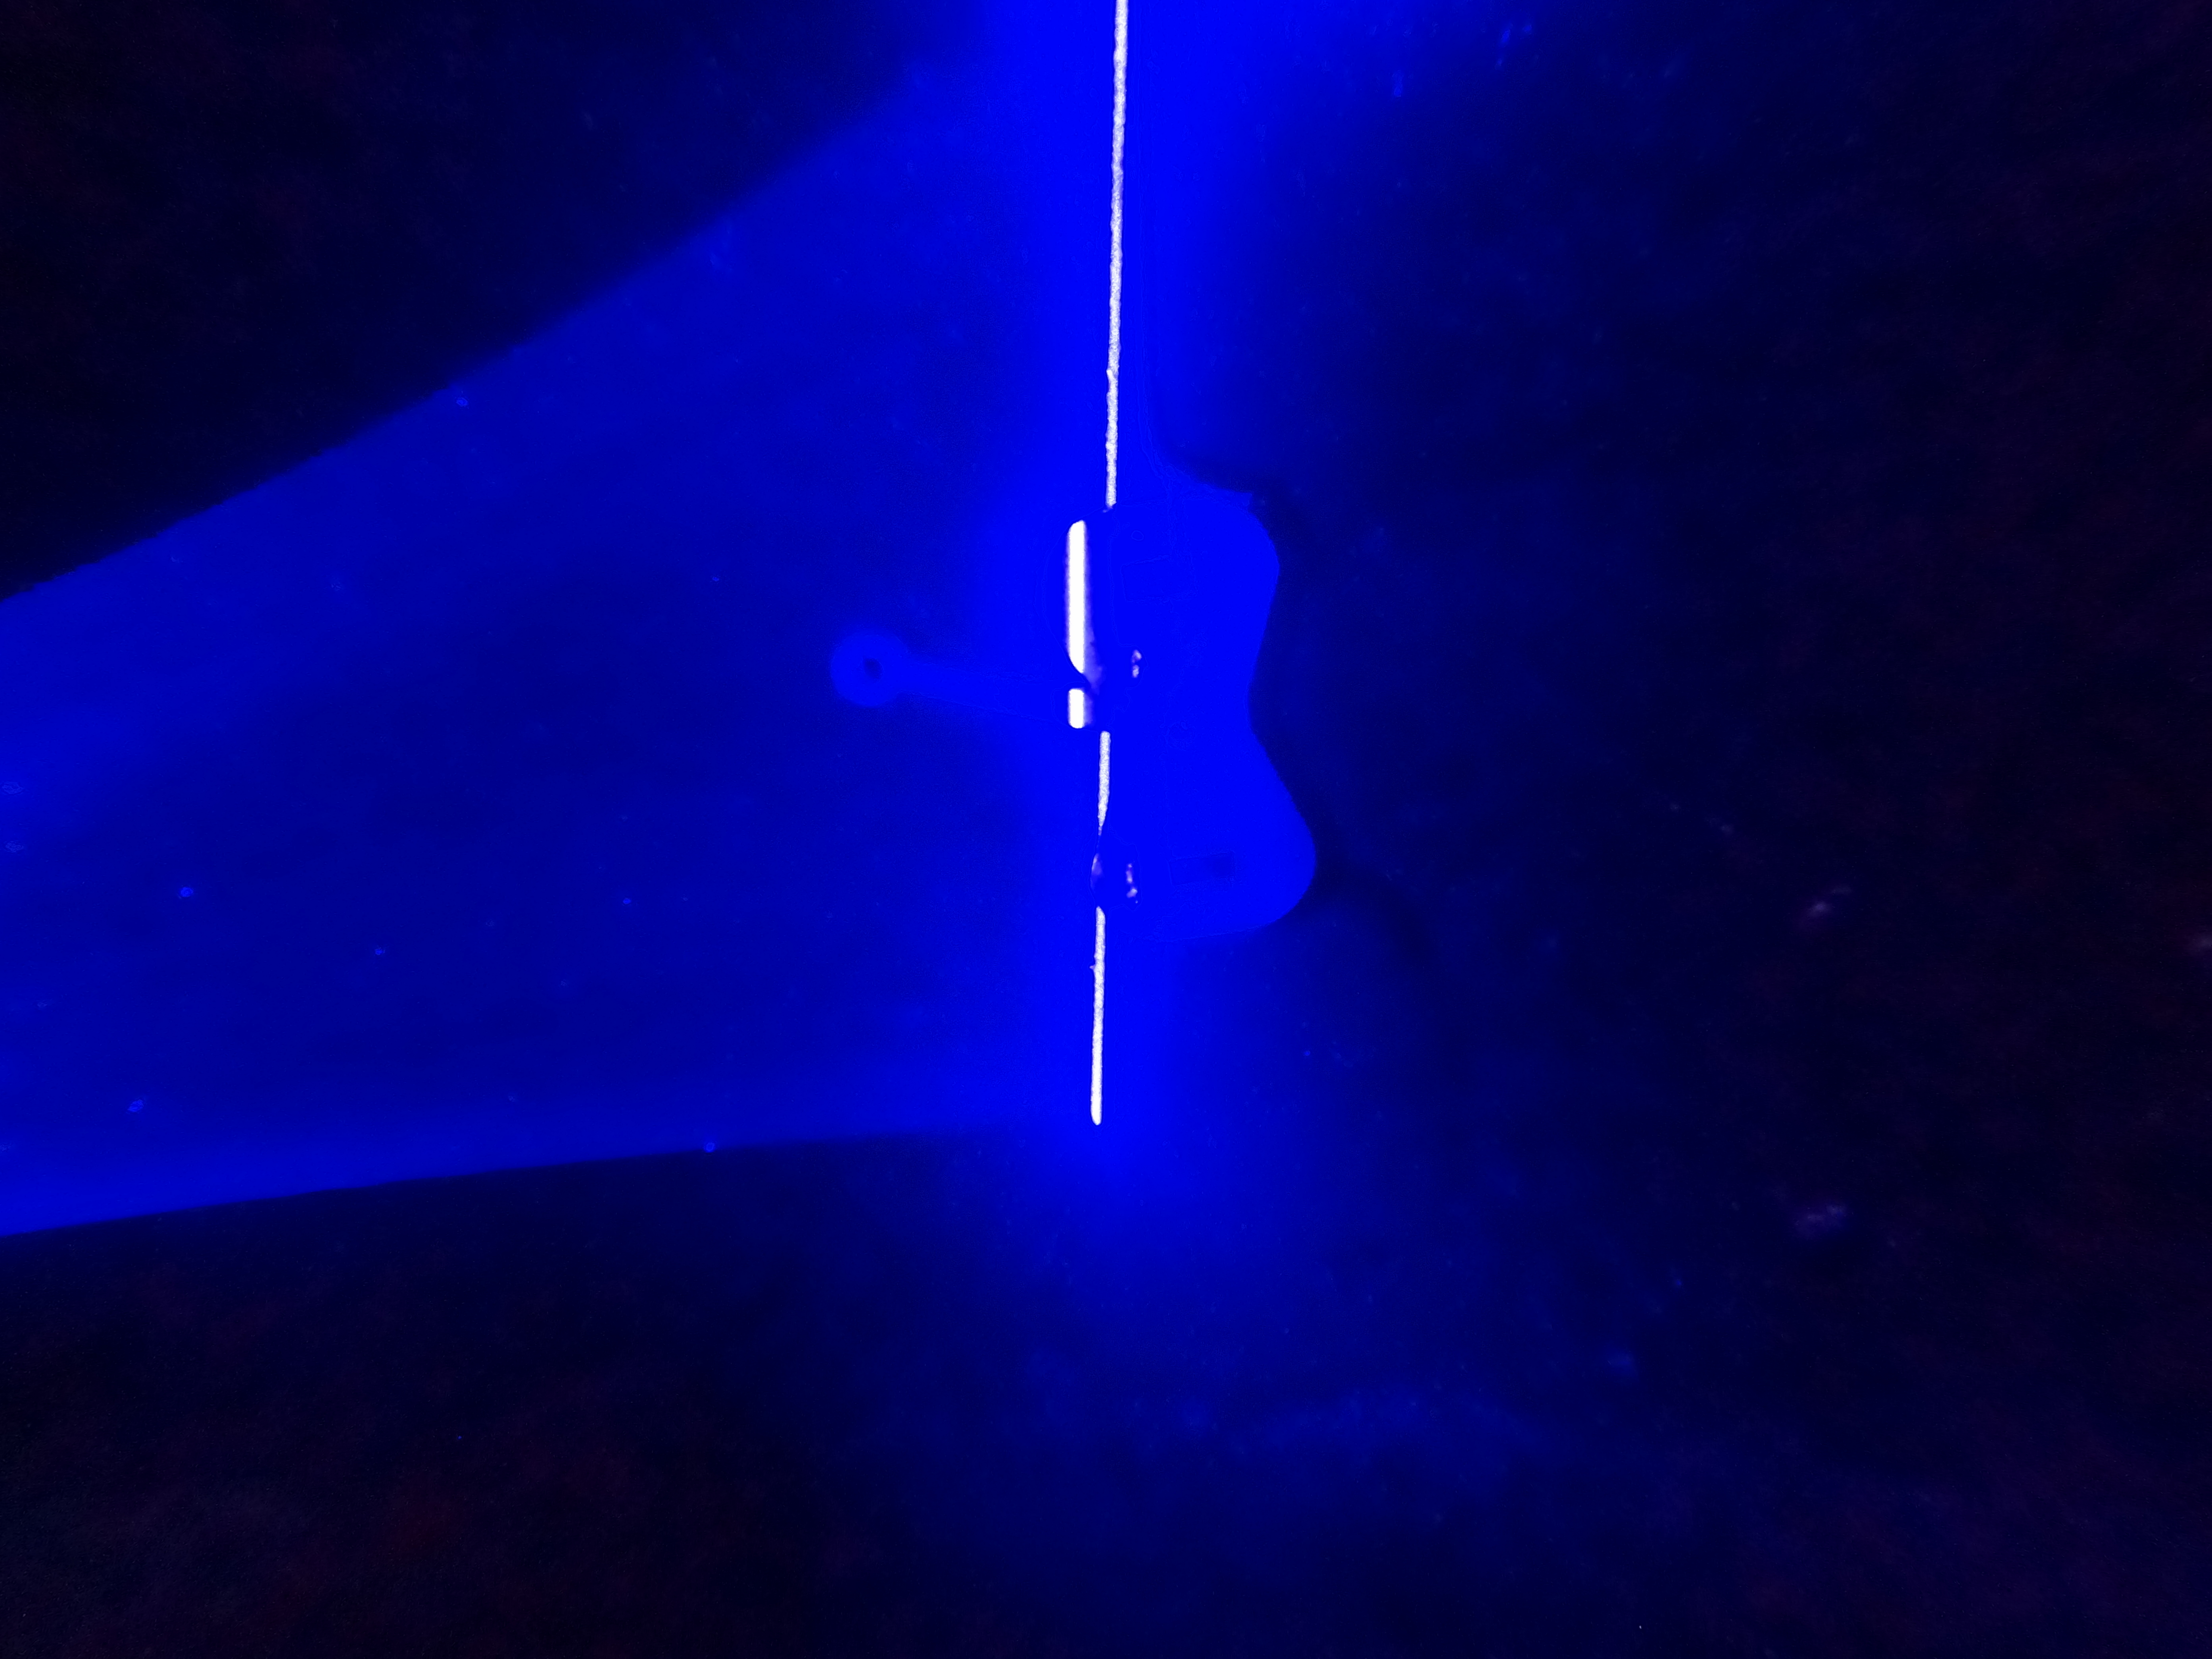

Supplement: Supplementary file 2257 [file G0016566.pdf › Level_1_2/G0016566.pdf]

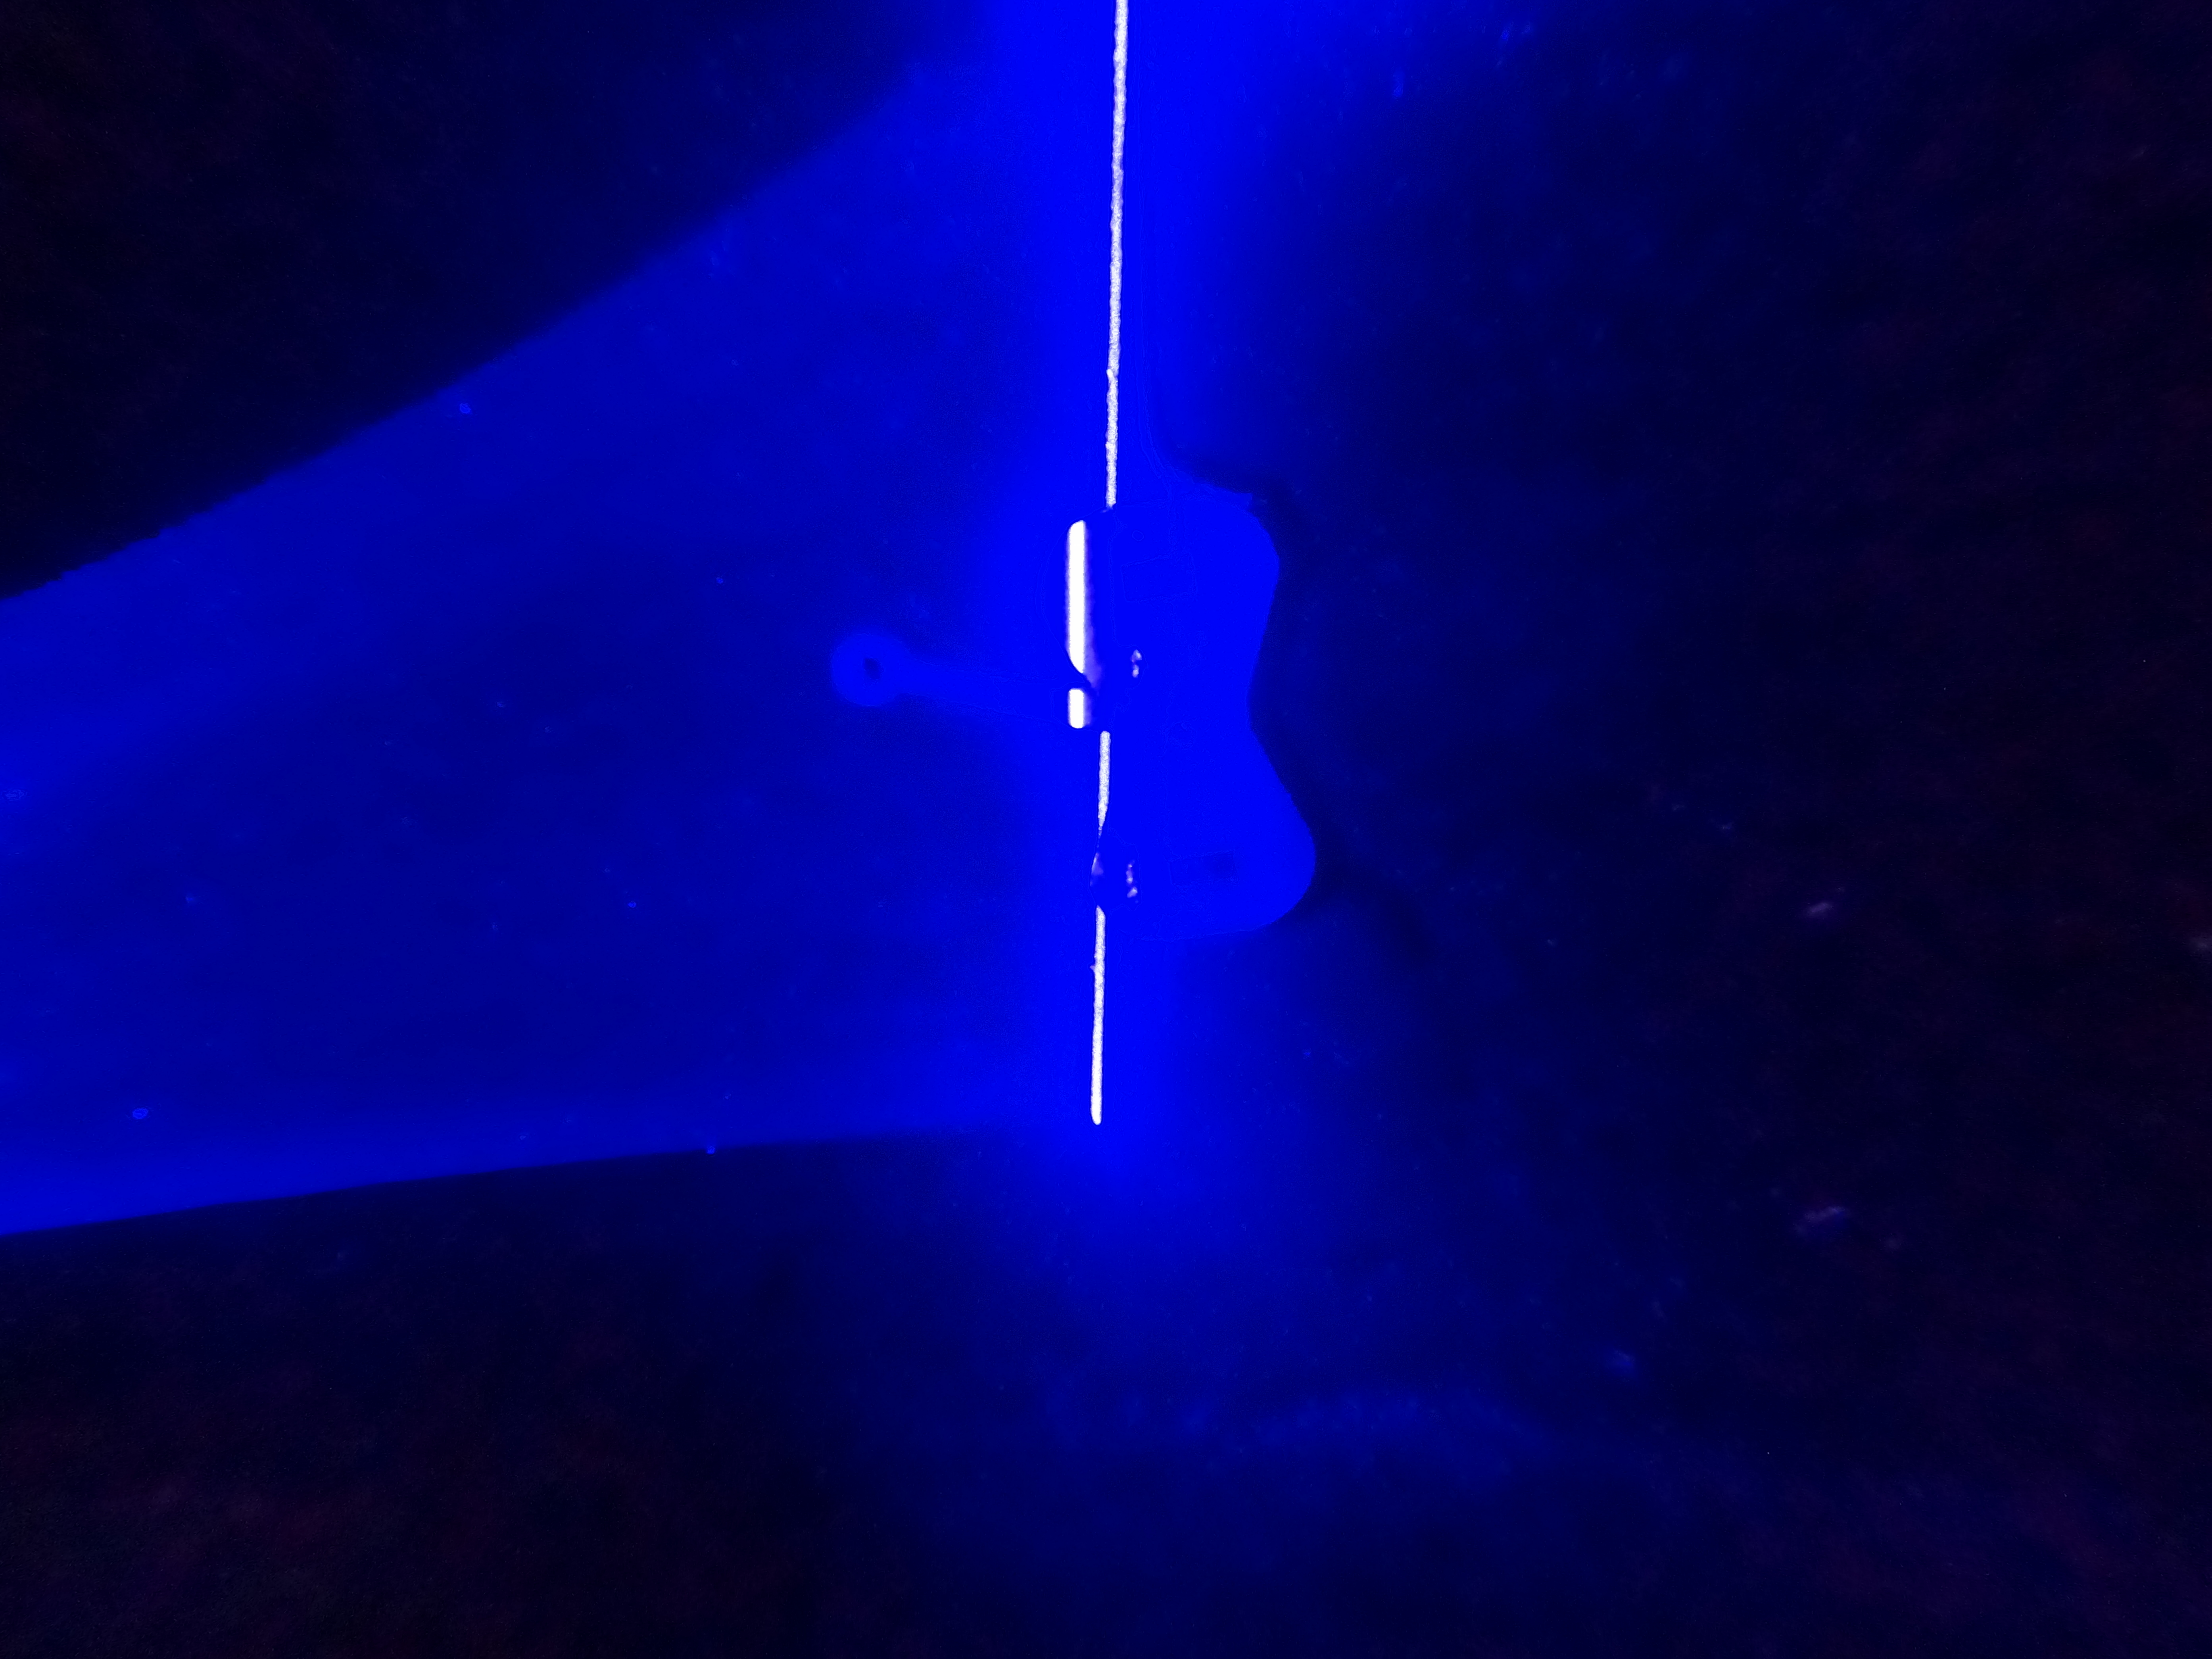

Supplement: Supplementary file 2258 [file G0016567.pdf › Level_1_2/G0016567.pdf]

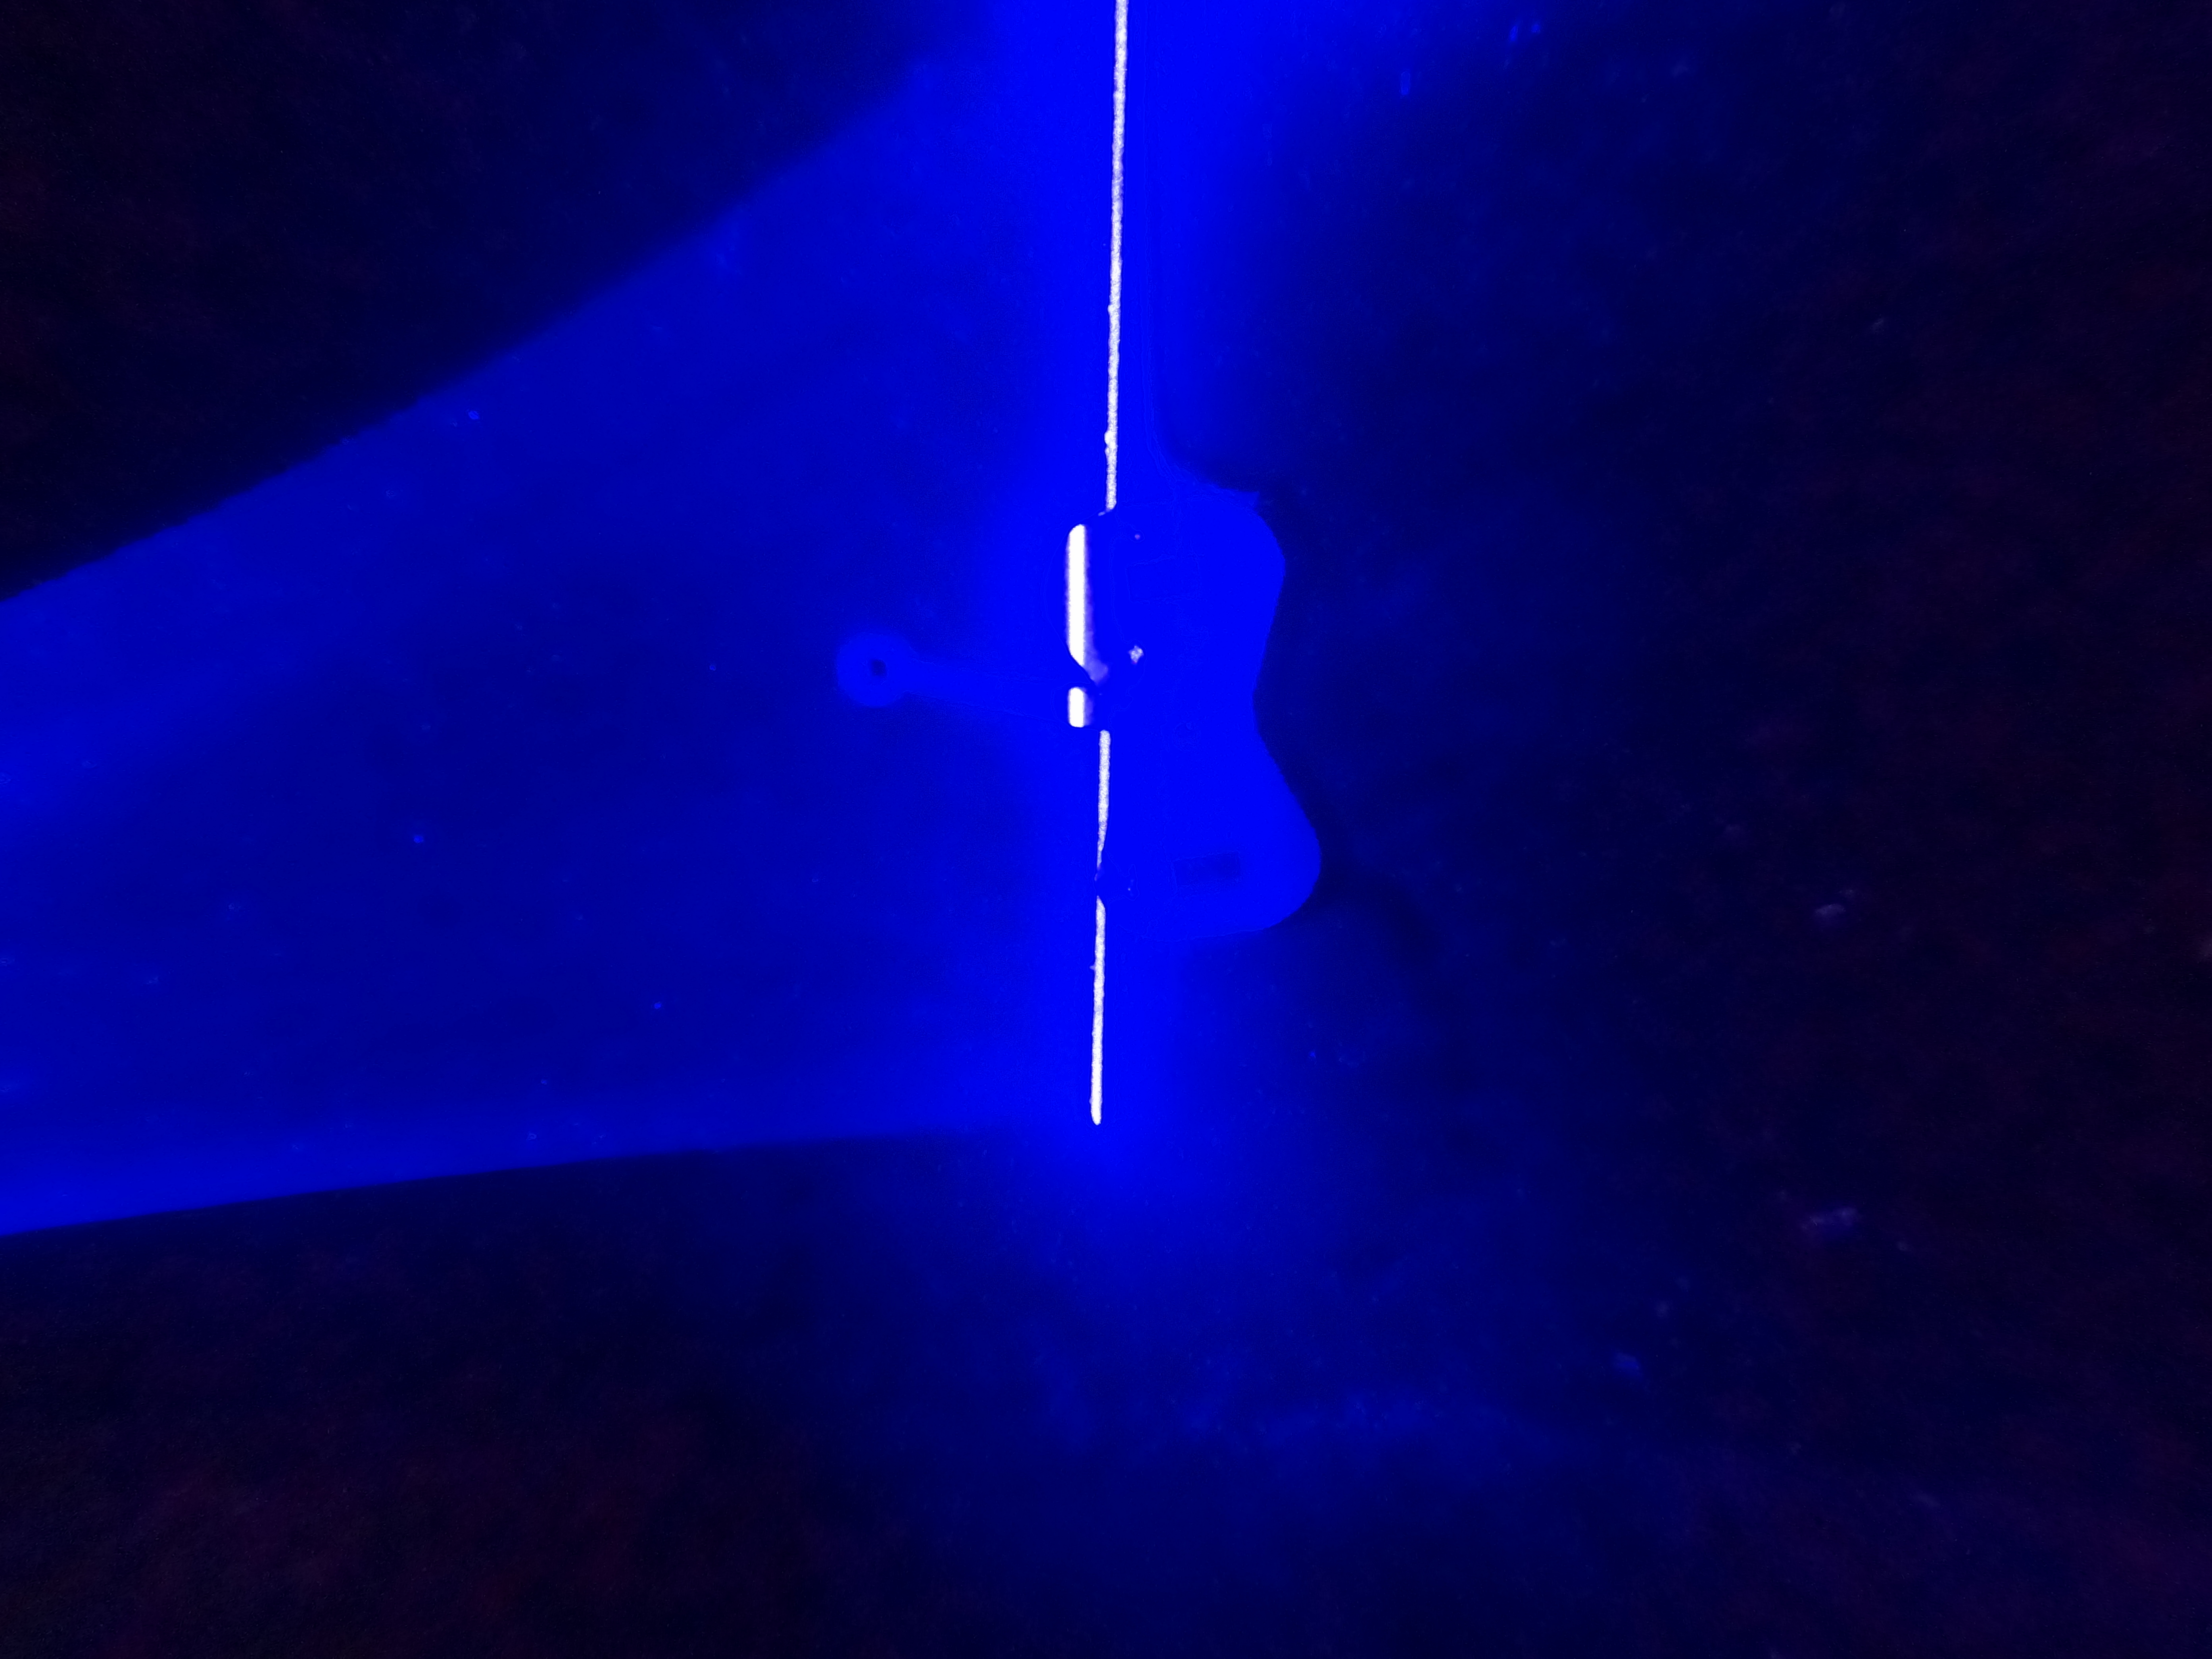

Supplement: Supplementary file 2259 [file G0016568.pdf › Level_1_2/G0016568.pdf]

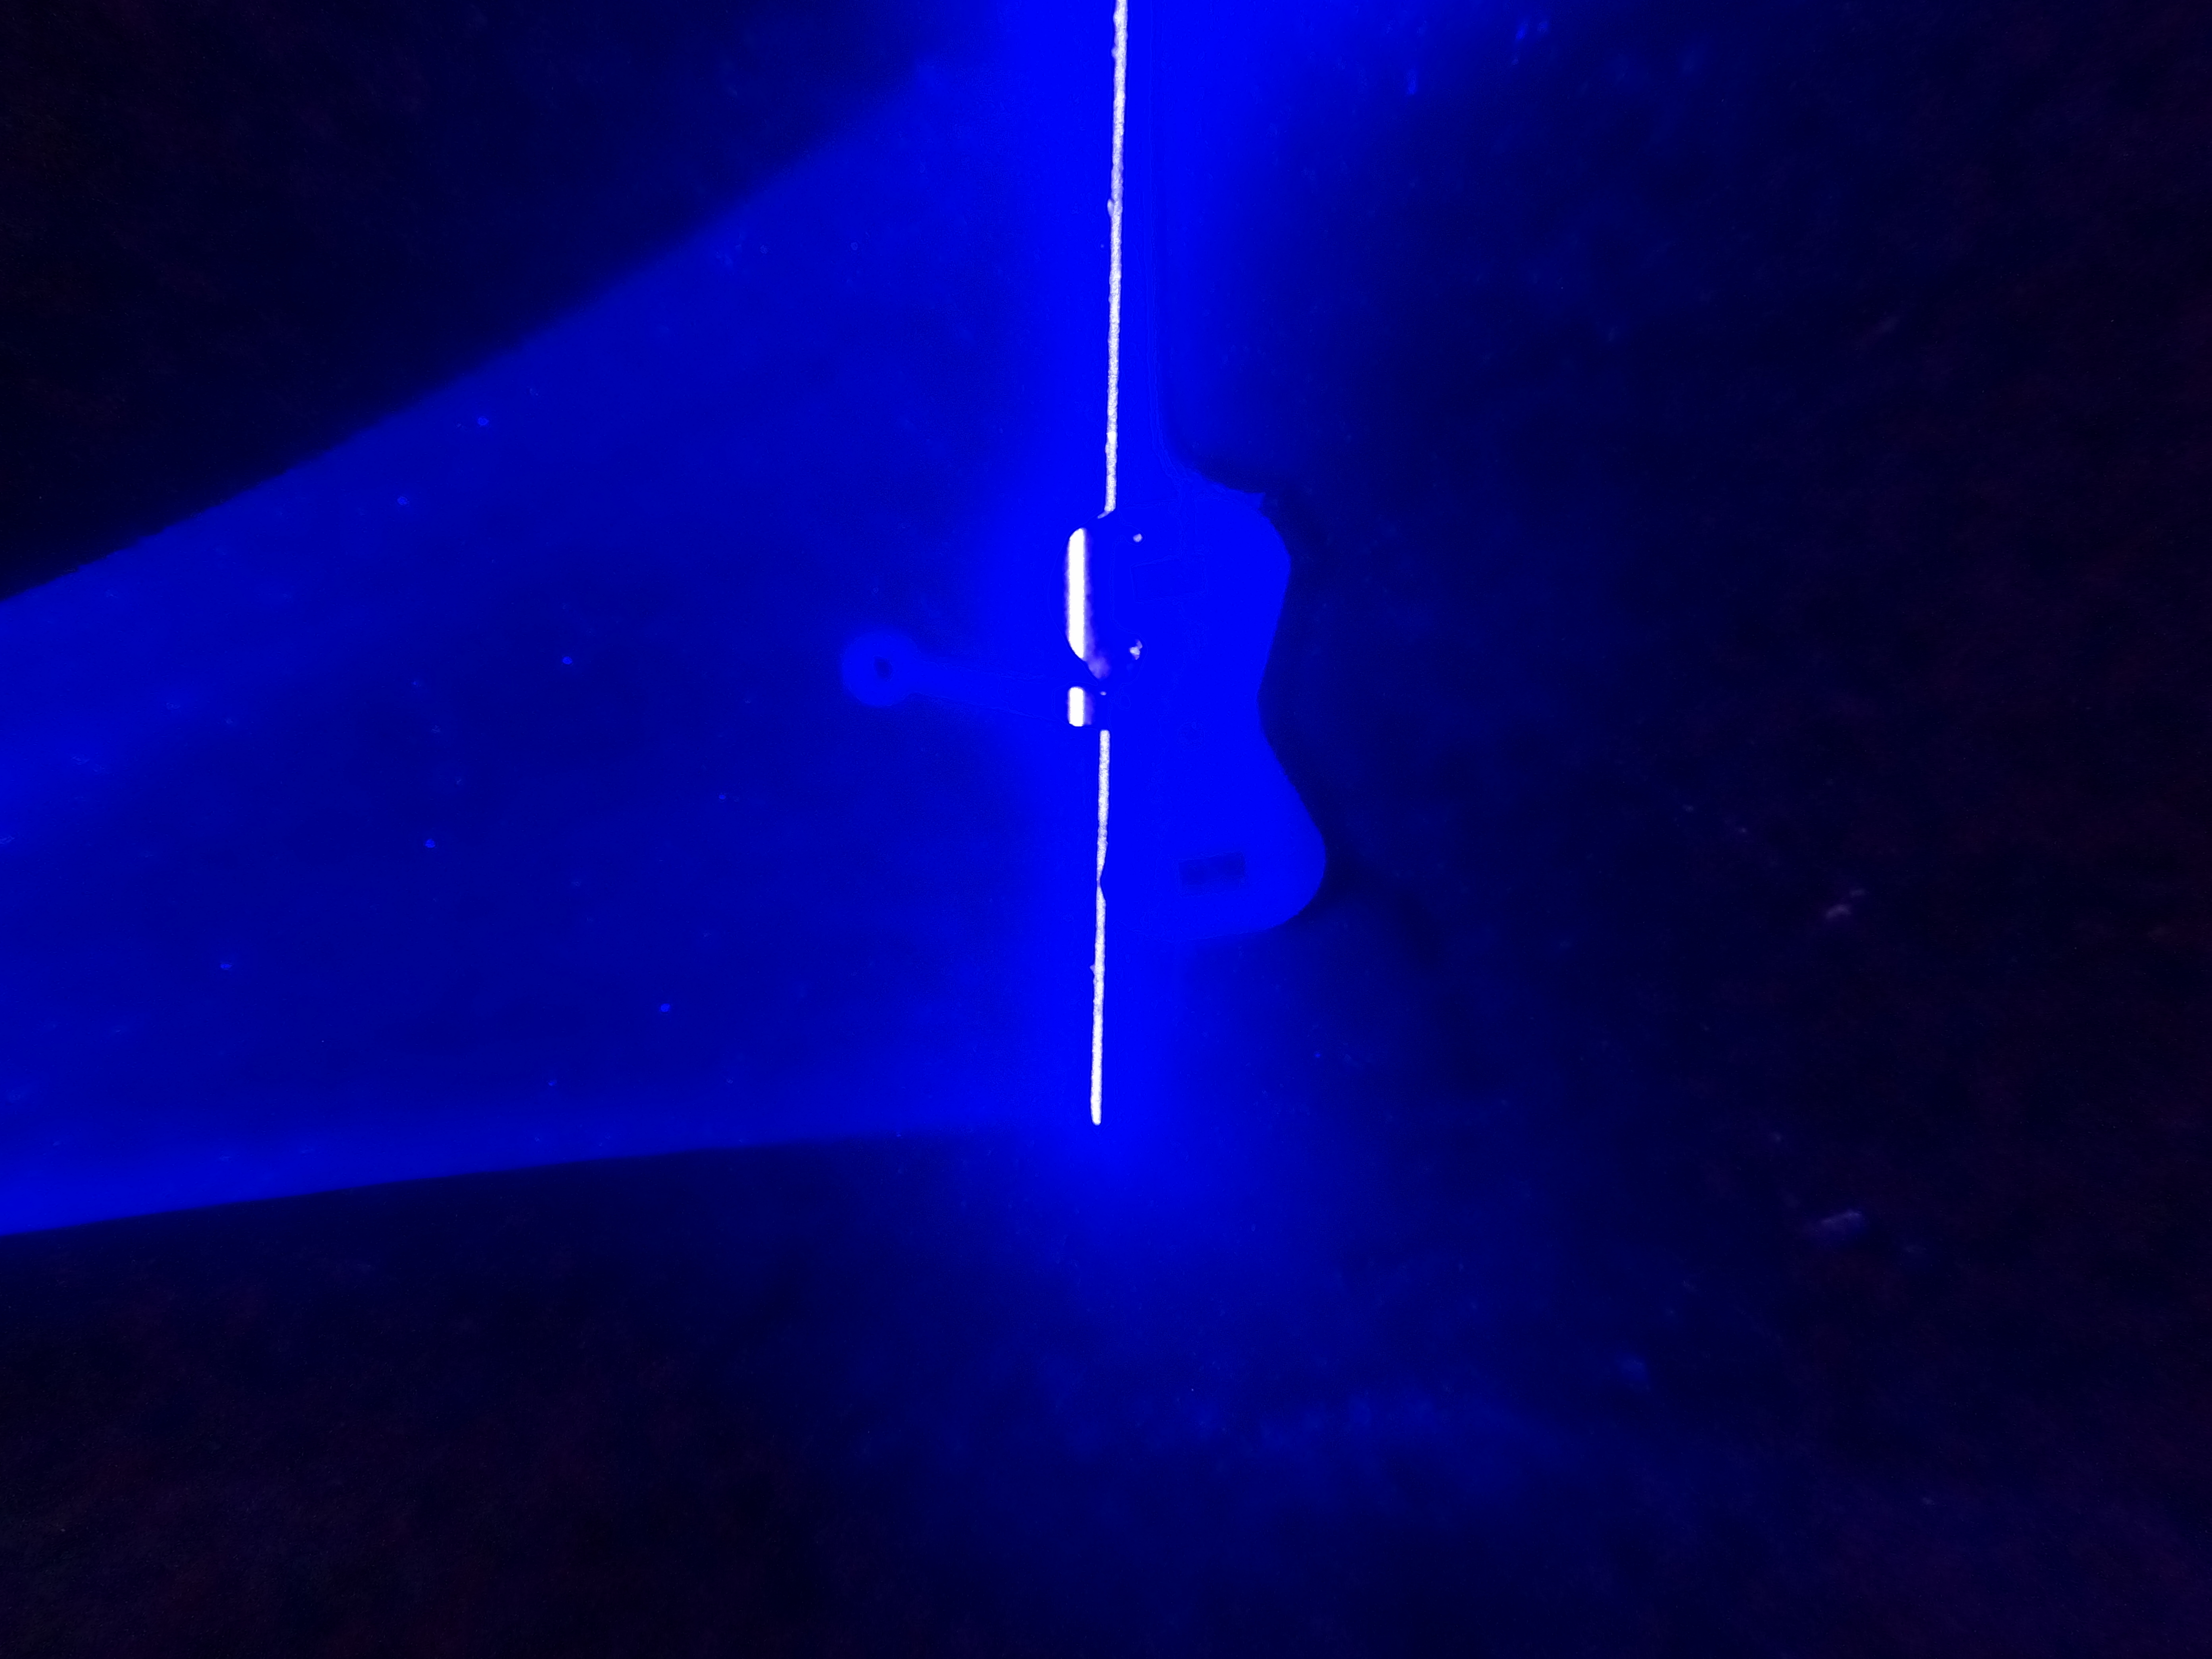

Supplement: Supplementary file 2260 [file G0016569.pdf › Level_1_2/G0016569.pdf]

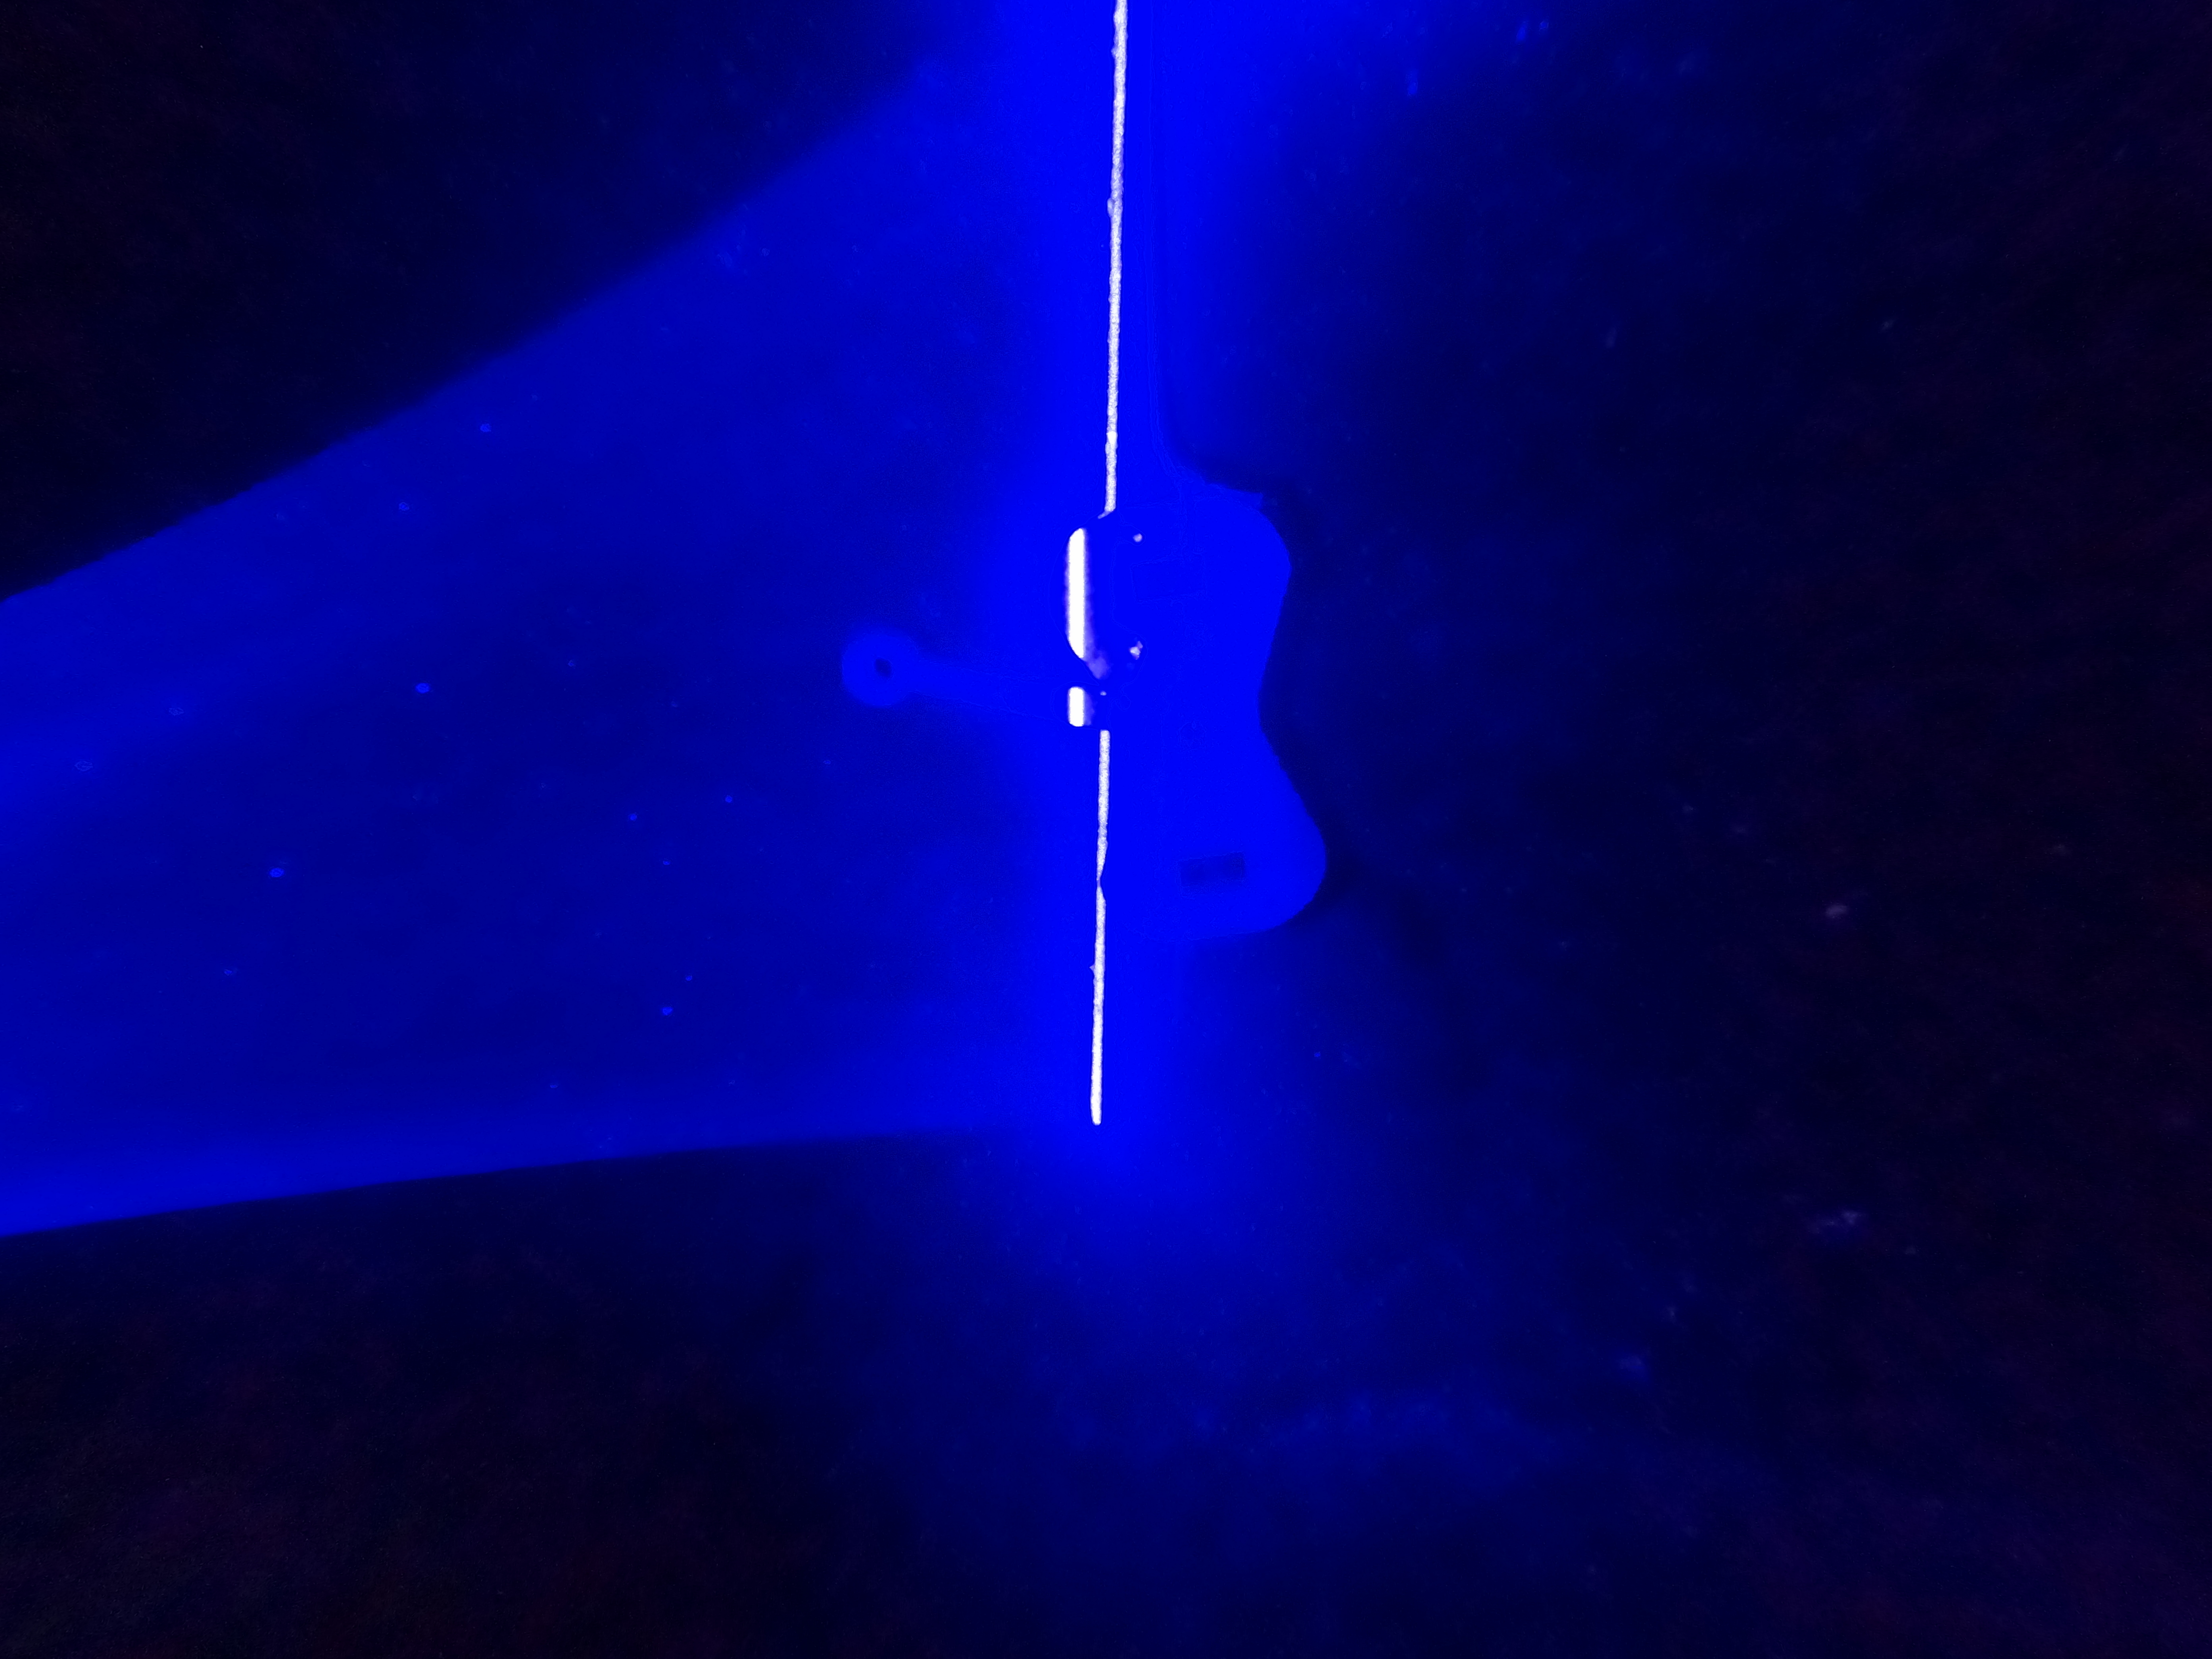

Supplement: Supplementary file 2261 [file G0016570.pdf › Level_1_2/G0016570.pdf]

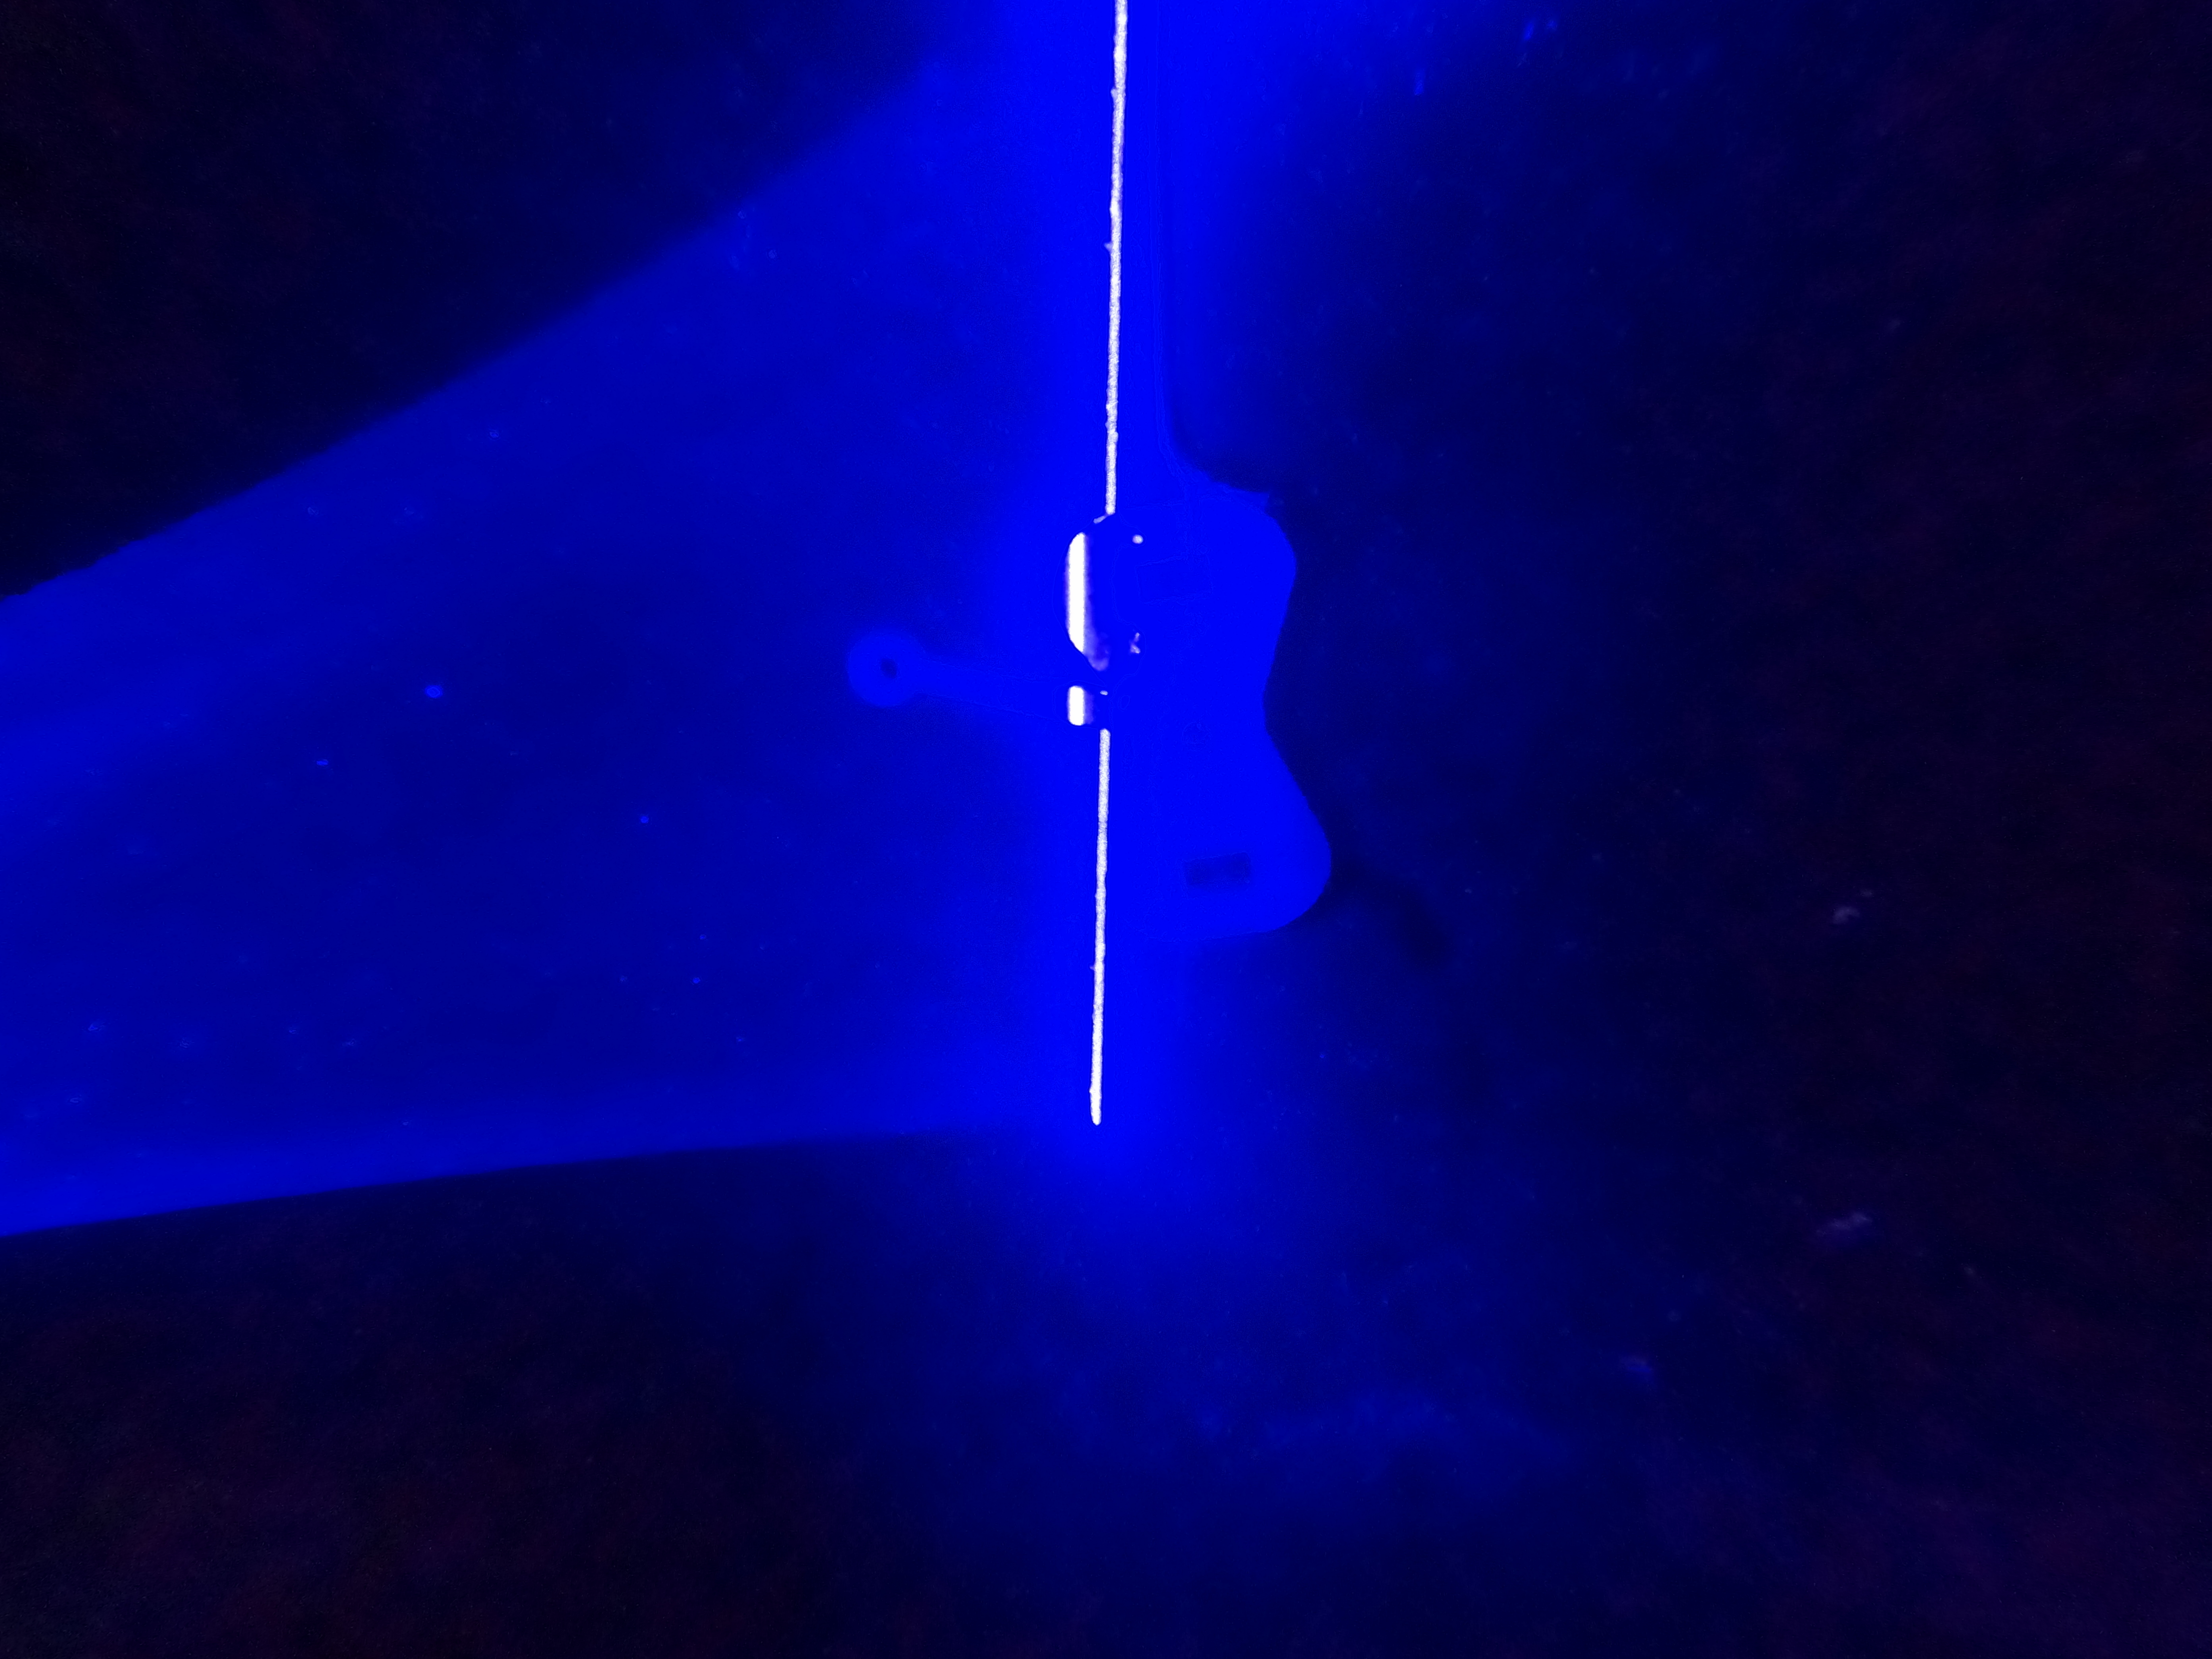

Supplement: Supplementary file 2262 [file G0016571.pdf › Level_1_2/G0016571.pdf]

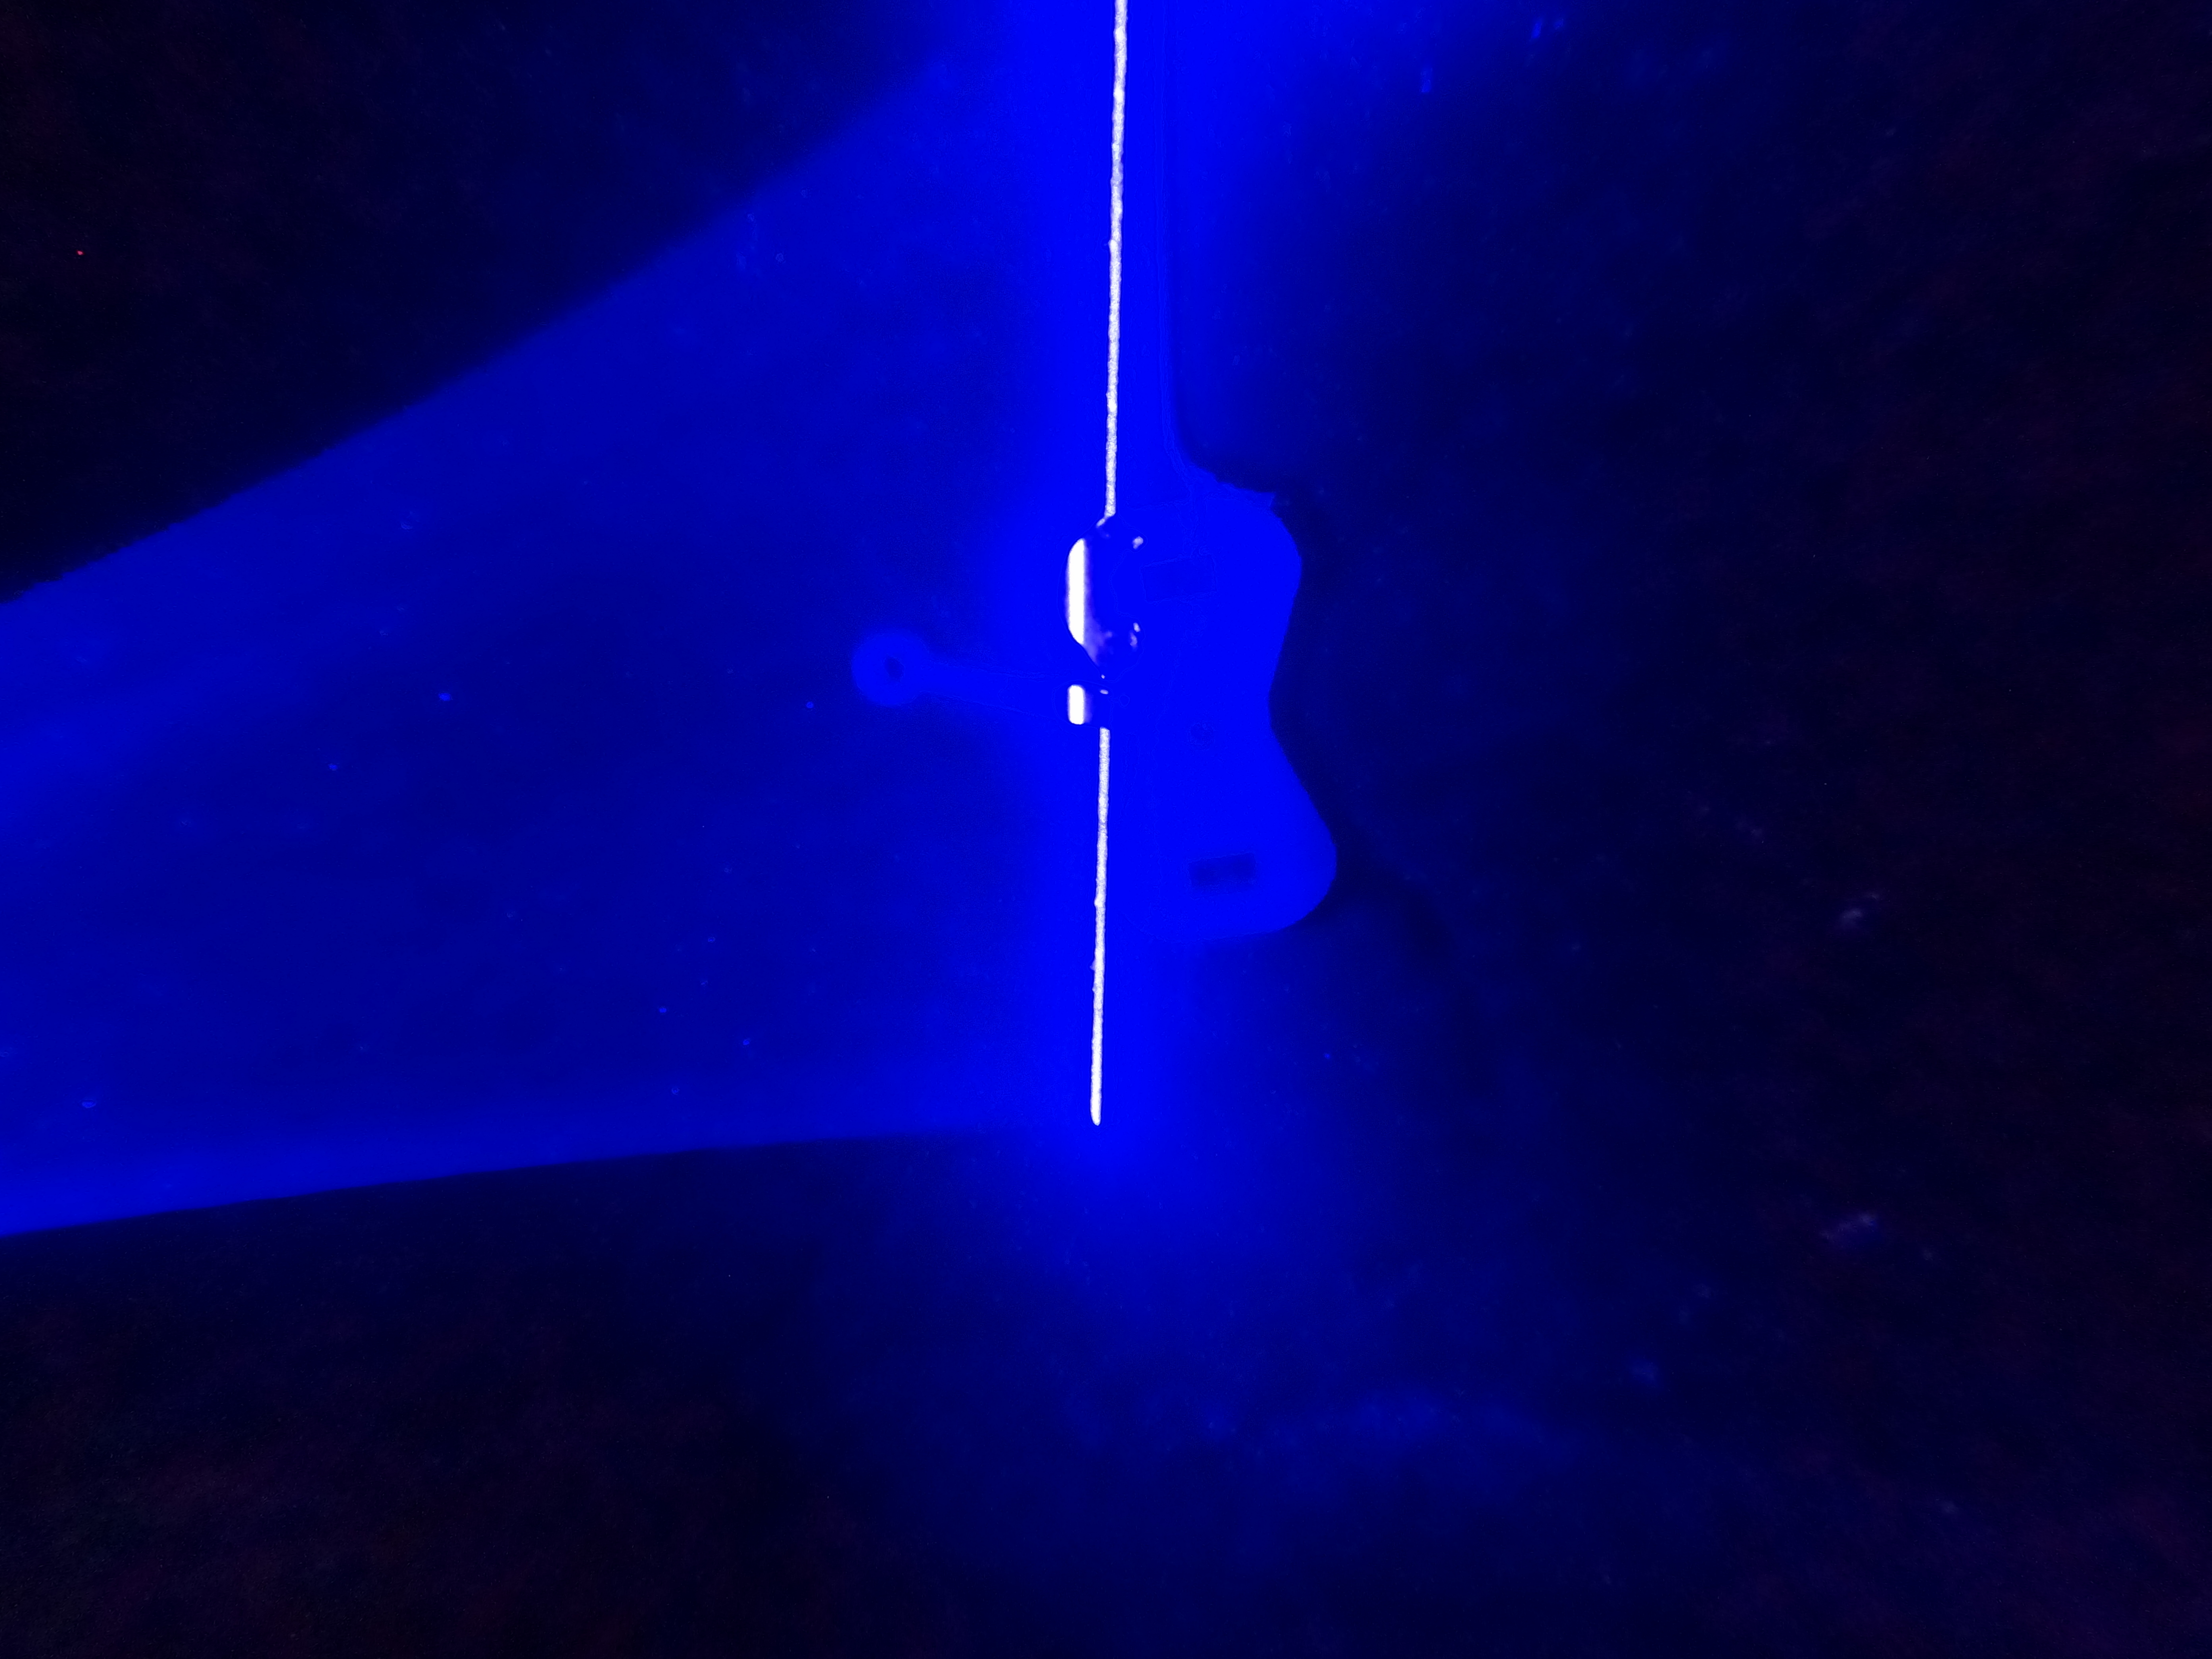

Supplement: Supplementary file 2263 [file G0016572.pdf › Level_1_2/G0016572.pdf]

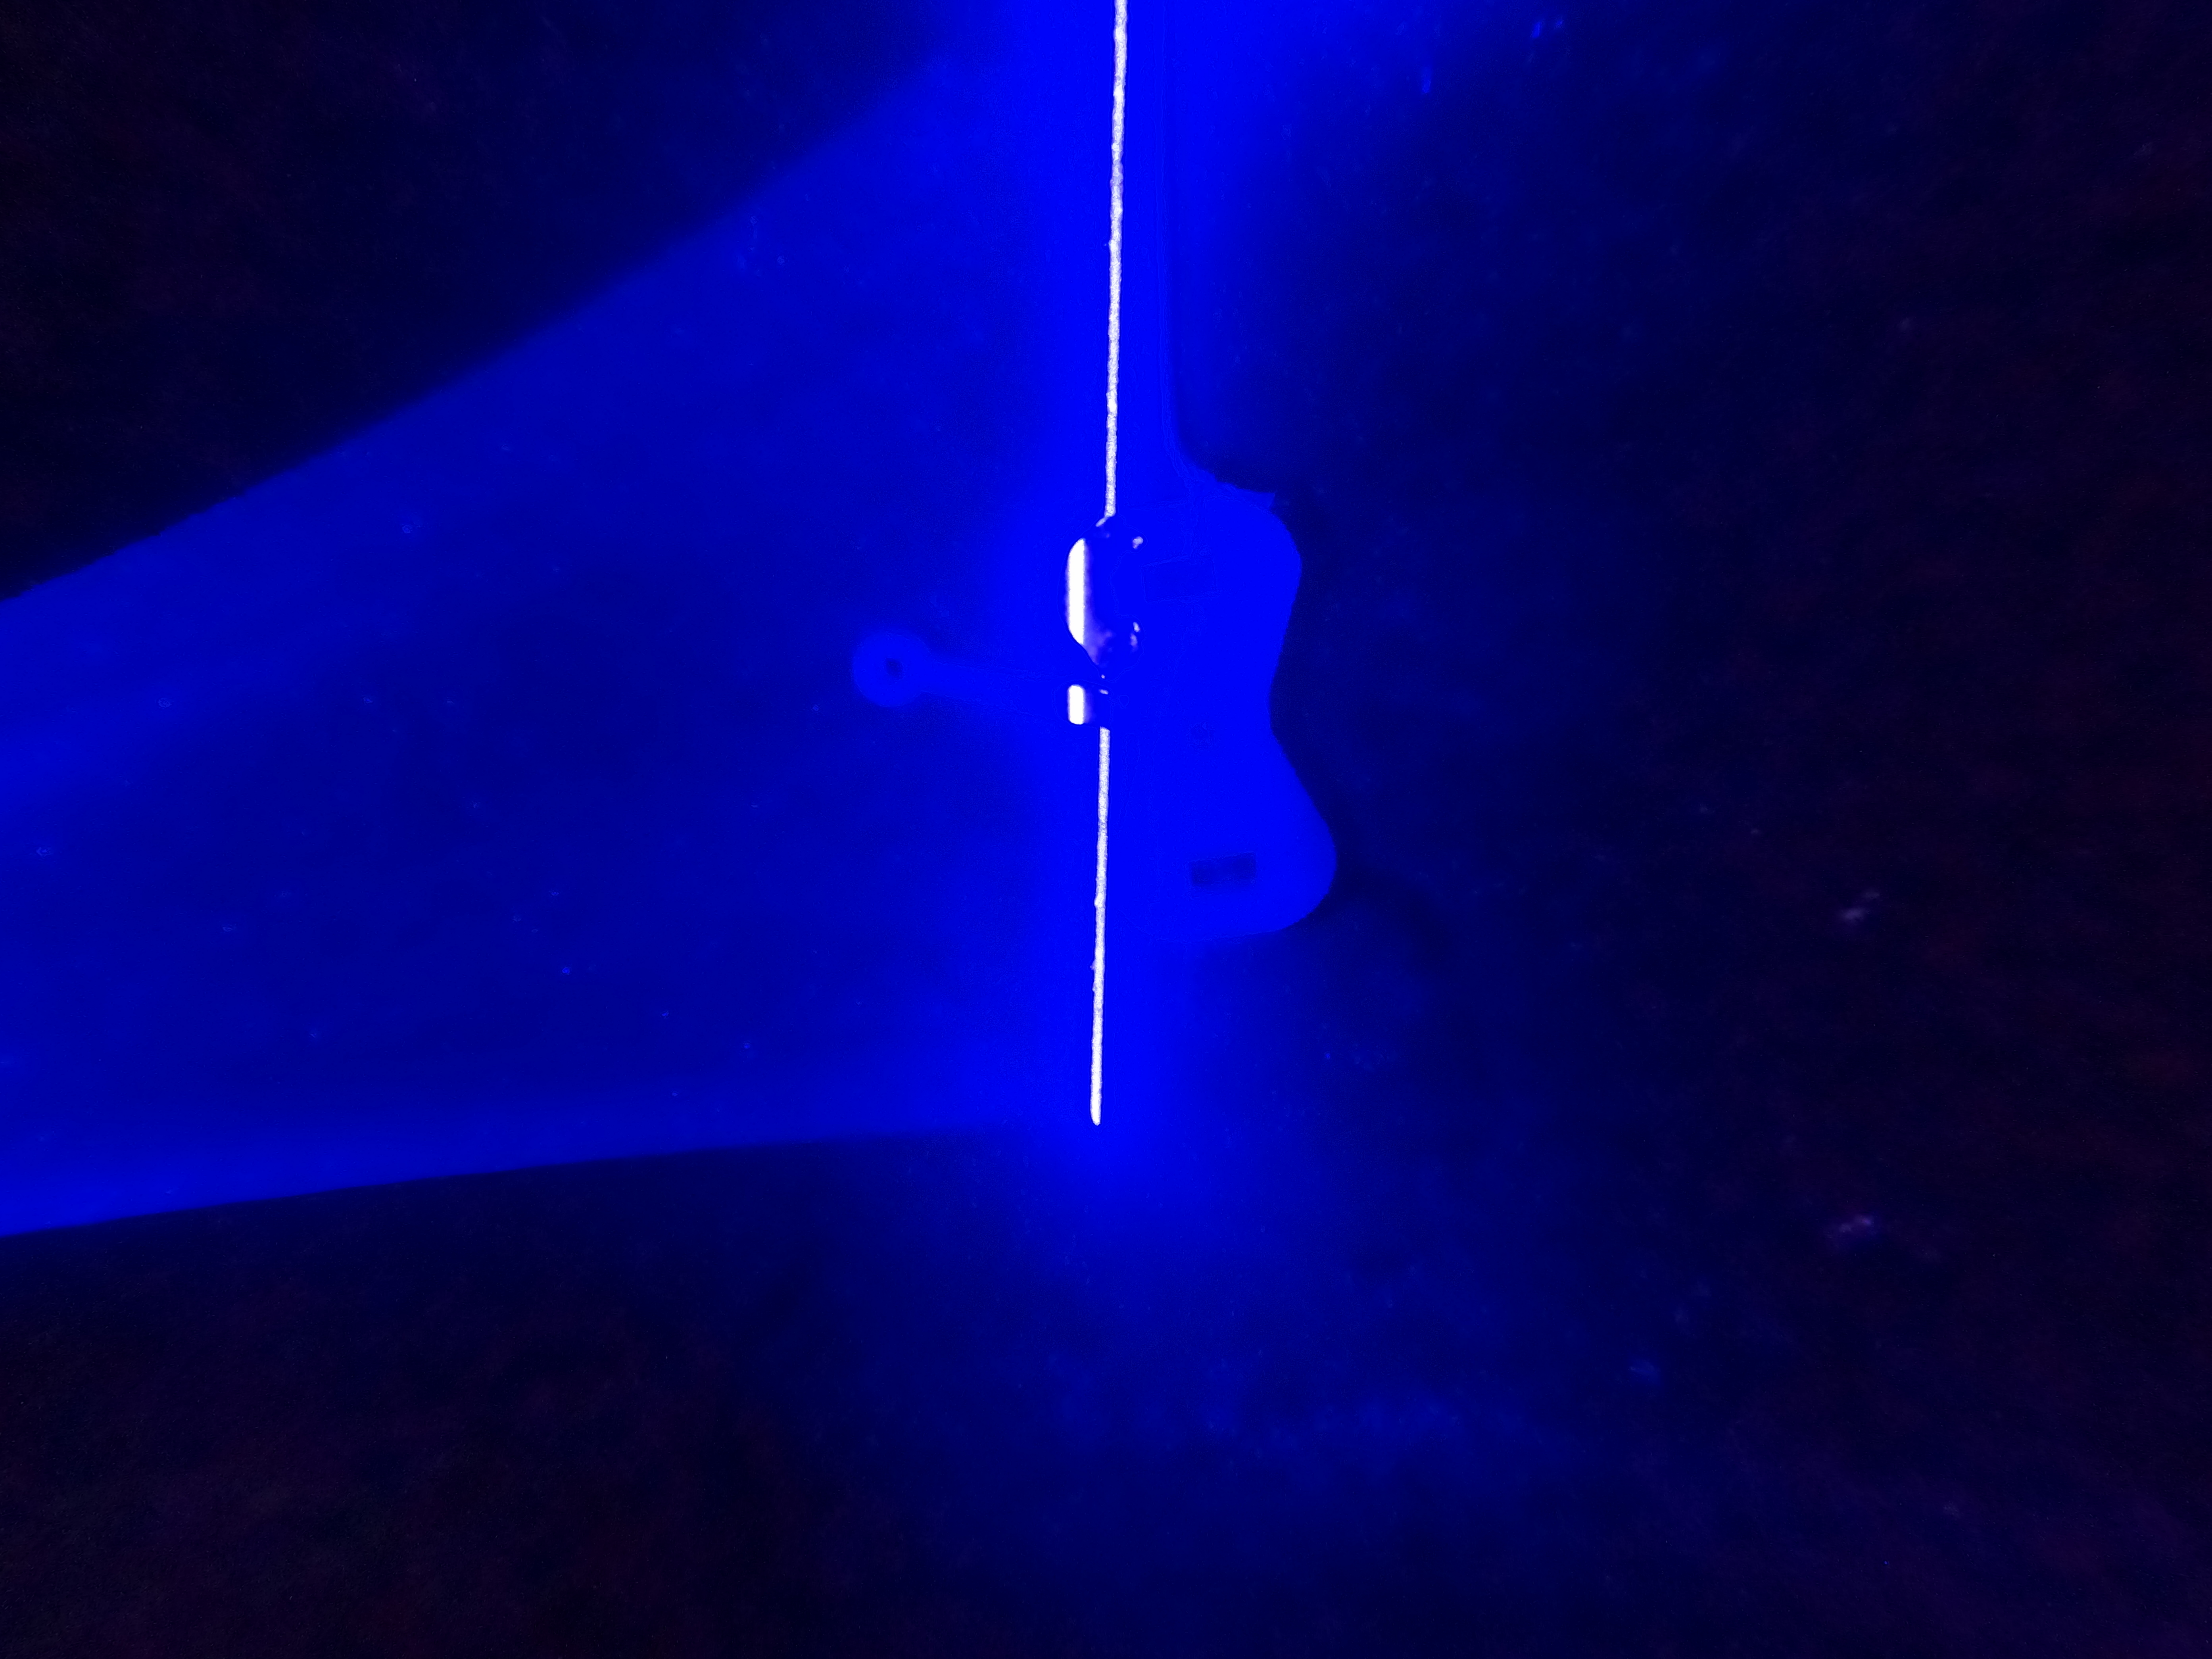

Supplement: Supplementary file 2264 [file G0016573.pdf › Level_1_2/G0016573.pdf]

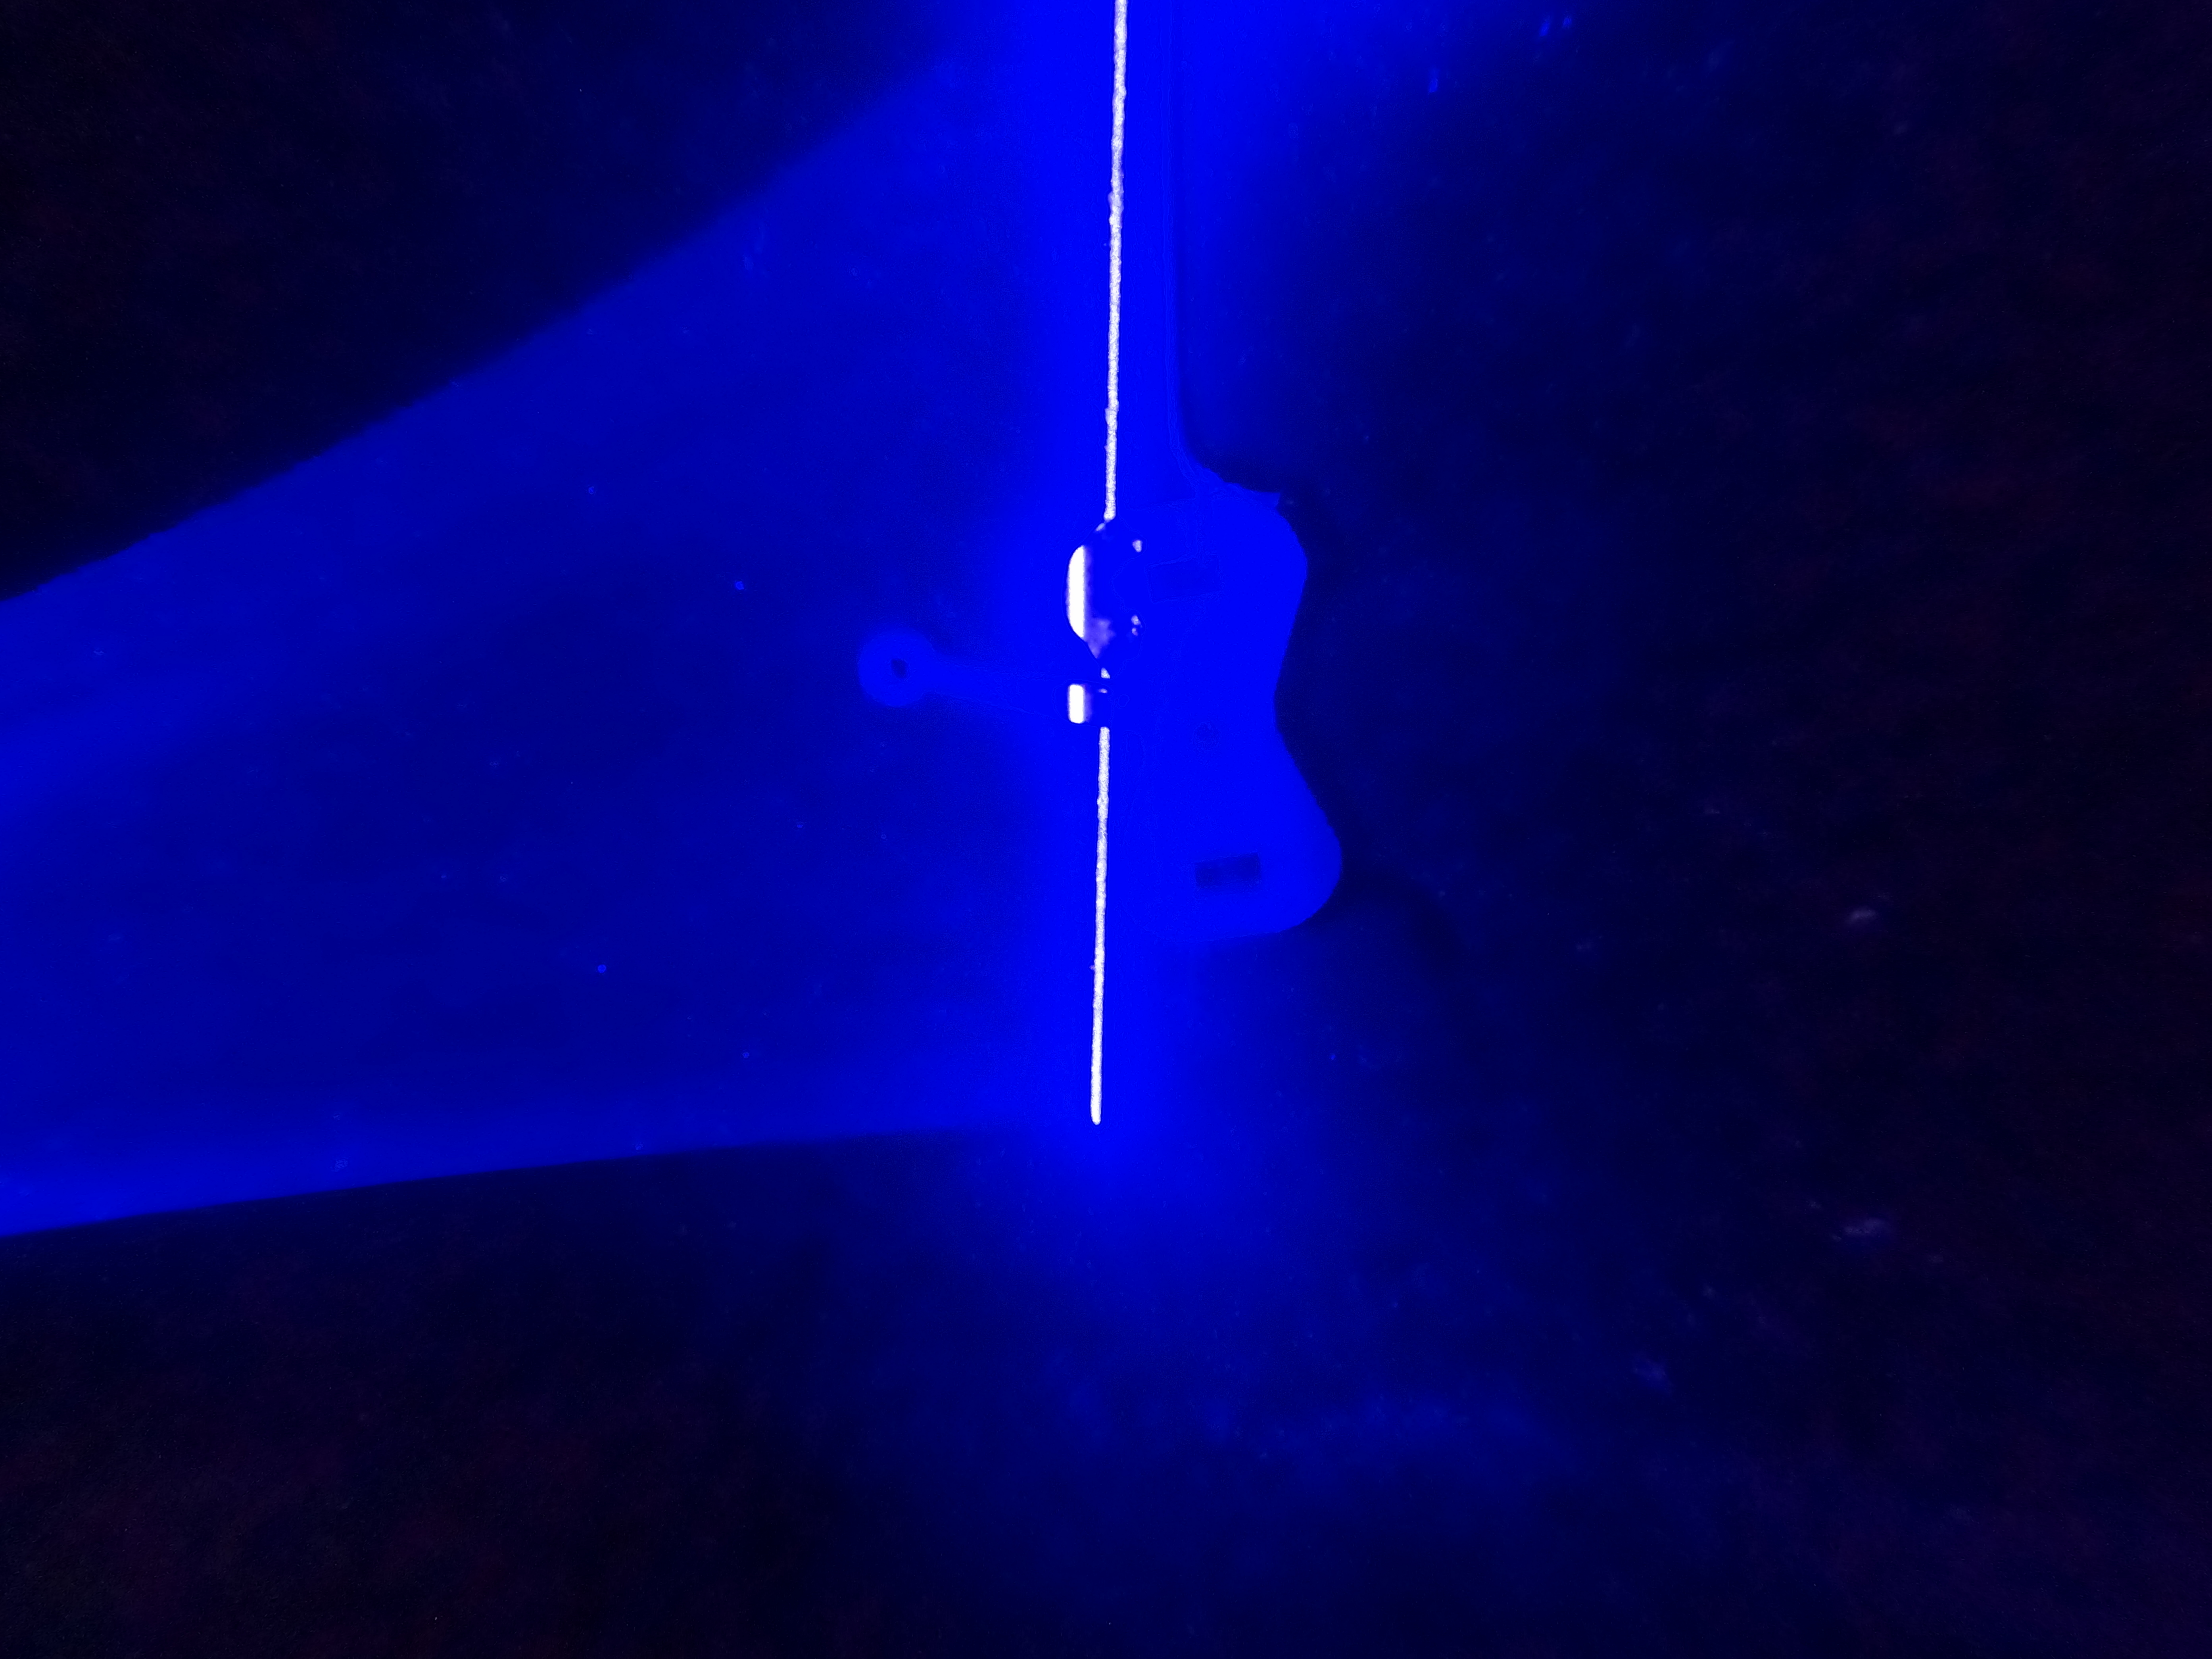

Supplement: Supplementary file 2265 [file G0016574.pdf › Level_1_2/G0016574.pdf]

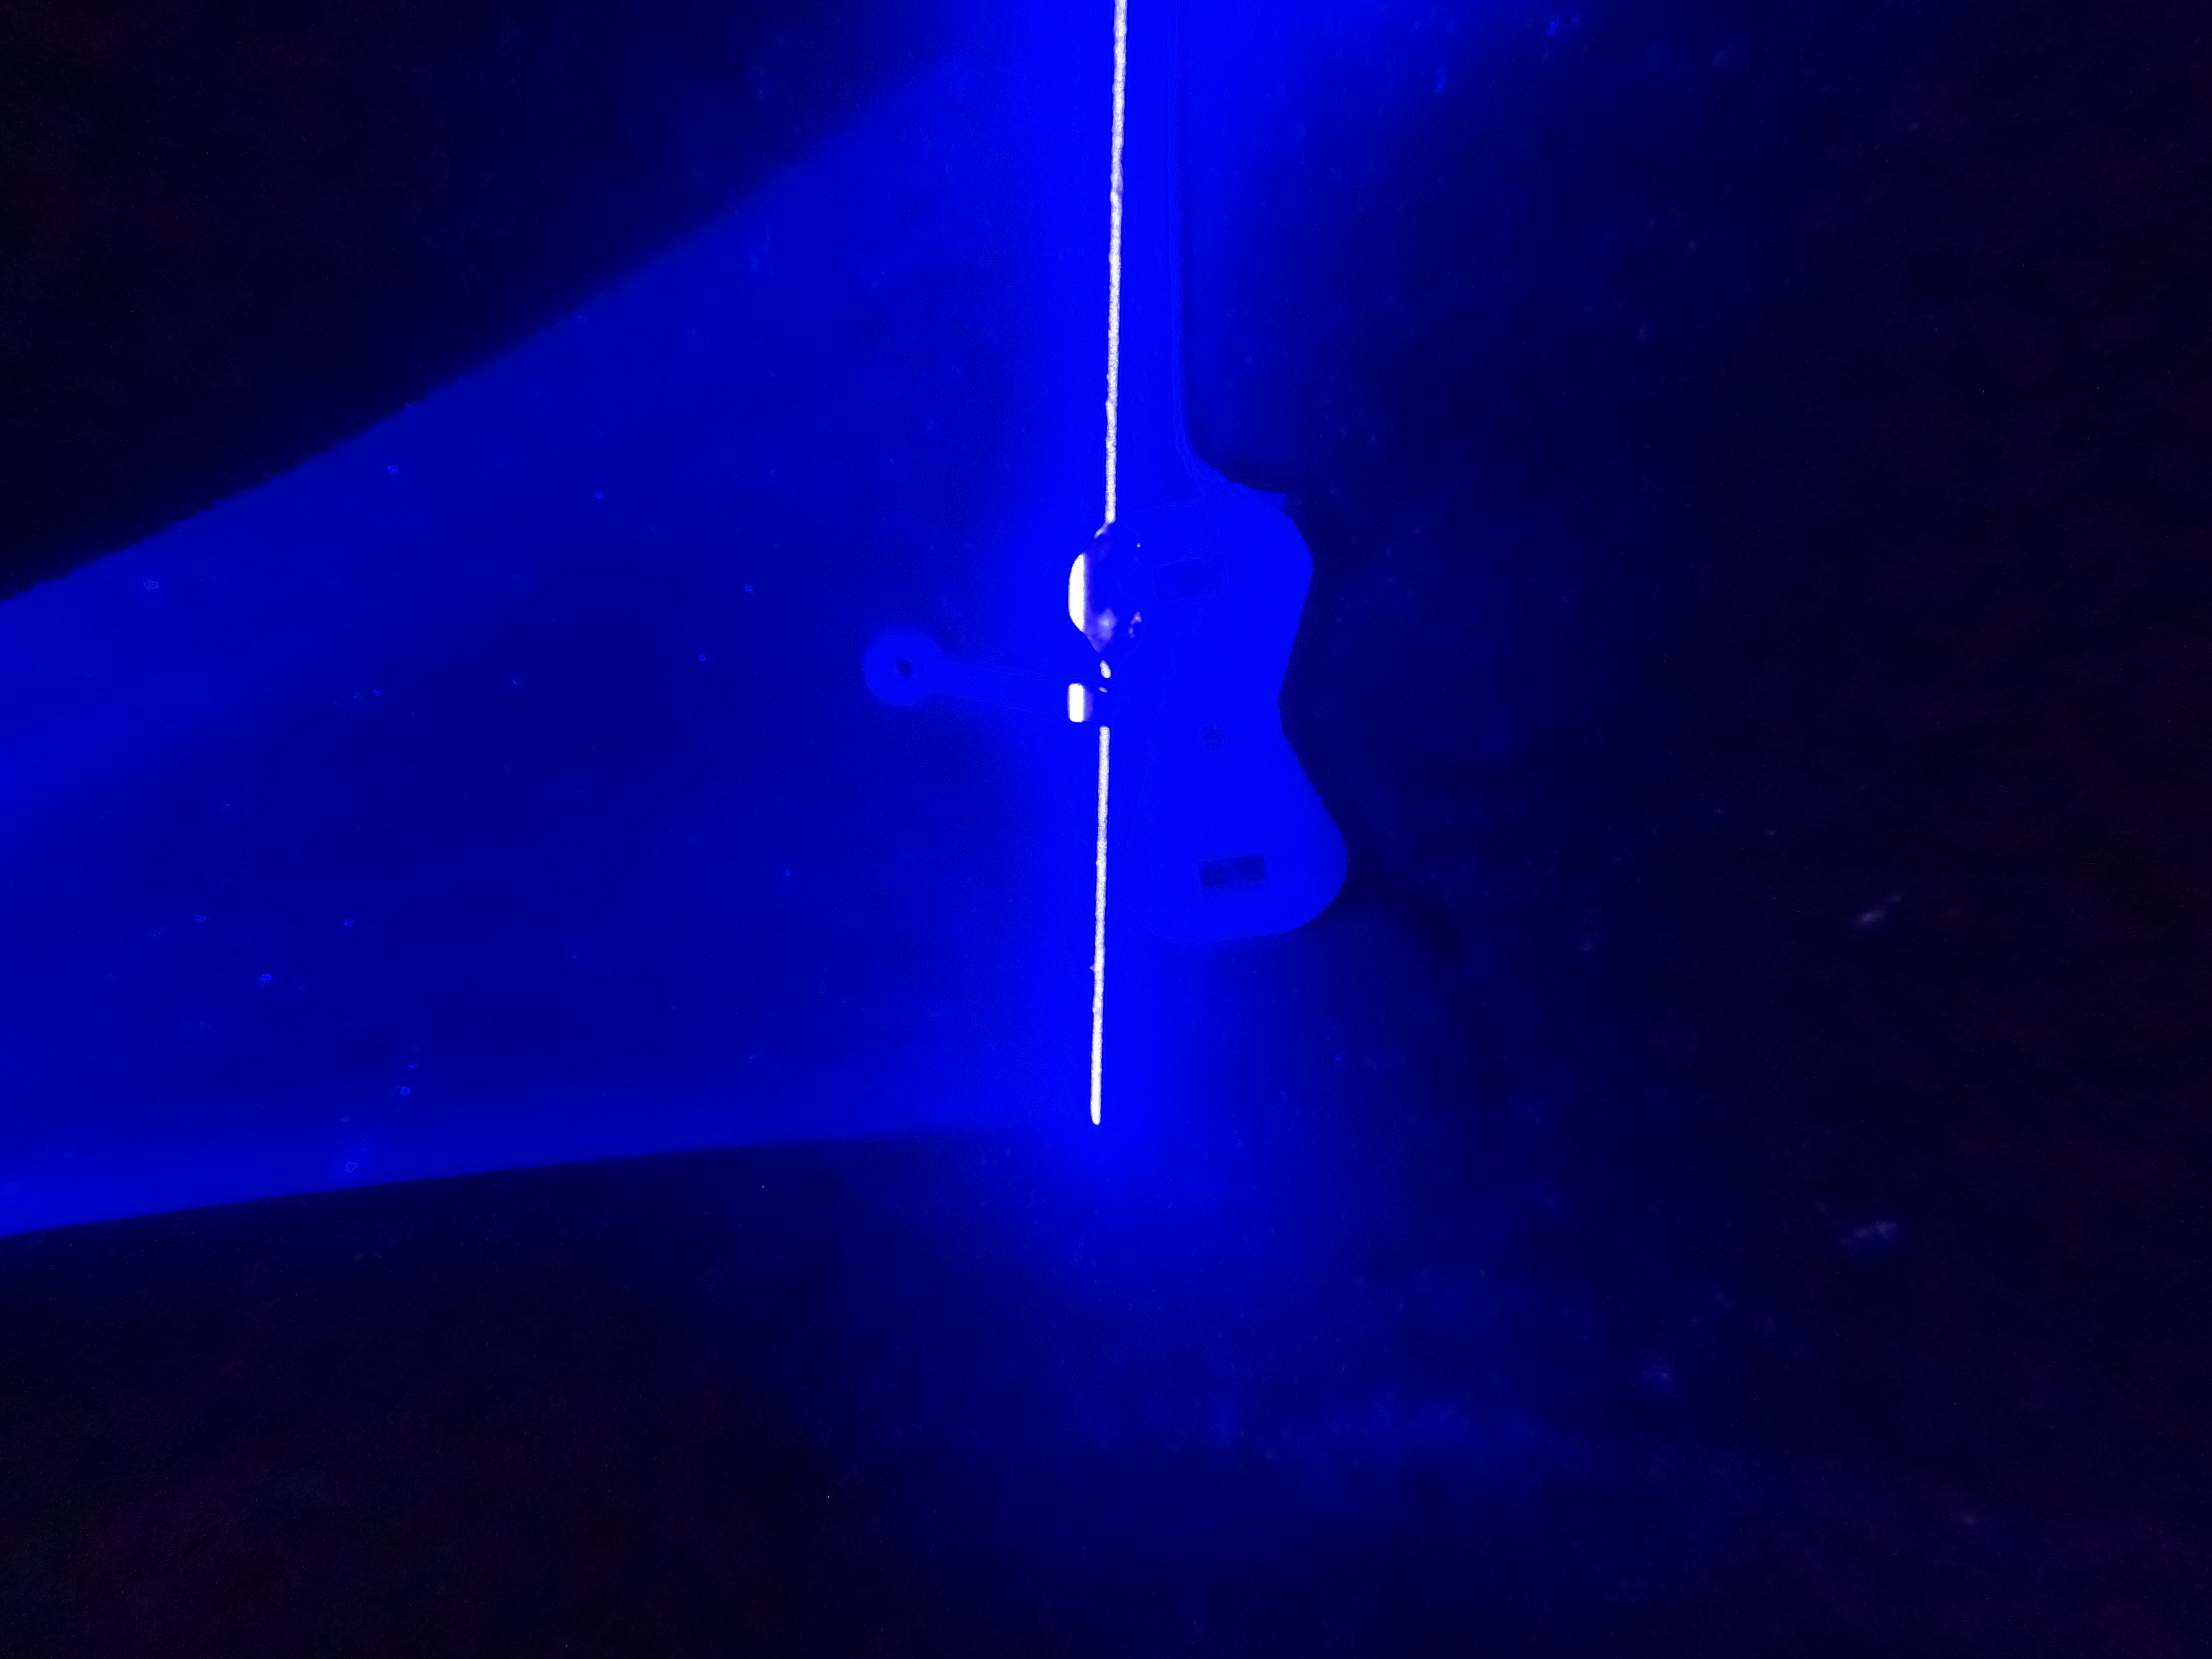

Supplement: Supplementary file 2266 [file G0016575.pdf › Level_1_2/G0016575.pdf]

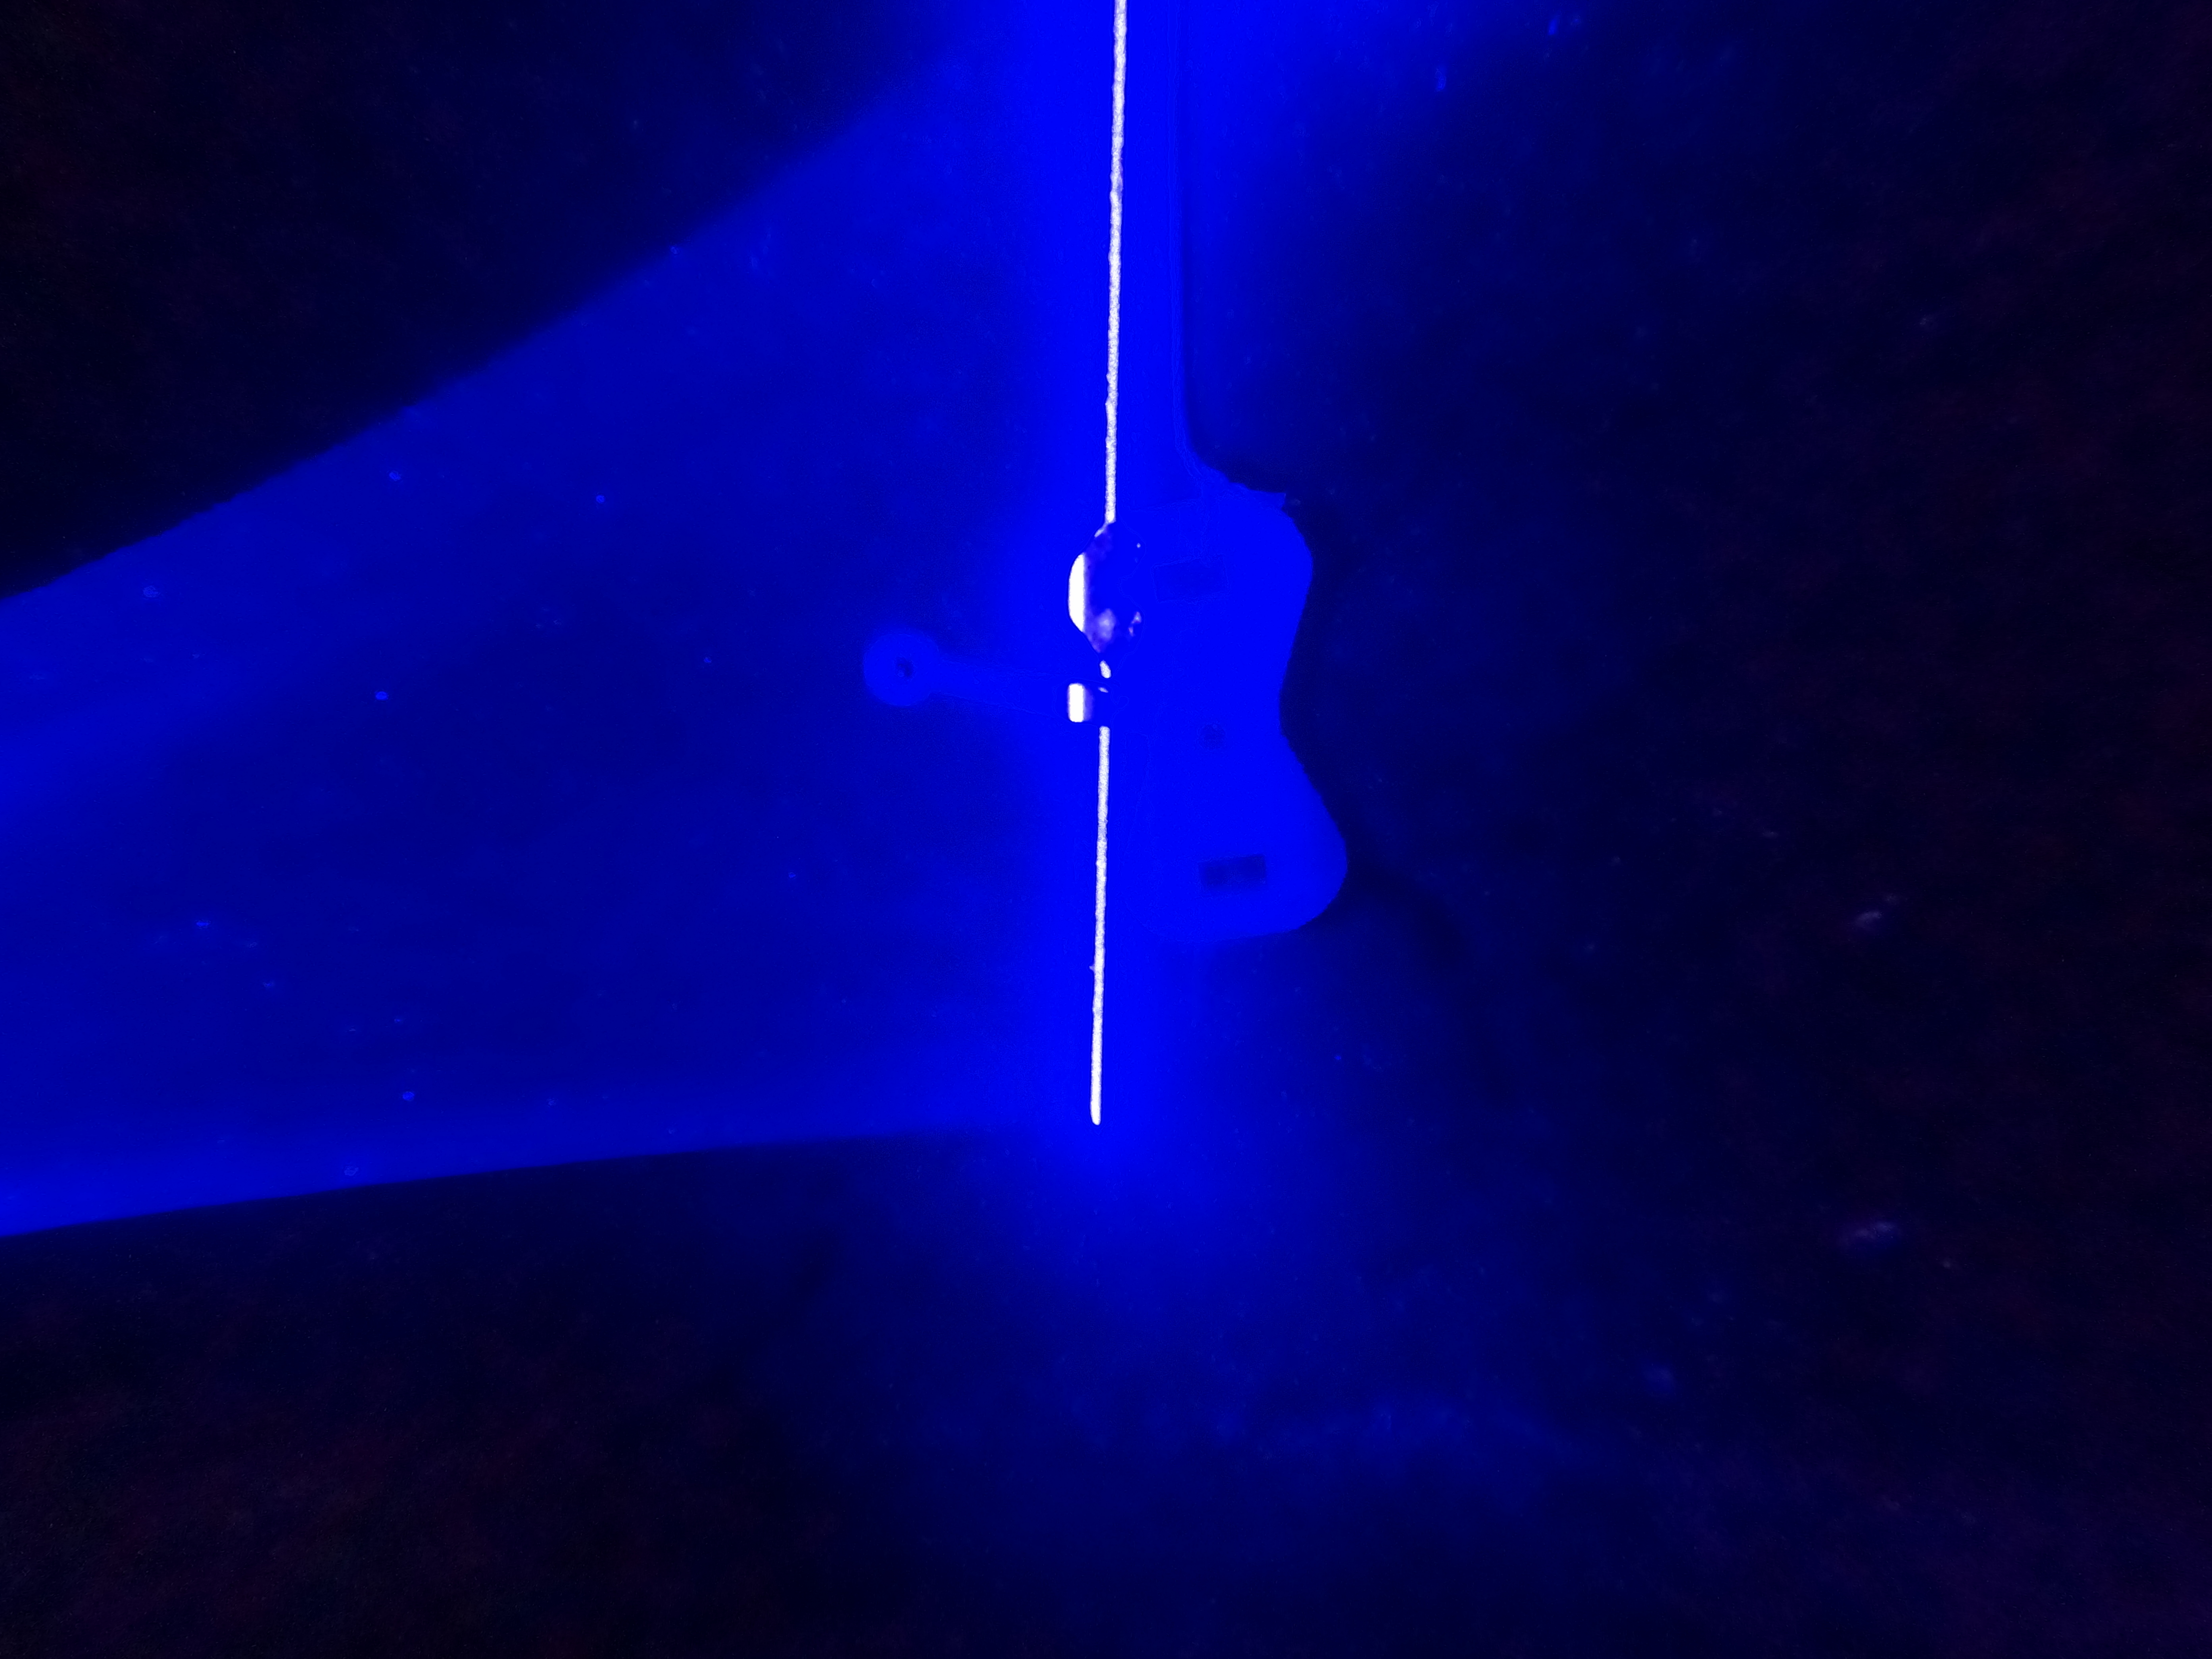

Supplement: Supplementary file 2267 [file G0016576.pdf › Level_1_2/G0016576.pdf]

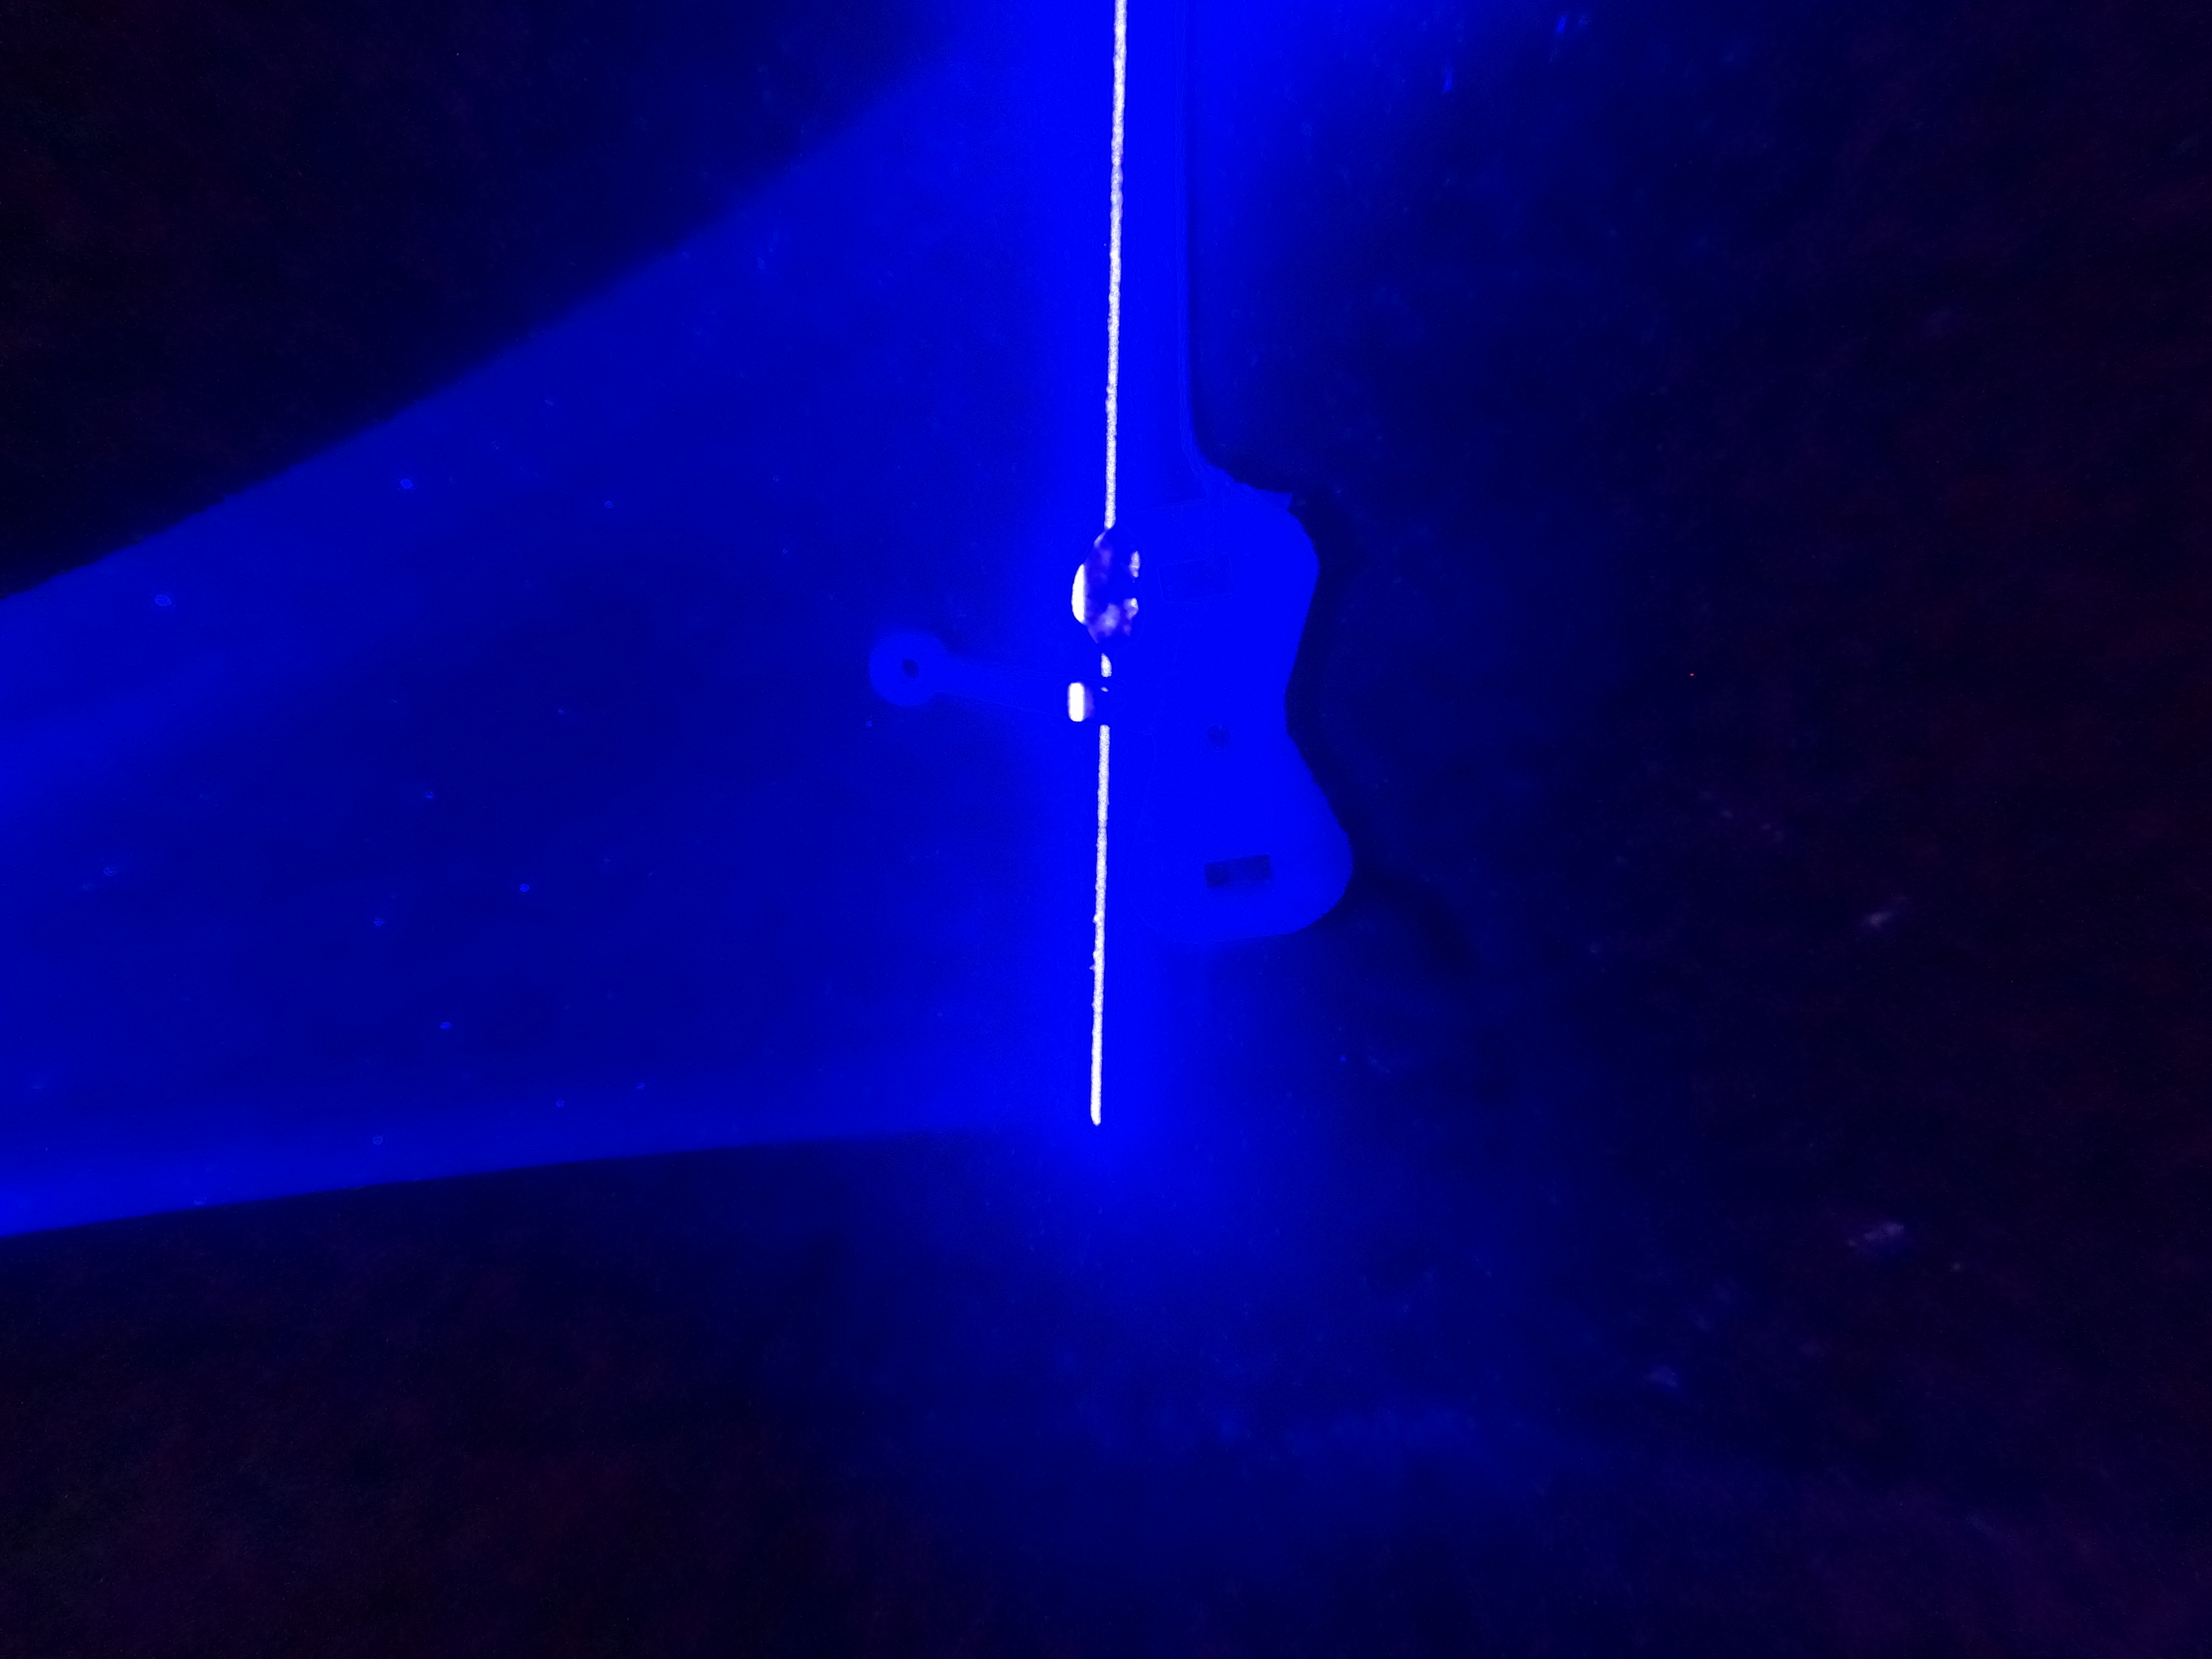

Supplement: Supplementary file 2268 [file G0016577.pdf › Level_1_2/G0016577.pdf]

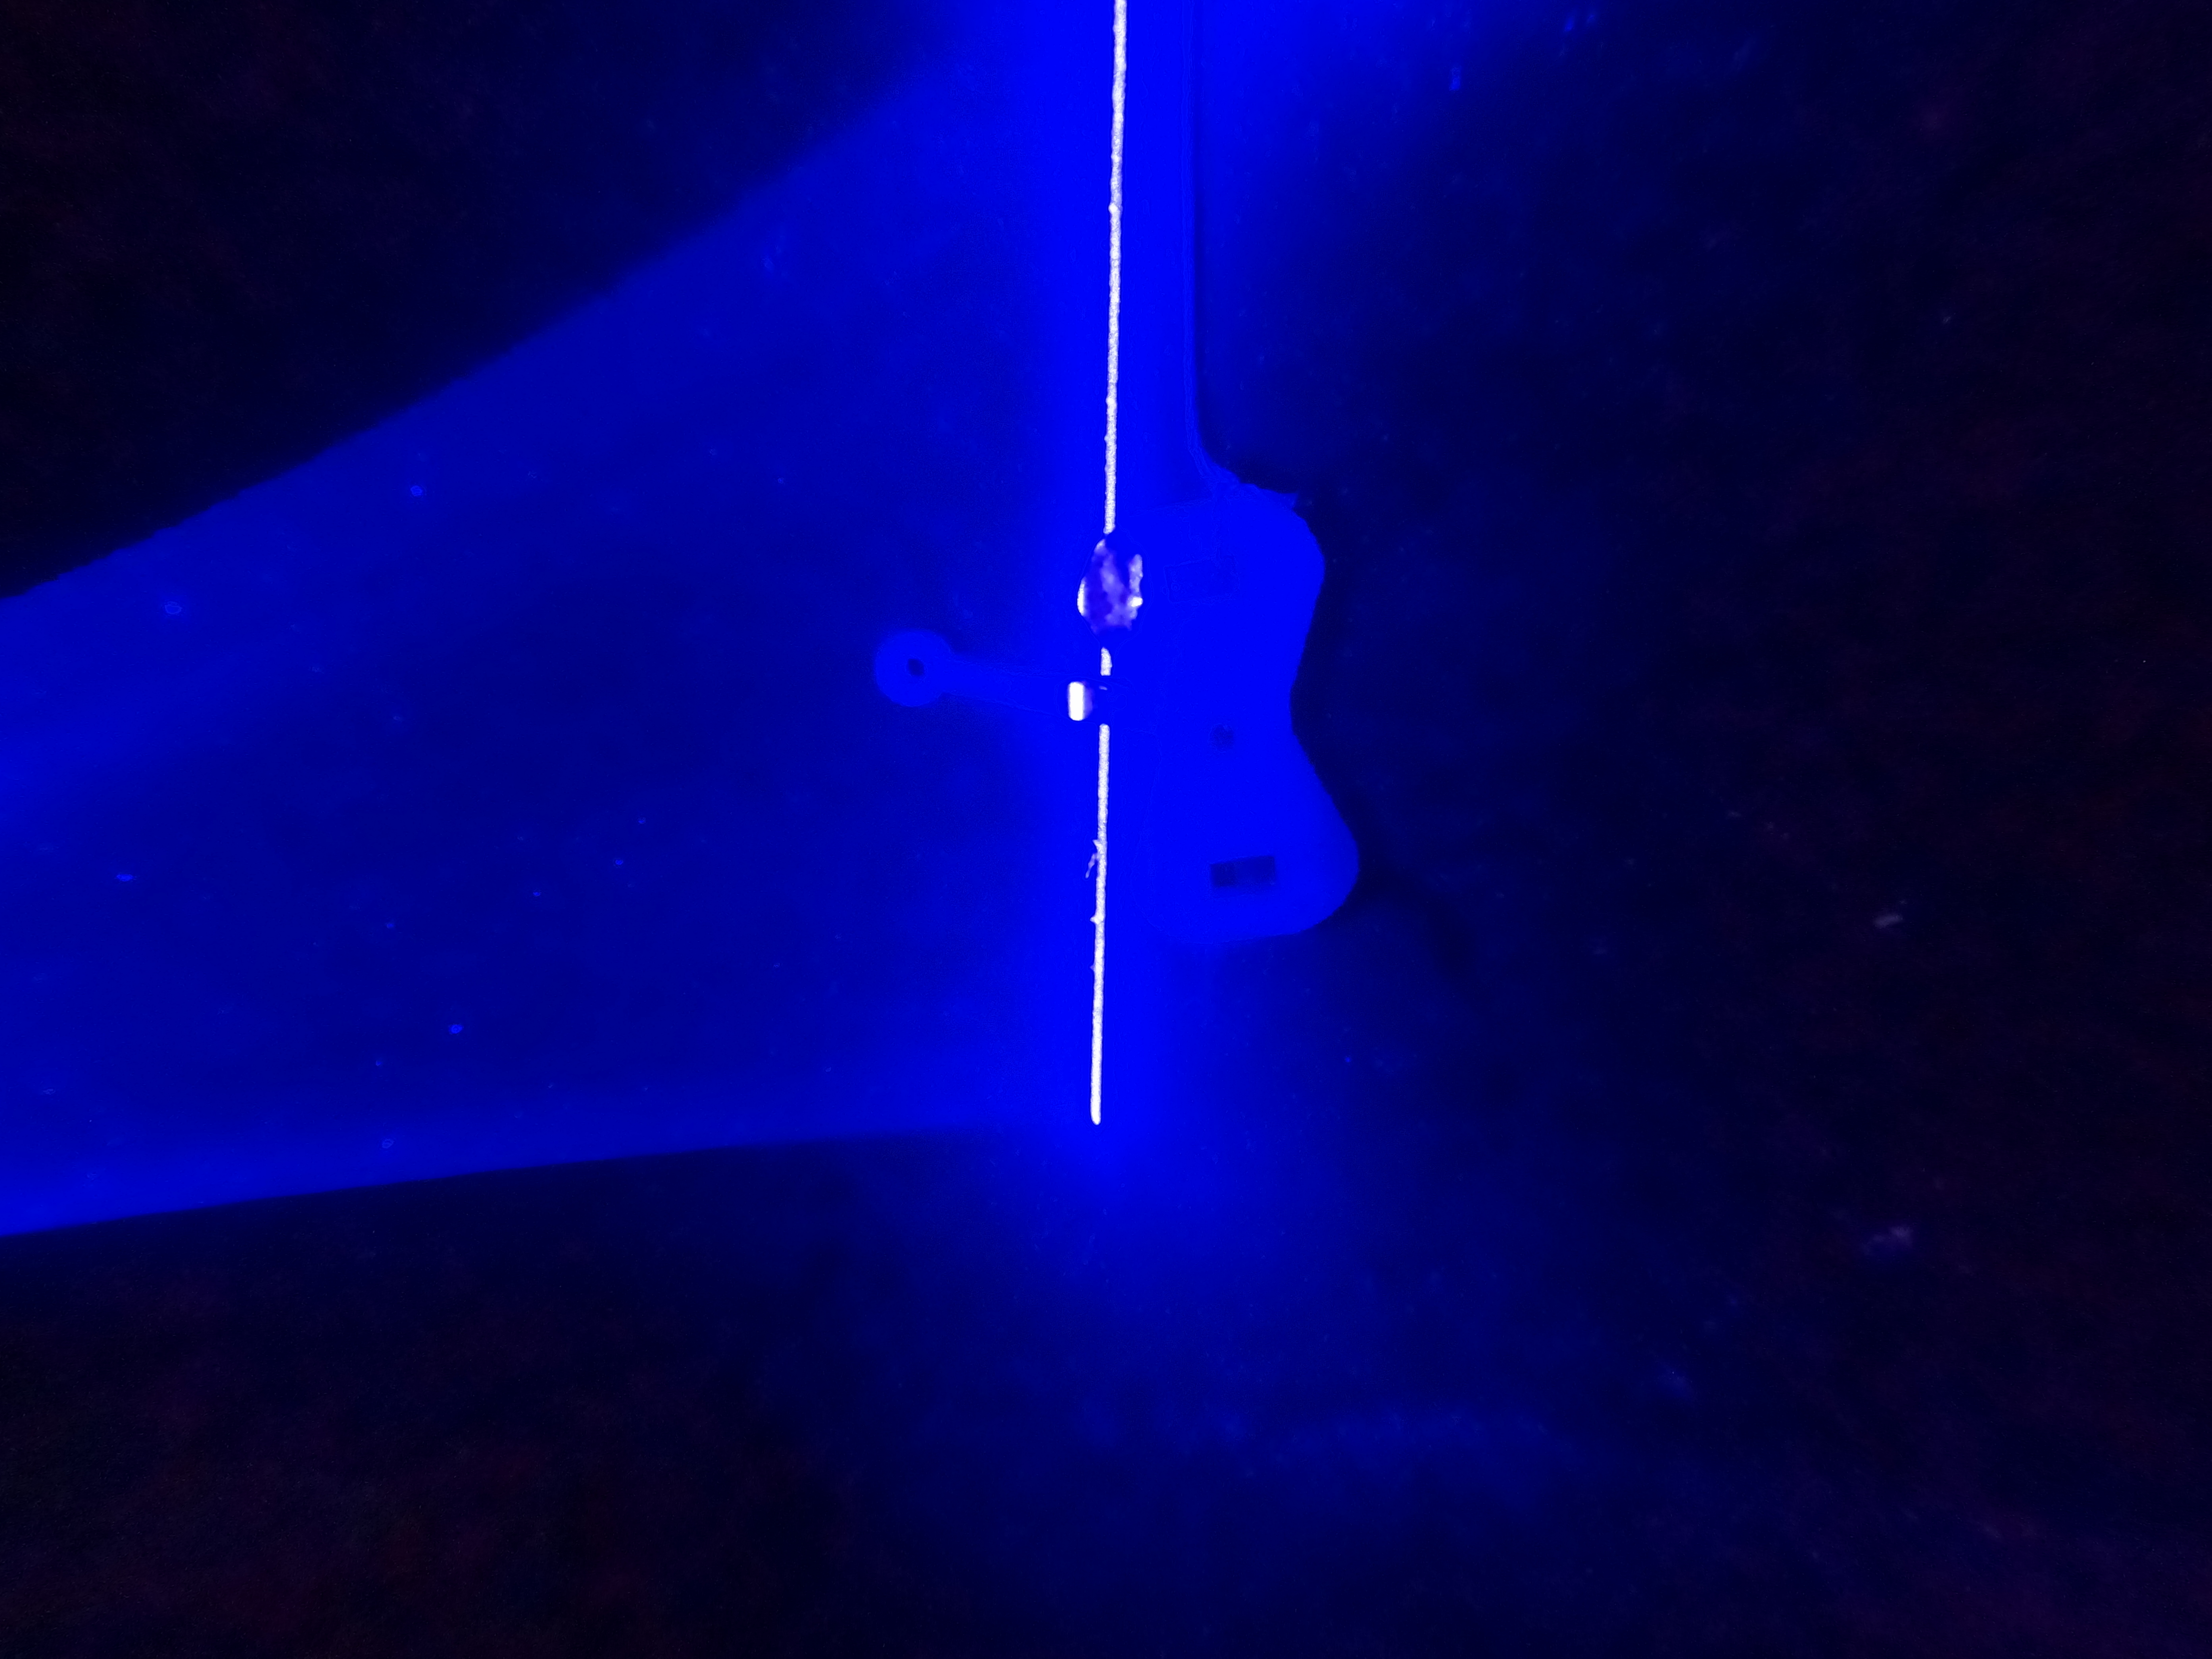

Supplement: Supplementary file 2269 [file G0016578.pdf › Level_1_2/G0016578.pdf]

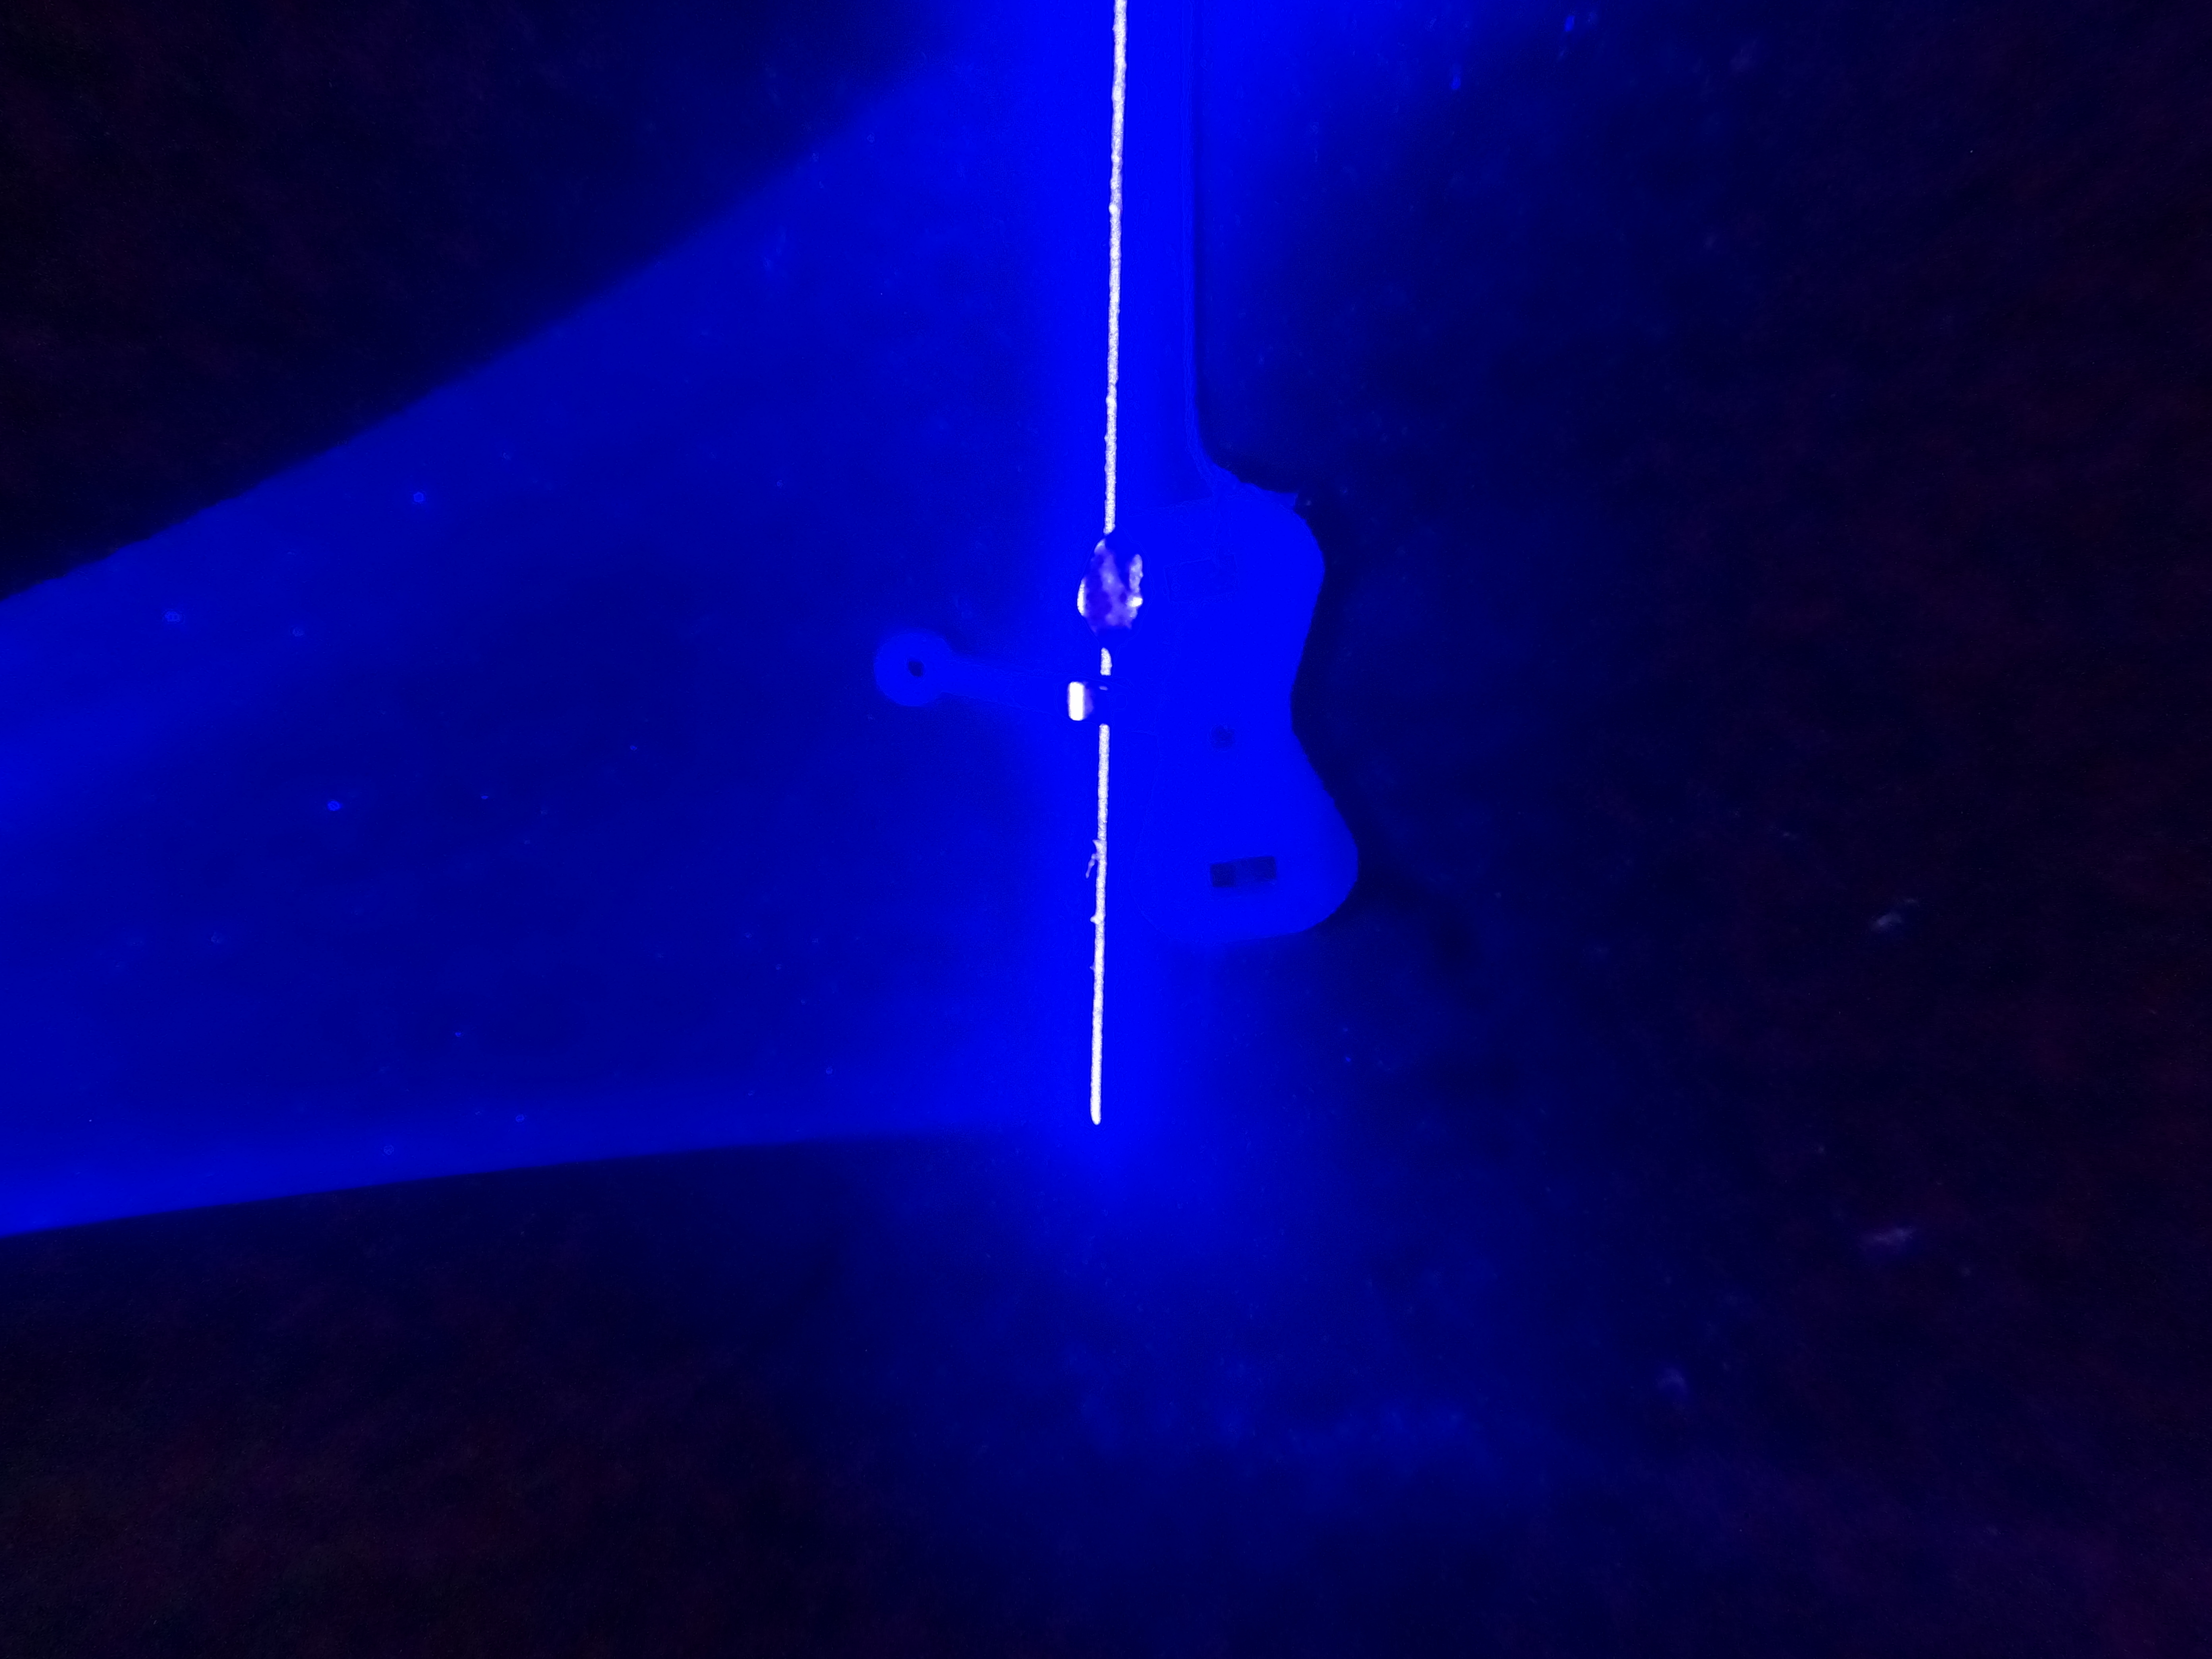

Supplement: Supplementary file 2270 [file G0016579.pdf › Level_1_2/G0016579.pdf]

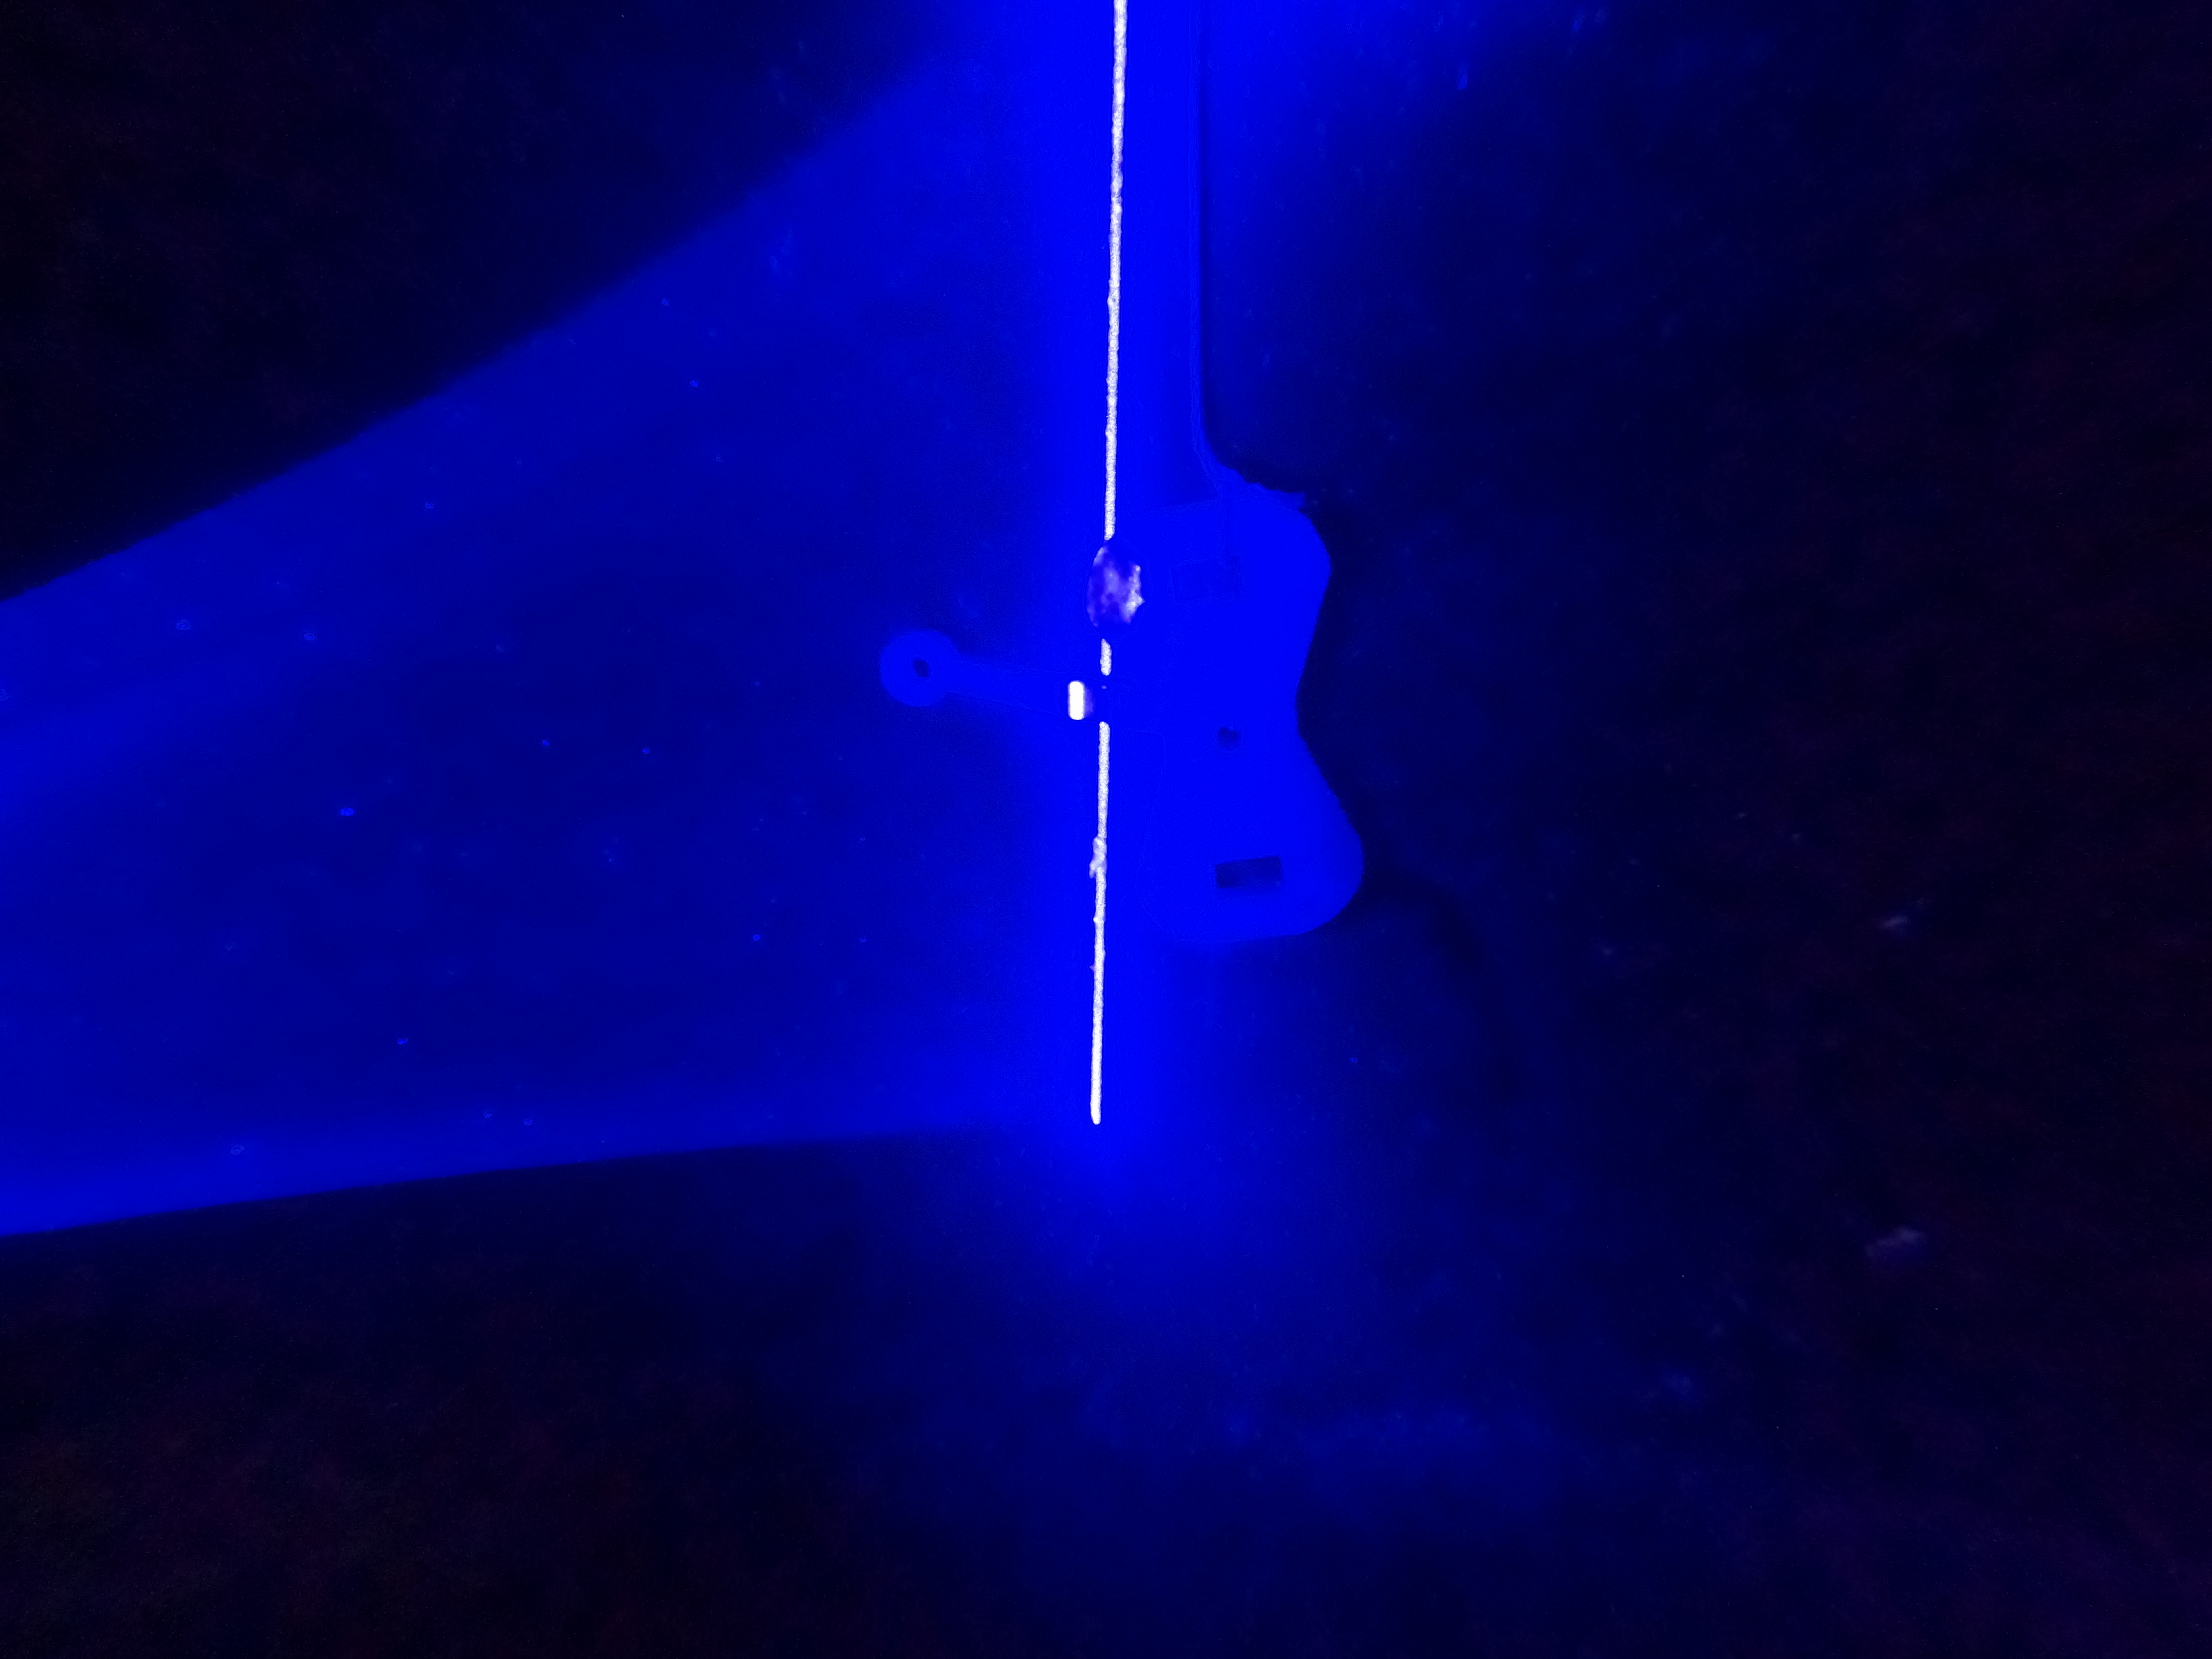

Supplement: Supplementary file 2271 [file G0016580.pdf › Level_1_2/G0016580.pdf]

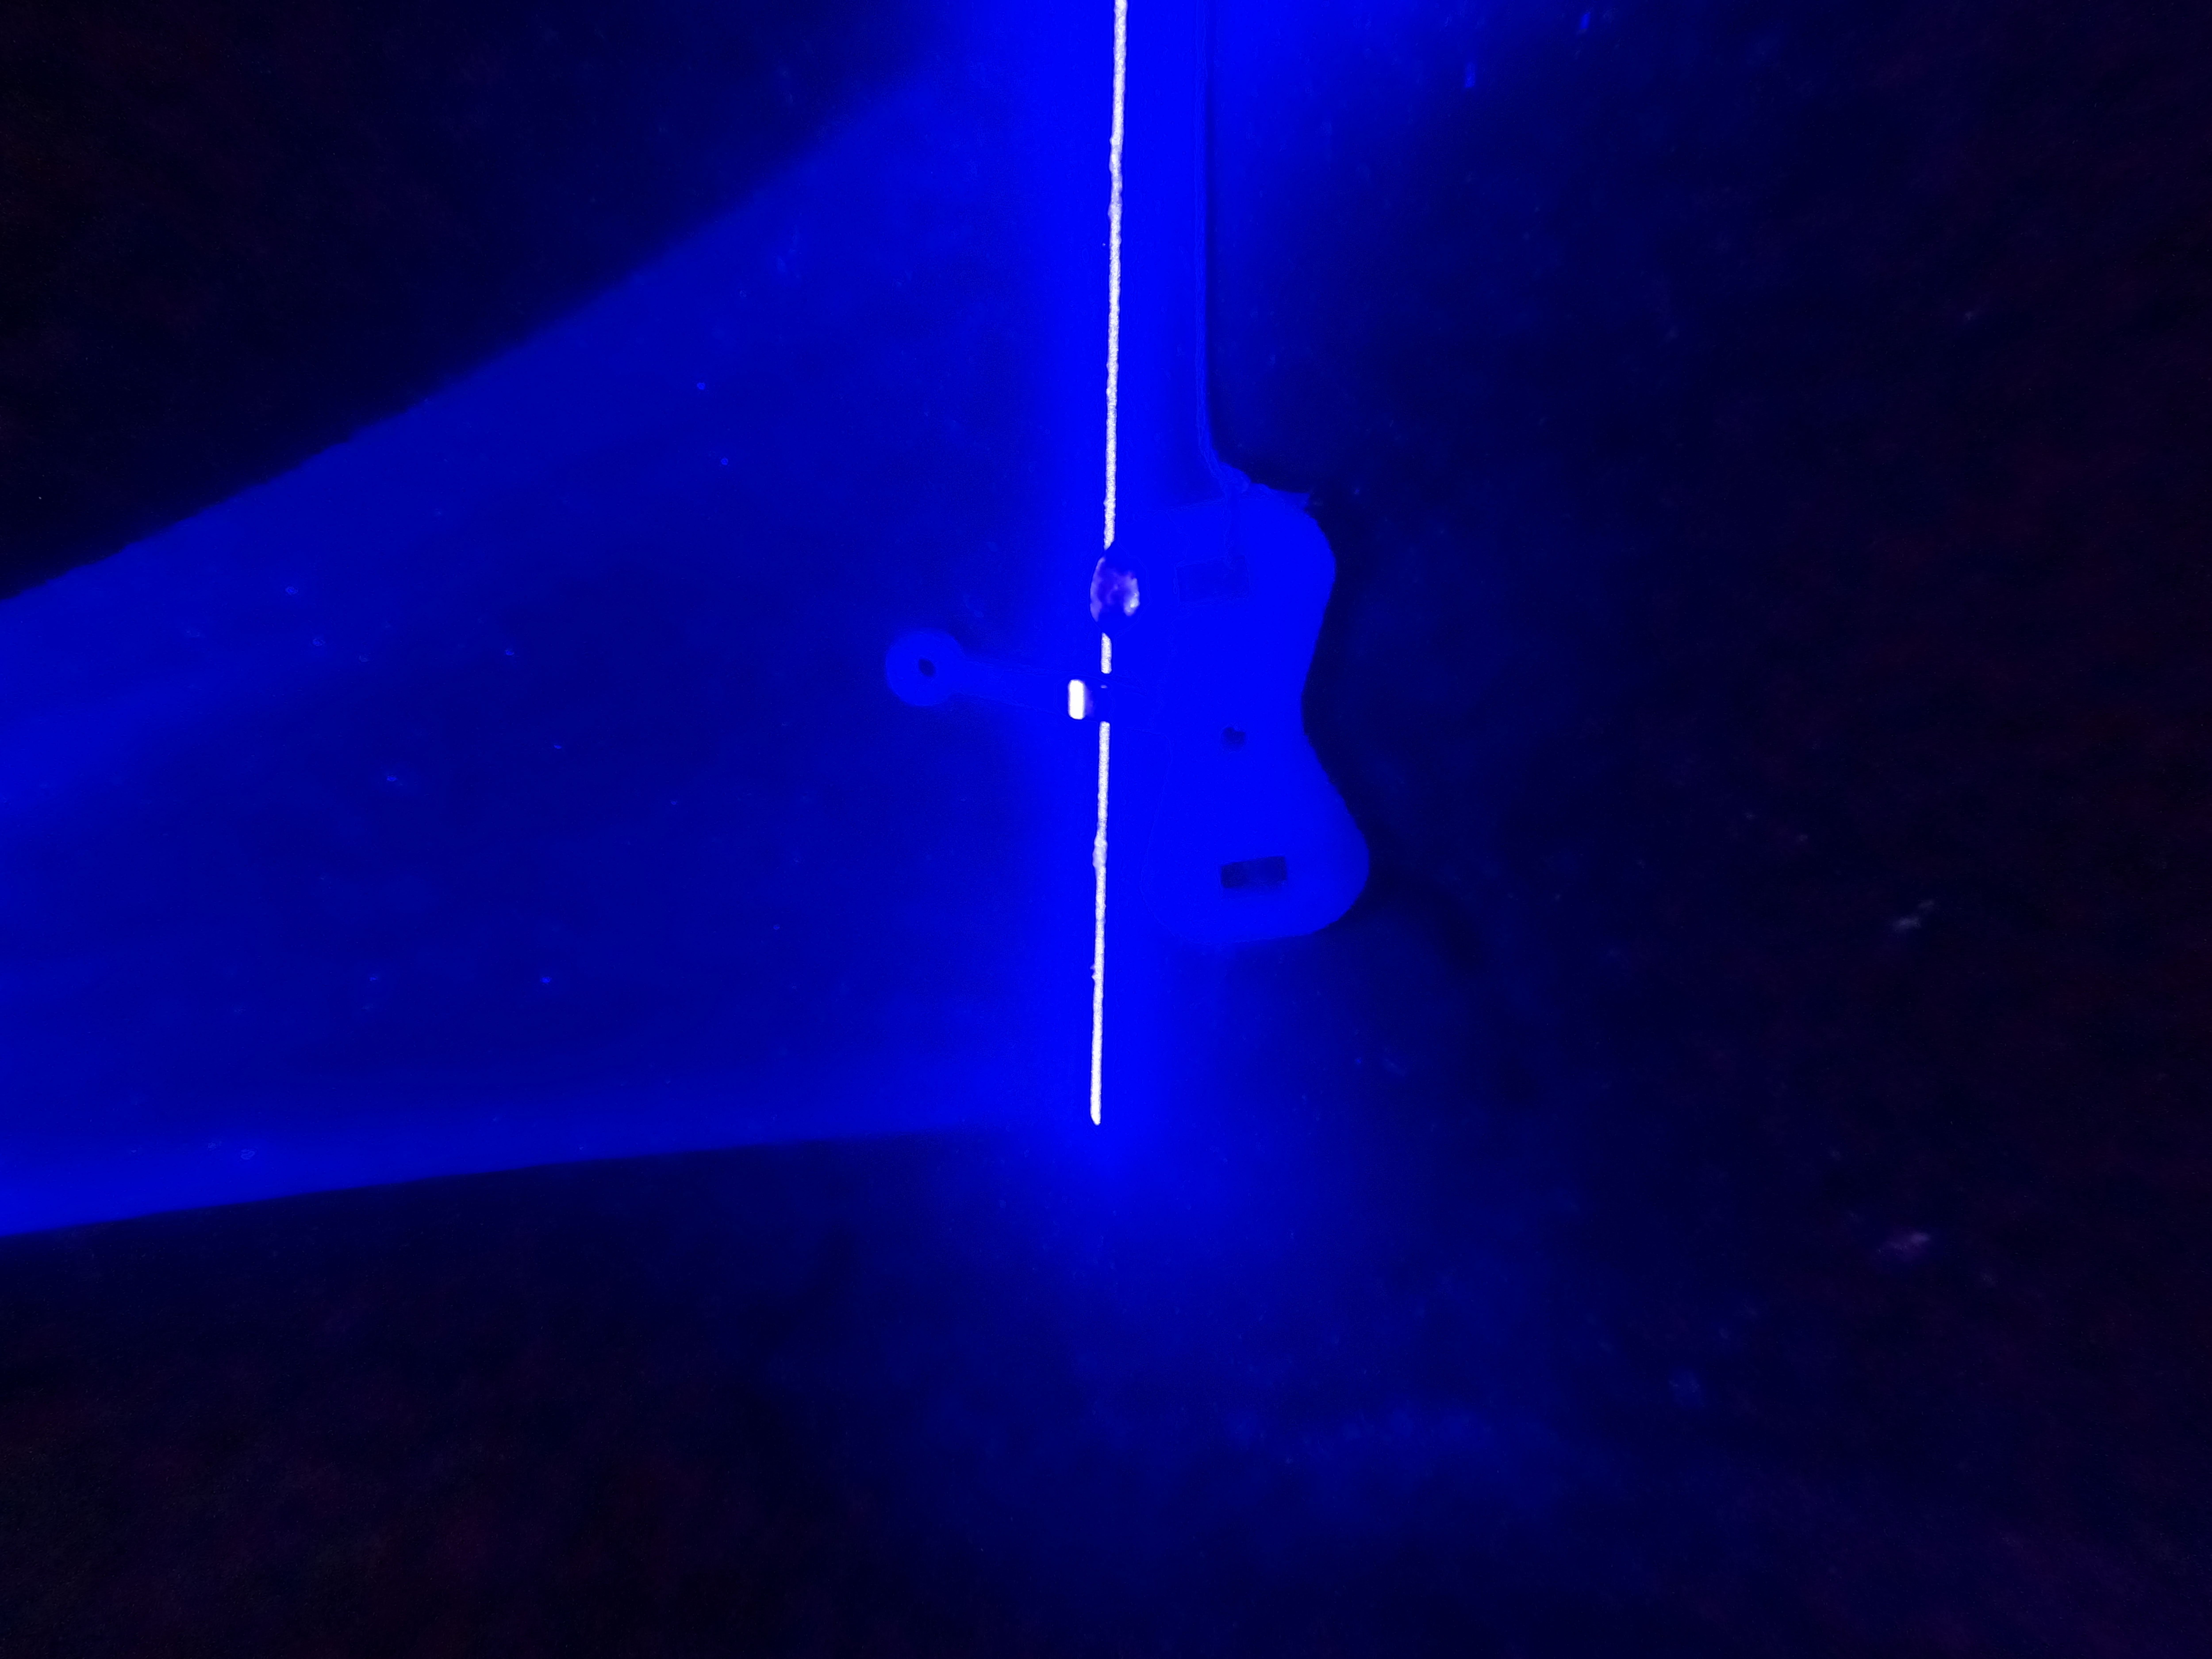

Supplement: Supplementary file 2272 [file G0016581.pdf › Level_1_2/G0016581.pdf]

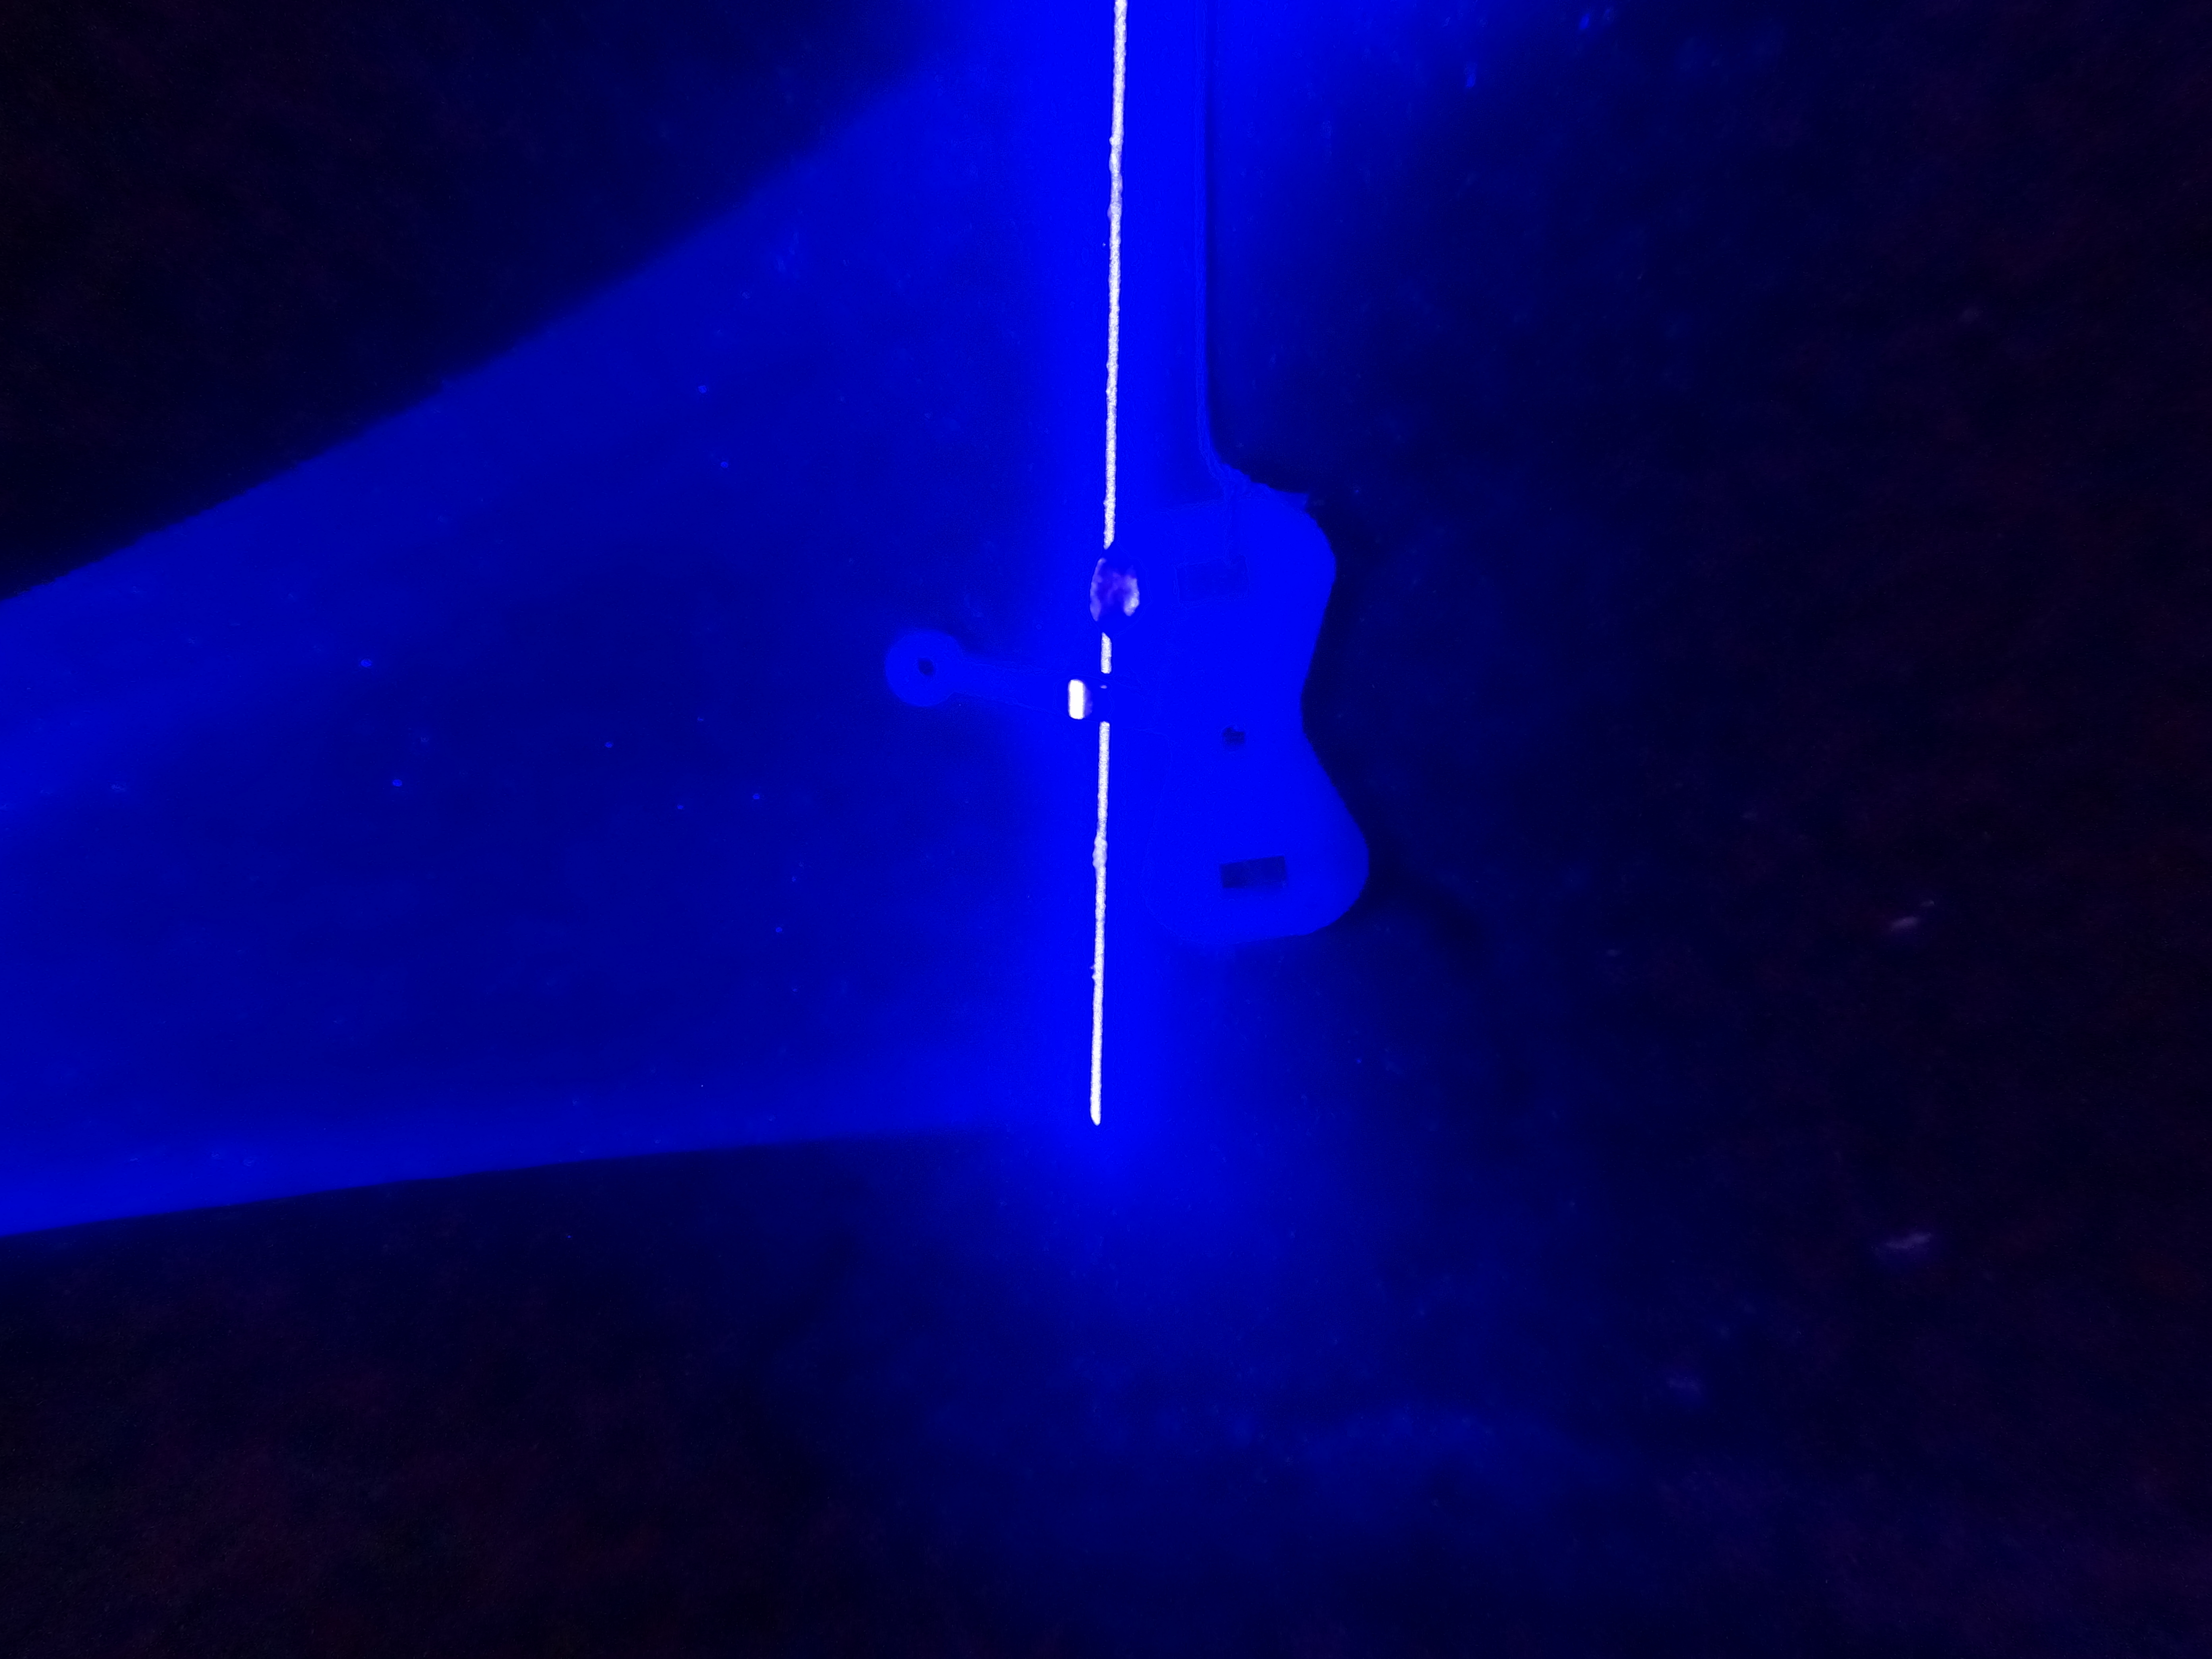

Supplement: Supplementary file 2273 [file G0016582.pdf › Level_1_2/G0016582.pdf]

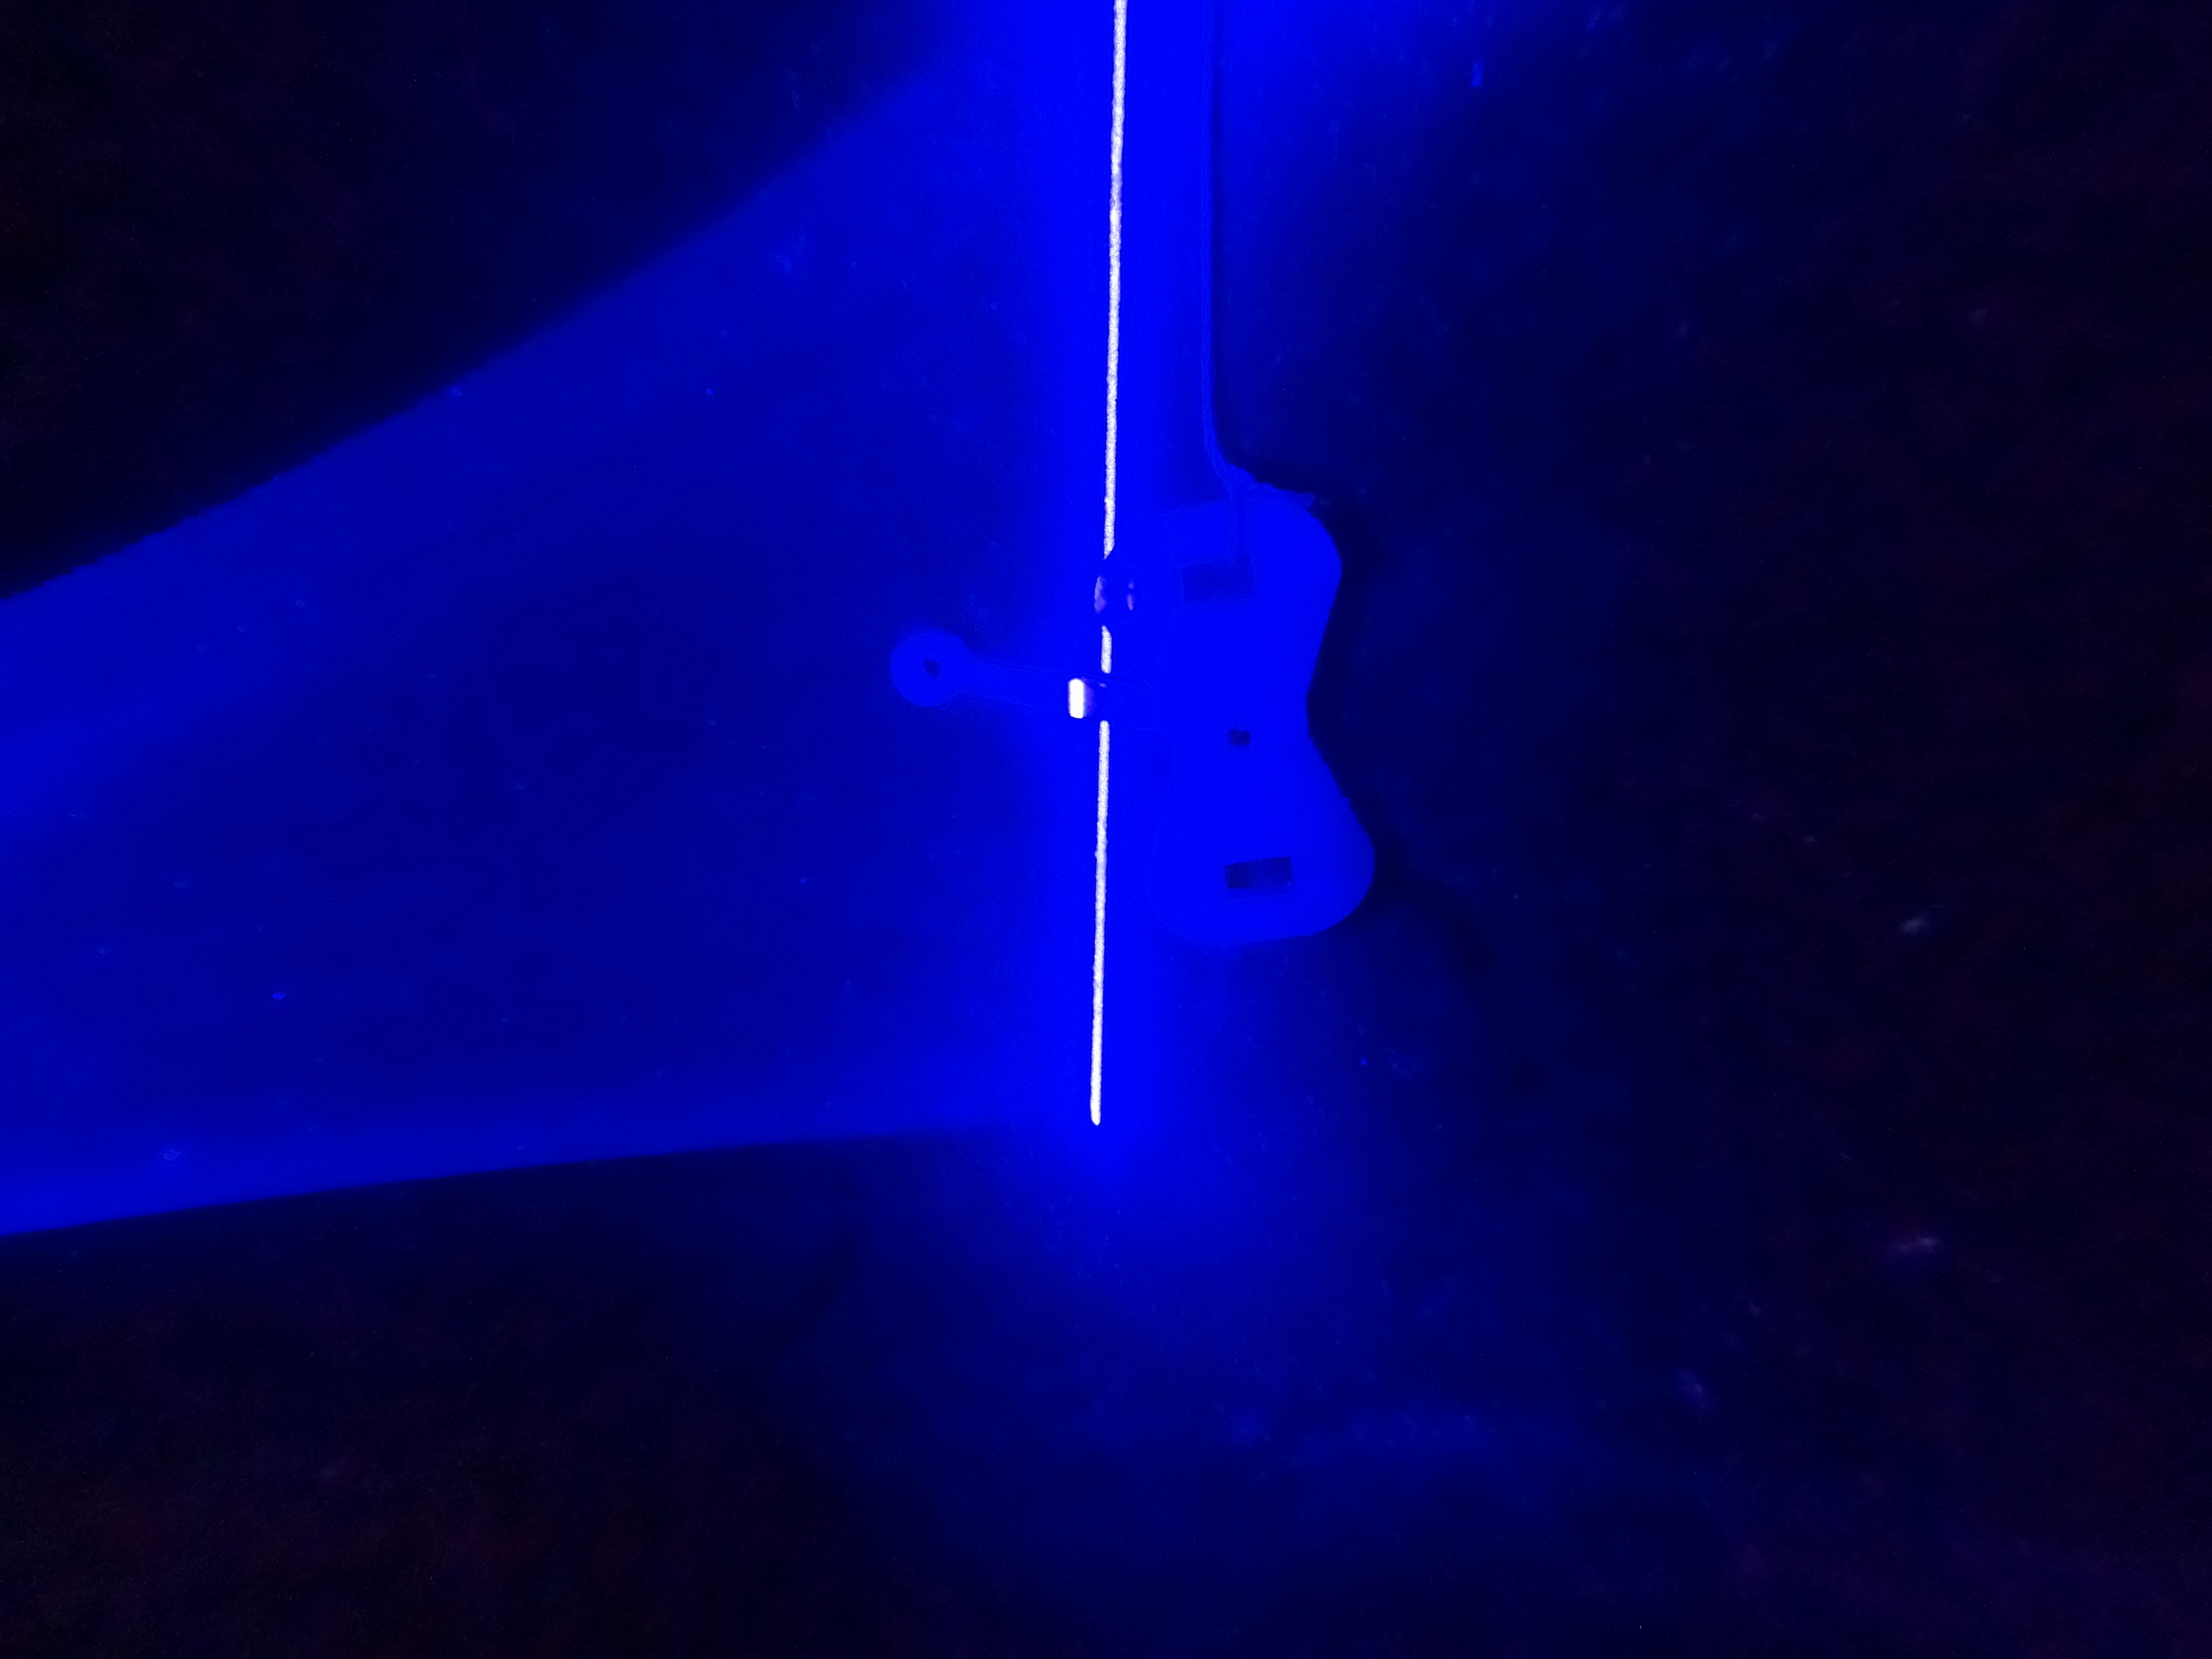

Supplement: Supplementary file 2274 [file G0016583.pdf › Level_1_2/G0016583.pdf]

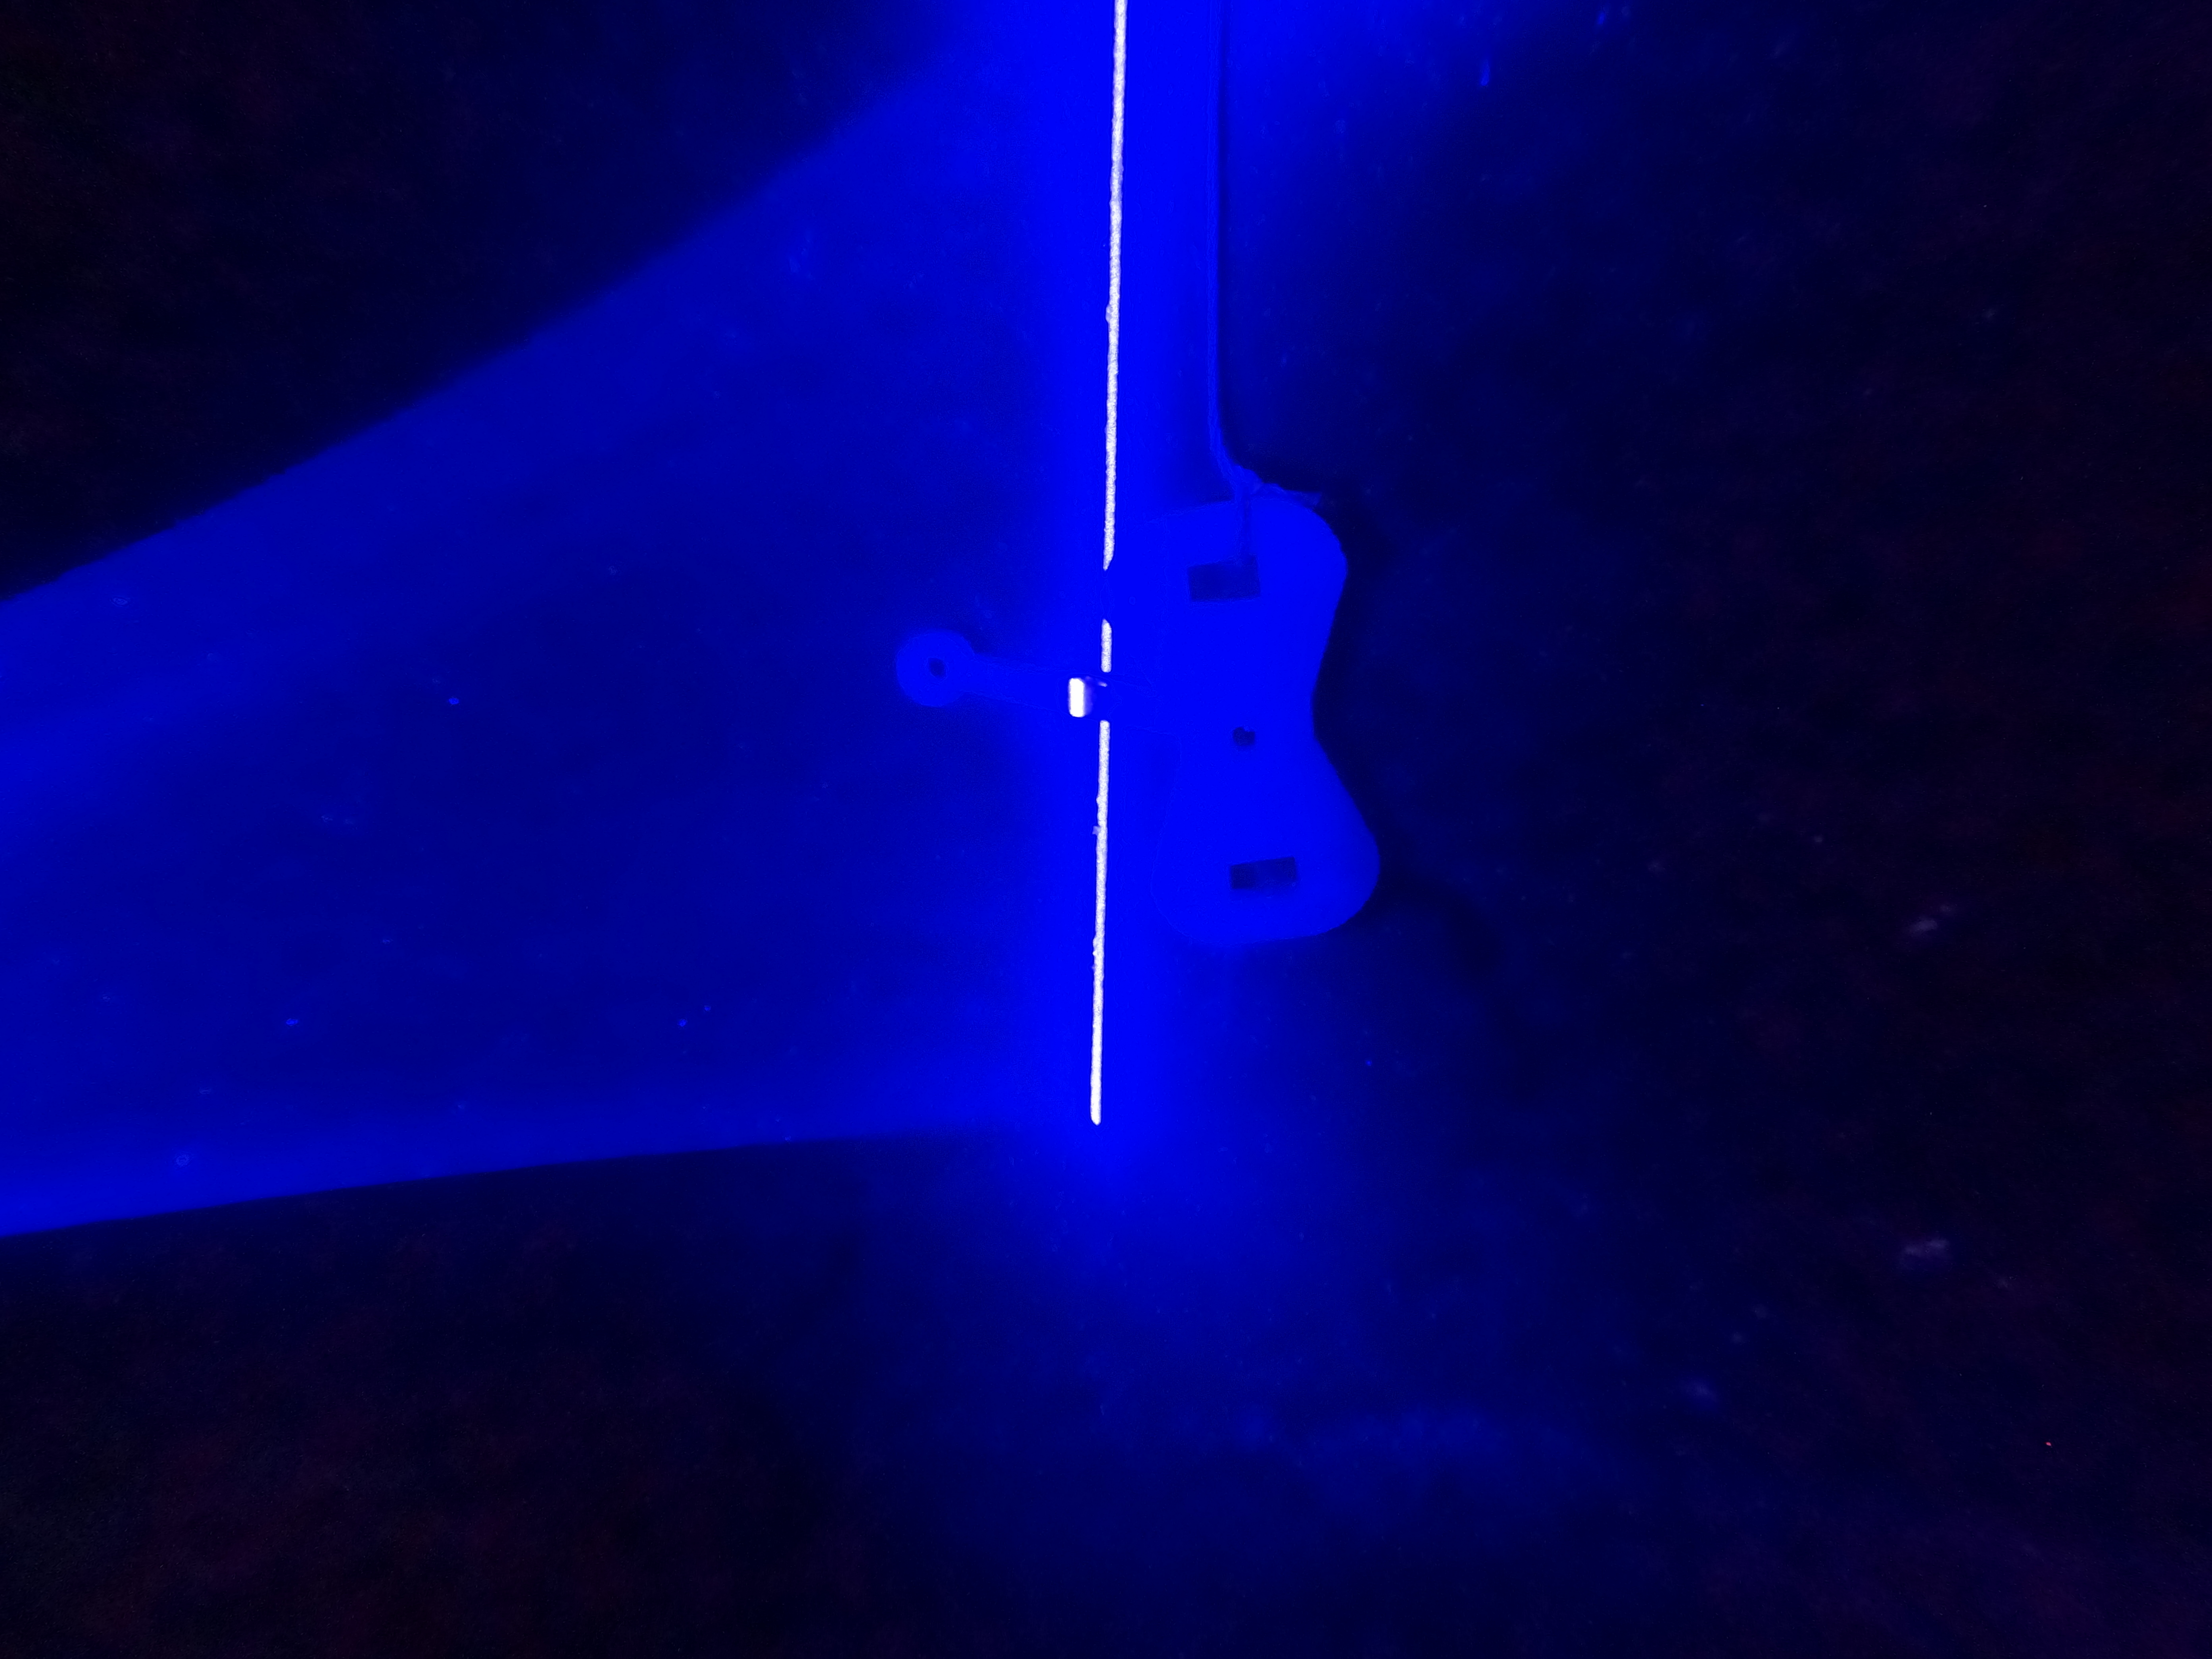

Supplement: Supplementary file 2275 [file G0016584.pdf › Level_1_2/G0016584.pdf]

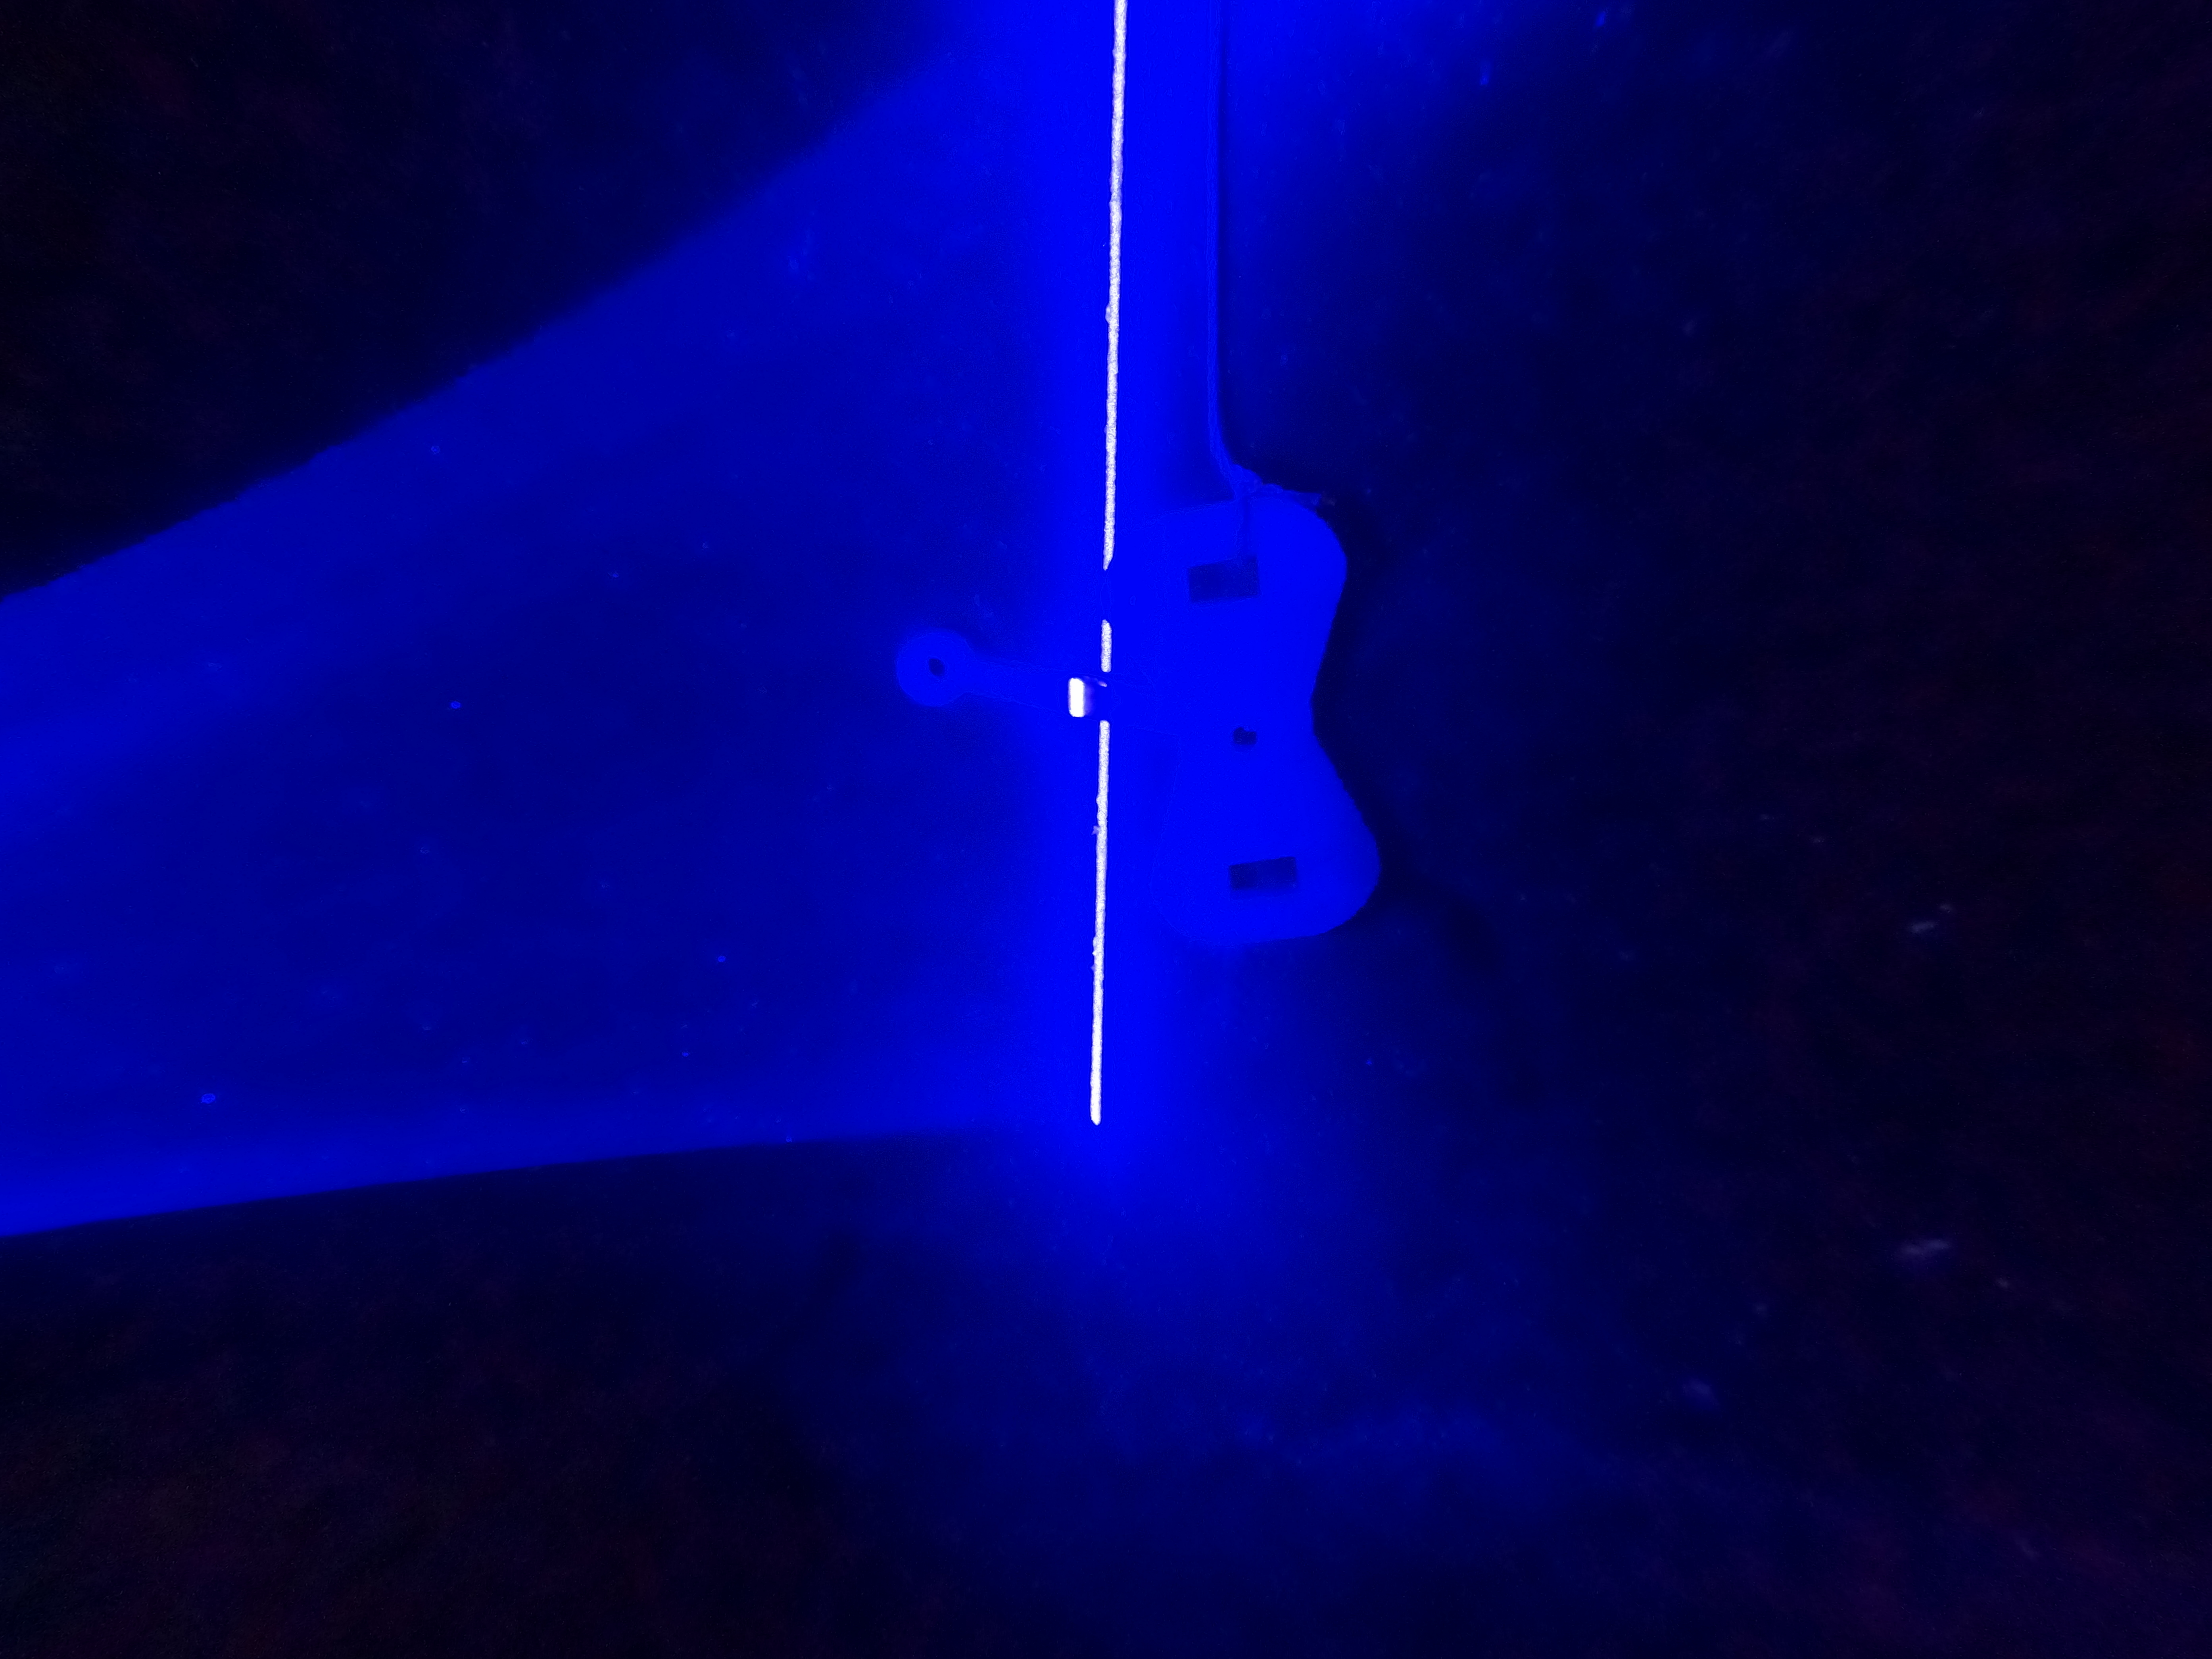

Supplement: Supplementary file 2276 [file G0016585.pdf › Level_1_2/G0016585.pdf]

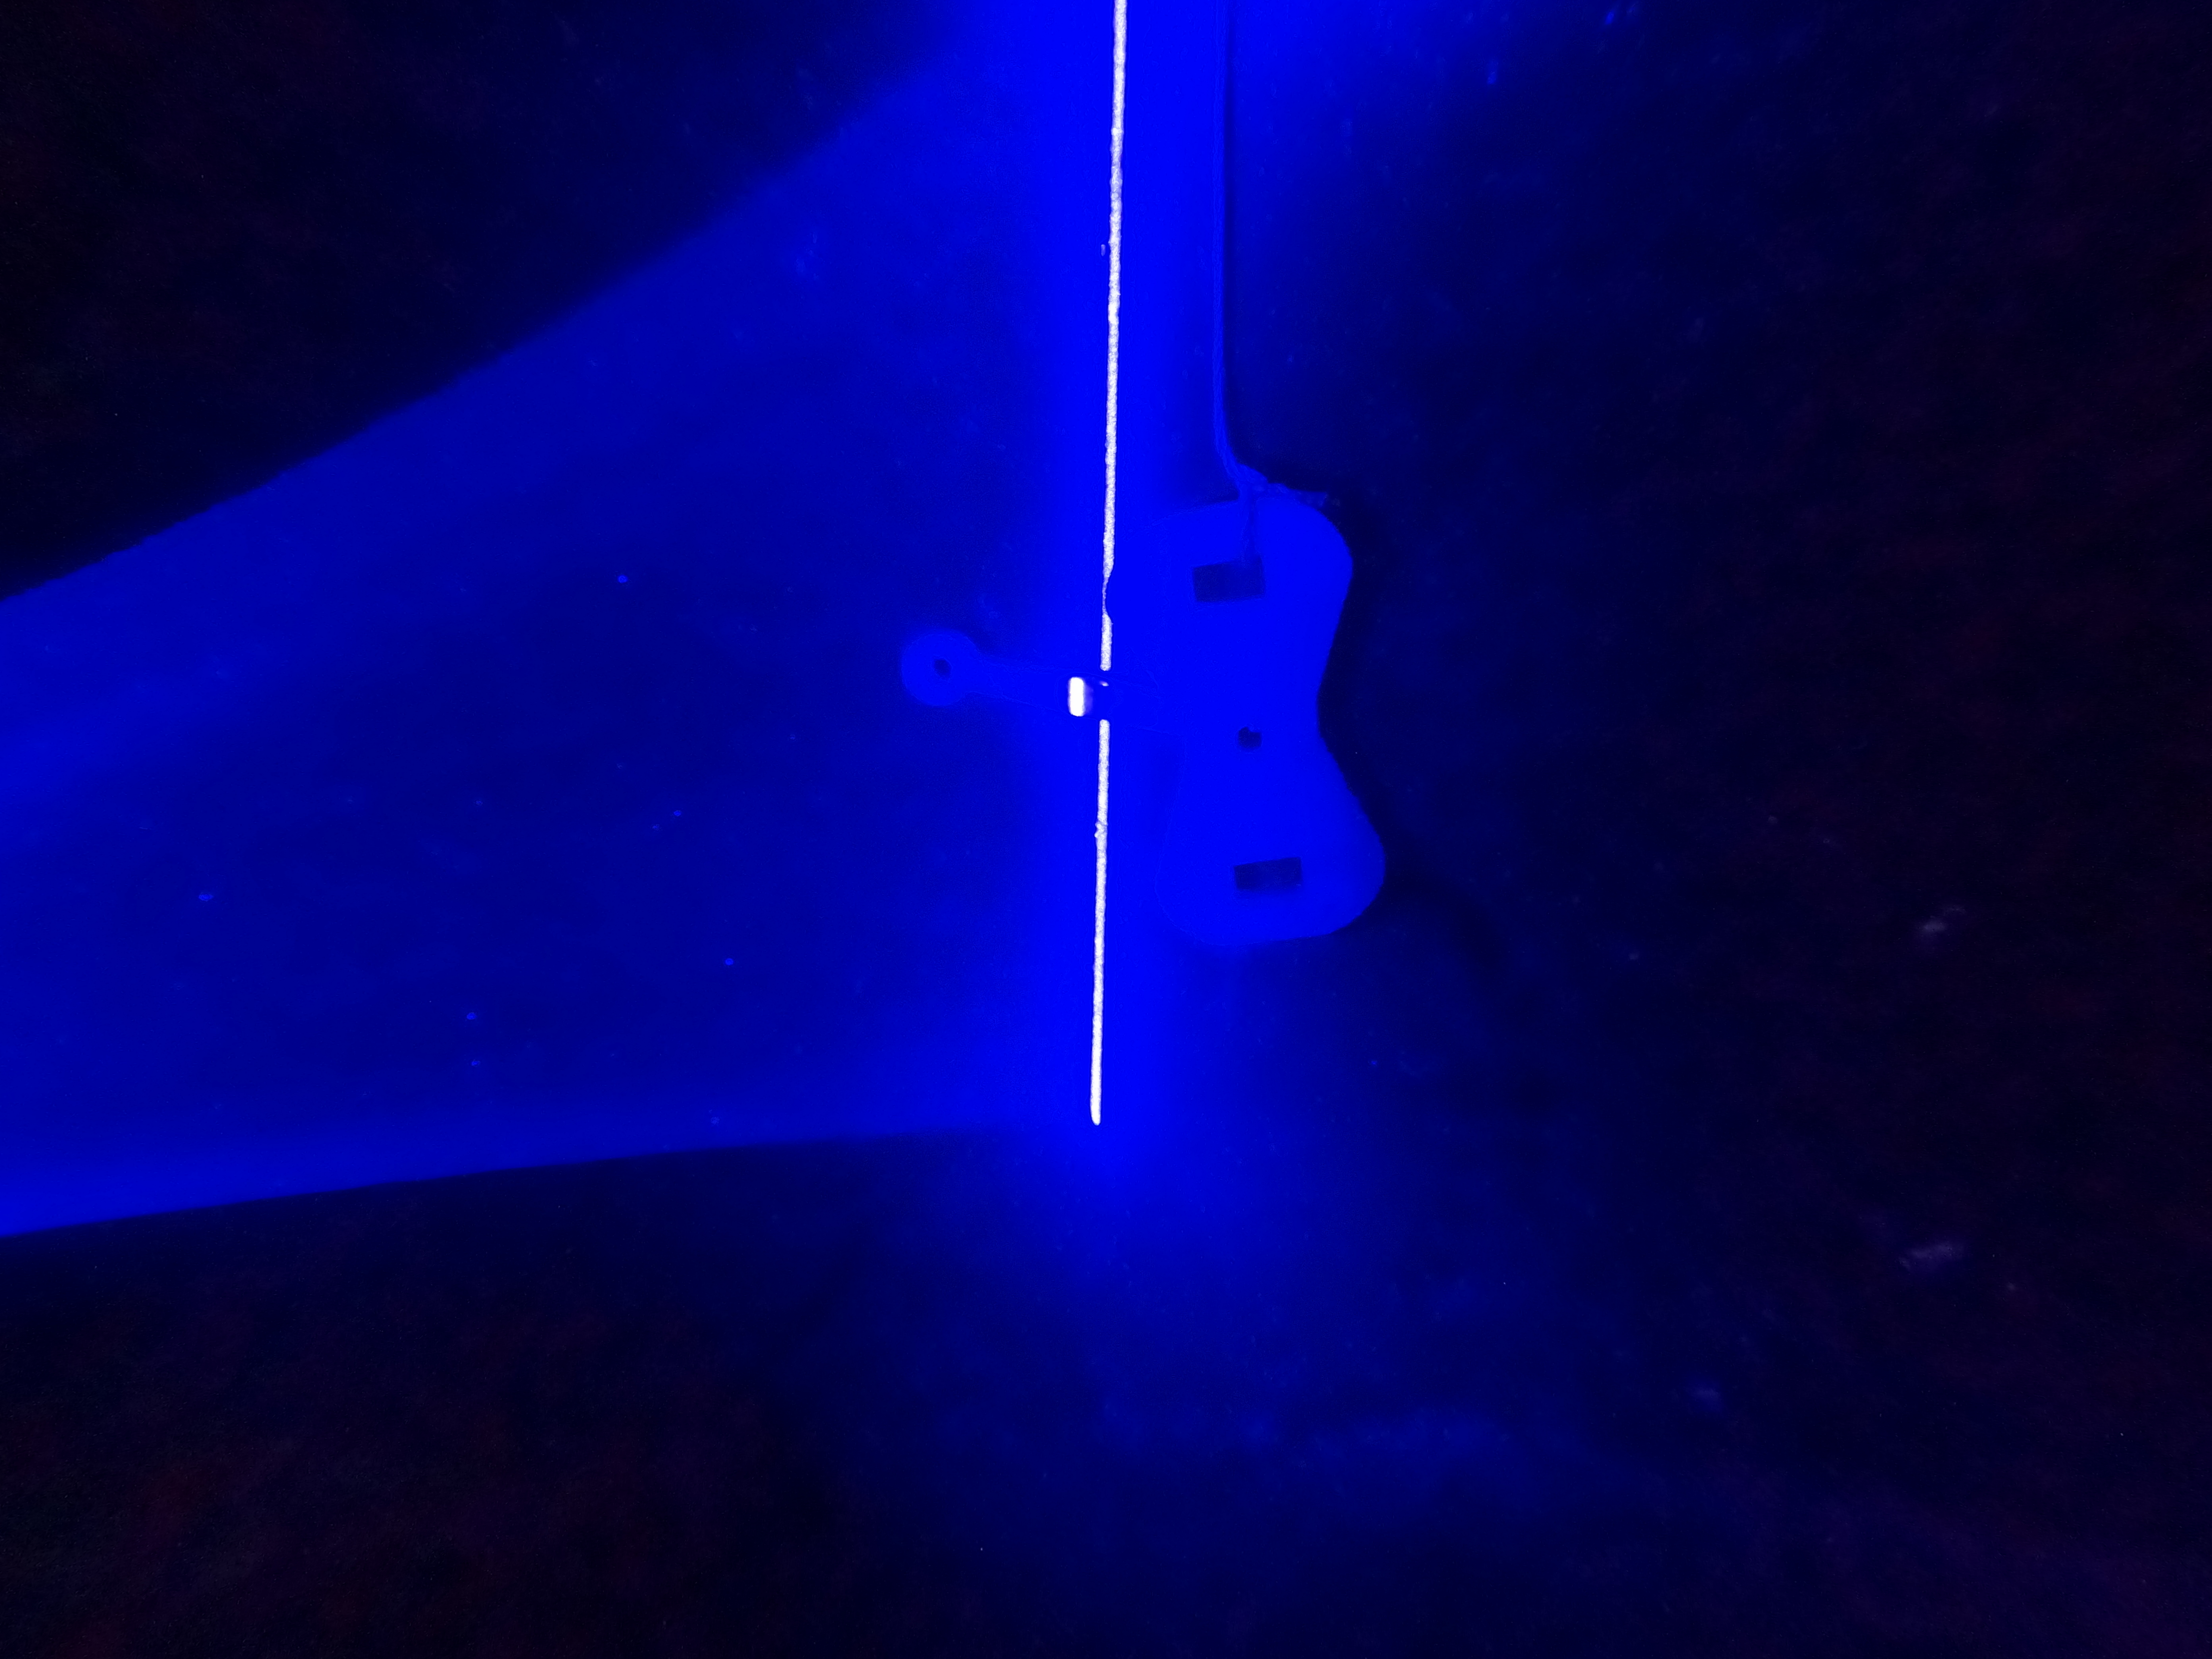

Supplement: Supplementary file 2277 [file G0016586.pdf › Level_1_2/G0016586.pdf]

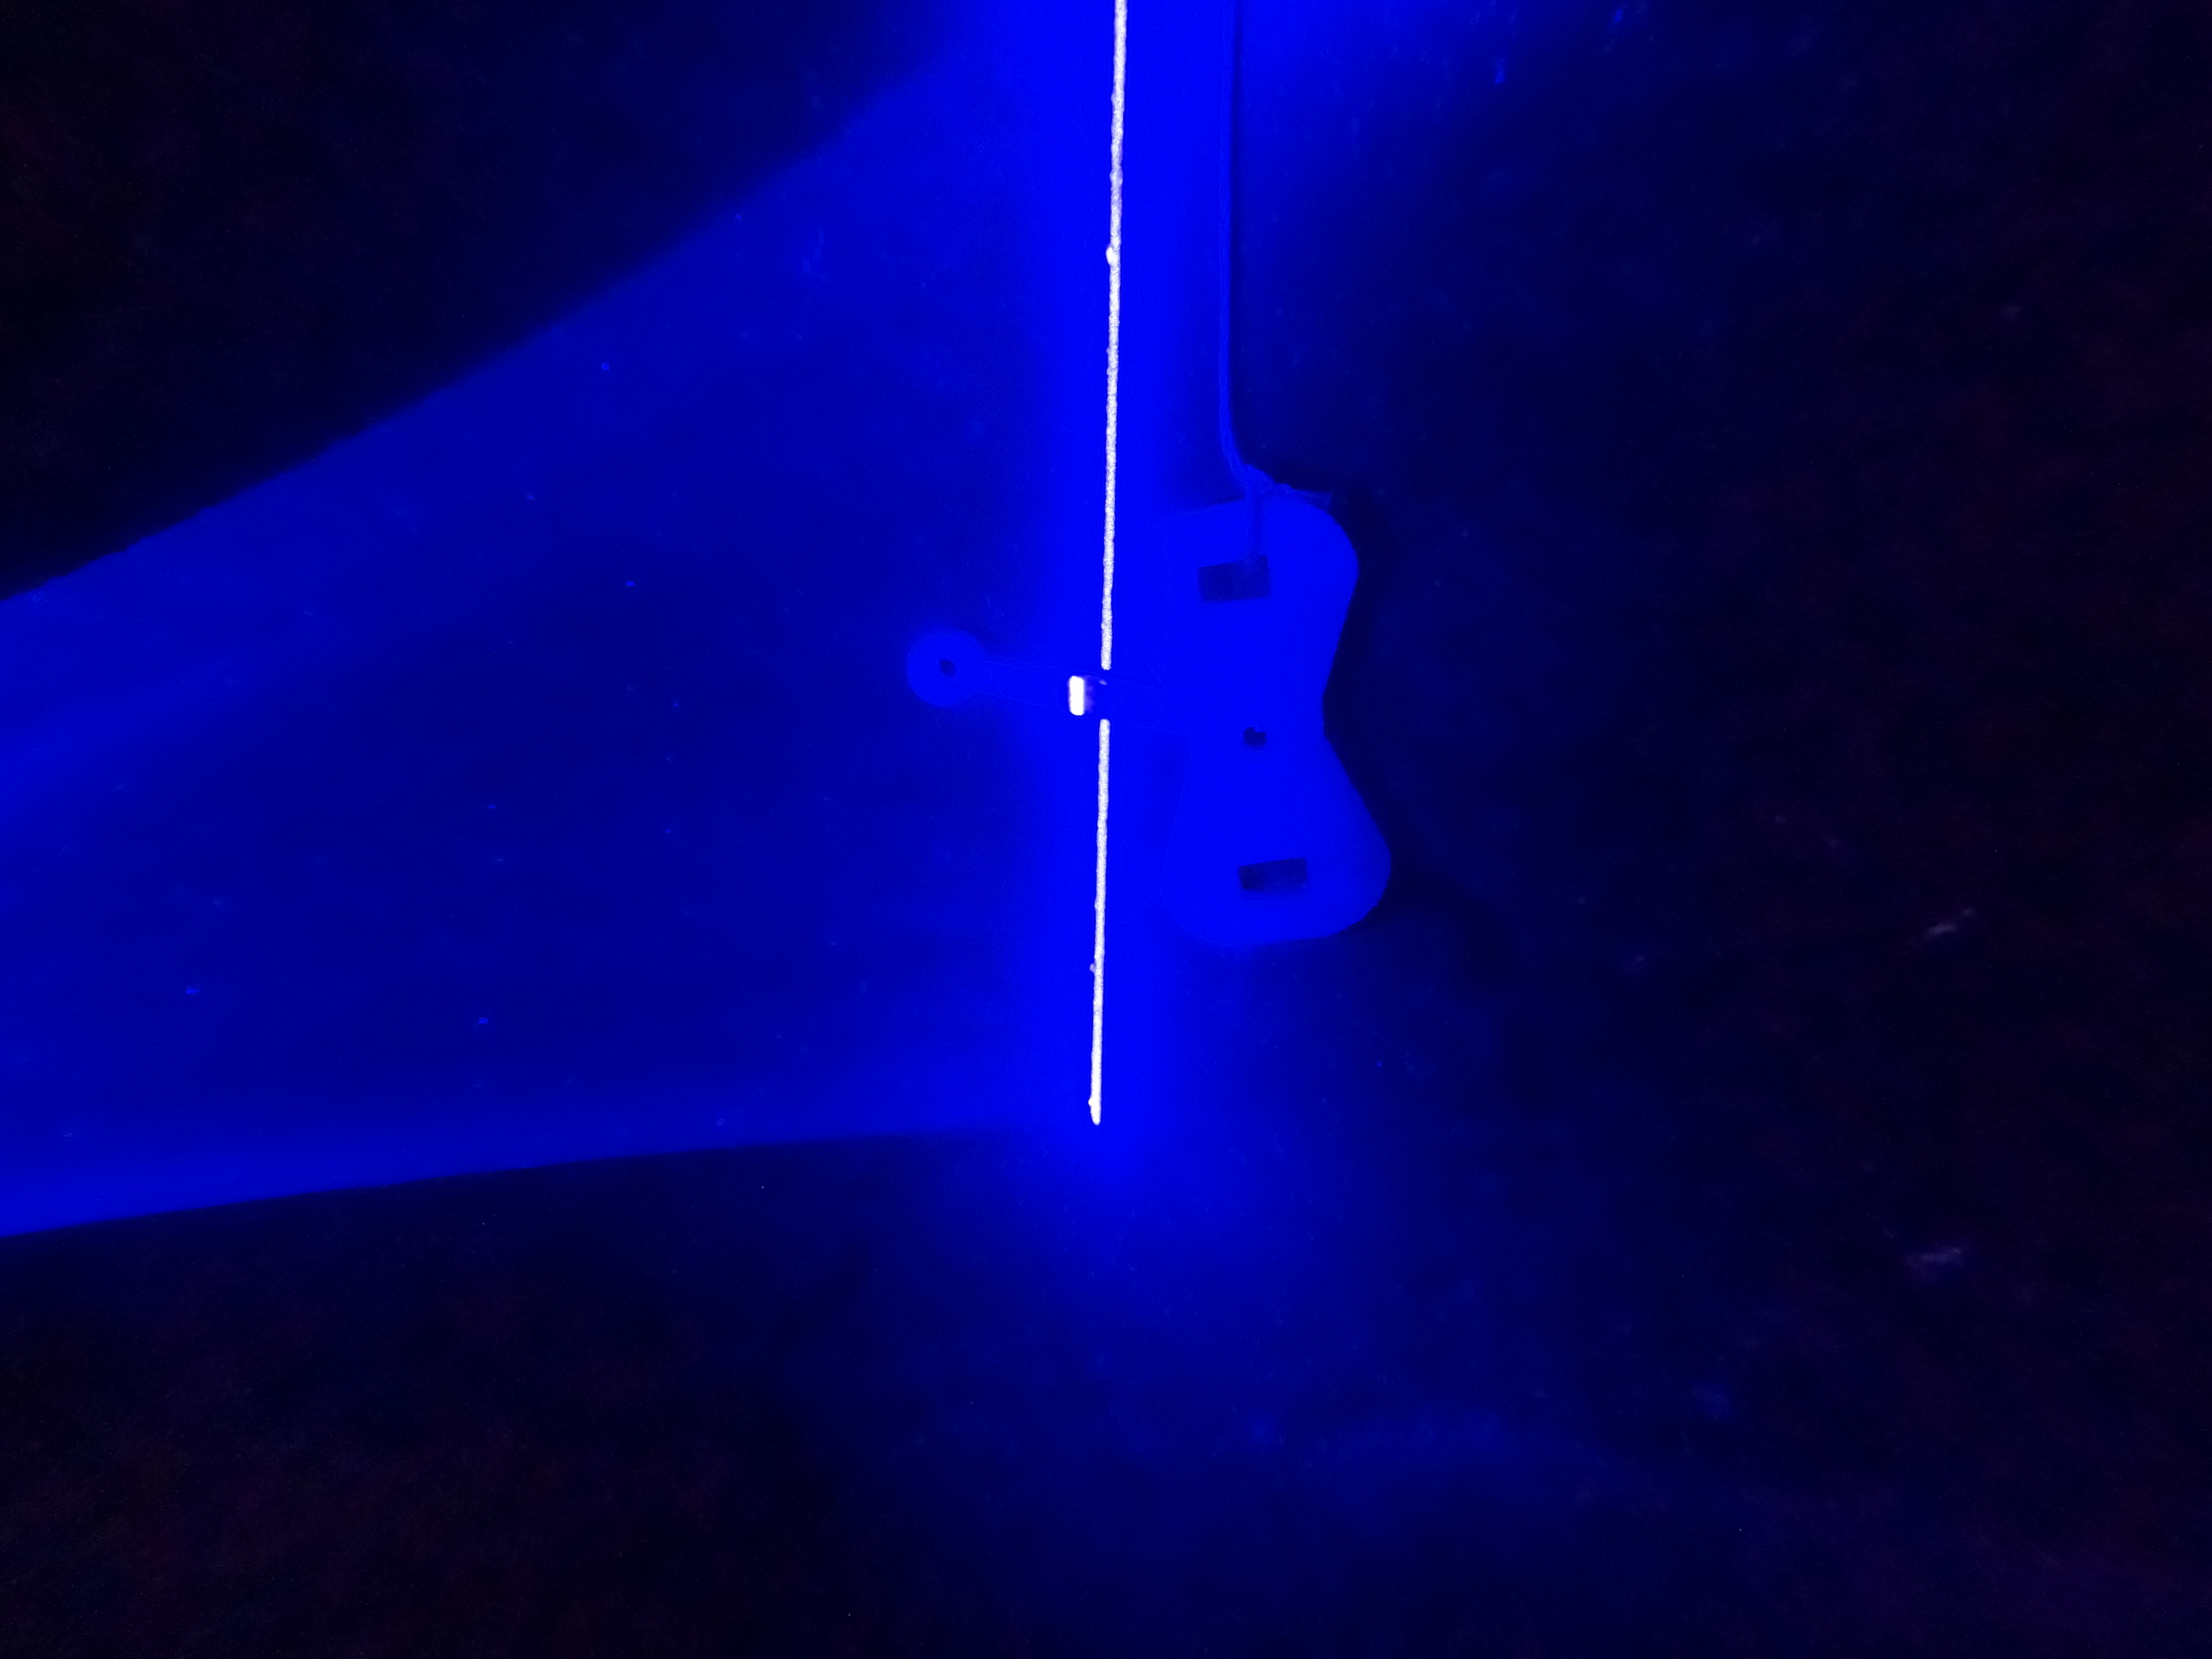

Supplement: Supplementary file 2278 [file G0016587.pdf › Level_1_2/G0016587.pdf]

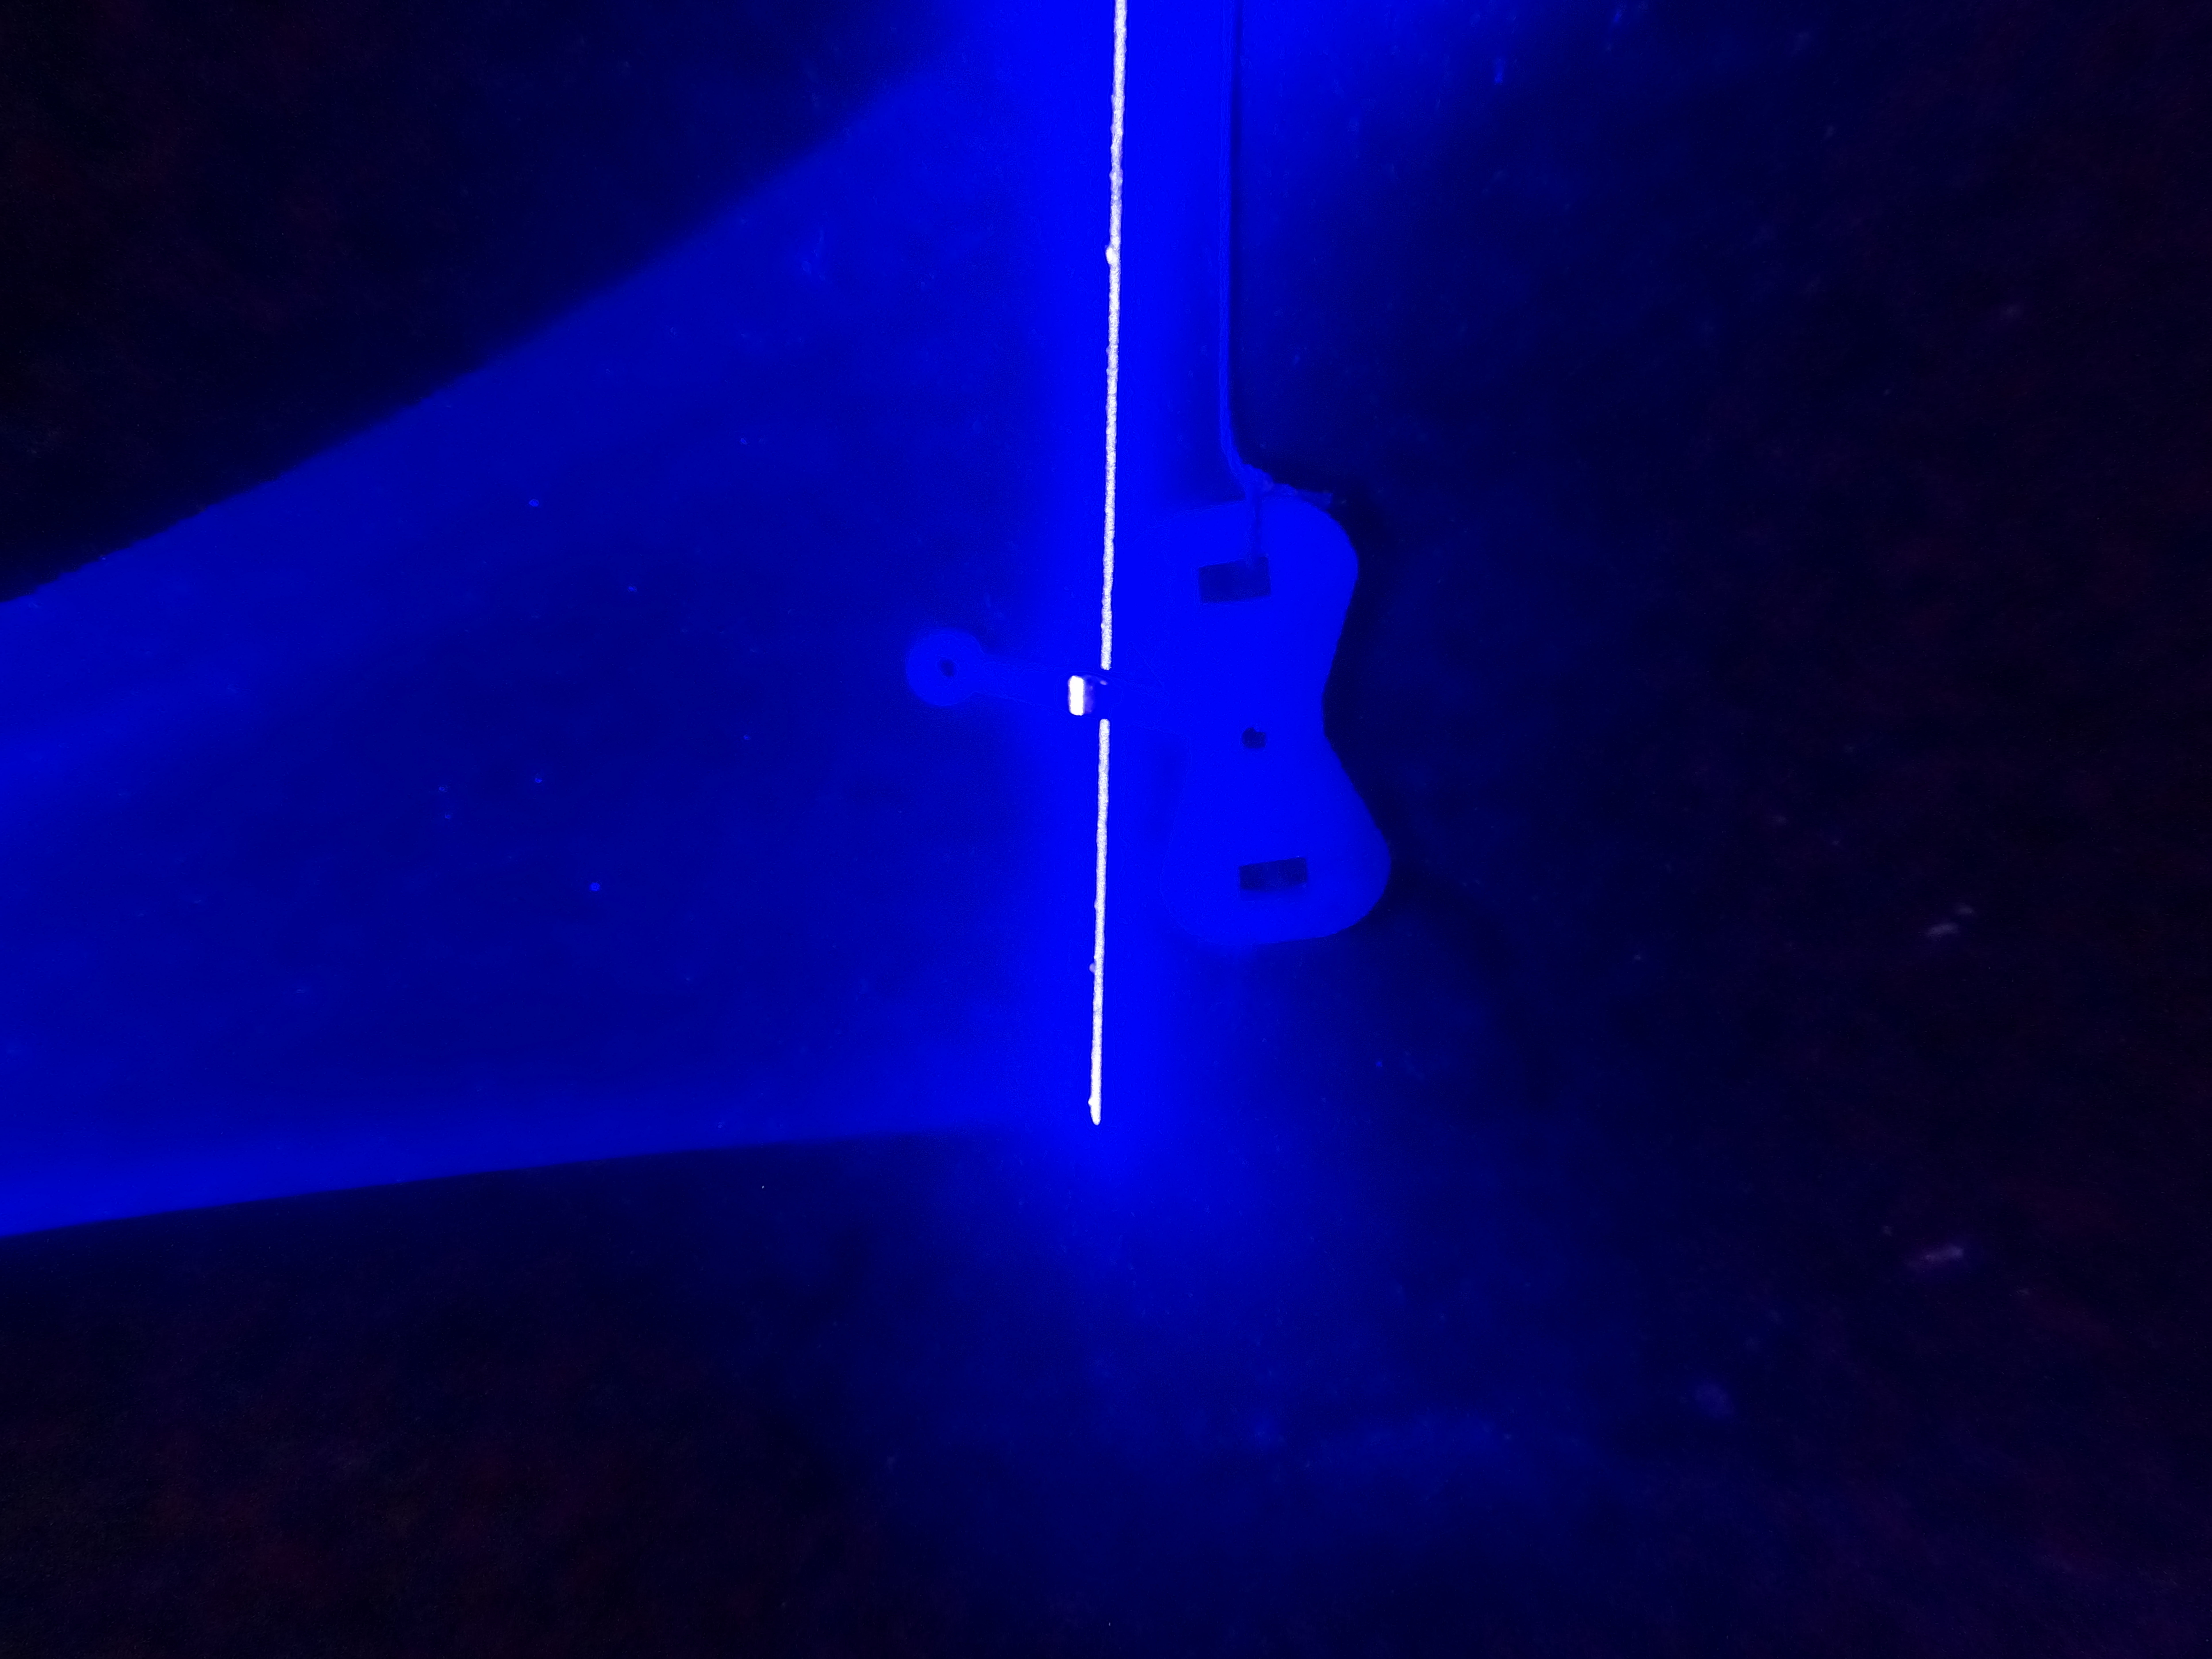

Supplement: Supplementary file 2279 [file G0016588.pdf › Level_1_2/G0016588.pdf]

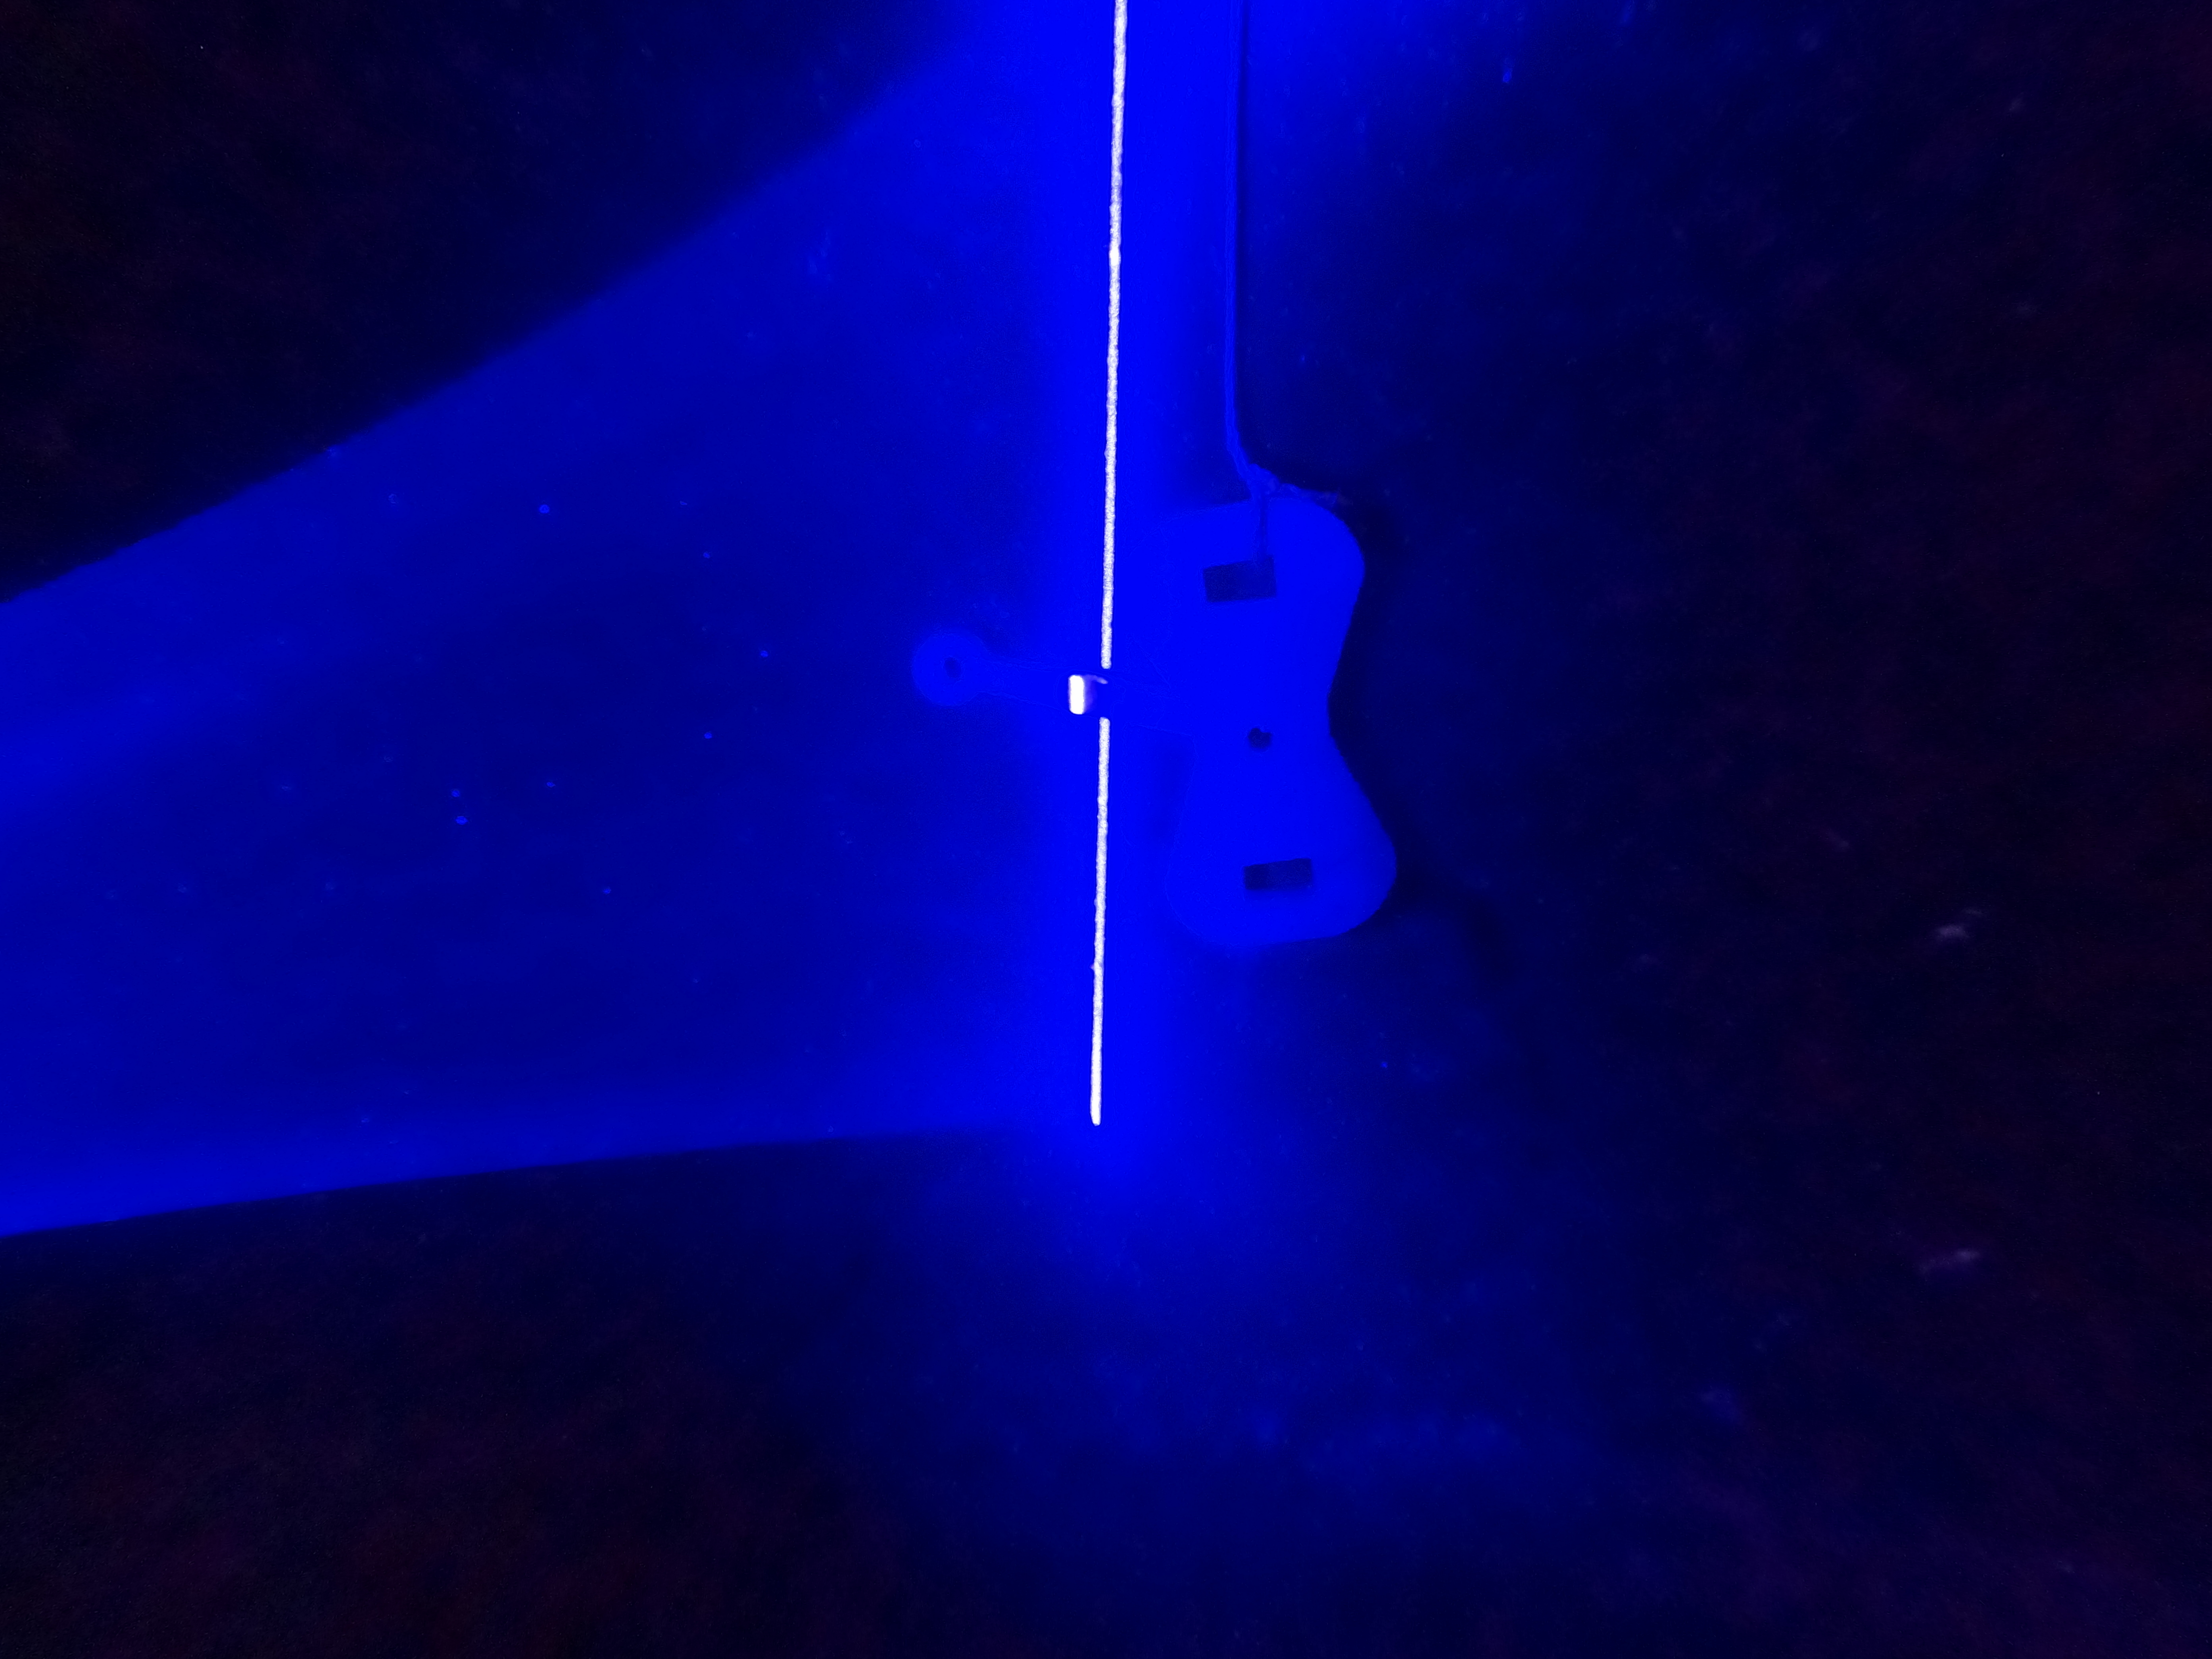

Supplement: Supplementary file 2280 [file G0016589.pdf › Level_1_2/G0016589.pdf]

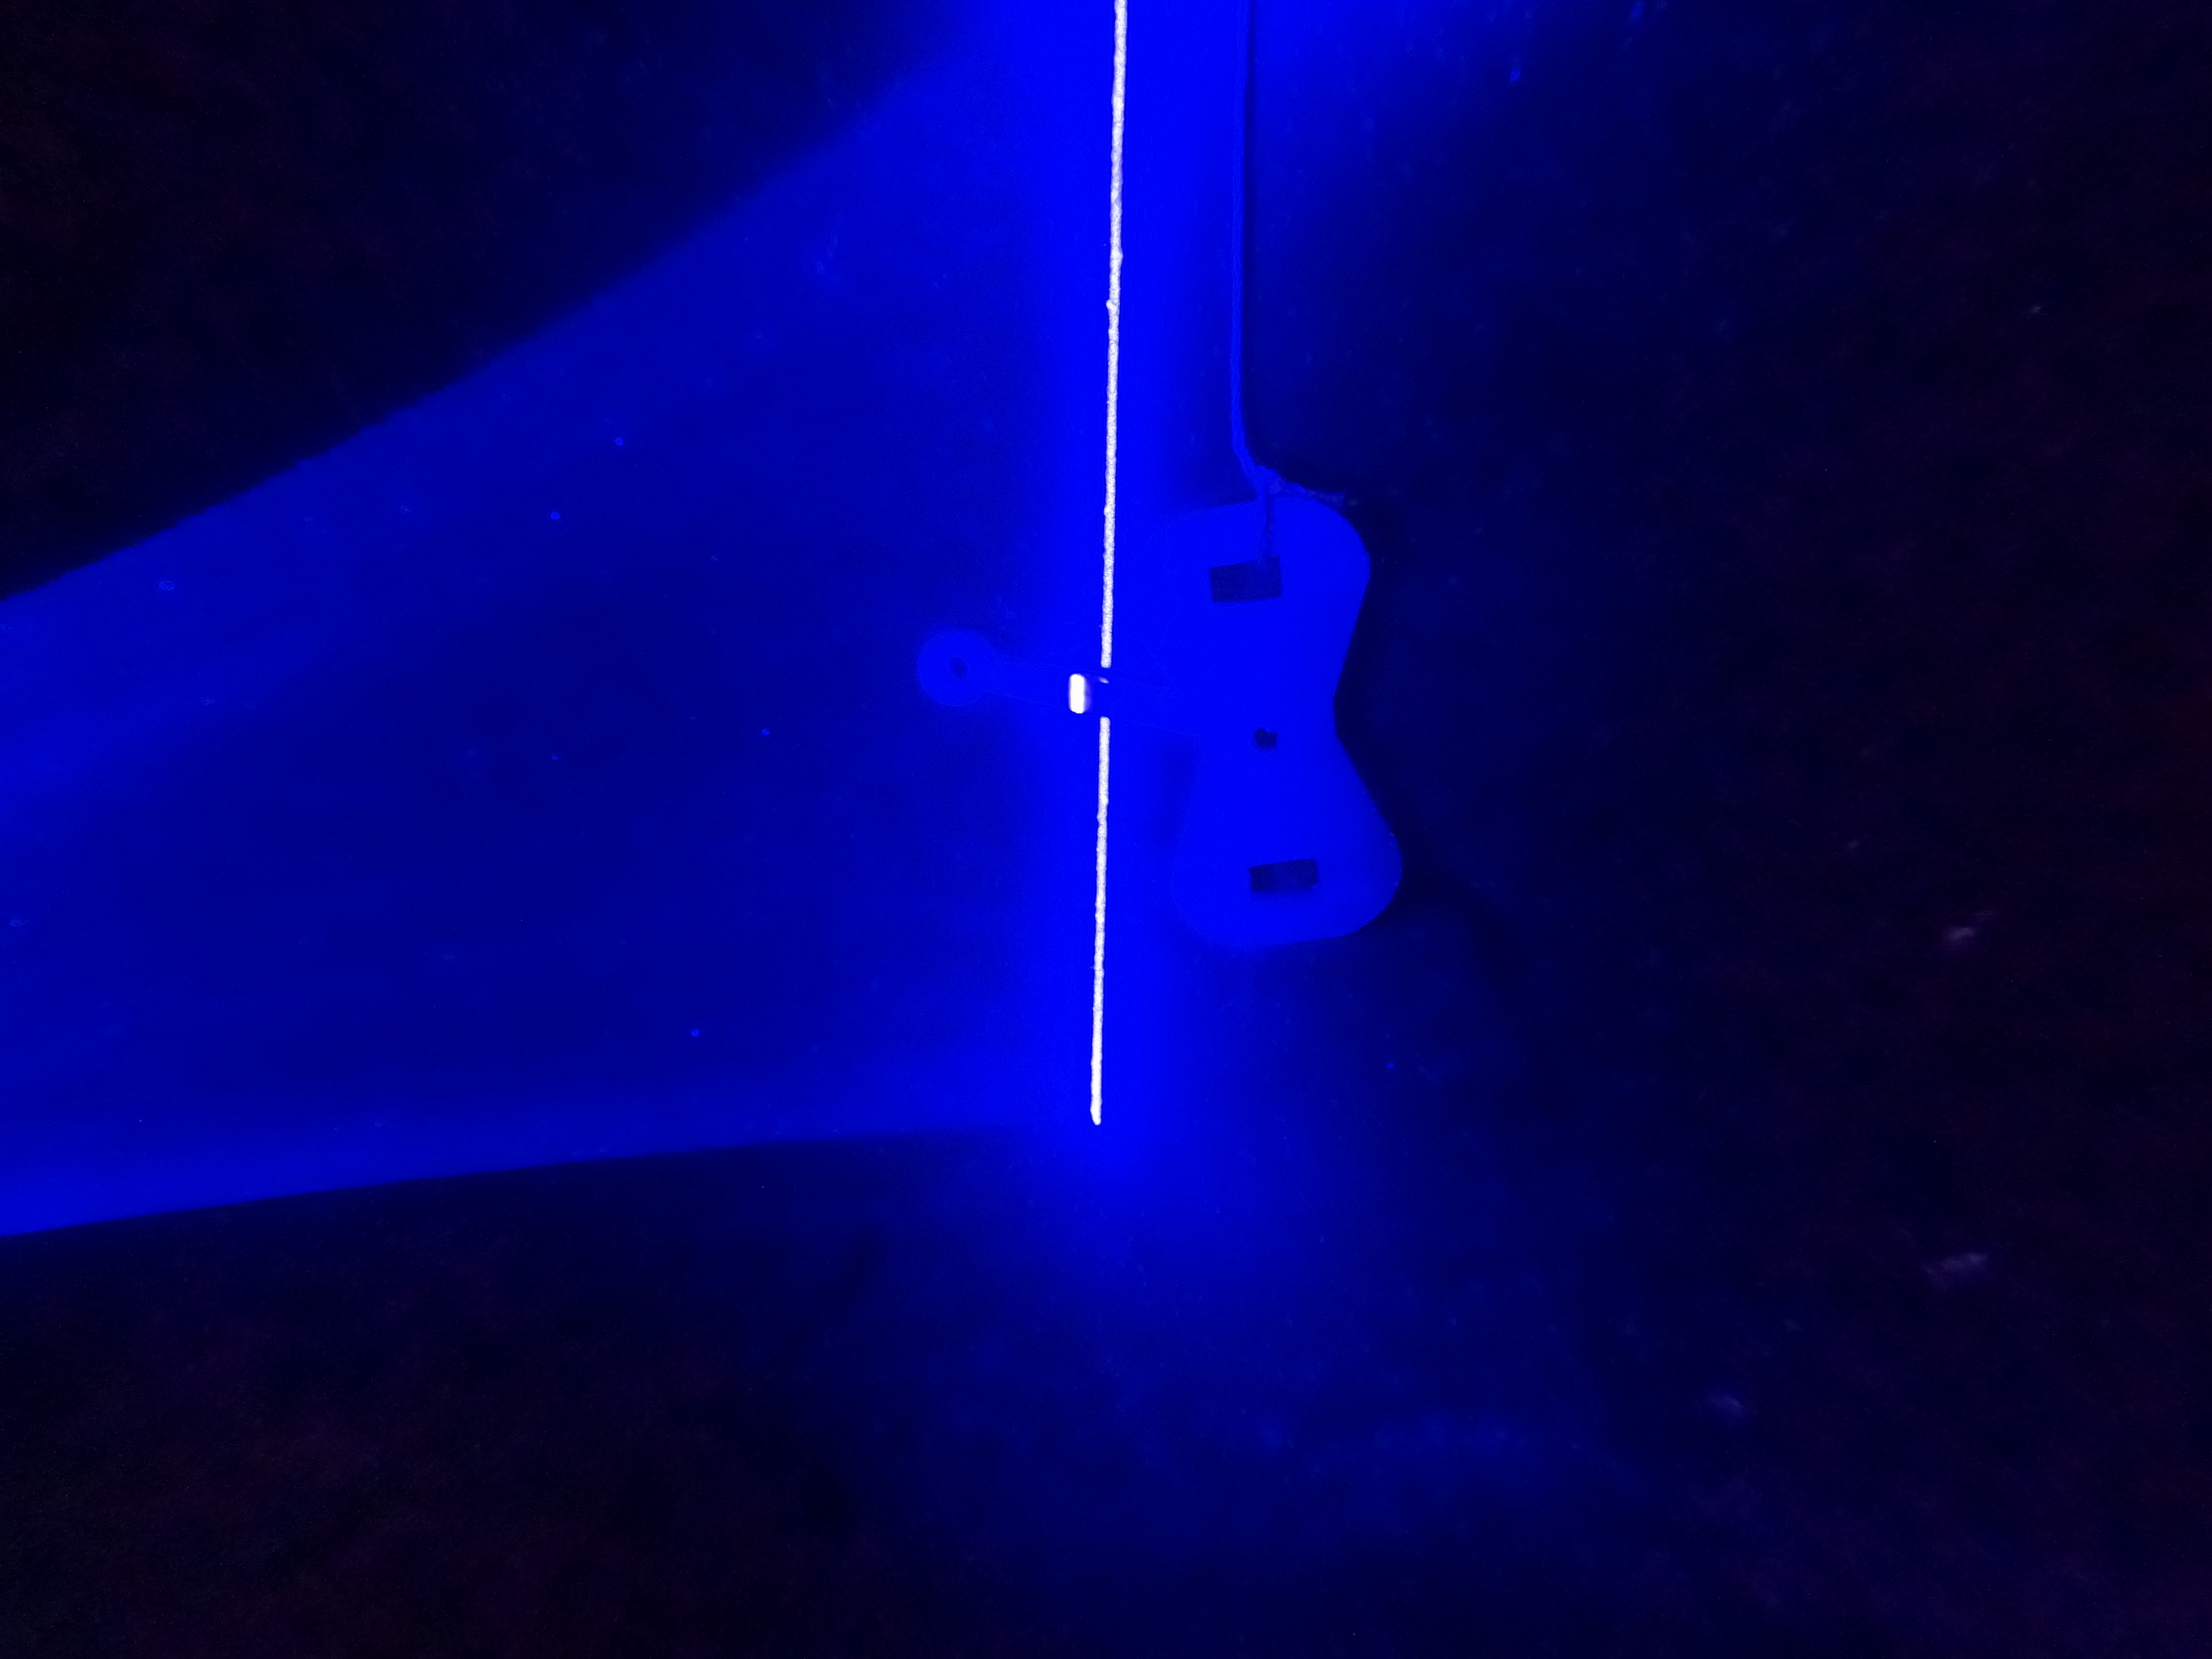

Supplement: Supplementary file 2281 [file G0016590.pdf › Level_1_2/G0016590.pdf]

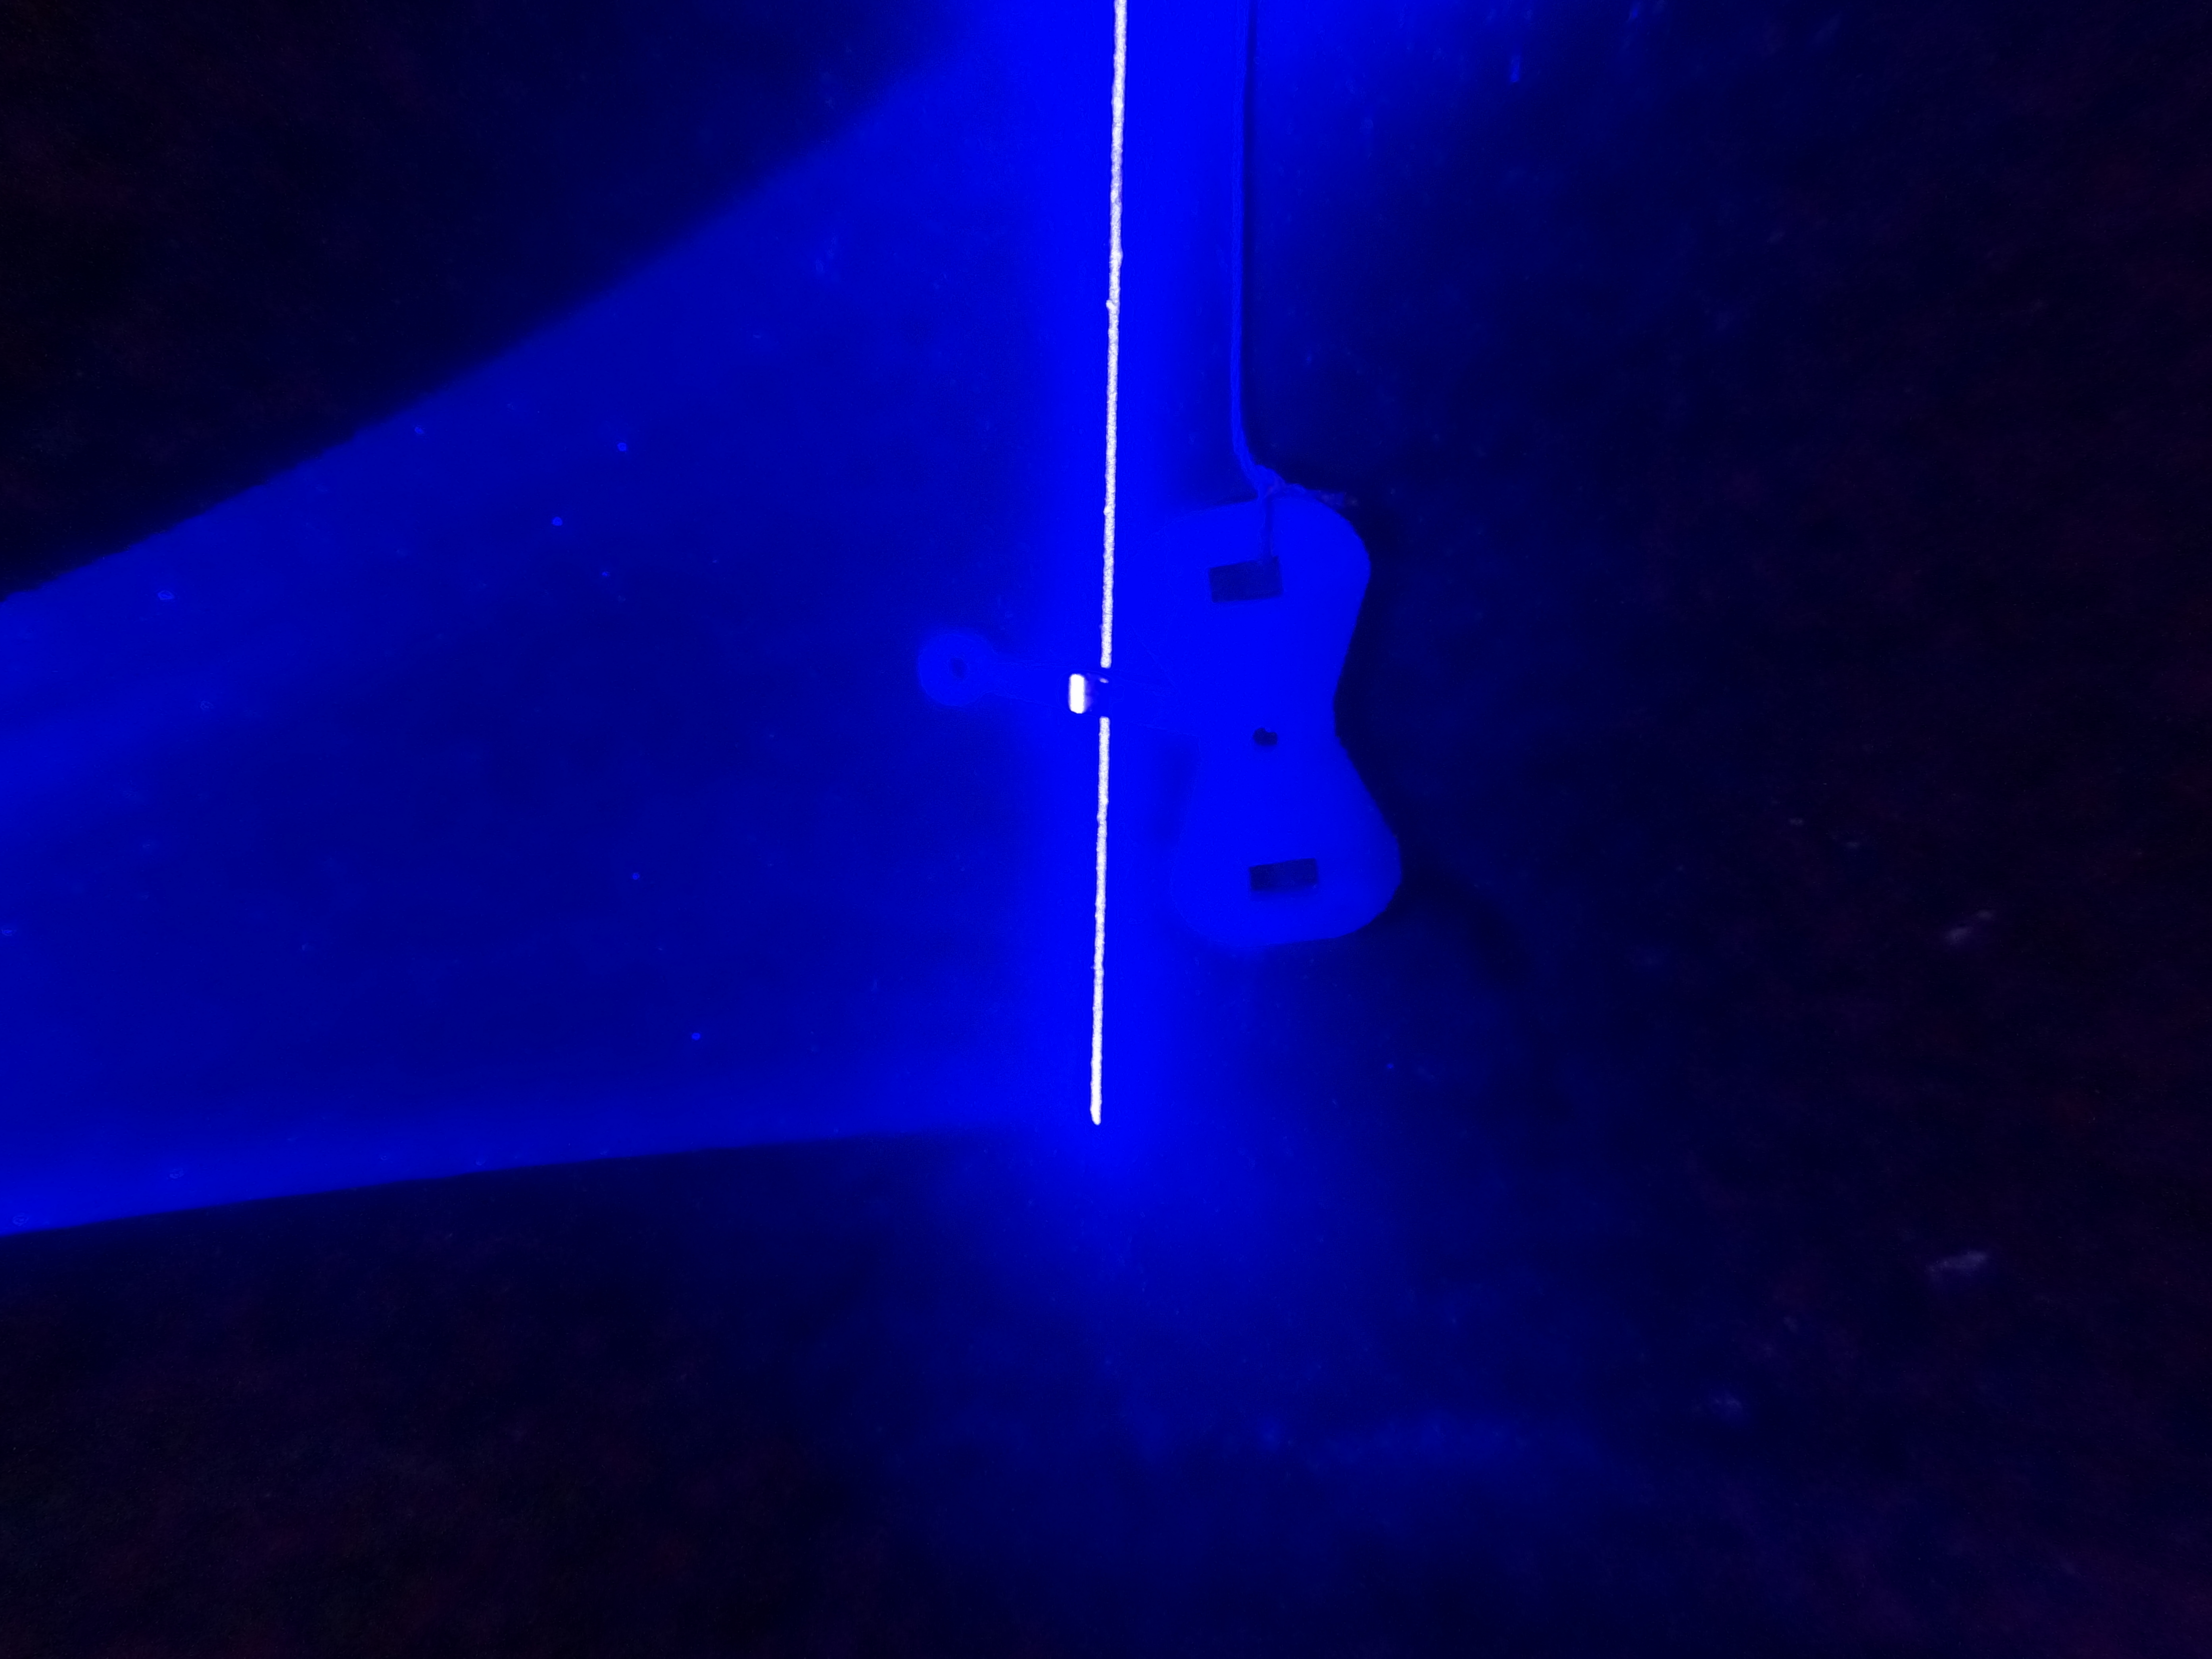

Supplement: Supplementary file 2282 [file G0016591.pdf › Level_1_2/G0016591.pdf]

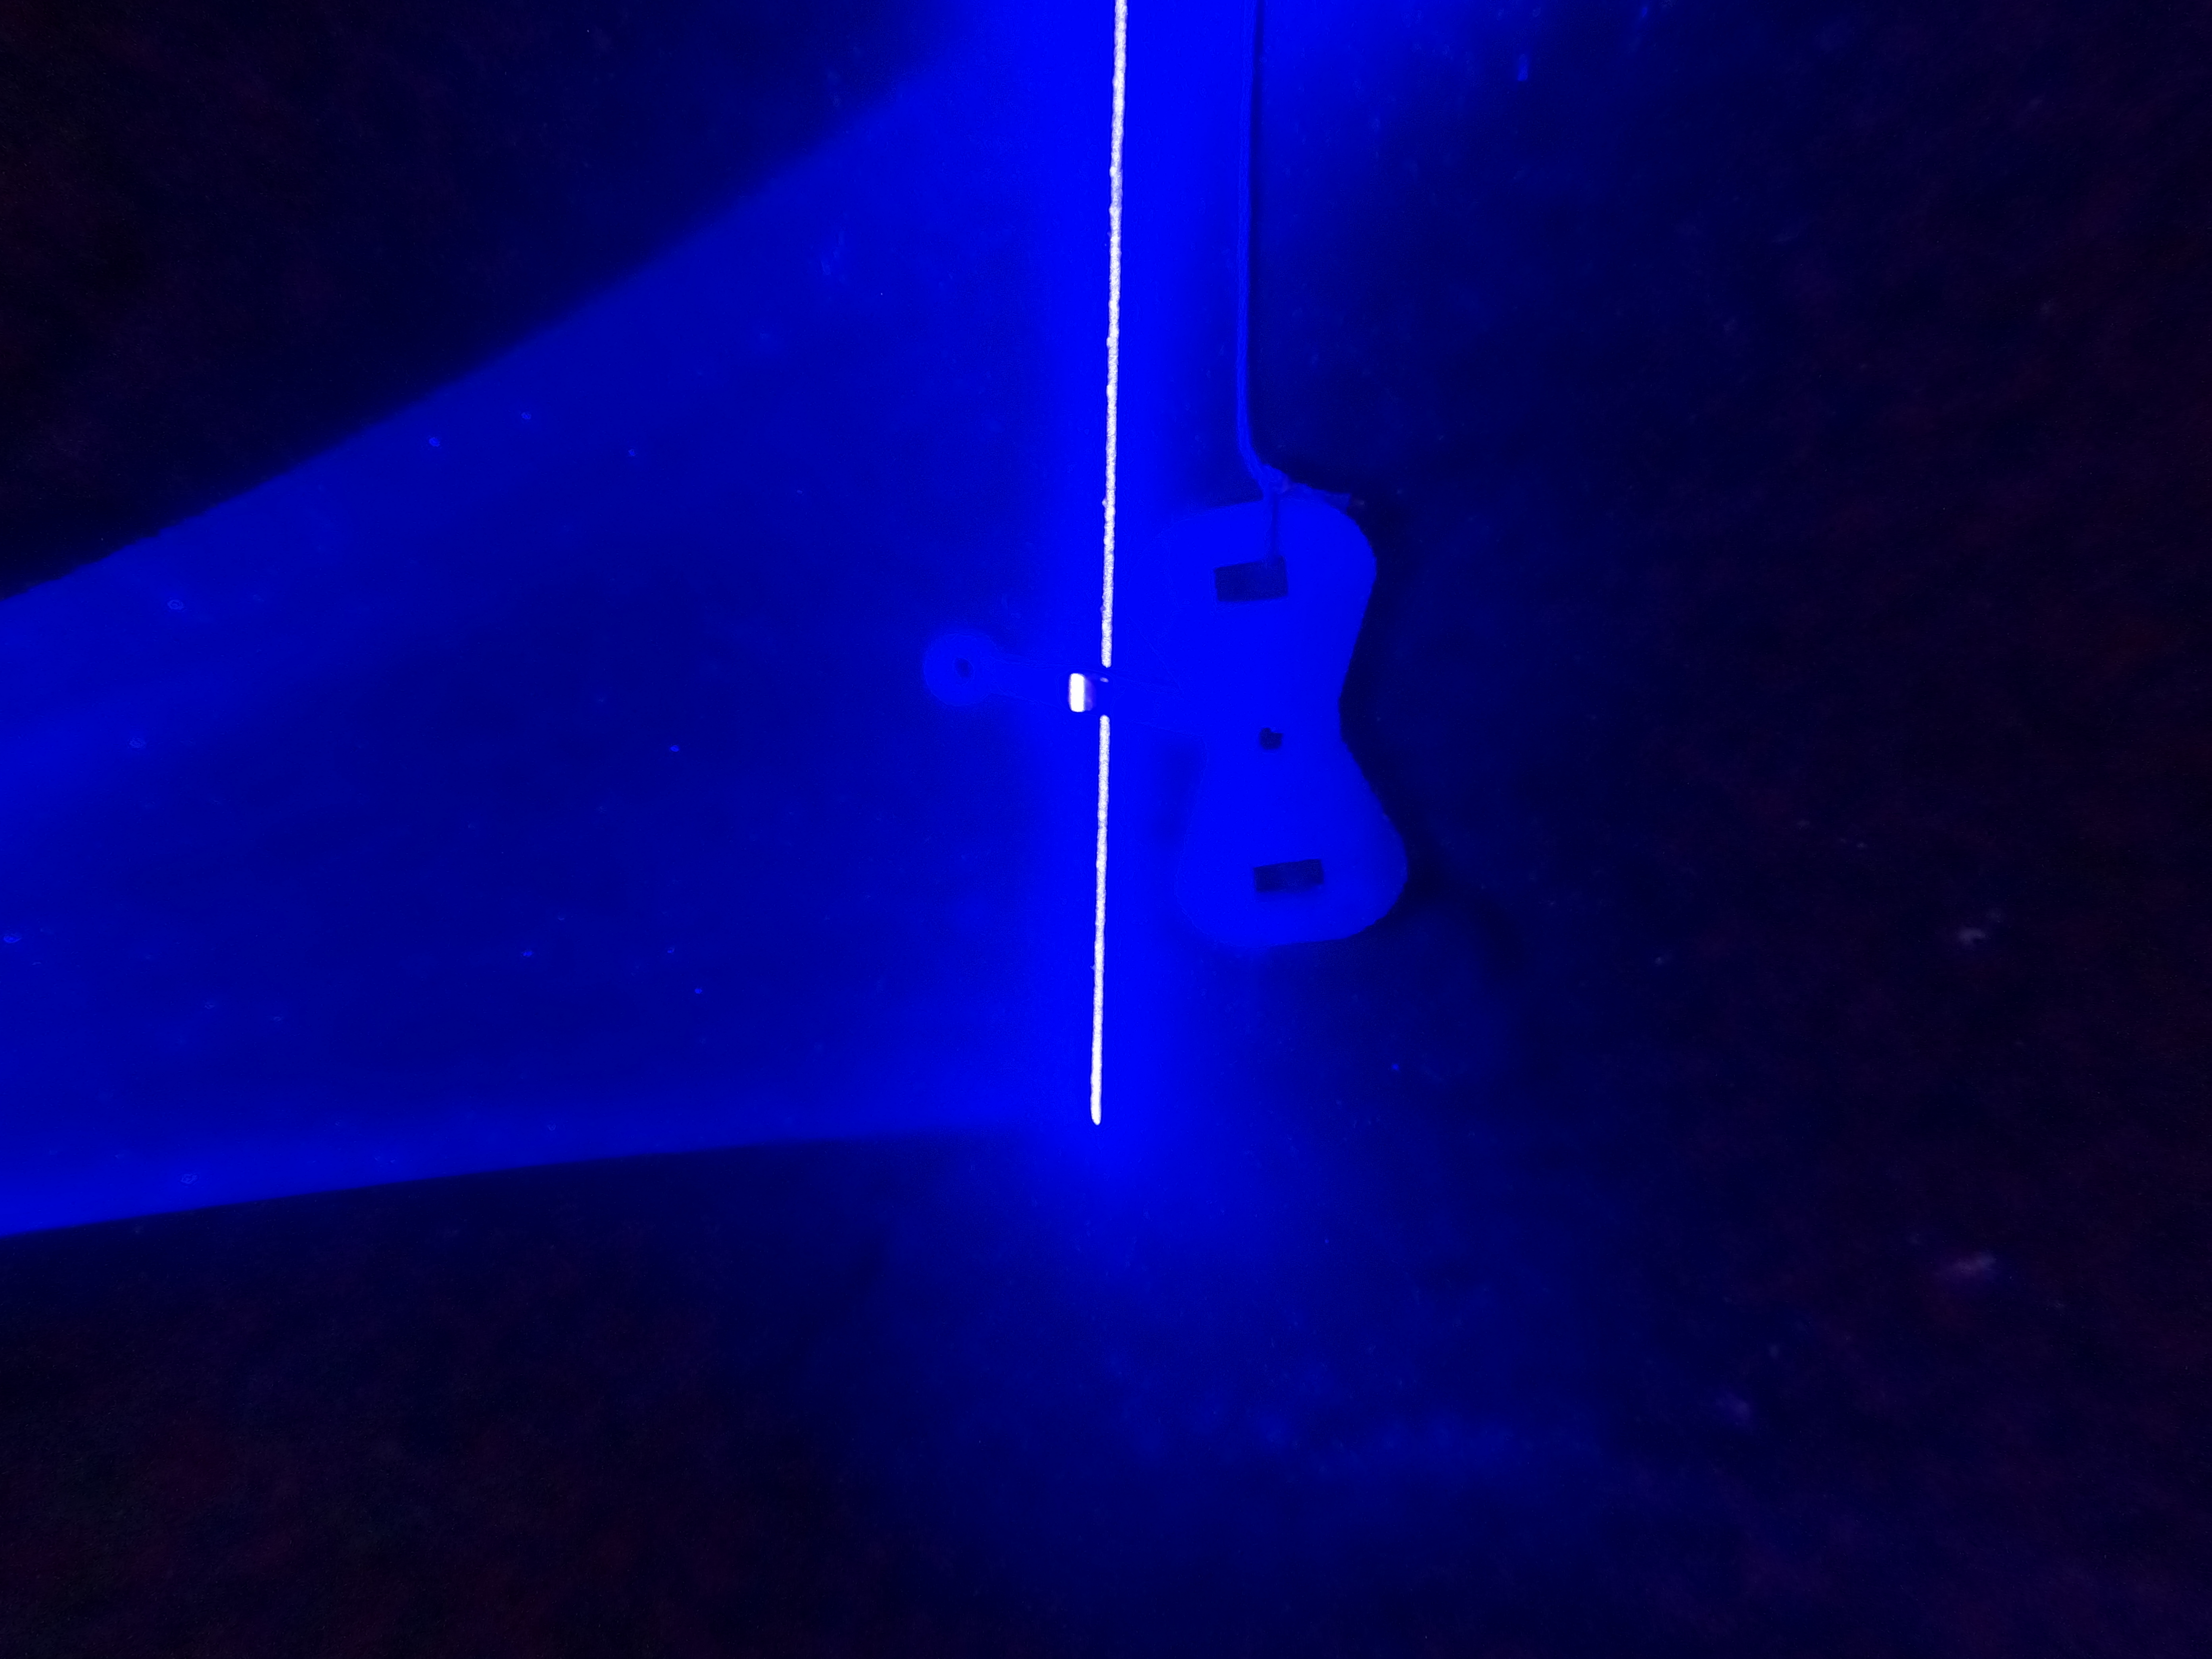

Supplement: Supplementary file 2283 [file G0016592.pdf › Level_1_2/G0016592.pdf]

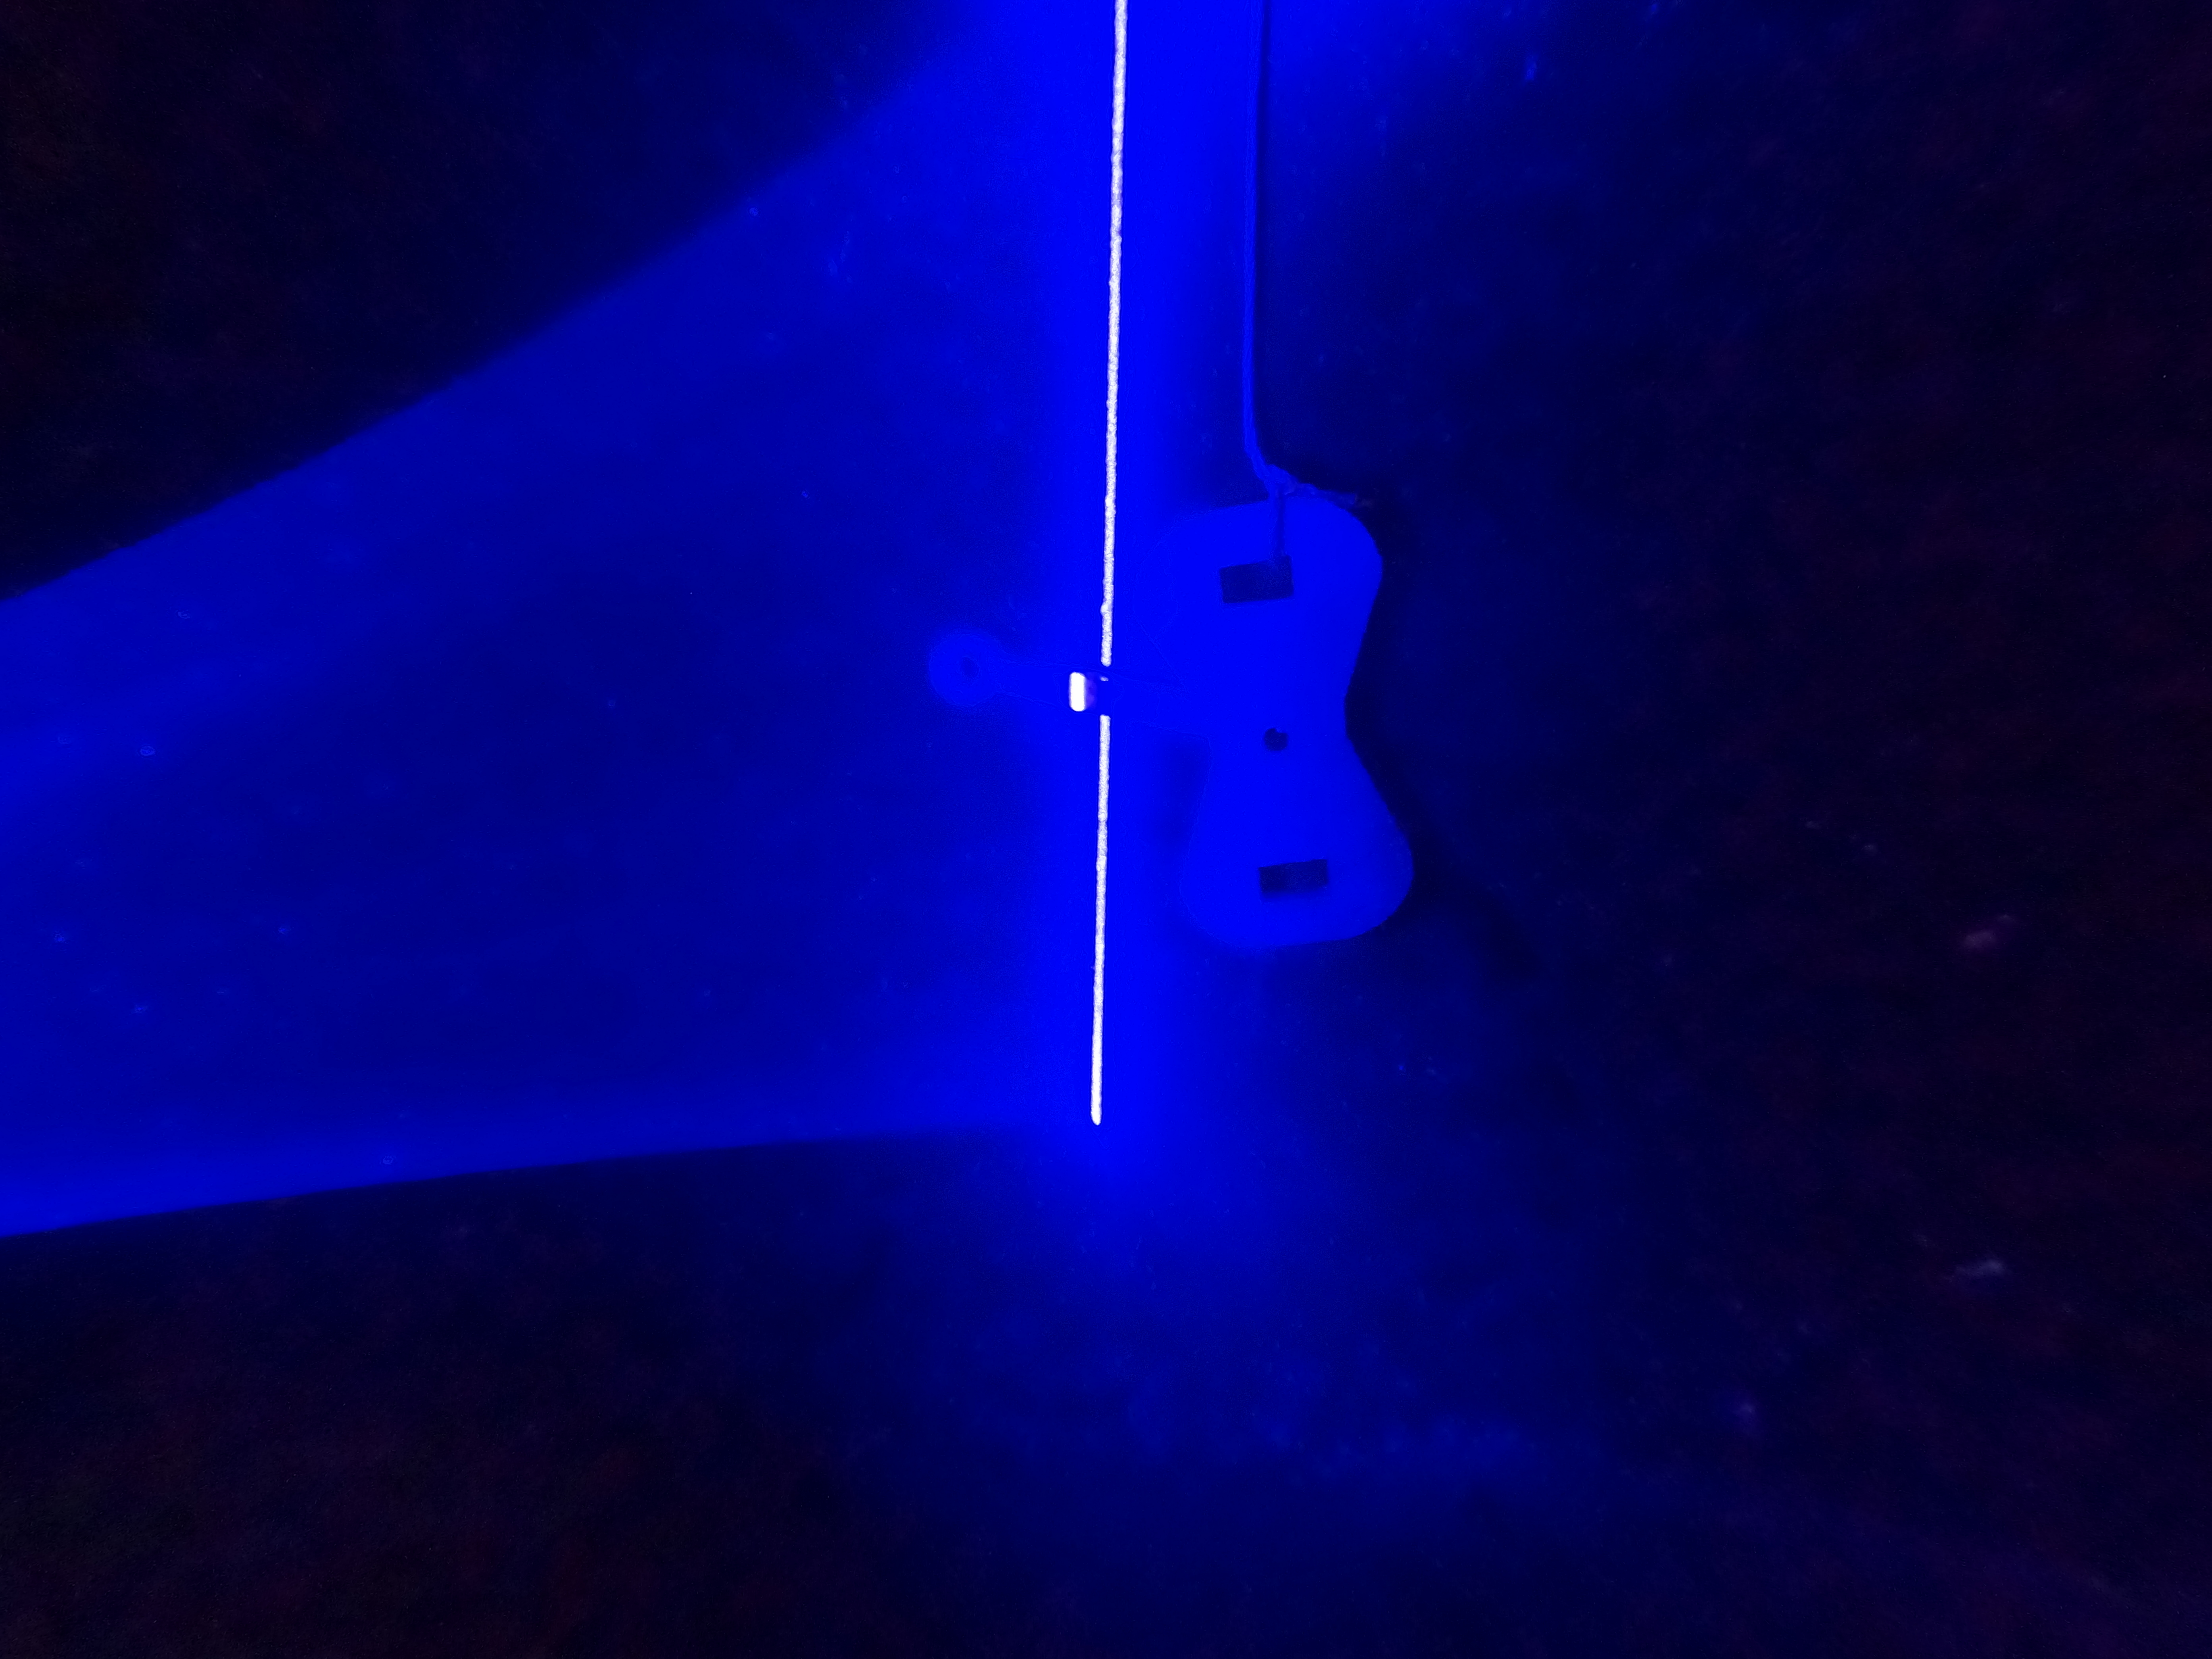

Supplement: Supplementary file 2284 [file G0016593.pdf › Level_1_2/G0016593.pdf]

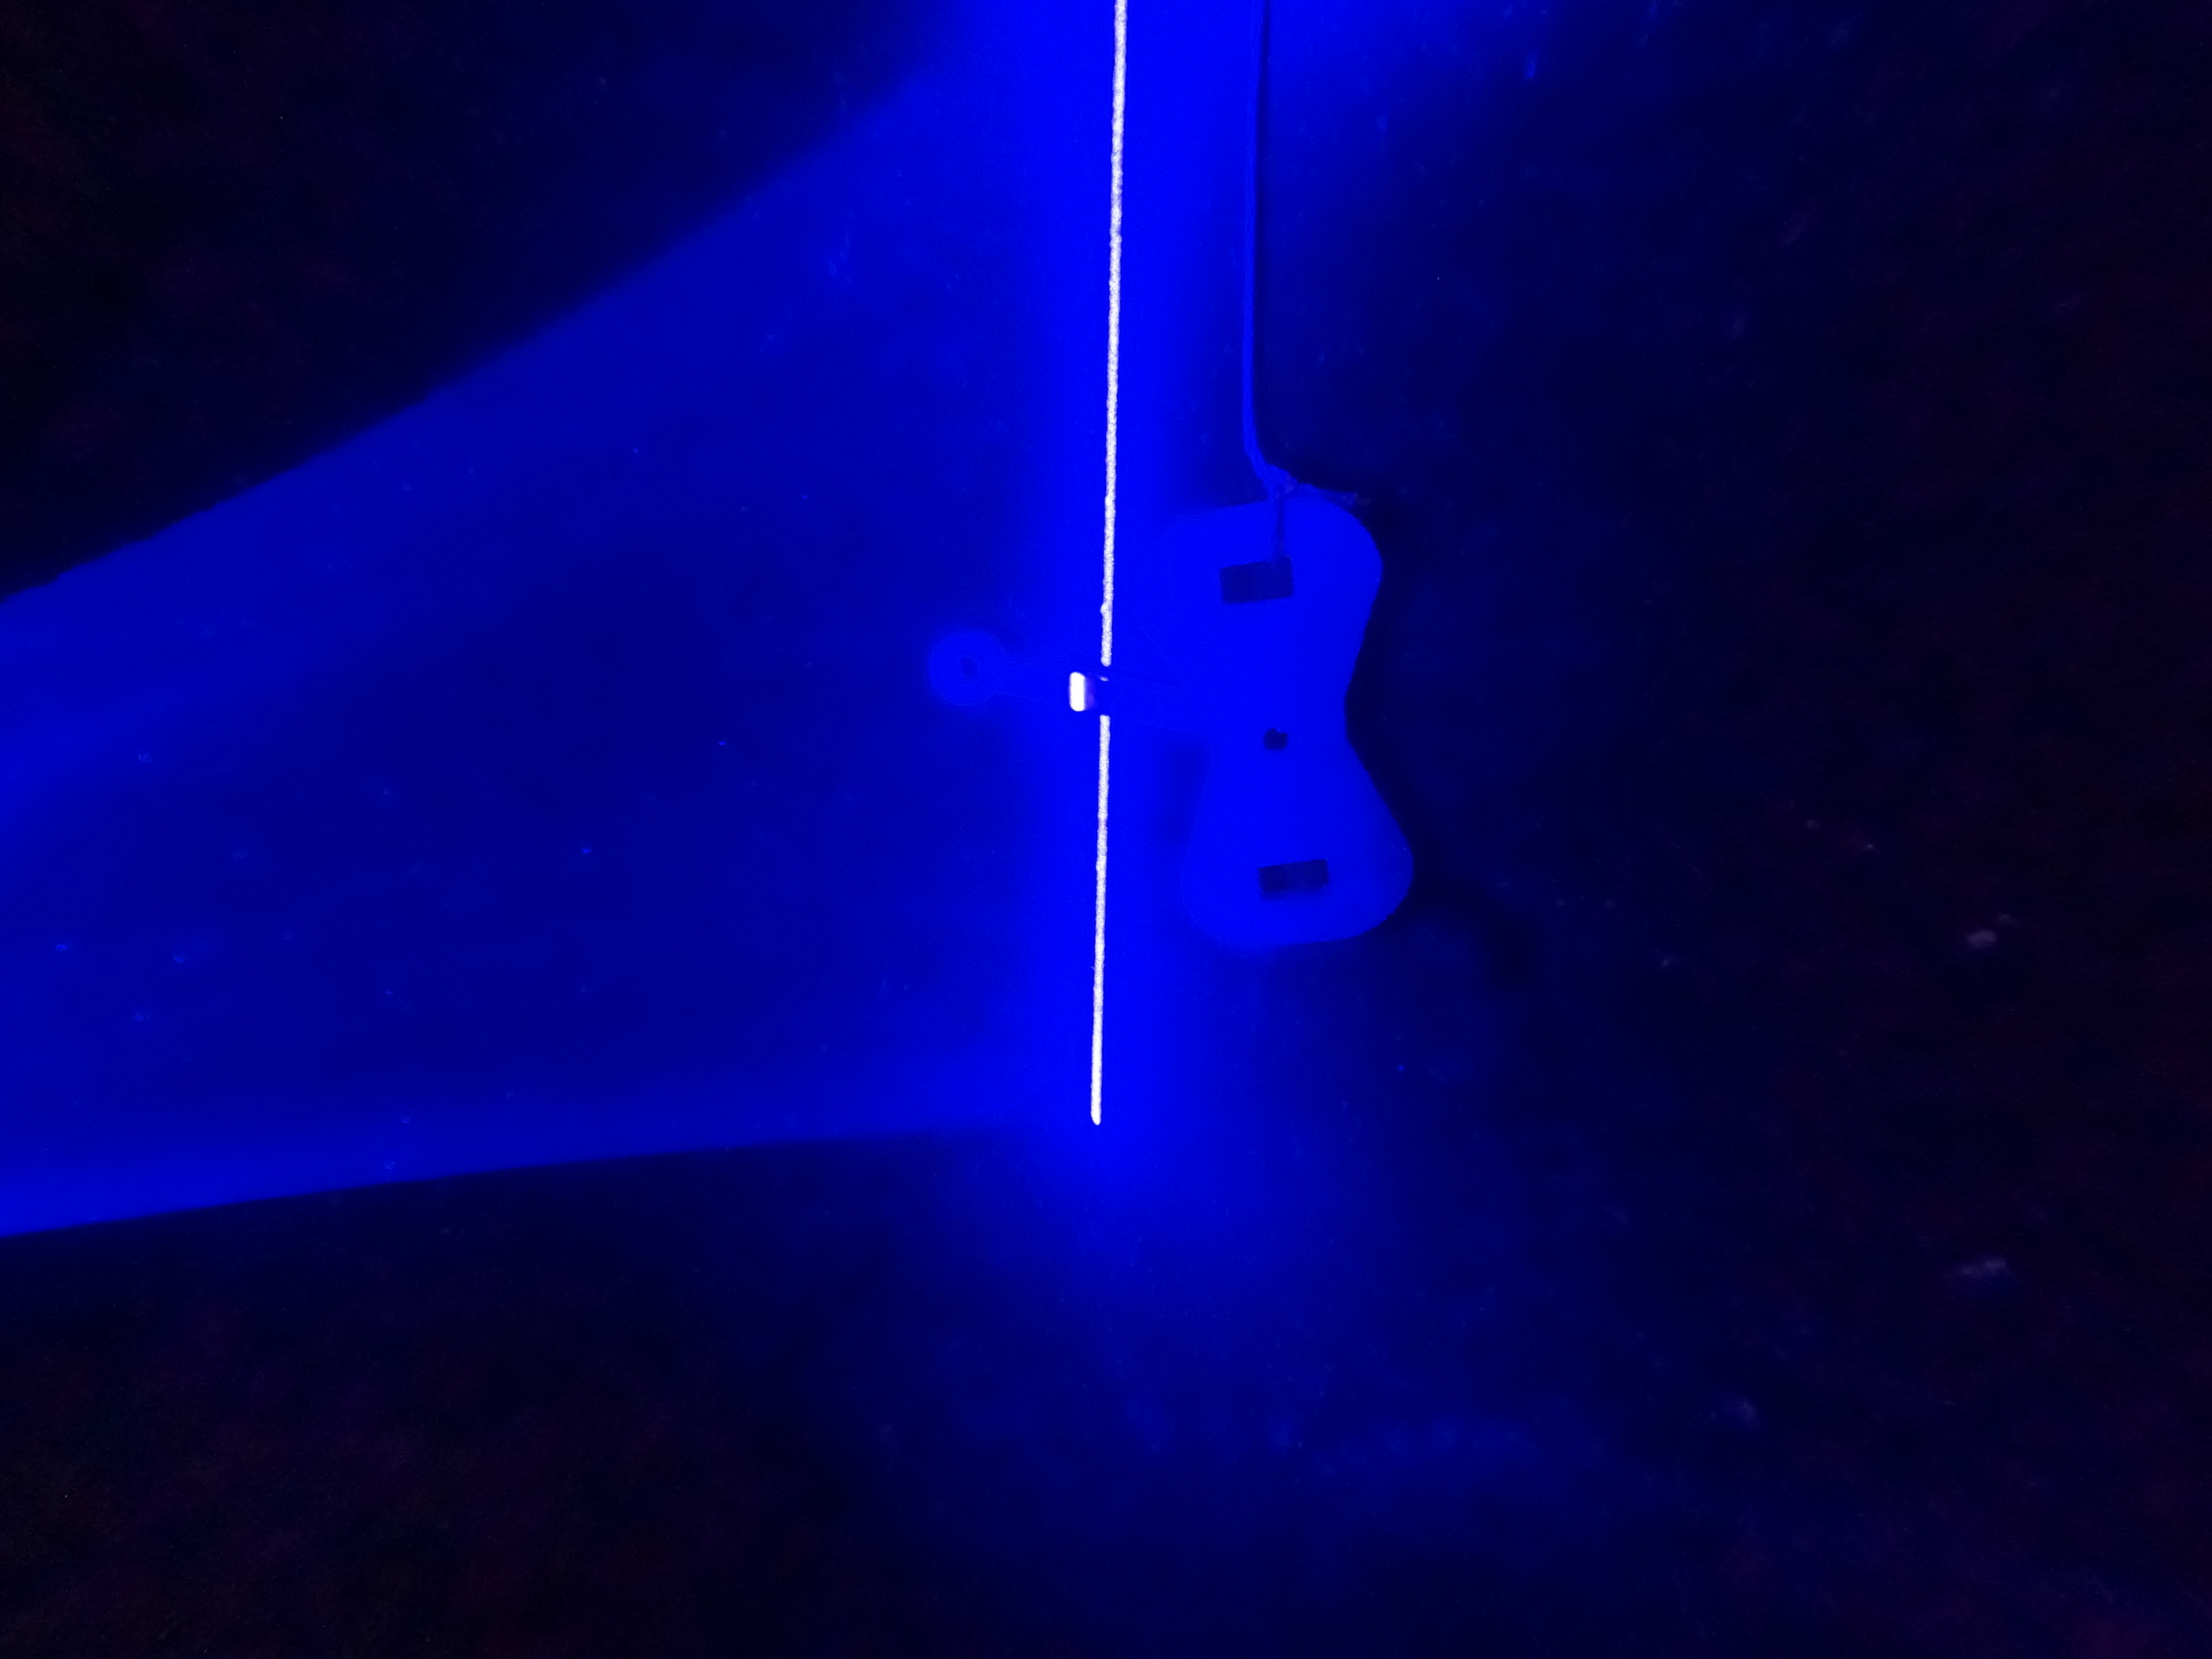

Supplement: Supplementary file 2285 [file G0016594.pdf › Level_1_2/G0016594.pdf]

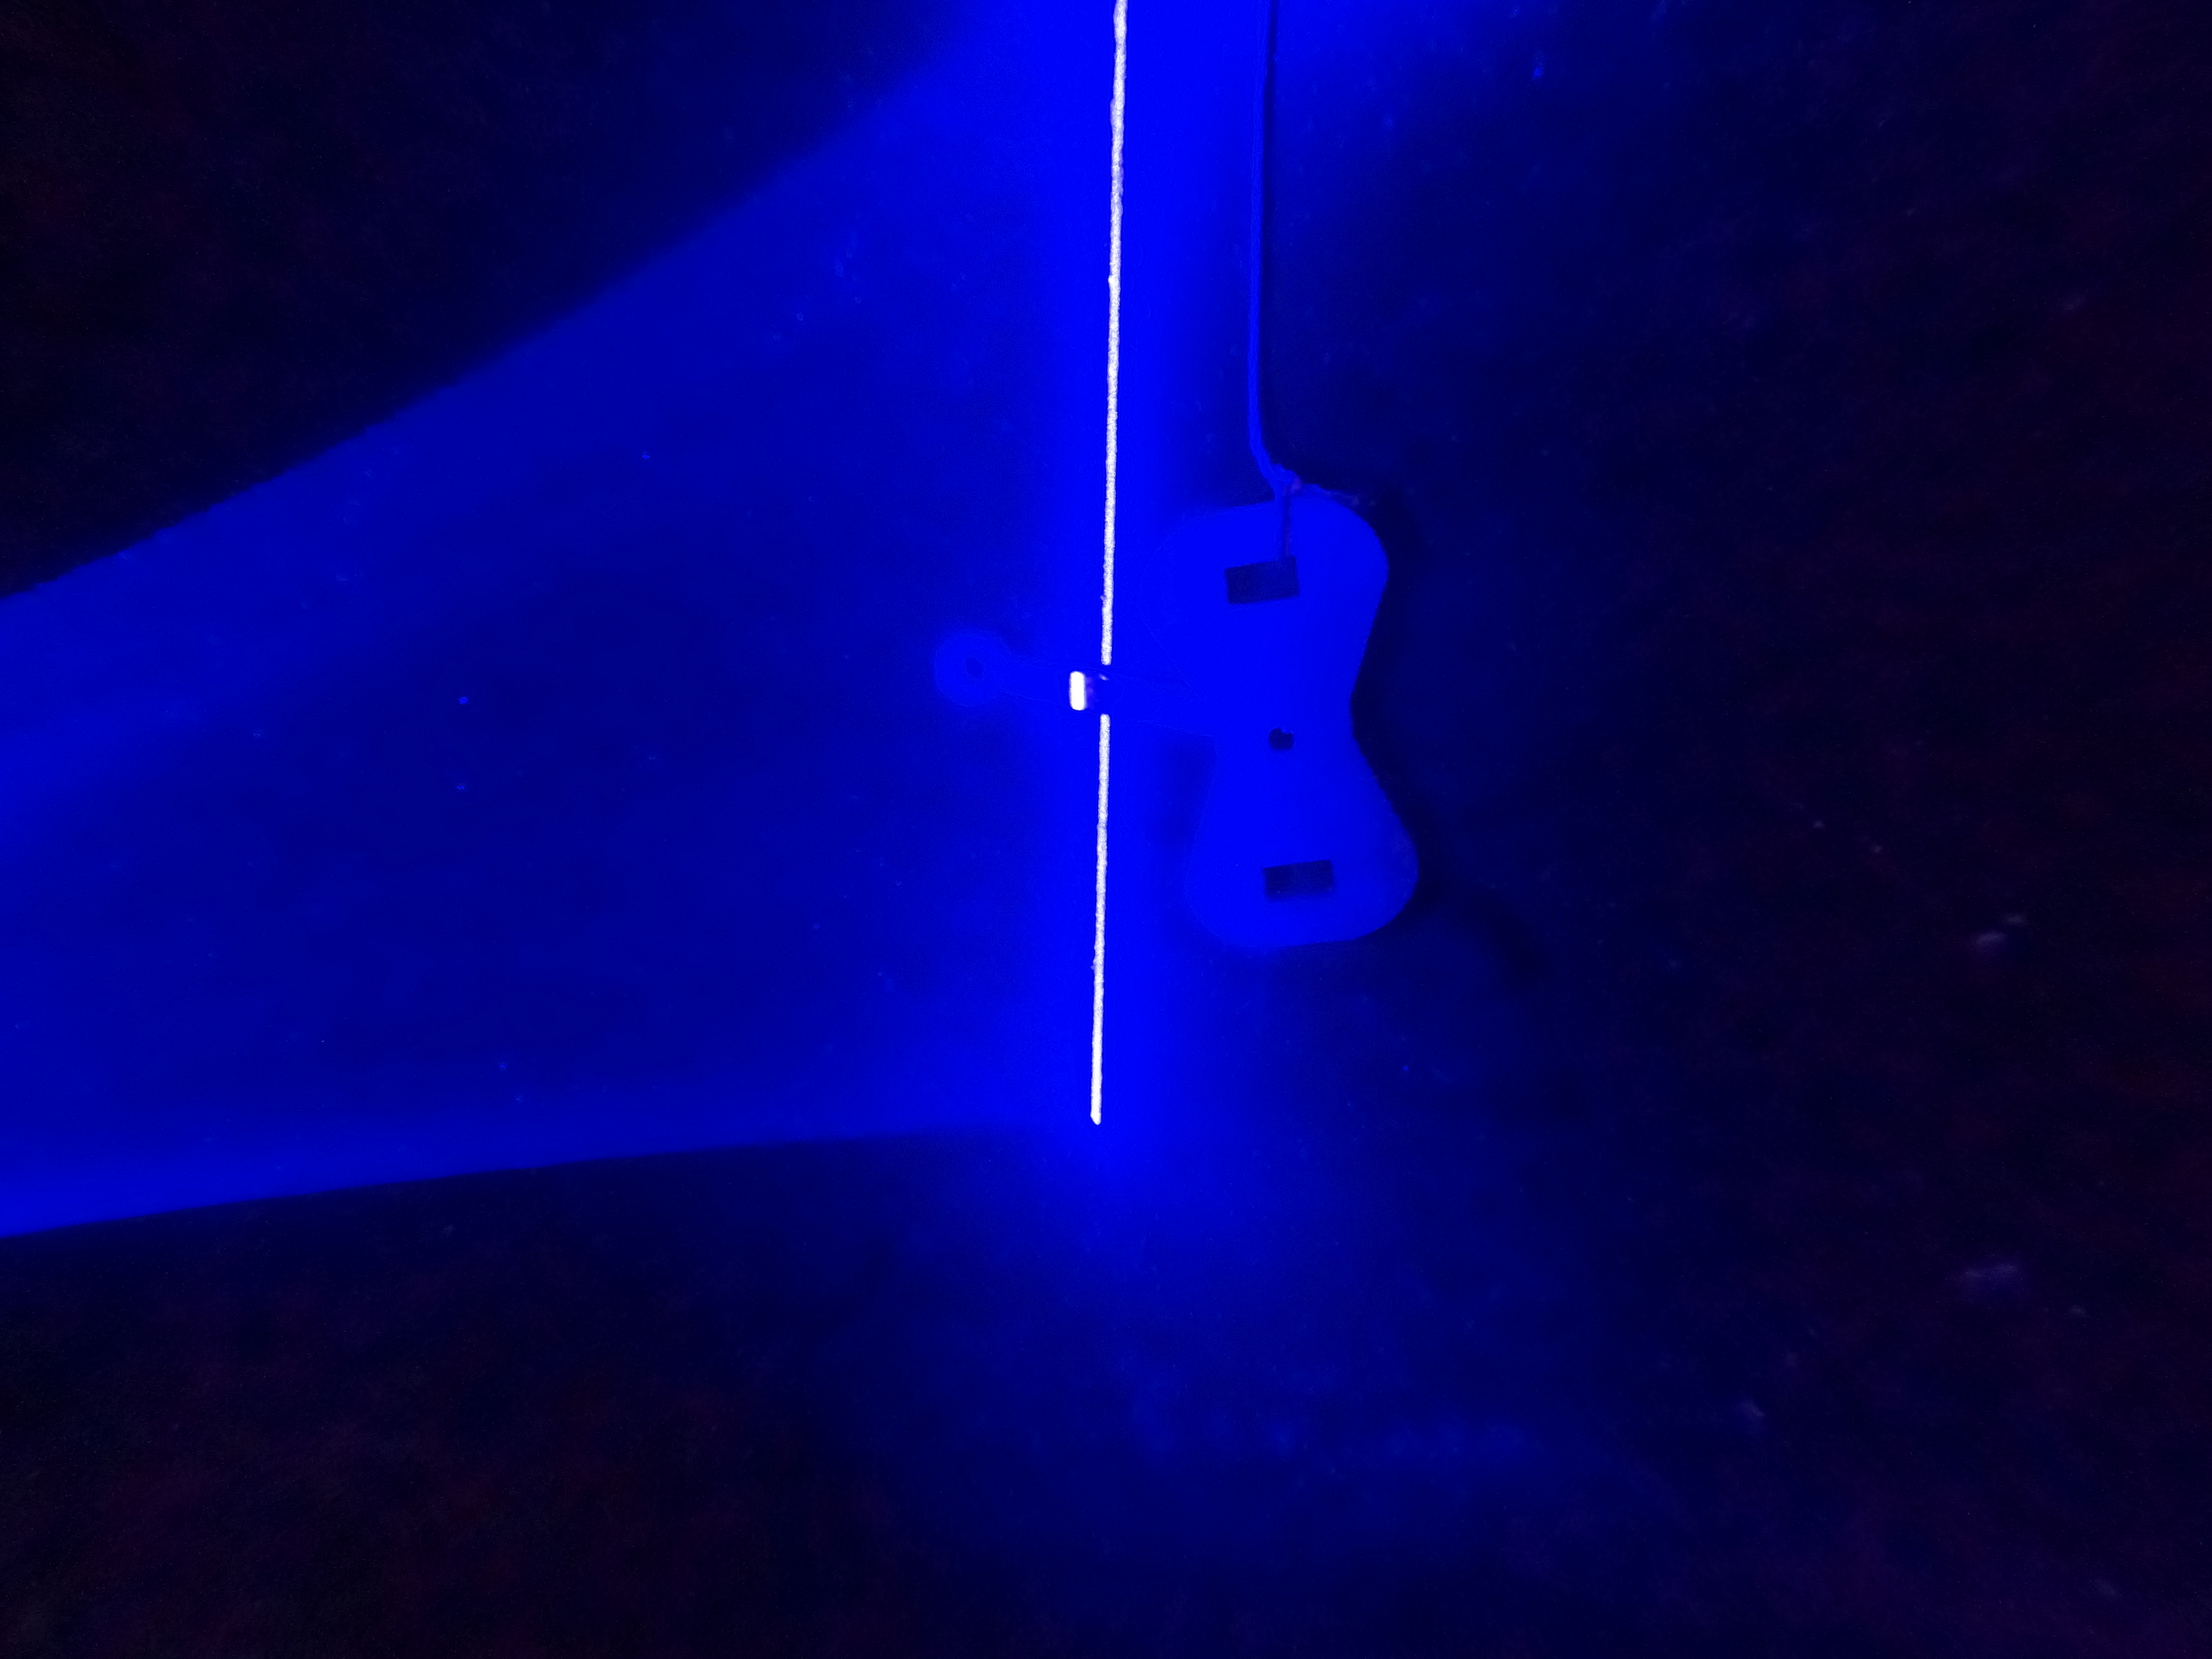

Supplement: Supplementary file 2286 [file G0016595.pdf › Level_1_2/G0016595.pdf]

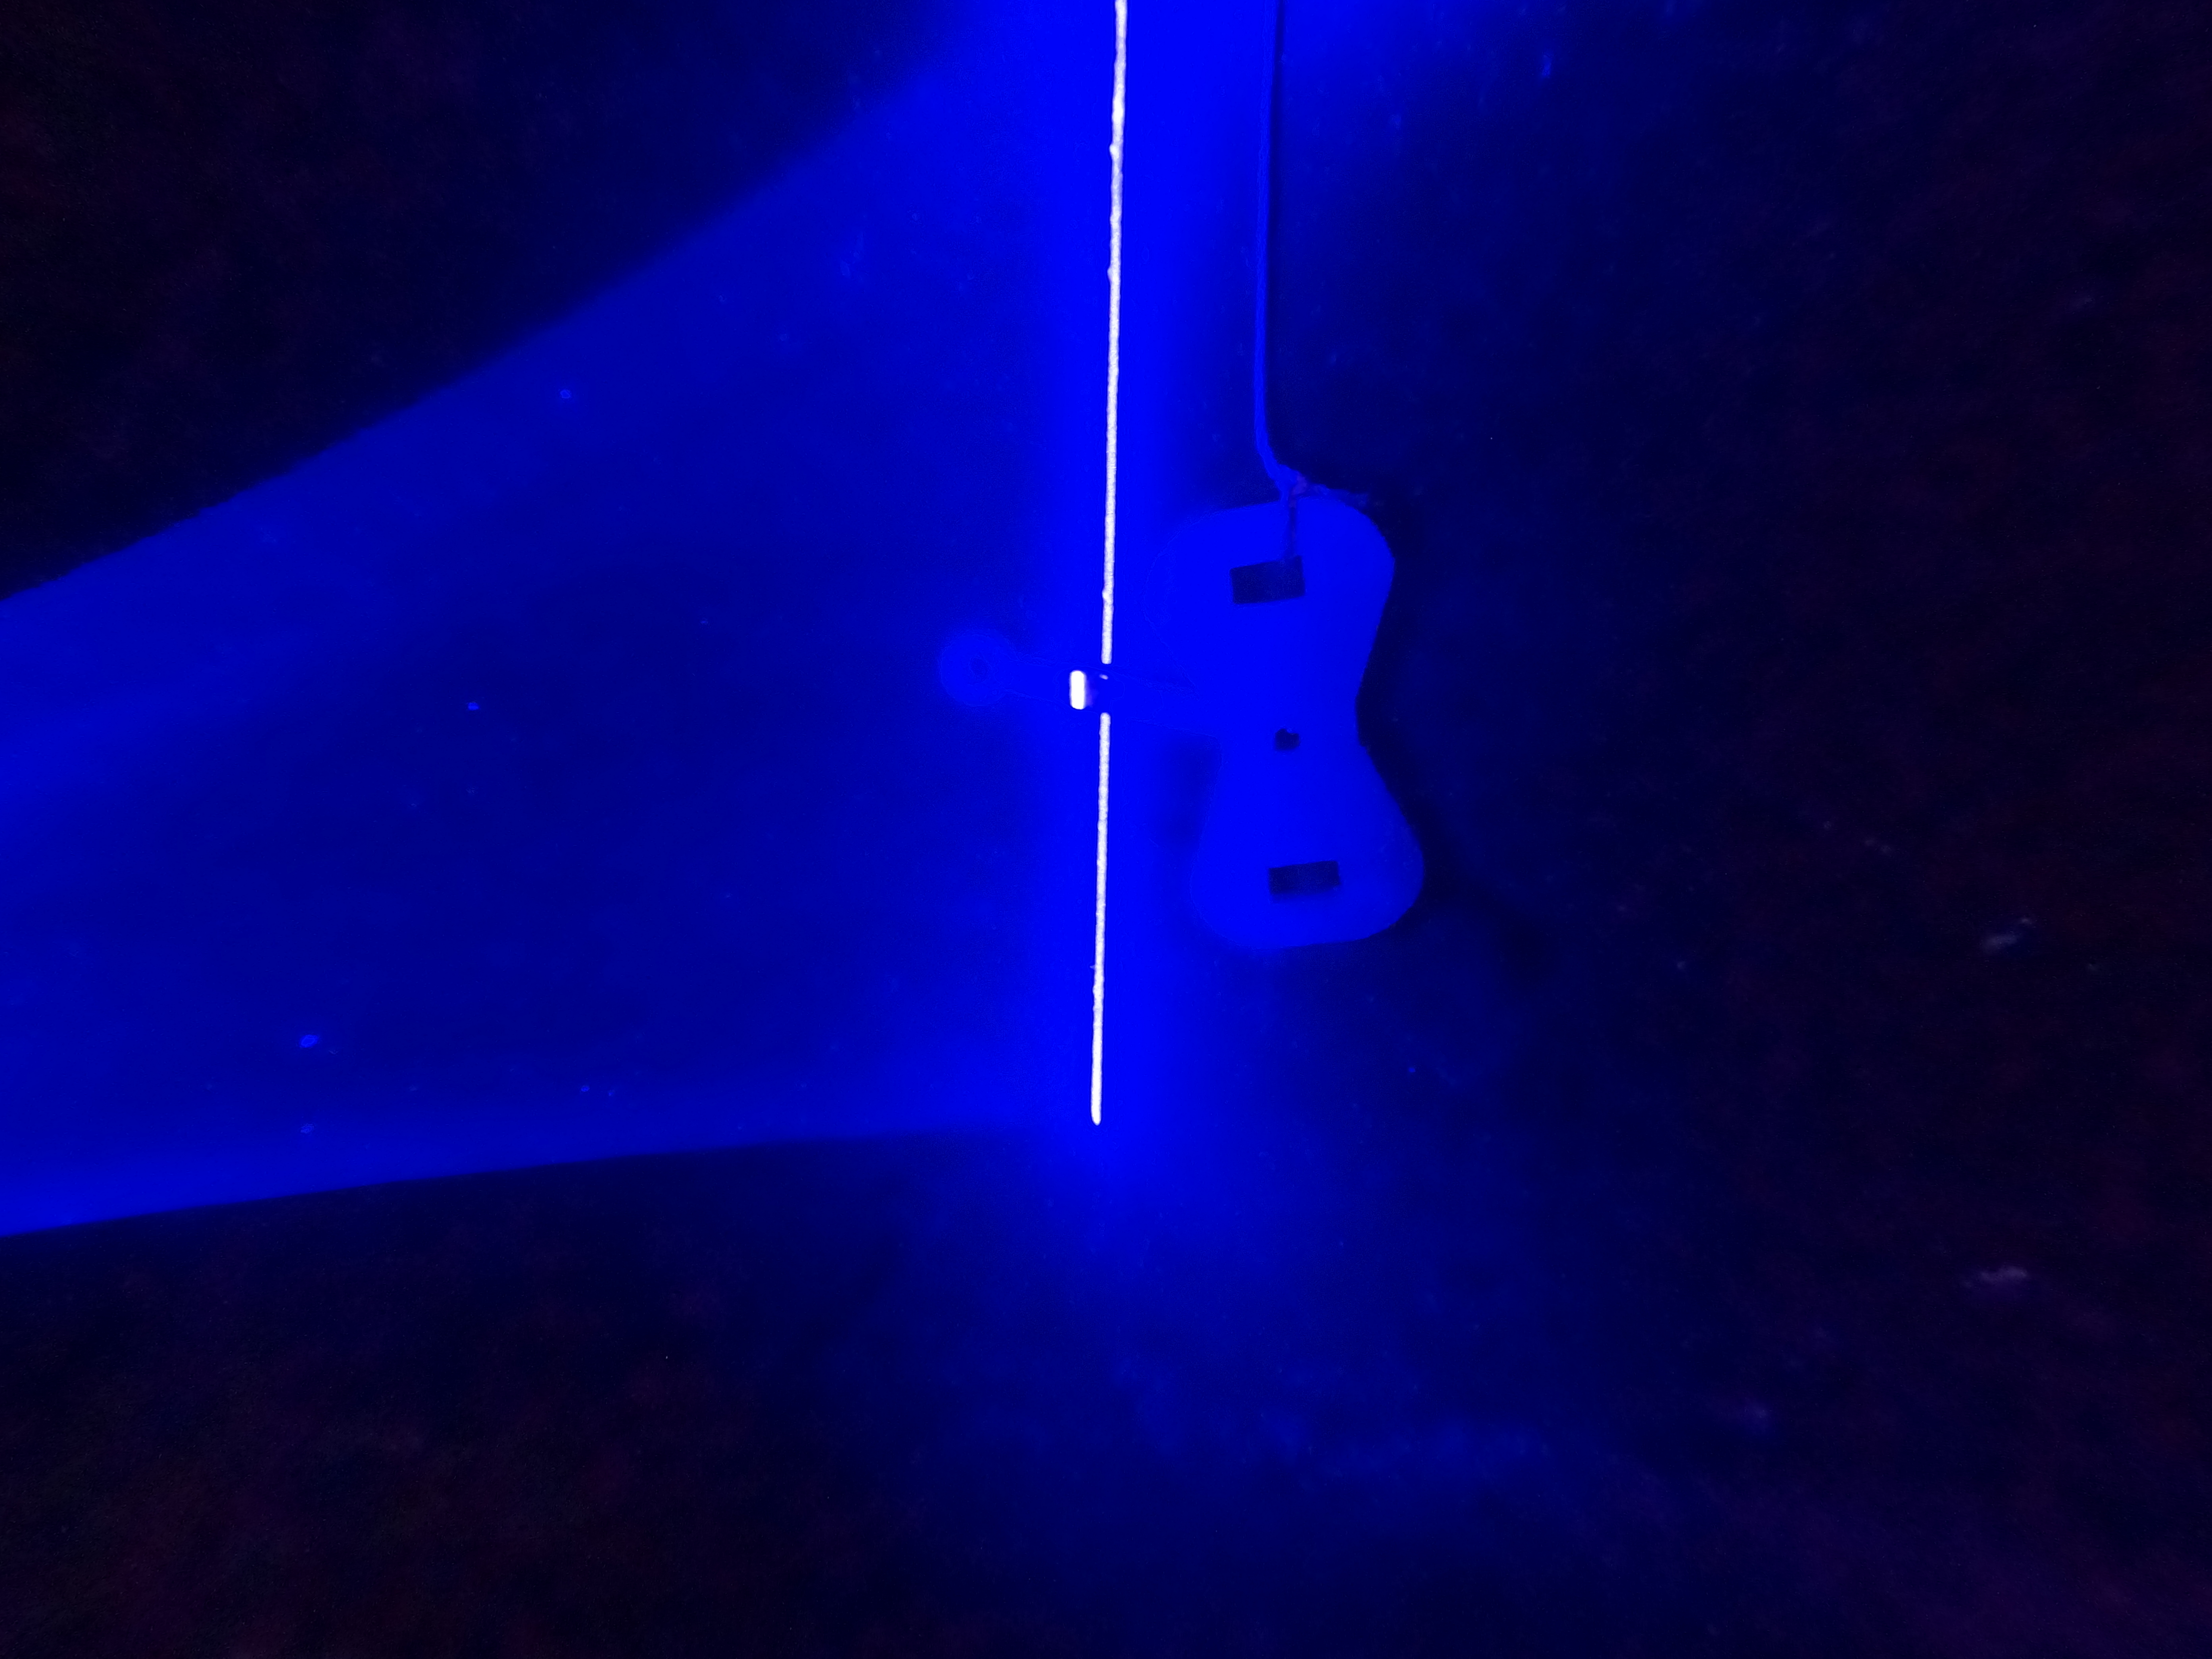

Supplement: Supplementary file 2287 [file G0016596.pdf › Level_1_2/G0016596.pdf]

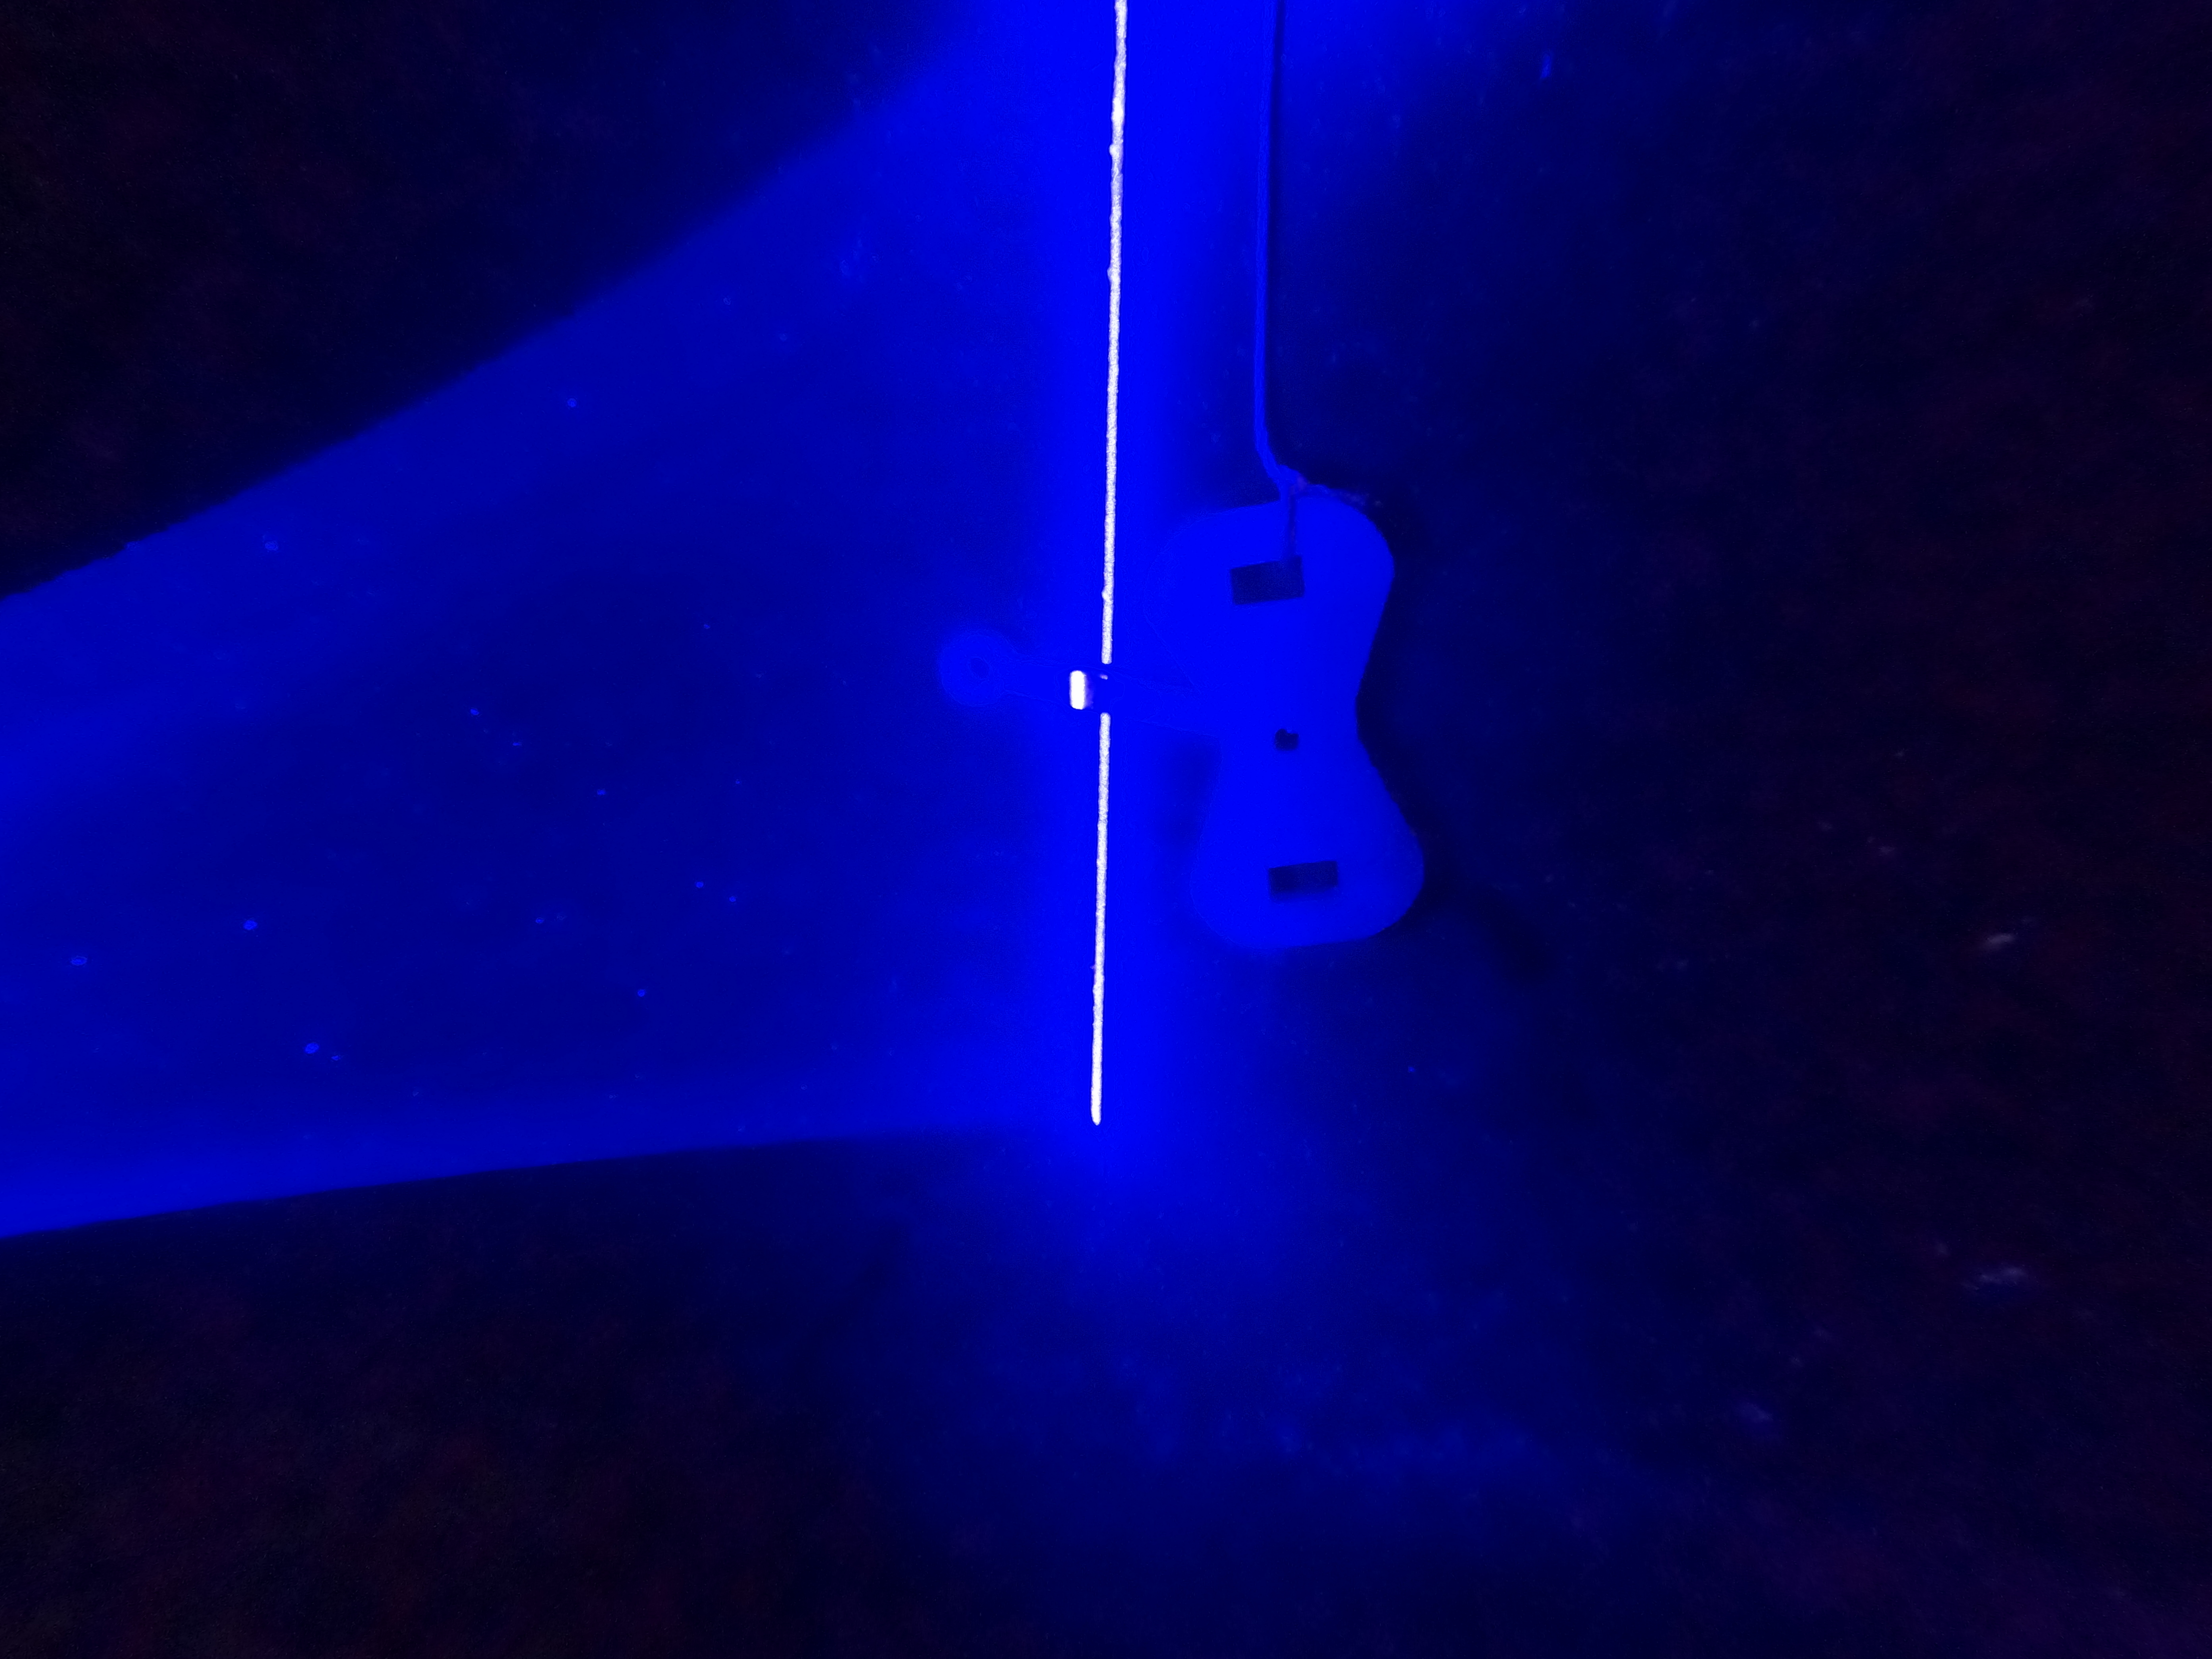

Supplement: Supplementary file 2288 [file G0016597.pdf › Level_1_2/G0016597.pdf]

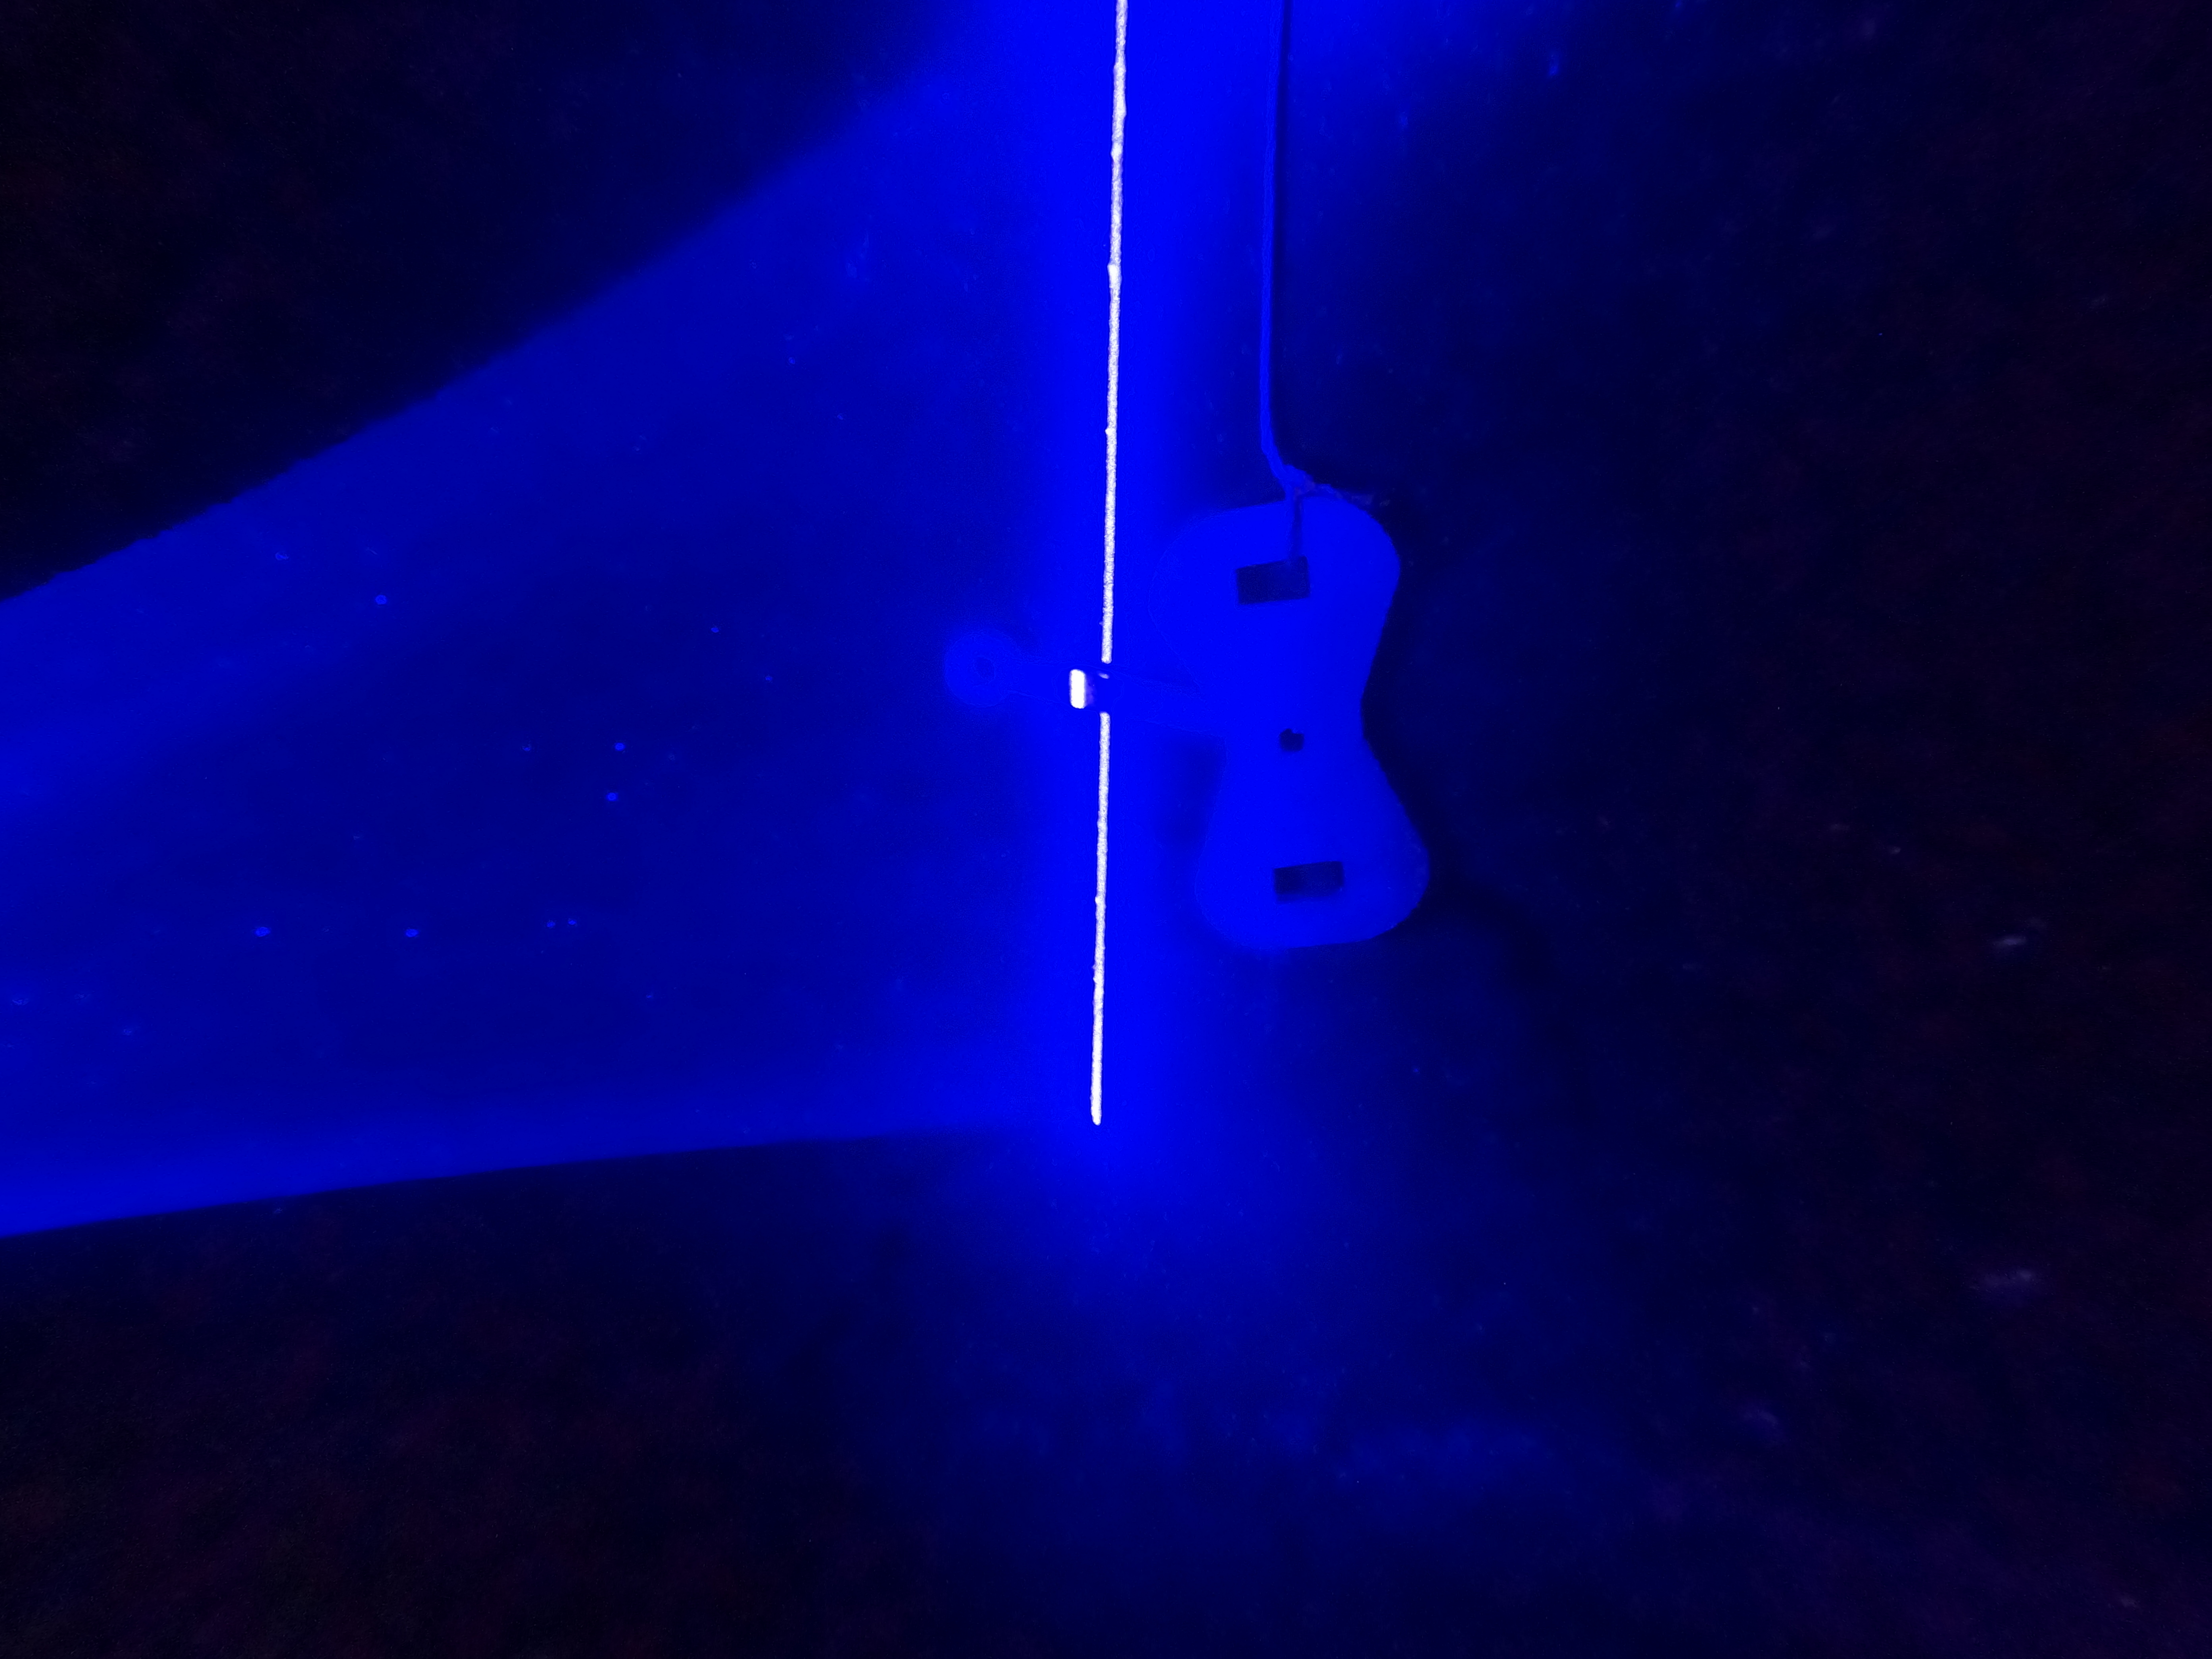

Supplement: Supplementary file 2289 [file G0016598.pdf › Level_1_2/G0016598.pdf]

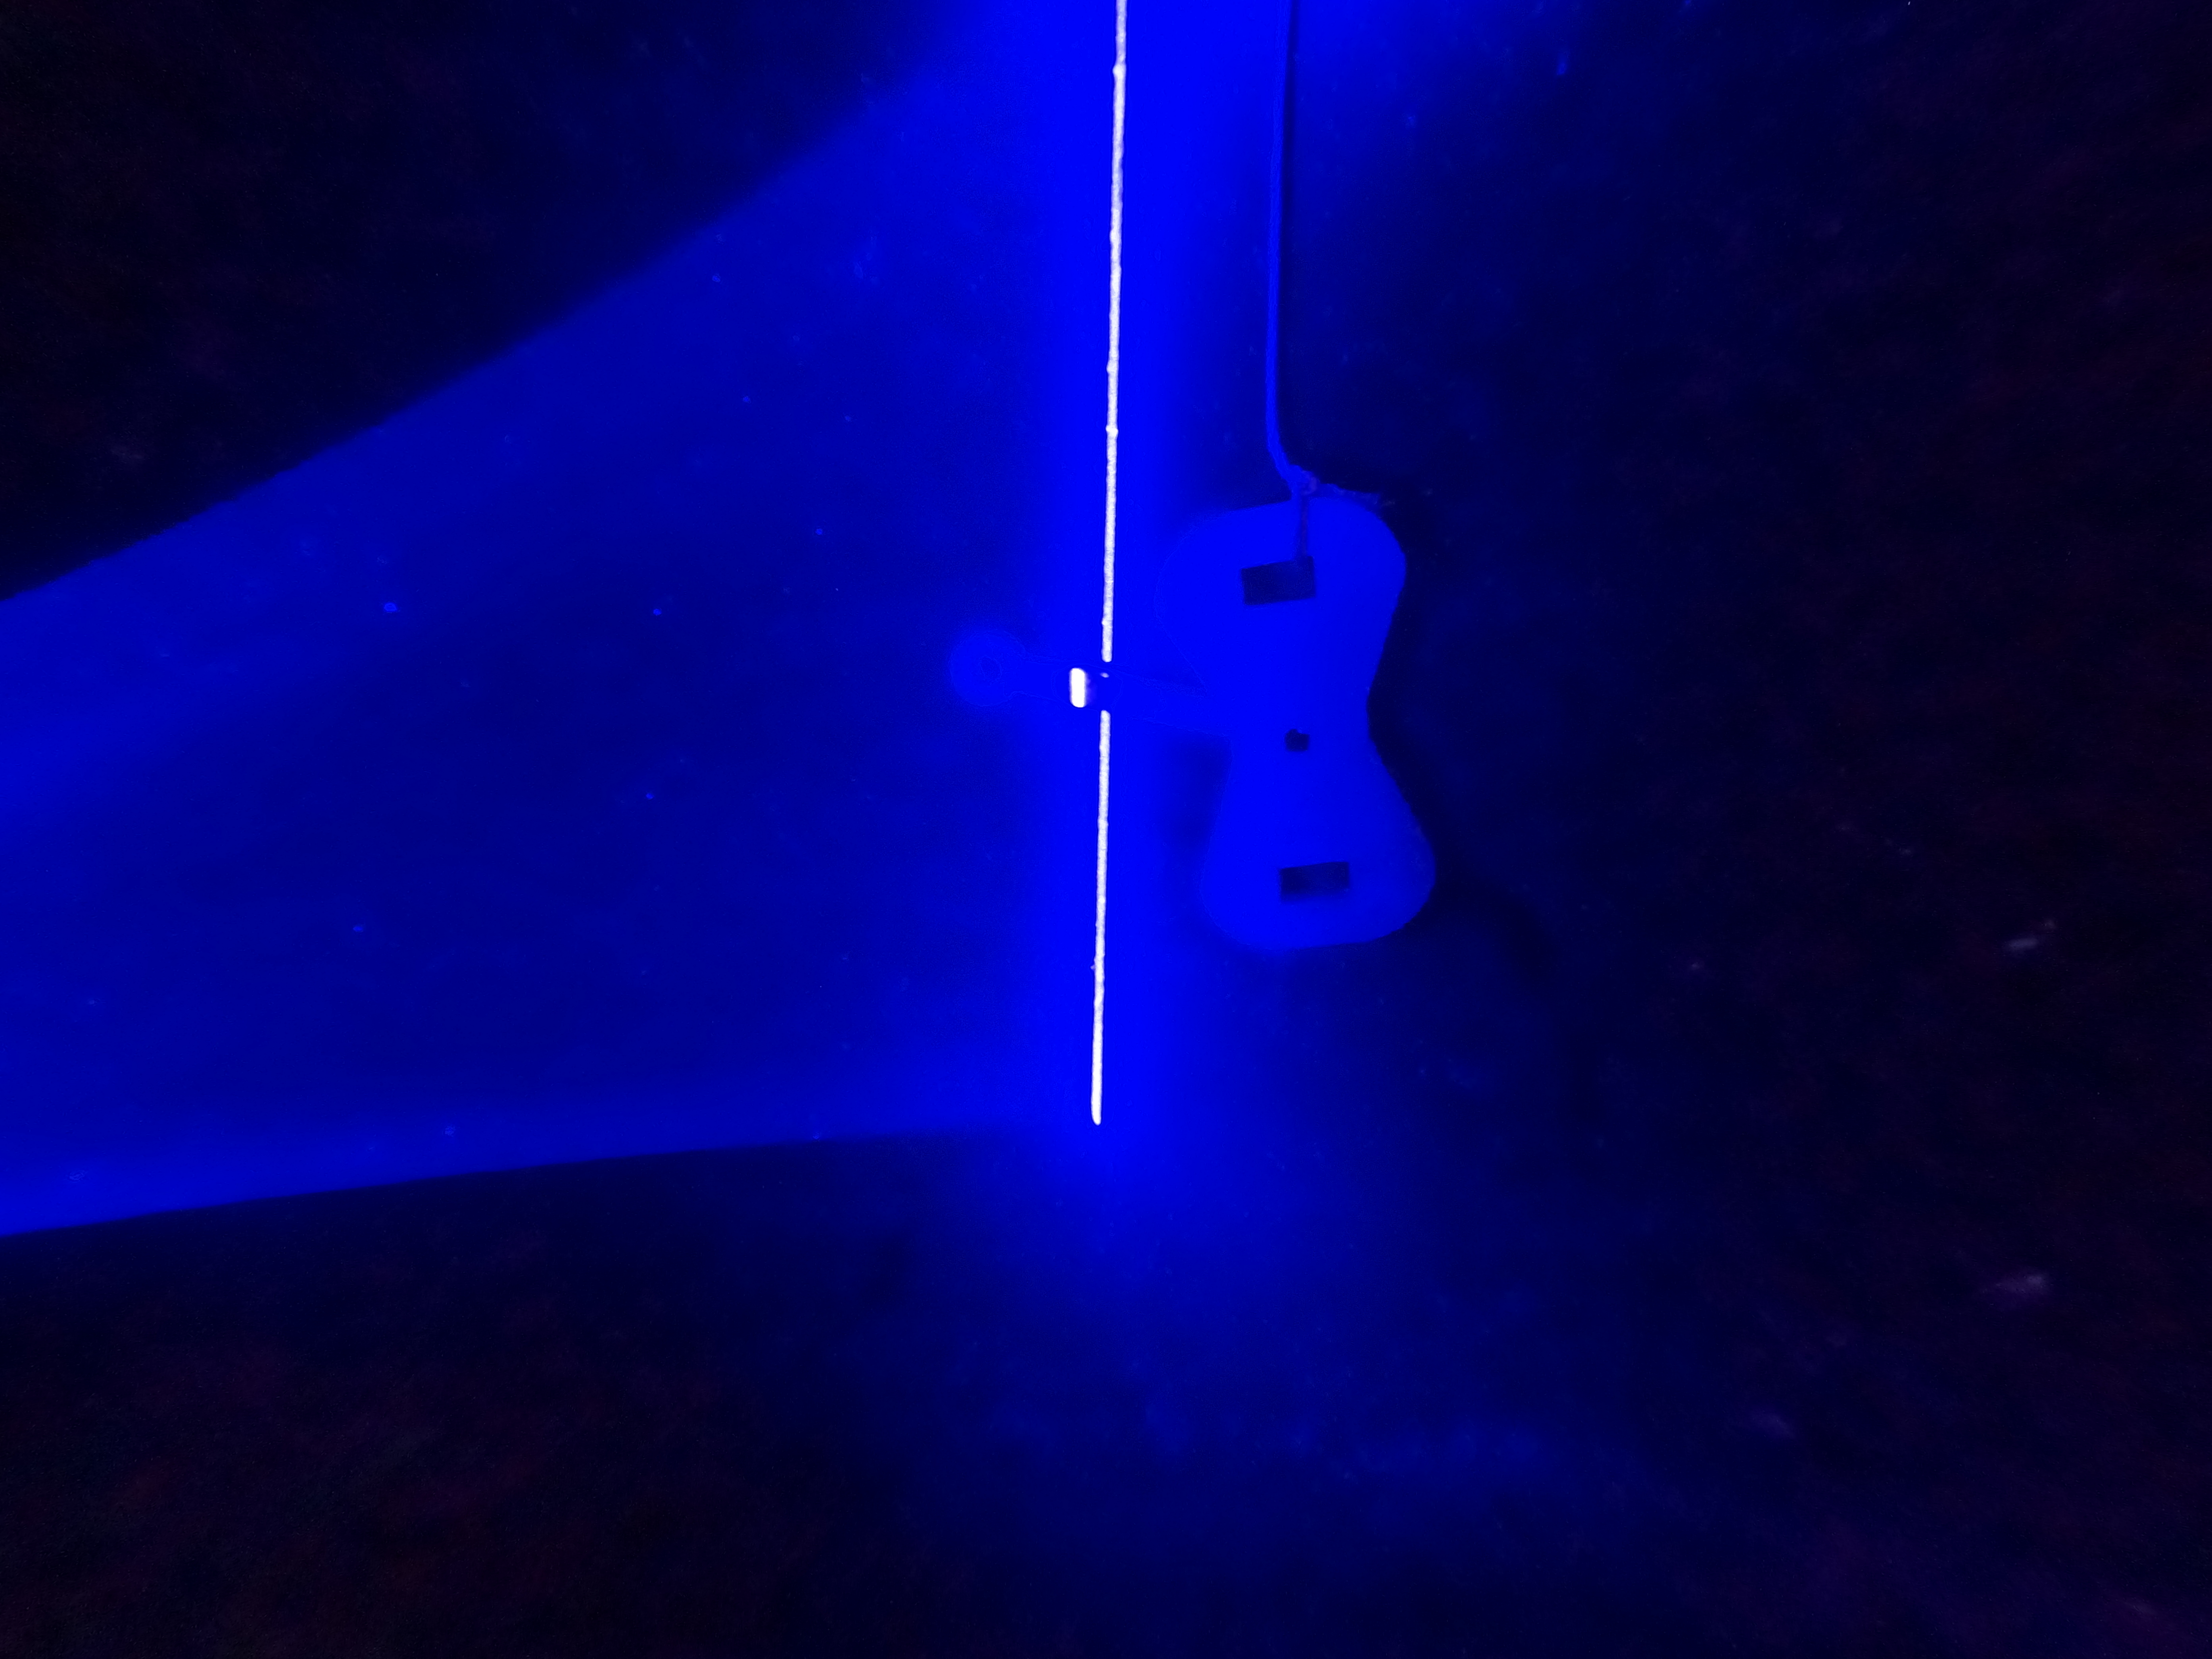

Supplement: Supplementary file 2290 [file G0016599.pdf › Level_1_2/G0016599.pdf]
