# Supplementary figures and images for: 3D reconstruction of shallow sea environment using direct system calibration and faint laser line extraction (part 23 of 35)
Source: Research Square preprint supplement (doi:10.21203/rs.3.rs-5262658/v1), 2024-12-02

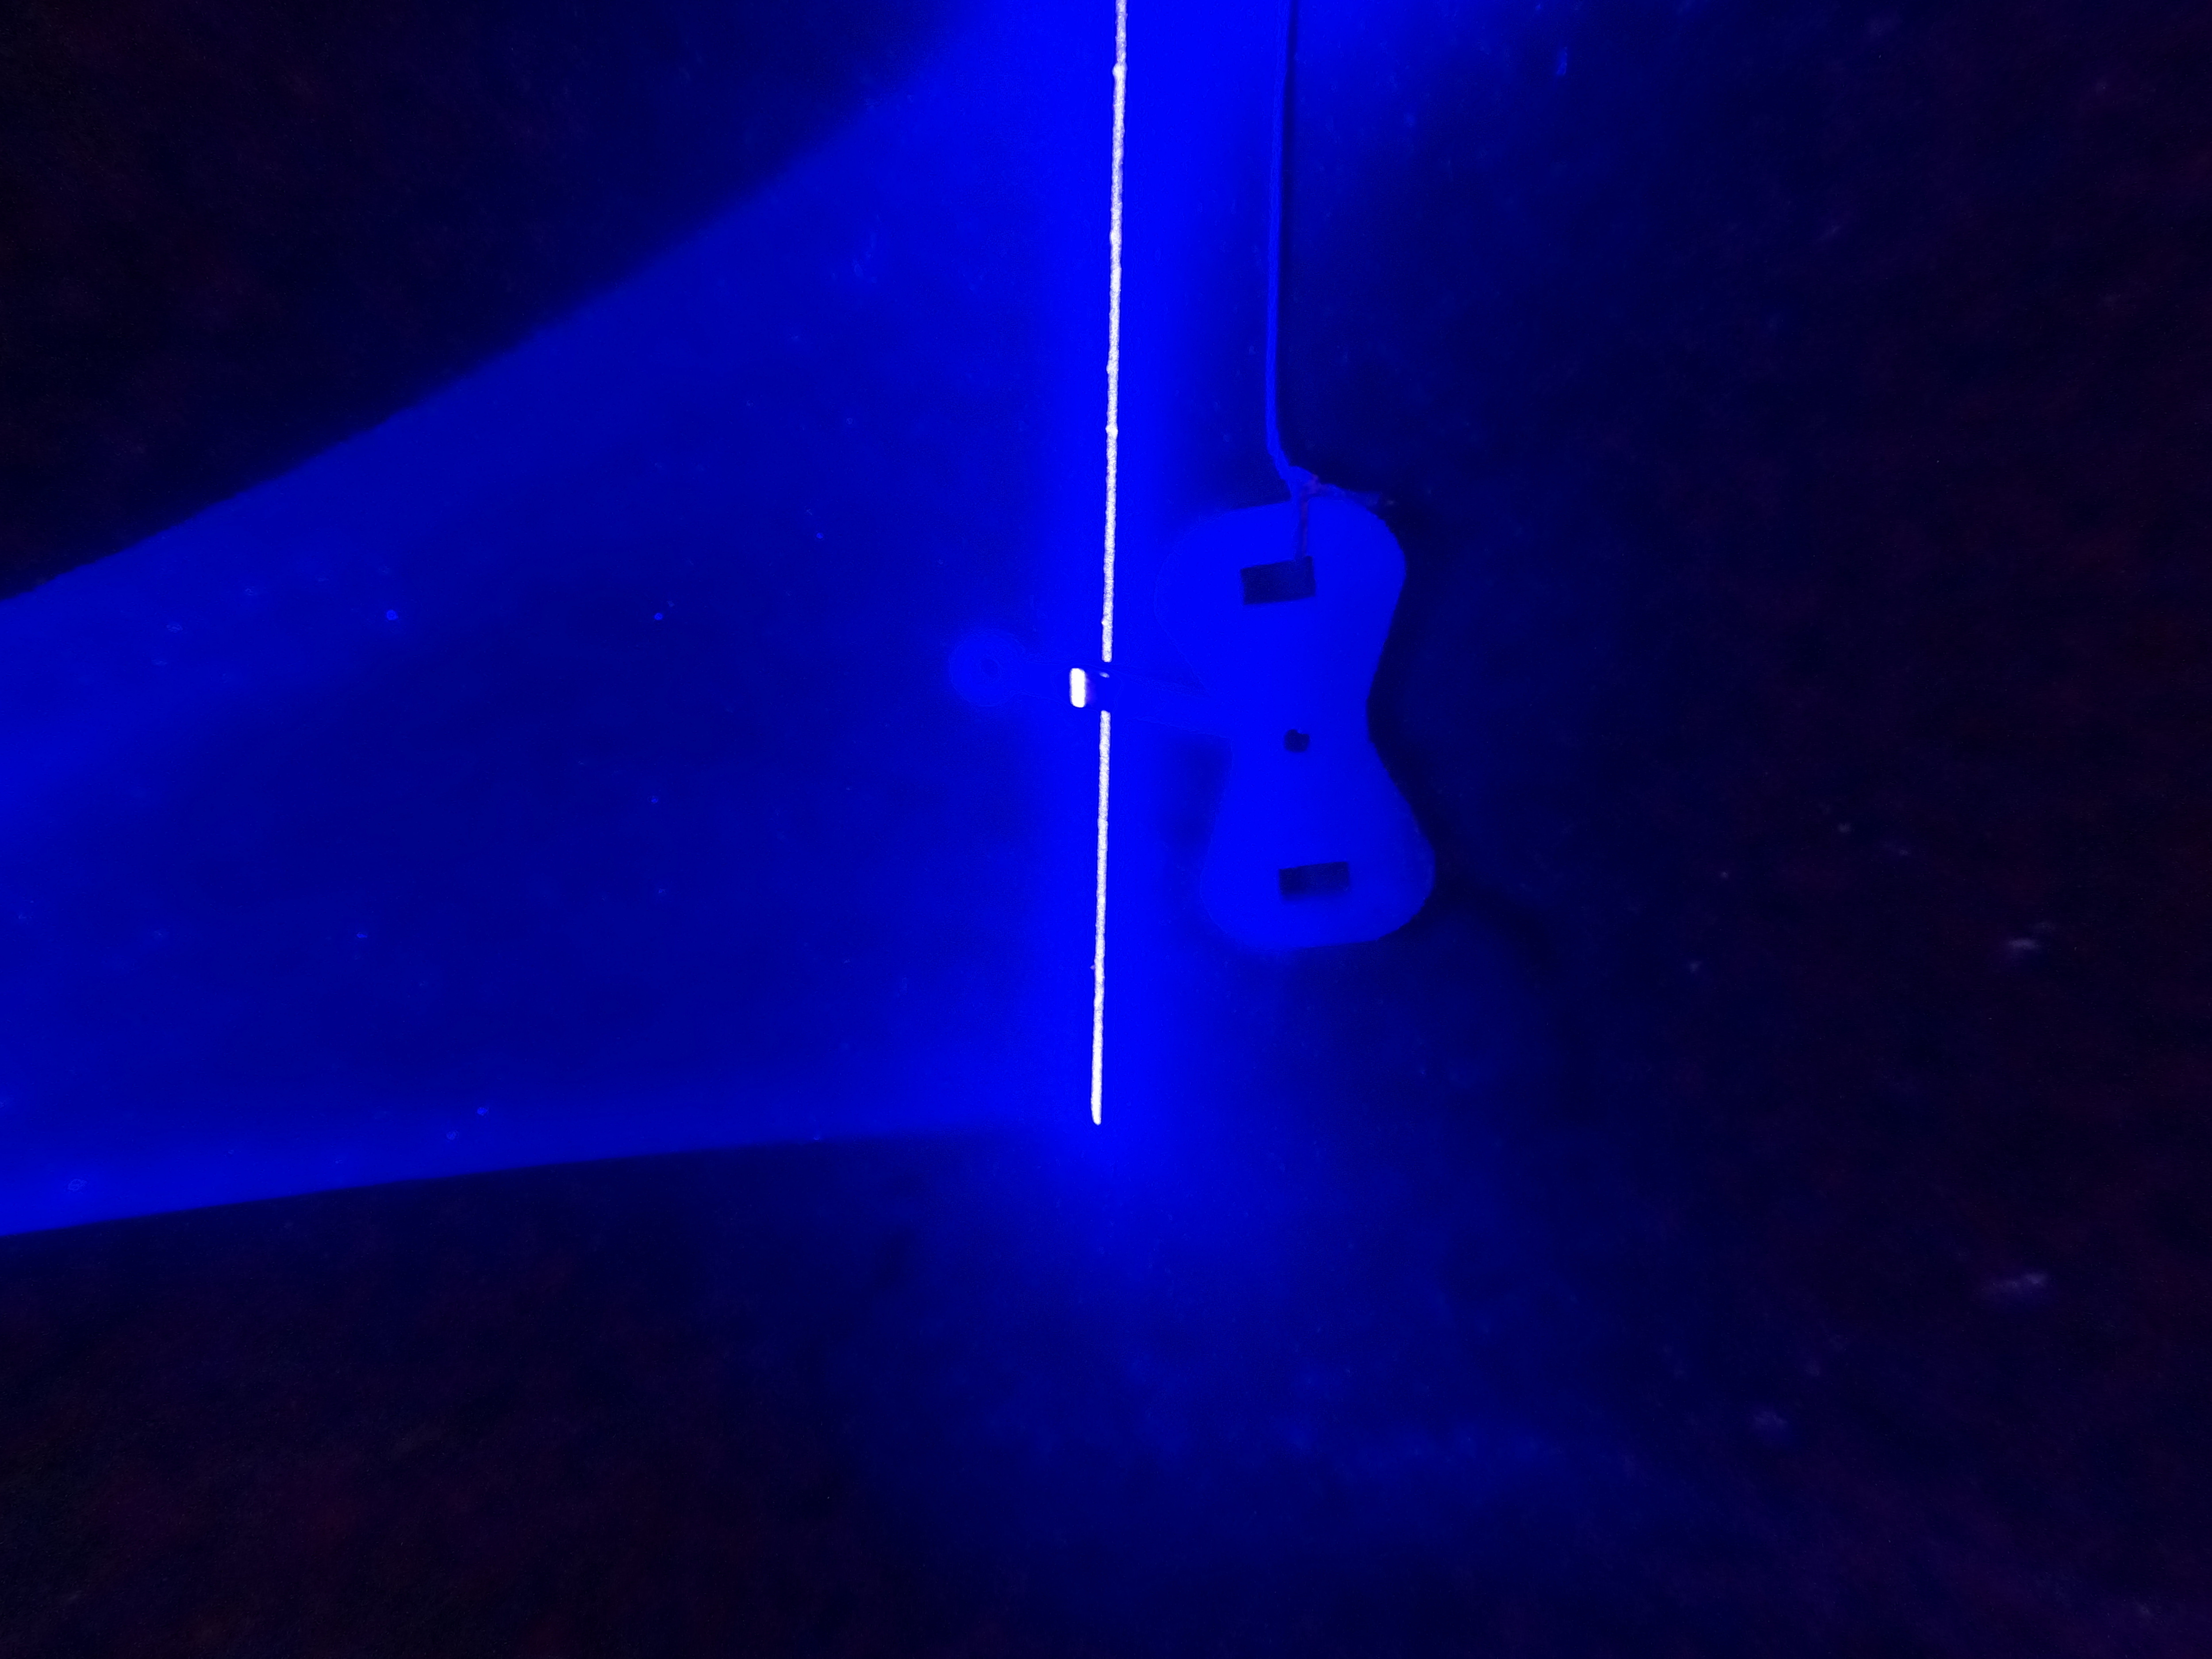

Supplement: Supplementary file 2291 [file G0016600.pdf › Level_1_2/G0016600.pdf]

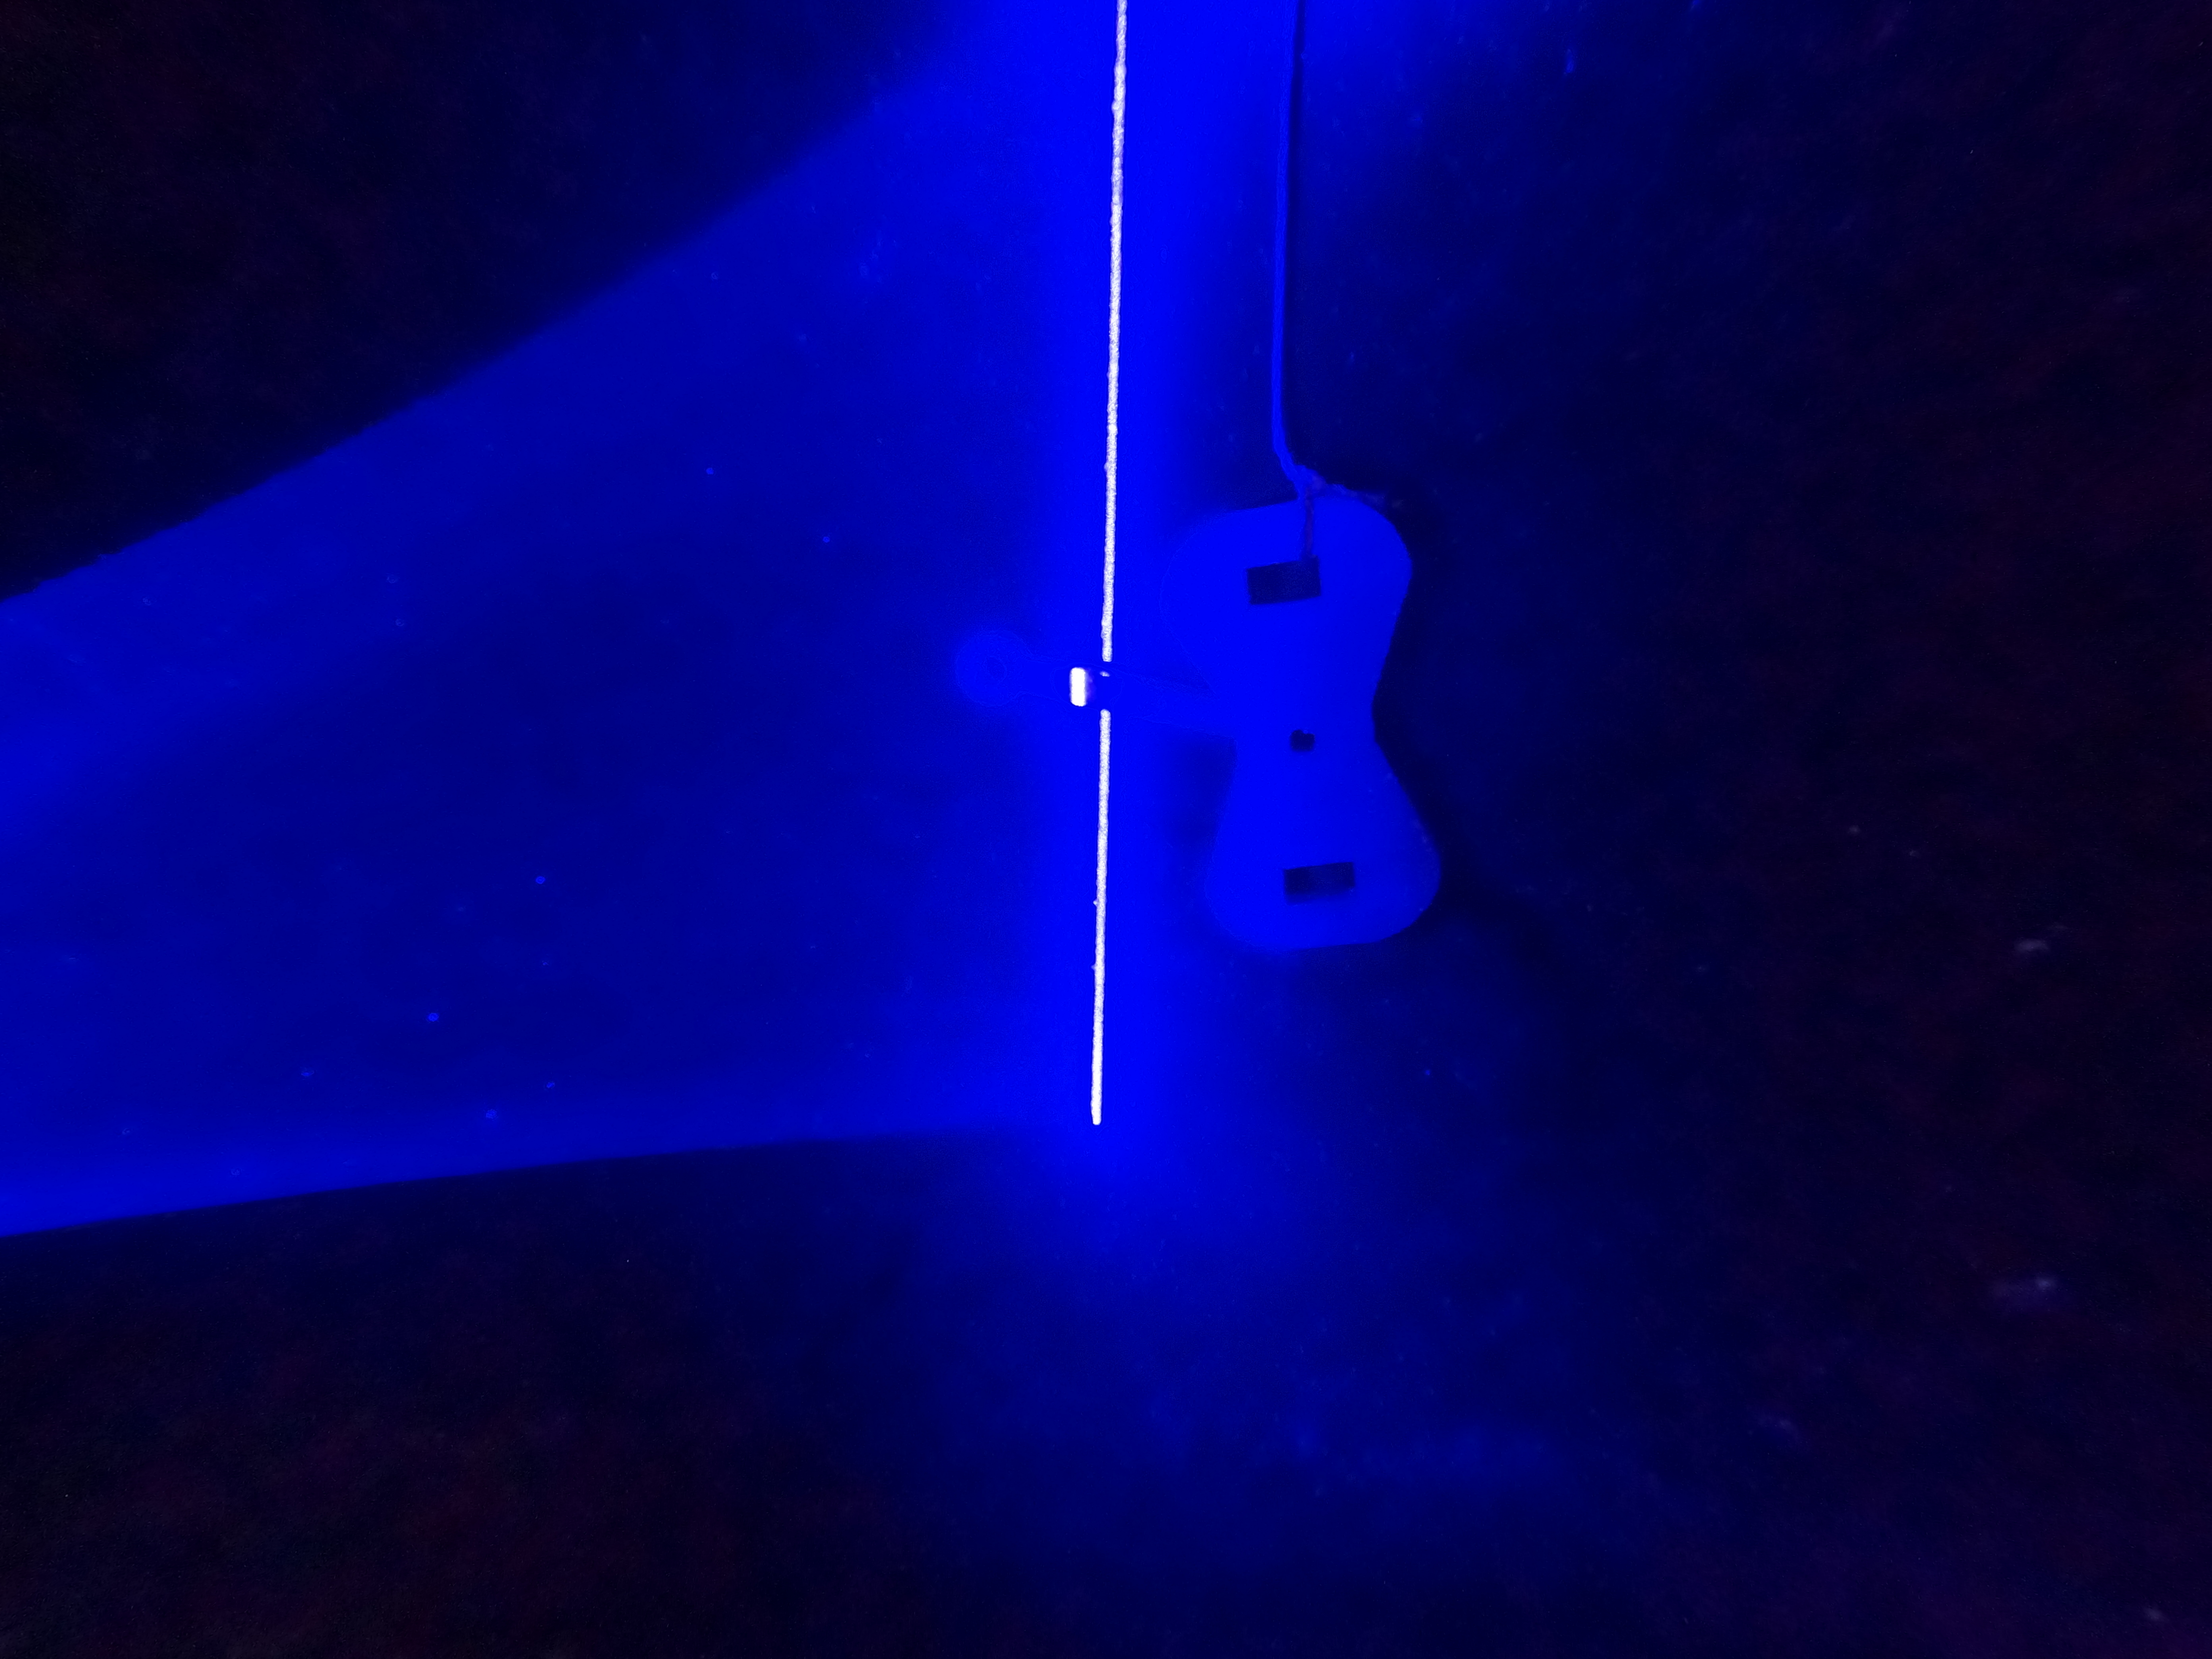

Supplement: Supplementary file 2292 [file G0016601.pdf › Level_1_2/G0016601.pdf]

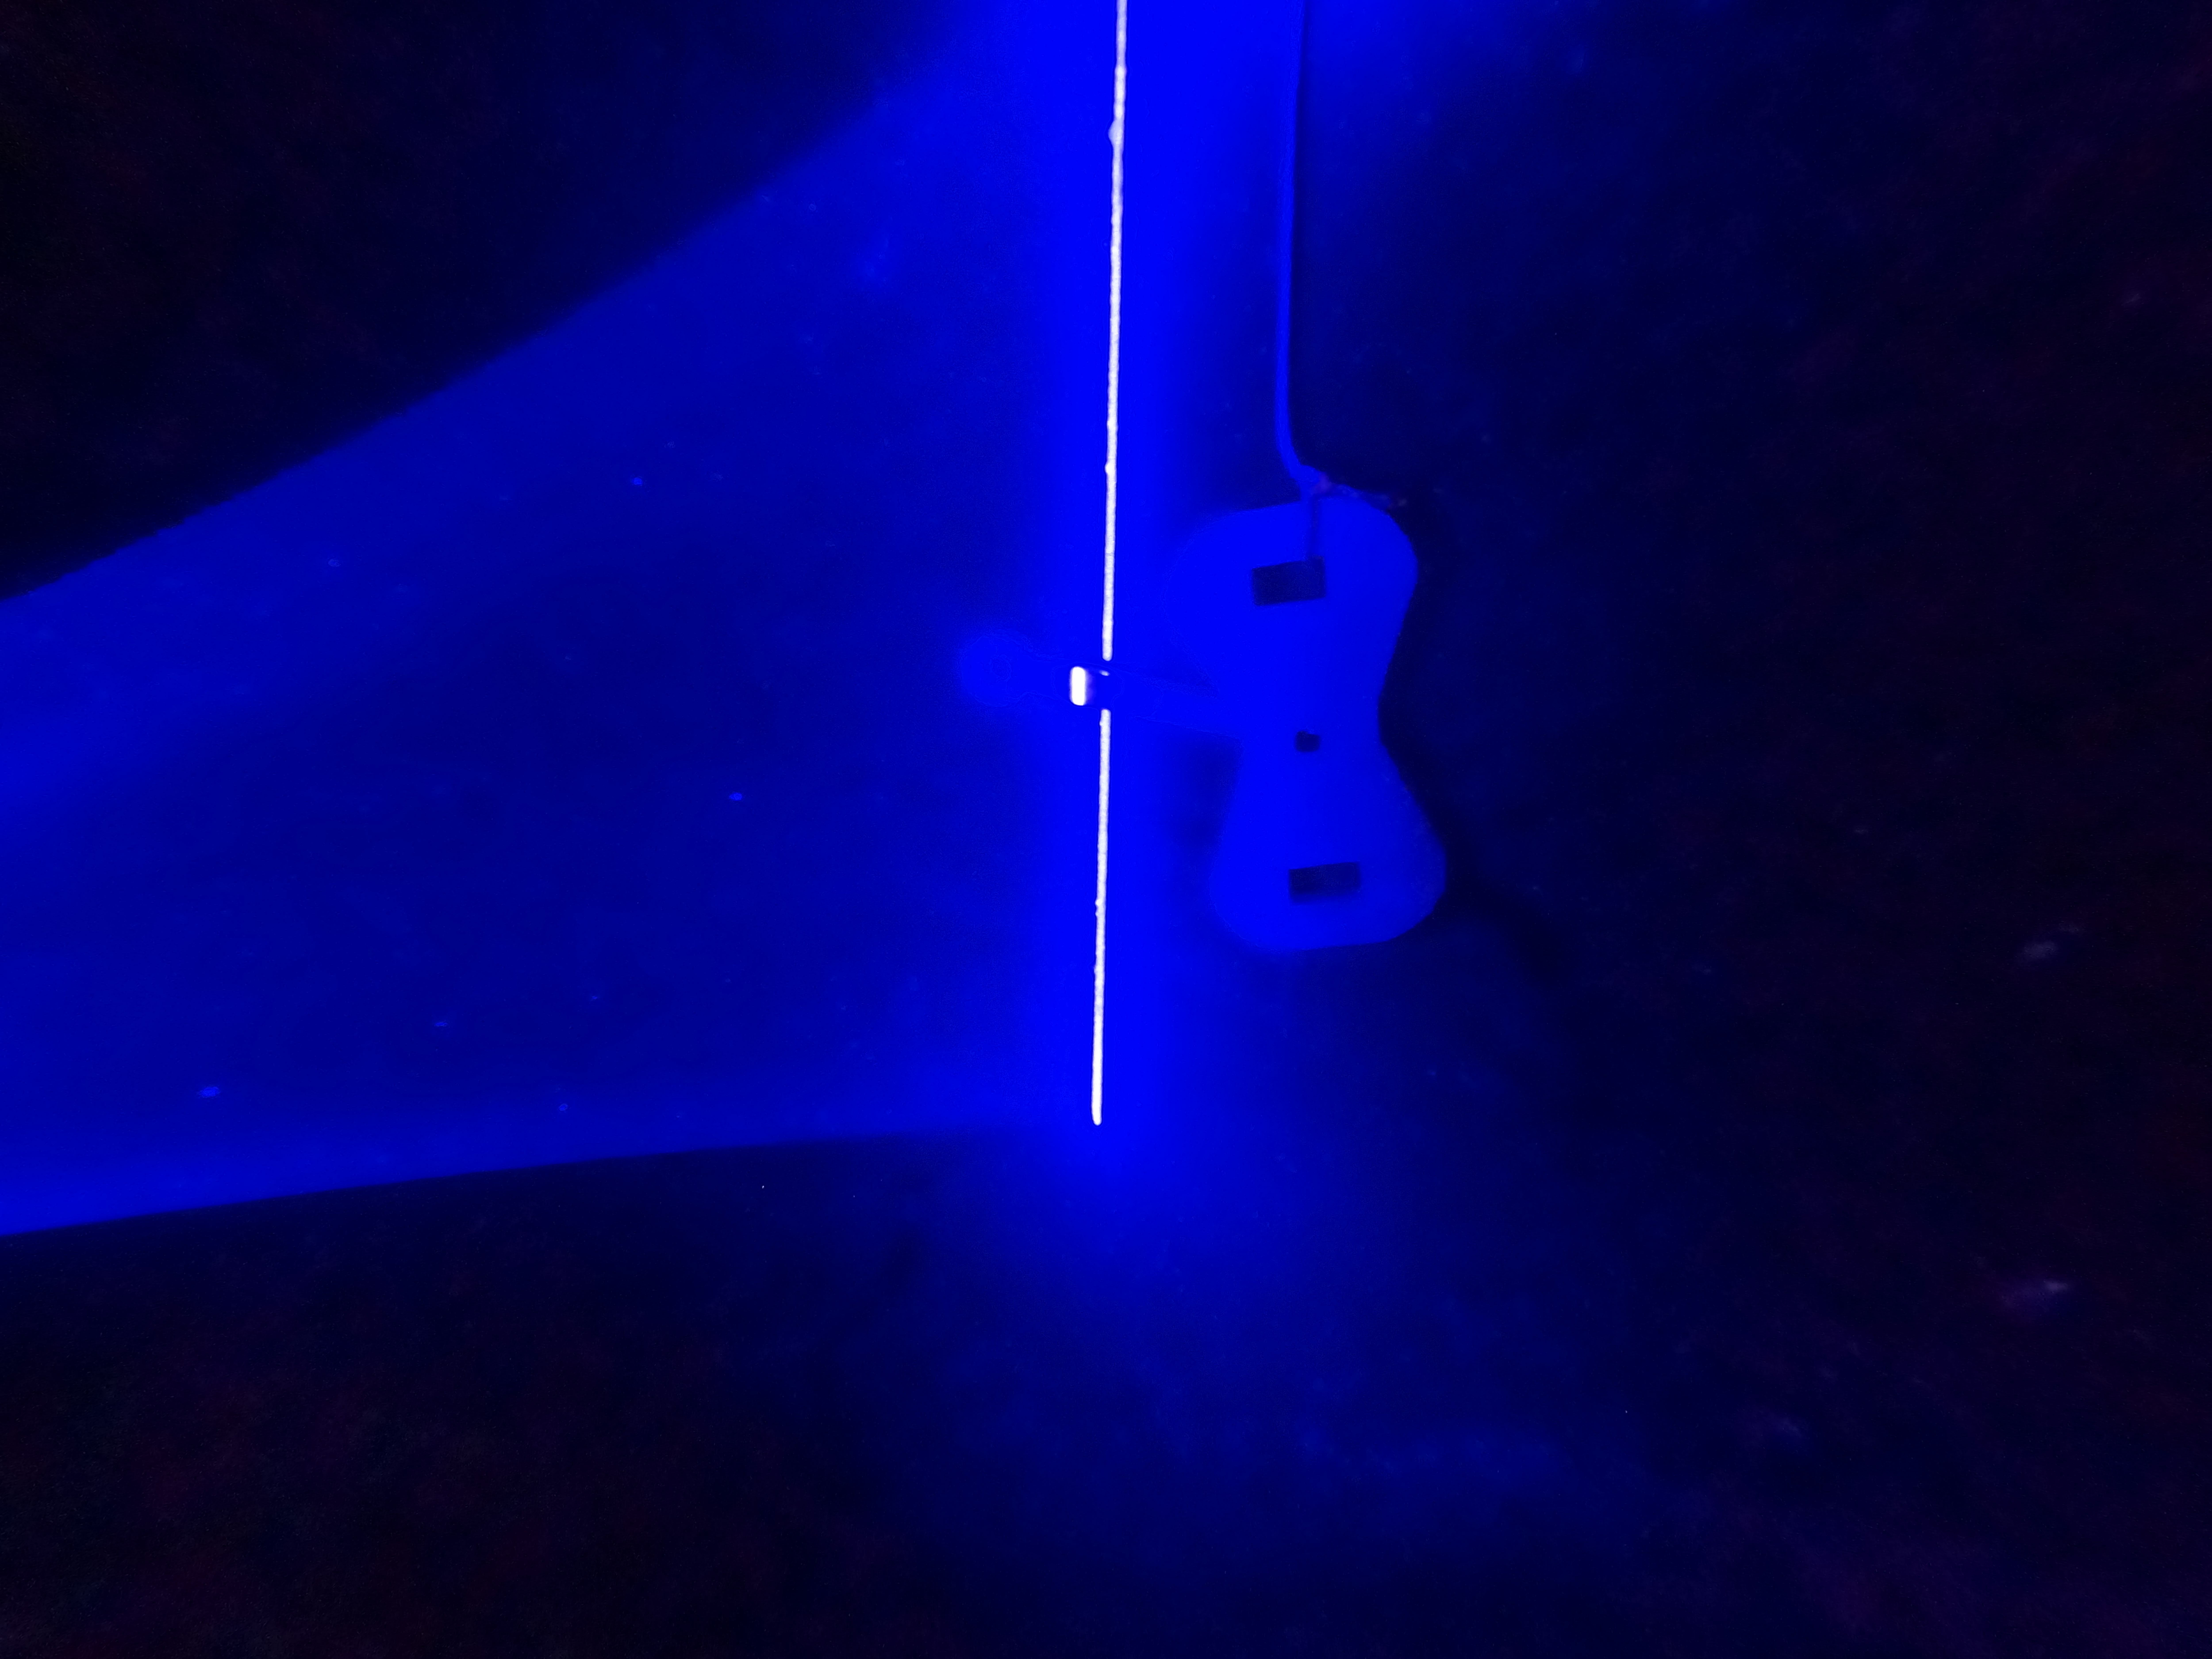

Supplement: Supplementary file 2293 [file G0016602.pdf › Level_1_2/G0016602.pdf]

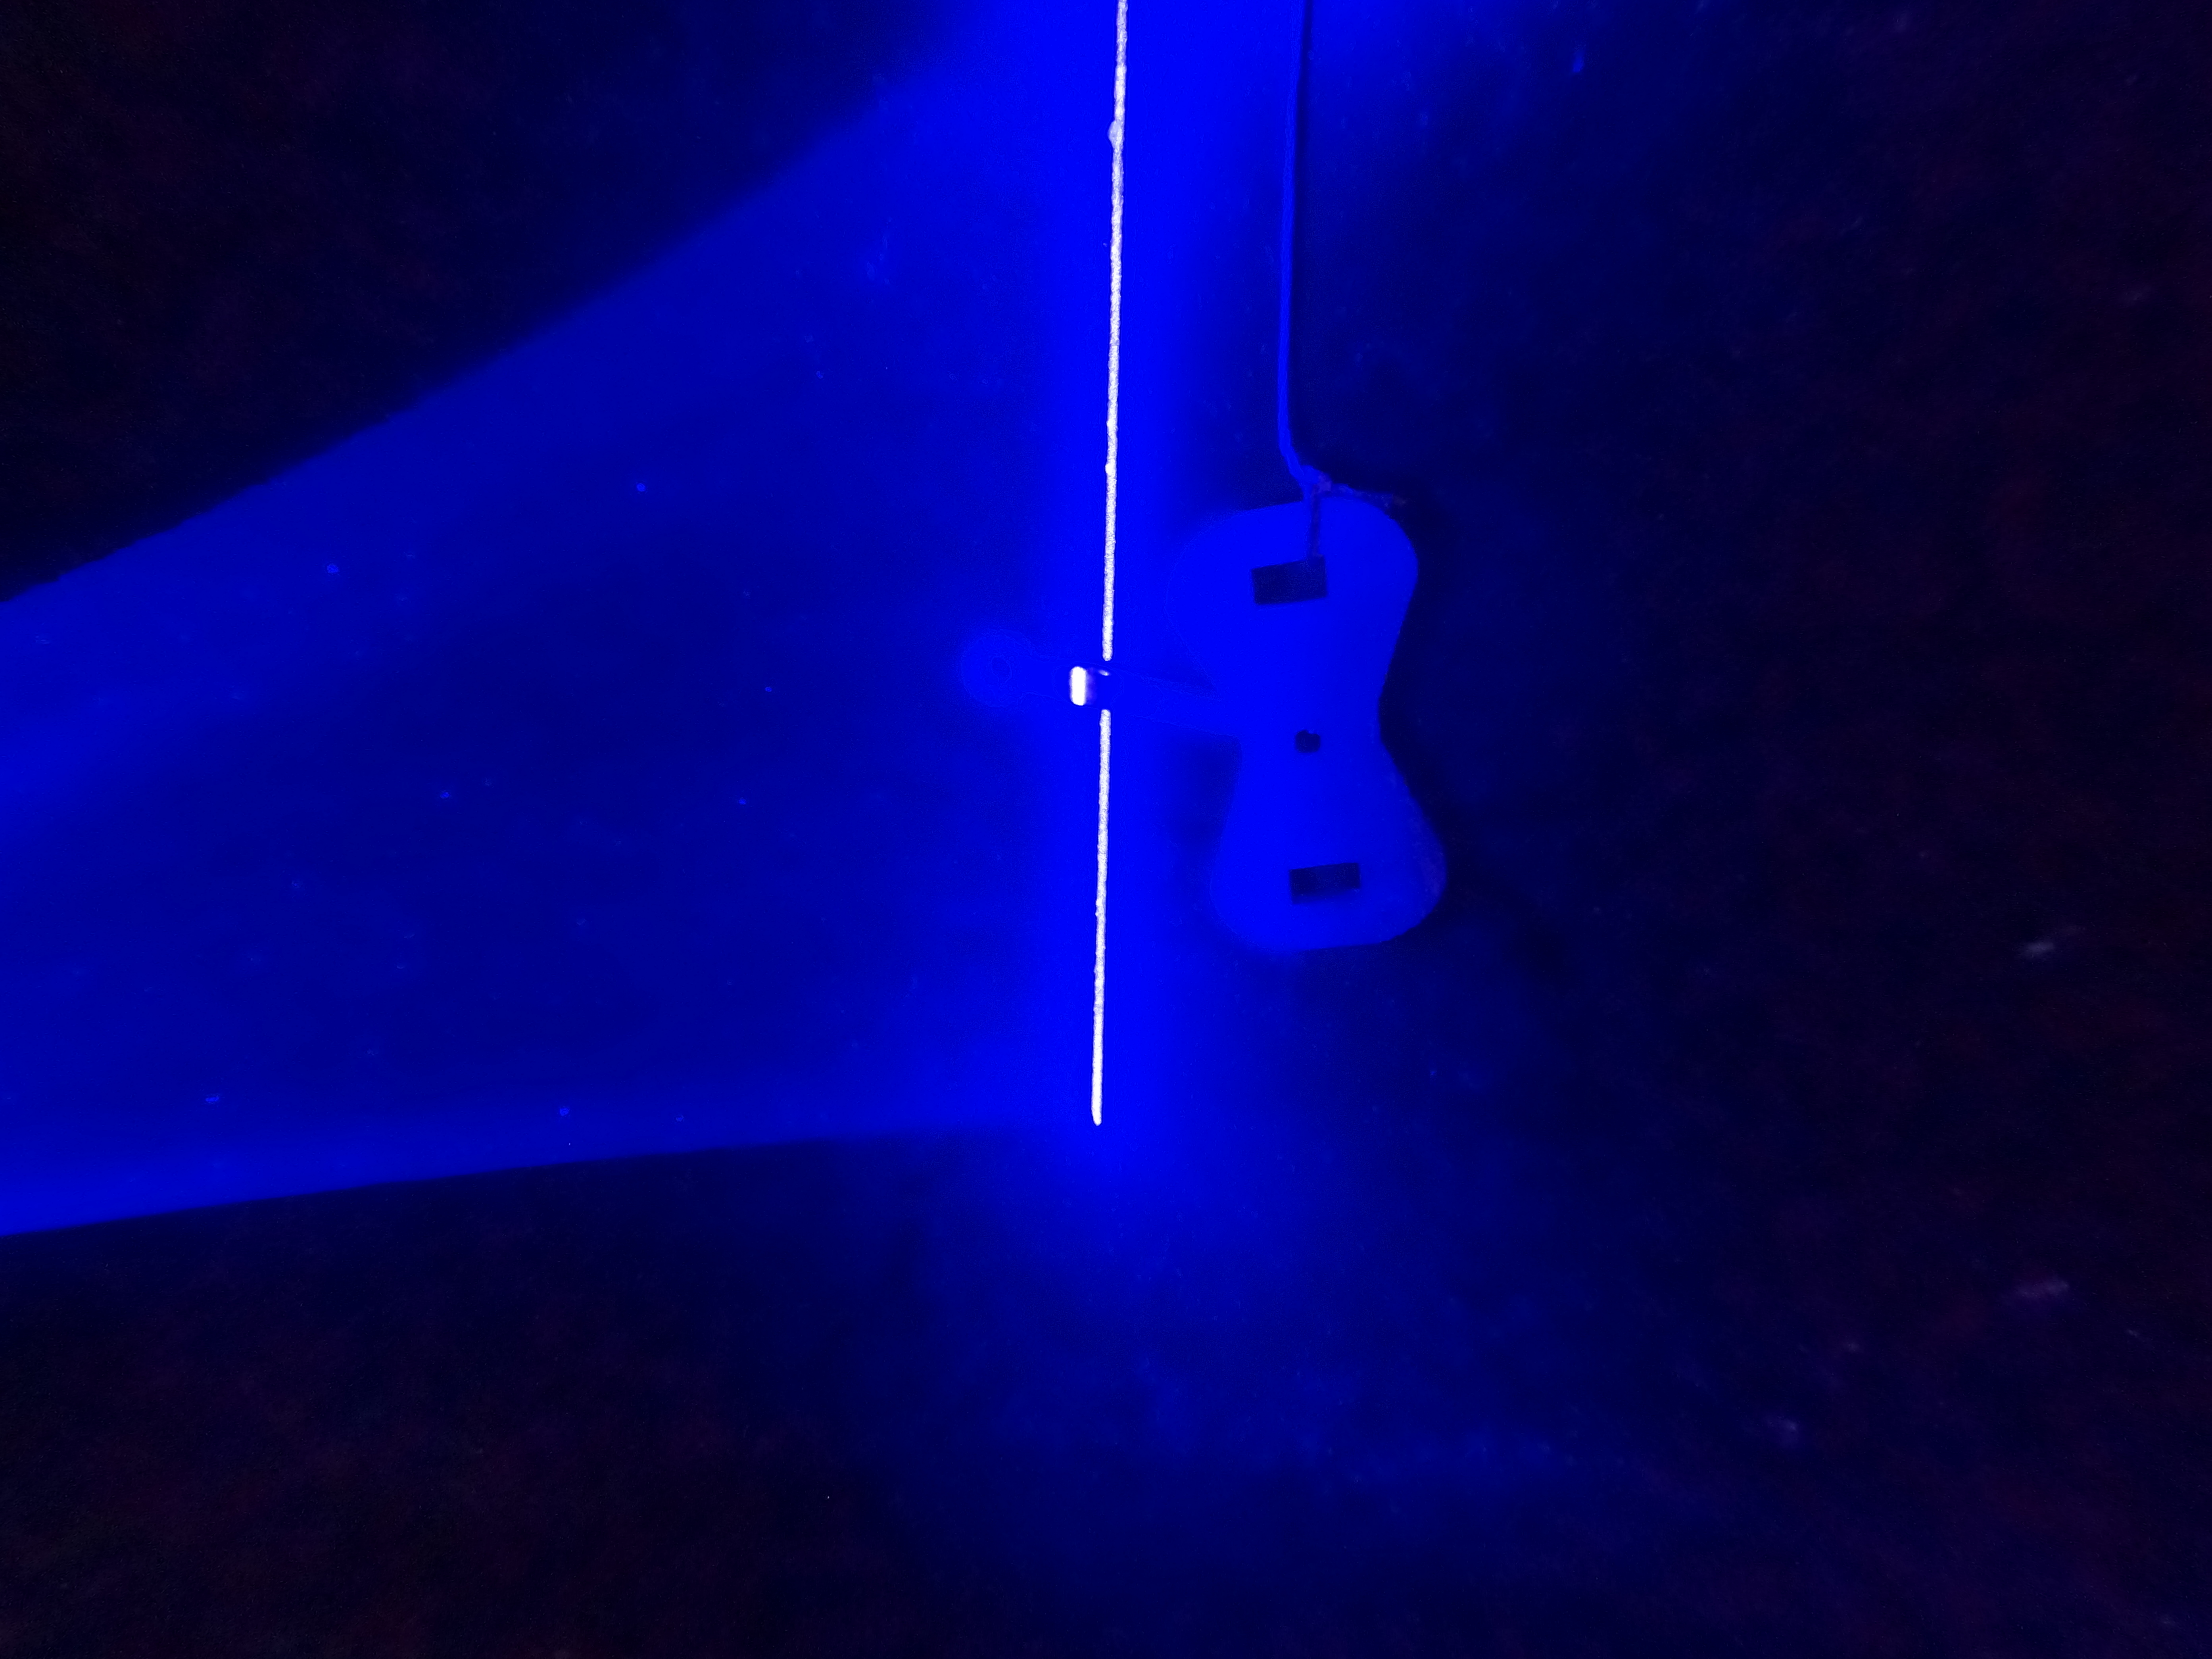

Supplement: Supplementary file 2294 [file G0016603.pdf › Level_1_2/G0016603.pdf]

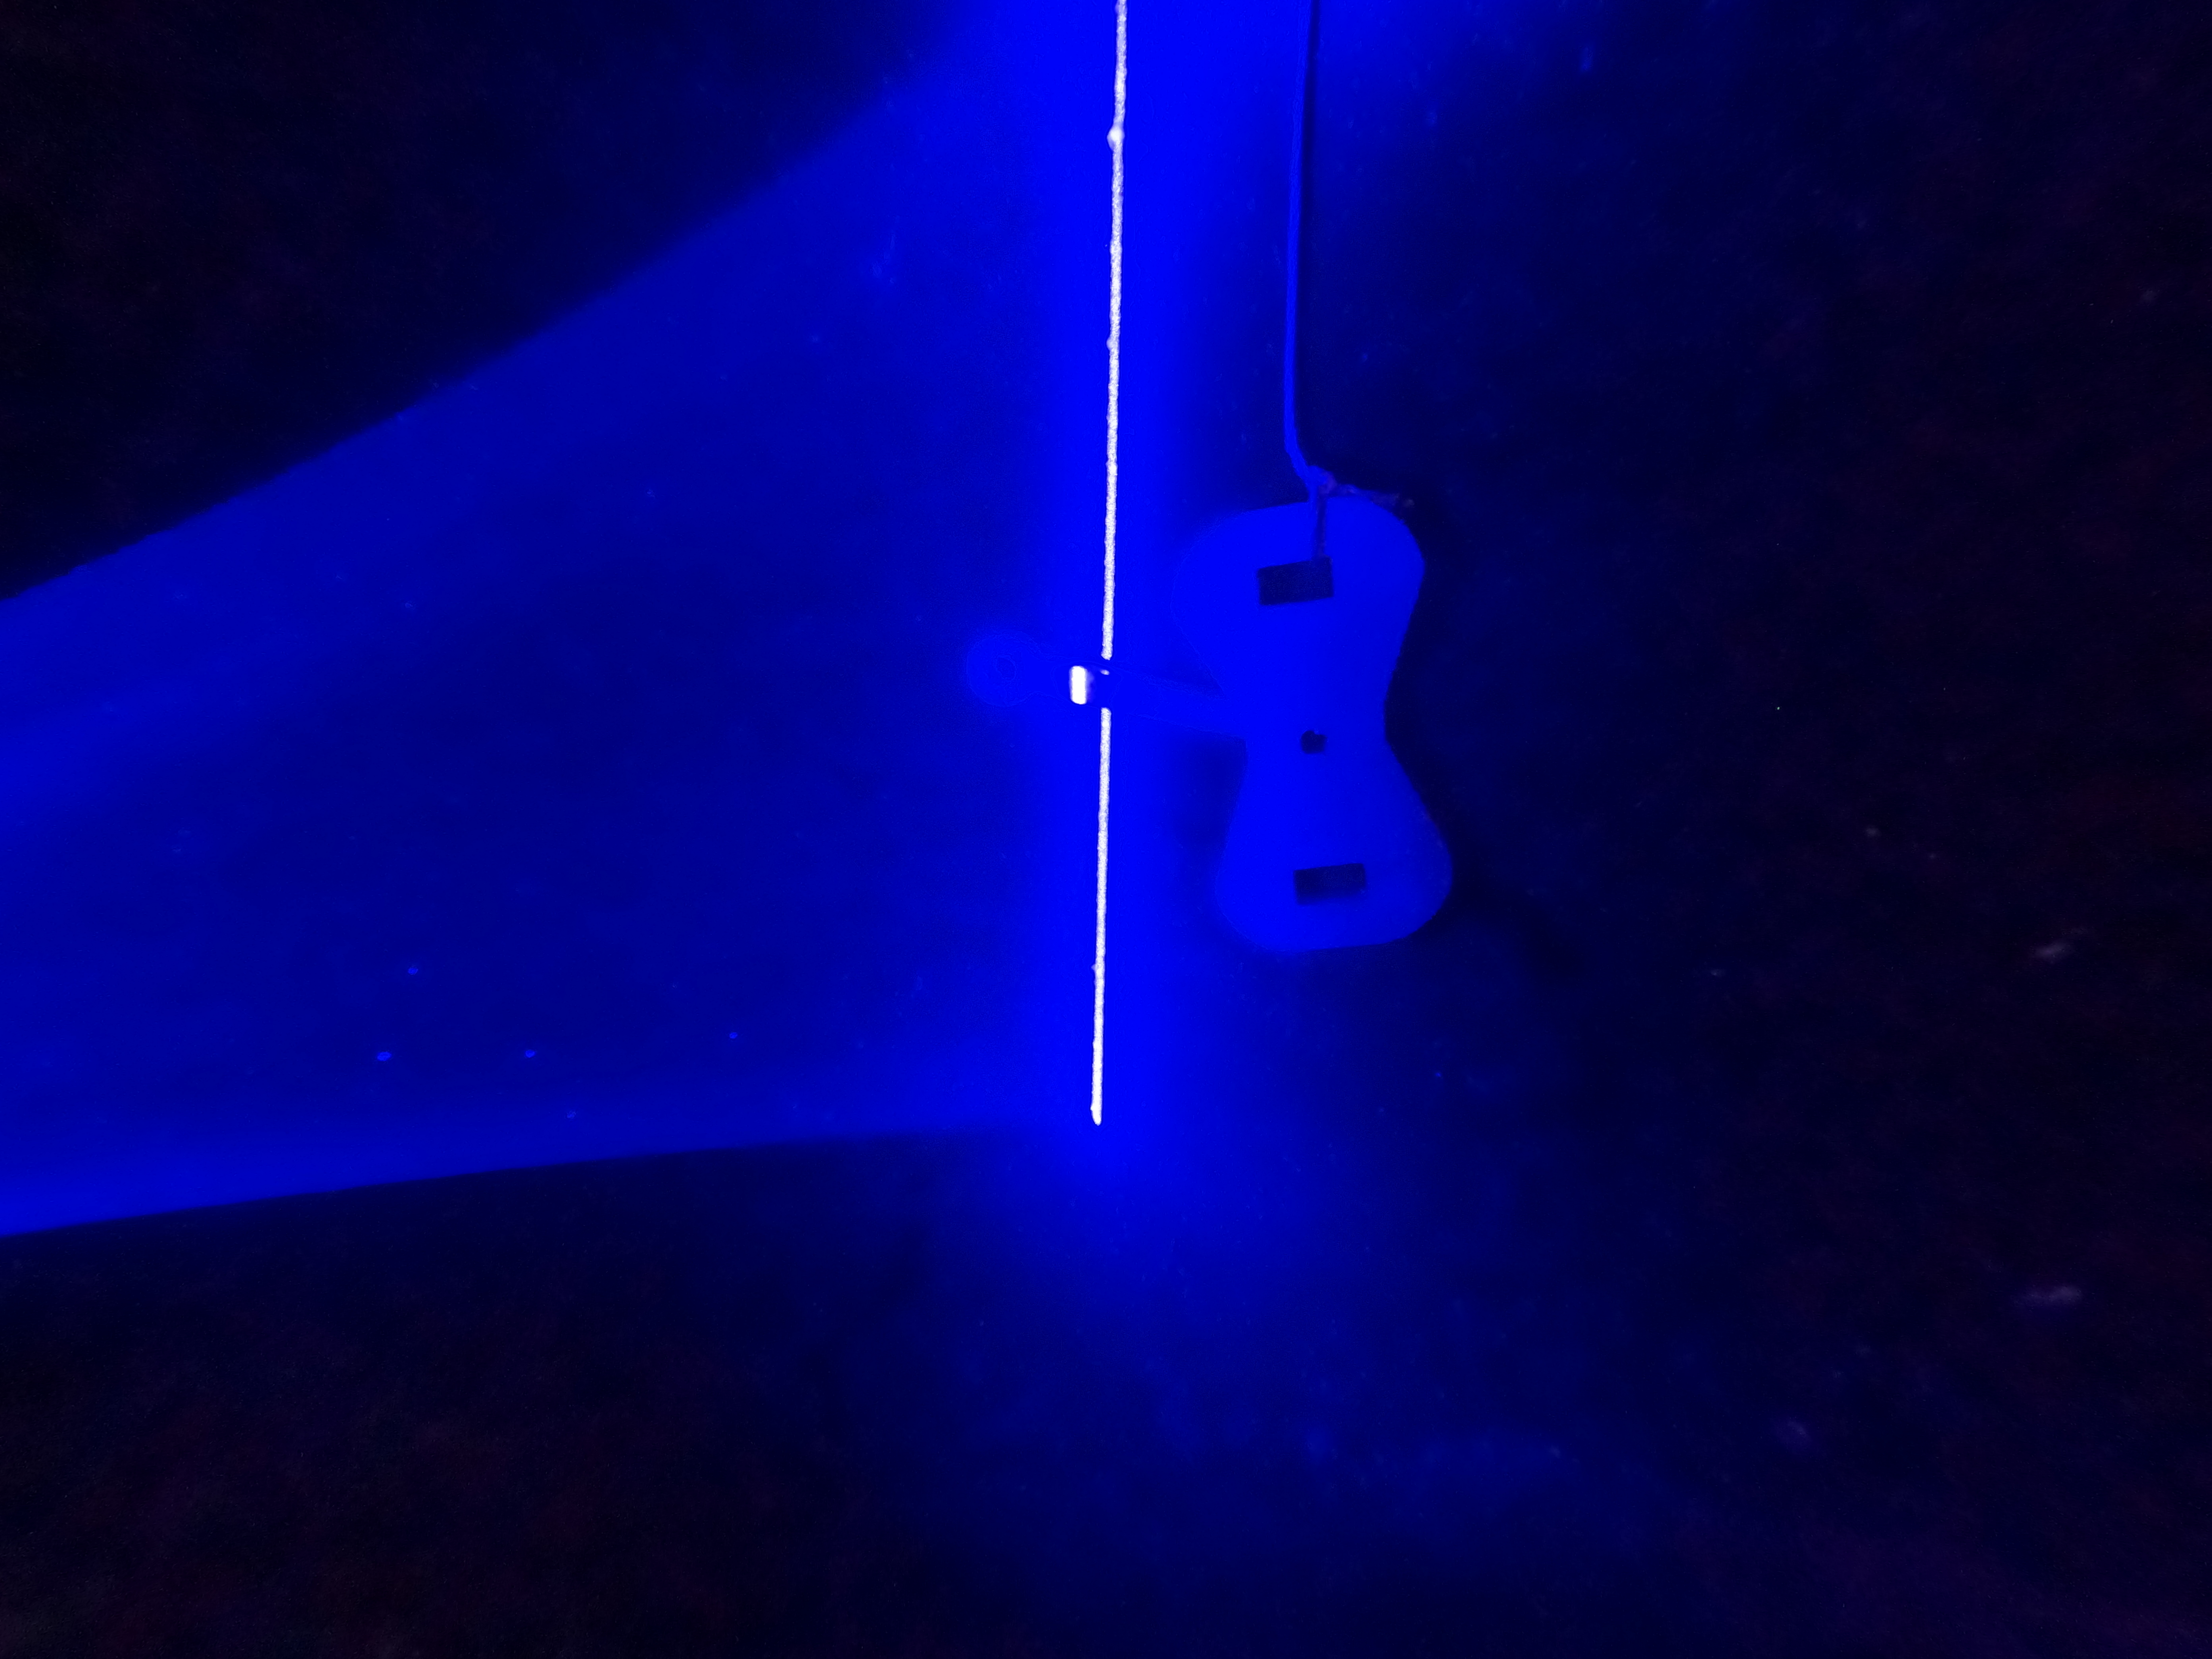

Supplement: Supplementary file 2295 [file G0016604.pdf › Level_1_2/G0016604.pdf]

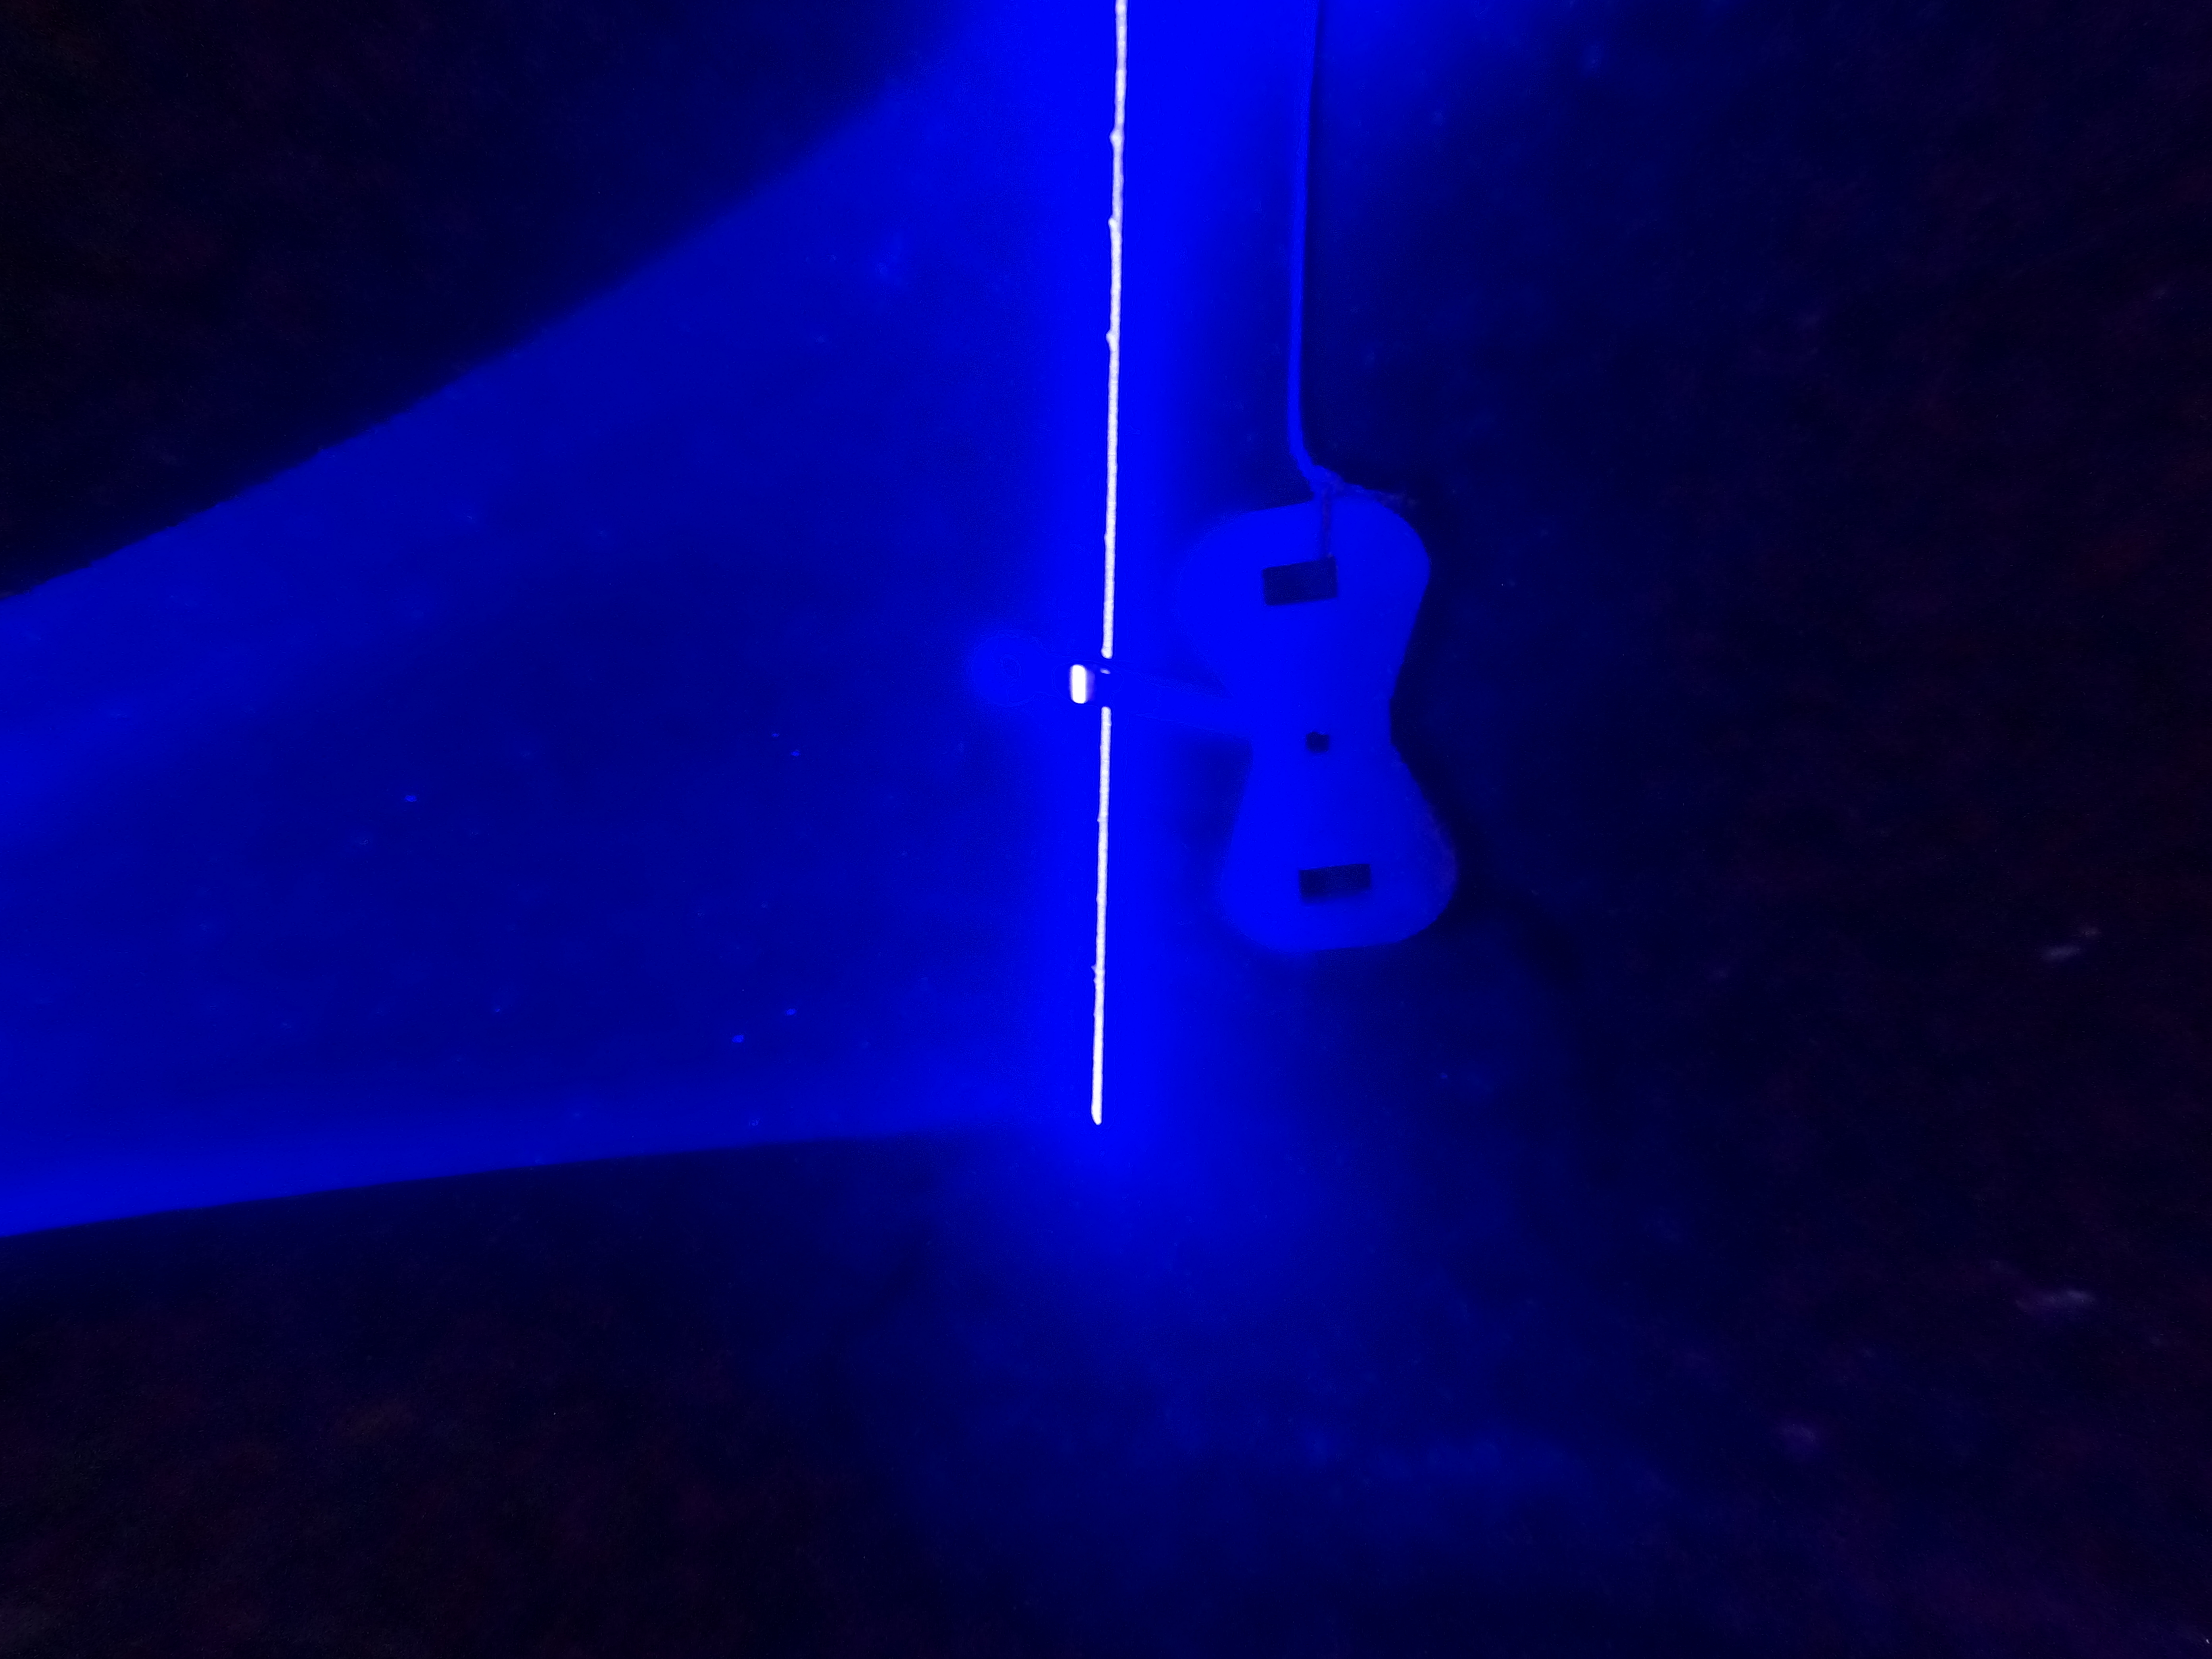

Supplement: Supplementary file 2296 [file G0016605.pdf › Level_1_2/G0016605.pdf]

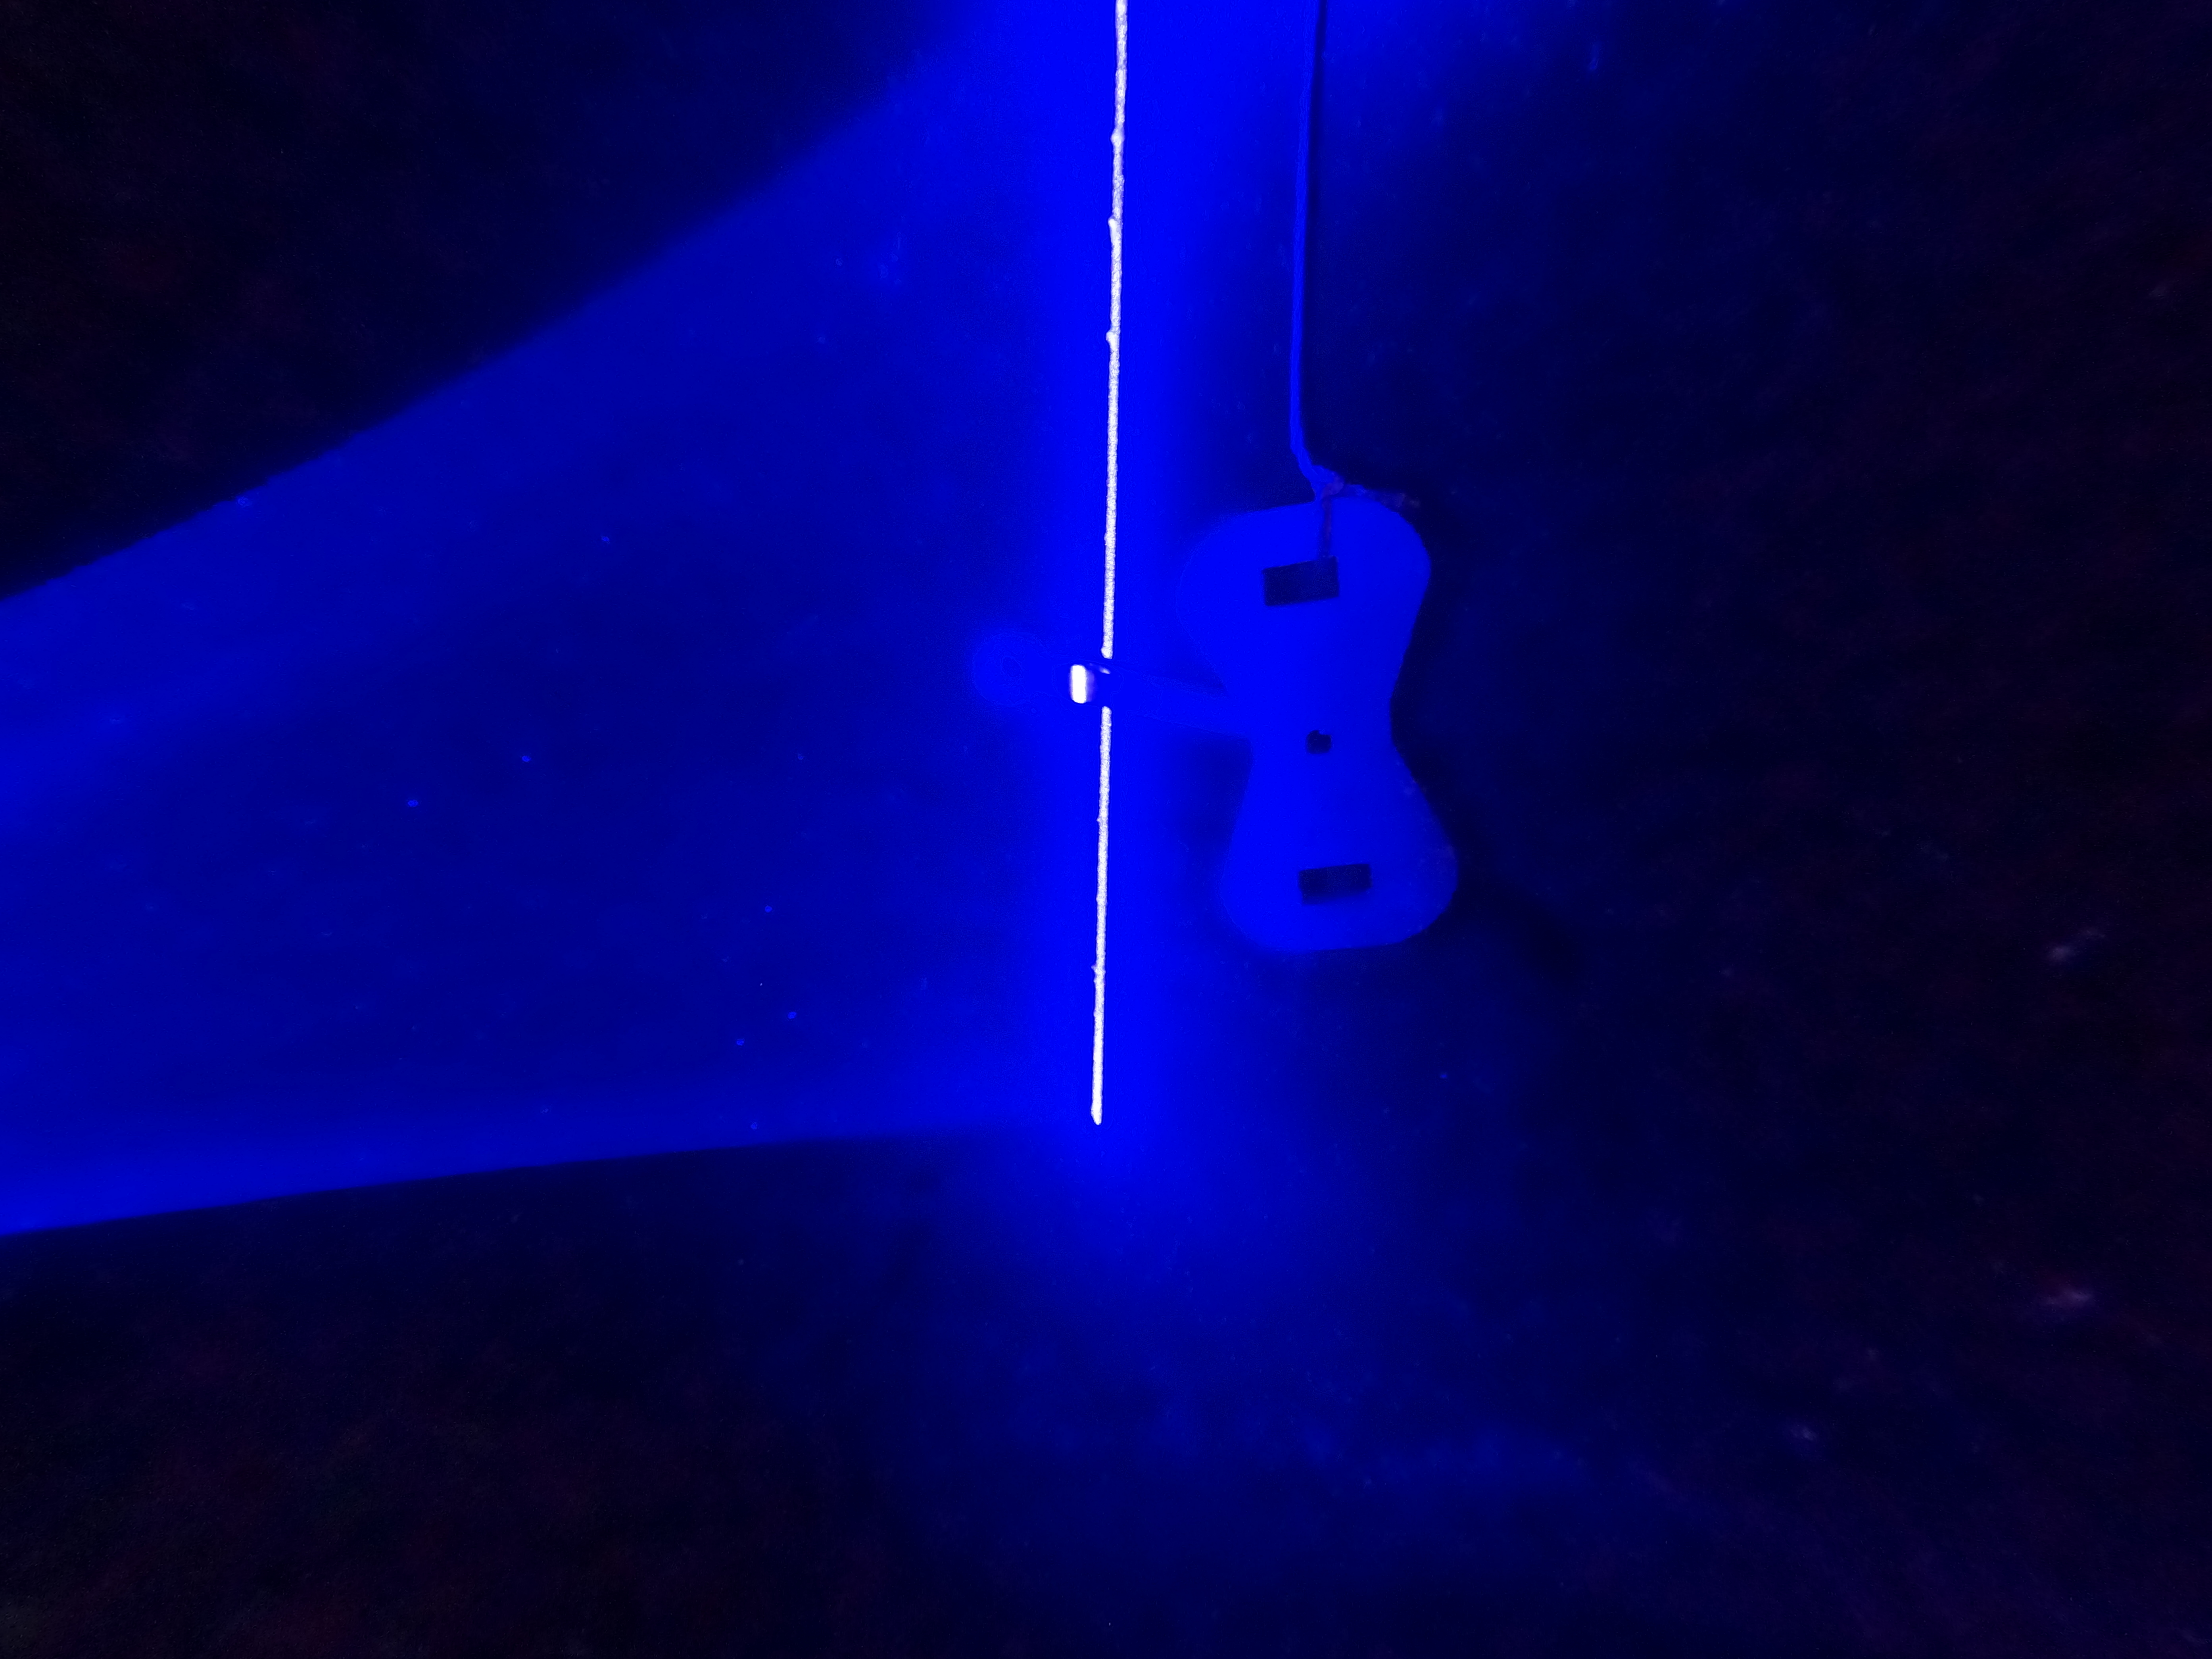

Supplement: Supplementary file 2297 [file G0016606.pdf › Level_1_2/G0016606.pdf]

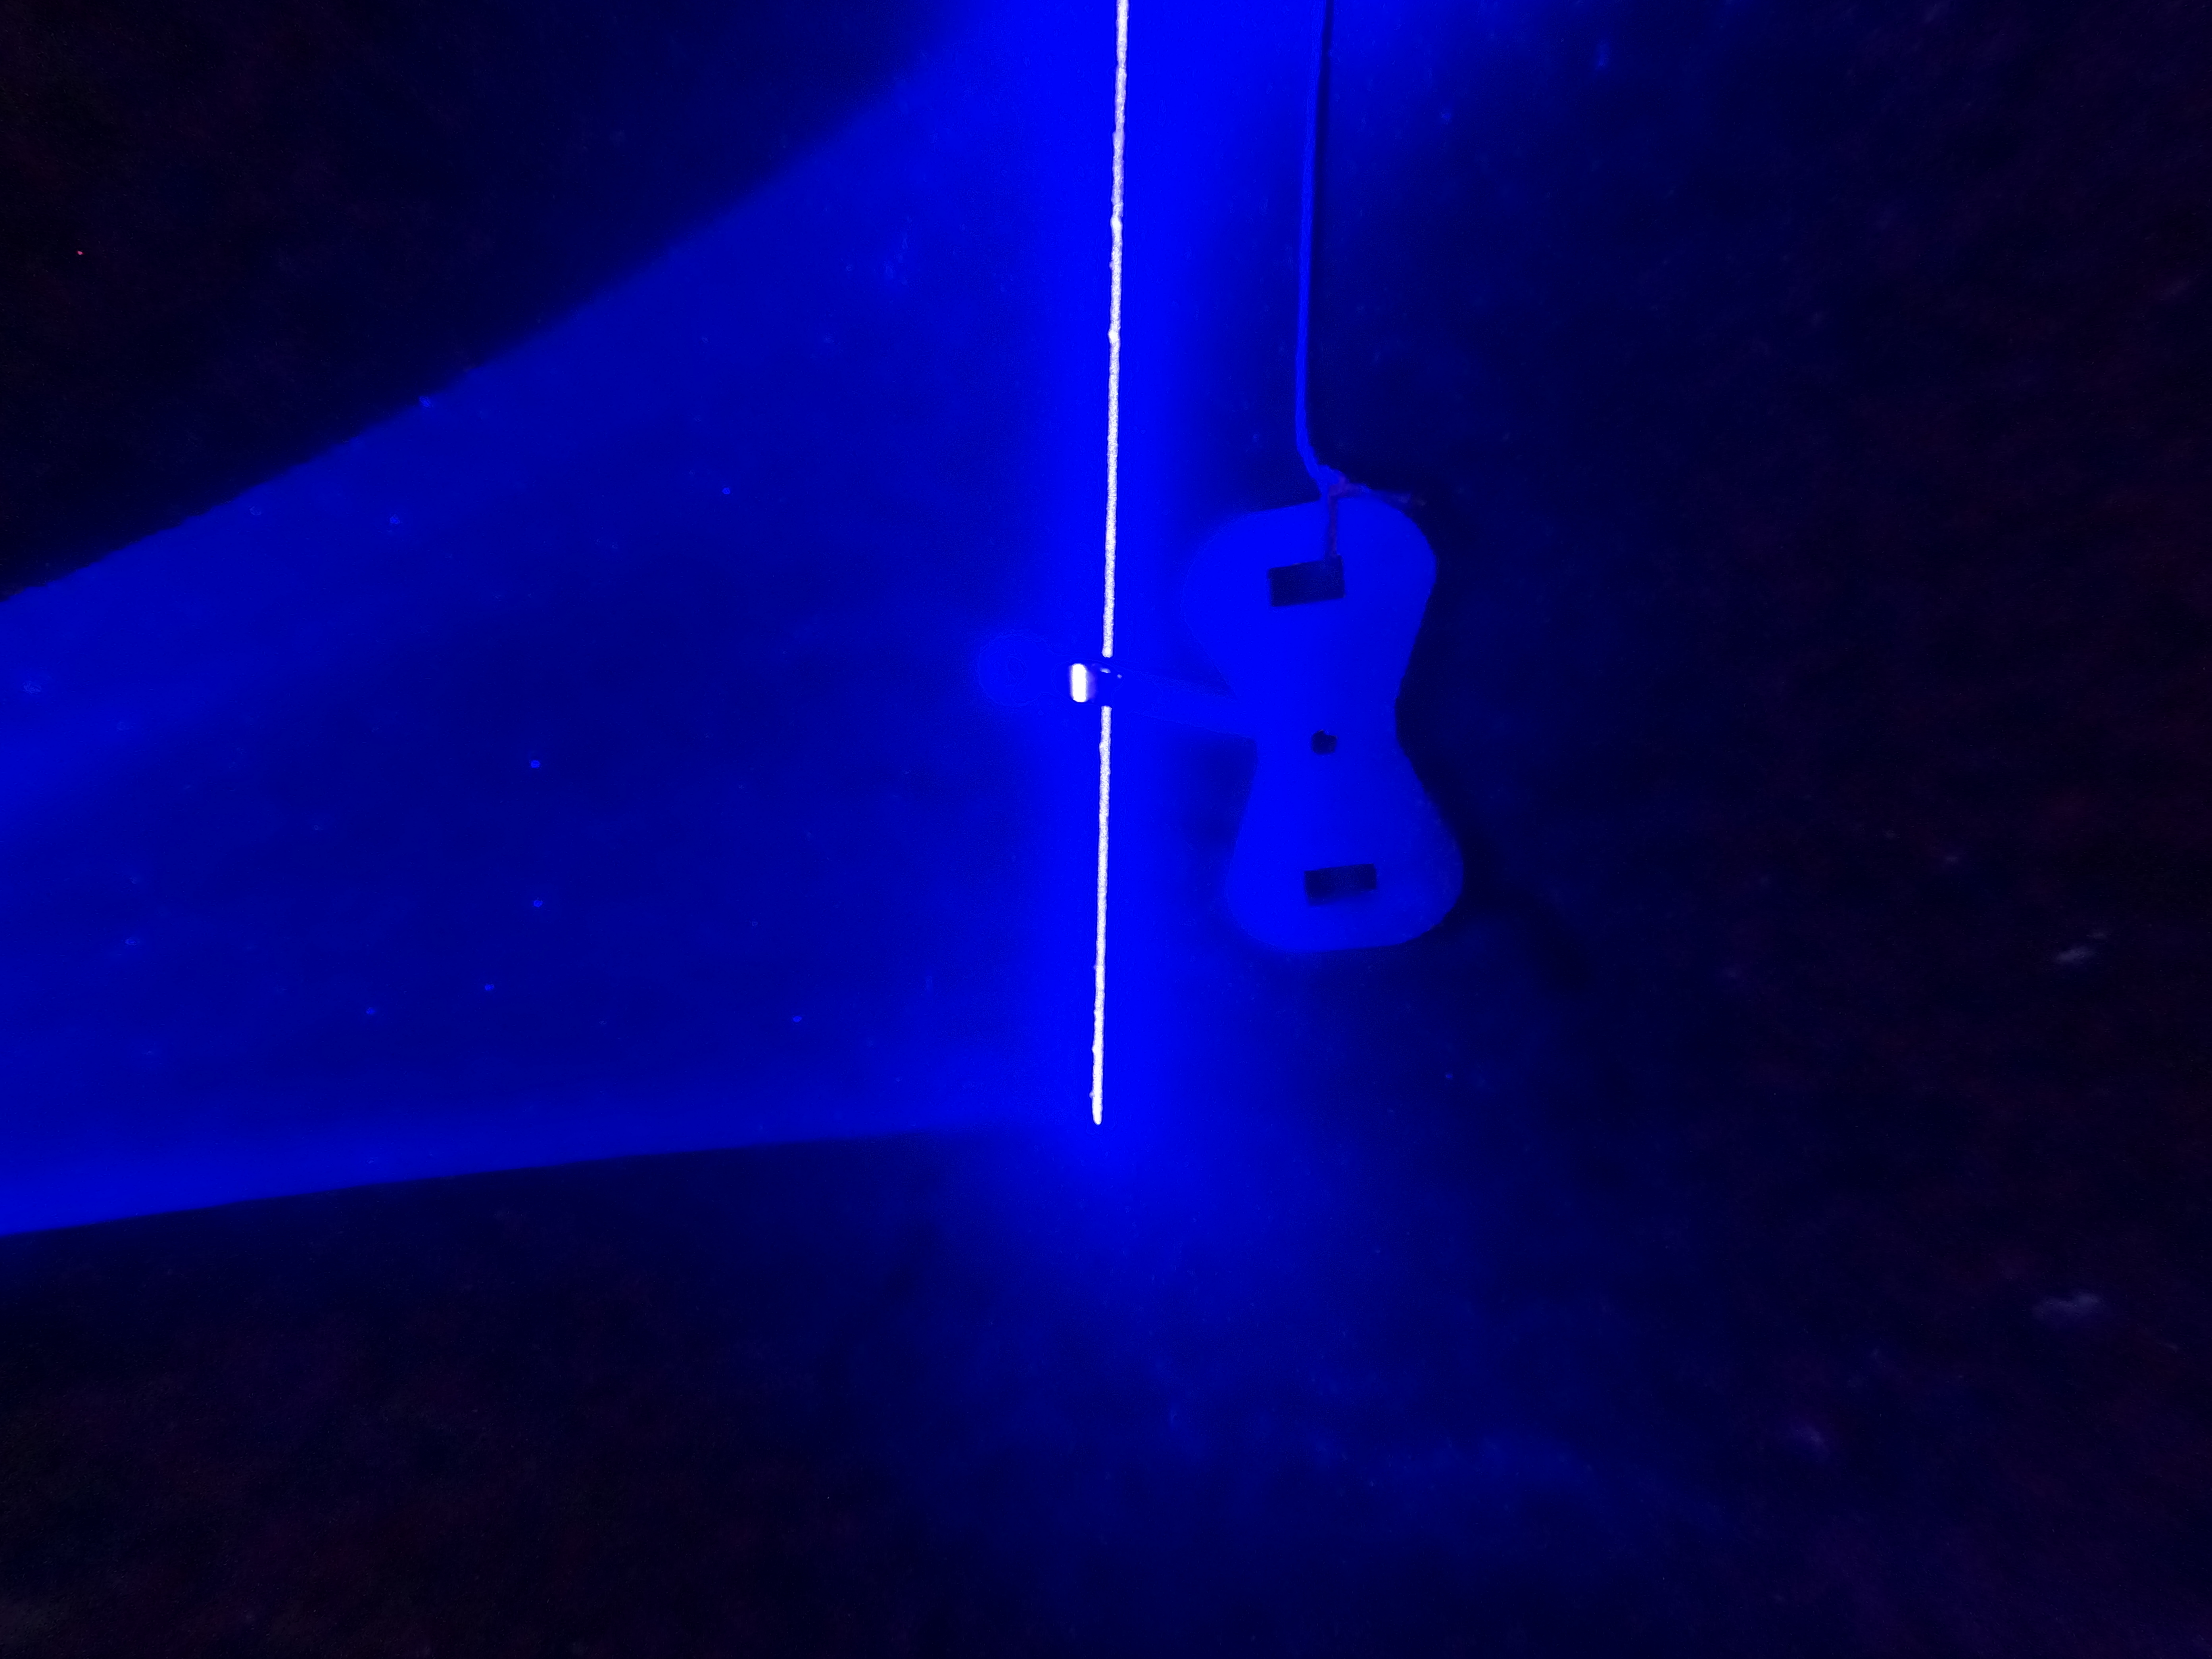

Supplement: Supplementary file 2298 [file G0016607.pdf › Level_1_2/G0016607.pdf]

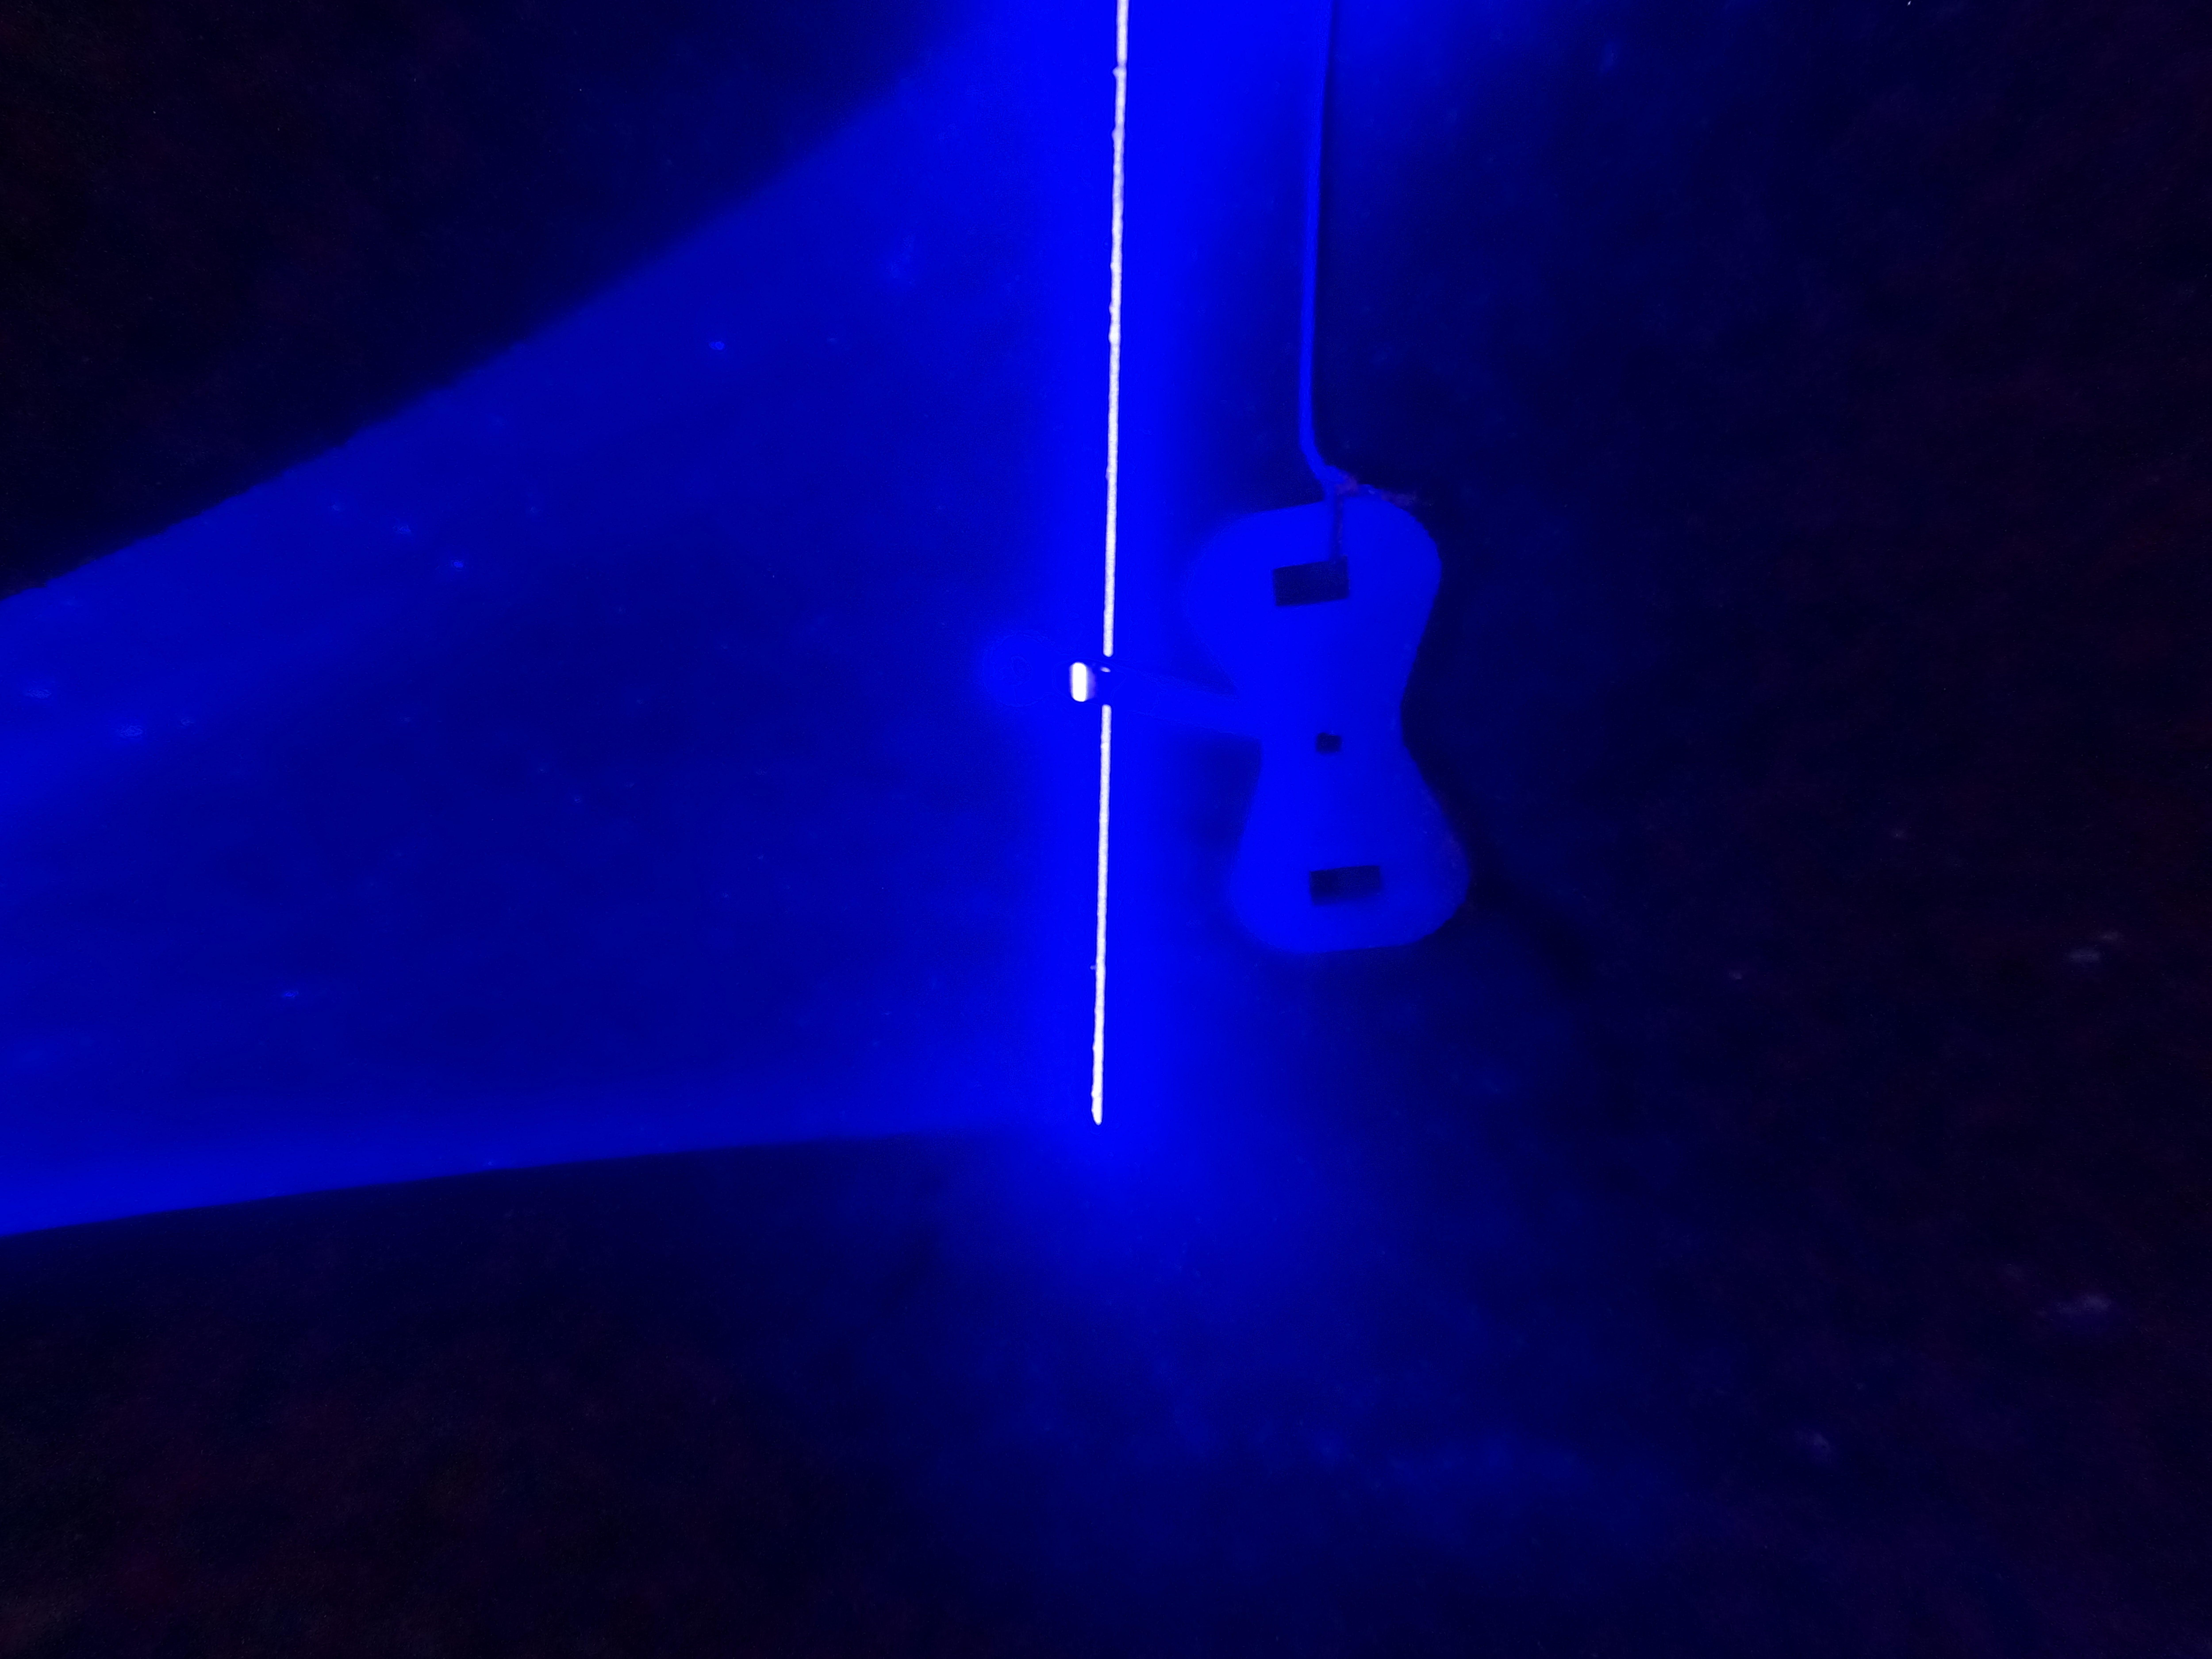

Supplement: Supplementary file 2299 [file G0016608.pdf › Level_1_2/G0016608.pdf]

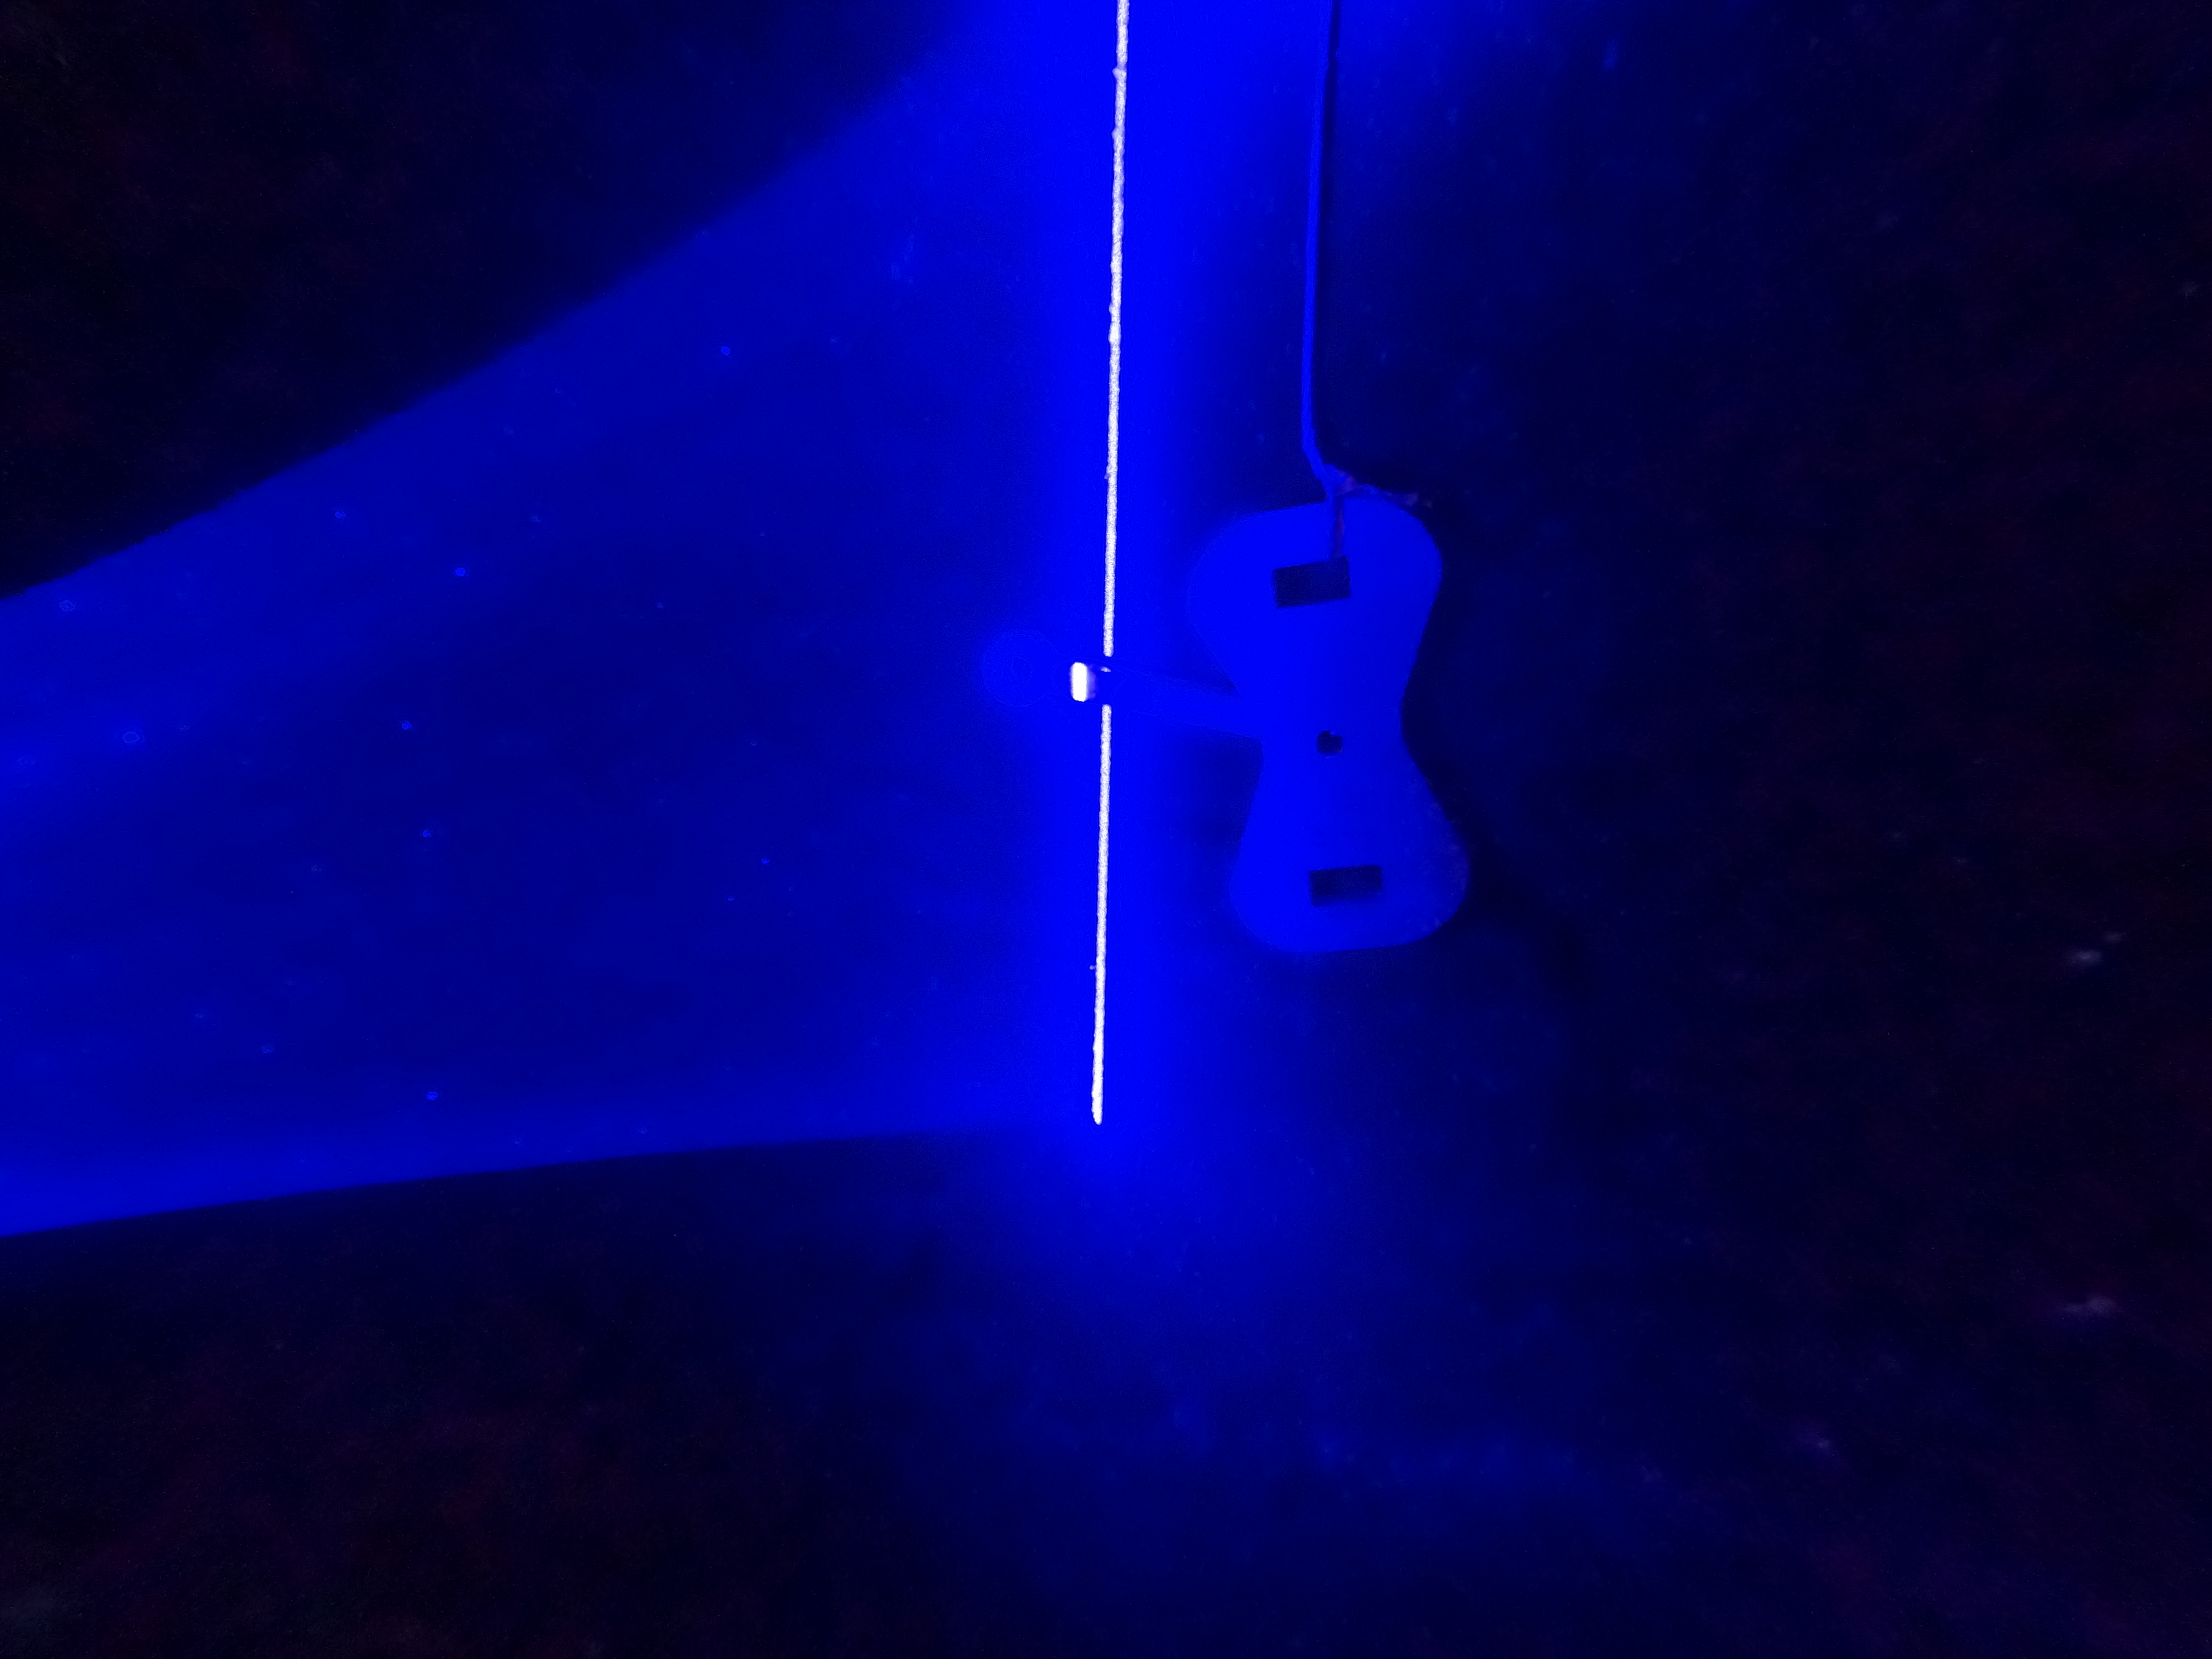

Supplement: Supplementary file 2300 [file G0016609.pdf › Level_1_2/G0016609.pdf]

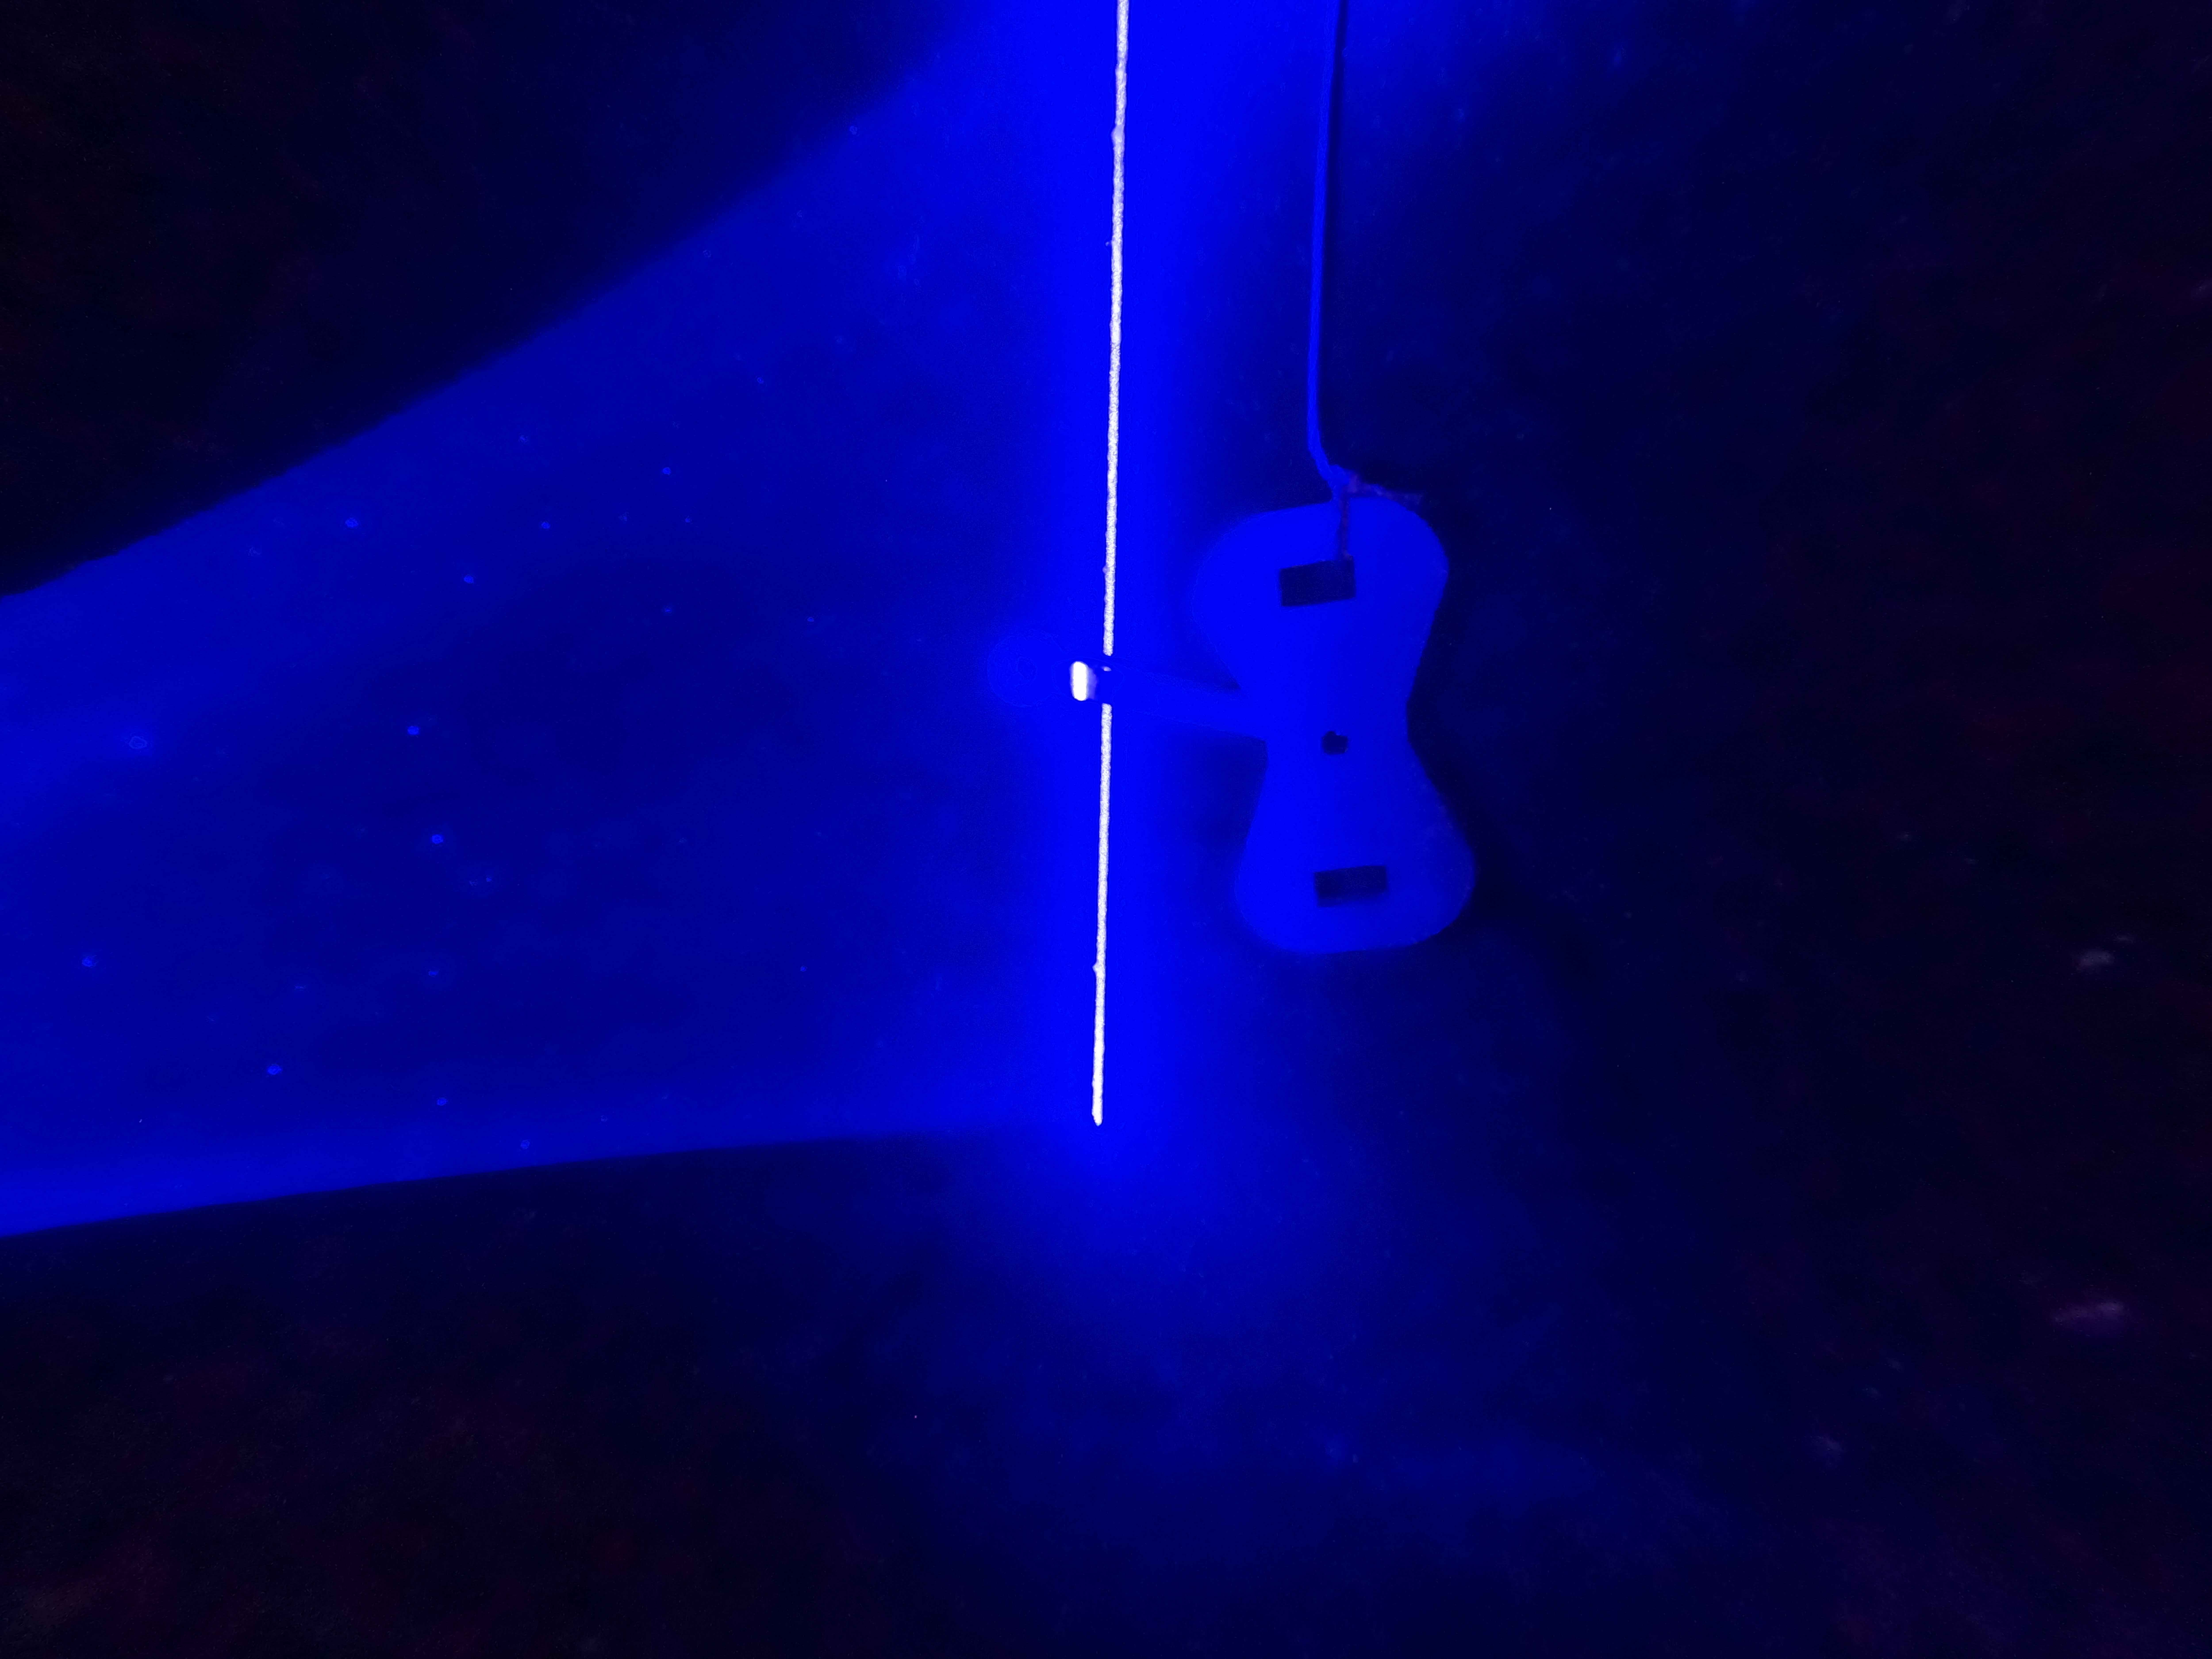

Supplement: Supplementary file 2301 [file G0016610.pdf › Level_1_2/G0016610.pdf]

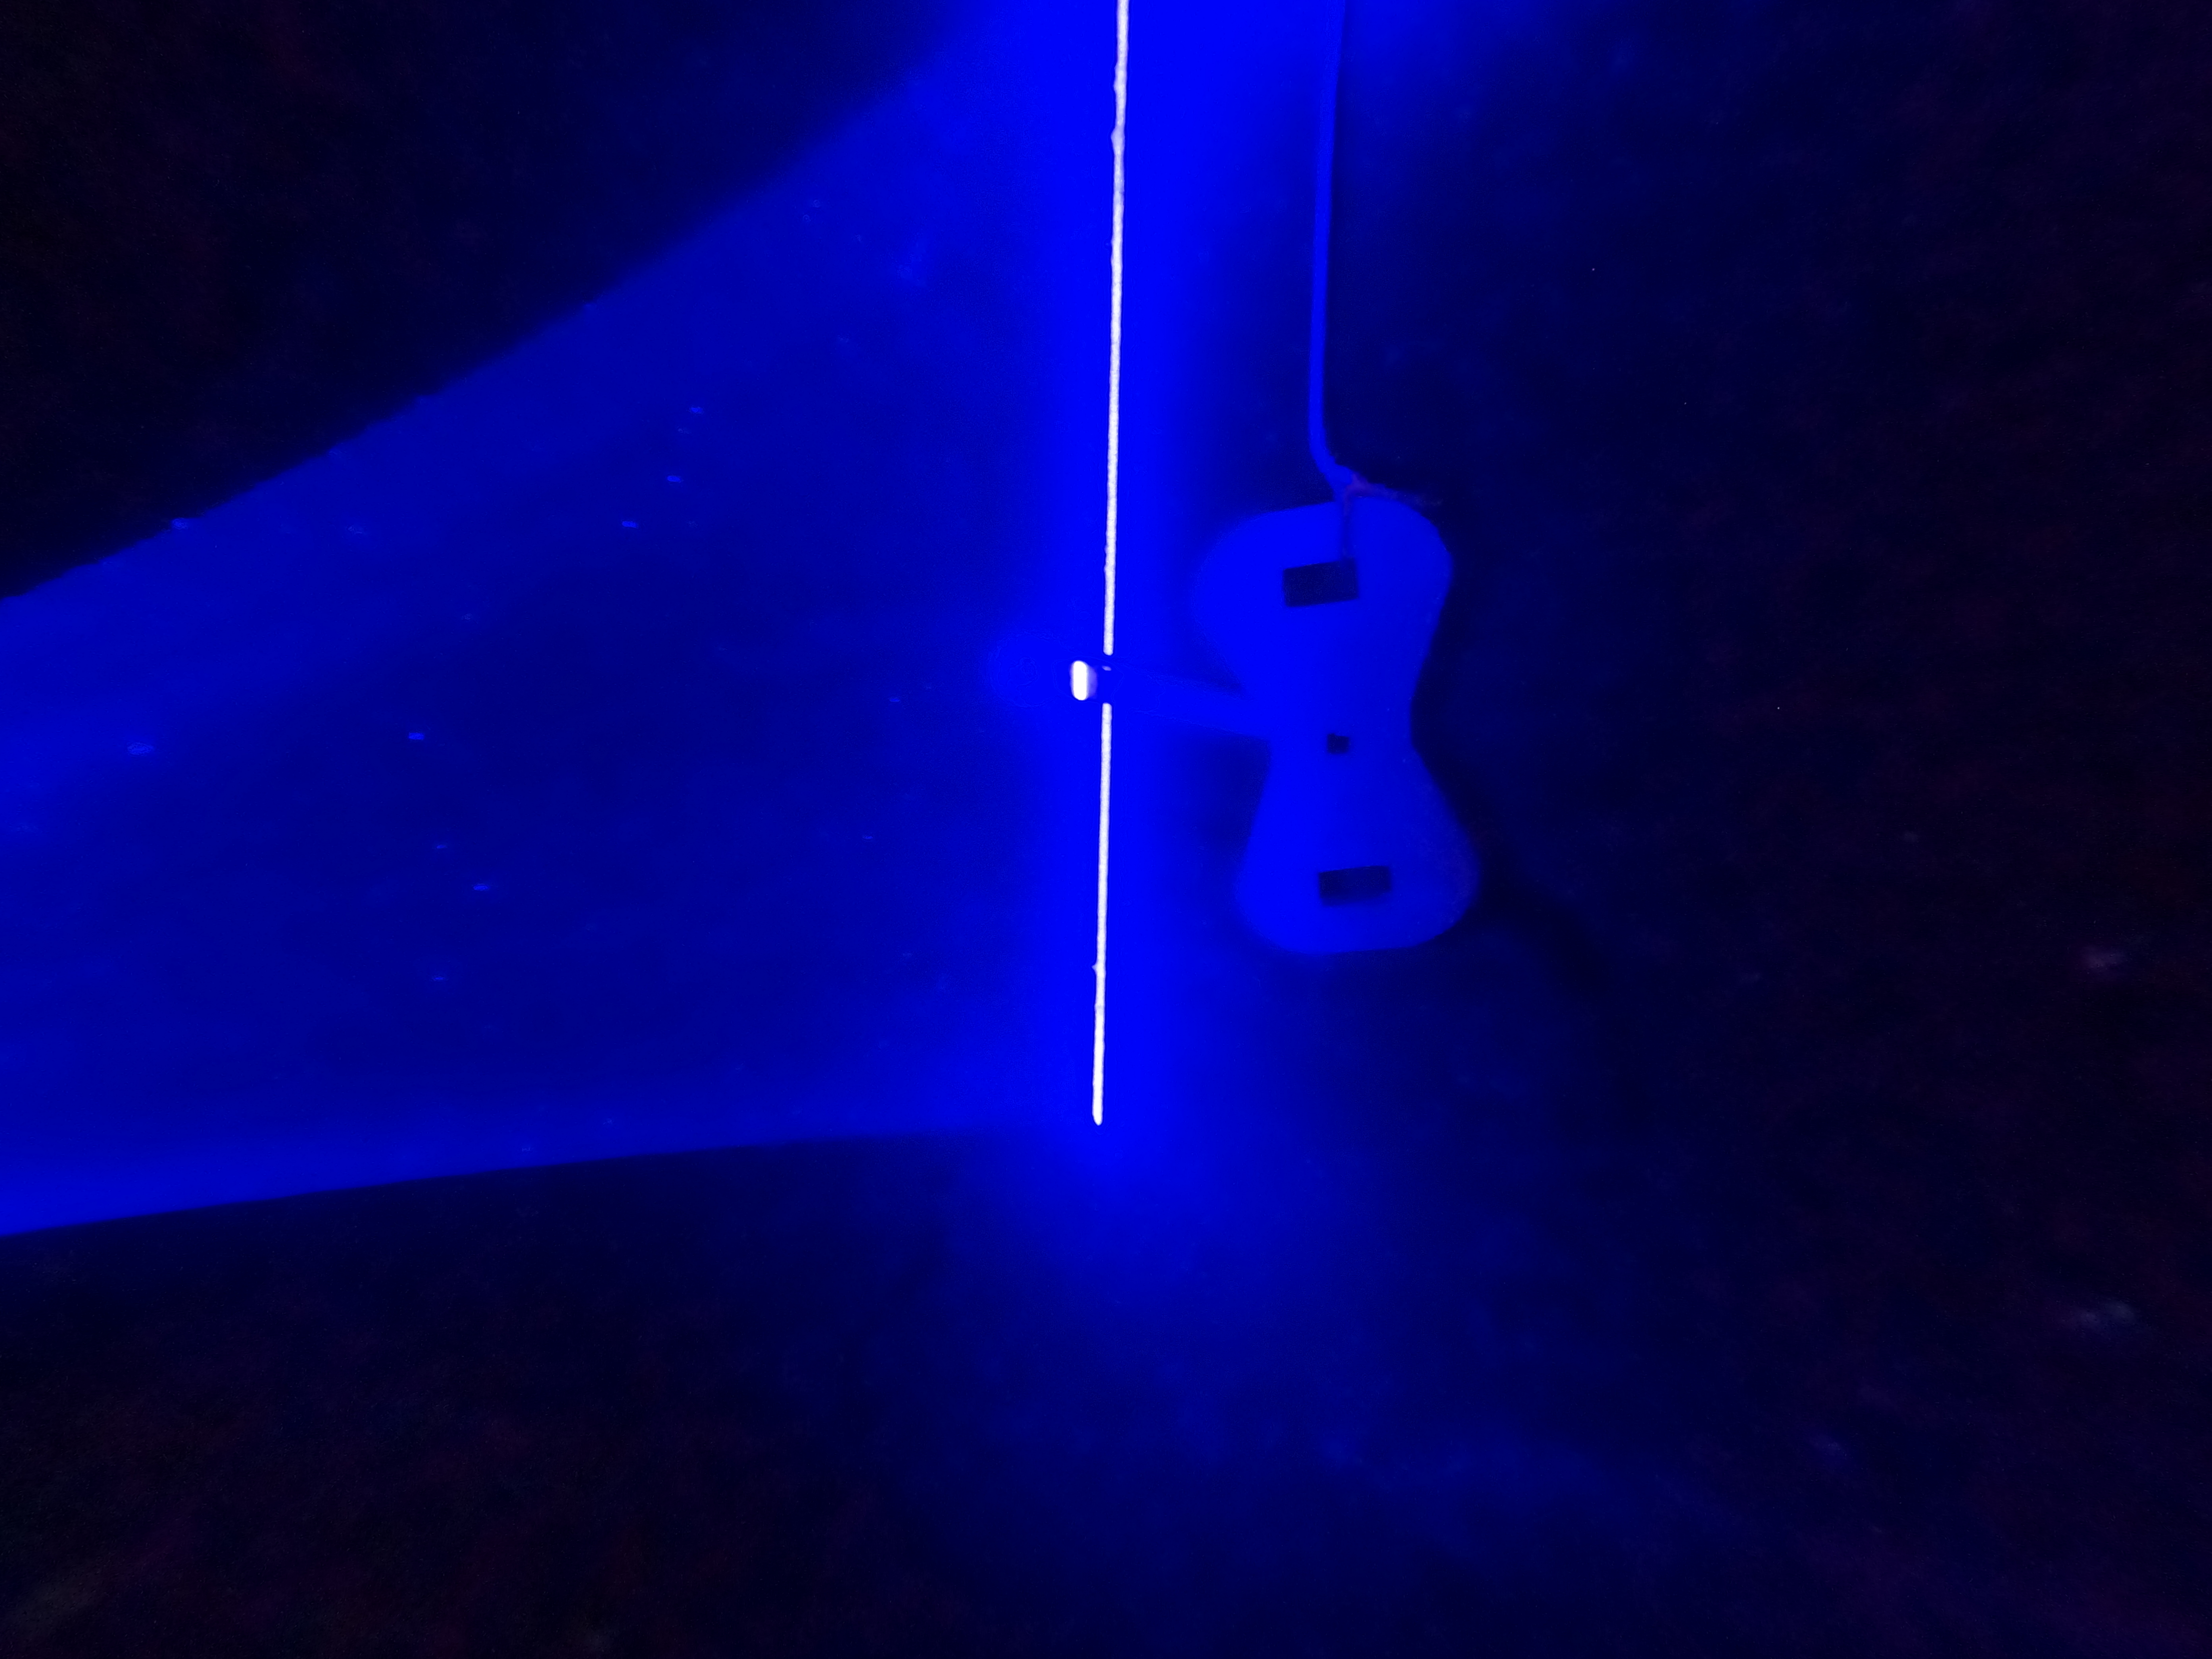

Supplement: Supplementary file 2302 [file G0016611.pdf › Level_1_2/G0016611.pdf]

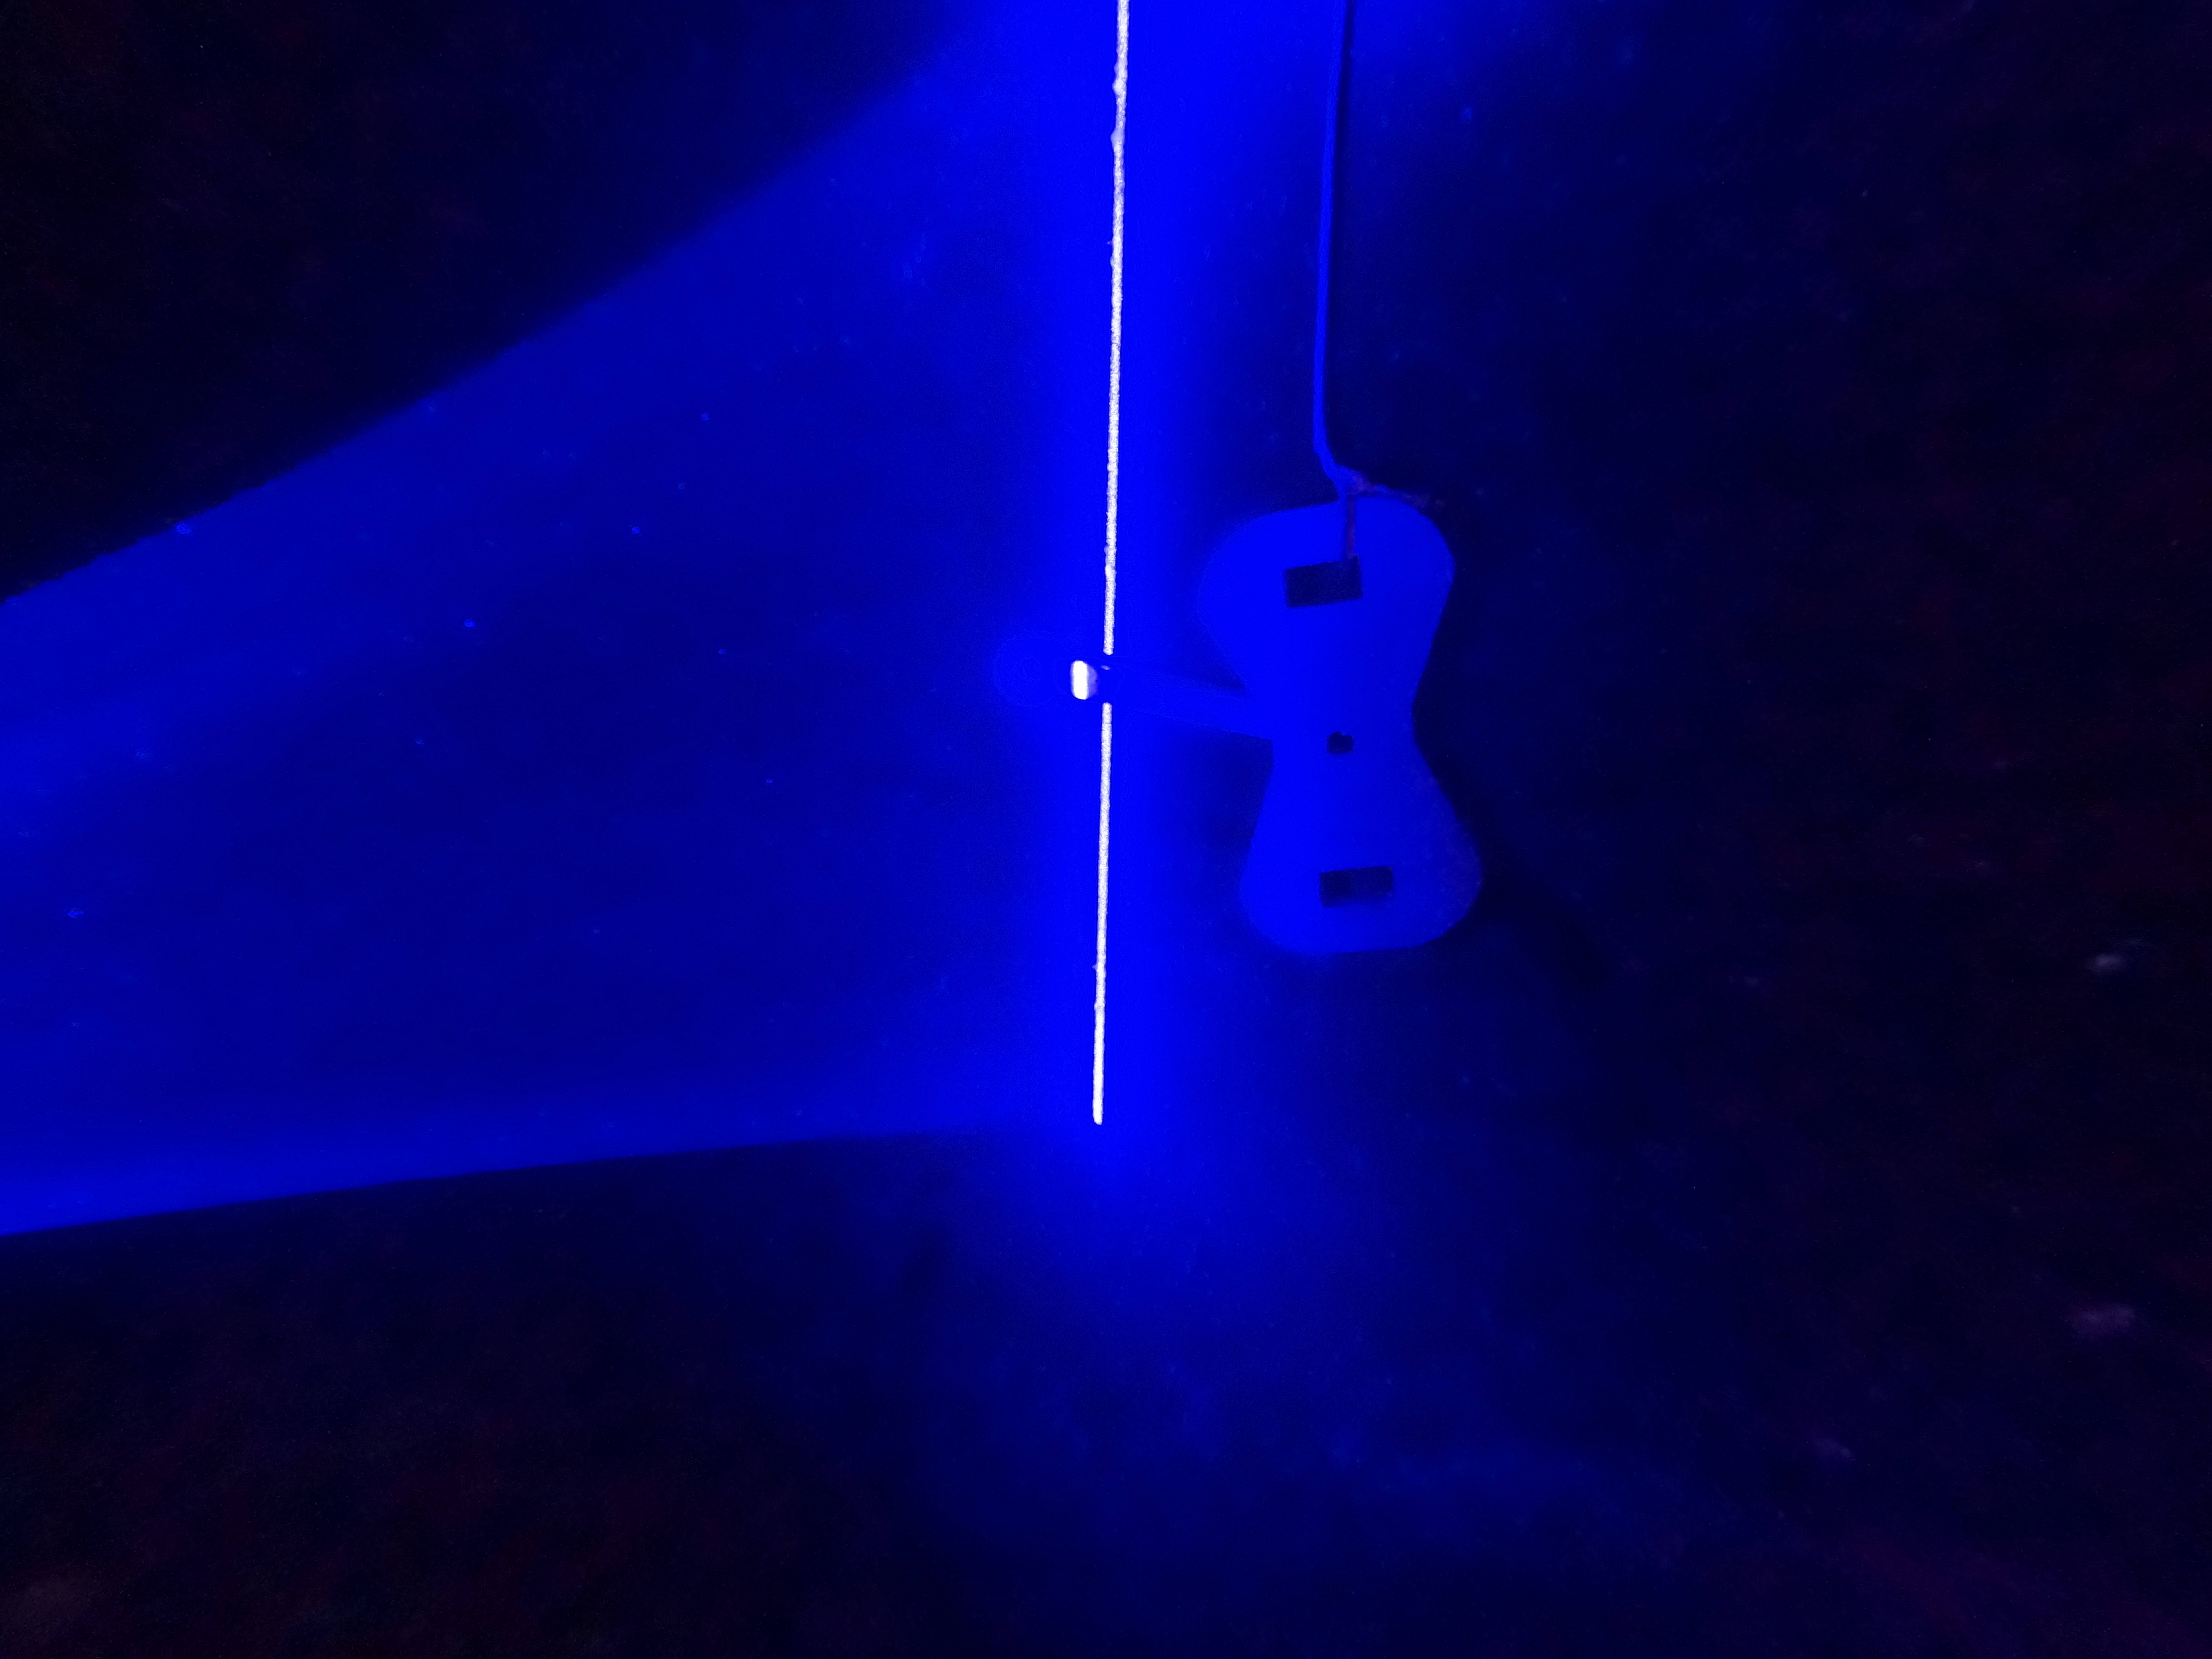

Supplement: Supplementary file 2303 [file G0016612.pdf › Level_1_2/G0016612.pdf]

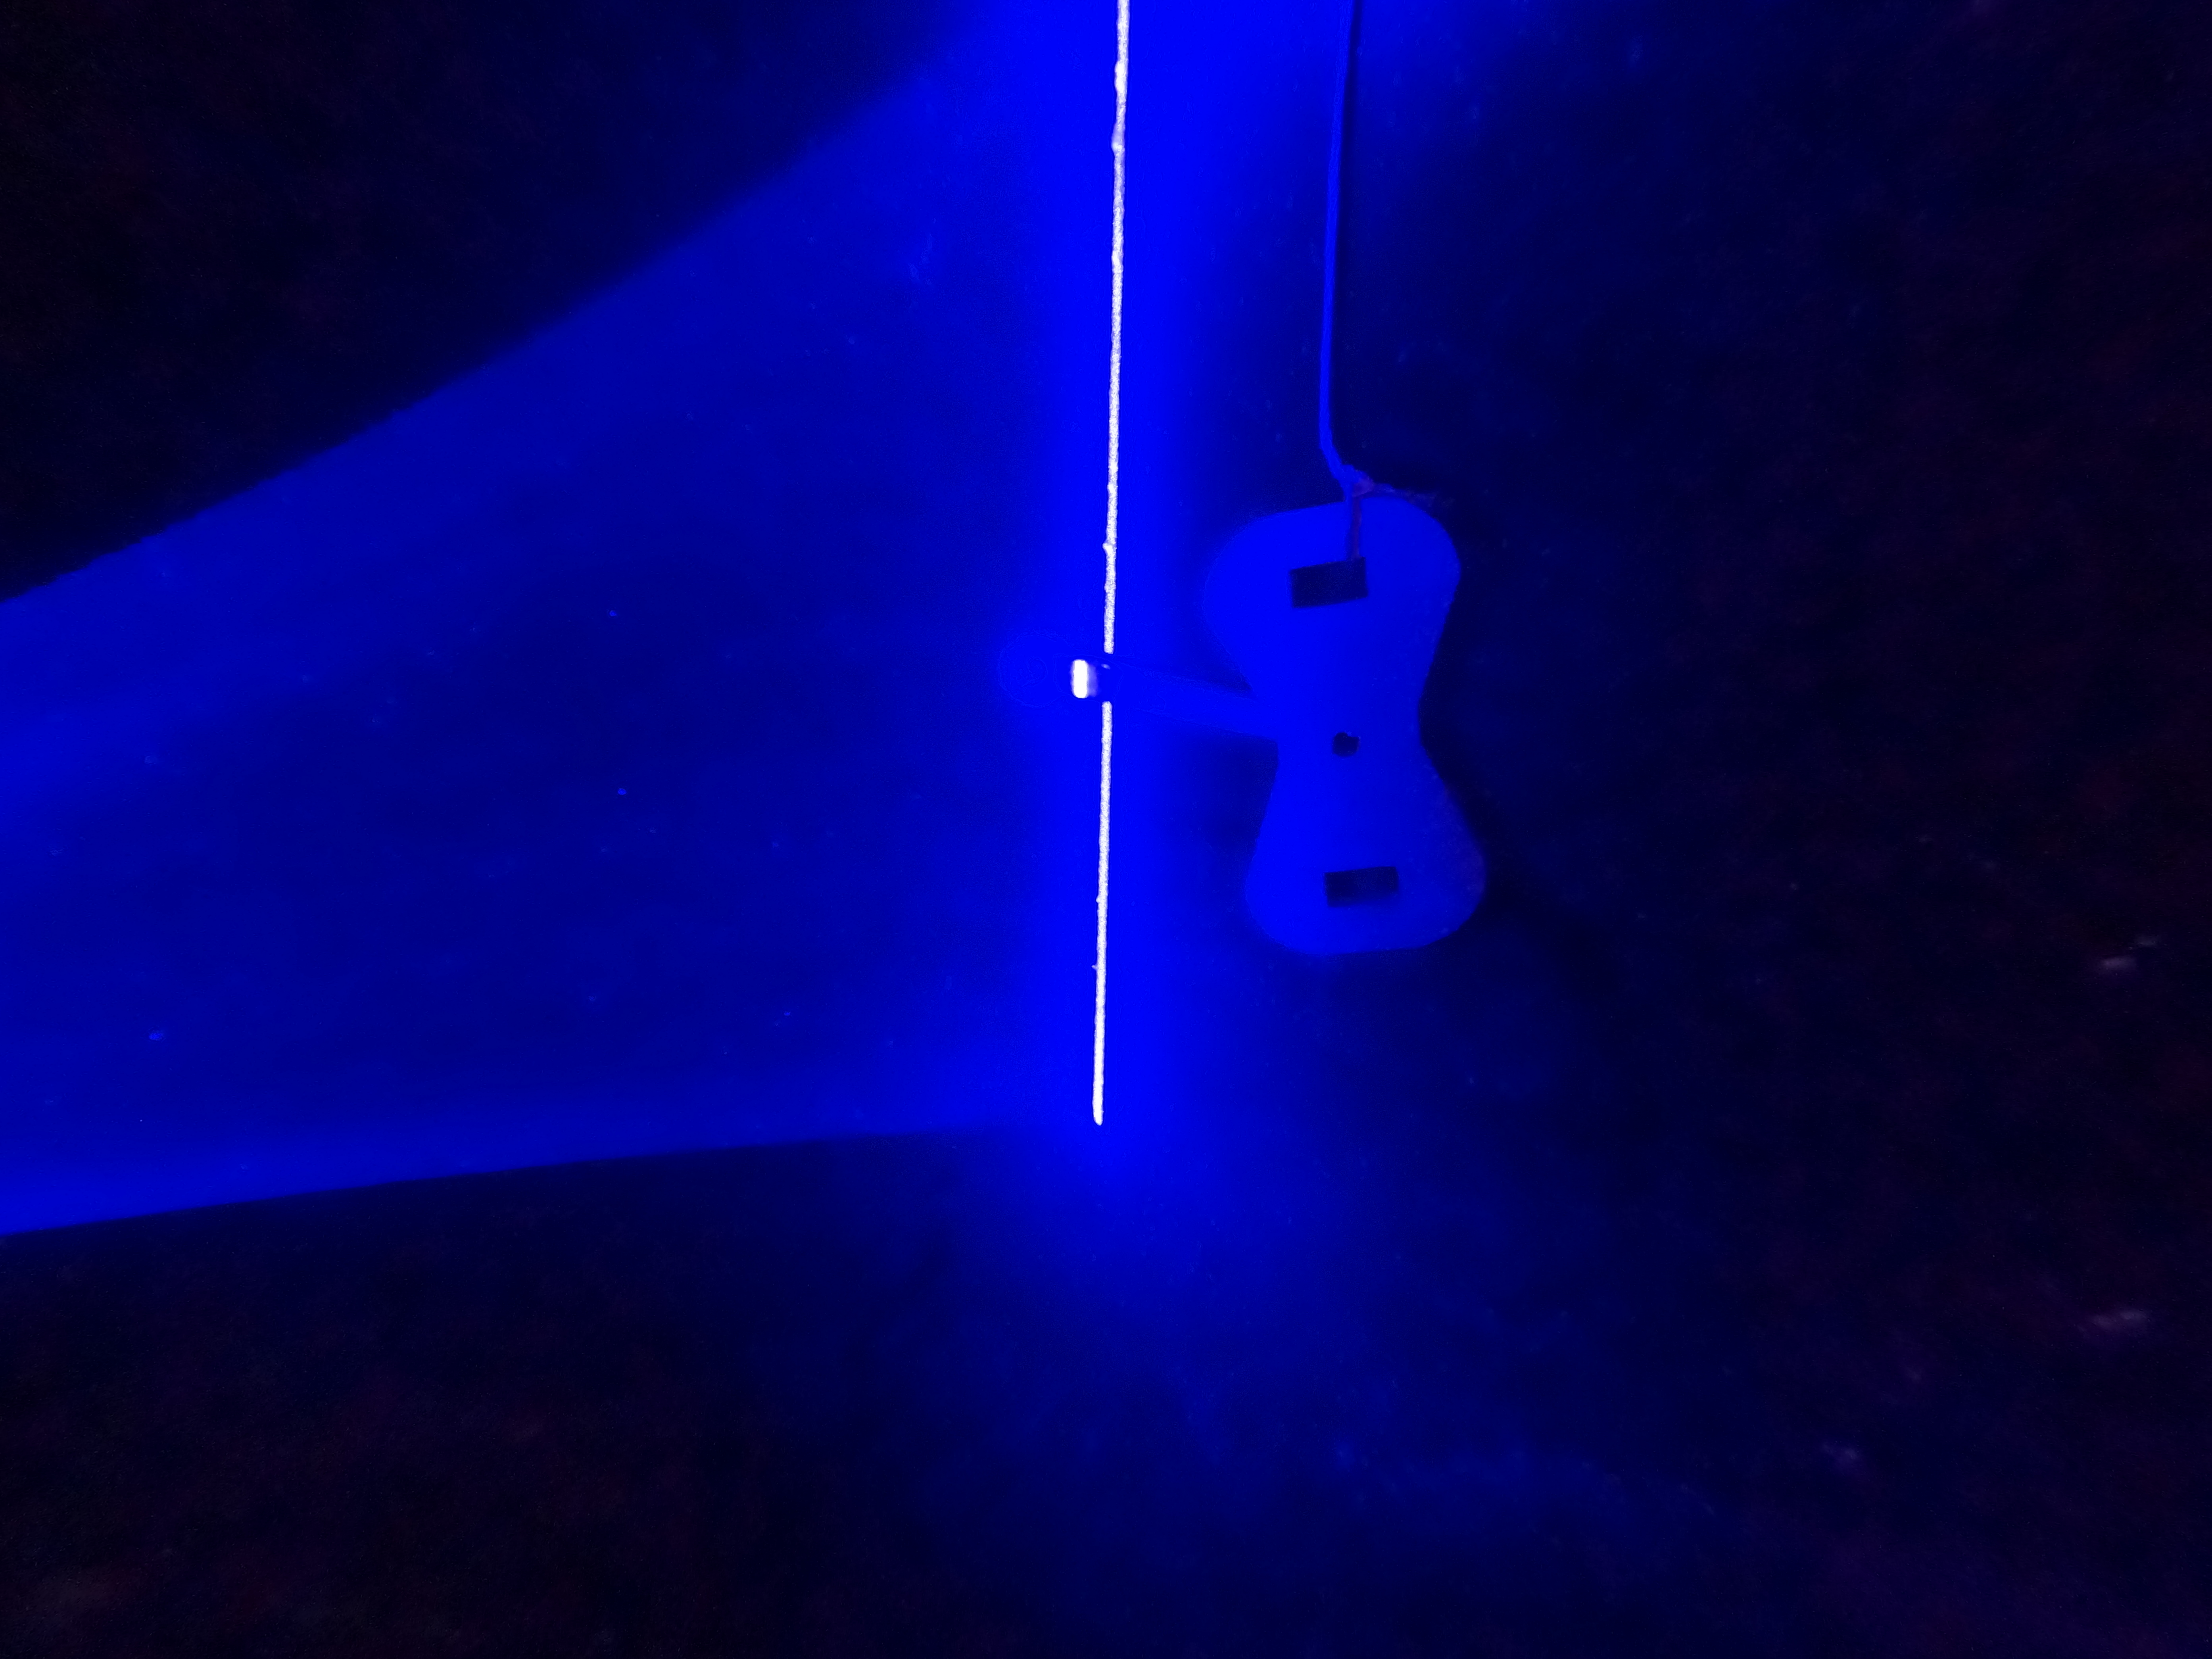

Supplement: Supplementary file 2304 [file G0016613.pdf › Level_1_2/G0016613.pdf]

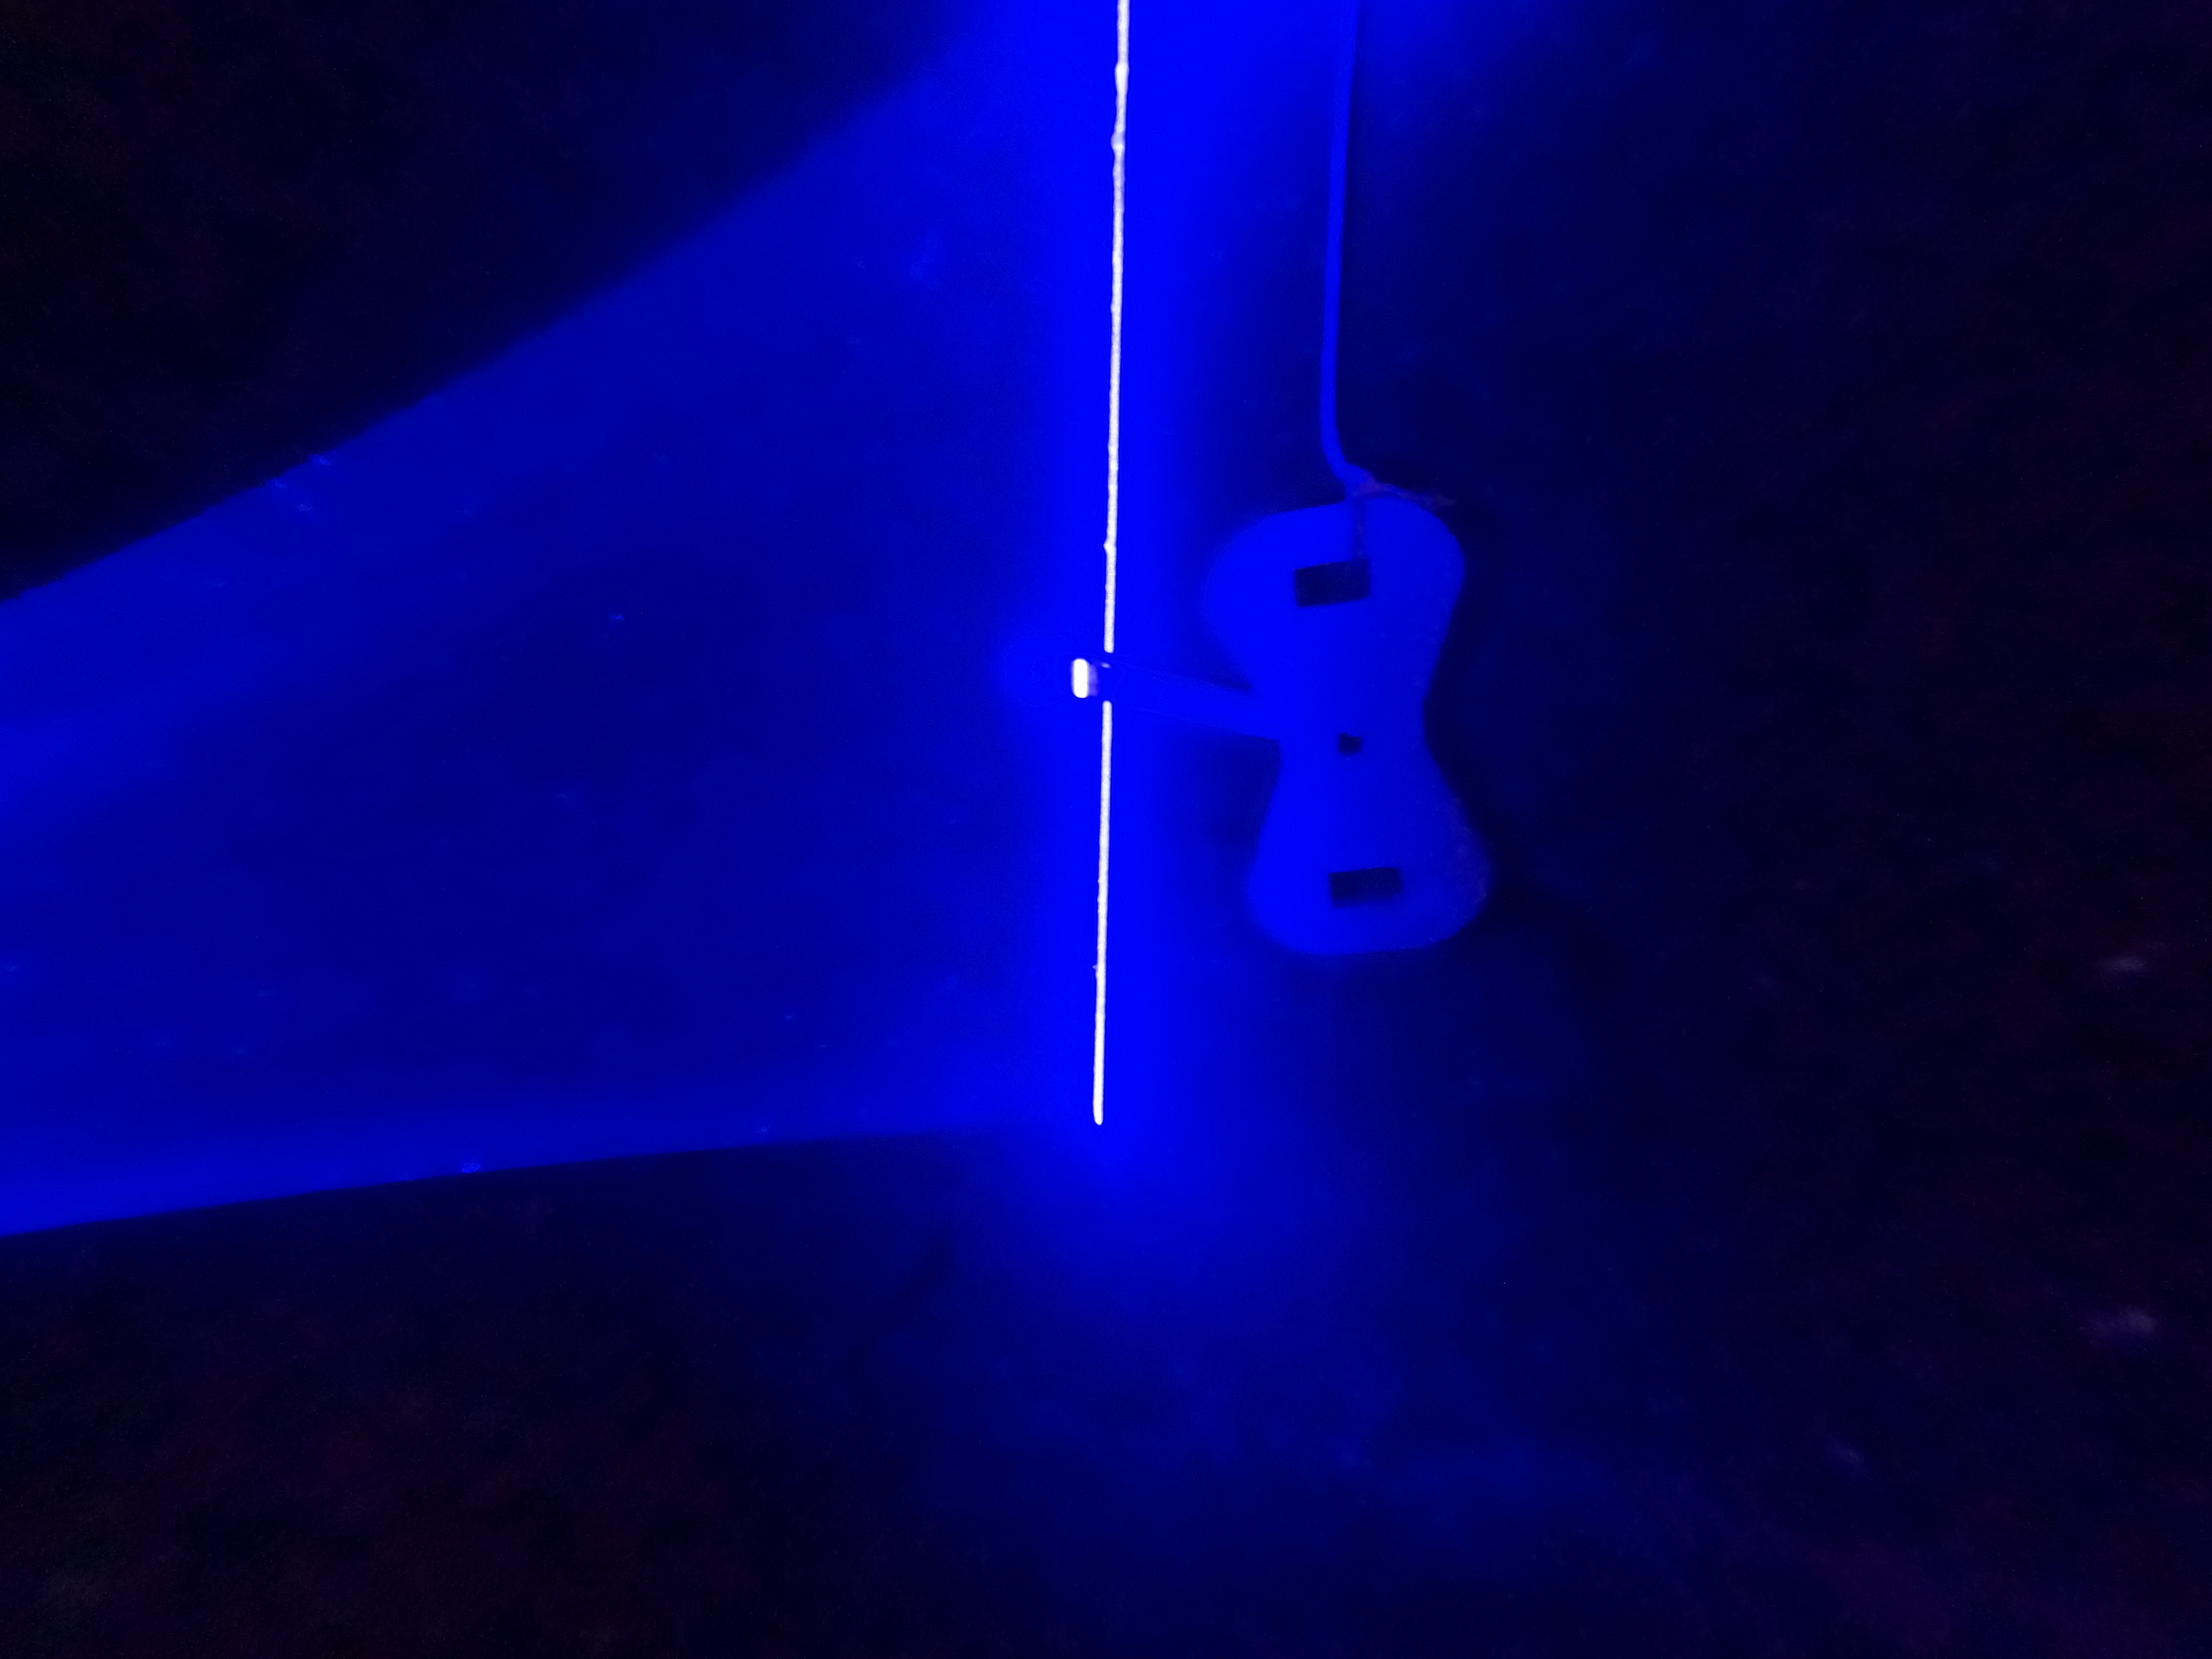

Supplement: Supplementary file 2305 [file G0016614.pdf › Level_1_2/G0016614.pdf]

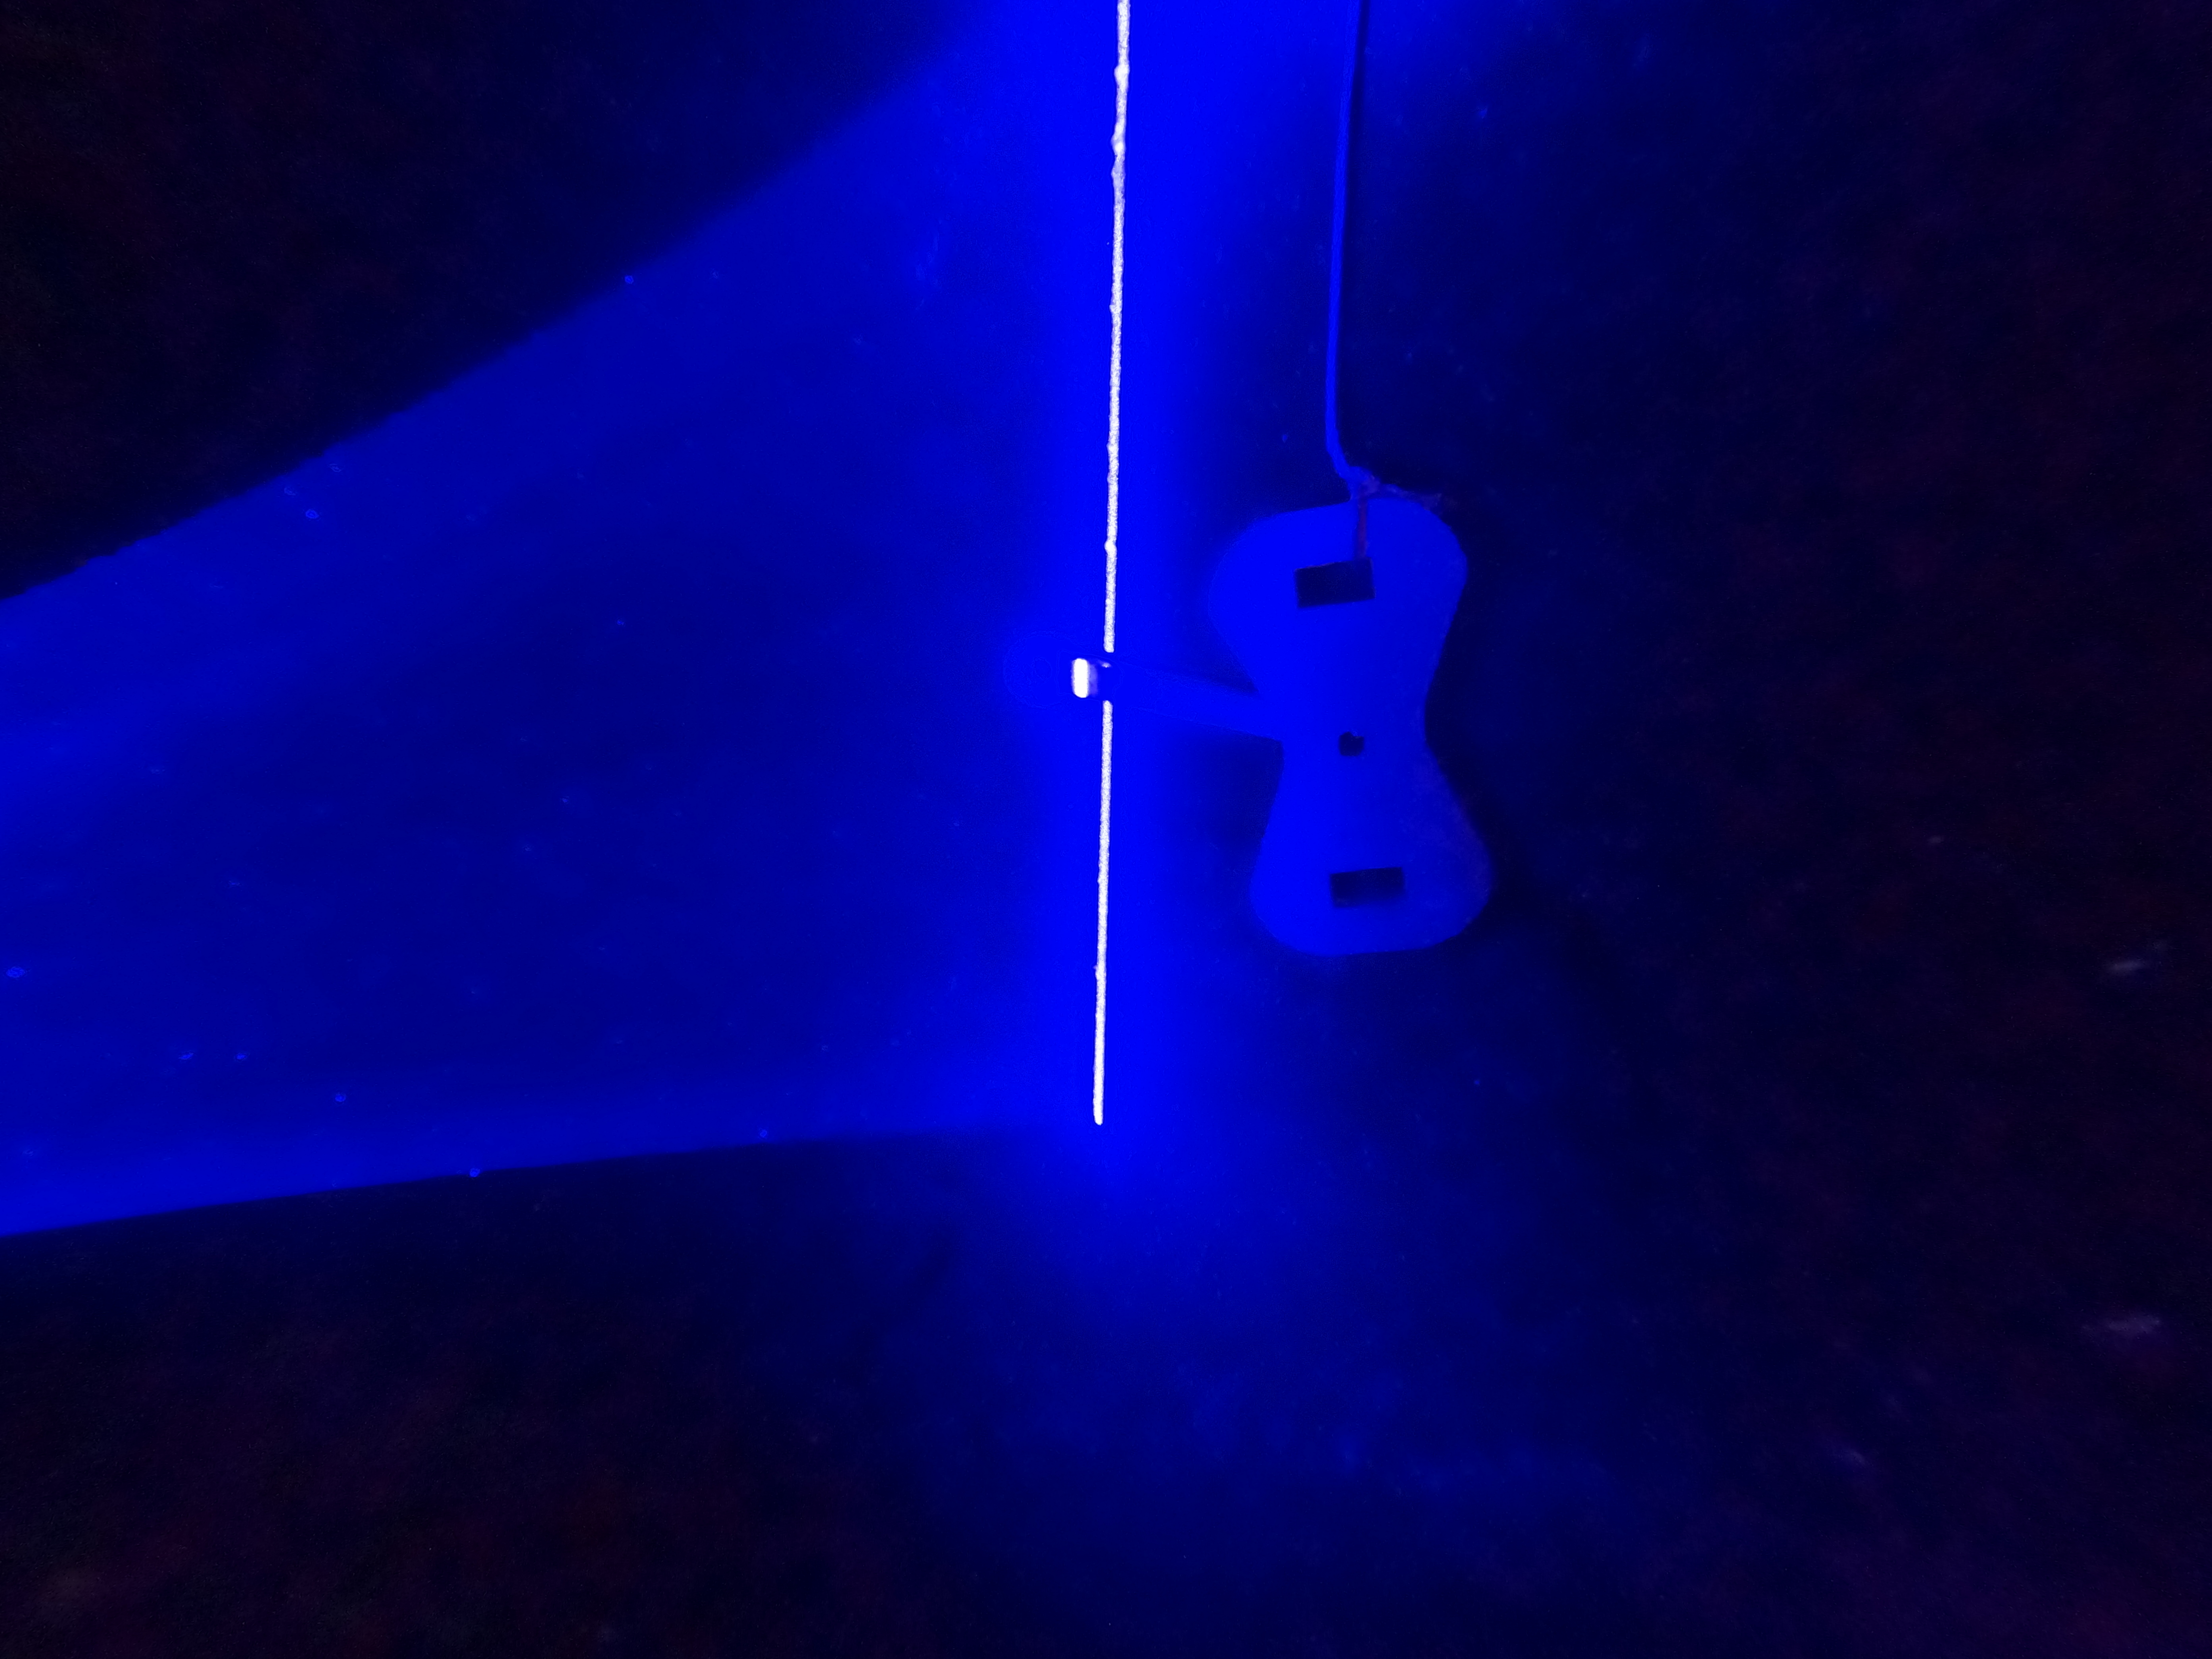

Supplement: Supplementary file 2306 [file G0016615.pdf › Level_1_2/G0016615.pdf]

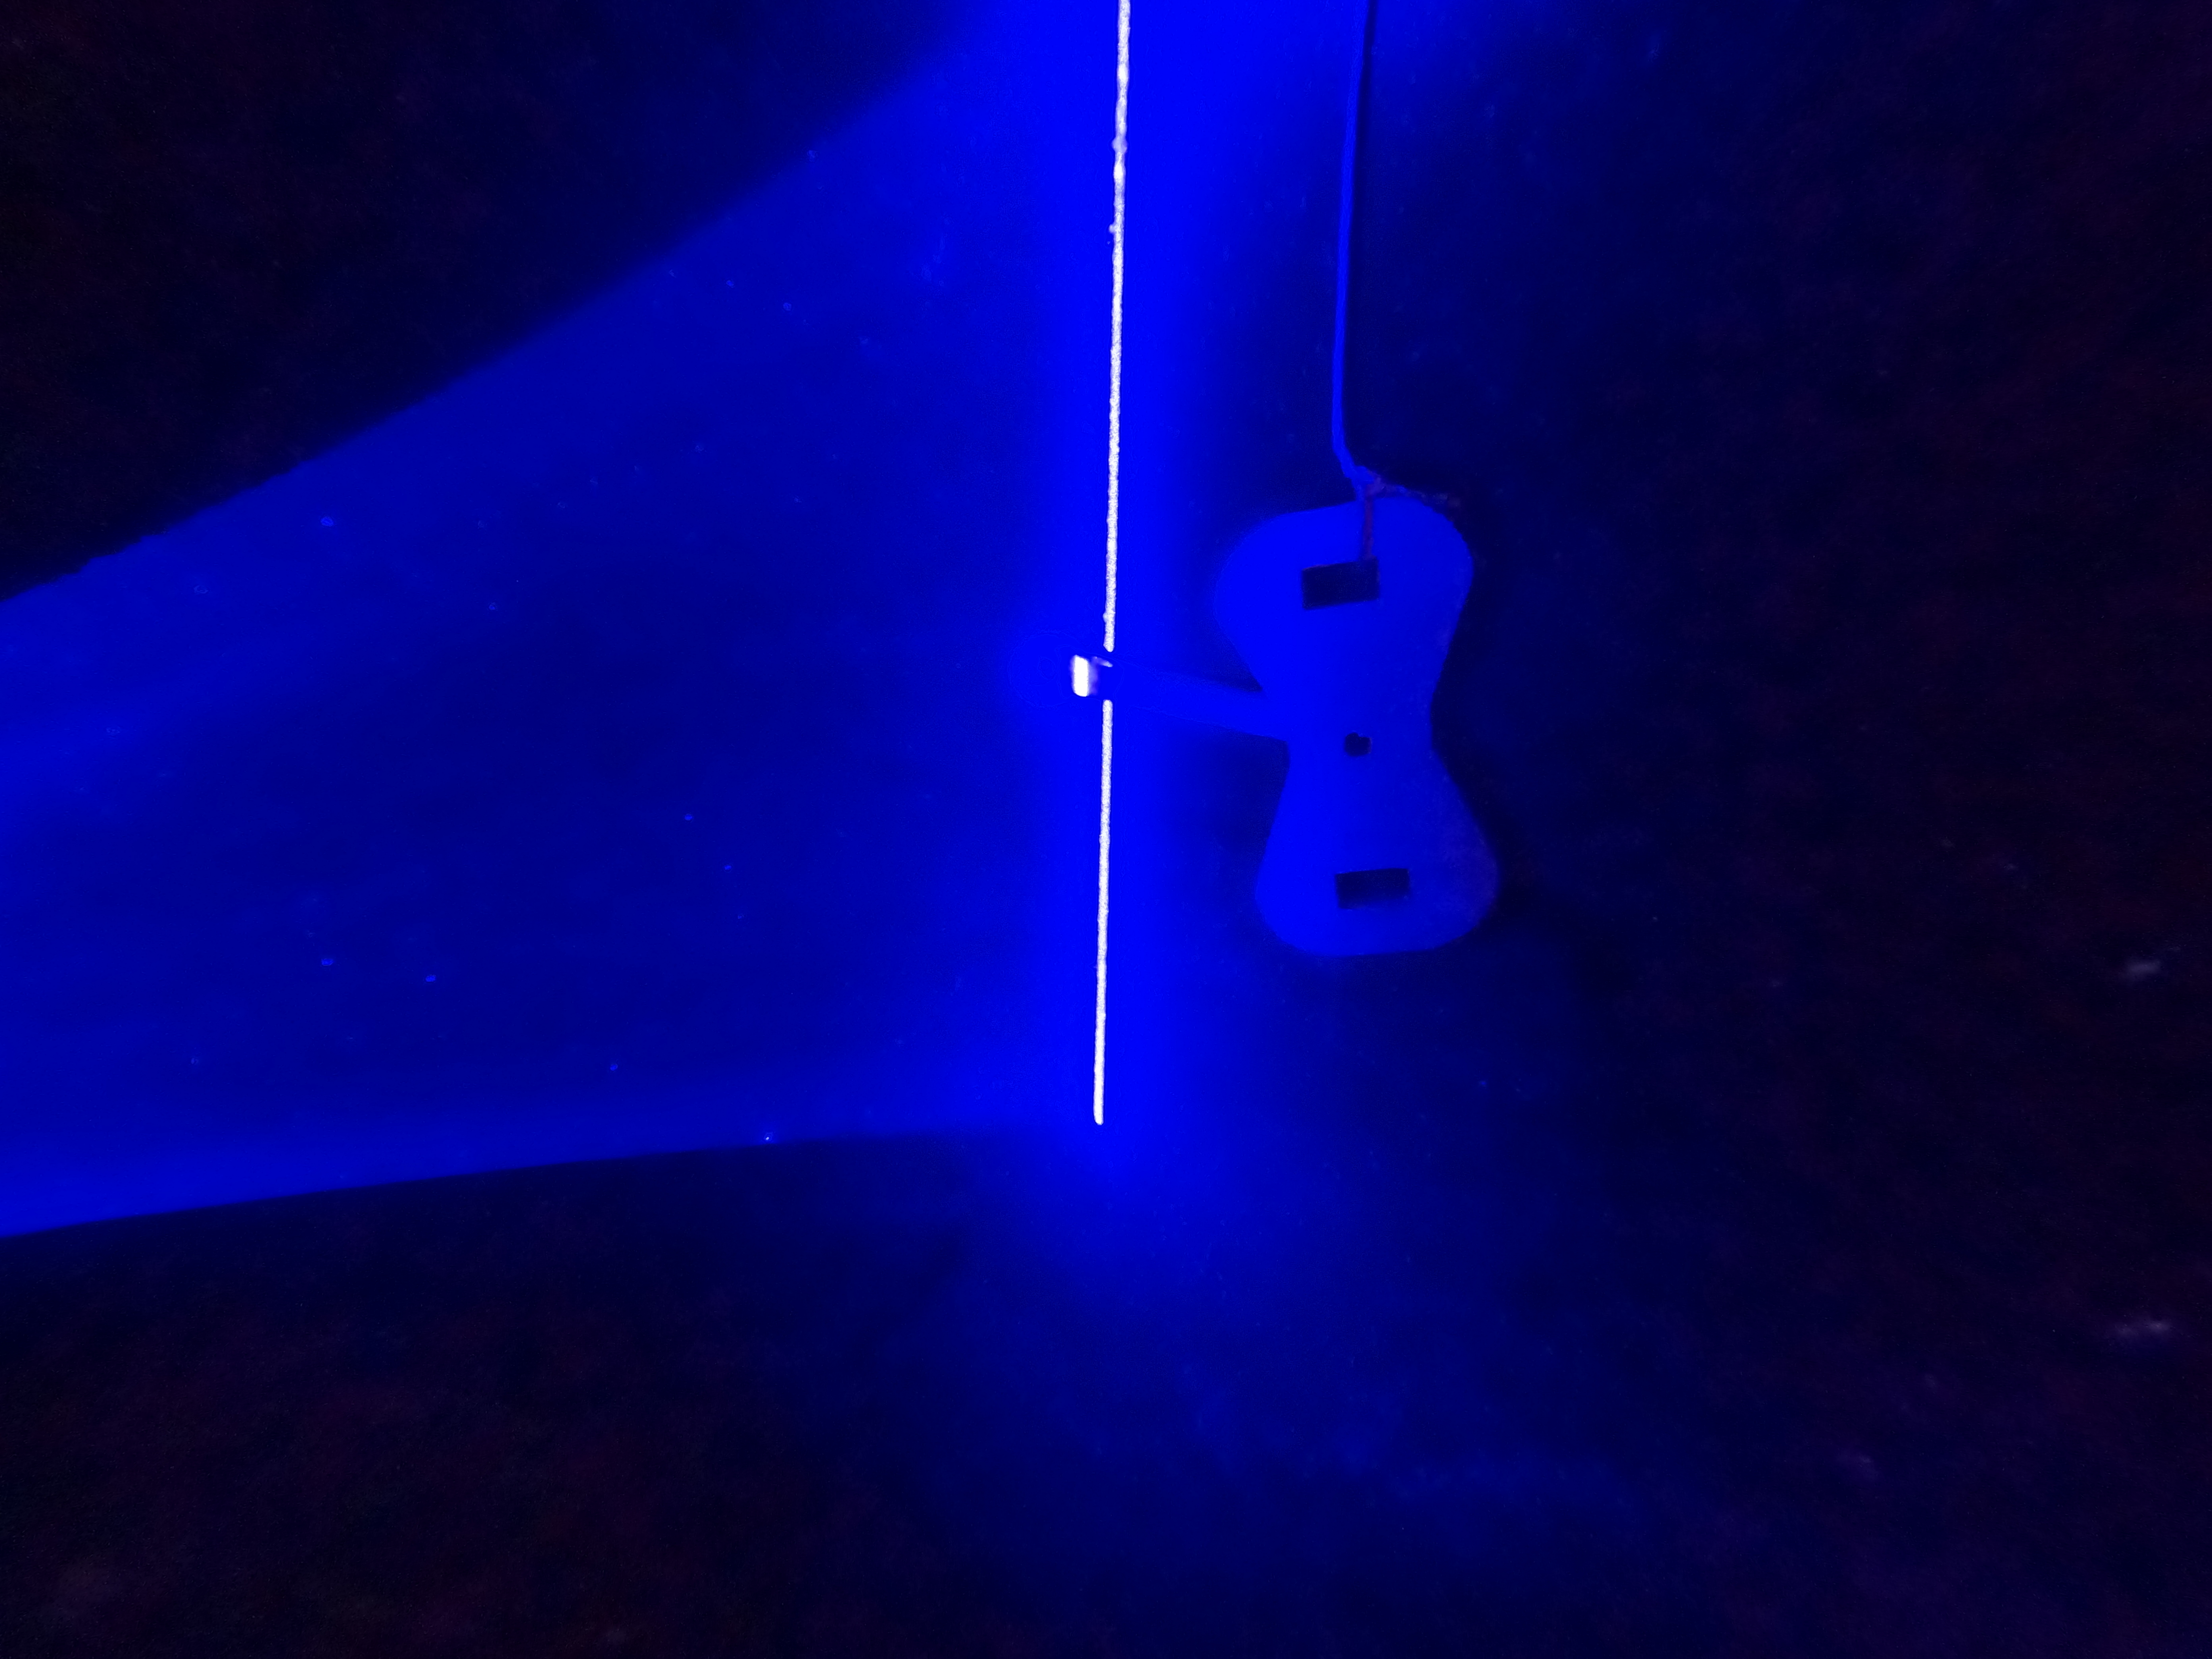

Supplement: Supplementary file 2307 [file G0016616.pdf › Level_1_2/G0016616.pdf]

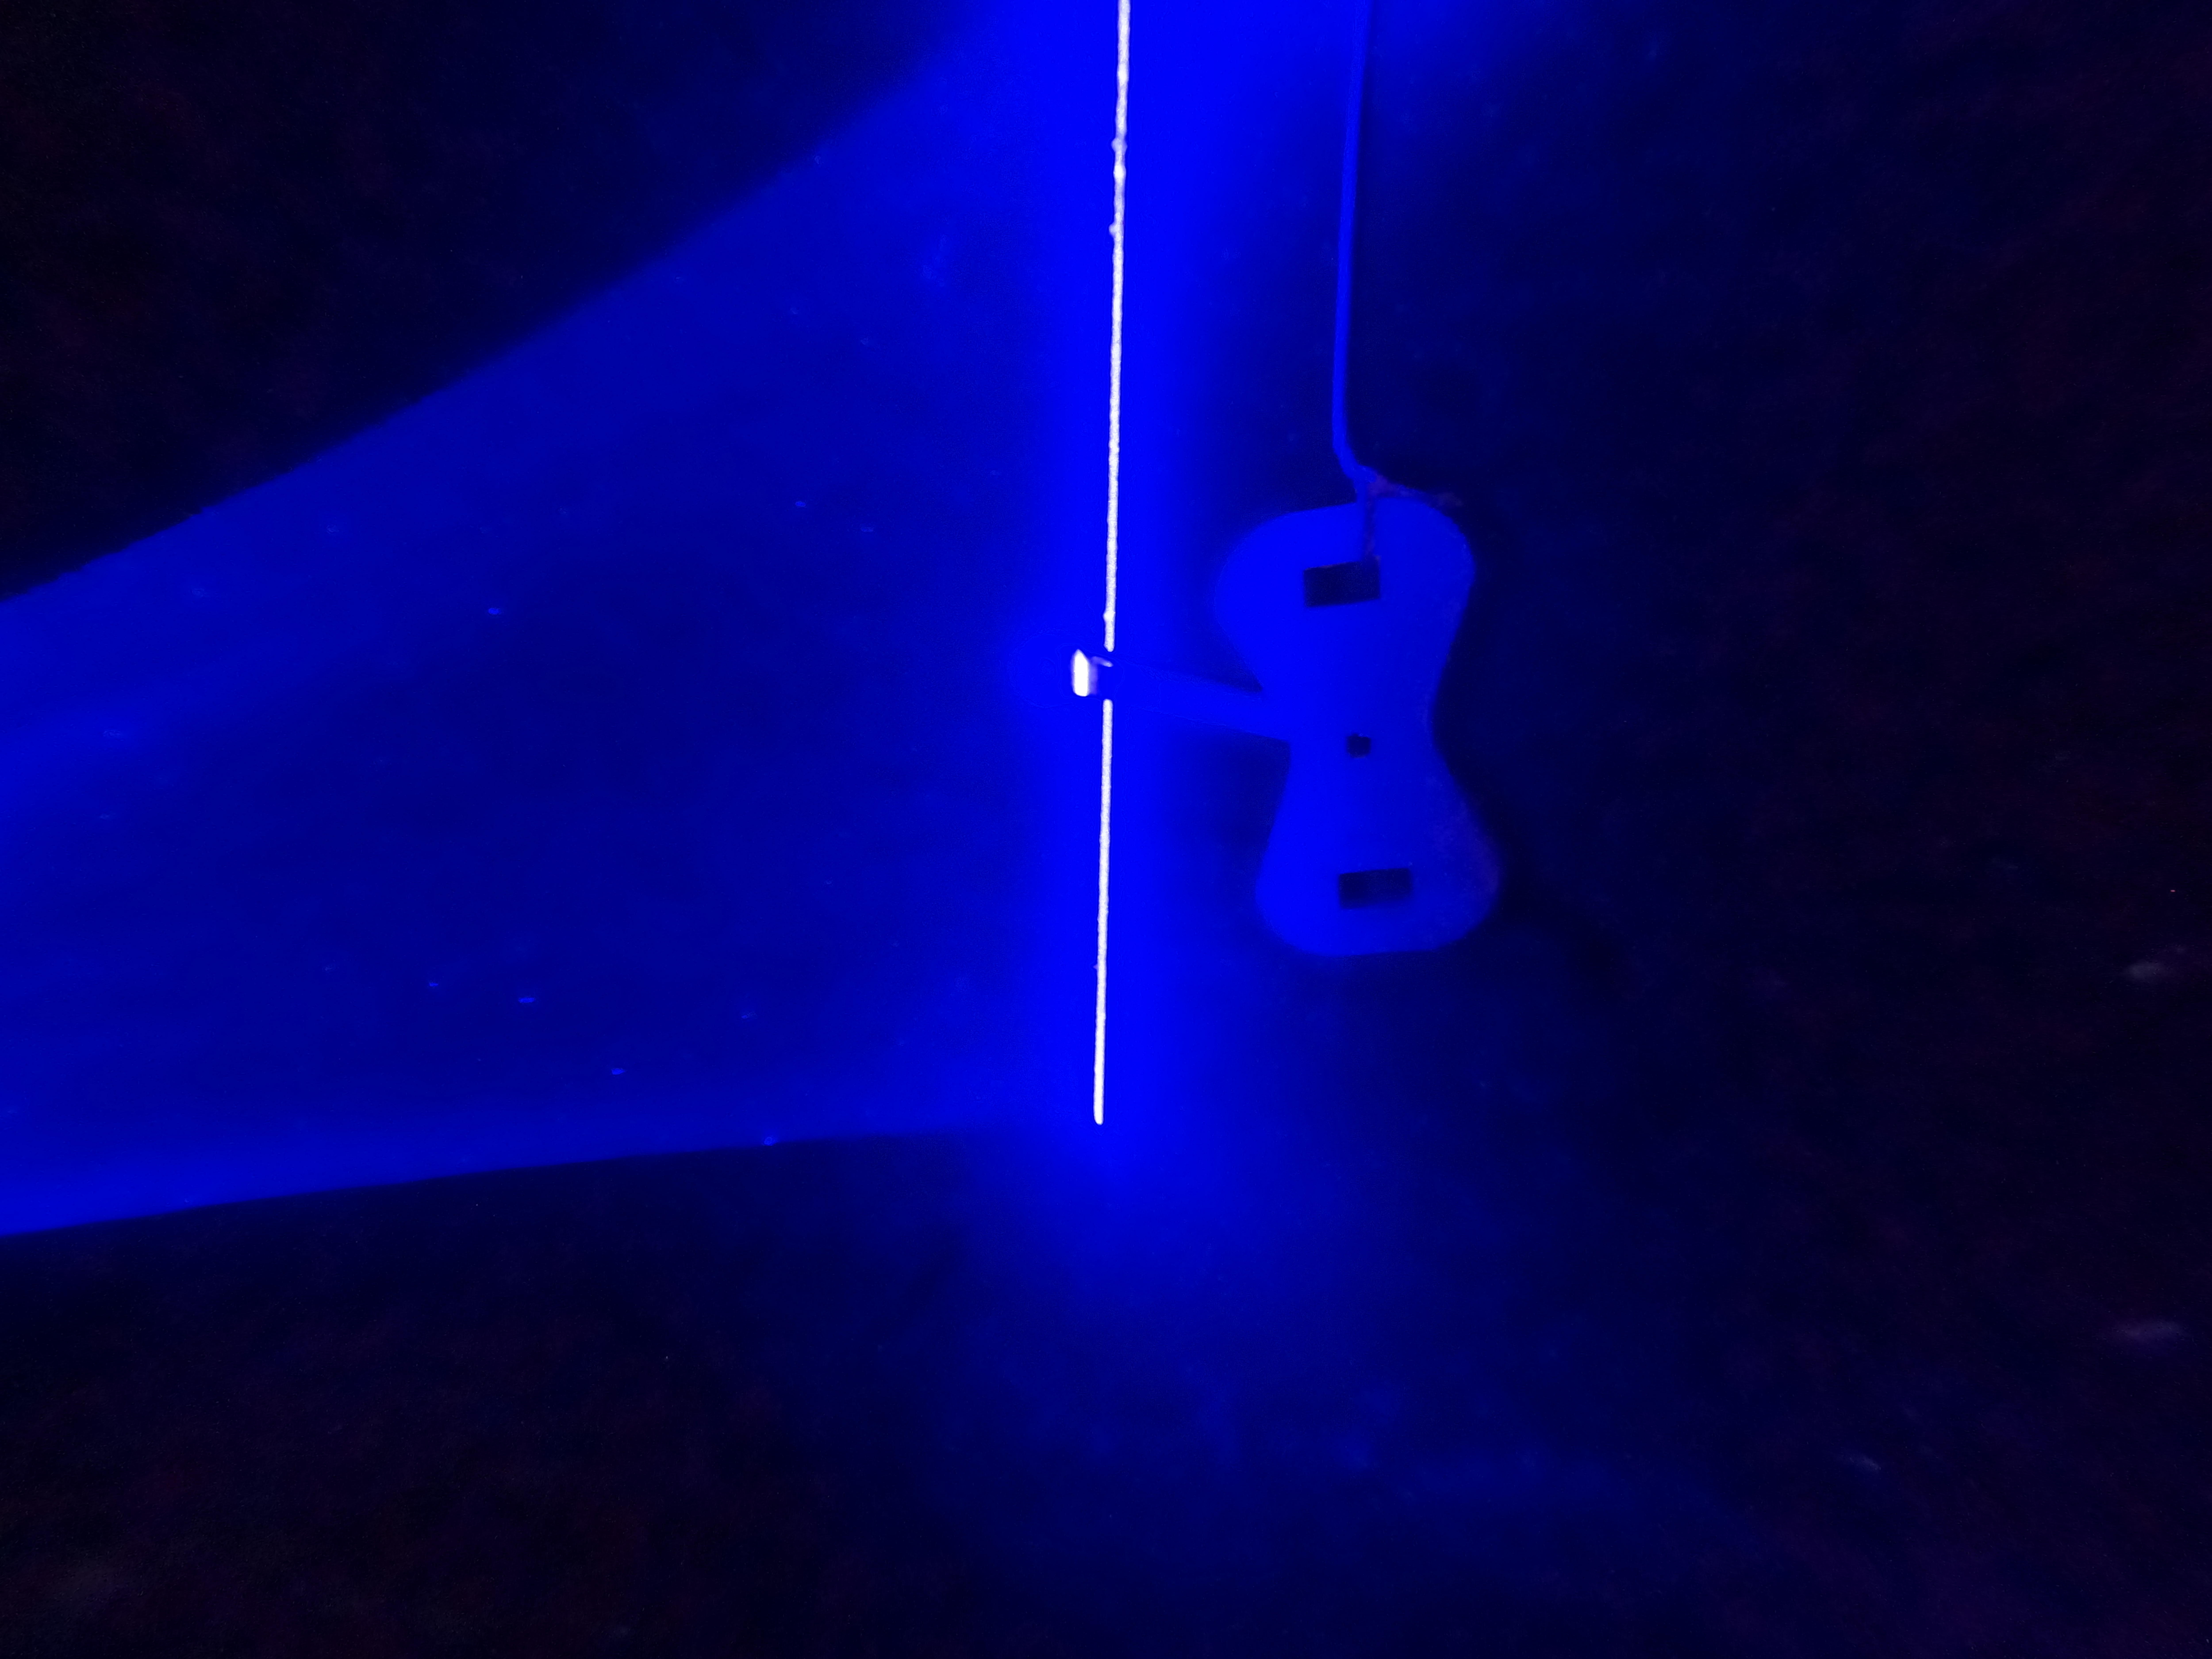

Supplement: Supplementary file 2308 [file G0016617.pdf › Level_1_2/G0016617.pdf]

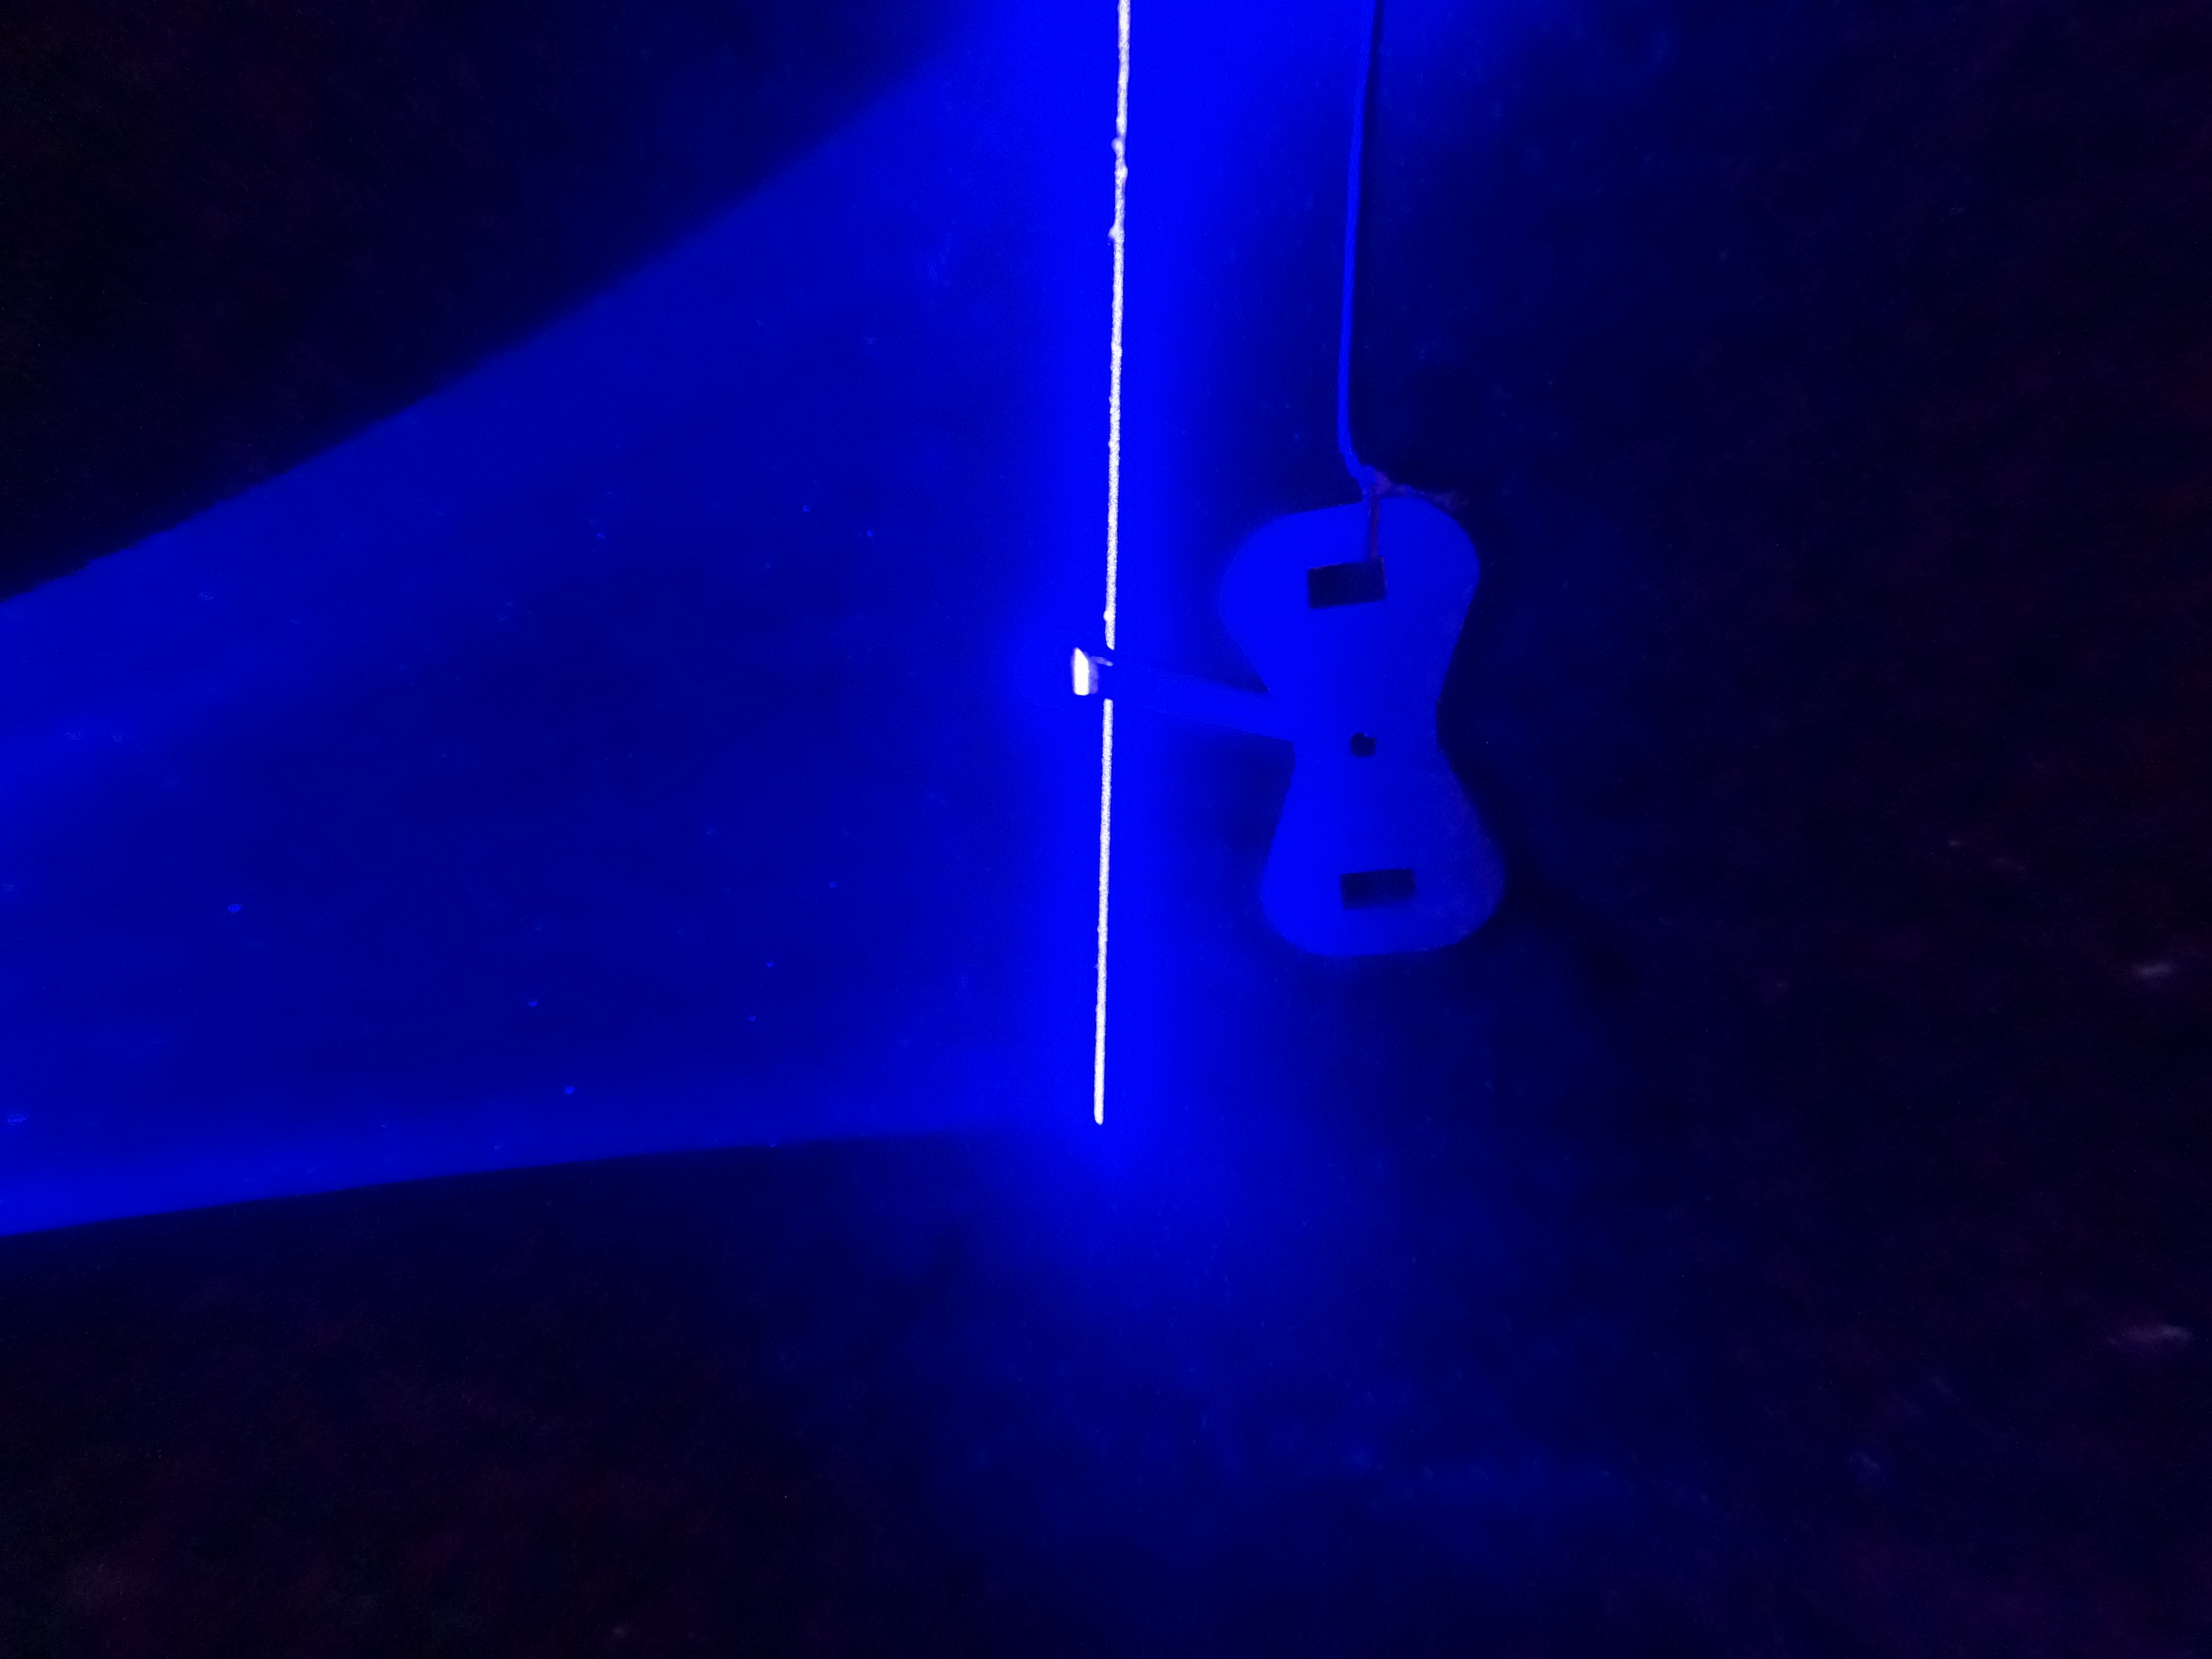

Supplement: Supplementary file 2309 [file G0016618.pdf › Level_1_2/G0016618.pdf]

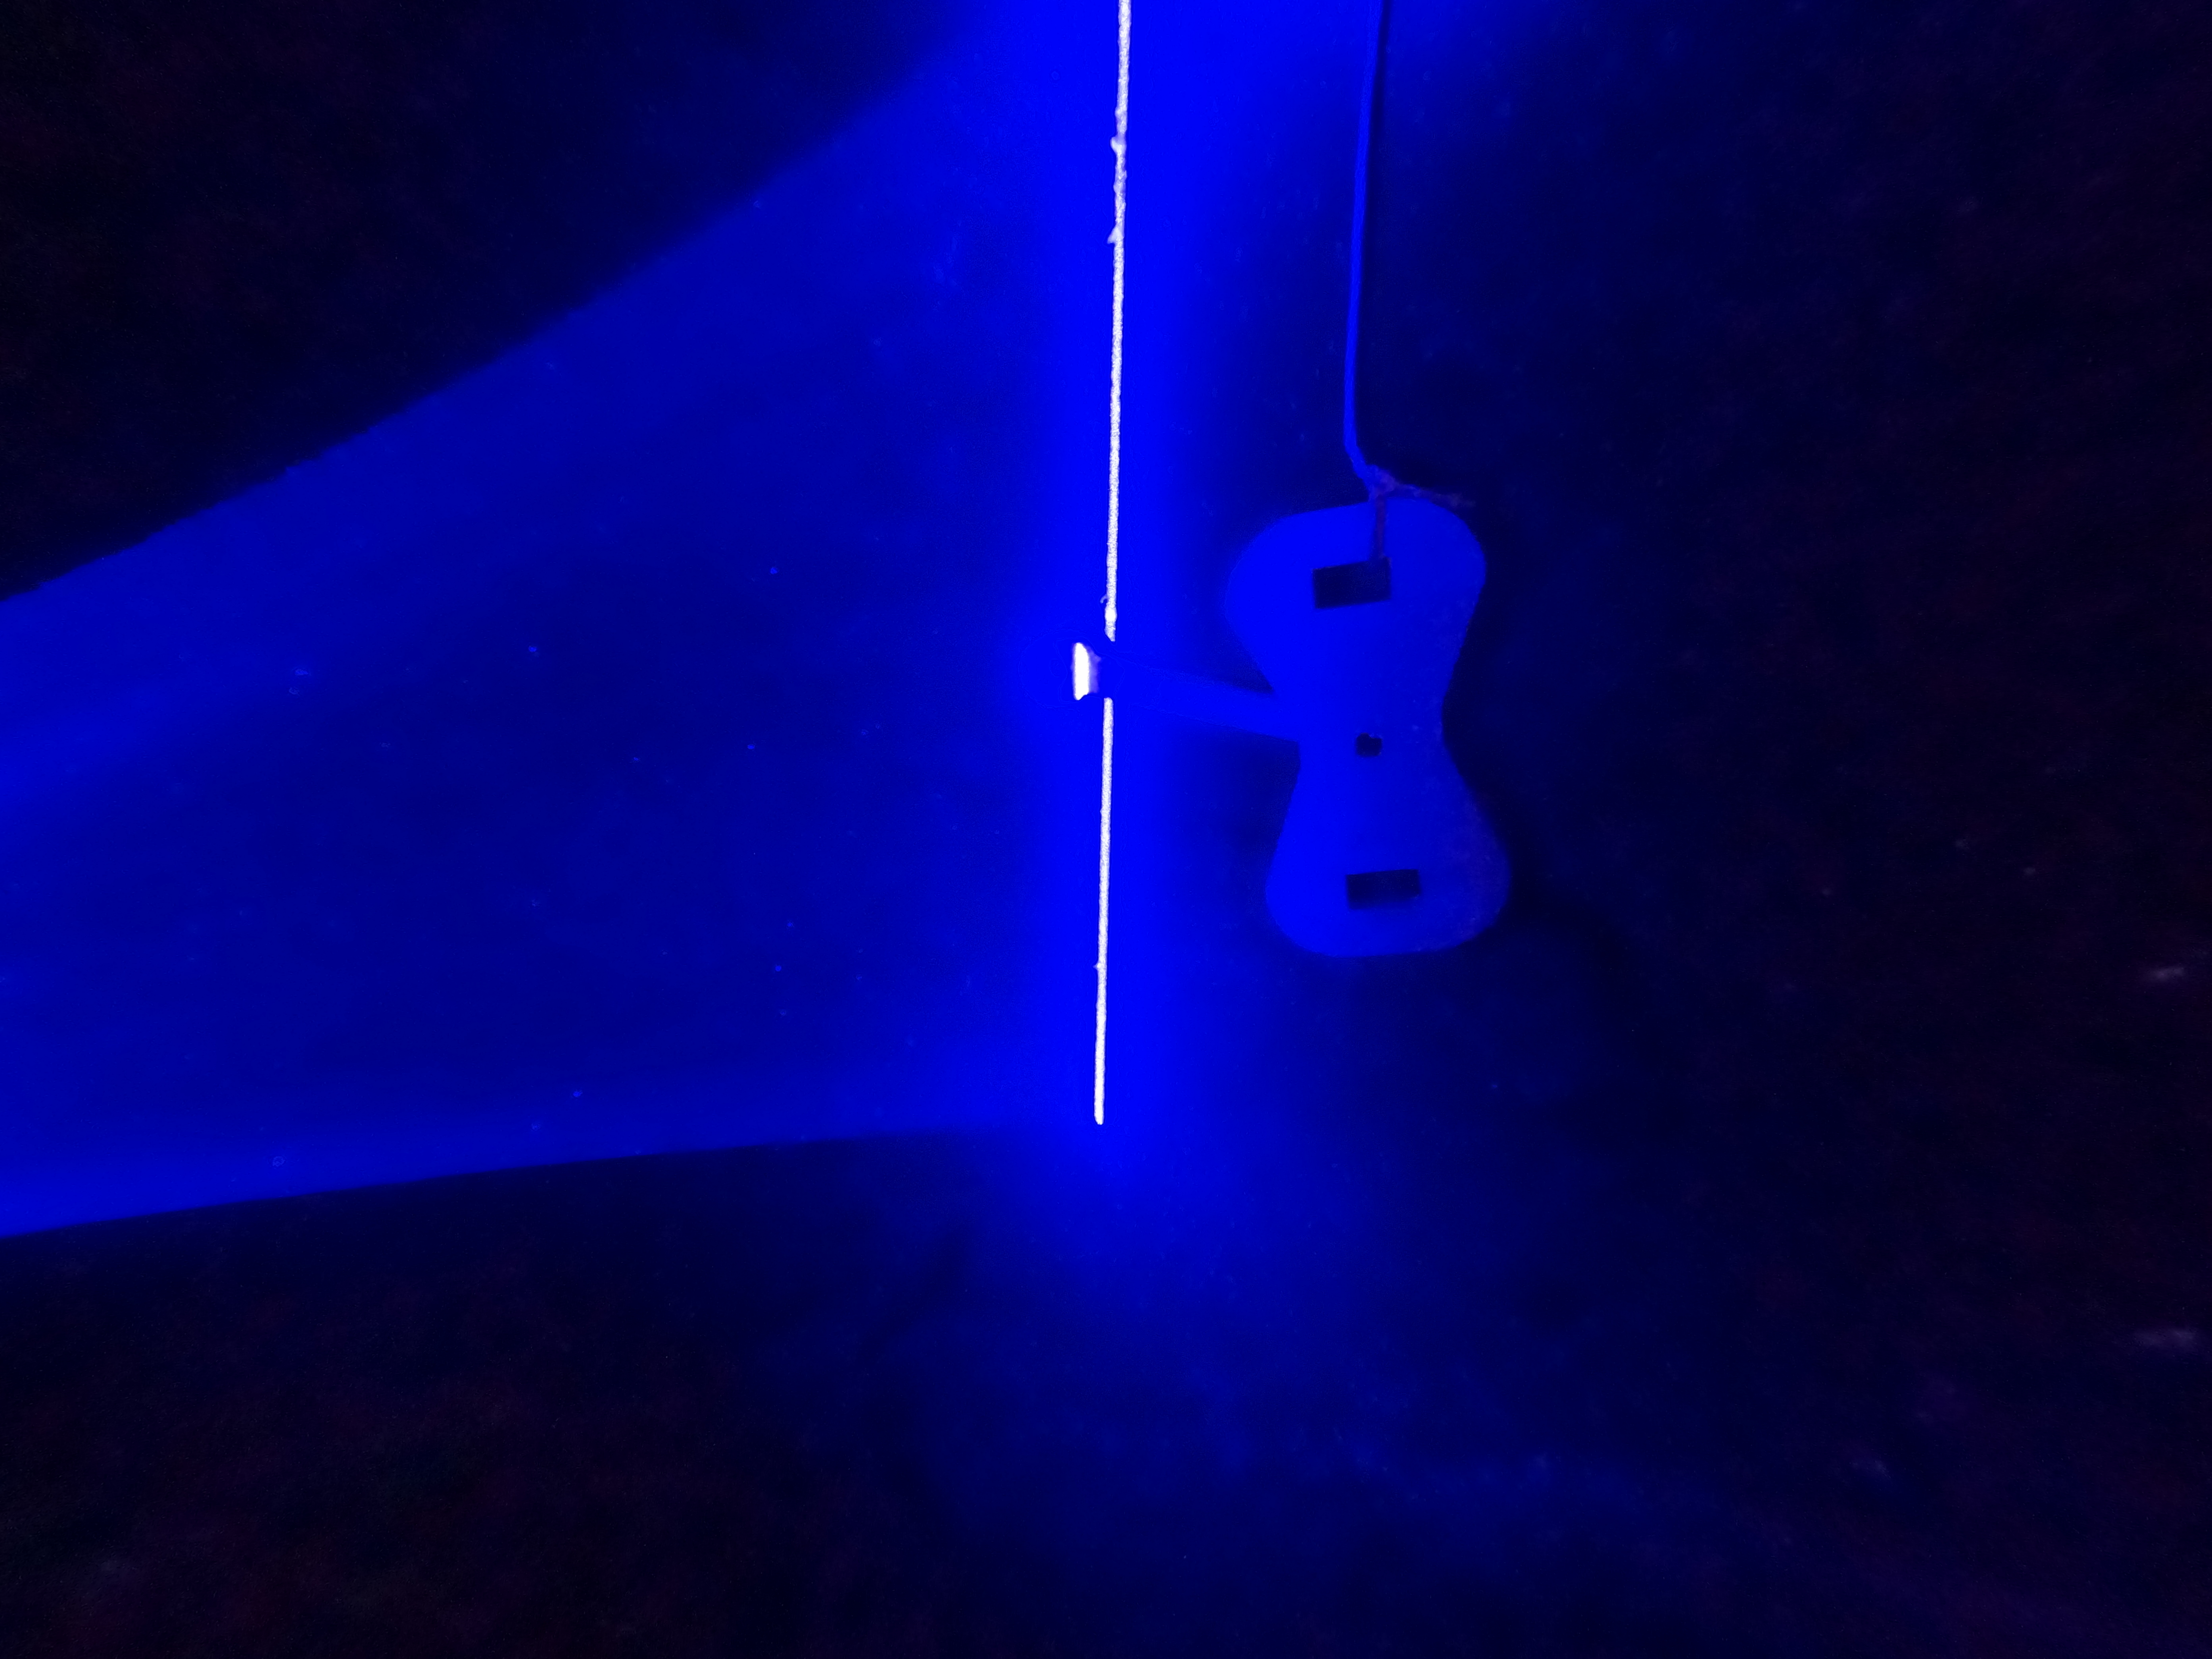

Supplement: Supplementary file 2310 [file G0016619.pdf › Level_1_2/G0016619.pdf]

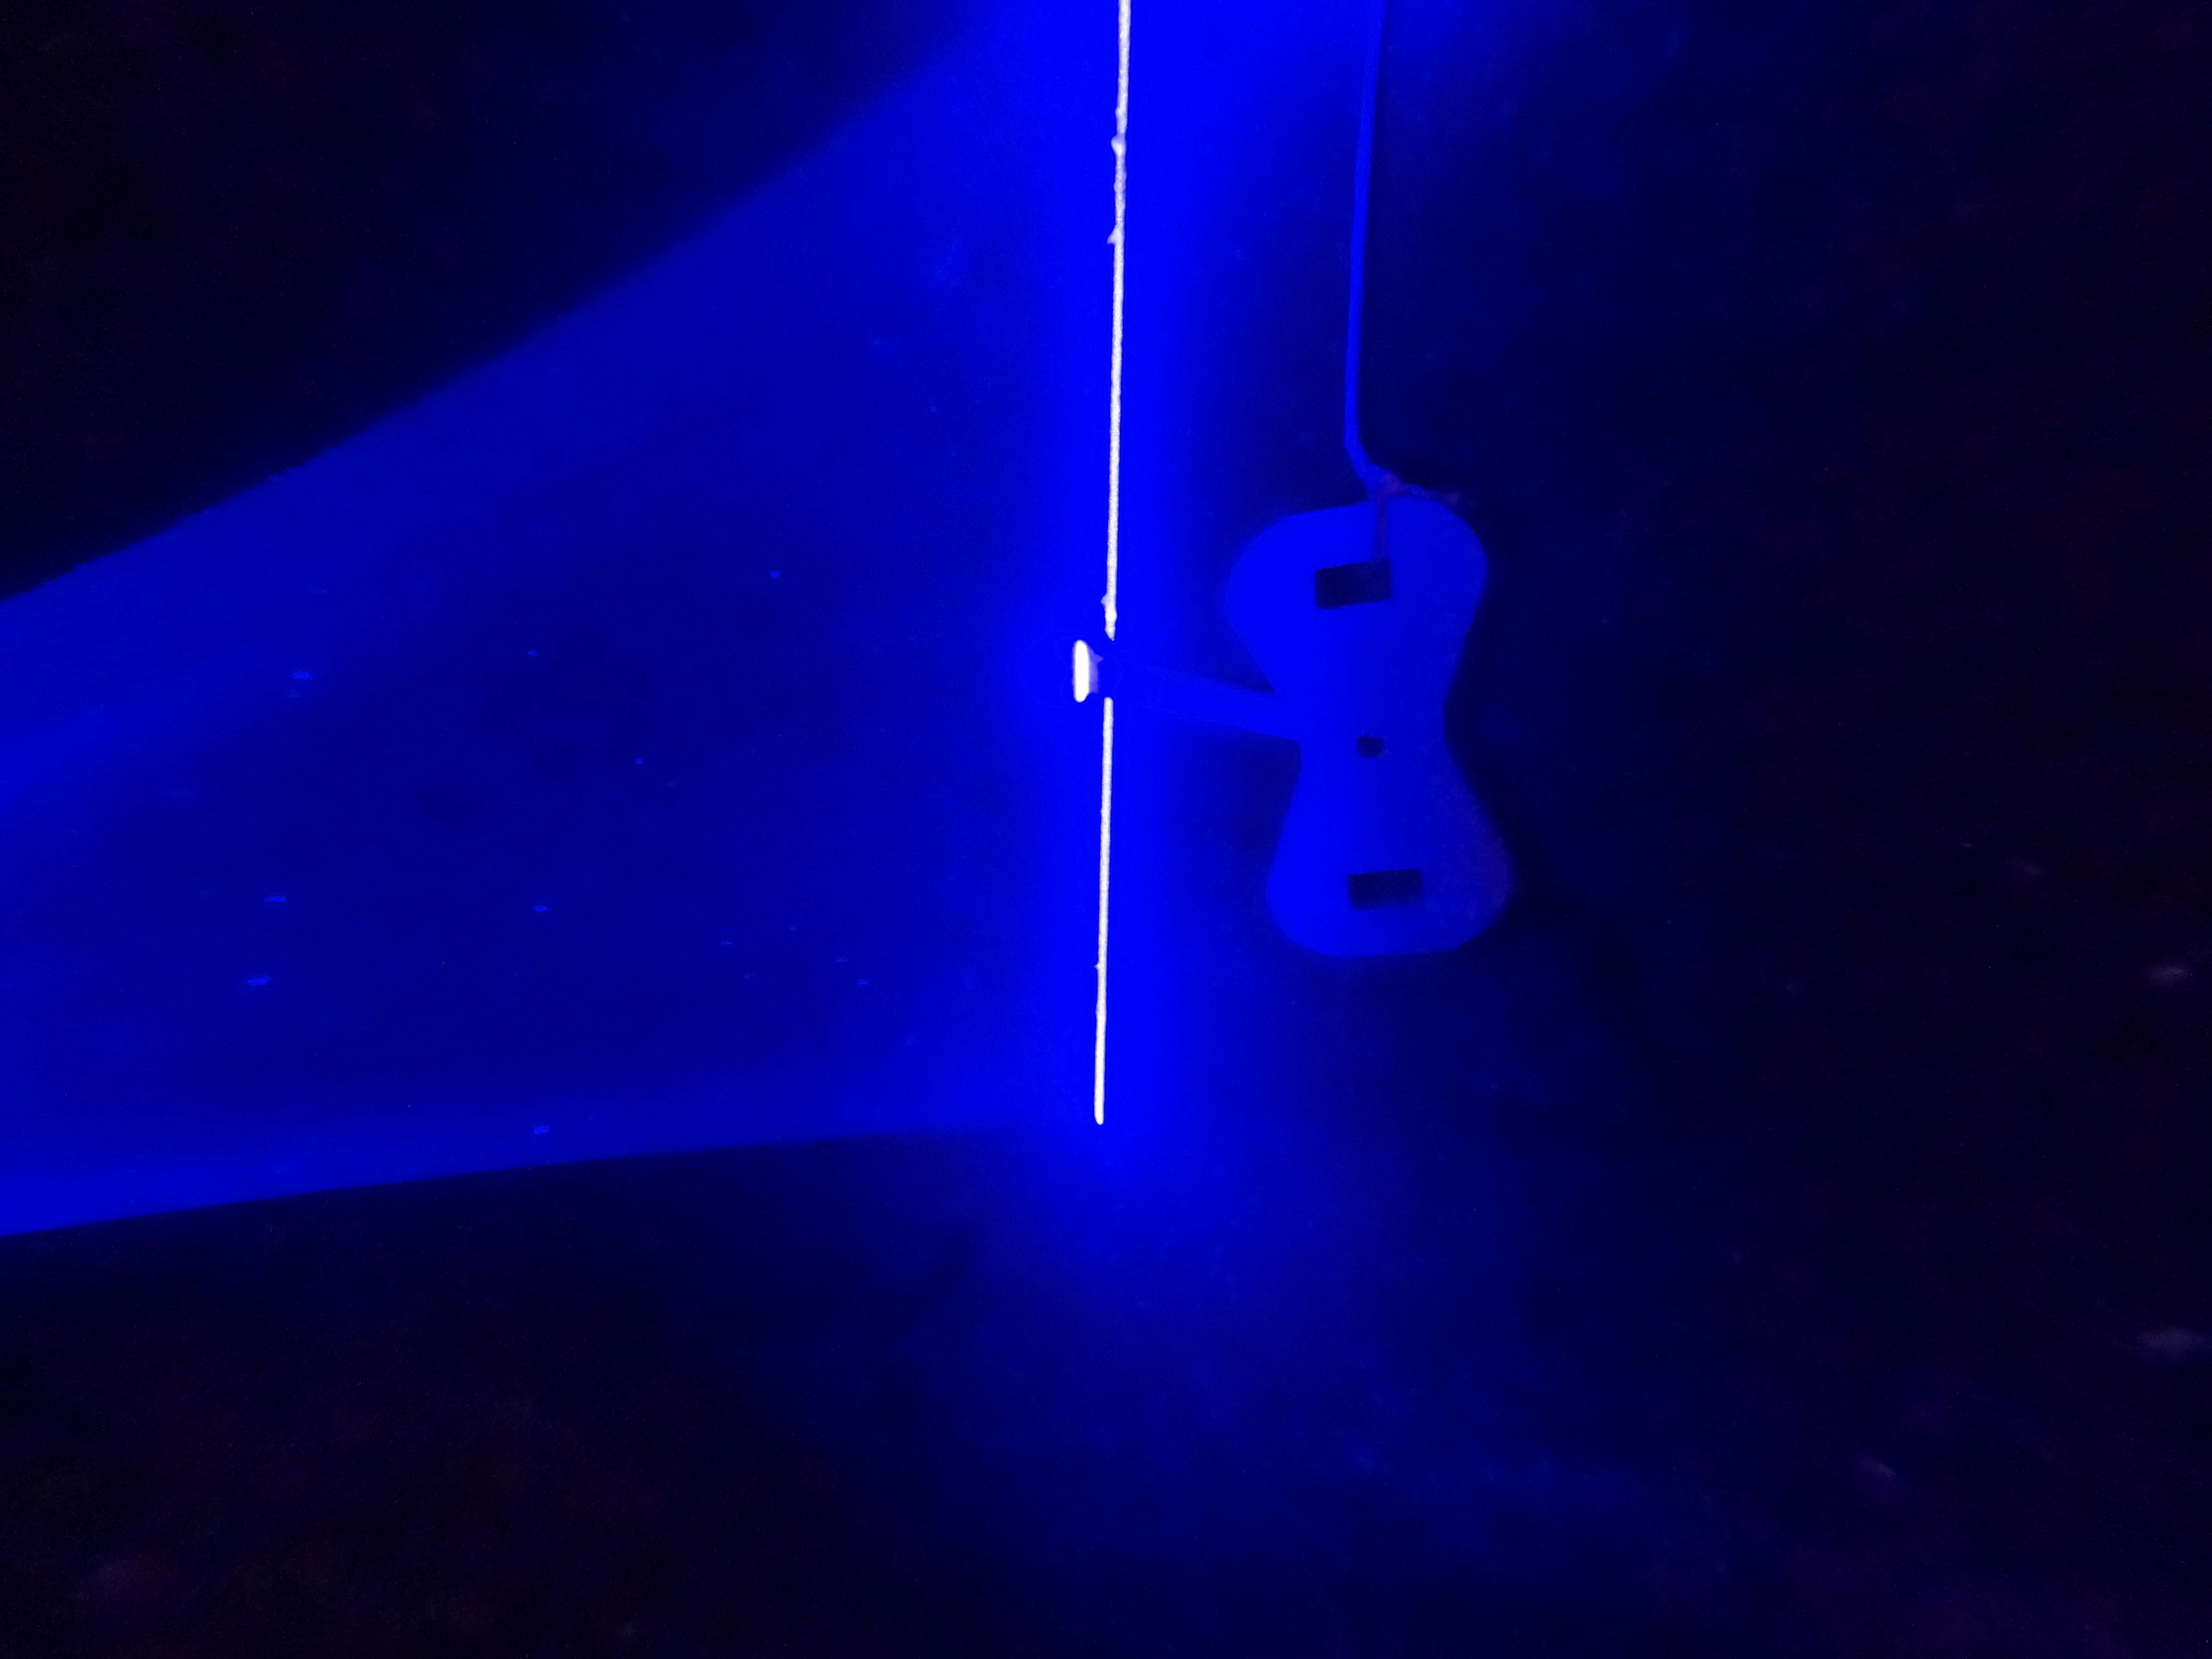

Supplement: Supplementary file 2311 [file G0016620.pdf › Level_1_2/G0016620.pdf]

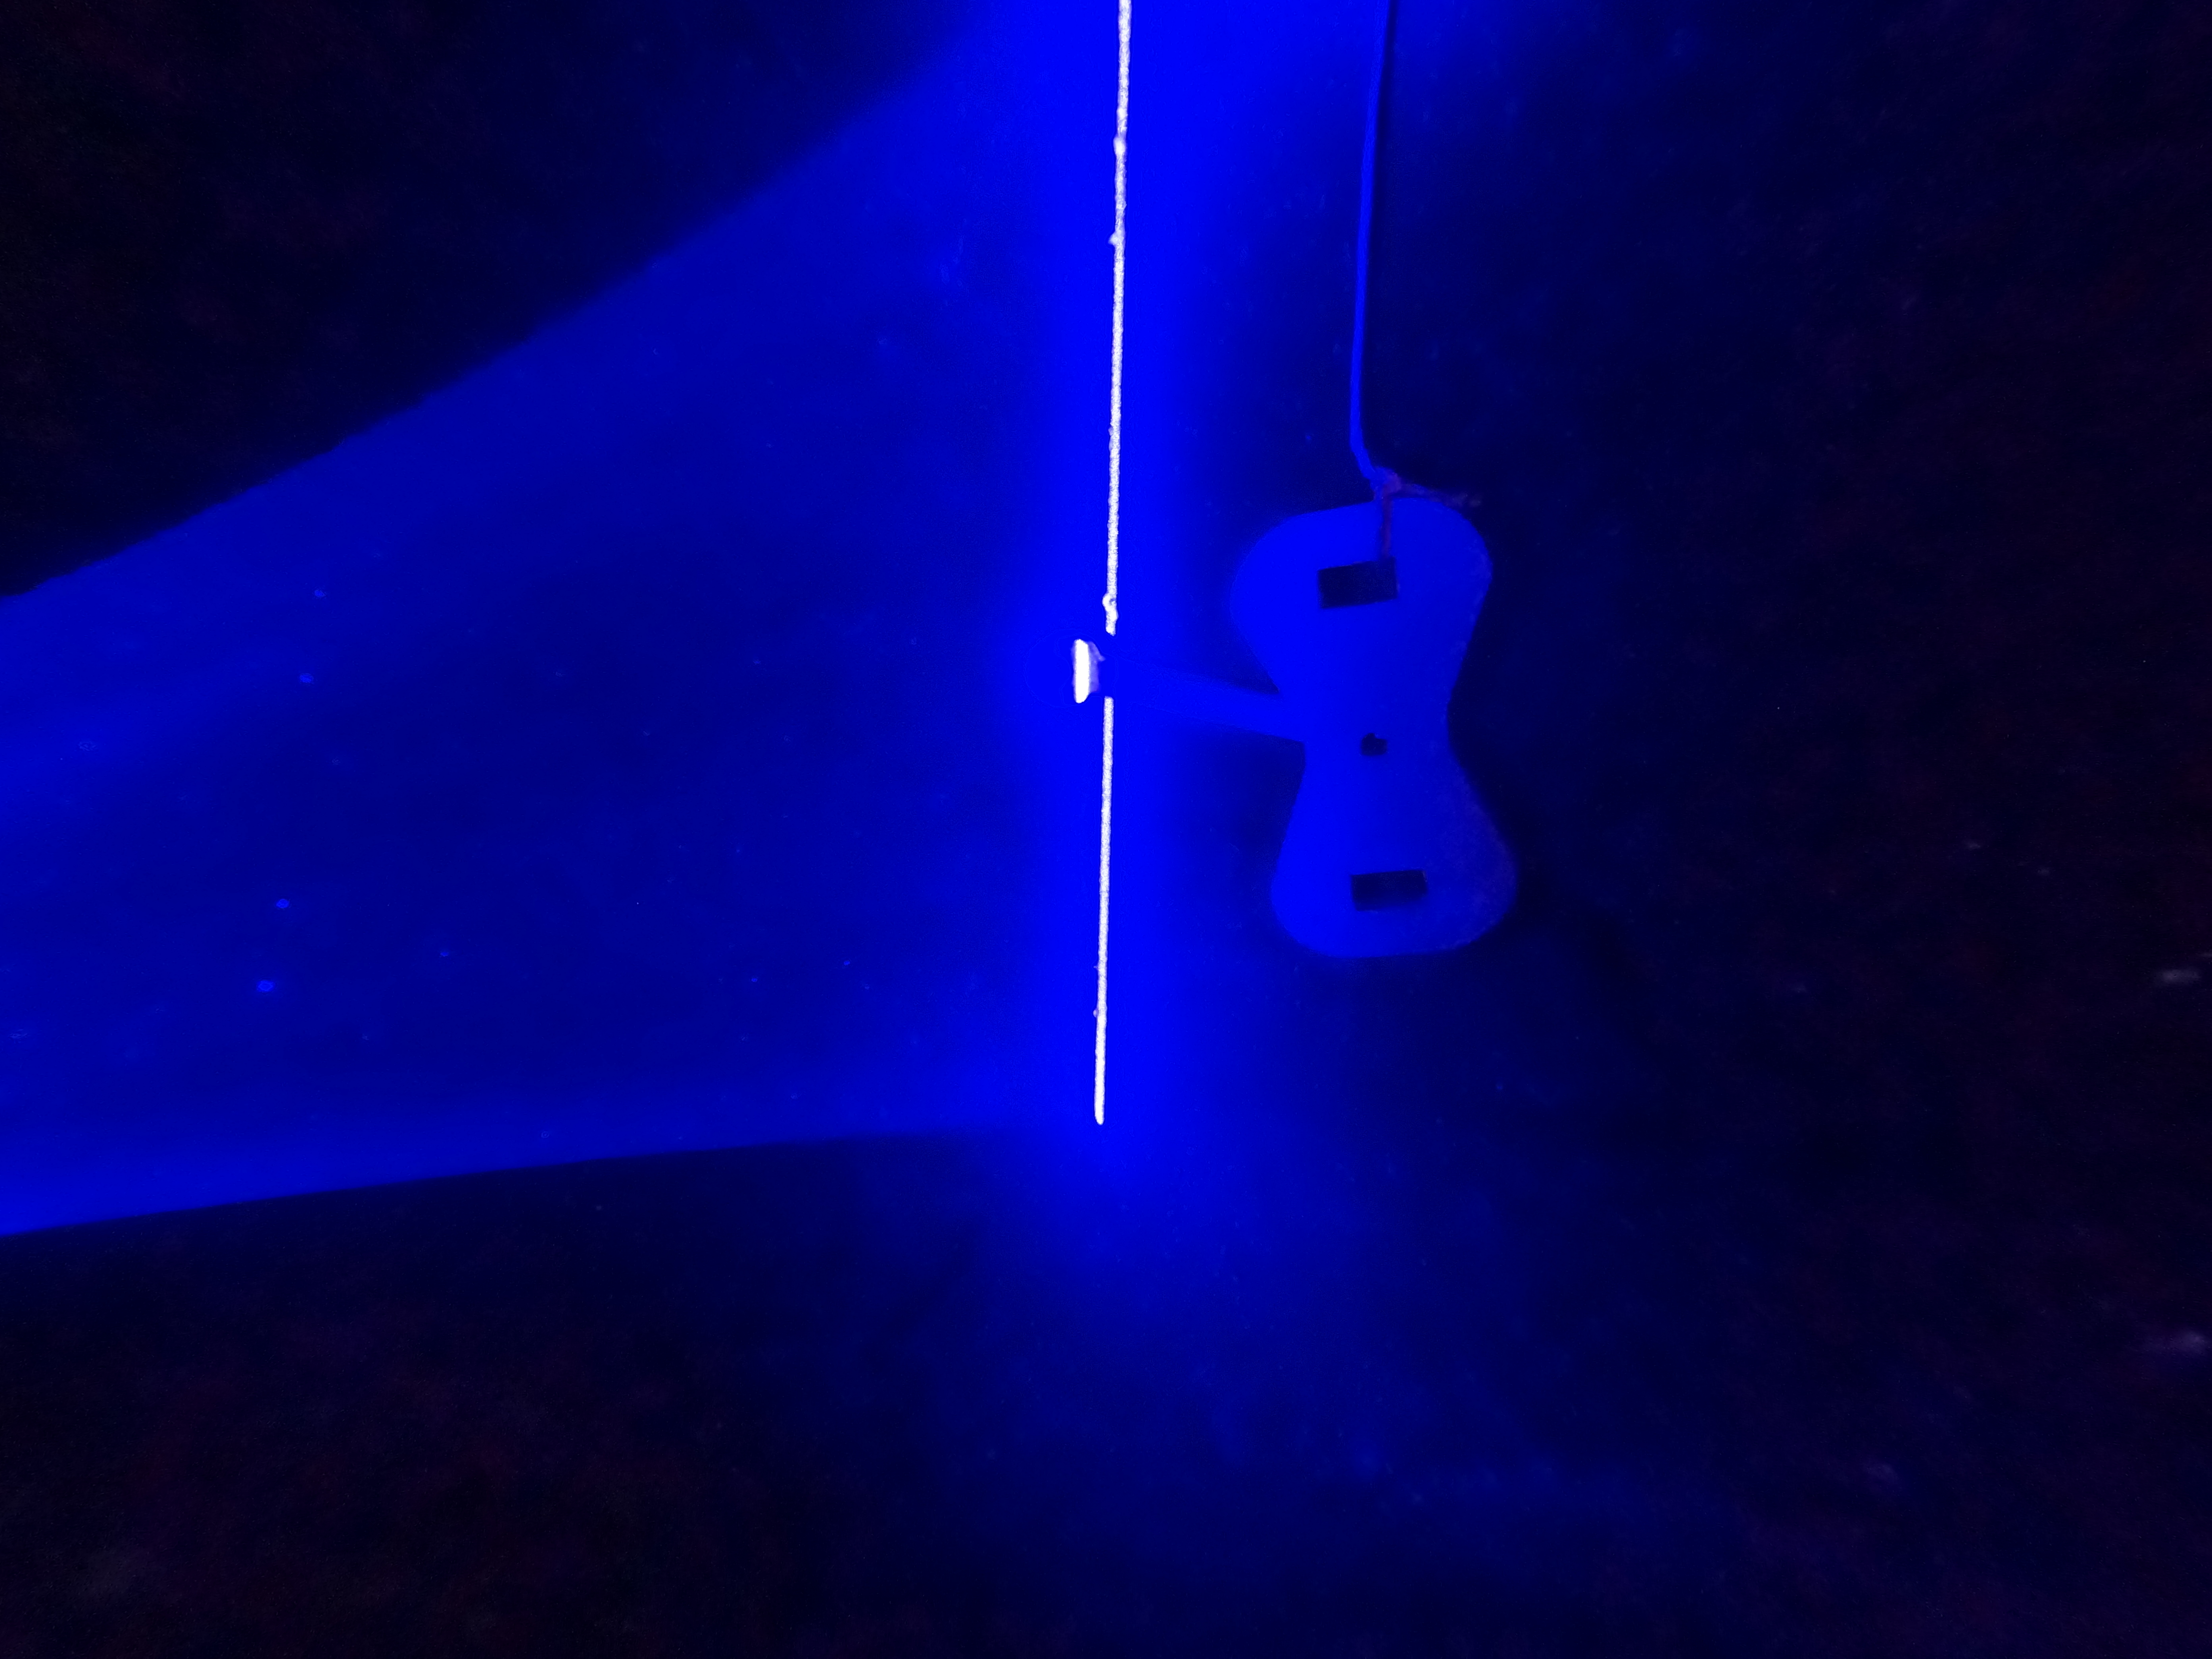

Supplement: Supplementary file 2312 [file G0016621.pdf › Level_1_2/G0016621.pdf]

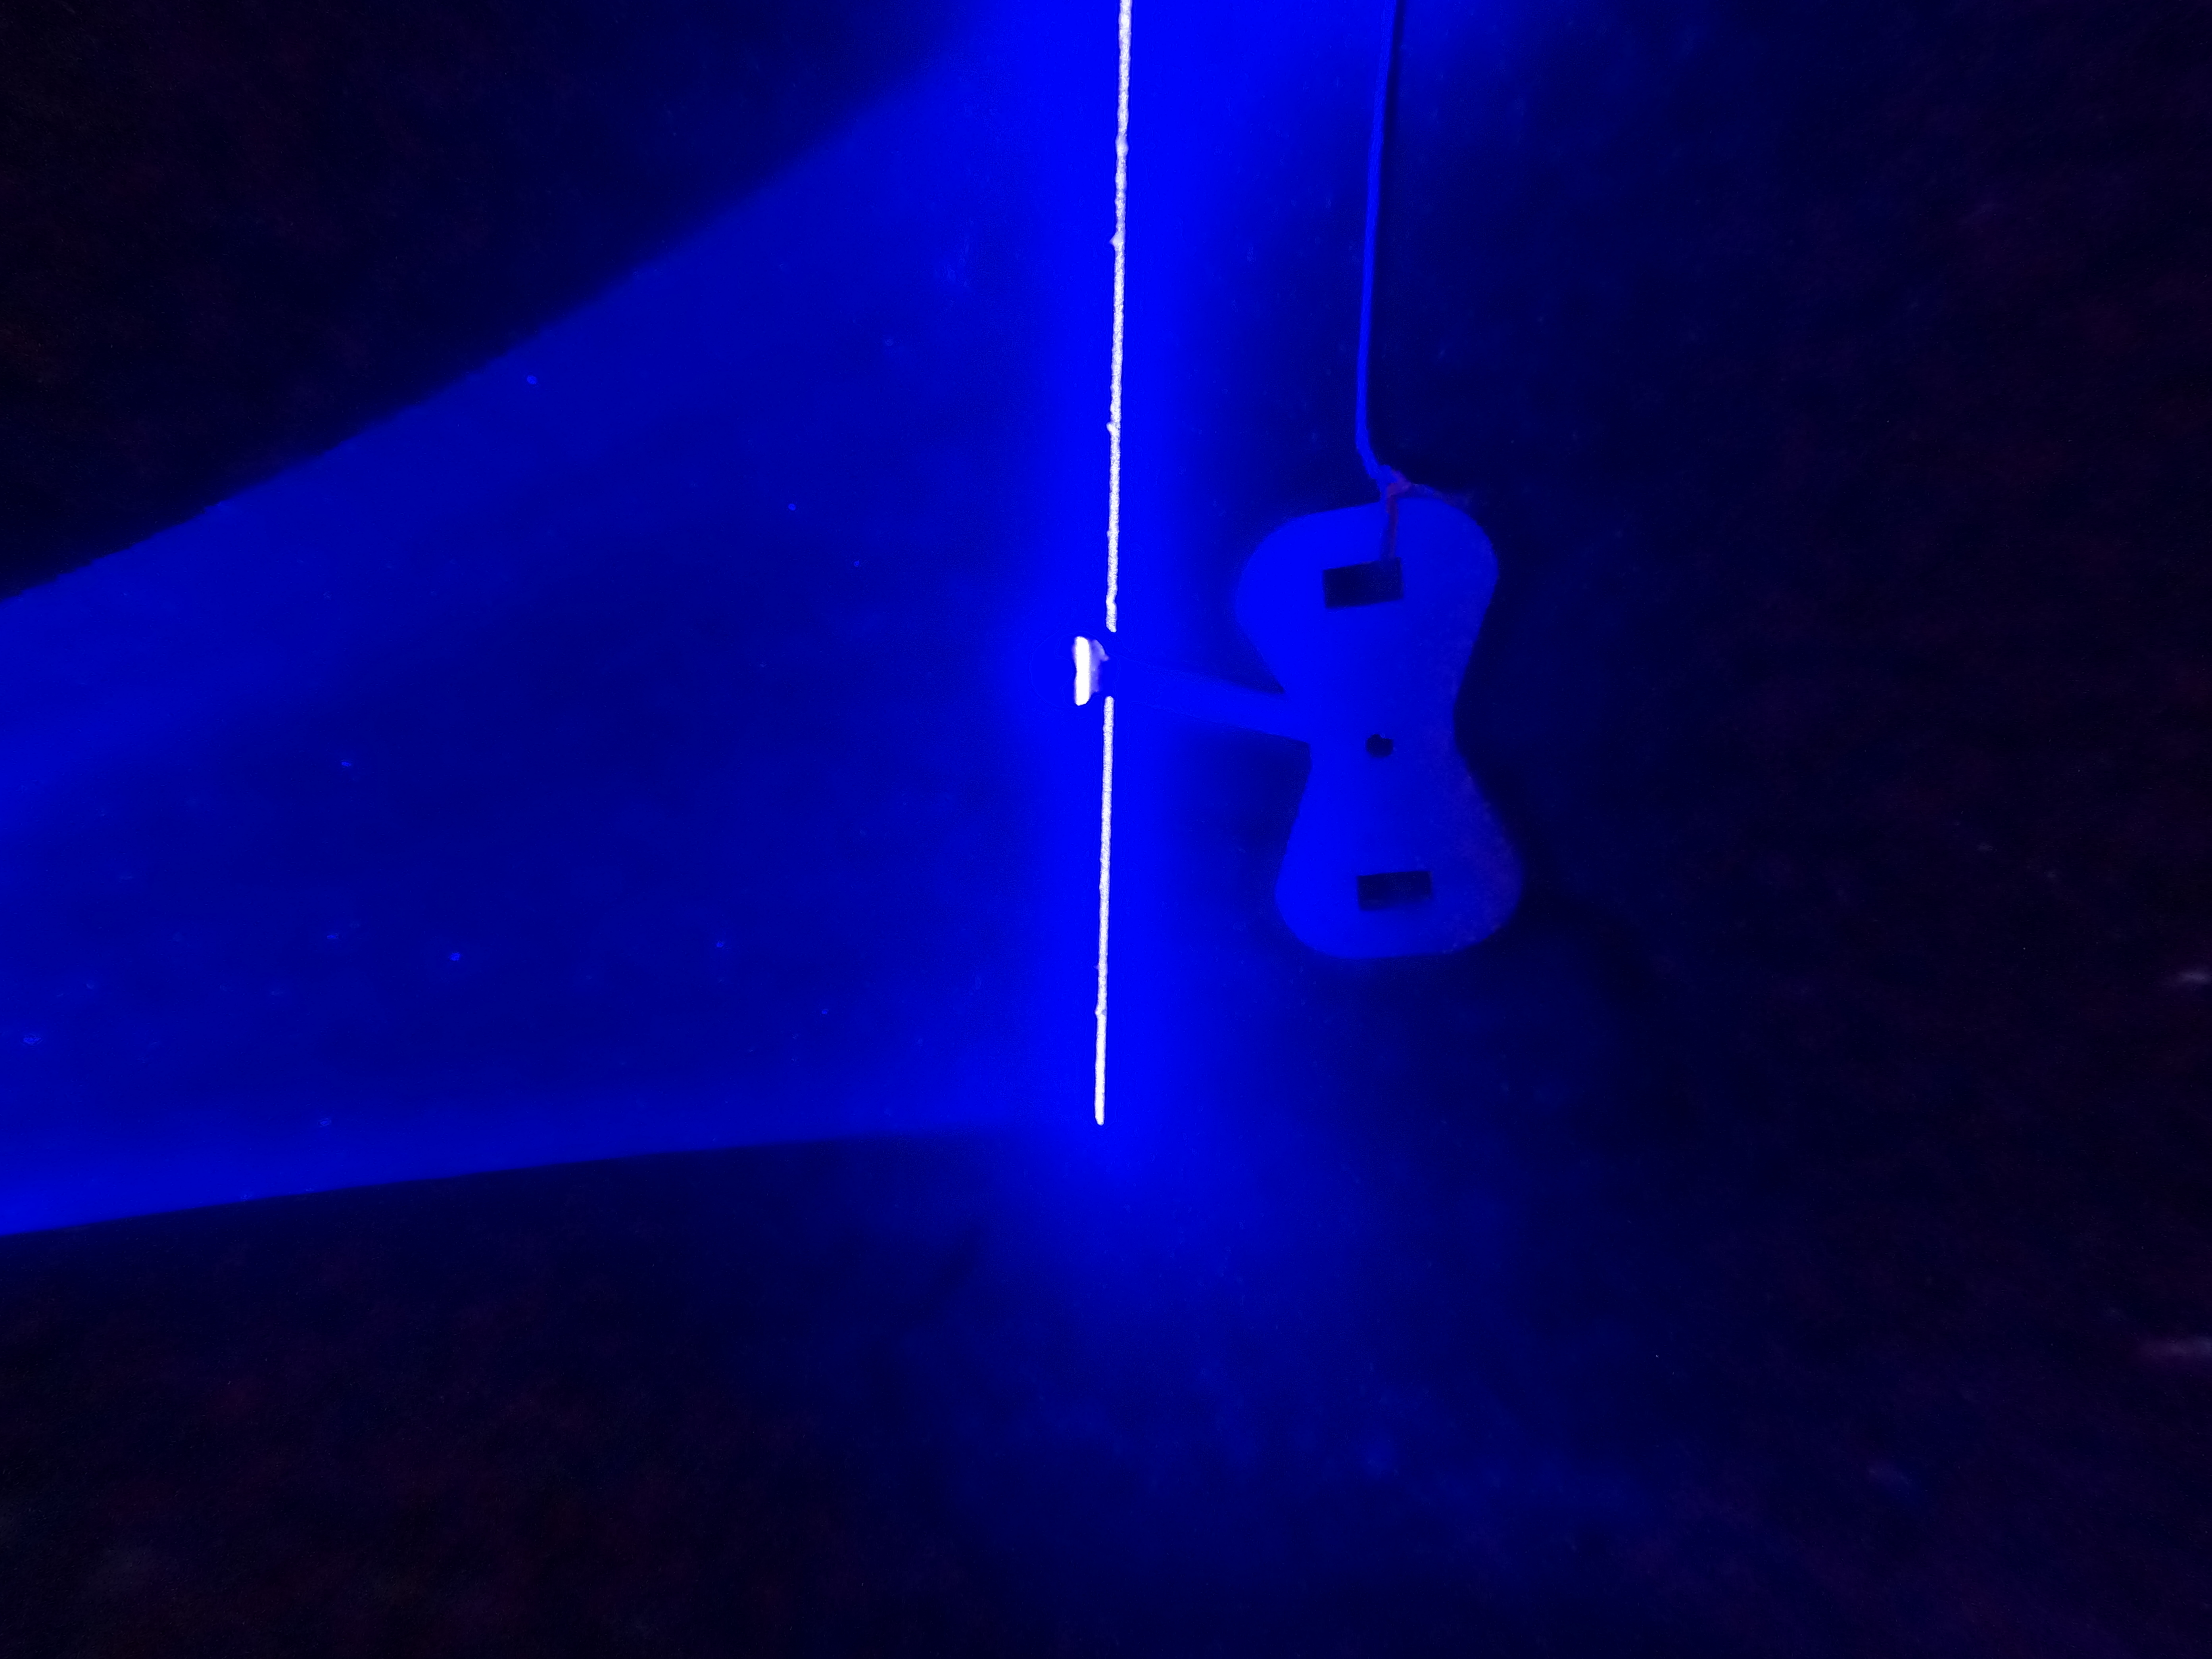

Supplement: Supplementary file 2313 [file G0016622.pdf › Level_1_2/G0016622.pdf]

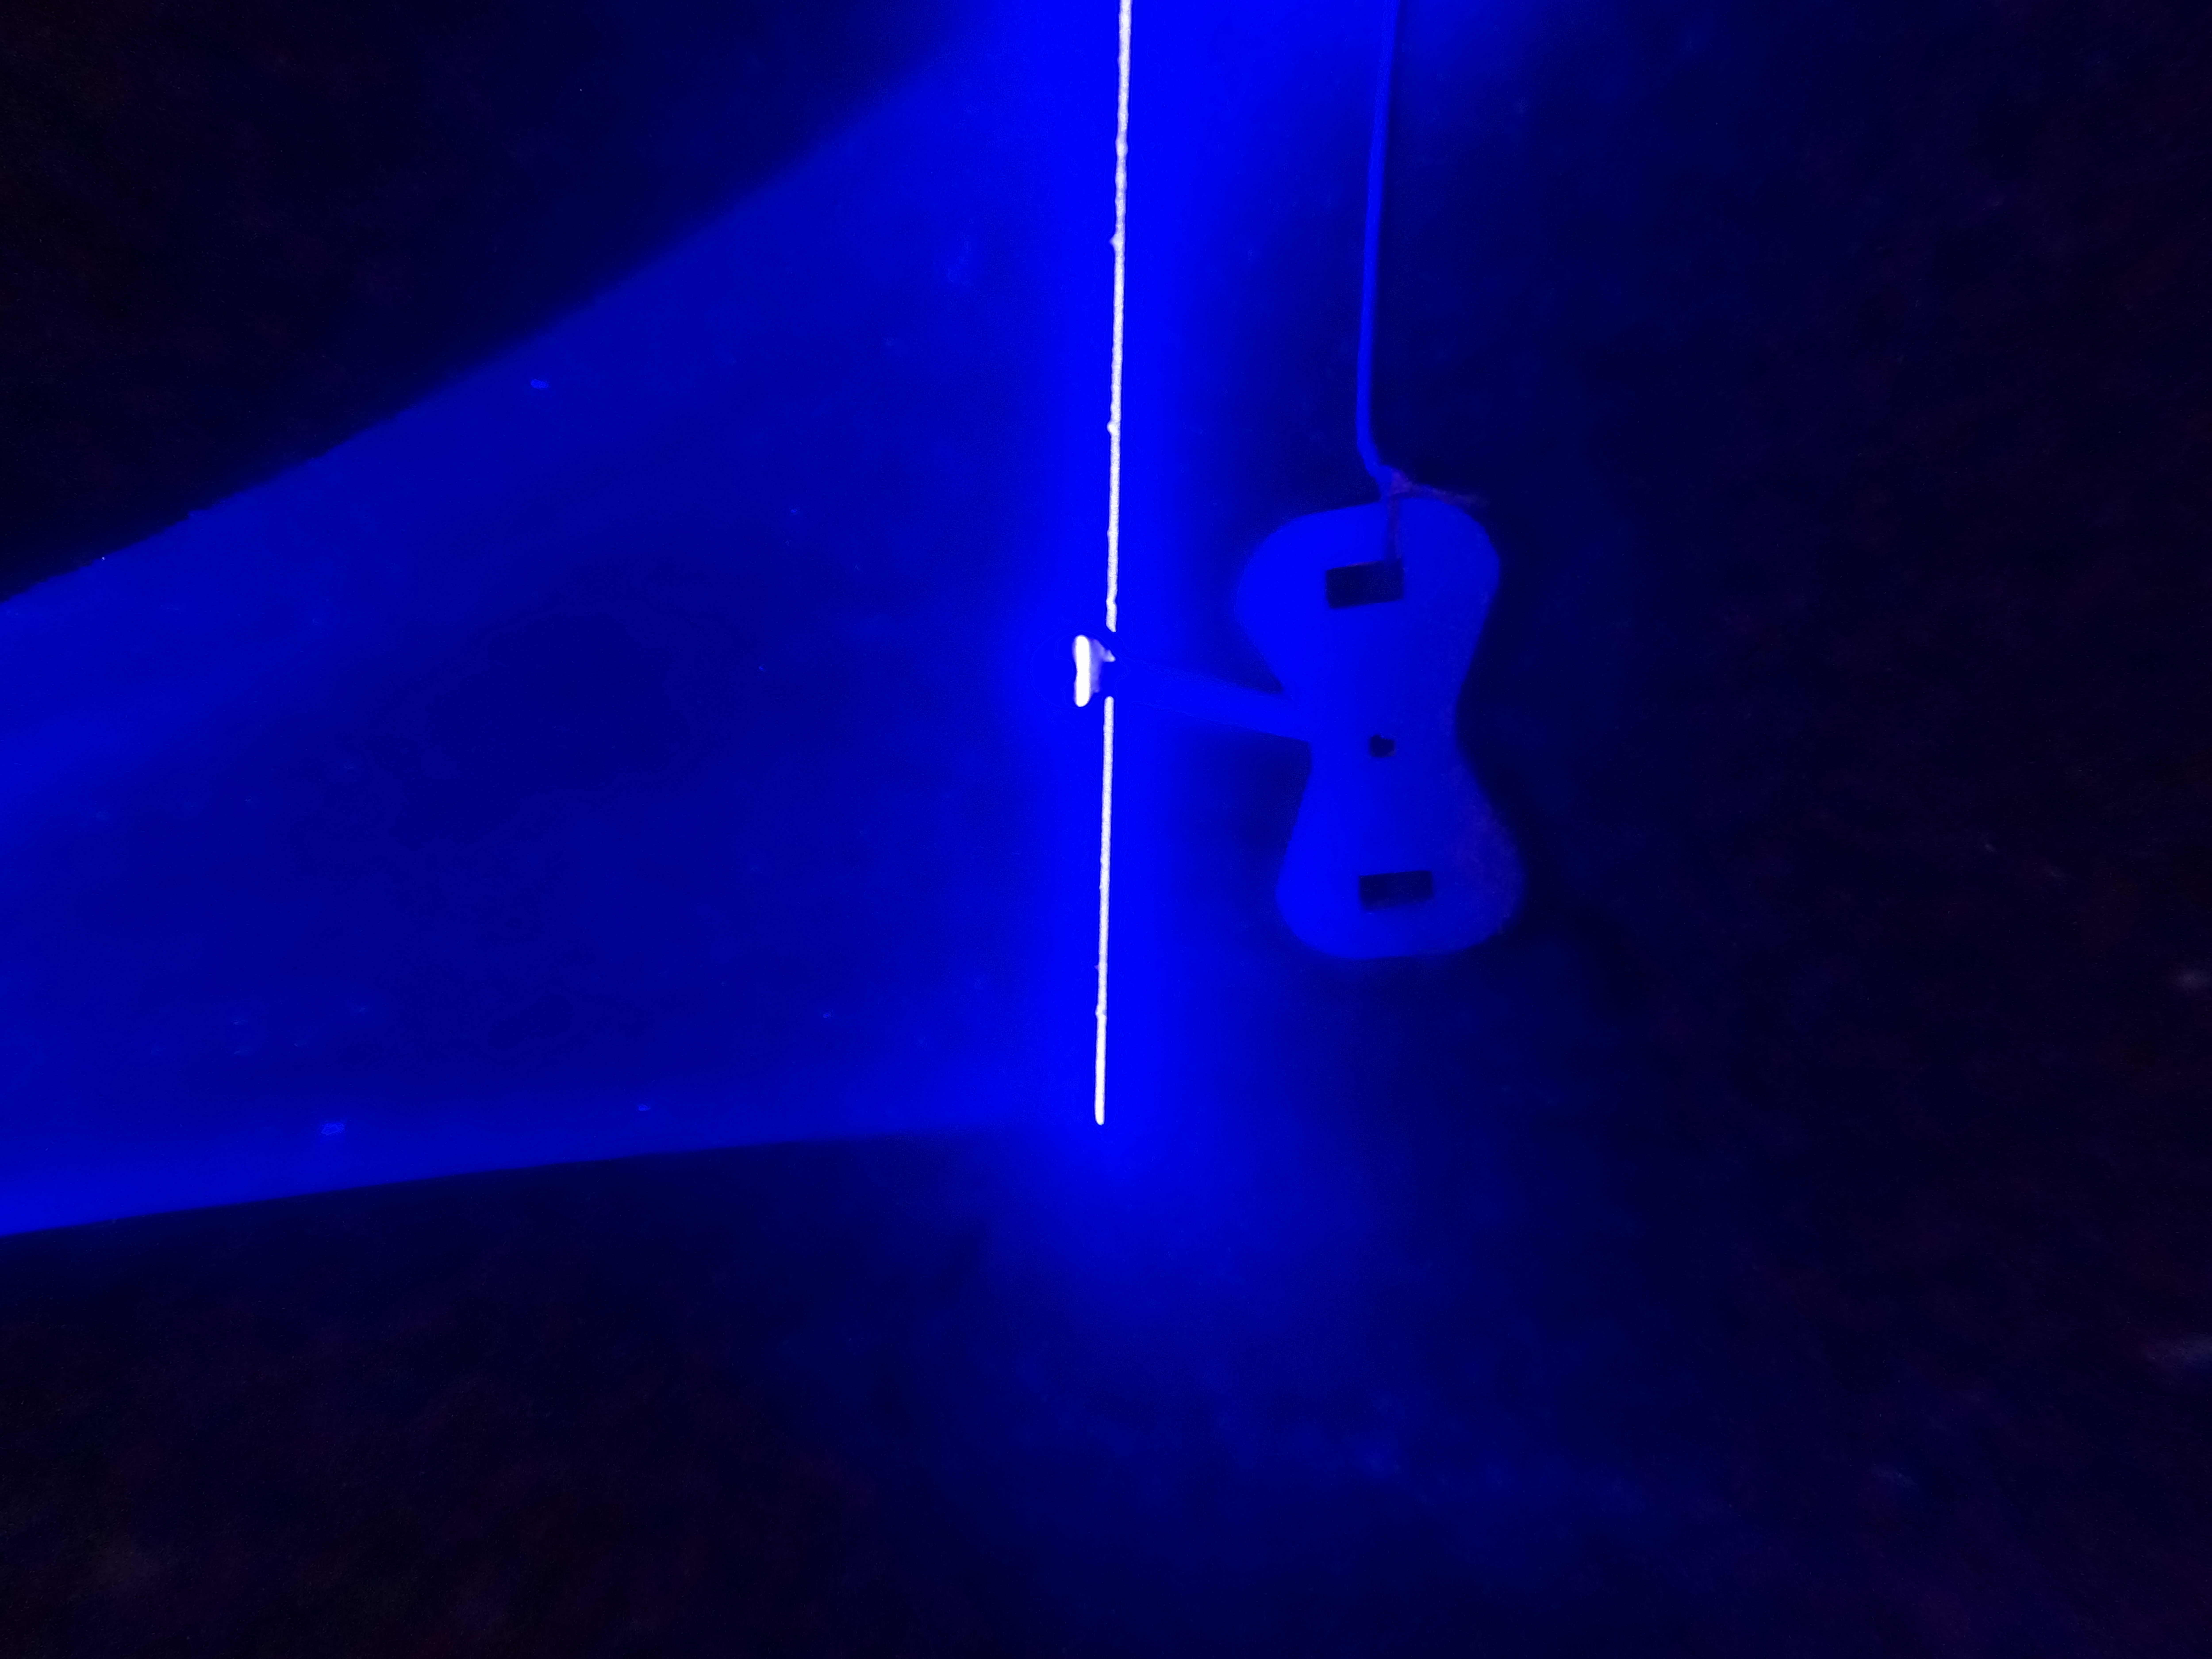

Supplement: Supplementary file 2314 [file G0016623.pdf › Level_1_2/G0016623.pdf]

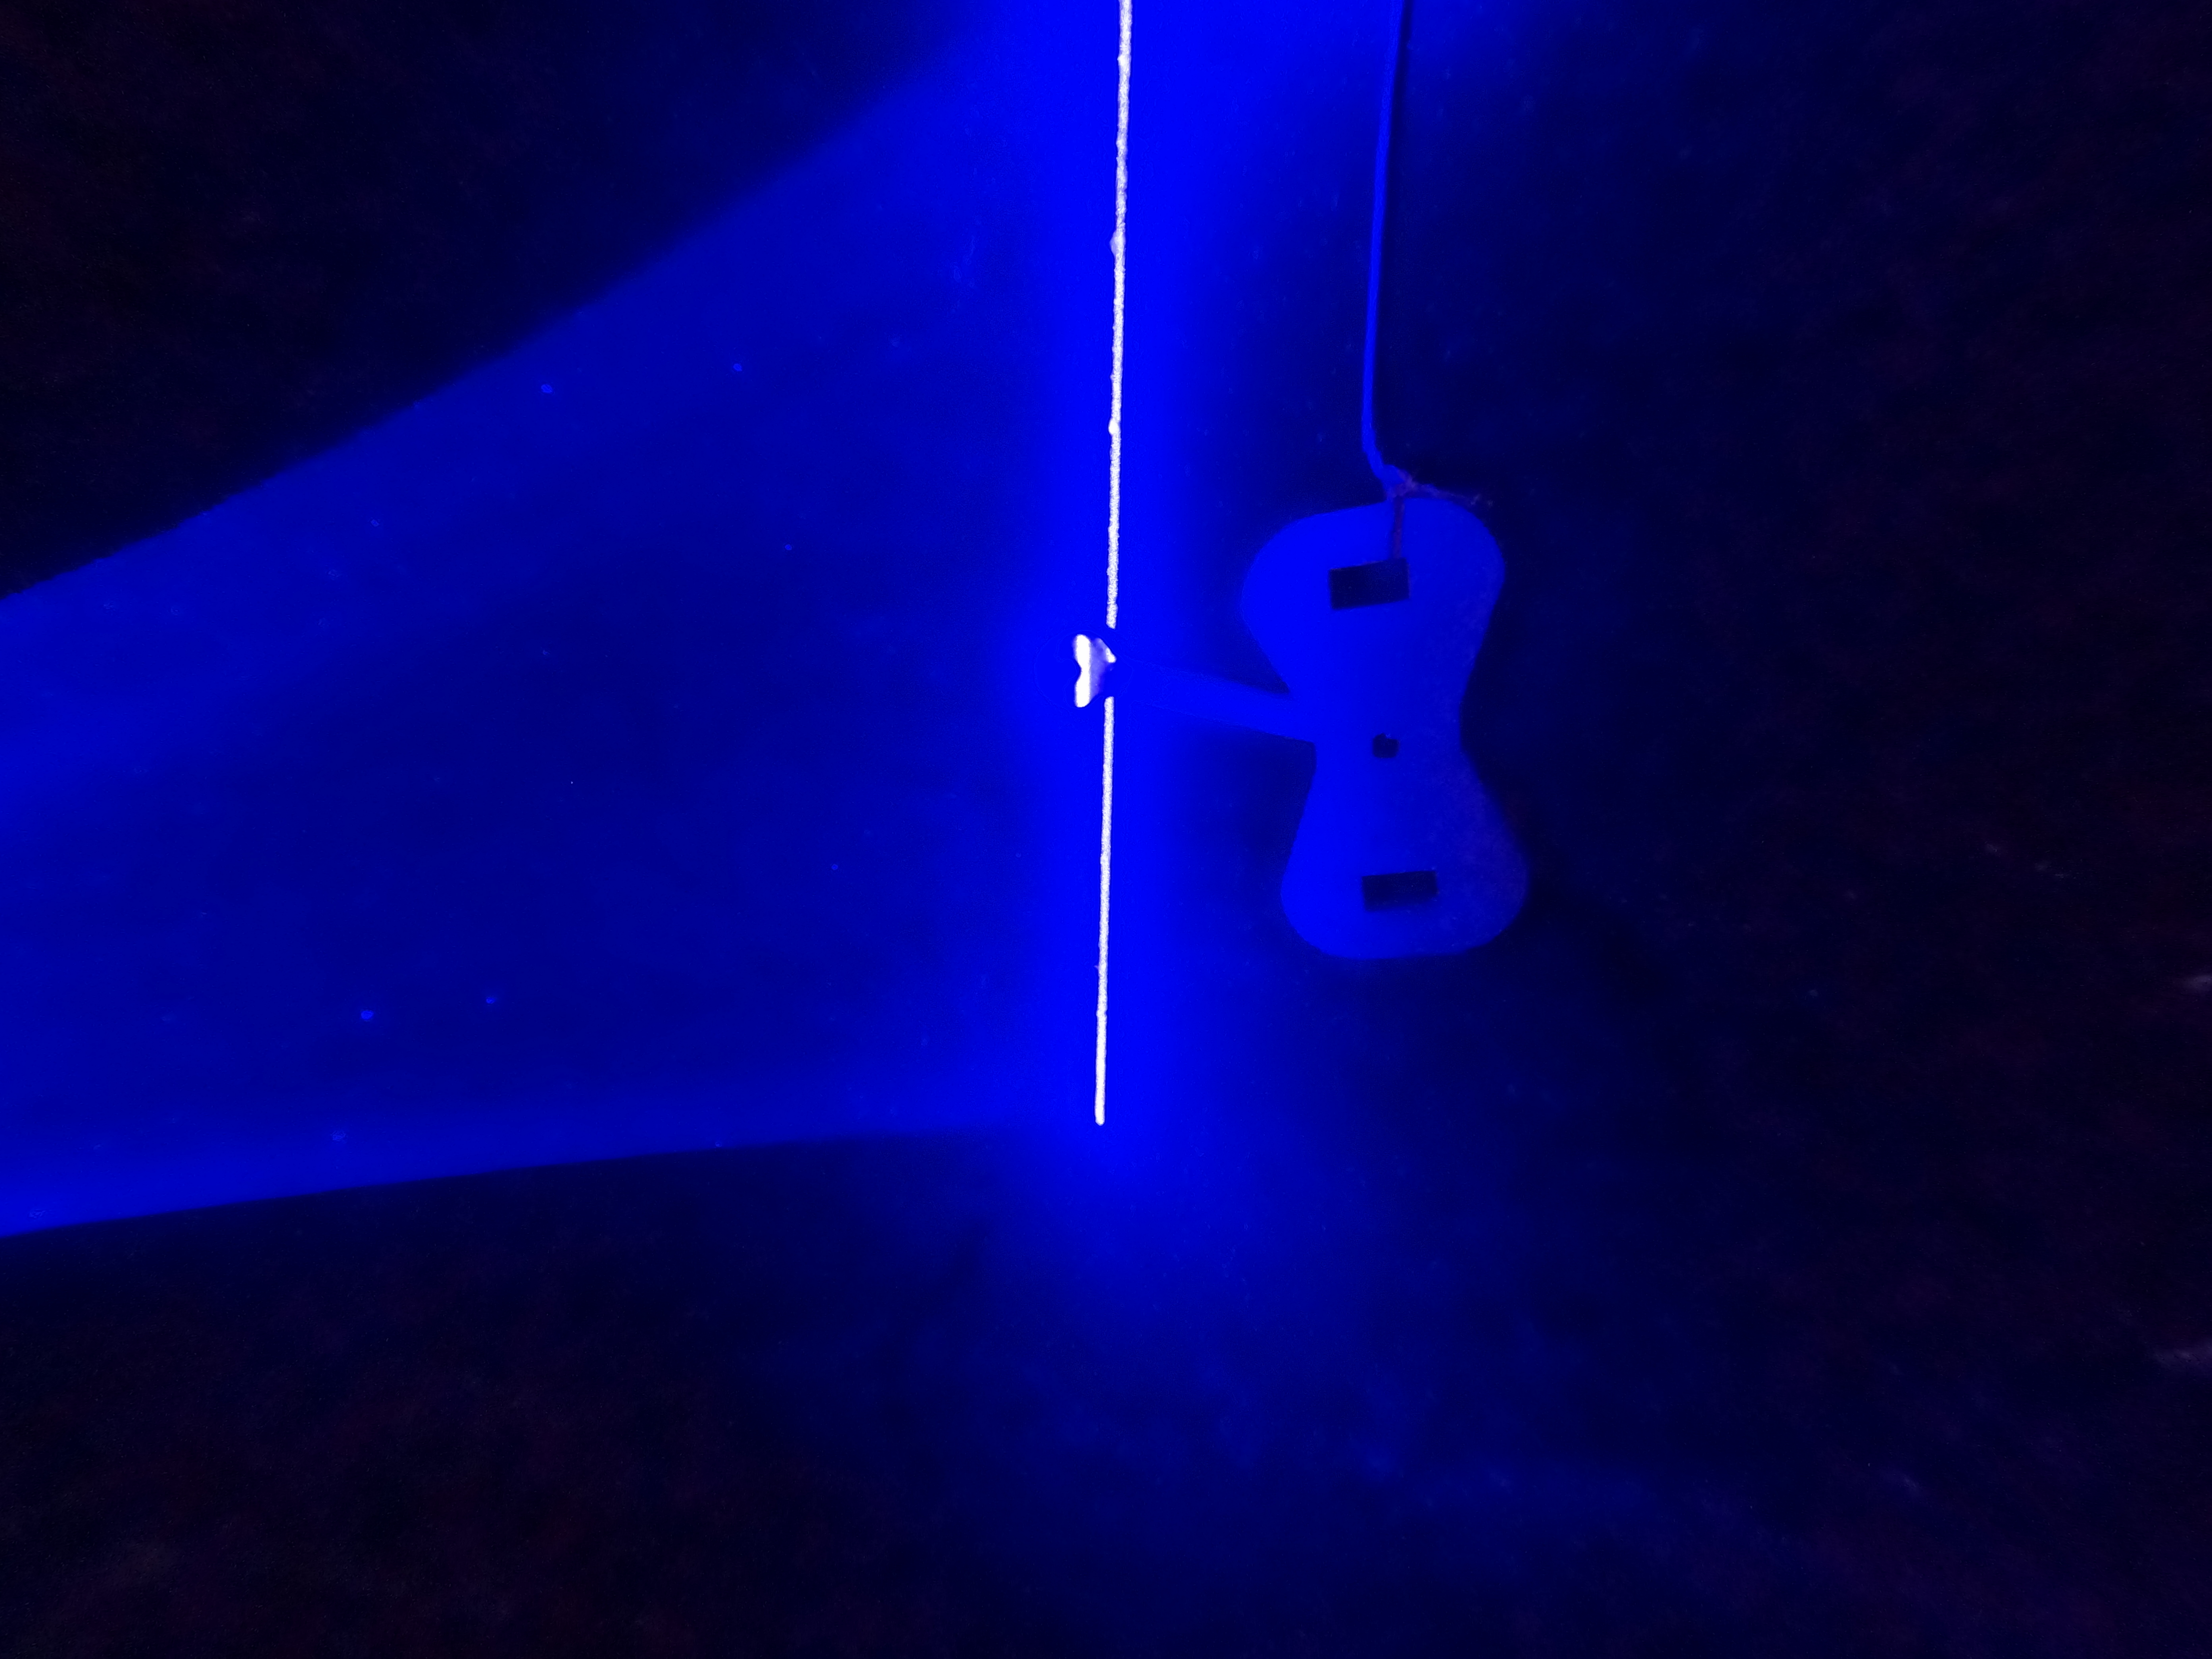

Supplement: Supplementary file 2315 [file G0016624.pdf › Level_1_2/G0016624.pdf]

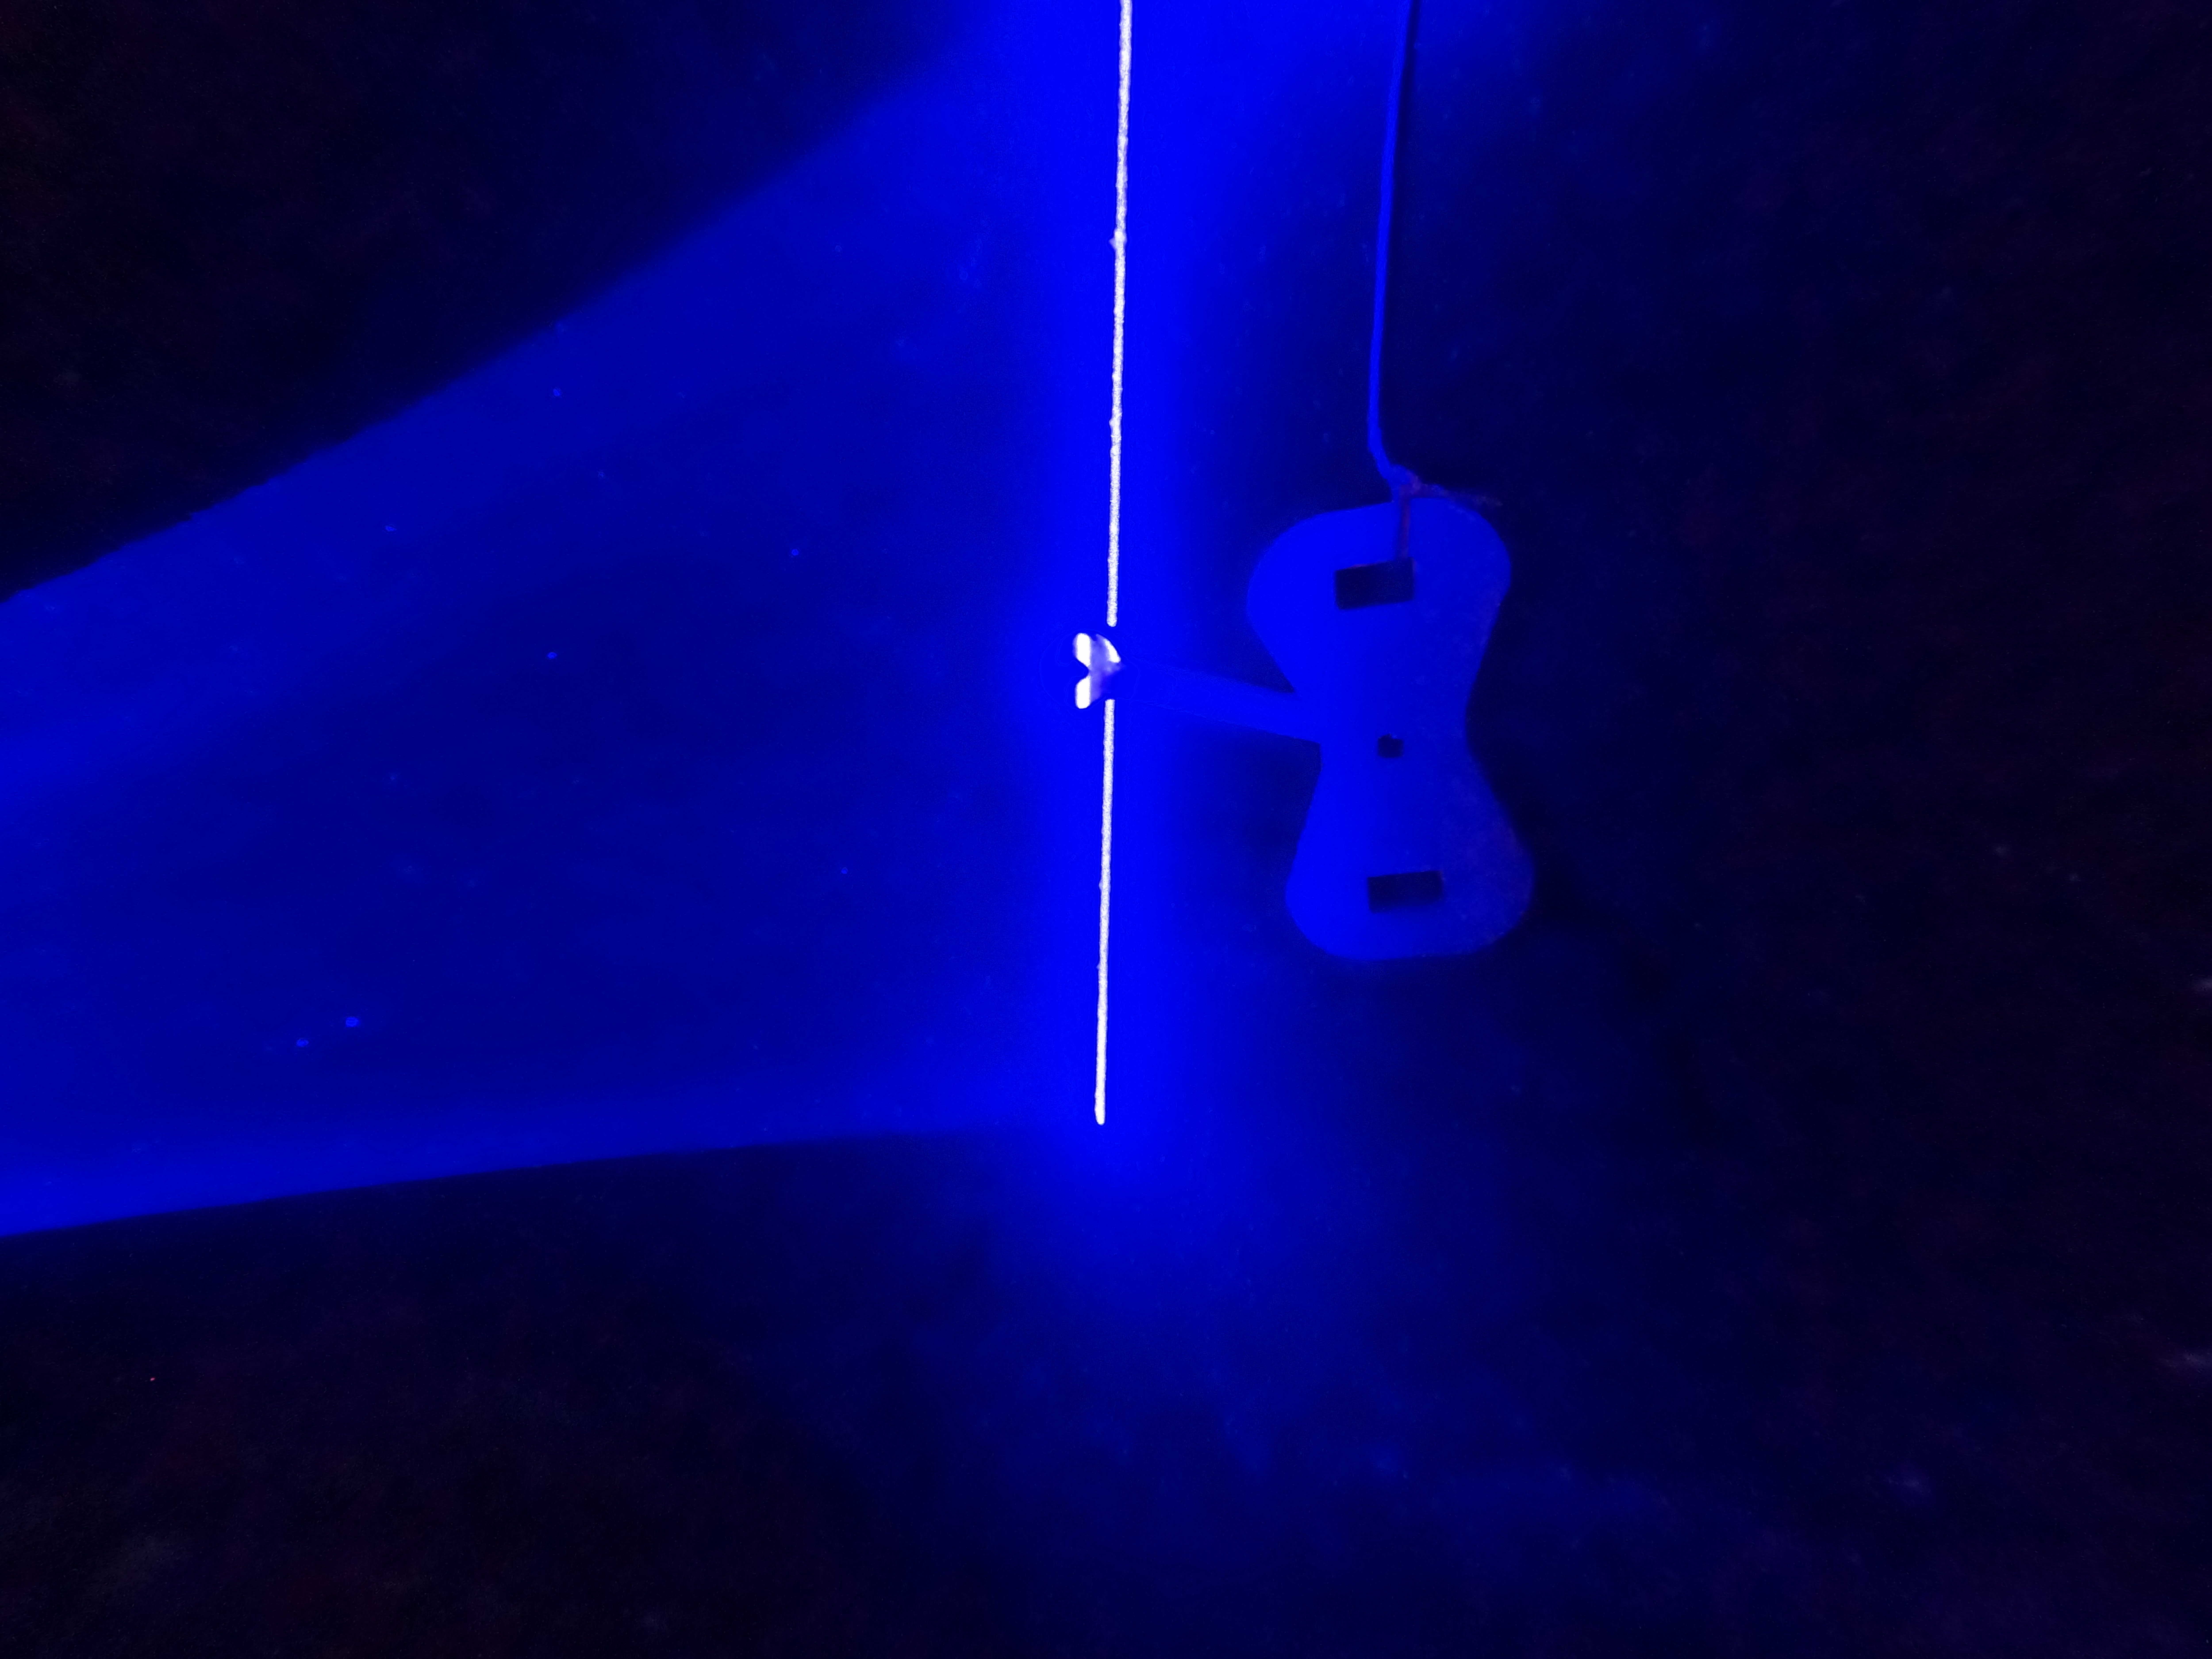

Supplement: Supplementary file 2316 [file G0016625.pdf › Level_1_2/G0016625.pdf]

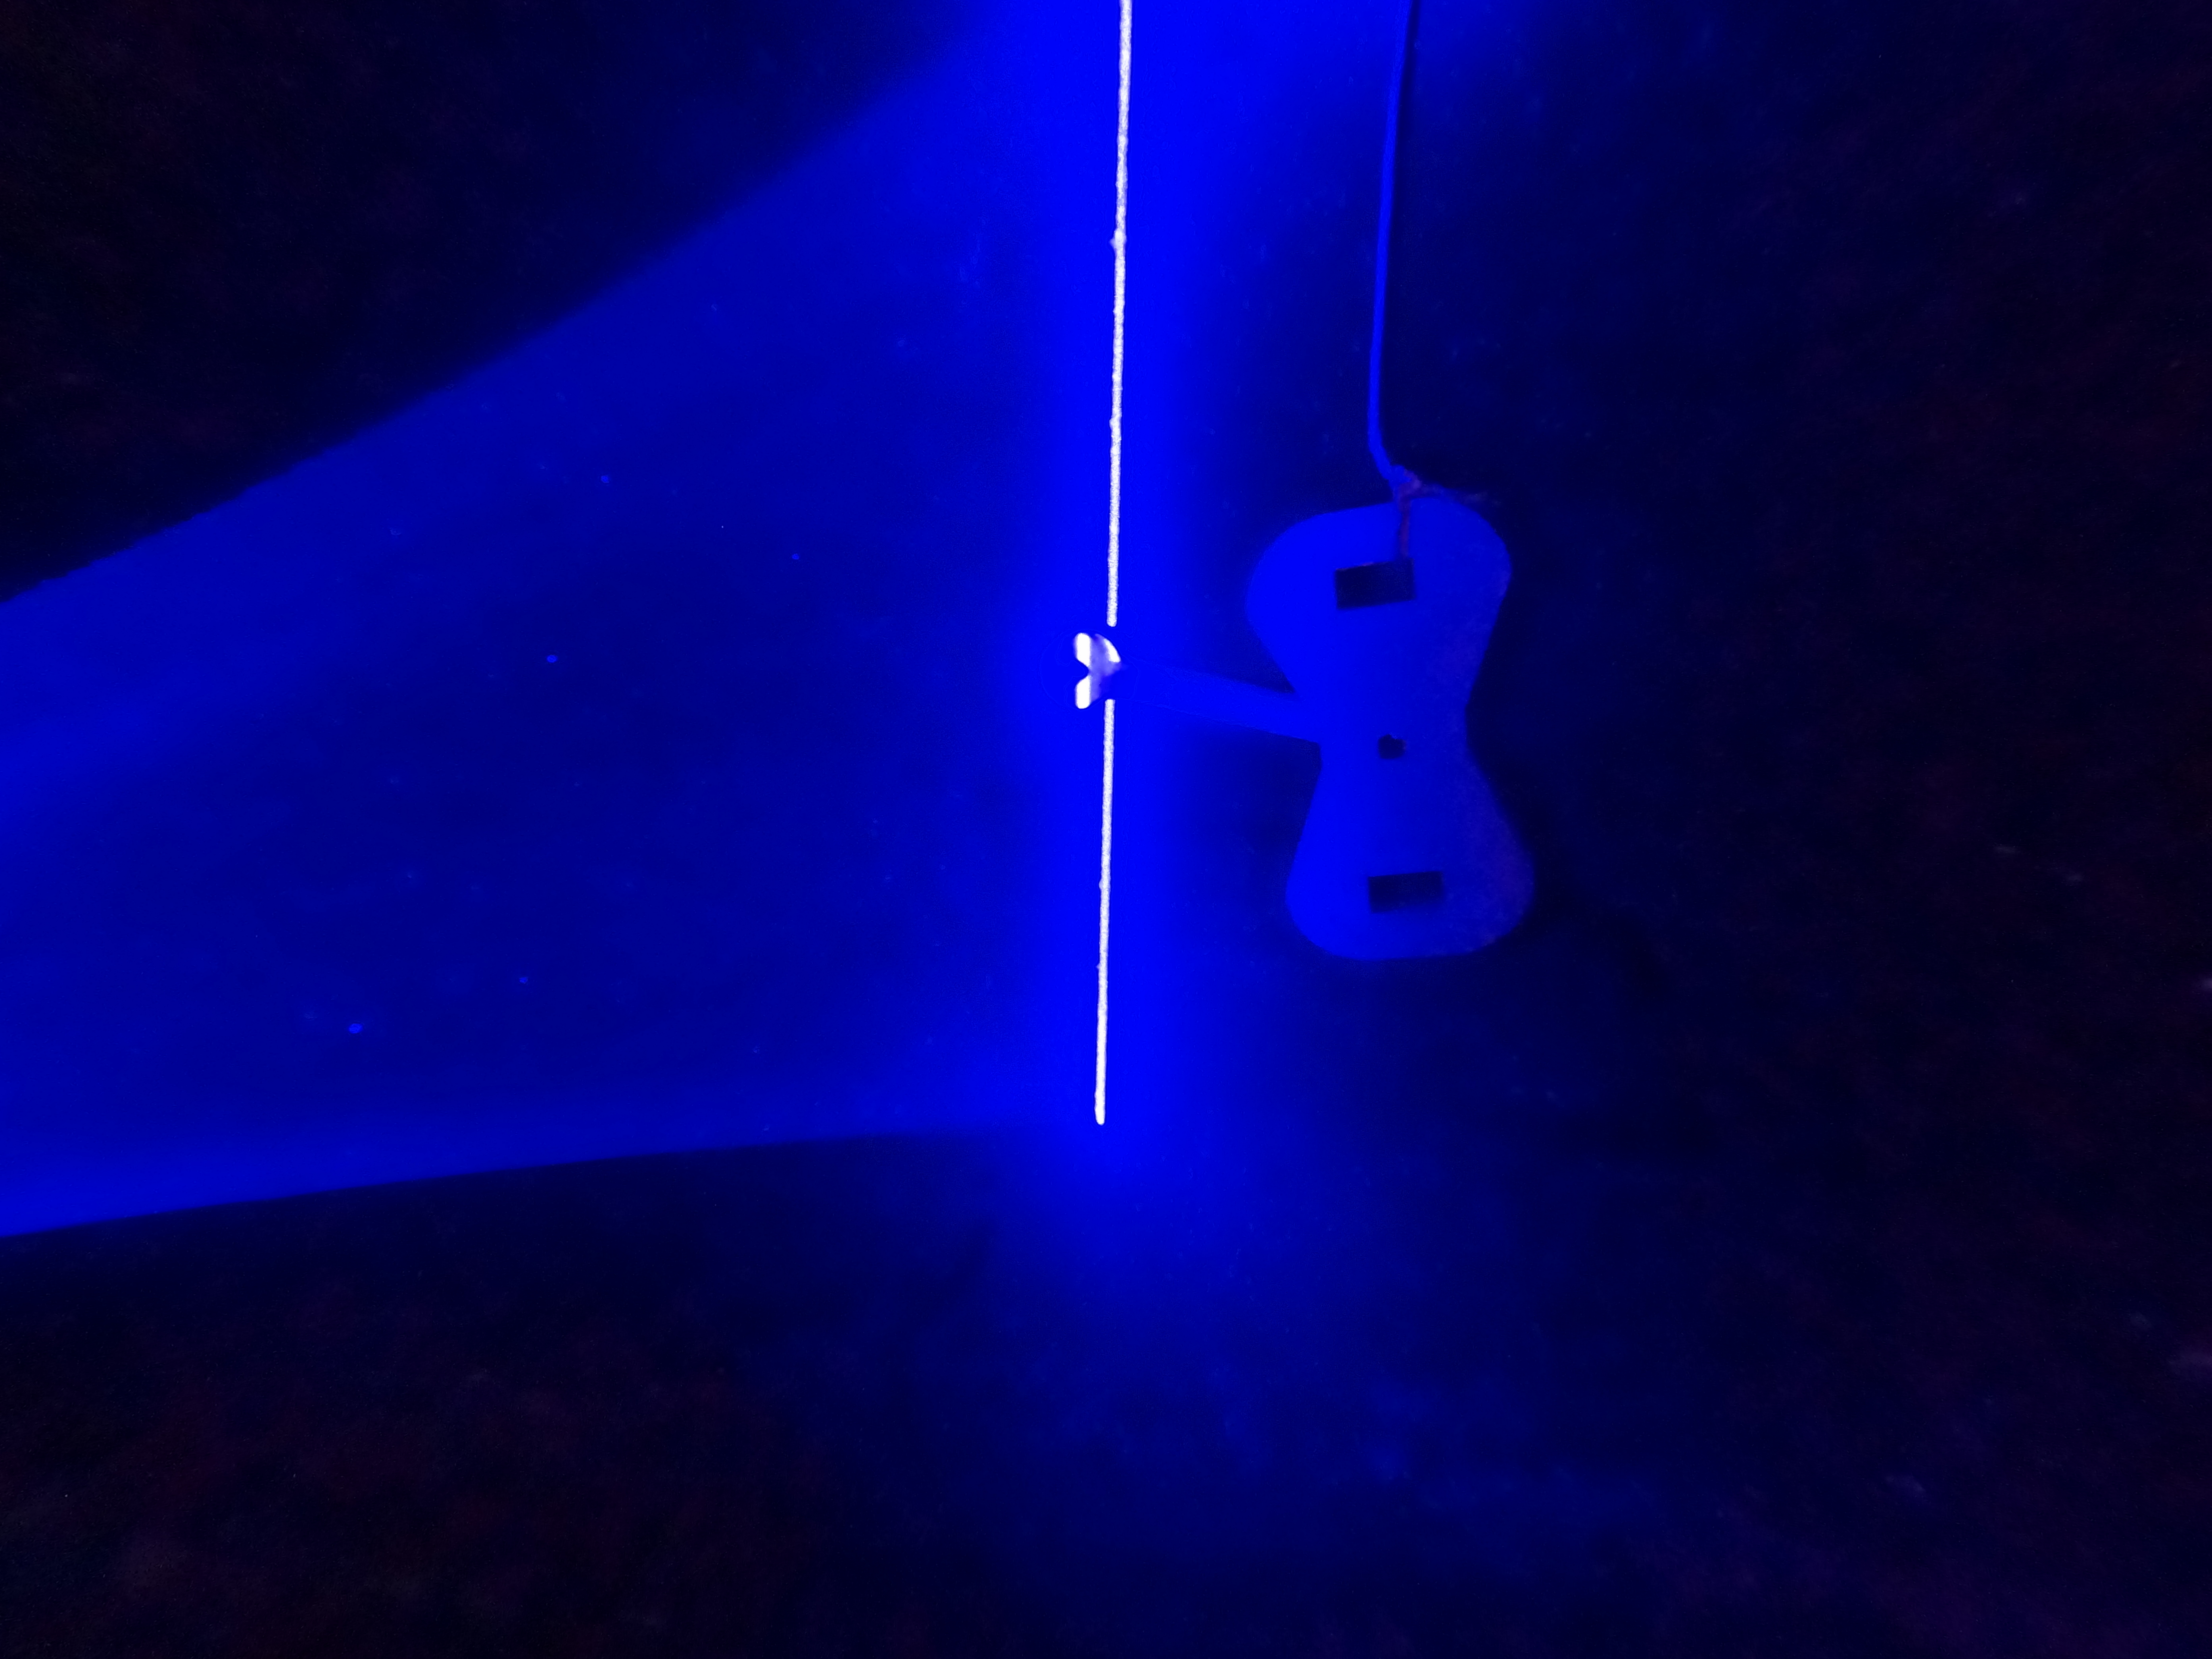

Supplement: Supplementary file 2317 [file G0016626.pdf › Level_1_2/G0016626.pdf]

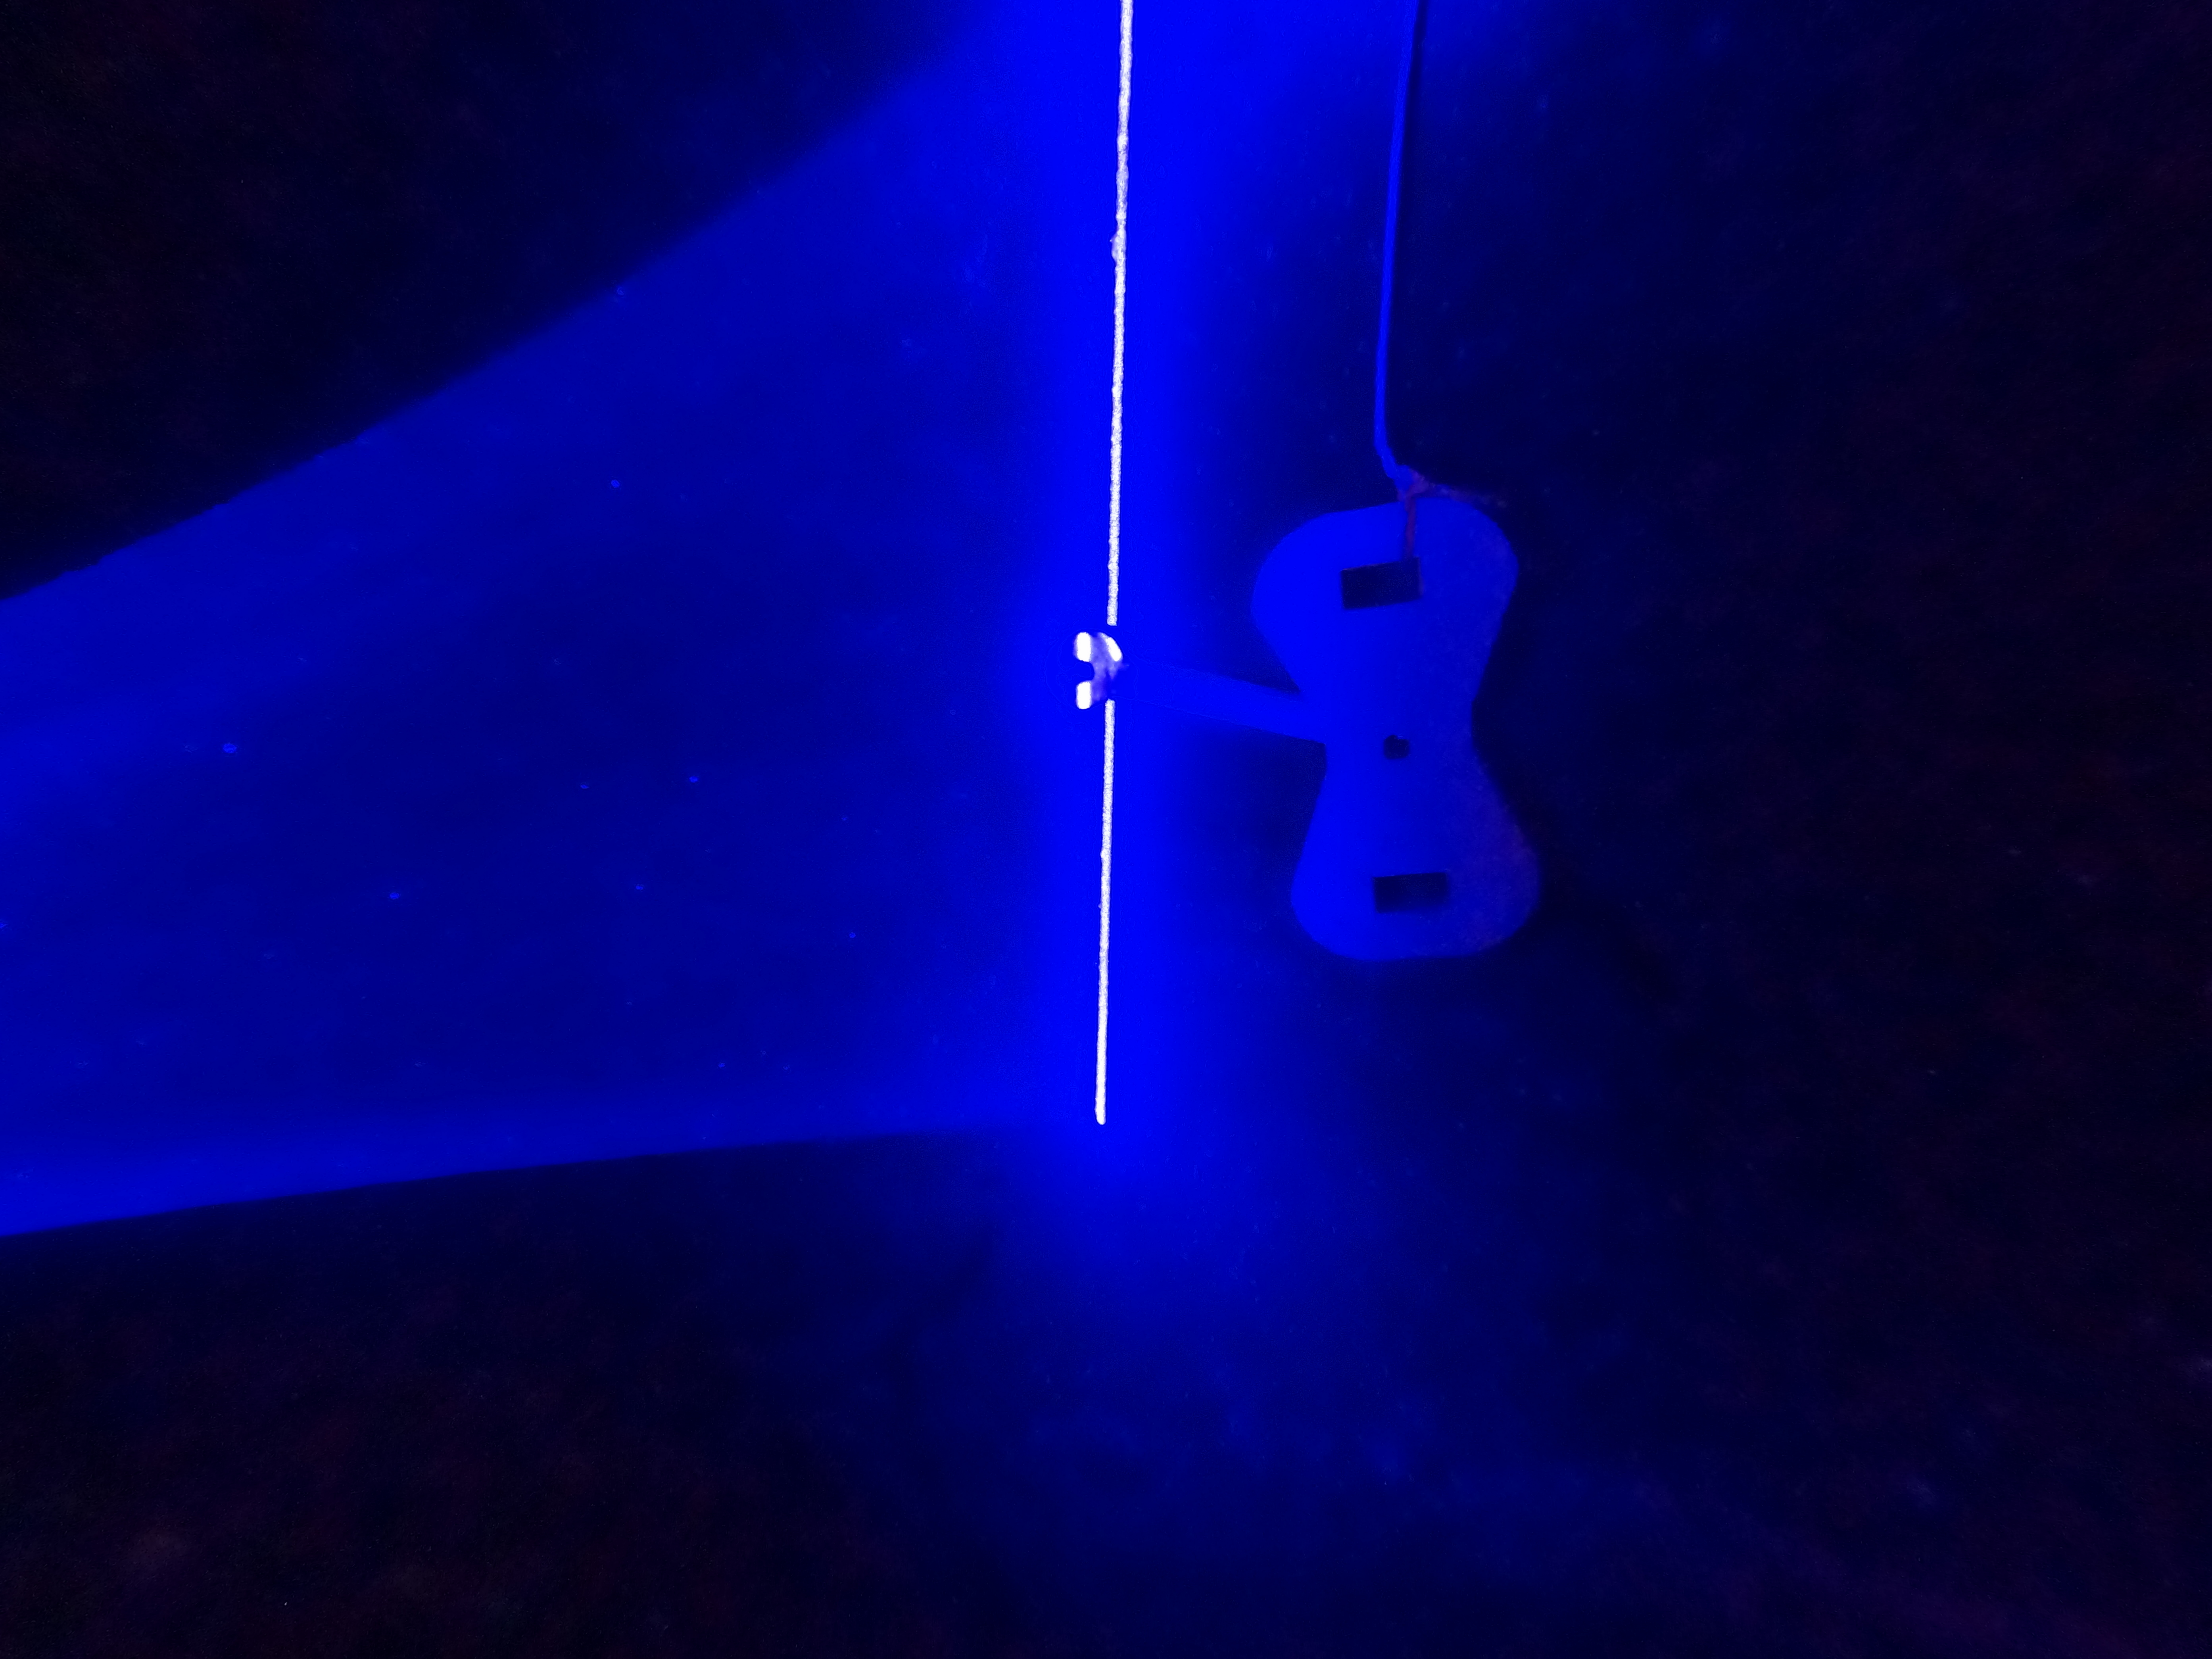

Supplement: Supplementary file 2318 [file G0016627.pdf › Level_1_2/G0016627.pdf]

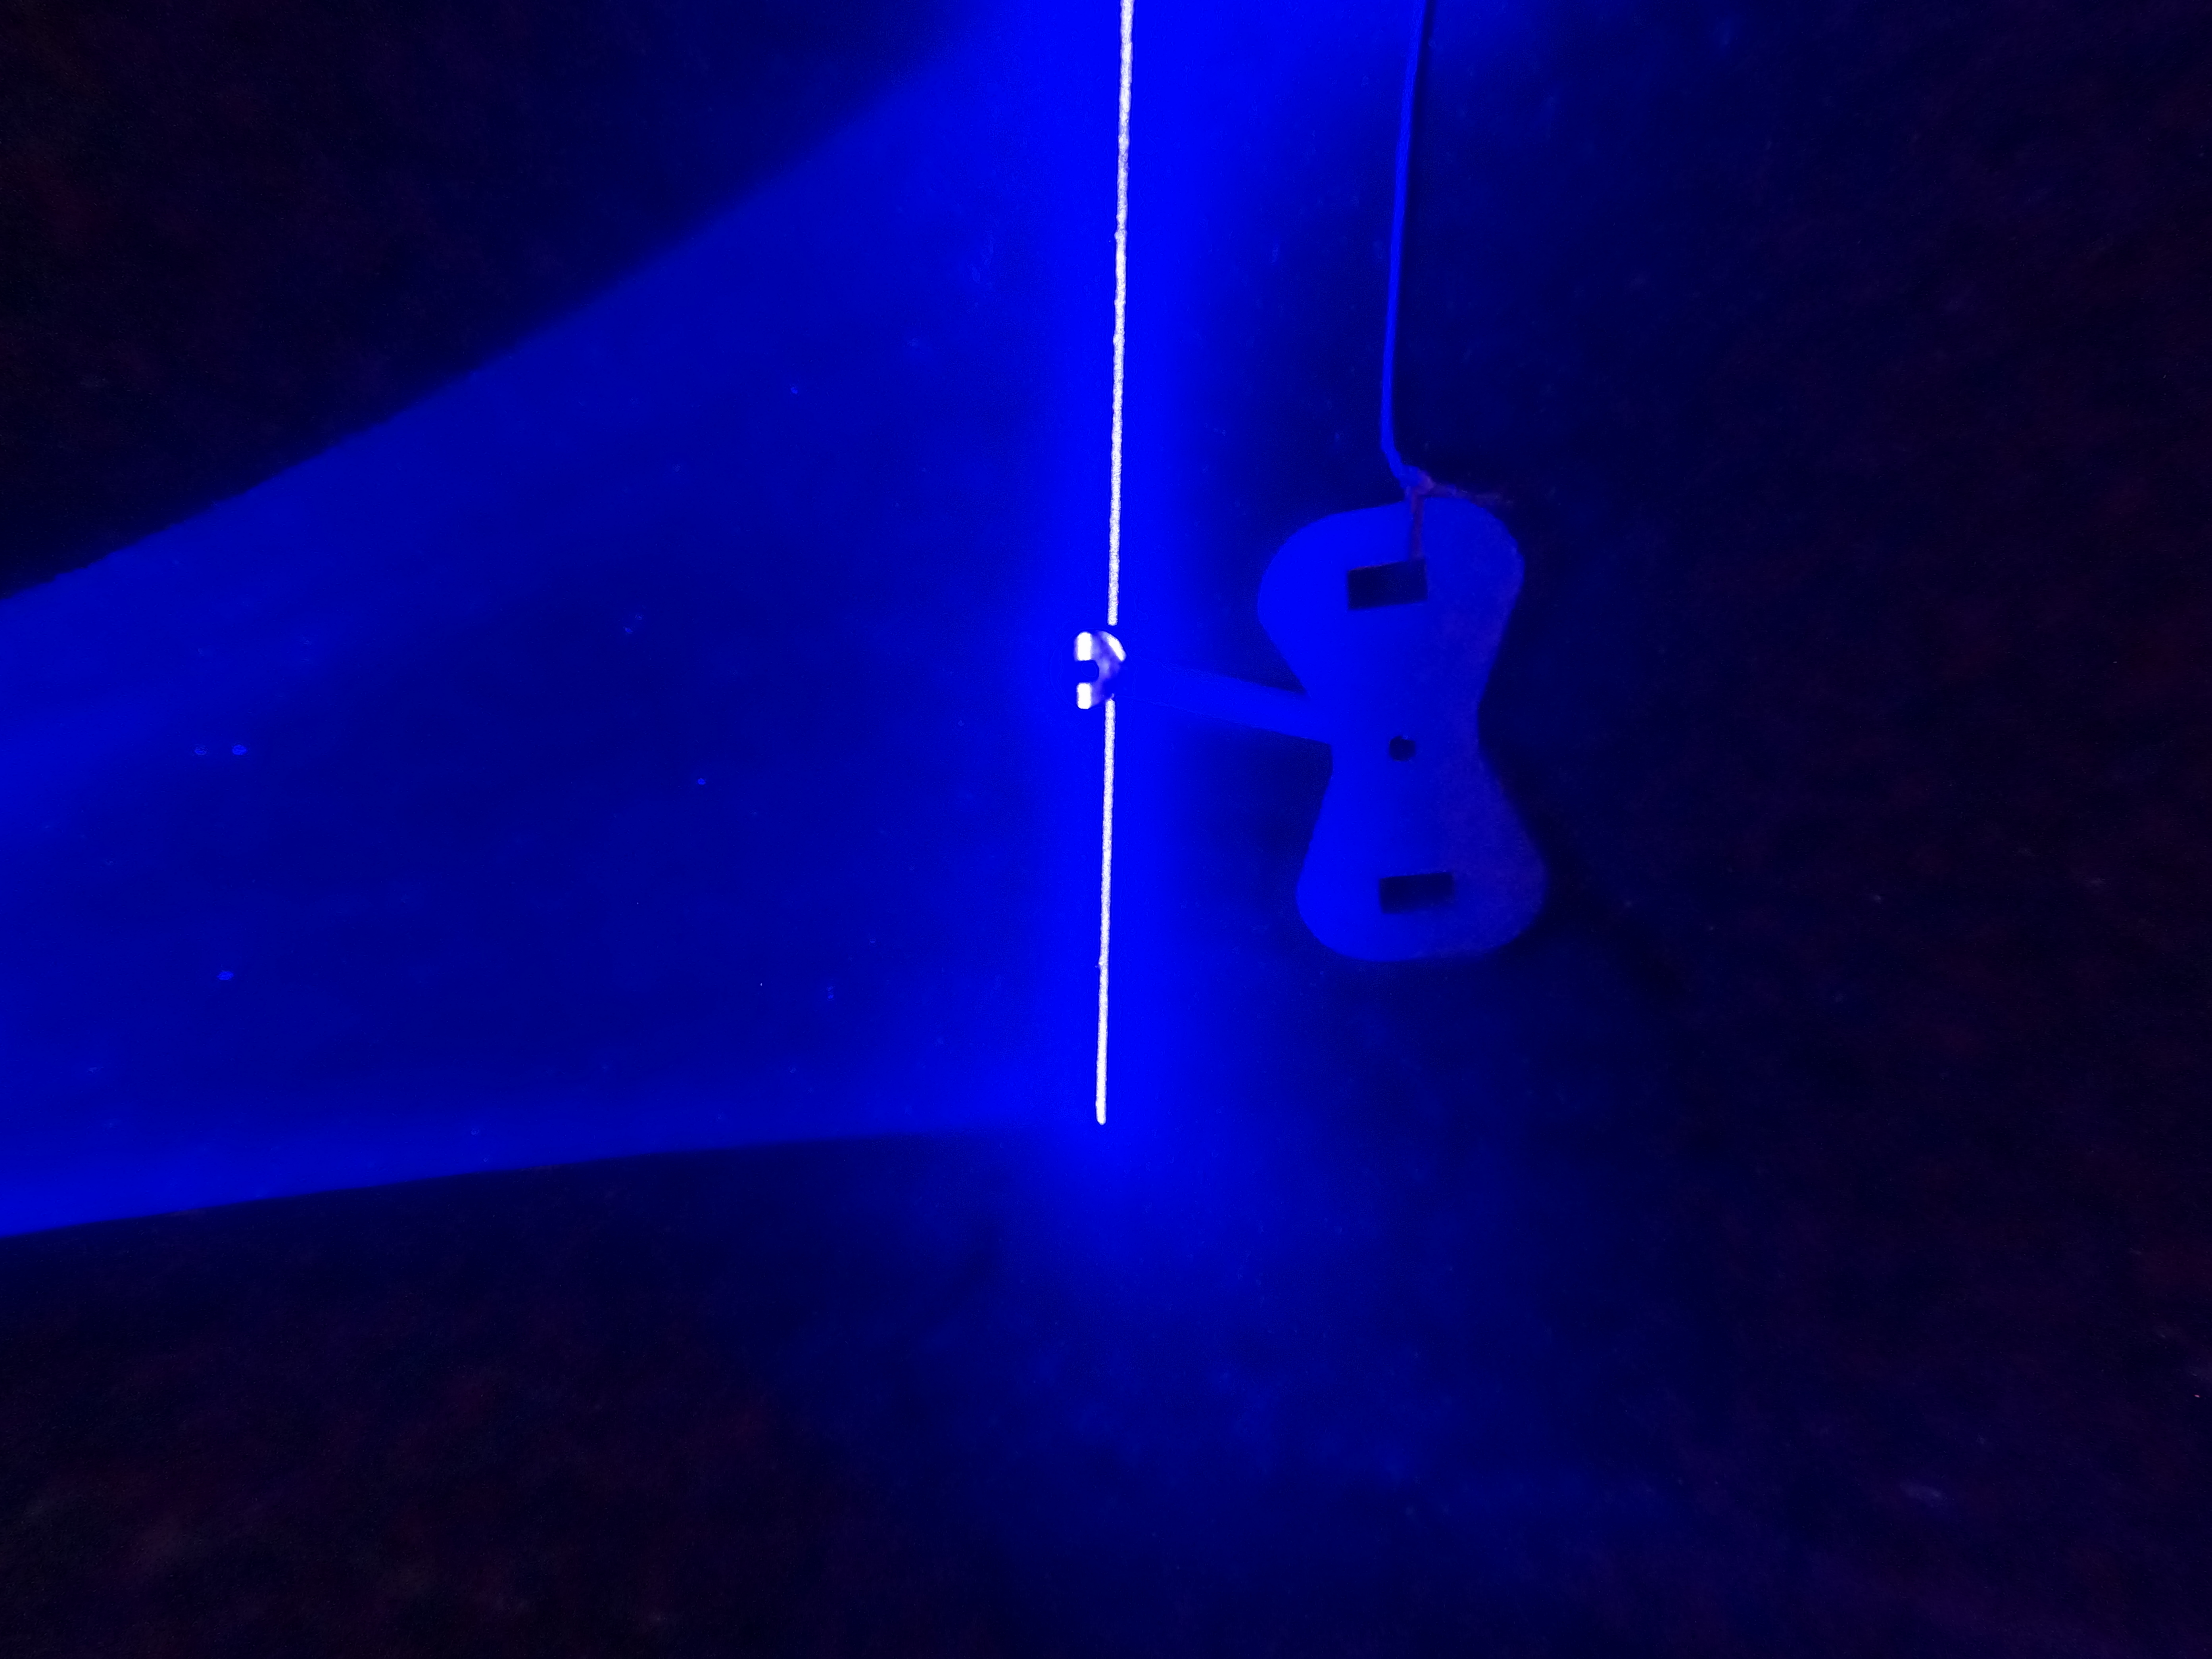

Supplement: Supplementary file 2319 [file G0016628.pdf › Level_1_2/G0016628.pdf]

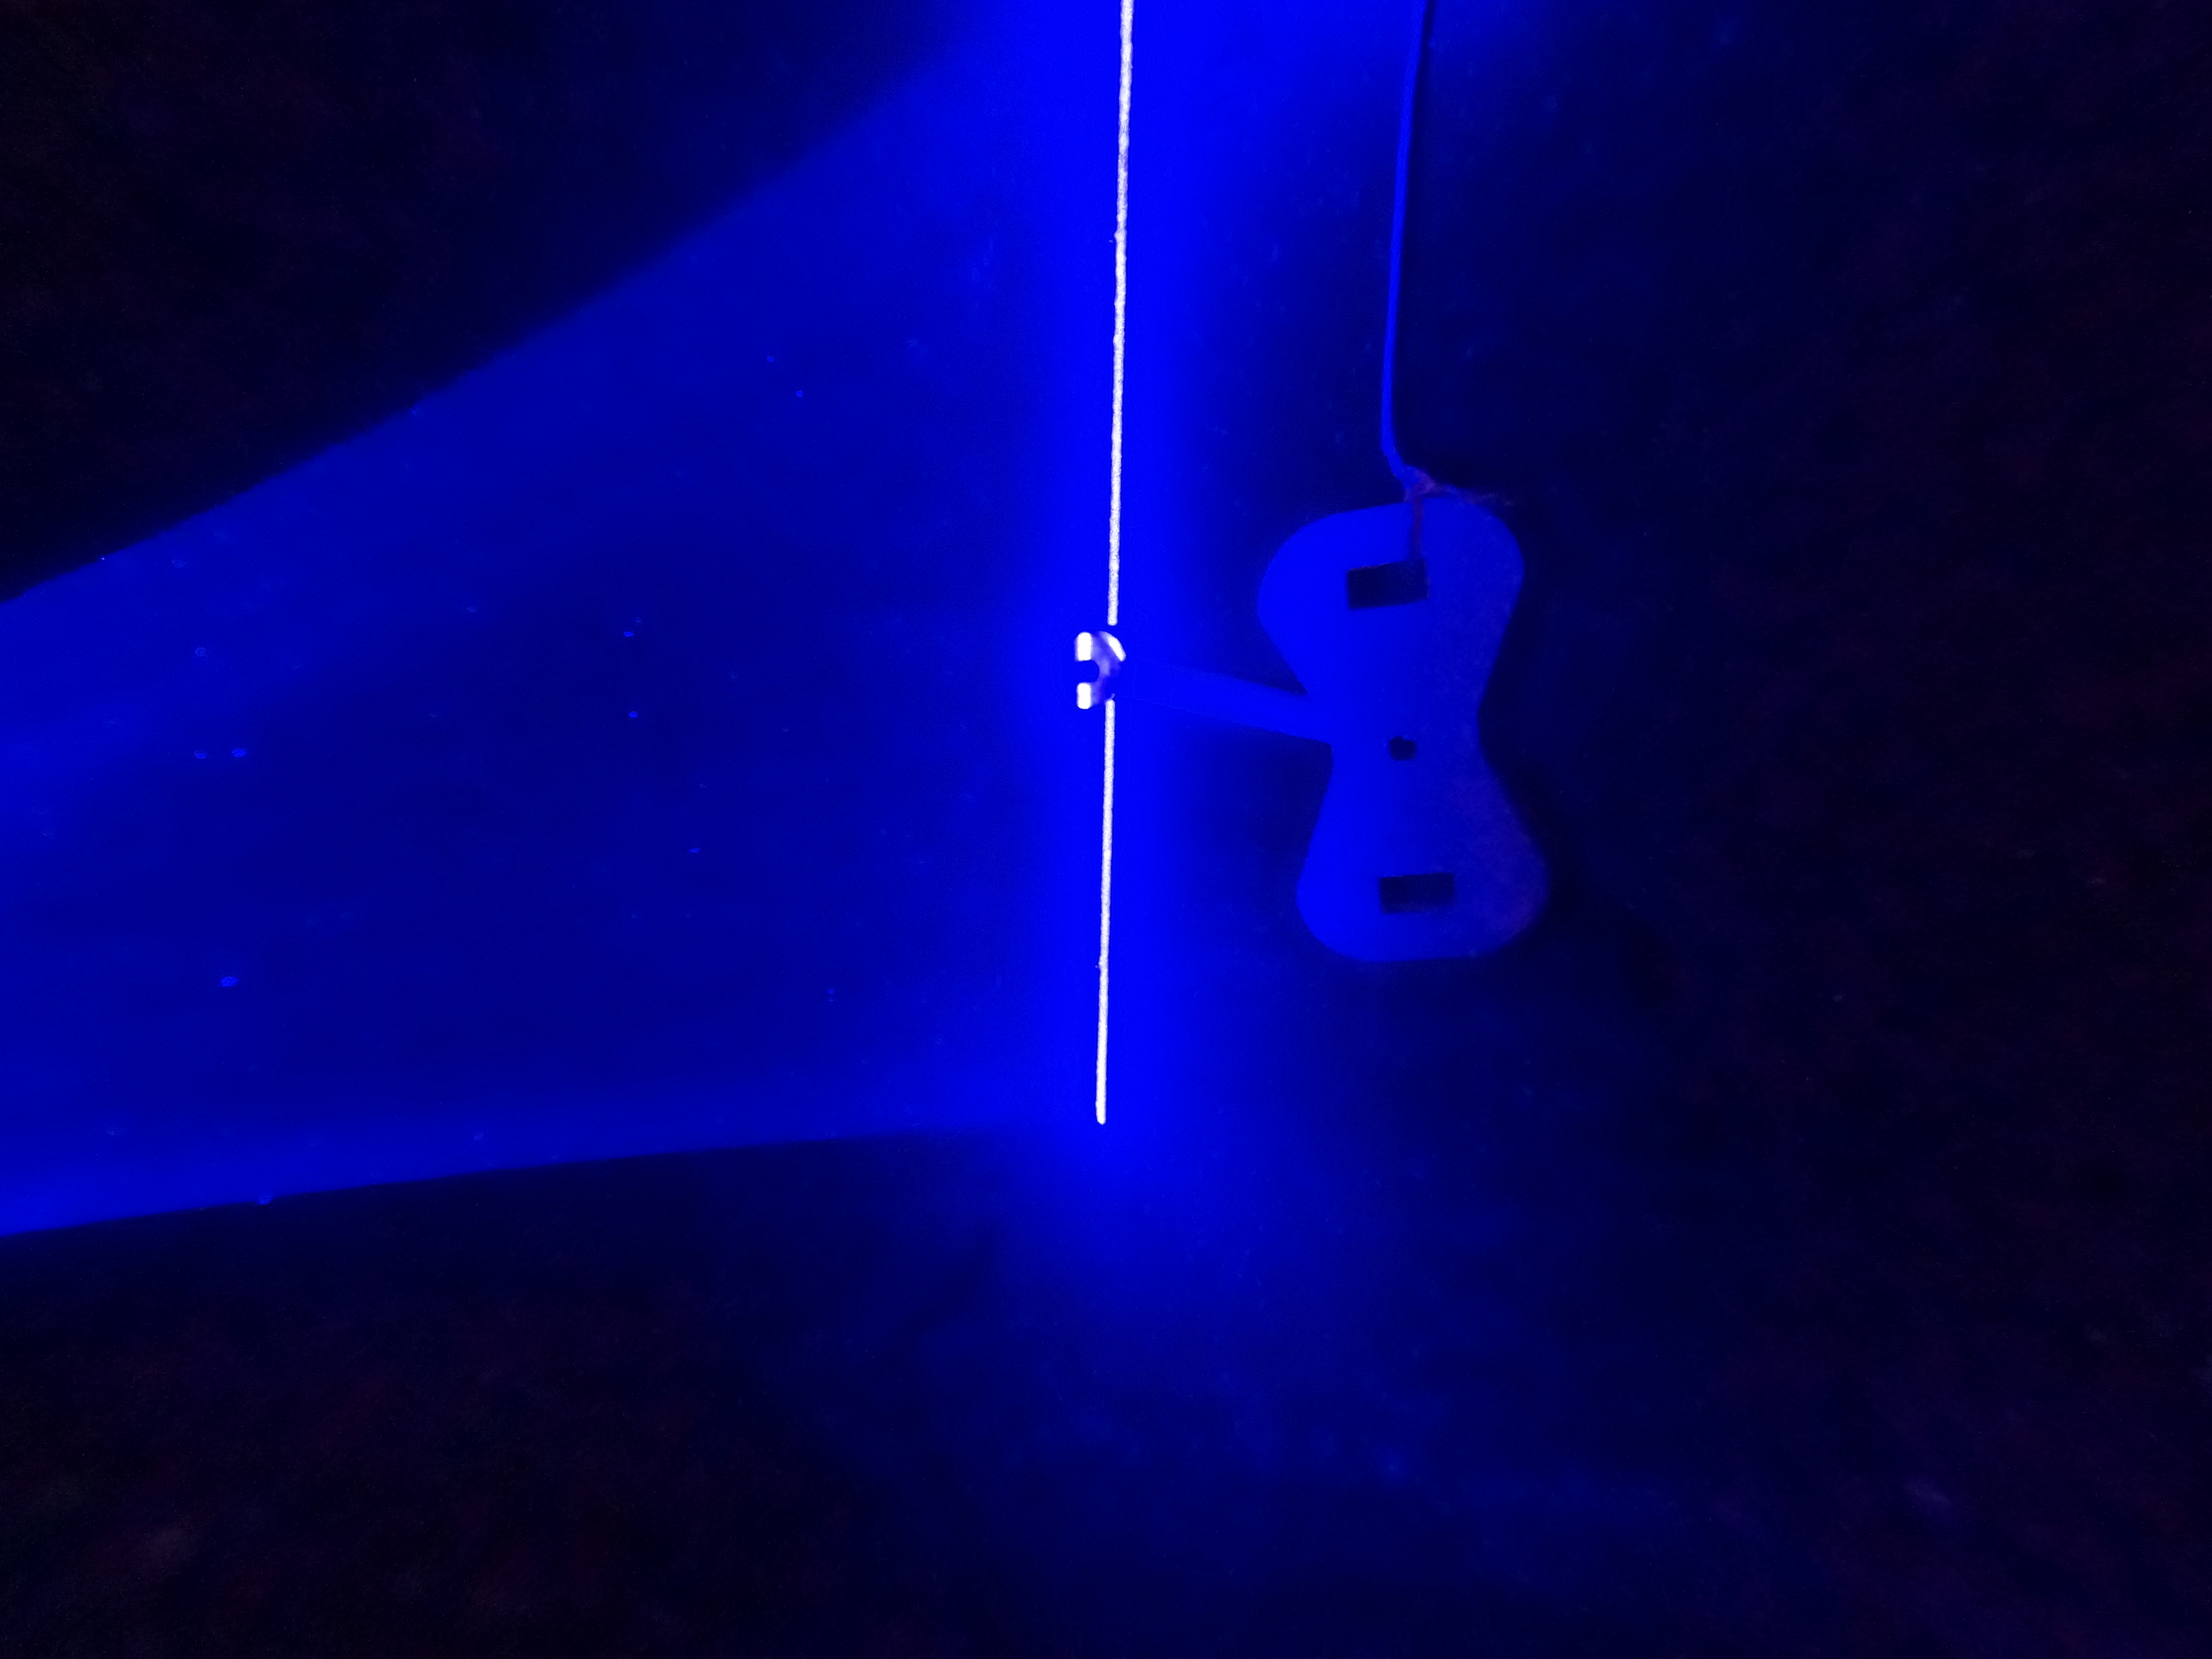

Supplement: Supplementary file 2320 [file G0016629.pdf › Level_1_2/G0016629.pdf]

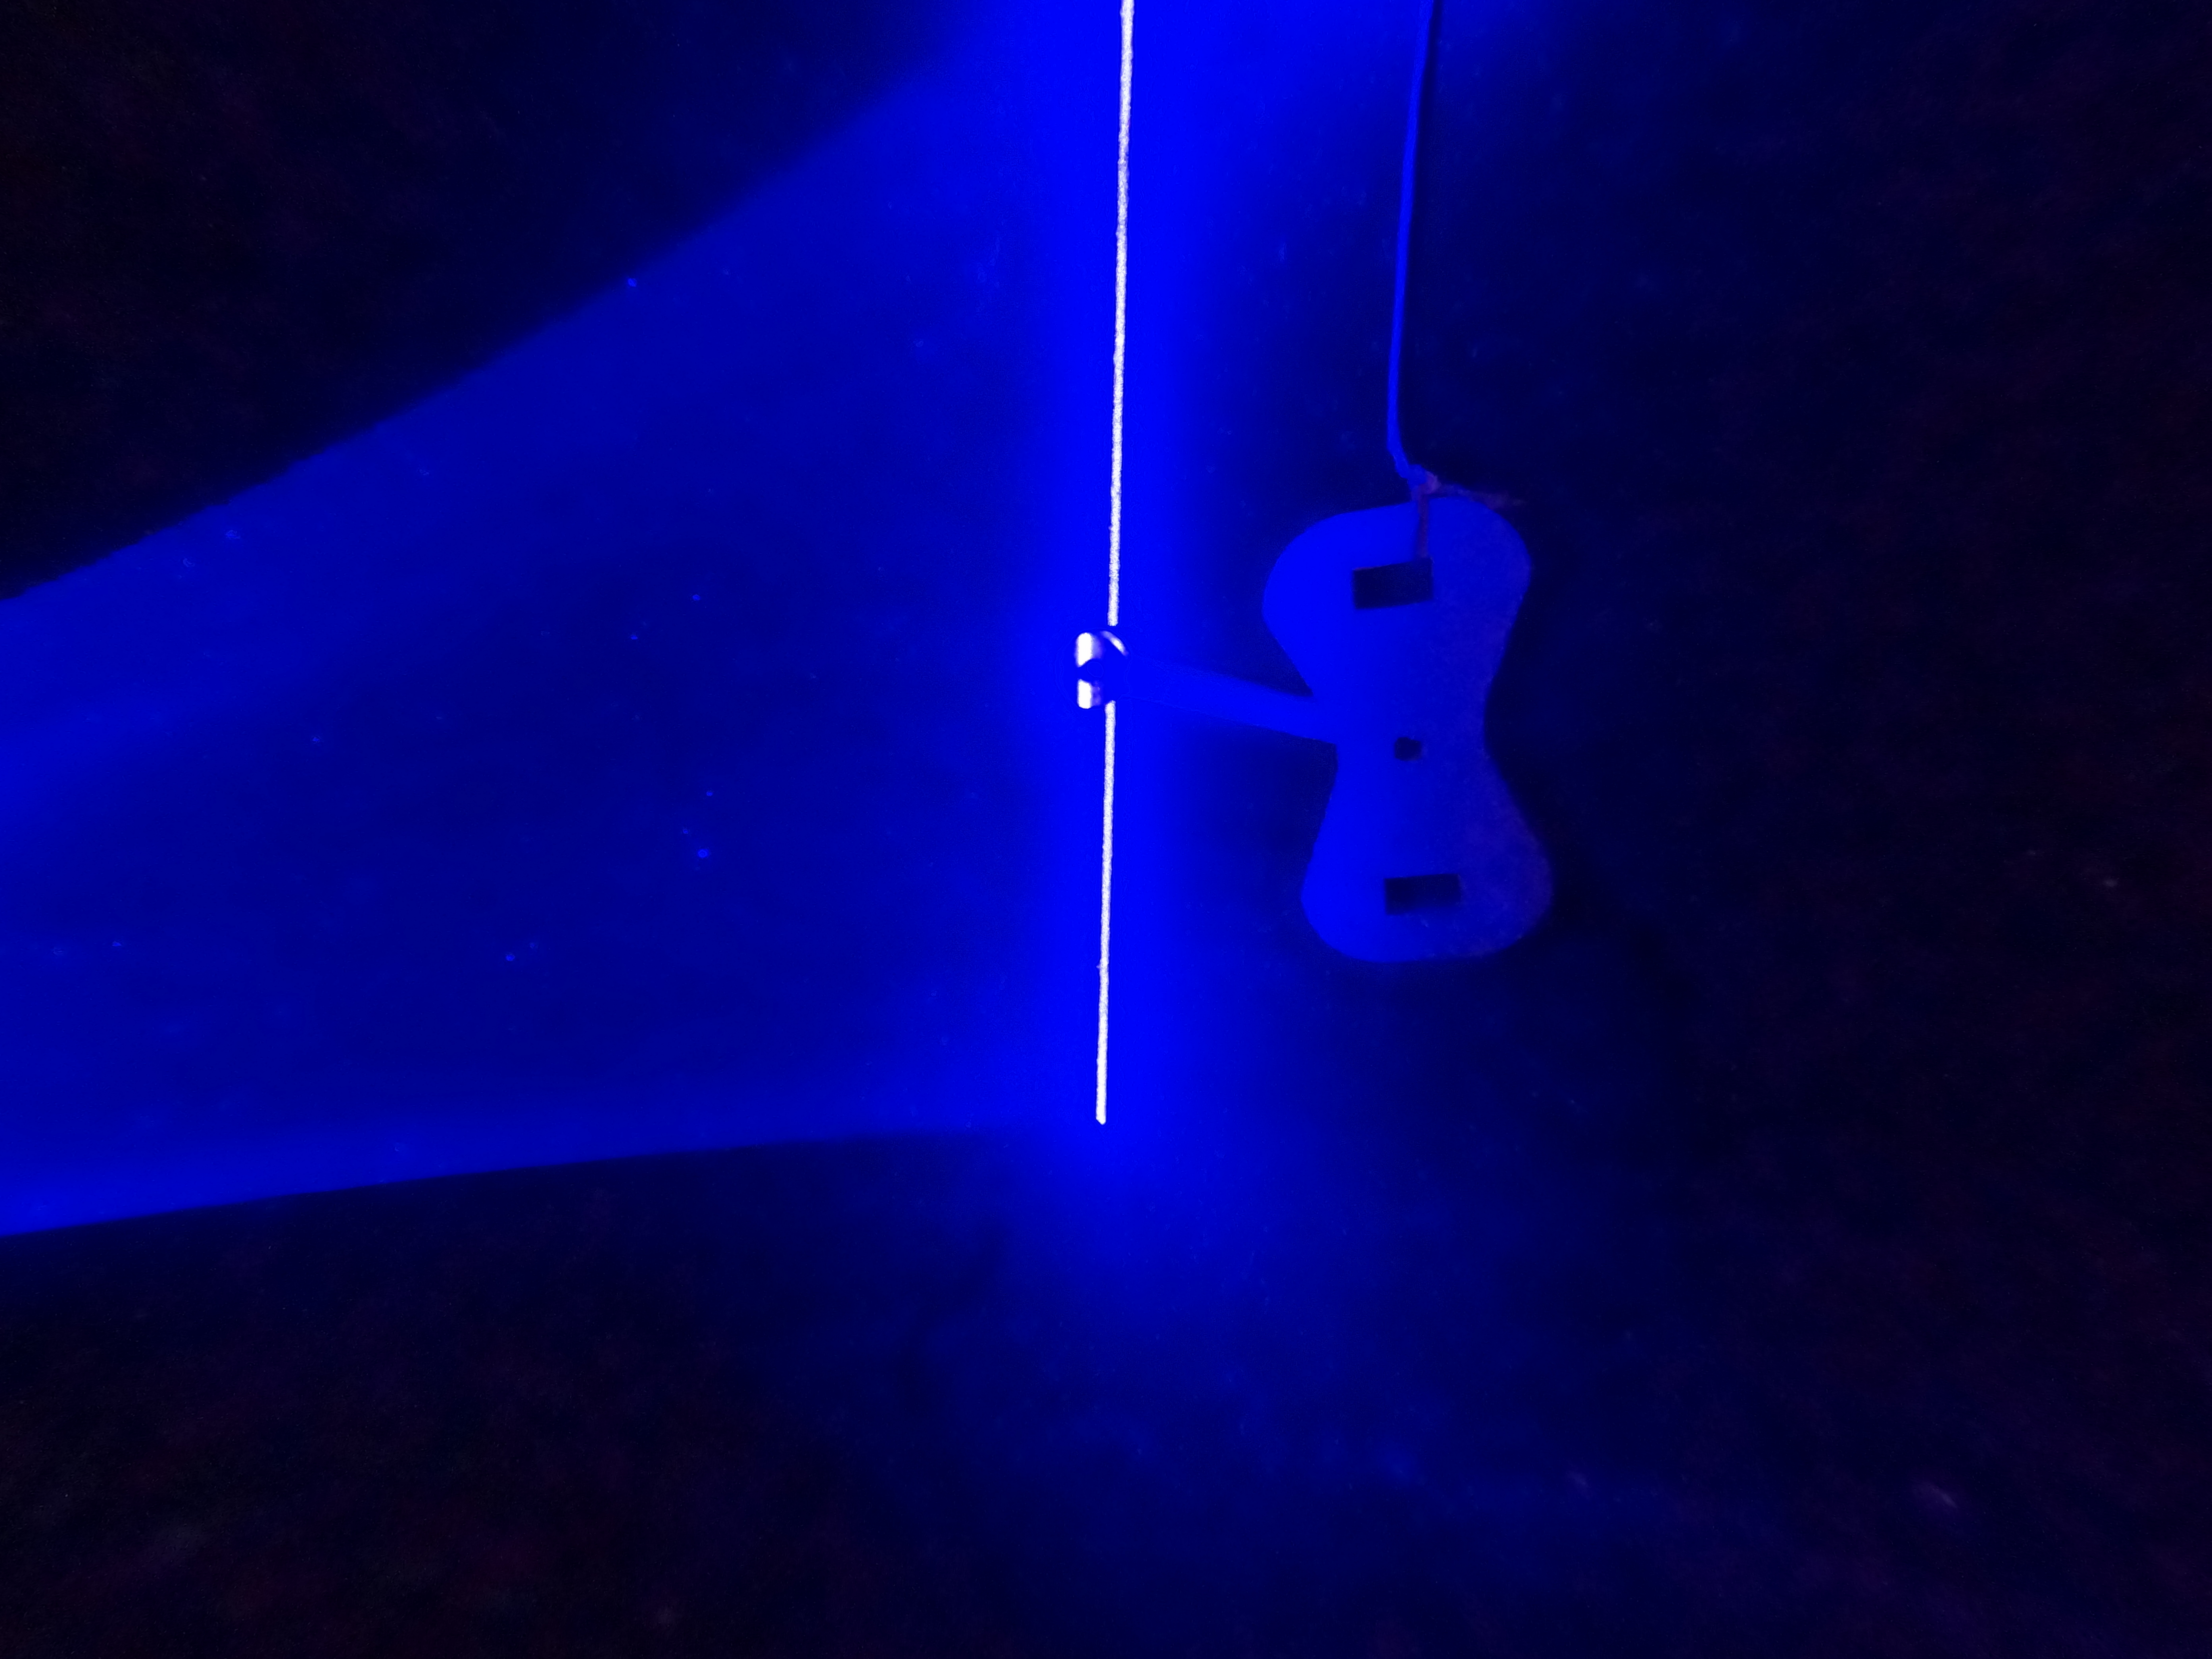

Supplement: Supplementary file 2321 [file G0016630.pdf › Level_1_2/G0016630.pdf]

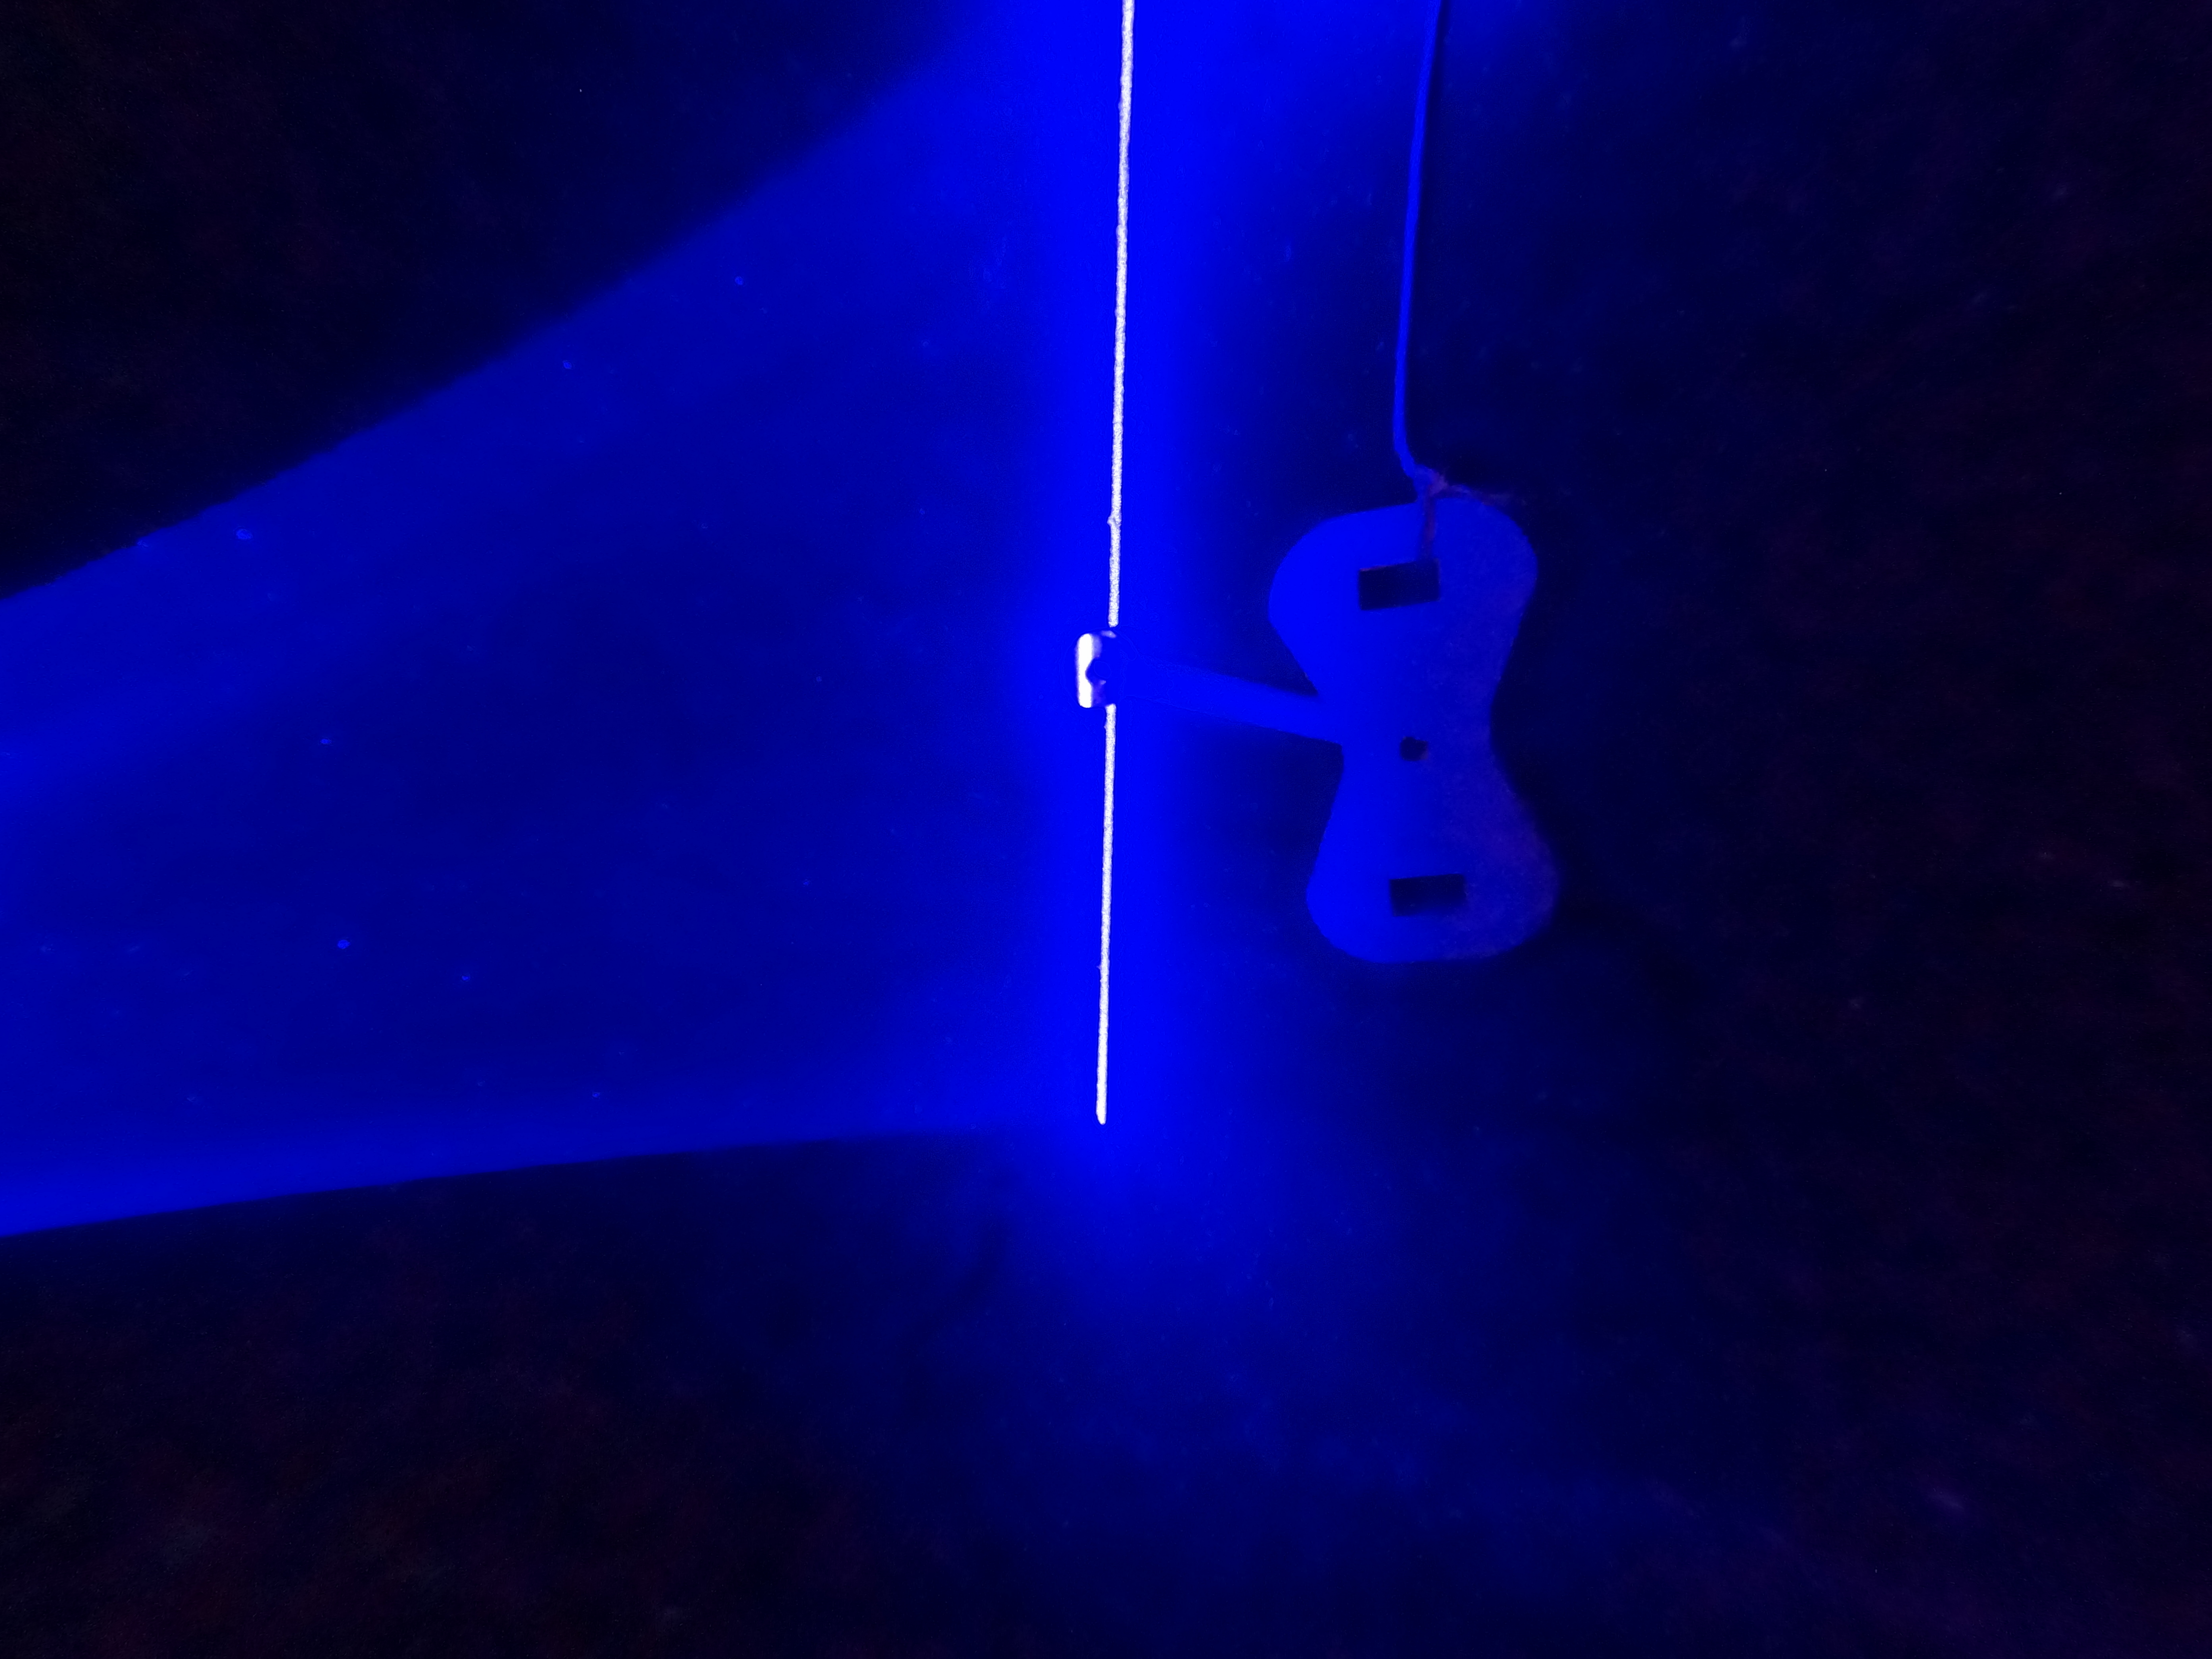

Supplement: Supplementary file 2322 [file G0016631.pdf › Level_1_2/G0016631.pdf]

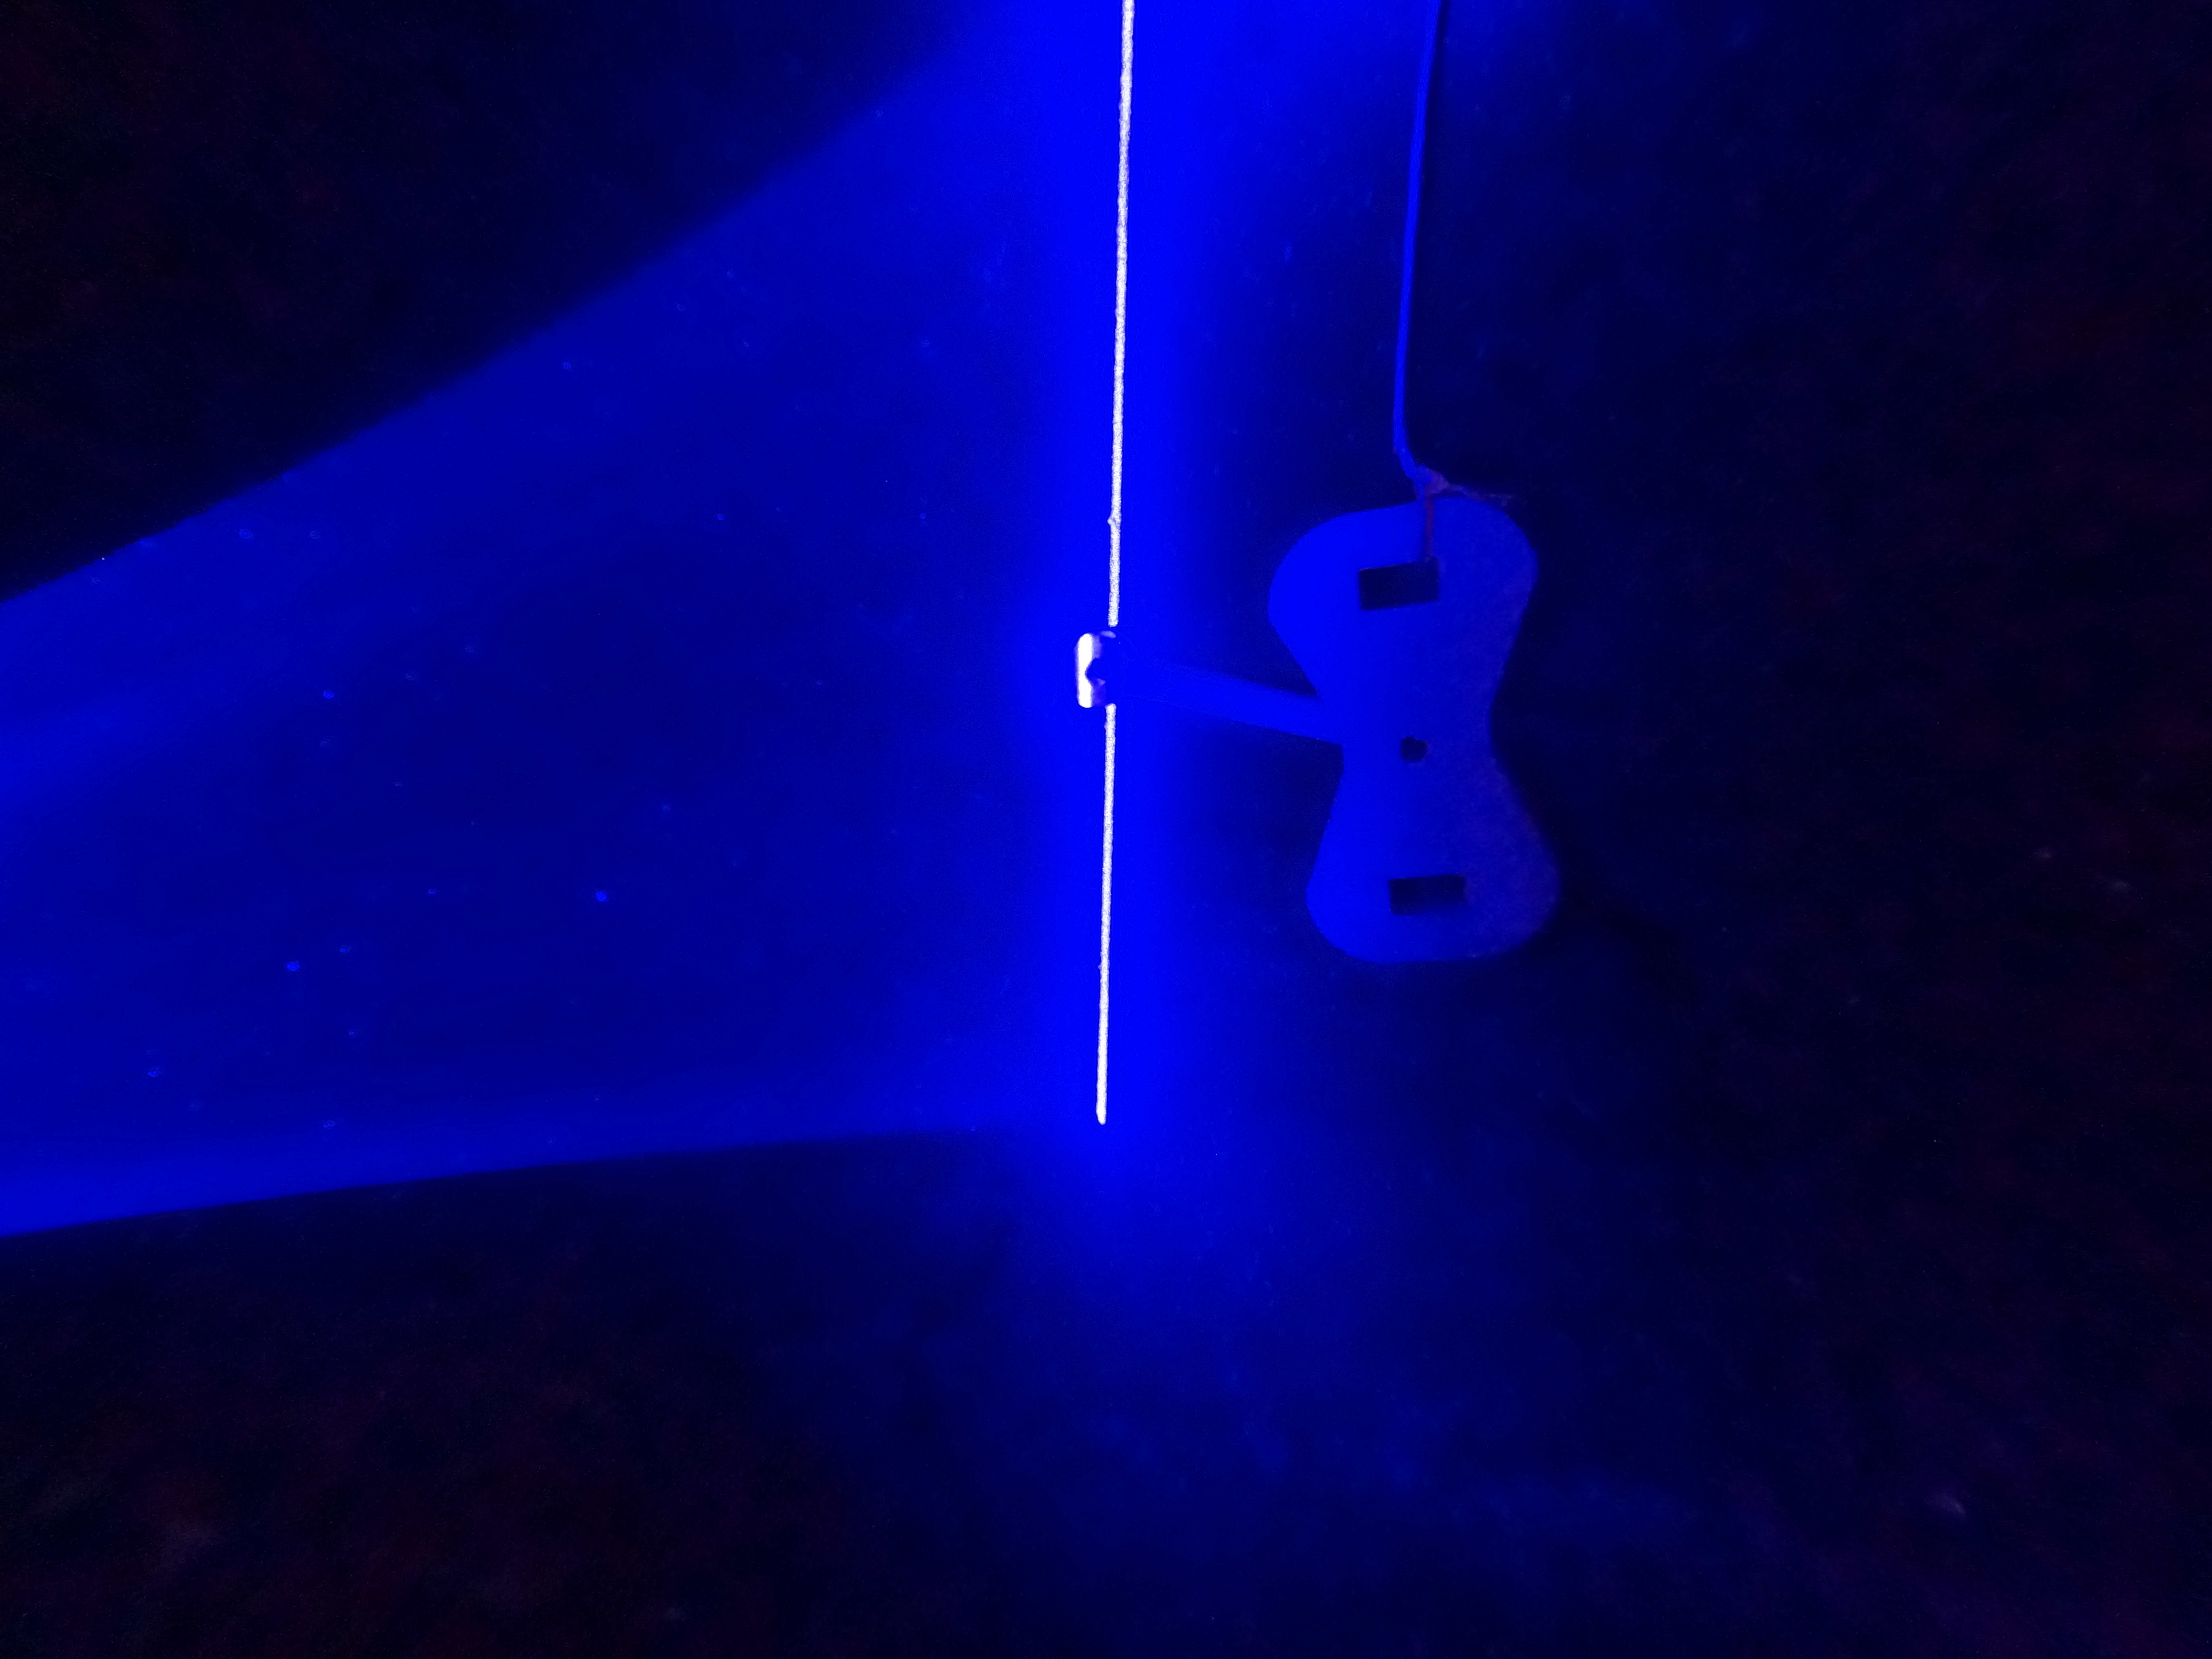

Supplement: Supplementary file 2323 [file G0016632.pdf › Level_1_2/G0016632.pdf]

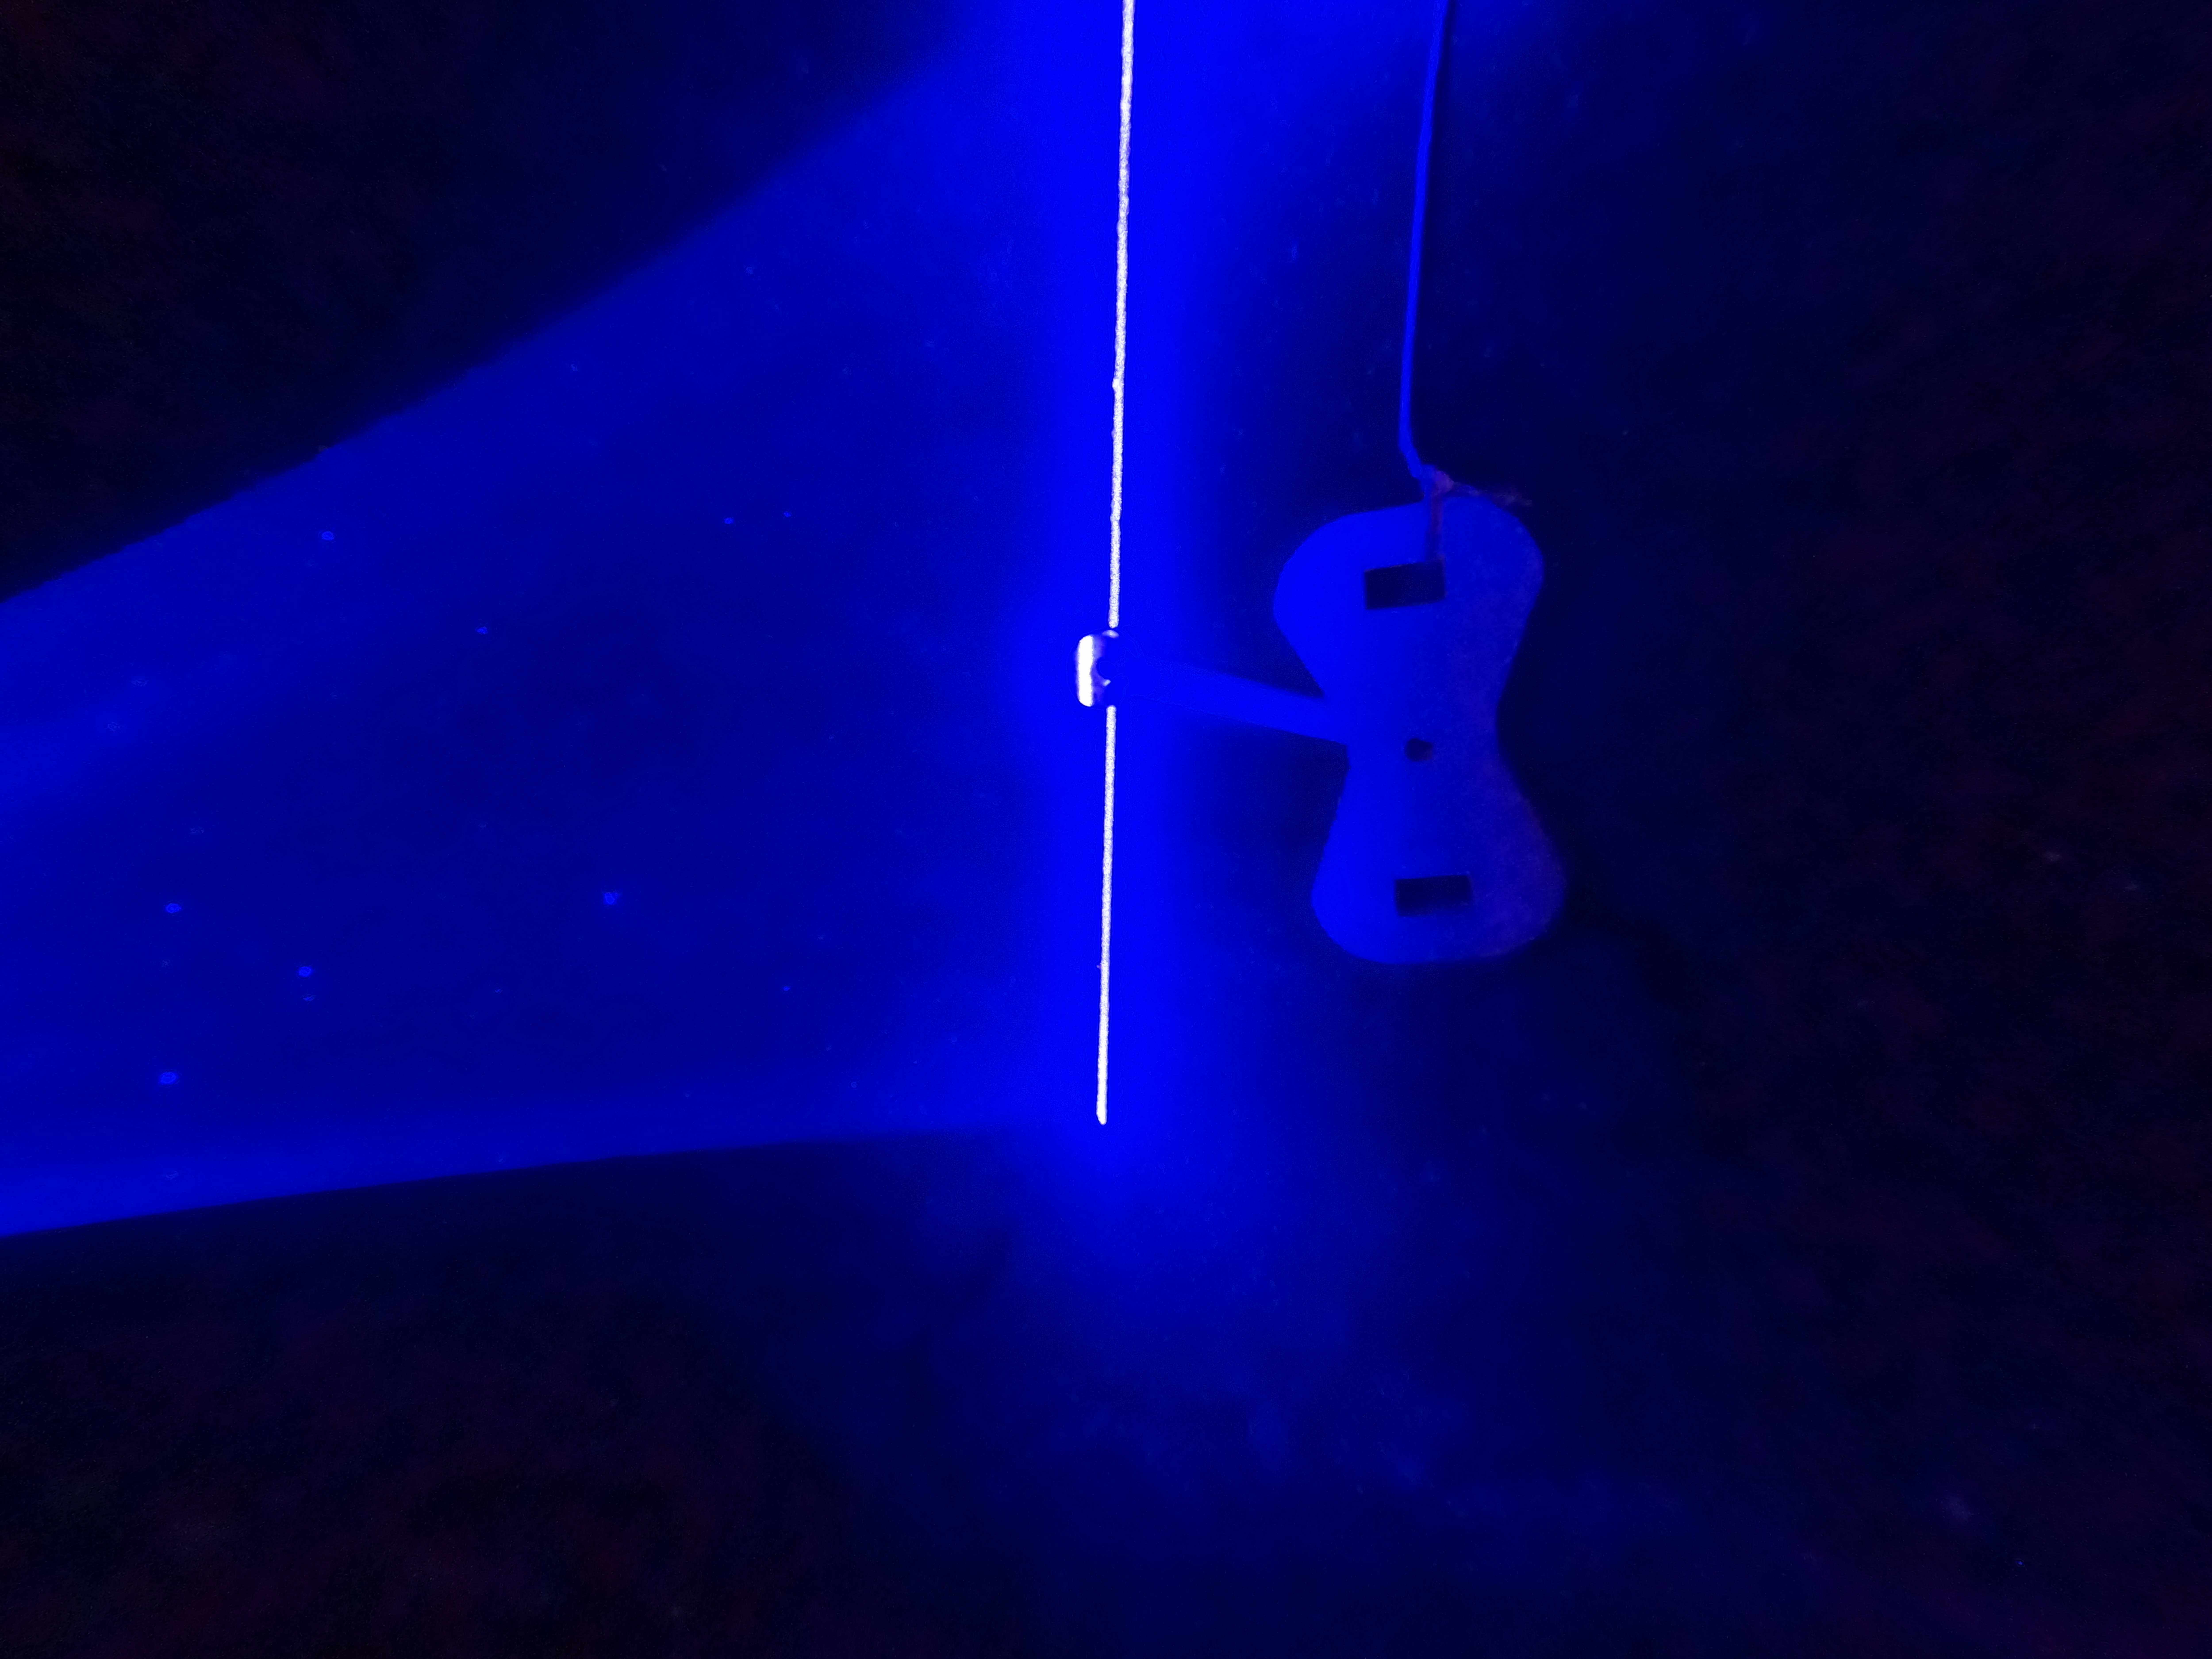

Supplement: Supplementary file 2324 [file G0016633.pdf › Level_1_2/G0016633.pdf]

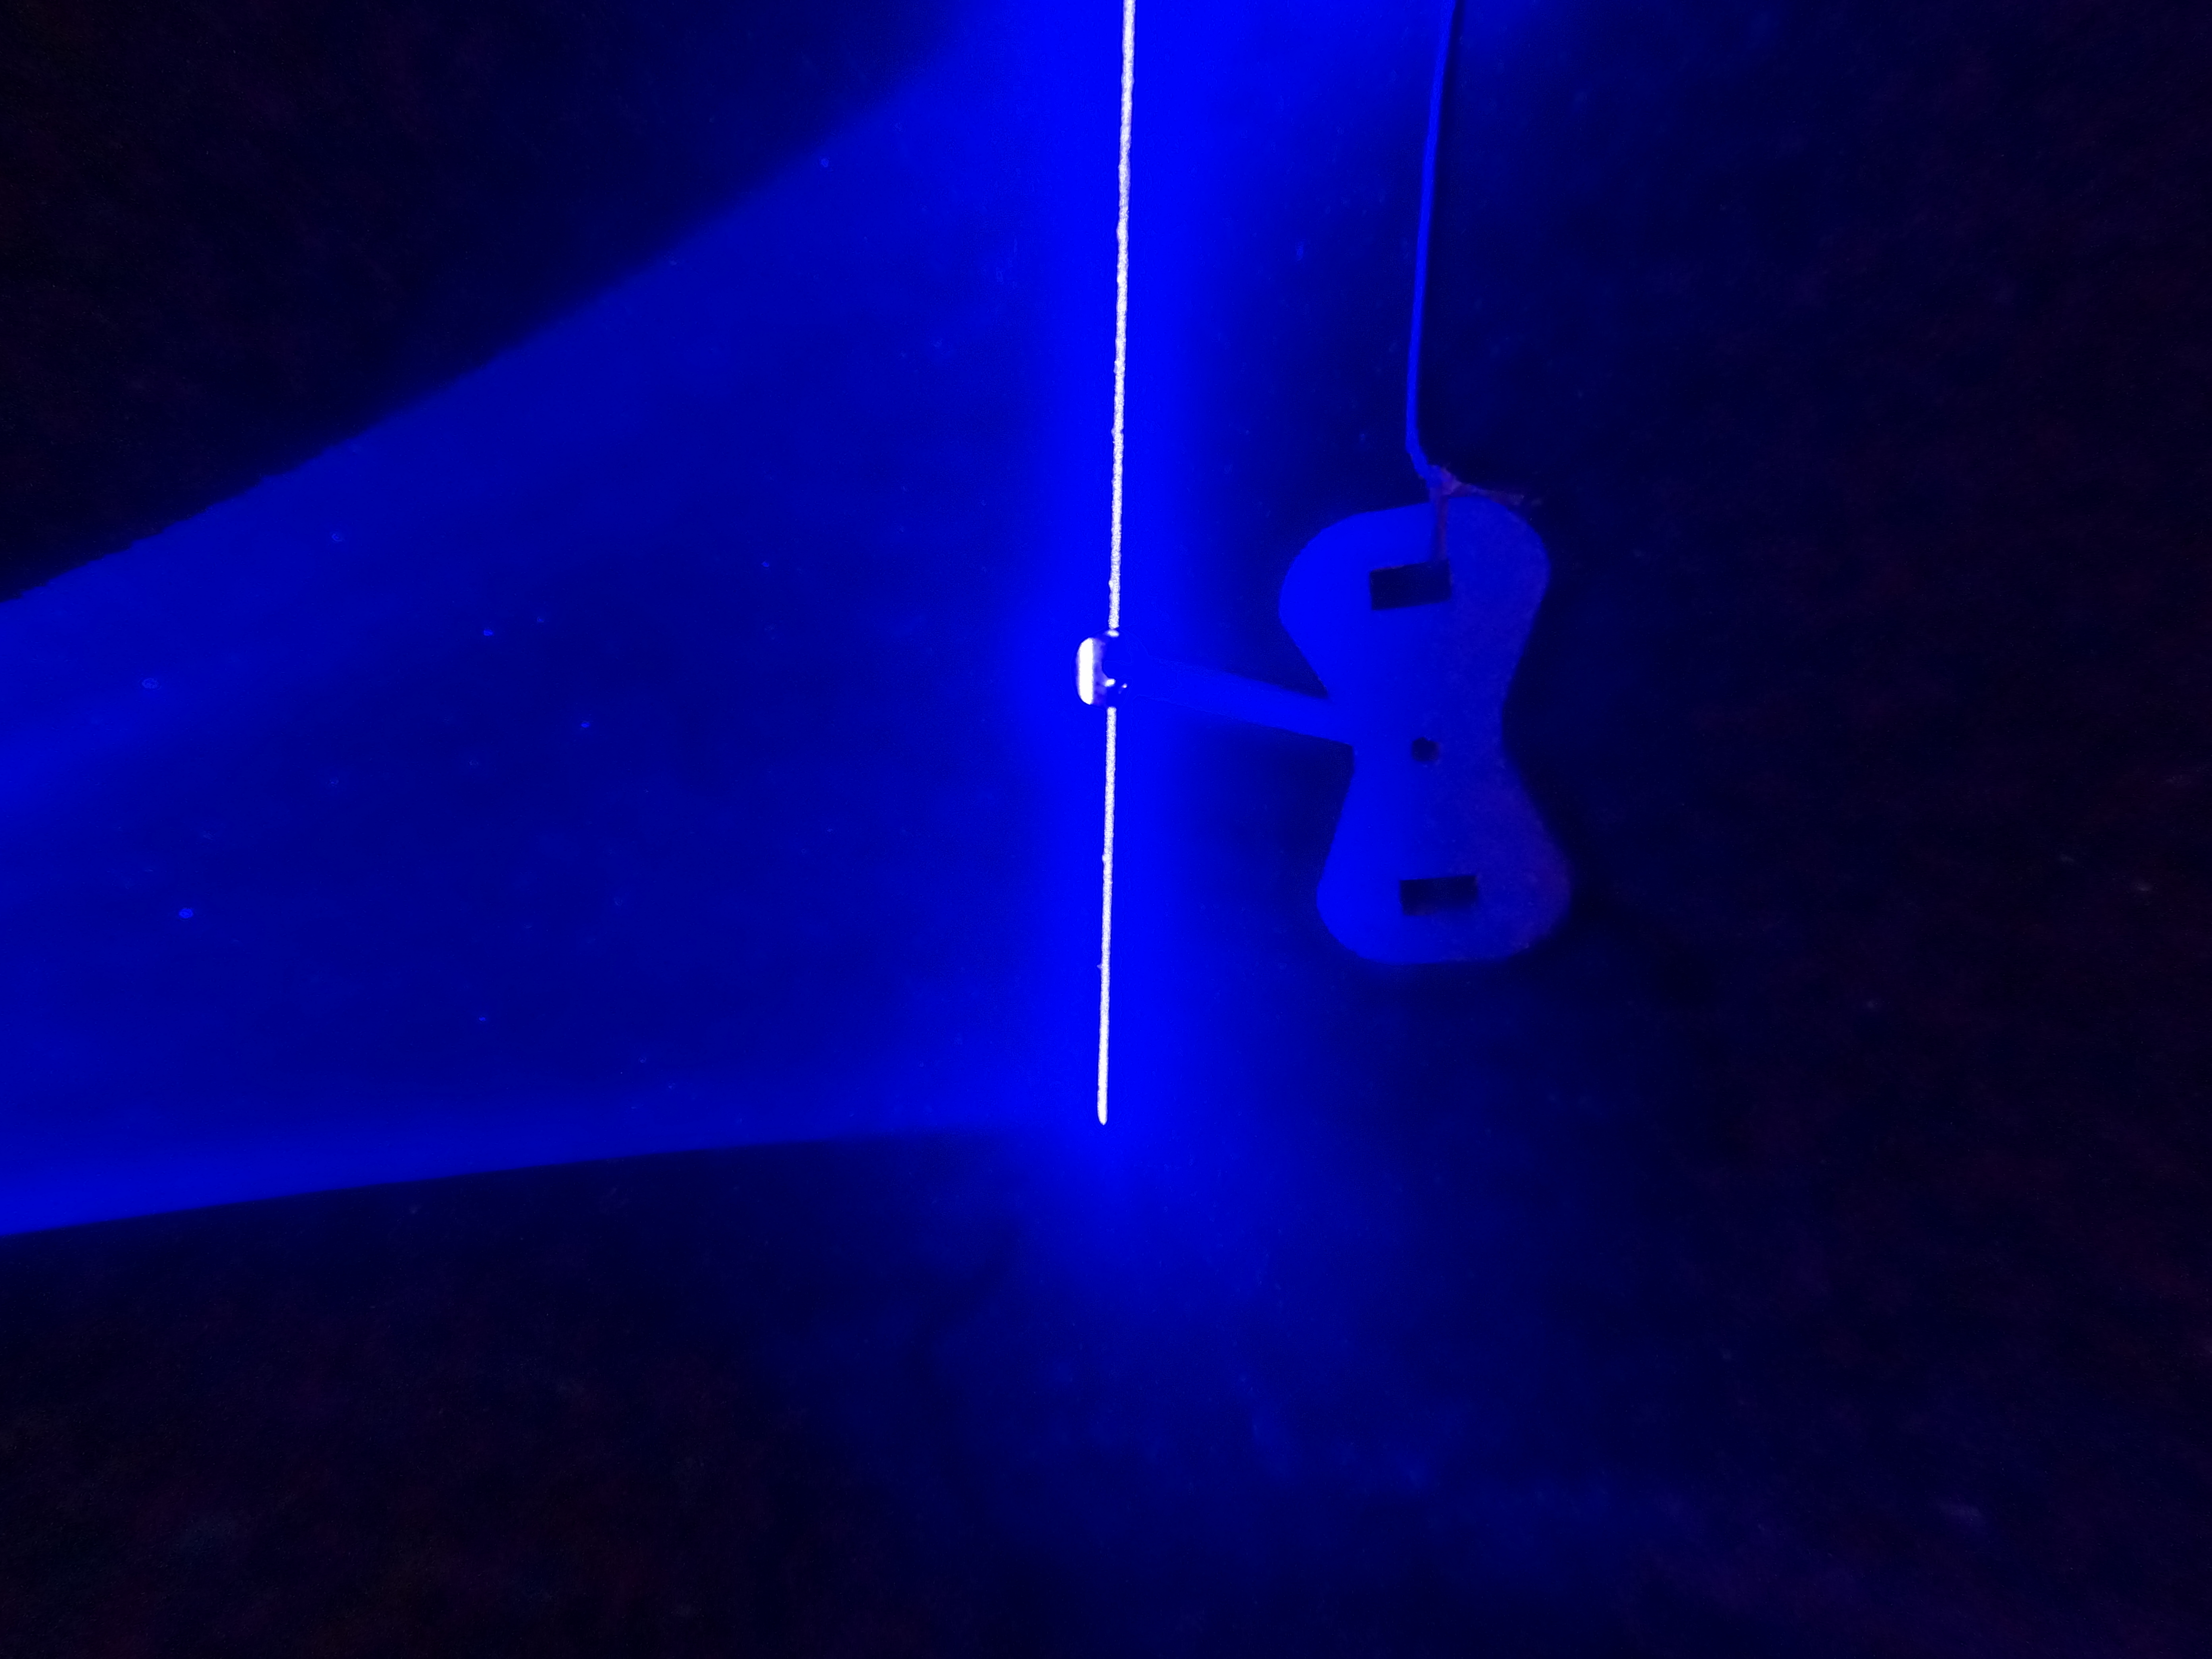

Supplement: Supplementary file 2325 [file G0016634.pdf › Level_1_2/G0016634.pdf]

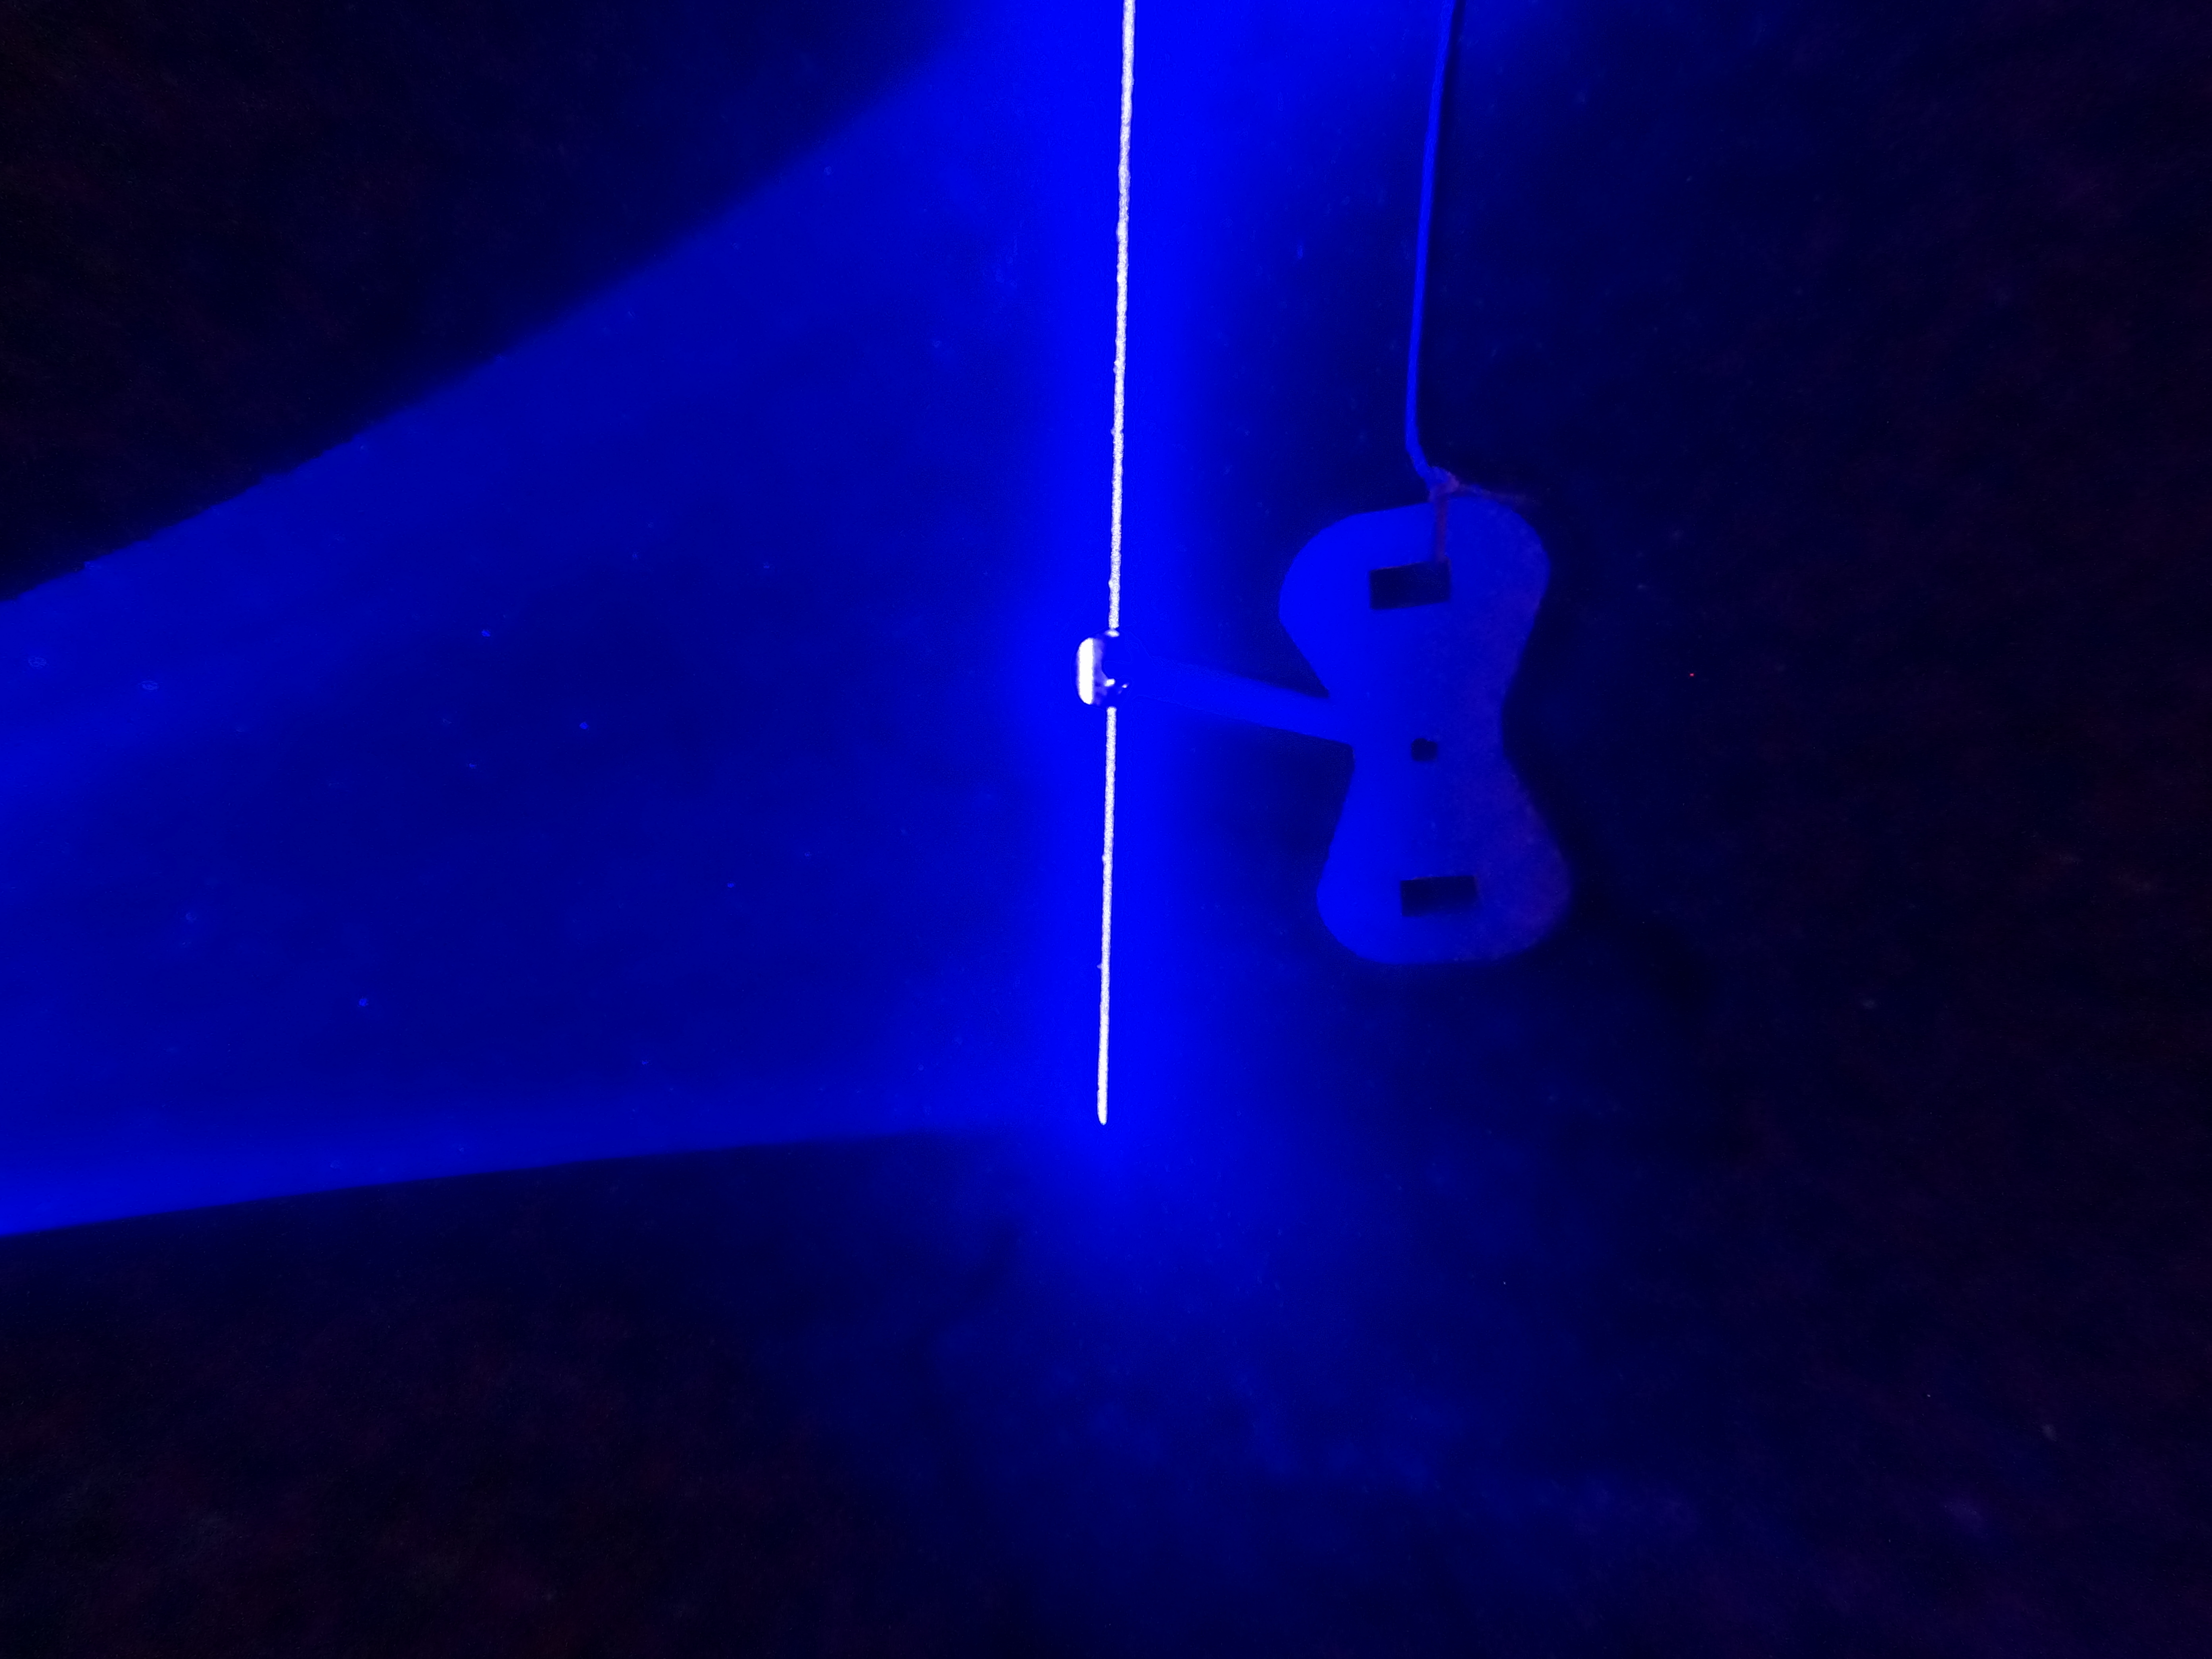

Supplement: Supplementary file 2326 [file G0016635.pdf › Level_1_2/G0016635.pdf]

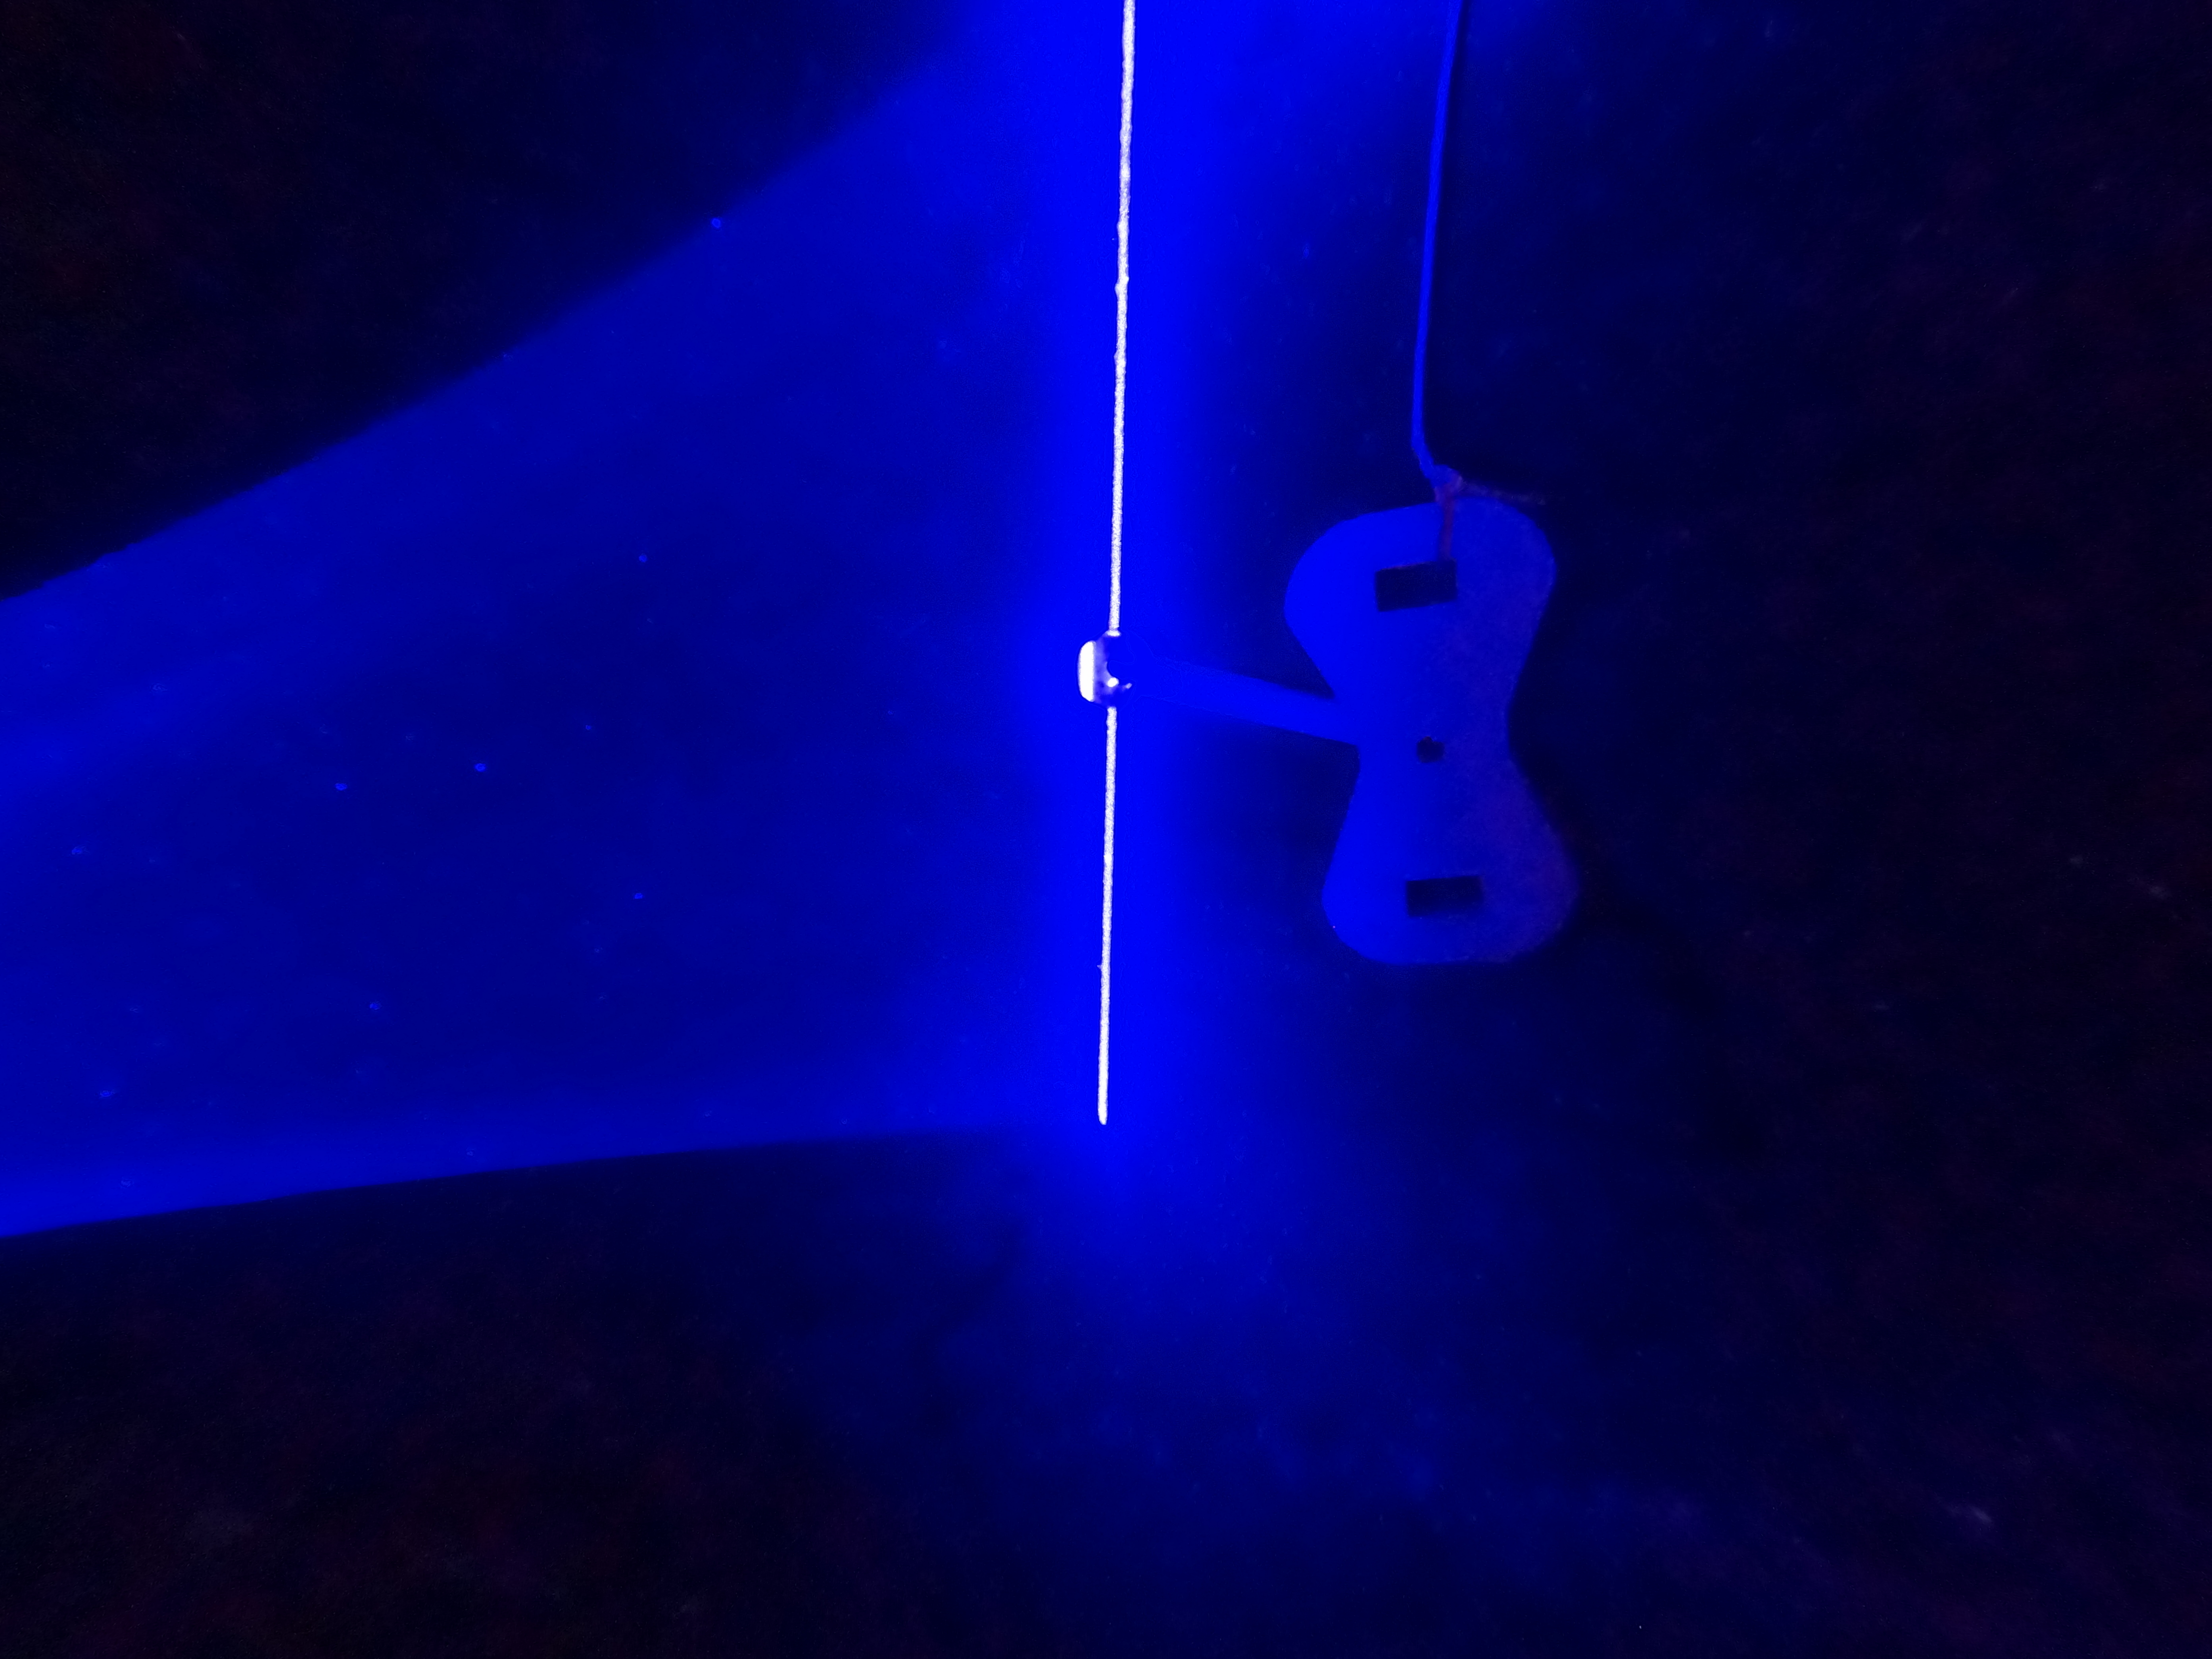

Supplement: Supplementary file 2327 [file G0016636.pdf › Level_1_2/G0016636.pdf]

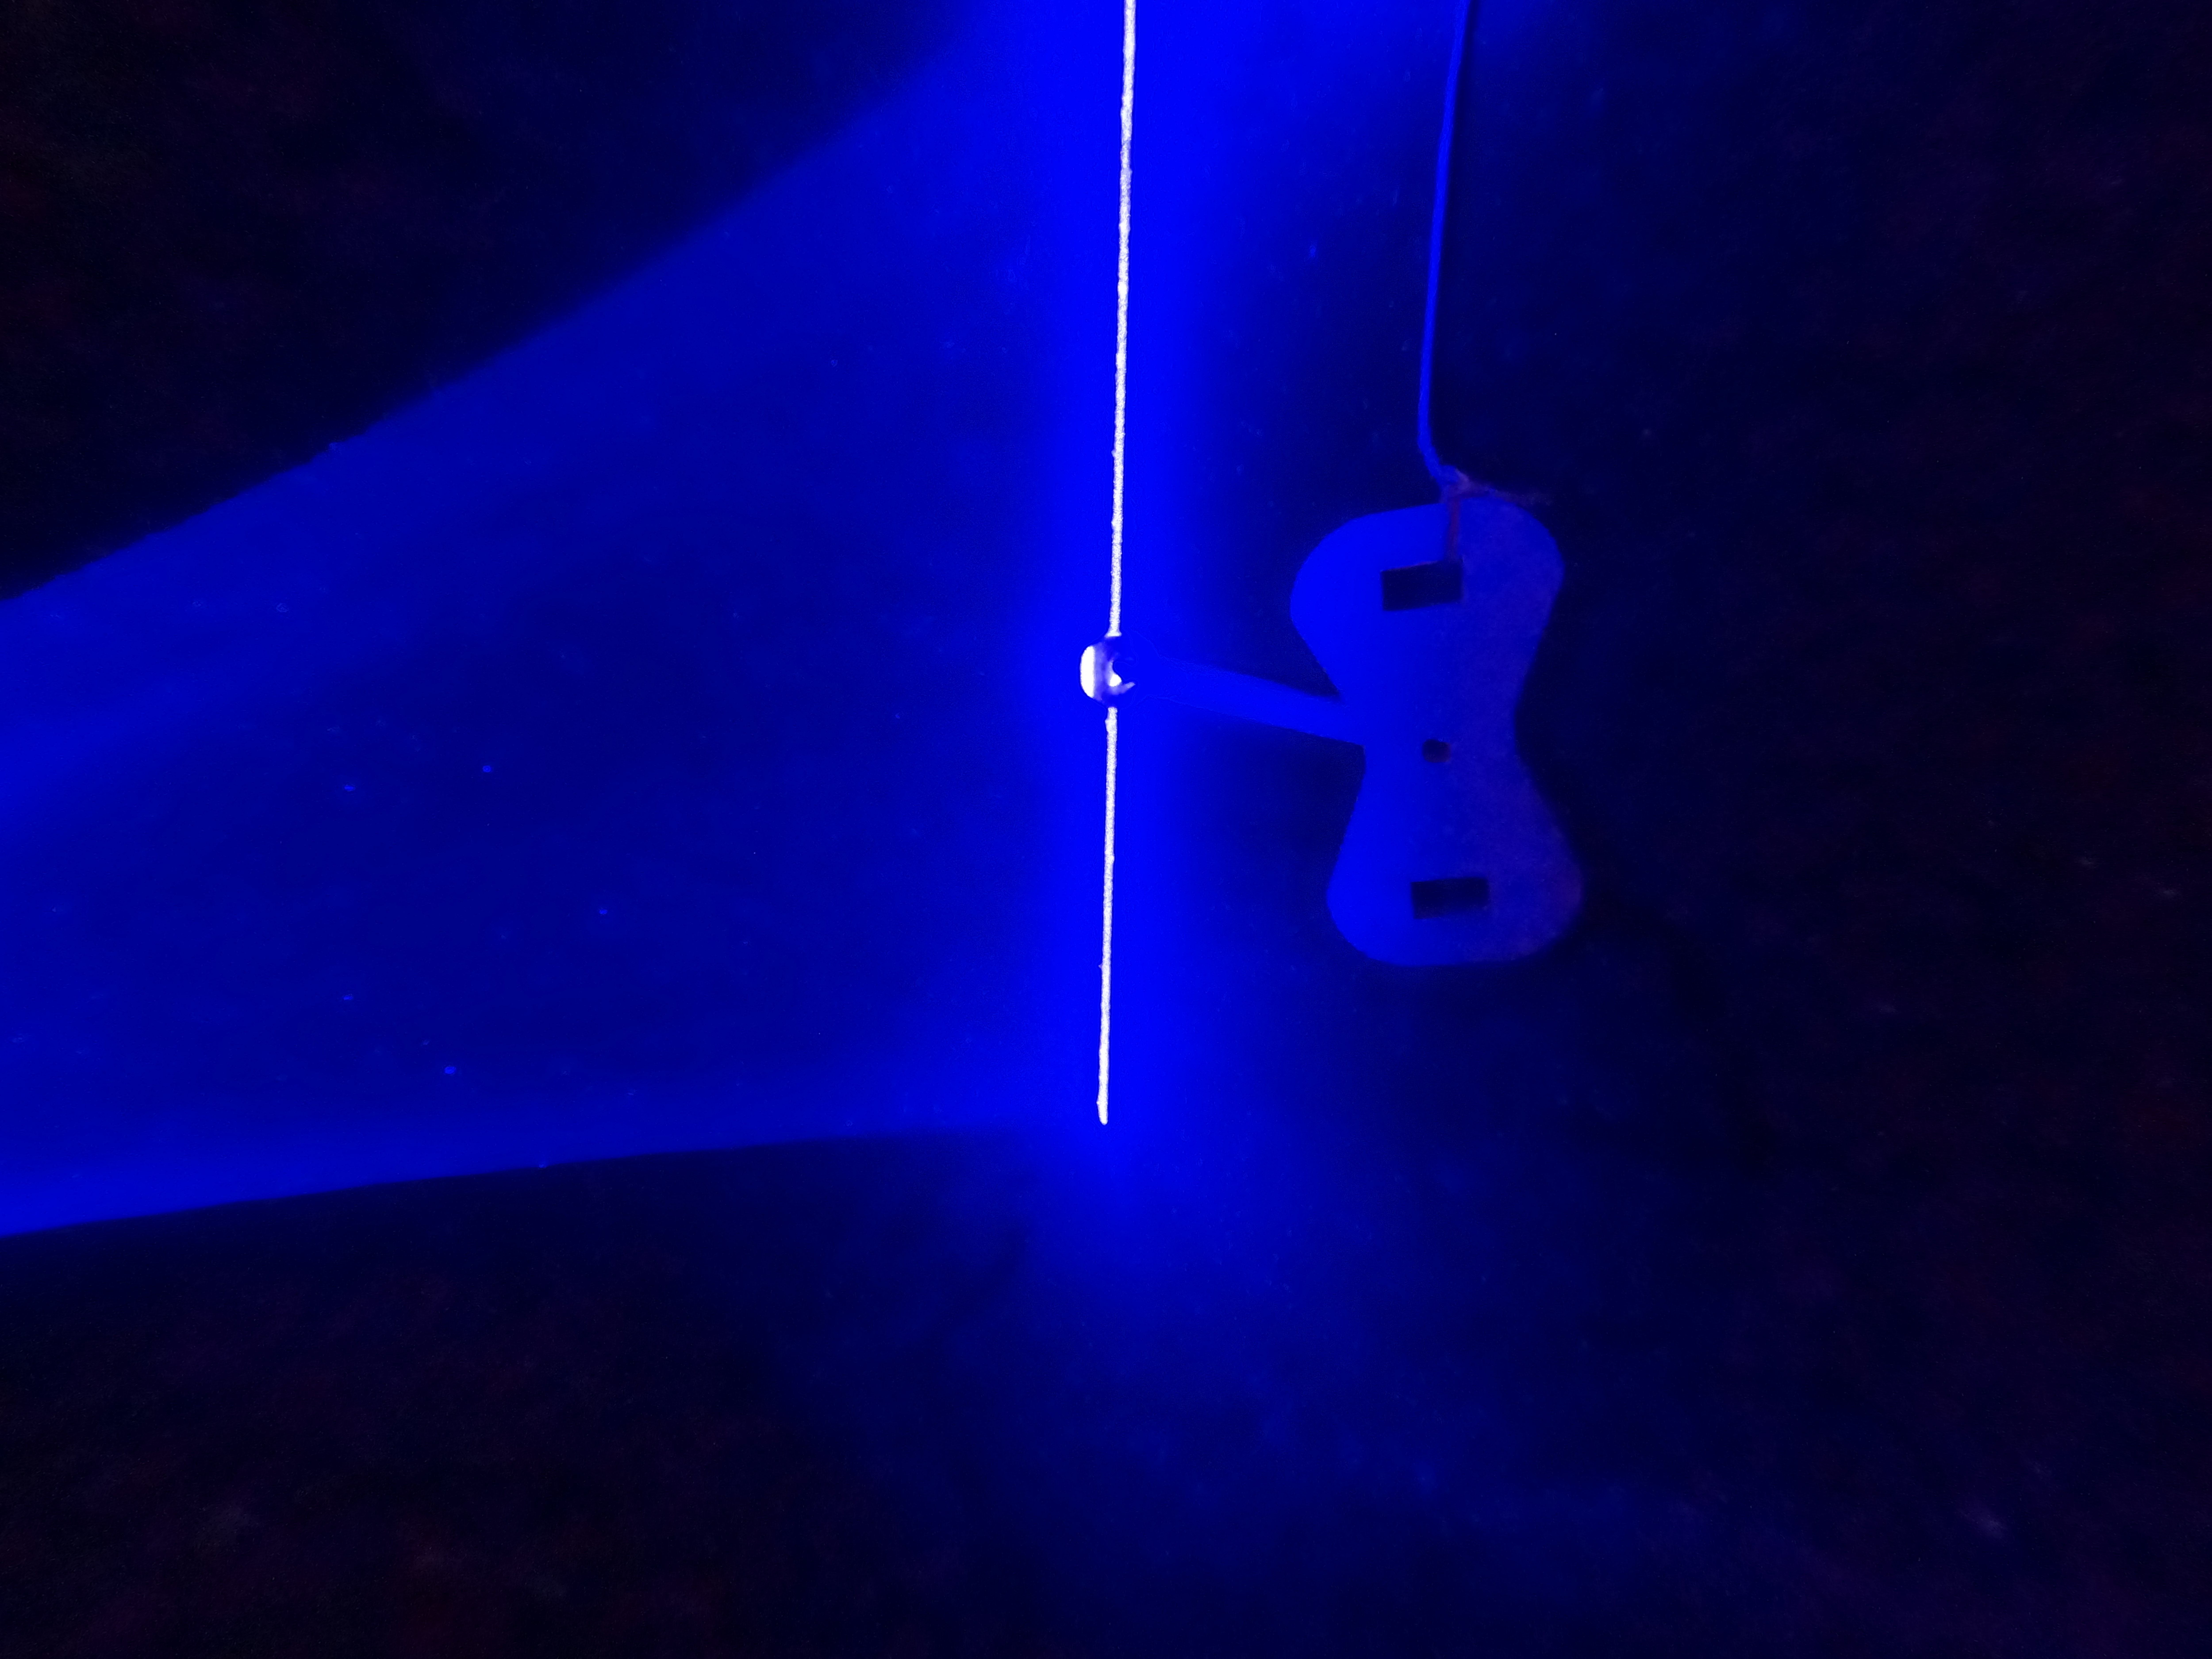

Supplement: Supplementary file 2328 [file G0016637.pdf › Level_1_2/G0016637.pdf]

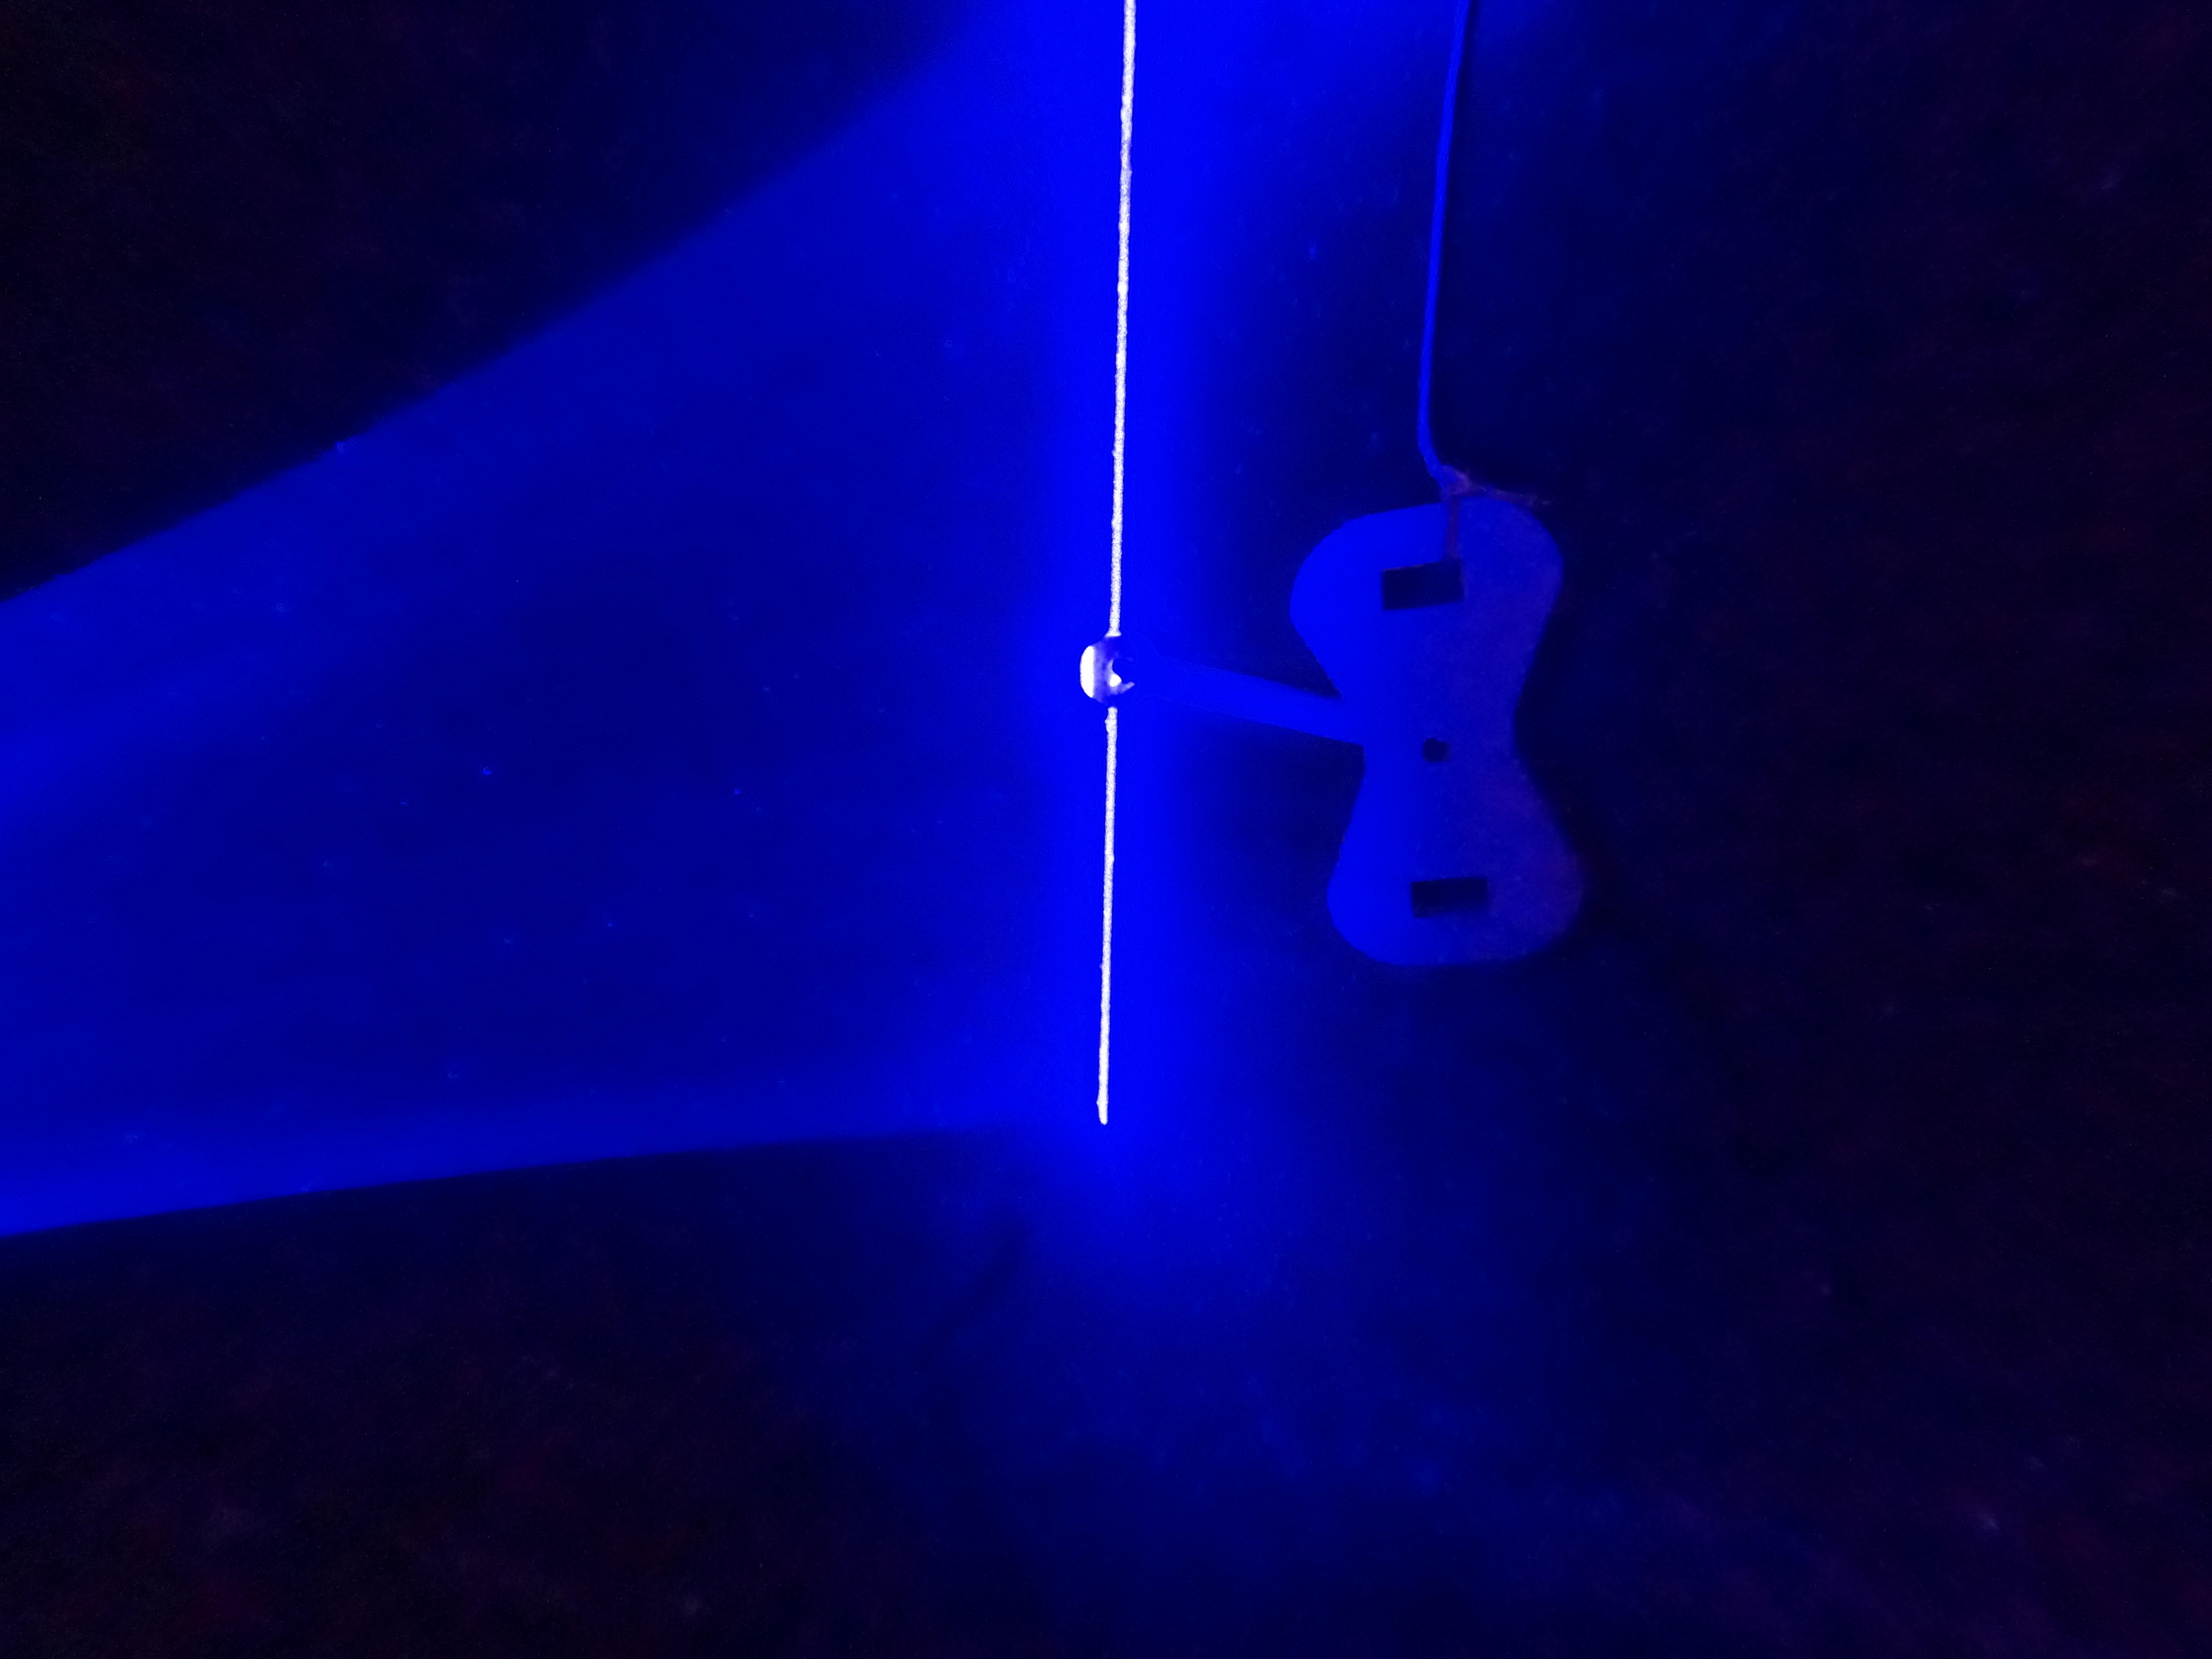

Supplement: Supplementary file 2329 [file G0016638.pdf › Level_1_2/G0016638.pdf]

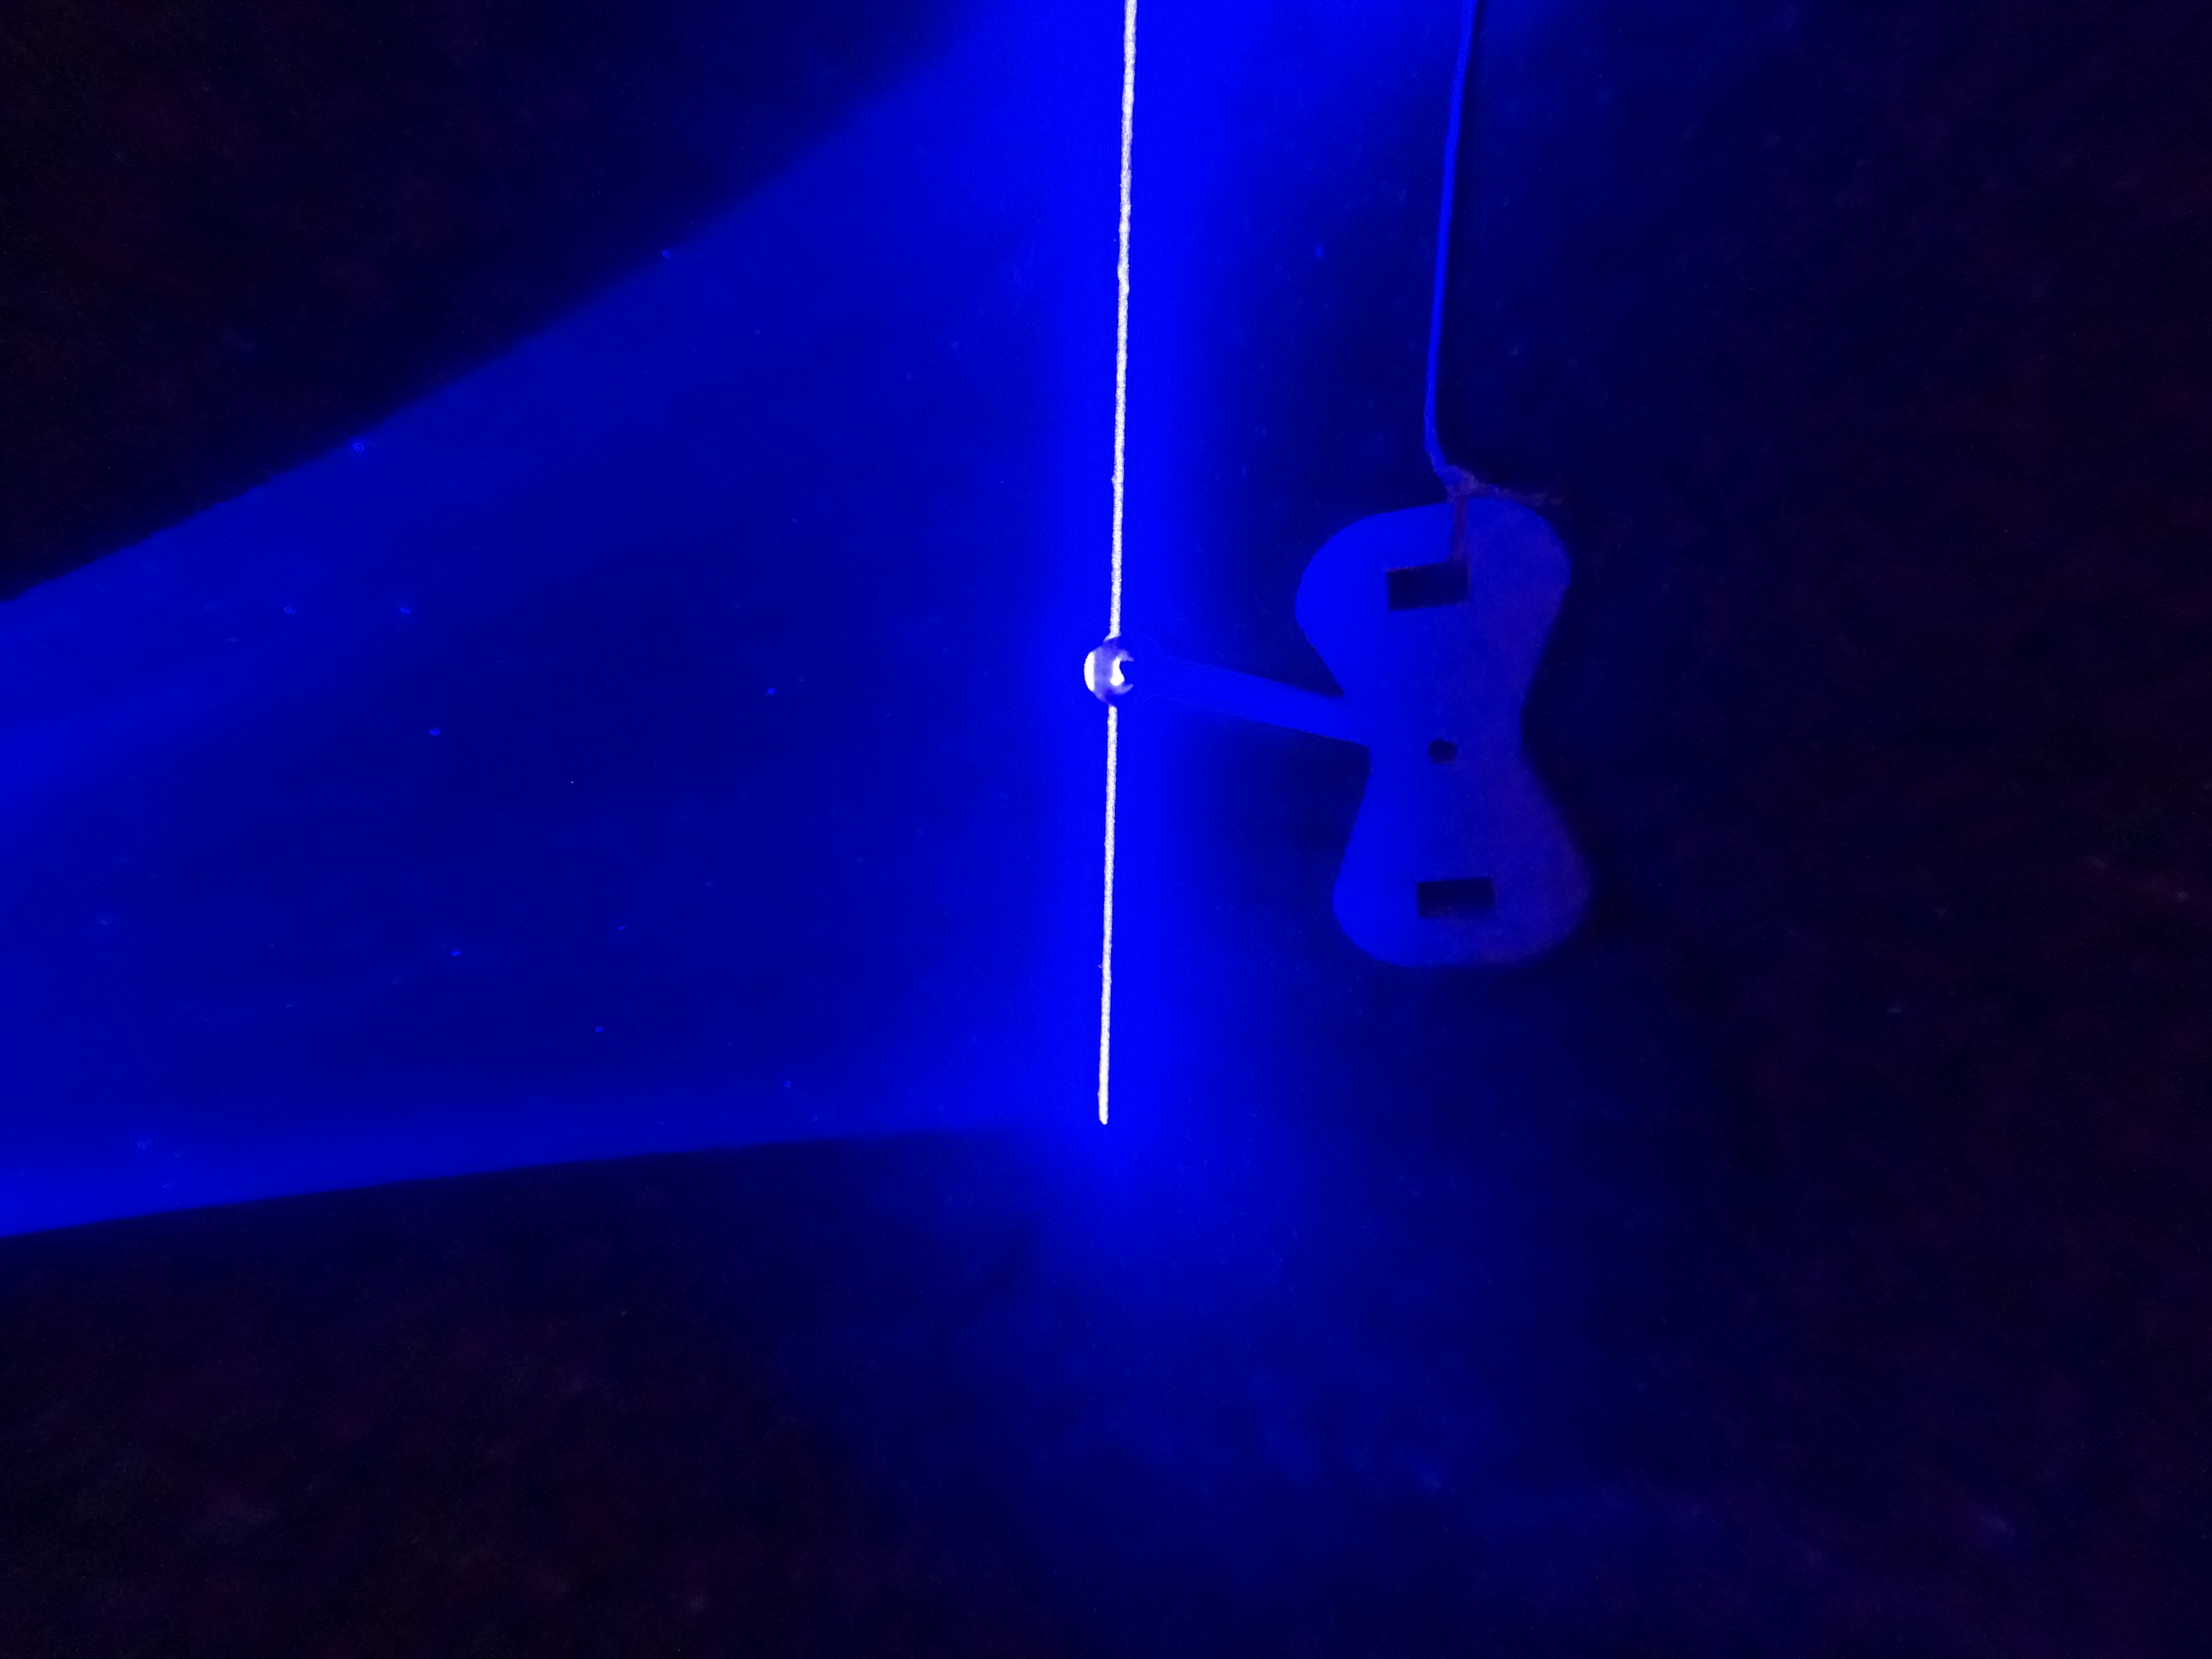

Supplement: Supplementary file 2330 [file G0016639.pdf › Level_1_2/G0016639.pdf]

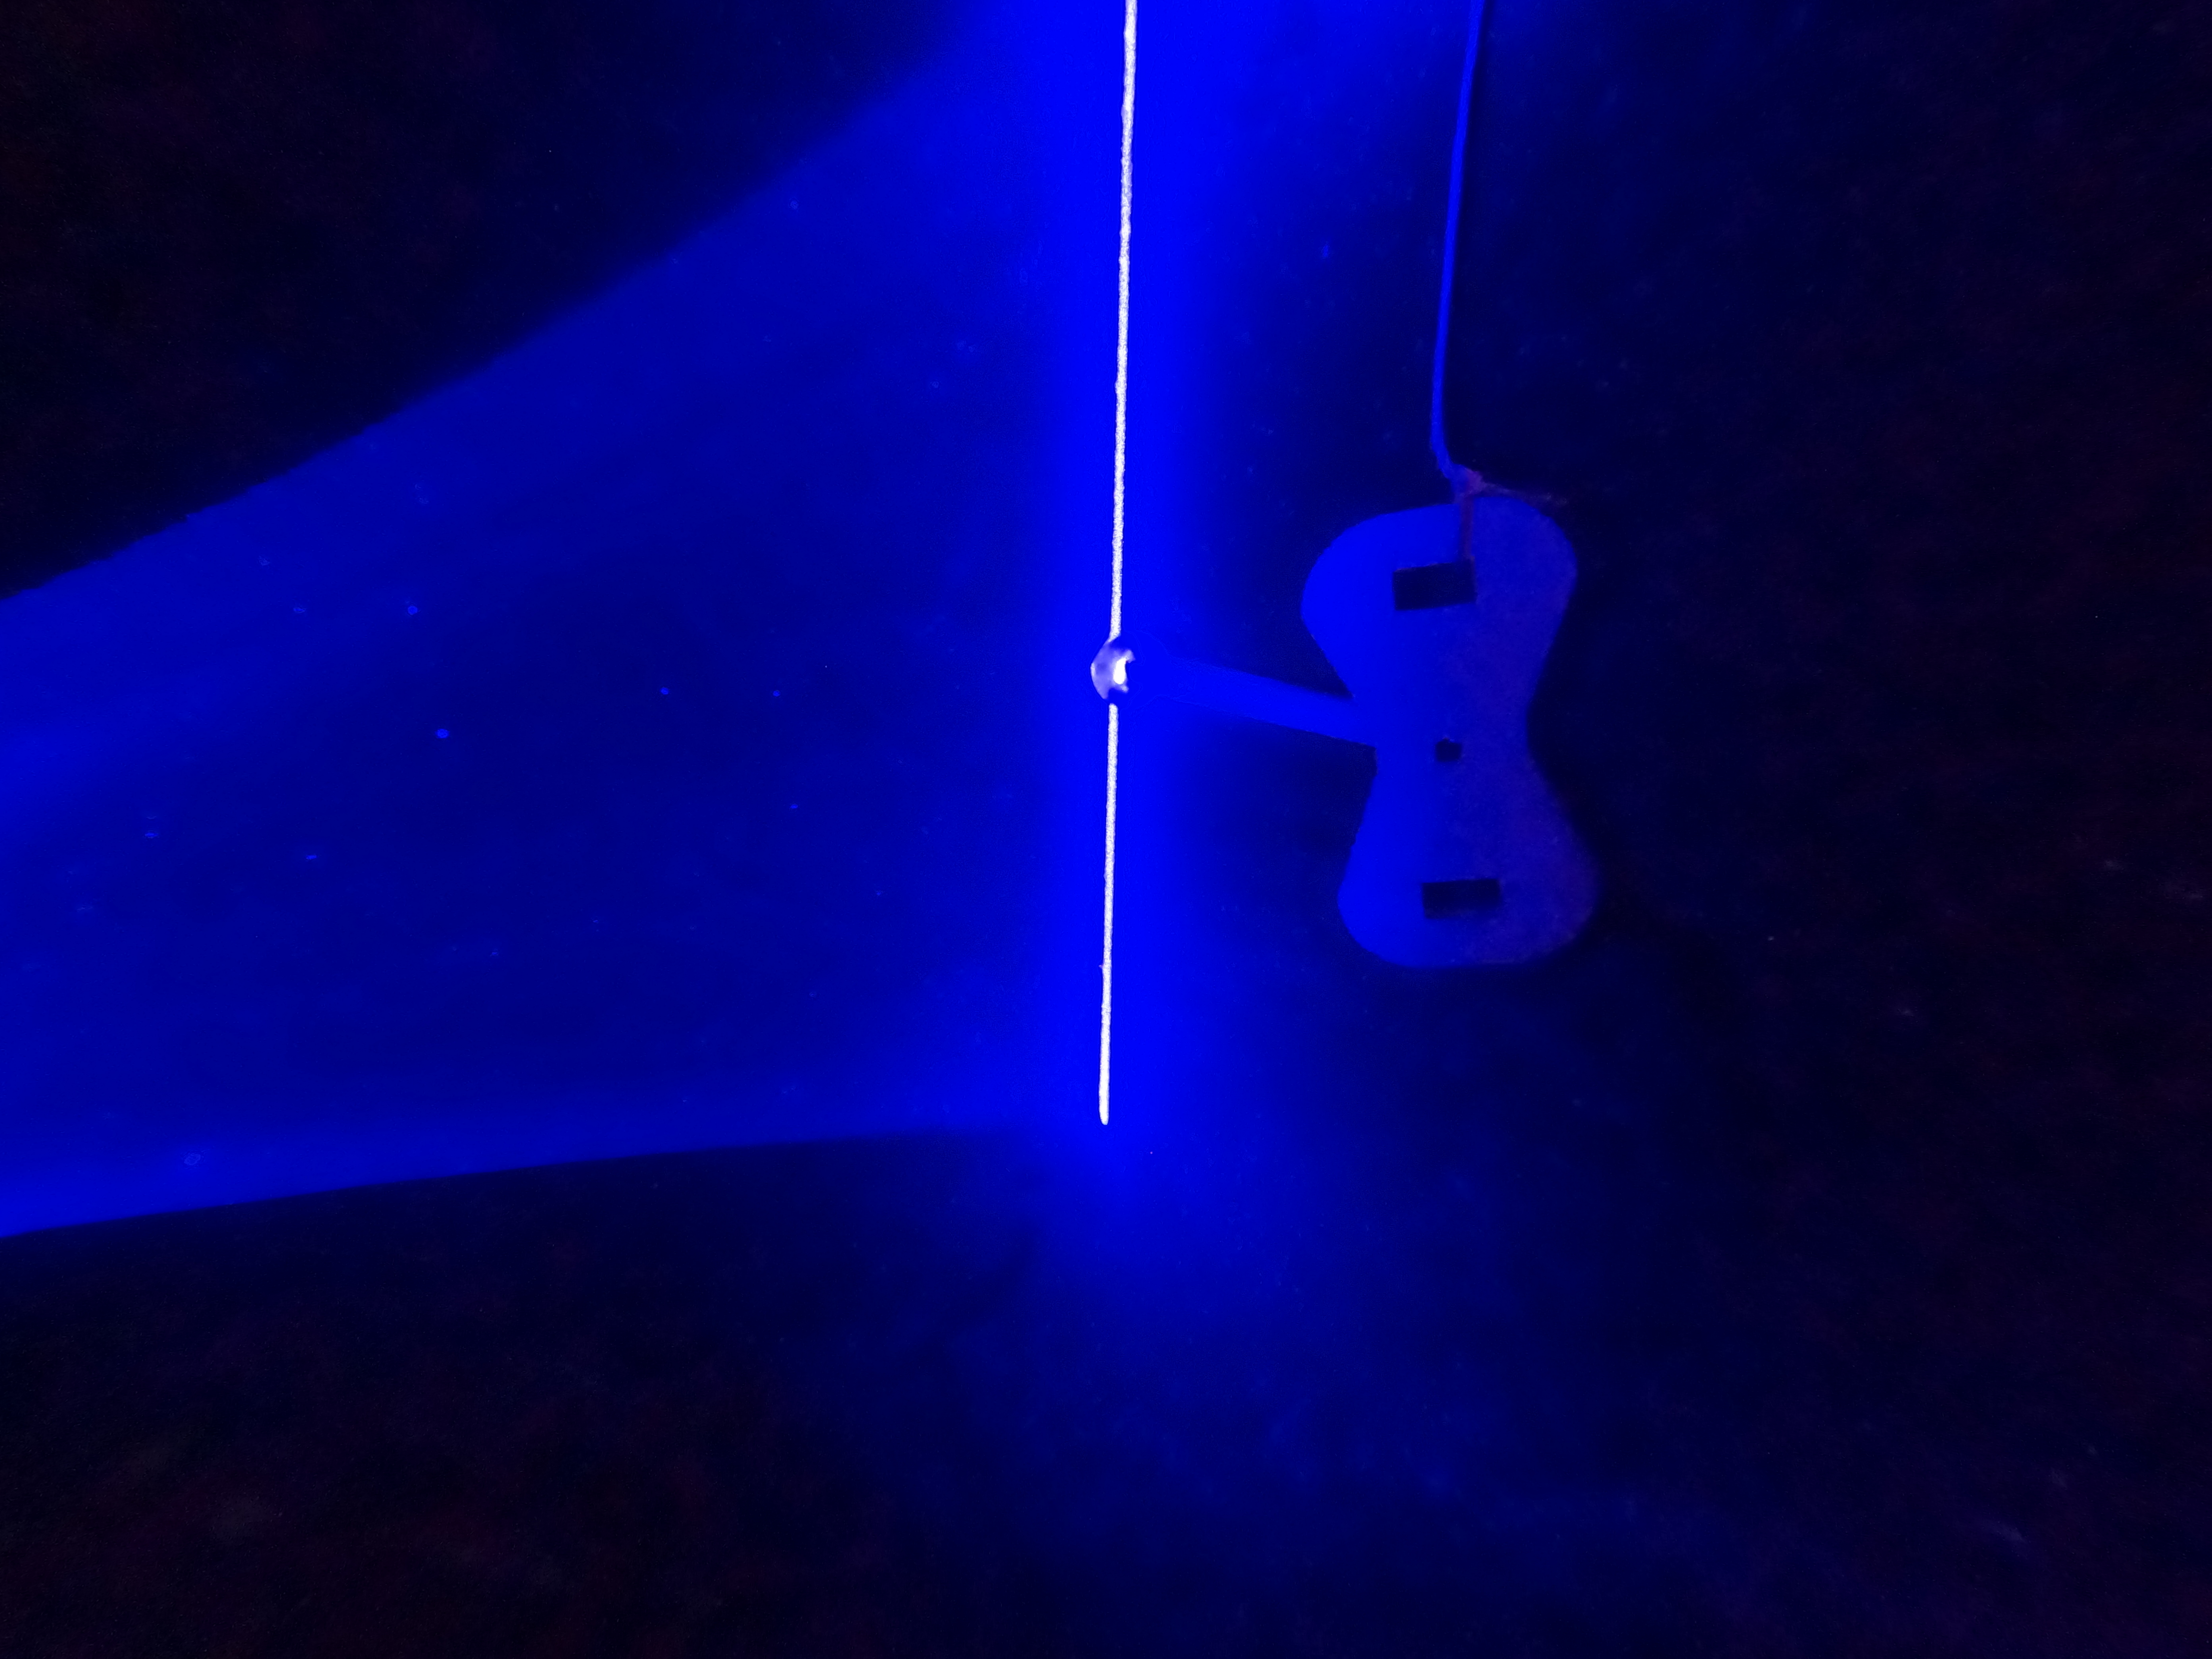

Supplement: Supplementary file 2331 [file G0016640.pdf › Level_1_2/G0016640.pdf]

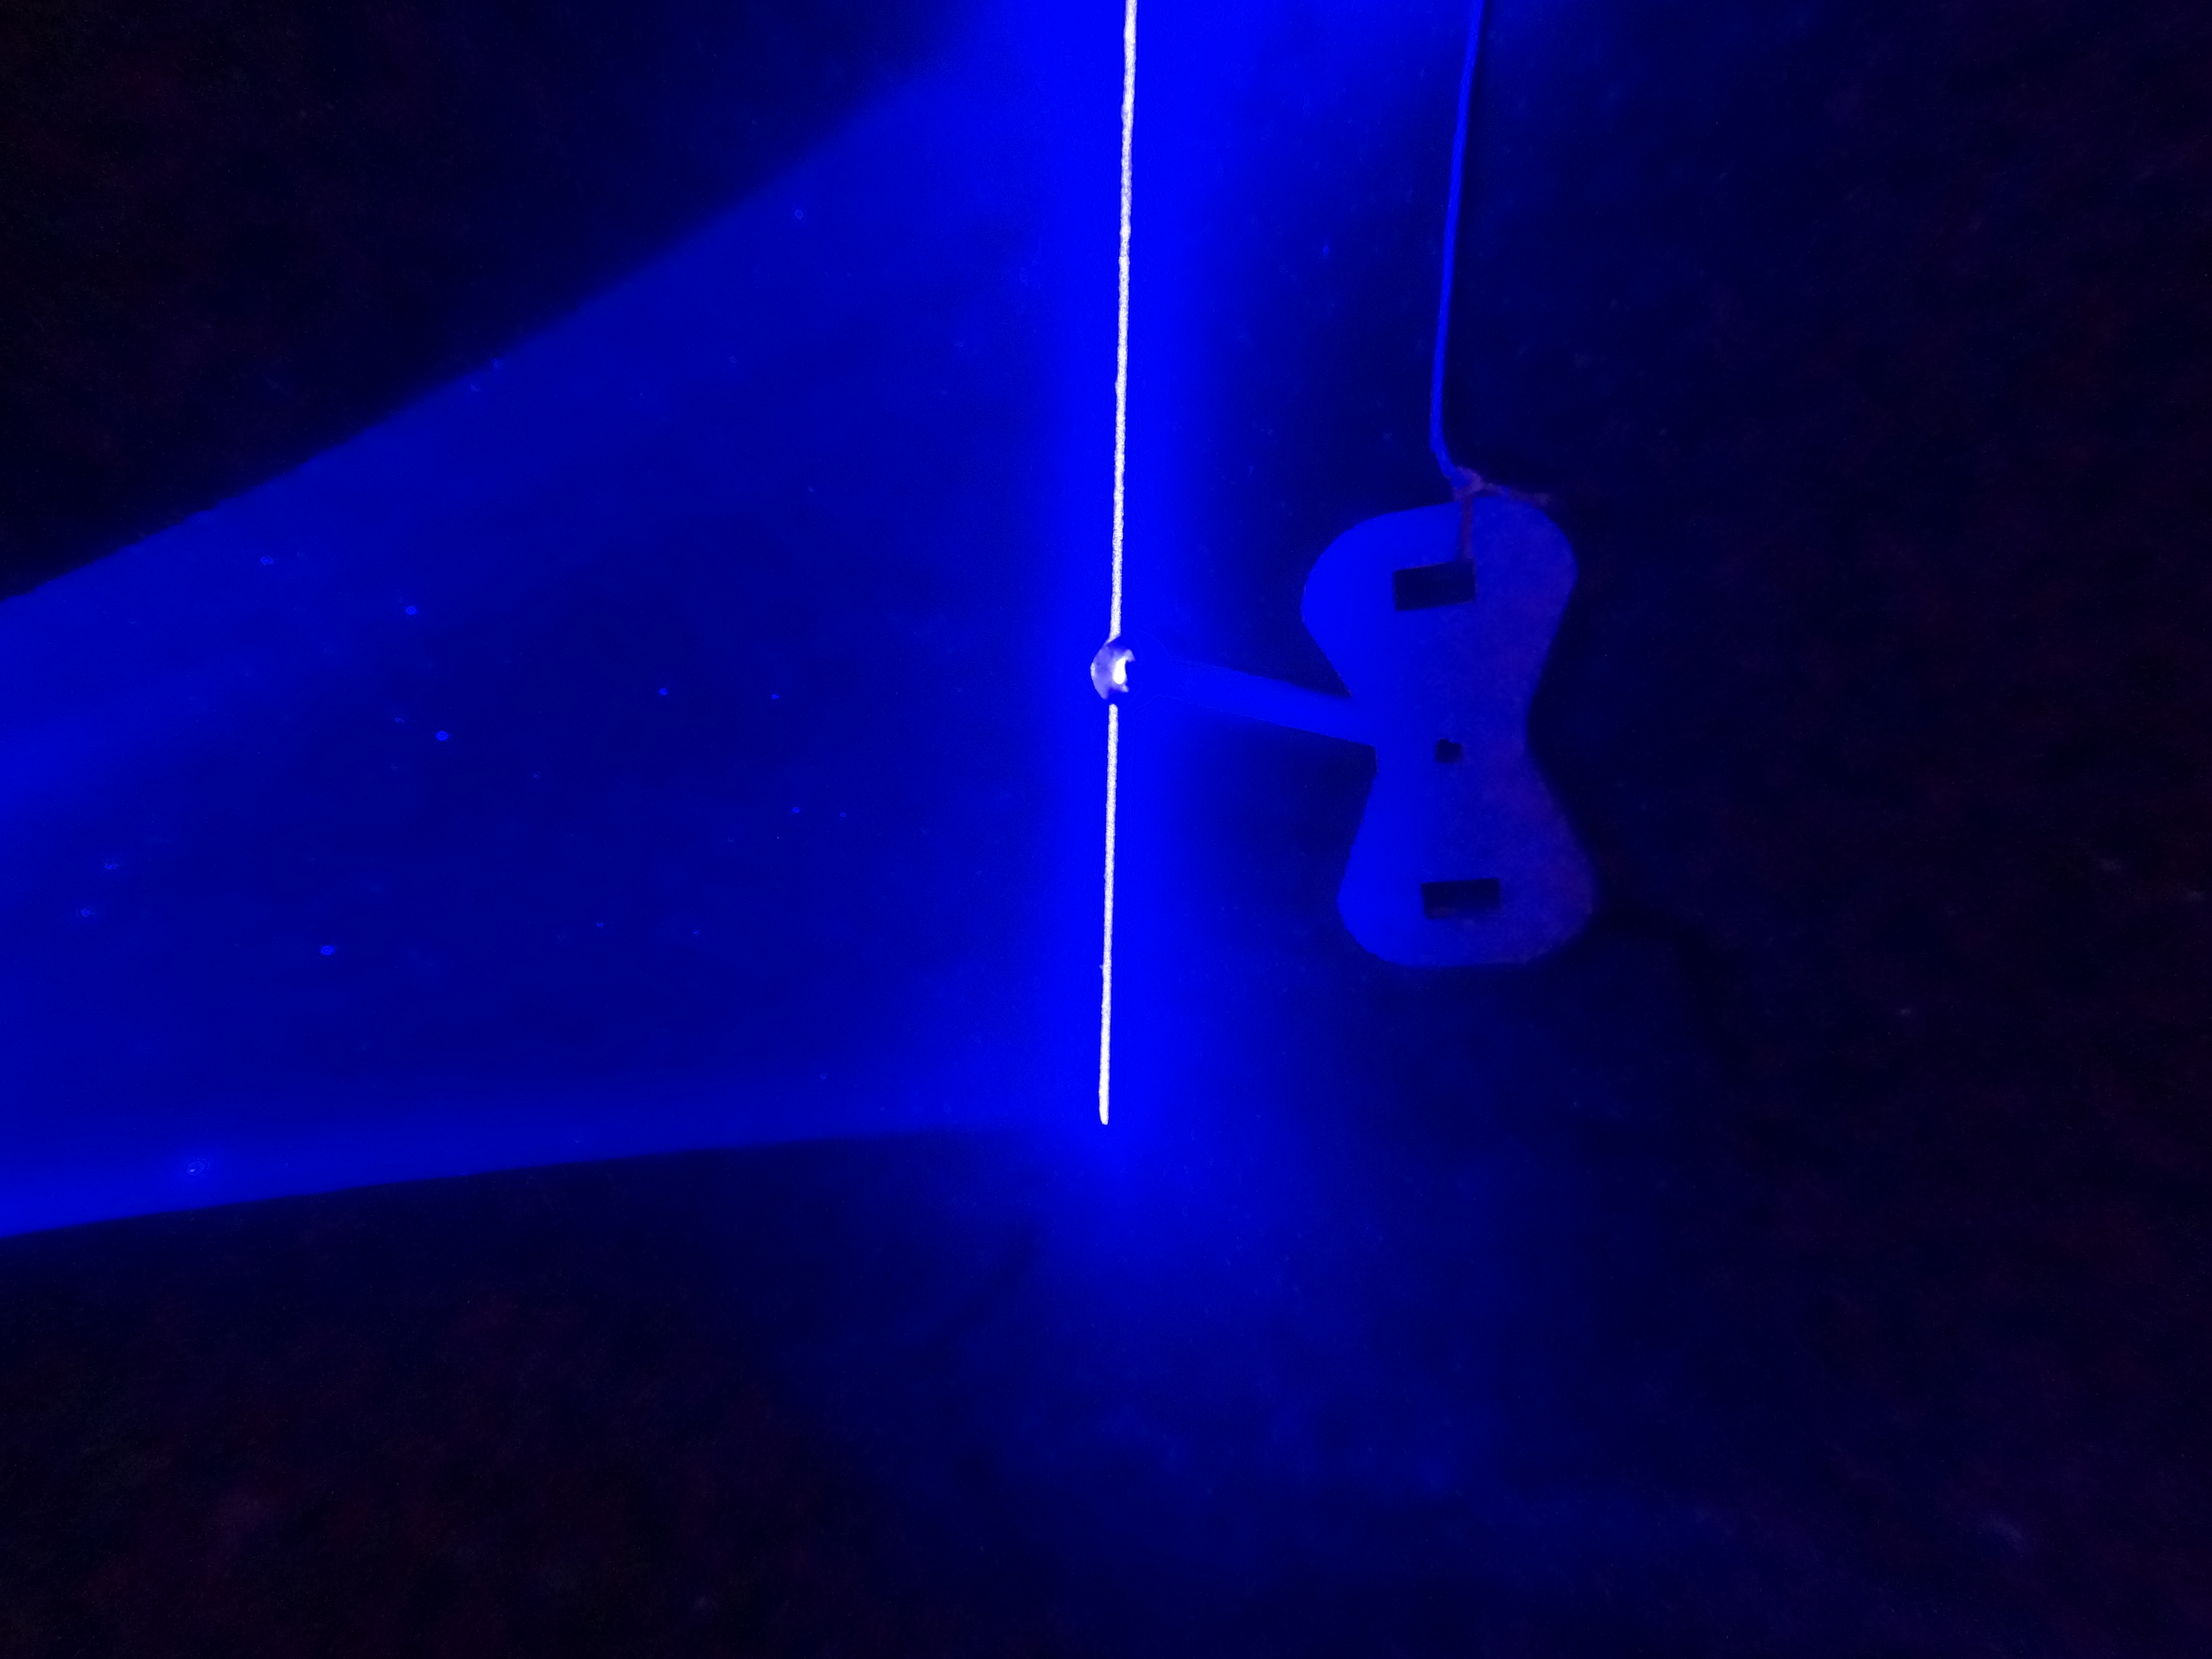

Supplement: Supplementary file 2332 [file G0016641.pdf › Level_1_2/G0016641.pdf]

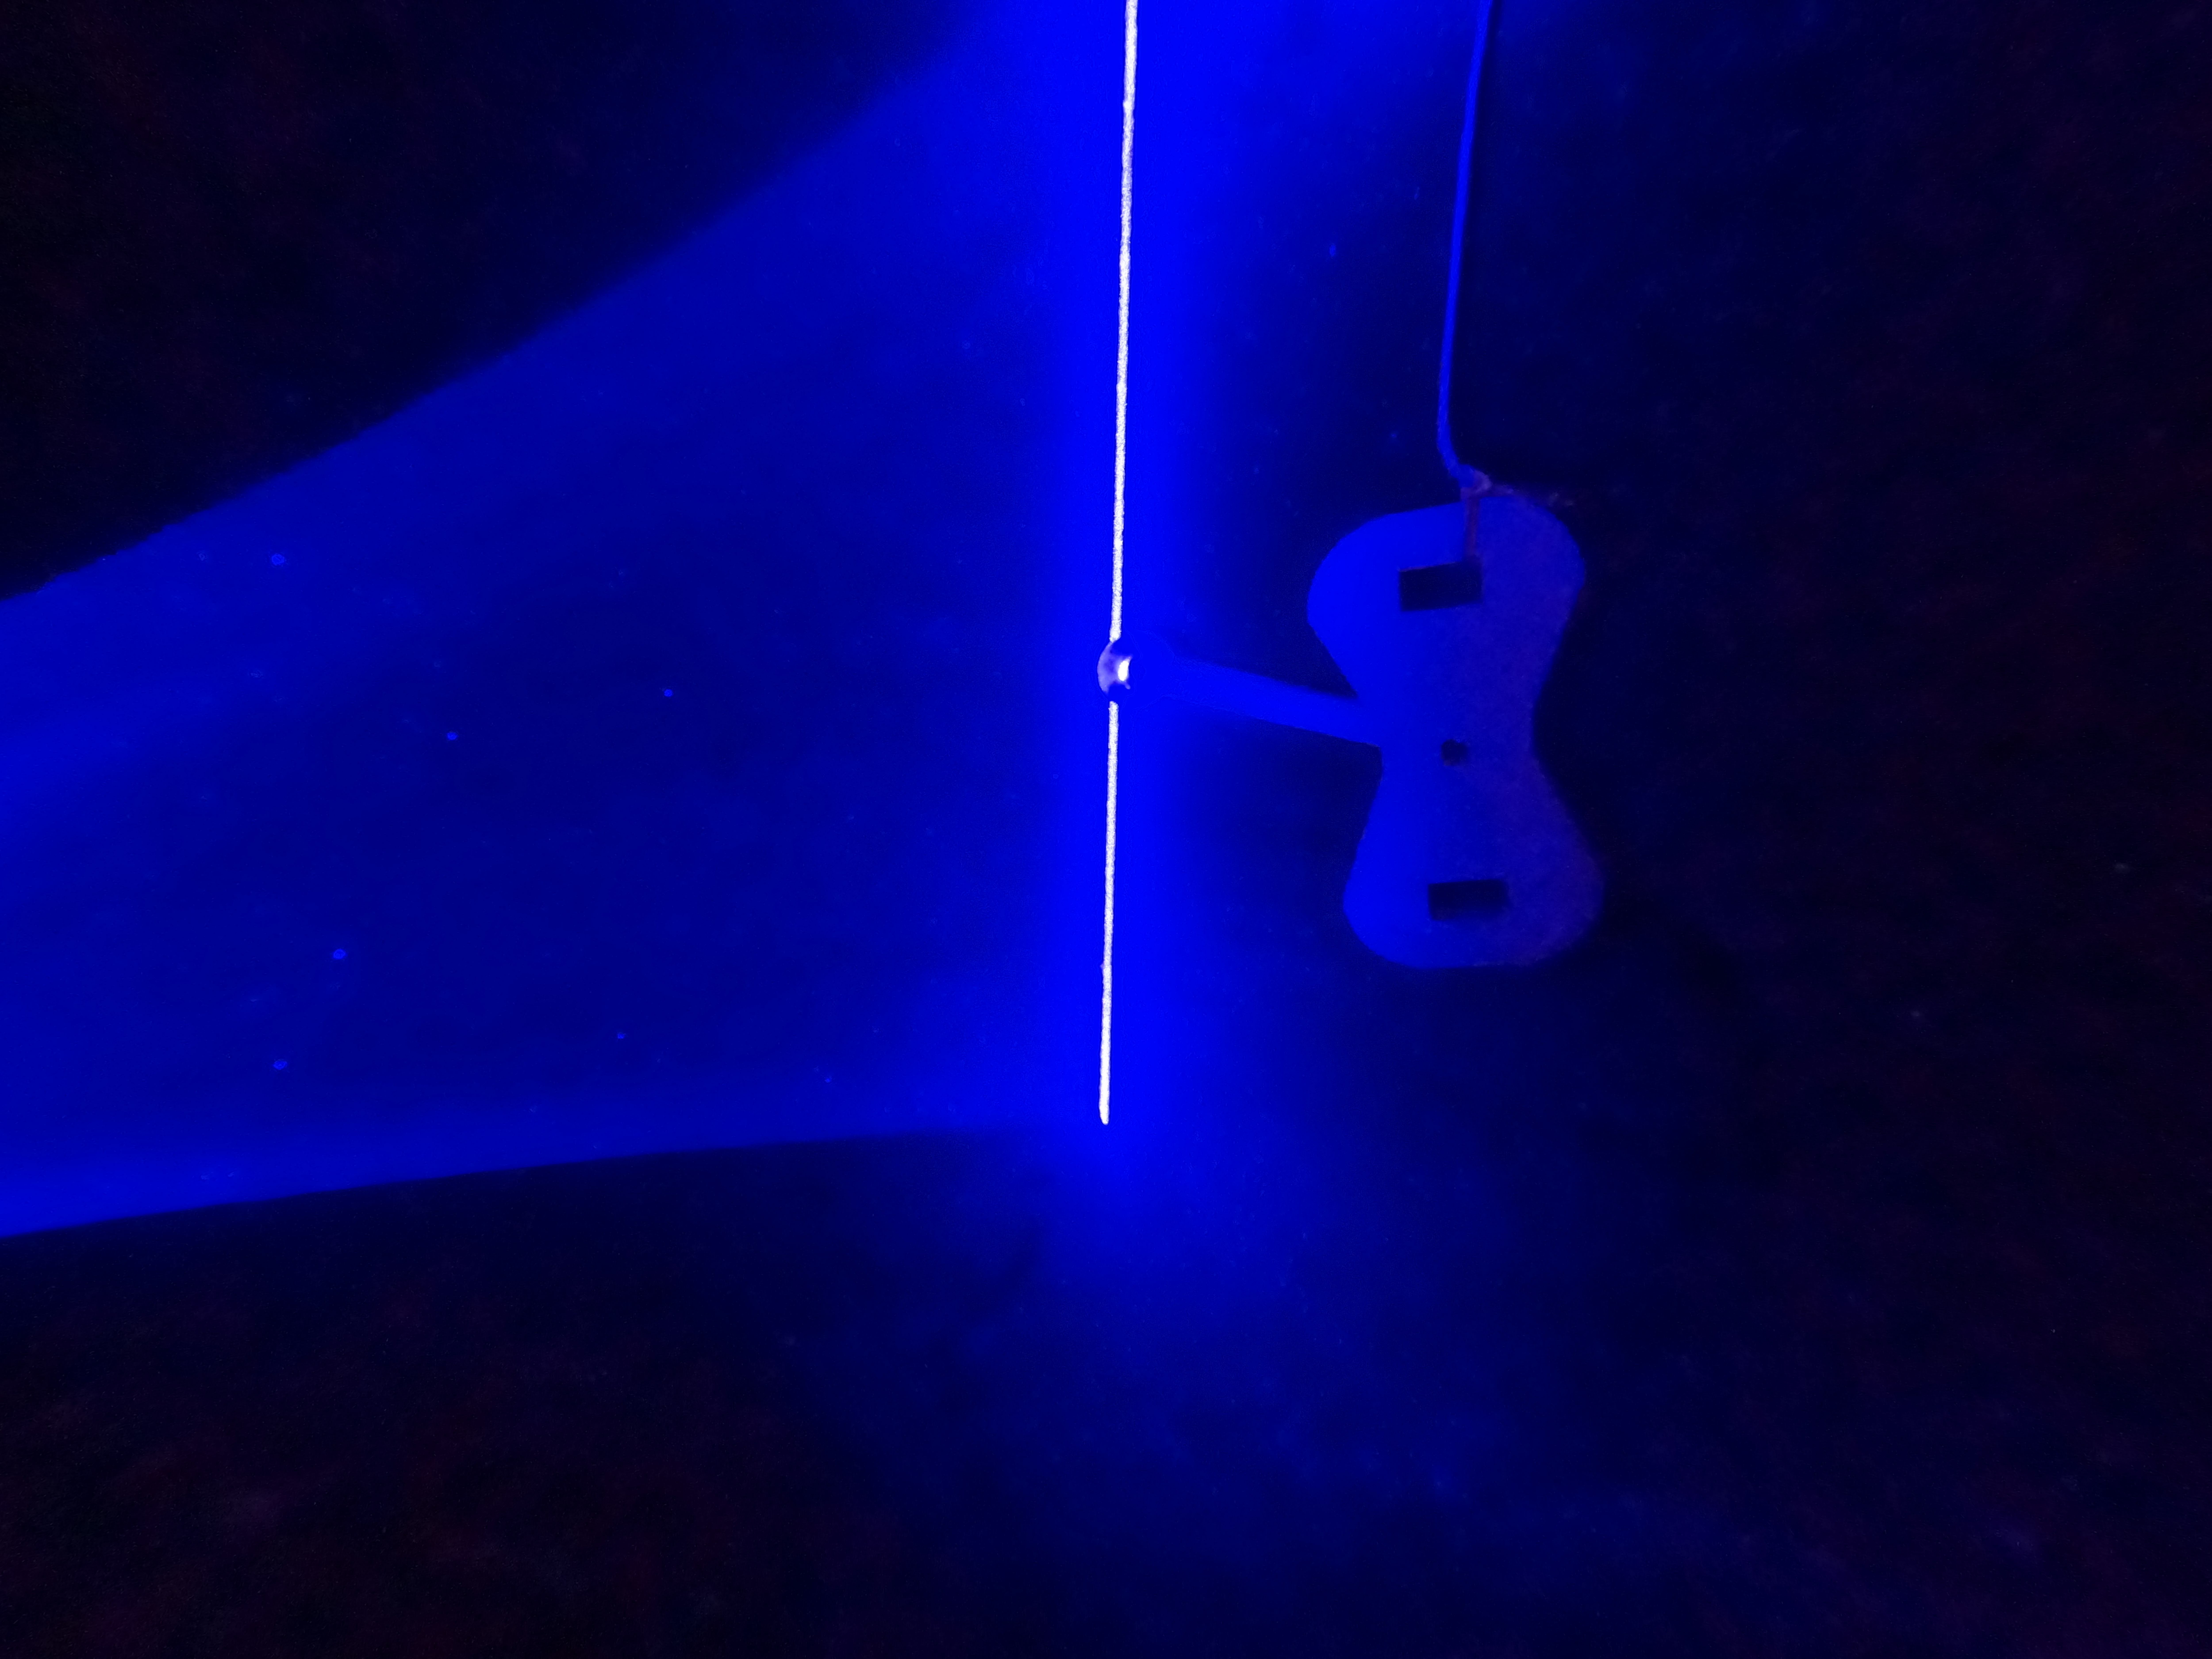

Supplement: Supplementary file 2333 [file G0016642.pdf › Level_1_2/G0016642.pdf]

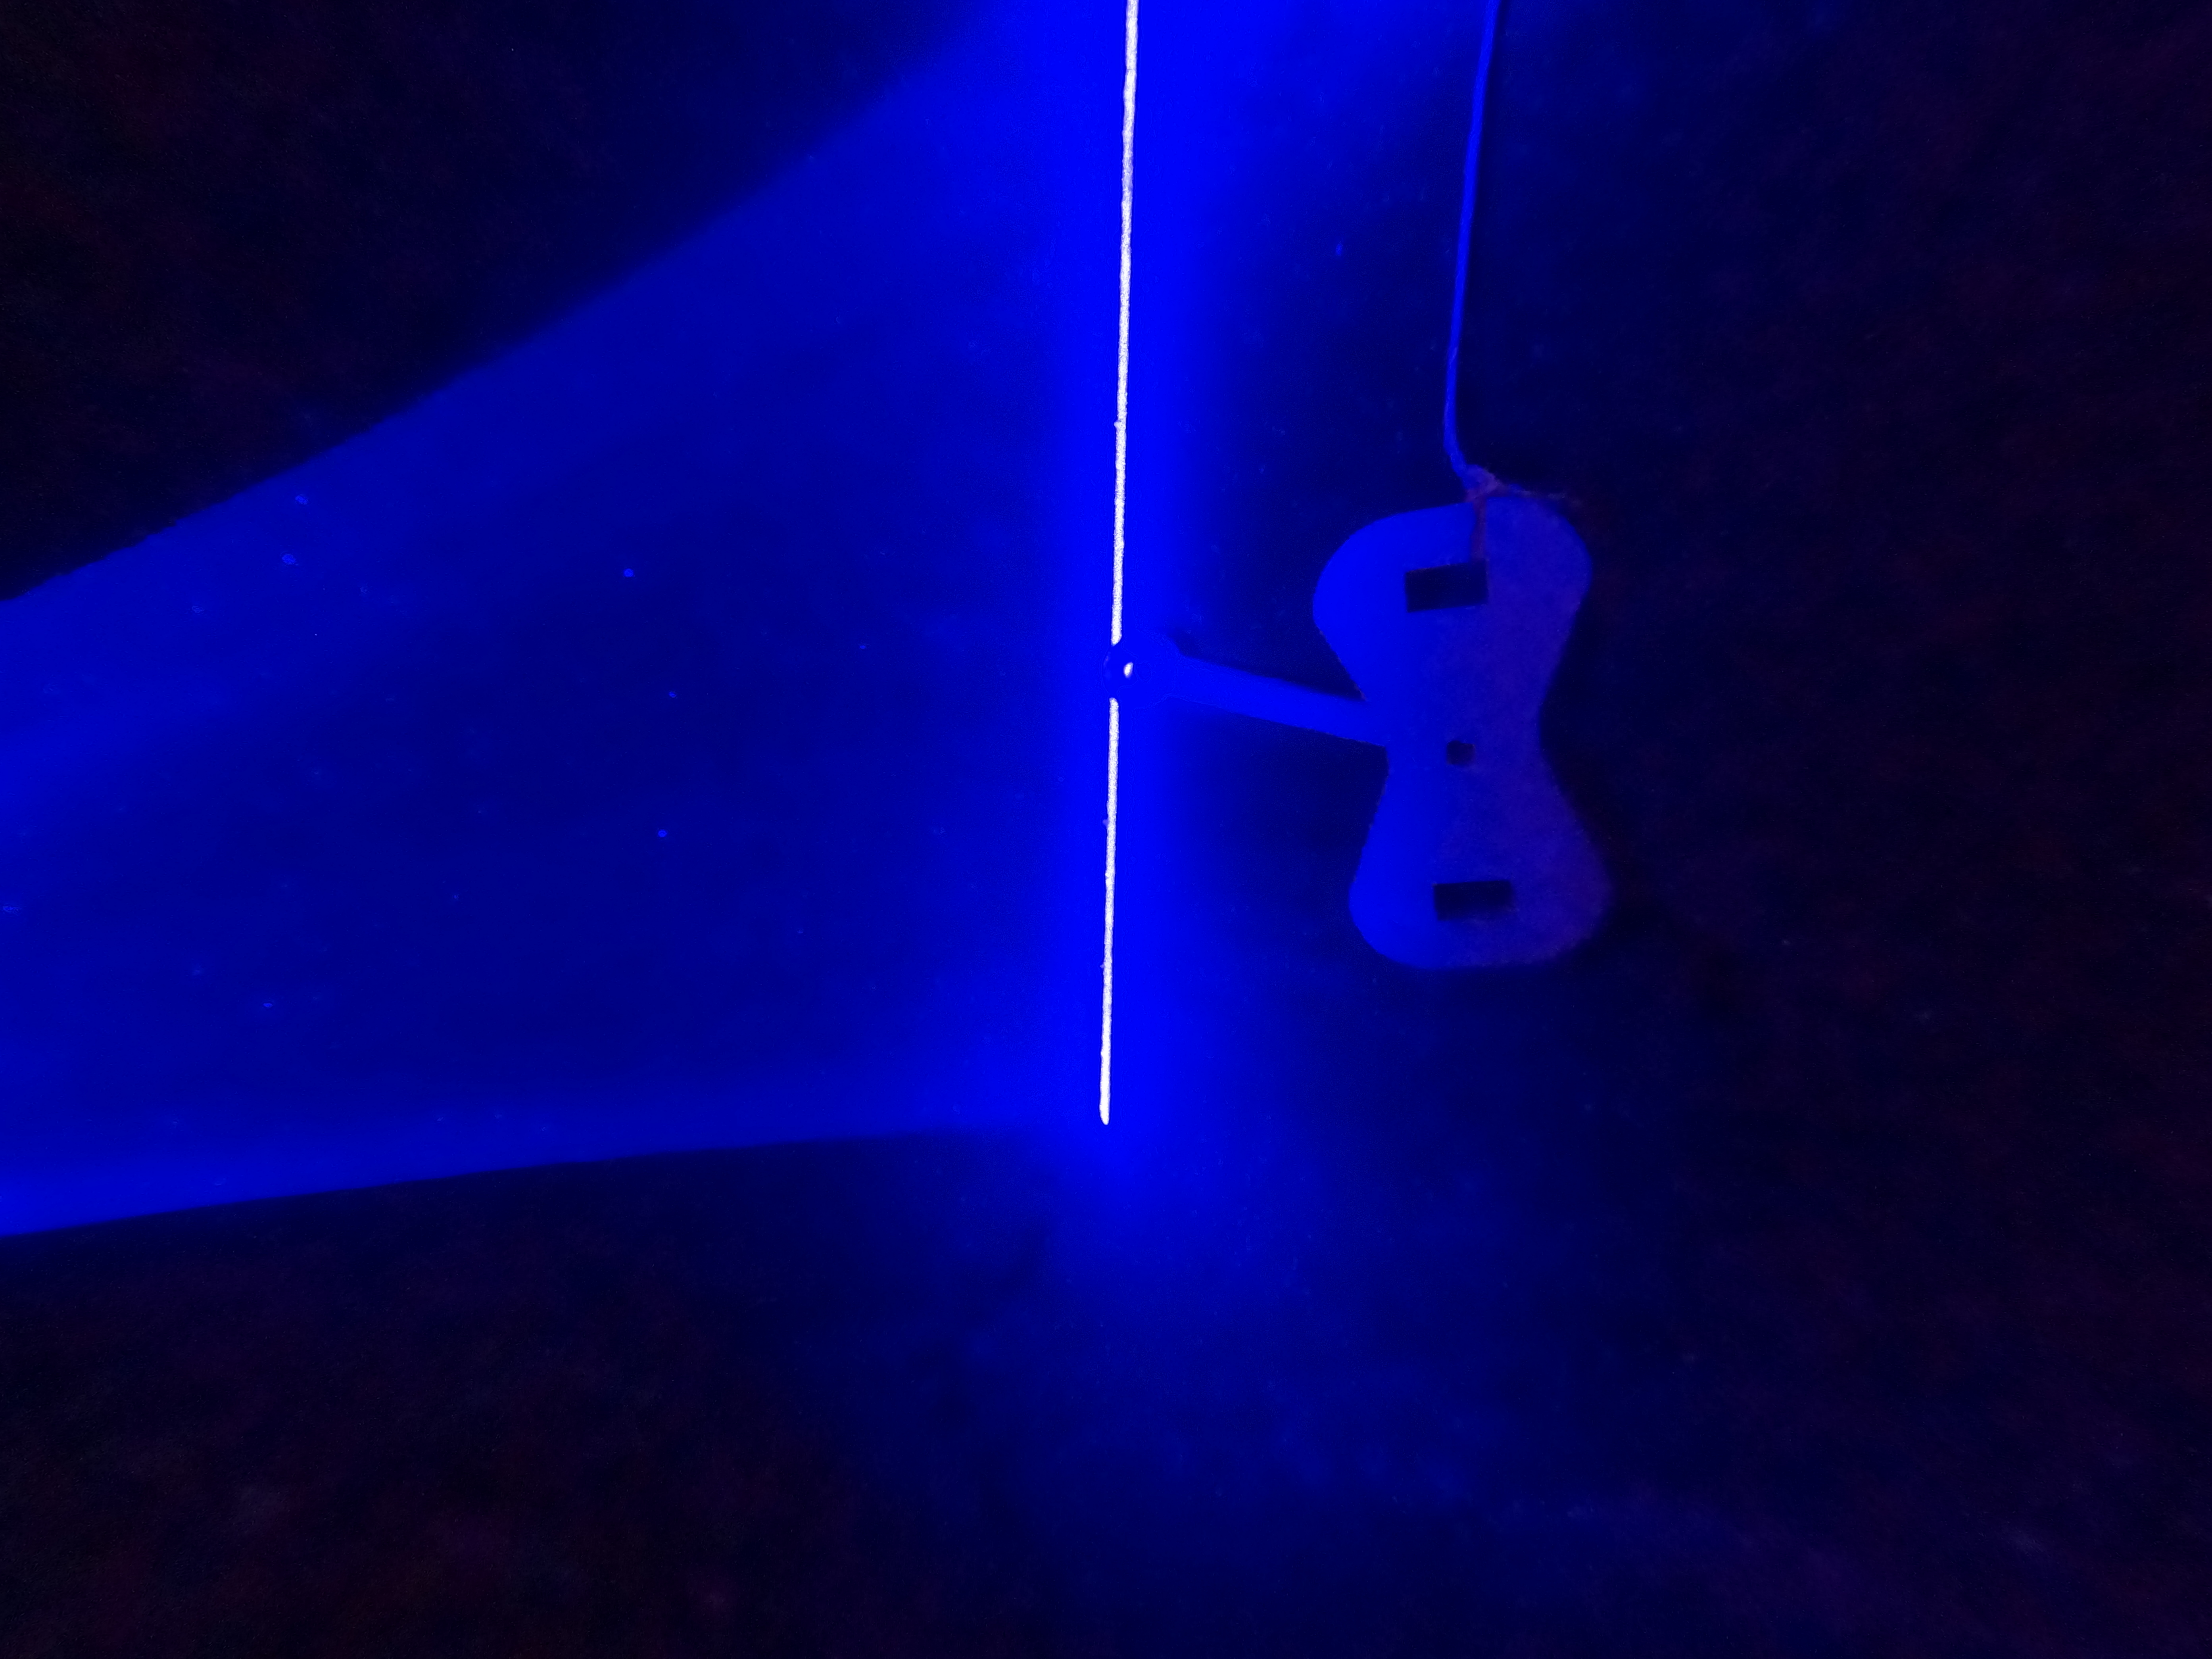

Supplement: Supplementary file 2334 [file G0016643.pdf › Level_1_2/G0016643.pdf]

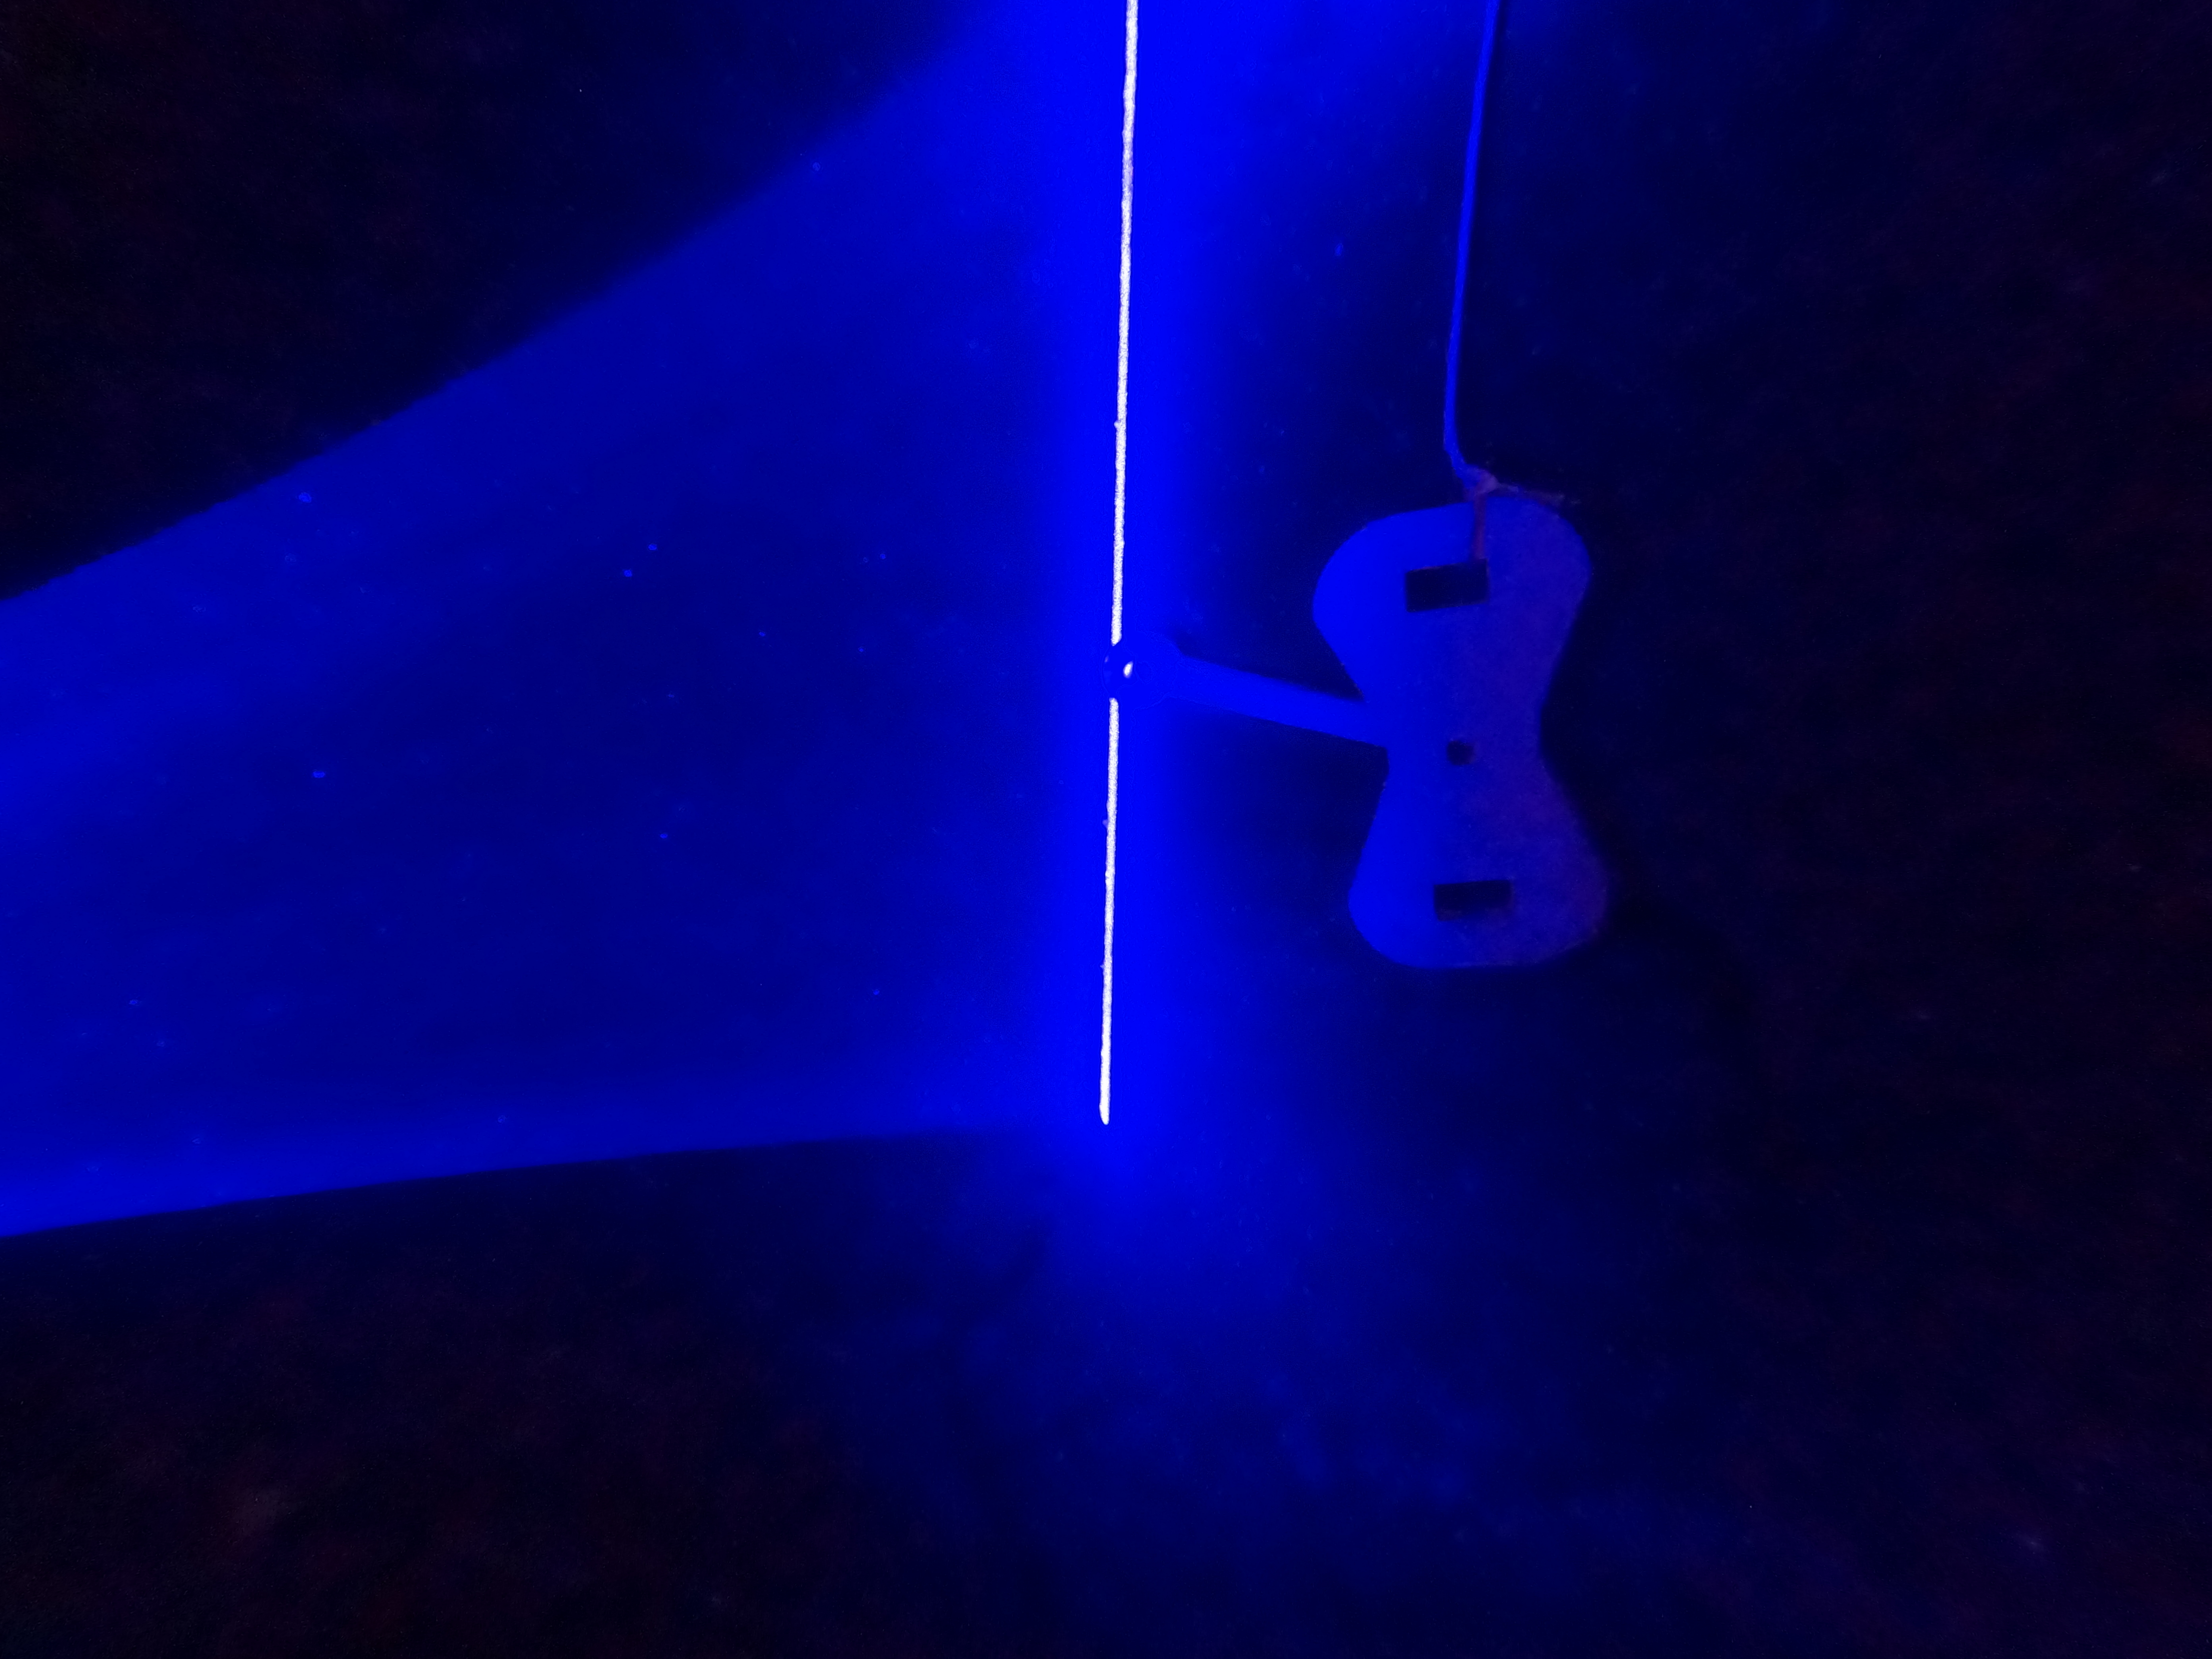

Supplement: Supplementary file 2335 [file G0016644.pdf › Level_1_2/G0016644.pdf]

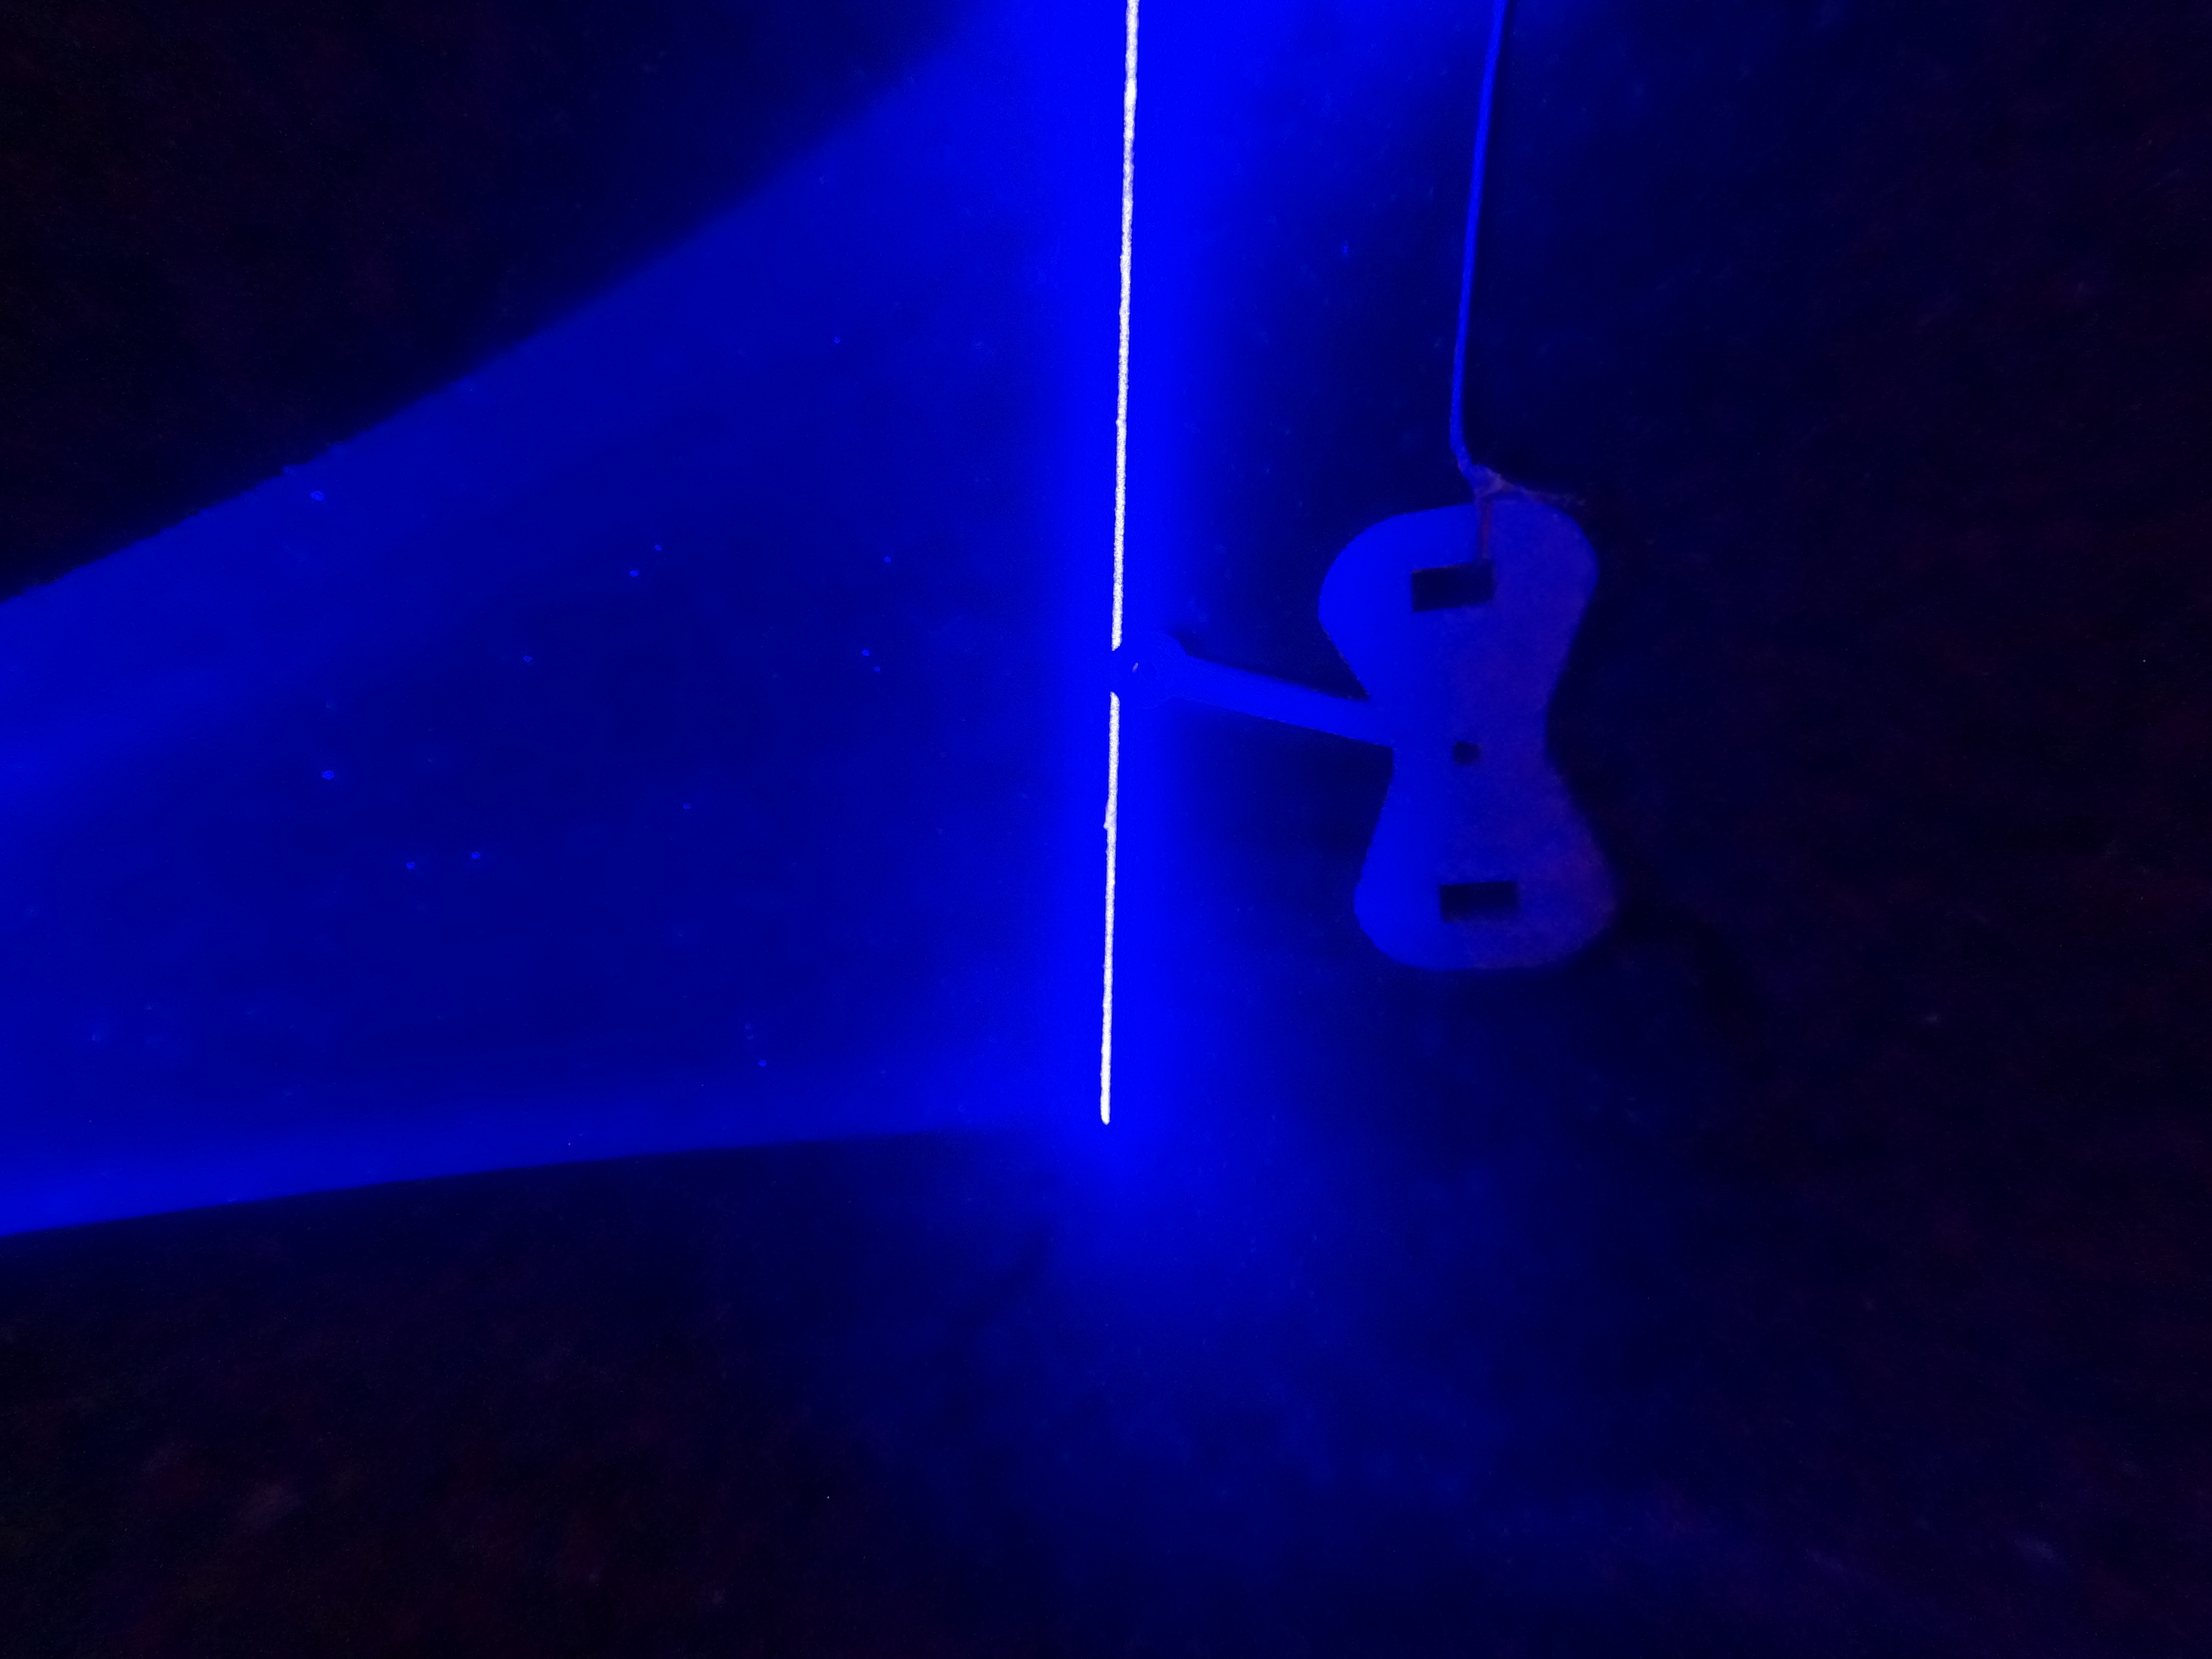

Supplement: Supplementary file 2336 [file G0016645.pdf › Level_1_2/G0016645.pdf]

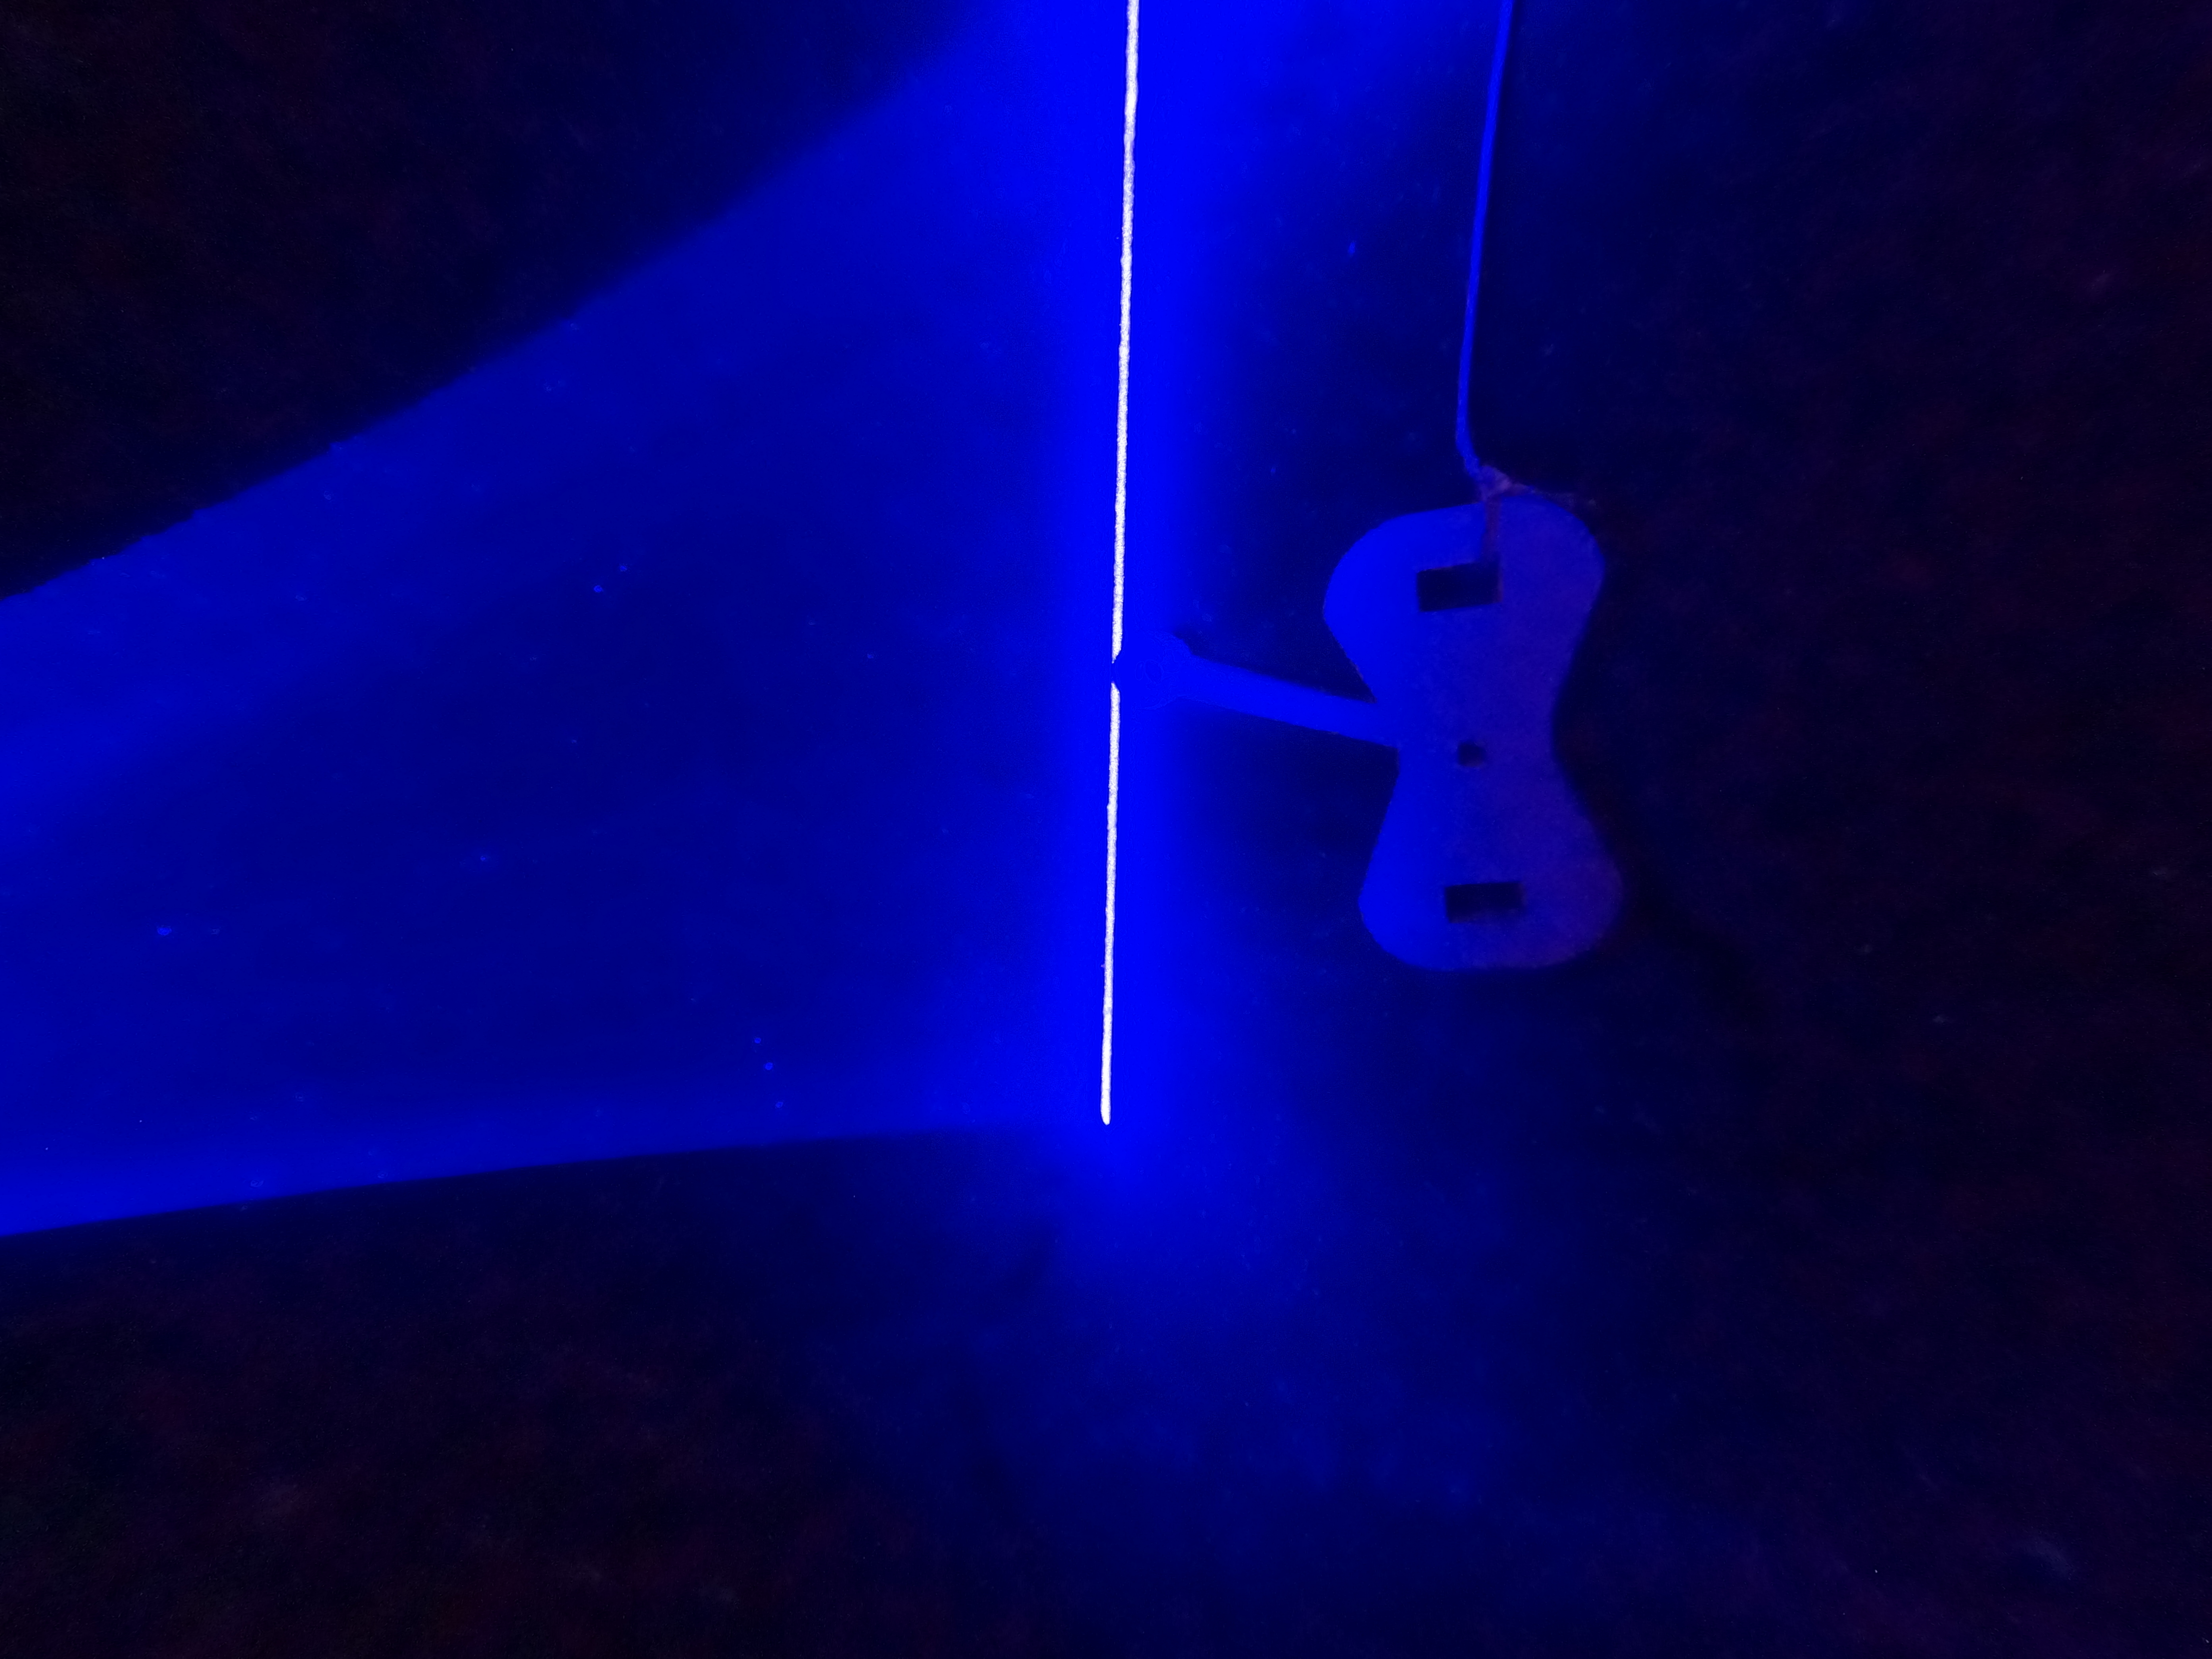

Supplement: Supplementary file 2337 [file G0016646.pdf › Level_1_2/G0016646.pdf]

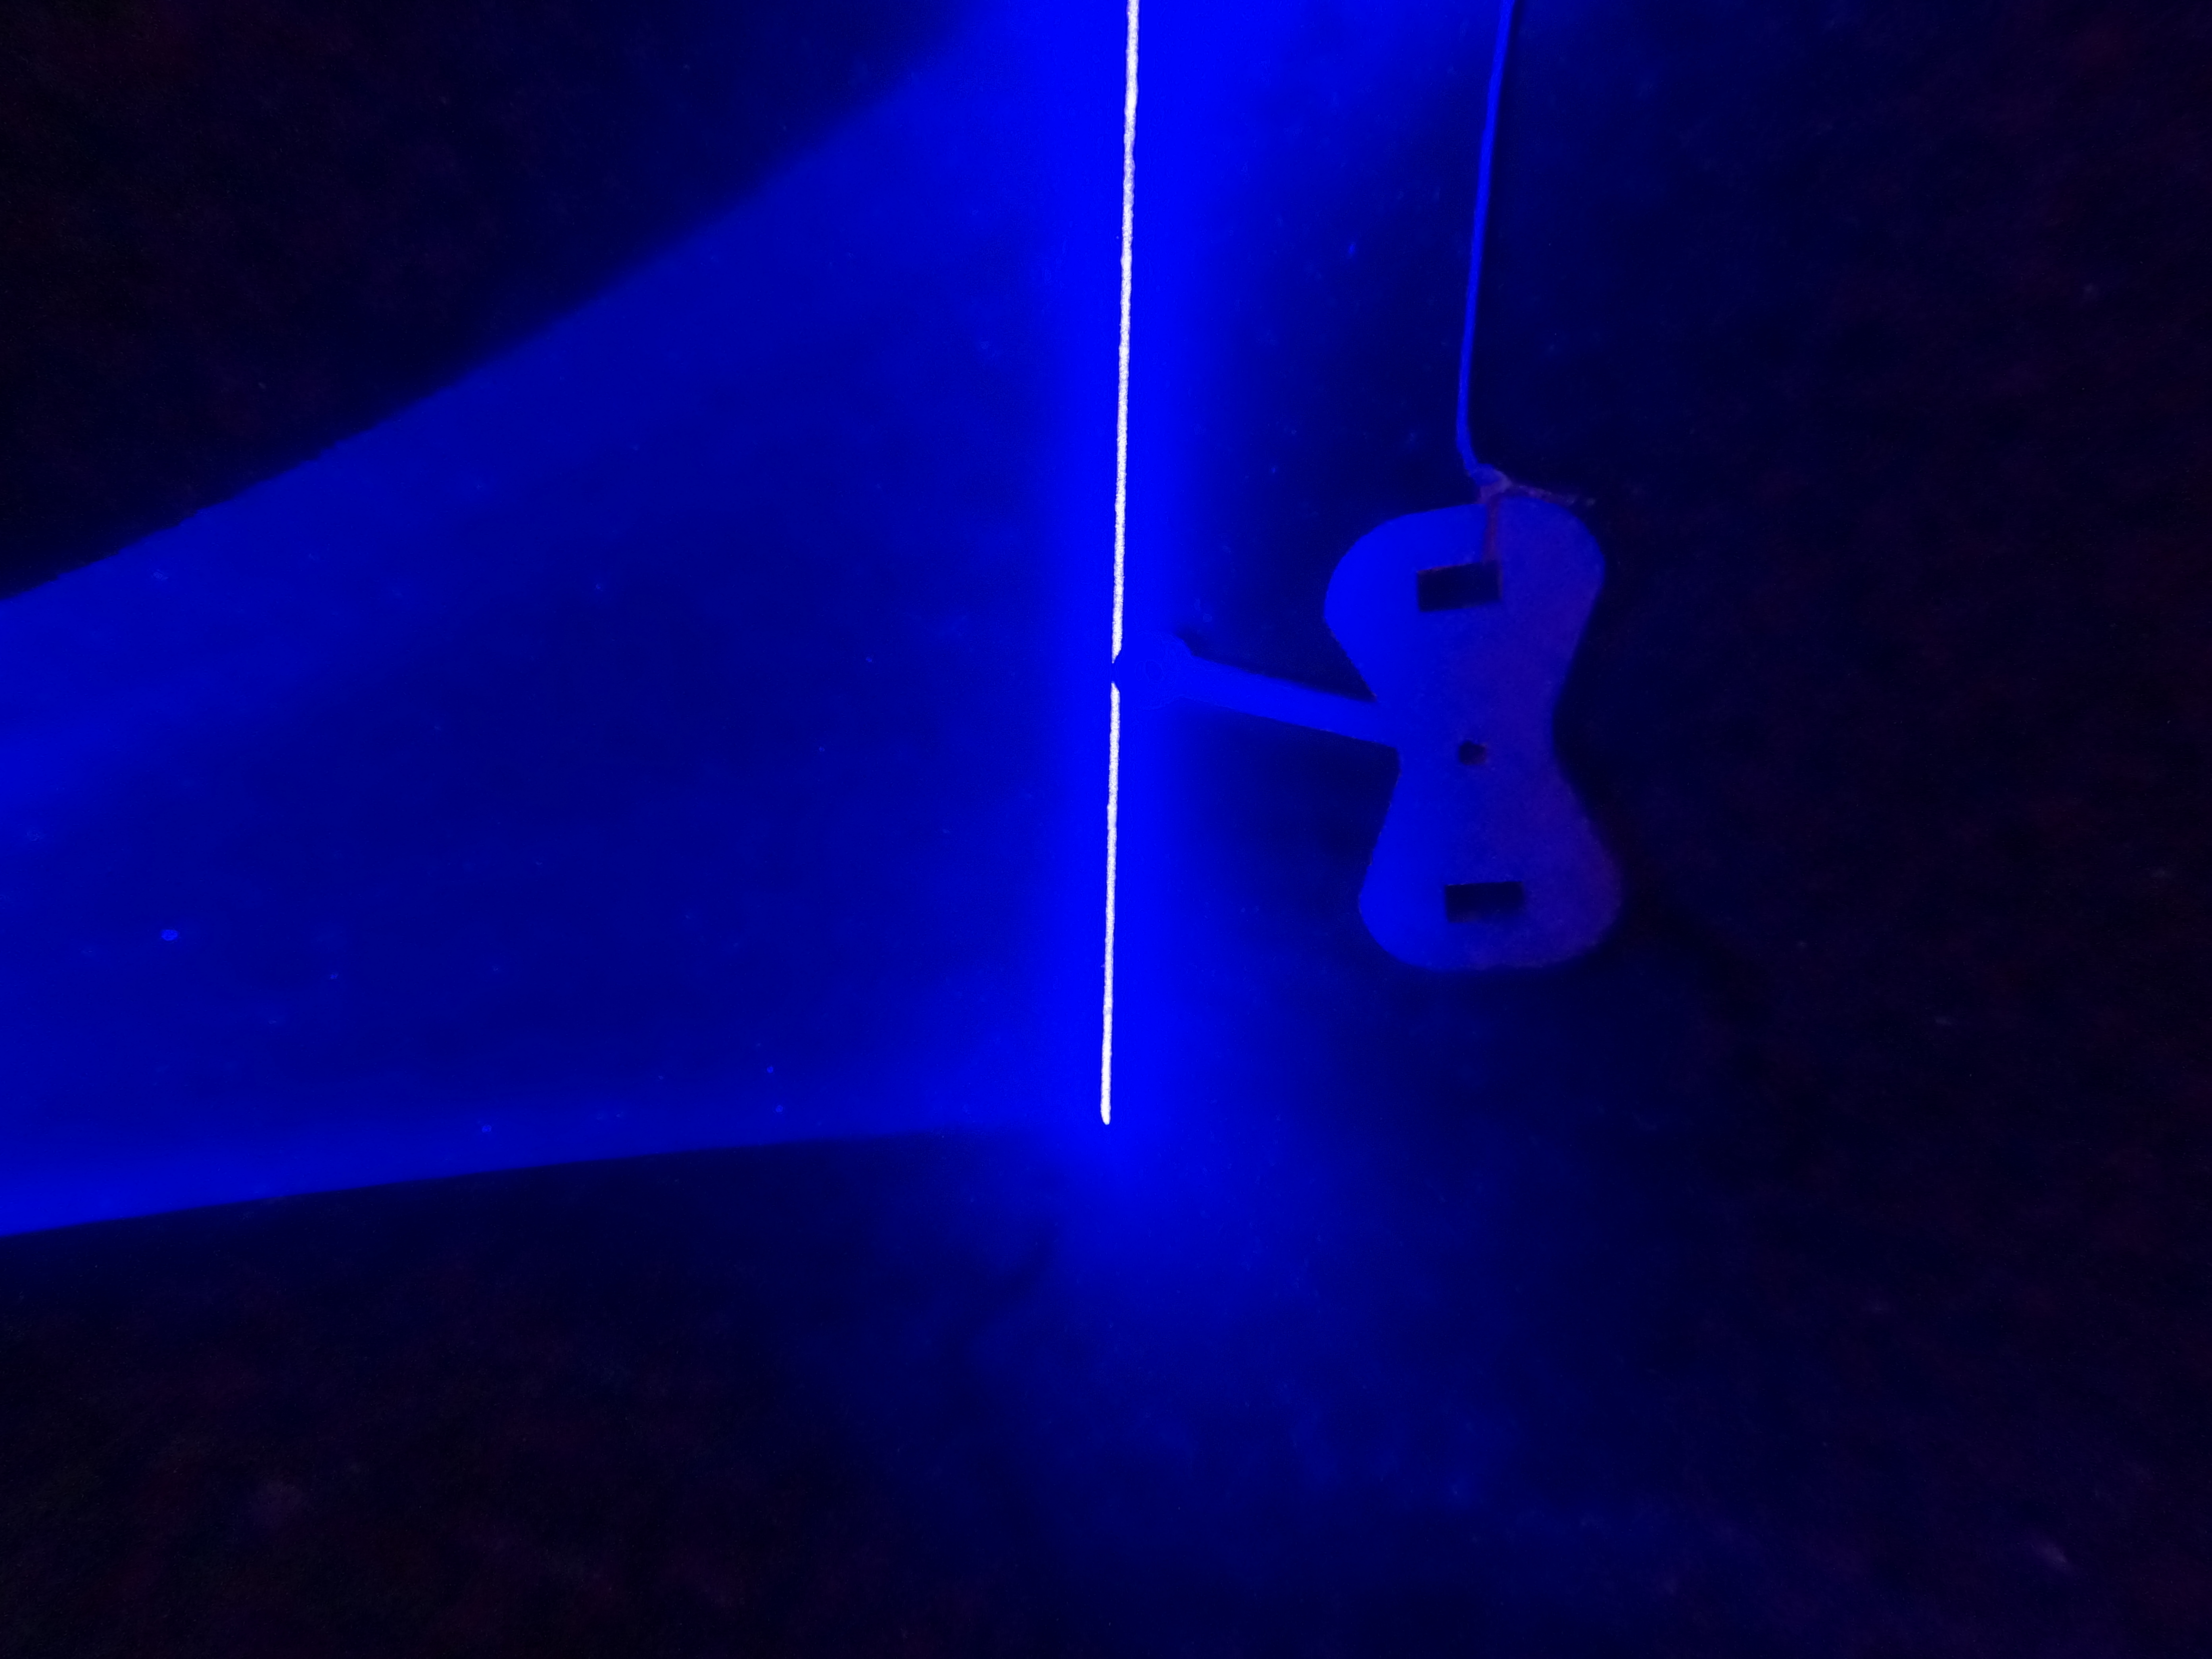

Supplement: Supplementary file 2338 [file G0016647.pdf › Level_1_2/G0016647.pdf]

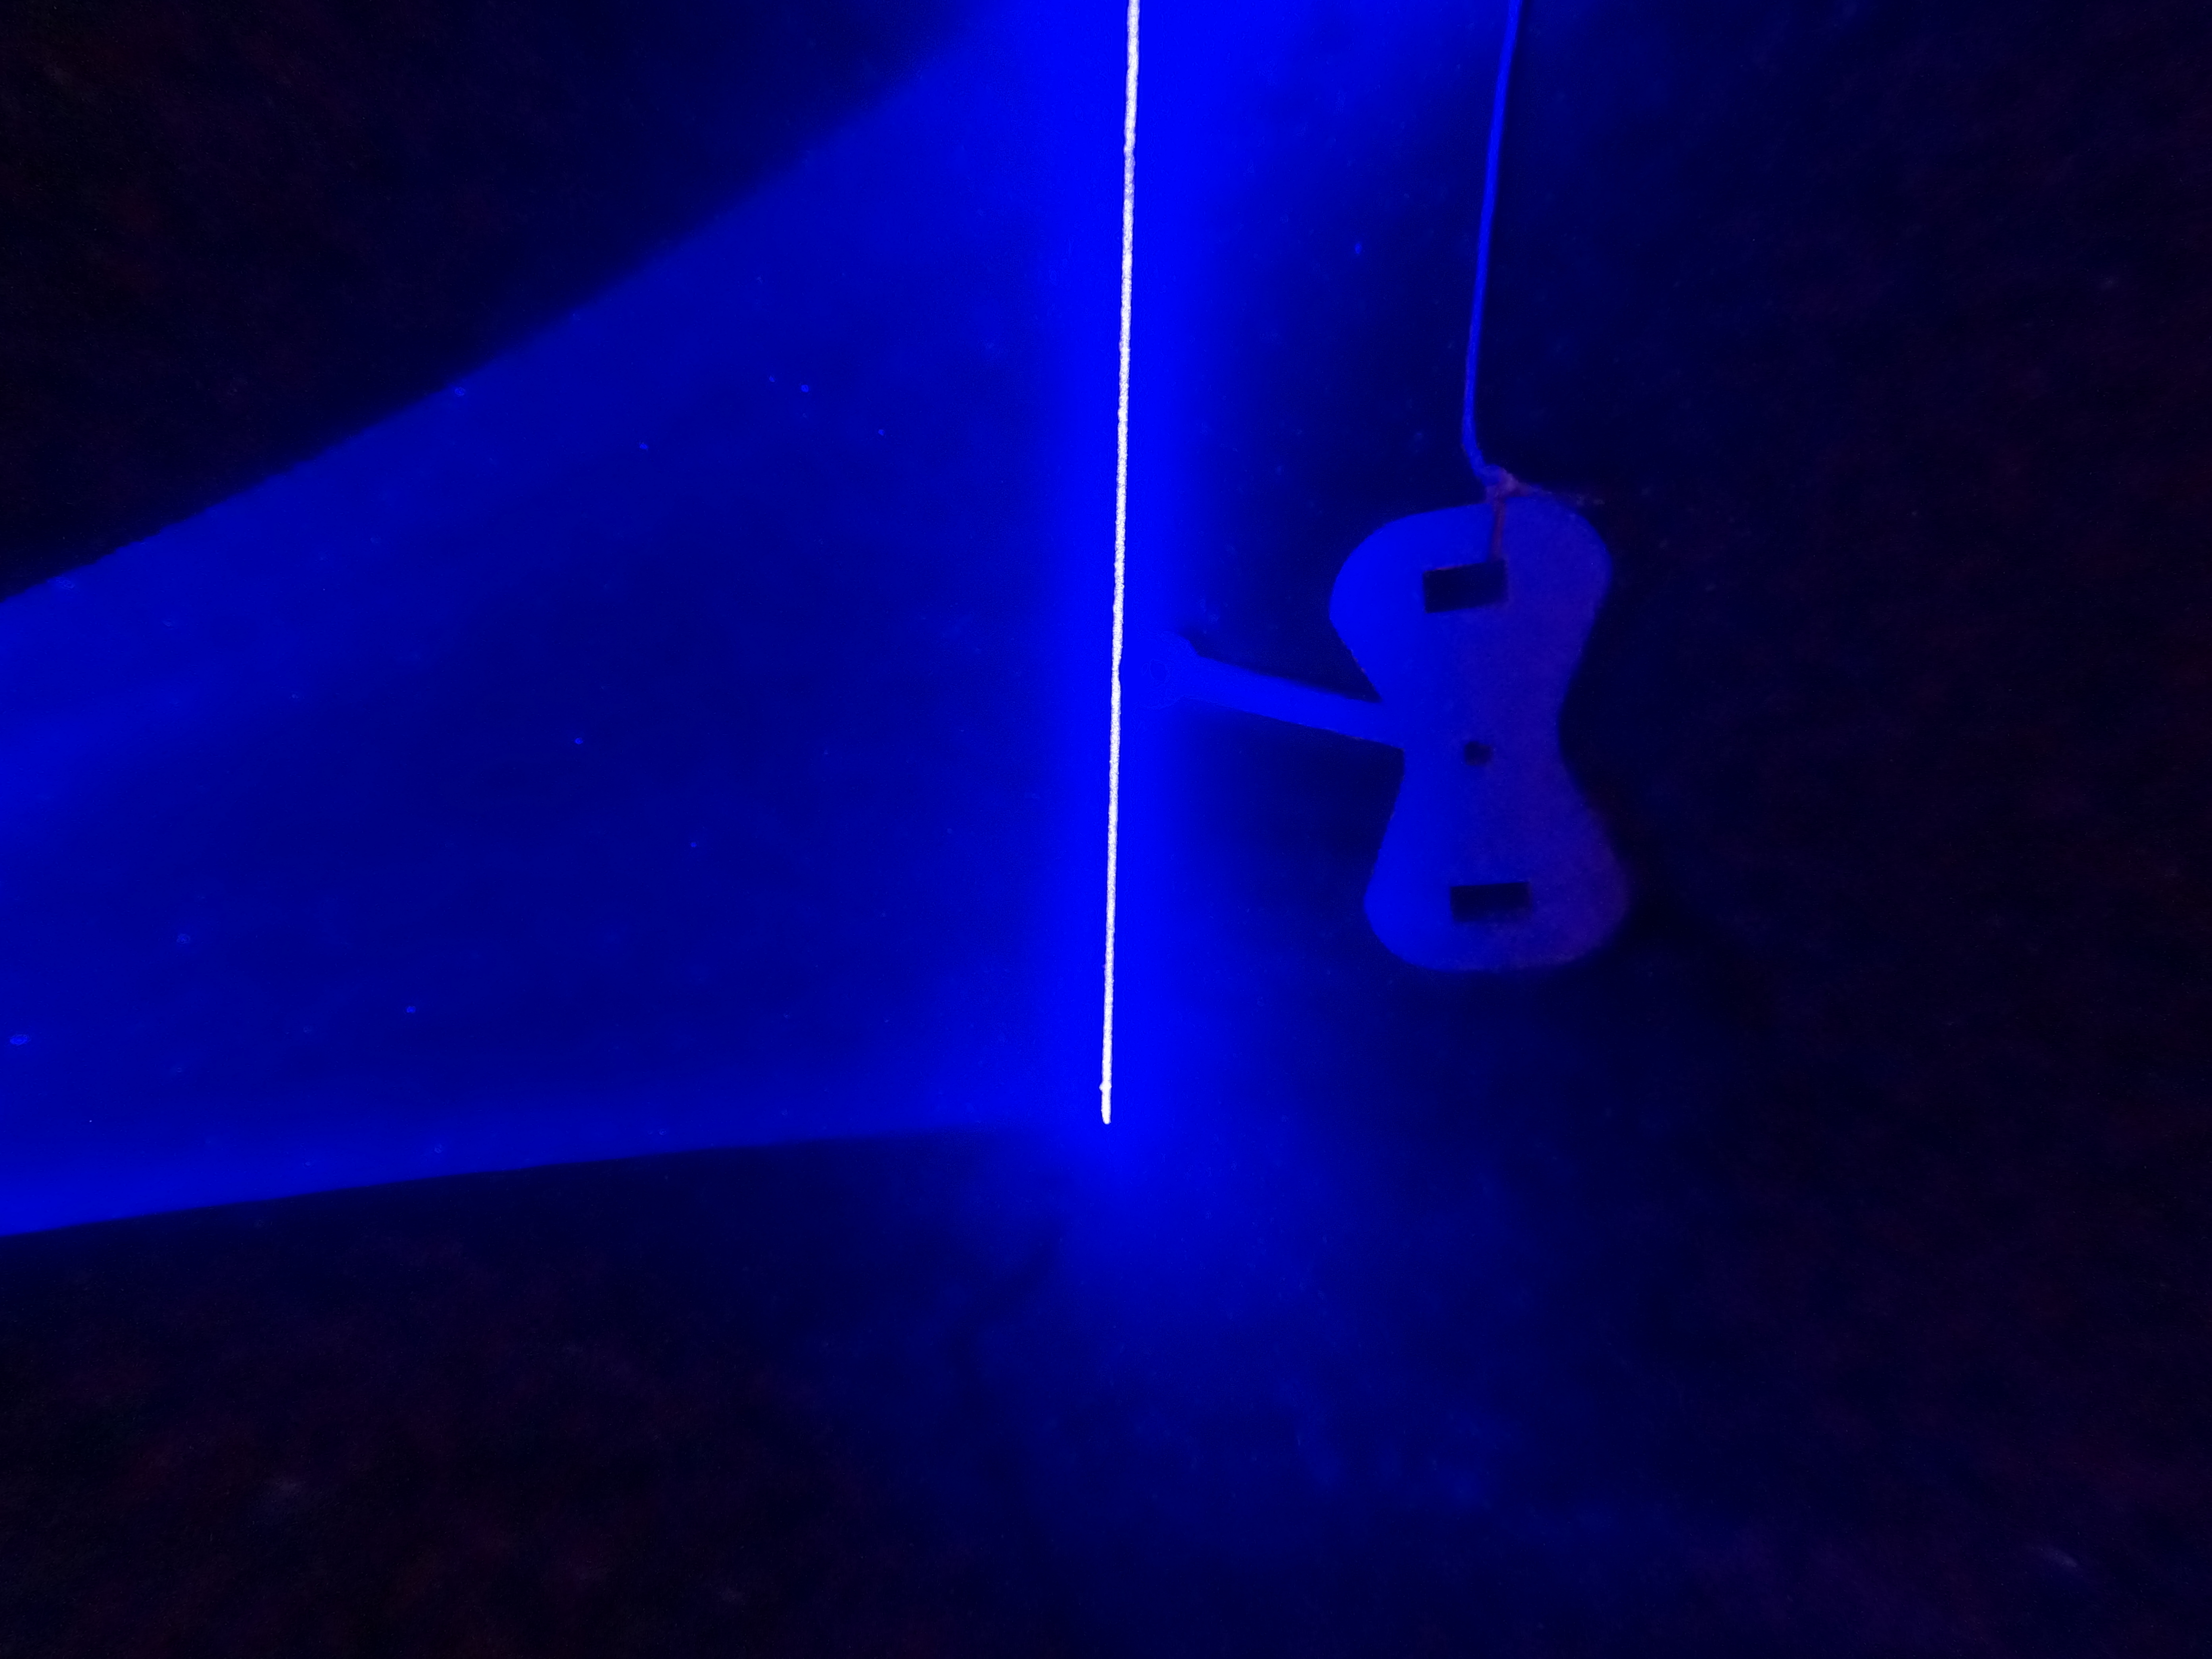

Supplement: Supplementary file 2339 [file G0016648.pdf › Level_1_2/G0016648.pdf]

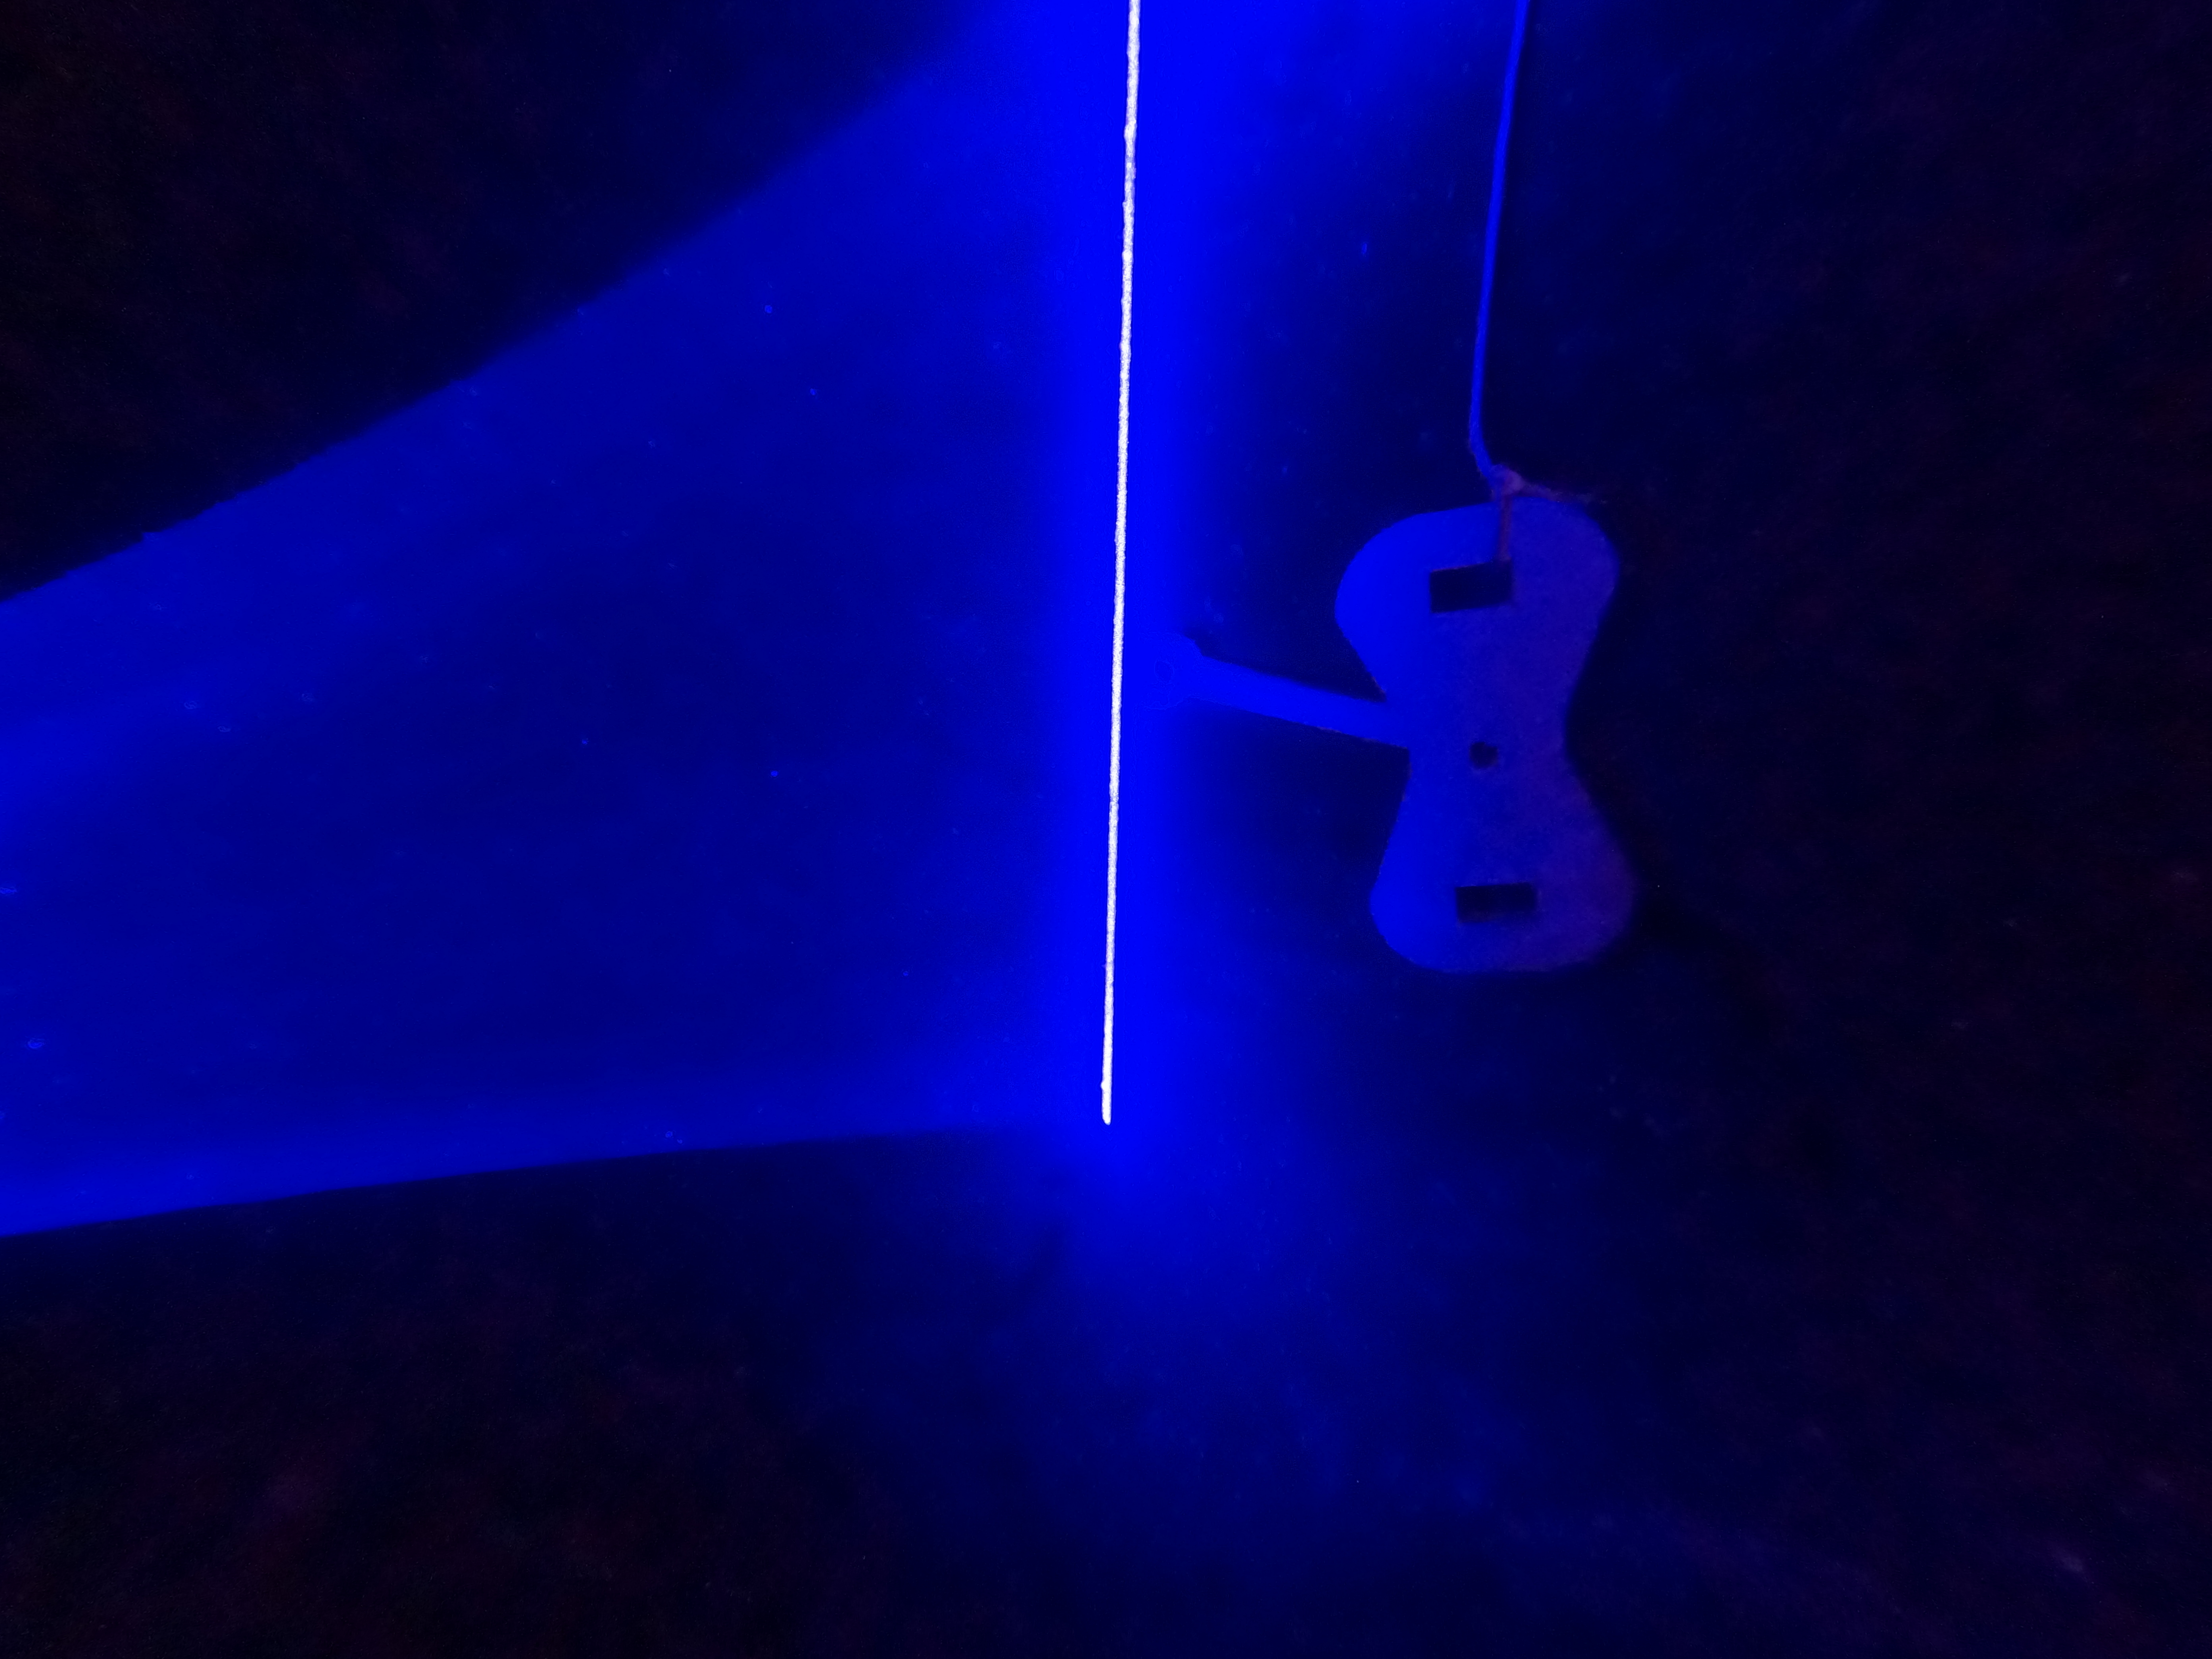

Supplement: Supplementary file 2340 [file G0016649.pdf › Level_1_2/G0016649.pdf]

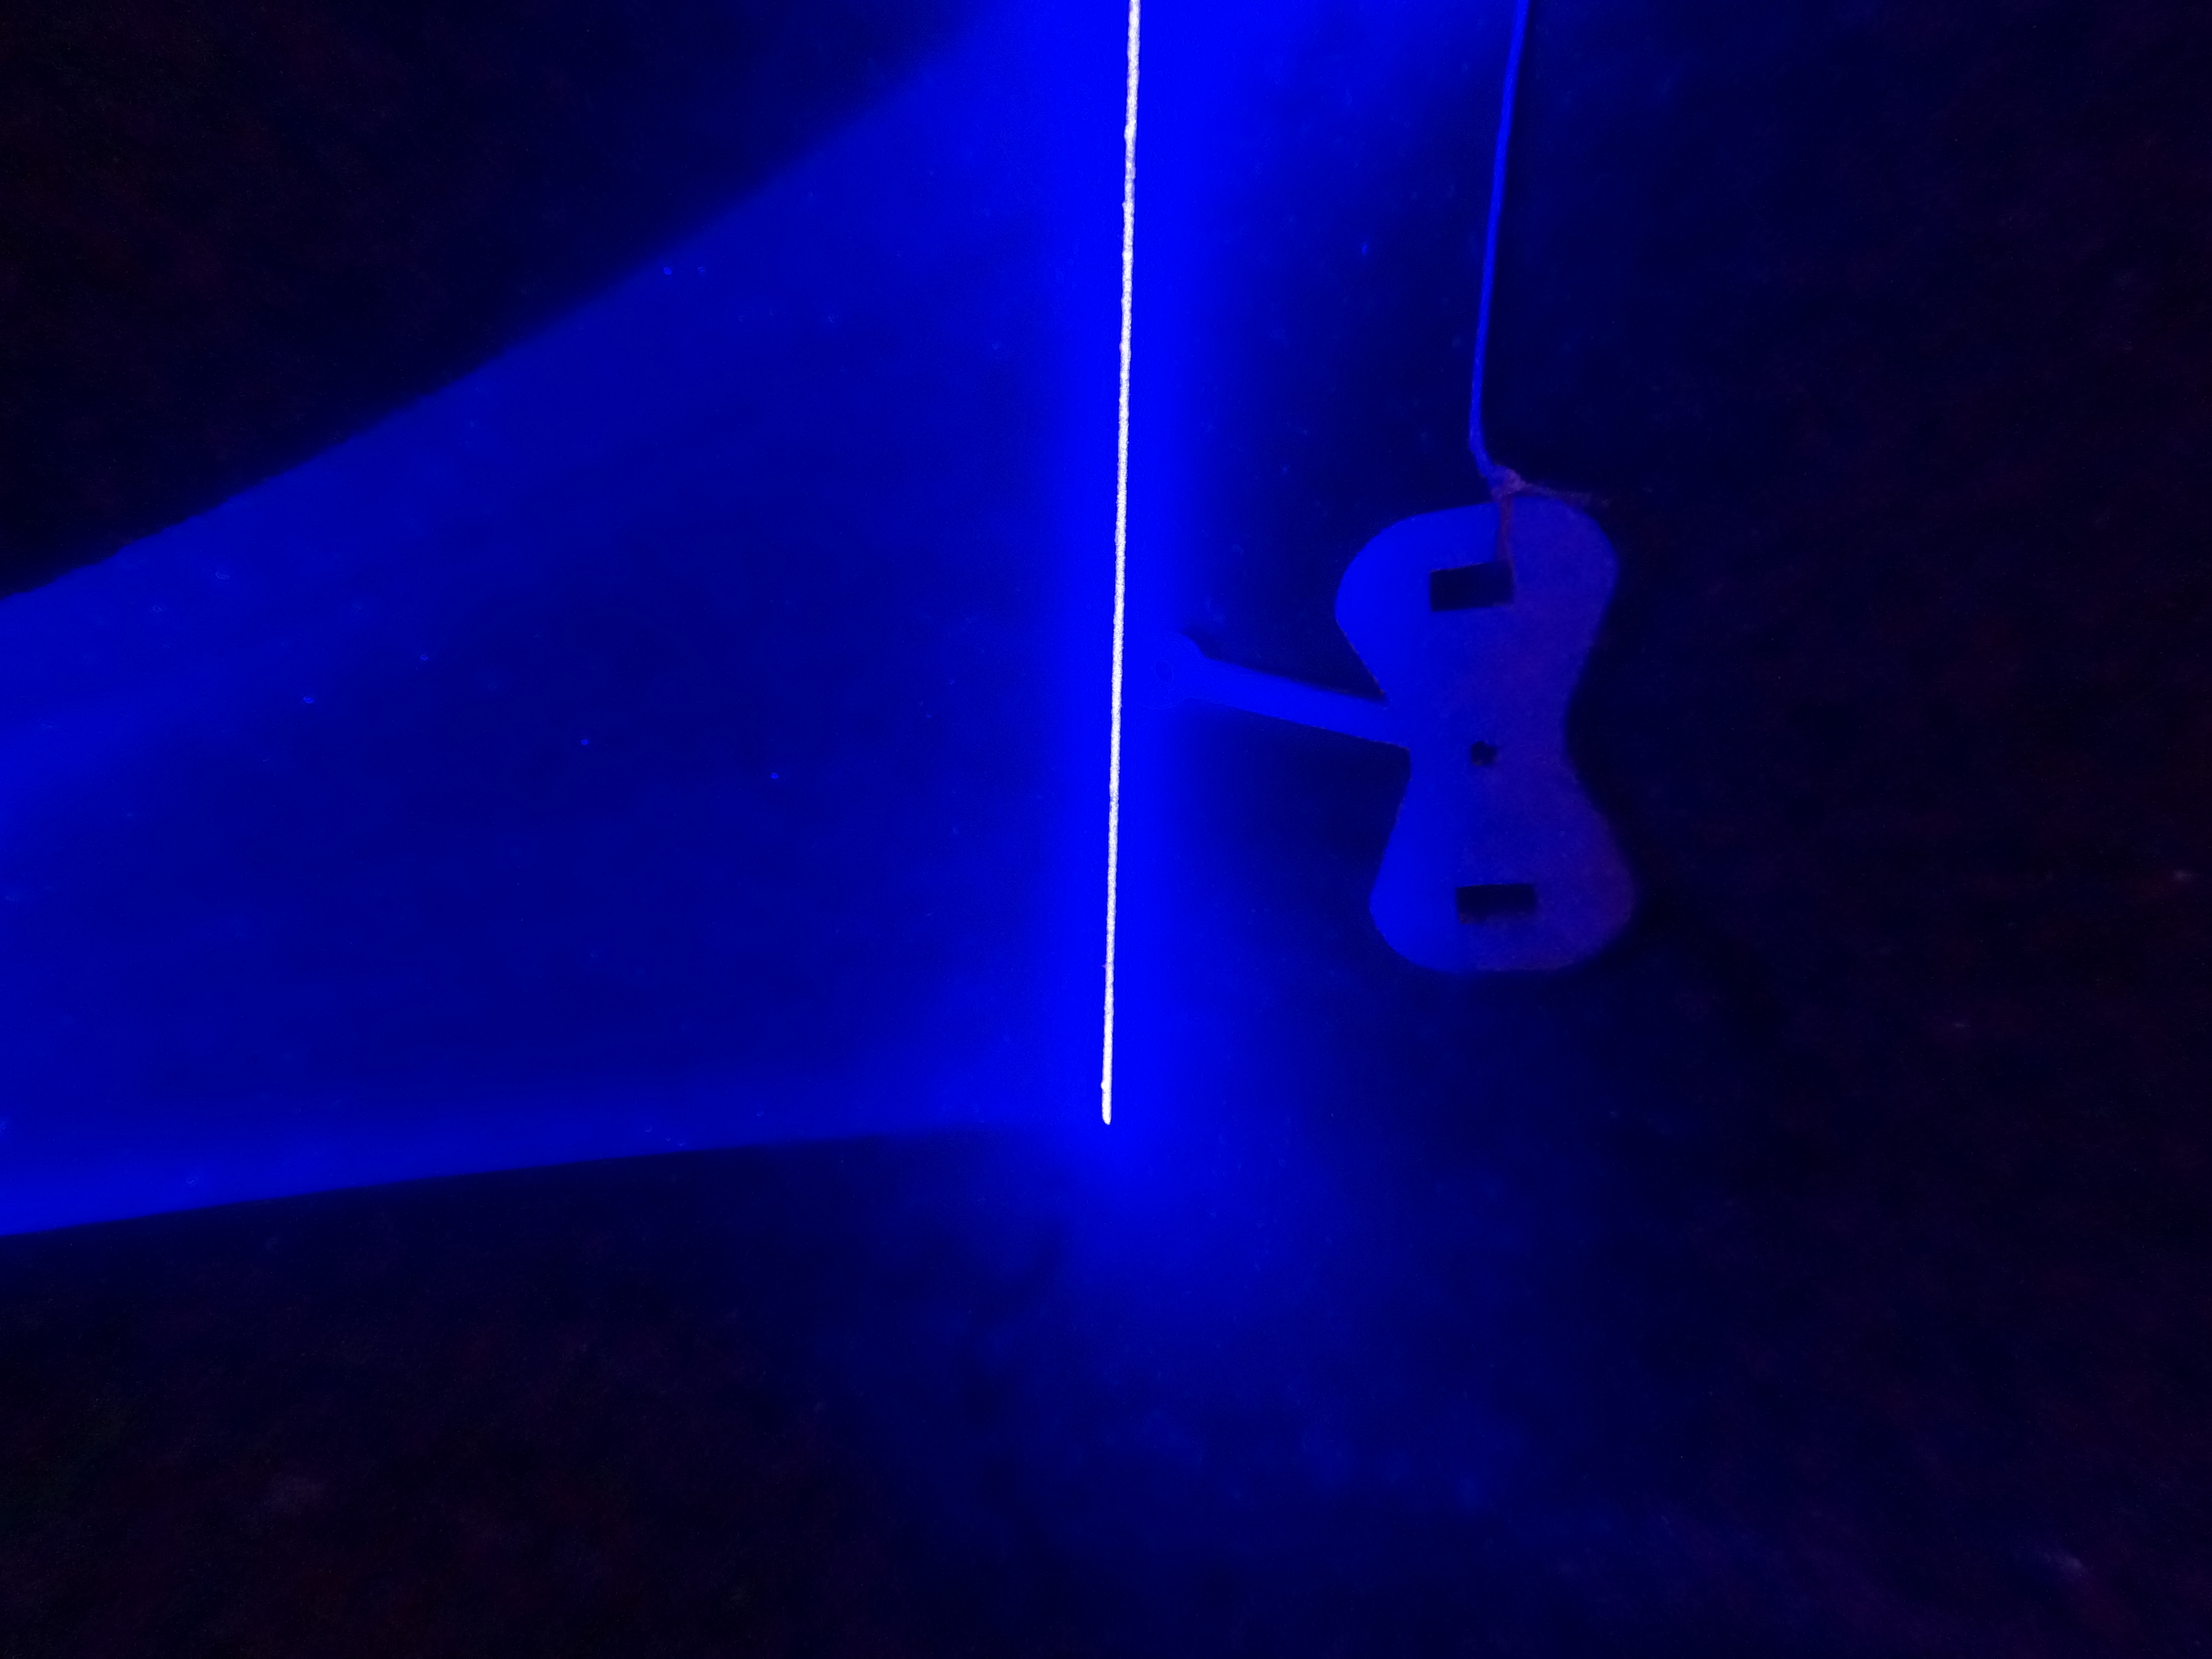

Supplement: Supplementary file 2341 [file G0016650.pdf › Level_1_2/G0016650.pdf]

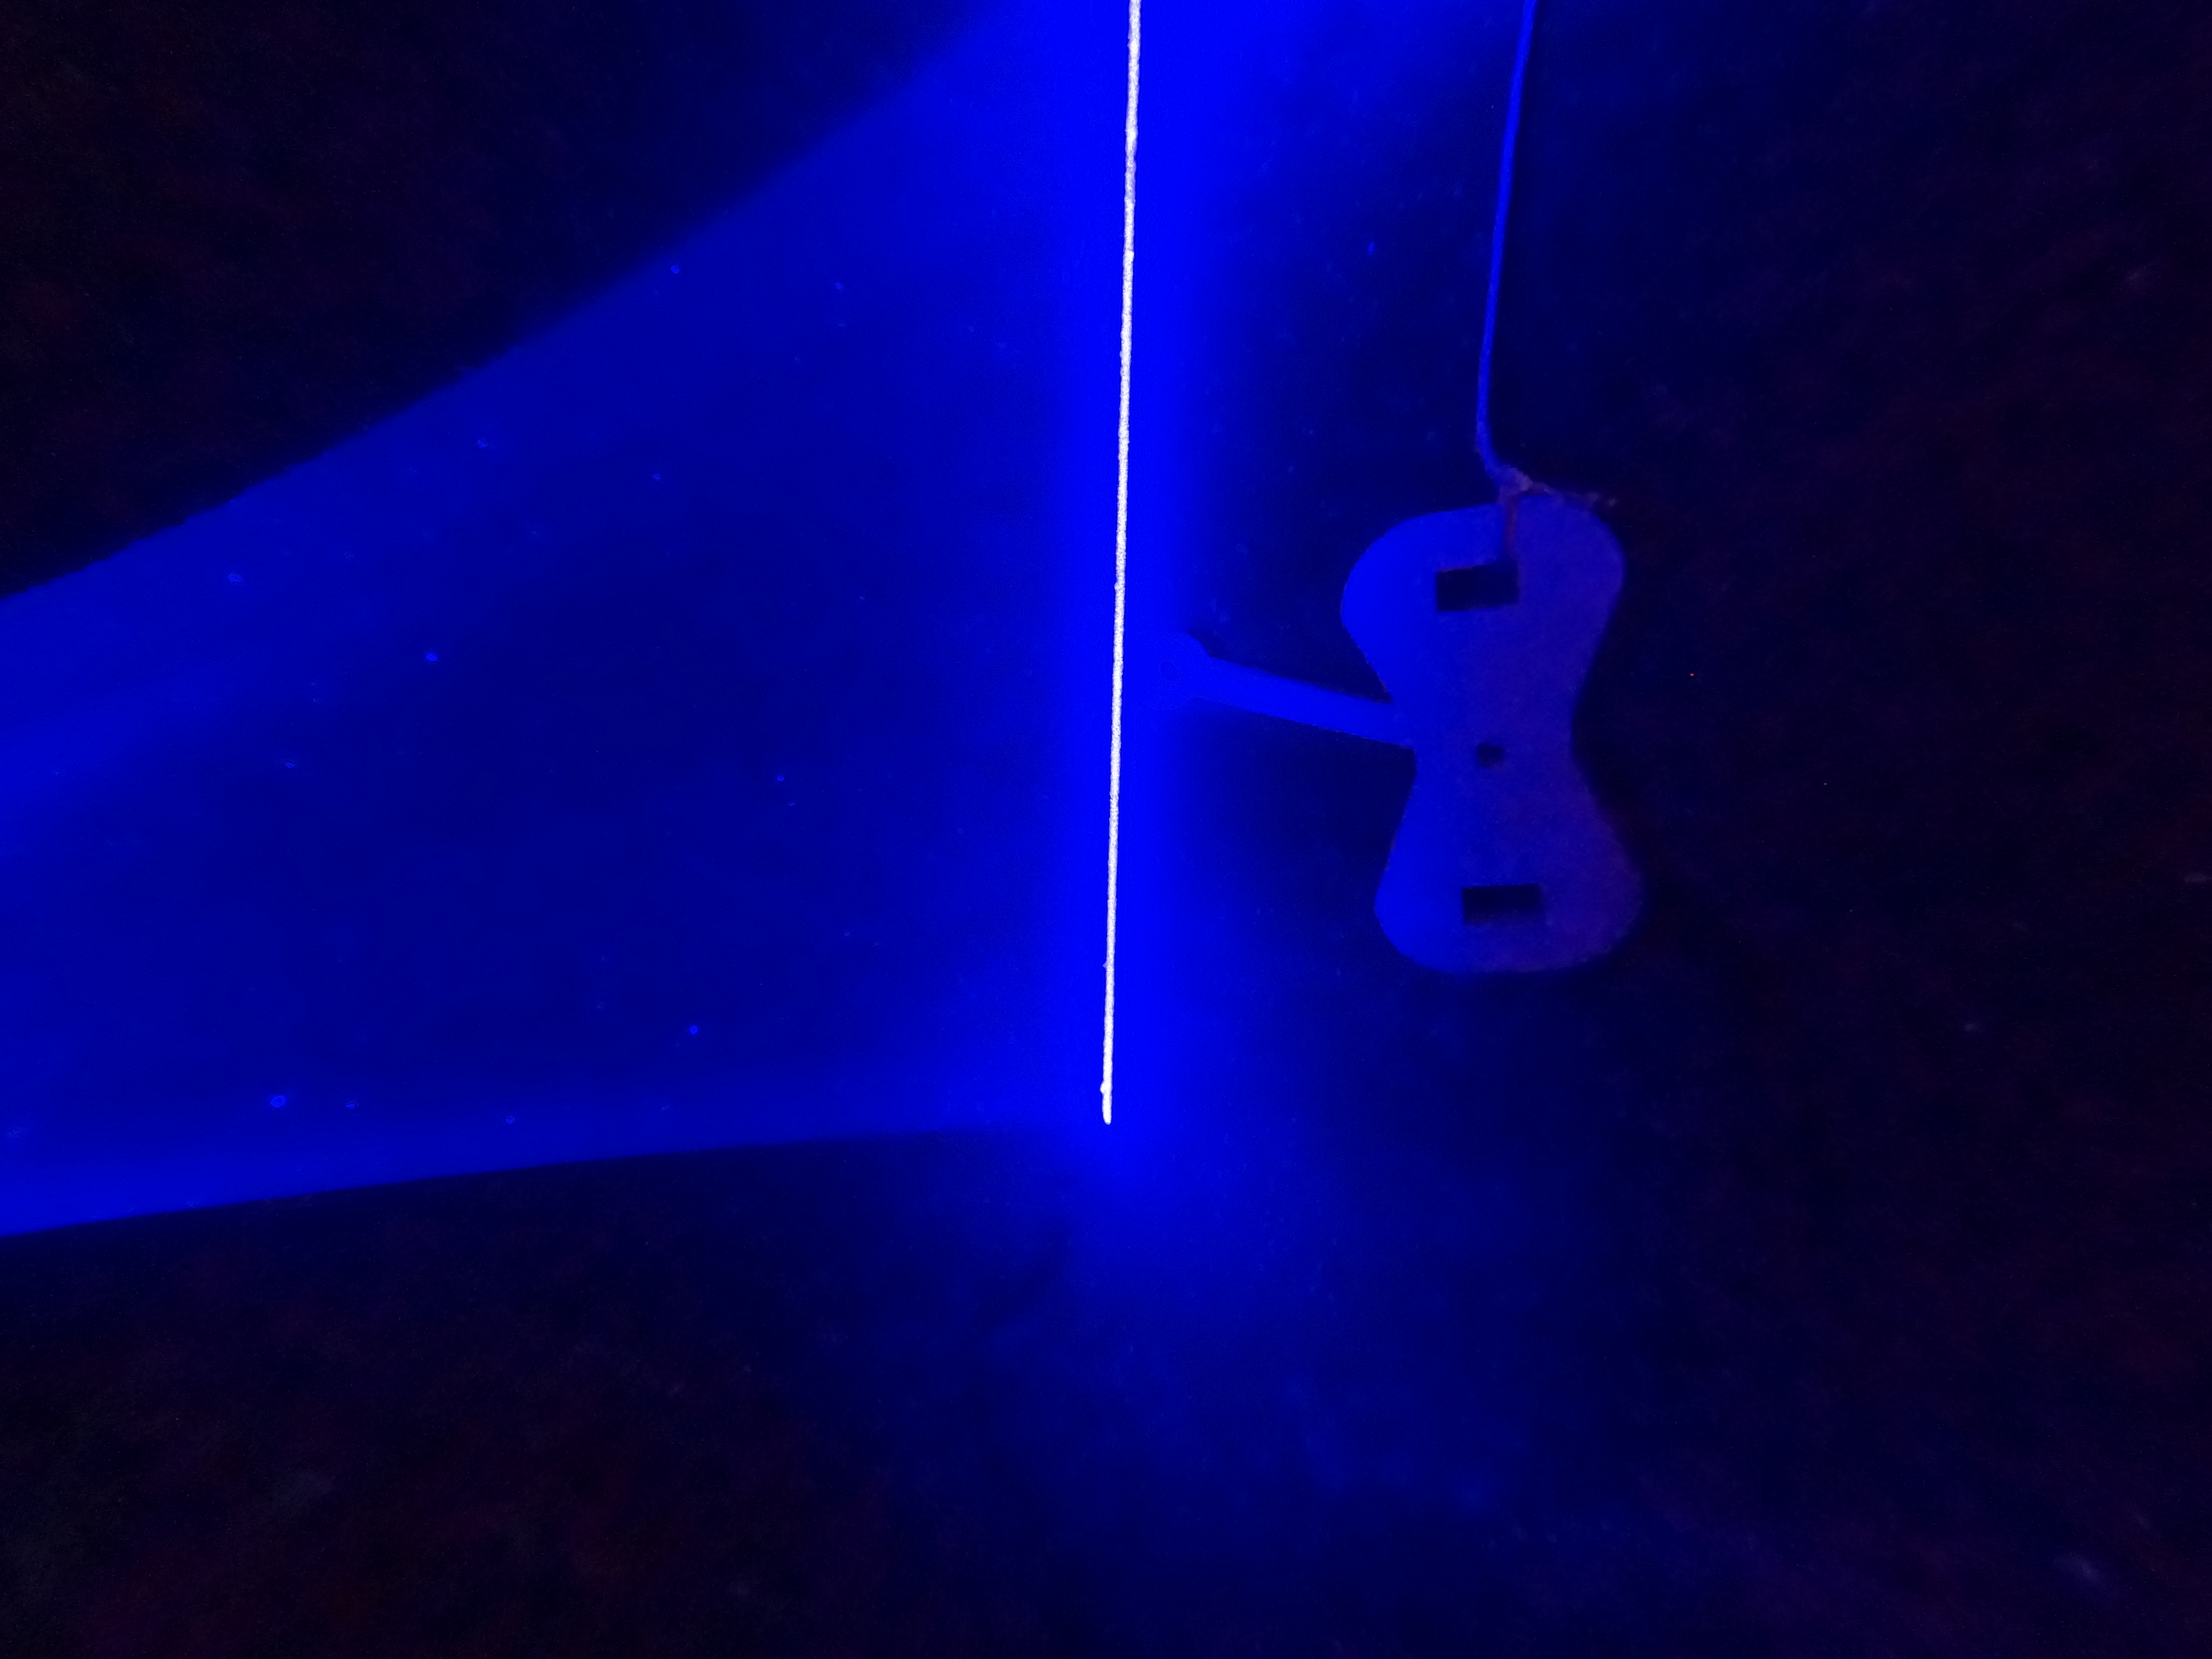

Supplement: Supplementary file 2342 [file G0016651.pdf › Level_1_2/G0016651.pdf]

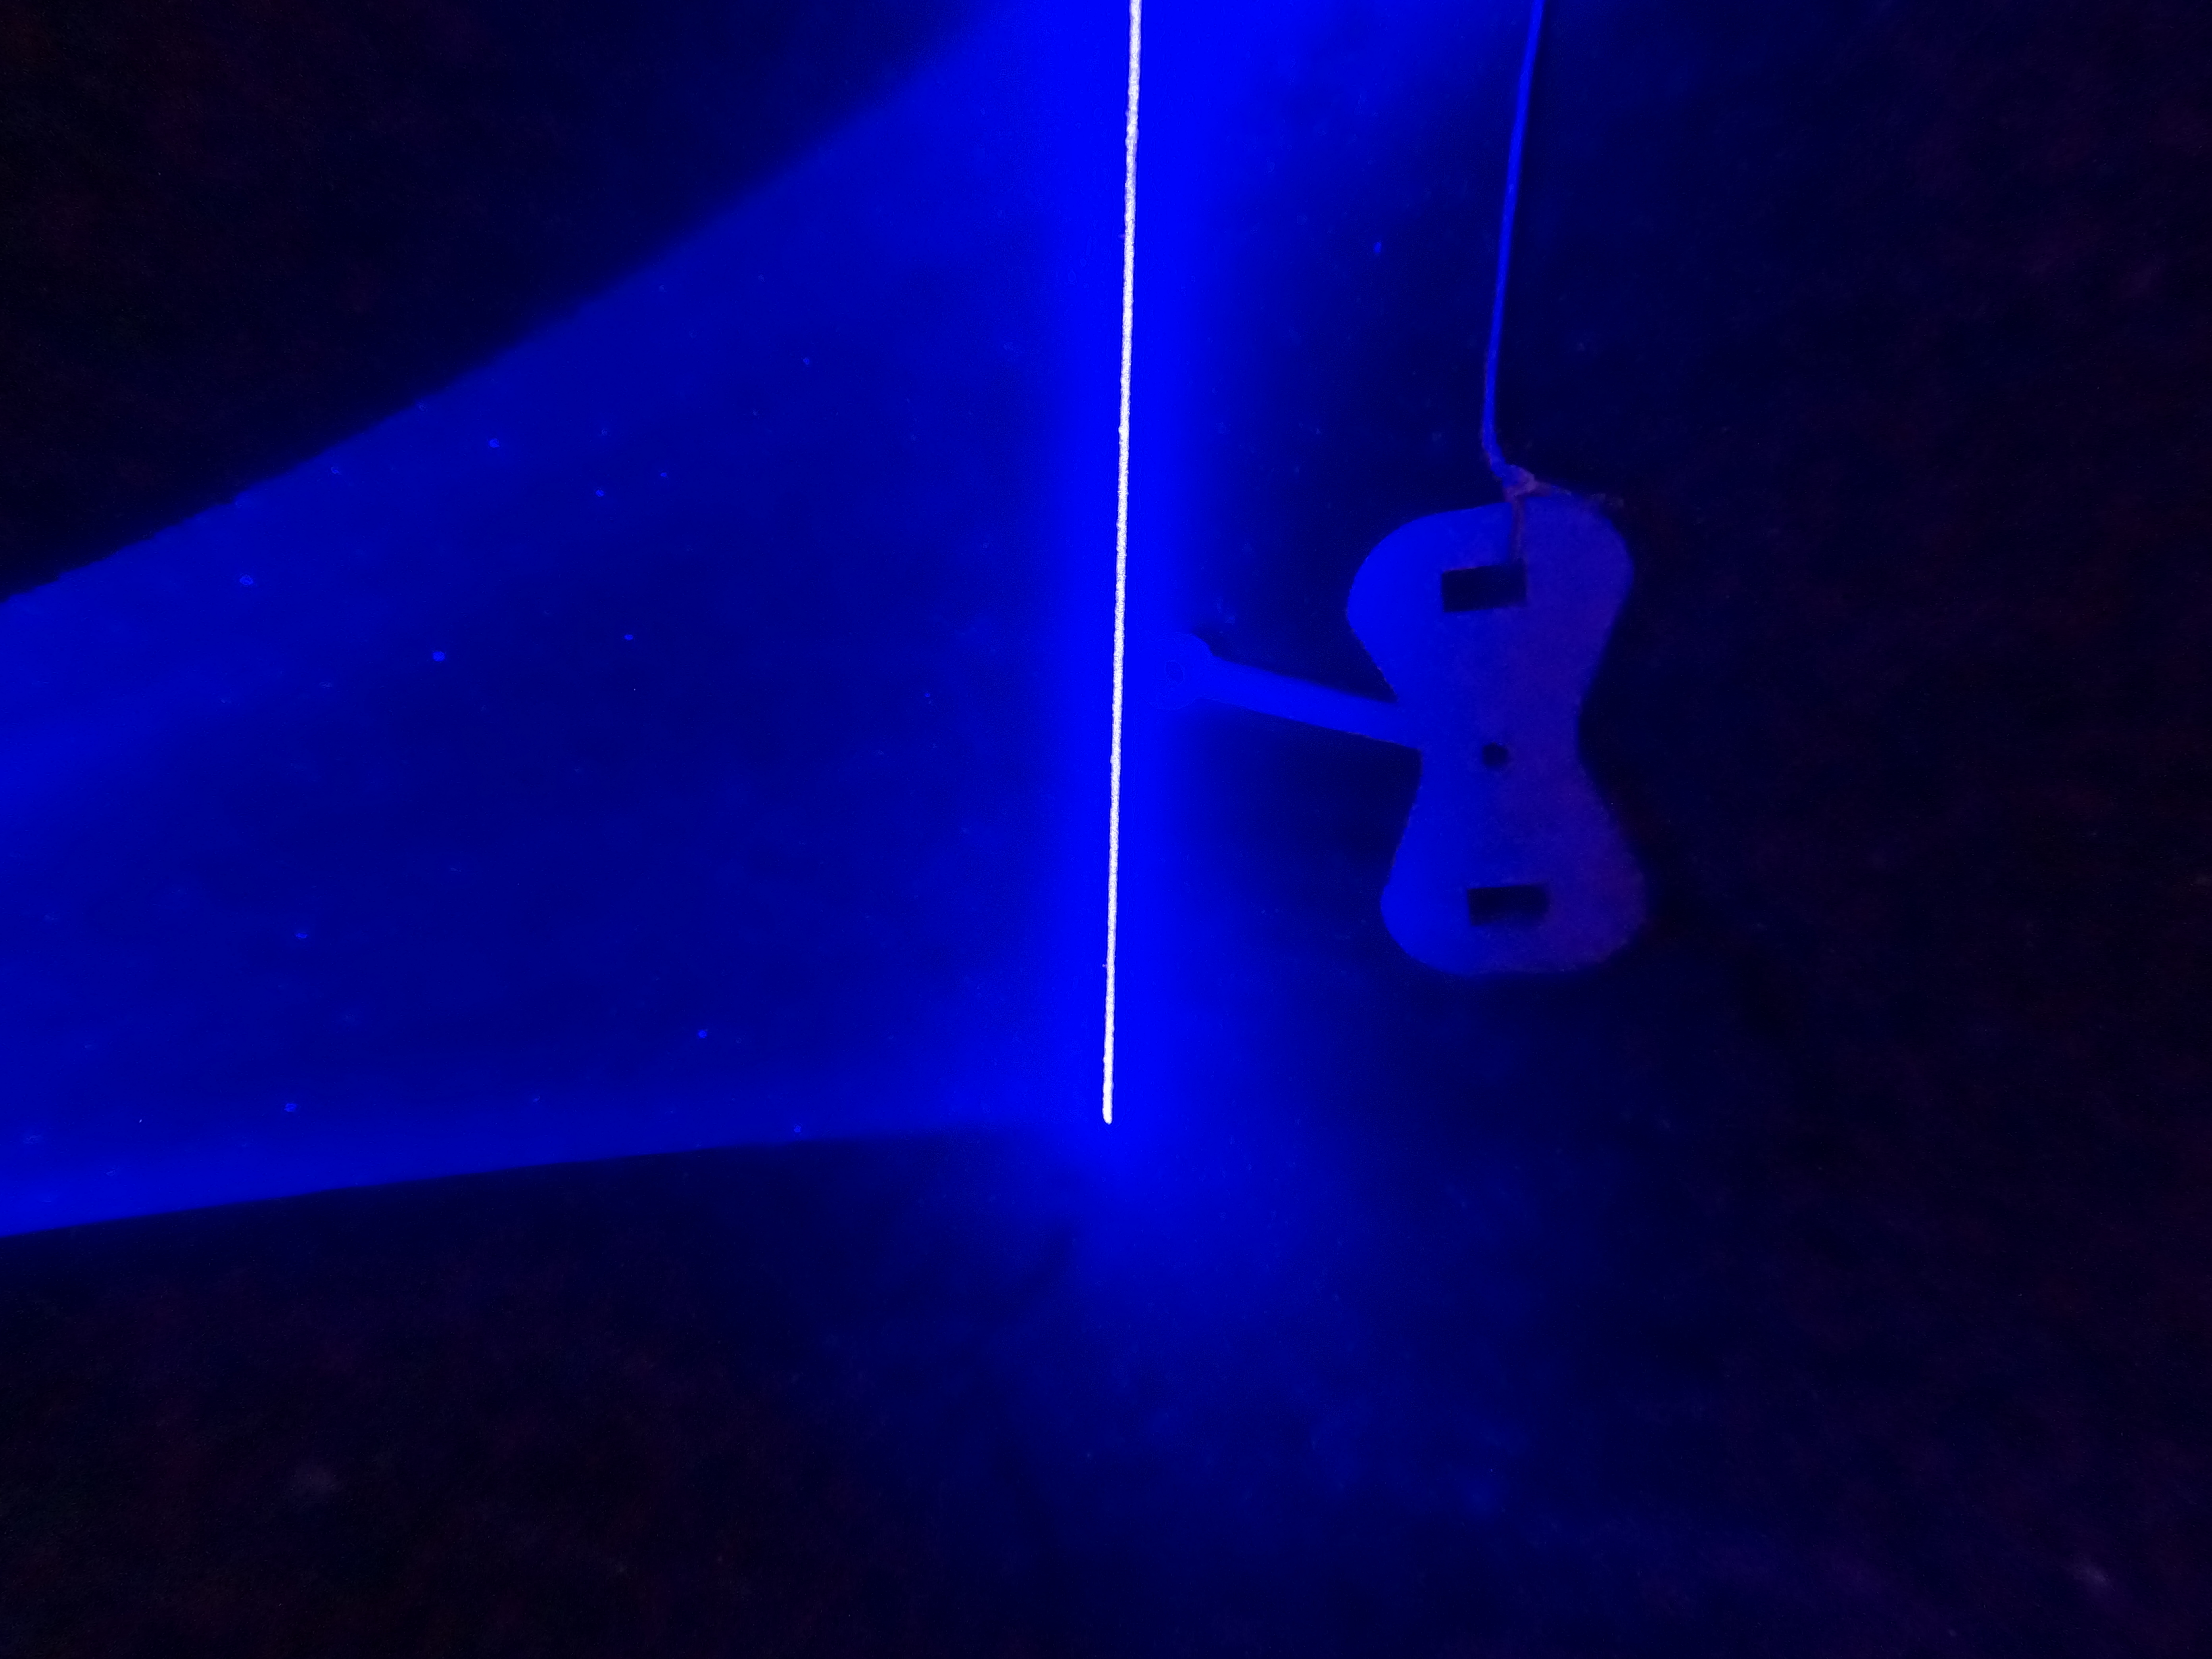

Supplement: Supplementary file 2343 [file G0016652.pdf › Level_1_2/G0016652.pdf]

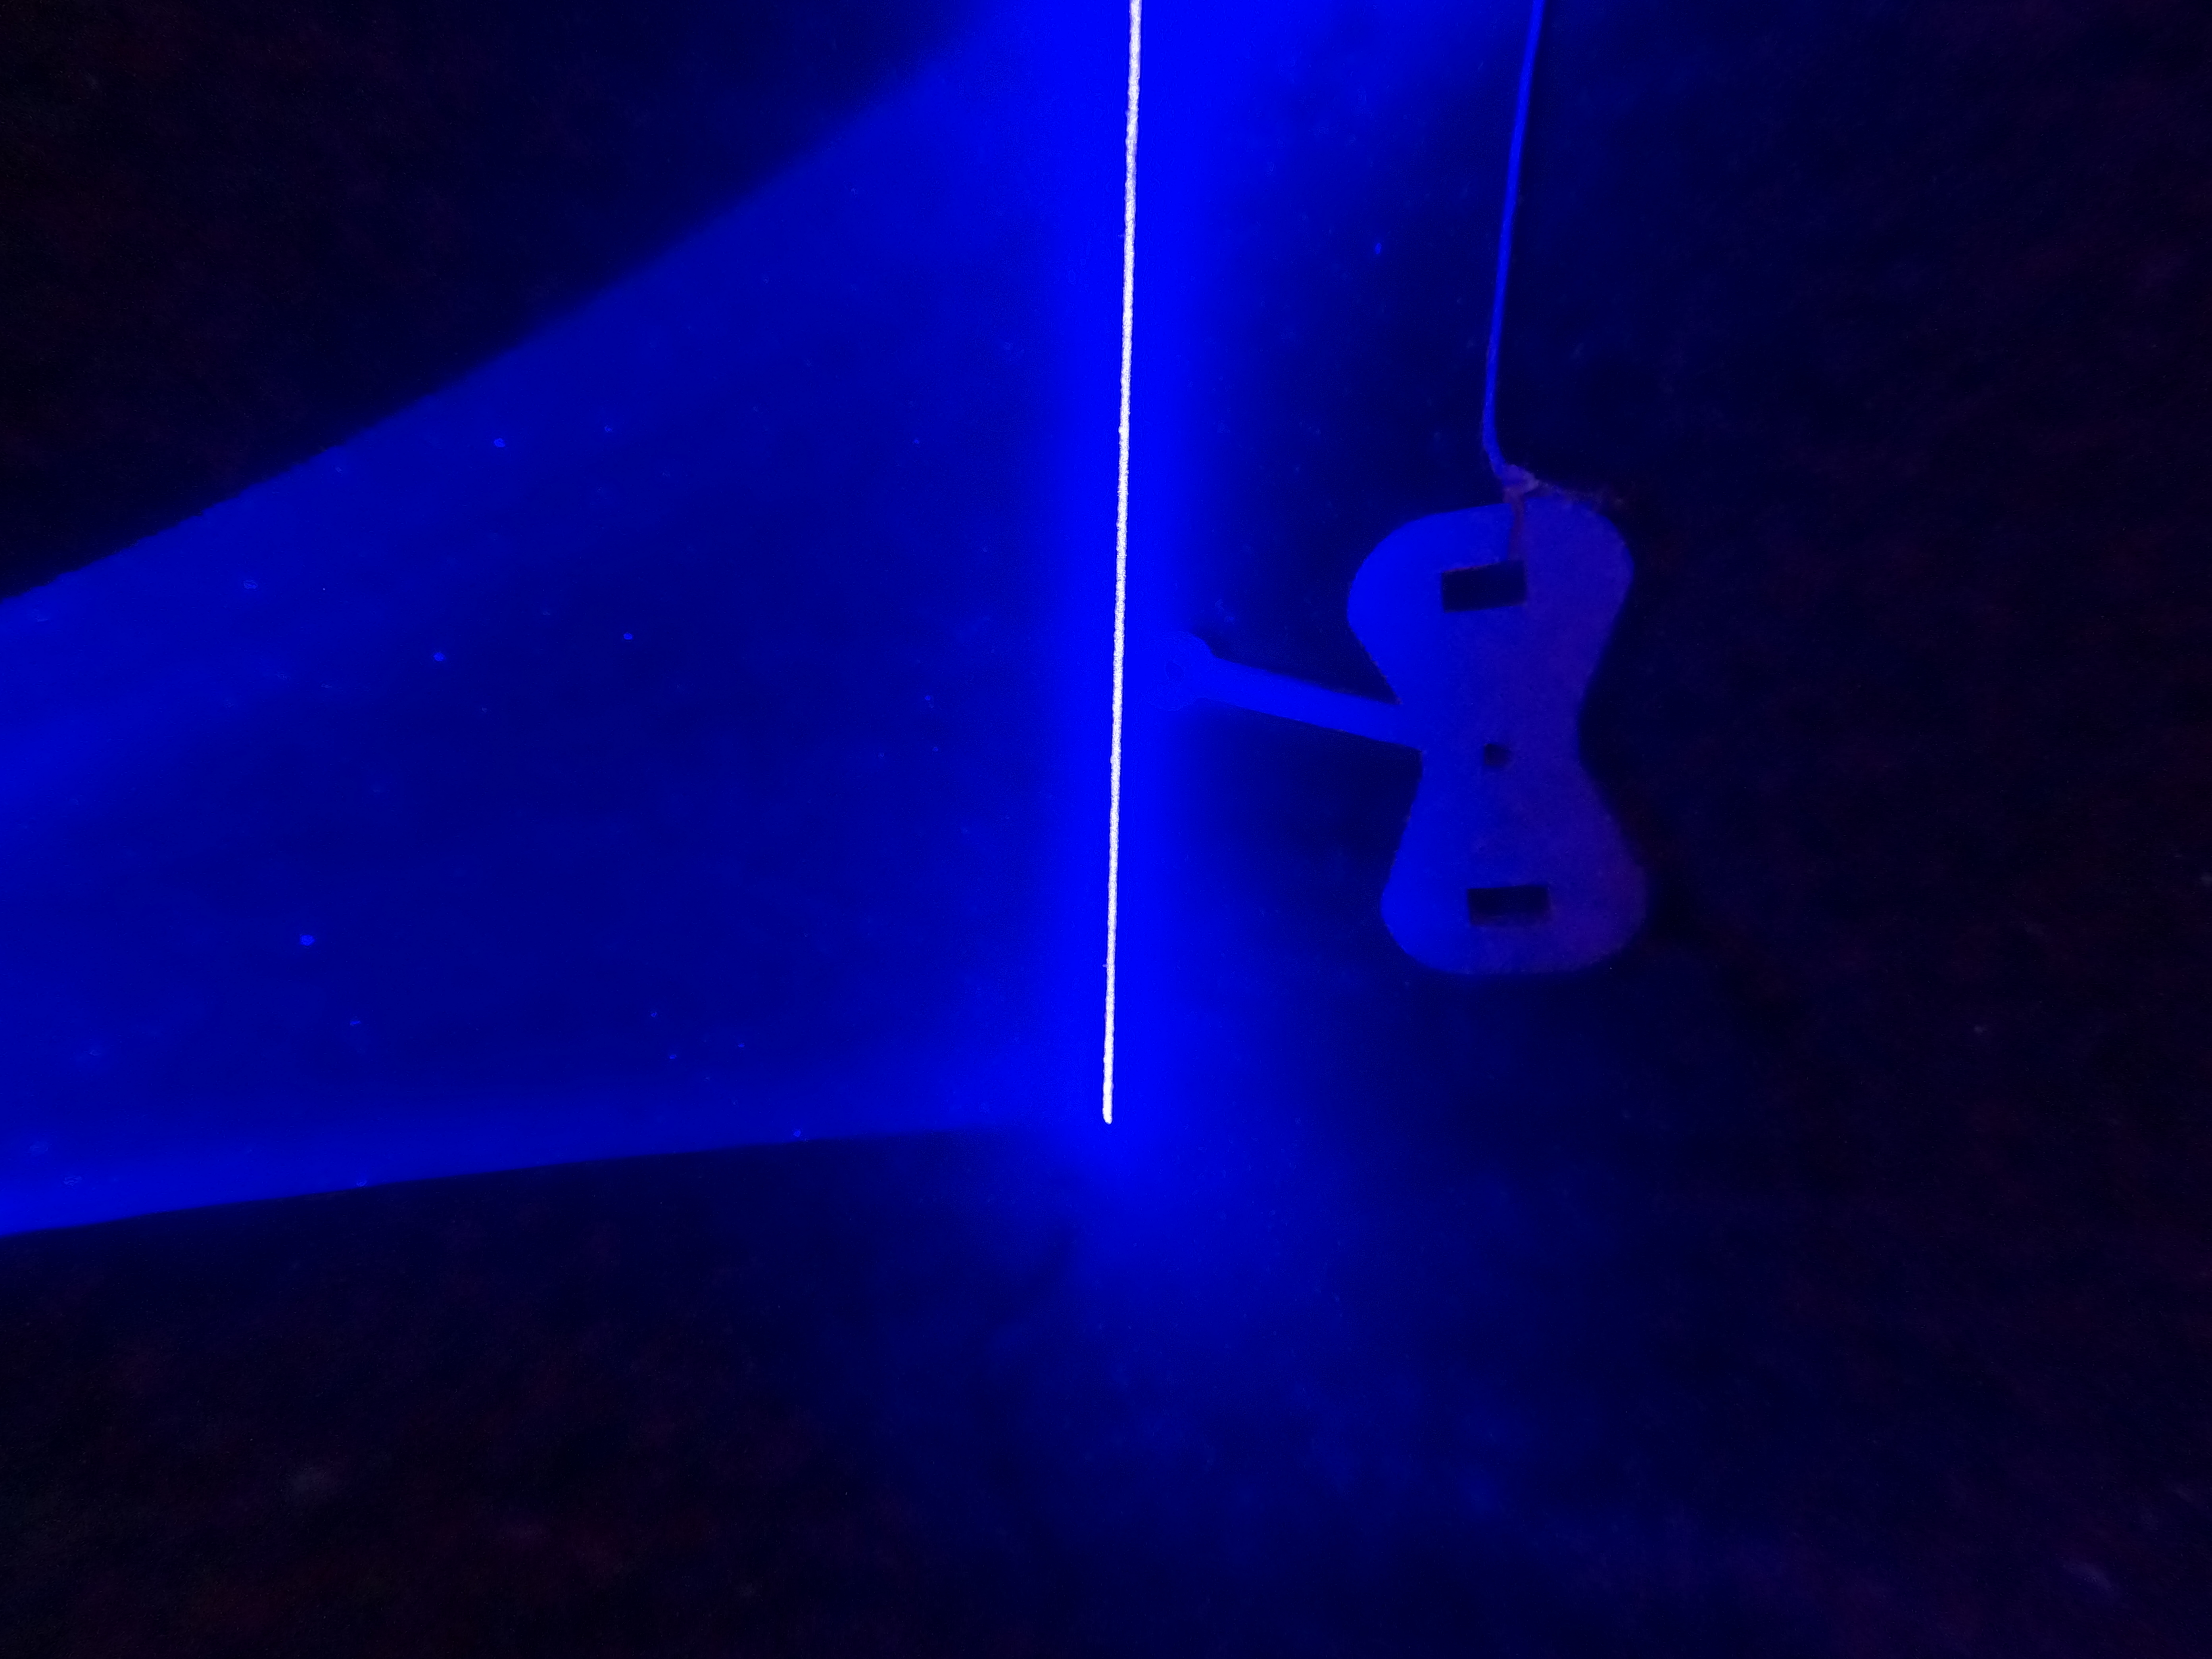

Supplement: Supplementary file 2344 [file G0016653.pdf › Level_1_2/G0016653.pdf]

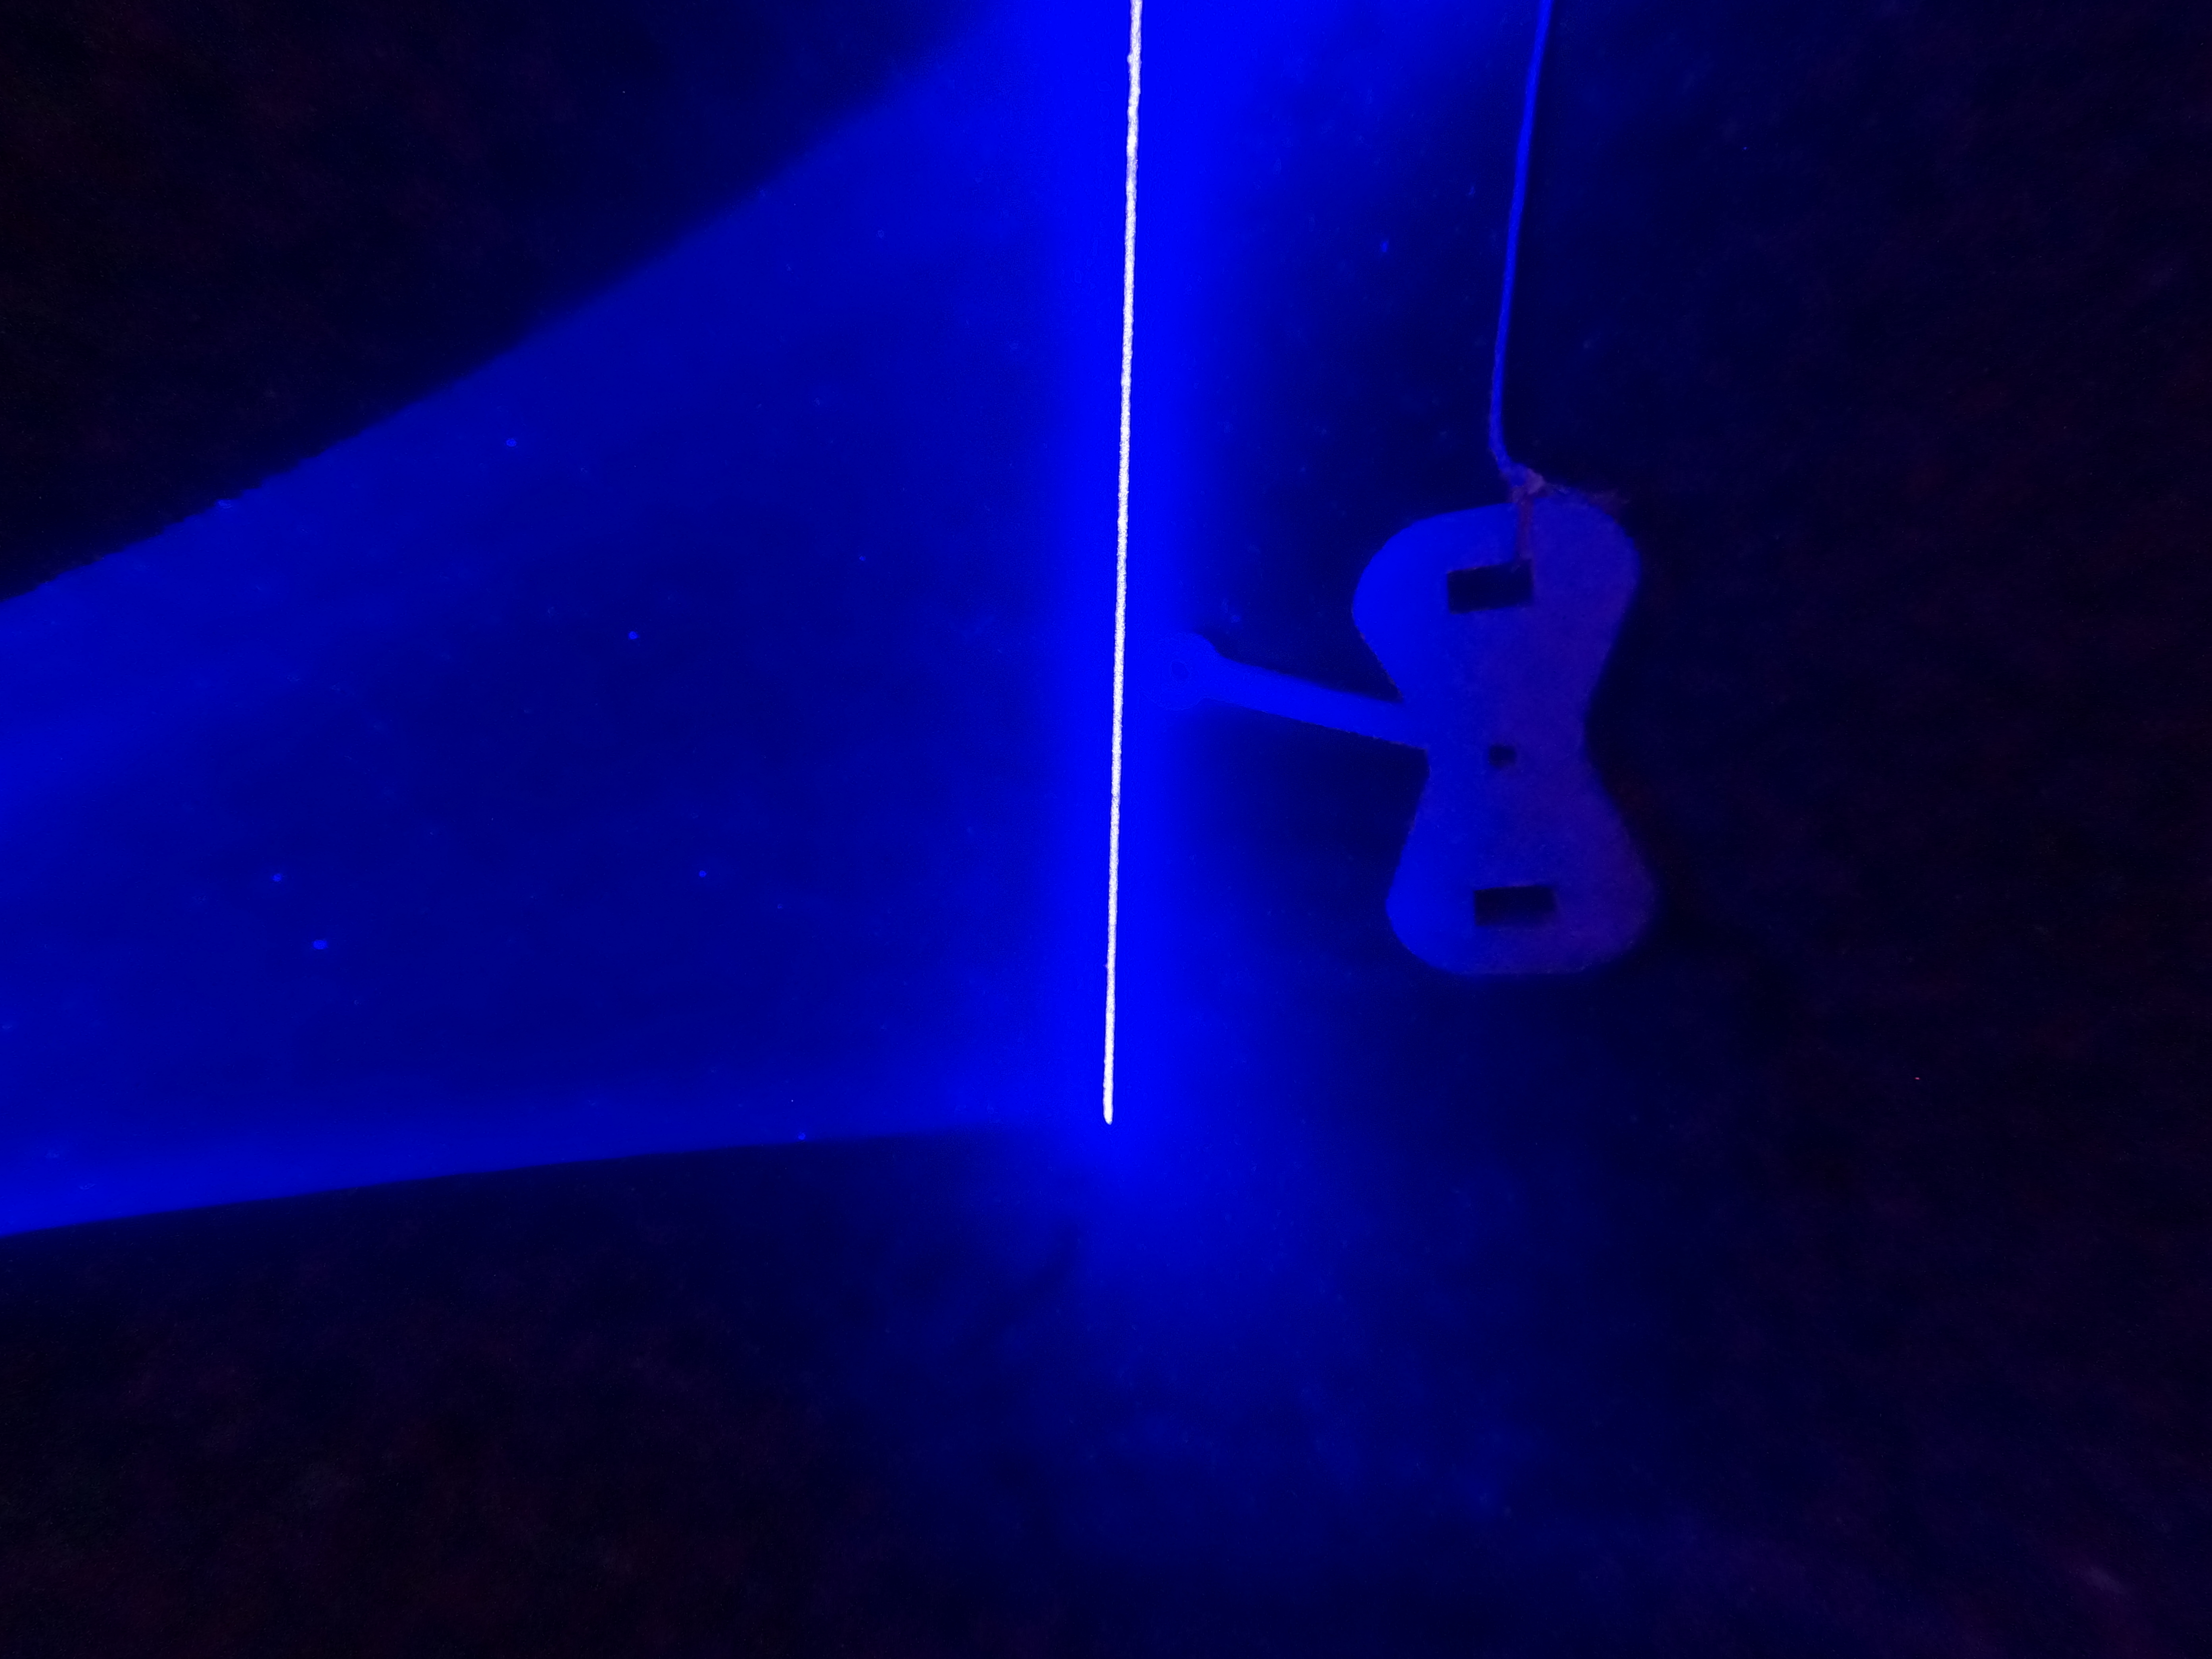

Supplement: Supplementary file 2345 [file G0016654.pdf › Level_1_2/G0016654.pdf]

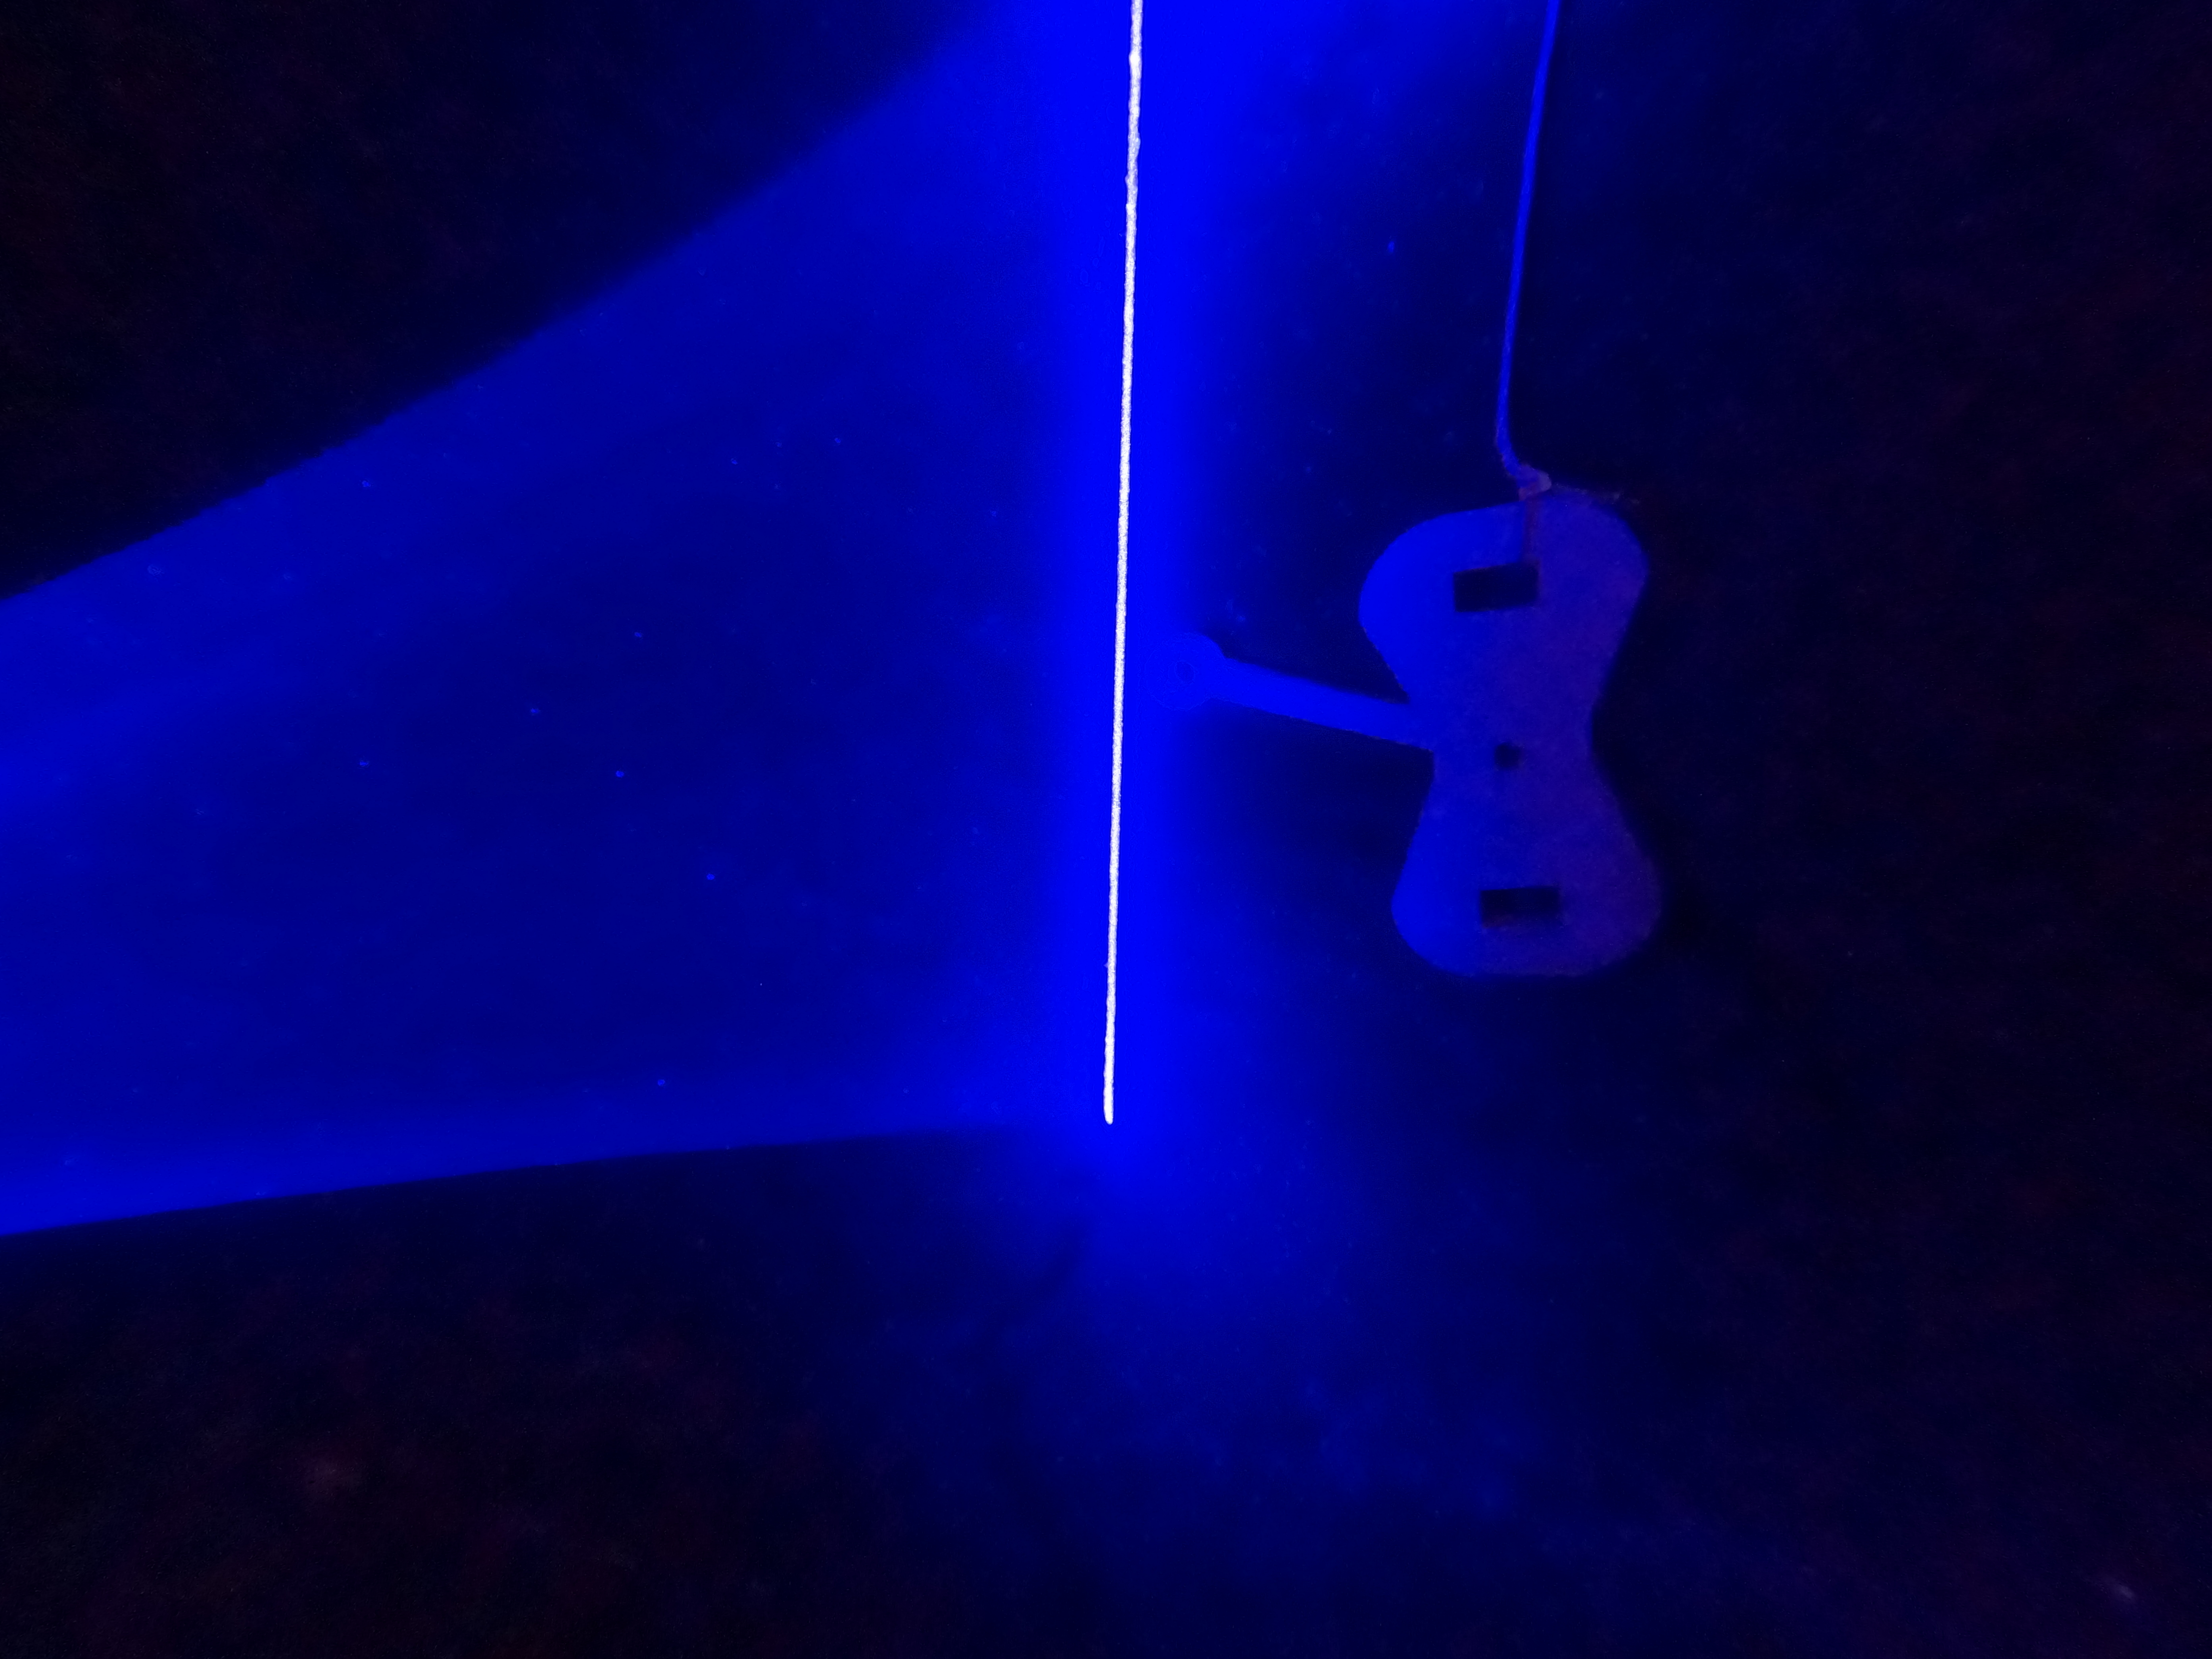

Supplement: Supplementary file 2346 [file G0016655.pdf › Level_1_2/G0016655.pdf]

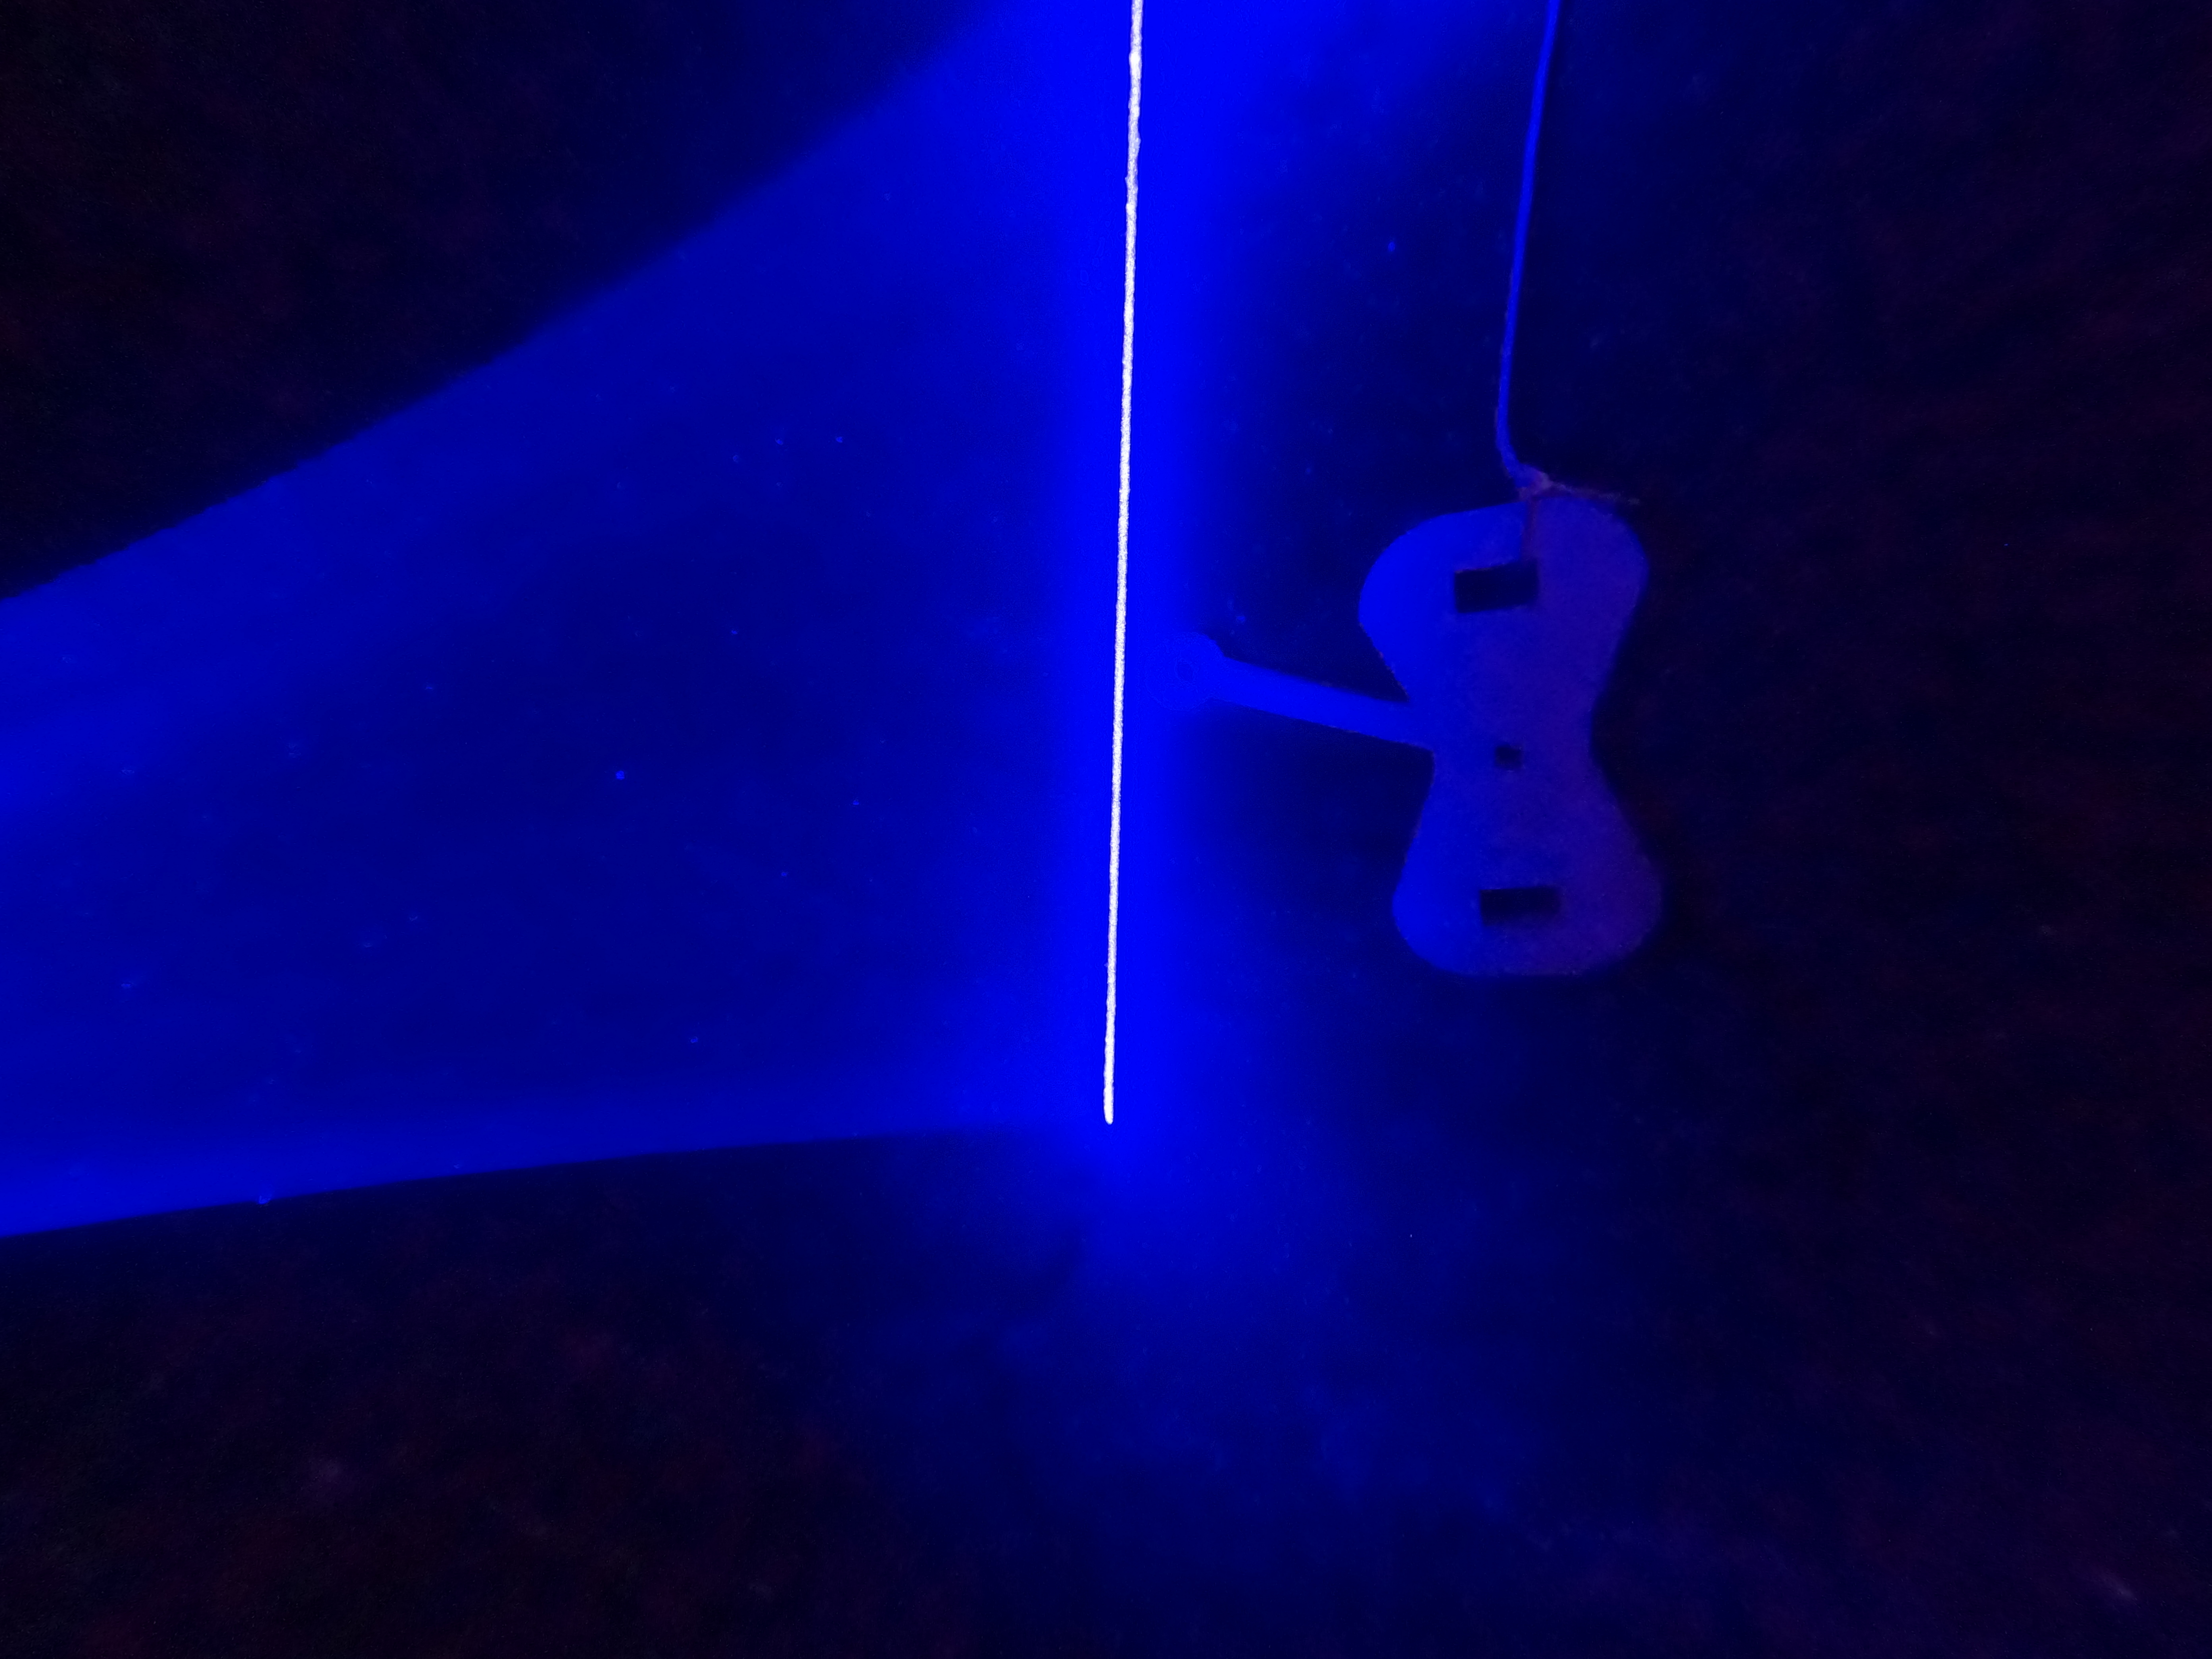

Supplement: Supplementary file 2347 [file G0016656.pdf › Level_1_2/G0016656.pdf]

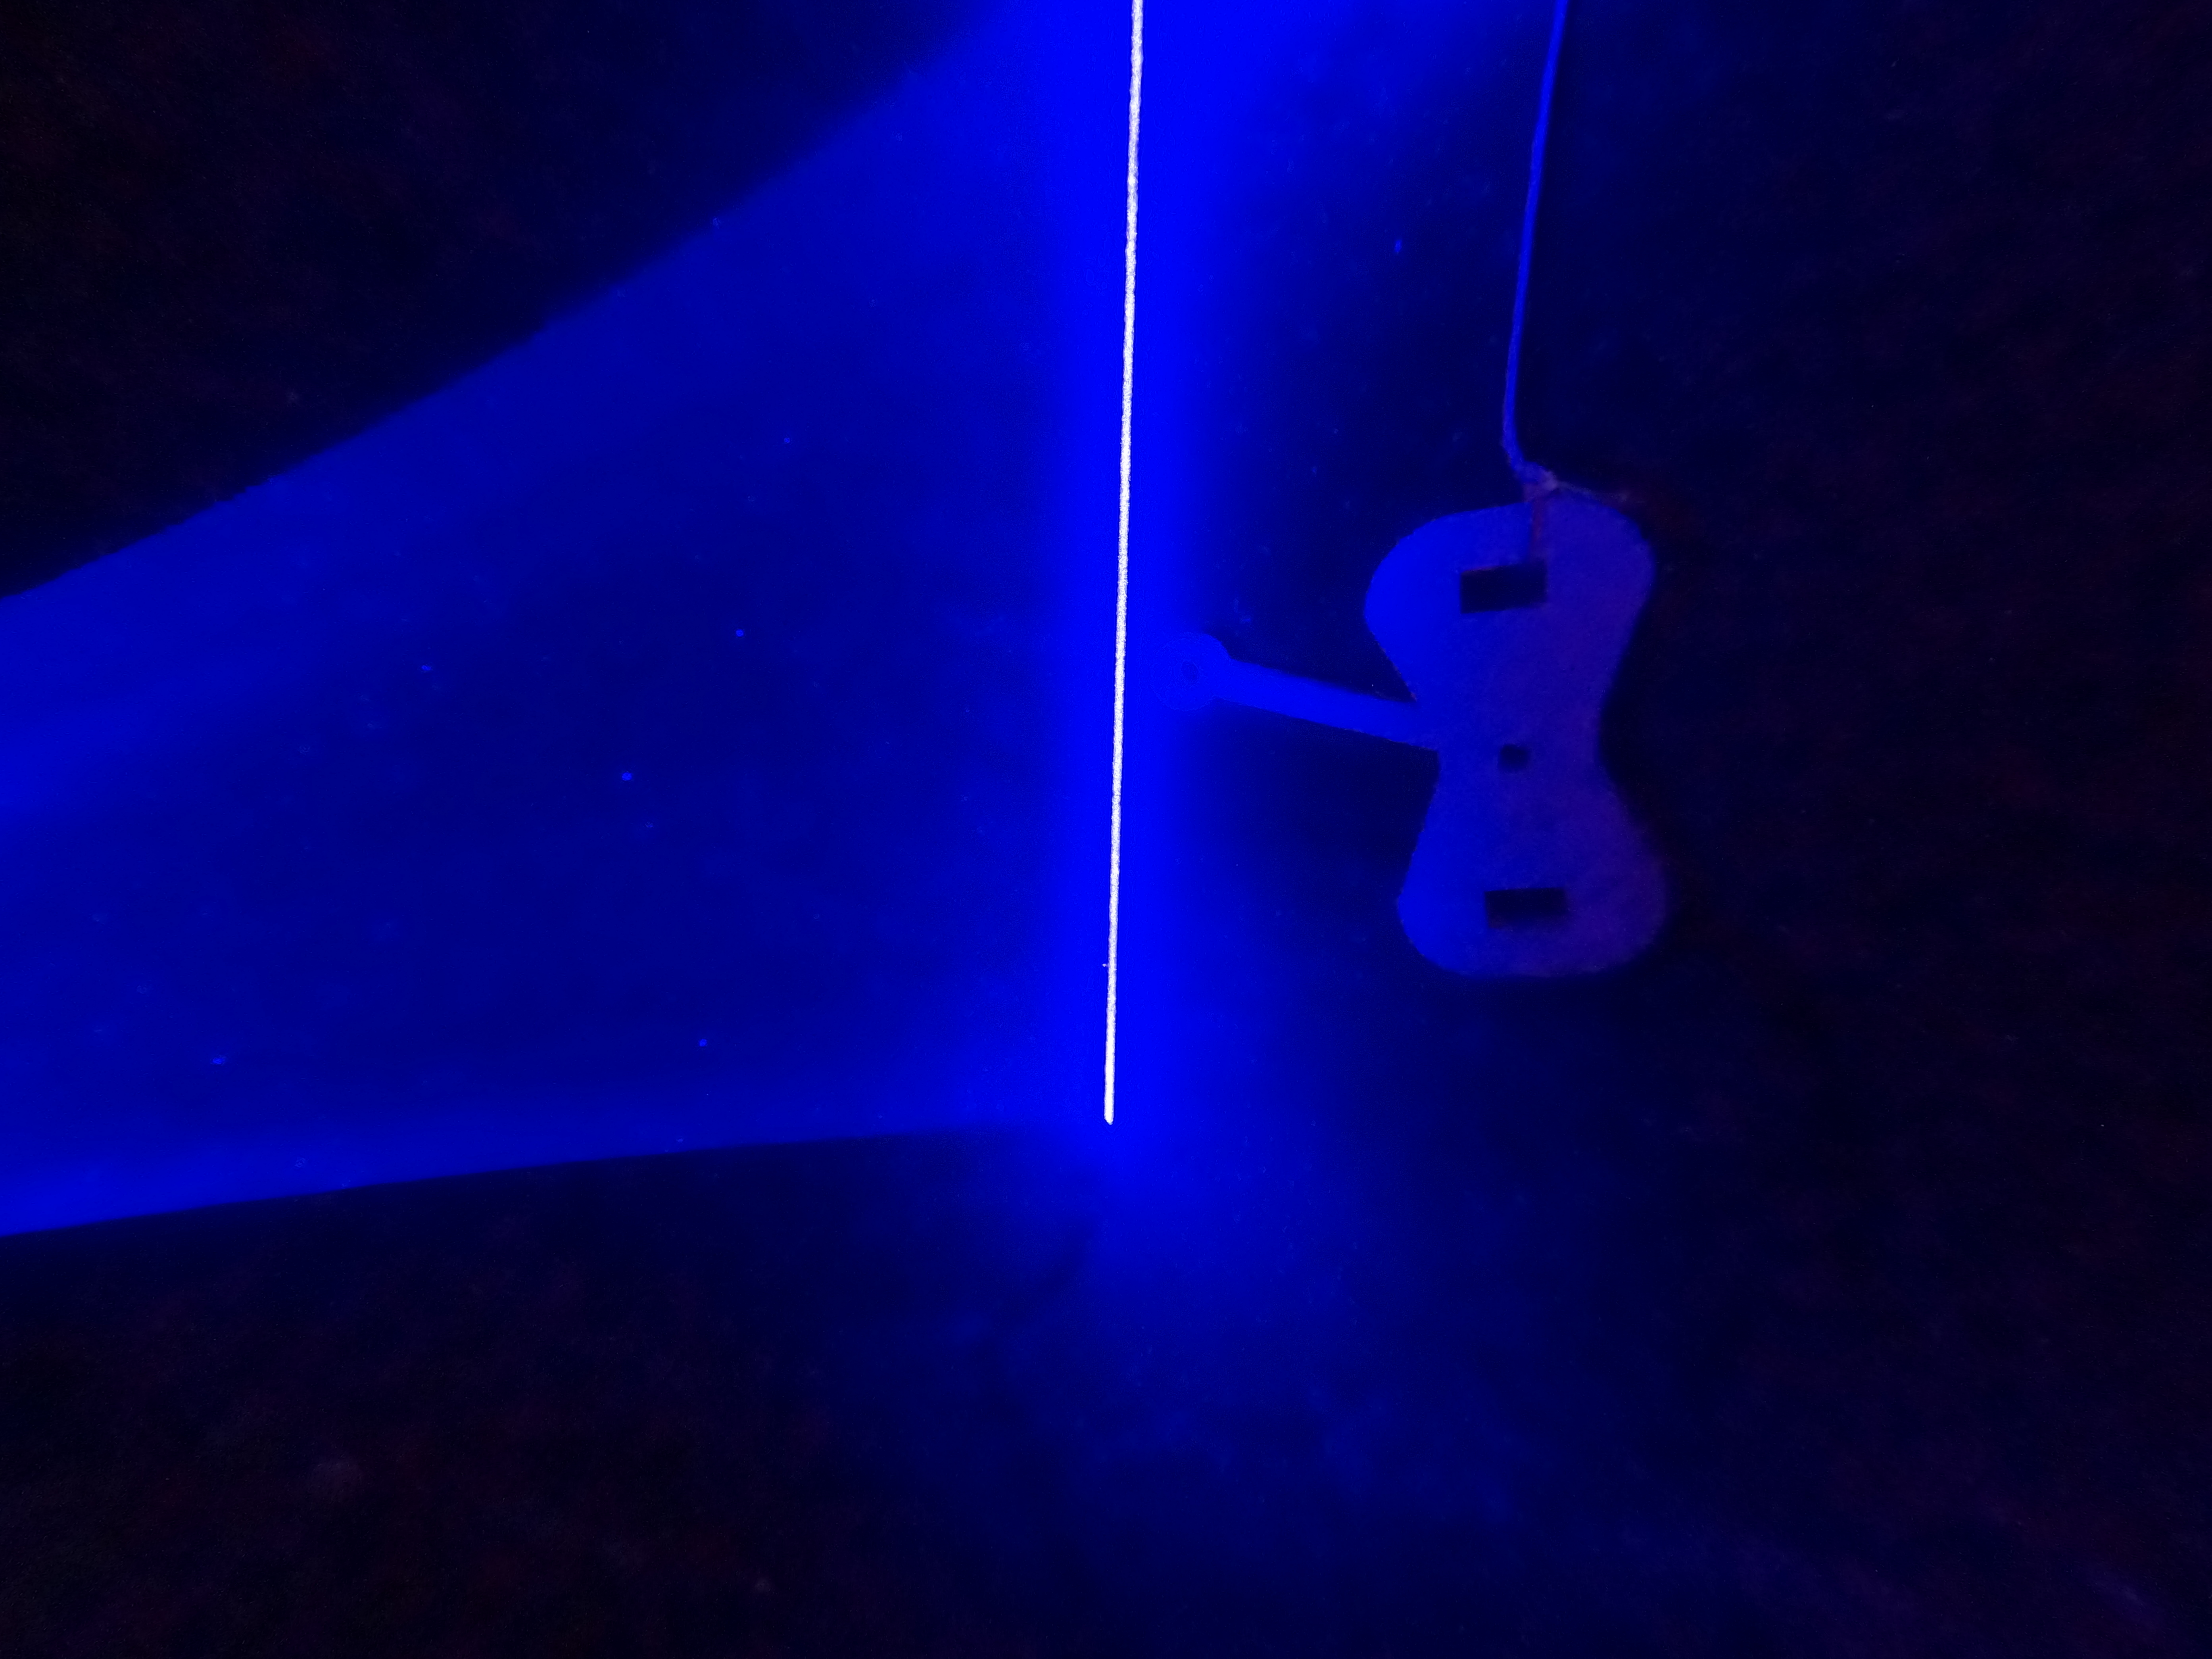

Supplement: Supplementary file 2348 [file G0016657.pdf › Level_1_2/G0016657.pdf]

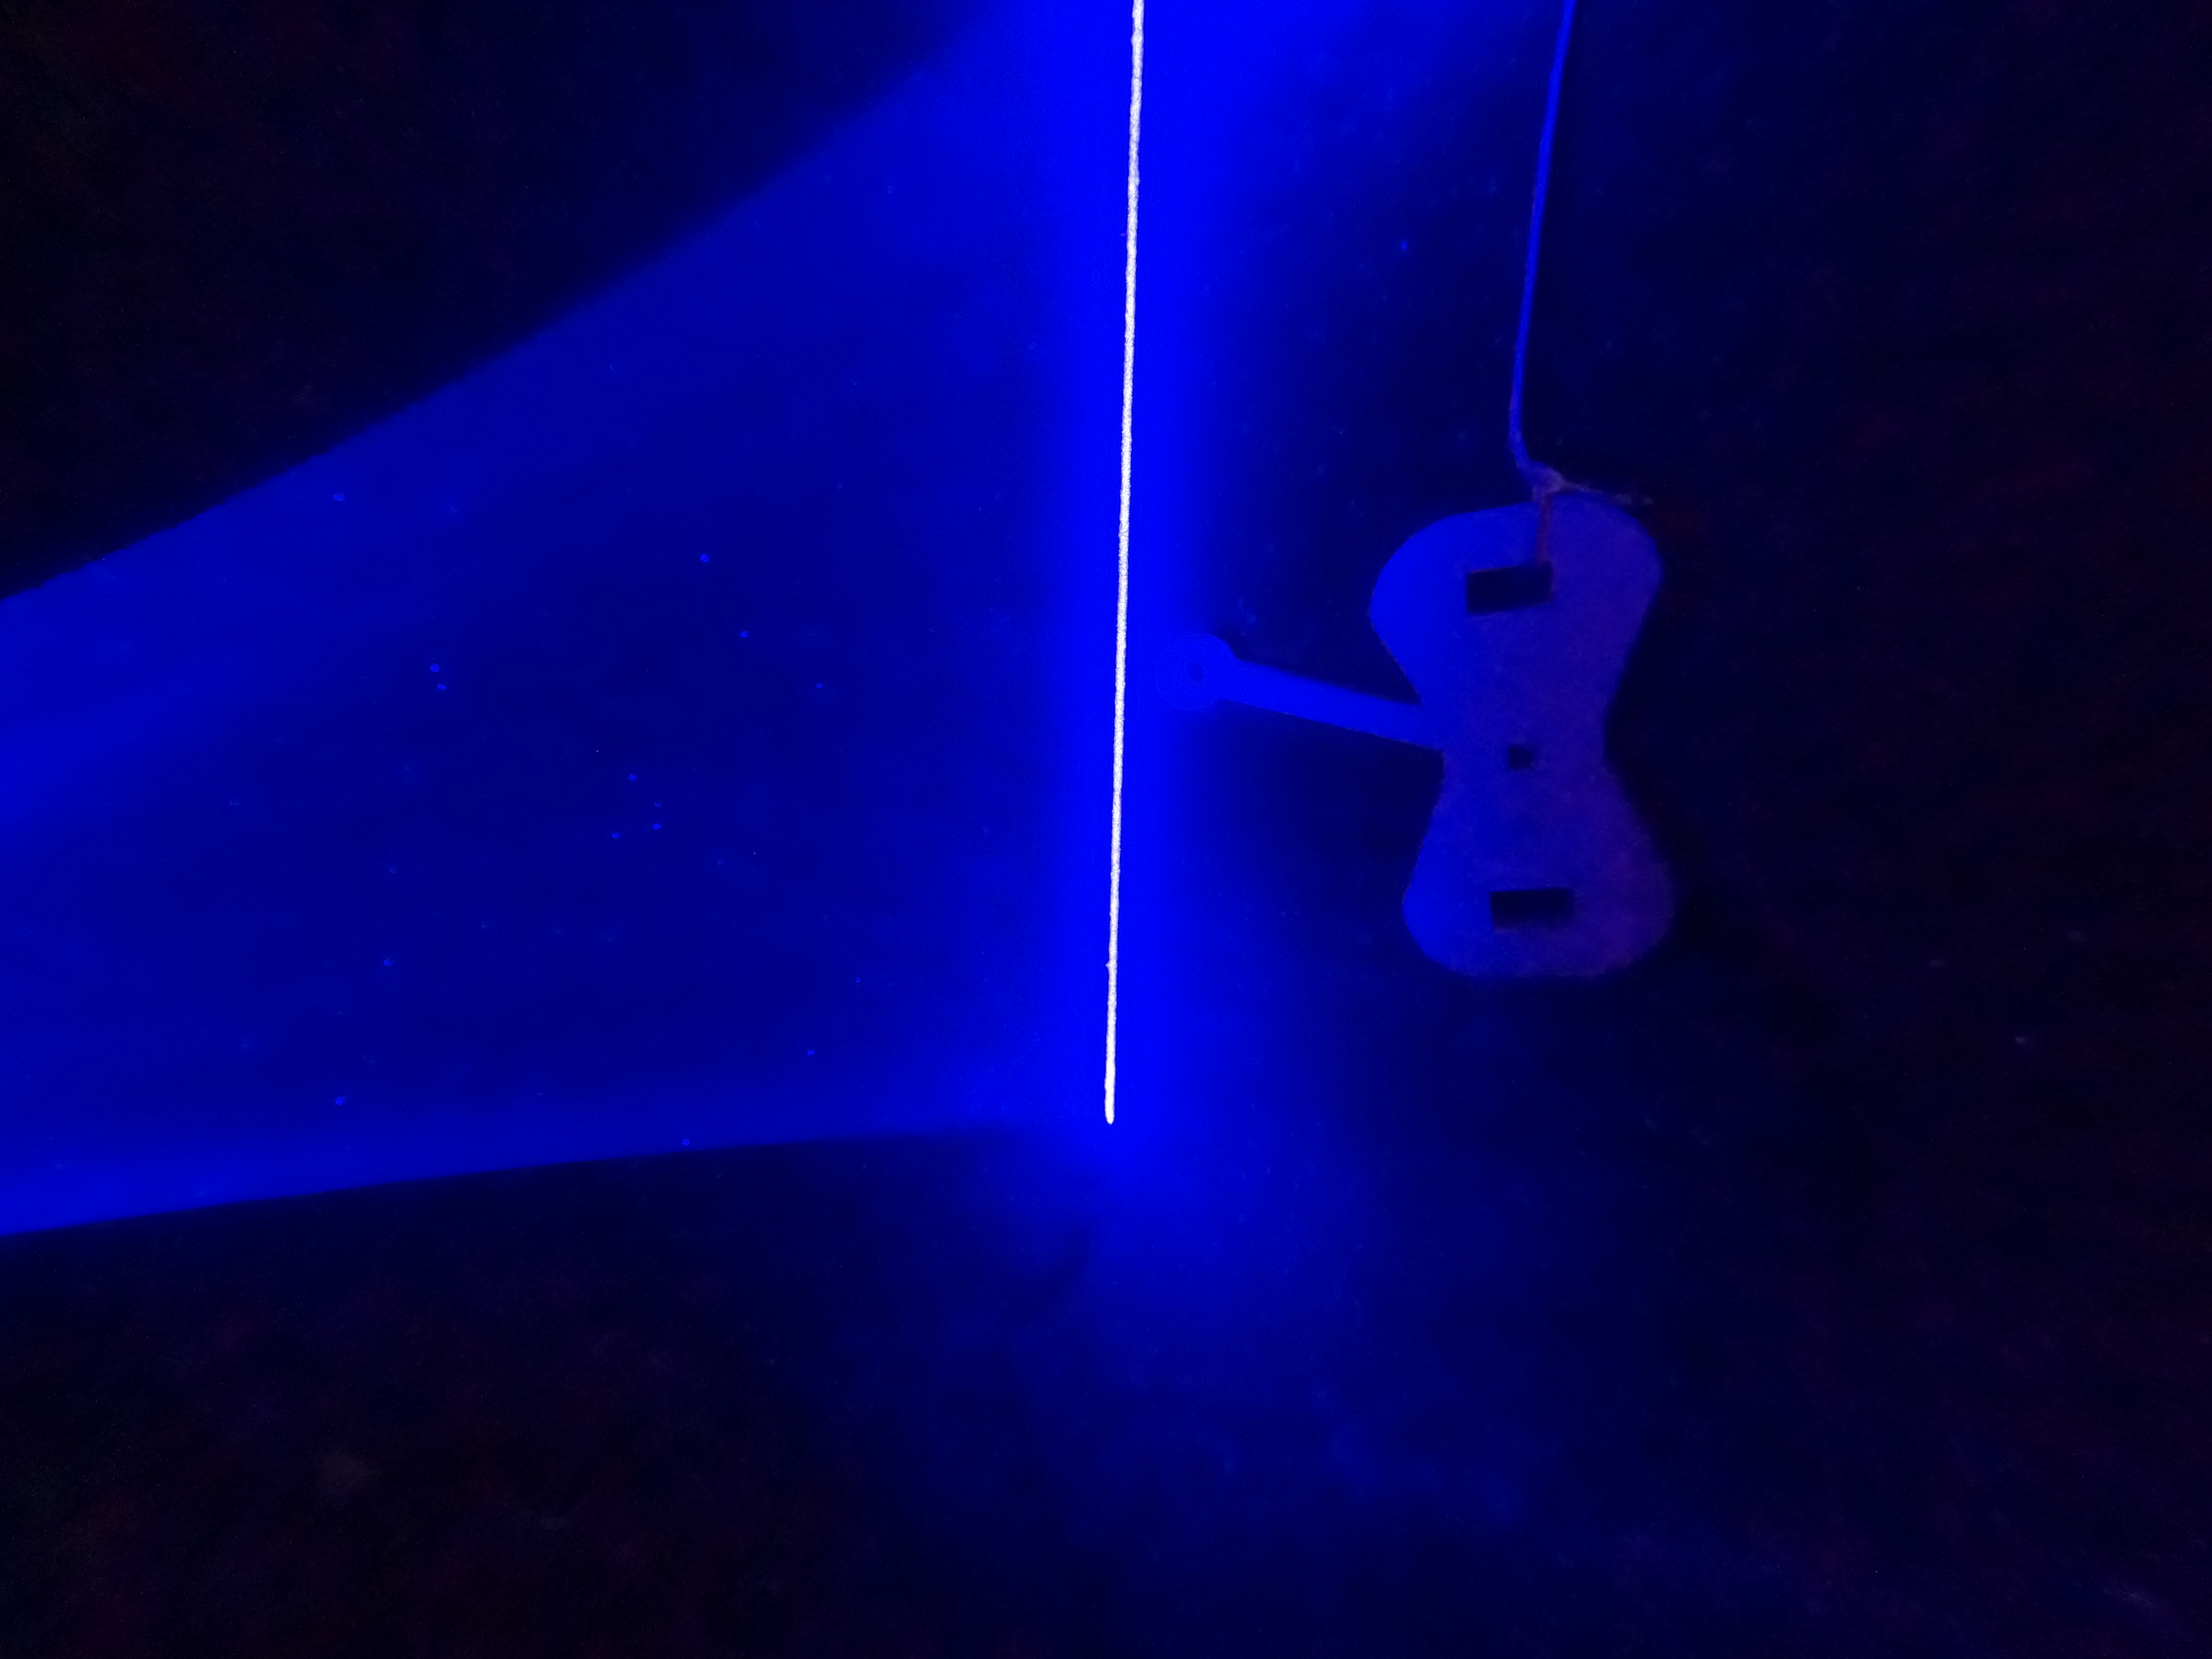

Supplement: Supplementary file 2349 [file G0016658.pdf › Level_1_2/G0016658.pdf]

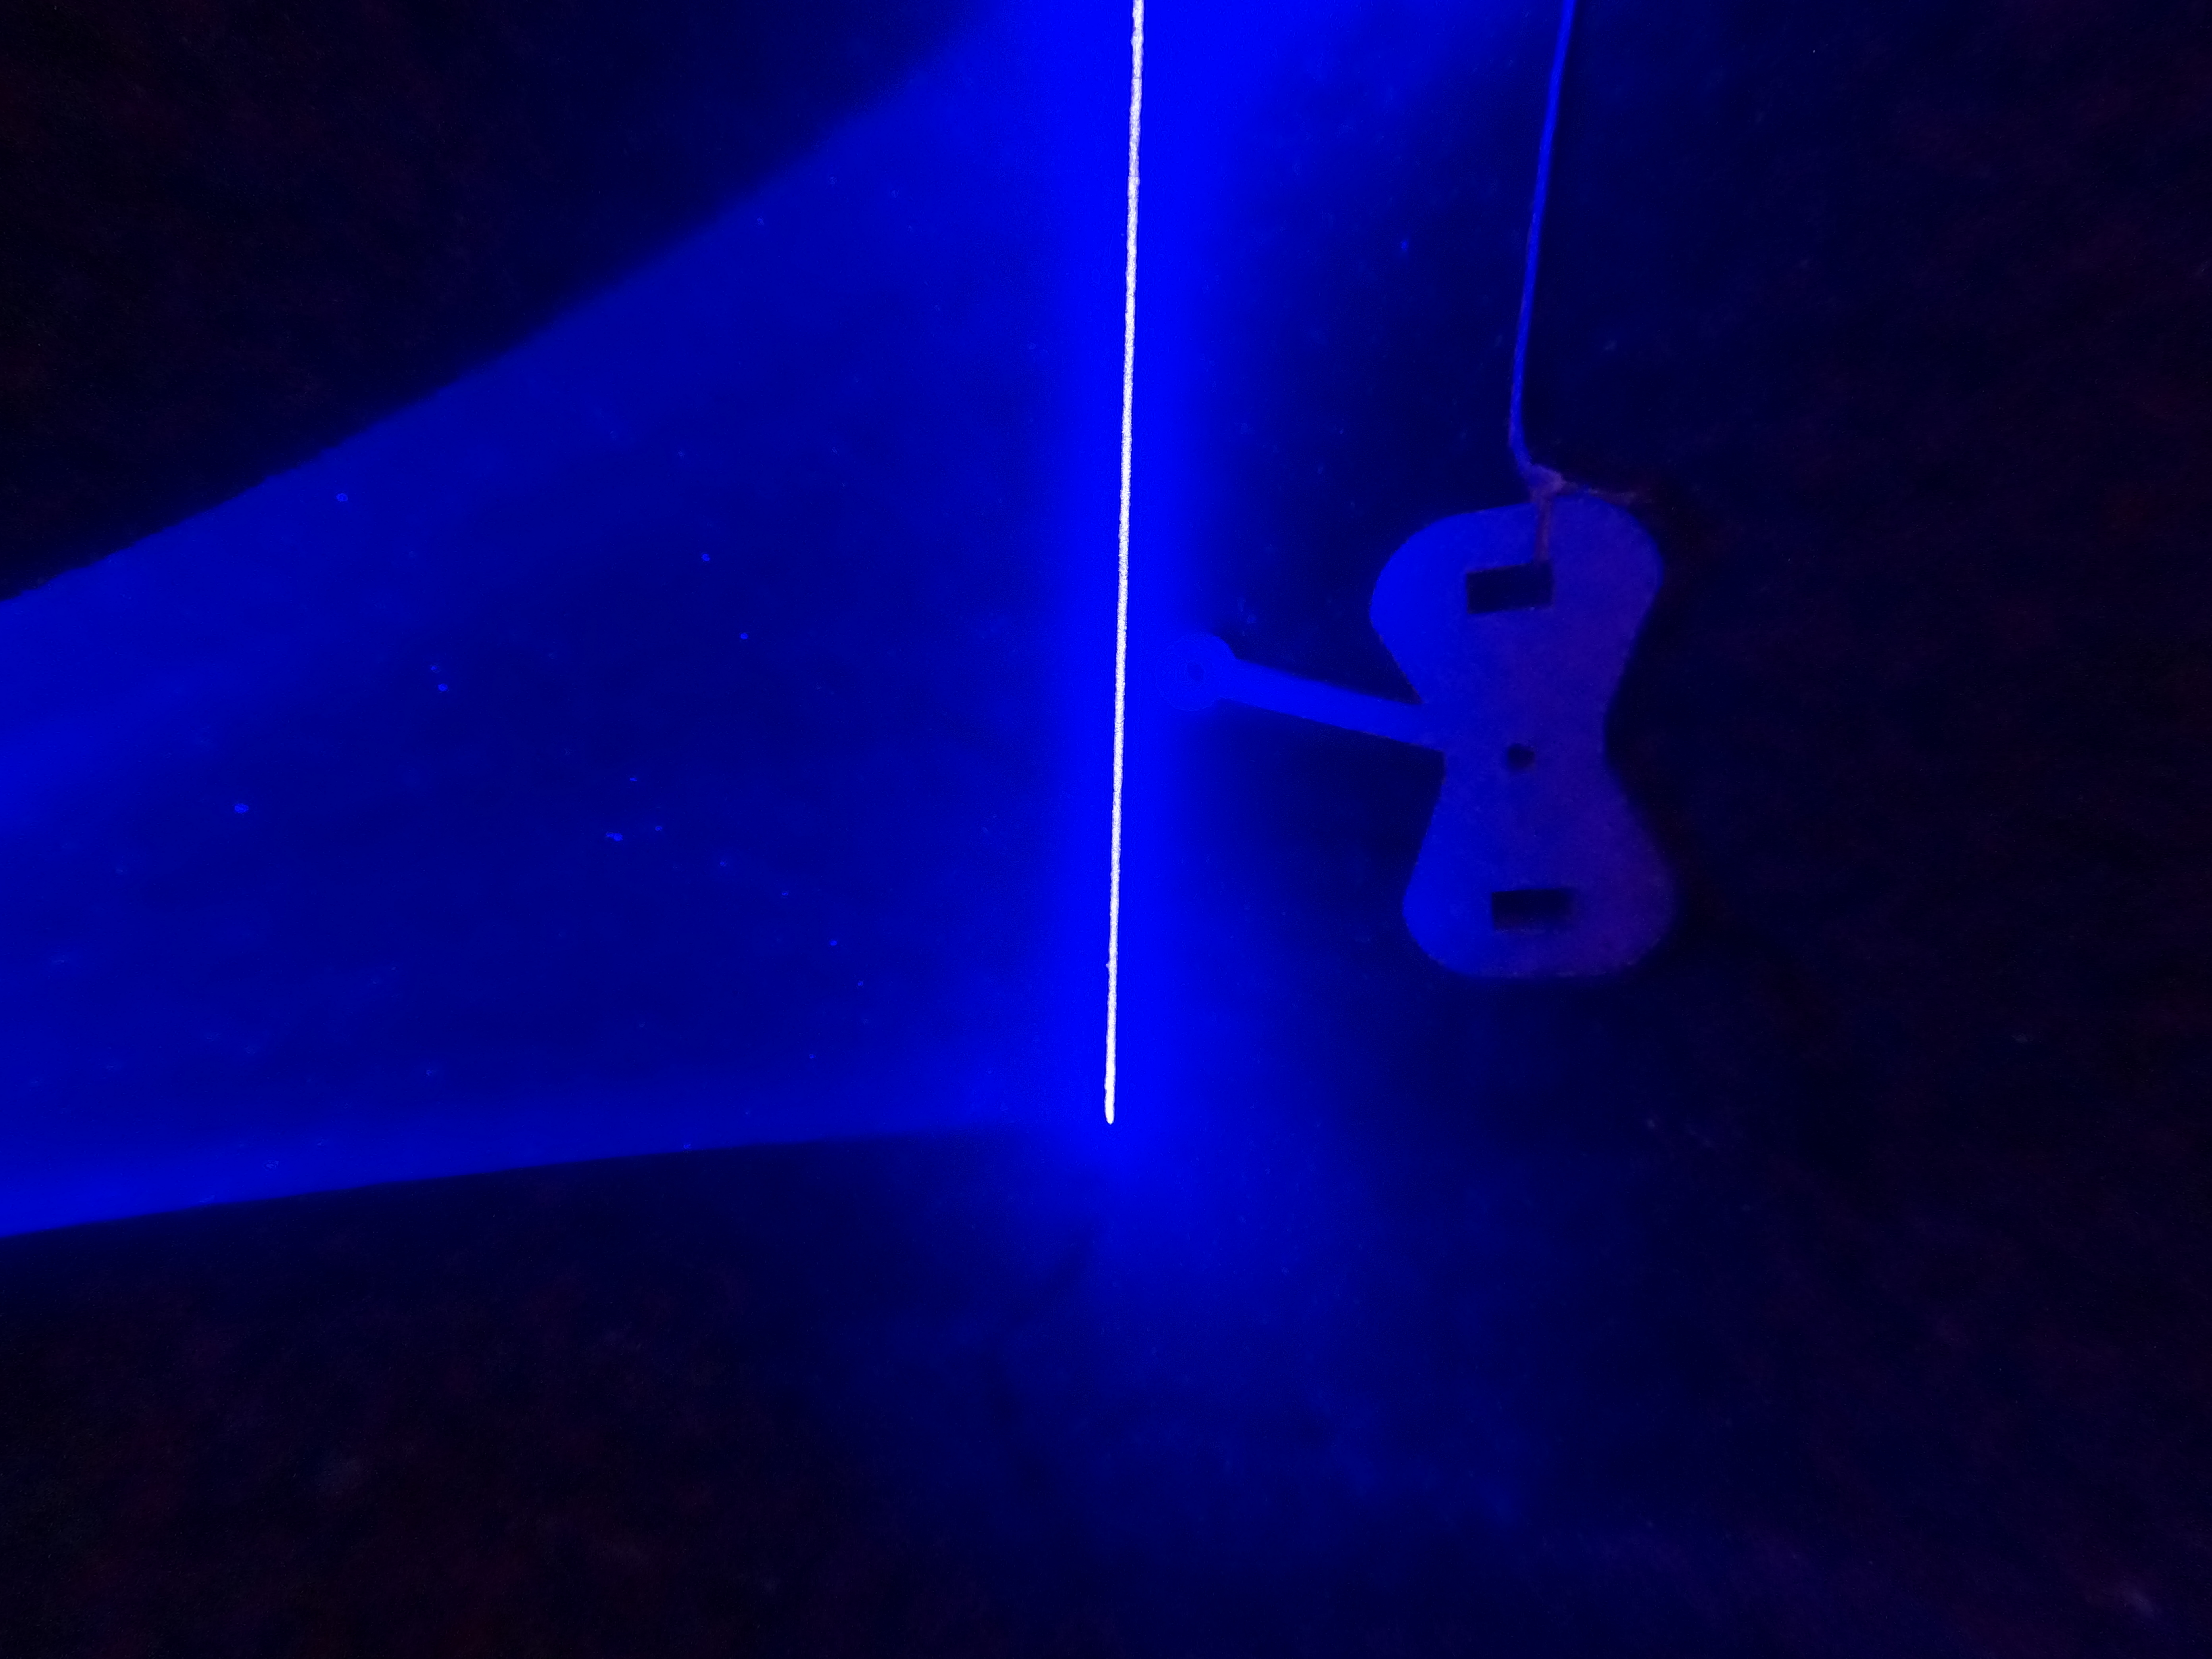

Supplement: Supplementary file 2350 [file G0016659.pdf › Level_1_2/G0016659.pdf]

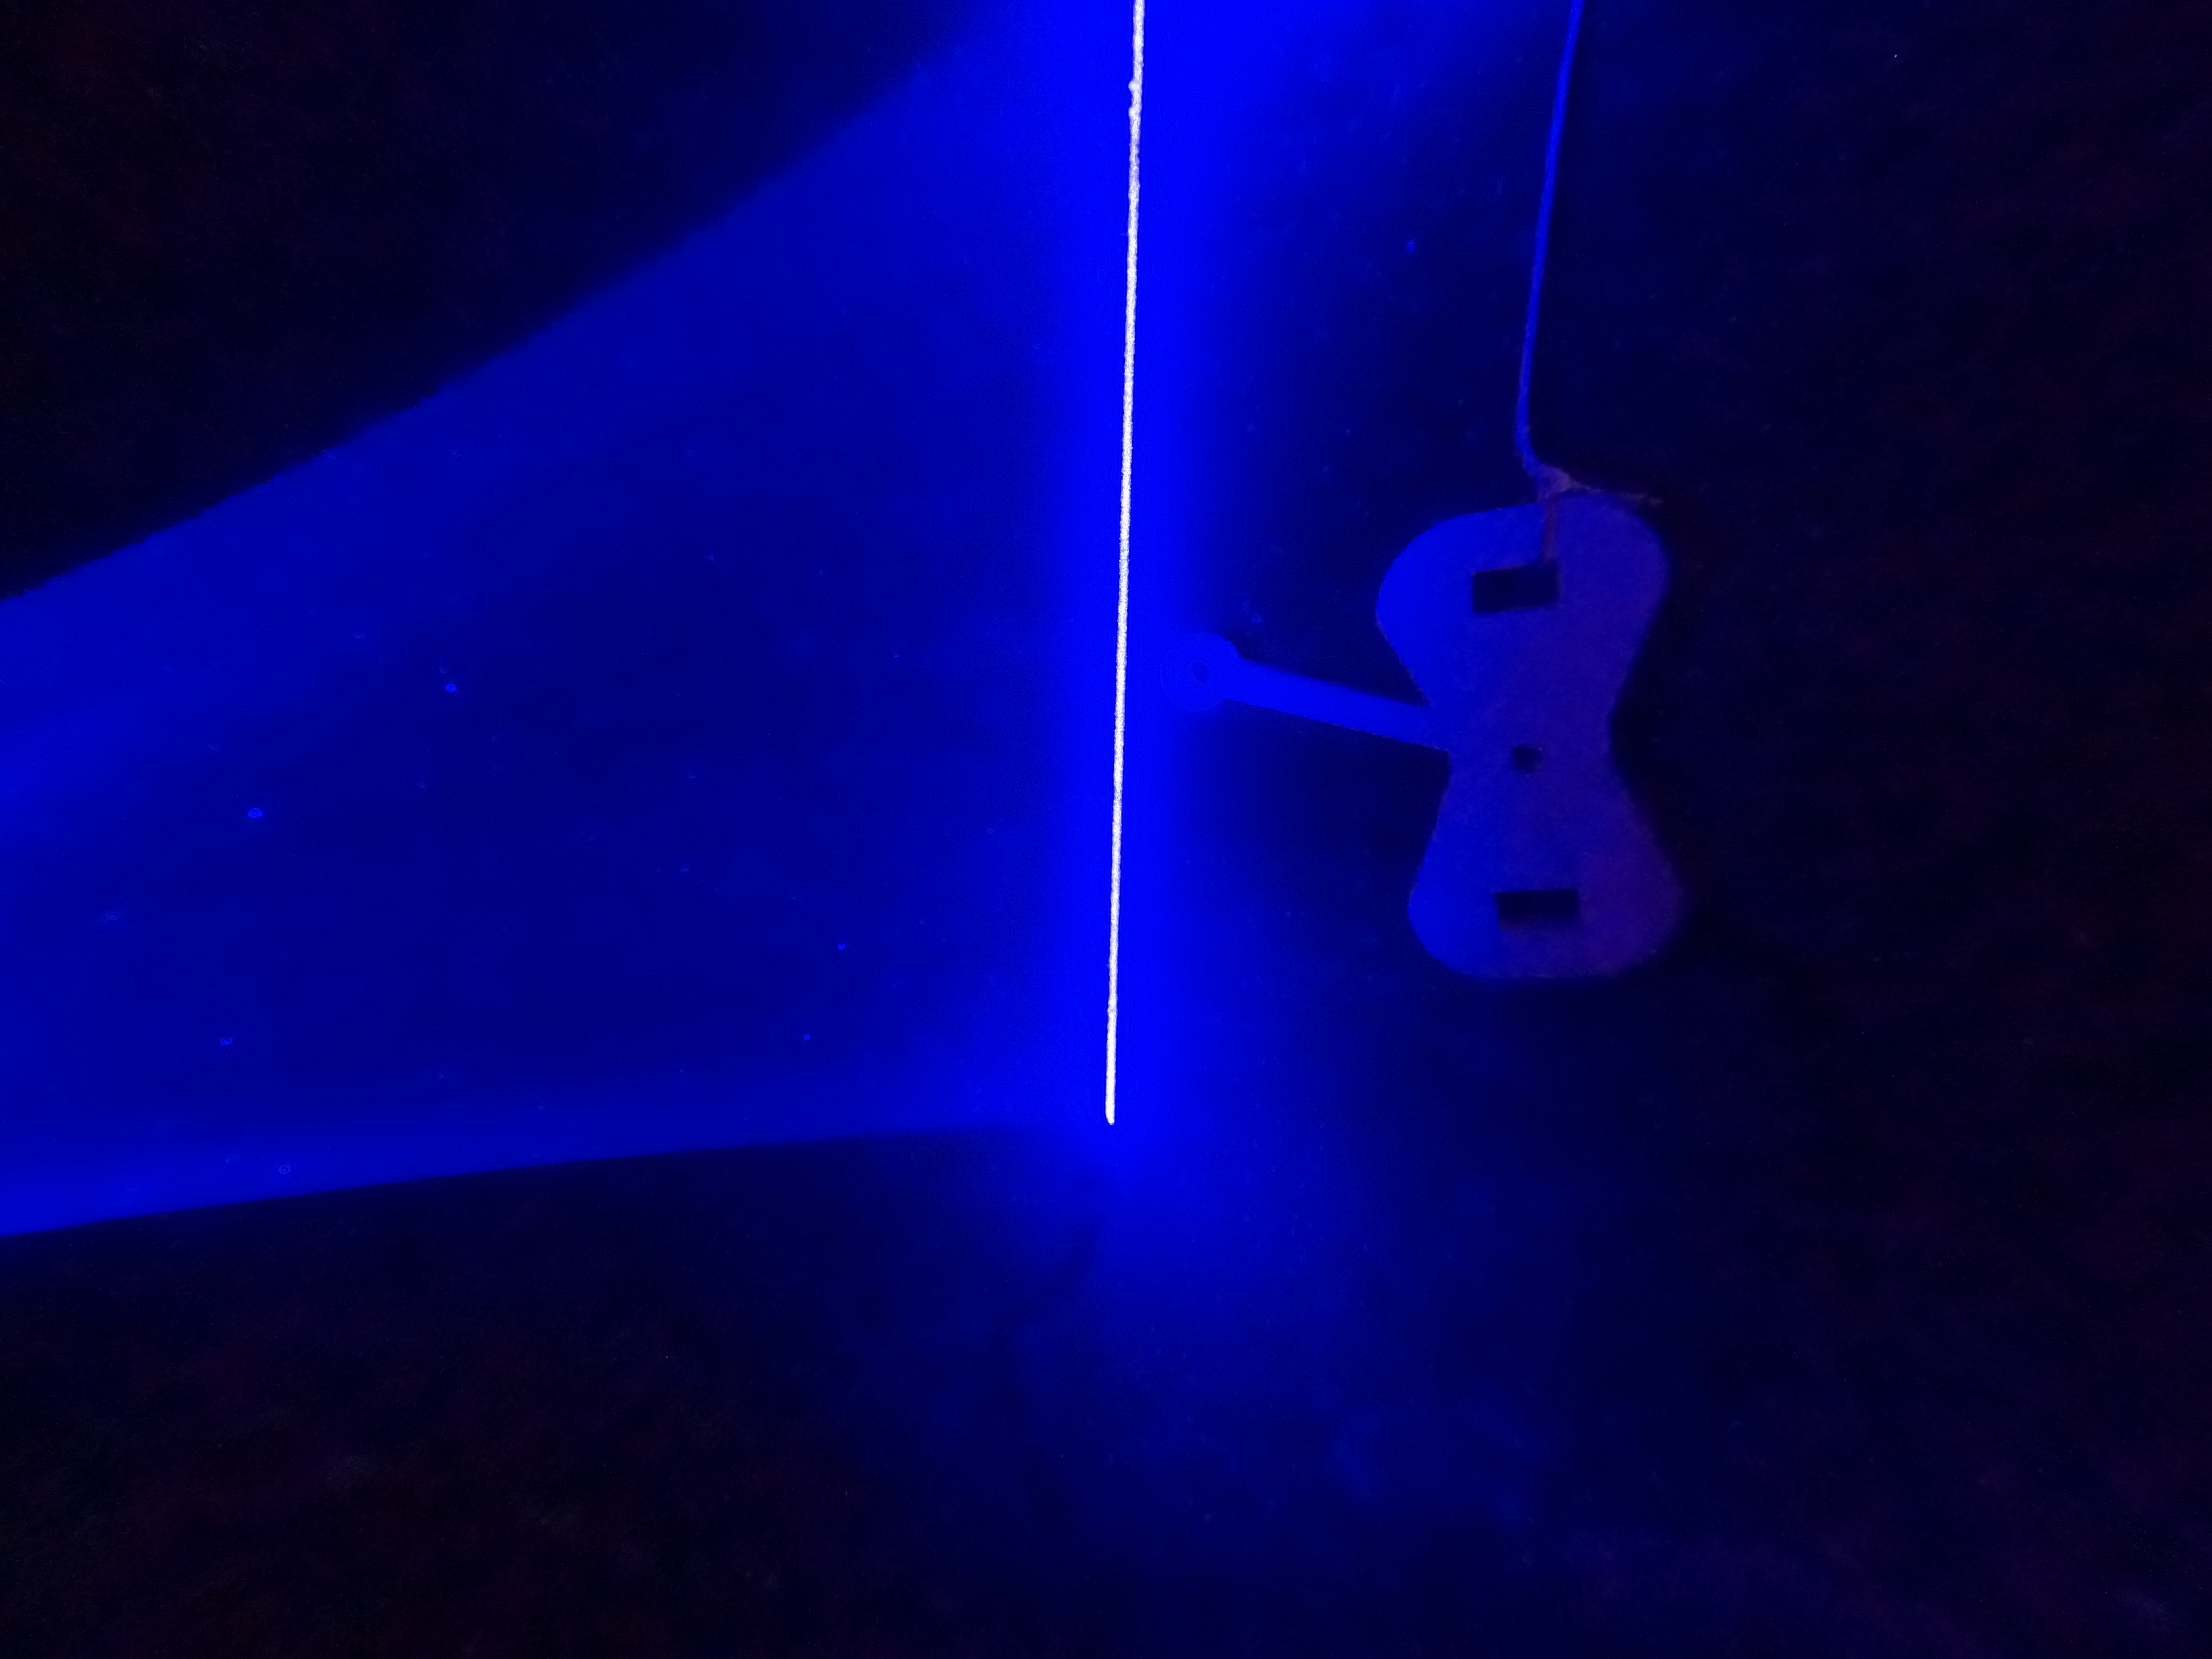

Supplement: Supplementary file 2351 [file G0016660.pdf › Level_1_2/G0016660.pdf]

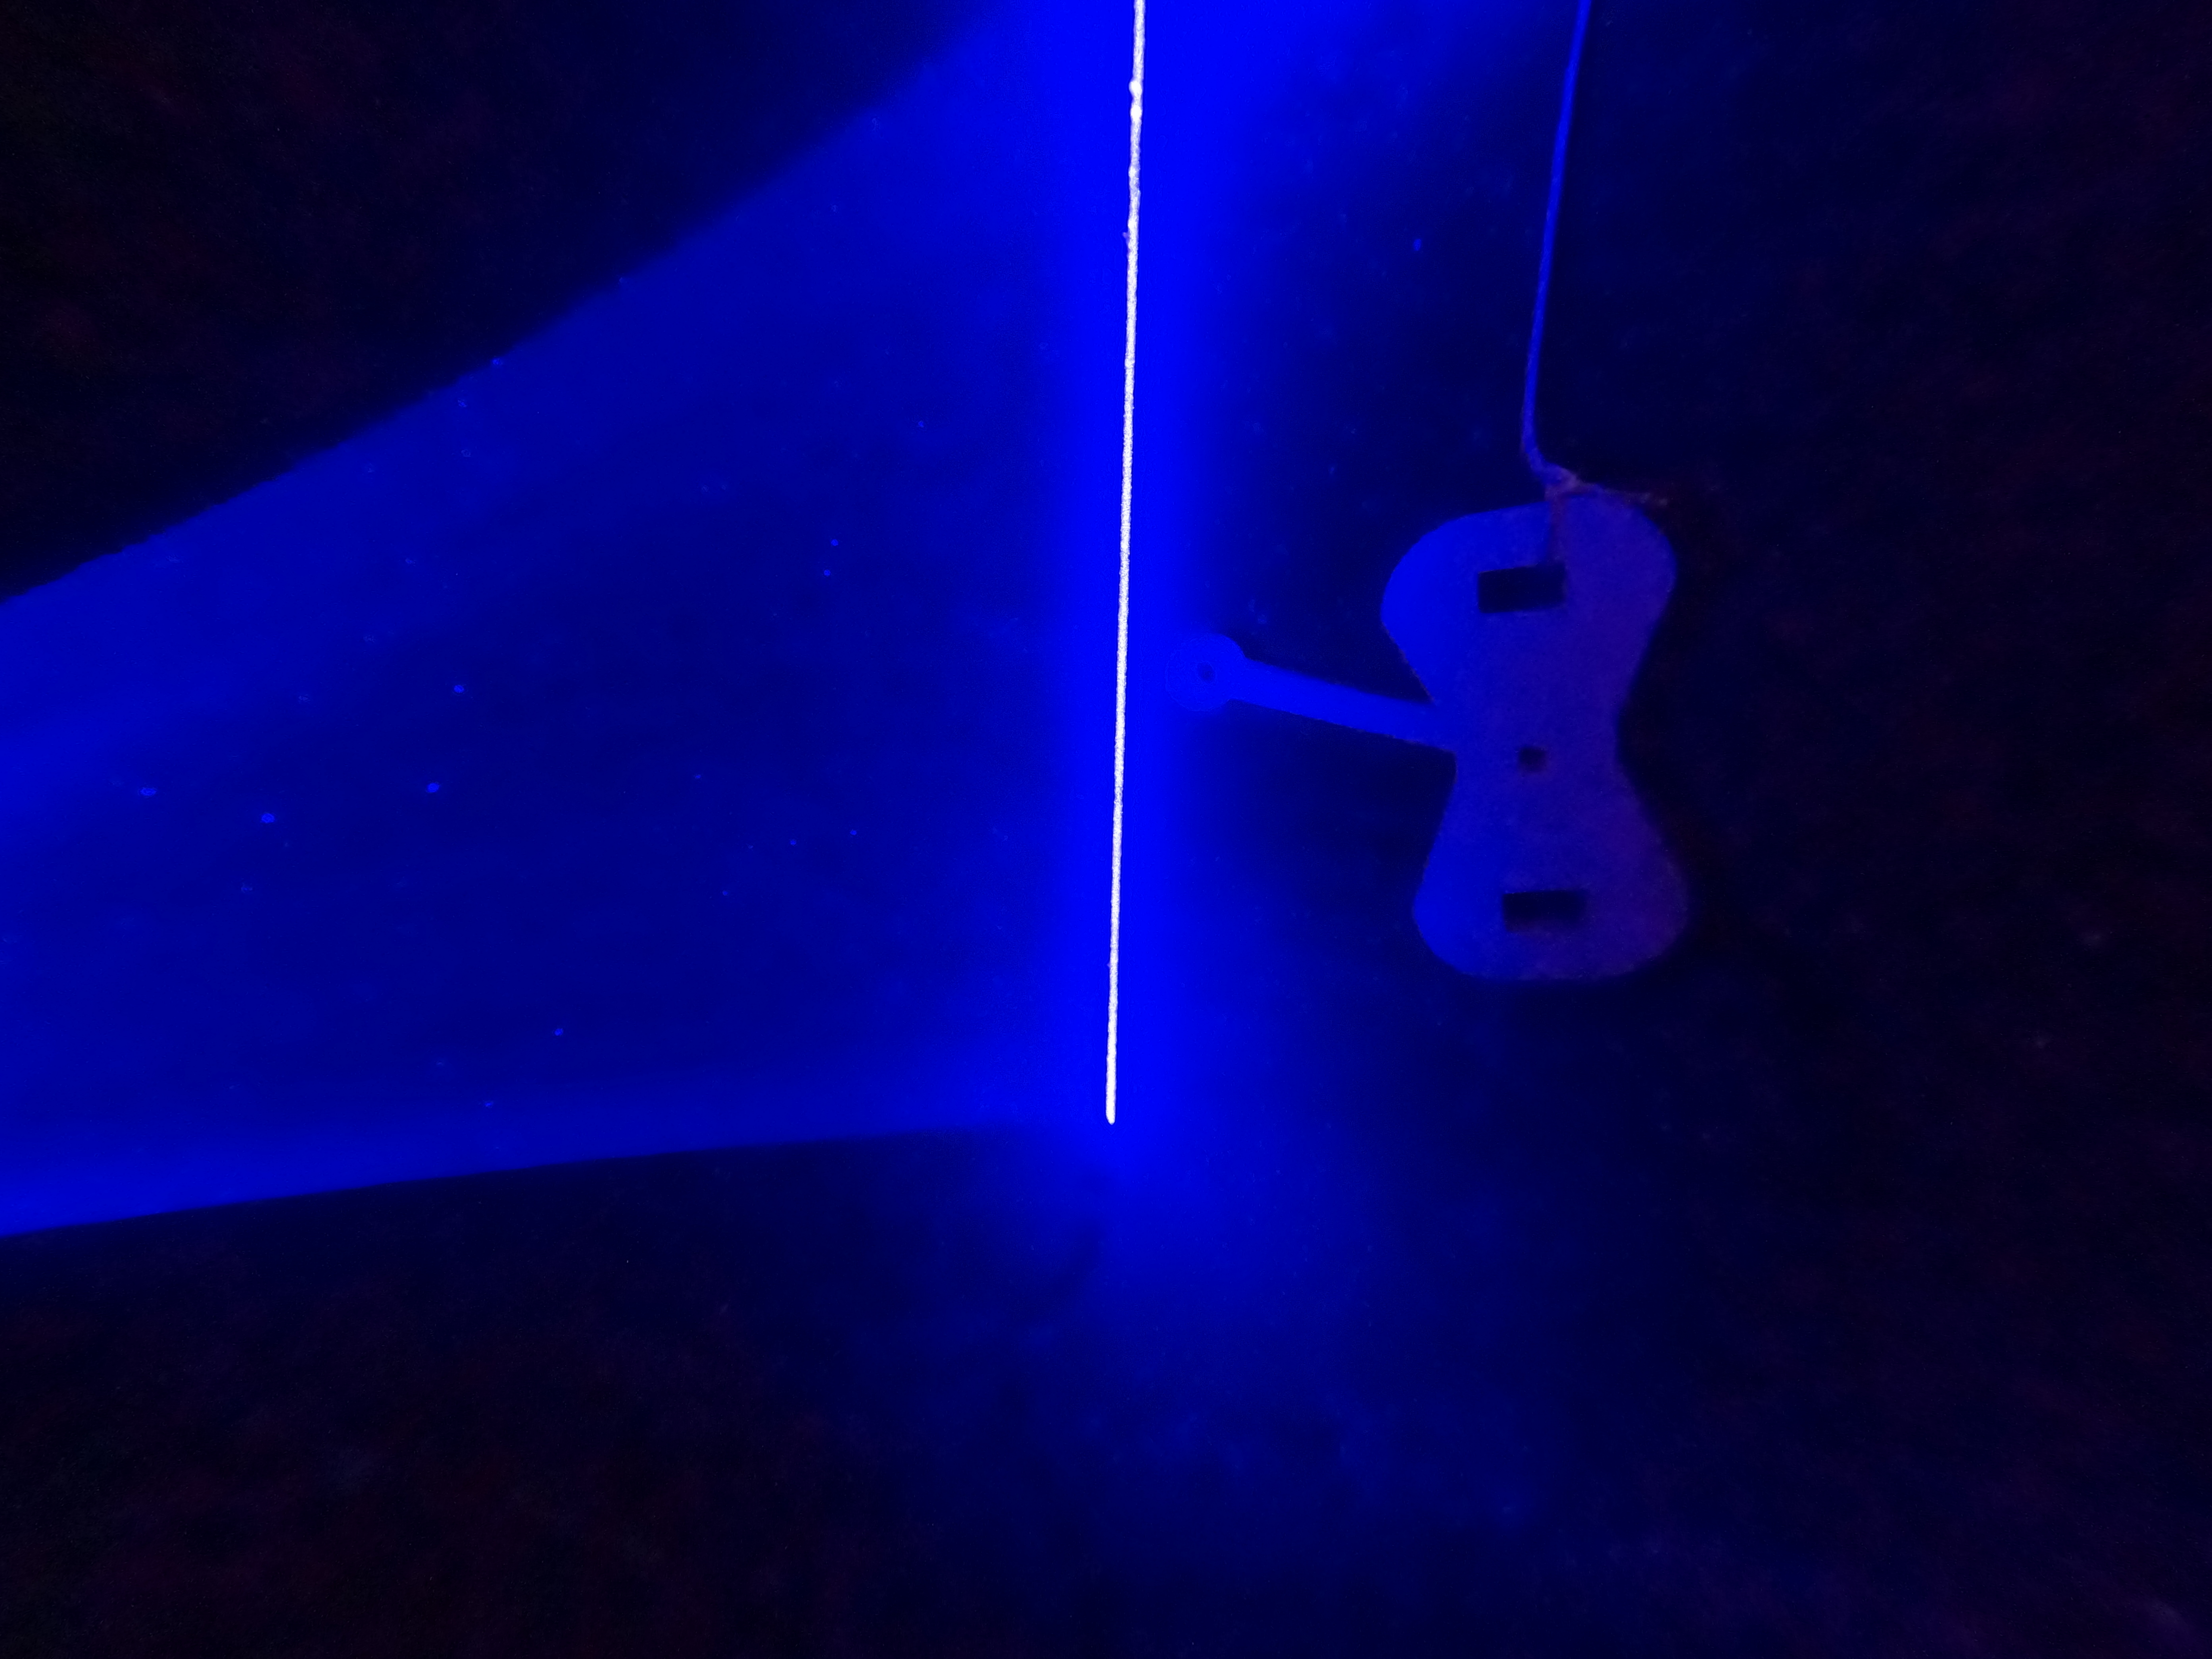

Supplement: Supplementary file 2352 [file G0016661.pdf › Level_1_2/G0016661.pdf]

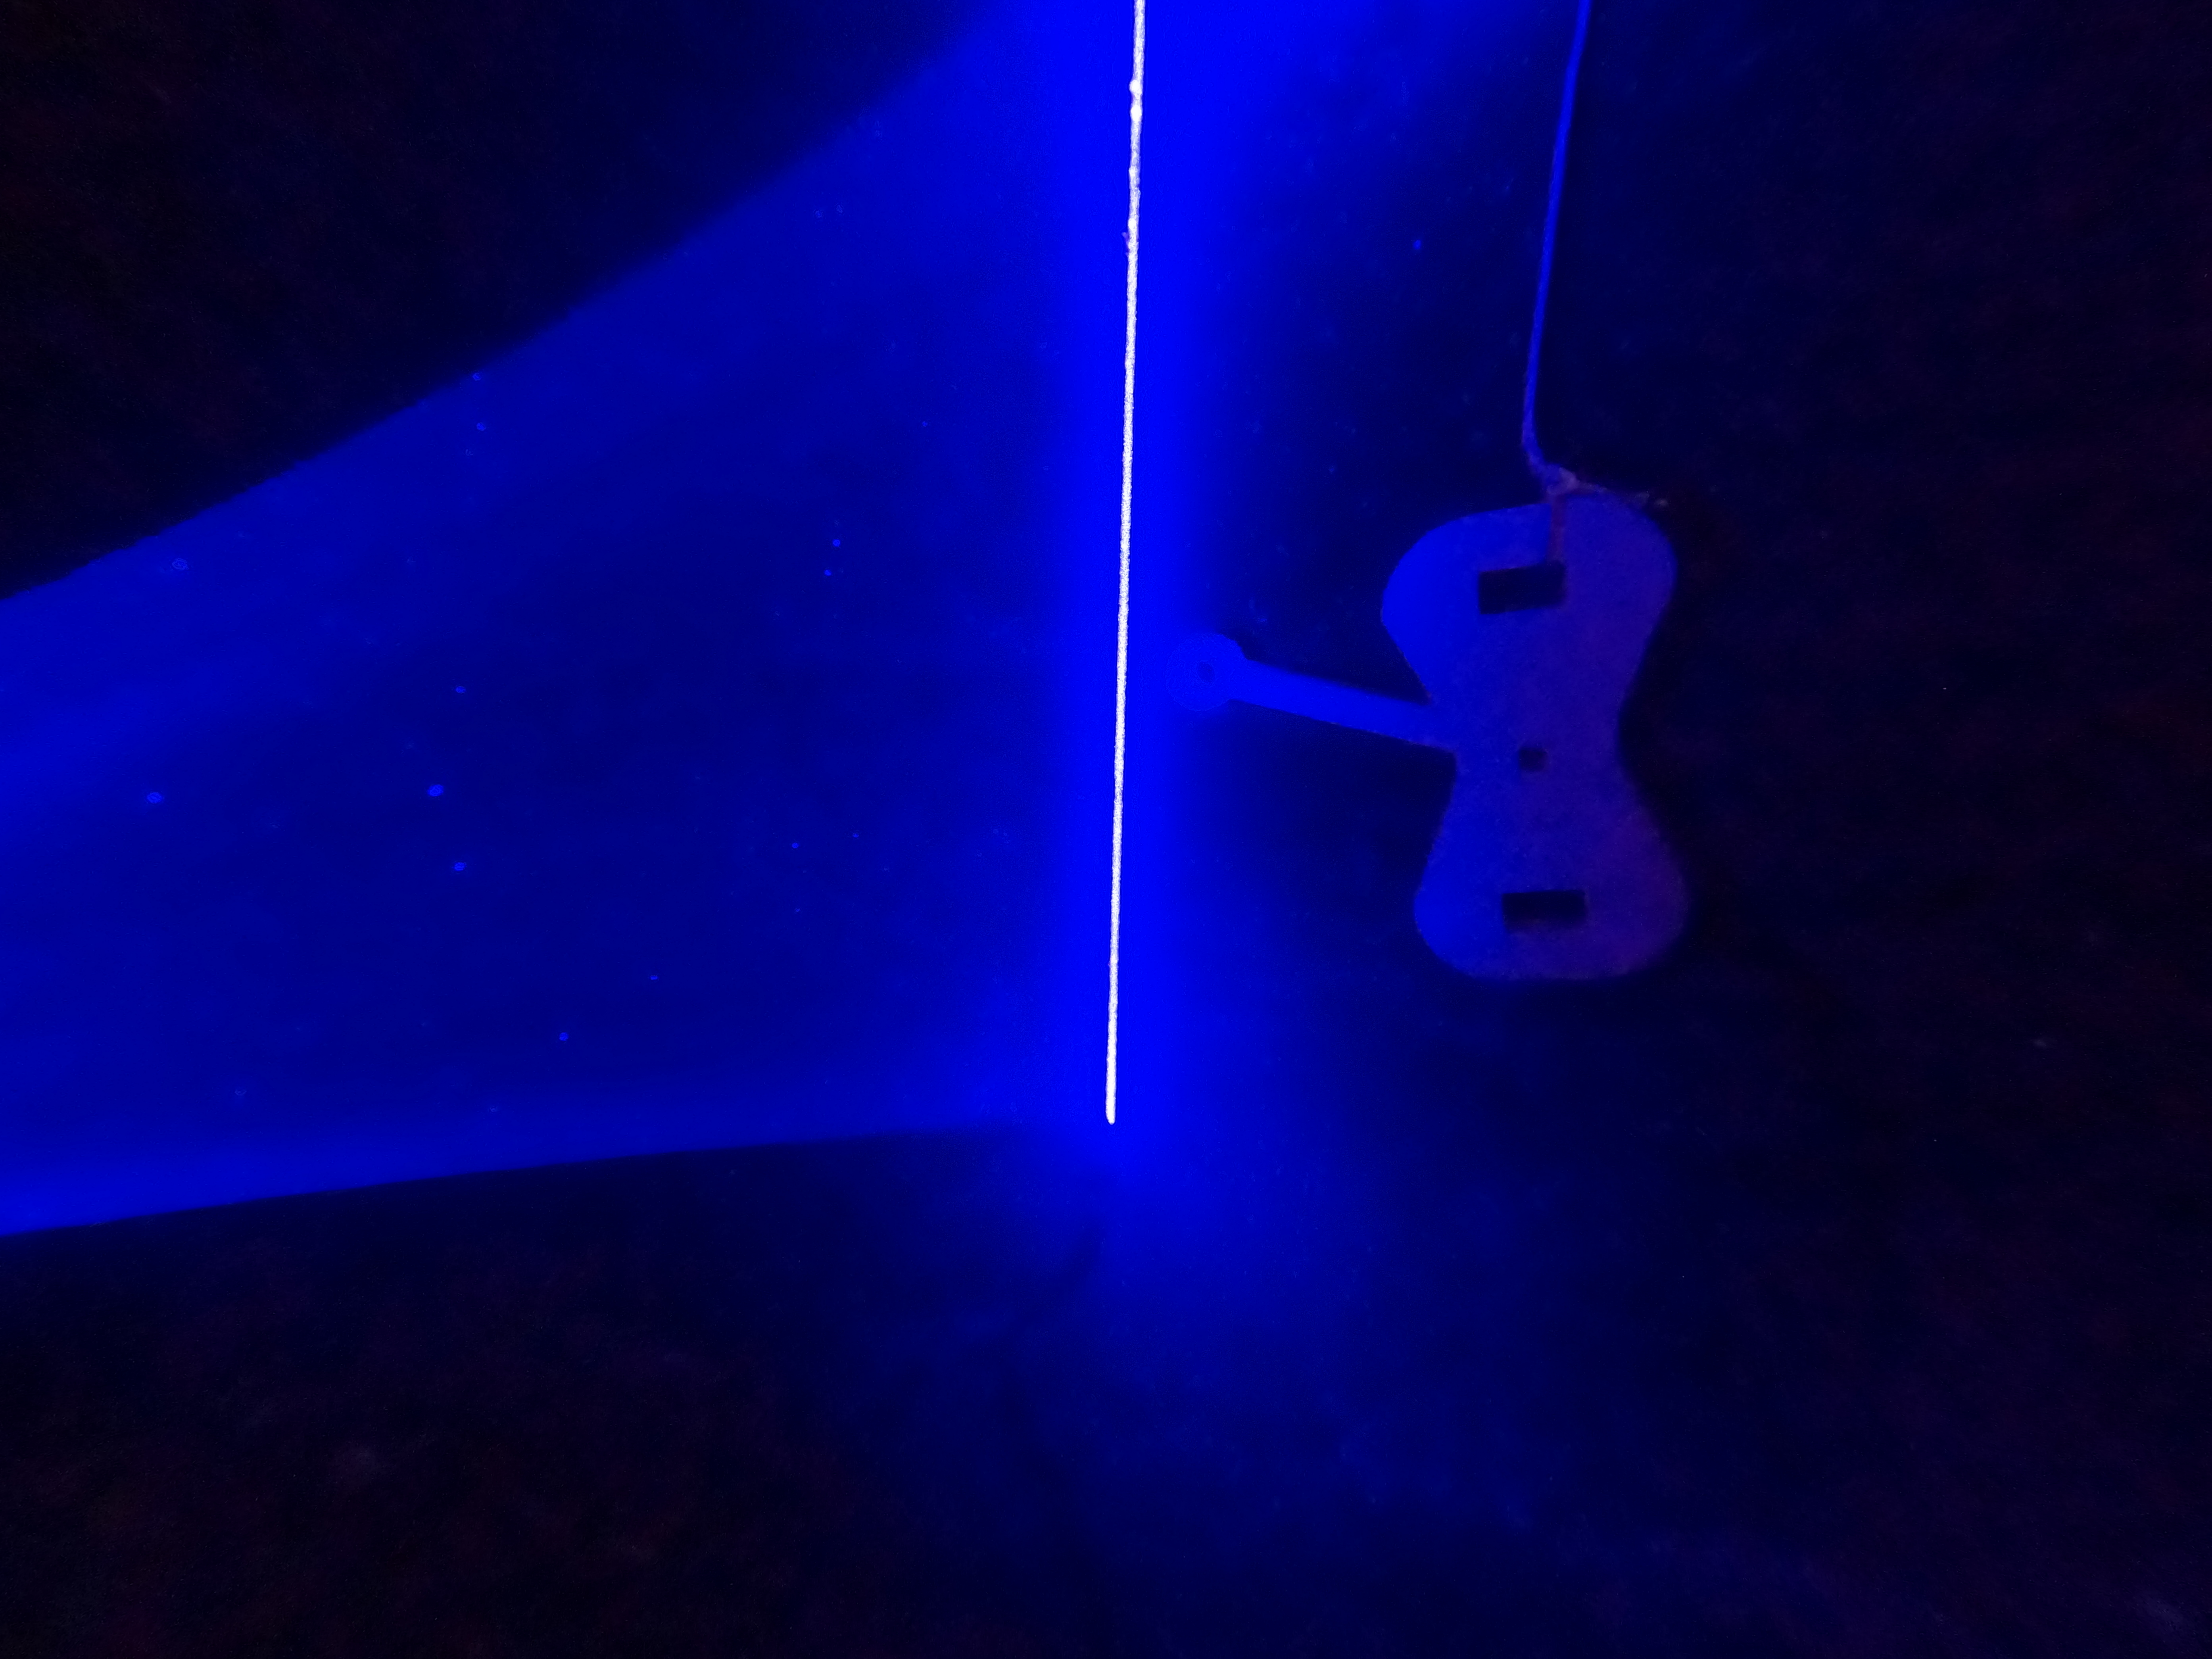

Supplement: Supplementary file 2353 [file G0016662.pdf › Level_1_2/G0016662.pdf]

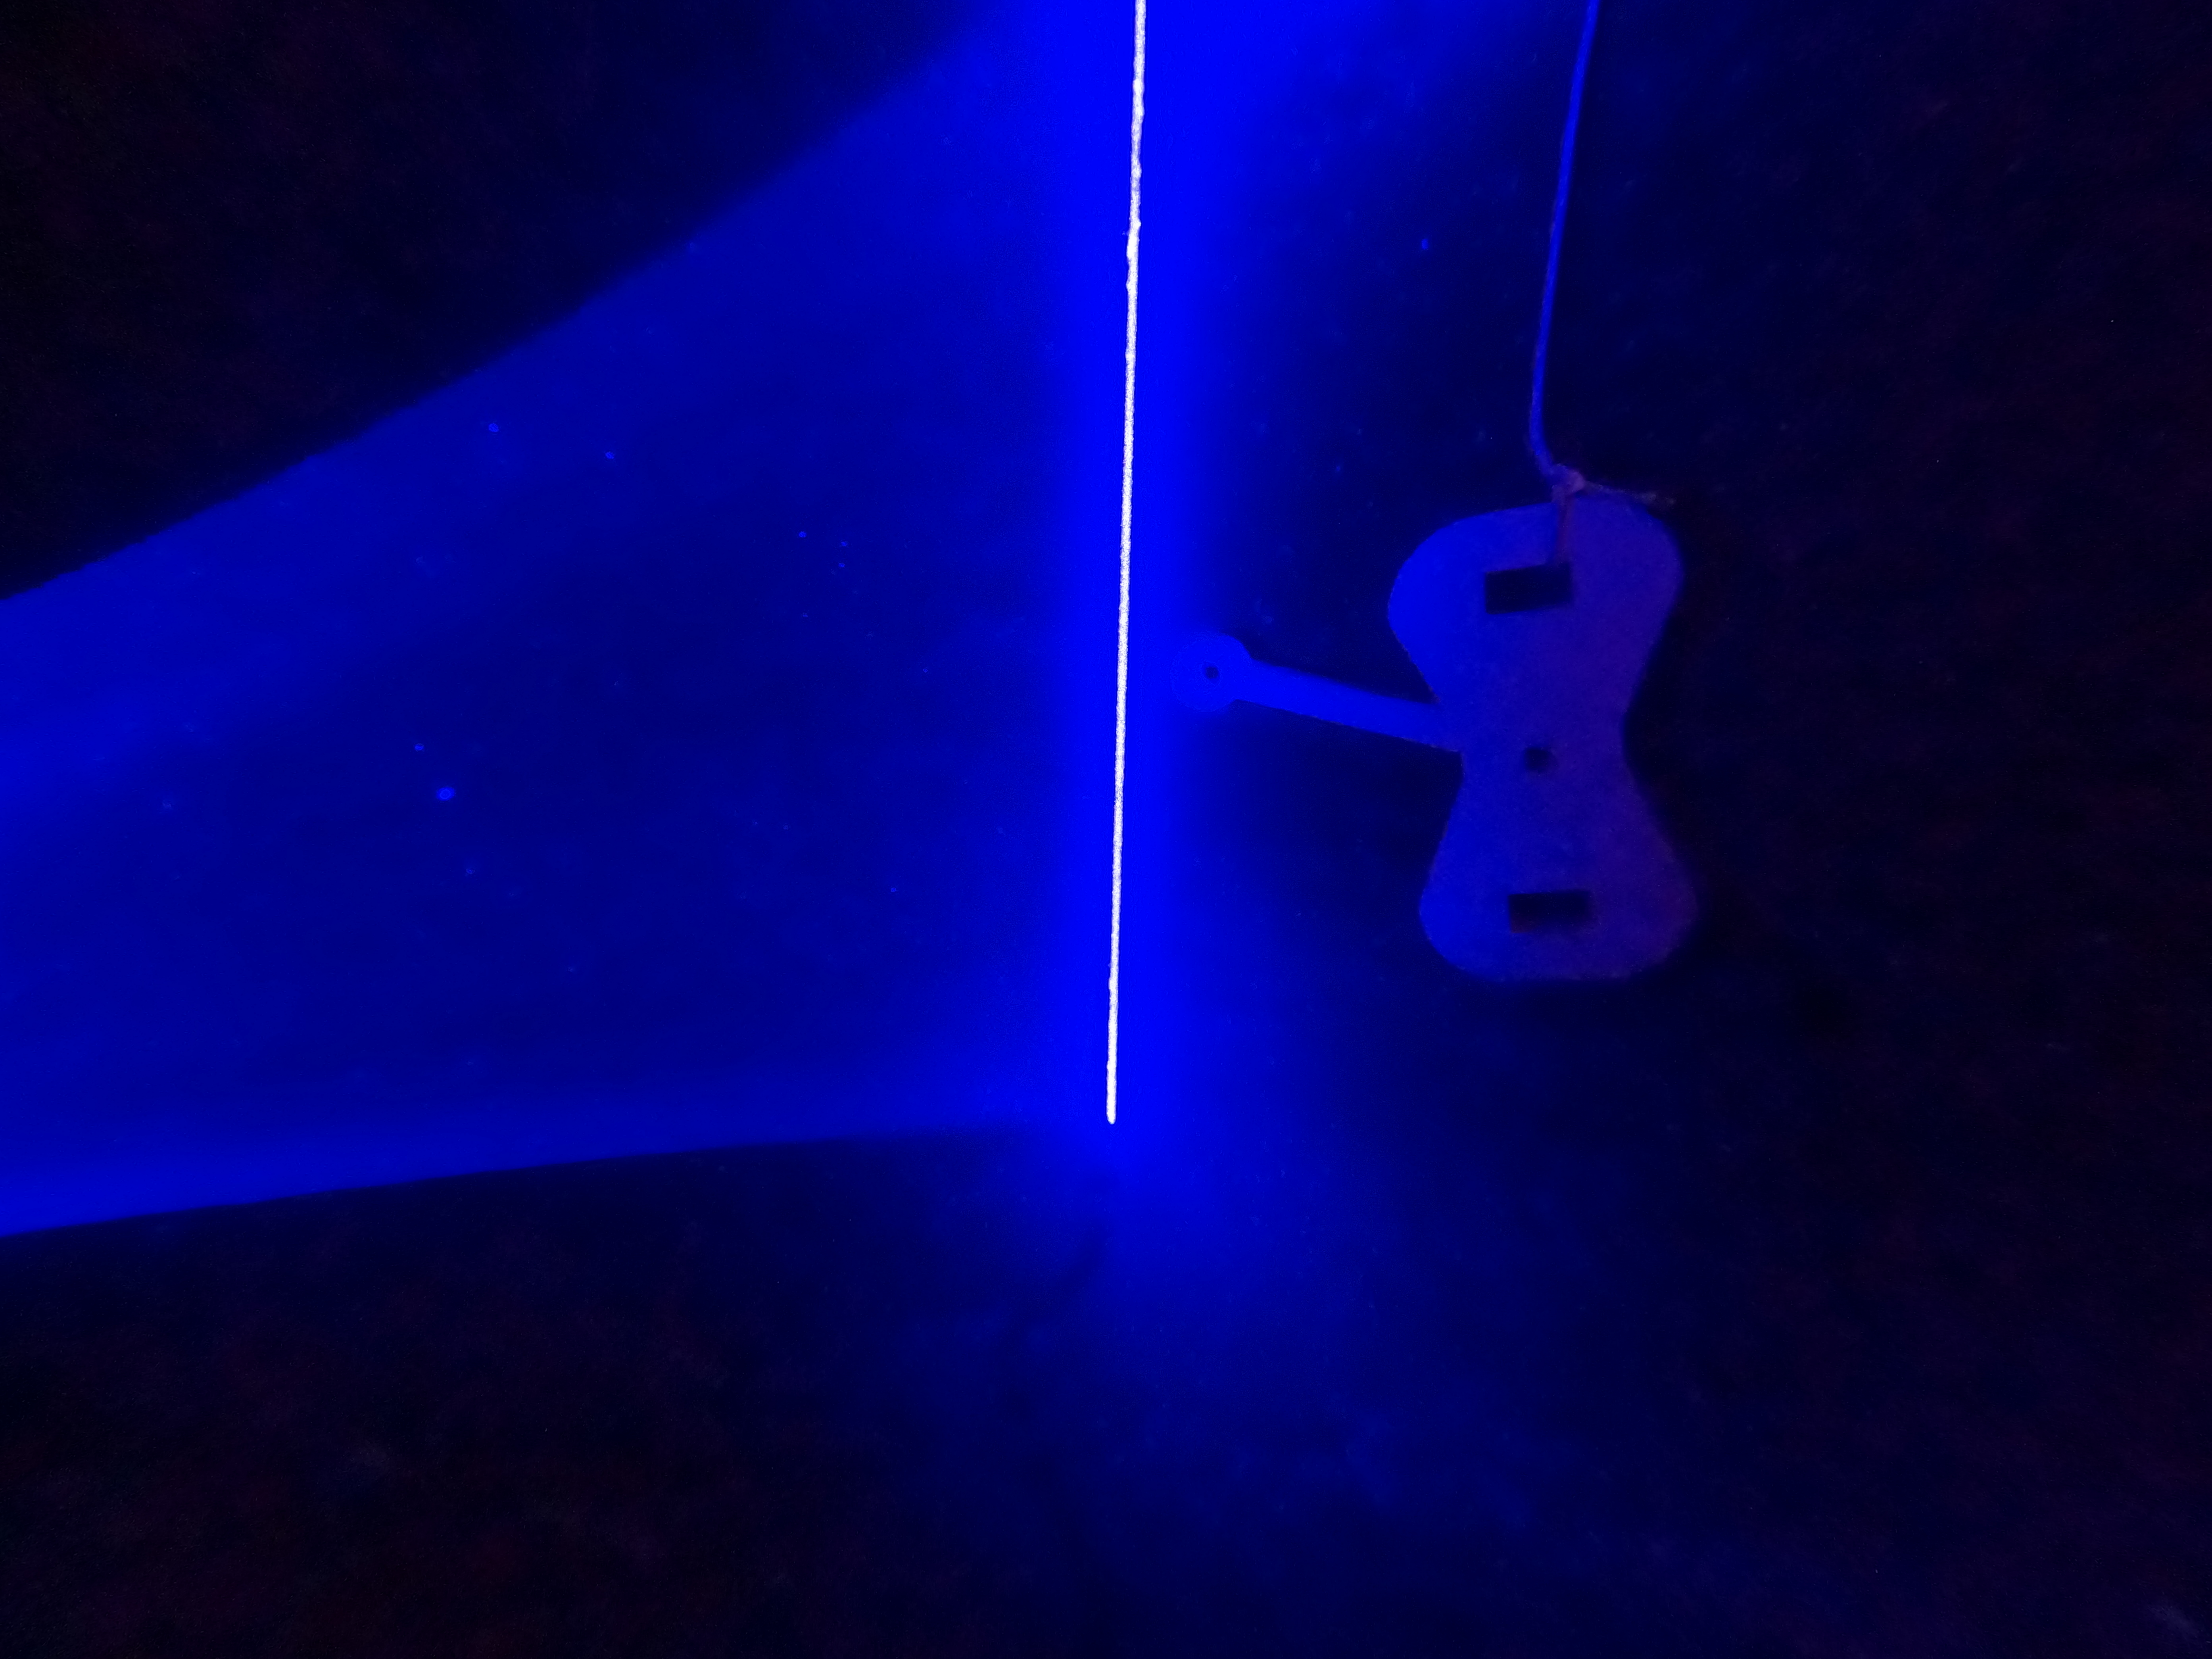

Supplement: Supplementary file 2354 [file G0016663.pdf › Level_1_2/G0016663.pdf]

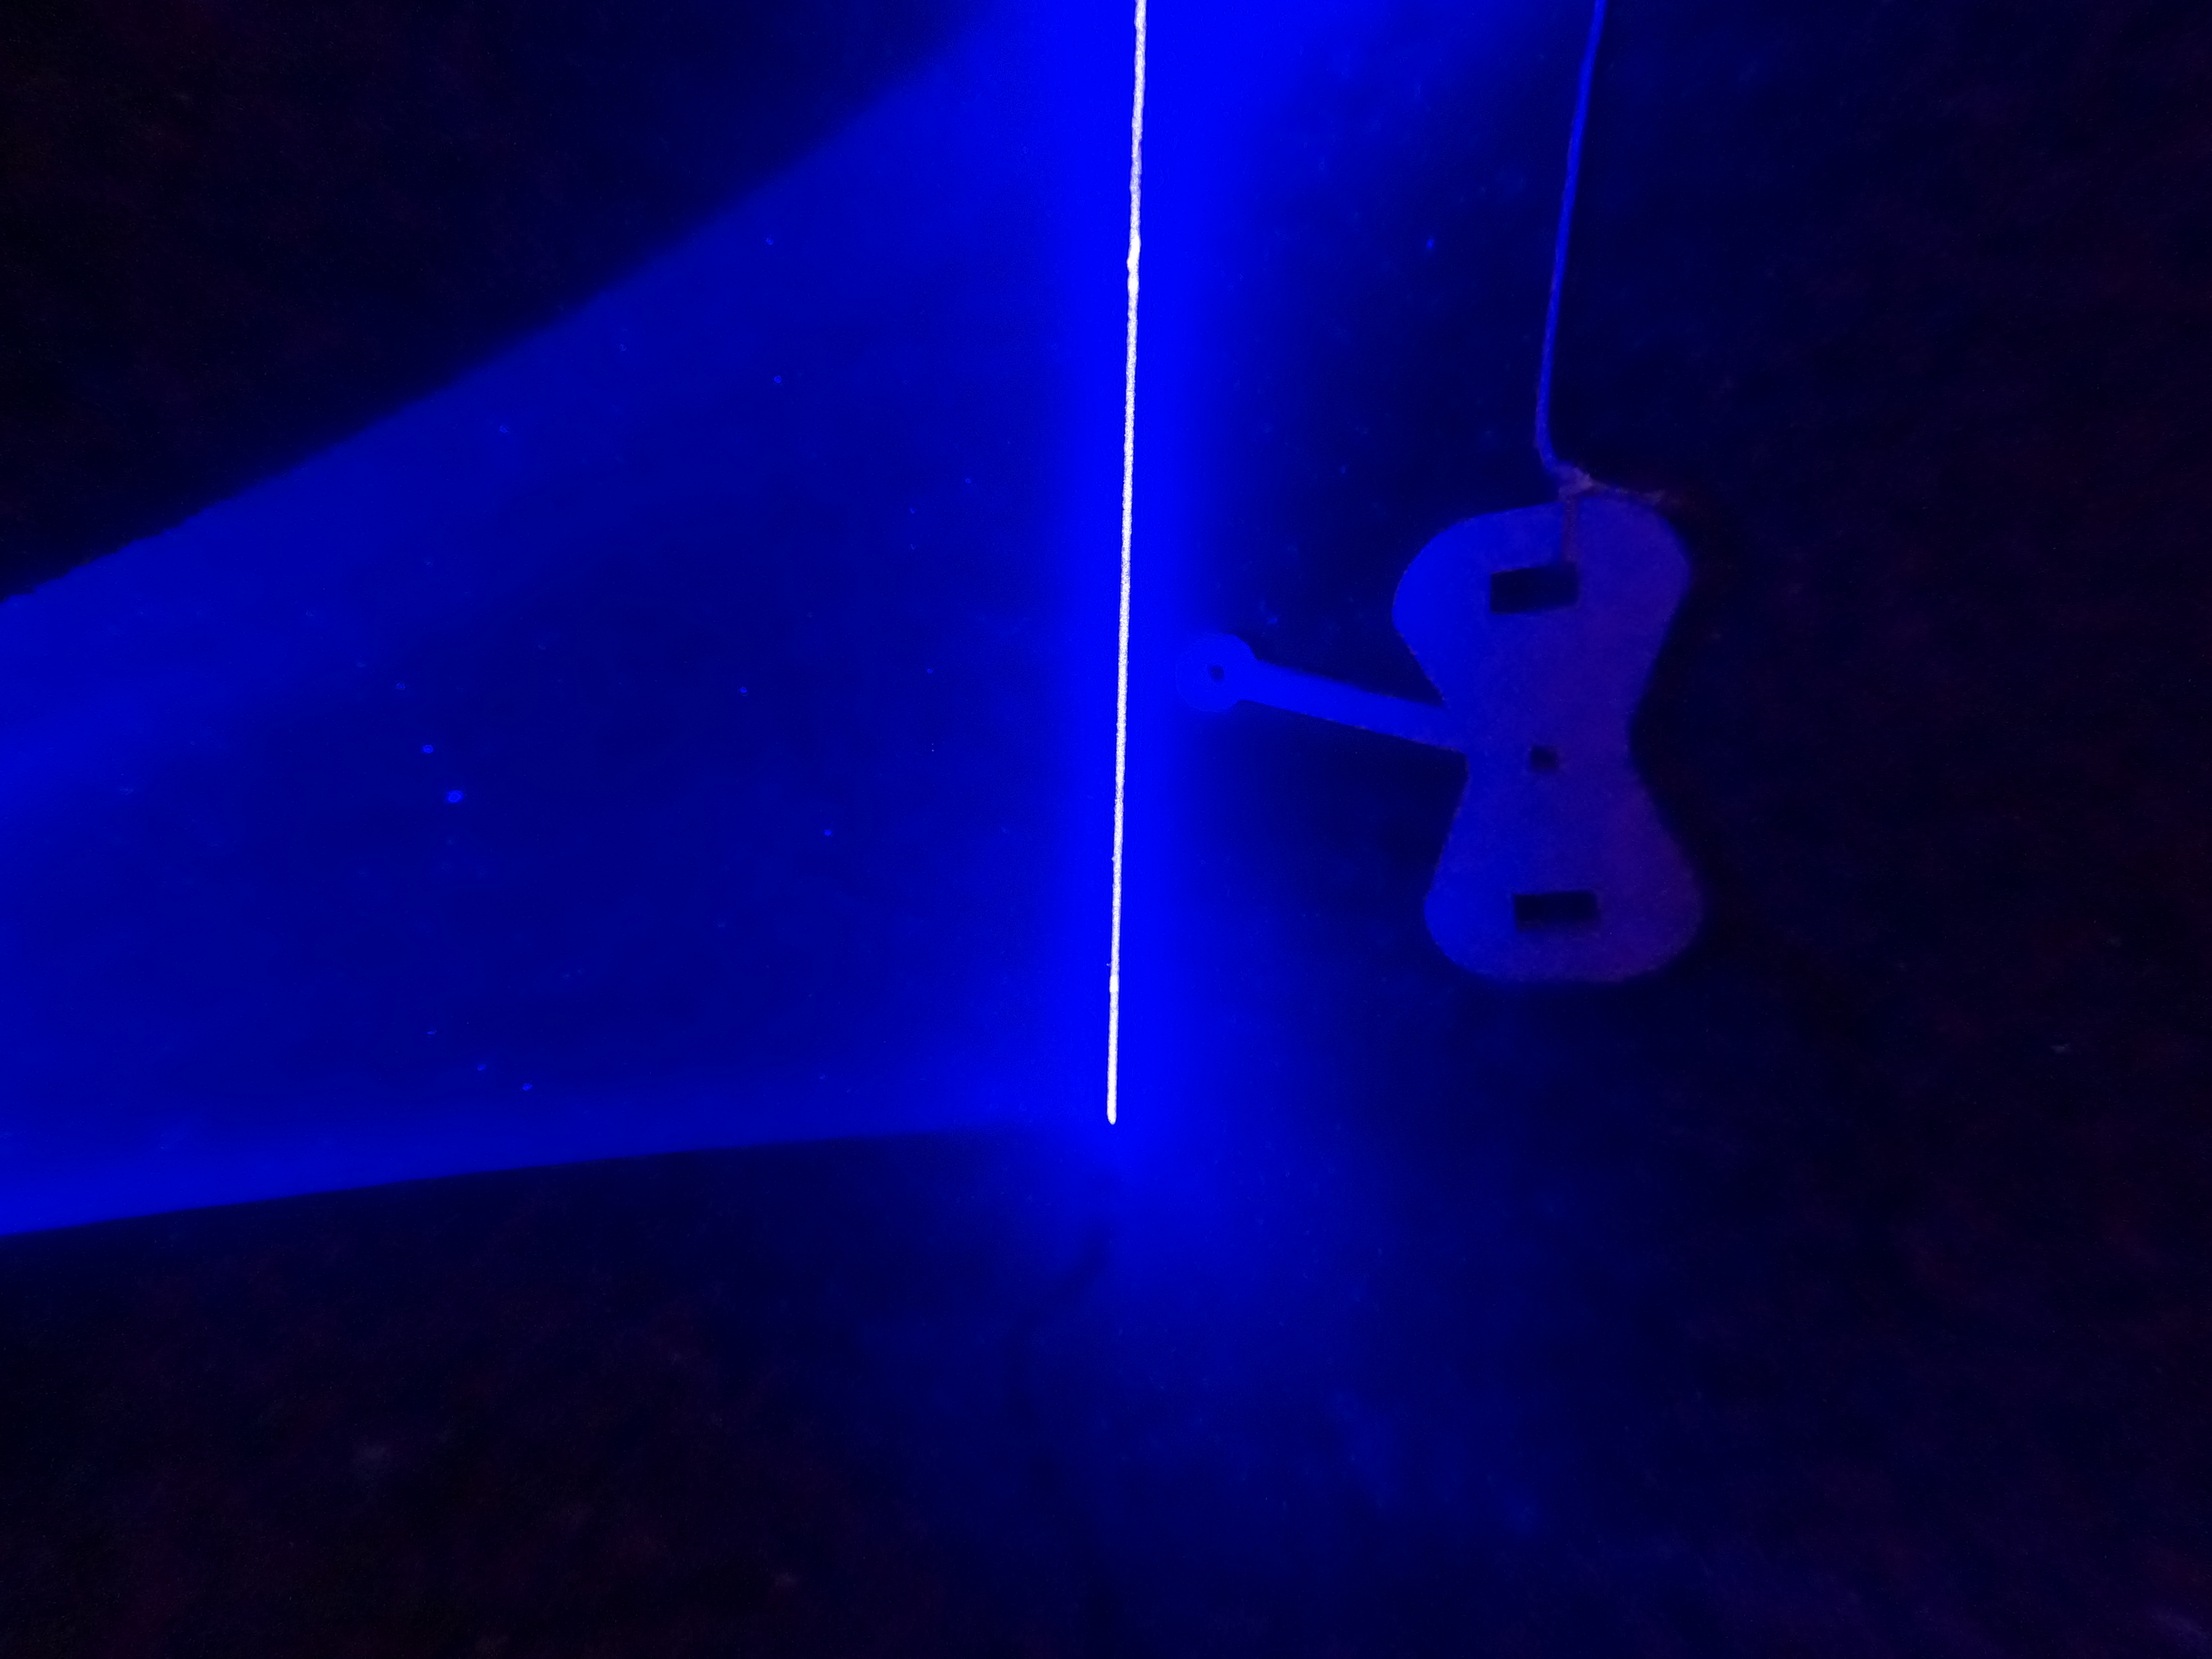

Supplement: Supplementary file 2355 [file G0016664.pdf › Level_1_2/G0016664.pdf]

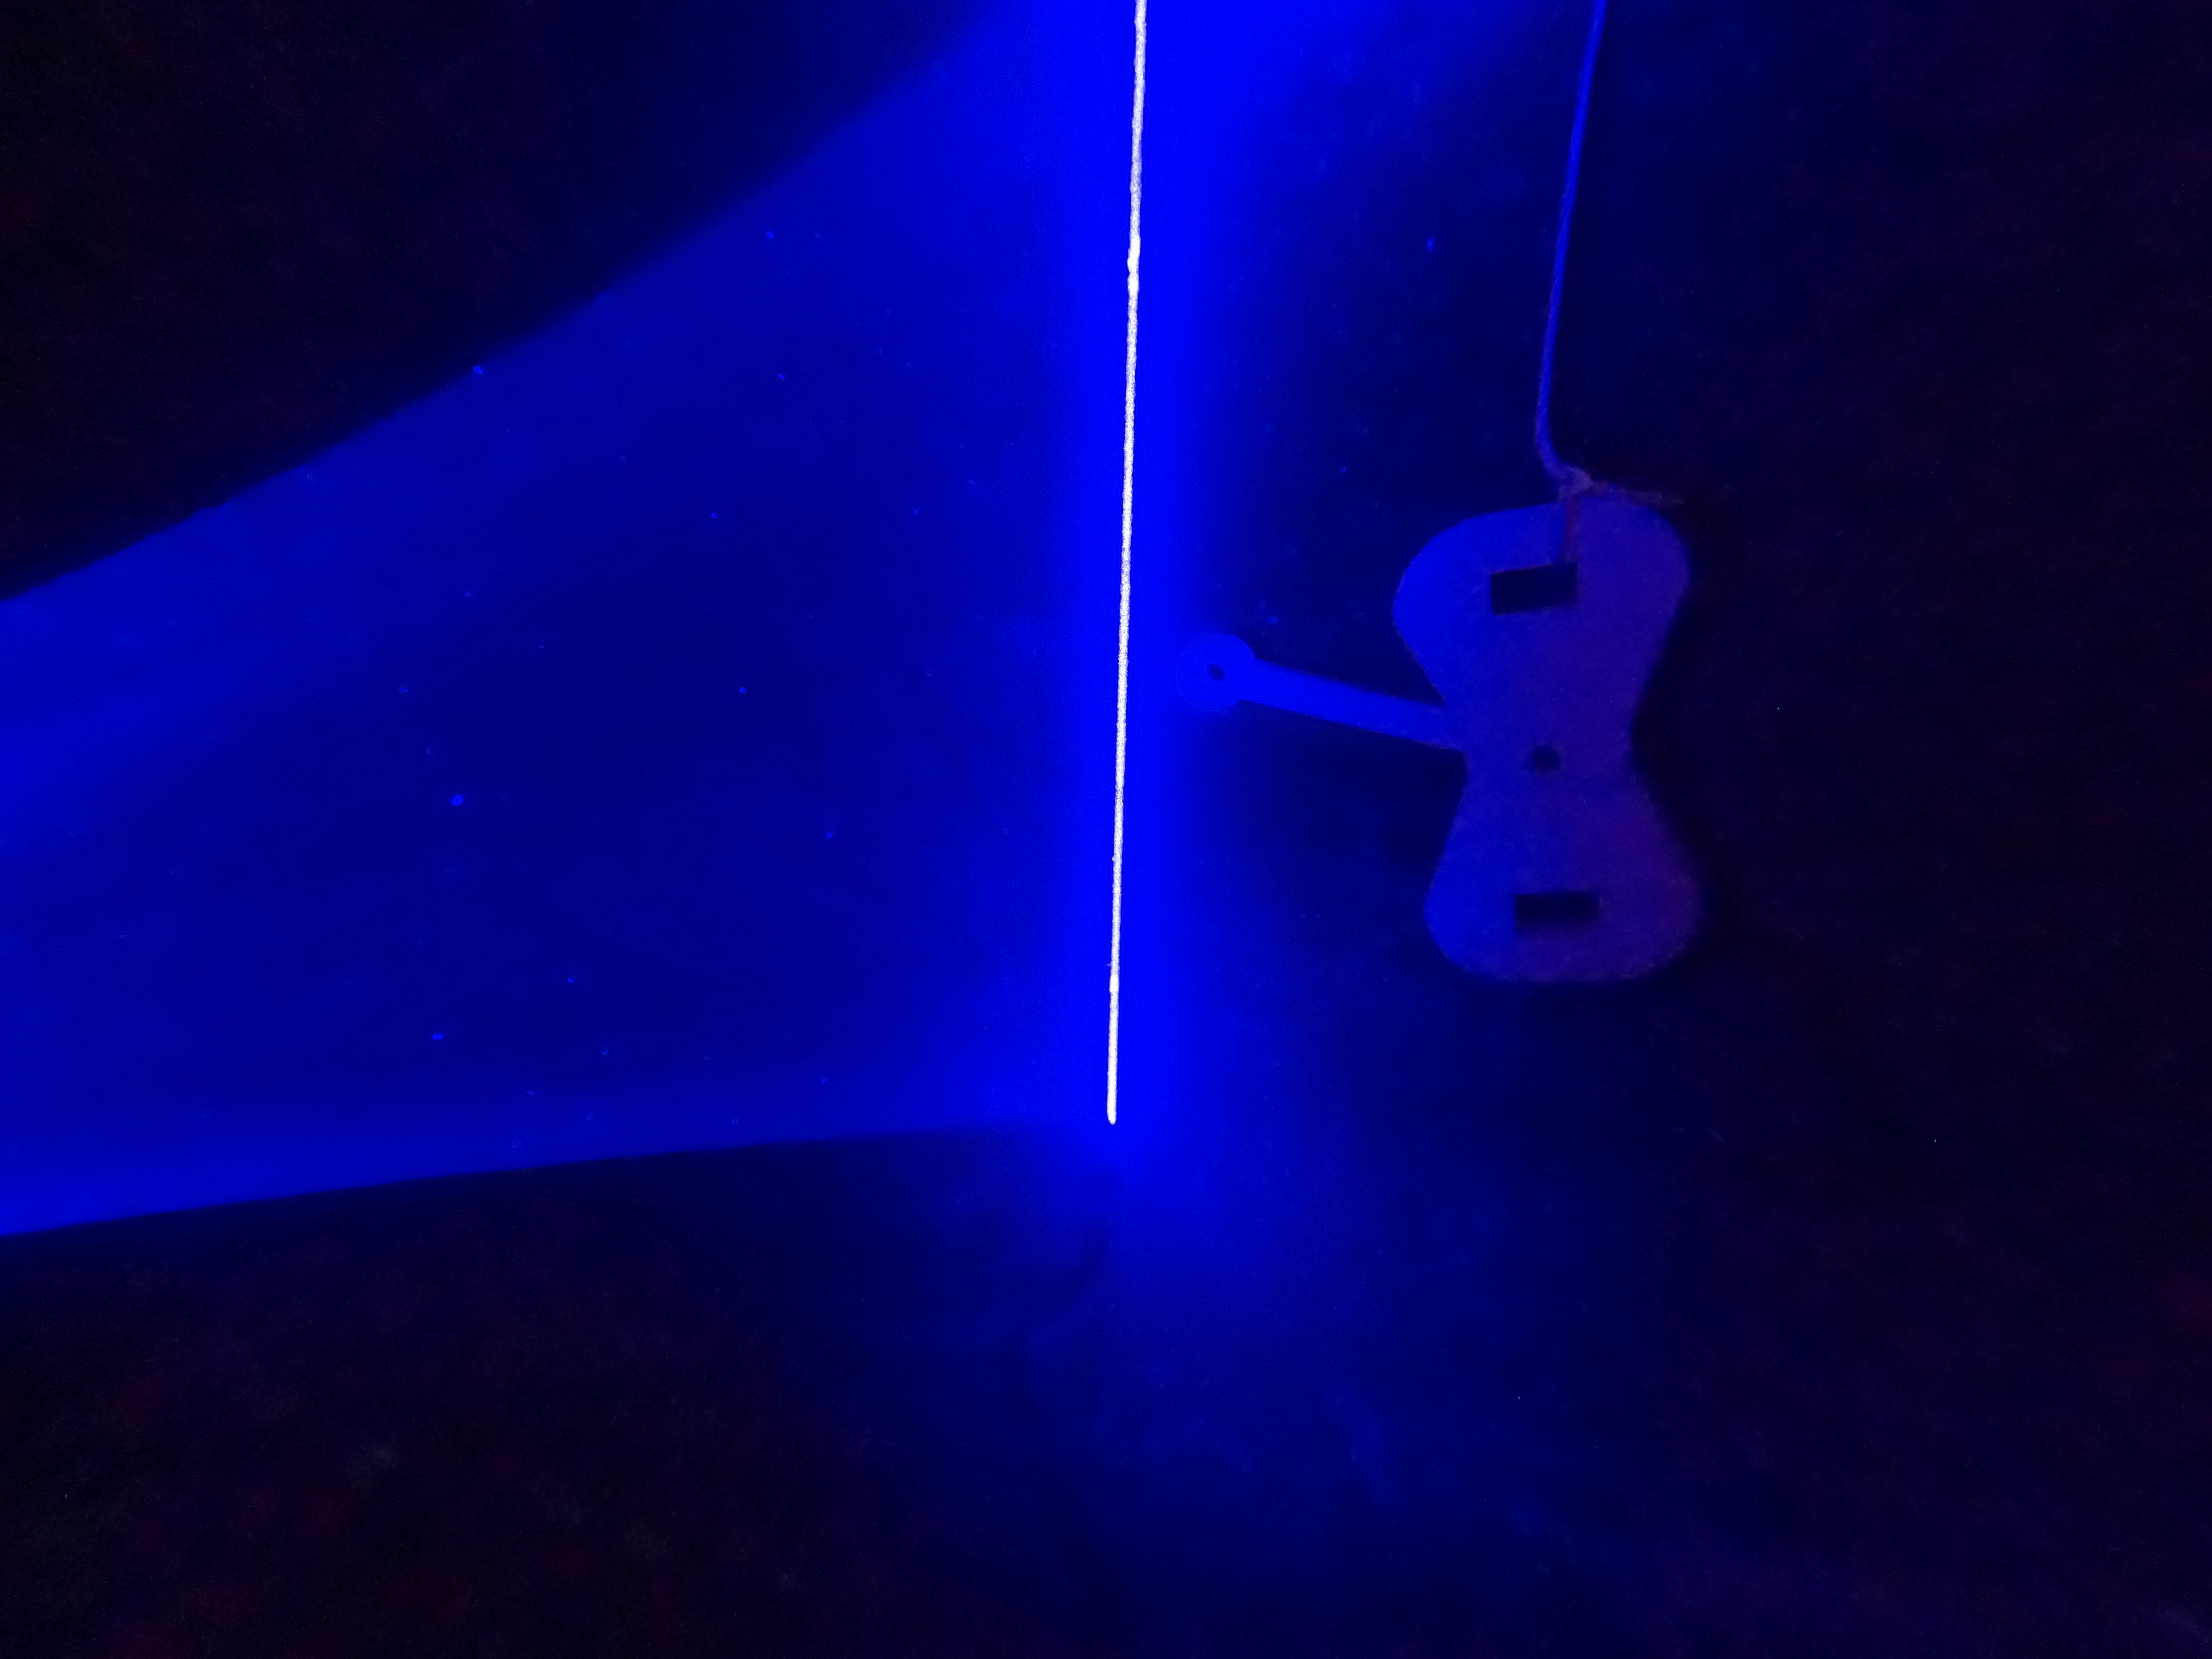

Supplement: Supplementary file 2356 [file G0016665.pdf › Level_1_2/G0016665.pdf]

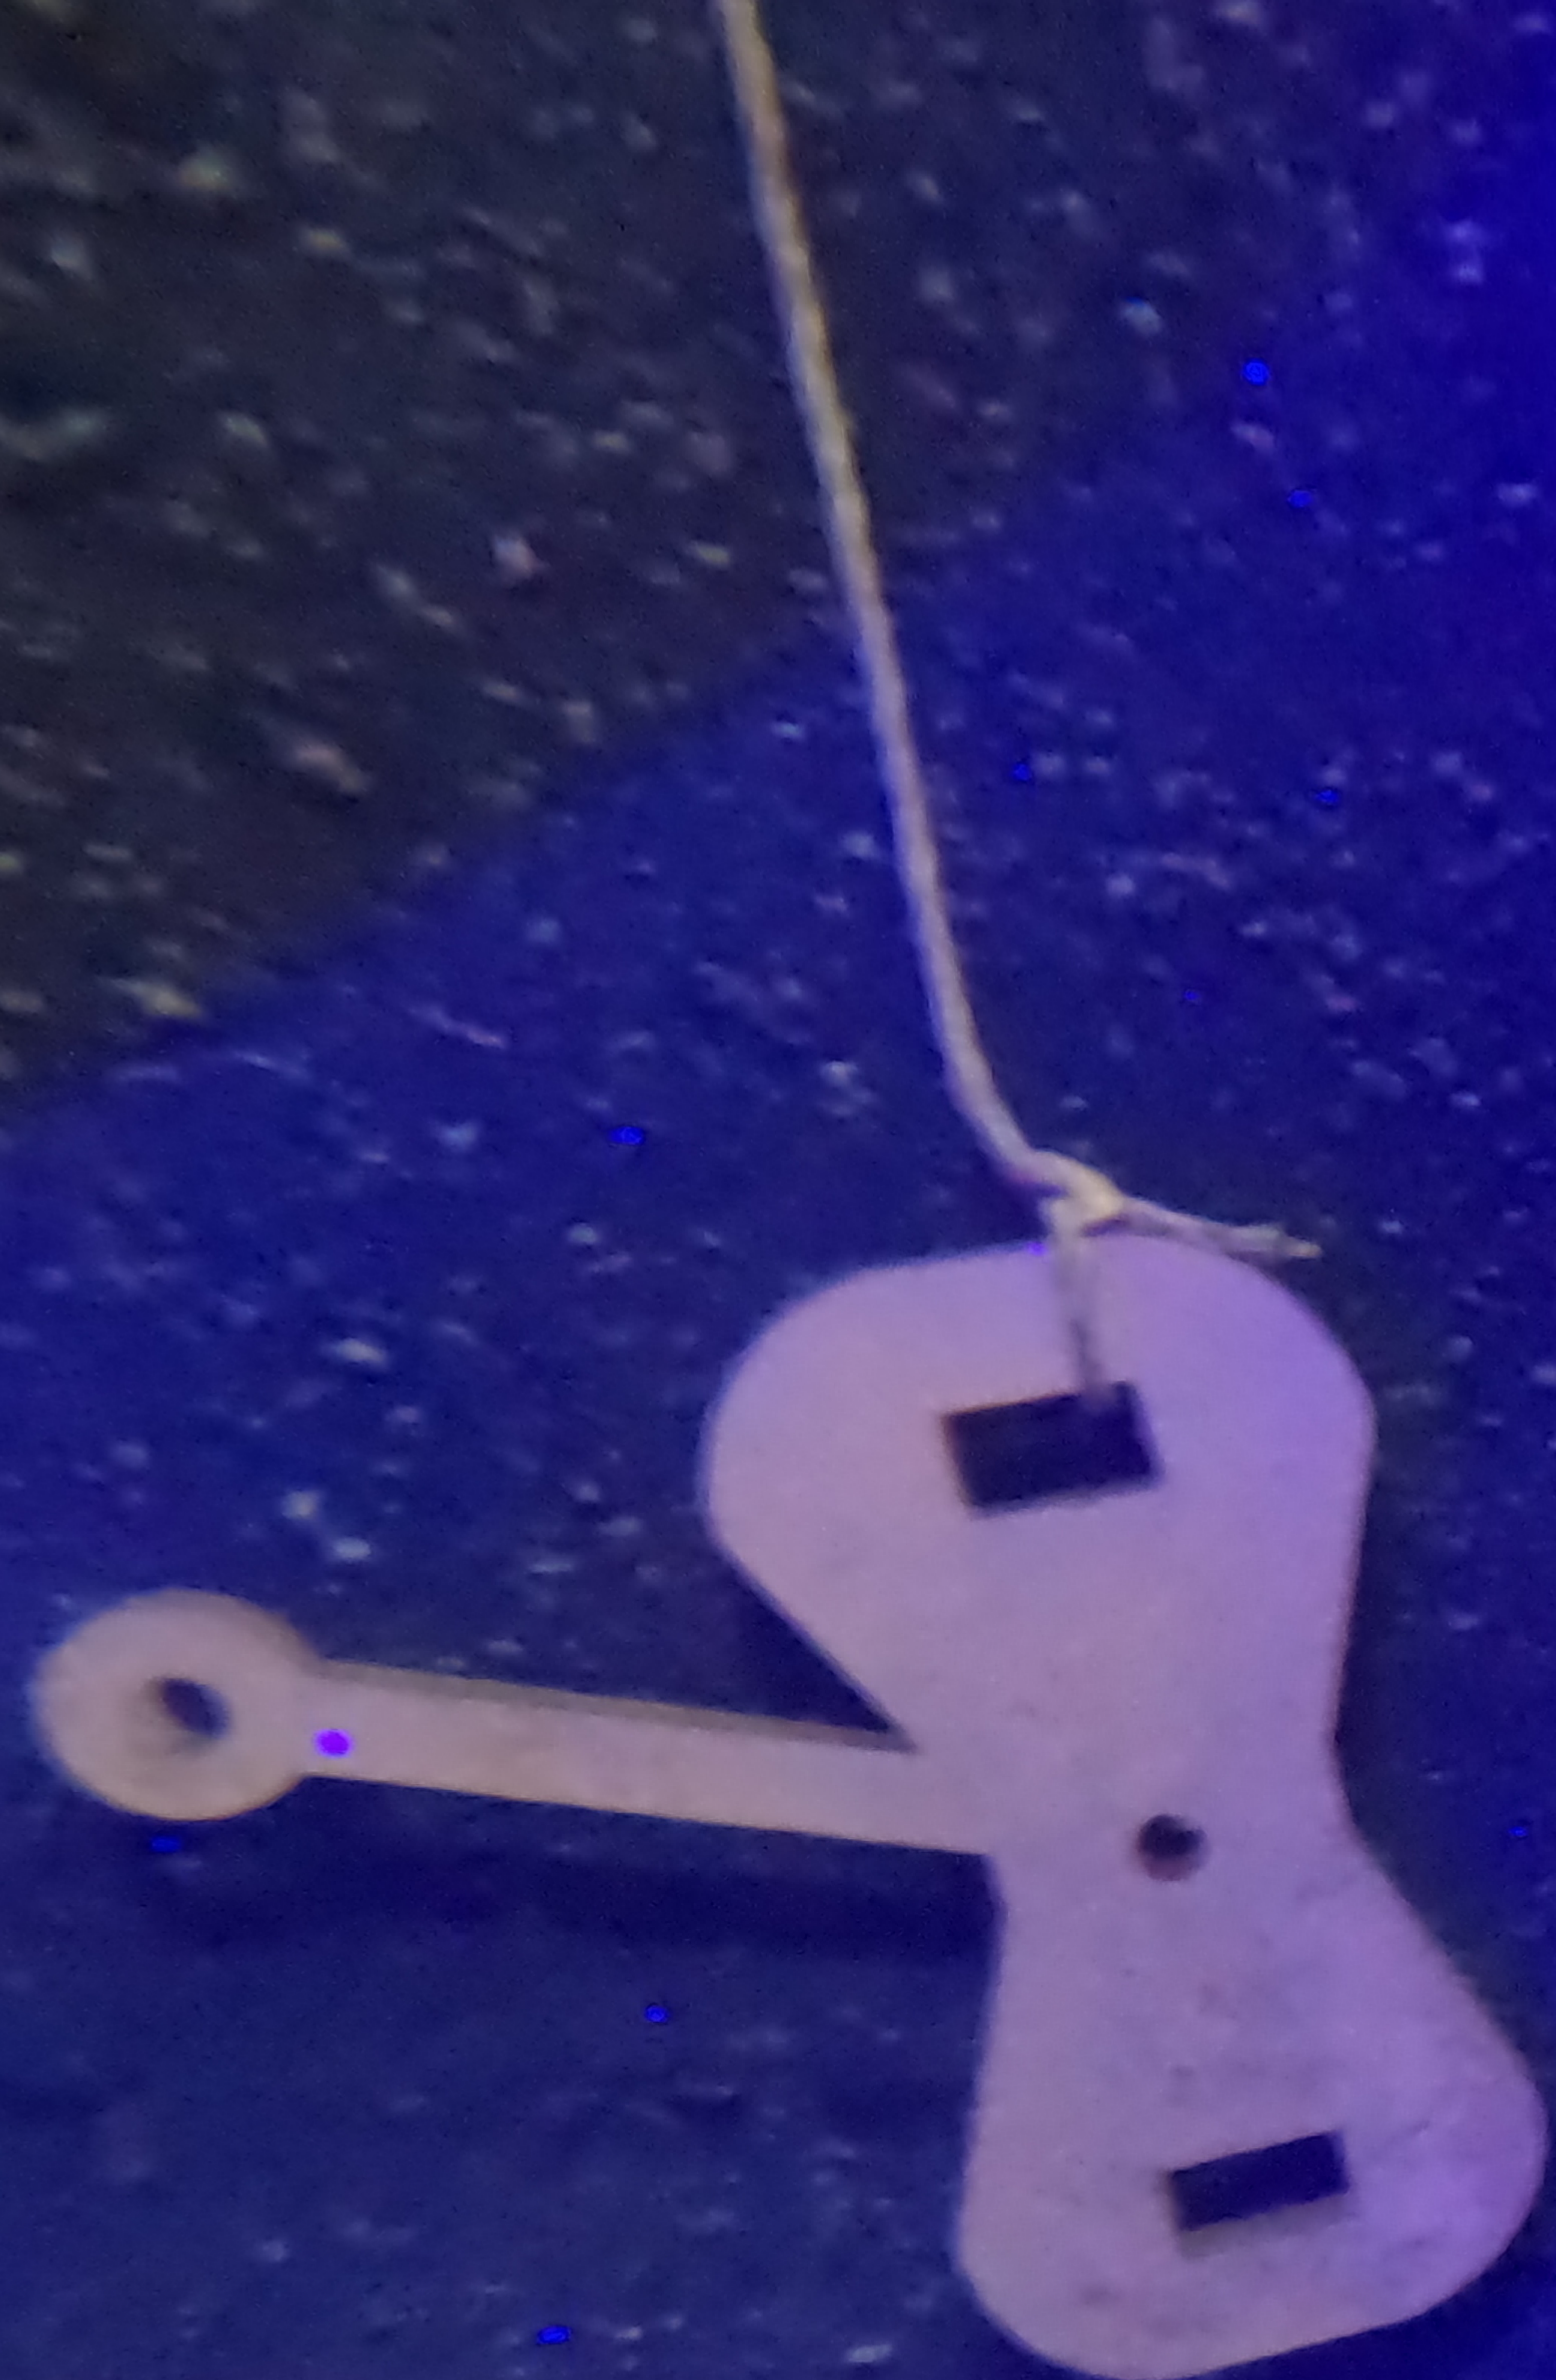

Supplement: Supplementary file 2357 [file G0015935.pdf › Level_2_2/G0015935.pdf]

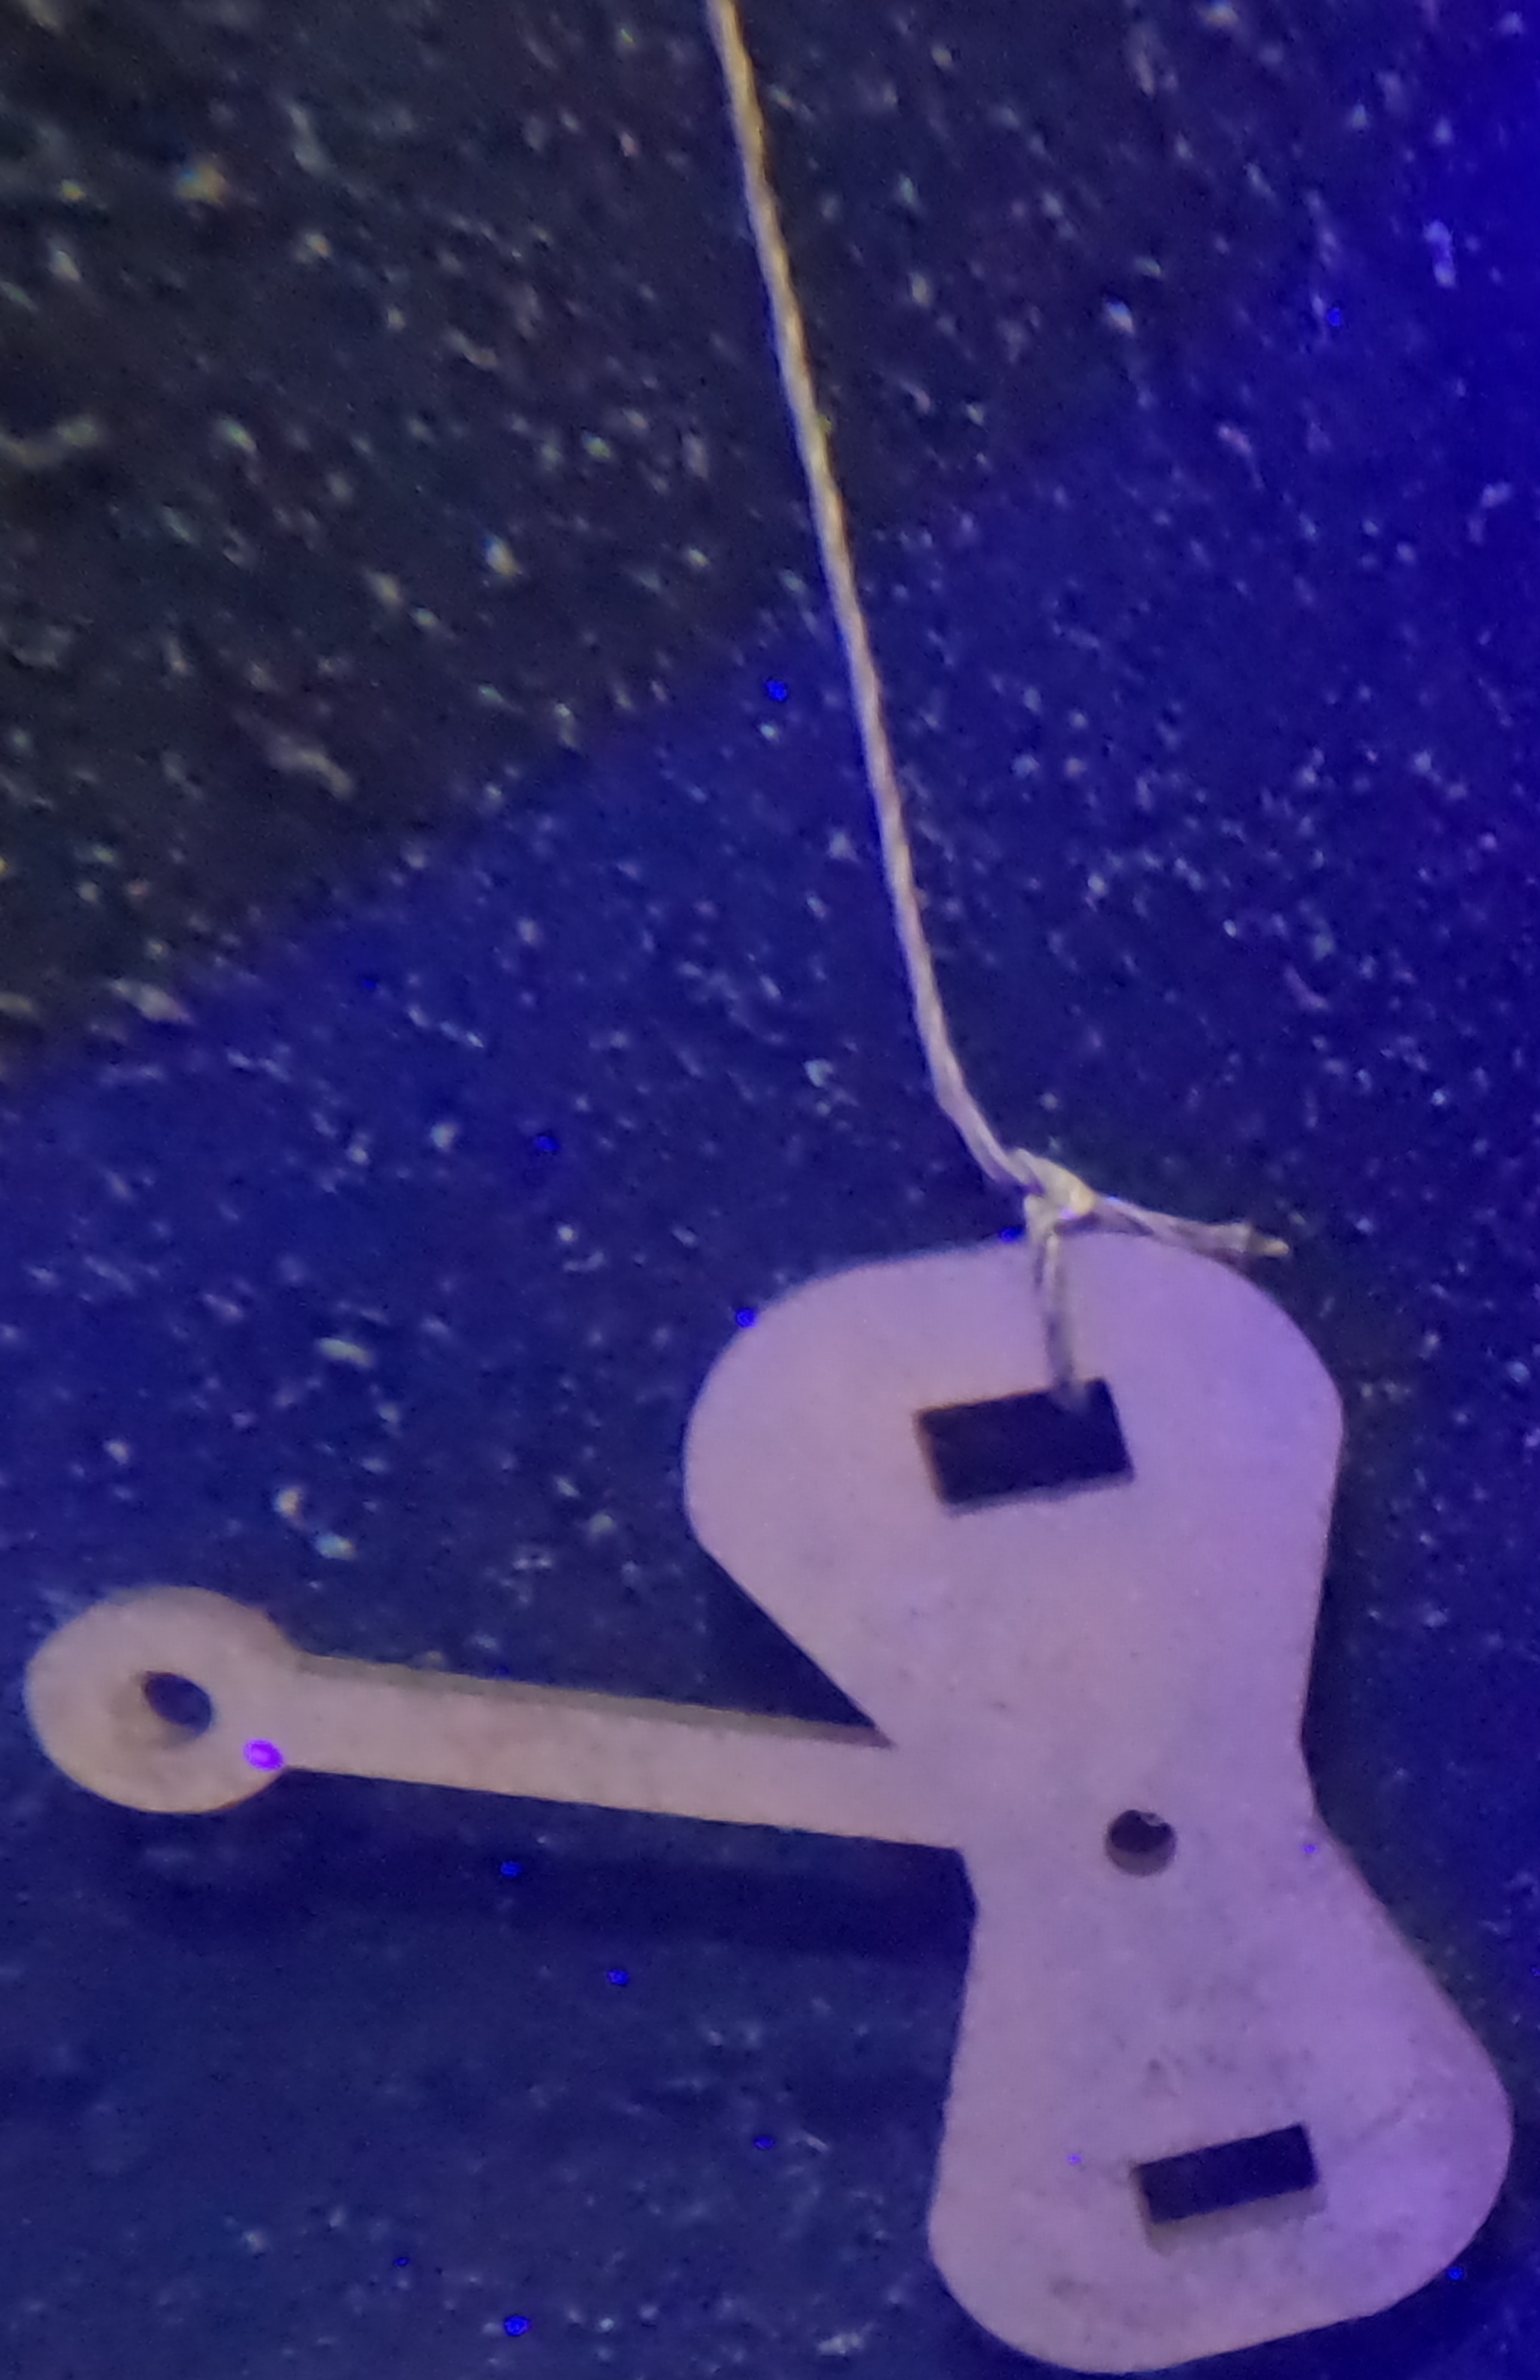

Supplement: Supplementary file 2358 [file G0015936.pdf › Level_2_2/G0015936.pdf]

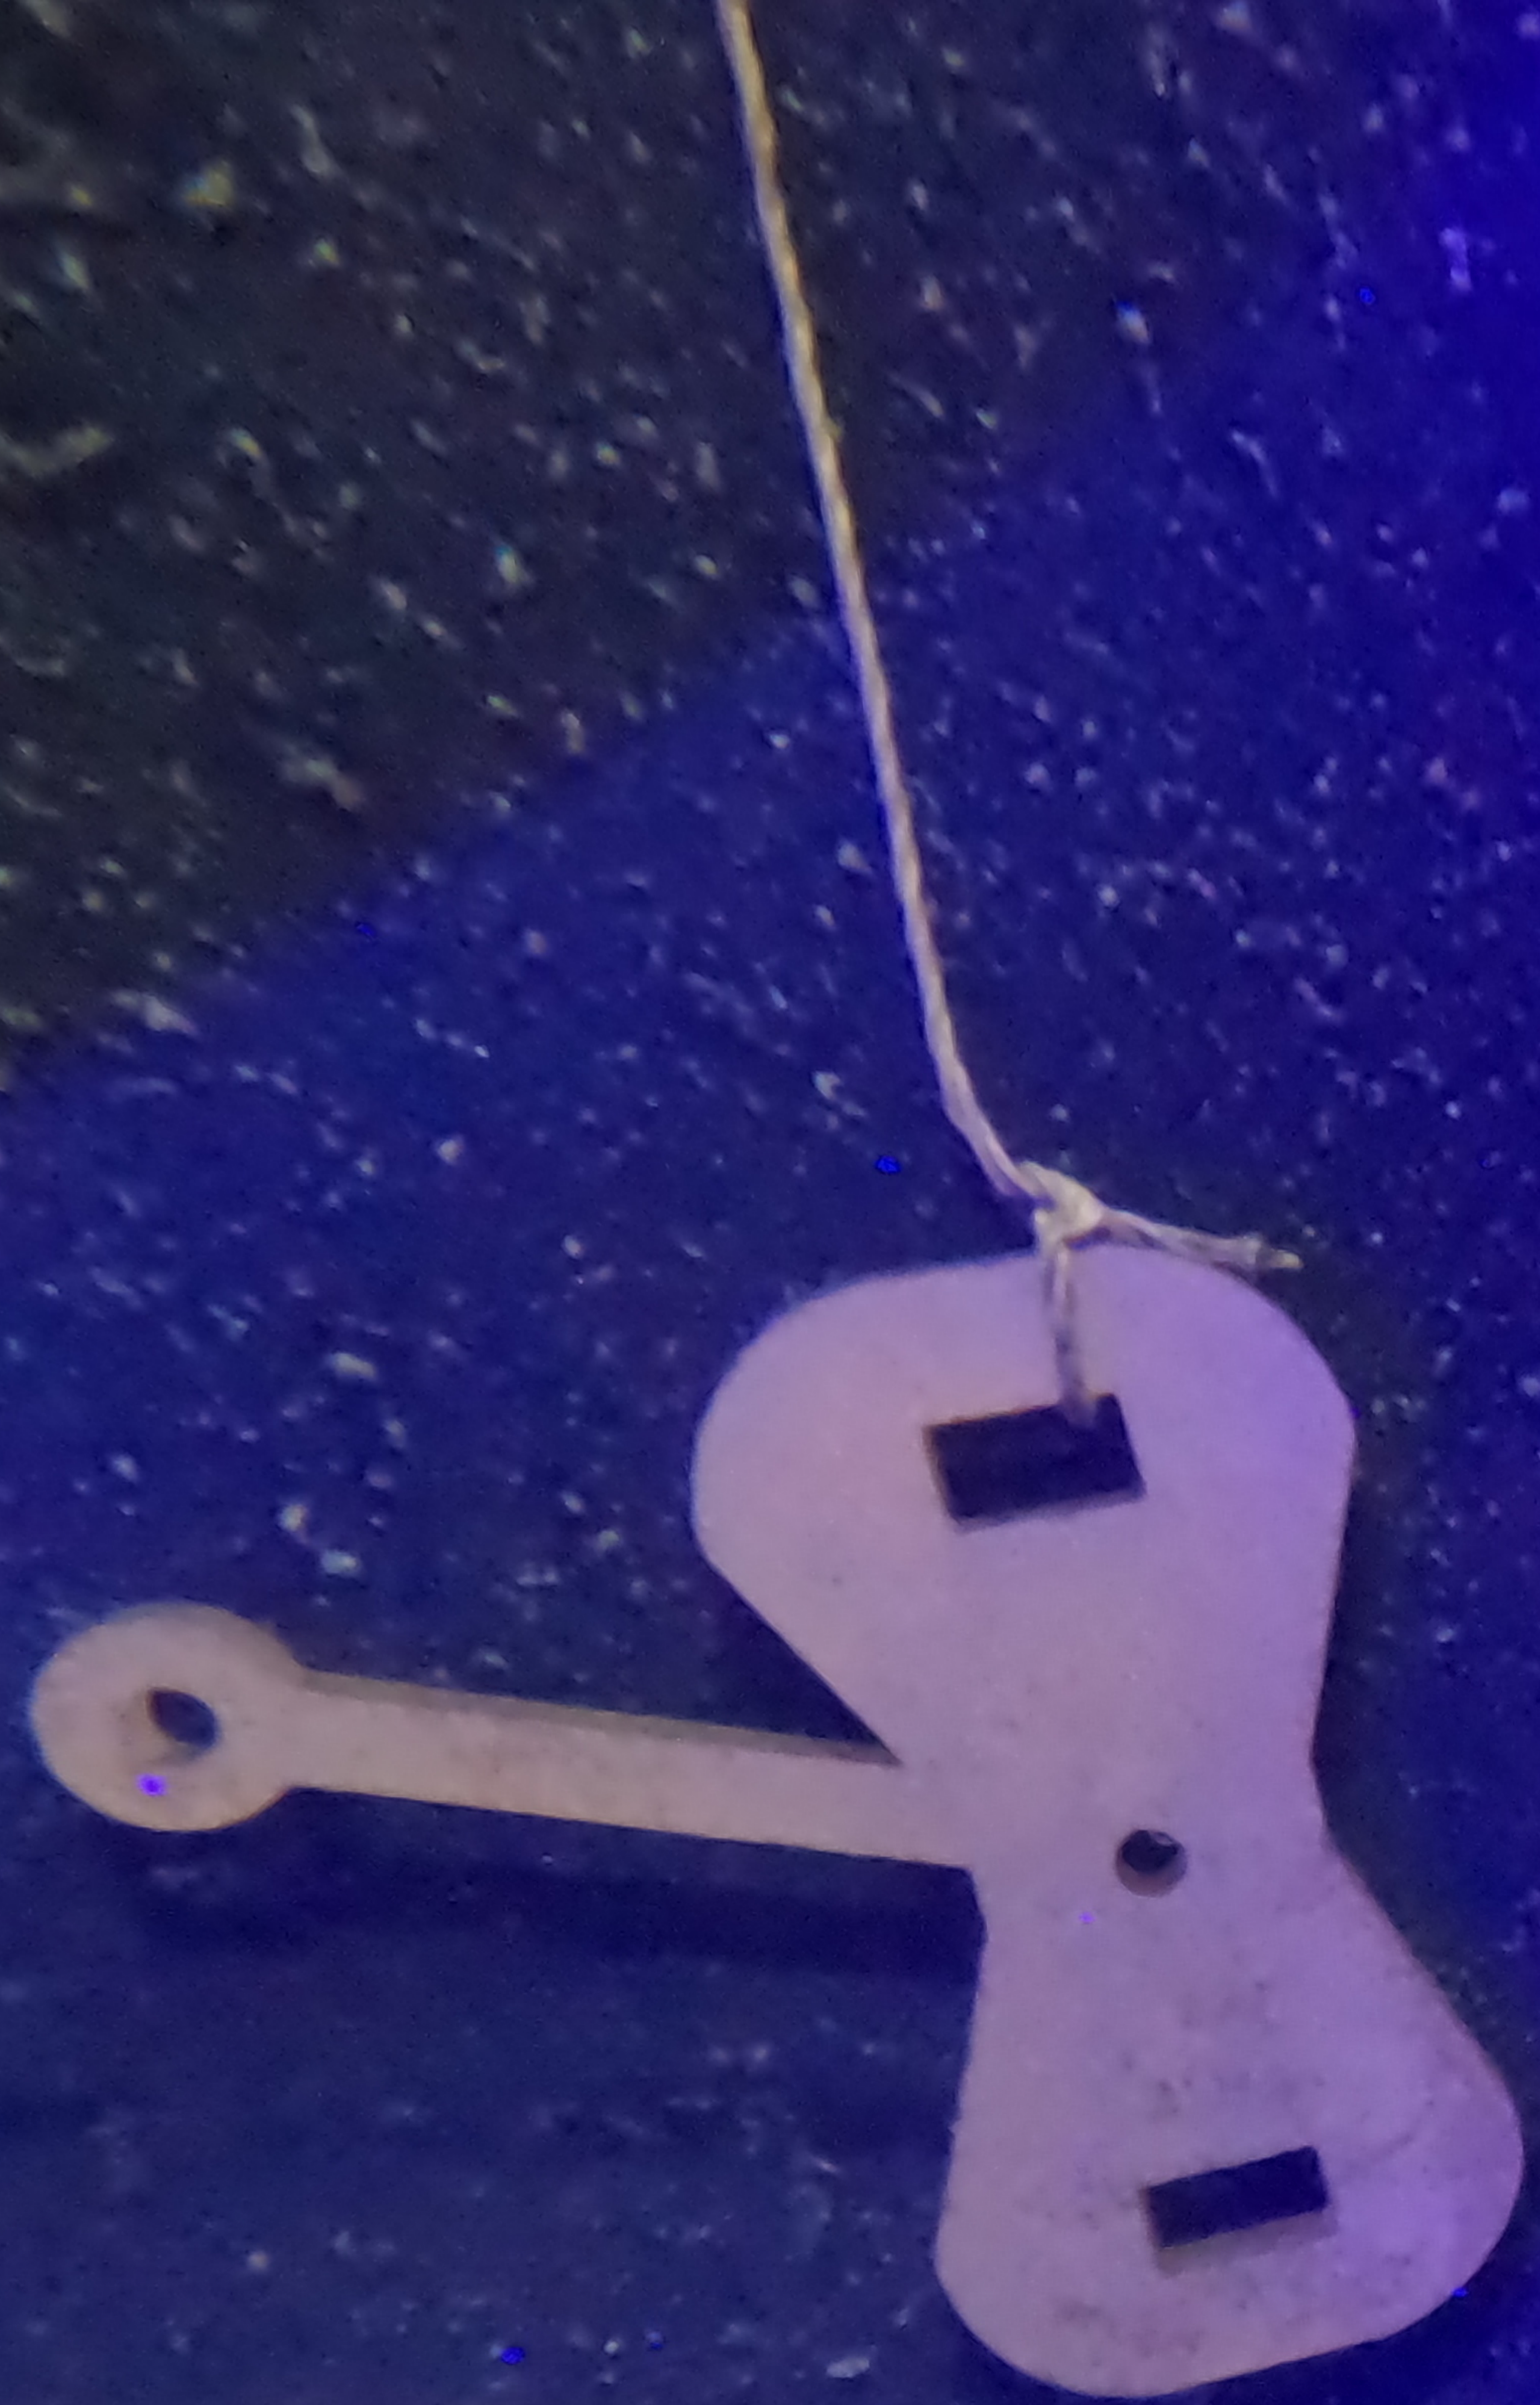

Supplement: Supplementary file 2359 [file G0015937.pdf › Level_2_2/G0015937.pdf]

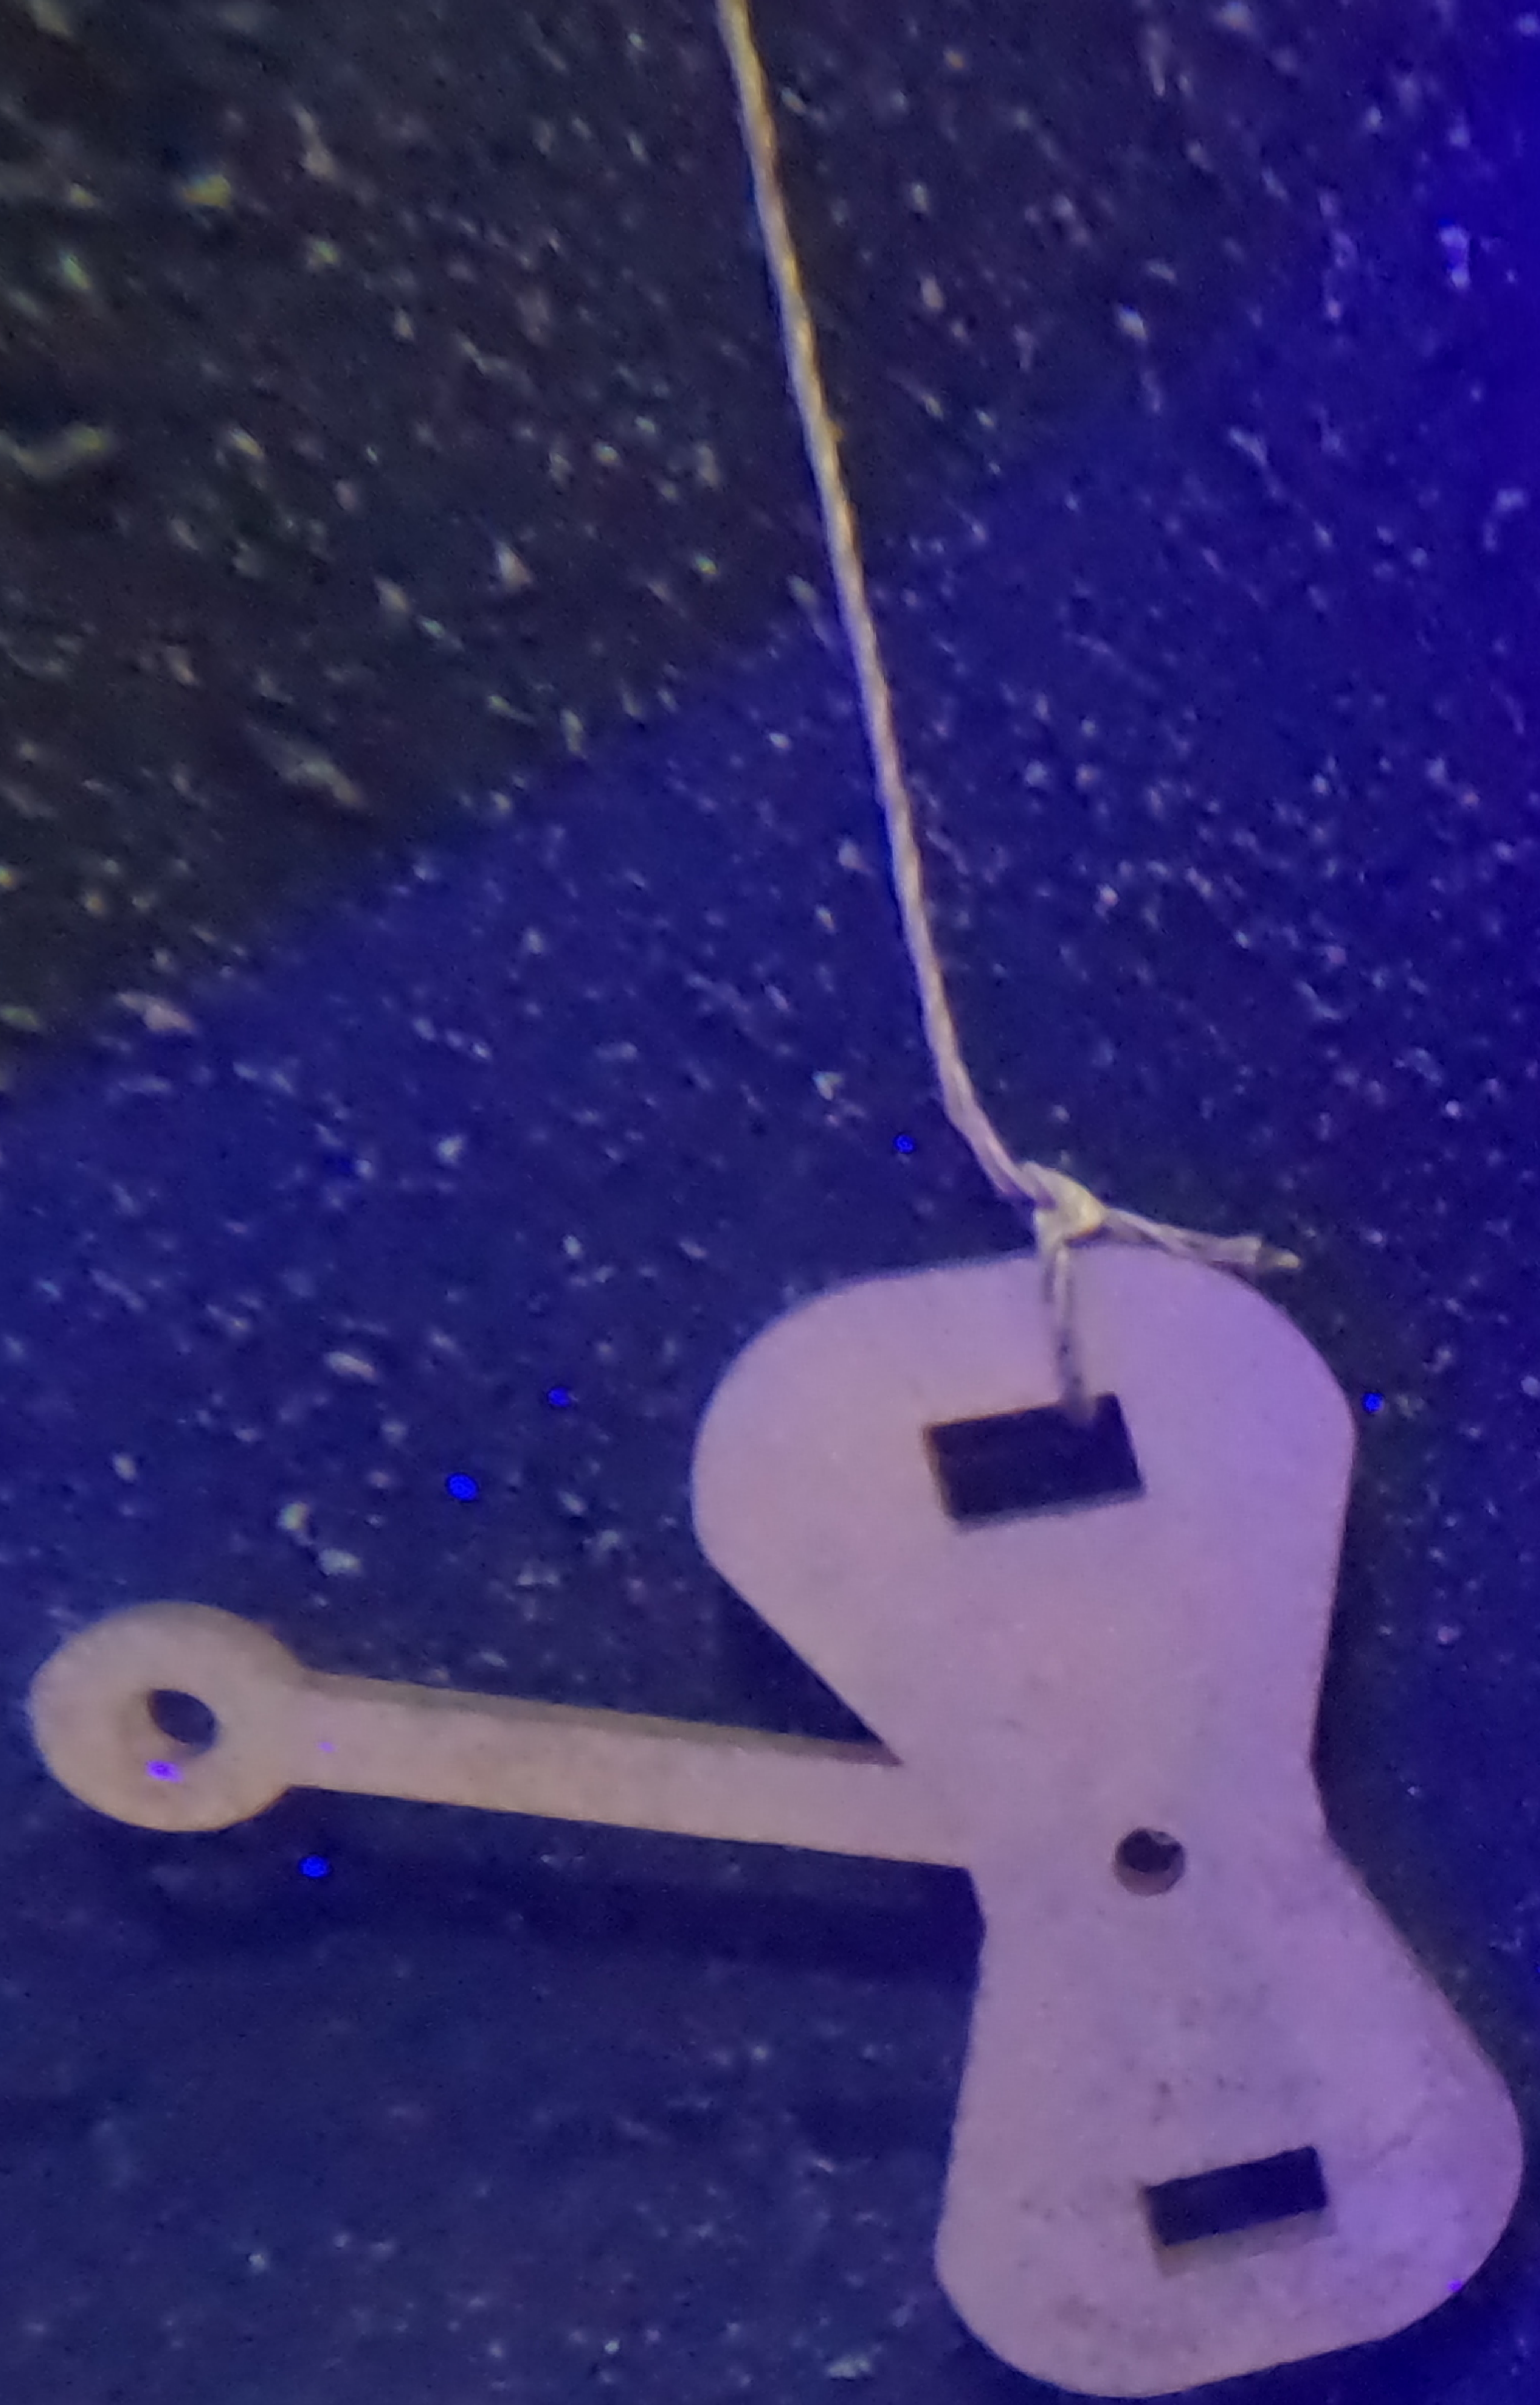

Supplement: Supplementary file 2360 [file G0015938.pdf › Level_2_2/G0015938.pdf]

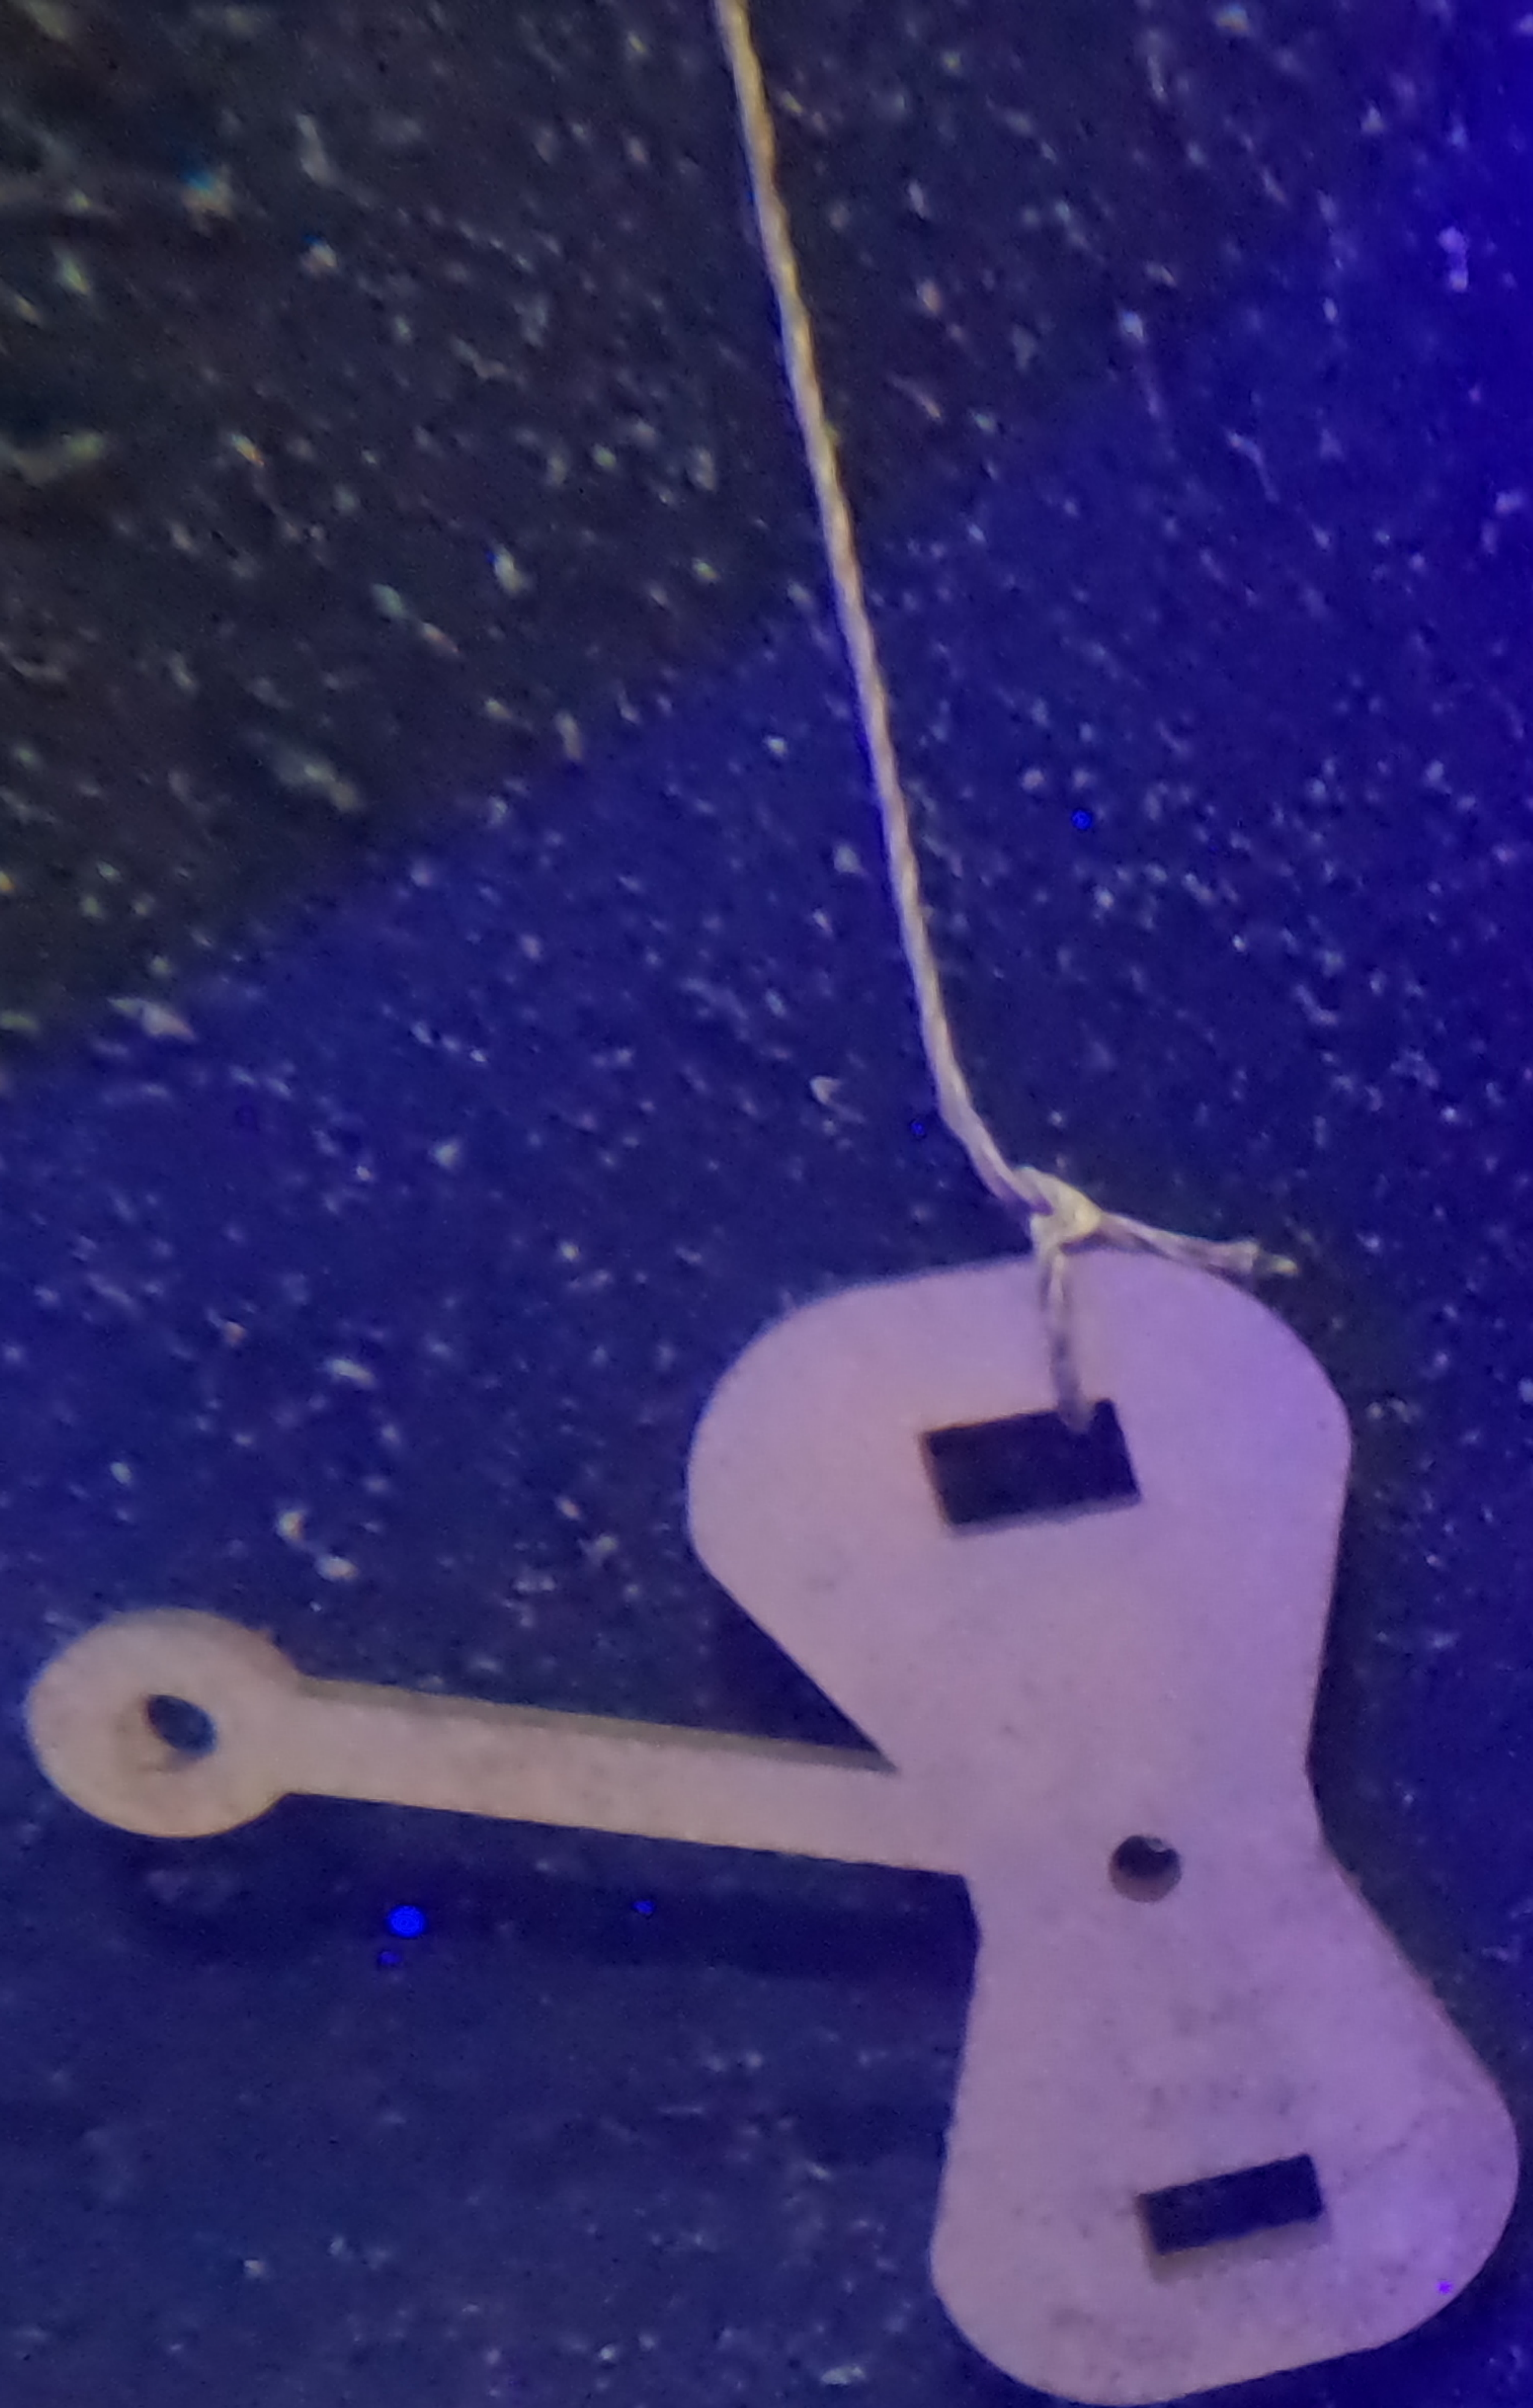

Supplement: Supplementary file 2361 [file G0015939.pdf › Level_2_2/G0015939.pdf]

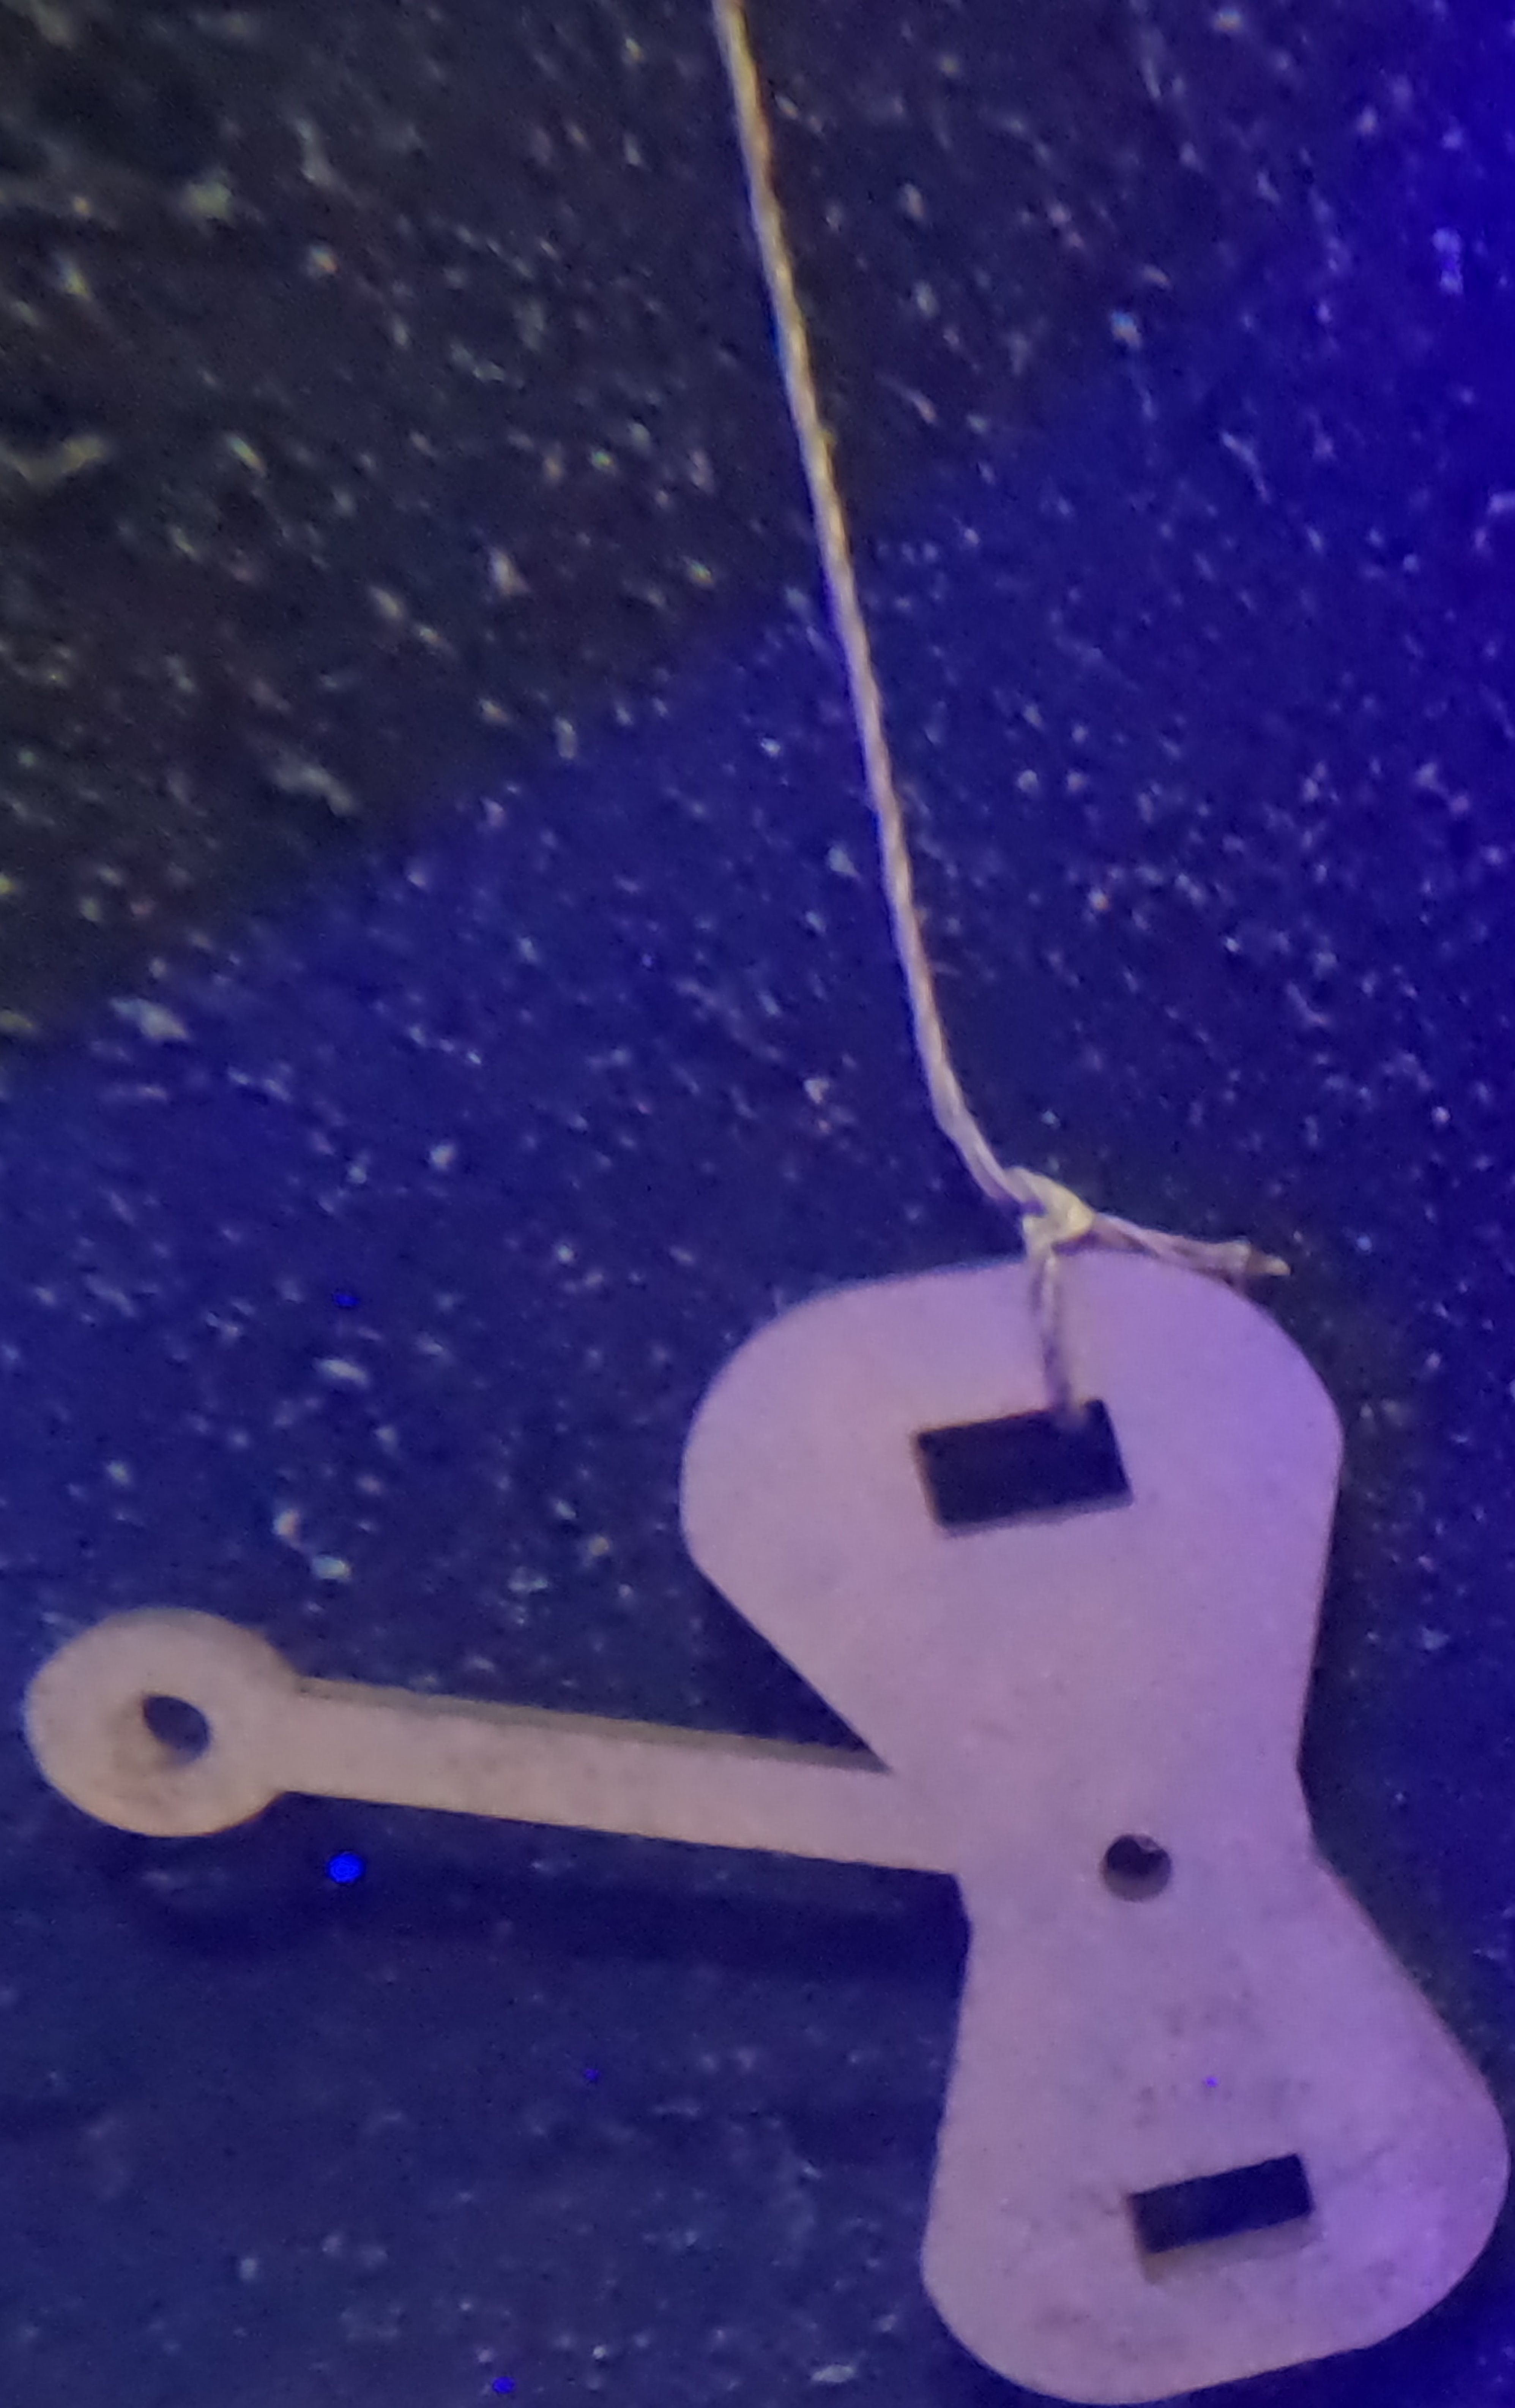

Supplement: Supplementary file 2362 [file G0015940.pdf › Level_2_2/G0015940.pdf]

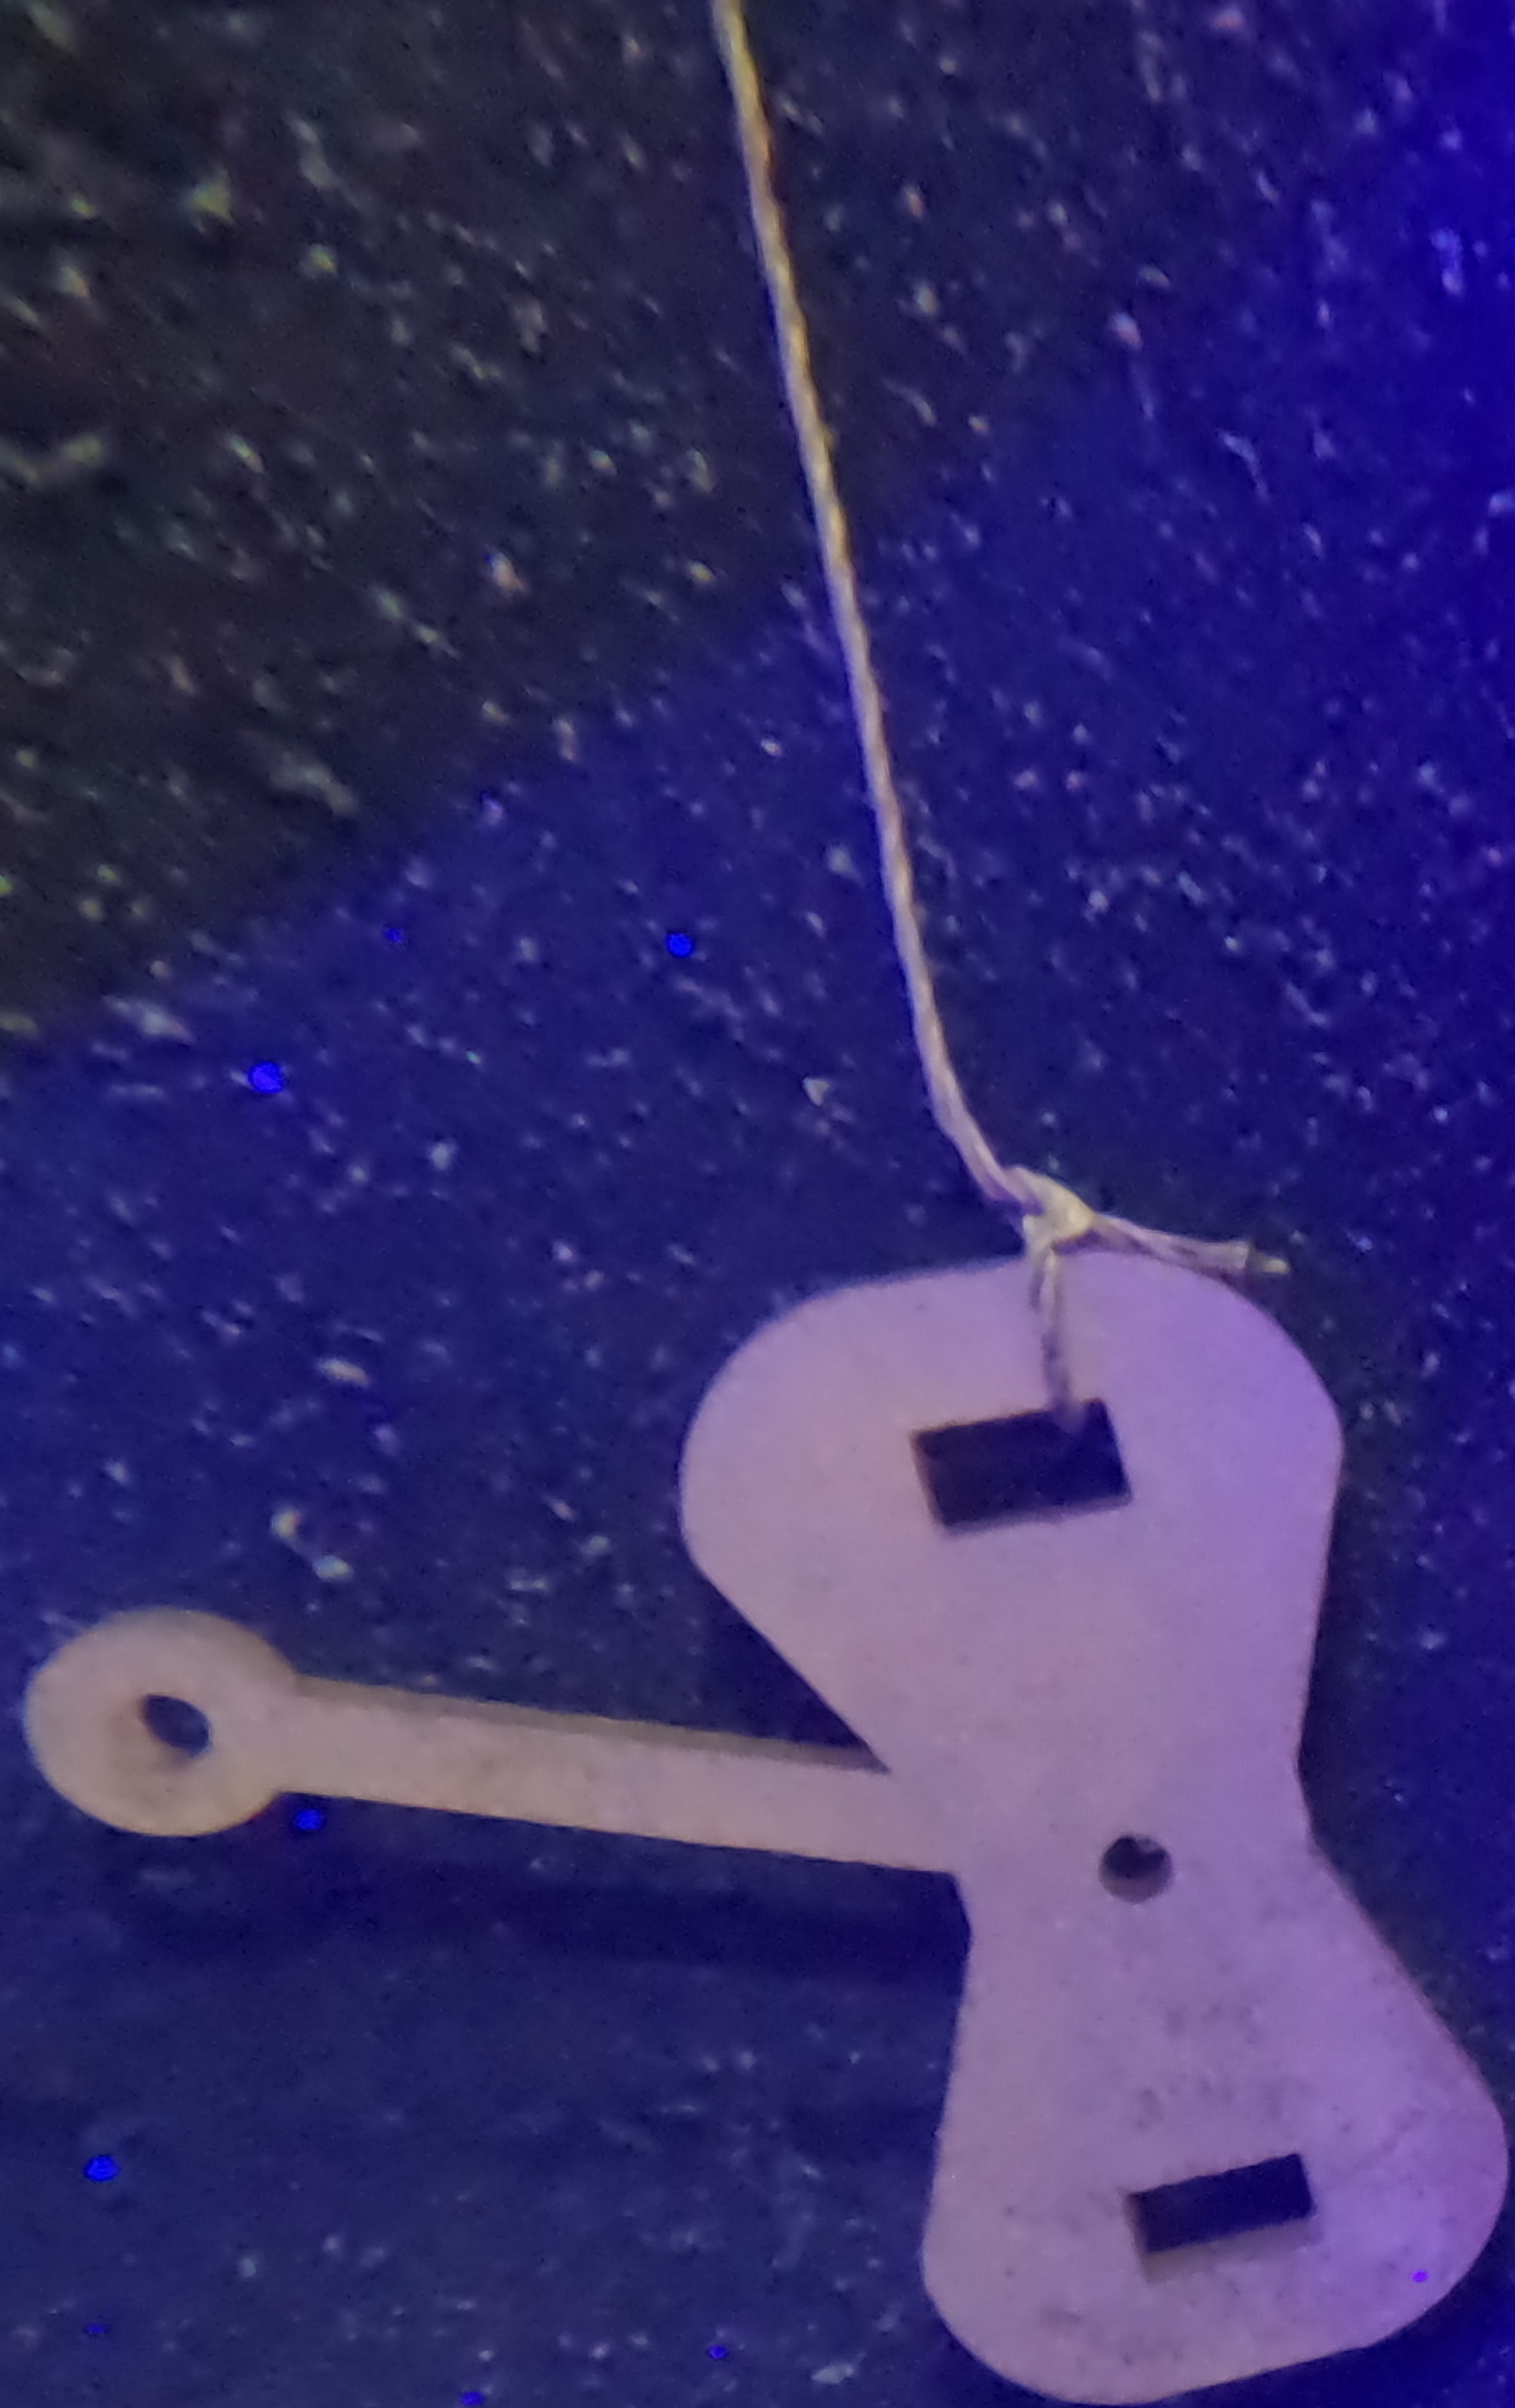

Supplement: Supplementary file 2363 [file G0015941.pdf › Level_2_2/G0015941.pdf]

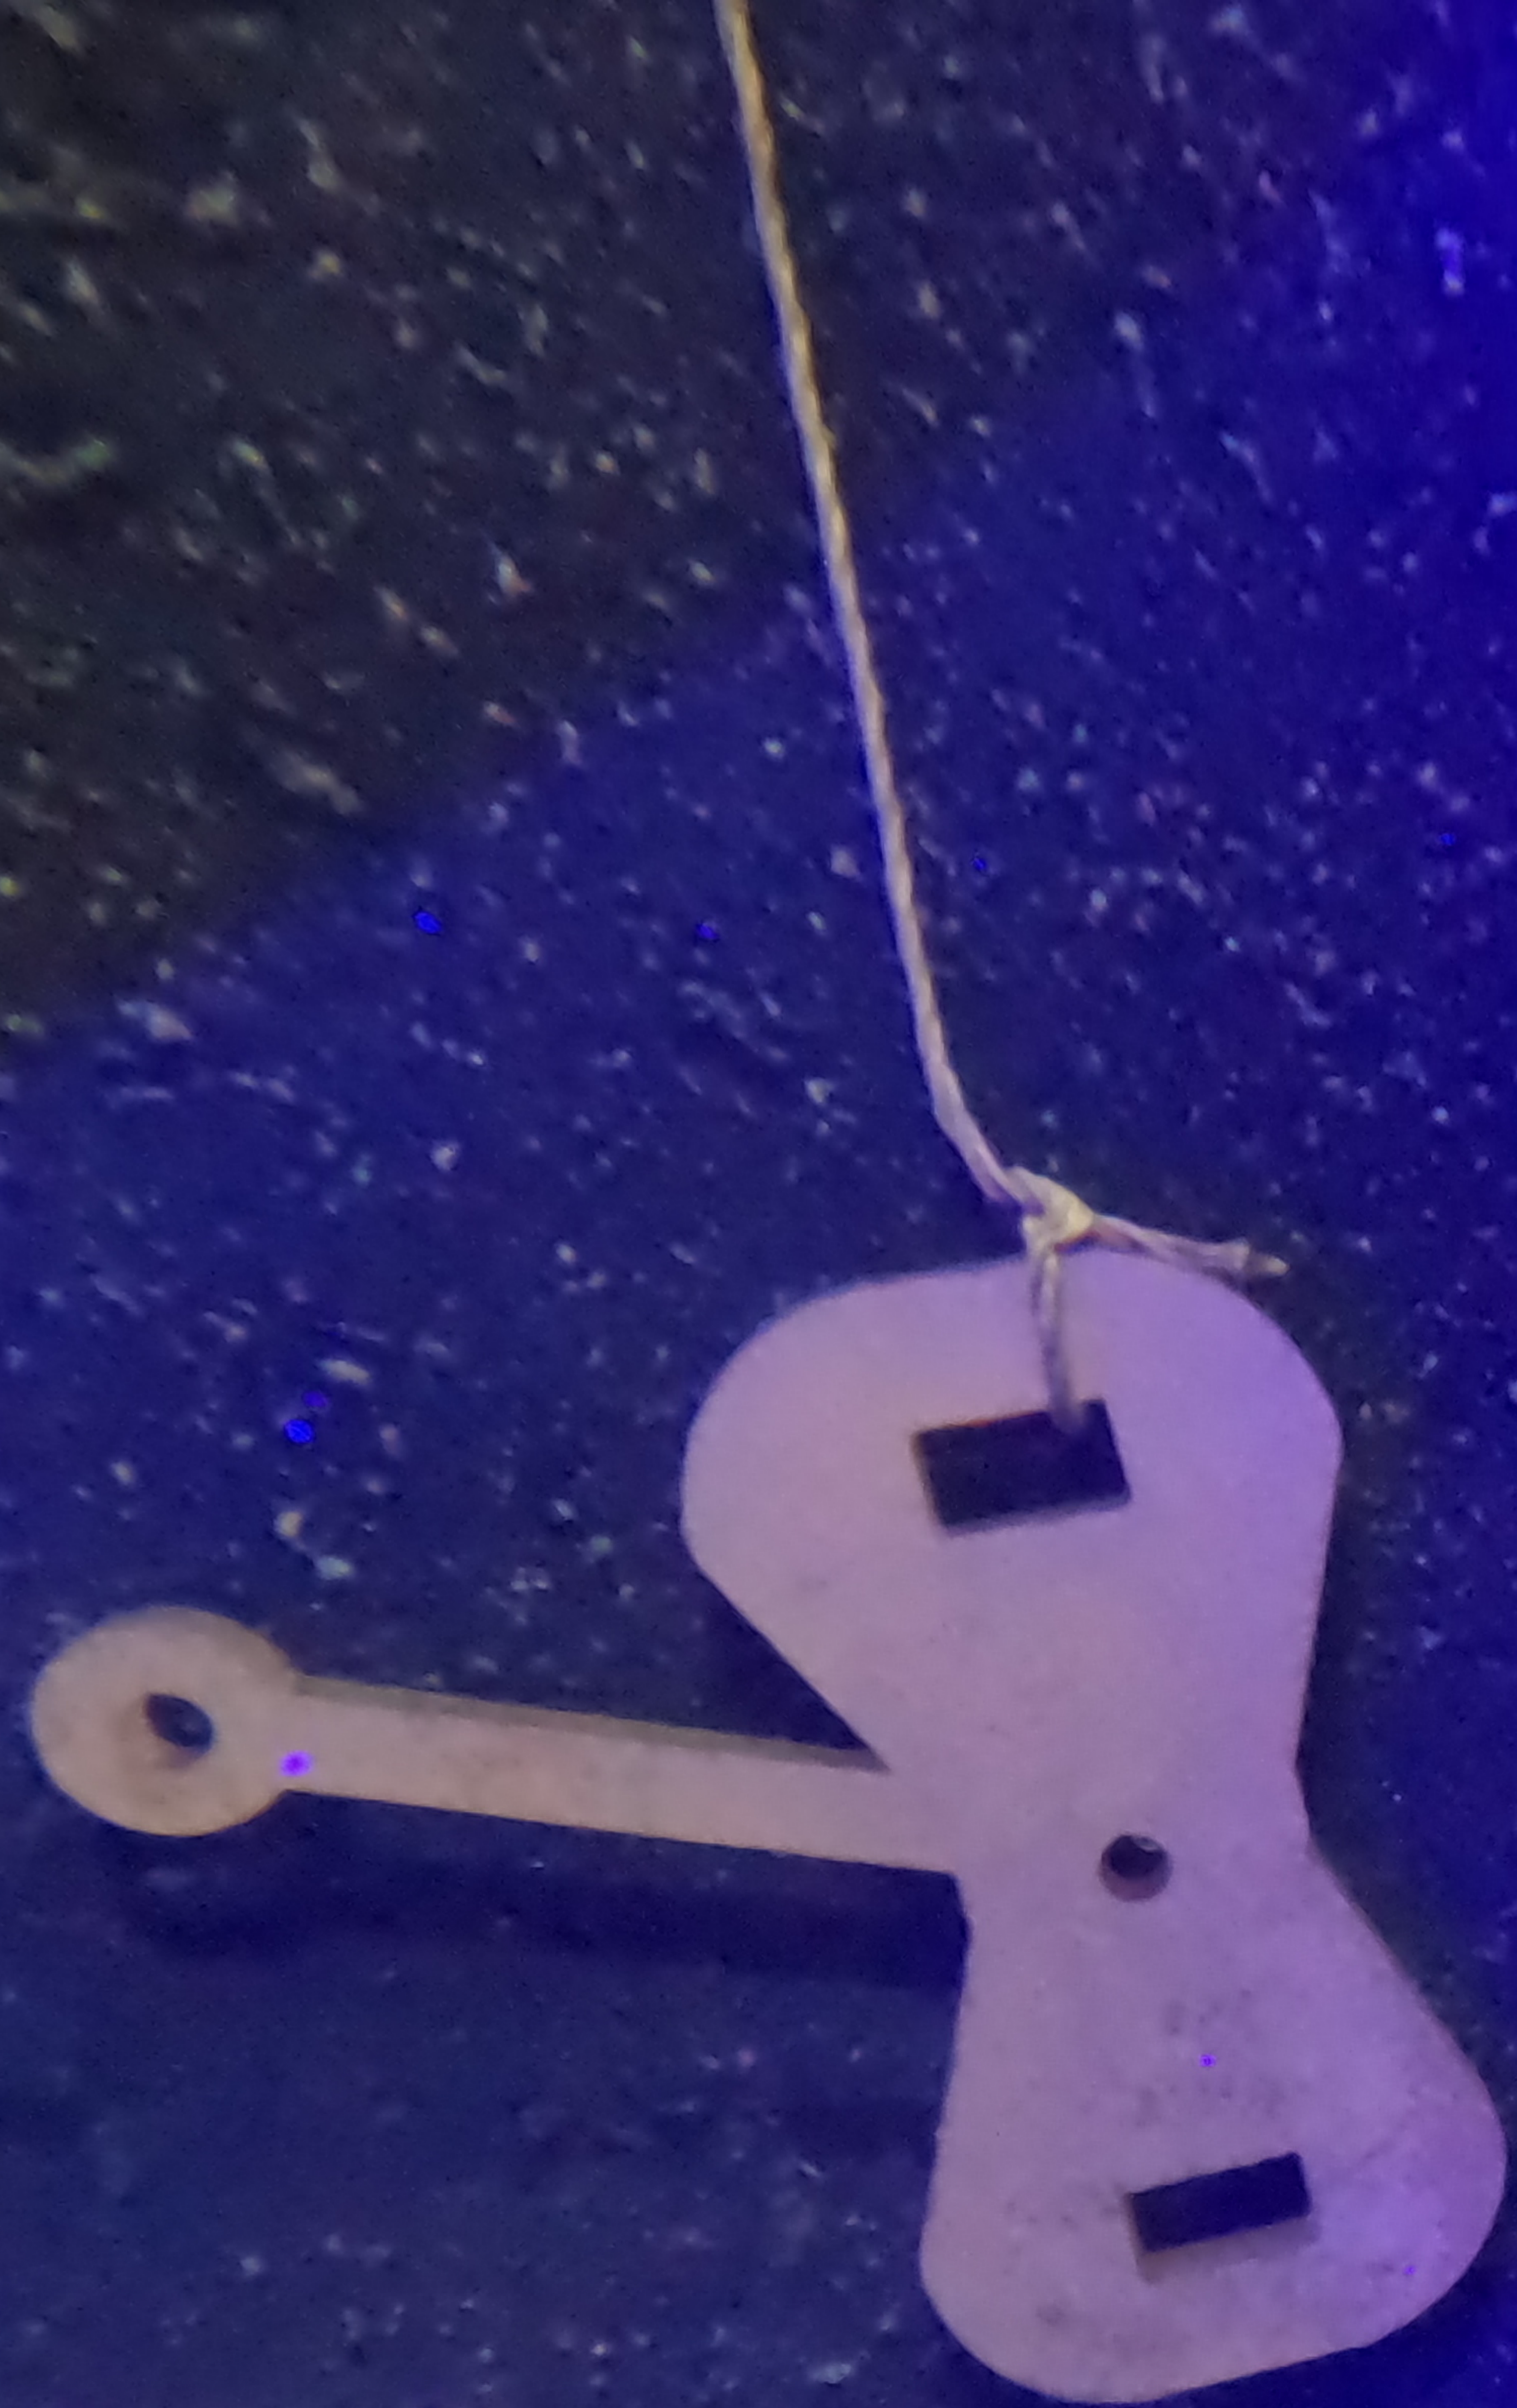

Supplement: Supplementary file 2364 [file G0015942.pdf › Level_2_2/G0015942.pdf]

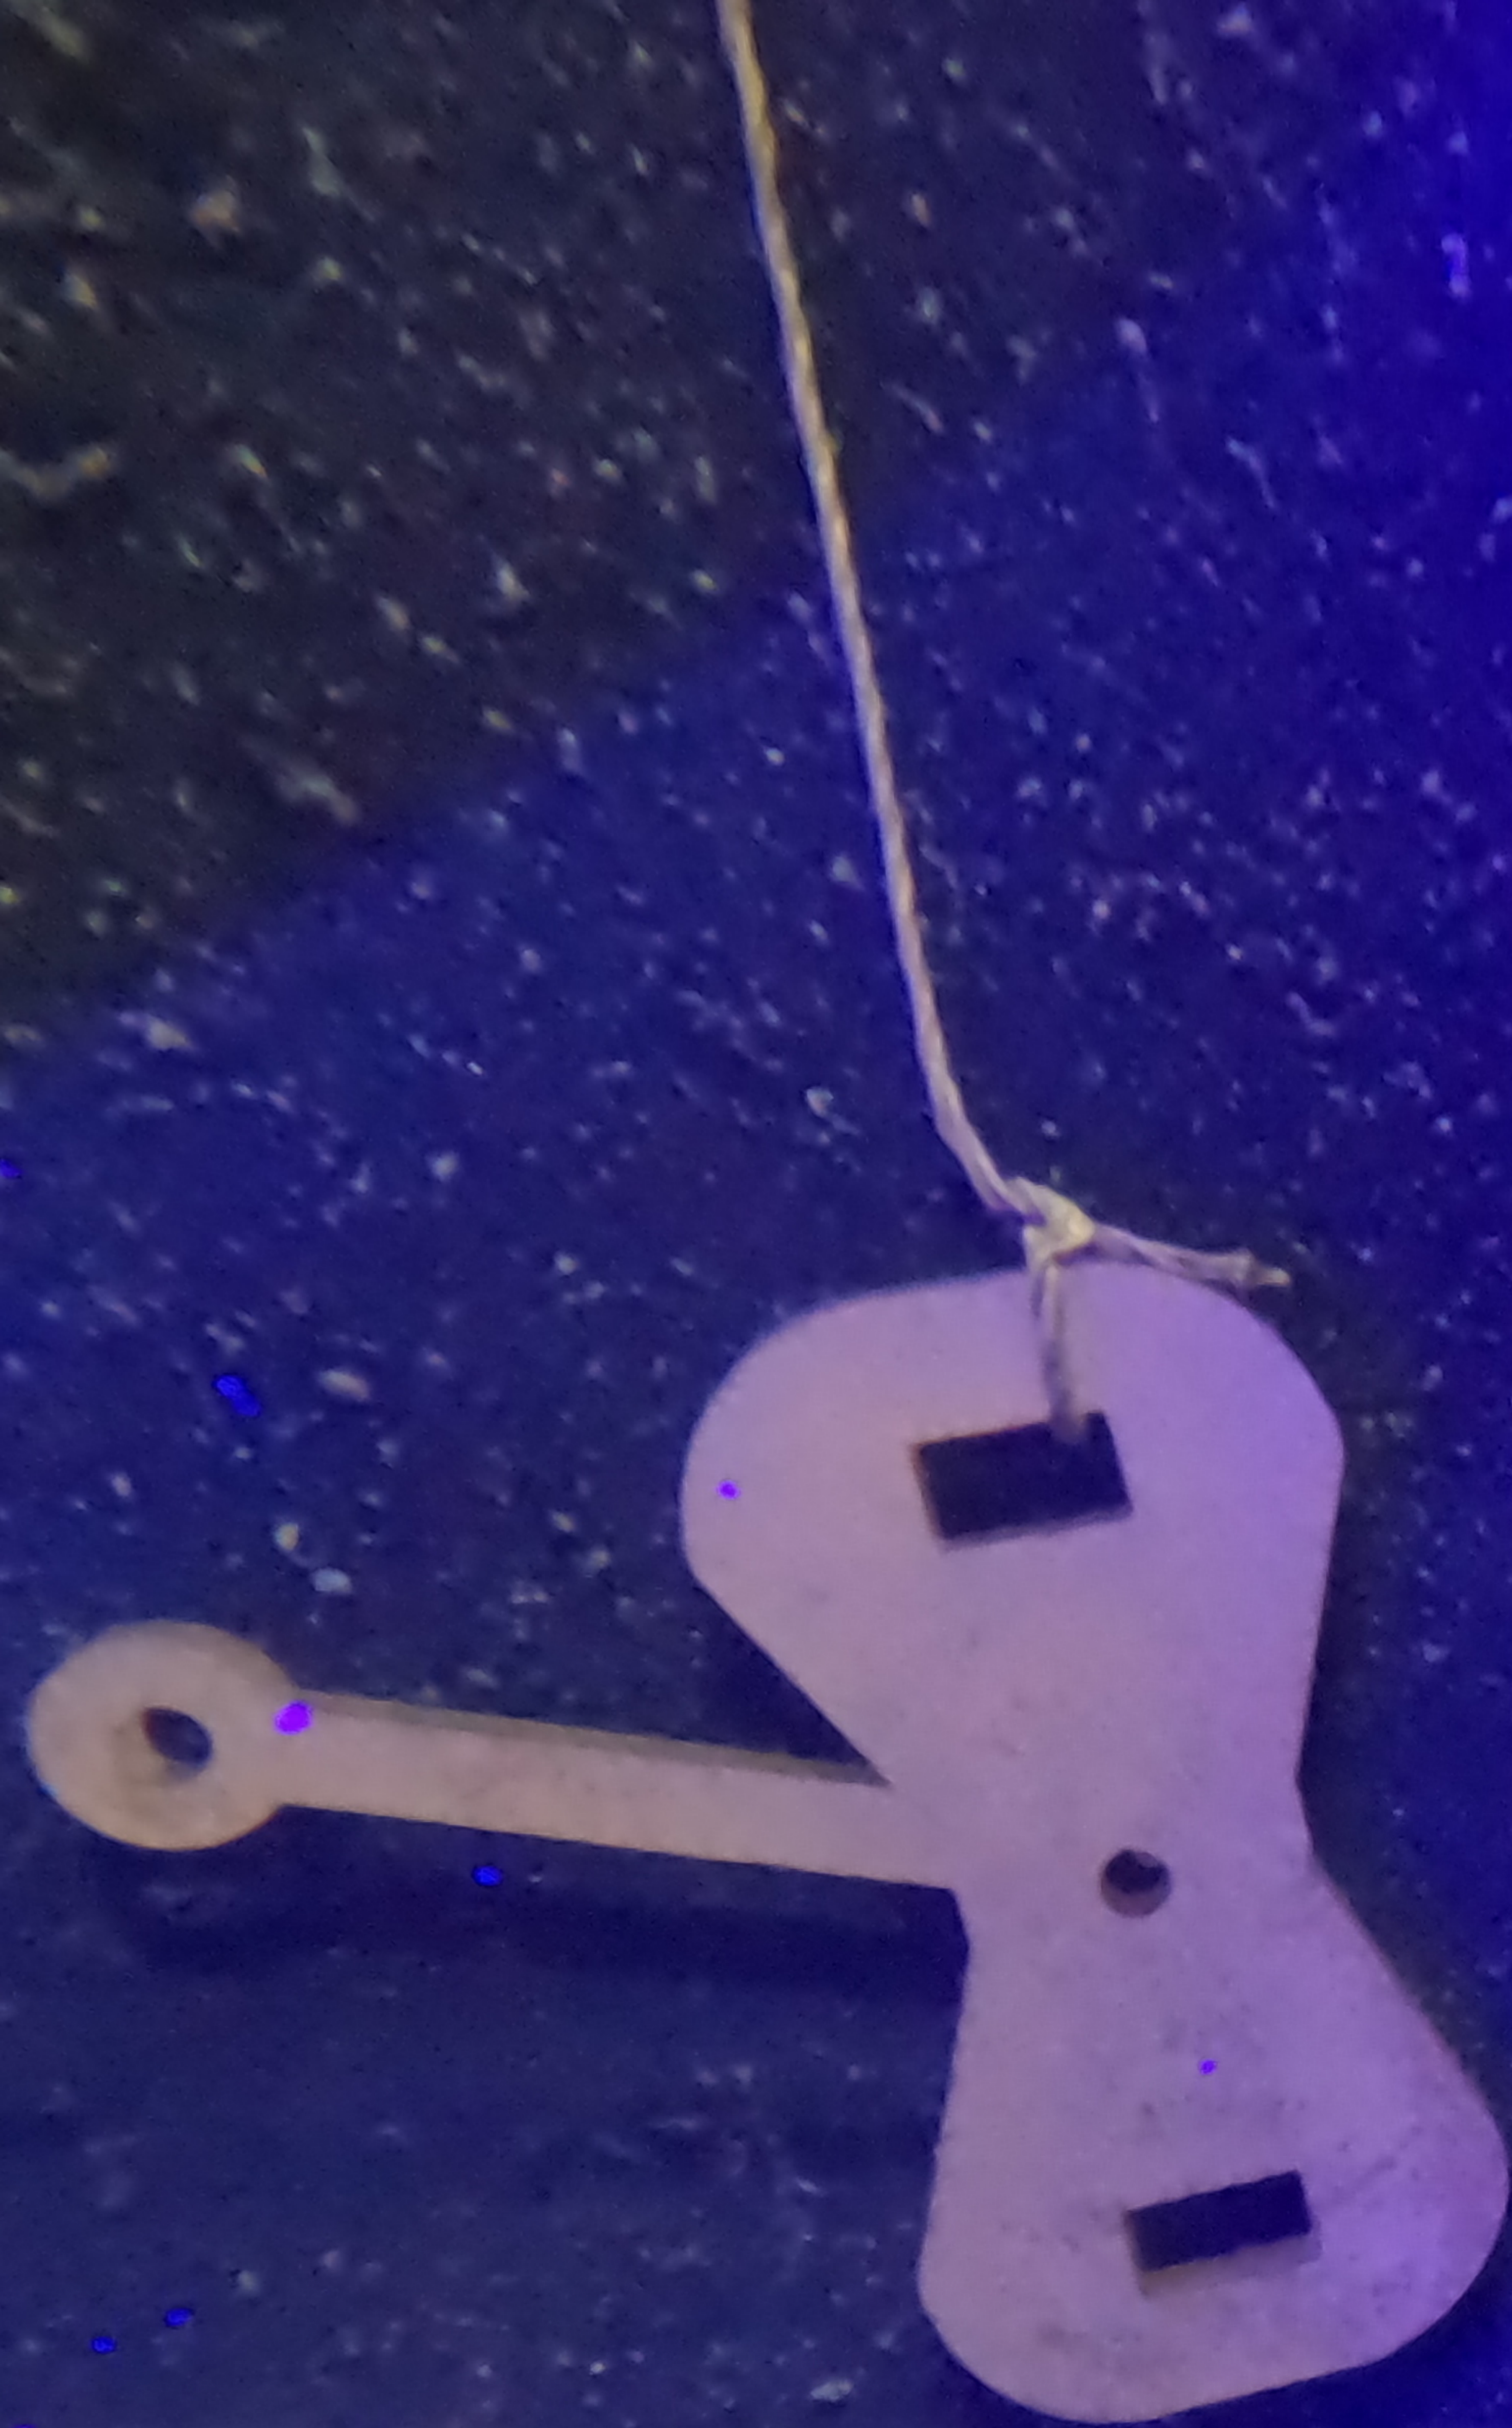

Supplement: Supplementary file 2365 [file G0015943.pdf › Level_2_2/G0015943.pdf]

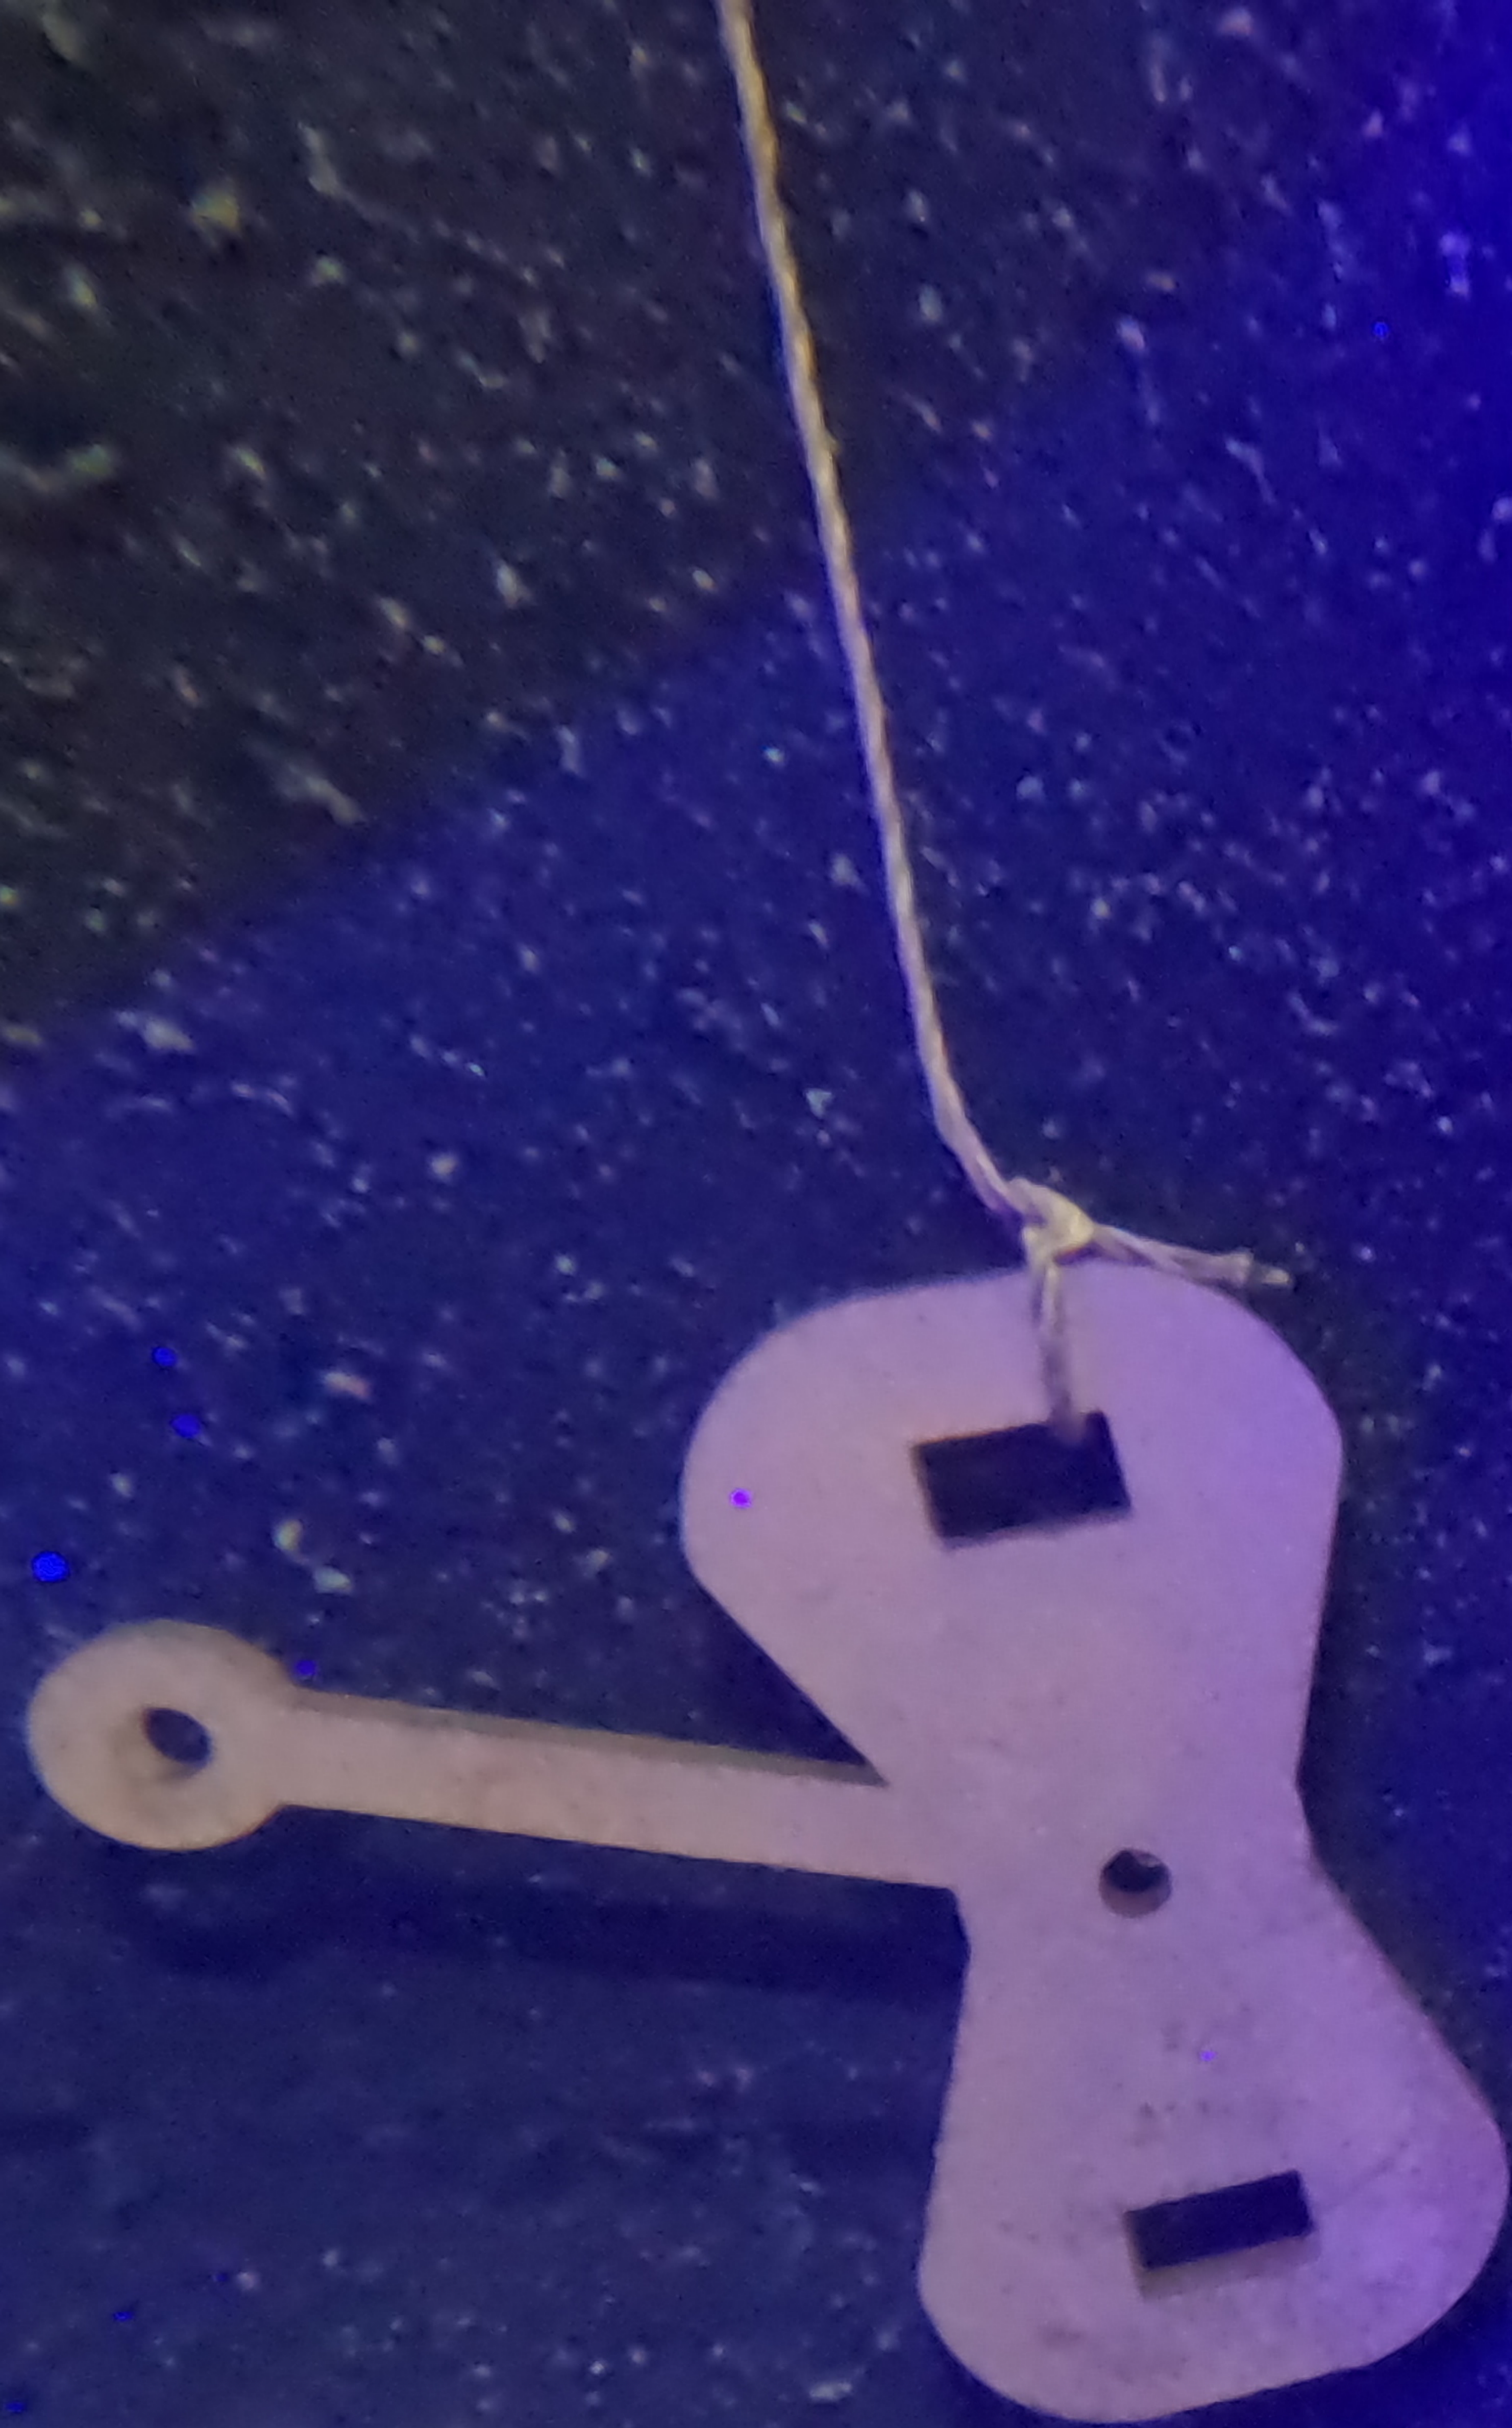

Supplement: Supplementary file 2366 [file G0015944.pdf › Level_2_2/G0015944.pdf]

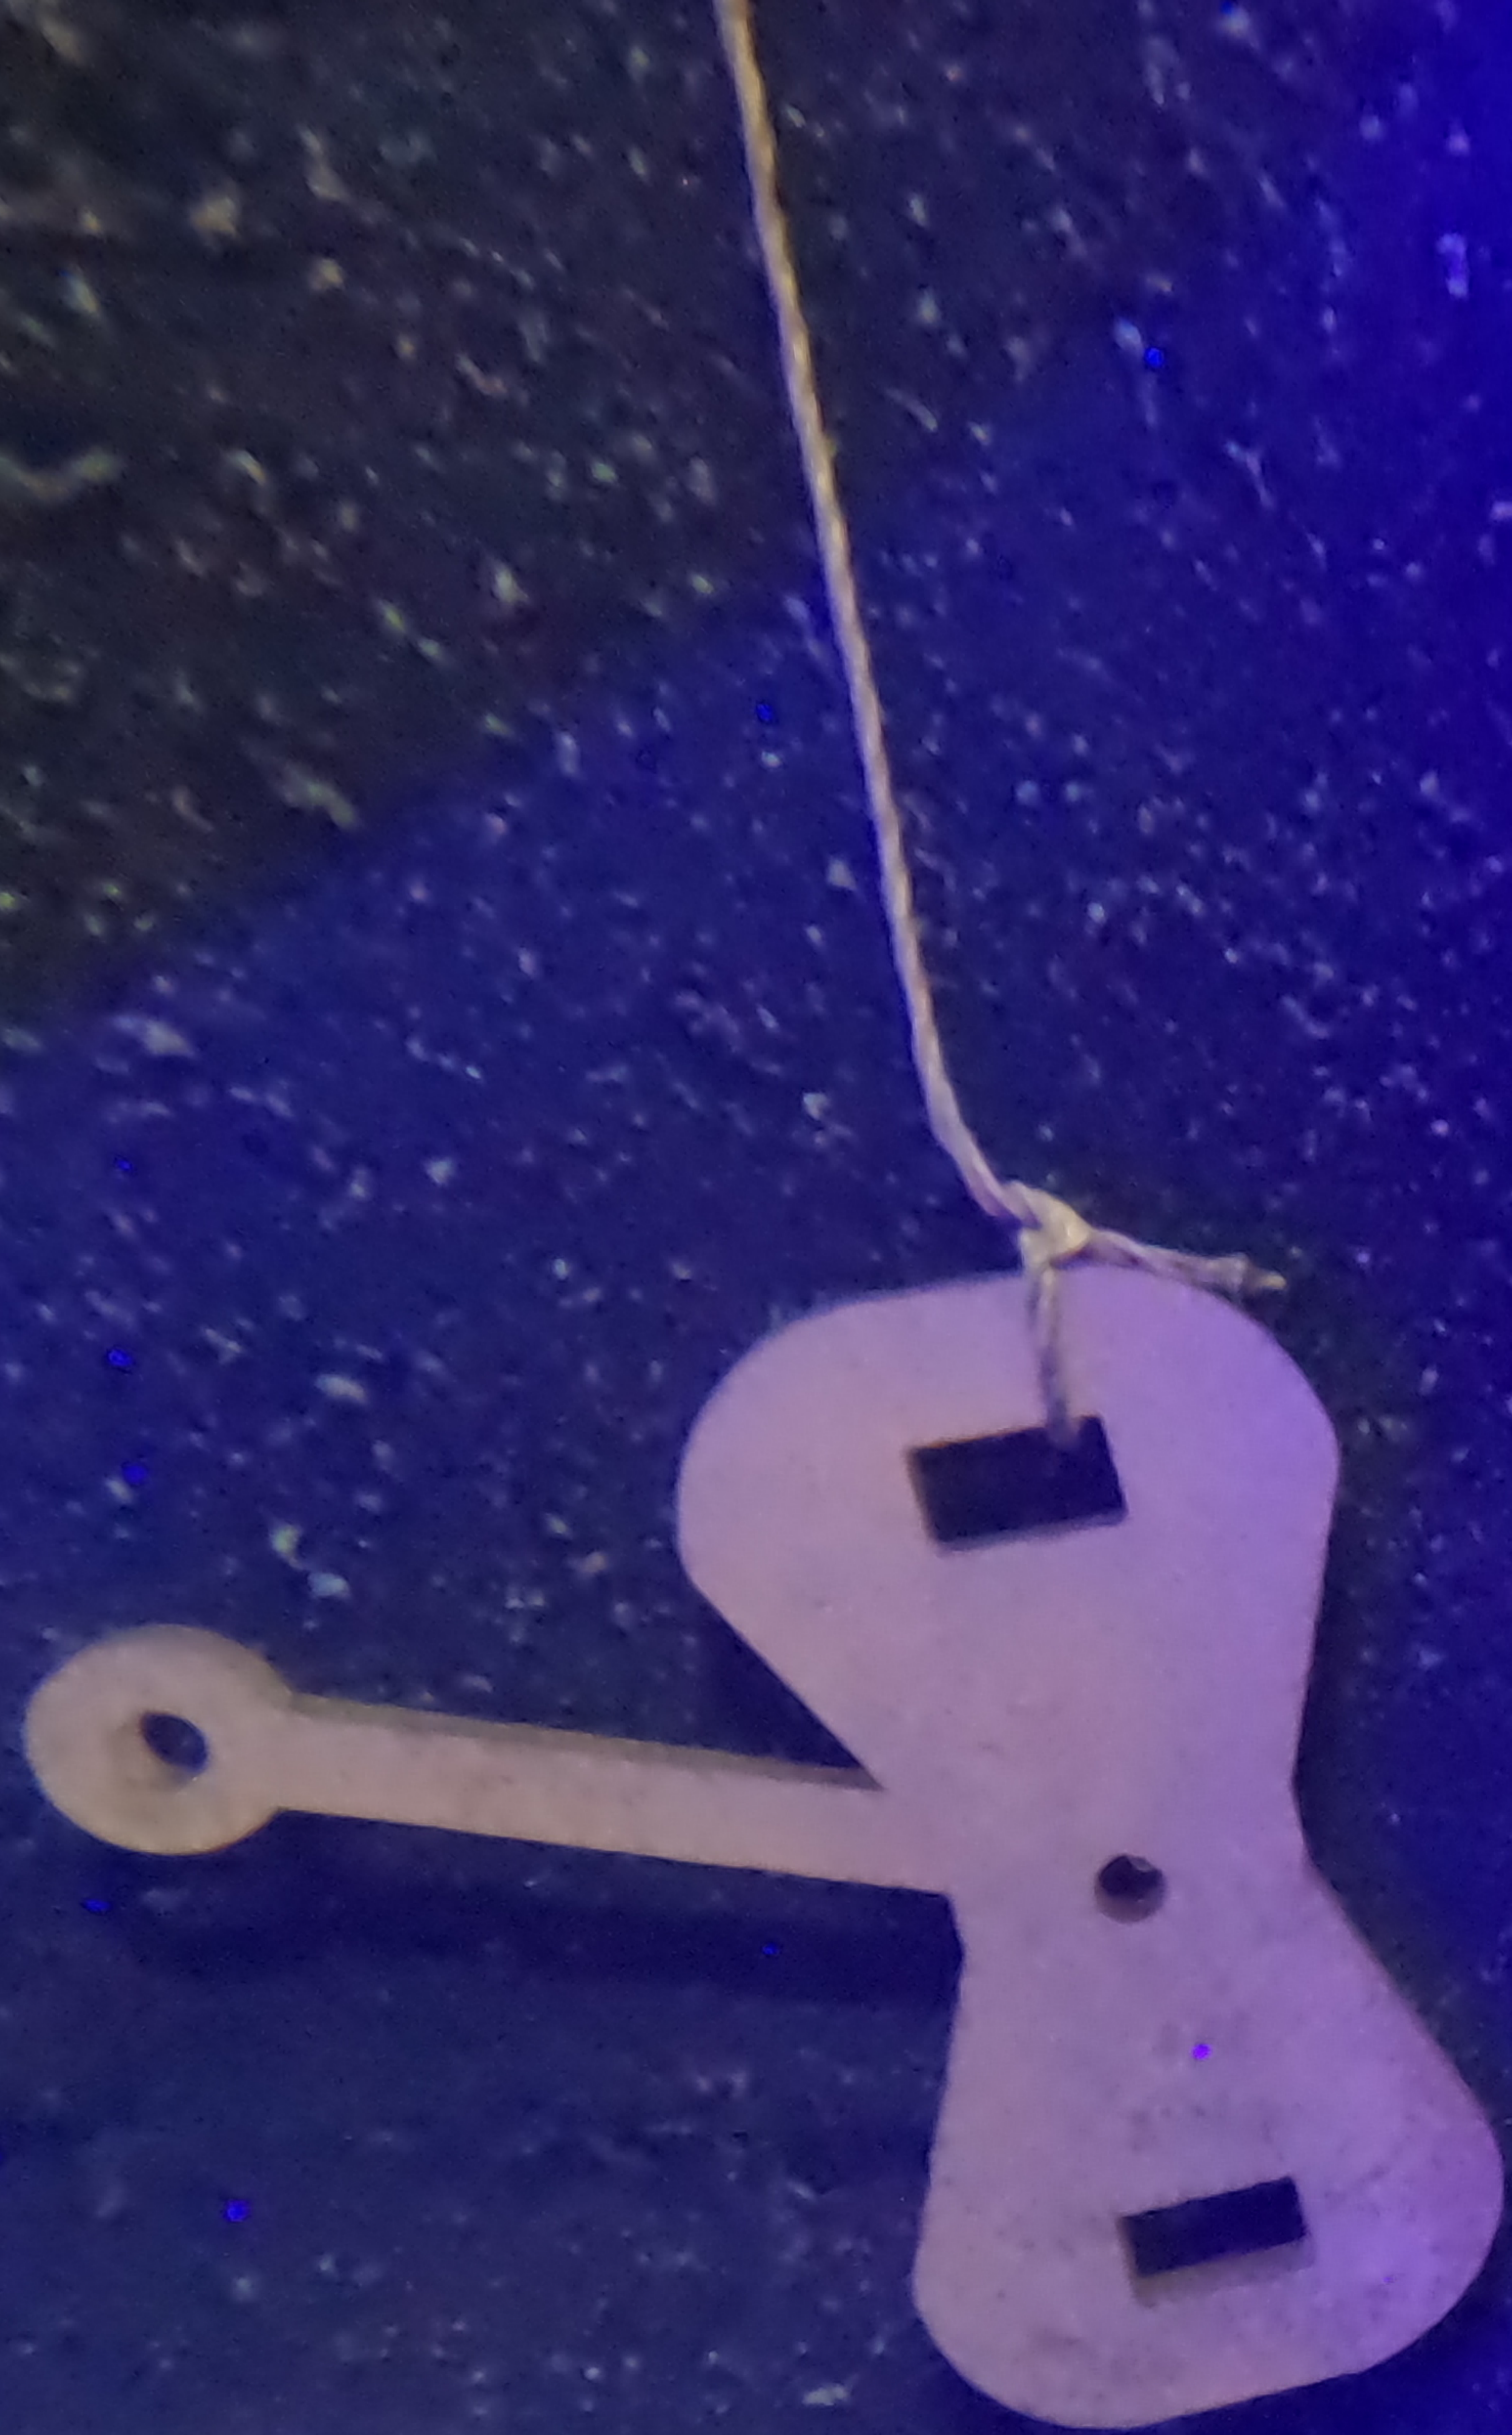

Supplement: Supplementary file 2367 [file G0015945.pdf › Level_2_2/G0015945.pdf]

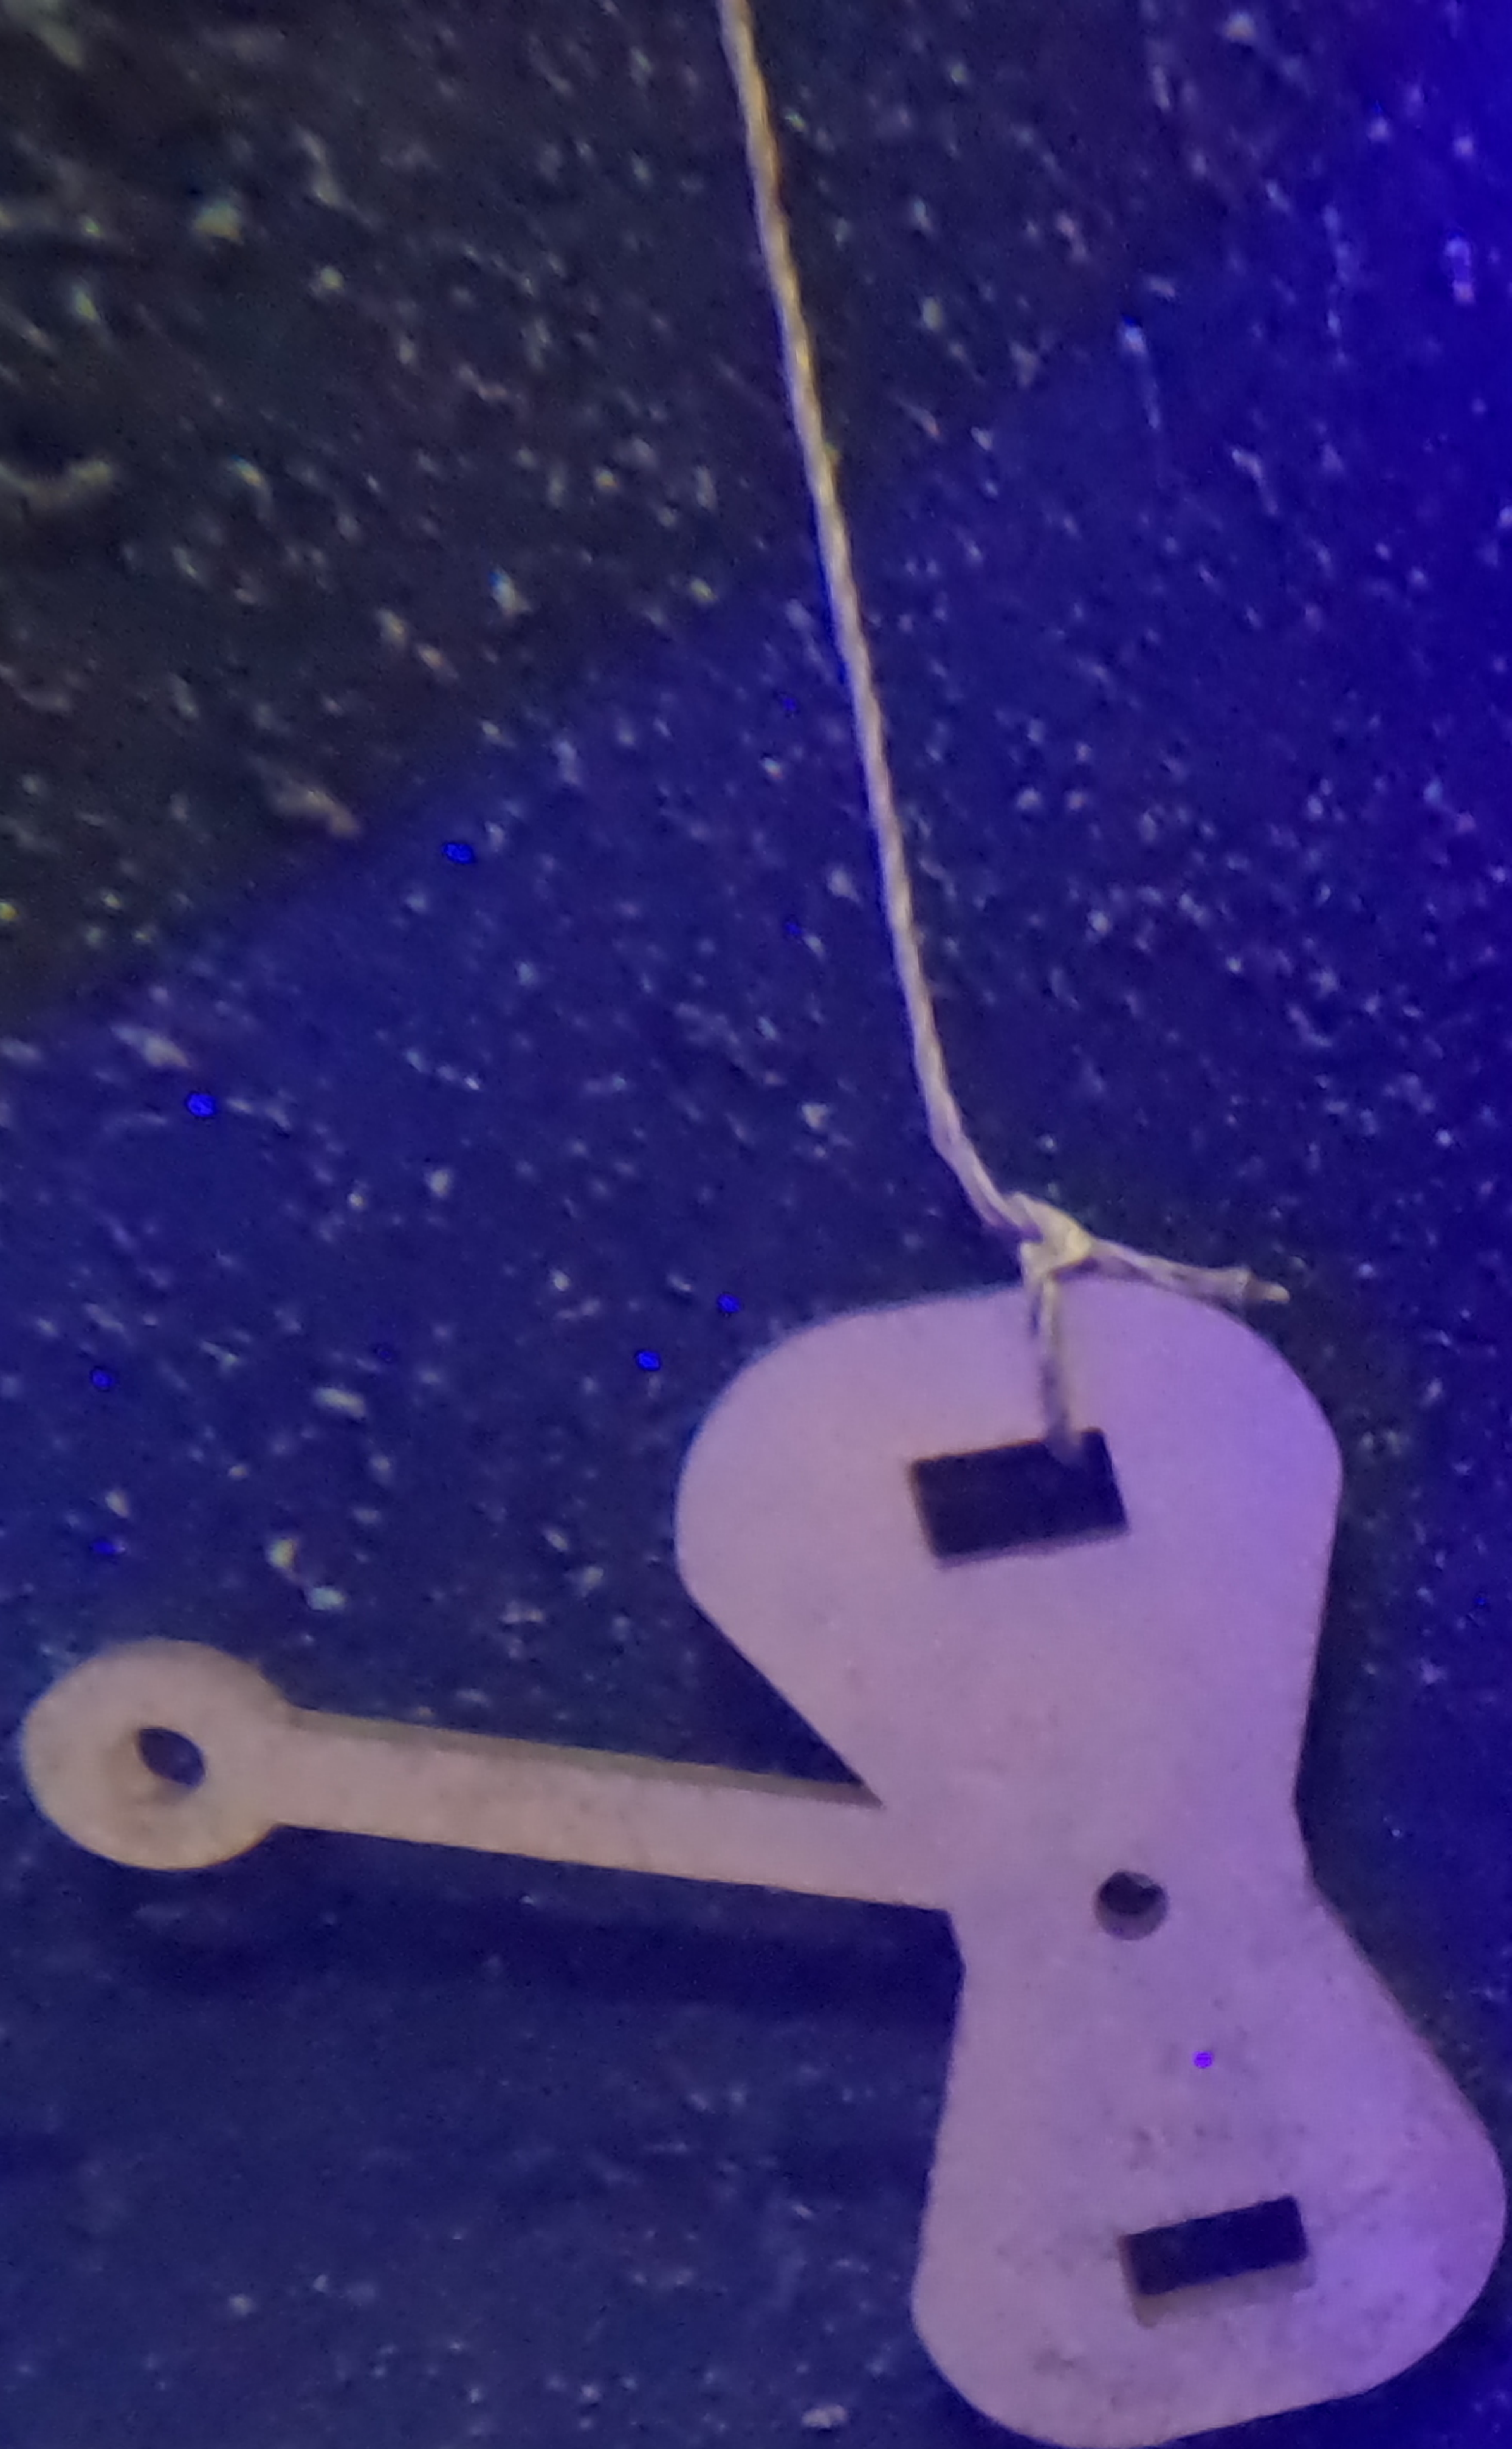

Supplement: Supplementary file 2368 [file G0015946.pdf › Level_2_2/G0015946.pdf]

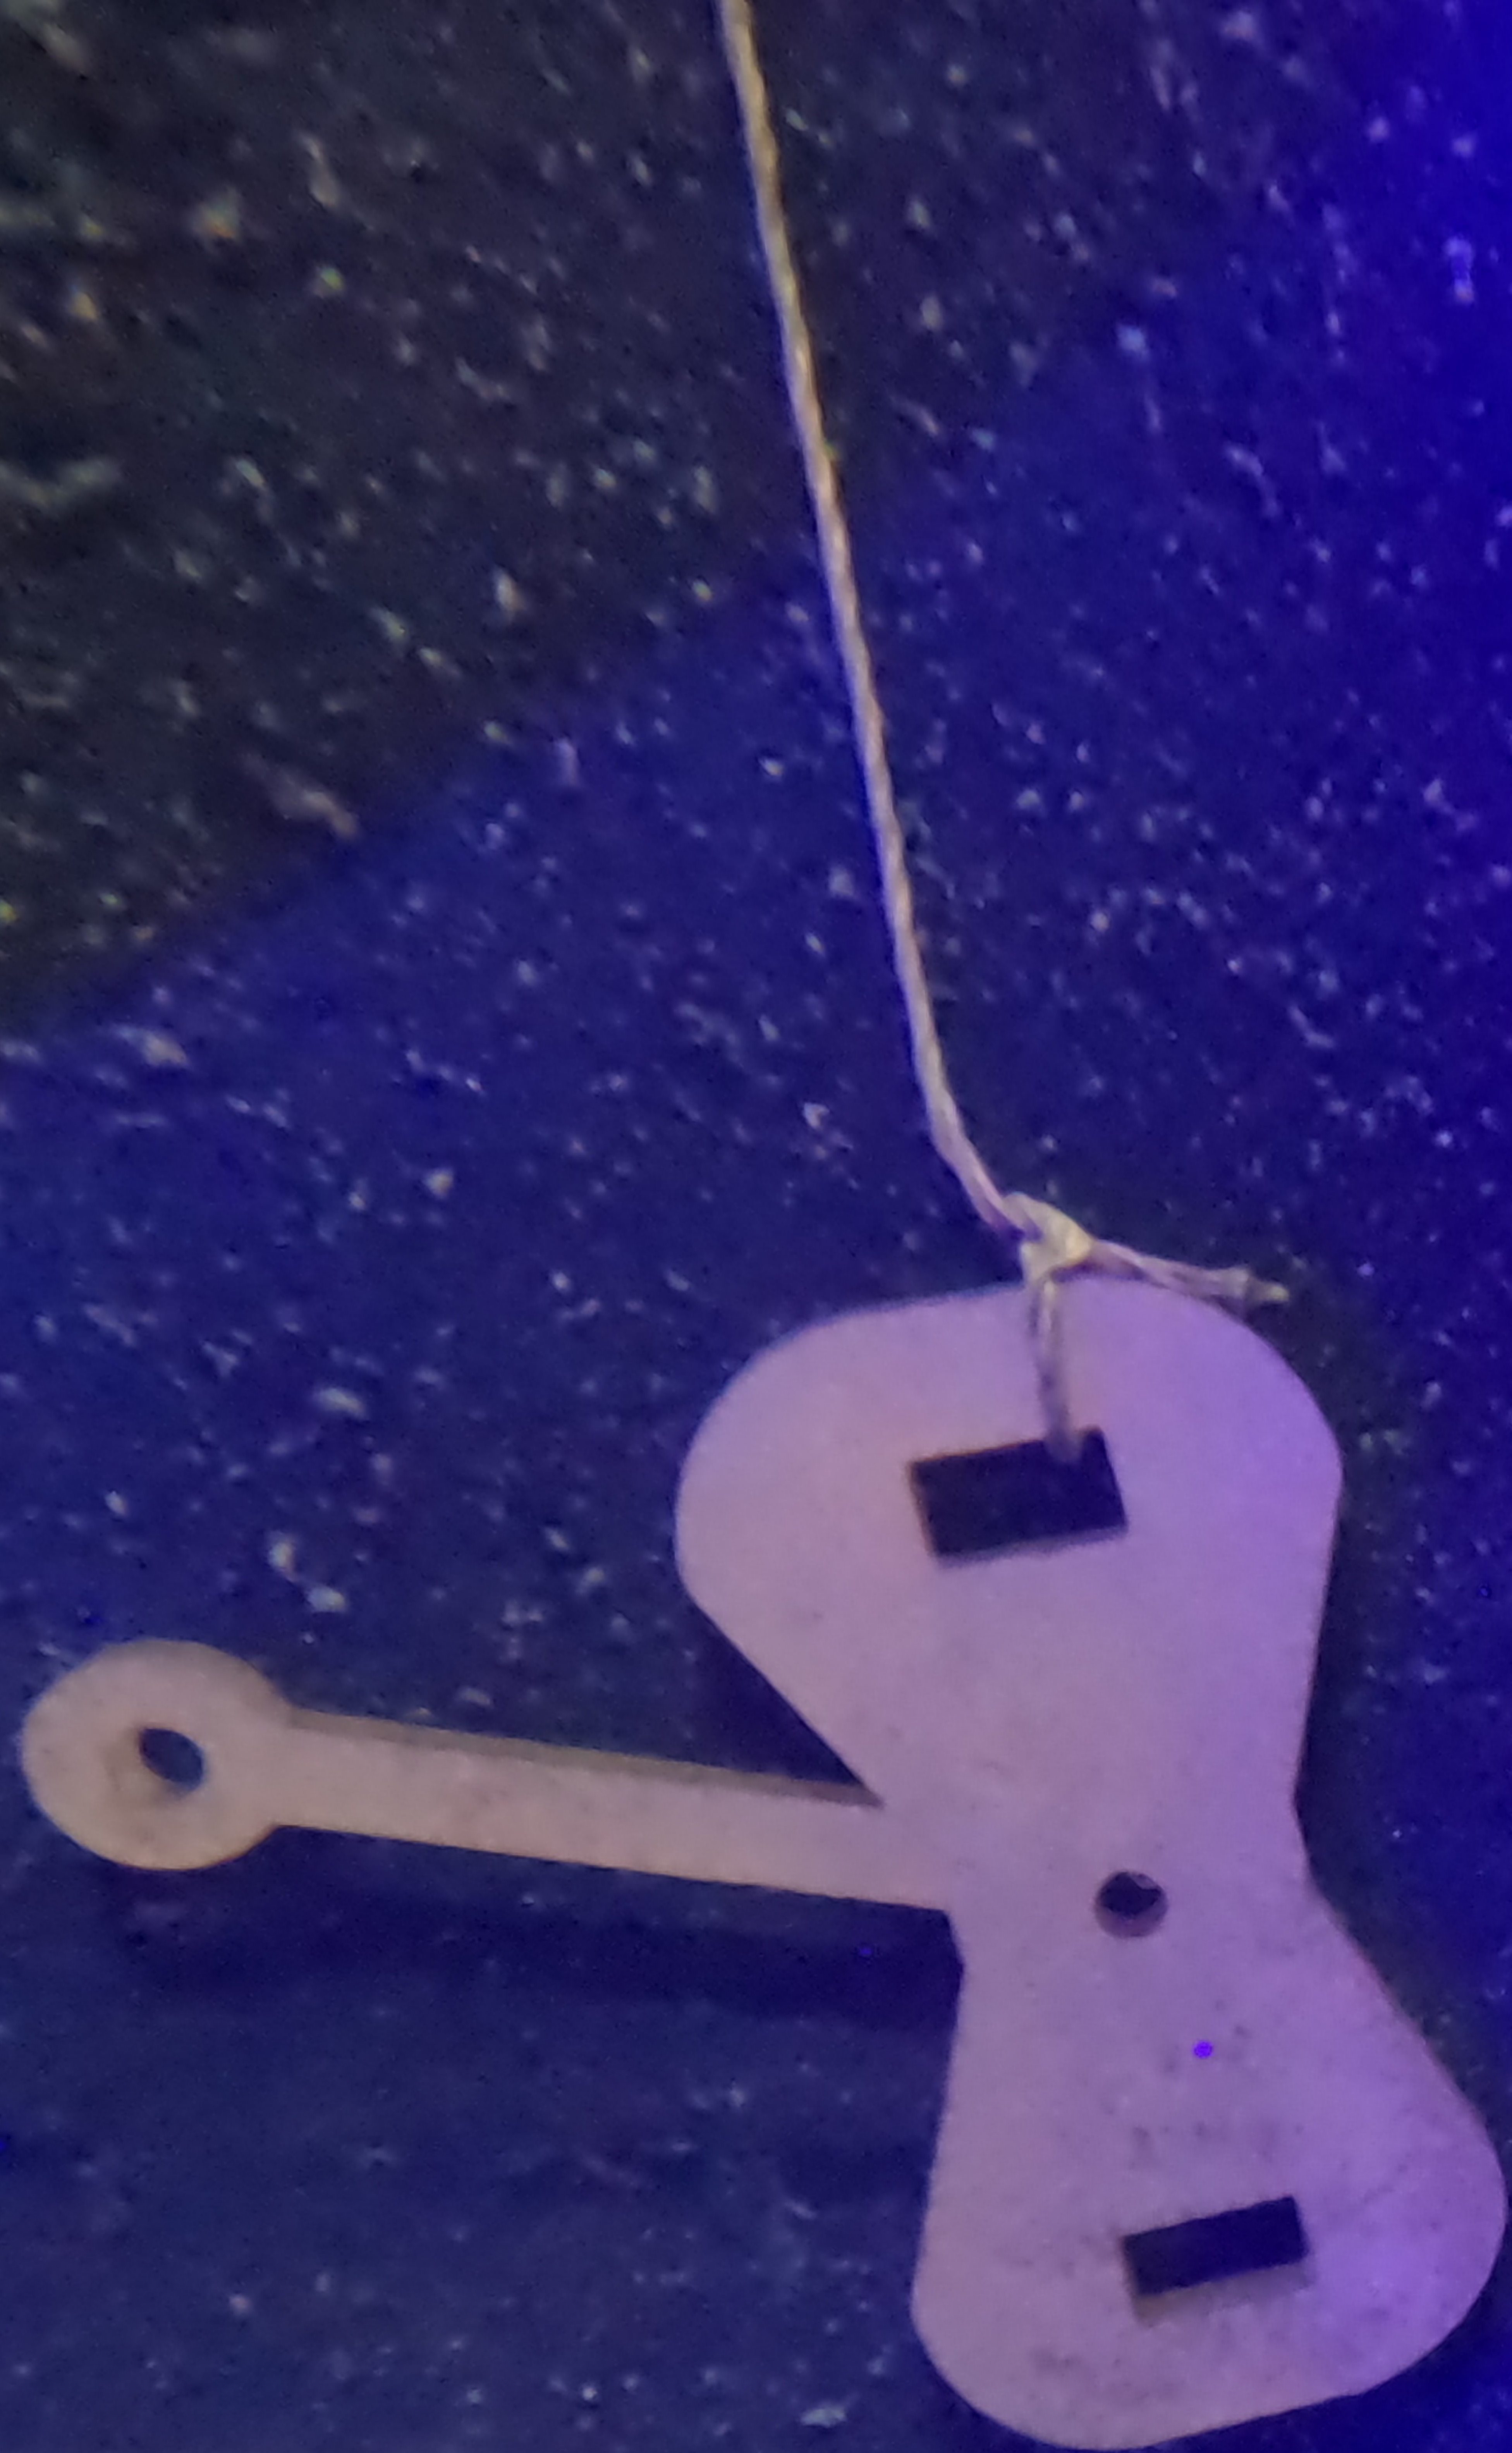

Supplement: Supplementary file 2369 [file G0015947.pdf › Level_2_2/G0015947.pdf]

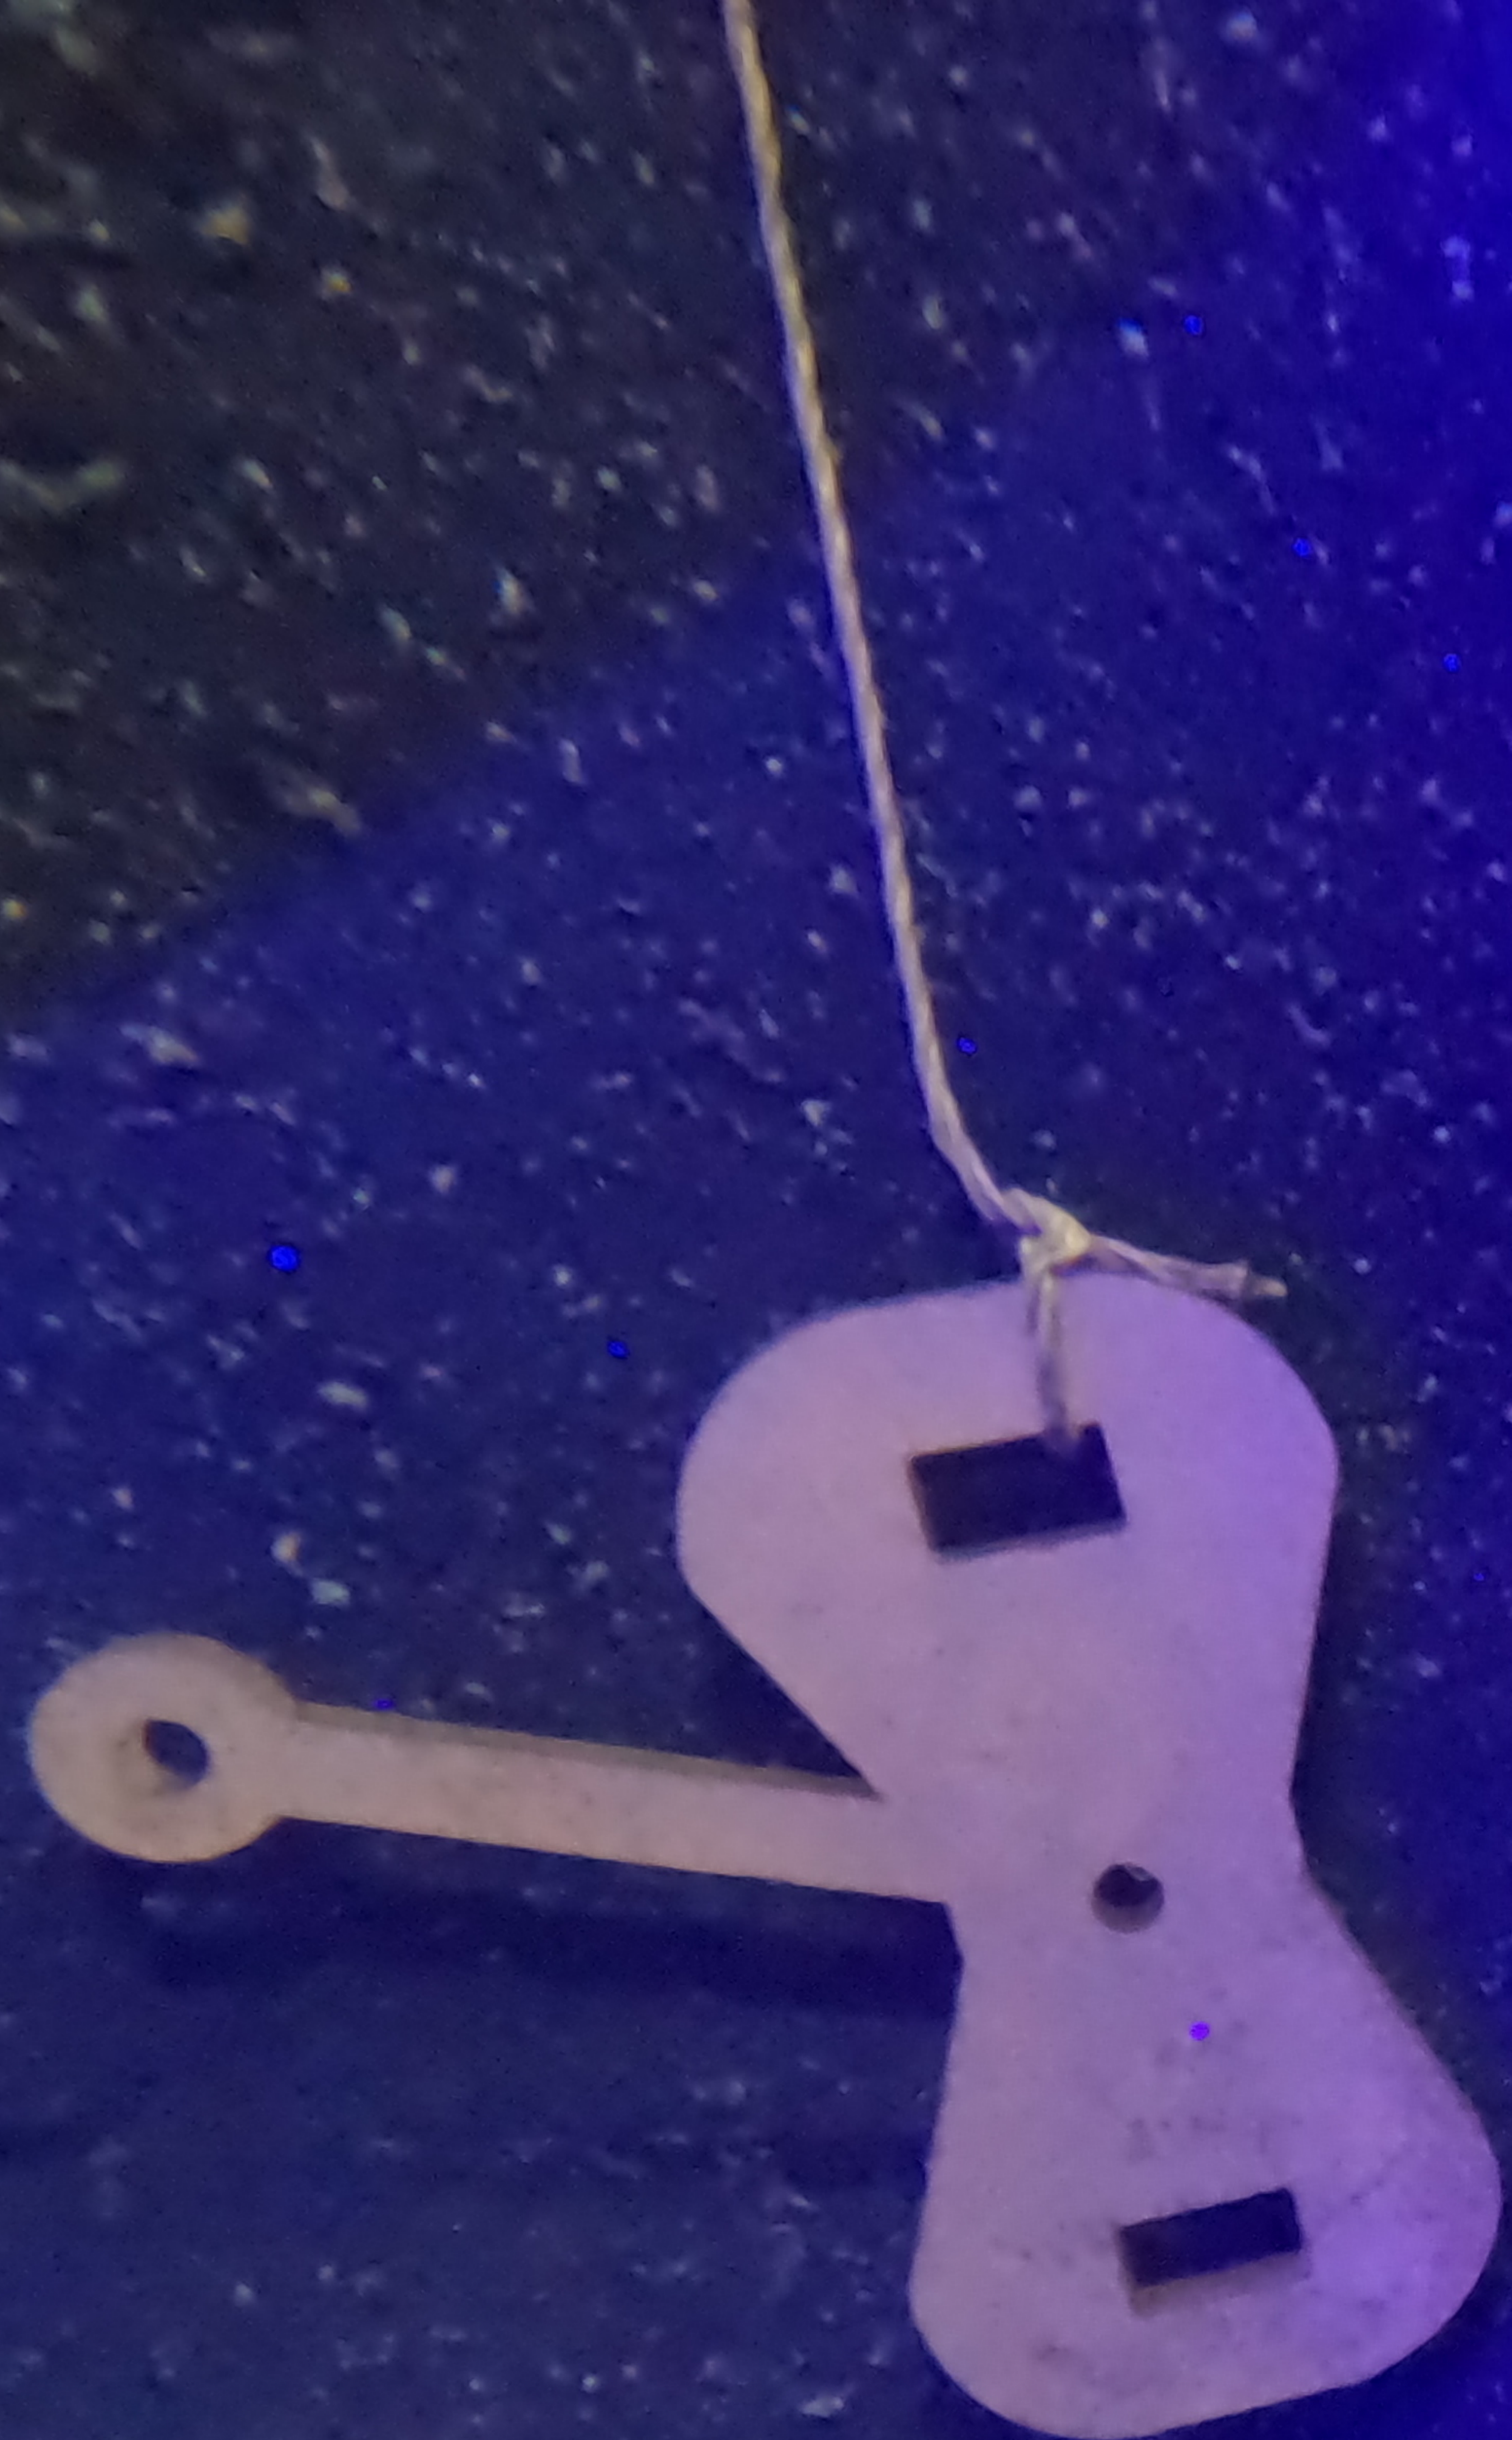

Supplement: Supplementary file 2370 [file G0015948.pdf › Level_2_2/G0015948.pdf]

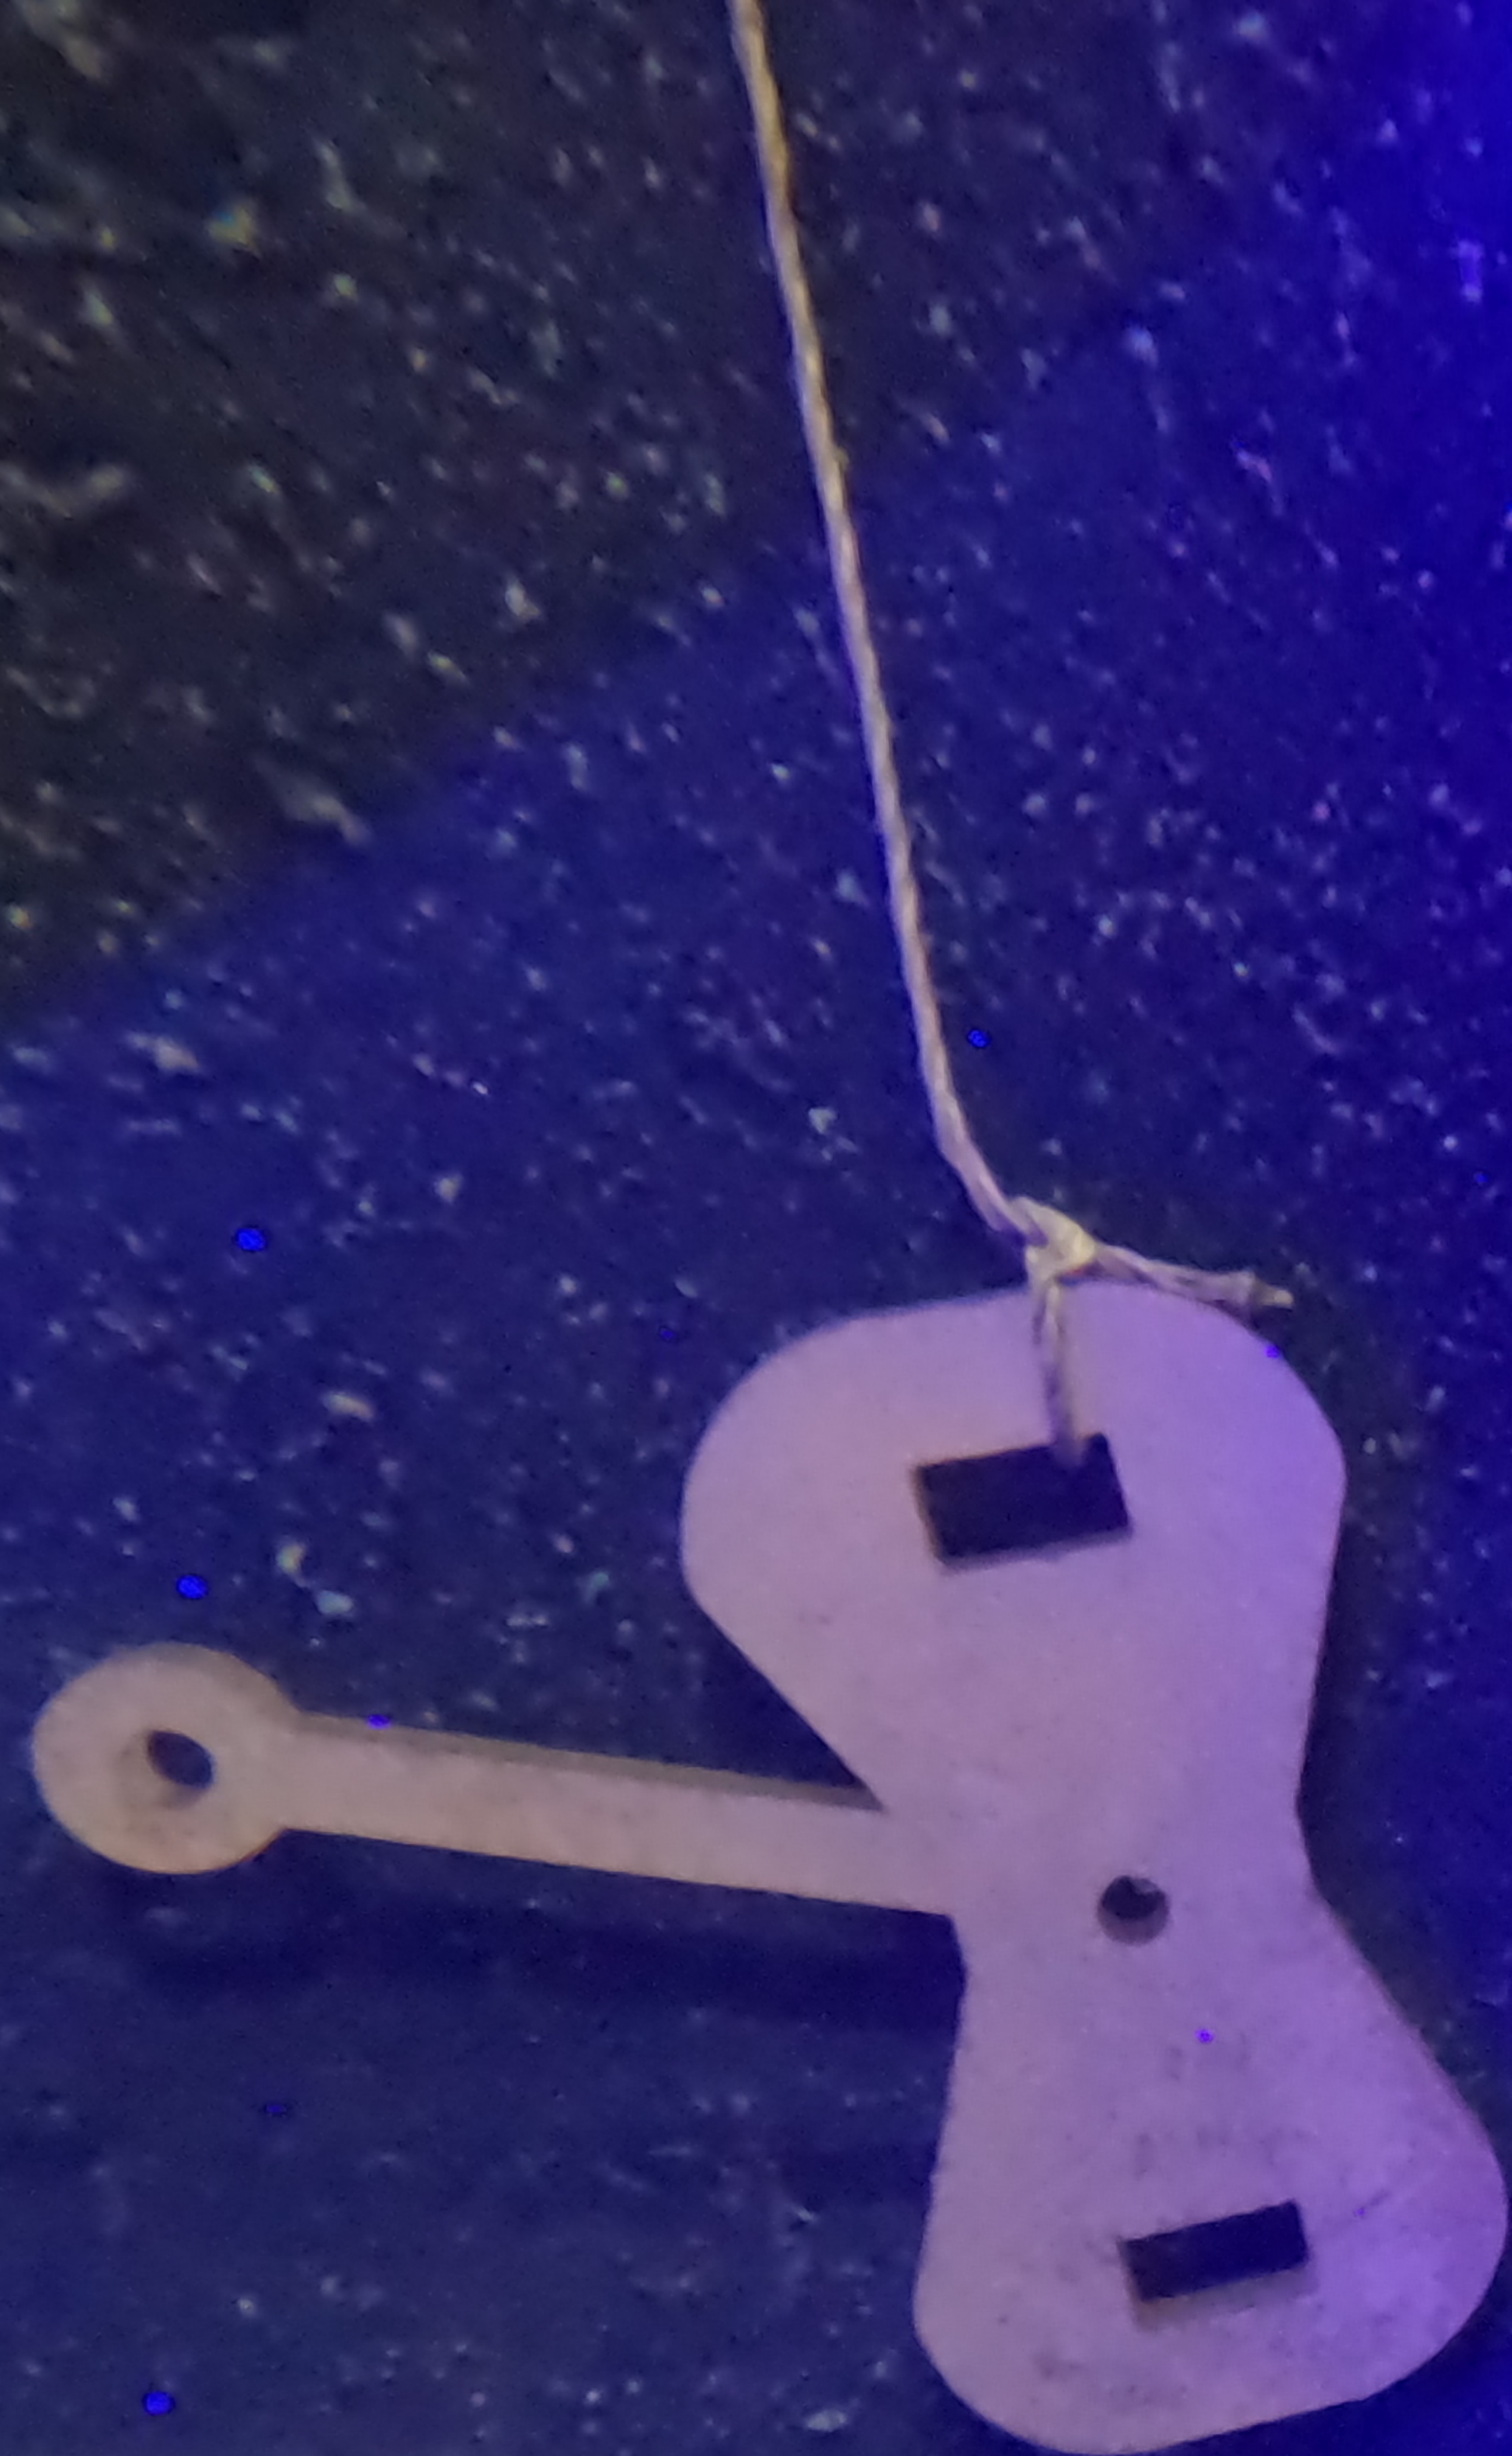

Supplement: Supplementary file 2371 [file G0015949.pdf › Level_2_2/G0015949.pdf]

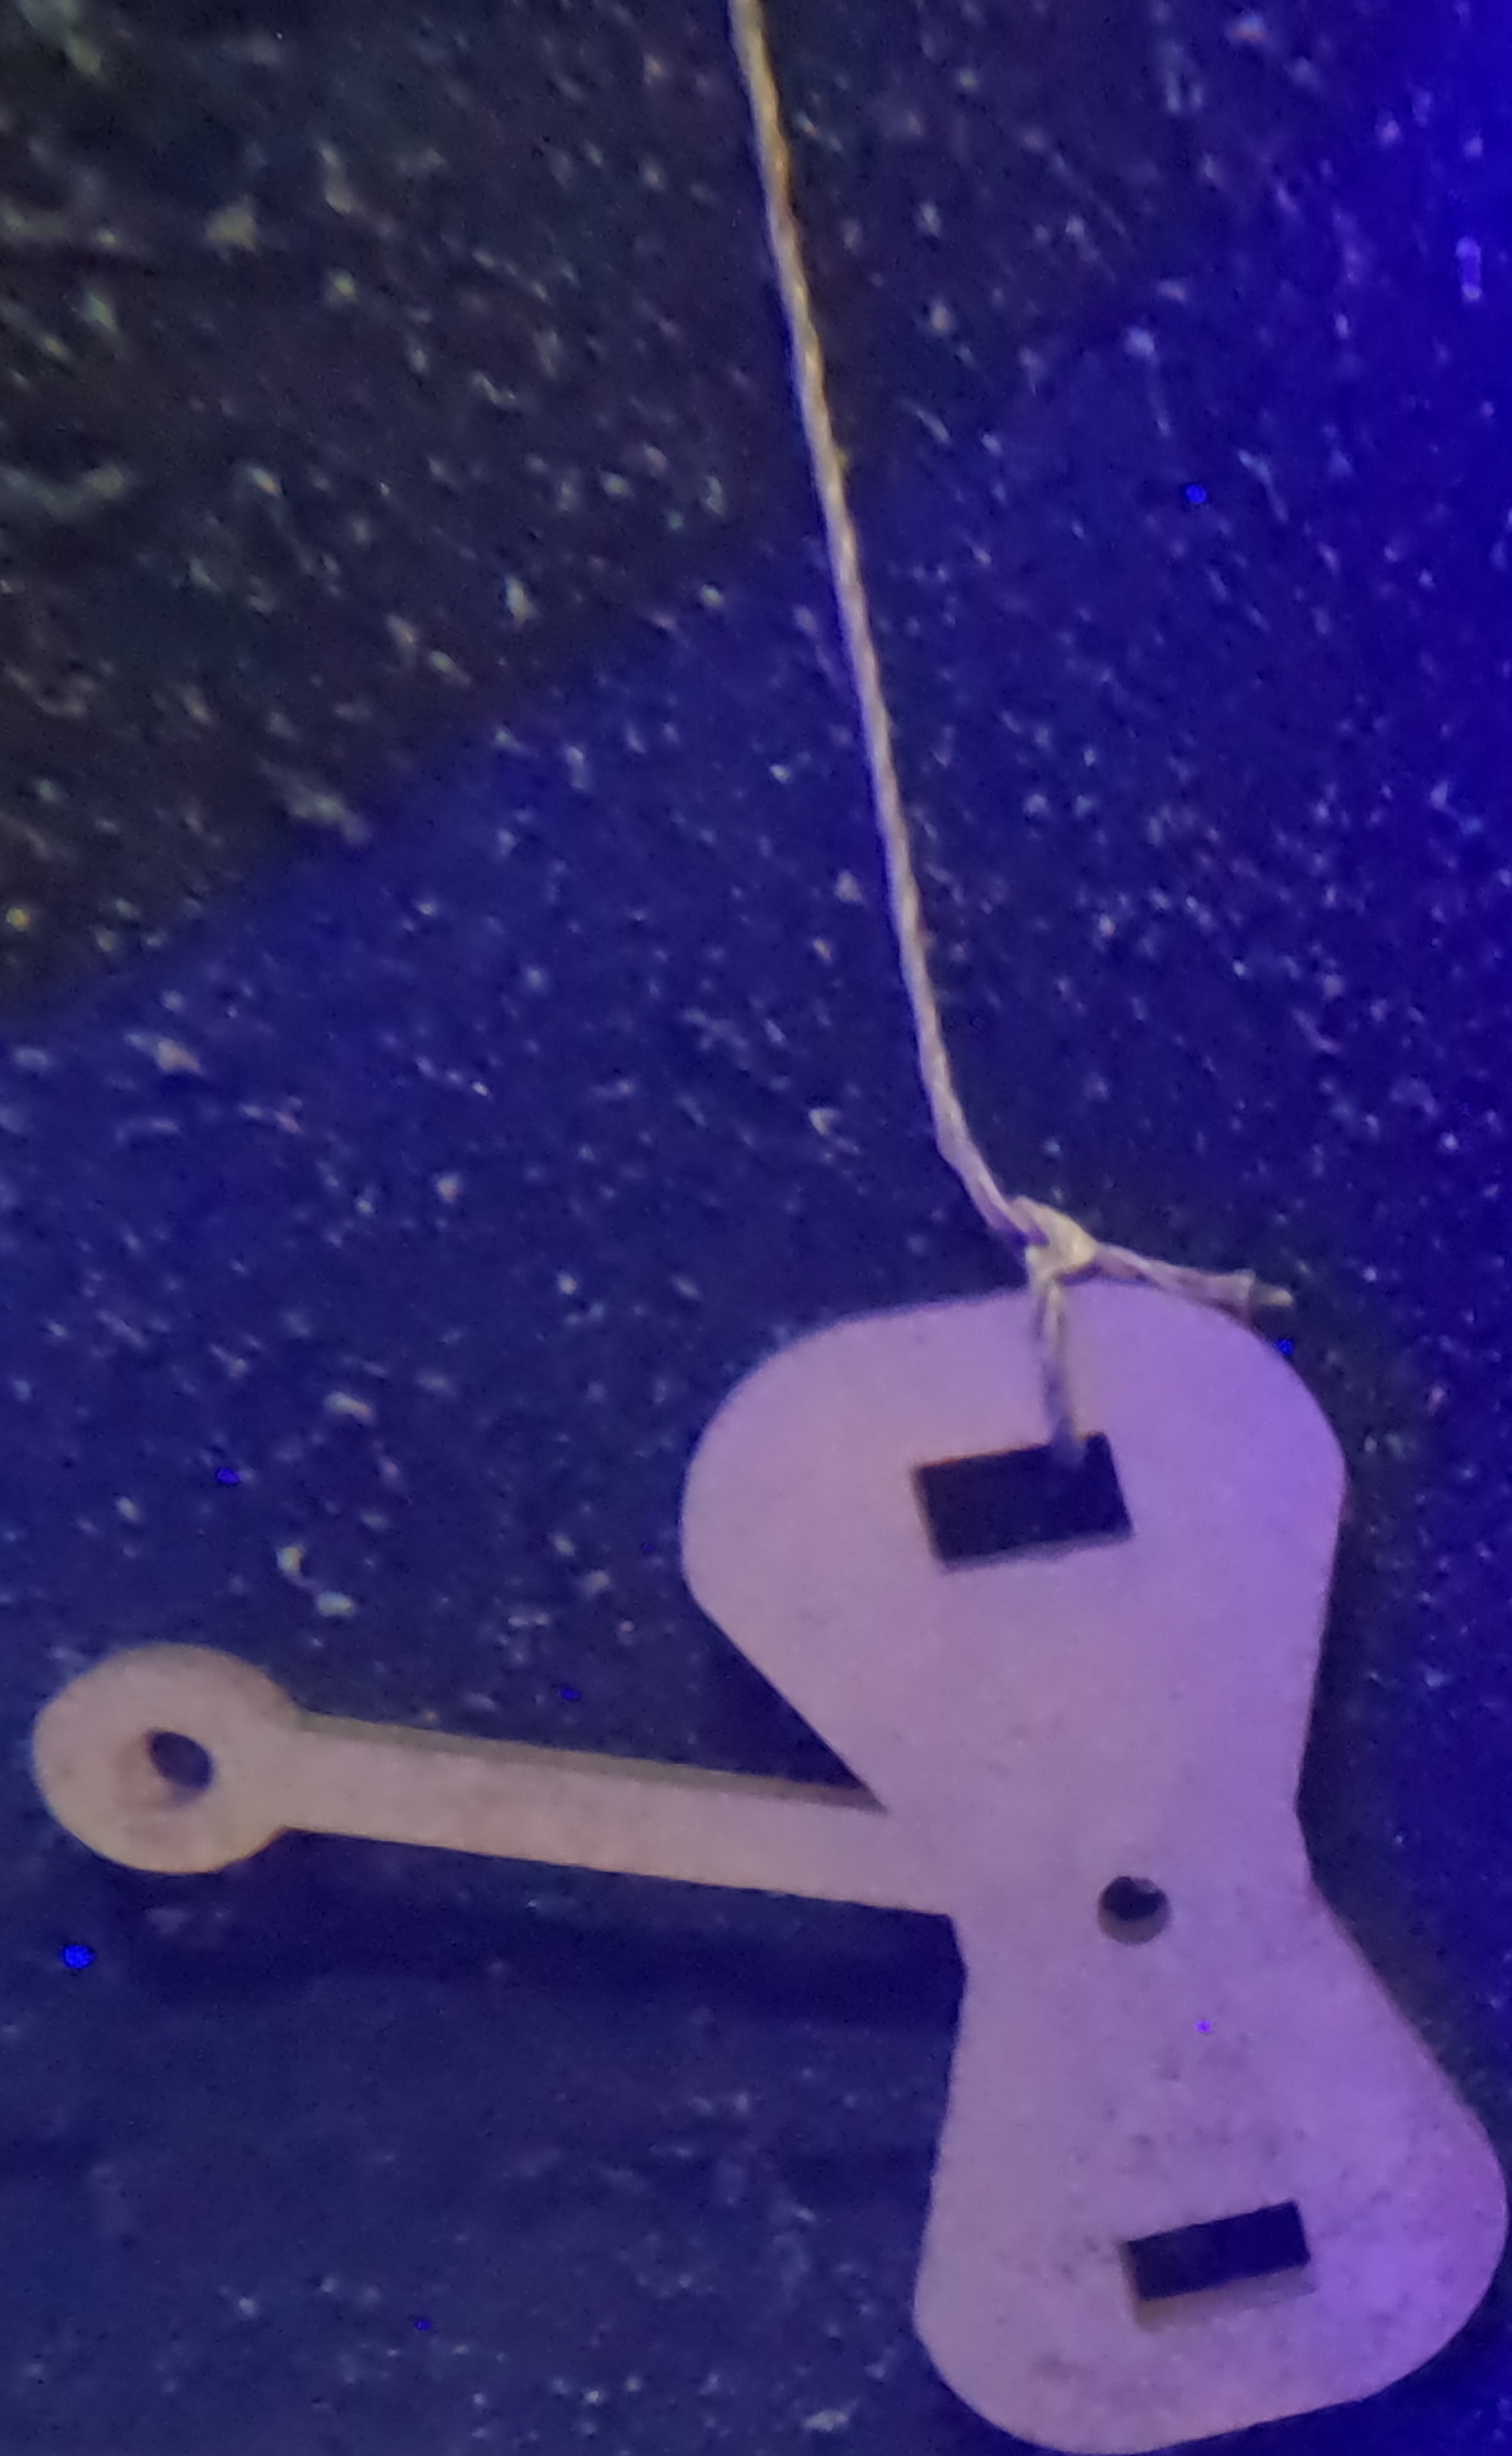

Supplement: Supplementary file 2372 [file G0015950.pdf › Level_2_2/G0015950.pdf]

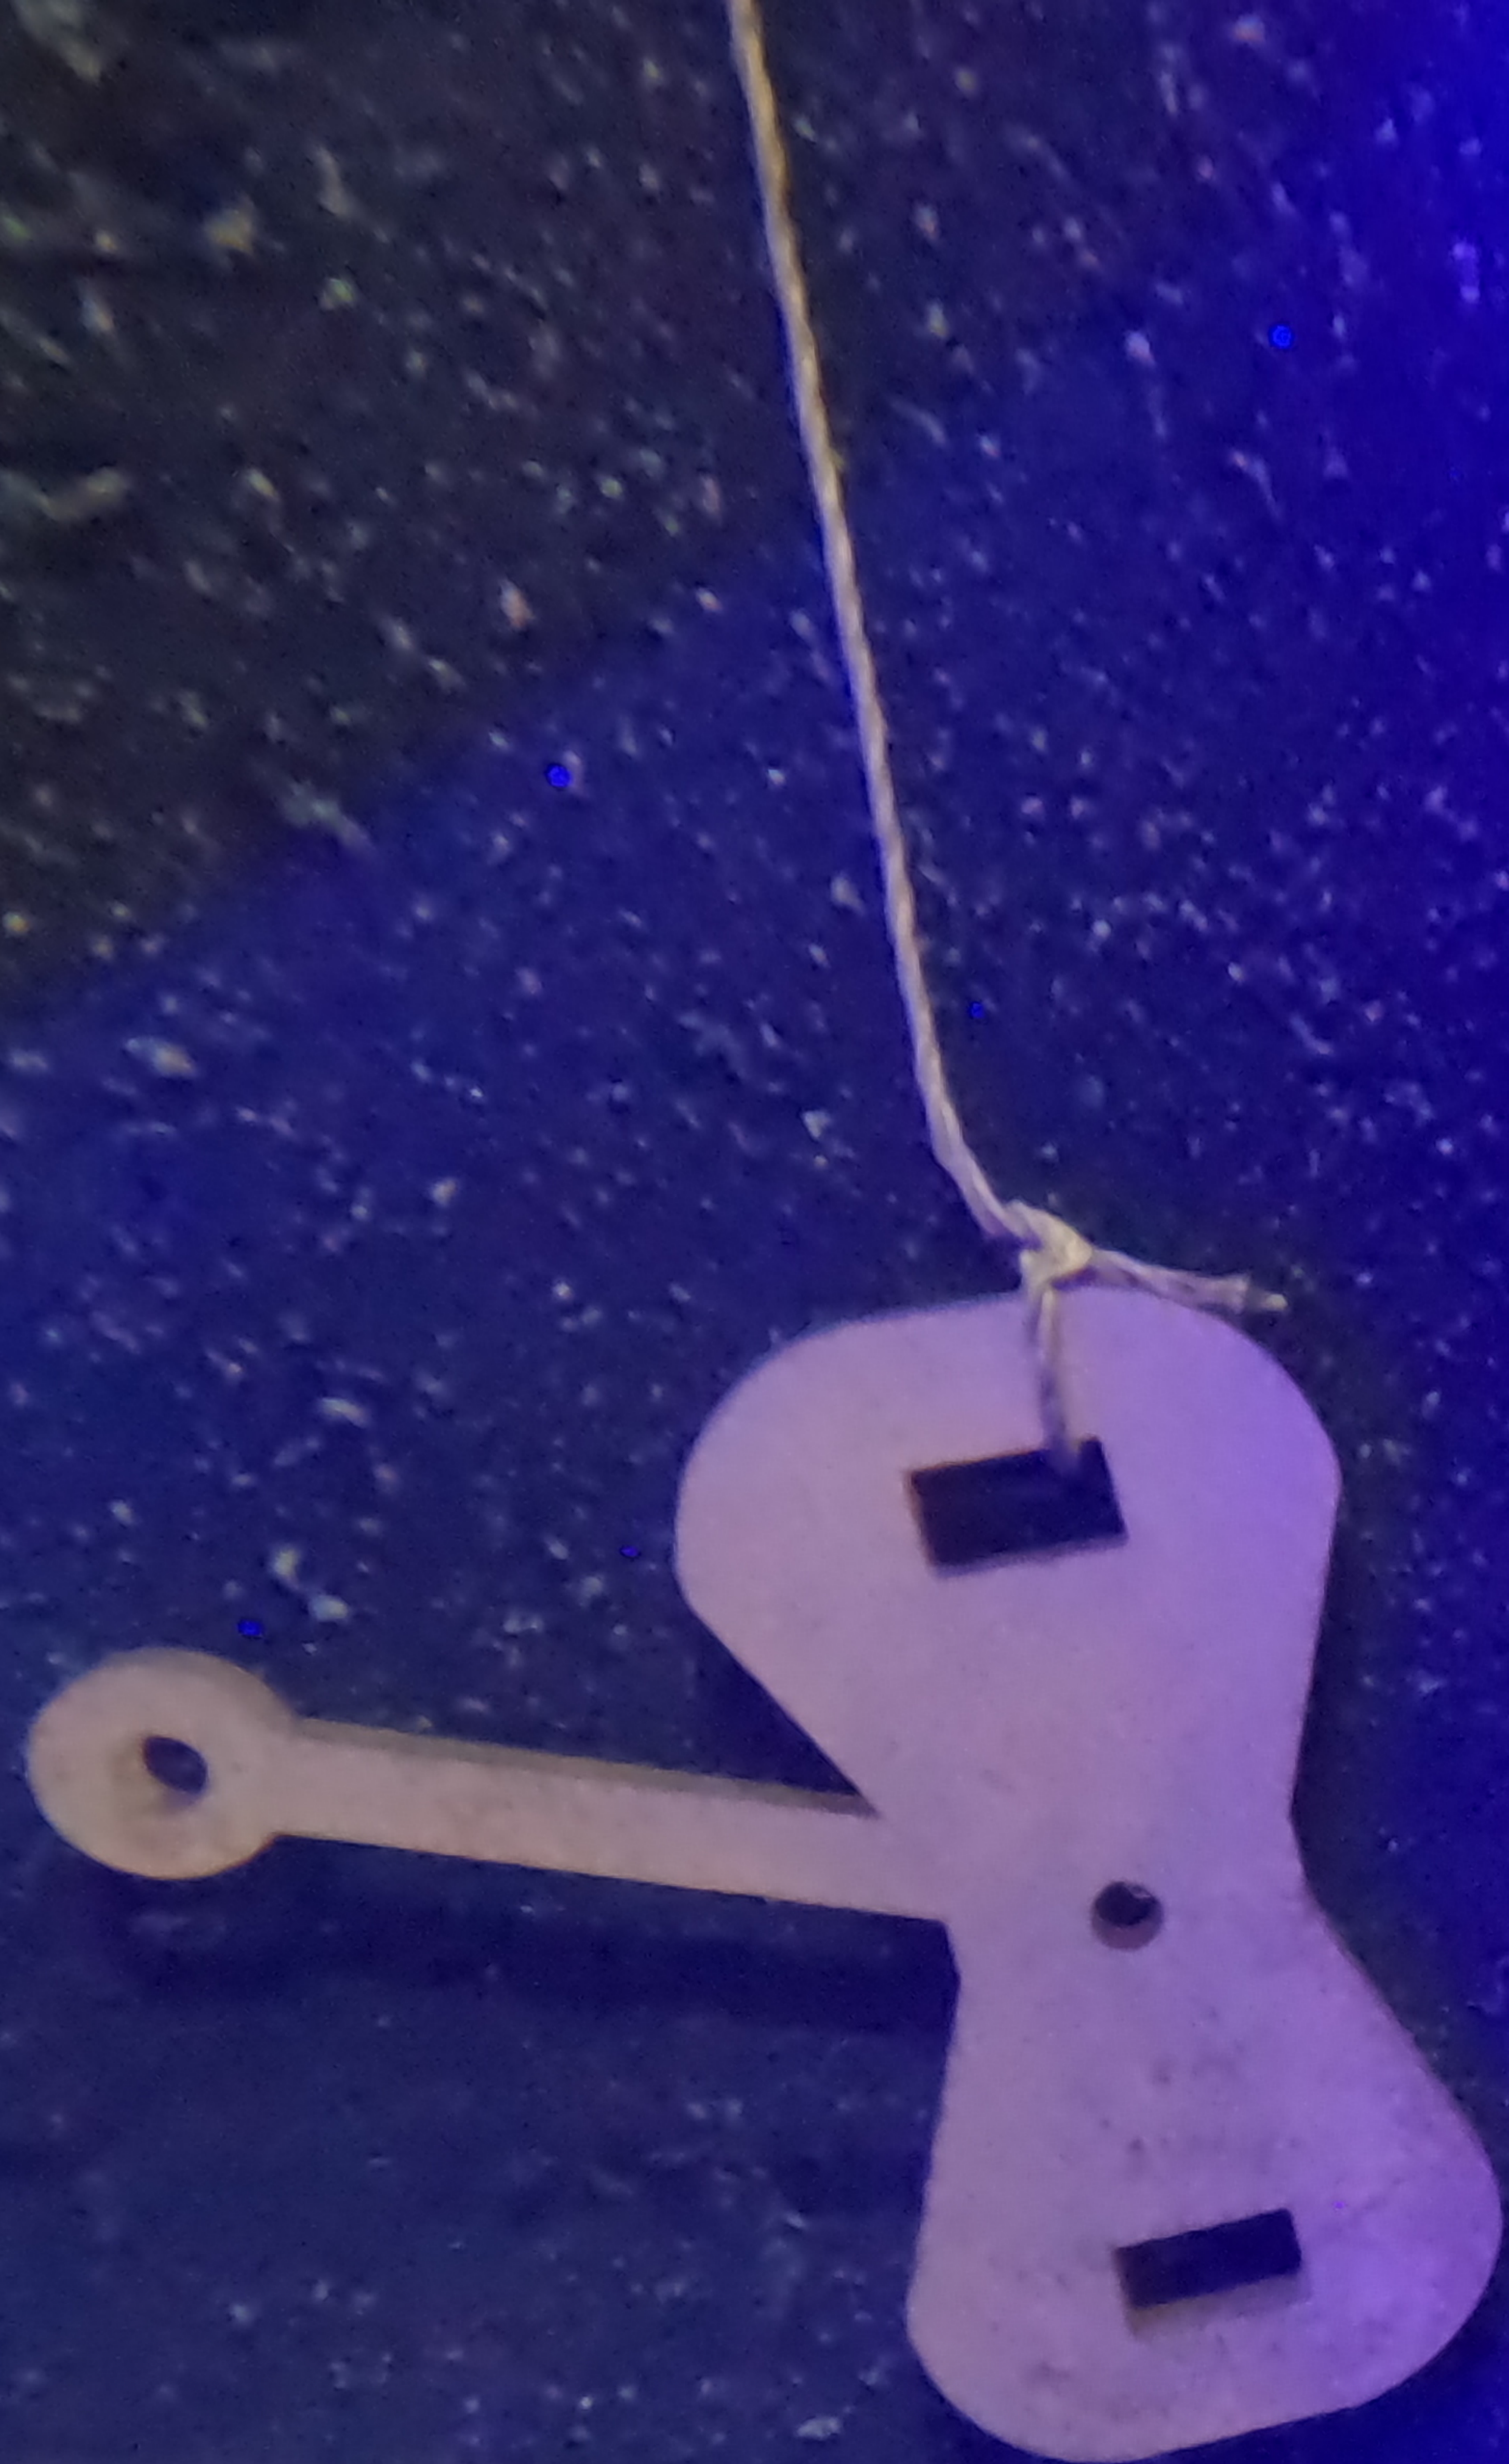

Supplement: Supplementary file 2373 [file G0015951.pdf › Level_2_2/G0015951.pdf]

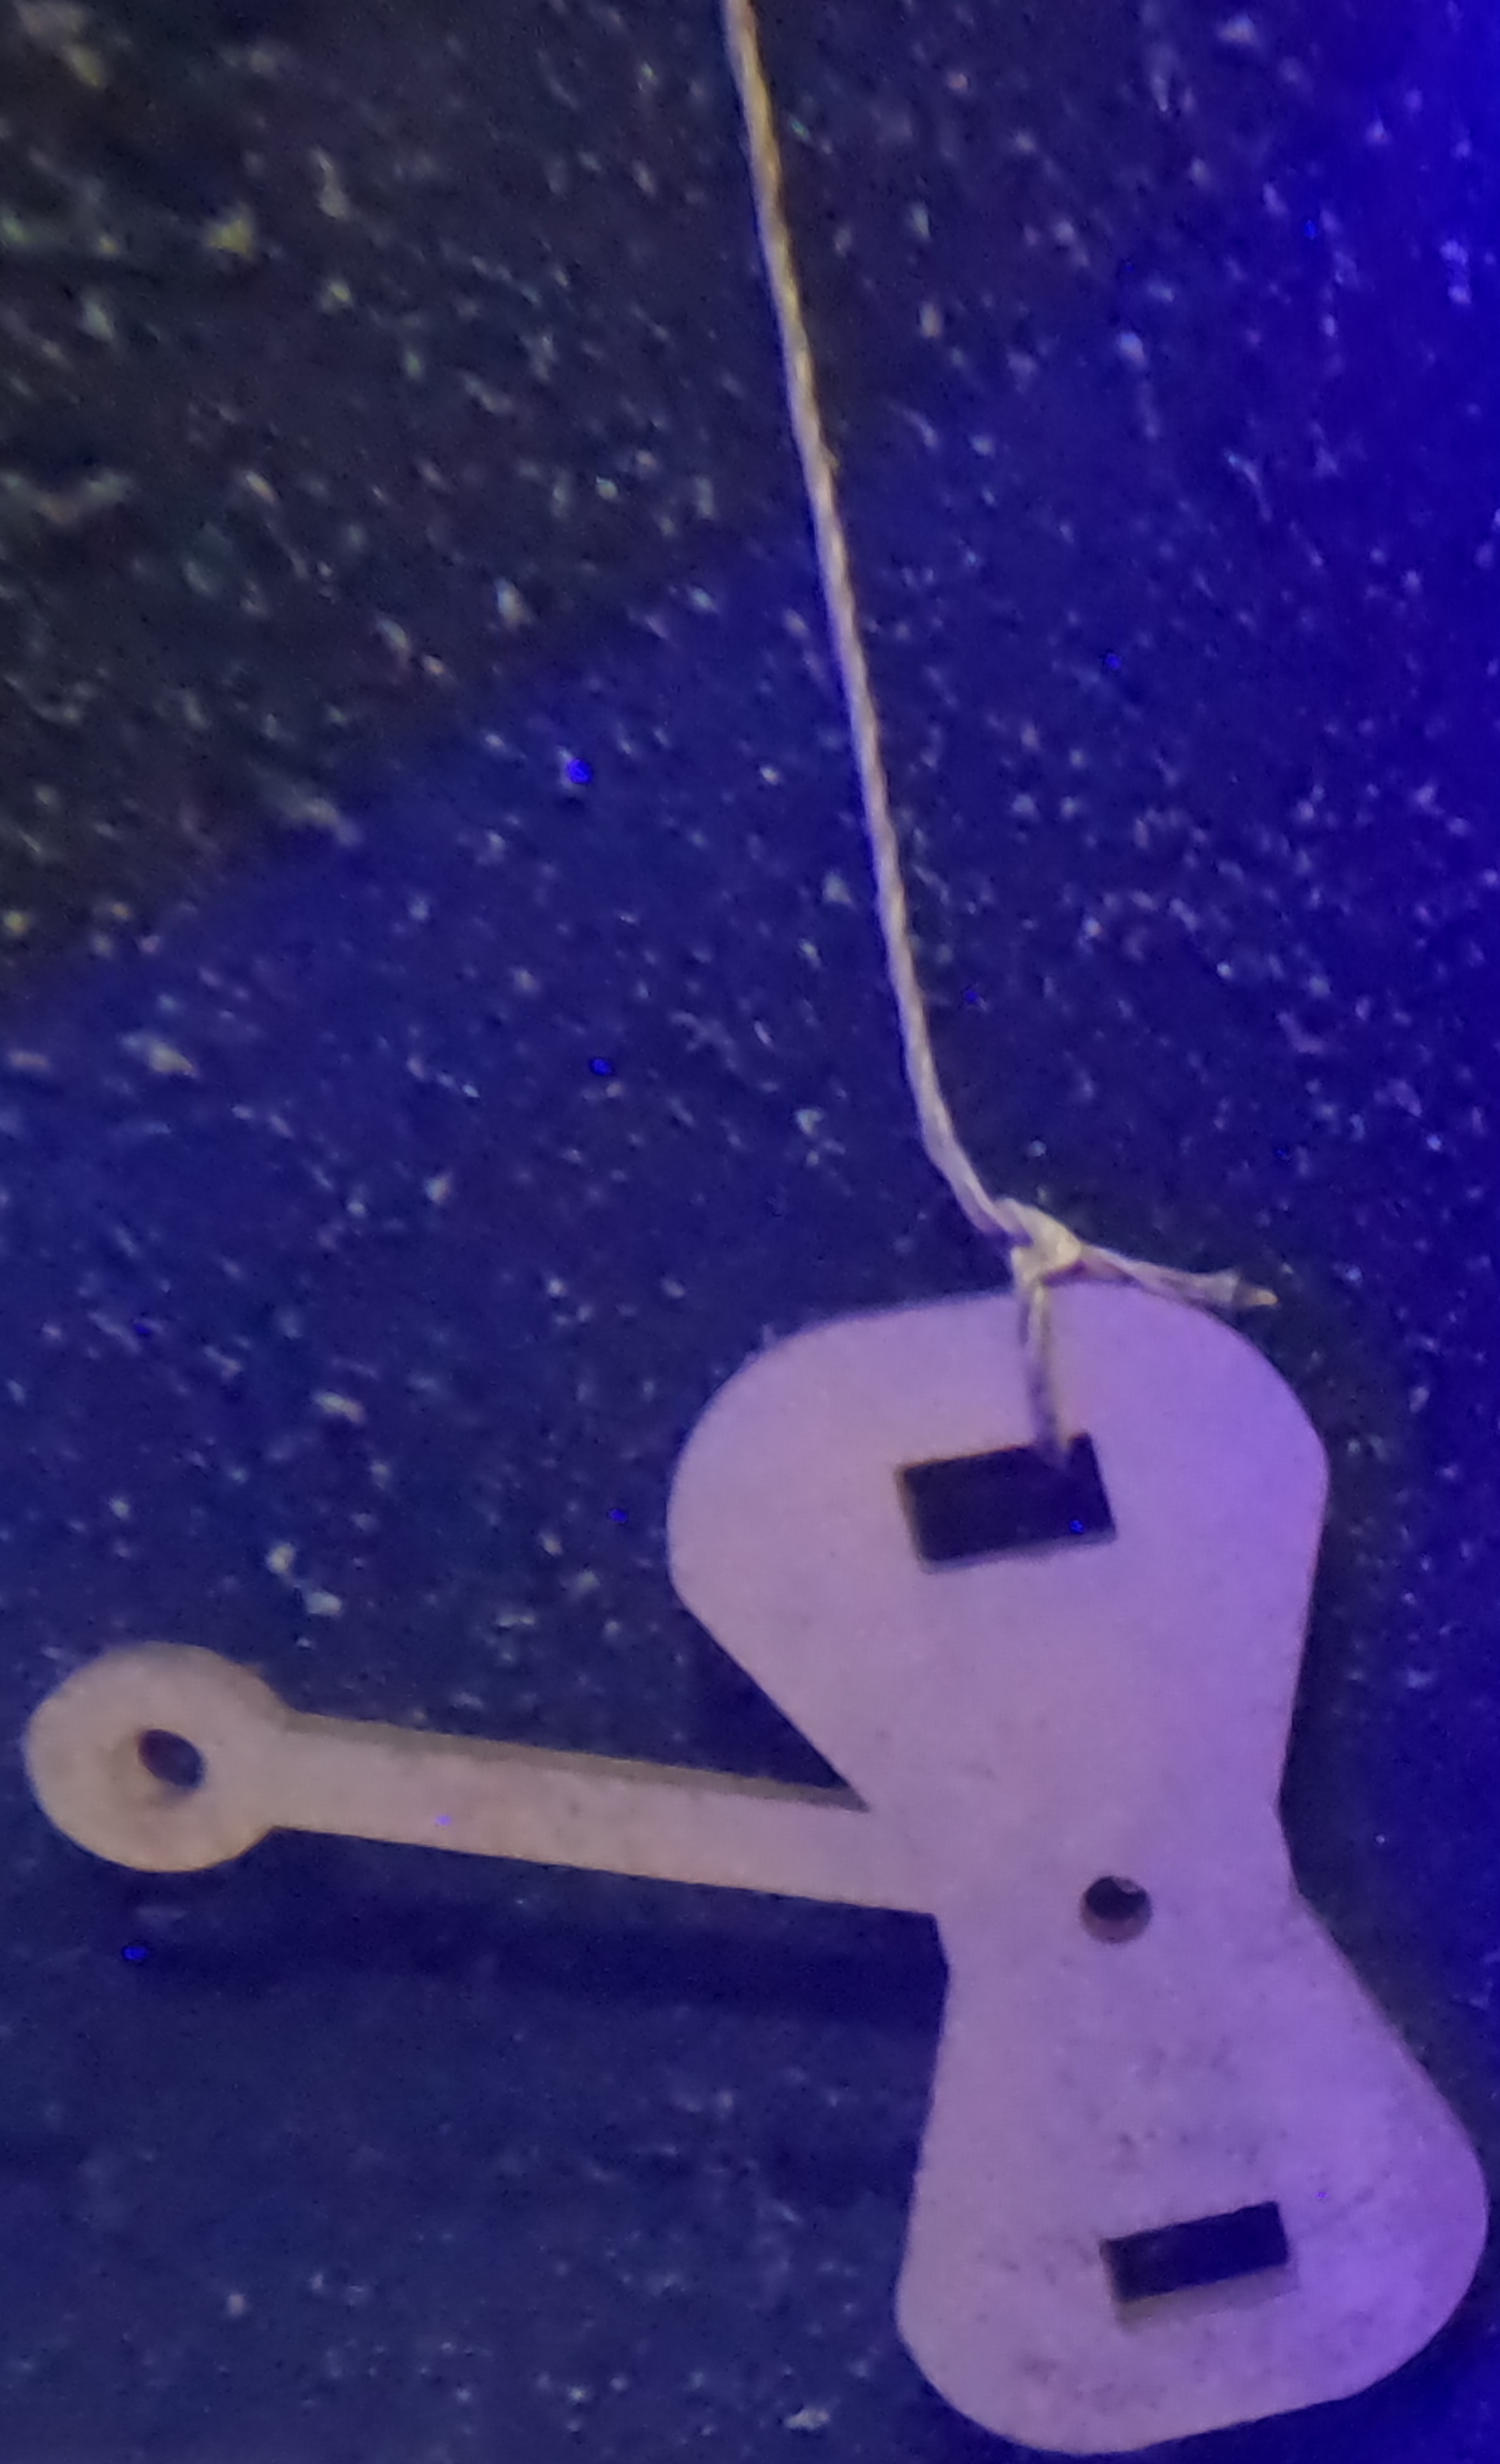

Supplement: Supplementary file 2374 [file G0015952.pdf › Level_2_2/G0015952.pdf]

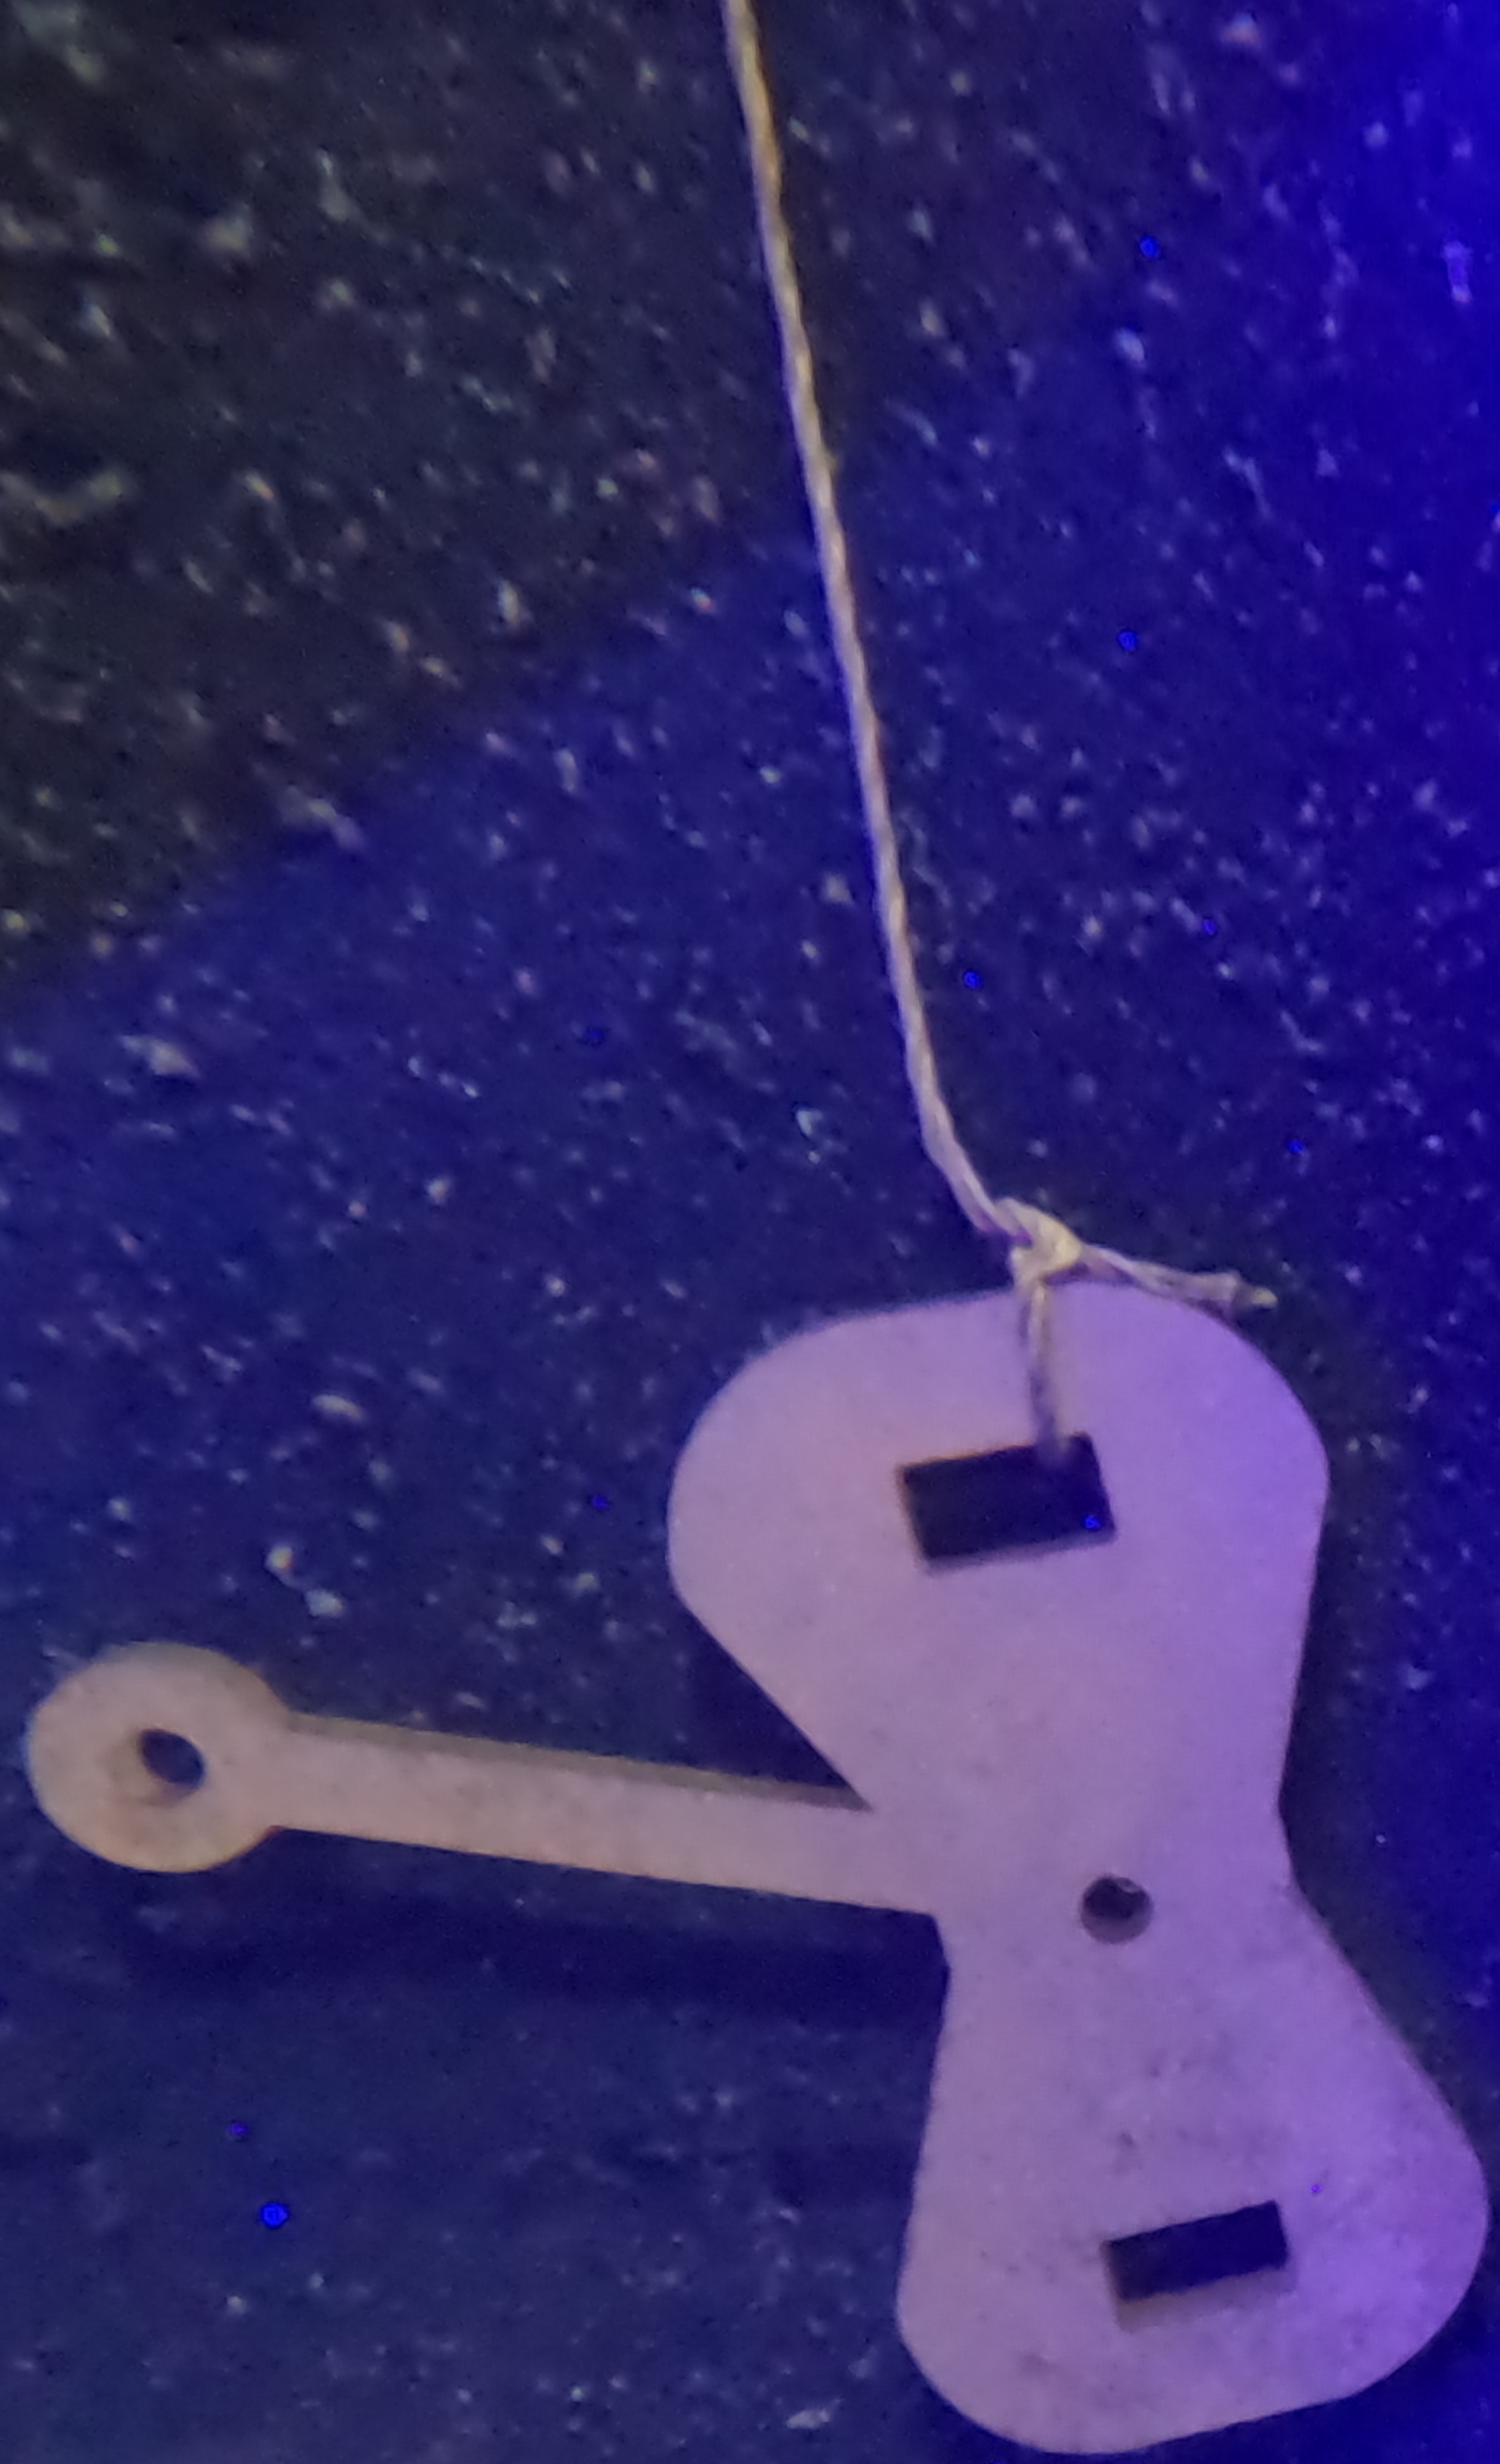

Supplement: Supplementary file 2375 [file G0015953.pdf › Level_2_2/G0015953.pdf]

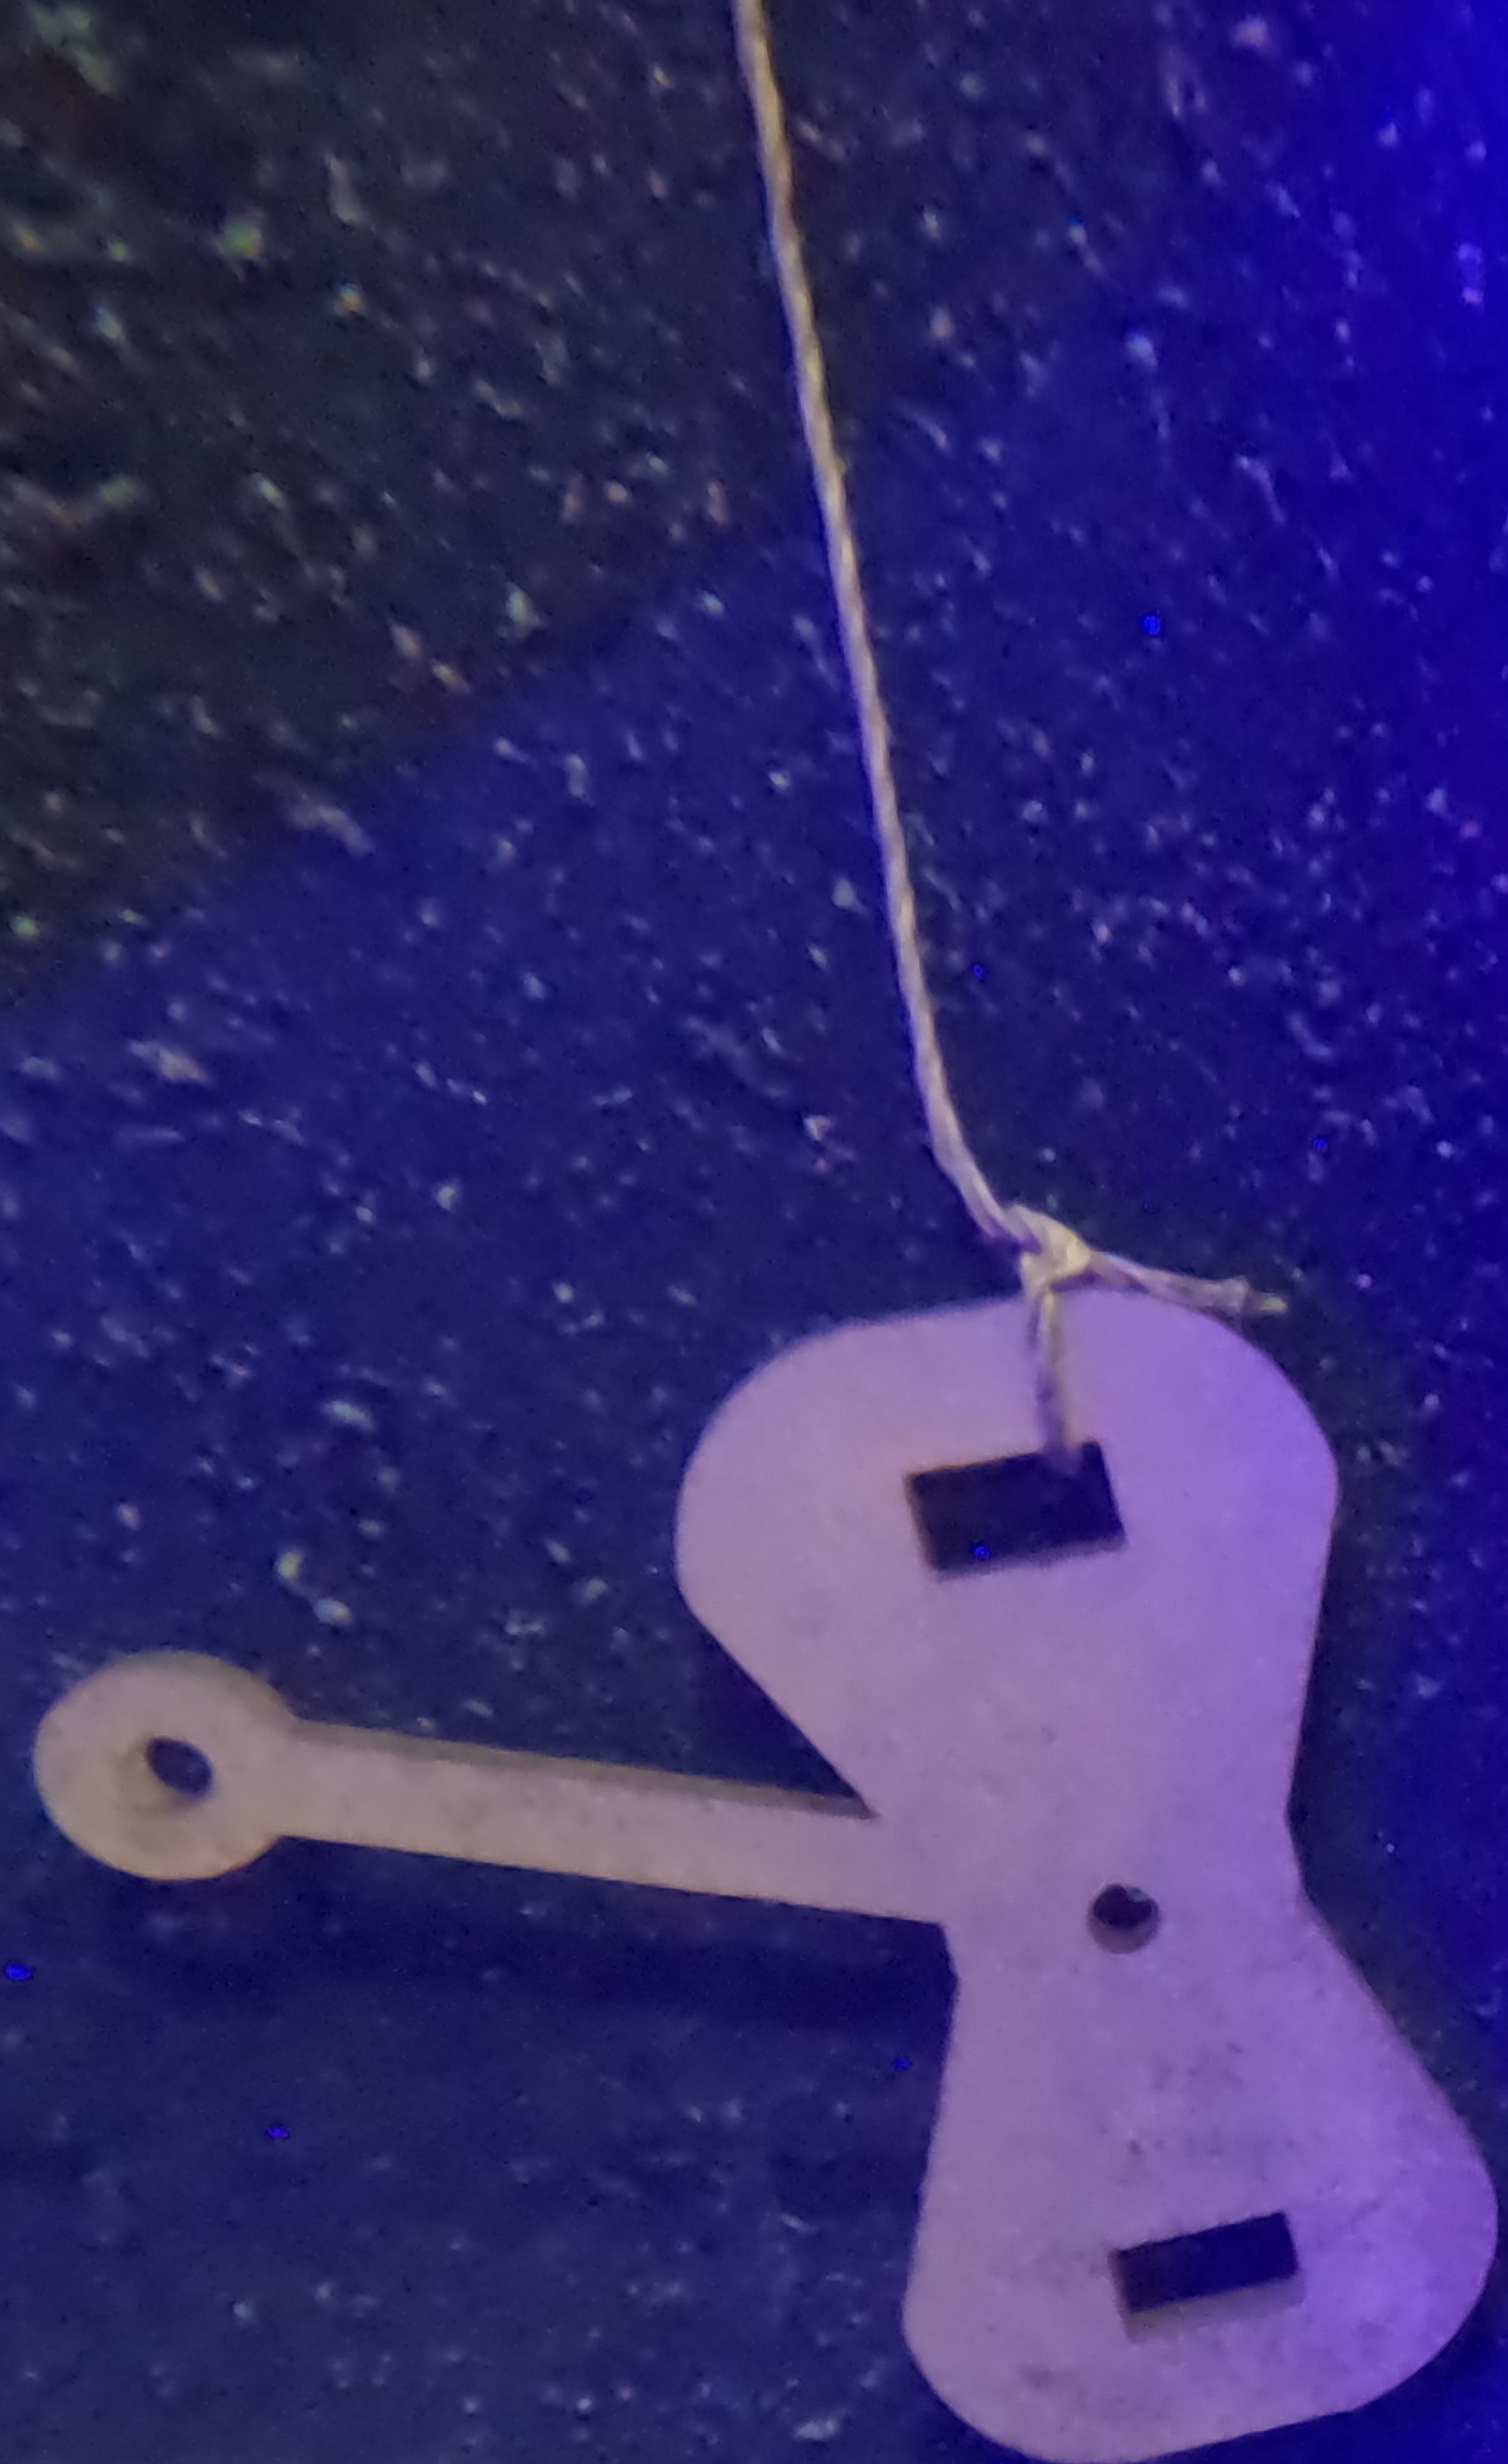

Supplement: Supplementary file 2376 [file G0015954.pdf › Level_2_2/G0015954.pdf]

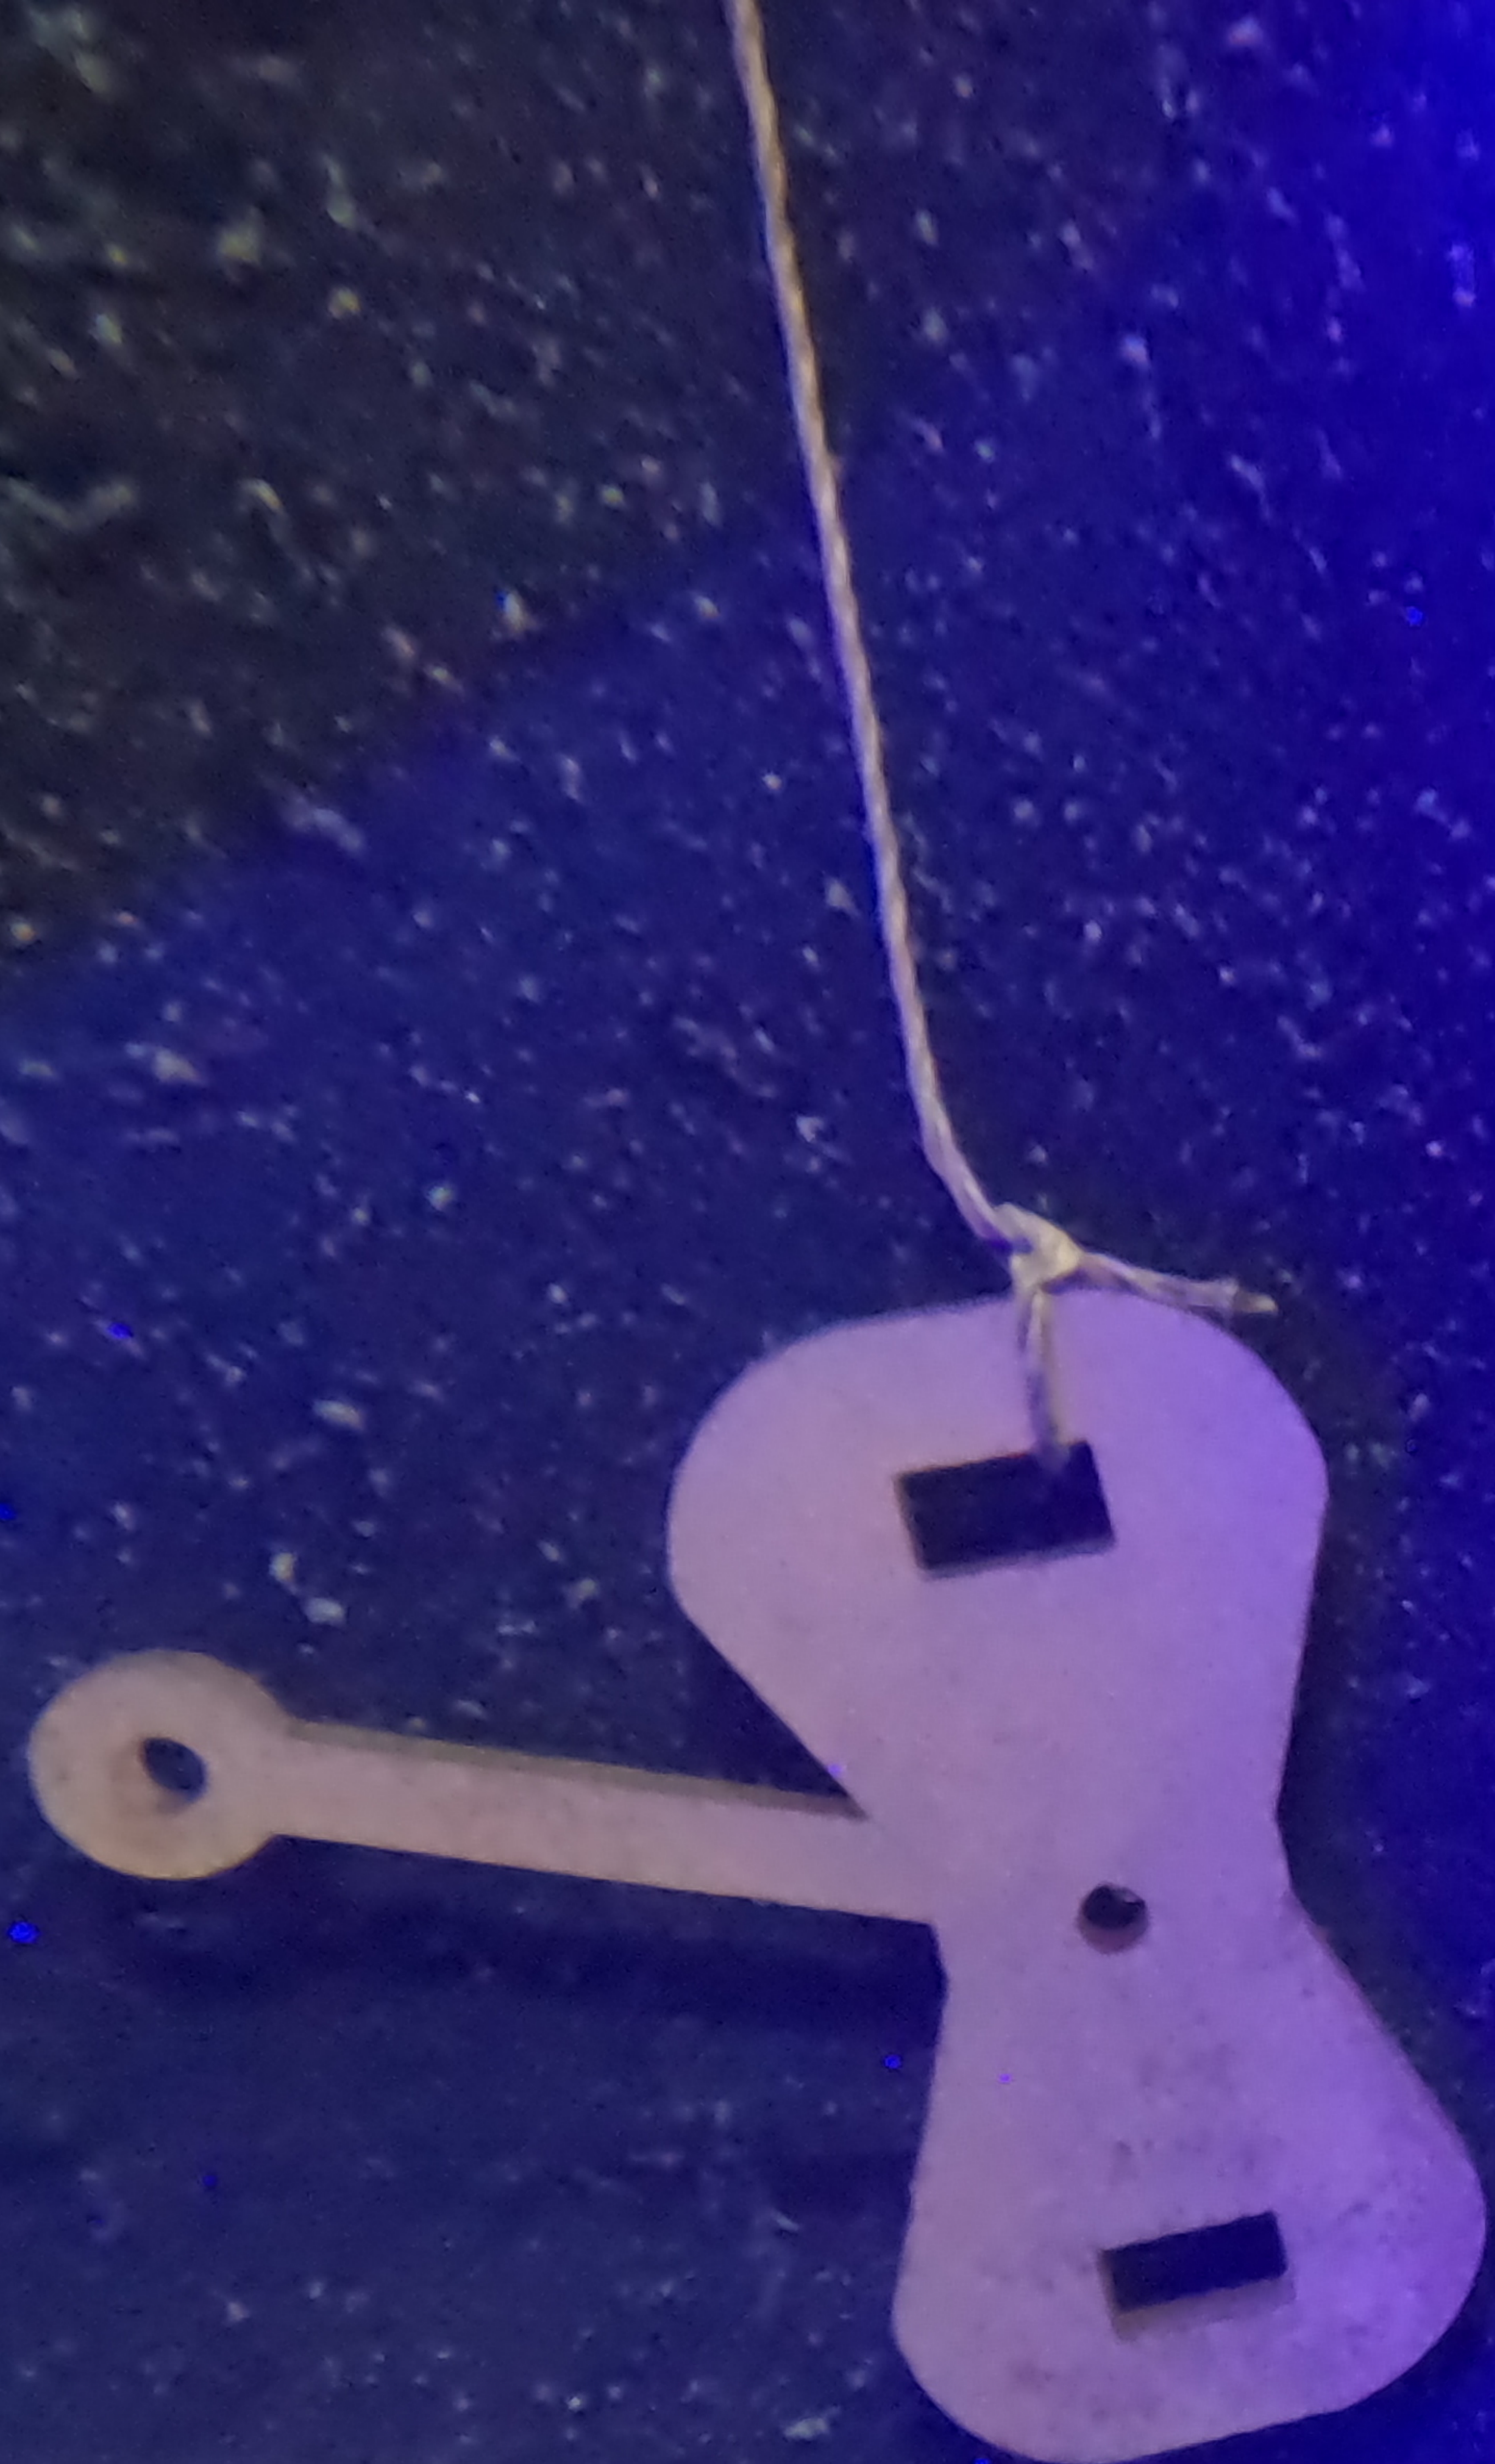

Supplement: Supplementary file 2377 [file G0015955.pdf › Level_2_2/G0015955.pdf]

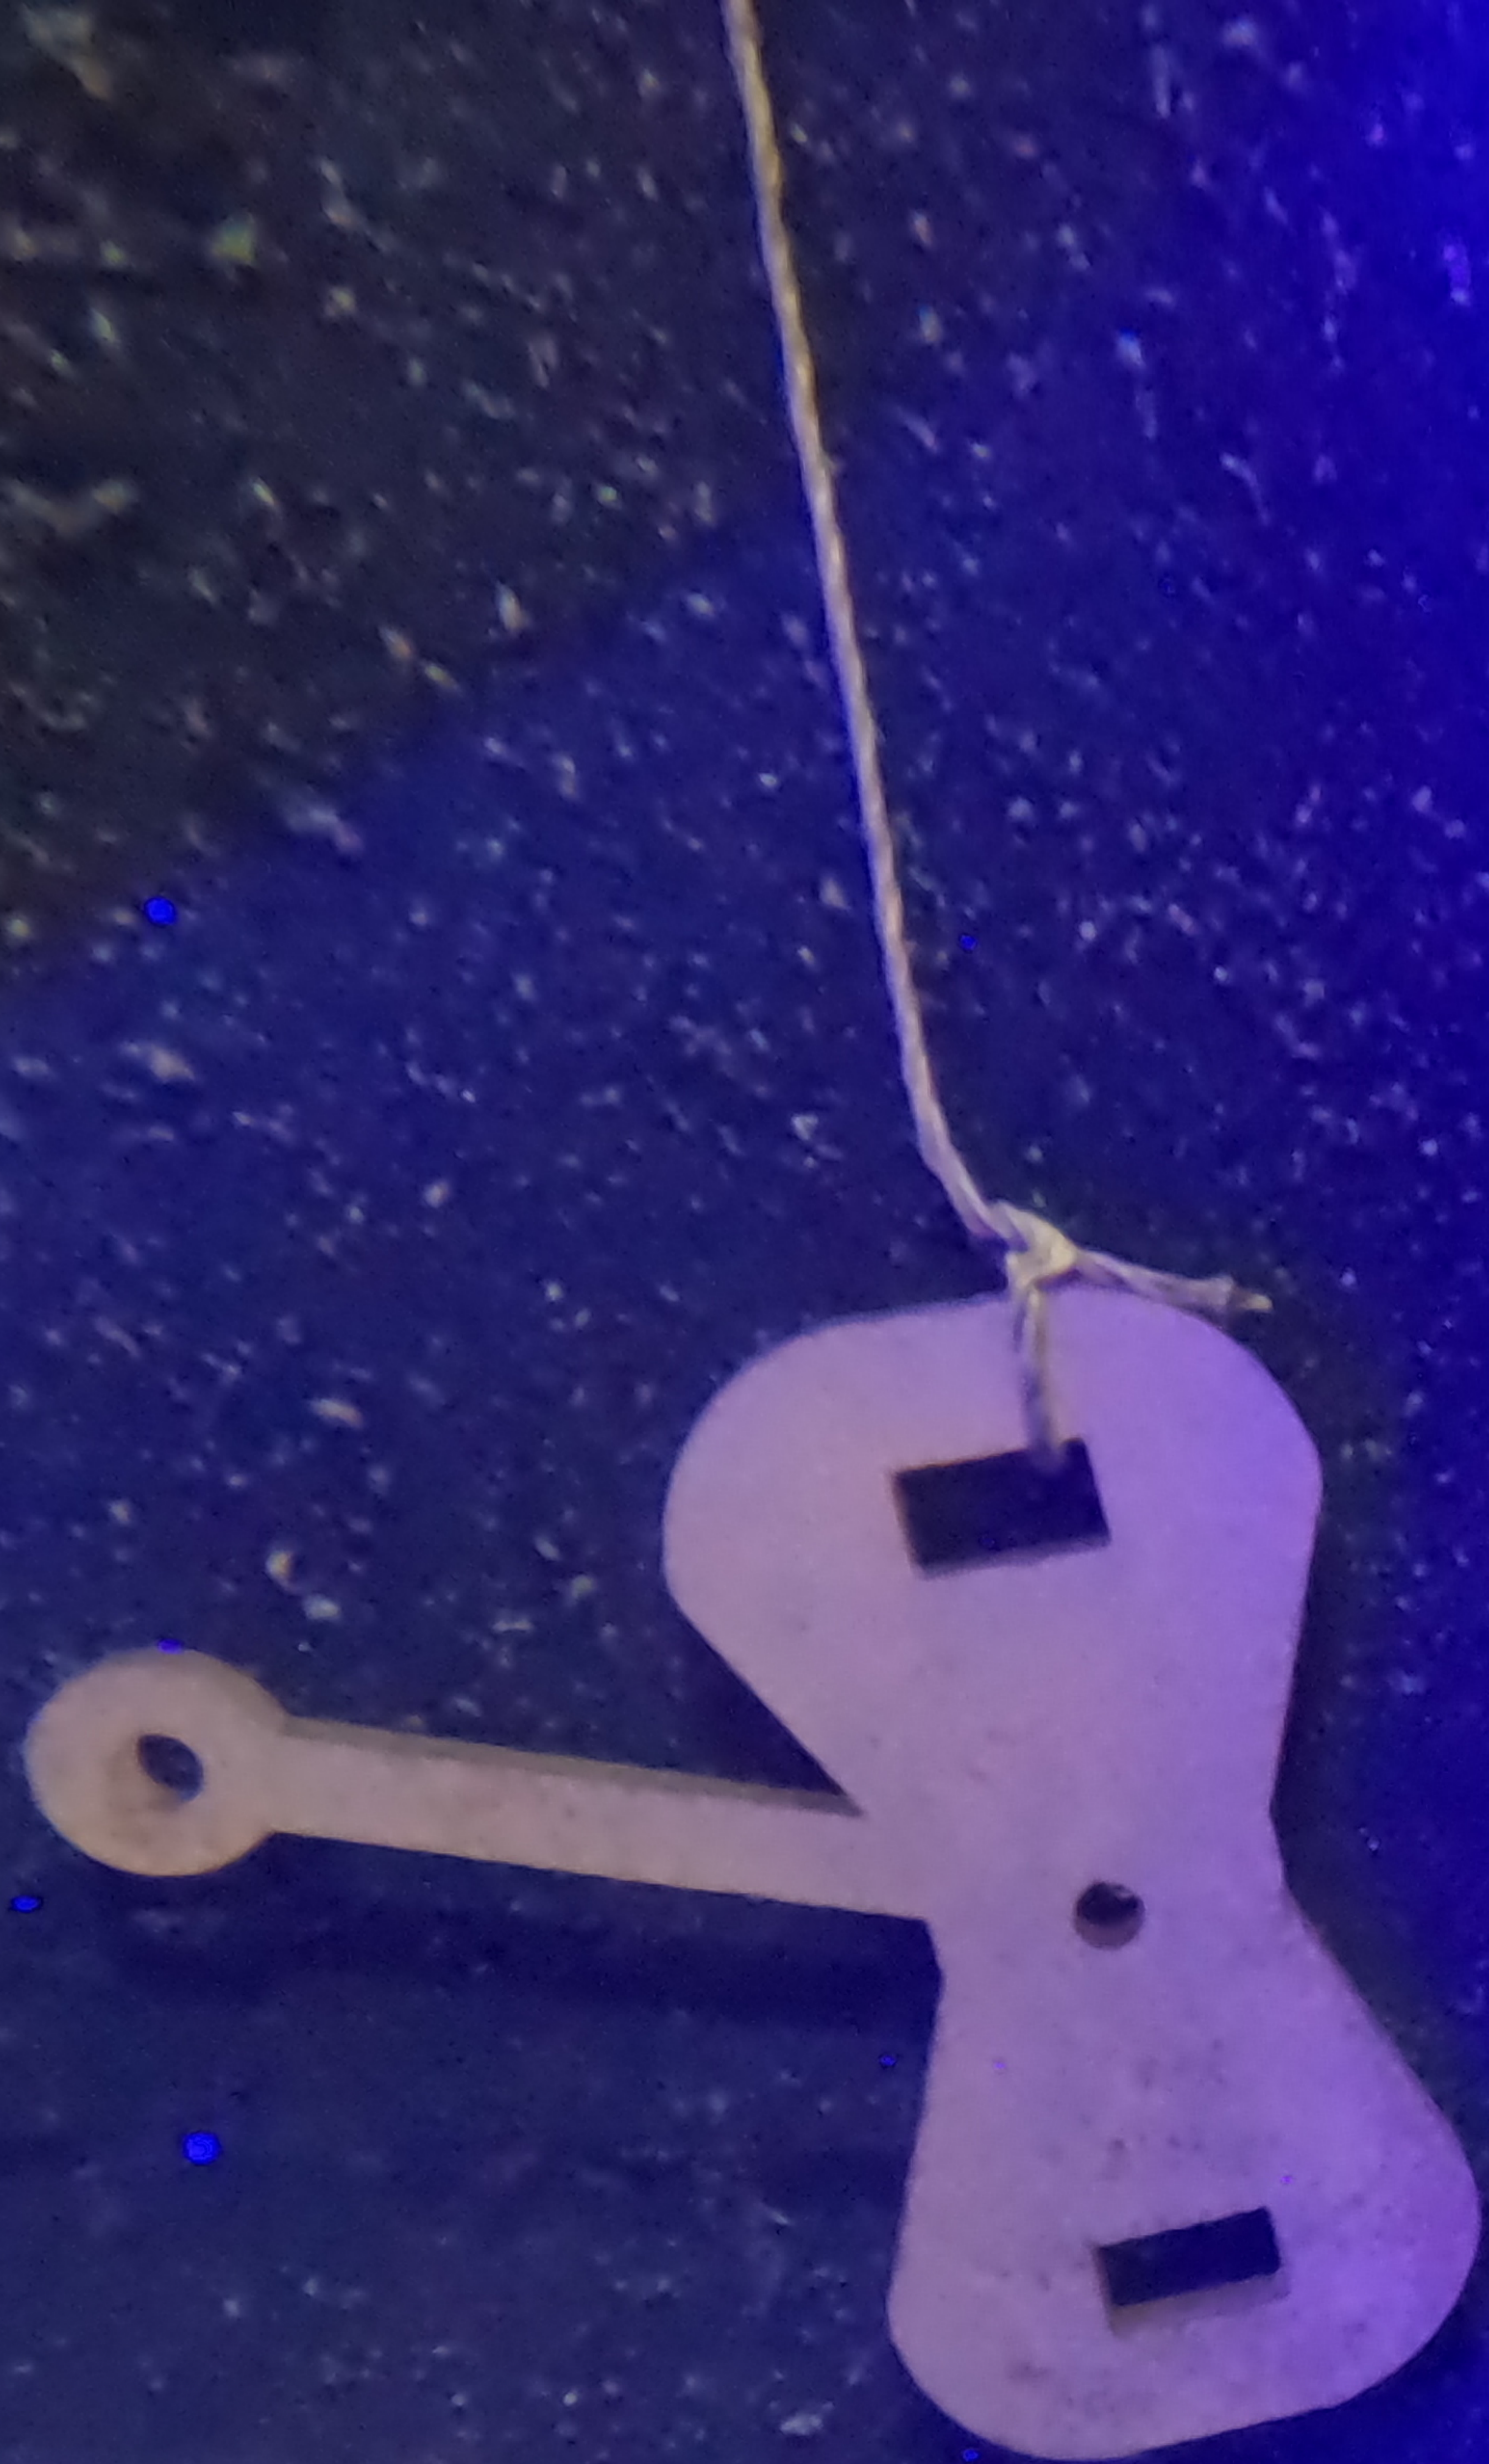

Supplement: Supplementary file 2378 [file G0015956.pdf › Level_2_2/G0015956.pdf]

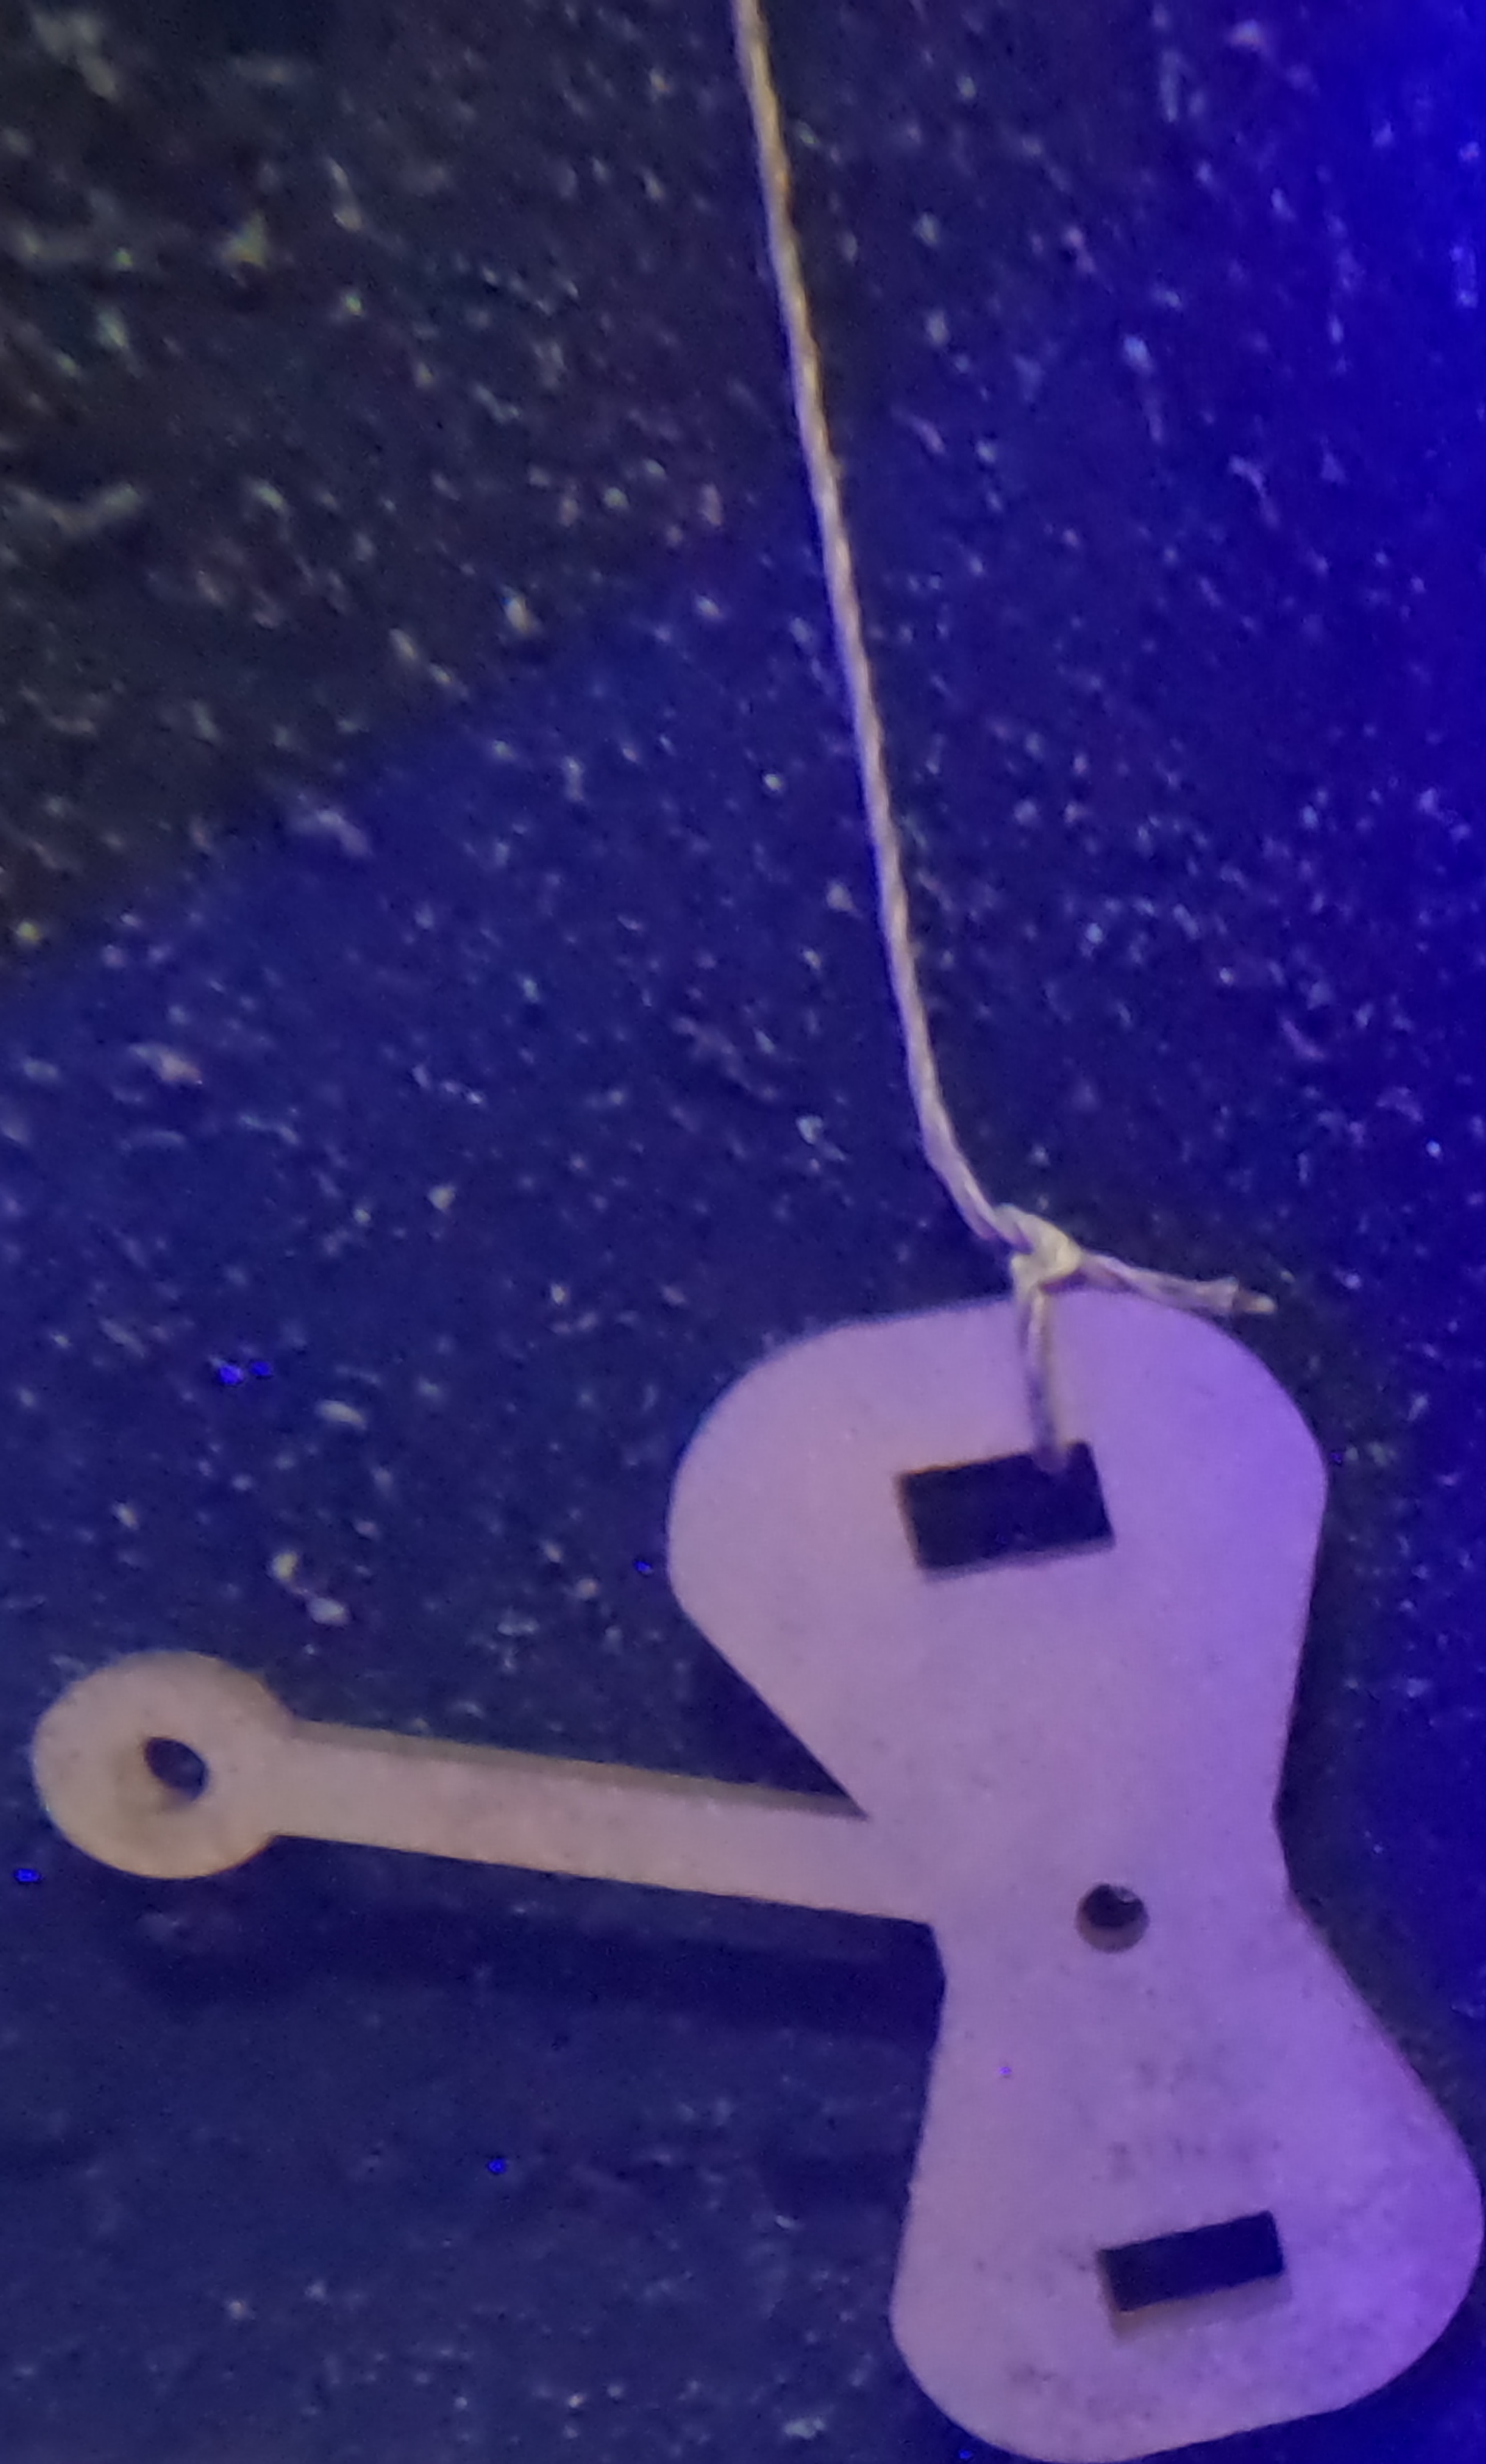

Supplement: Supplementary file 2379 [file G0015957.pdf › Level_2_2/G0015957.pdf]

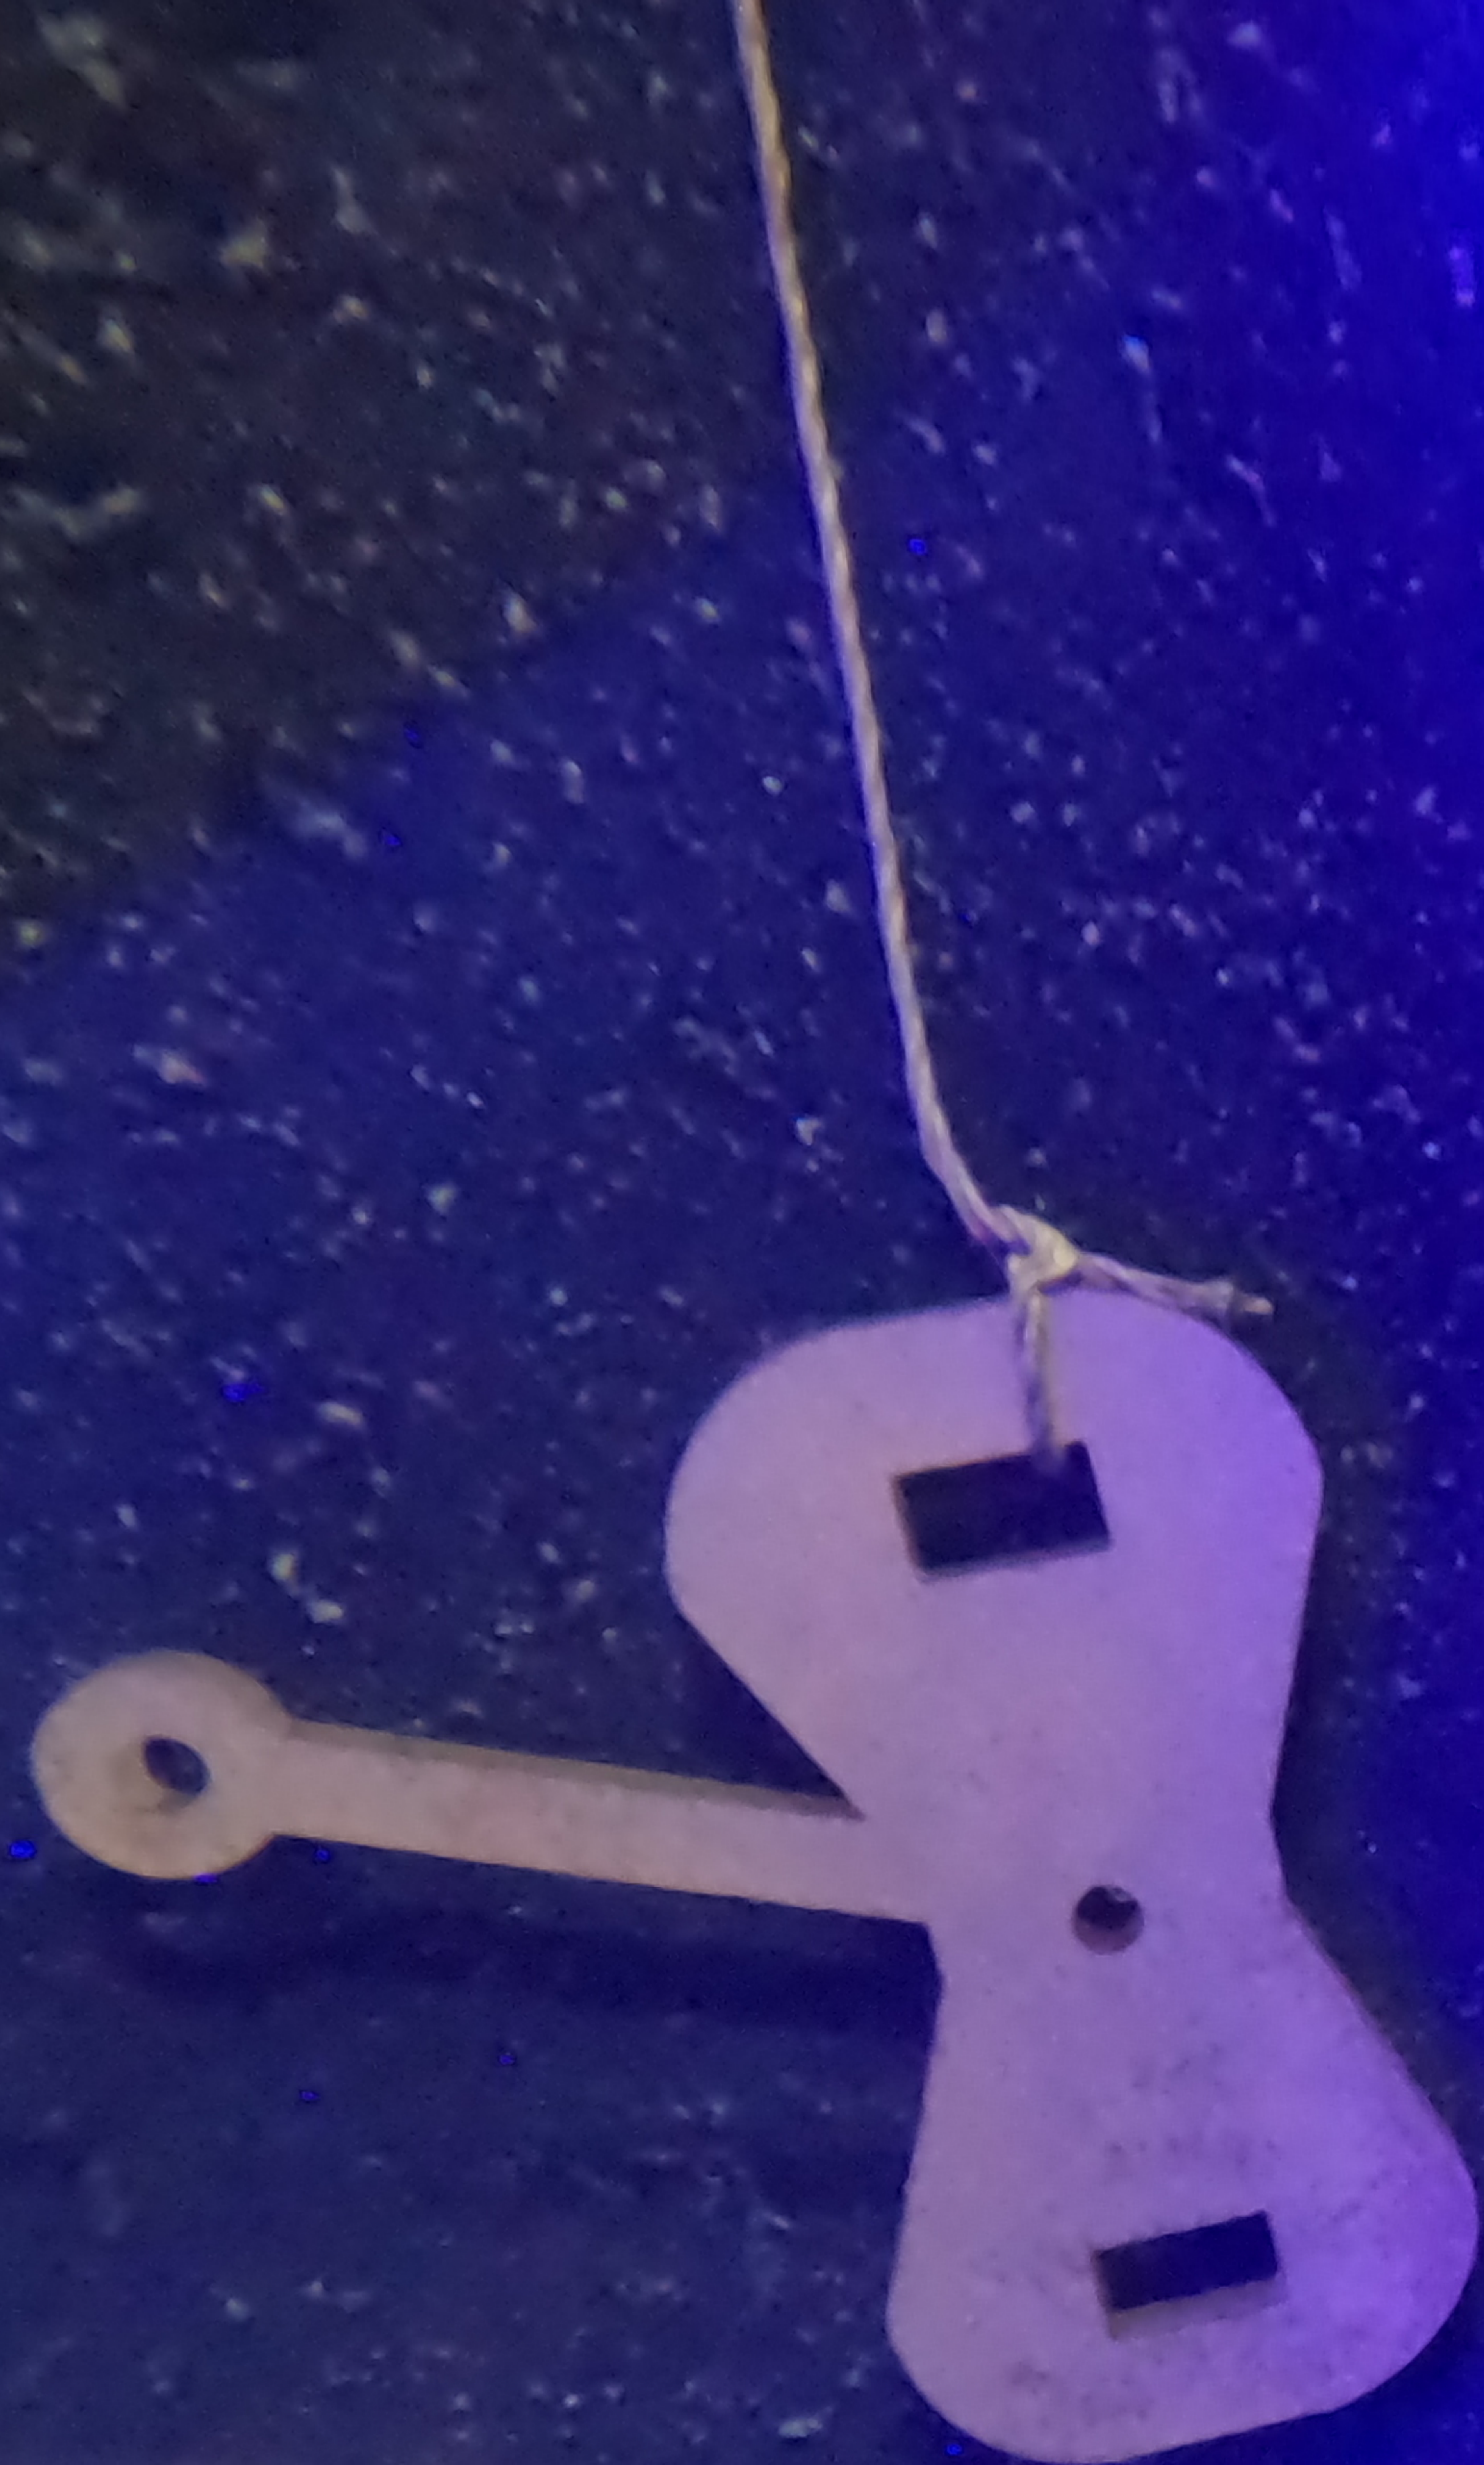

Supplement: Supplementary file 2380 [file G0015958.pdf › Level_2_2/G0015958.pdf]

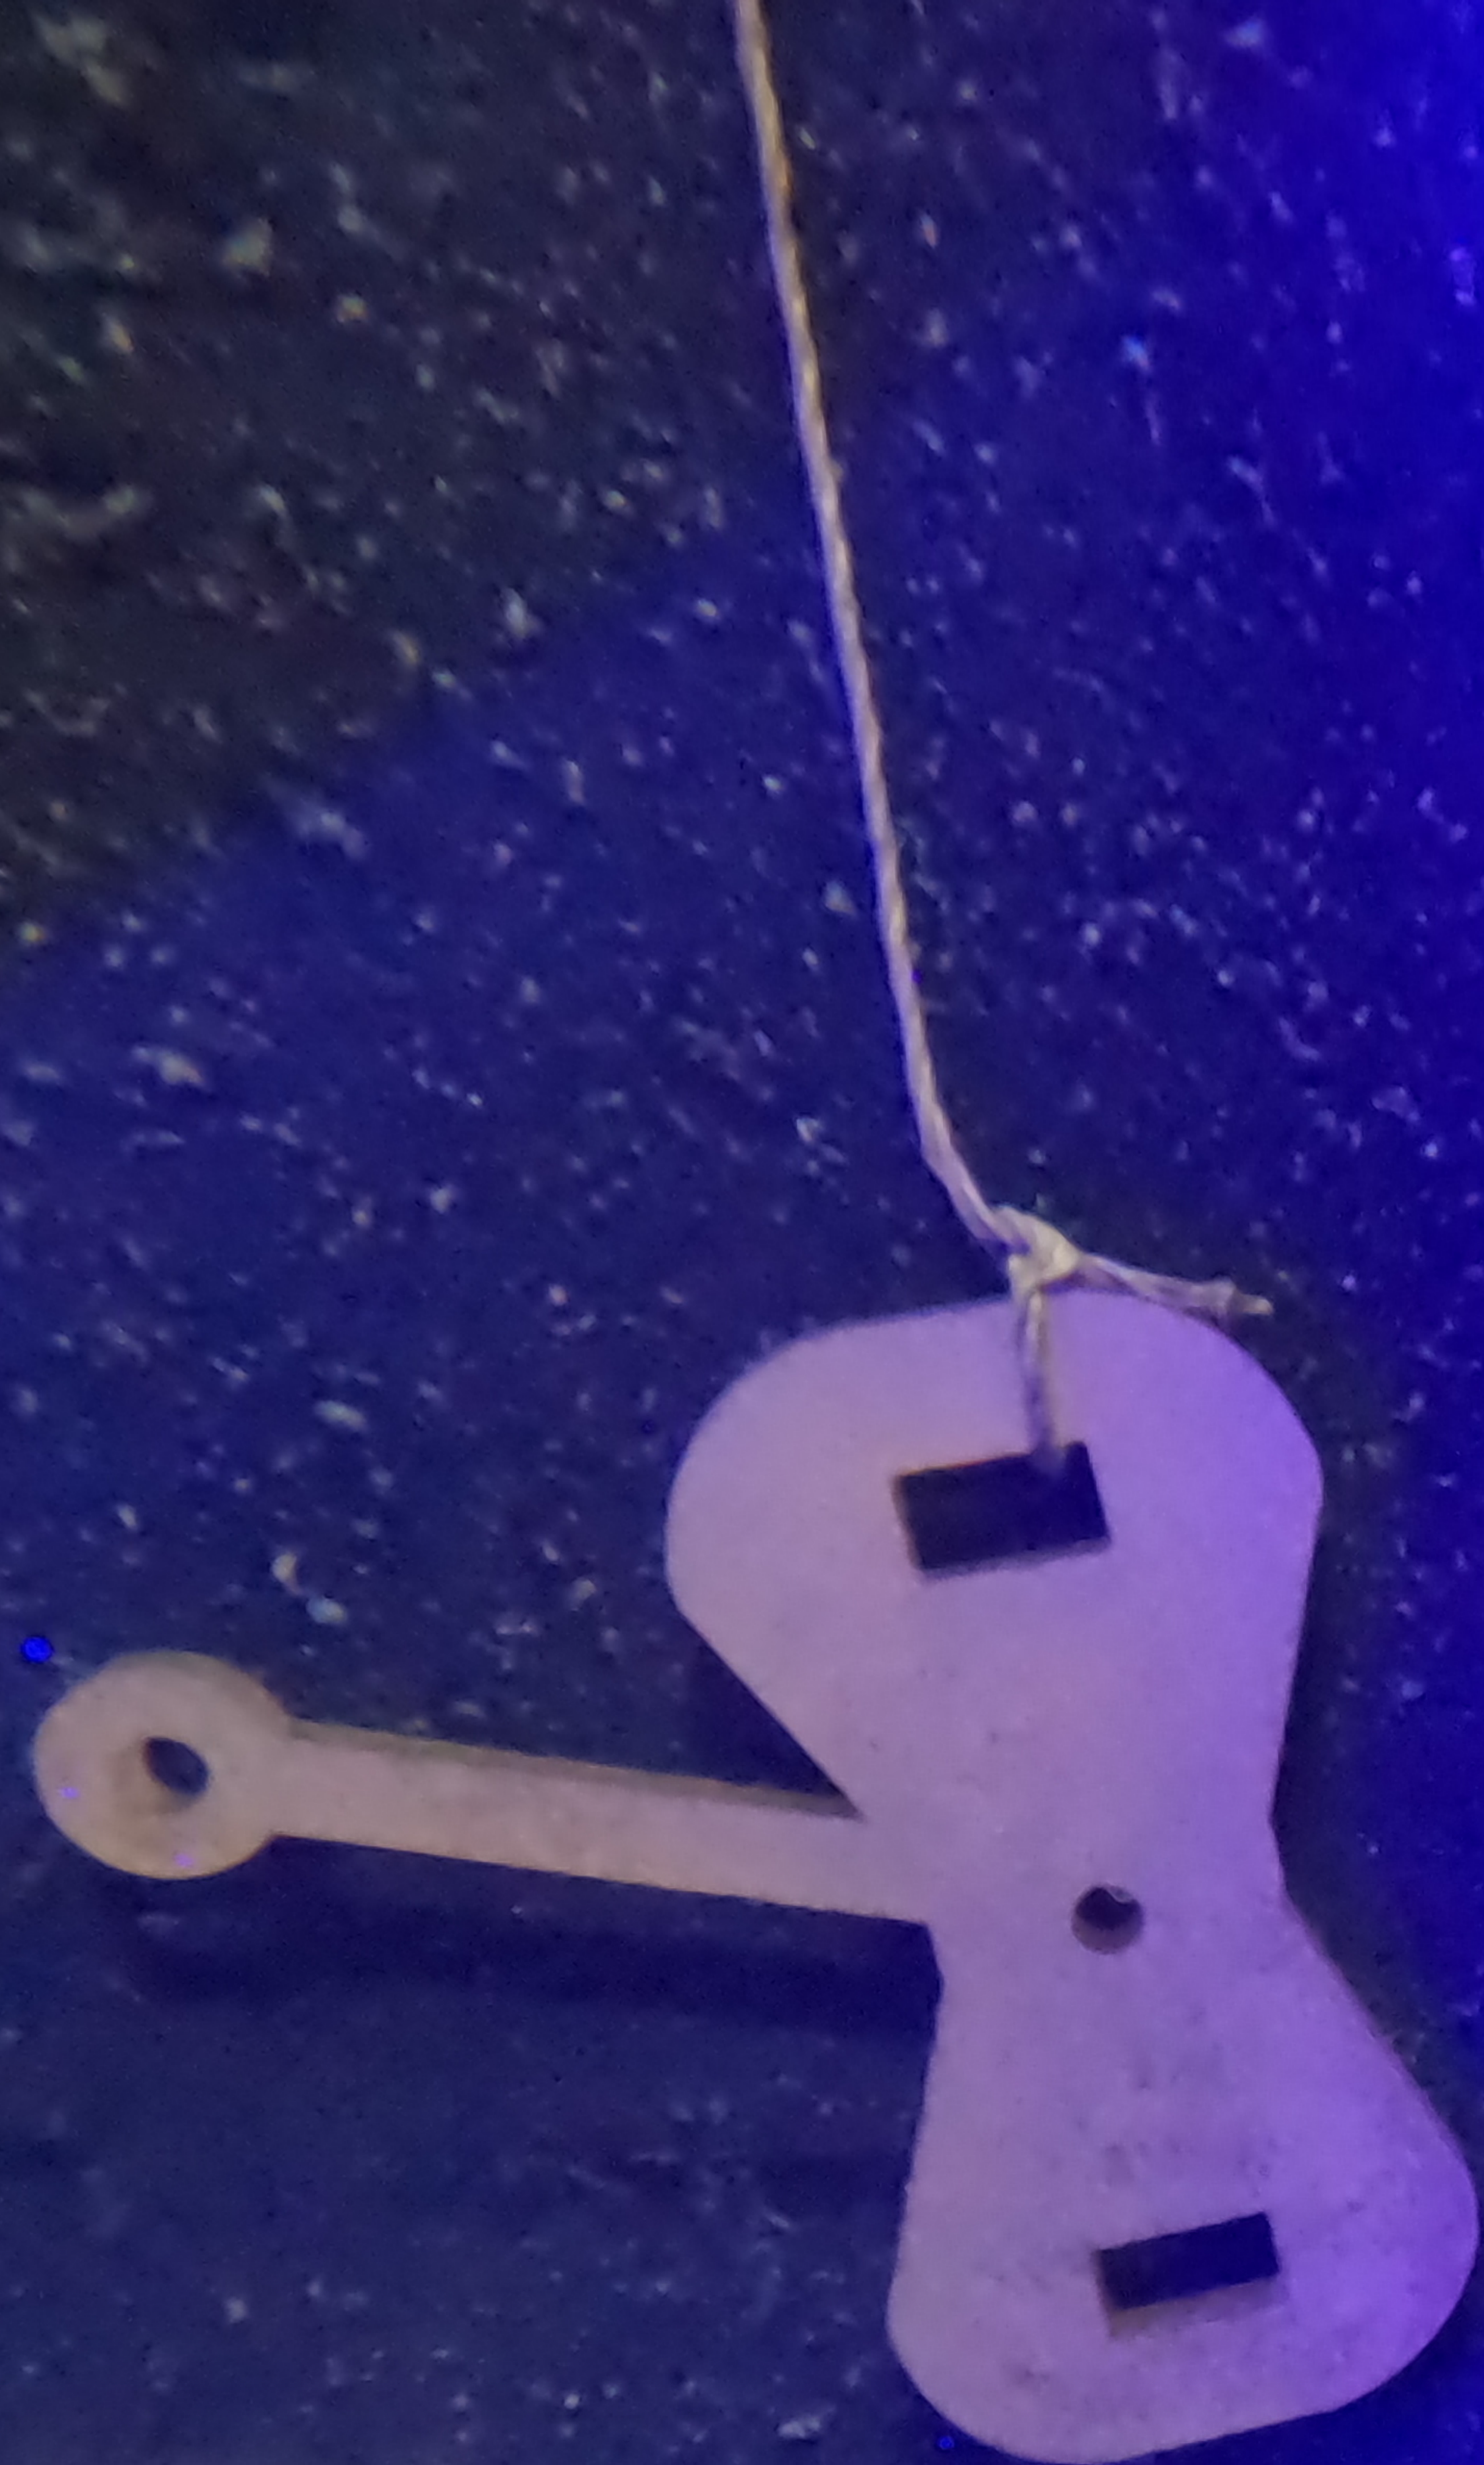

Supplement: Supplementary file 2381 [file G0015959.pdf › Level_2_2/G0015959.pdf]

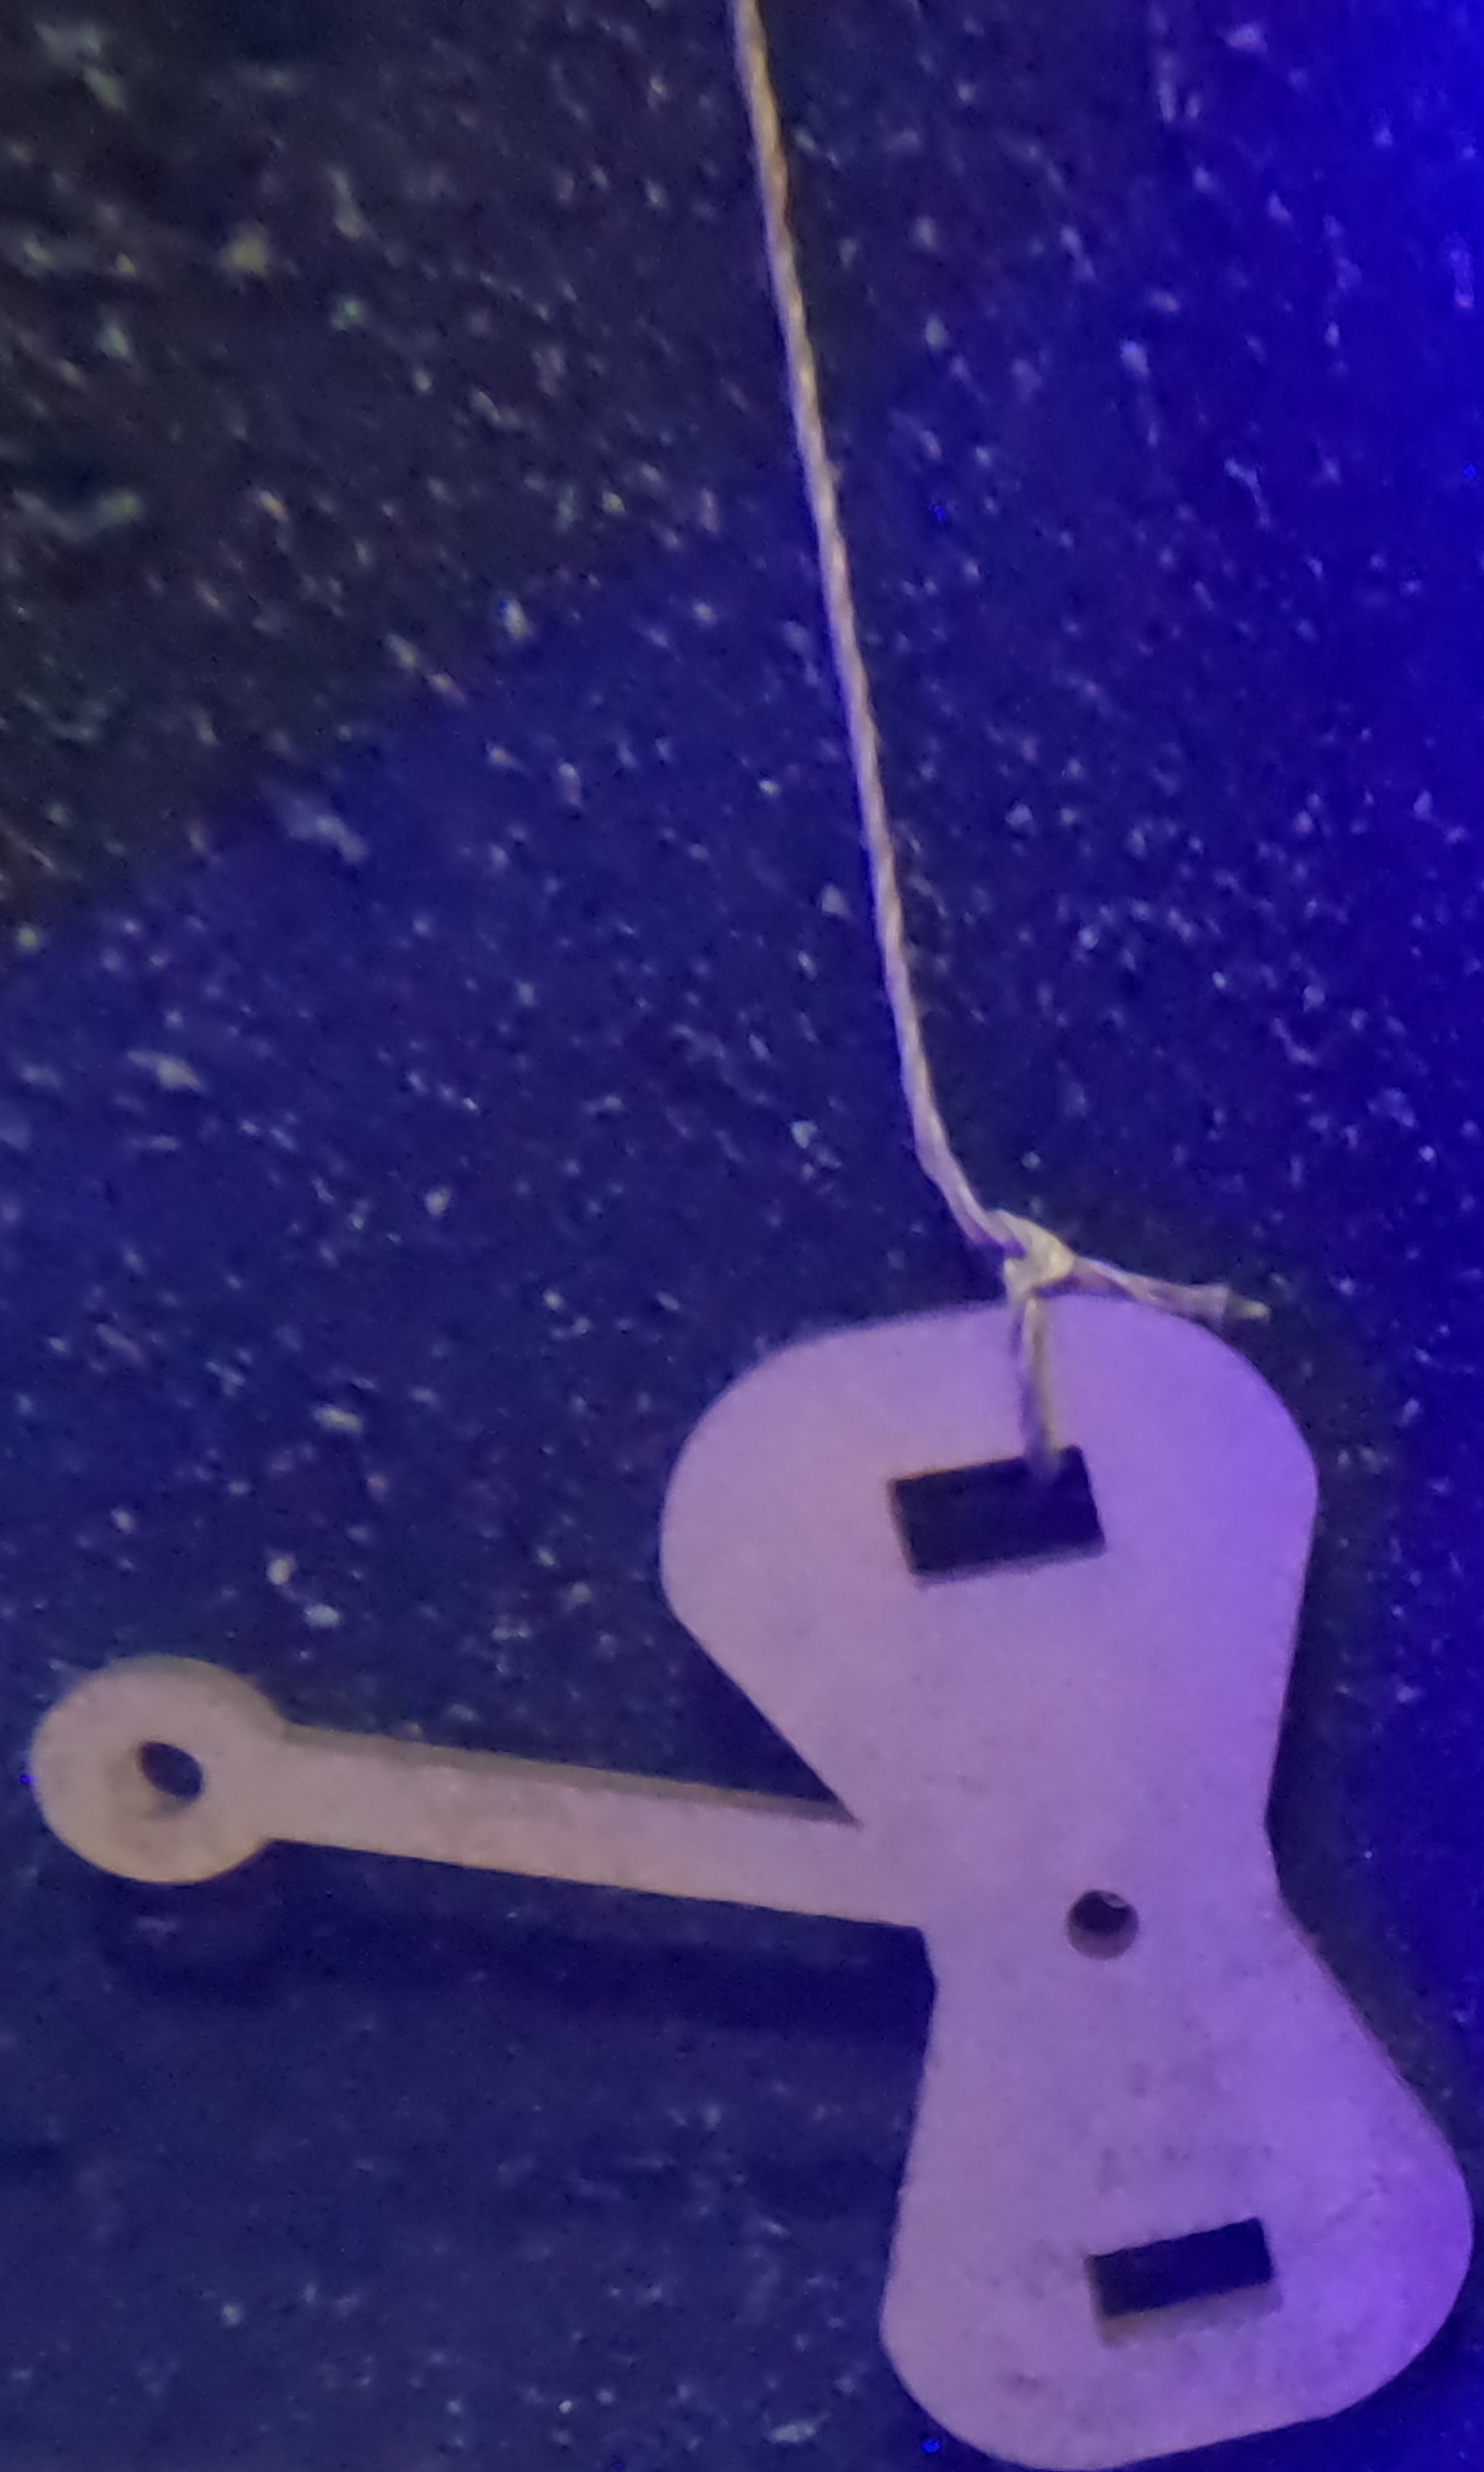

Supplement: Supplementary file 2382 [file G0015960.pdf › Level_2_2/G0015960.pdf]

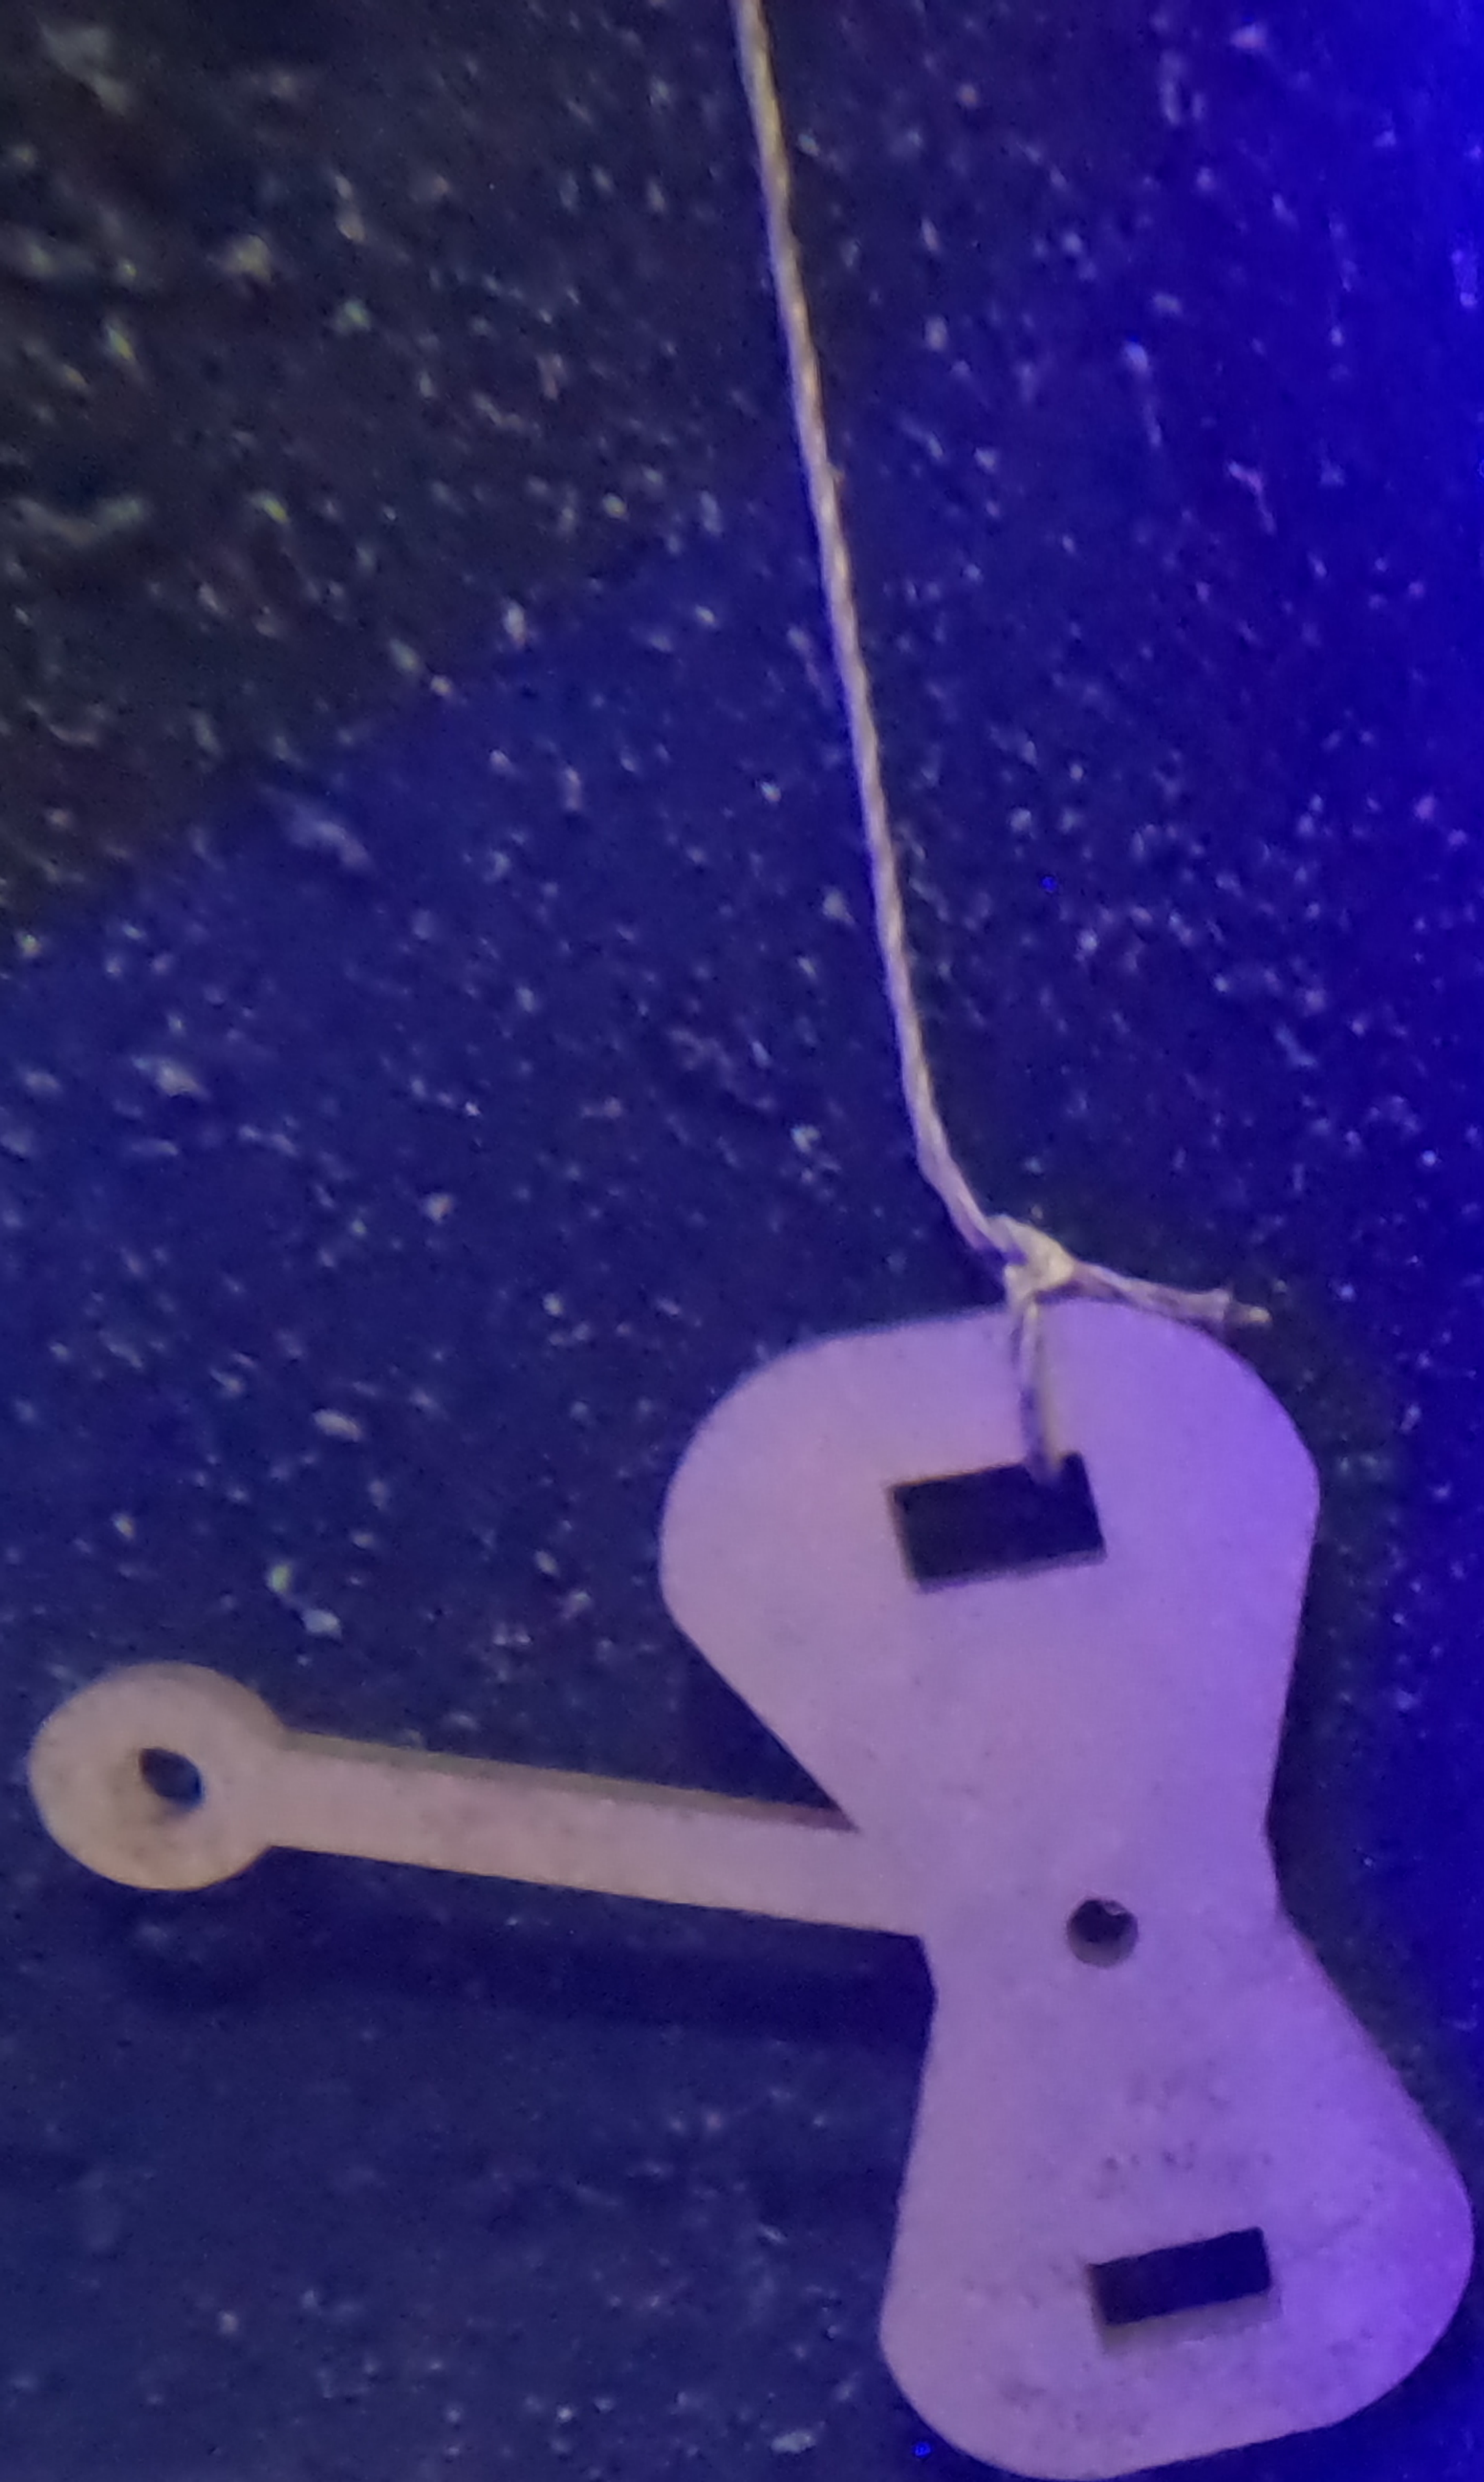

Supplement: Supplementary file 2383 [file G0015961.pdf › Level_2_2/G0015961.pdf]

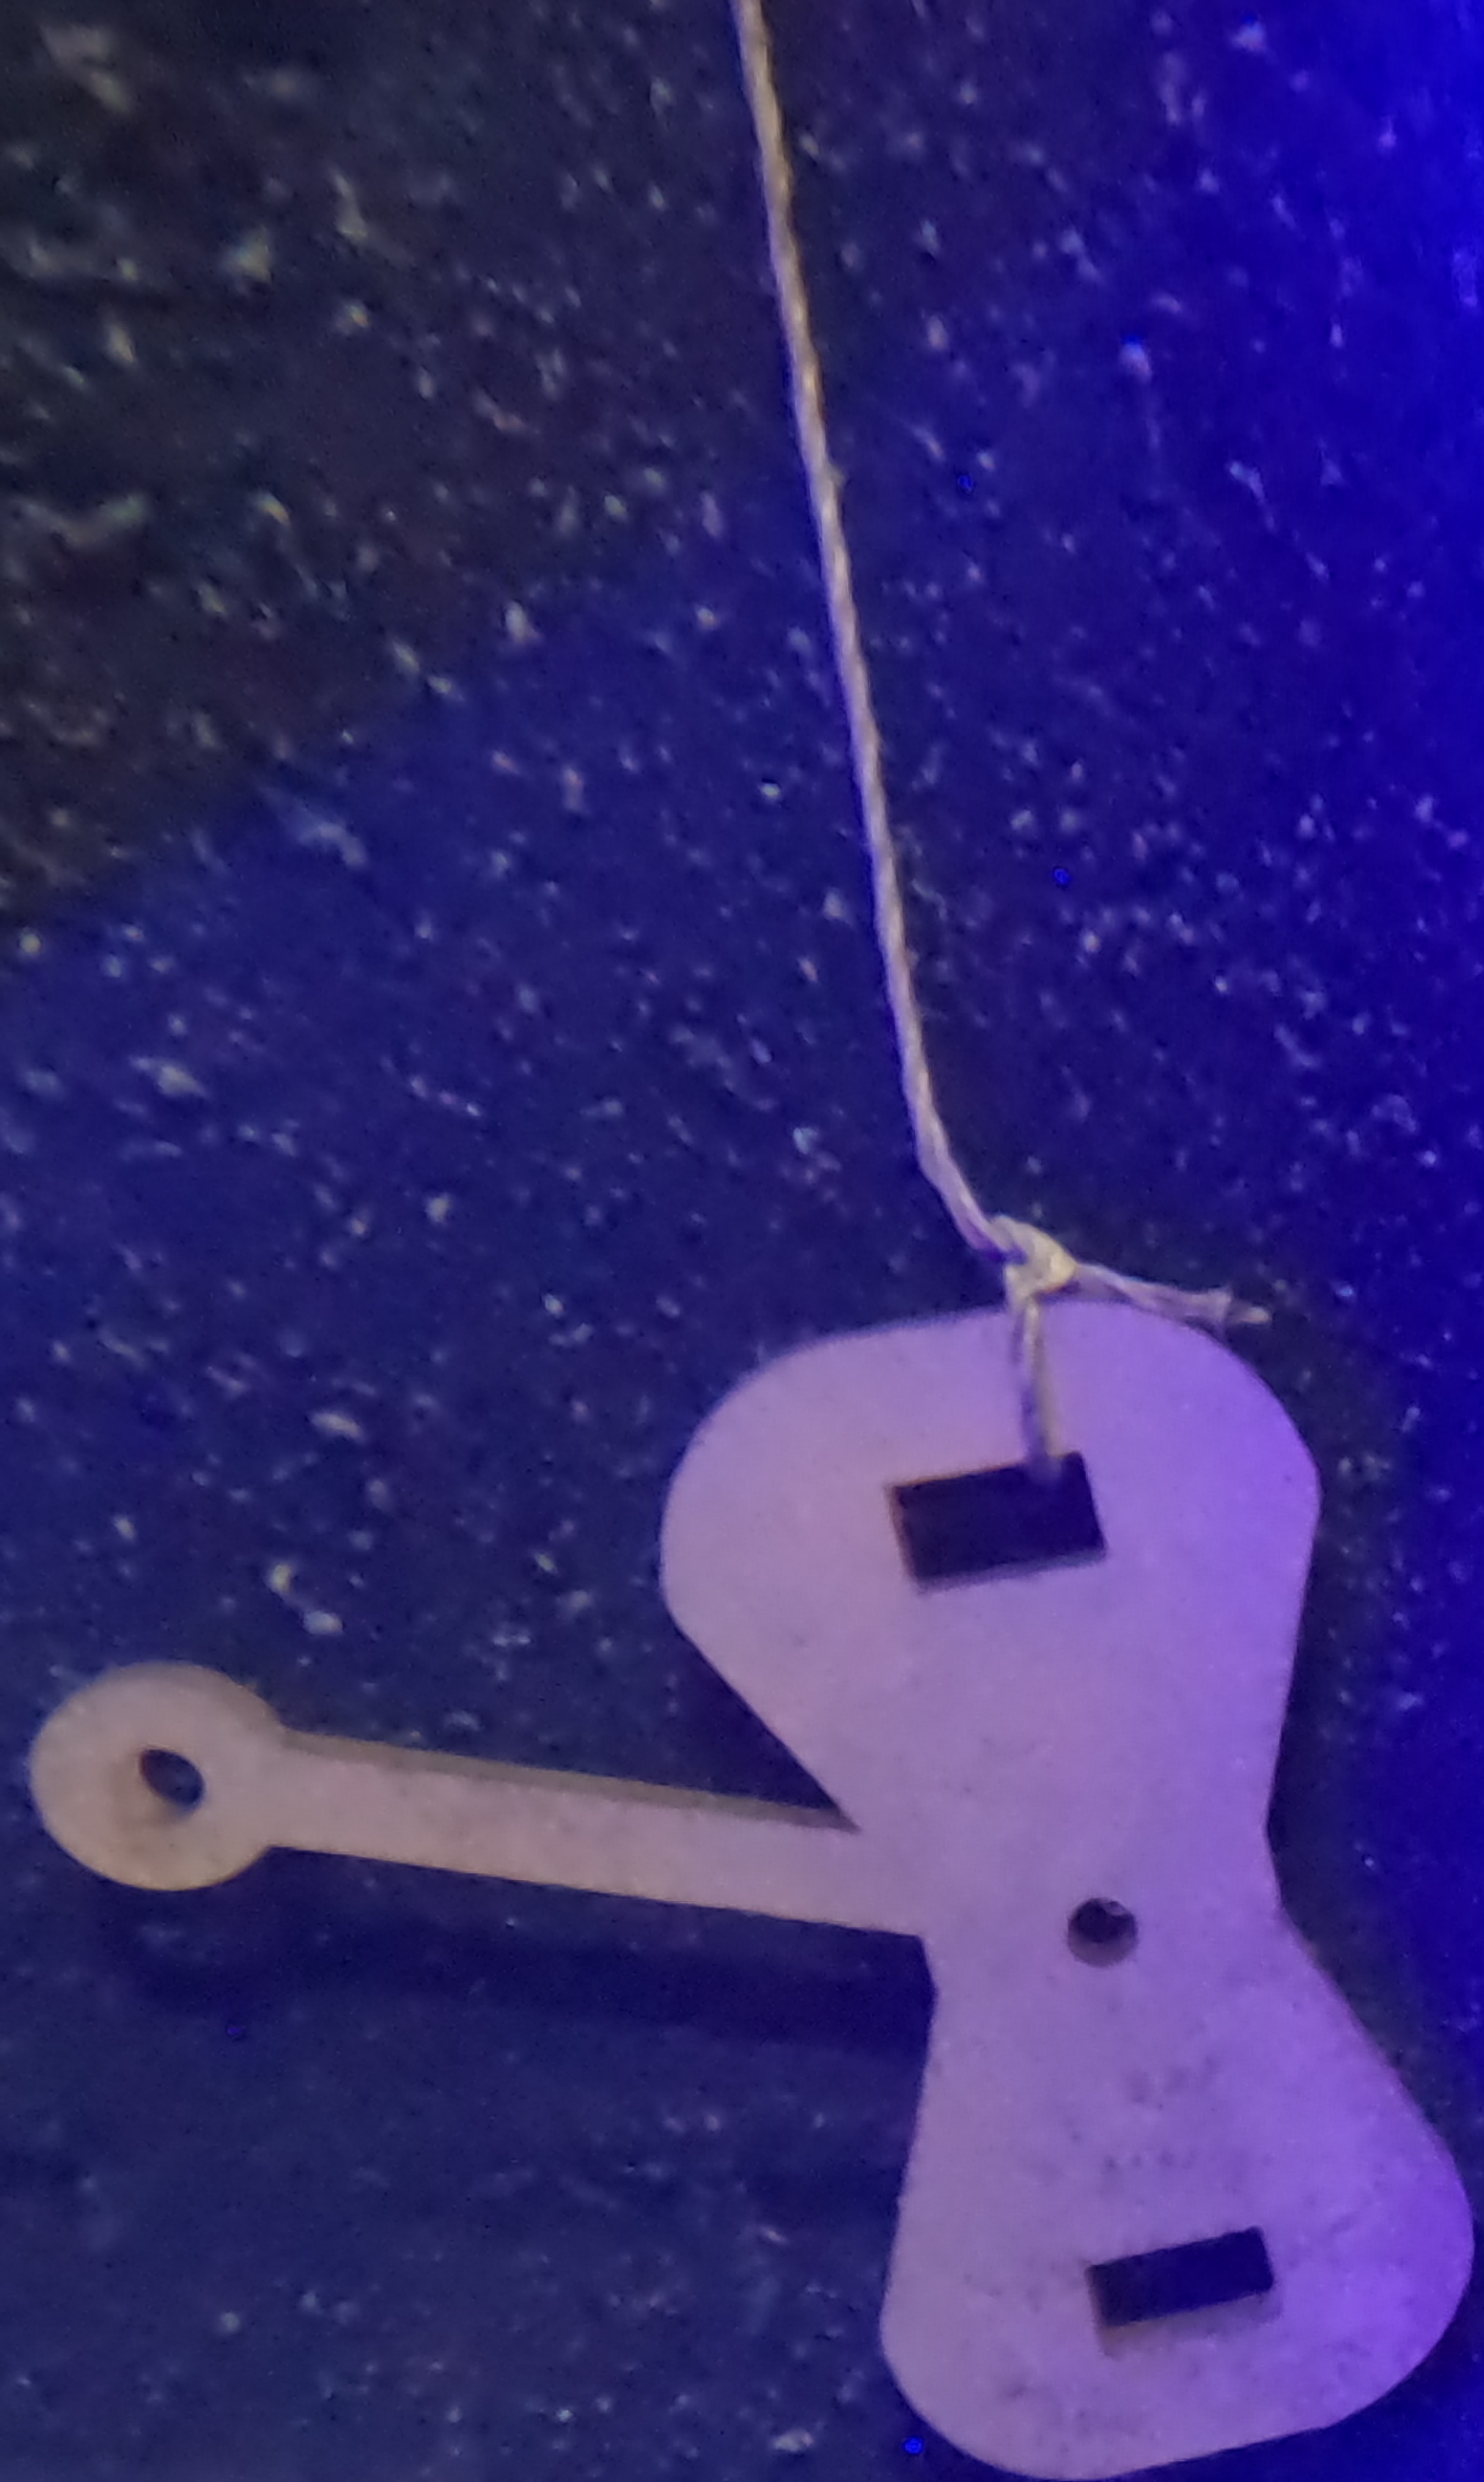

Supplement: Supplementary file 2384 [file G0015962.pdf › Level_2_2/G0015962.pdf]

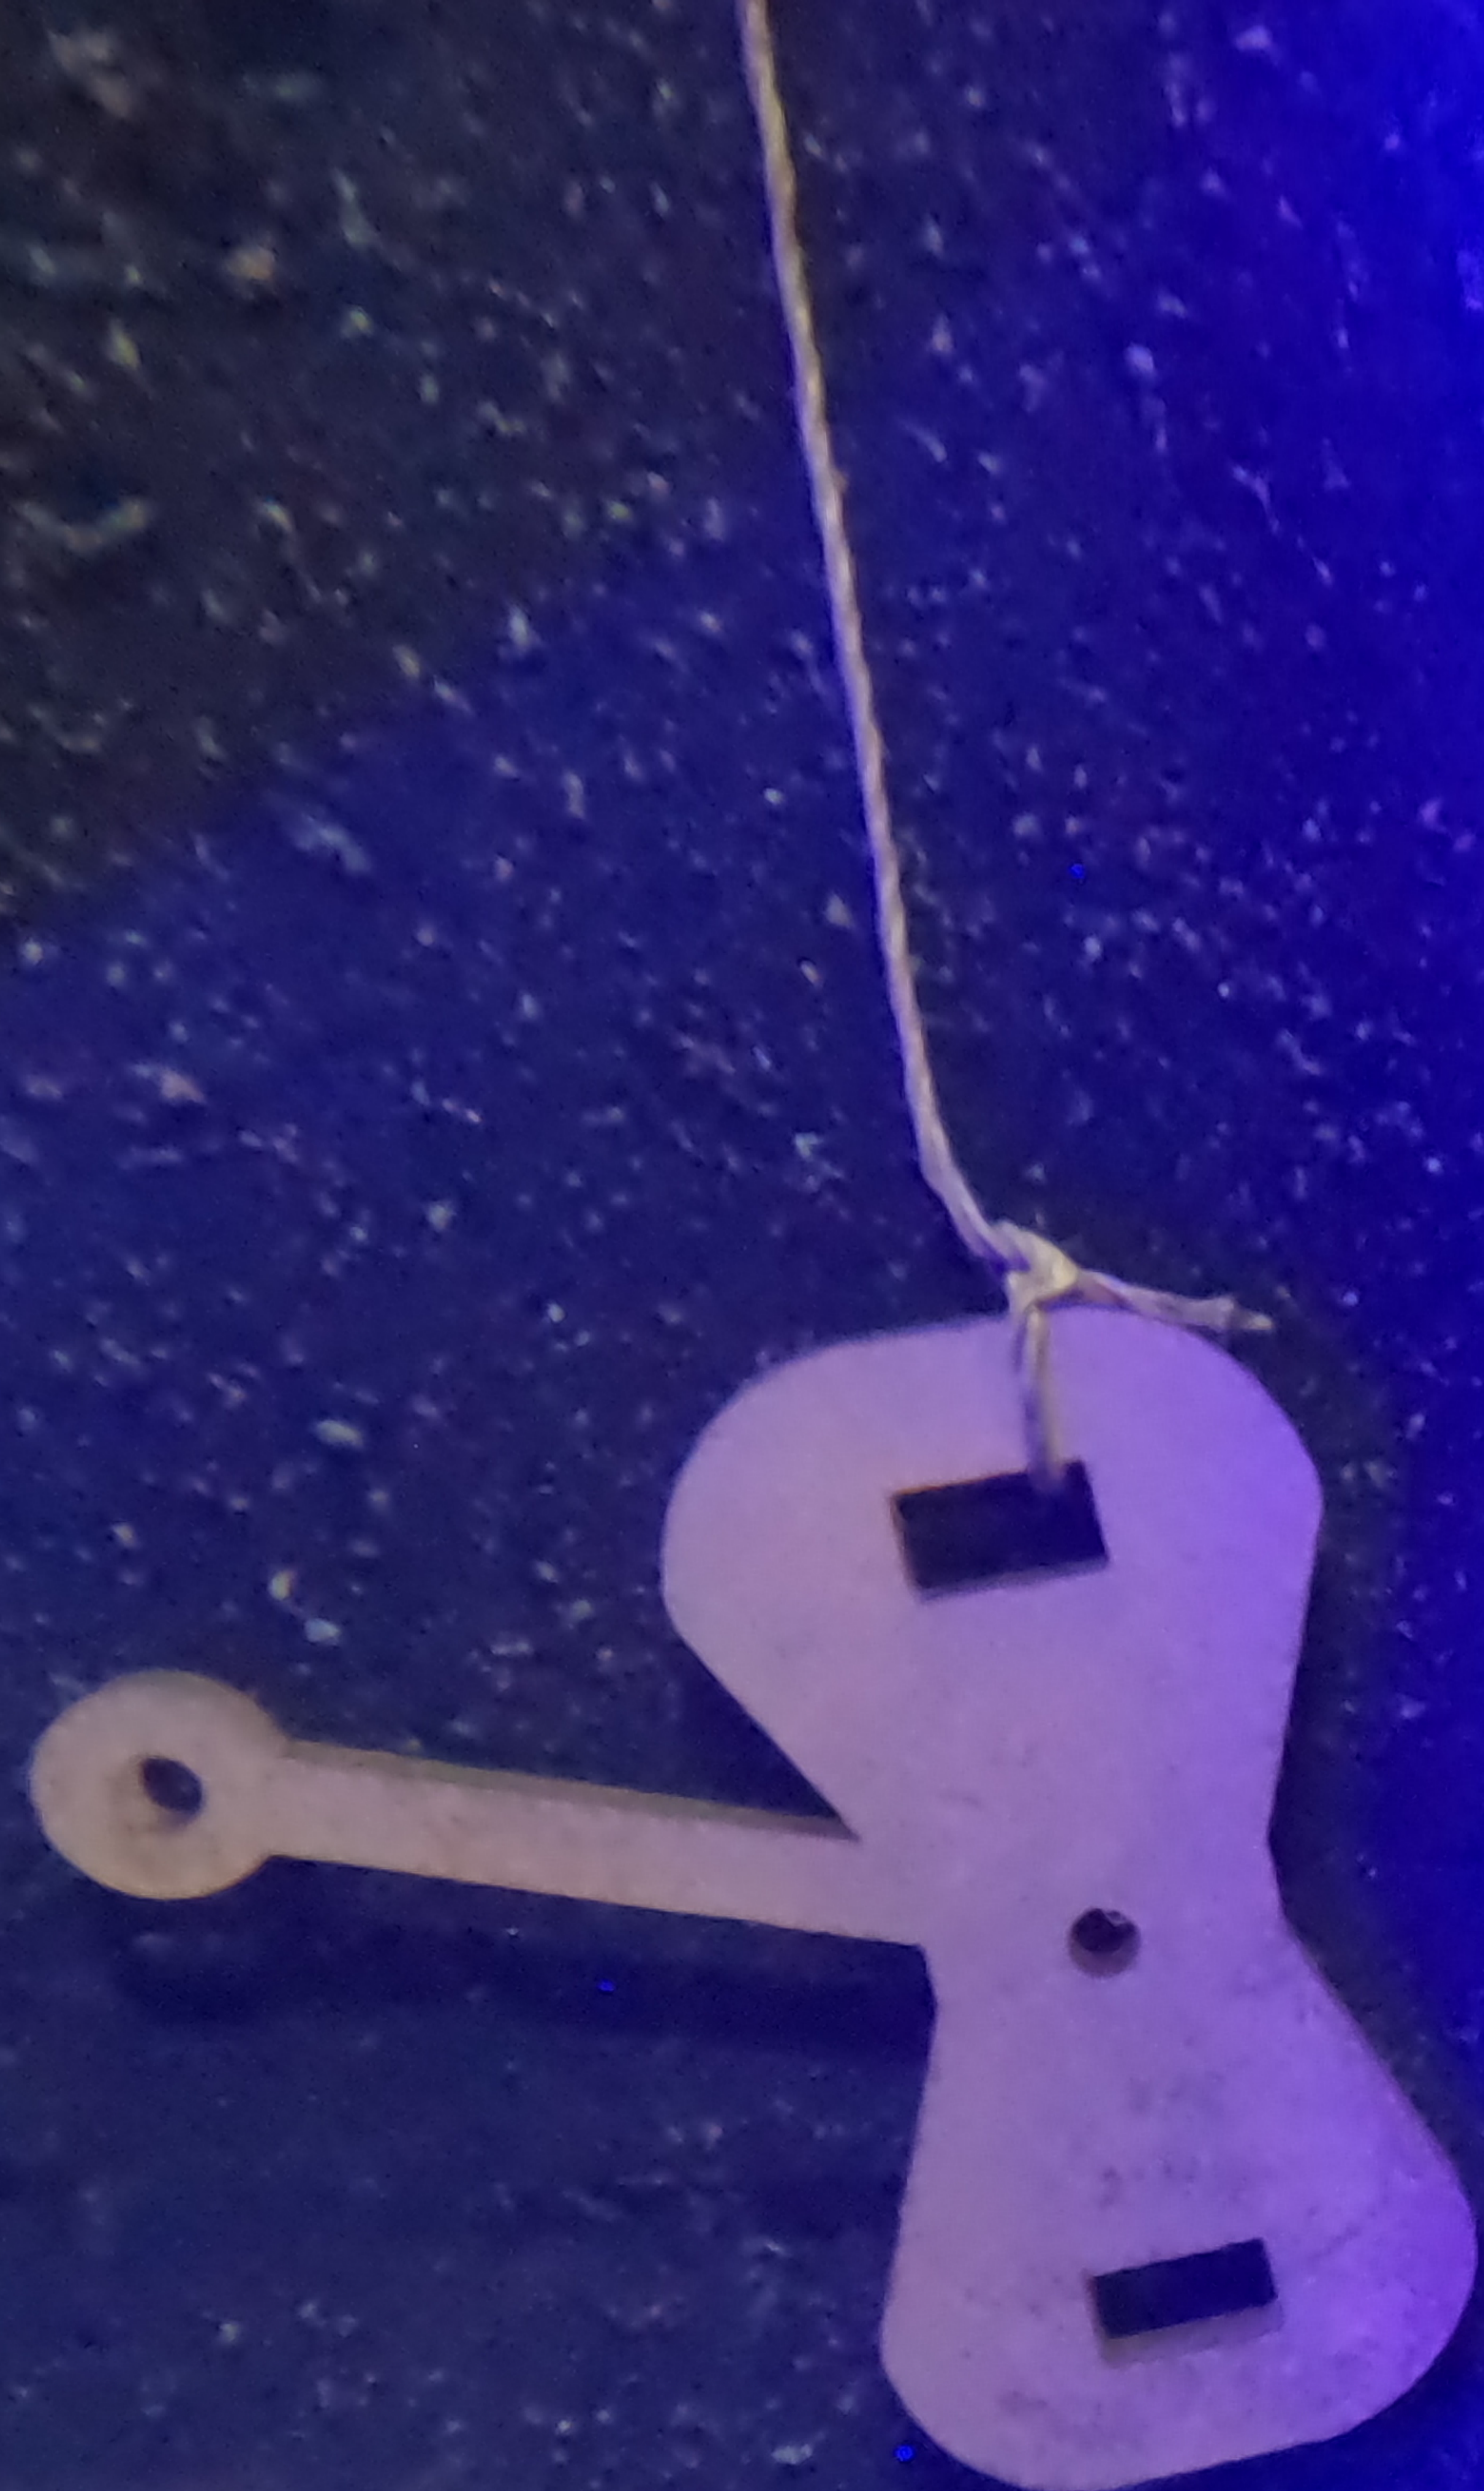

Supplement: Supplementary file 2385 [file G0015963.pdf › Level_2_2/G0015963.pdf]

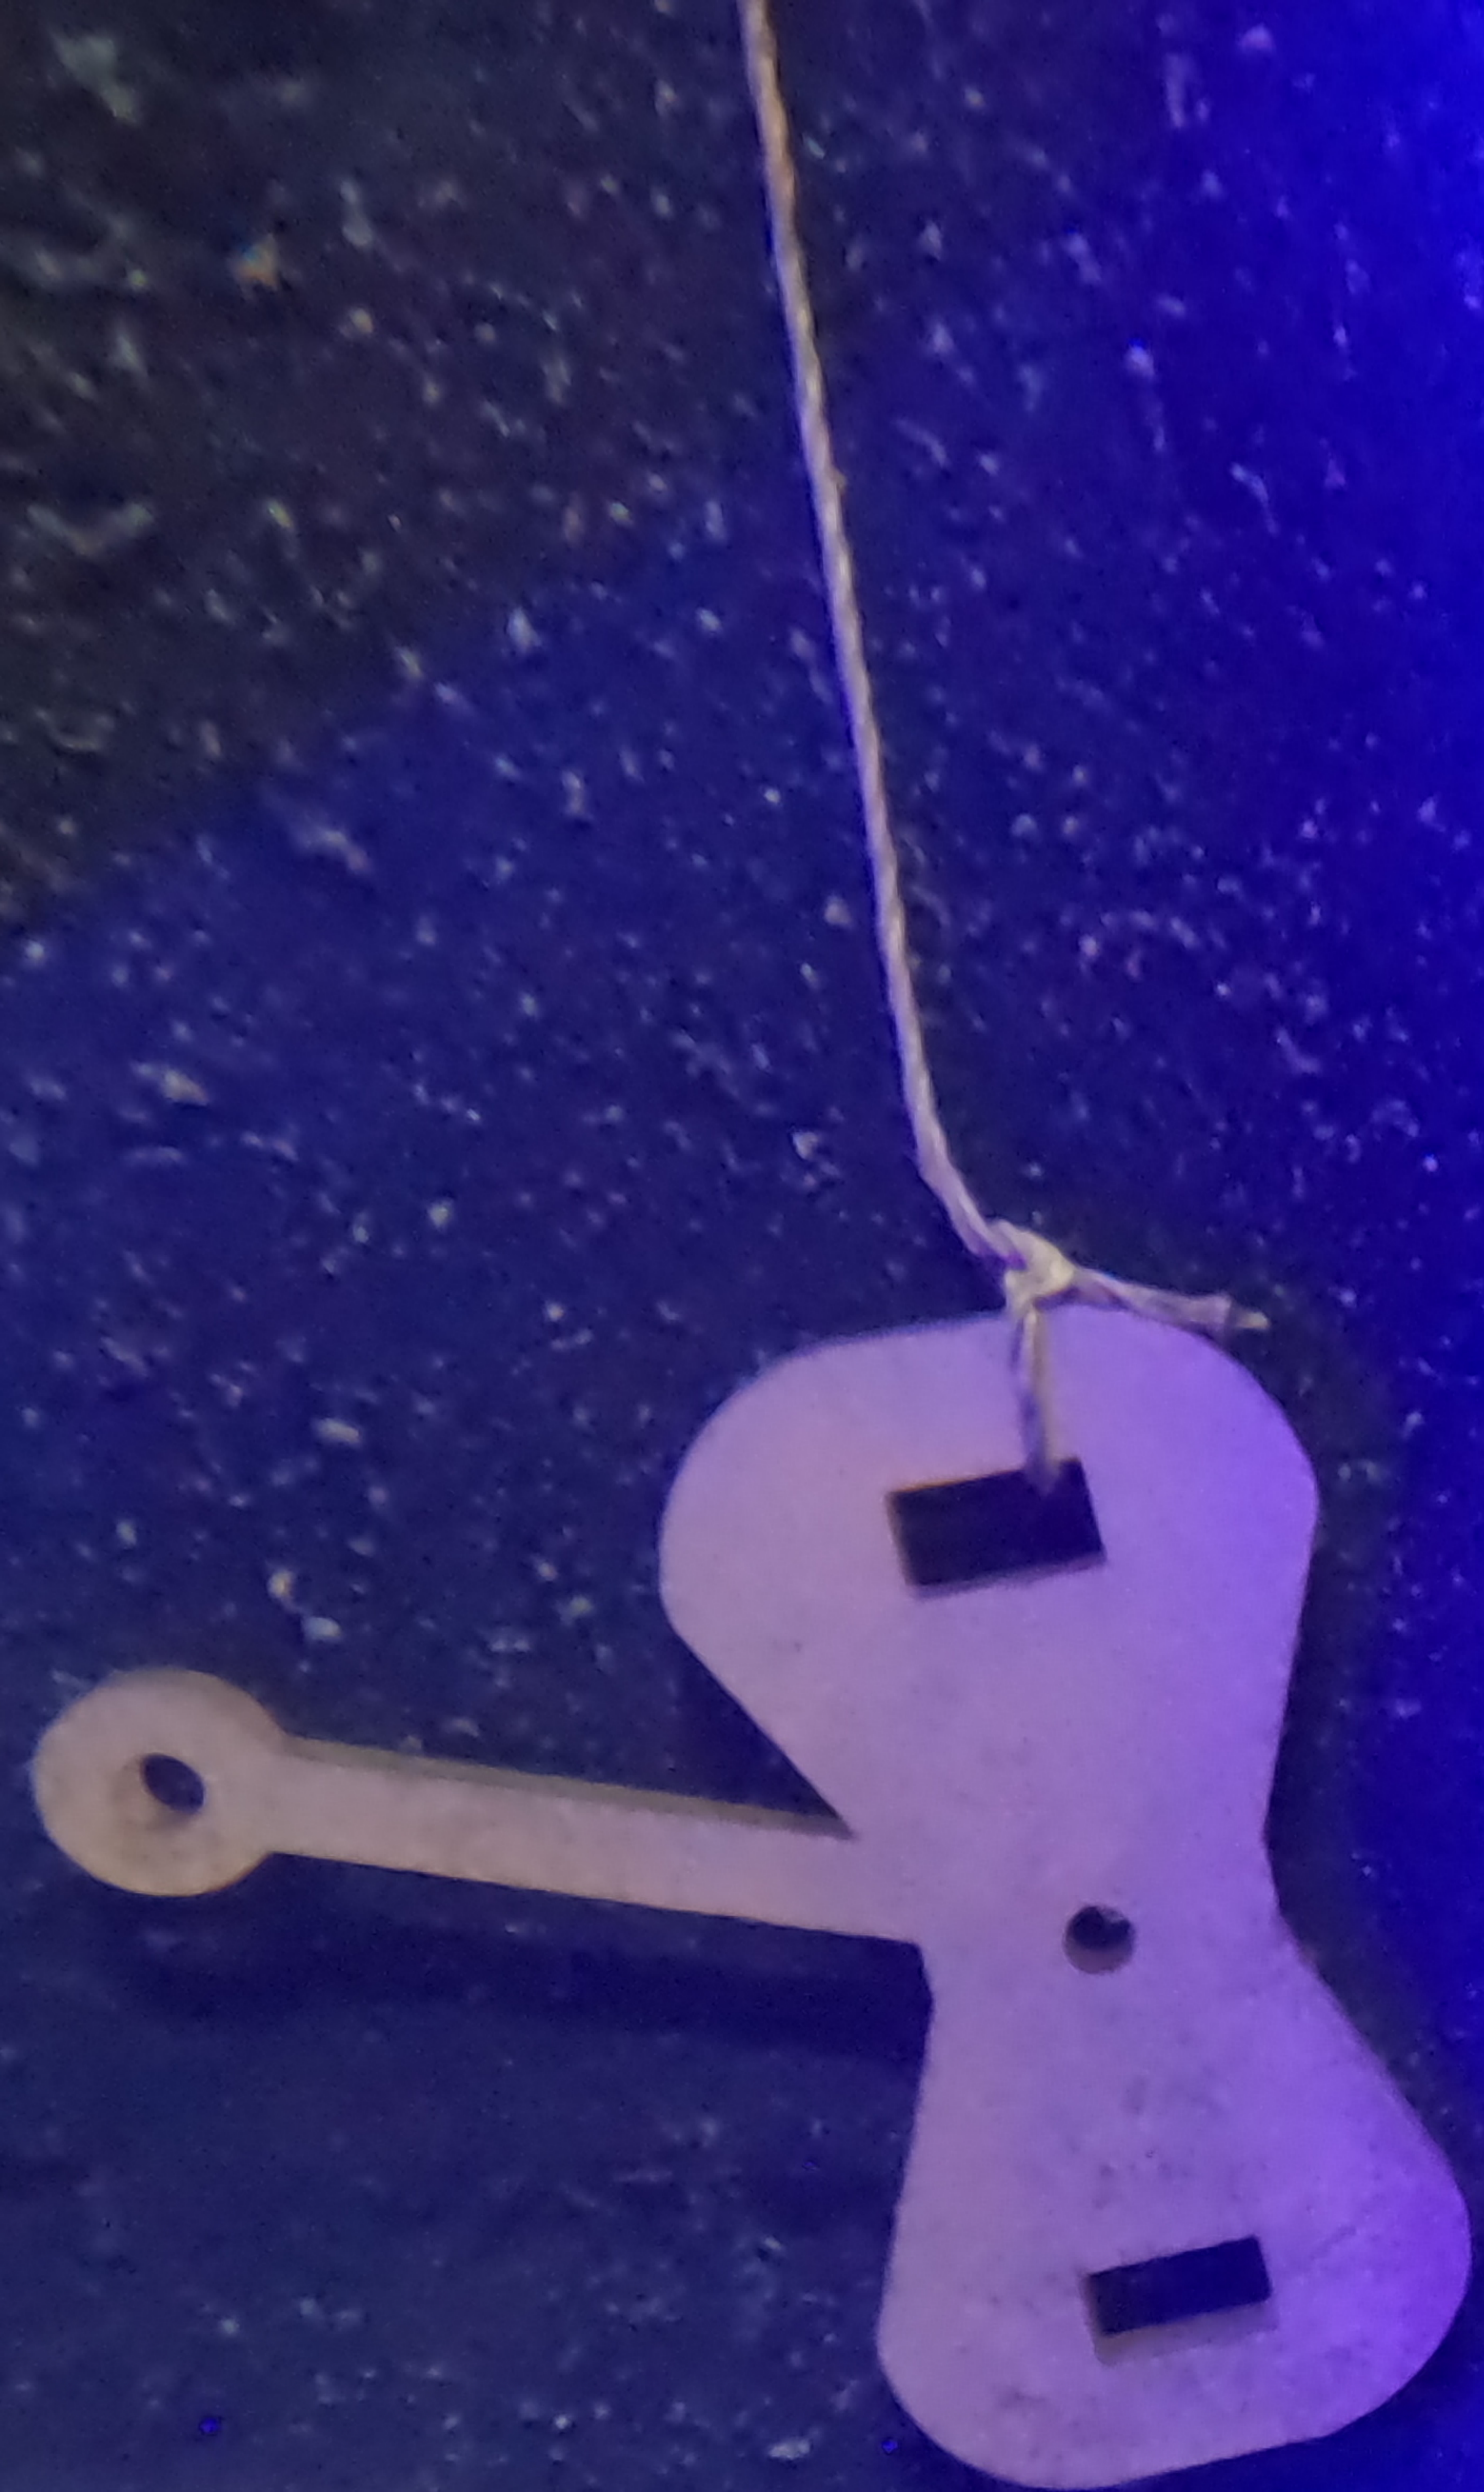

Supplement: Supplementary file 2386 [file G0015964.pdf › Level_2_2/G0015964.pdf]

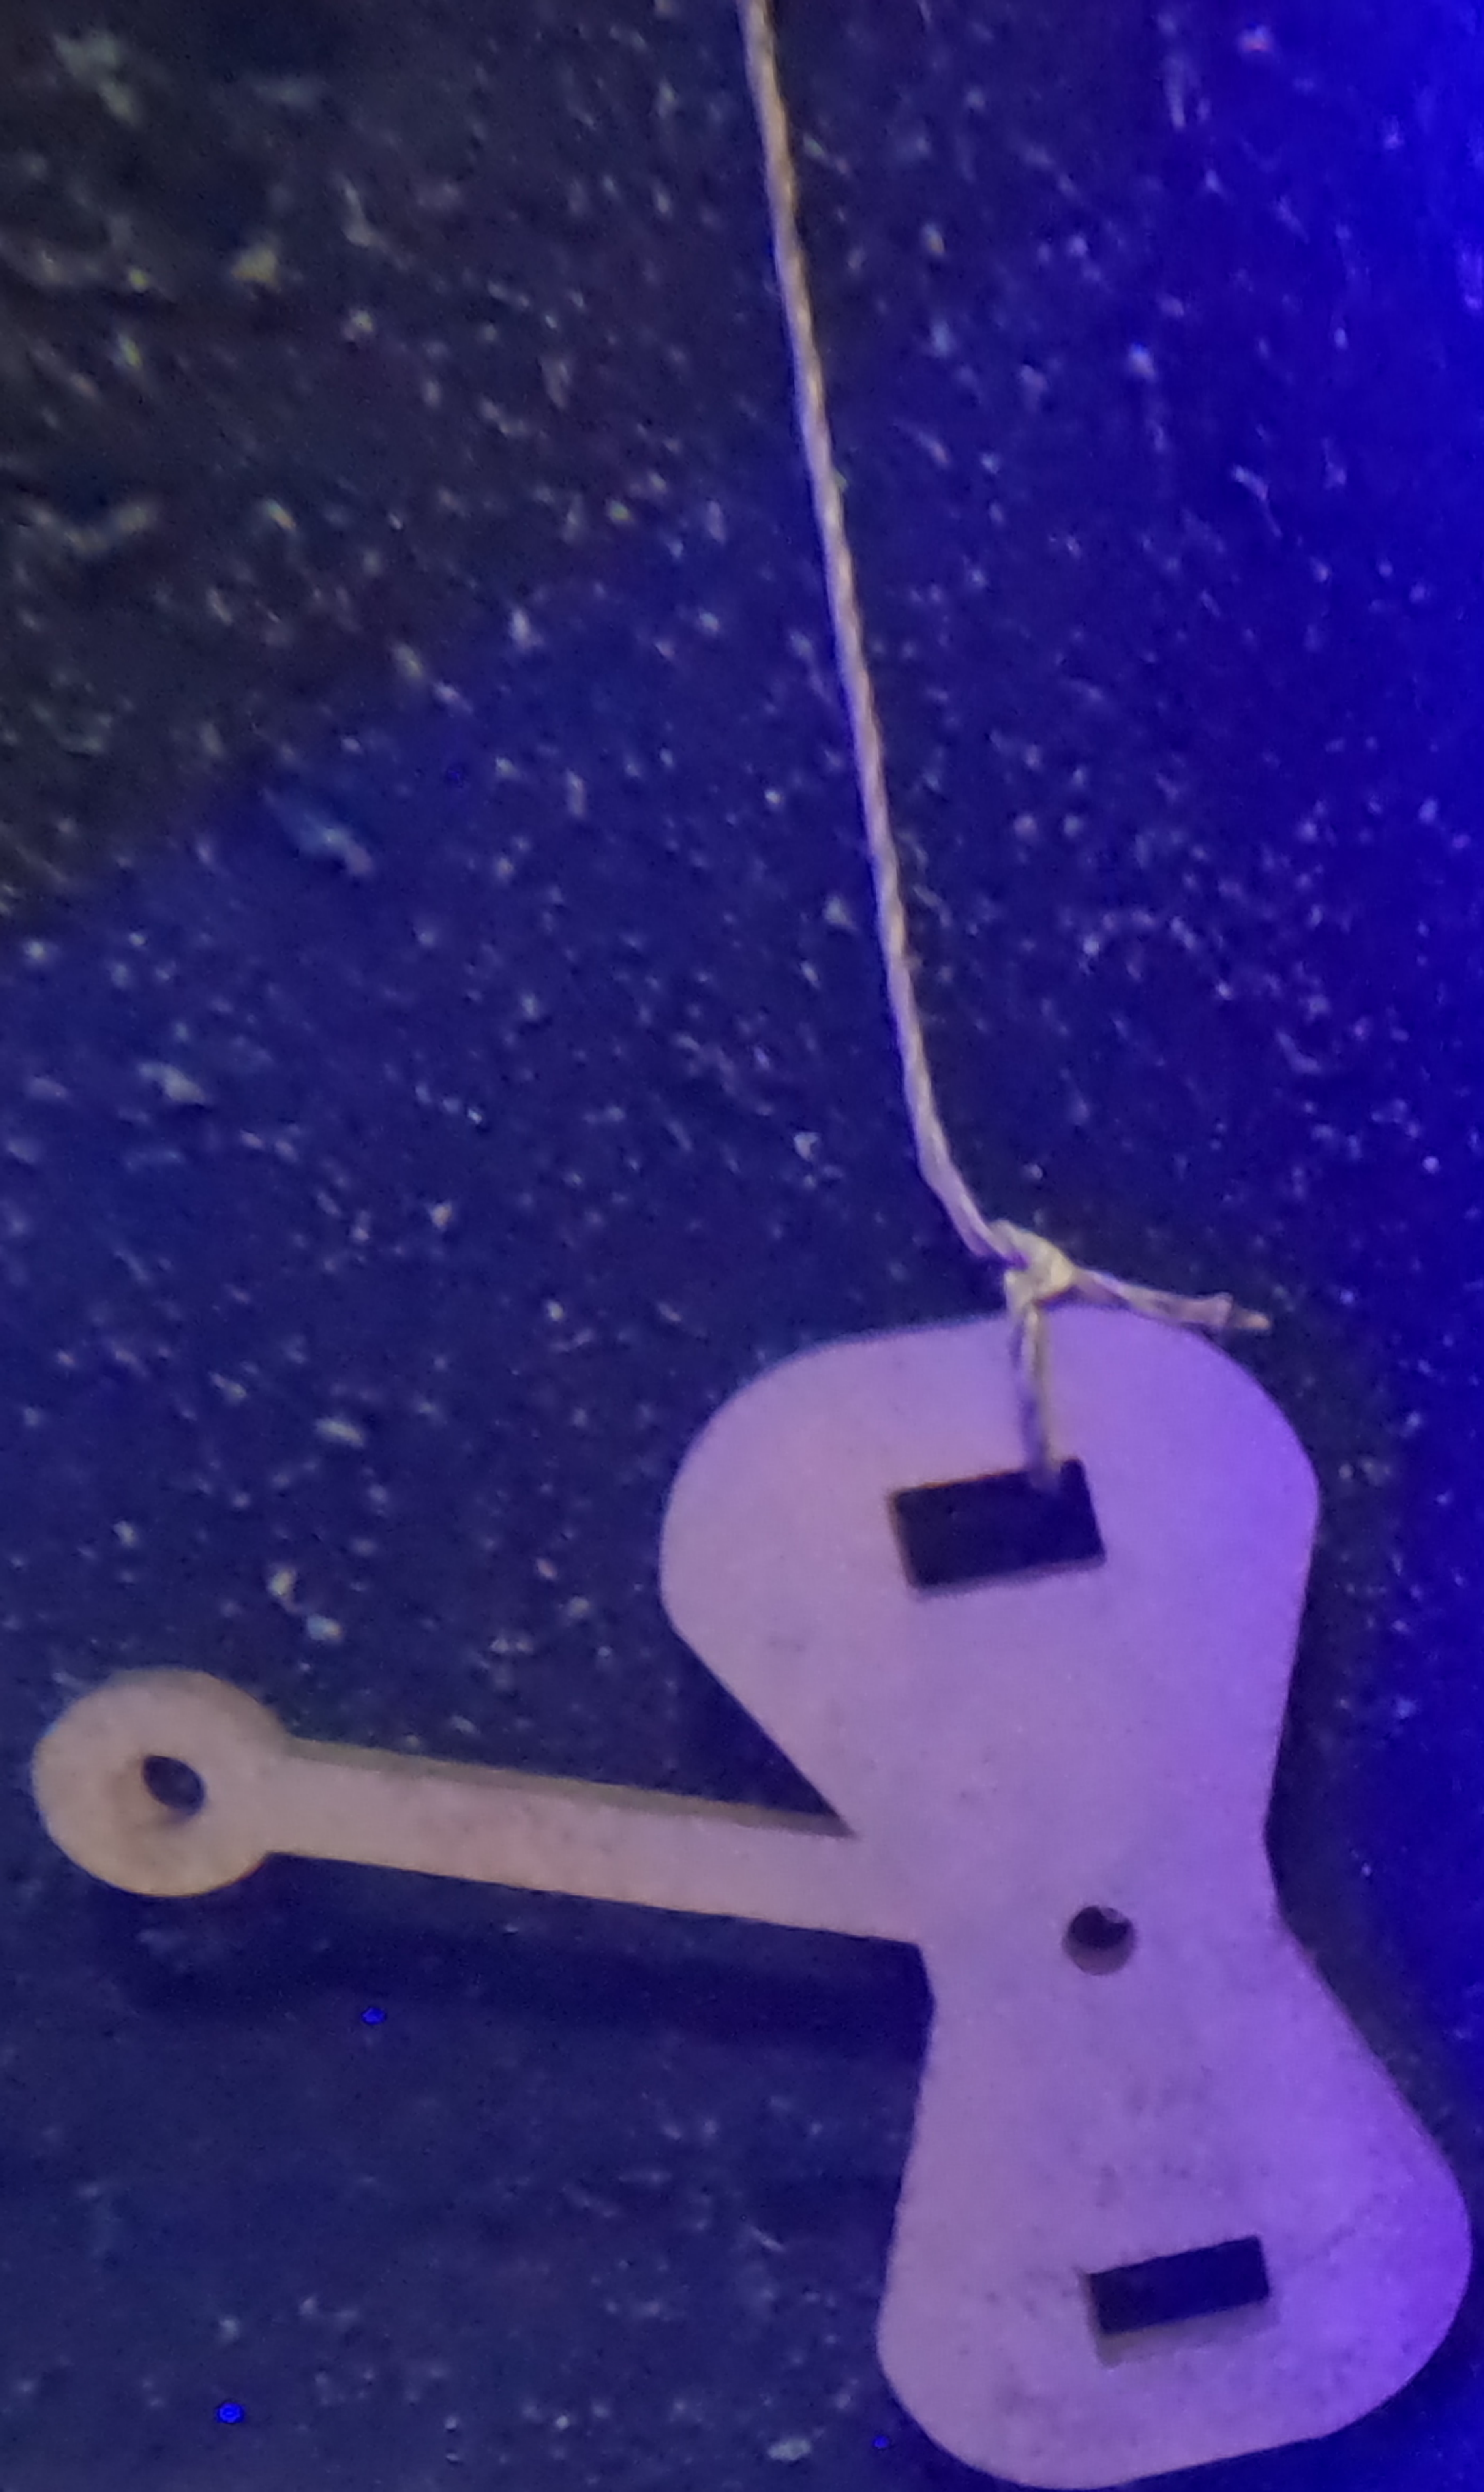

Supplement: Supplementary file 2387 [file G0015965.pdf › Level_2_2/G0015965.pdf]

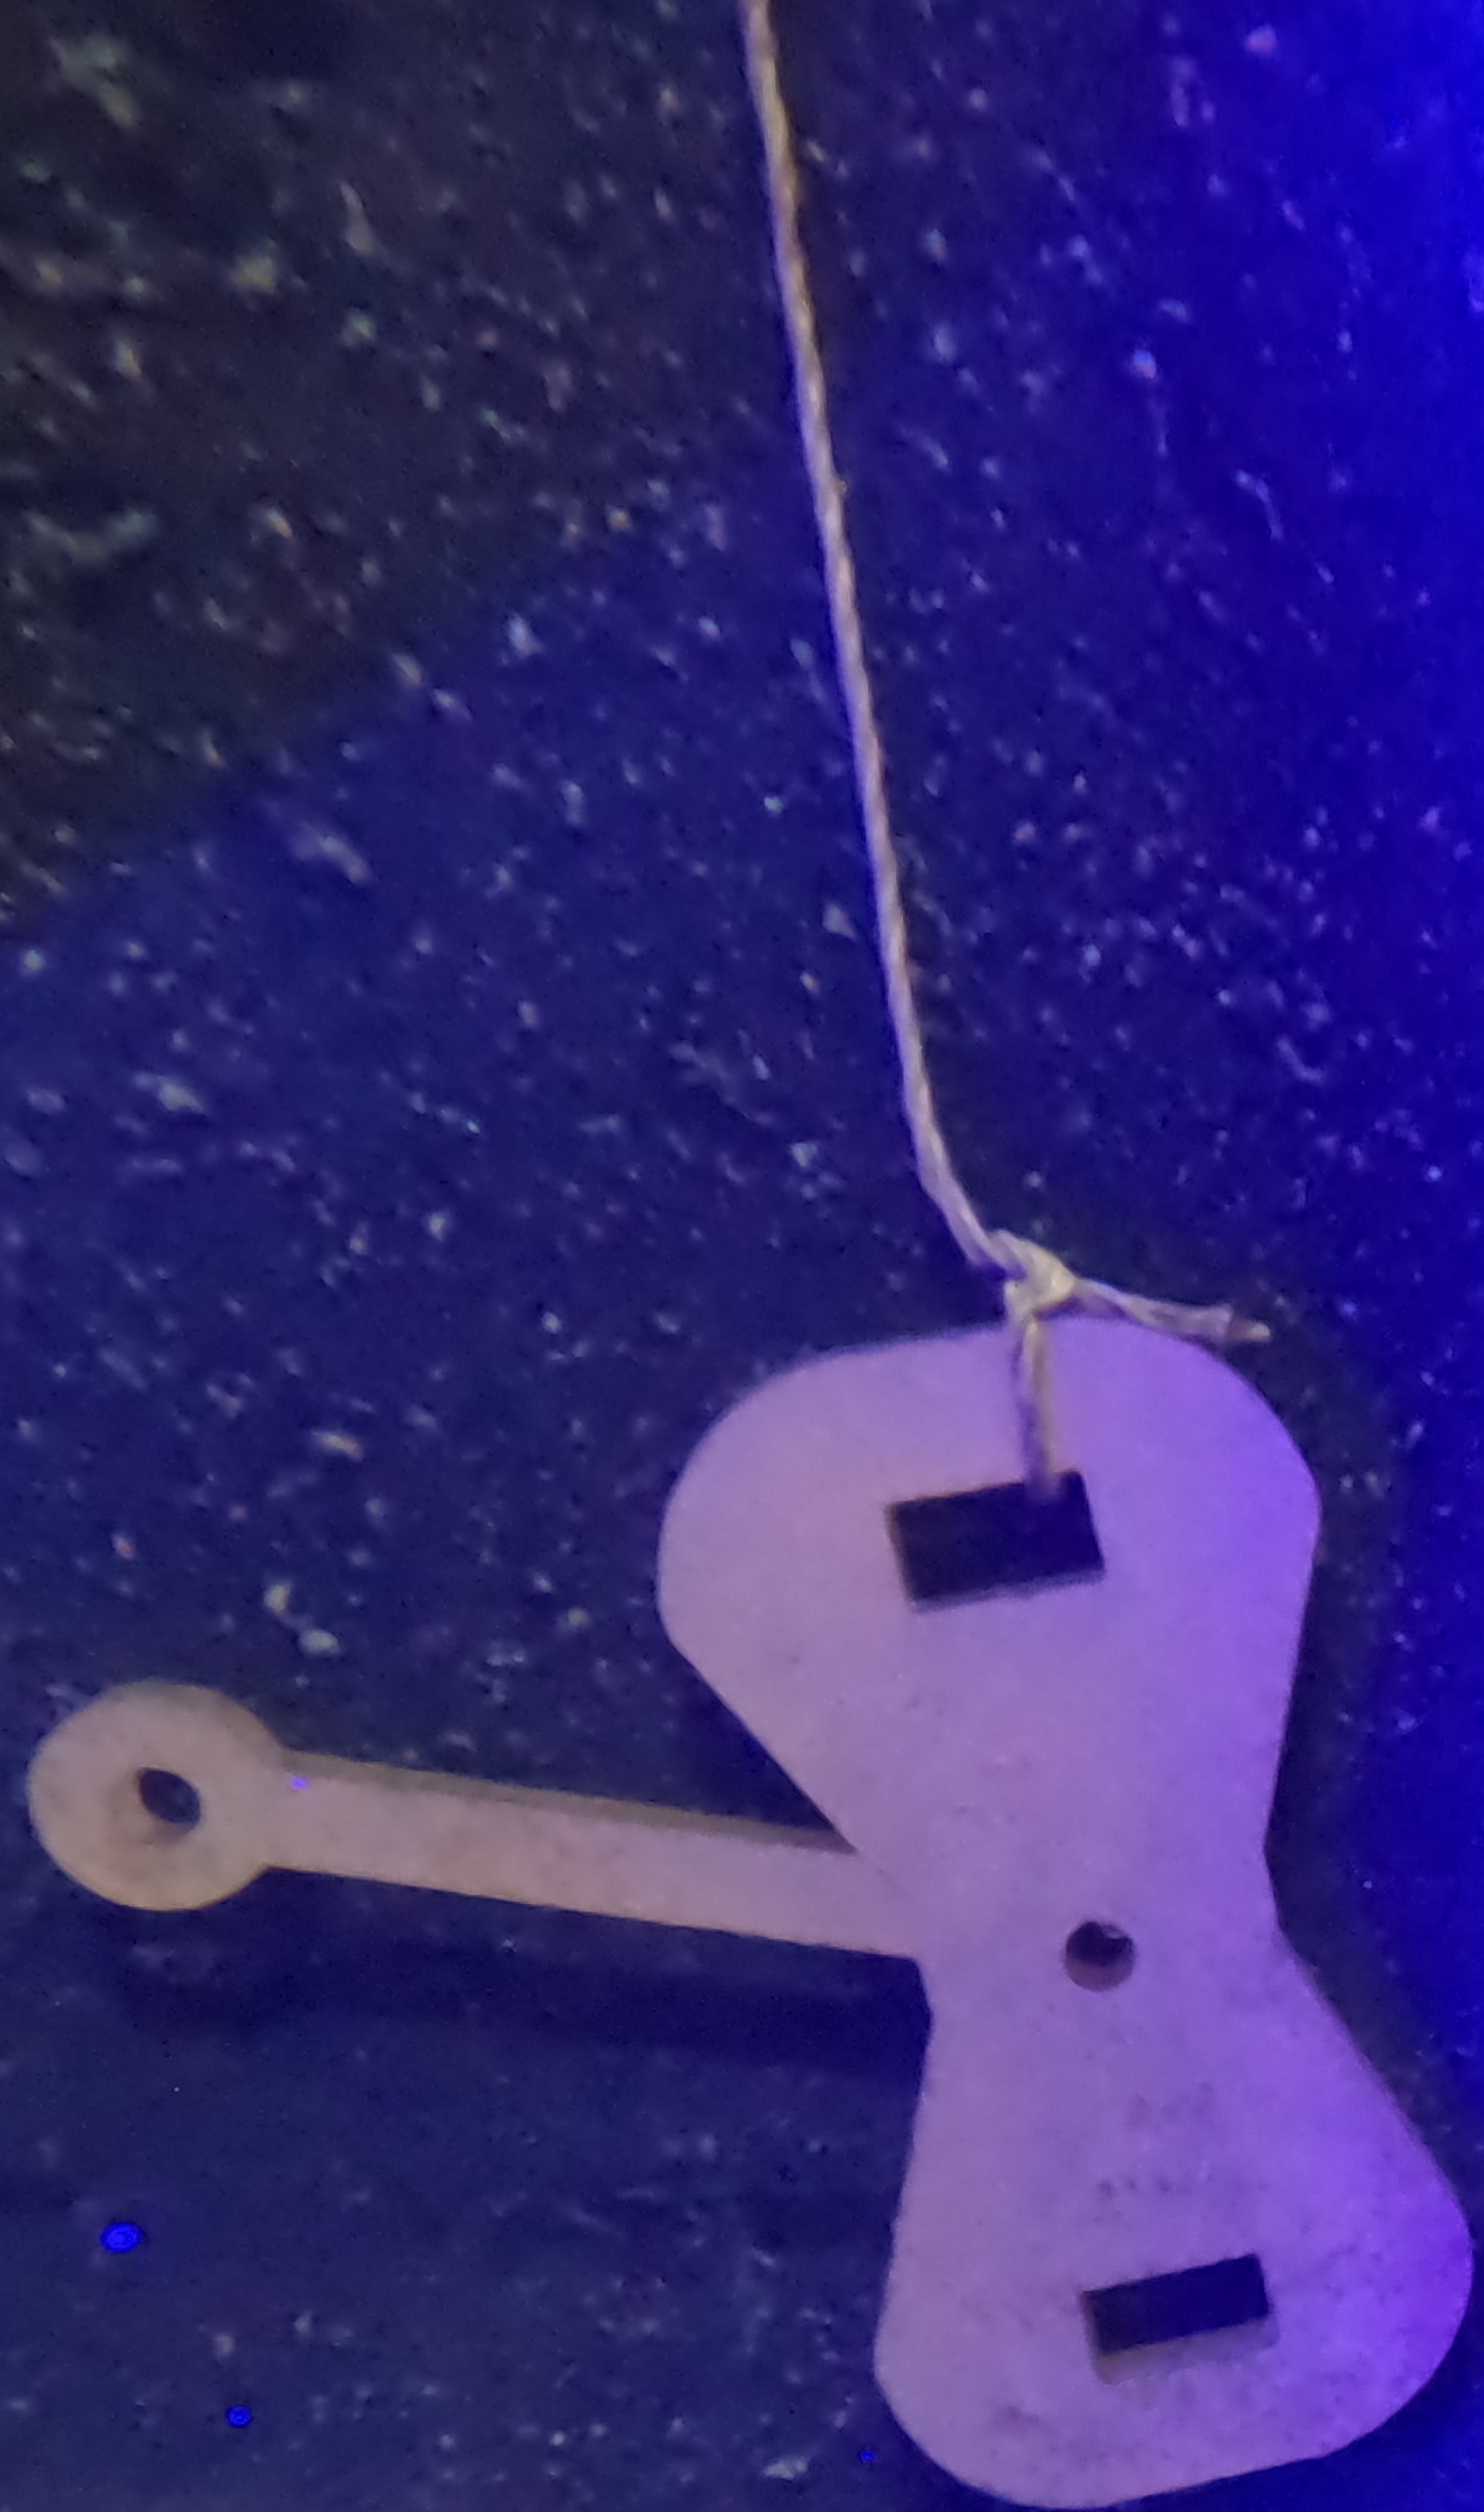

Supplement: Supplementary file 2388 [file G0015966.pdf › Level_2_2/G0015966.pdf]

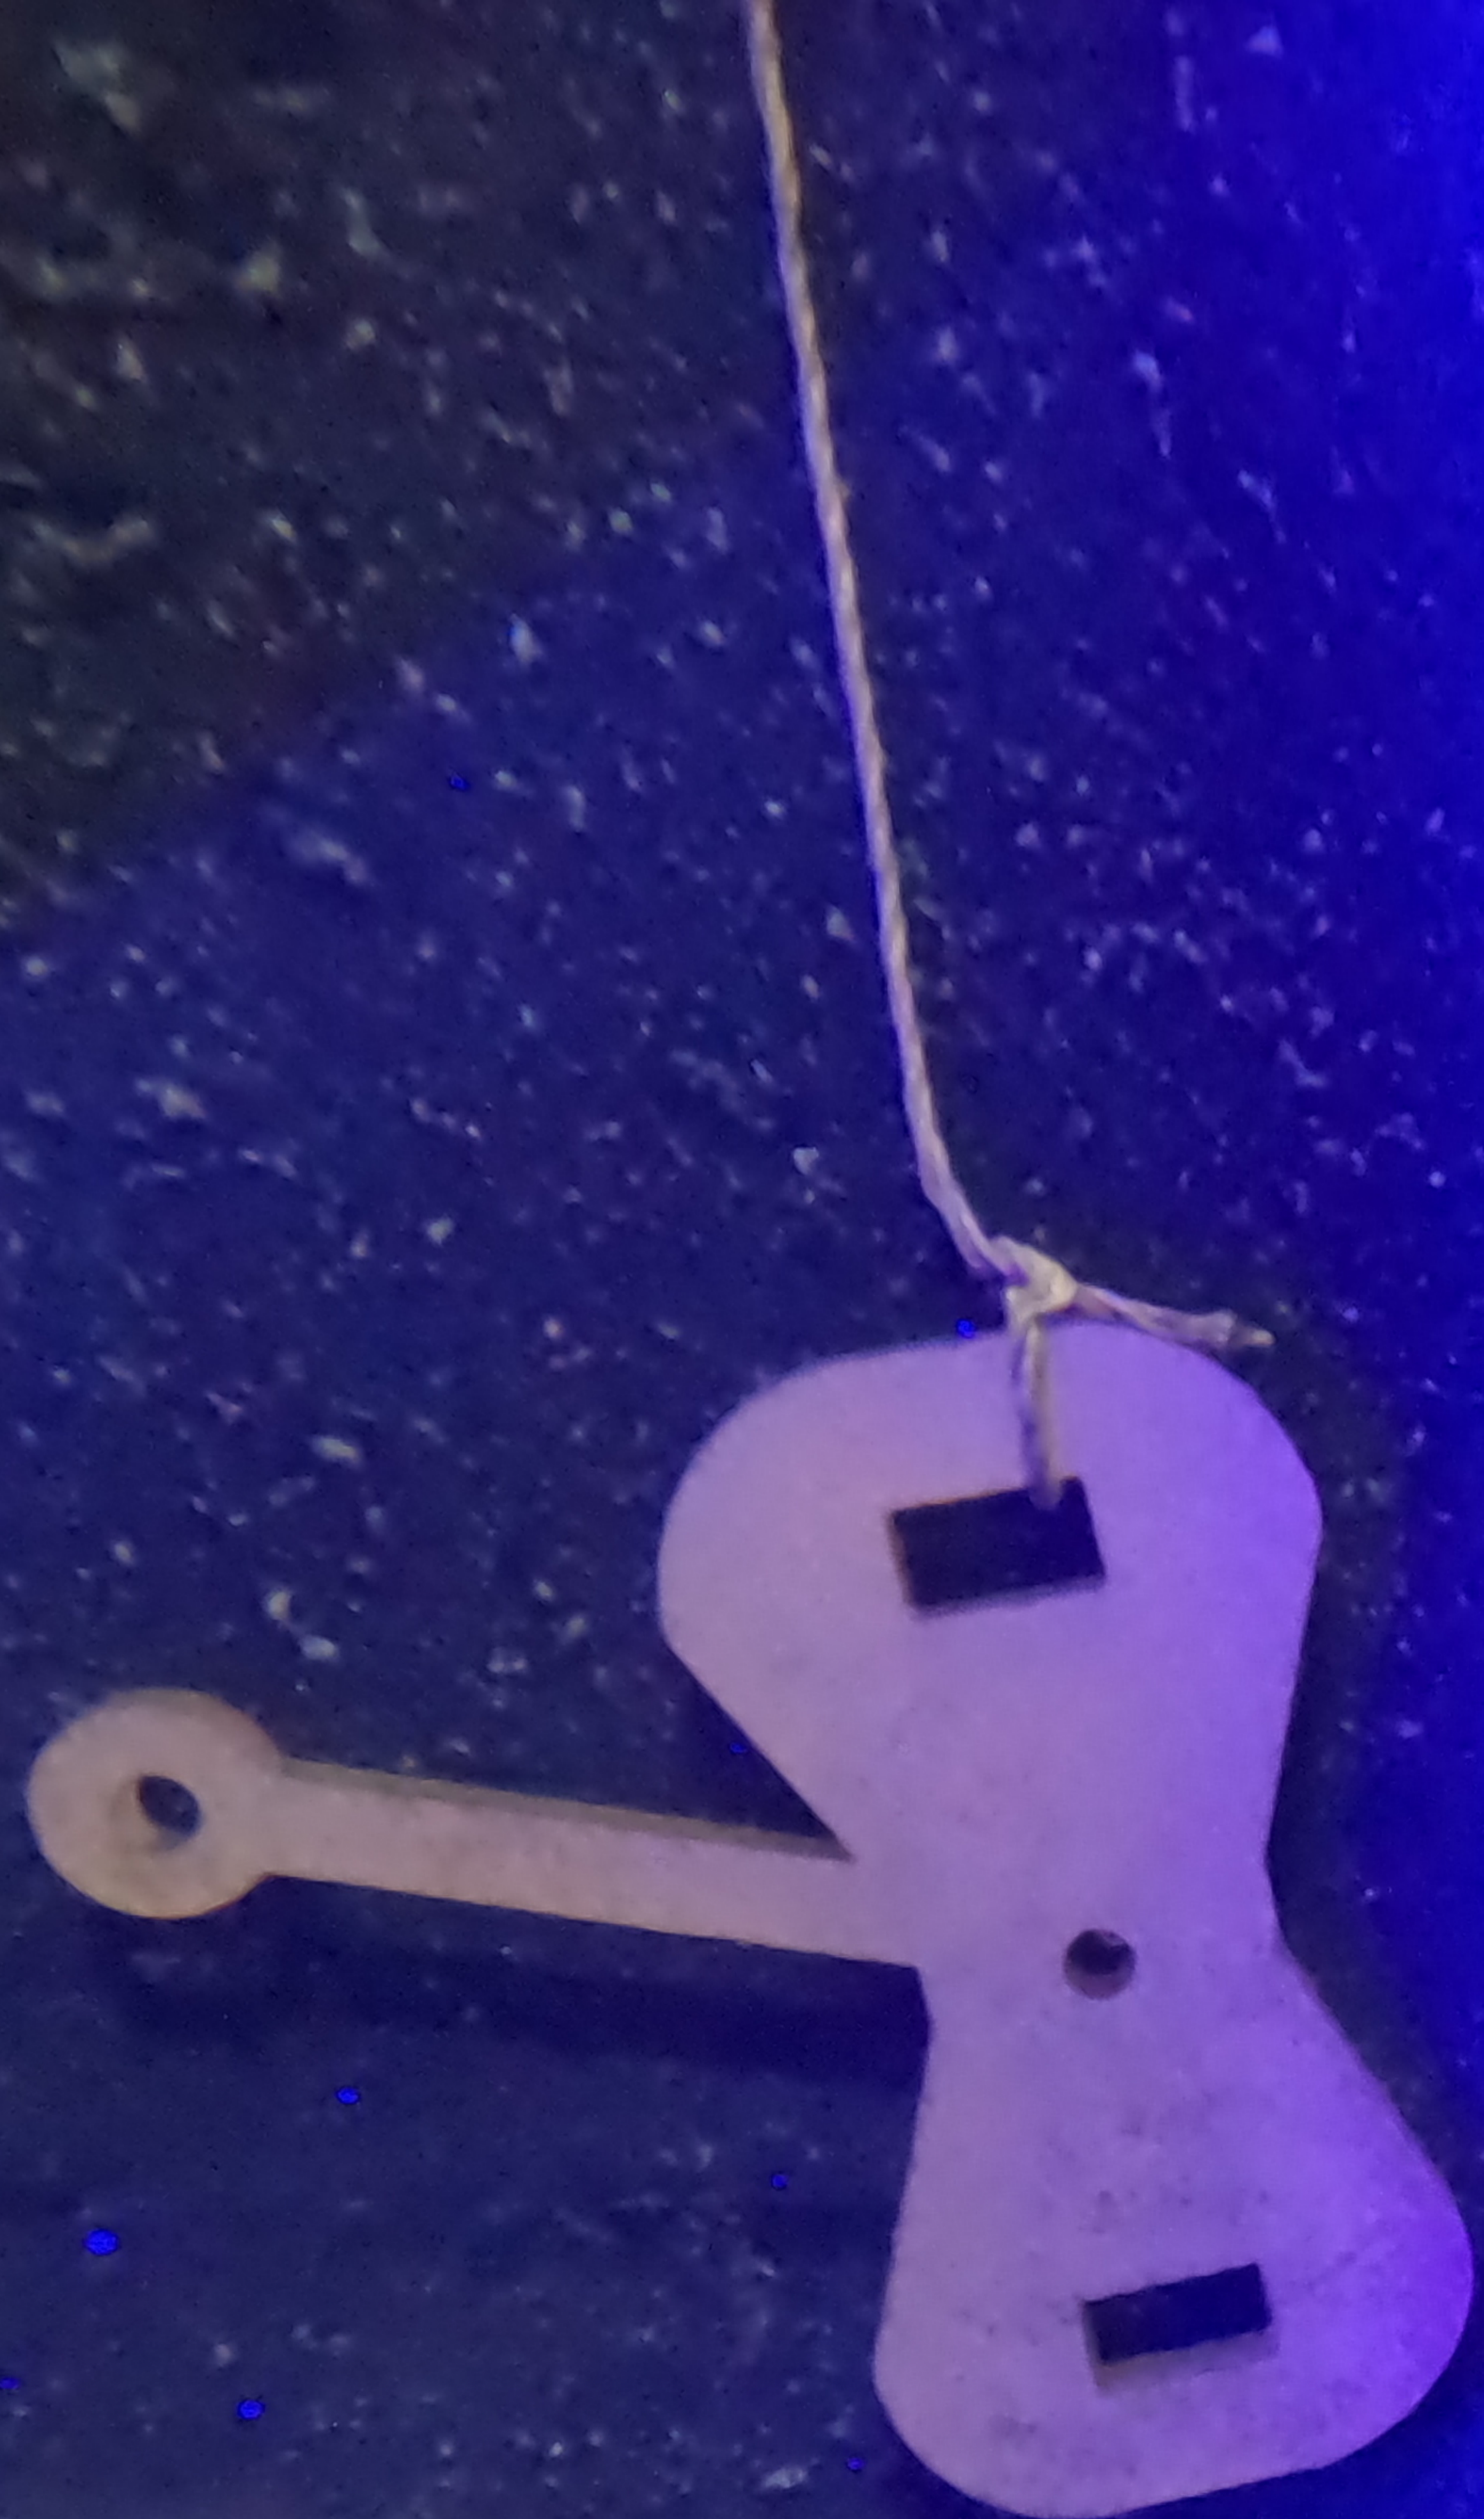

Supplement: Supplementary file 2389 [file G0015967.pdf › Level_2_2/G0015967.pdf]

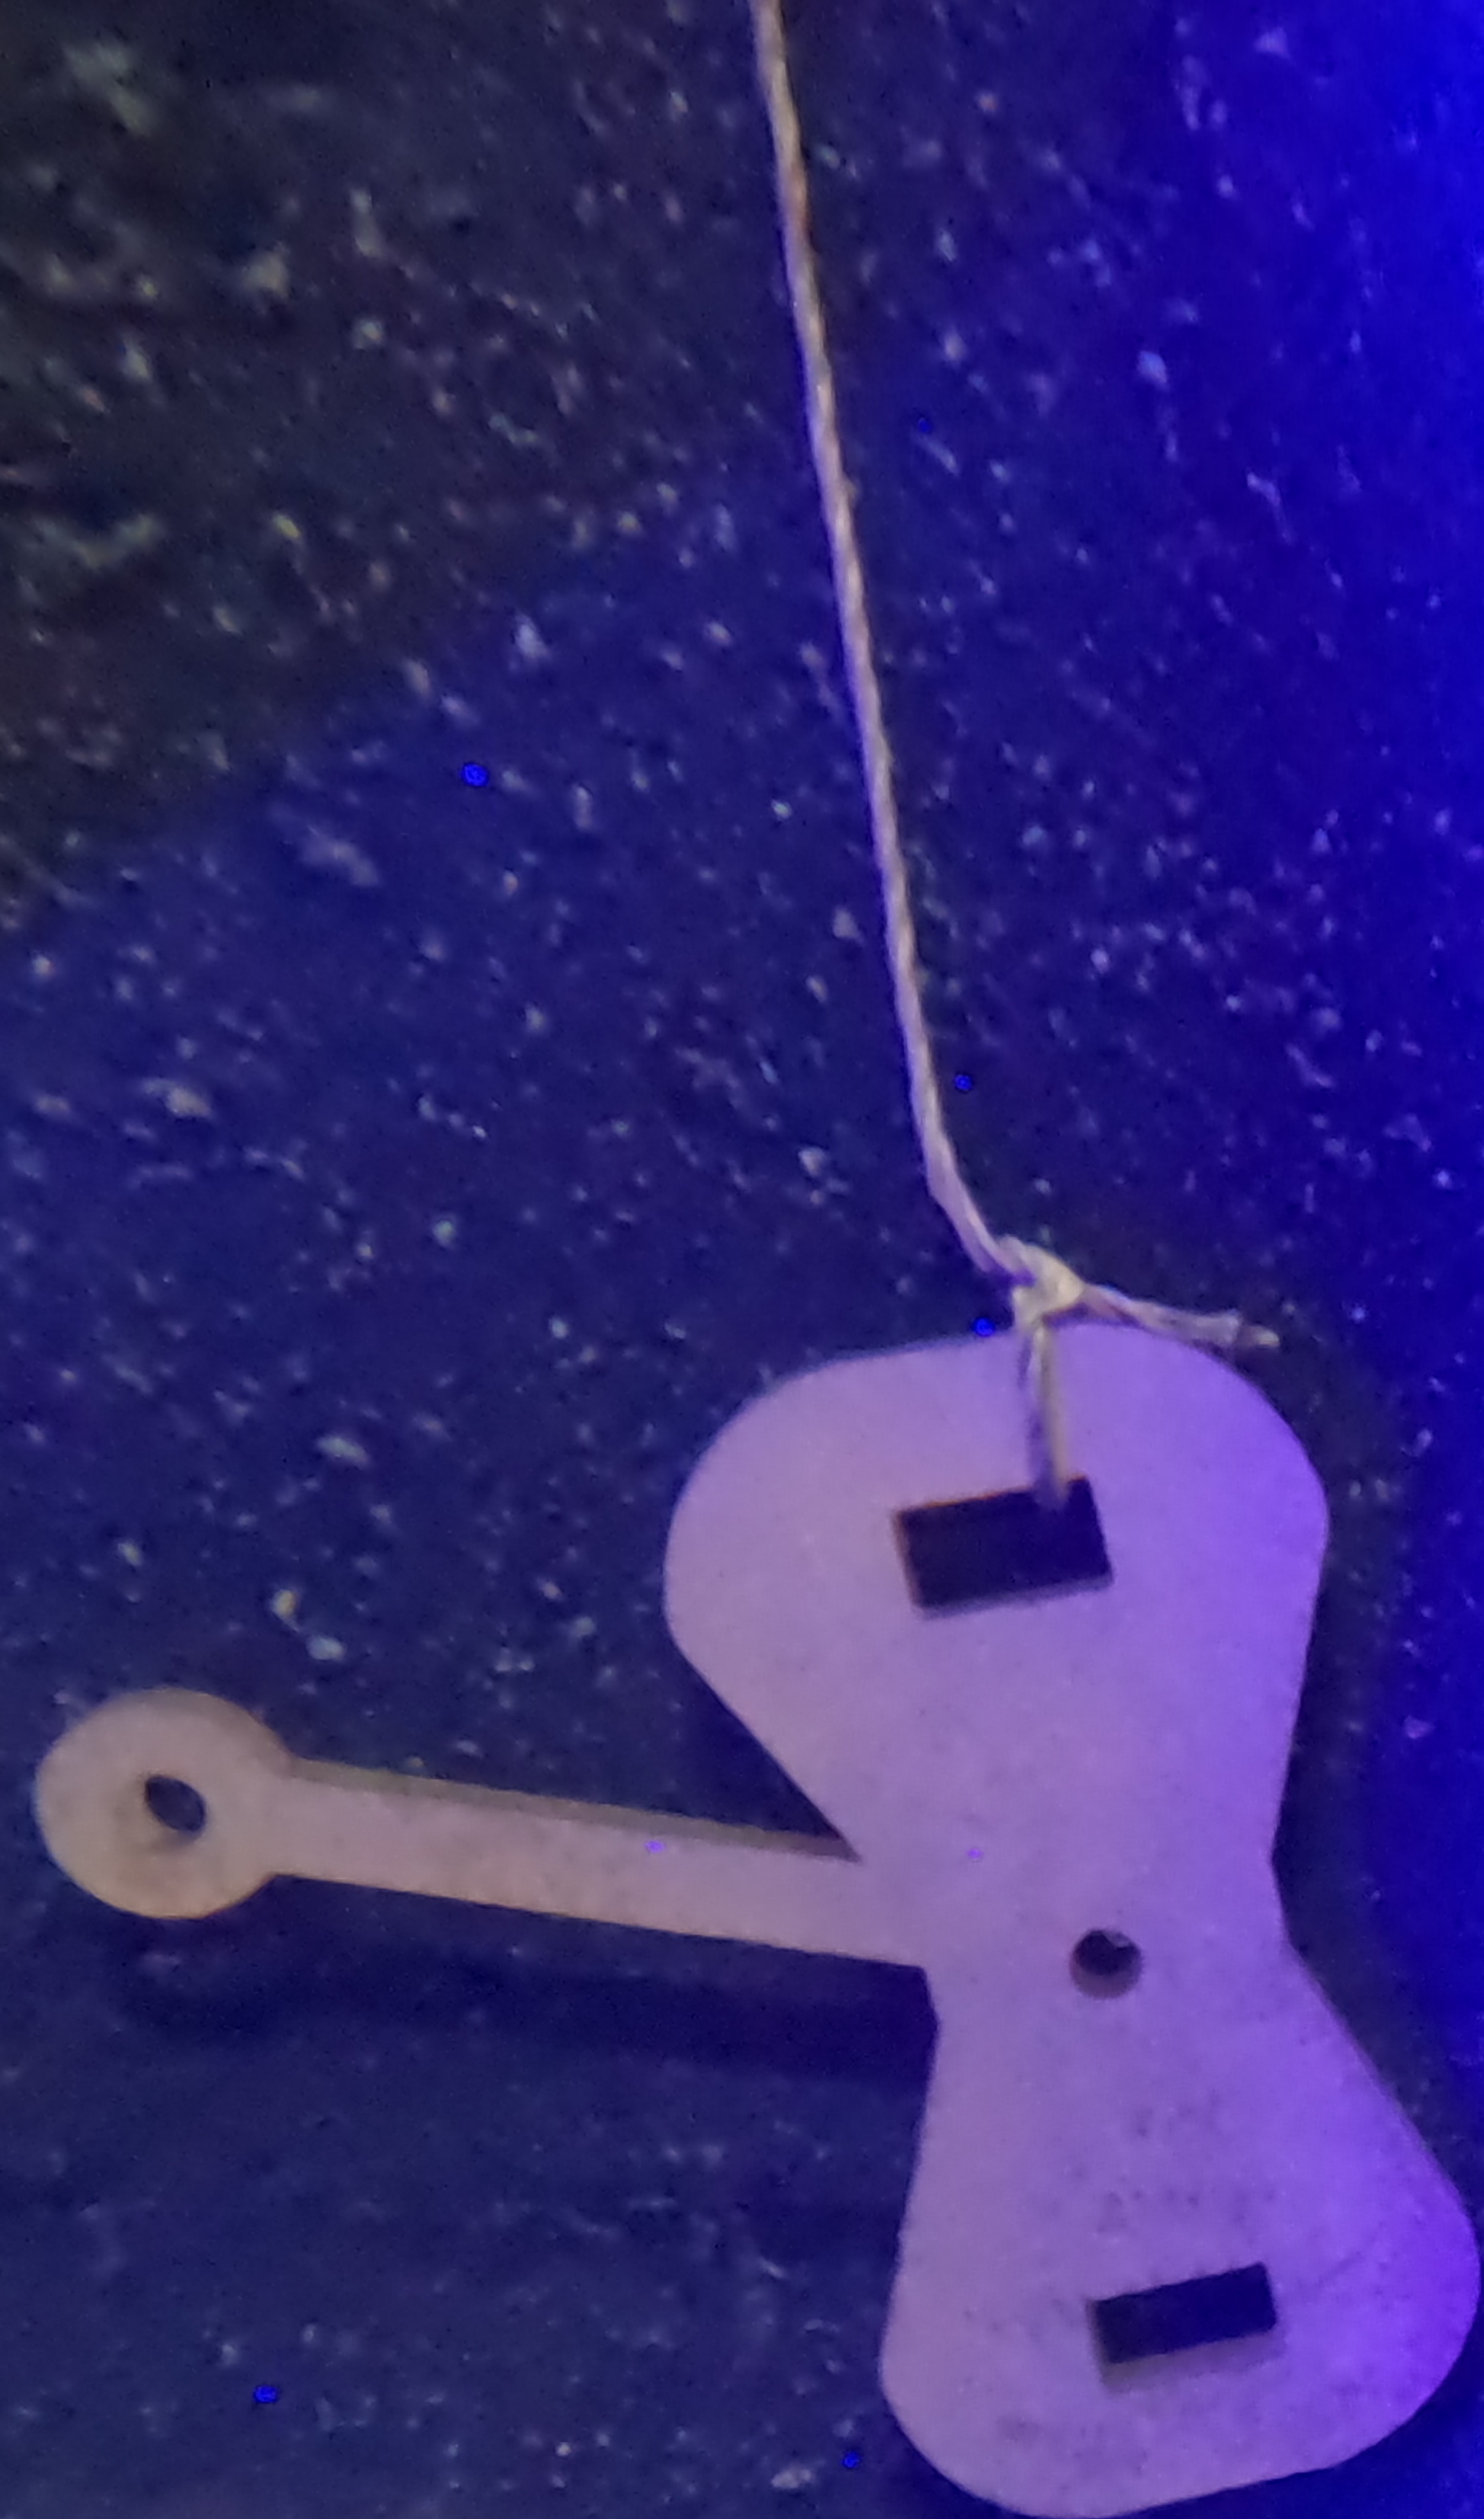

Supplement: Supplementary file 2390 [file G0015968.pdf › Level_2_2/G0015968.pdf]
