# Supplementary figures and images for: 3D reconstruction of shallow sea environment using direct system calibration and faint laser line extraction (part 24 of 35)
Source: Research Square preprint supplement (doi:10.21203/rs.3.rs-5262658/v1), 2024-12-02

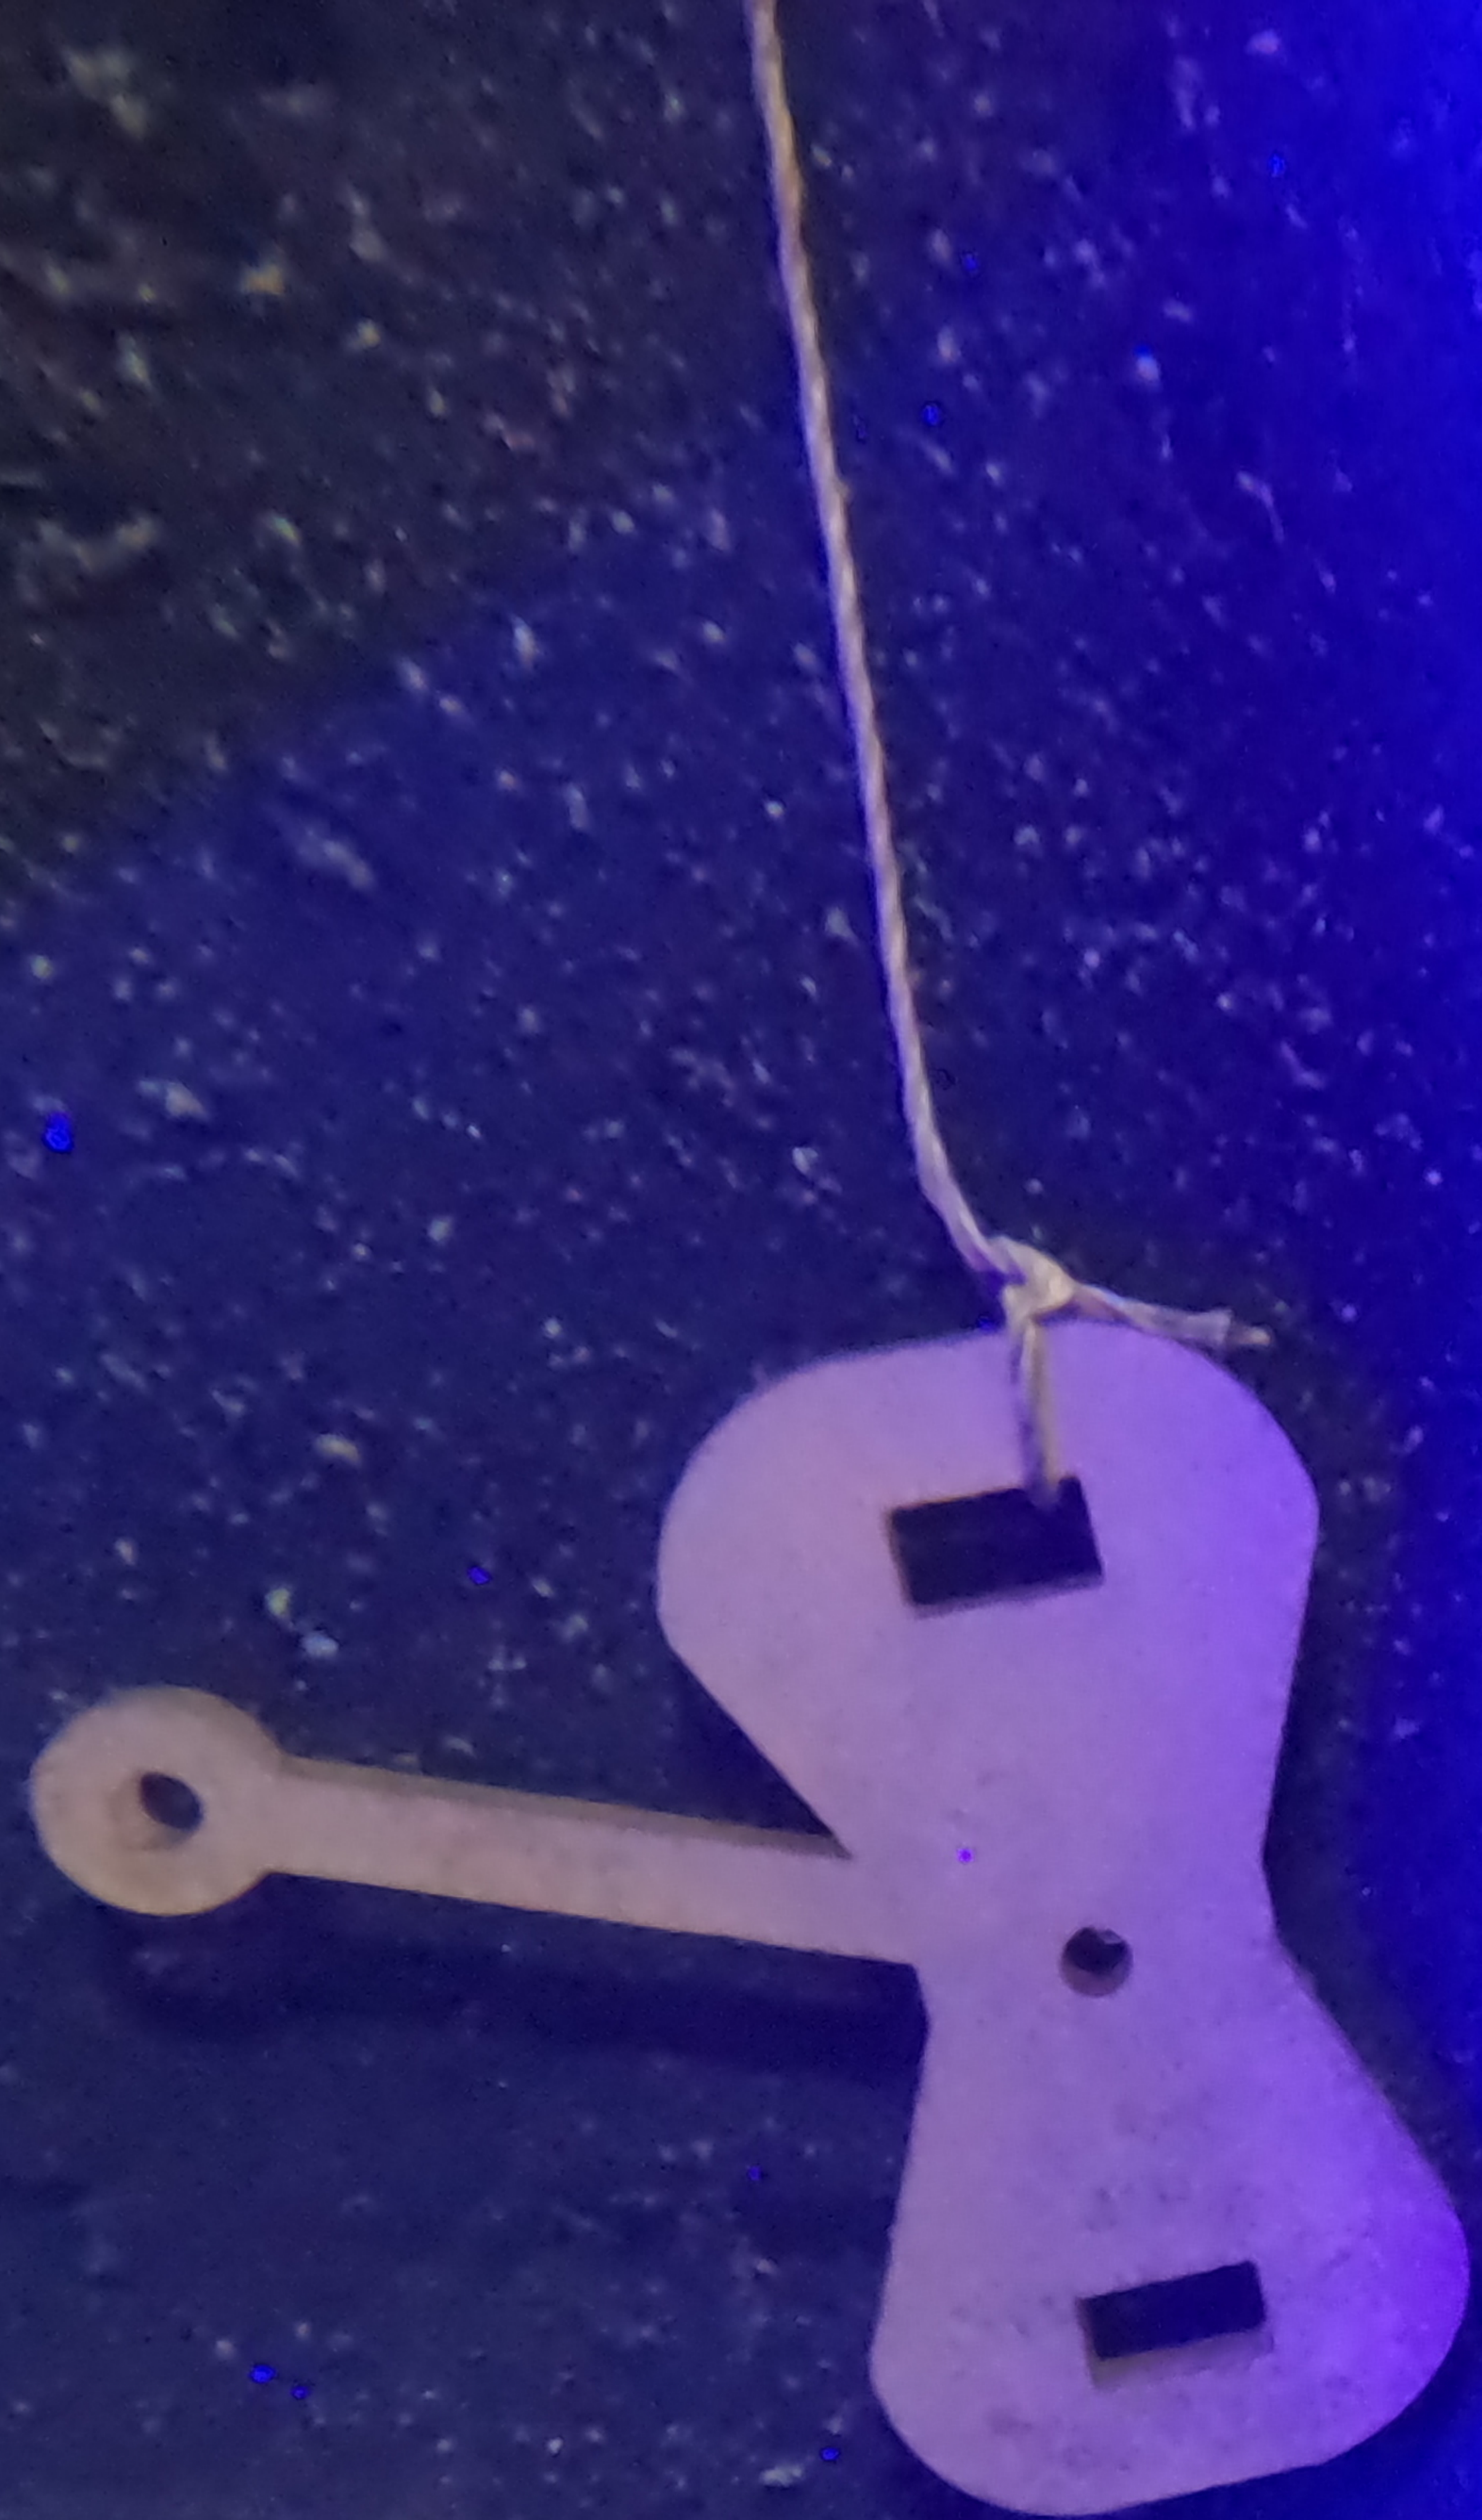

Supplement: Supplementary file 2391 [file G0015969.pdf › Level_2_2/G0015969.pdf]

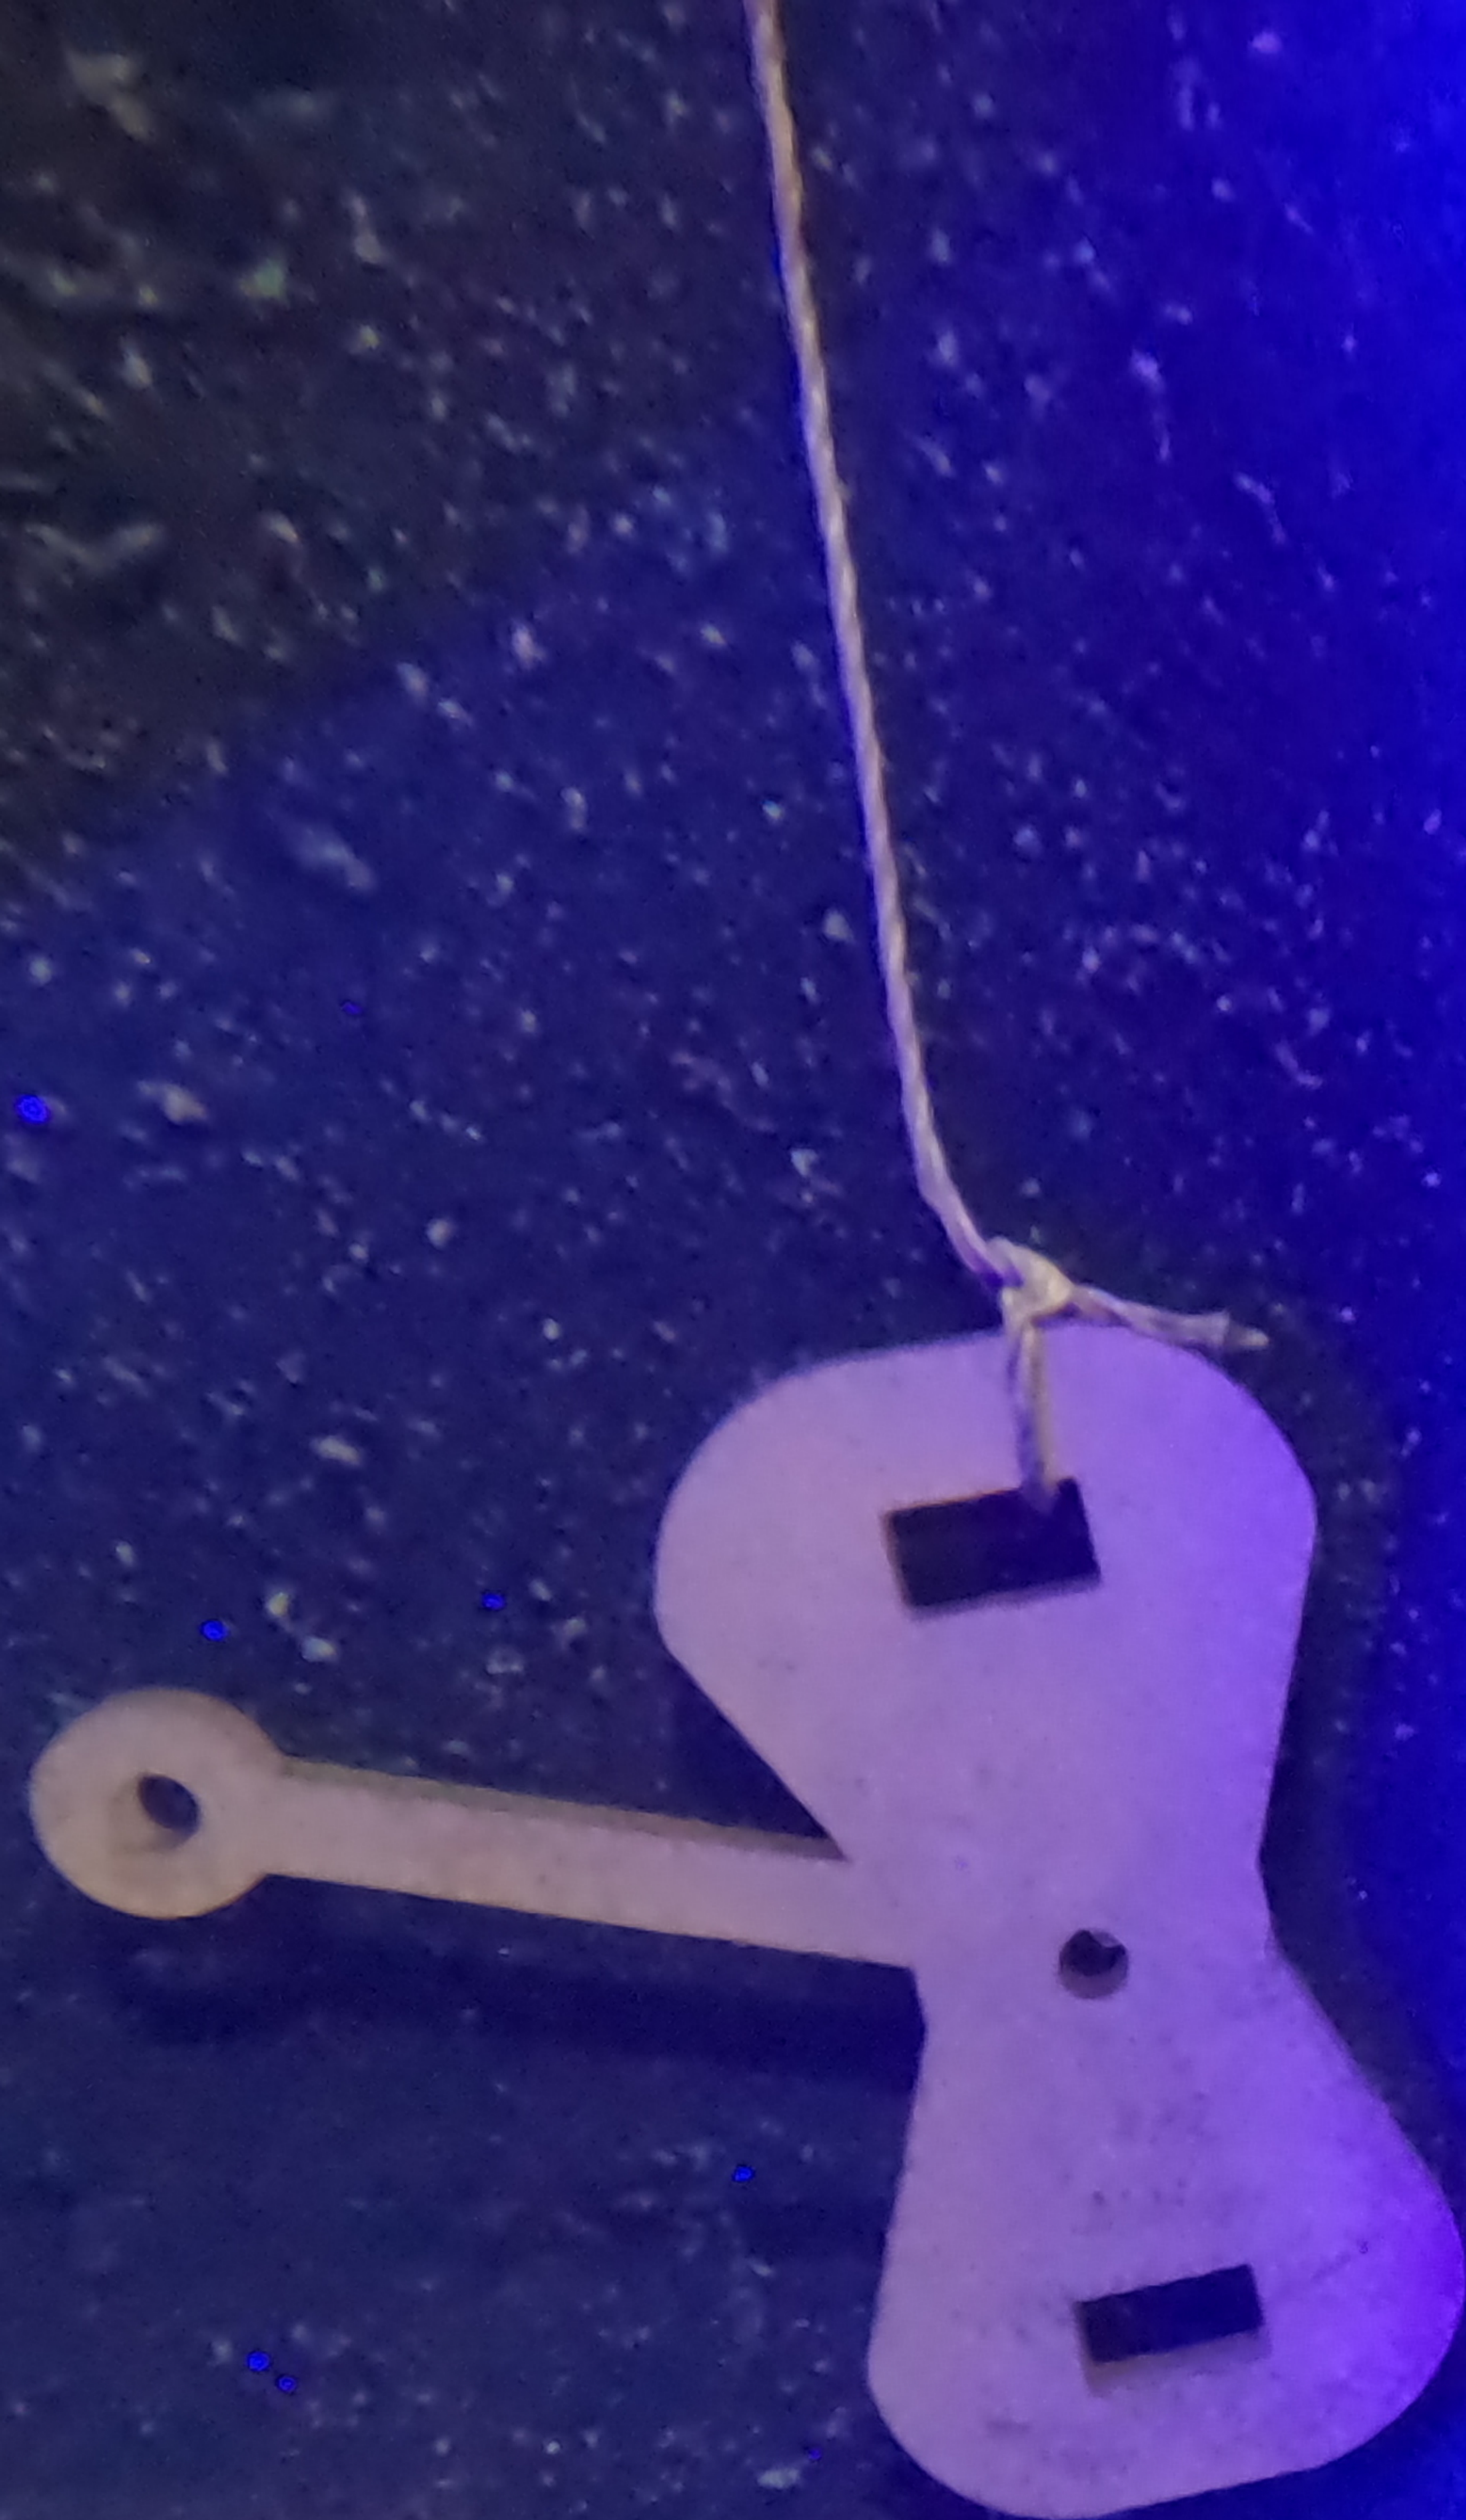

Supplement: Supplementary file 2392 [file G0015970.pdf › Level_2_2/G0015970.pdf]

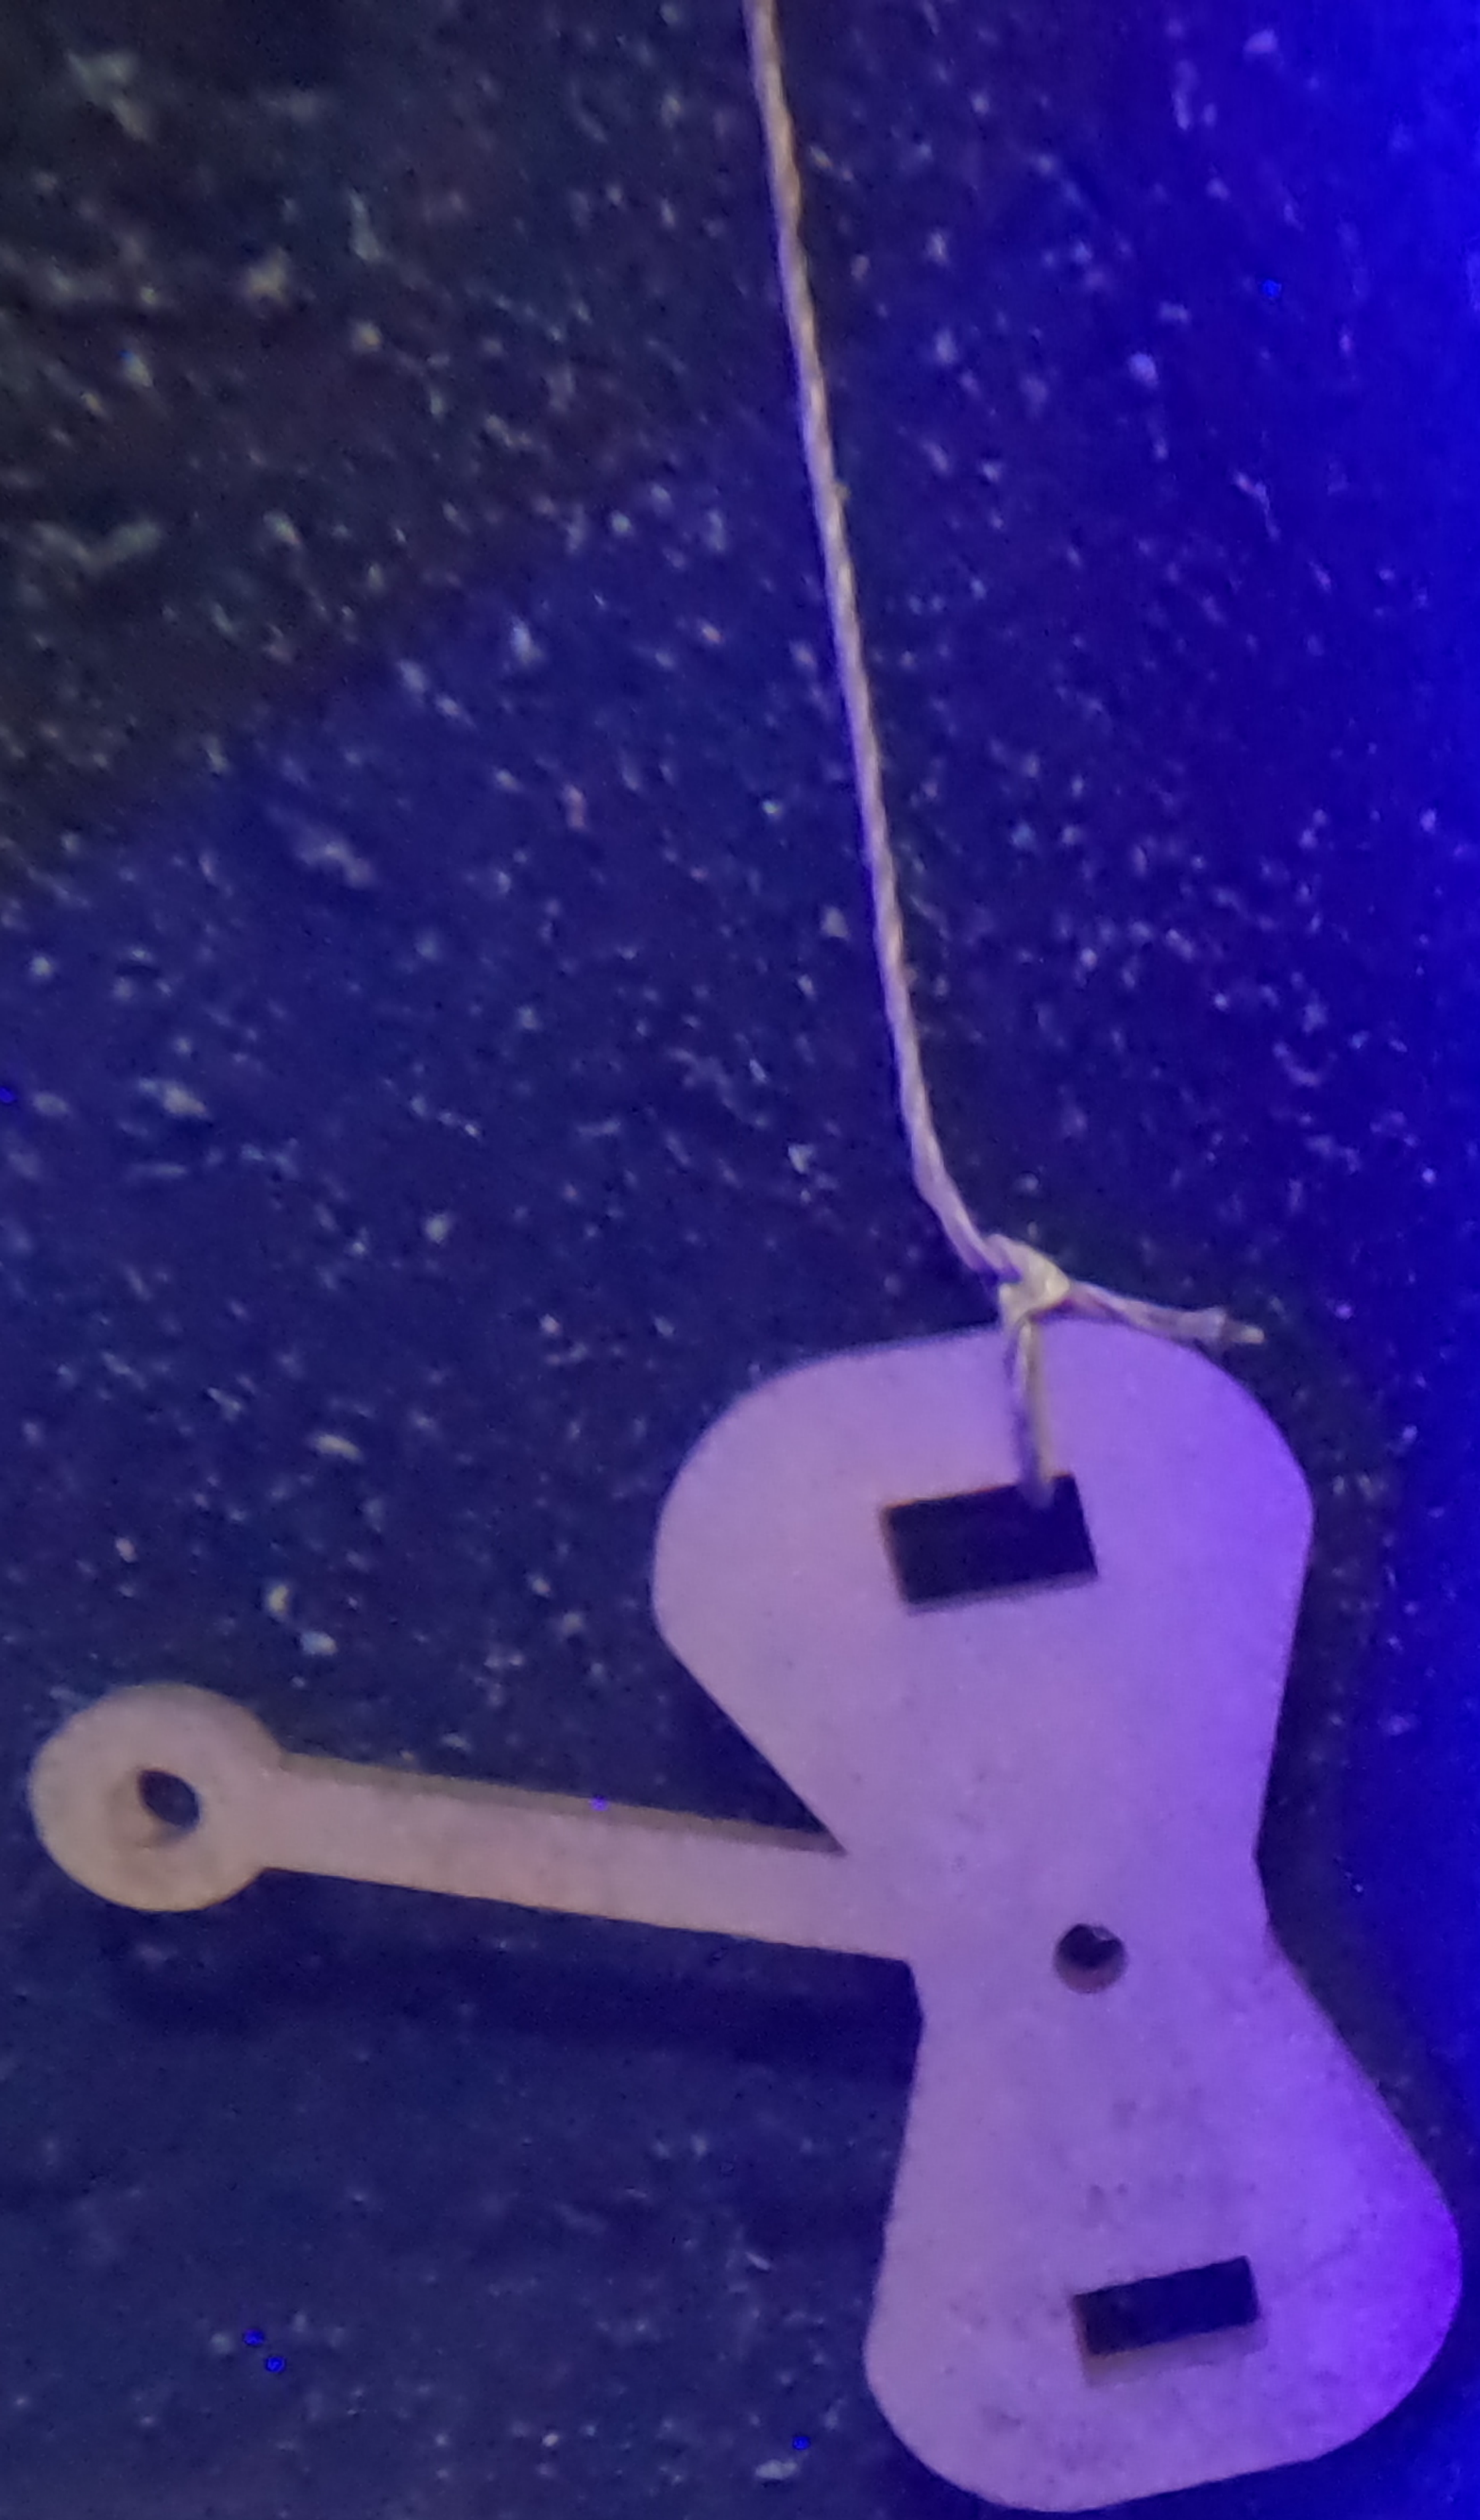

Supplement: Supplementary file 2393 [file G0015971.pdf › Level_2_2/G0015971.pdf]

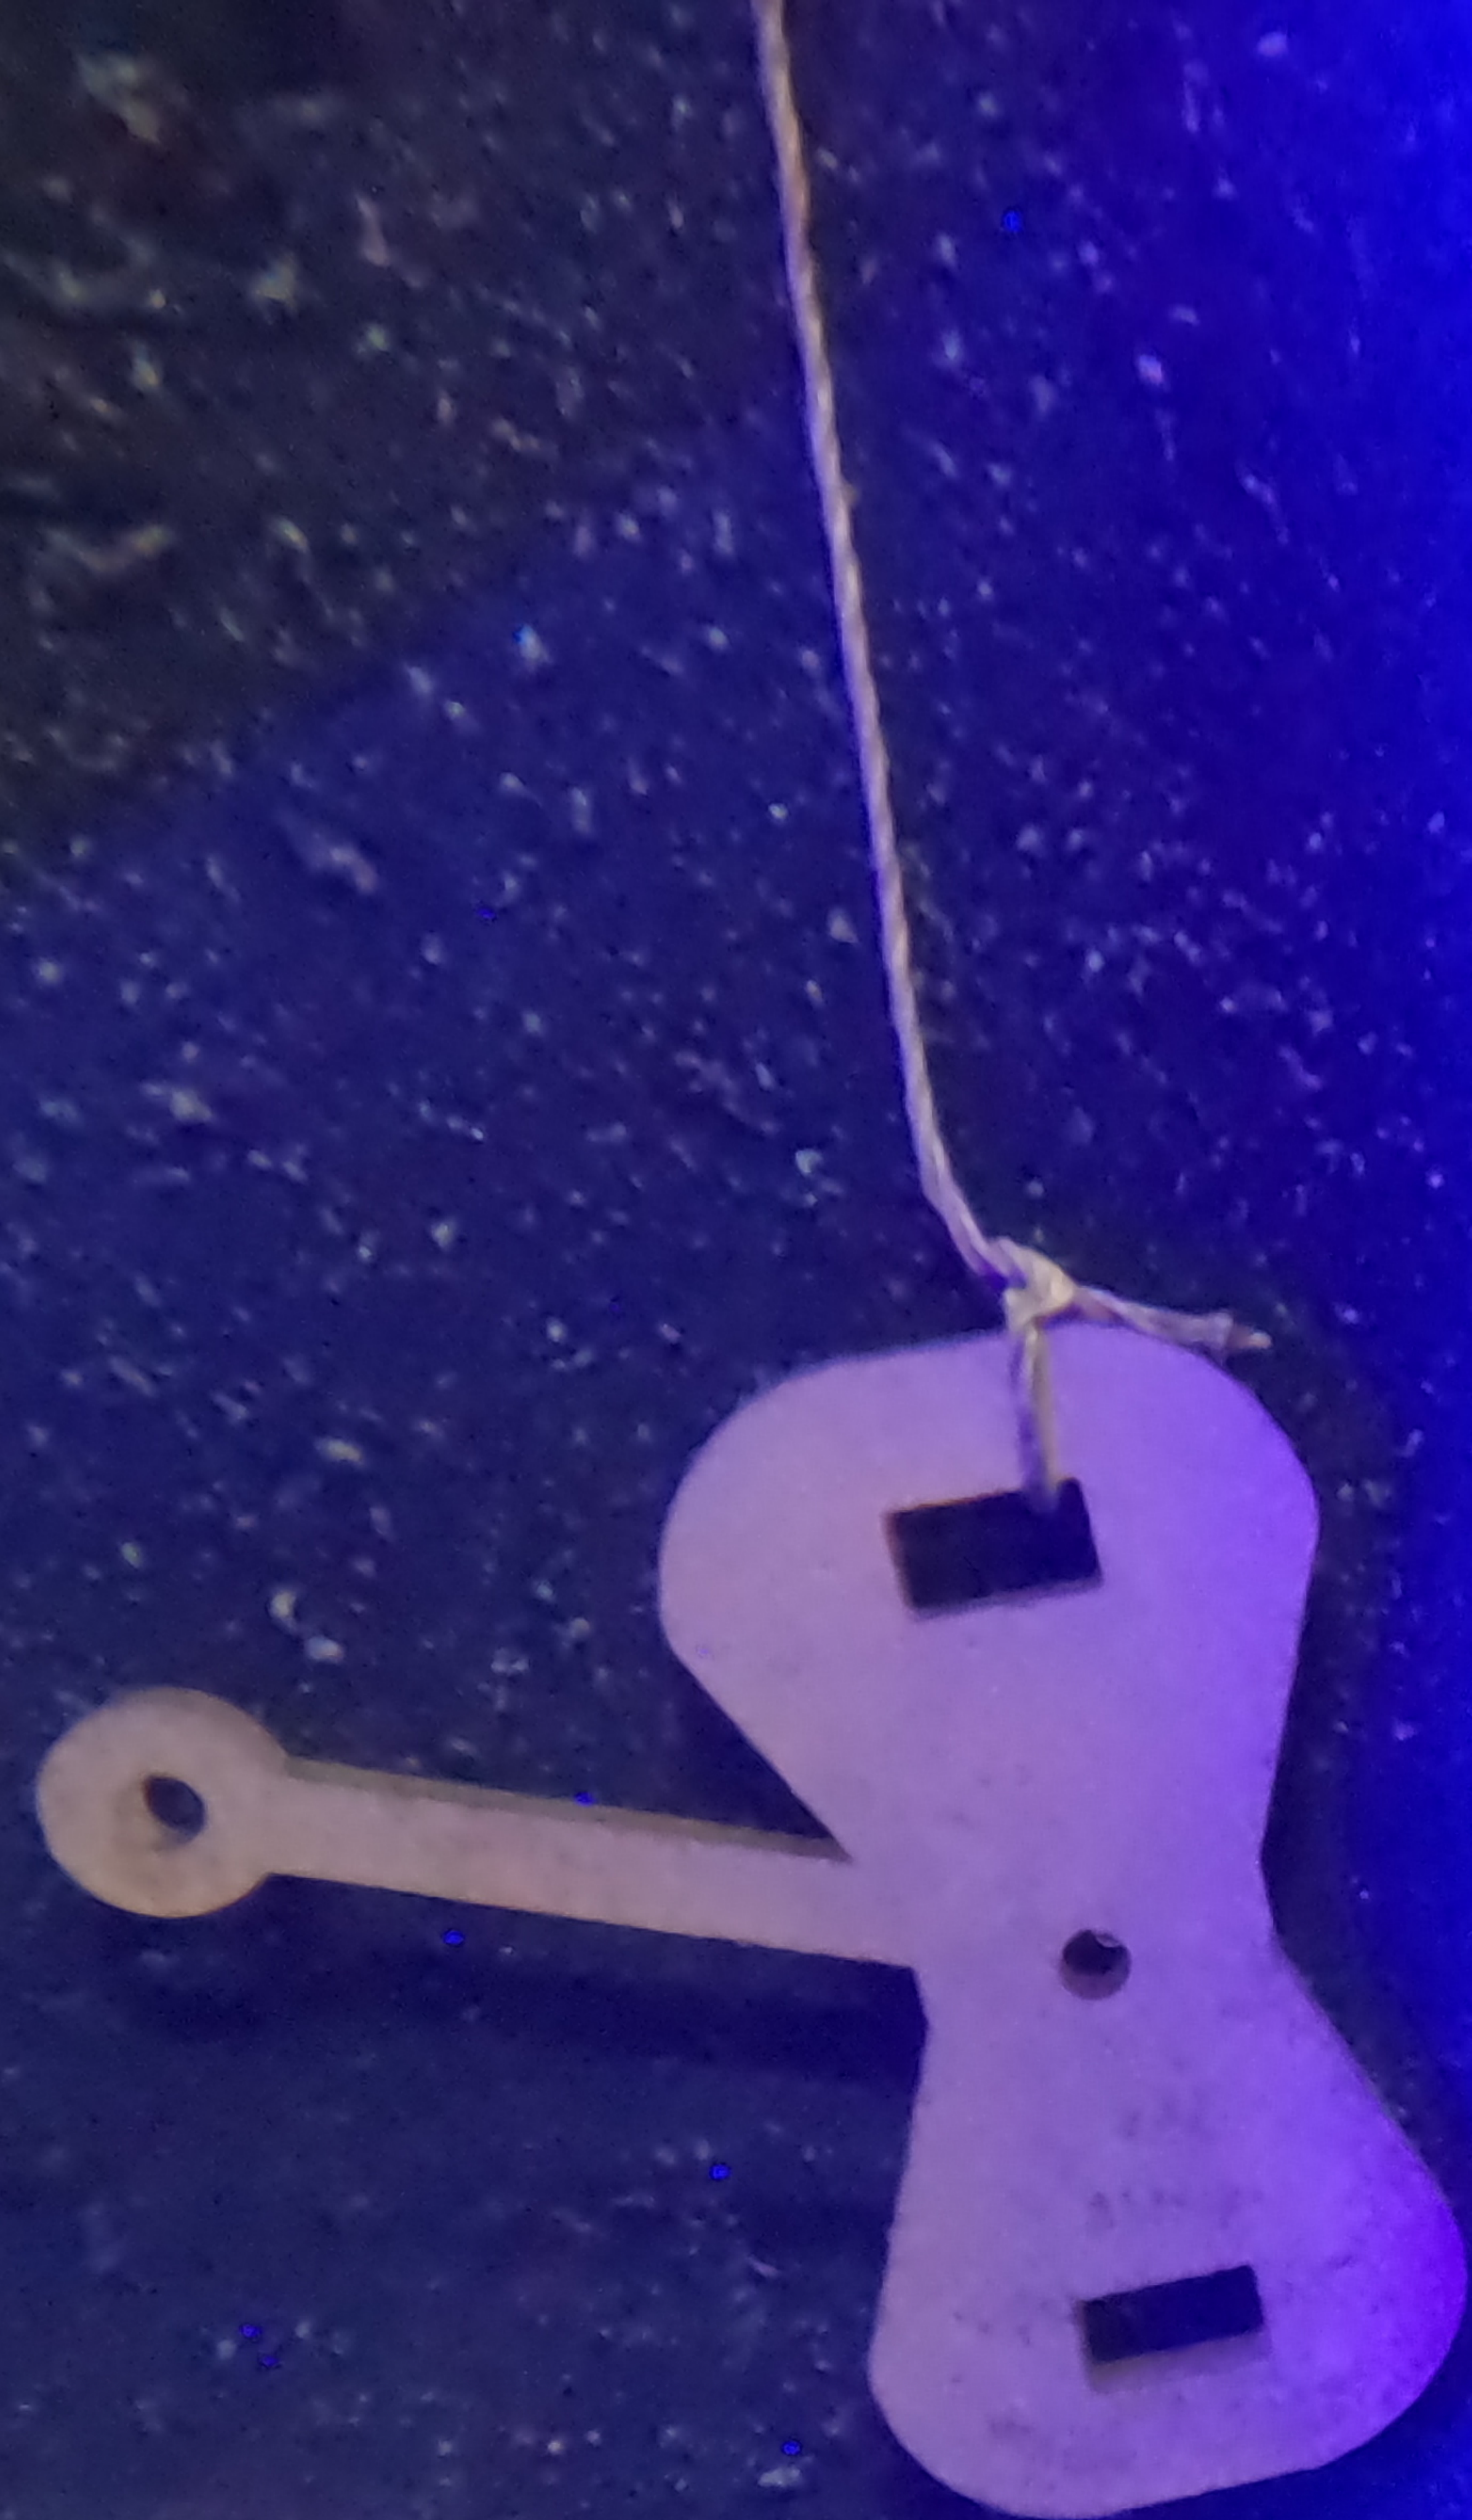

Supplement: Supplementary file 2394 [file G0015972.pdf › Level_2_2/G0015972.pdf]

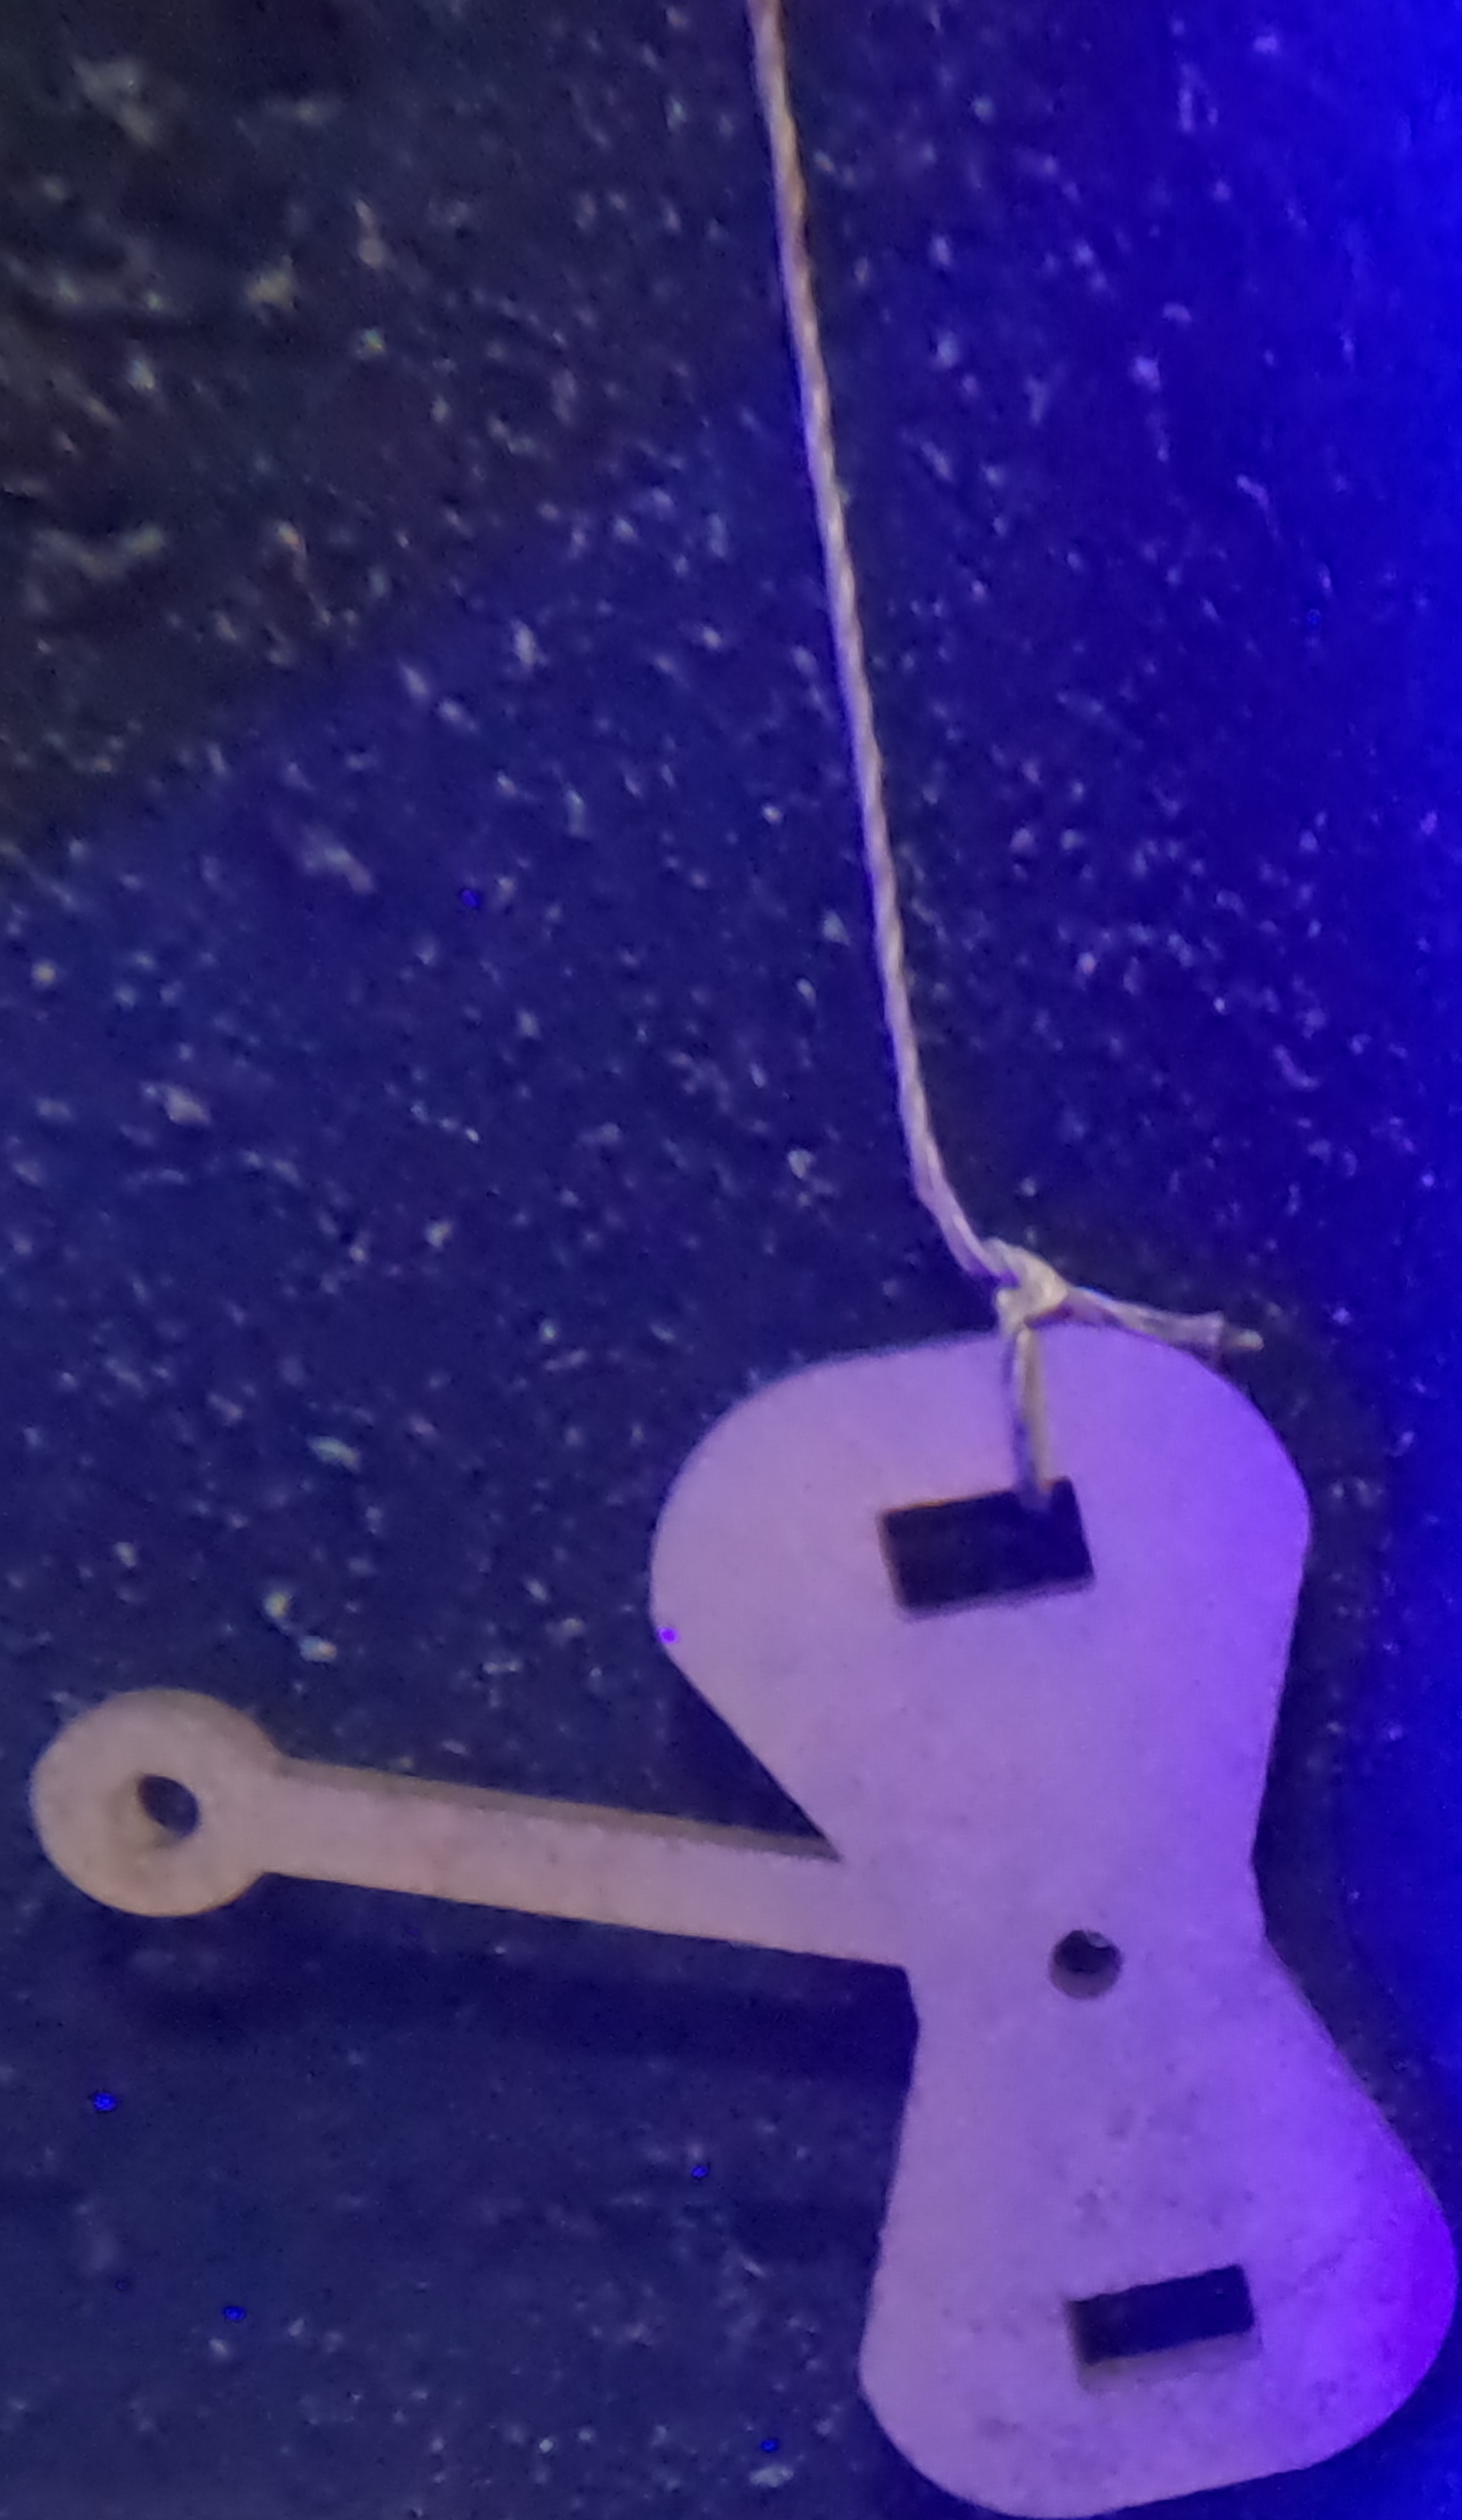

Supplement: Supplementary file 2395 [file G0015973.pdf › Level_2_2/G0015973.pdf]

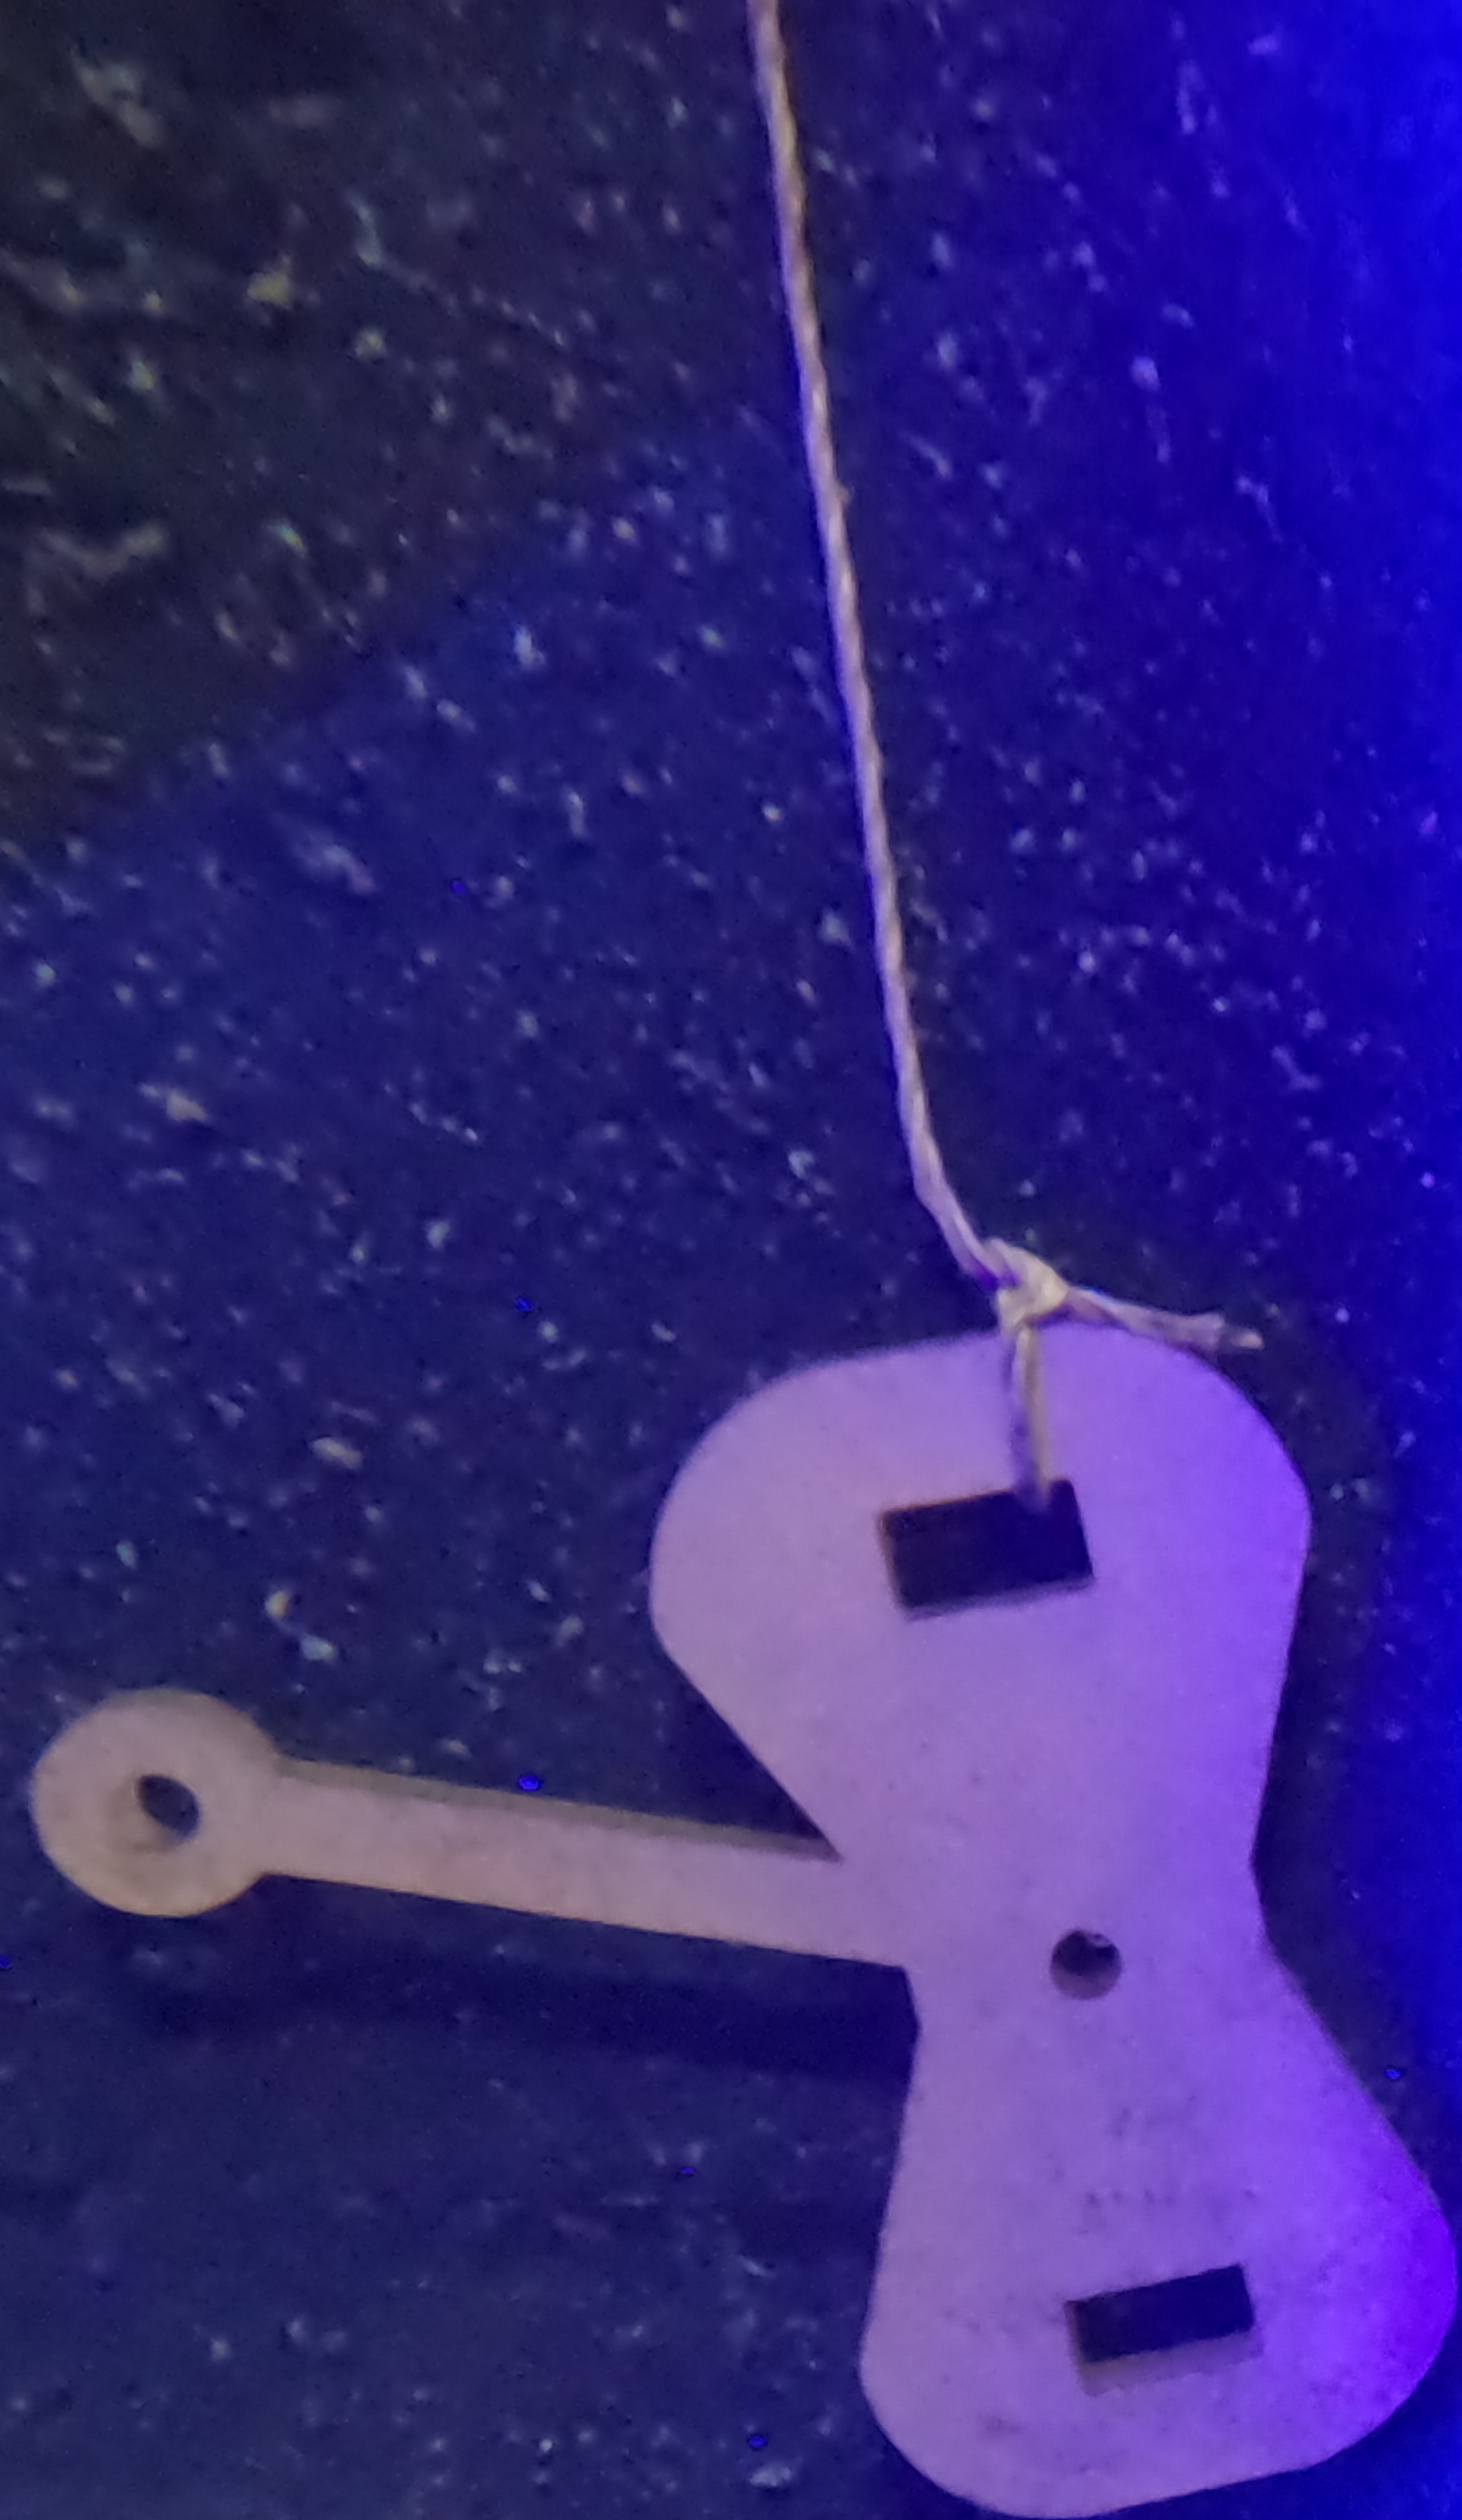

Supplement: Supplementary file 2396 [file G0015974.pdf › Level_2_2/G0015974.pdf]

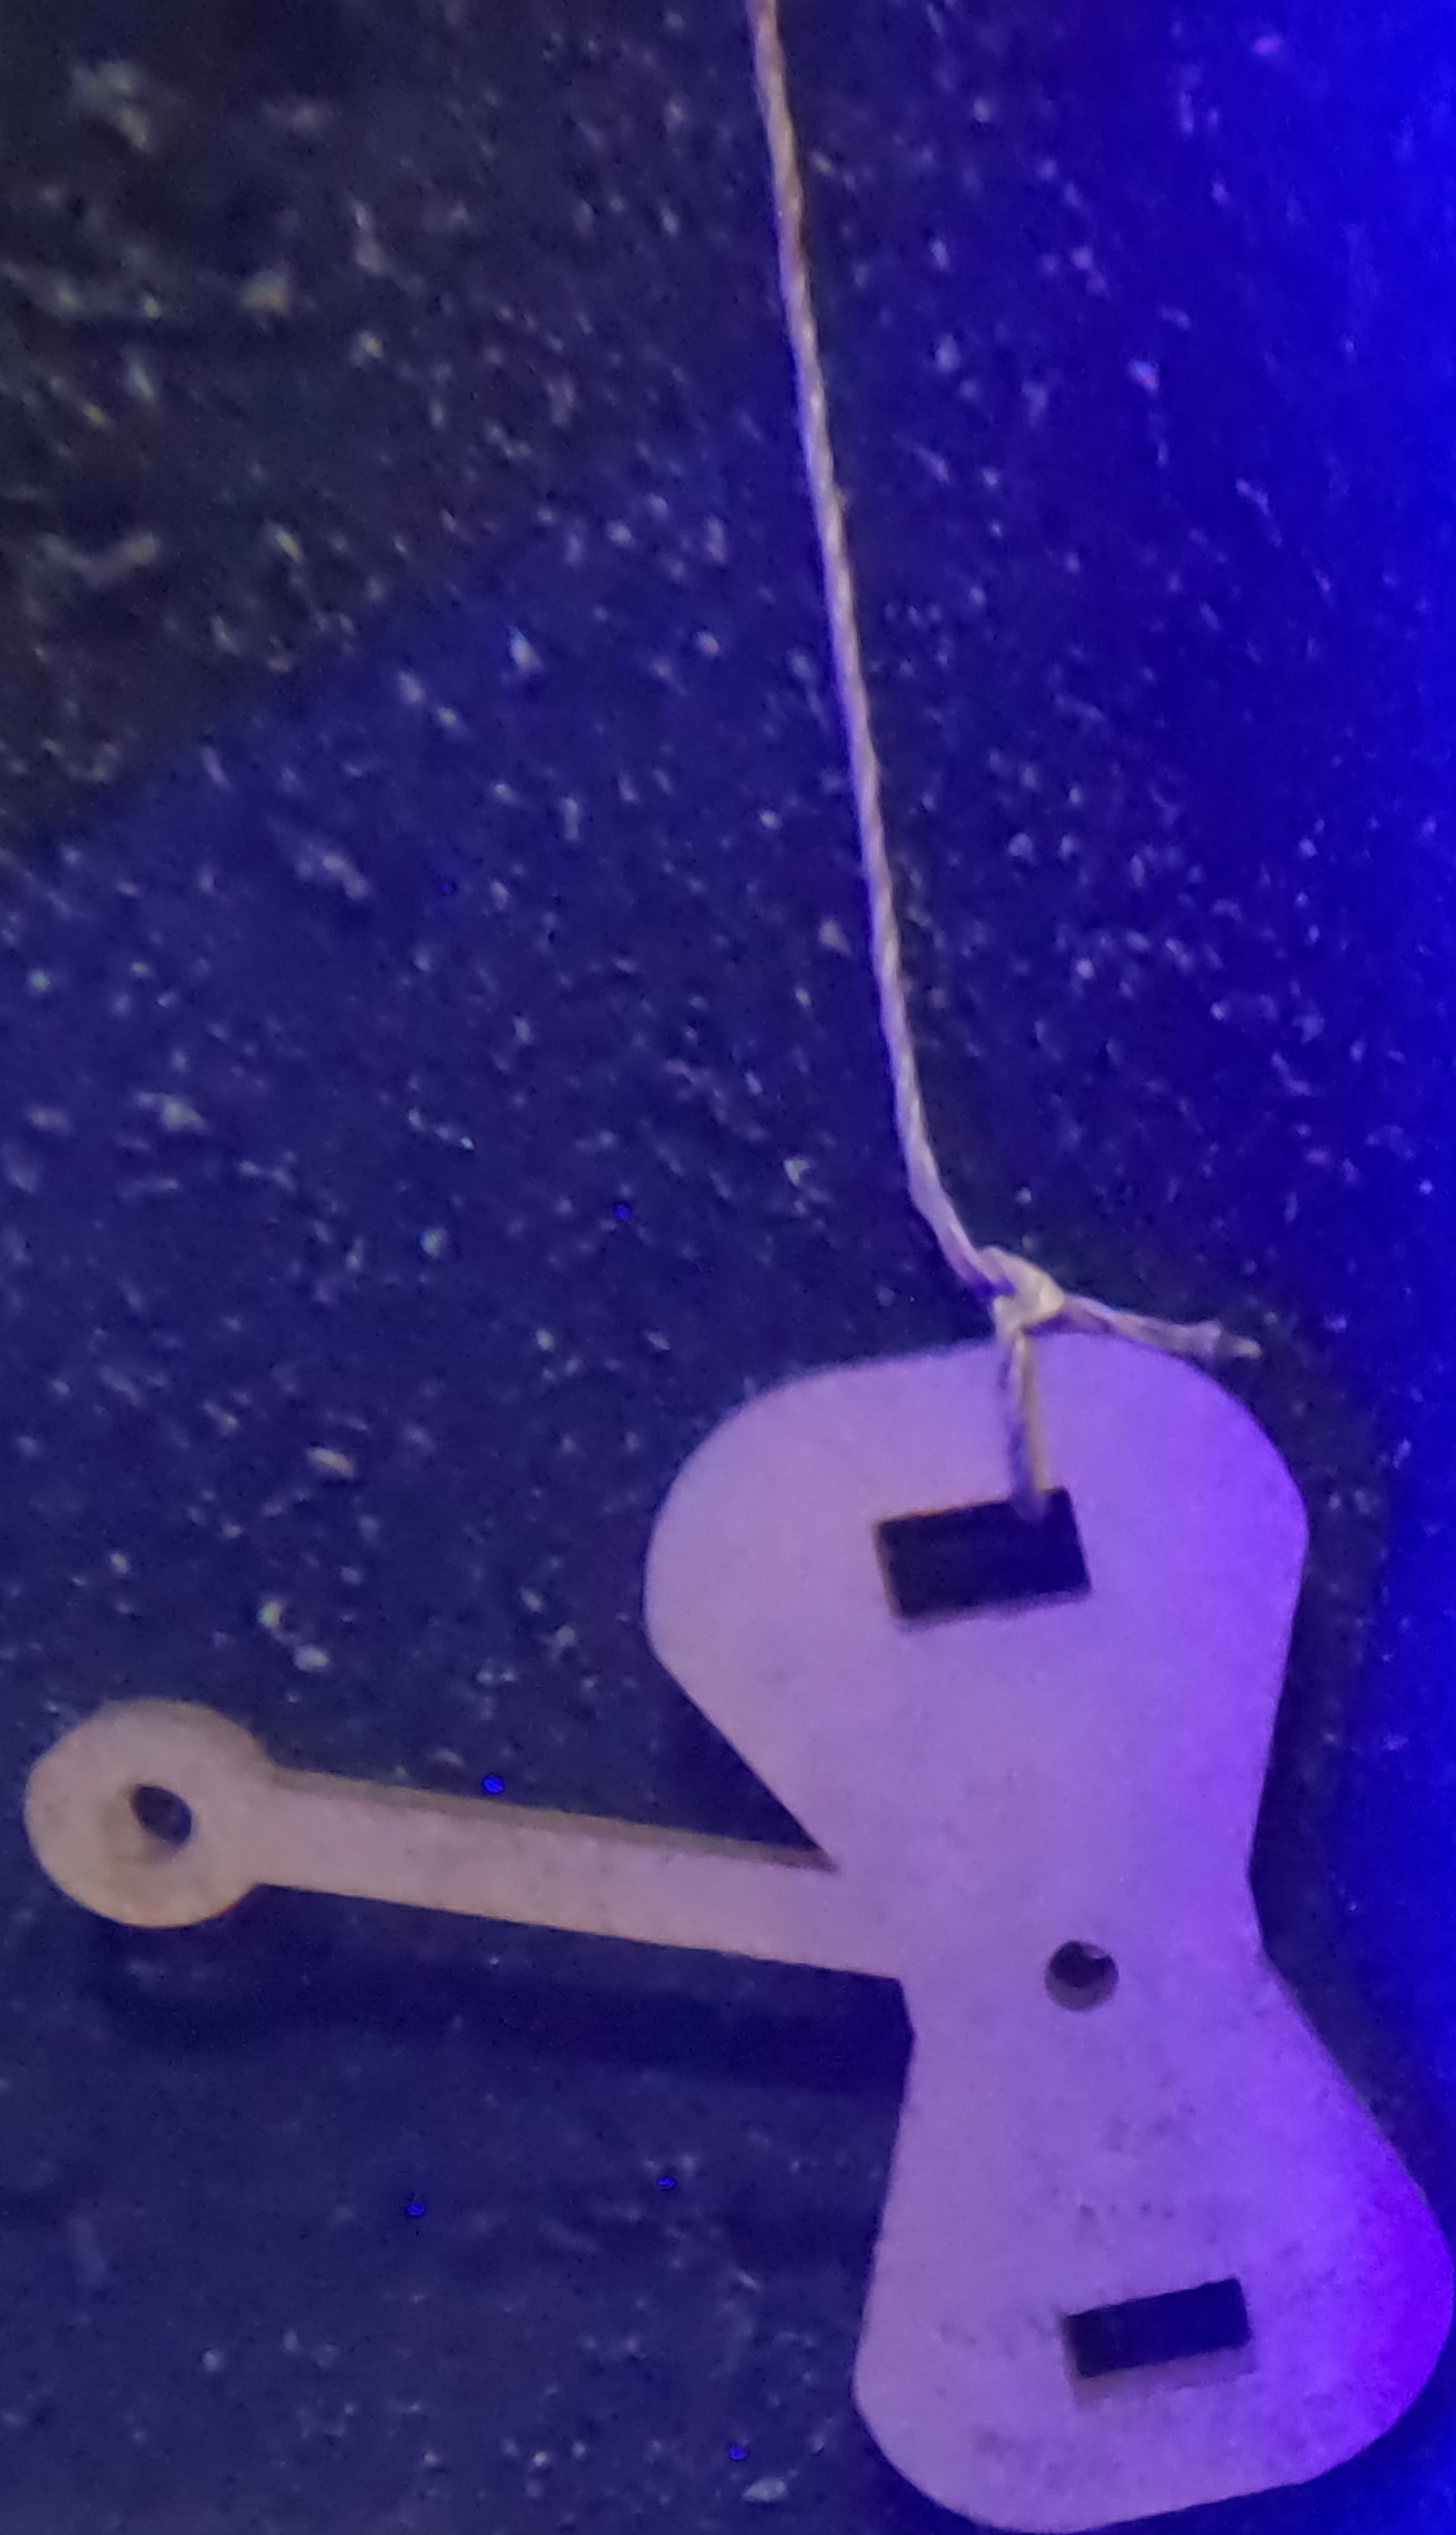

Supplement: Supplementary file 2397 [file G0015975.pdf › Level_2_2/G0015975.pdf]

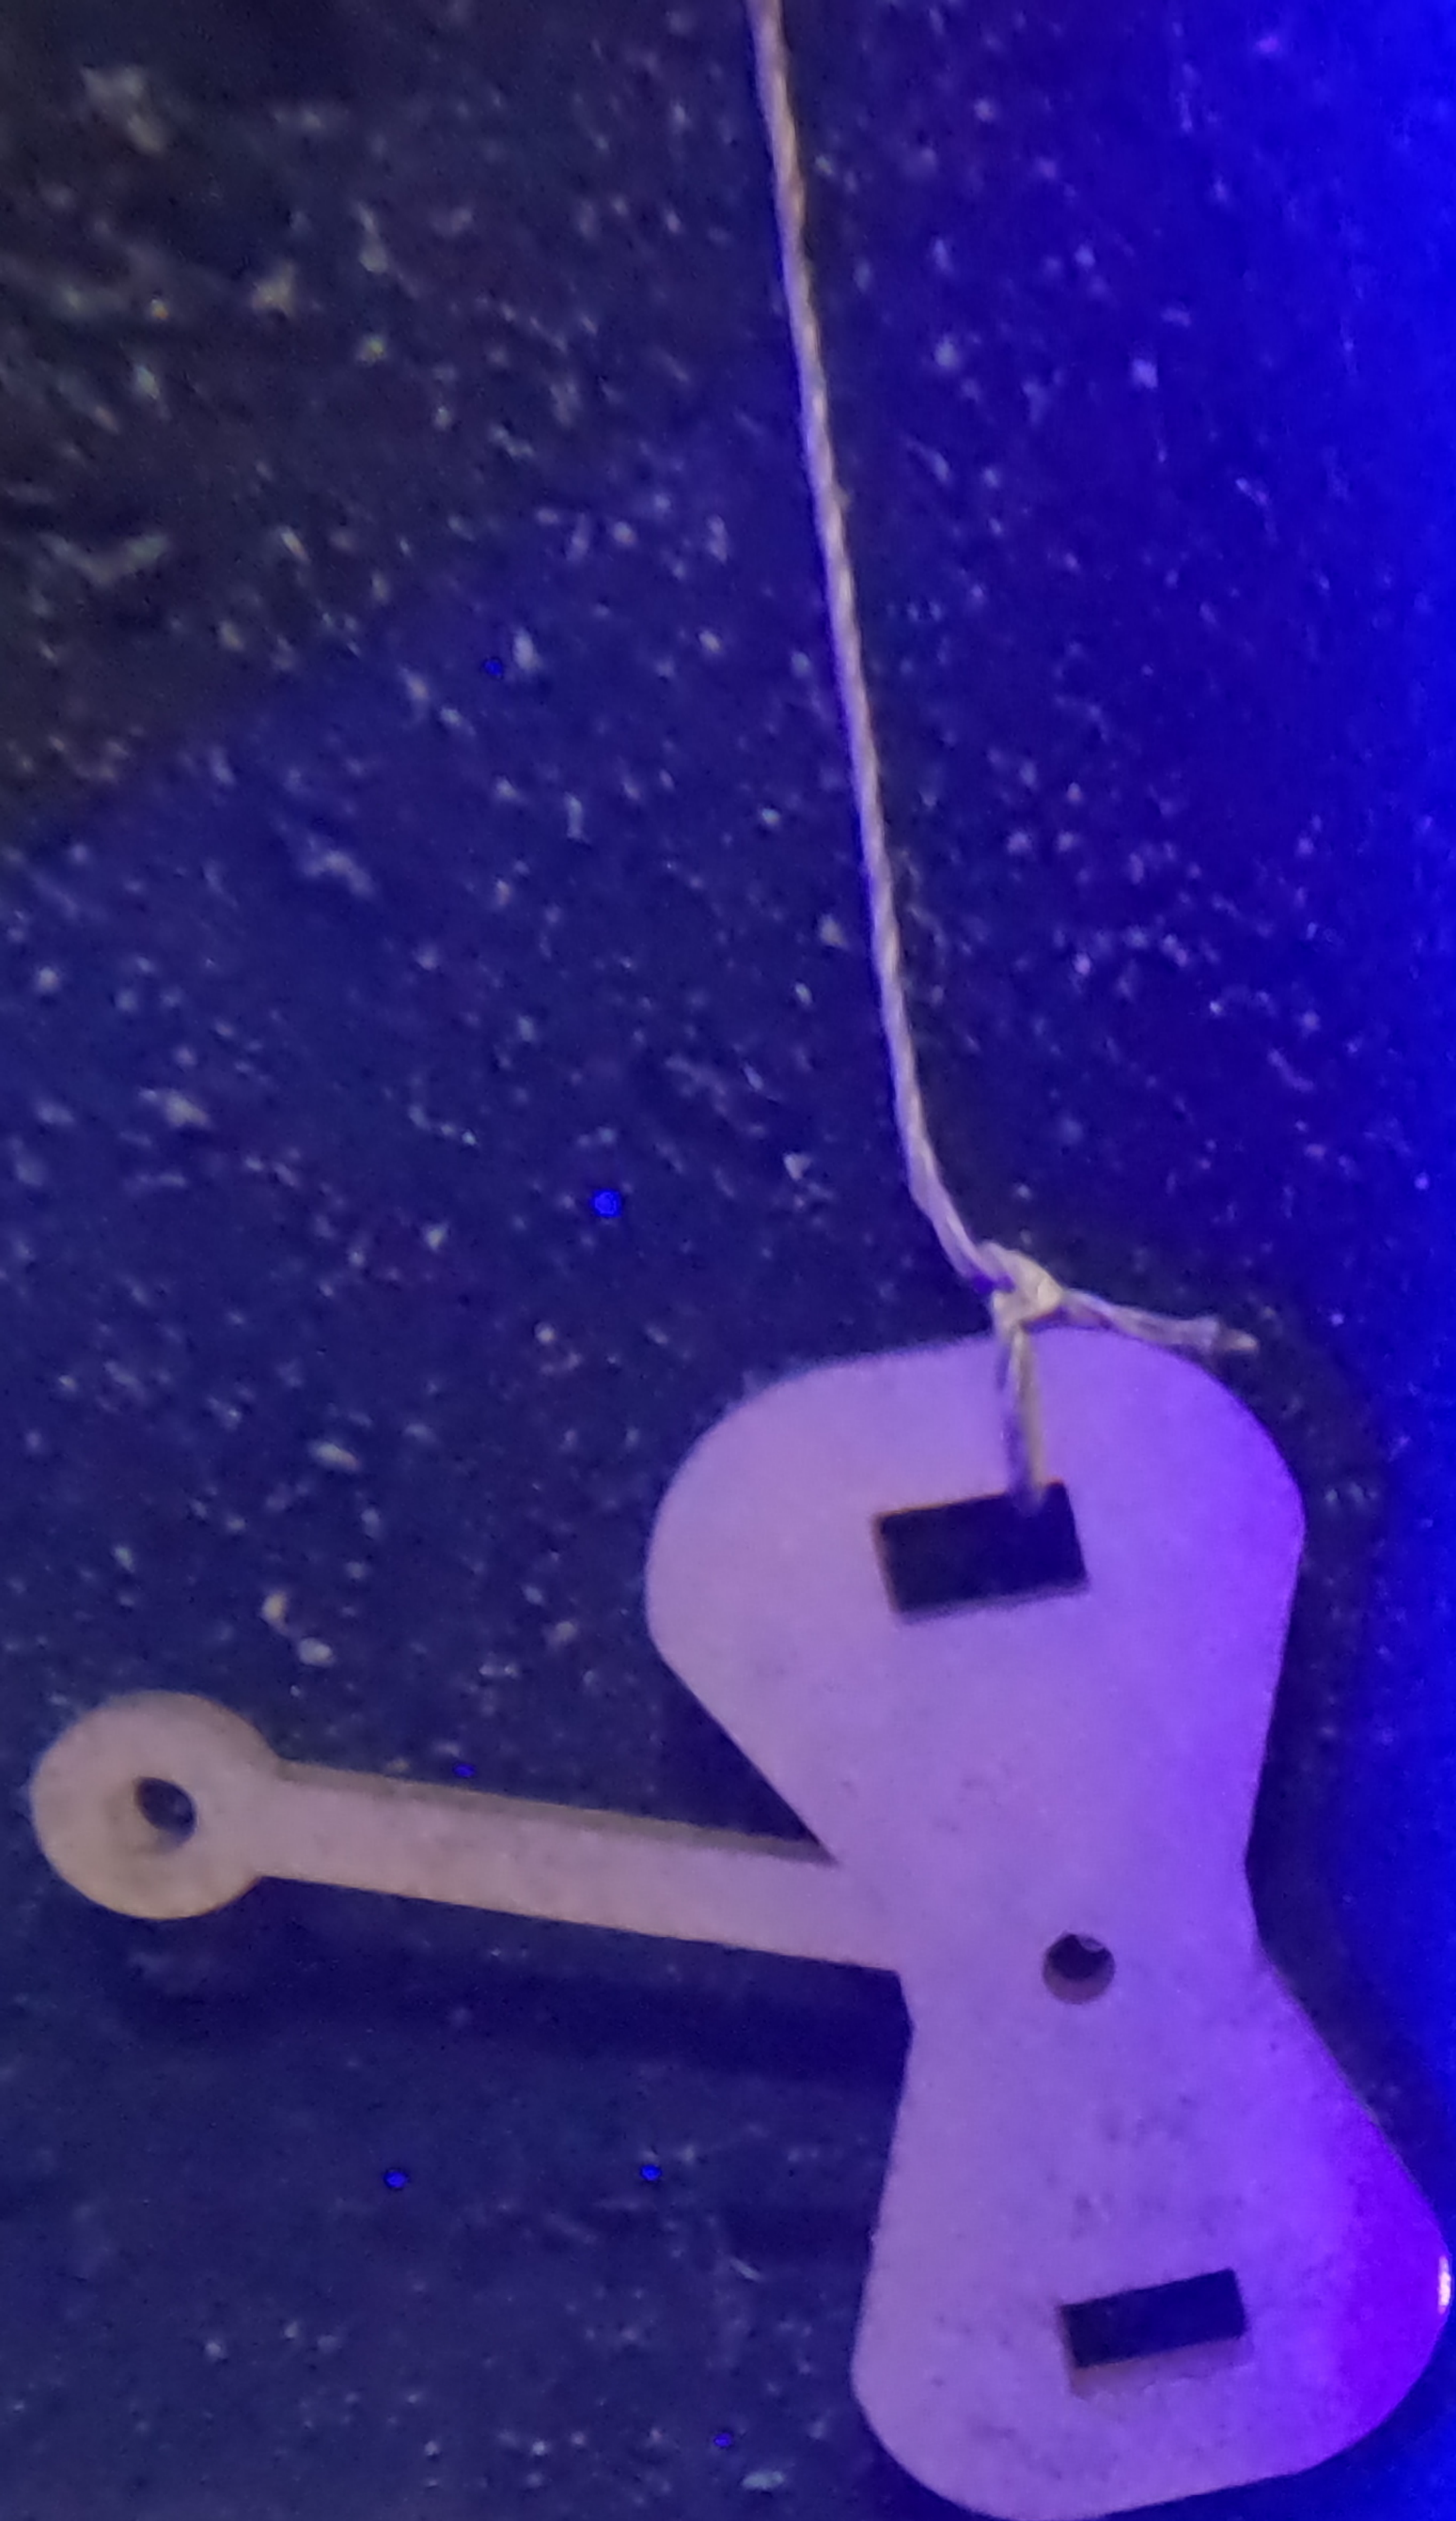

Supplement: Supplementary file 2398 [file G0015976.pdf › Level_2_2/G0015976.pdf]

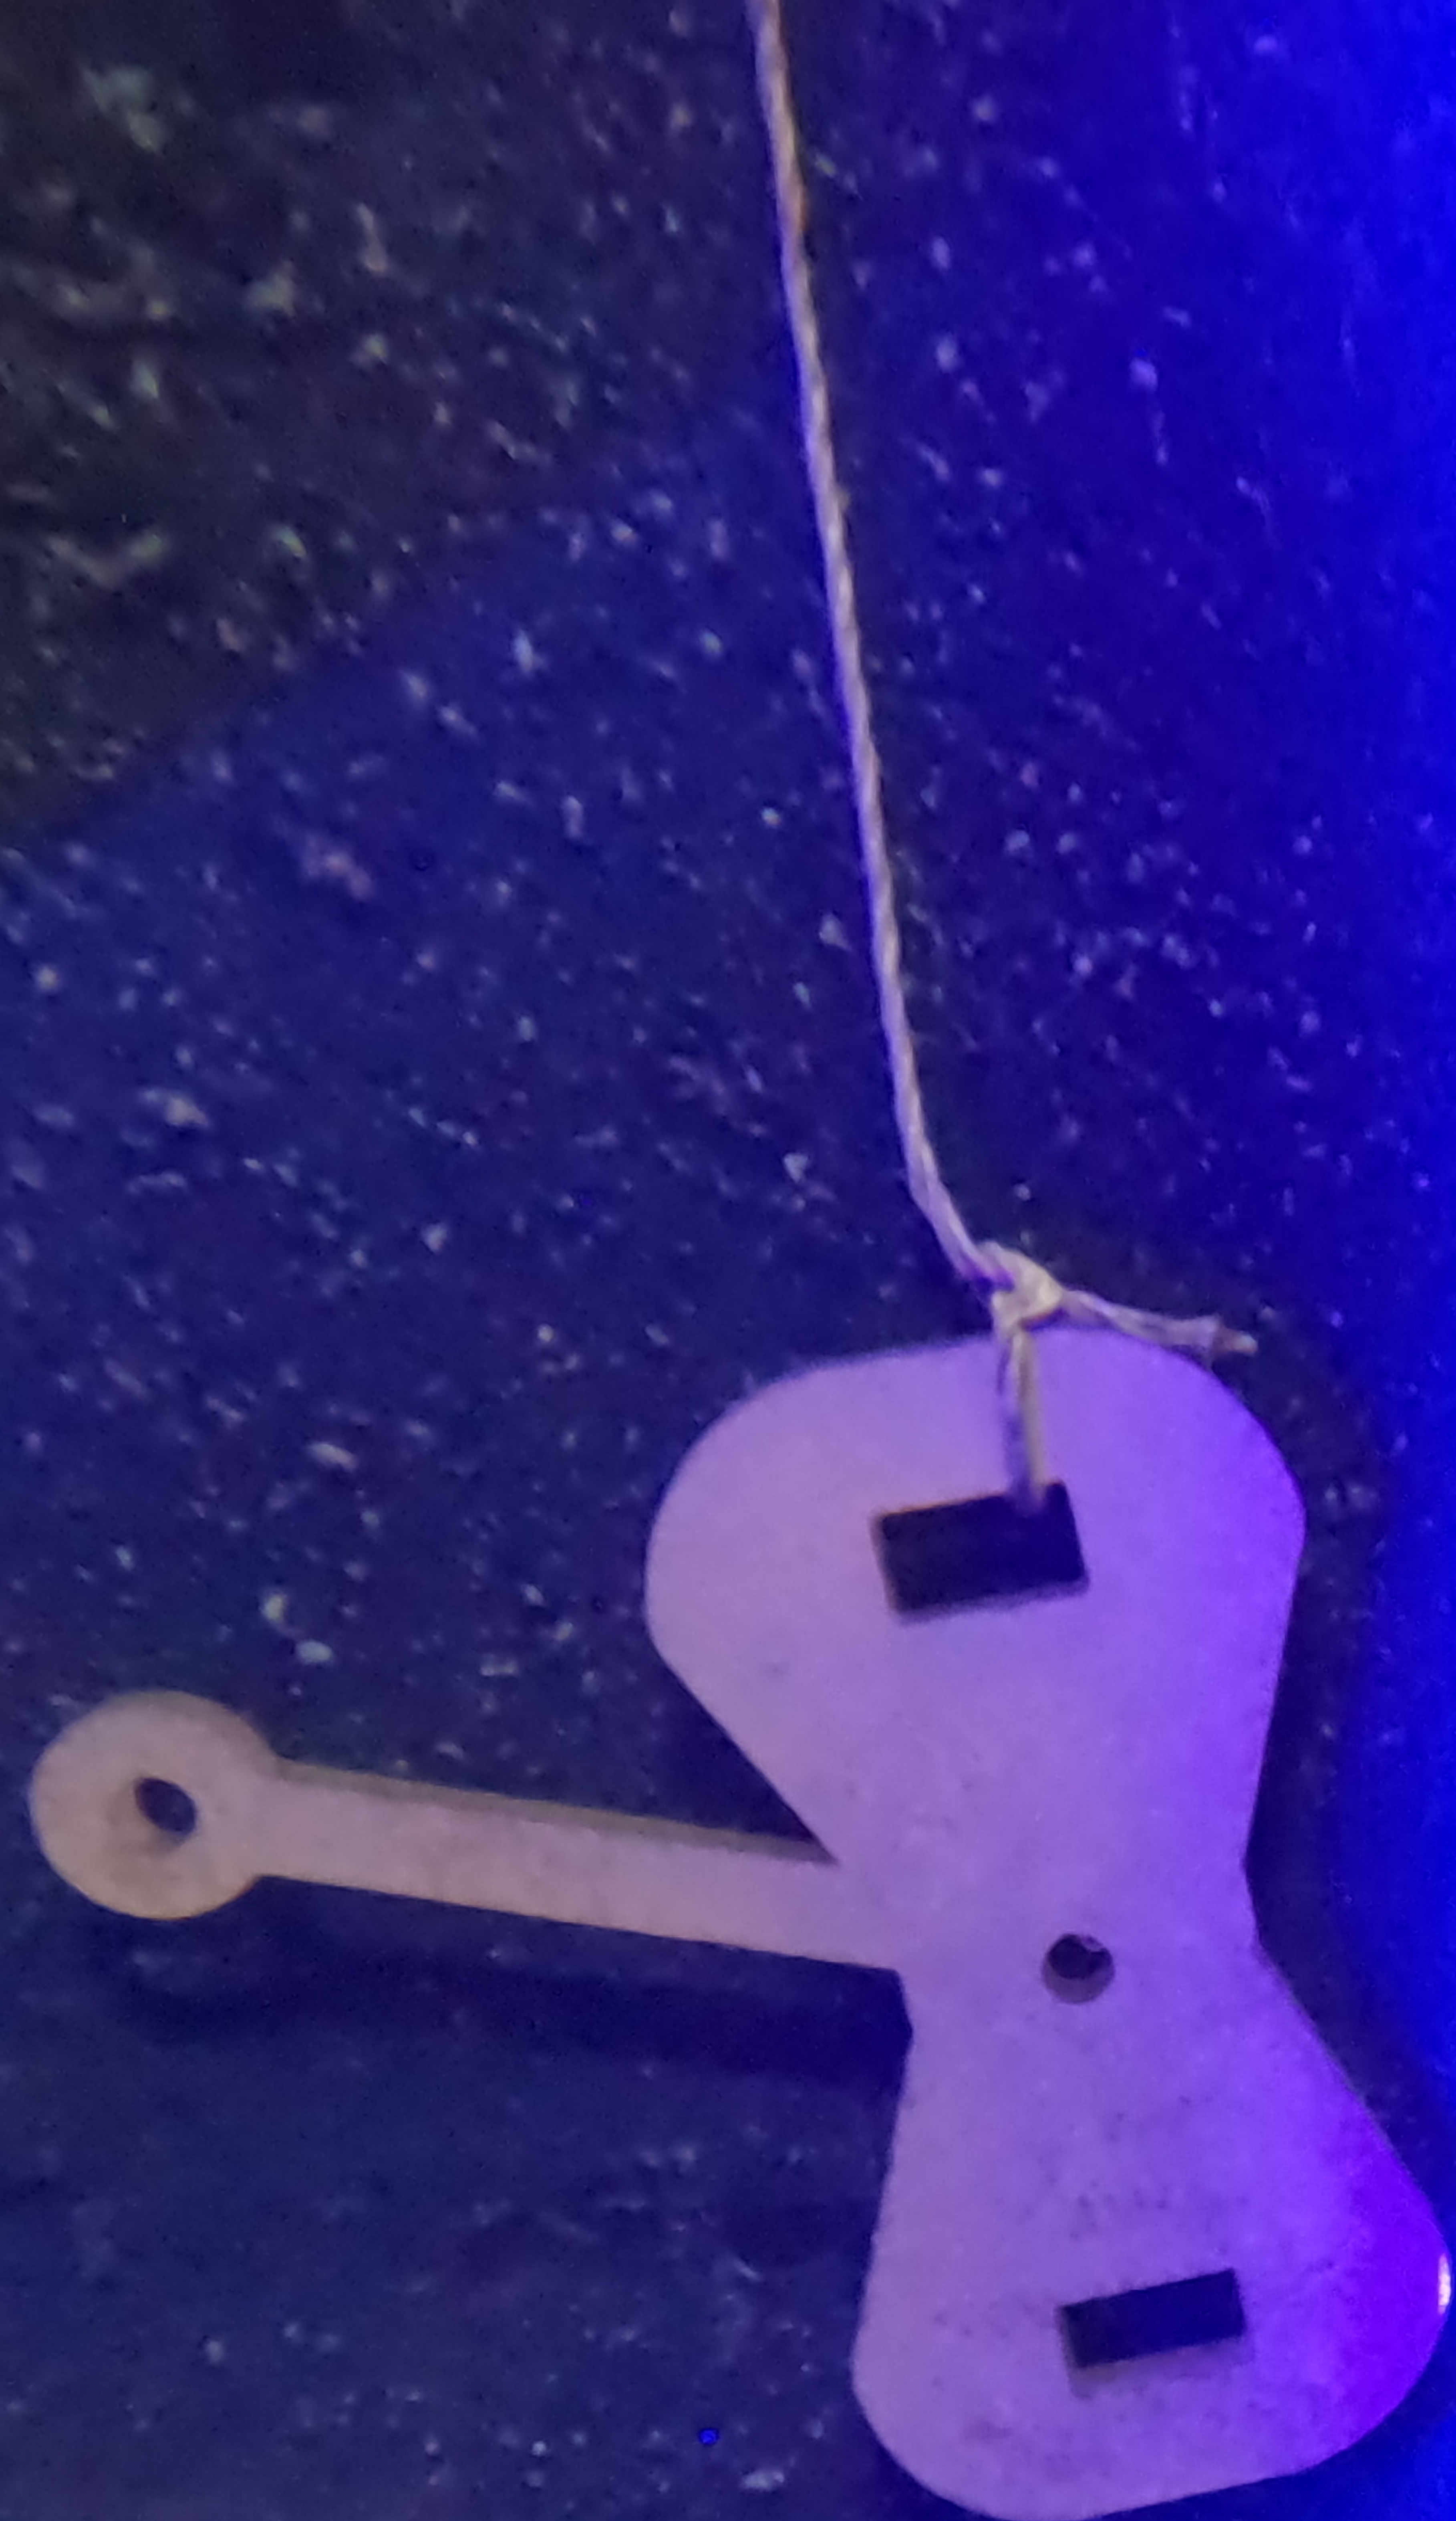

Supplement: Supplementary file 2399 [file G0015977.pdf › Level_2_2/G0015977.pdf]

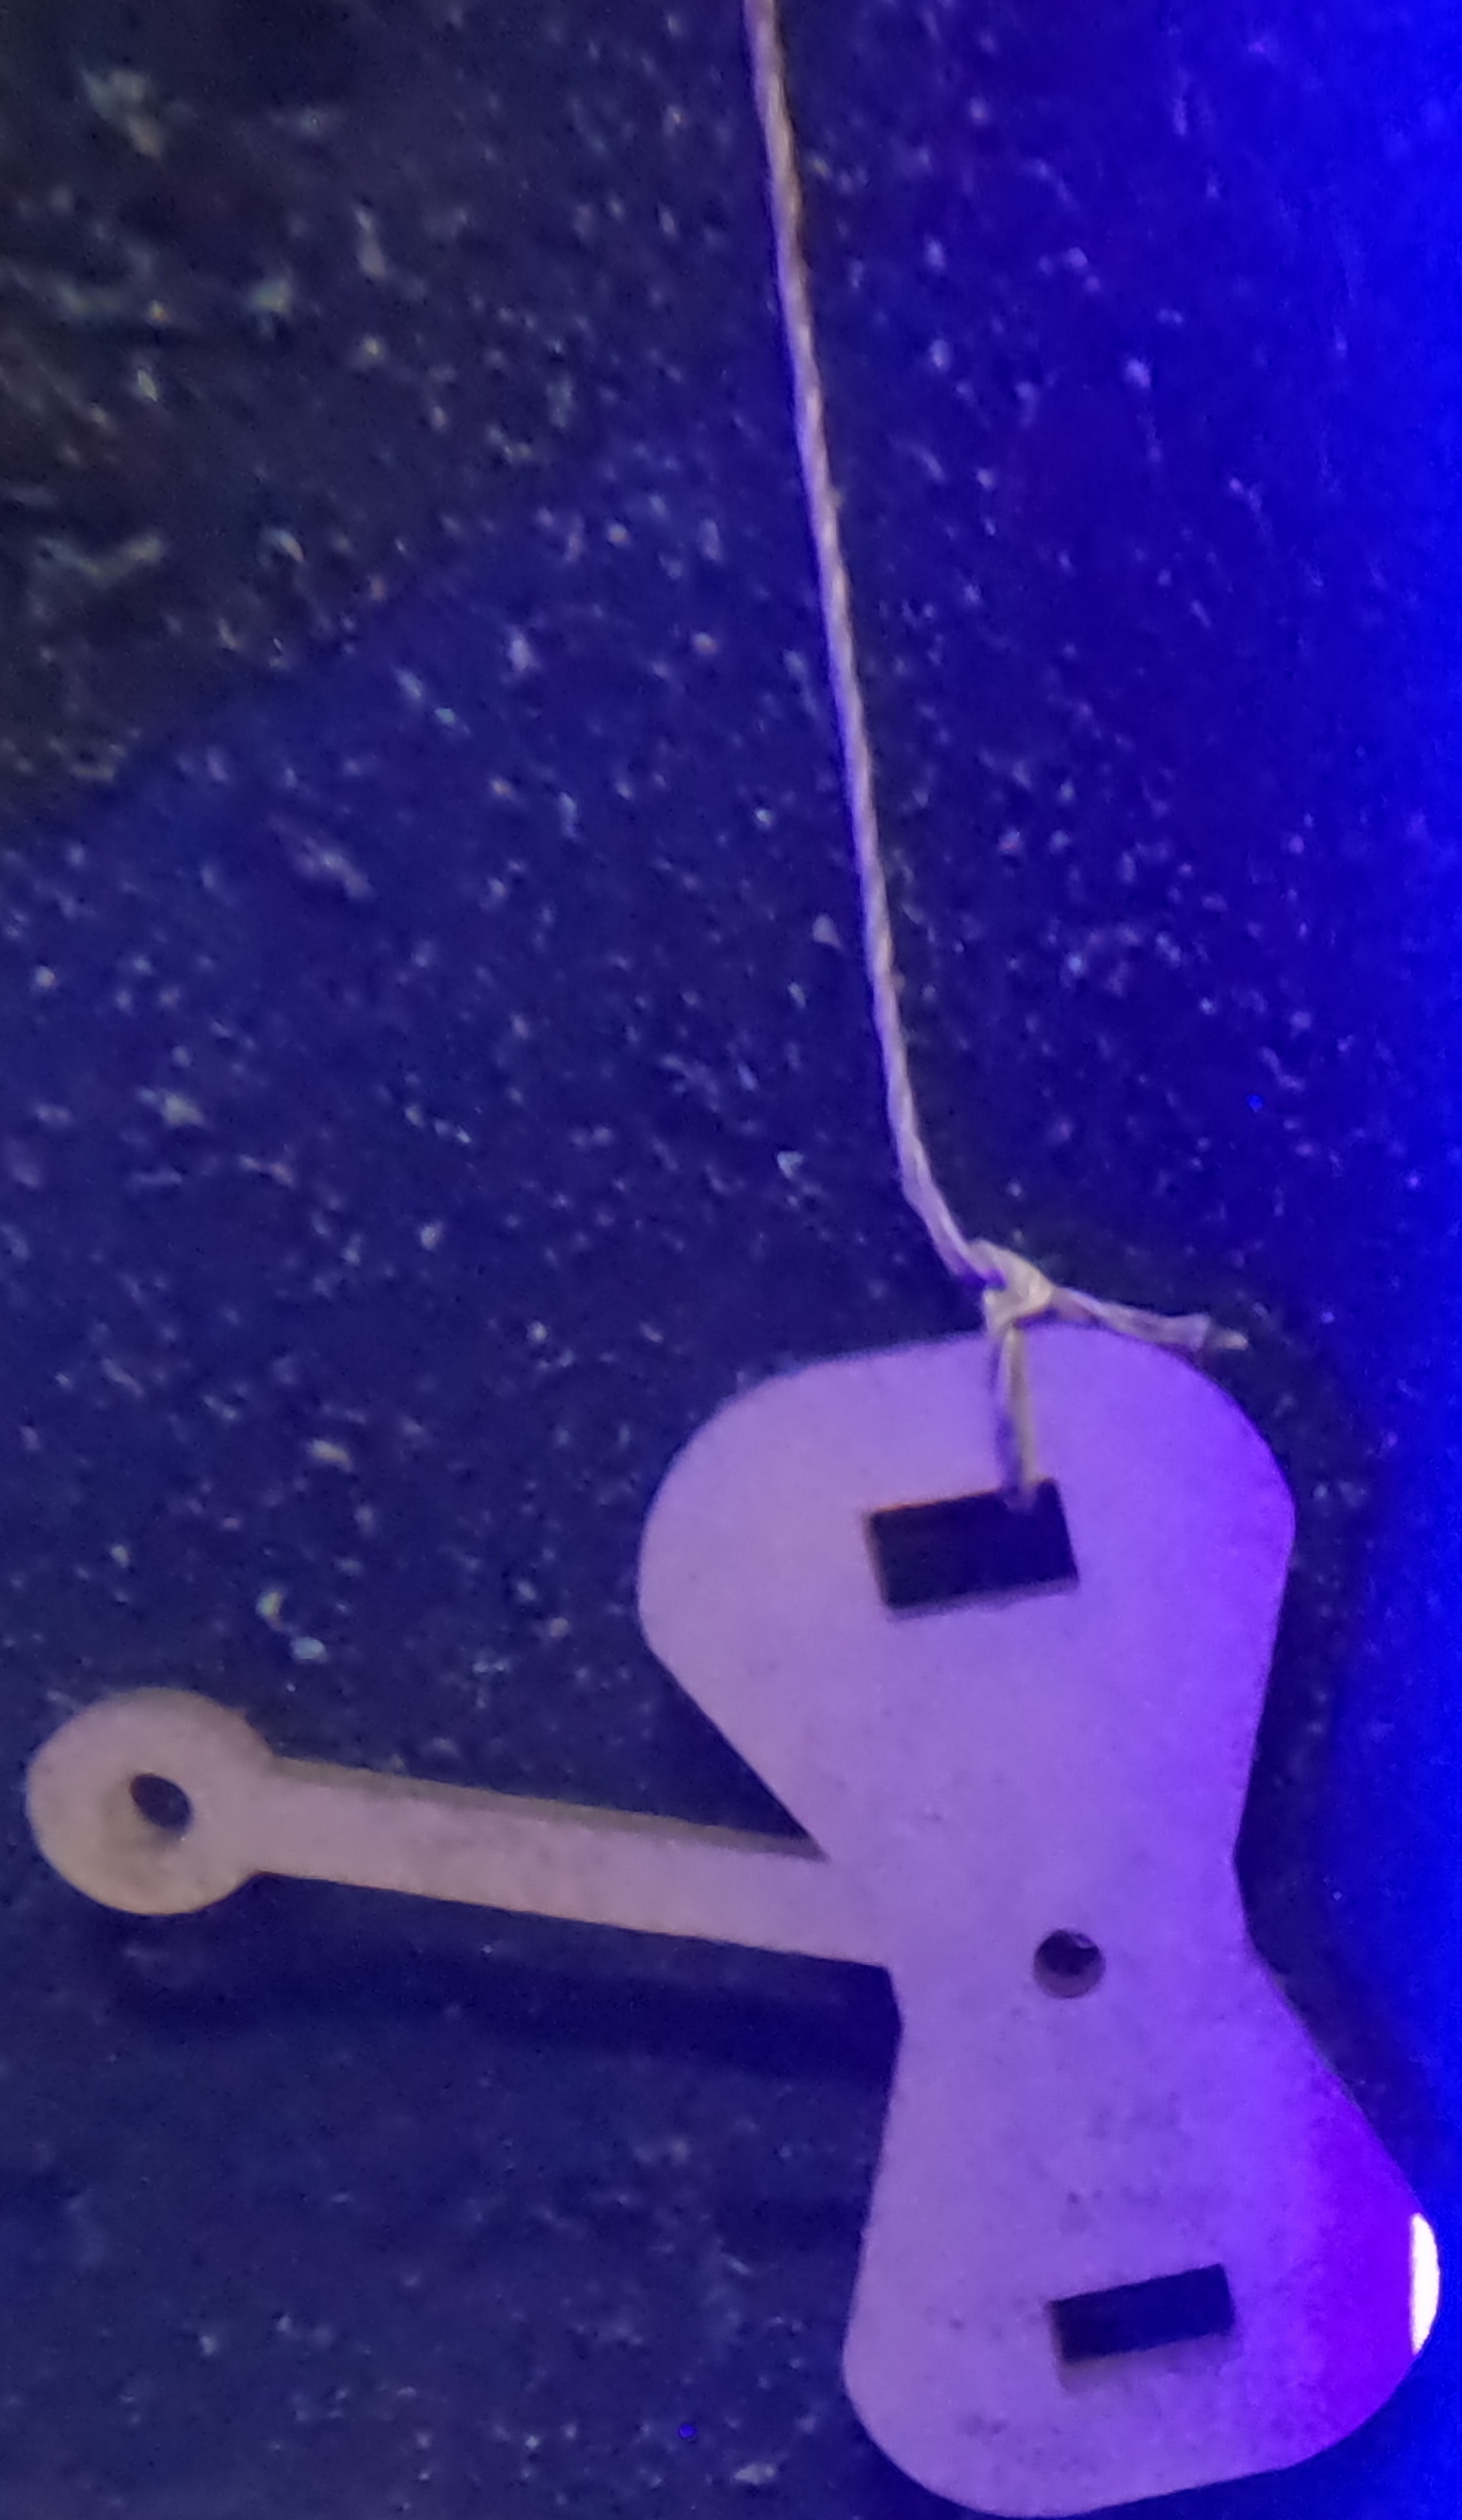

Supplement: Supplementary file 2400 [file G0015978.pdf › Level_2_2/G0015978.pdf]

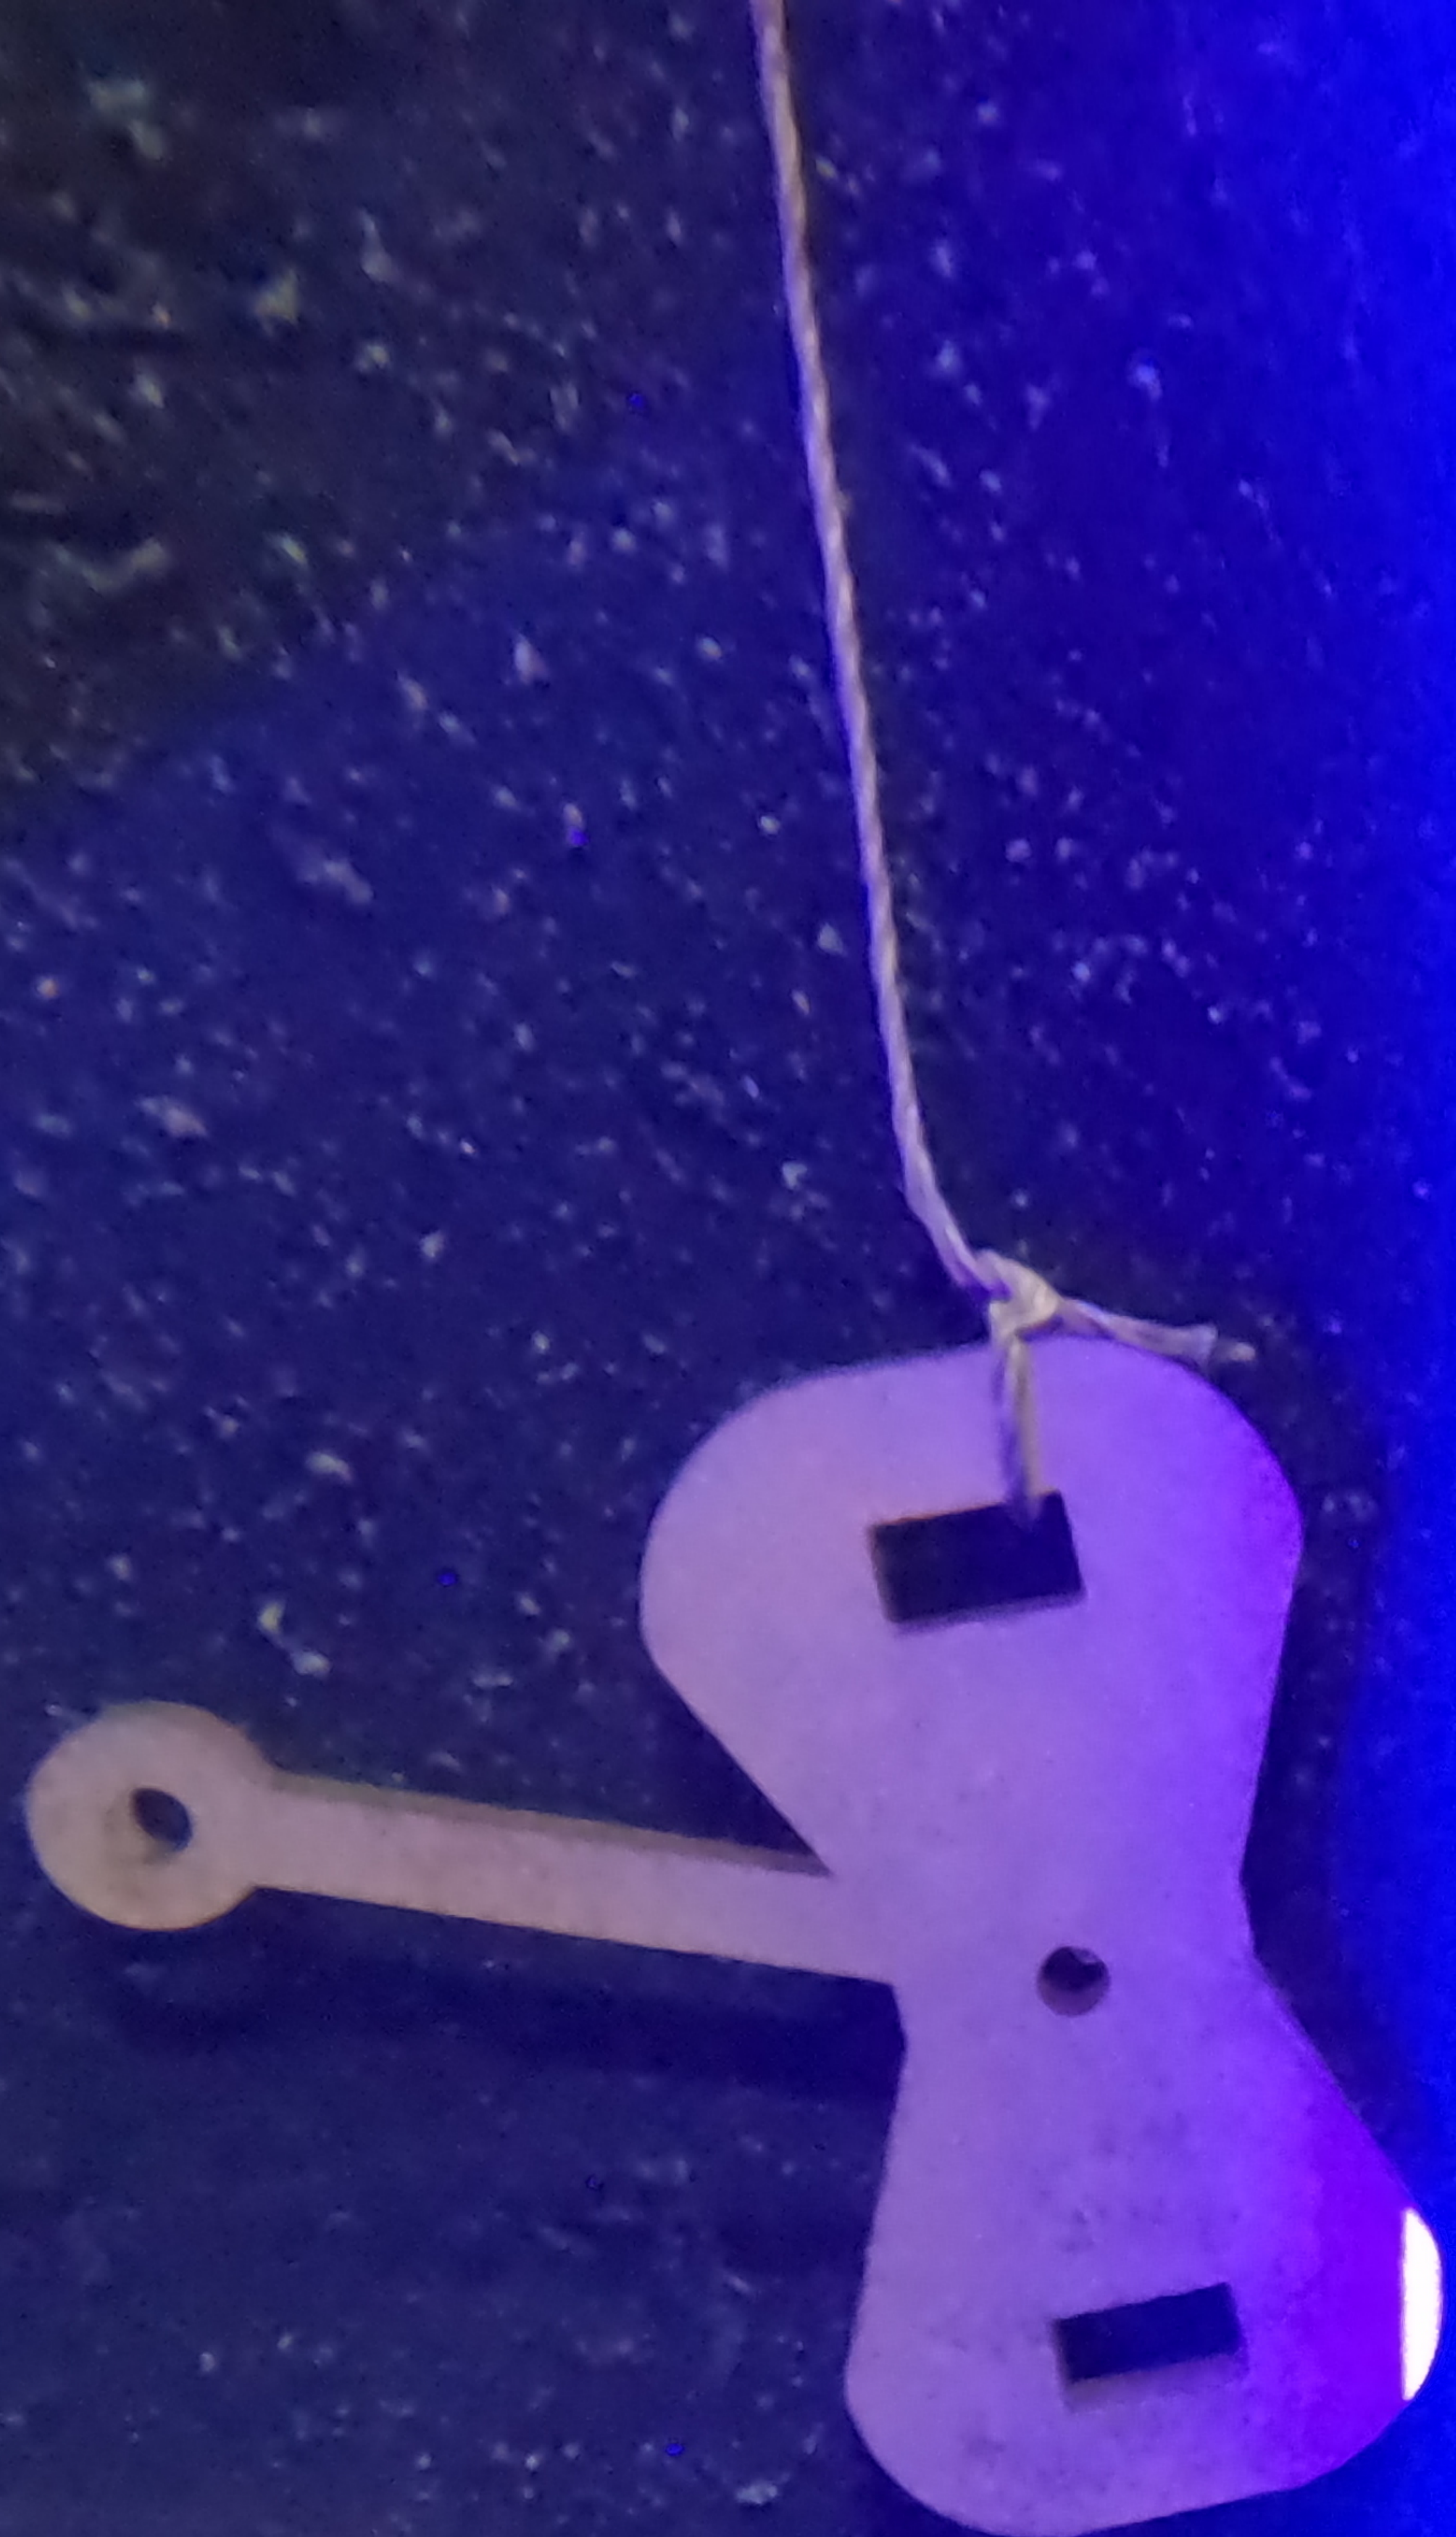

Supplement: Supplementary file 2401 [file G0015979.pdf › Level_2_2/G0015979.pdf]

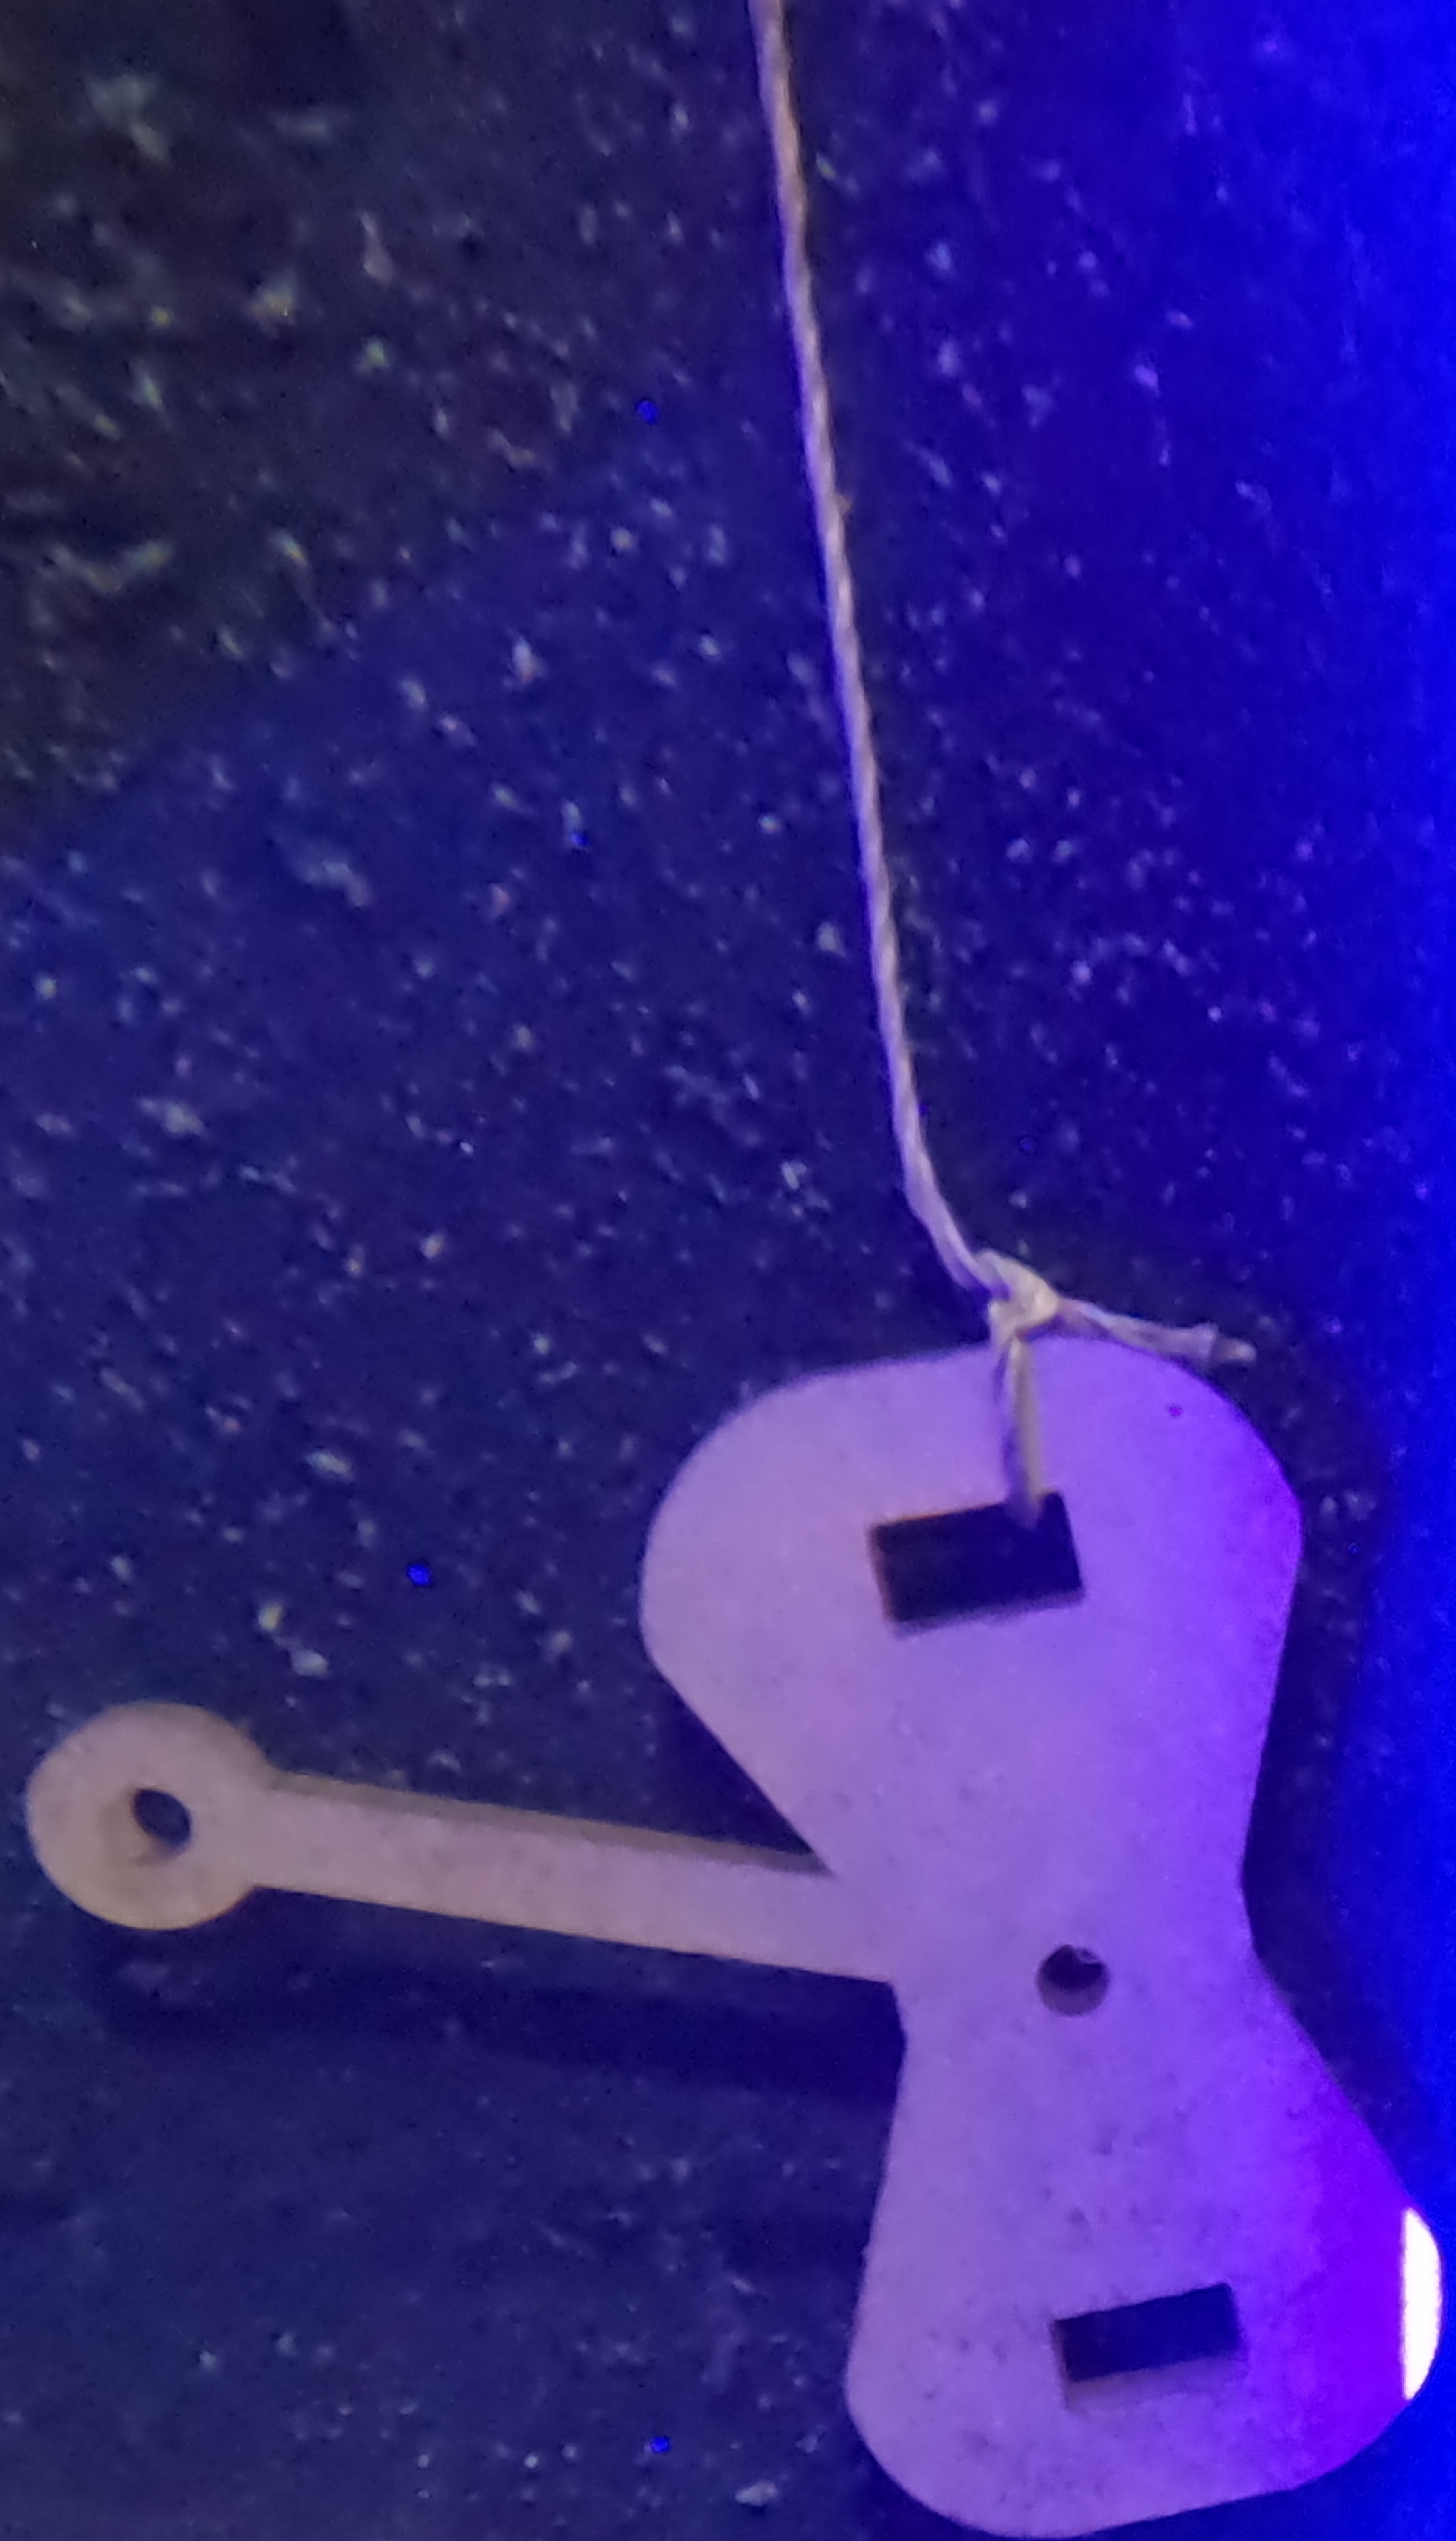

Supplement: Supplementary file 2402 [file G0015980.pdf › Level_2_2/G0015980.pdf]

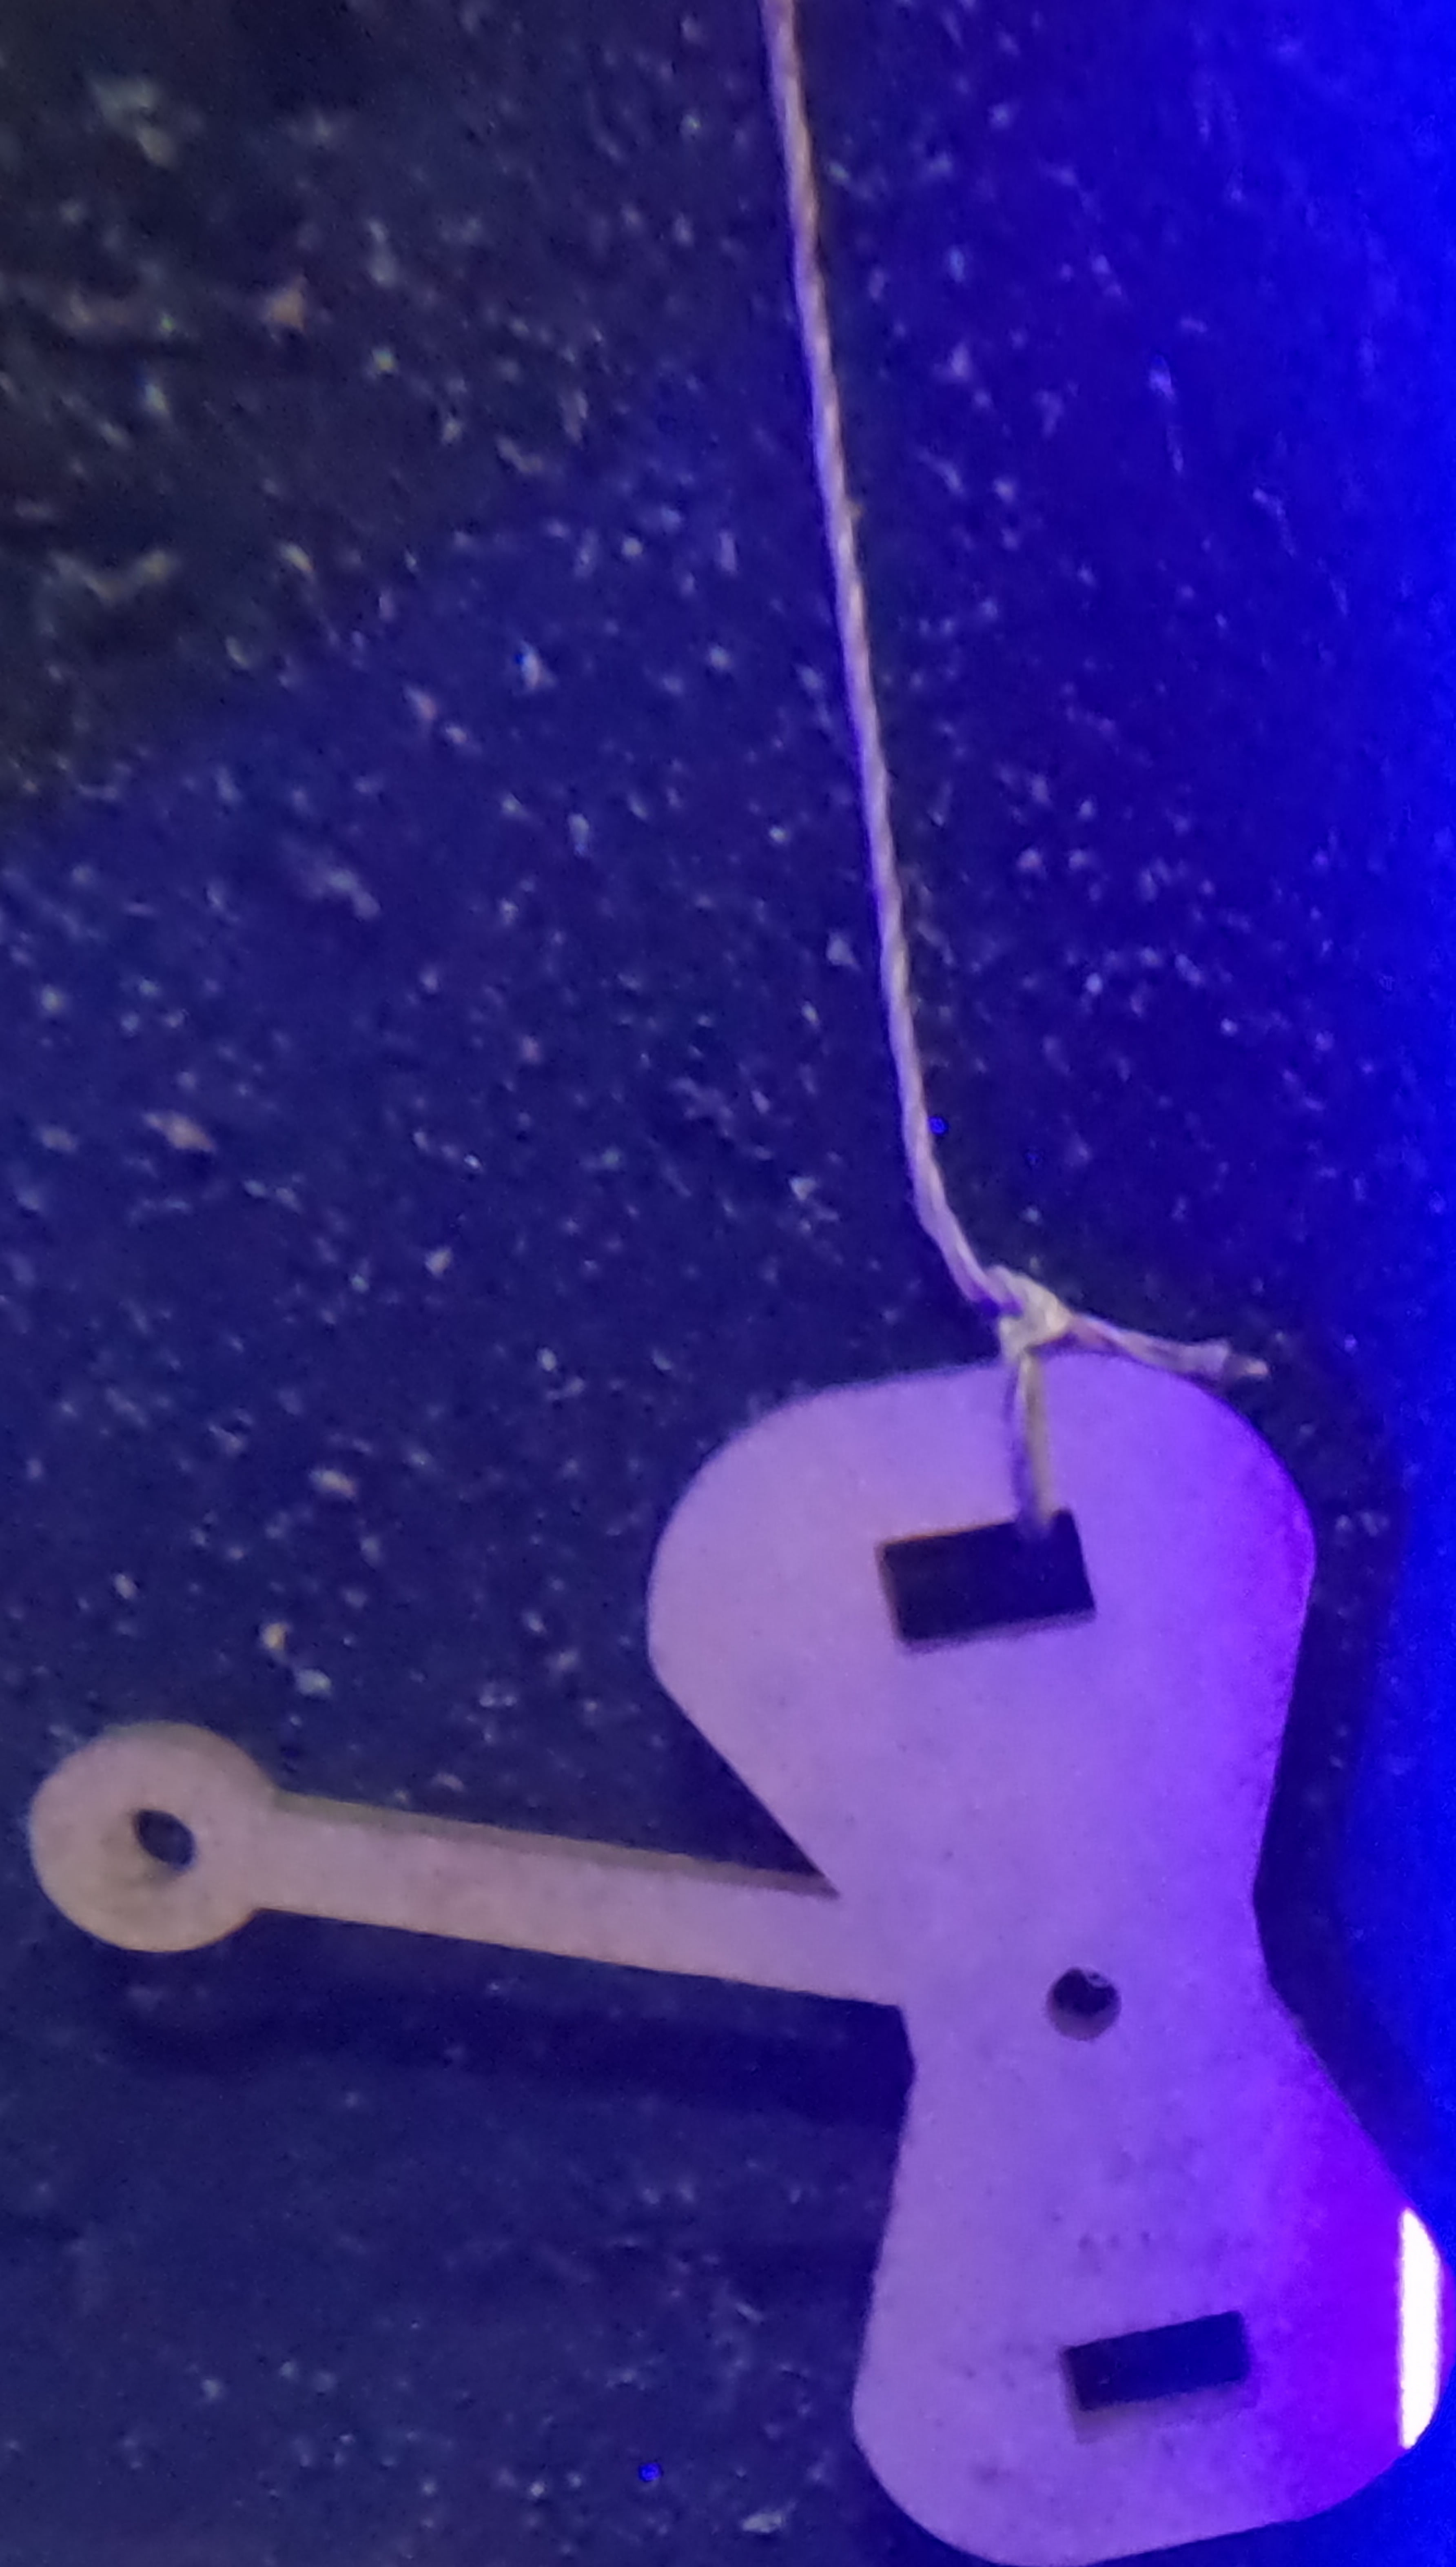

Supplement: Supplementary file 2403 [file G0015981.pdf › Level_2_2/G0015981.pdf]

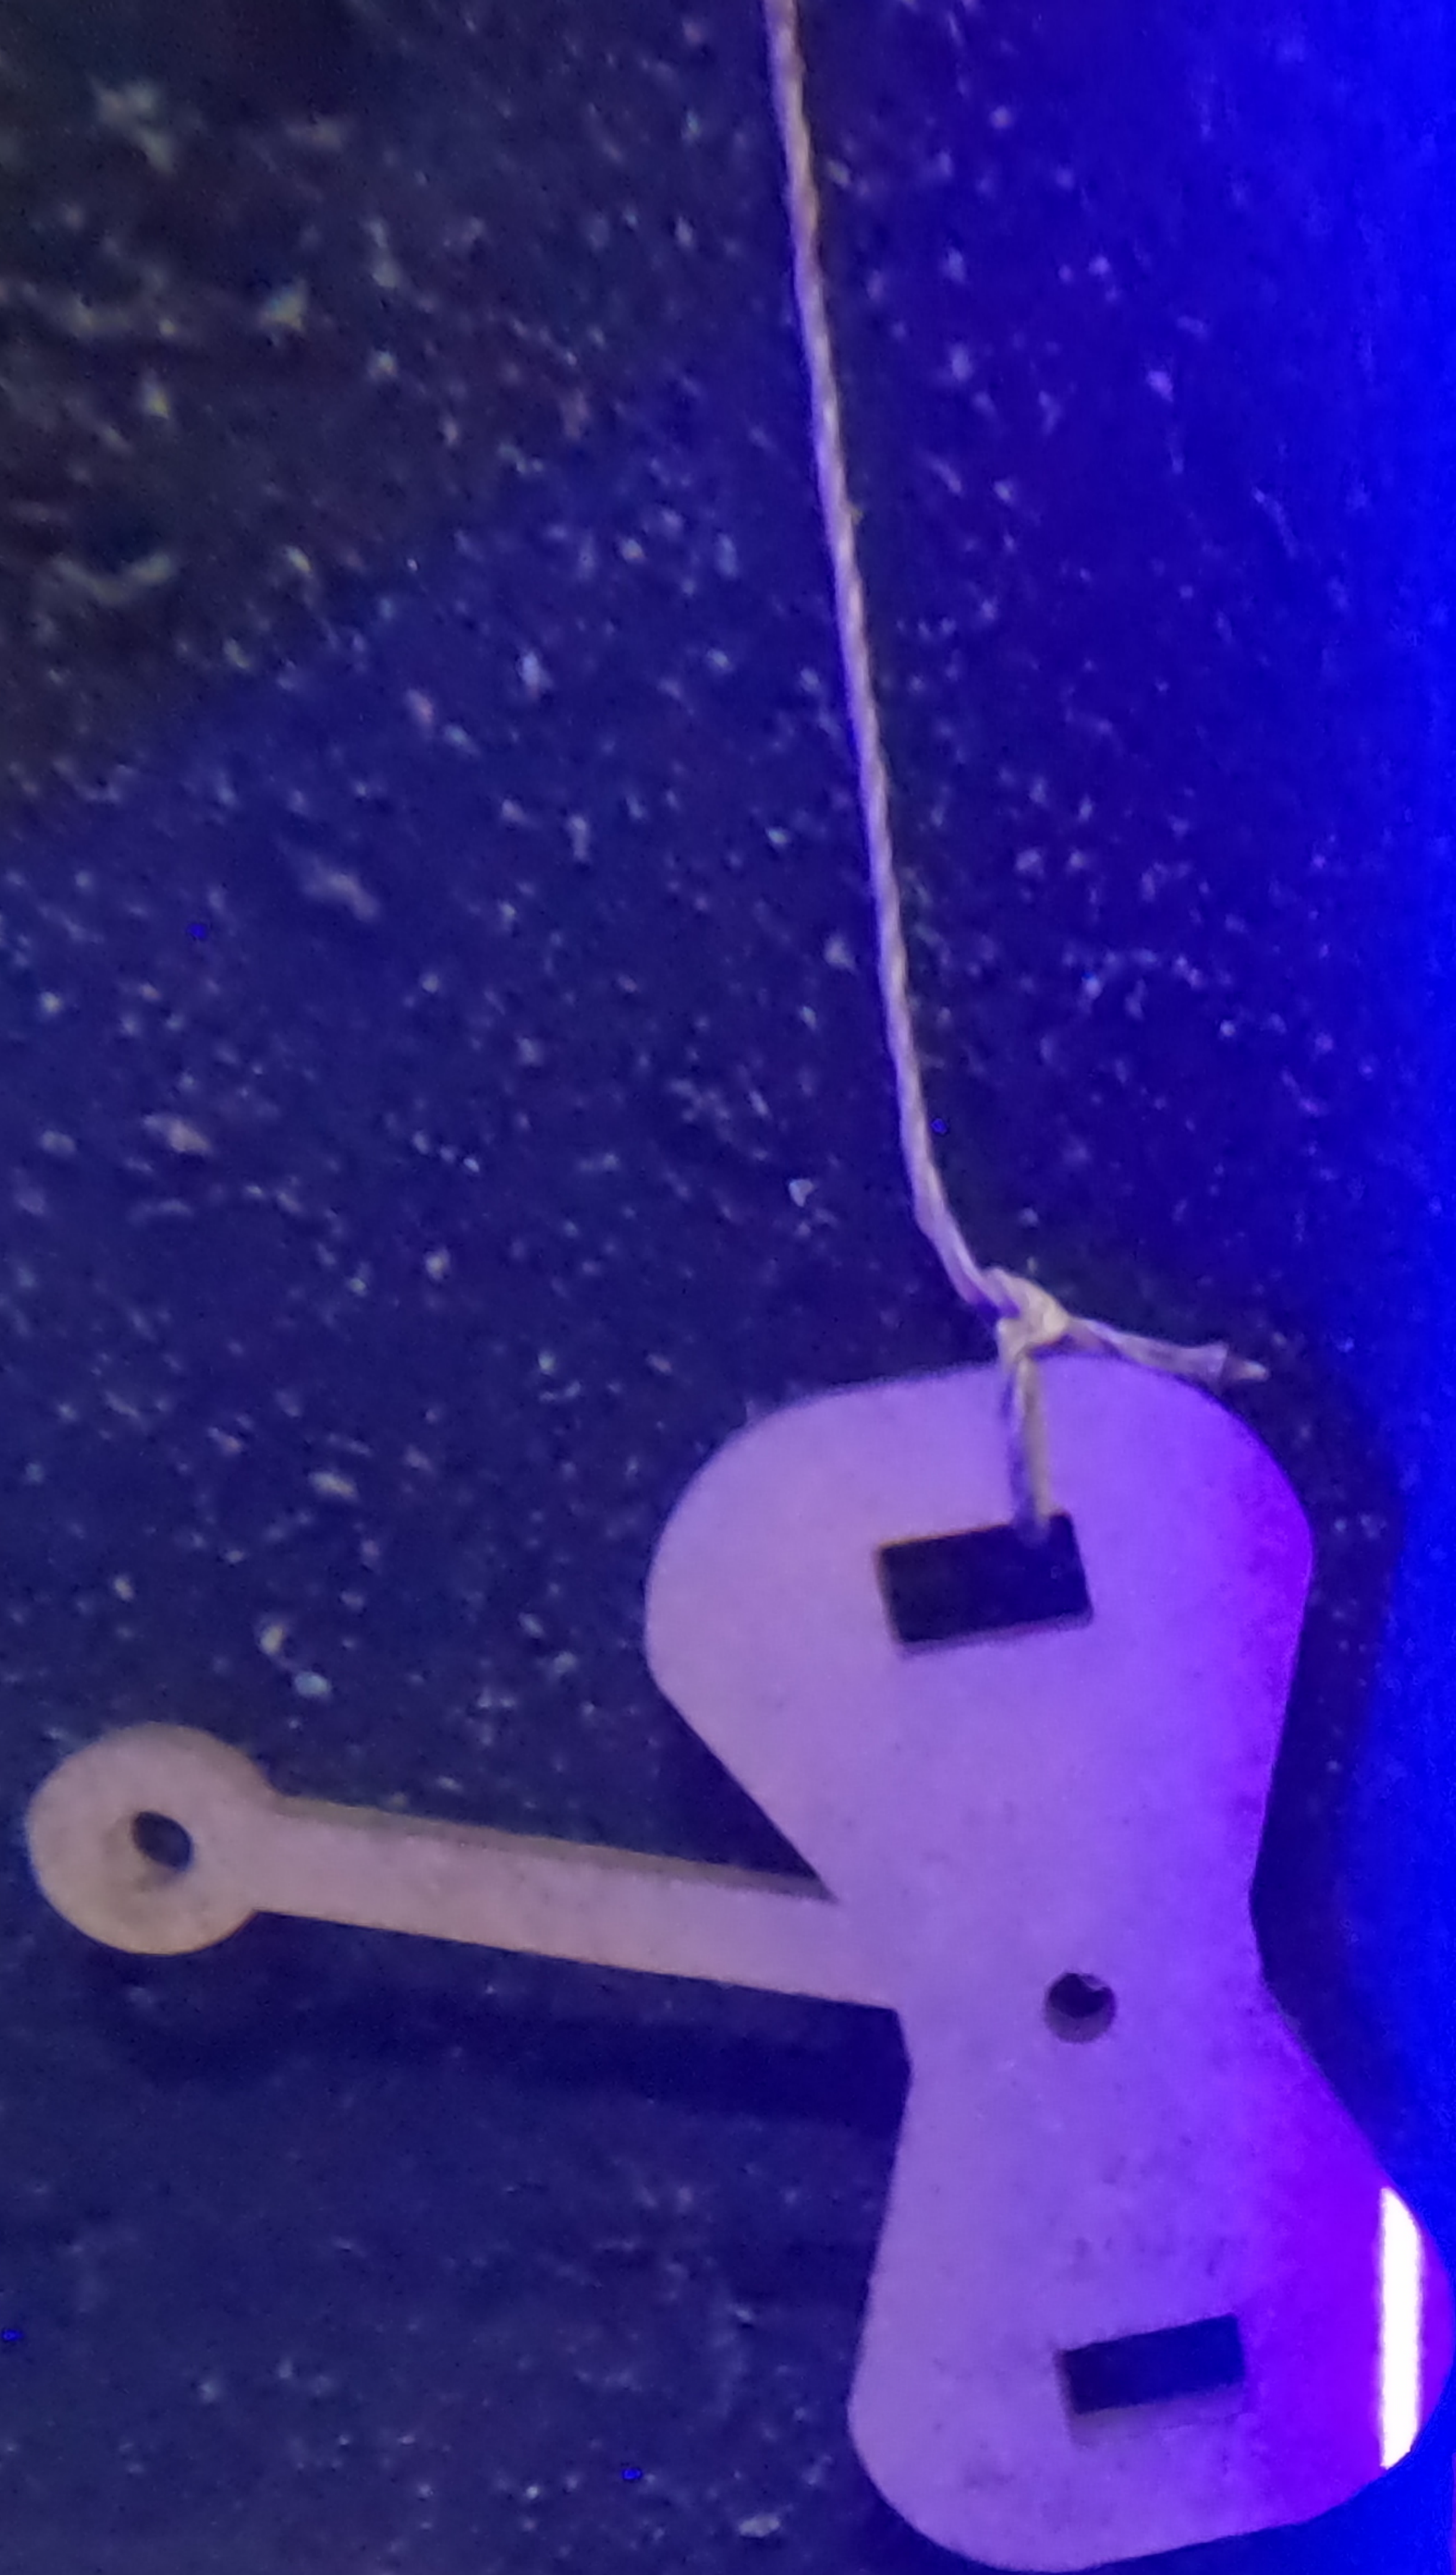

Supplement: Supplementary file 2404 [file G0015982.pdf › Level_2_2/G0015982.pdf]

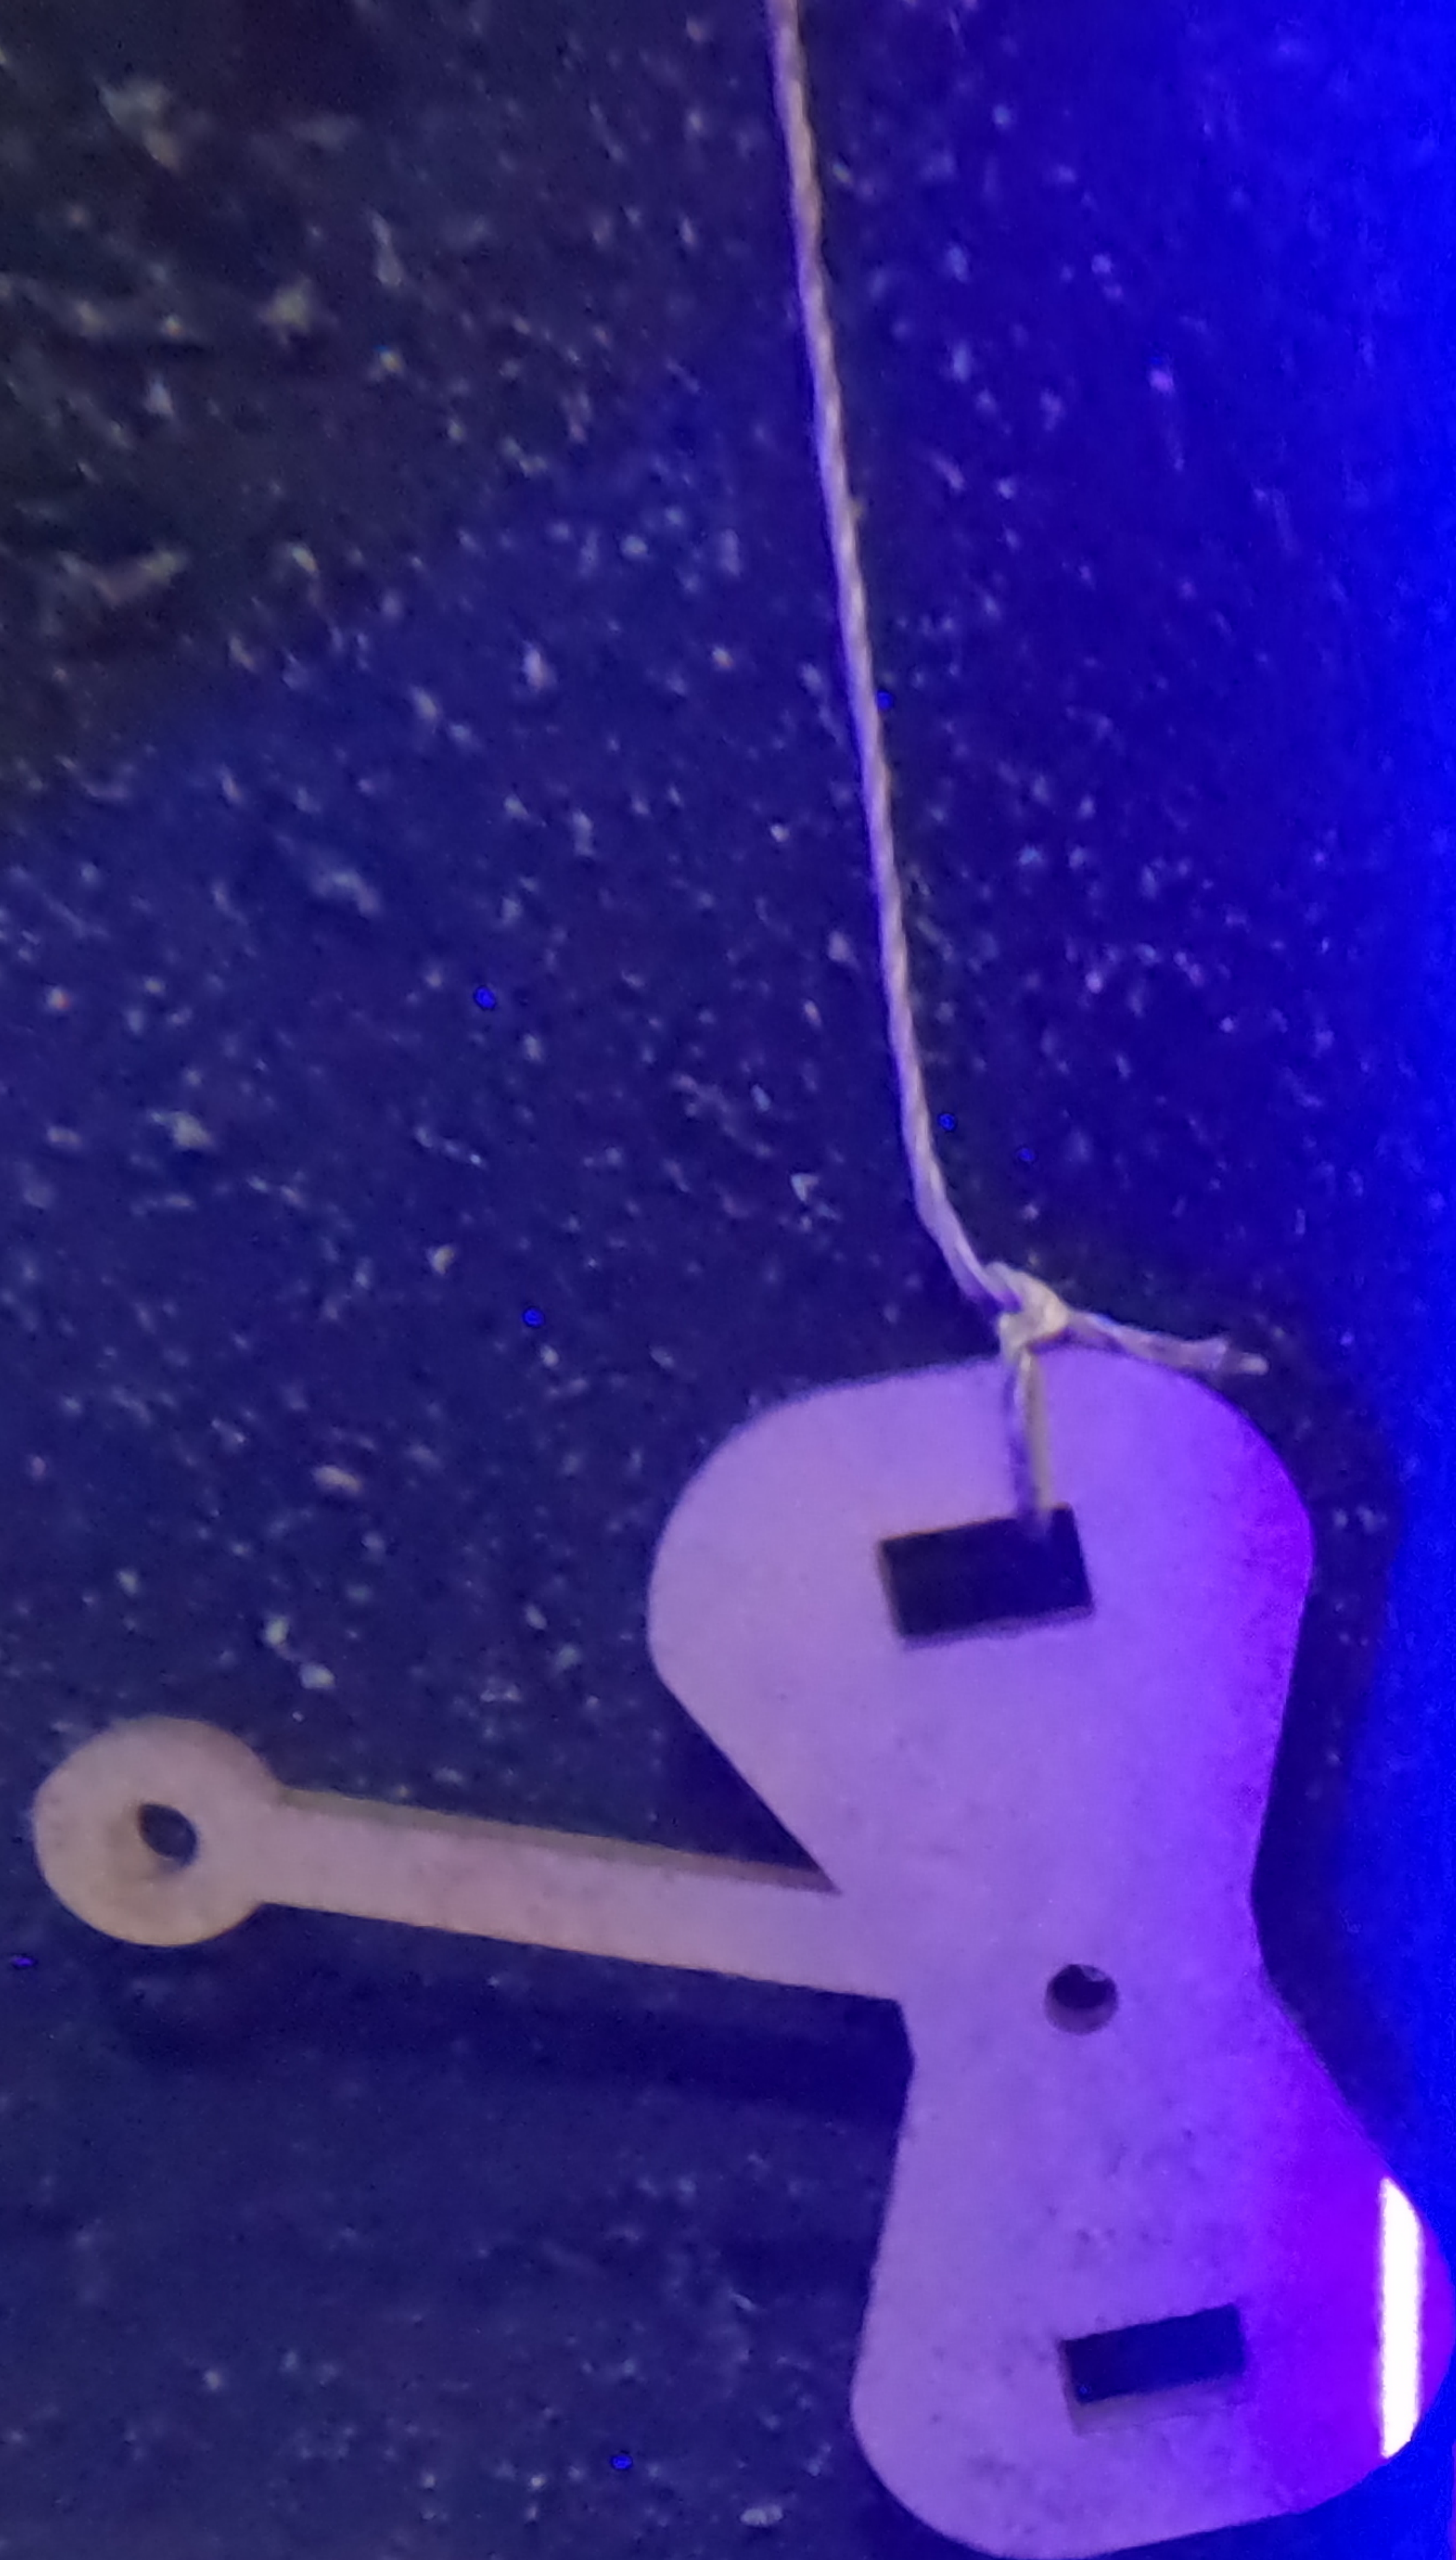

Supplement: Supplementary file 2405 [file G0015983.pdf › Level_2_2/G0015983.pdf]

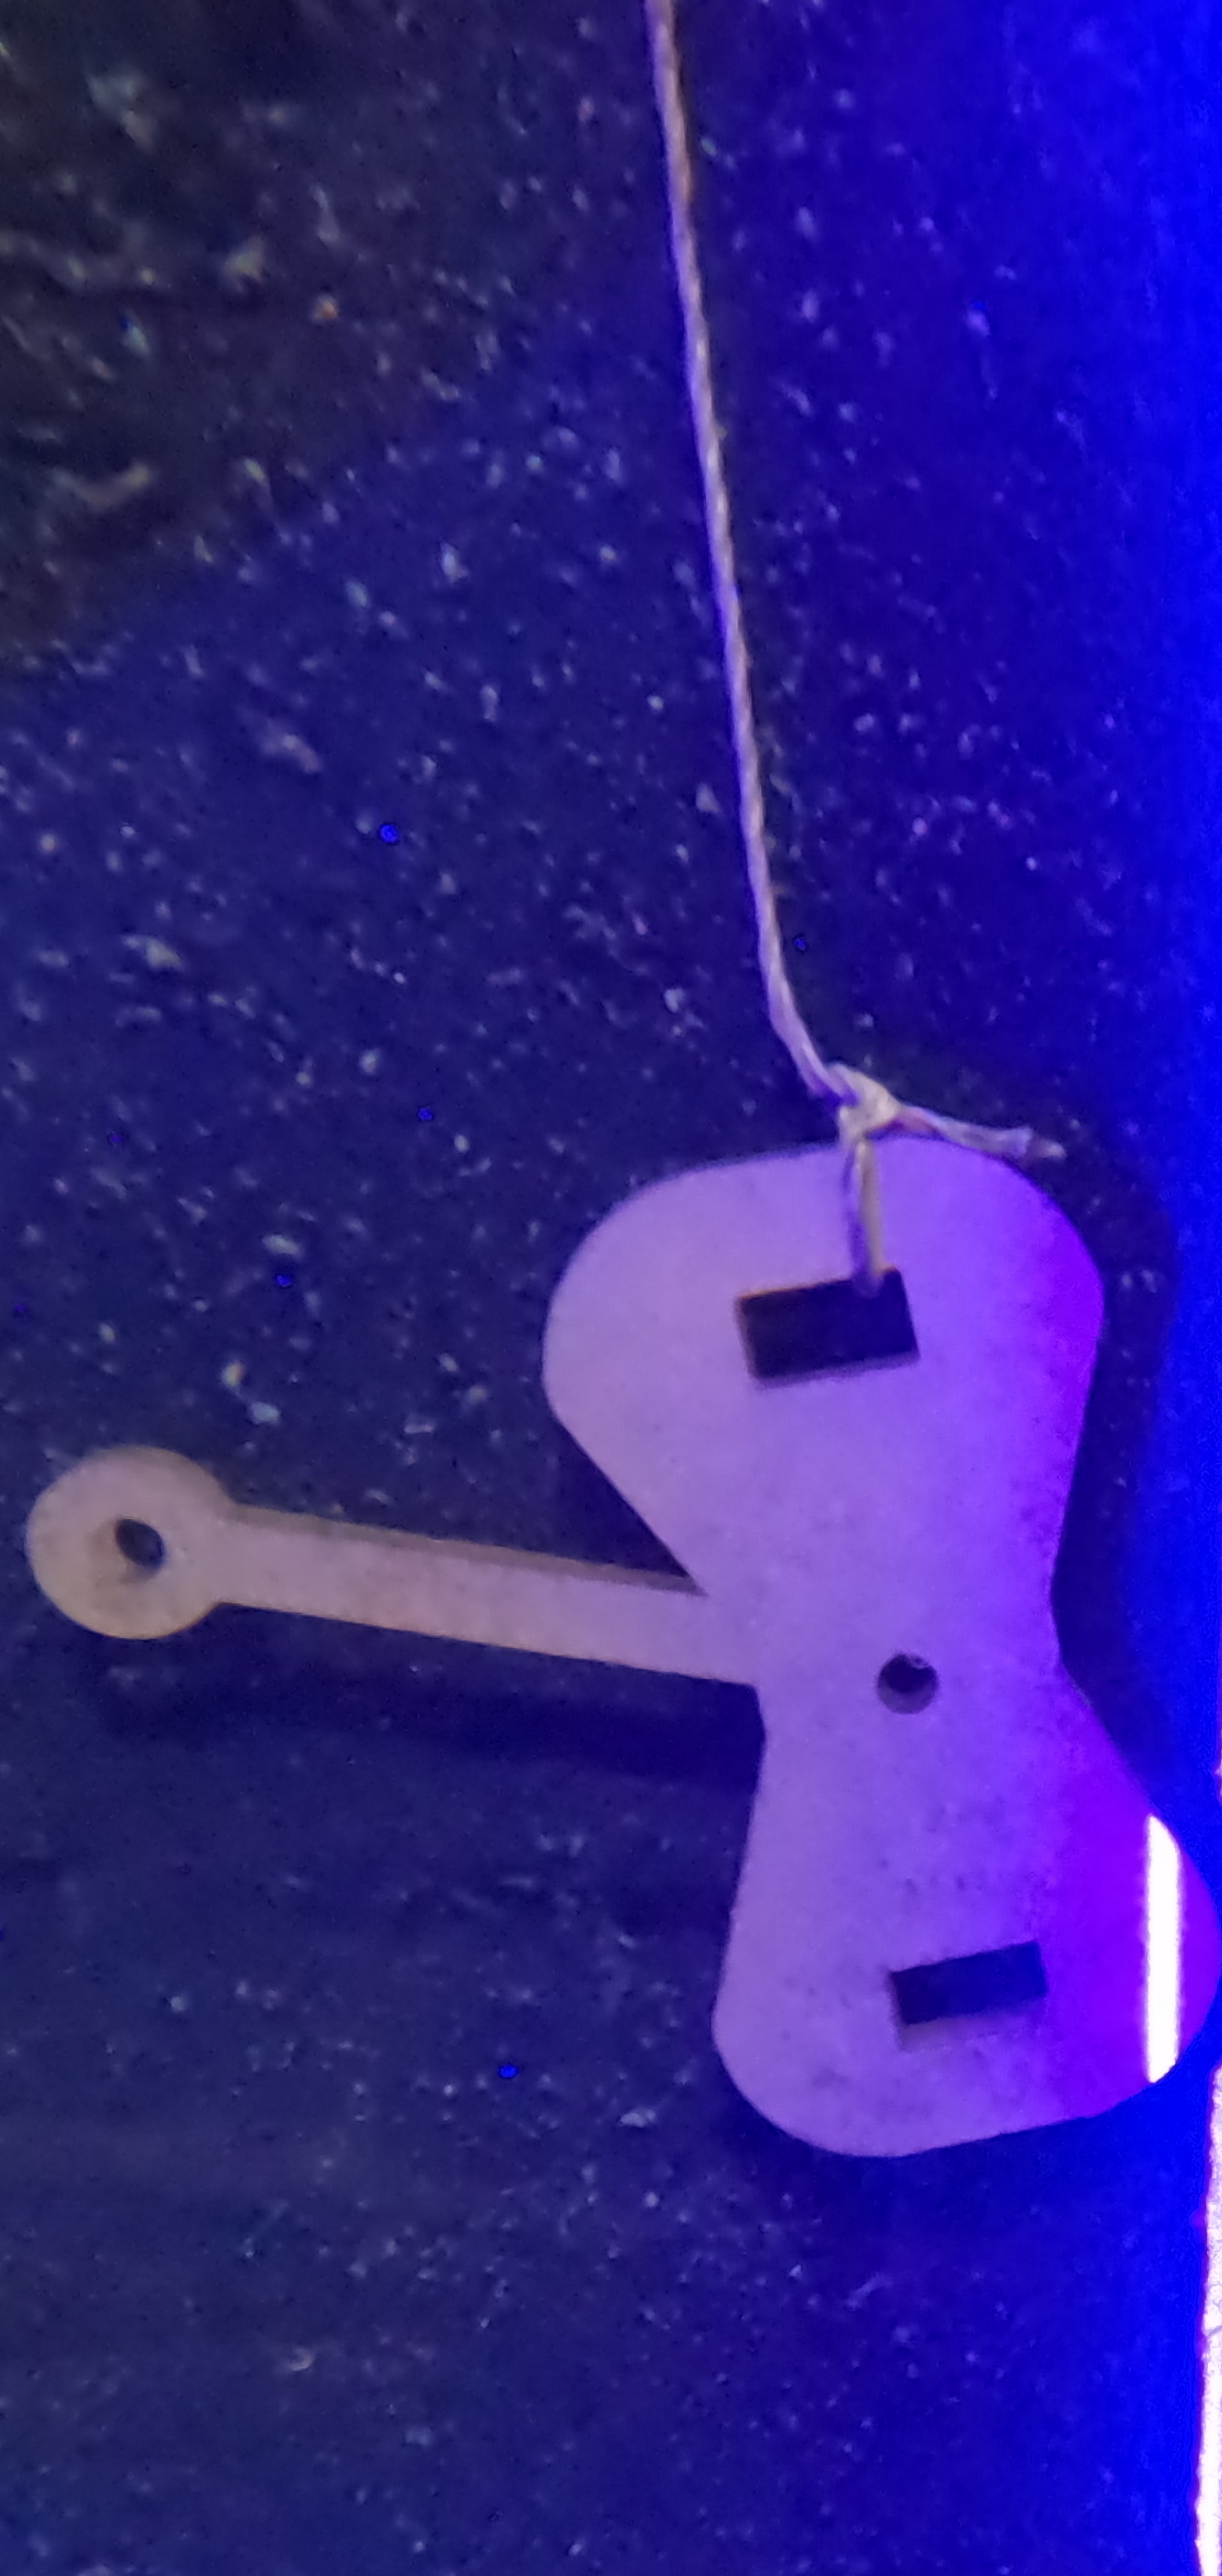

Supplement: Supplementary file 2406 [file G0015984.pdf › Level_2_2/G0015984.pdf]

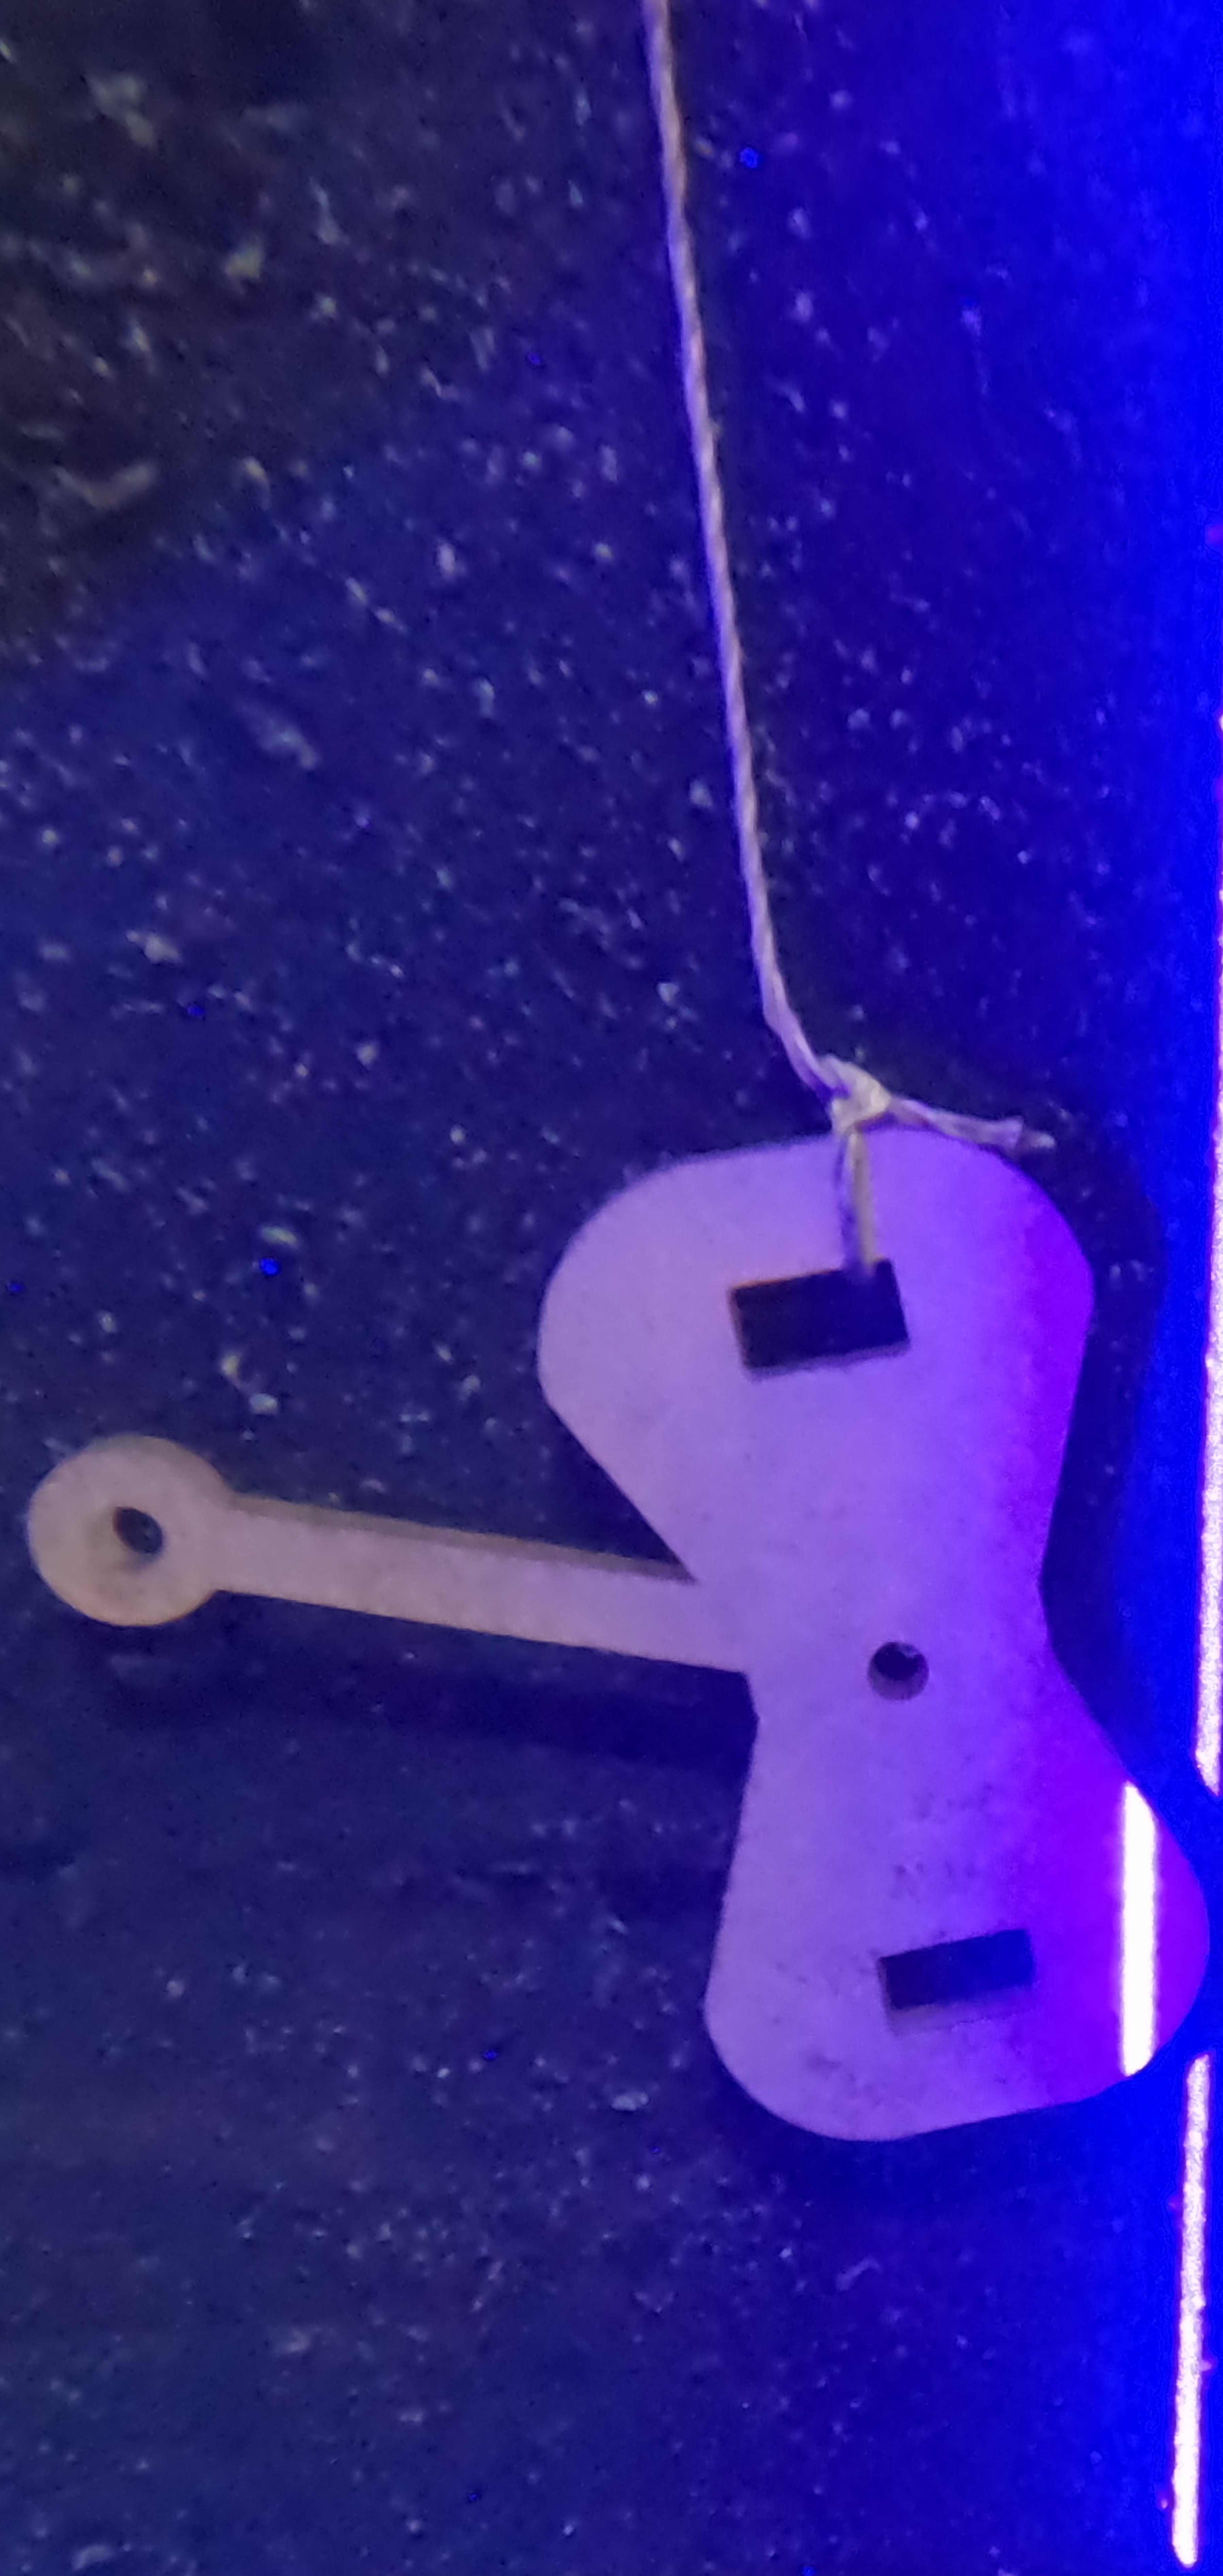

Supplement: Supplementary file 2407 [file G0015985.pdf › Level_2_2/G0015985.pdf]

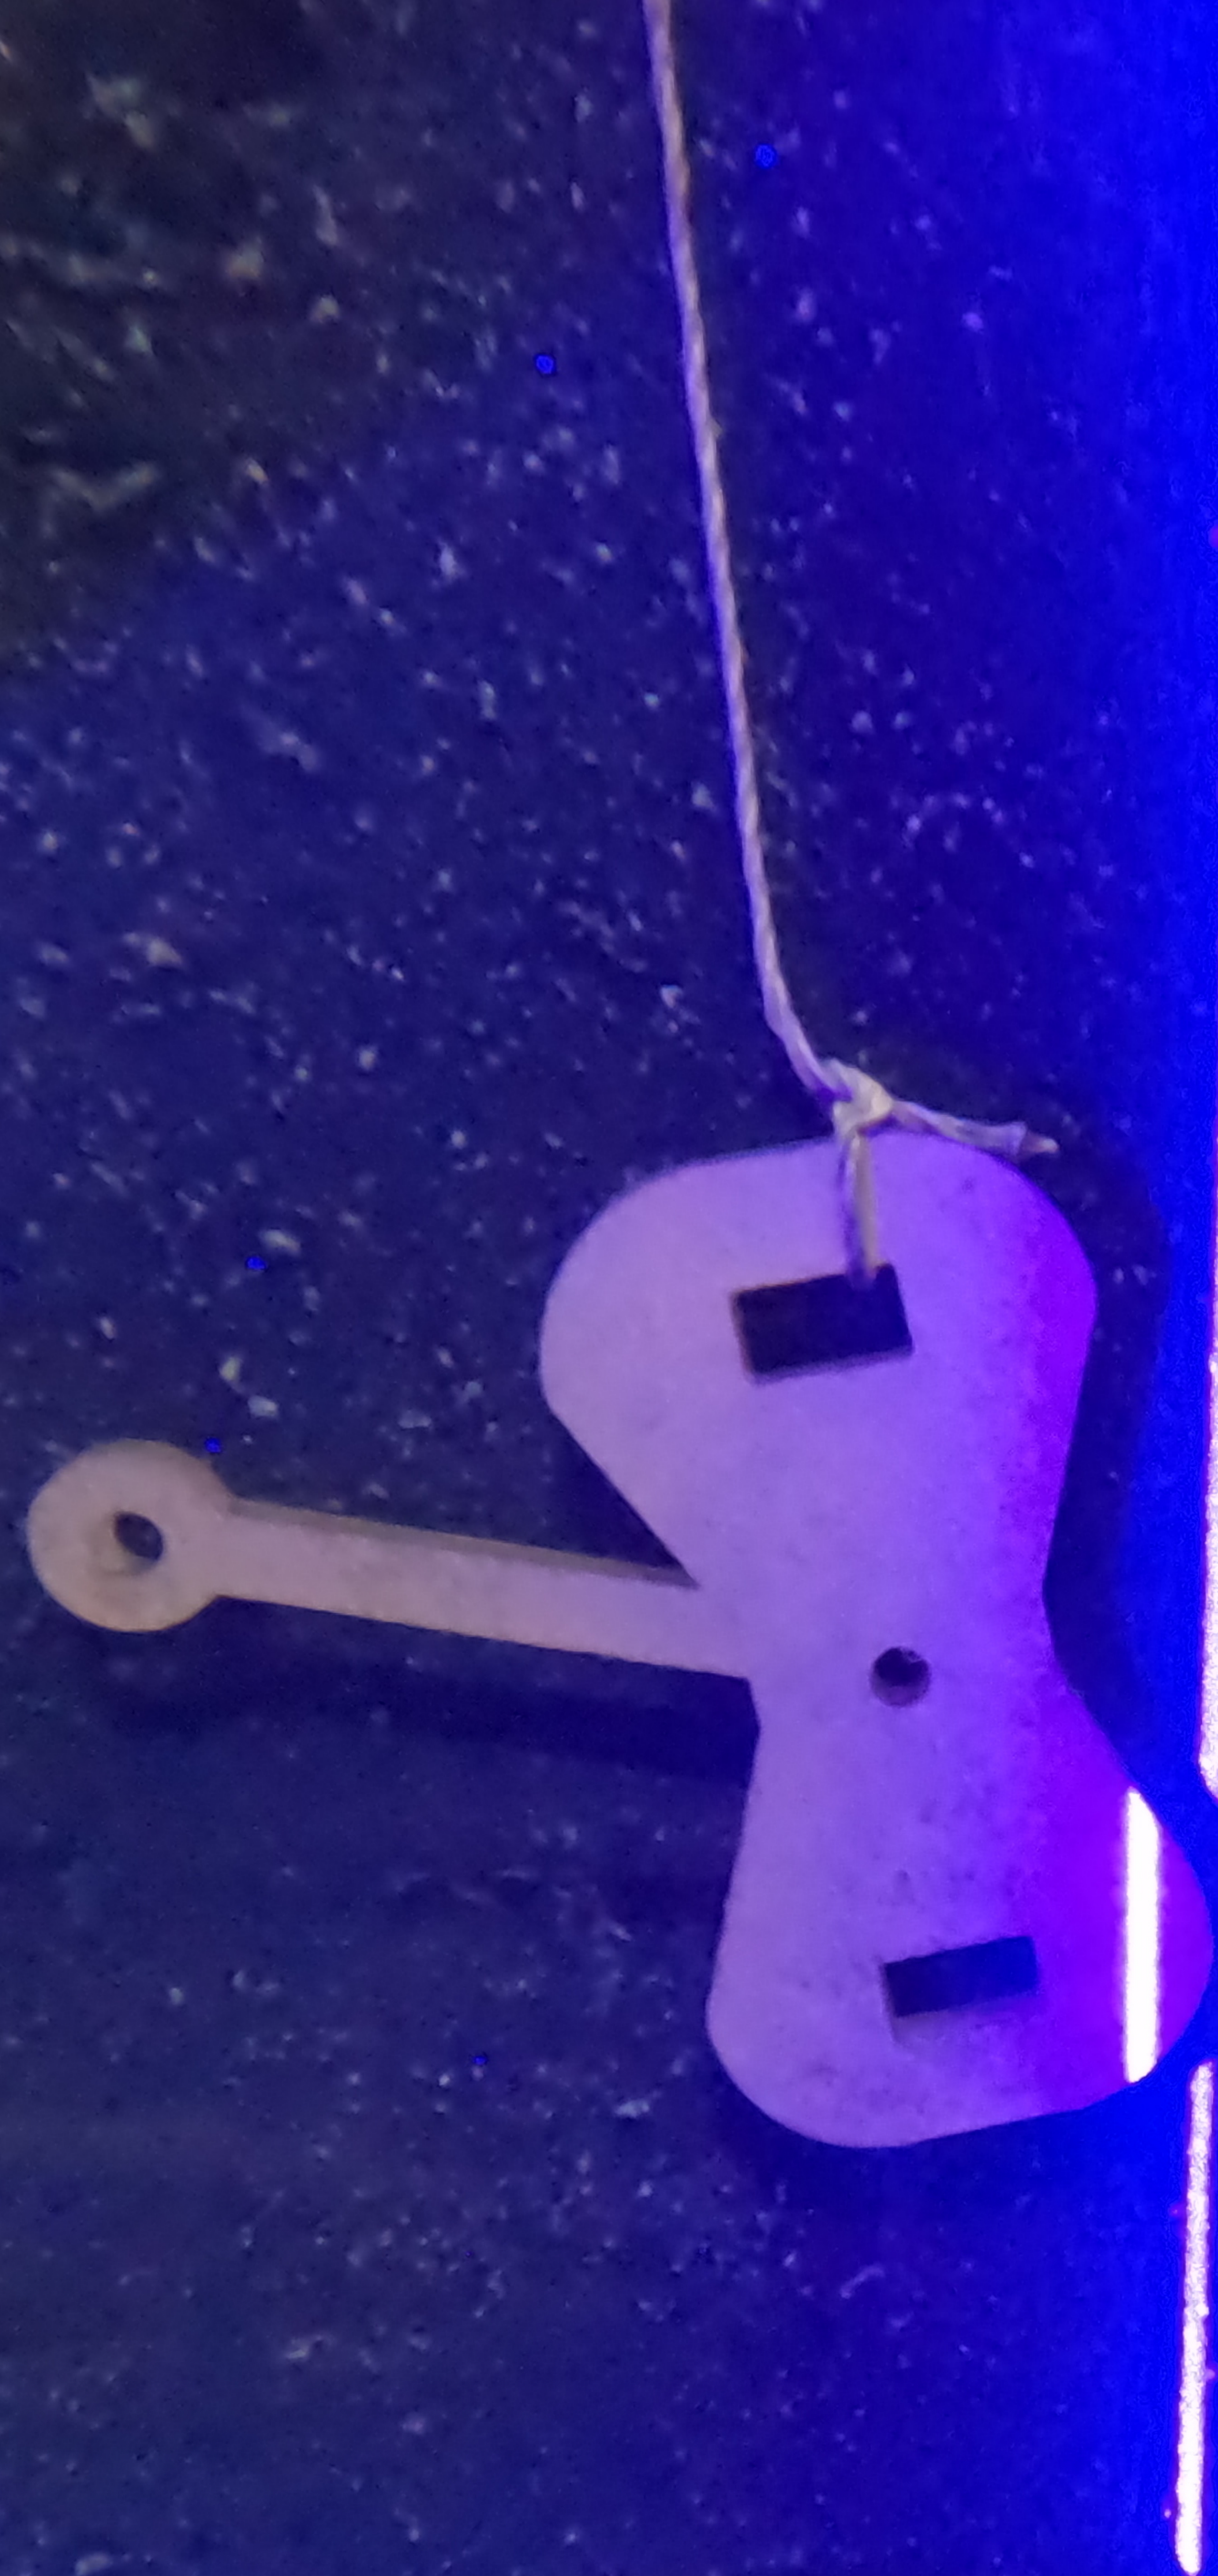

Supplement: Supplementary file 2408 [file G0015986.pdf › Level_2_2/G0015986.pdf]

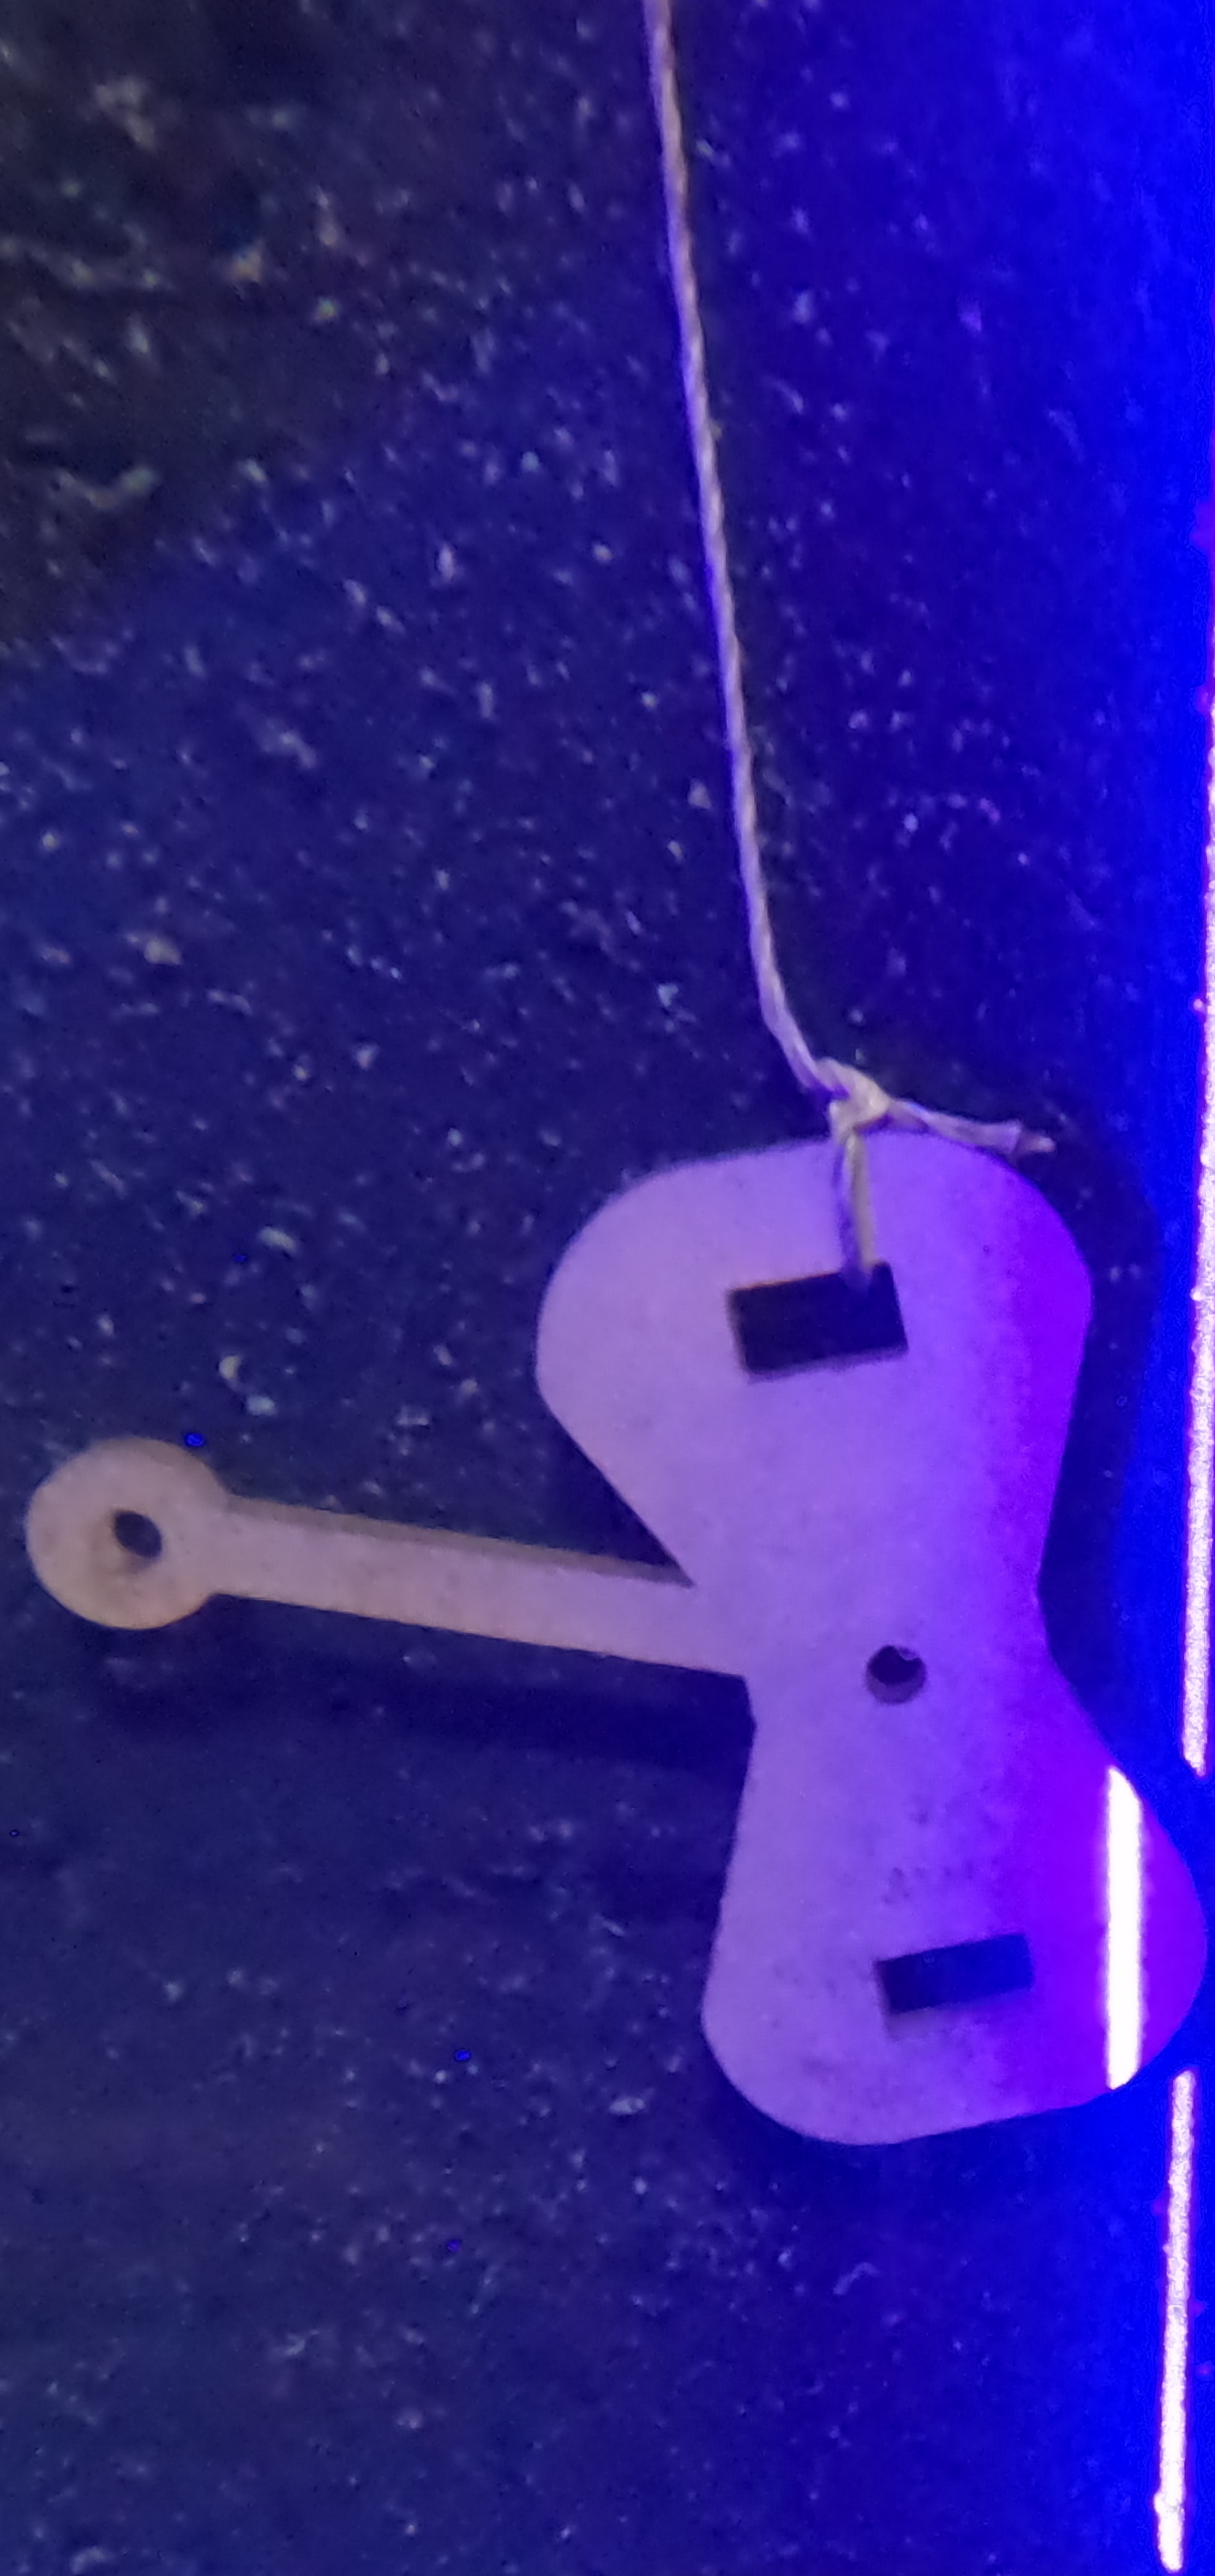

Supplement: Supplementary file 2409 [file G0015987.pdf › Level_2_2/G0015987.pdf]

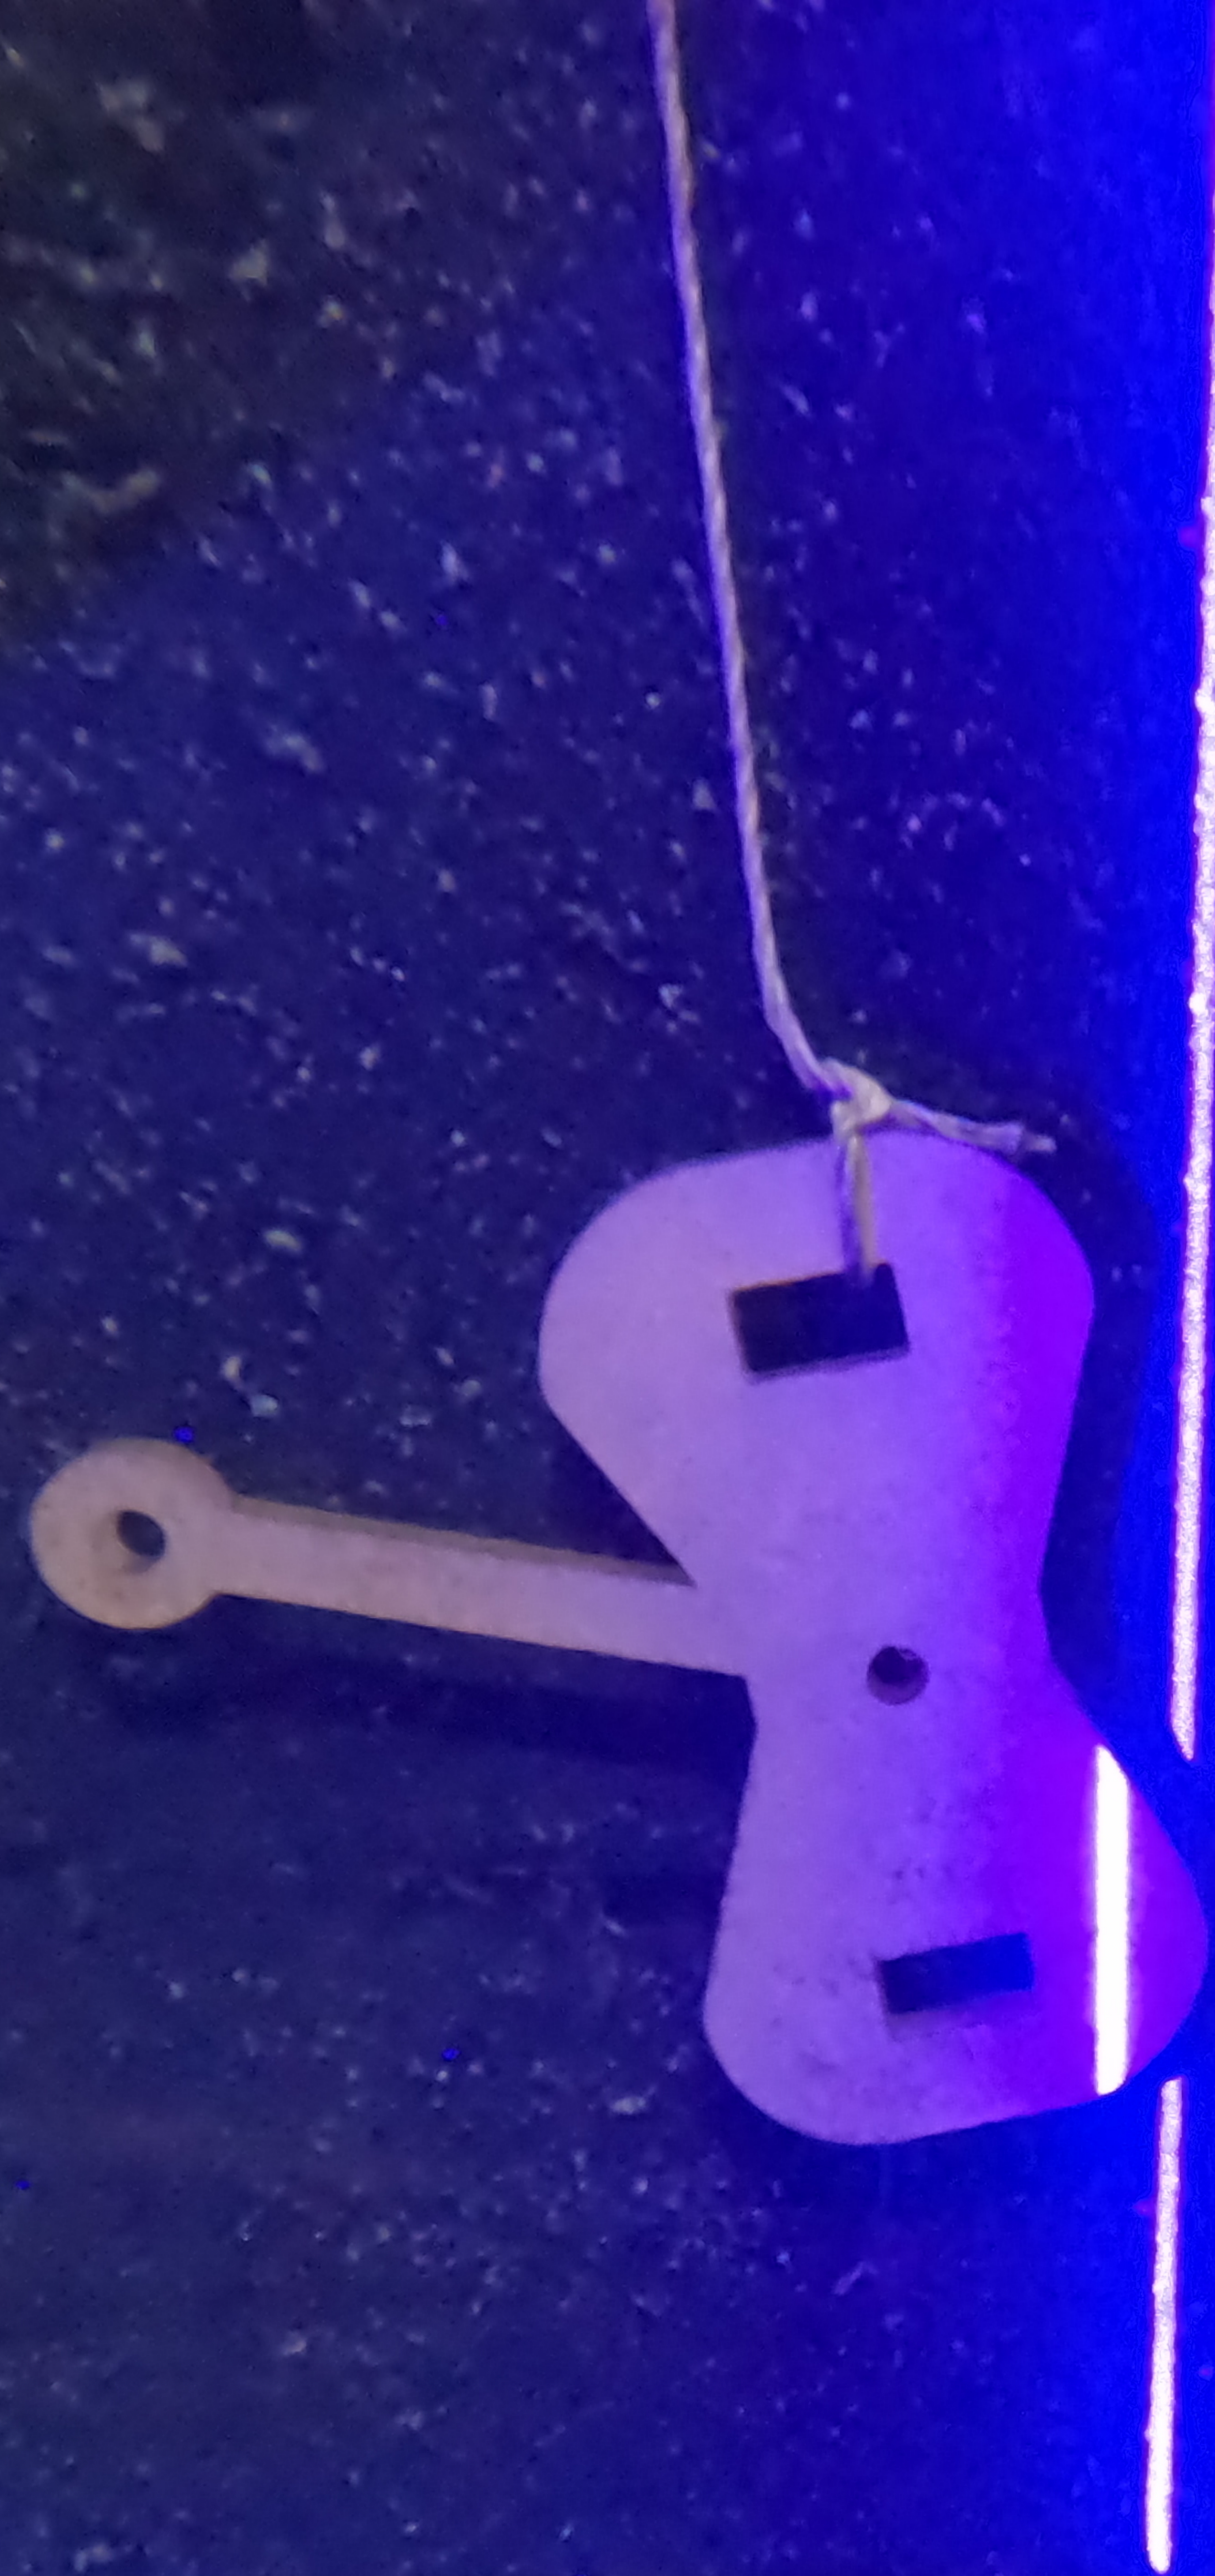

Supplement: Supplementary file 2410 [file G0015988.pdf › Level_2_2/G0015988.pdf]

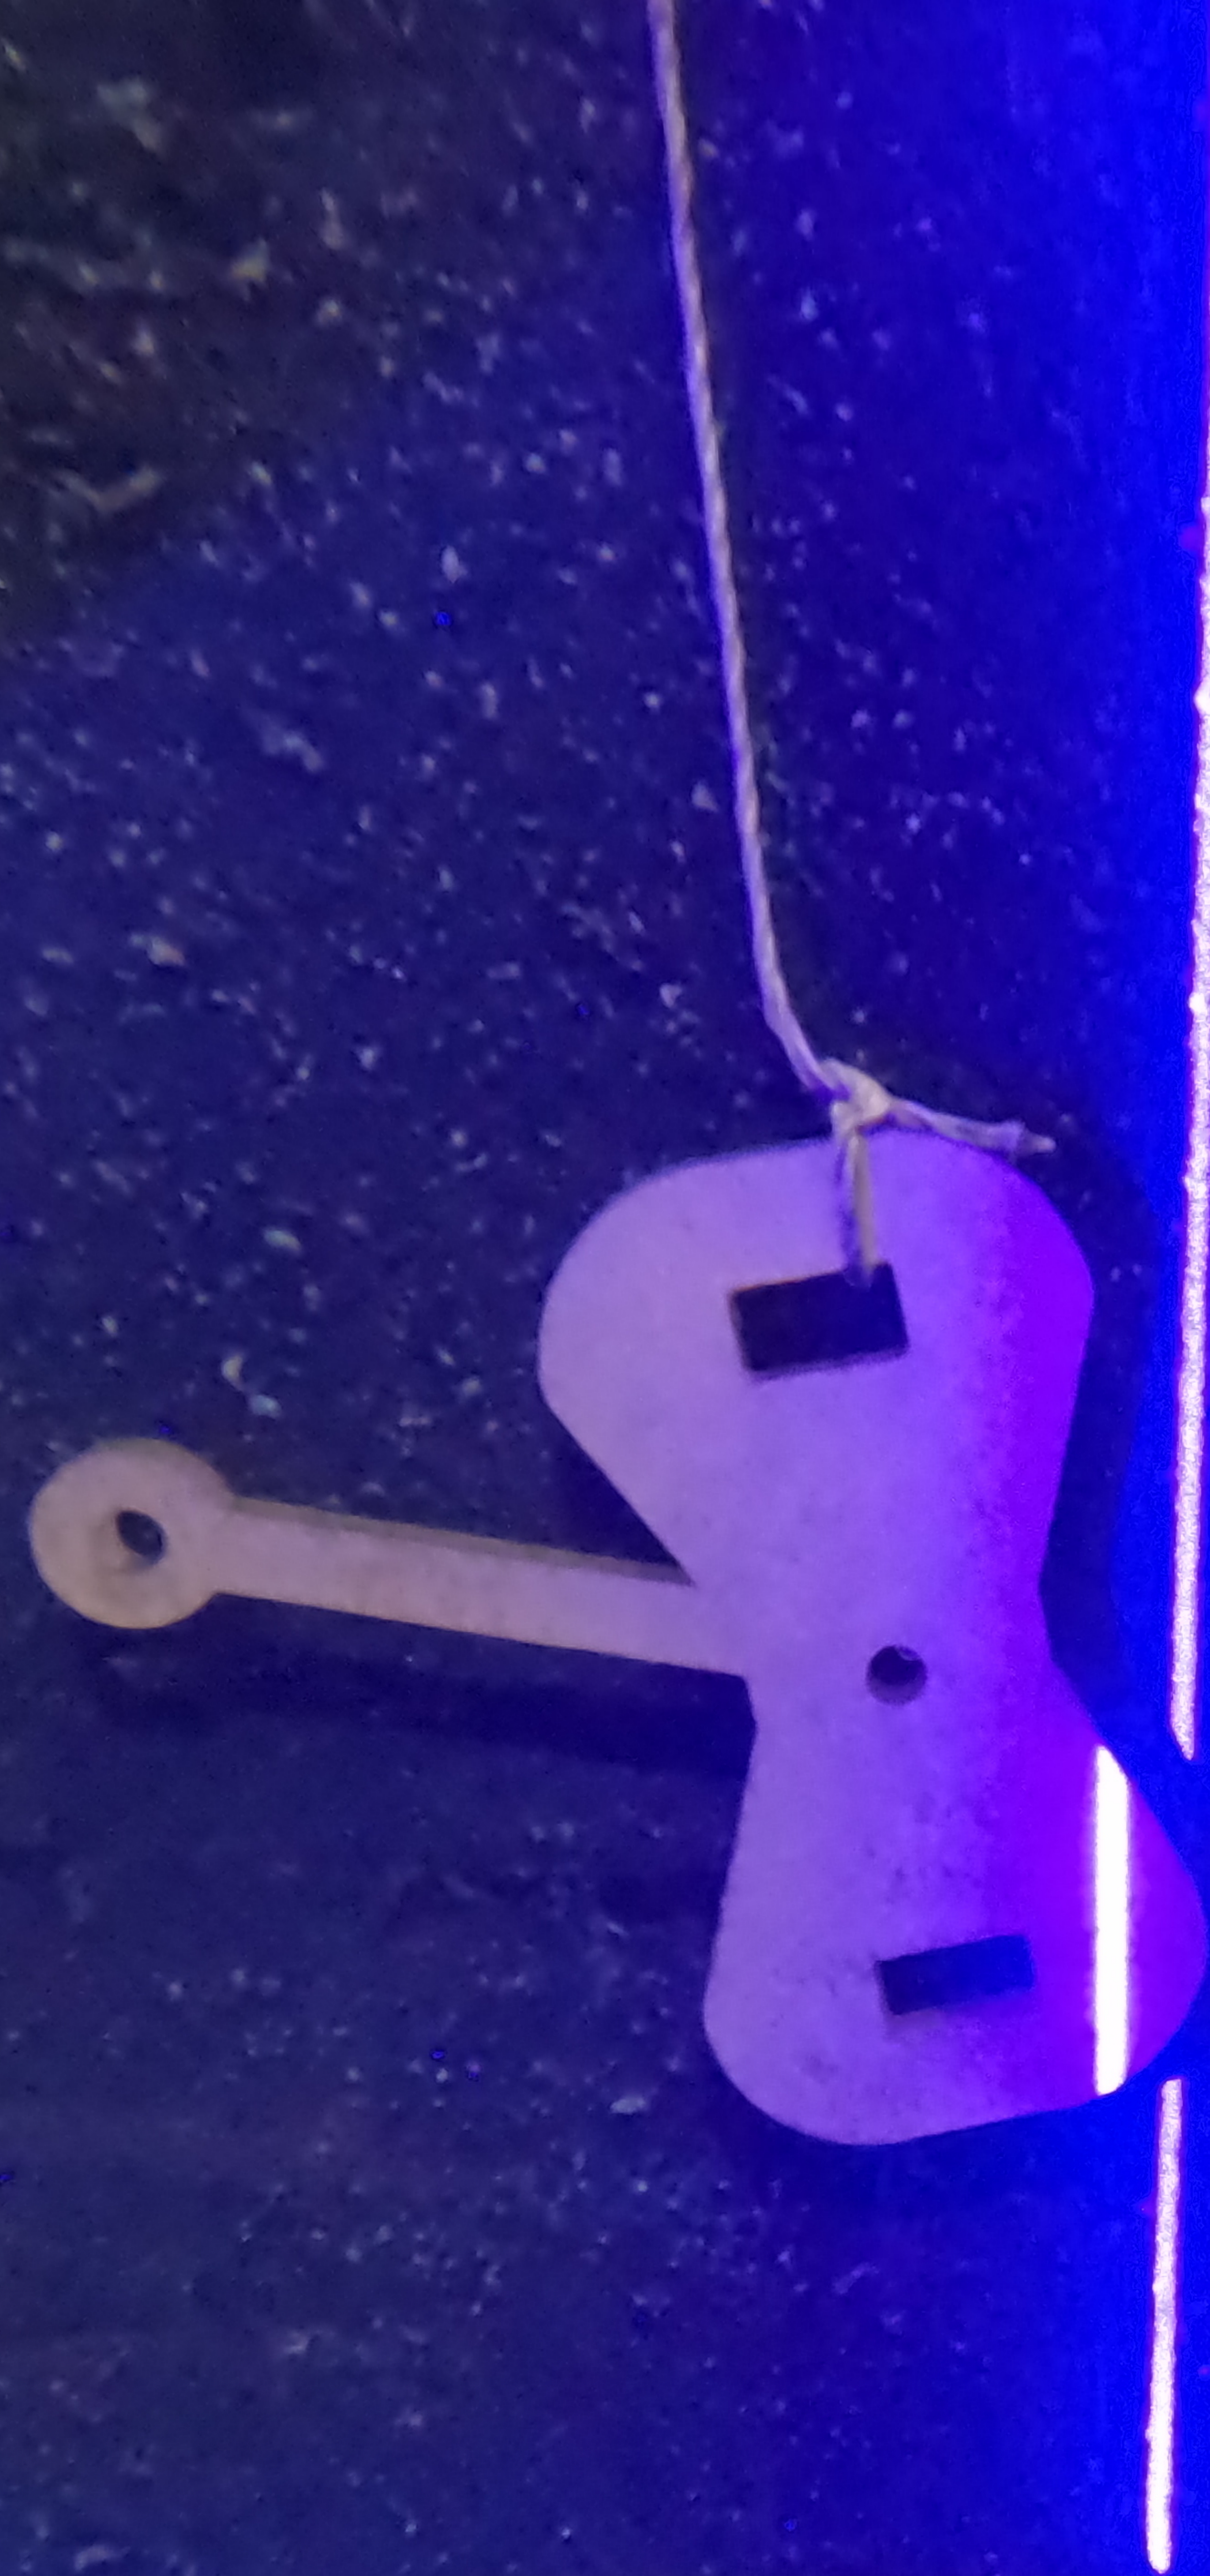

Supplement: Supplementary file 2411 [file G0015989.pdf › Level_2_2/G0015989.pdf]

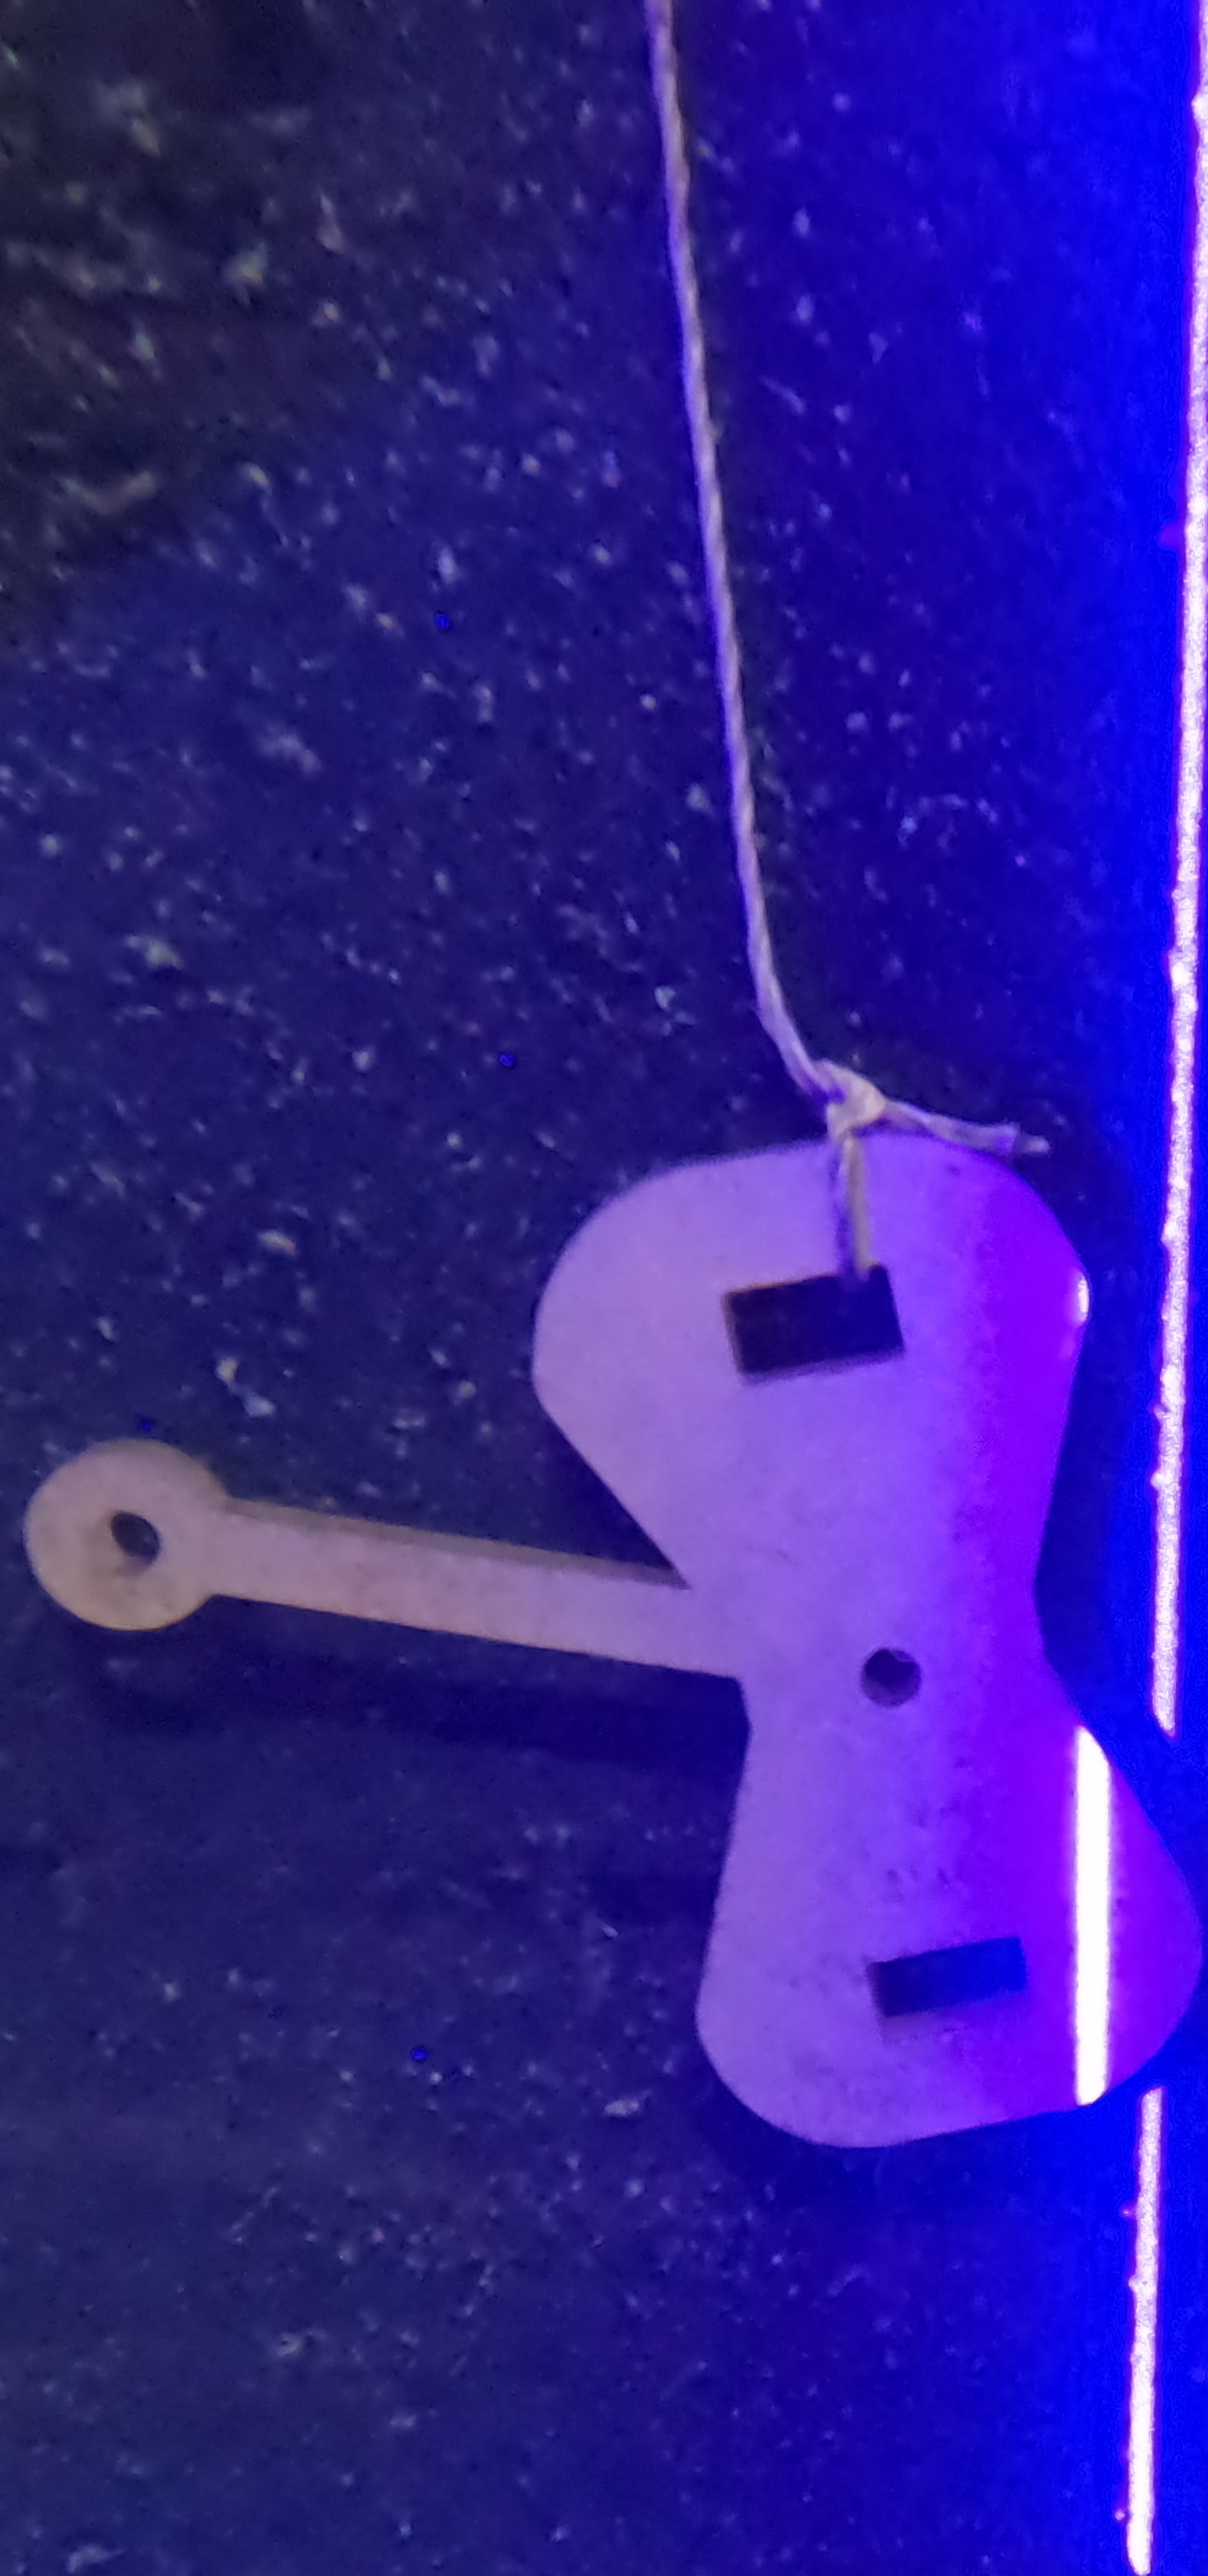

Supplement: Supplementary file 2412 [file G0015990.pdf › Level_2_2/G0015990.pdf]

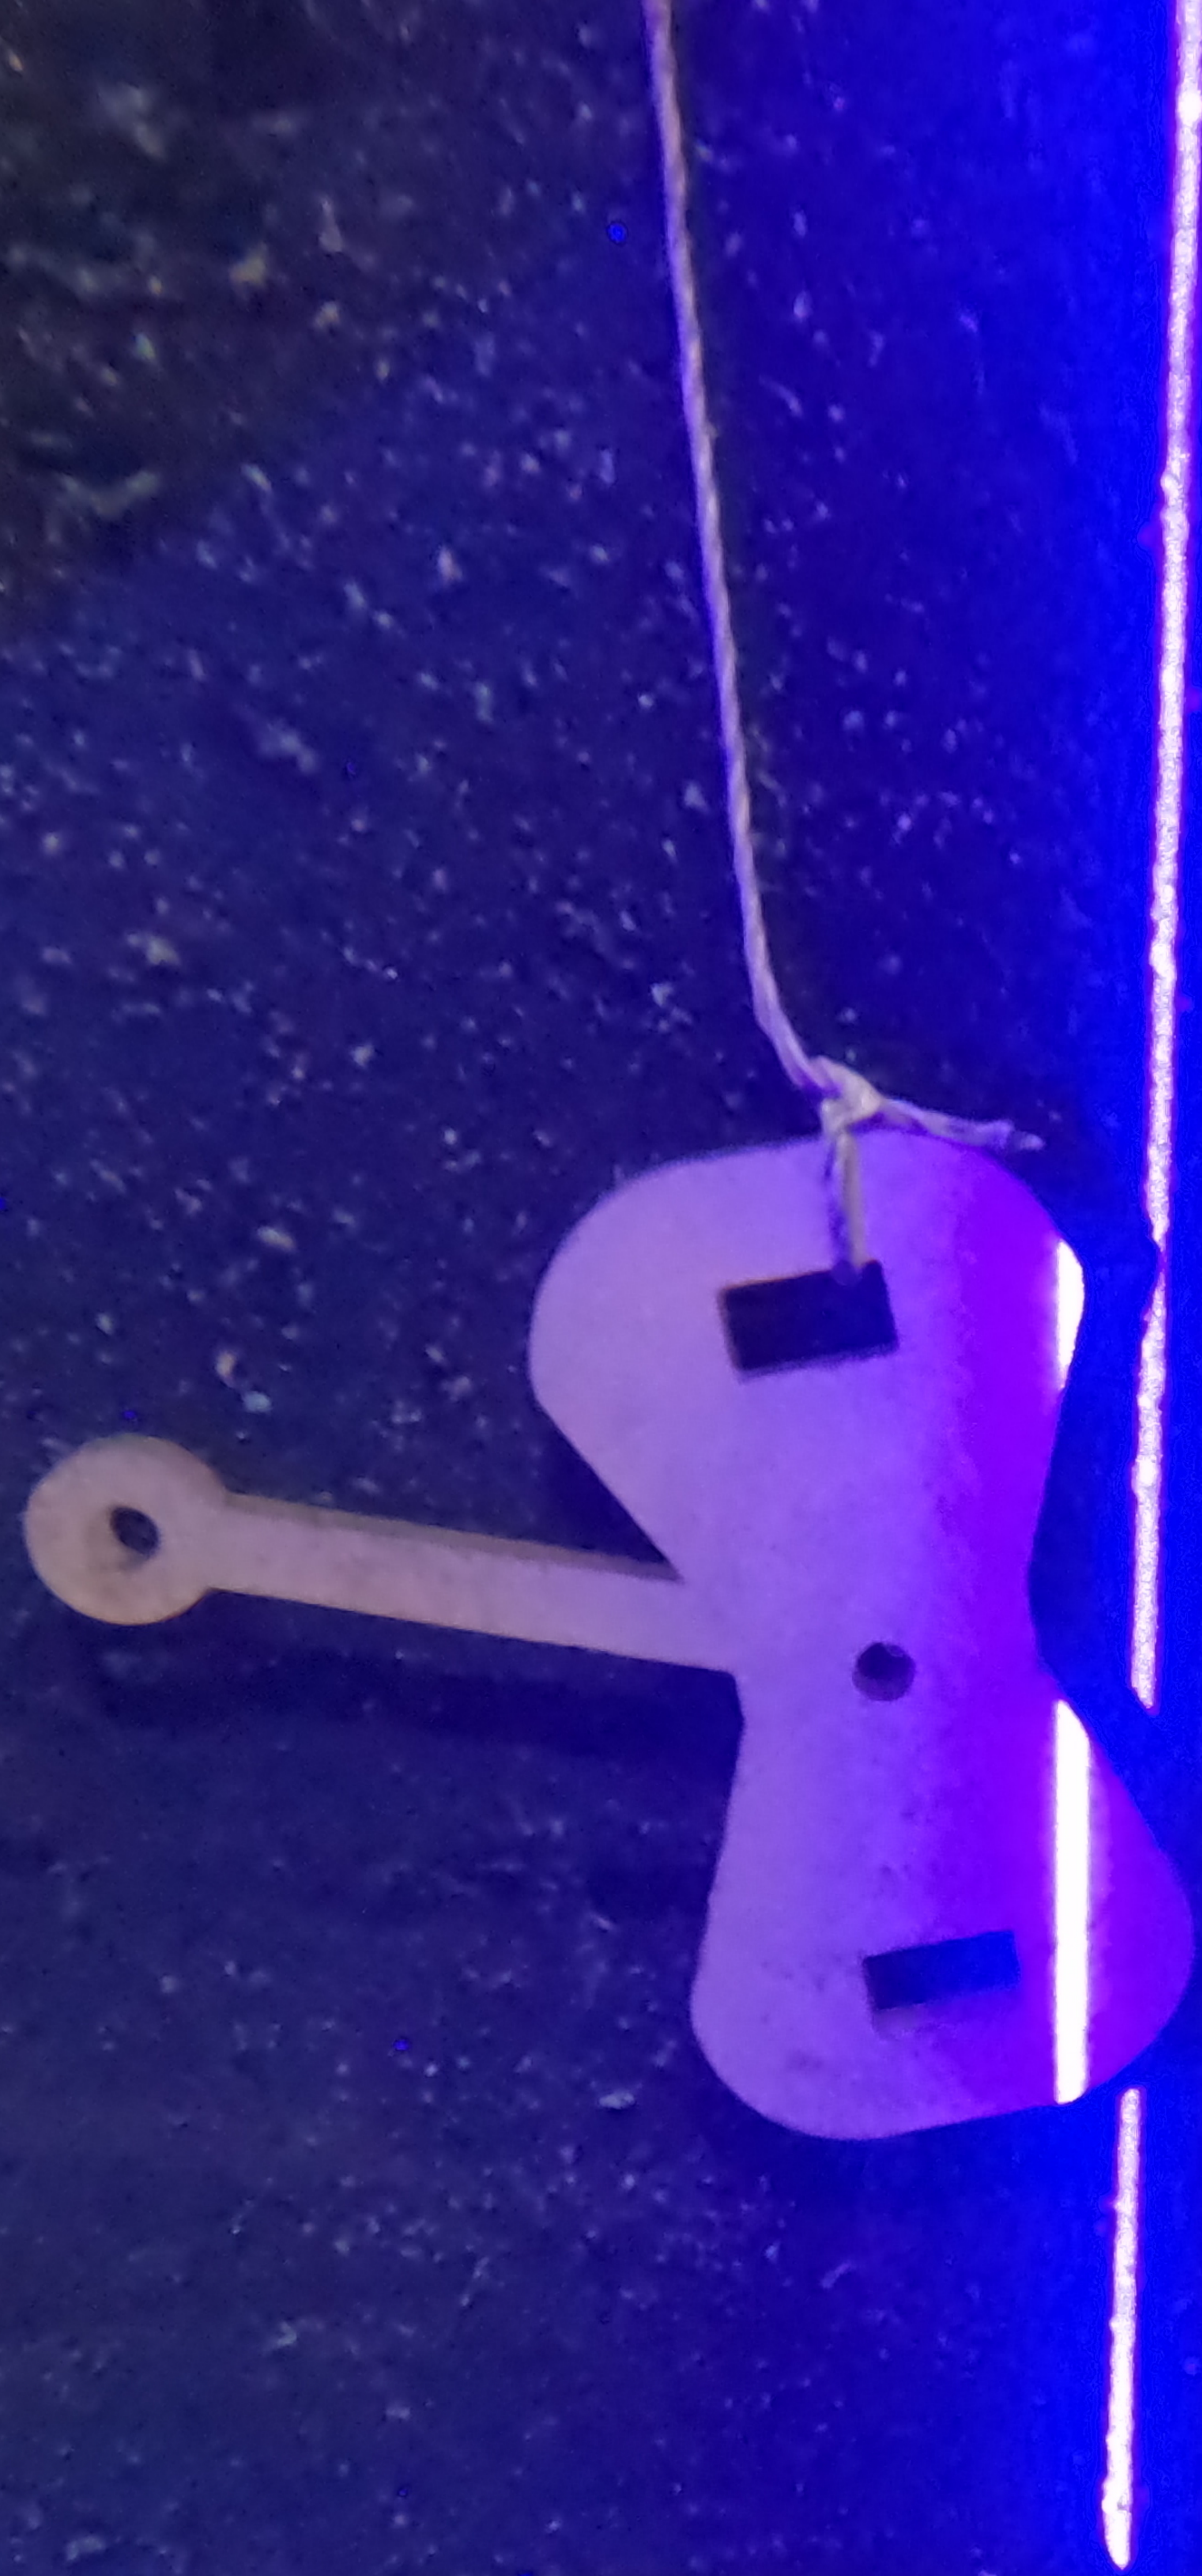

Supplement: Supplementary file 2413 [file G0015991.pdf › Level_2_2/G0015991.pdf]

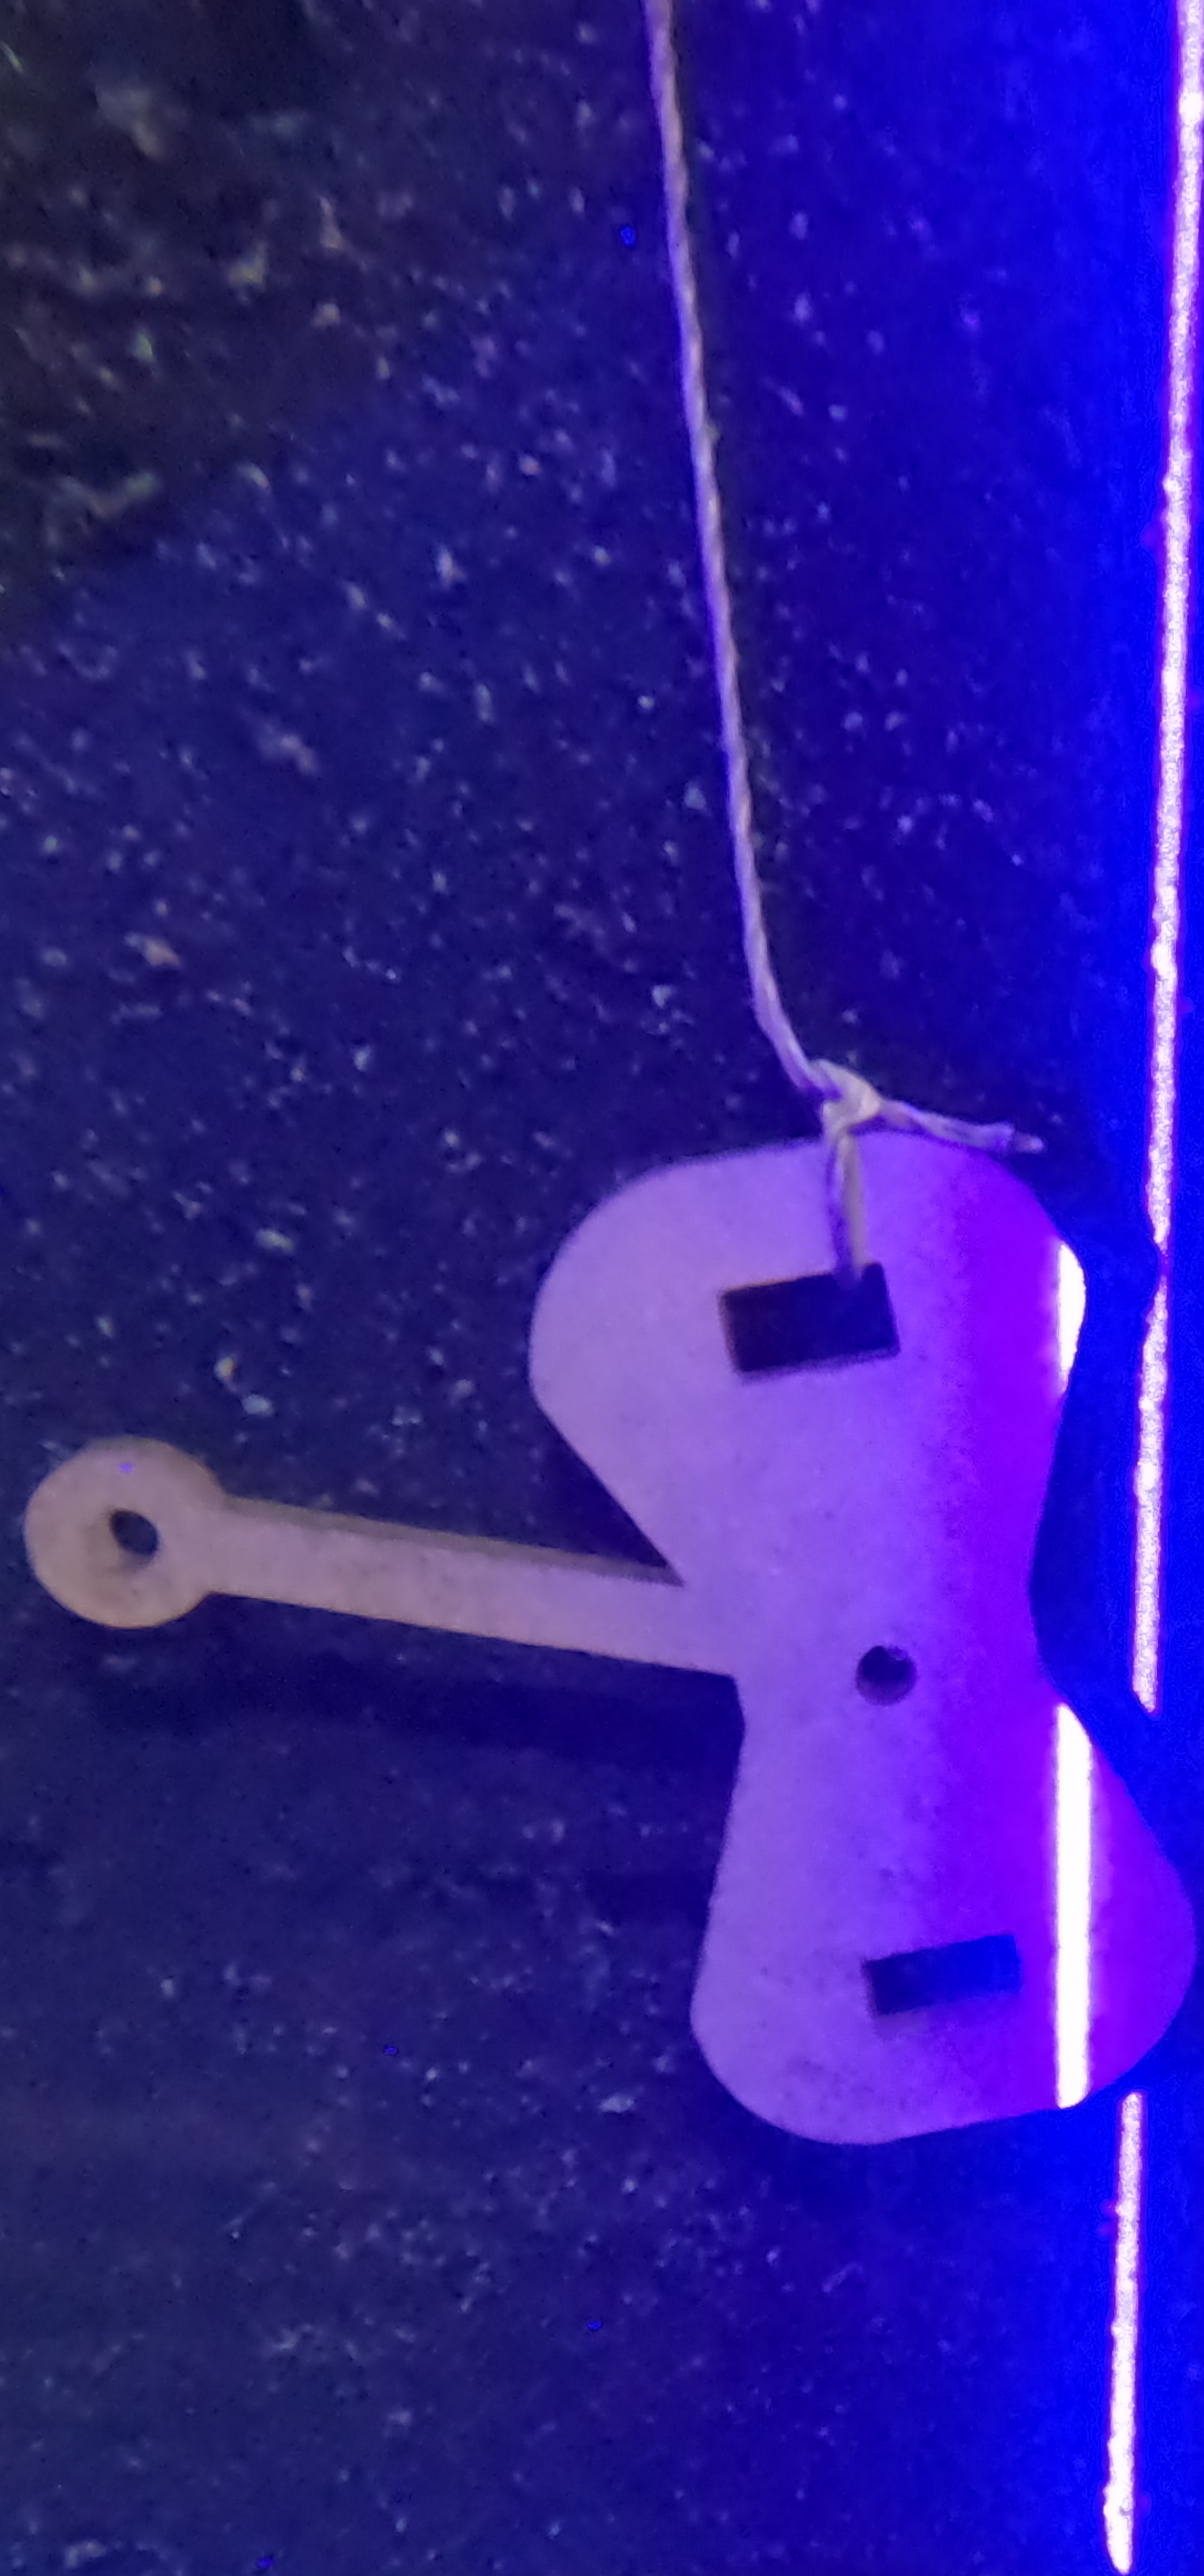

Supplement: Supplementary file 2414 [file G0015992.pdf › Level_2_2/G0015992.pdf]

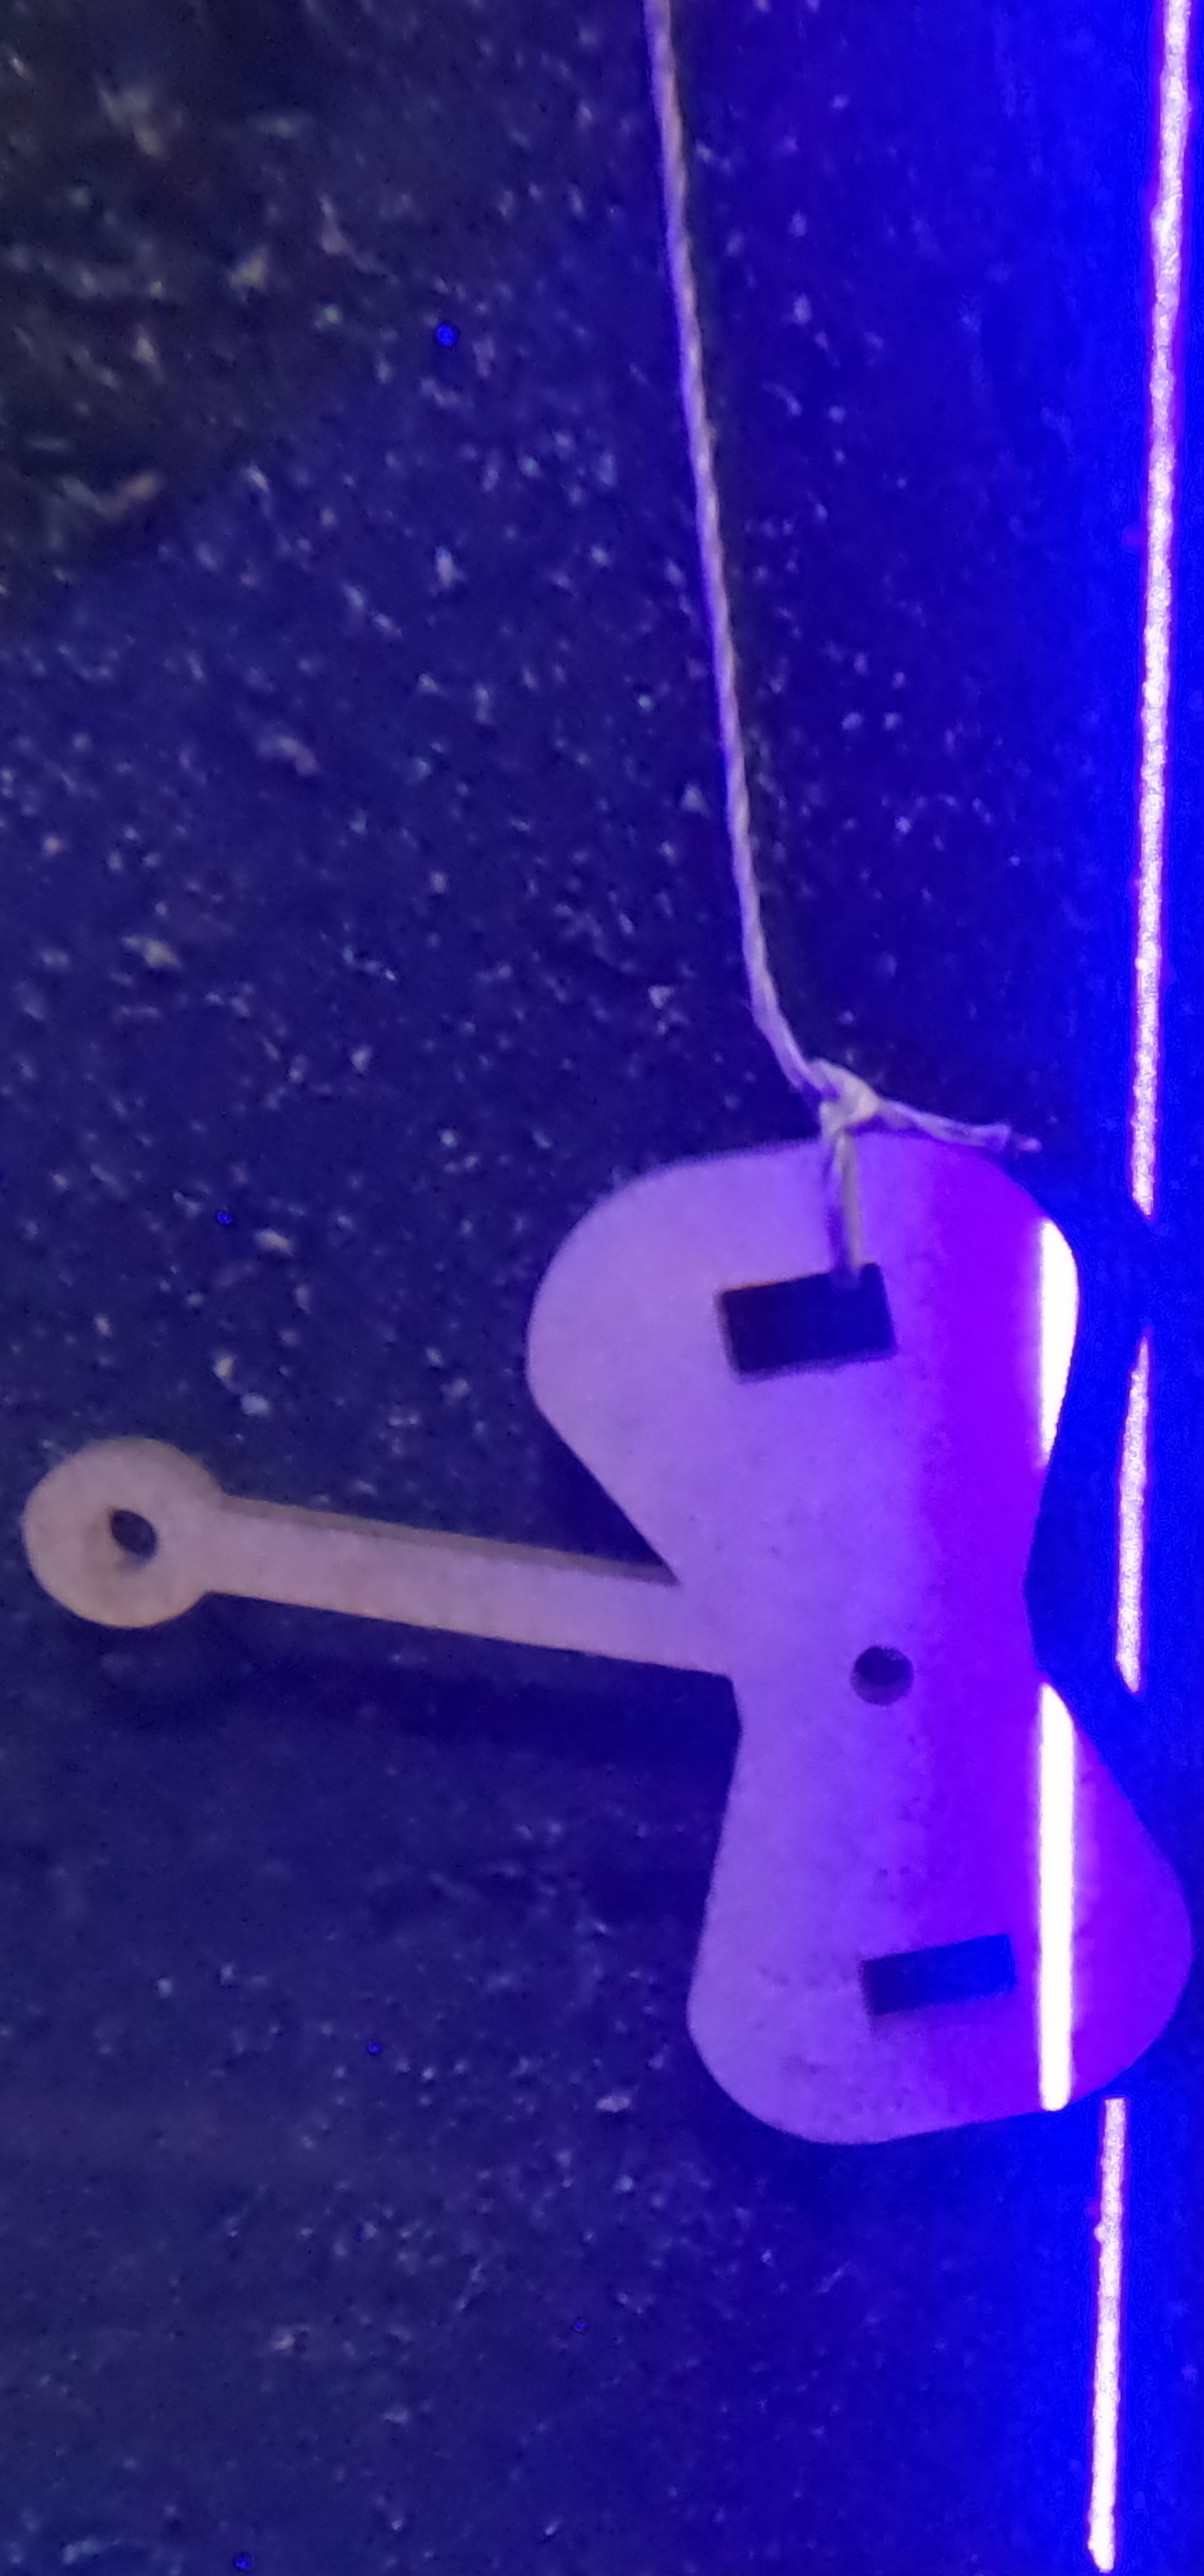

Supplement: Supplementary file 2415 [file G0015993.pdf › Level_2_2/G0015993.pdf]

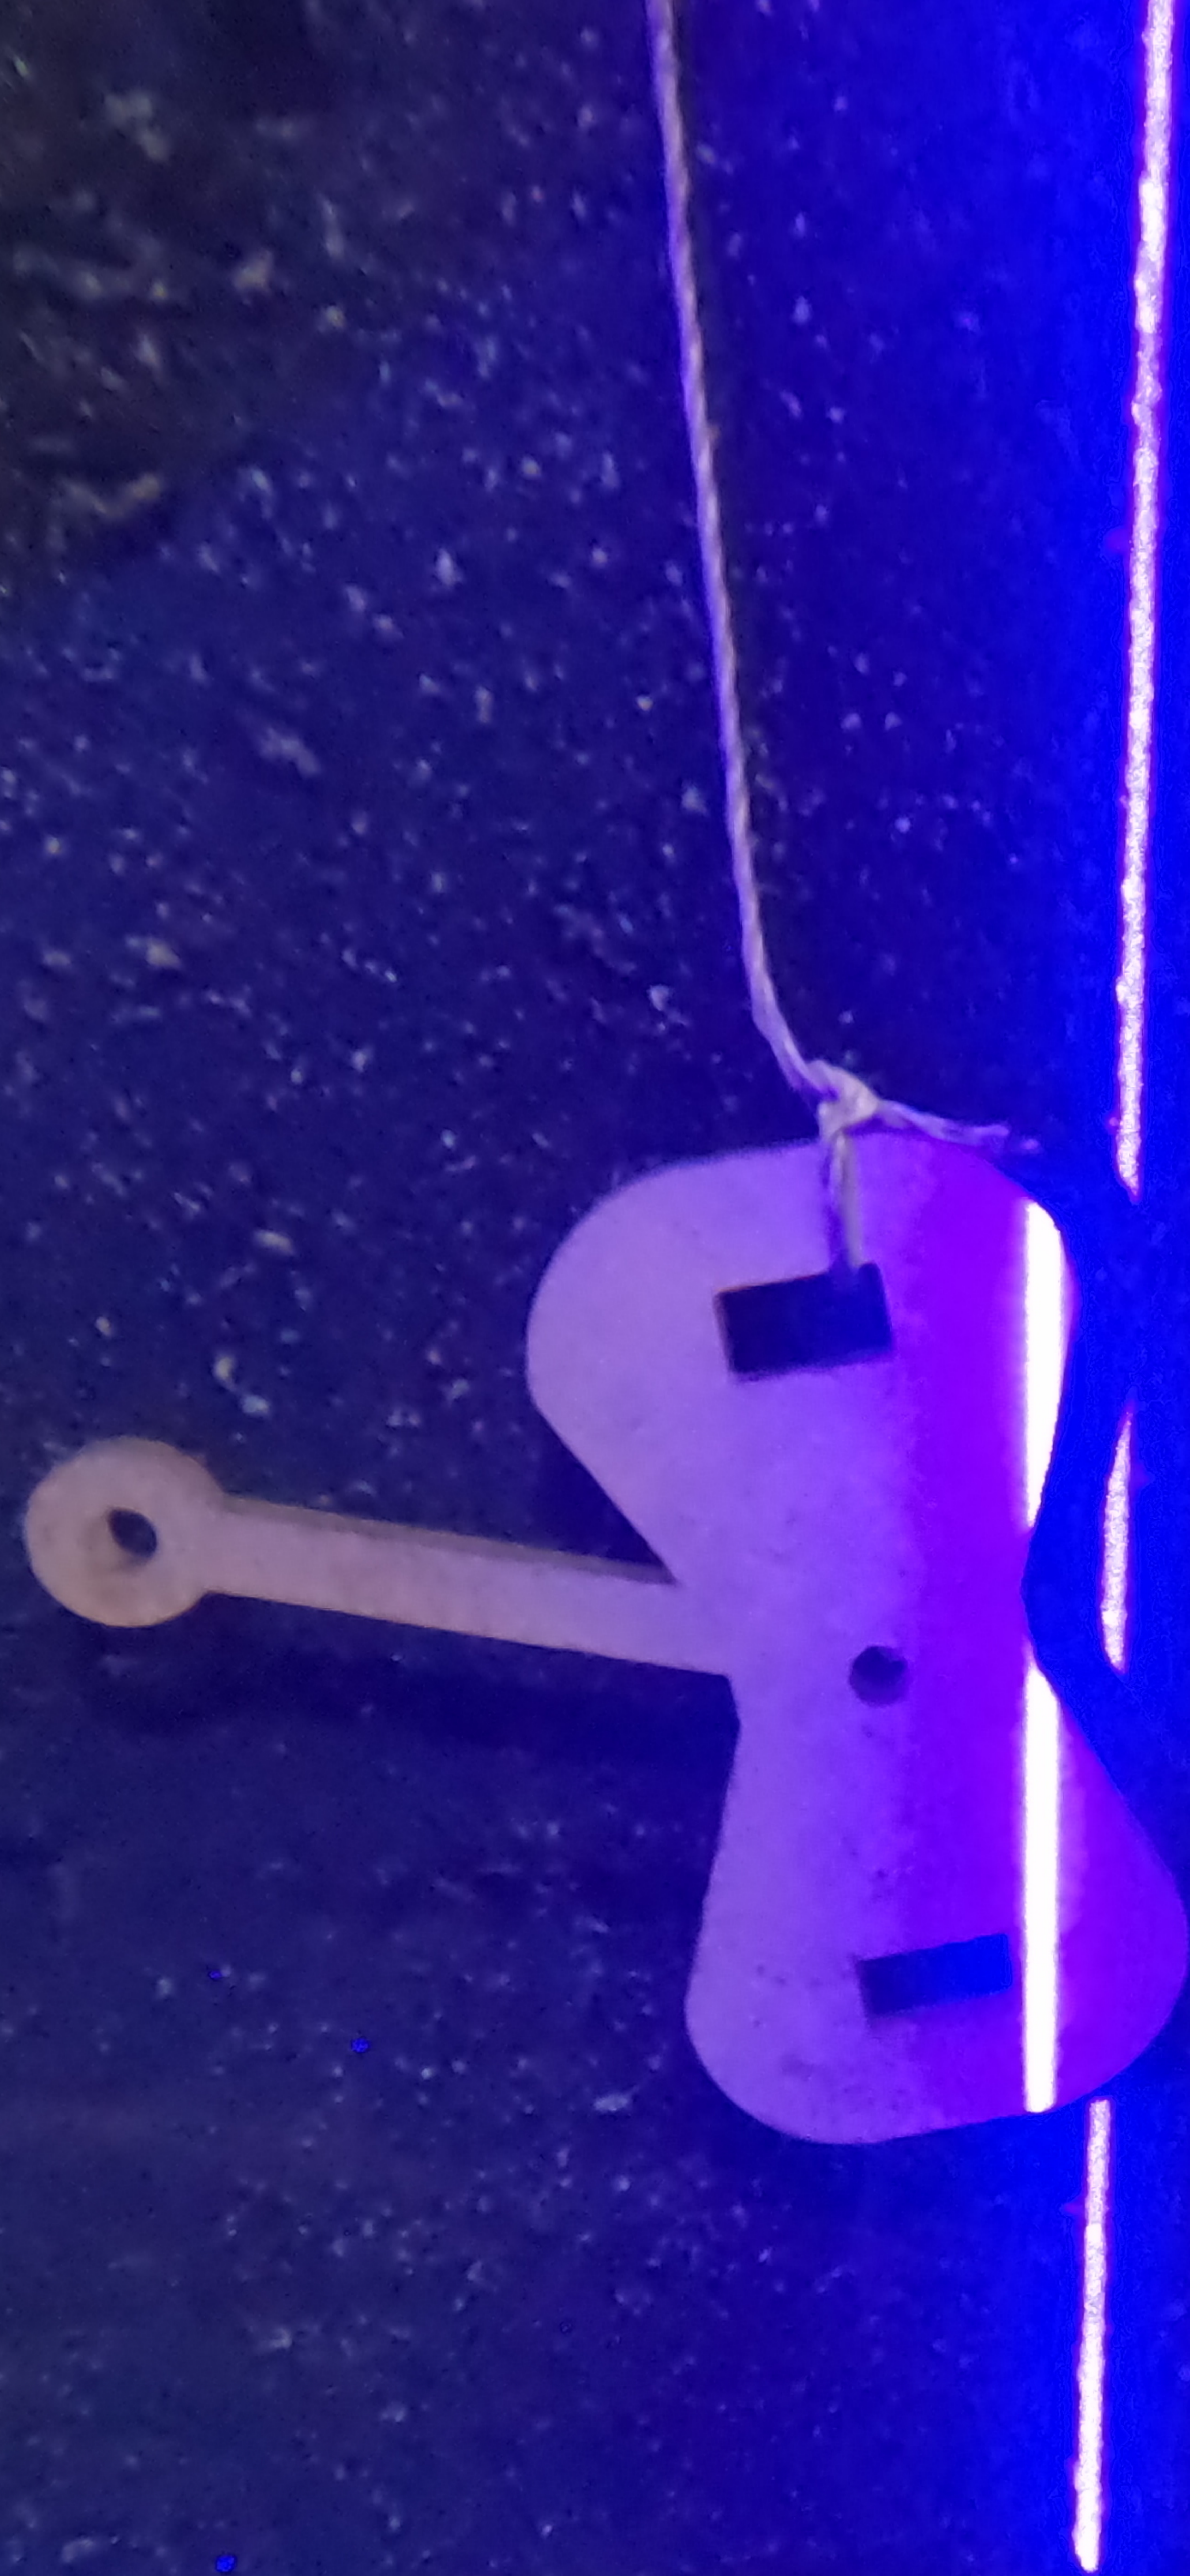

Supplement: Supplementary file 2416 [file G0015994.pdf › Level_2_2/G0015994.pdf]

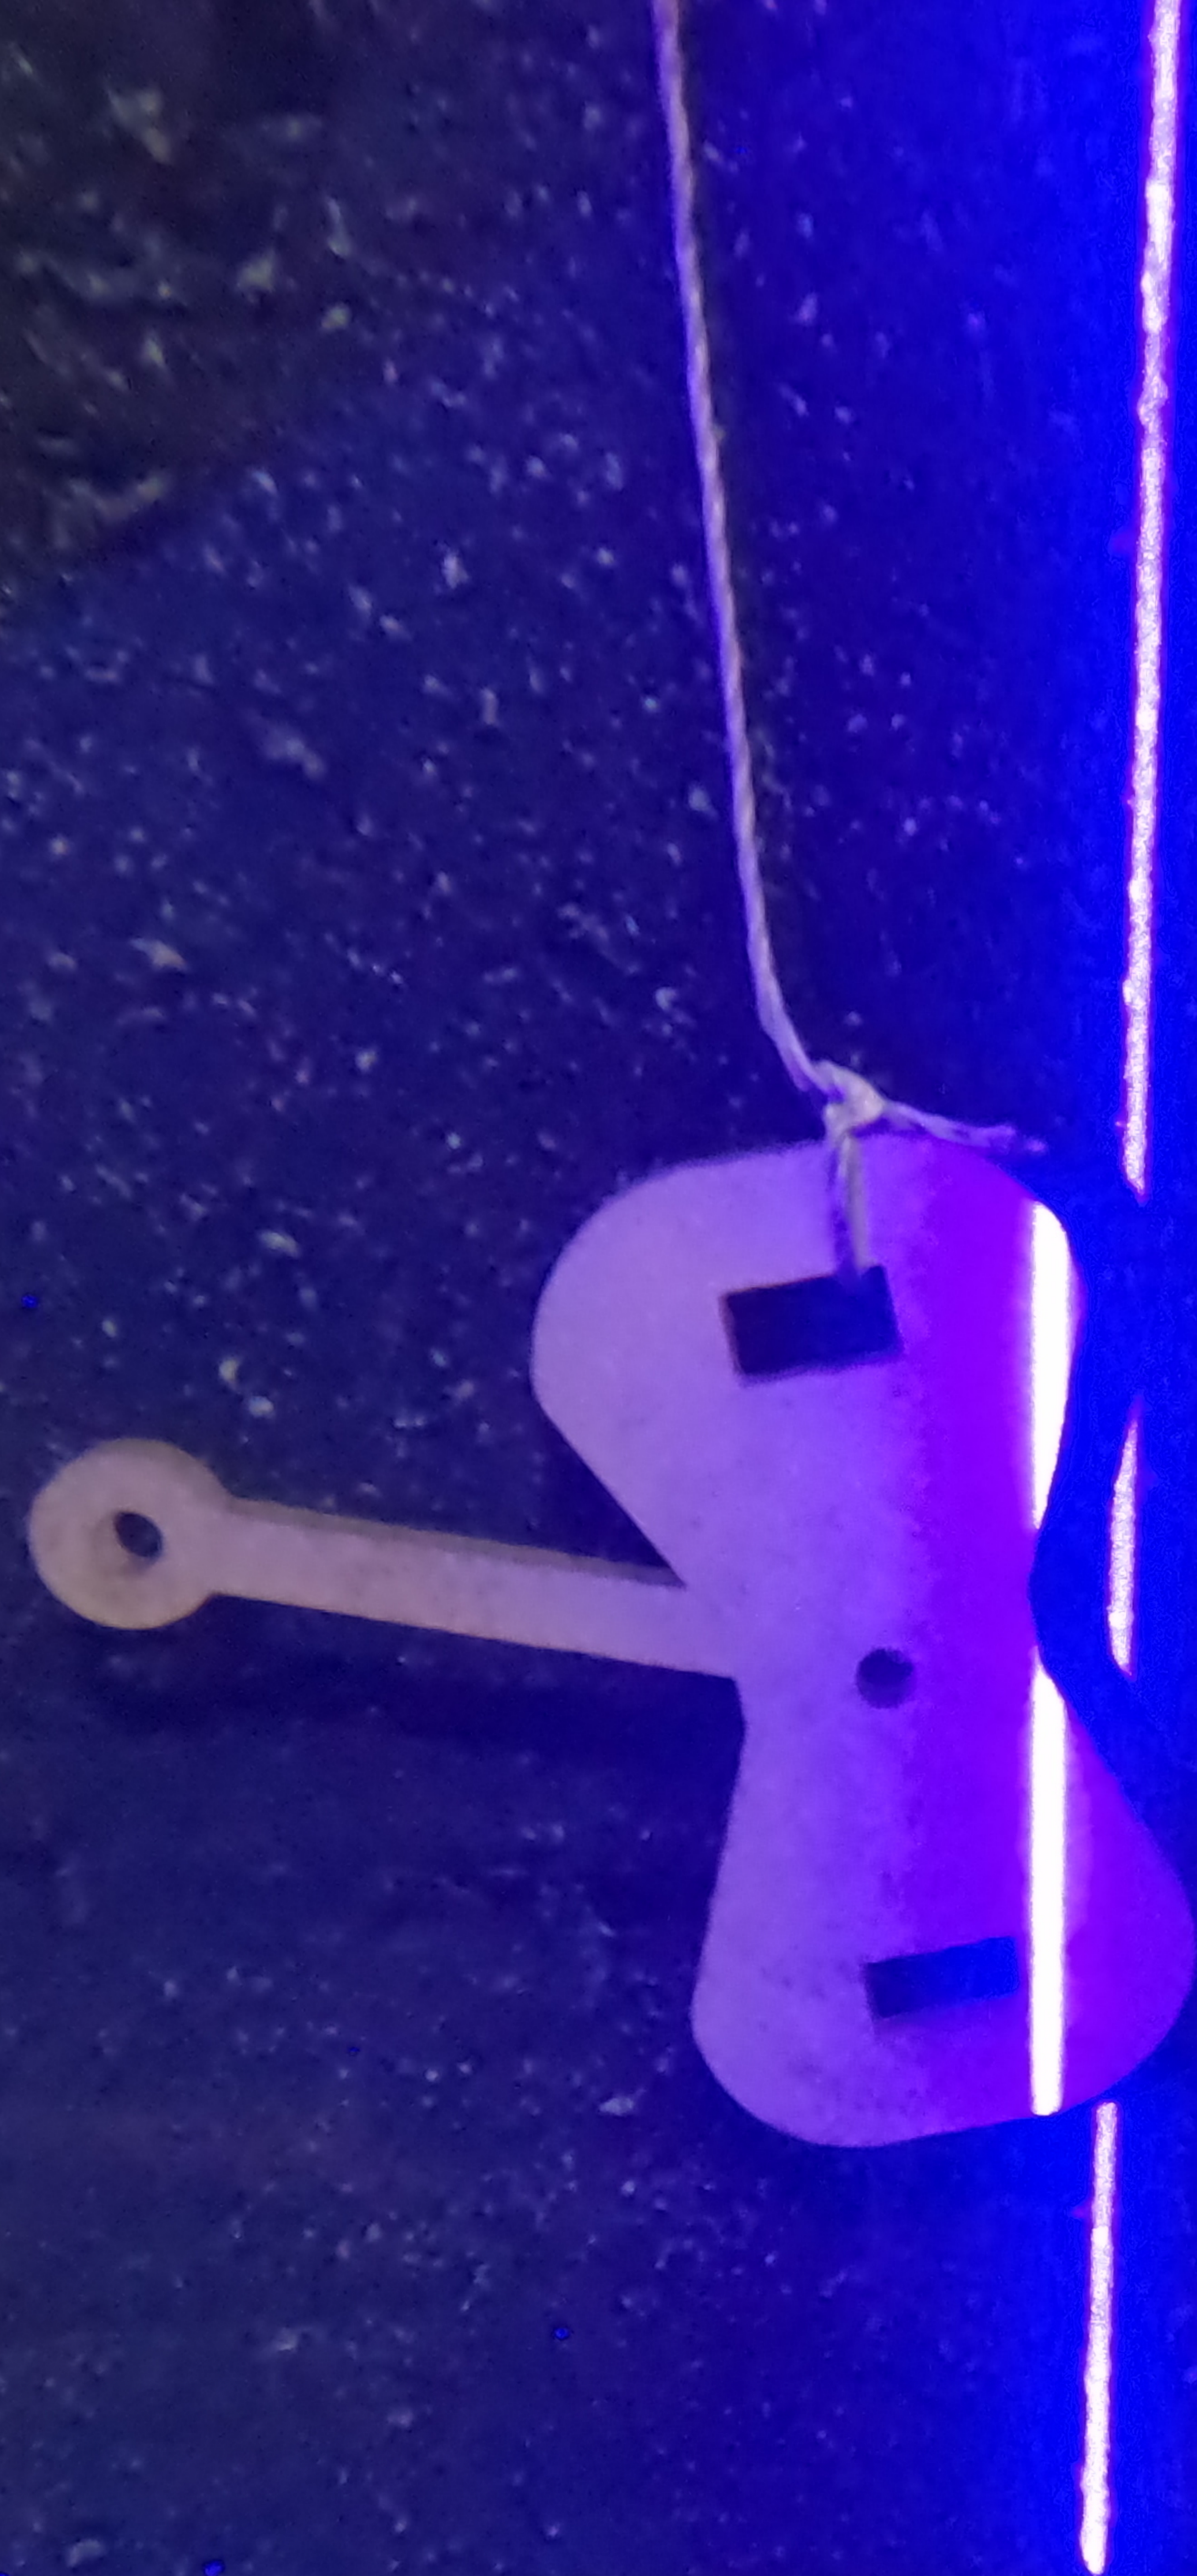

Supplement: Supplementary file 2417 [file G0015995.pdf › Level_2_2/G0015995.pdf]

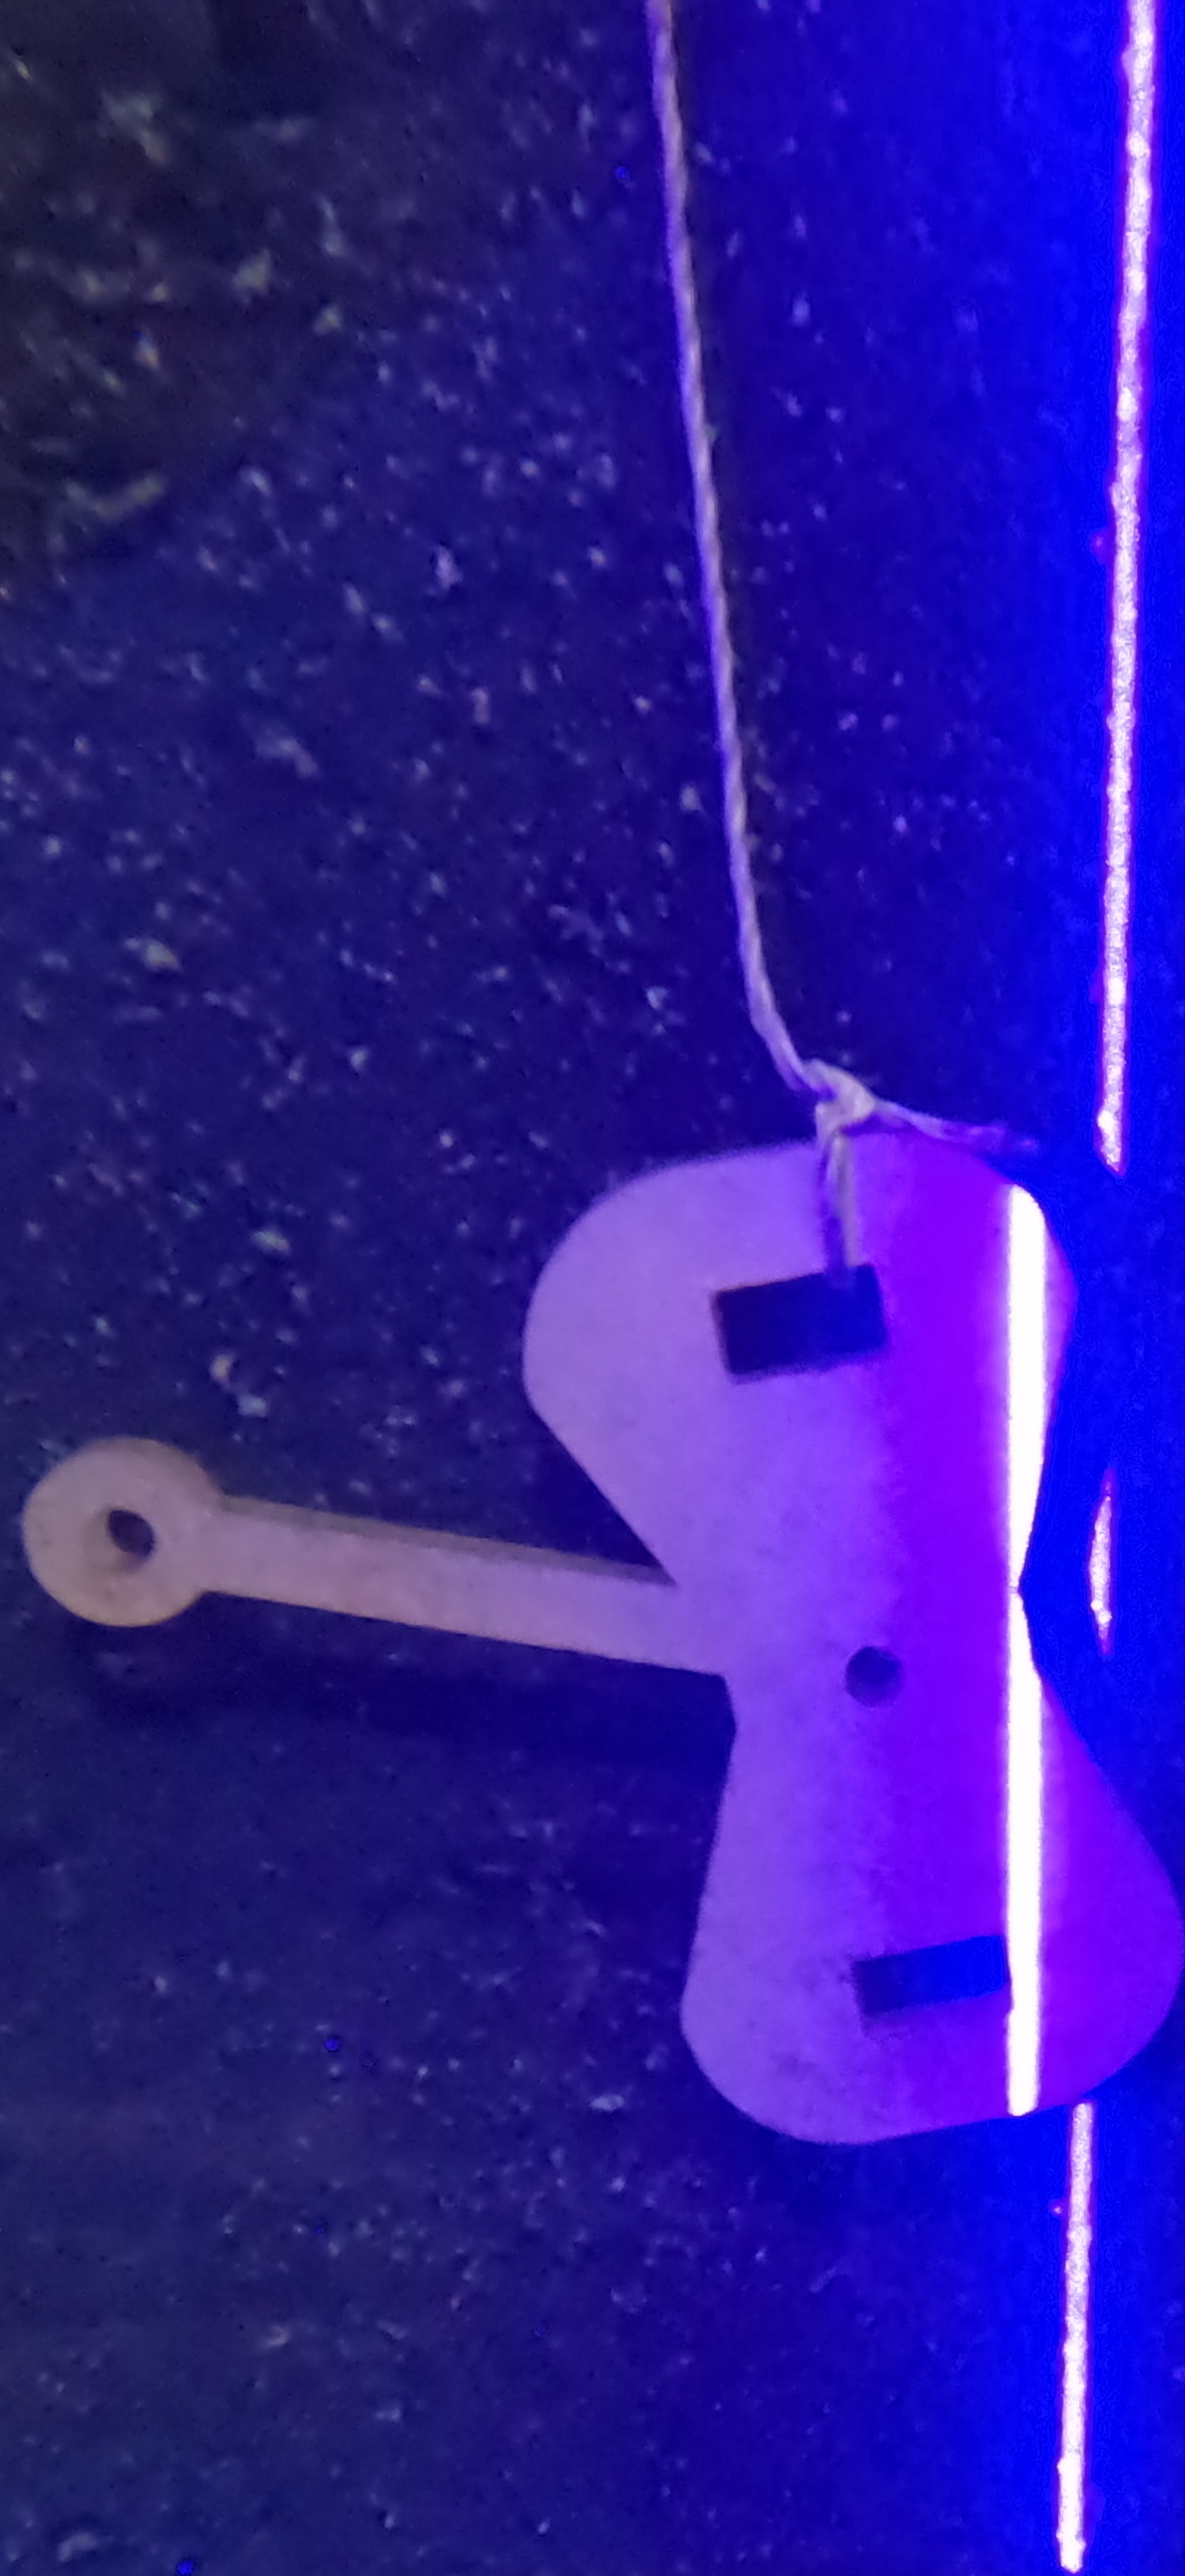

Supplement: Supplementary file 2418 [file G0015996.pdf › Level_2_2/G0015996.pdf]

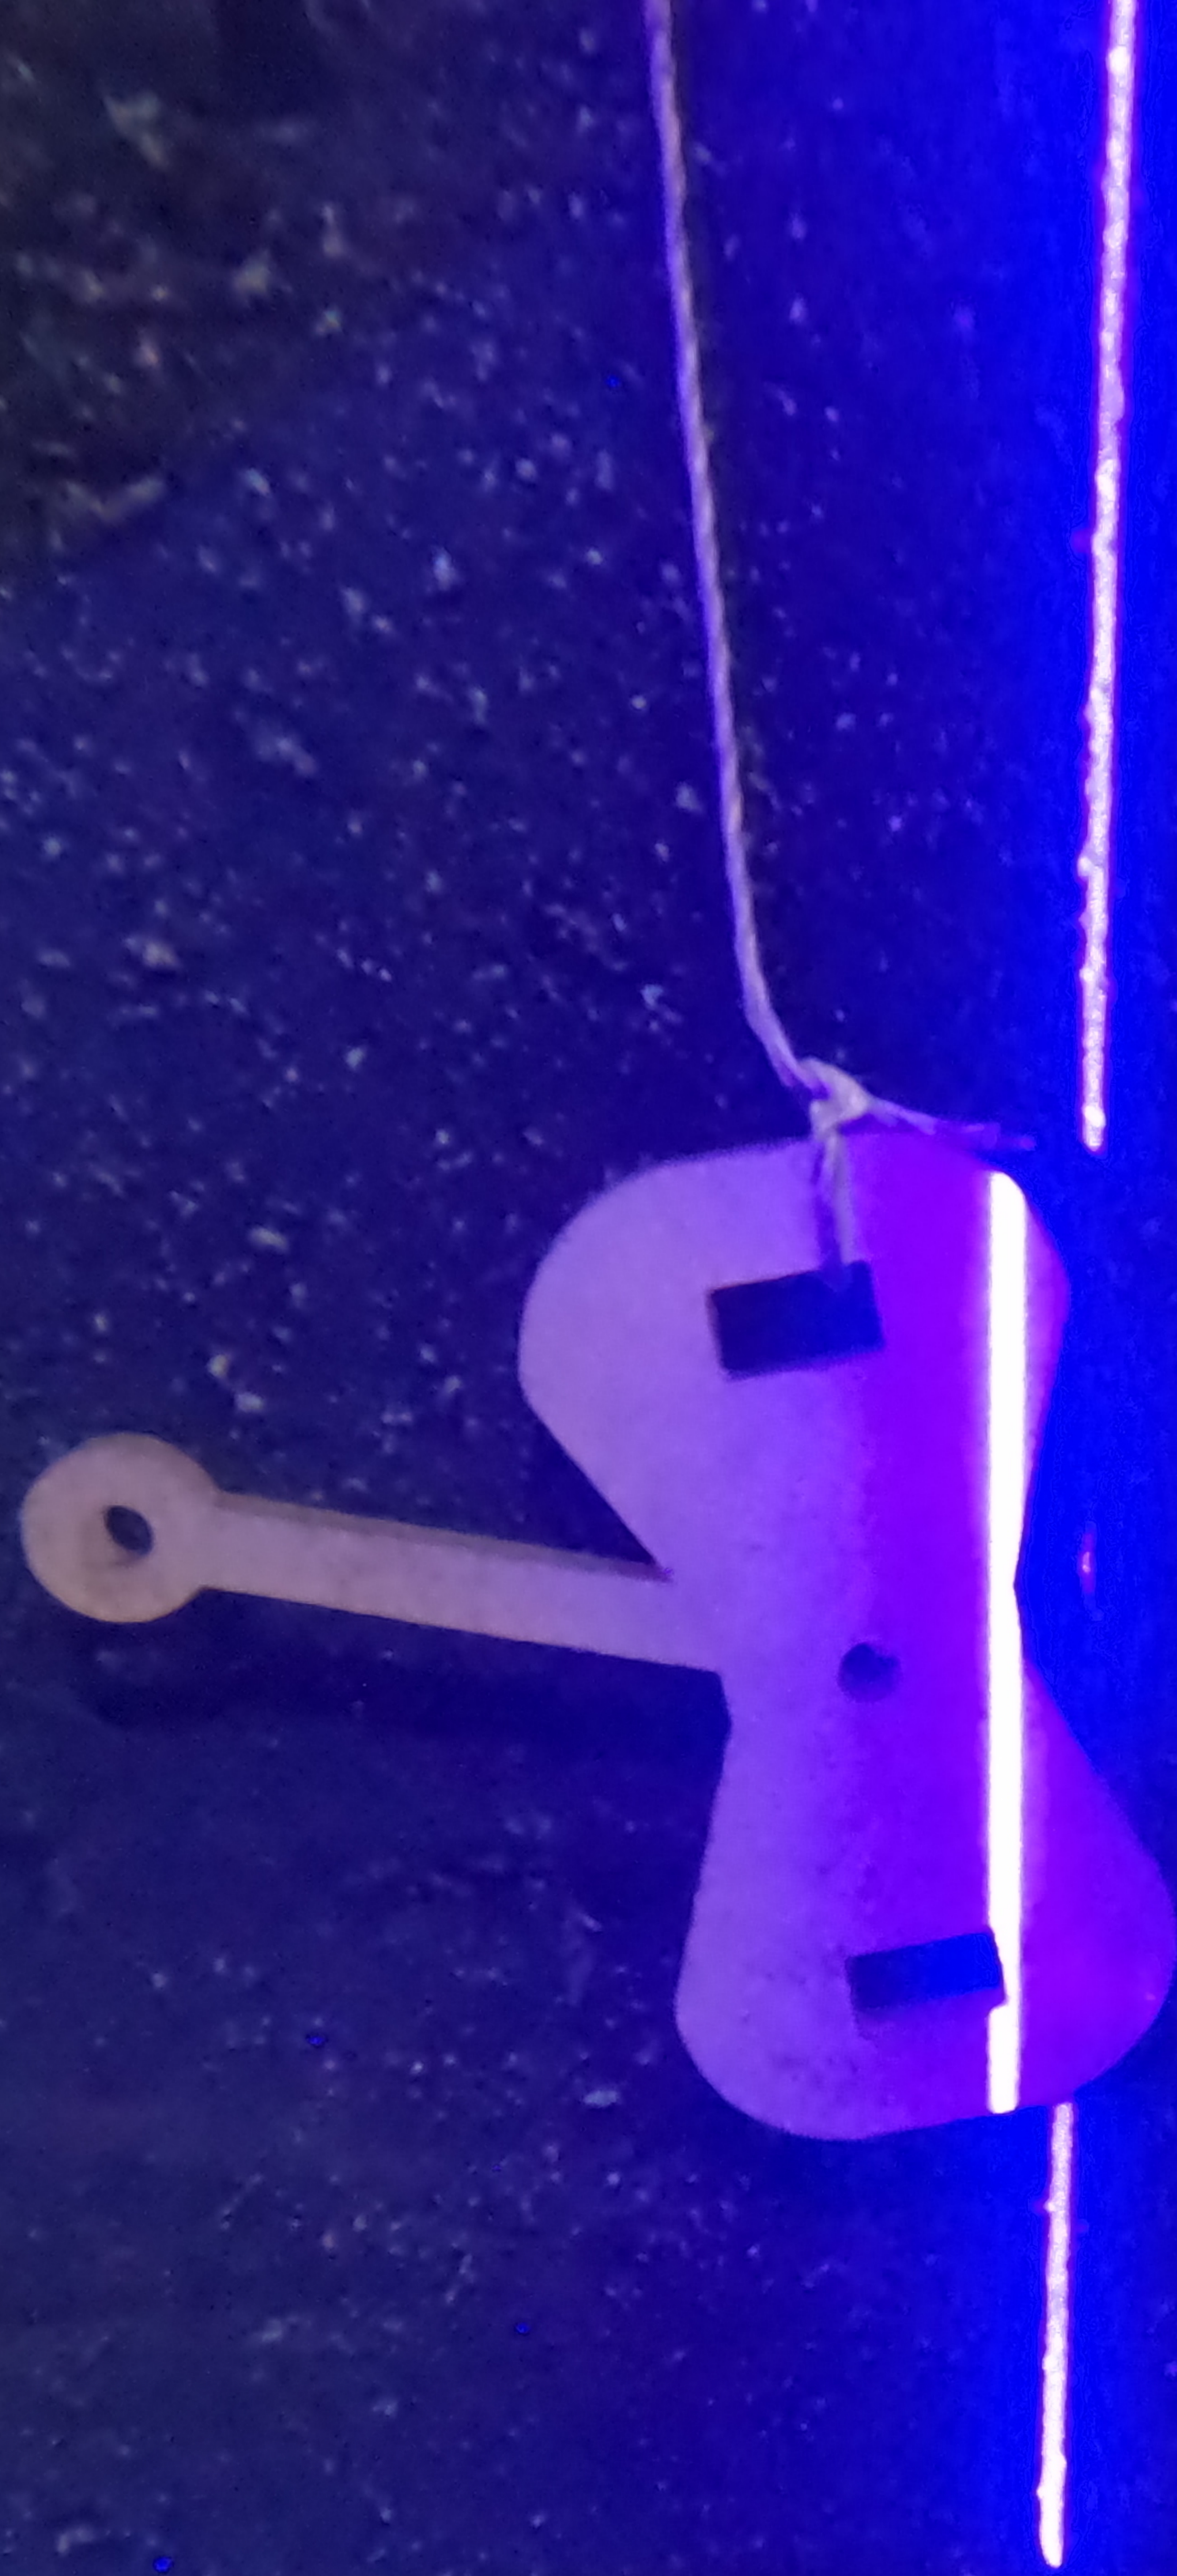

Supplement: Supplementary file 2419 [file G0015997.pdf › Level_2_2/G0015997.pdf]

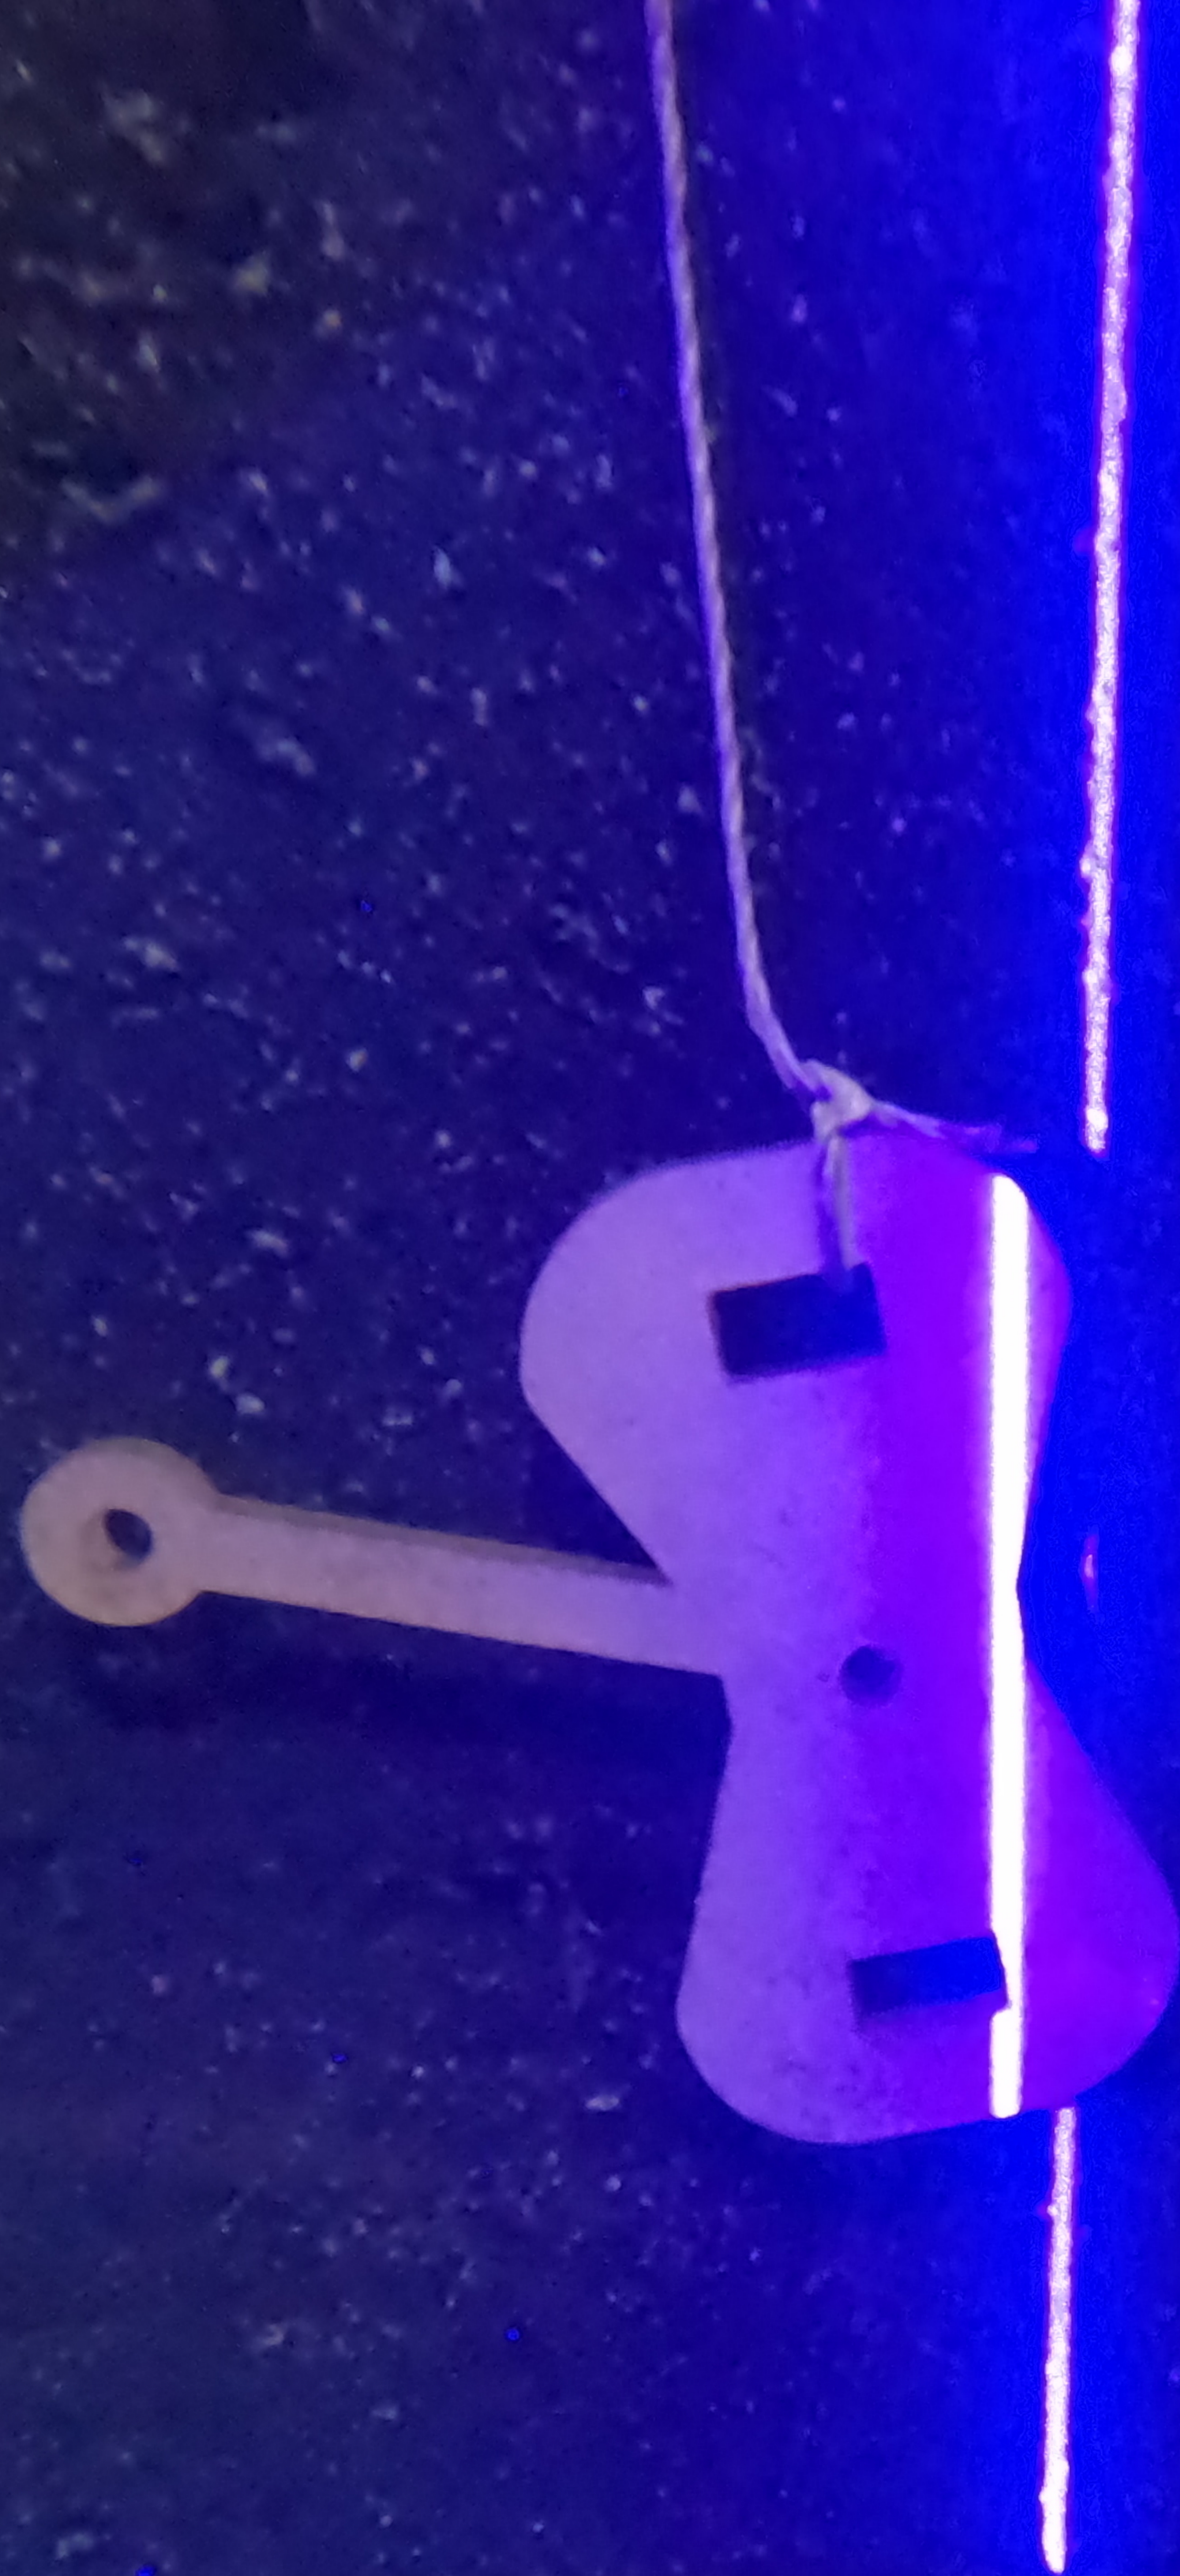

Supplement: Supplementary file 2420 [file G0015998.pdf › Level_2_2/G0015998.pdf]

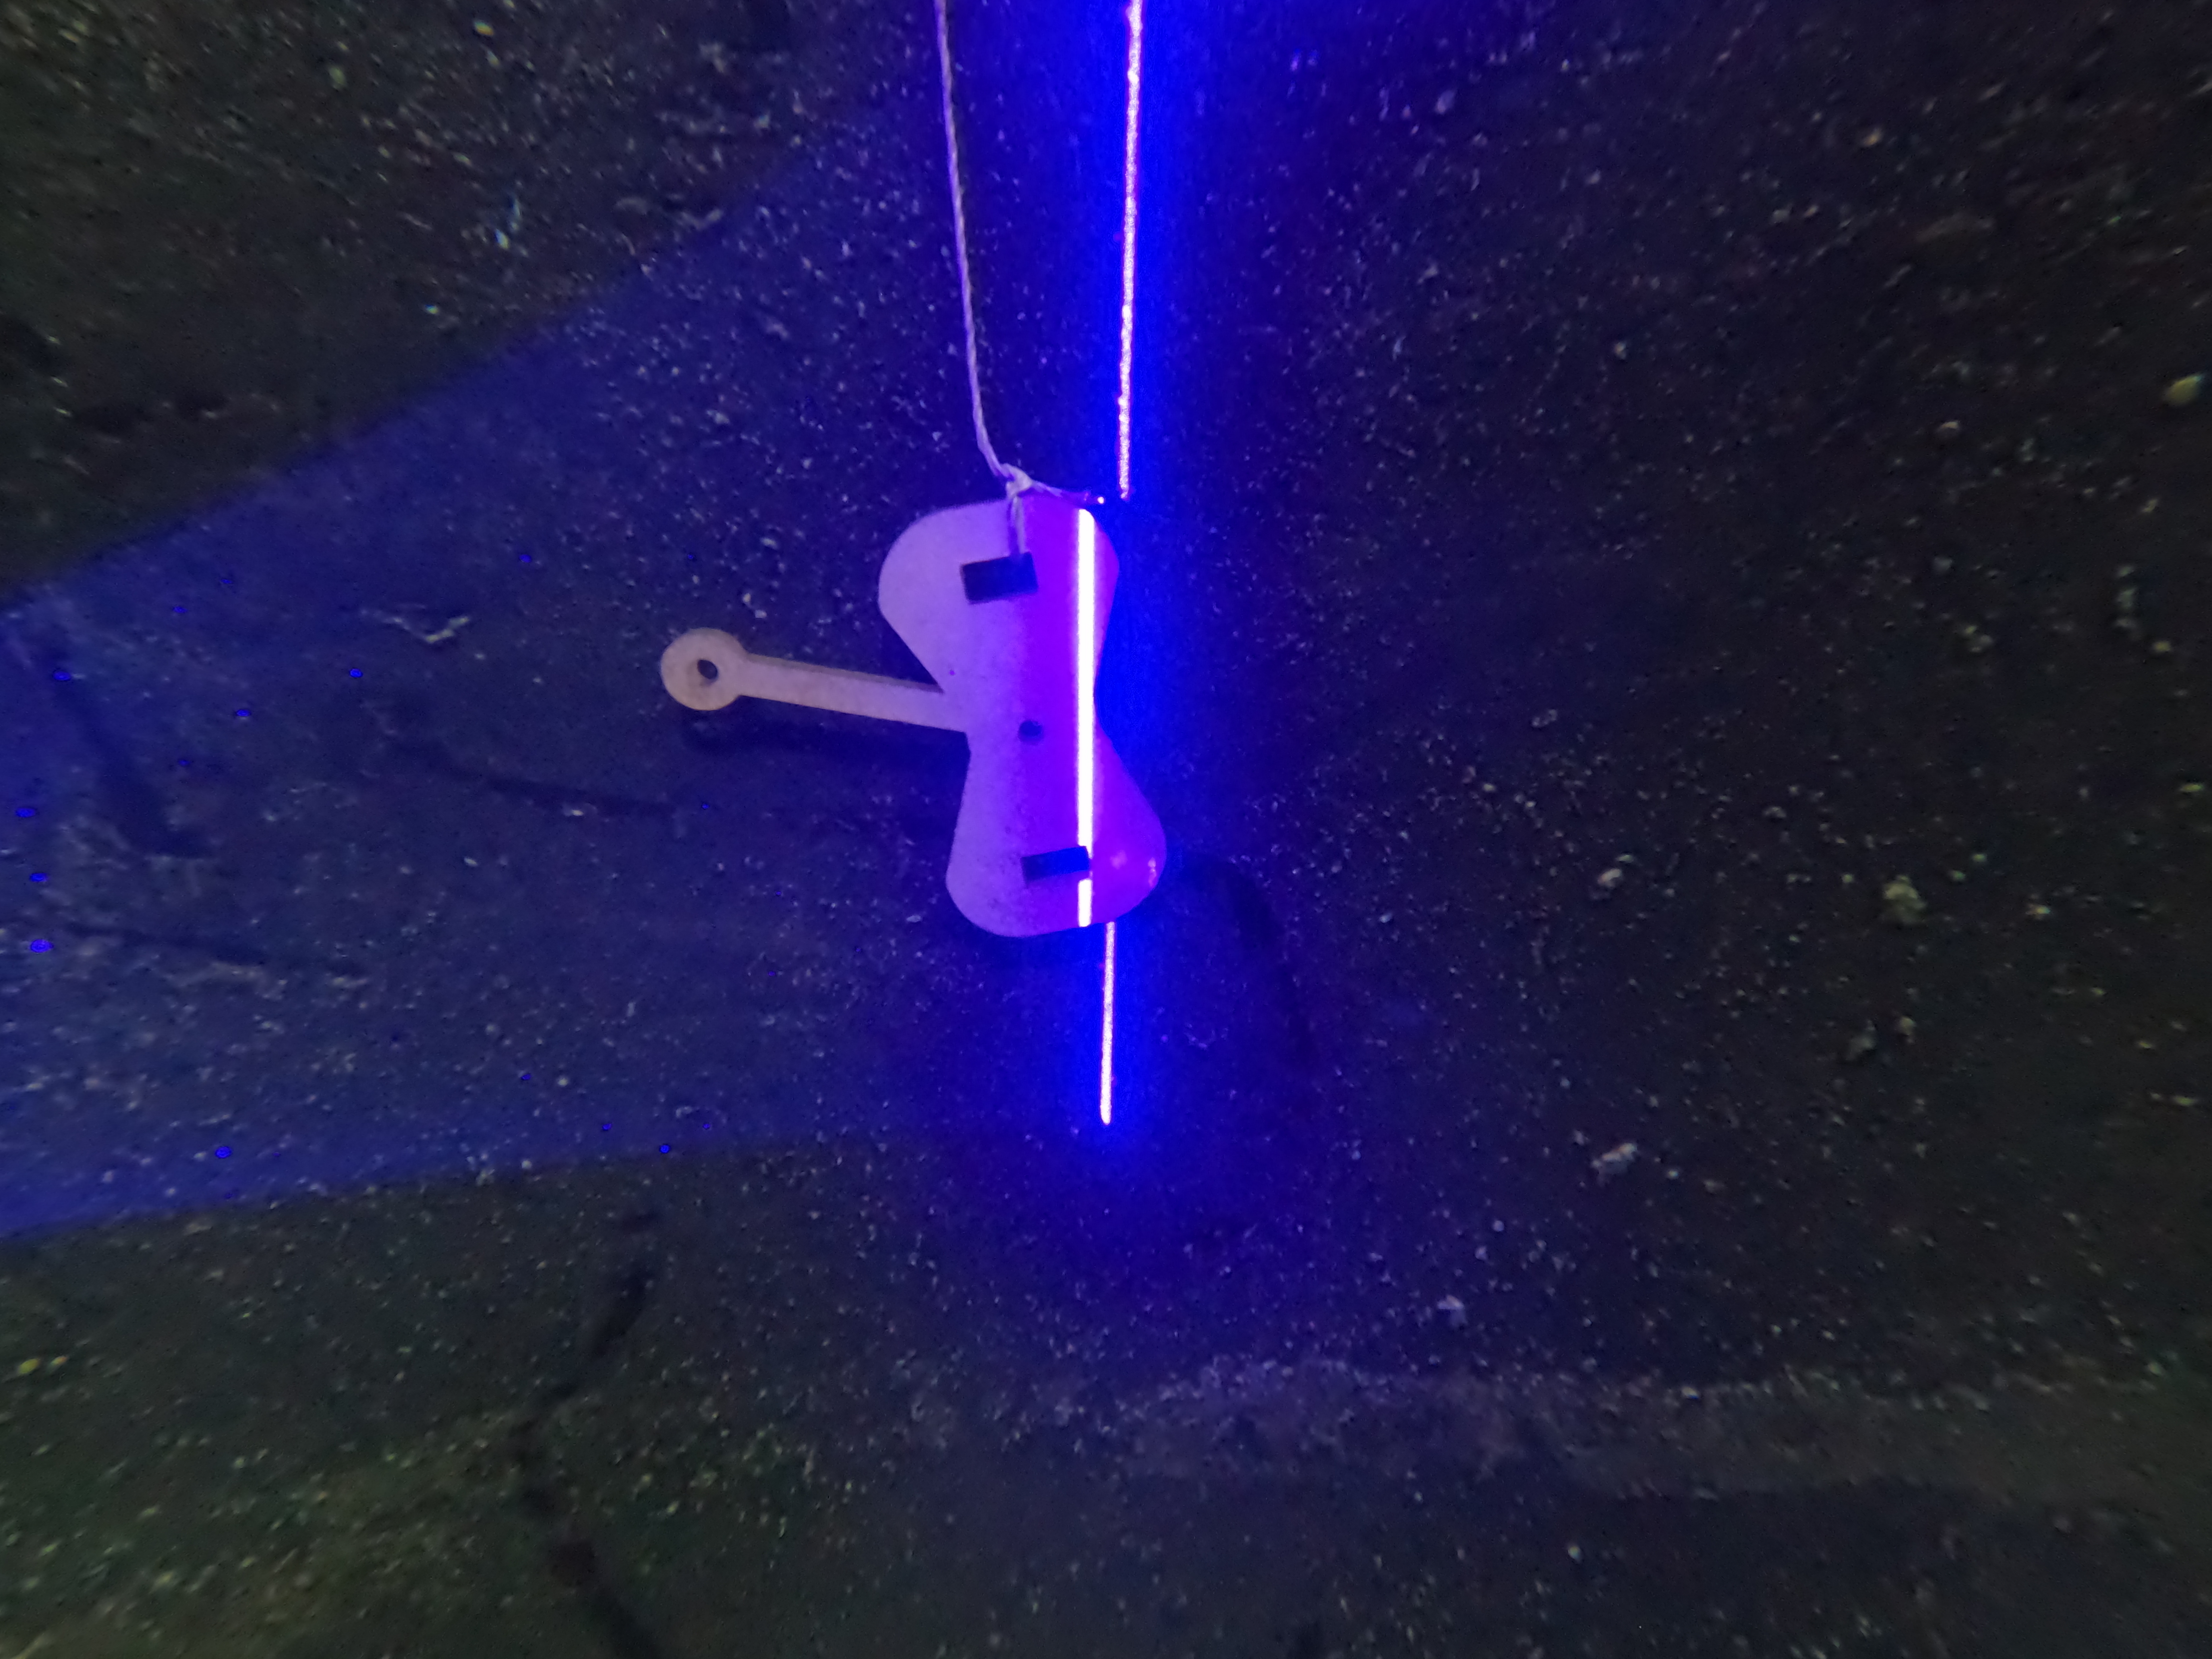

Supplement: Supplementary file 2421 [file G0015999.pdf › Level_2_2/G0015999.pdf]

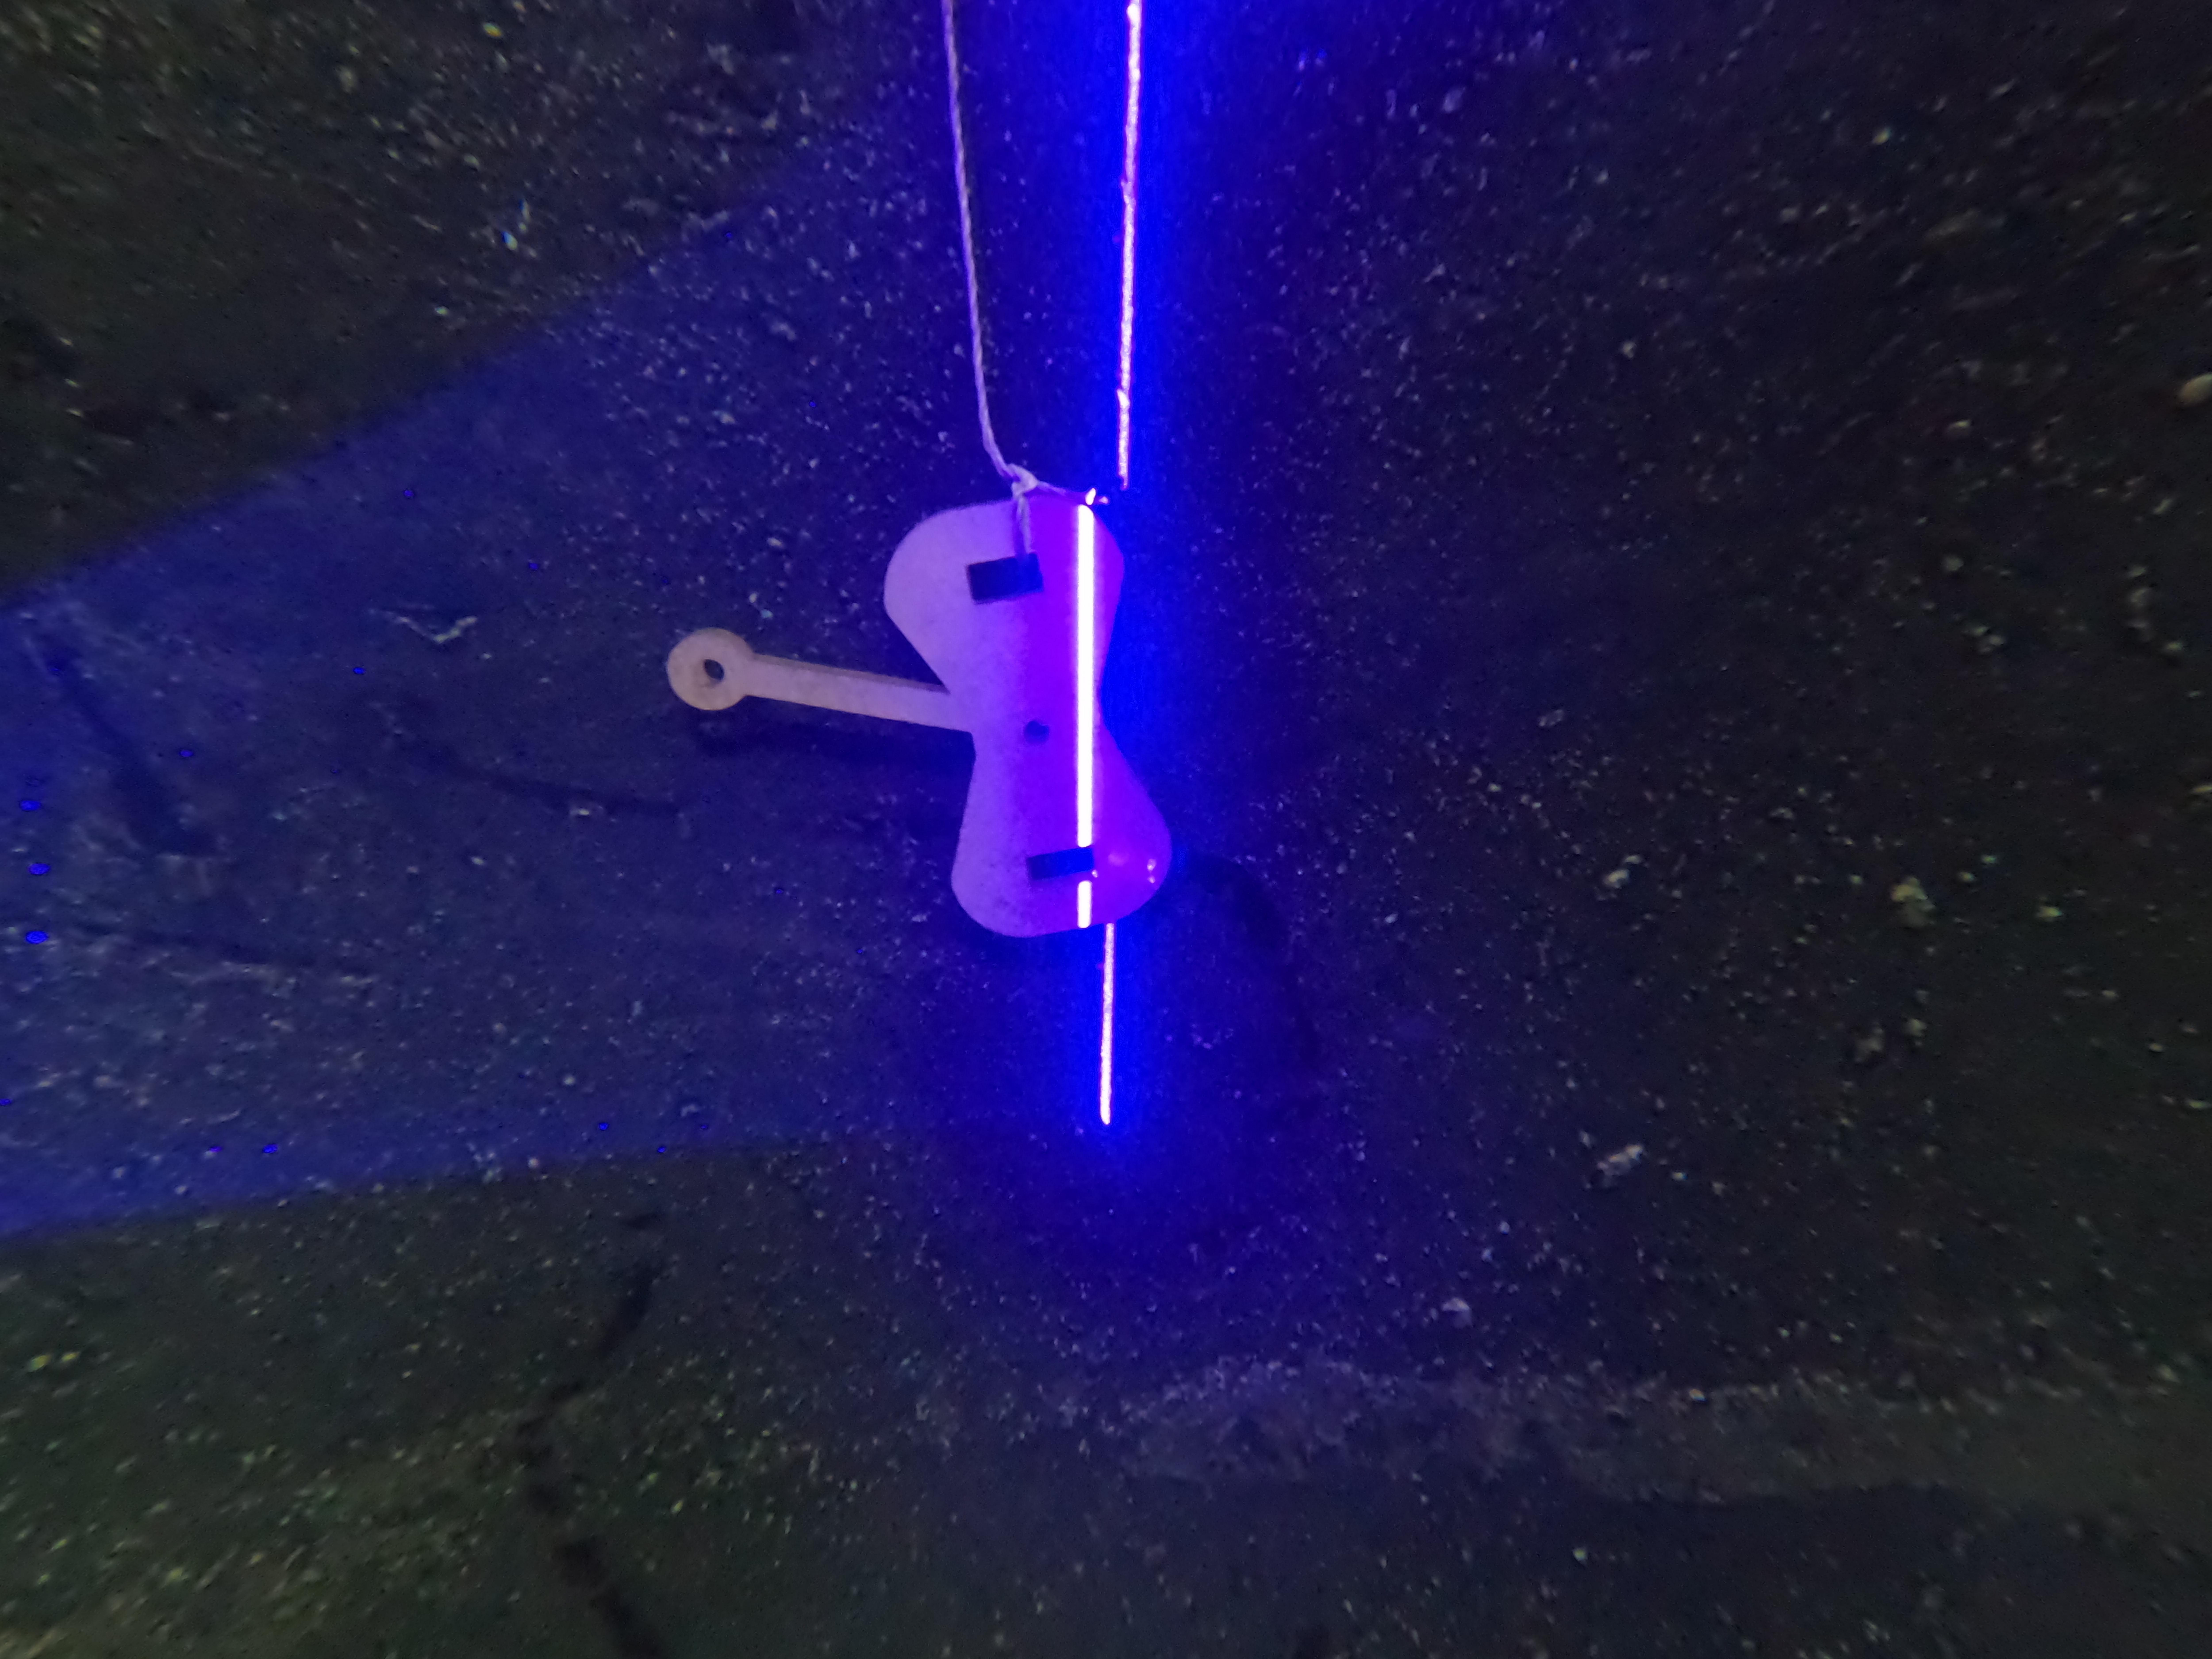

Supplement: Supplementary file 2422 [file G0016000.pdf › Level_2_2/G0016000.pdf]

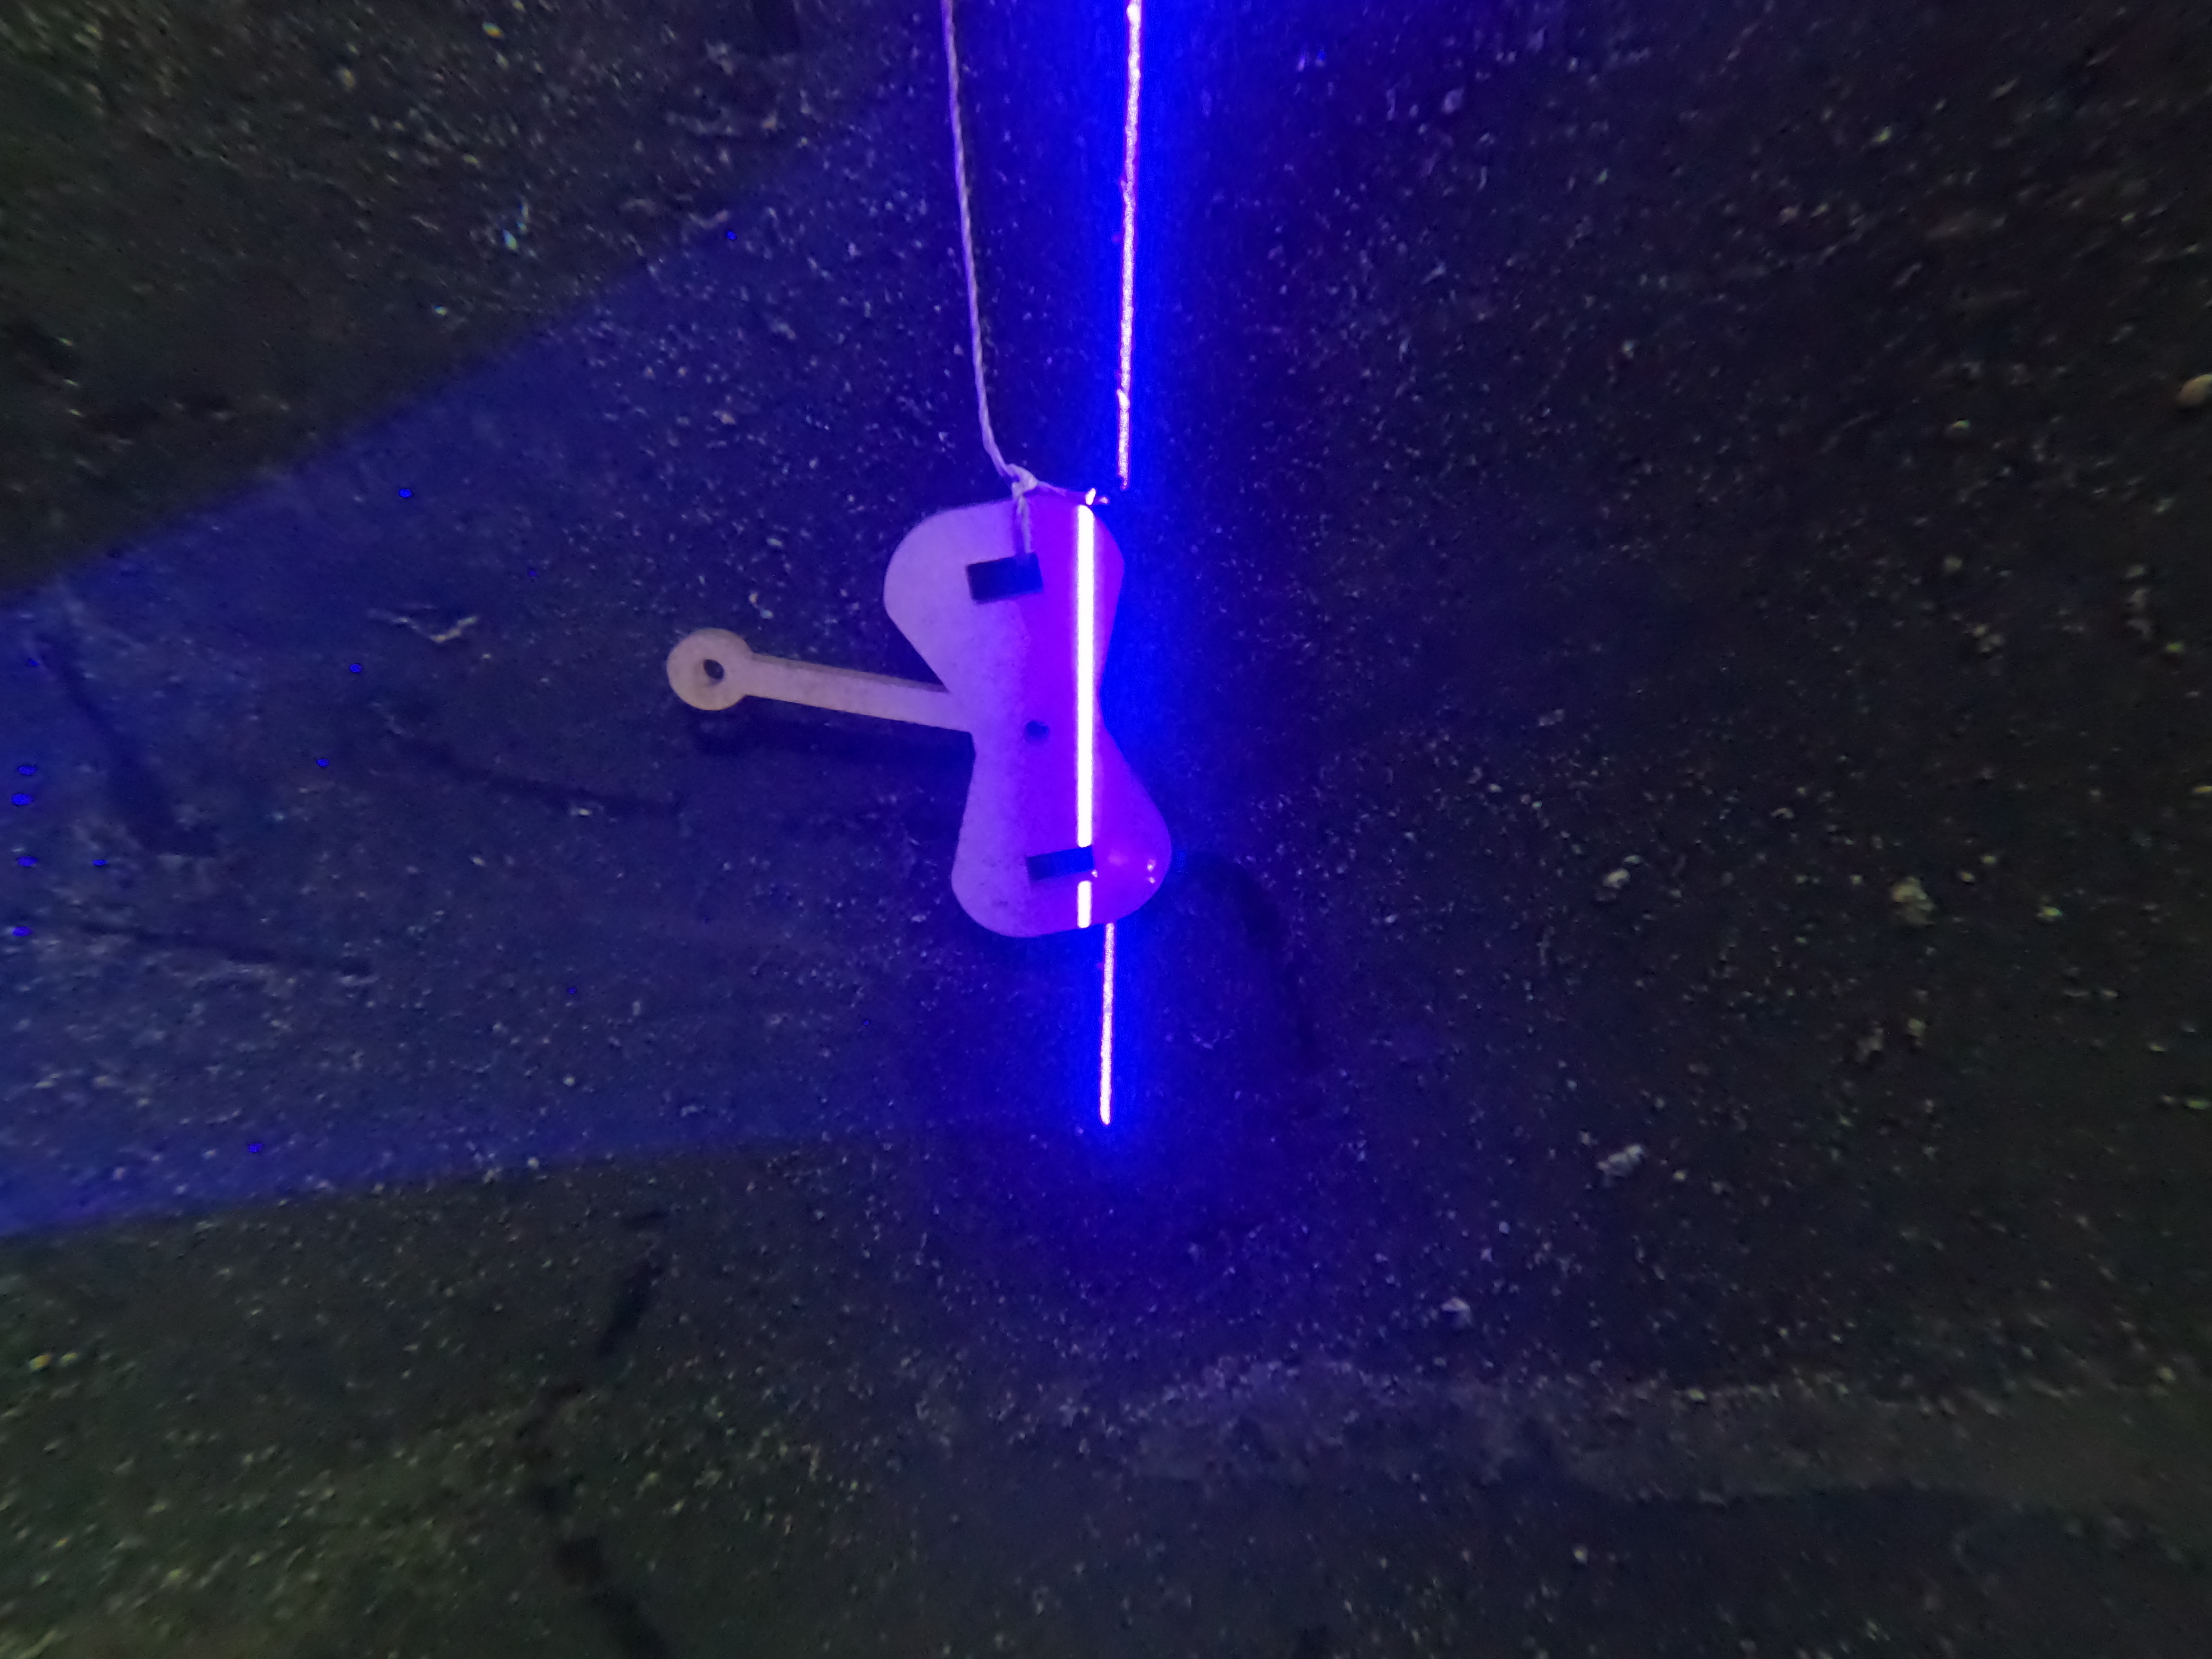

Supplement: Supplementary file 2423 [file G0016001.pdf › Level_2_2/G0016001.pdf]

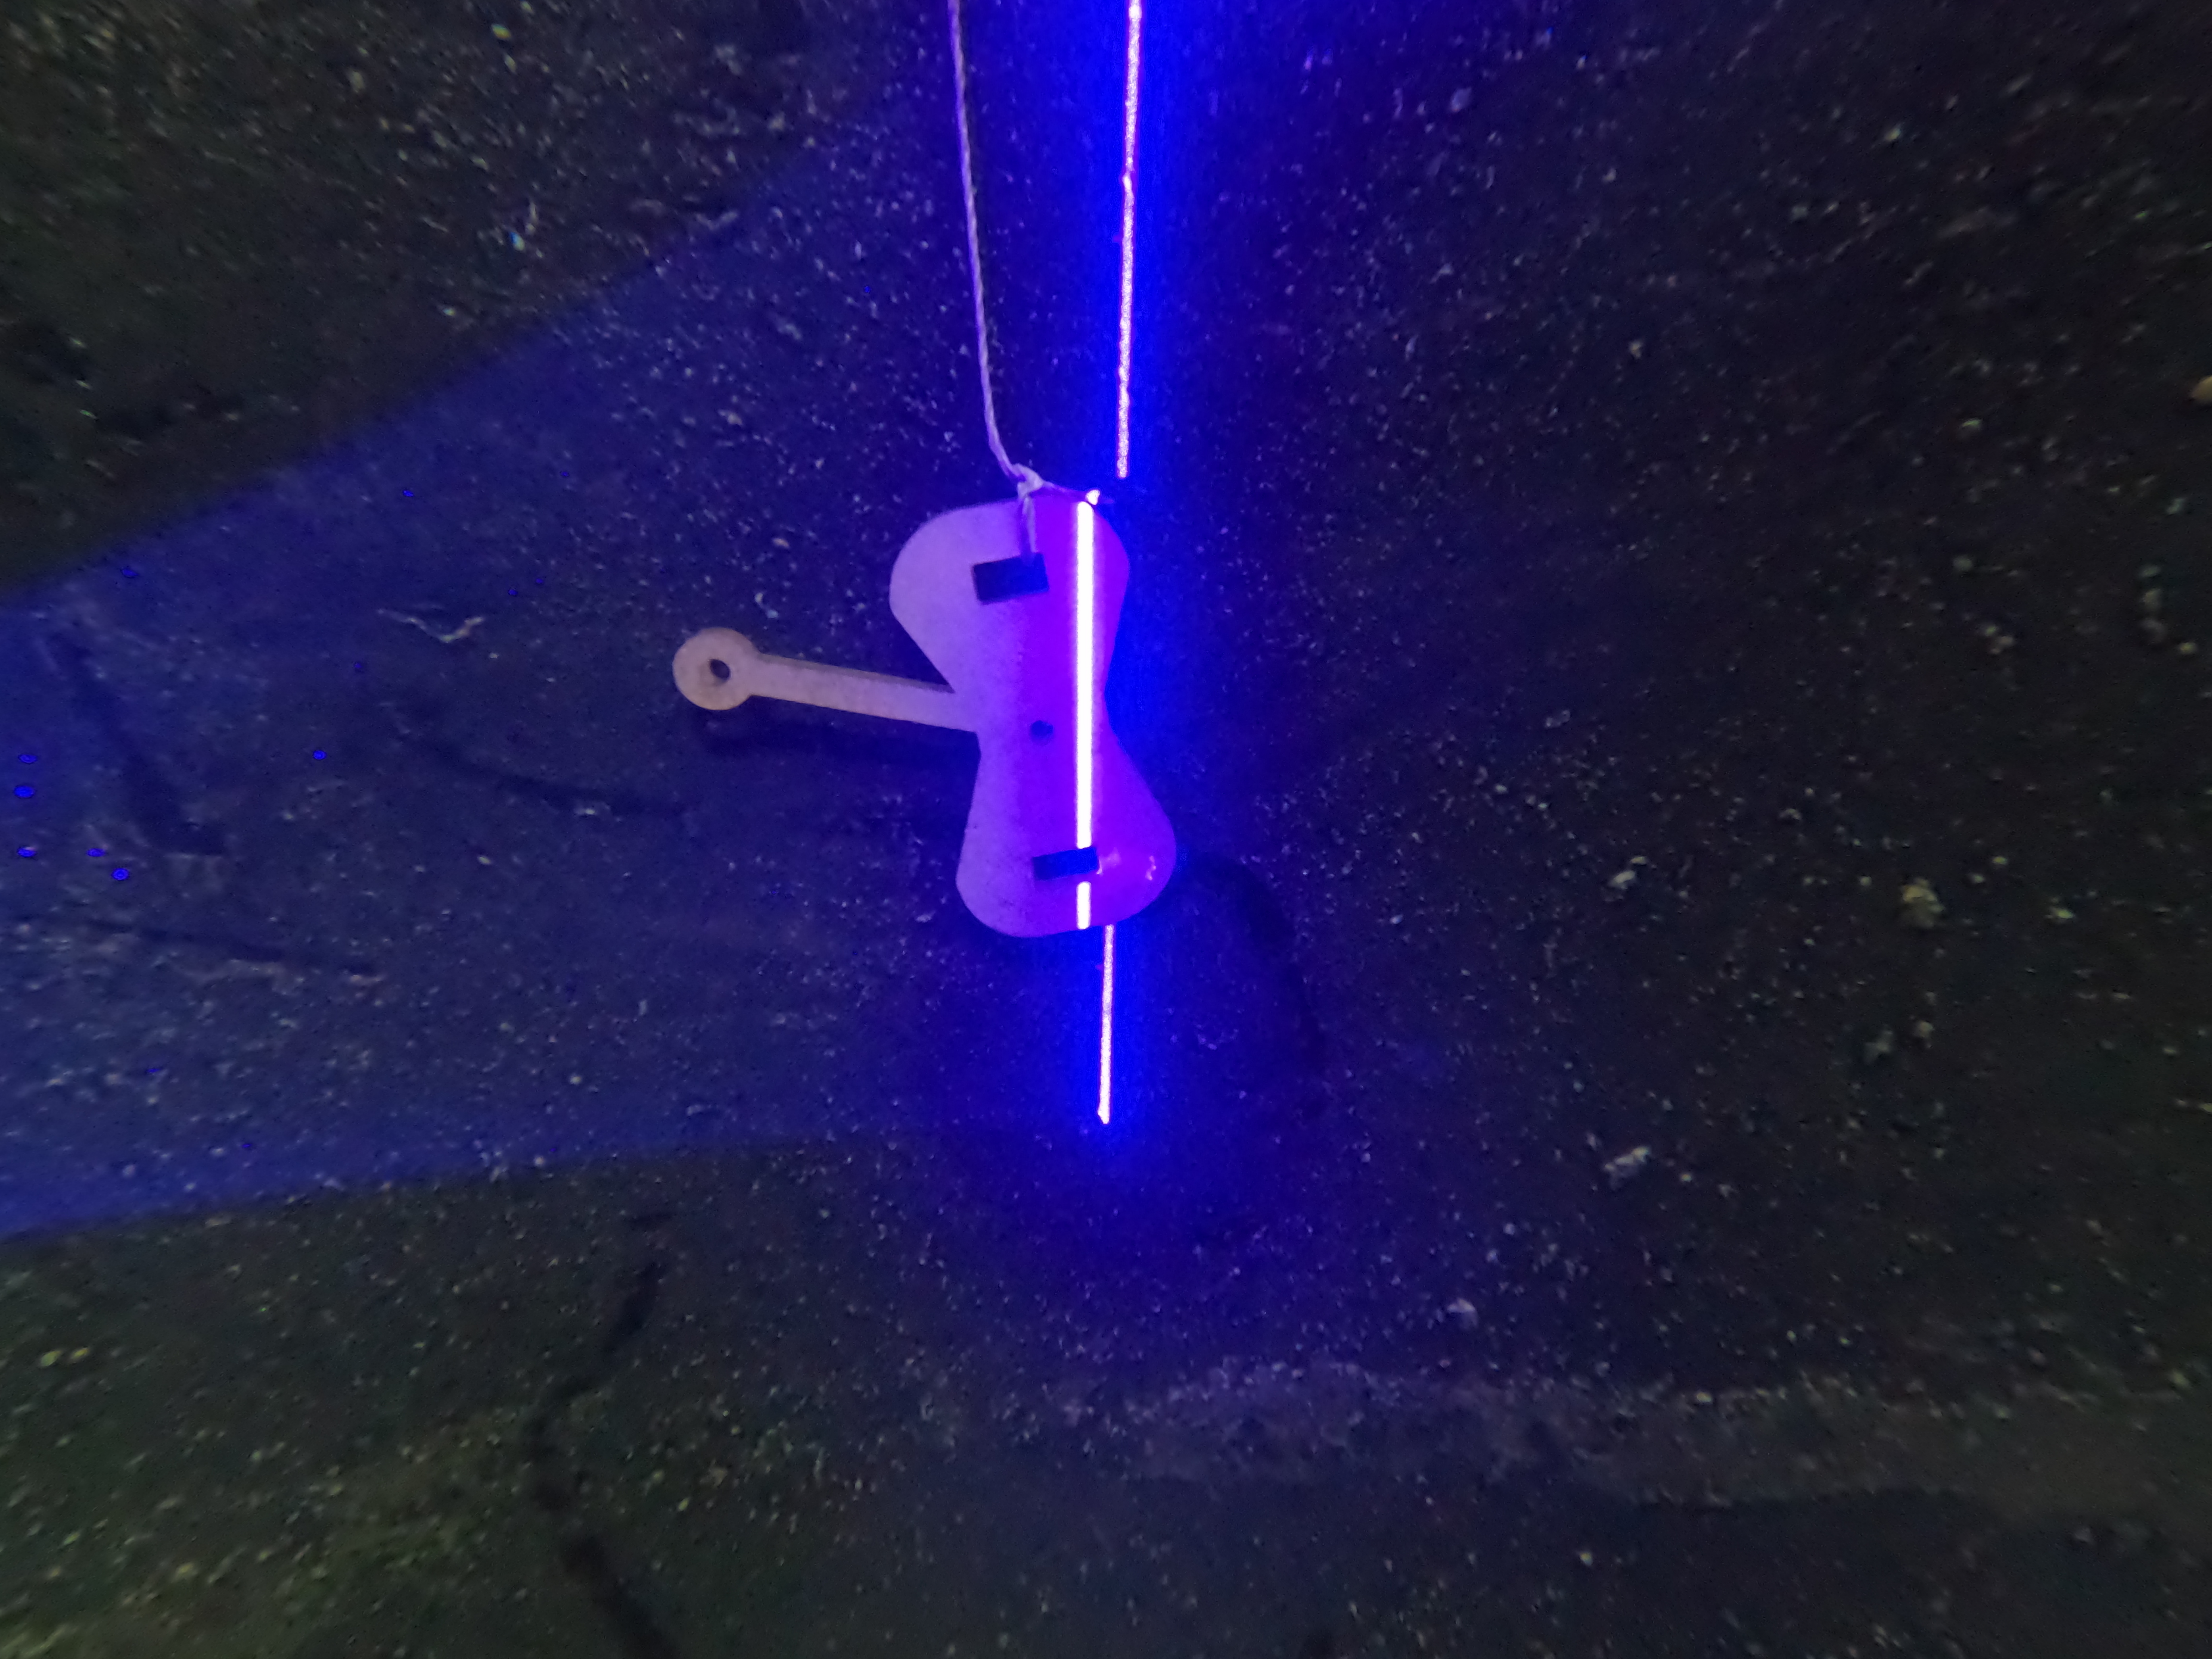

Supplement: Supplementary file 2424 [file G0016002.pdf › Level_2_2/G0016002.pdf]

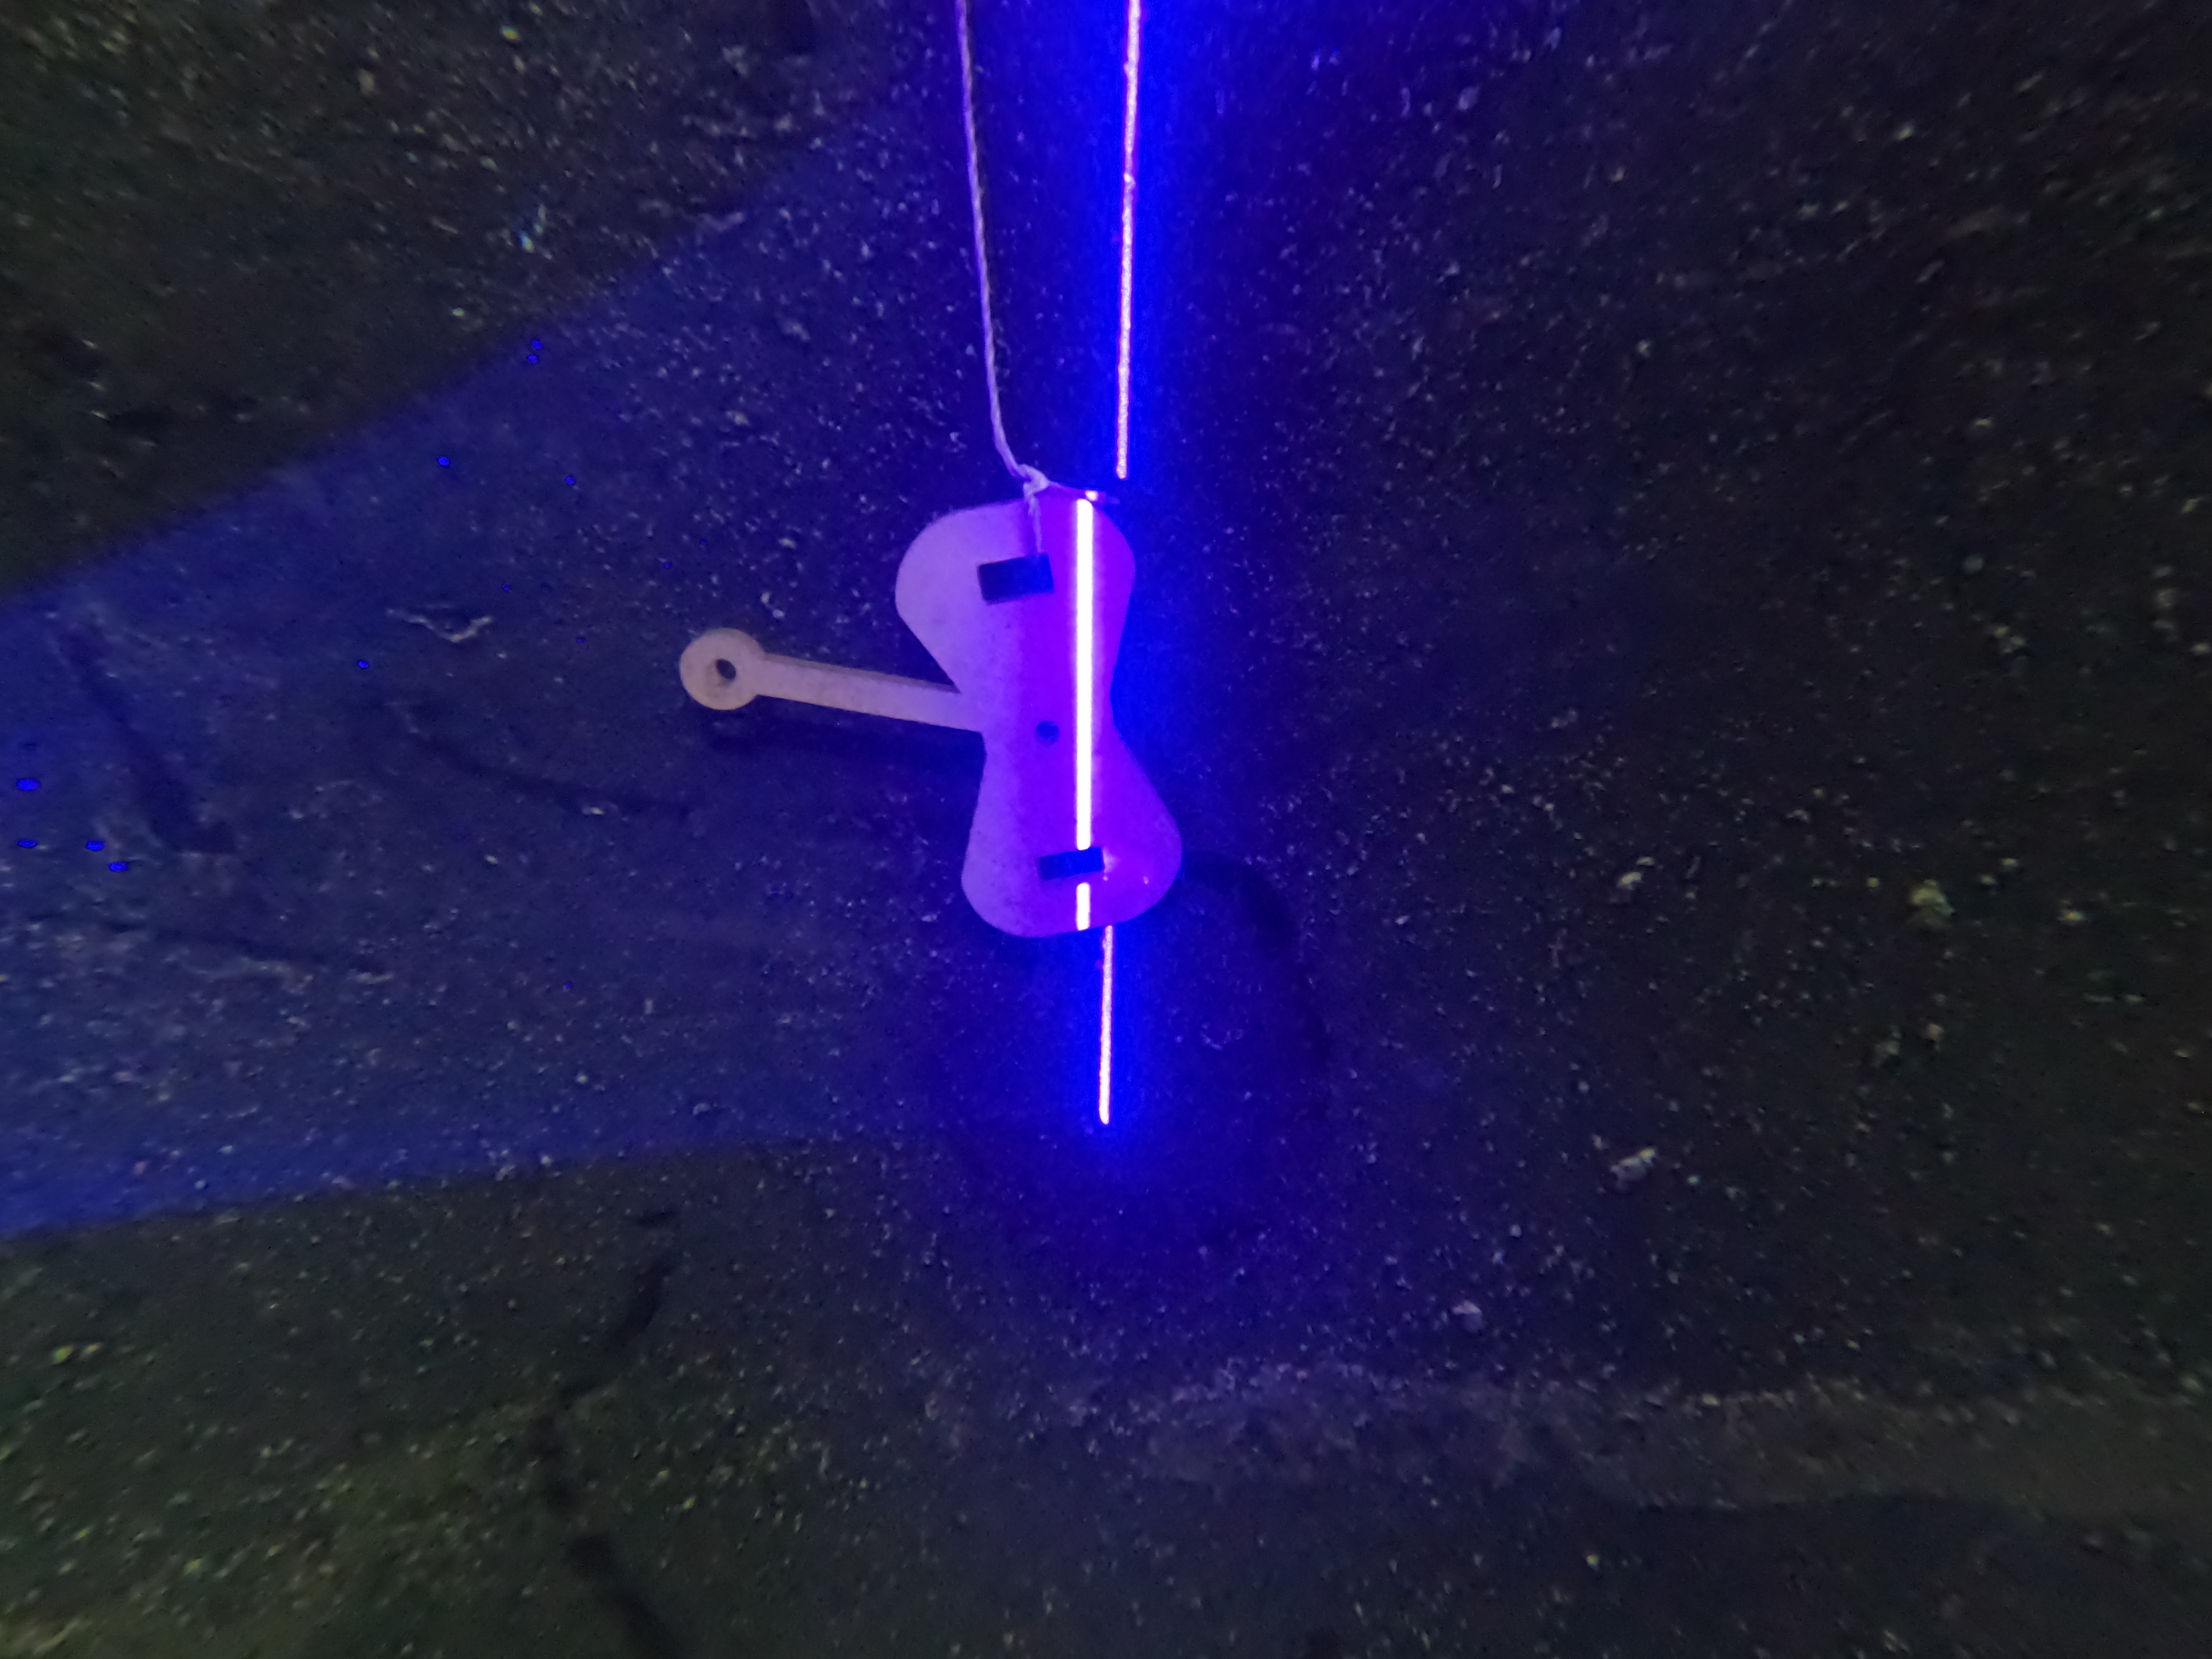

Supplement: Supplementary file 2425 [file G0016003.pdf › Level_2_2/G0016003.pdf]

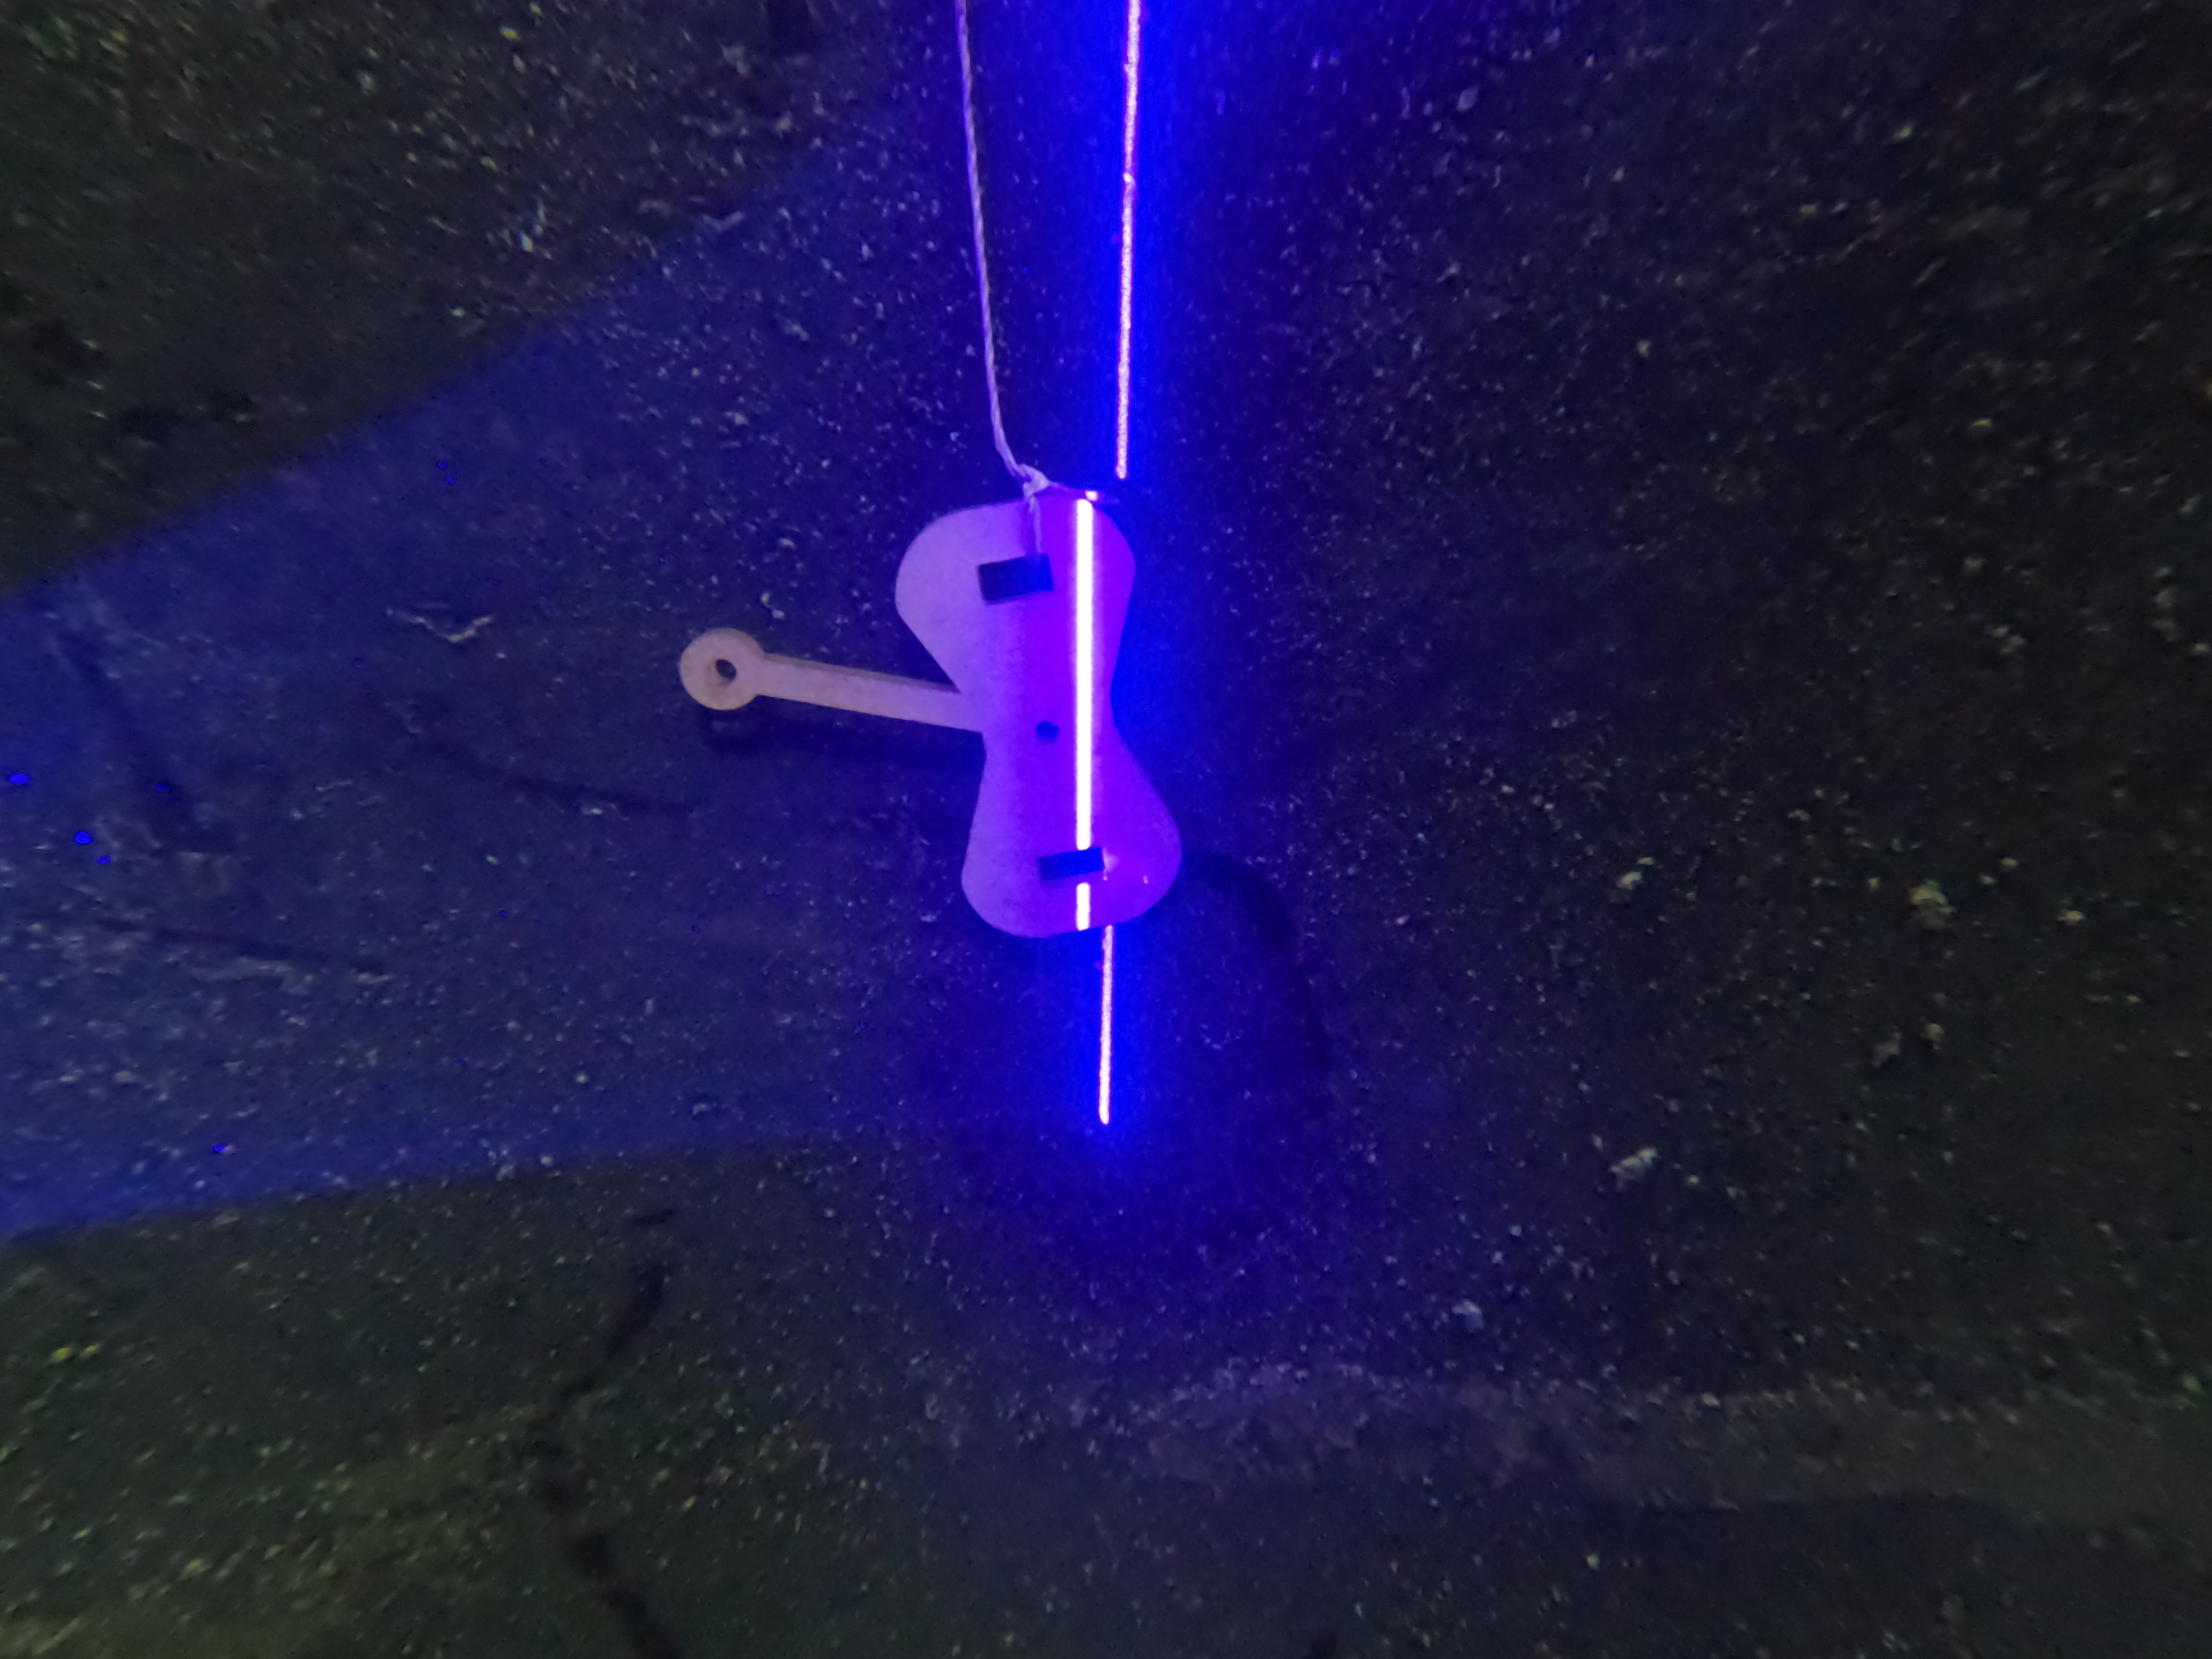

Supplement: Supplementary file 2426 [file G0016004.pdf › Level_2_2/G0016004.pdf]

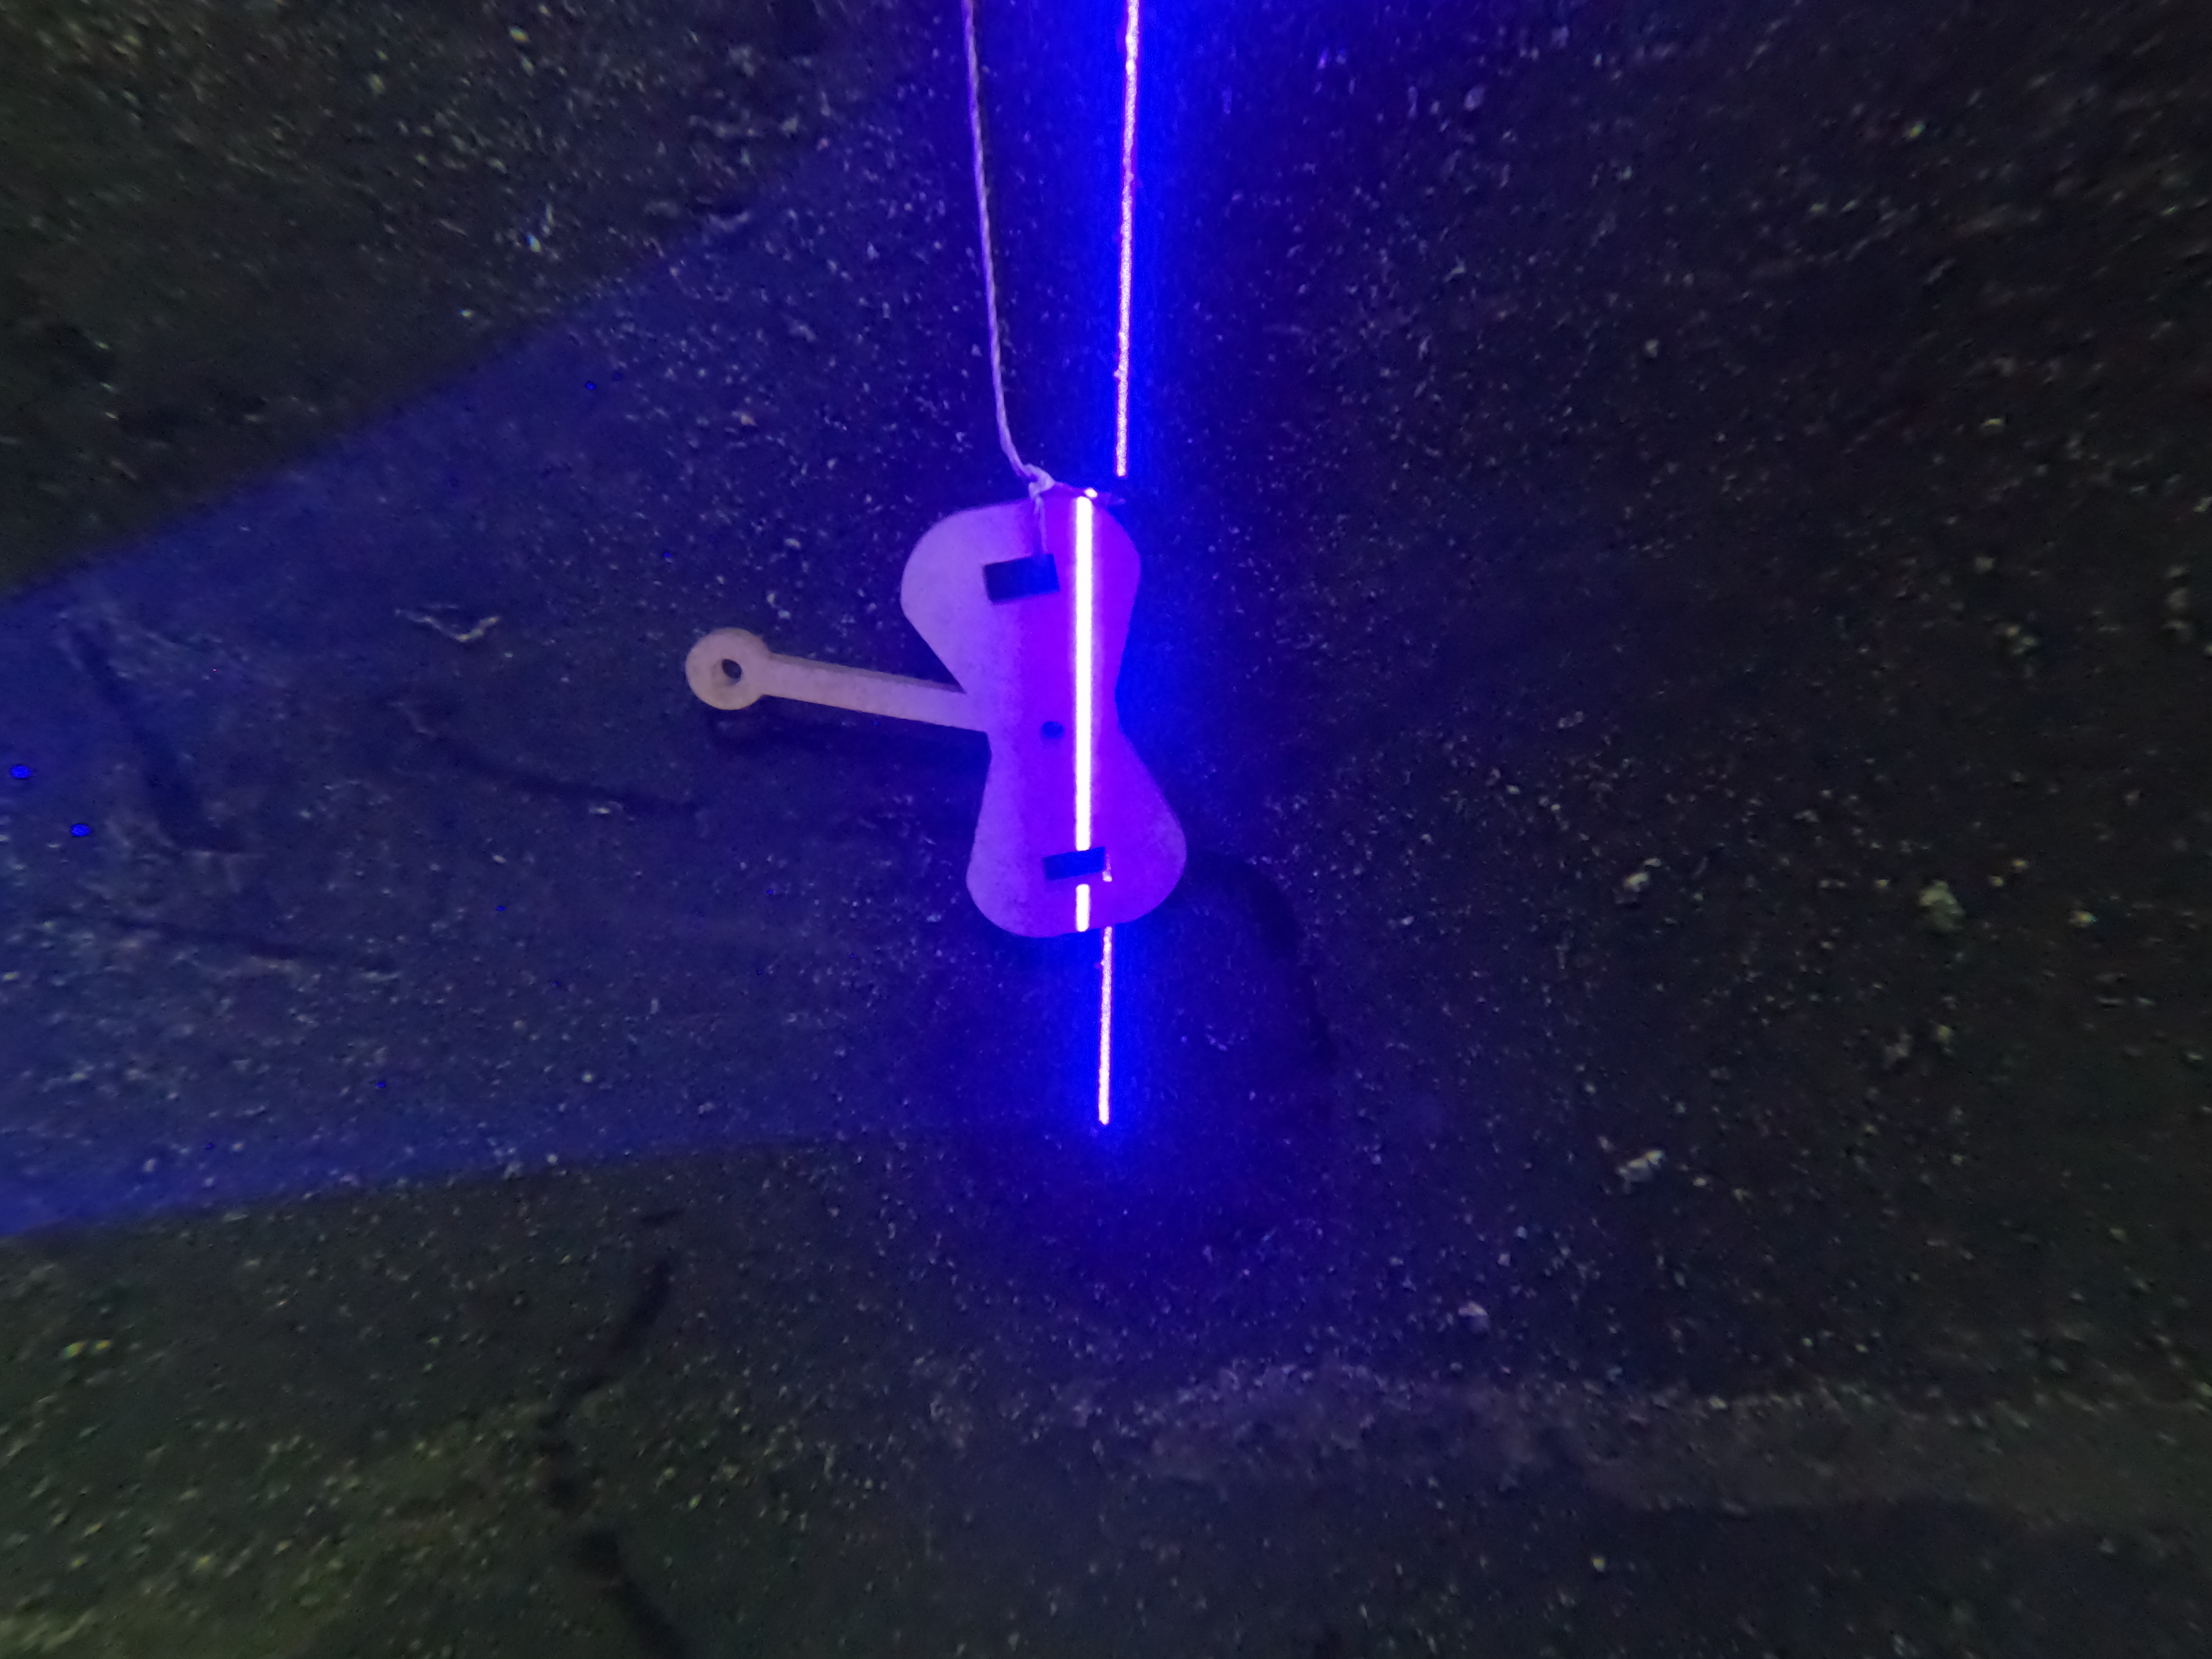

Supplement: Supplementary file 2427 [file G0016005.pdf › Level_2_2/G0016005.pdf]

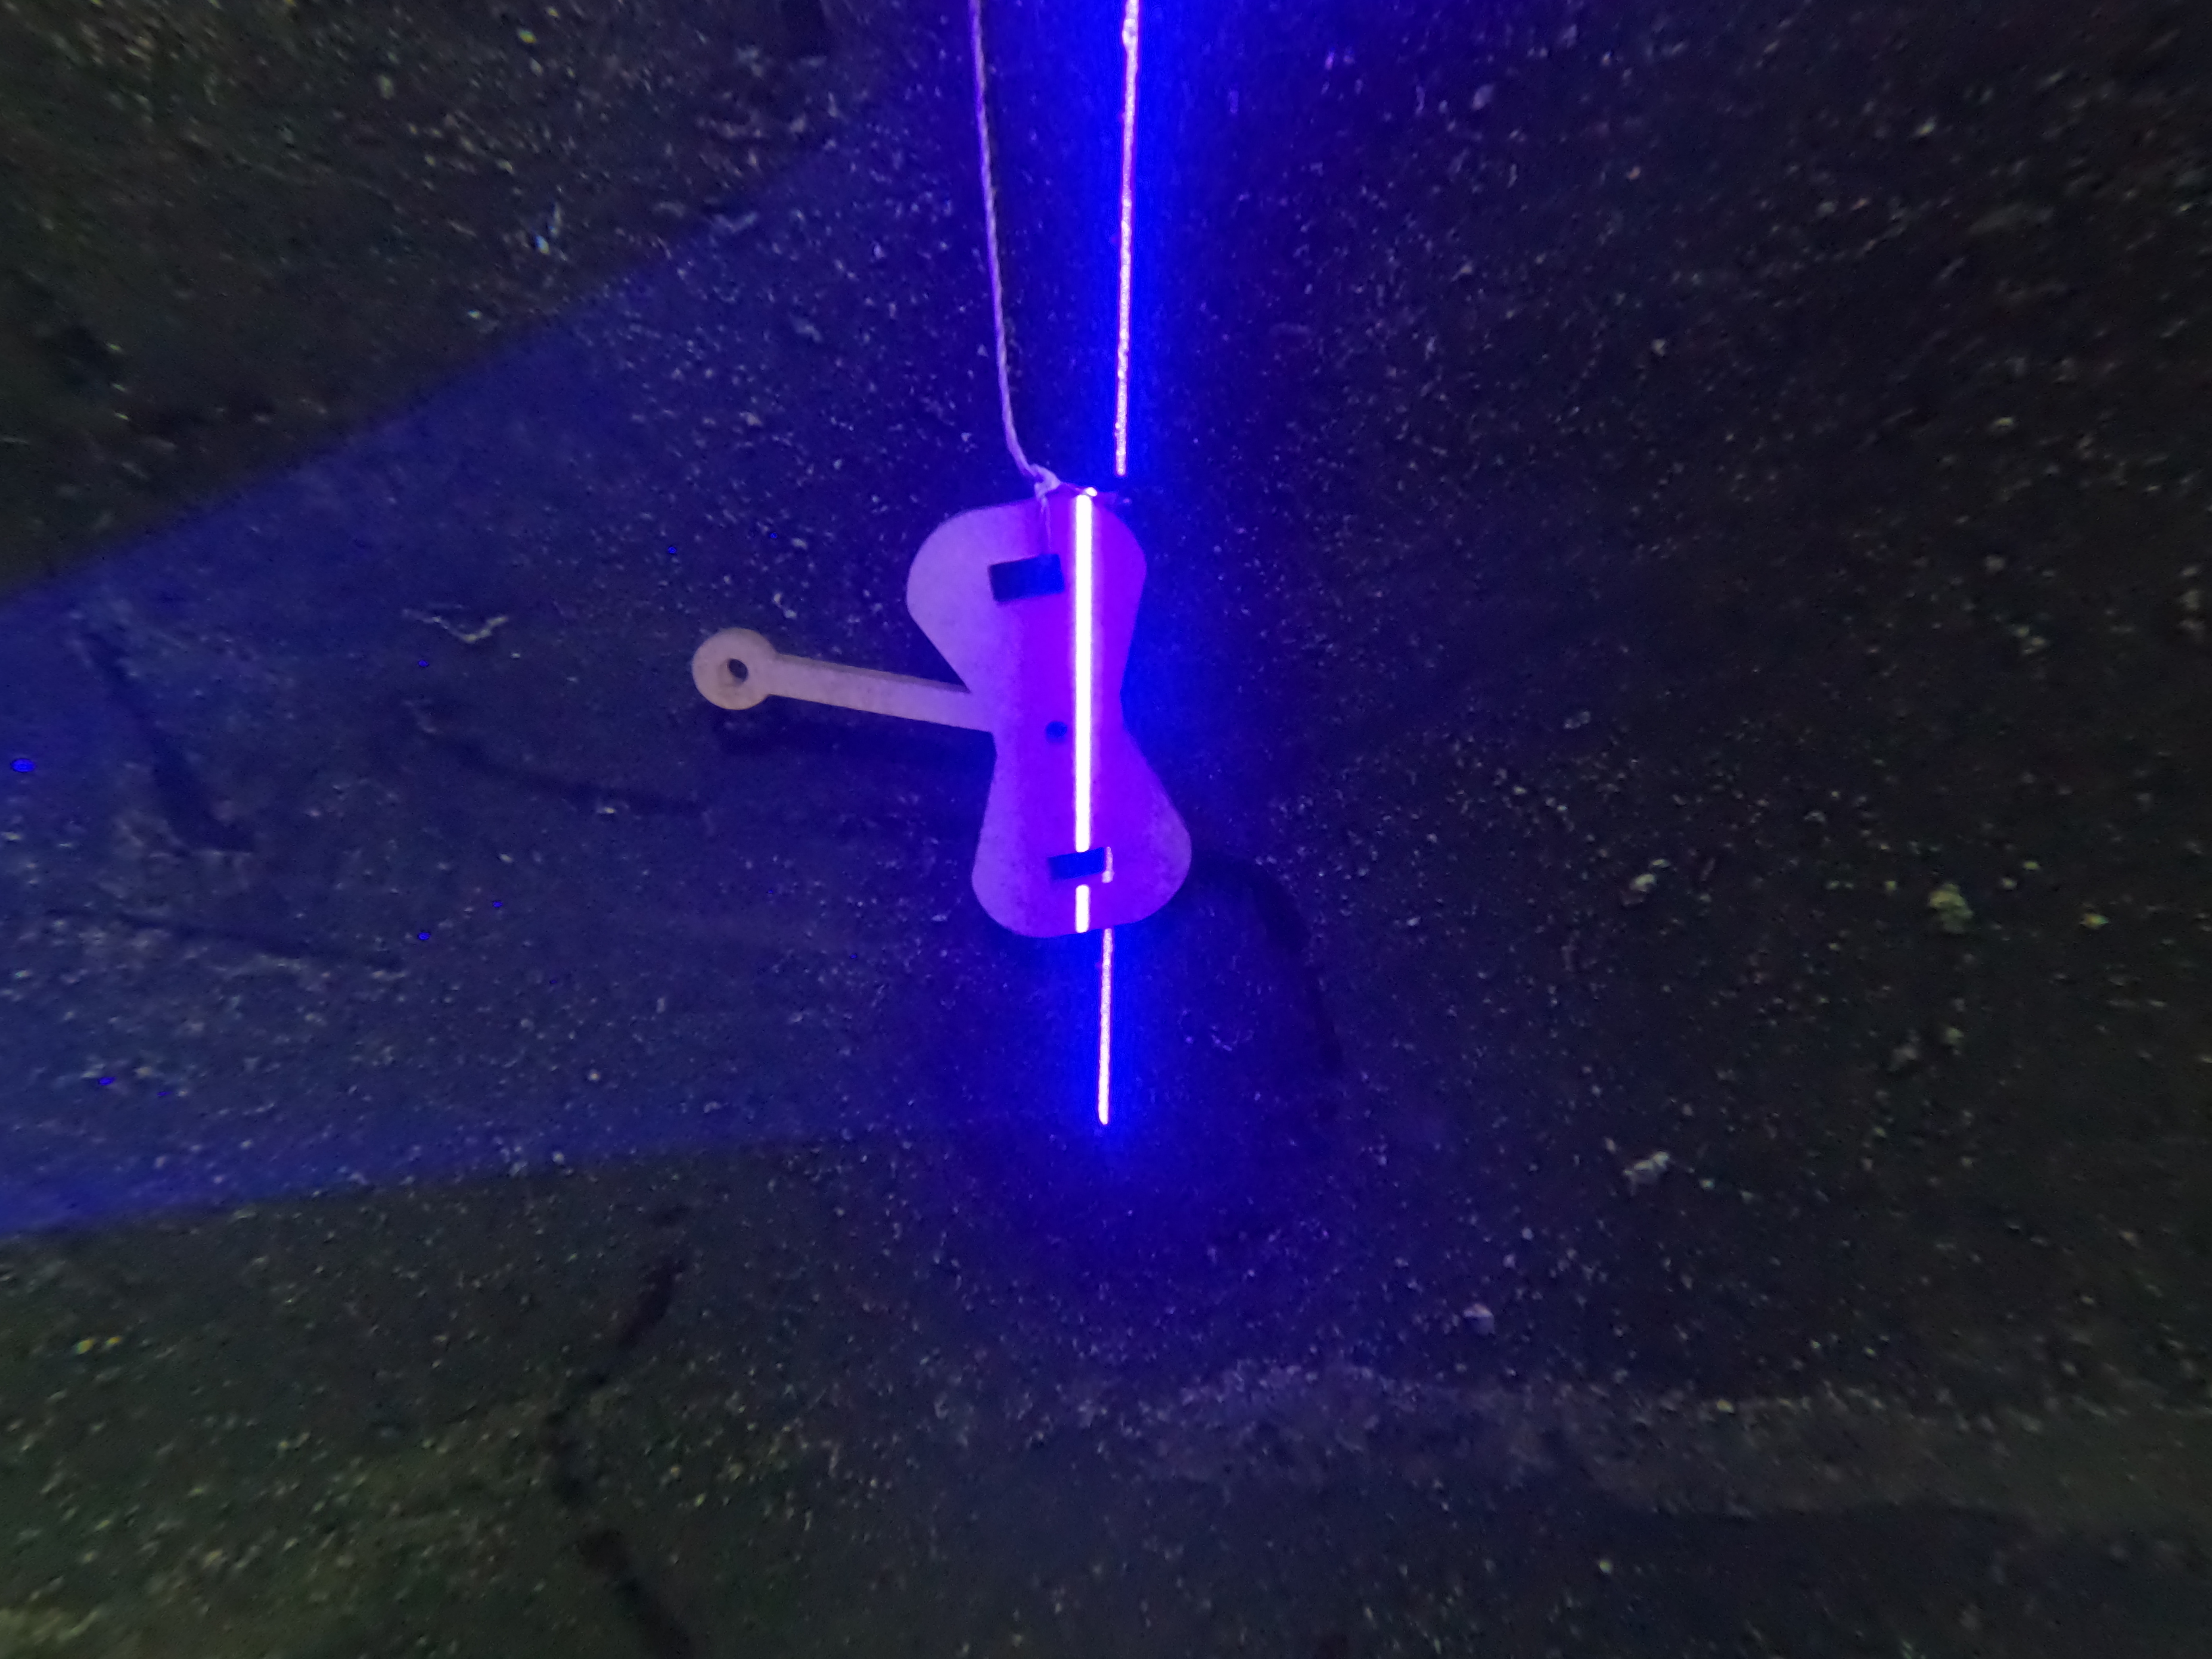

Supplement: Supplementary file 2428 [file G0016006.pdf › Level_2_2/G0016006.pdf]

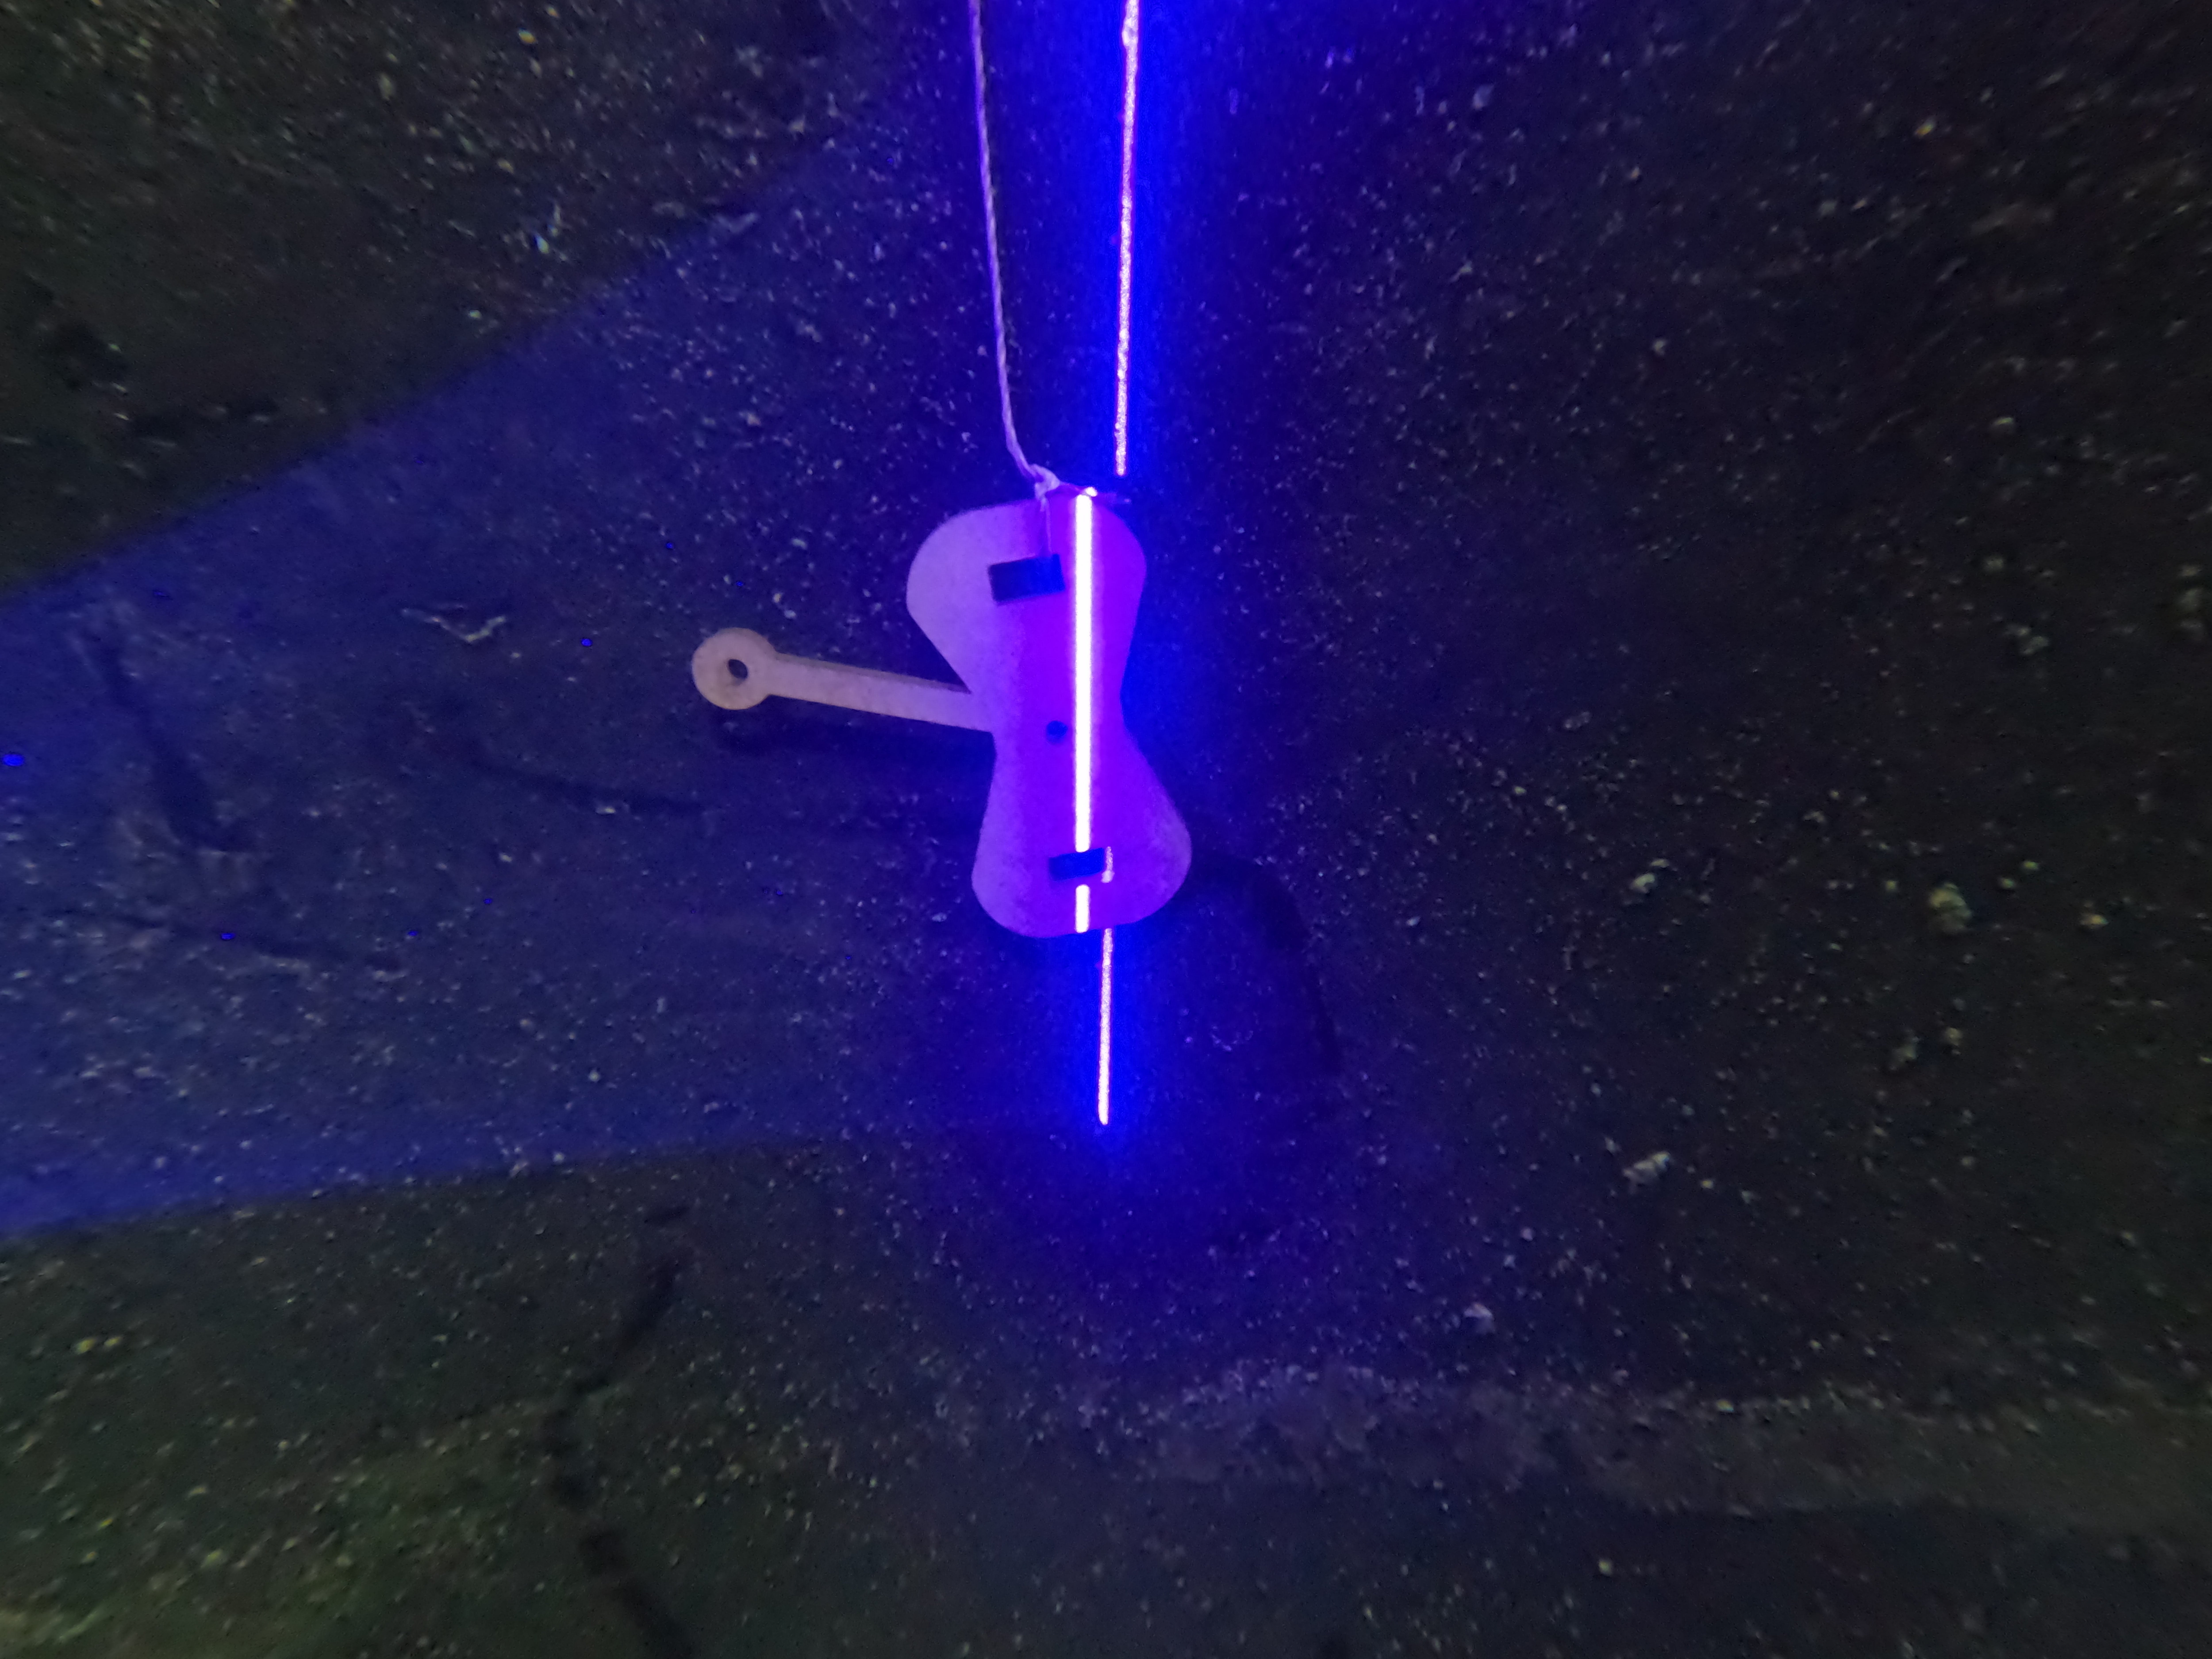

Supplement: Supplementary file 2429 [file G0016007.pdf › Level_2_2/G0016007.pdf]

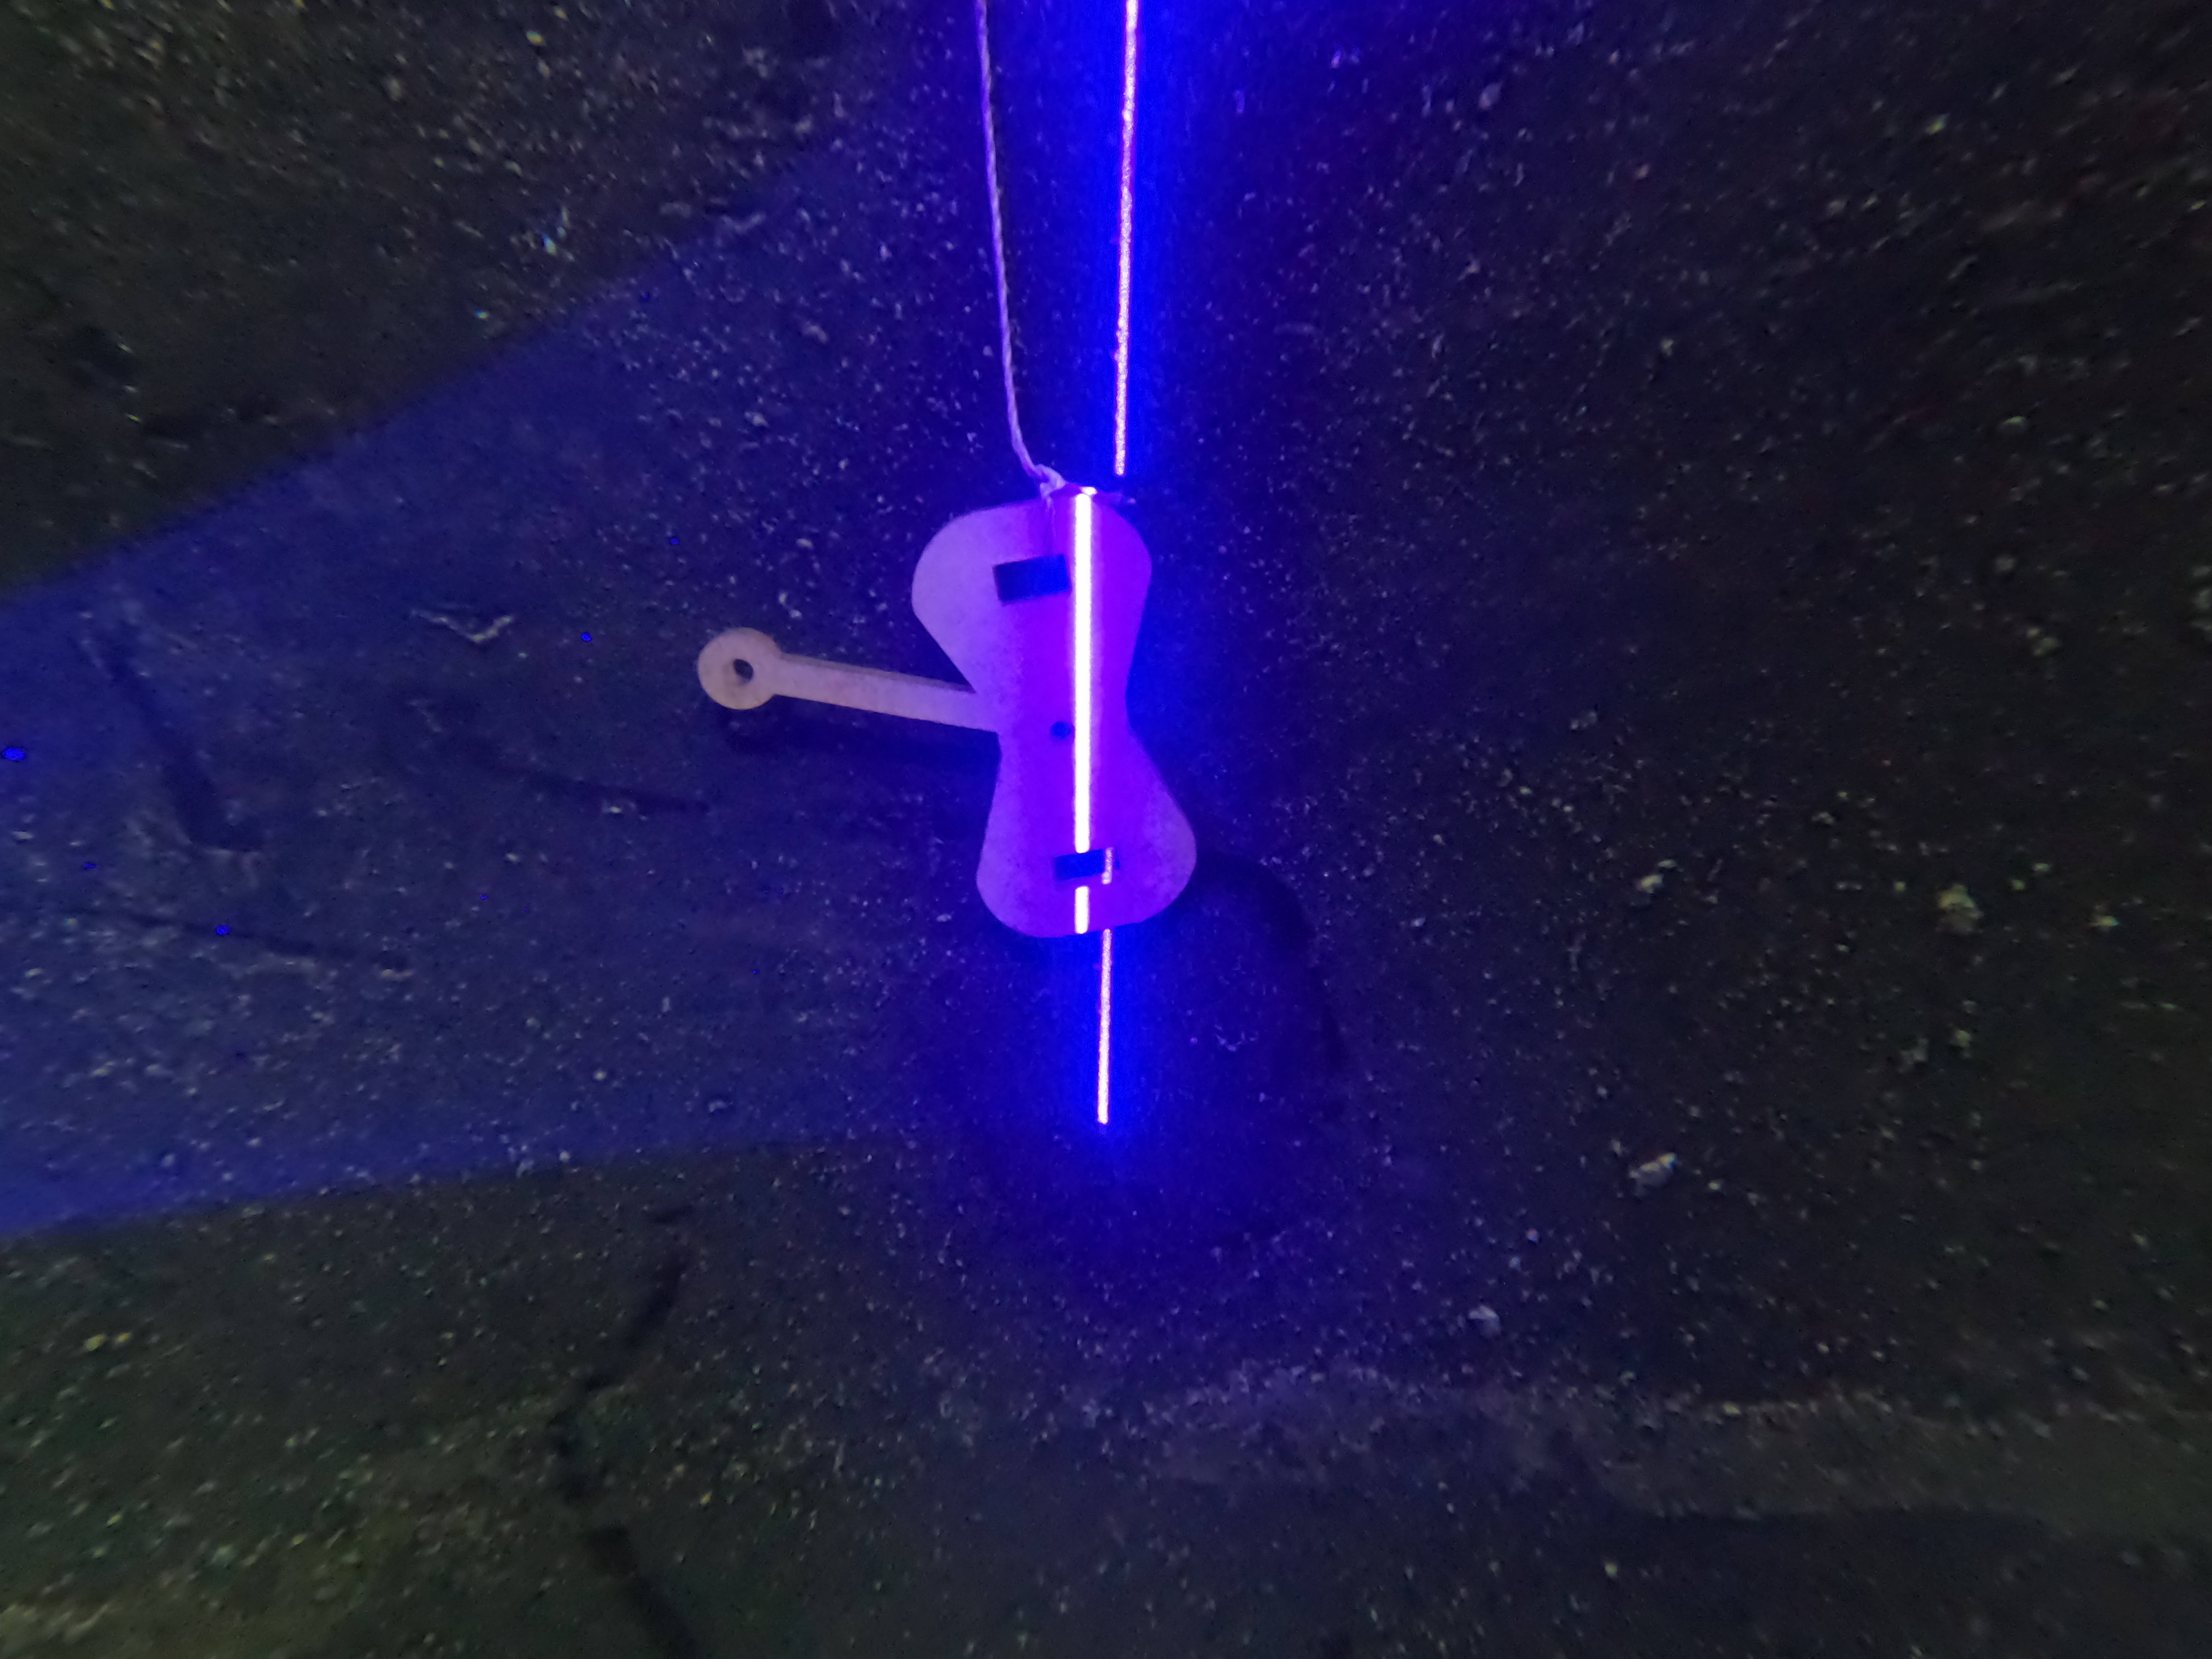

Supplement: Supplementary file 2430 [file G0016008.pdf › Level_2_2/G0016008.pdf]

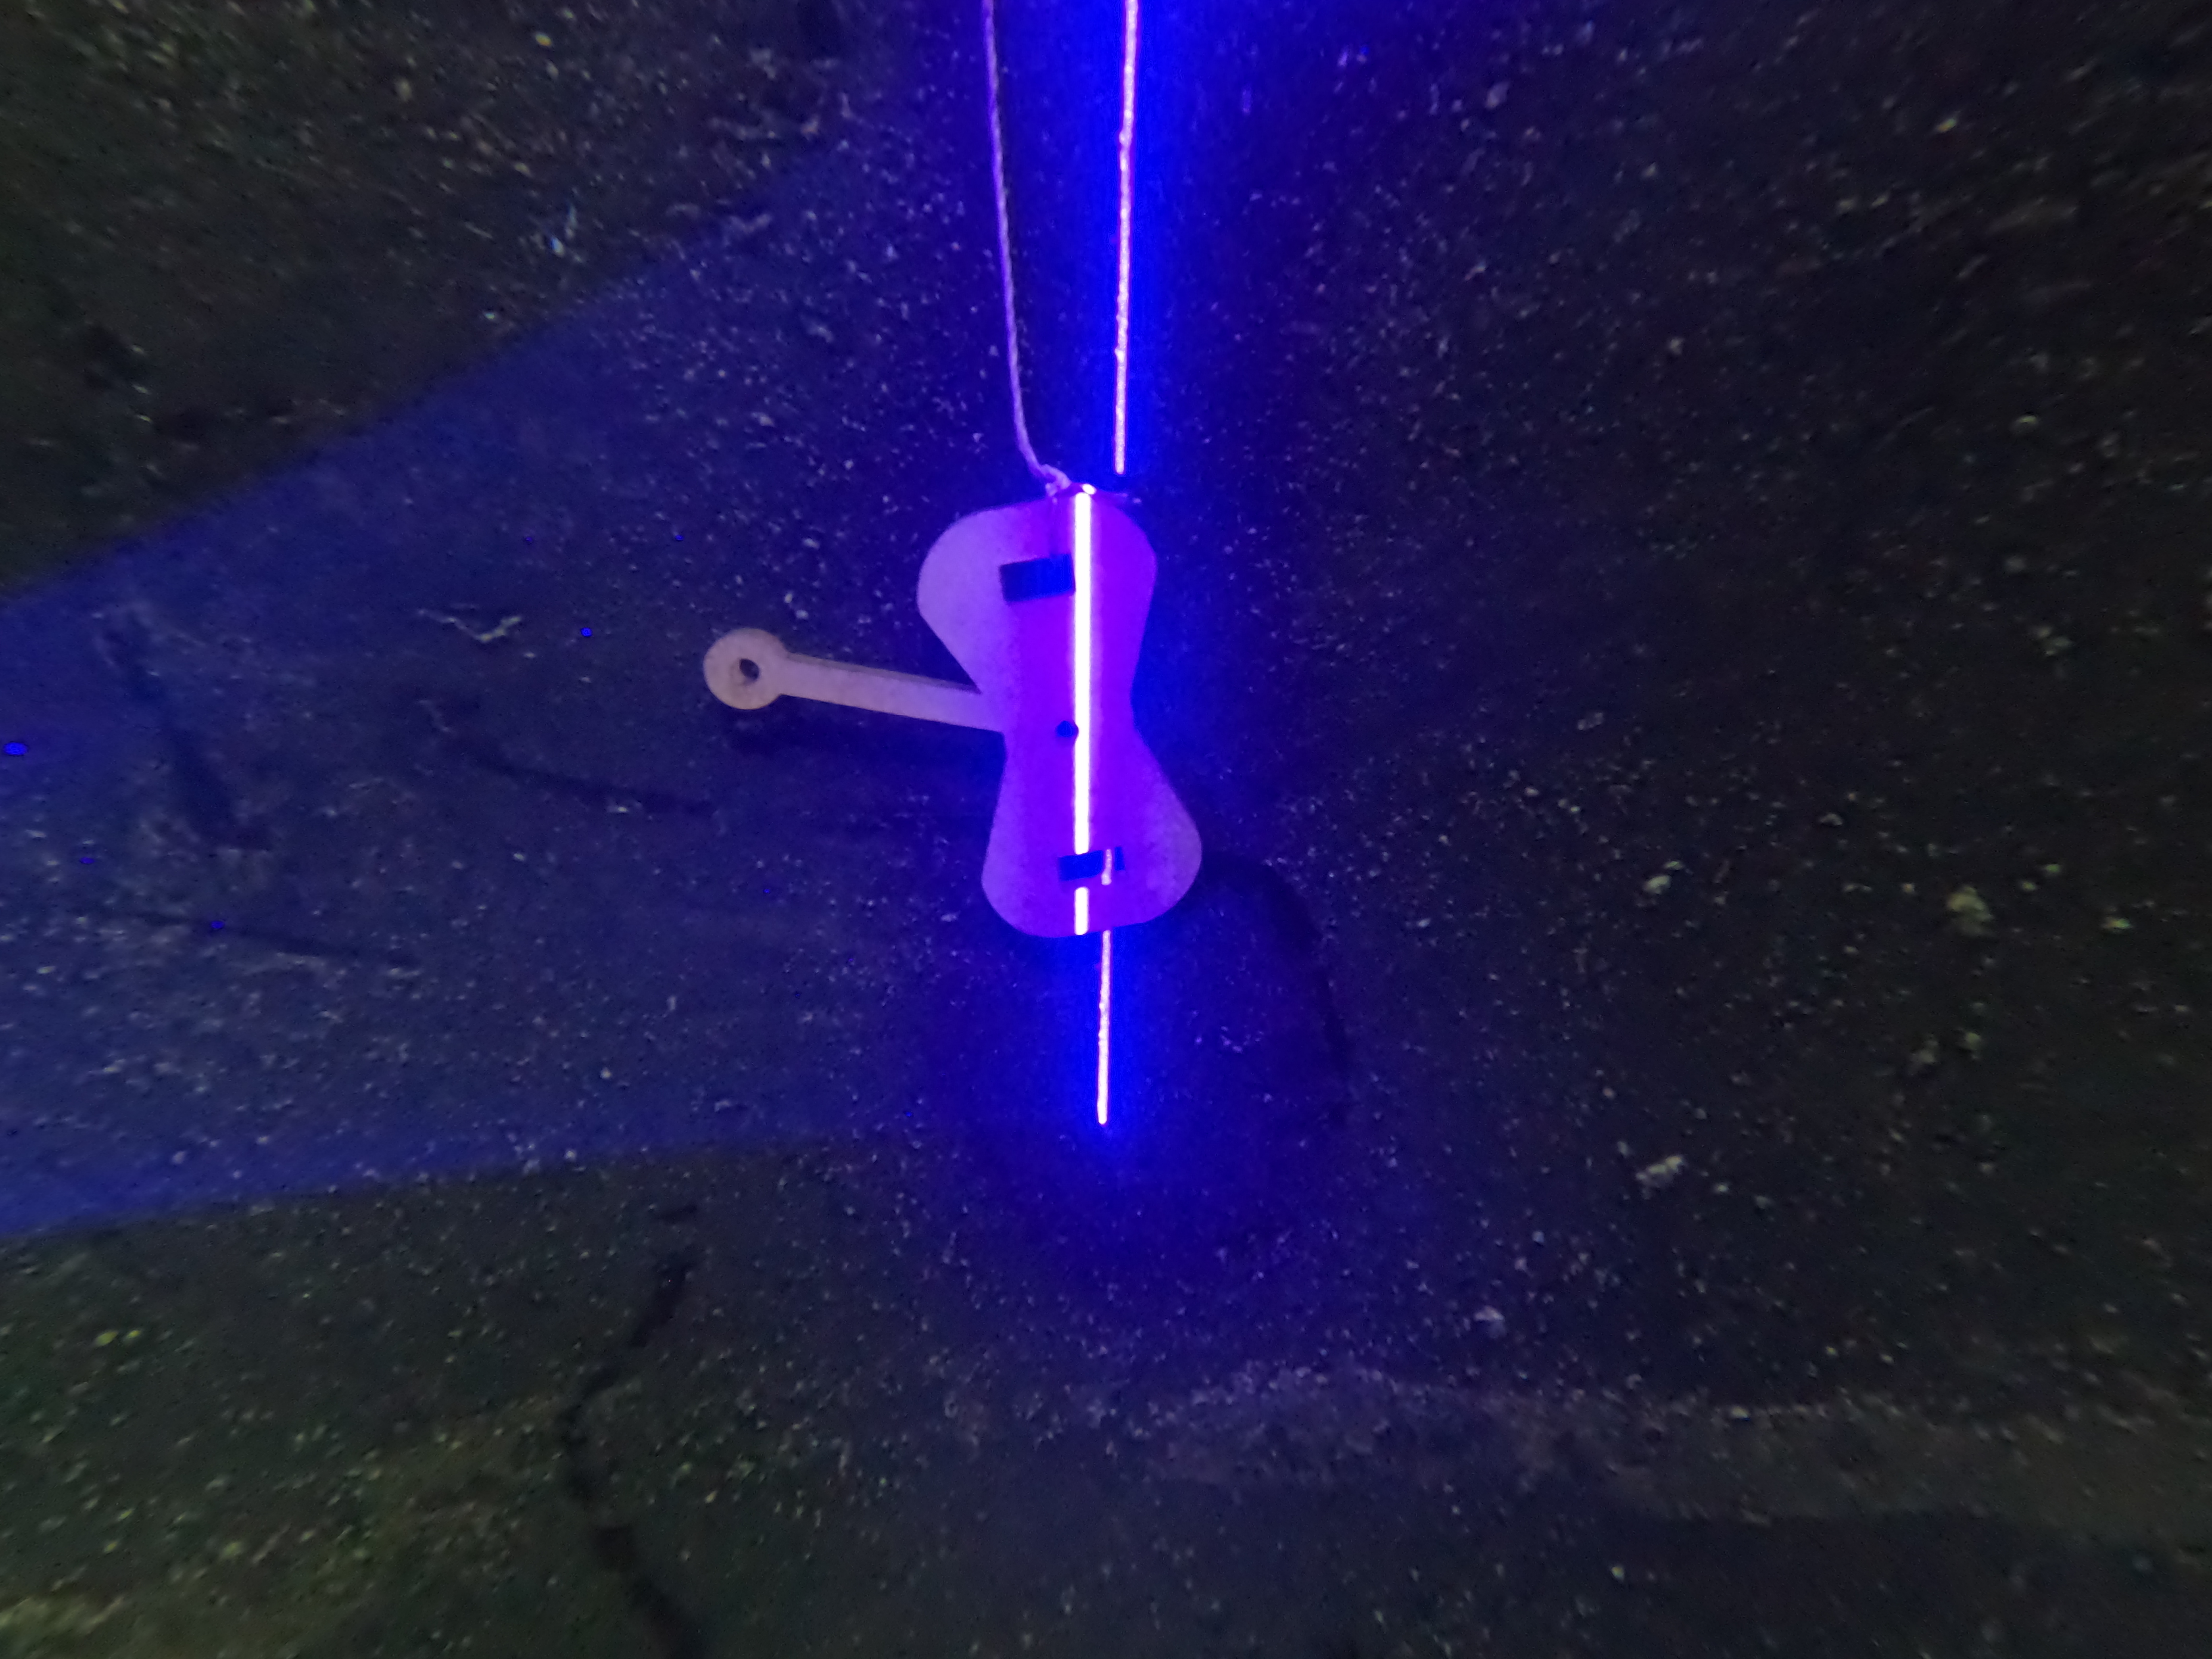

Supplement: Supplementary file 2431 [file G0016009.pdf › Level_2_2/G0016009.pdf]

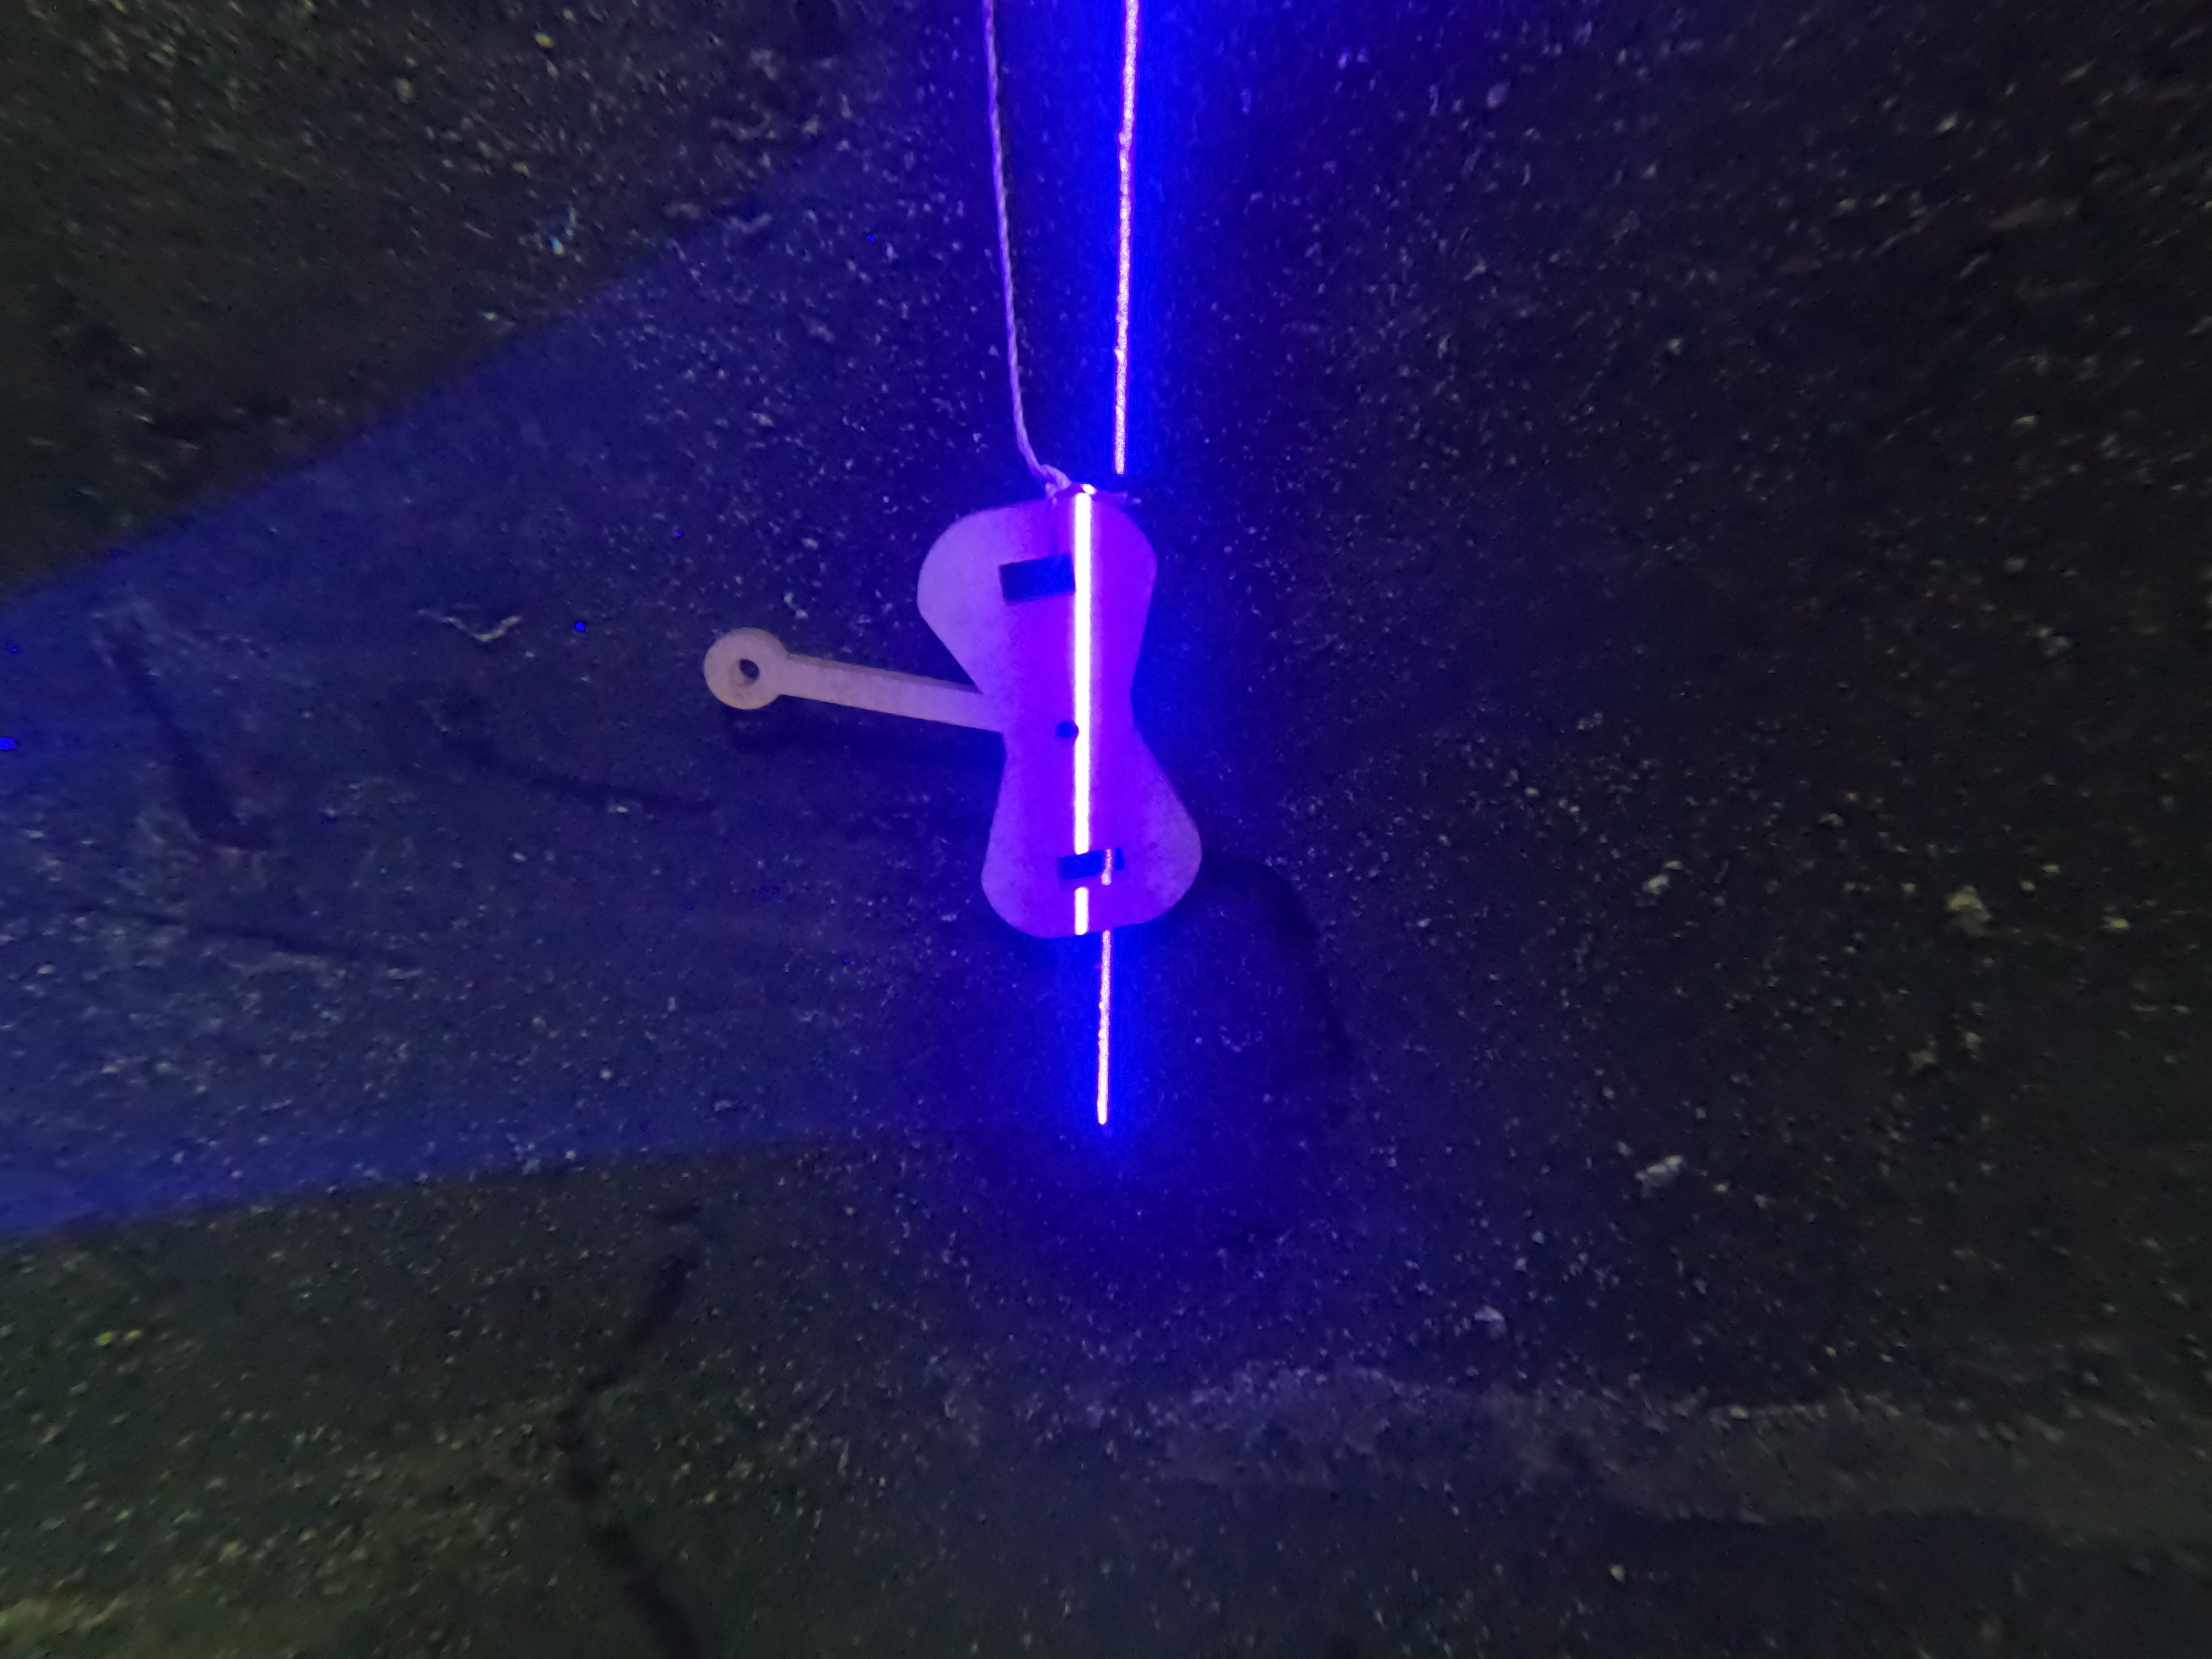

Supplement: Supplementary file 2432 [file G0016010.pdf › Level_2_2/G0016010.pdf]

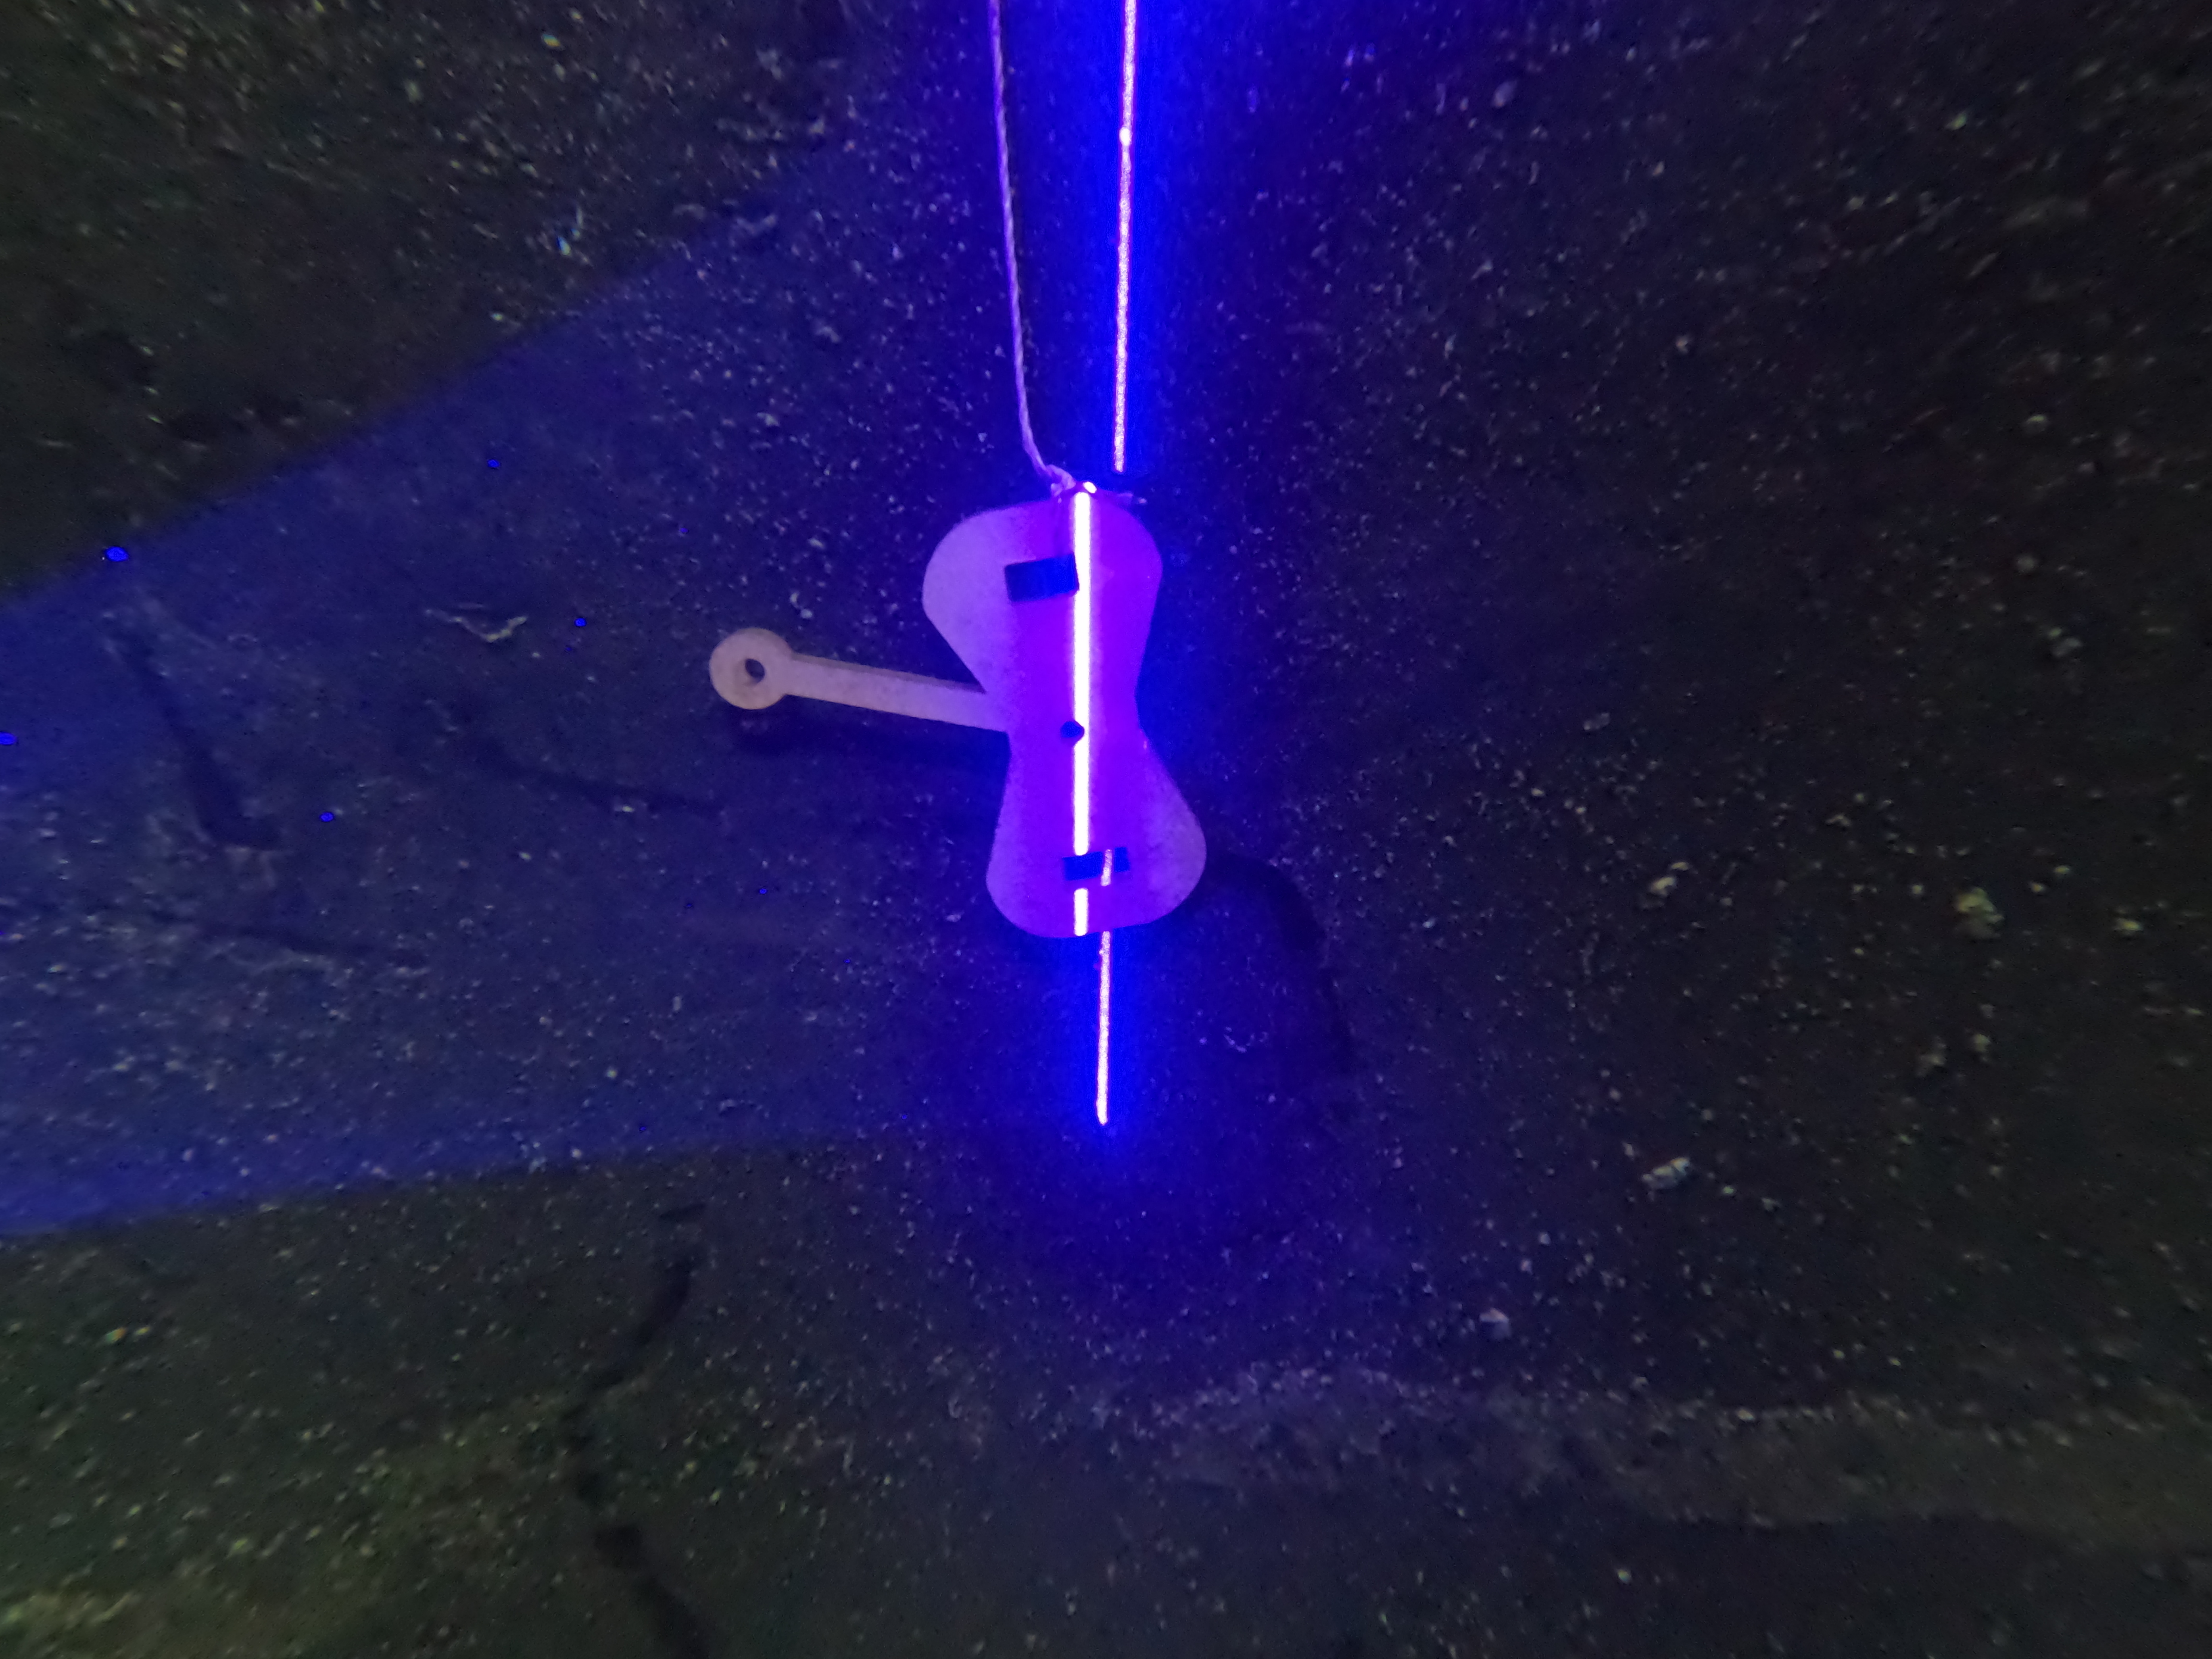

Supplement: Supplementary file 2433 [file G0016011.pdf › Level_2_2/G0016011.pdf]

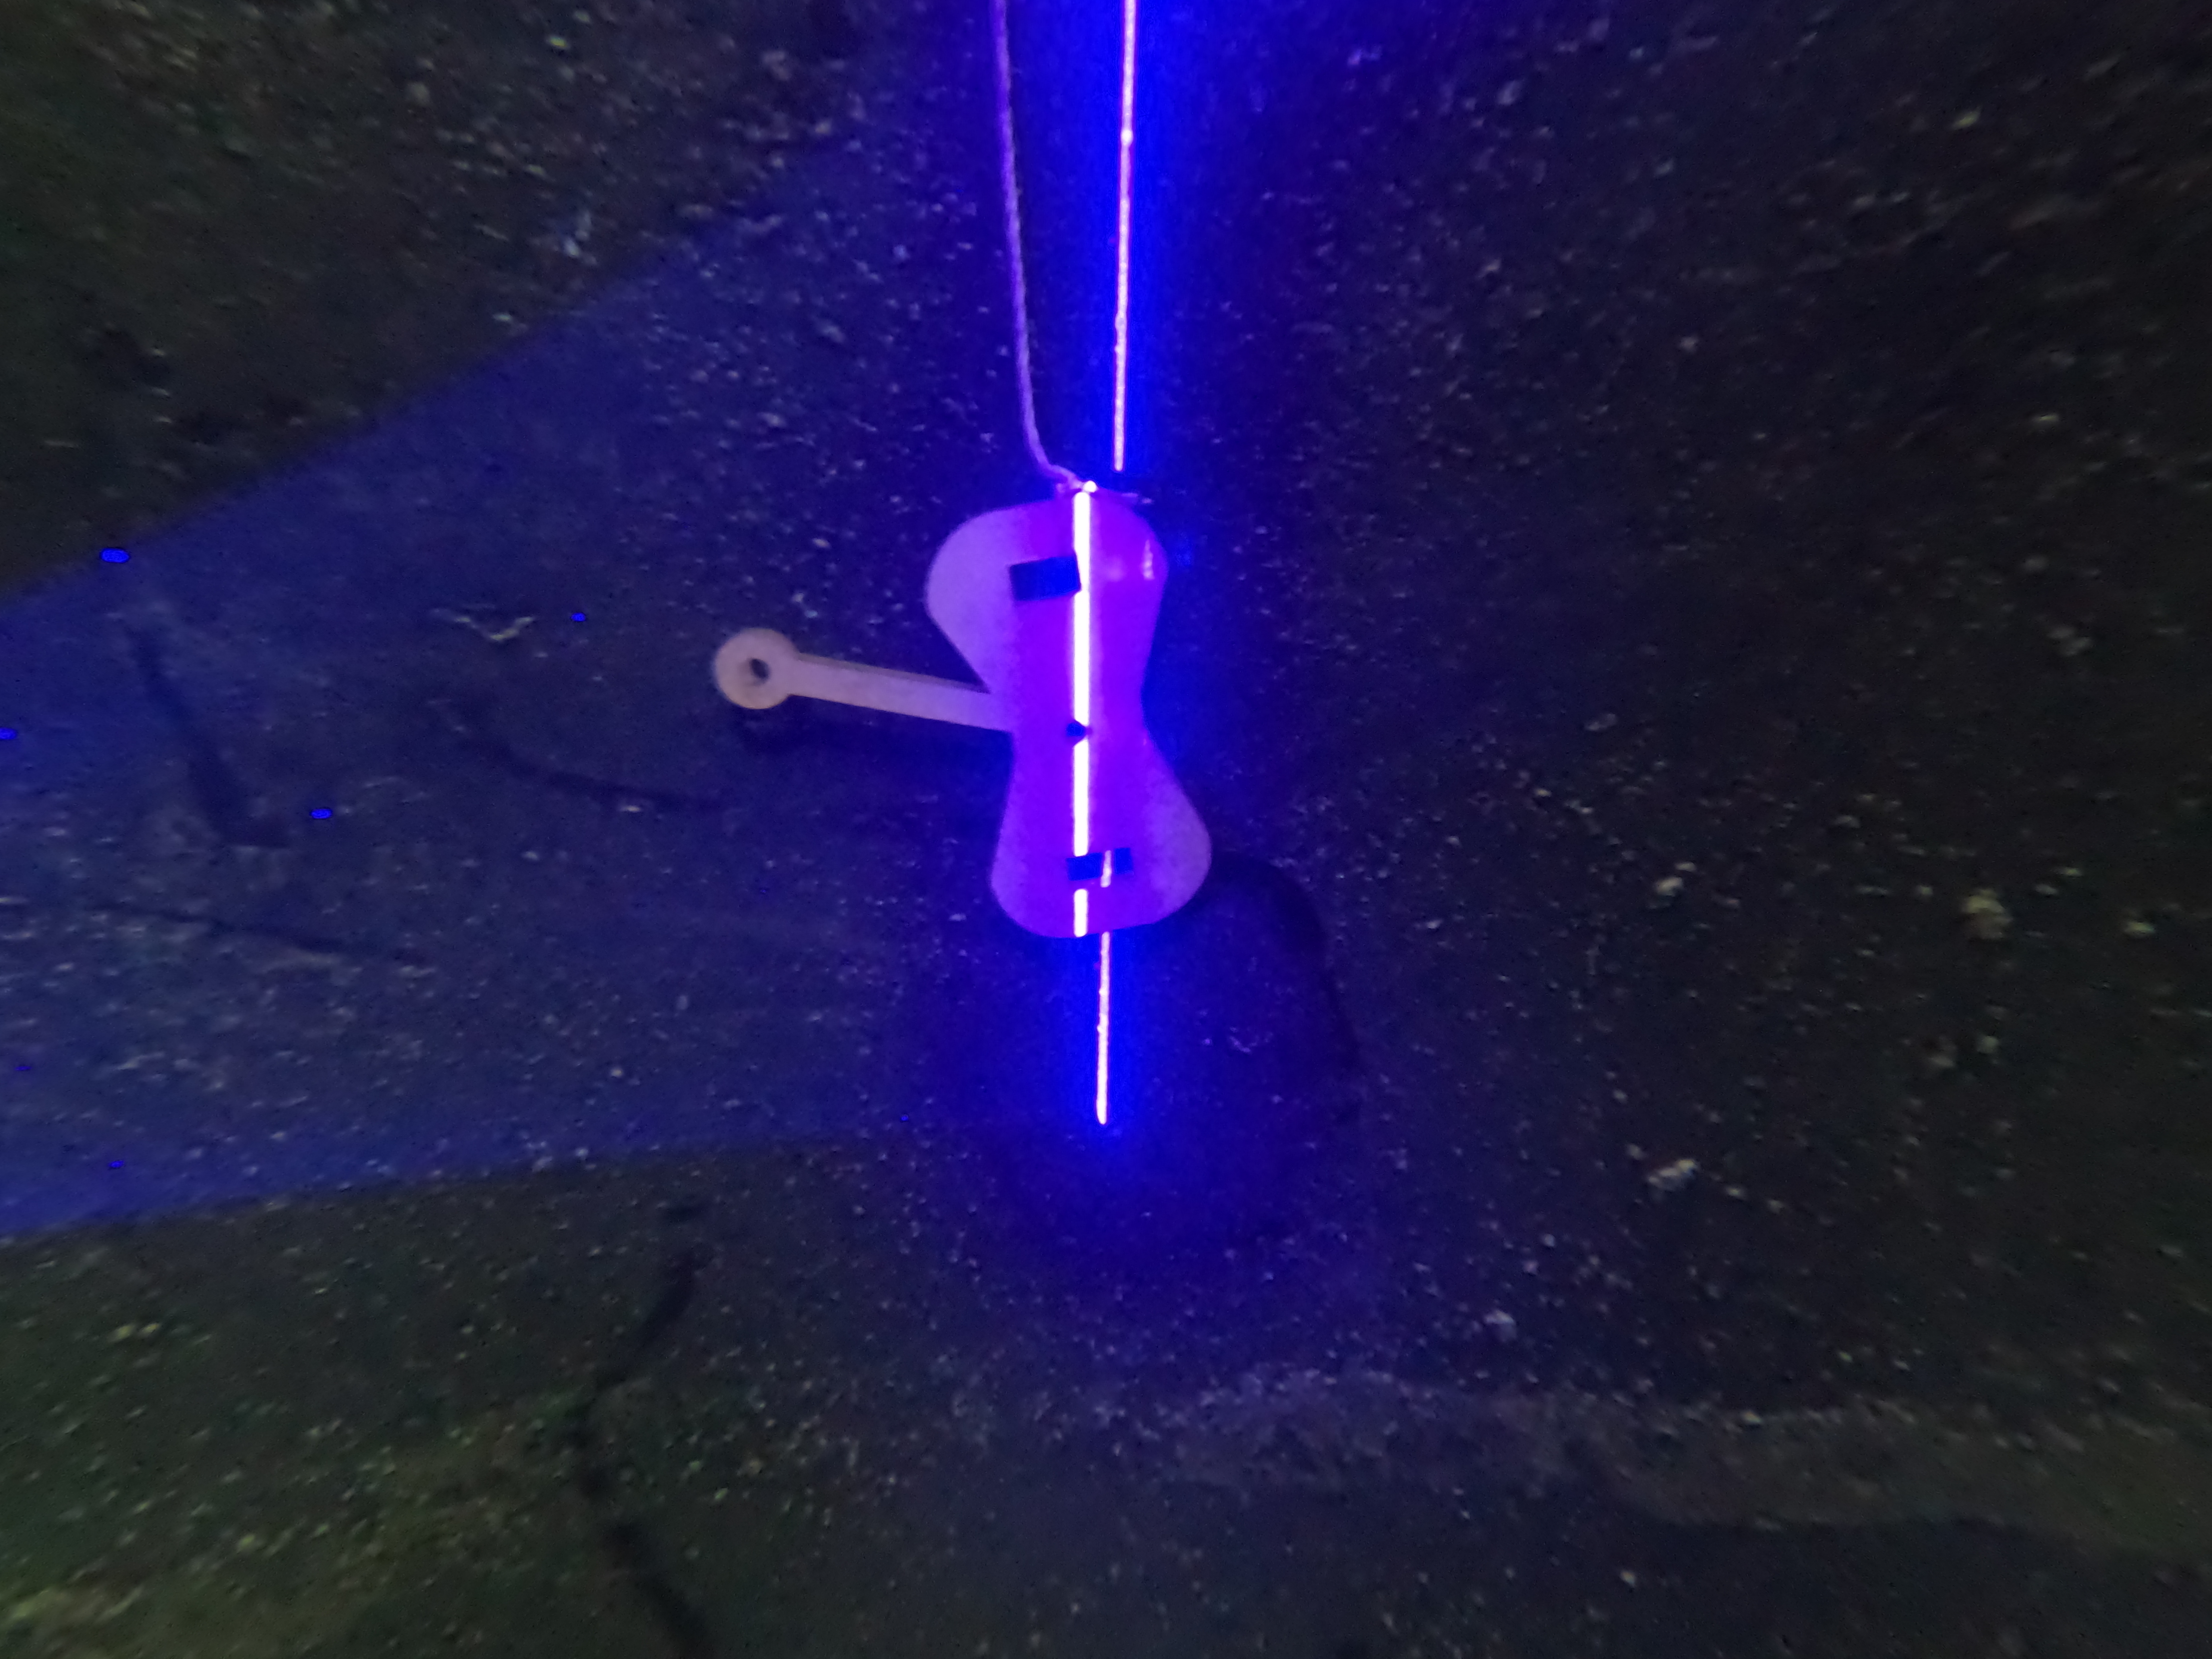

Supplement: Supplementary file 2434 [file G0016012.pdf › Level_2_2/G0016012.pdf]

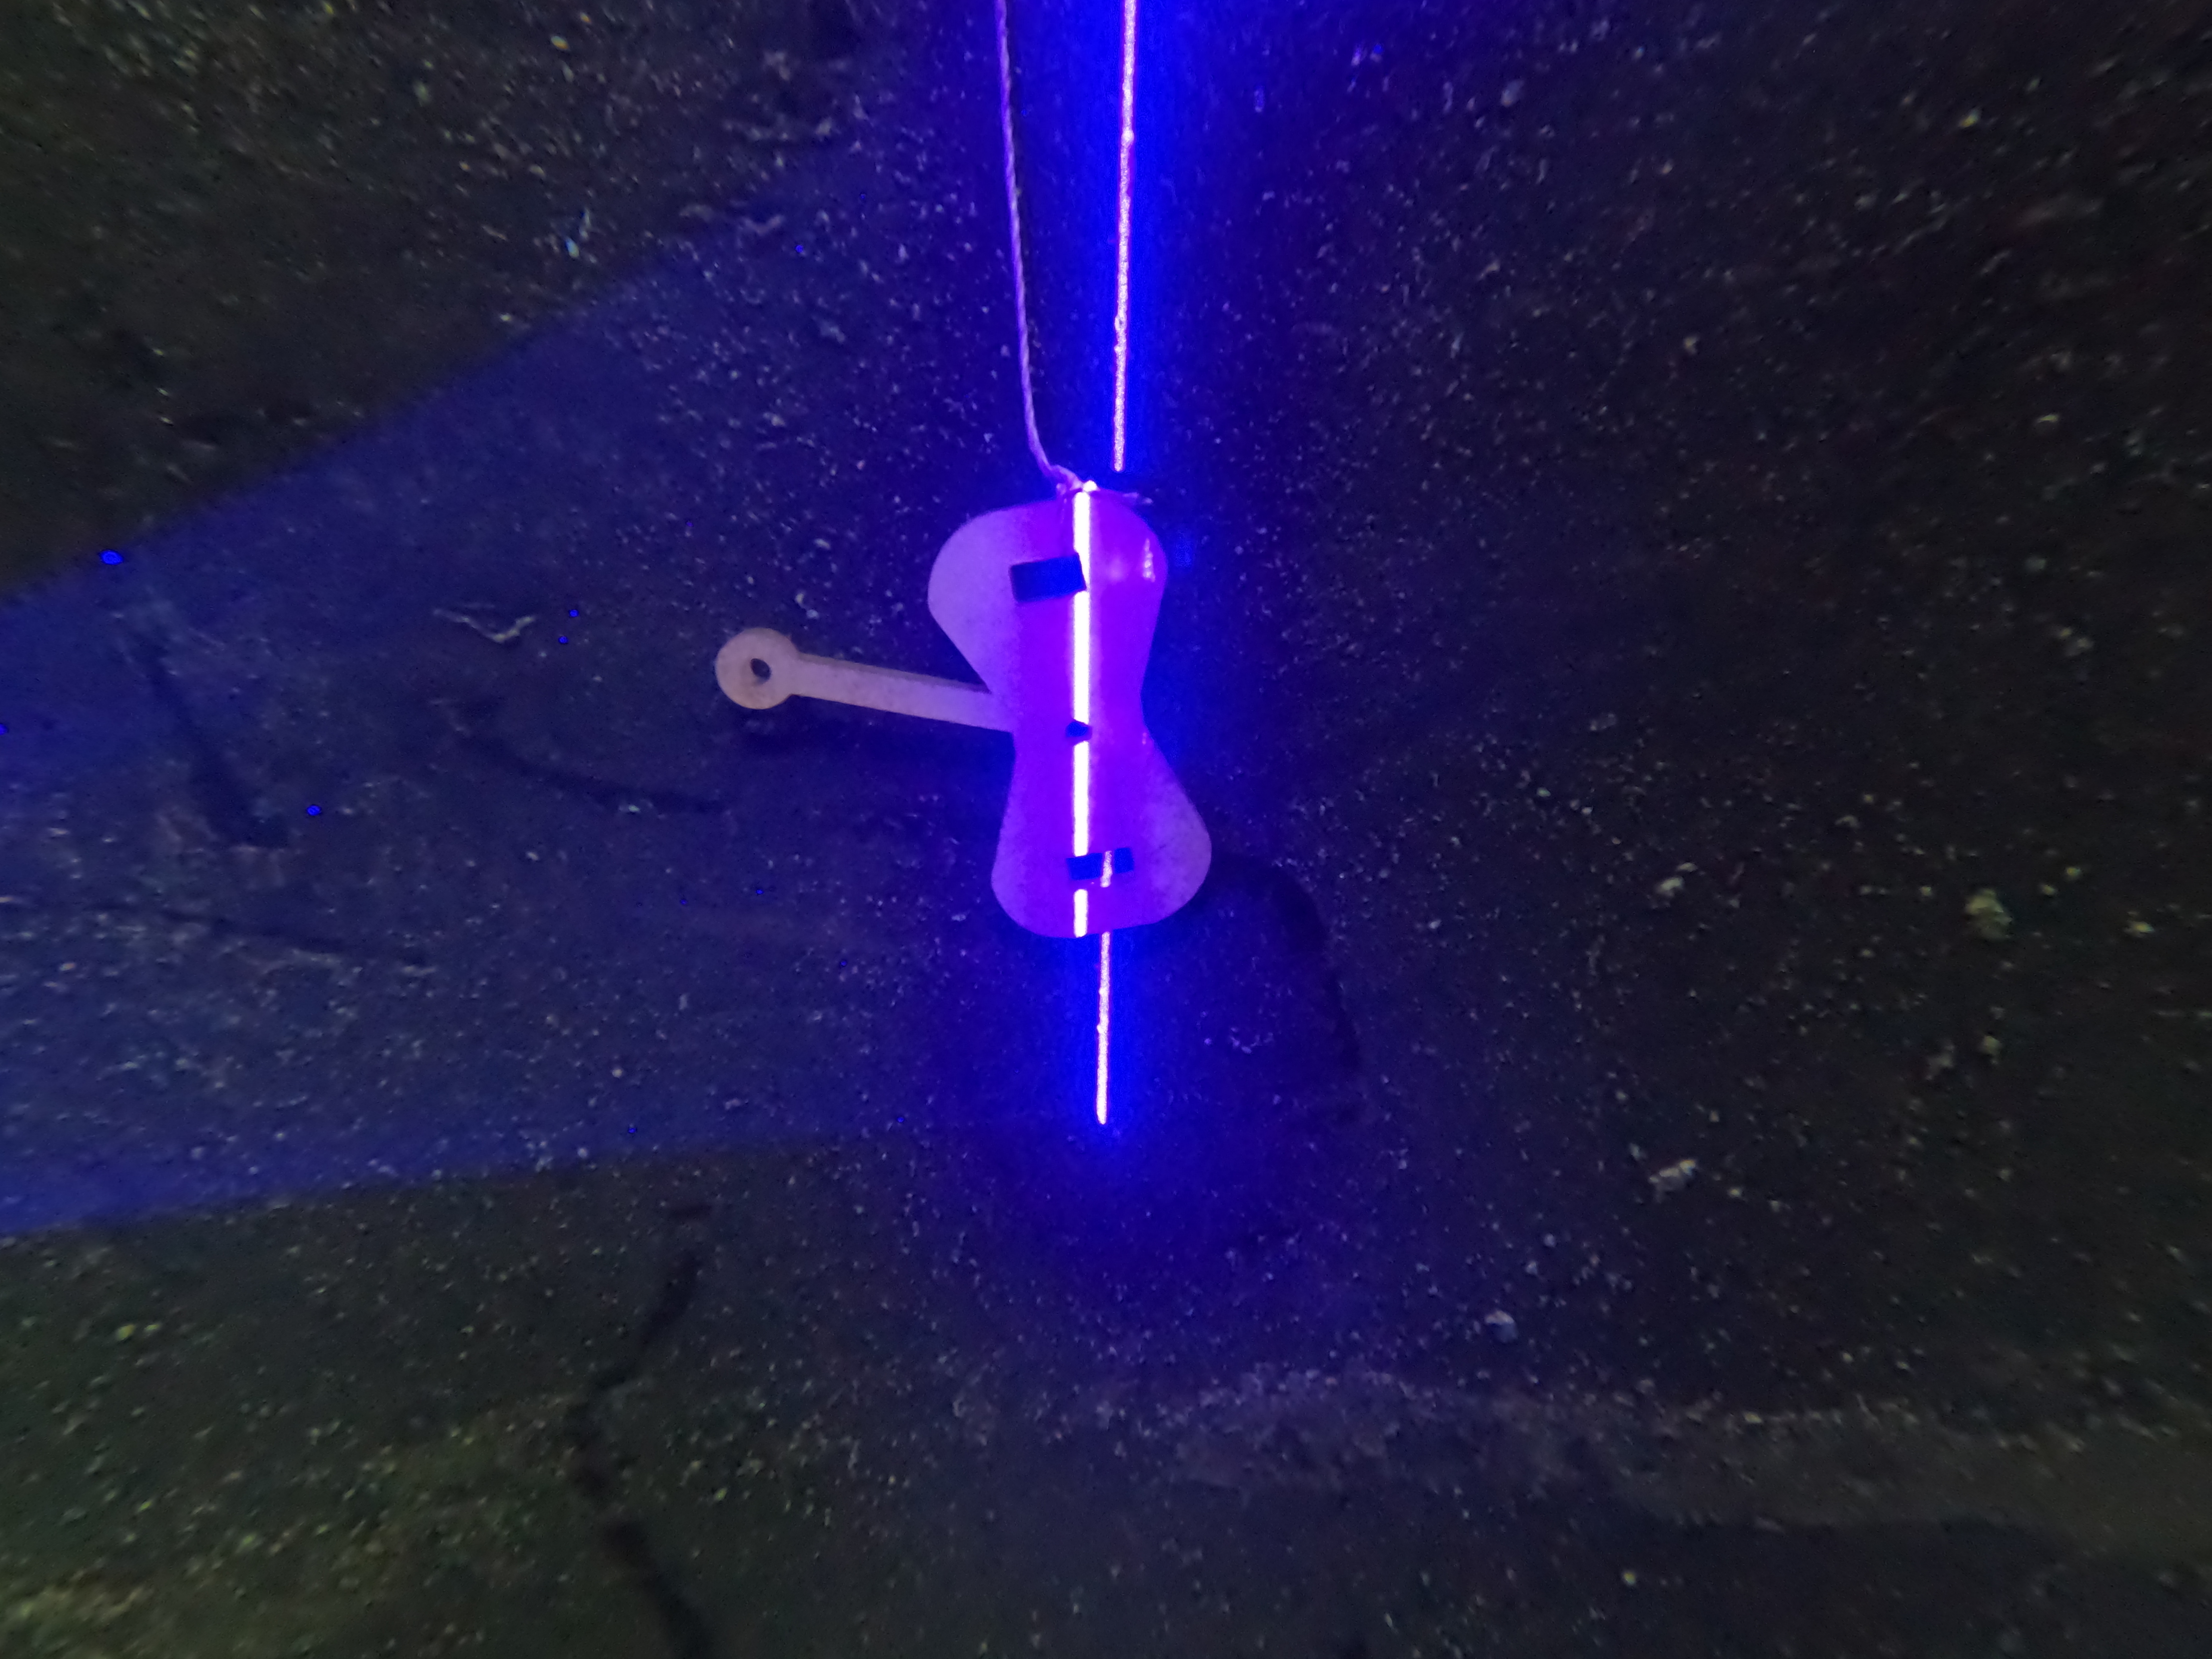

Supplement: Supplementary file 2435 [file G0016013.pdf › Level_2_2/G0016013.pdf]

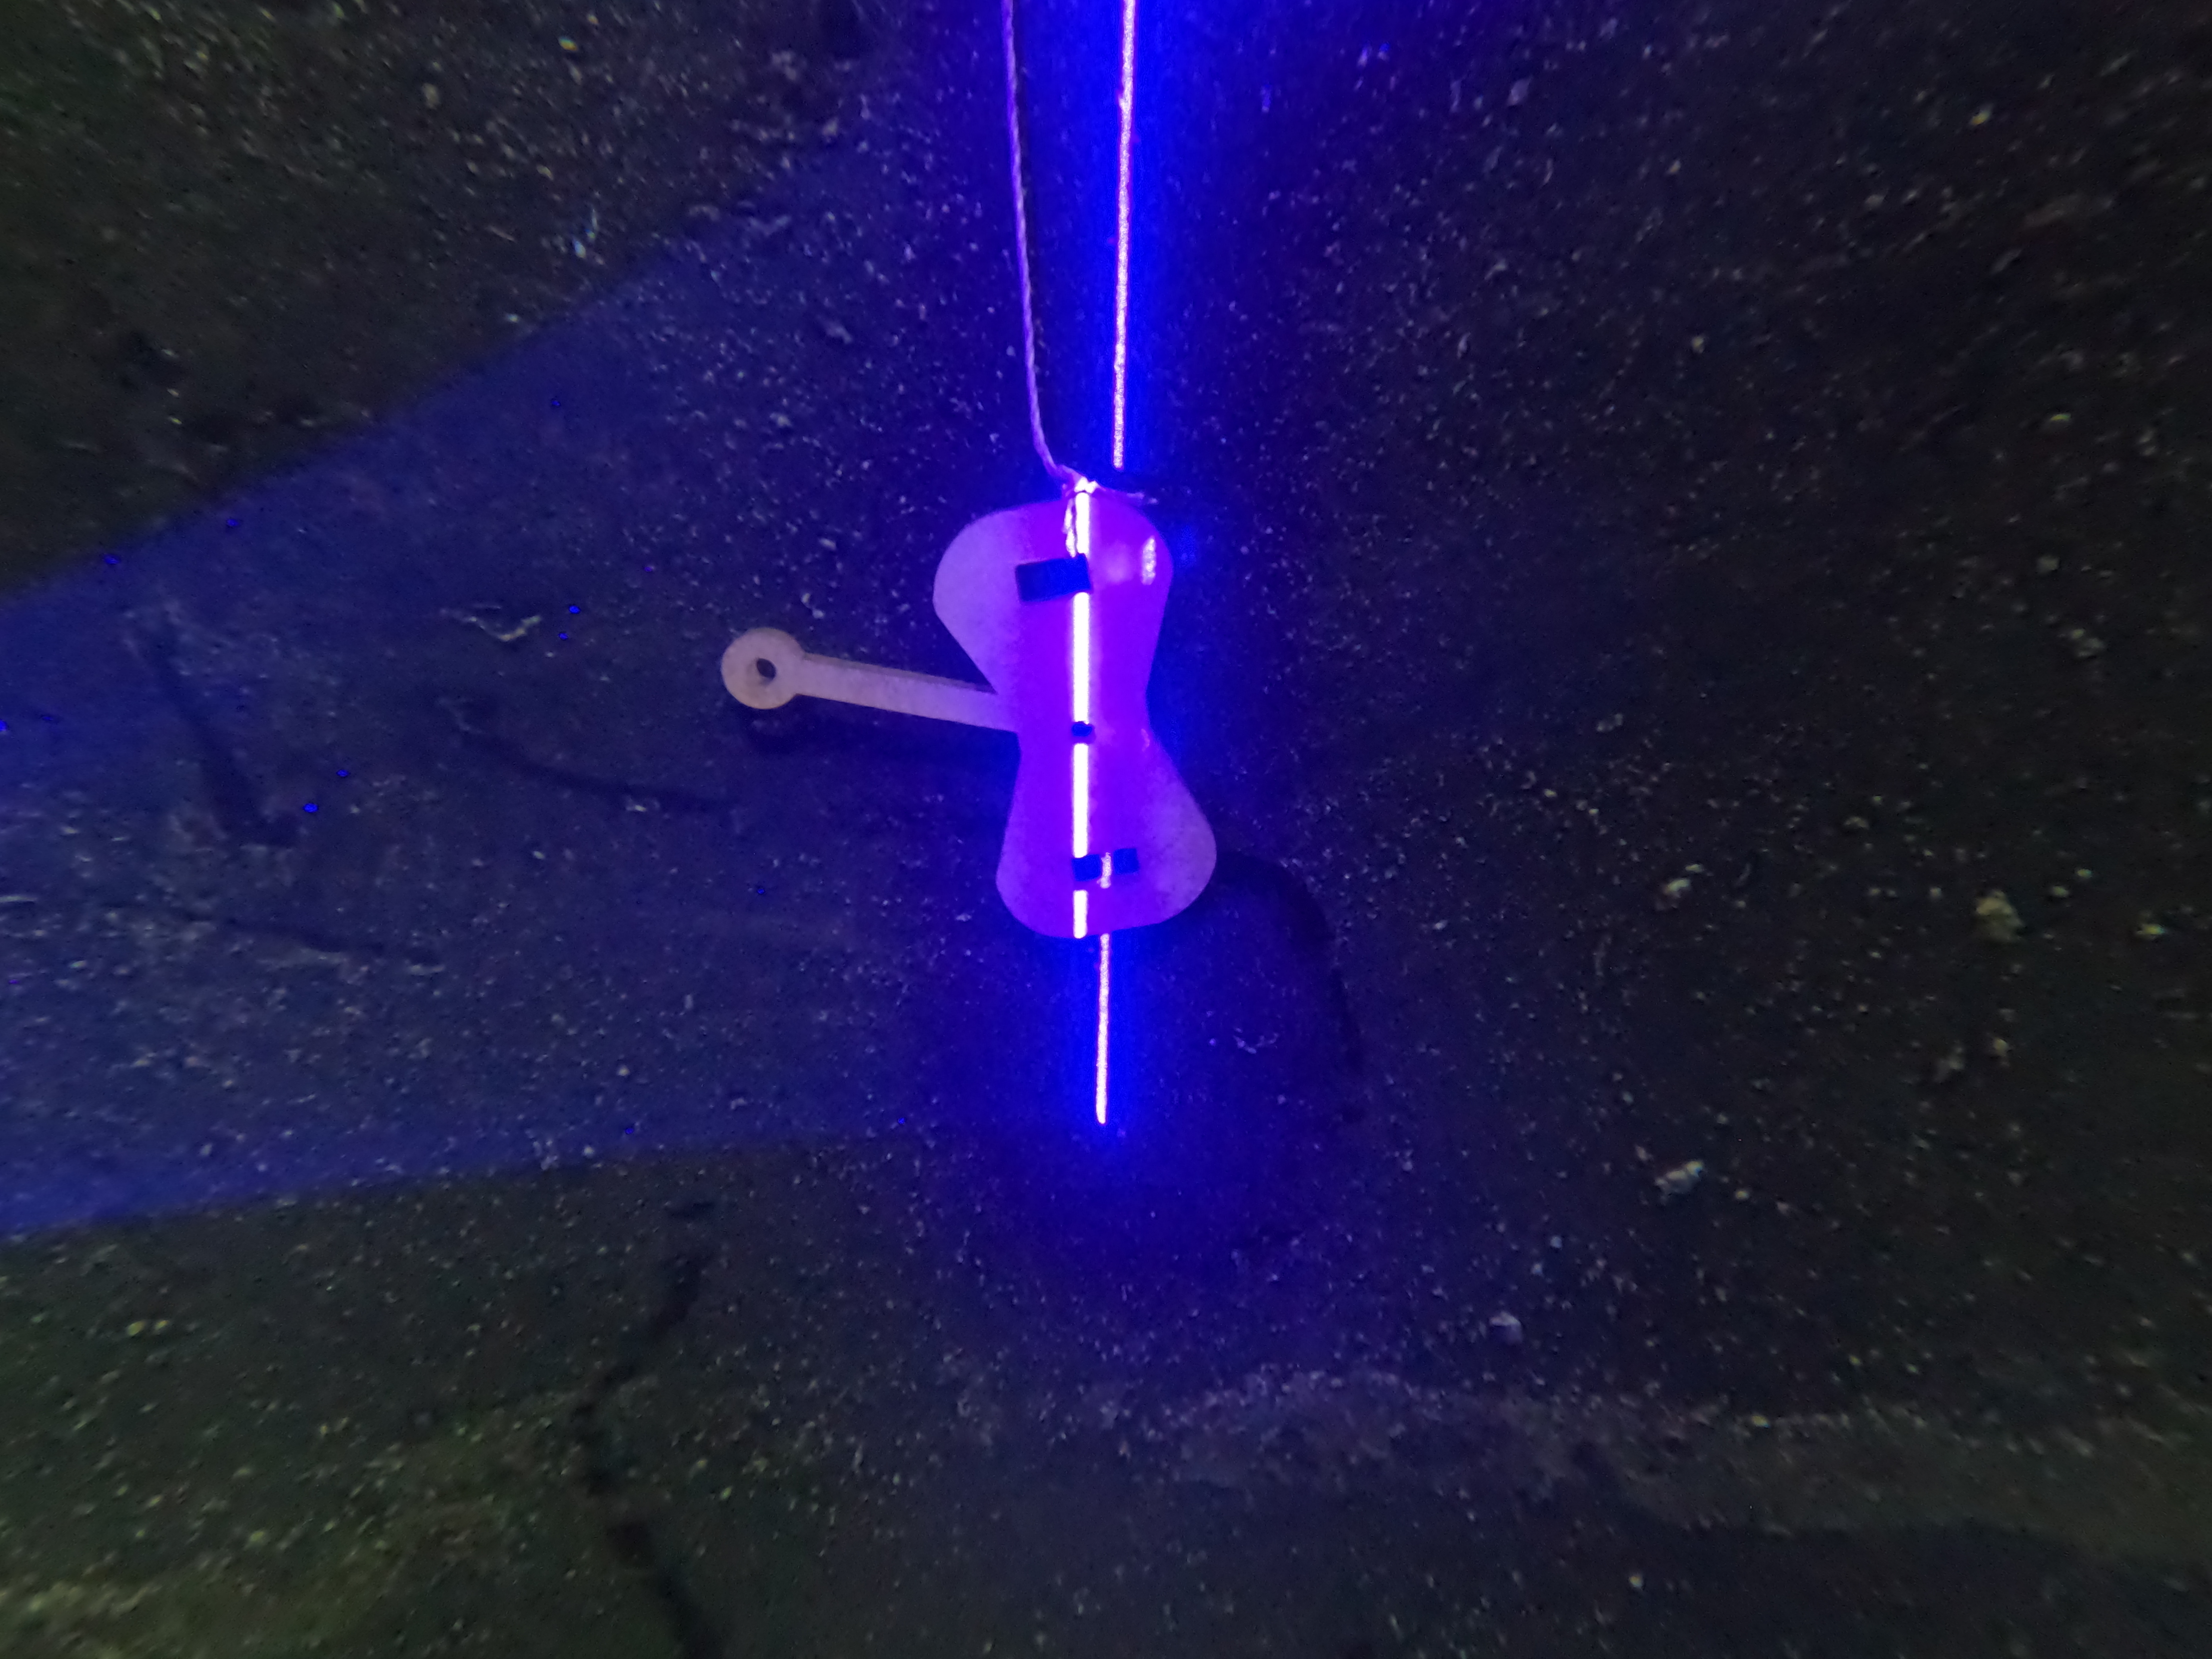

Supplement: Supplementary file 2436 [file G0016014.pdf › Level_2_2/G0016014.pdf]

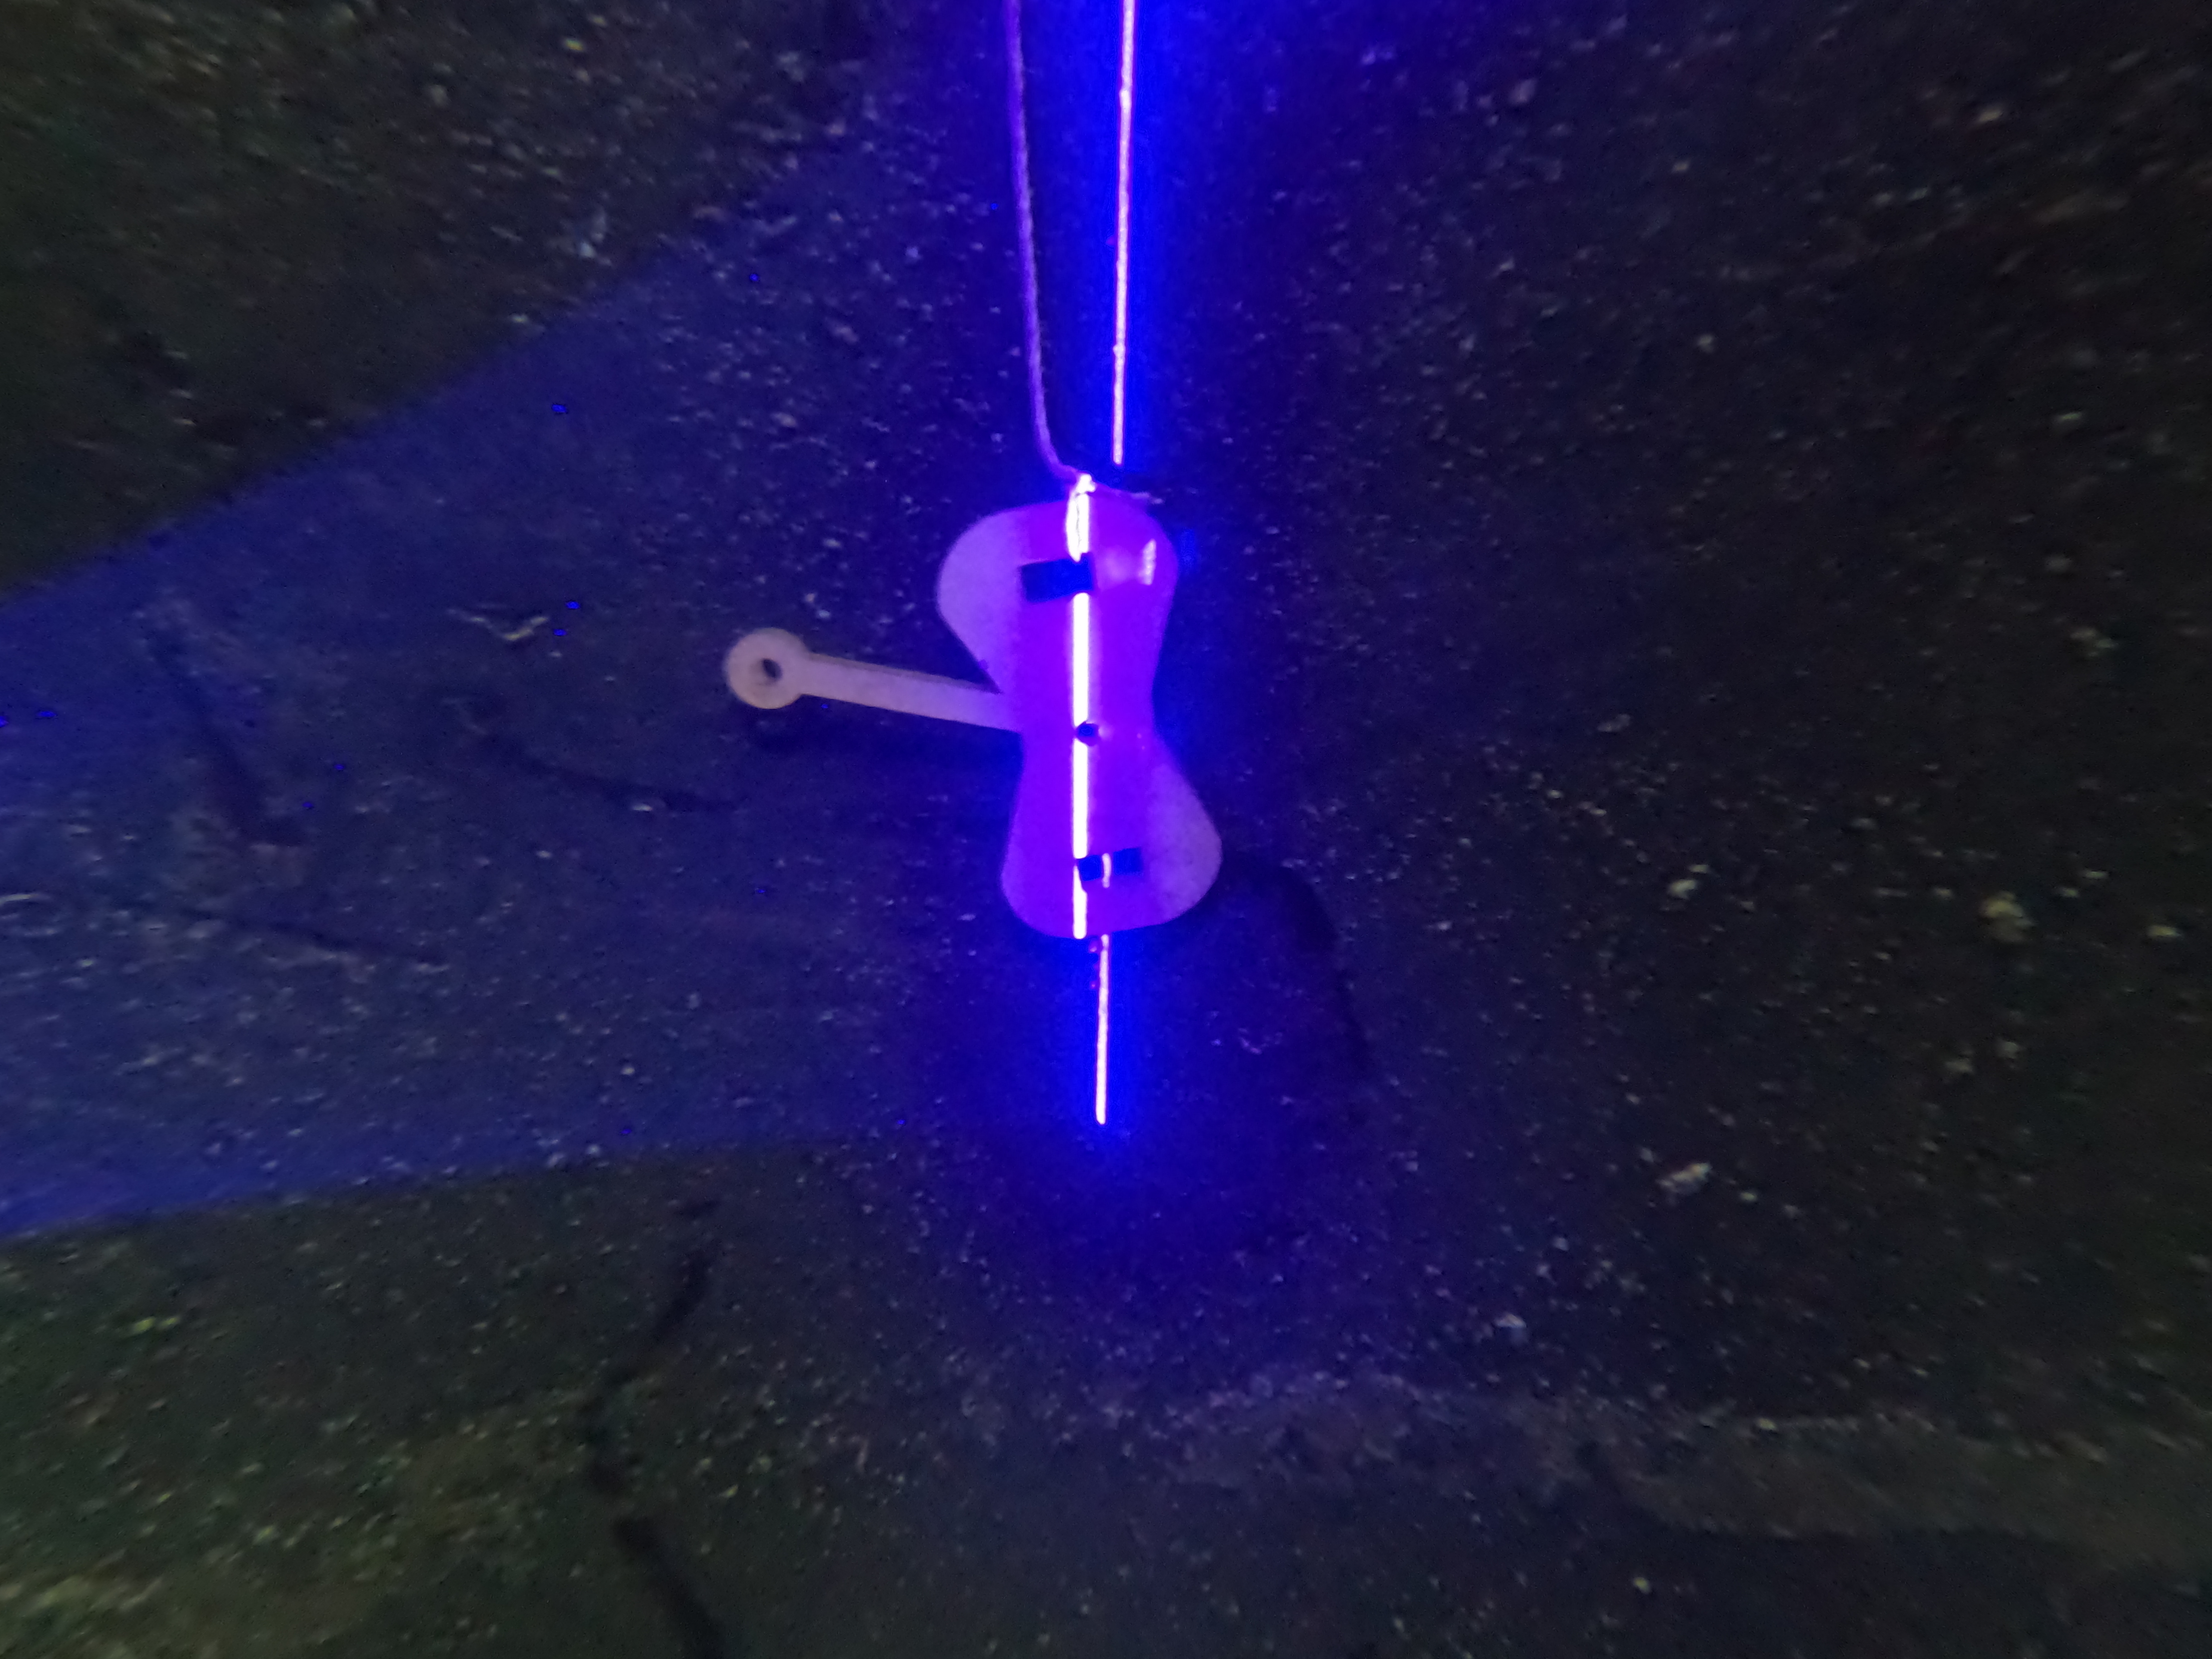

Supplement: Supplementary file 2437 [file G0016015.pdf › Level_2_2/G0016015.pdf]

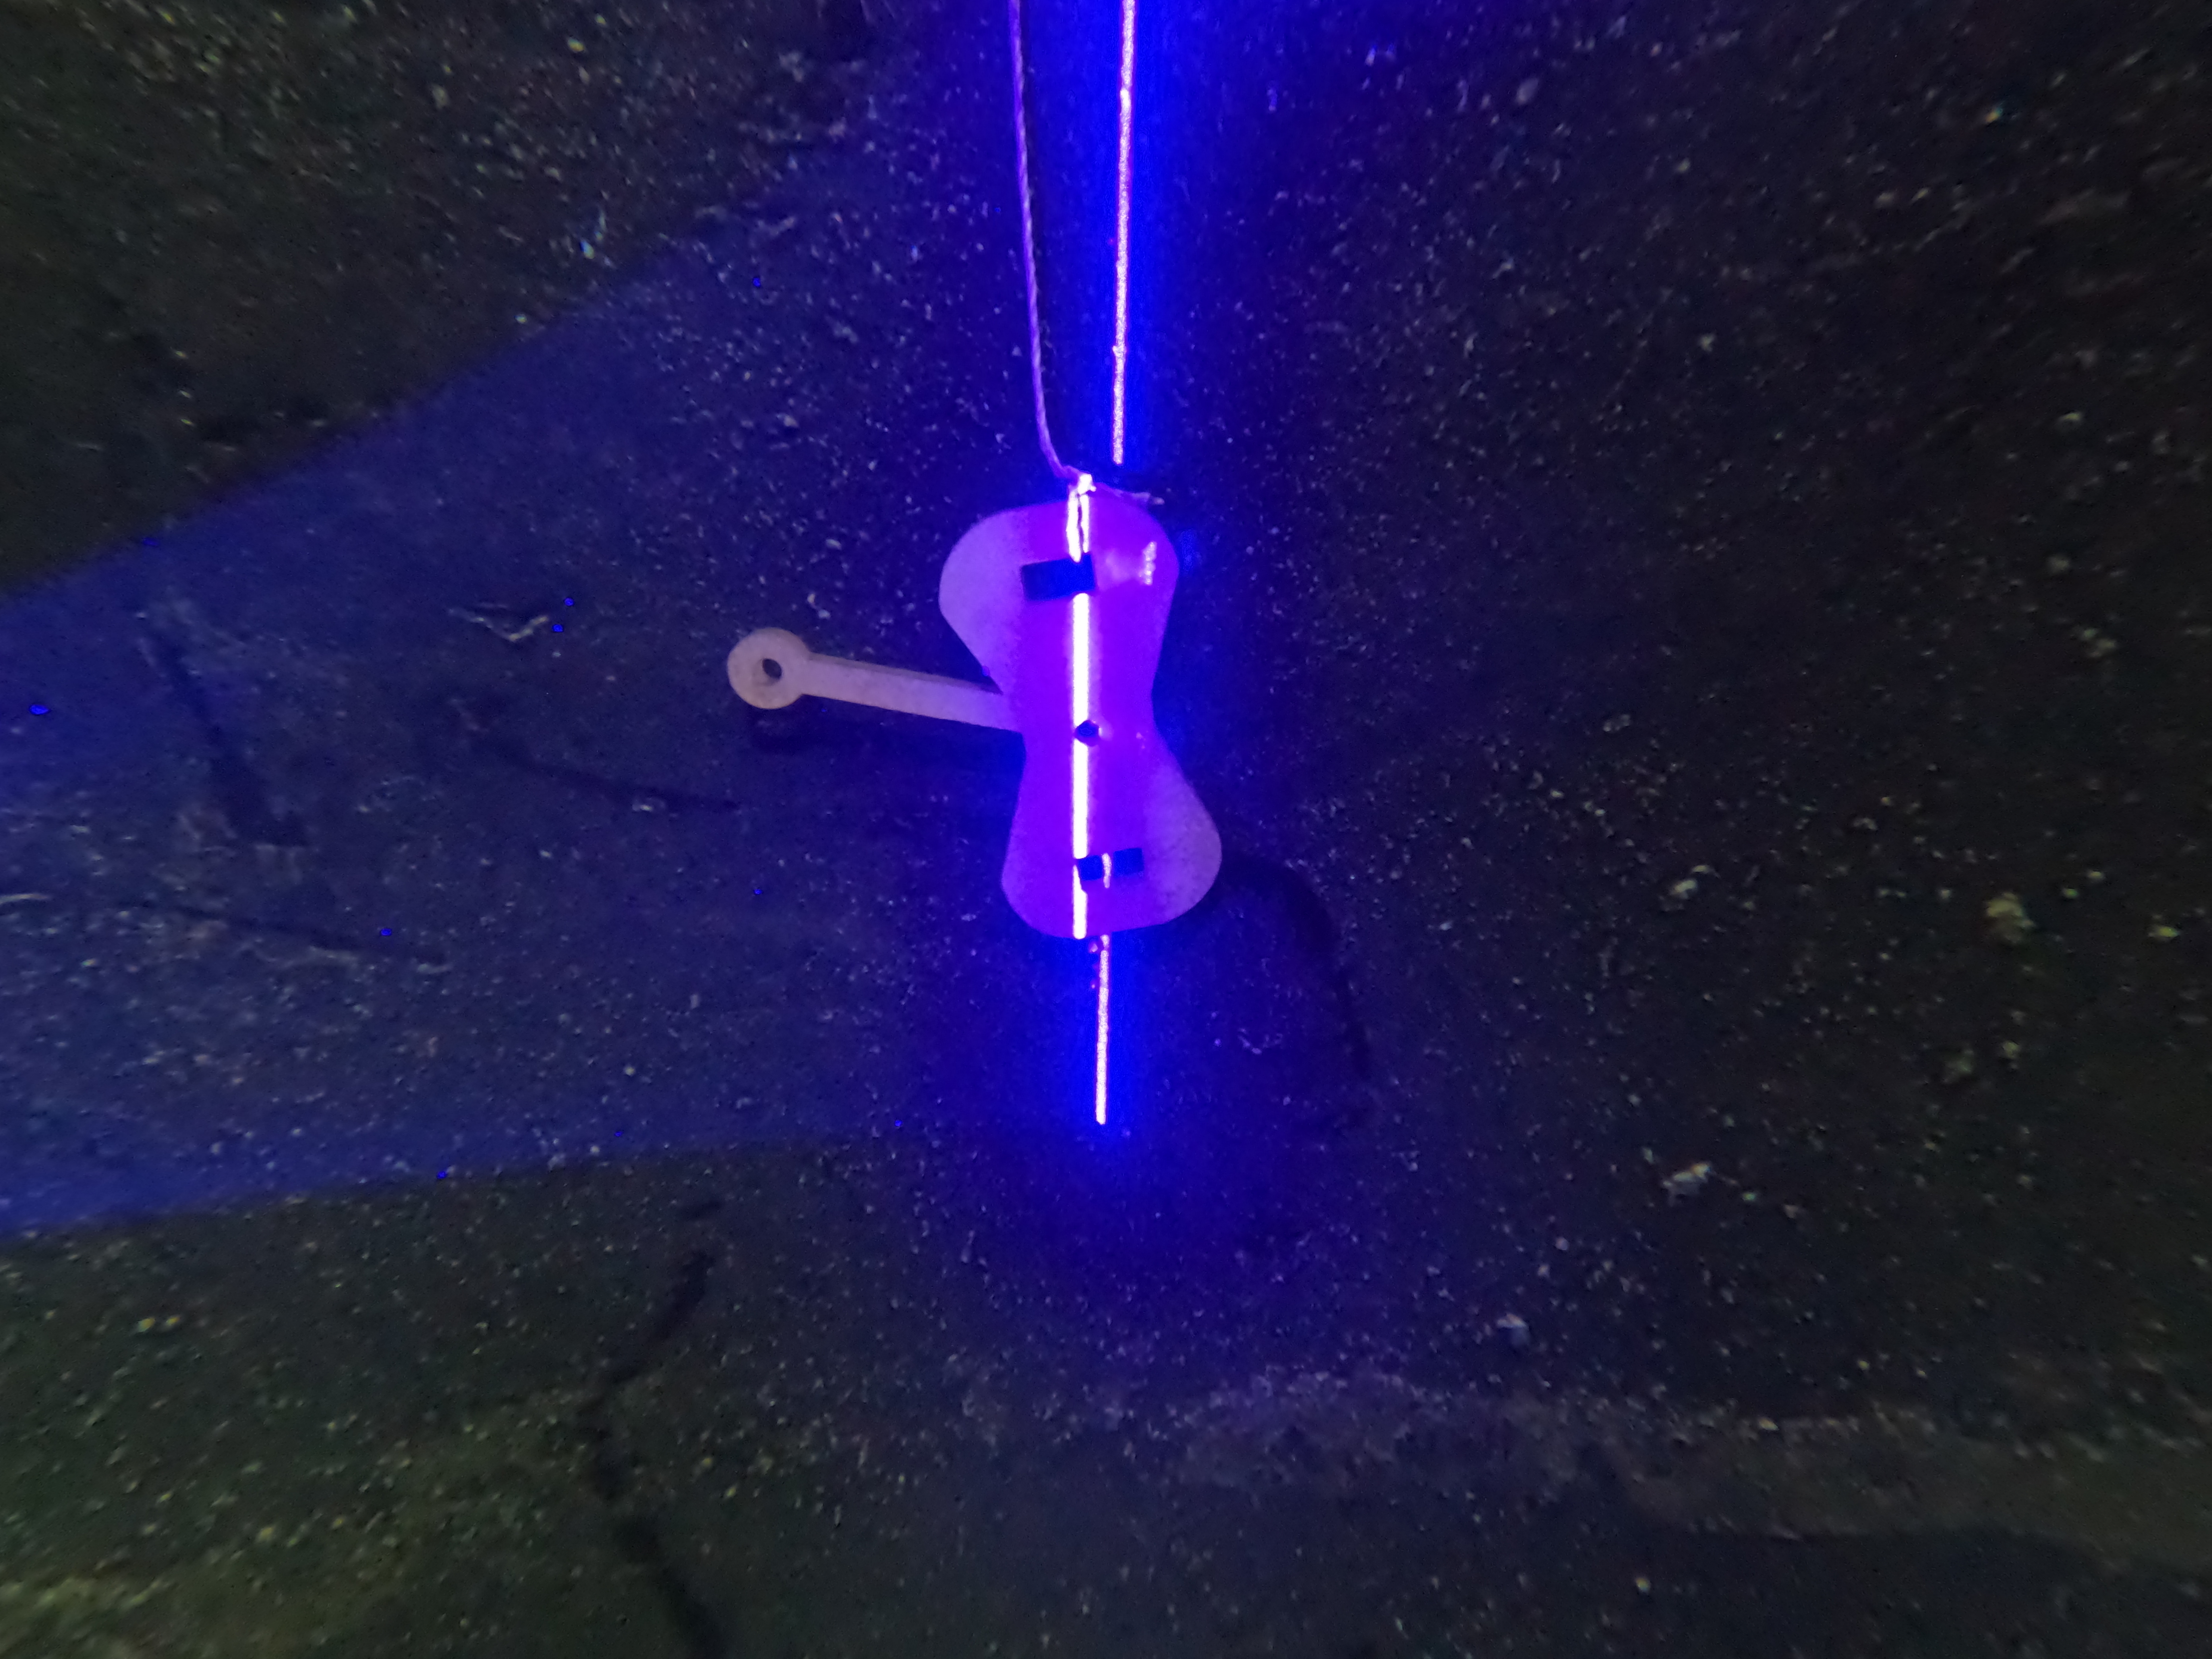

Supplement: Supplementary file 2438 [file G0016016.pdf › Level_2_2/G0016016.pdf]

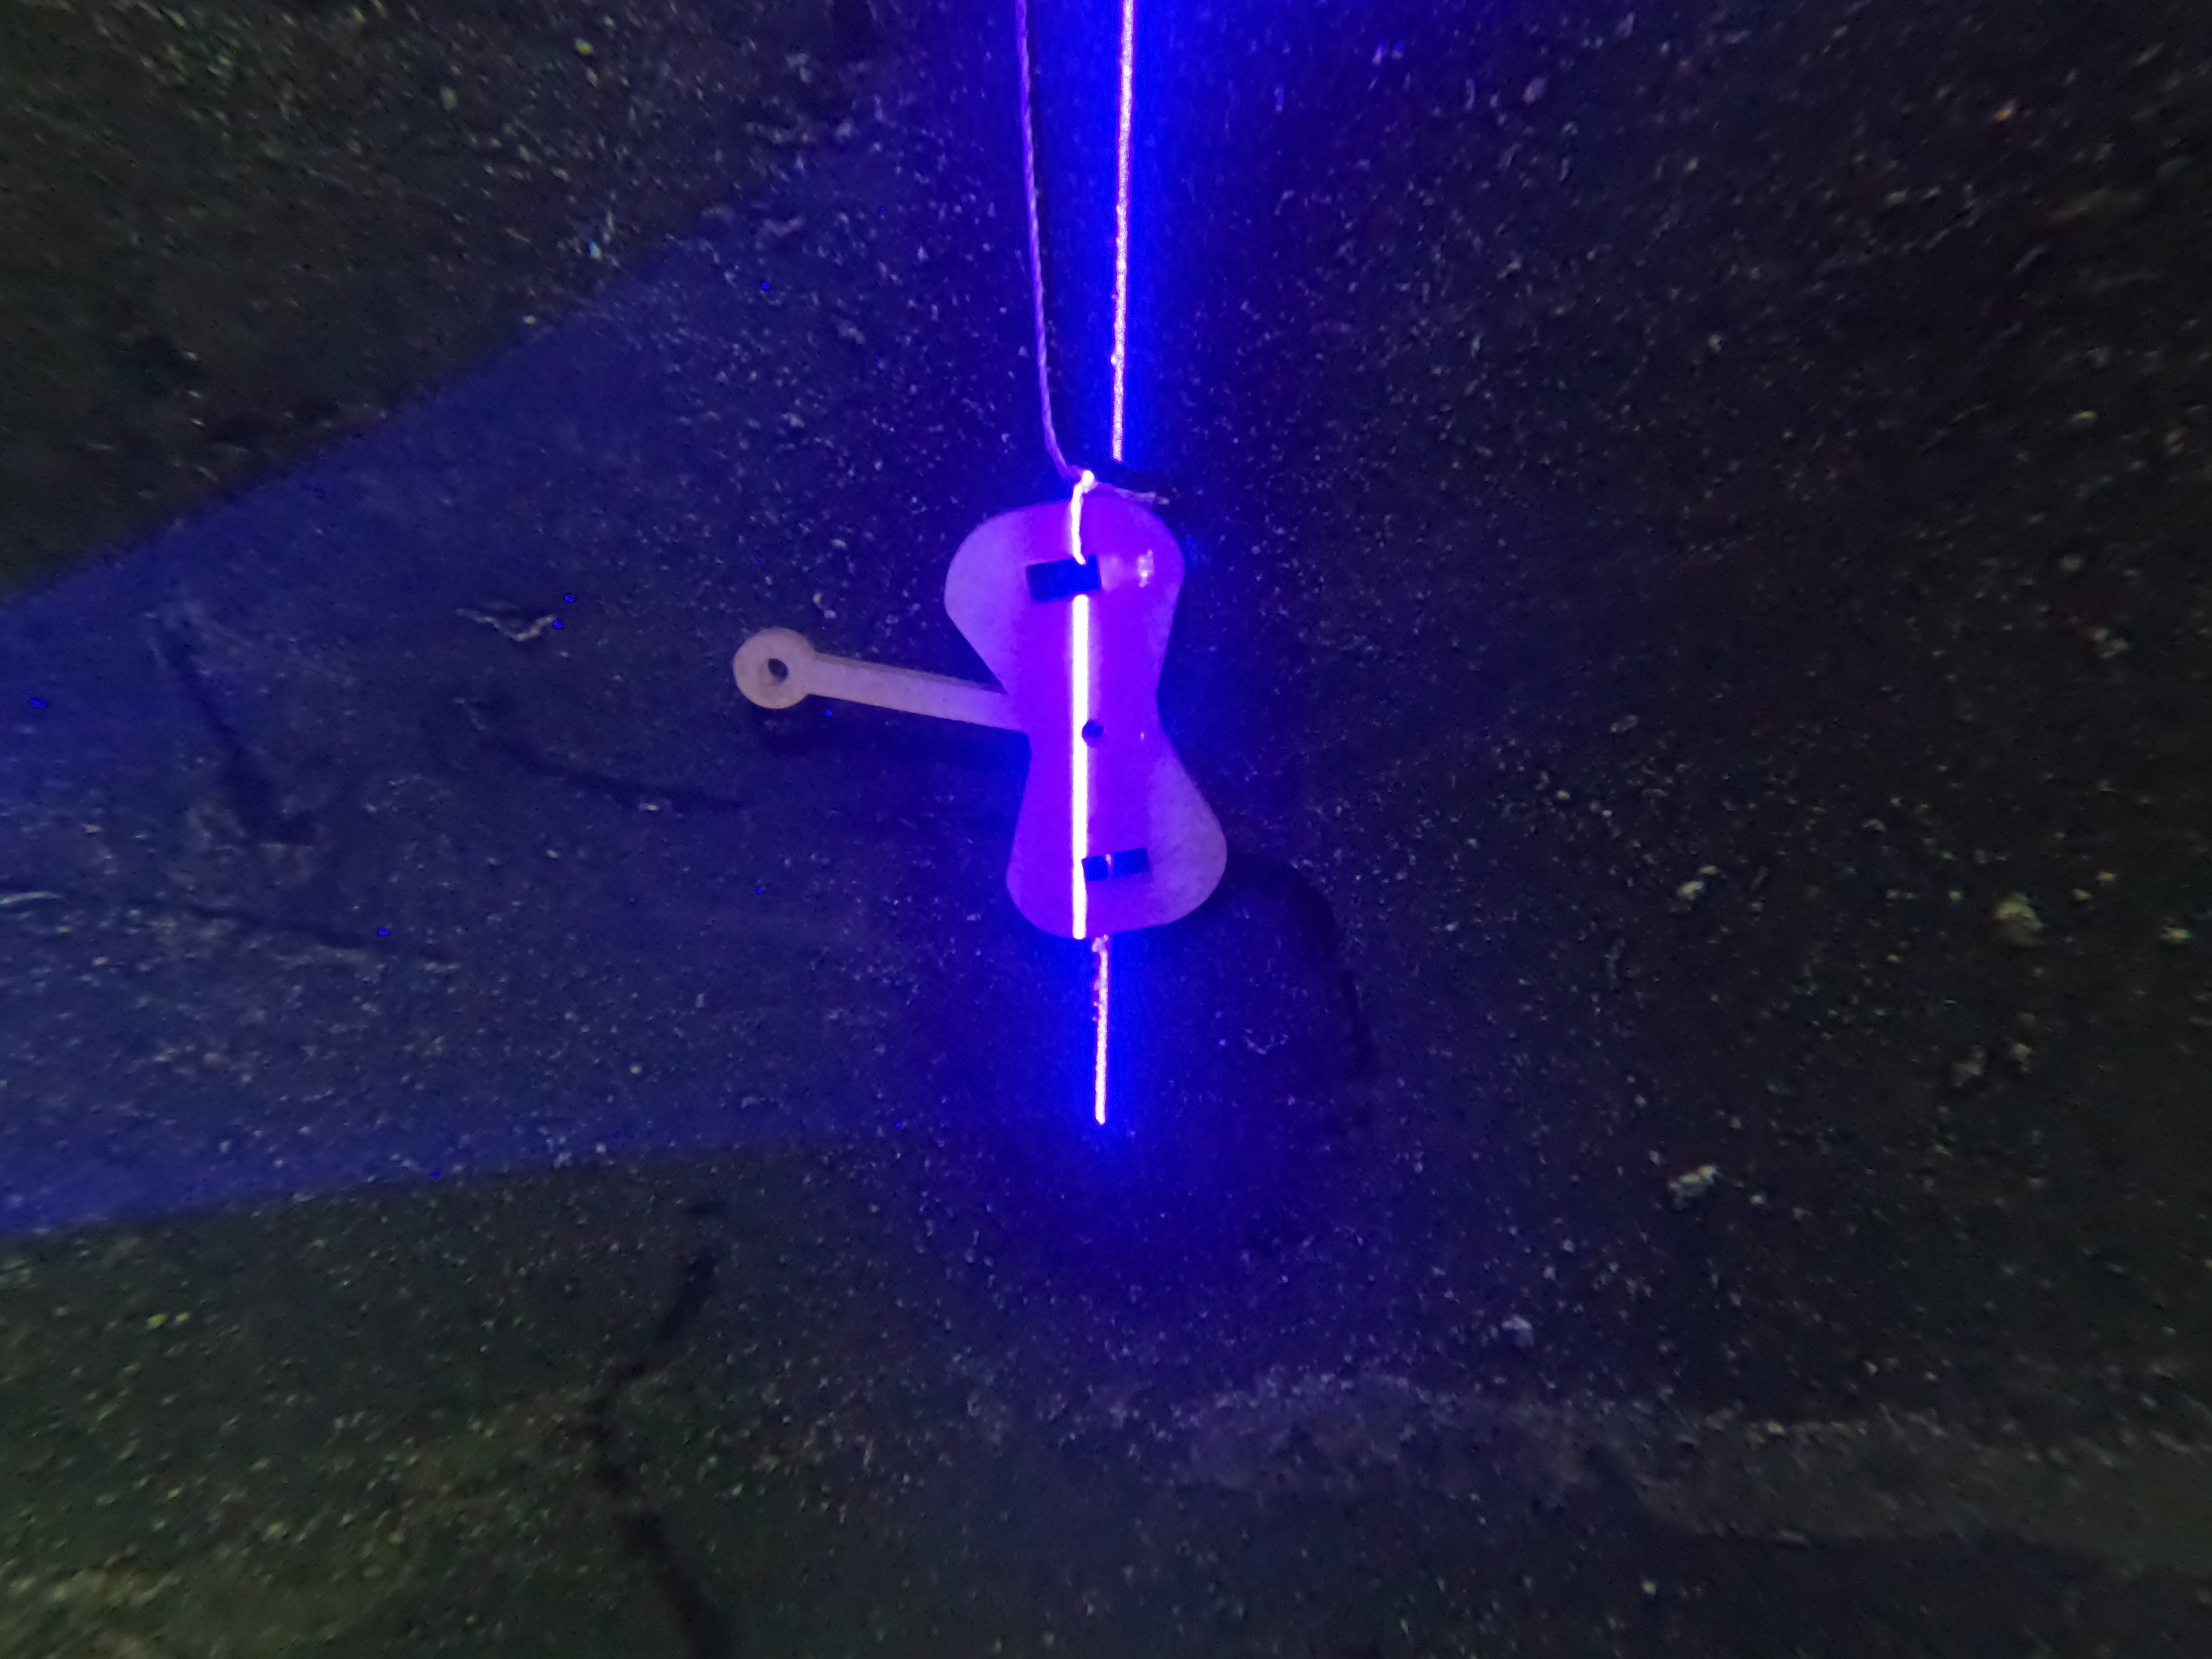

Supplement: Supplementary file 2439 [file G0016017.pdf › Level_2_2/G0016017.pdf]

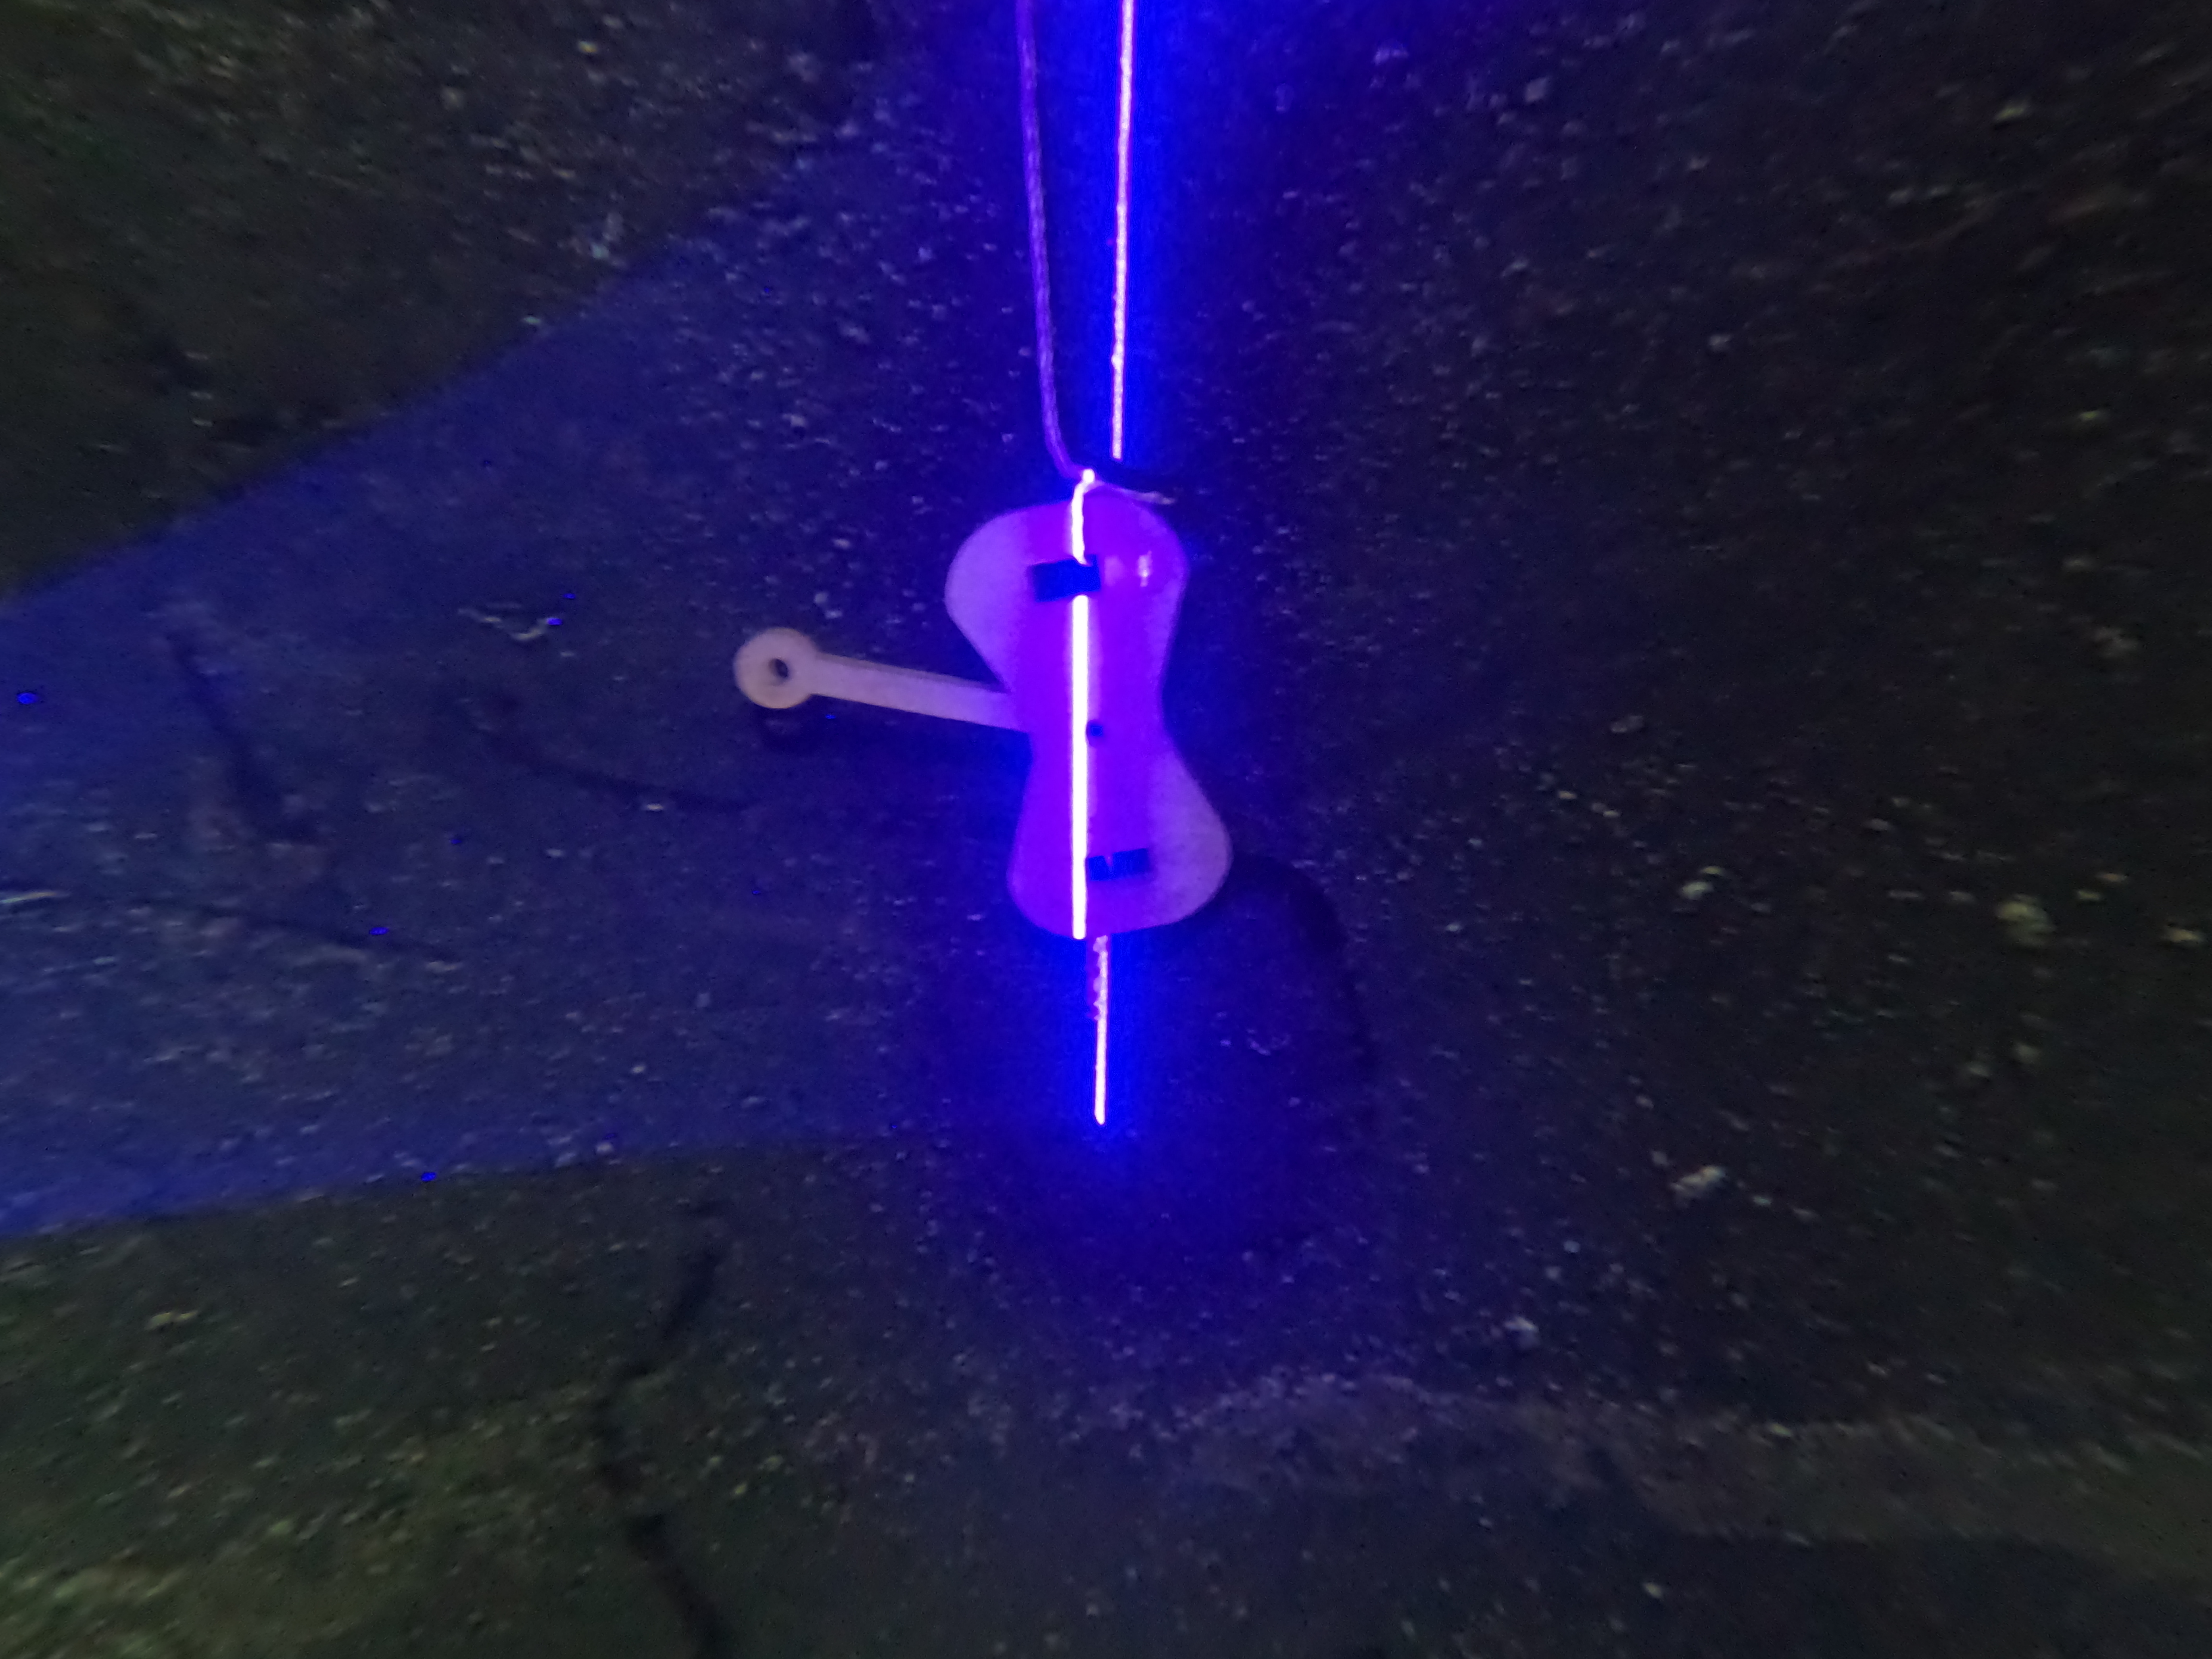

Supplement: Supplementary file 2440 [file G0016018.pdf › Level_2_2/G0016018.pdf]

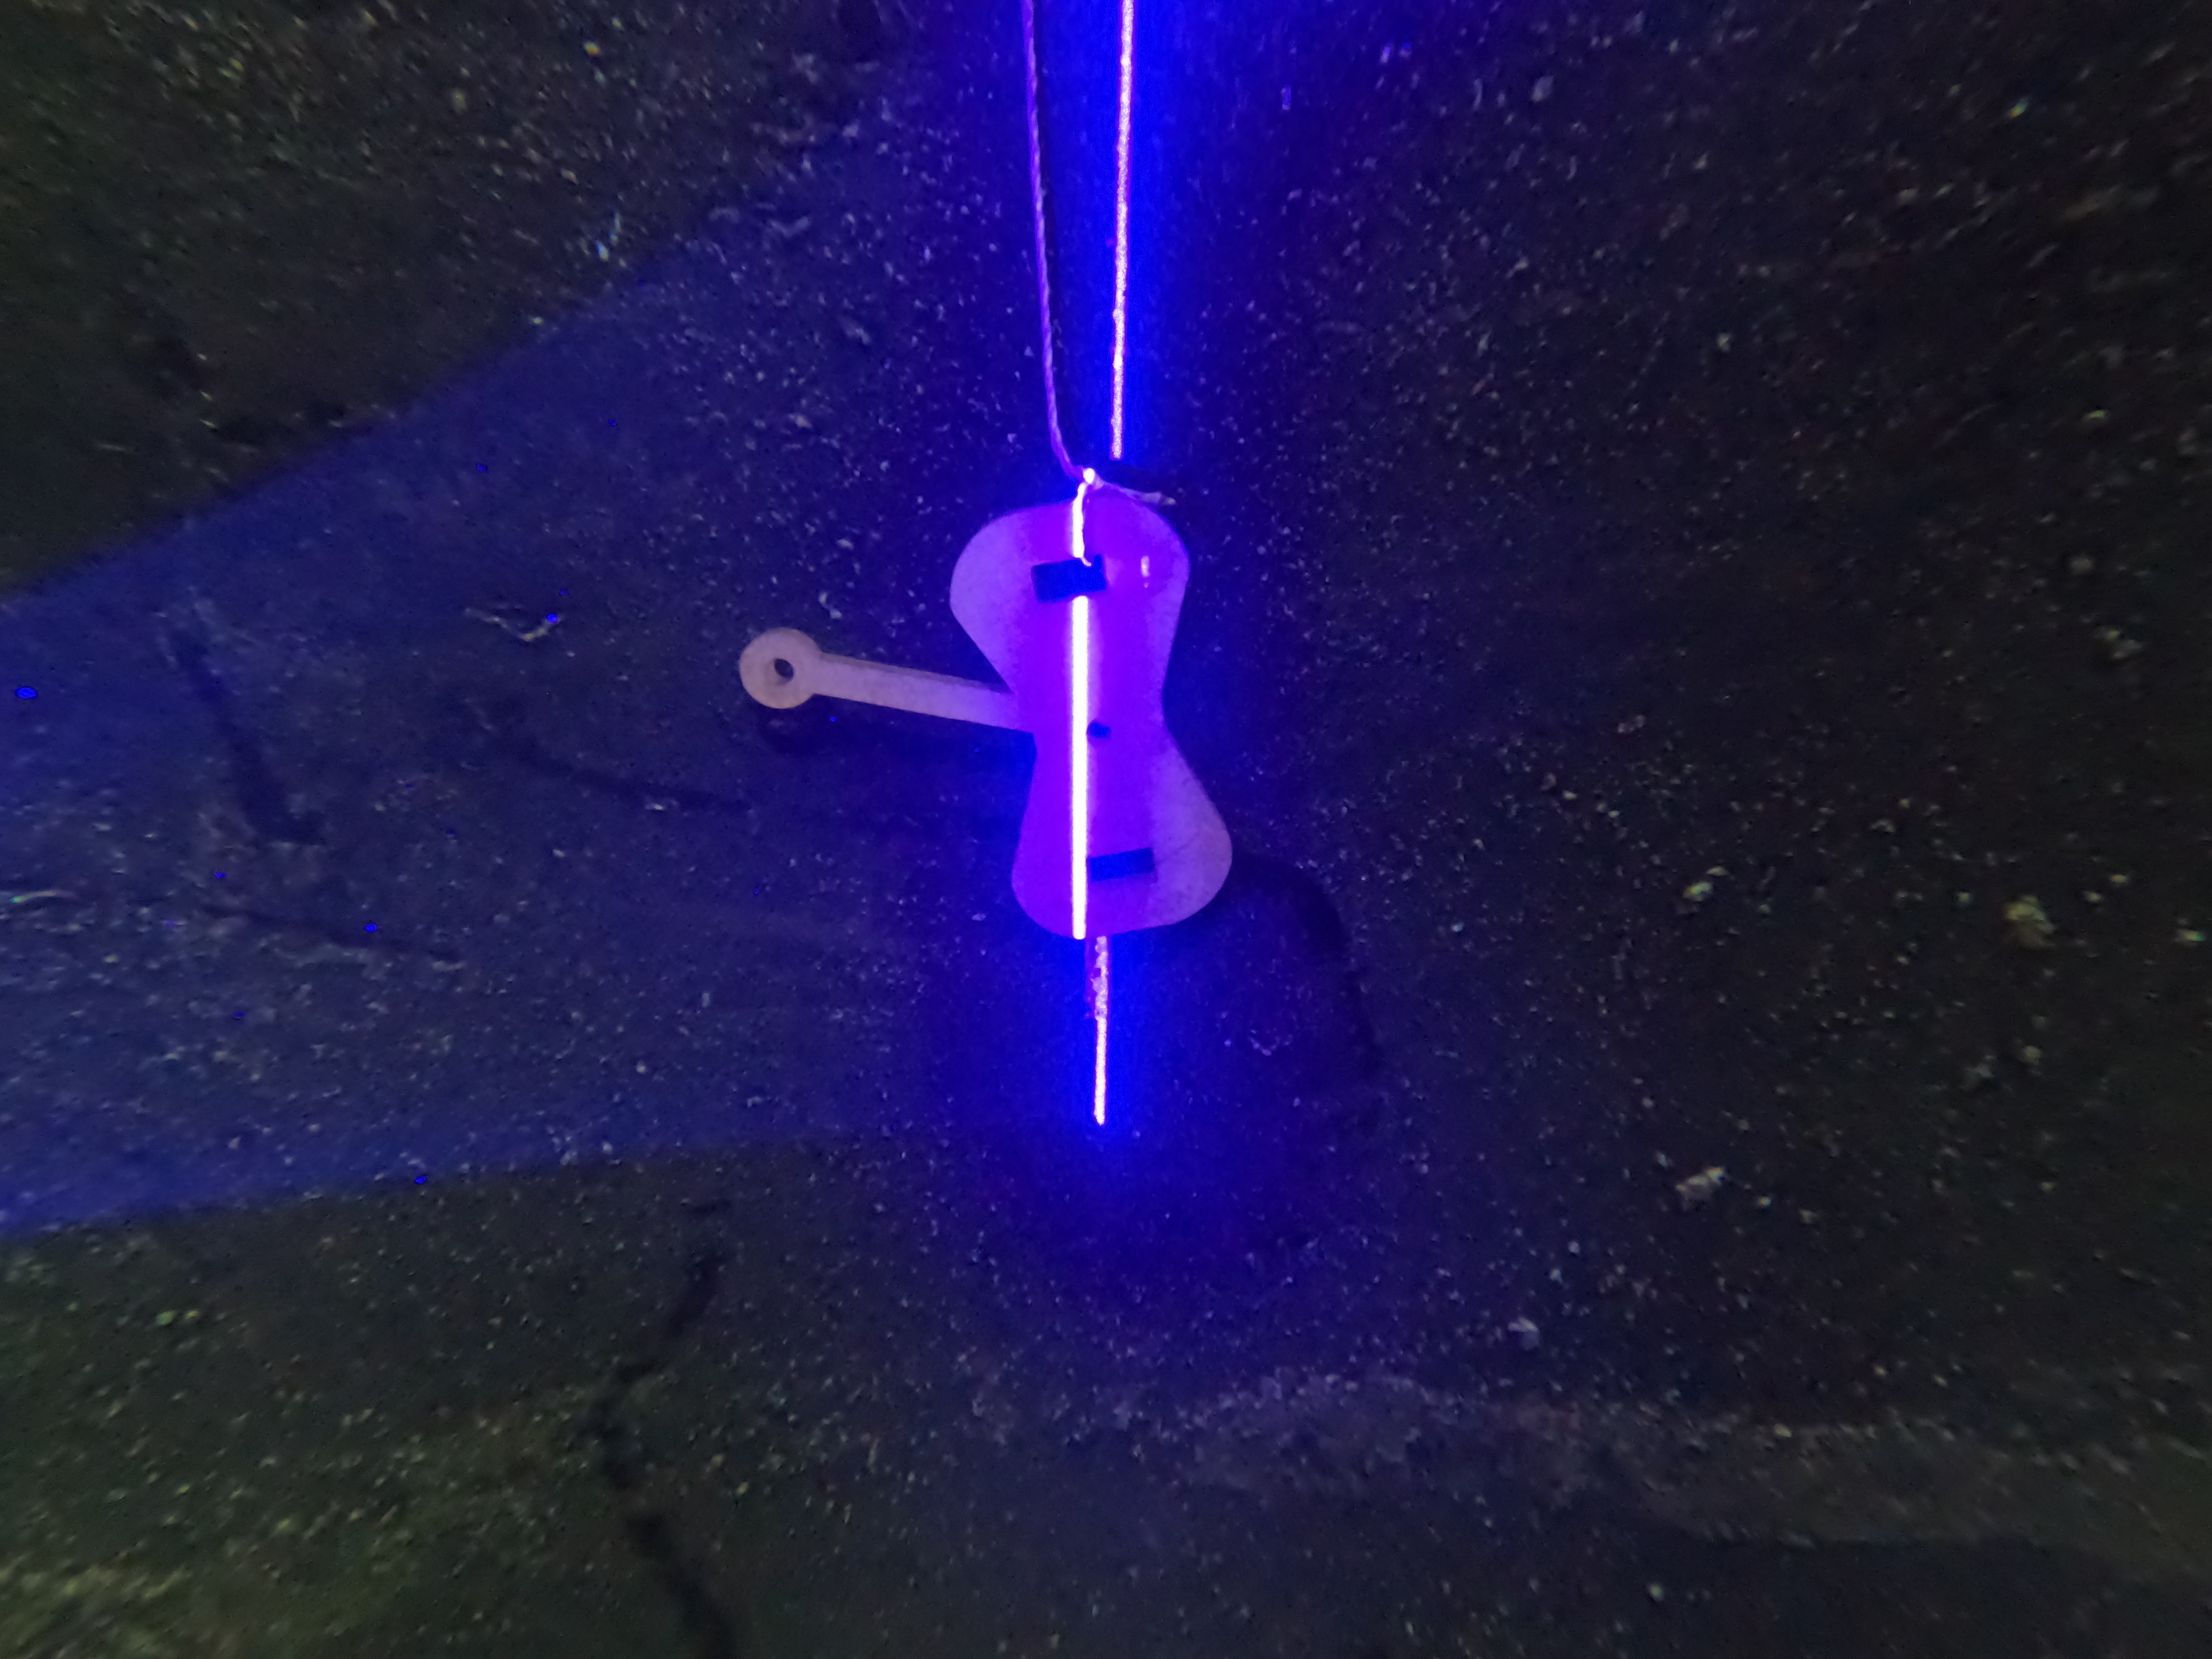

Supplement: Supplementary file 2441 [file G0016019.pdf › Level_2_2/G0016019.pdf]

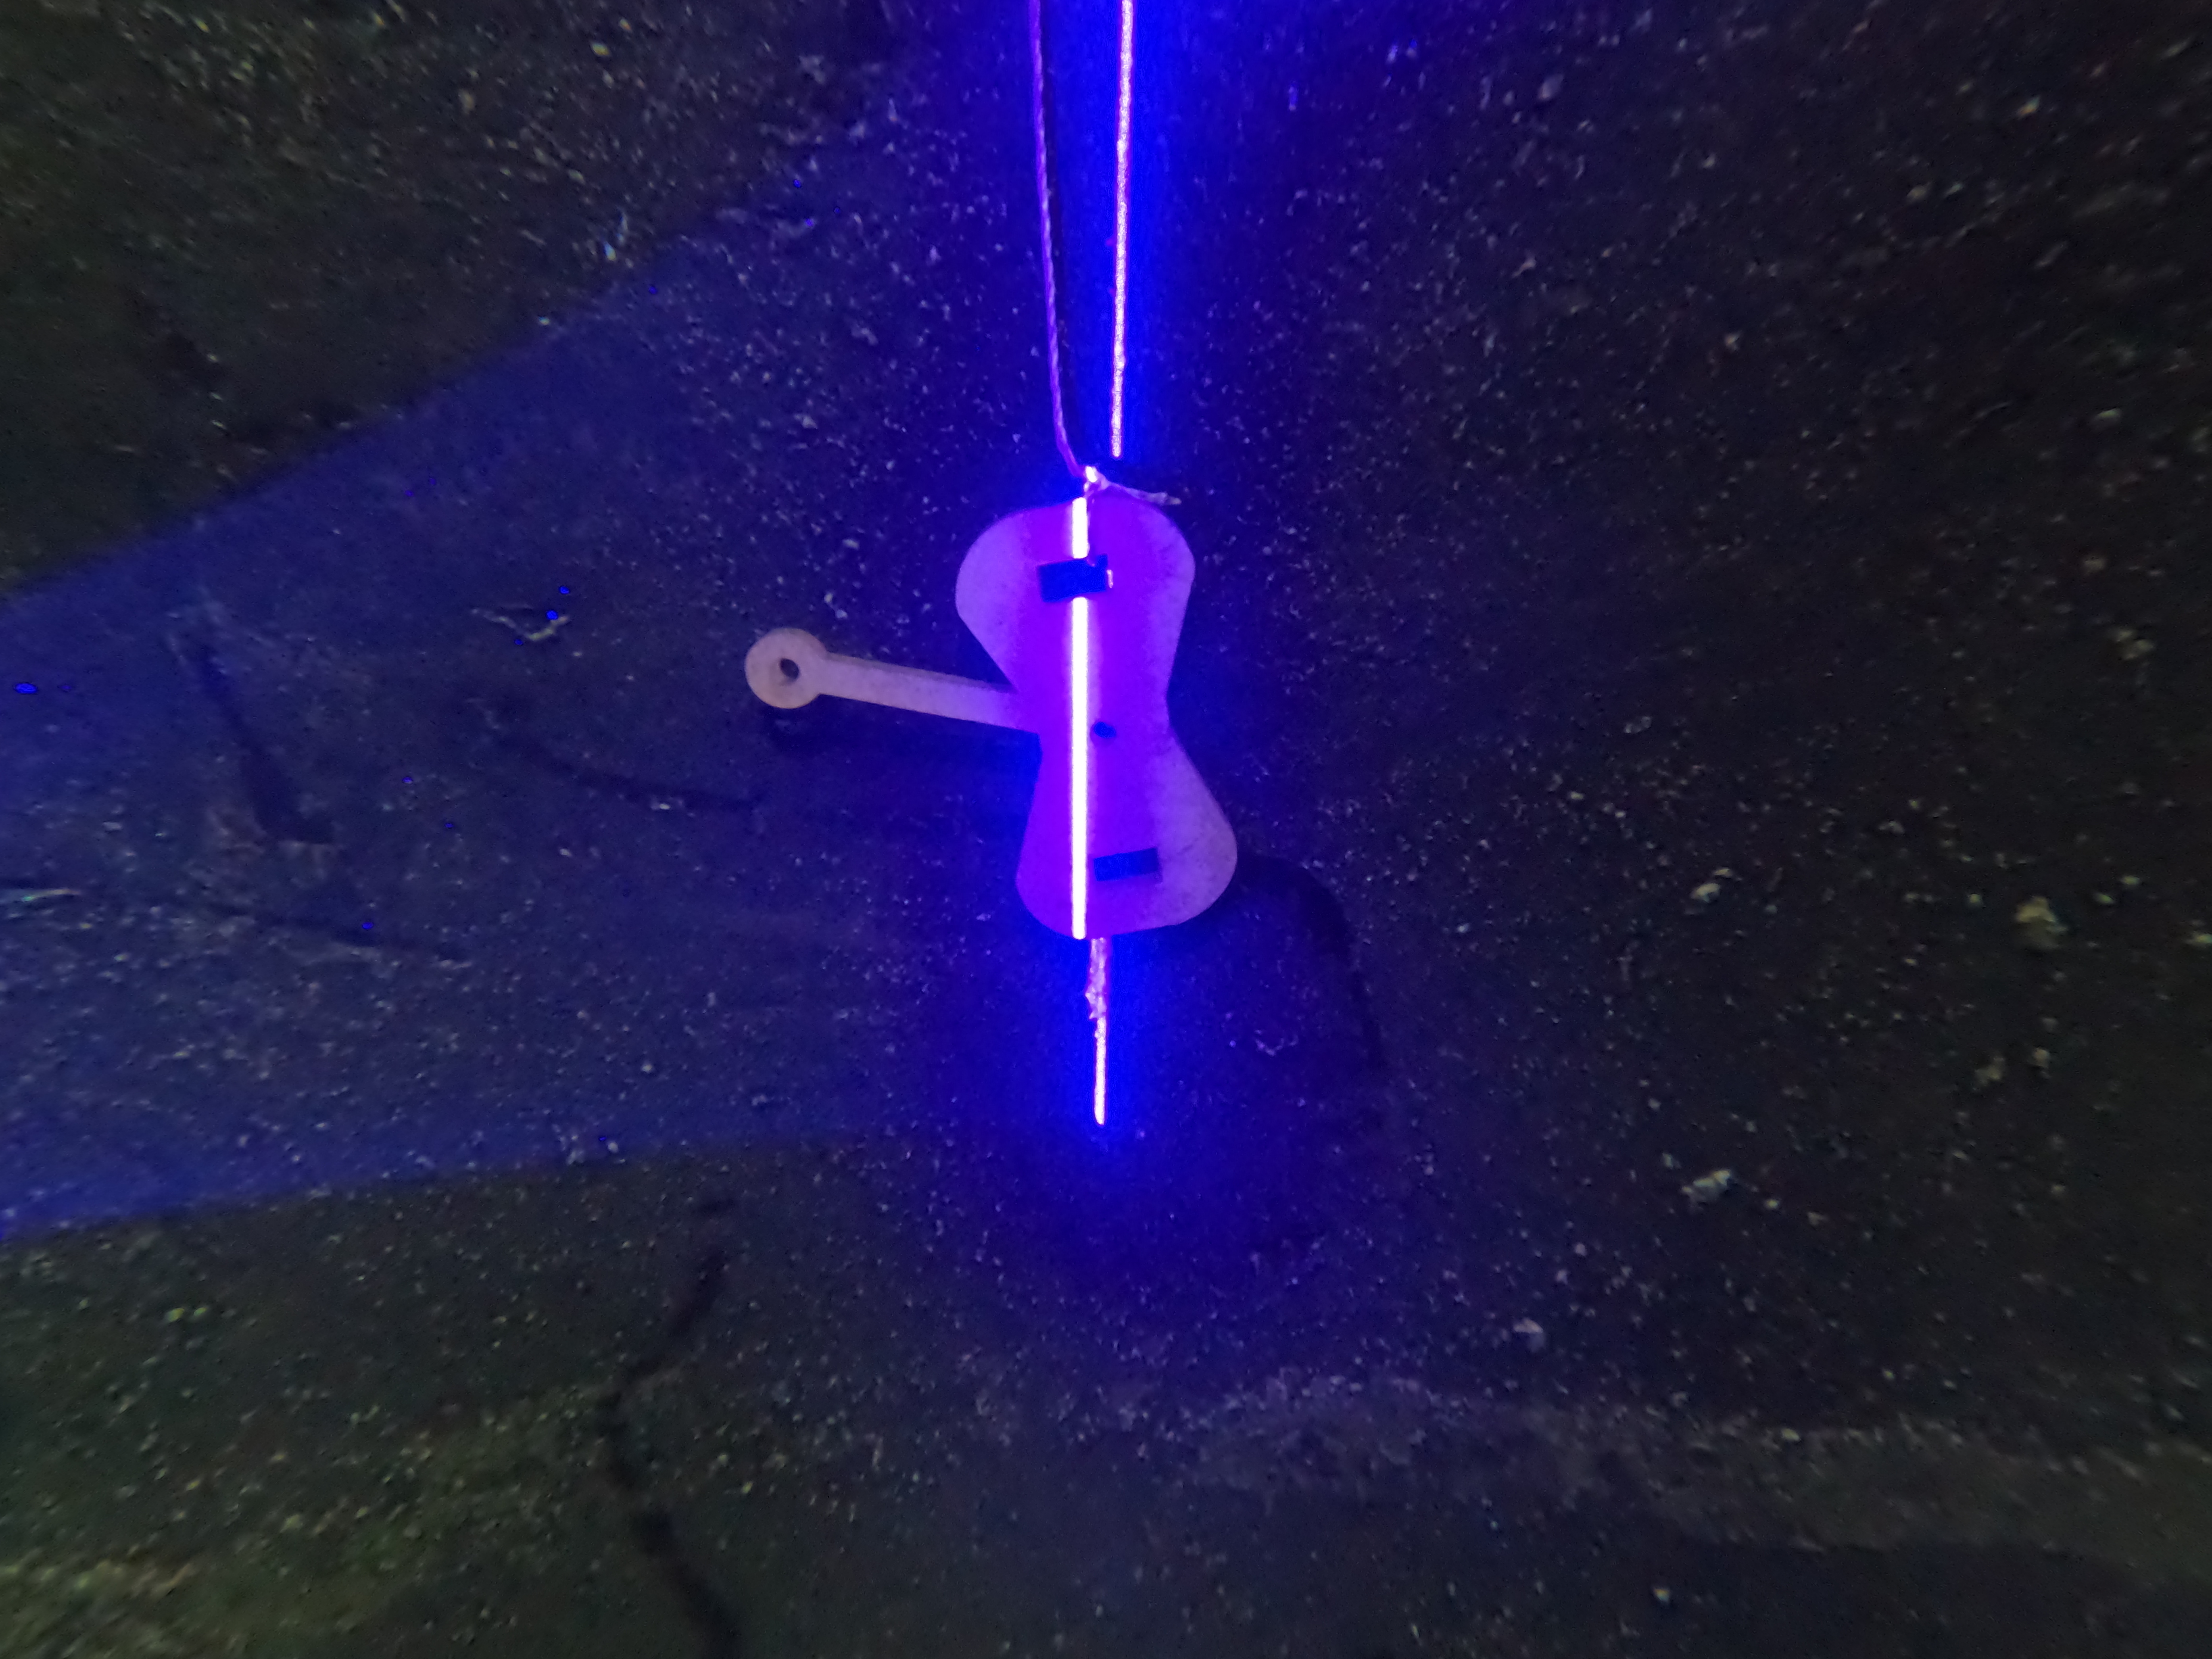

Supplement: Supplementary file 2442 [file G0016020.pdf › Level_2_2/G0016020.pdf]

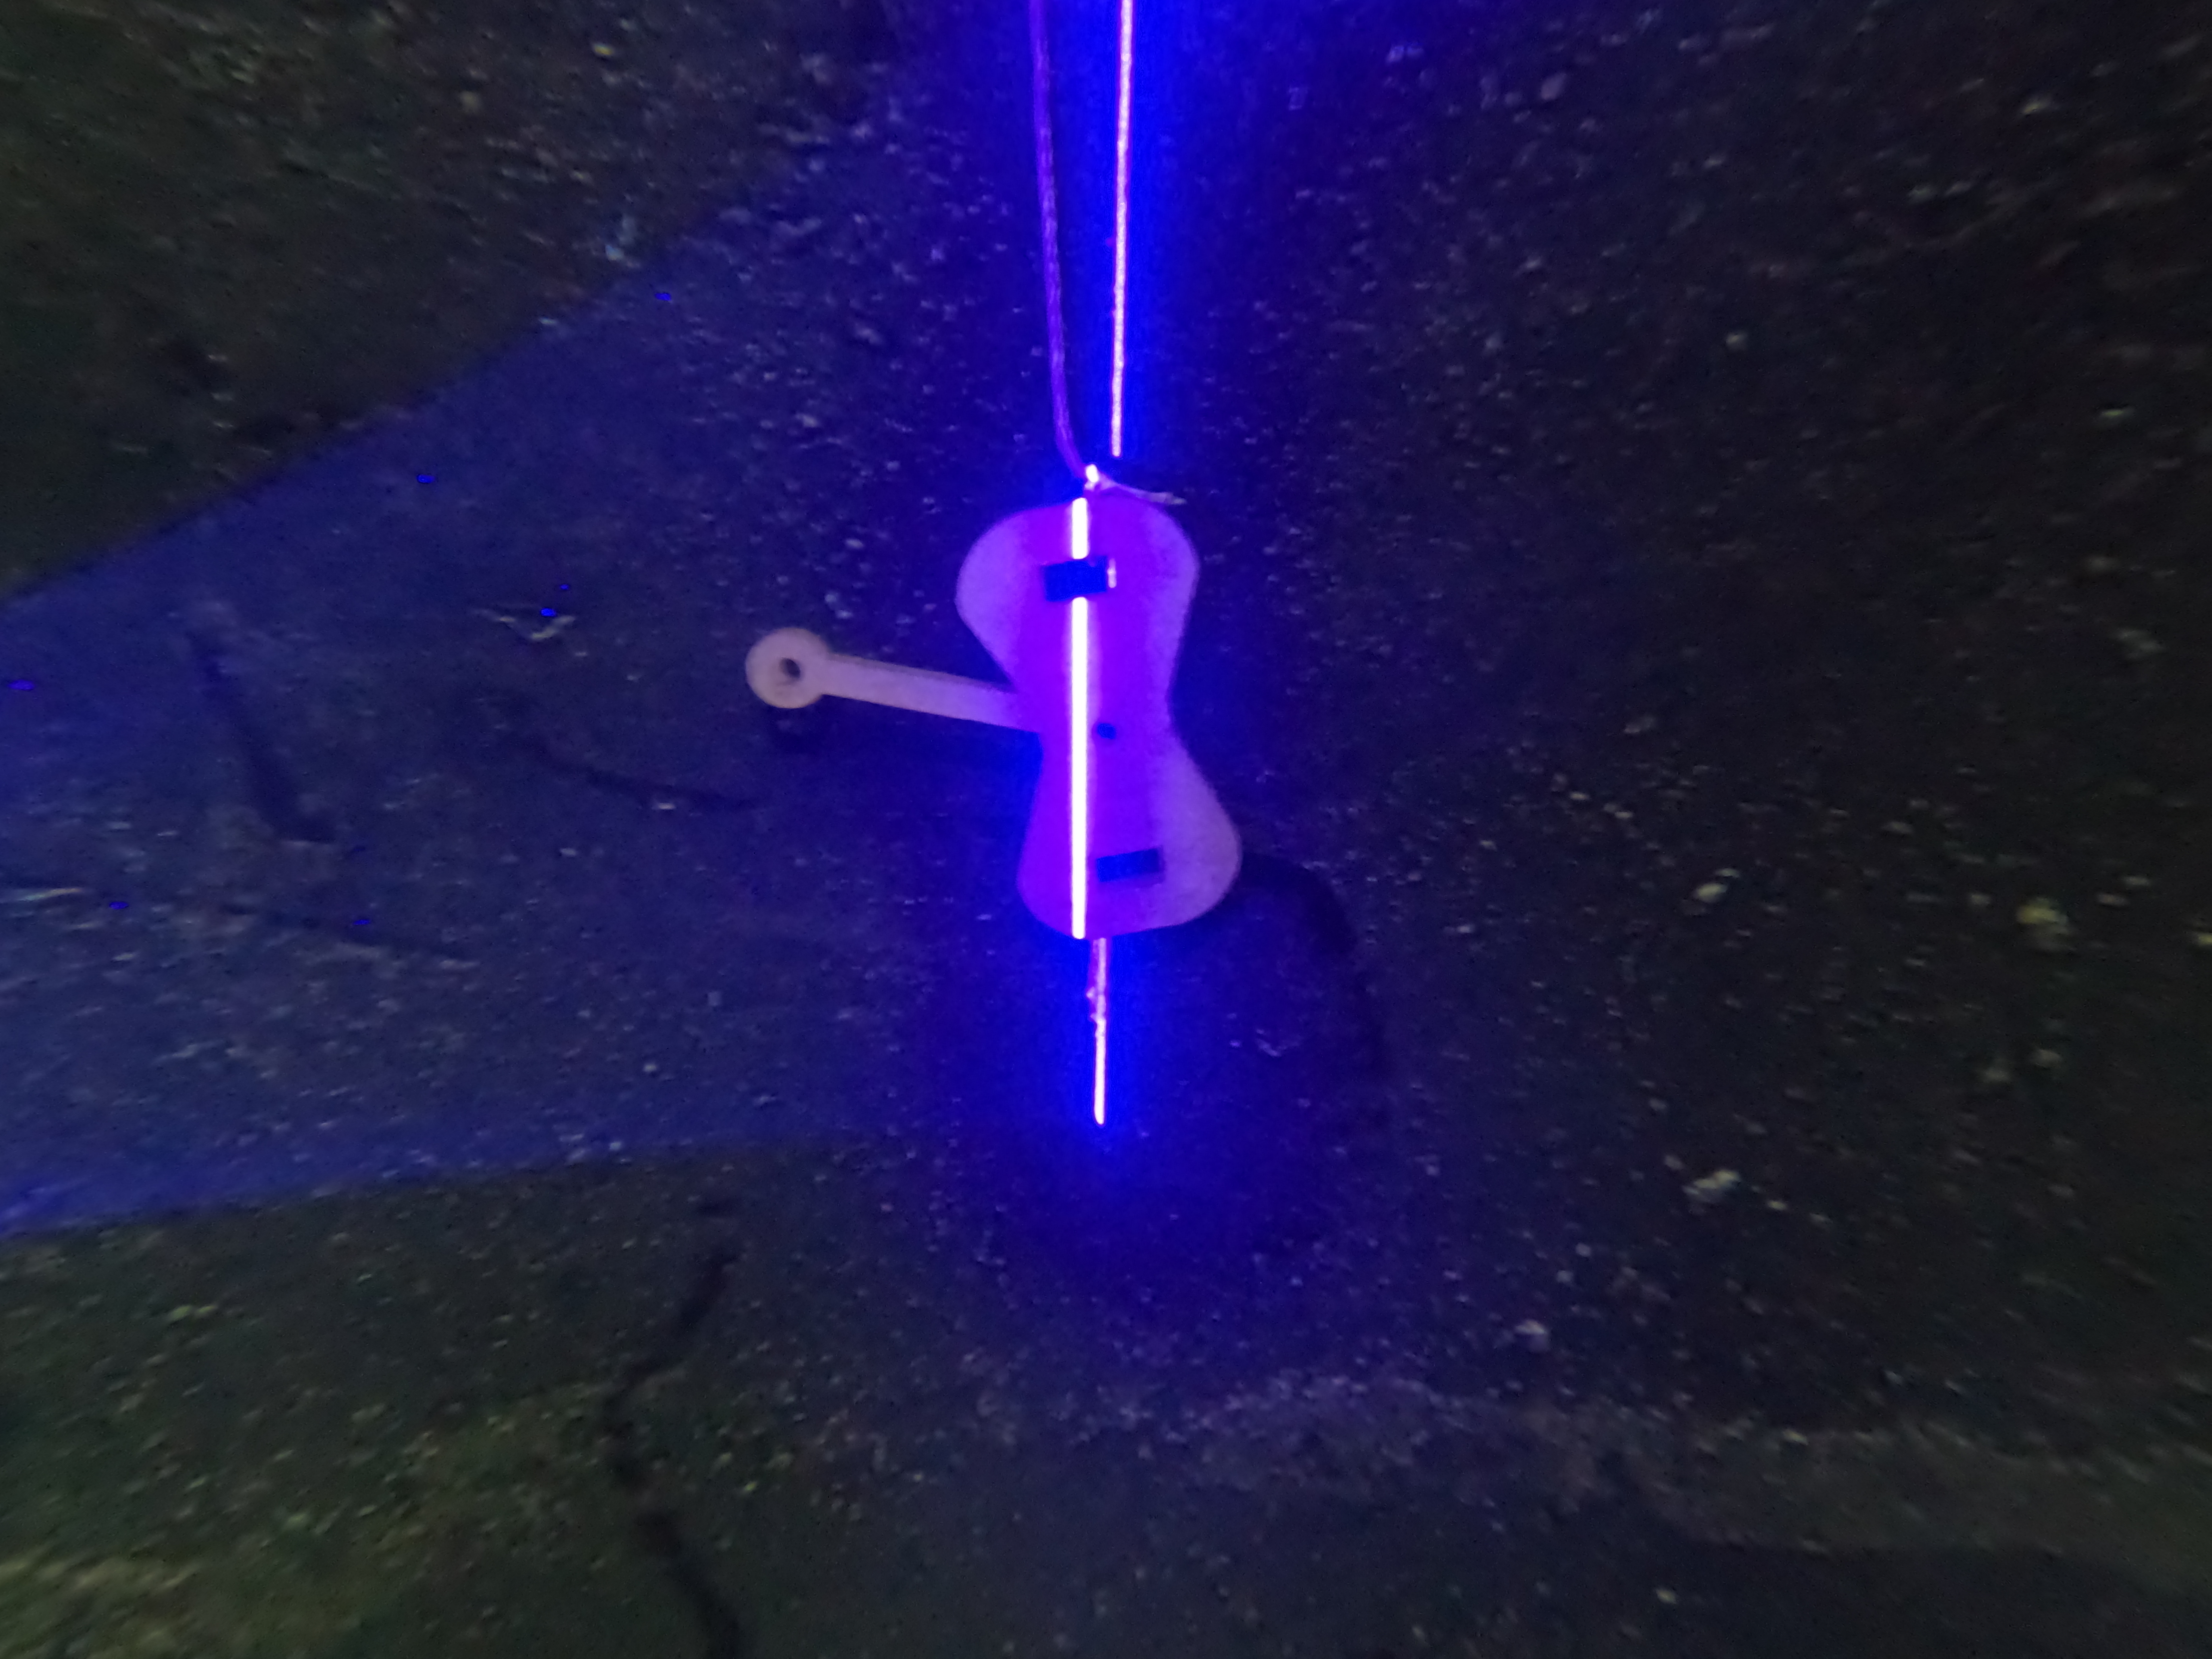

Supplement: Supplementary file 2443 [file G0016021.pdf › Level_2_2/G0016021.pdf]

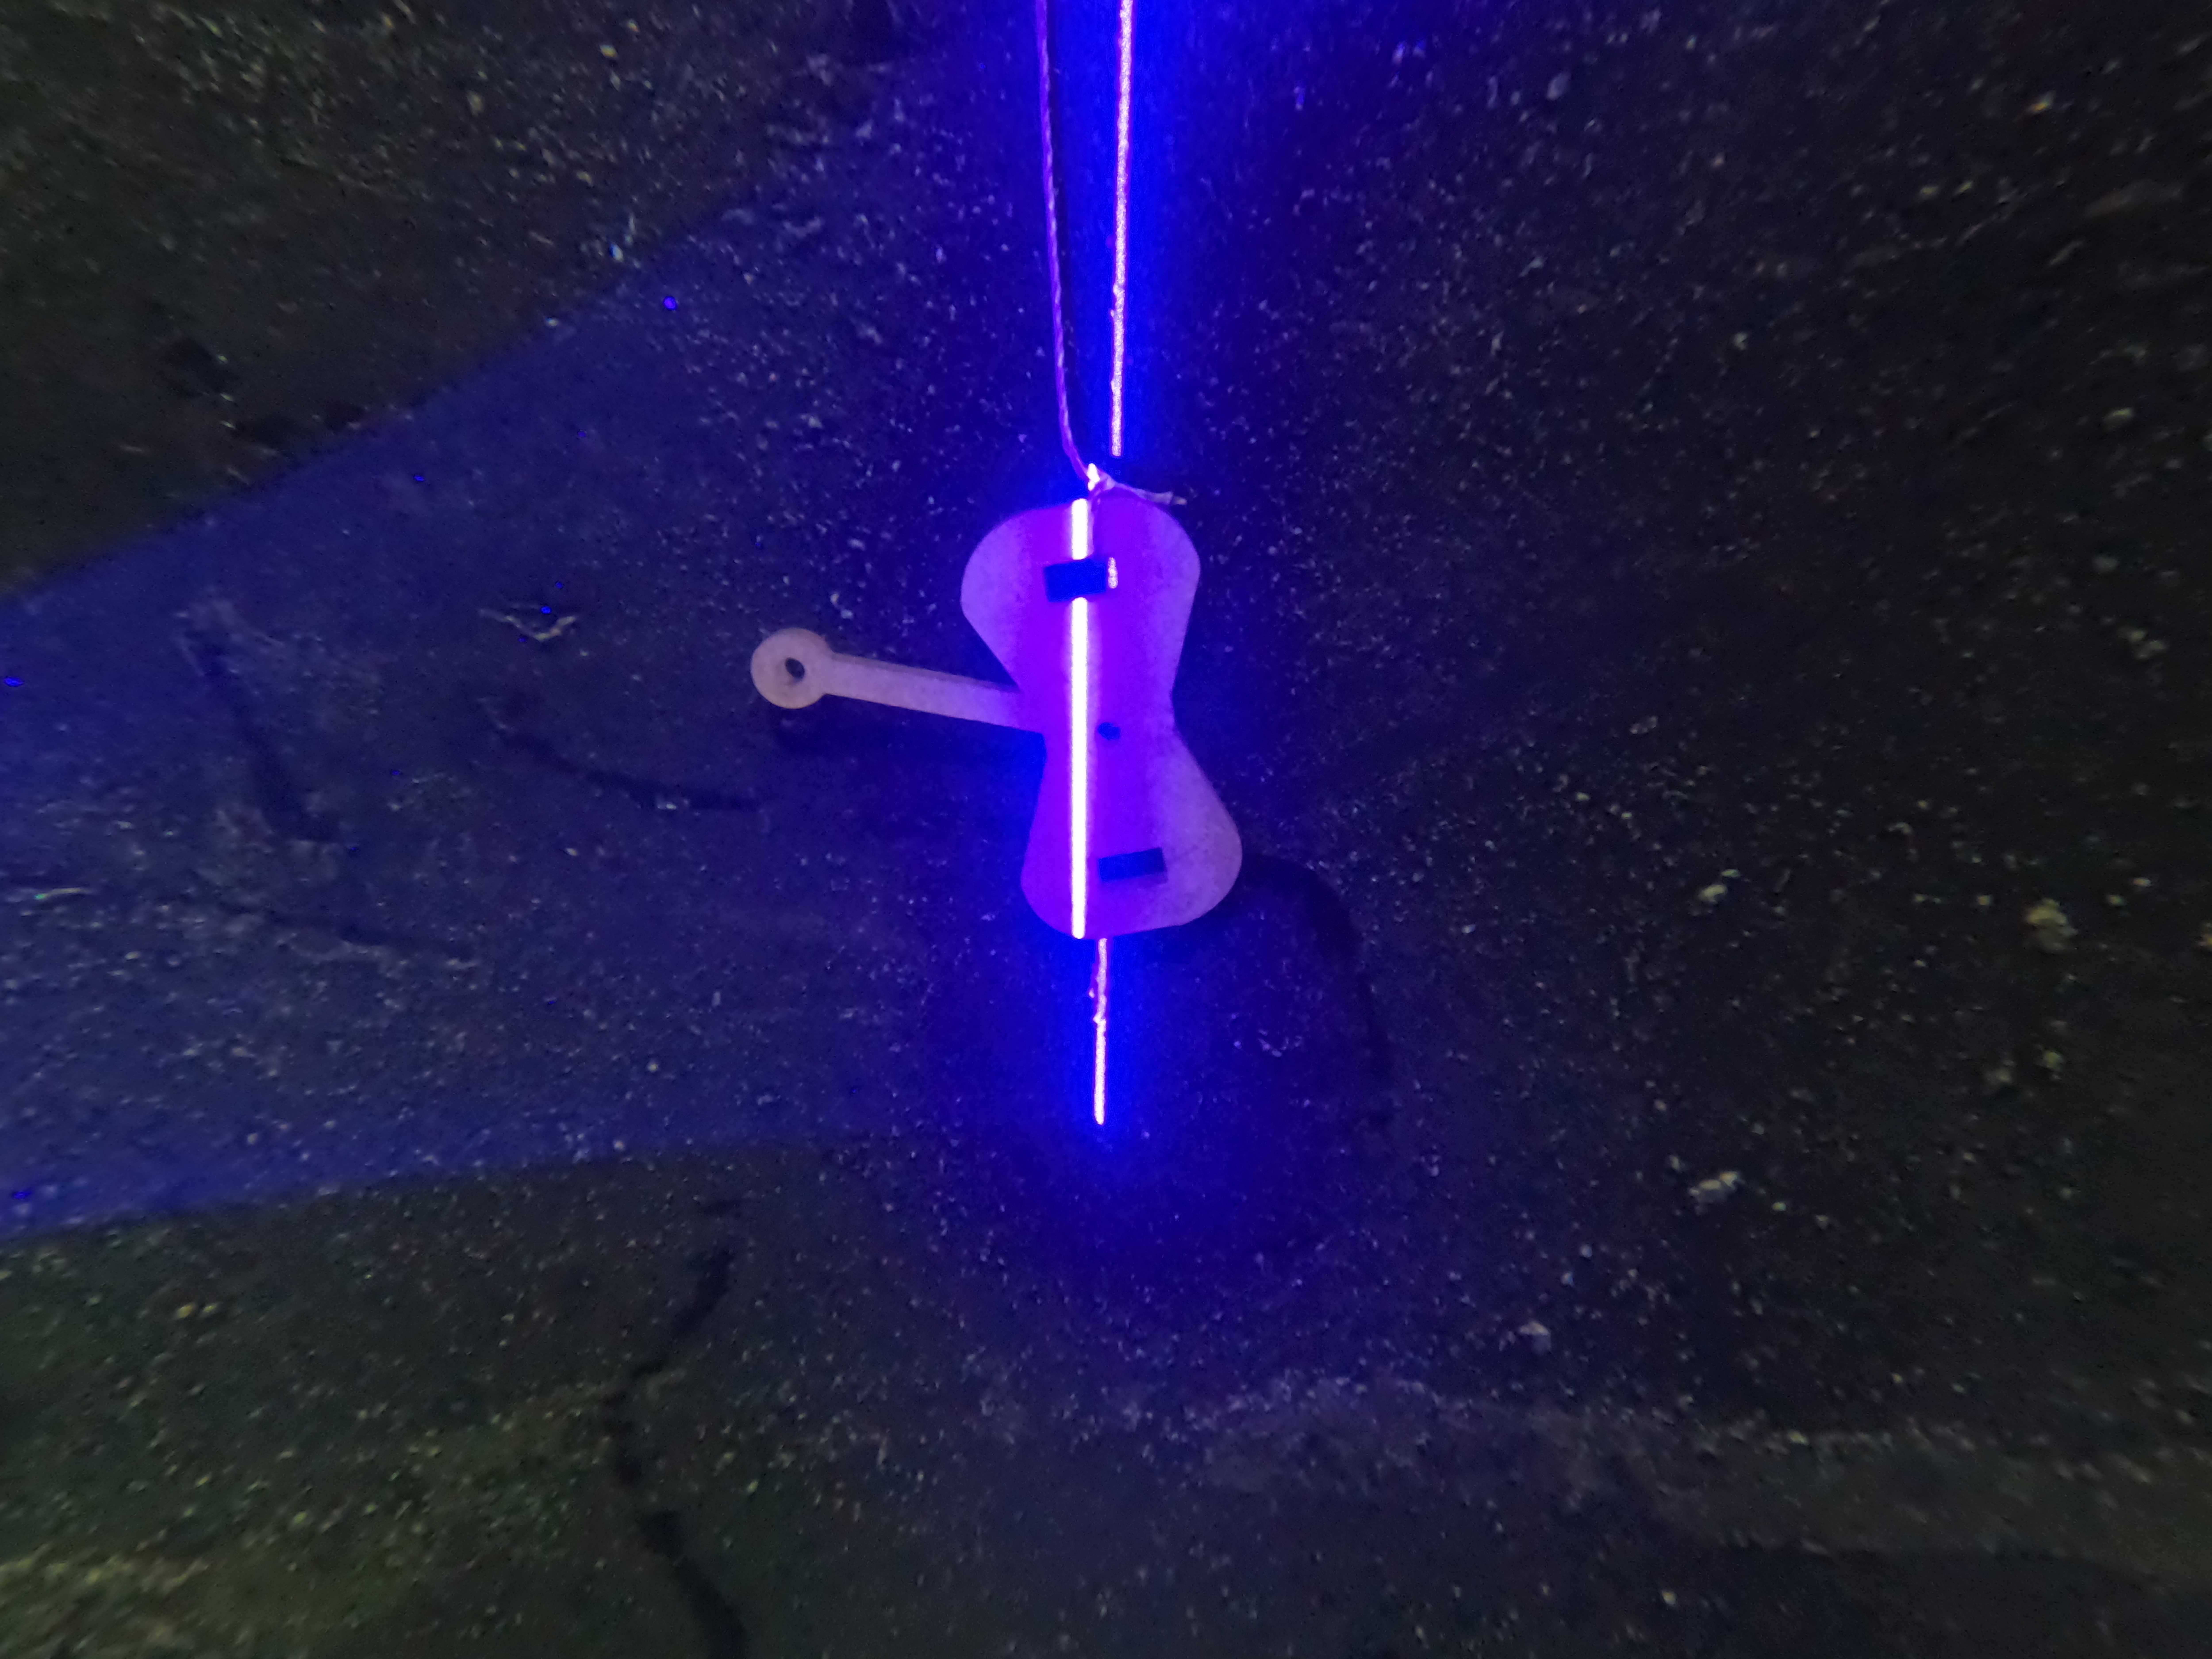

Supplement: Supplementary file 2444 [file G0016022.pdf › Level_2_2/G0016022.pdf]

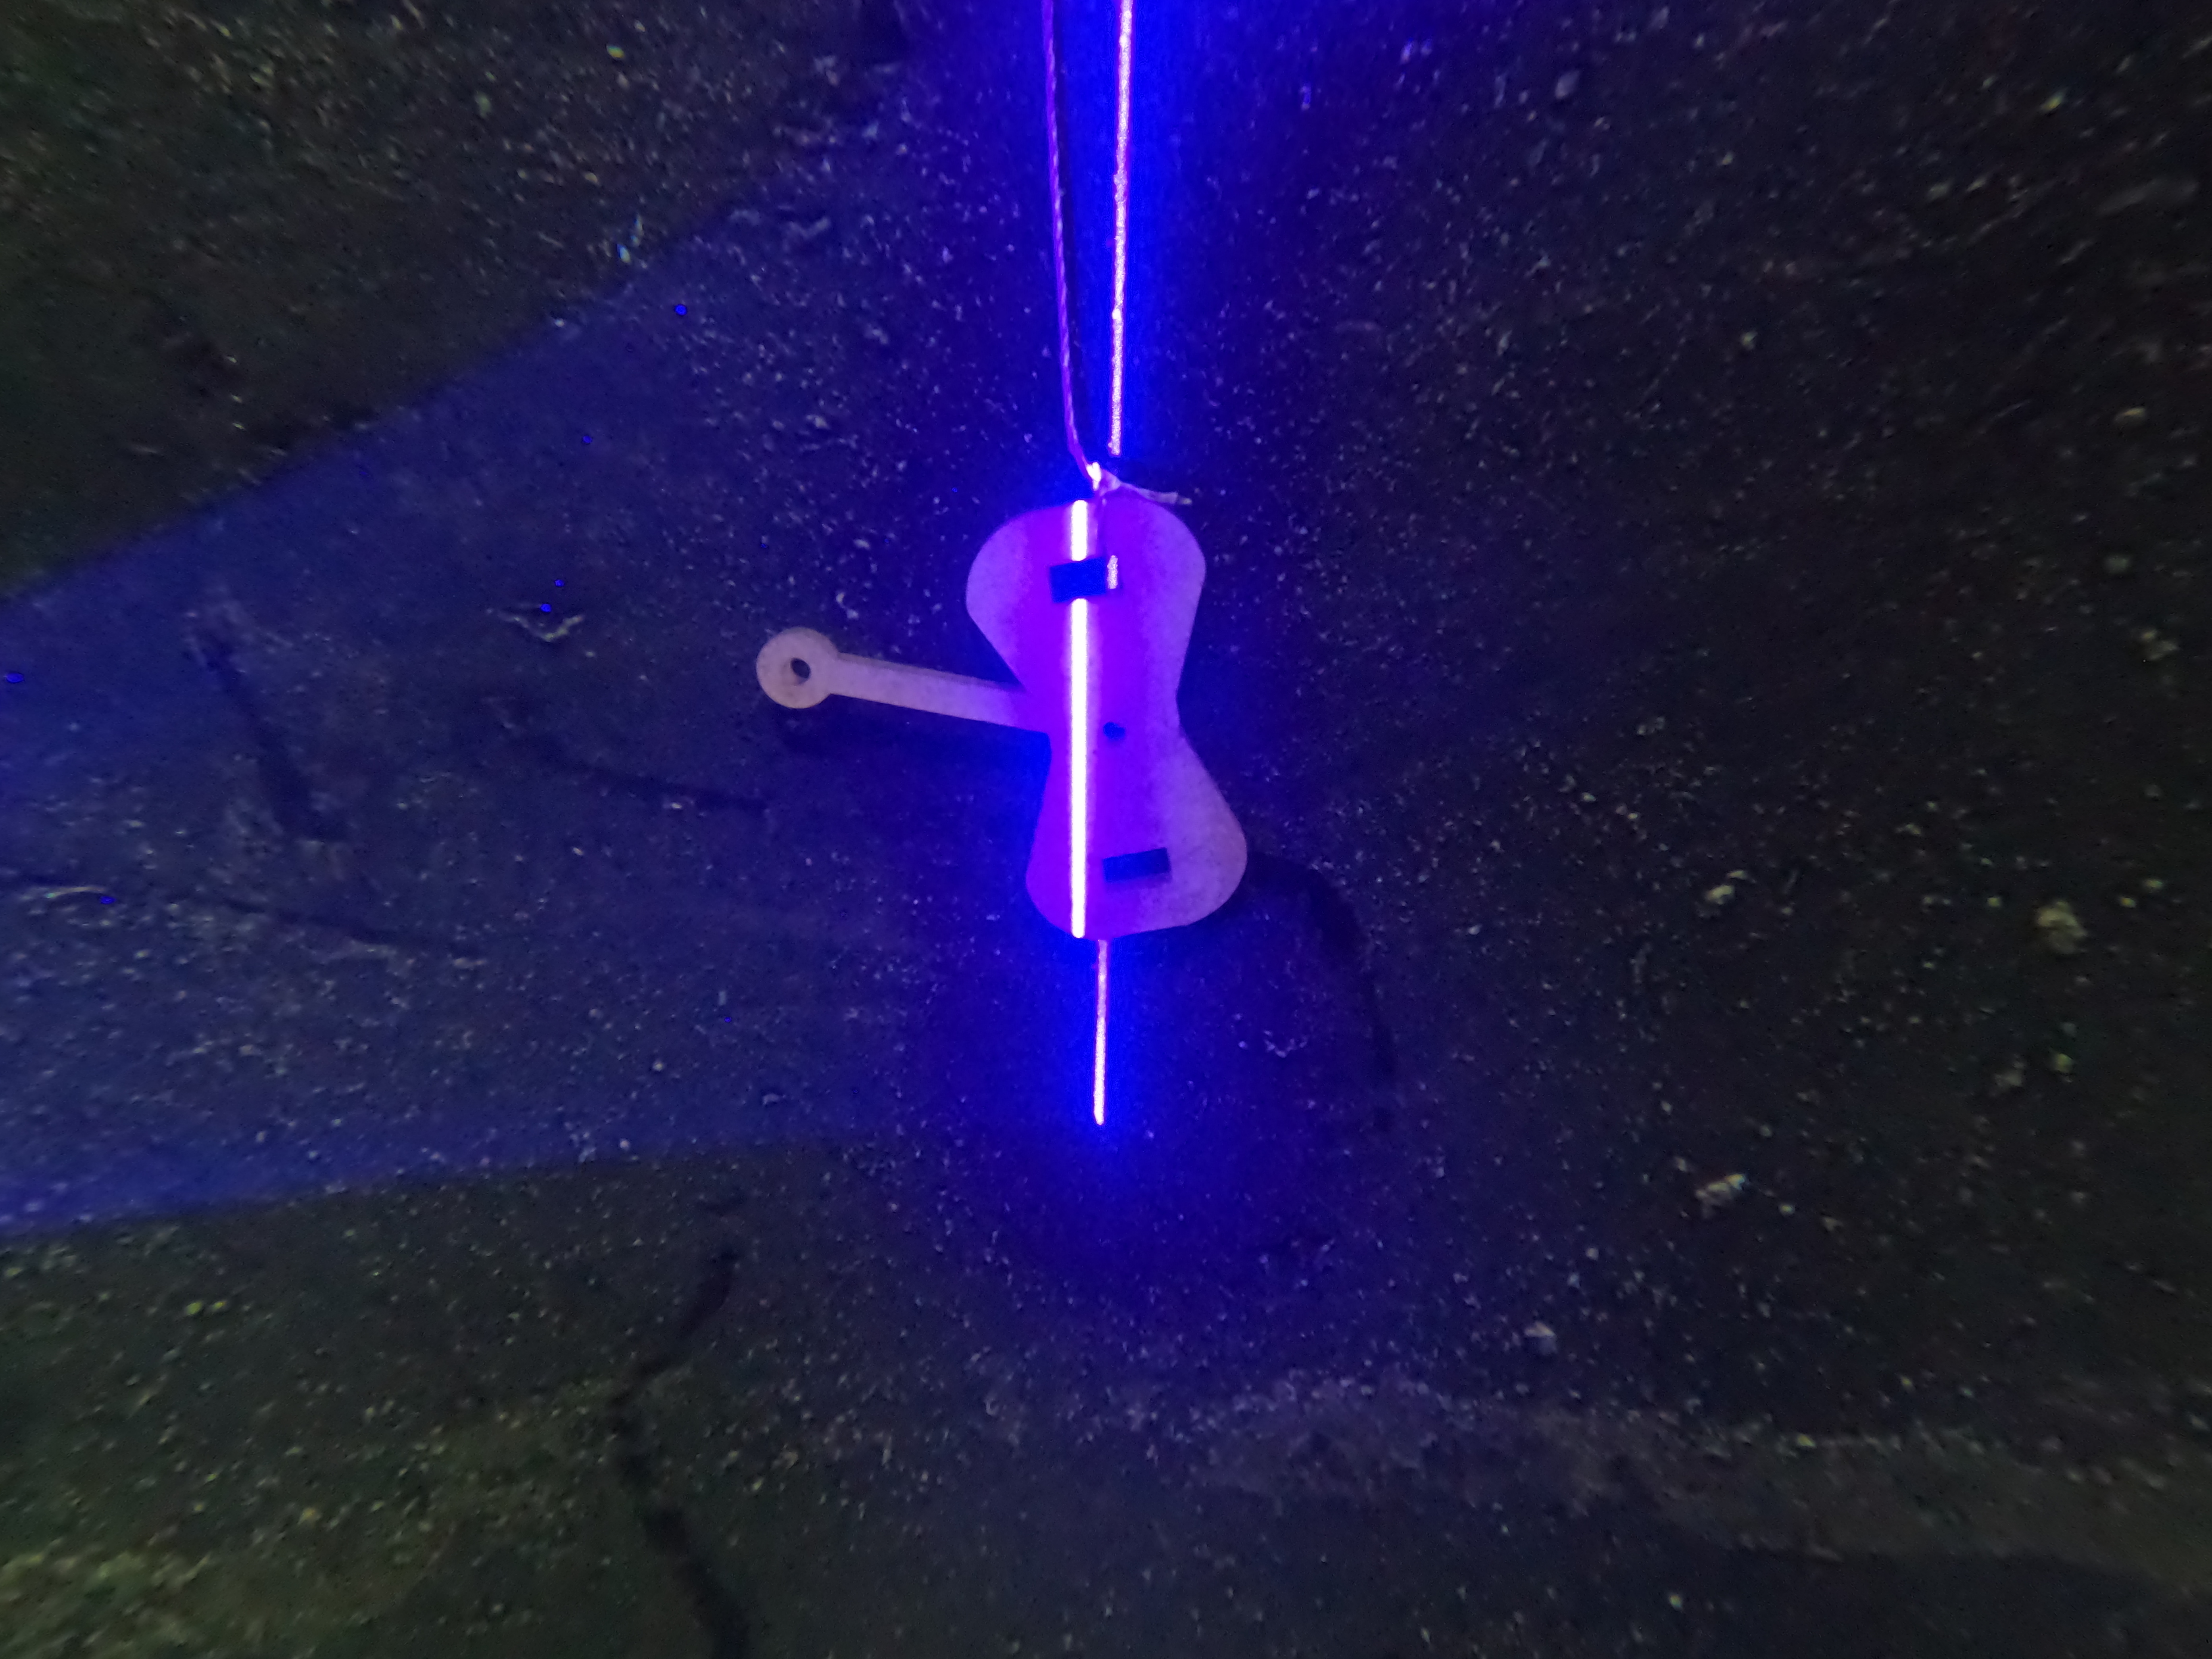

Supplement: Supplementary file 2445 [file G0016023.pdf › Level_2_2/G0016023.pdf]

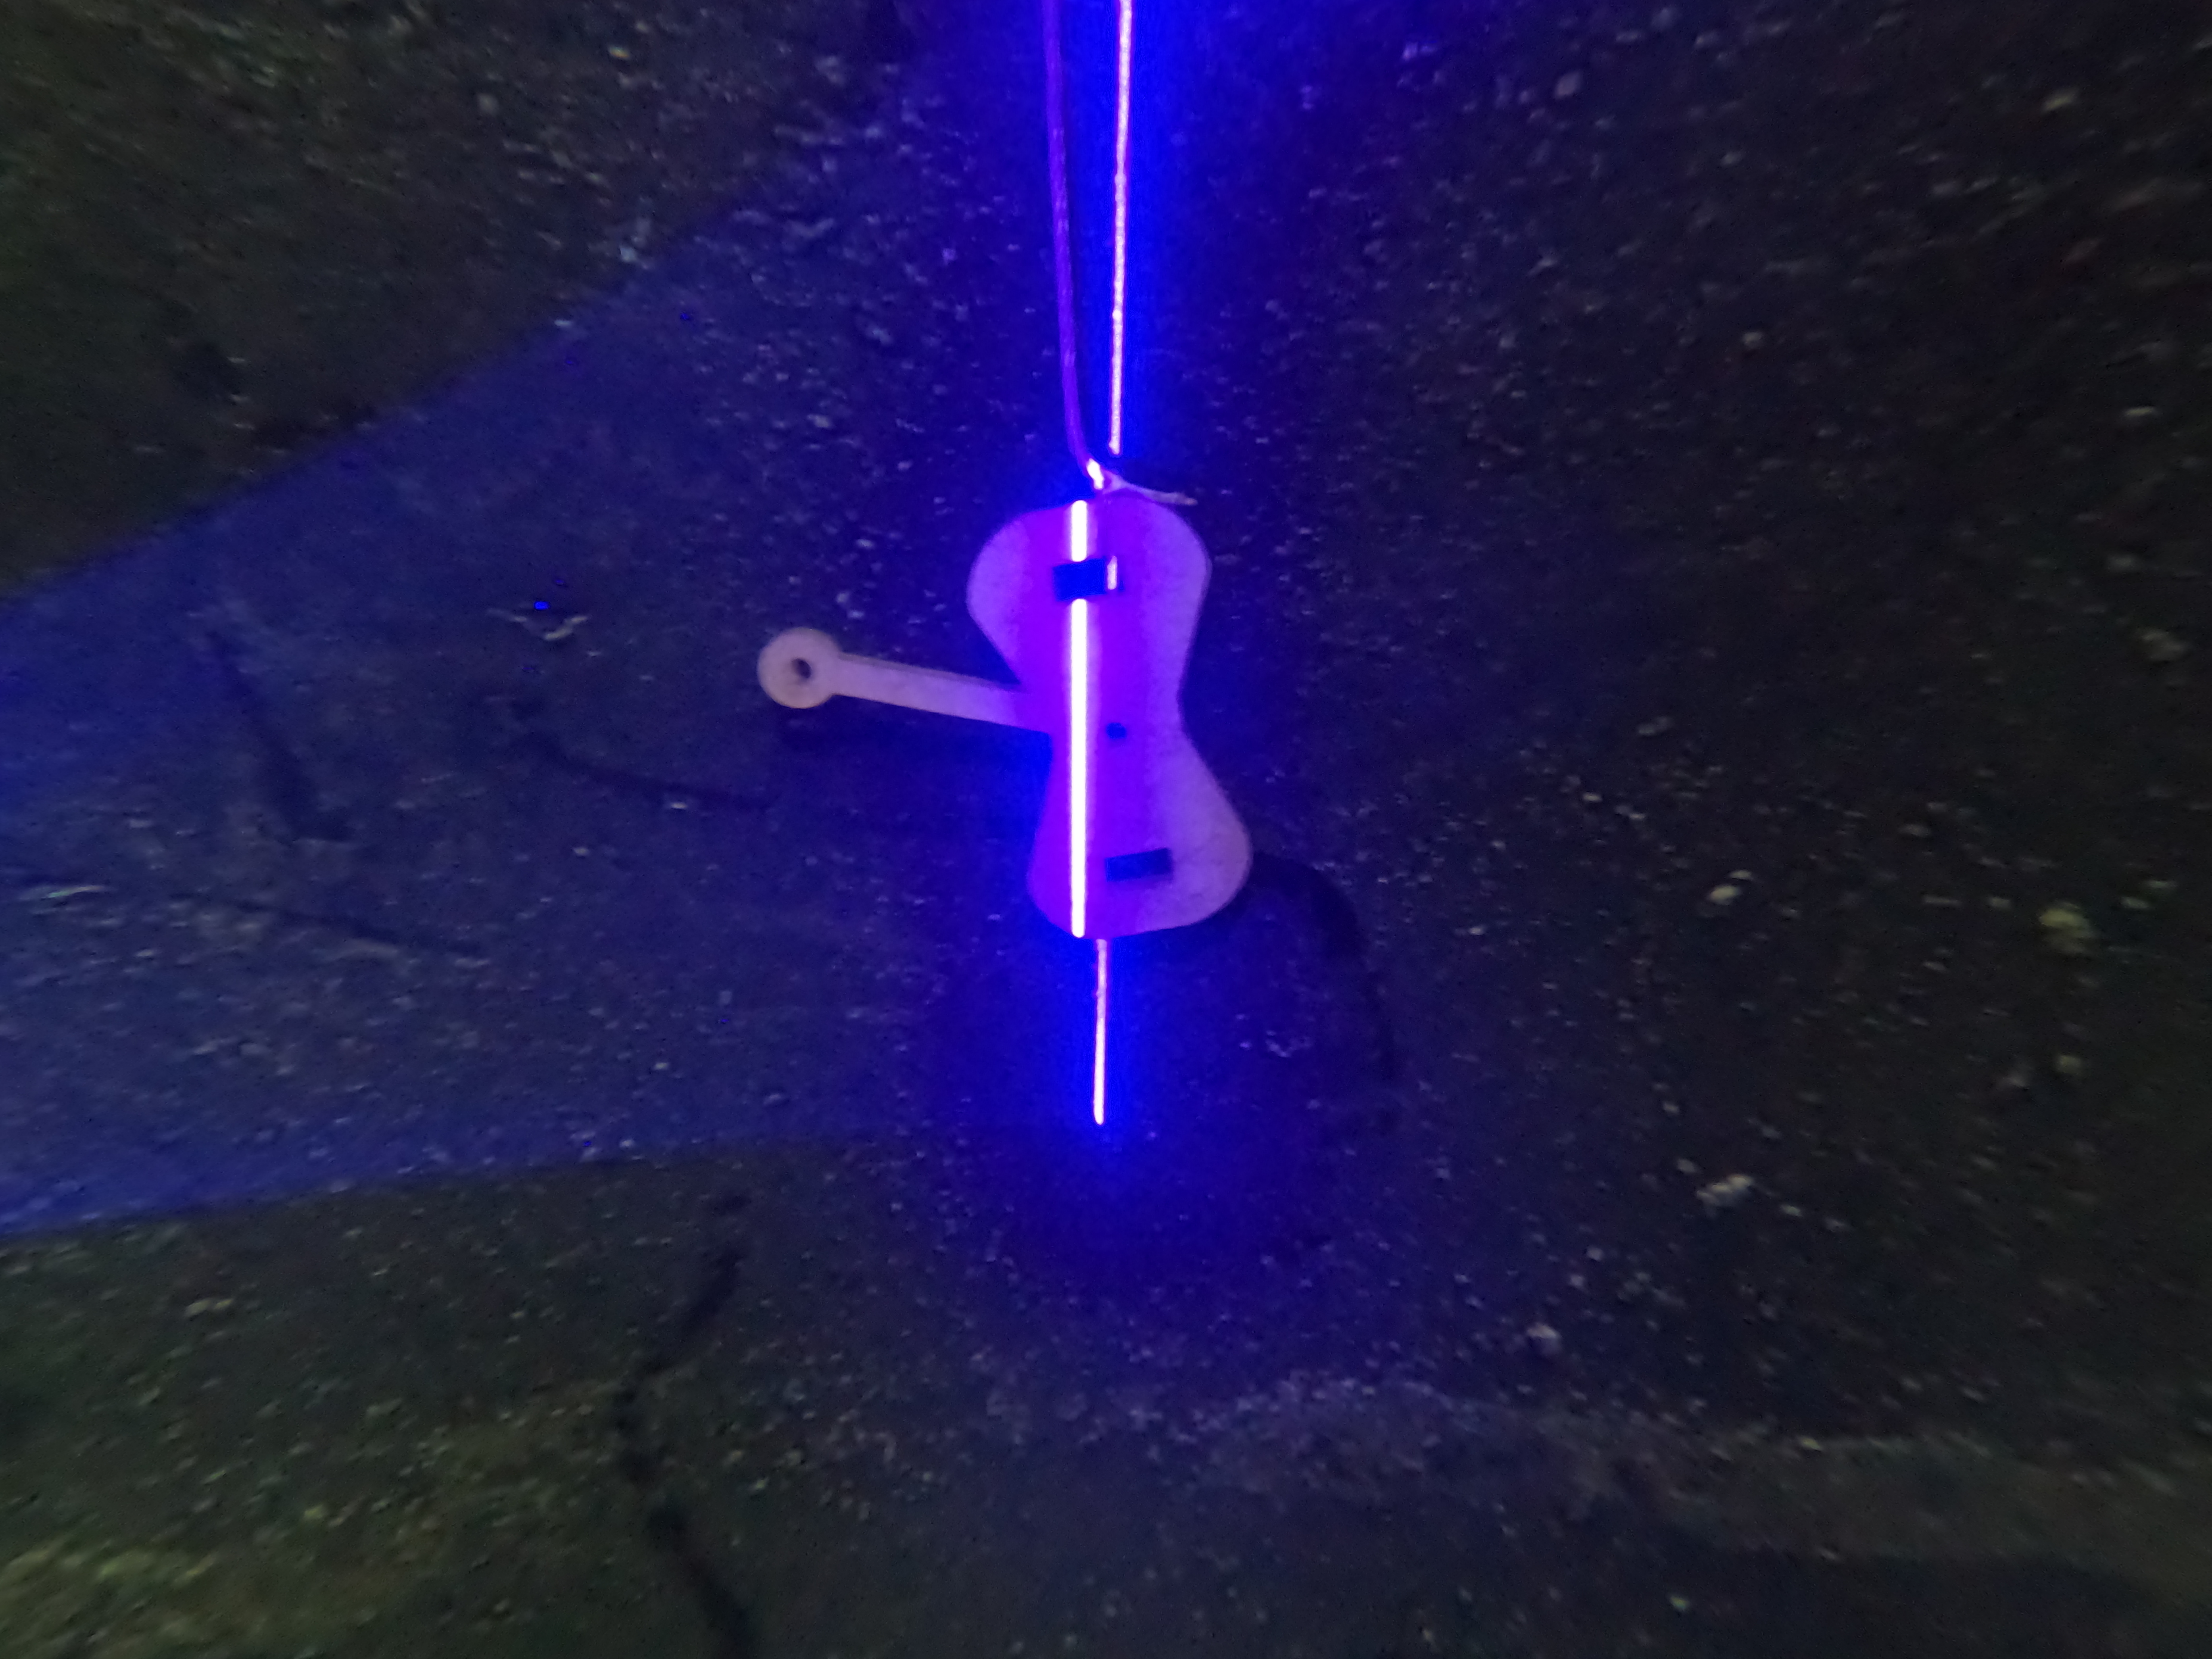

Supplement: Supplementary file 2446 [file G0016024.pdf › Level_2_2/G0016024.pdf]

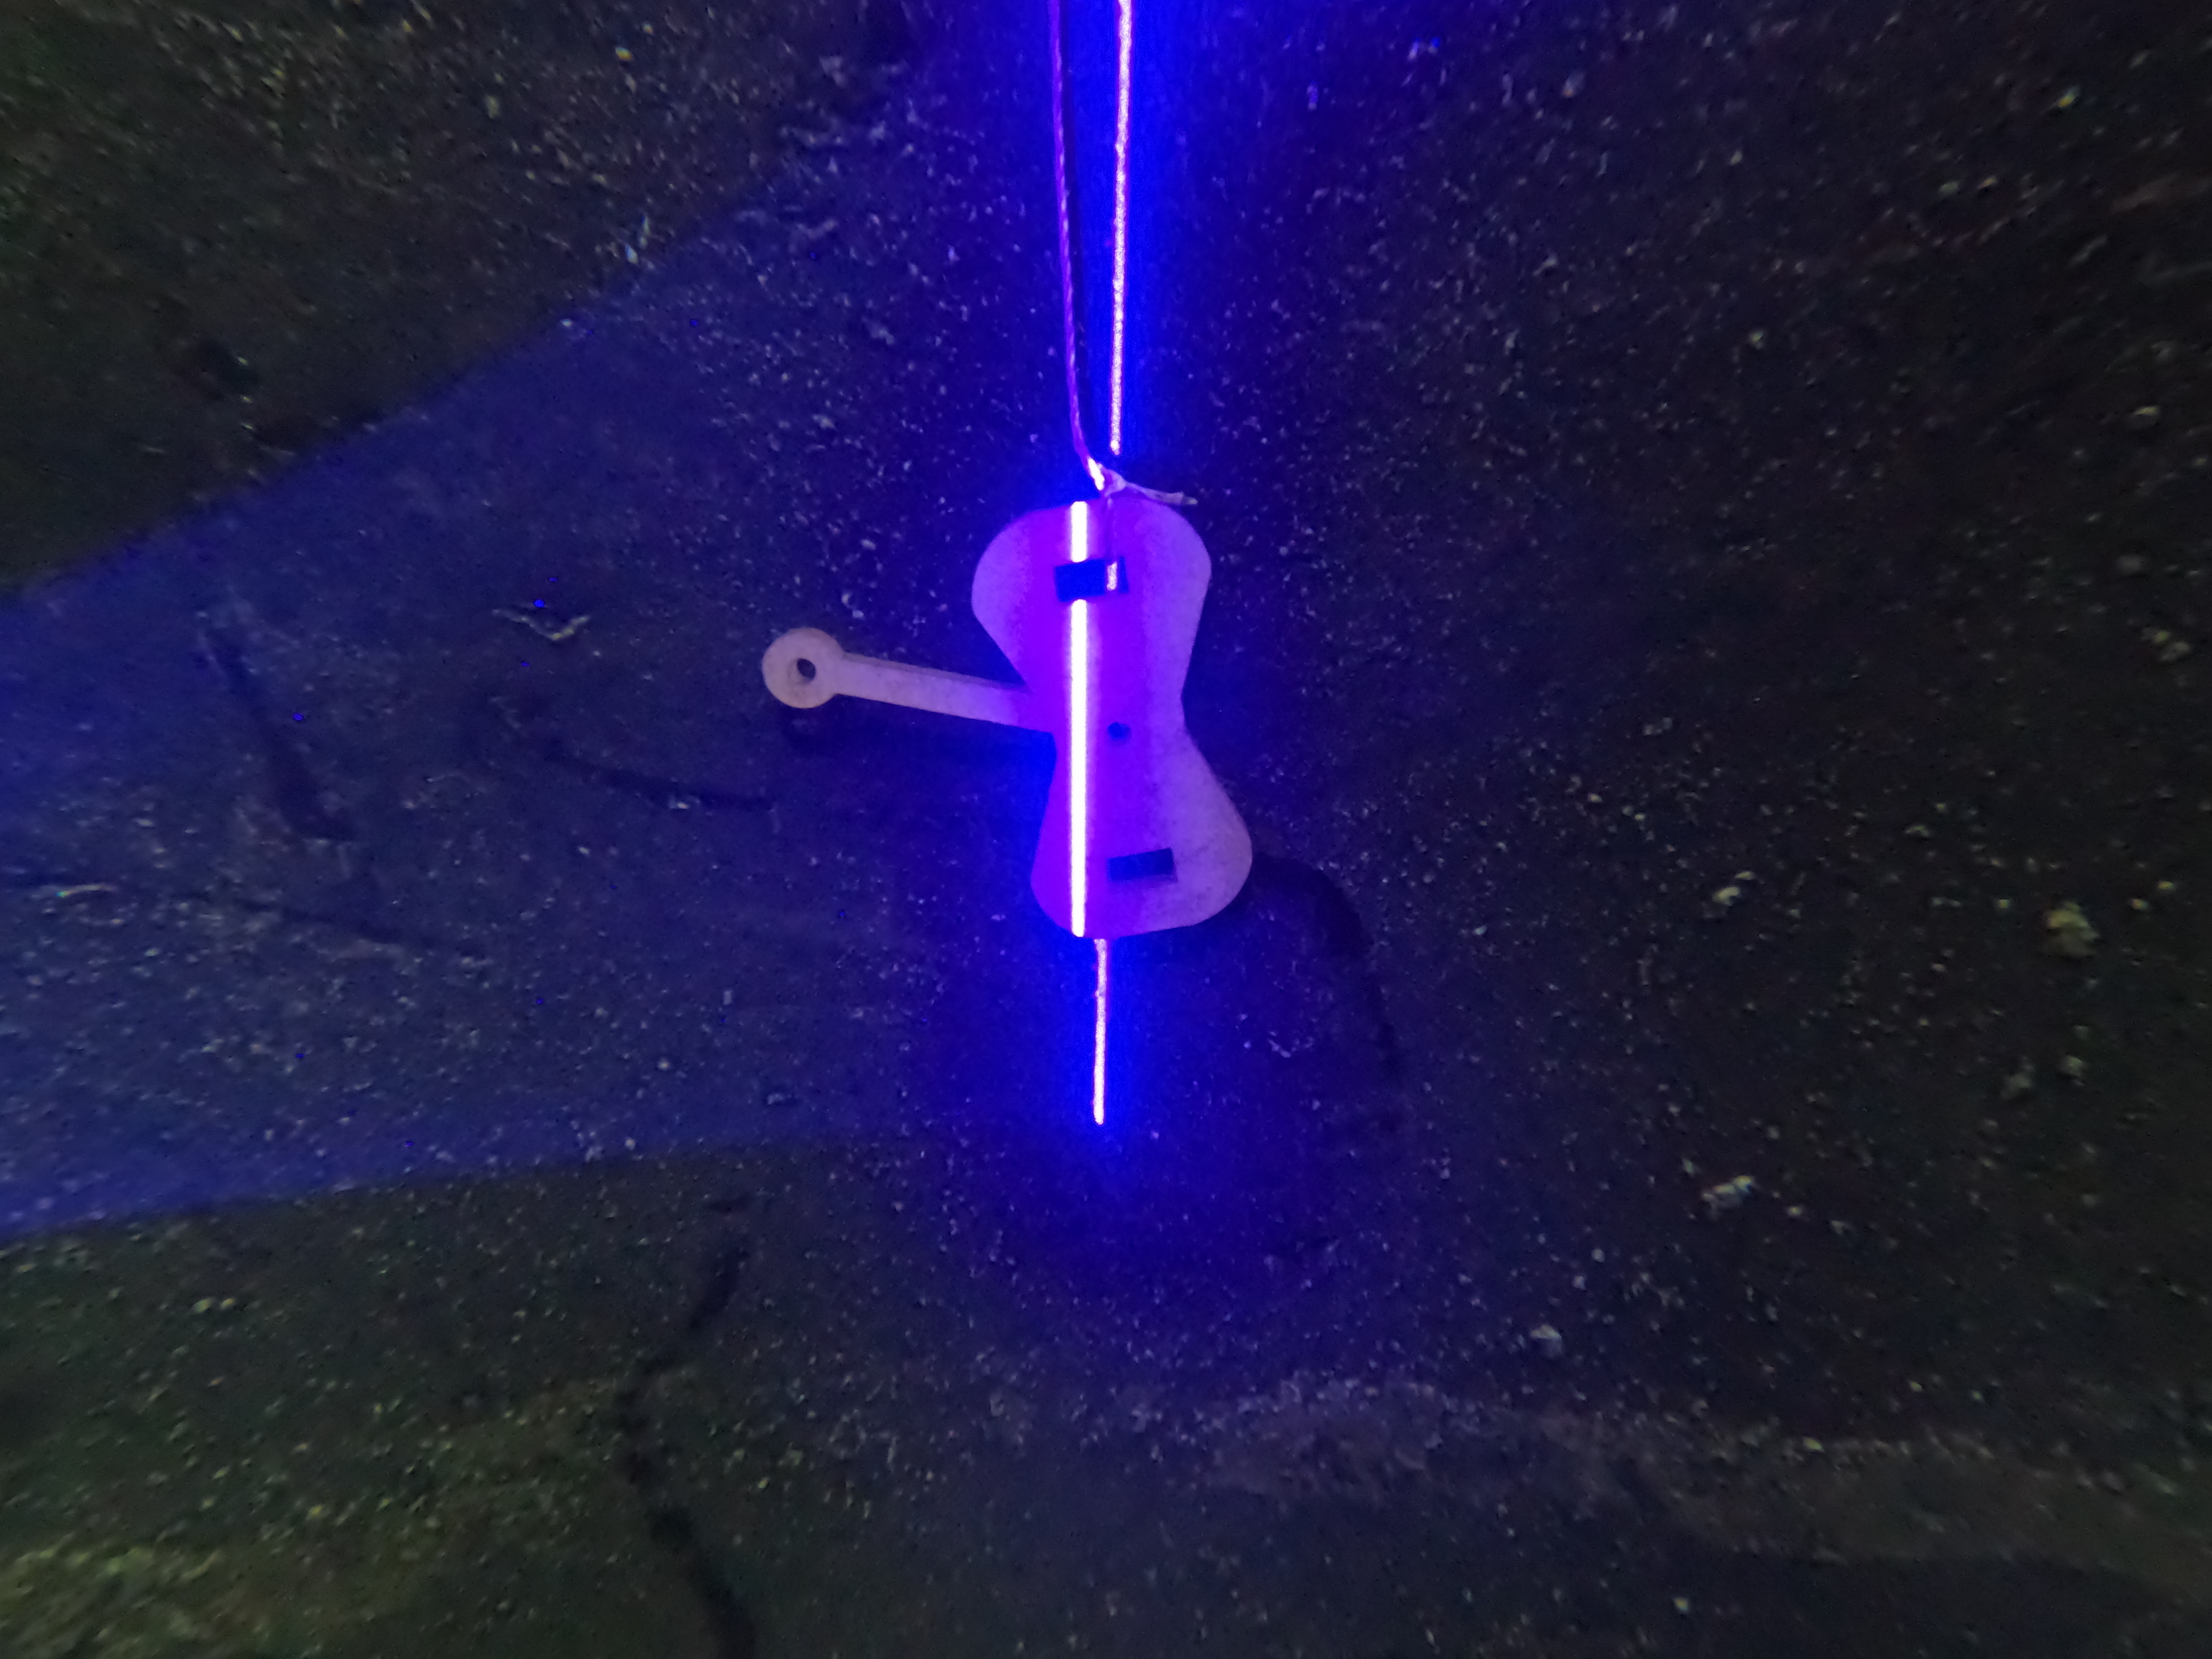

Supplement: Supplementary file 2447 [file G0016025.pdf › Level_2_2/G0016025.pdf]

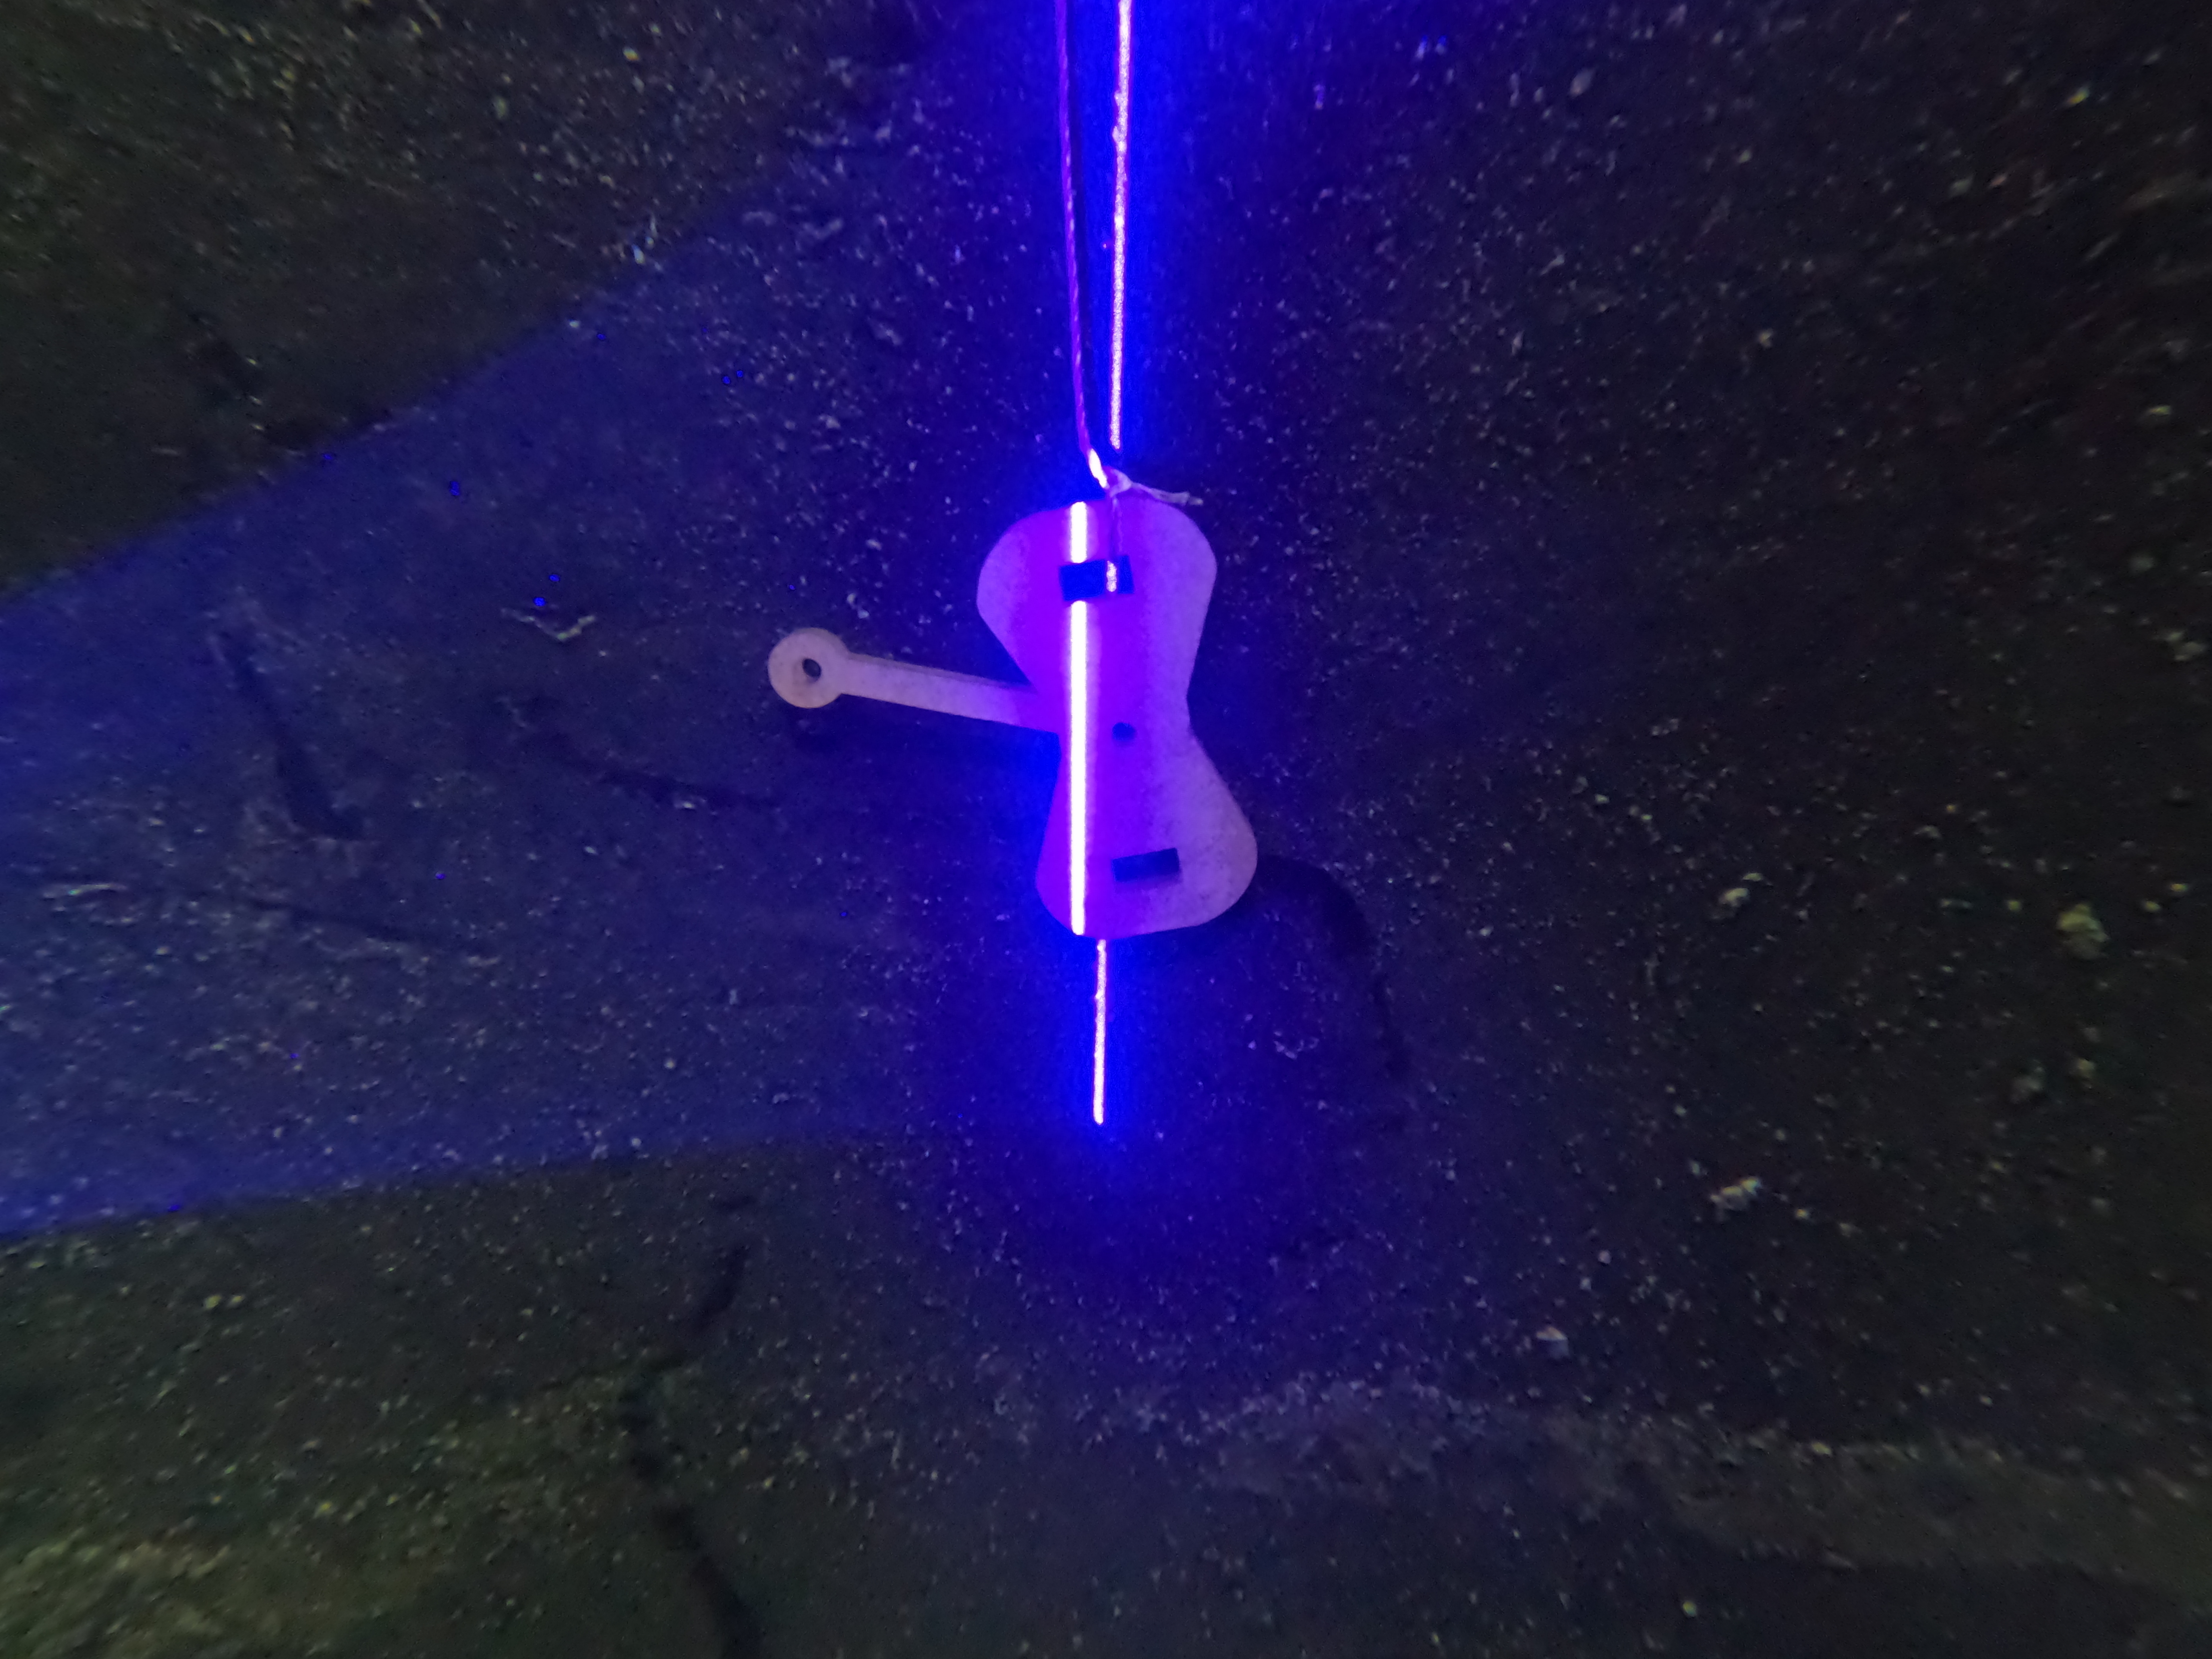

Supplement: Supplementary file 2448 [file G0016026.pdf › Level_2_2/G0016026.pdf]

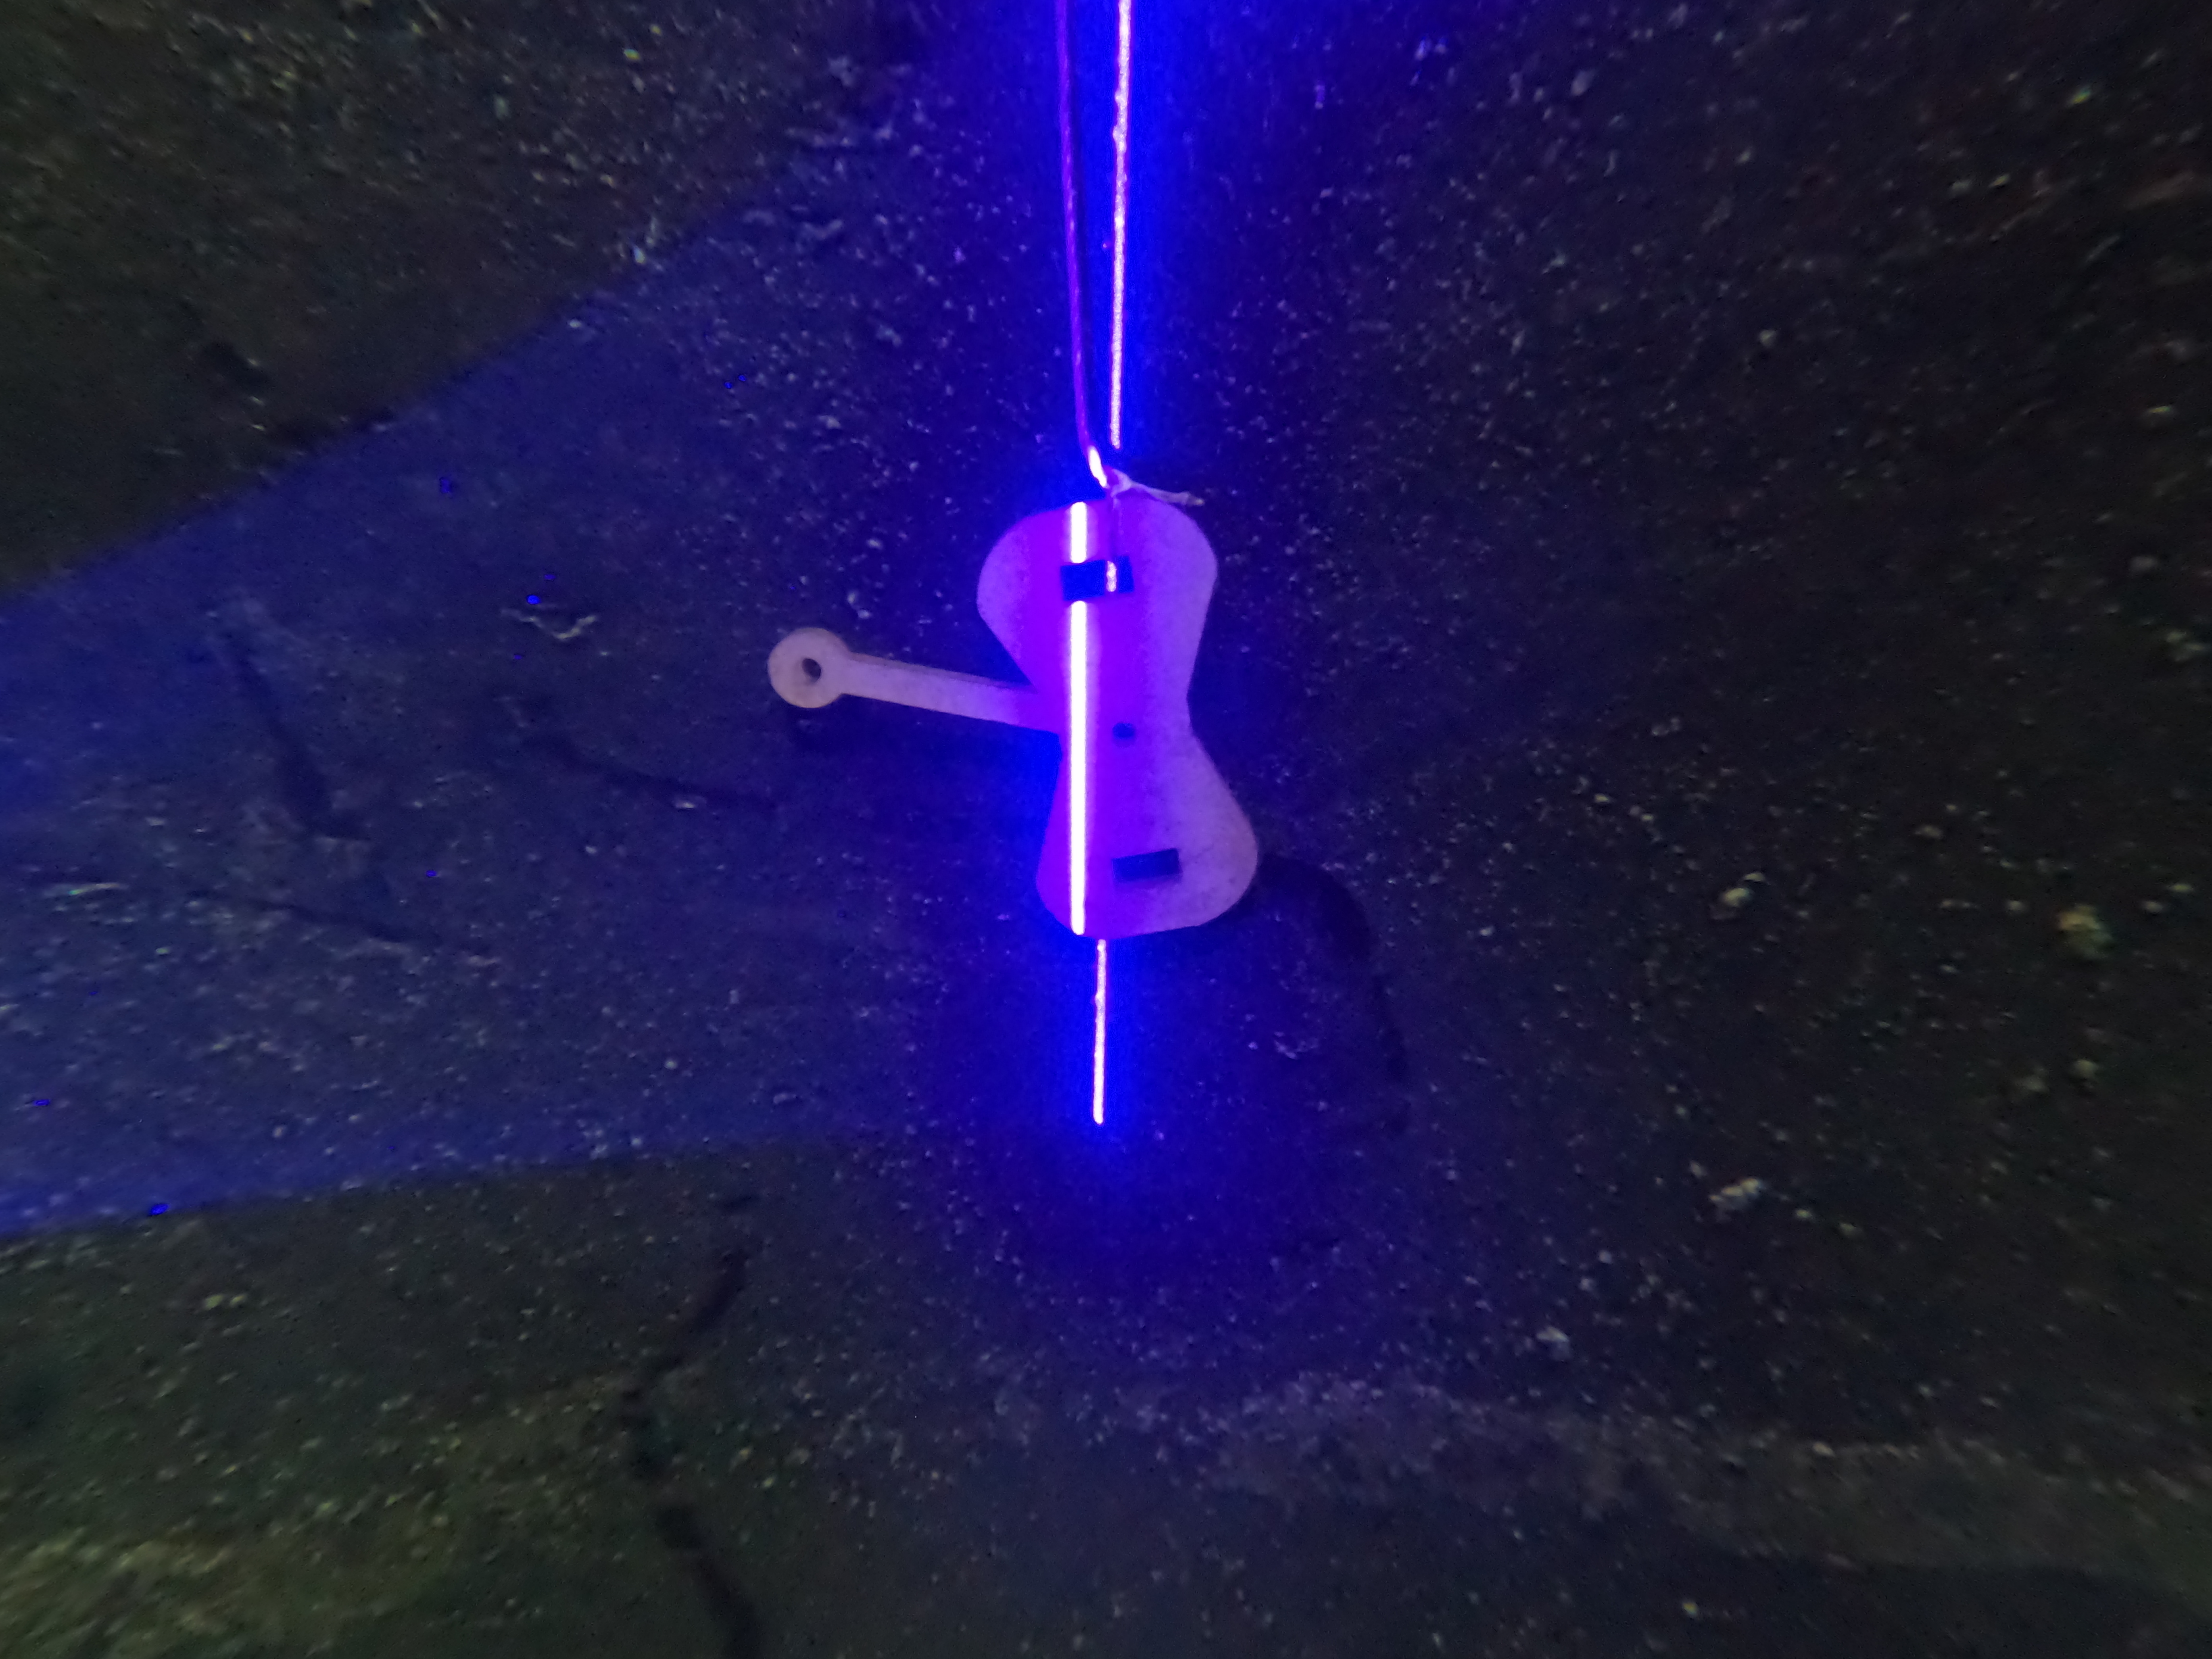

Supplement: Supplementary file 2449 [file G0016027.pdf › Level_2_2/G0016027.pdf]

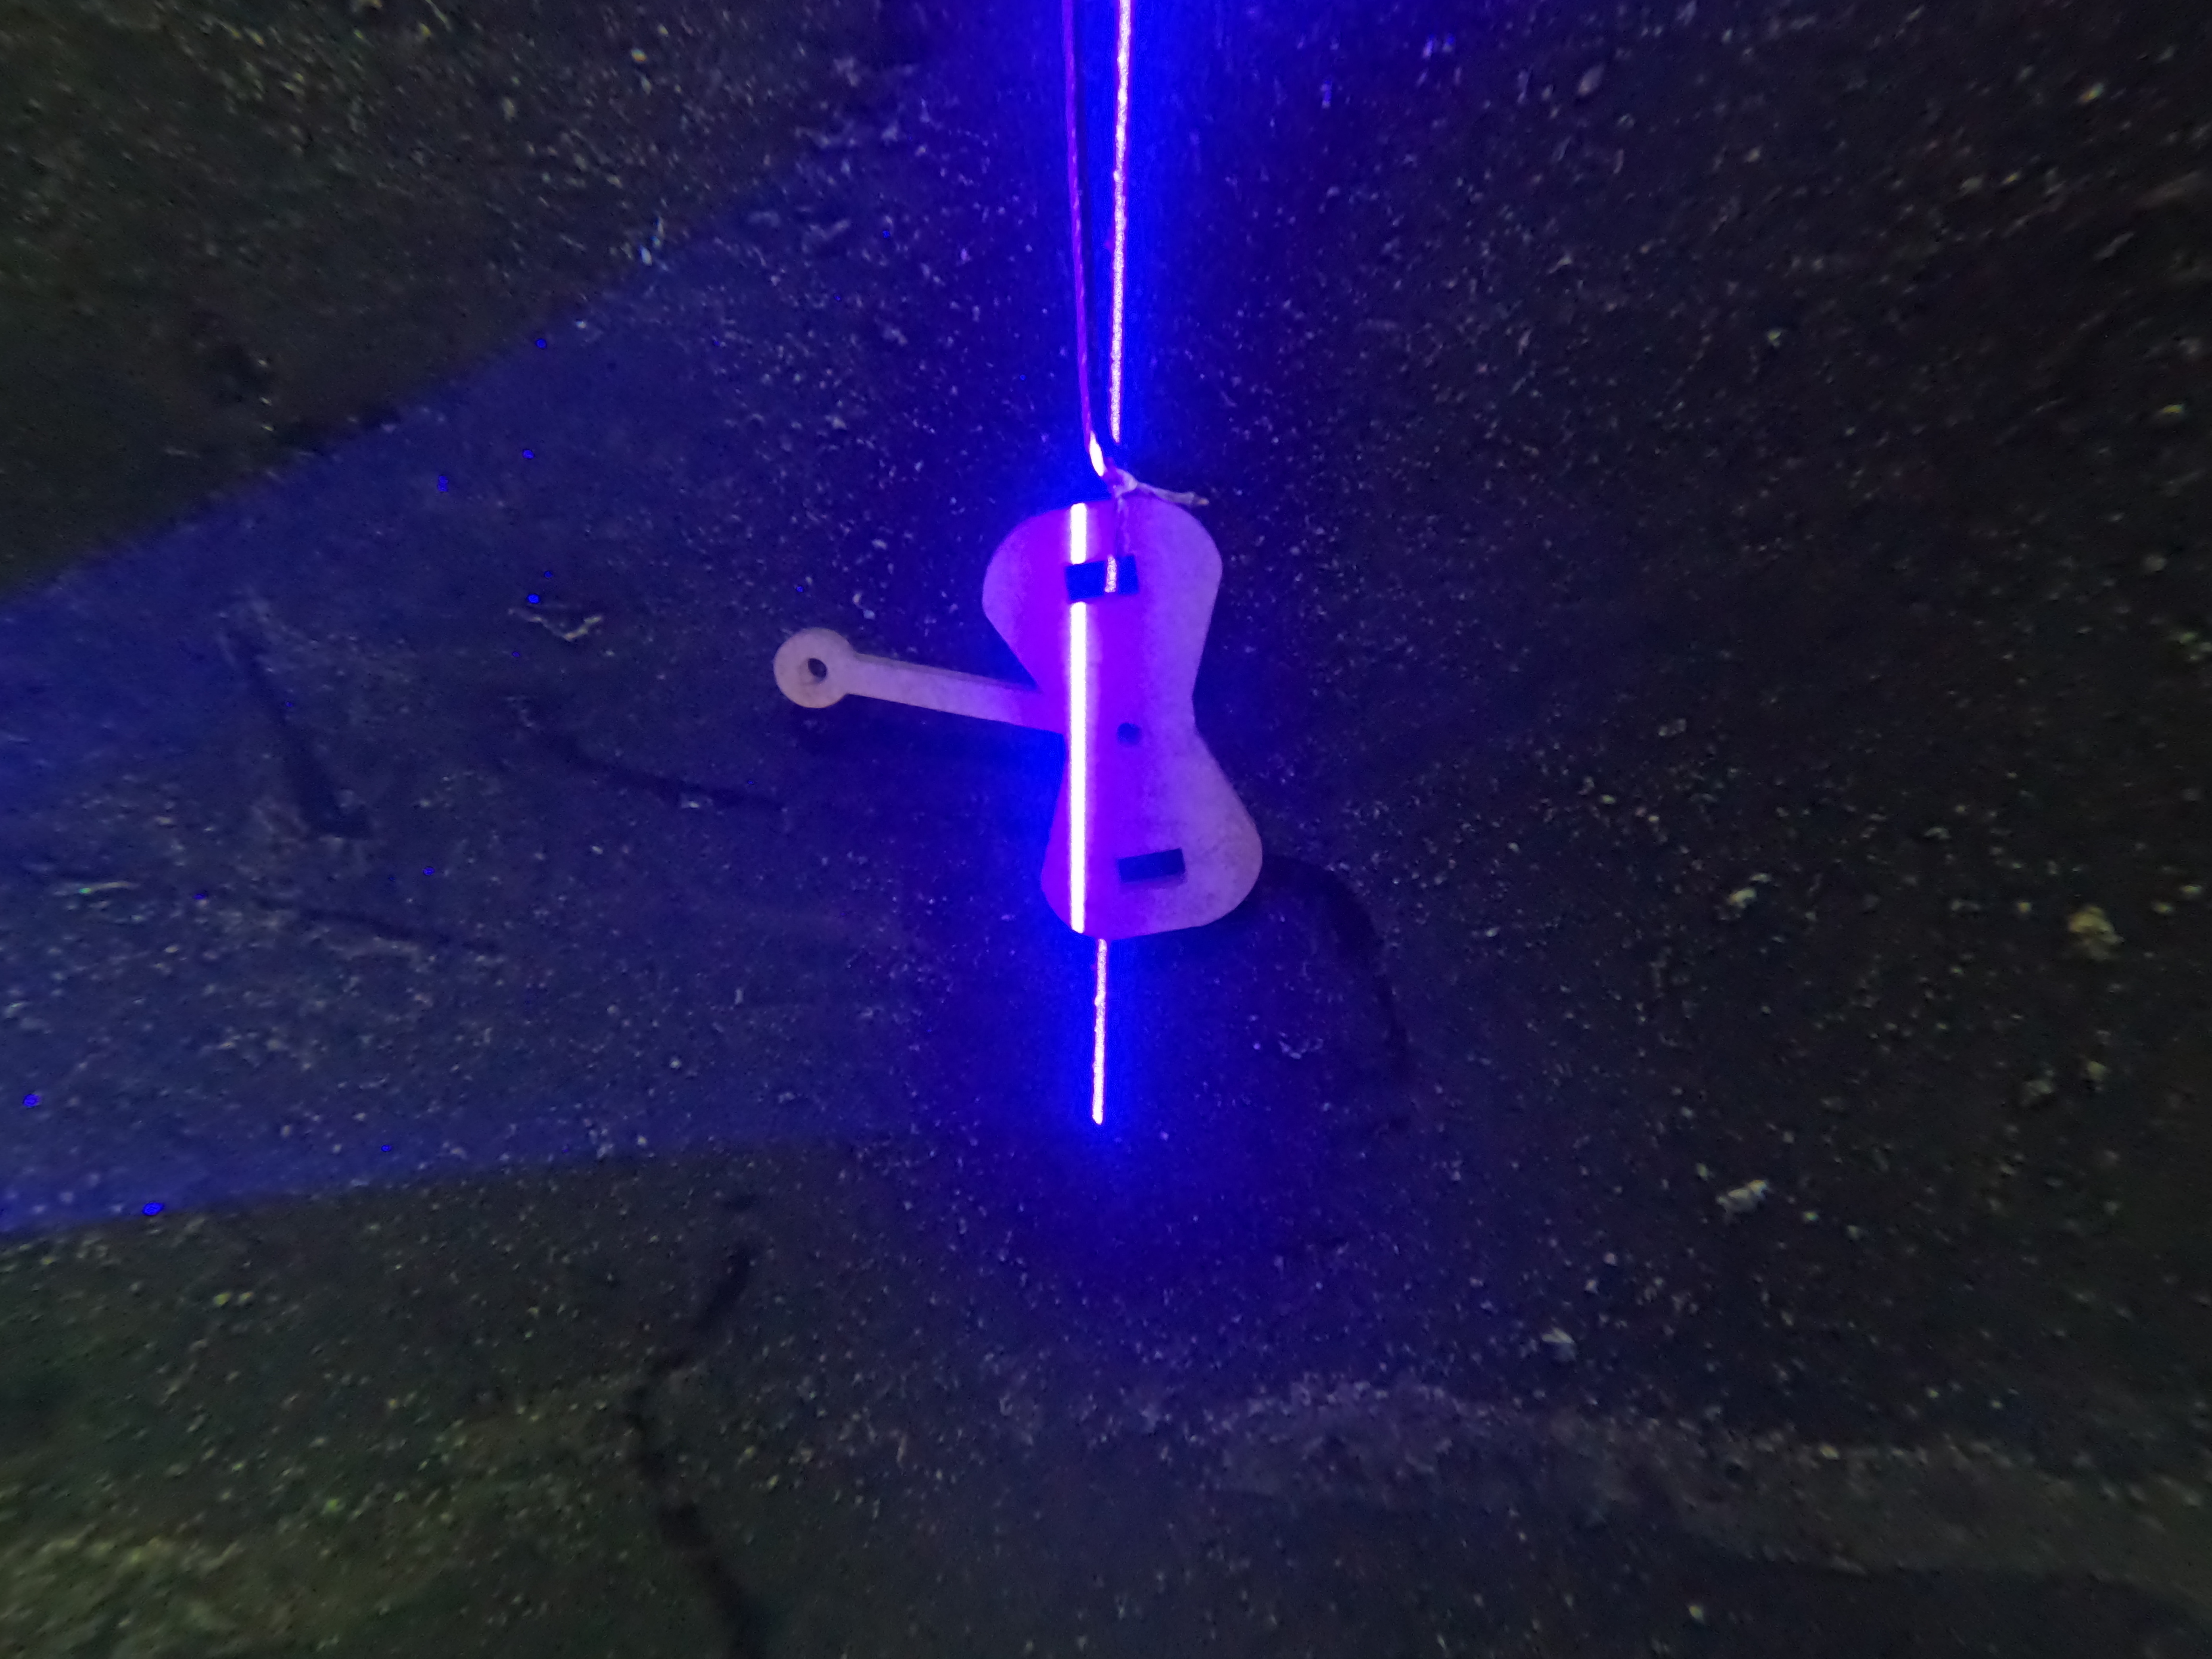

Supplement: Supplementary file 2450 [file G0016028.pdf › Level_2_2/G0016028.pdf]

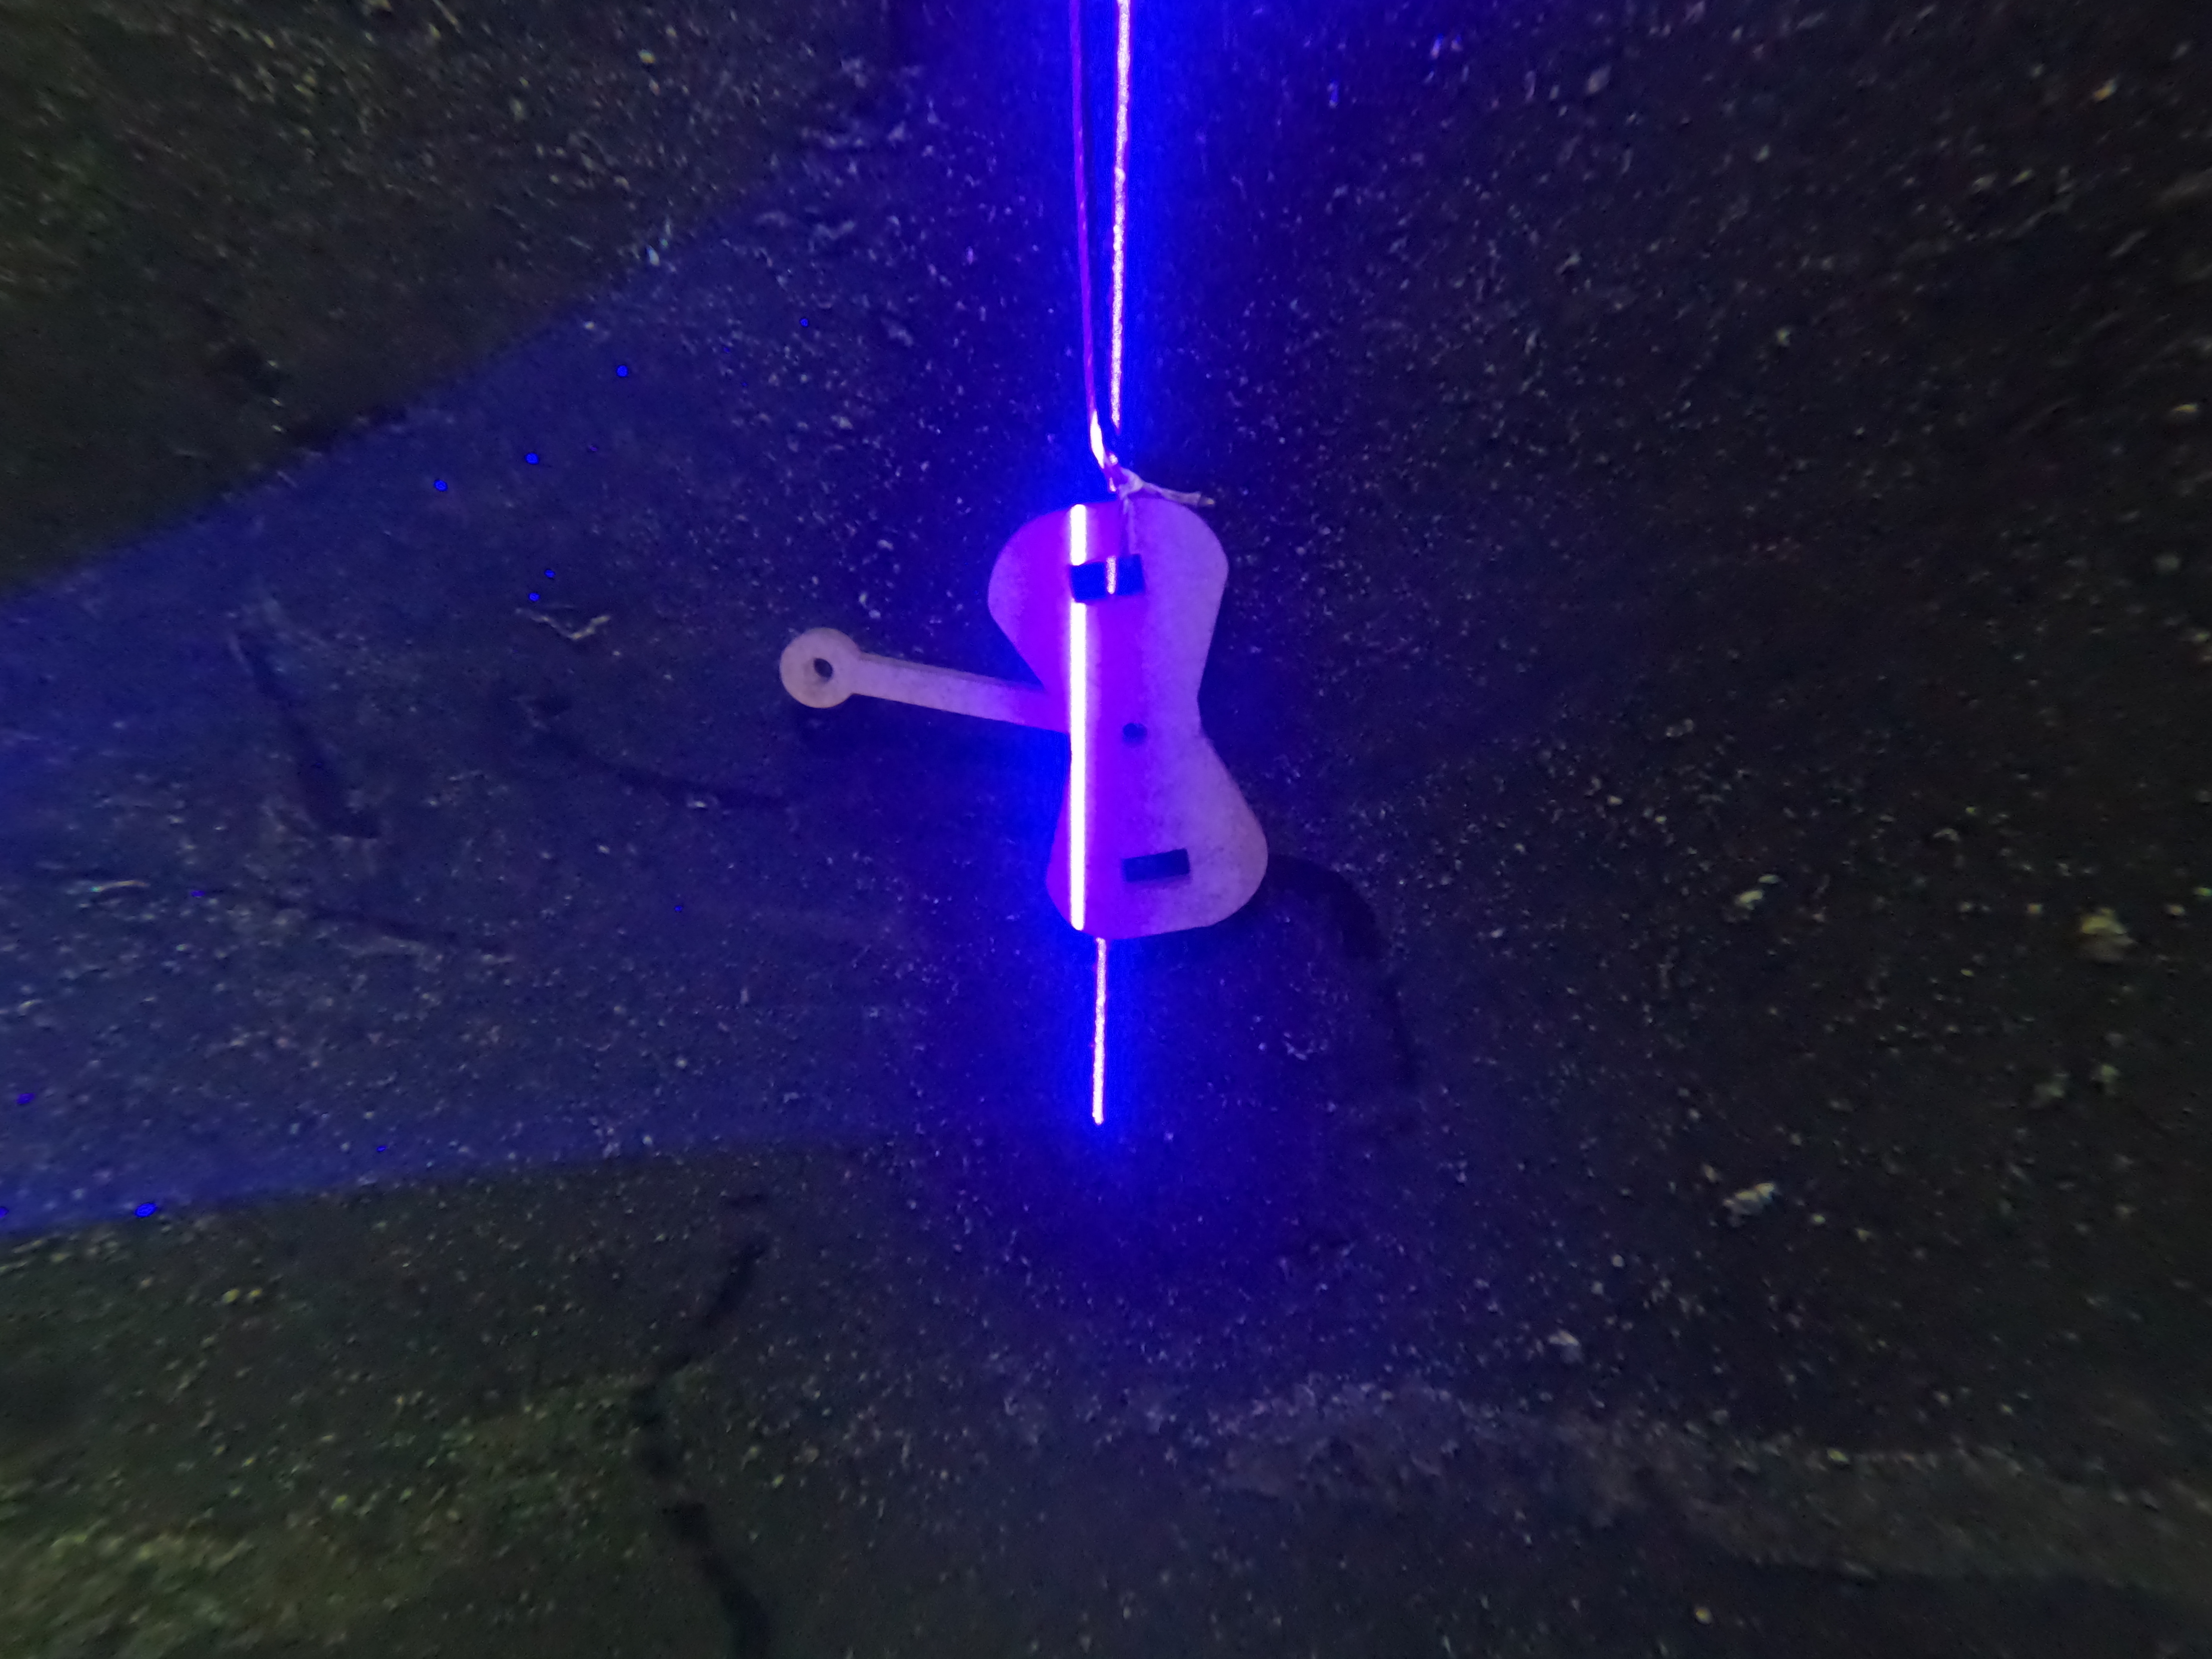

Supplement: Supplementary file 2451 [file G0016029.pdf › Level_2_2/G0016029.pdf]

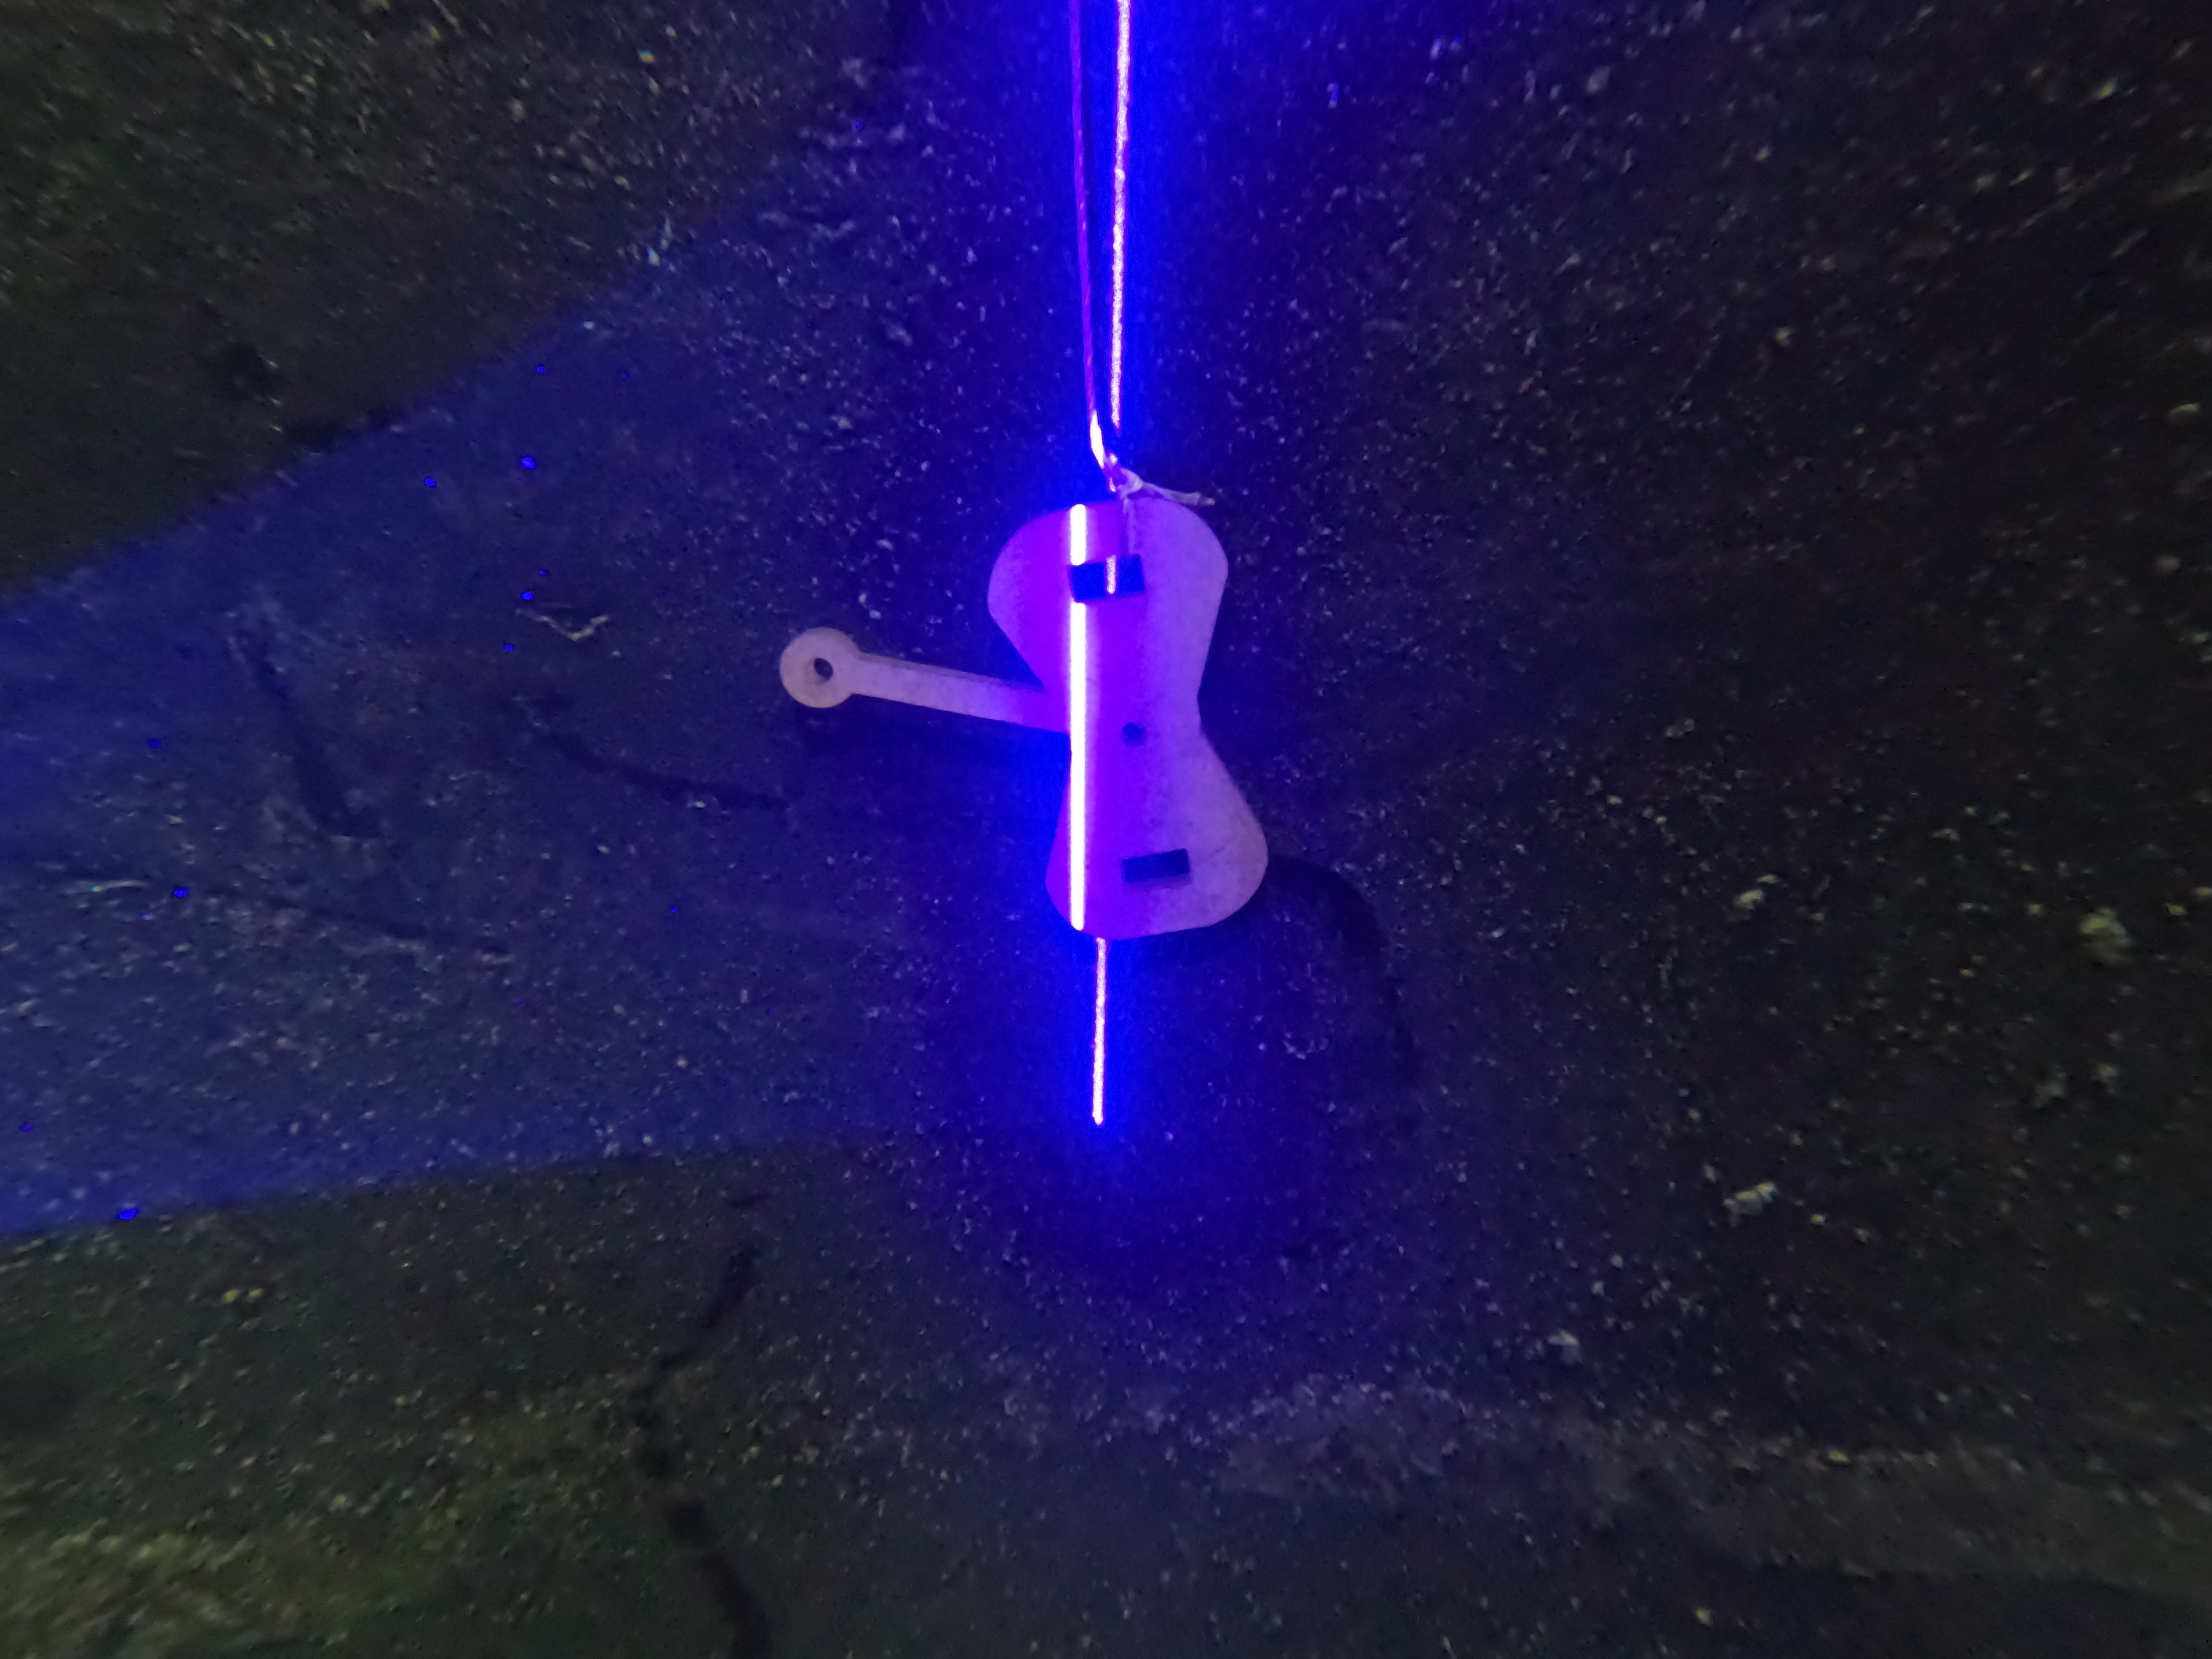

Supplement: Supplementary file 2452 [file G0016030.pdf › Level_2_2/G0016030.pdf]

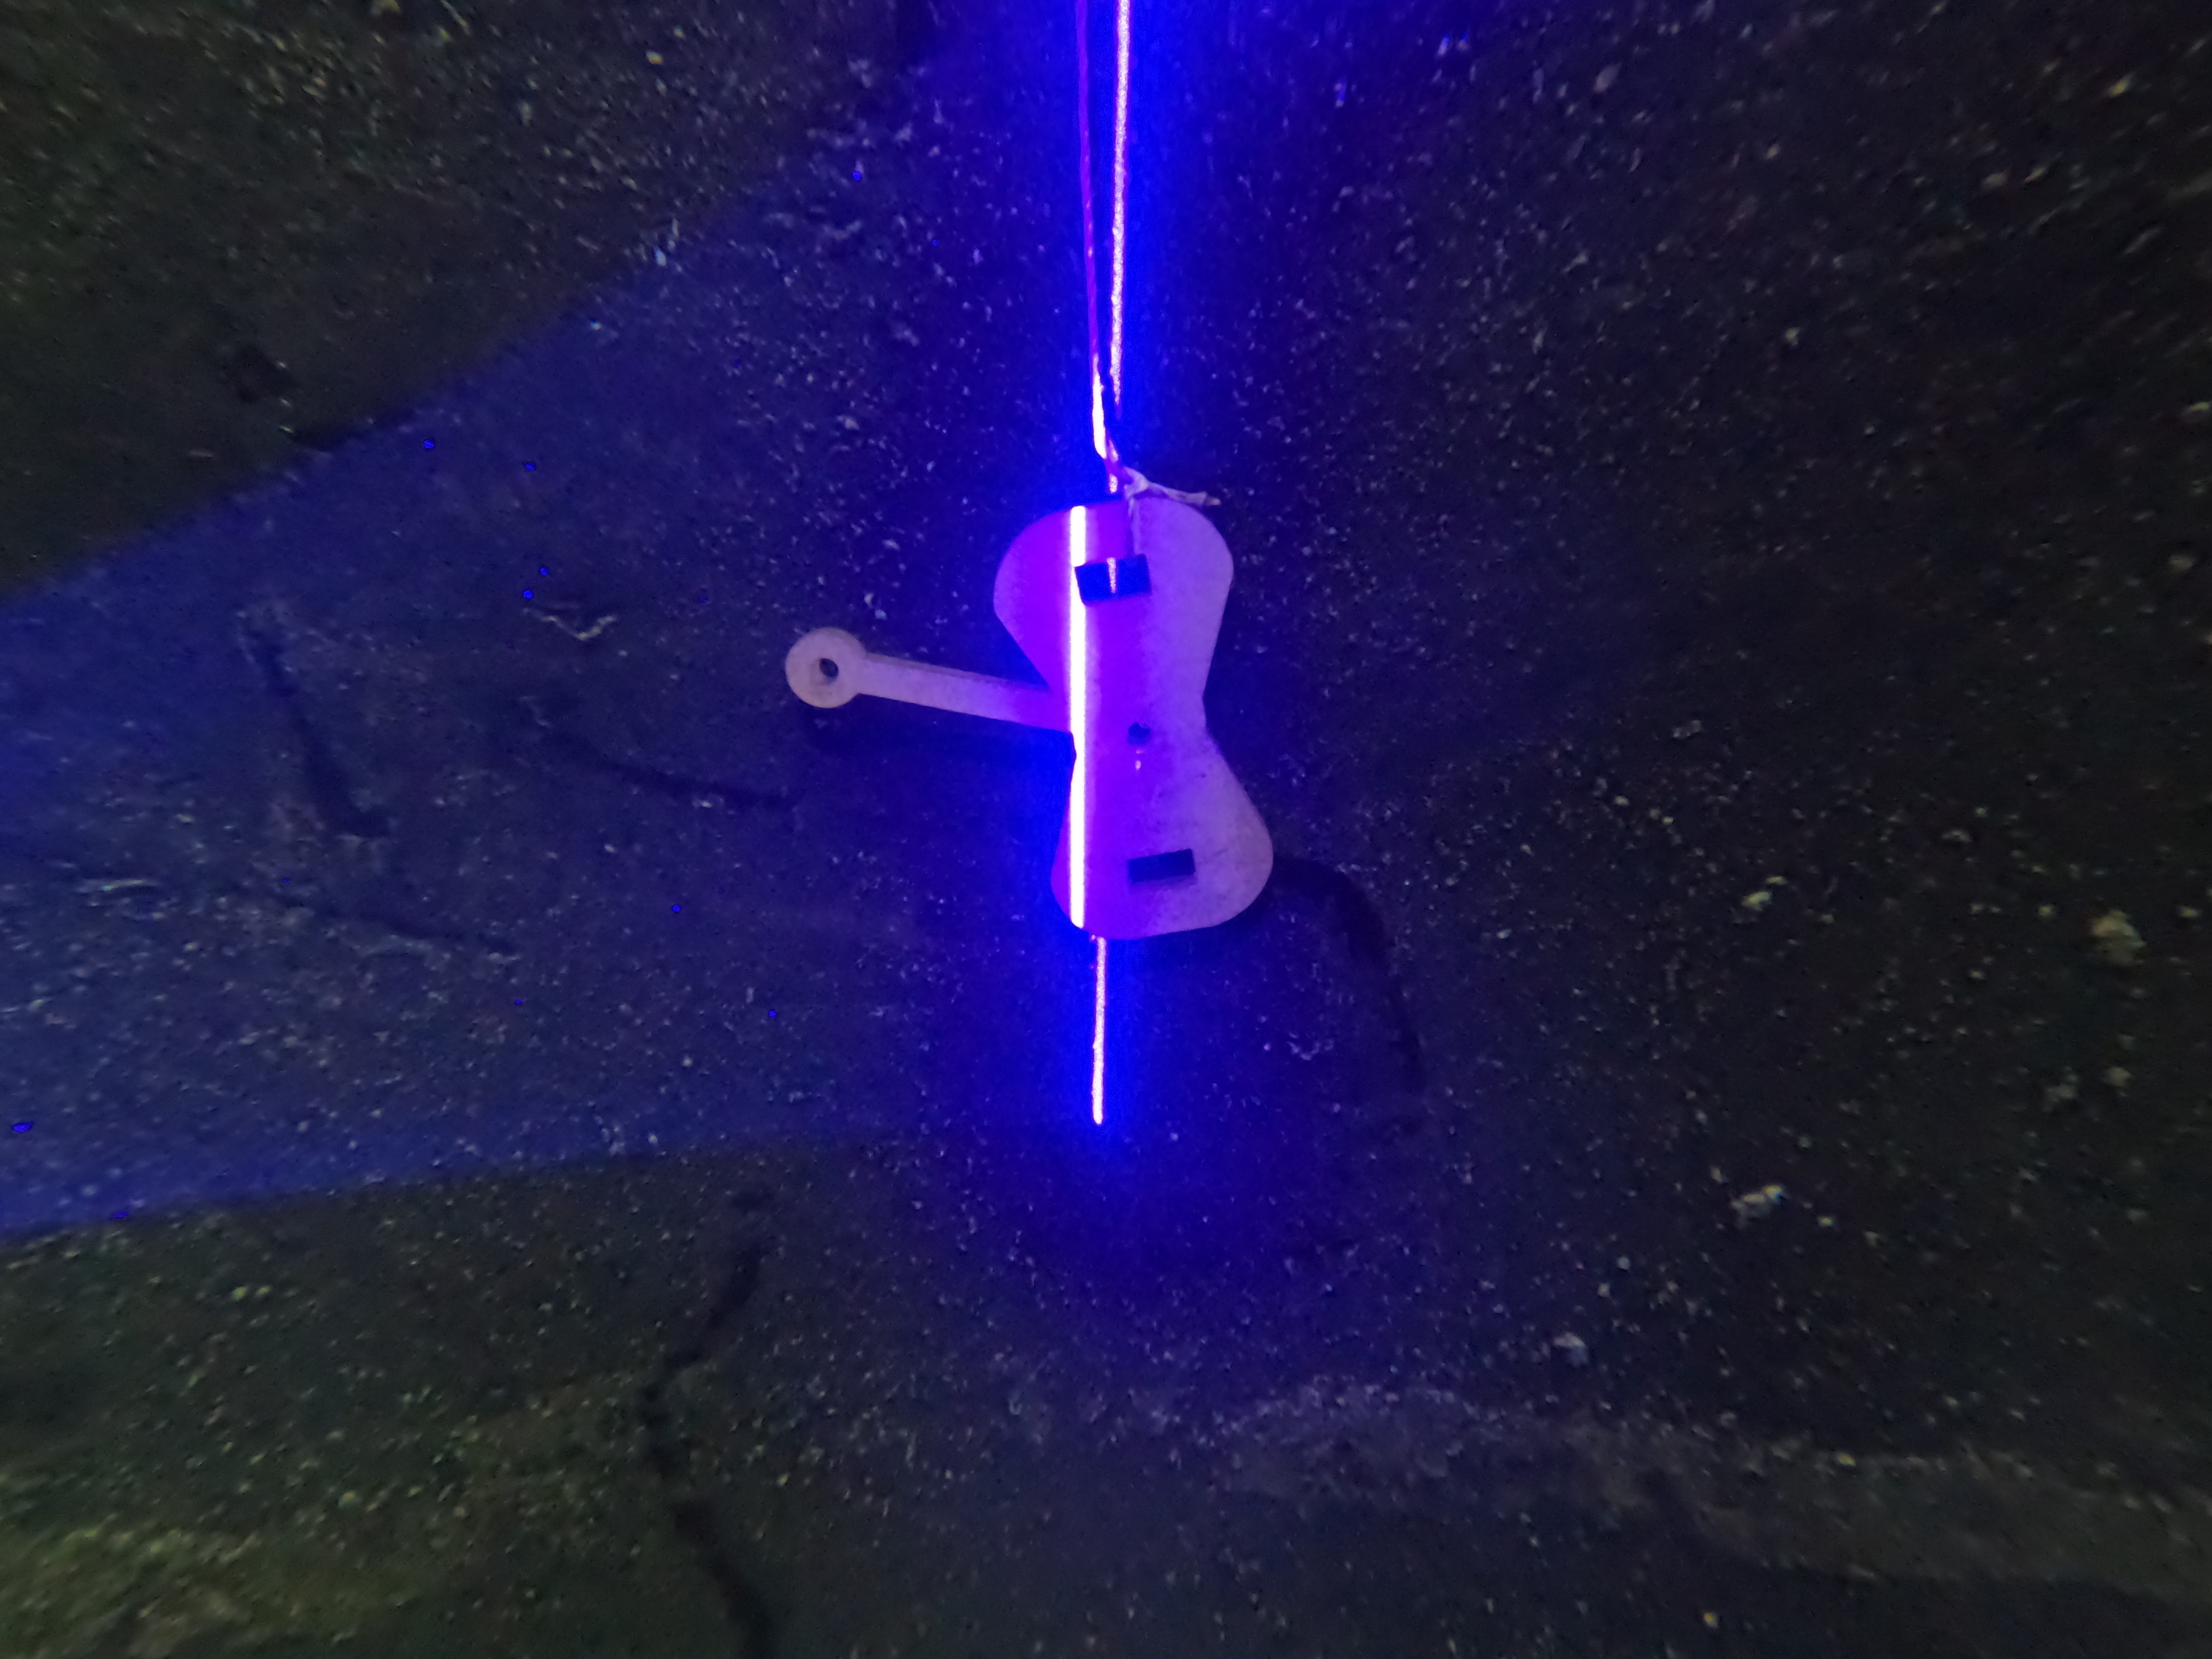

Supplement: Supplementary file 2453 [file G0016031.pdf › Level_2_2/G0016031.pdf]

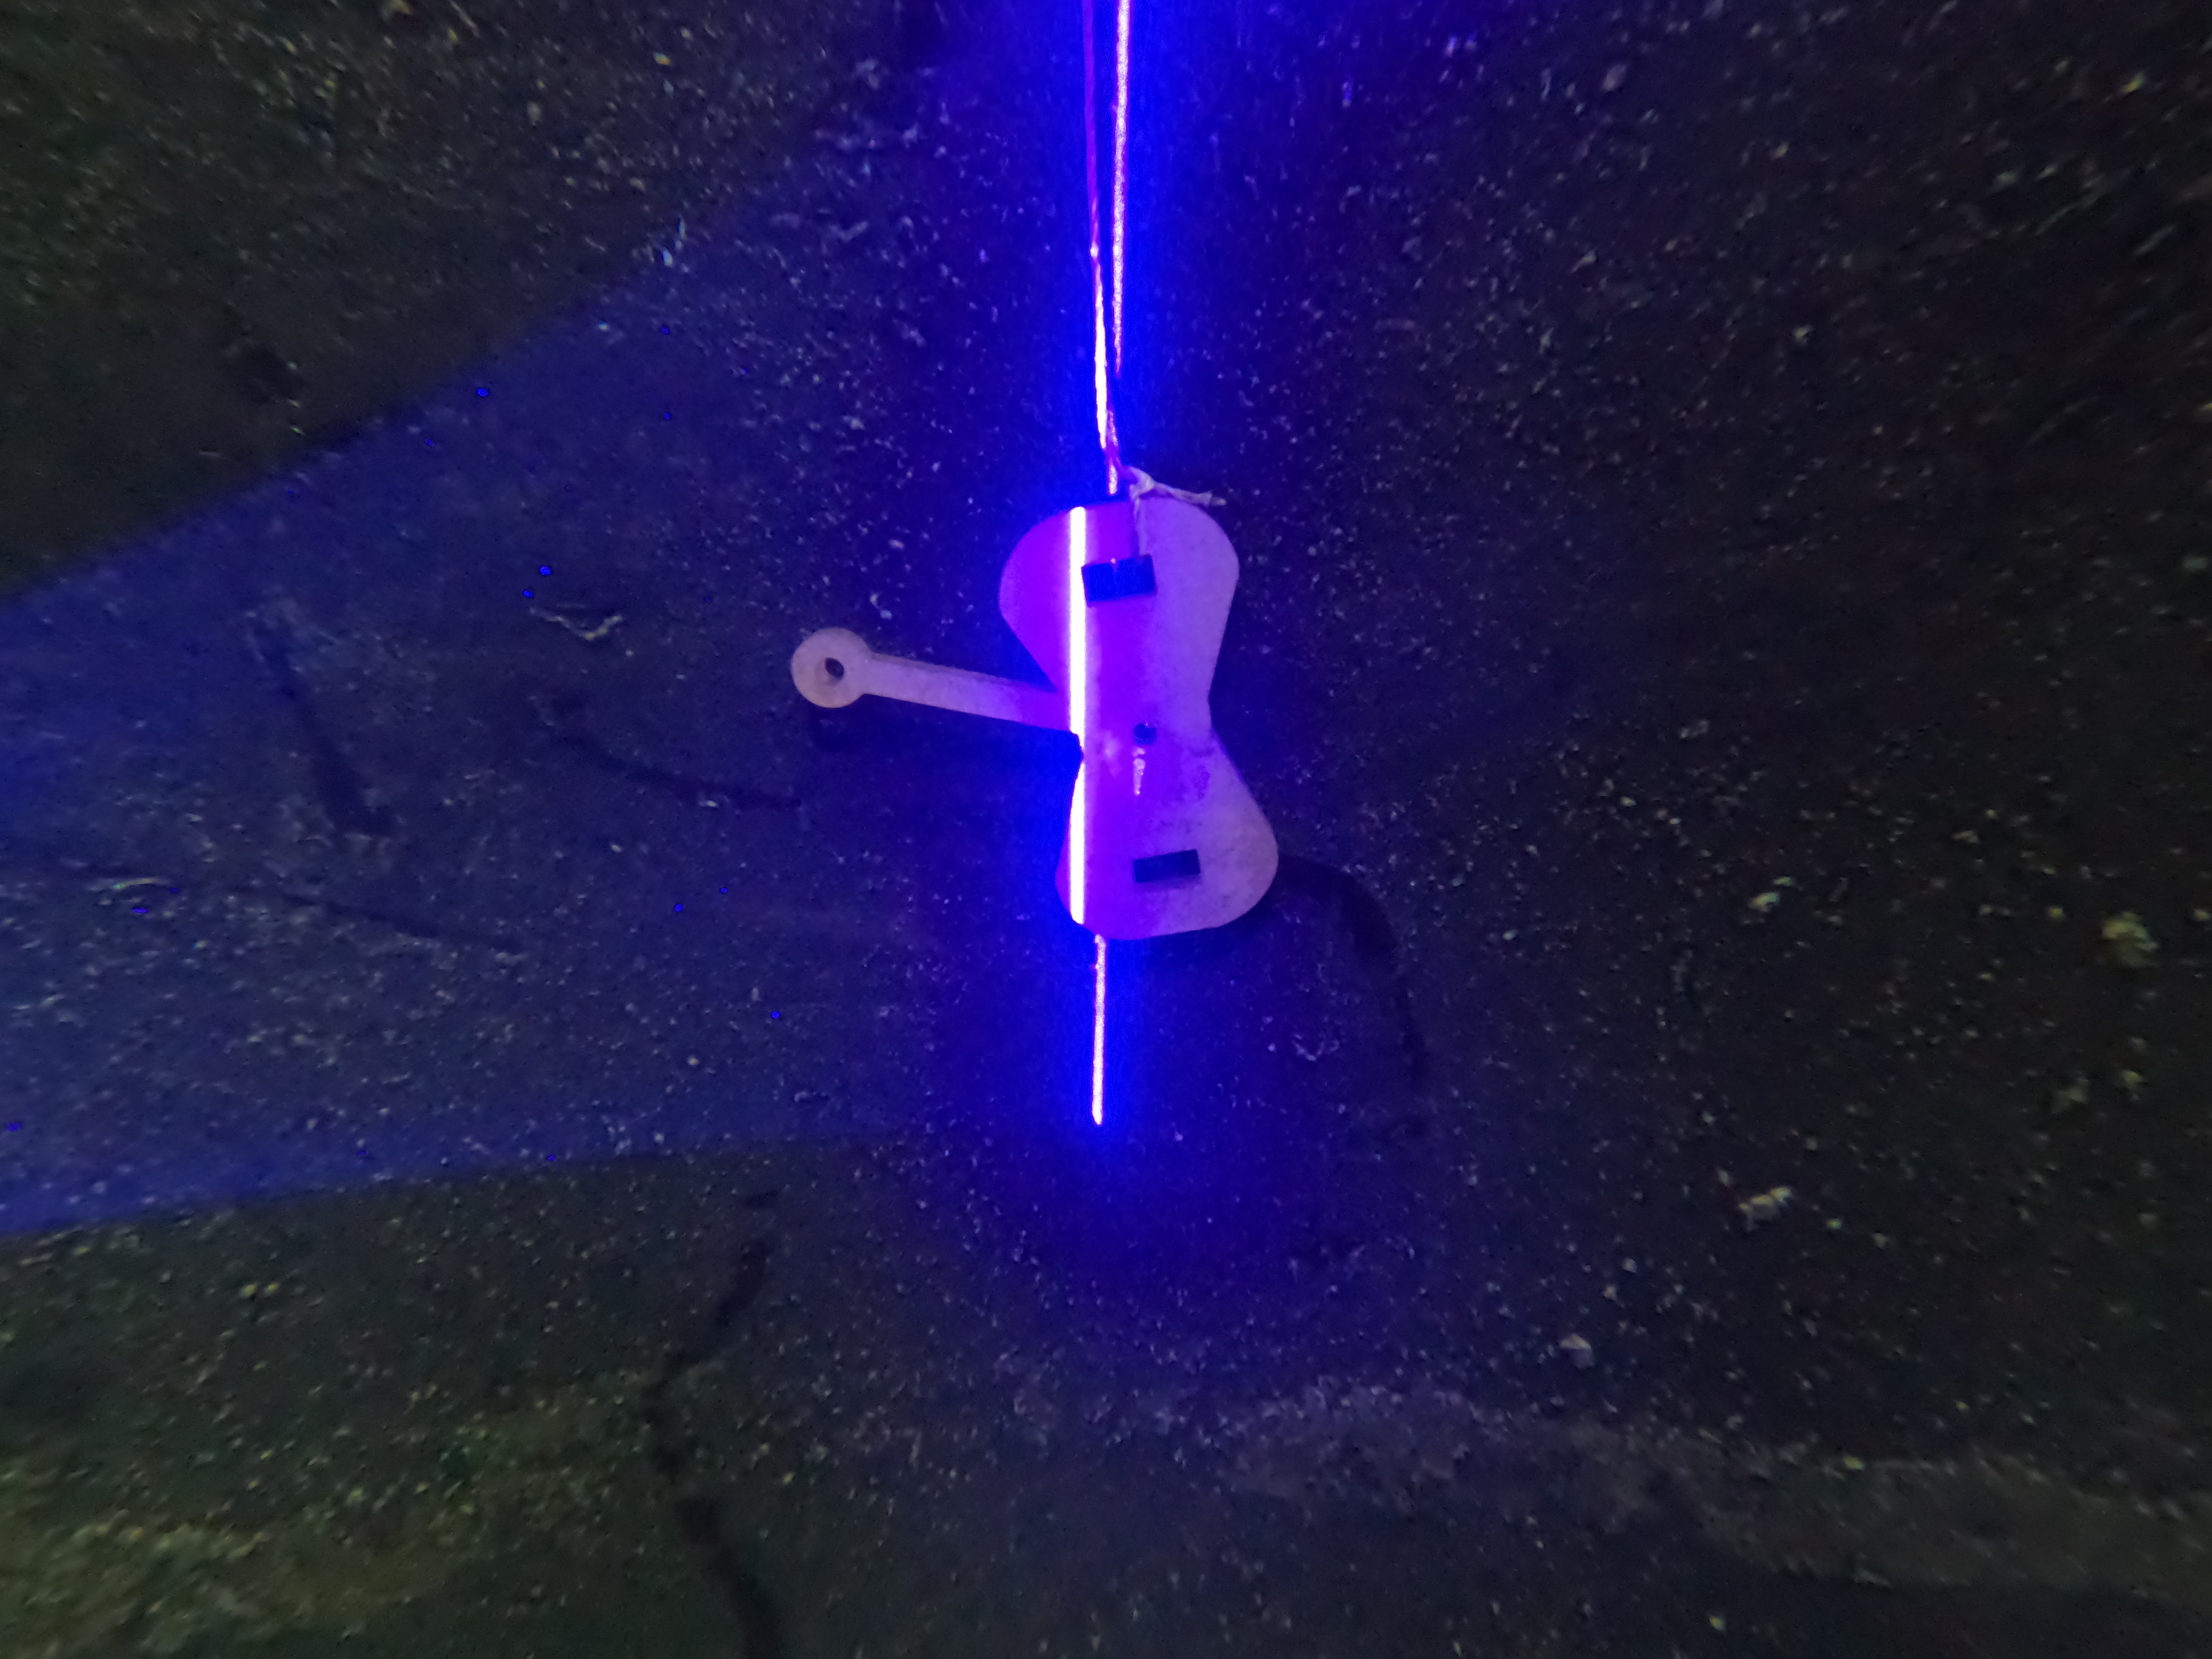

Supplement: Supplementary file 2454 [file G0016032.pdf › Level_2_2/G0016032.pdf]

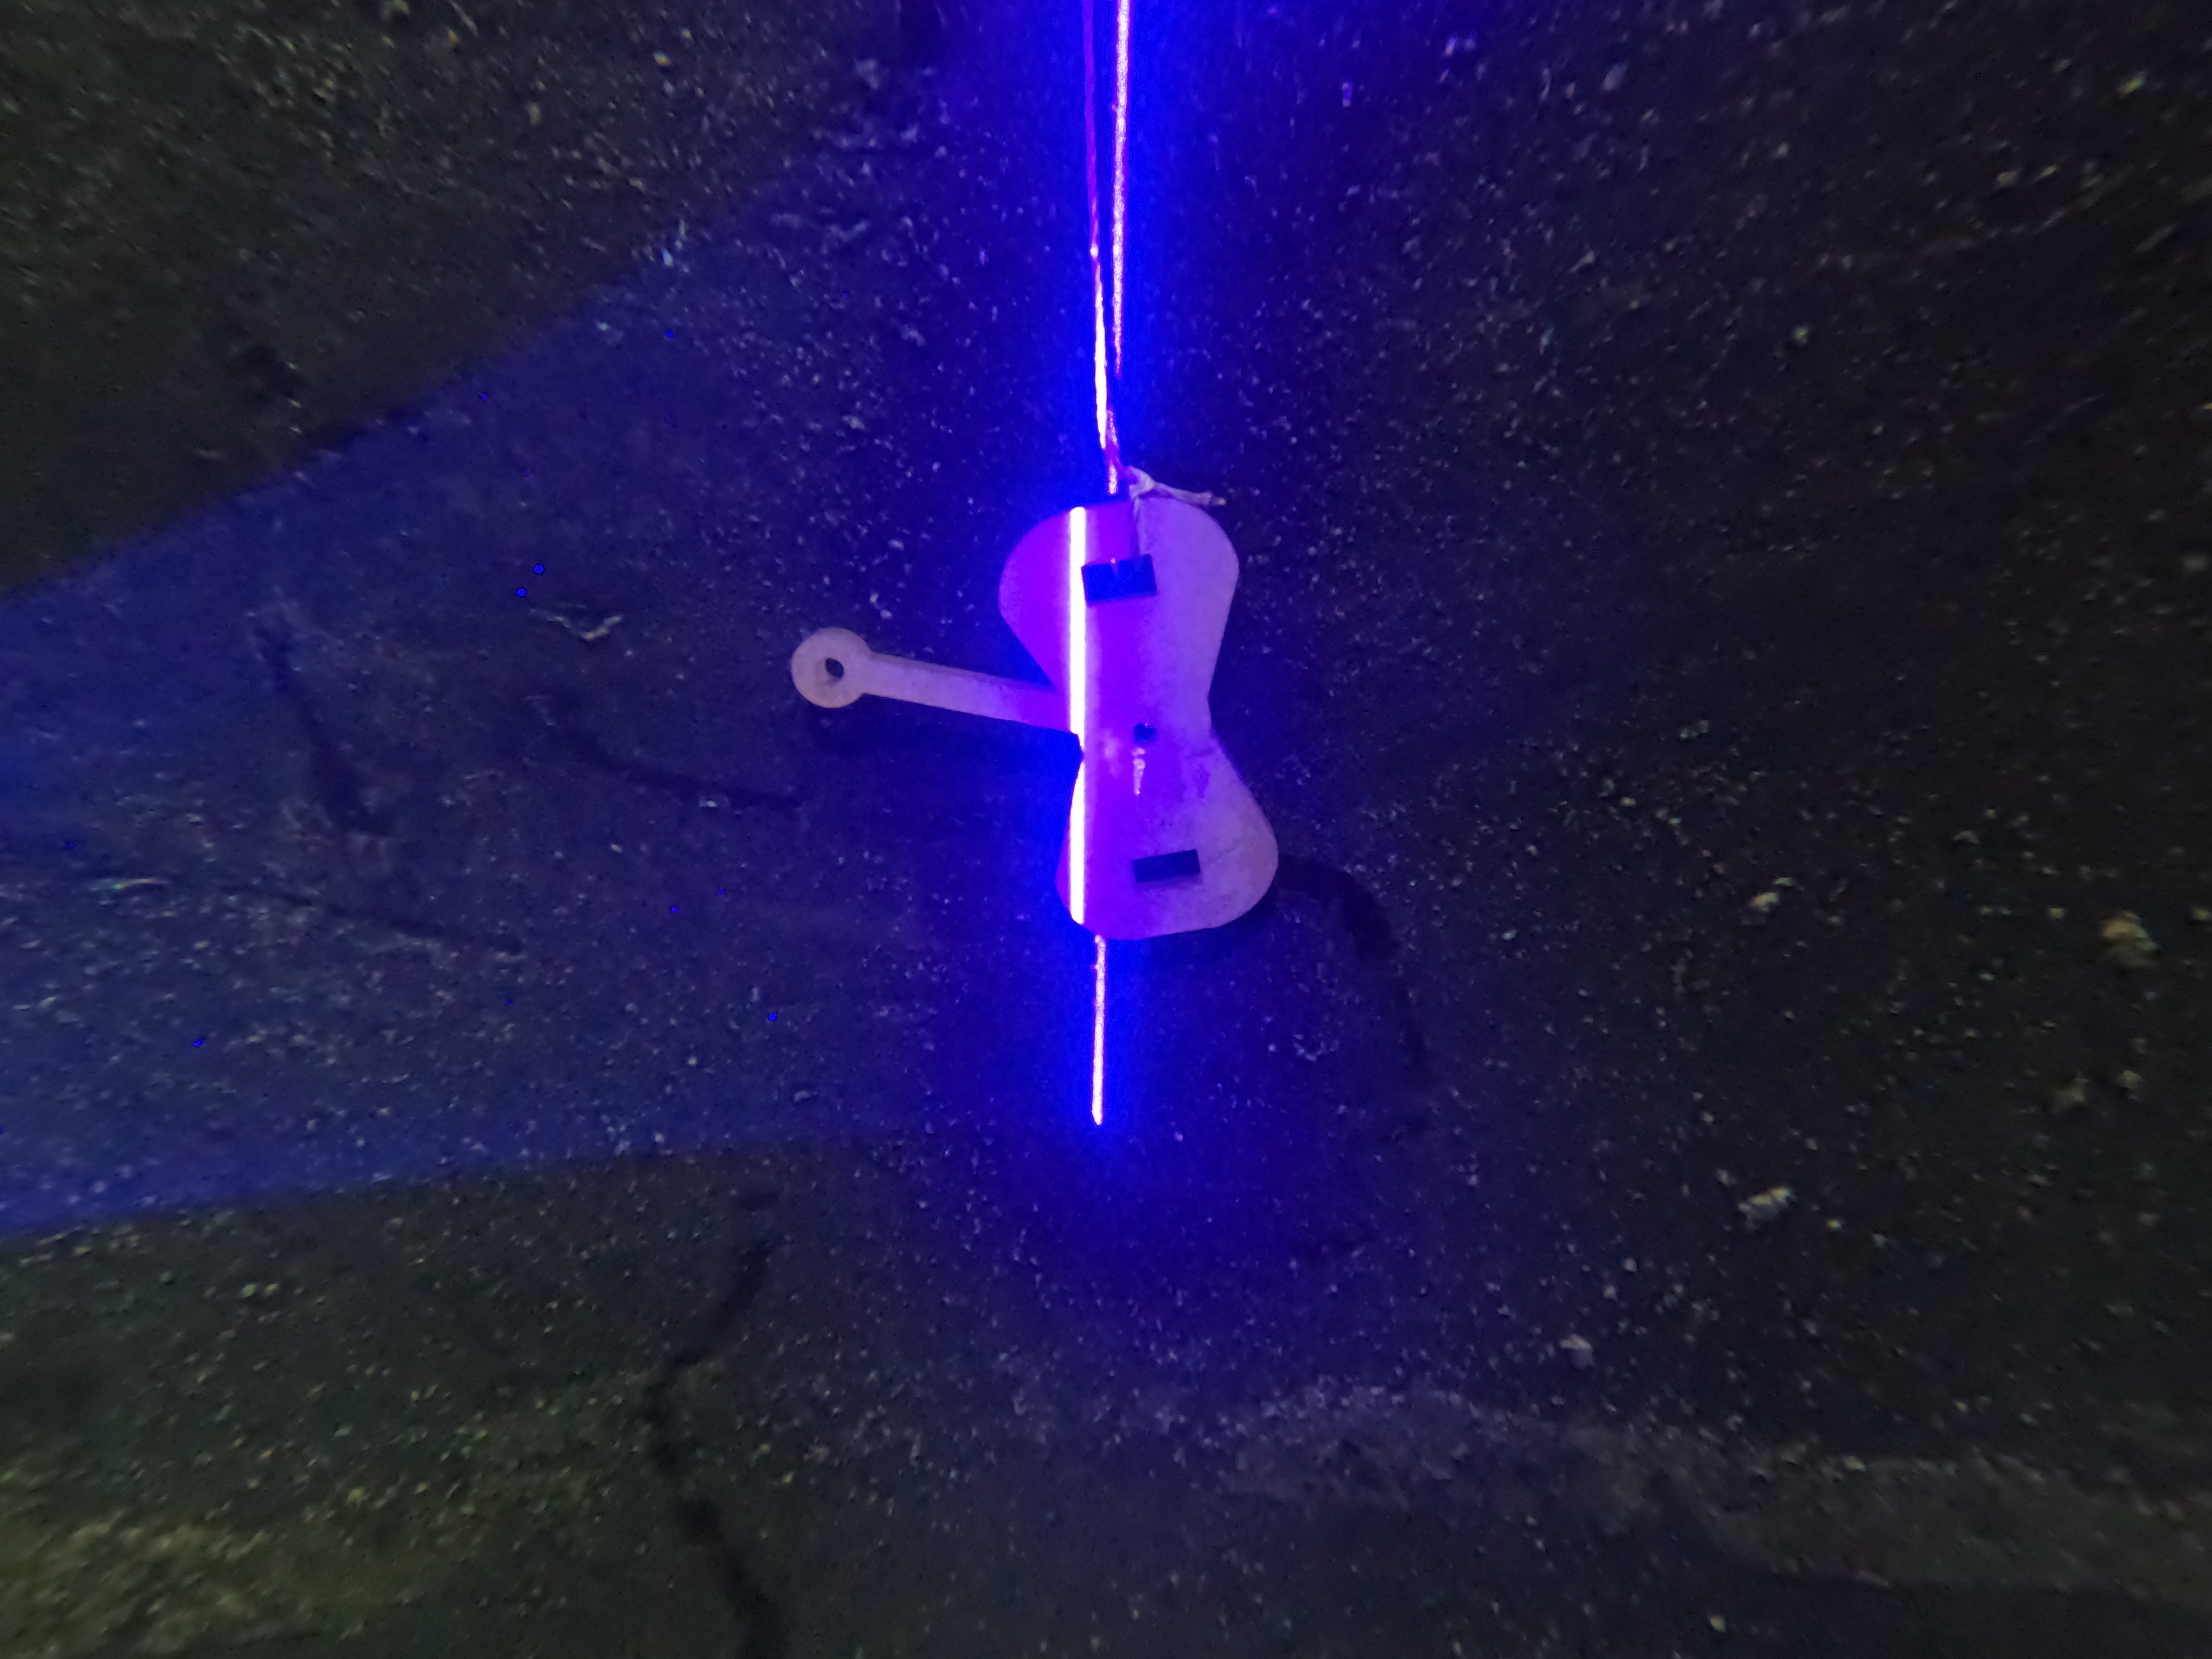

Supplement: Supplementary file 2455 [file G0016033.pdf › Level_2_2/G0016033.pdf]

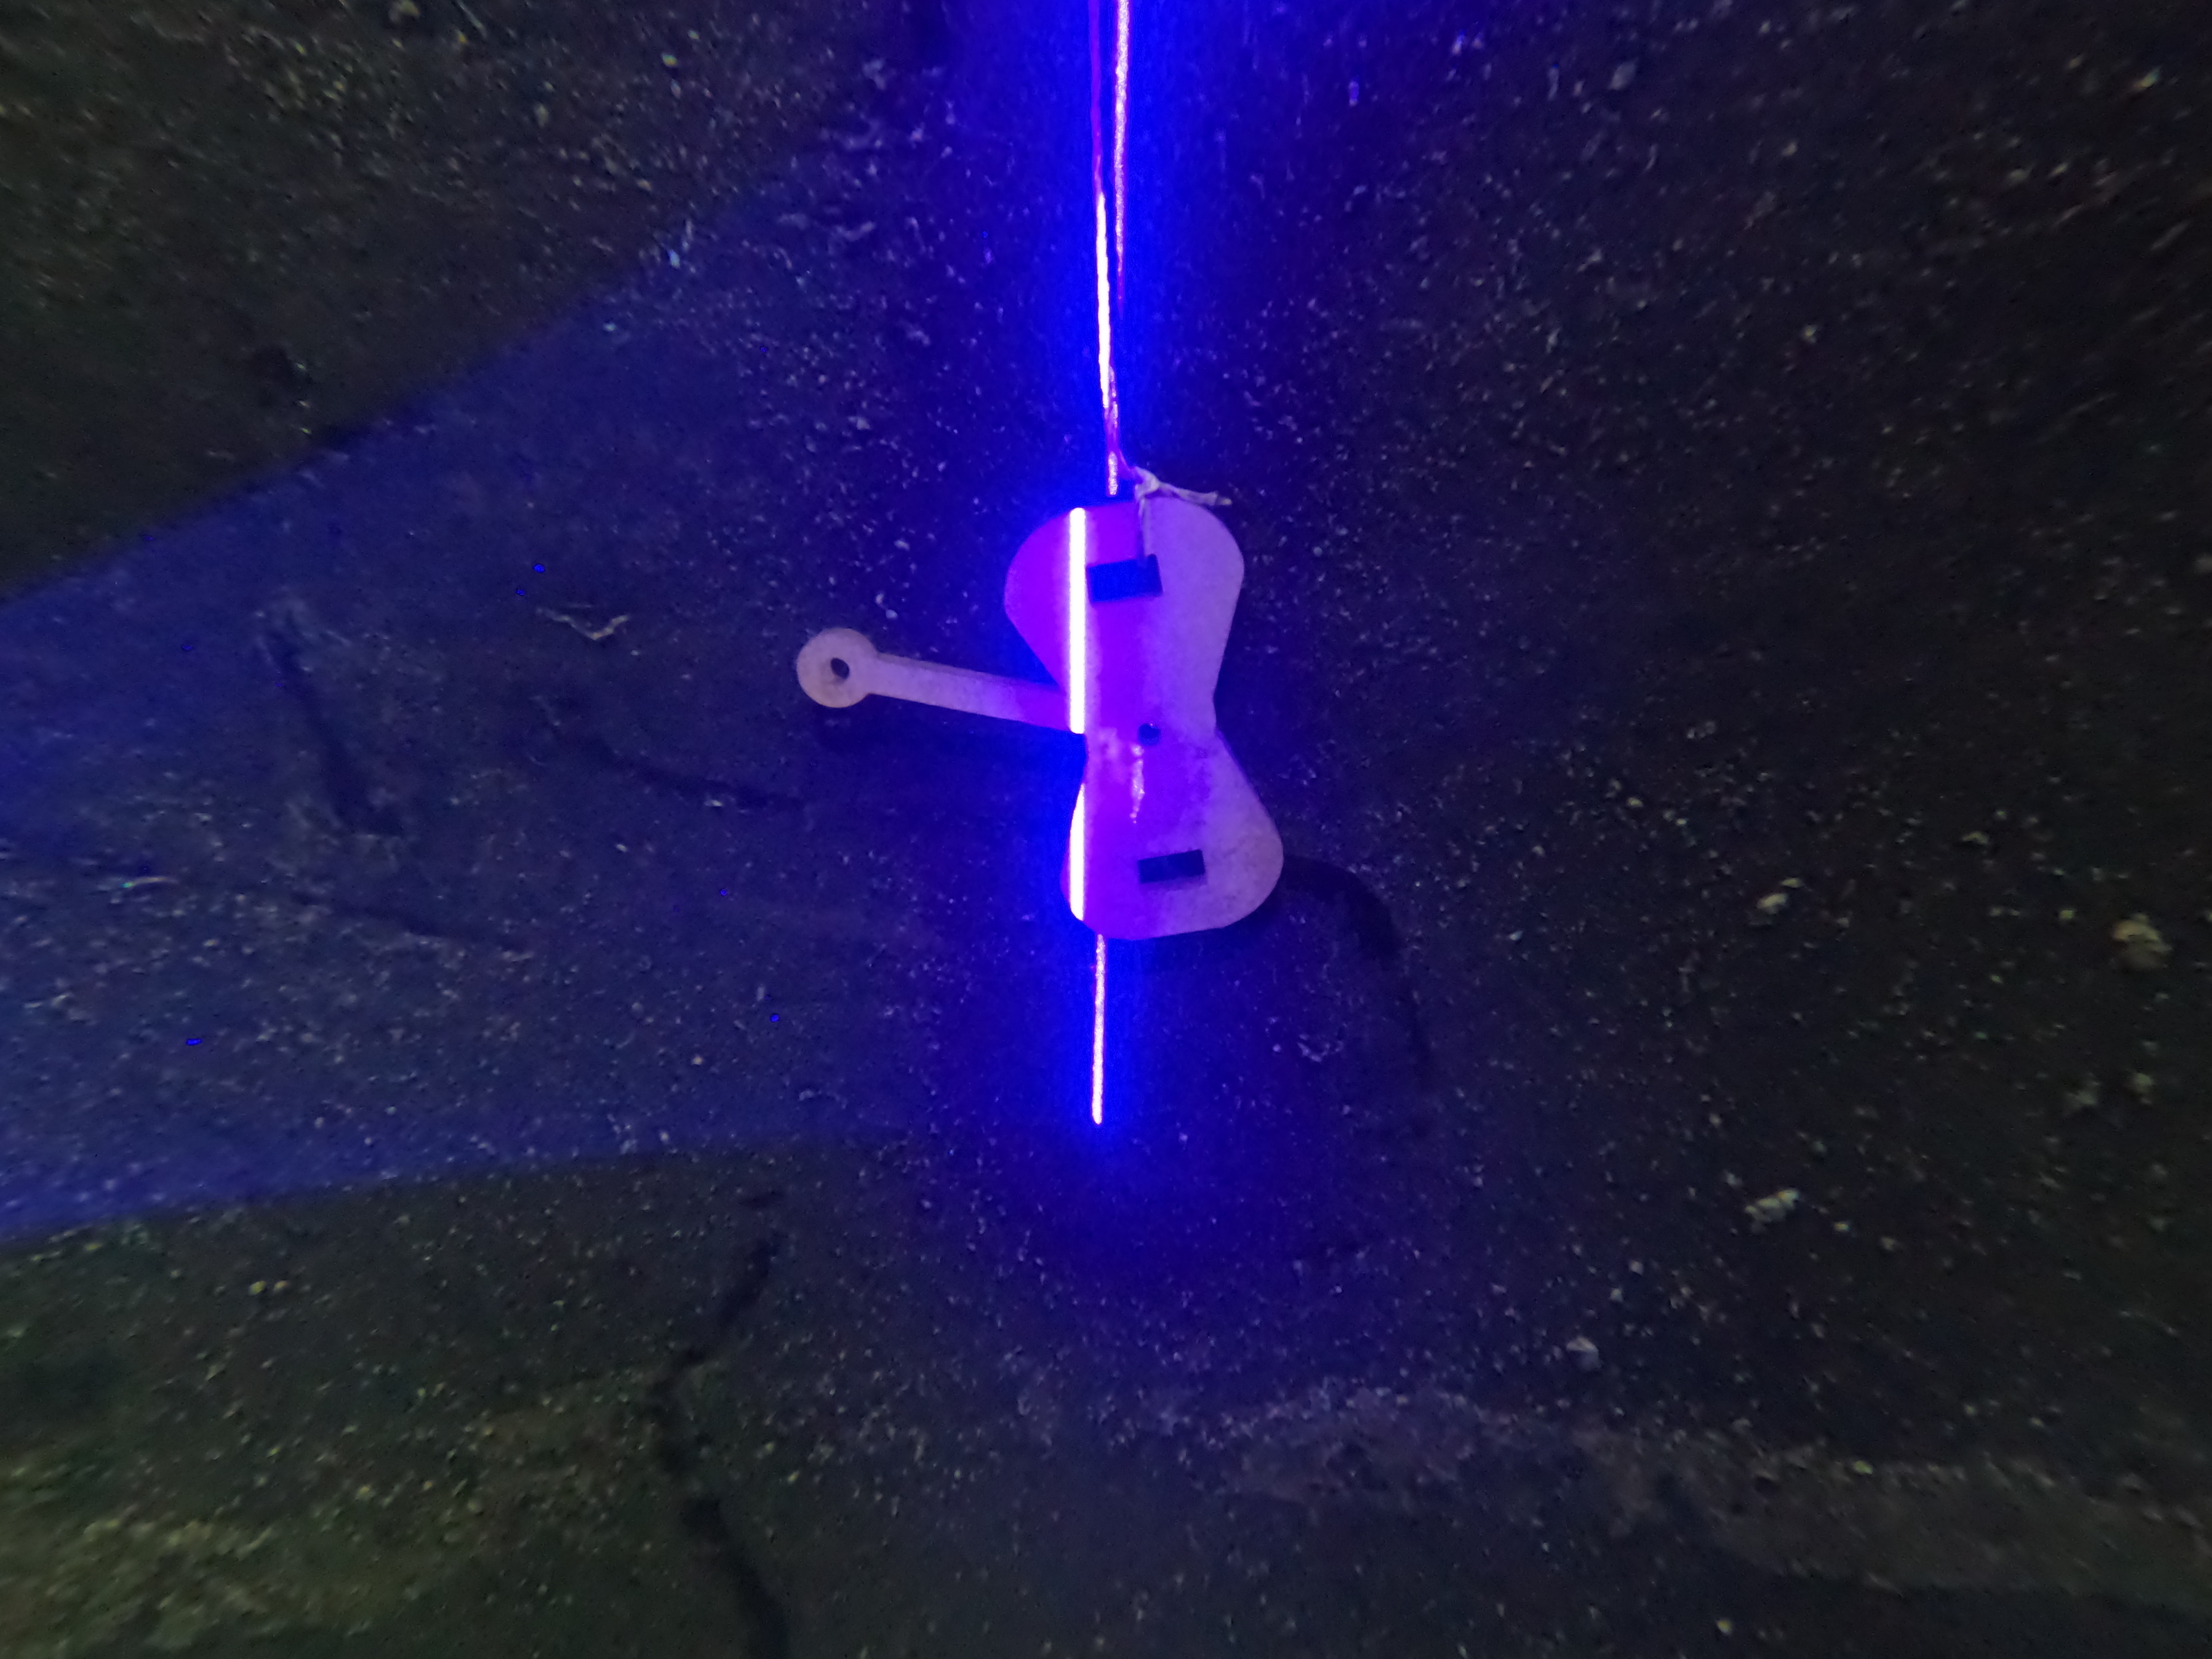

Supplement: Supplementary file 2456 [file G0016034.pdf › Level_2_2/G0016034.pdf]

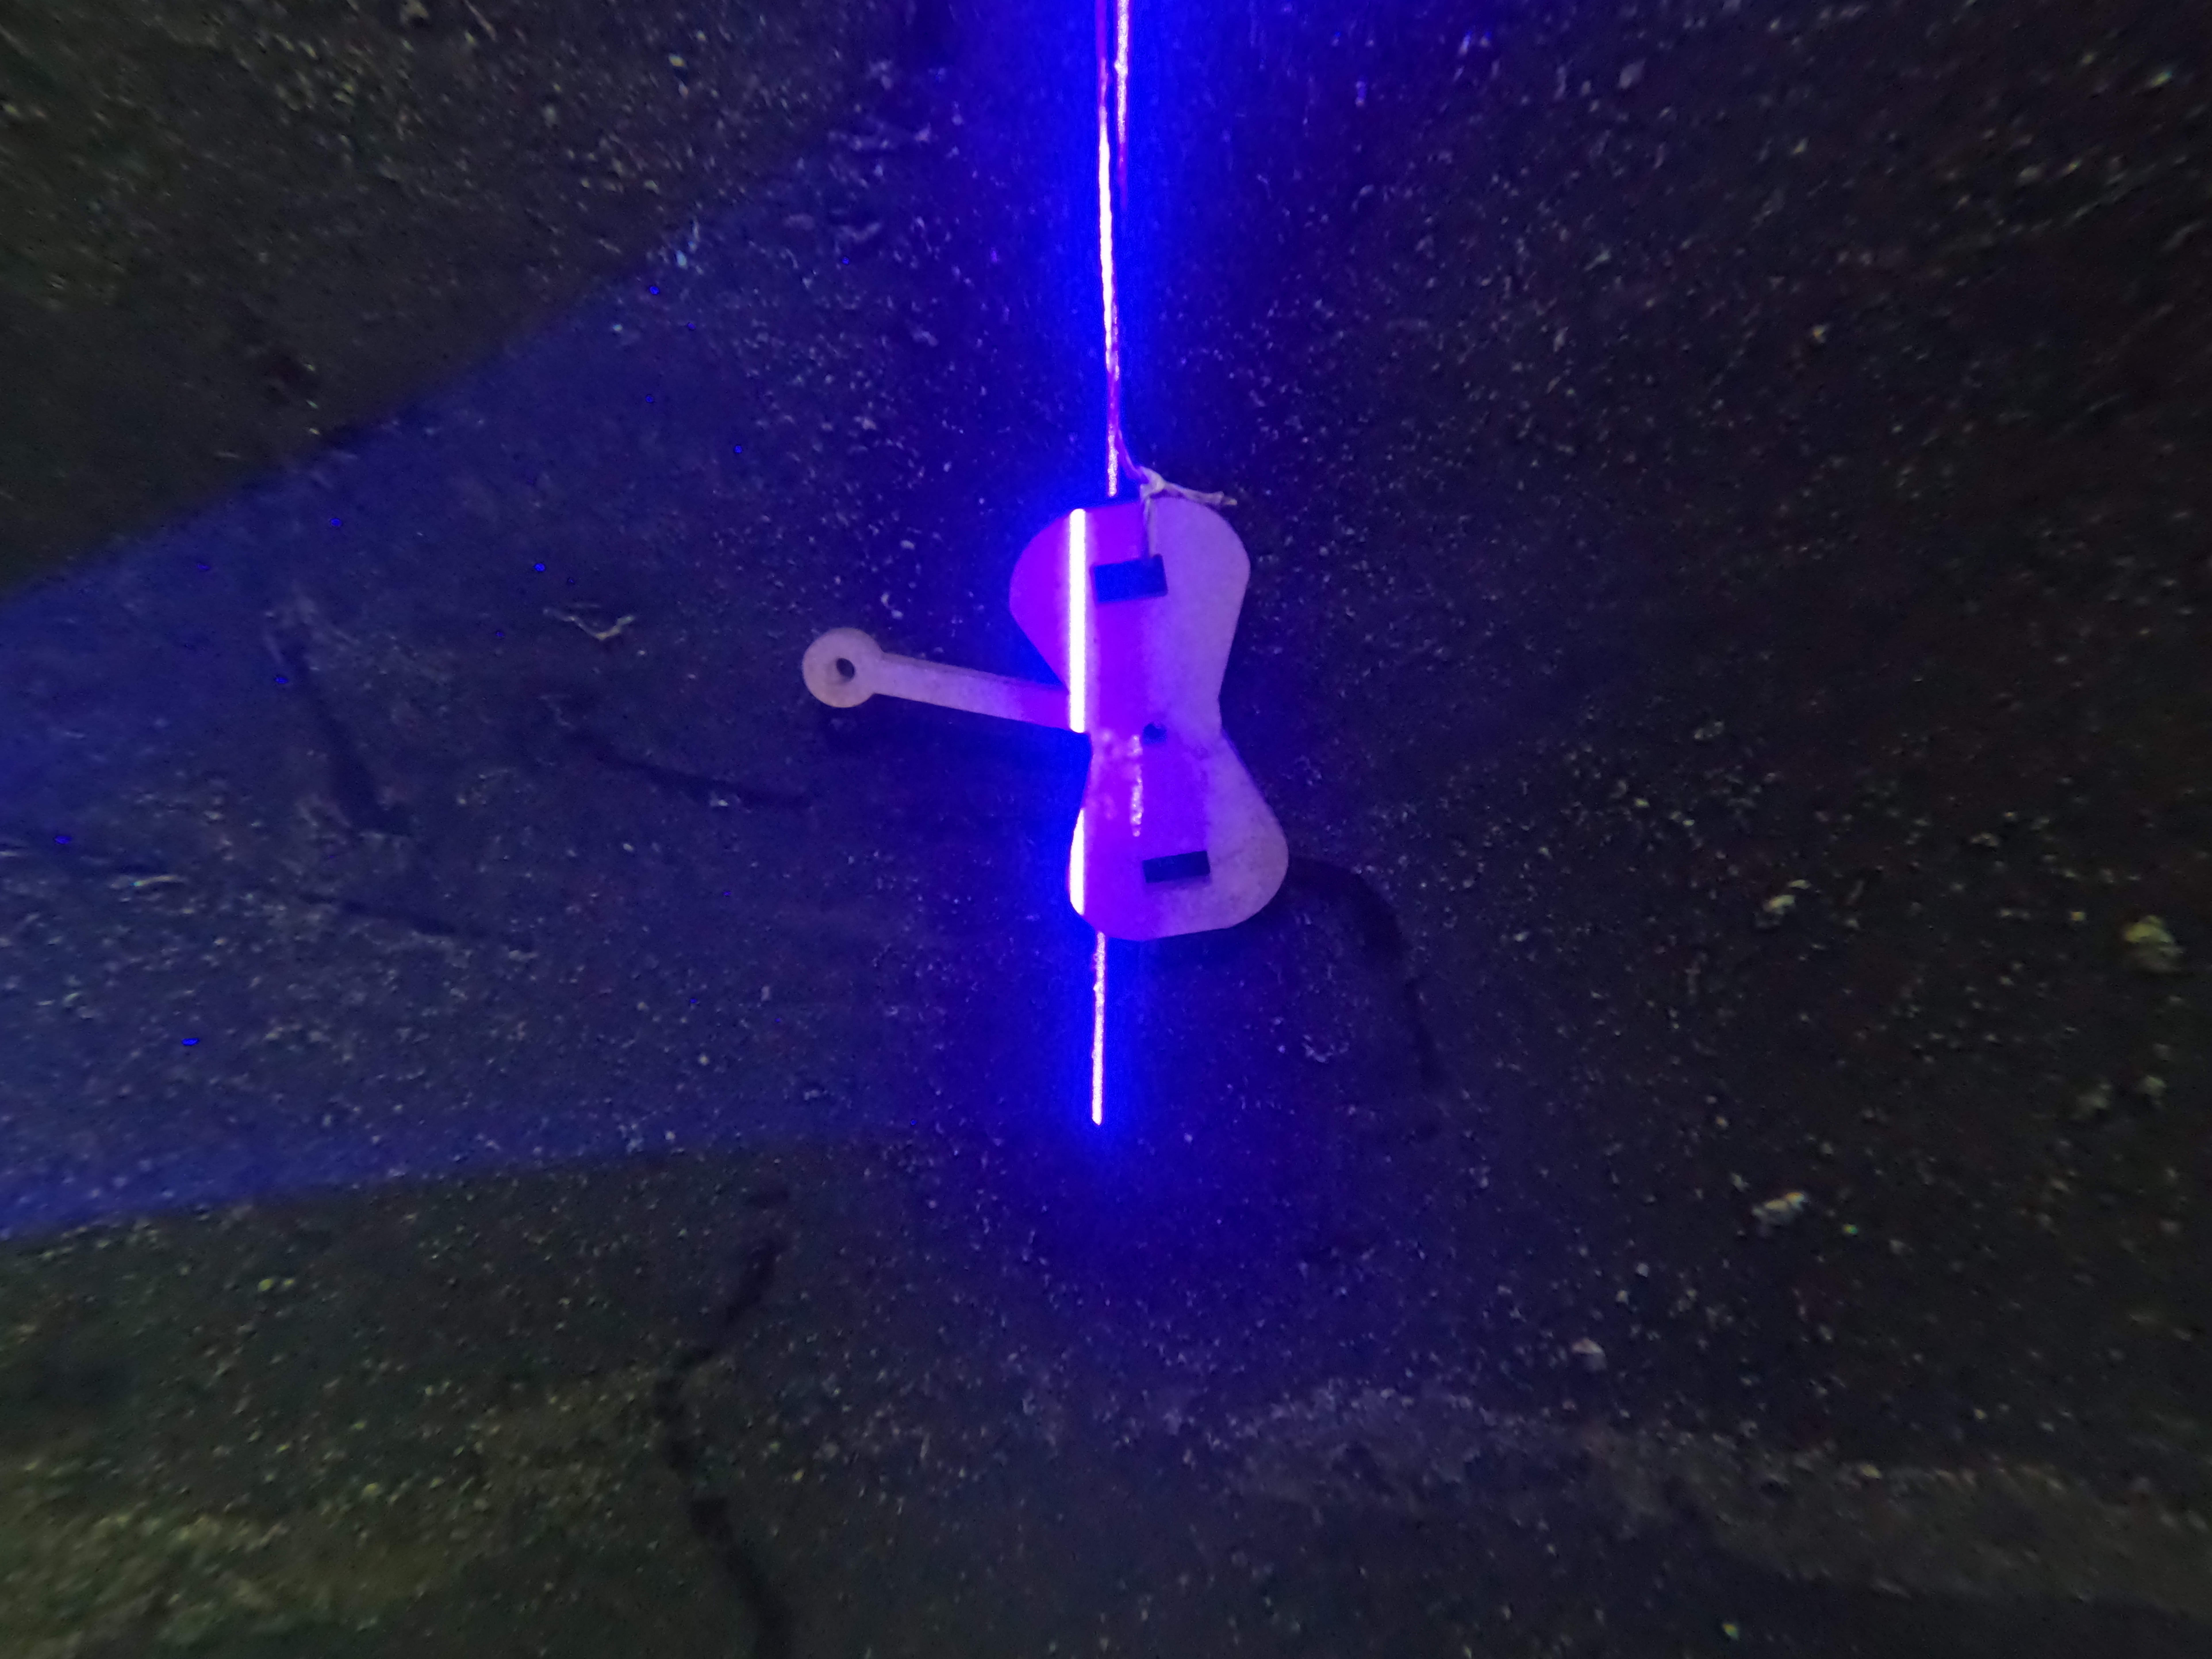

Supplement: Supplementary file 2457 [file G0016035.pdf › Level_2_2/G0016035.pdf]

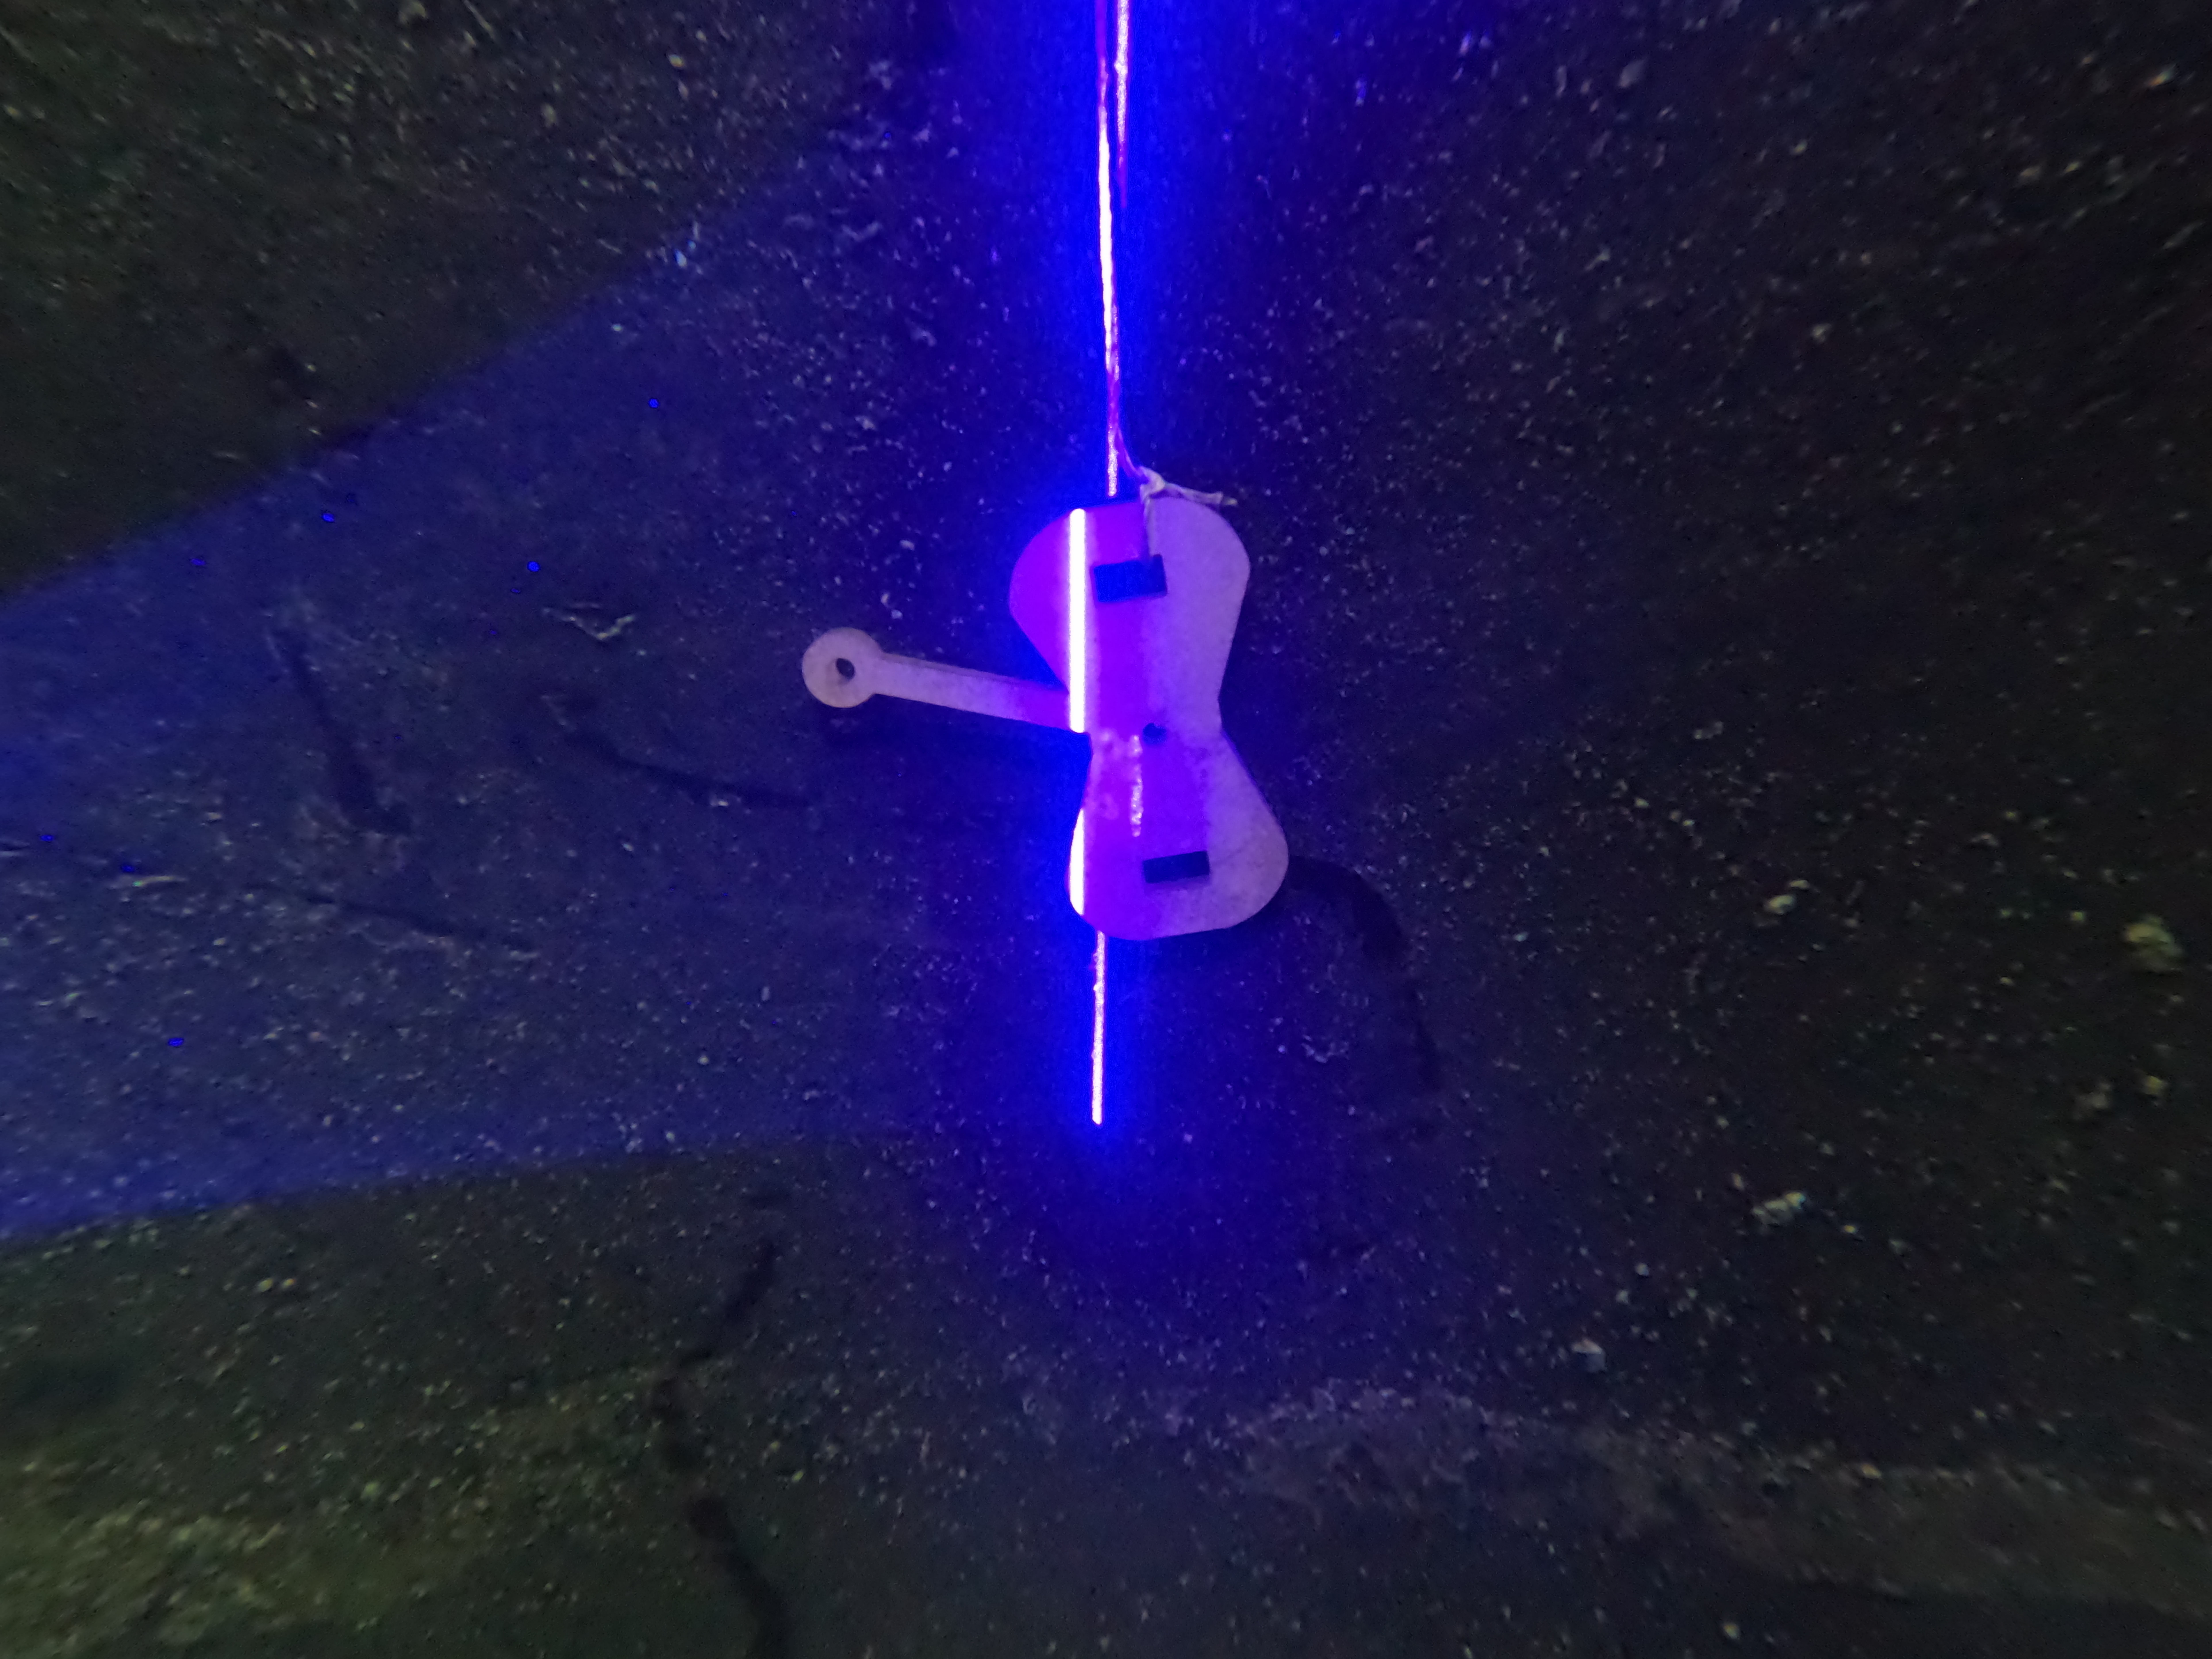

Supplement: Supplementary file 2458 [file G0016036.pdf › Level_2_2/G0016036.pdf]

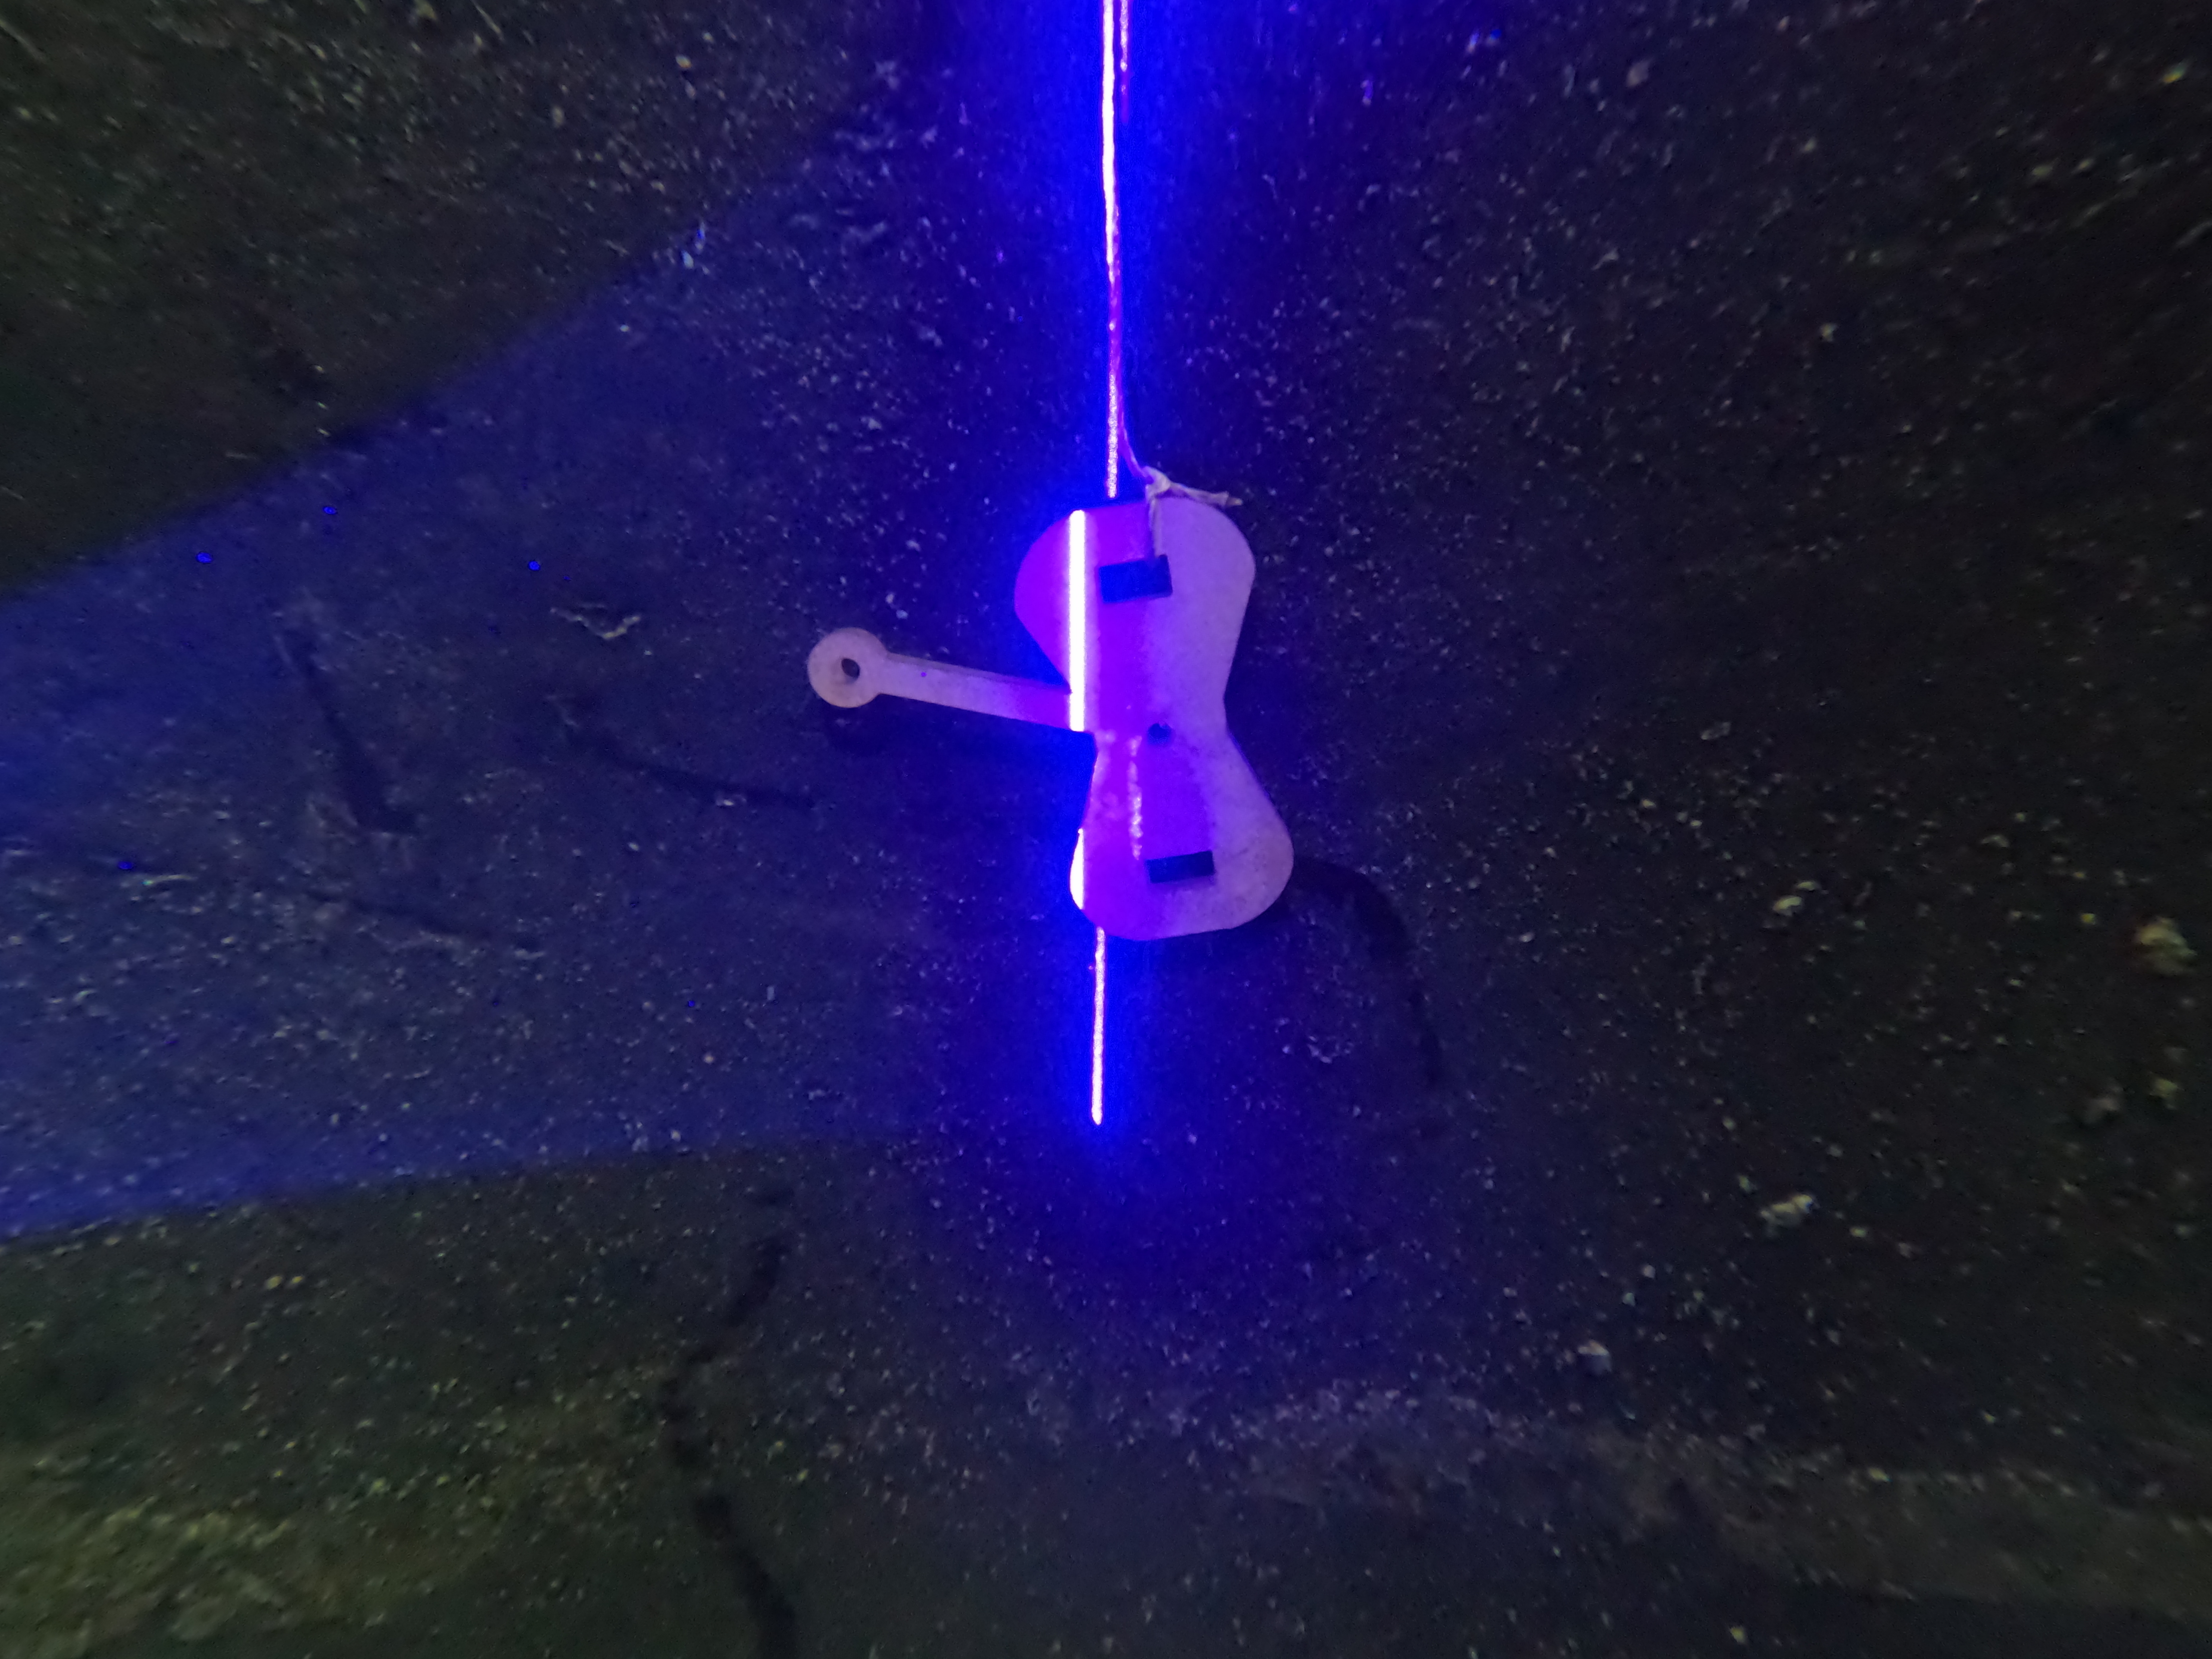

Supplement: Supplementary file 2459 [file G0016037.pdf › Level_2_2/G0016037.pdf]

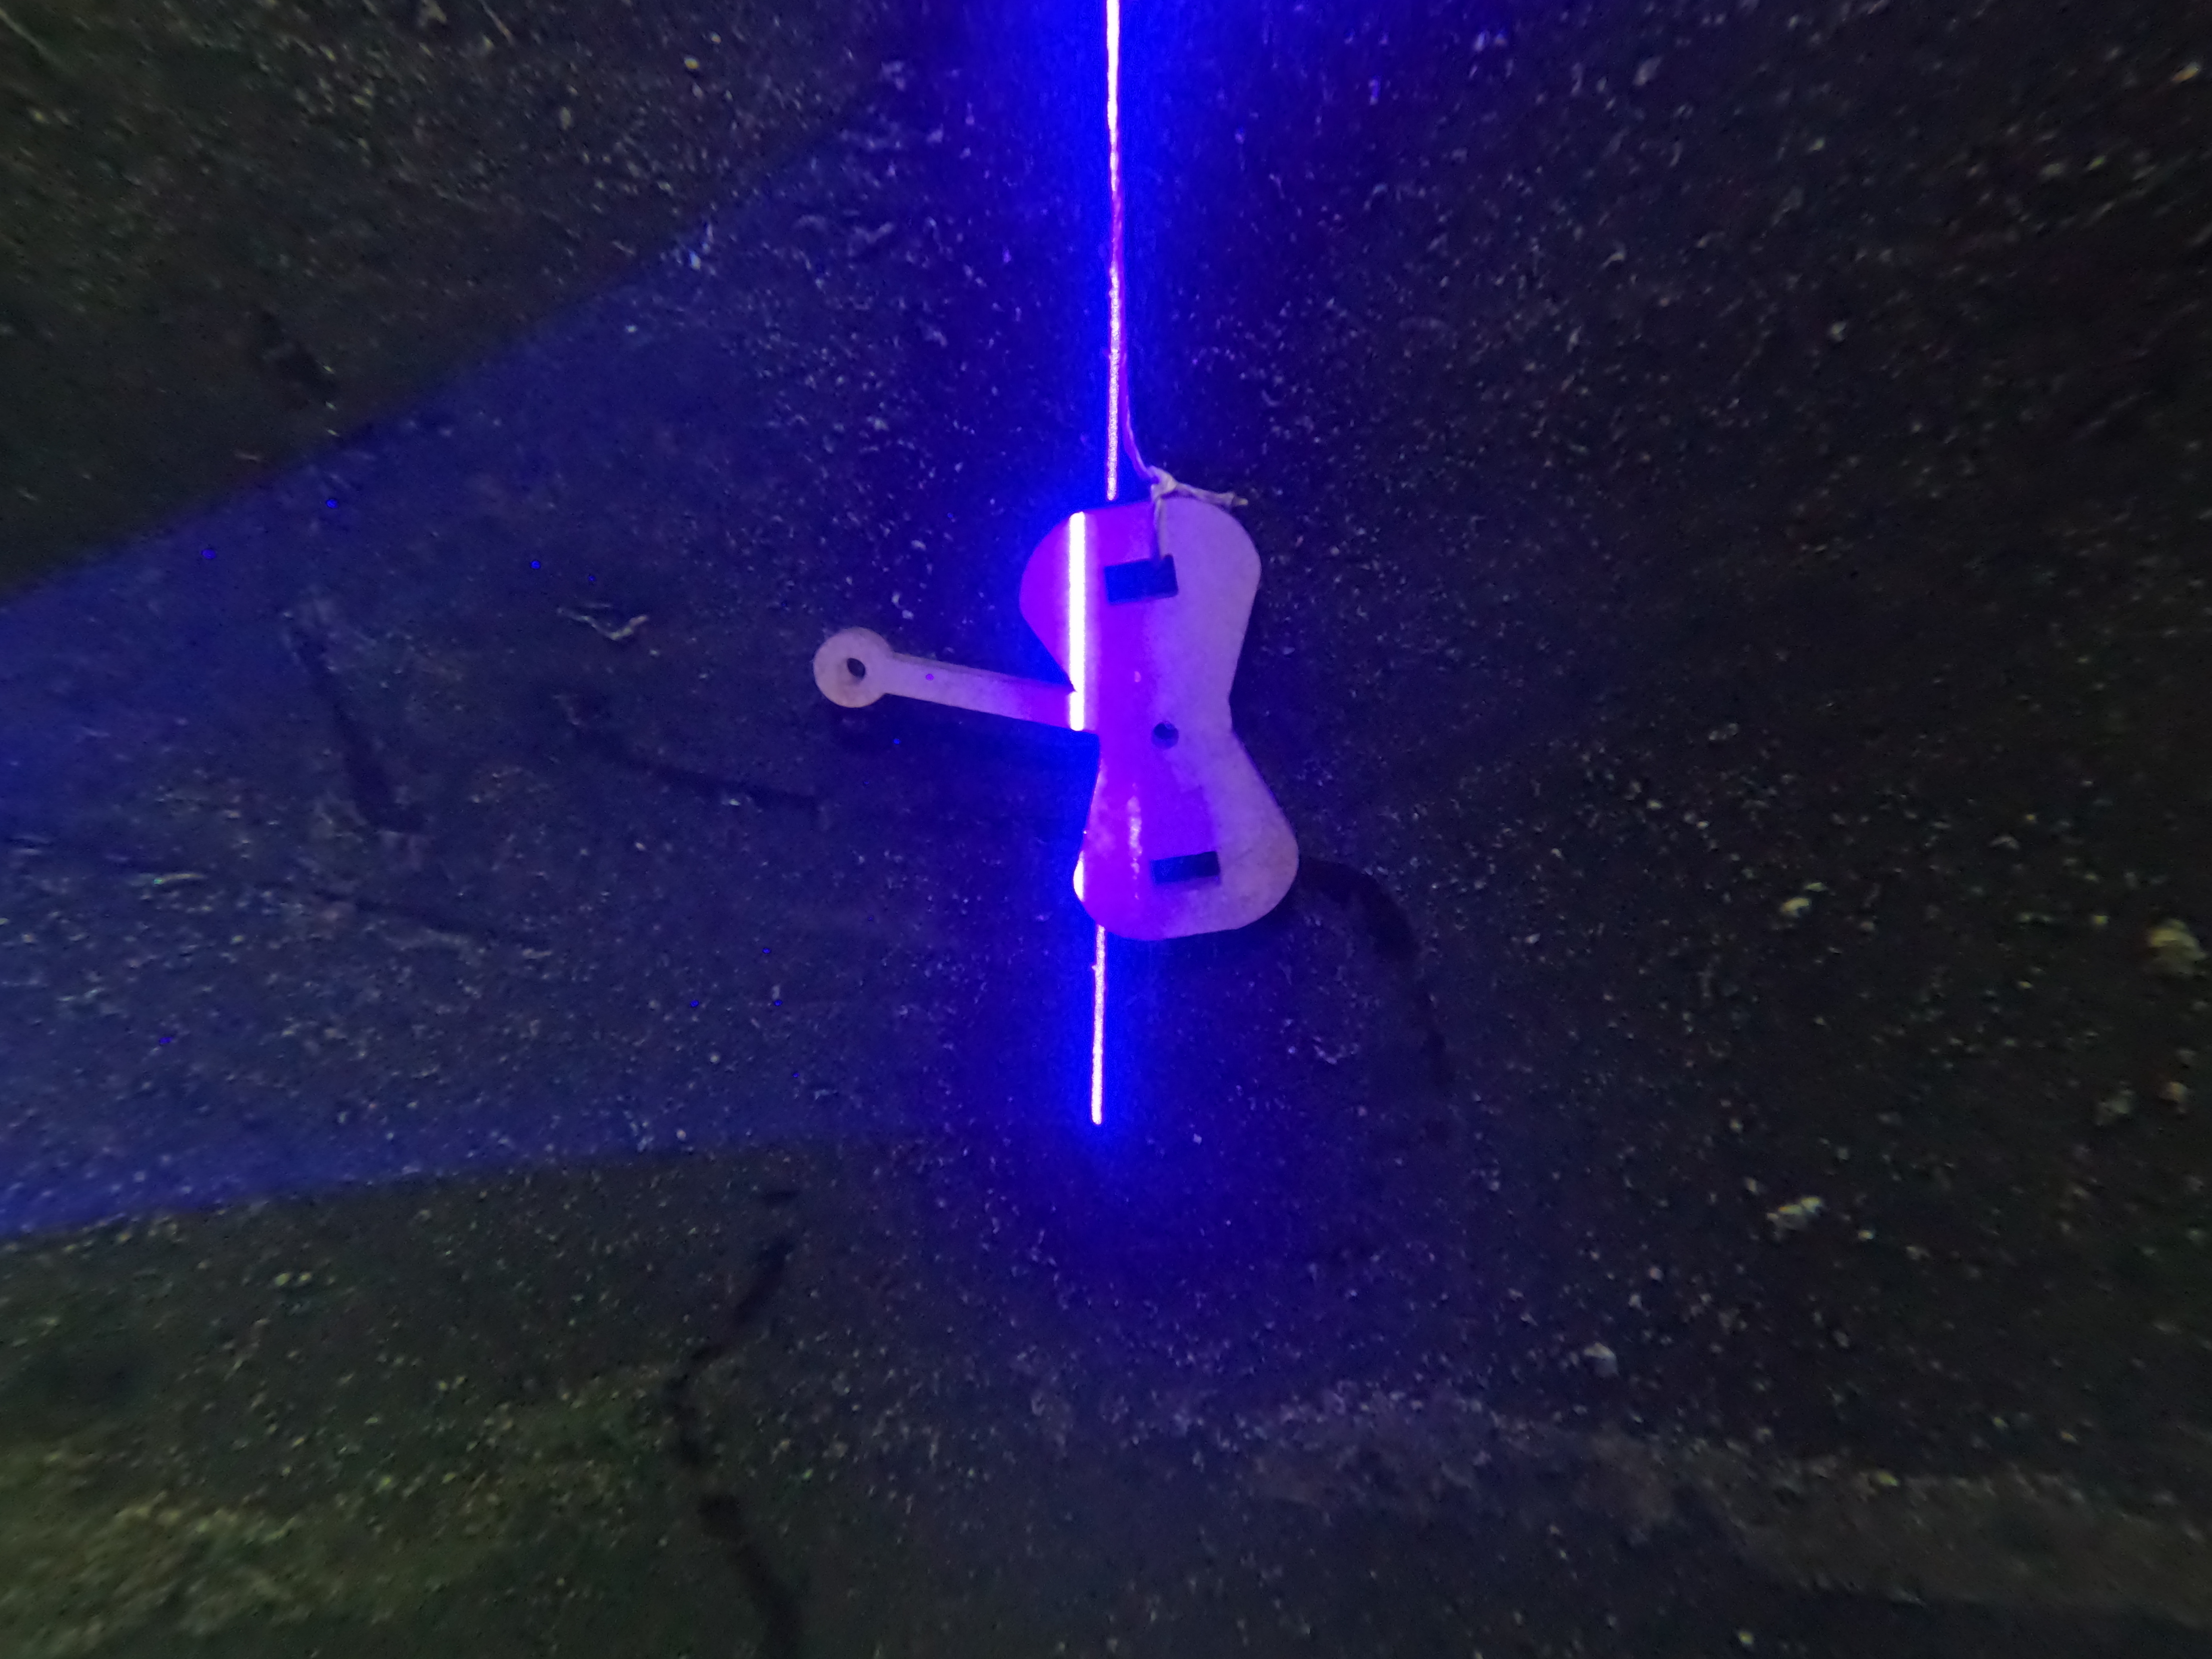

Supplement: Supplementary file 2460 [file G0016038.pdf › Level_2_2/G0016038.pdf]

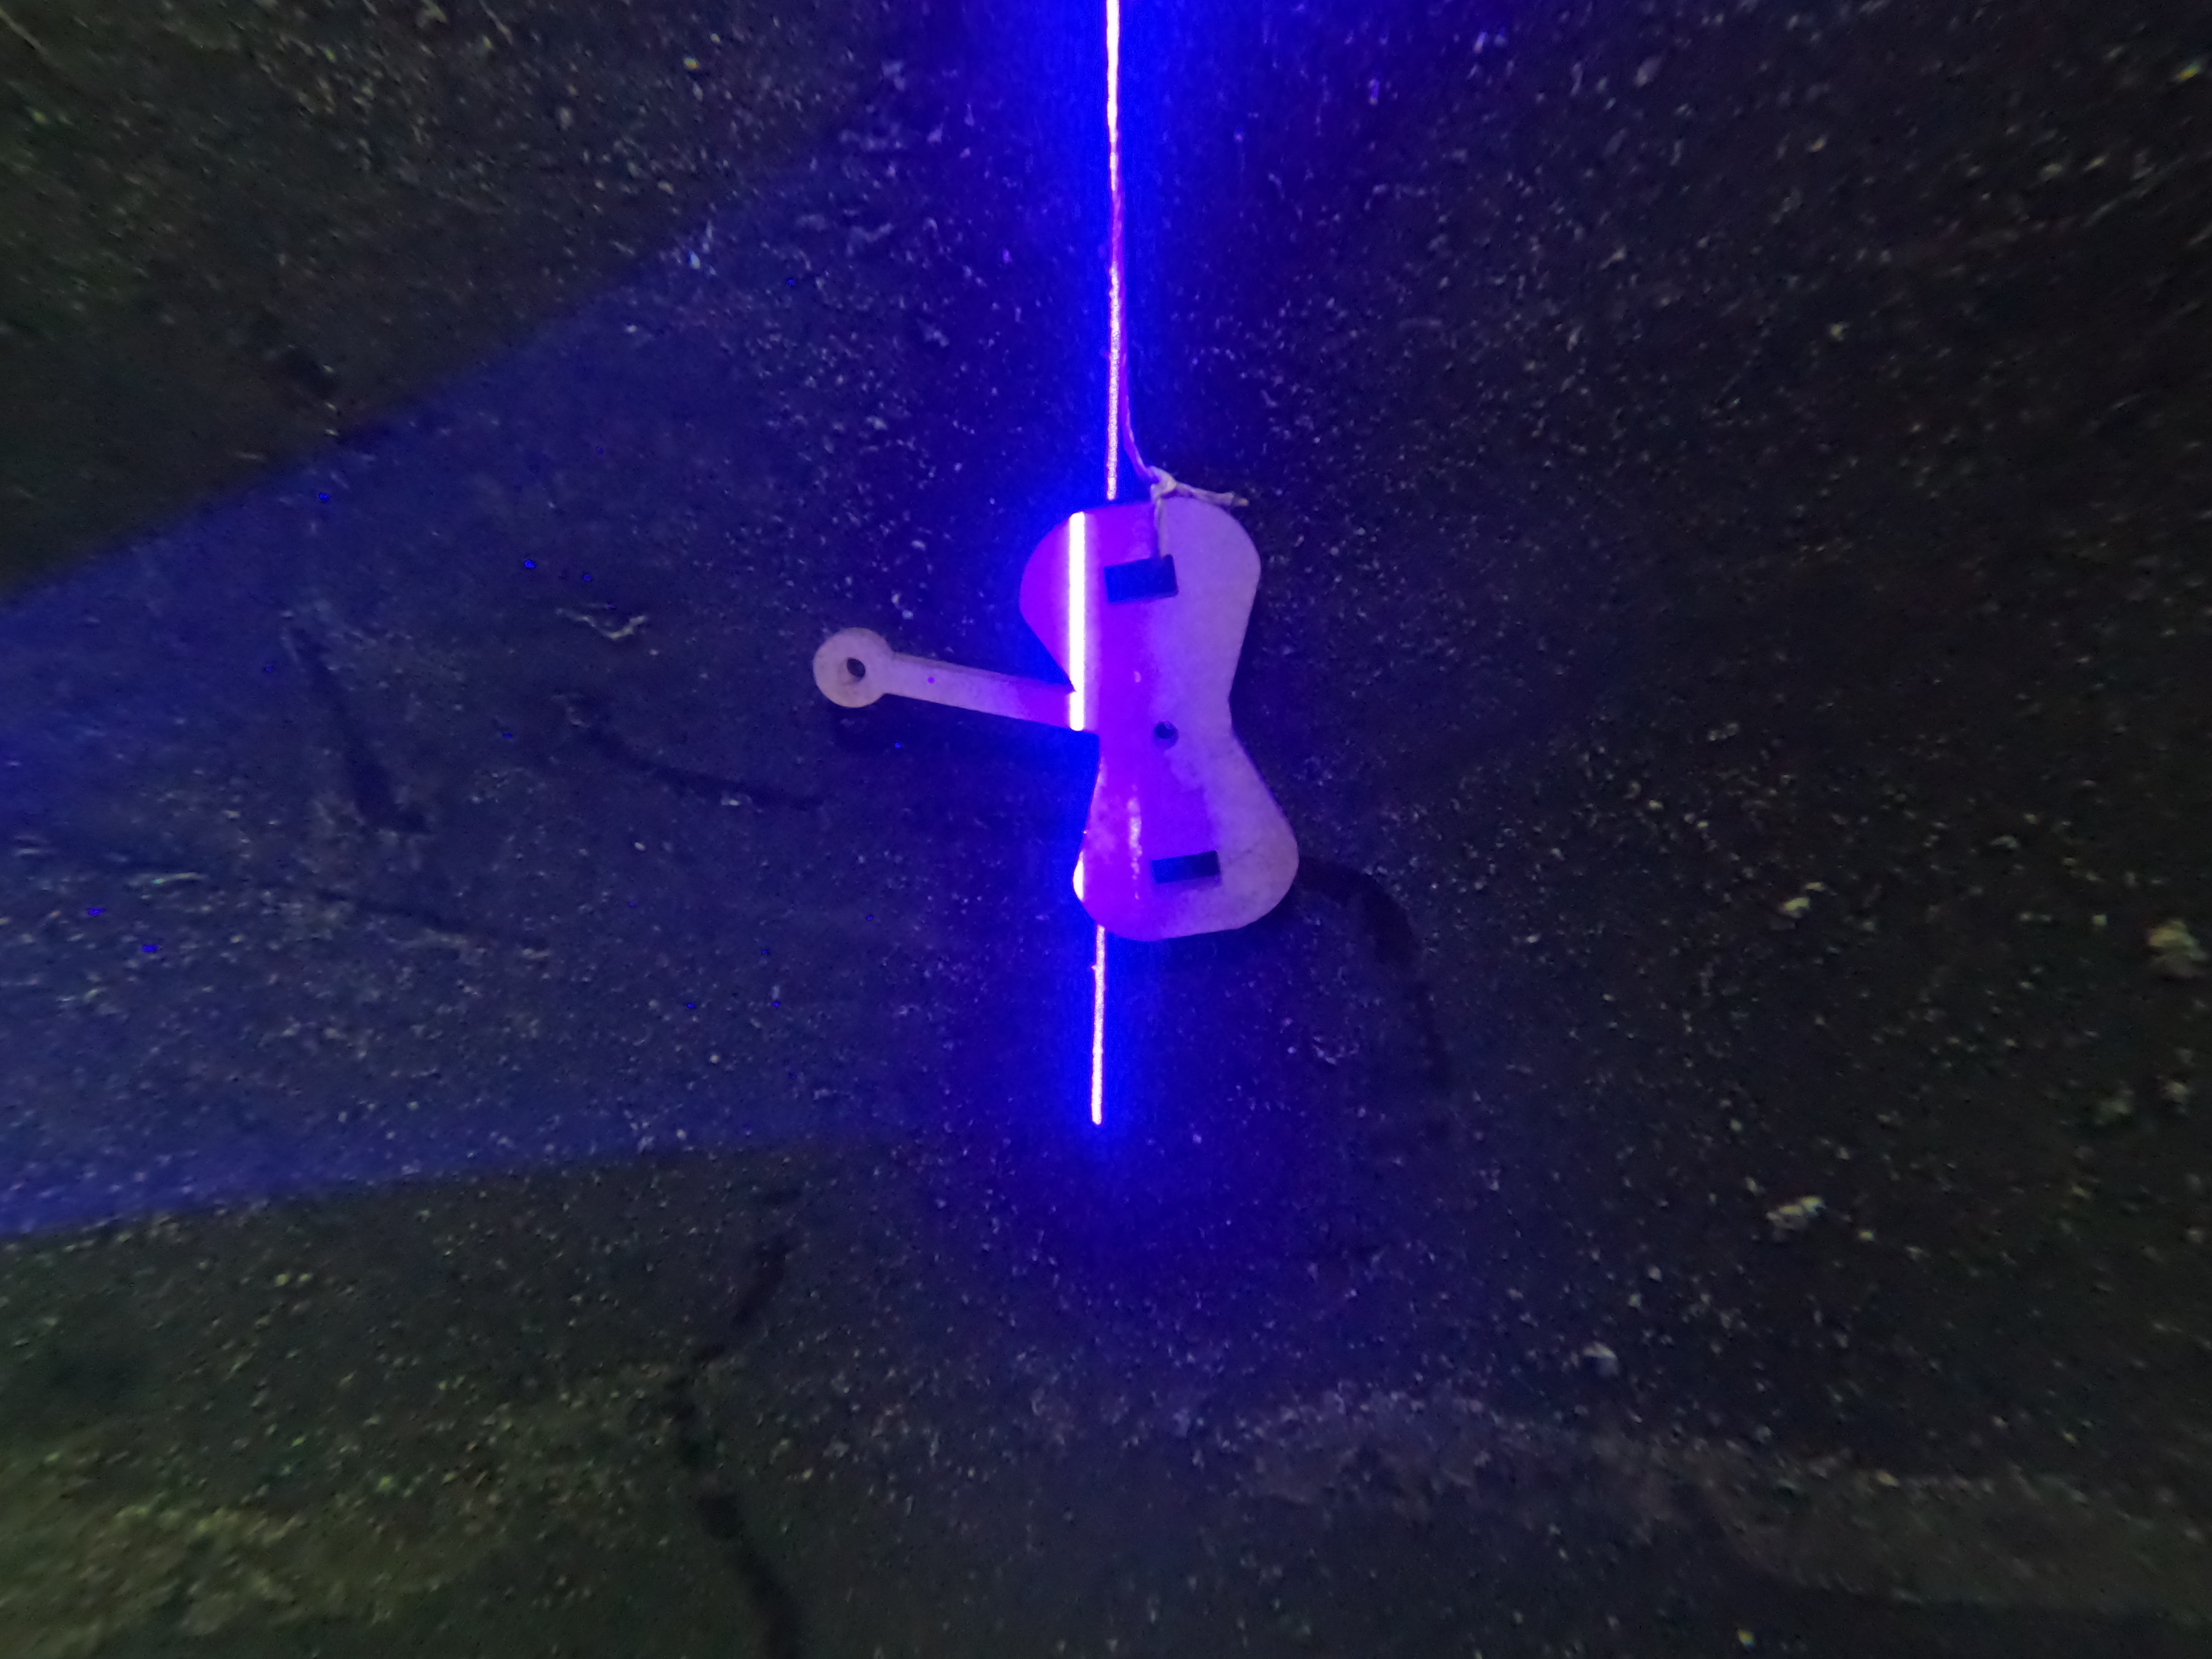

Supplement: Supplementary file 2461 [file G0016039.pdf › Level_2_2/G0016039.pdf]

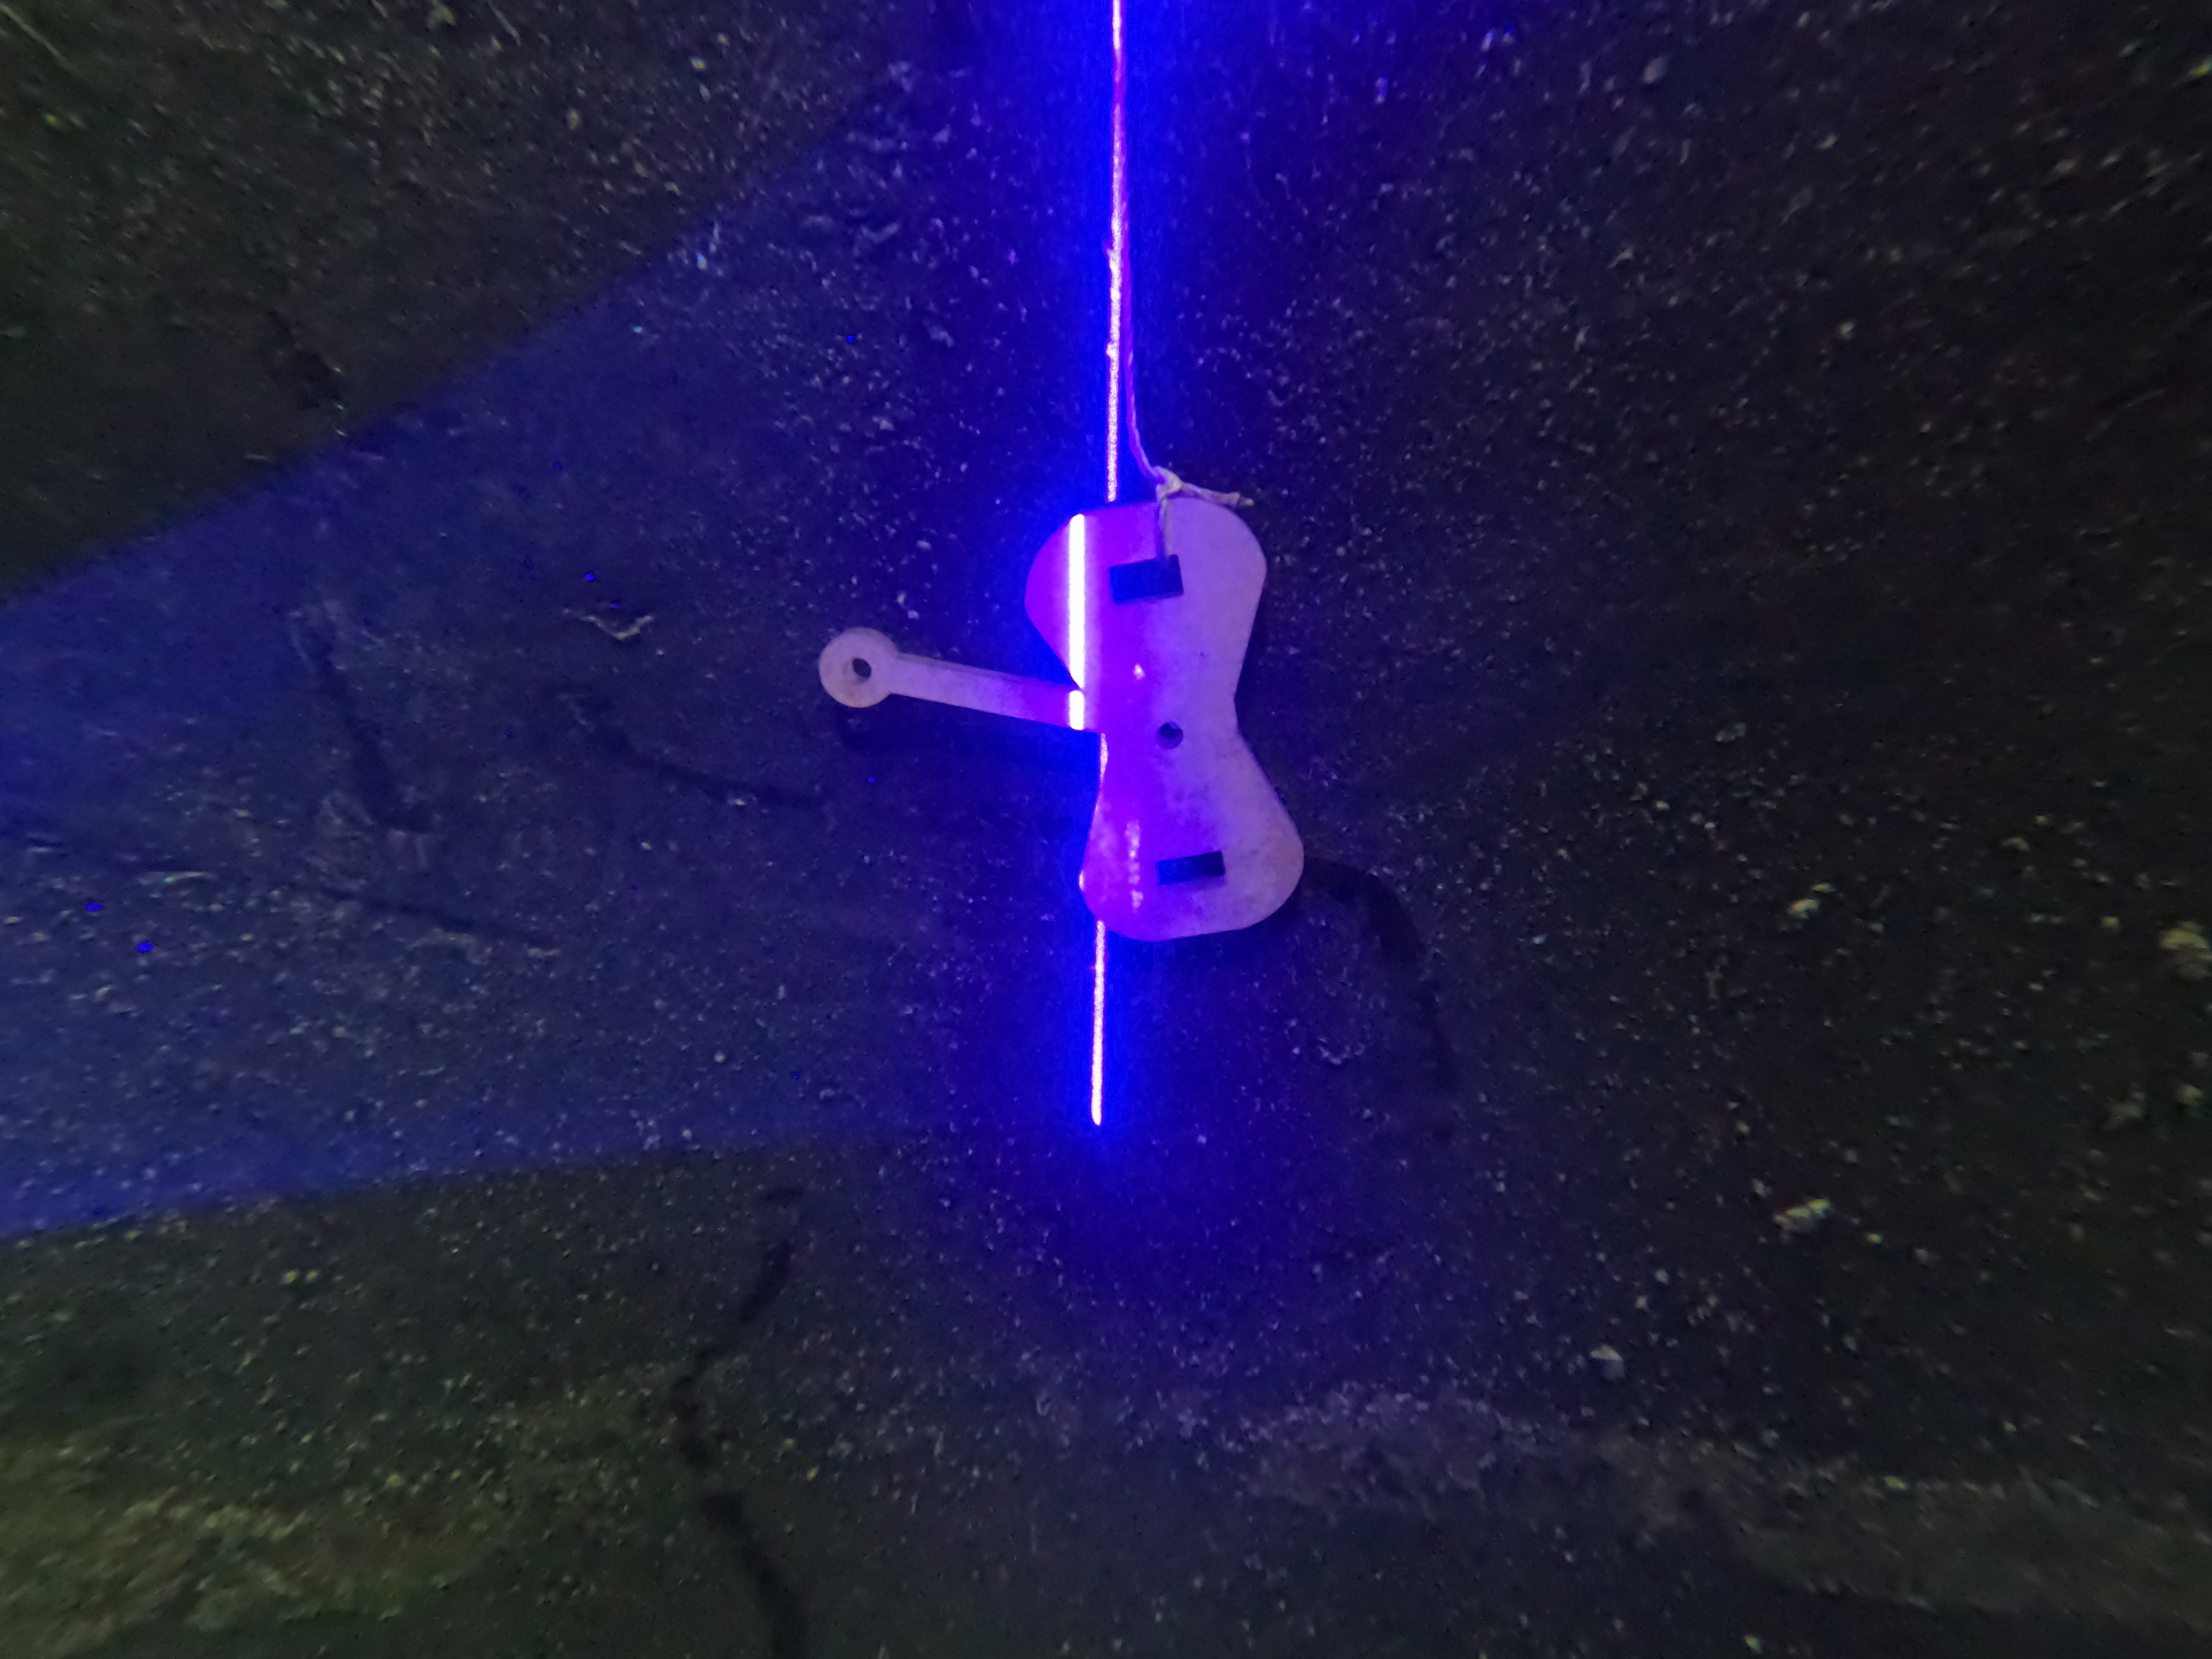

Supplement: Supplementary file 2462 [file G0016040.pdf › Level_2_2/G0016040.pdf]

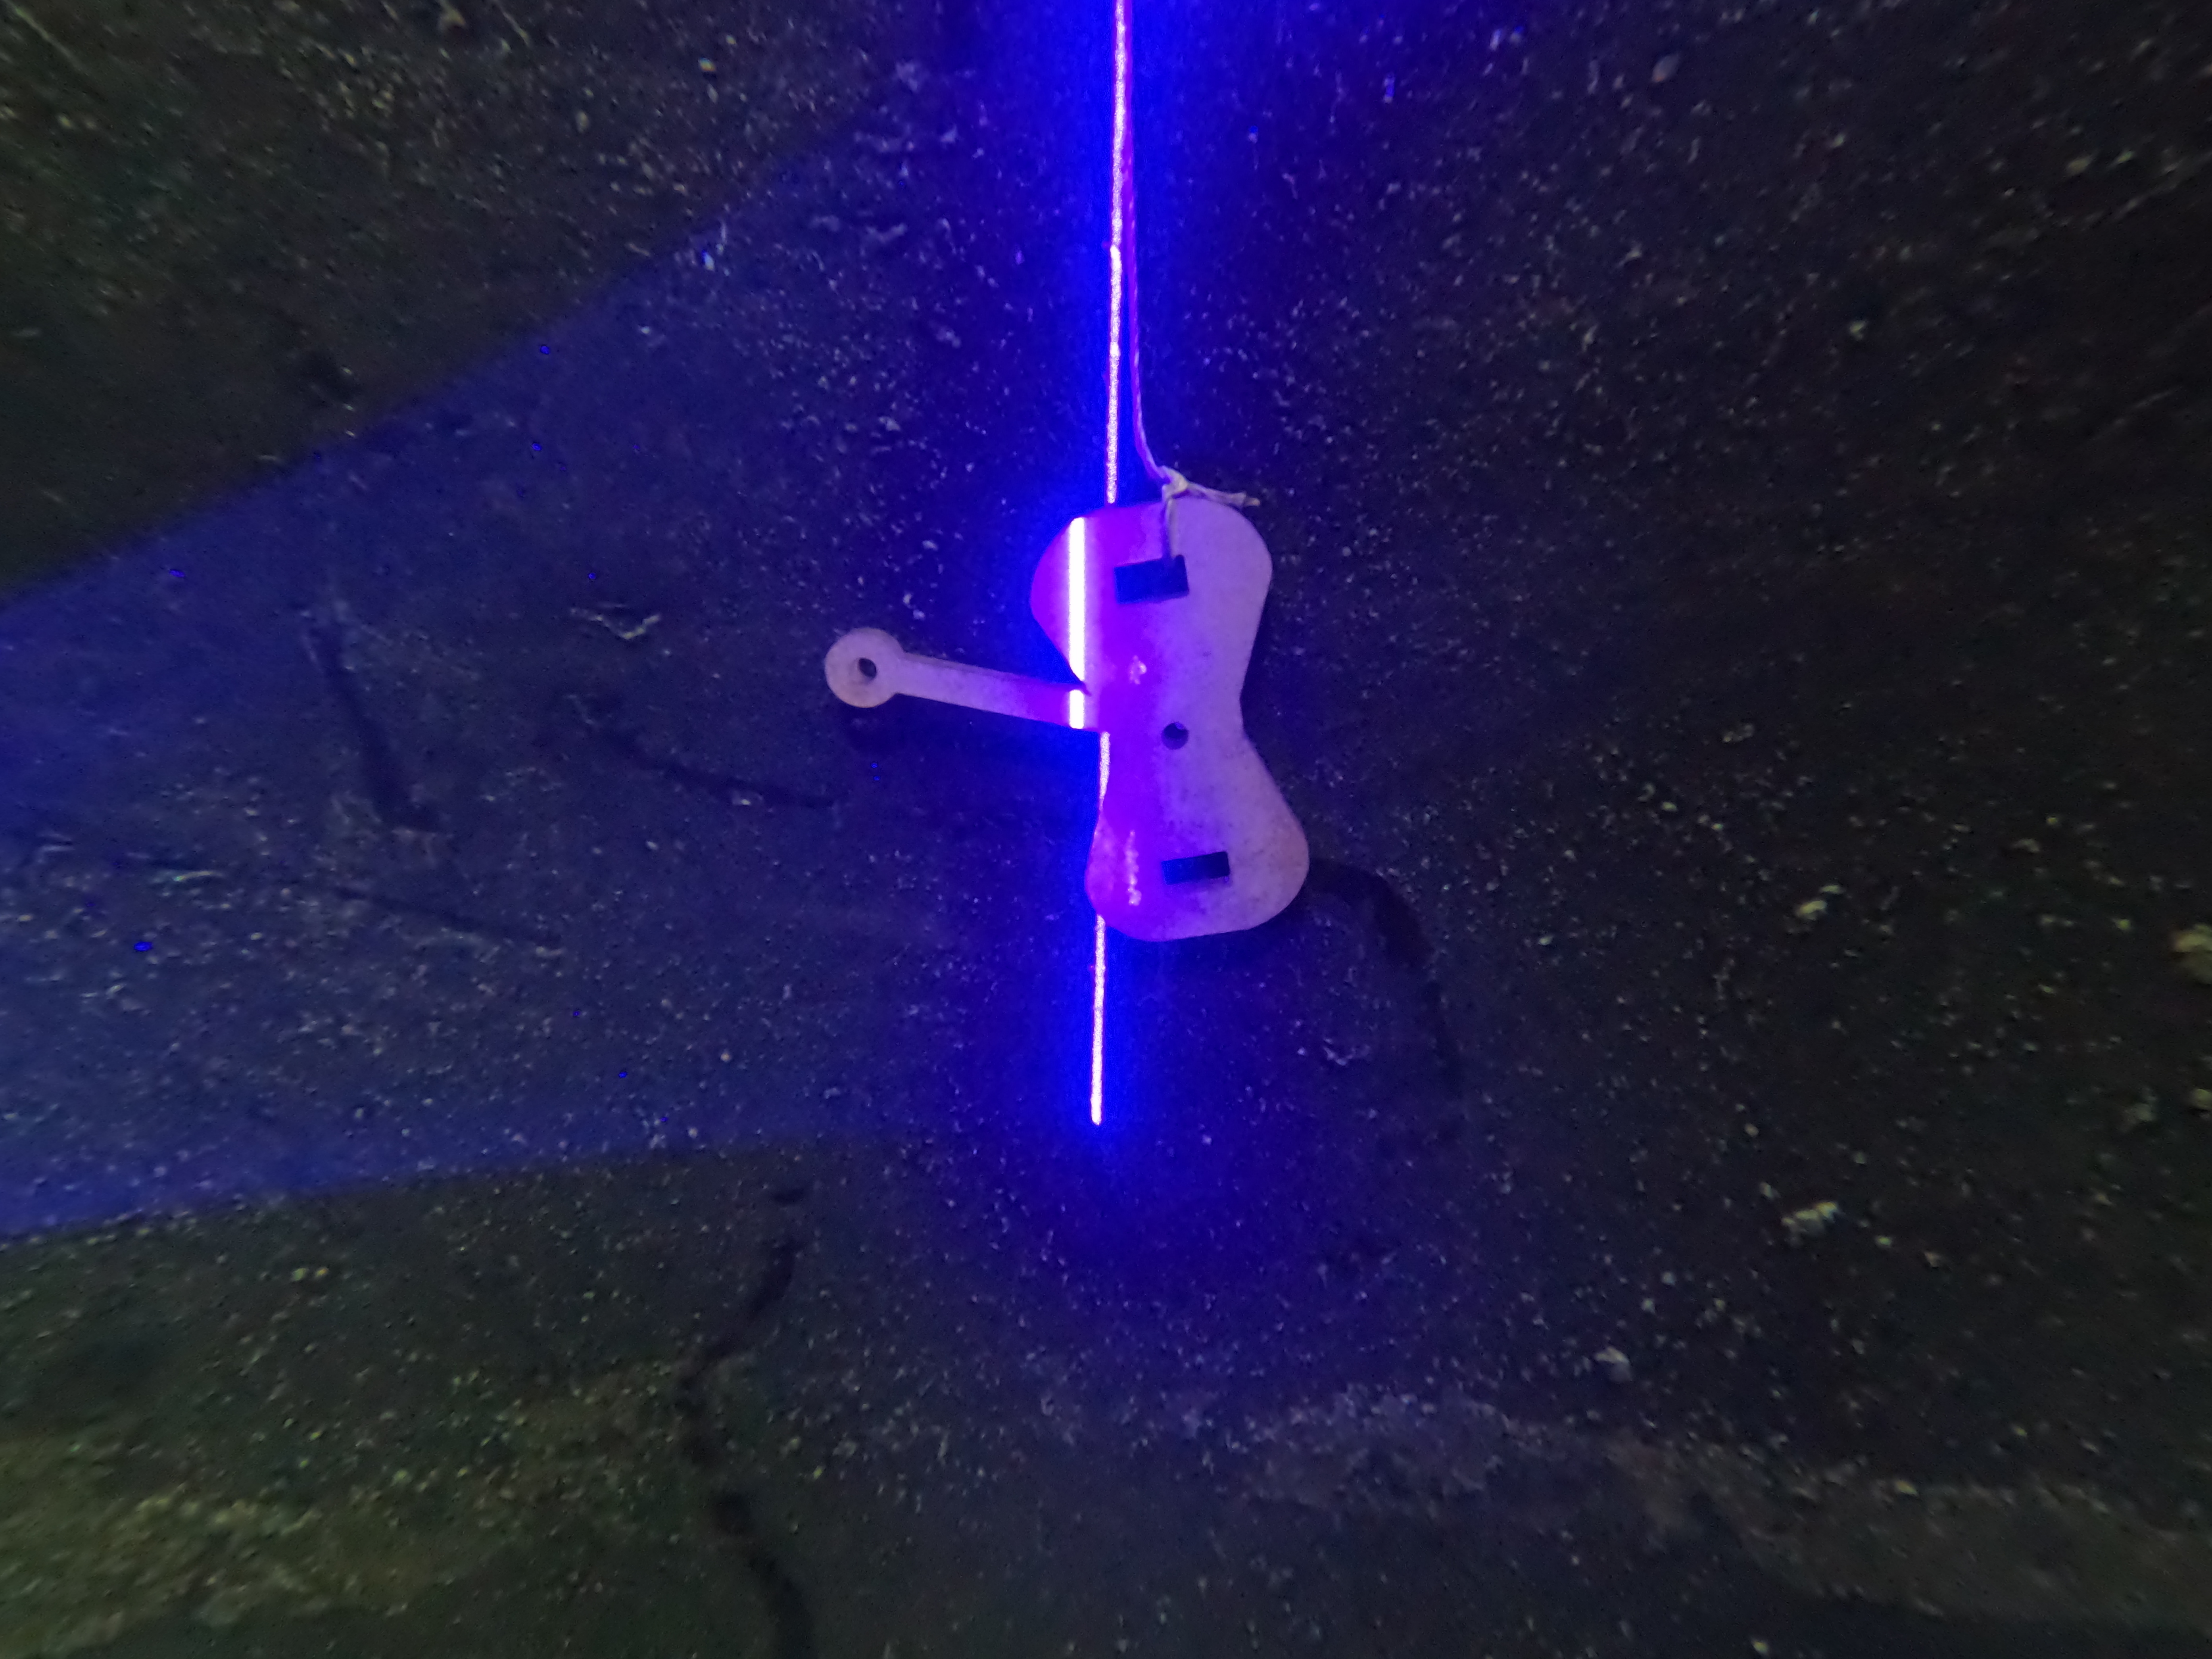

Supplement: Supplementary file 2463 [file G0016041.pdf › Level_2_2/G0016041.pdf]

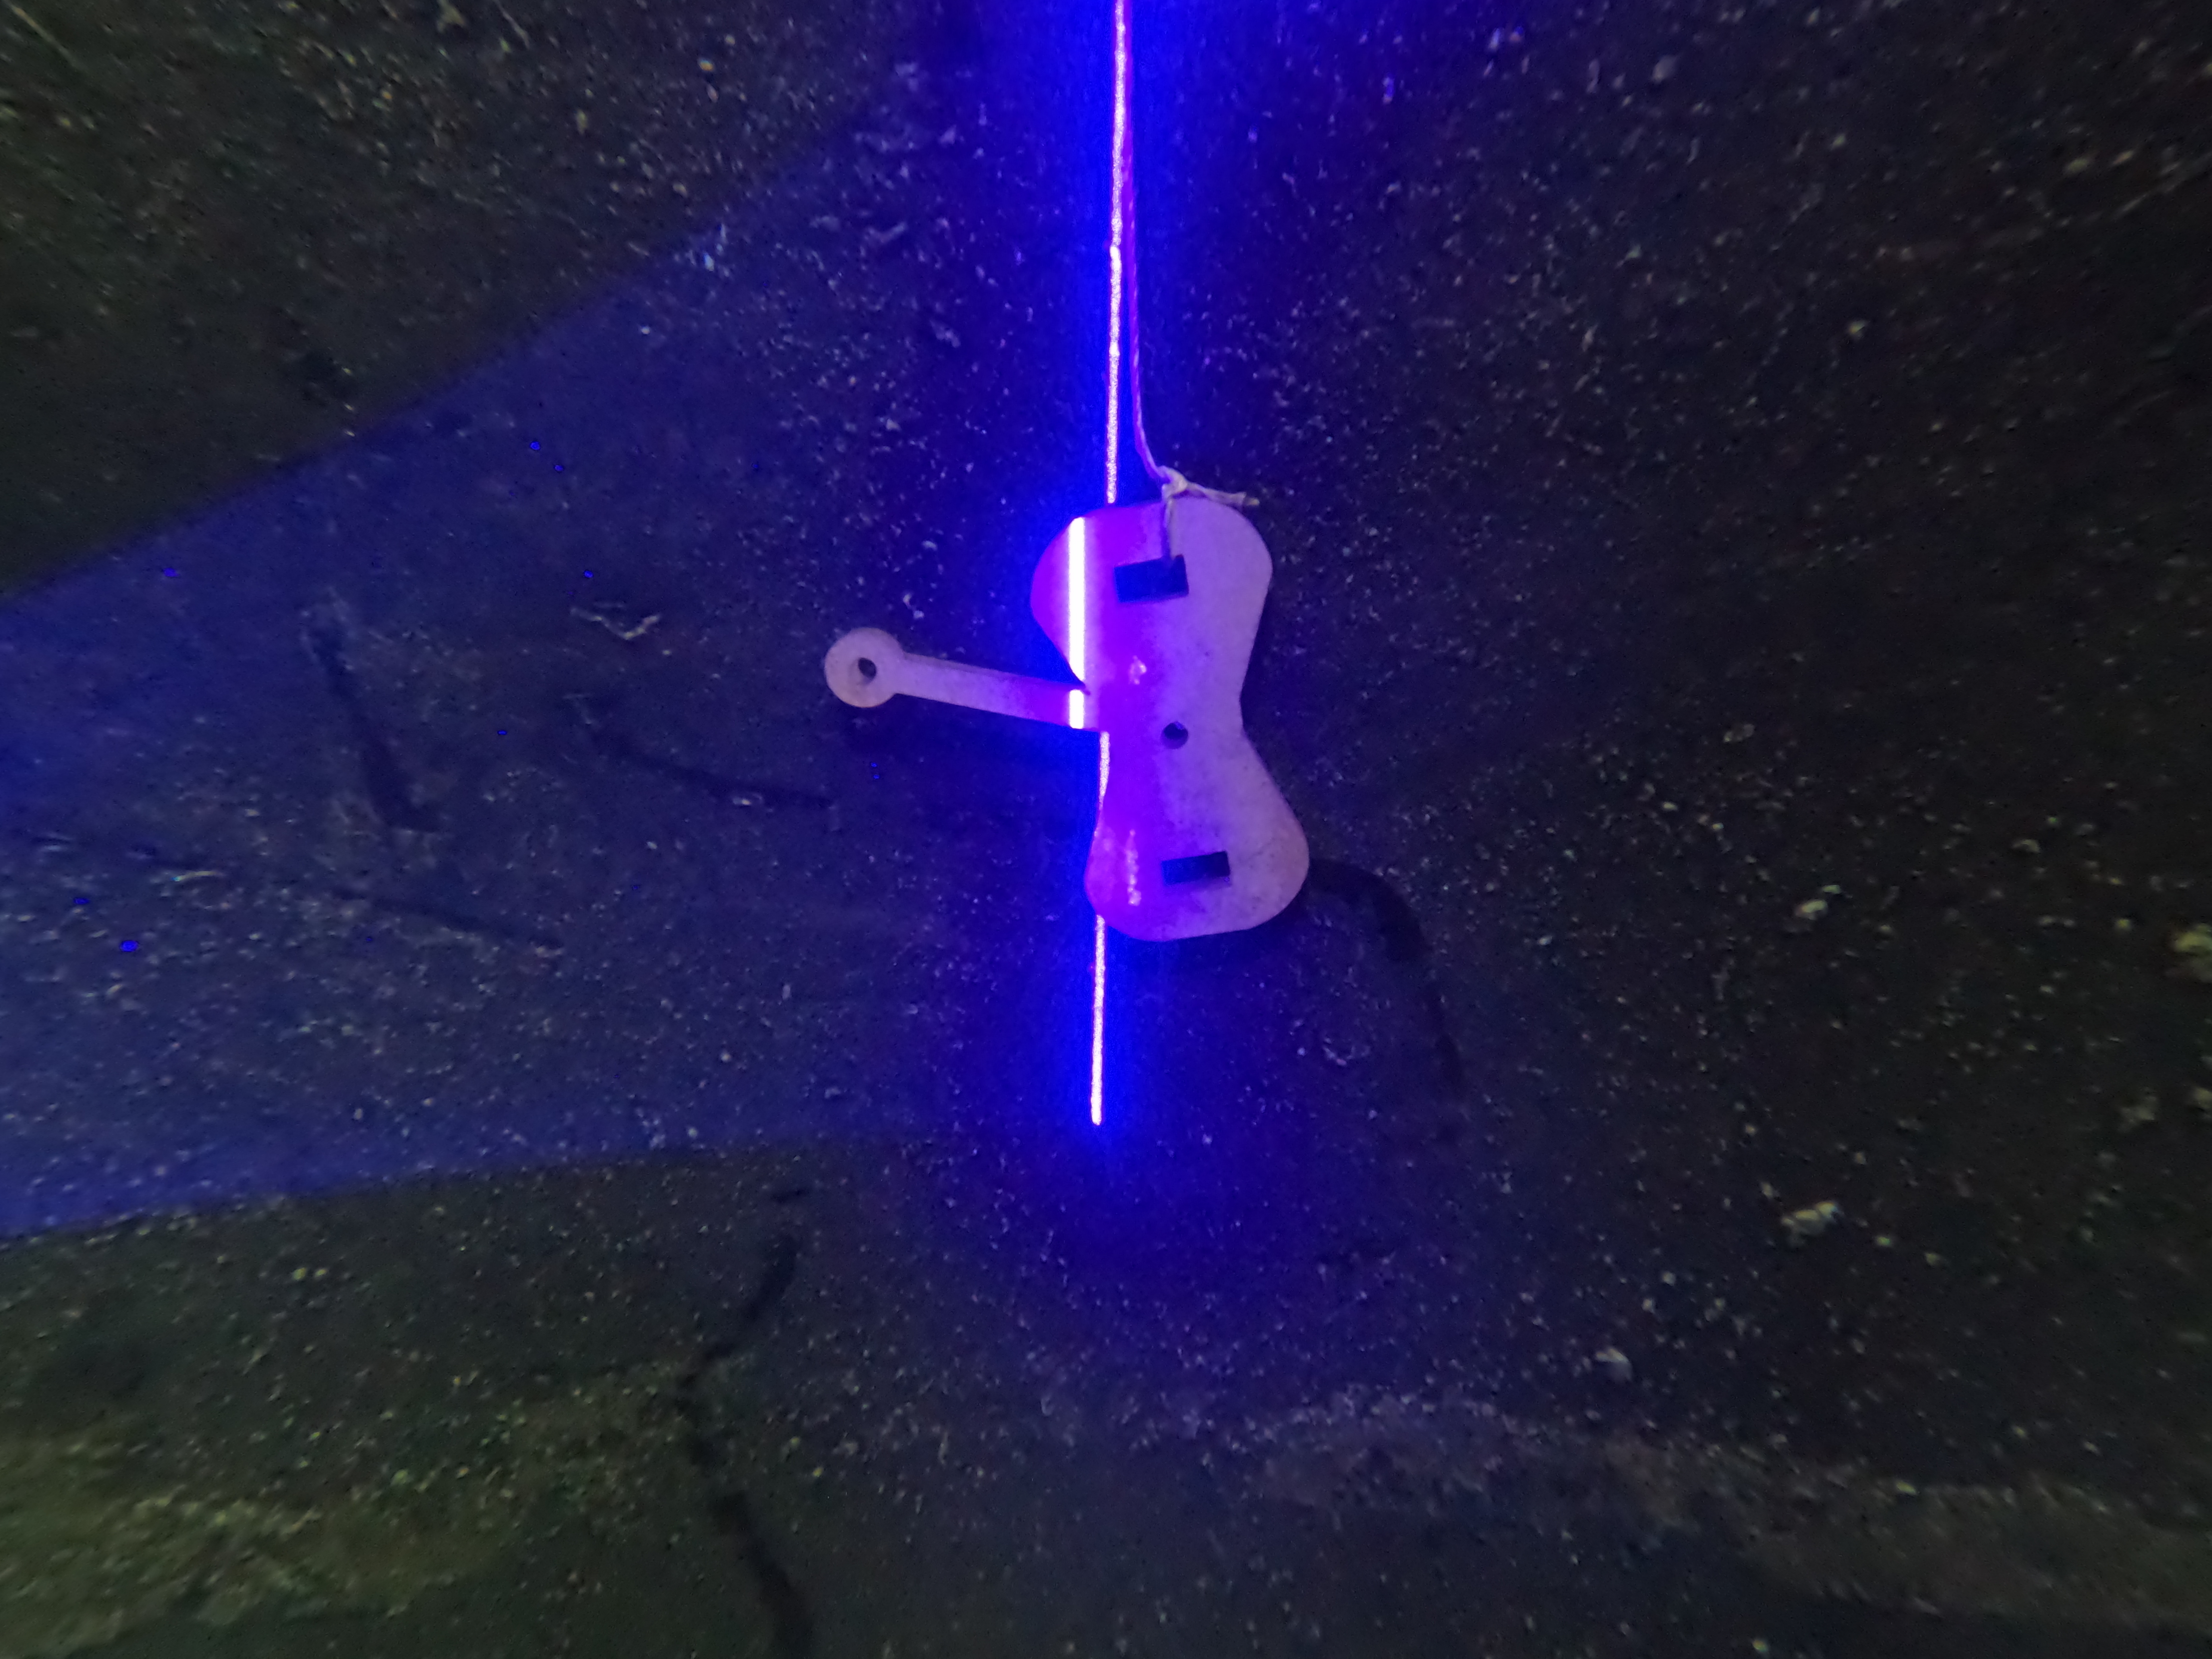

Supplement: Supplementary file 2464 [file G0016042.pdf › Level_2_2/G0016042.pdf]

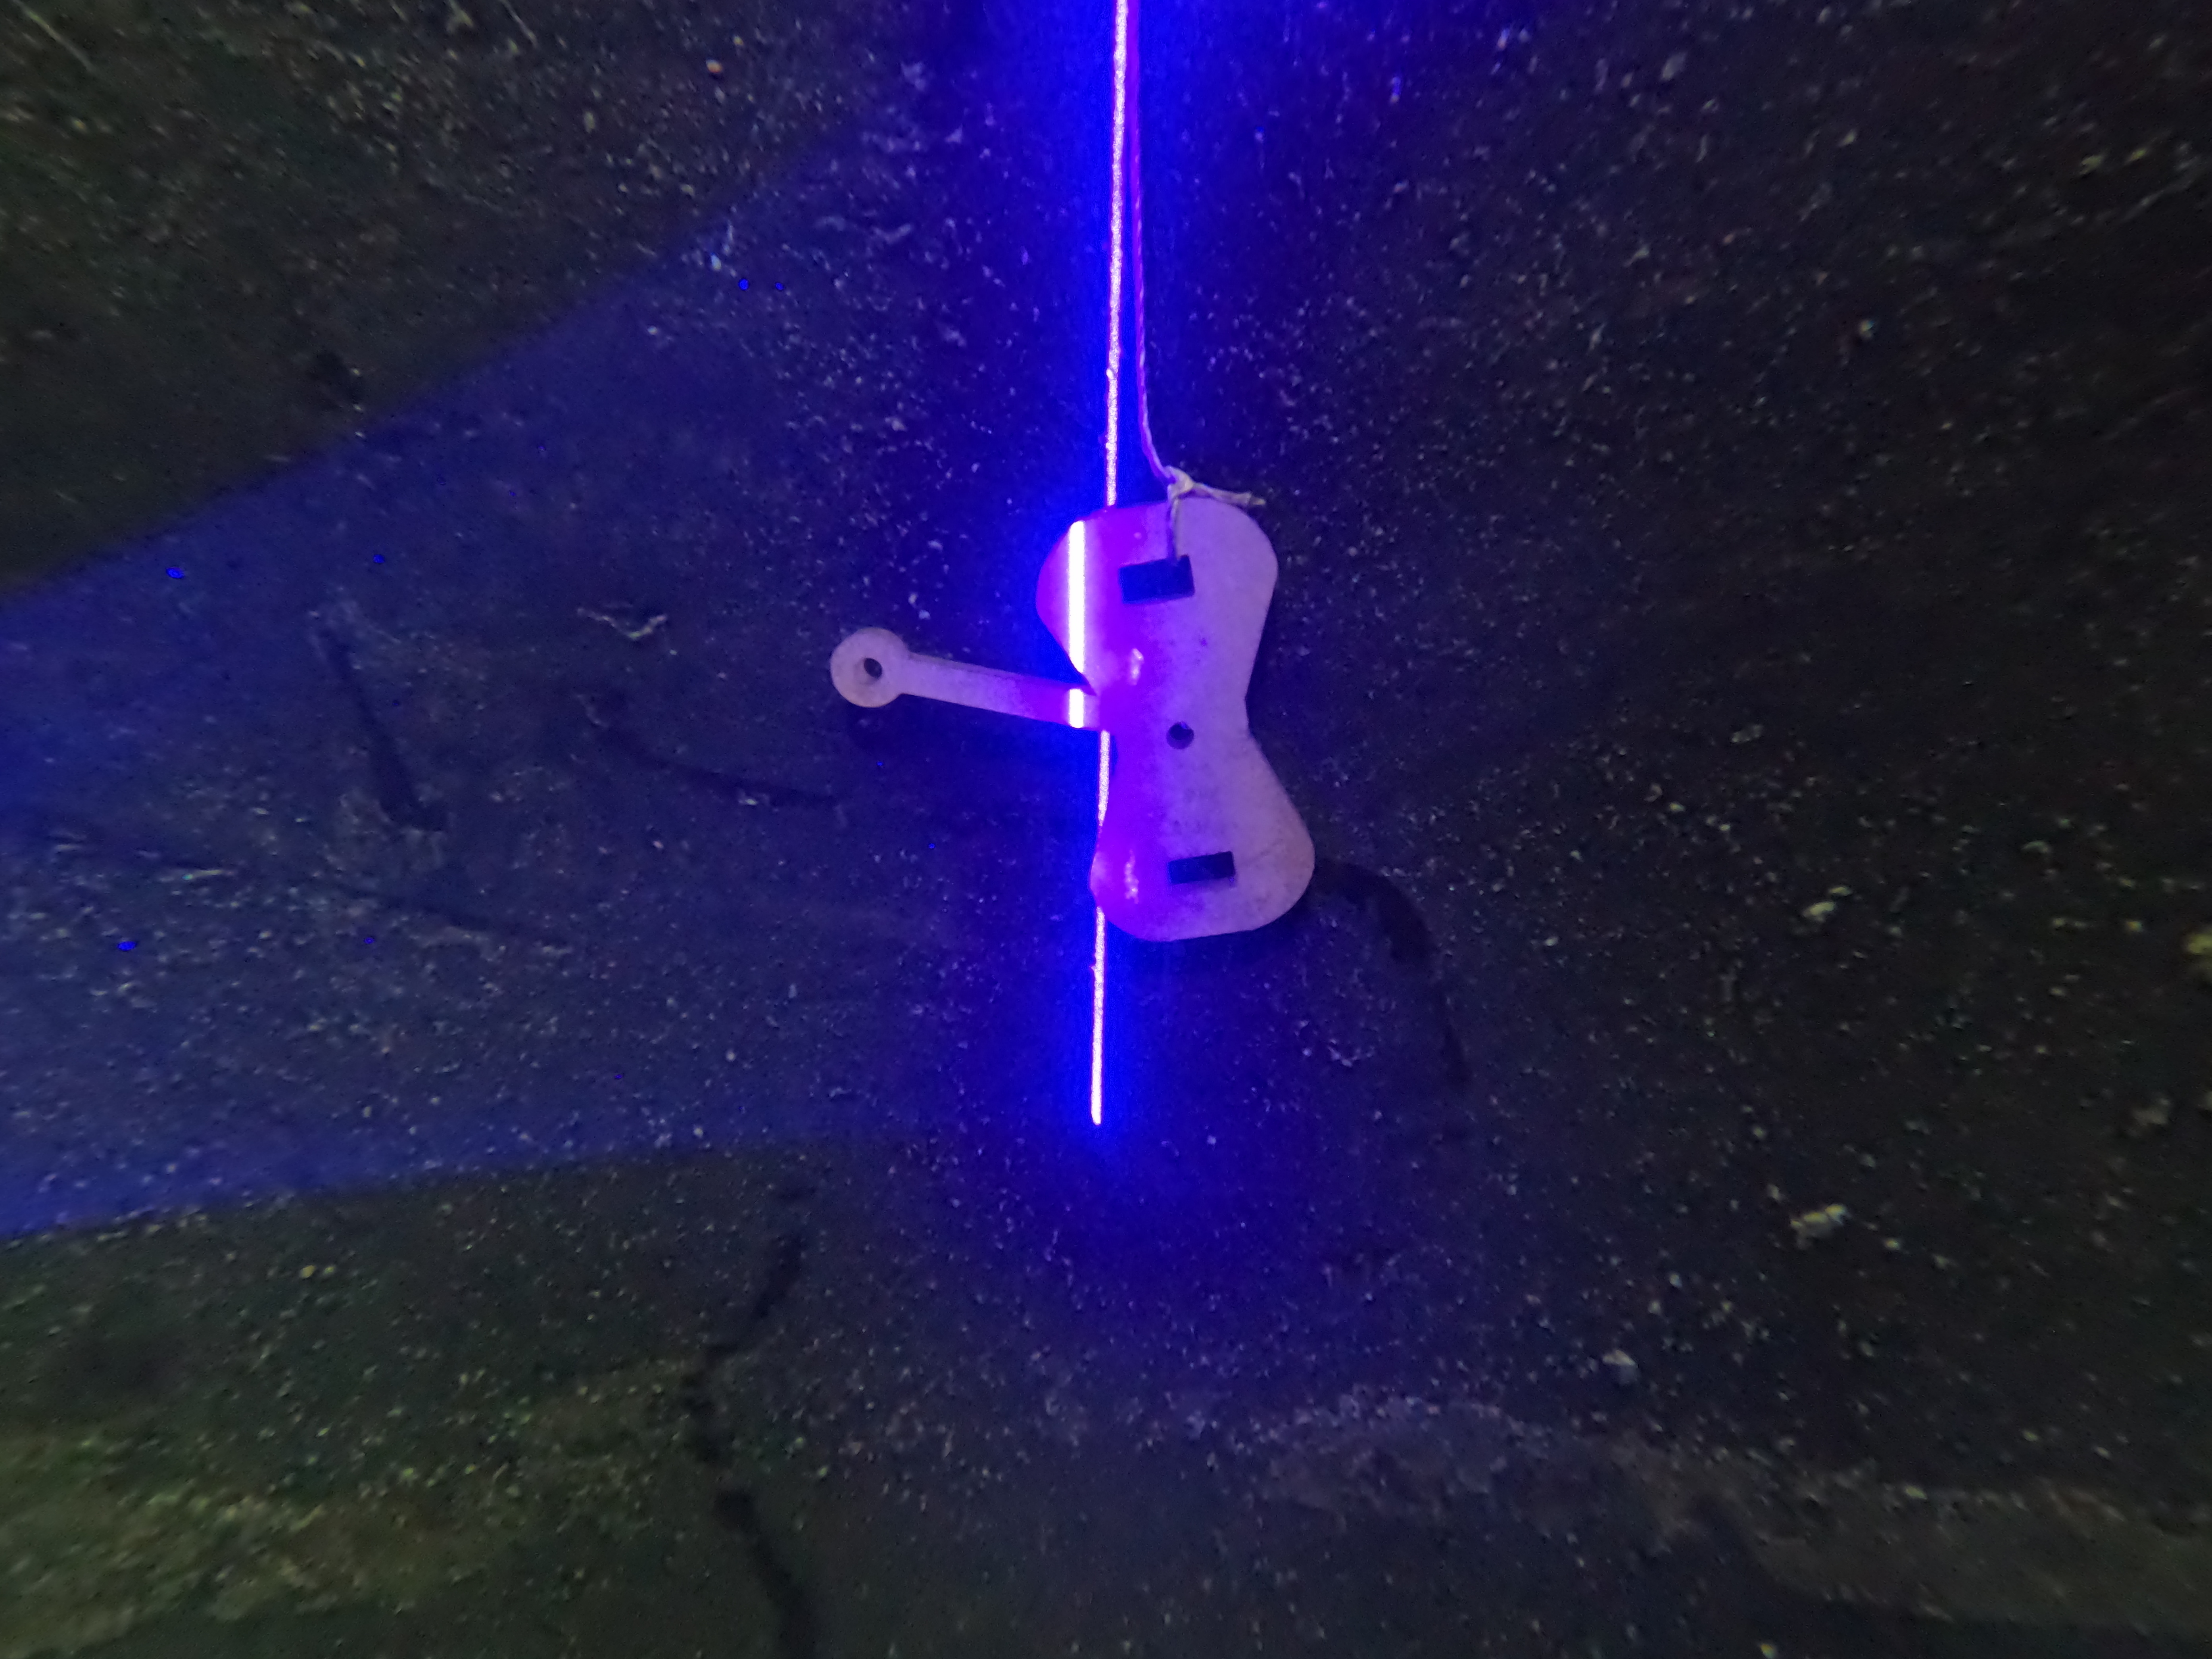

Supplement: Supplementary file 2465 [file G0016043.pdf › Level_2_2/G0016043.pdf]

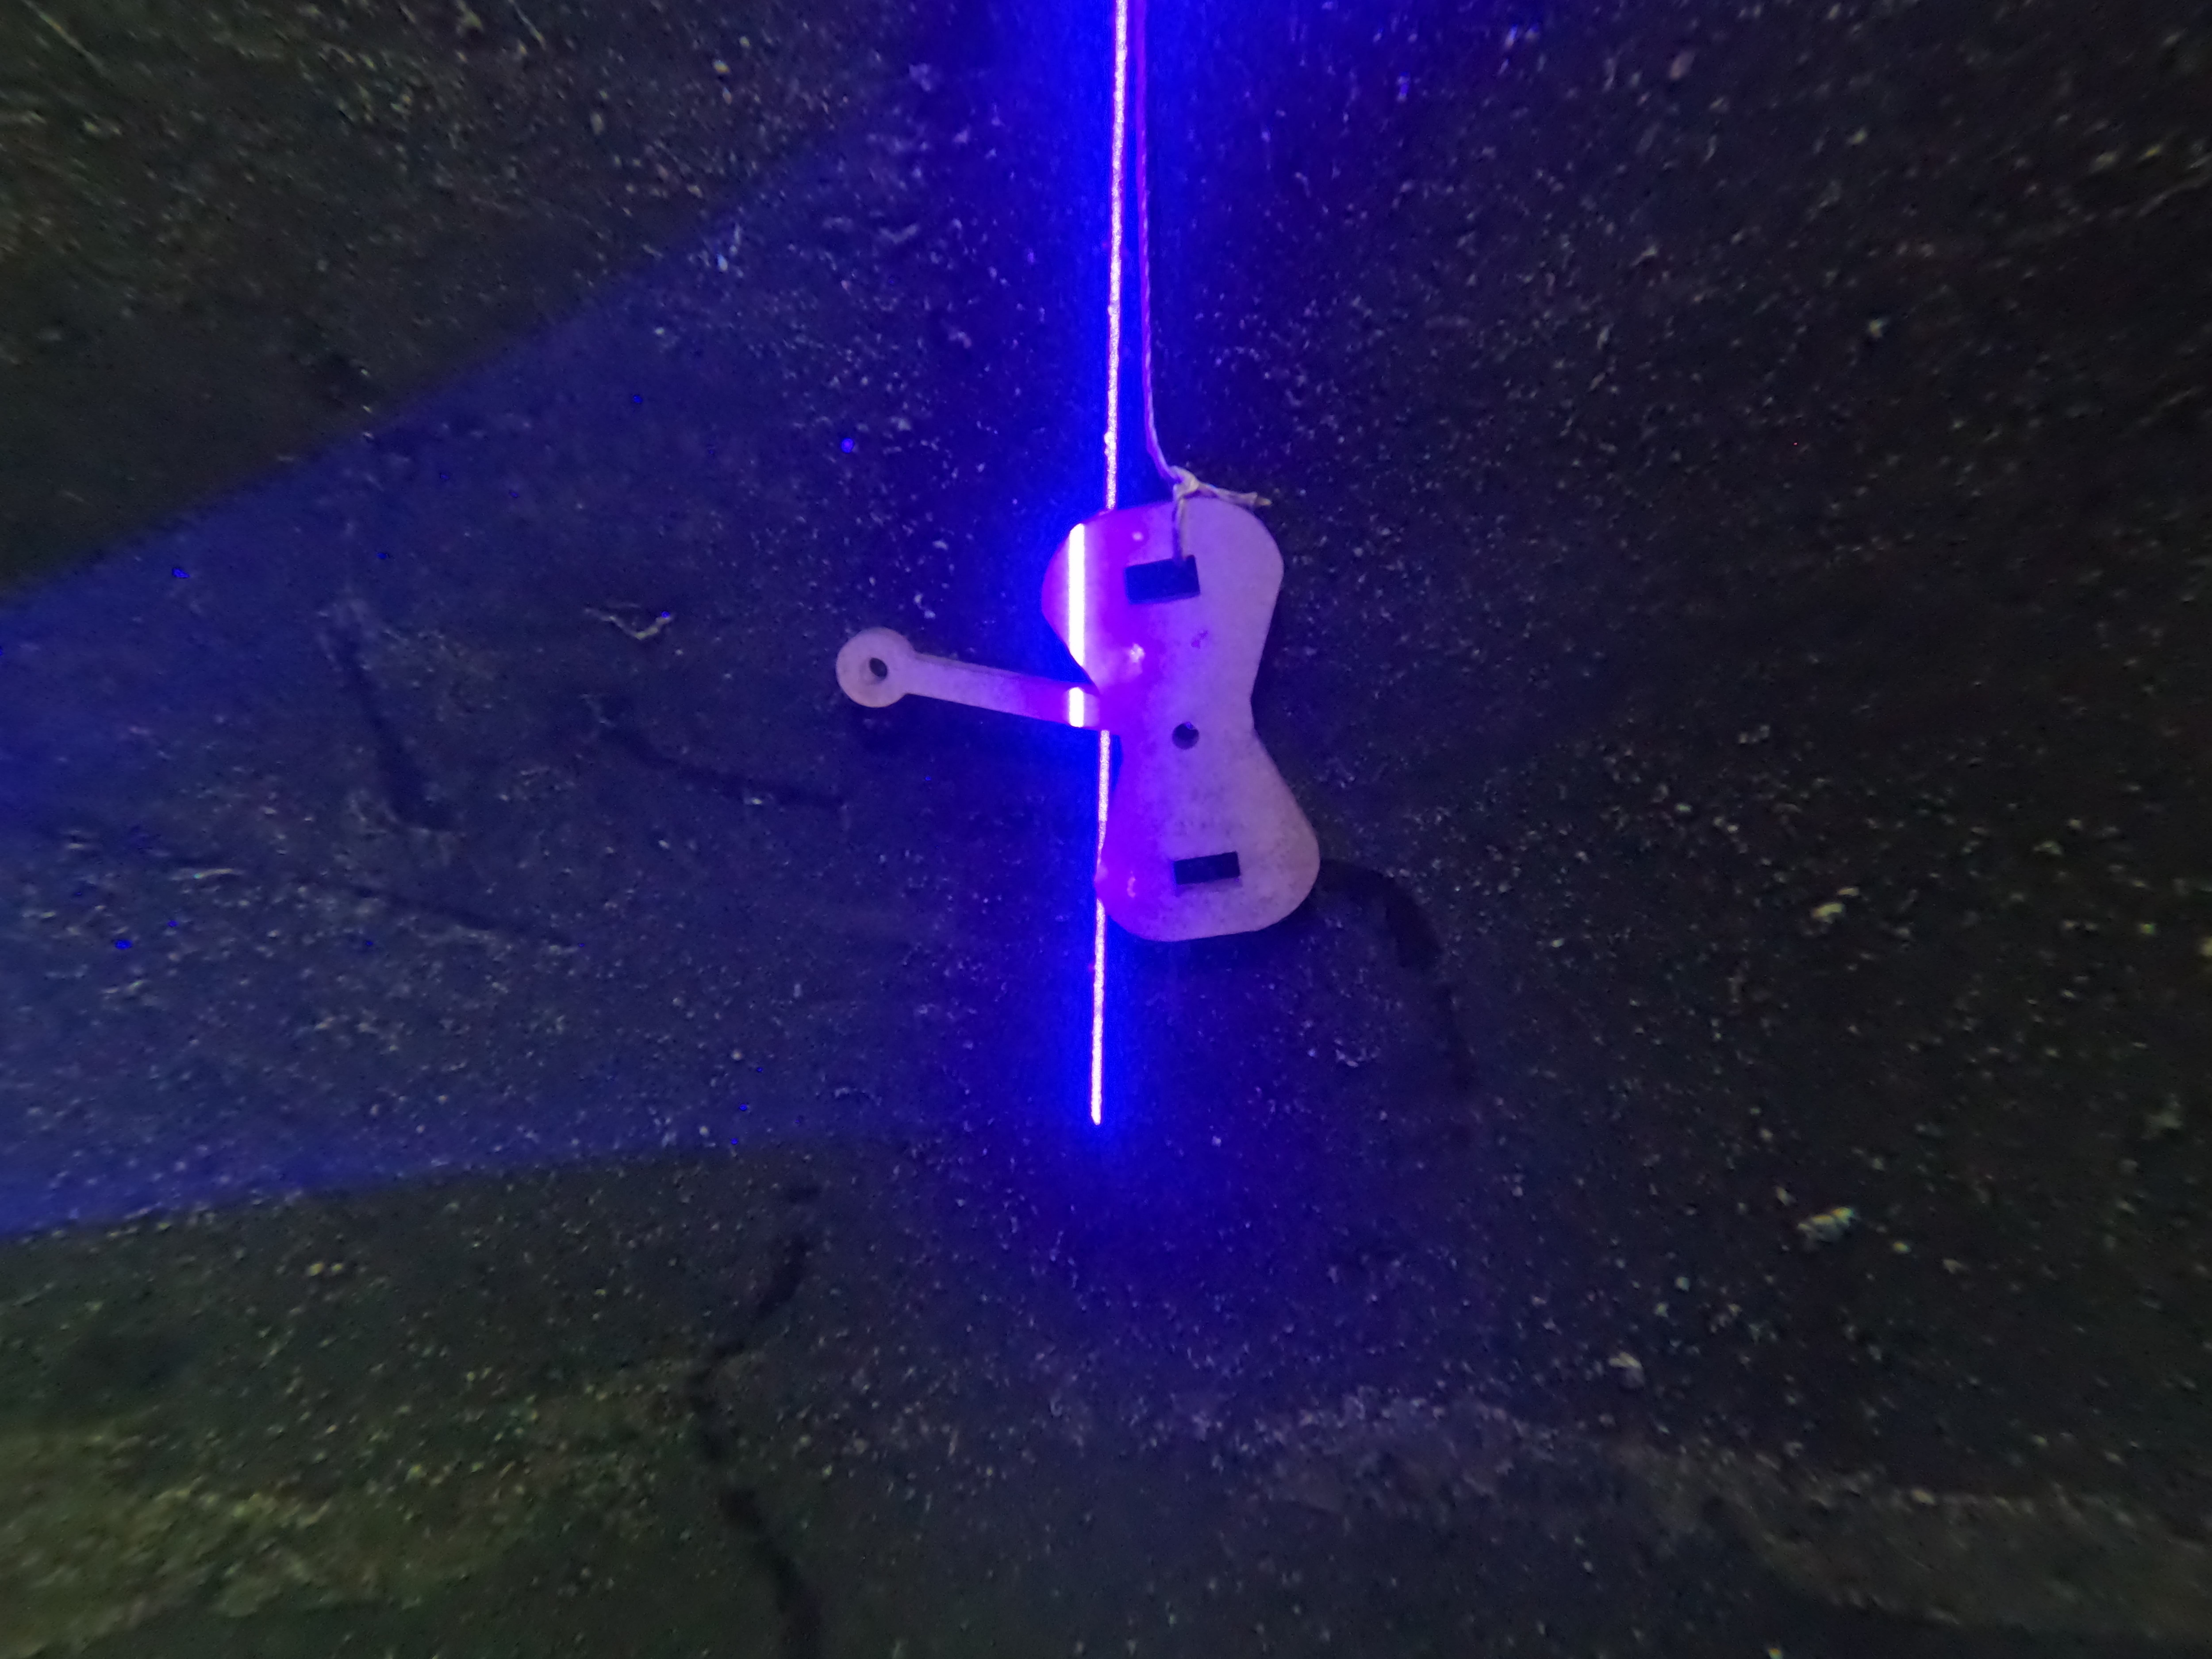

Supplement: Supplementary file 2466 [file G0016044.pdf › Level_2_2/G0016044.pdf]

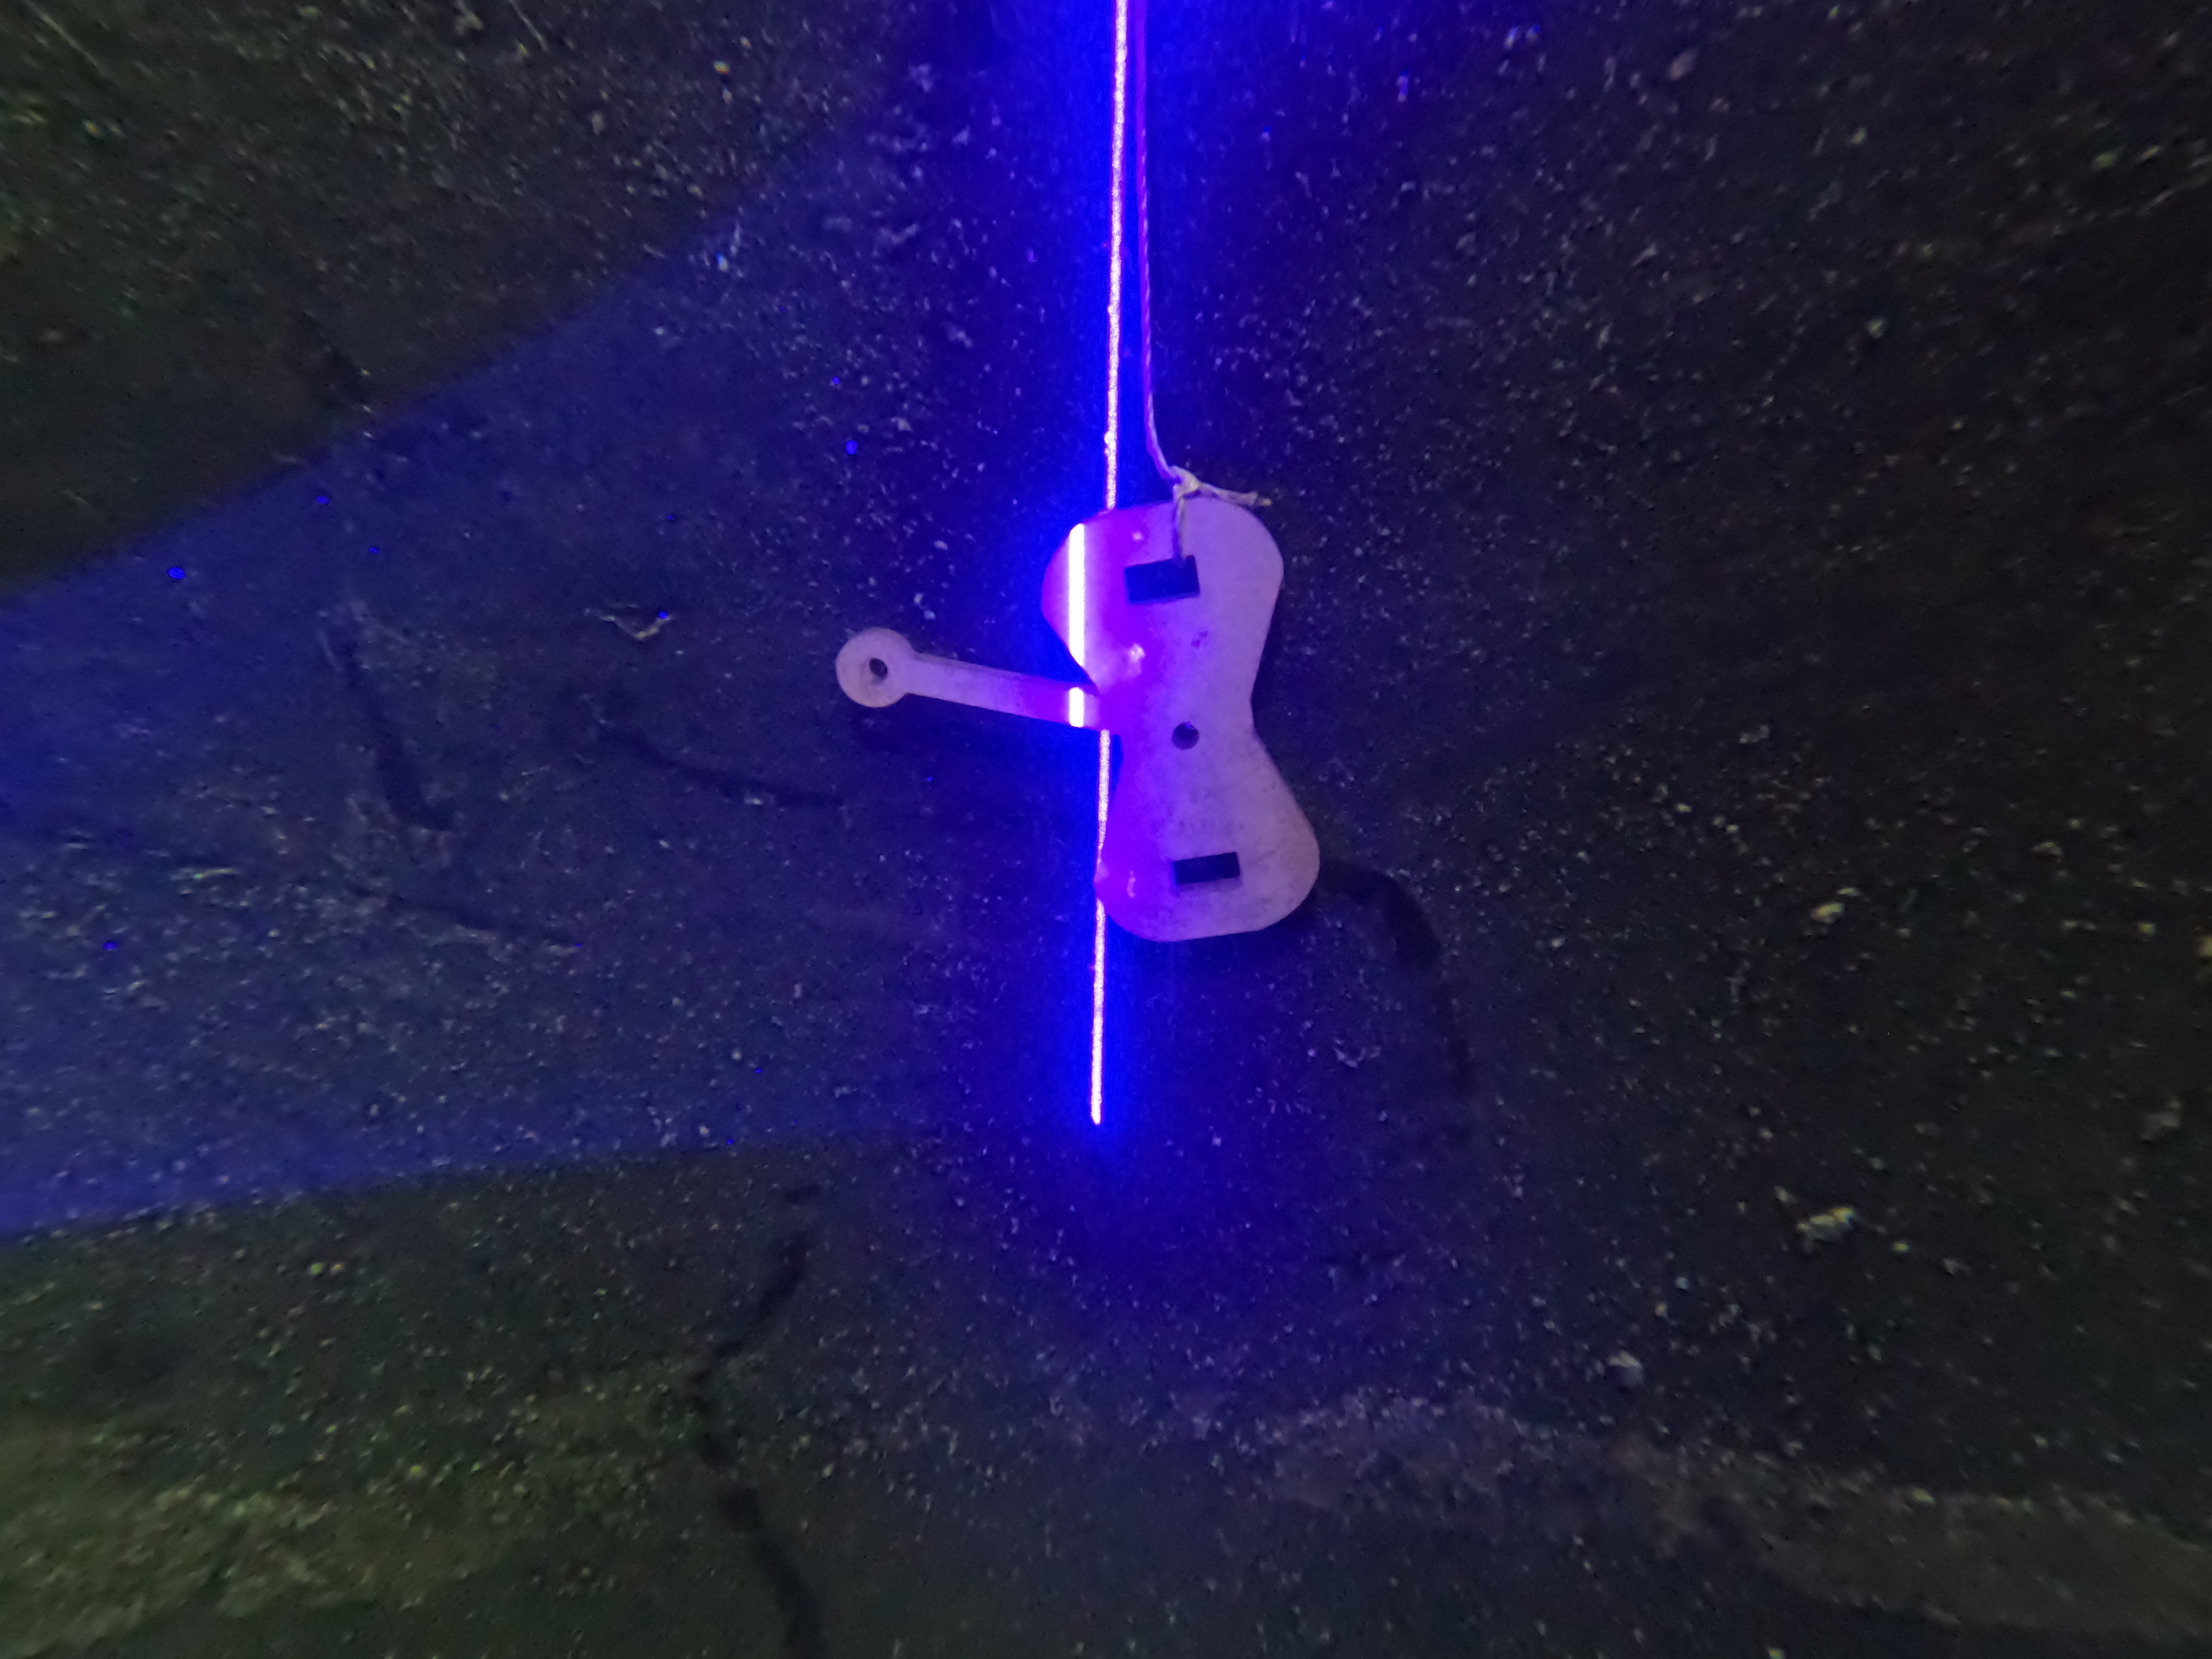

Supplement: Supplementary file 2467 [file G0016045.pdf › Level_2_2/G0016045.pdf]

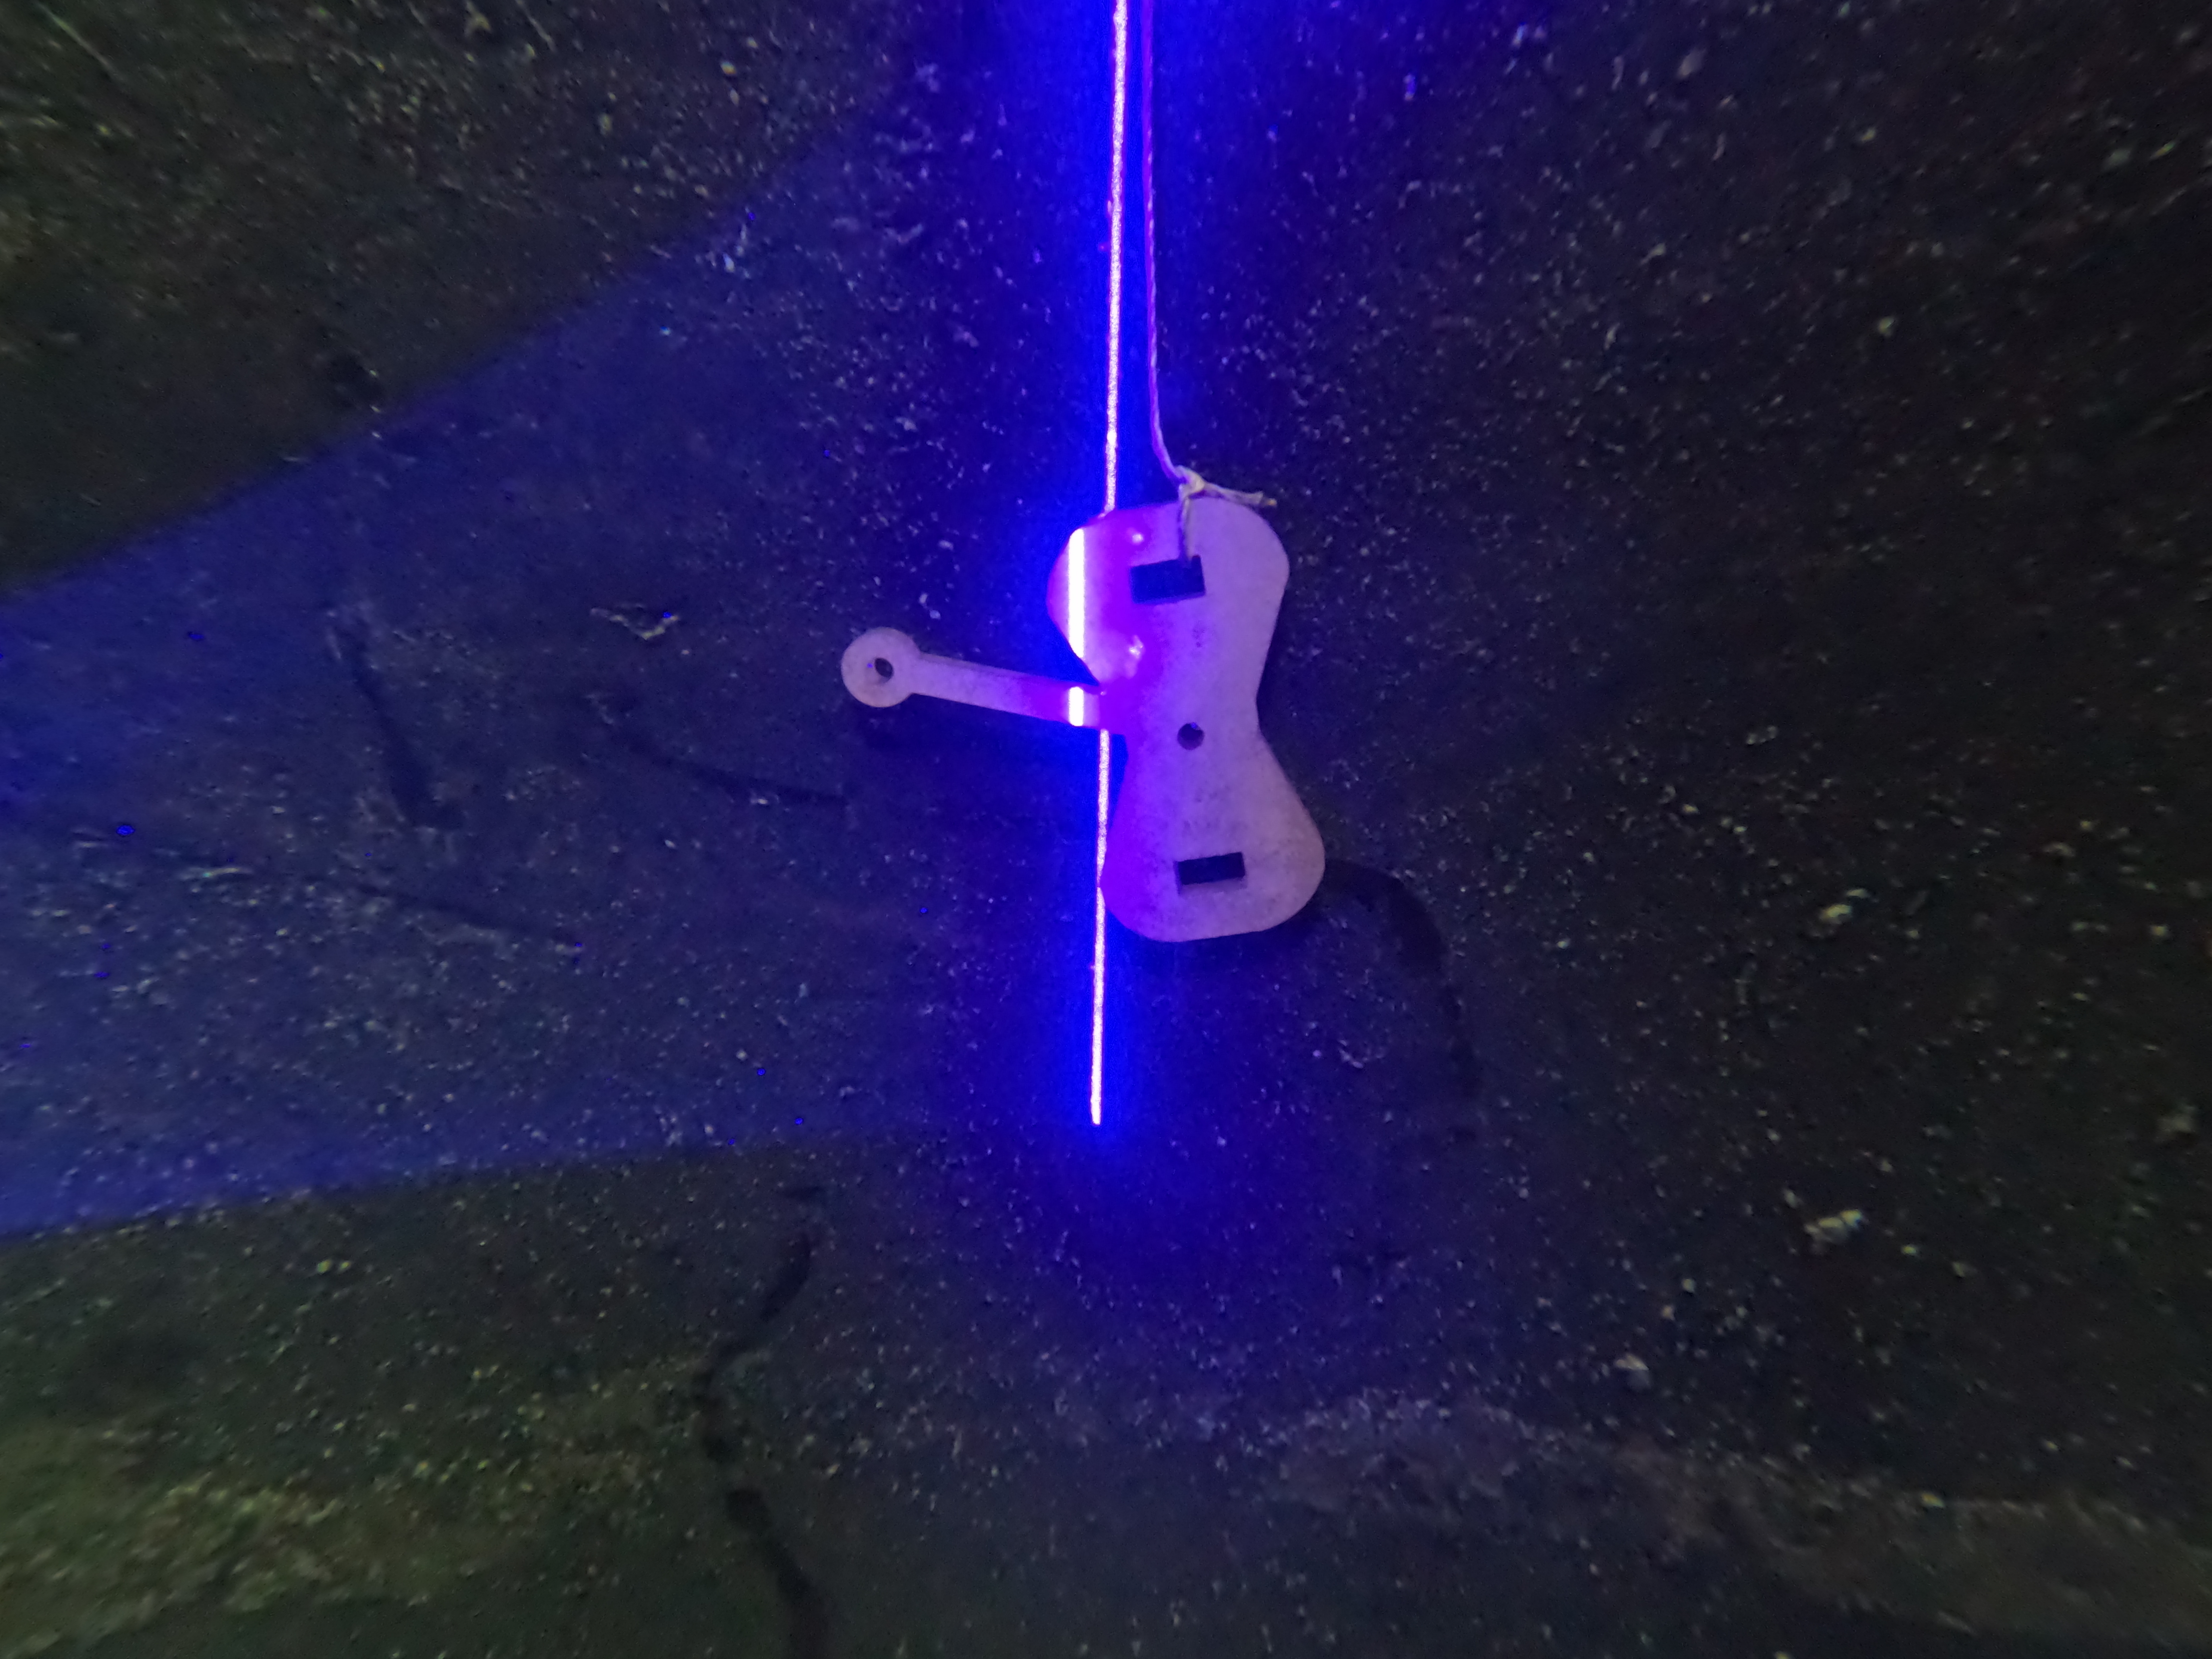

Supplement: Supplementary file 2468 [file G0016046.pdf › Level_2_2/G0016046.pdf]

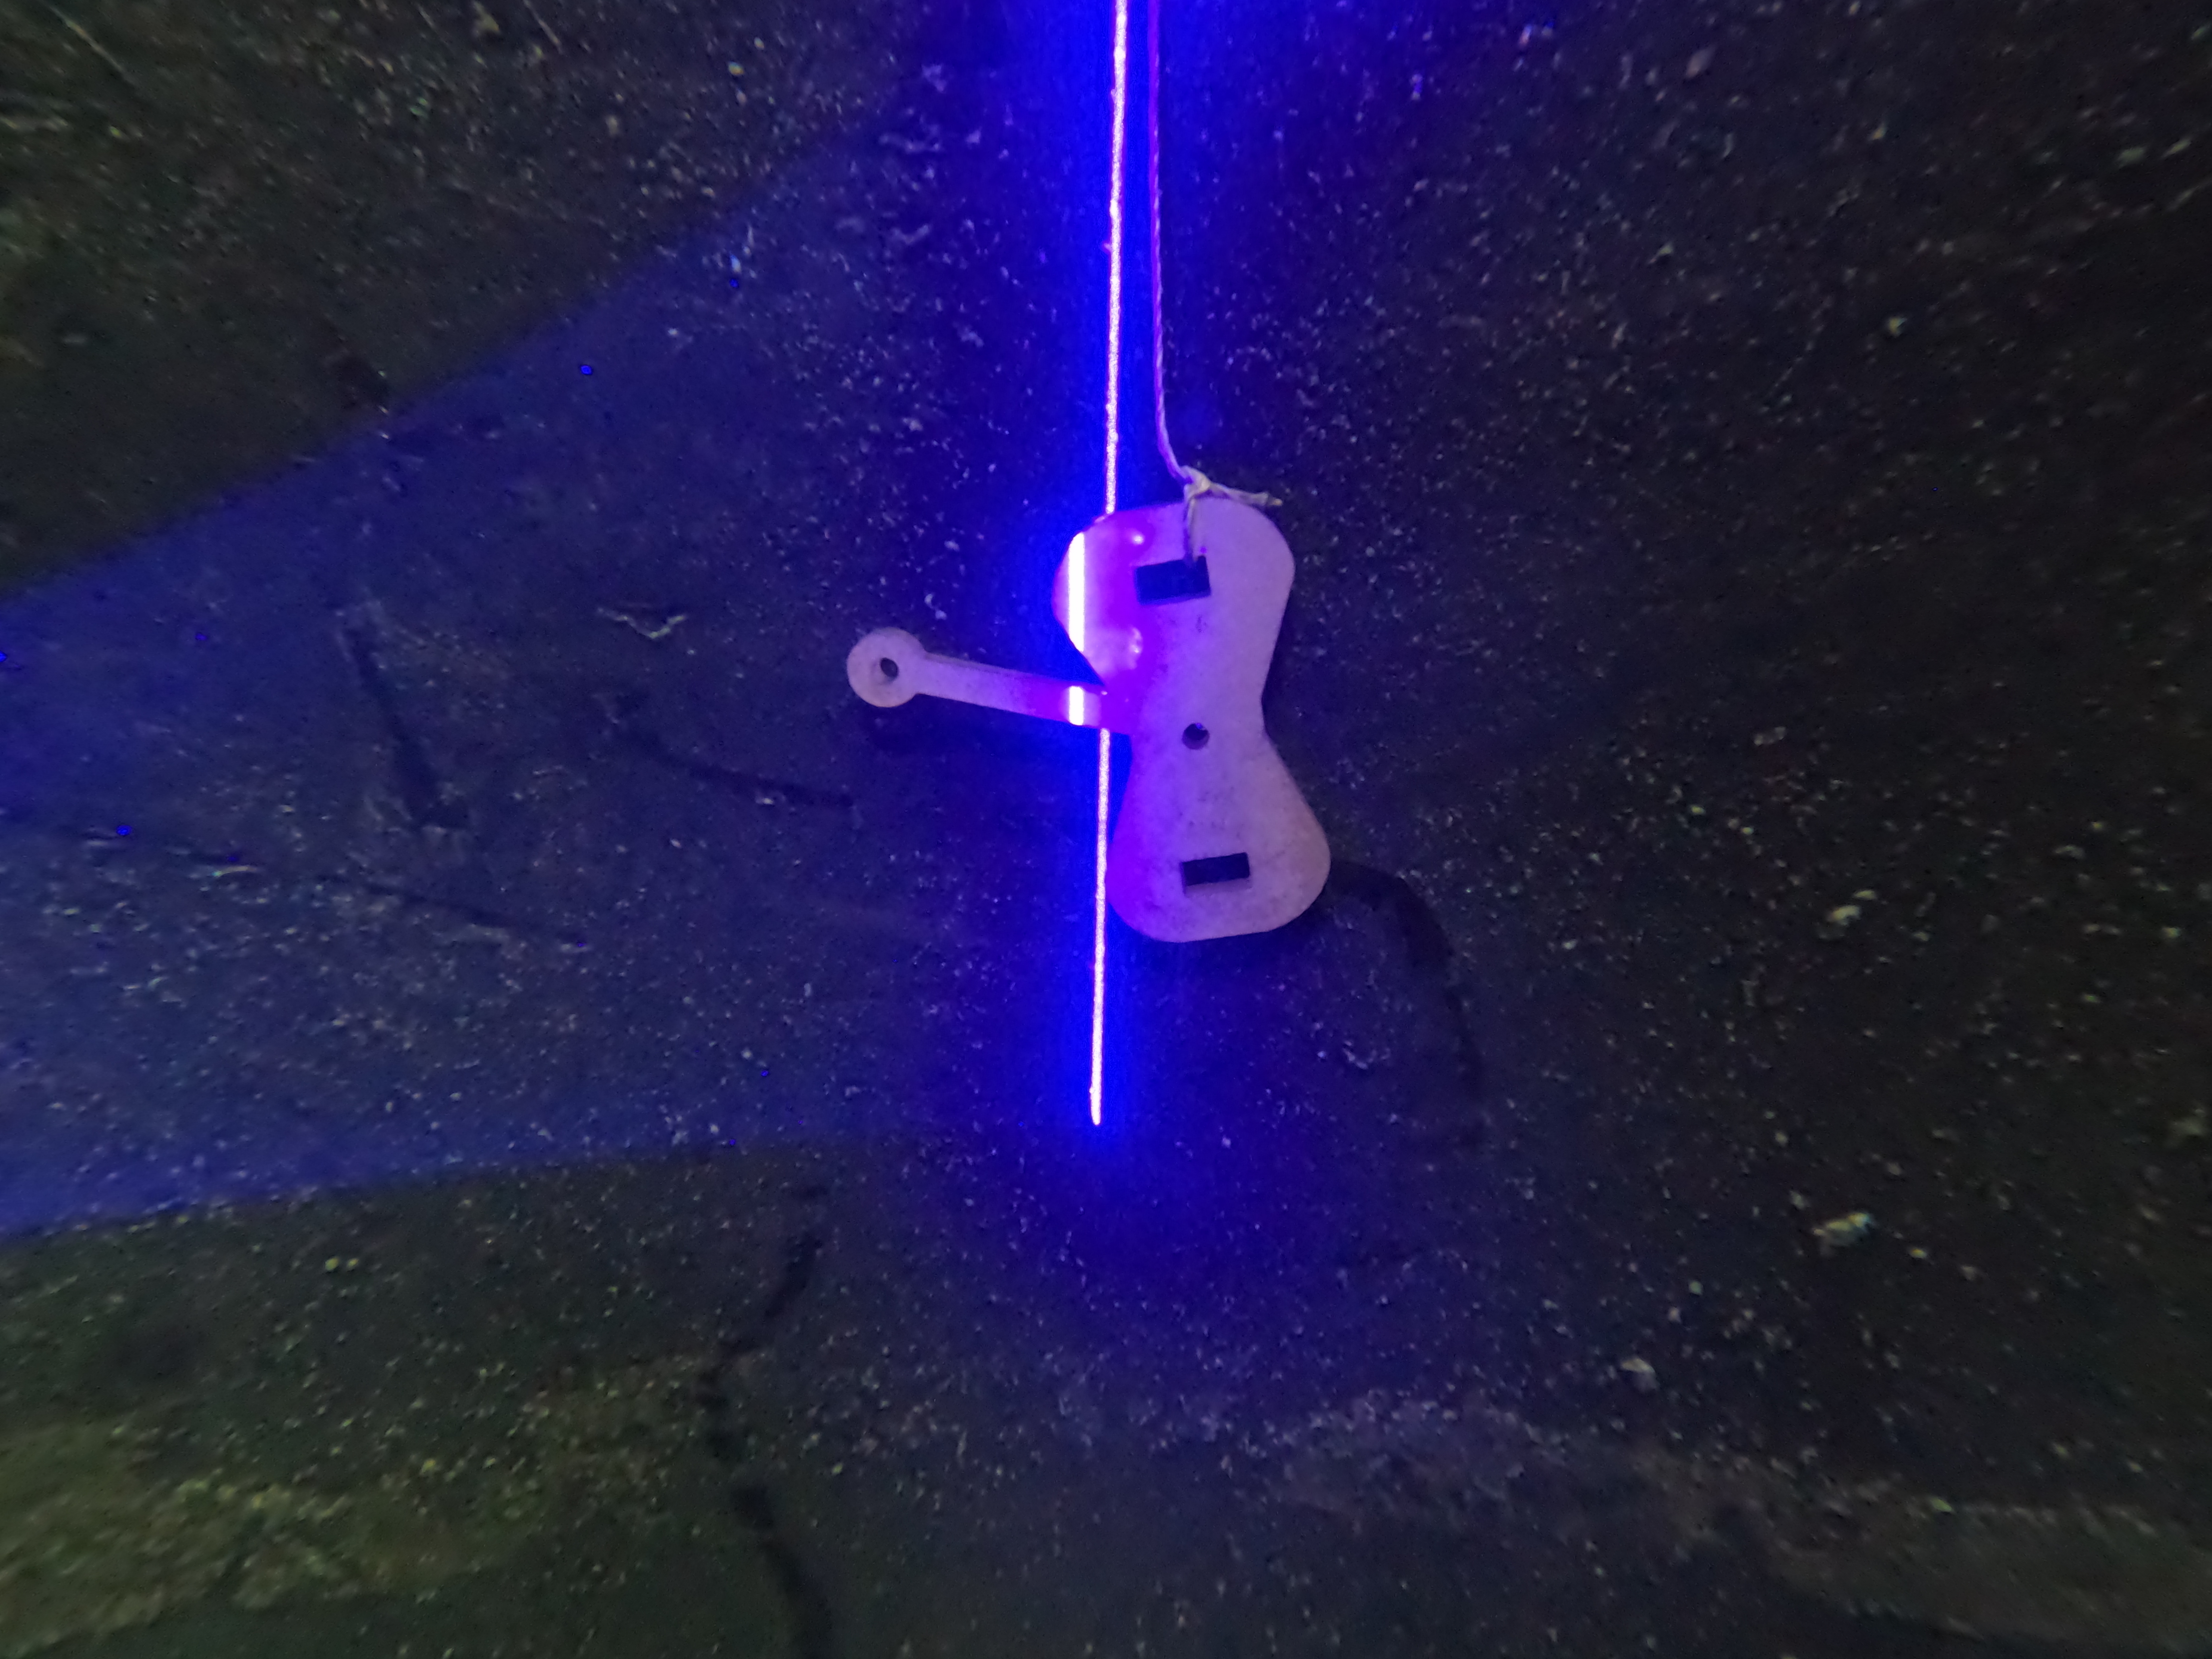

Supplement: Supplementary file 2469 [file G0016047.pdf › Level_2_2/G0016047.pdf]

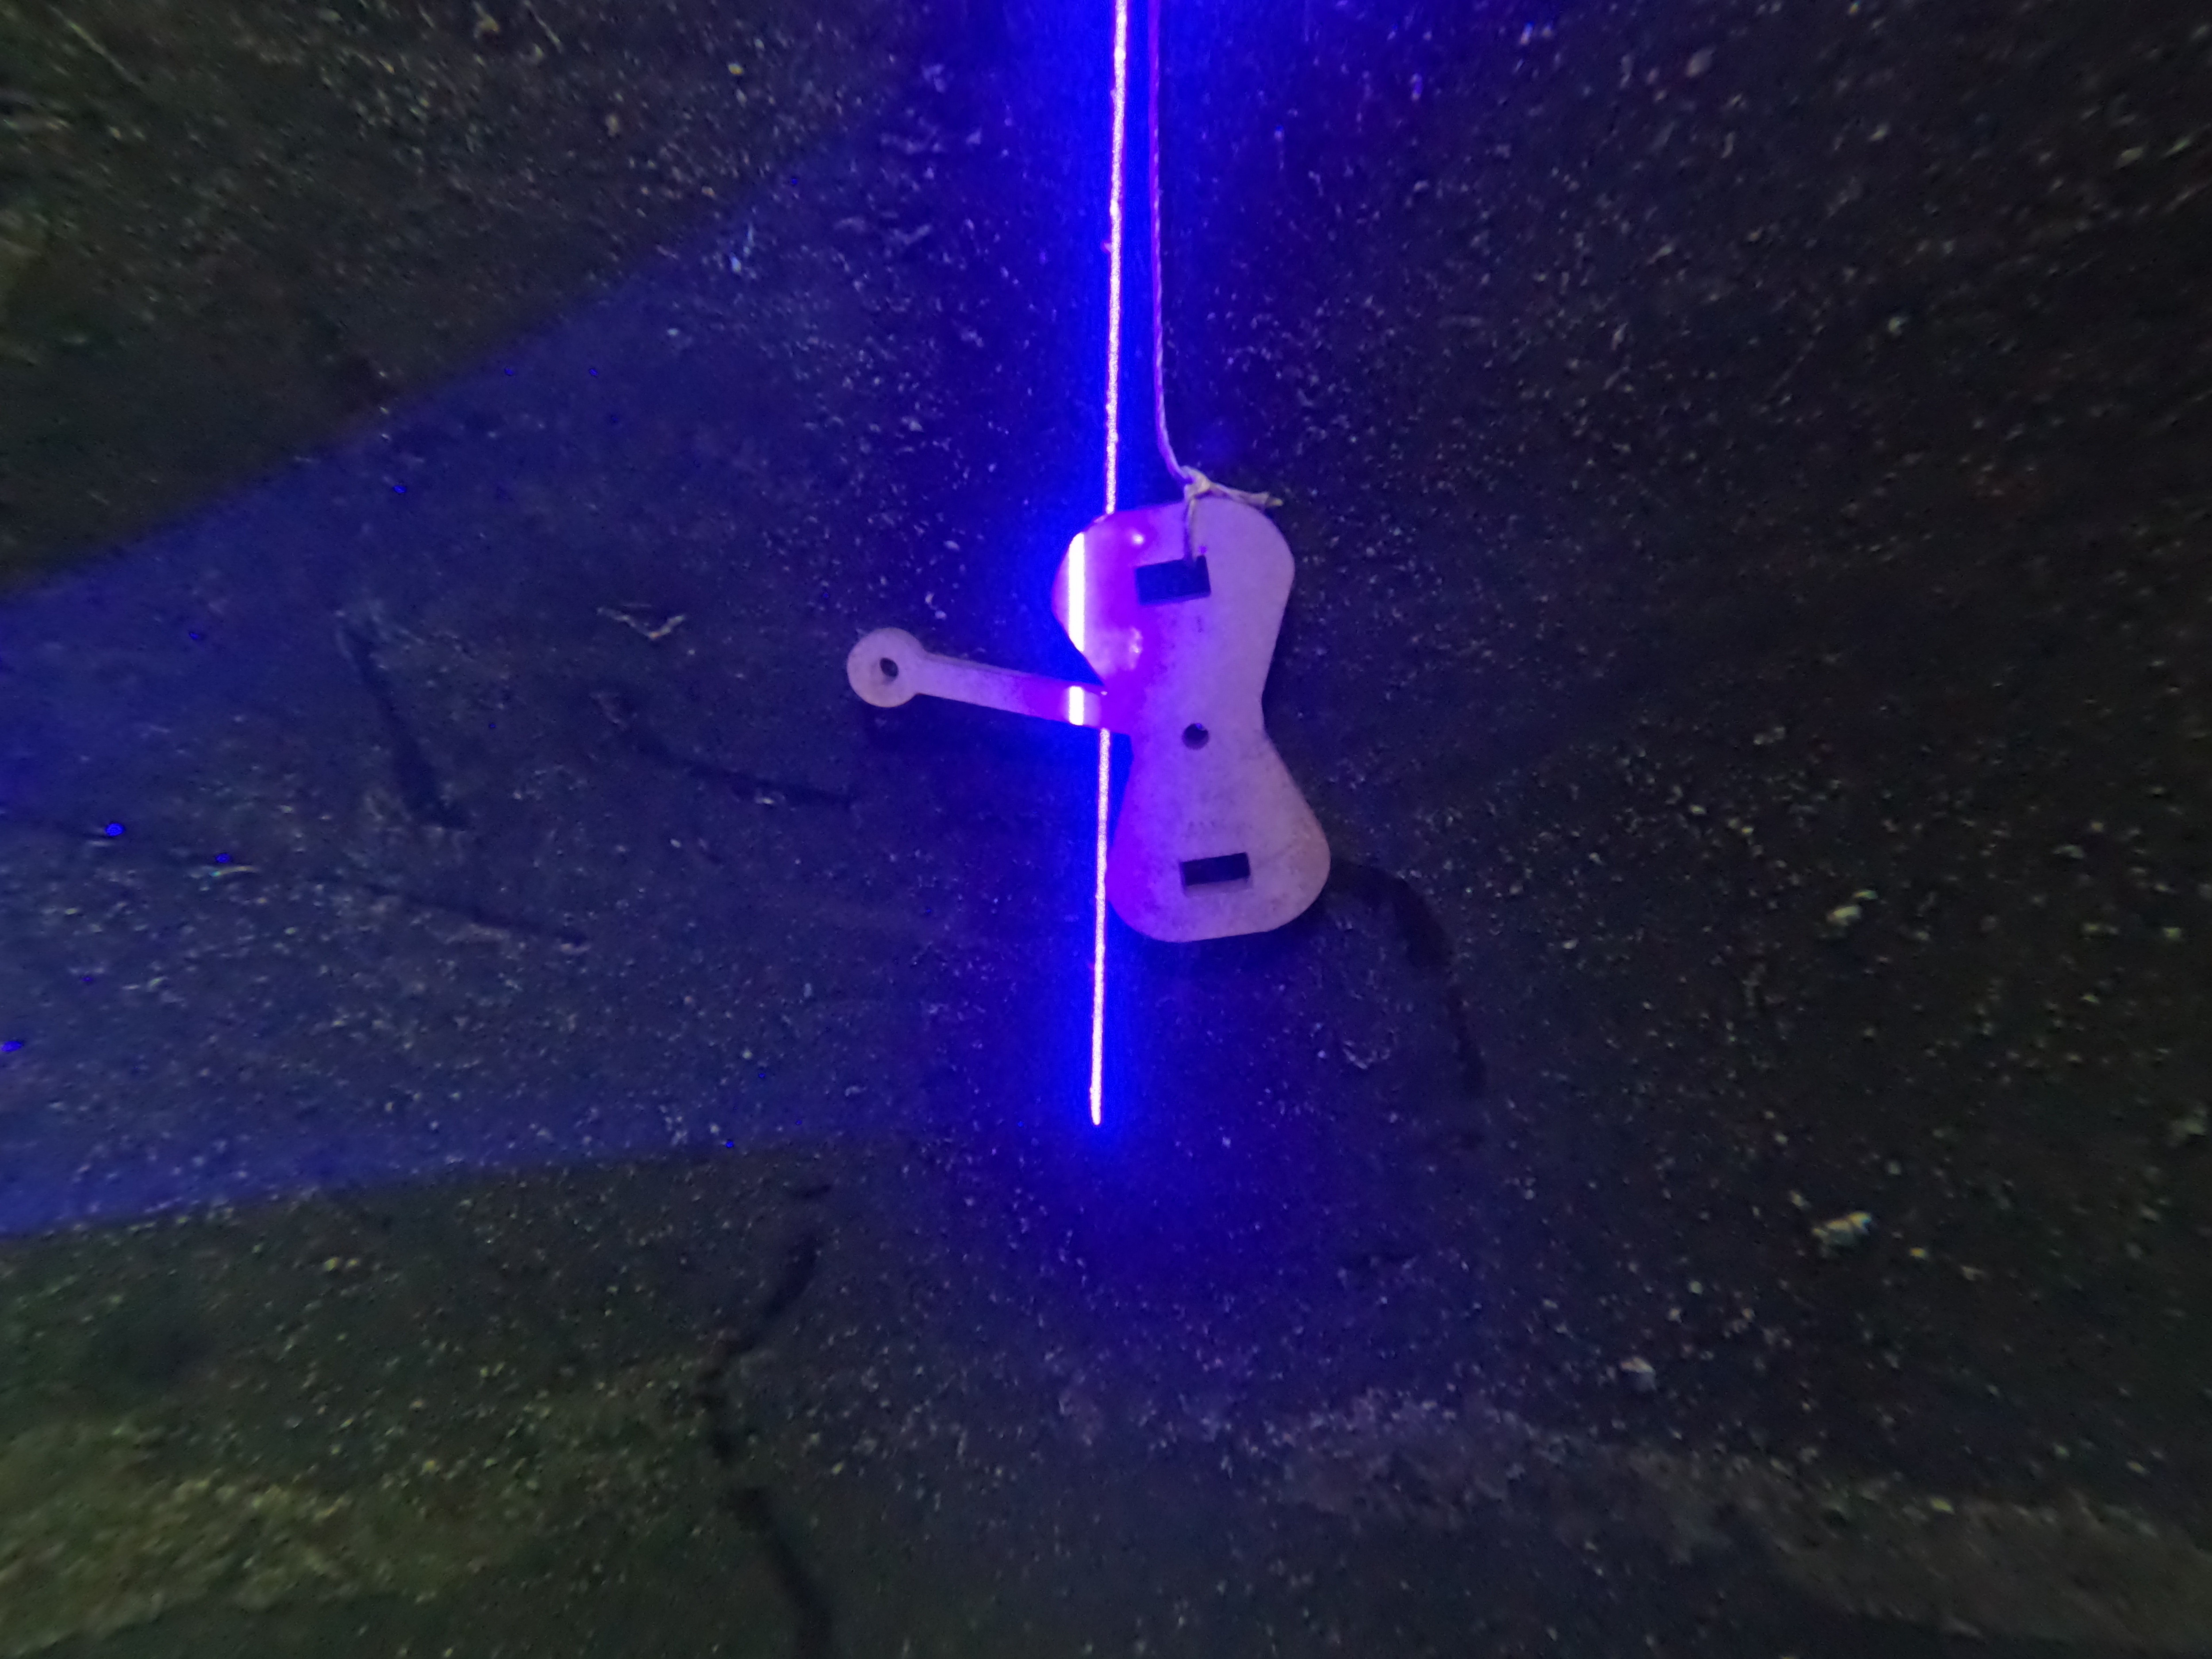

Supplement: Supplementary file 2470 [file G0016048.pdf › Level_2_2/G0016048.pdf]

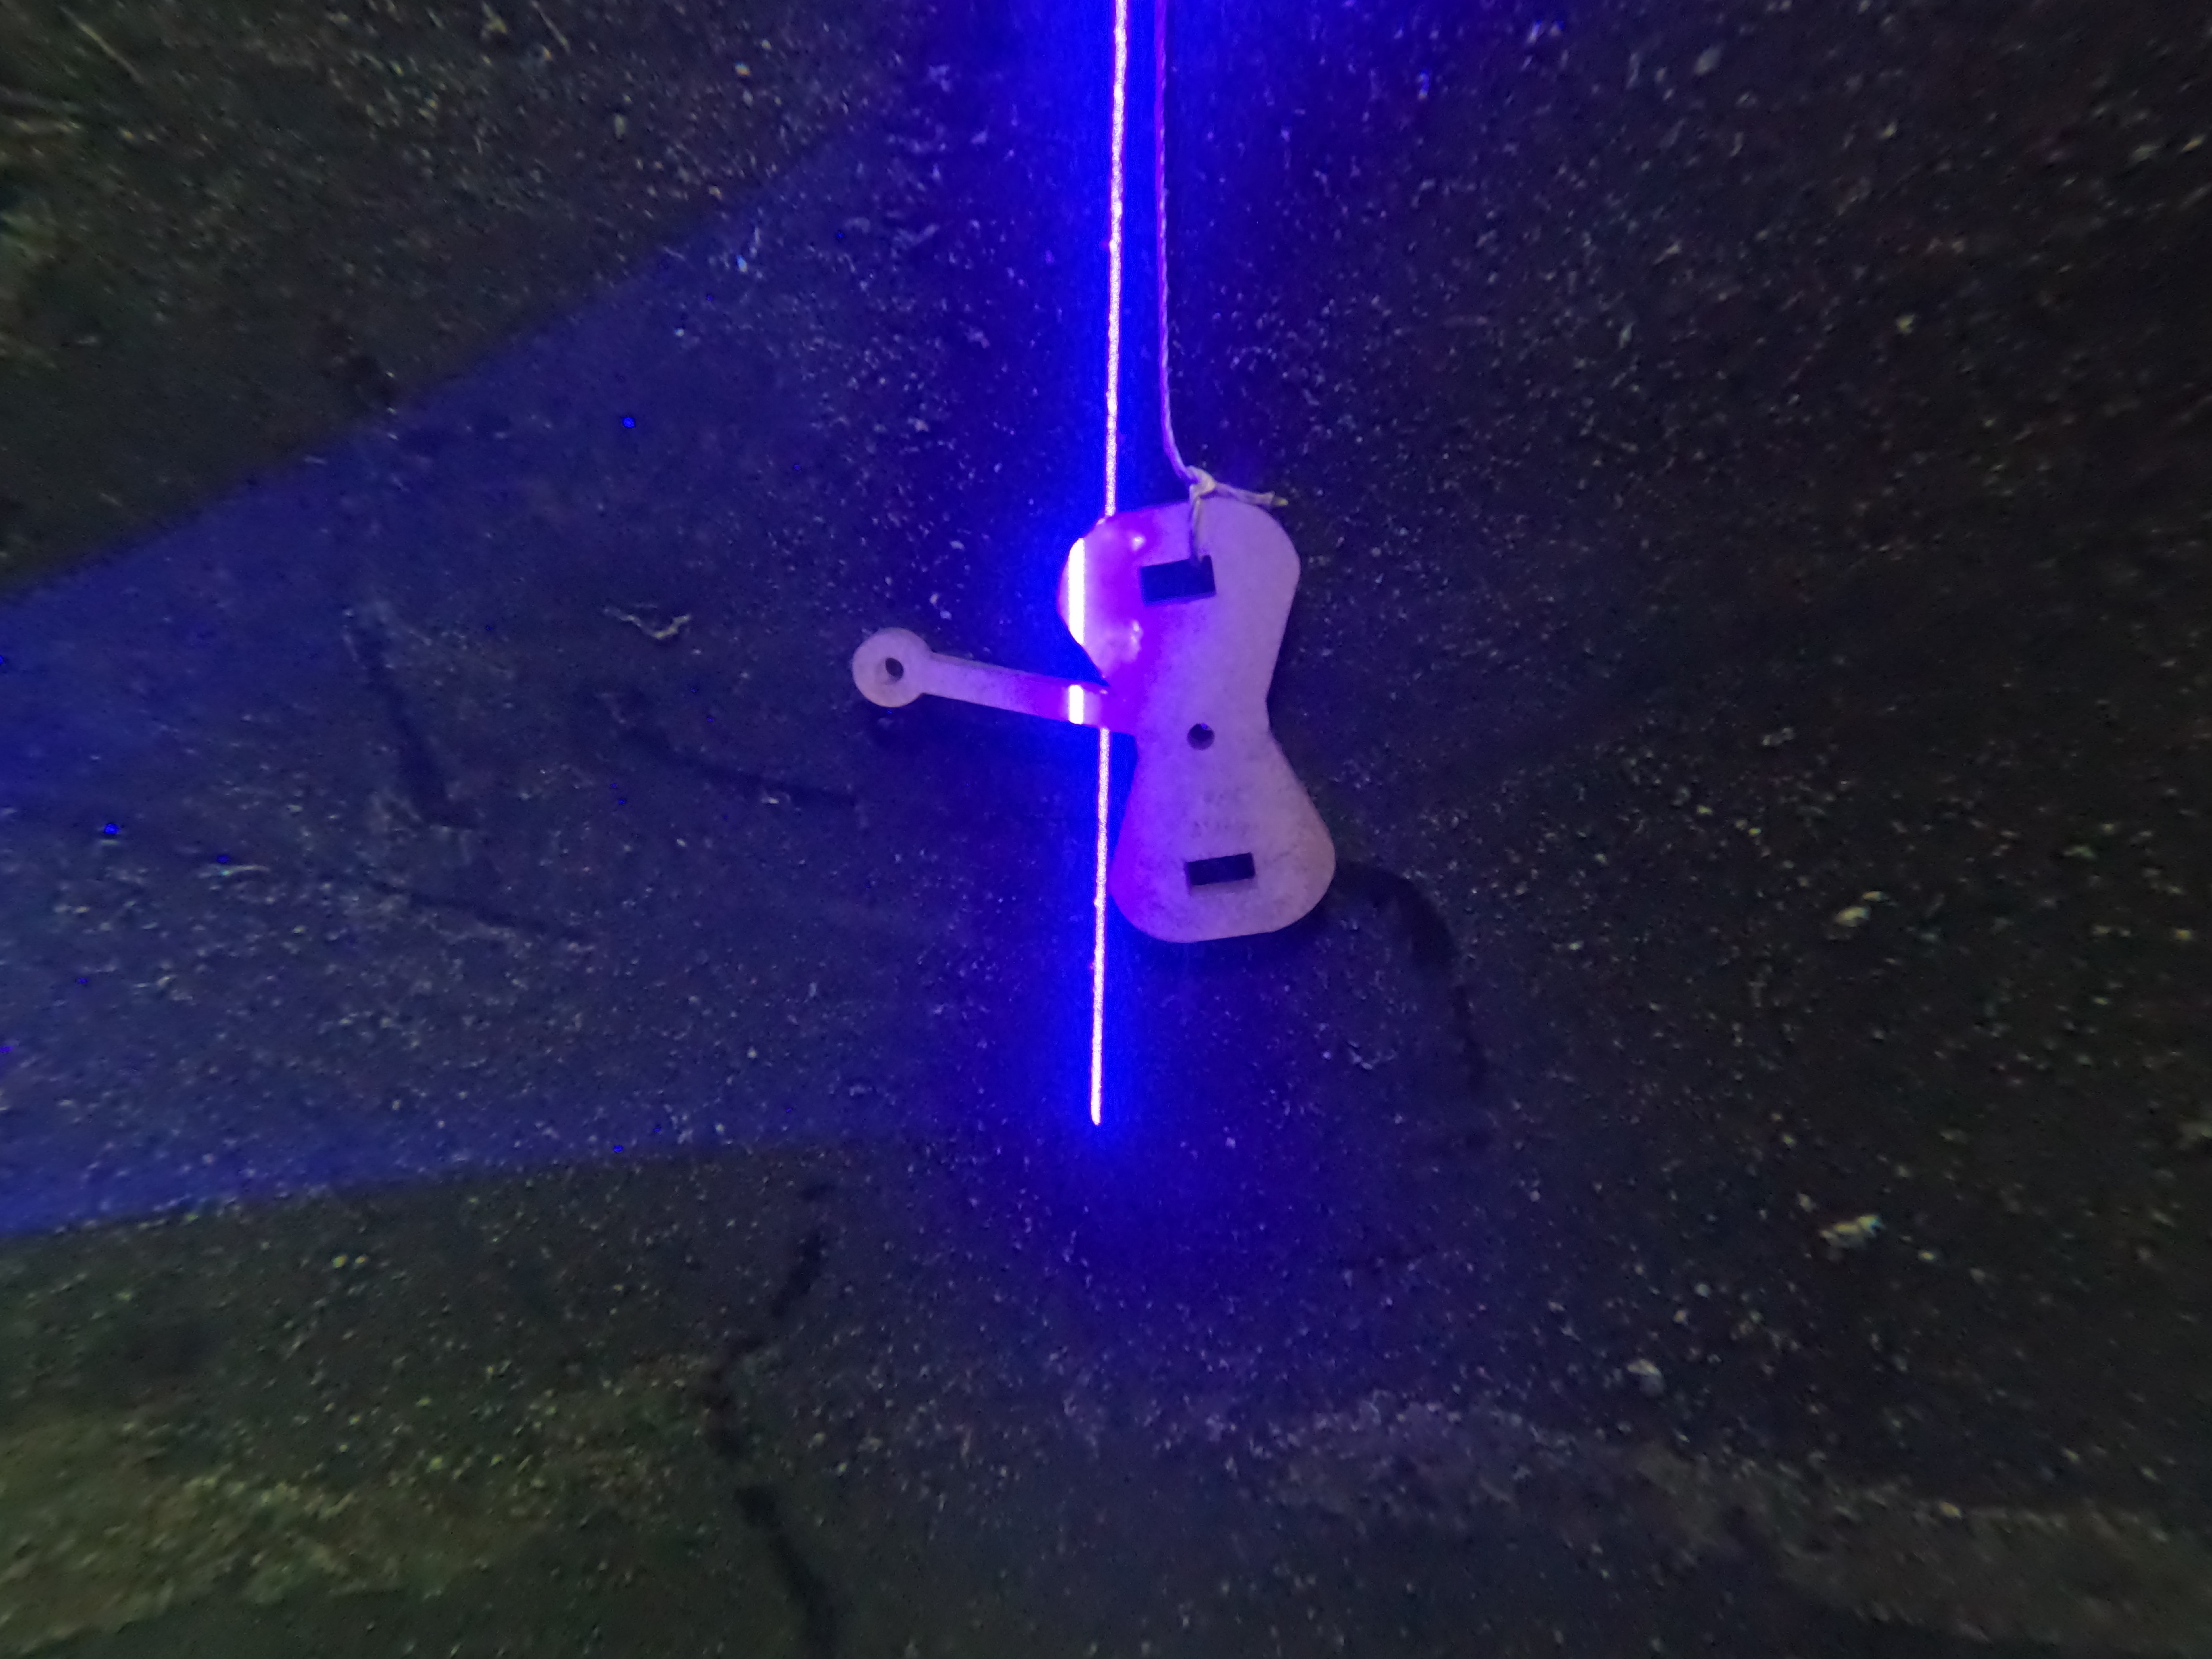

Supplement: Supplementary file 2471 [file G0016049.pdf › Level_2_2/G0016049.pdf]

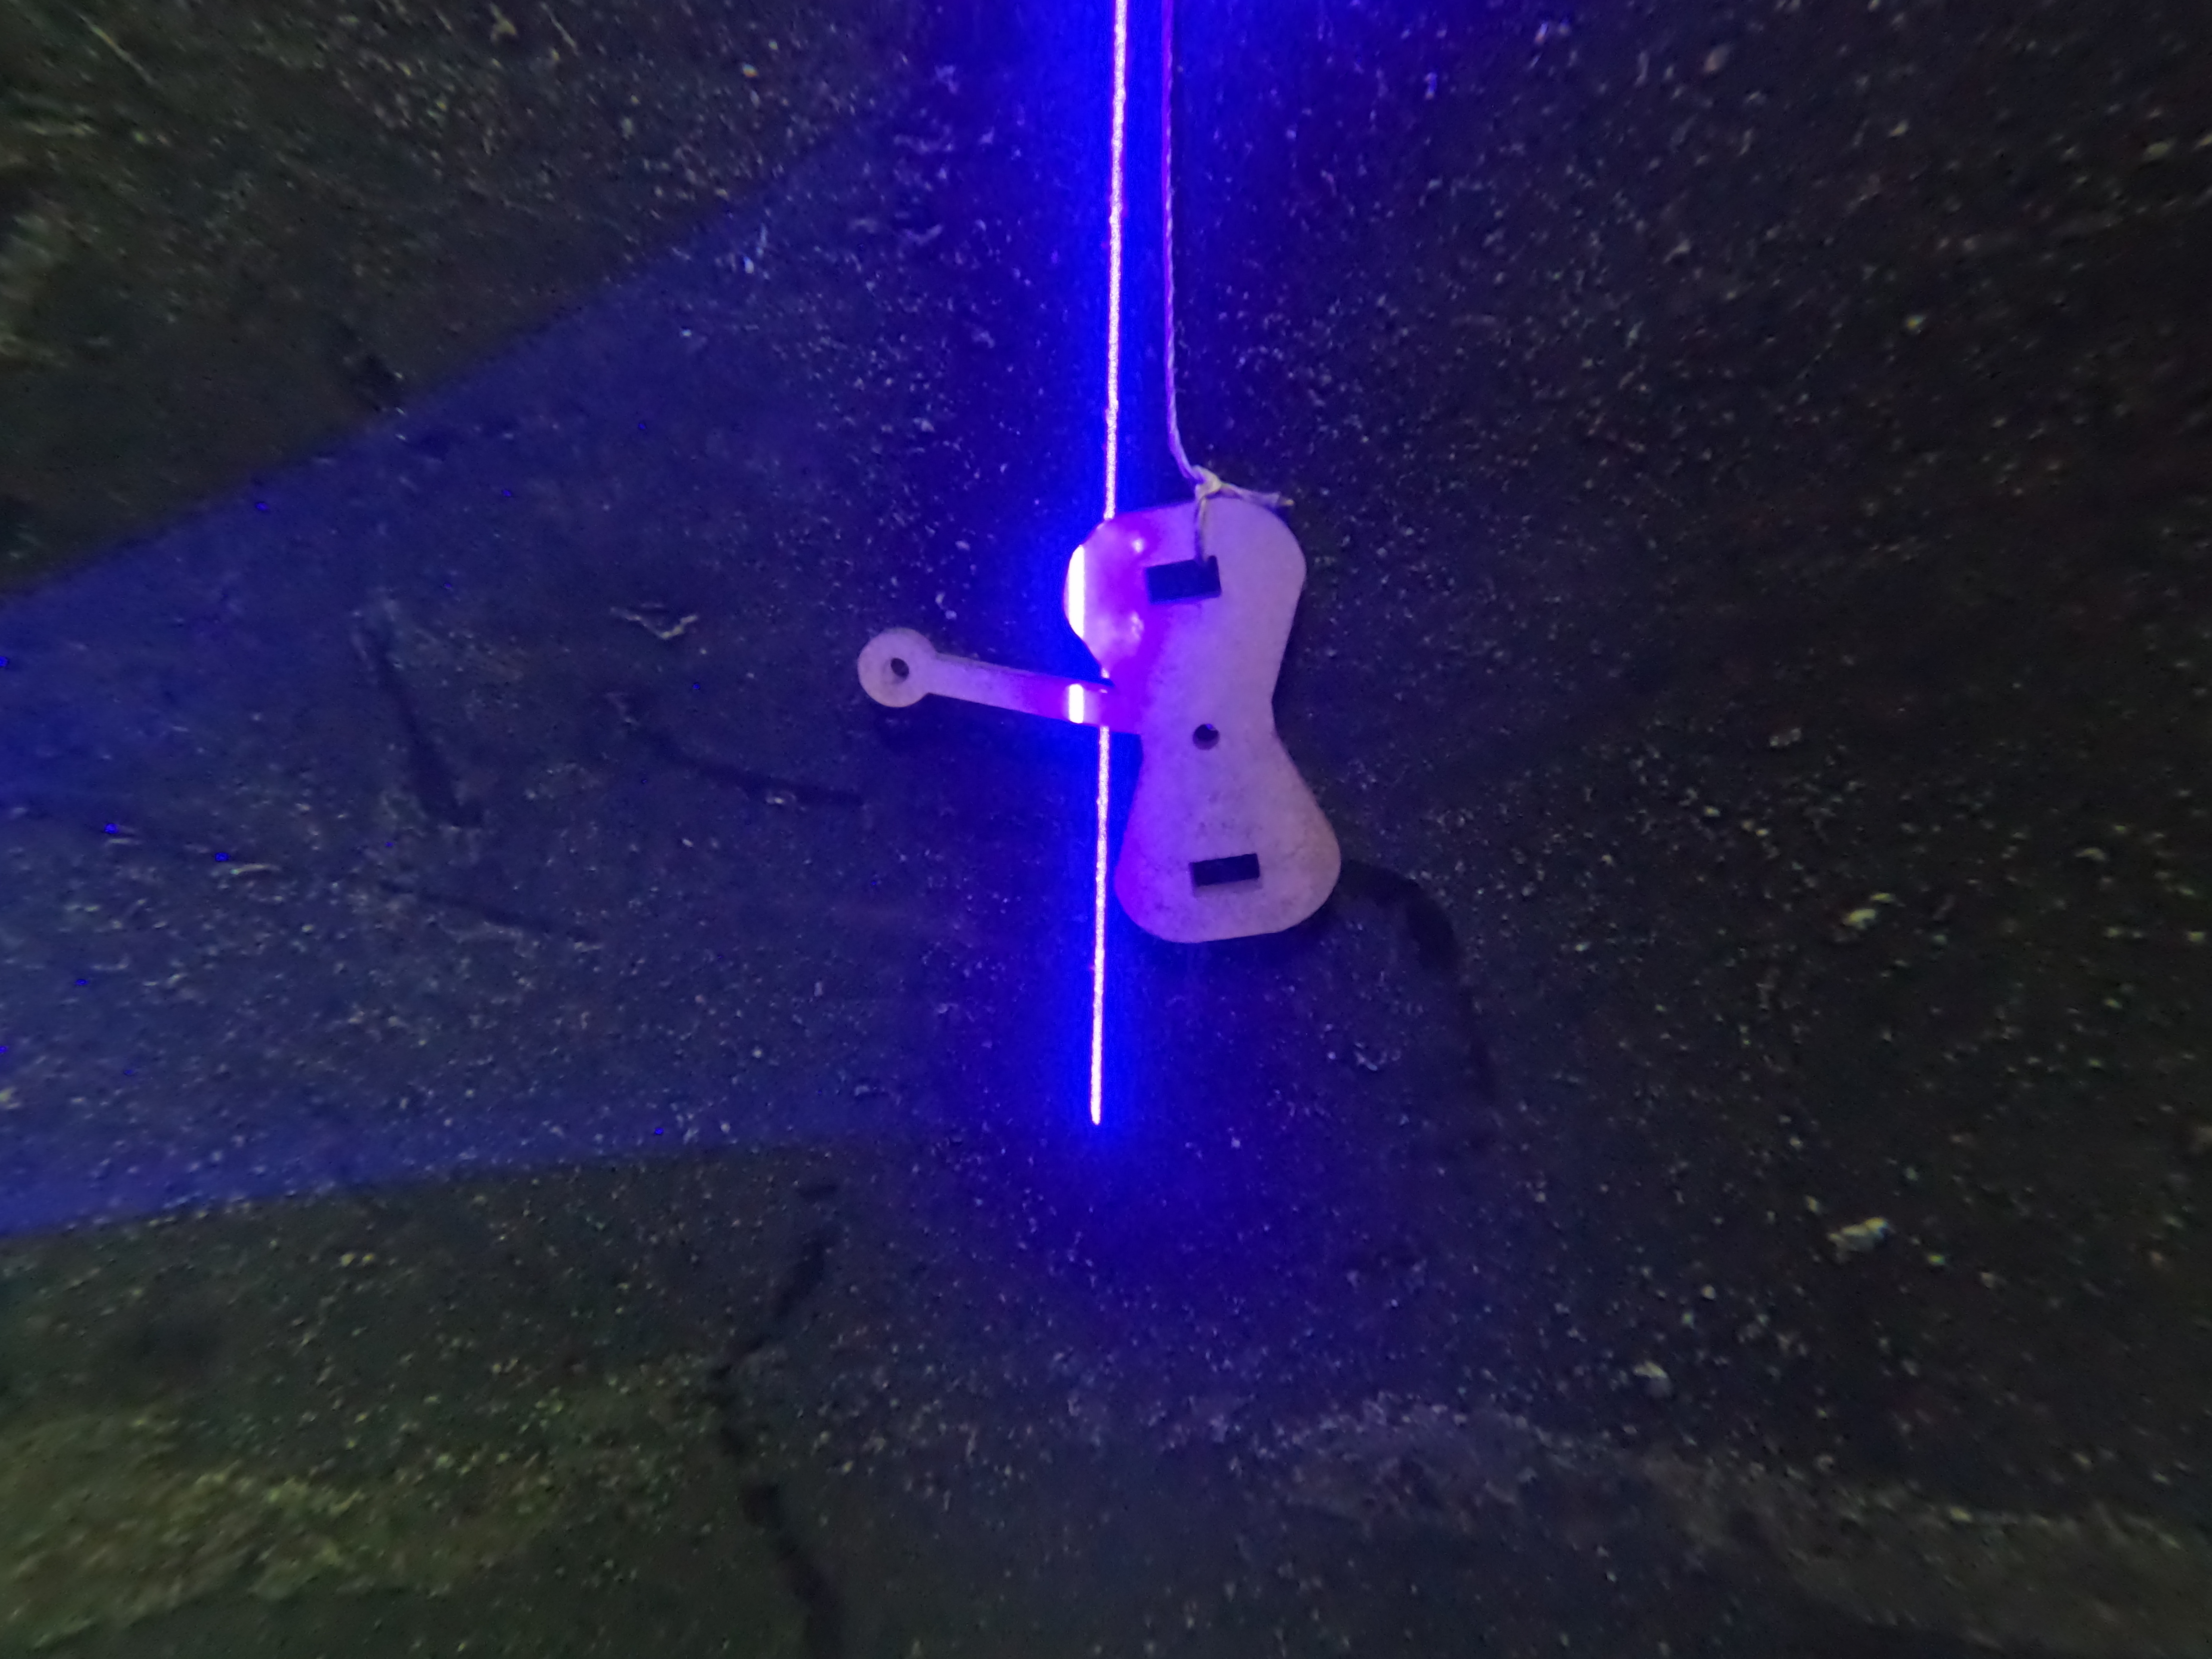

Supplement: Supplementary file 2472 [file G0016050.pdf › Level_2_2/G0016050.pdf]

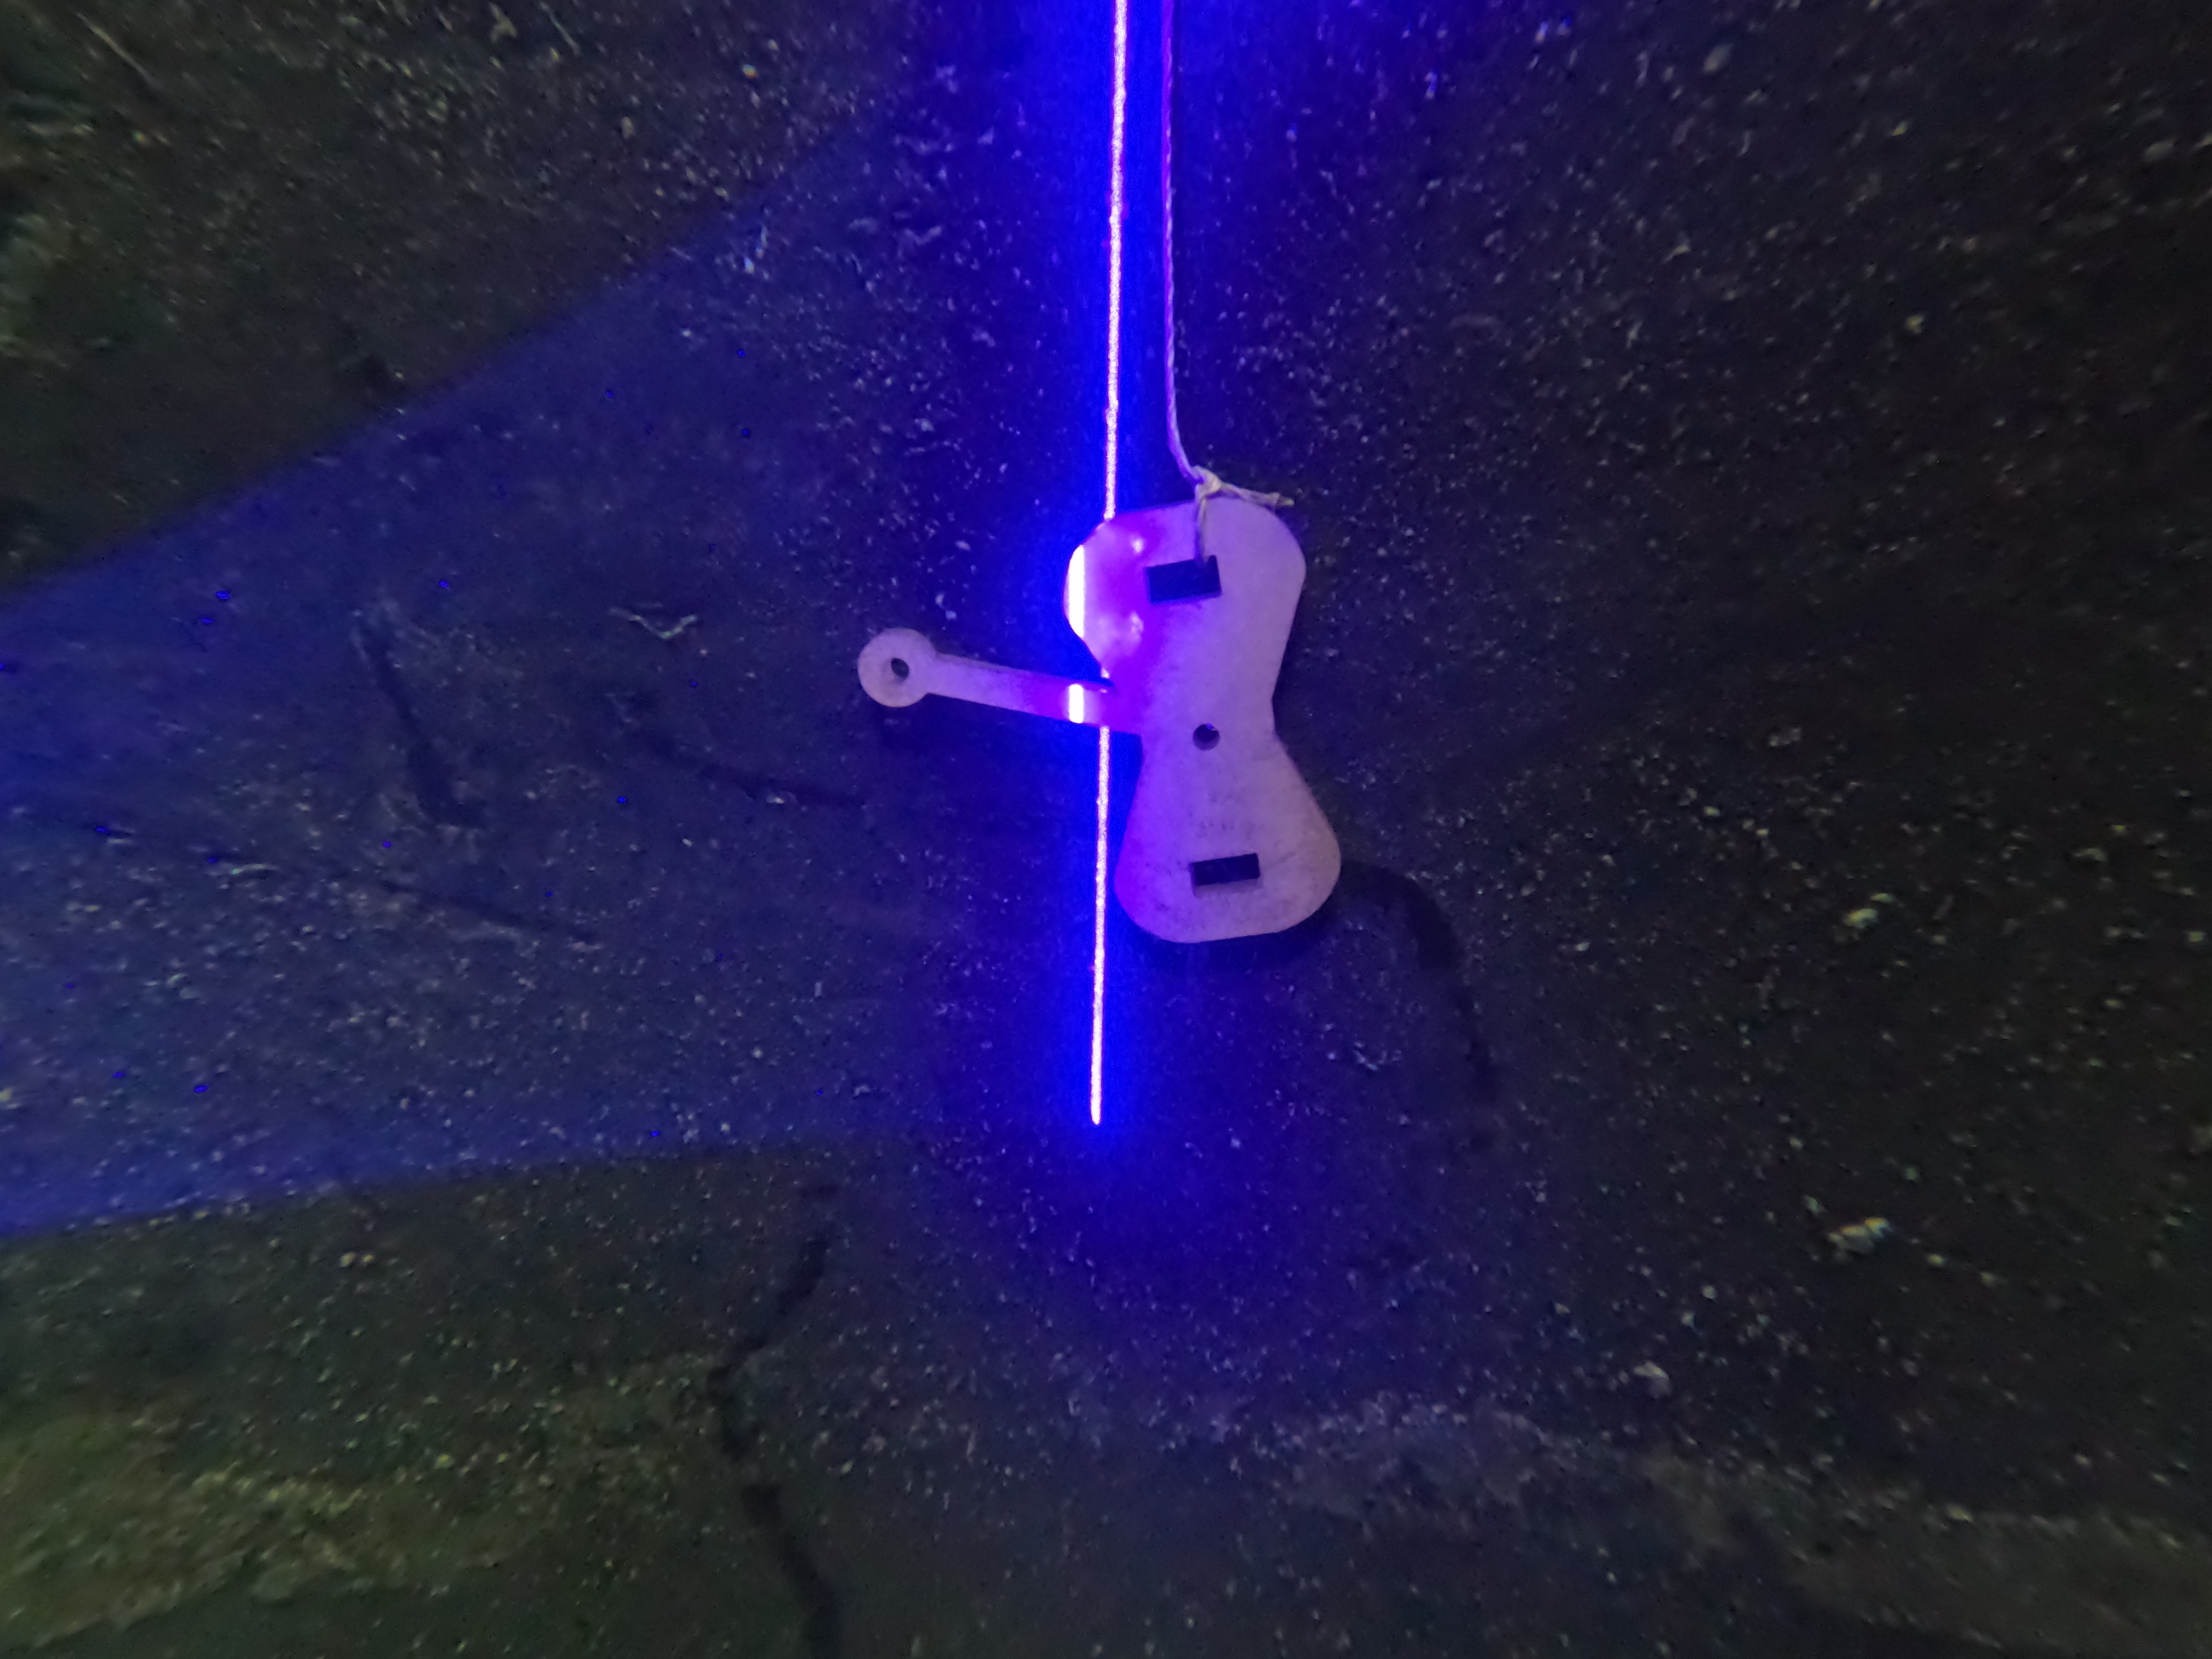

Supplement: Supplementary file 2473 [file G0016051.pdf › Level_2_2/G0016051.pdf]

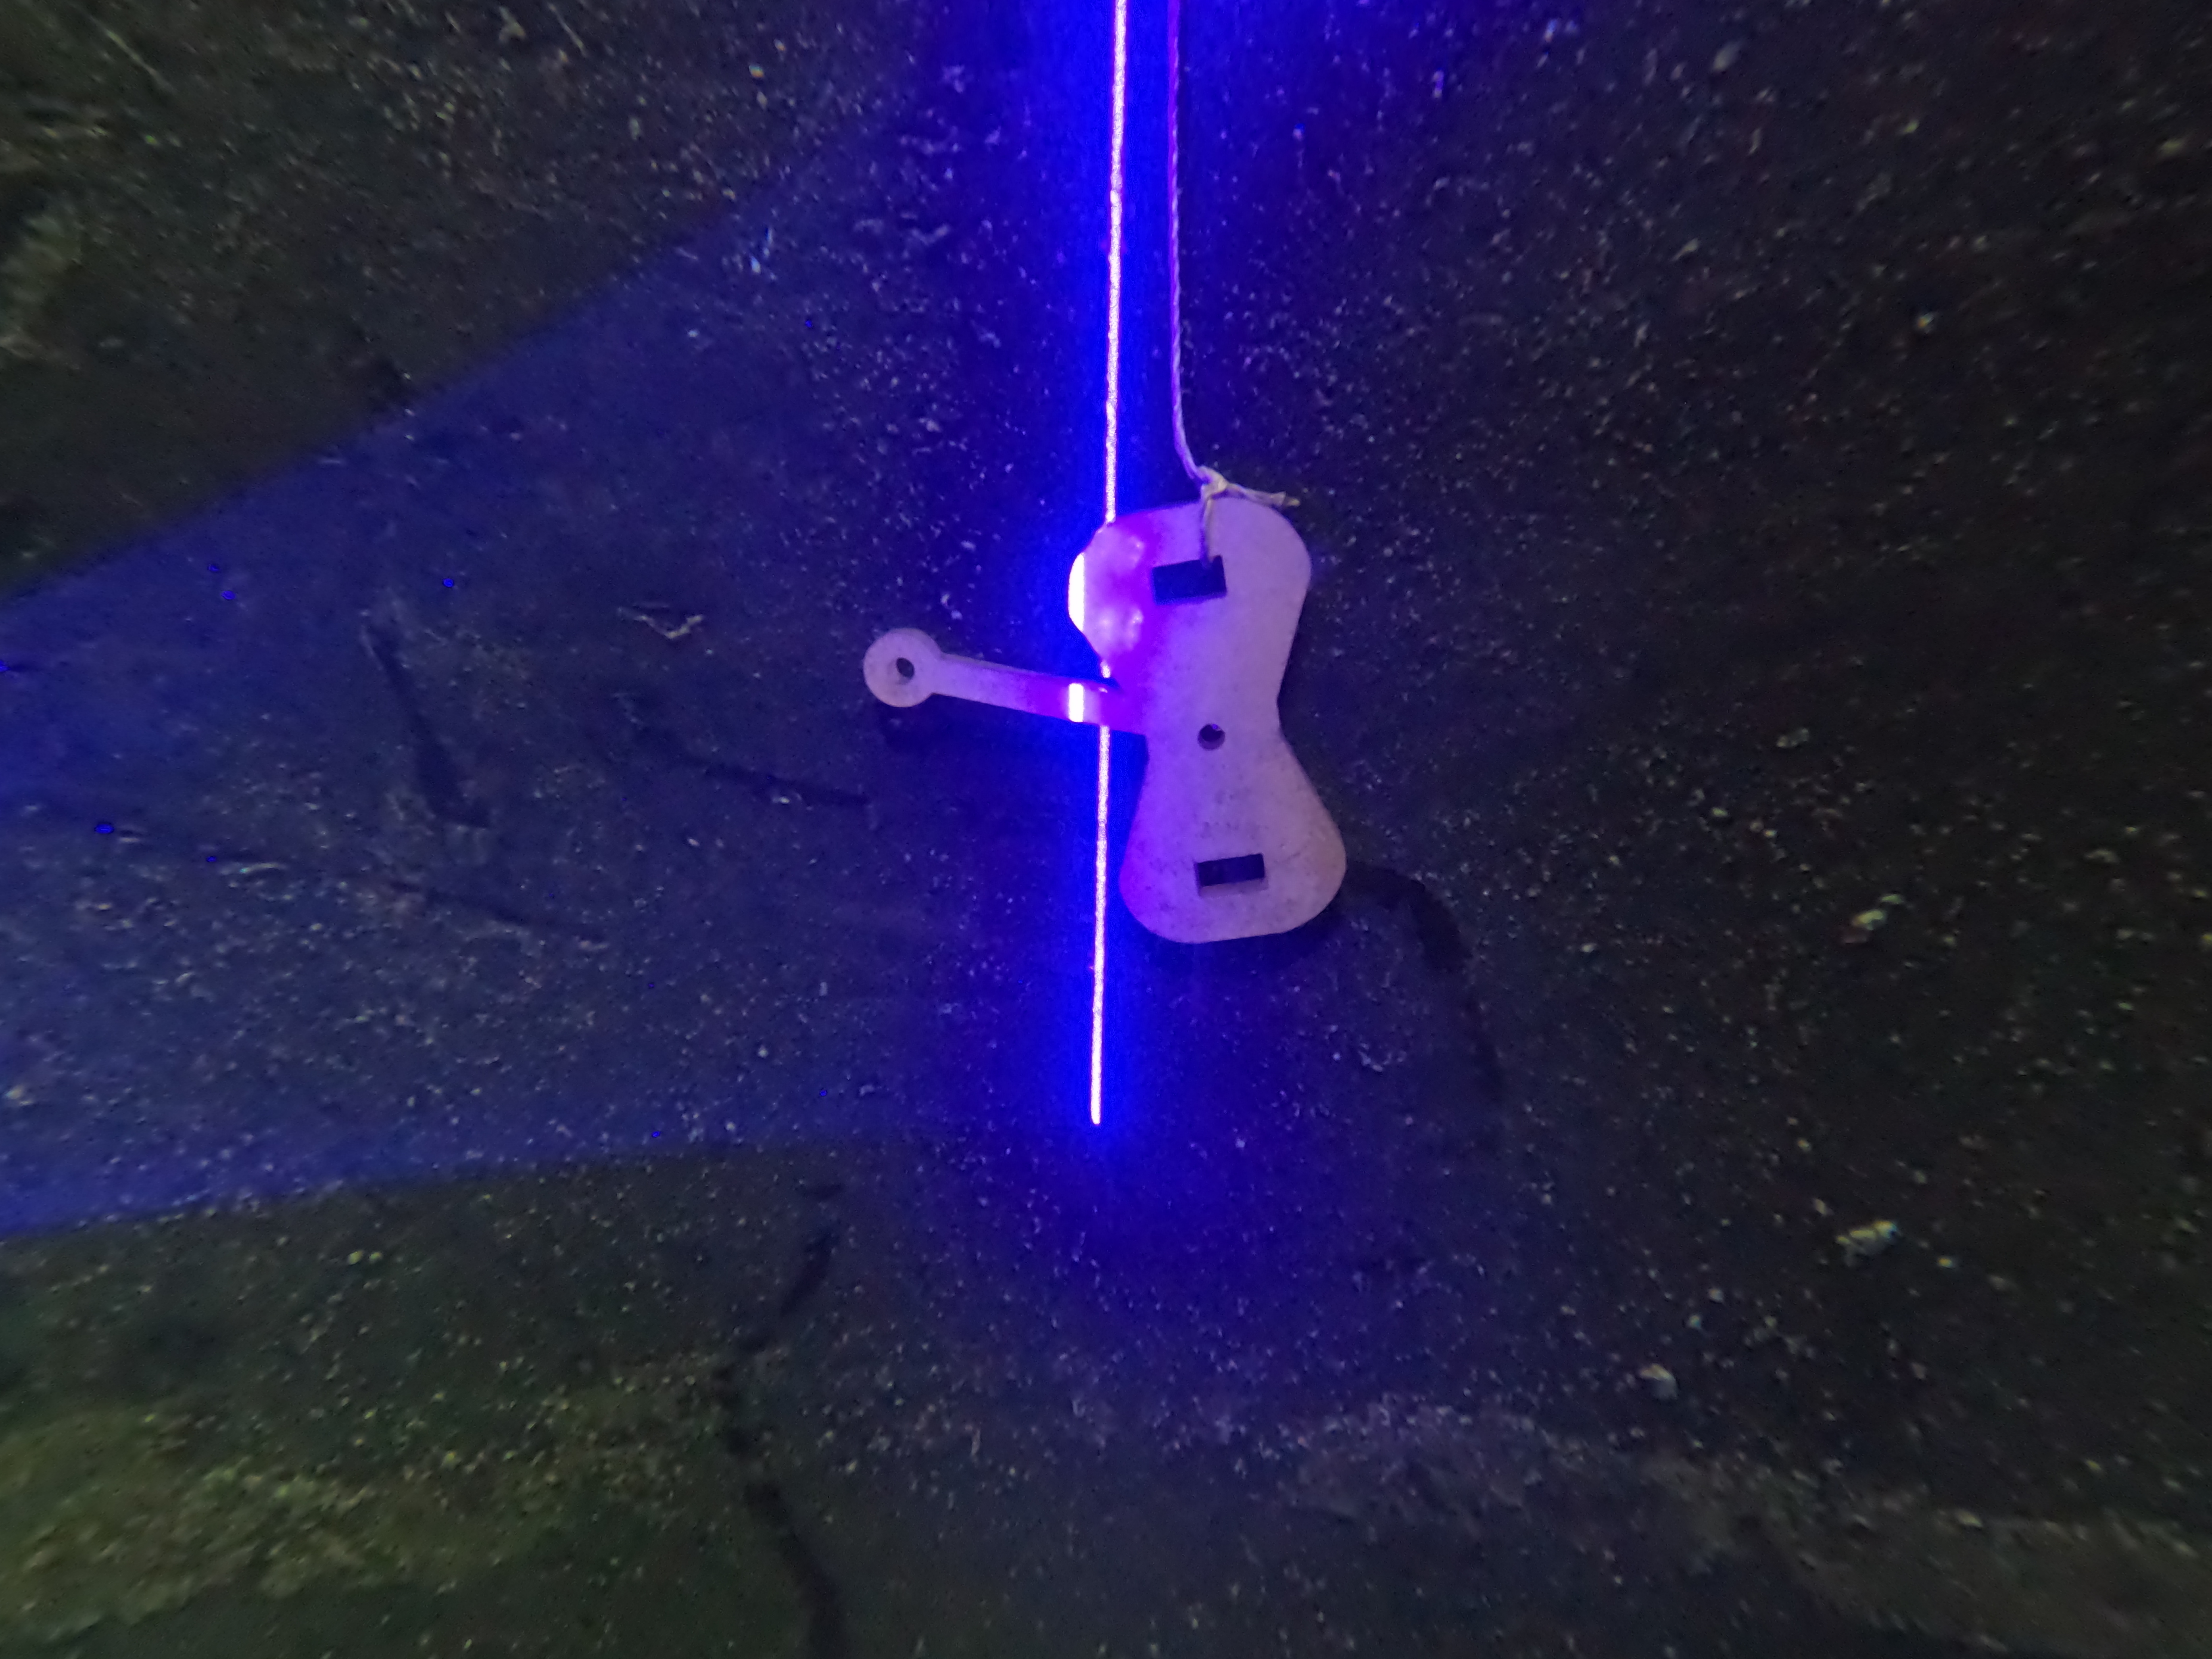

Supplement: Supplementary file 2474 [file G0016052.pdf › Level_2_2/G0016052.pdf]

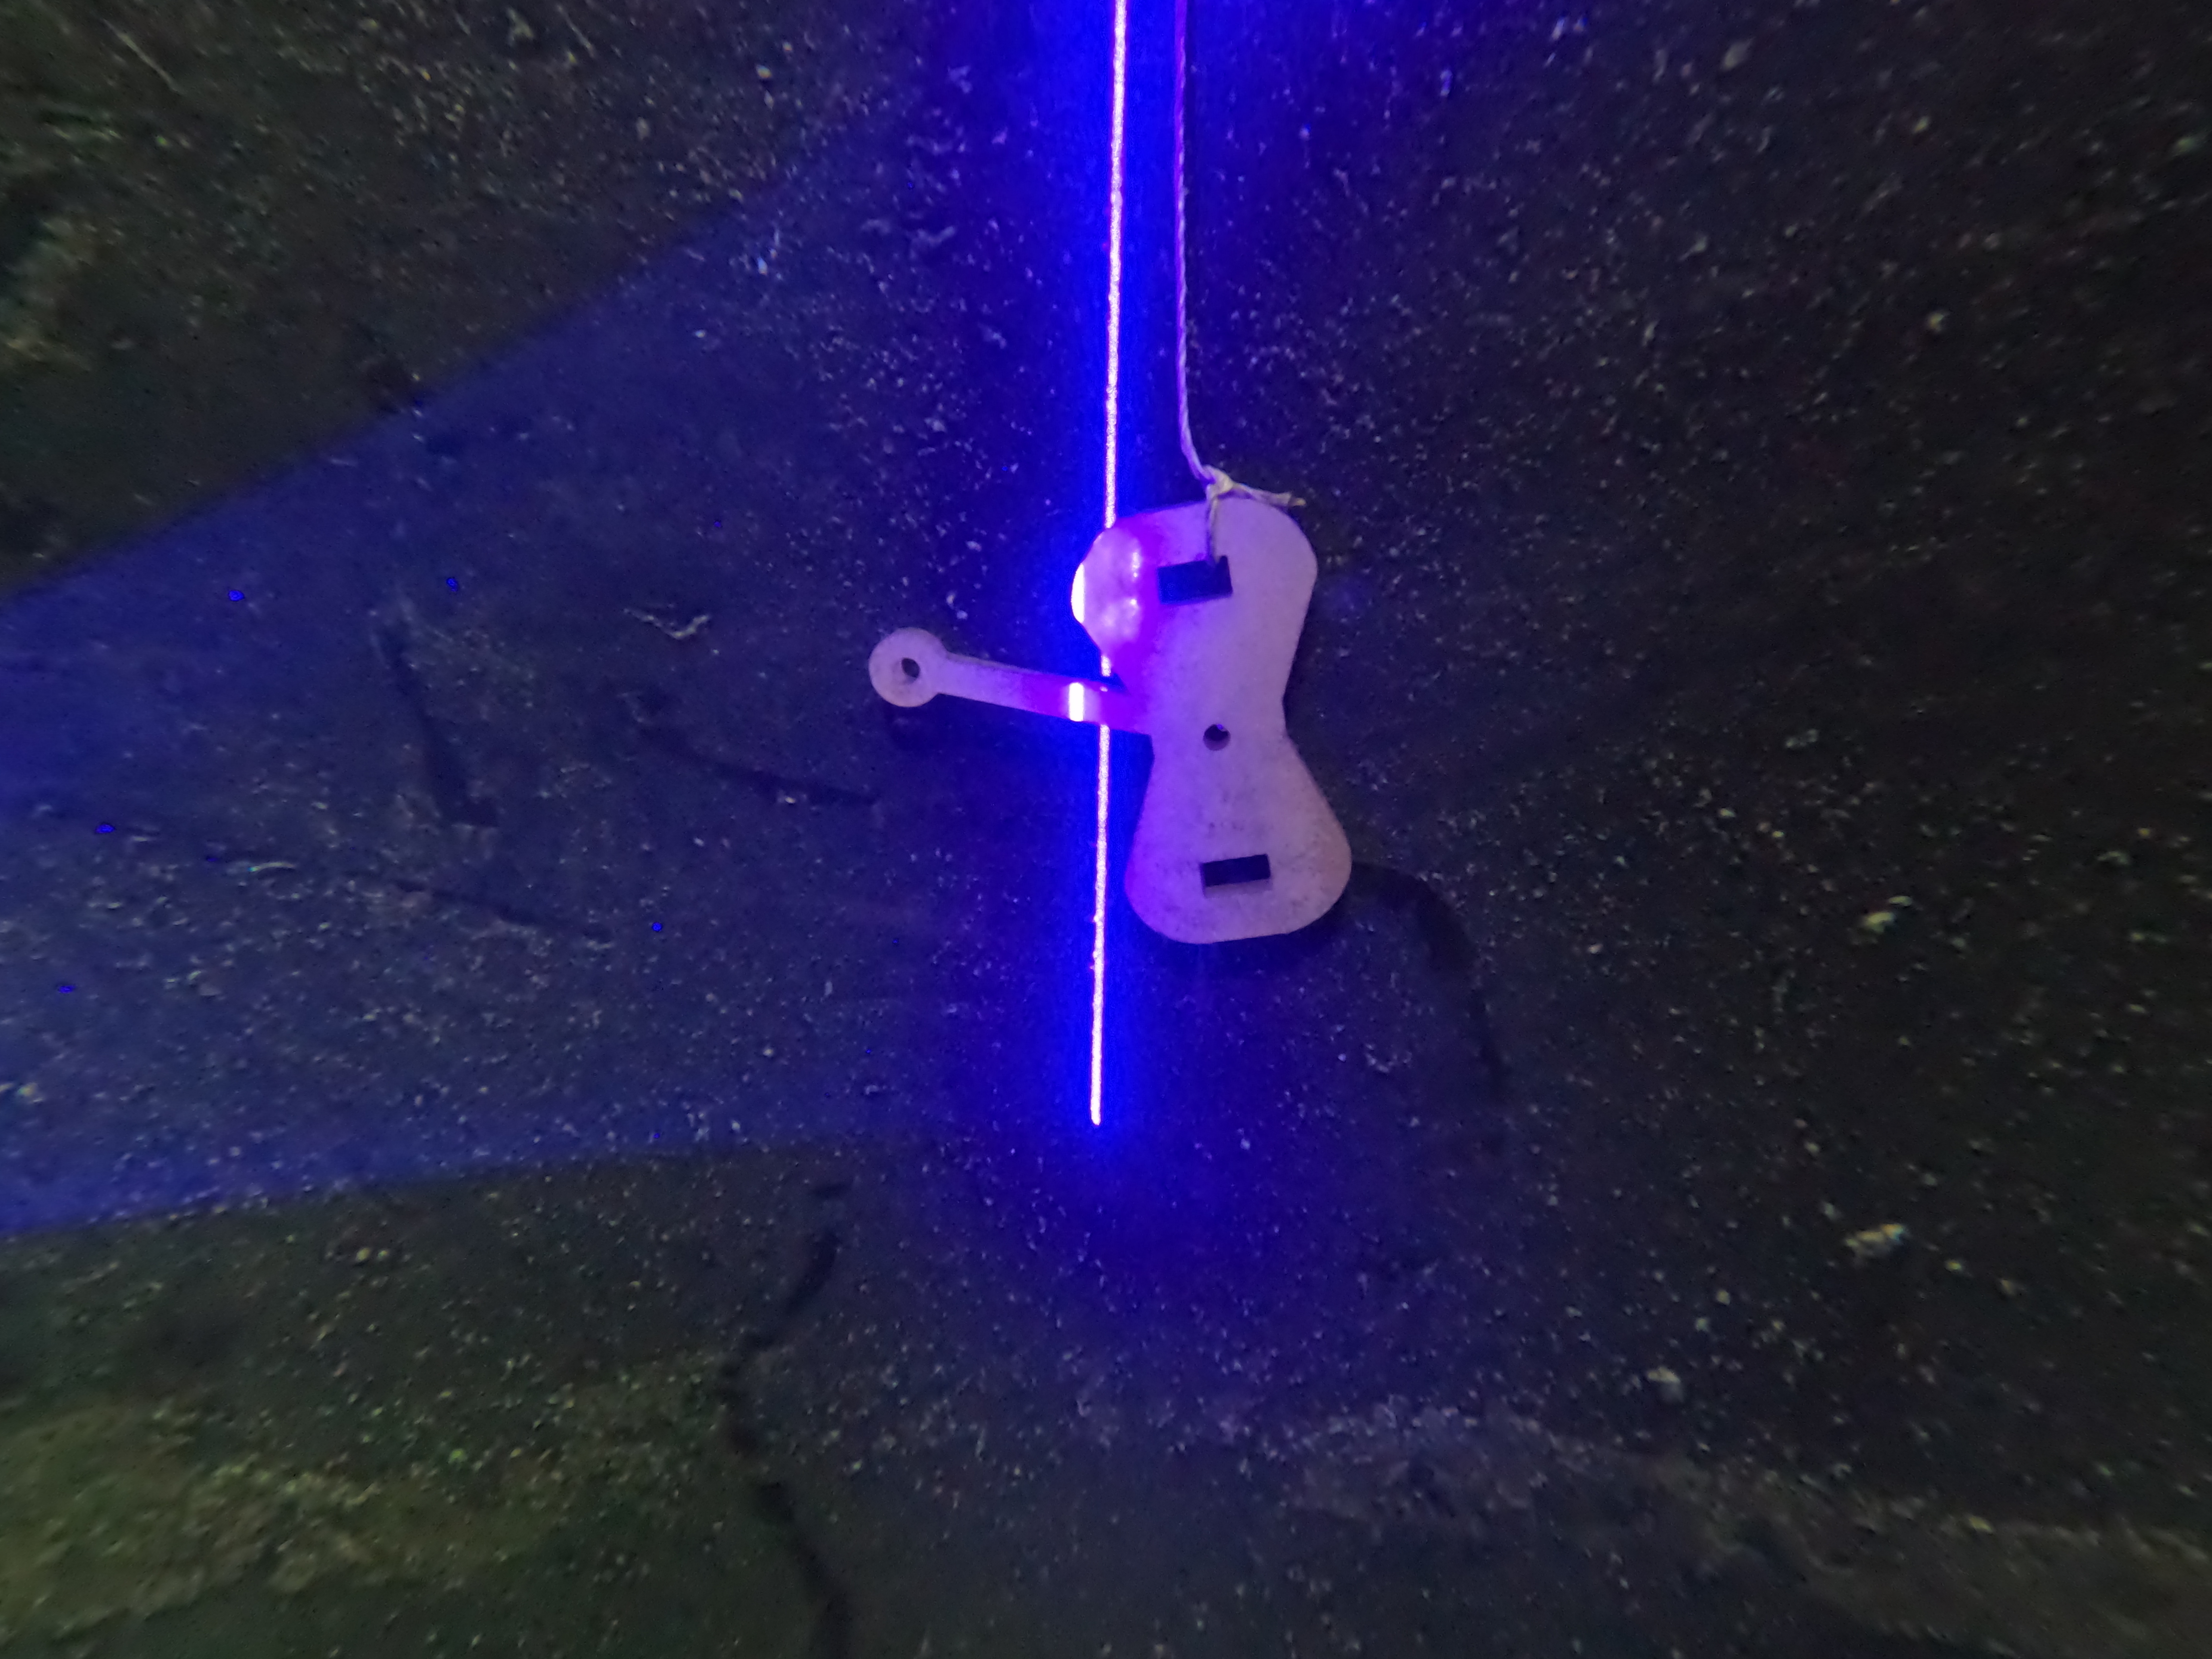

Supplement: Supplementary file 2475 [file G0016053.pdf › Level_2_2/G0016053.pdf]

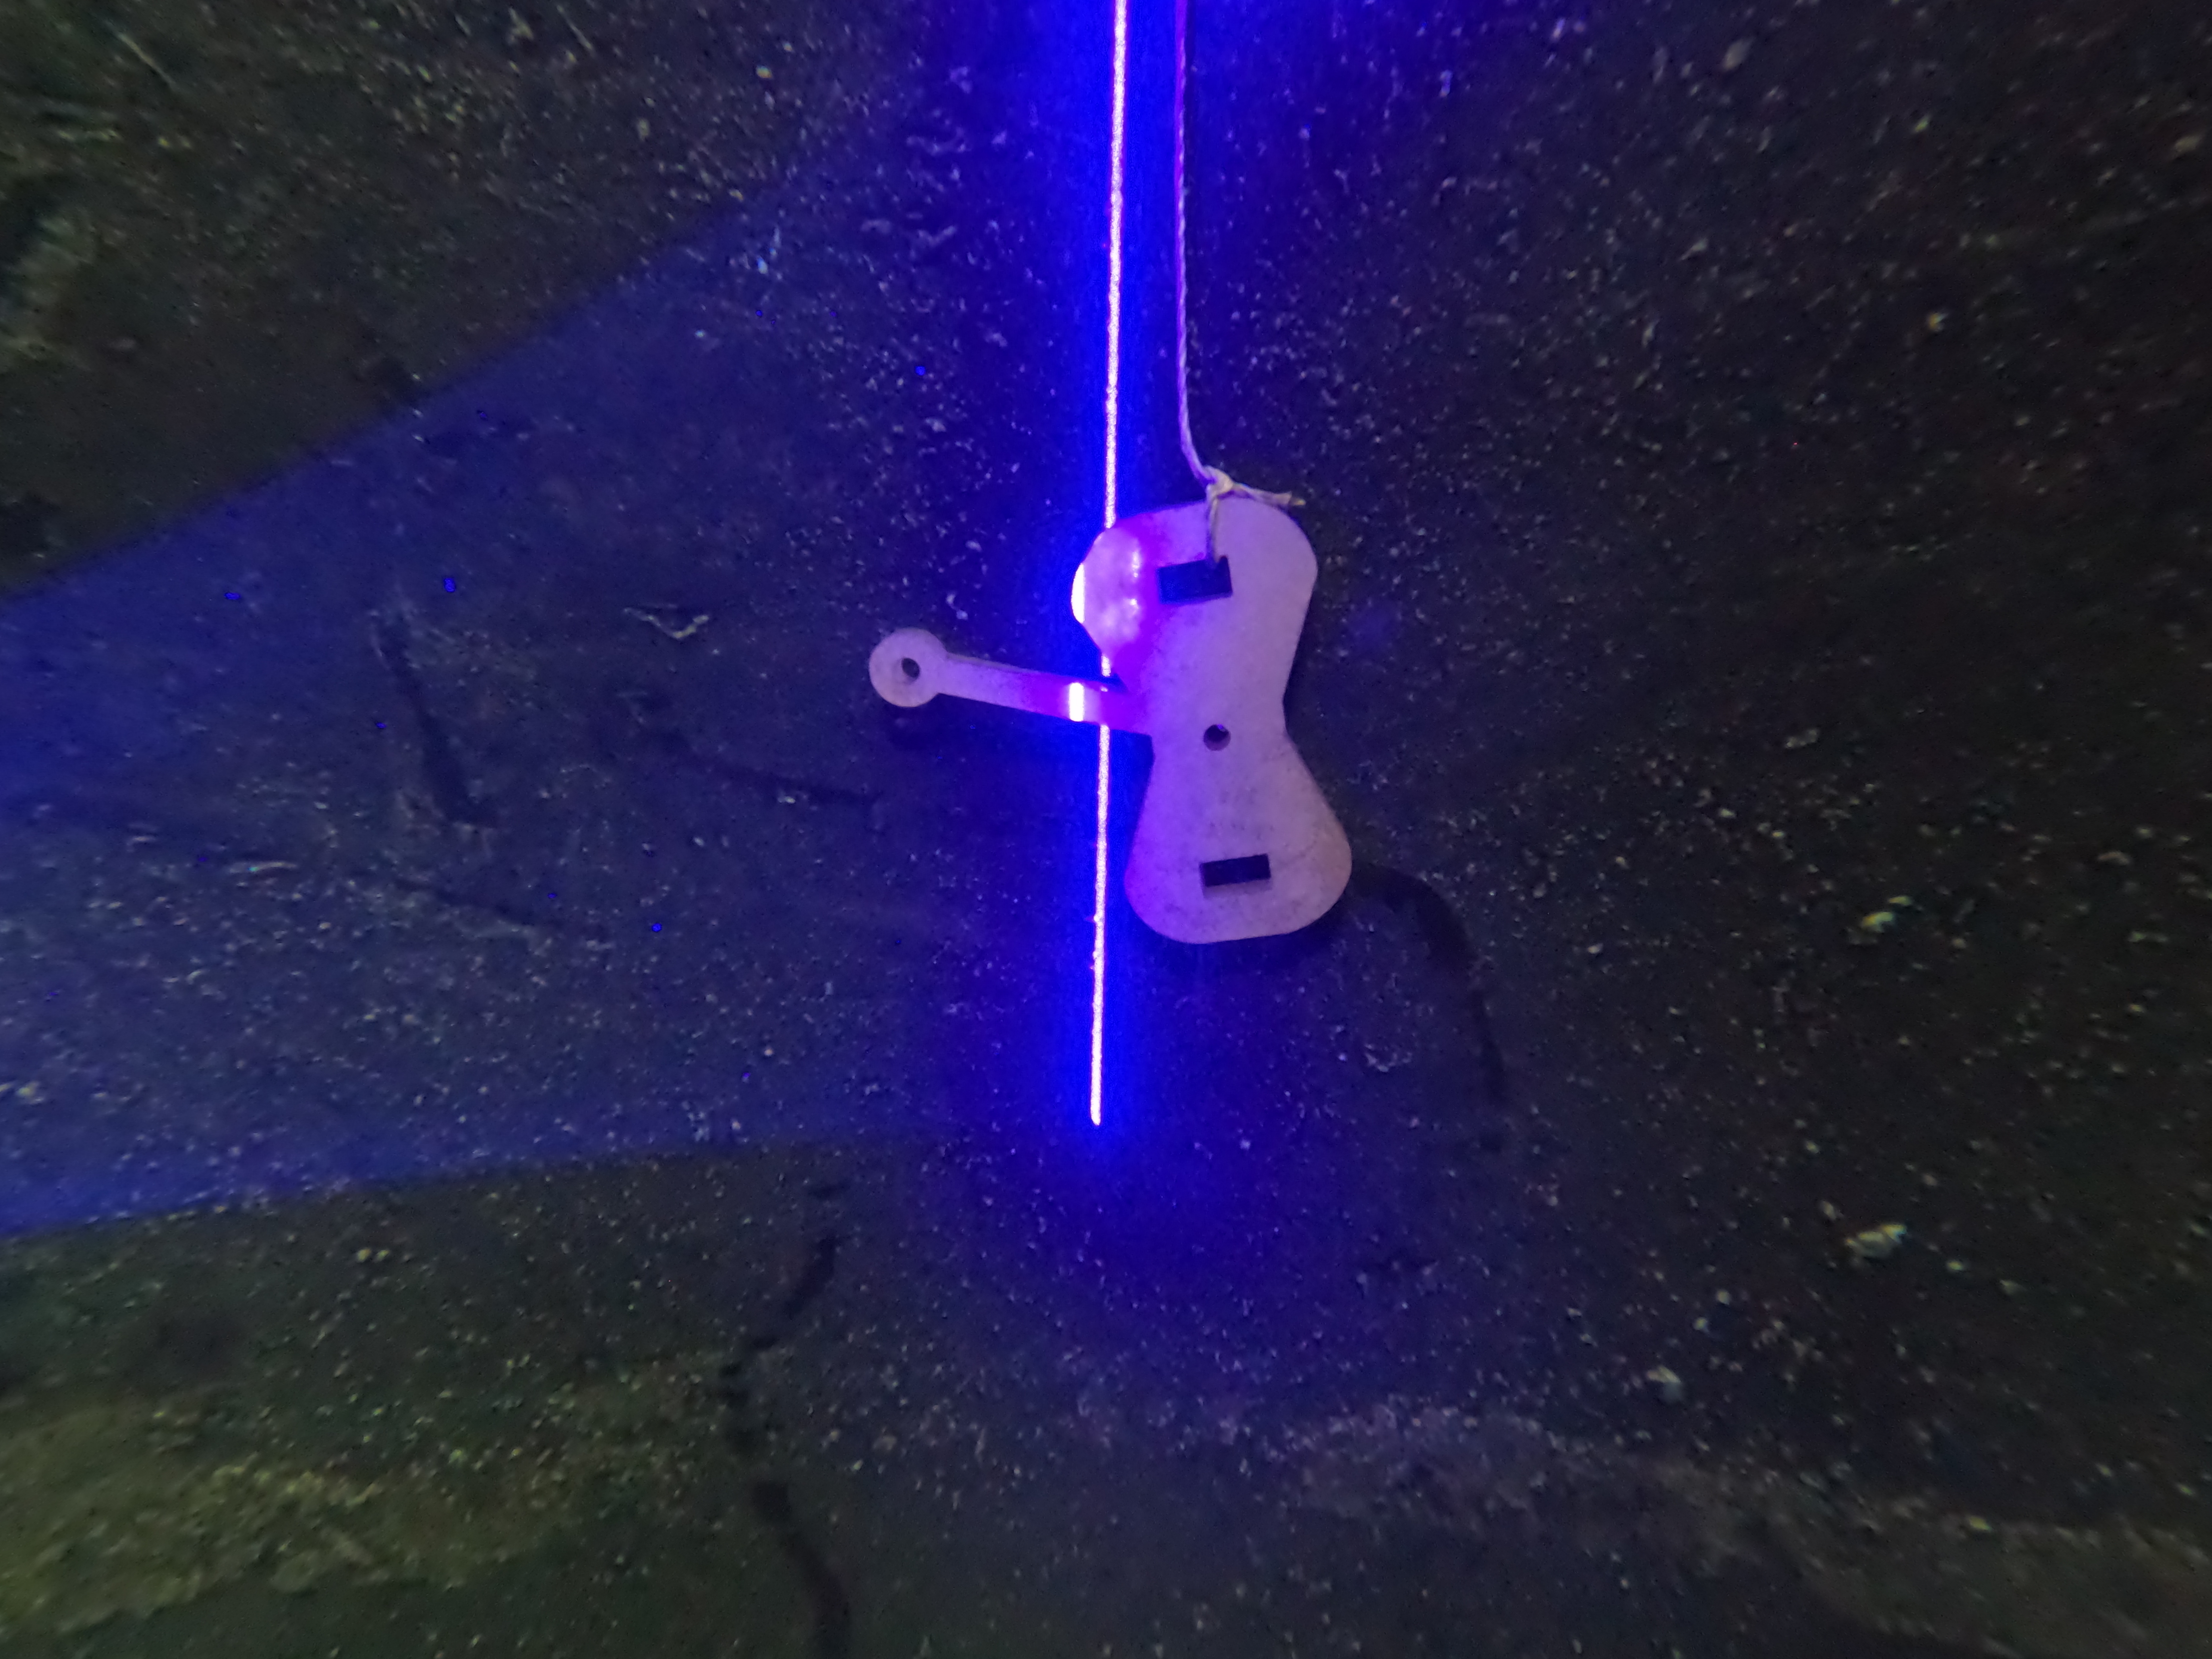

Supplement: Supplementary file 2476 [file G0016054.pdf › Level_2_2/G0016054.pdf]

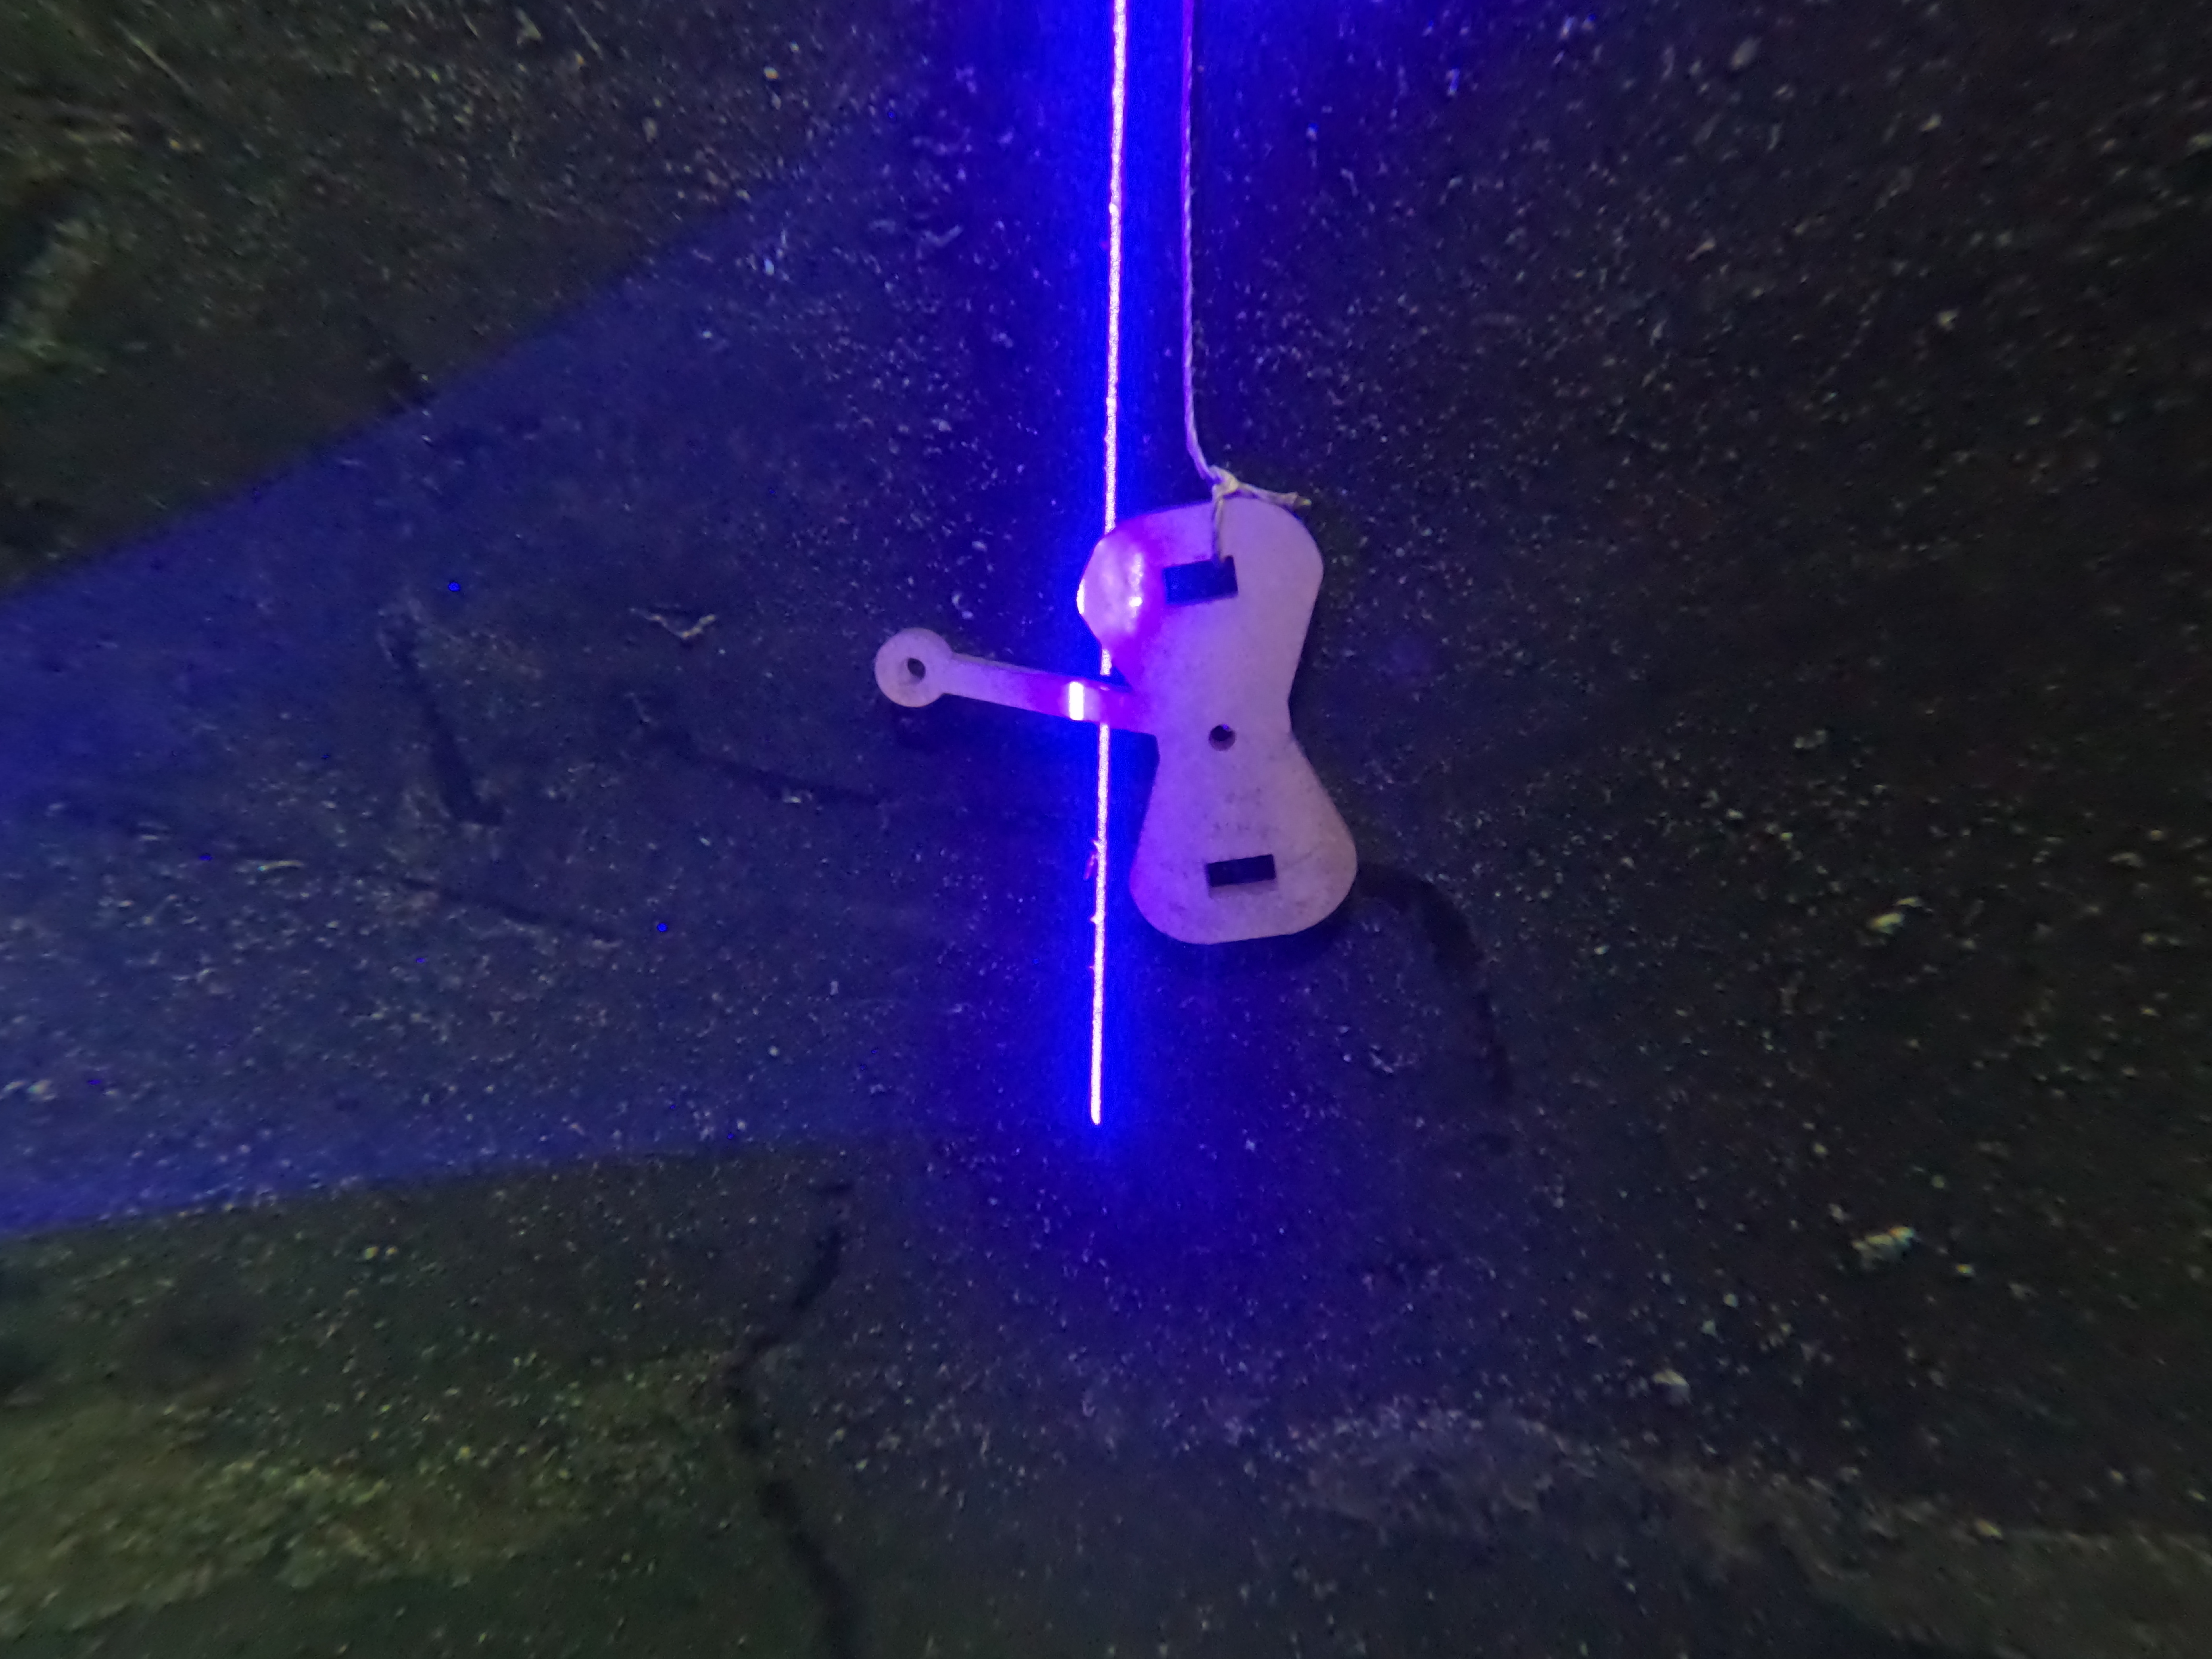

Supplement: Supplementary file 2477 [file G0016055.pdf › Level_2_2/G0016055.pdf]

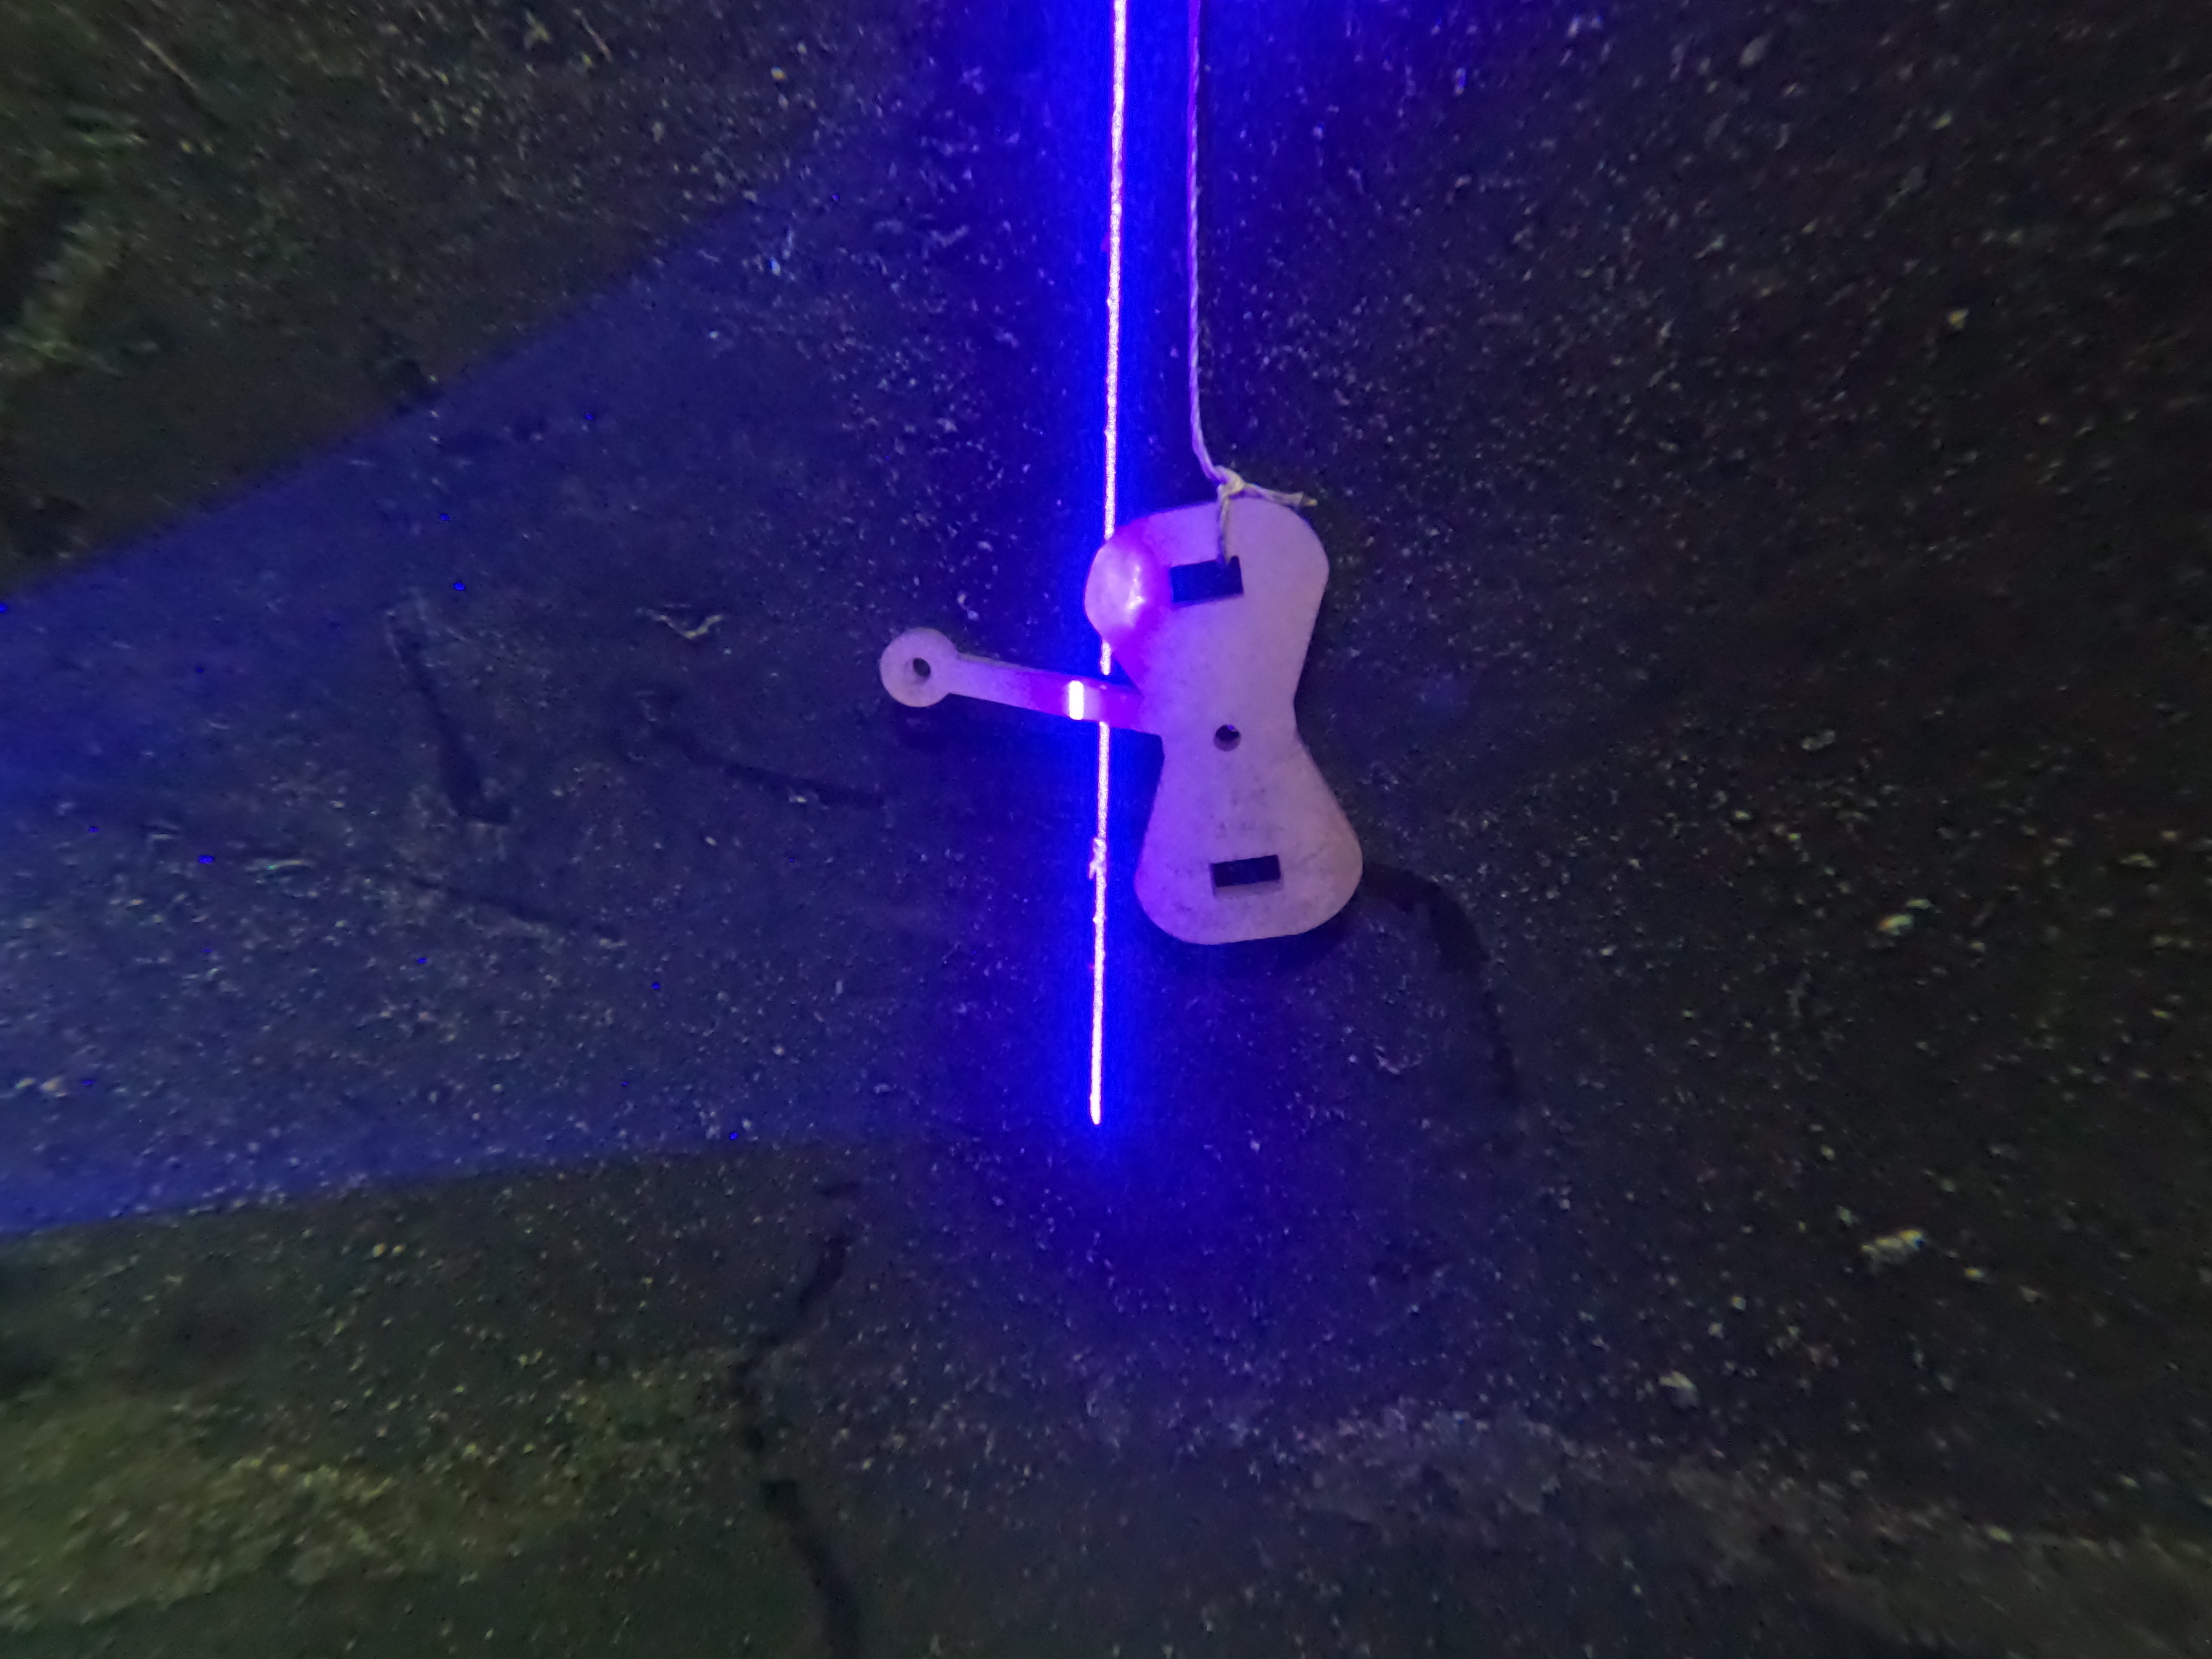

Supplement: Supplementary file 2478 [file G0016056.pdf › Level_2_2/G0016056.pdf]

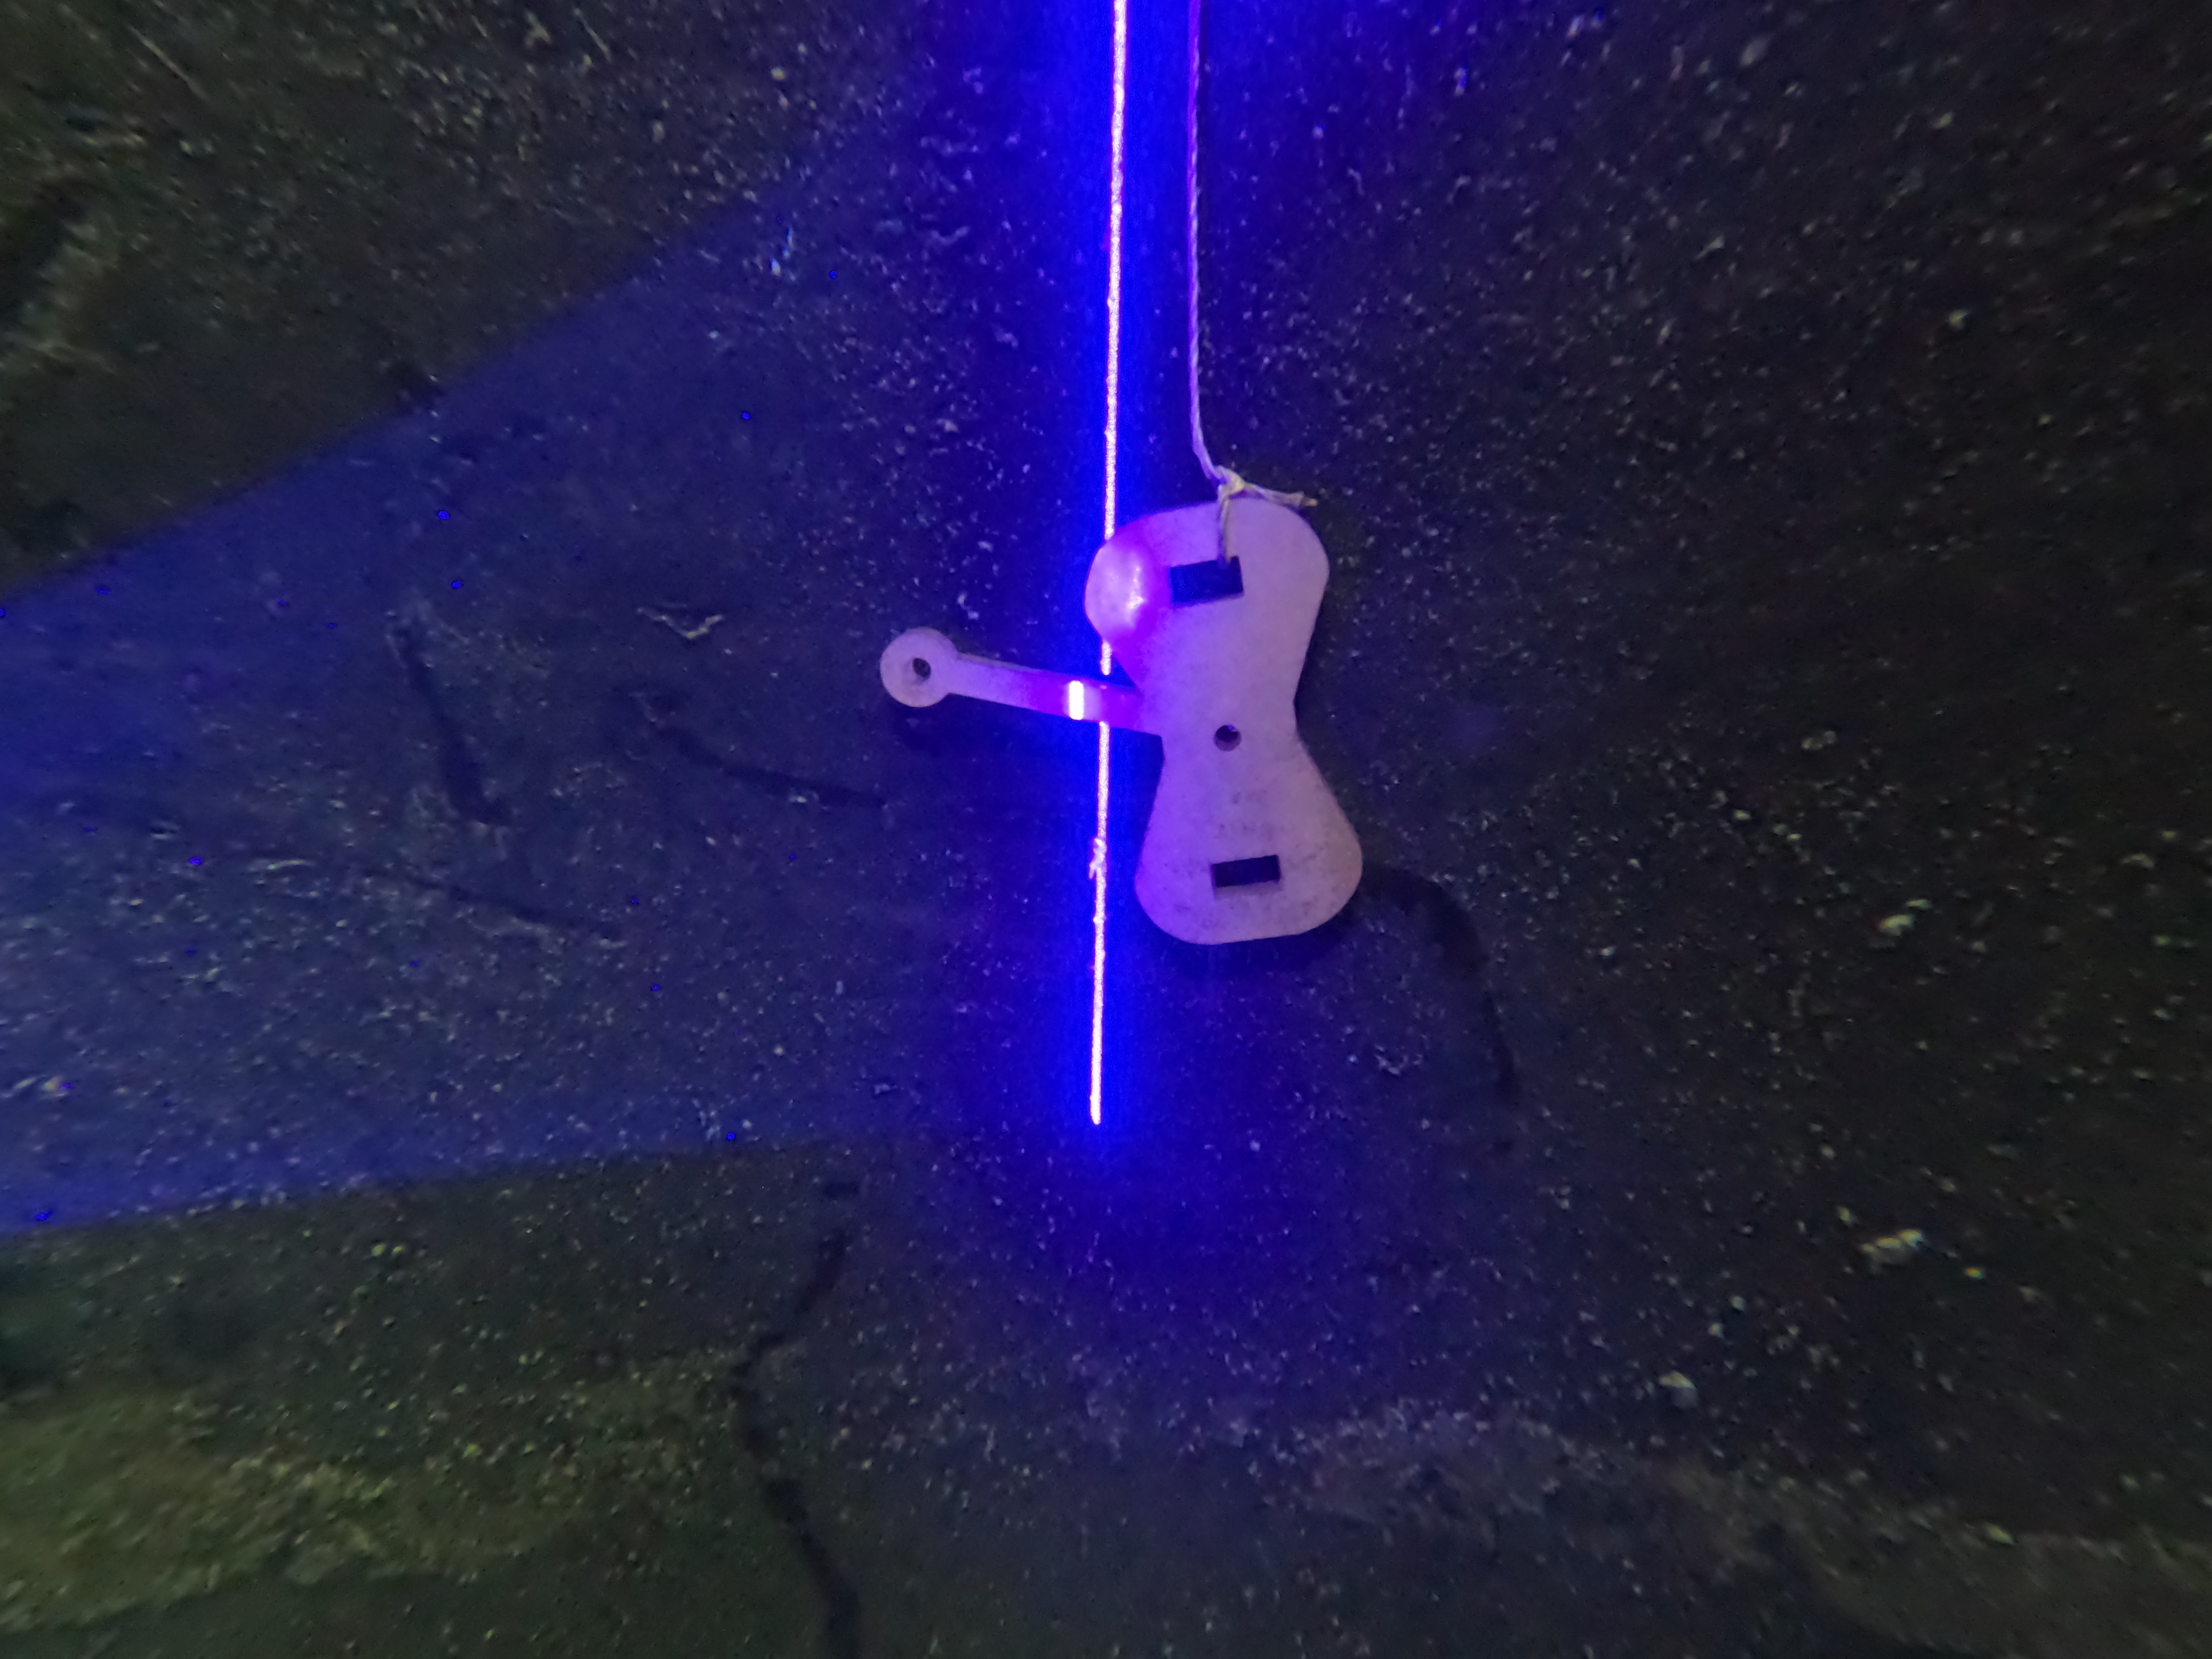

Supplement: Supplementary file 2479 [file G0016057.pdf › Level_2_2/G0016057.pdf]

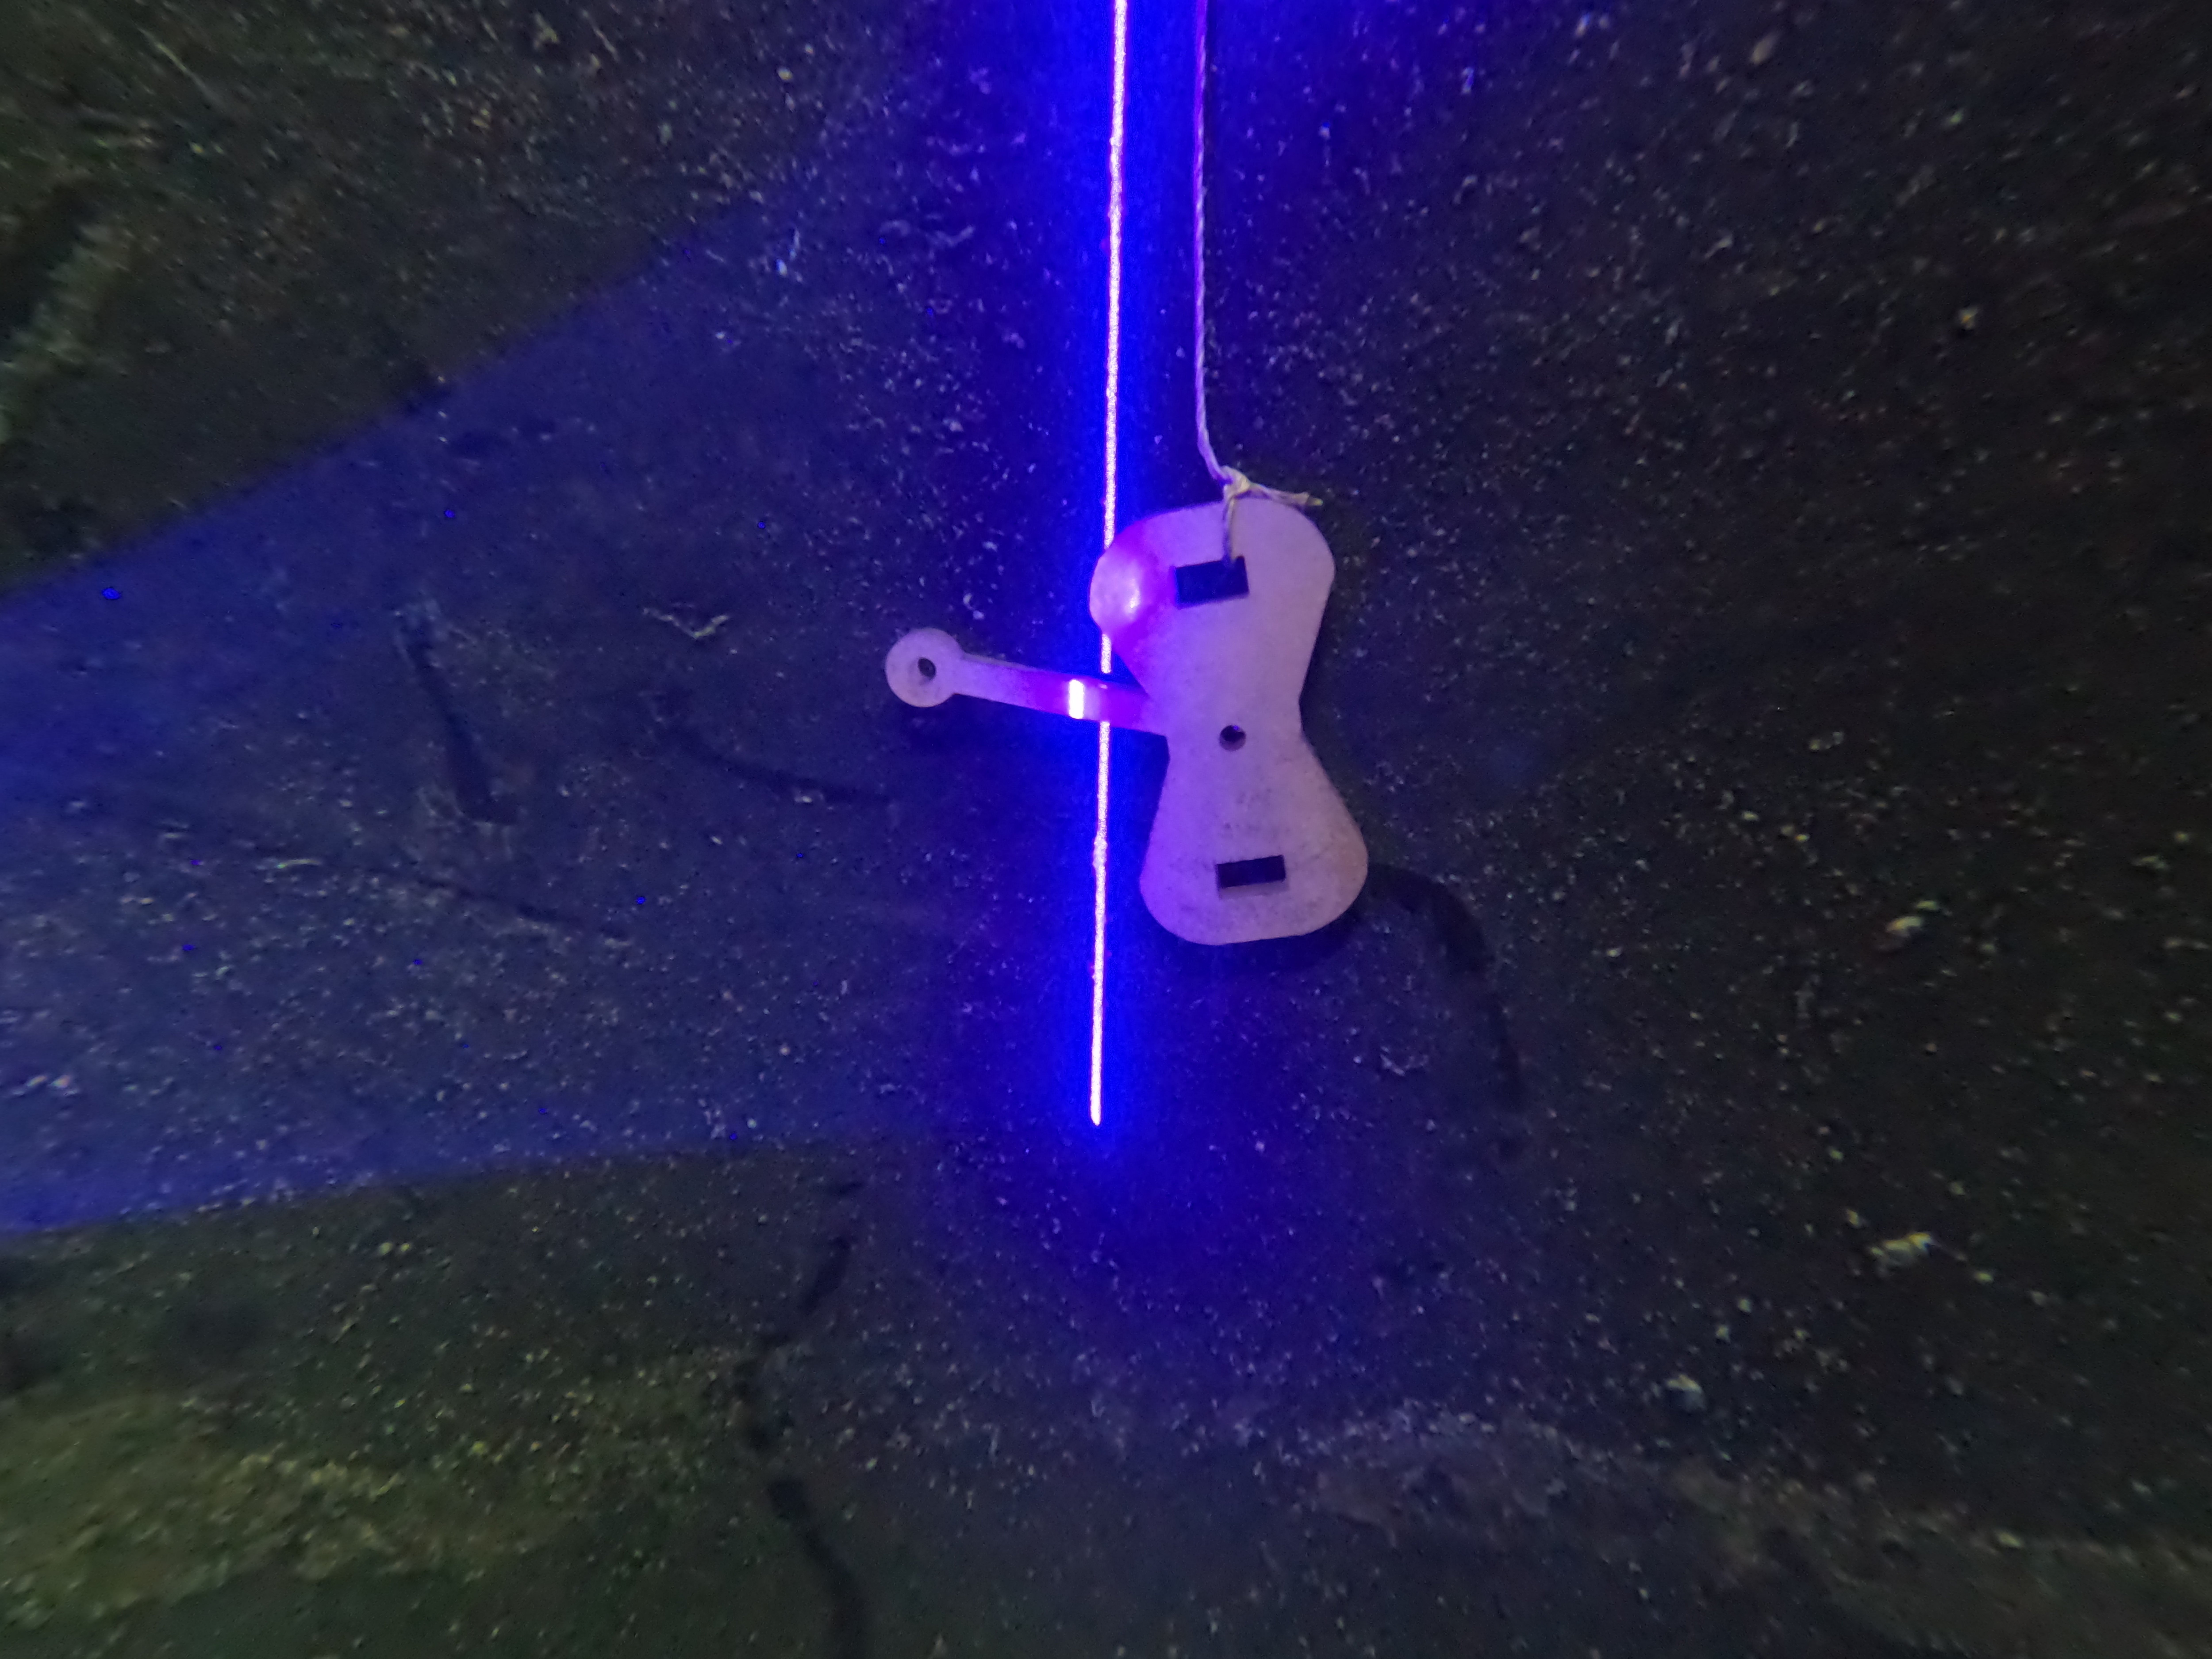

Supplement: Supplementary file 2480 [file G0016058.pdf › Level_2_2/G0016058.pdf]

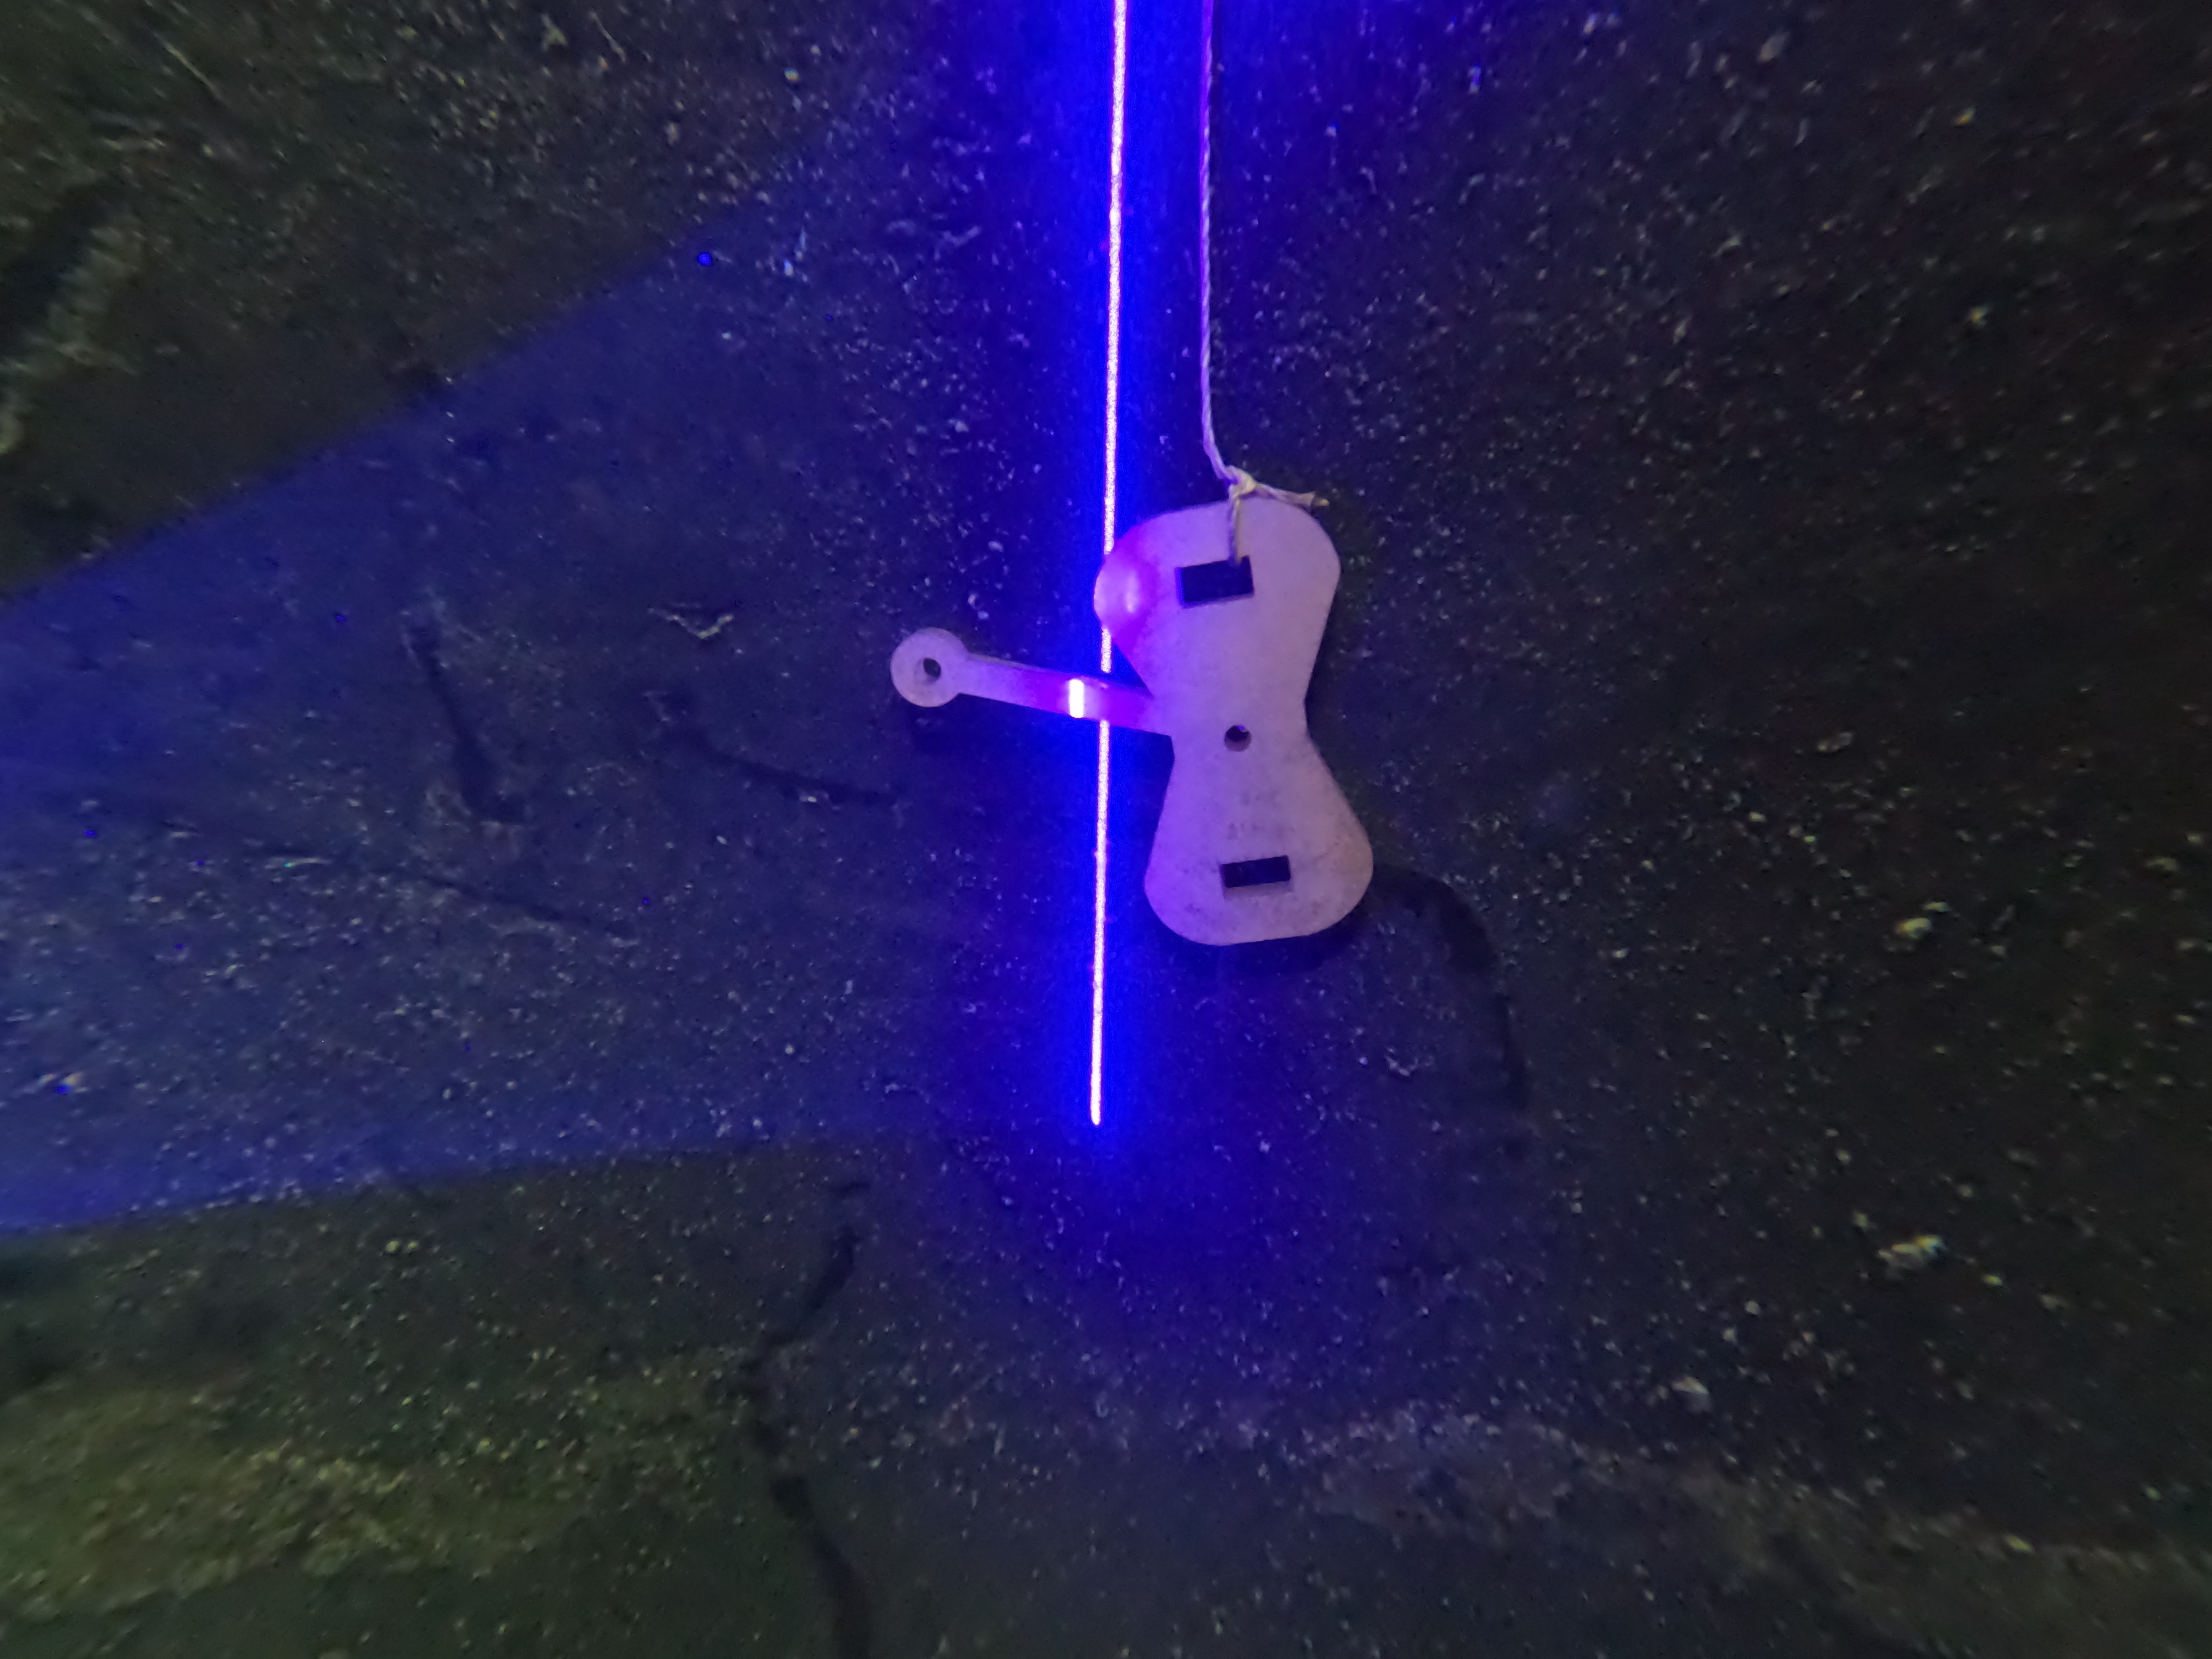

Supplement: Supplementary file 2481 [file G0016059.pdf › Level_2_2/G0016059.pdf]

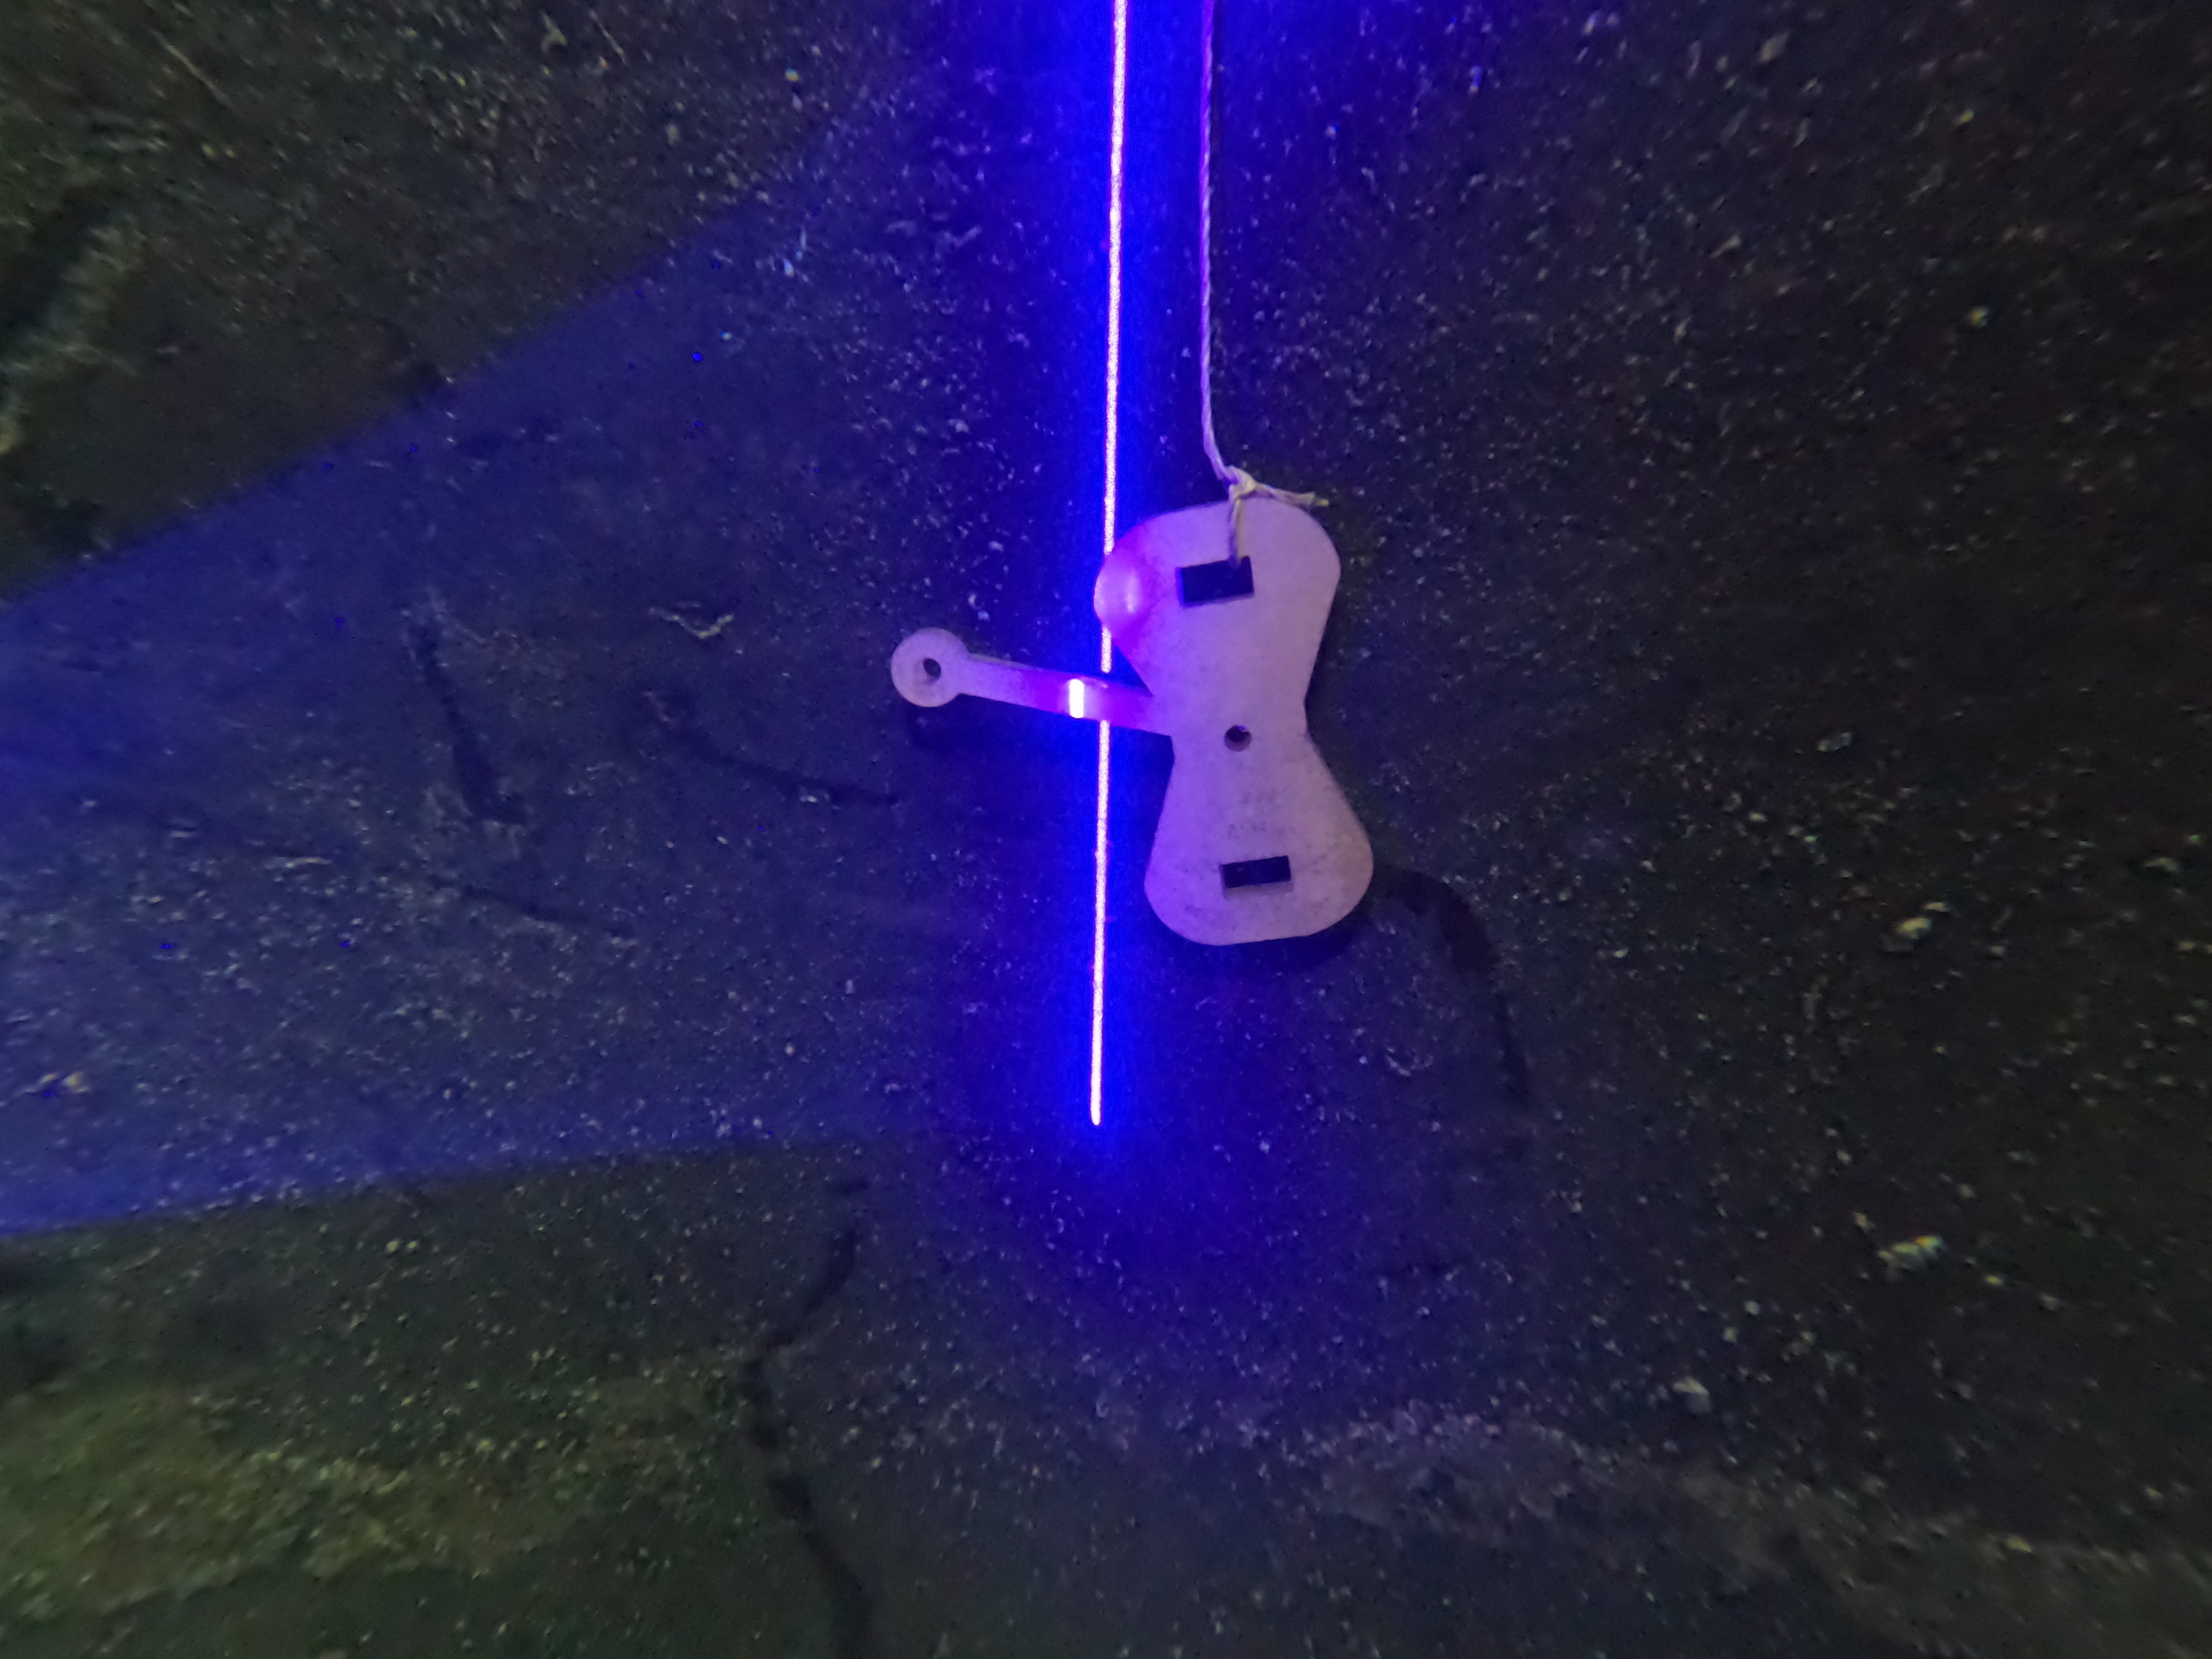

Supplement: Supplementary file 2482 [file G0016060.pdf › Level_2_2/G0016060.pdf]

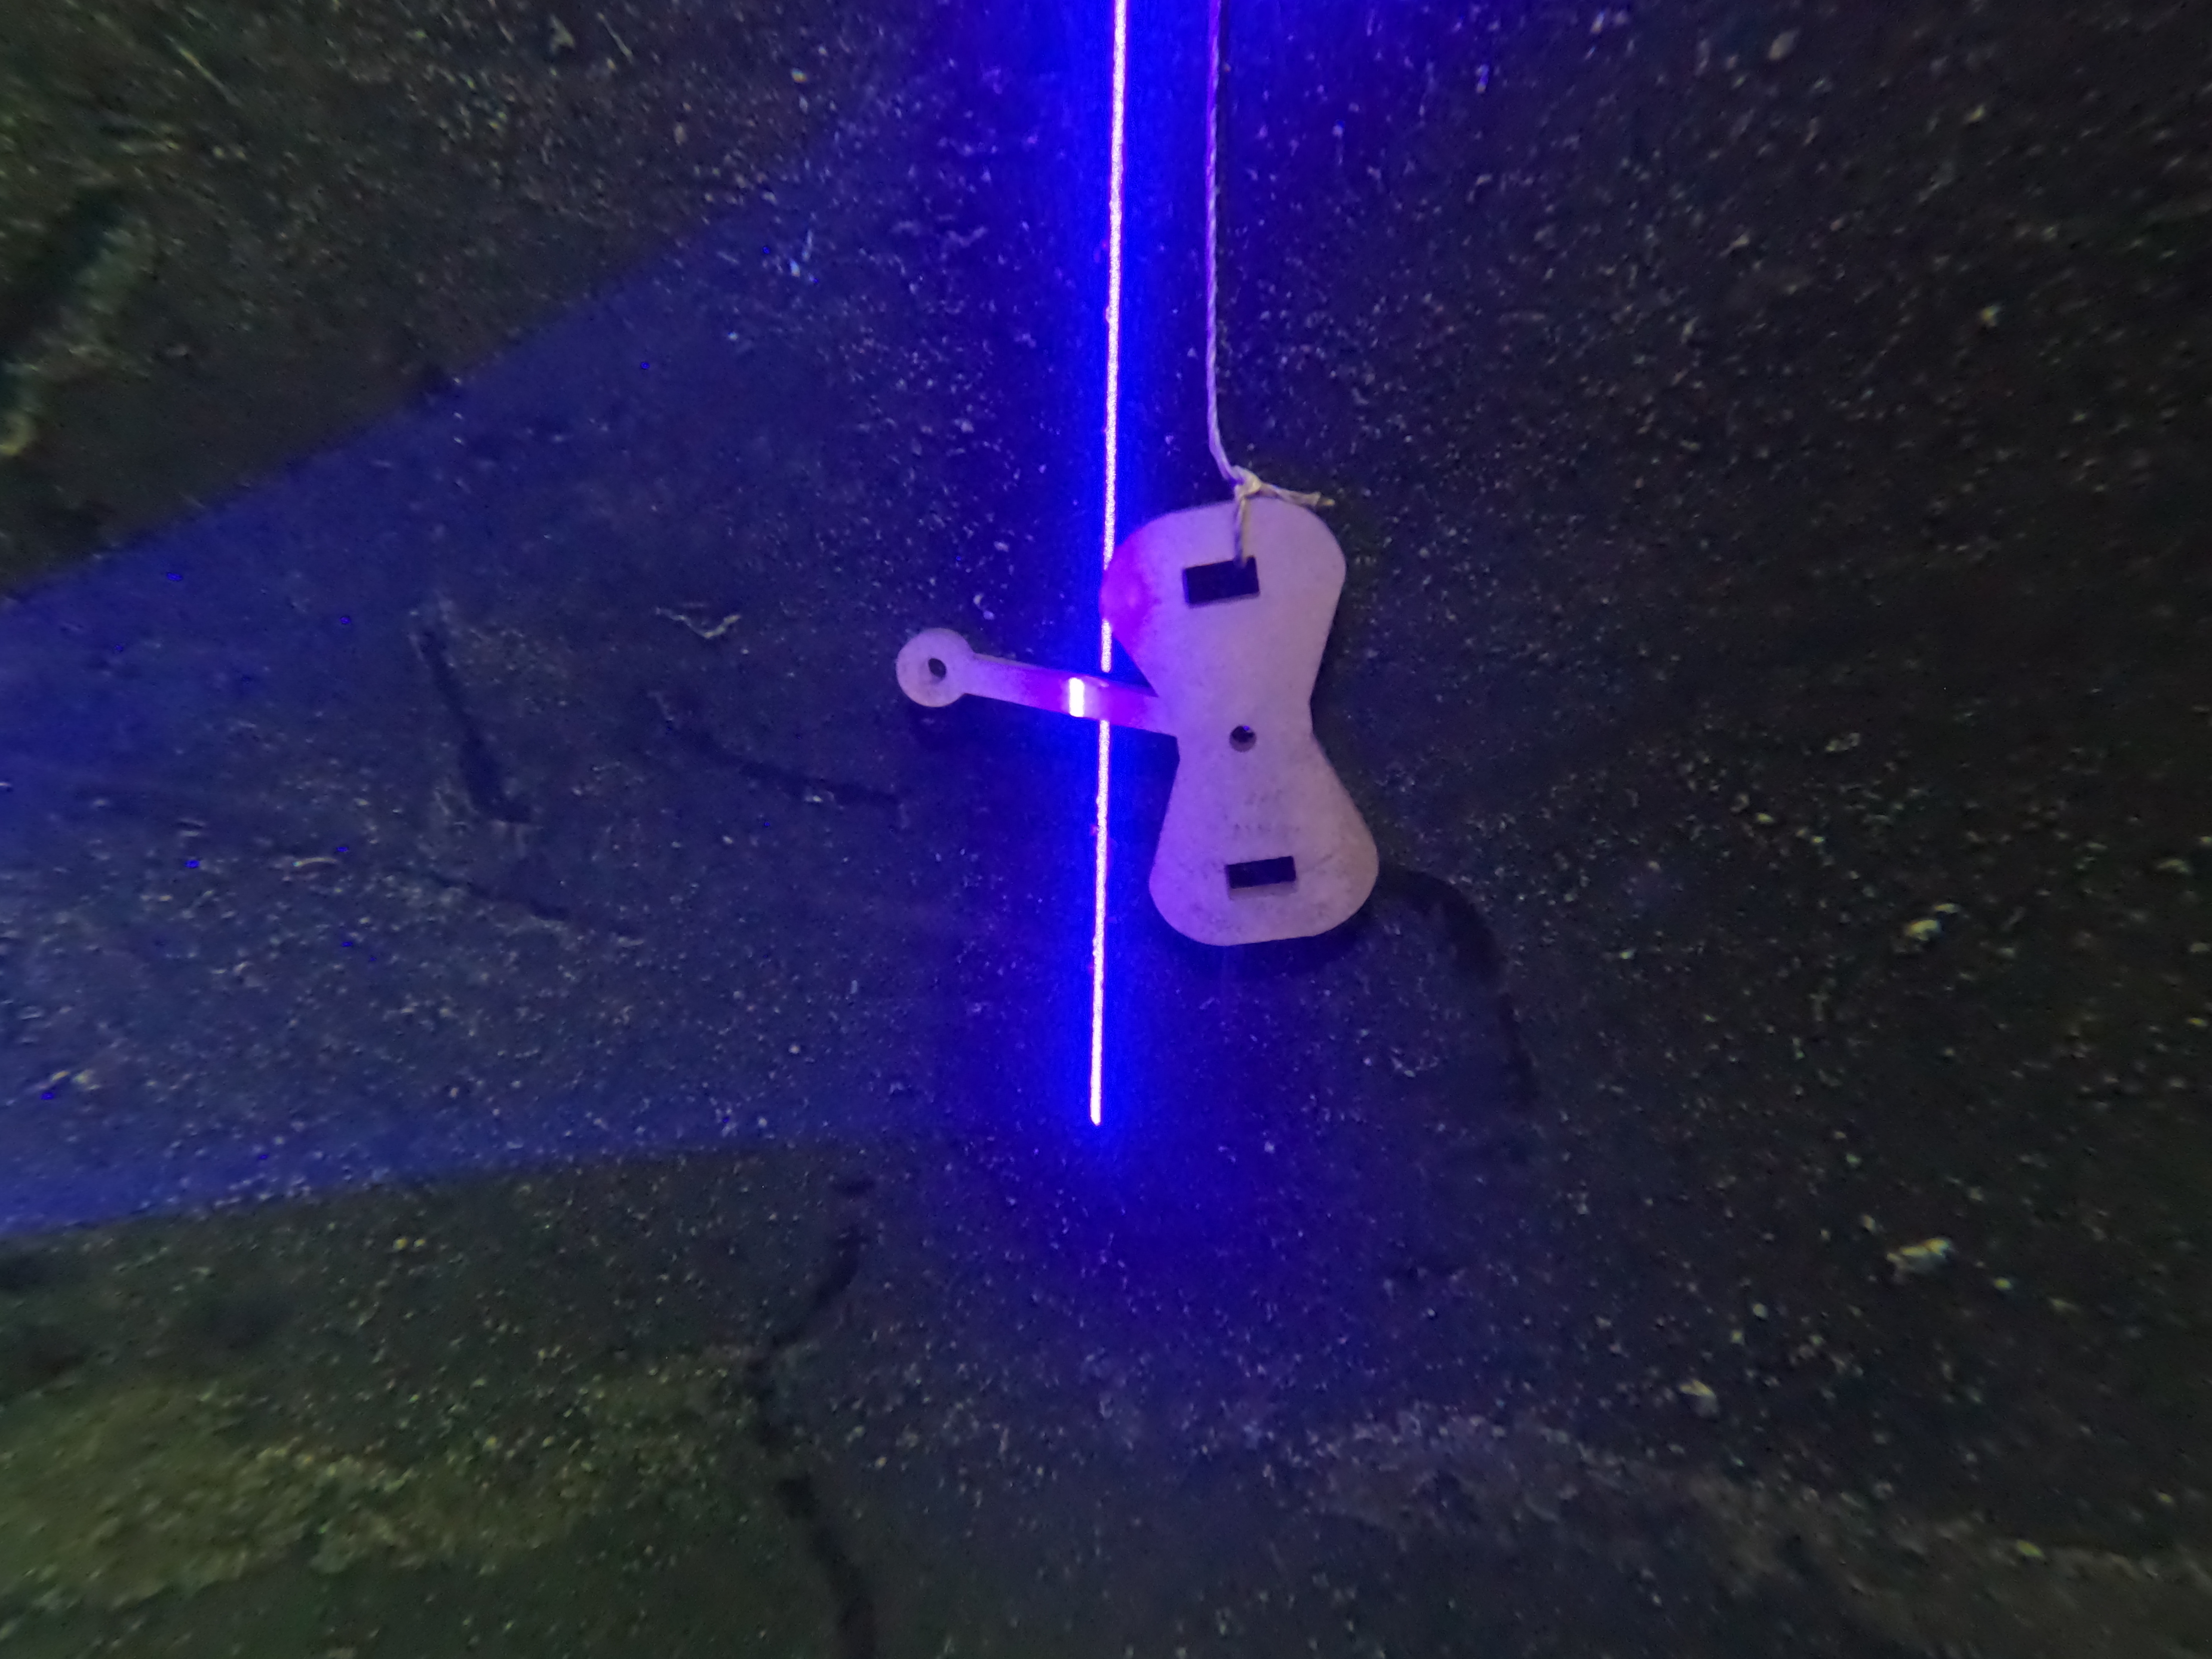

Supplement: Supplementary file 2483 [file G0016061.pdf › Level_2_2/G0016061.pdf]

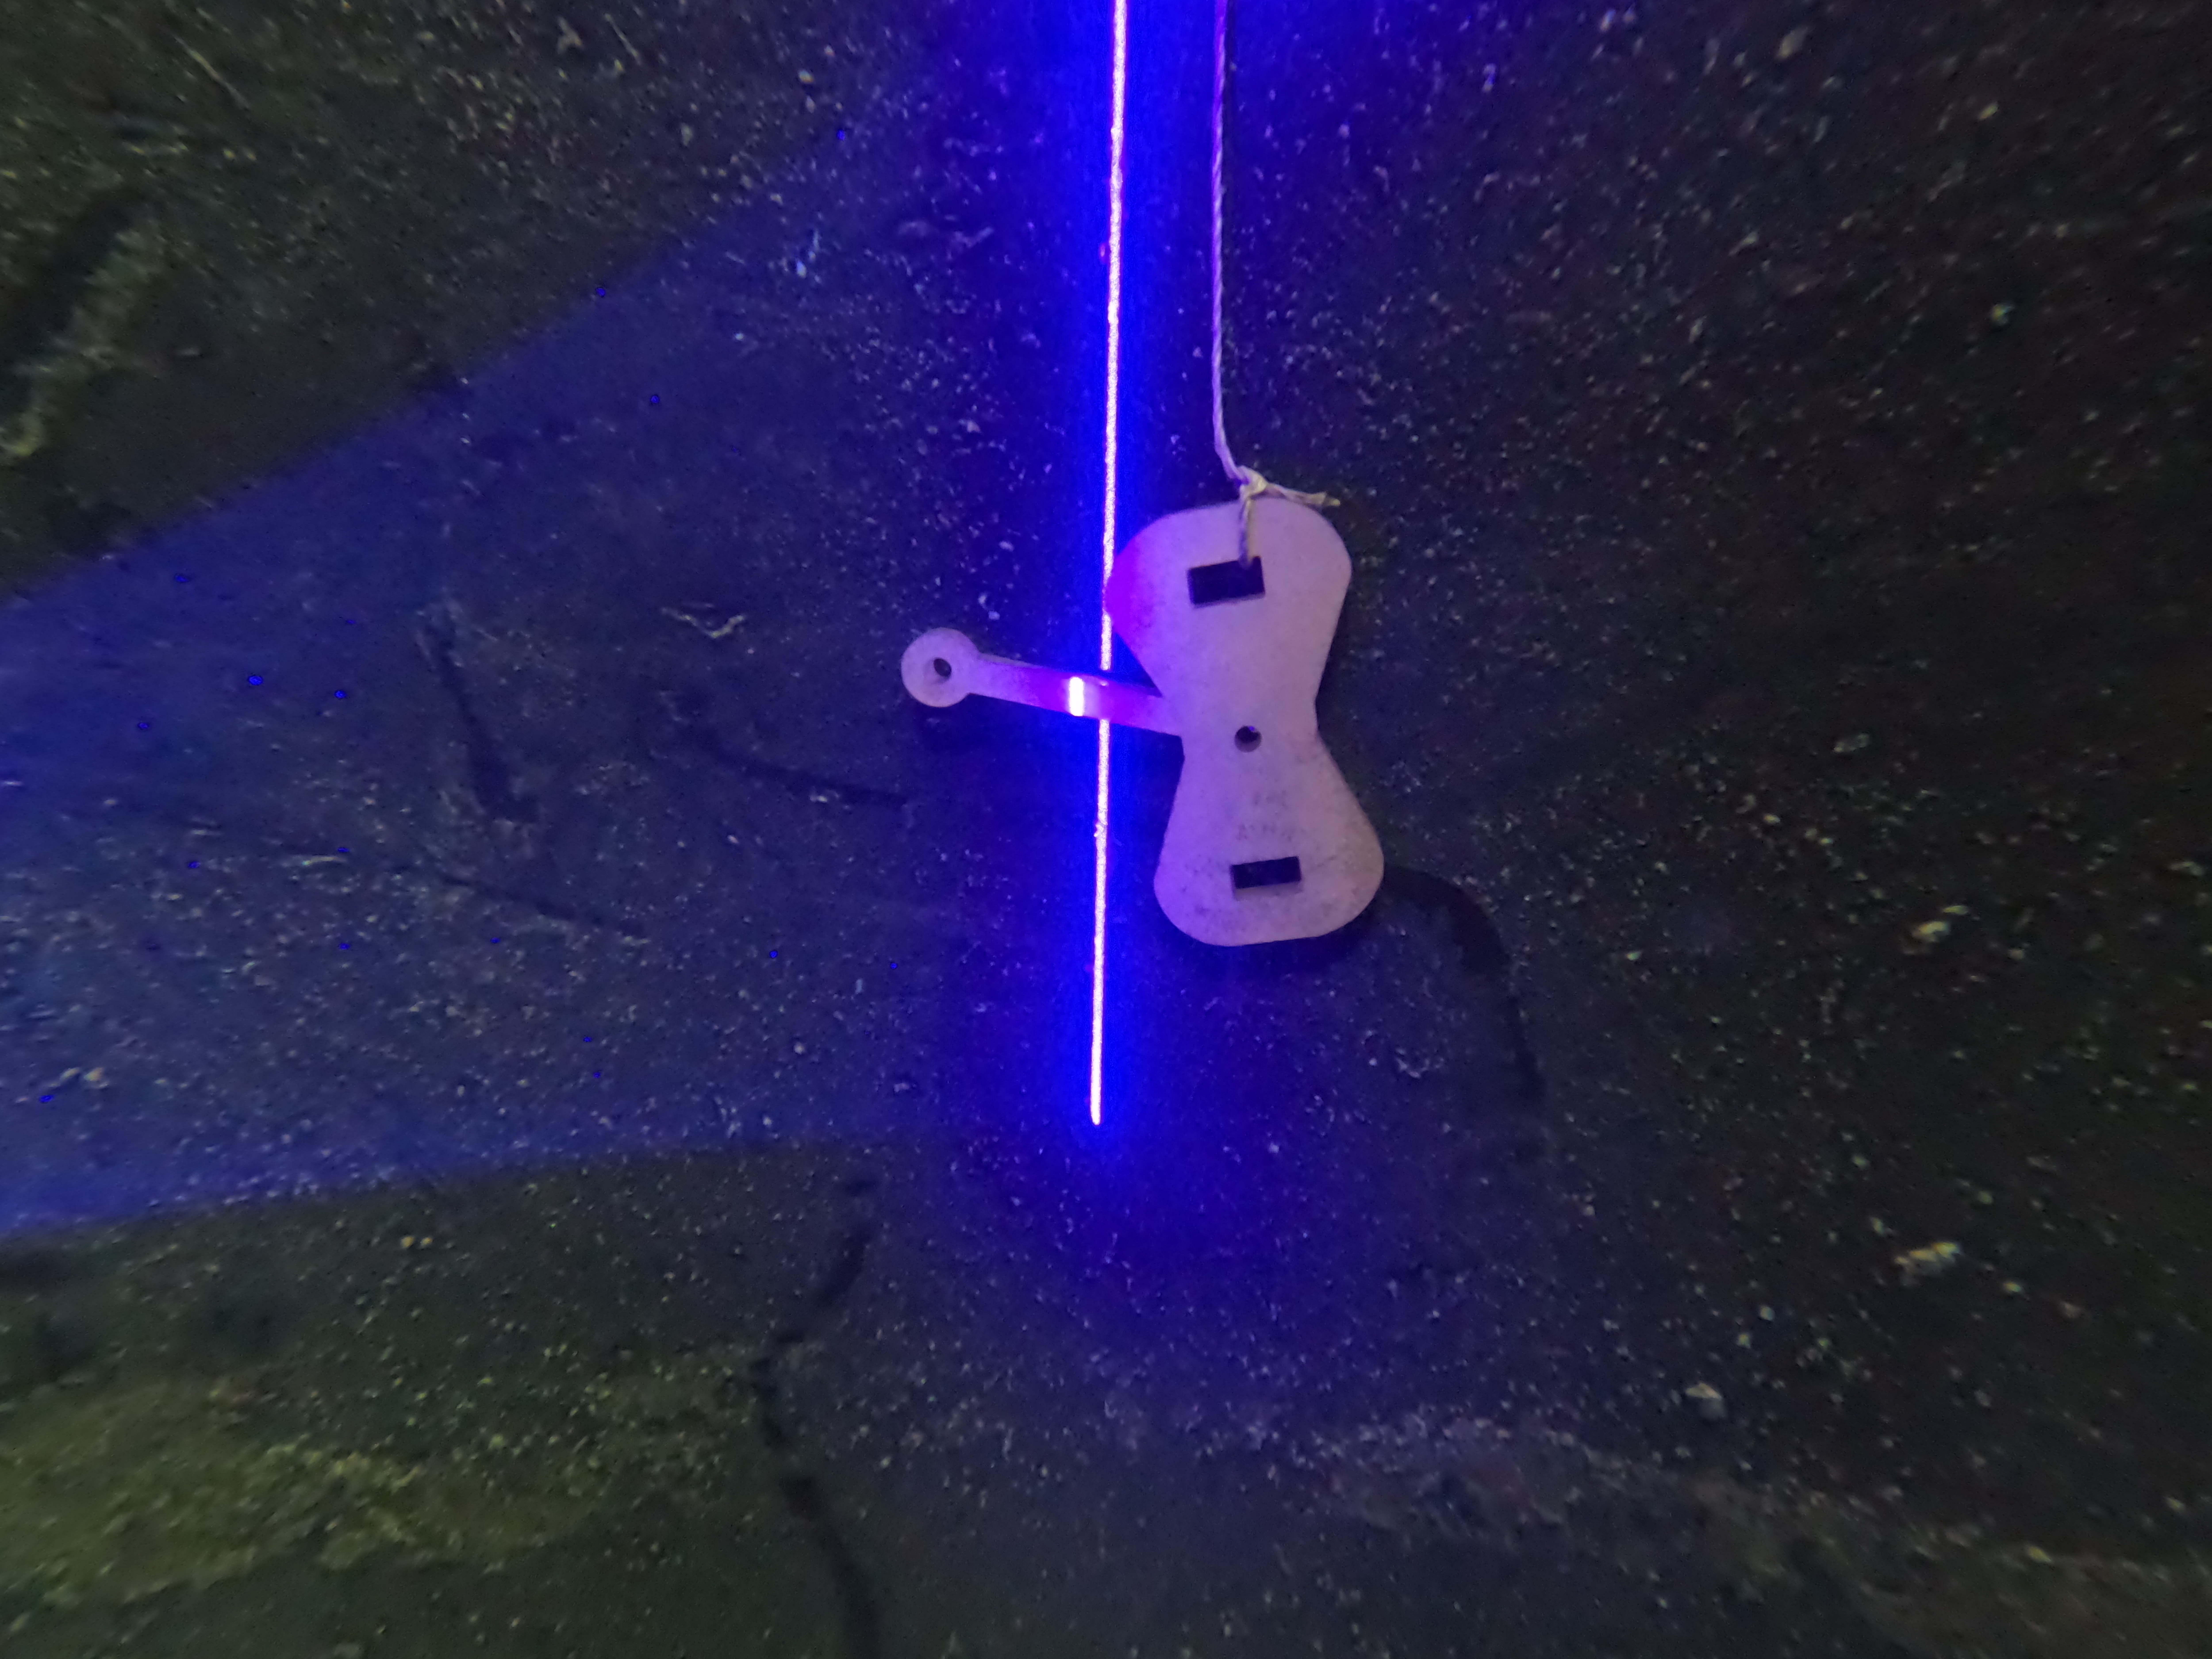

Supplement: Supplementary file 2484 [file G0016062.pdf › Level_2_2/G0016062.pdf]

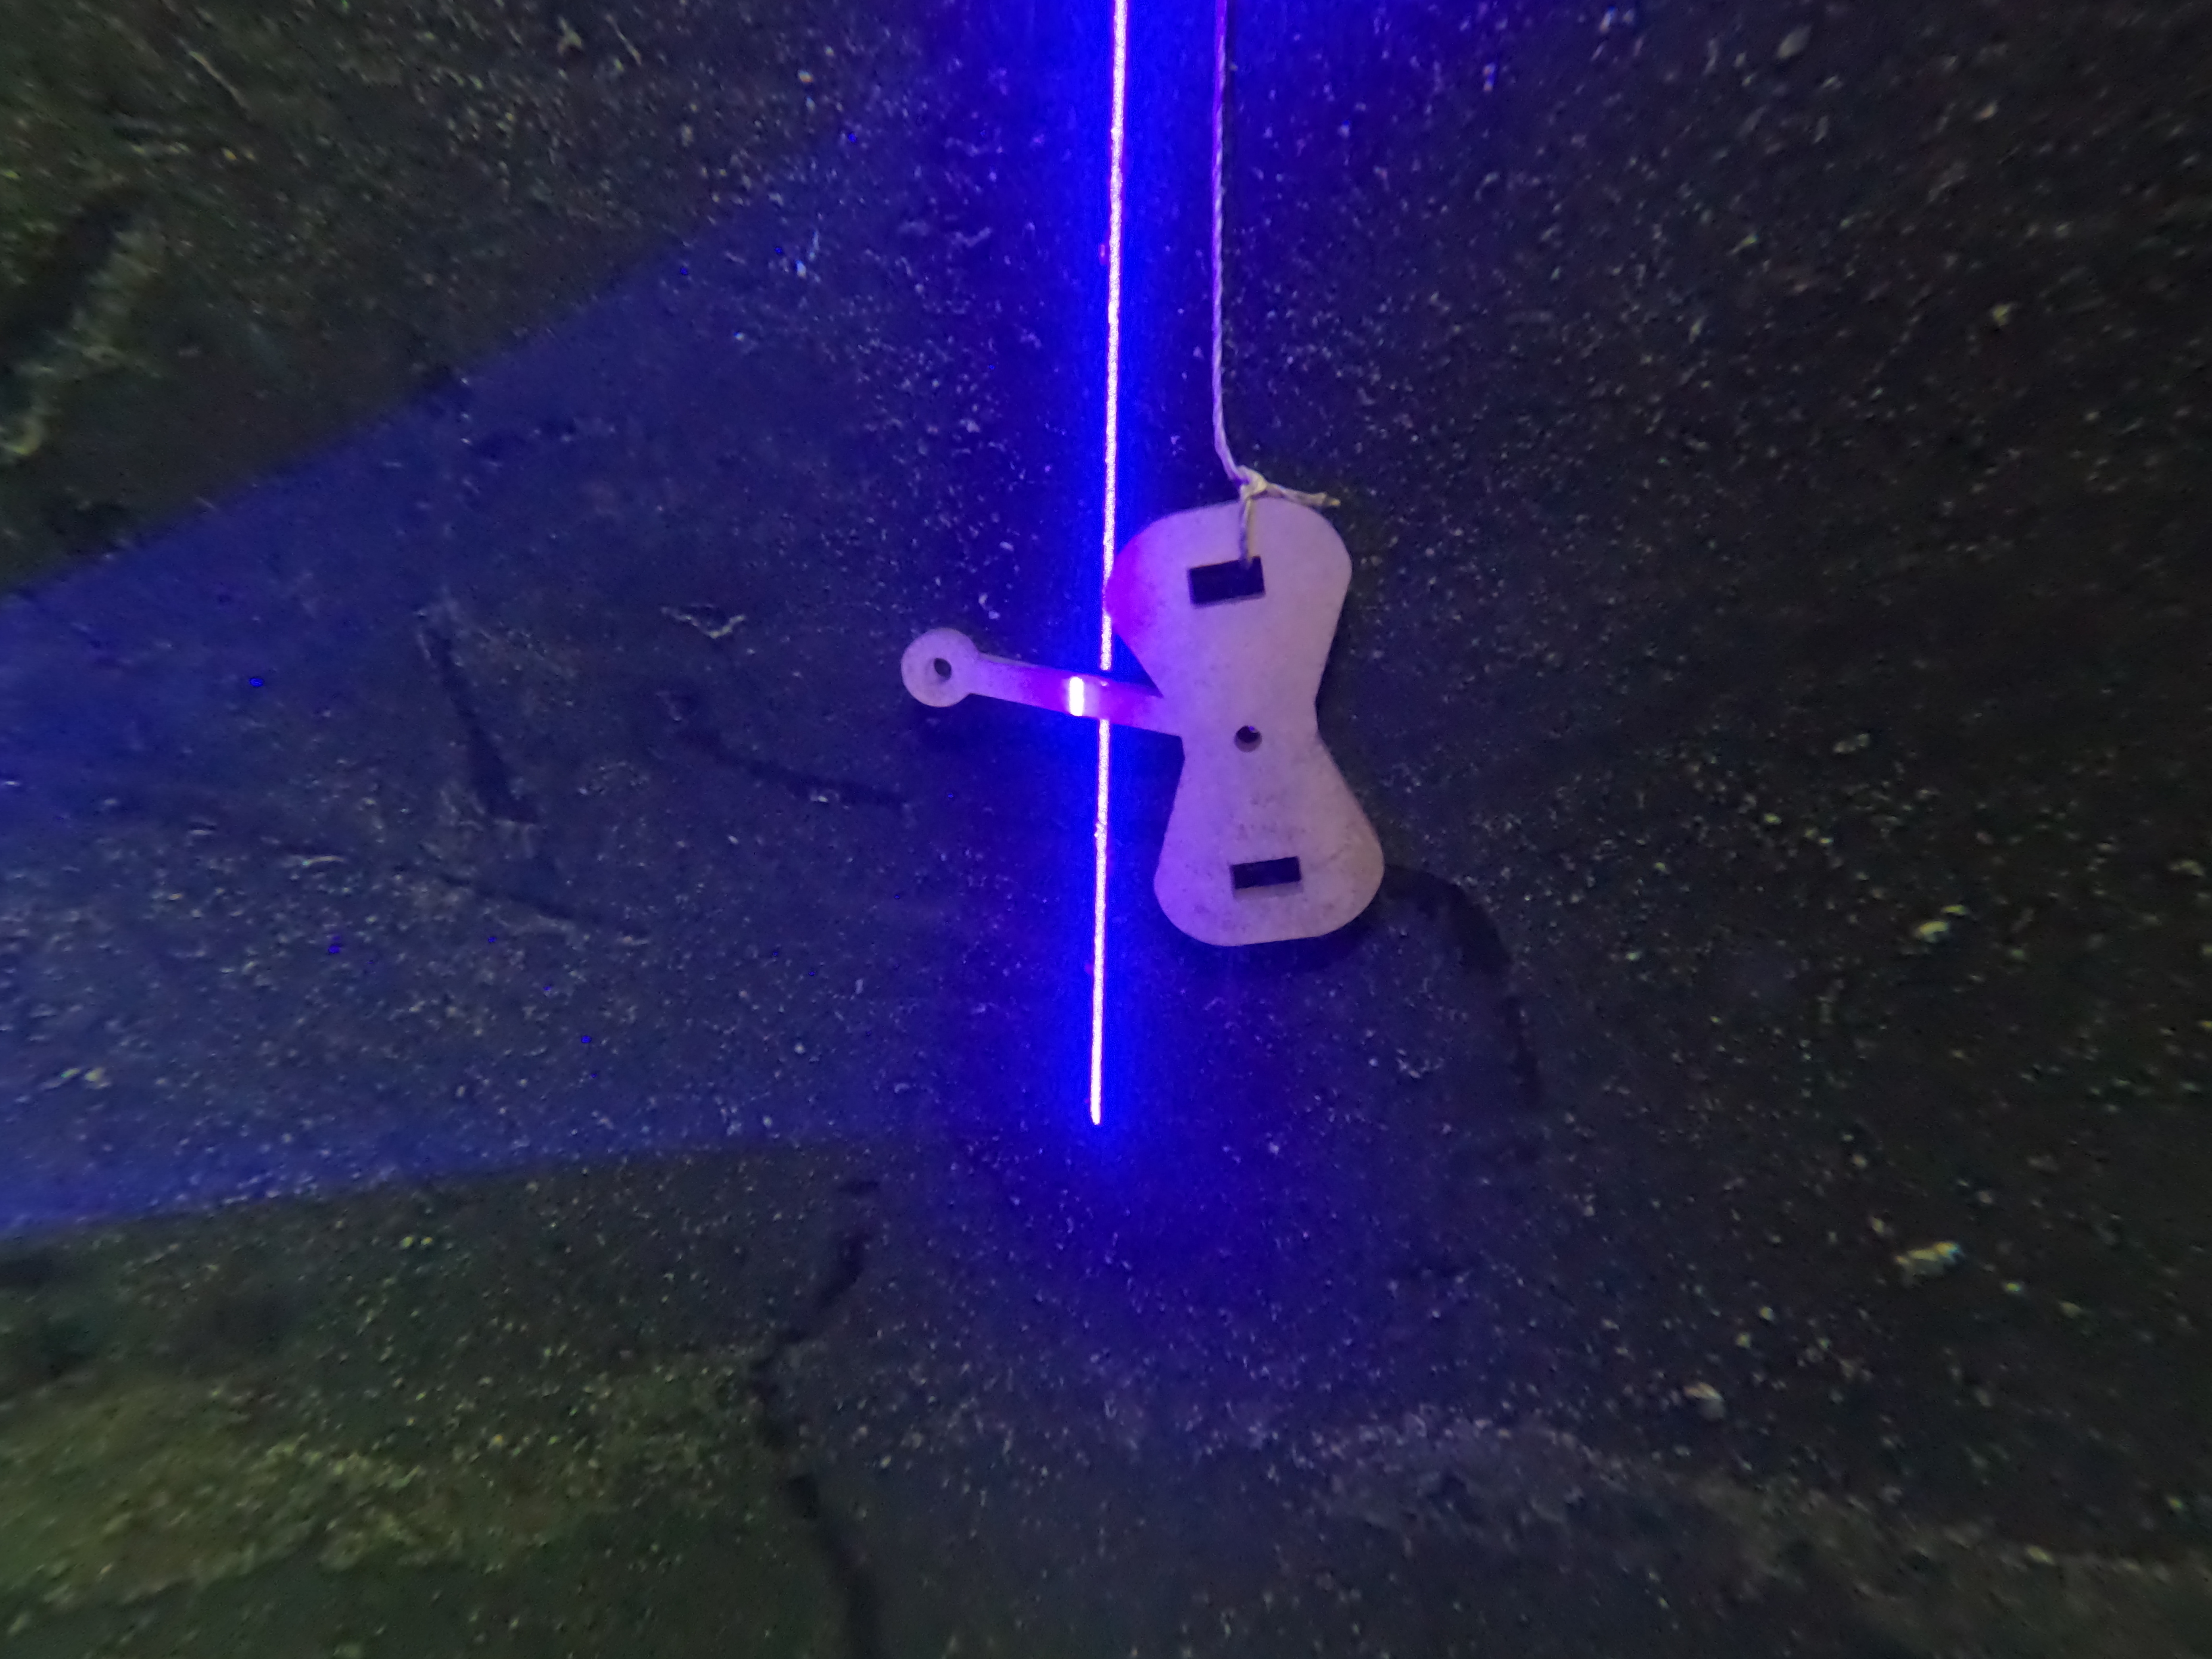

Supplement: Supplementary file 2485 [file G0016063.pdf › Level_2_2/G0016063.pdf]

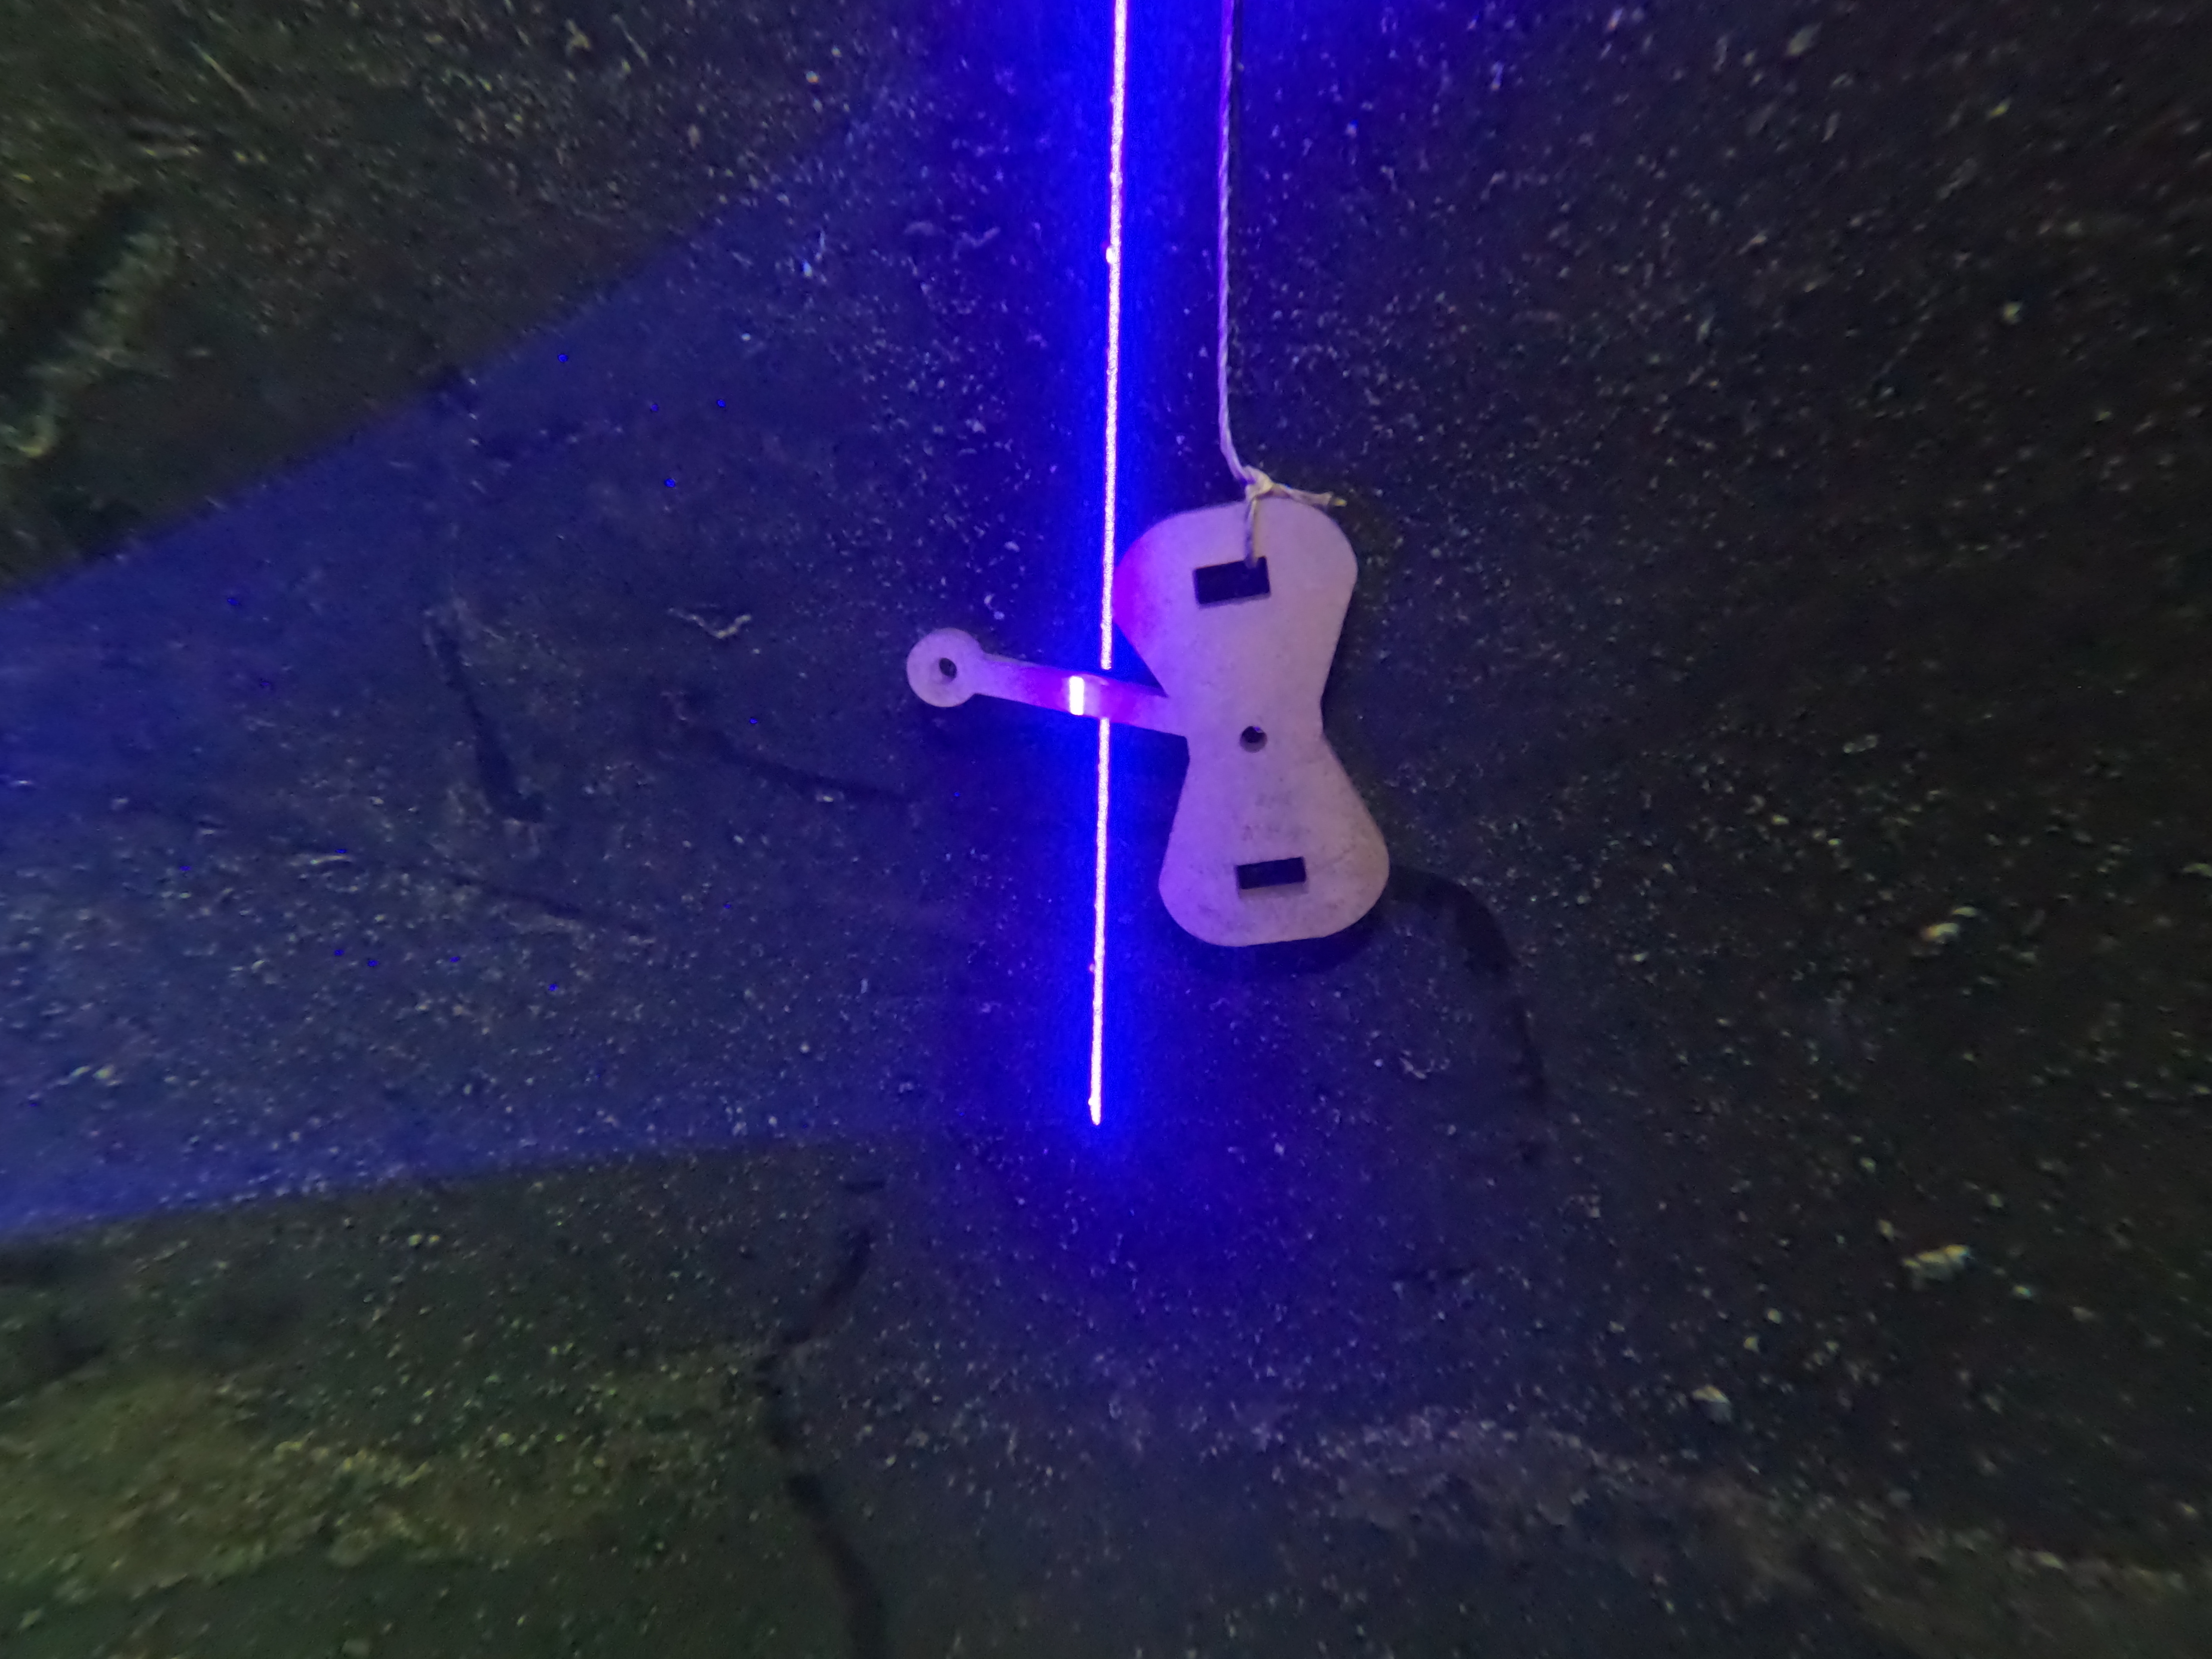

Supplement: Supplementary file 2486 [file G0016064.pdf › Level_2_2/G0016064.pdf]

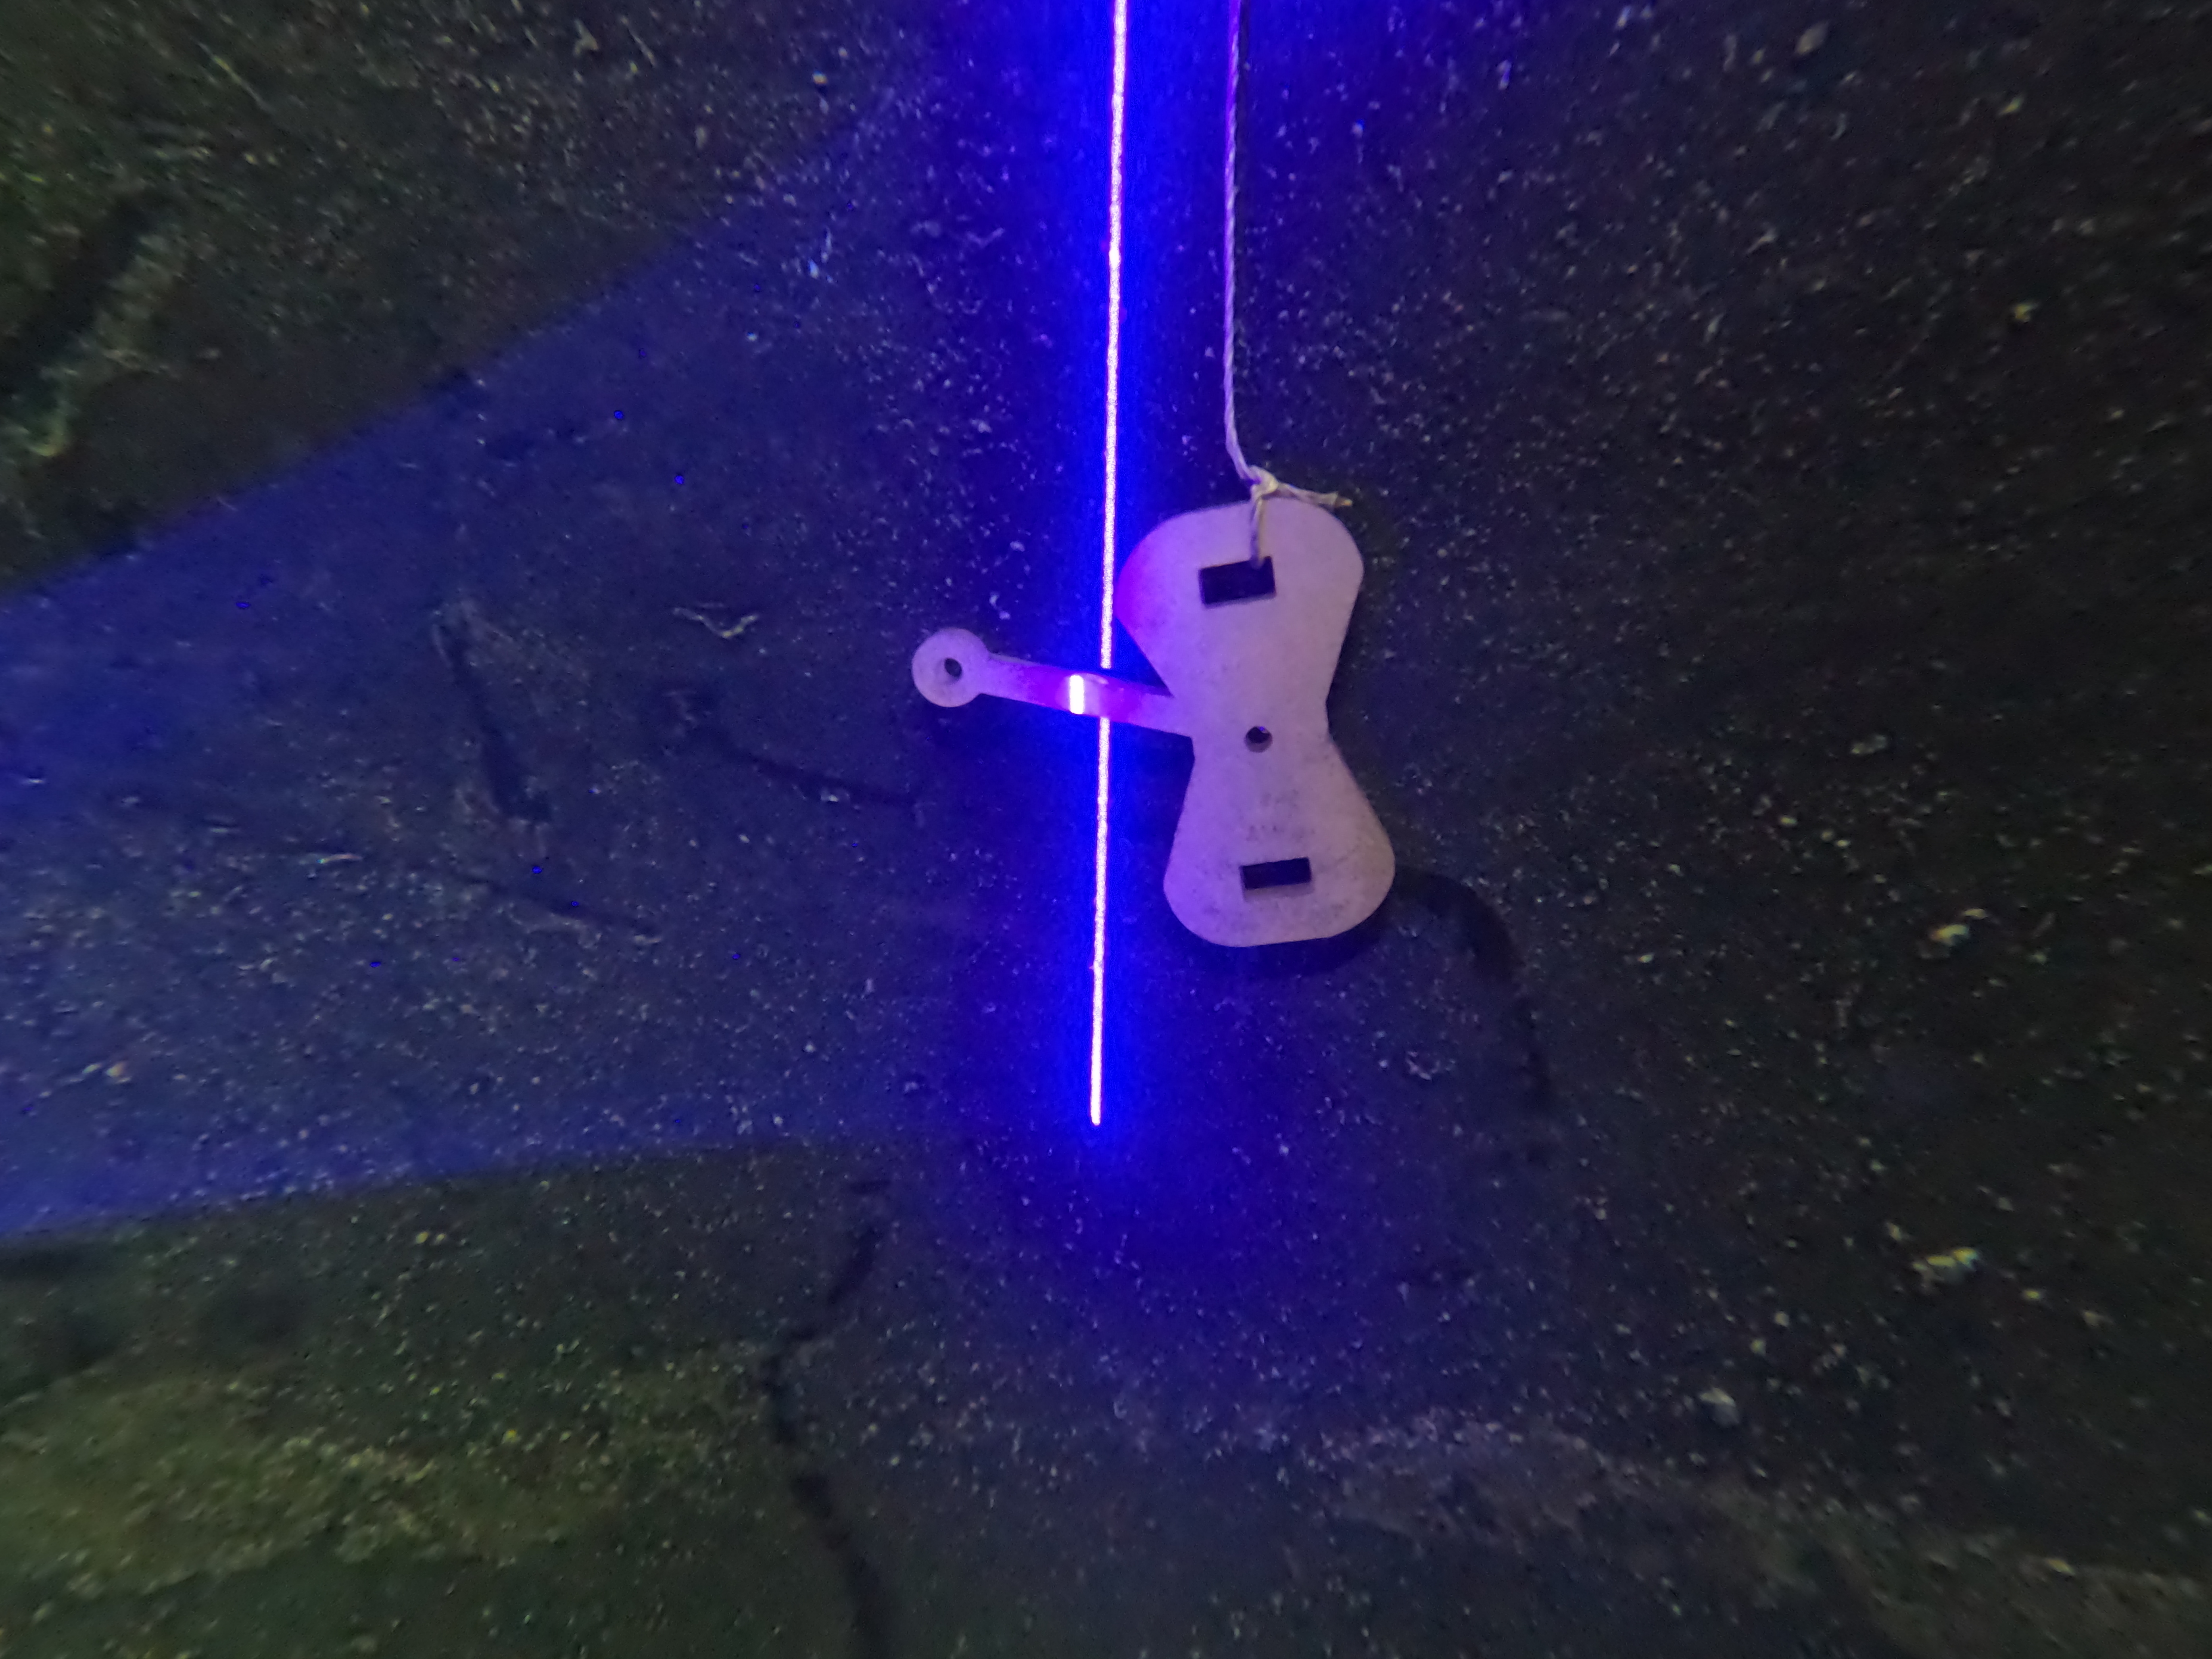

Supplement: Supplementary file 2487 [file G0016065.pdf › Level_2_2/G0016065.pdf]

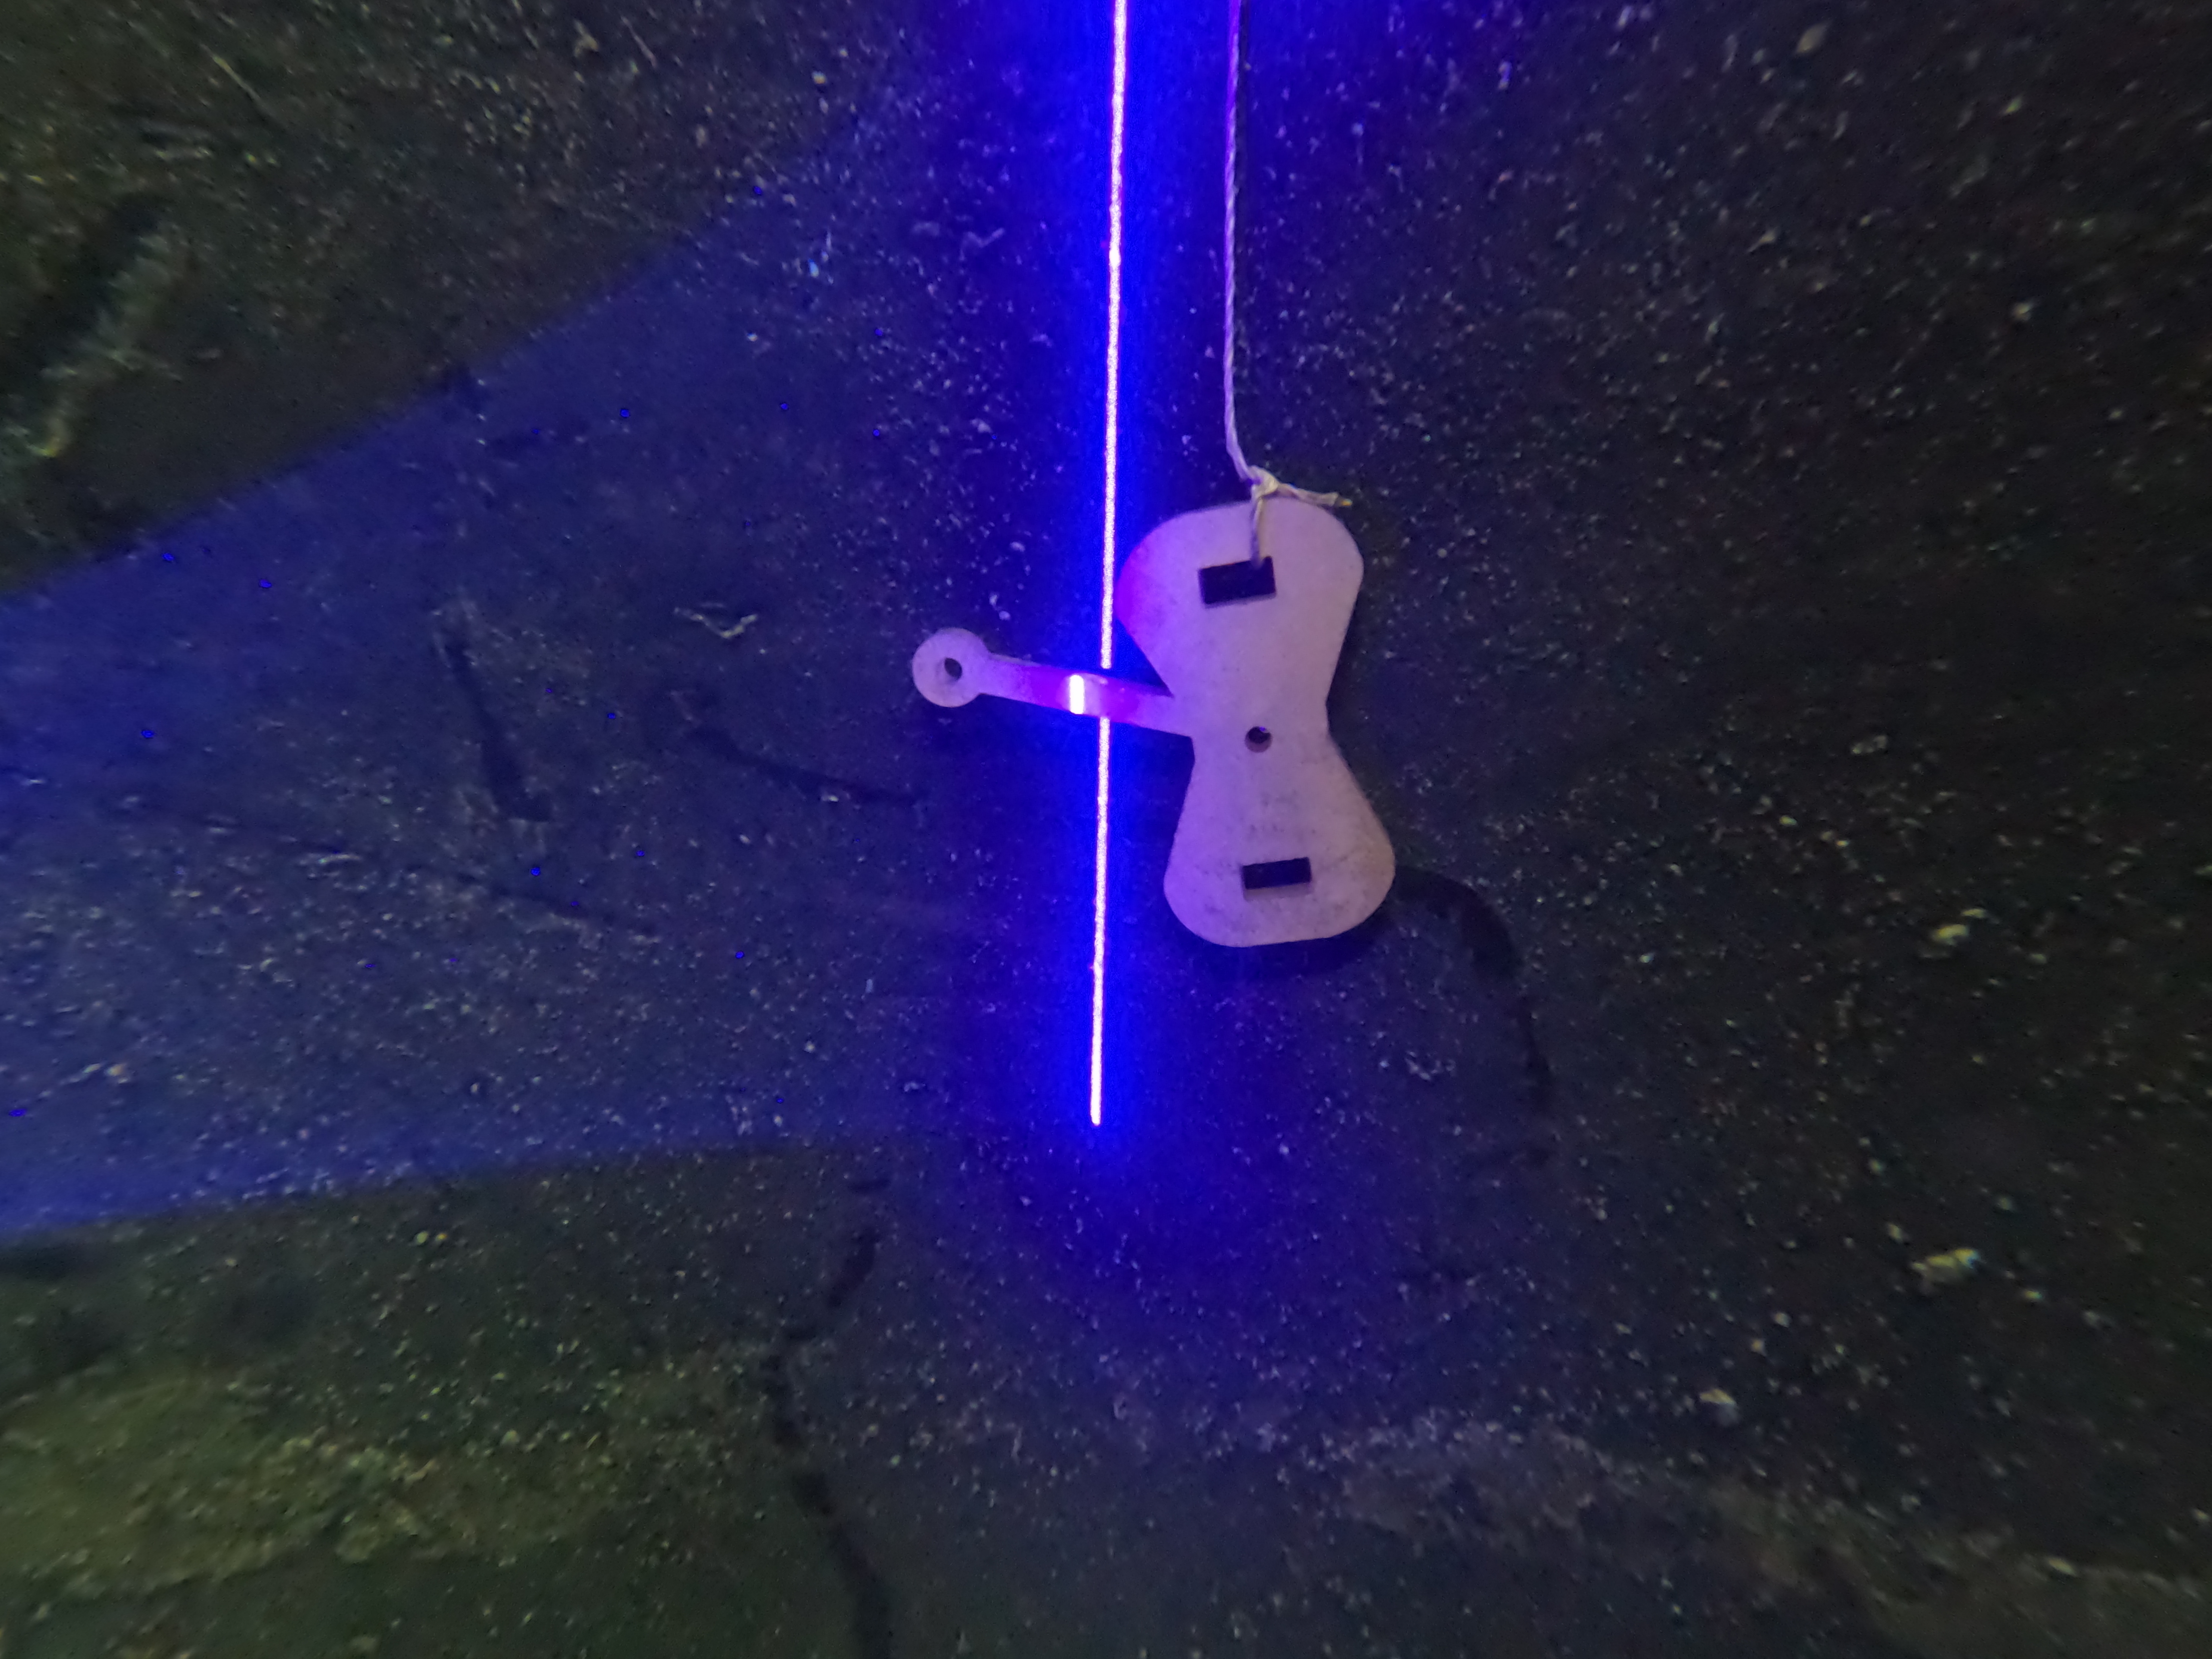

Supplement: Supplementary file 2488 [file G0016066.pdf › Level_2_2/G0016066.pdf]

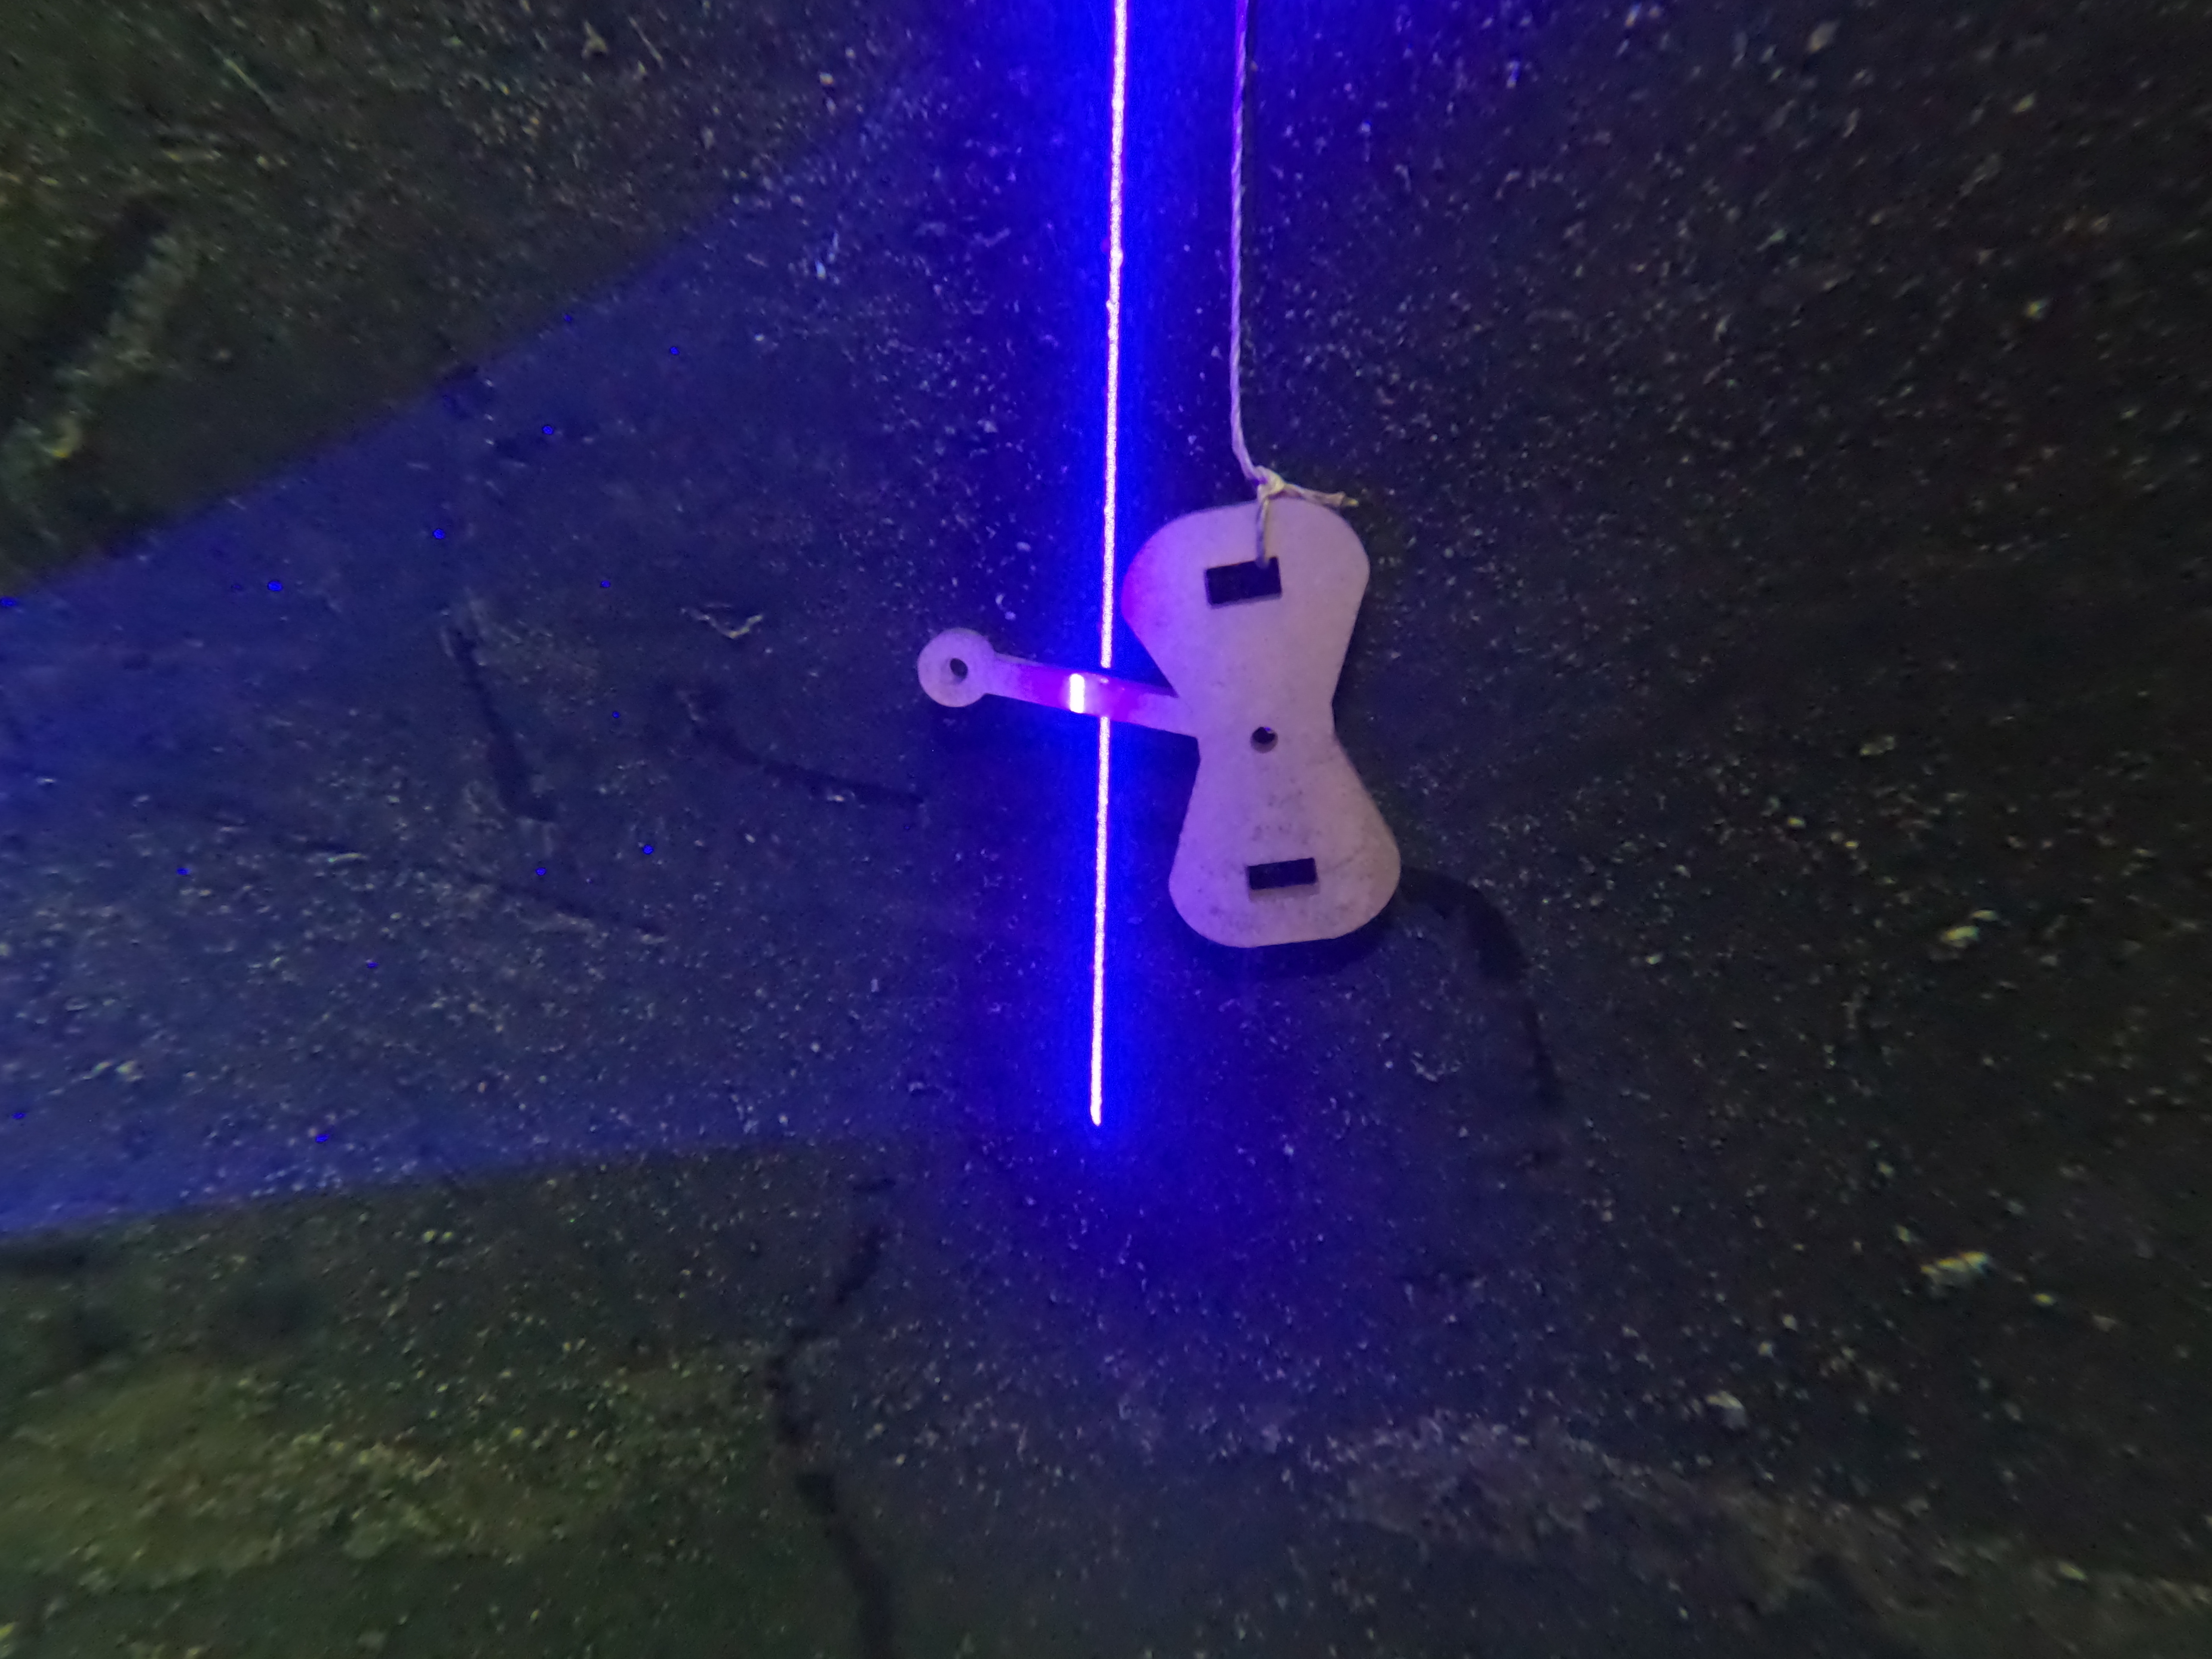

Supplement: Supplementary file 2489 [file G0016067.pdf › Level_2_2/G0016067.pdf]

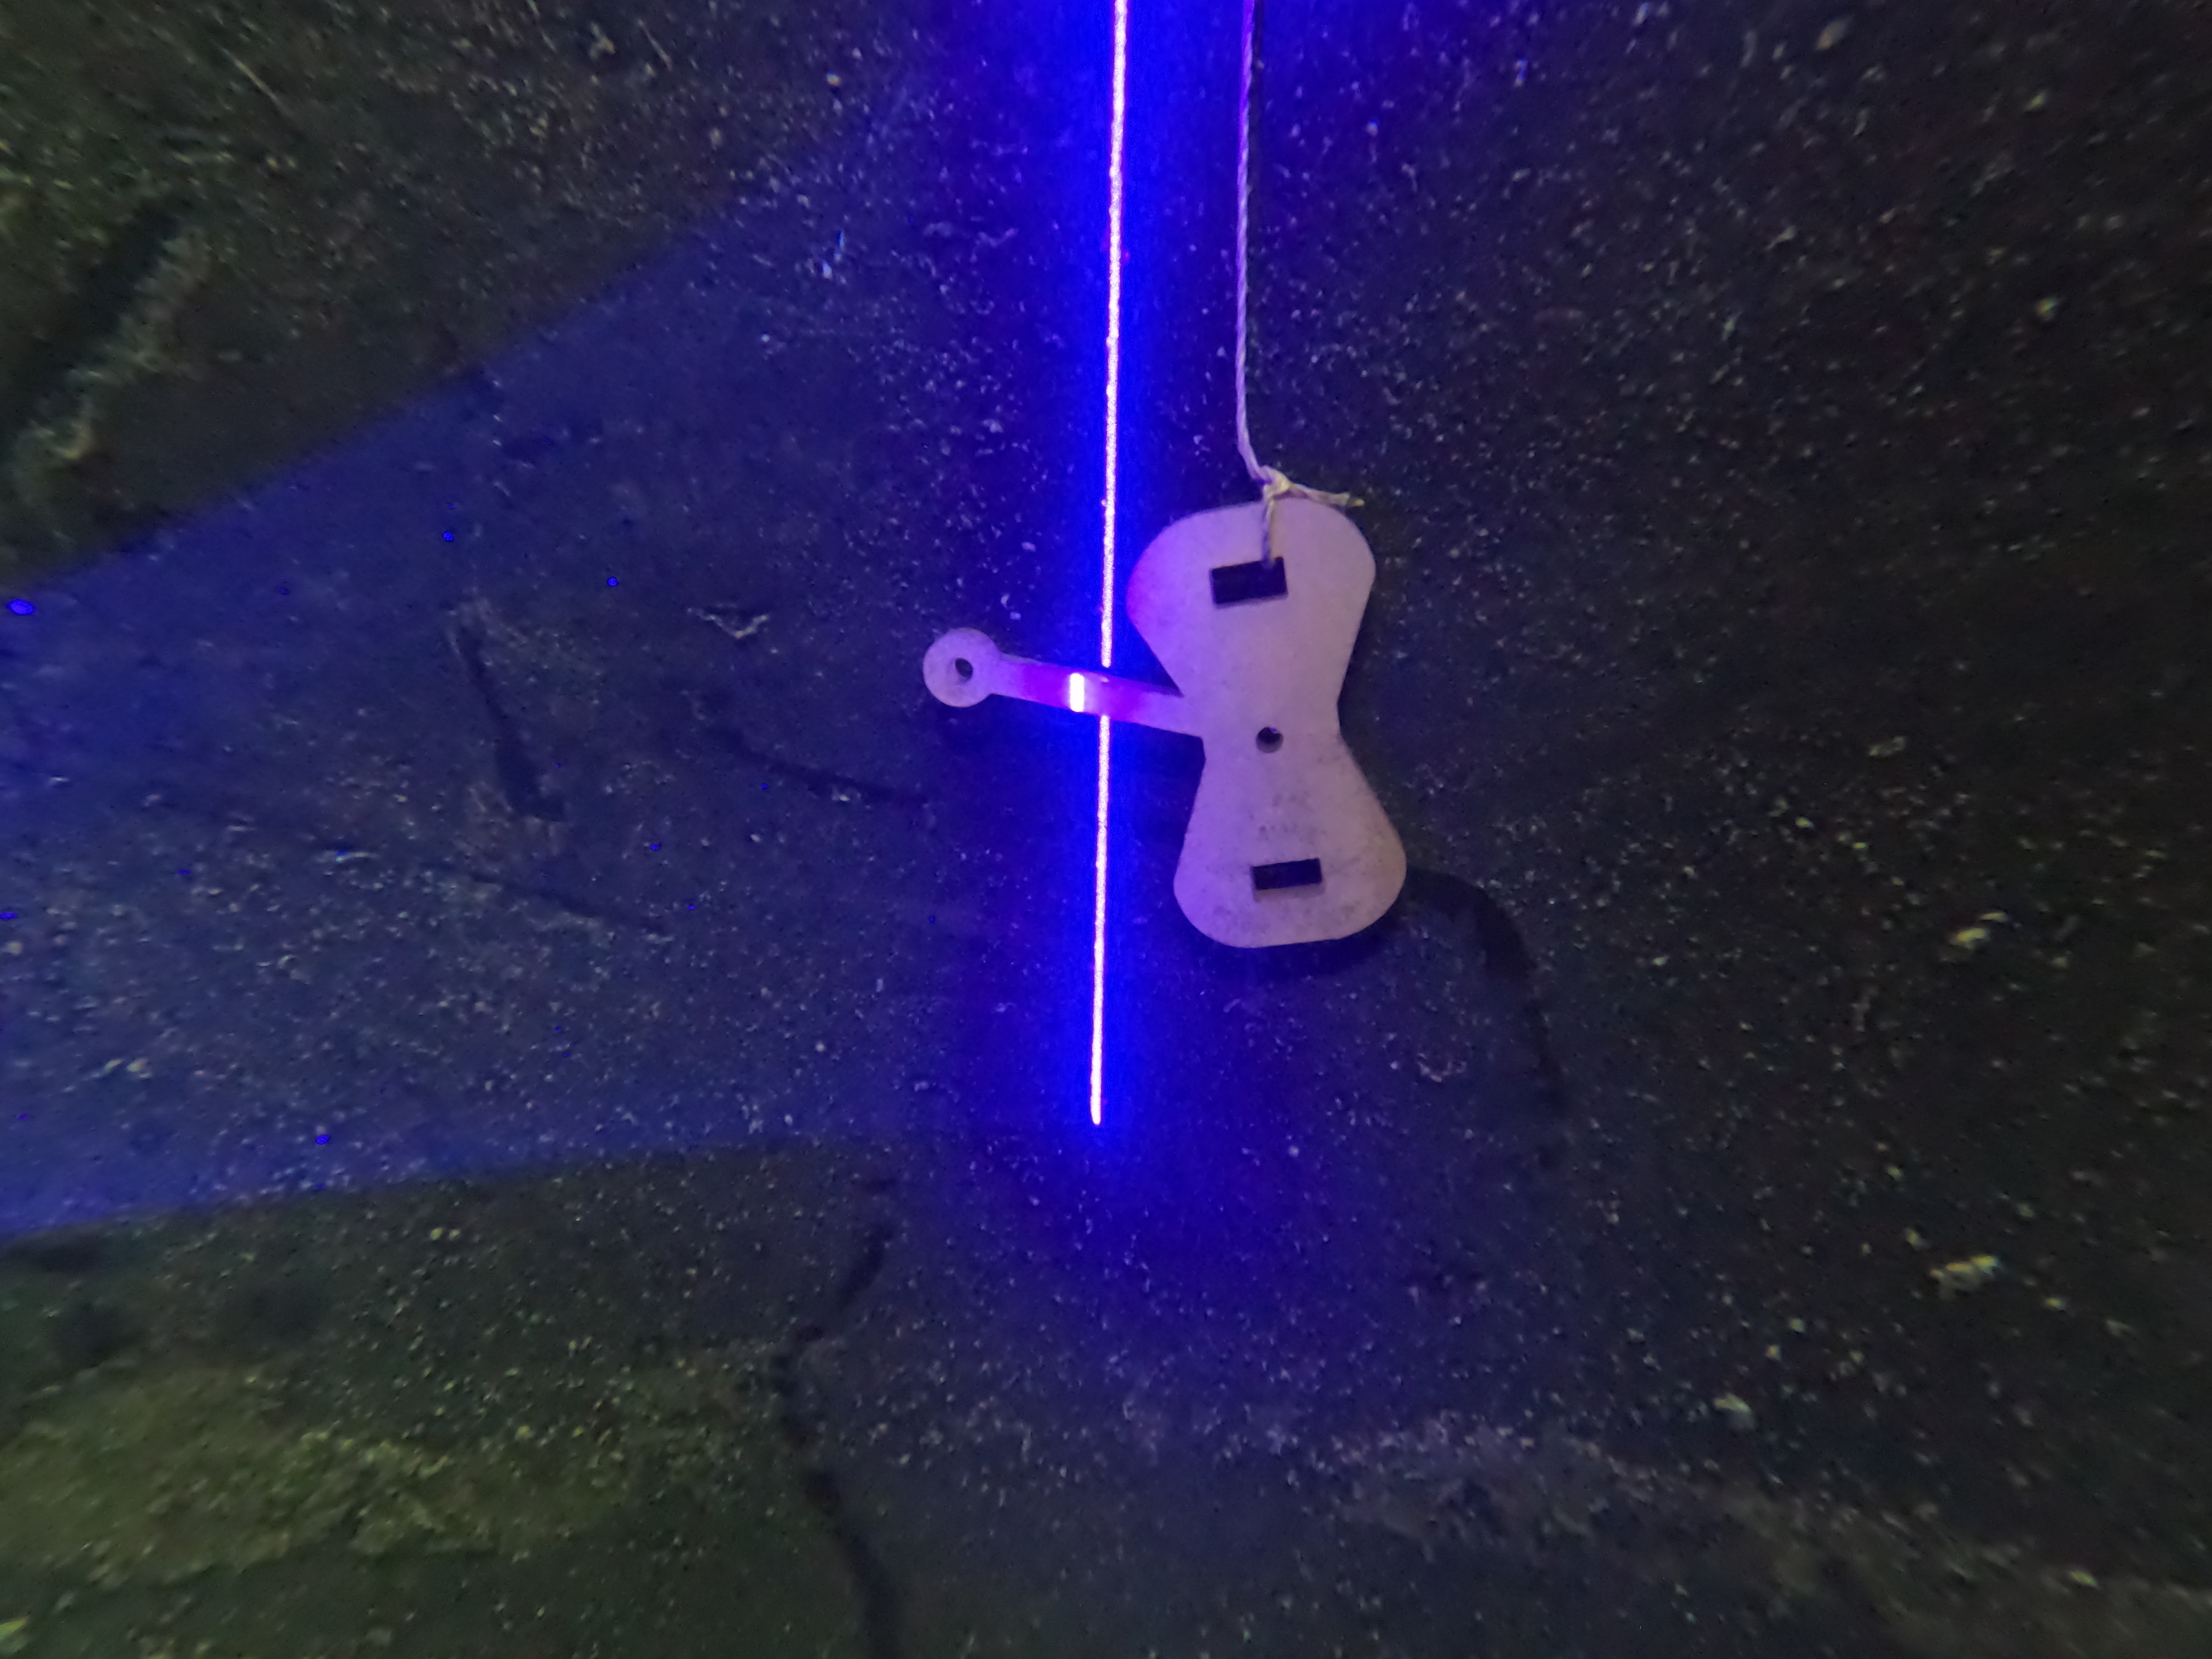

Supplement: Supplementary file 2490 [file G0016068.pdf › Level_2_2/G0016068.pdf]
