# Supplementary figures and images for: 3D reconstruction of shallow sea environment using direct system calibration and faint laser line extraction (part 25 of 35)
Source: Research Square preprint supplement (doi:10.21203/rs.3.rs-5262658/v1), 2024-12-02

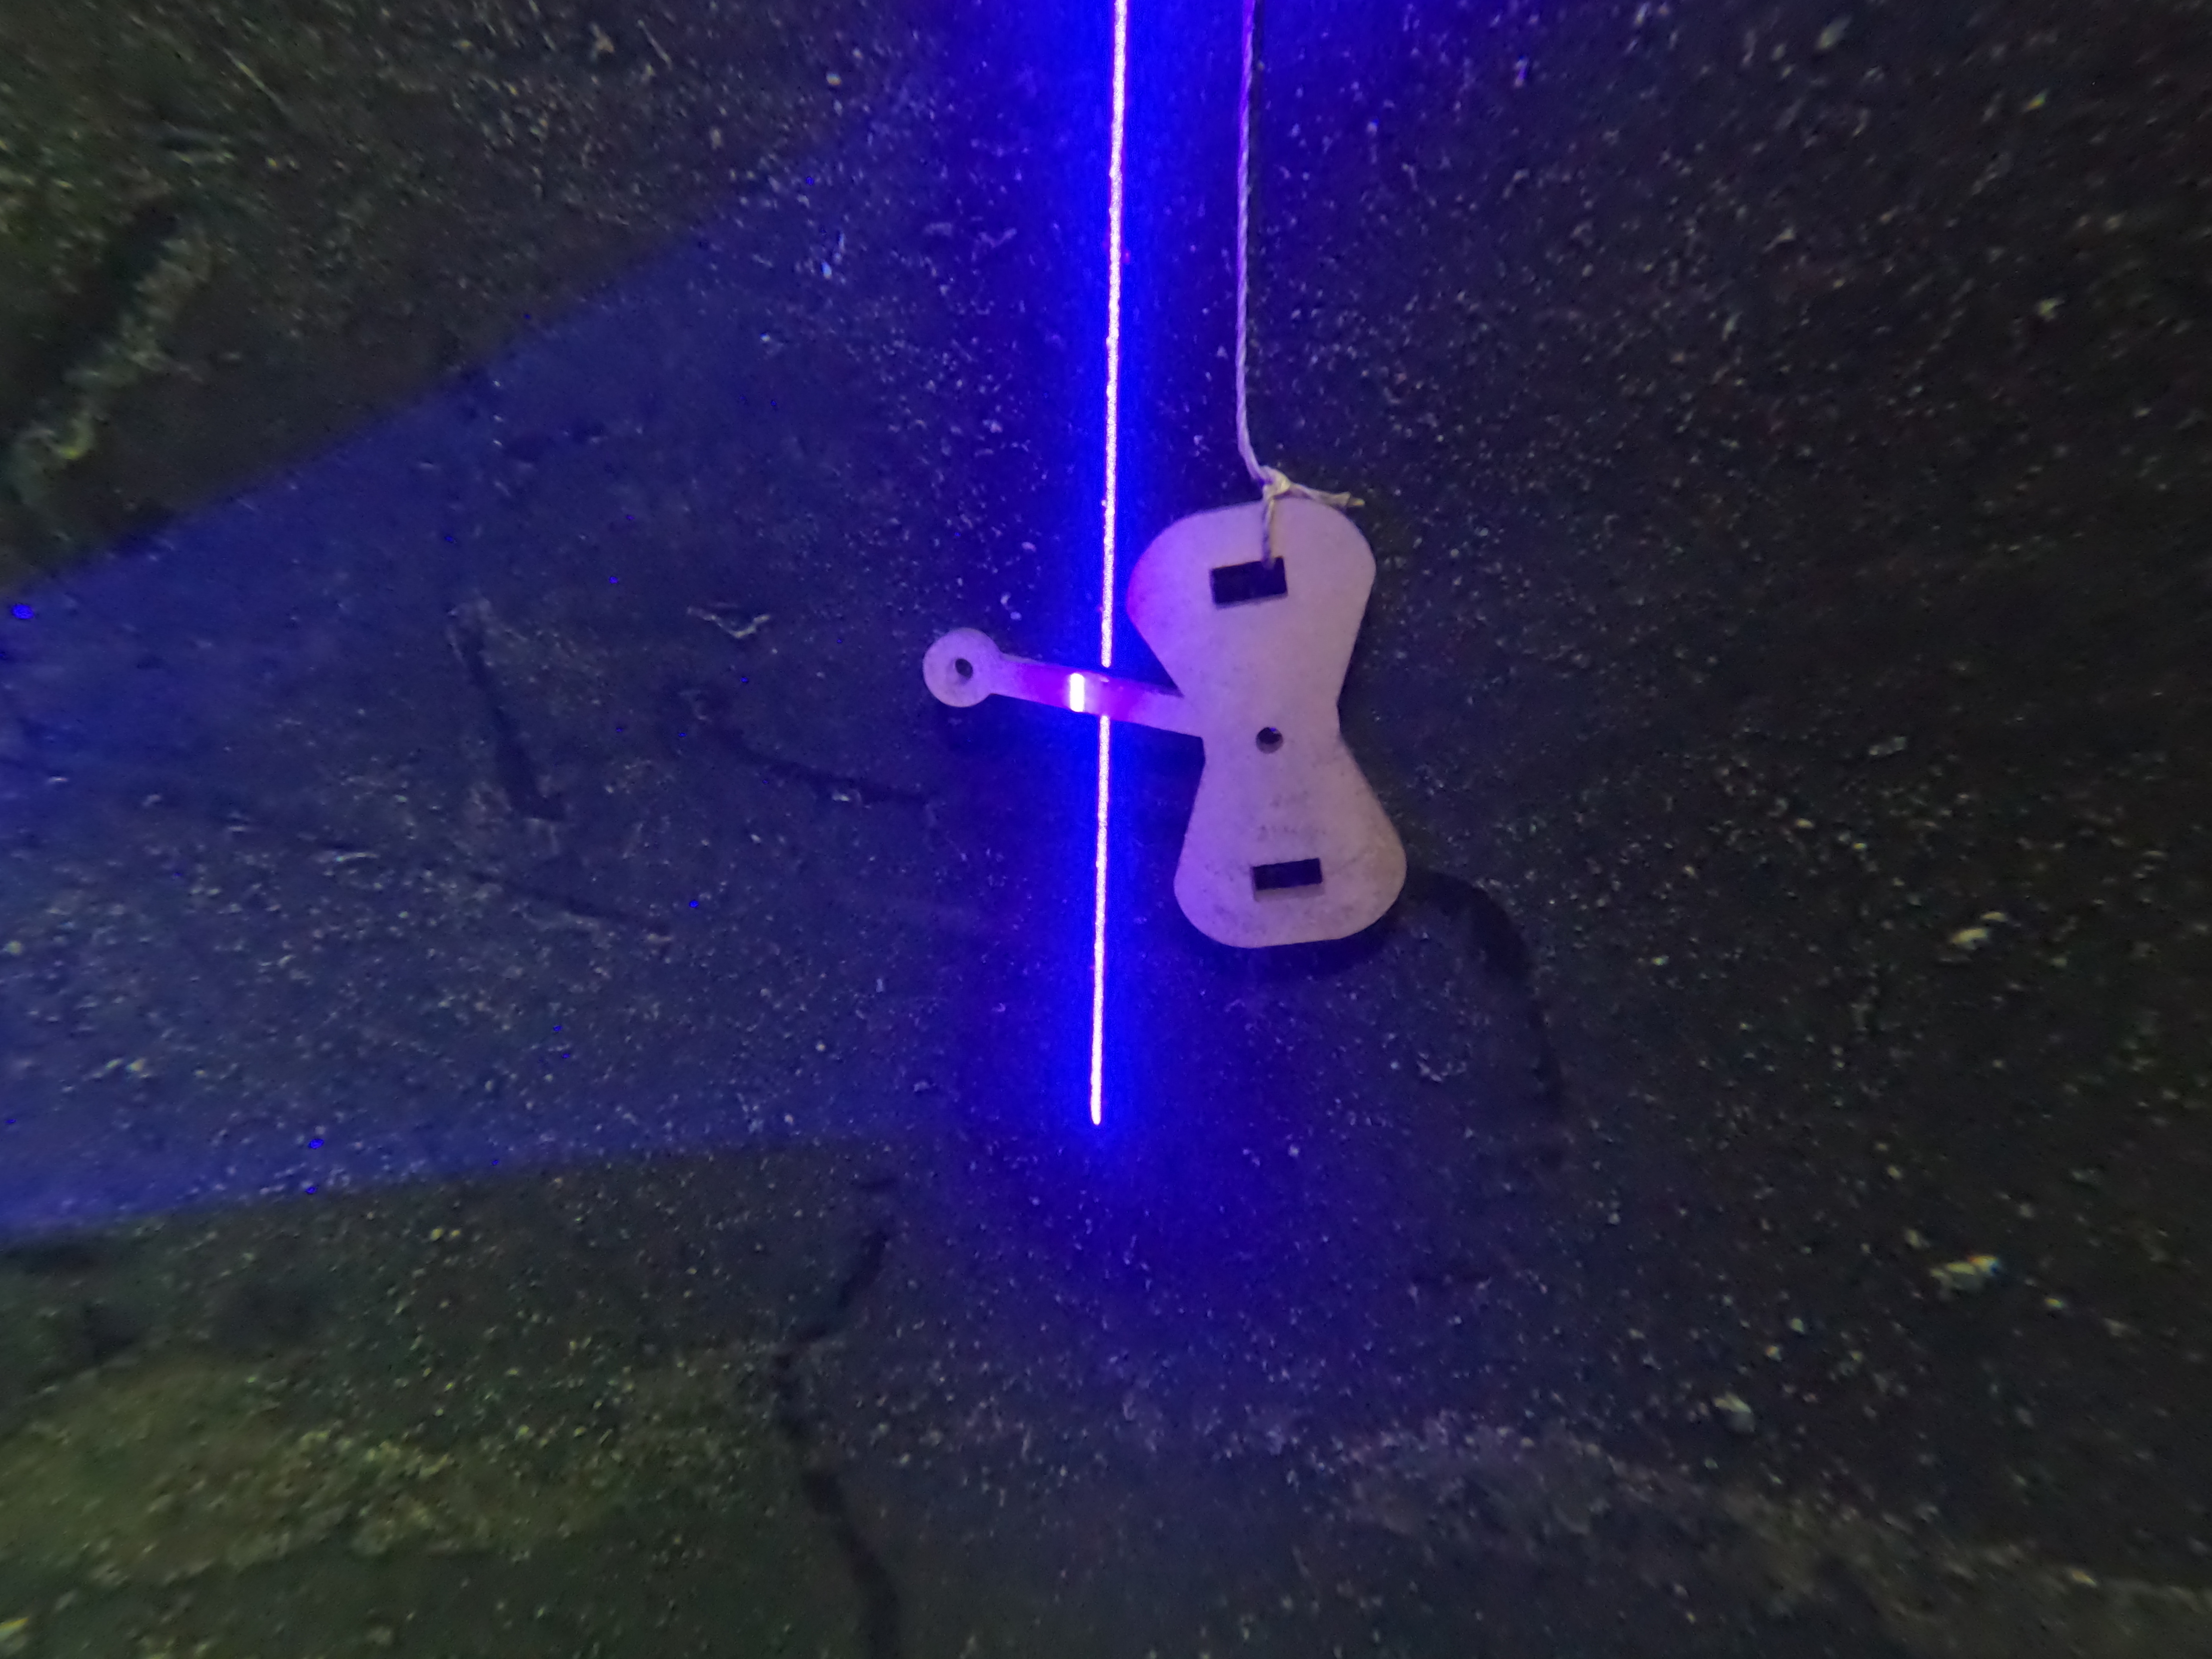

Supplement: Supplementary file 2491 [file G0016069.pdf › Level_2_2/G0016069.pdf]

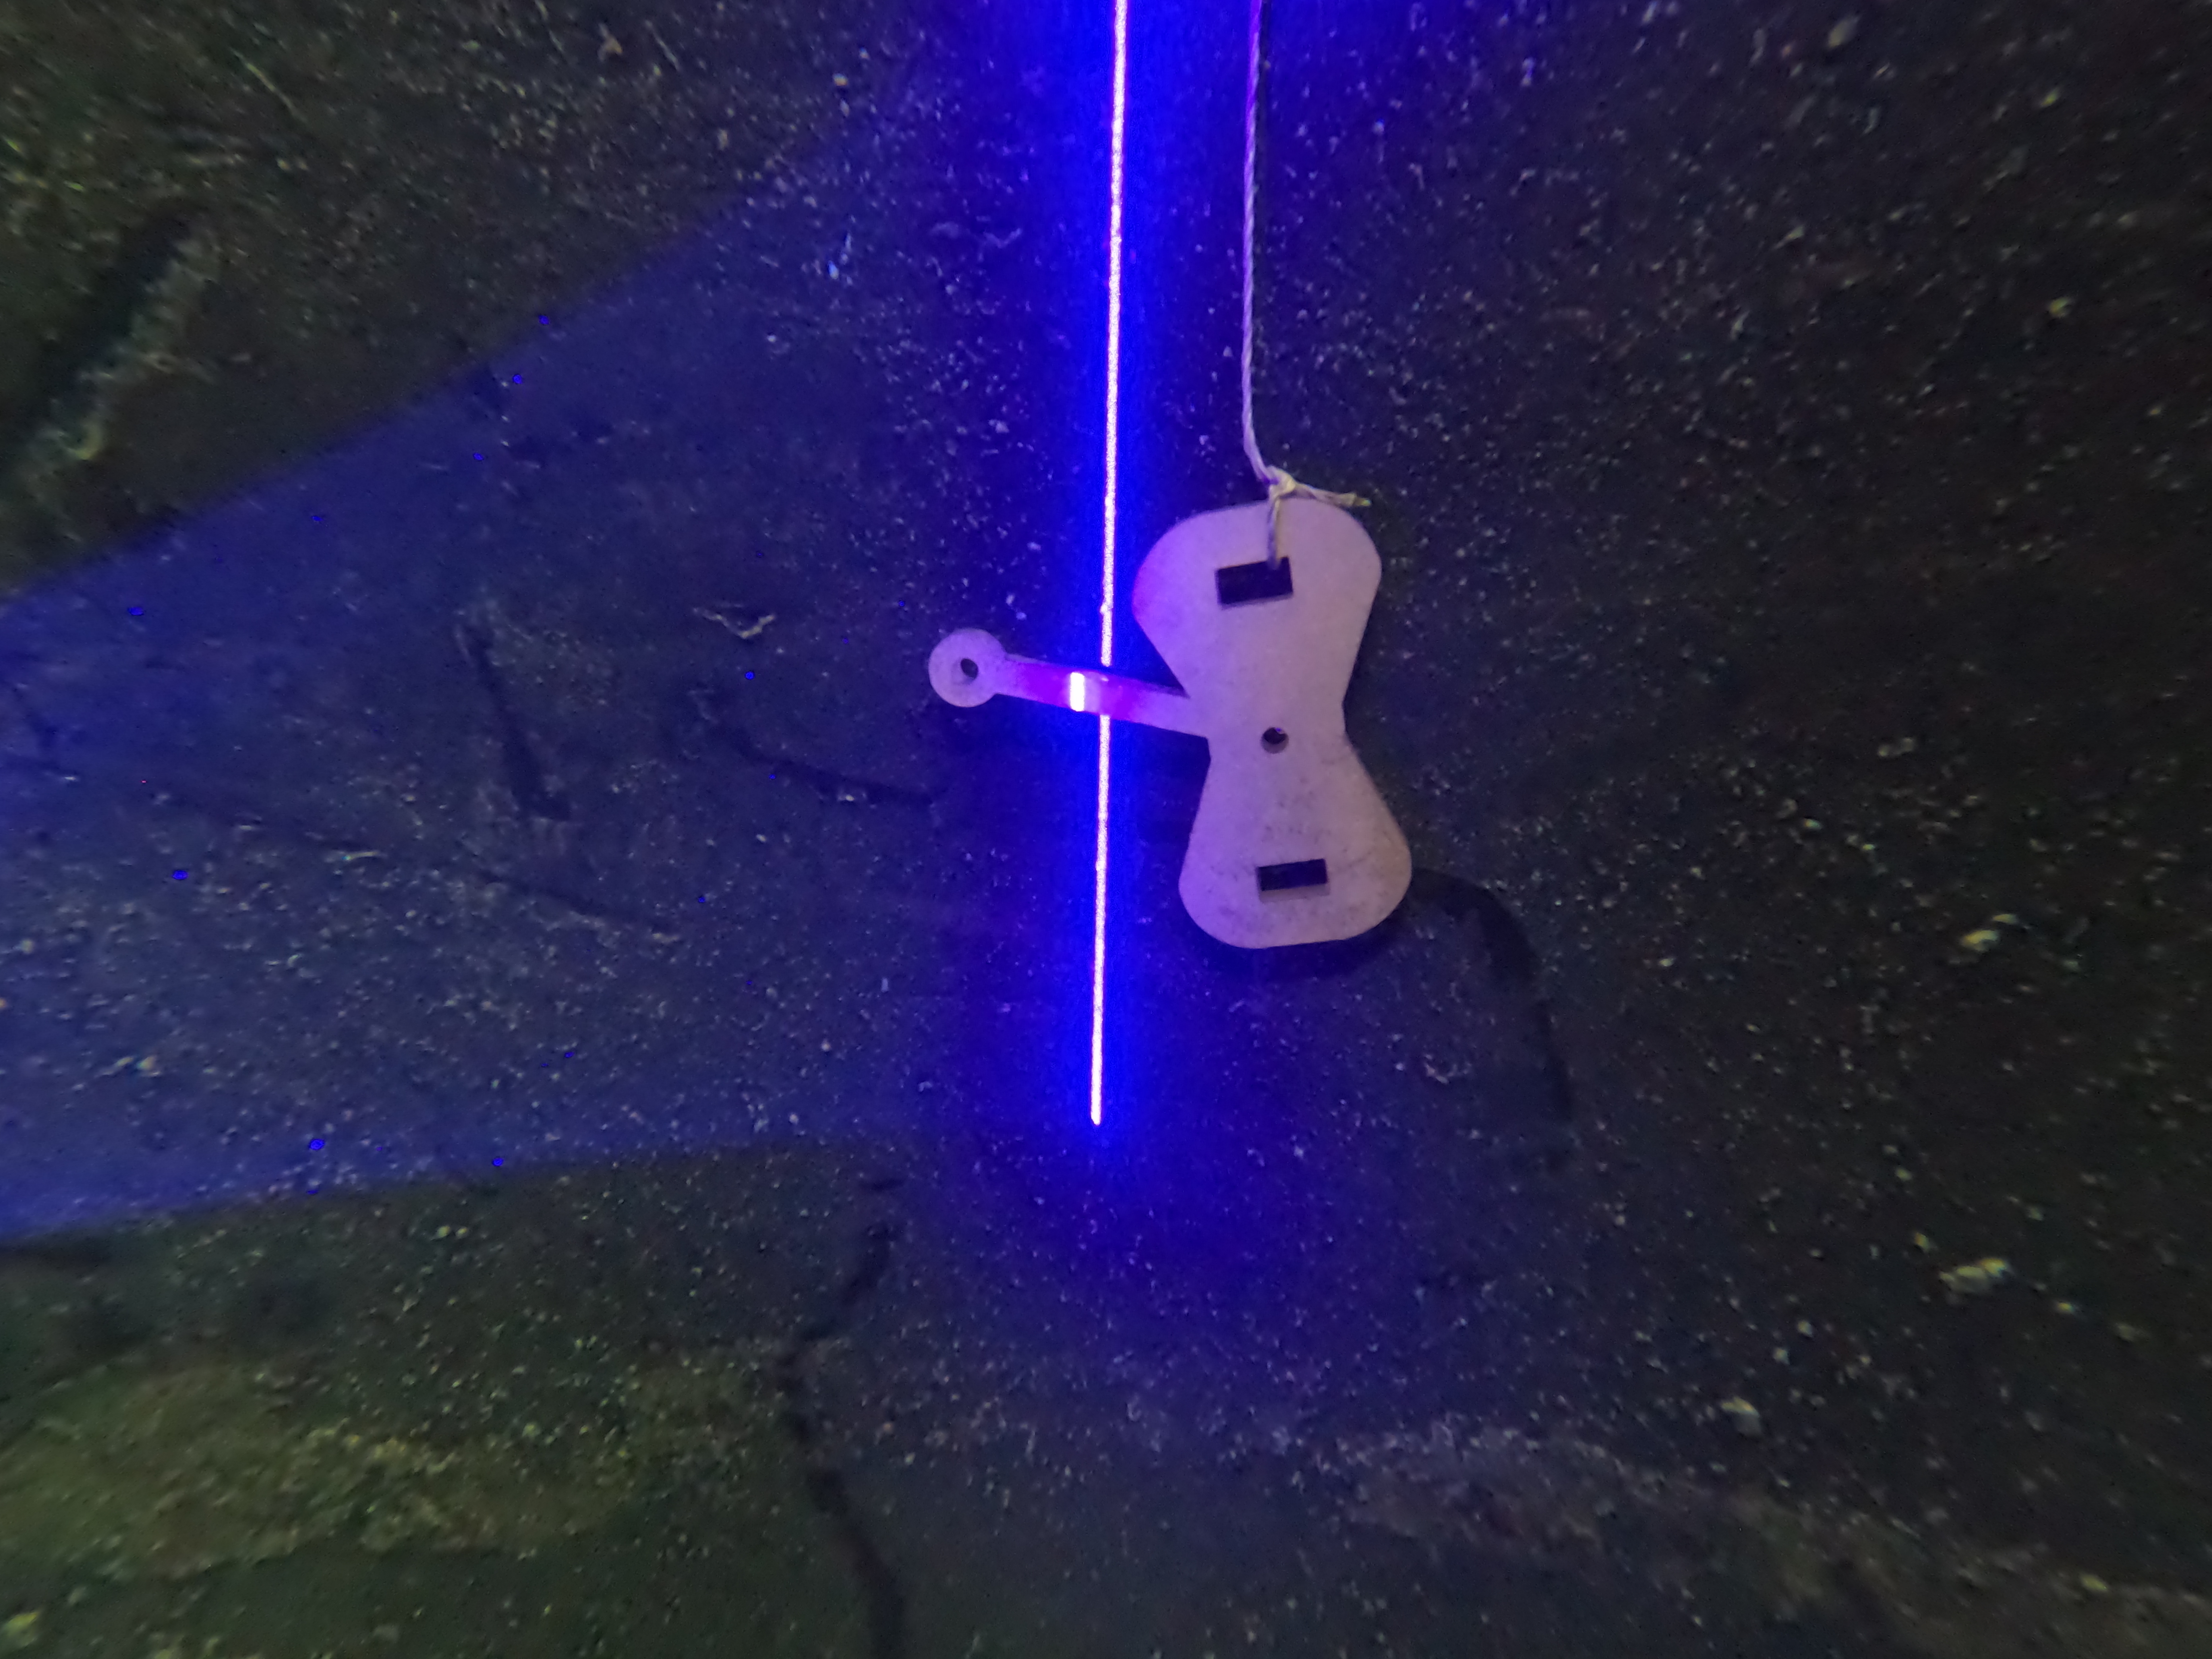

Supplement: Supplementary file 2492 [file G0016070.pdf › Level_2_2/G0016070.pdf]

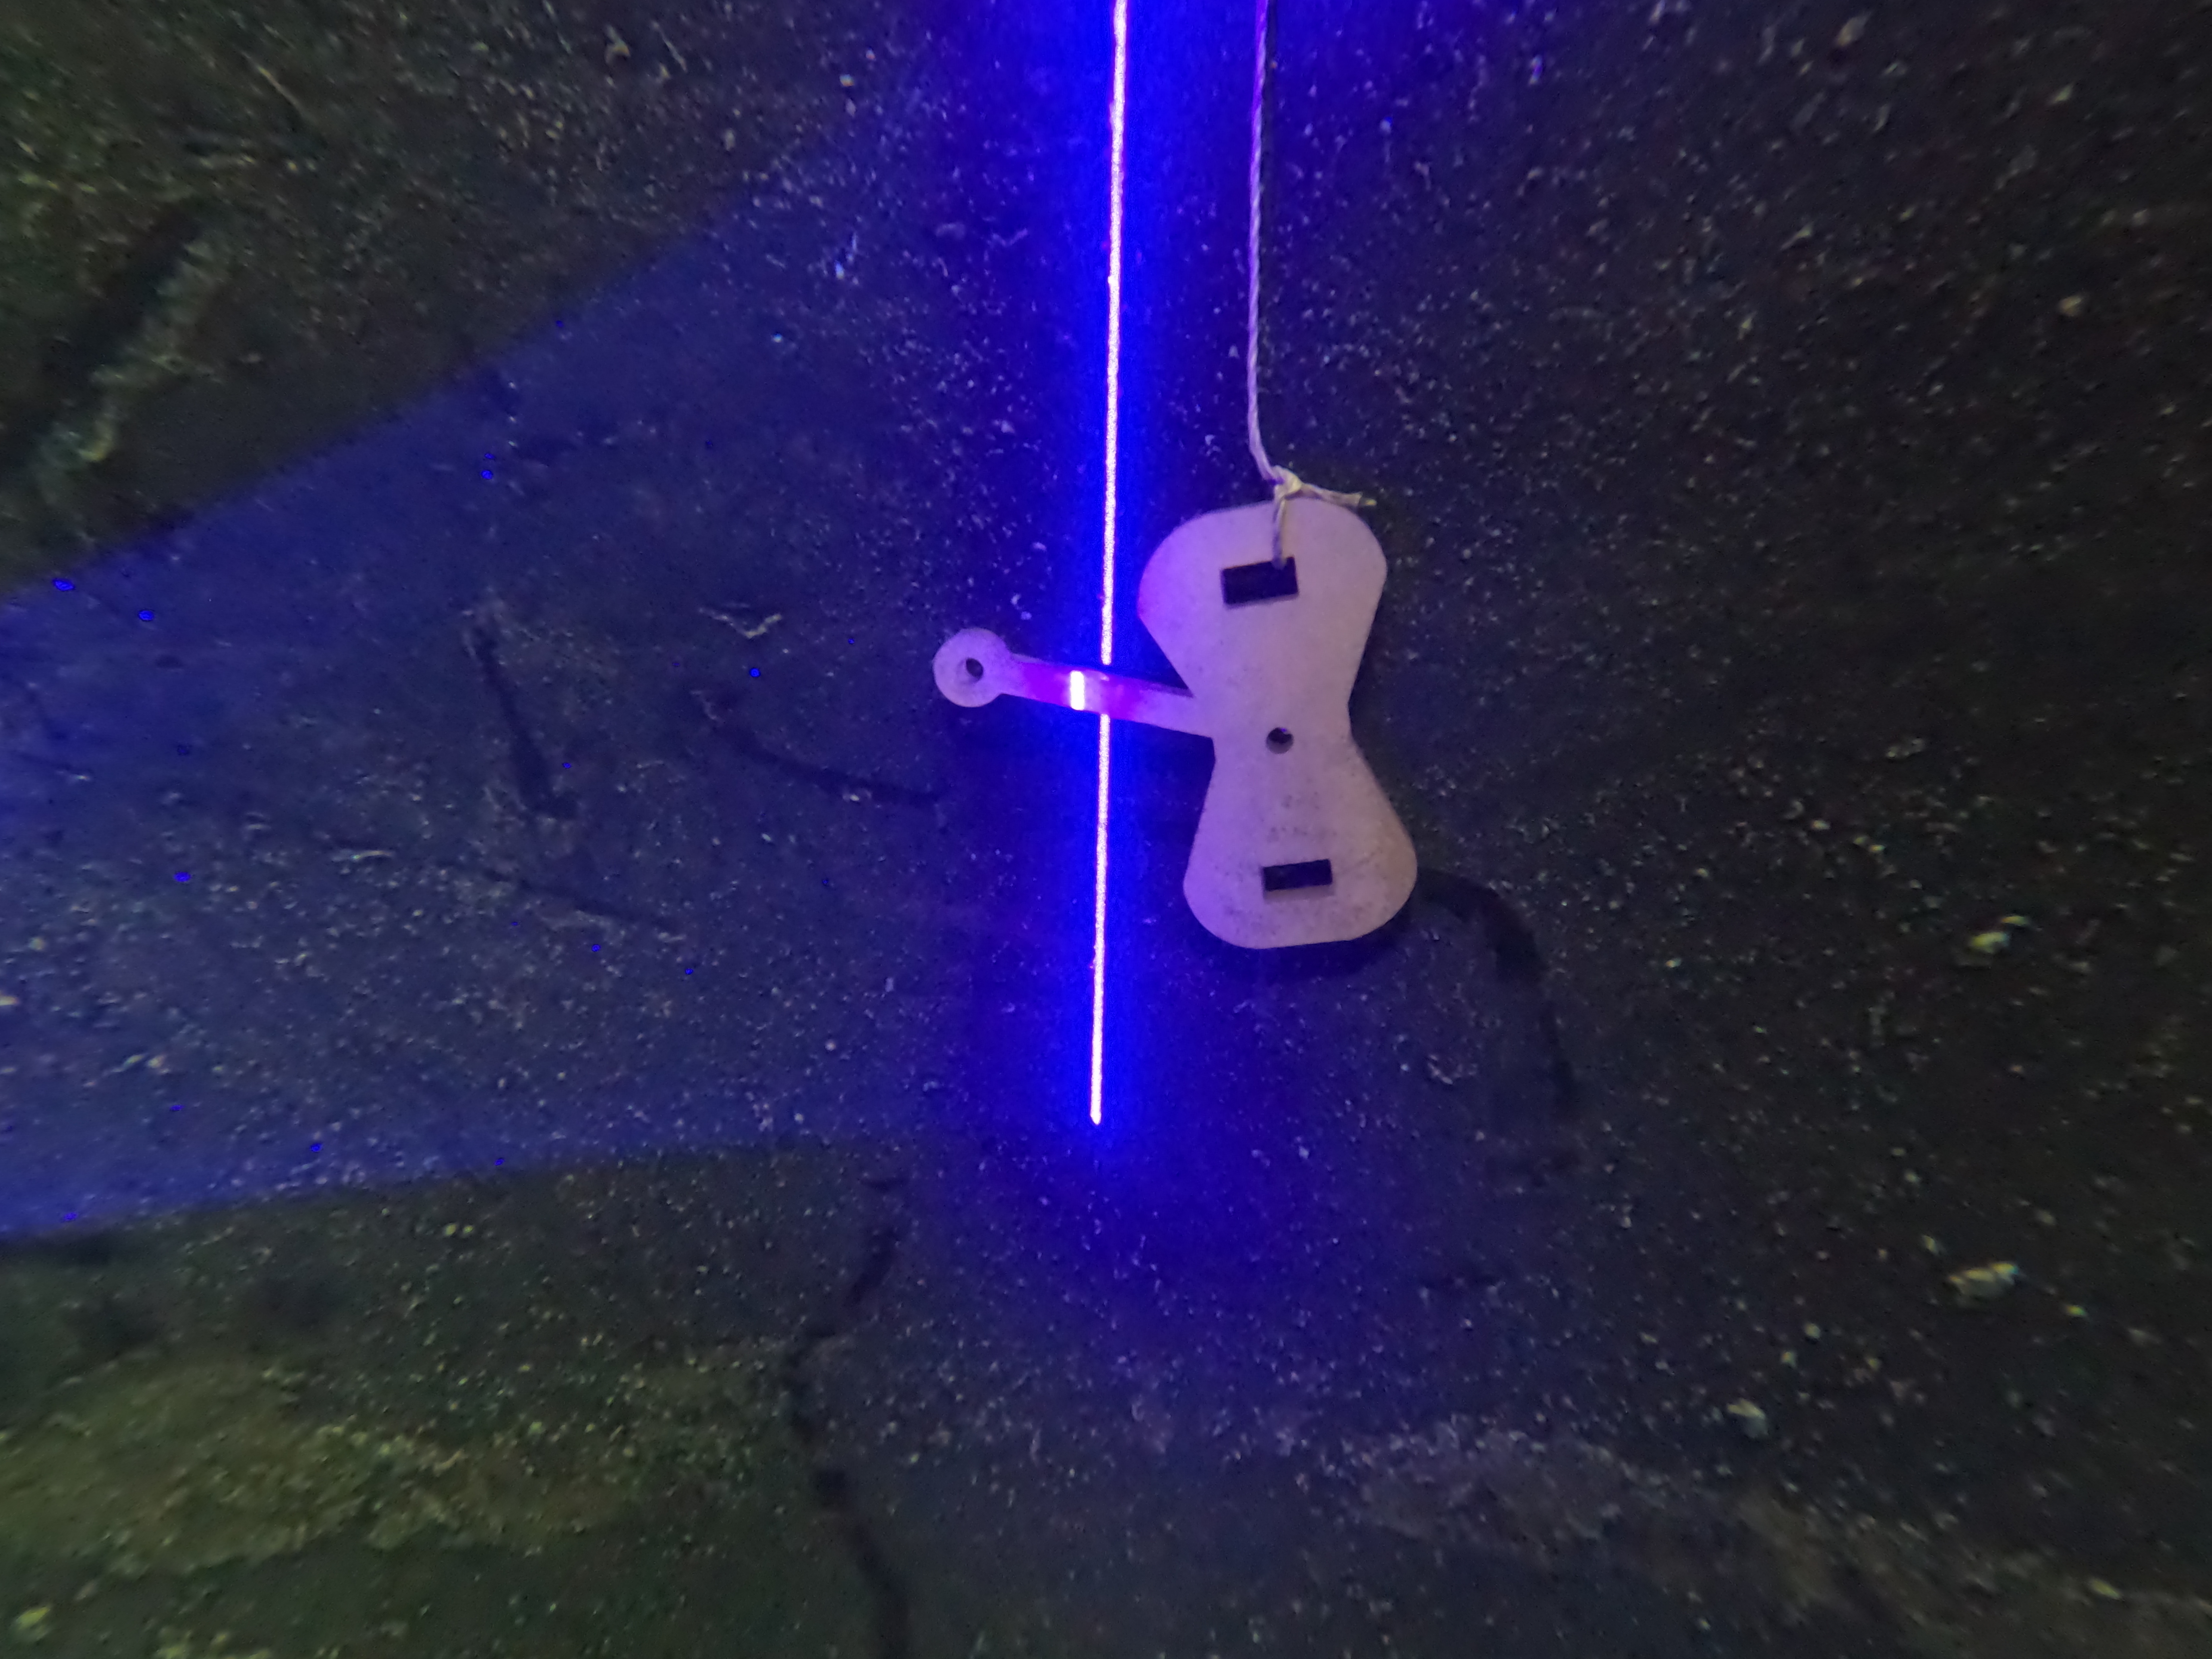

Supplement: Supplementary file 2493 [file G0016071.pdf › Level_2_2/G0016071.pdf]

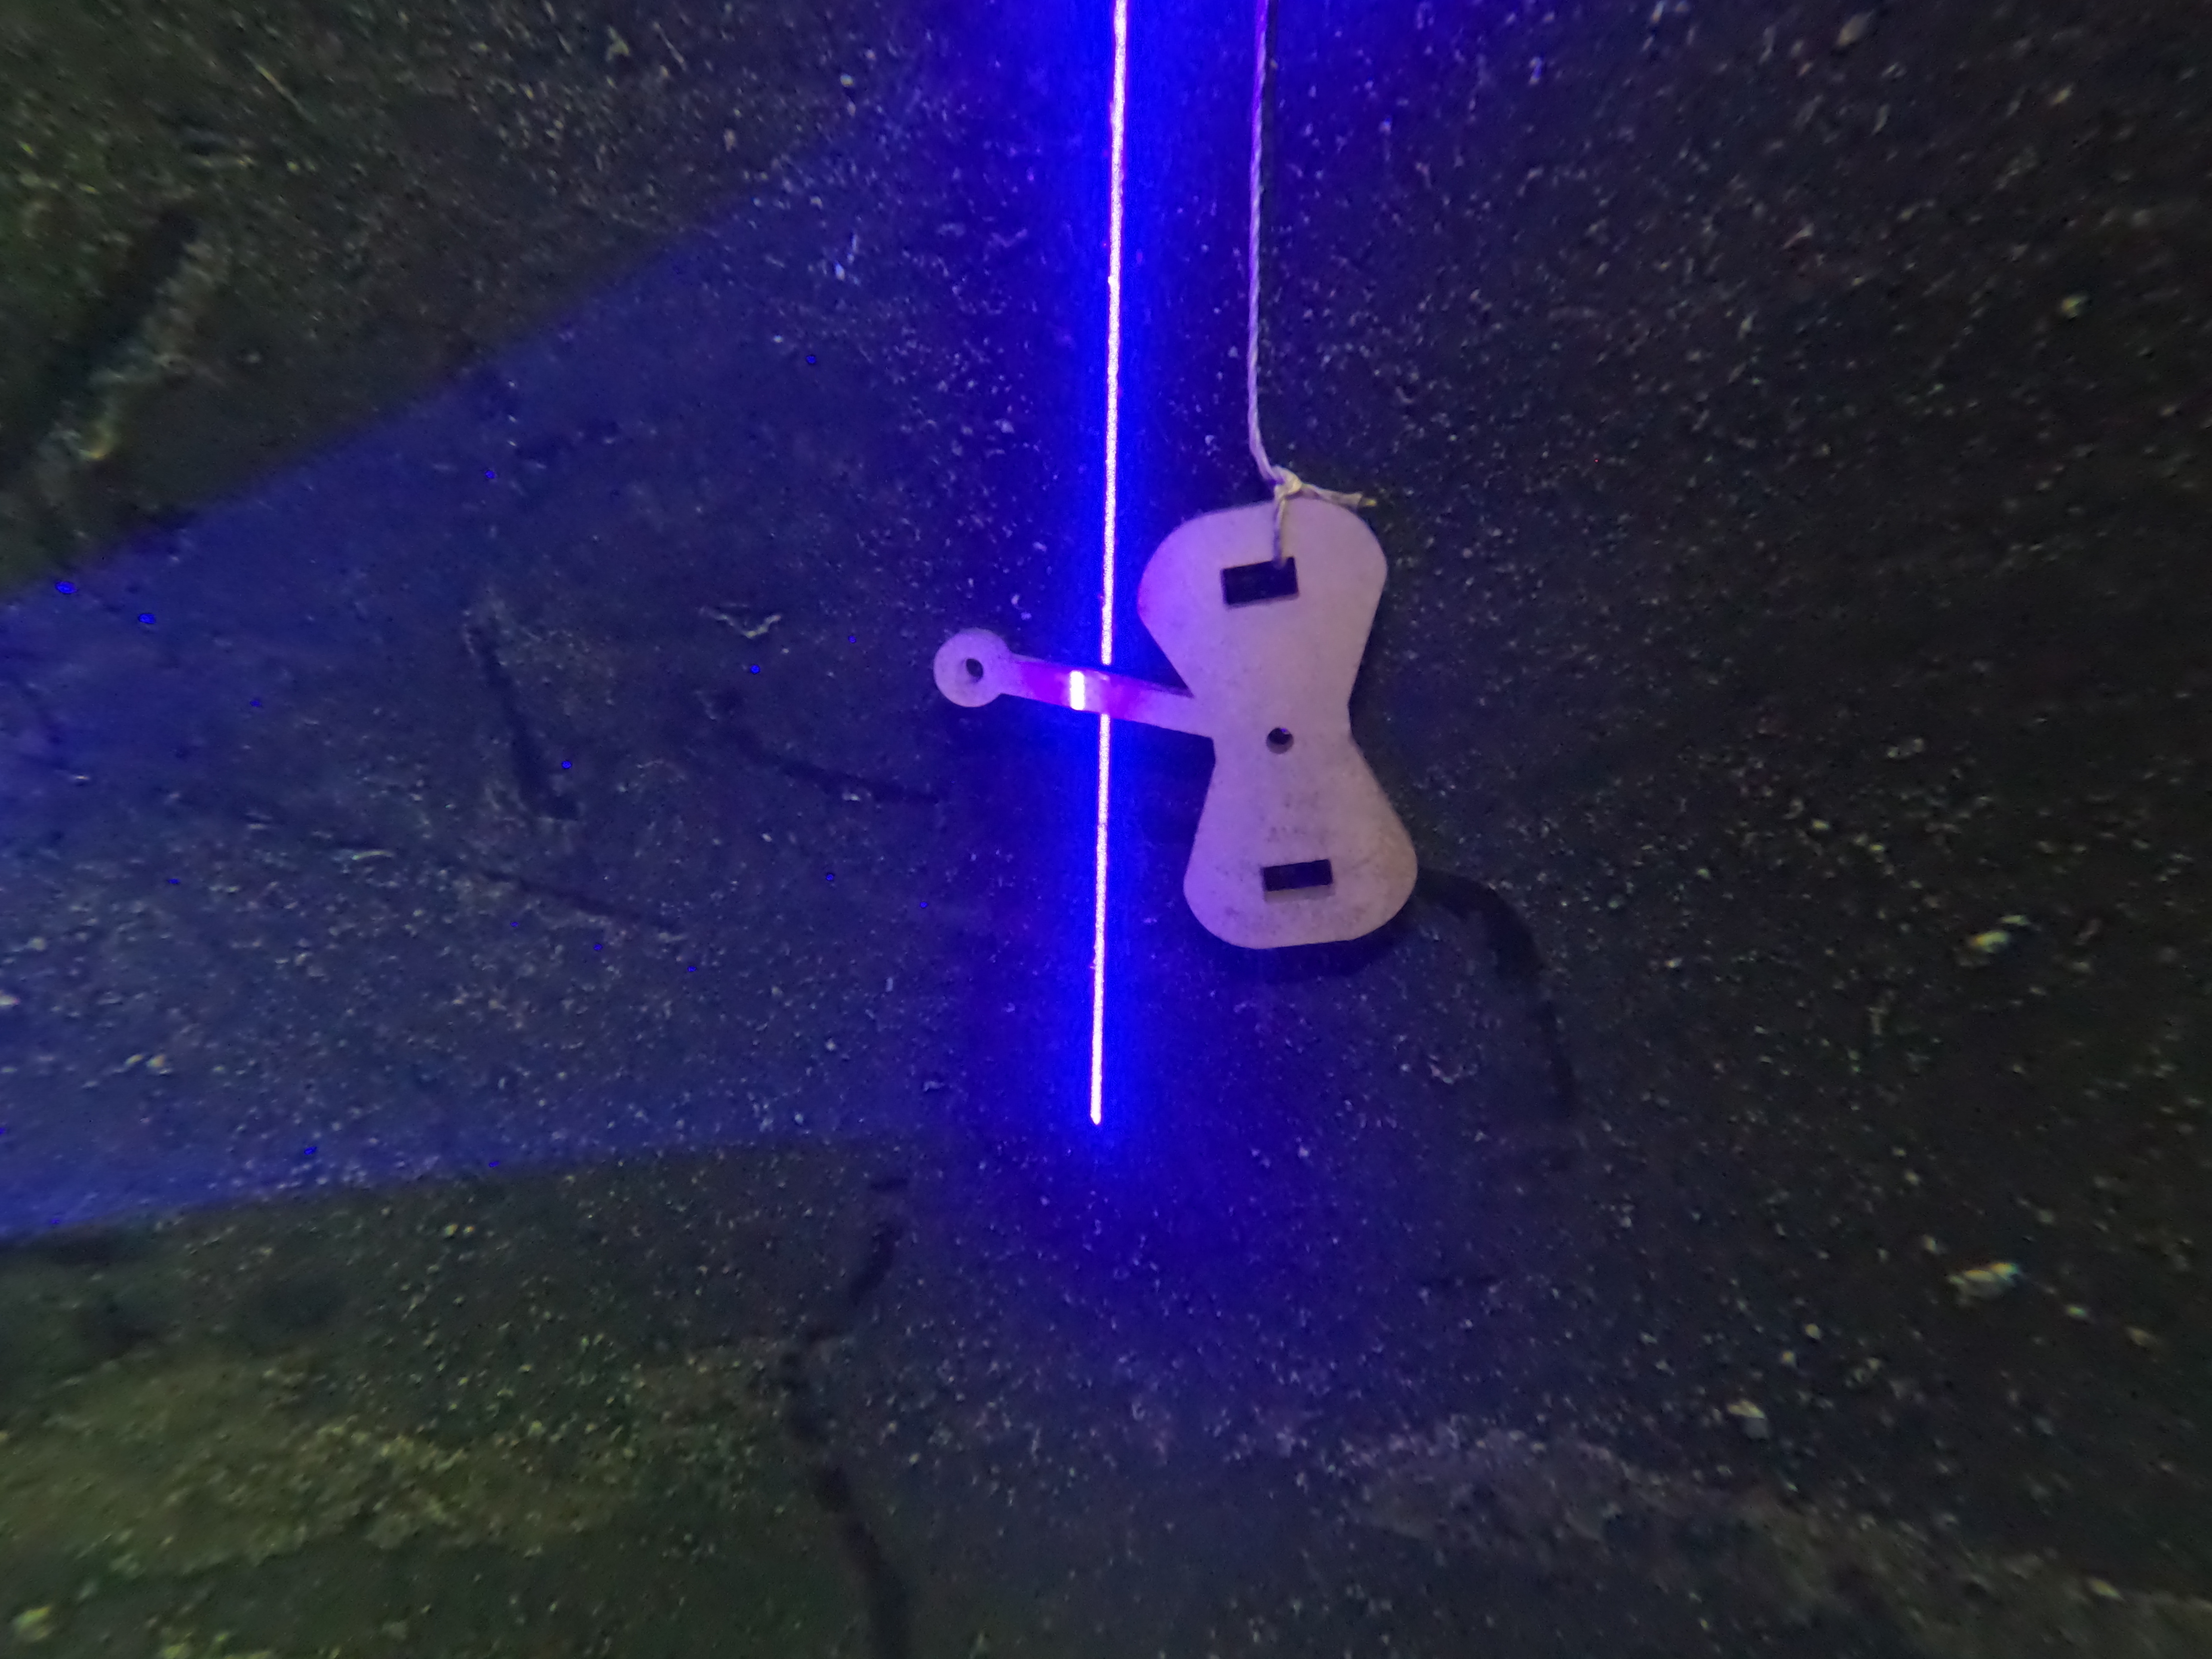

Supplement: Supplementary file 2494 [file G0016072.pdf › Level_2_2/G0016072.pdf]

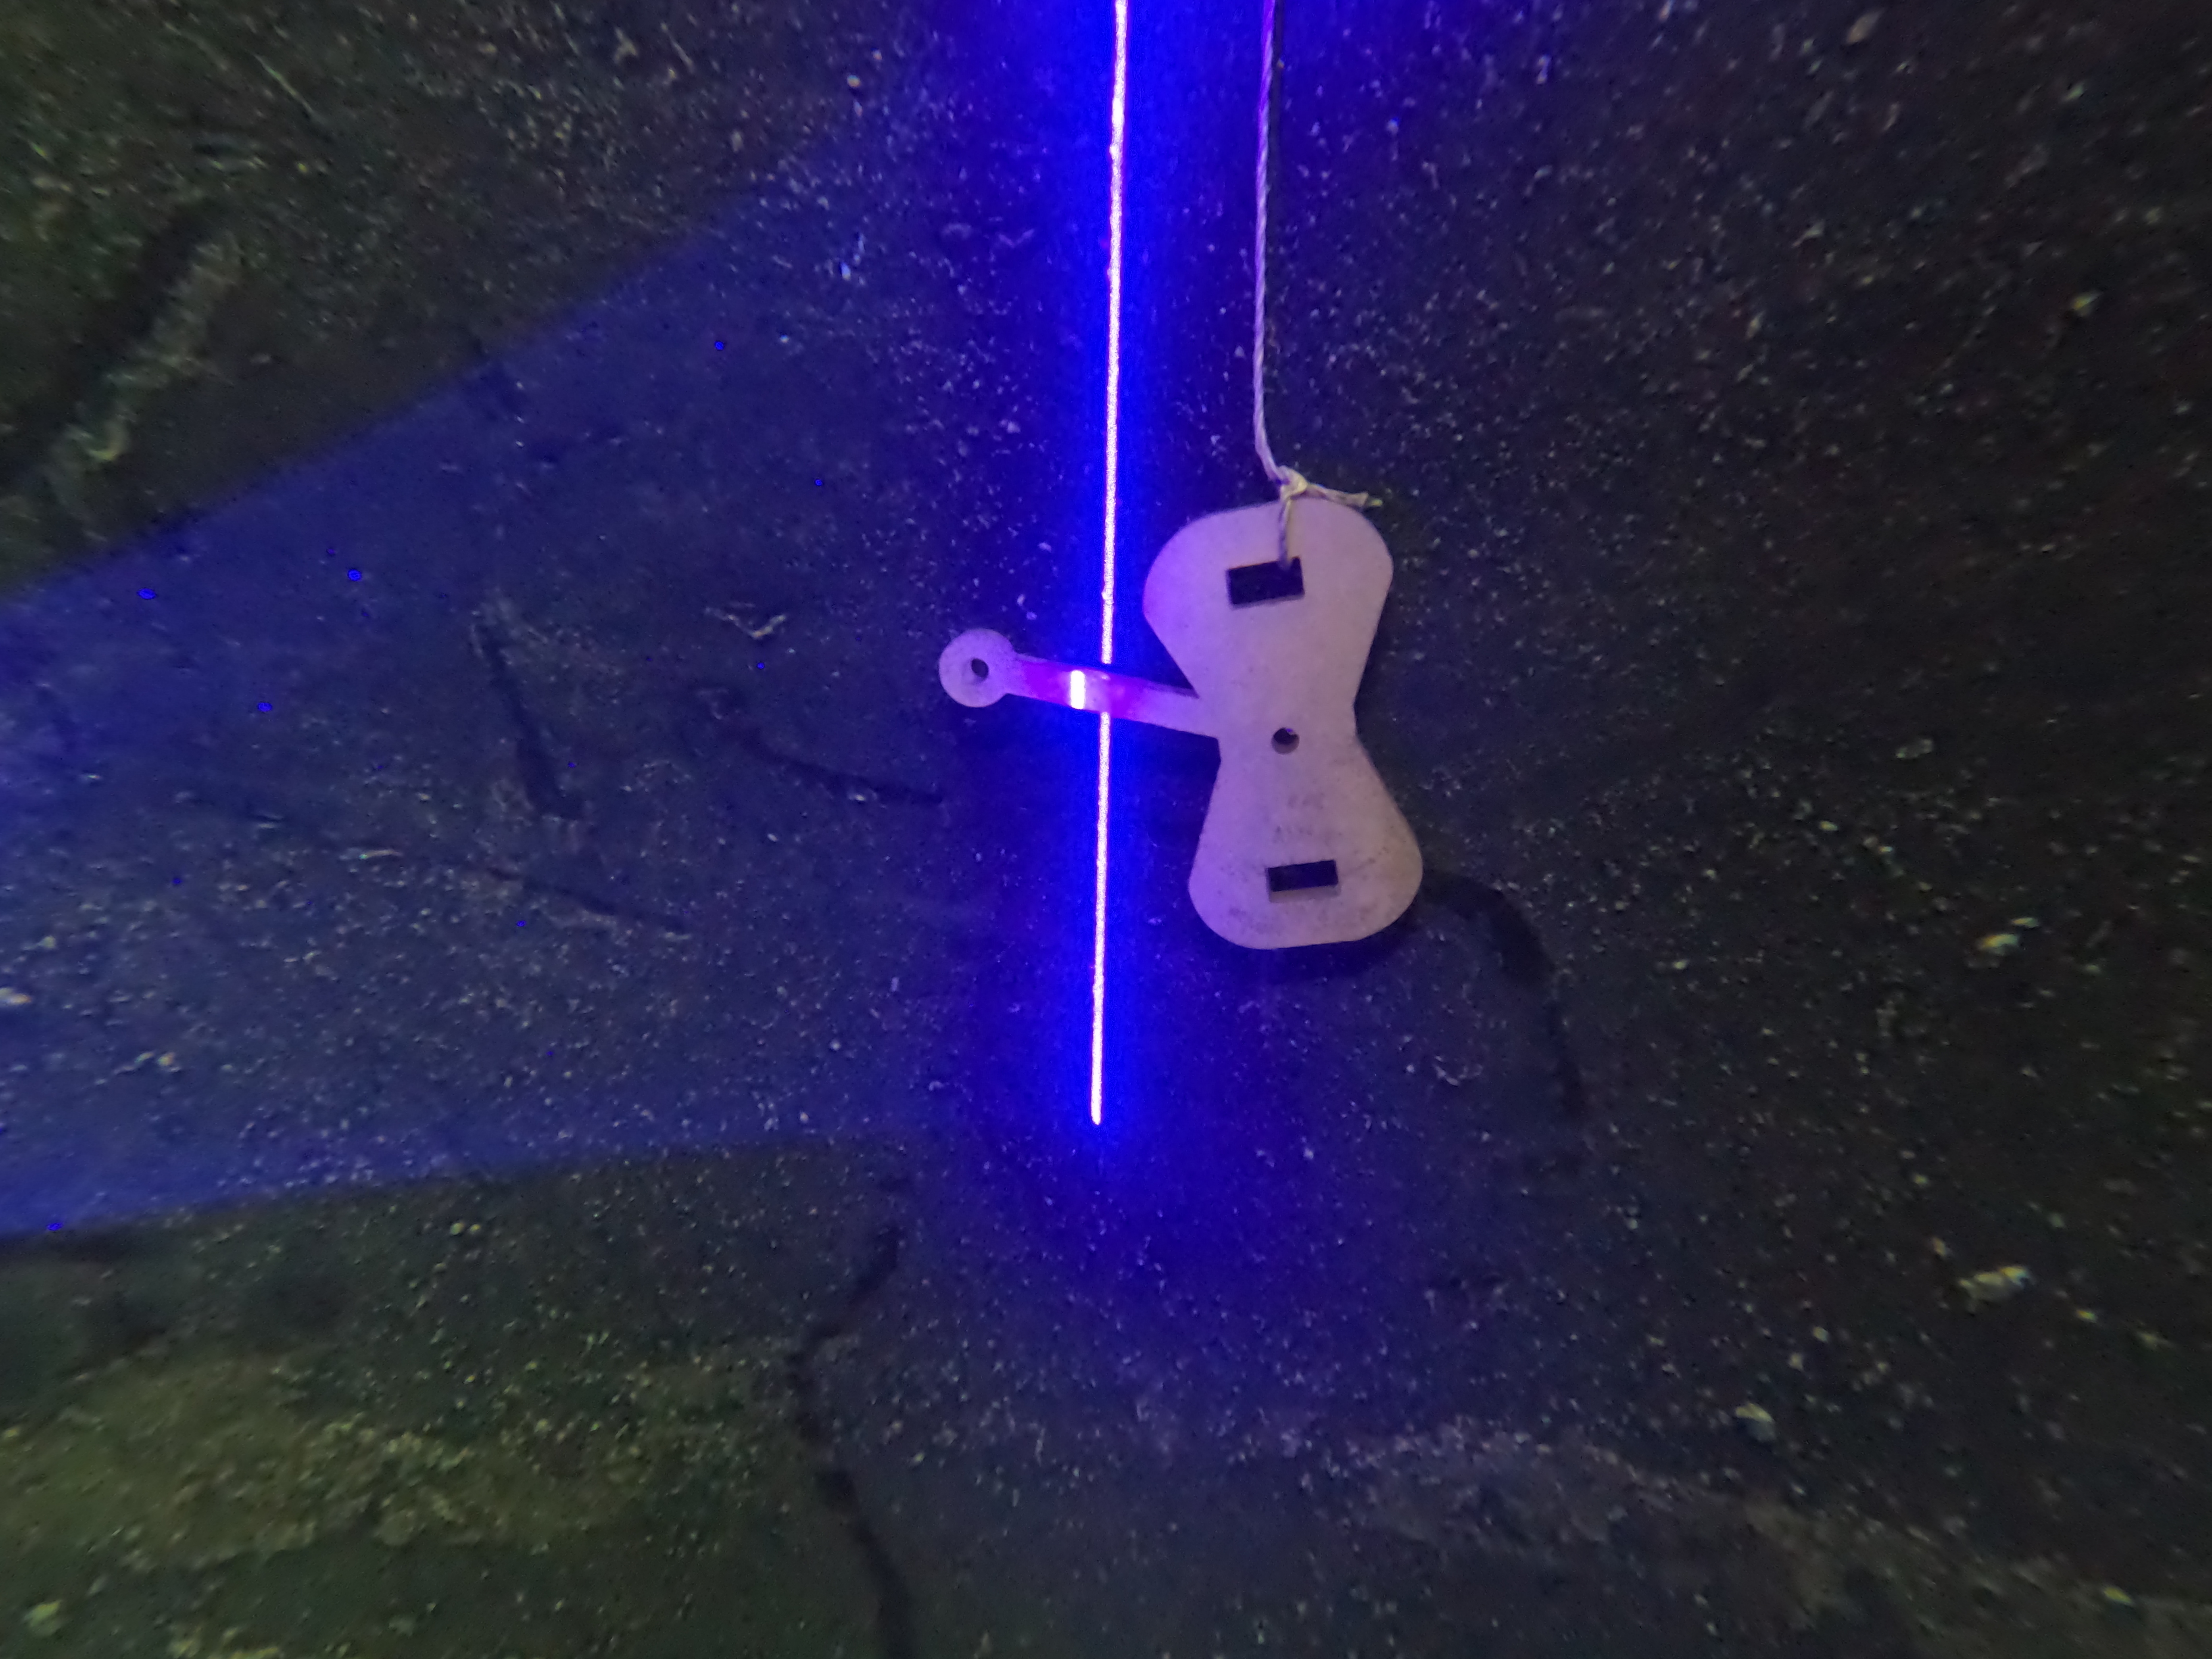

Supplement: Supplementary file 2495 [file G0016073.pdf › Level_2_2/G0016073.pdf]

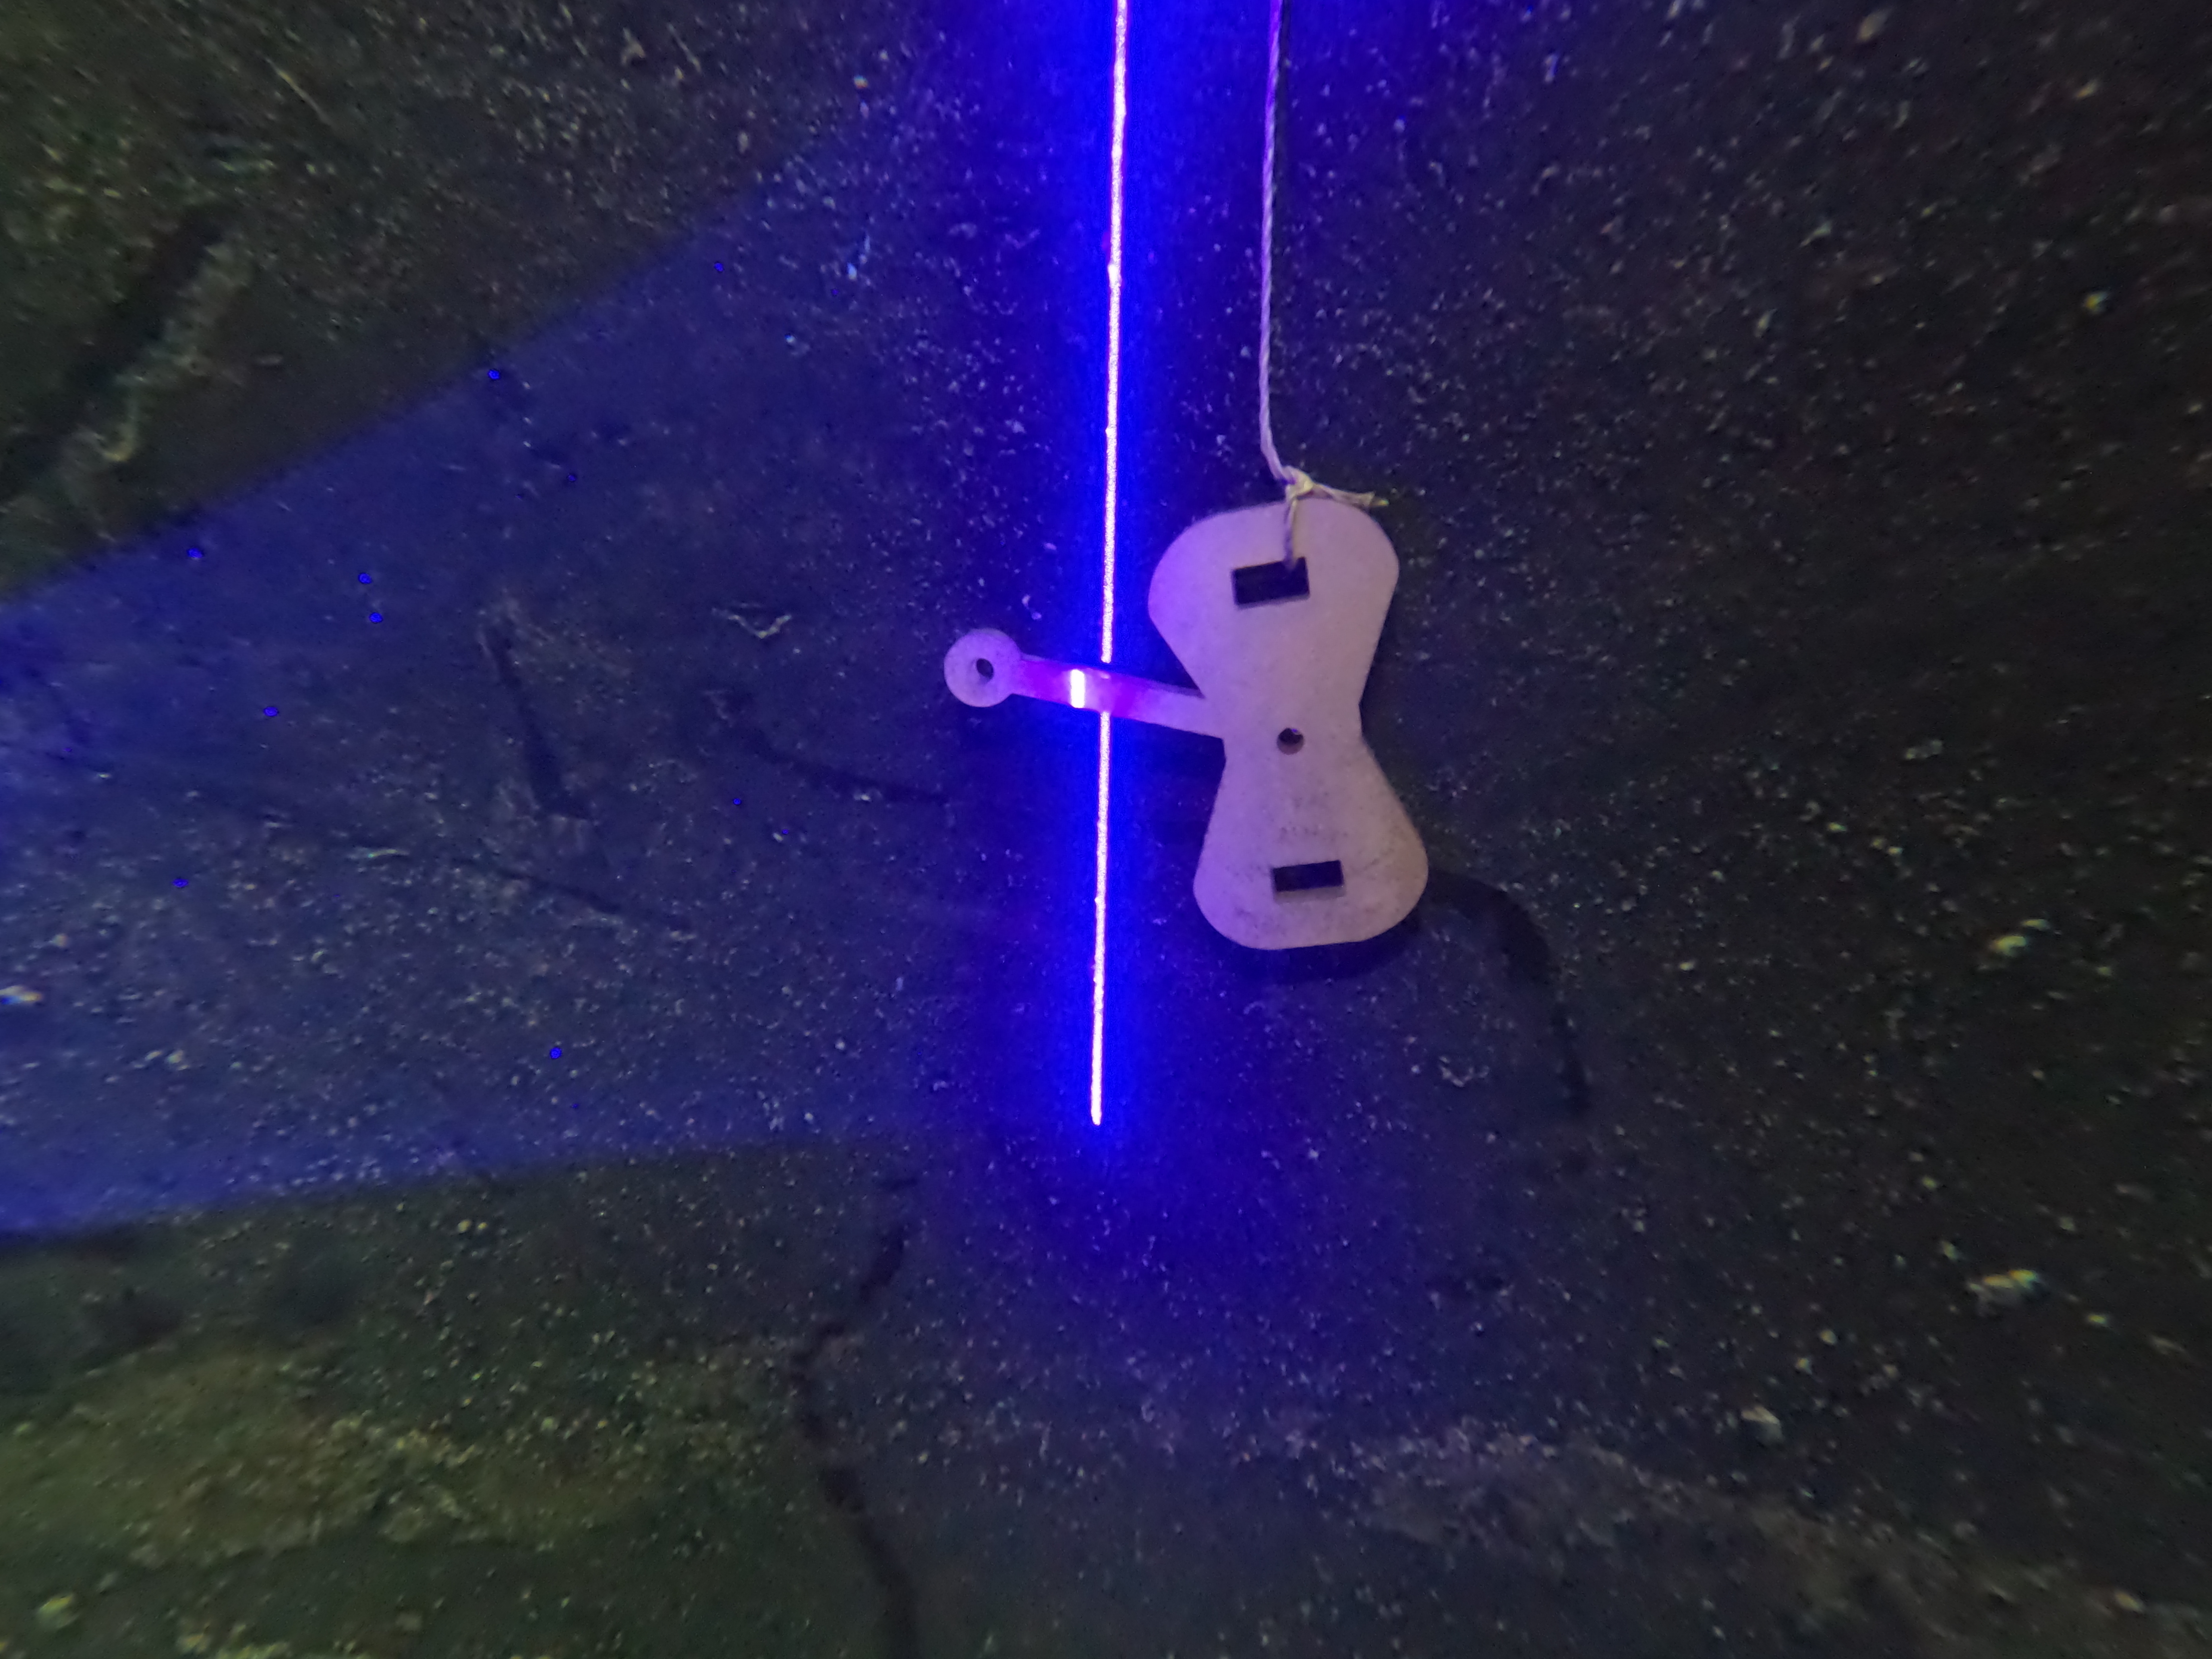

Supplement: Supplementary file 2496 [file G0016074.pdf › Level_2_2/G0016074.pdf]

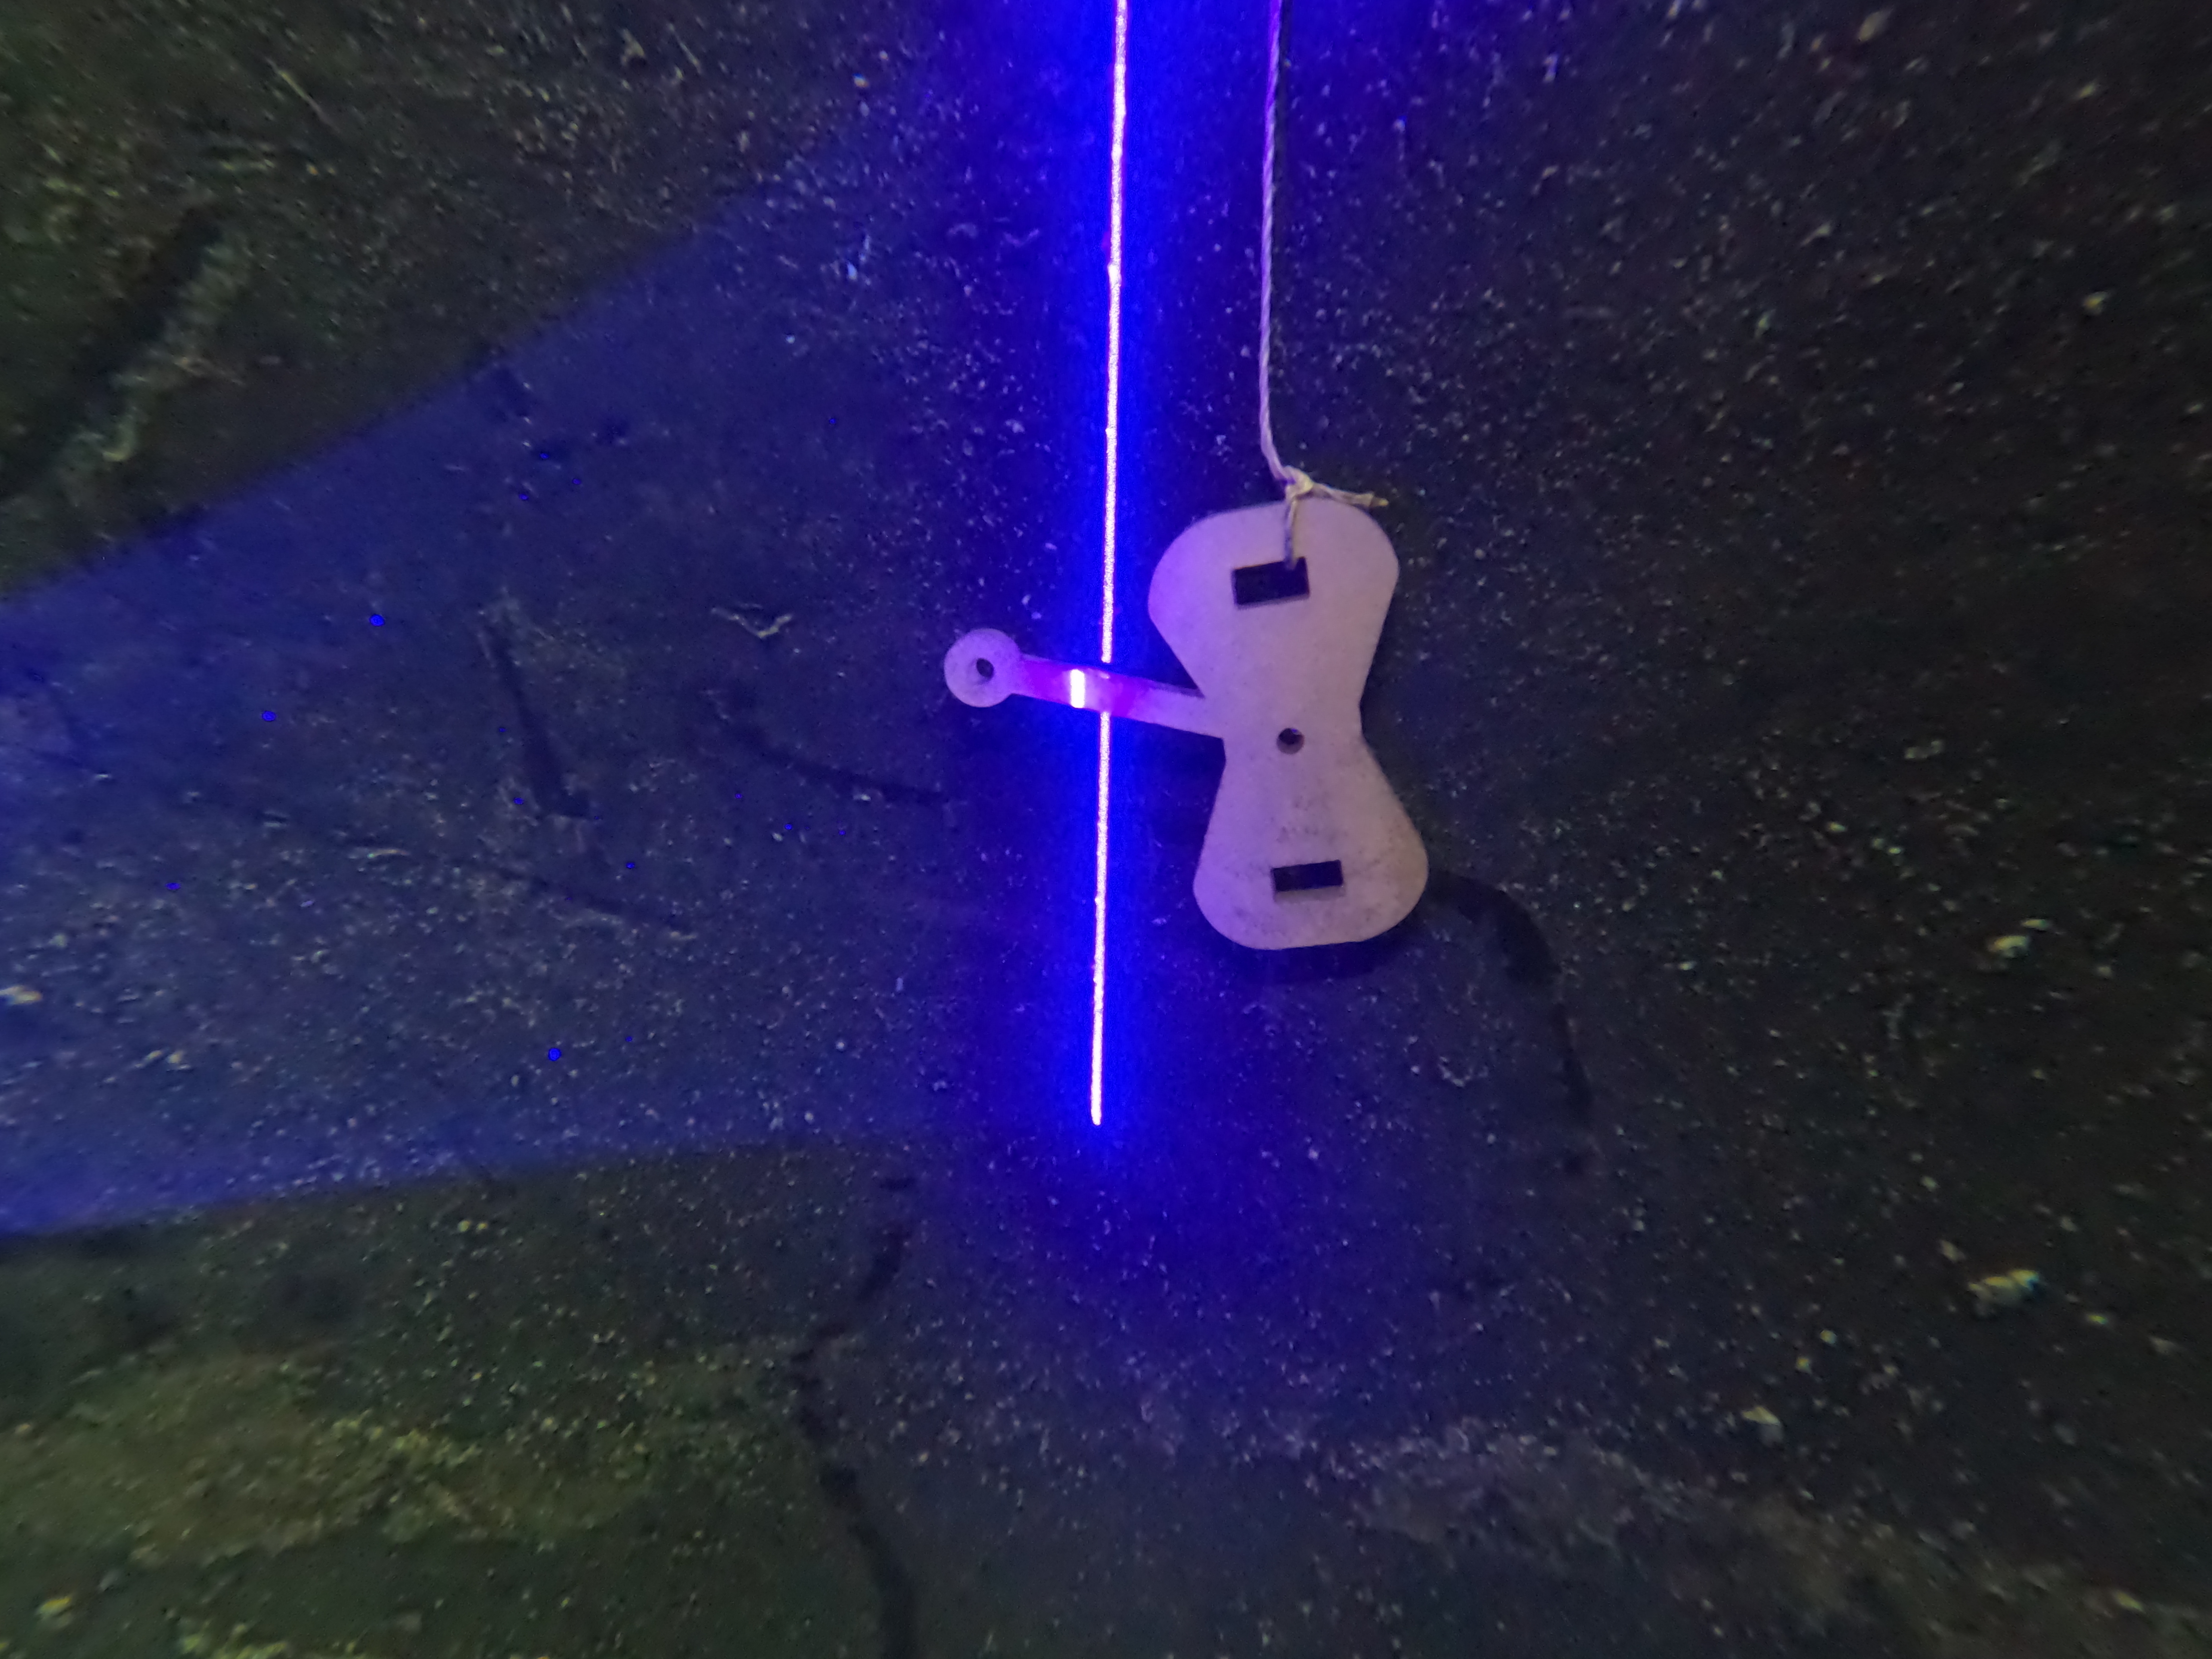

Supplement: Supplementary file 2497 [file G0016075.pdf › Level_2_2/G0016075.pdf]

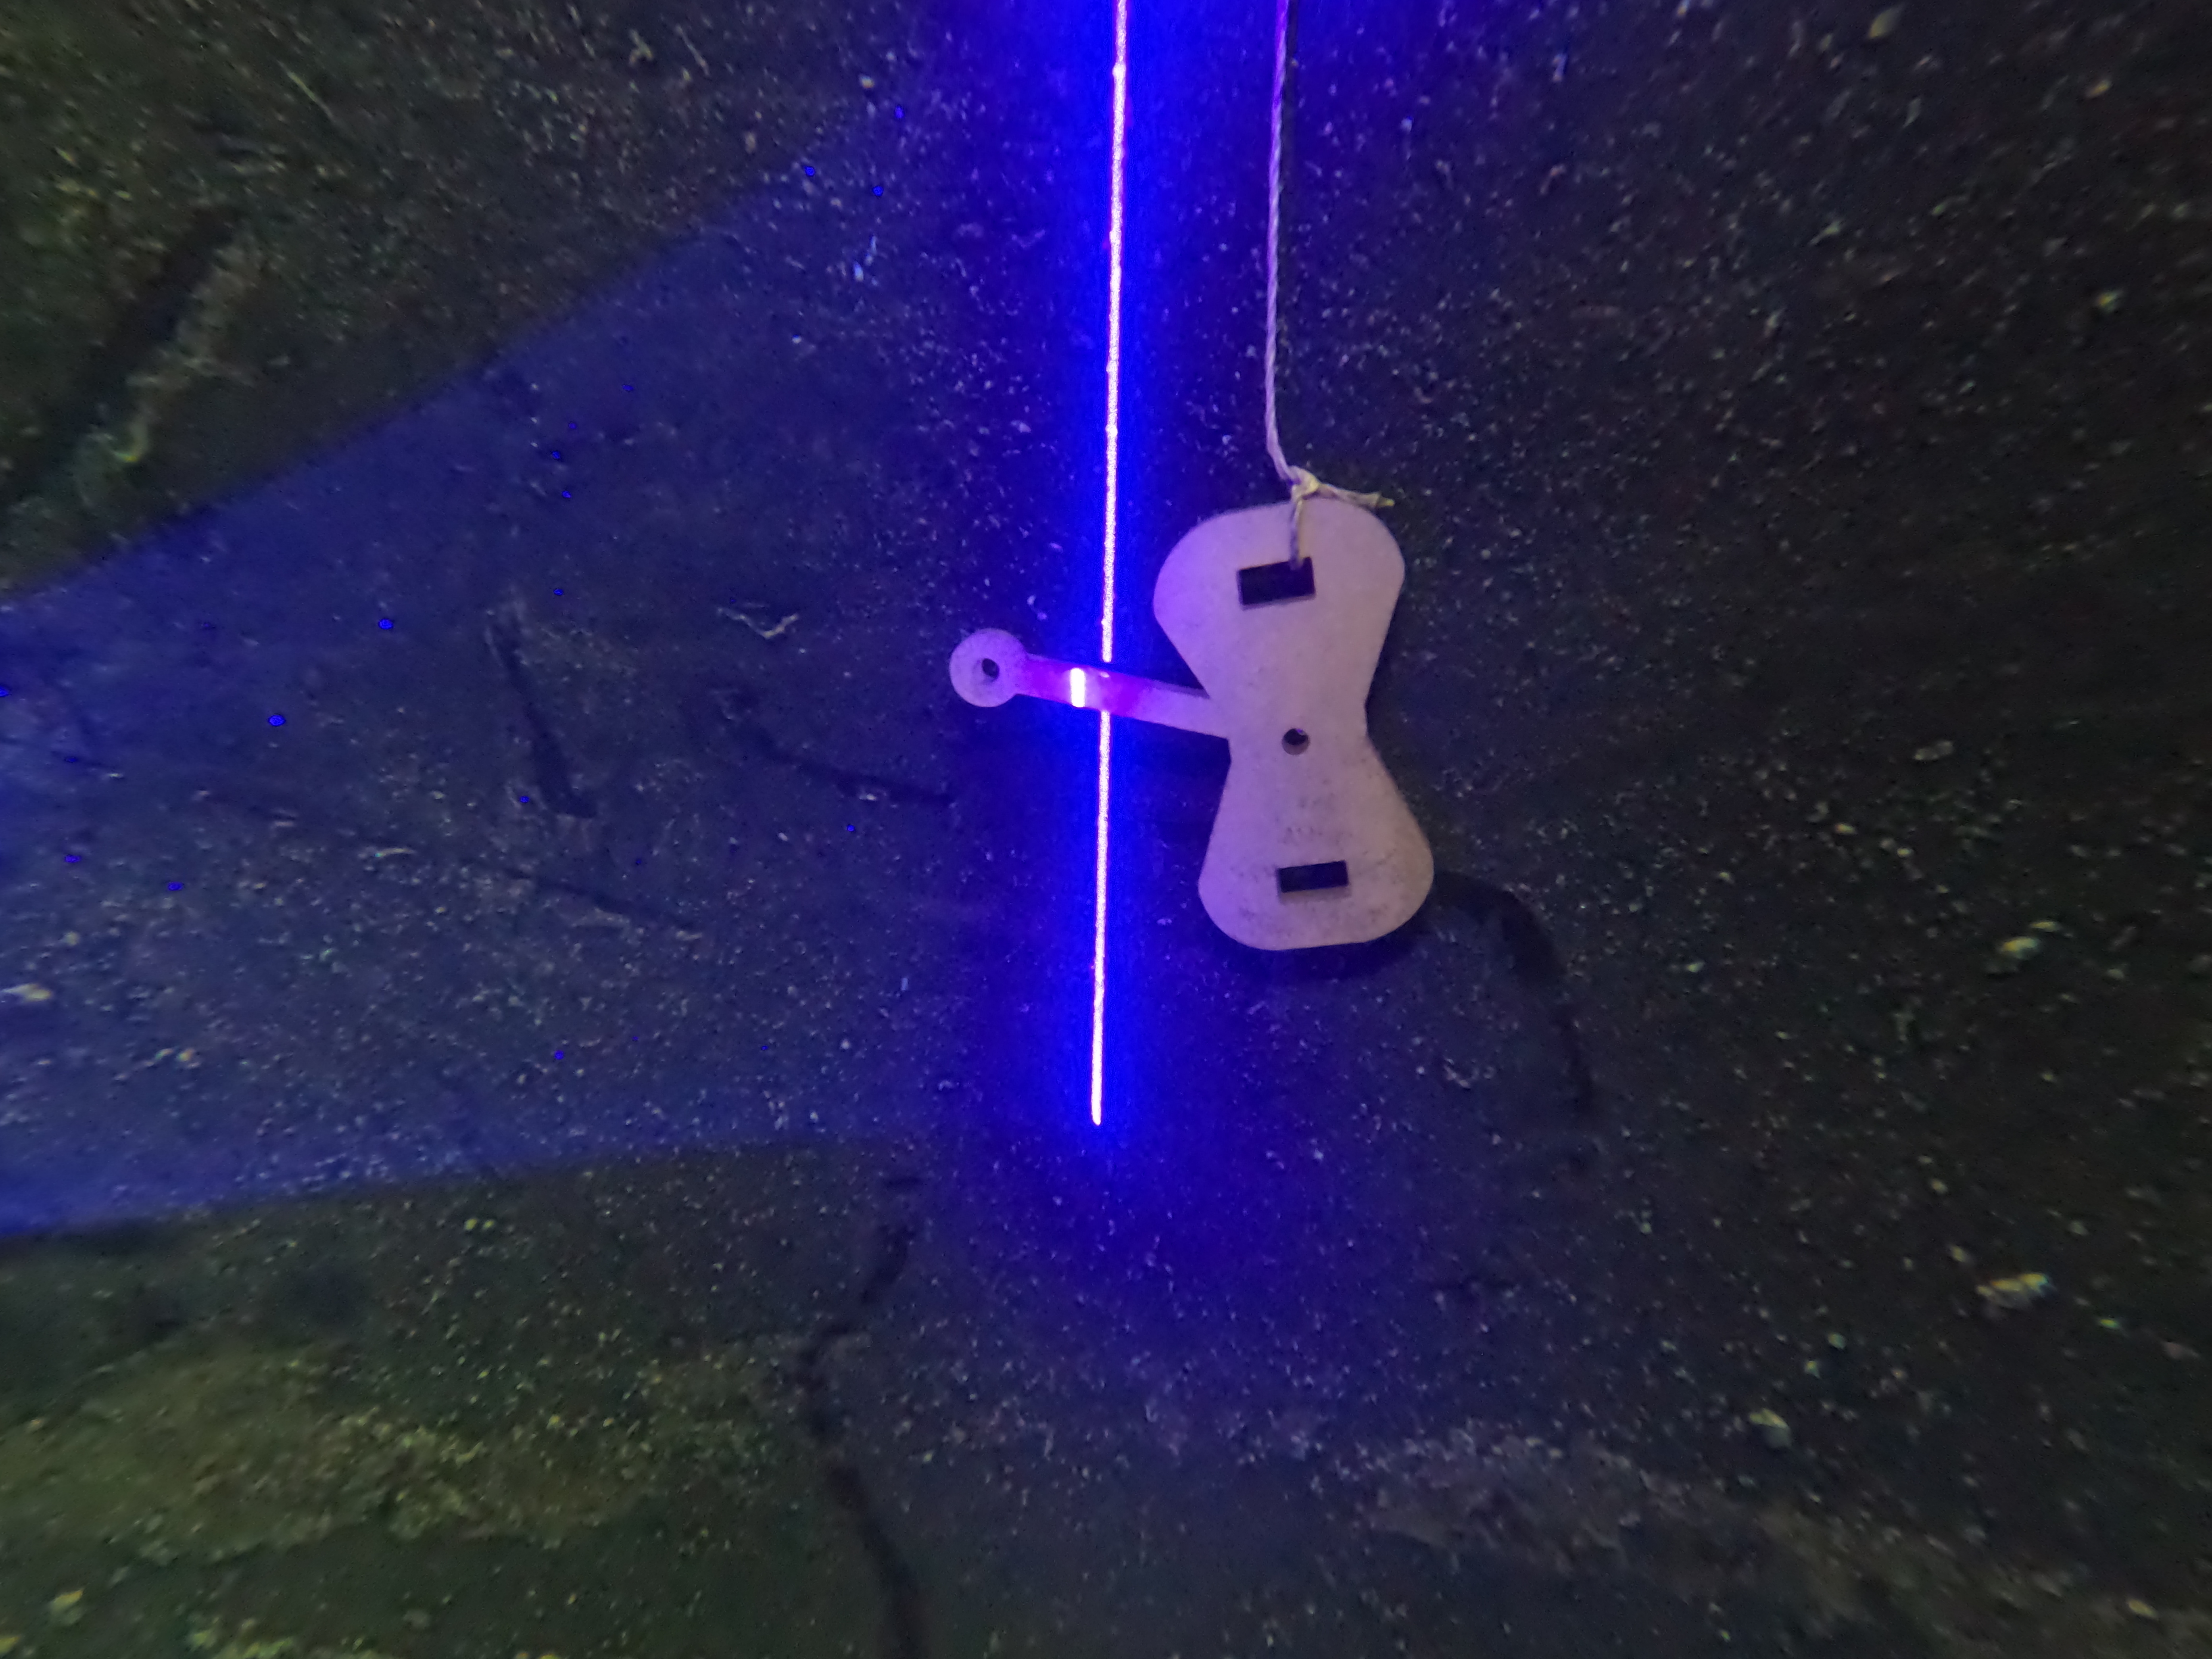

Supplement: Supplementary file 2498 [file G0016076.pdf › Level_2_2/G0016076.pdf]

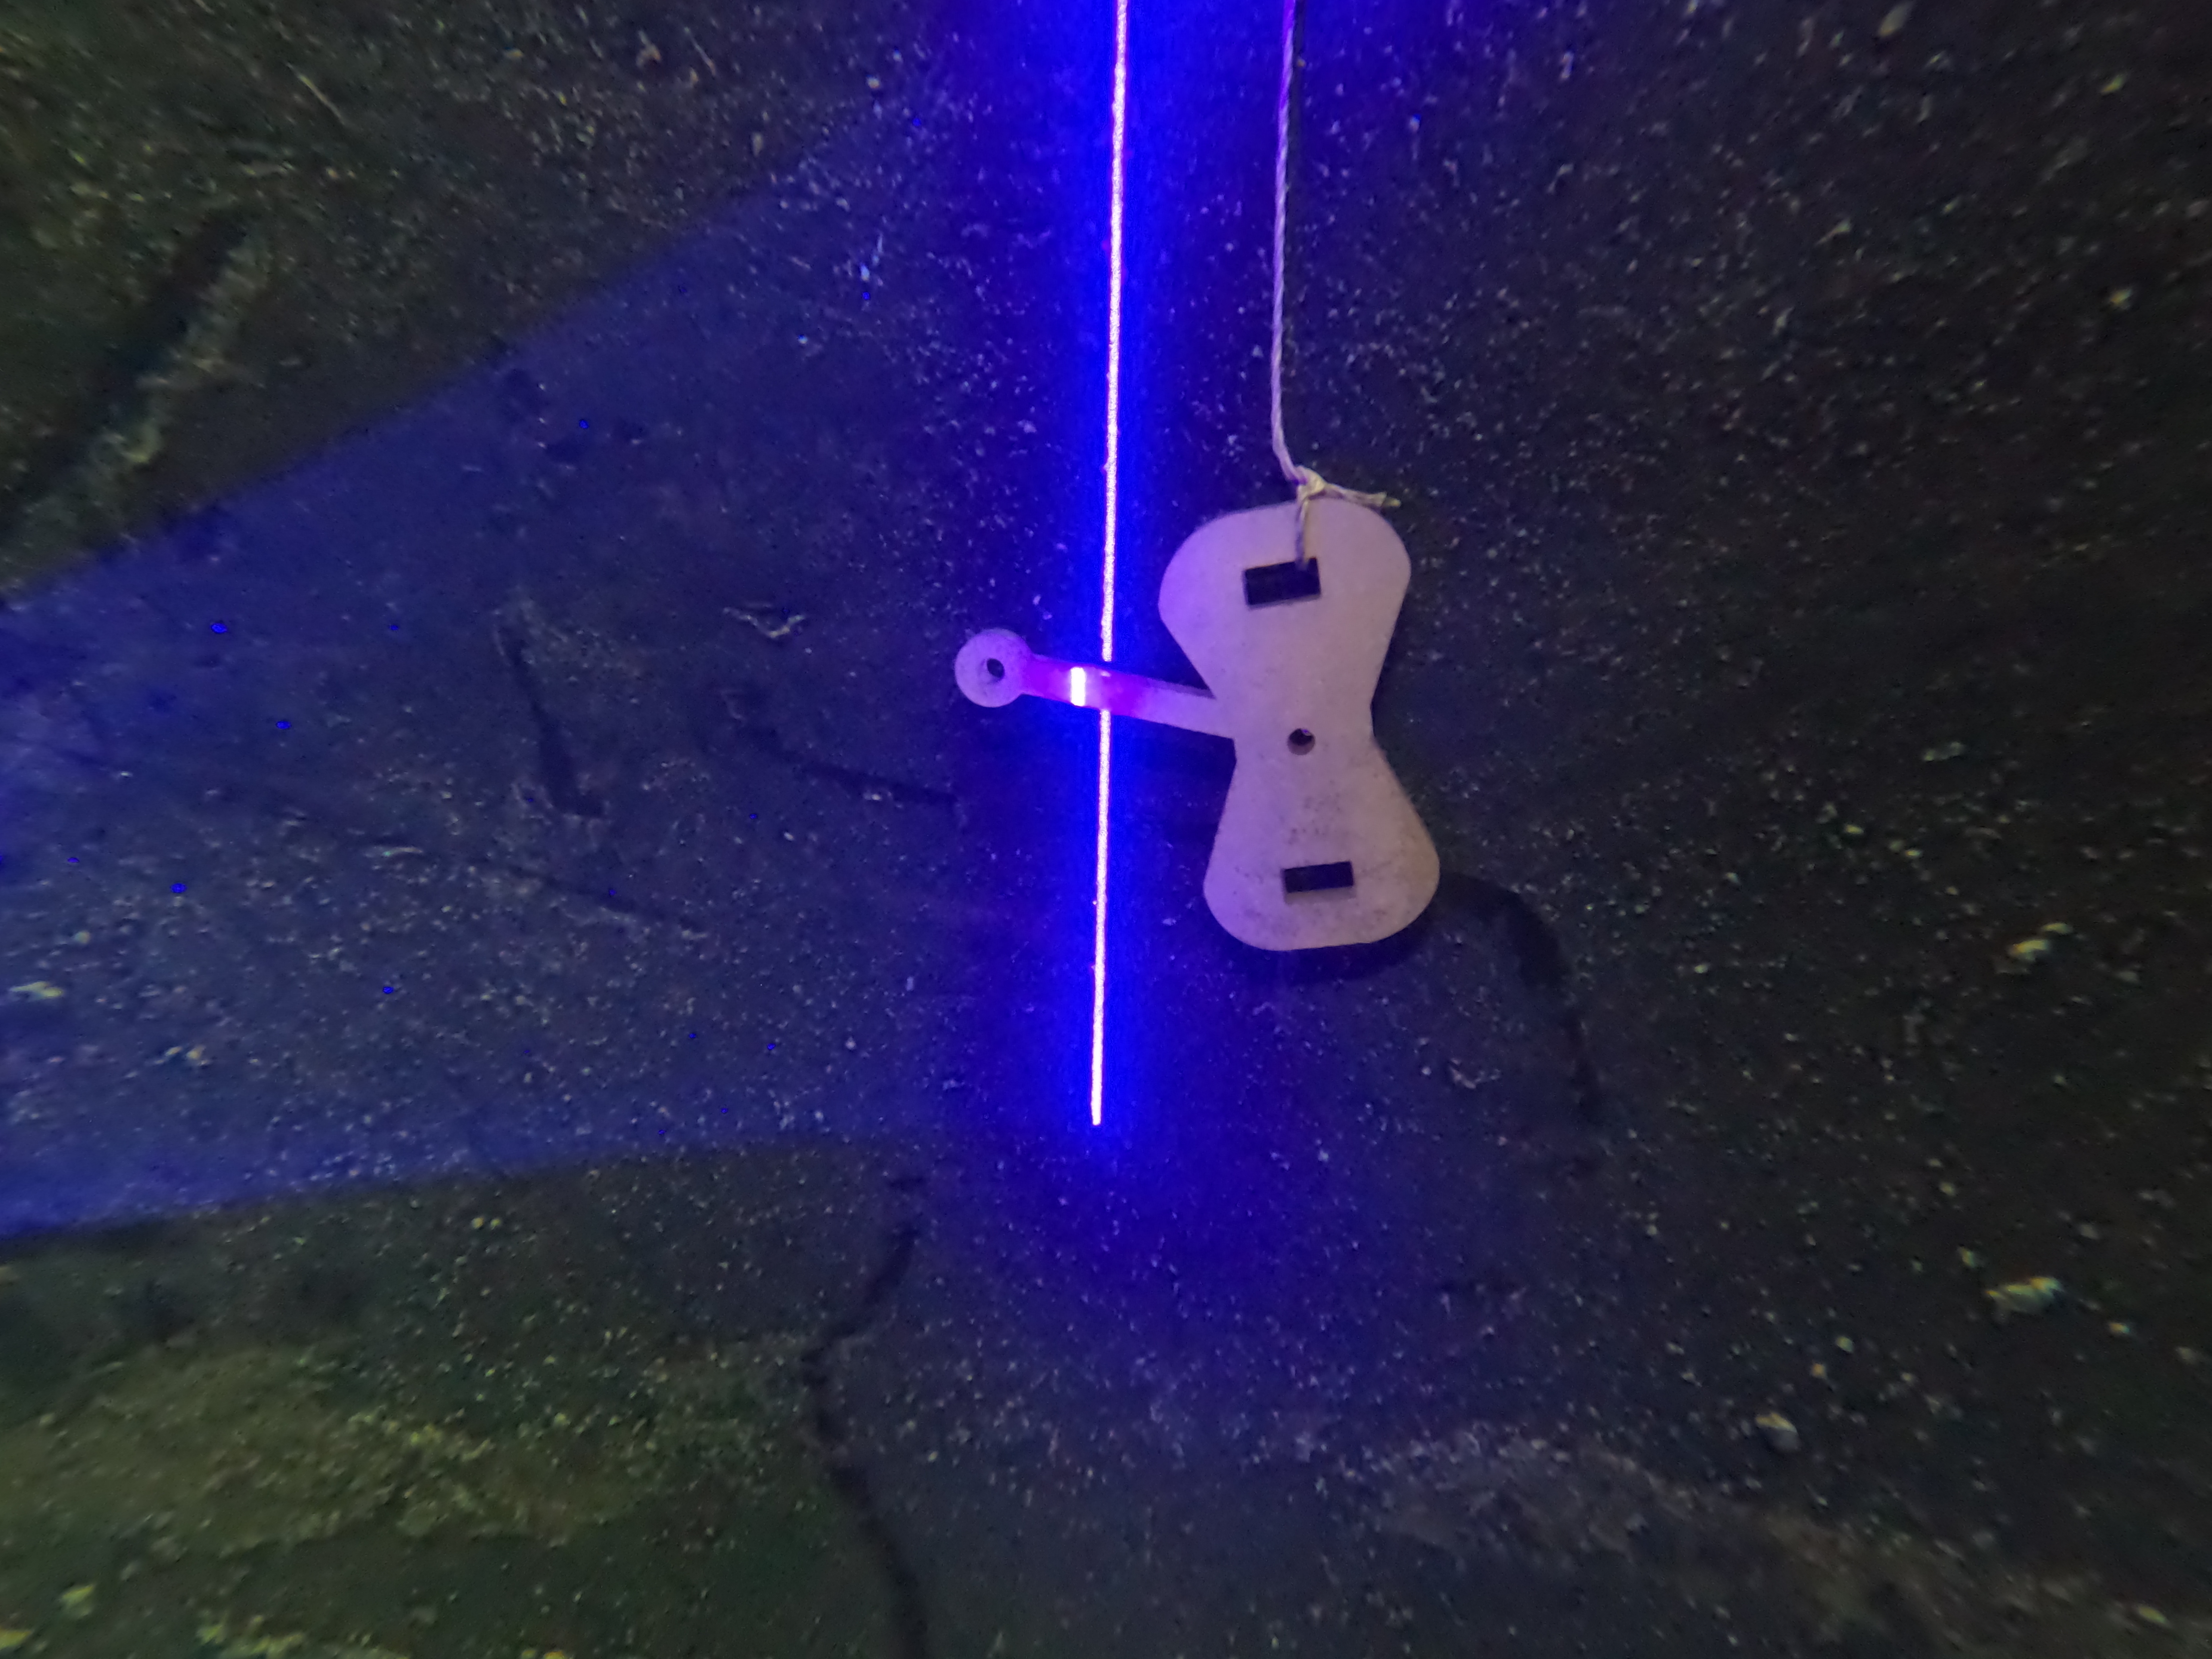

Supplement: Supplementary file 2499 [file G0016077.pdf › Level_2_2/G0016077.pdf]

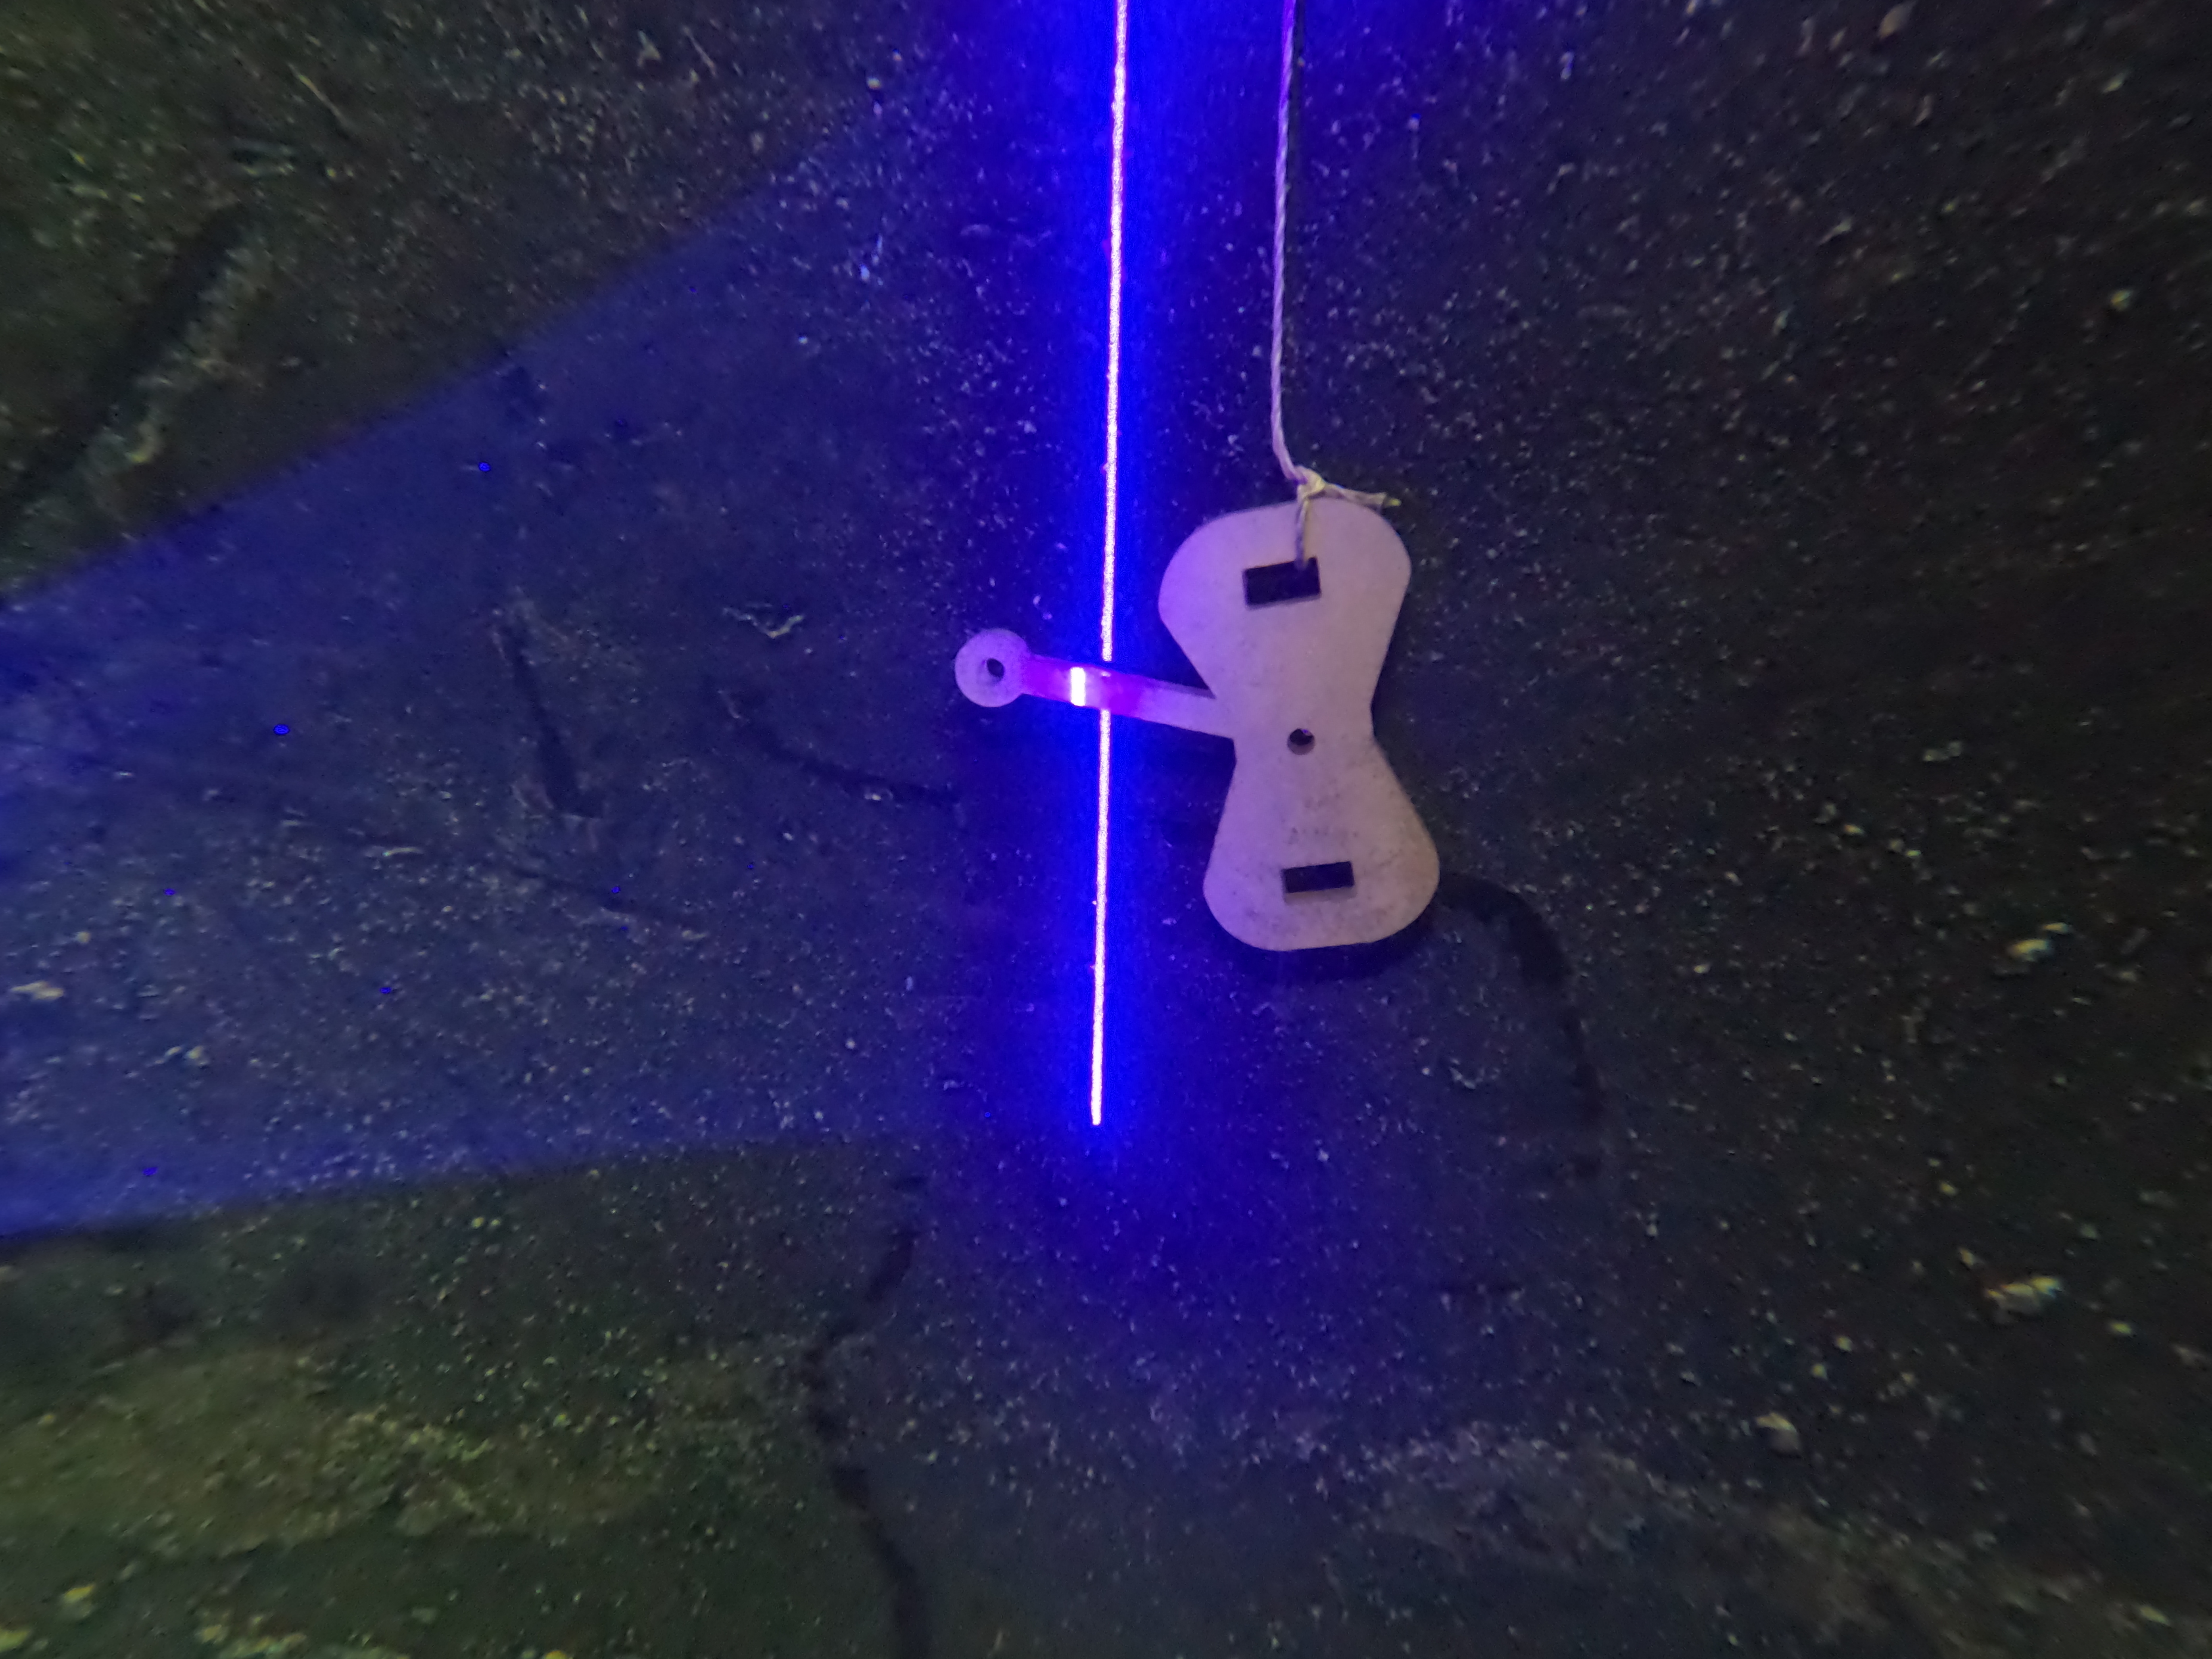

Supplement: Supplementary file 2500 [file G0016078.pdf › Level_2_2/G0016078.pdf]

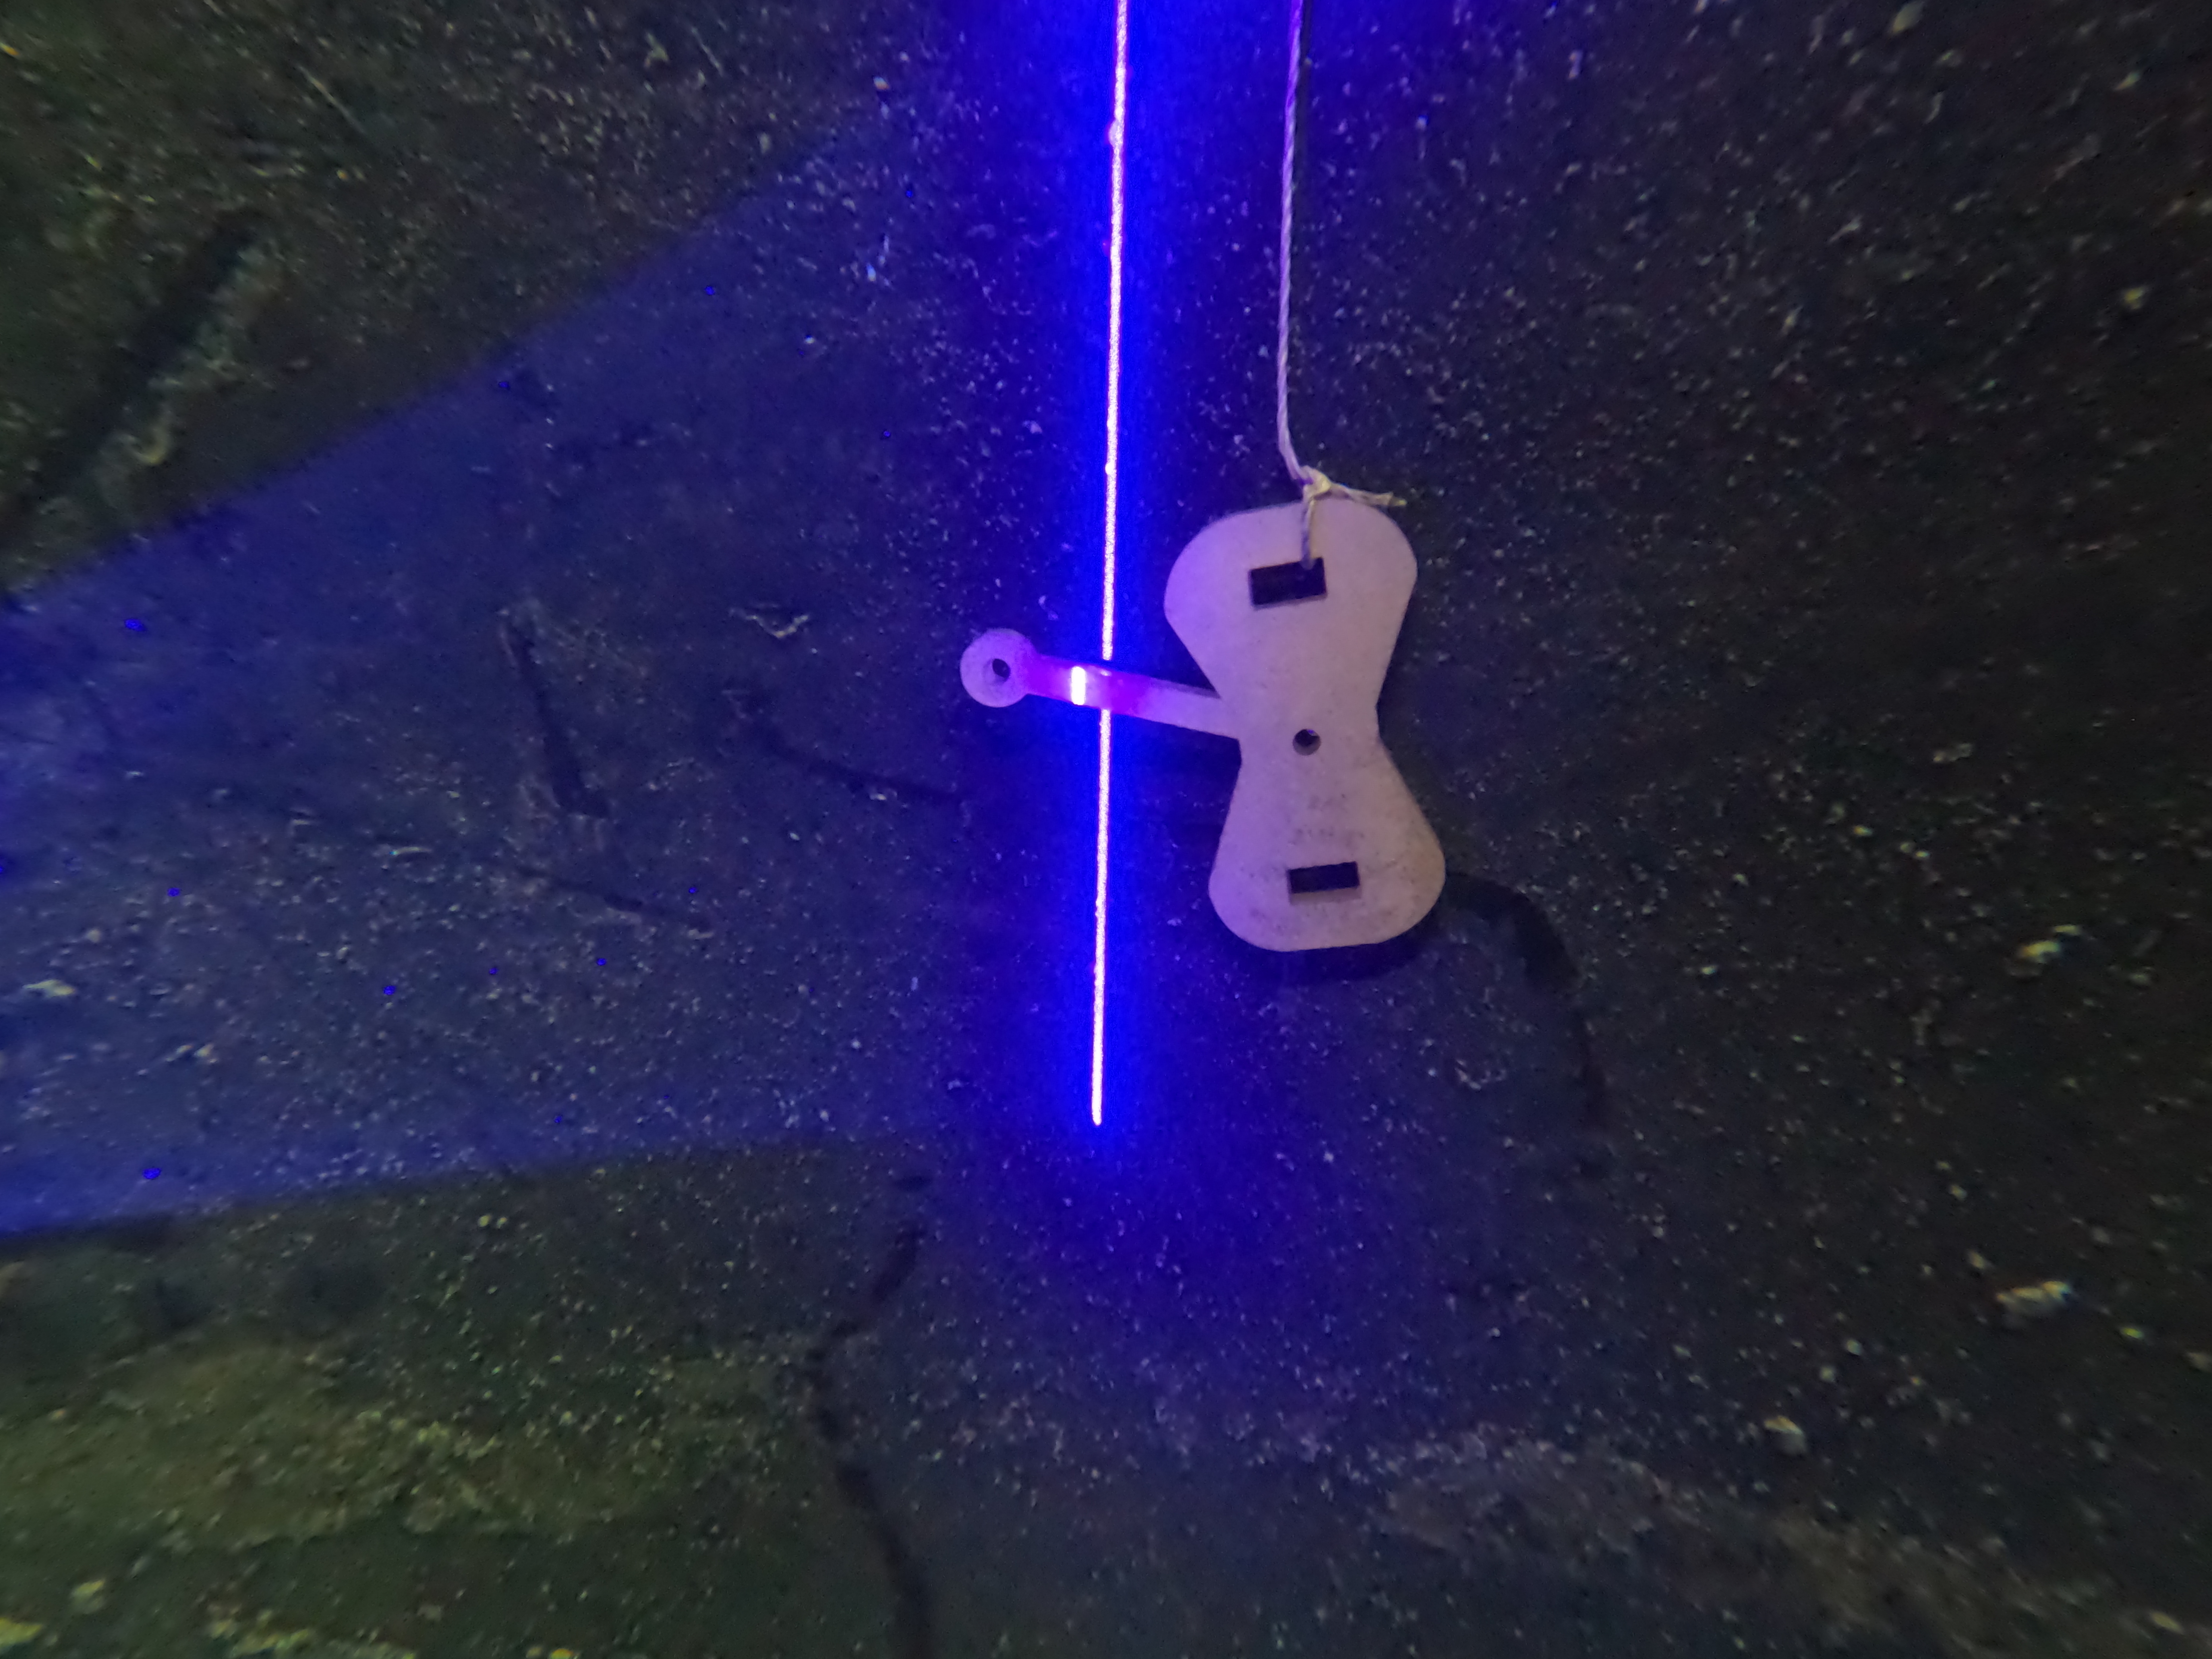

Supplement: Supplementary file 2501 [file G0016079.pdf › Level_2_2/G0016079.pdf]

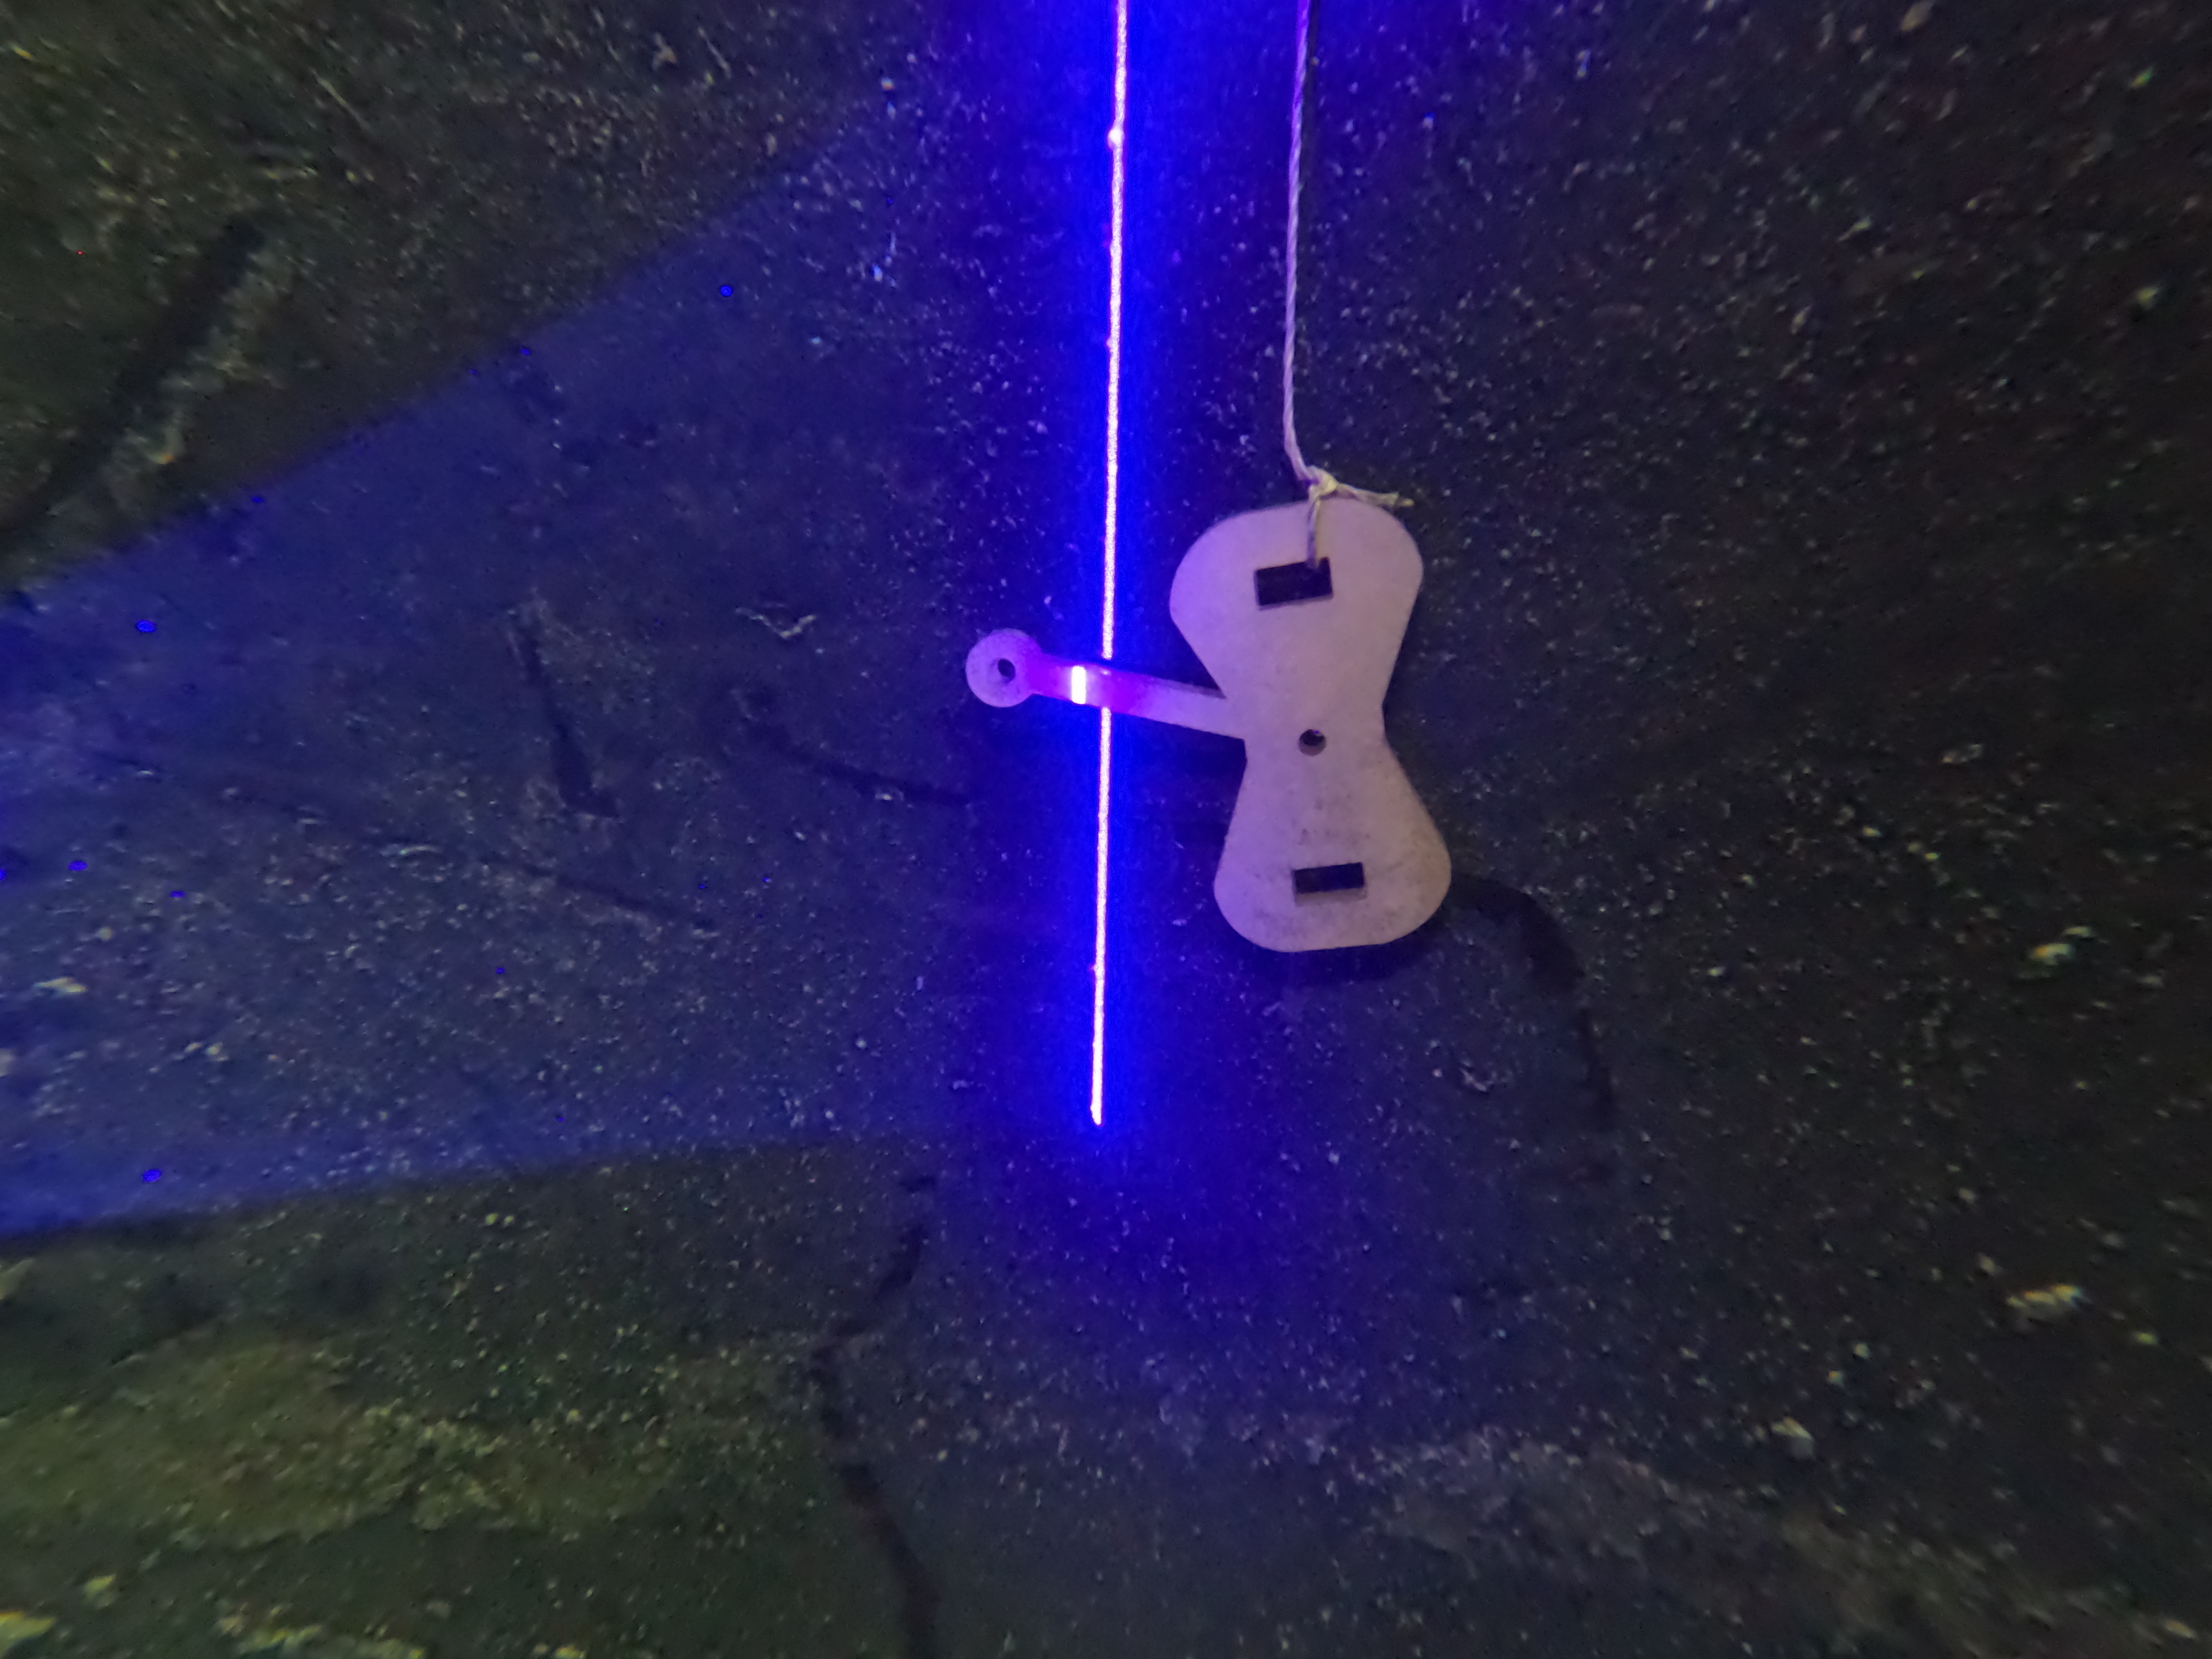

Supplement: Supplementary file 2502 [file G0016080.pdf › Level_2_2/G0016080.pdf]

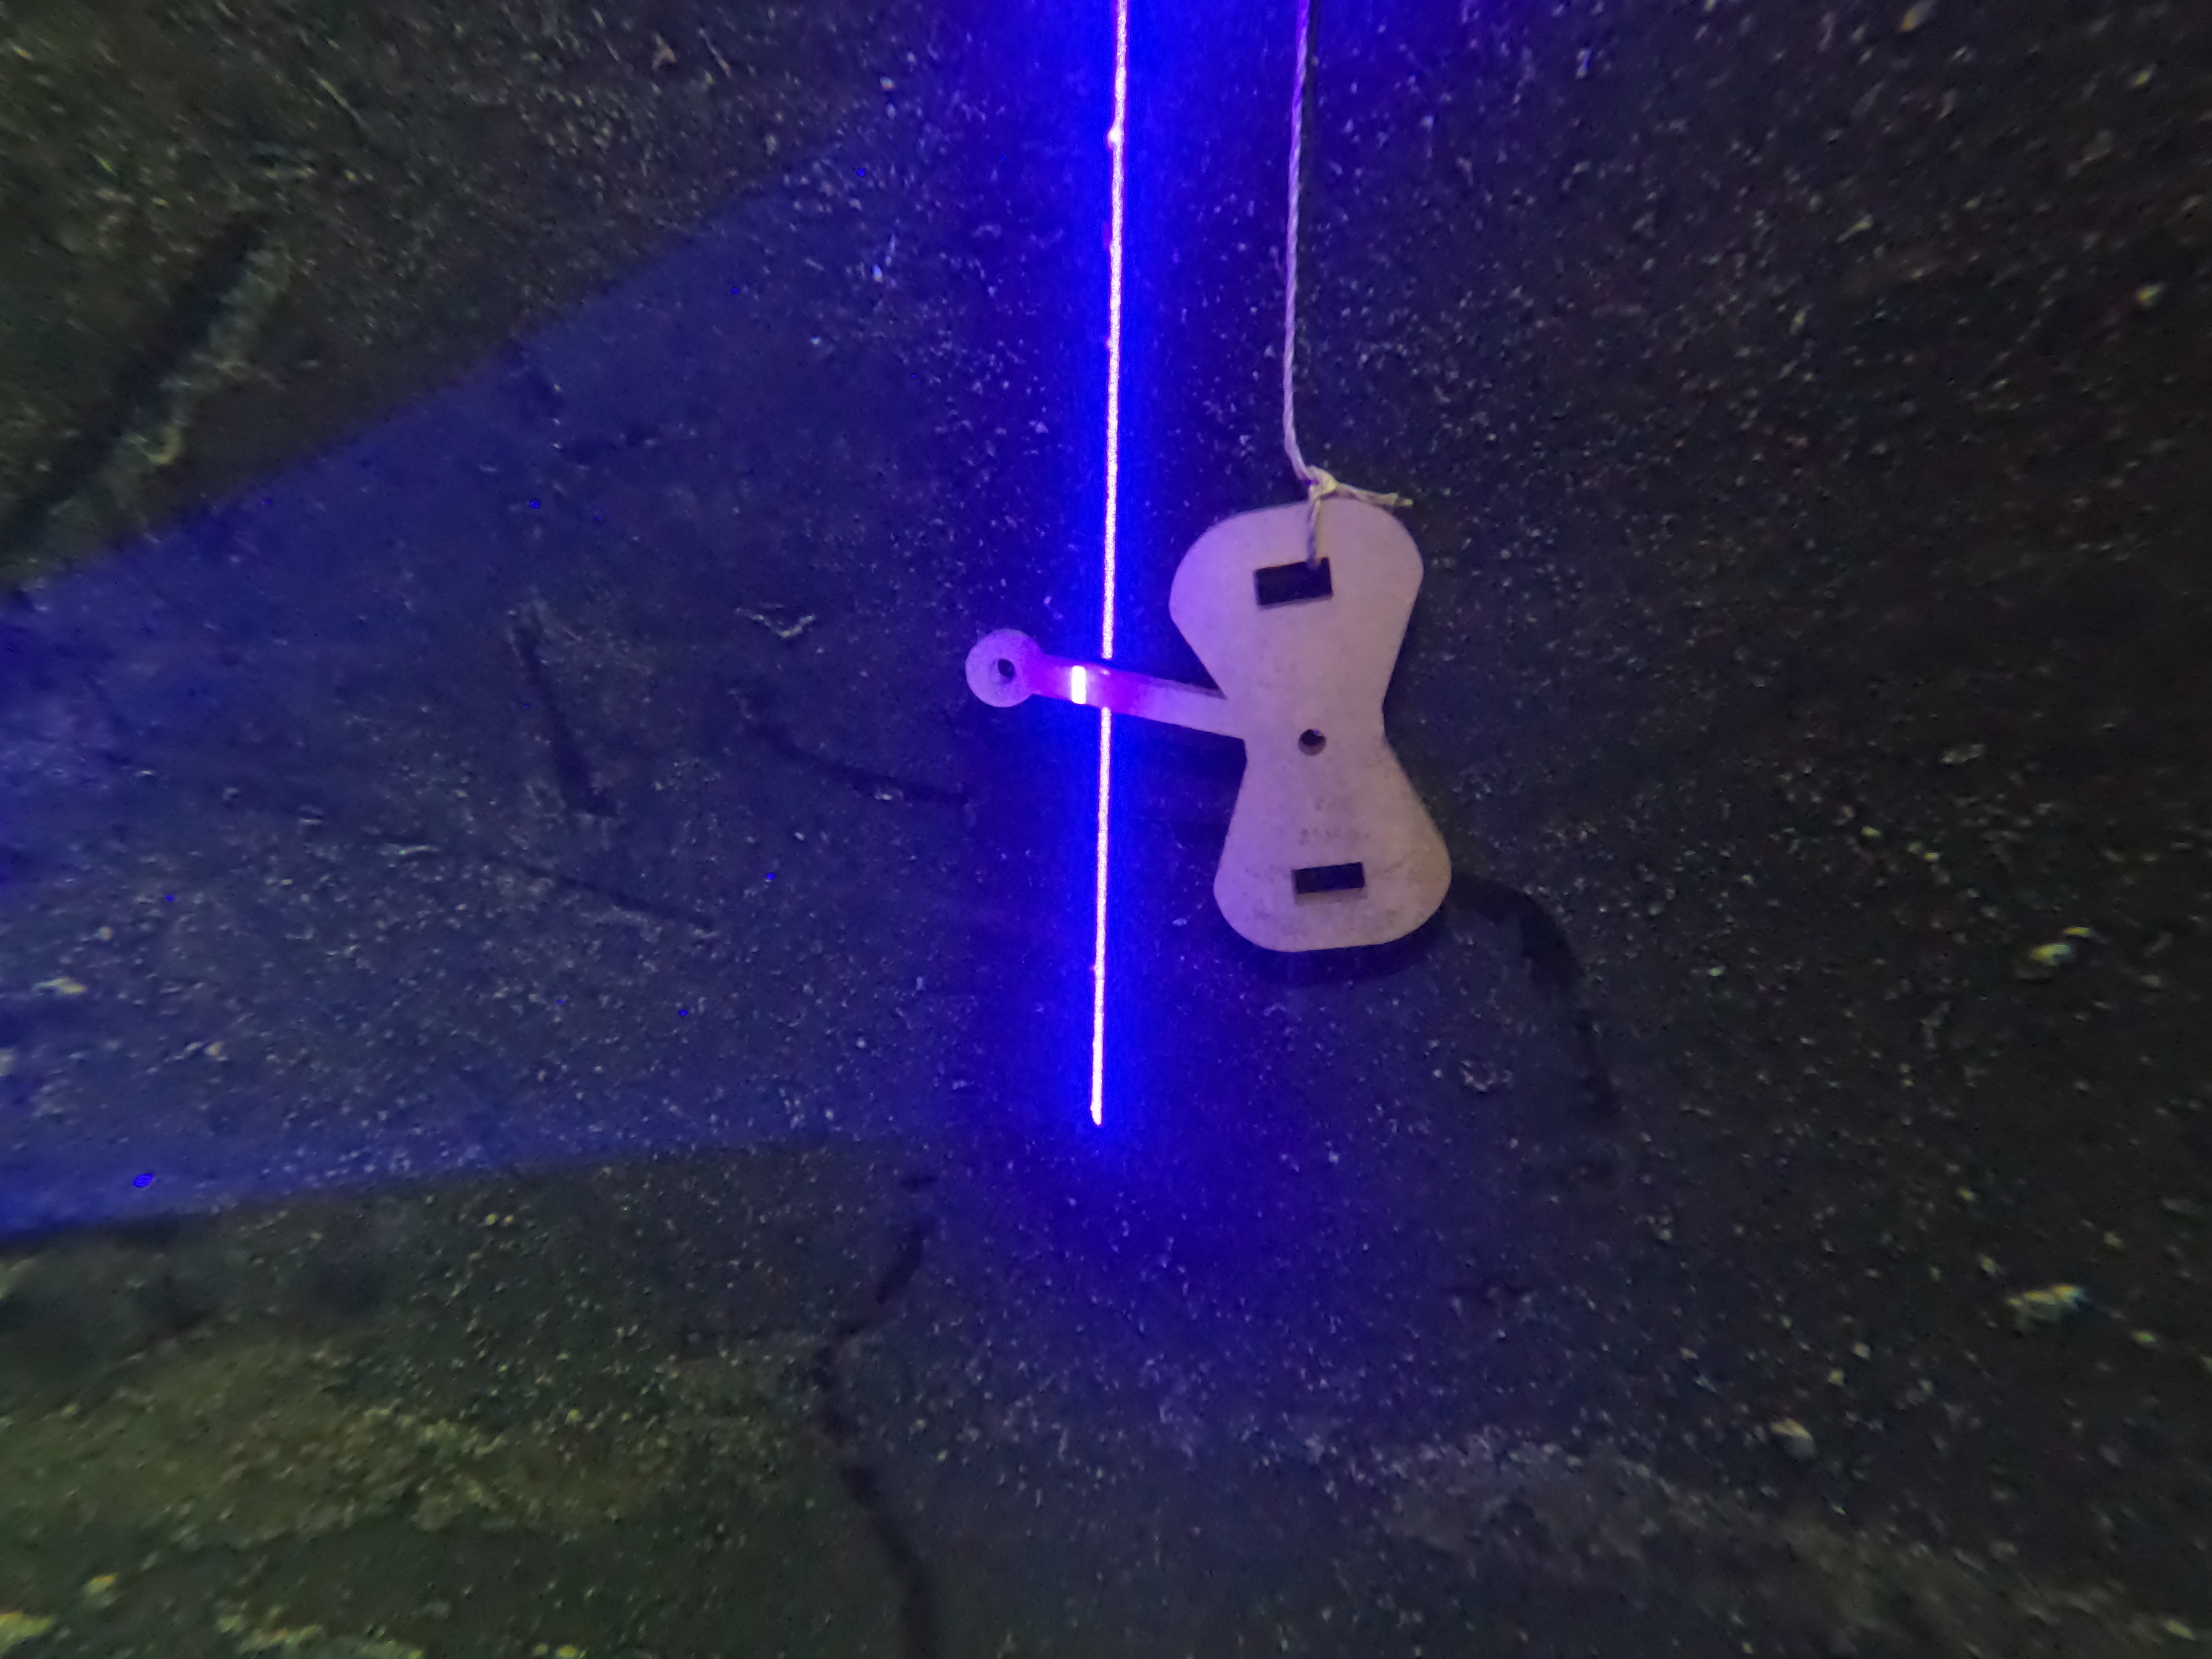

Supplement: Supplementary file 2503 [file G0016081.pdf › Level_2_2/G0016081.pdf]

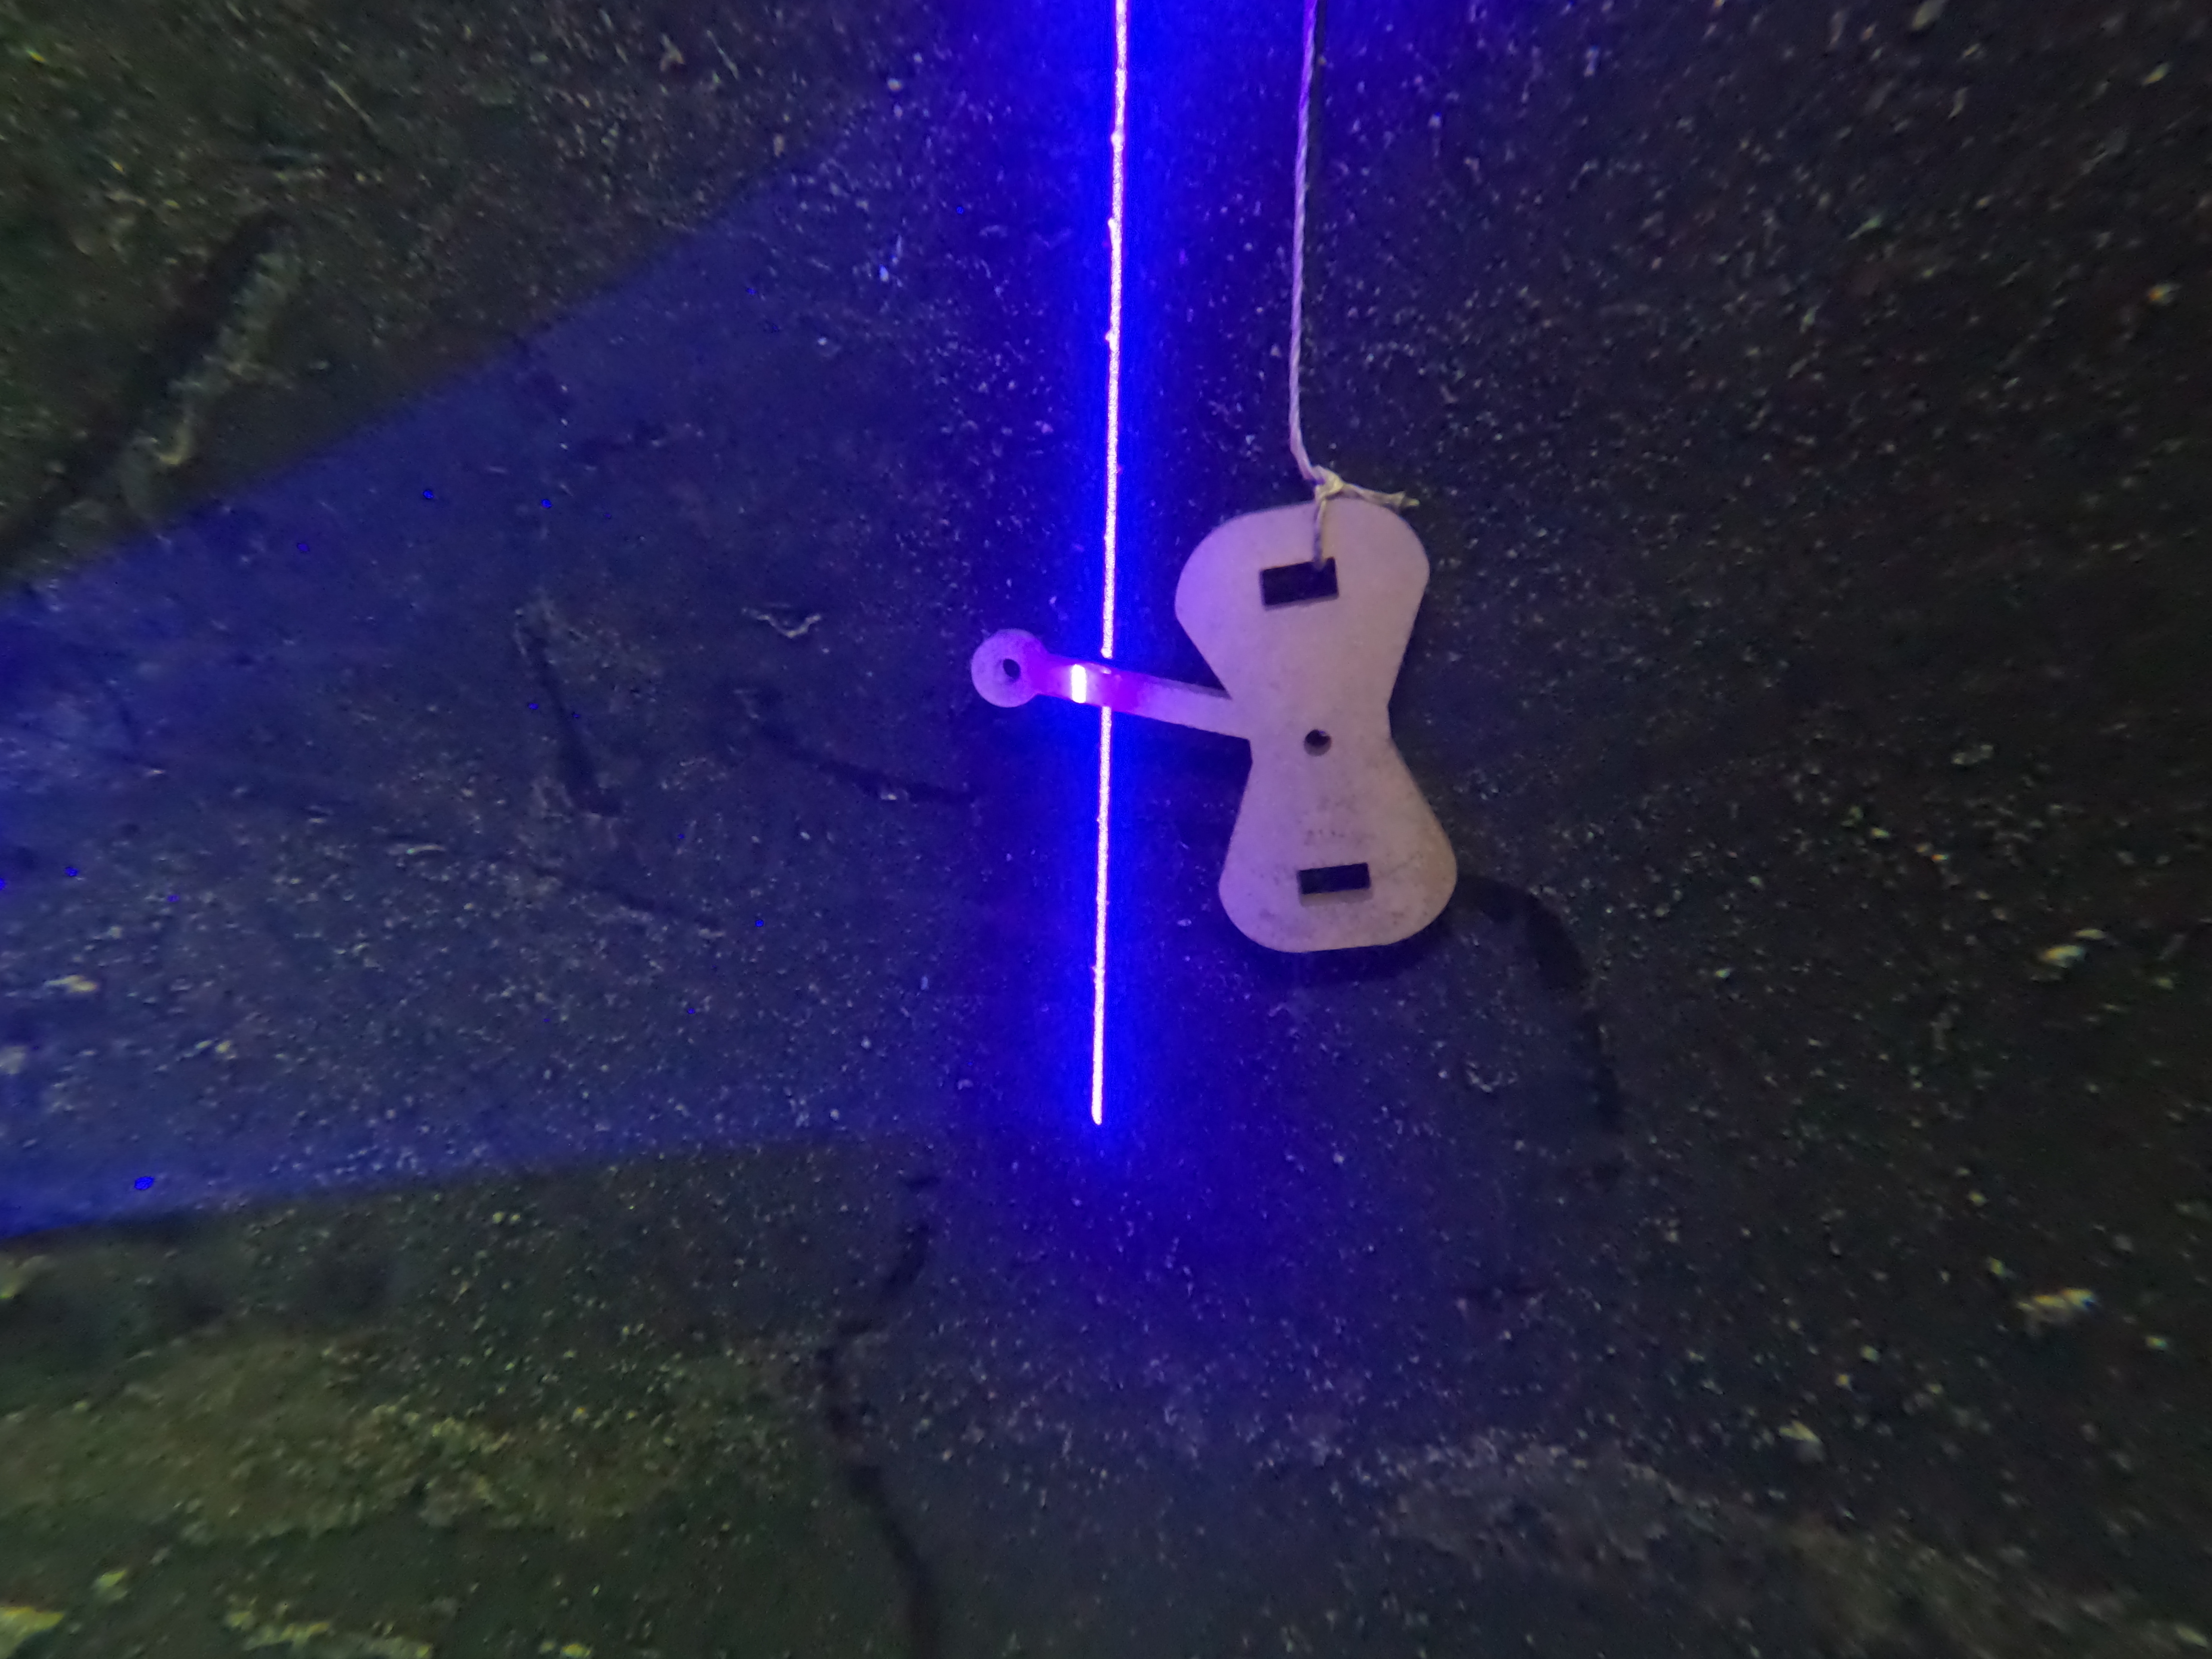

Supplement: Supplementary file 2504 [file G0016082.pdf › Level_2_2/G0016082.pdf]

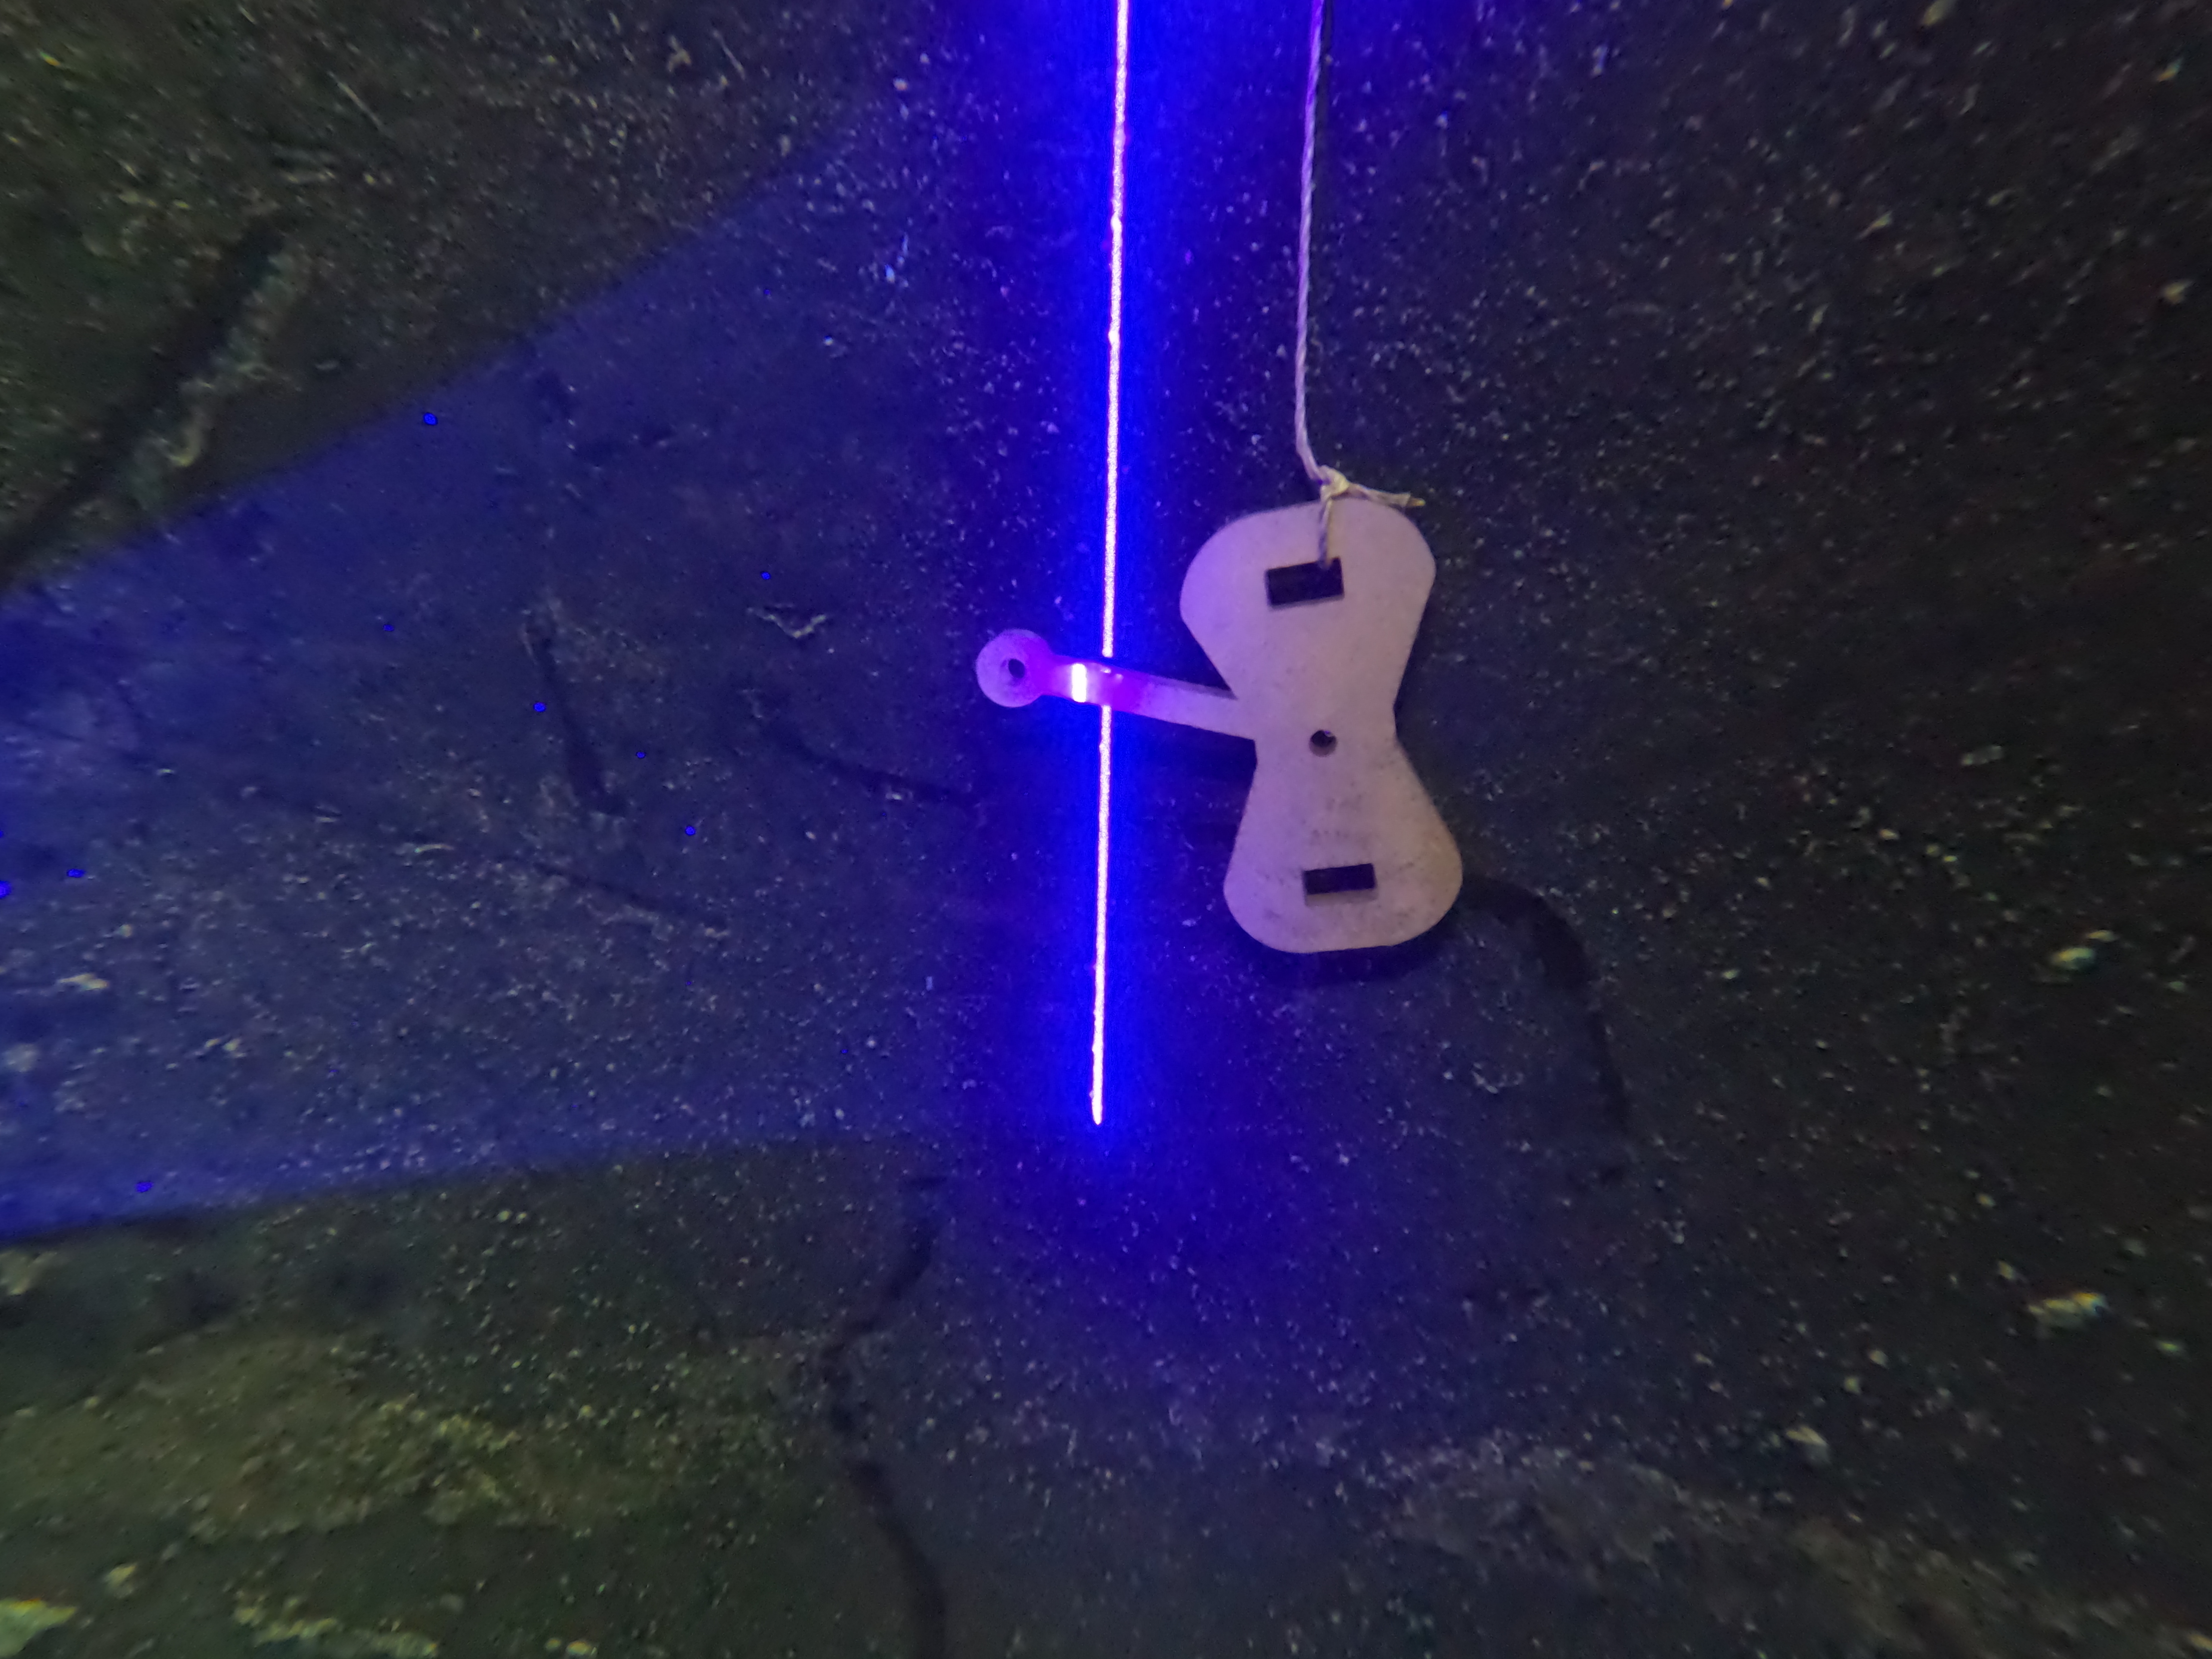

Supplement: Supplementary file 2505 [file G0016083.pdf › Level_2_2/G0016083.pdf]

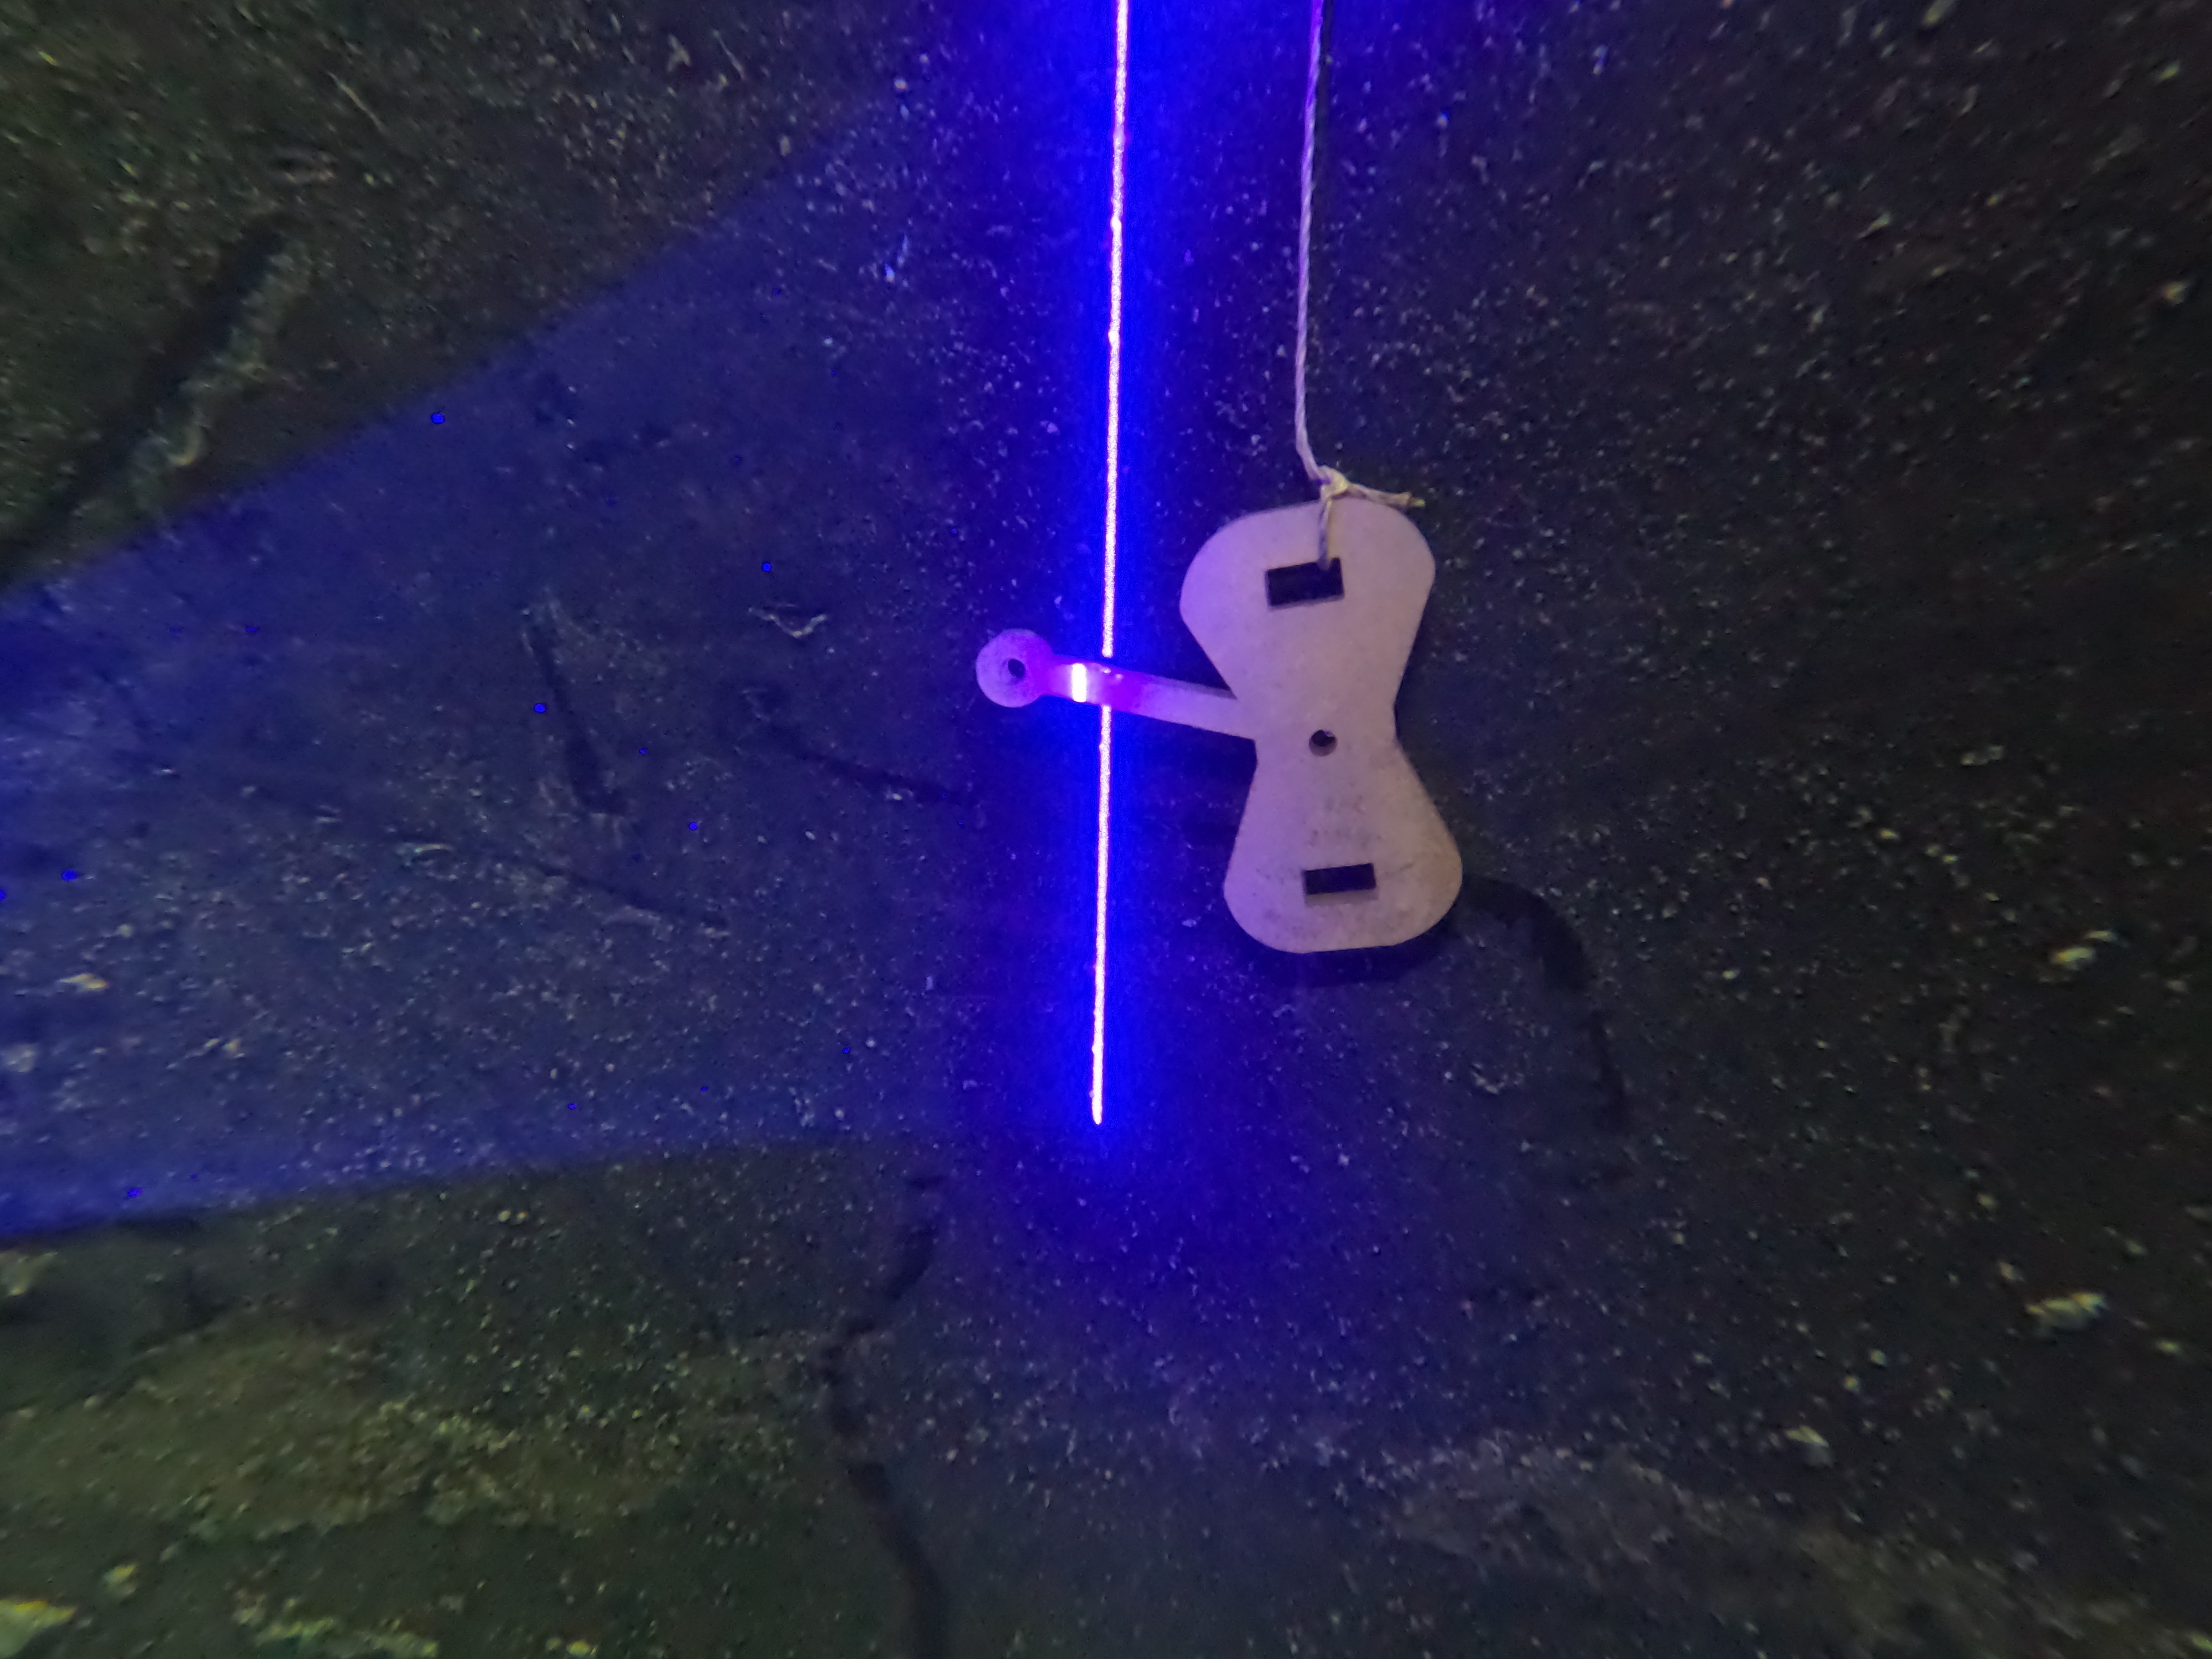

Supplement: Supplementary file 2506 [file G0016084.pdf › Level_2_2/G0016084.pdf]

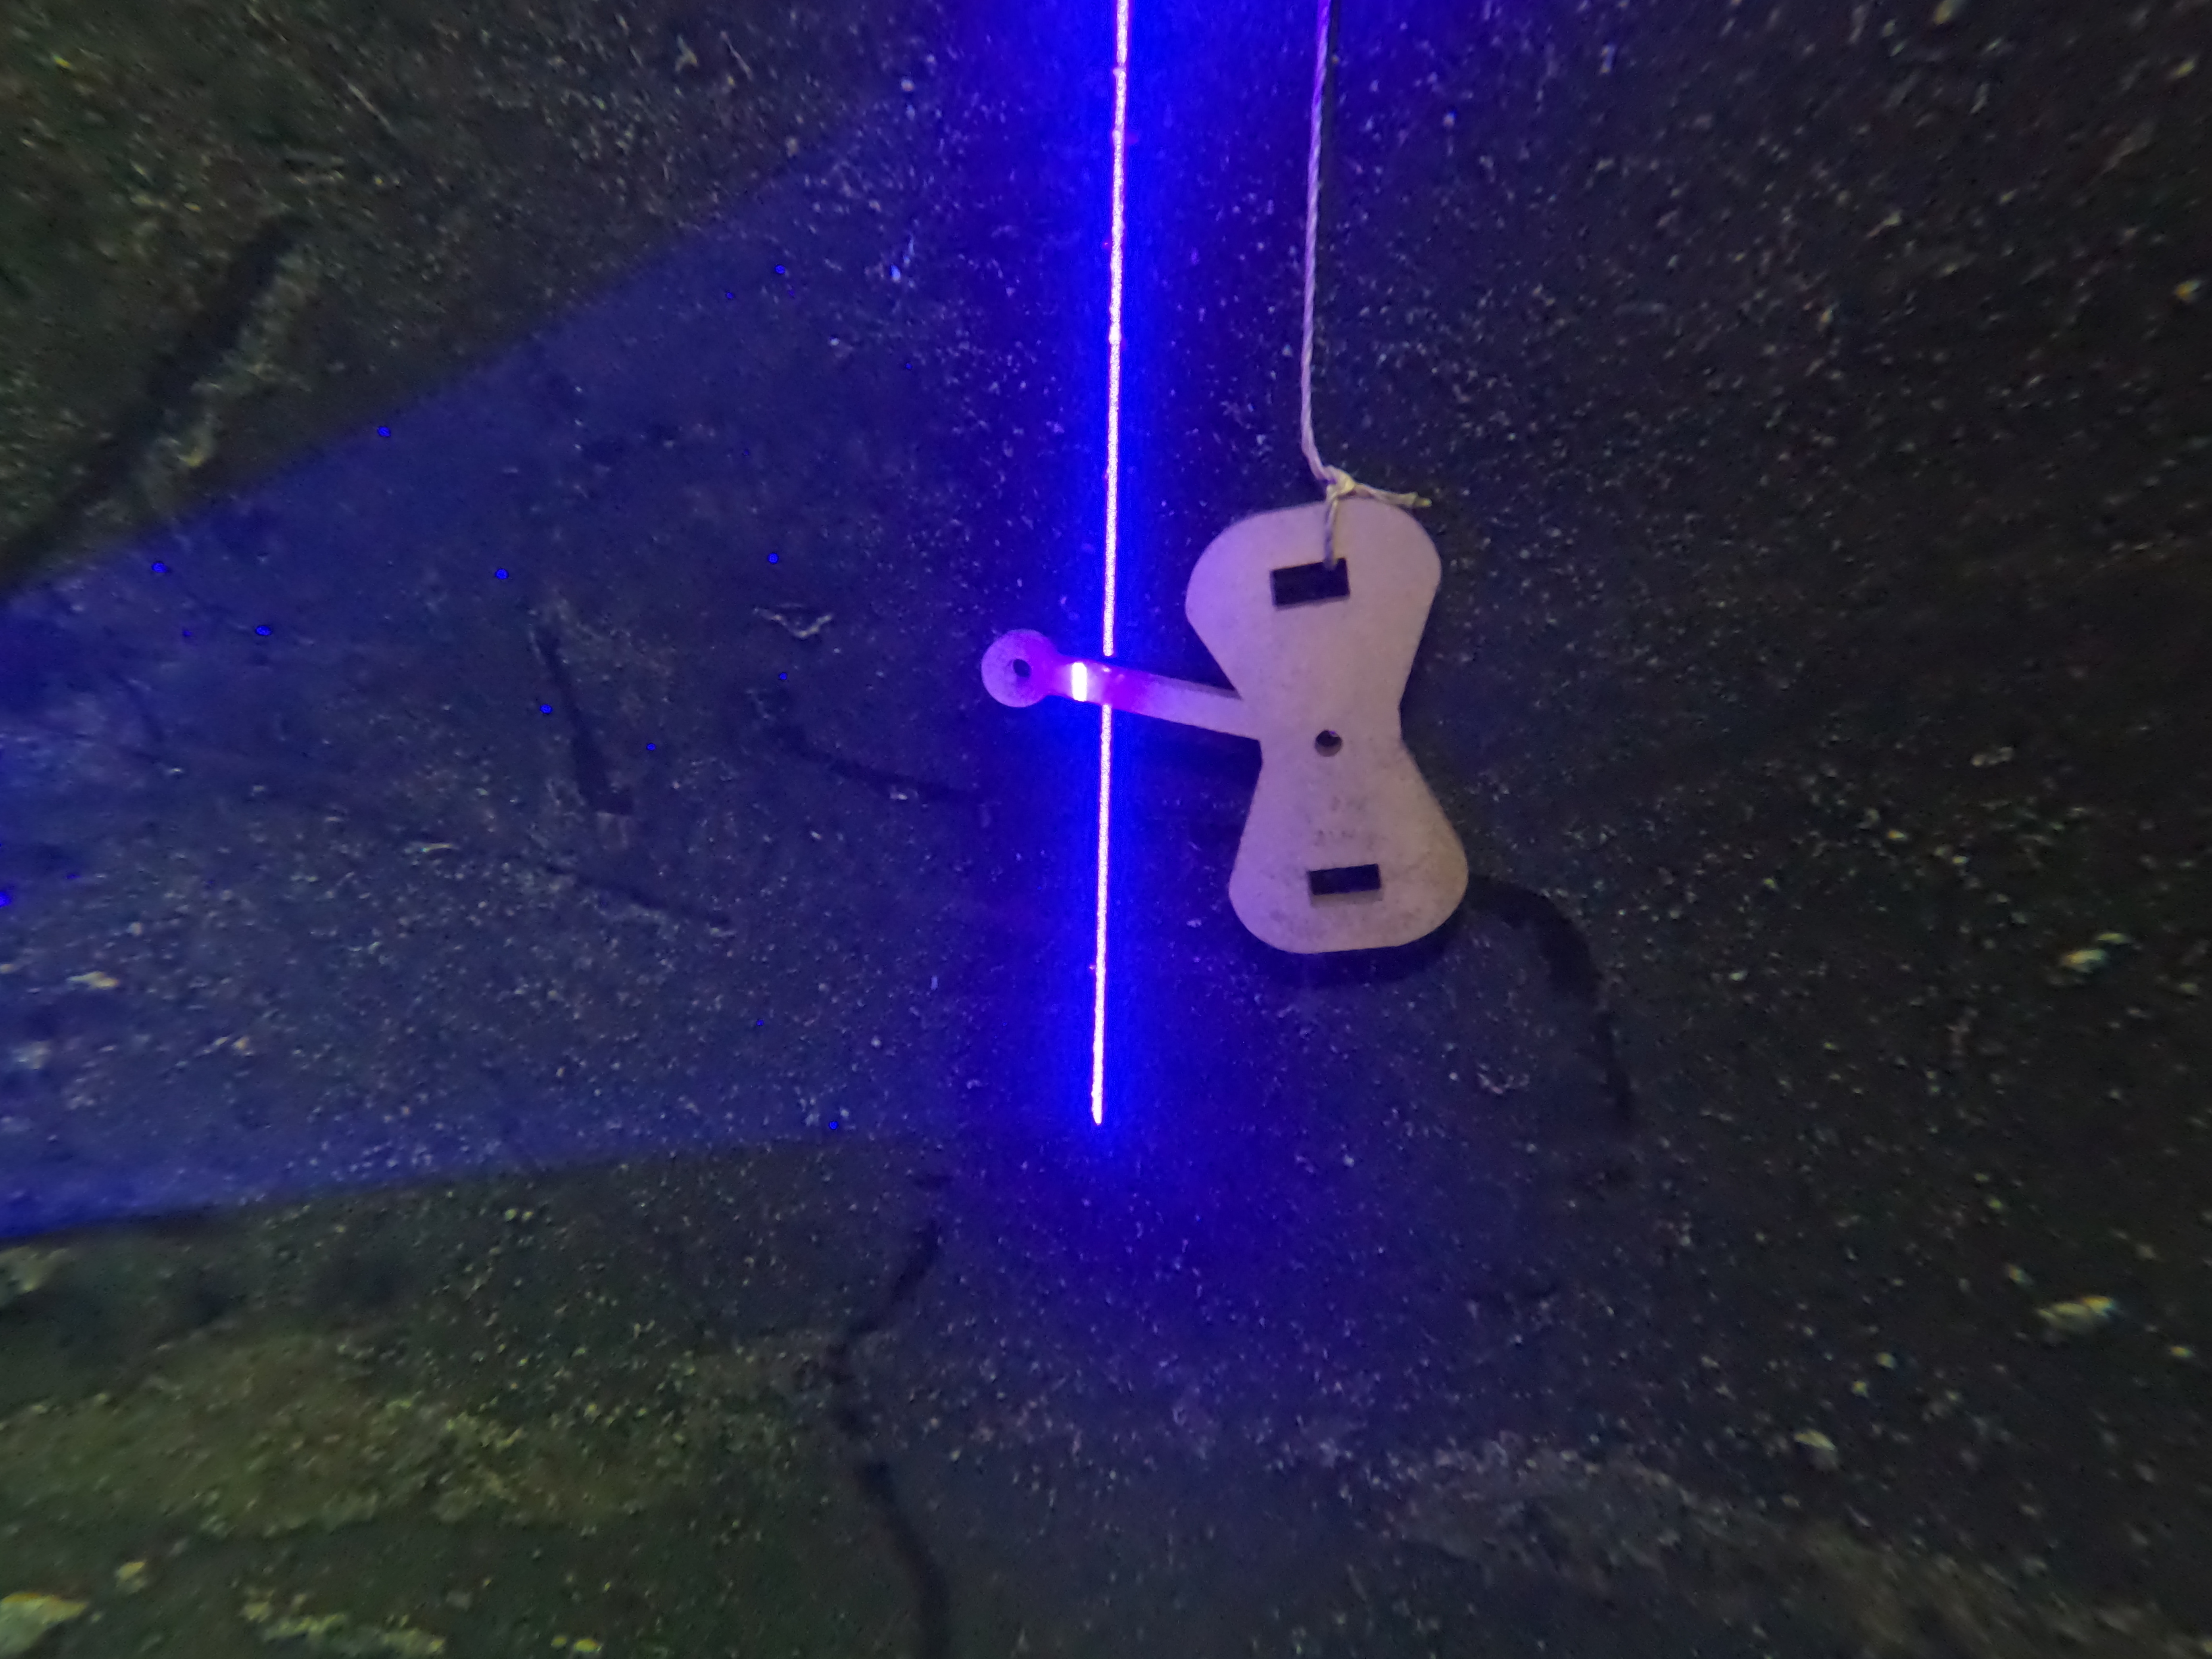

Supplement: Supplementary file 2507 [file G0016085.pdf › Level_2_2/G0016085.pdf]

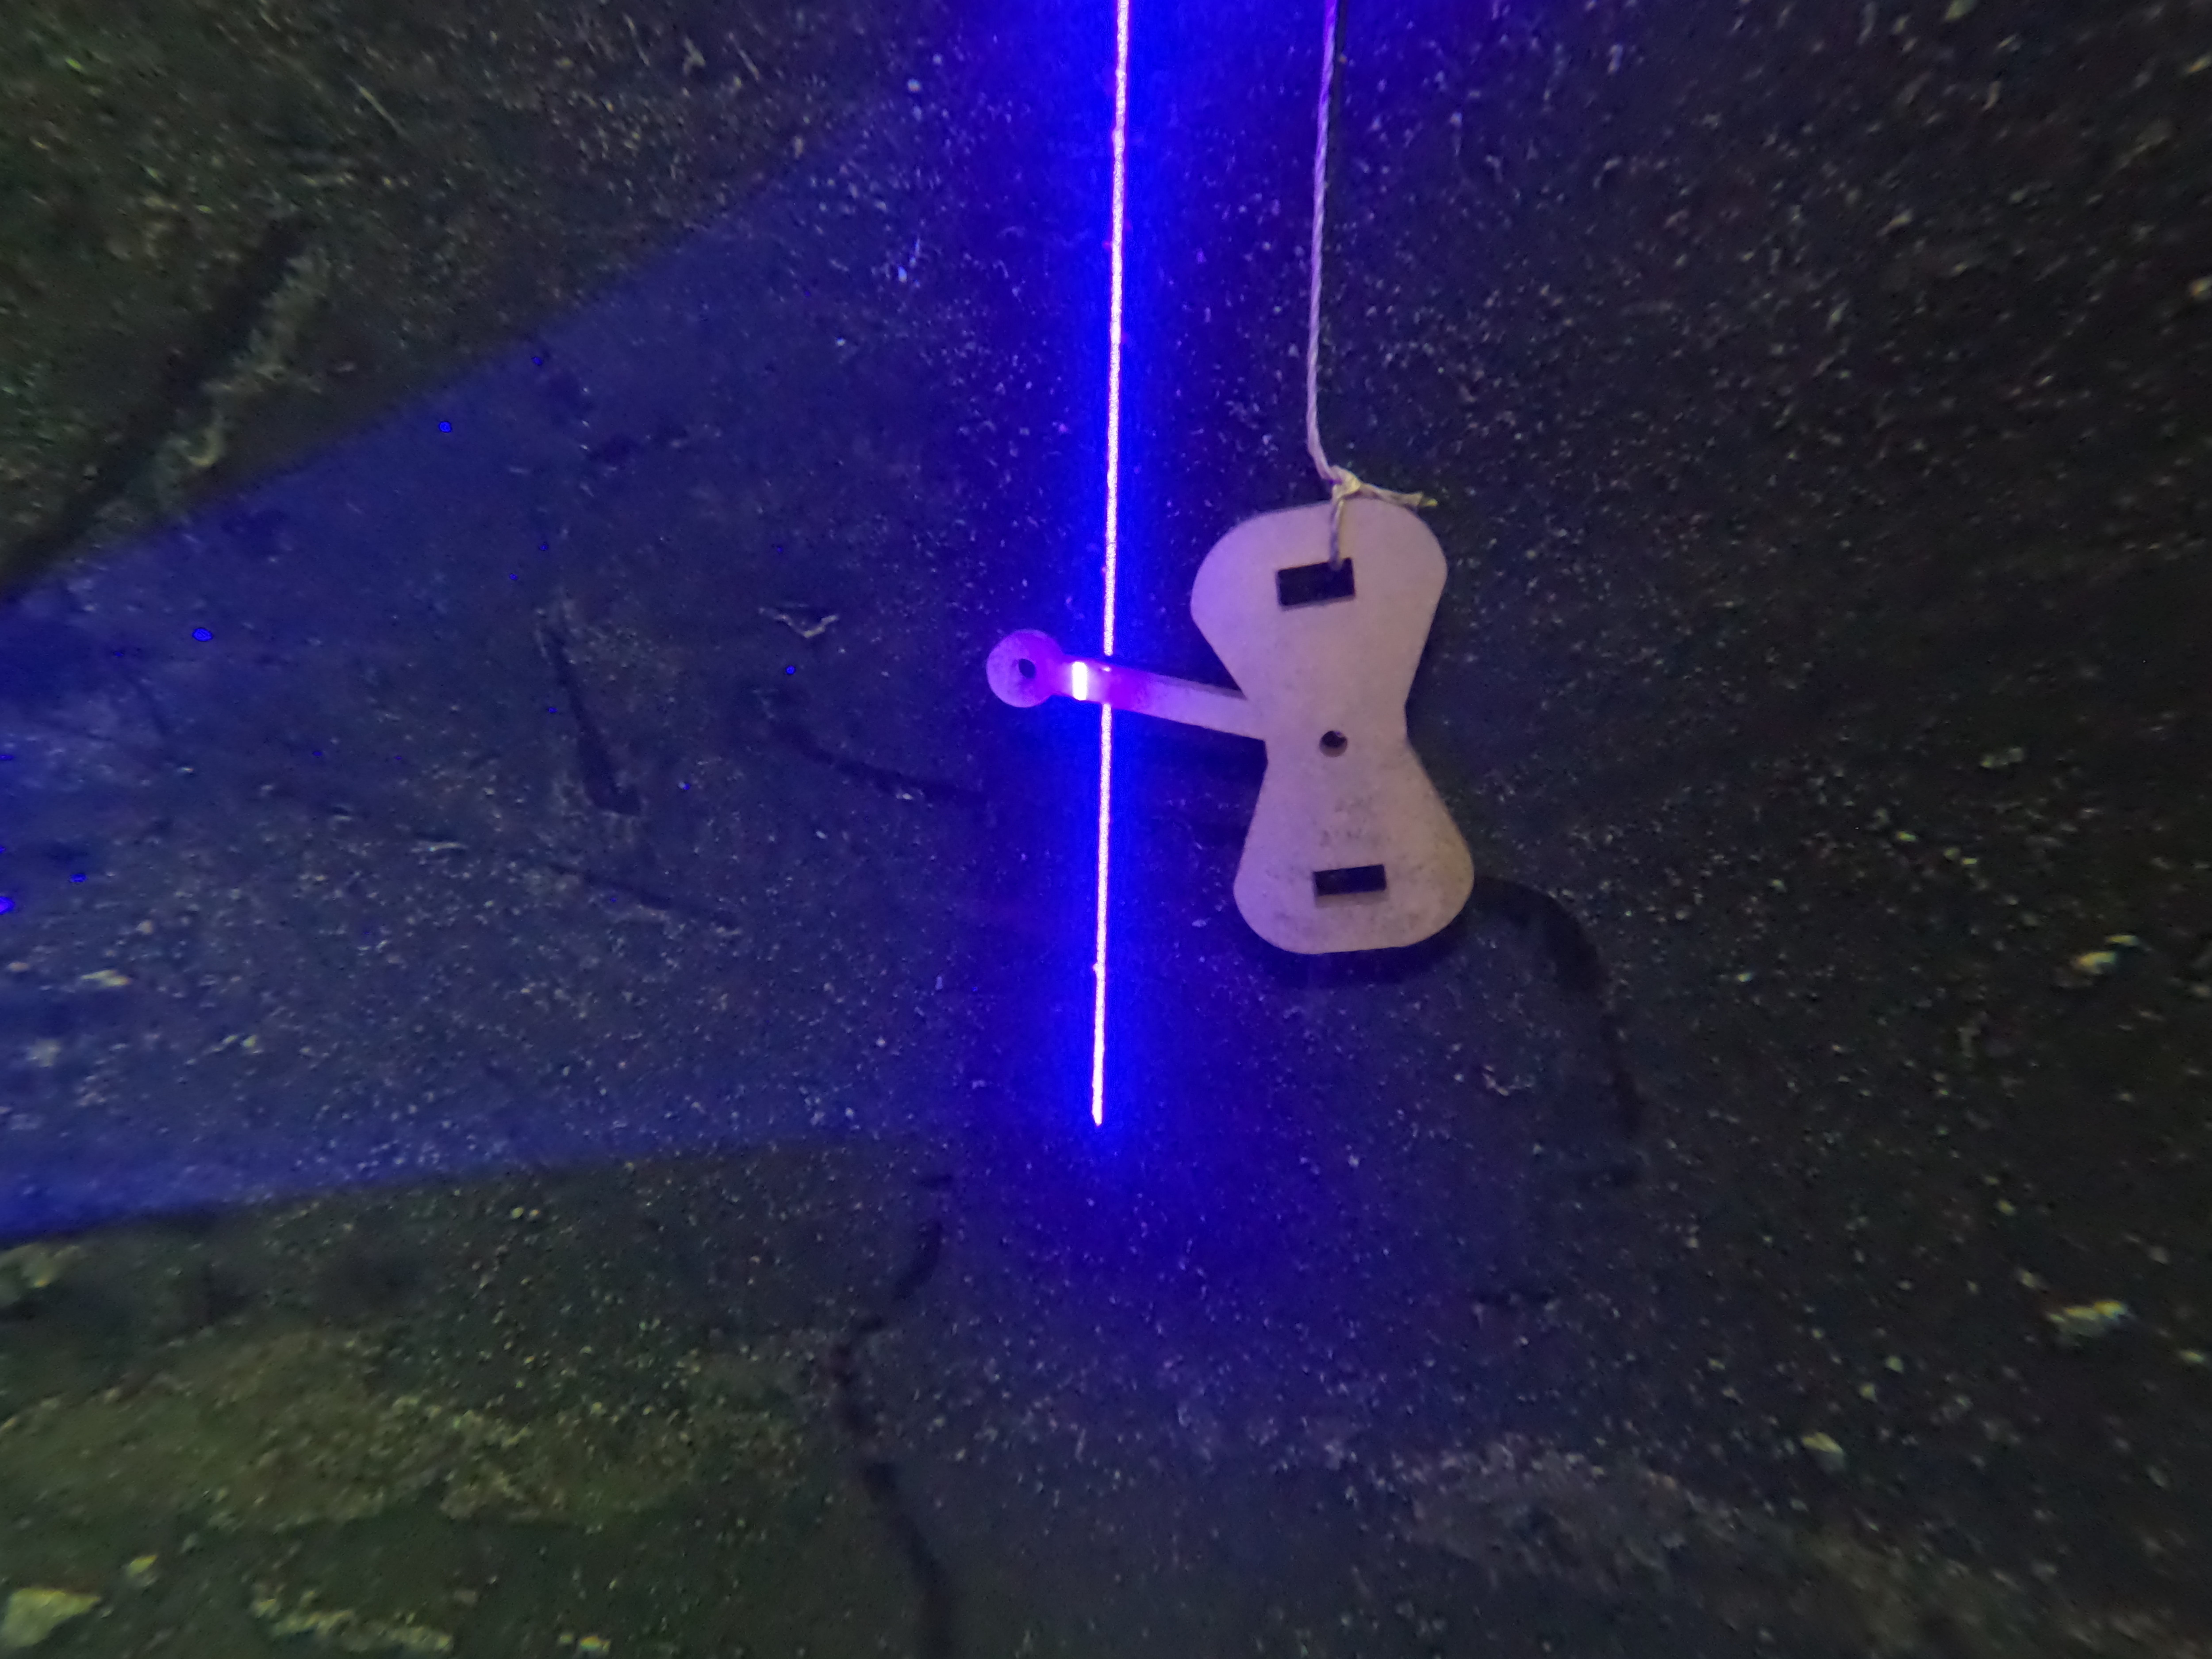

Supplement: Supplementary file 2508 [file G0016086.pdf › Level_2_2/G0016086.pdf]

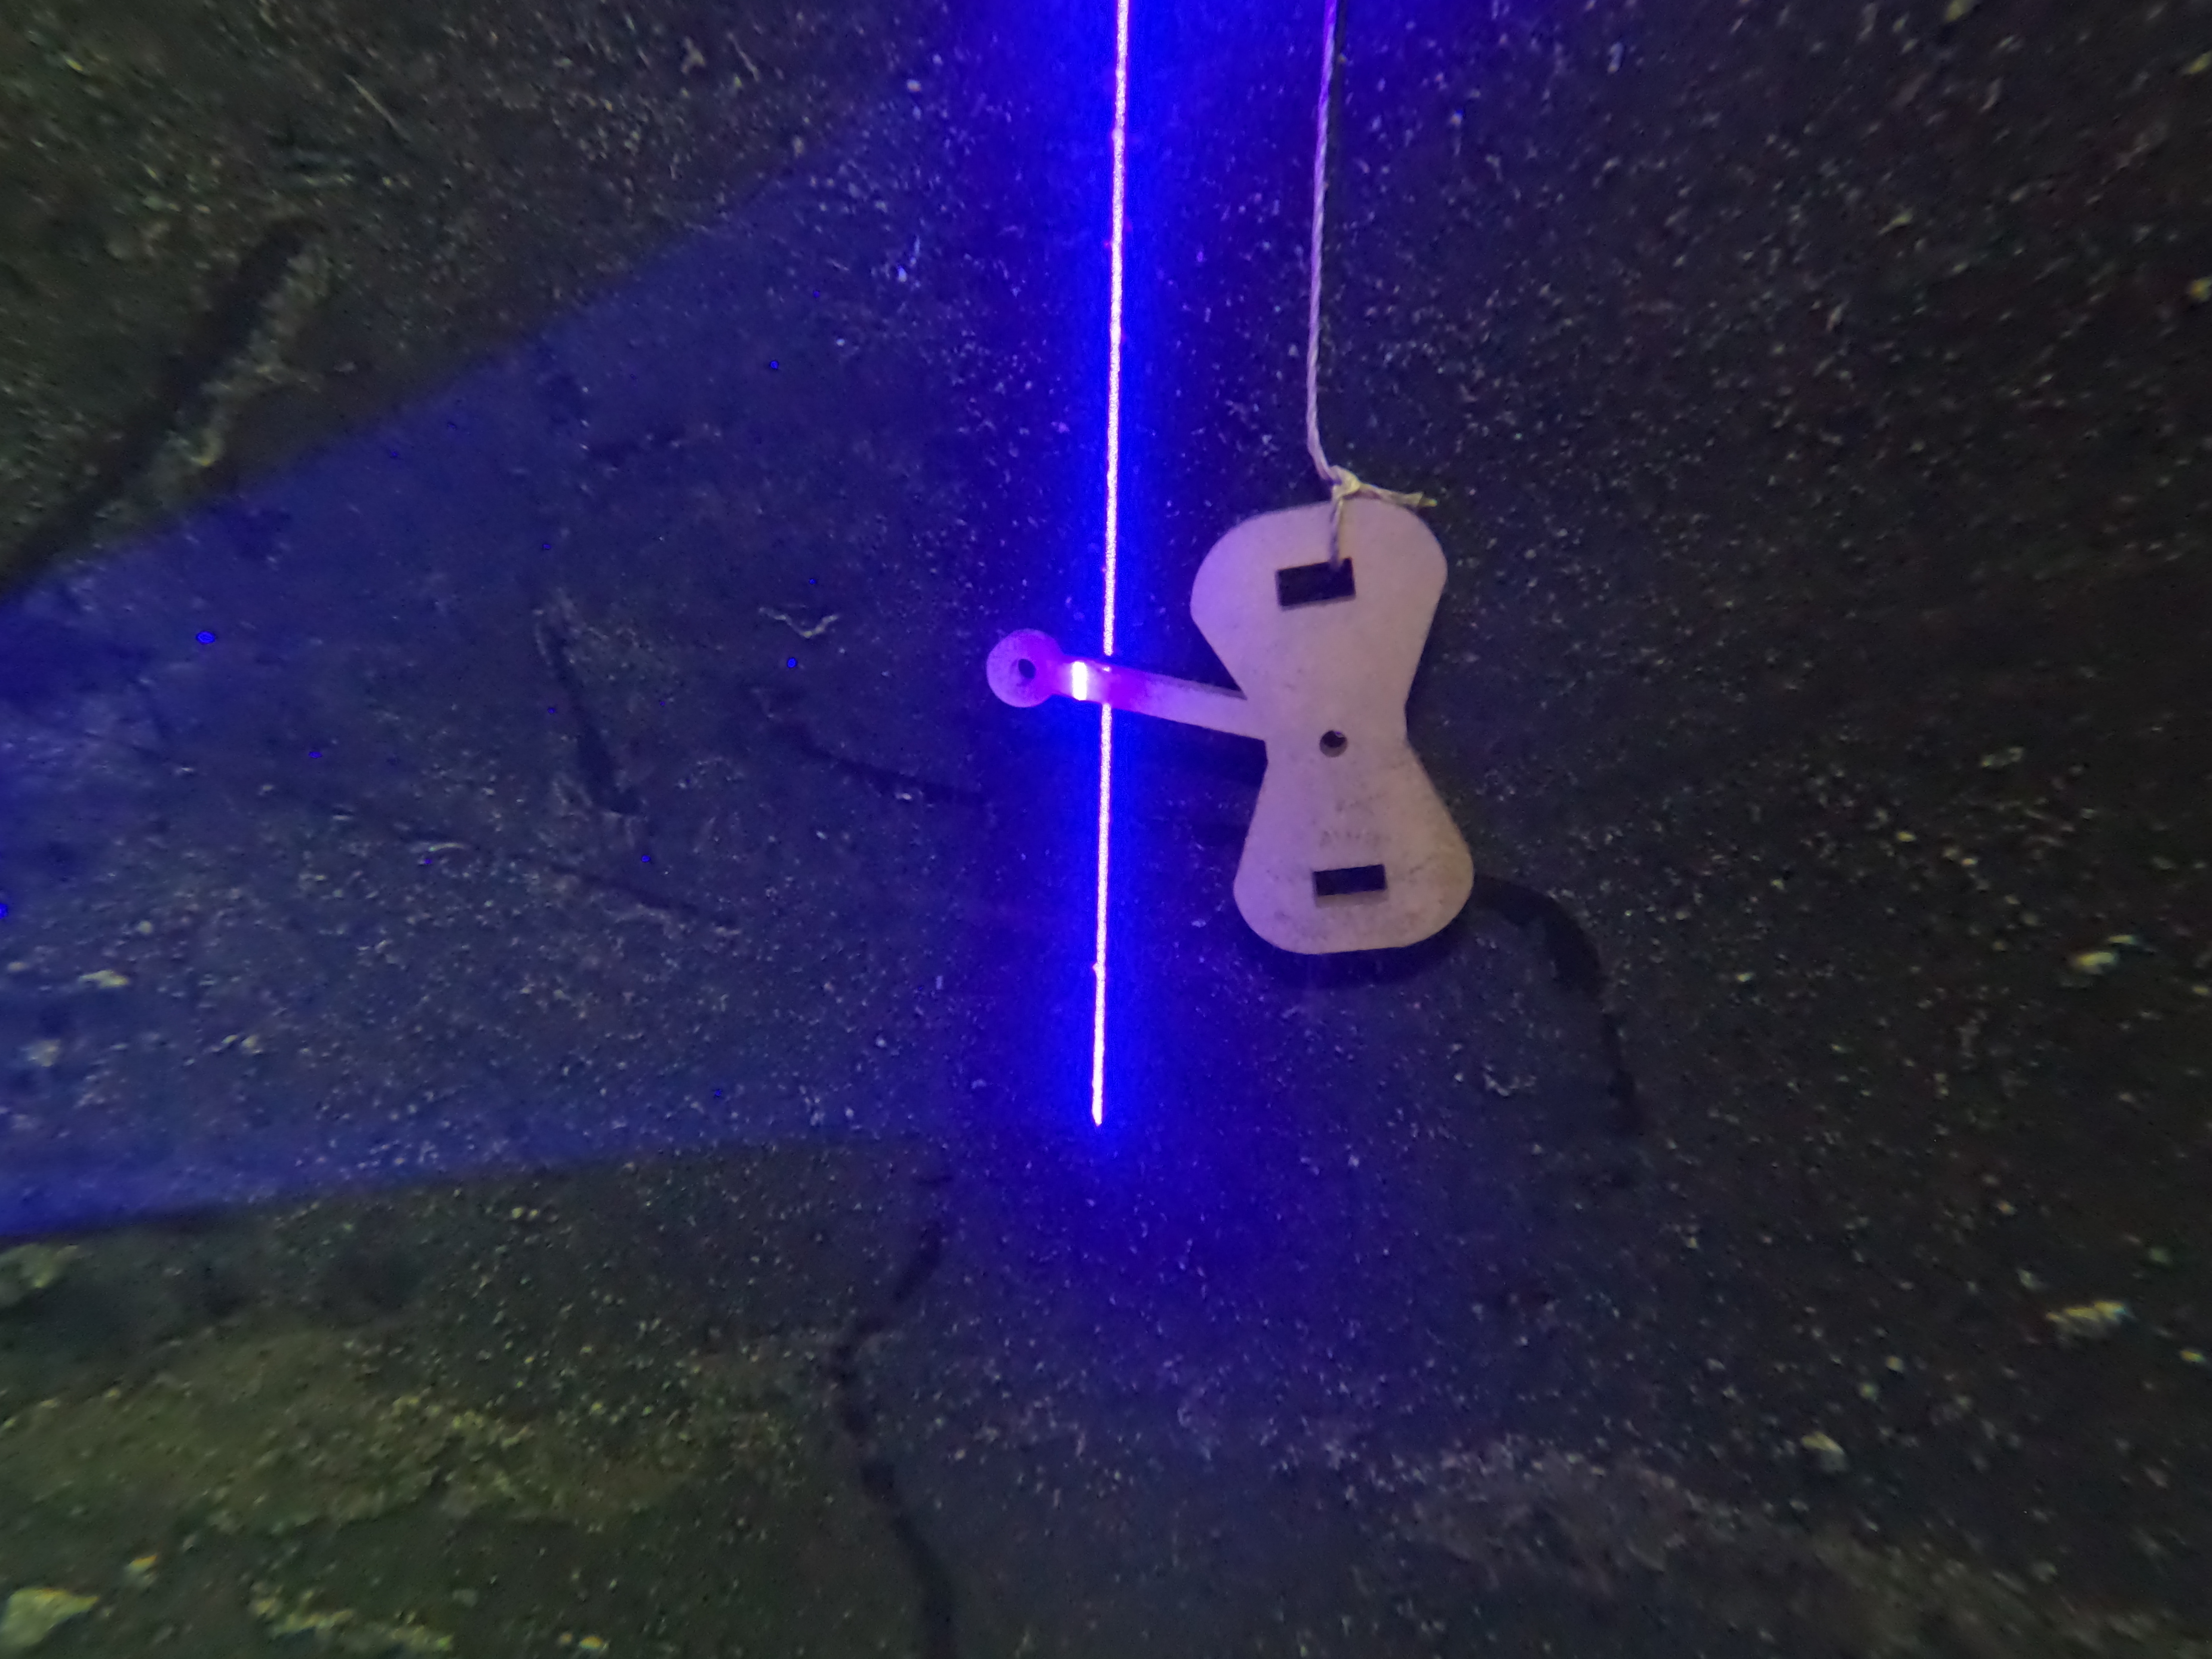

Supplement: Supplementary file 2509 [file G0016087.pdf › Level_2_2/G0016087.pdf]

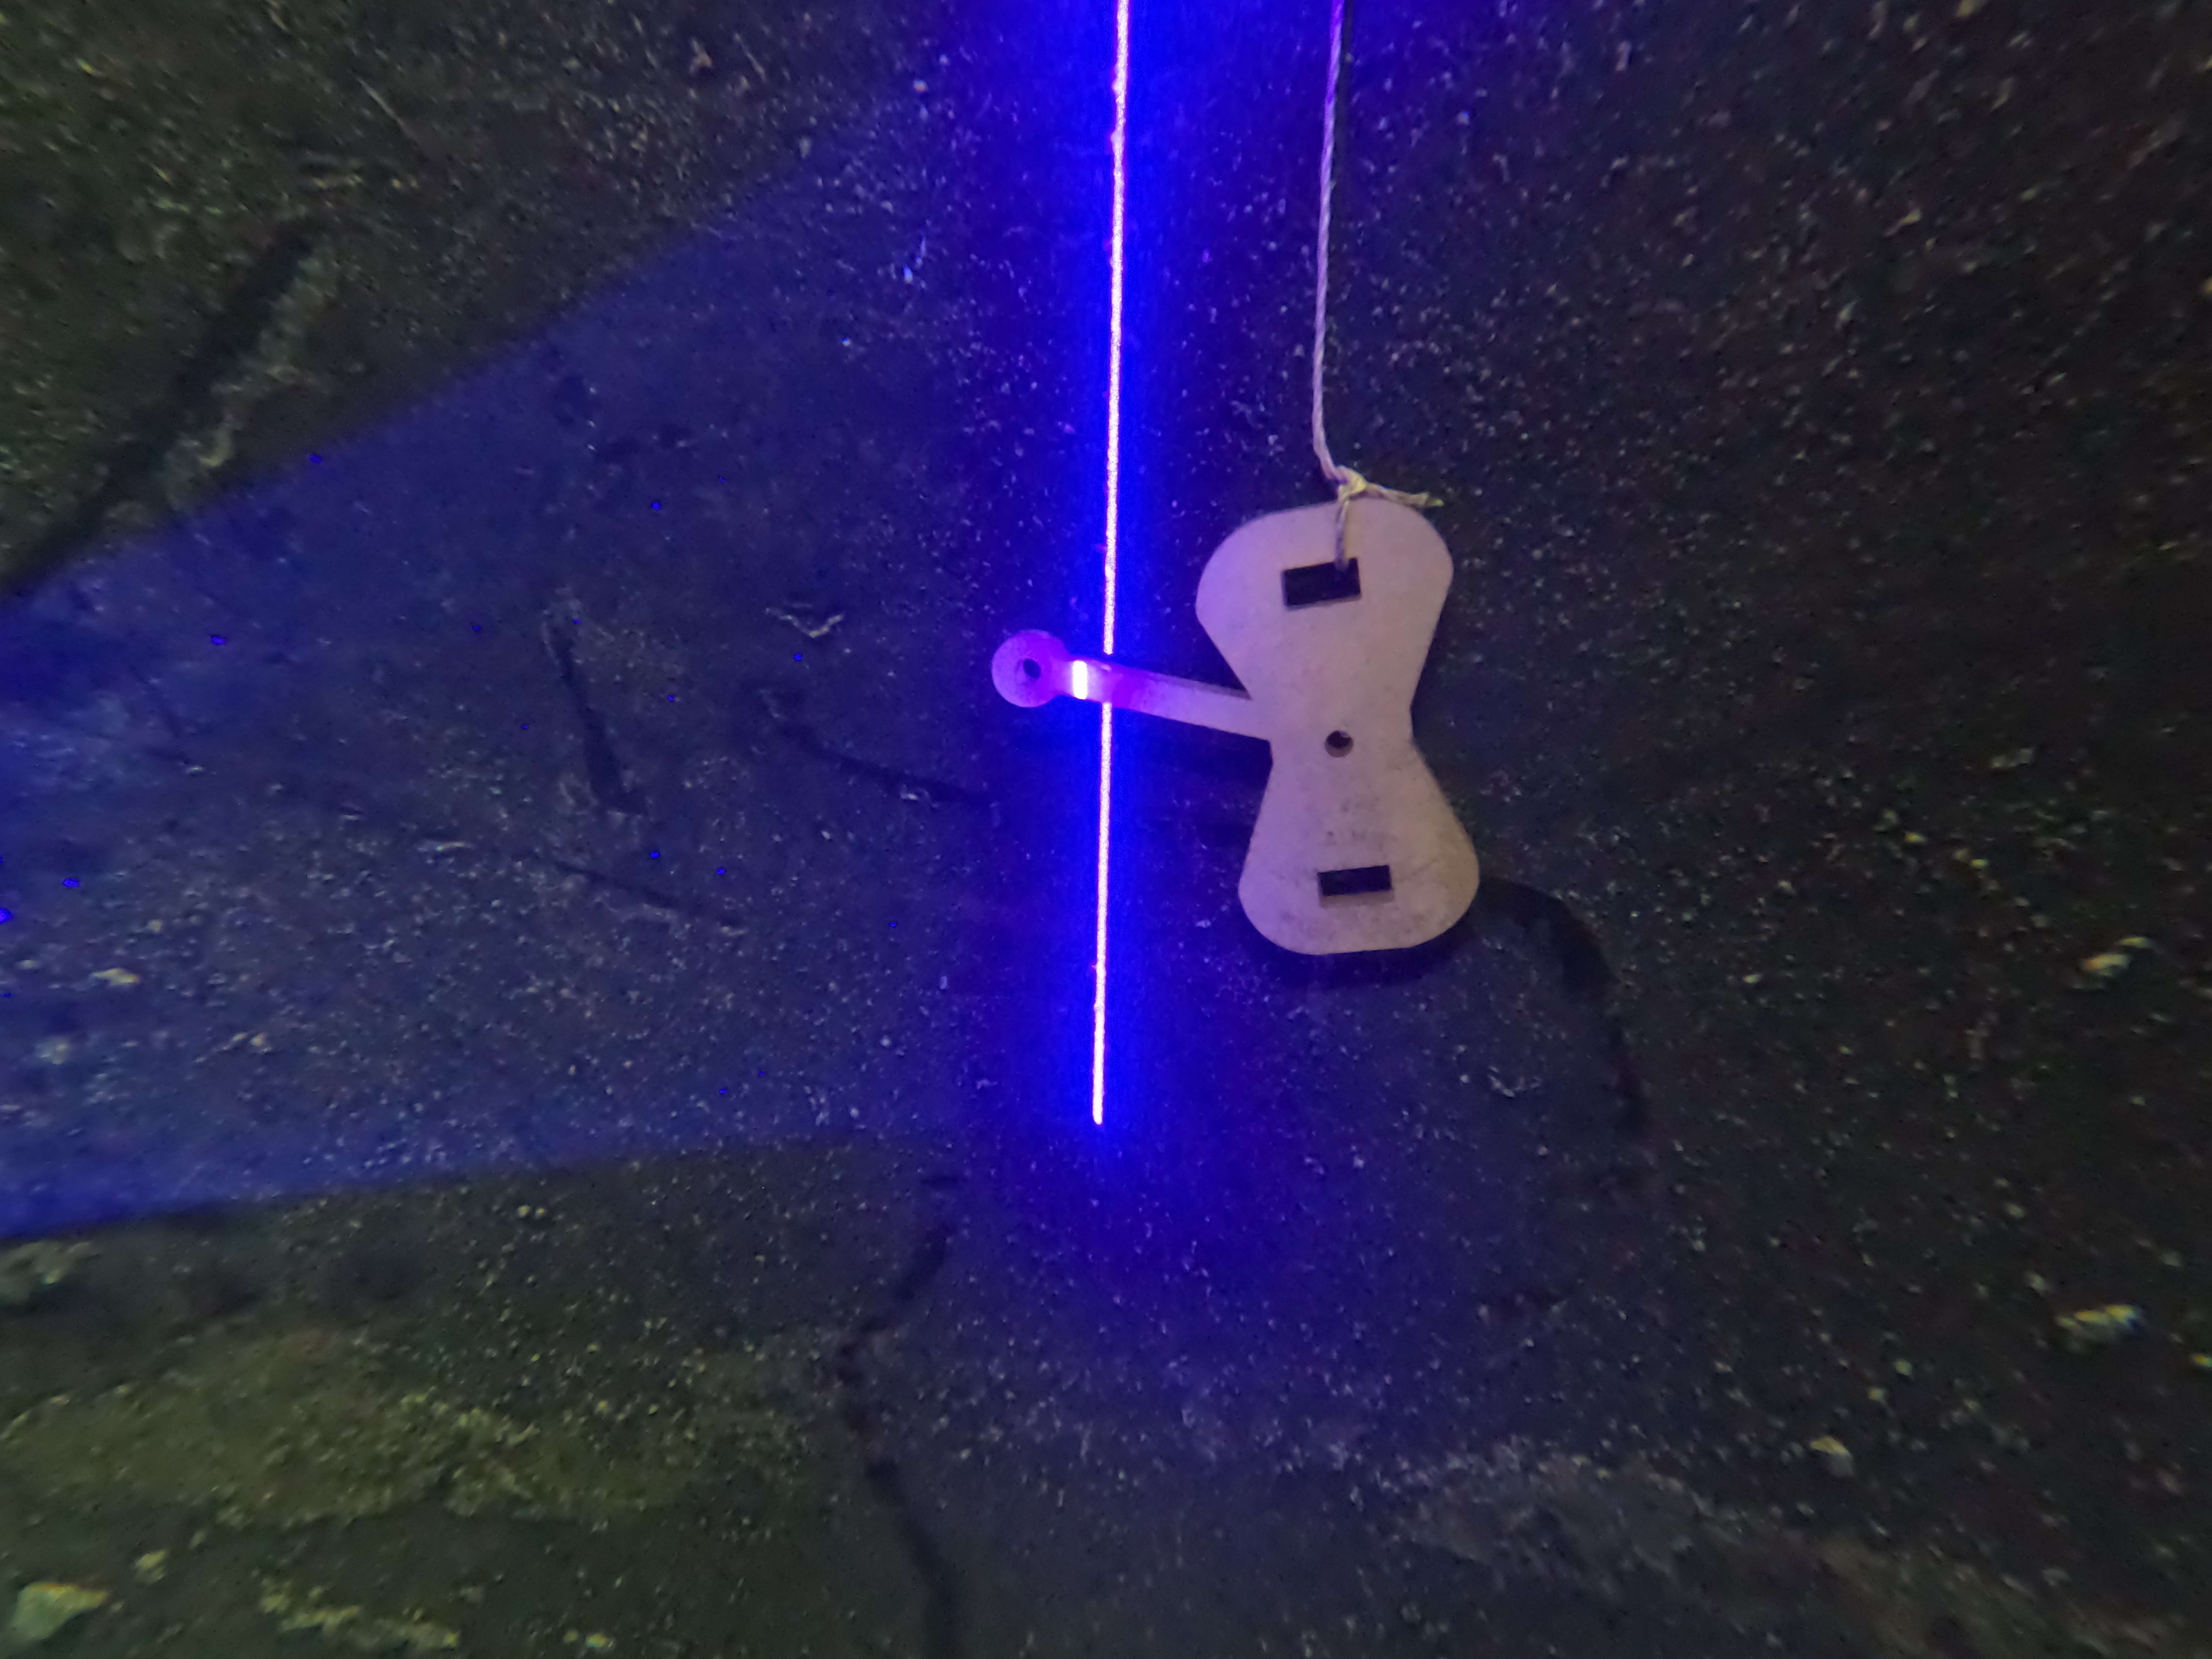

Supplement: Supplementary file 2510 [file G0016088.pdf › Level_2_2/G0016088.pdf]

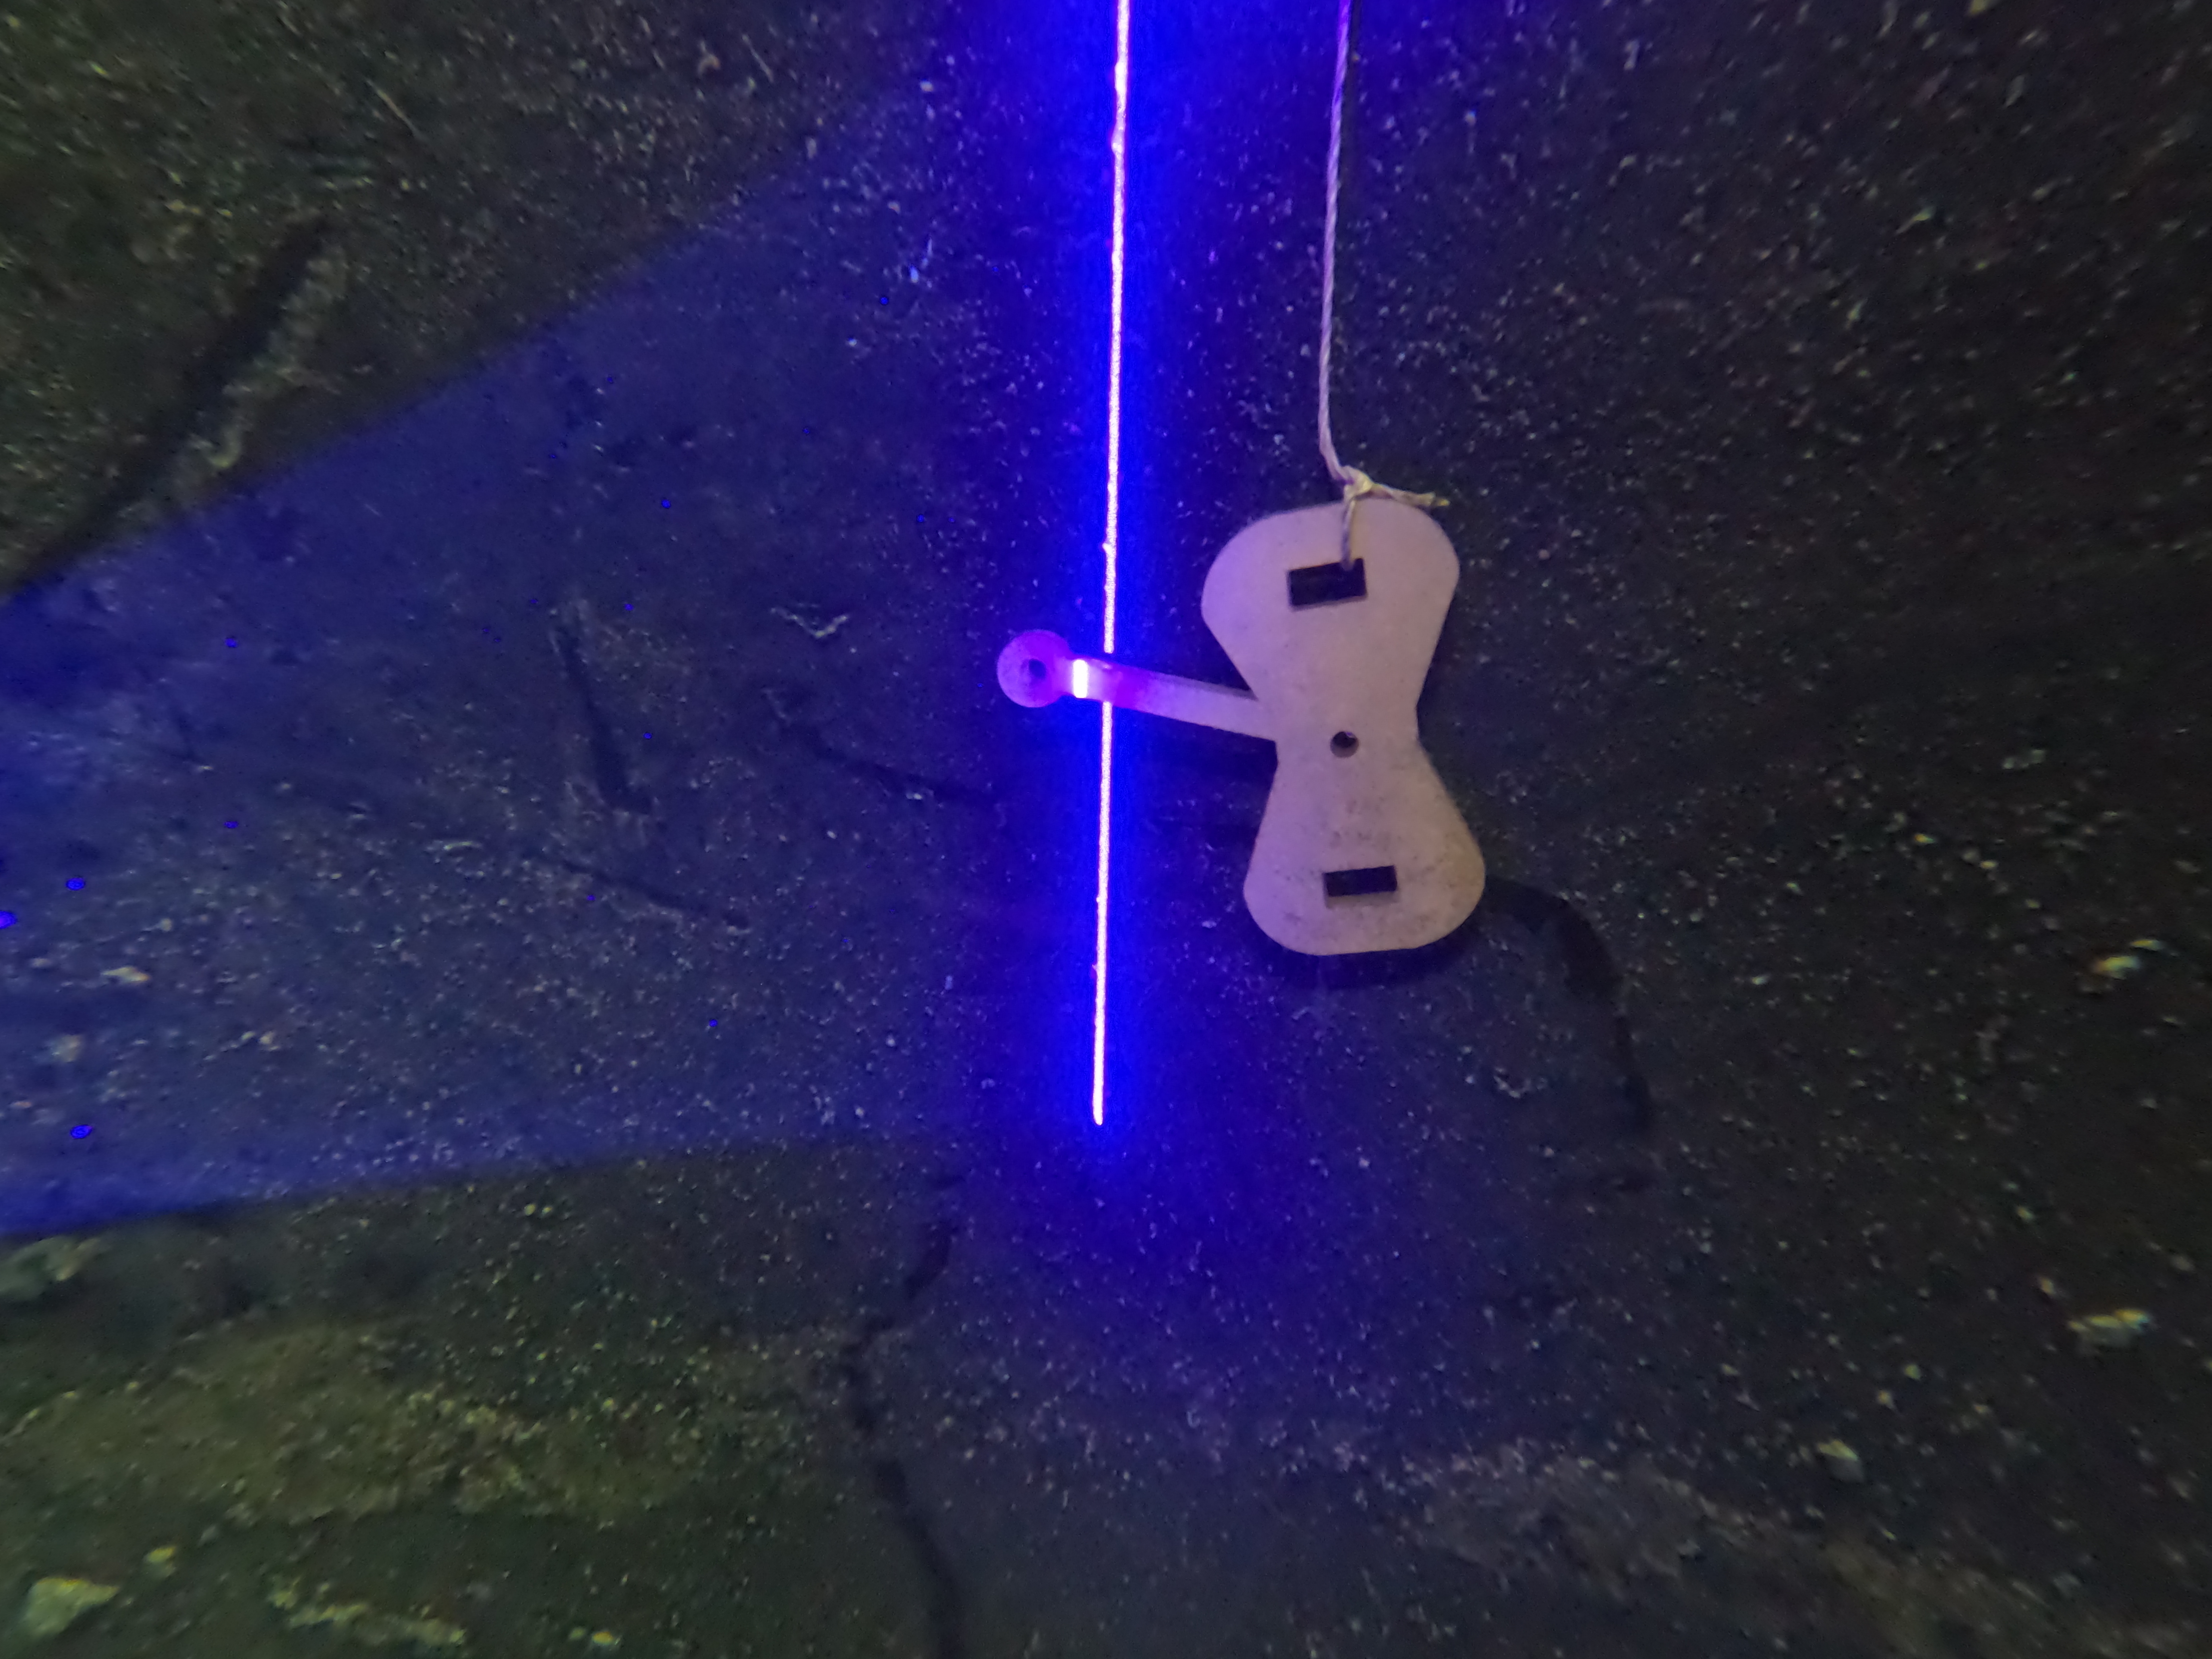

Supplement: Supplementary file 2511 [file G0016089.pdf › Level_2_2/G0016089.pdf]

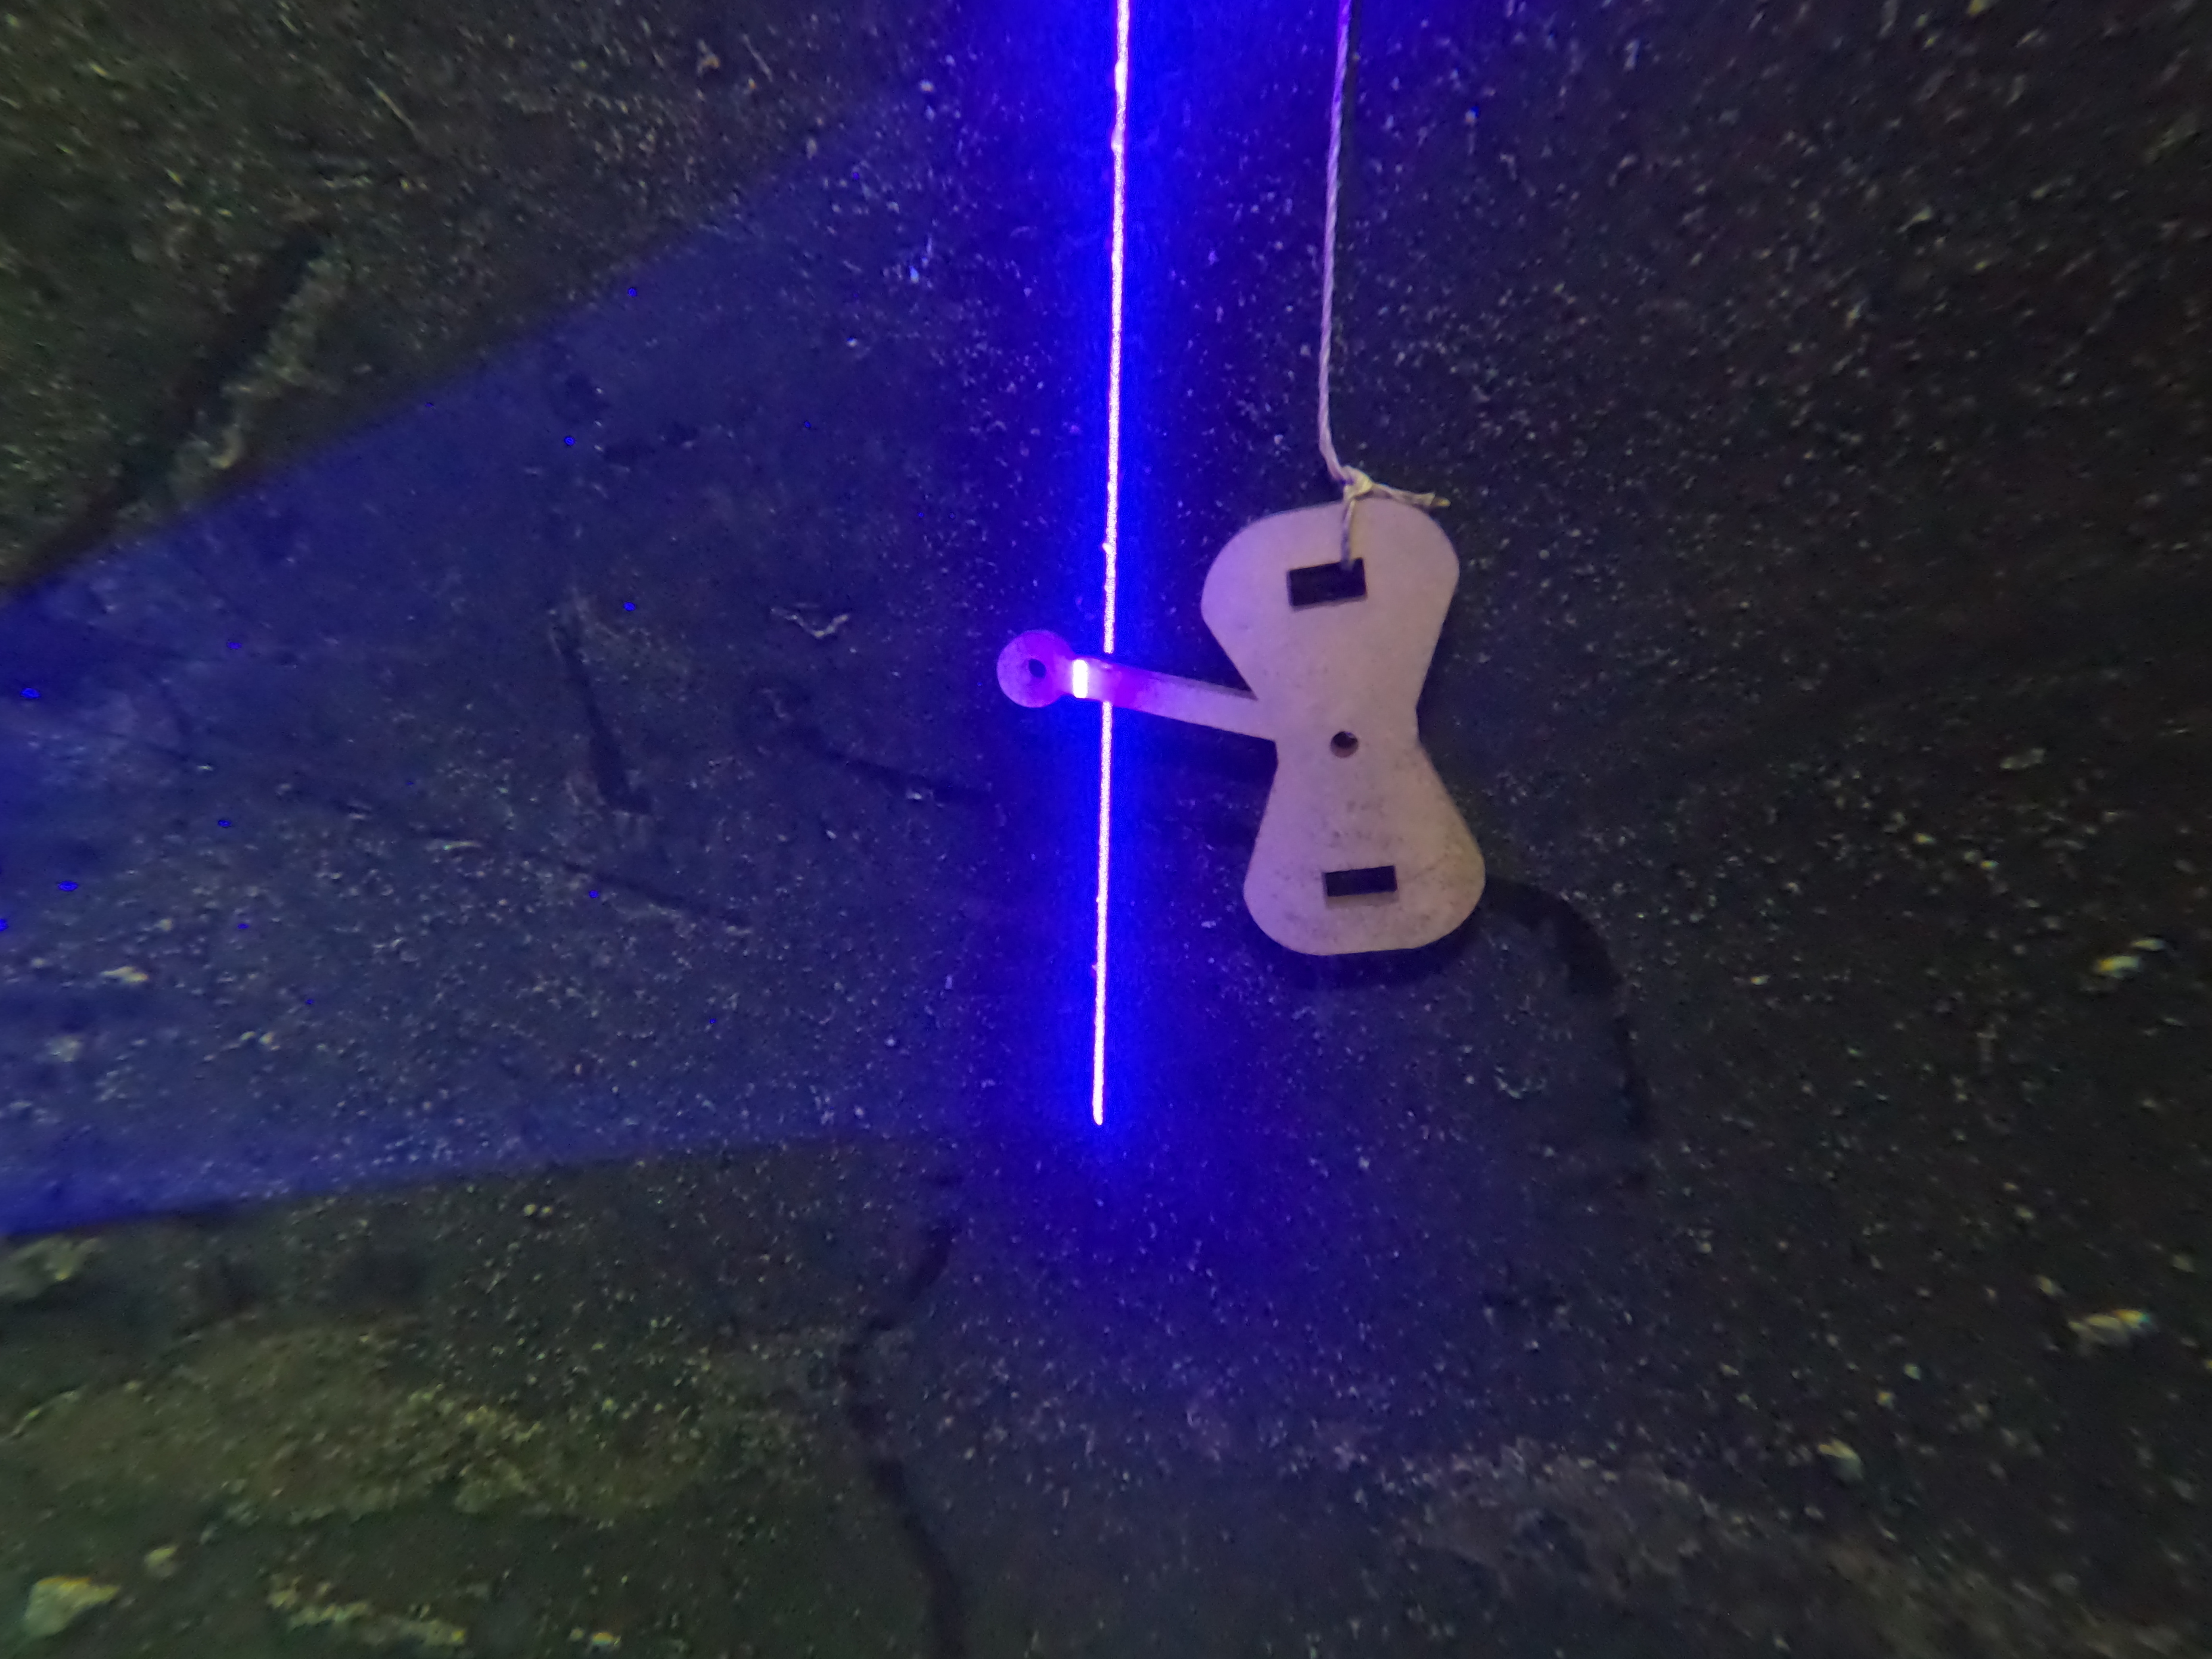

Supplement: Supplementary file 2512 [file G0016090.pdf › Level_2_2/G0016090.pdf]

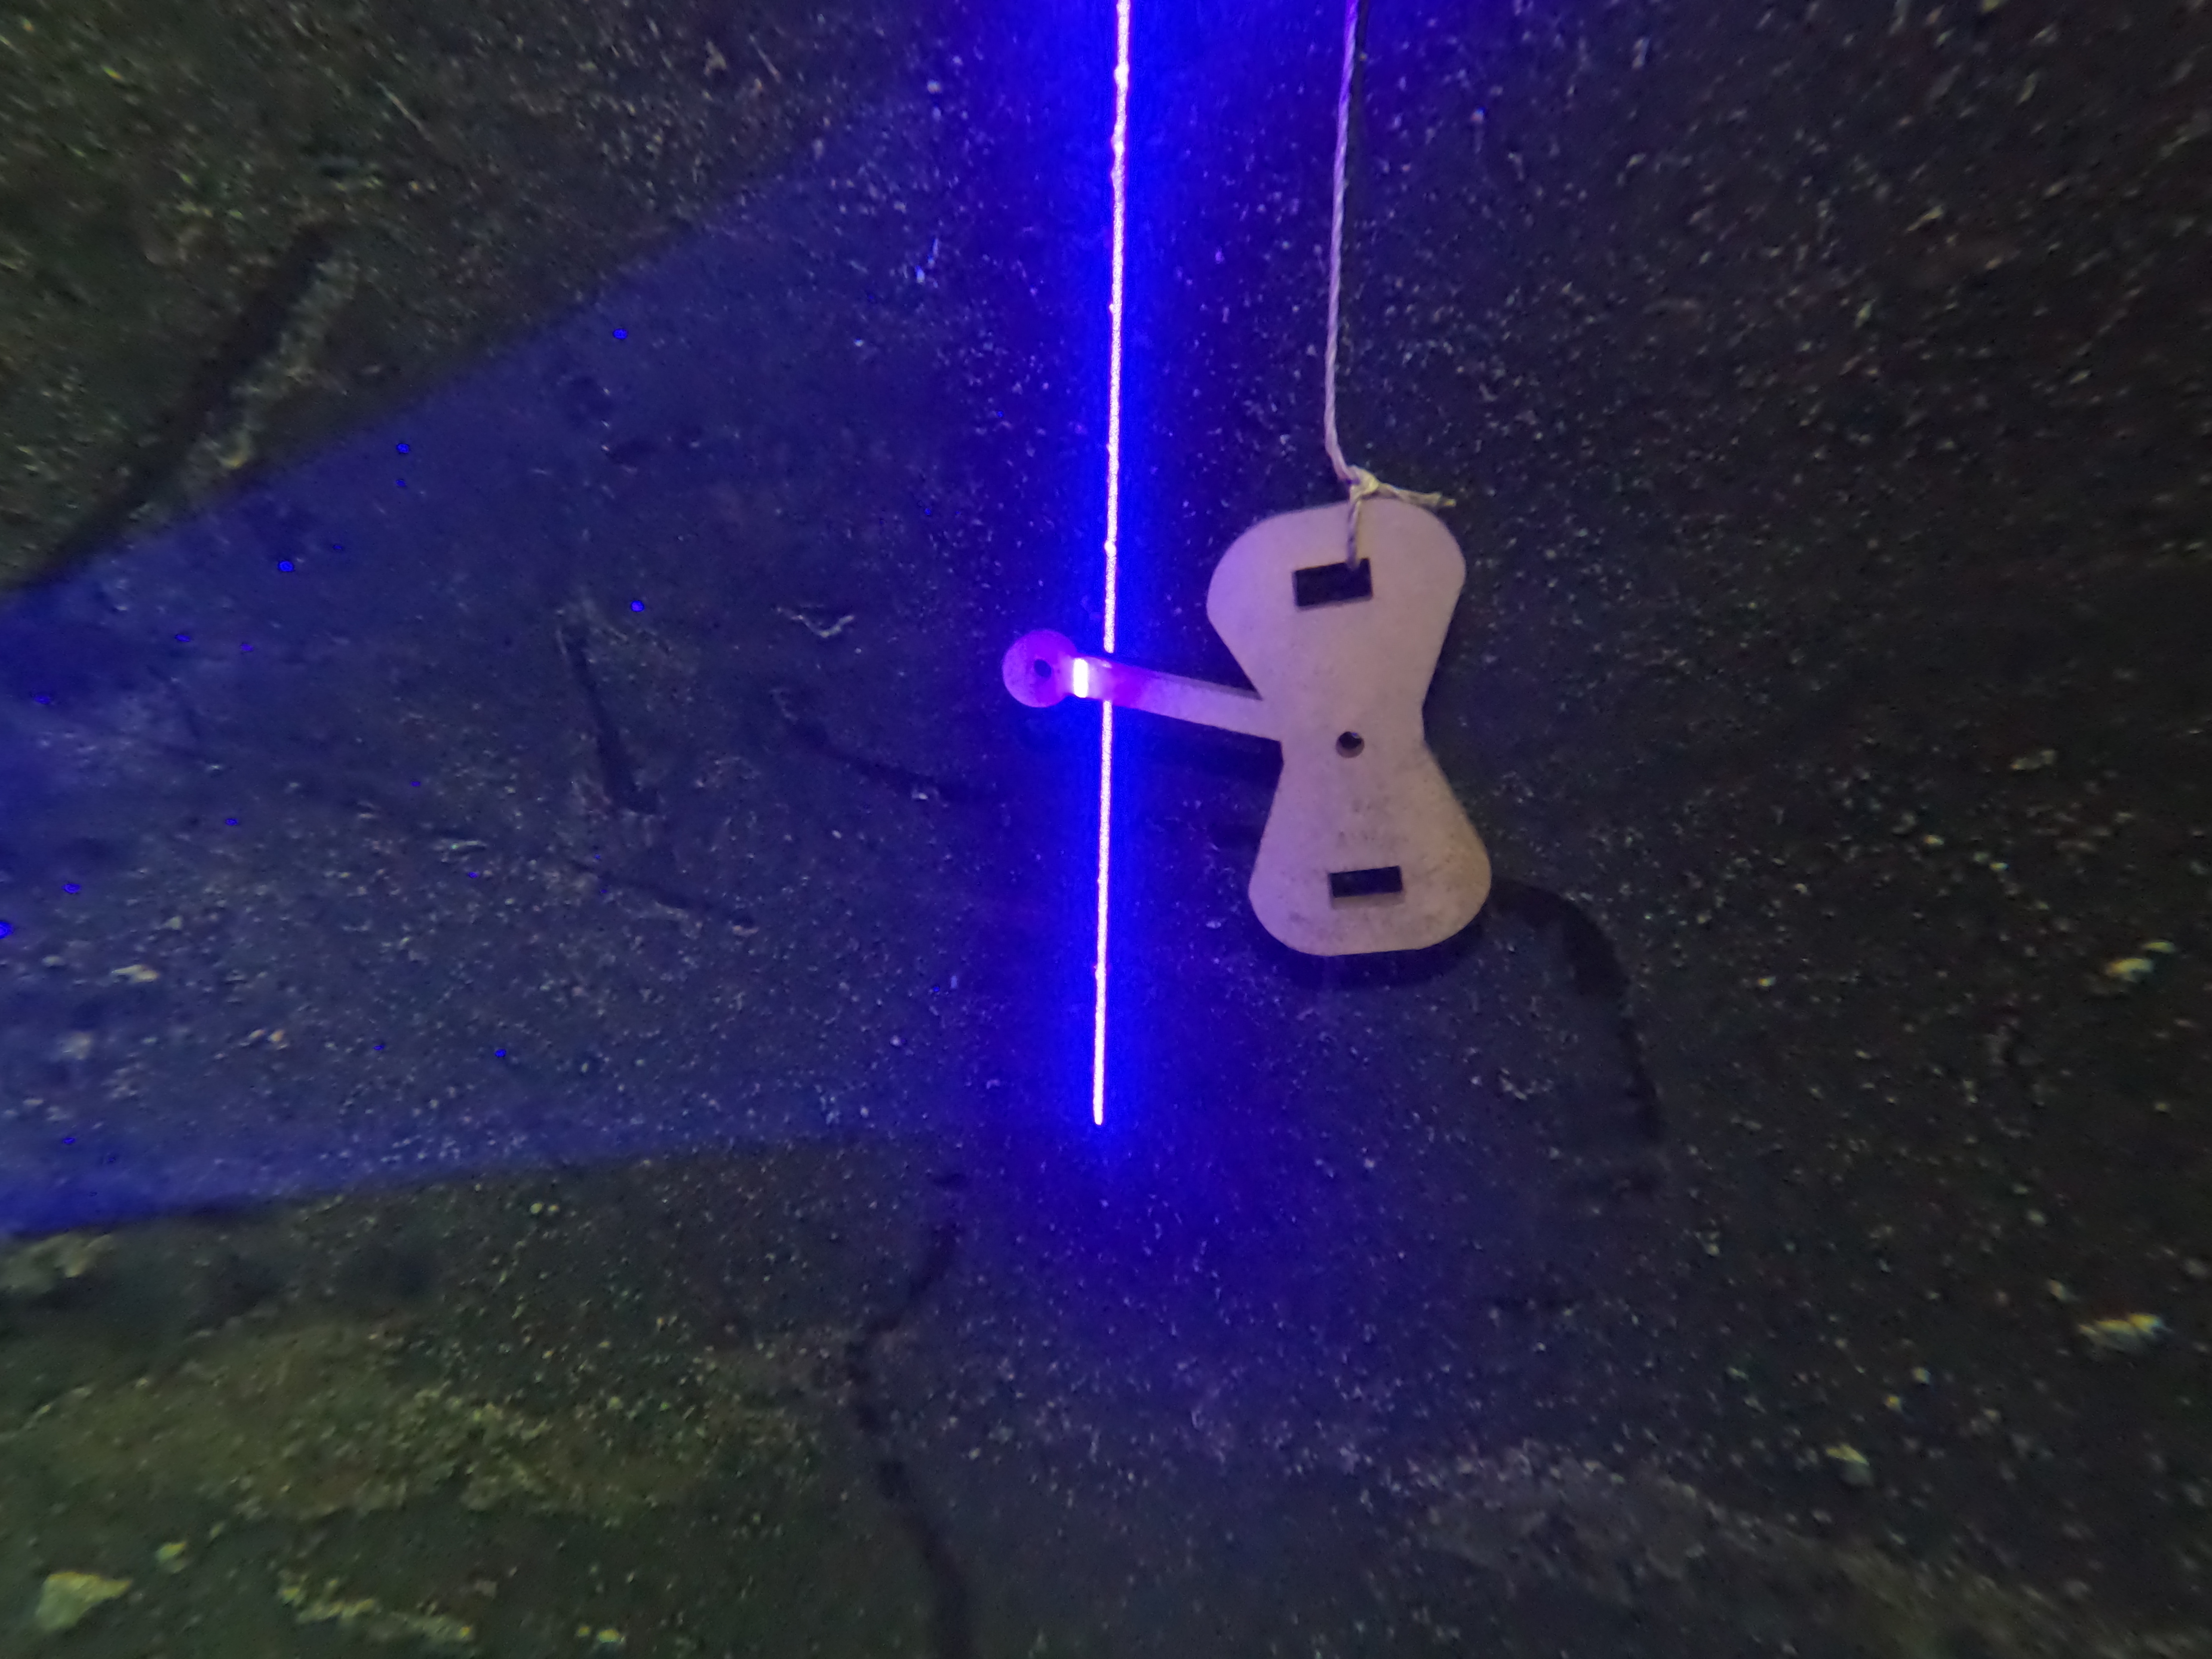

Supplement: Supplementary file 2513 [file G0016091.pdf › Level_2_2/G0016091.pdf]

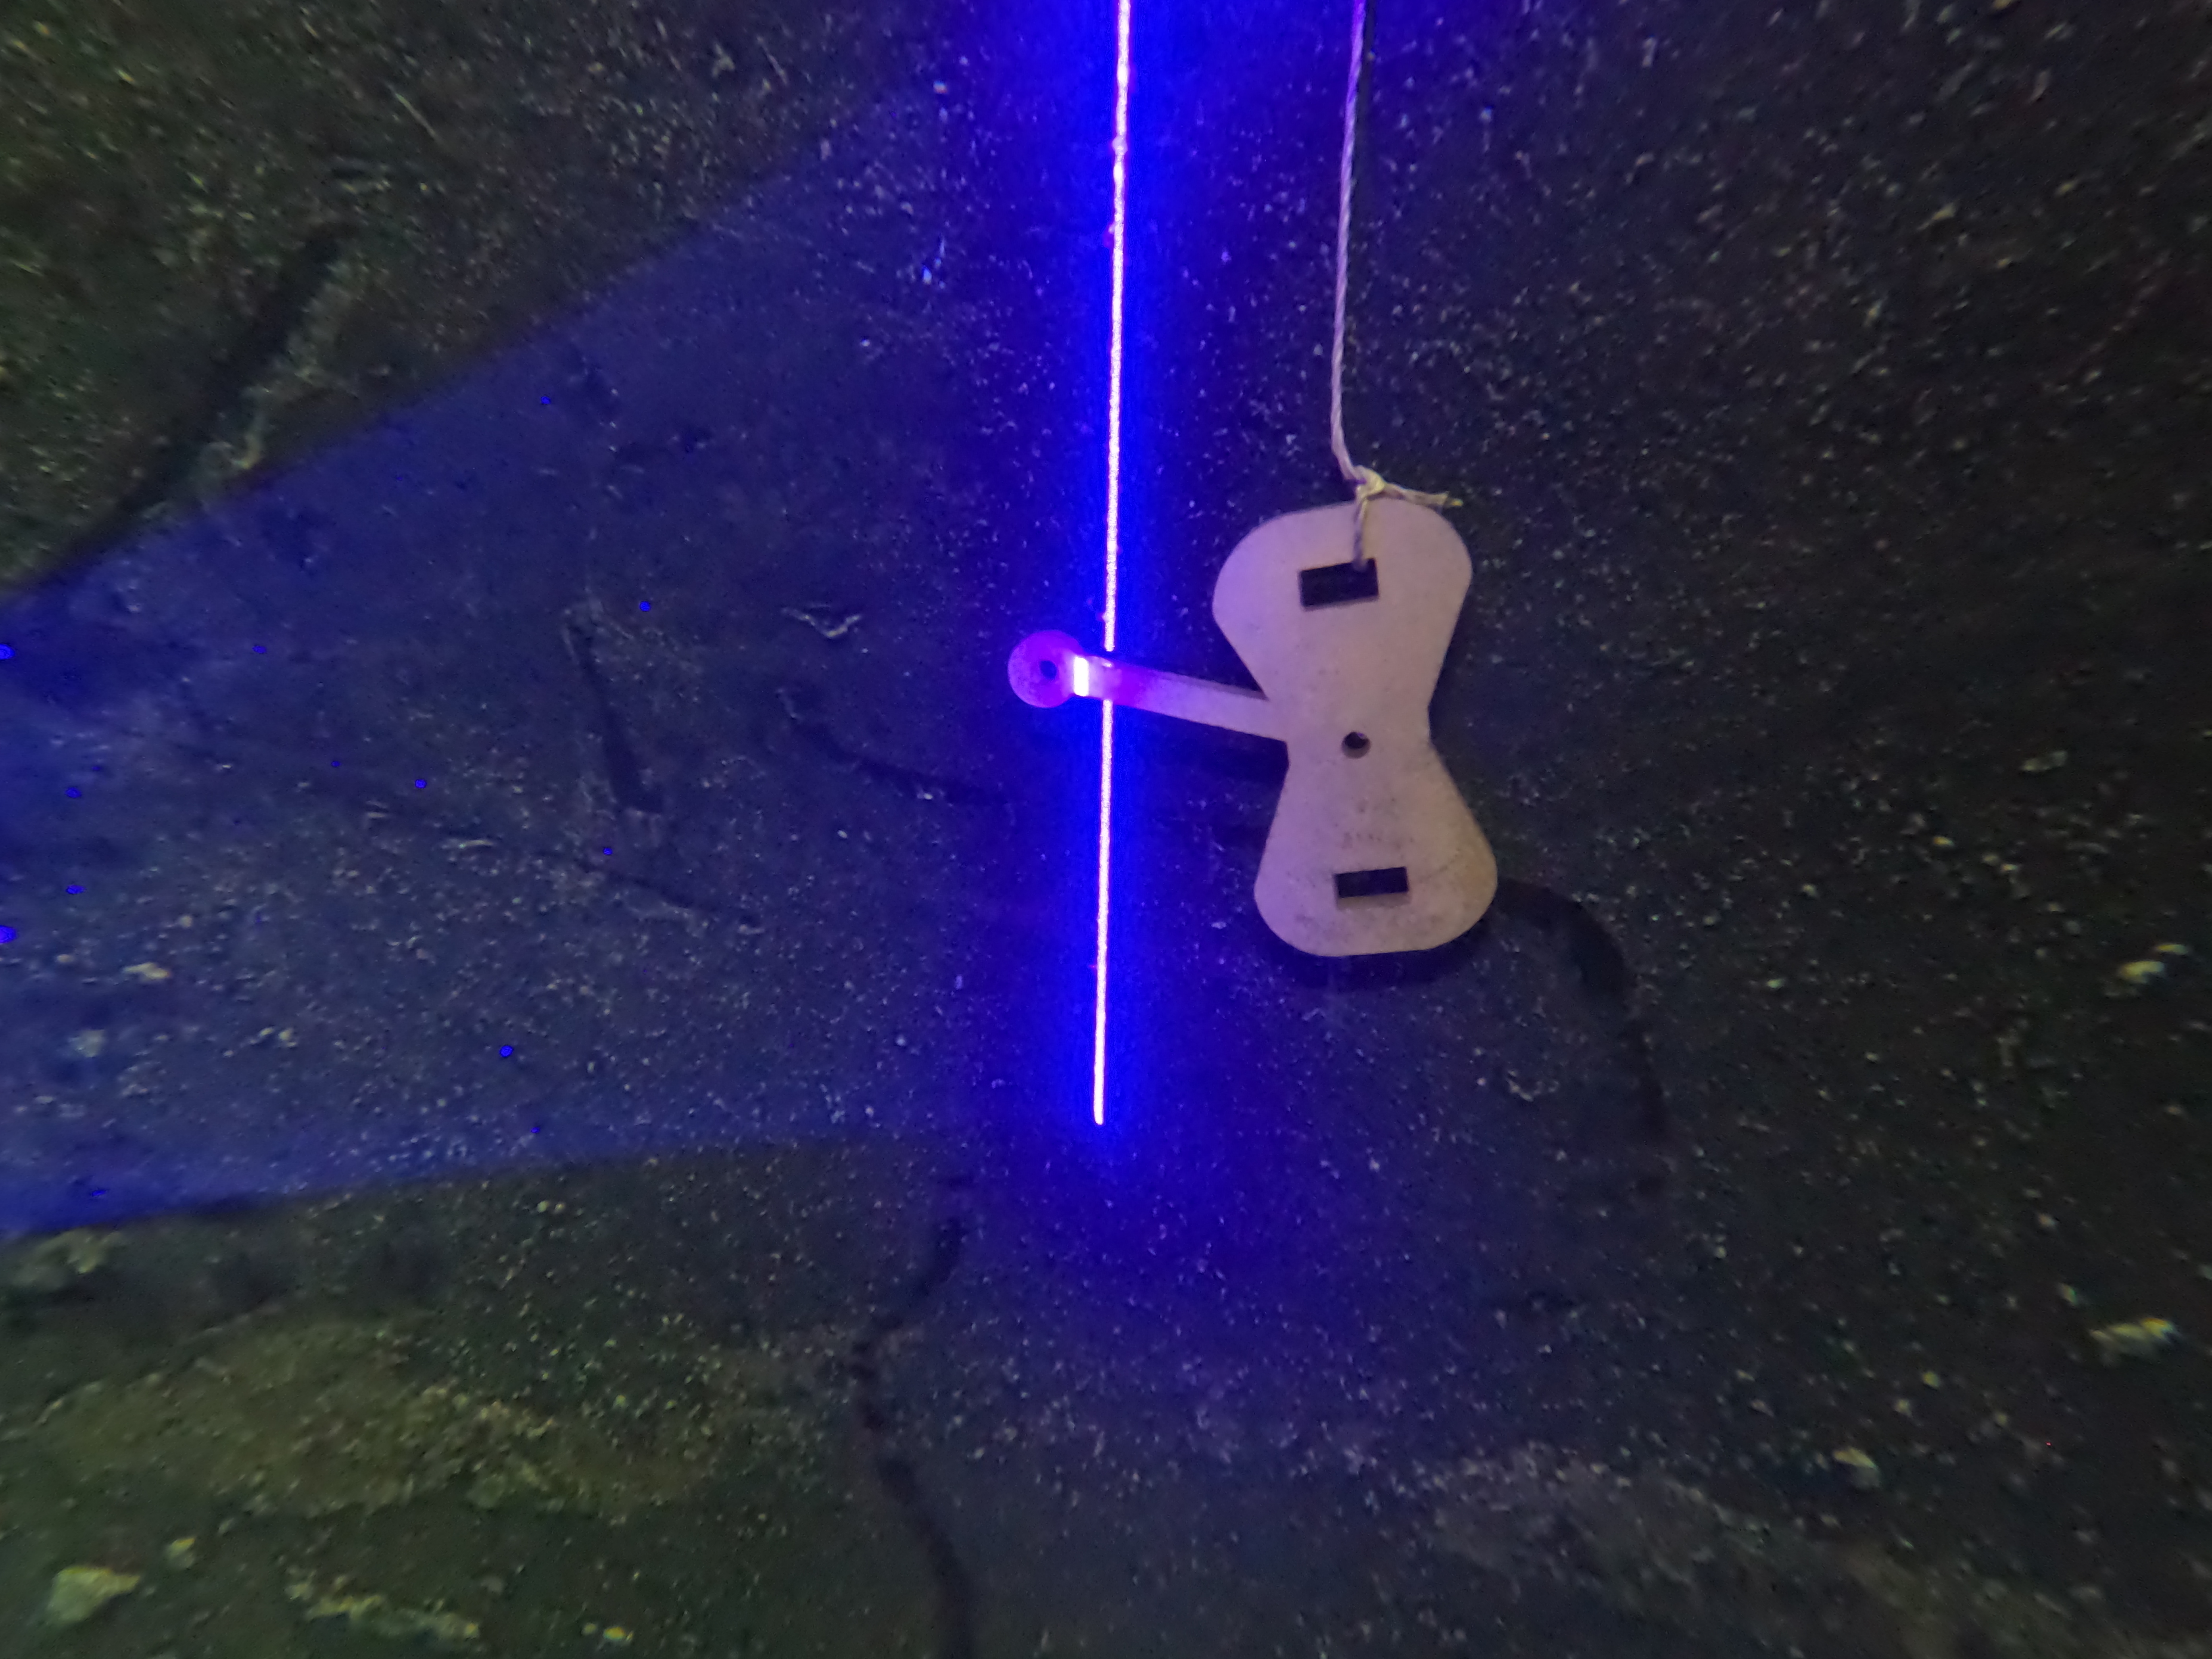

Supplement: Supplementary file 2514 [file G0016092.pdf › Level_2_2/G0016092.pdf]

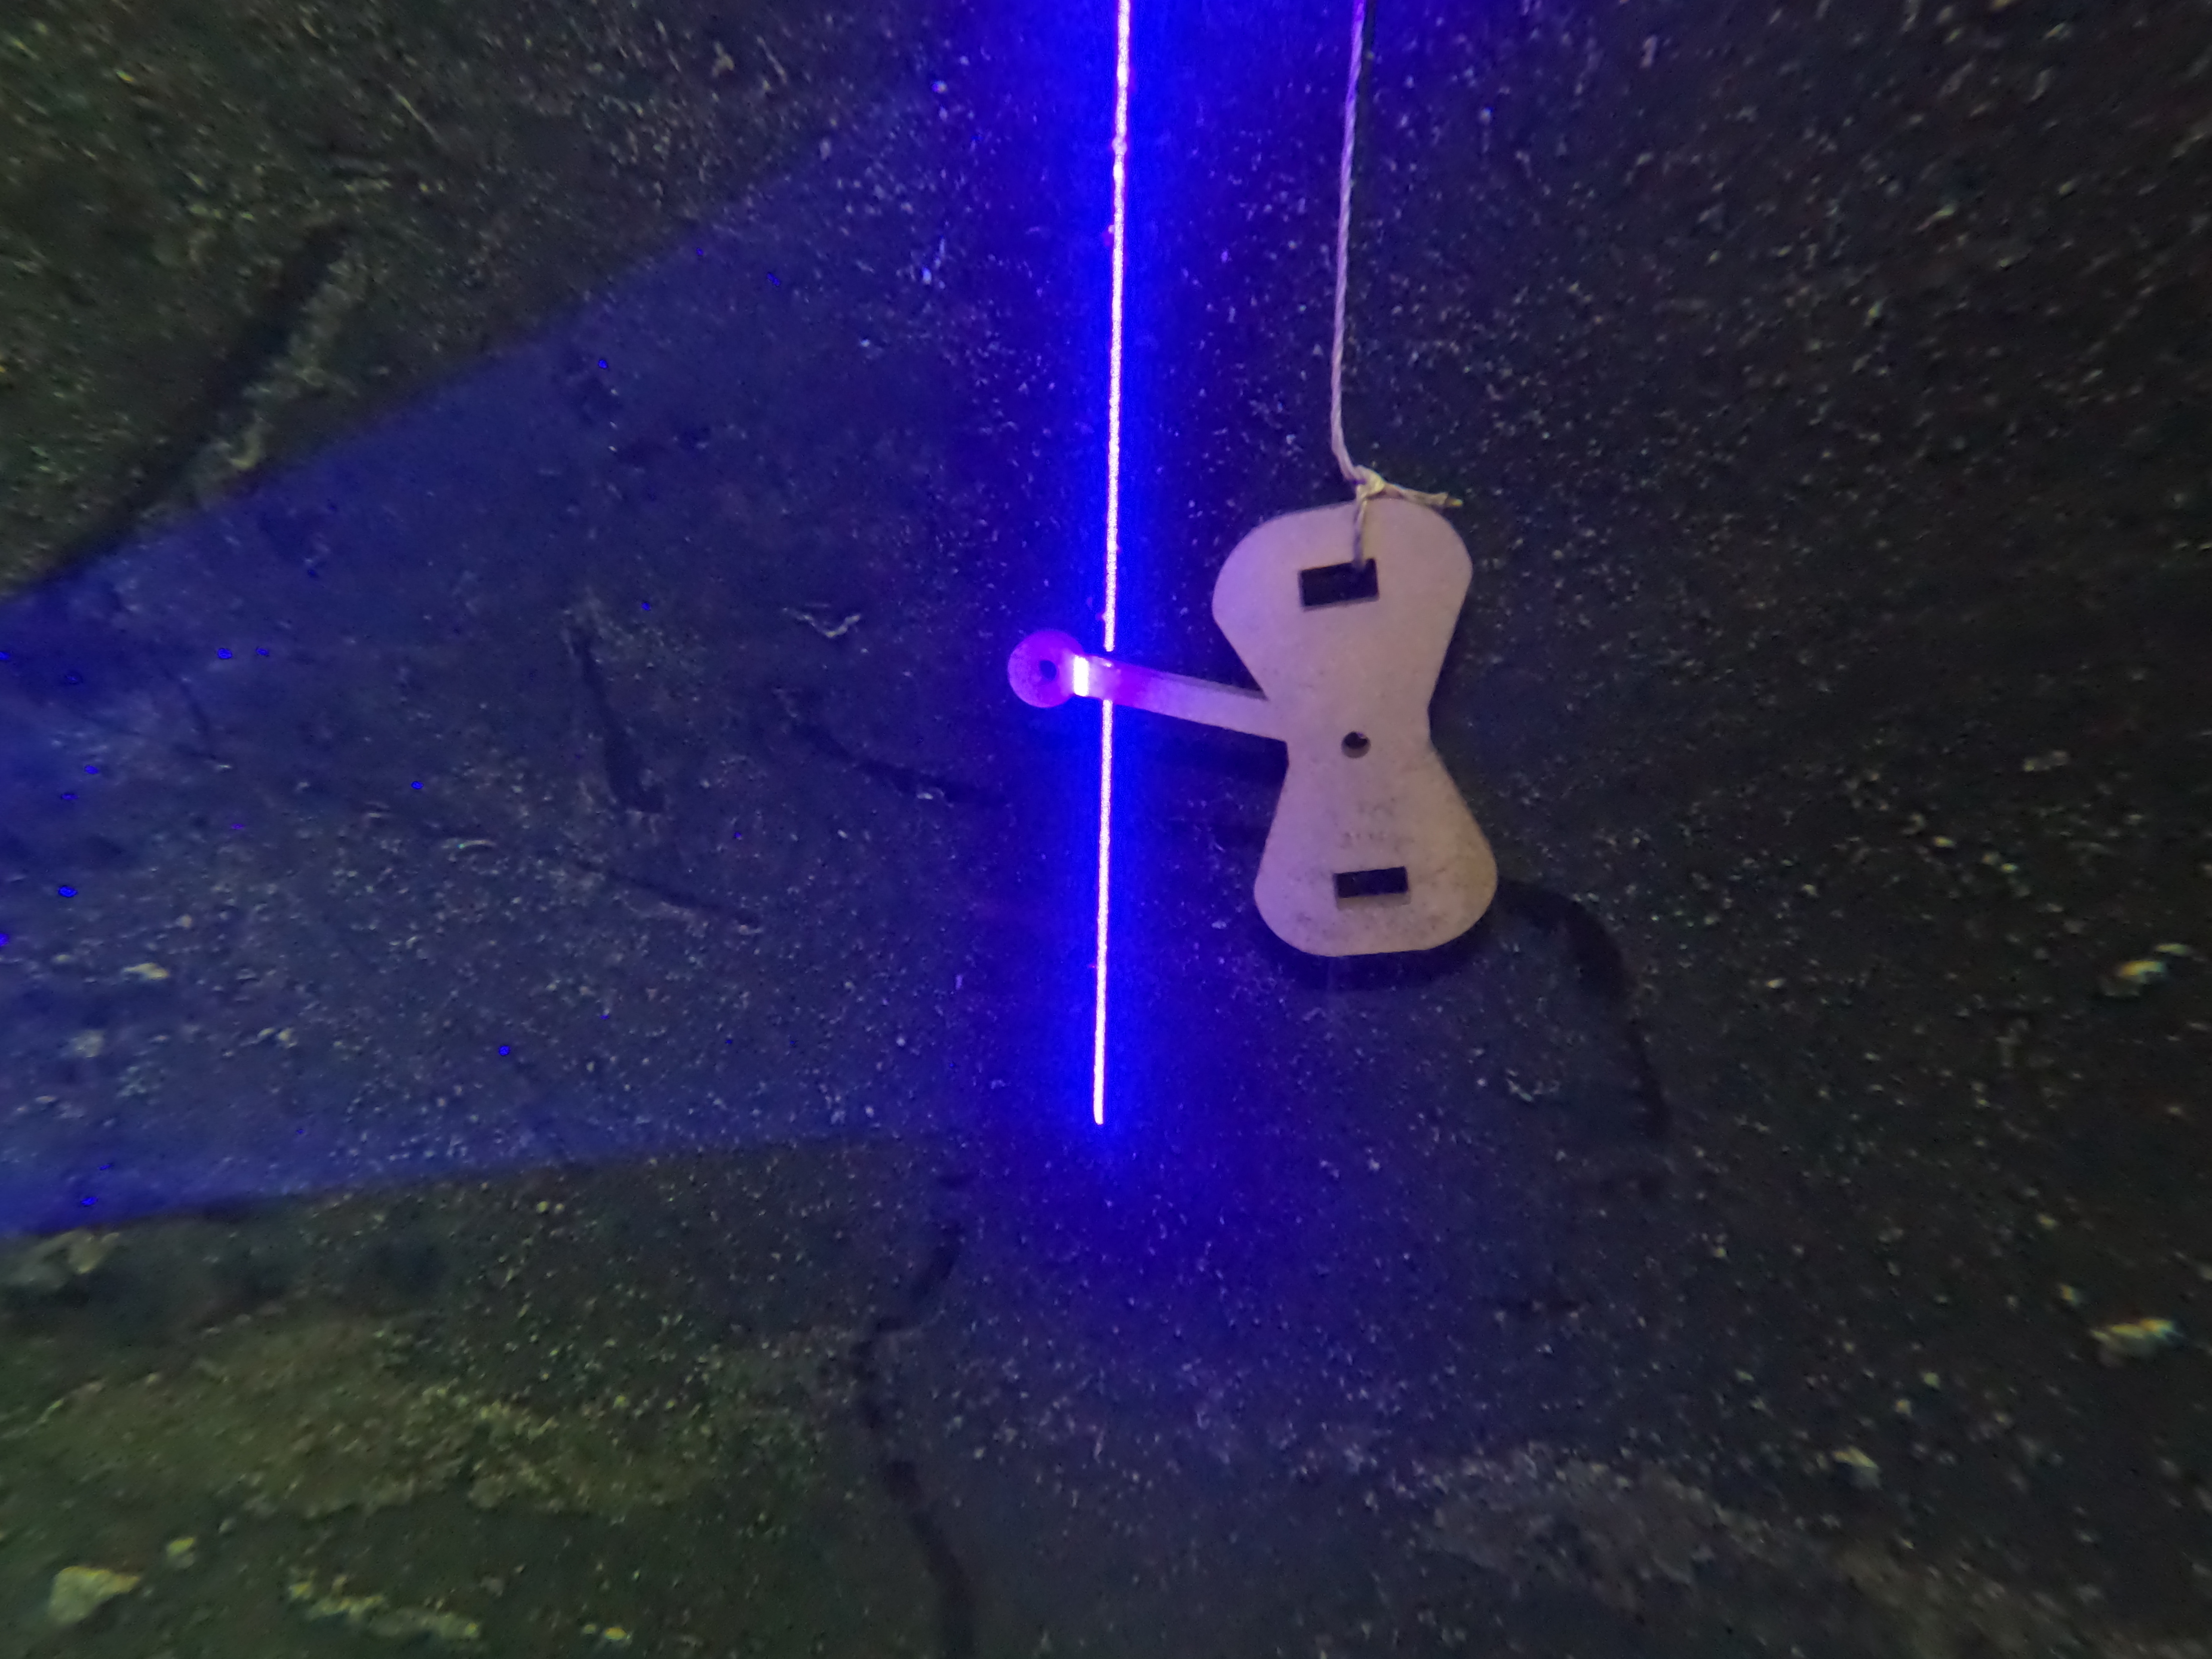

Supplement: Supplementary file 2515 [file G0016093.pdf › Level_2_2/G0016093.pdf]

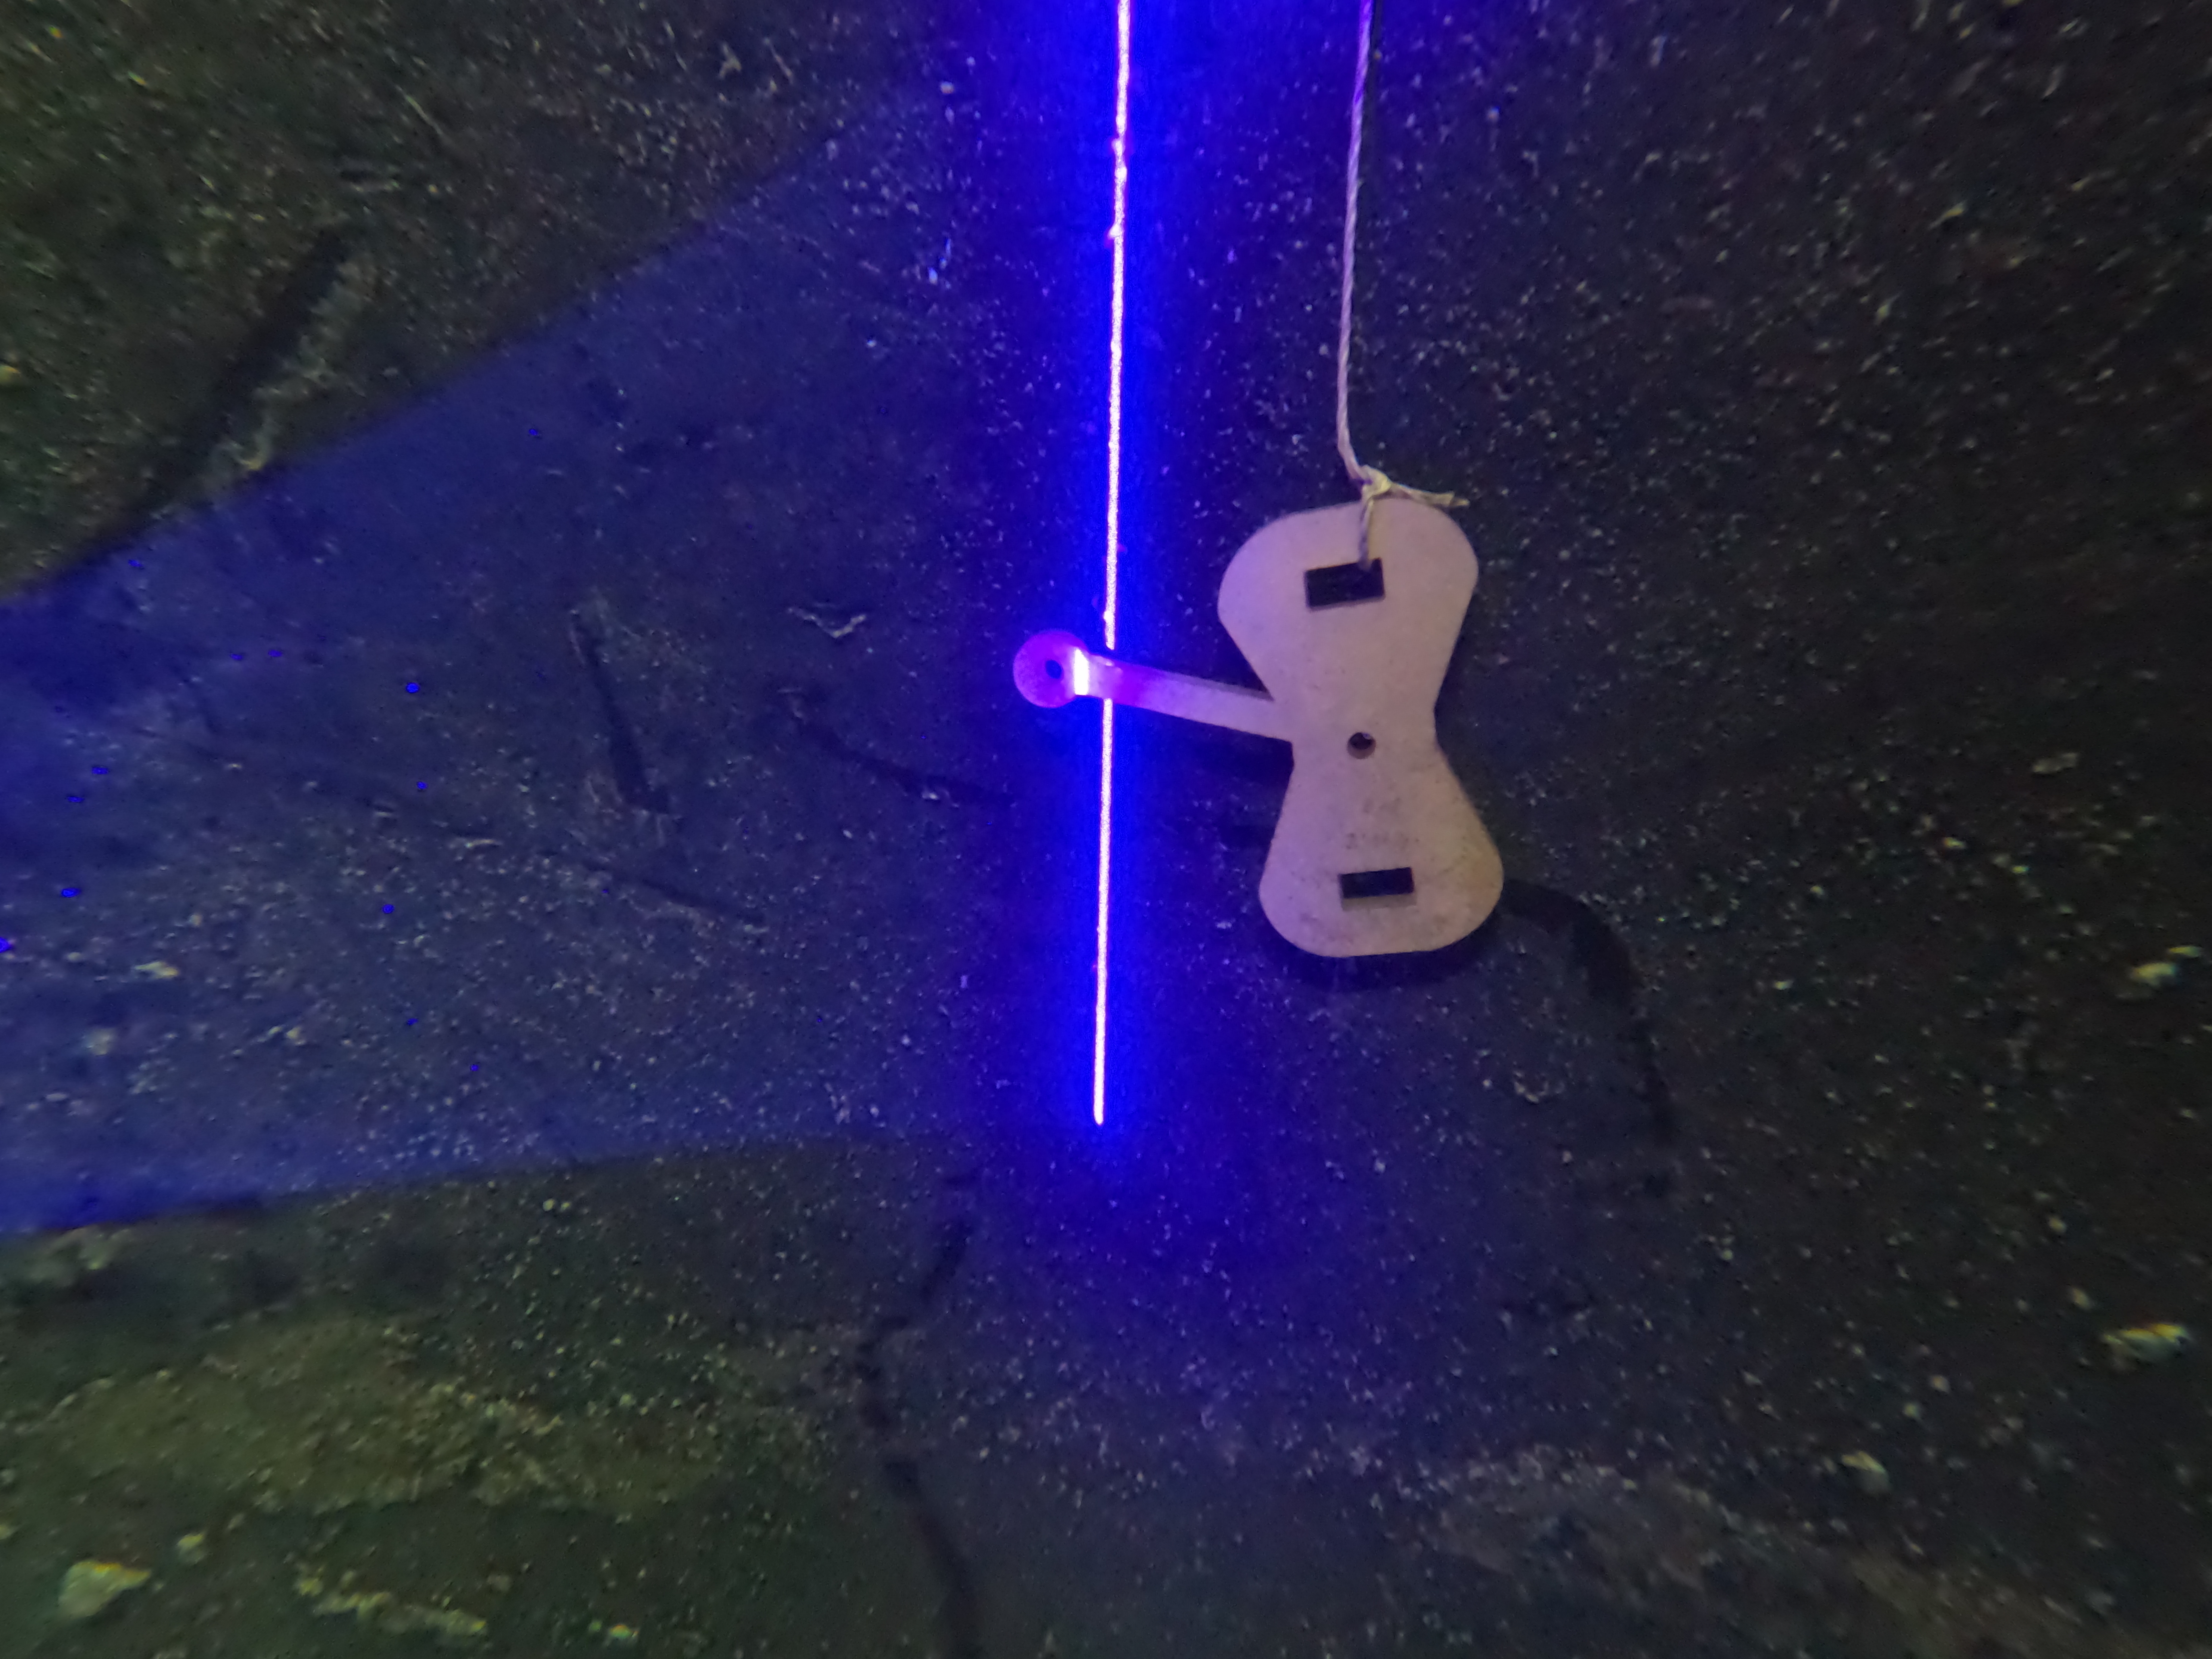

Supplement: Supplementary file 2516 [file G0016094.pdf › Level_2_2/G0016094.pdf]

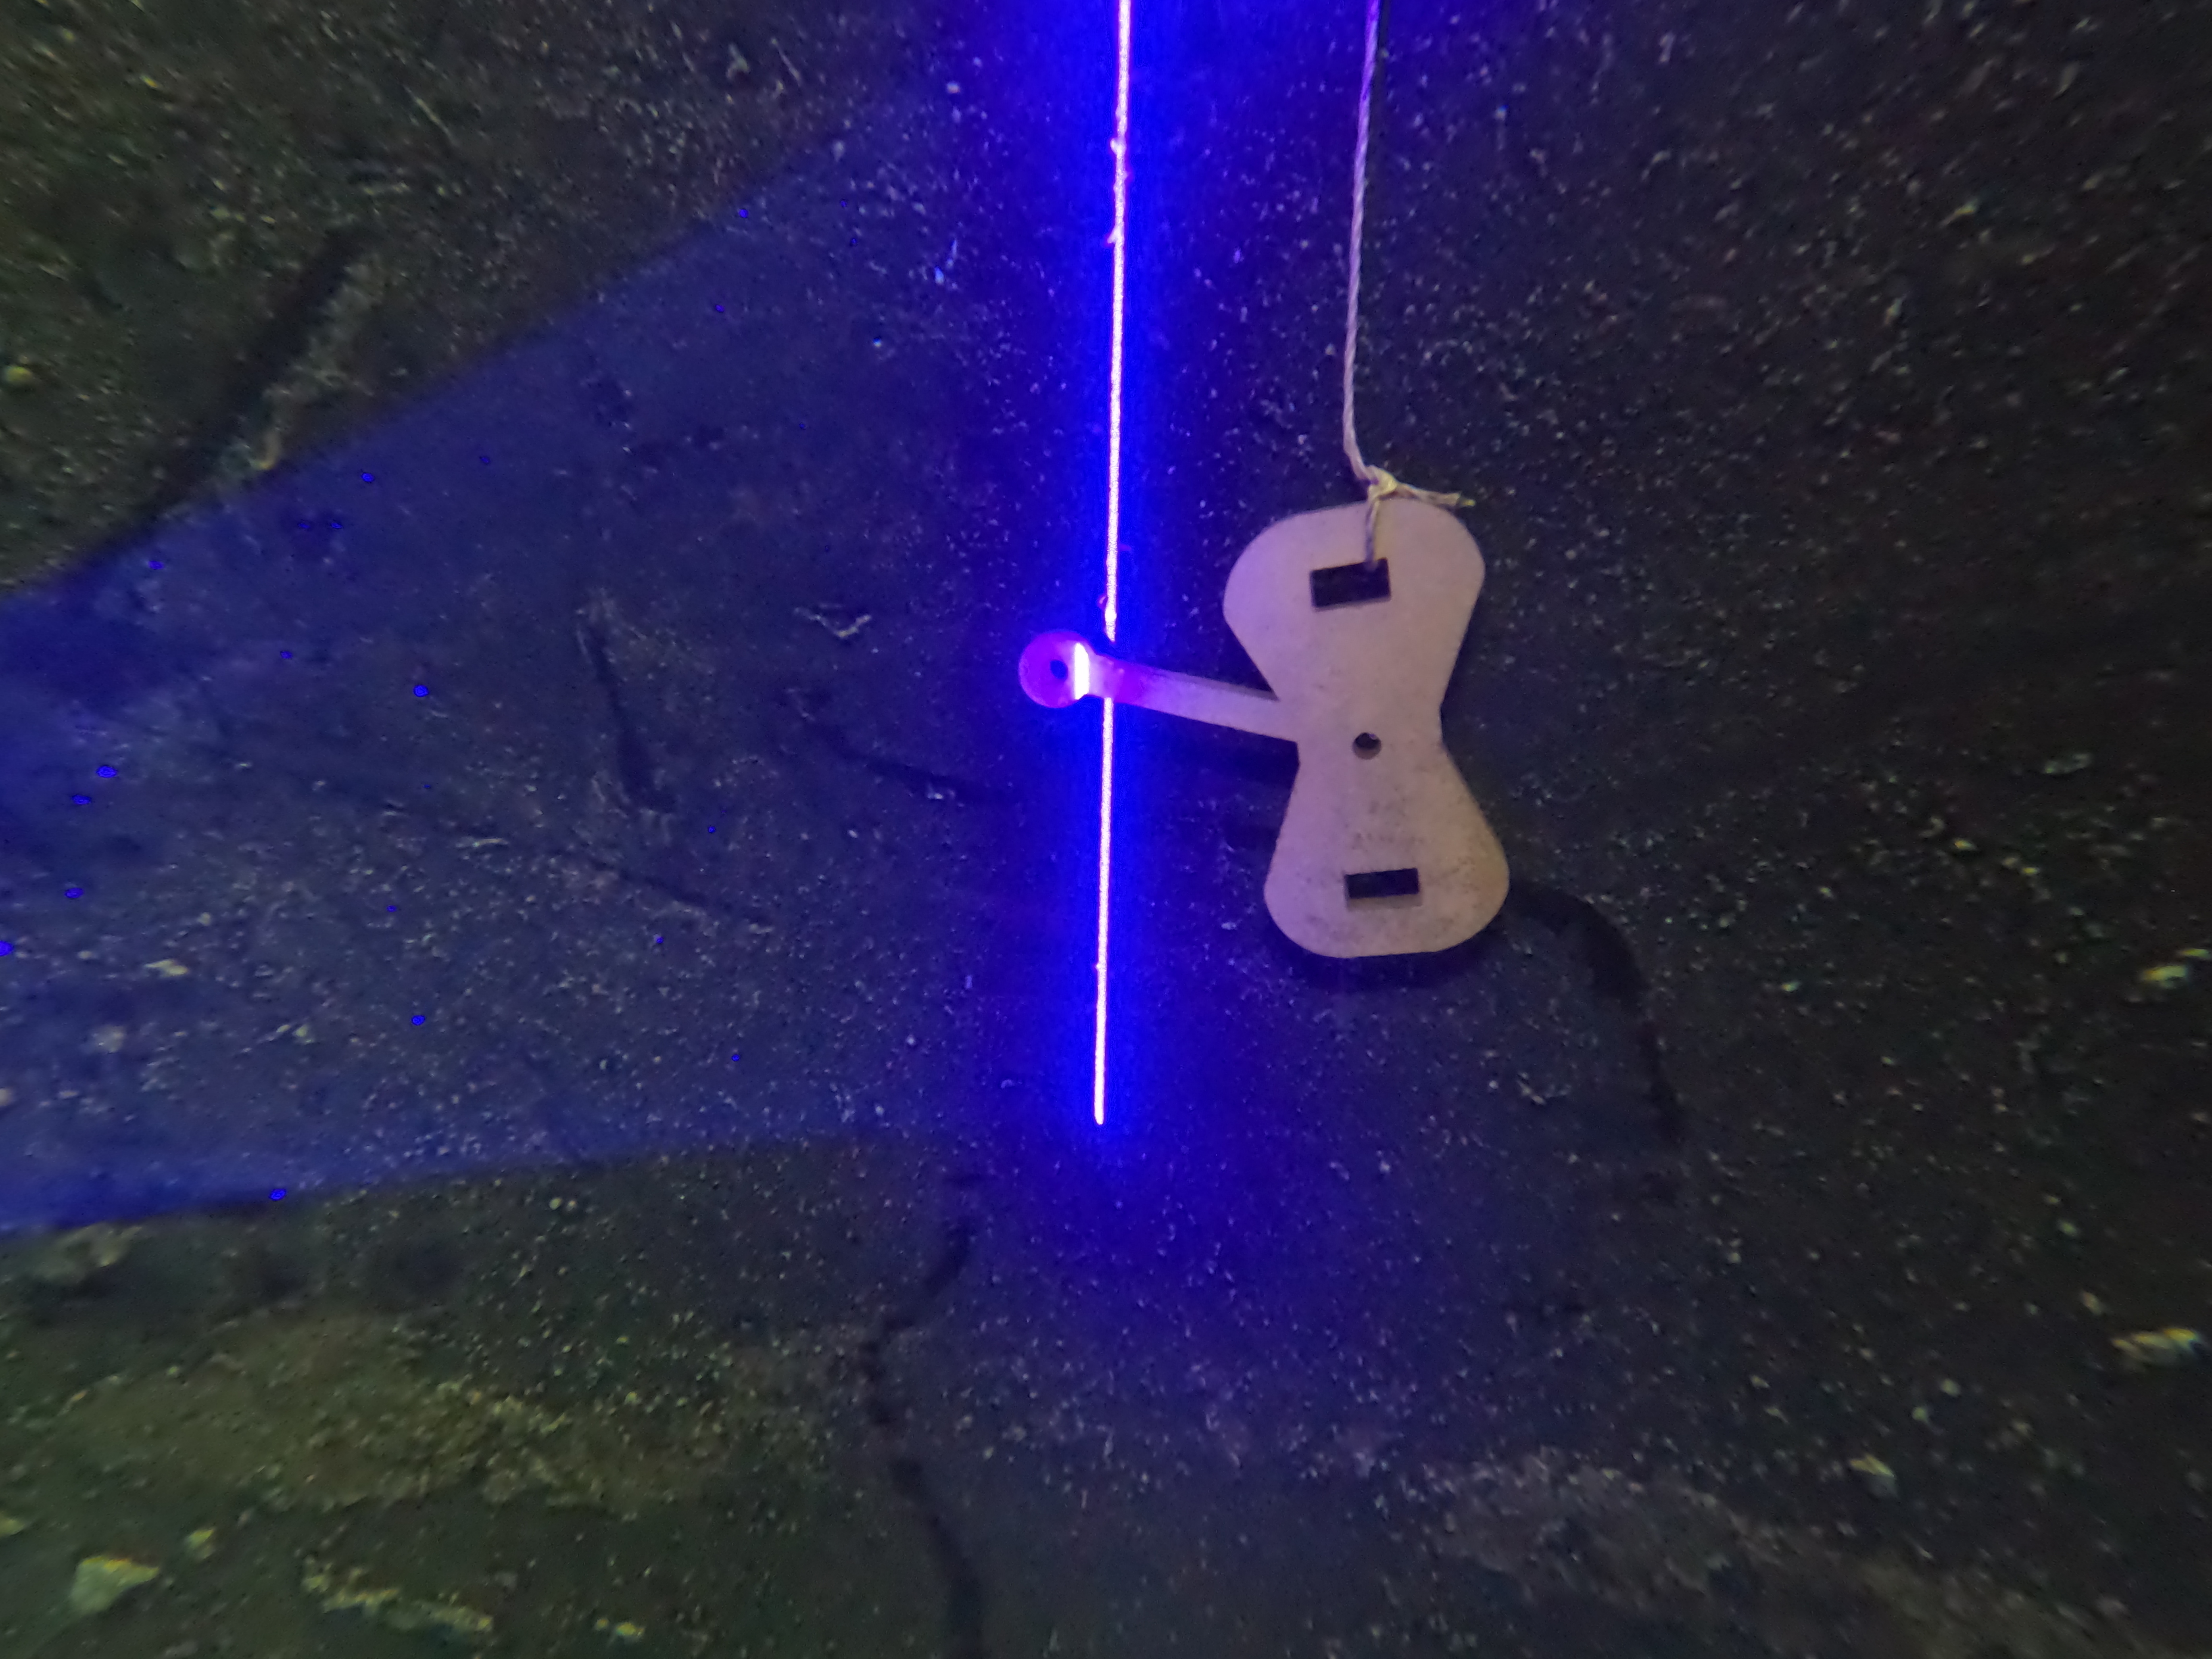

Supplement: Supplementary file 2517 [file G0016095.pdf › Level_2_2/G0016095.pdf]

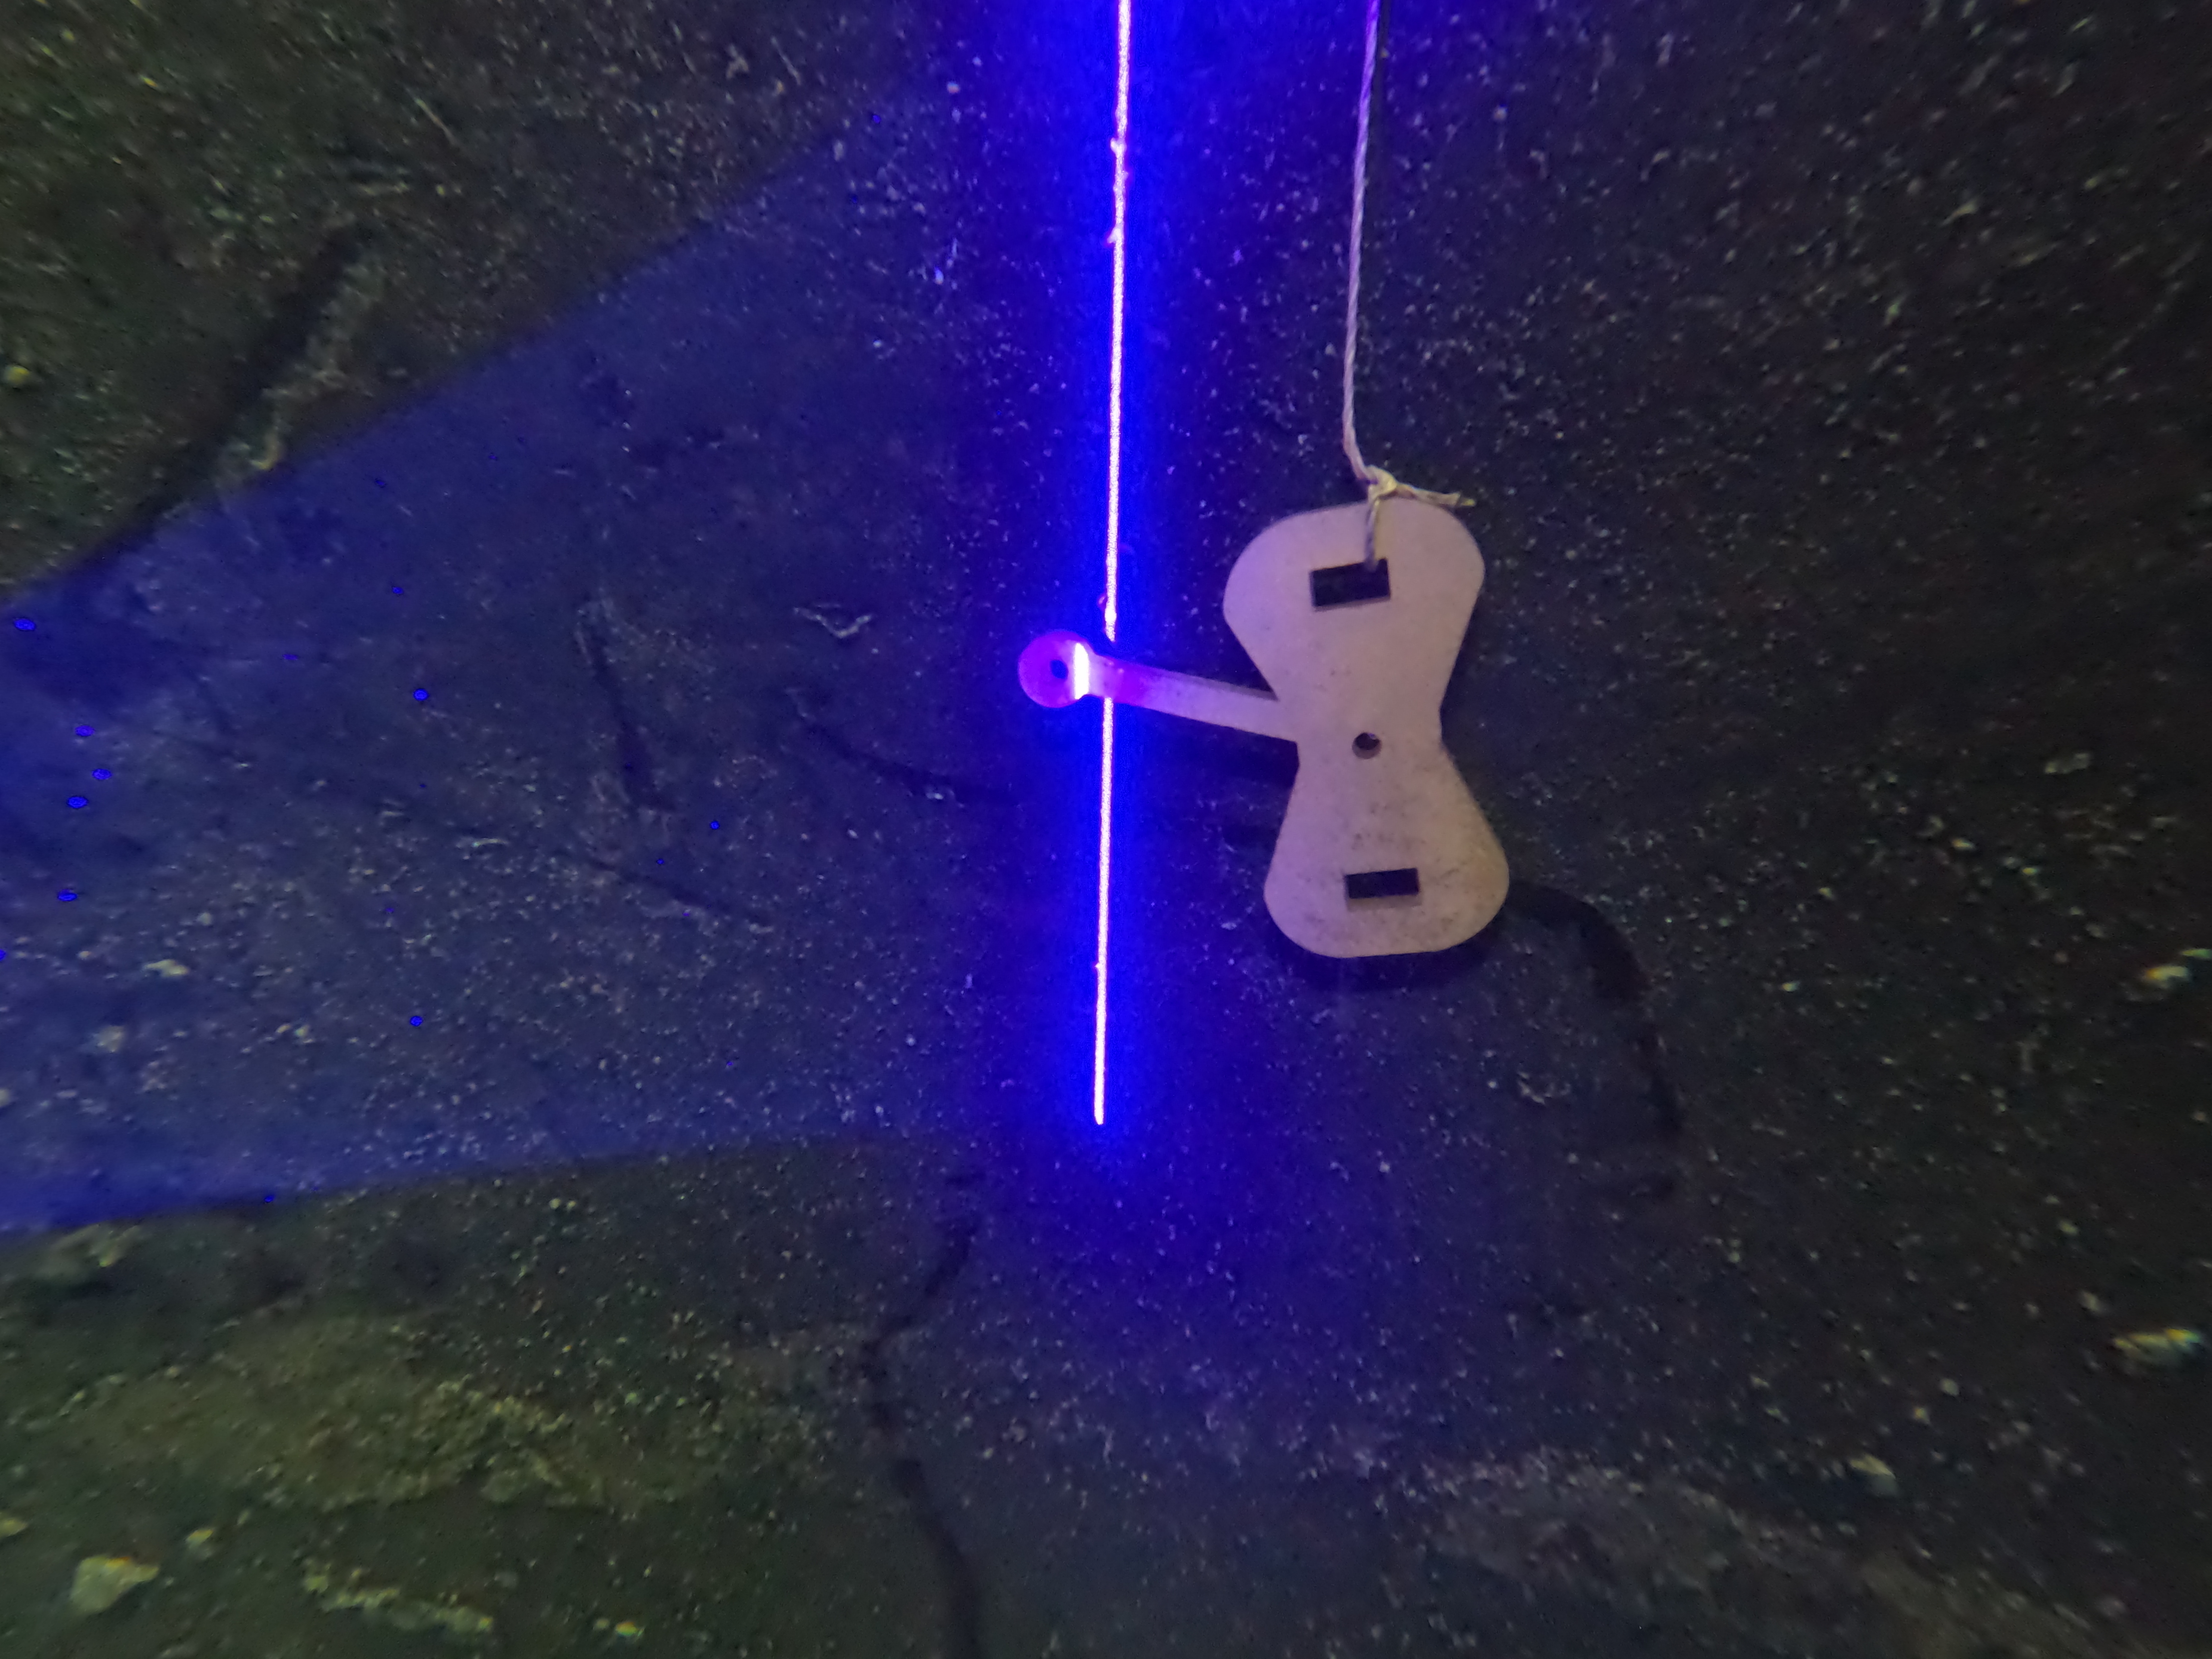

Supplement: Supplementary file 2518 [file G0016096.pdf › Level_2_2/G0016096.pdf]

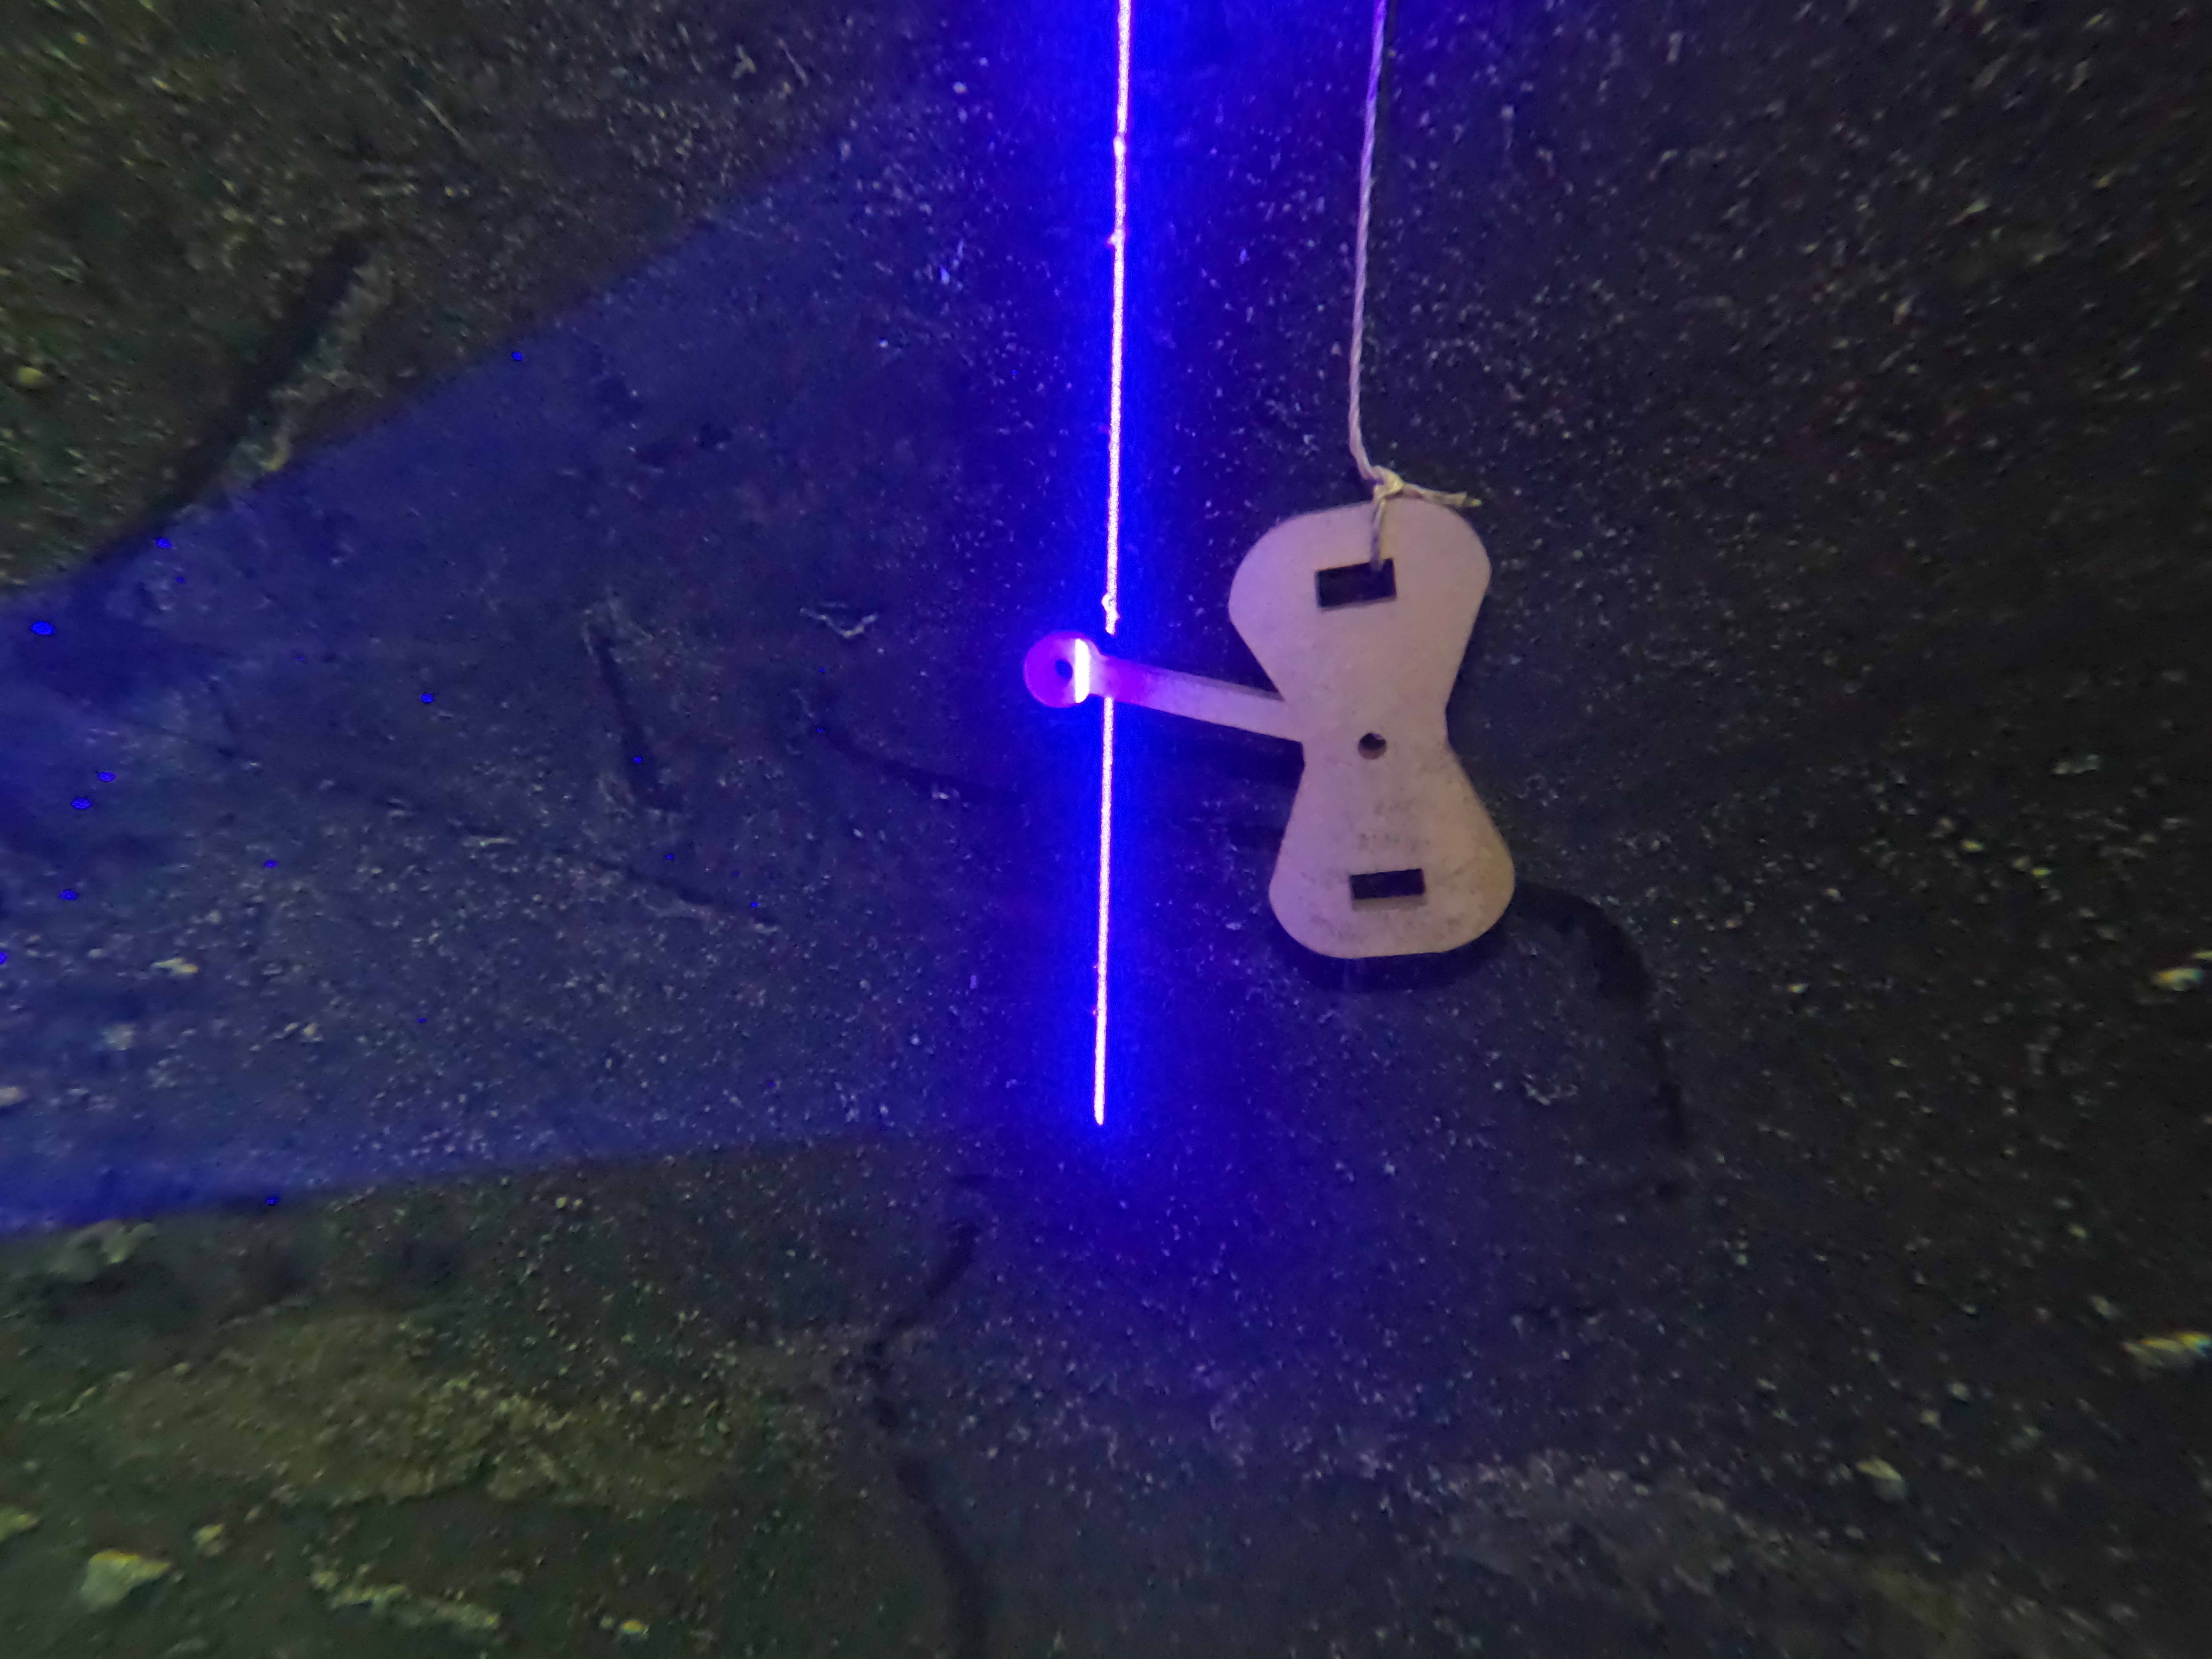

Supplement: Supplementary file 2519 [file G0016097.pdf › Level_2_2/G0016097.pdf]

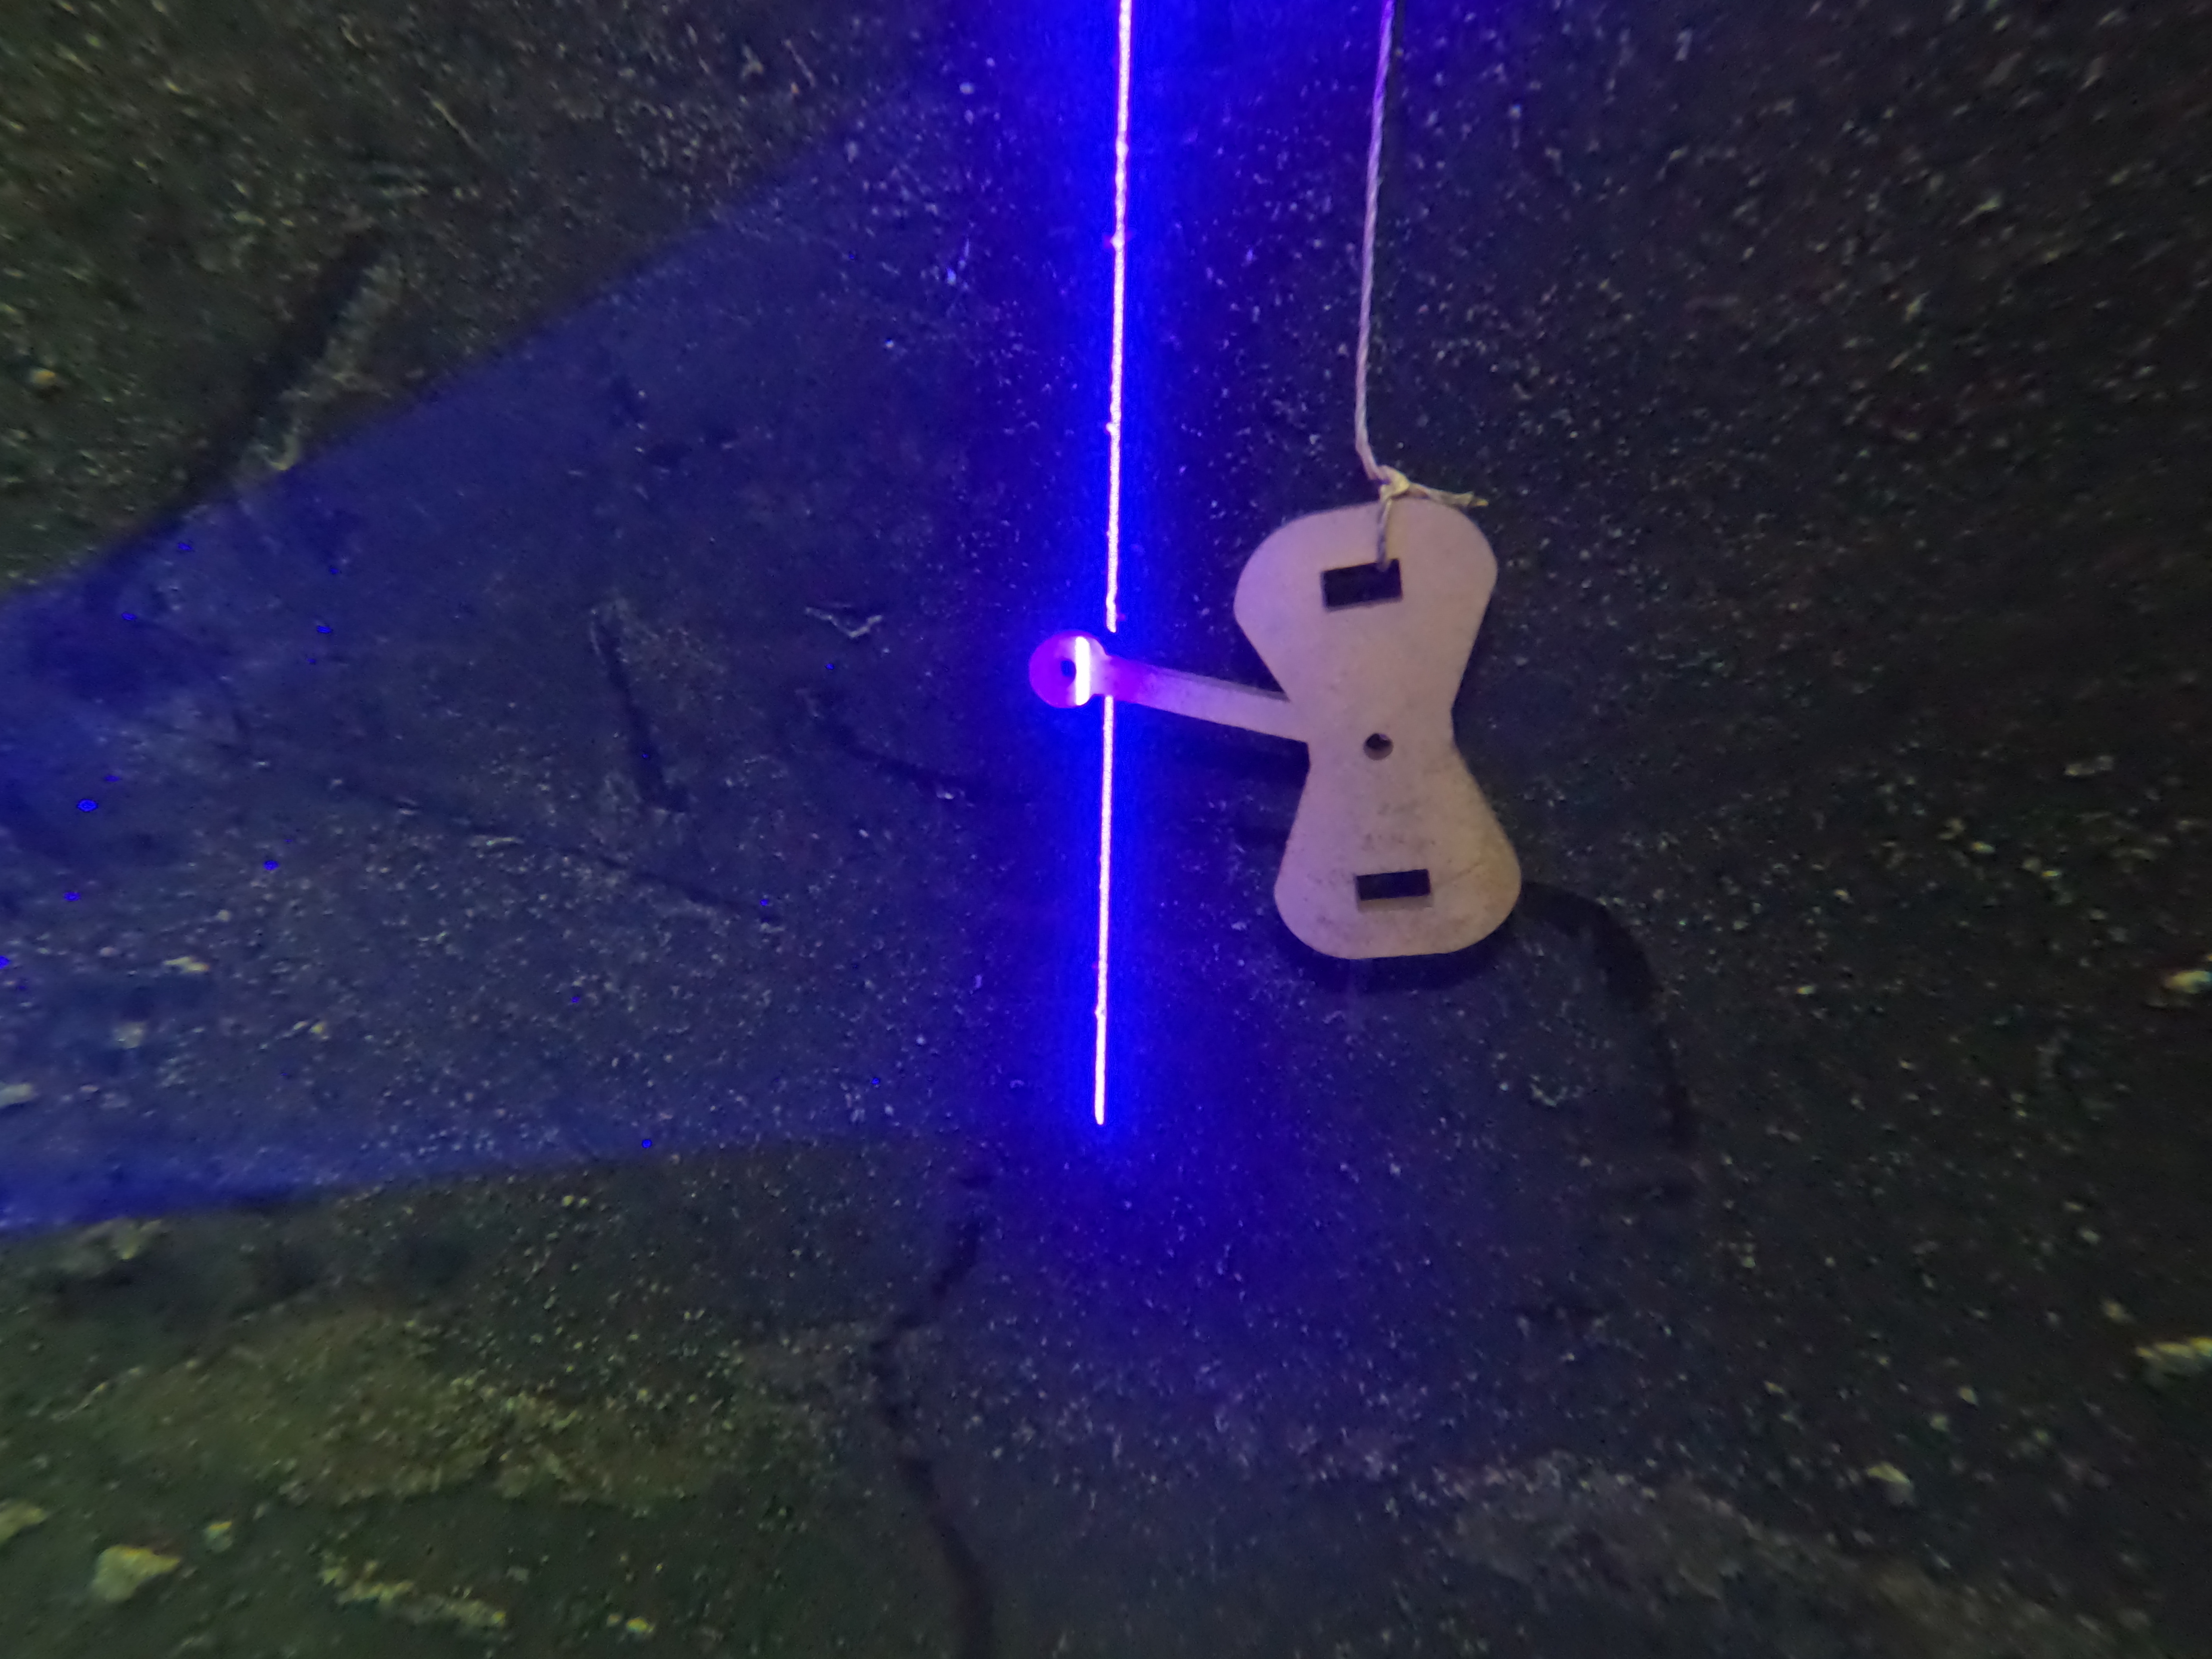

Supplement: Supplementary file 2520 [file G0016098.pdf › Level_2_2/G0016098.pdf]

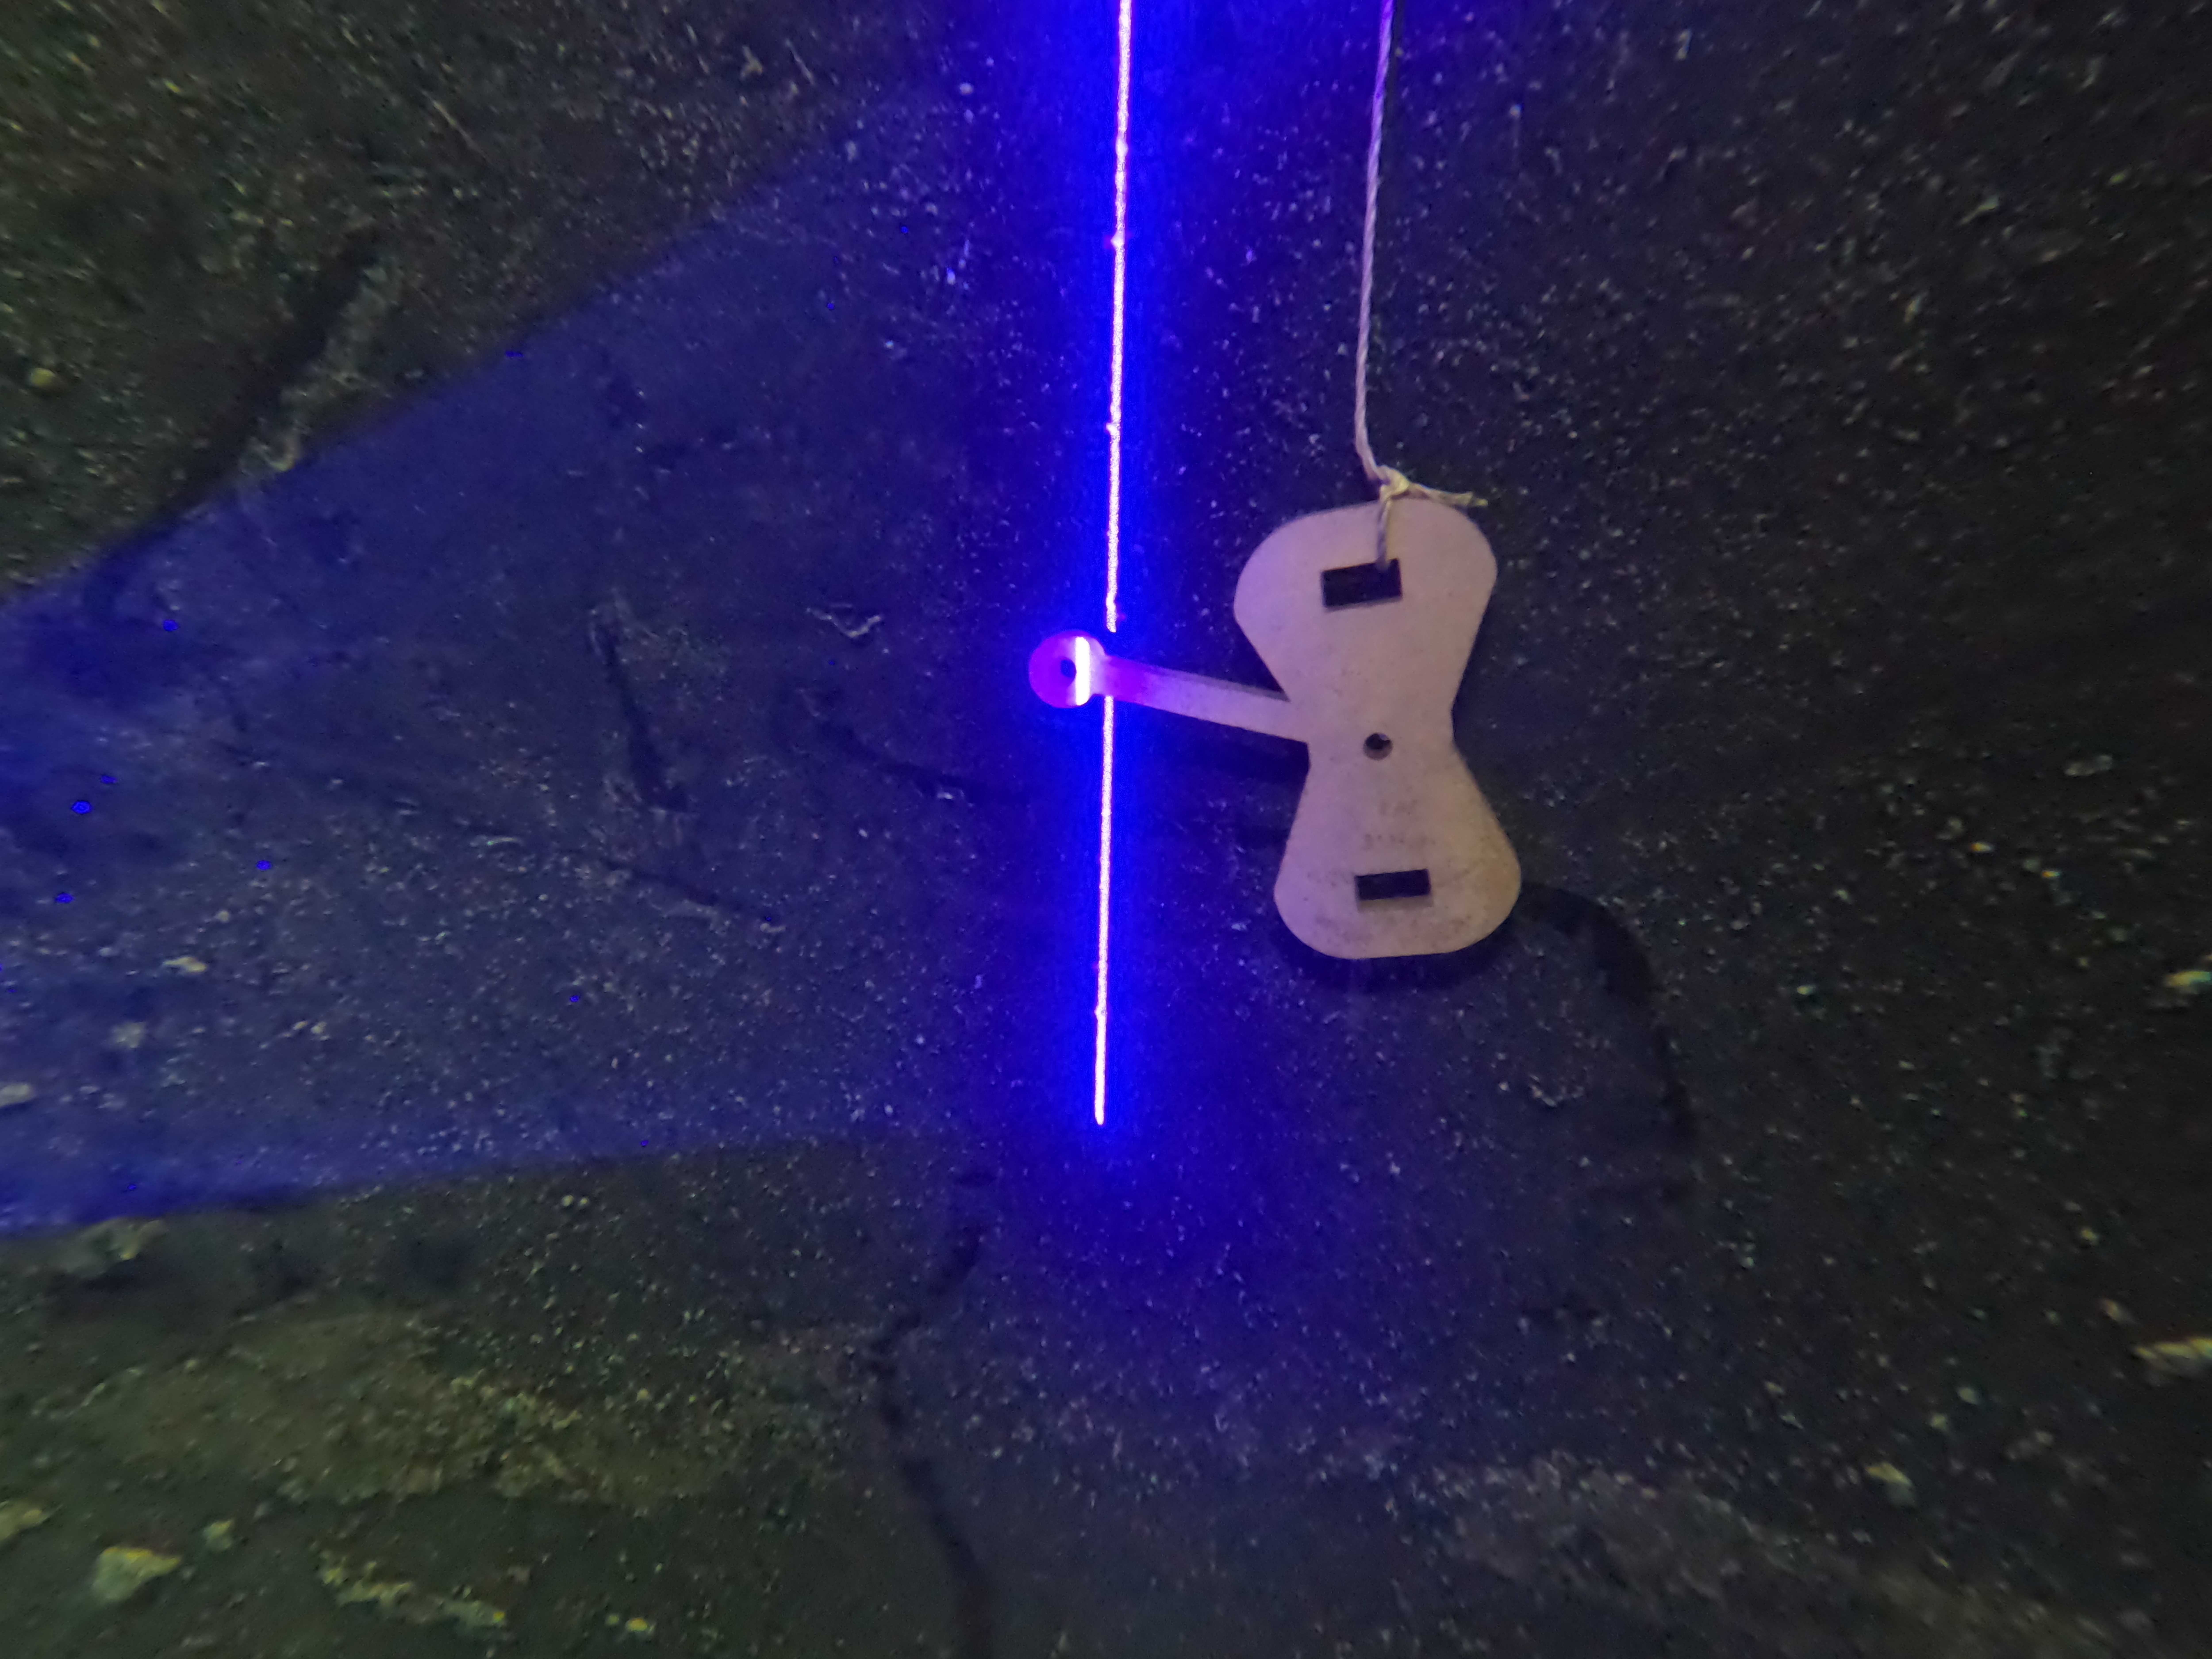

Supplement: Supplementary file 2521 [file G0016099.pdf › Level_2_2/G0016099.pdf]

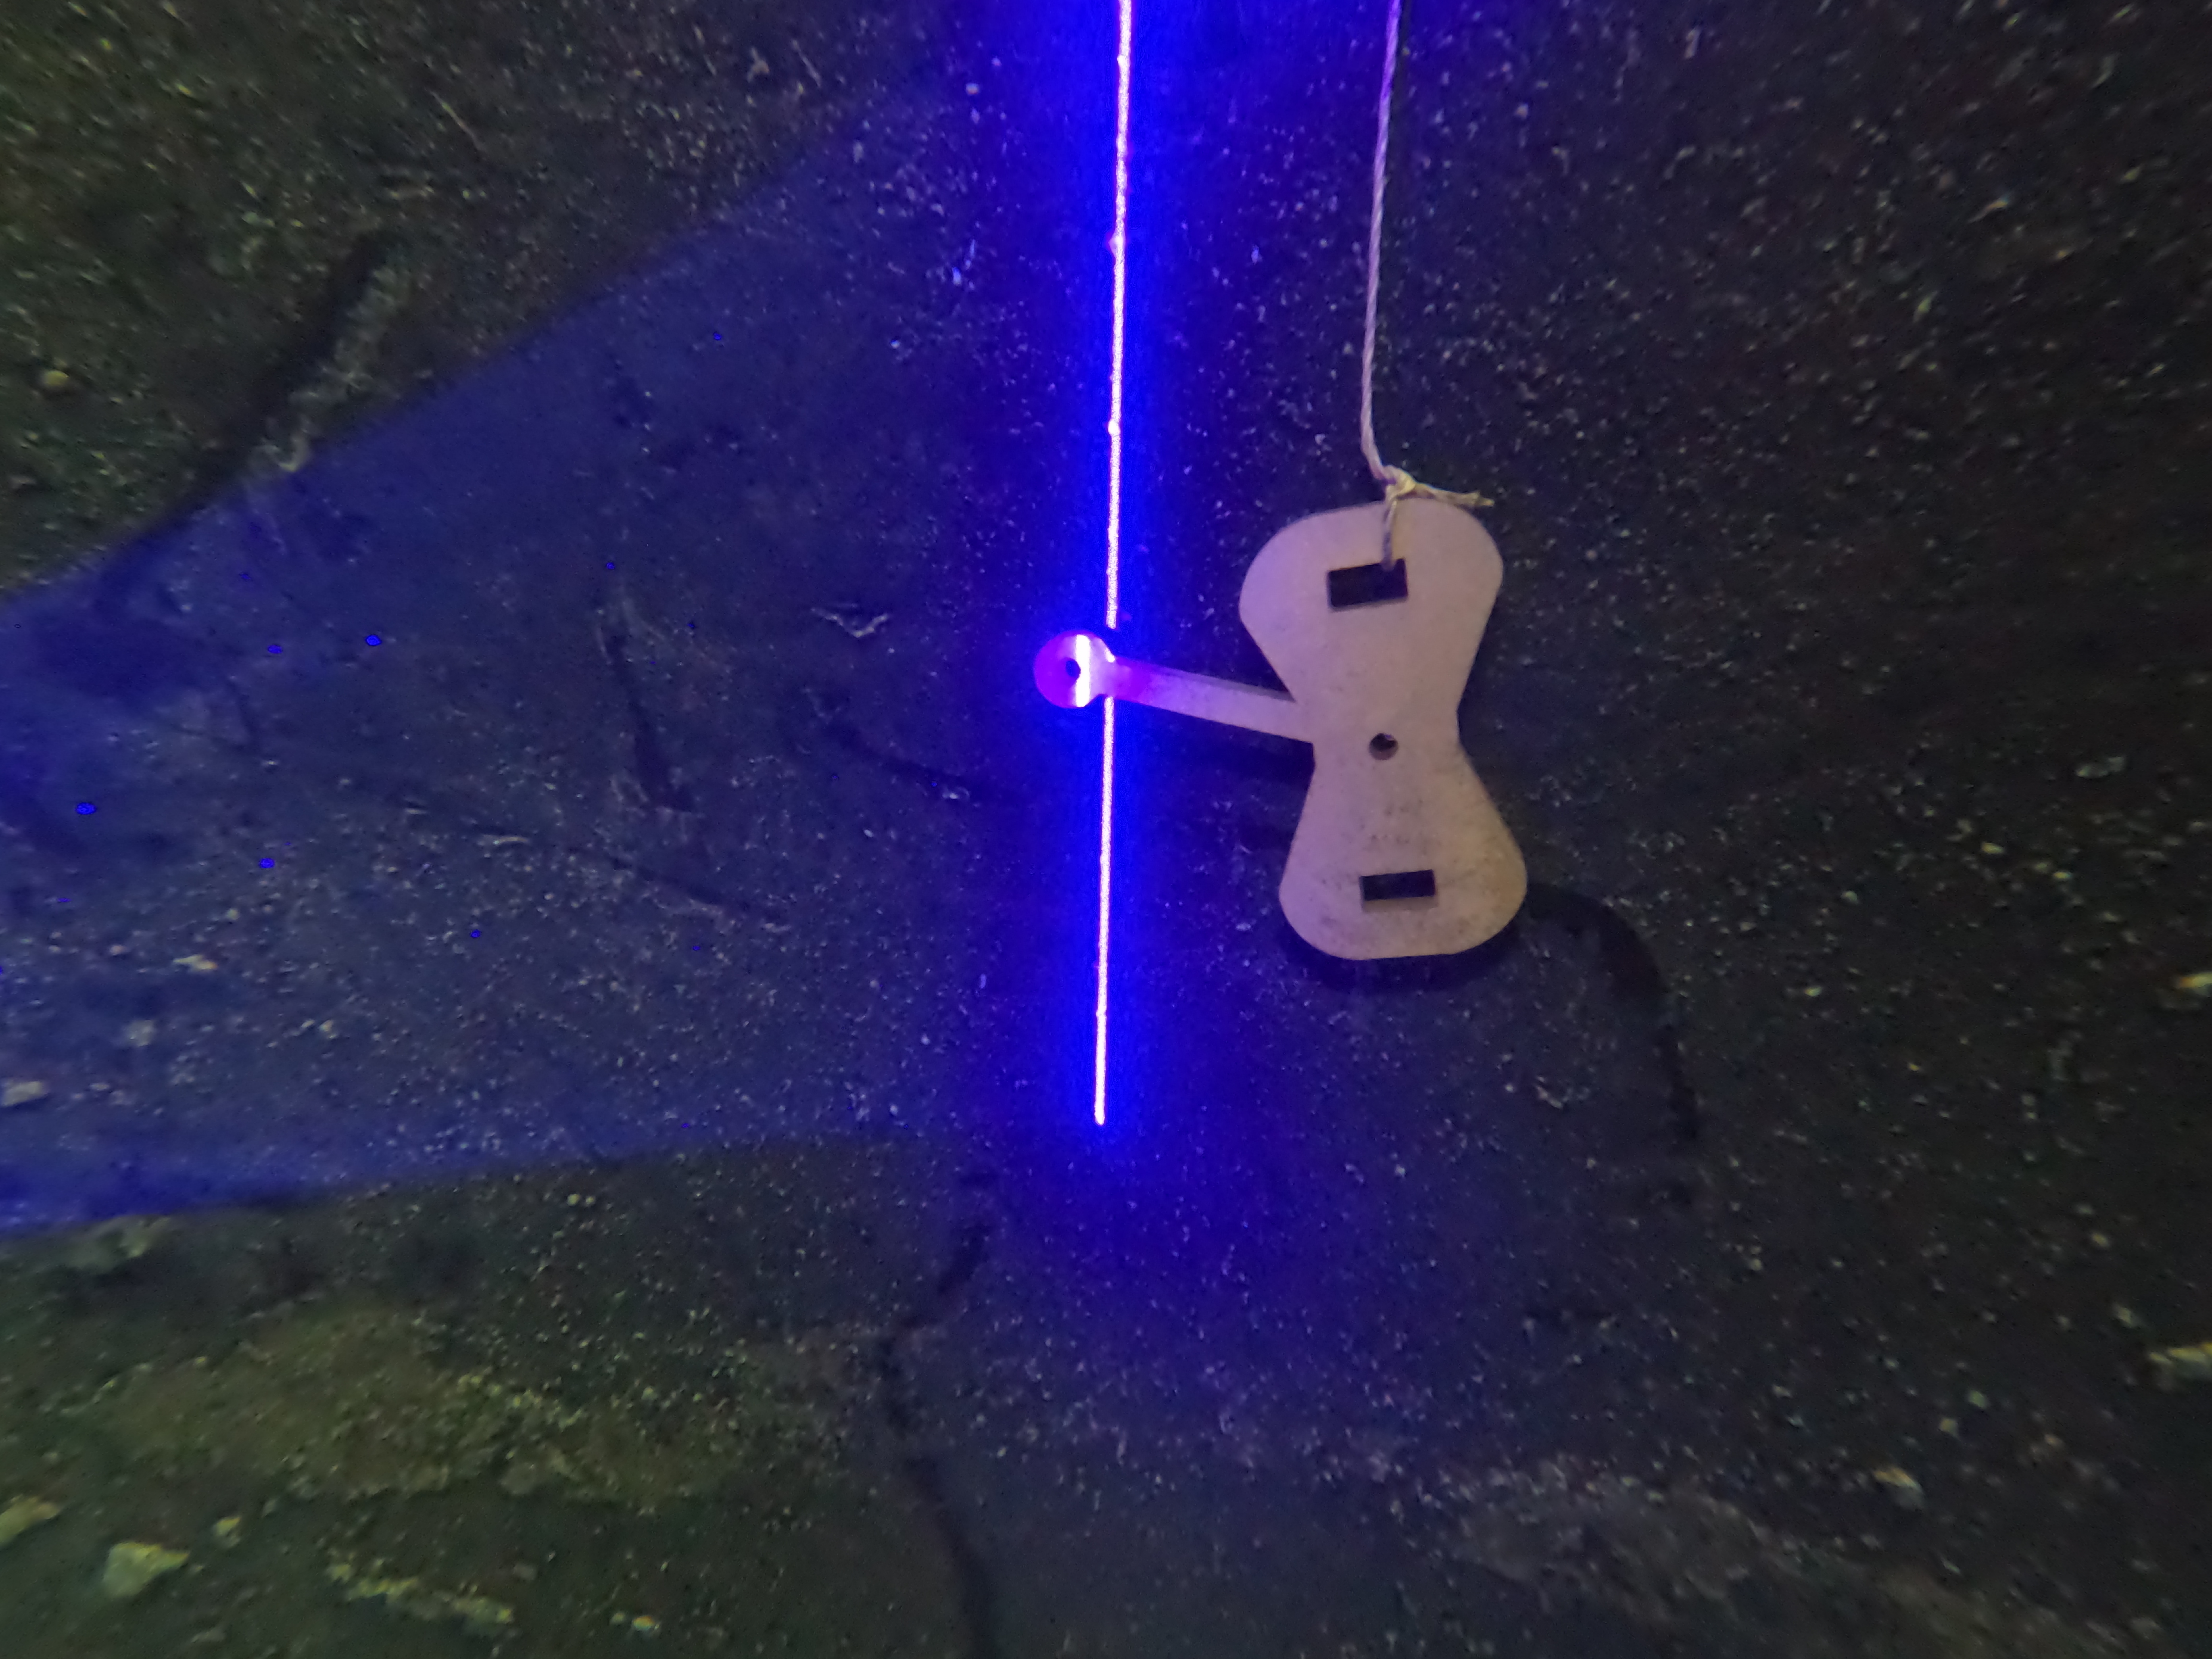

Supplement: Supplementary file 2522 [file G0016100.pdf › Level_2_2/G0016100.pdf]

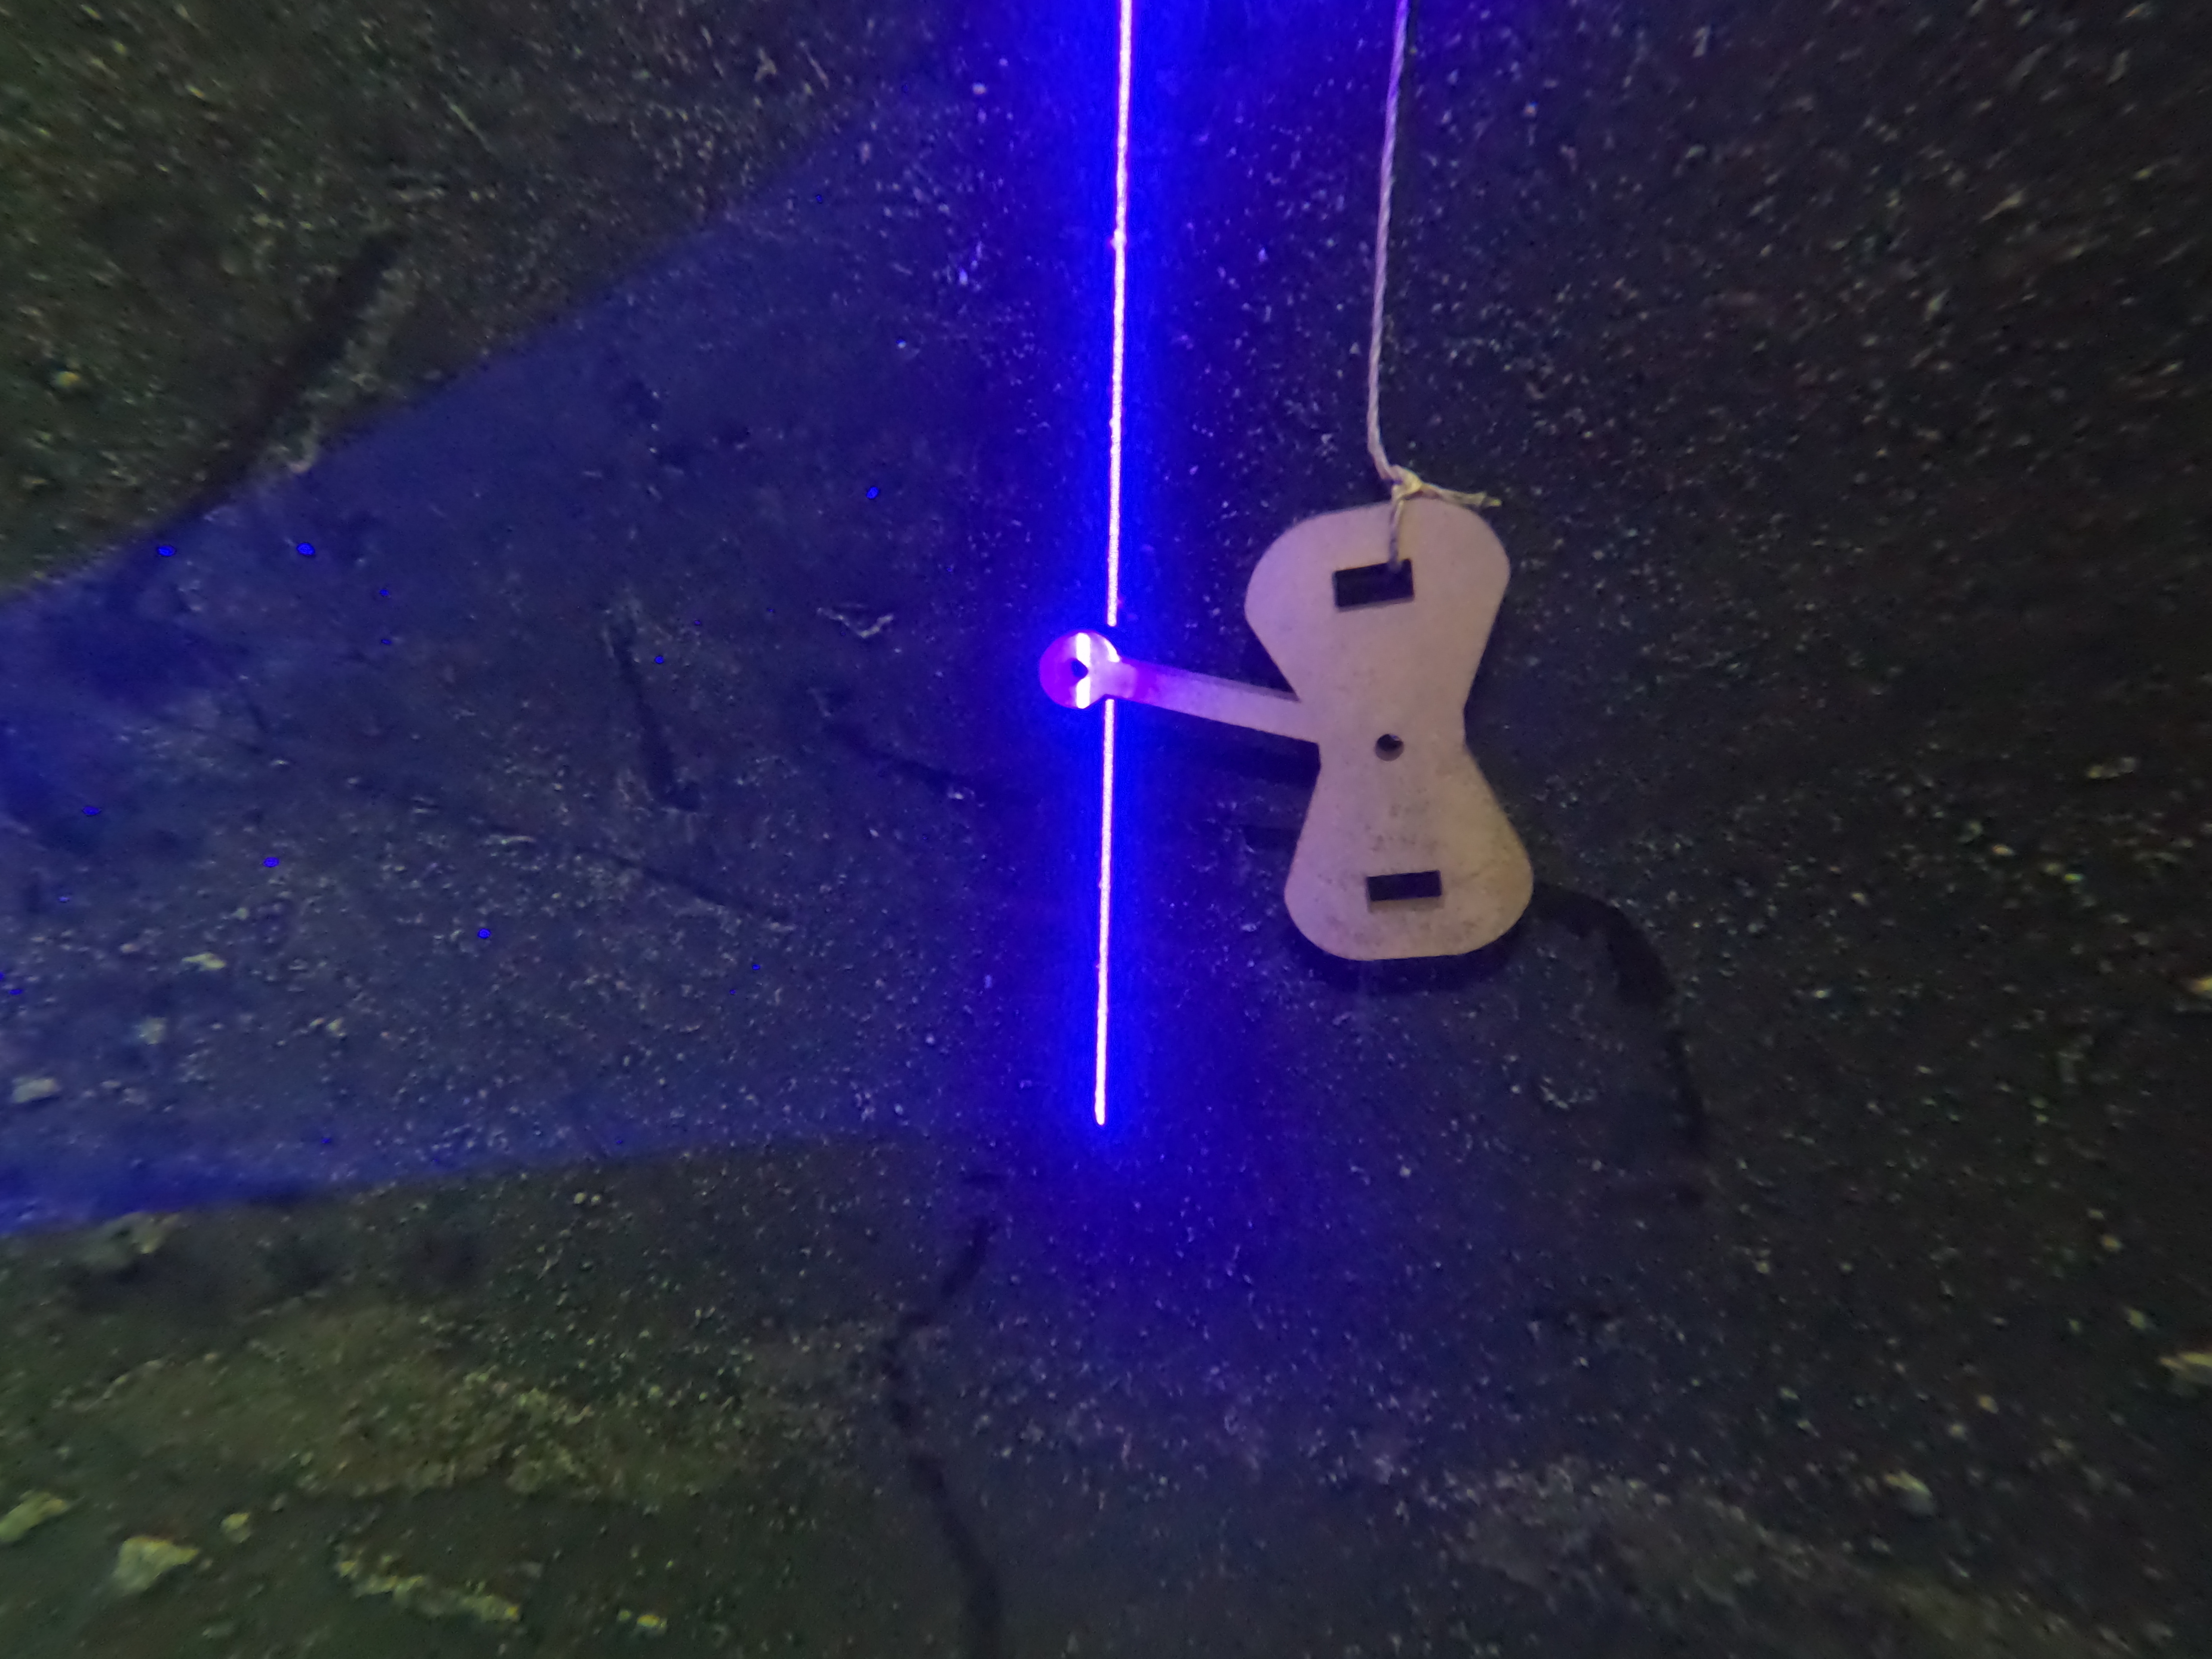

Supplement: Supplementary file 2523 [file G0016101.pdf › Level_2_2/G0016101.pdf]

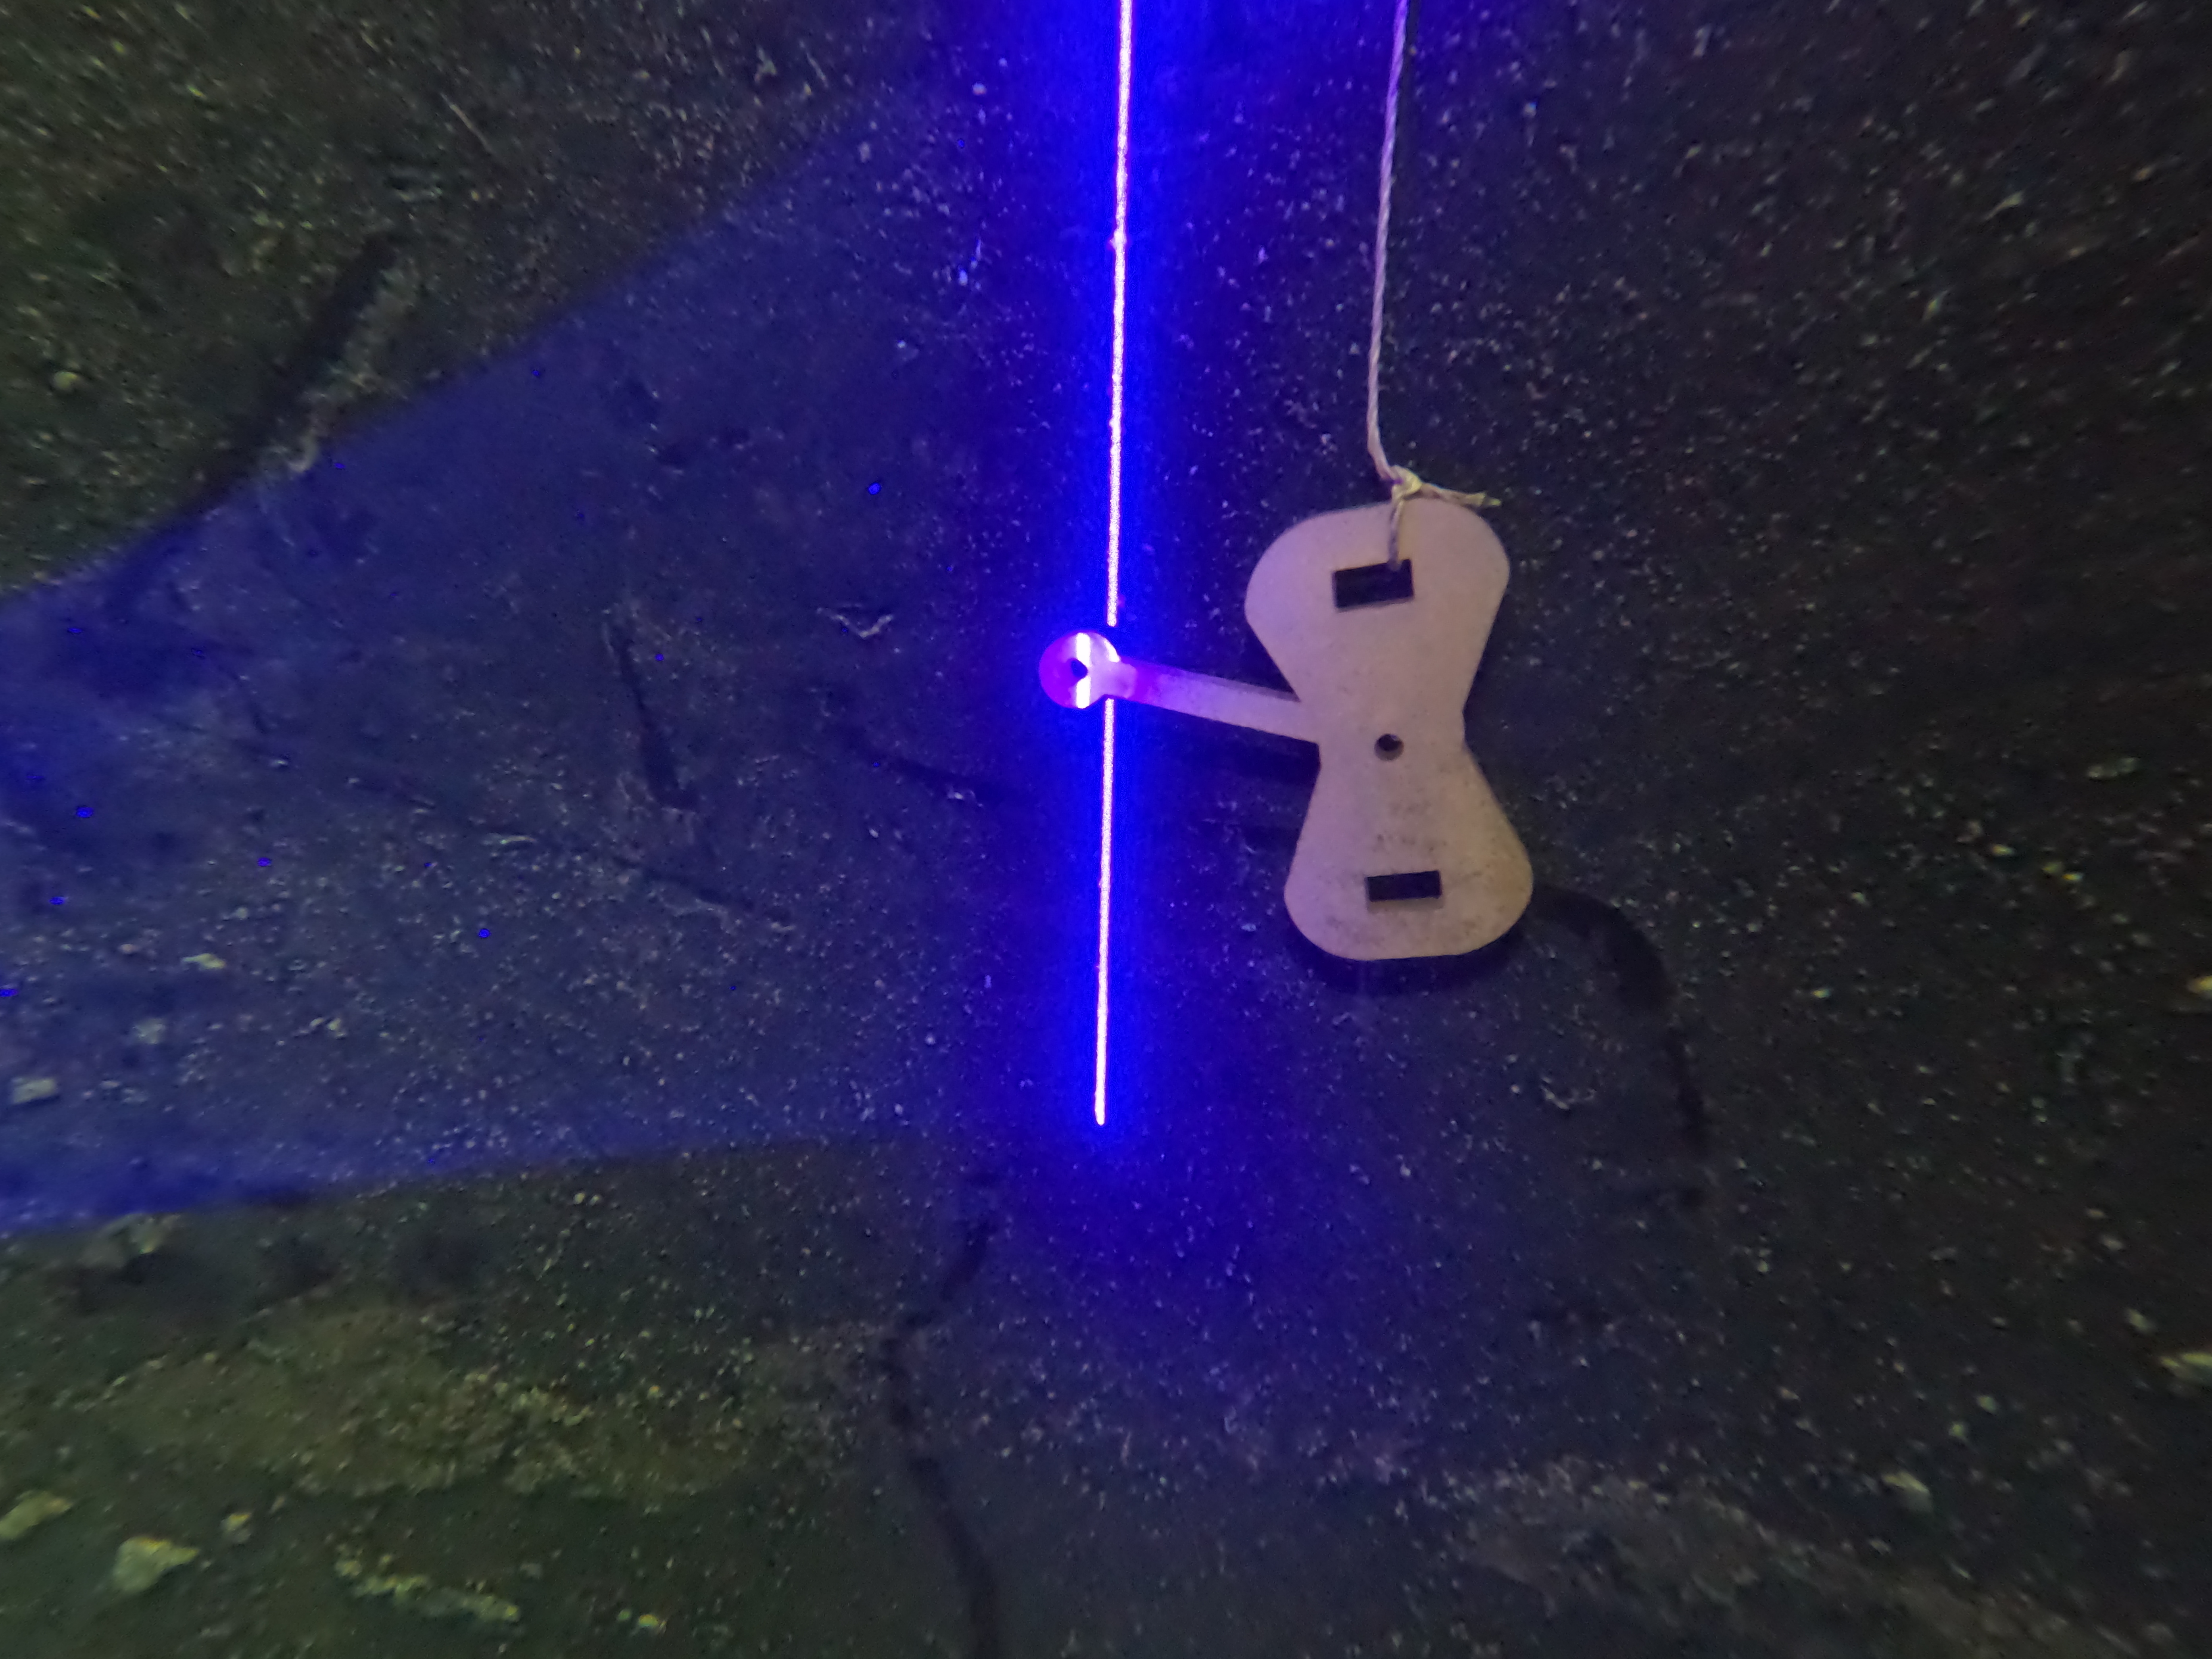

Supplement: Supplementary file 2524 [file G0016102.pdf › Level_2_2/G0016102.pdf]

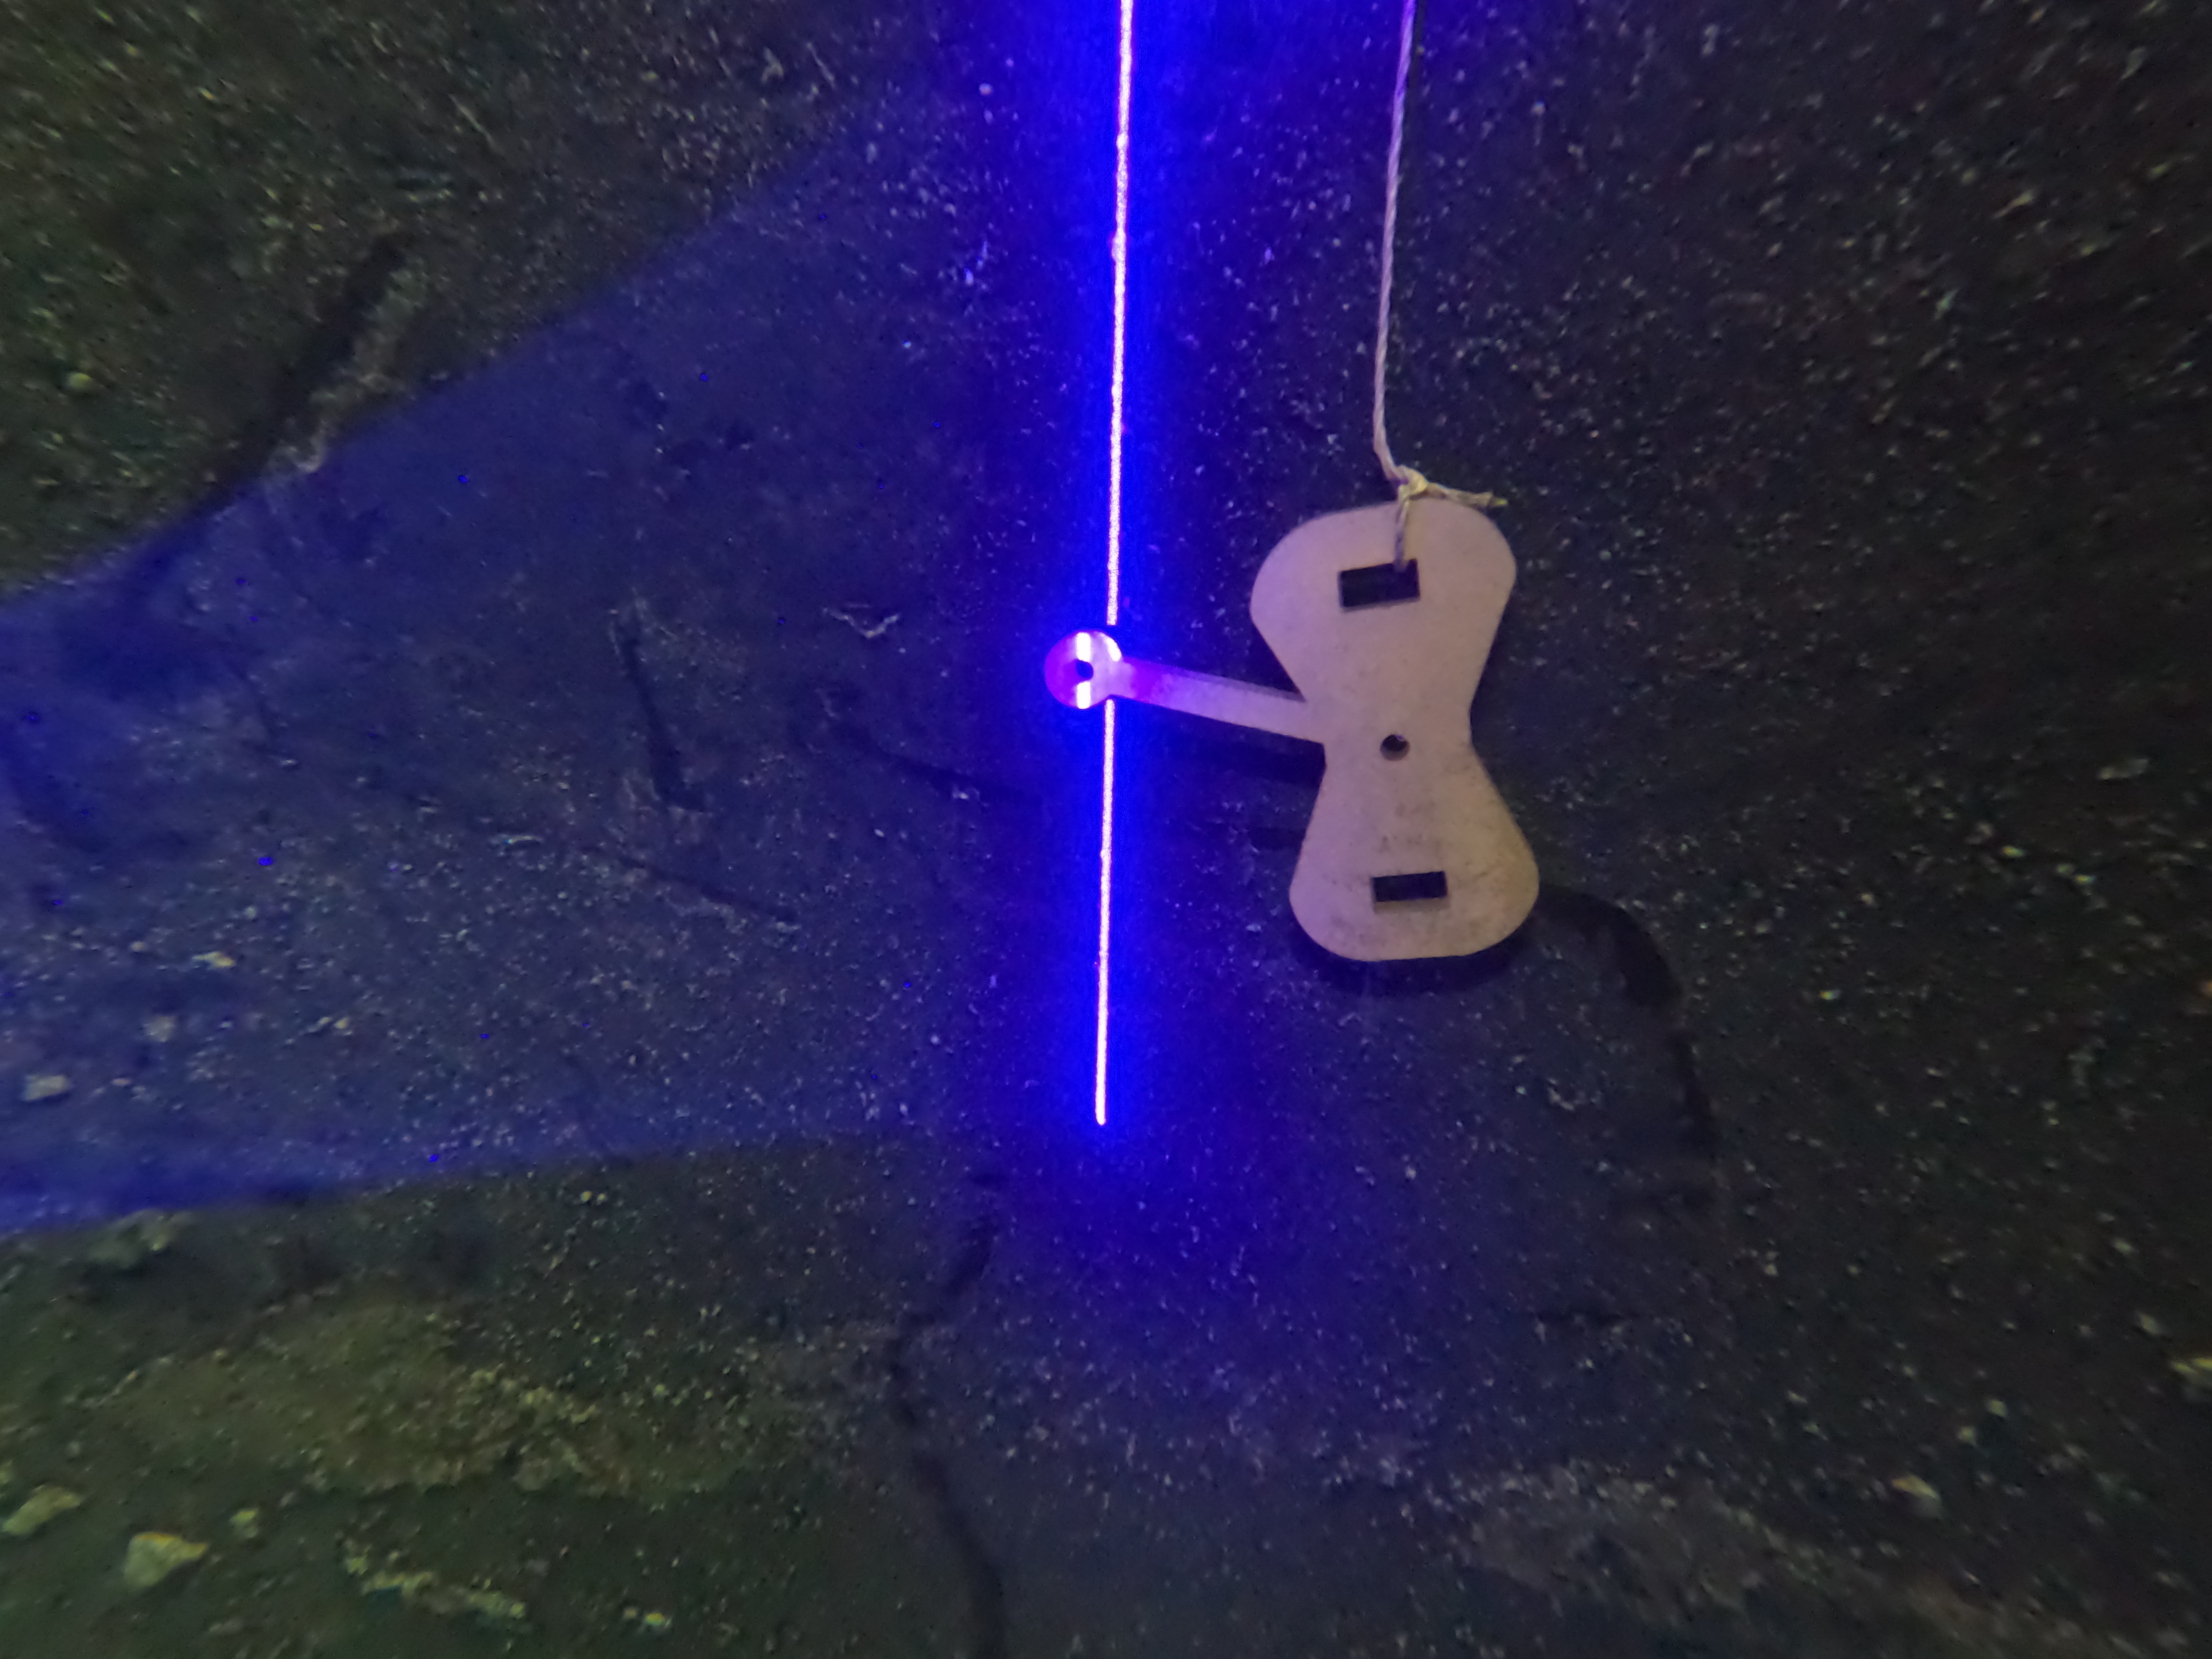

Supplement: Supplementary file 2525 [file G0016103.pdf › Level_2_2/G0016103.pdf]

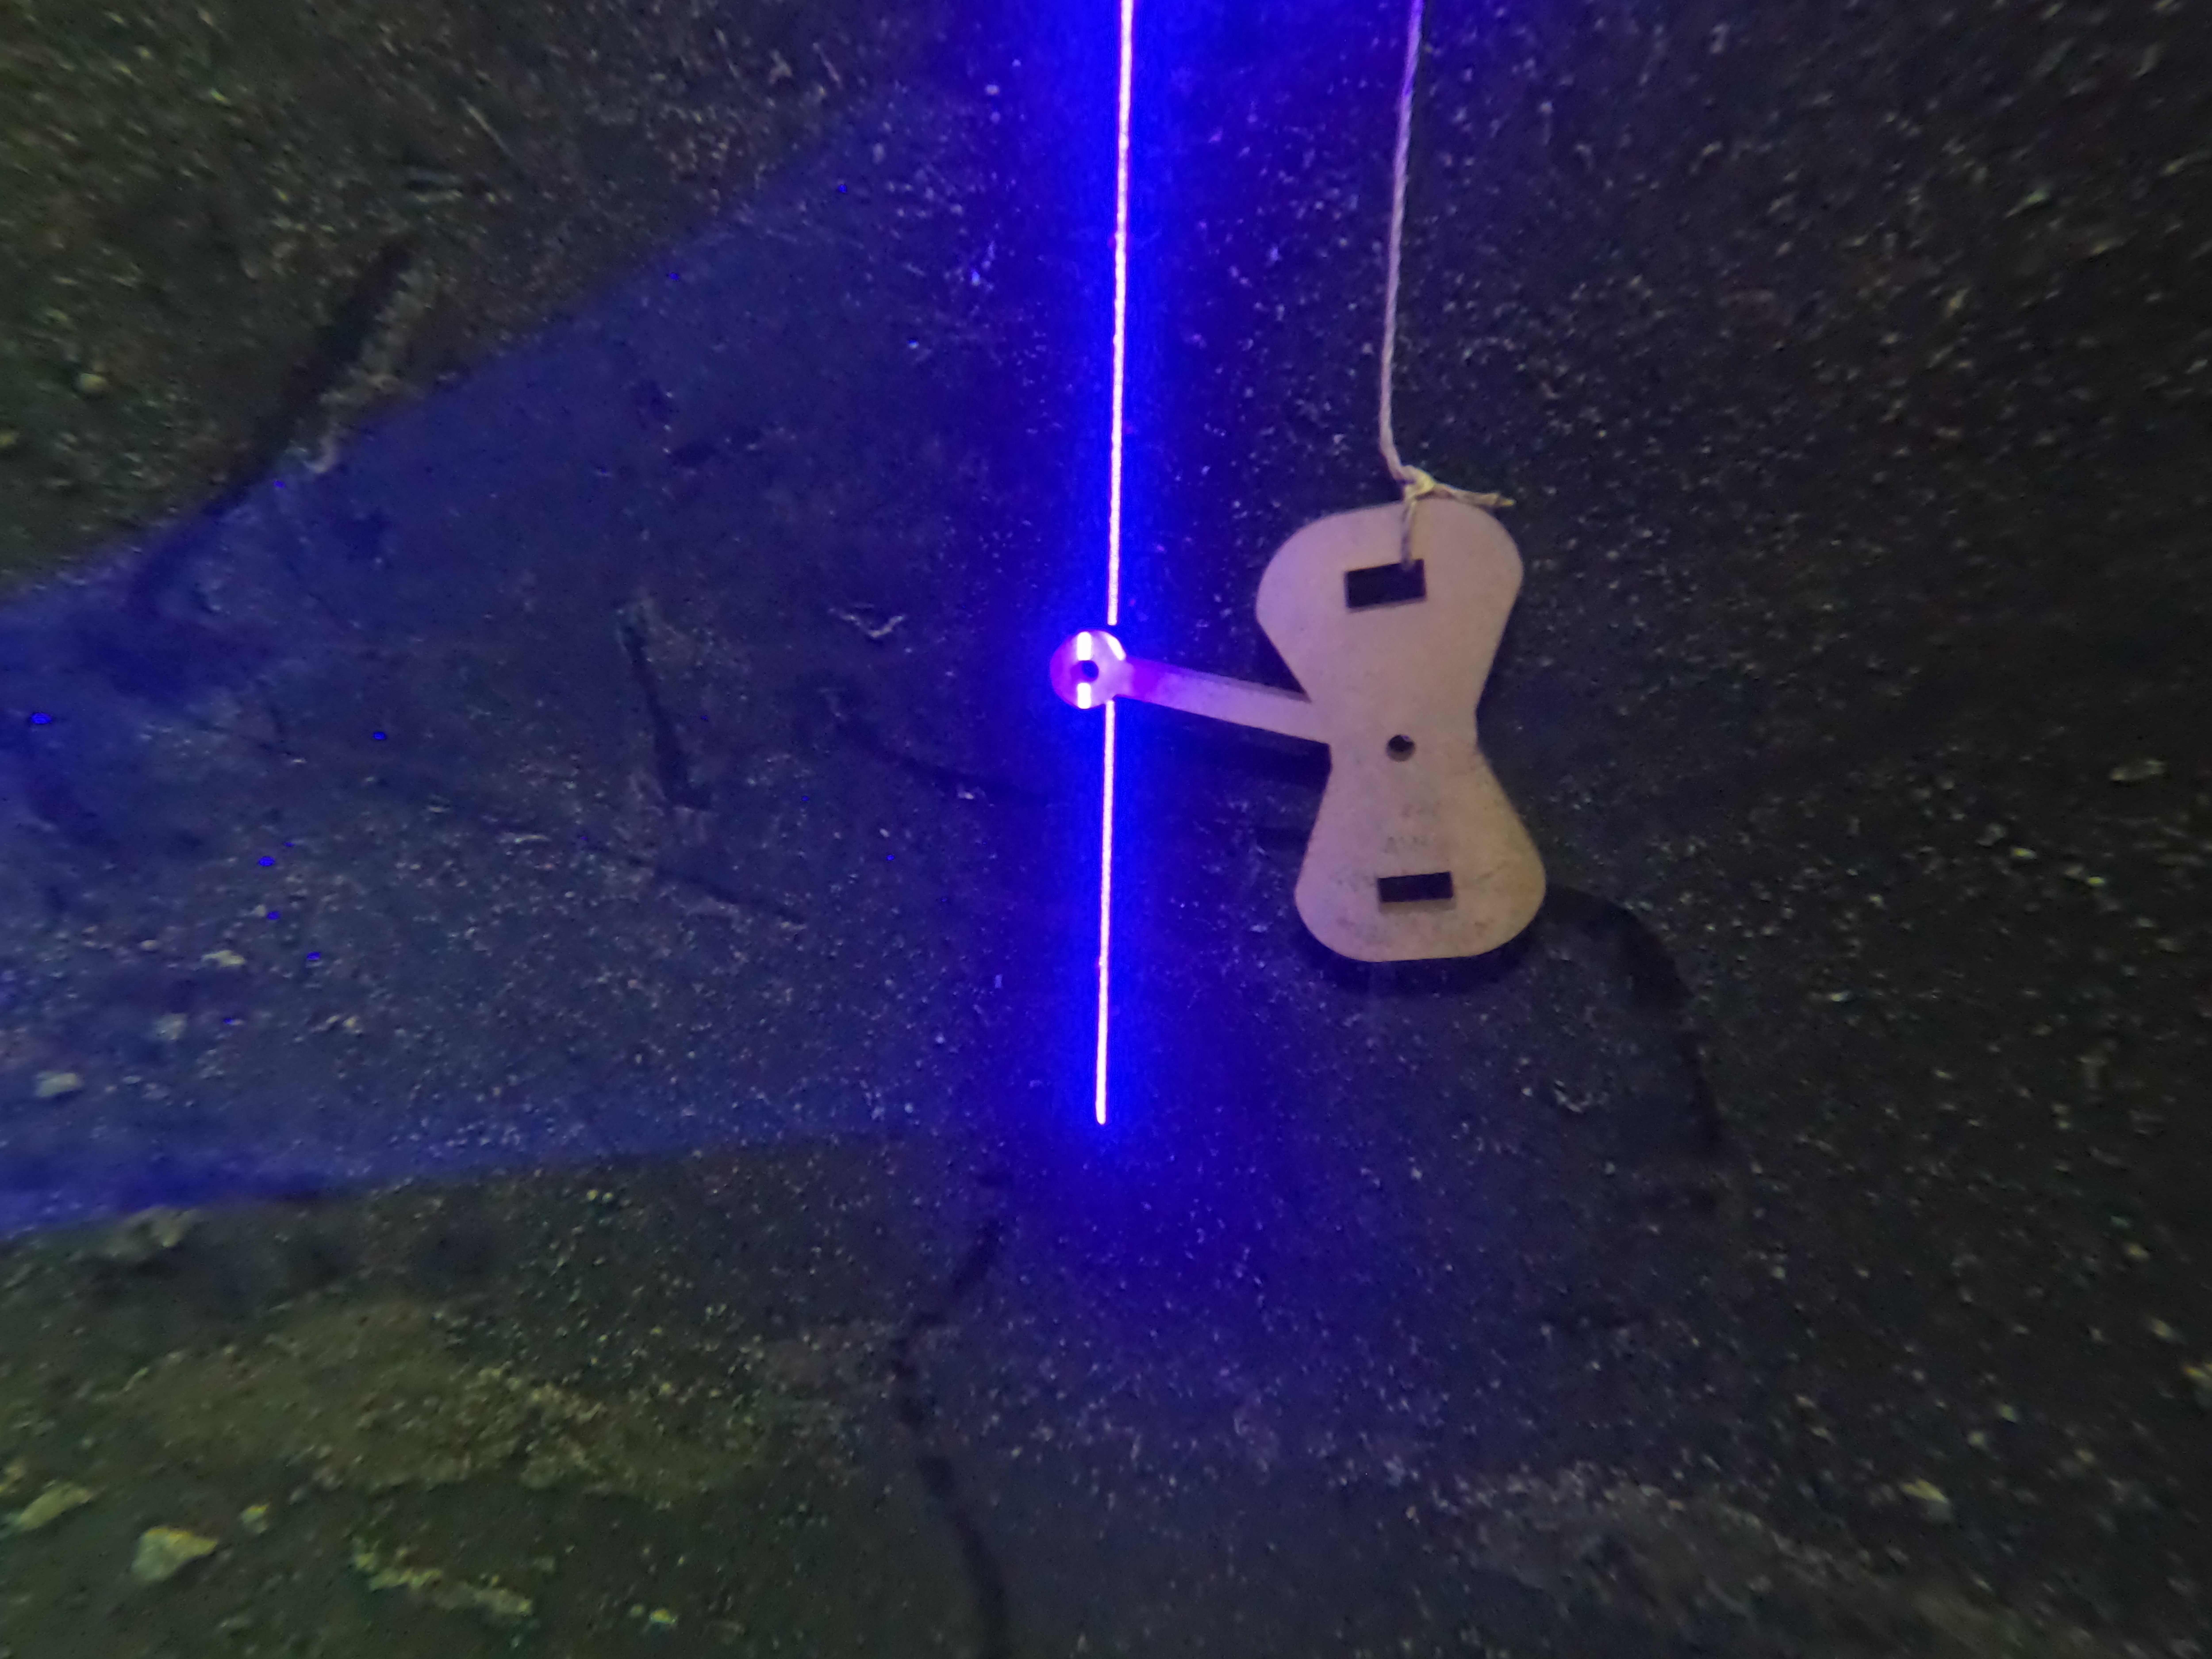

Supplement: Supplementary file 2526 [file G0016104.pdf › Level_2_2/G0016104.pdf]

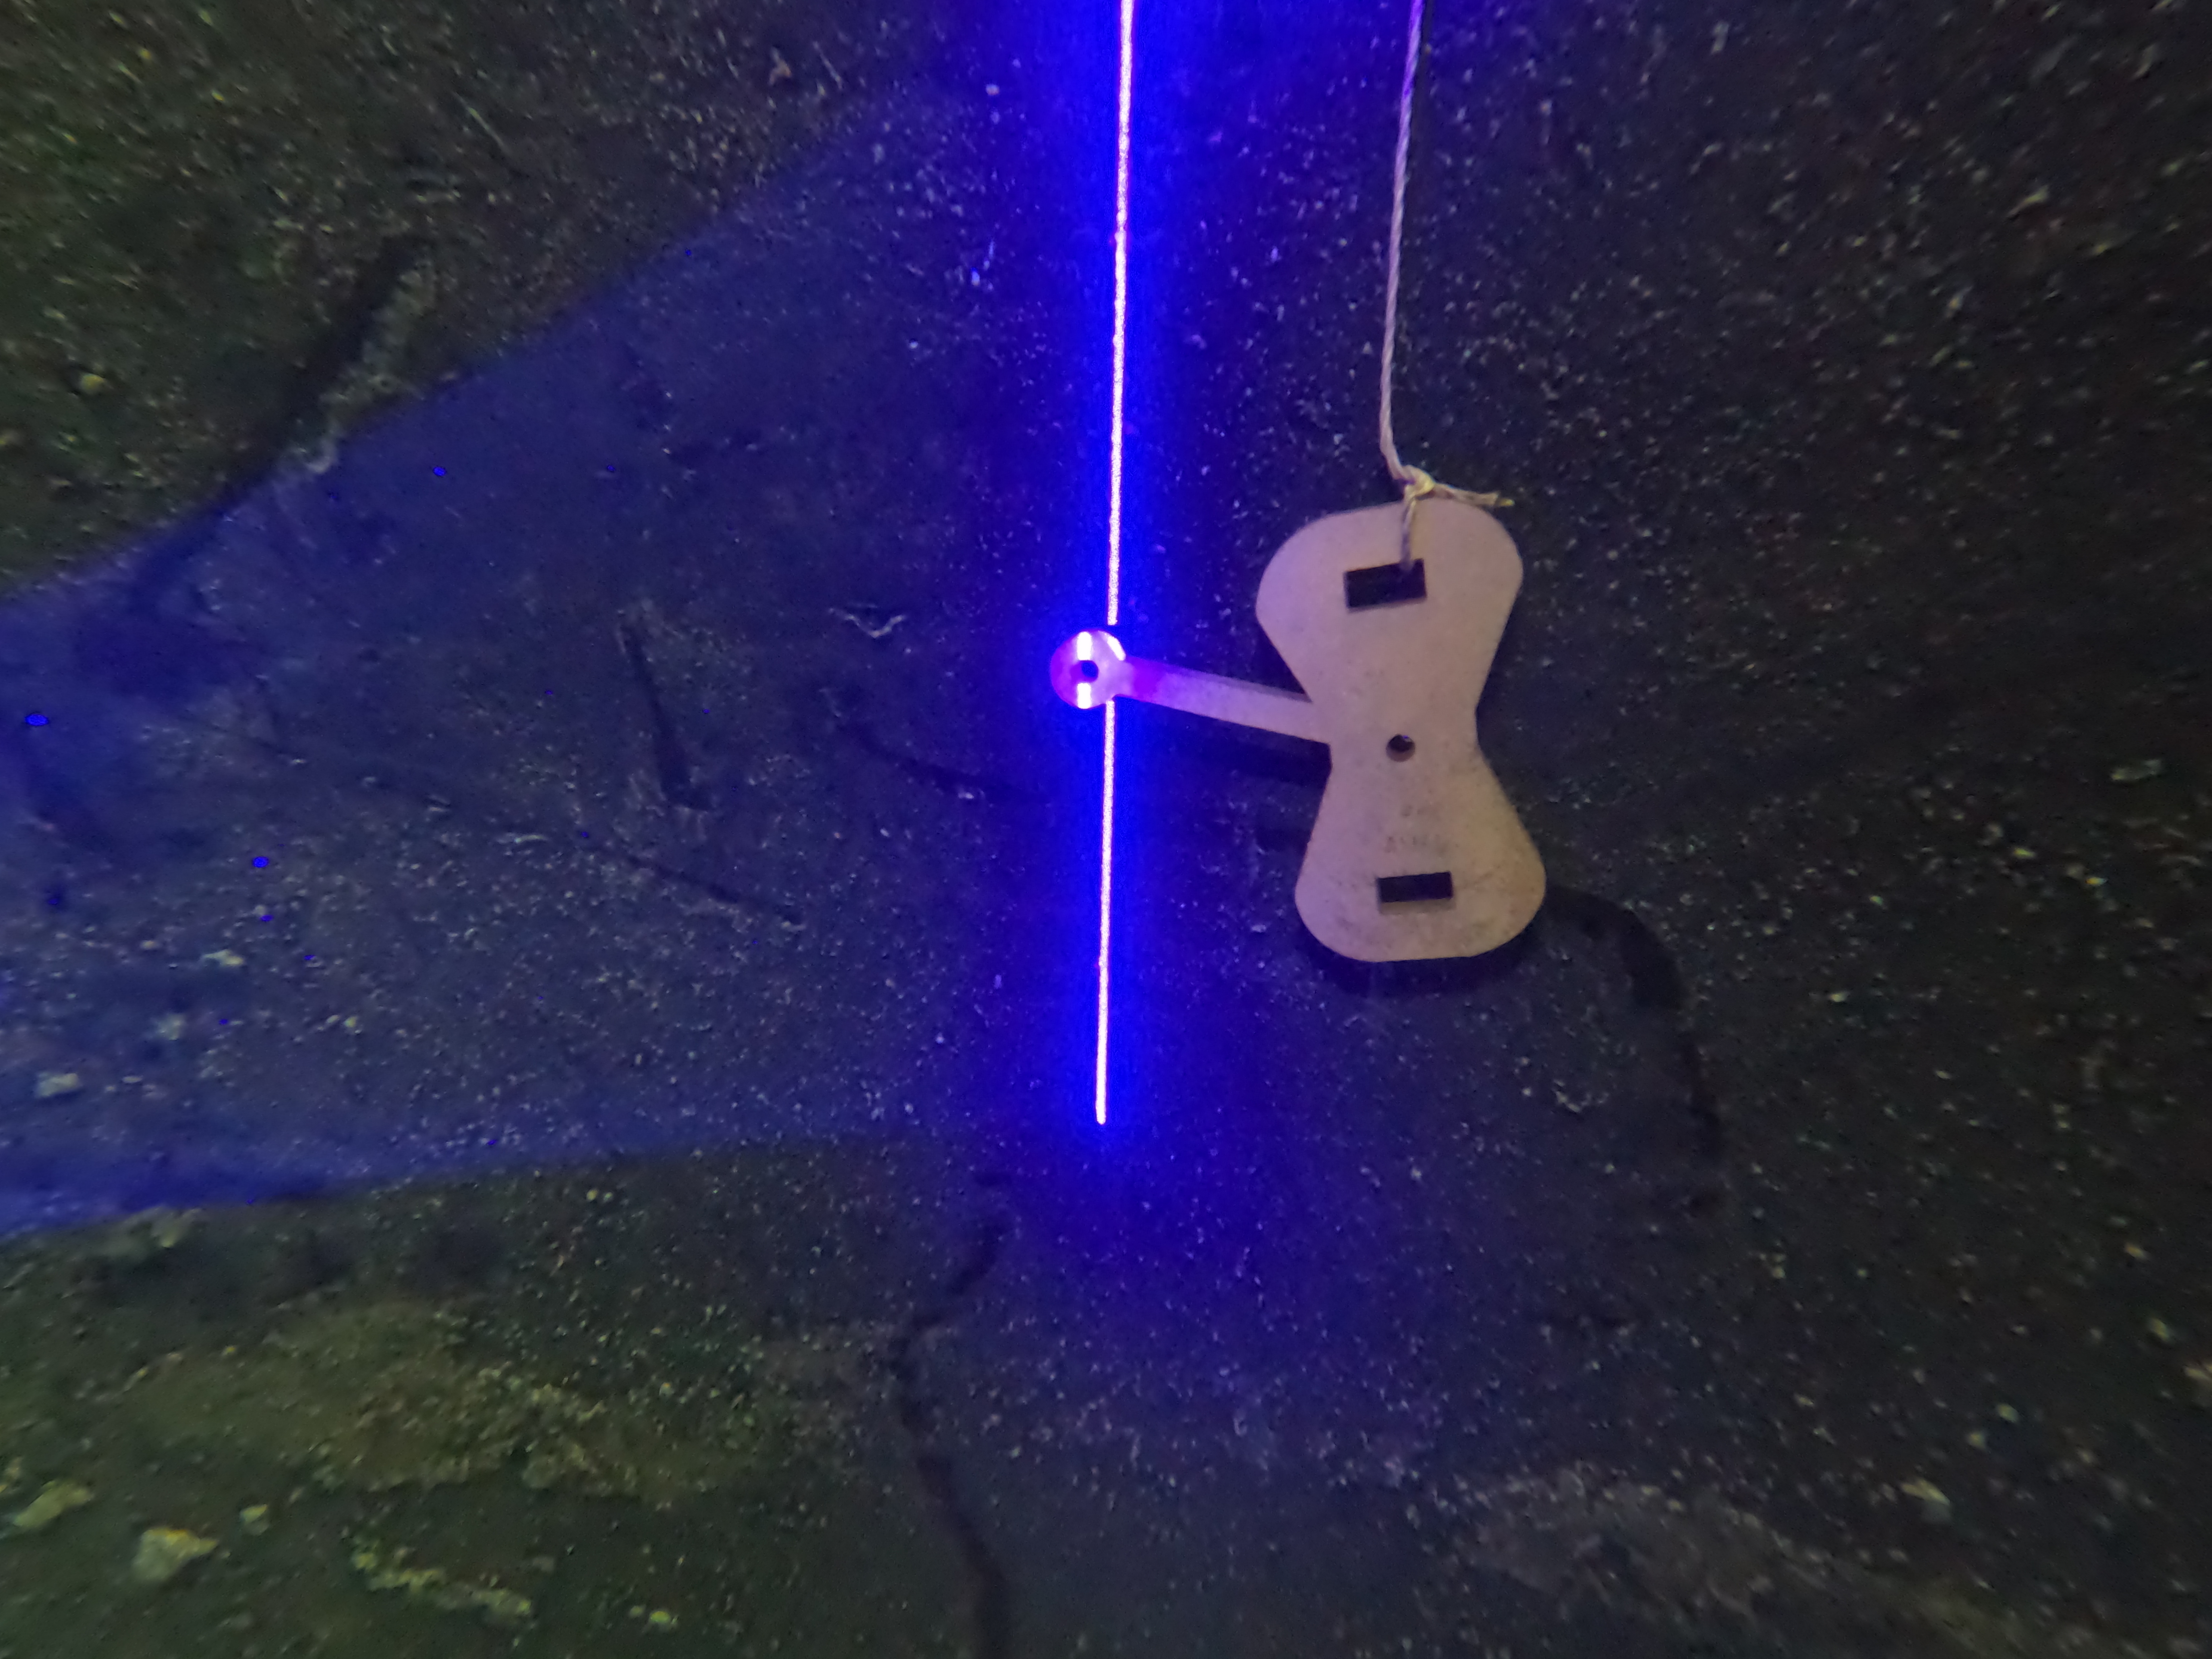

Supplement: Supplementary file 2527 [file G0016105.pdf › Level_2_2/G0016105.pdf]

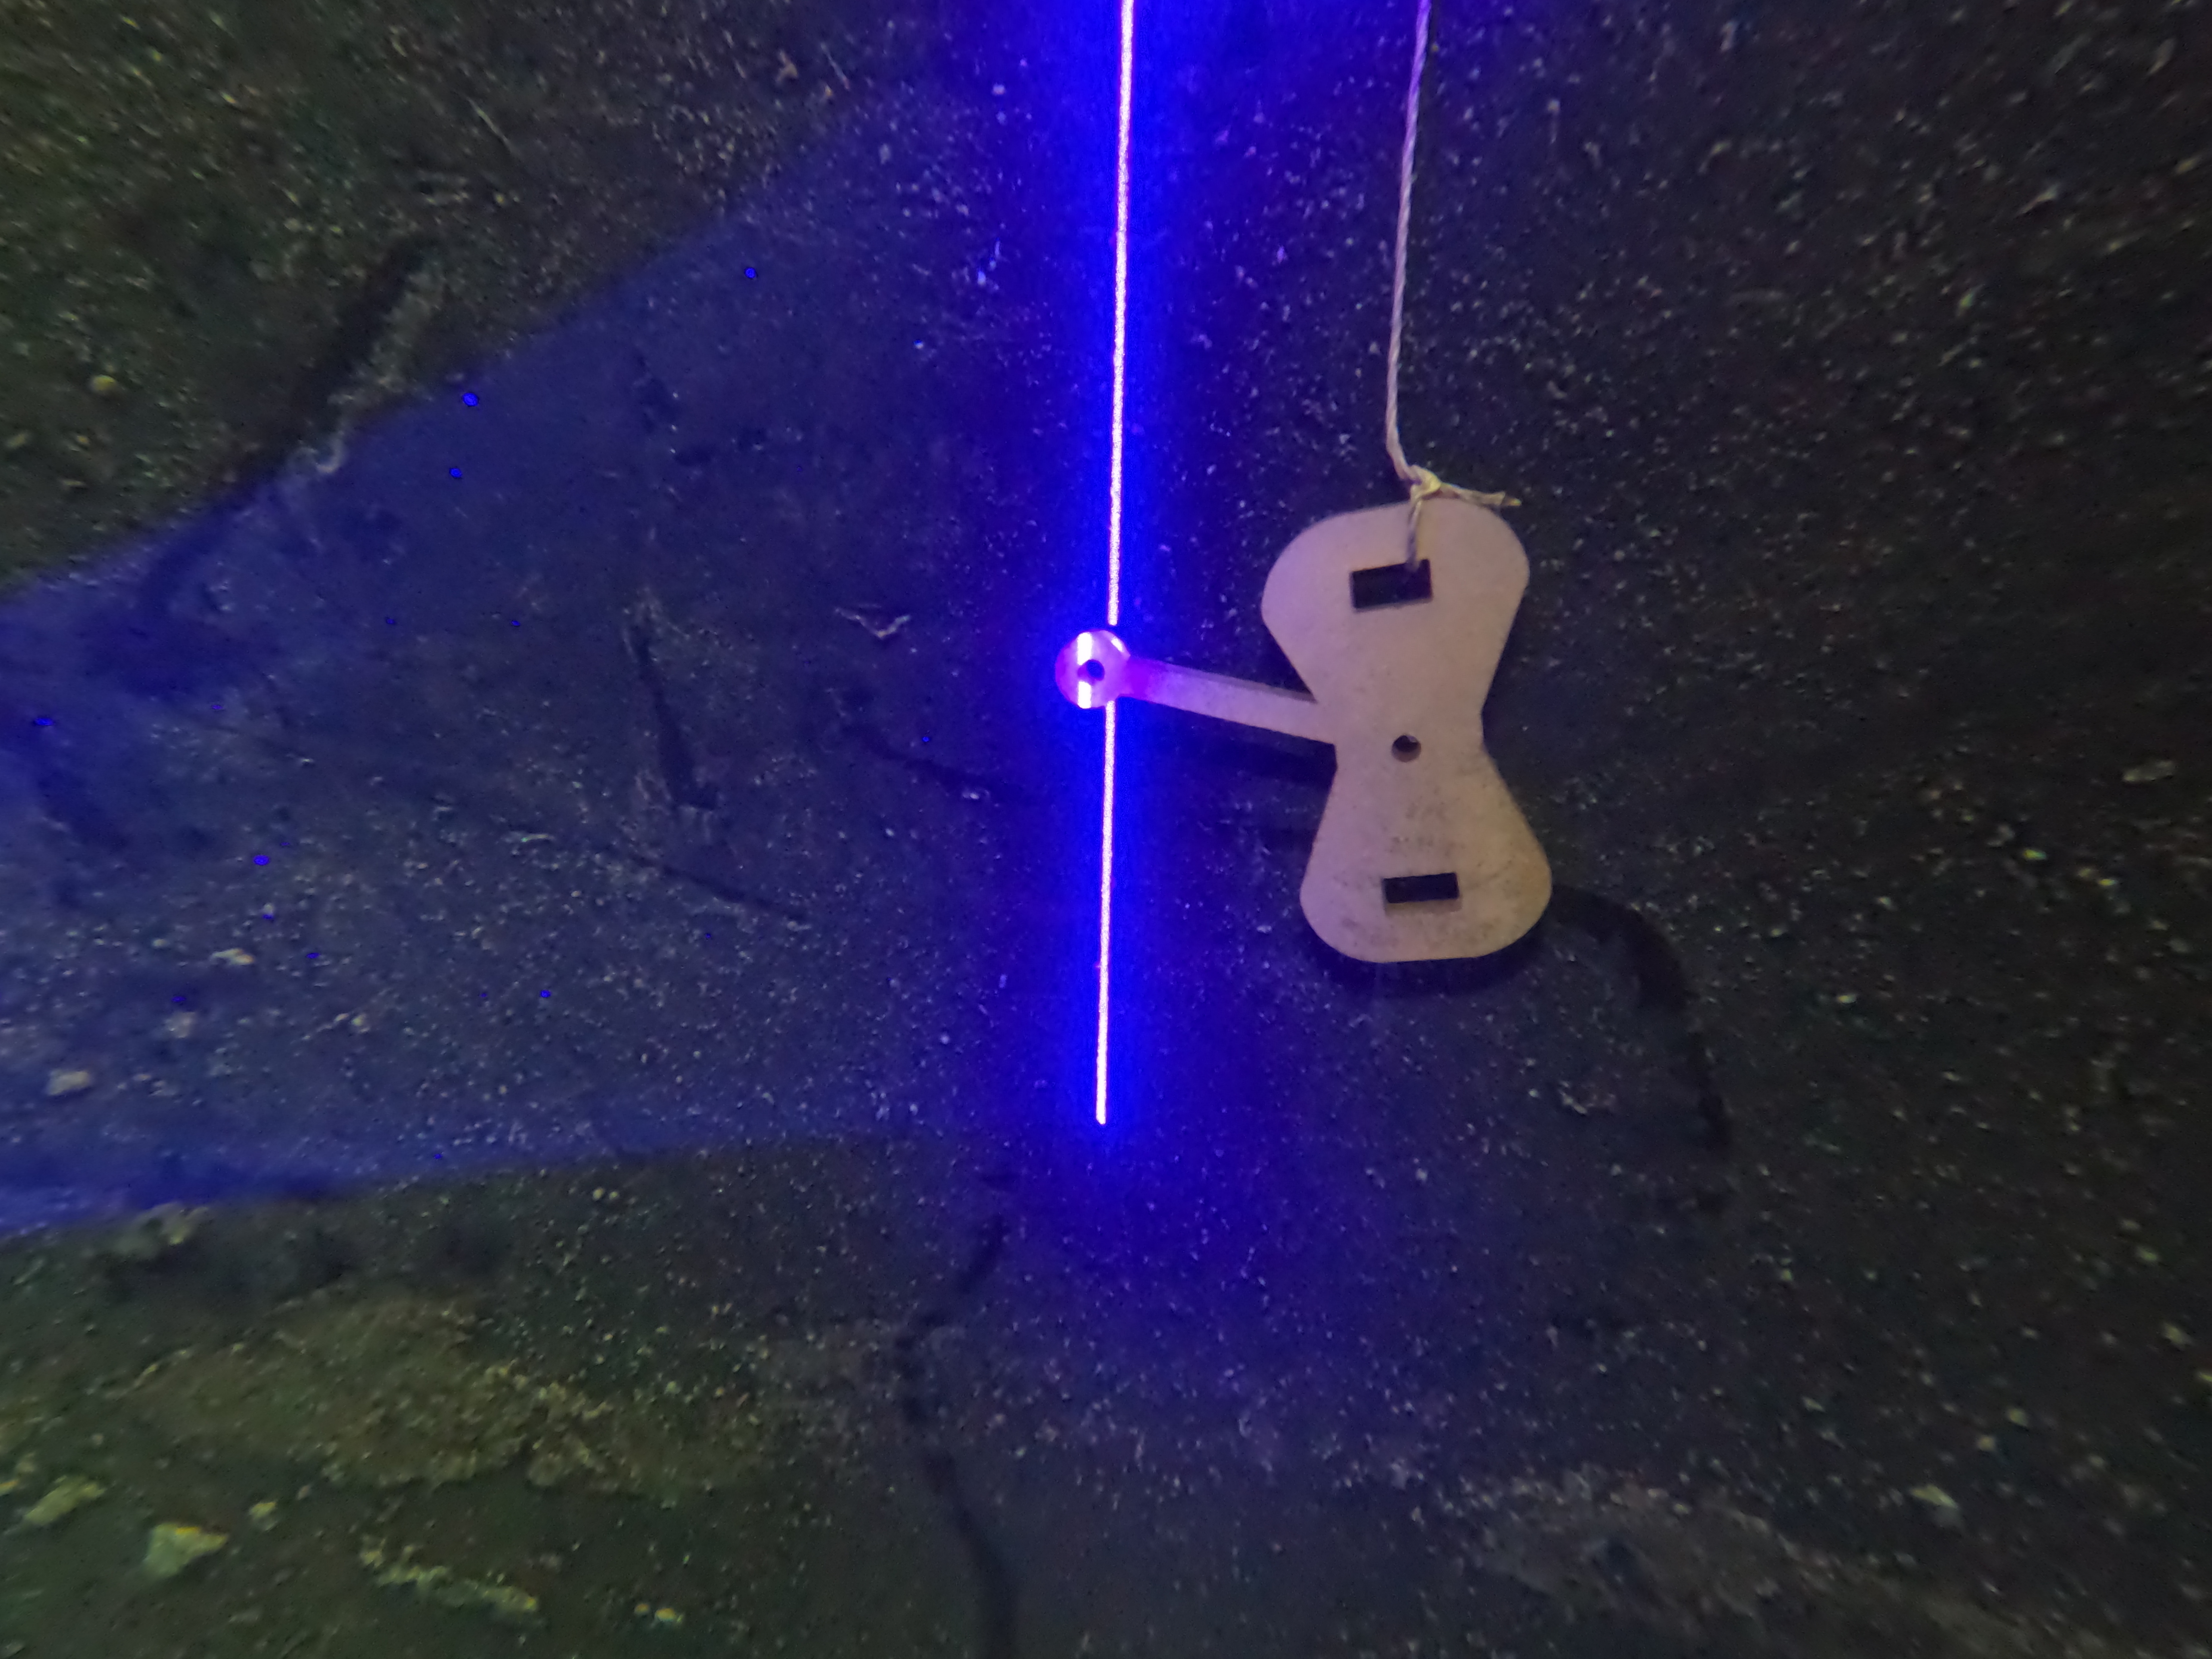

Supplement: Supplementary file 2528 [file G0016106.pdf › Level_2_2/G0016106.pdf]

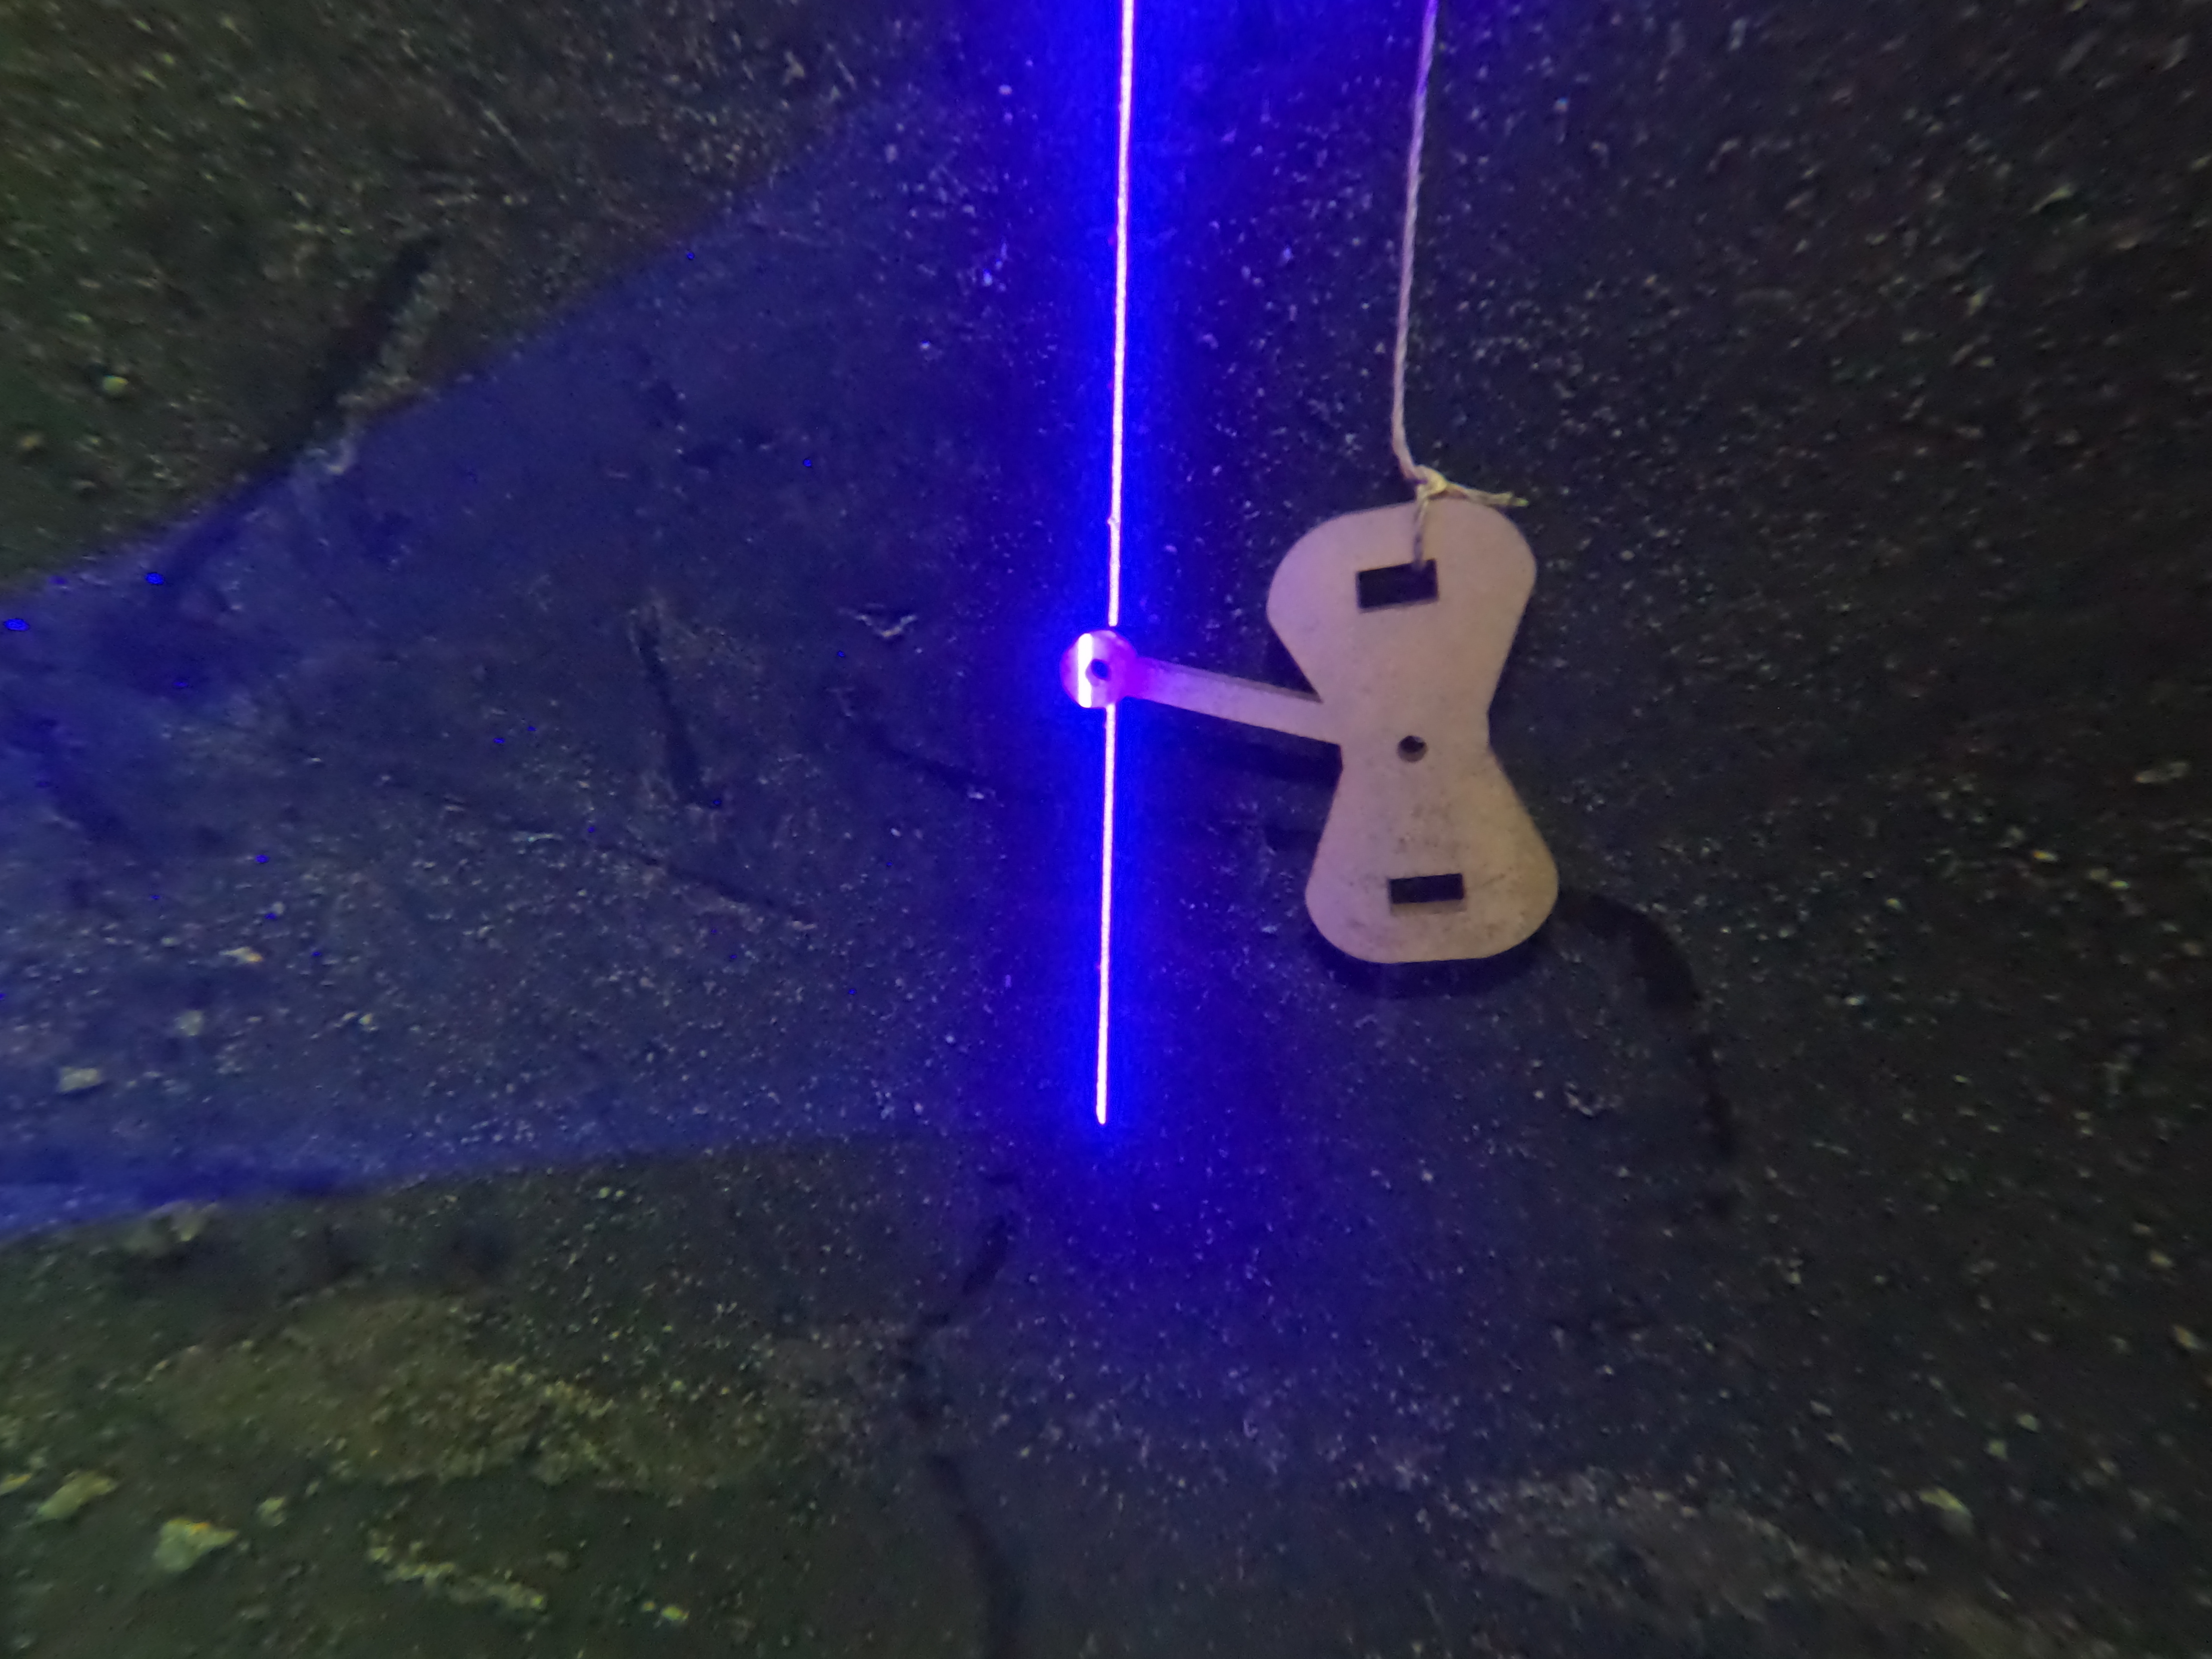

Supplement: Supplementary file 2529 [file G0016107.pdf › Level_2_2/G0016107.pdf]

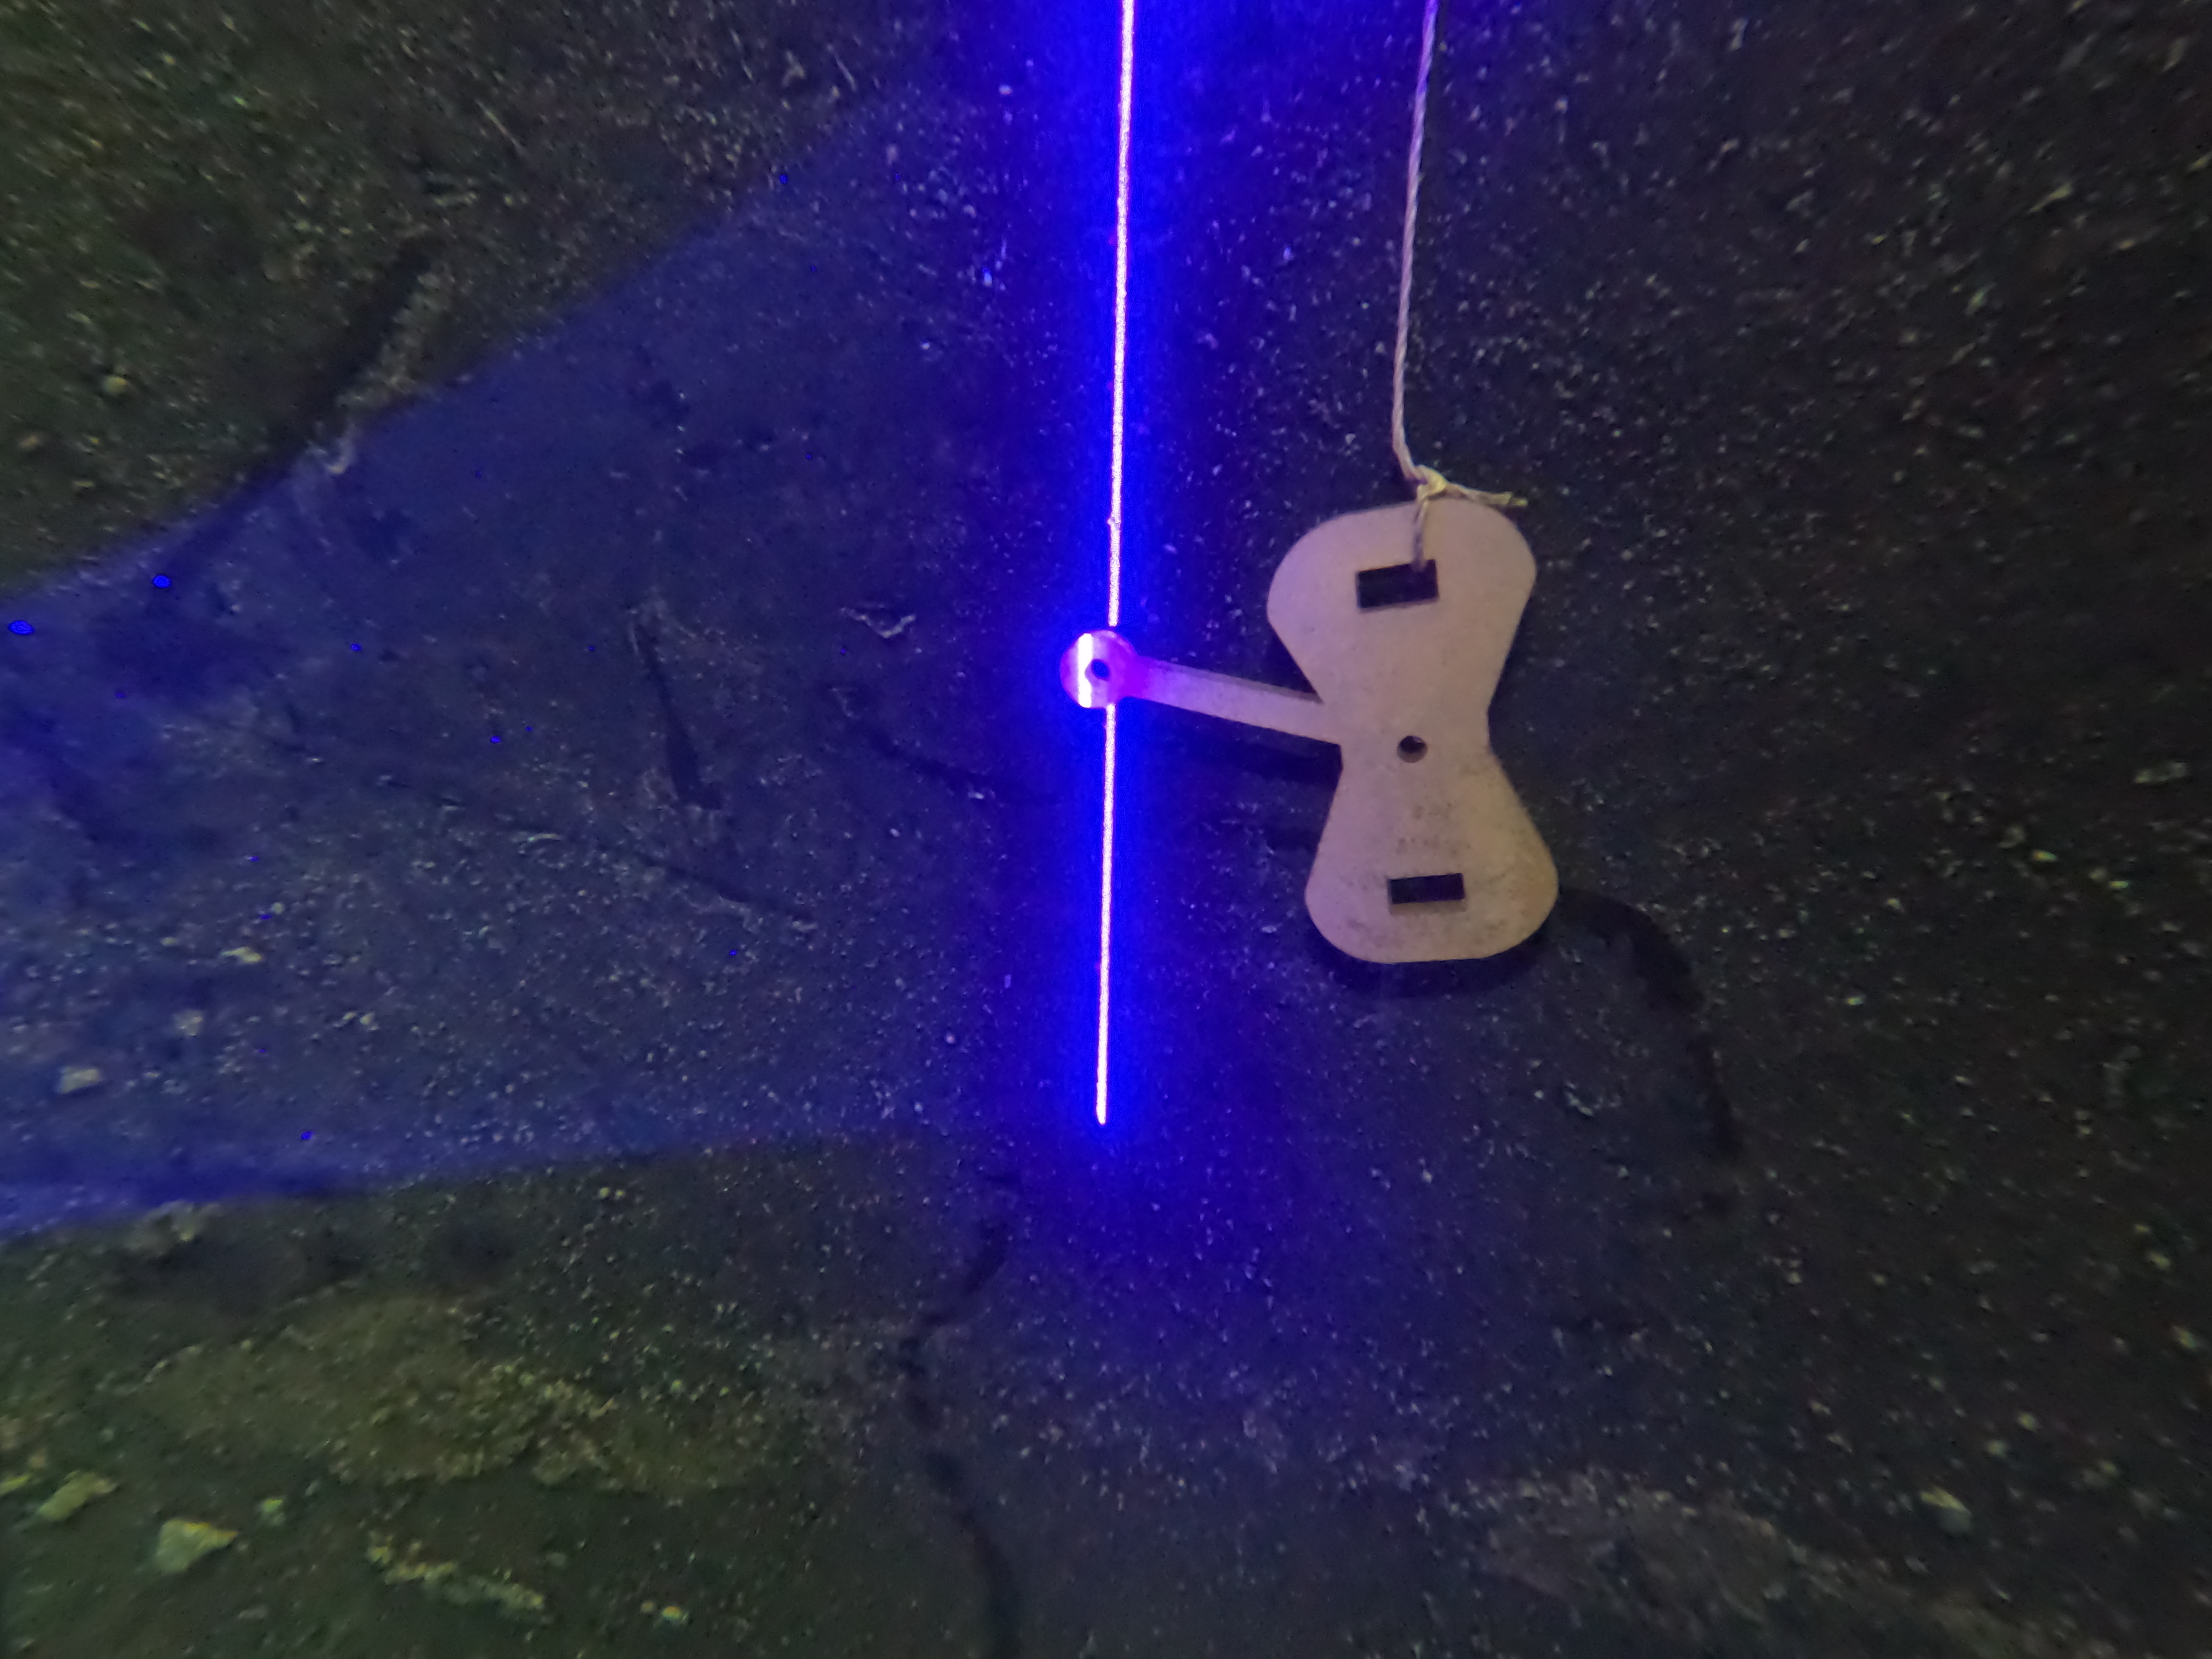

Supplement: Supplementary file 2530 [file G0016108.pdf › Level_2_2/G0016108.pdf]

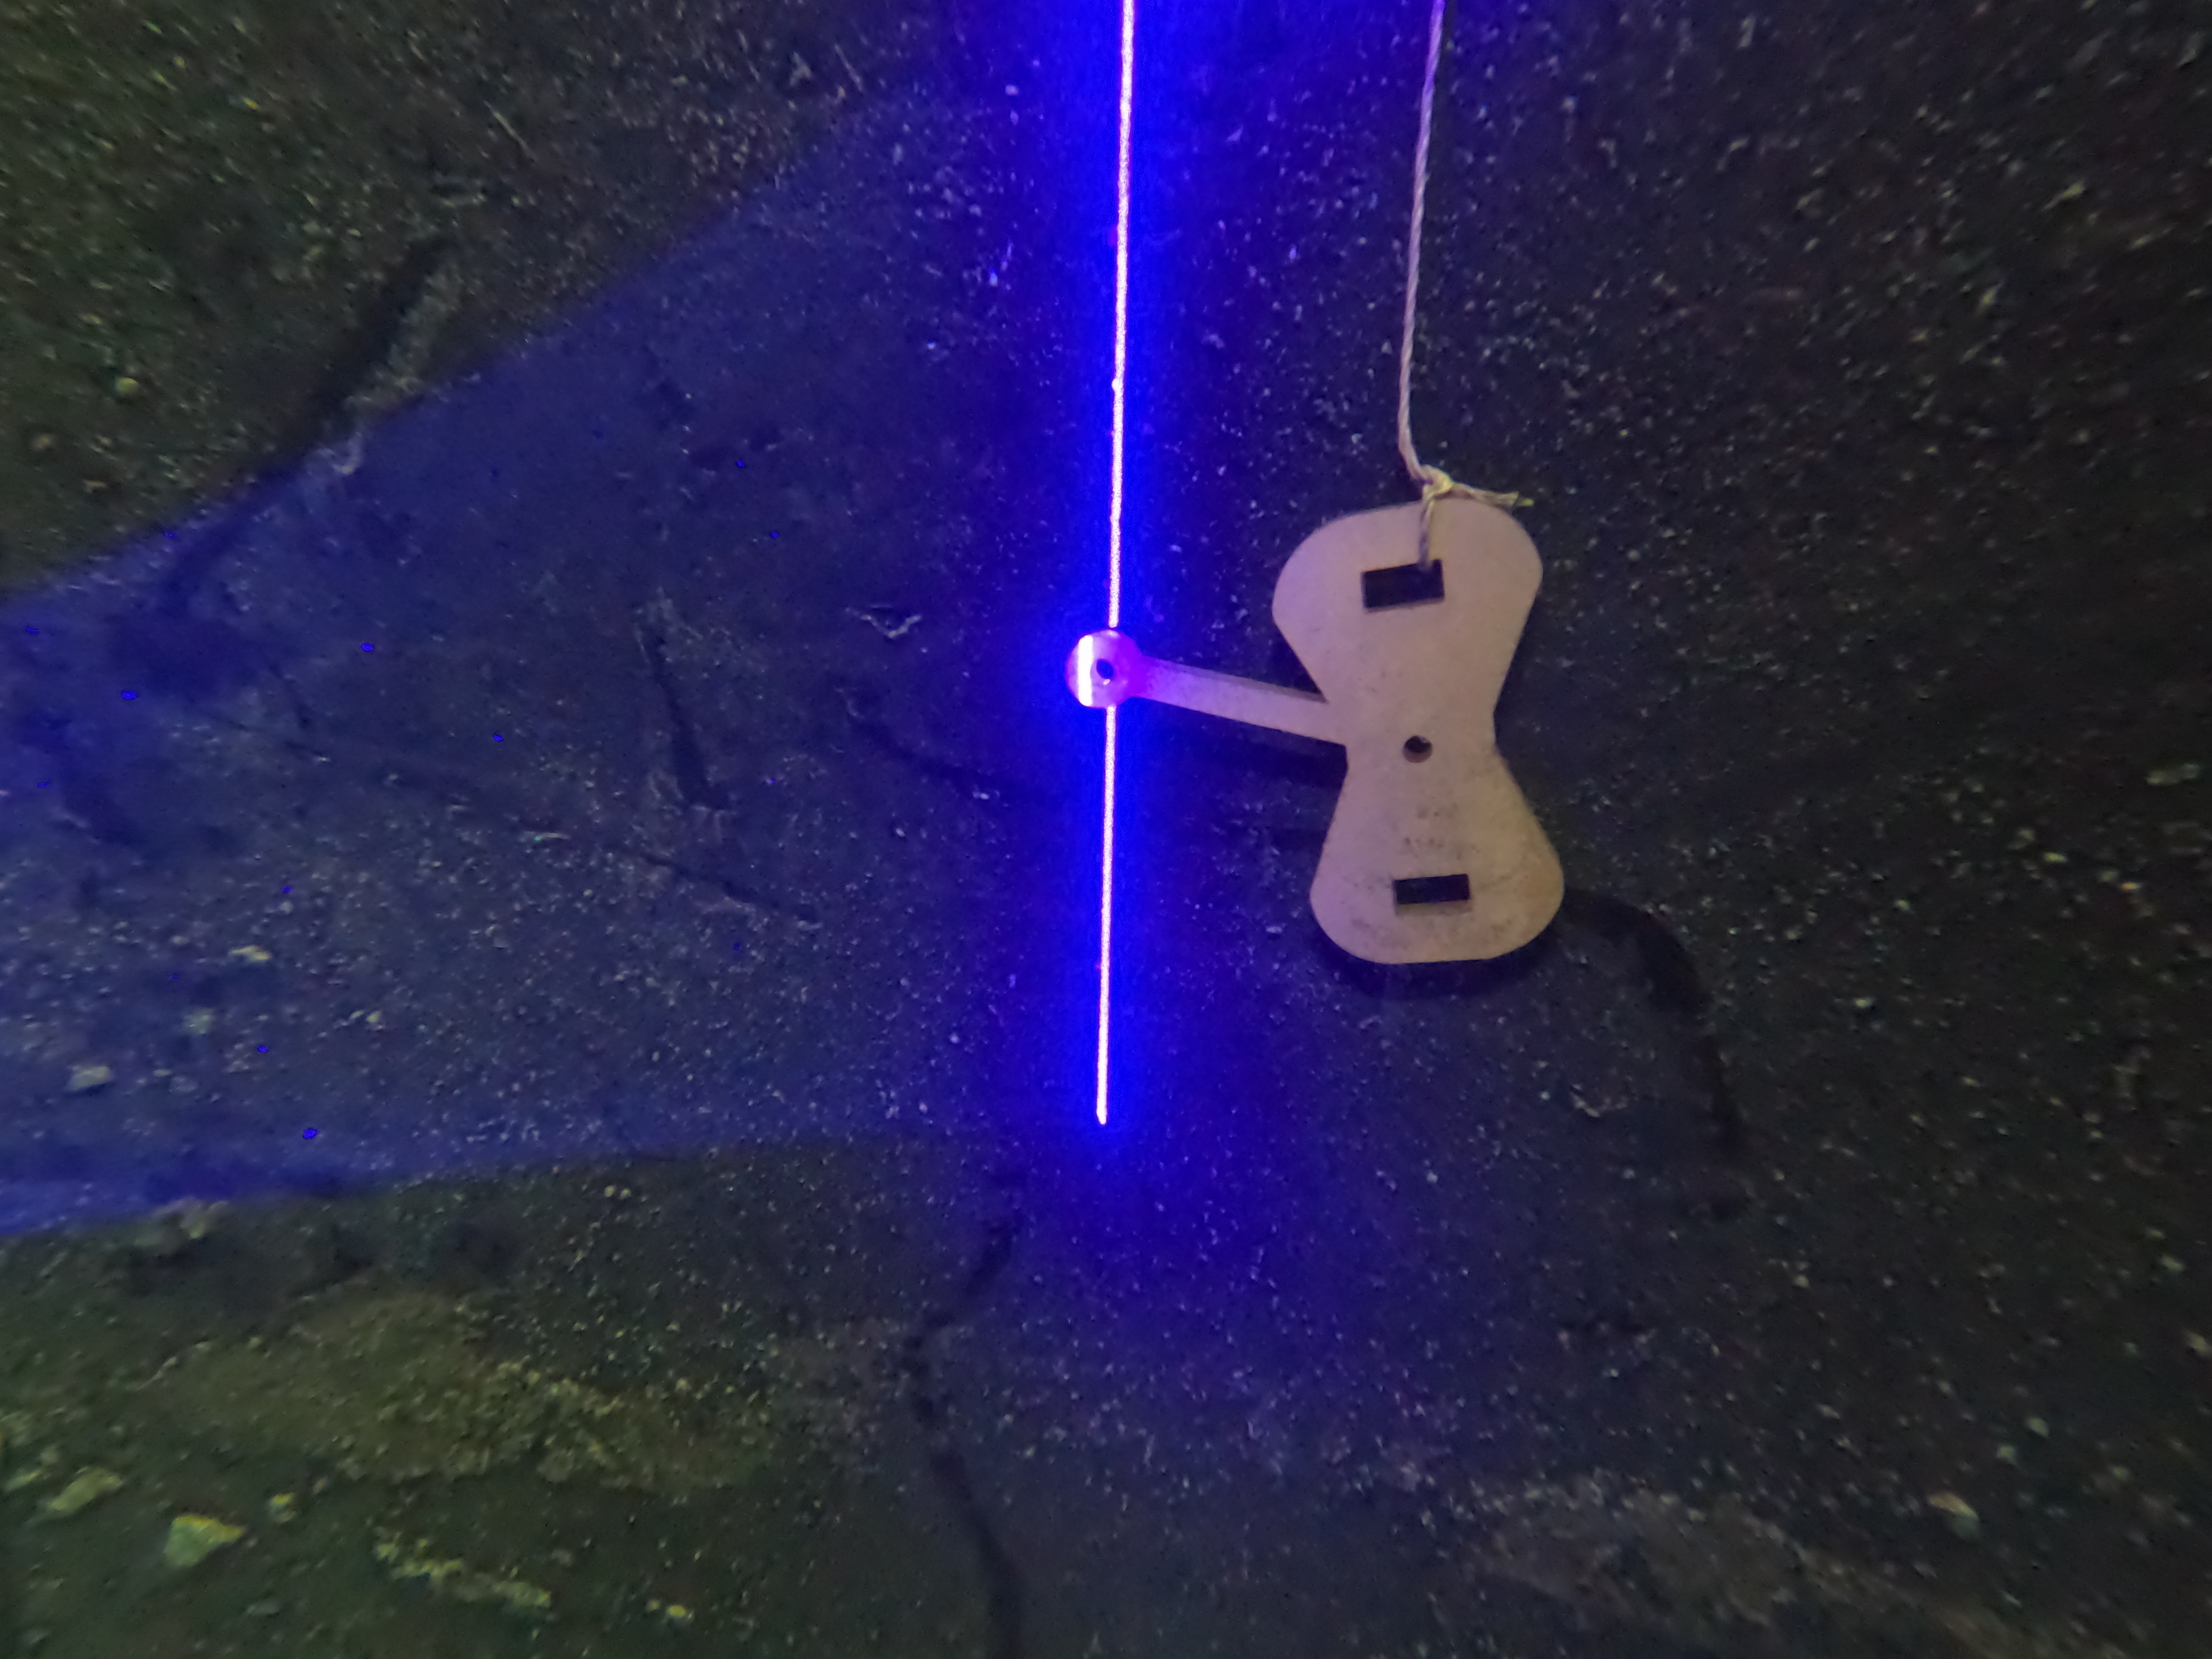

Supplement: Supplementary file 2531 [file G0016109.pdf › Level_2_2/G0016109.pdf]

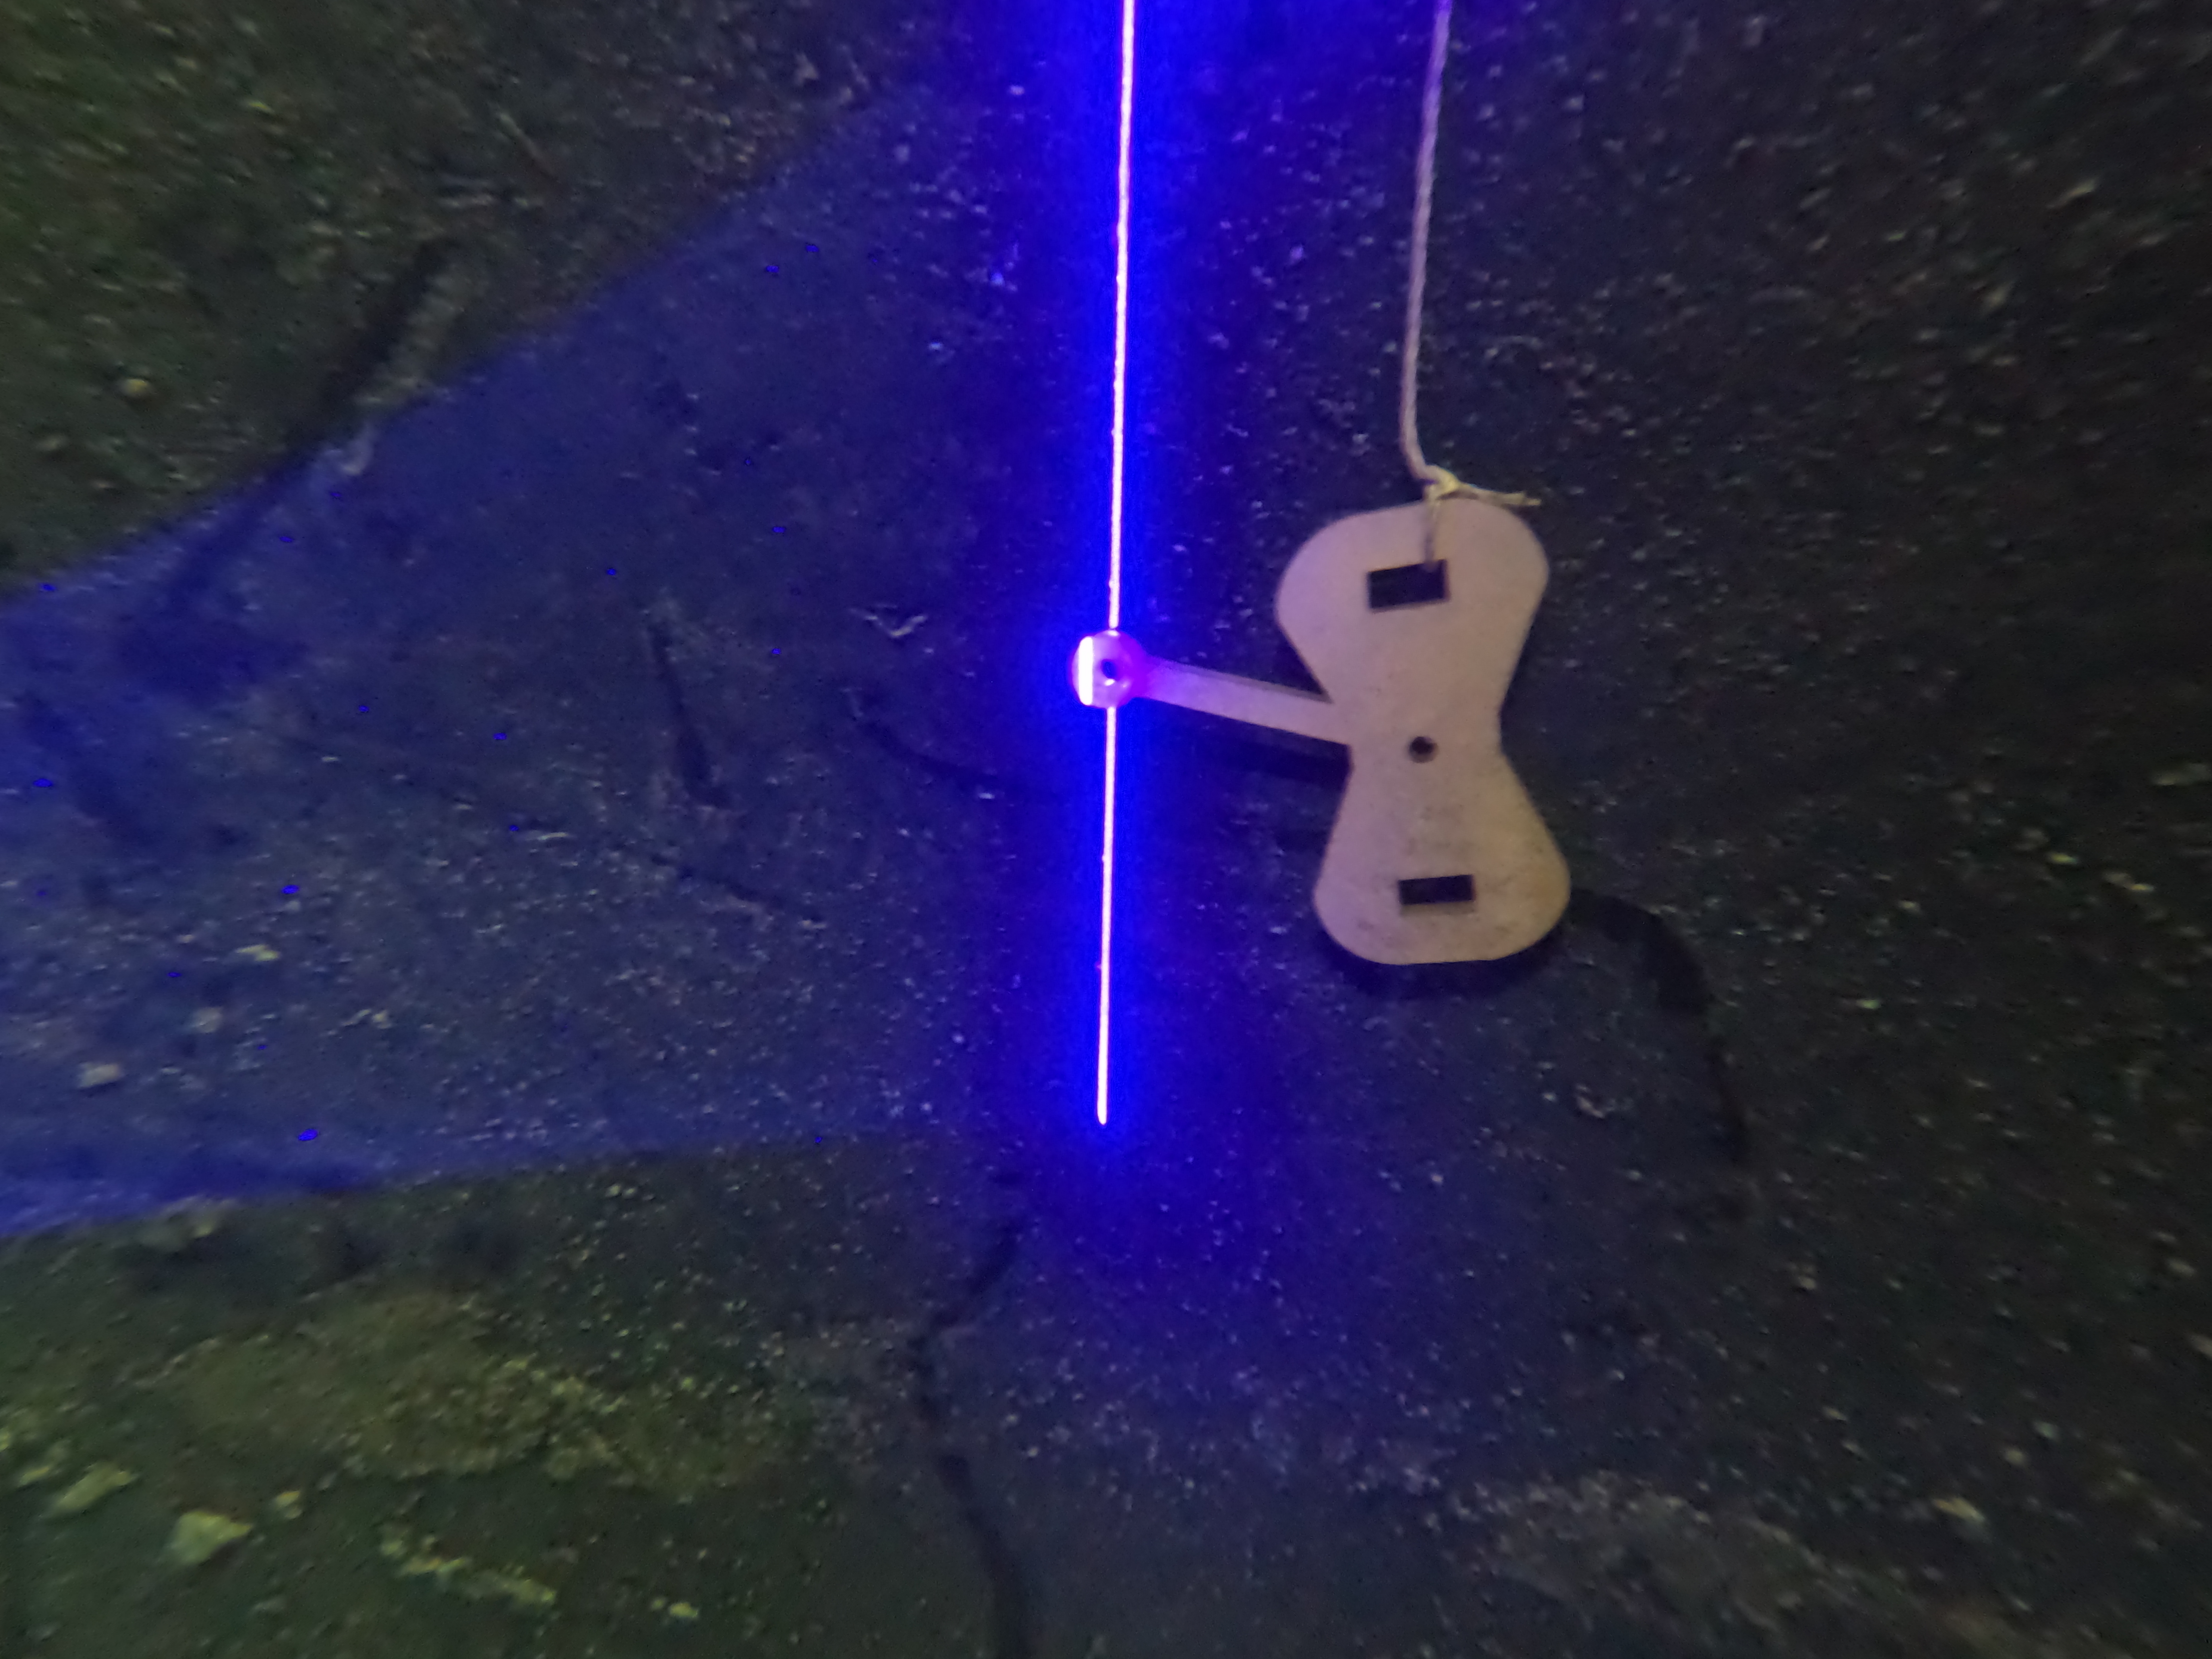

Supplement: Supplementary file 2532 [file G0016110.pdf › Level_2_2/G0016110.pdf]

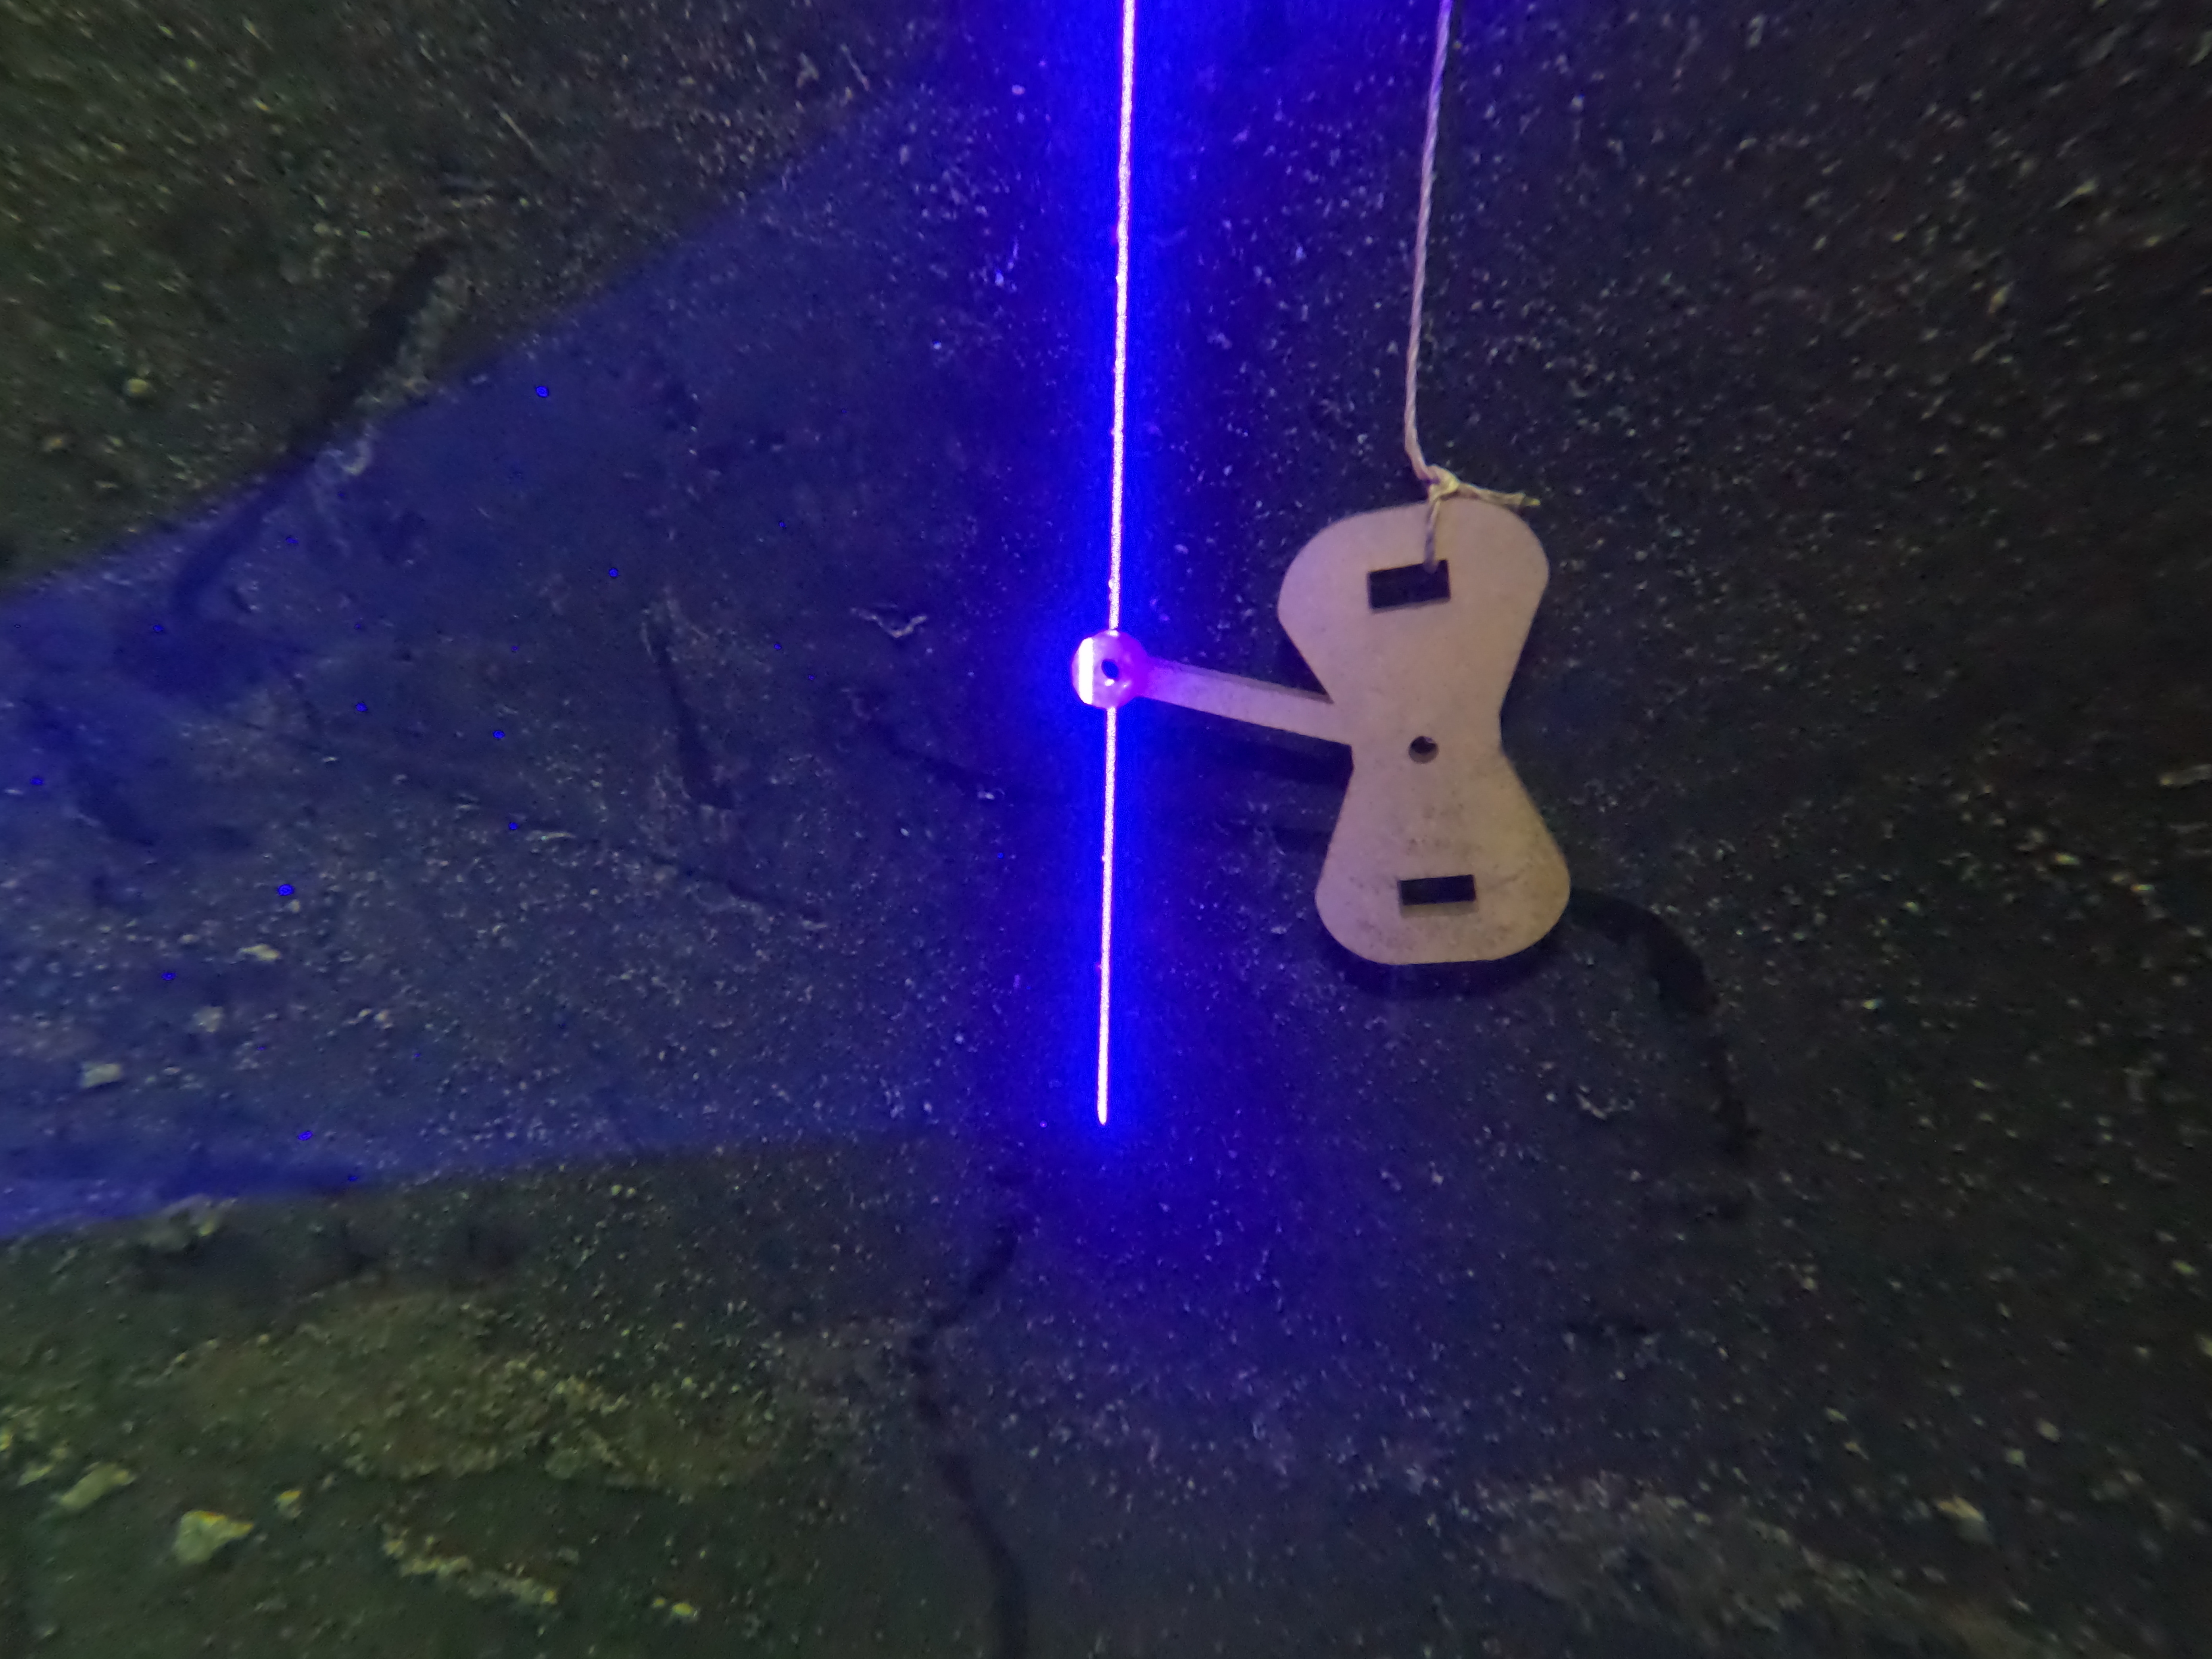

Supplement: Supplementary file 2533 [file G0016111.pdf › Level_2_2/G0016111.pdf]

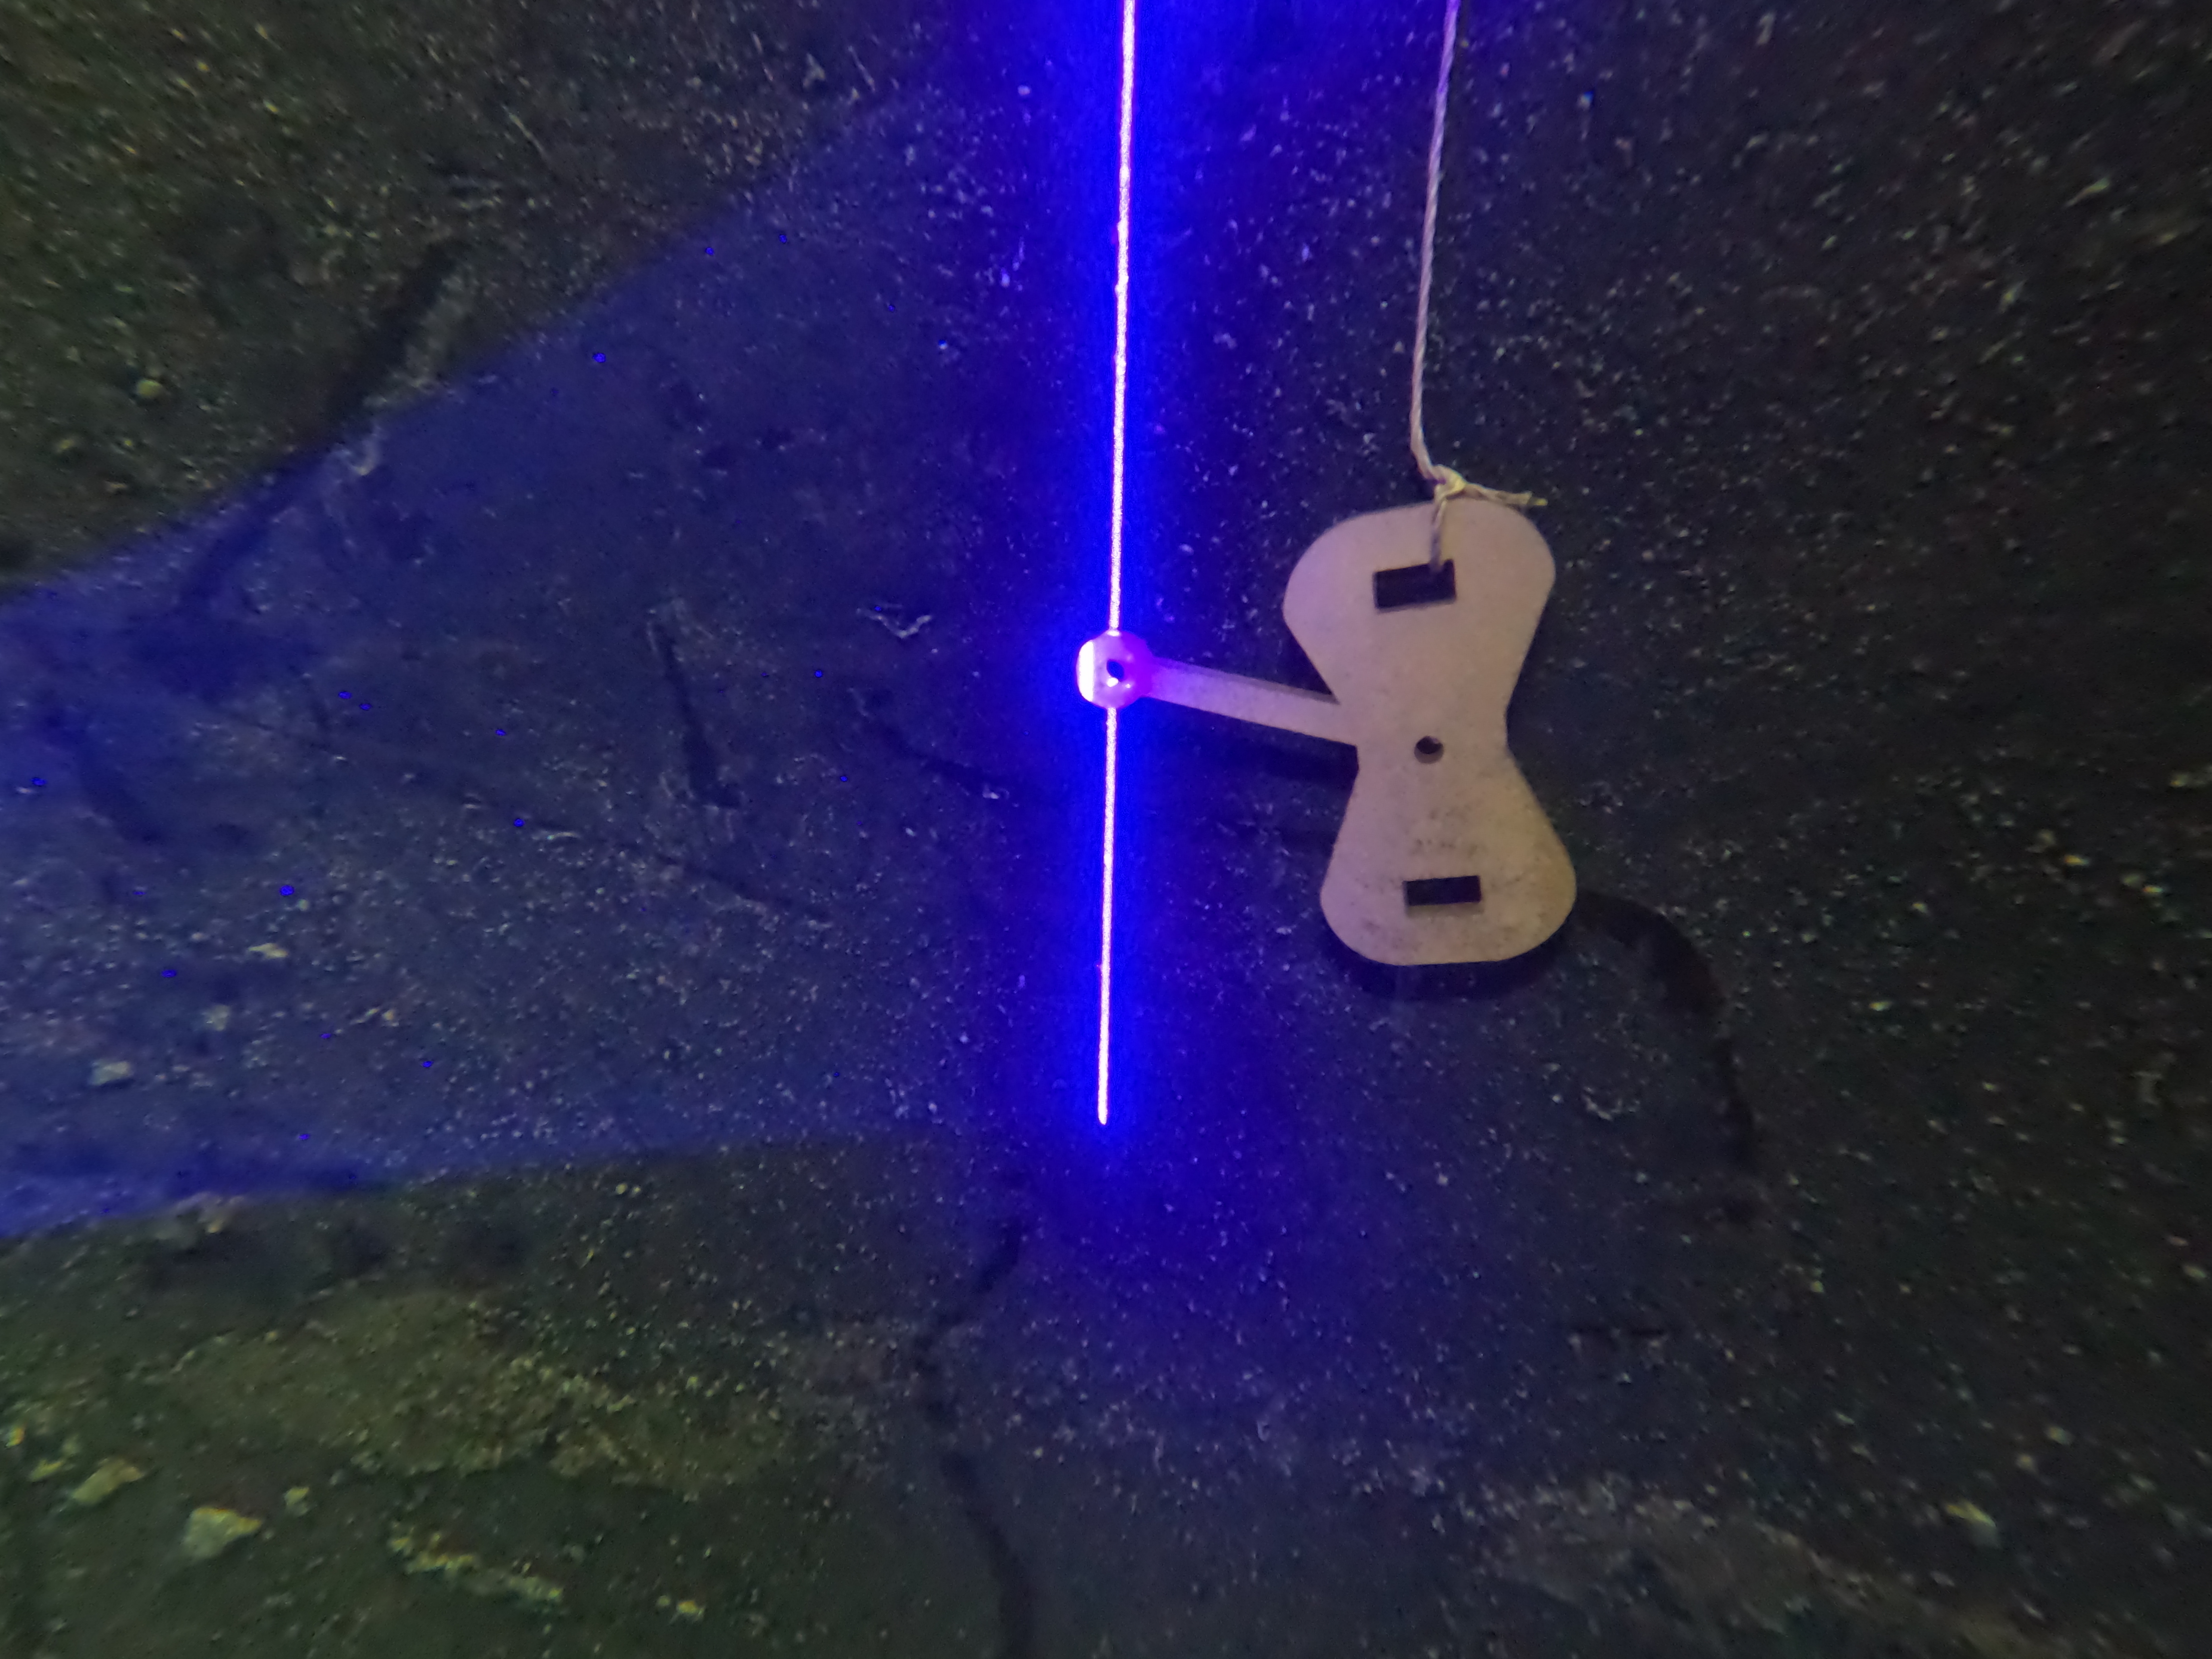

Supplement: Supplementary file 2534 [file G0016112.pdf › Level_2_2/G0016112.pdf]

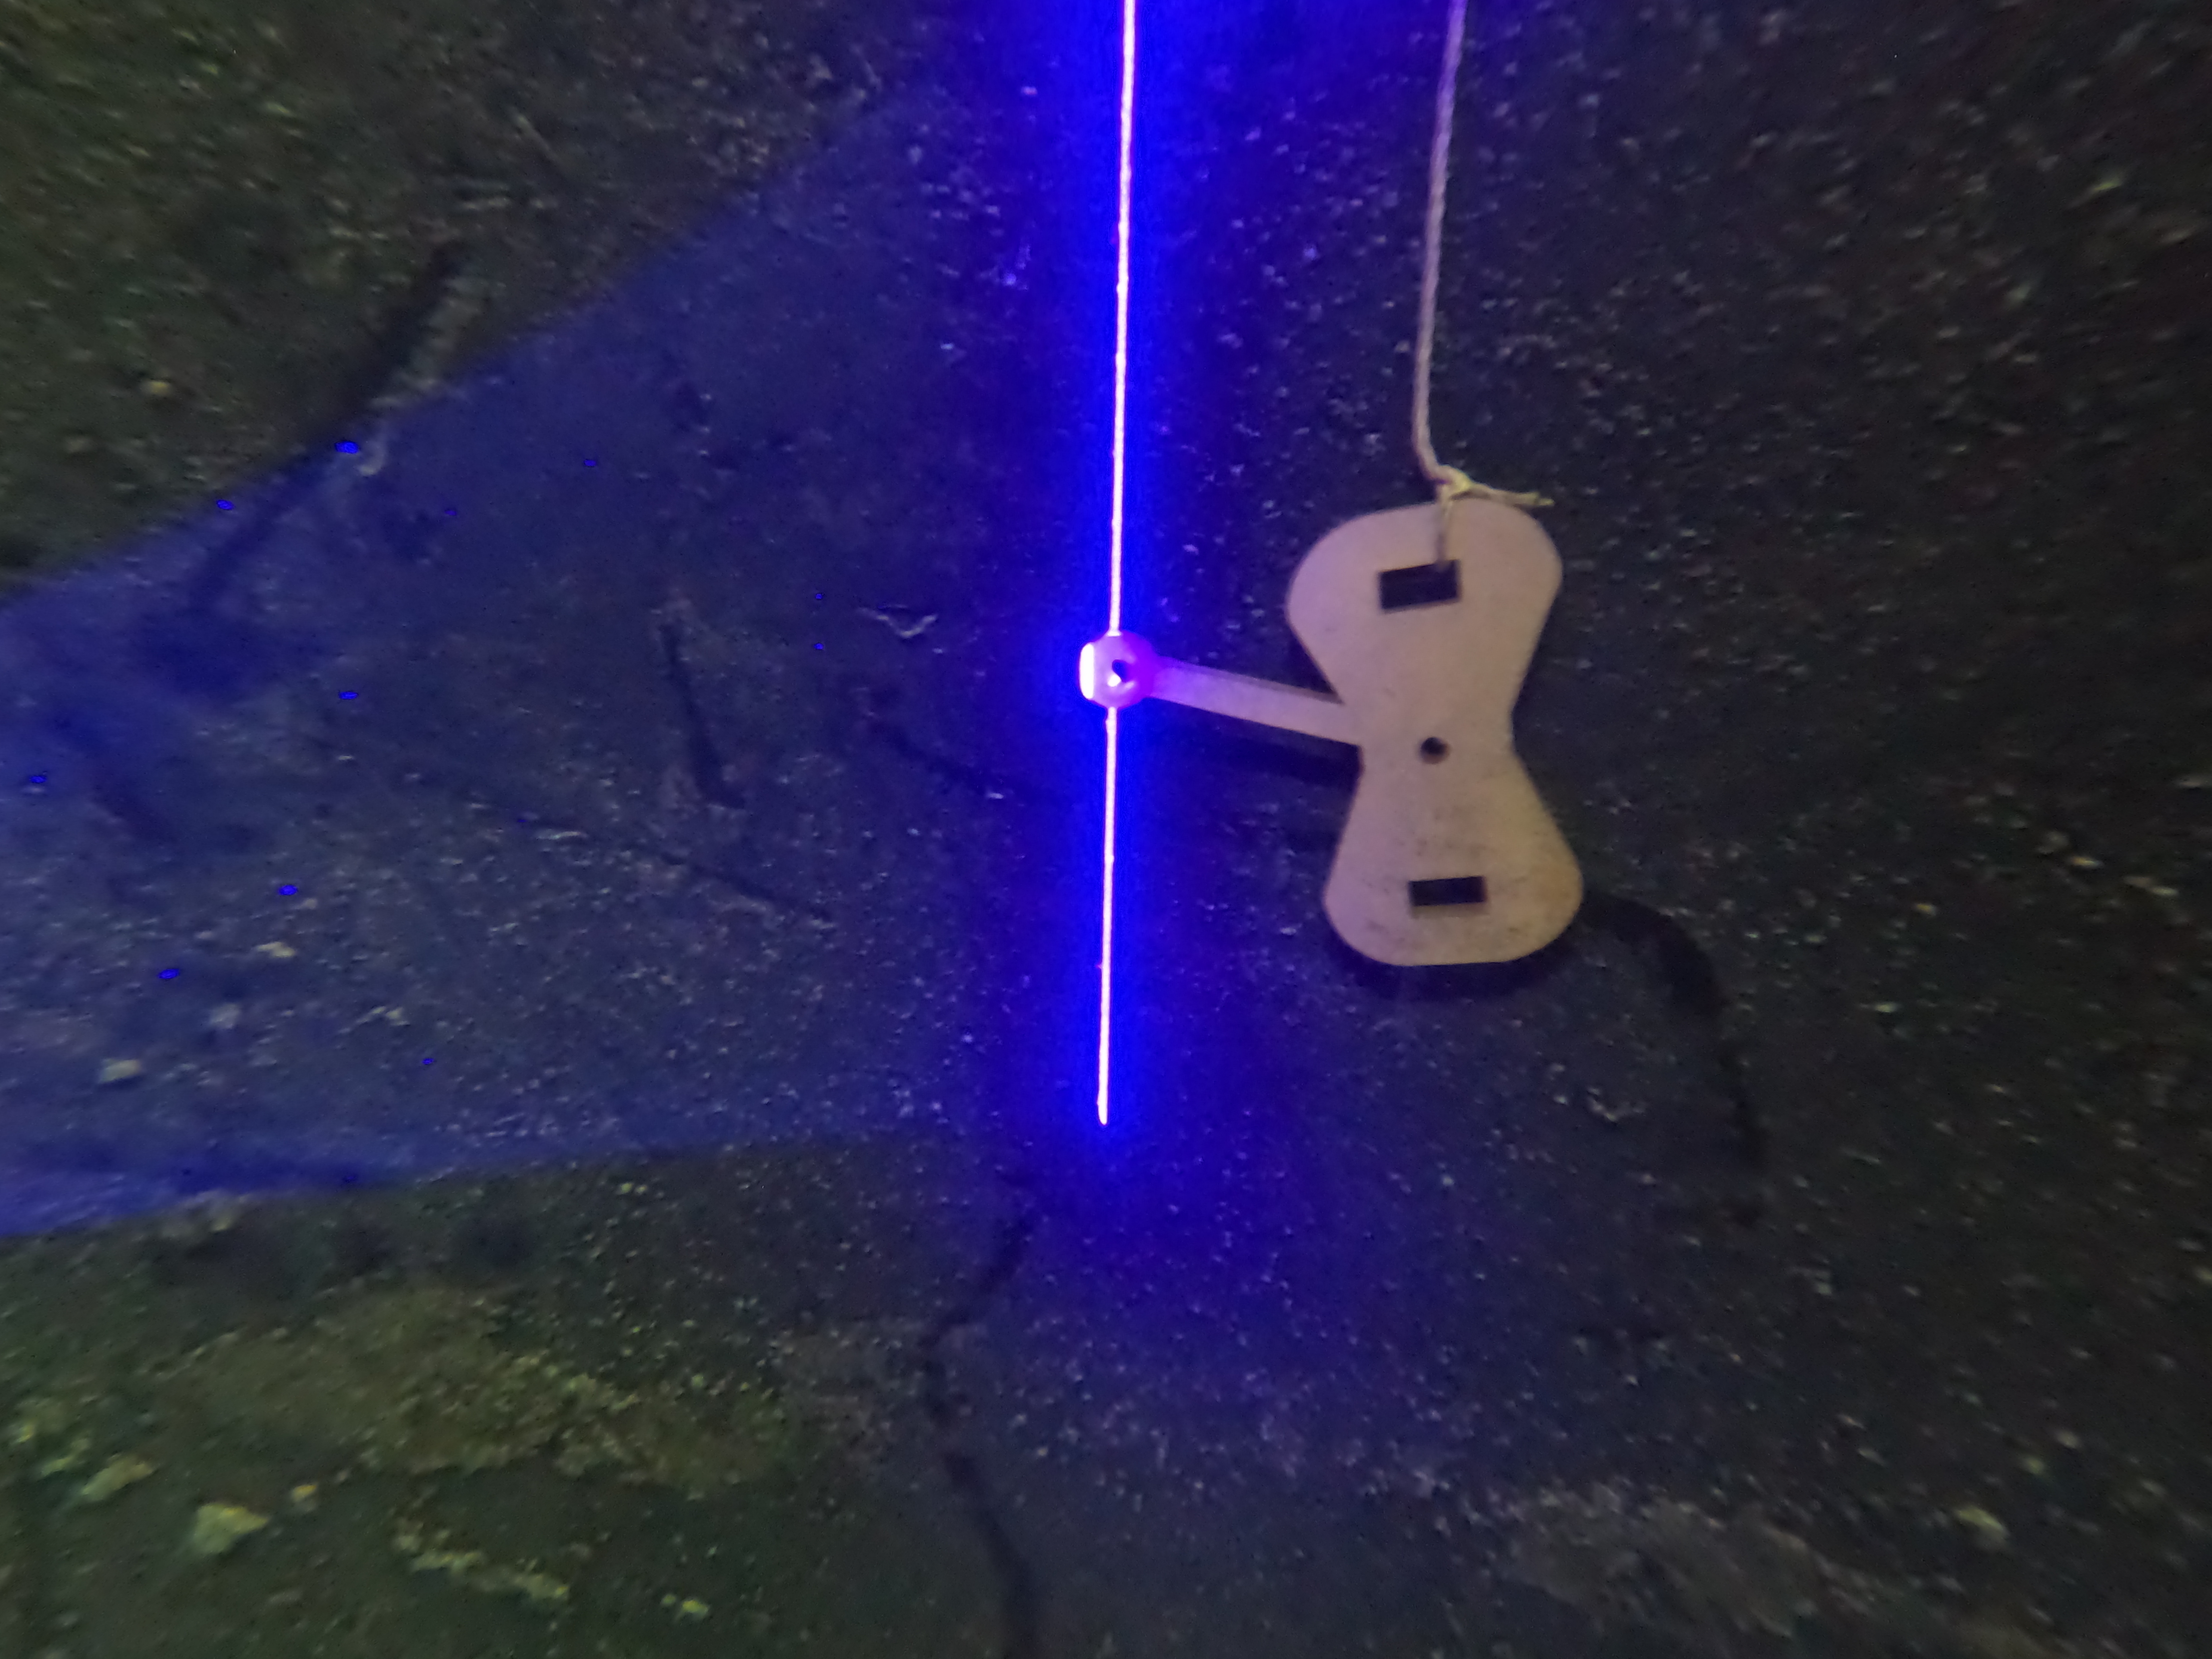

Supplement: Supplementary file 2535 [file G0016113.pdf › Level_2_2/G0016113.pdf]

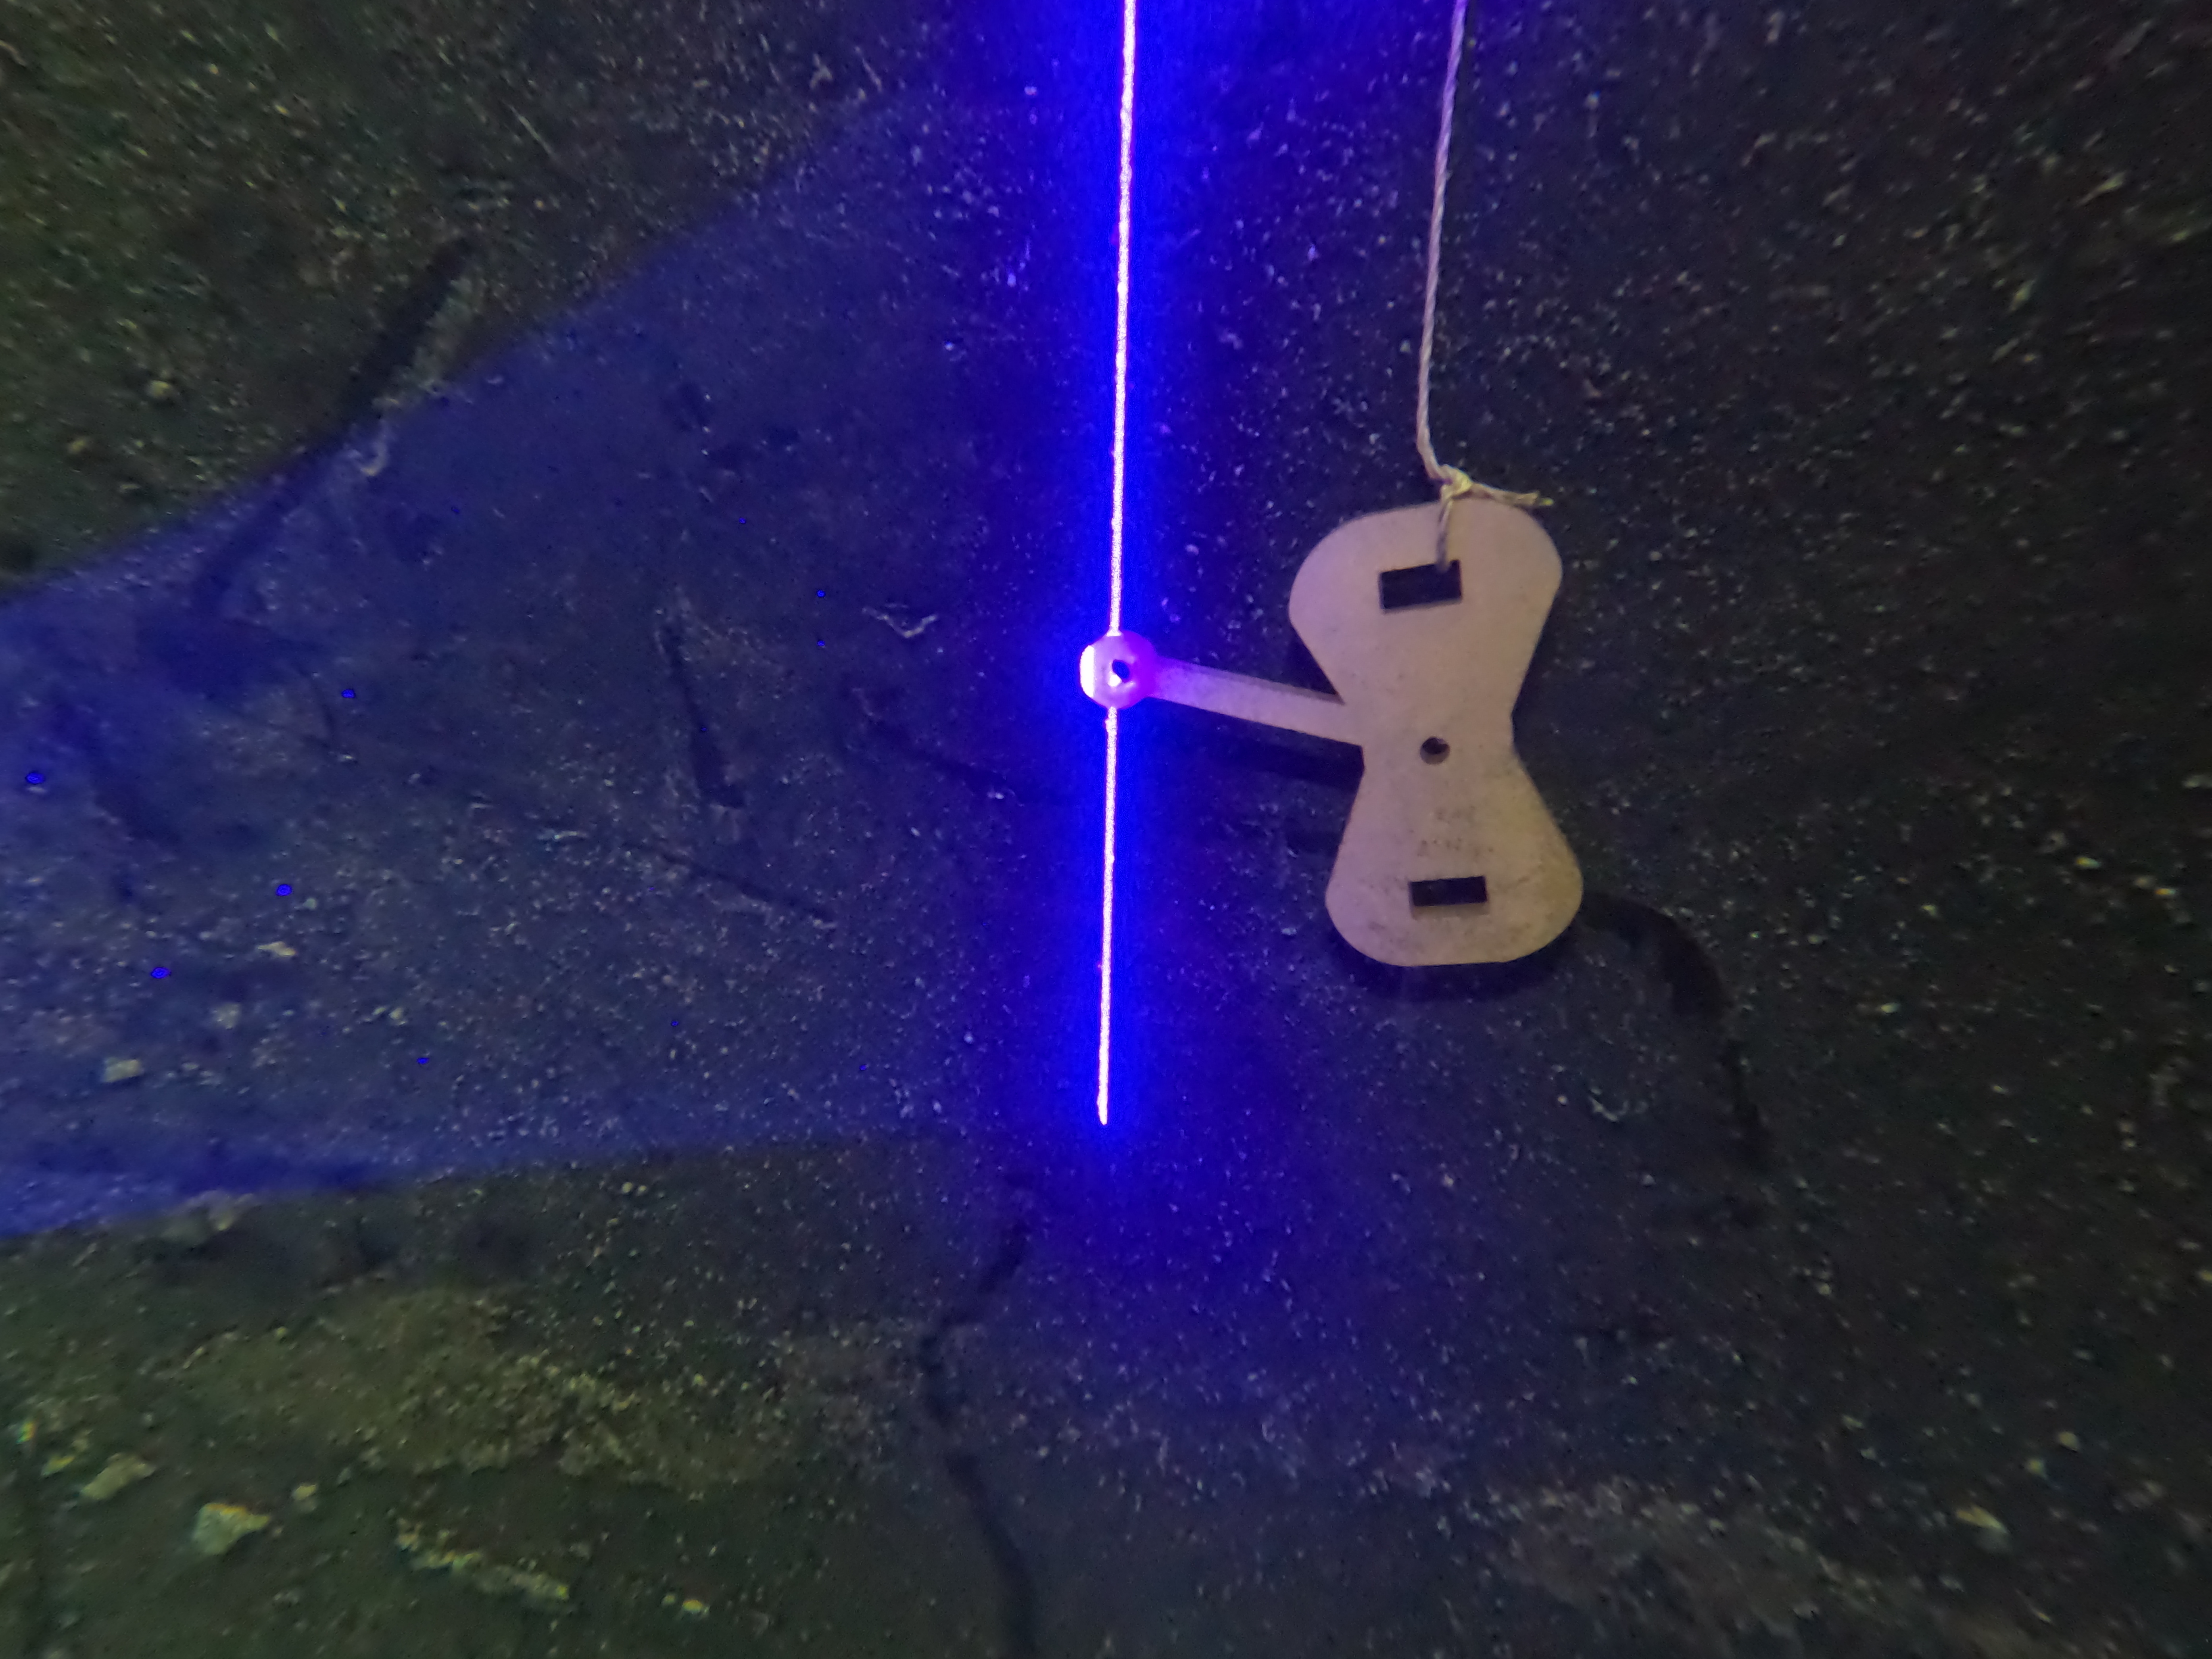

Supplement: Supplementary file 2536 [file G0016114.pdf › Level_2_2/G0016114.pdf]

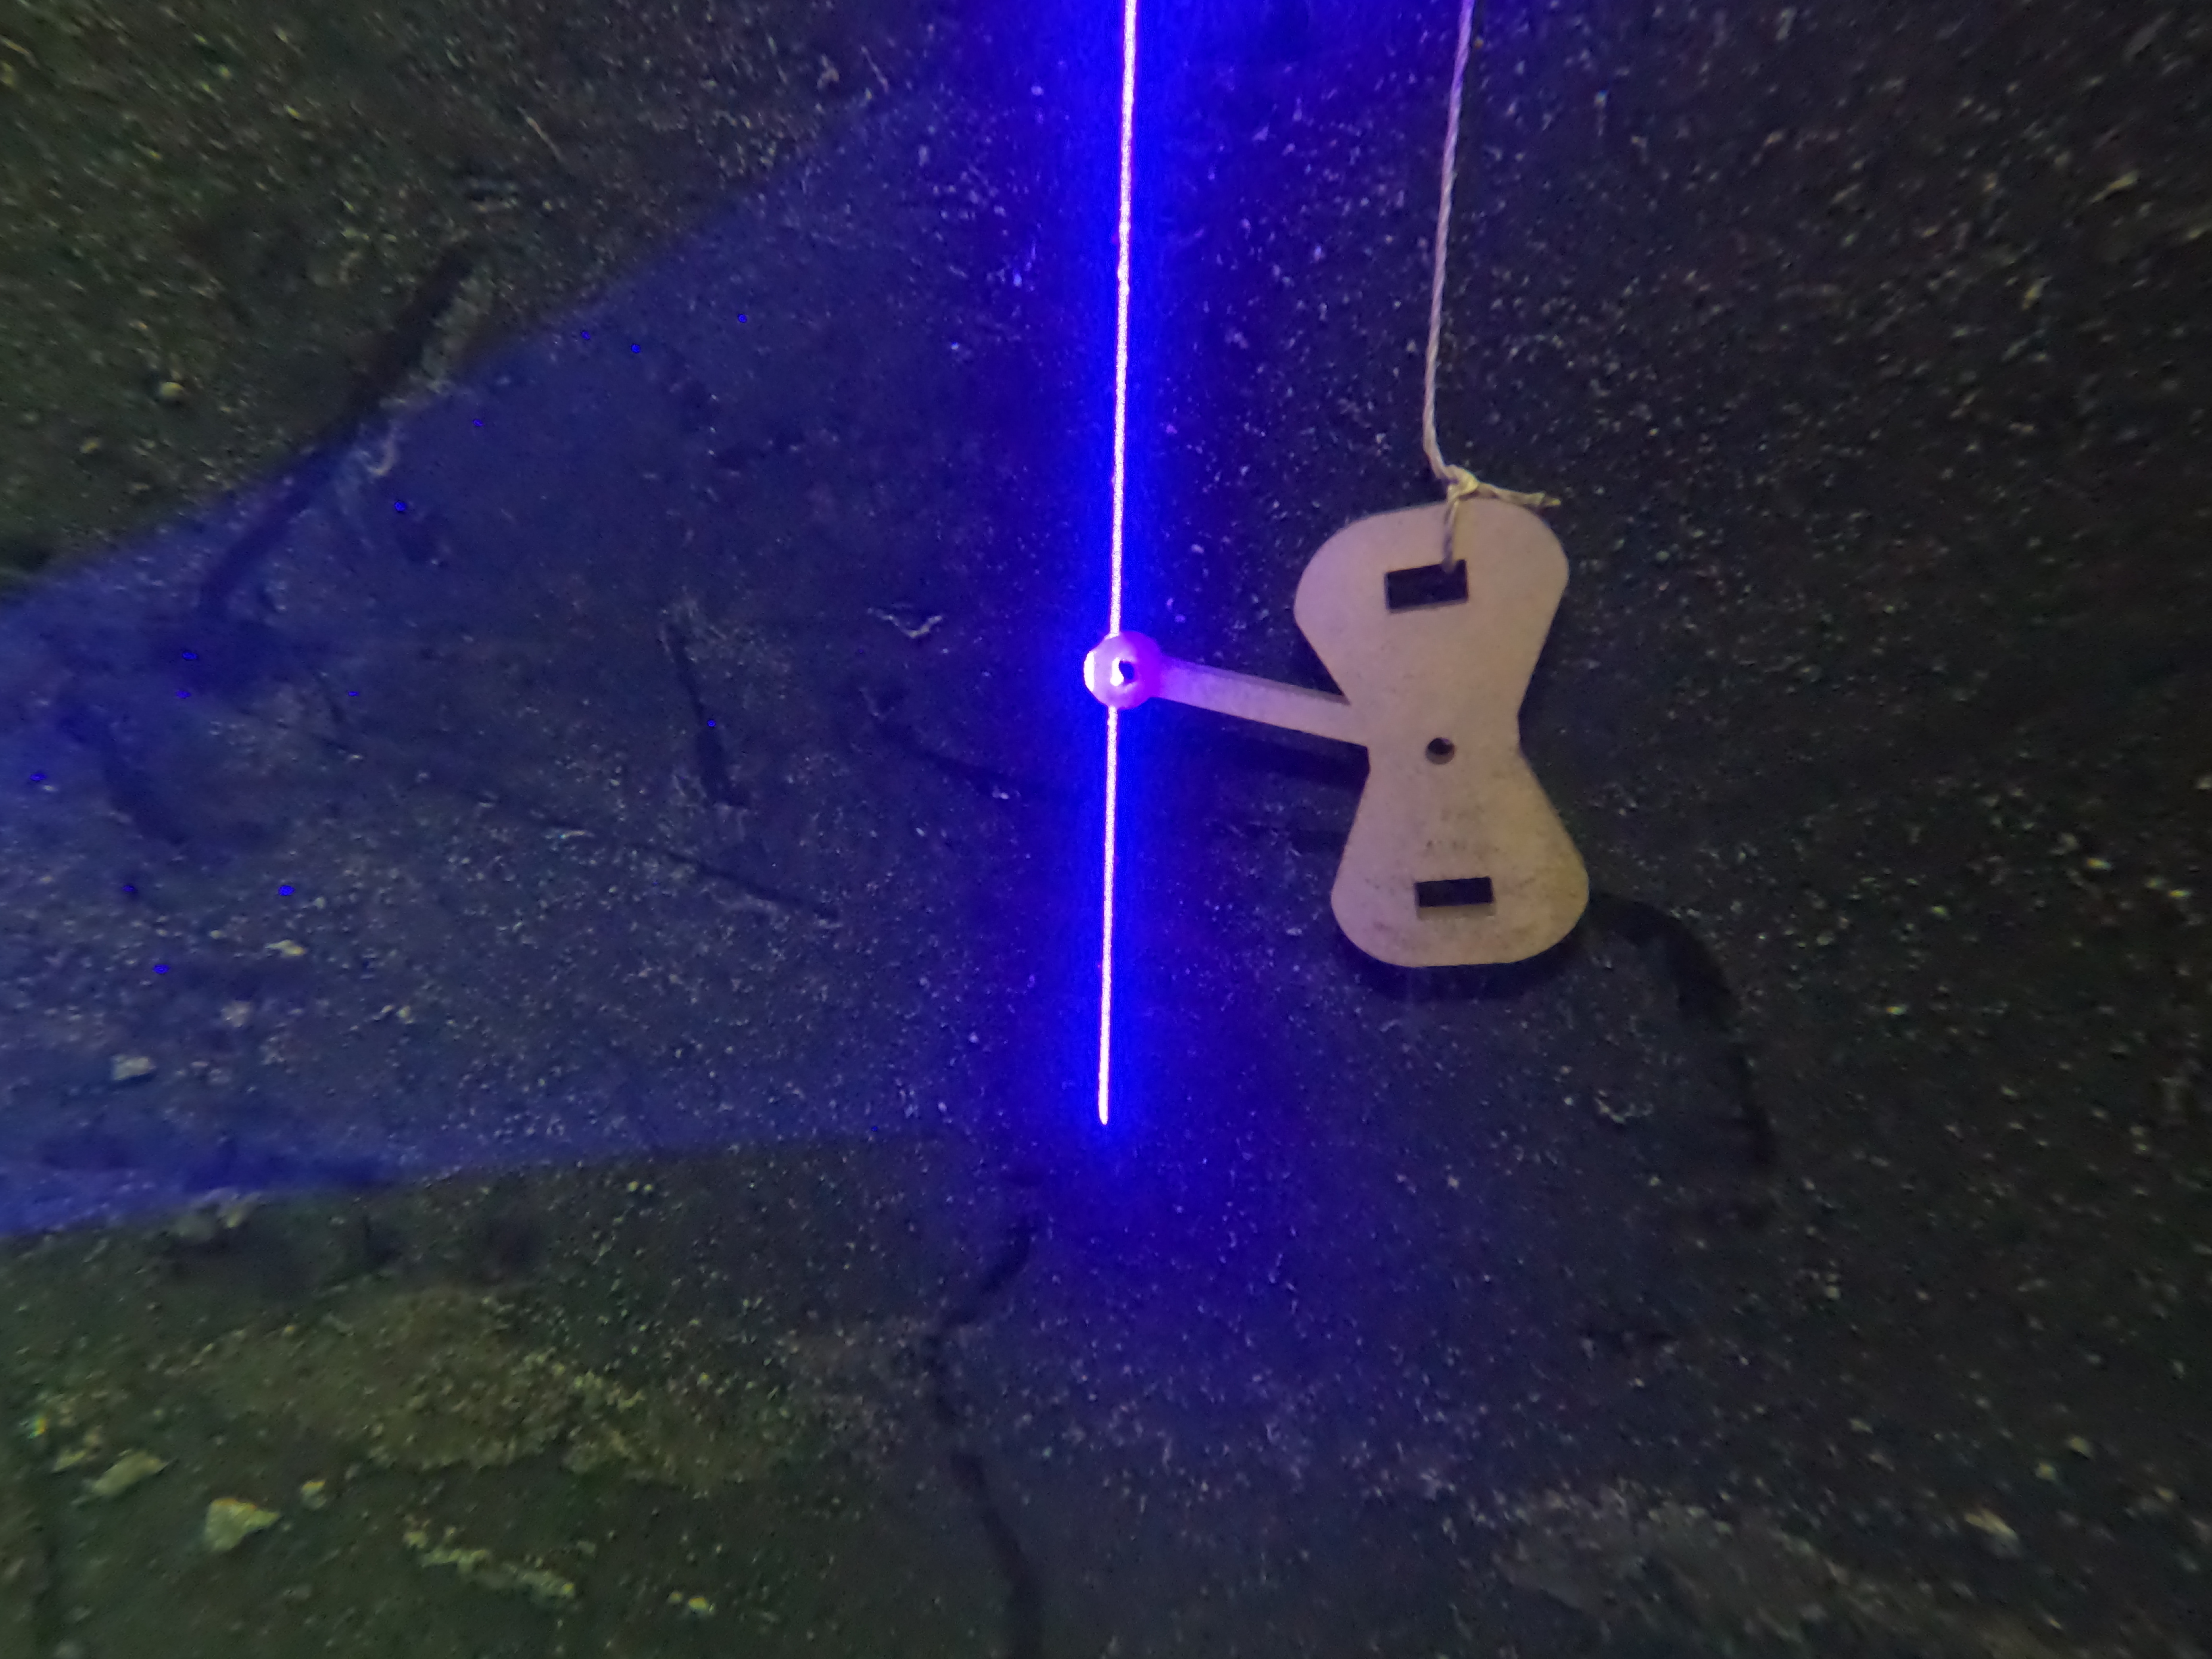

Supplement: Supplementary file 2537 [file G0016115.pdf › Level_2_2/G0016115.pdf]

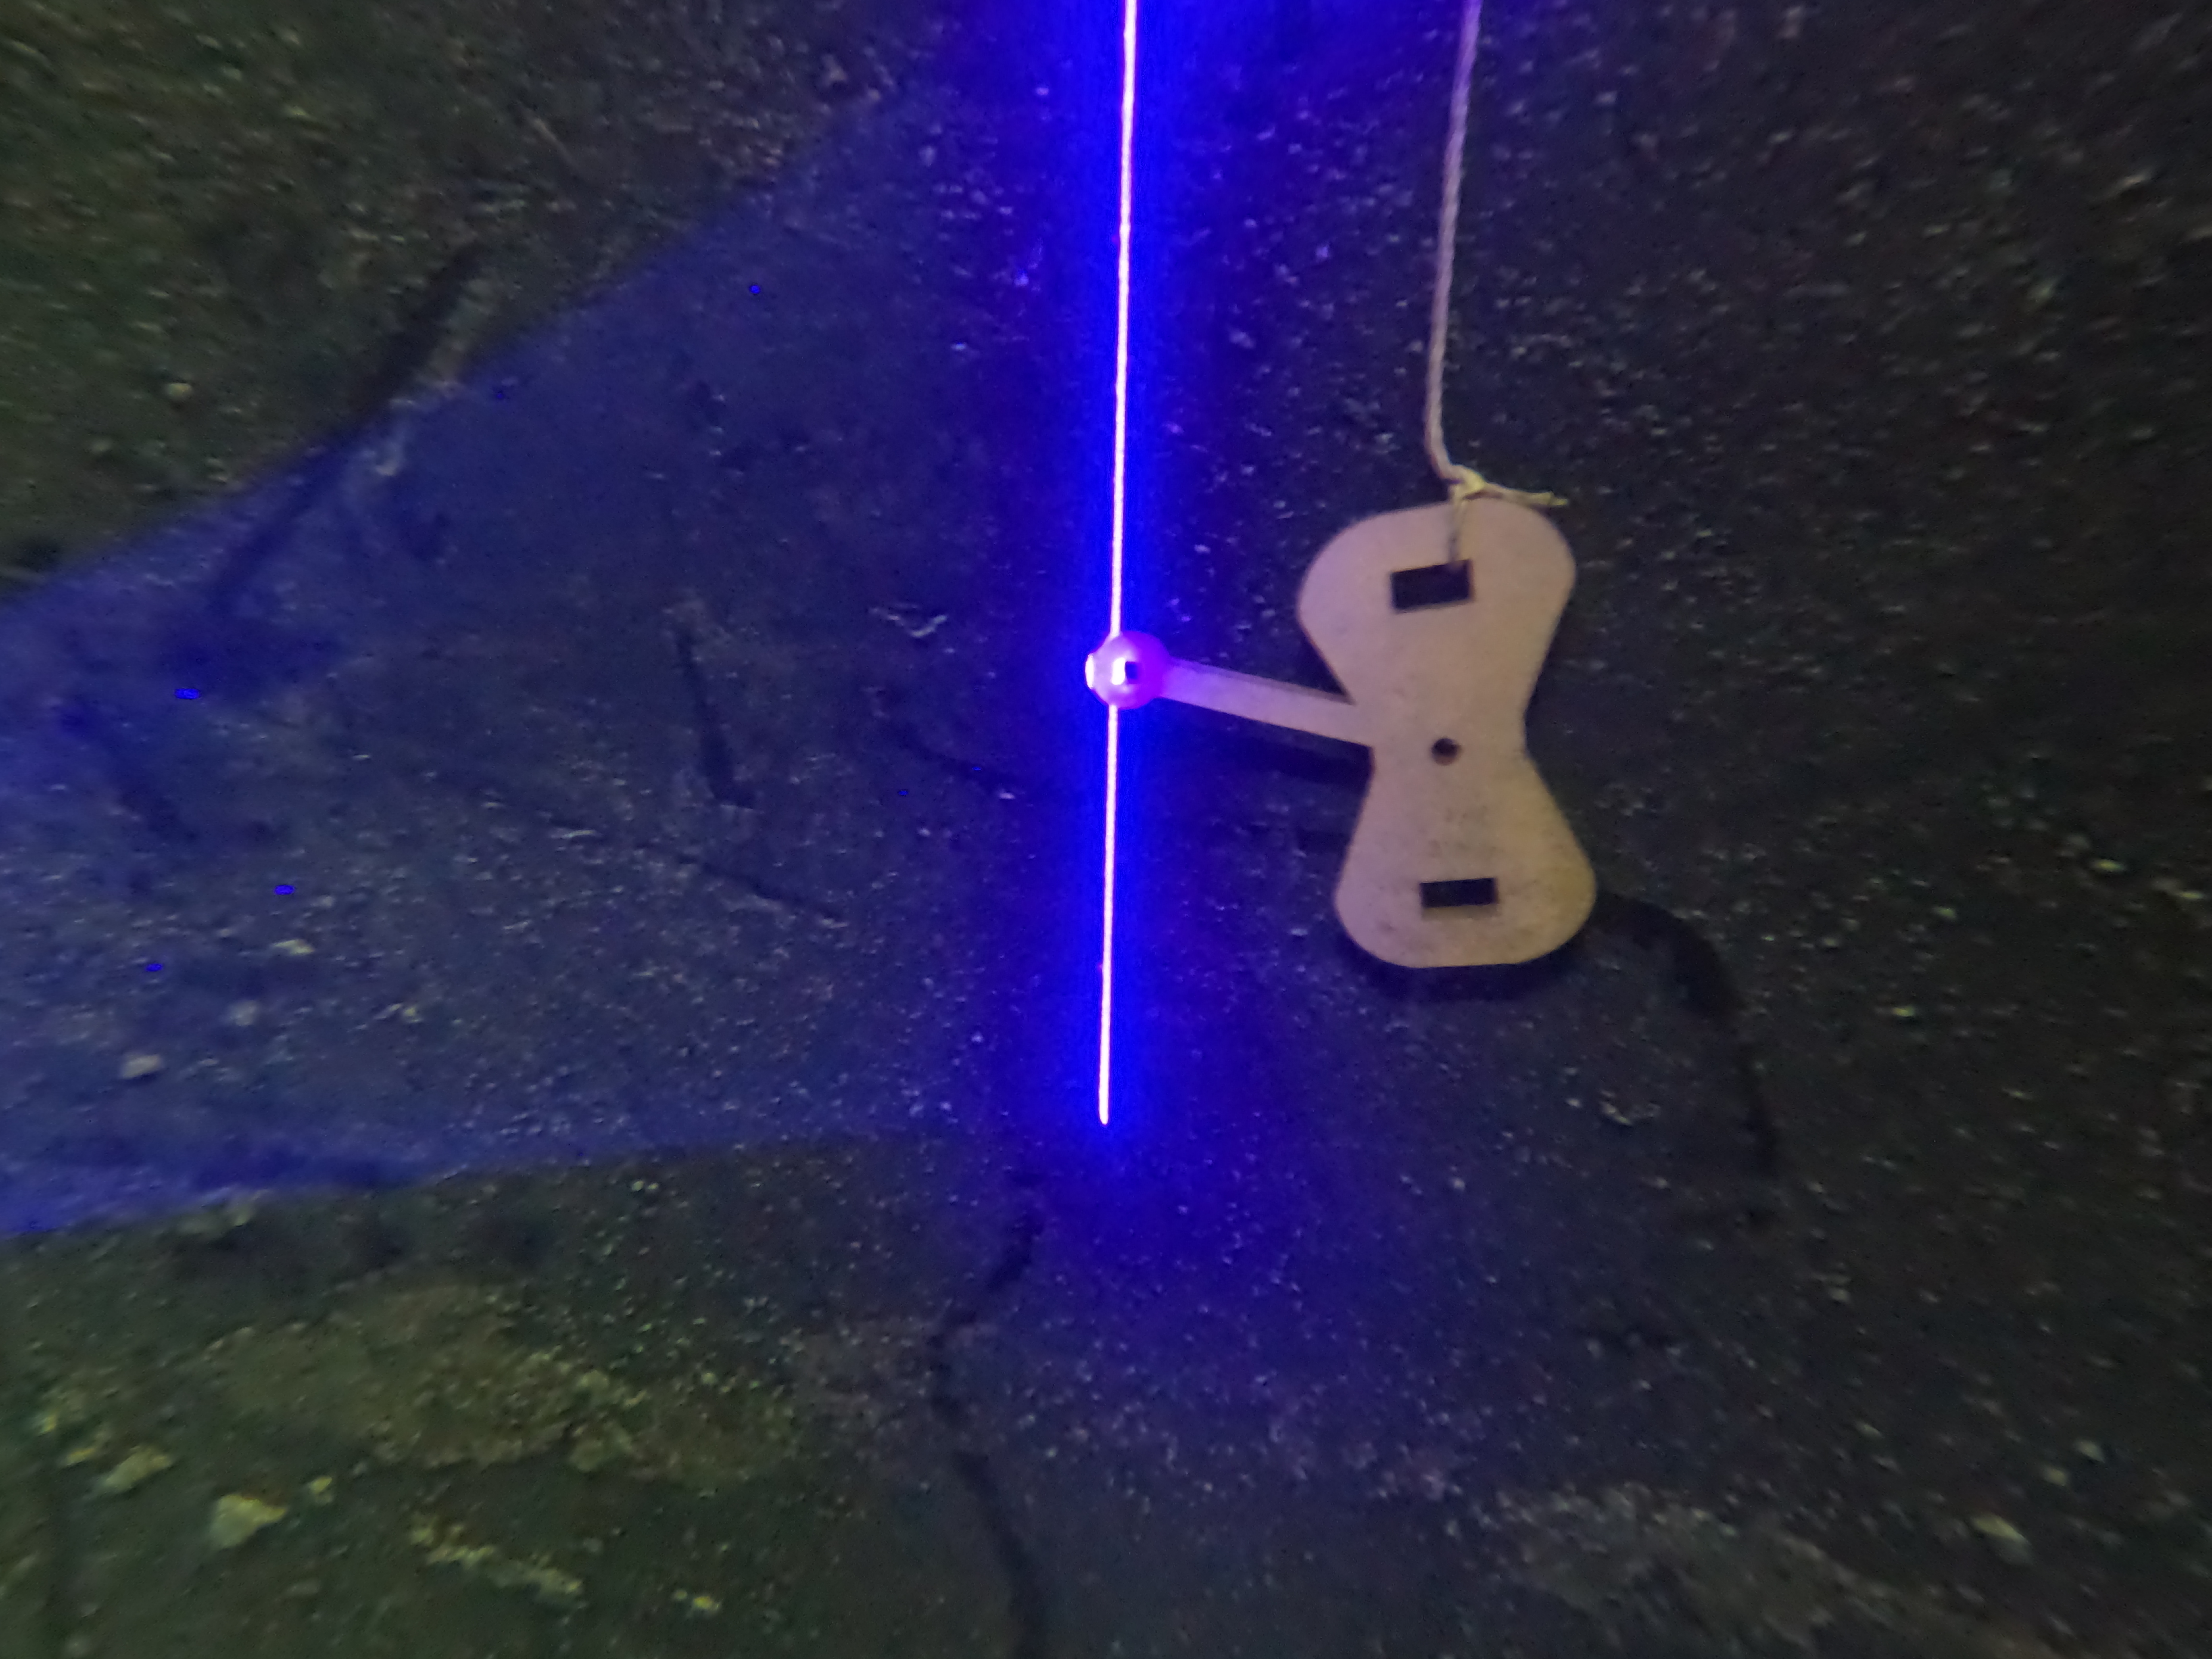

Supplement: Supplementary file 2538 [file G0016116.pdf › Level_2_2/G0016116.pdf]

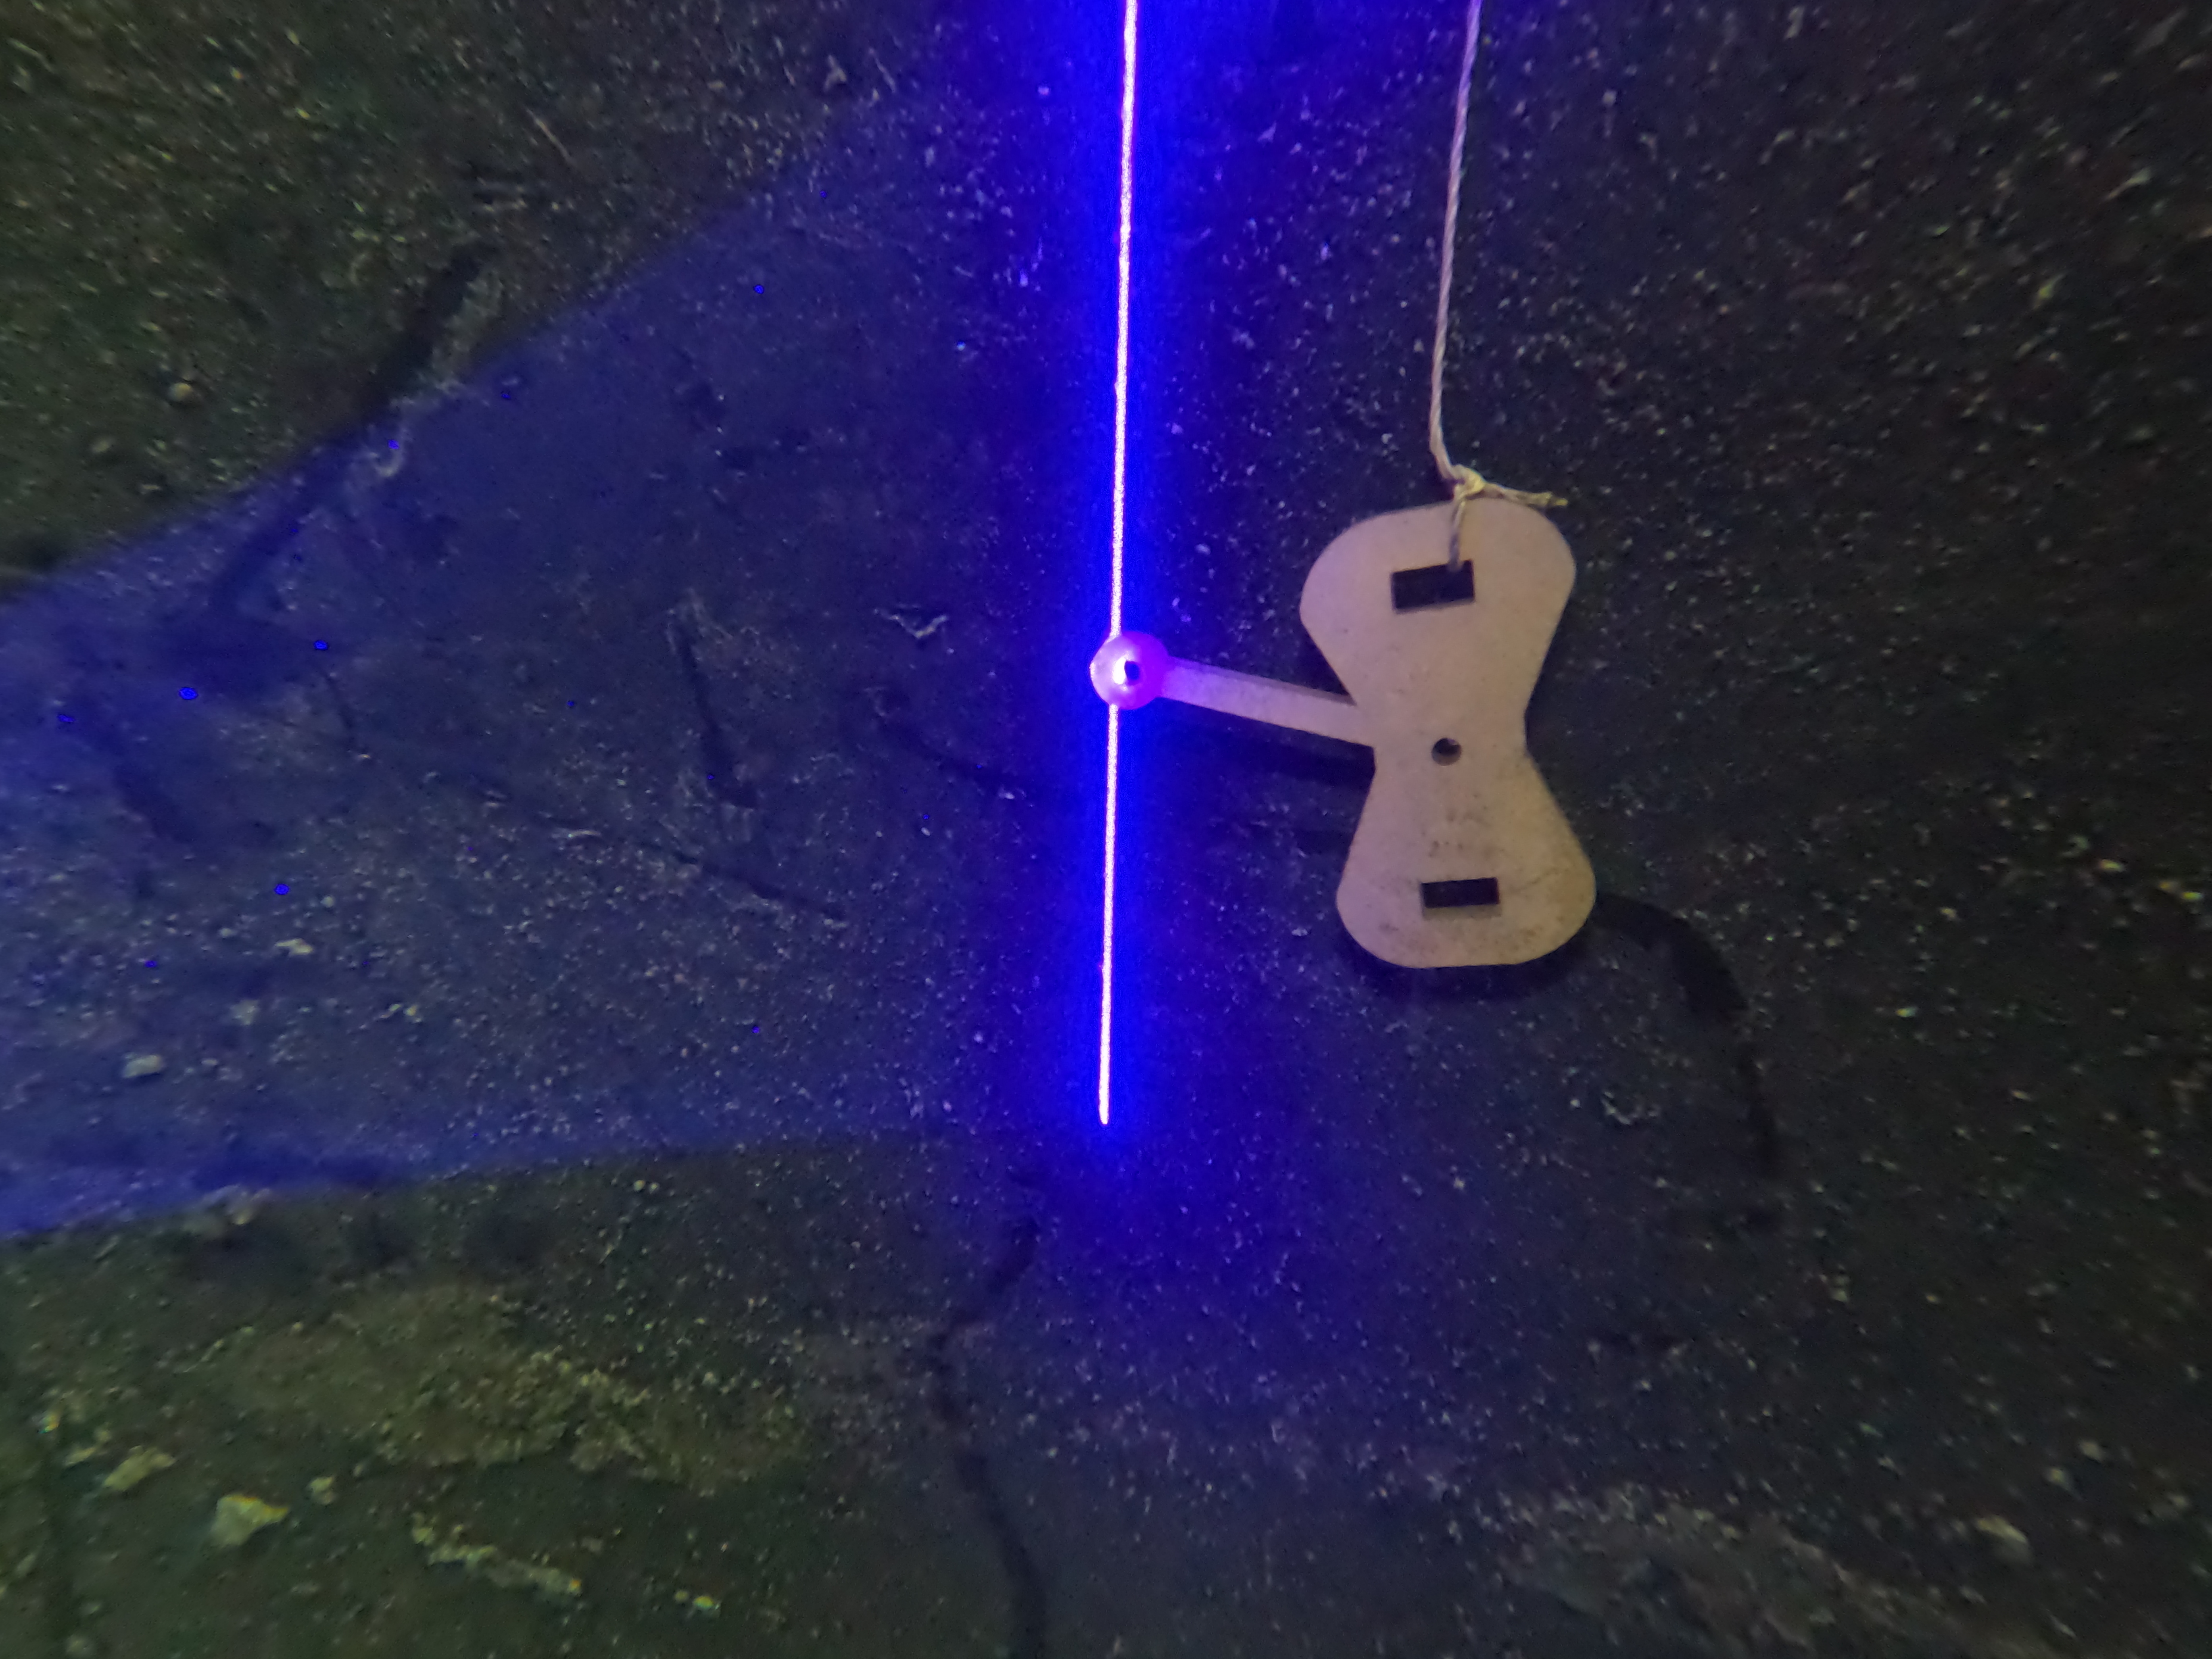

Supplement: Supplementary file 2539 [file G0016117.pdf › Level_2_2/G0016117.pdf]

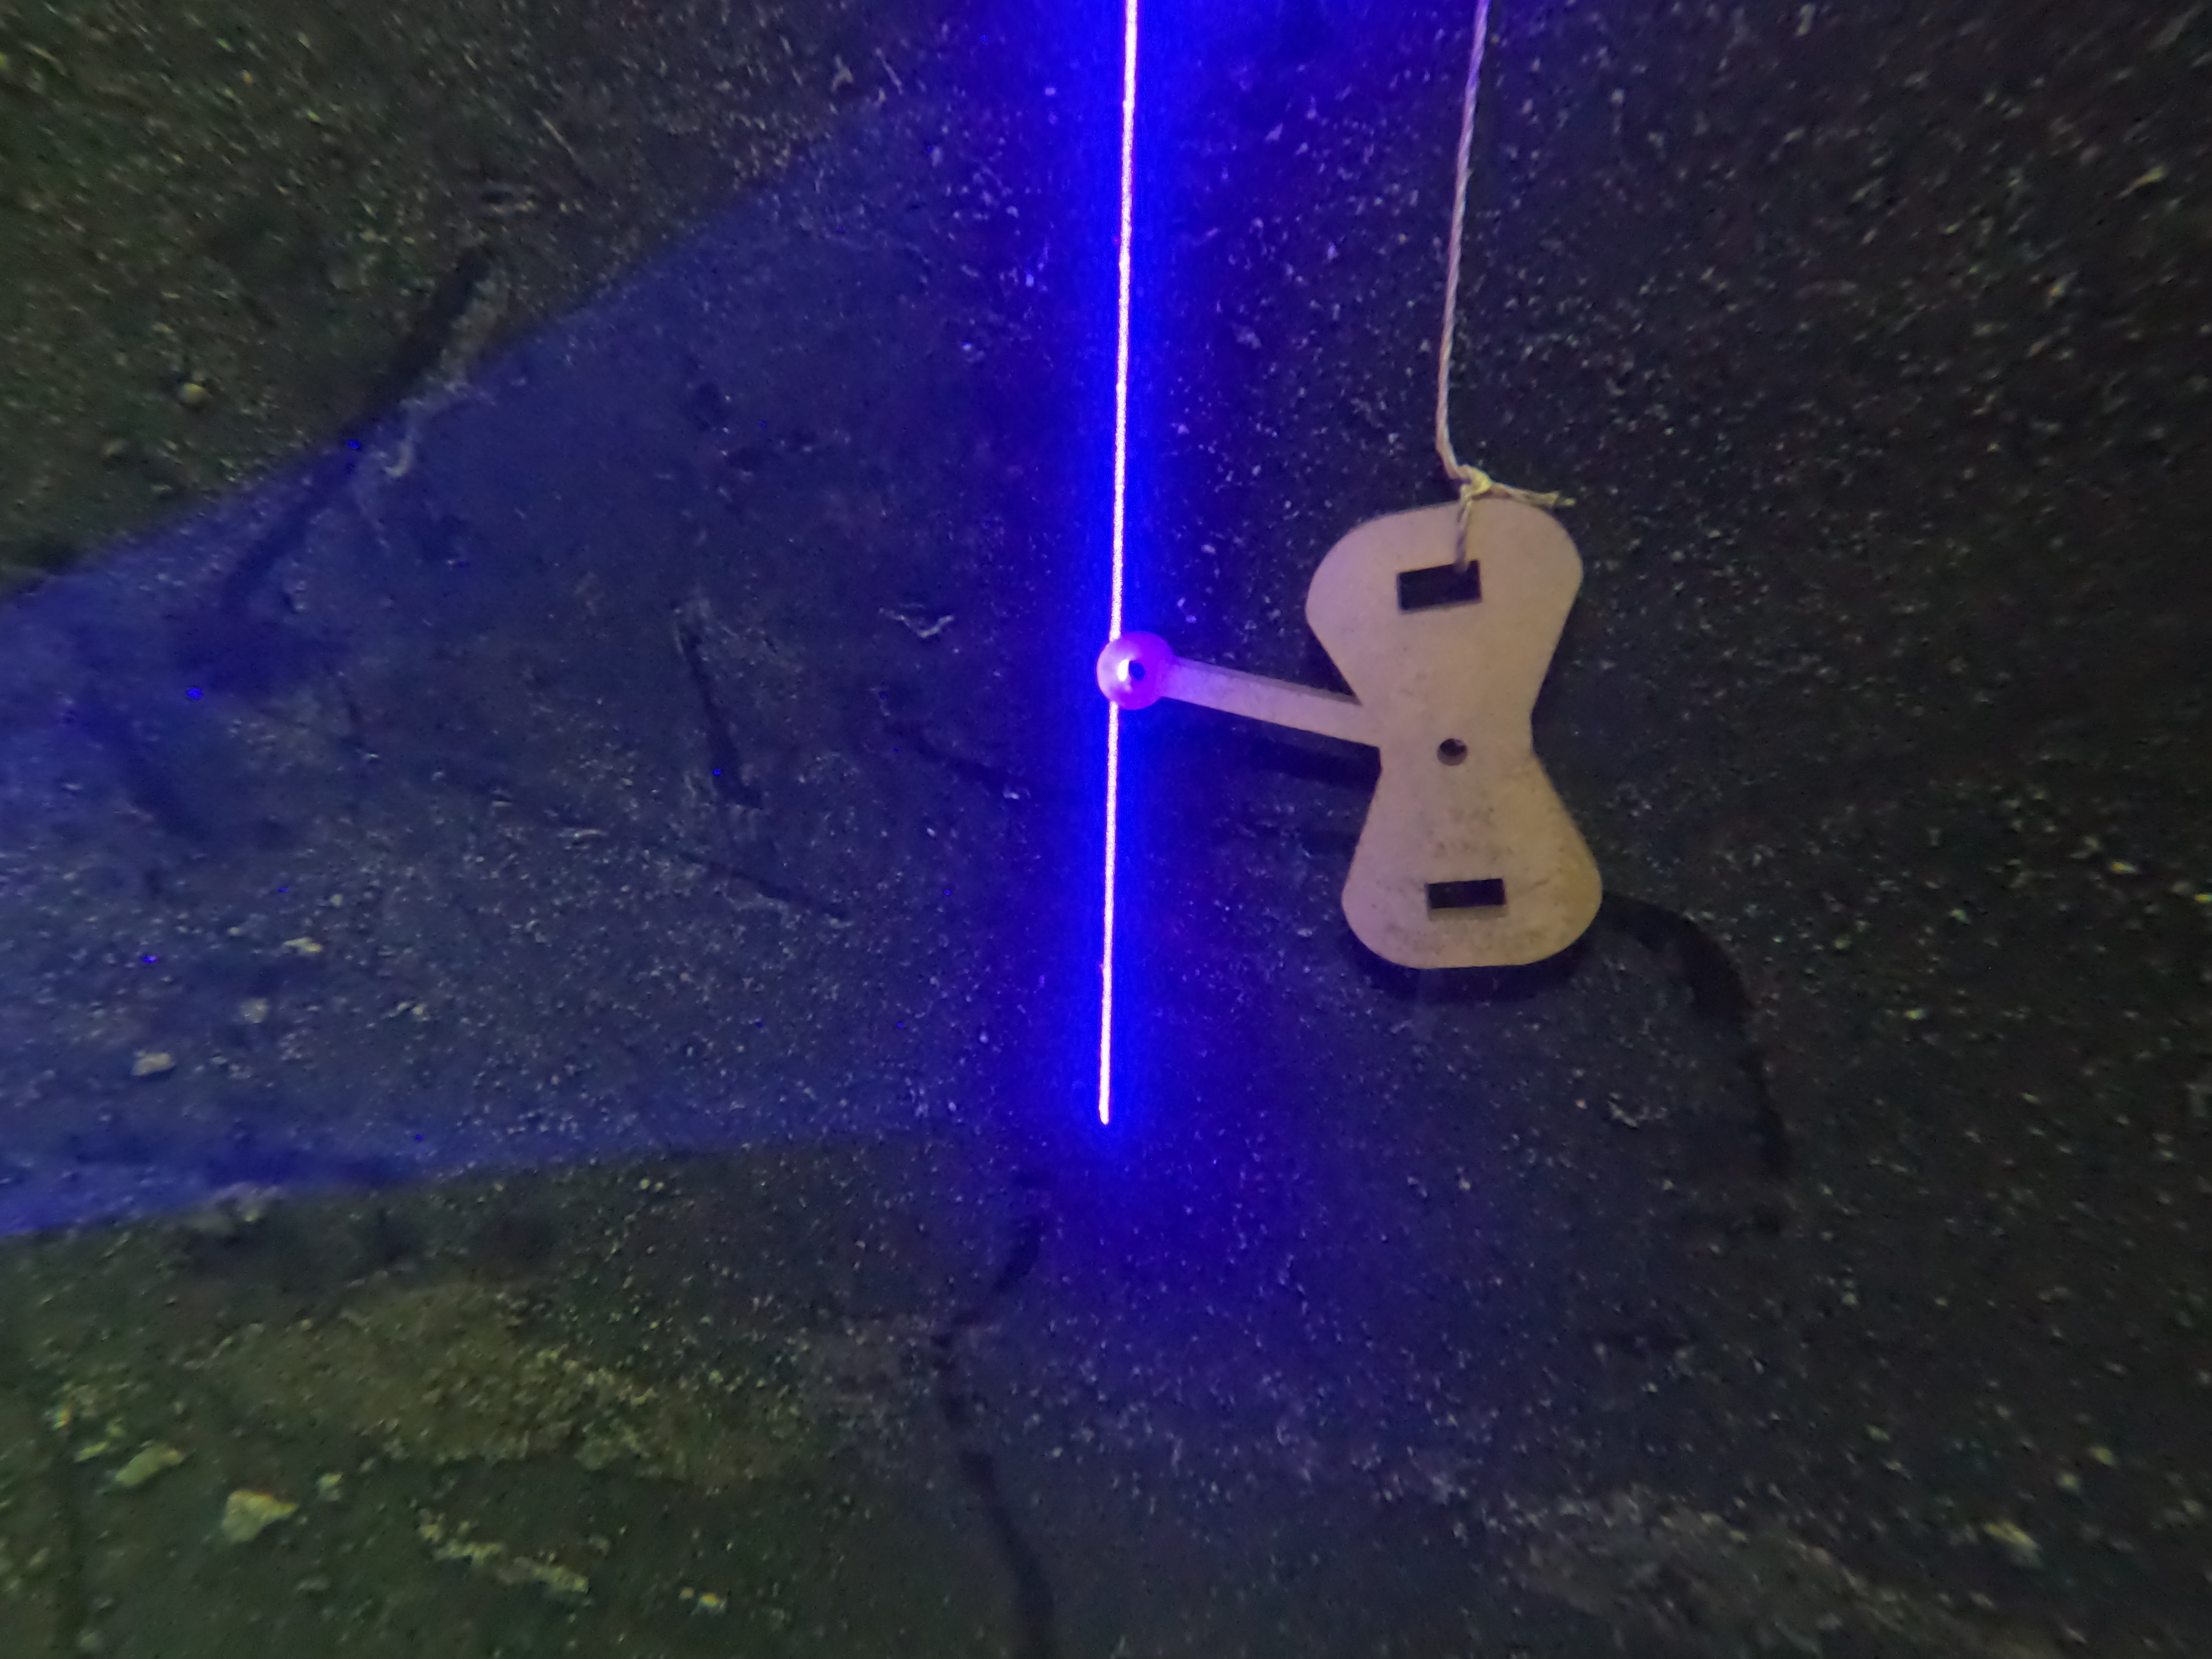

Supplement: Supplementary file 2540 [file G0016118.pdf › Level_2_2/G0016118.pdf]

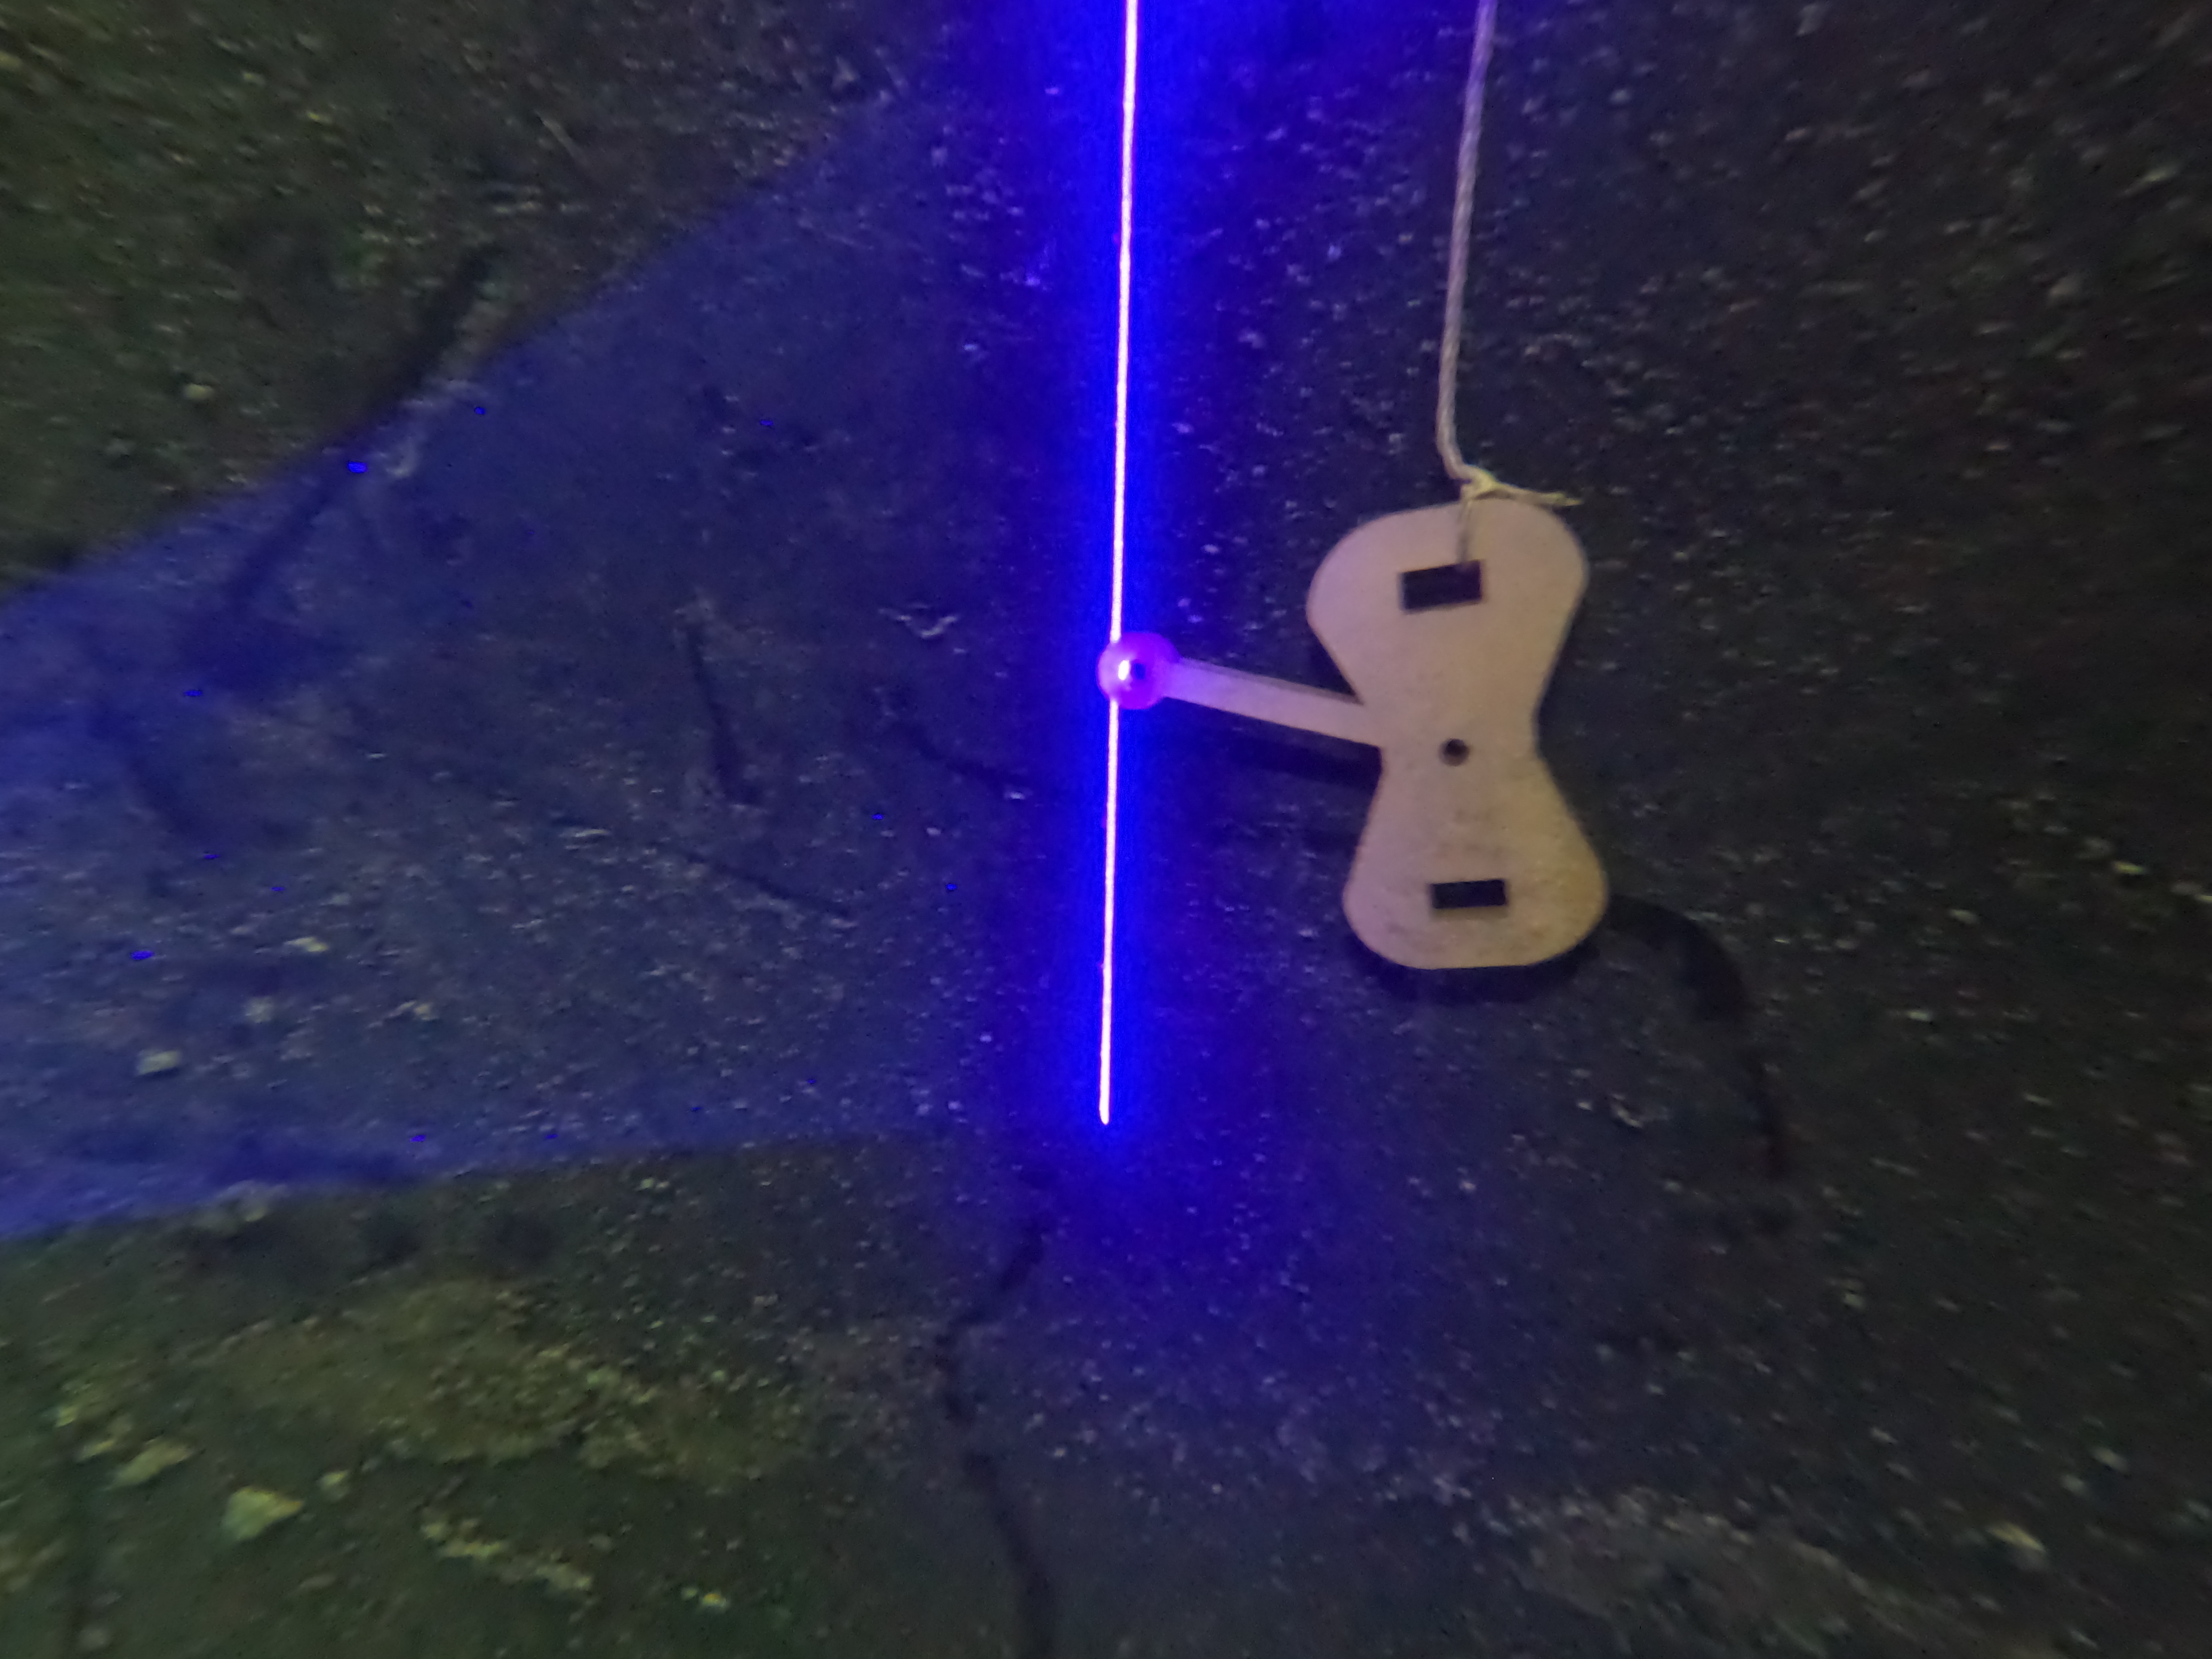

Supplement: Supplementary file 2541 [file G0016119.pdf › Level_2_2/G0016119.pdf]

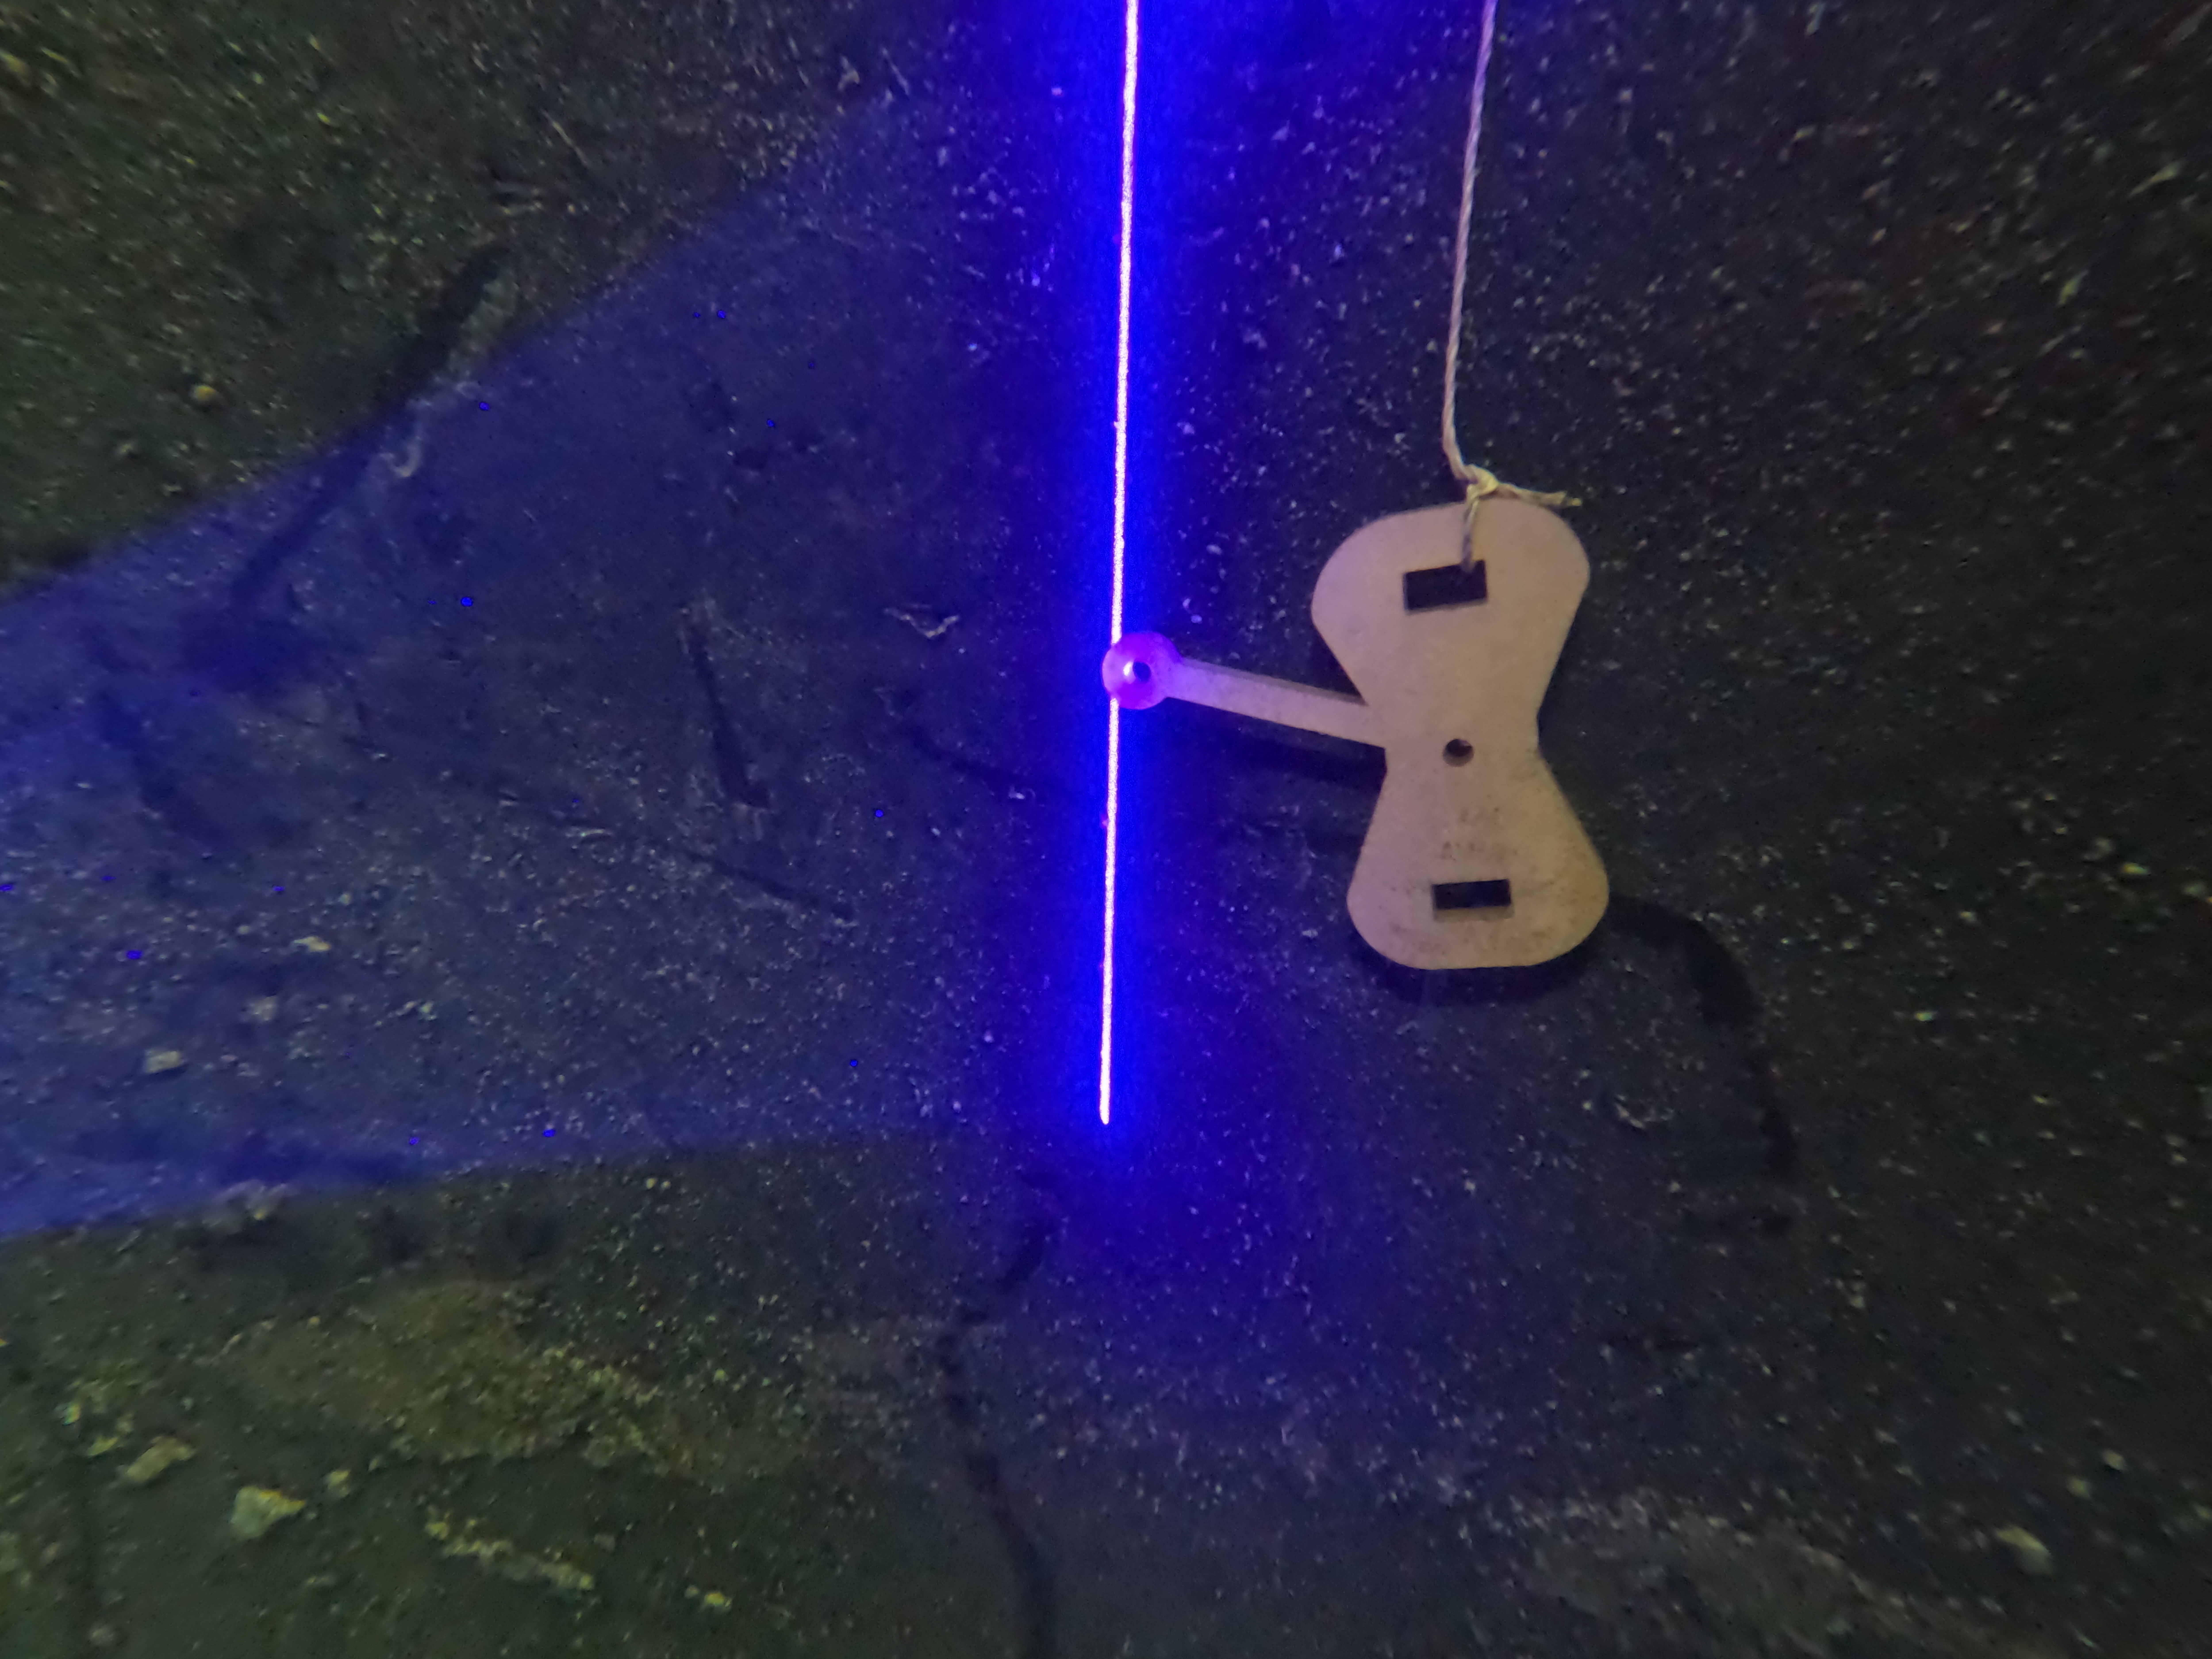

Supplement: Supplementary file 2542 [file G0016120.pdf › Level_2_2/G0016120.pdf]

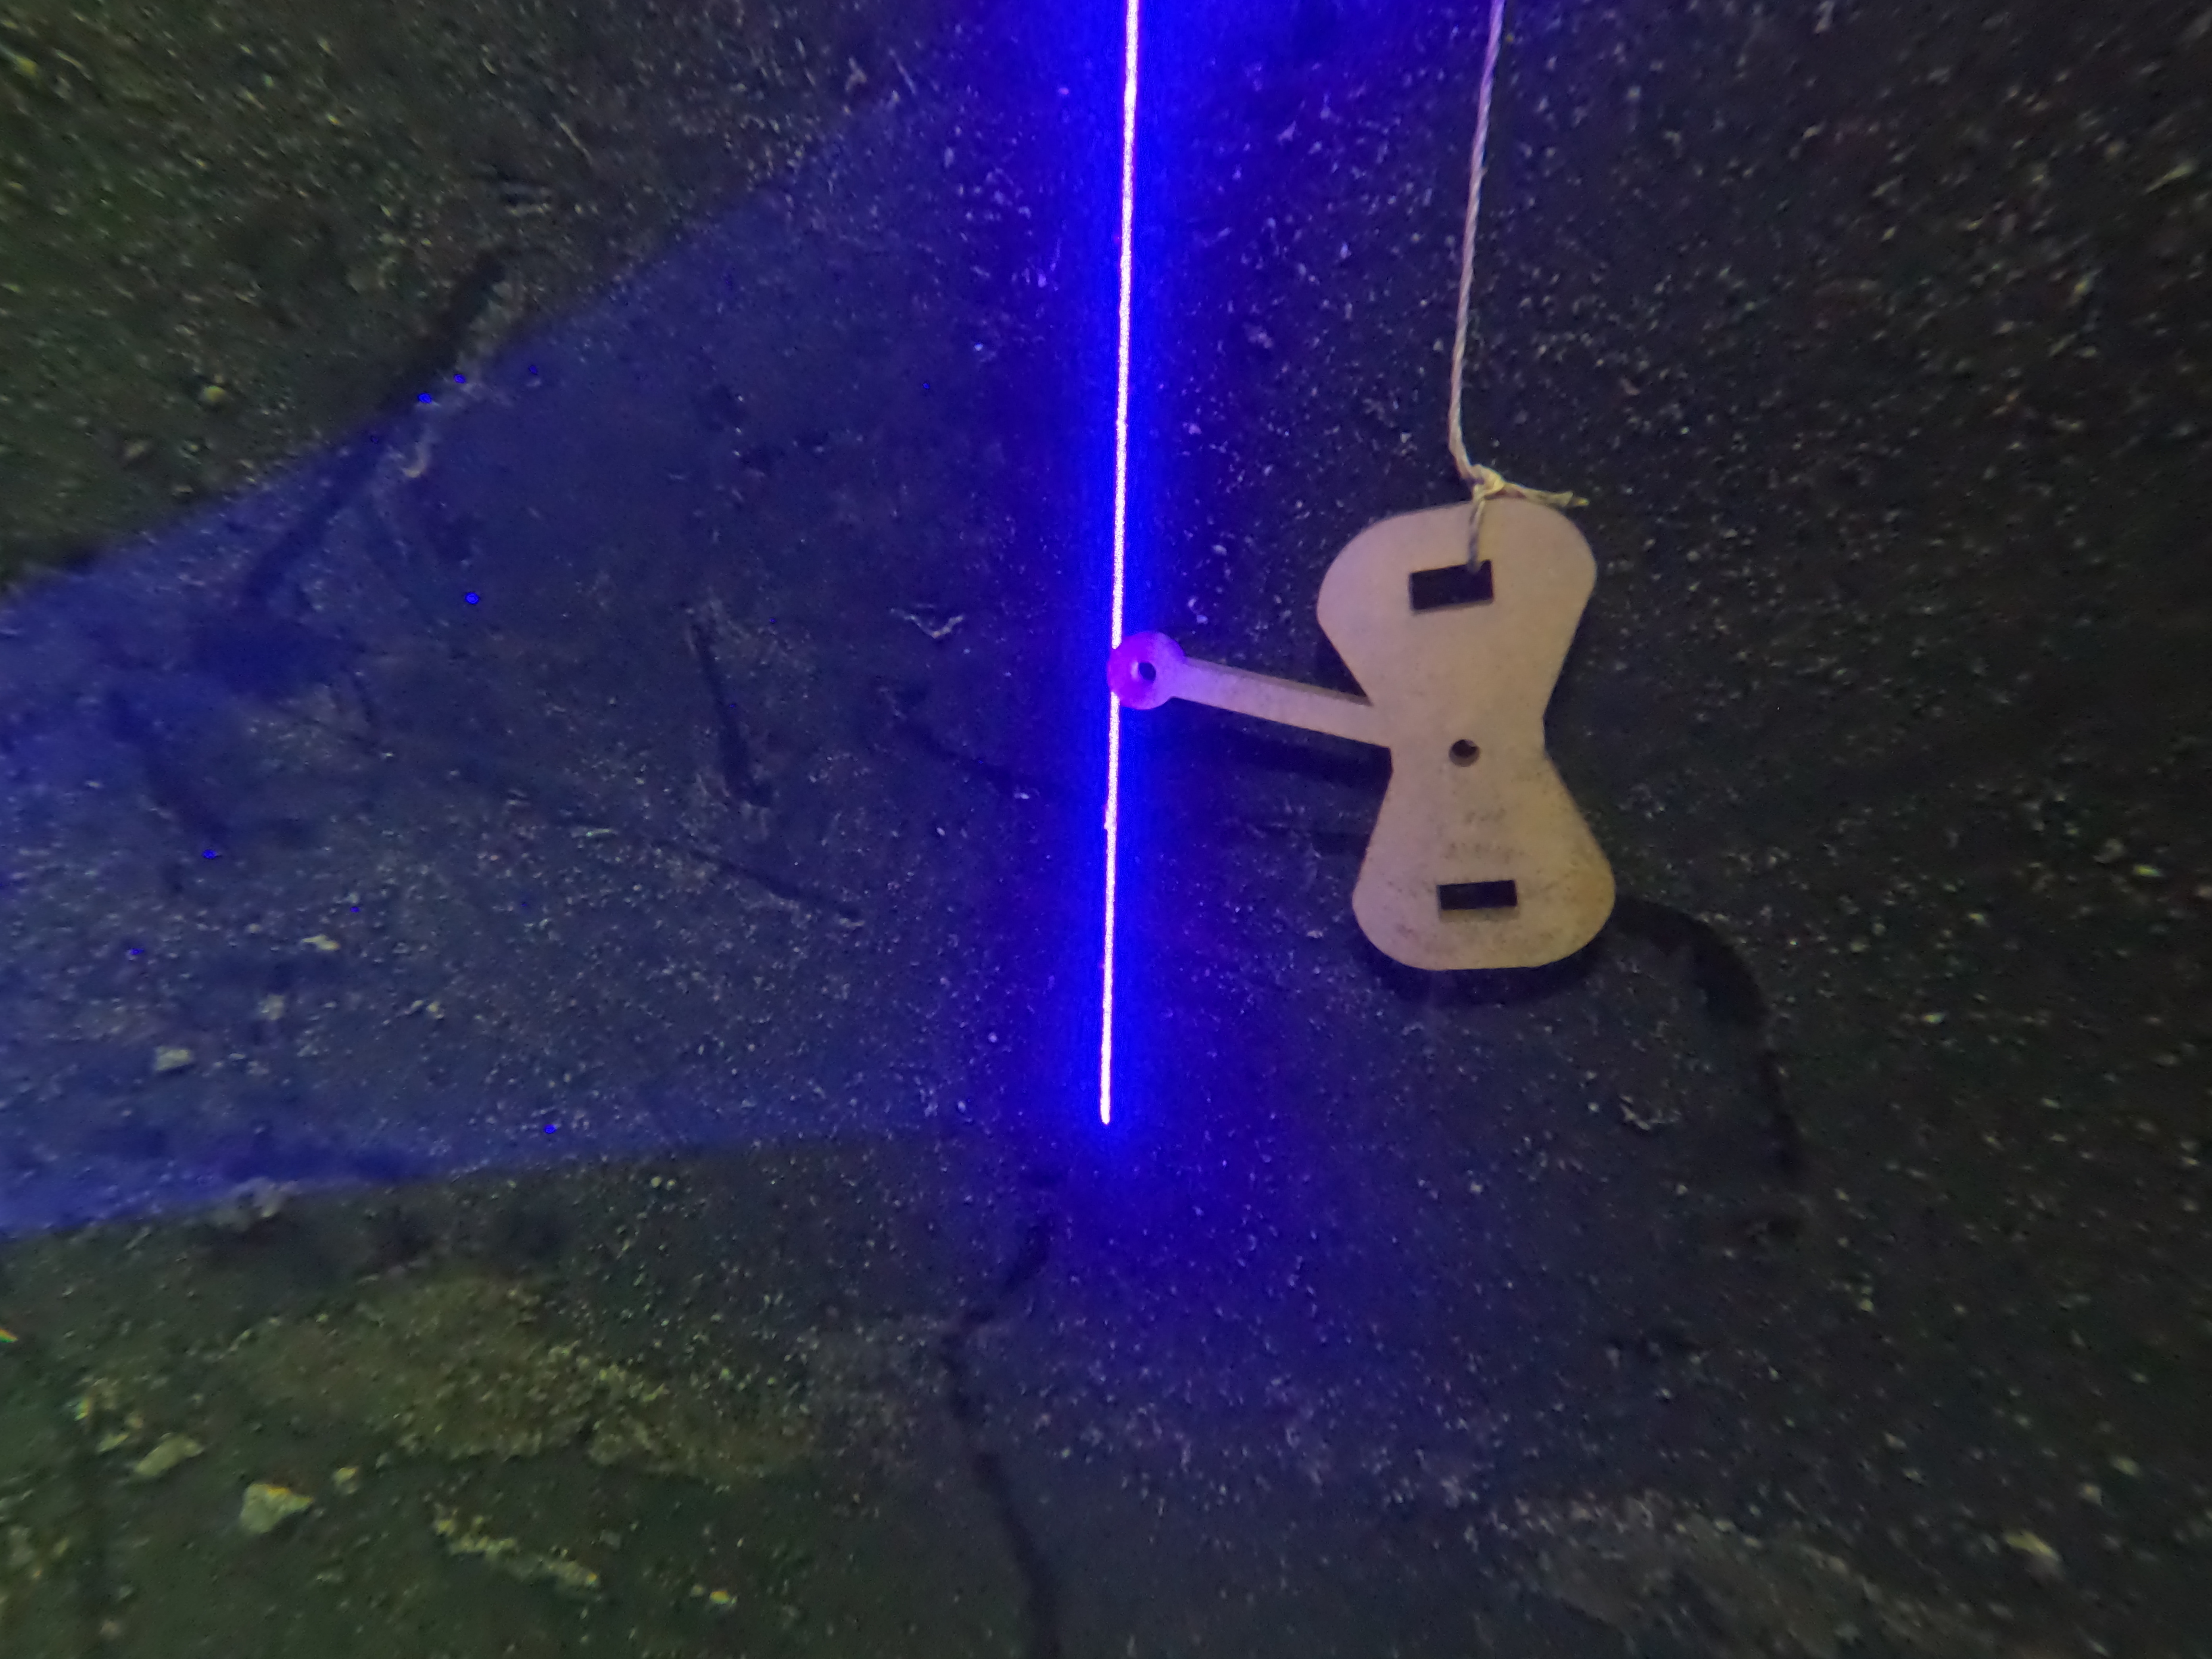

Supplement: Supplementary file 2543 [file G0016121.pdf › Level_2_2/G0016121.pdf]

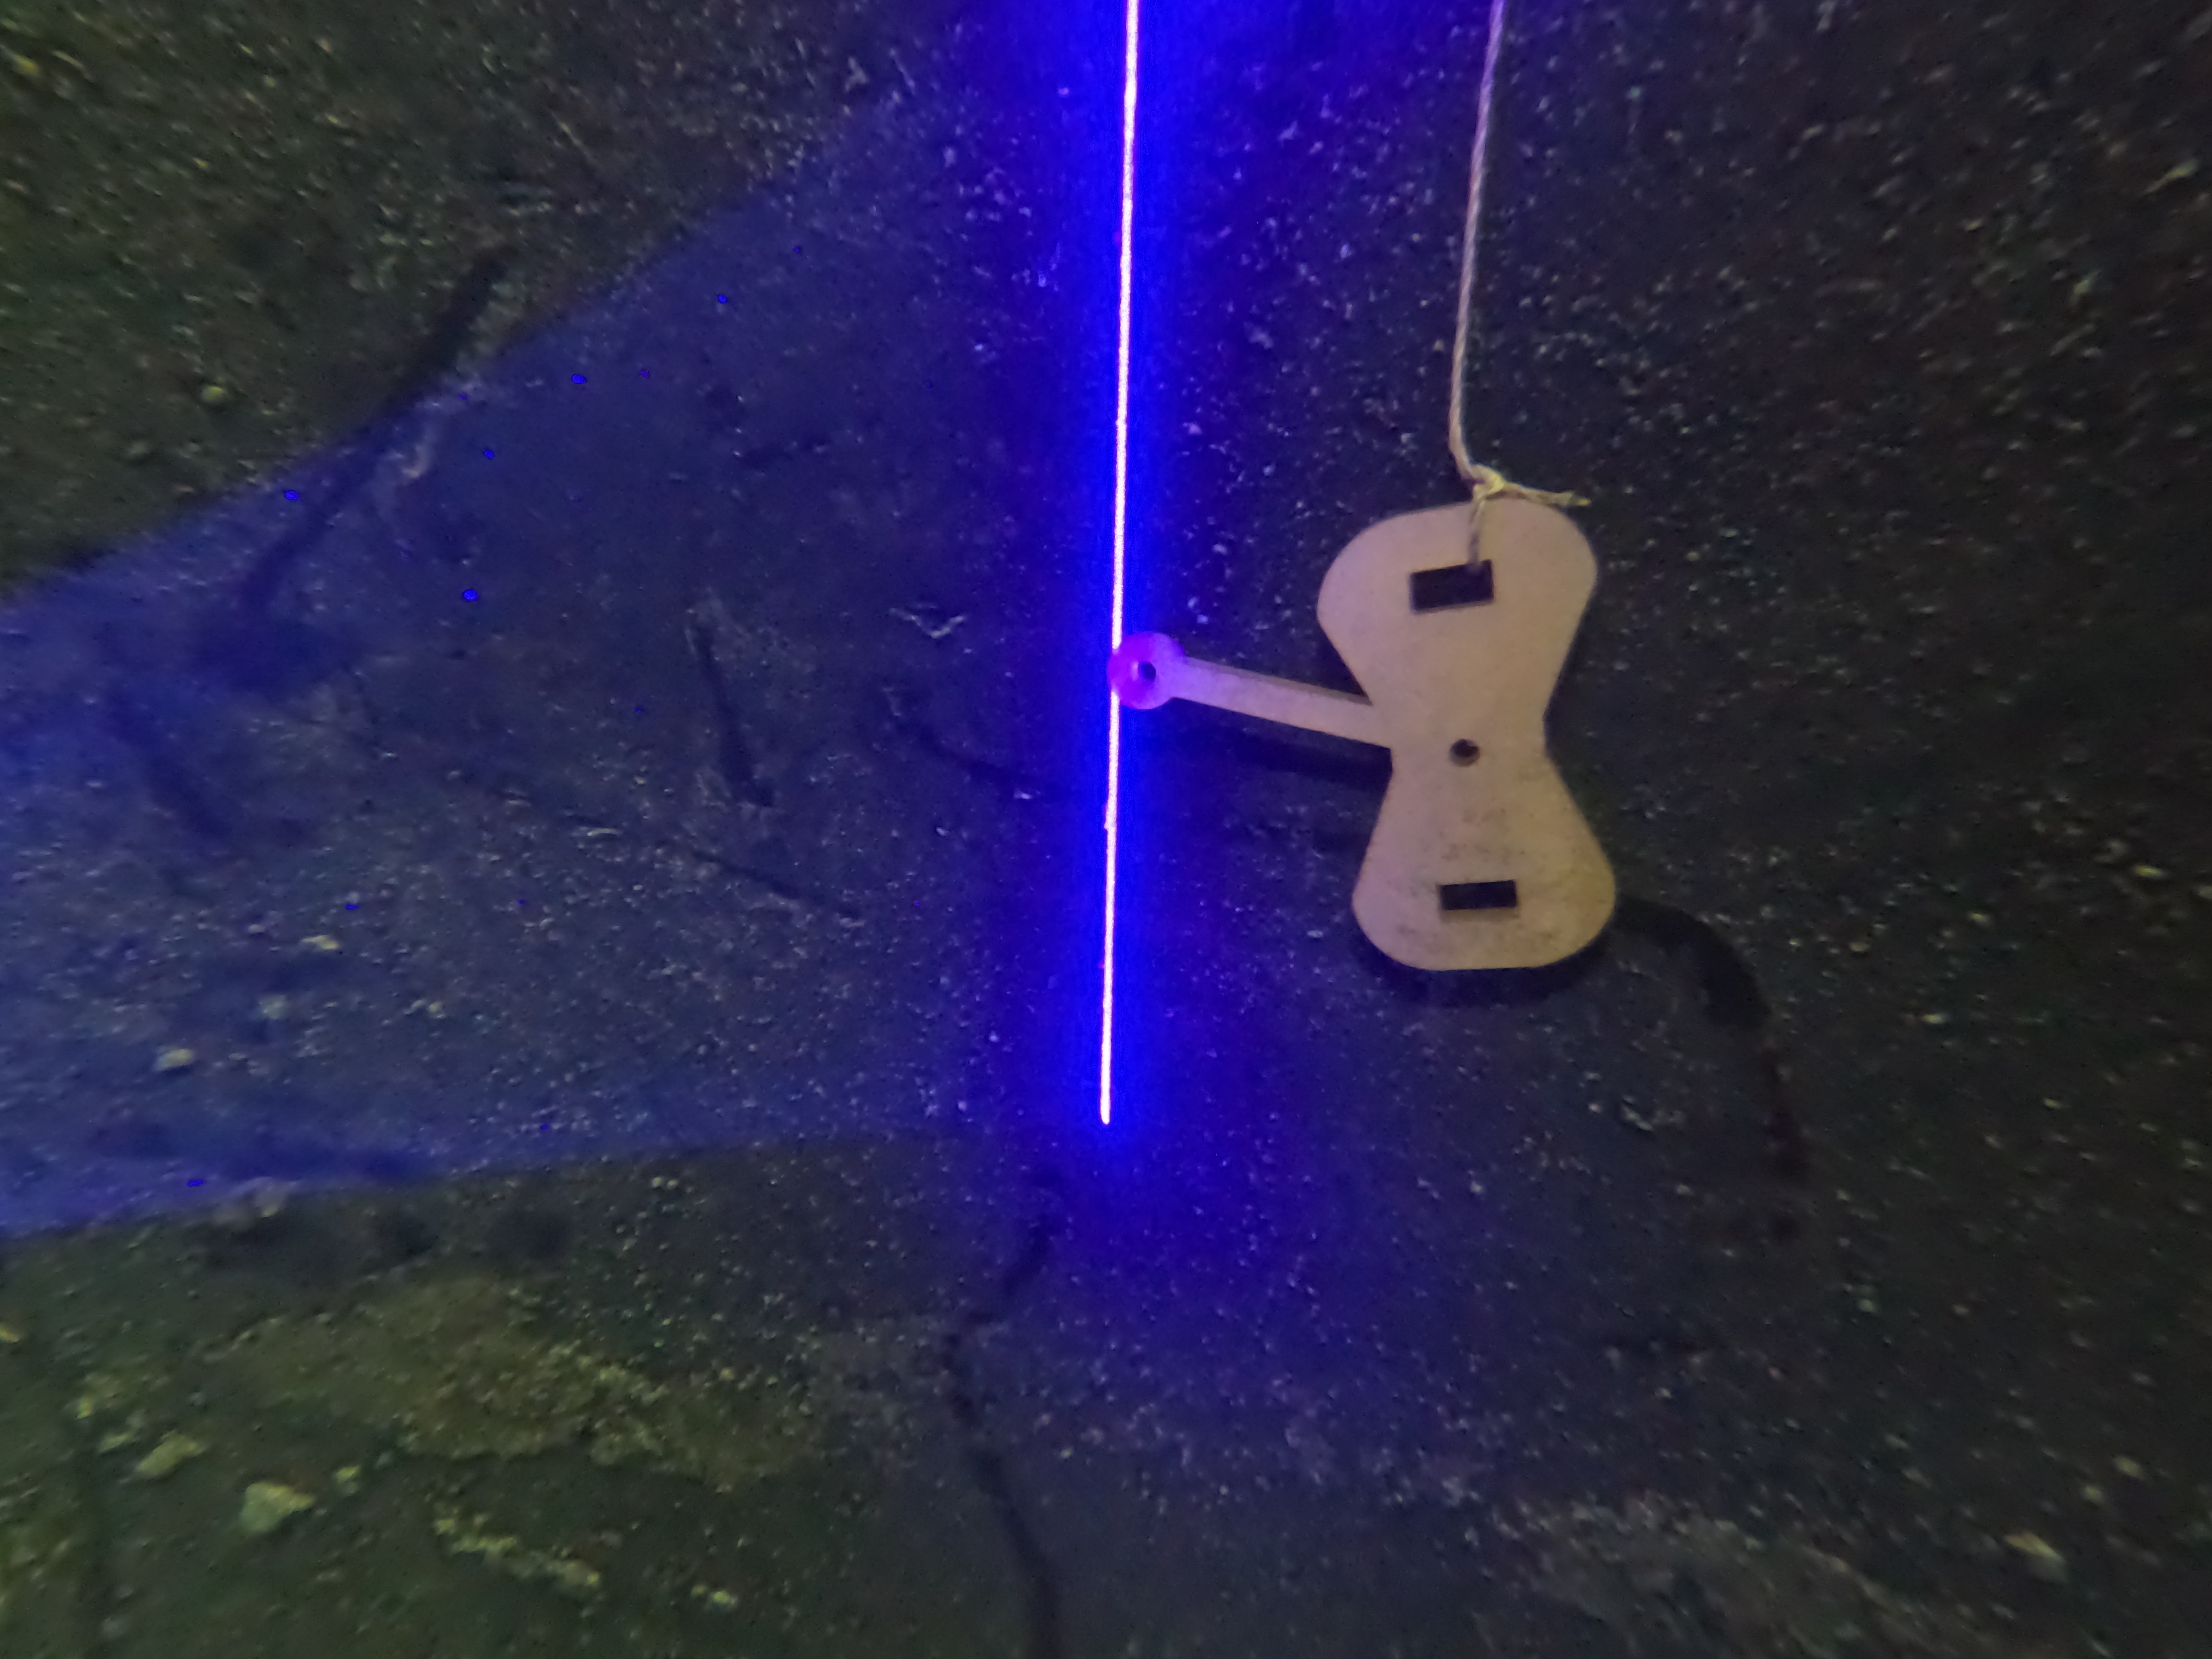

Supplement: Supplementary file 2544 [file G0016122.pdf › Level_2_2/G0016122.pdf]

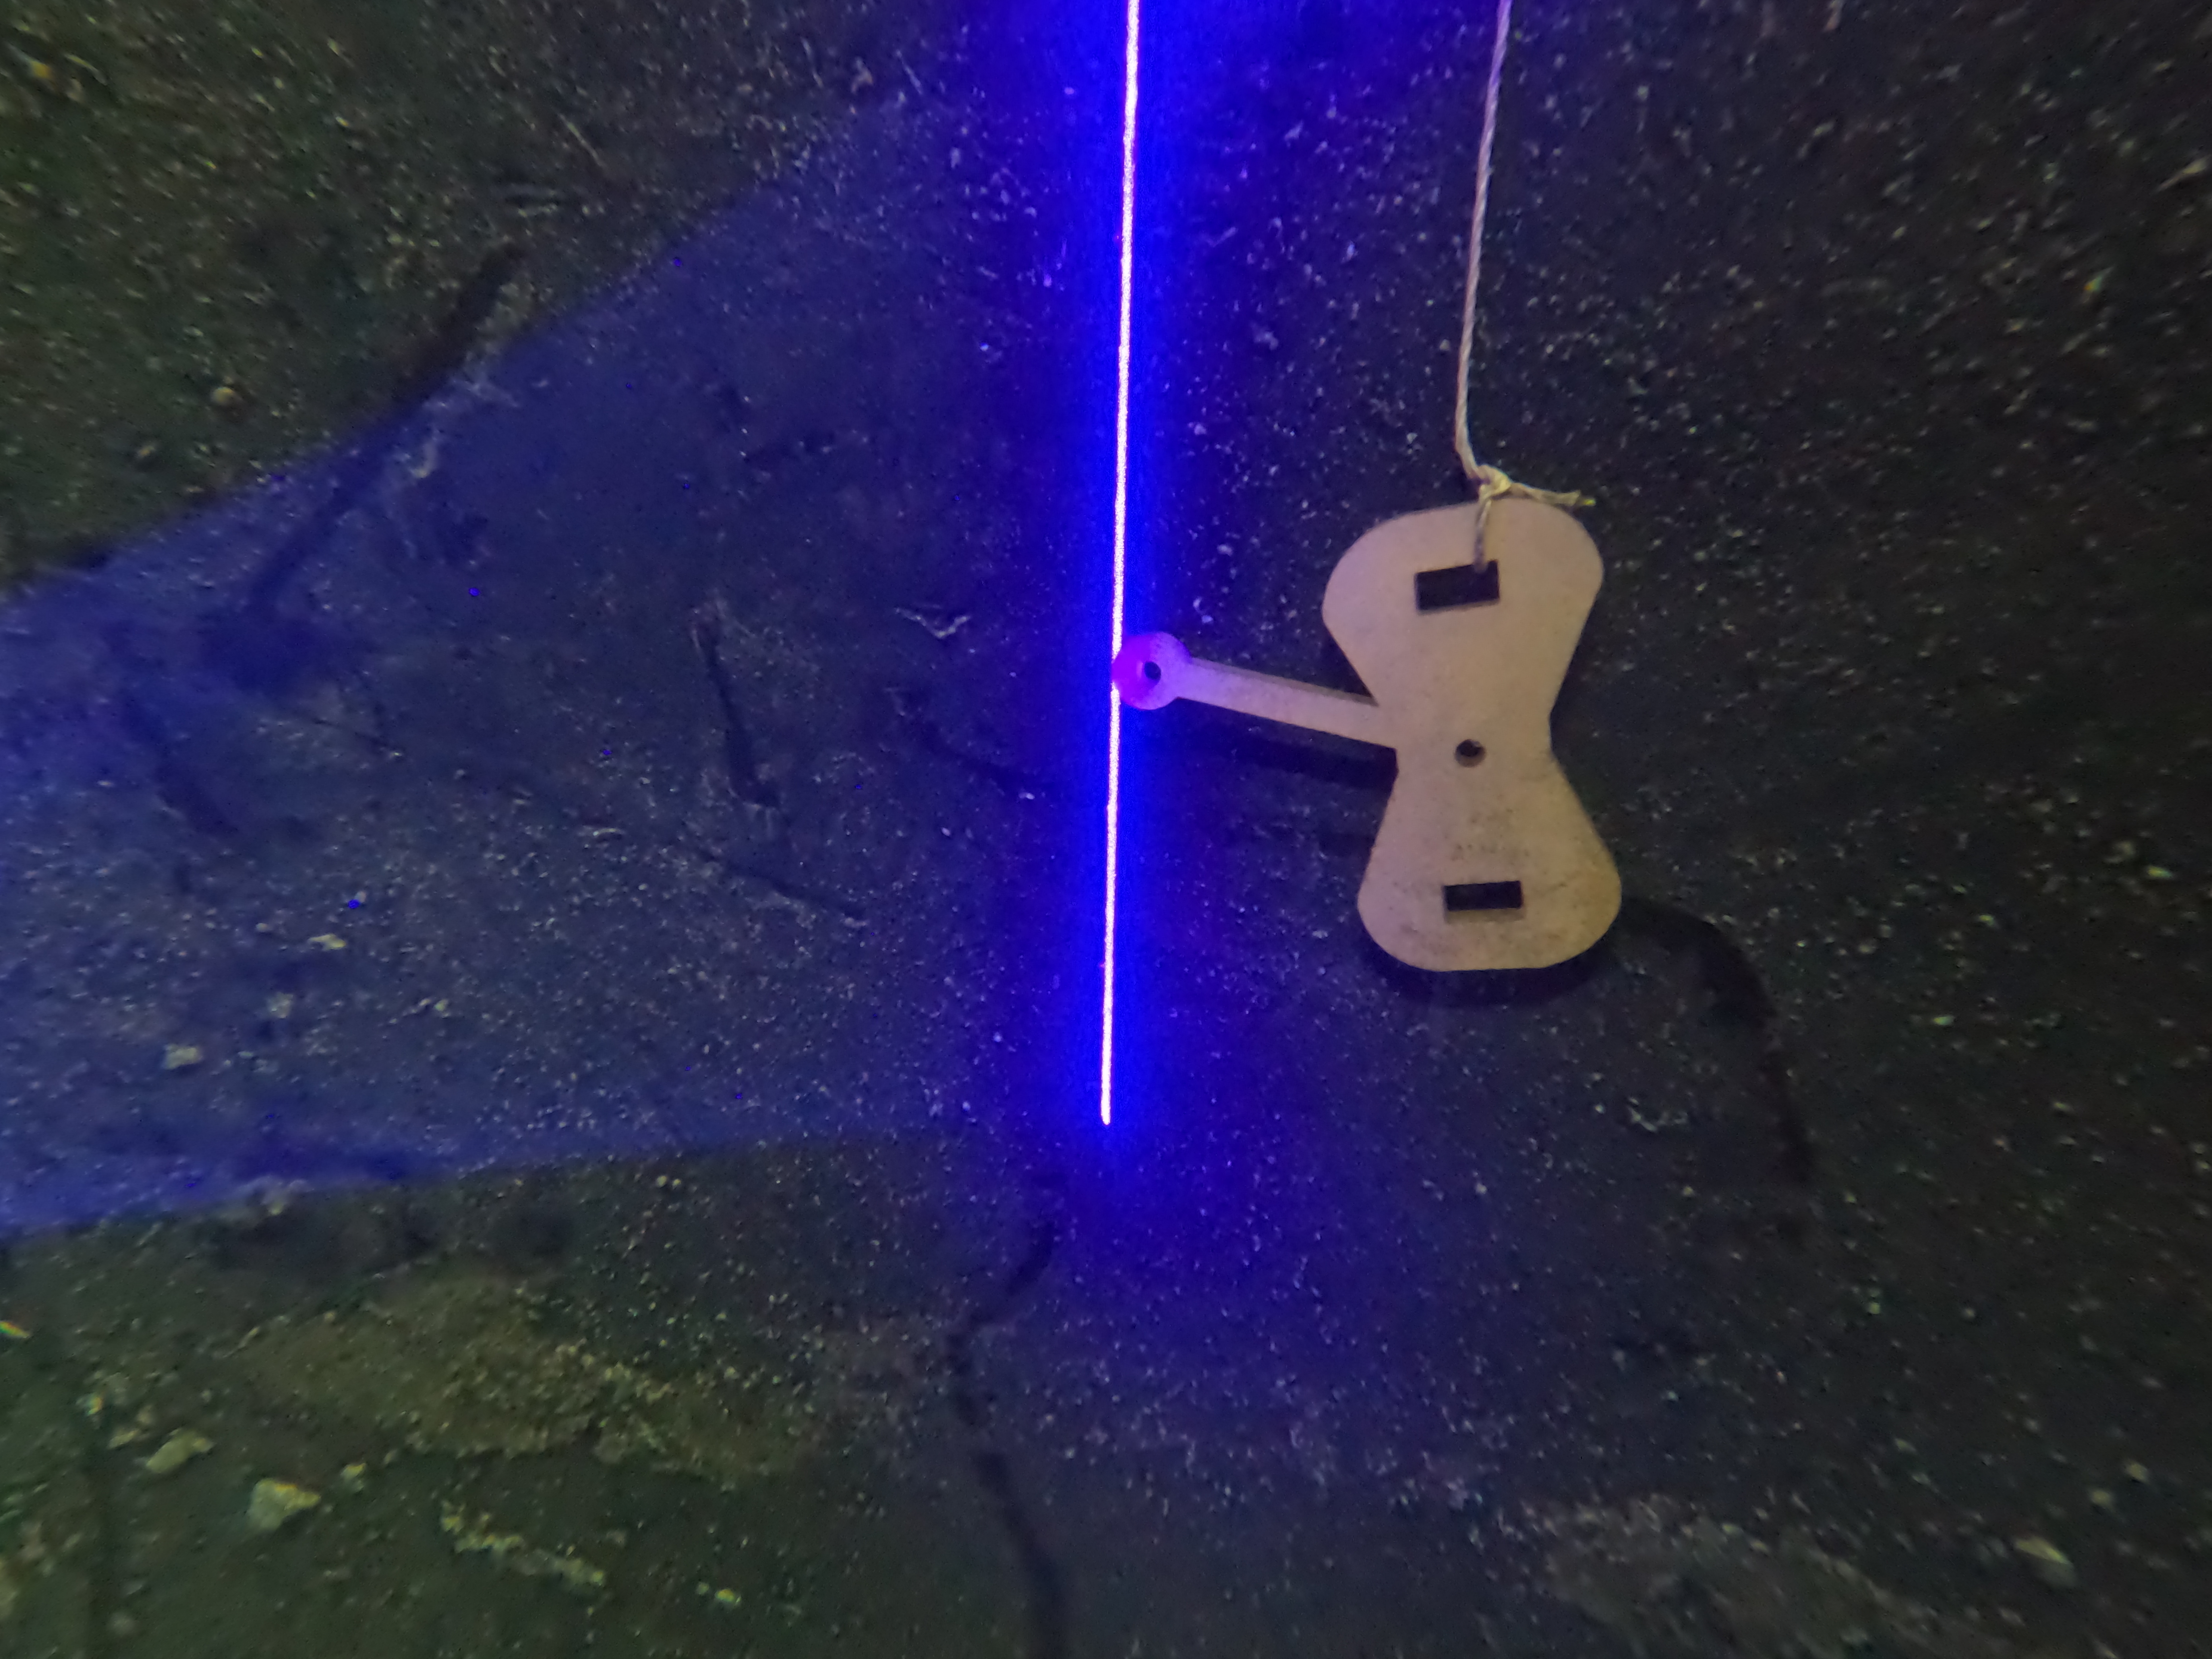

Supplement: Supplementary file 2545 [file G0016123.pdf › Level_2_2/G0016123.pdf]

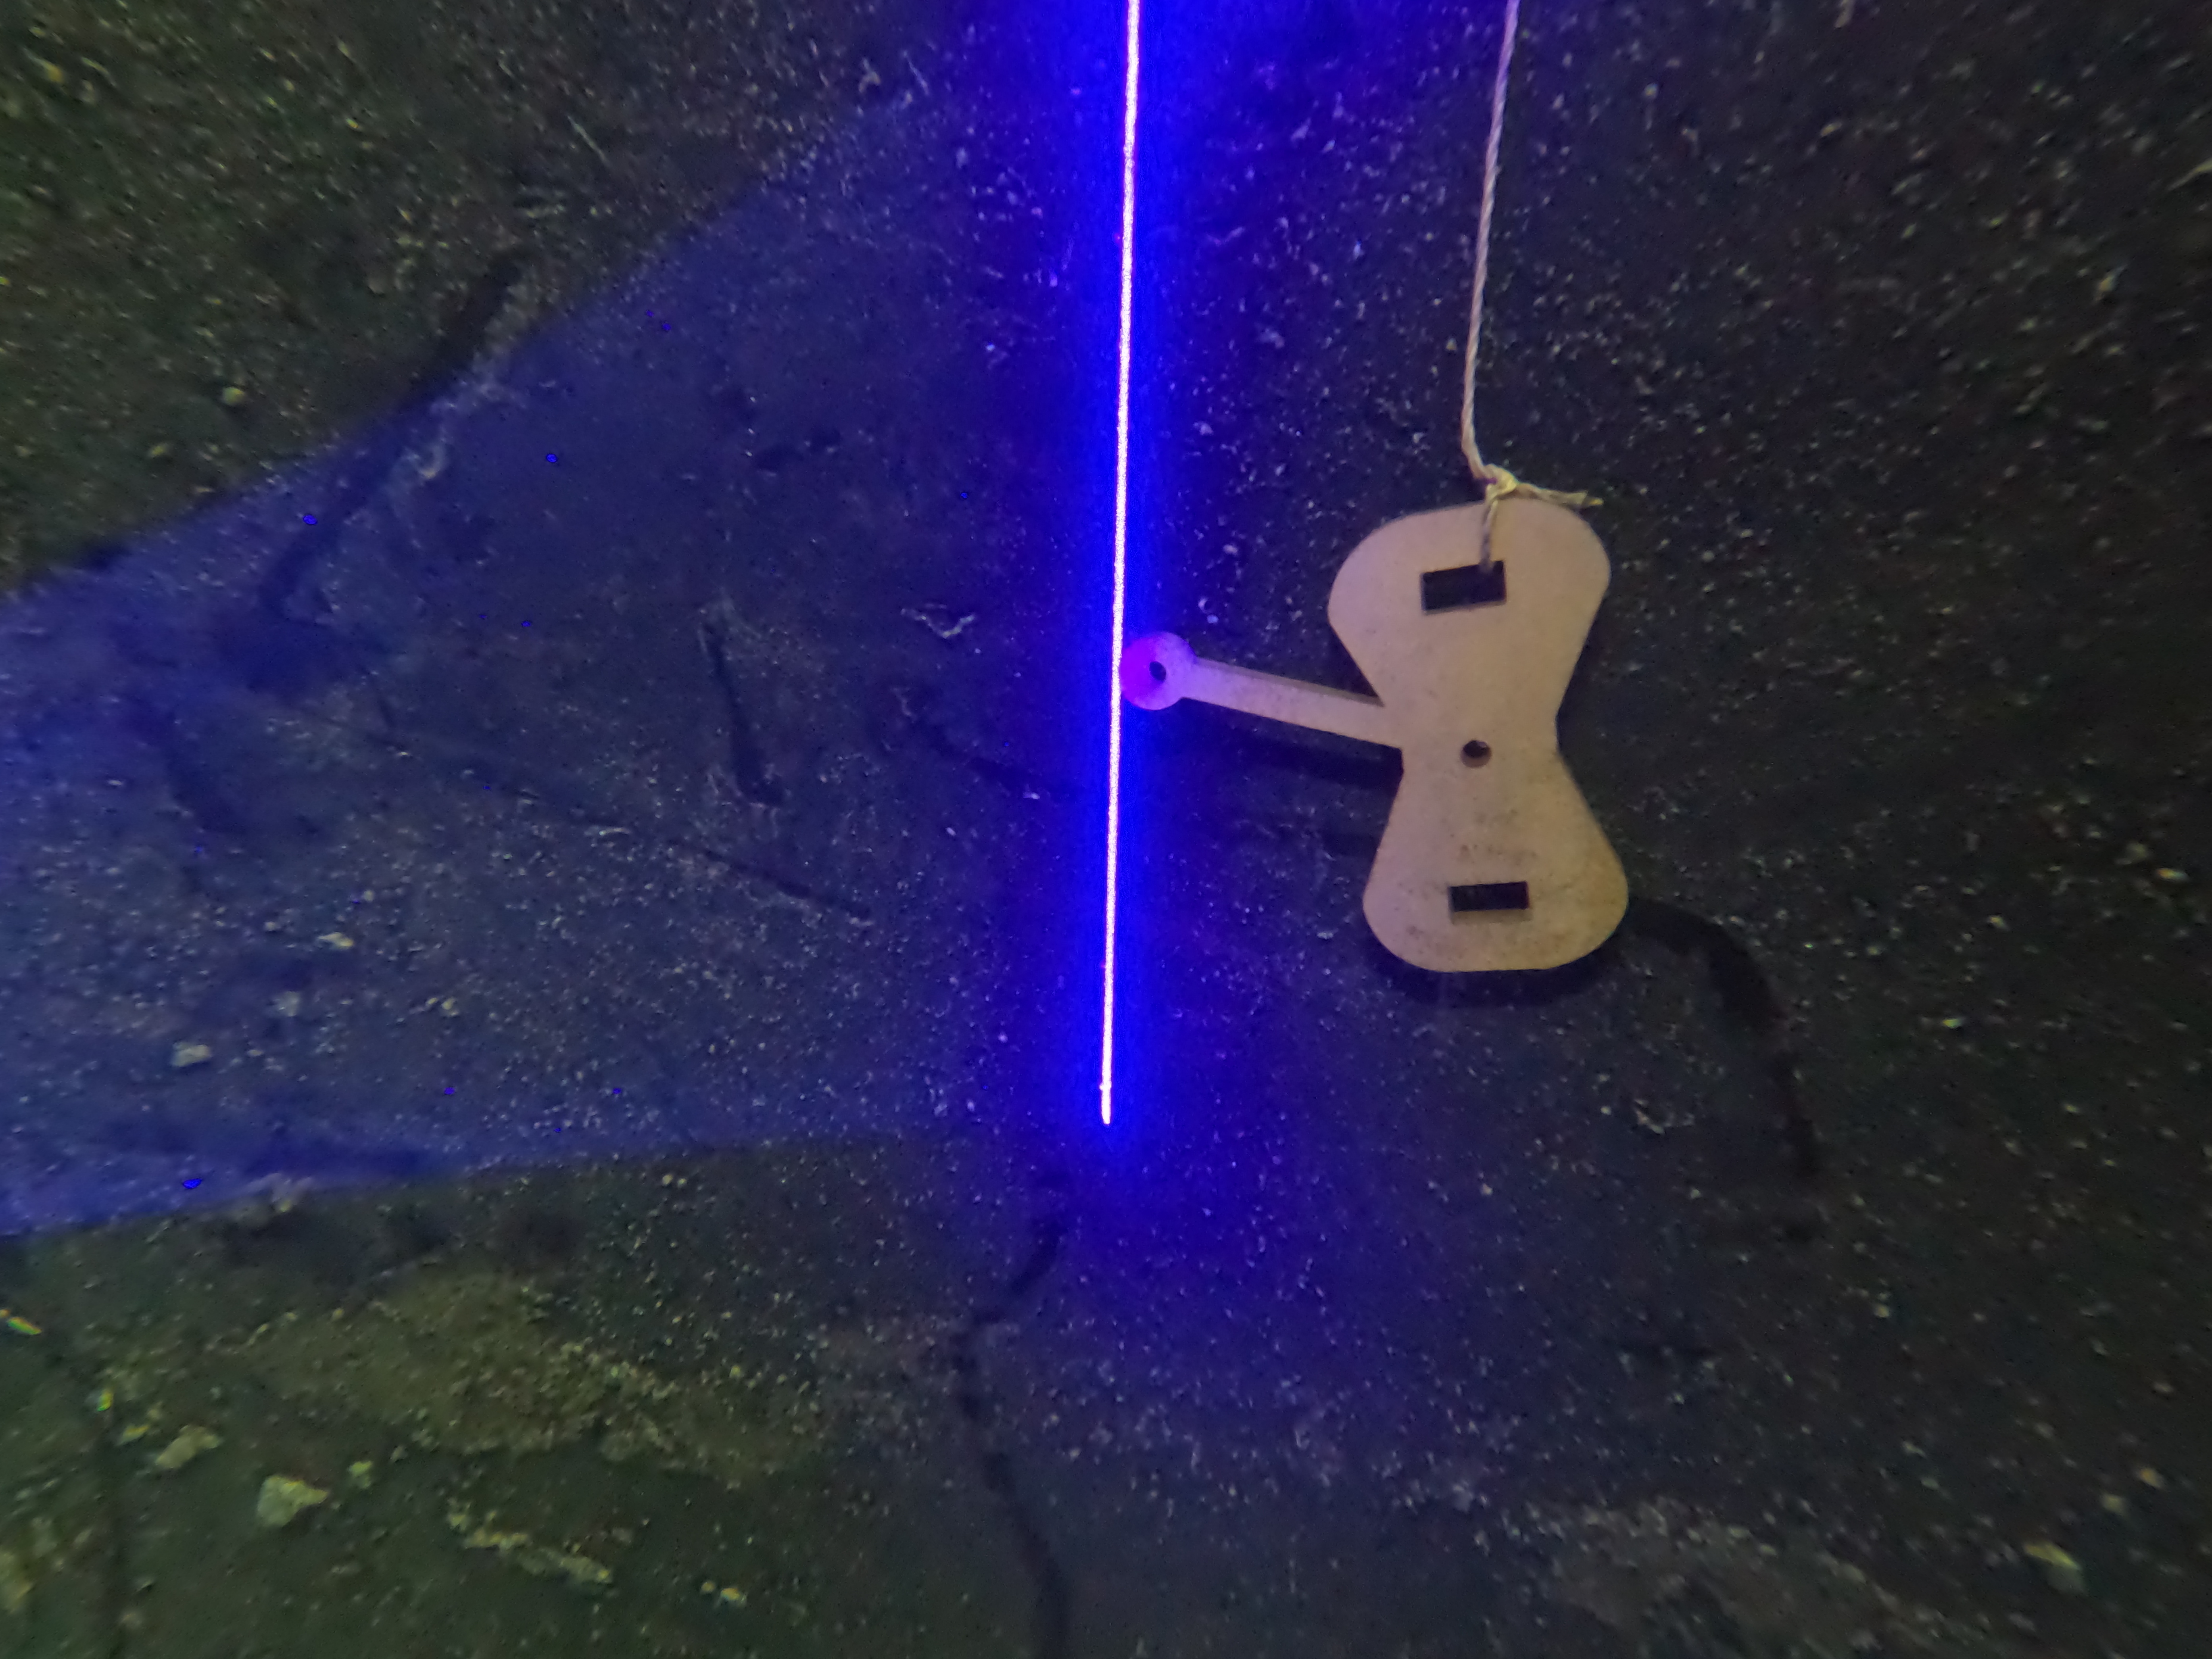

Supplement: Supplementary file 2546 [file G0016124.pdf › Level_2_2/G0016124.pdf]

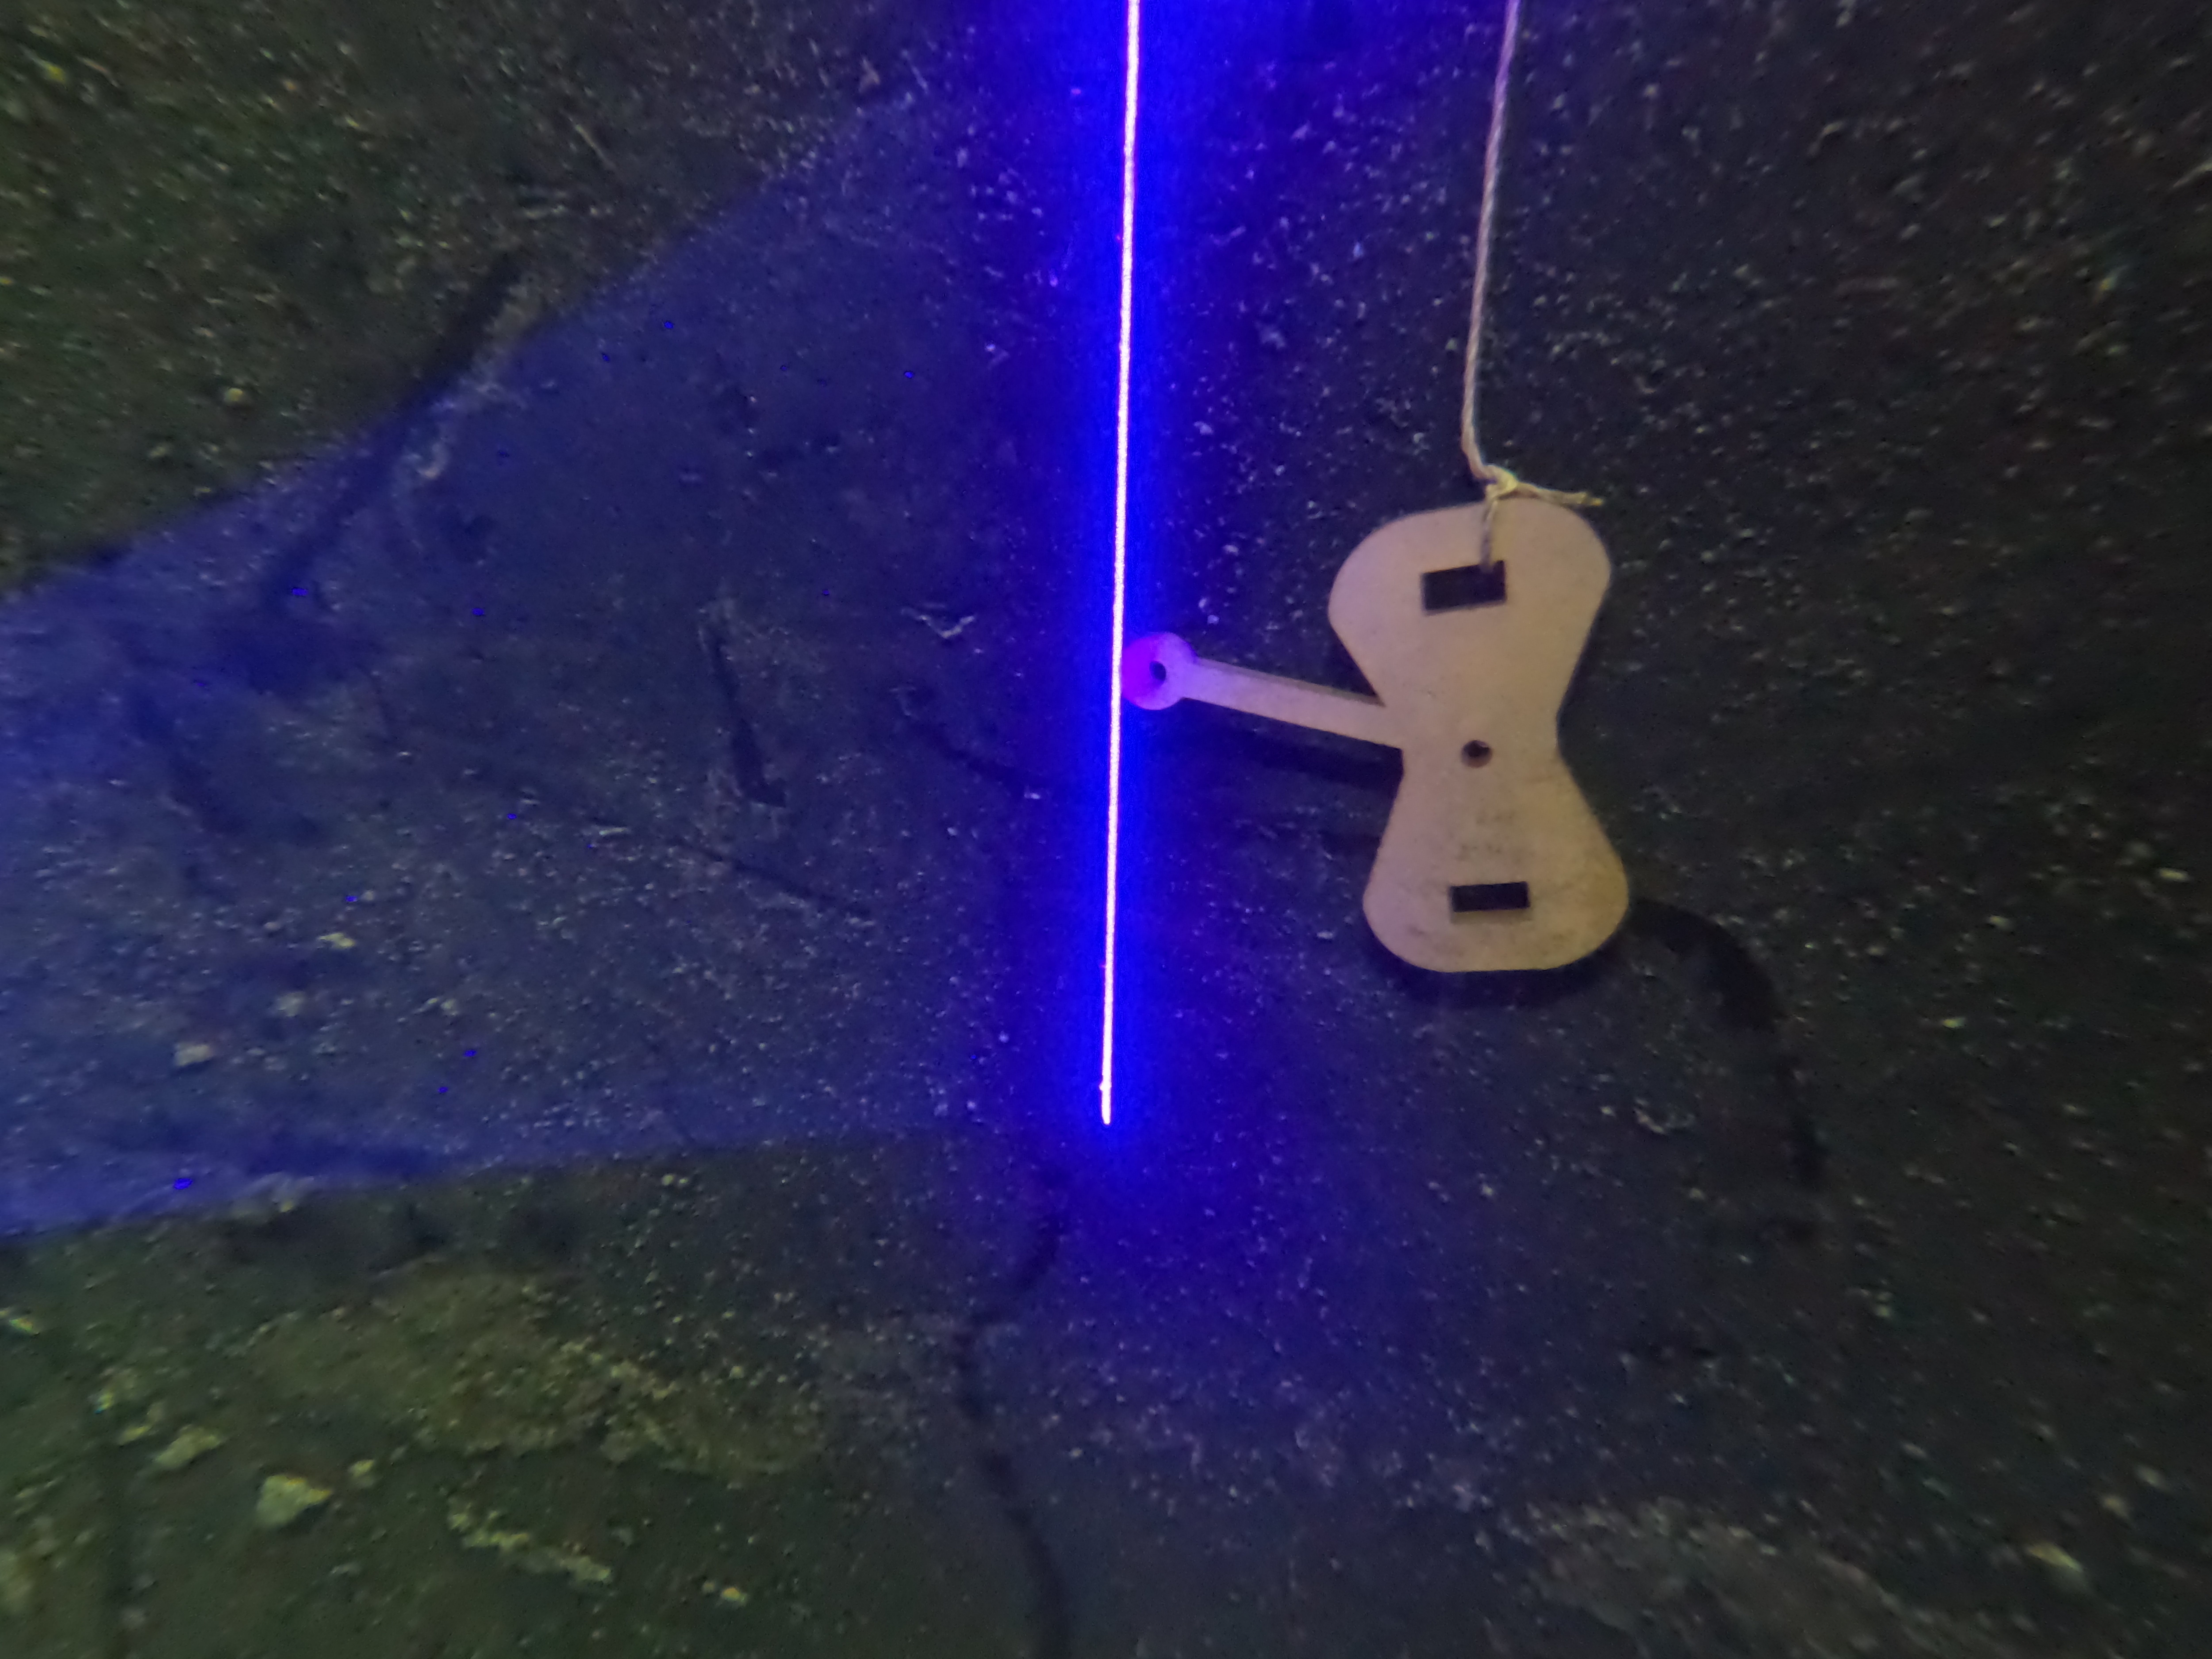

Supplement: Supplementary file 2547 [file G0016125.pdf › Level_2_2/G0016125.pdf]

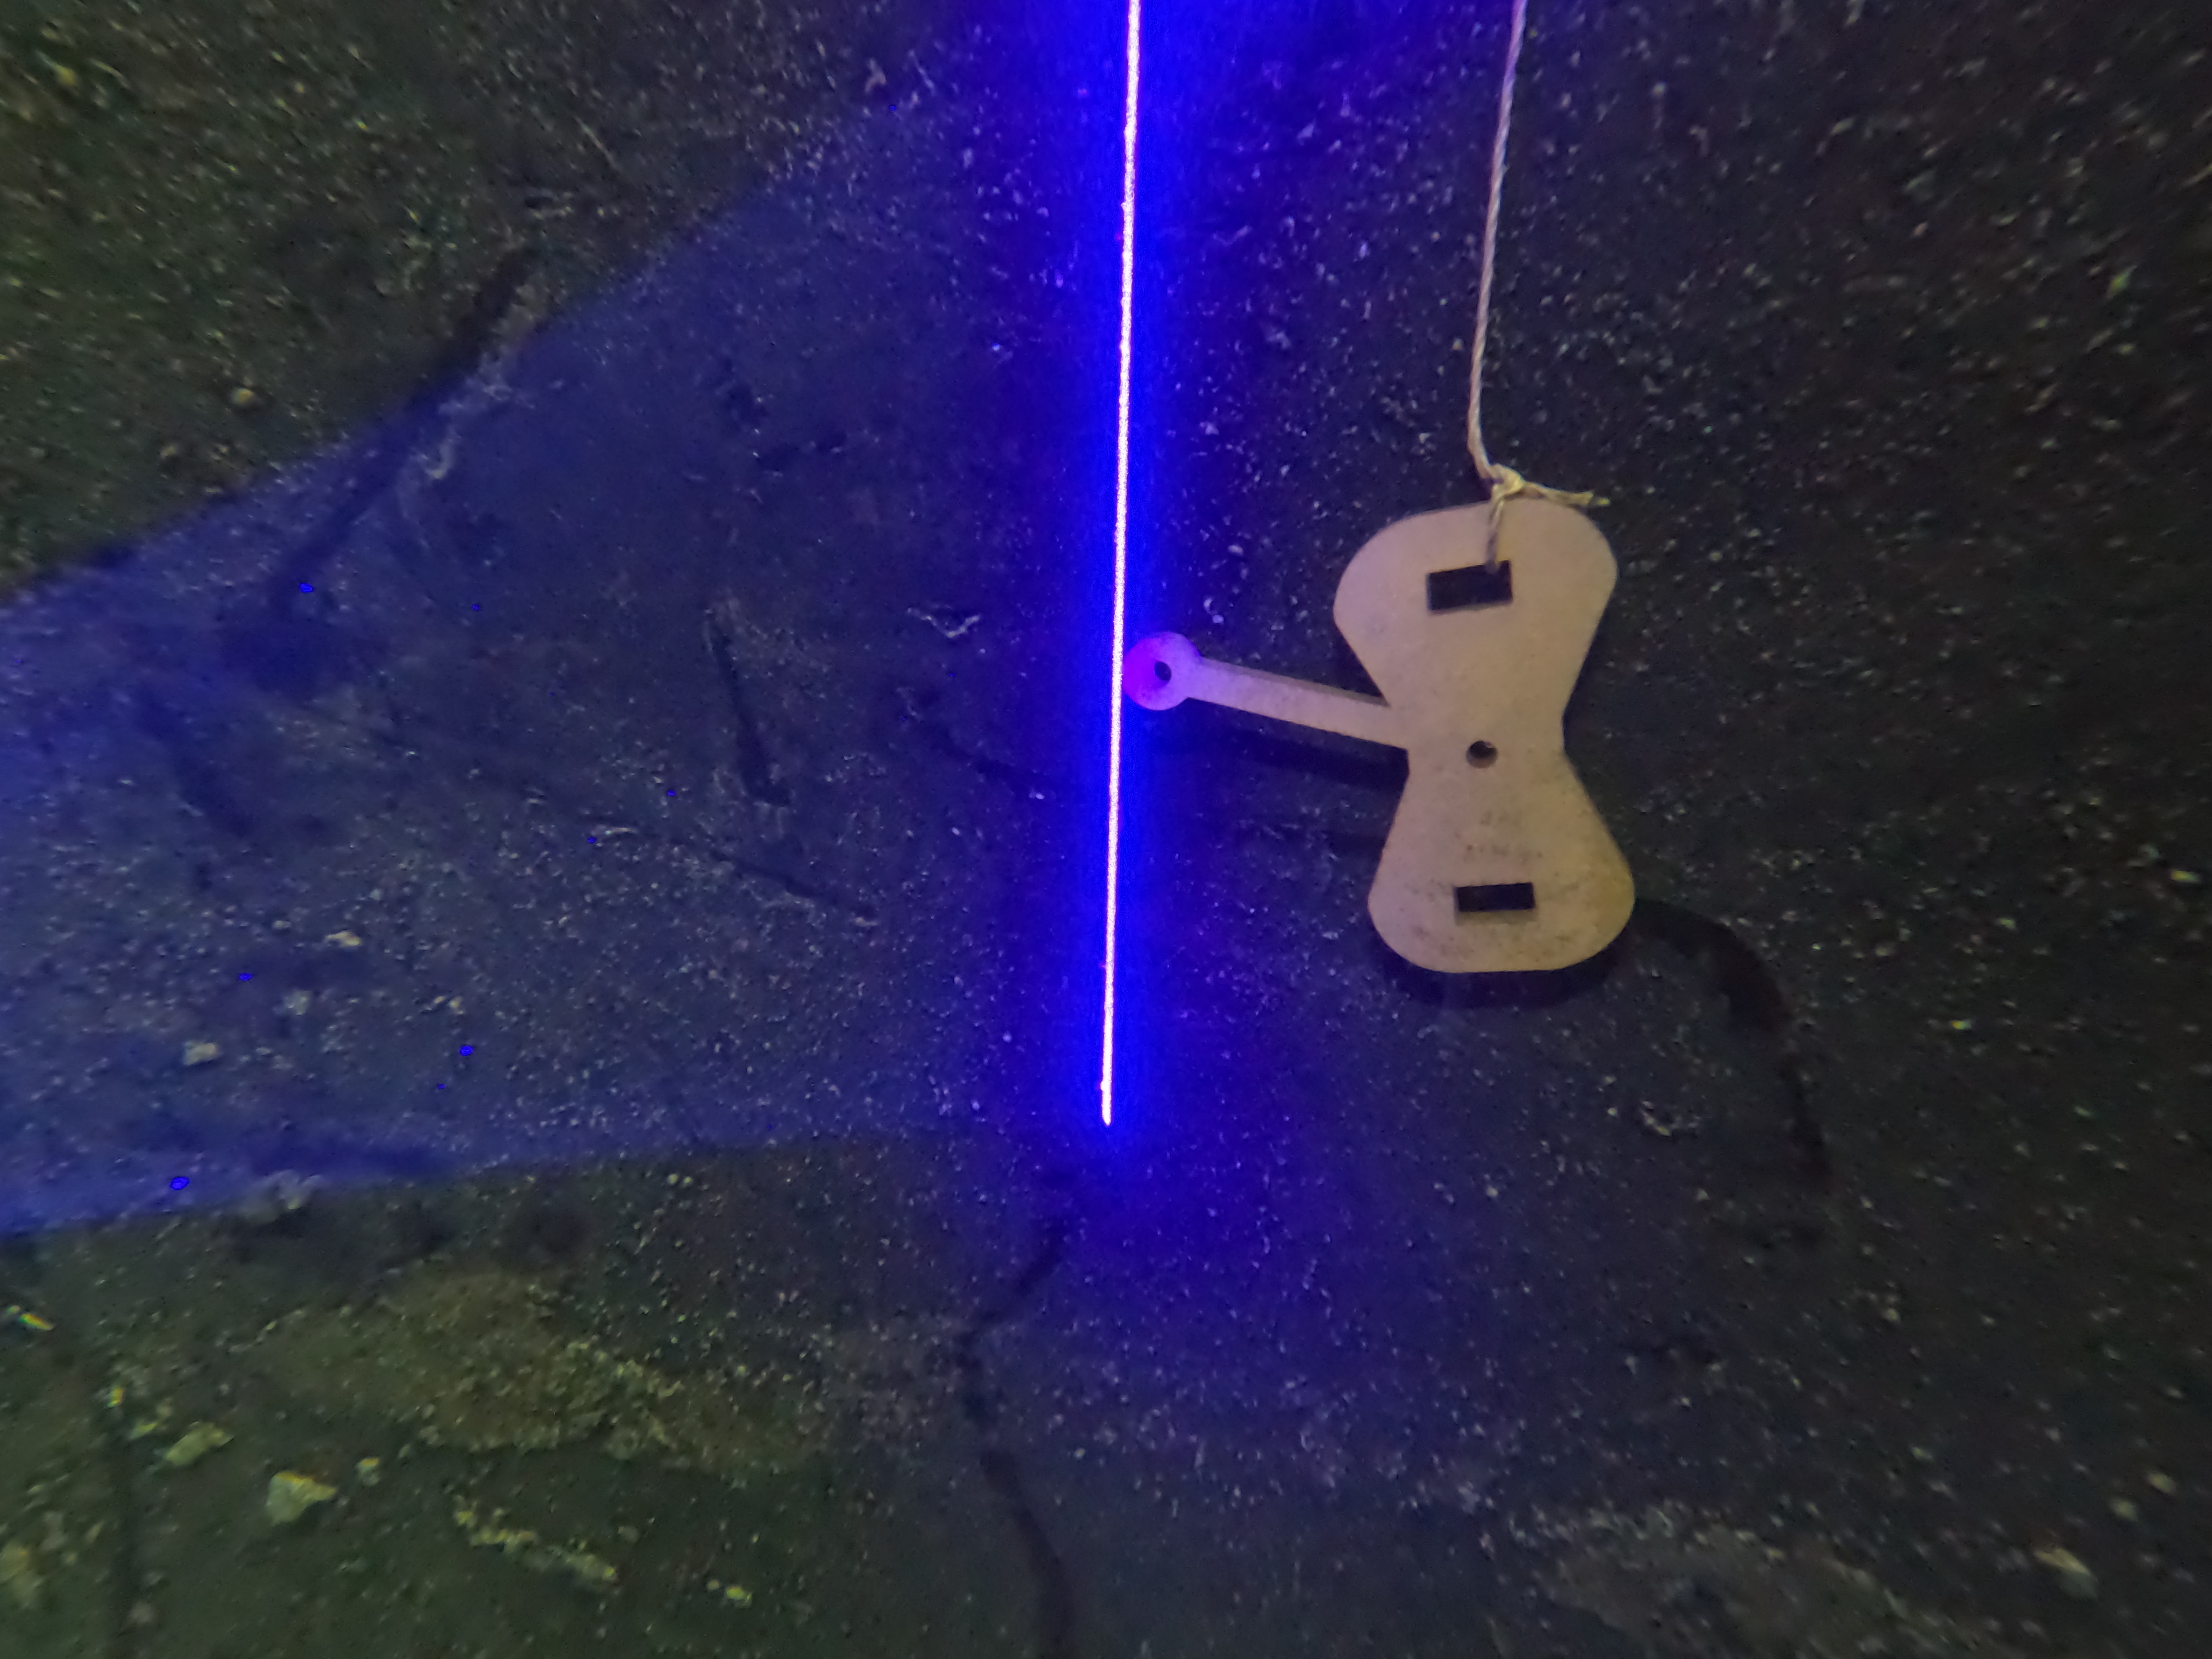

Supplement: Supplementary file 2548 [file G0016126.pdf › Level_2_2/G0016126.pdf]

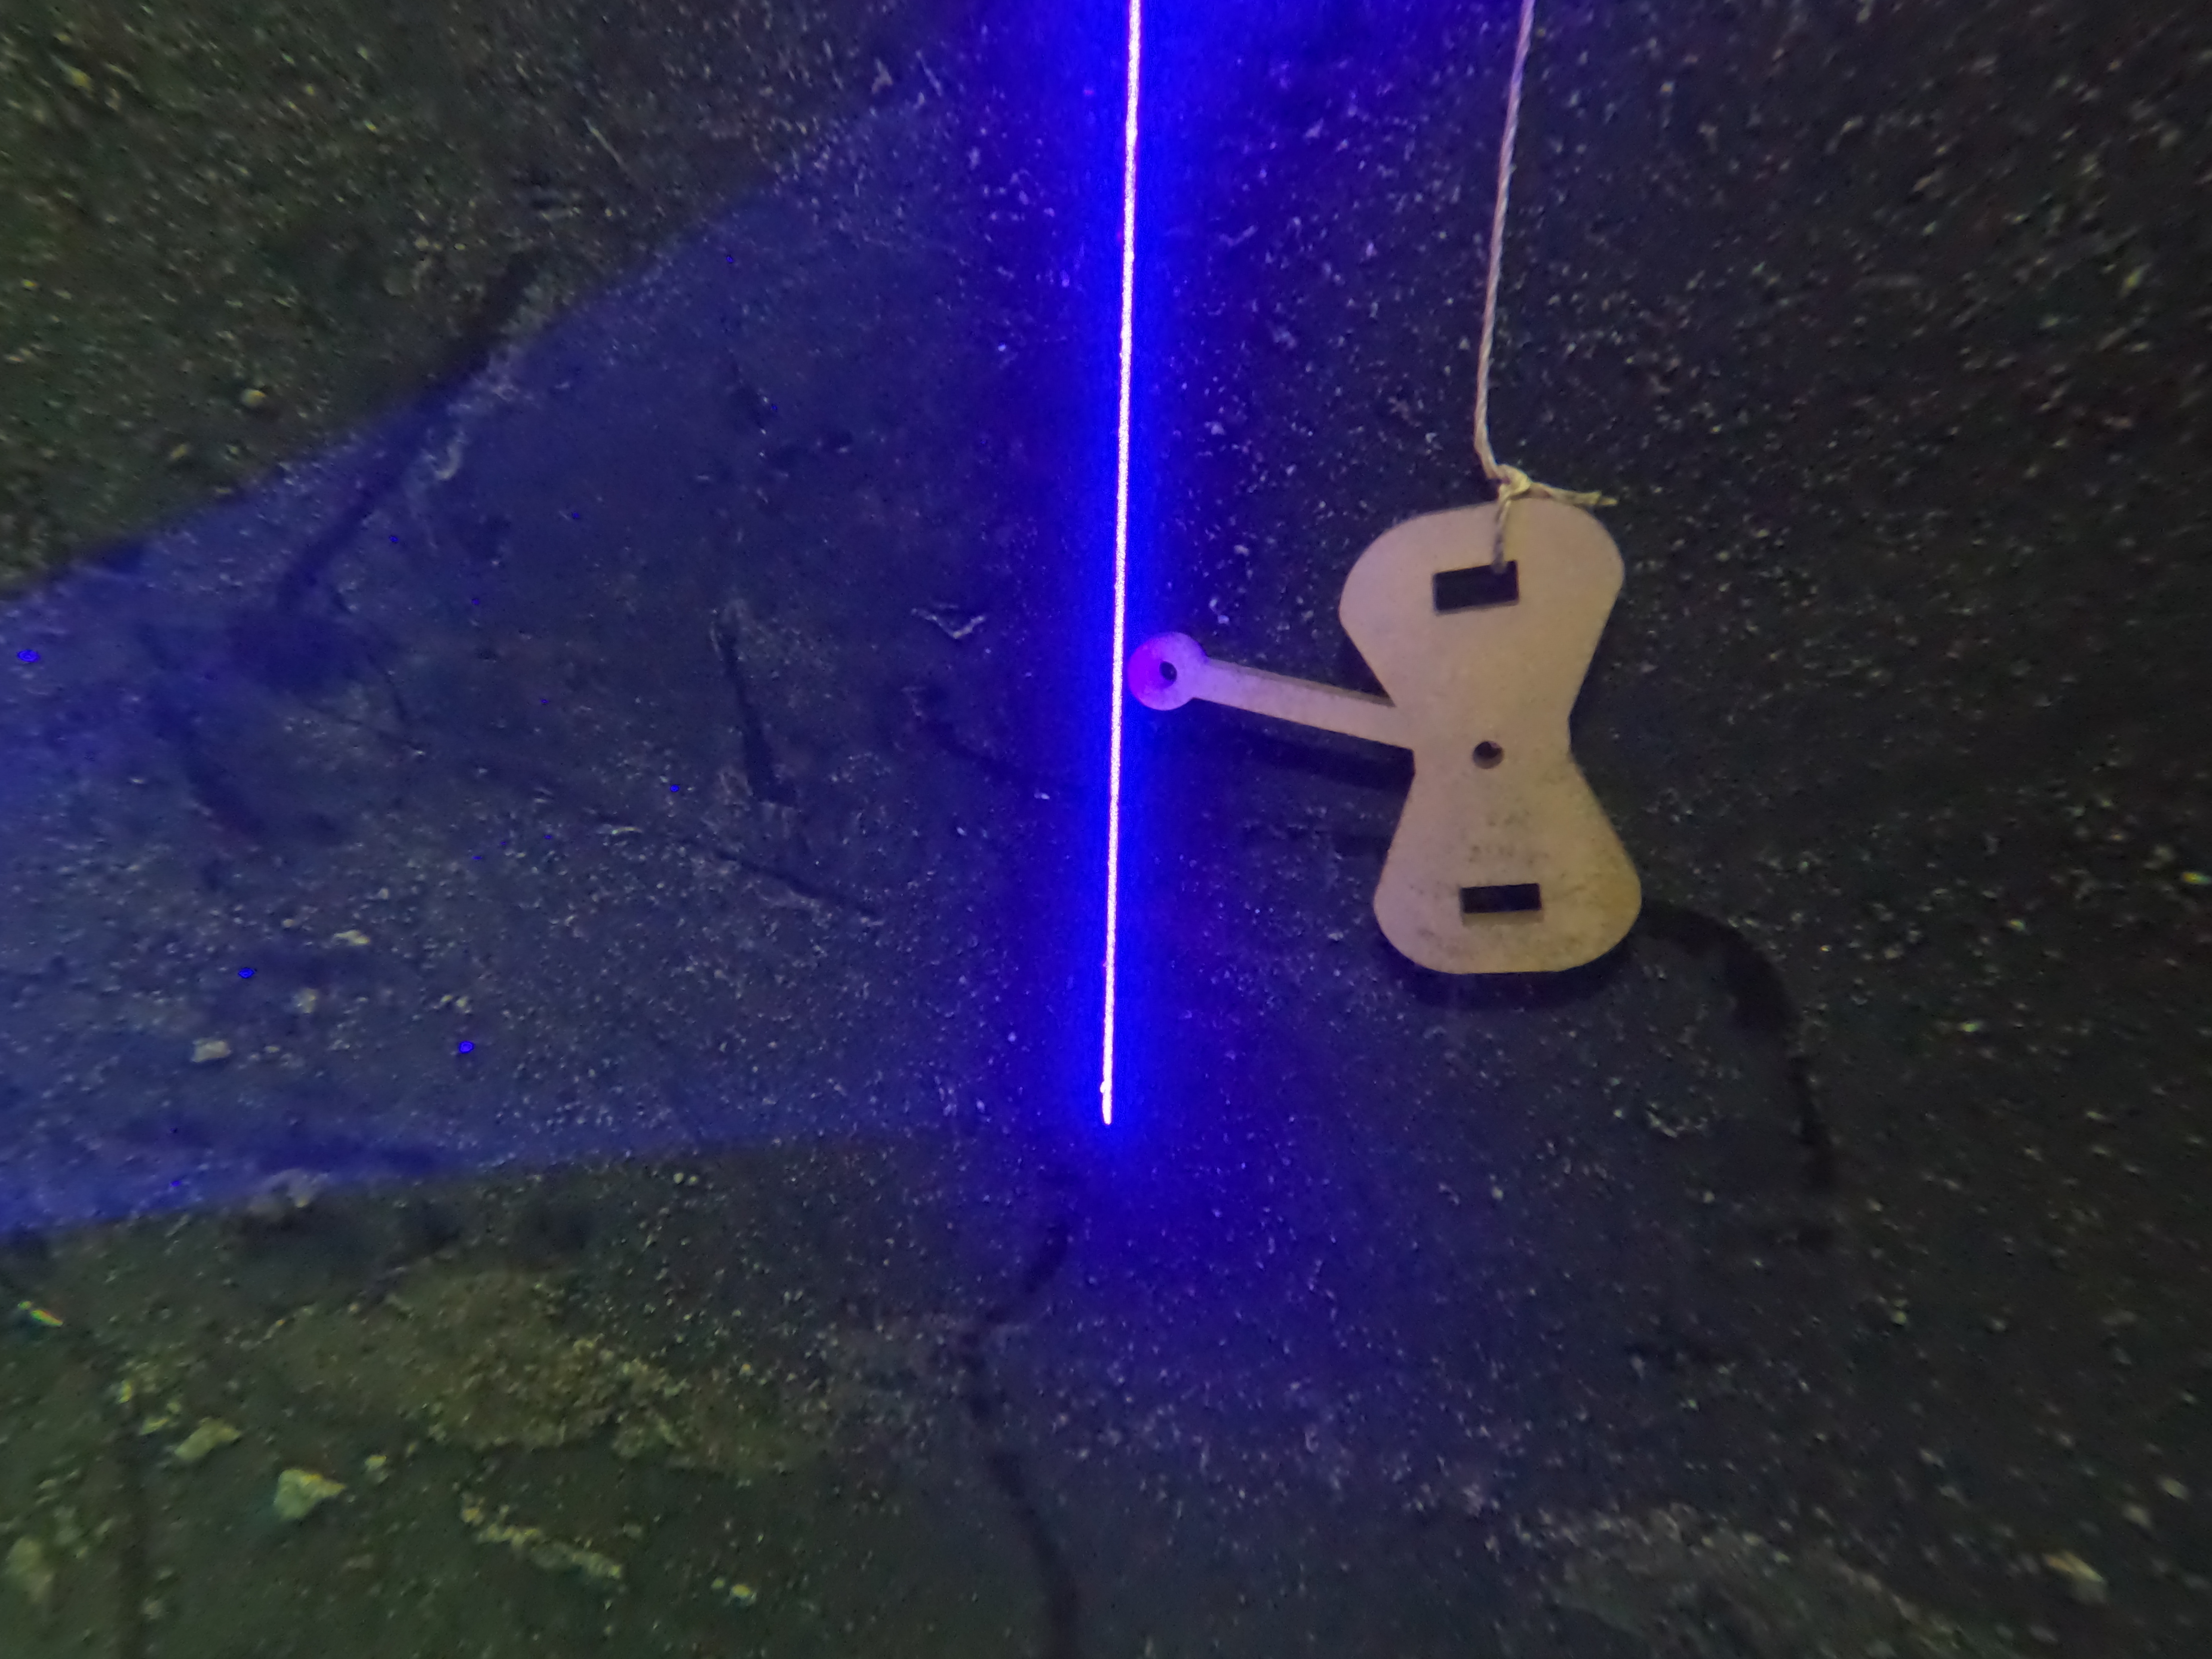

Supplement: Supplementary file 2549 [file G0016127.pdf › Level_2_2/G0016127.pdf]

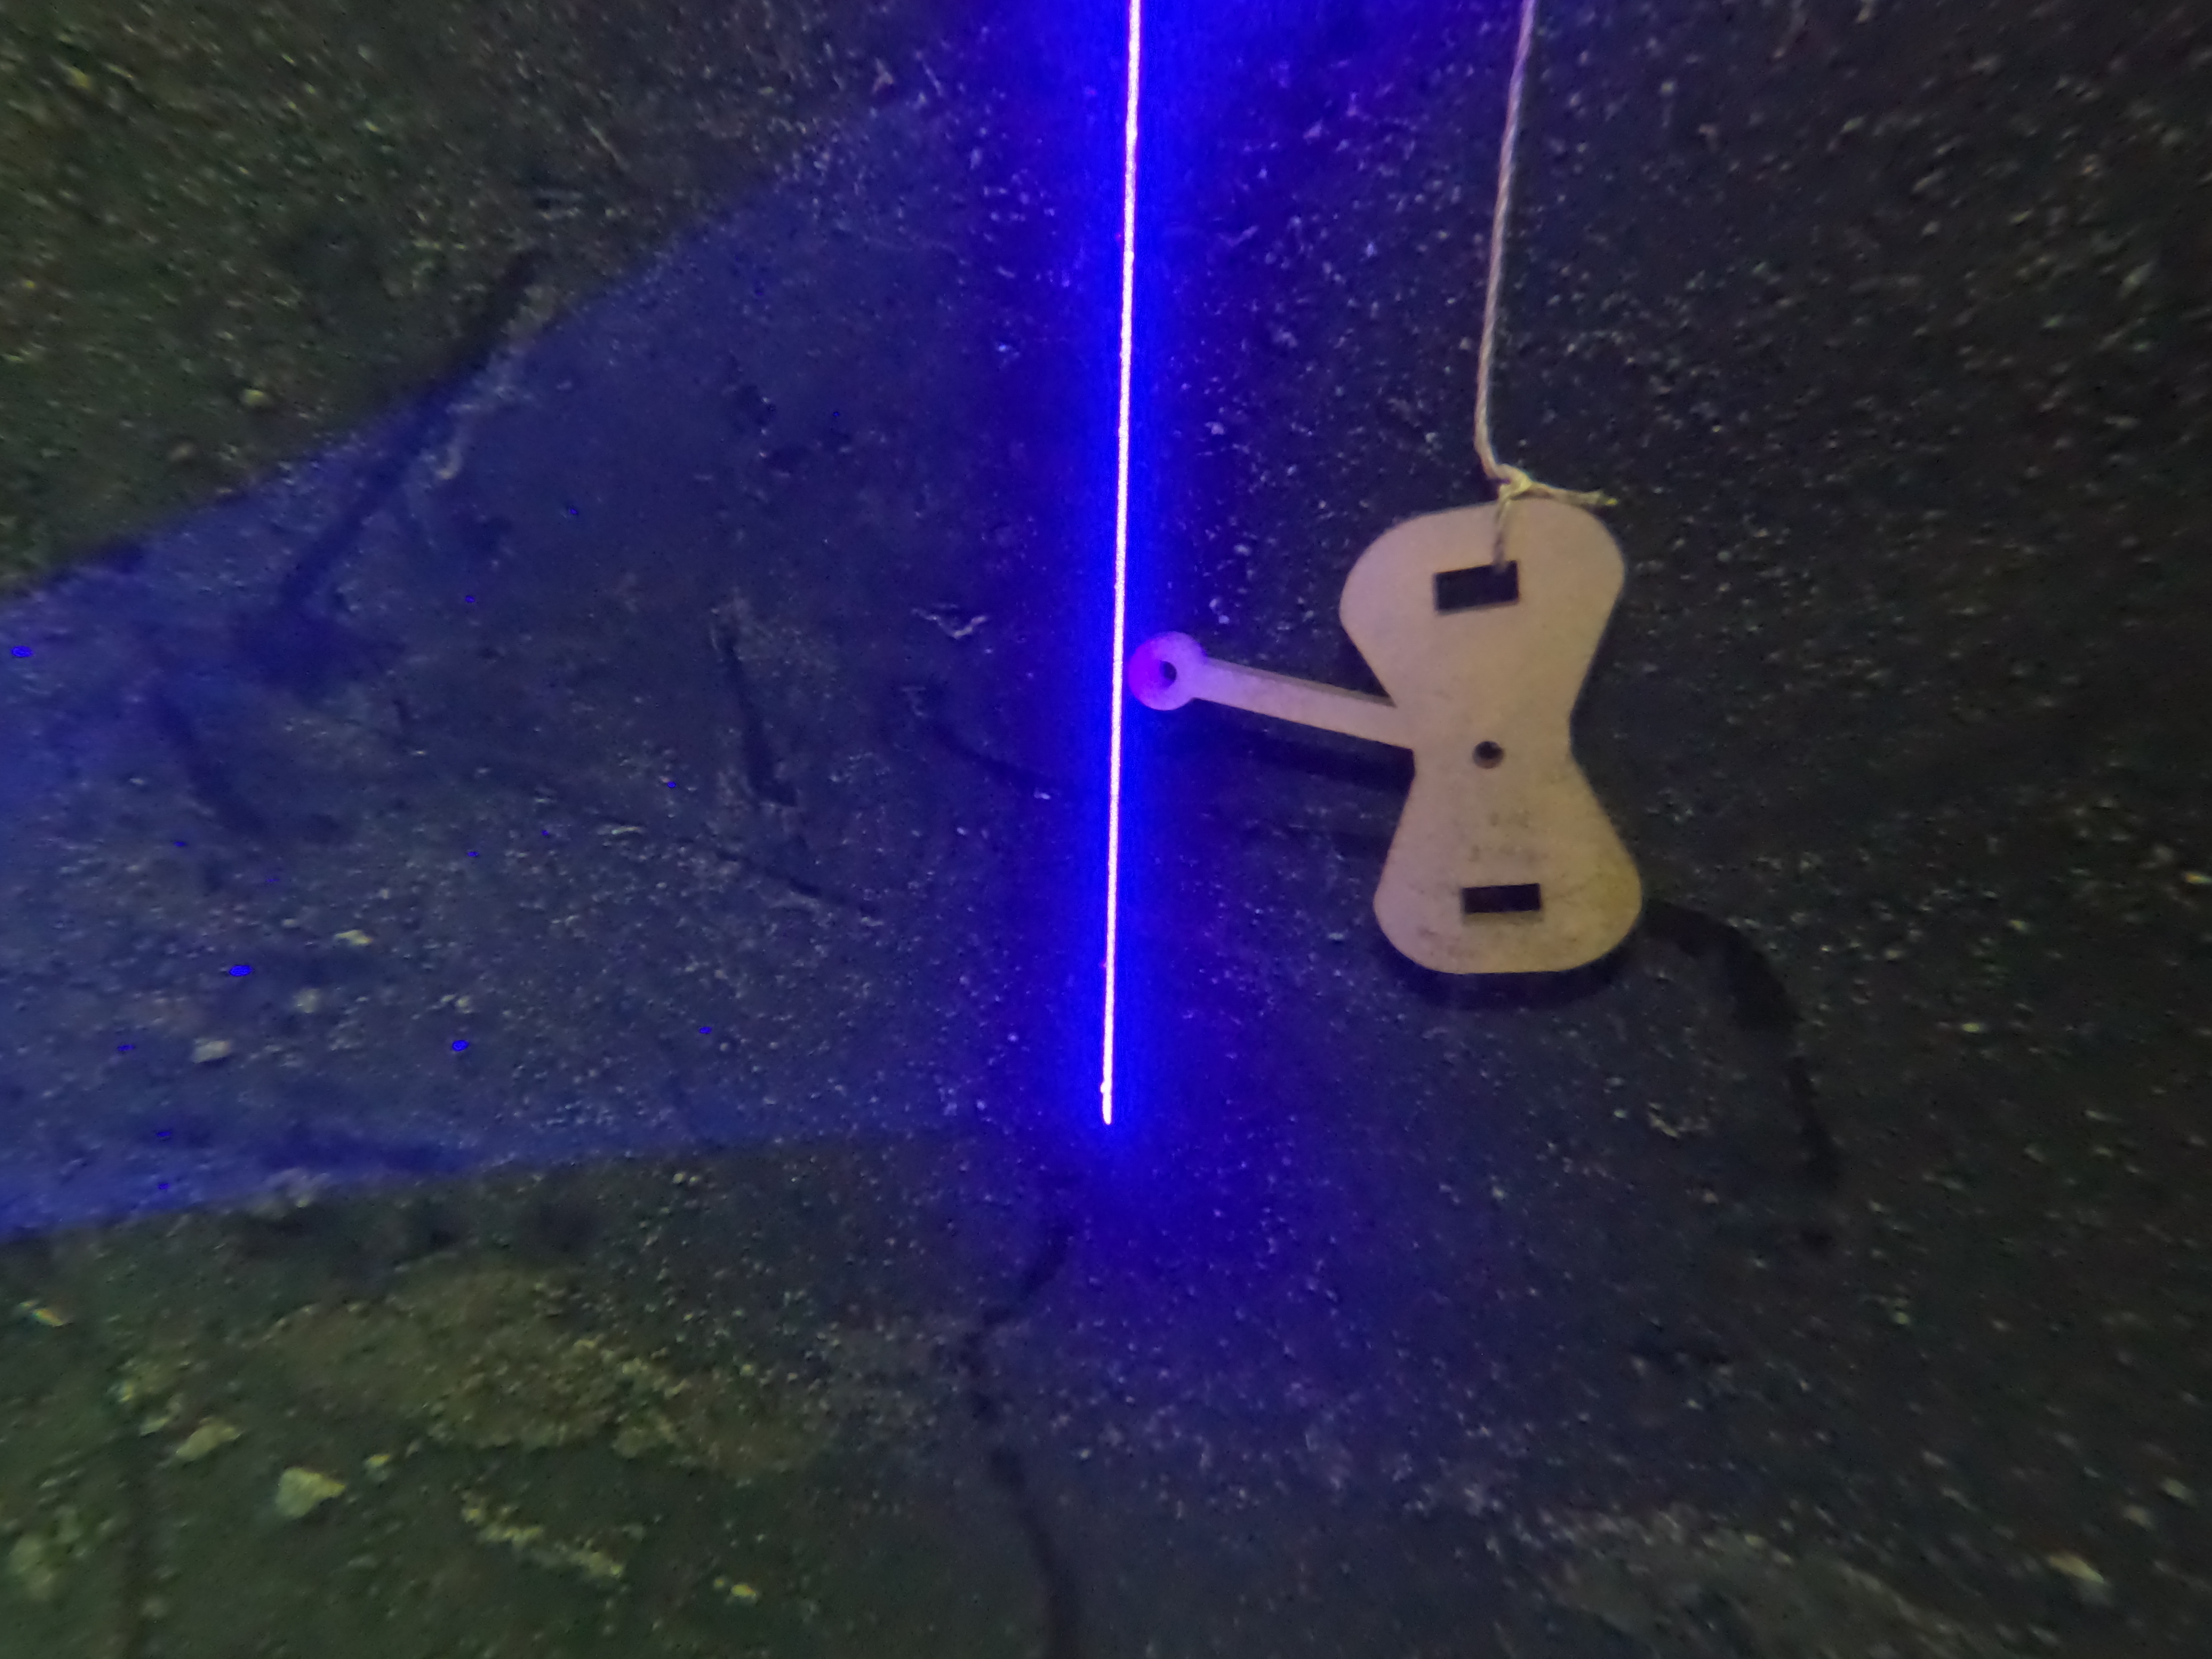

Supplement: Supplementary file 2550 [file G0016128.pdf › Level_2_2/G0016128.pdf]

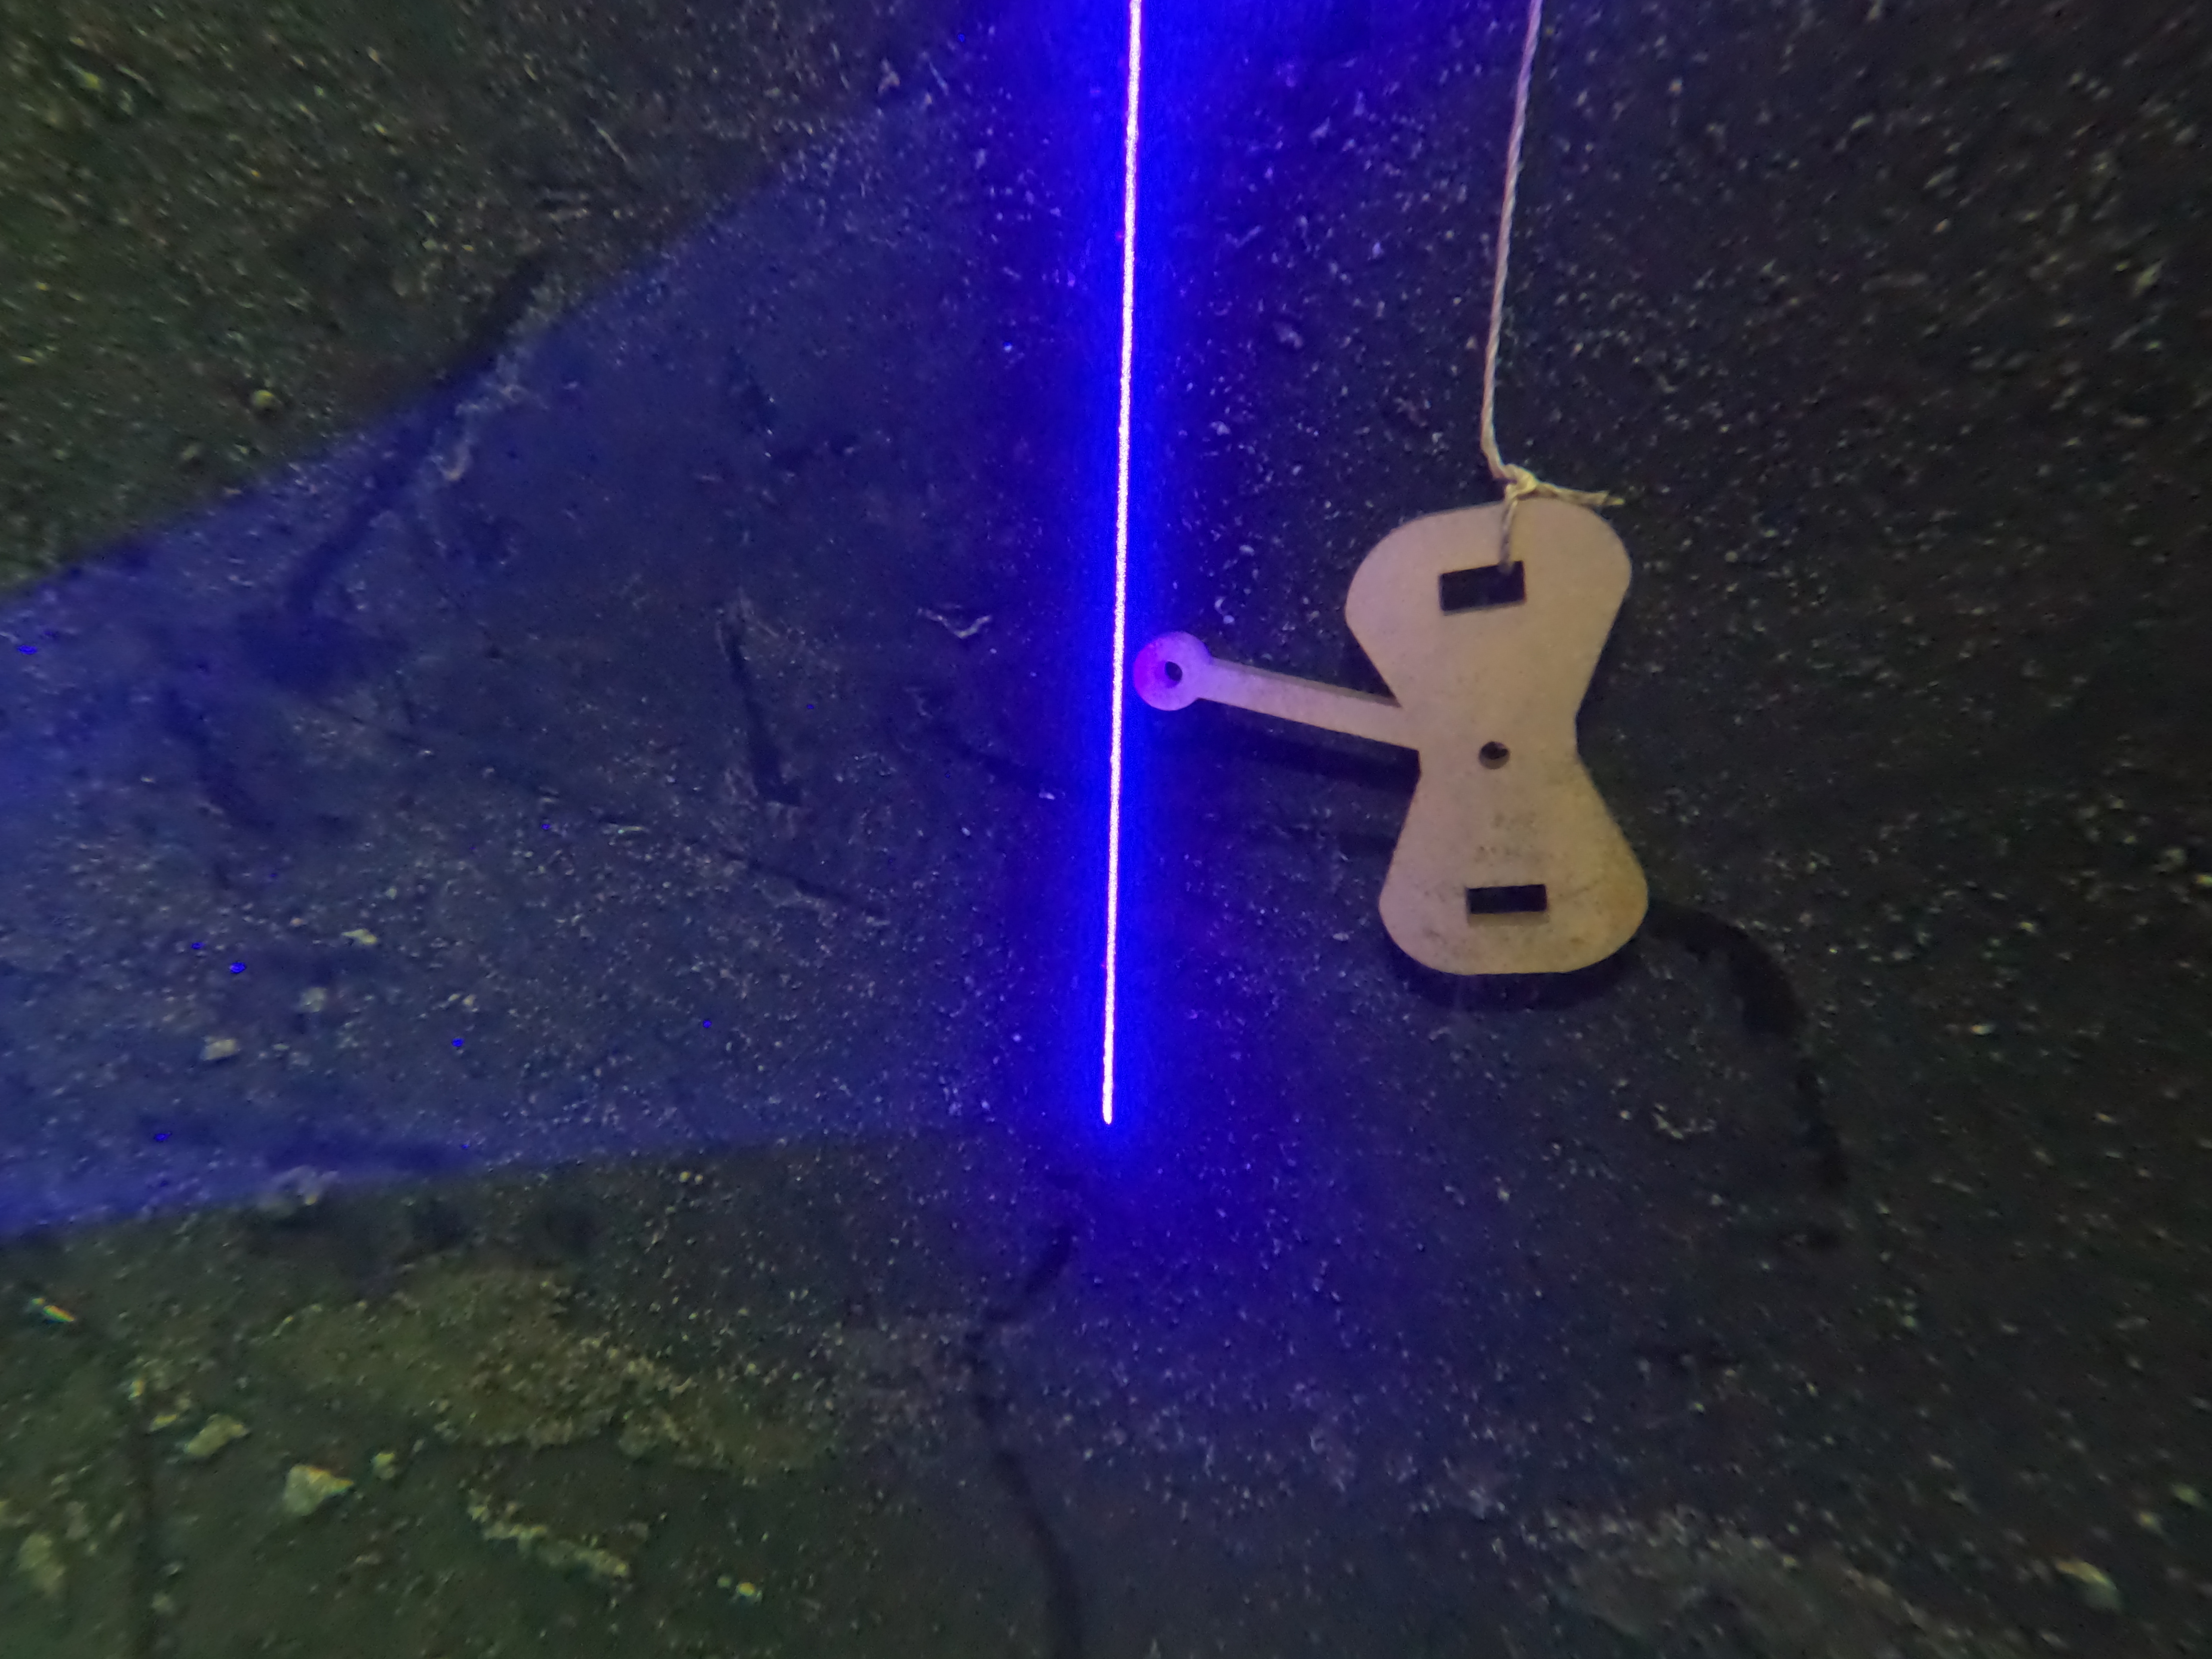

Supplement: Supplementary file 2551 [file G0016129.pdf › Level_2_2/G0016129.pdf]

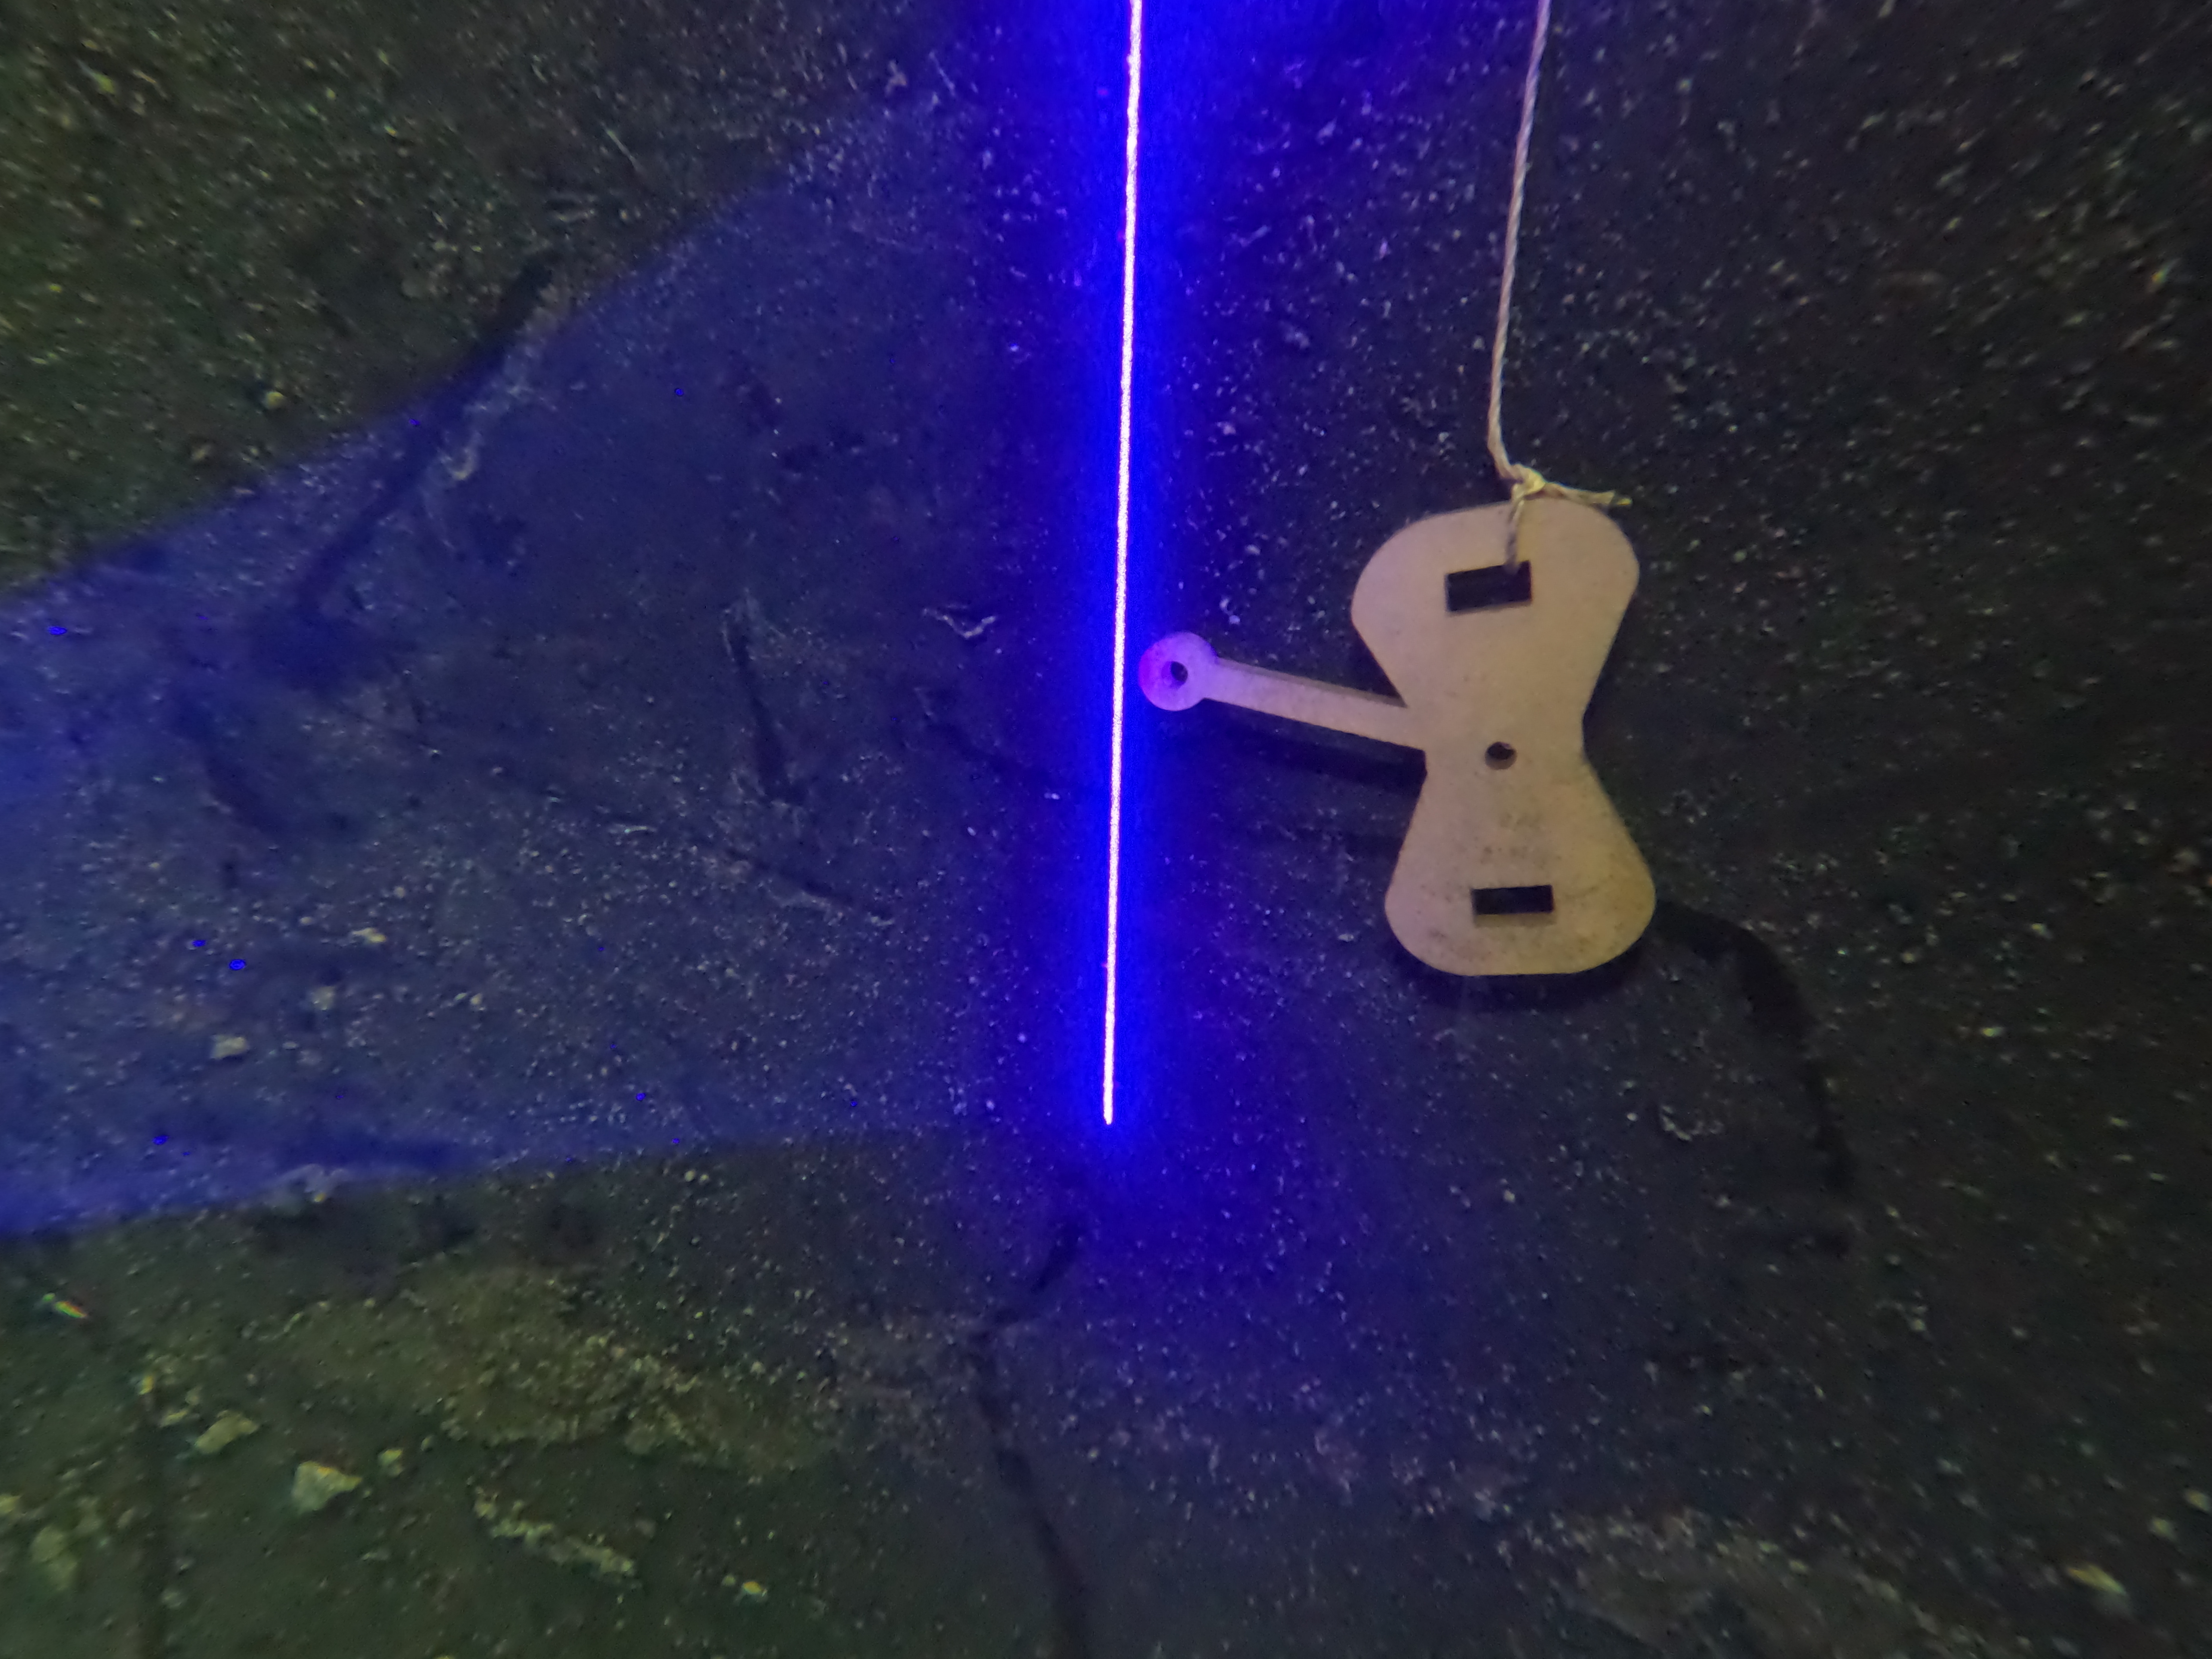

Supplement: Supplementary file 2552 [file G0016130.pdf › Level_2_2/G0016130.pdf]

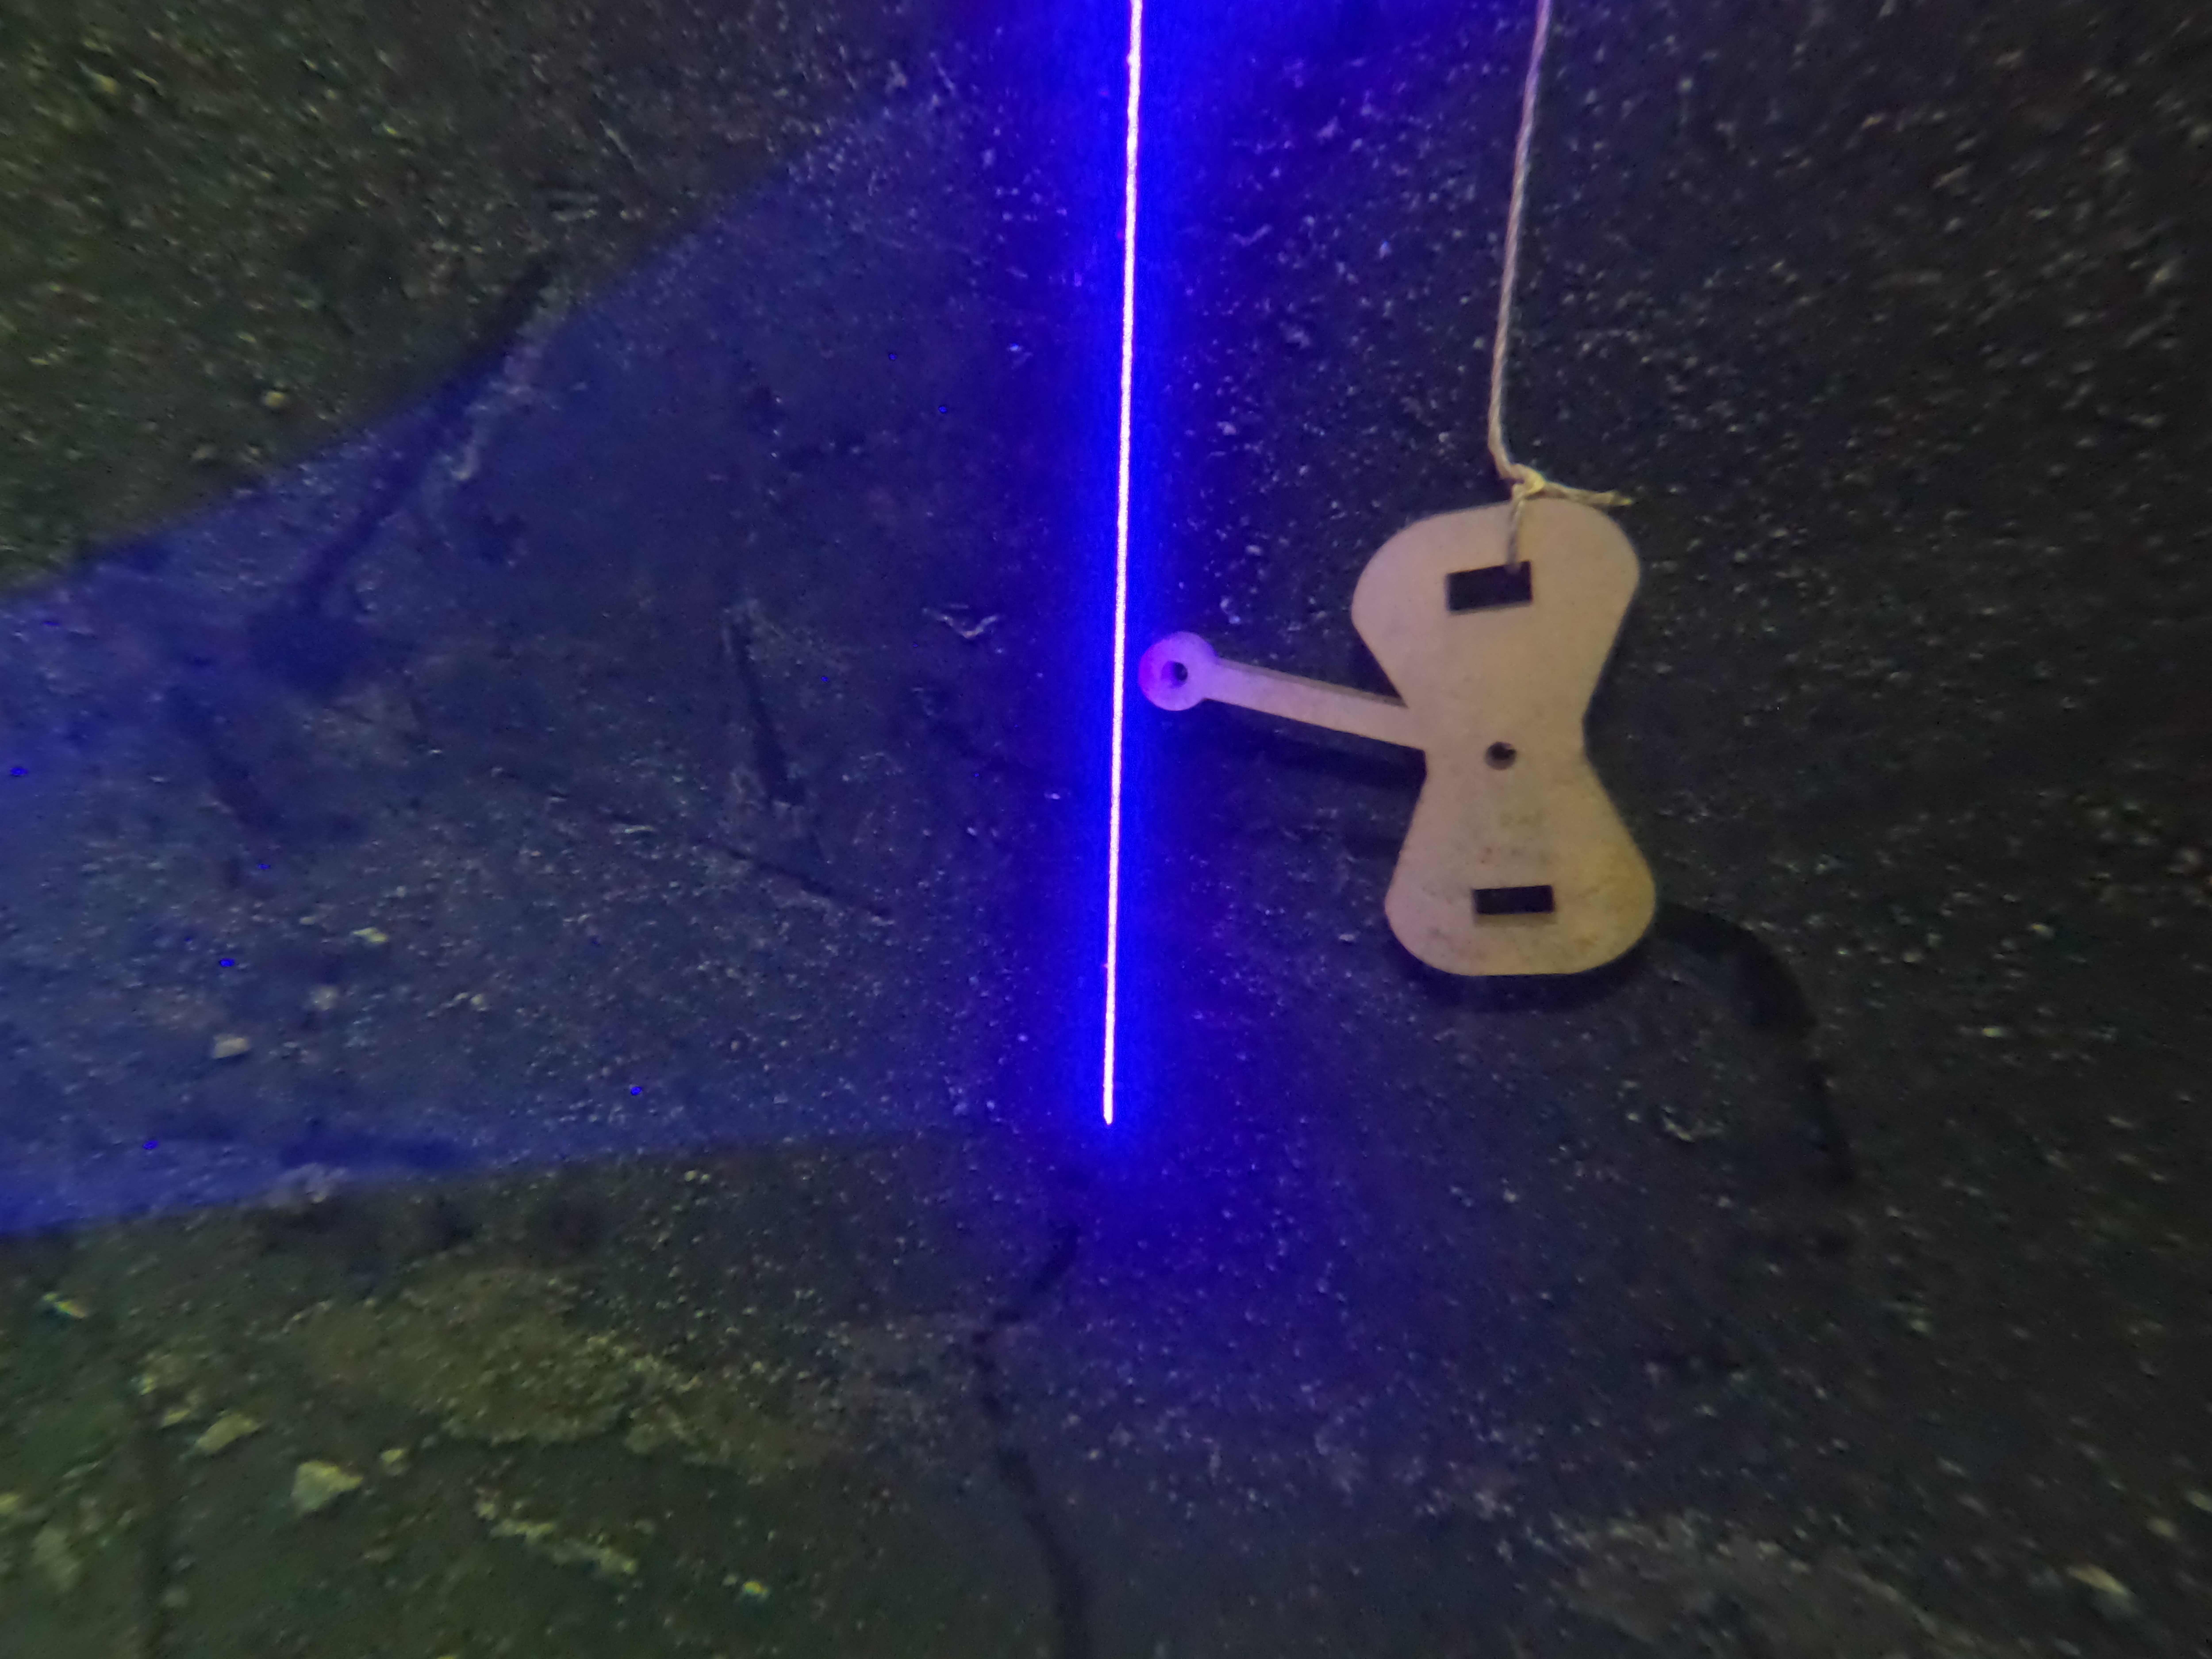

Supplement: Supplementary file 2553 [file G0016131.pdf › Level_2_2/G0016131.pdf]

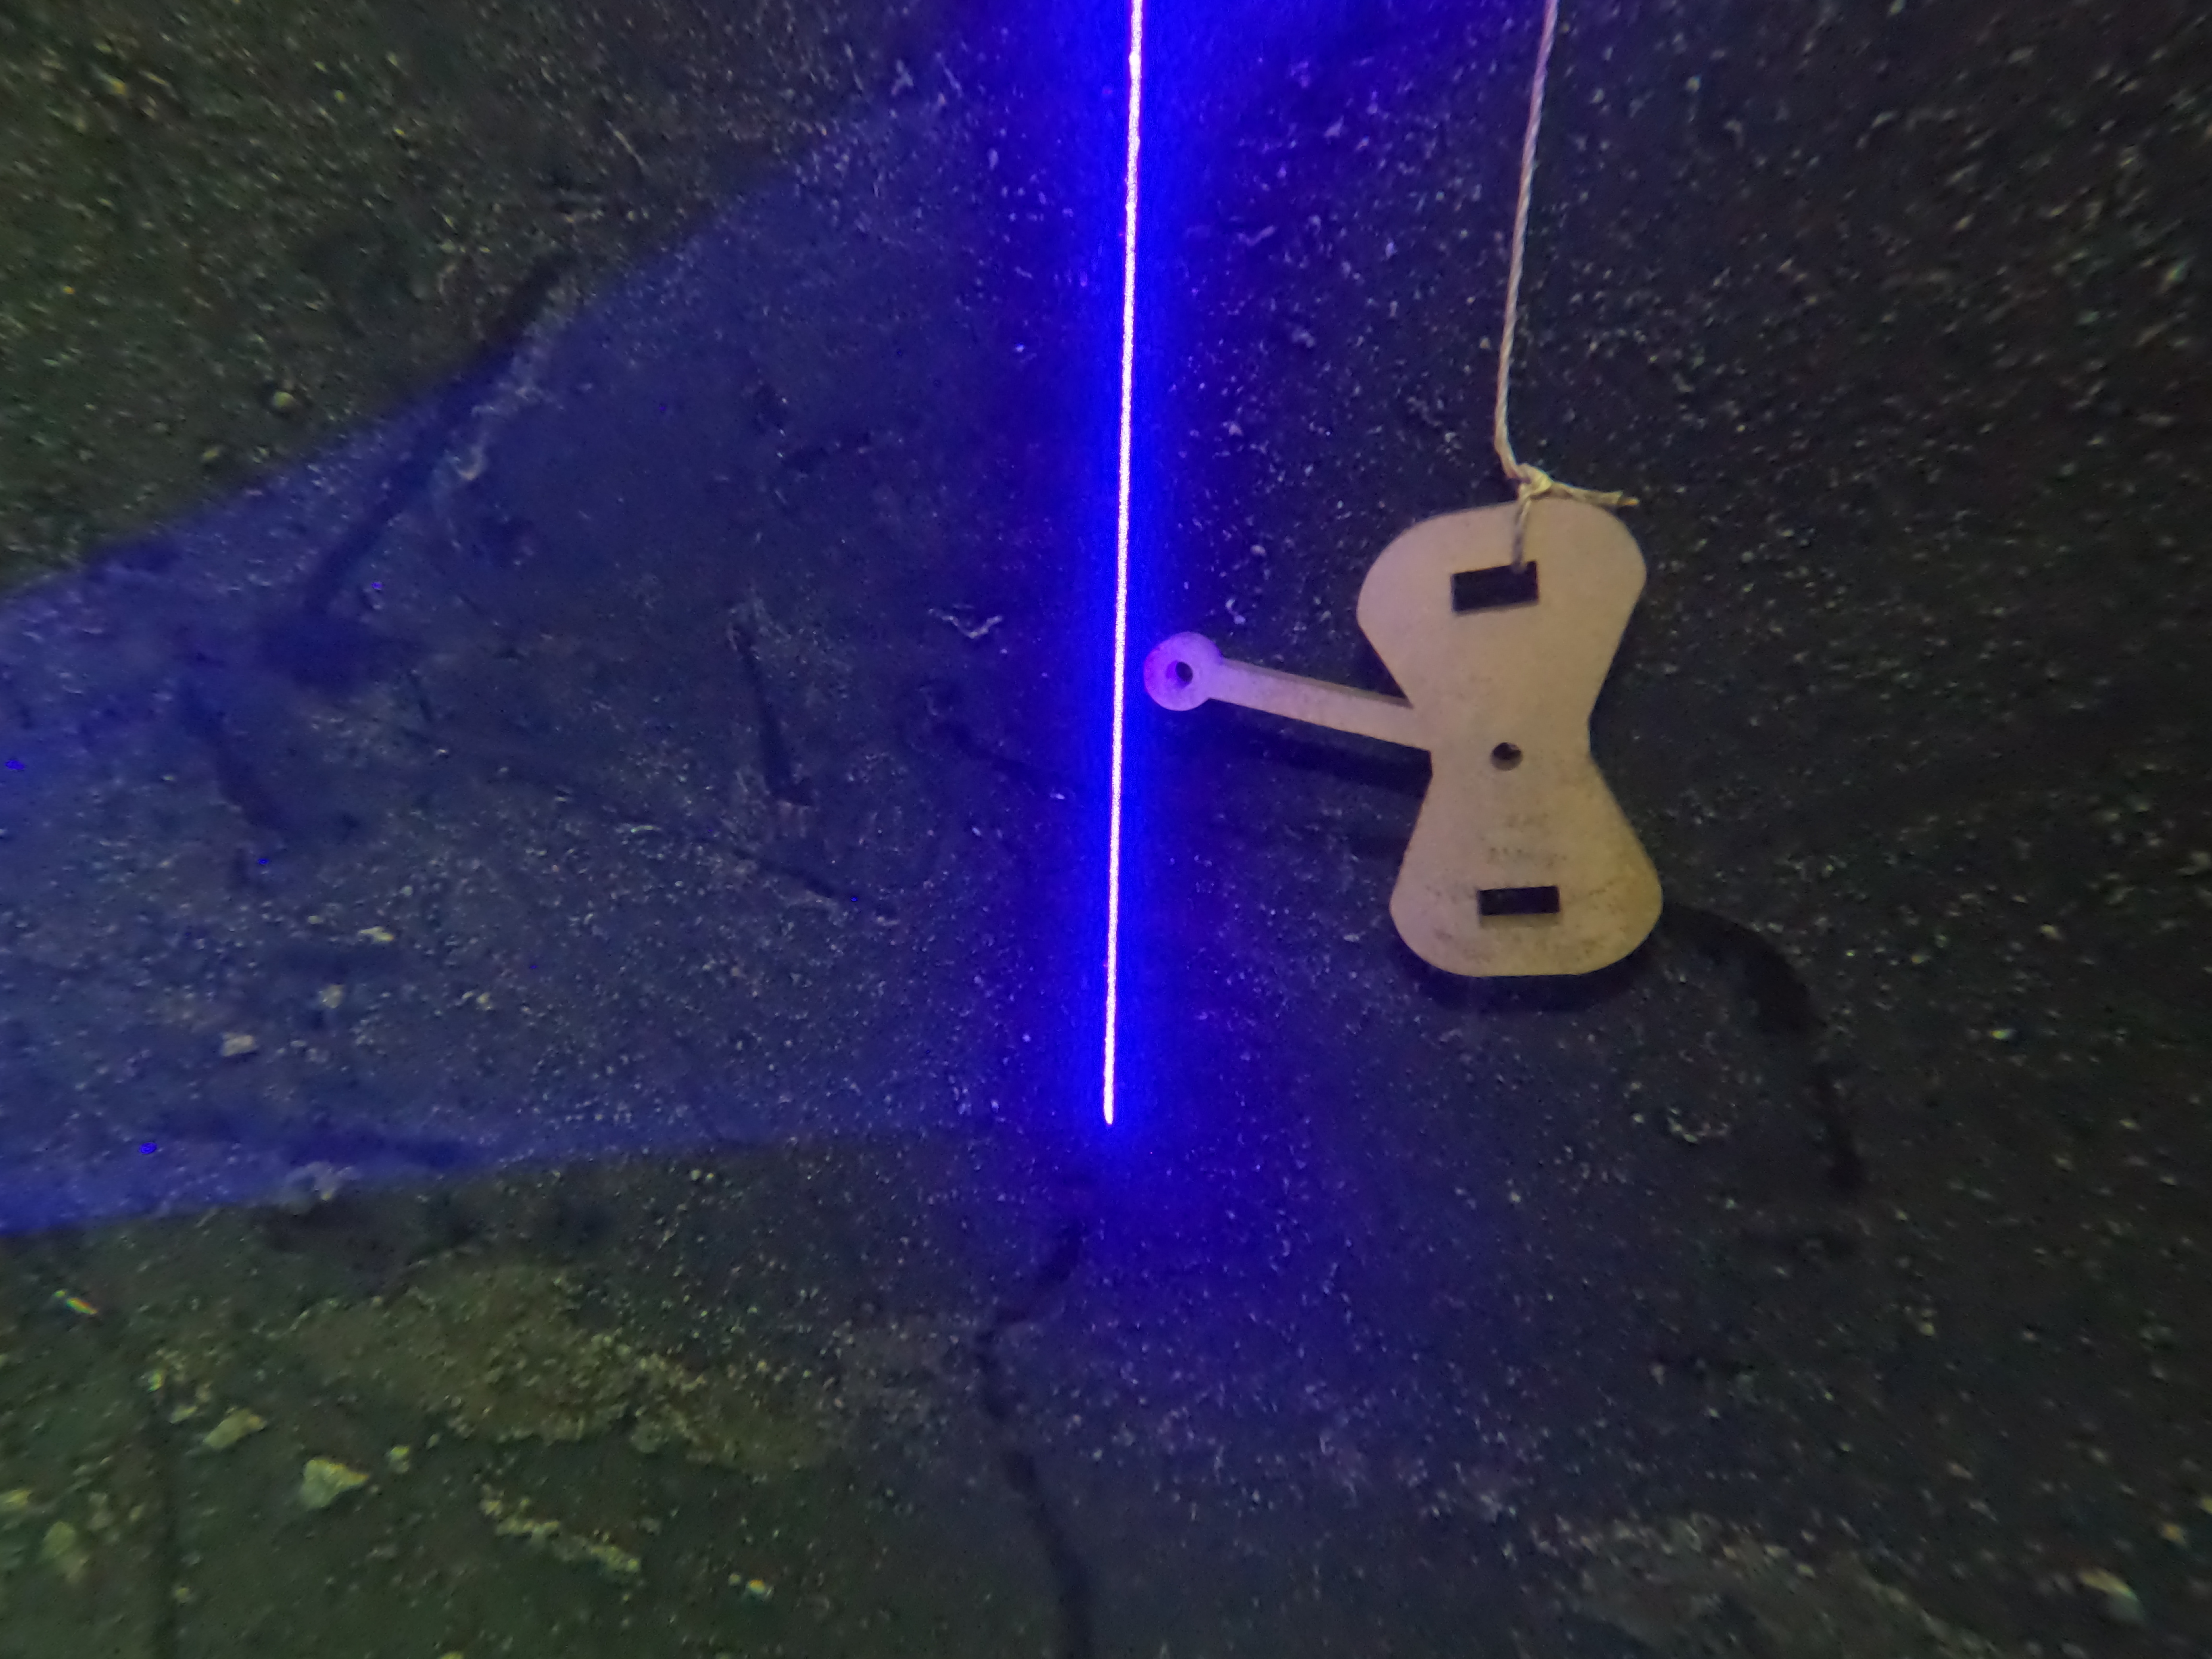

Supplement: Supplementary file 2554 [file G0016132.pdf › Level_2_2/G0016132.pdf]

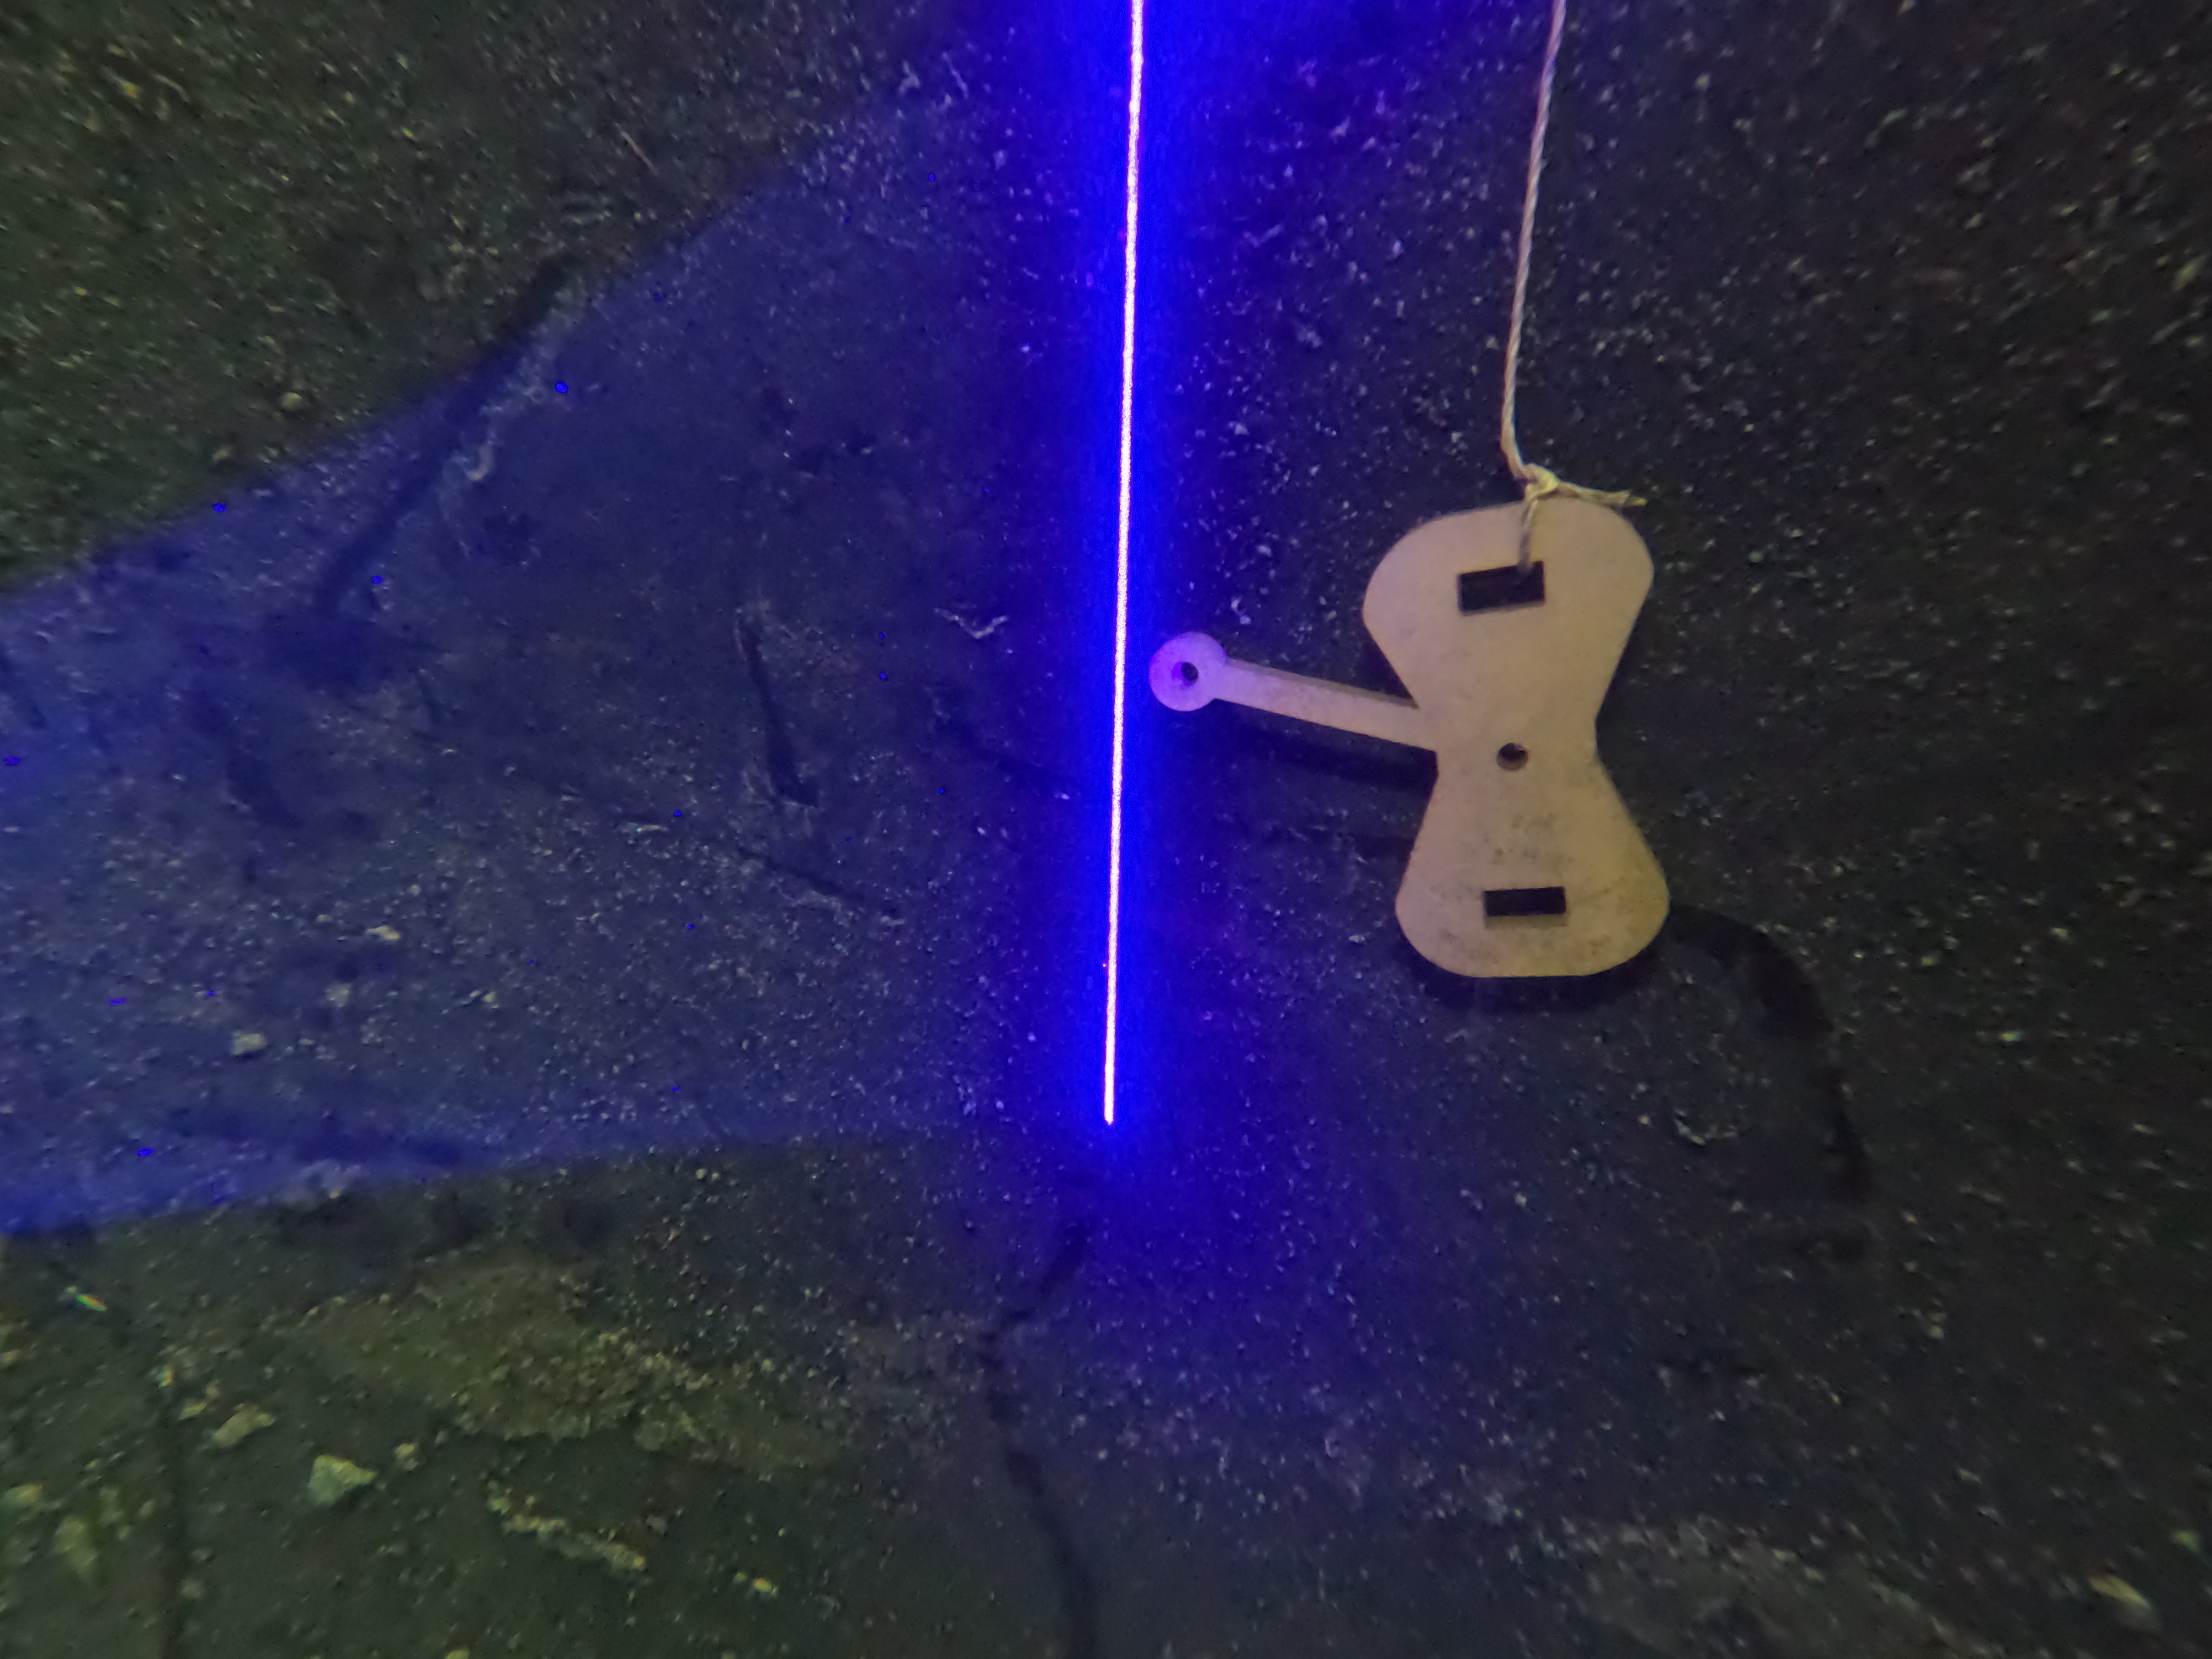

Supplement: Supplementary file 2555 [file G0016133.pdf › Level_2_2/G0016133.pdf]

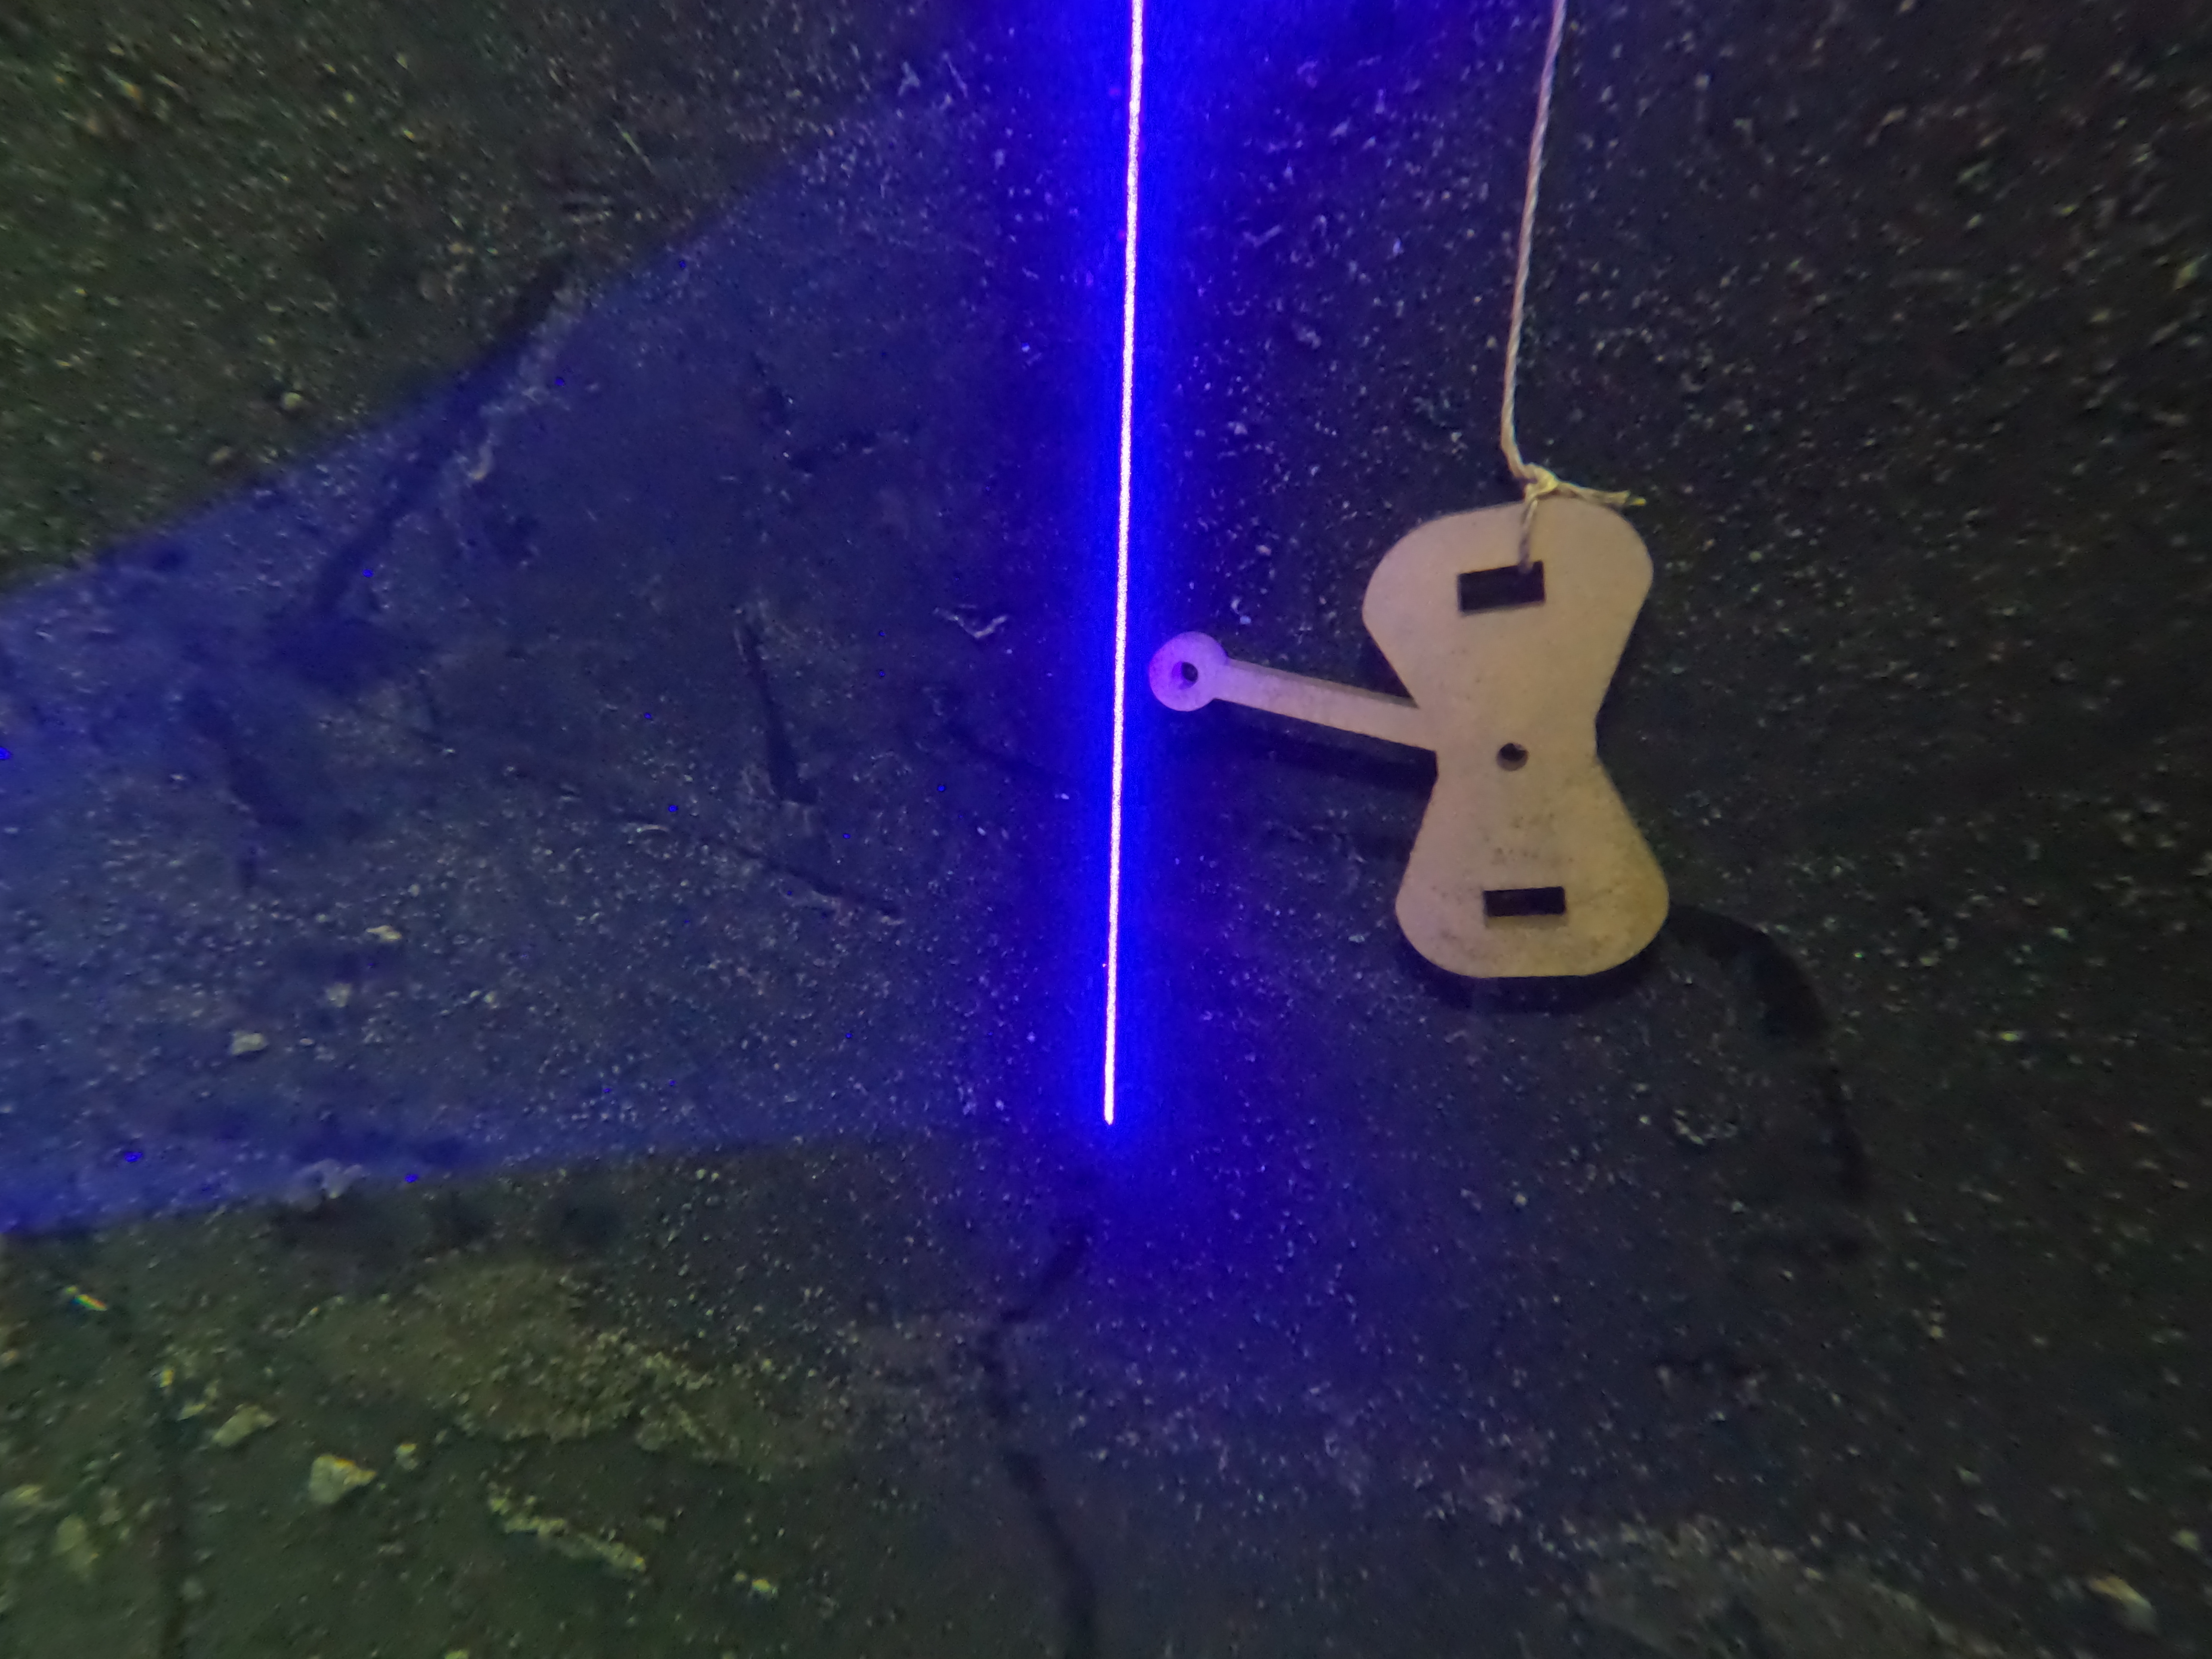

Supplement: Supplementary file 2556 [file G0016134.pdf › Level_2_2/G0016134.pdf]

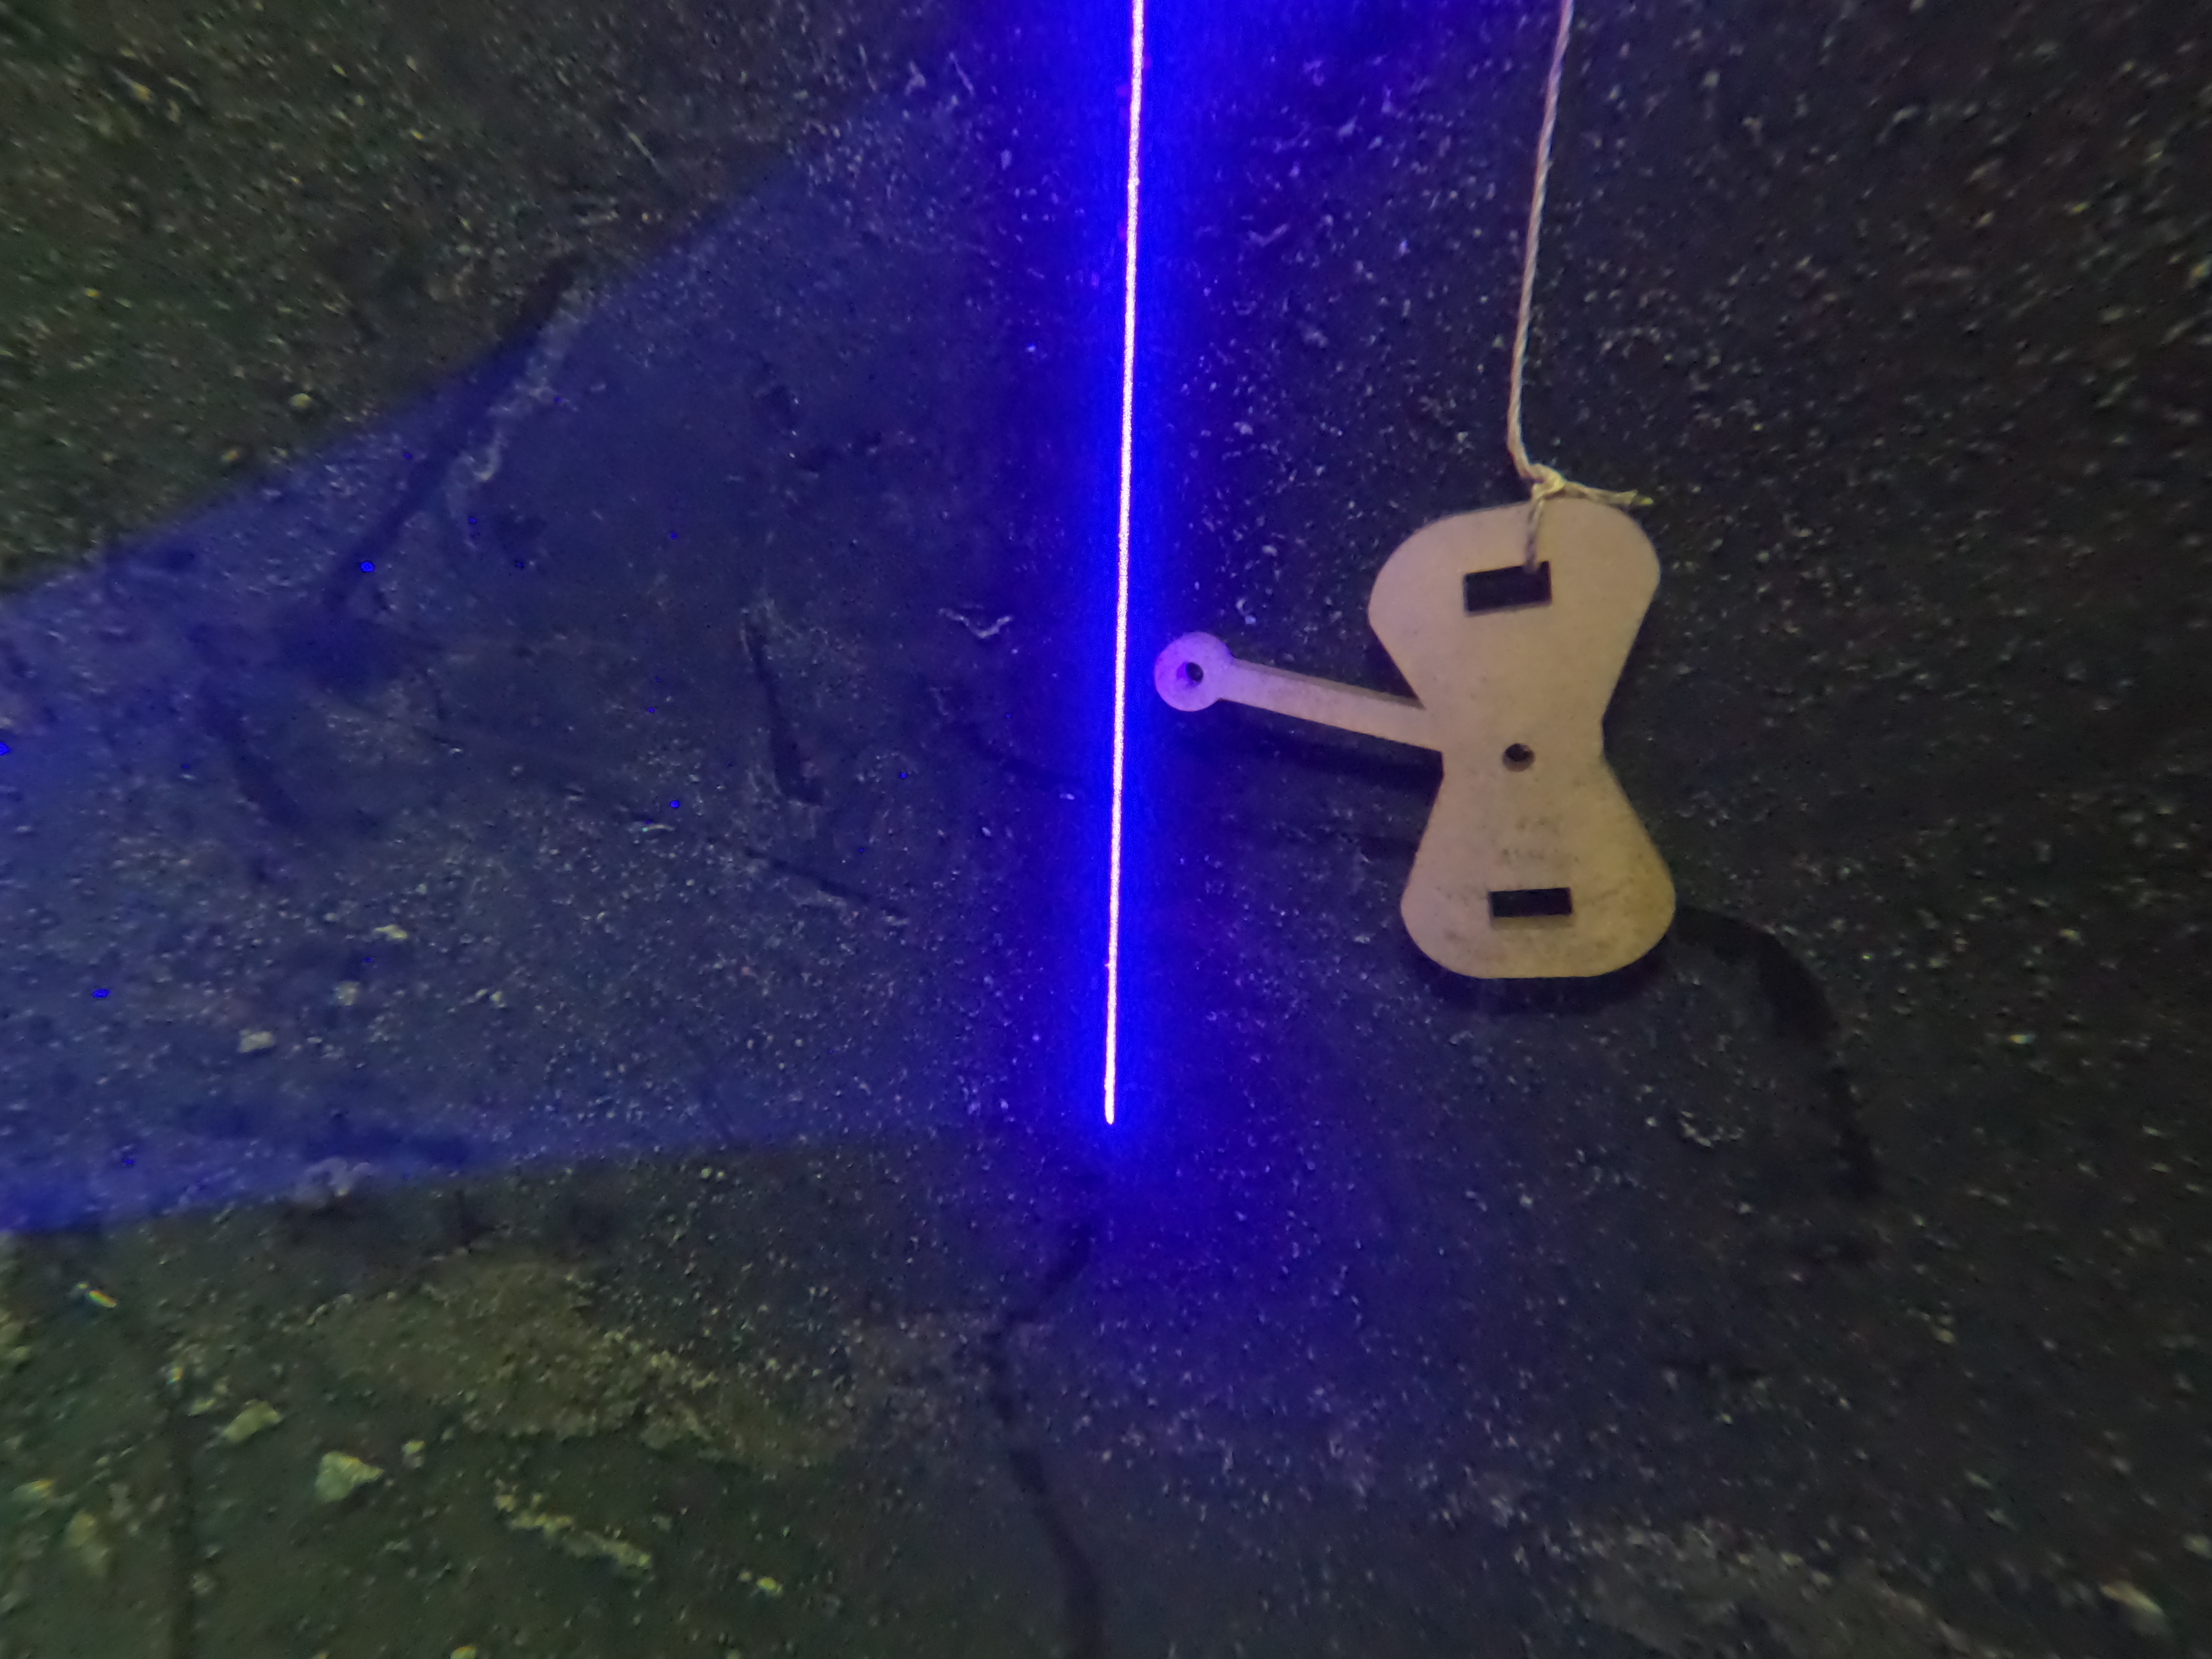

Supplement: Supplementary file 2557 [file G0016135.pdf › Level_2_2/G0016135.pdf]

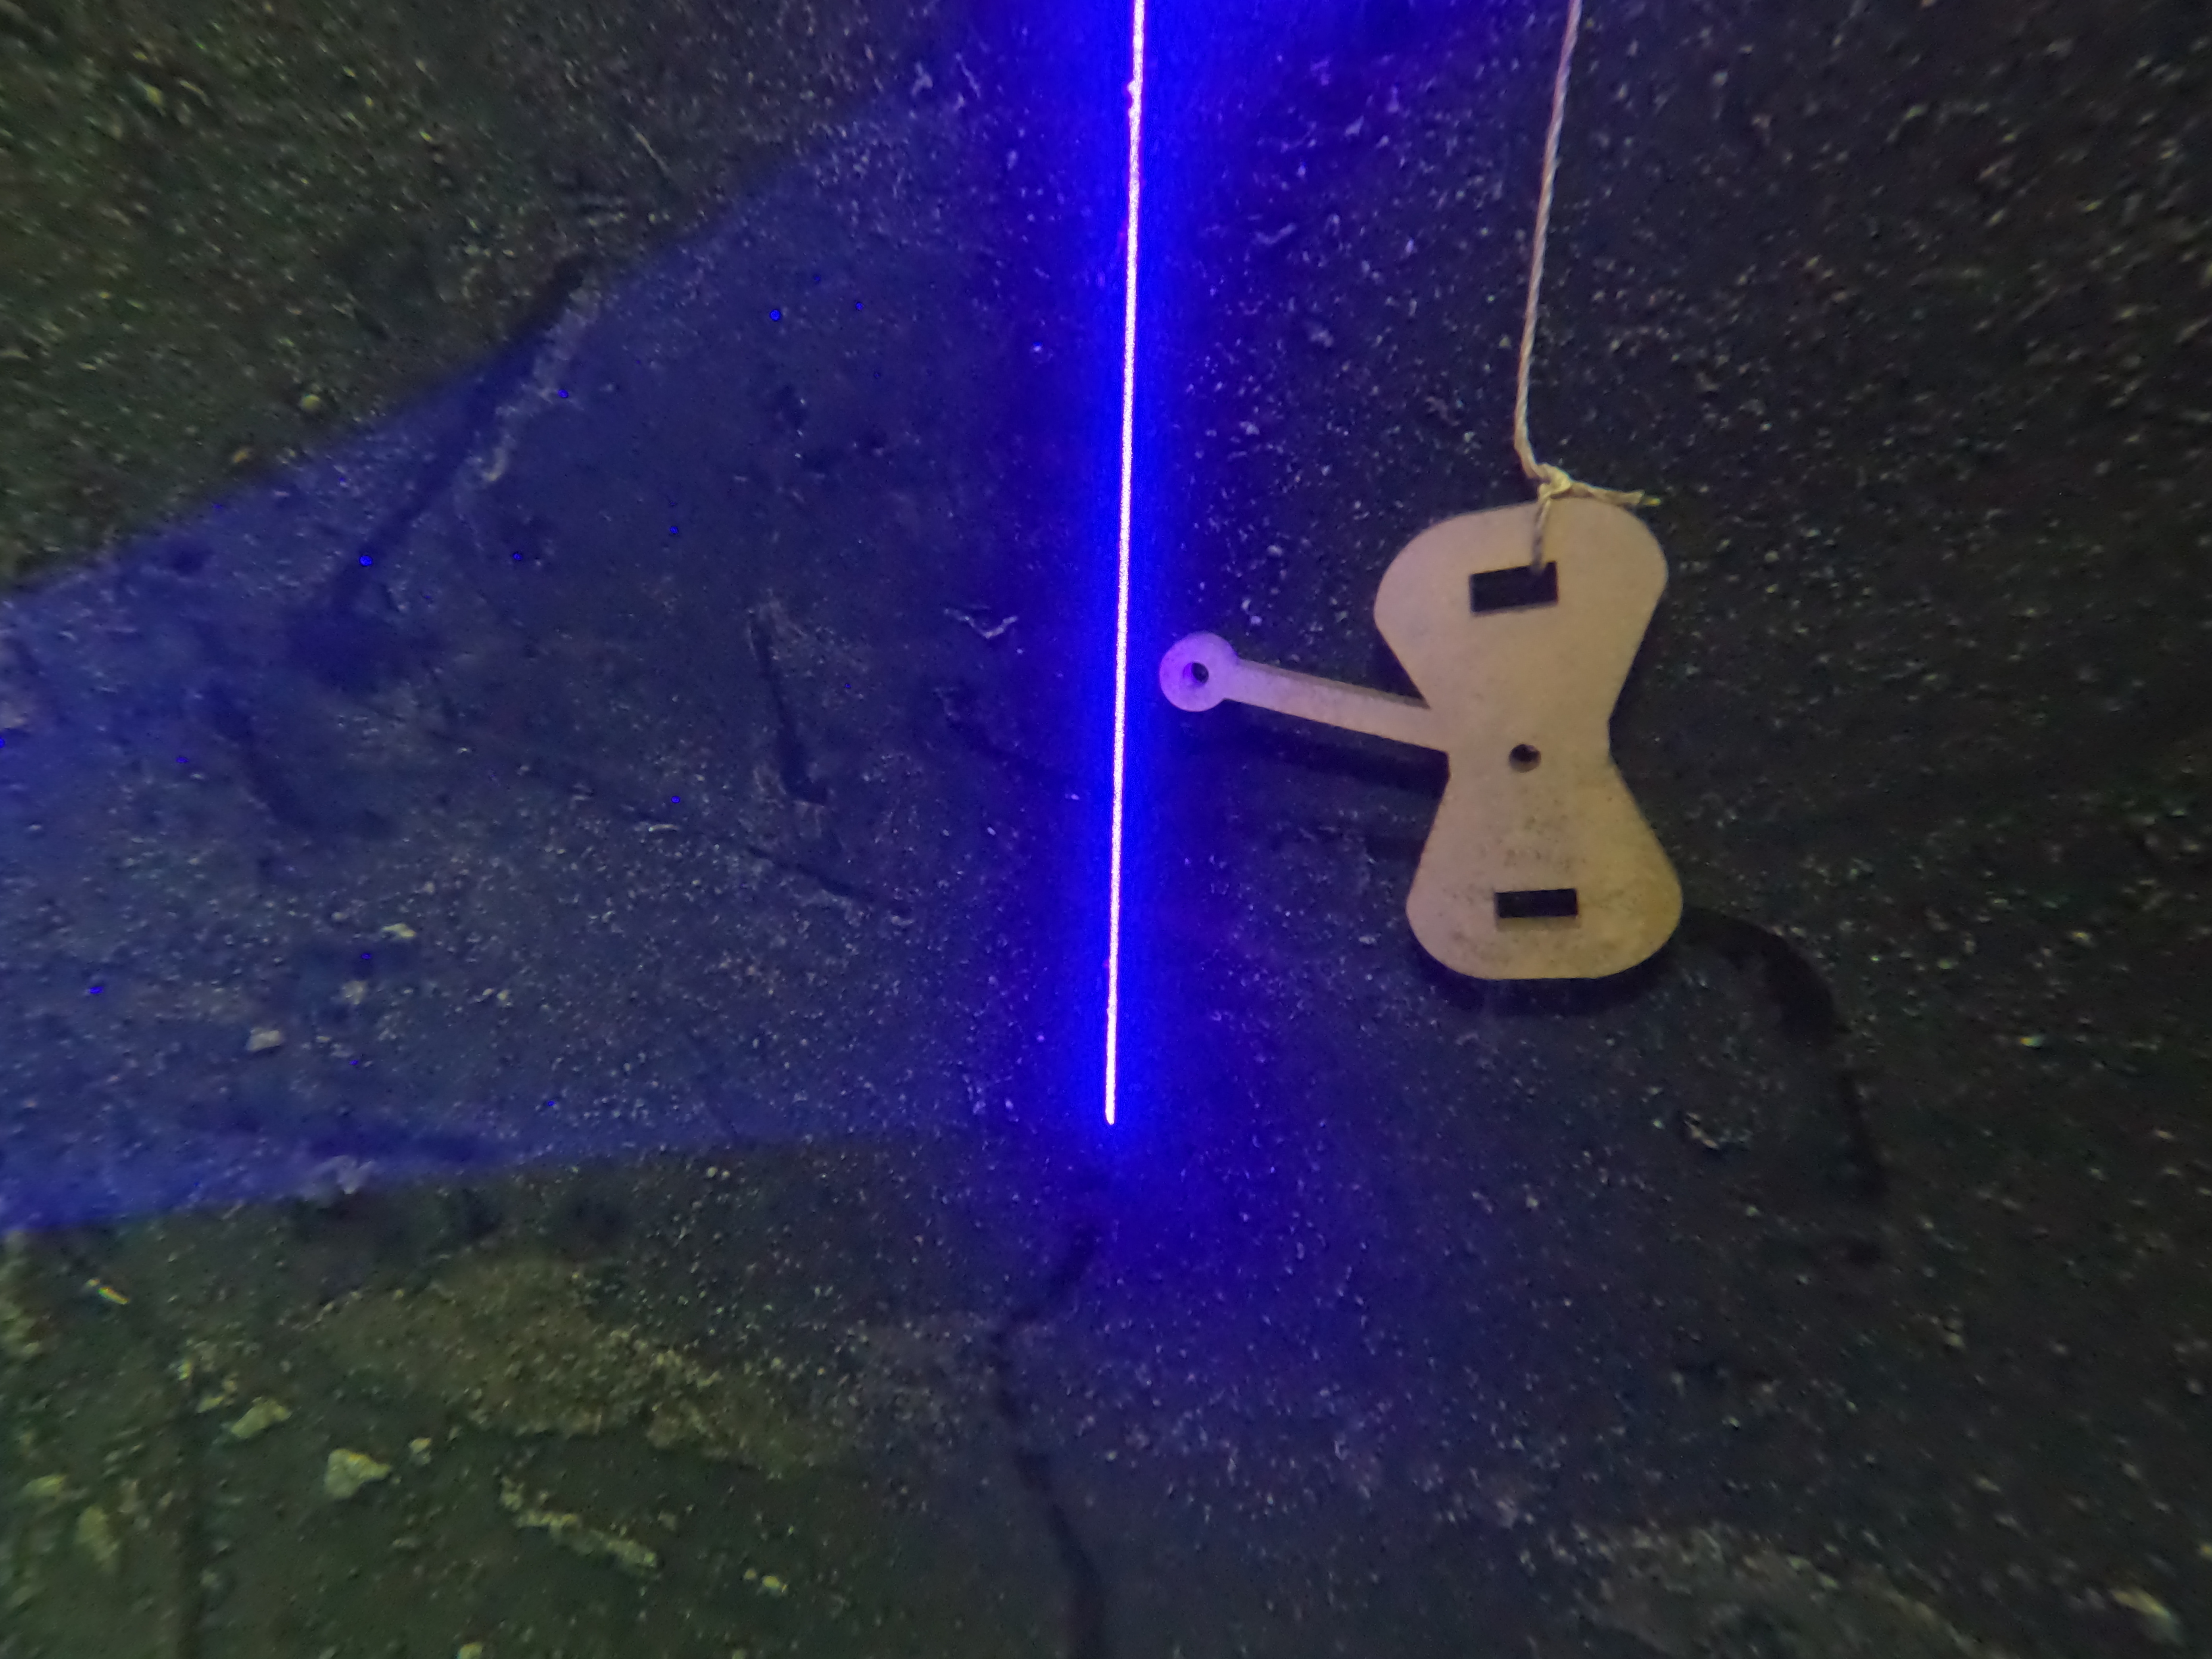

Supplement: Supplementary file 2558 [file G0016136.pdf › Level_2_2/G0016136.pdf]

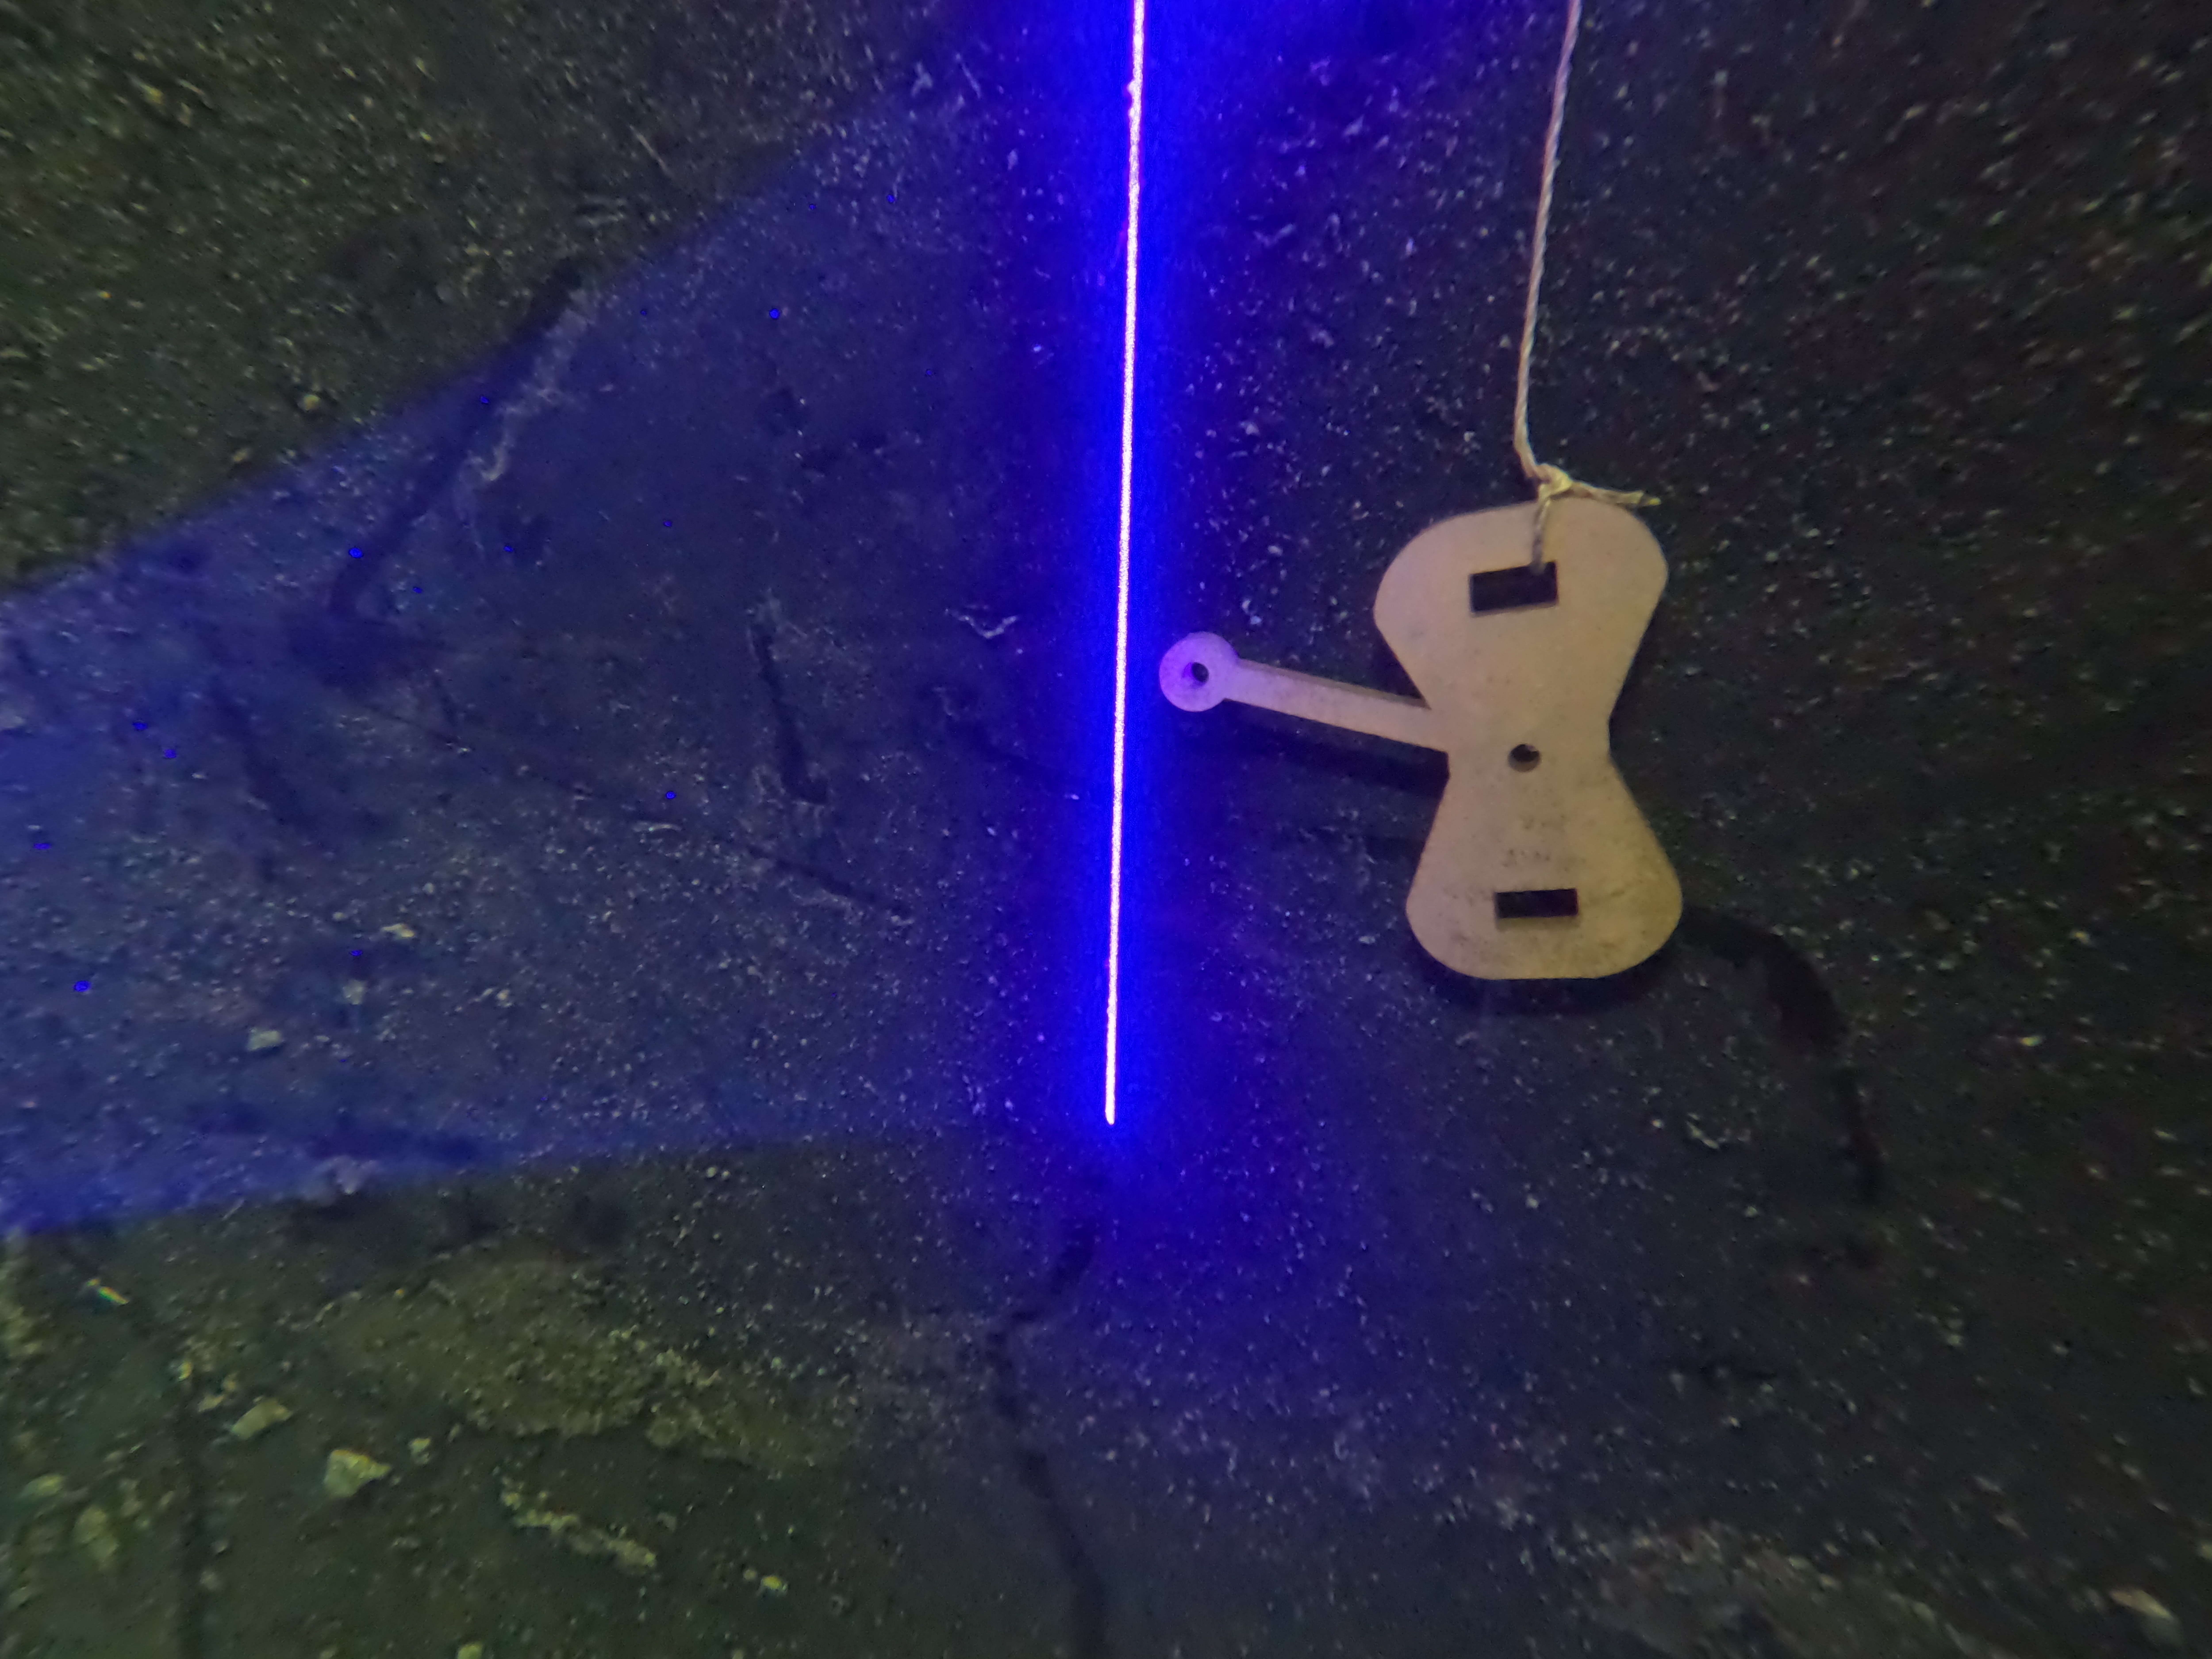

Supplement: Supplementary file 2559 [file G0016137.pdf › Level_2_2/G0016137.pdf]

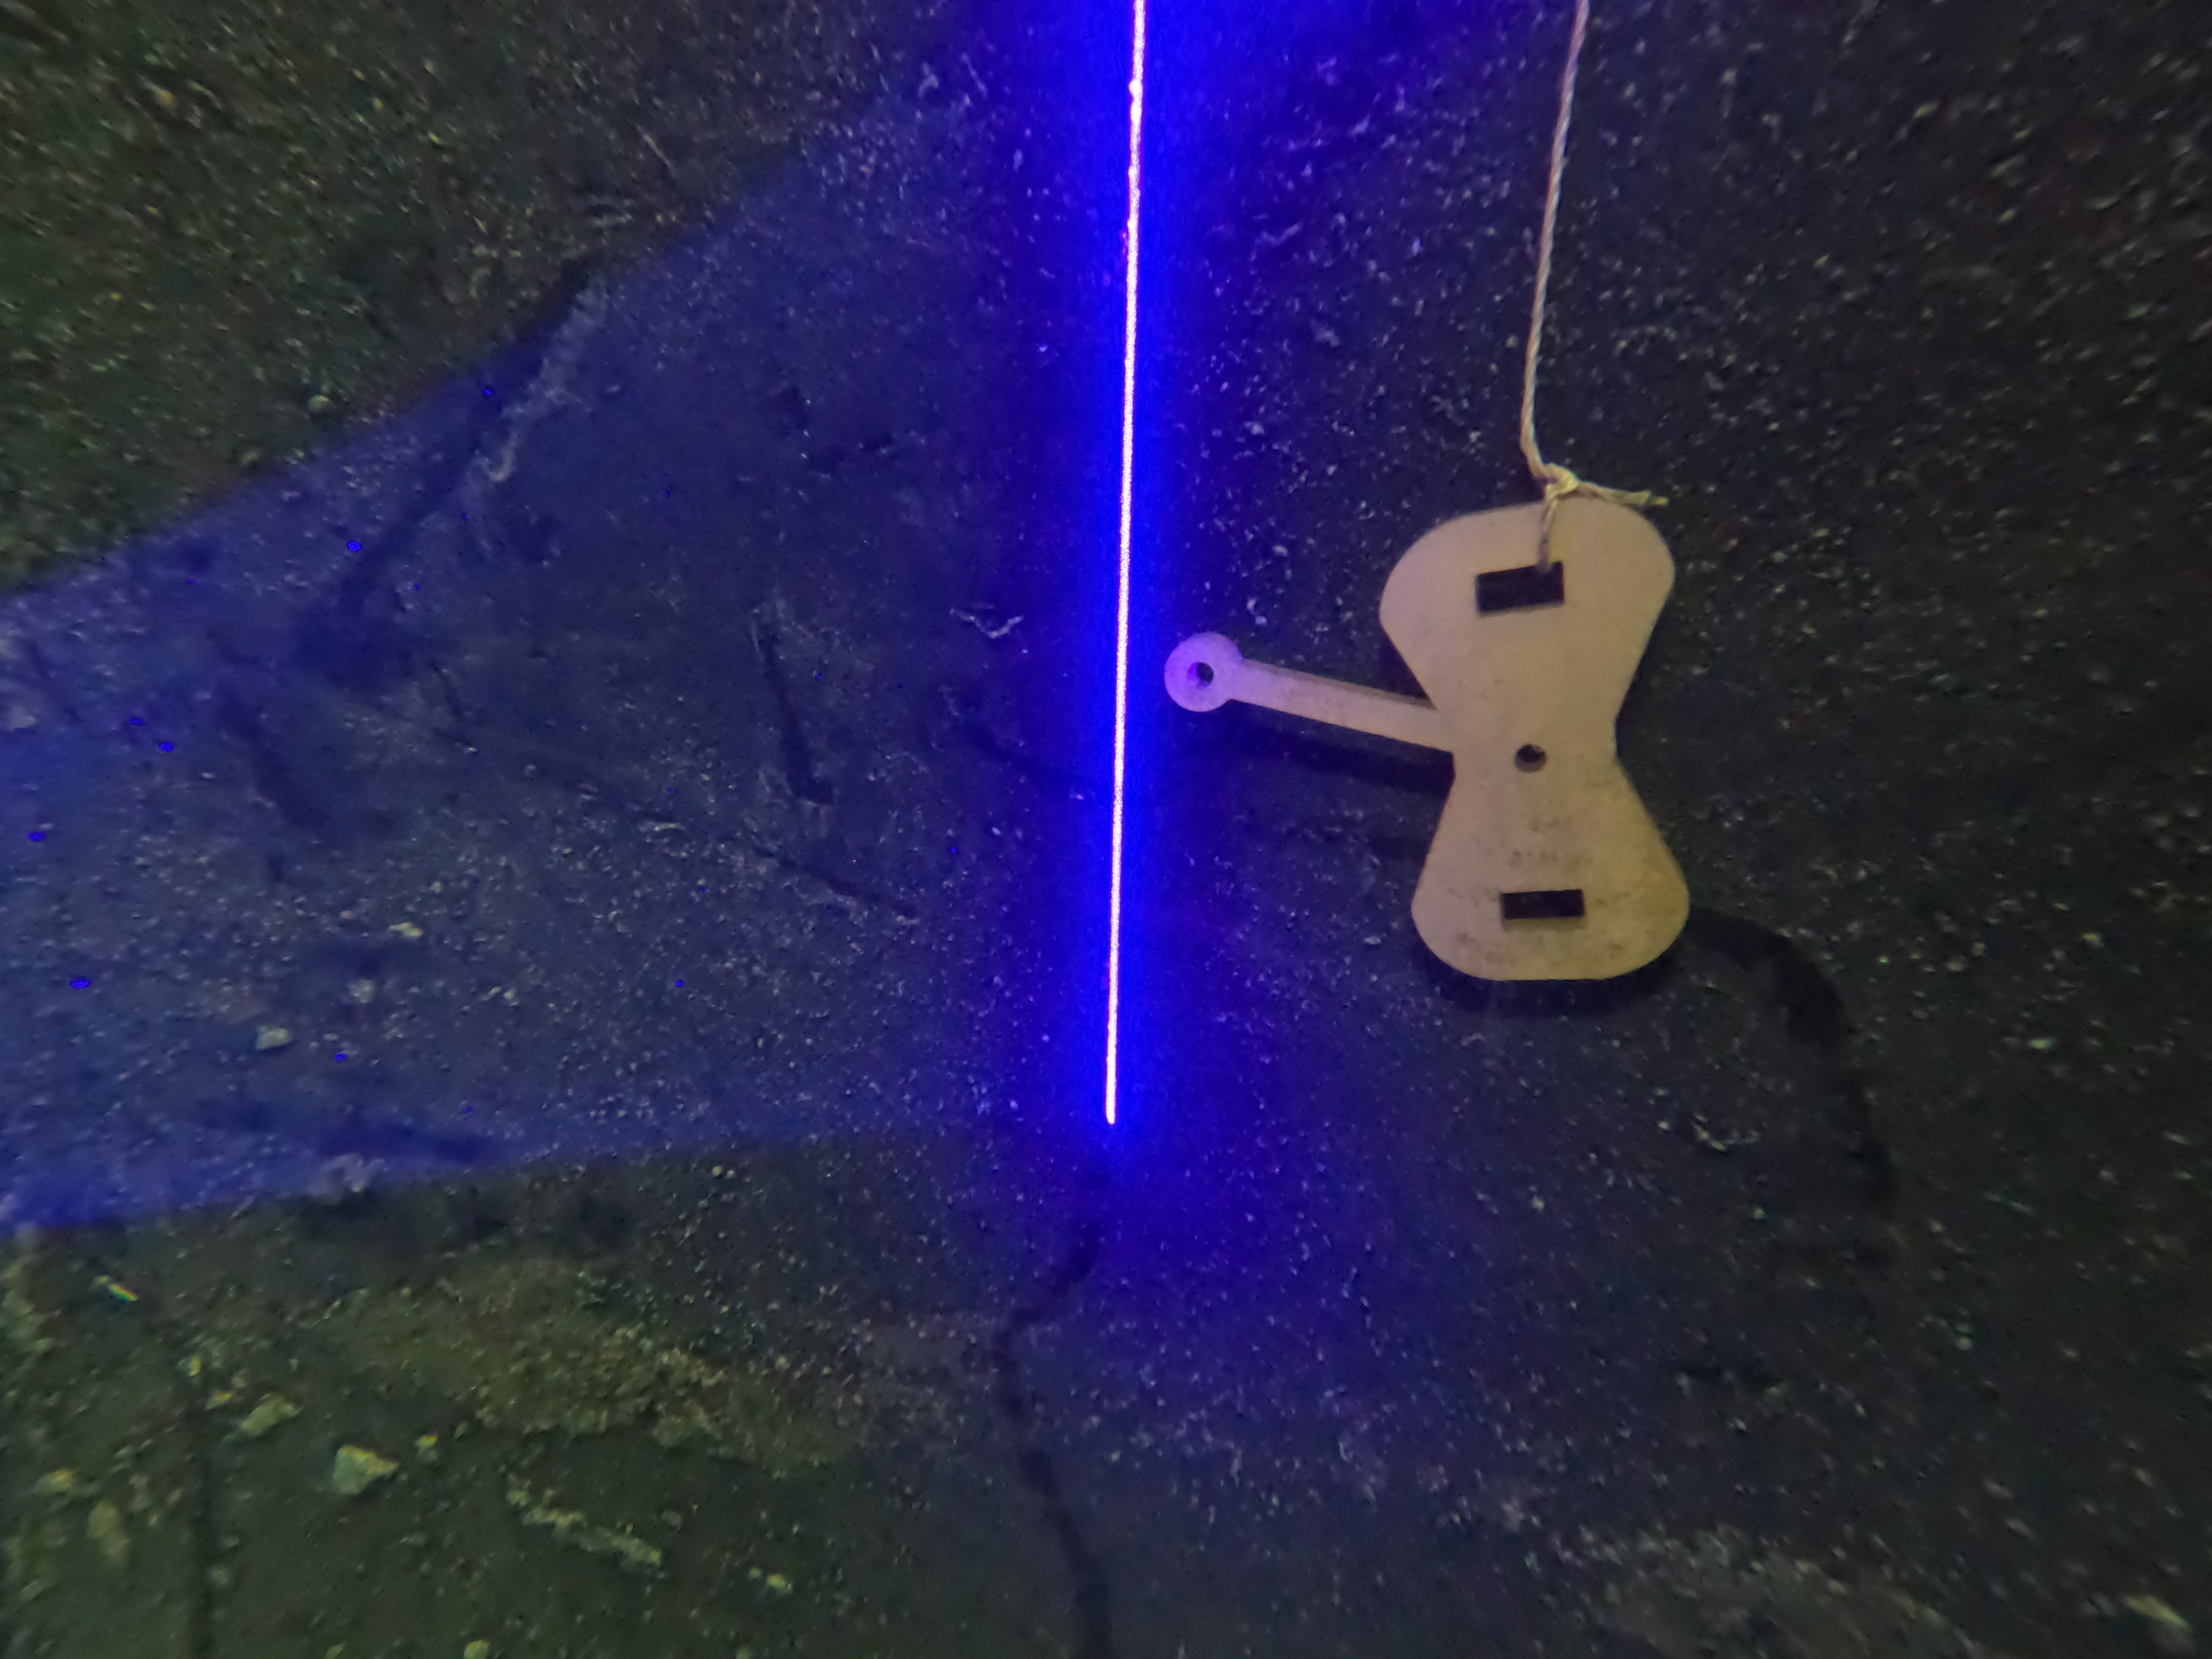

Supplement: Supplementary file 2560 [file G0016138.pdf › Level_2_2/G0016138.pdf]

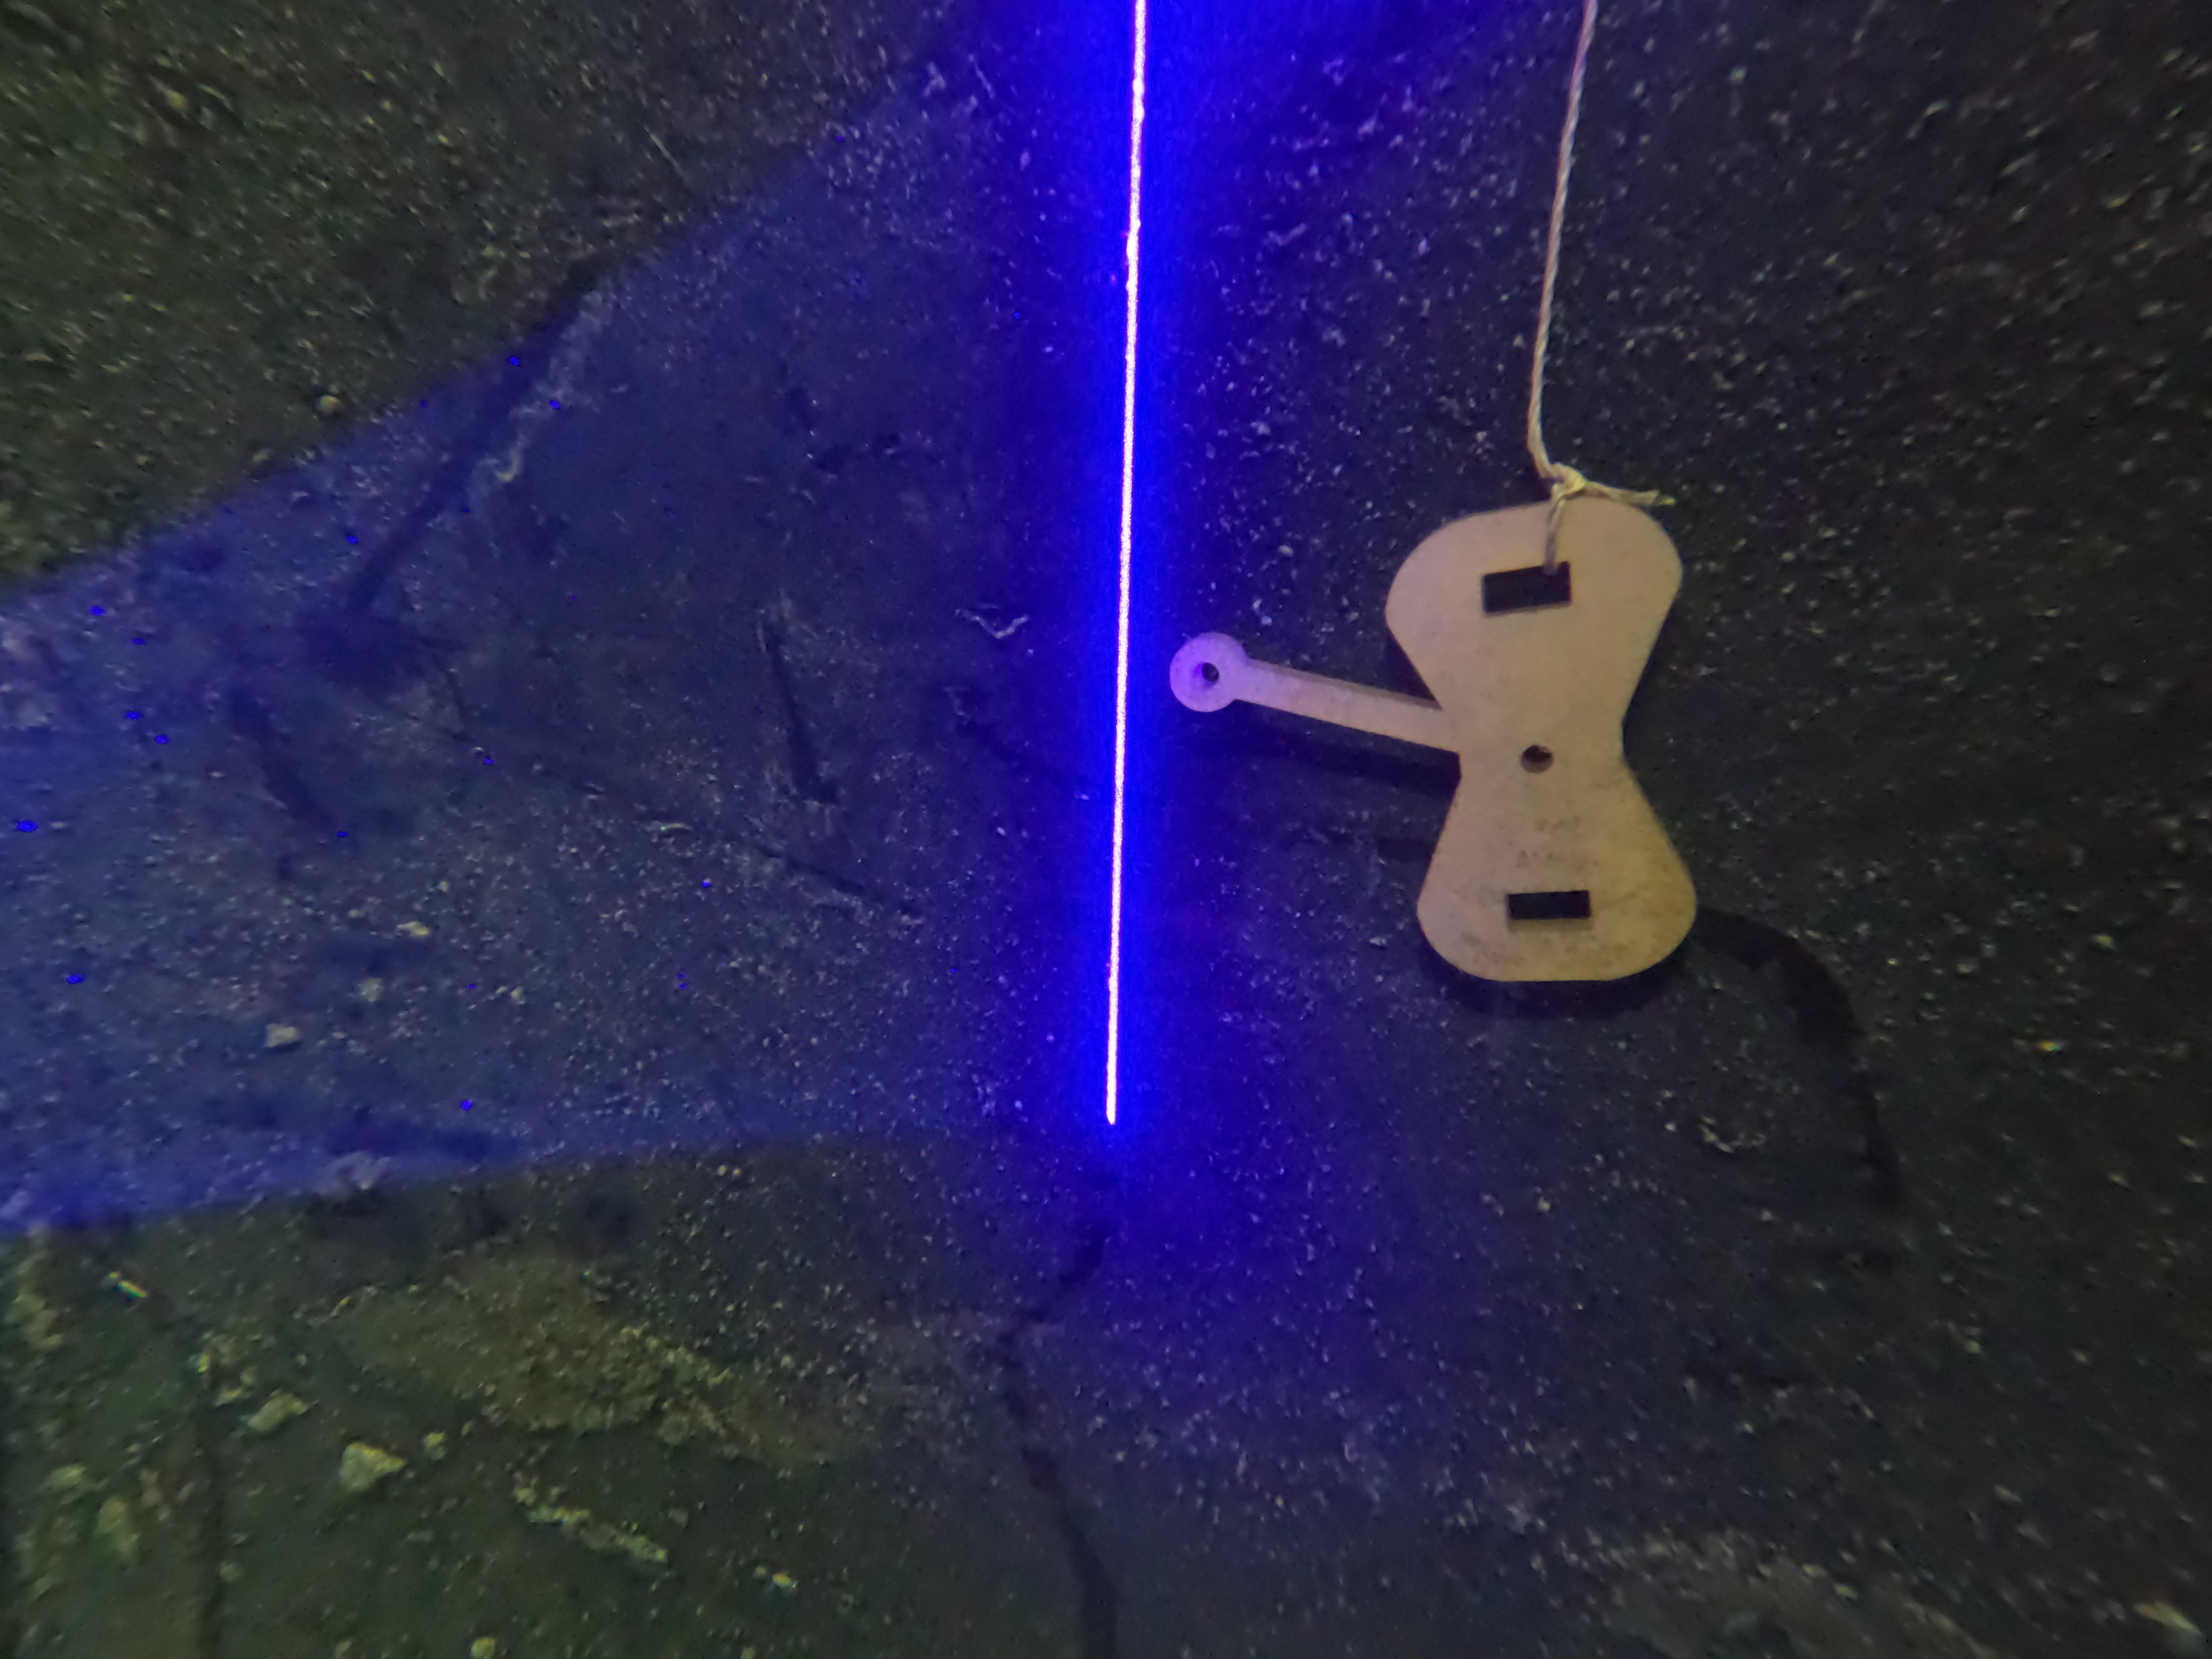

Supplement: Supplementary file 2561 [file G0016139.pdf › Level_2_2/G0016139.pdf]

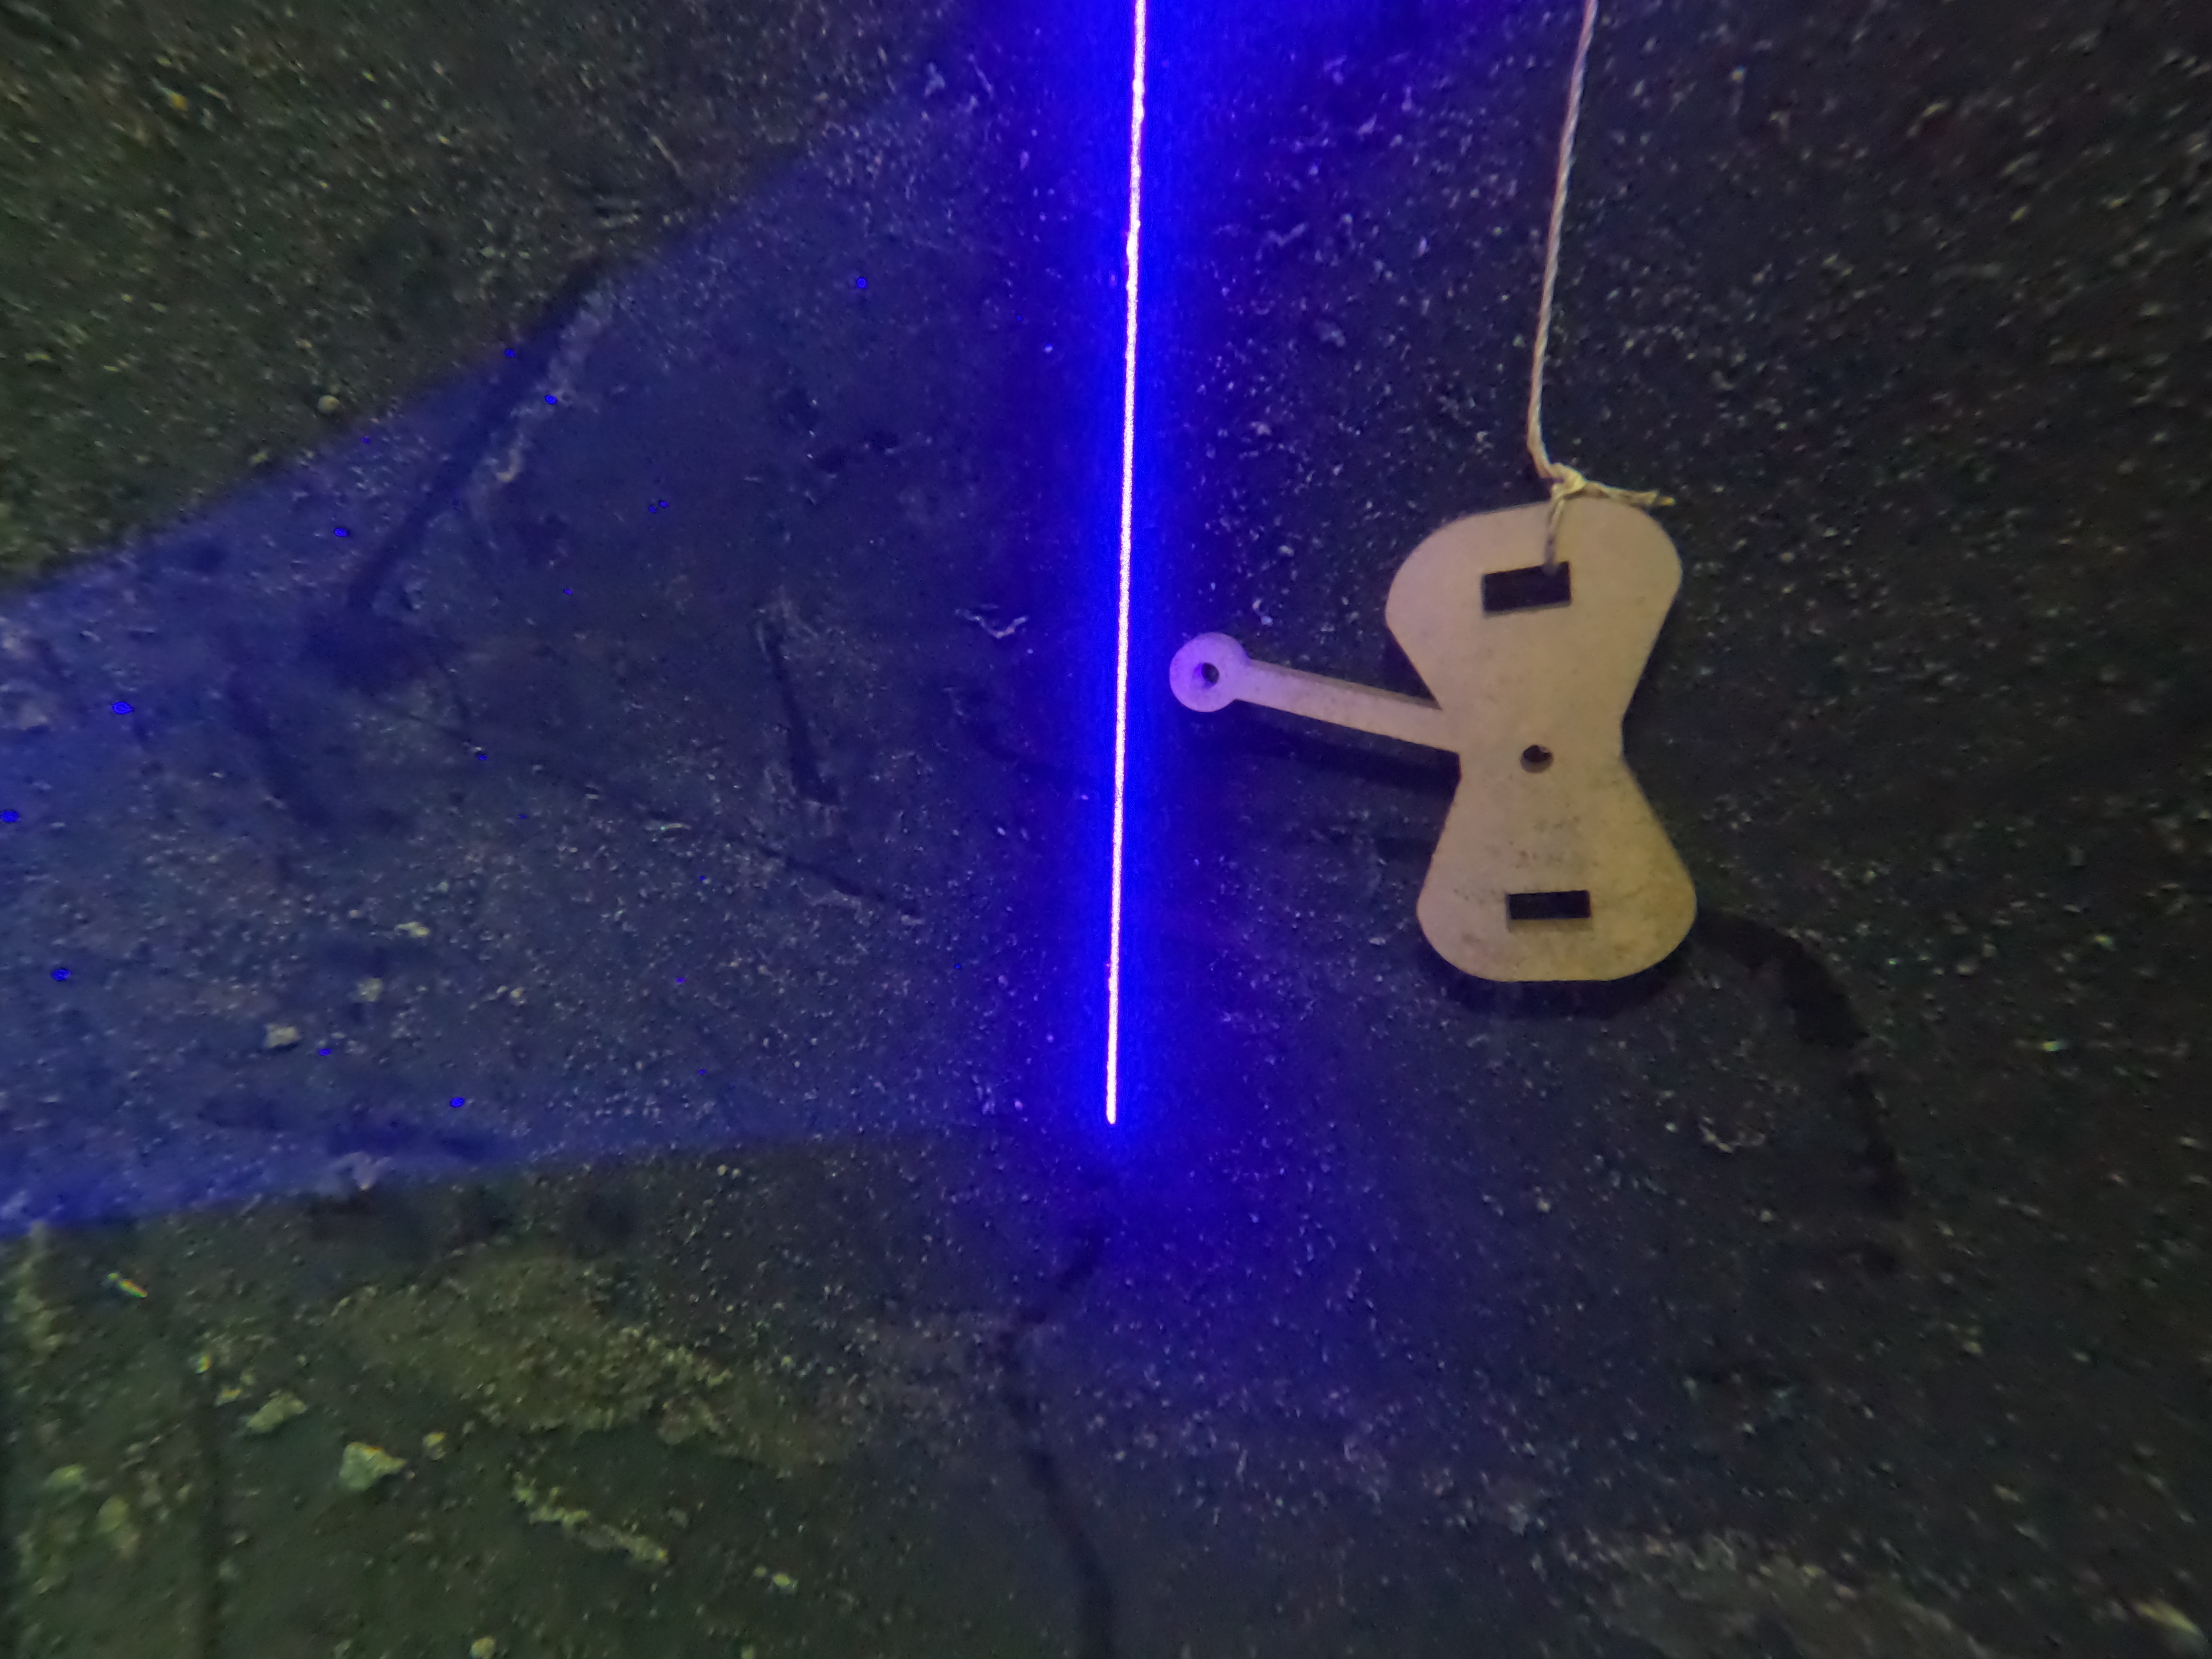

Supplement: Supplementary file 2562 [file G0016140.pdf › Level_2_2/G0016140.pdf]

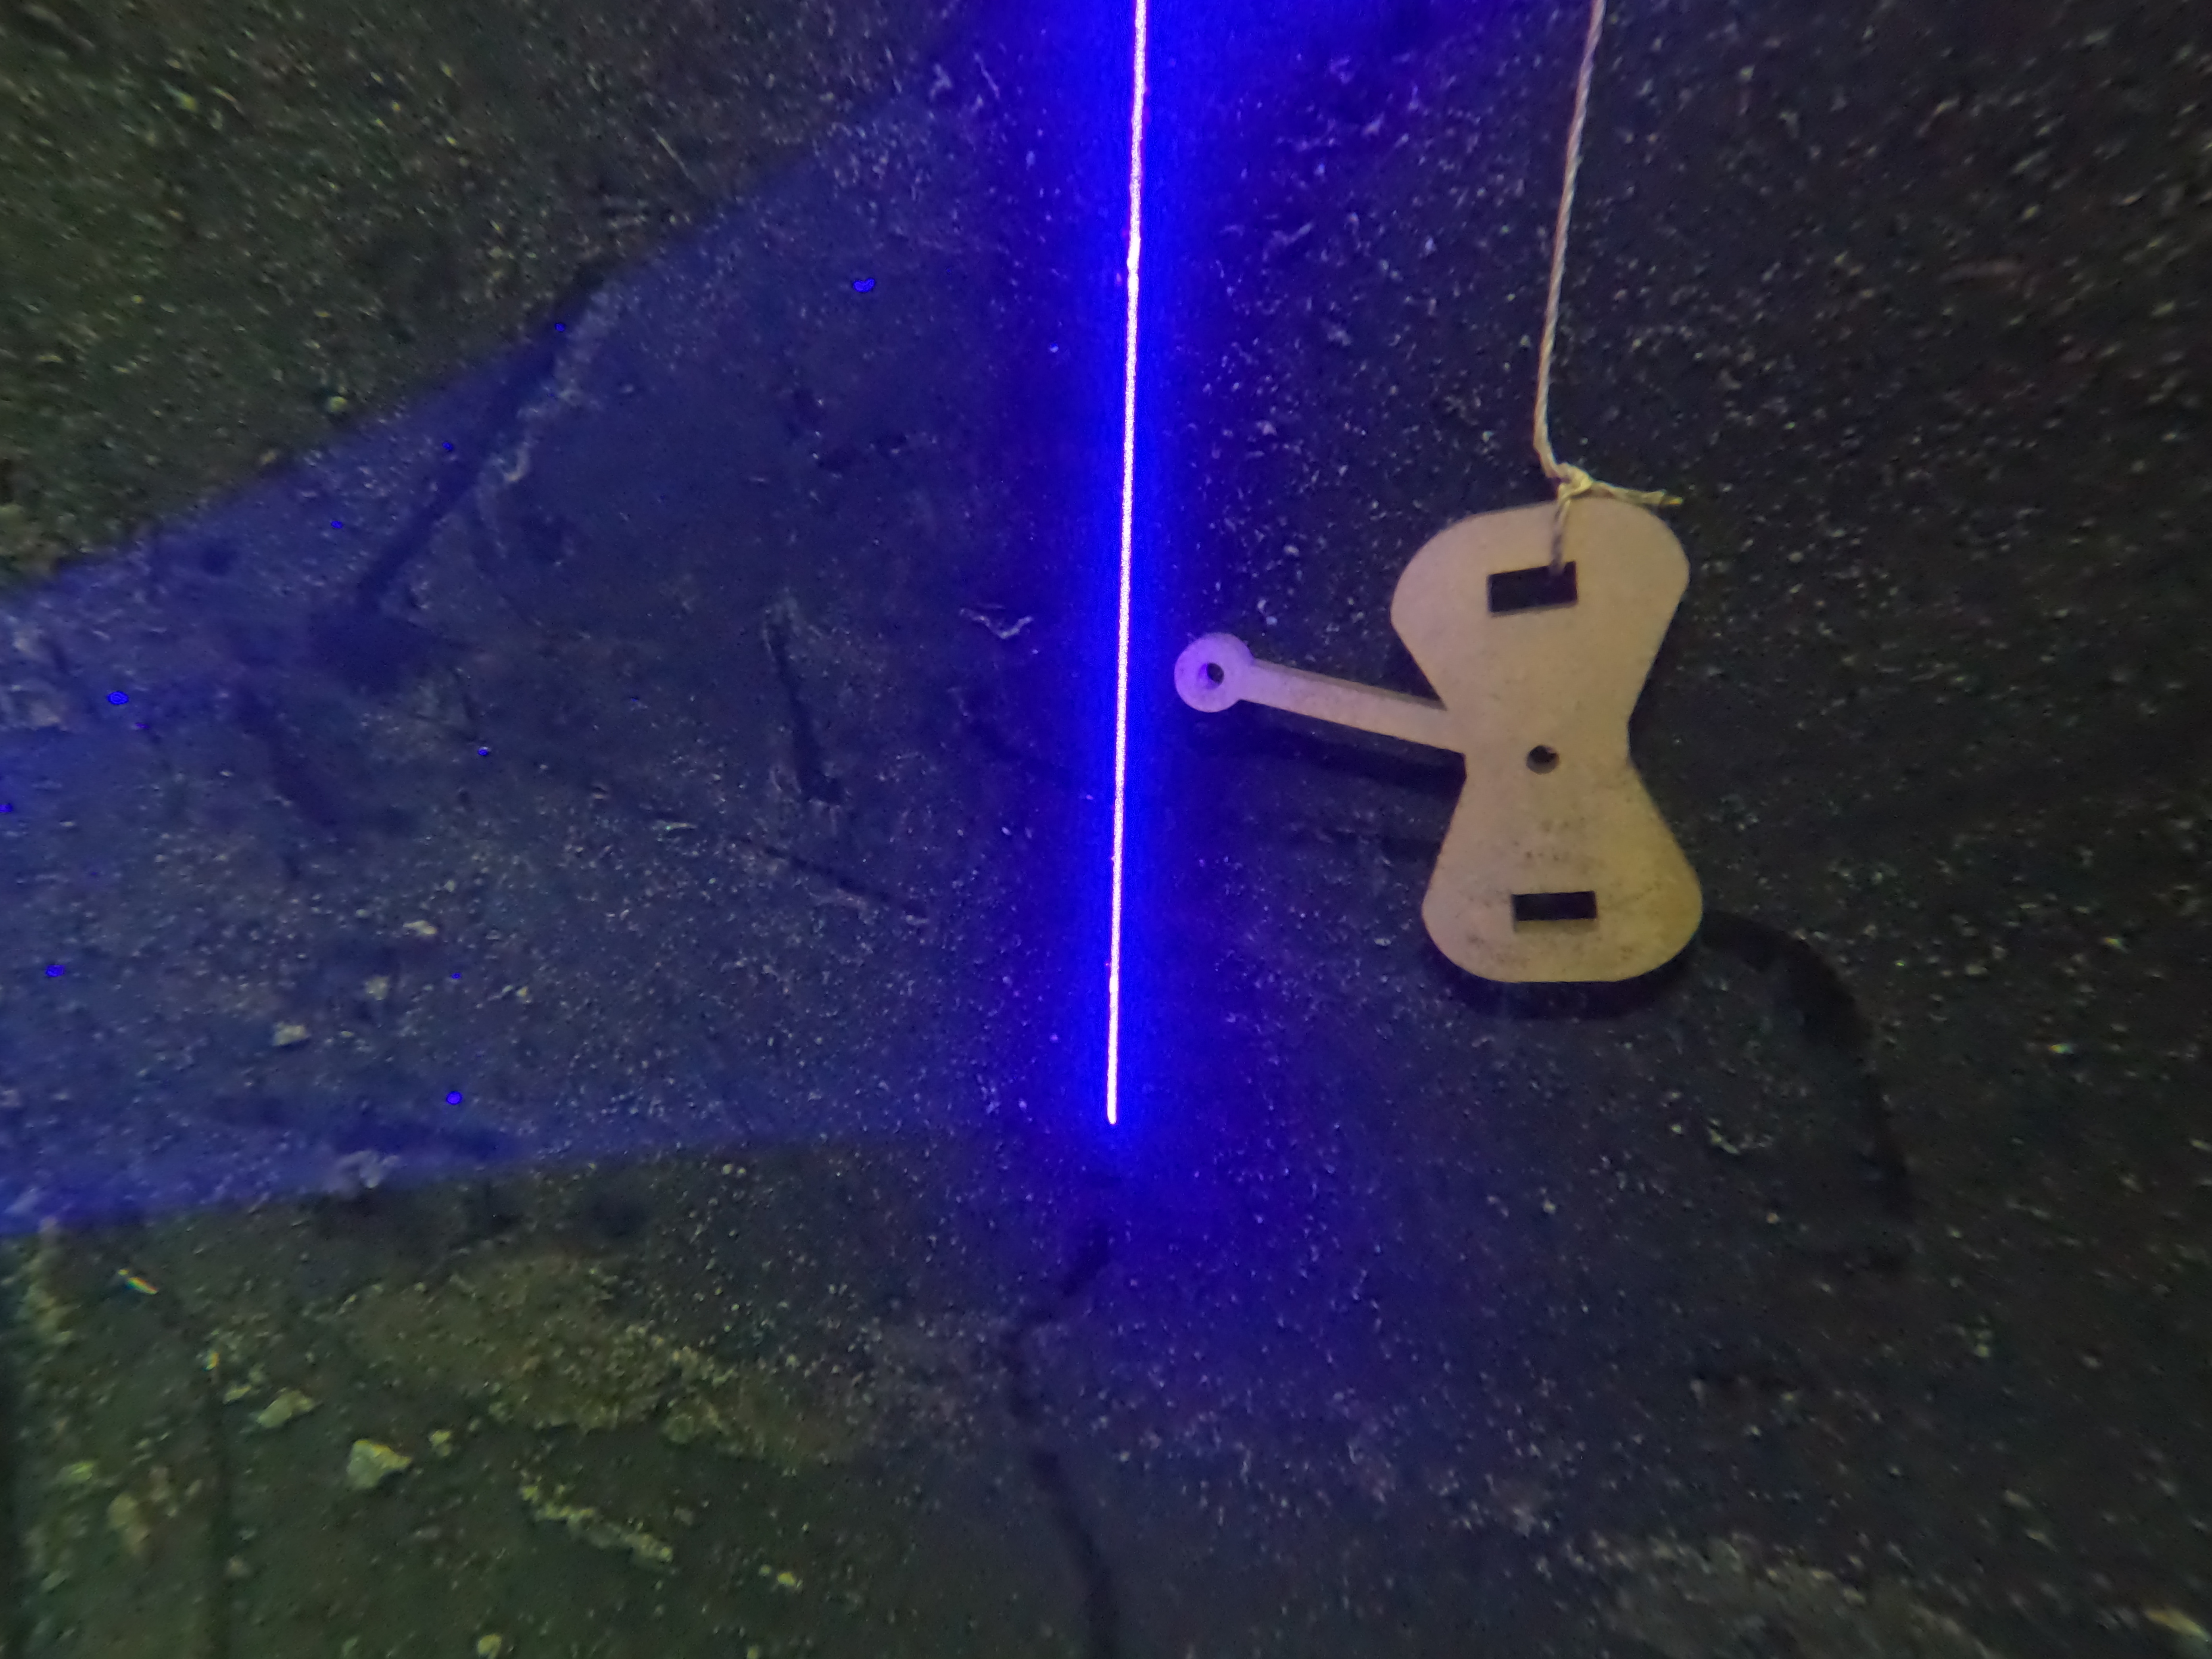

Supplement: Supplementary file 2563 [file G0016141.pdf › Level_2_2/G0016141.pdf]

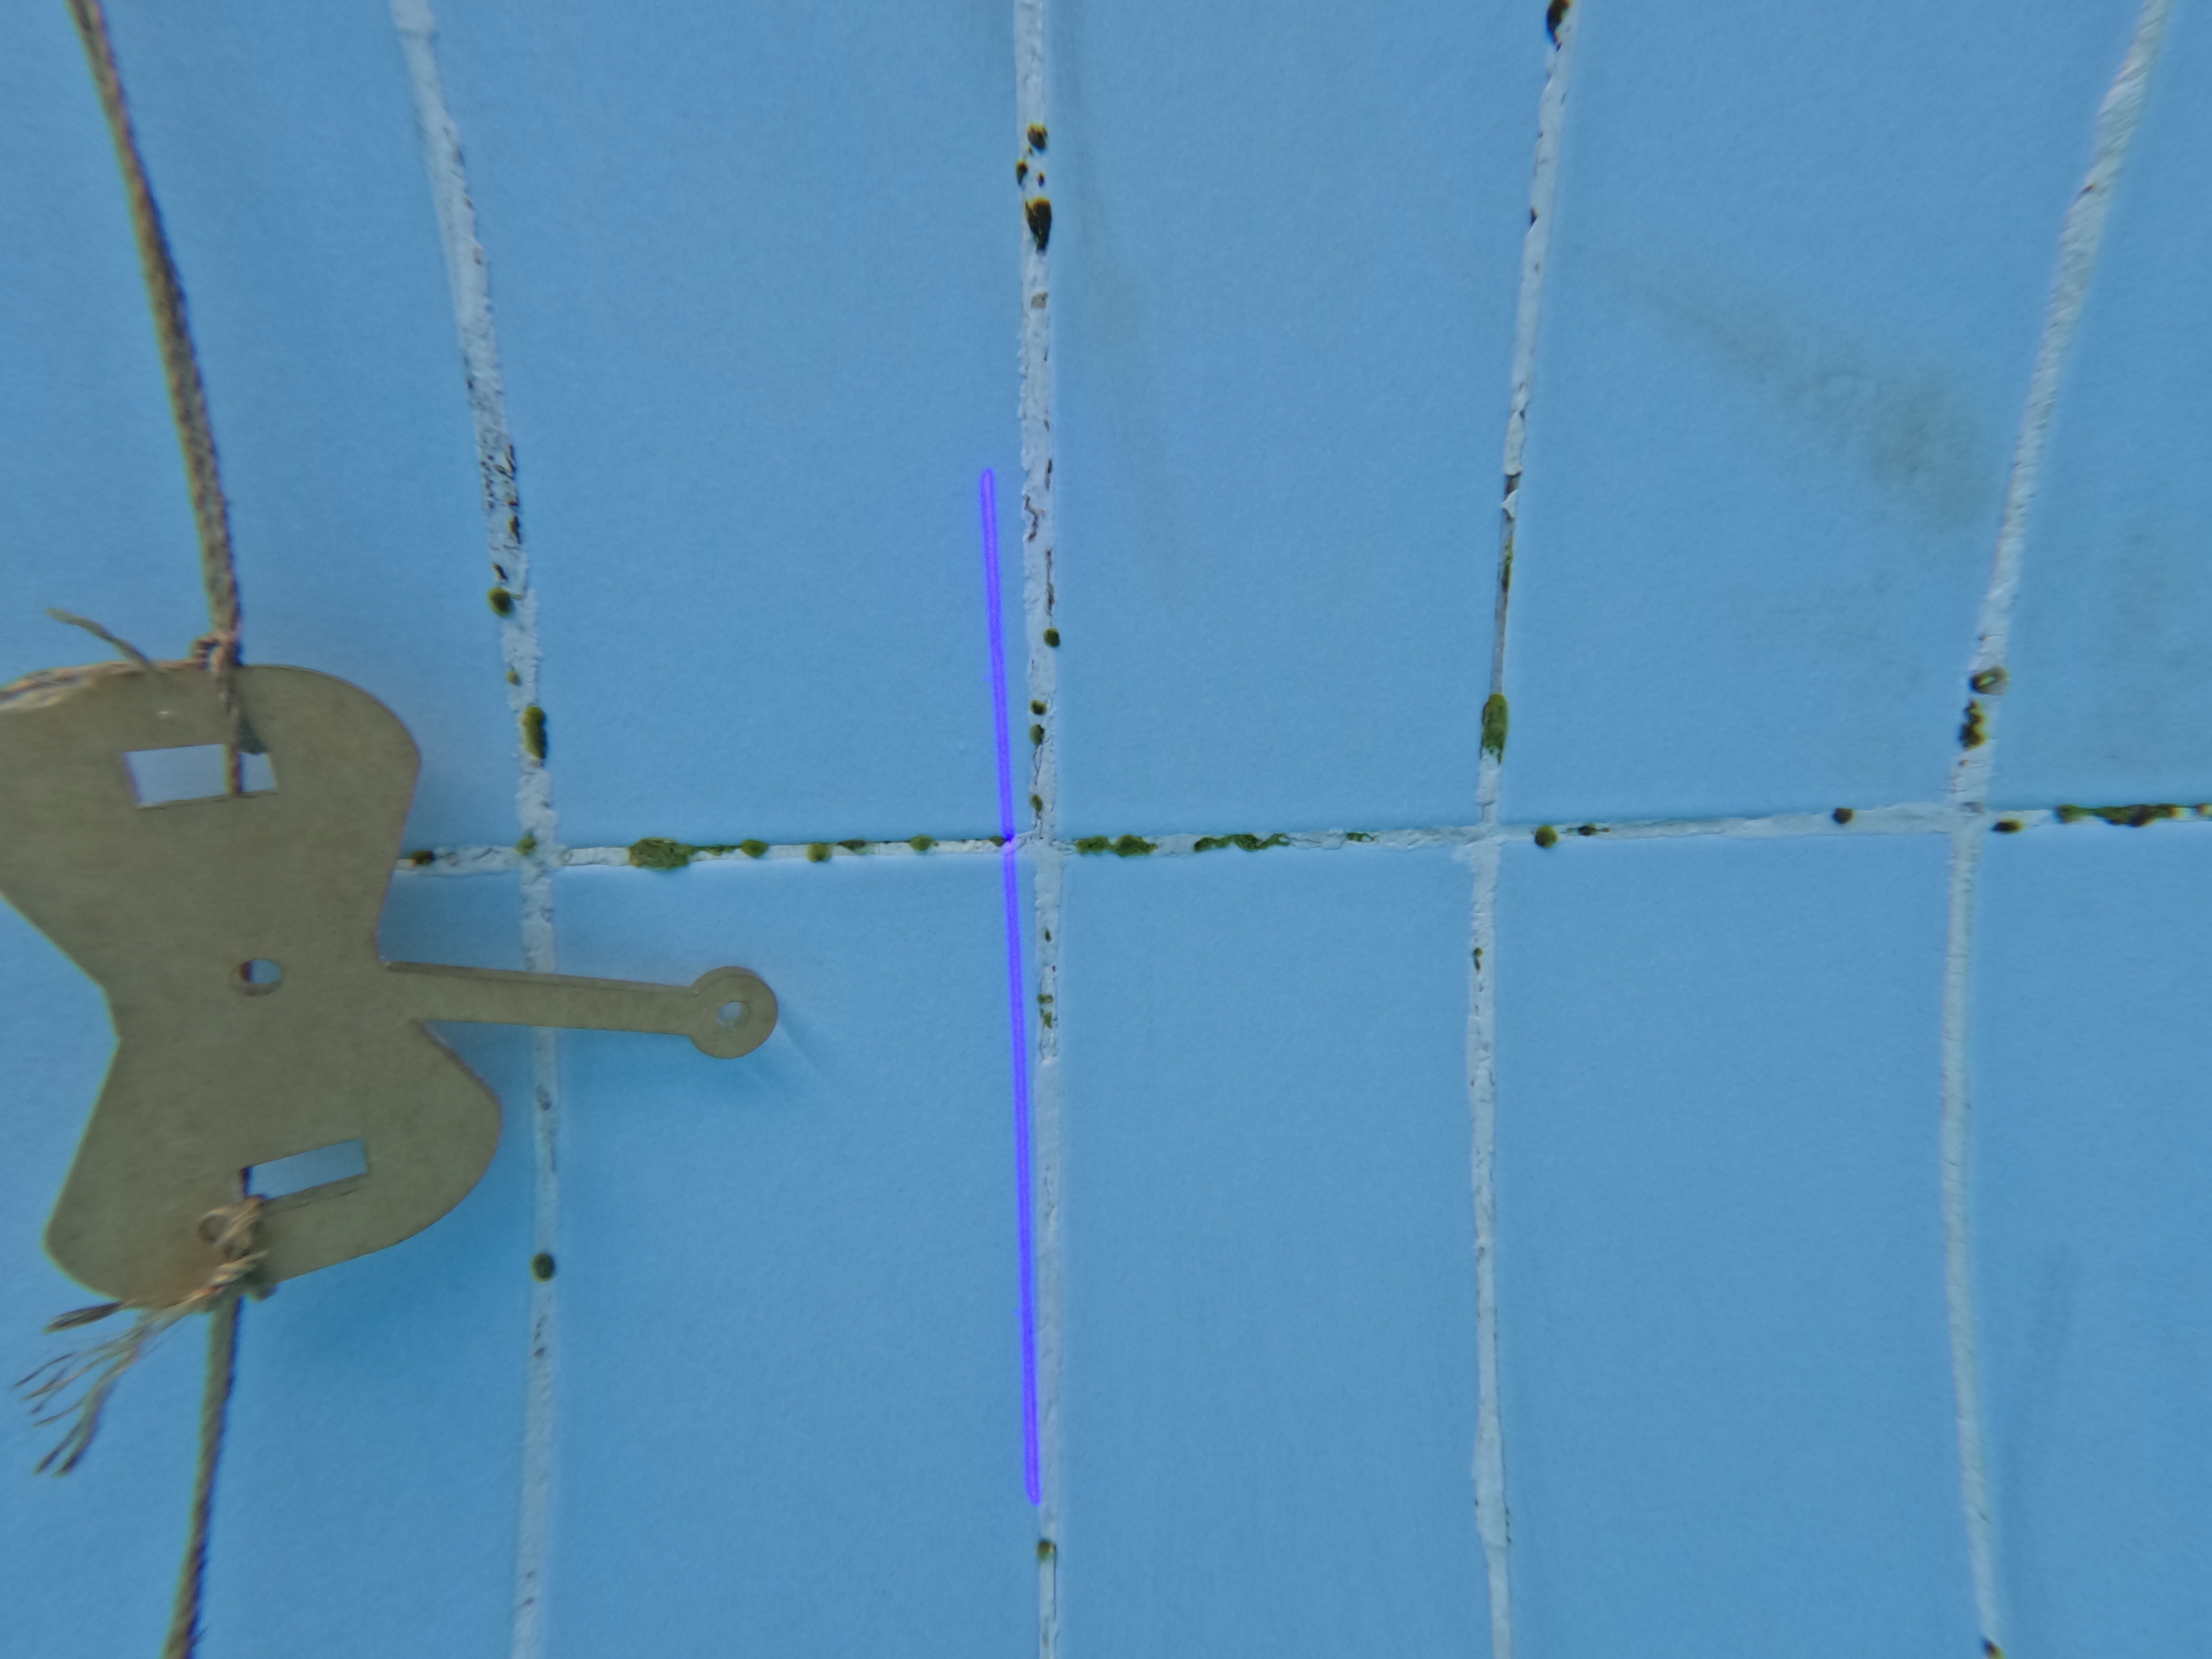

Supplement: Supplementary file 2564 [file G0050862.pdf › Level_2_2/G0050862.pdf]

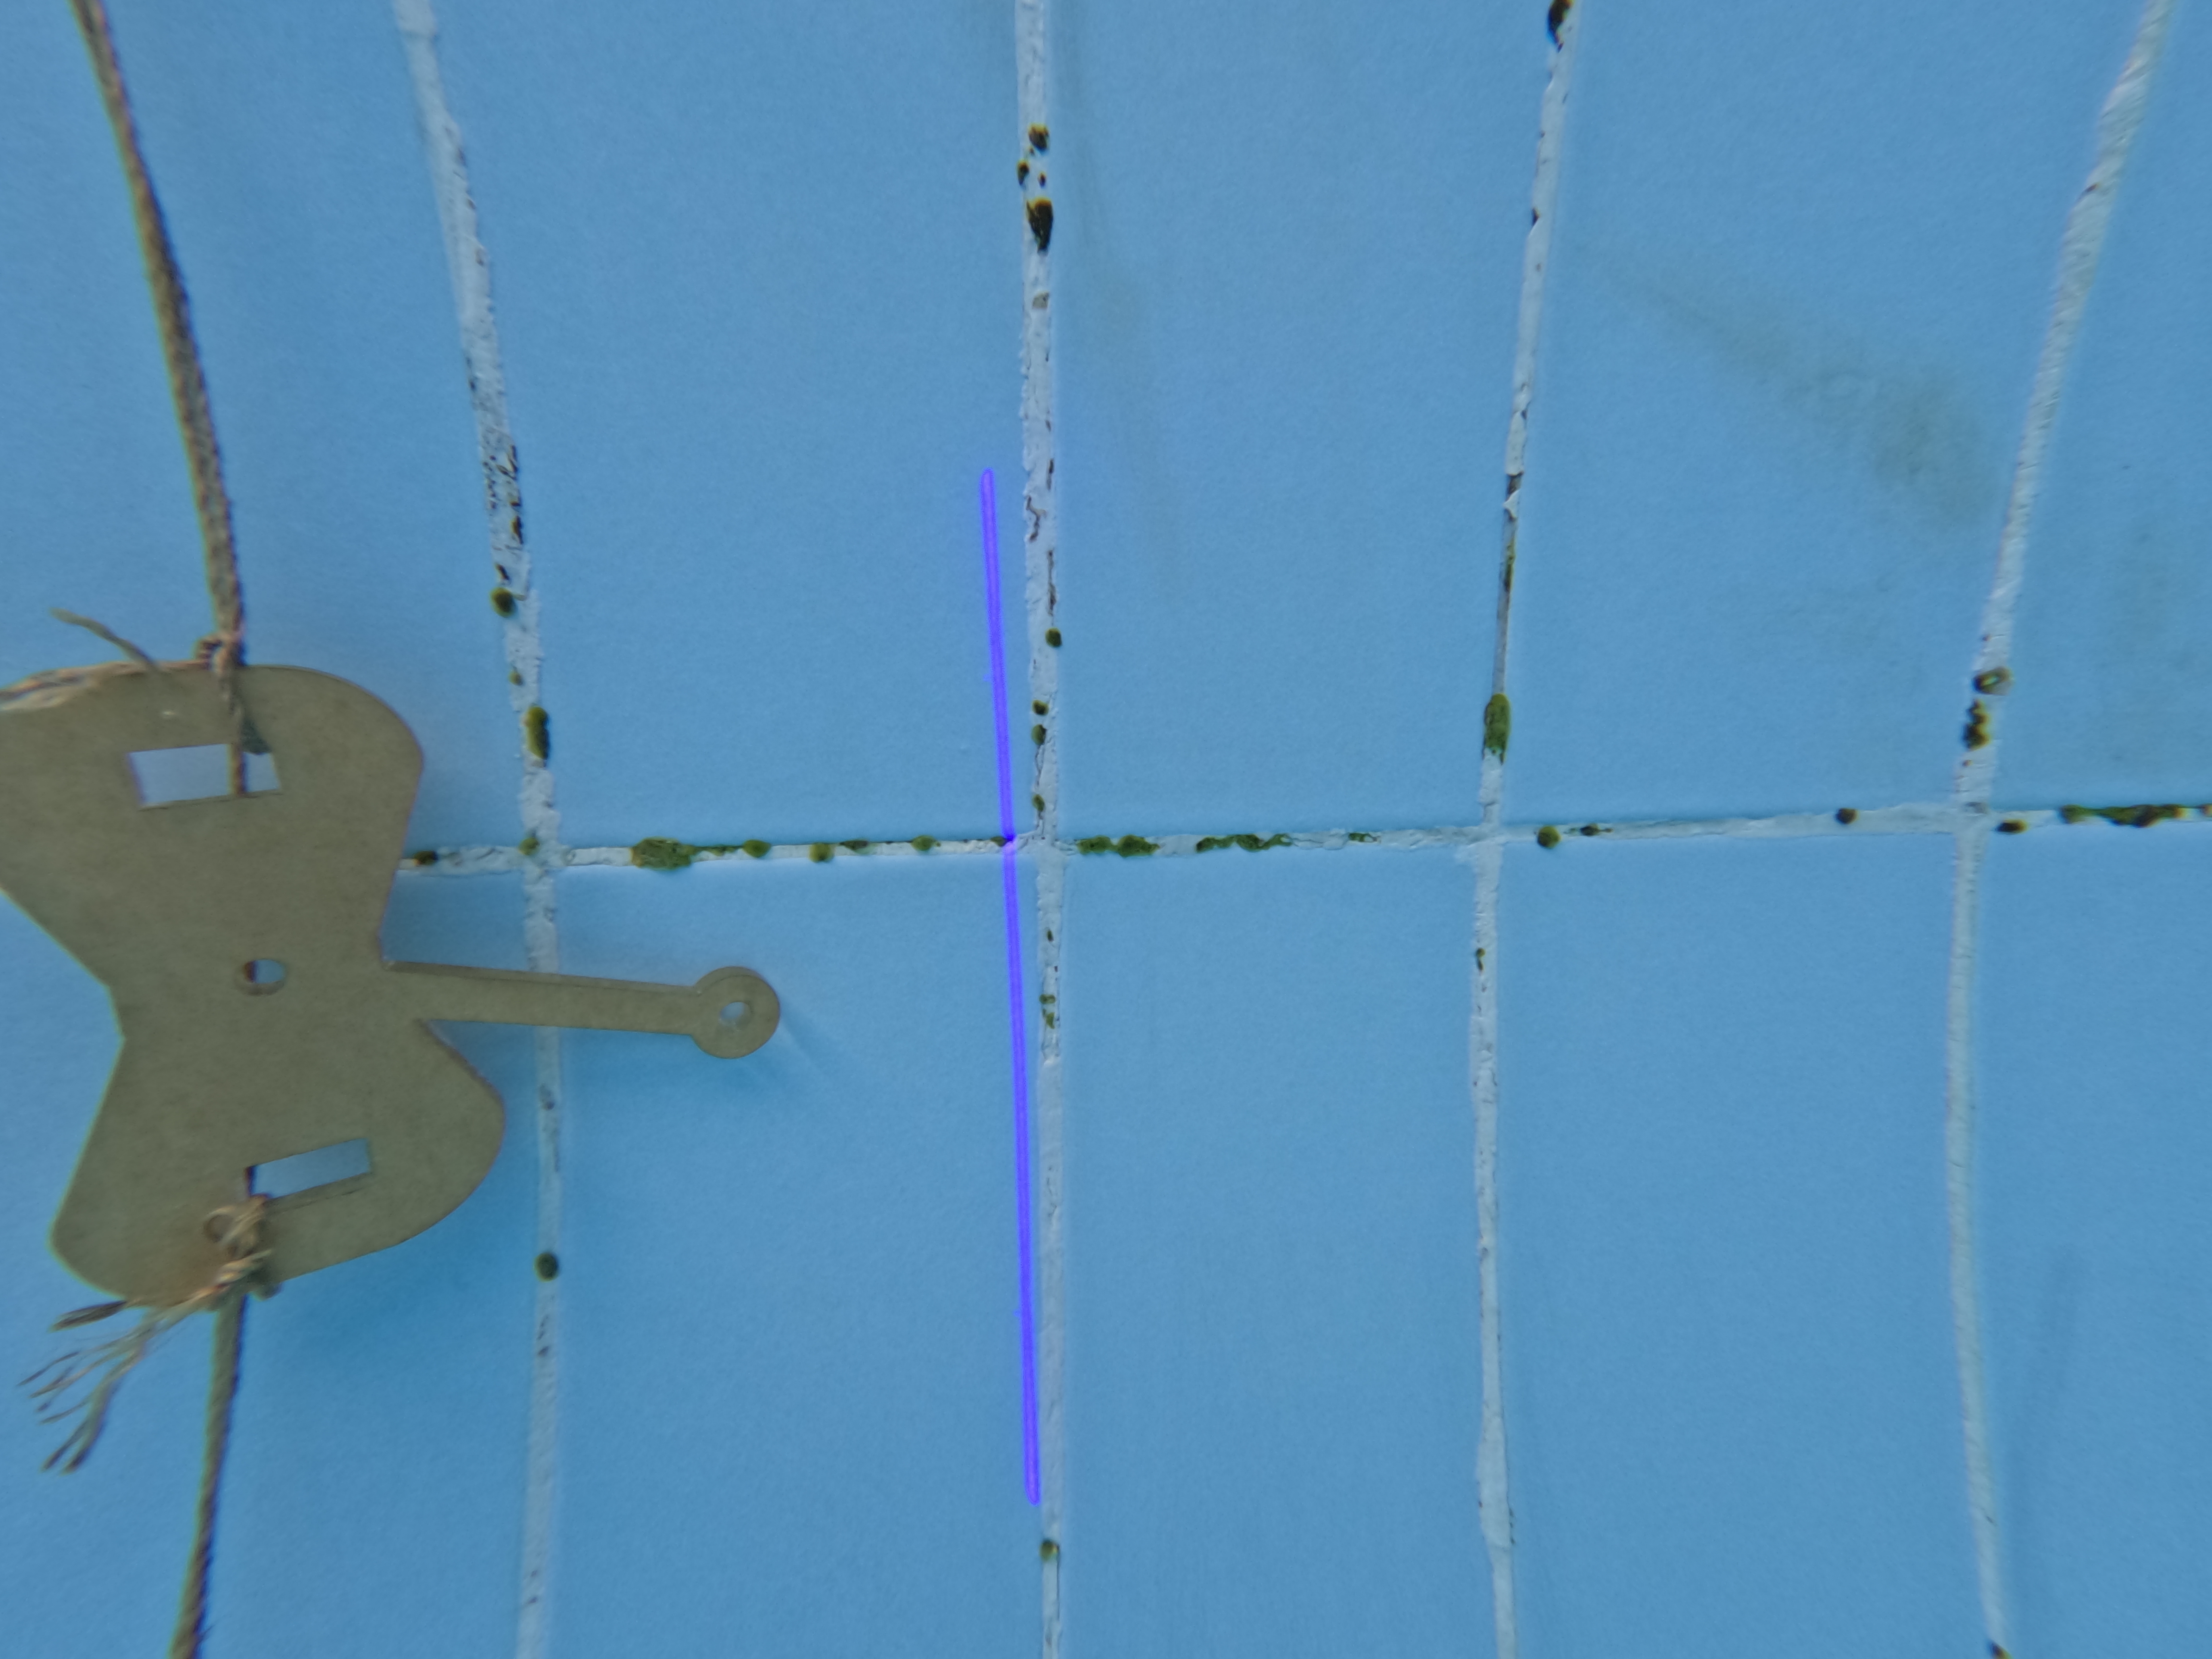

Supplement: Supplementary file 2565 [file G0050863.pdf › Level_2_2/G0050863.pdf]

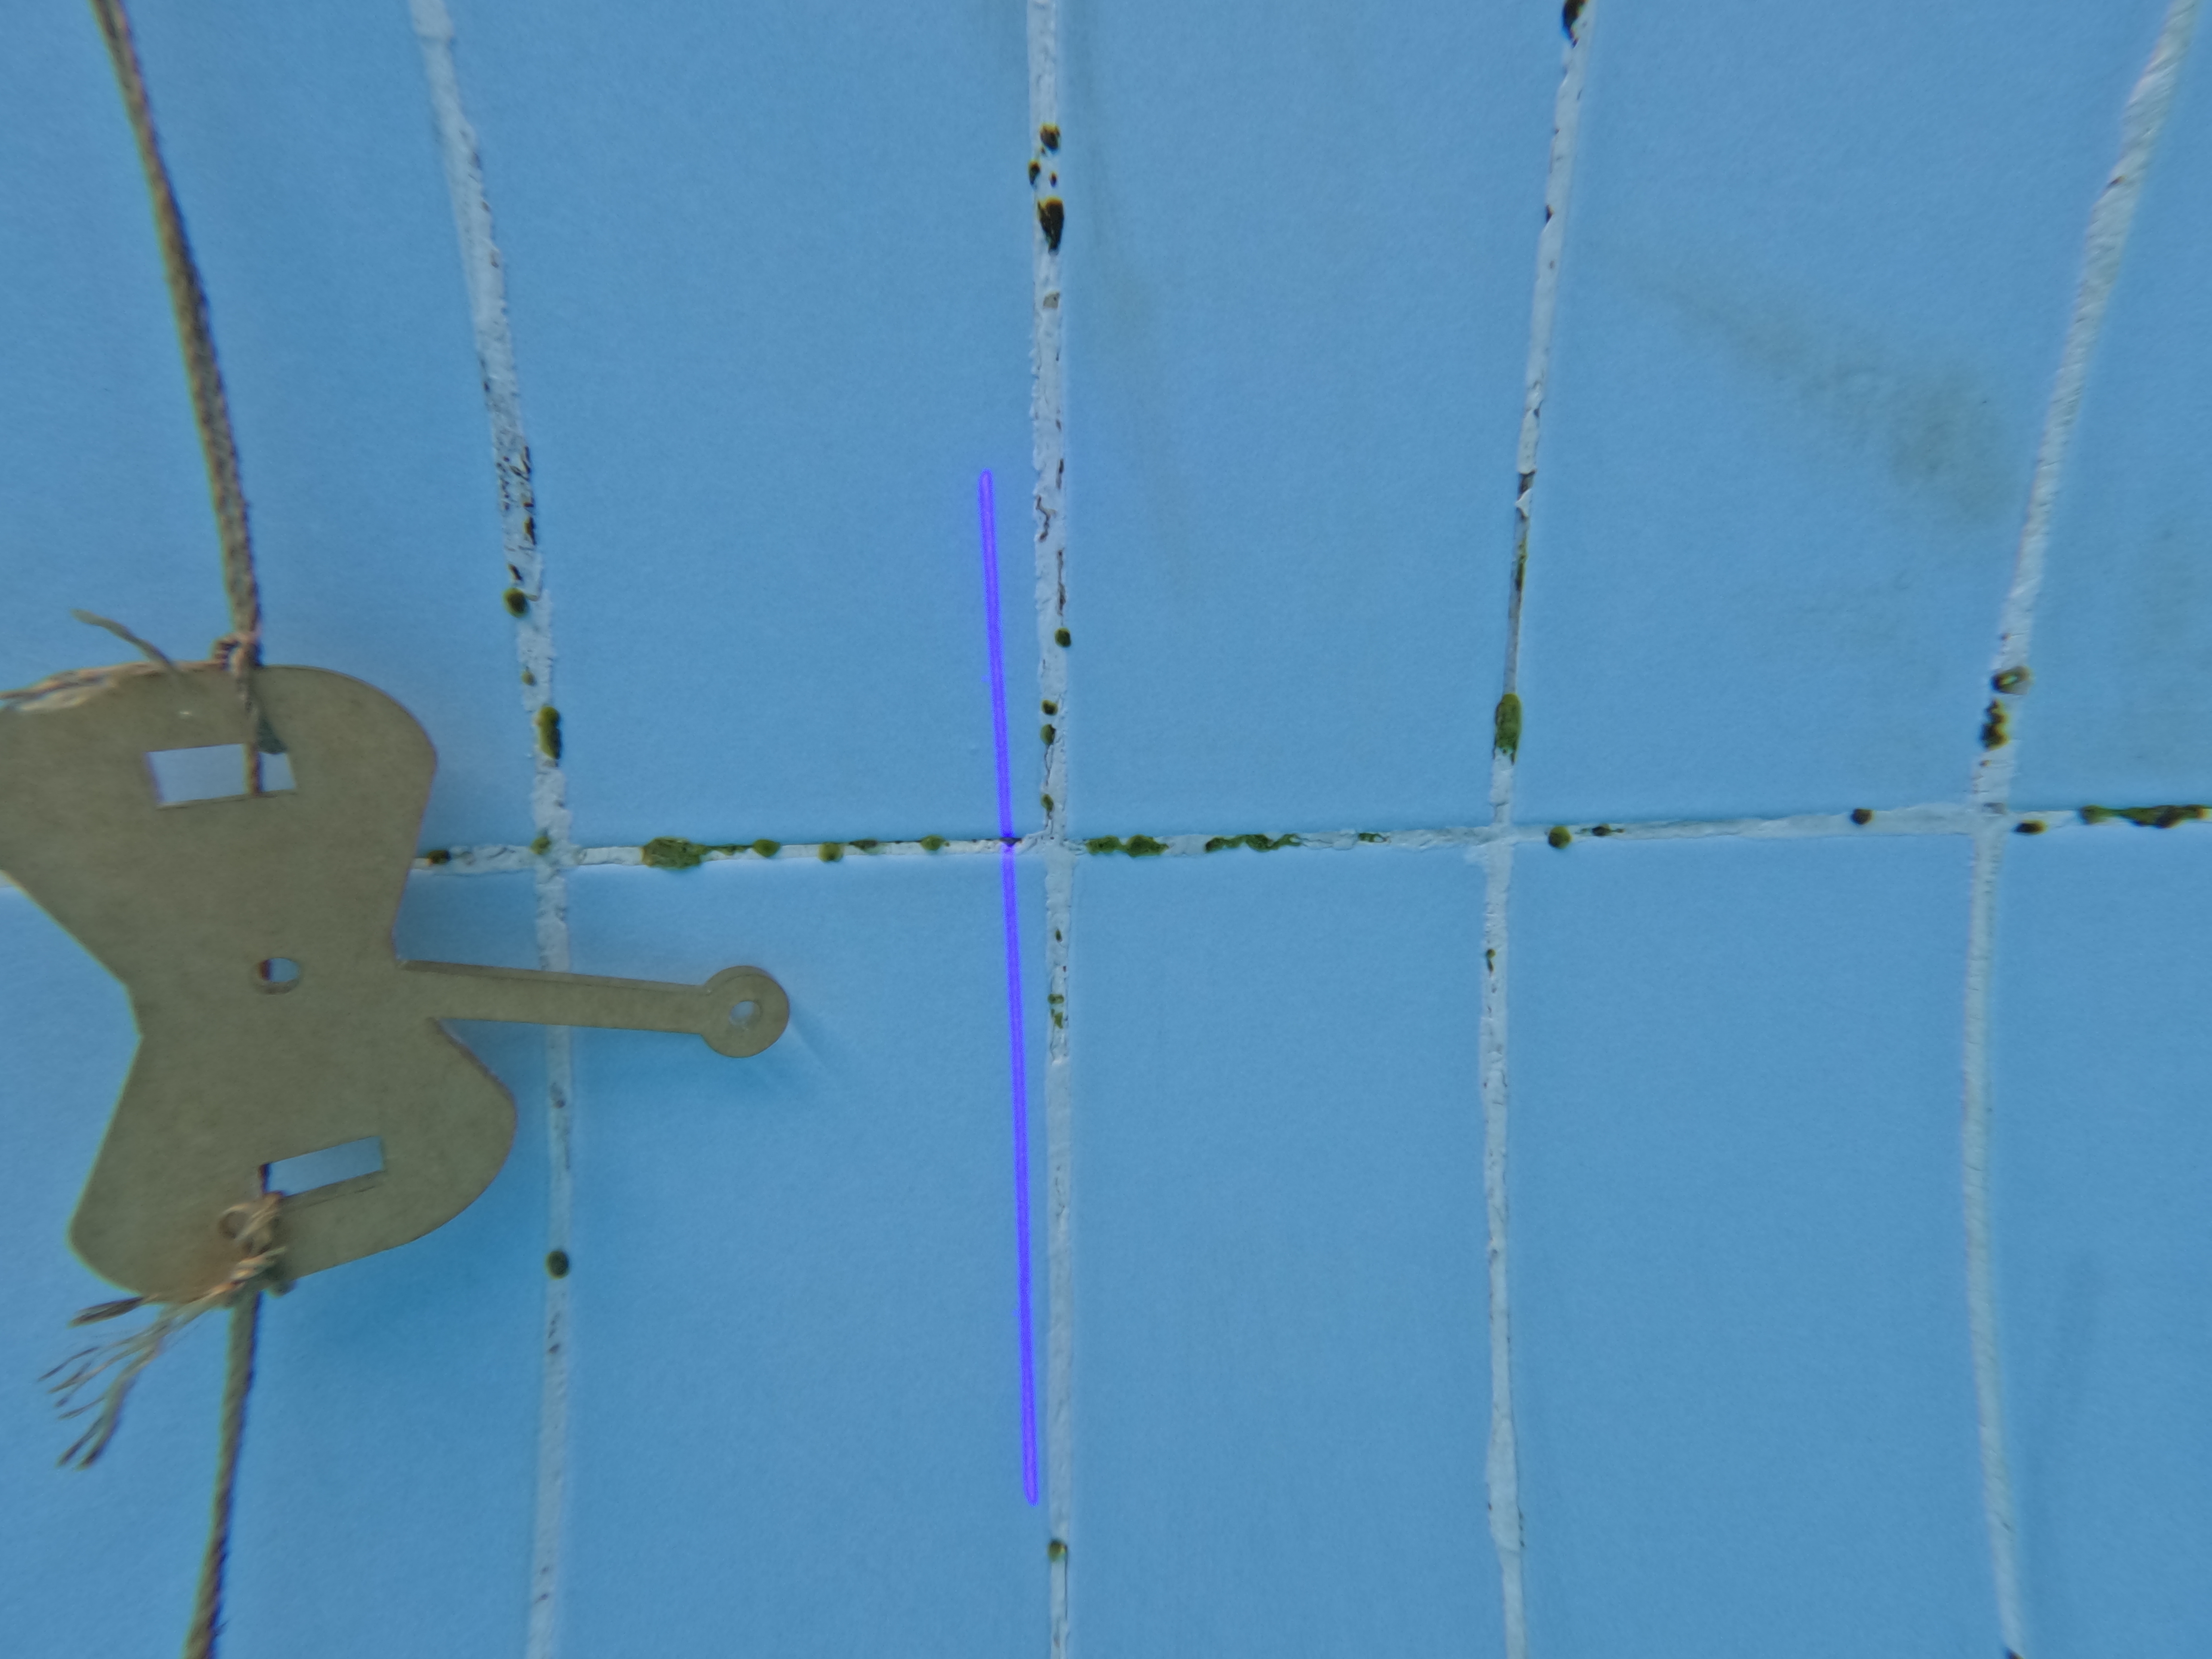

Supplement: Supplementary file 2566 [file G0050864.pdf › Level_2_2/G0050864.pdf]

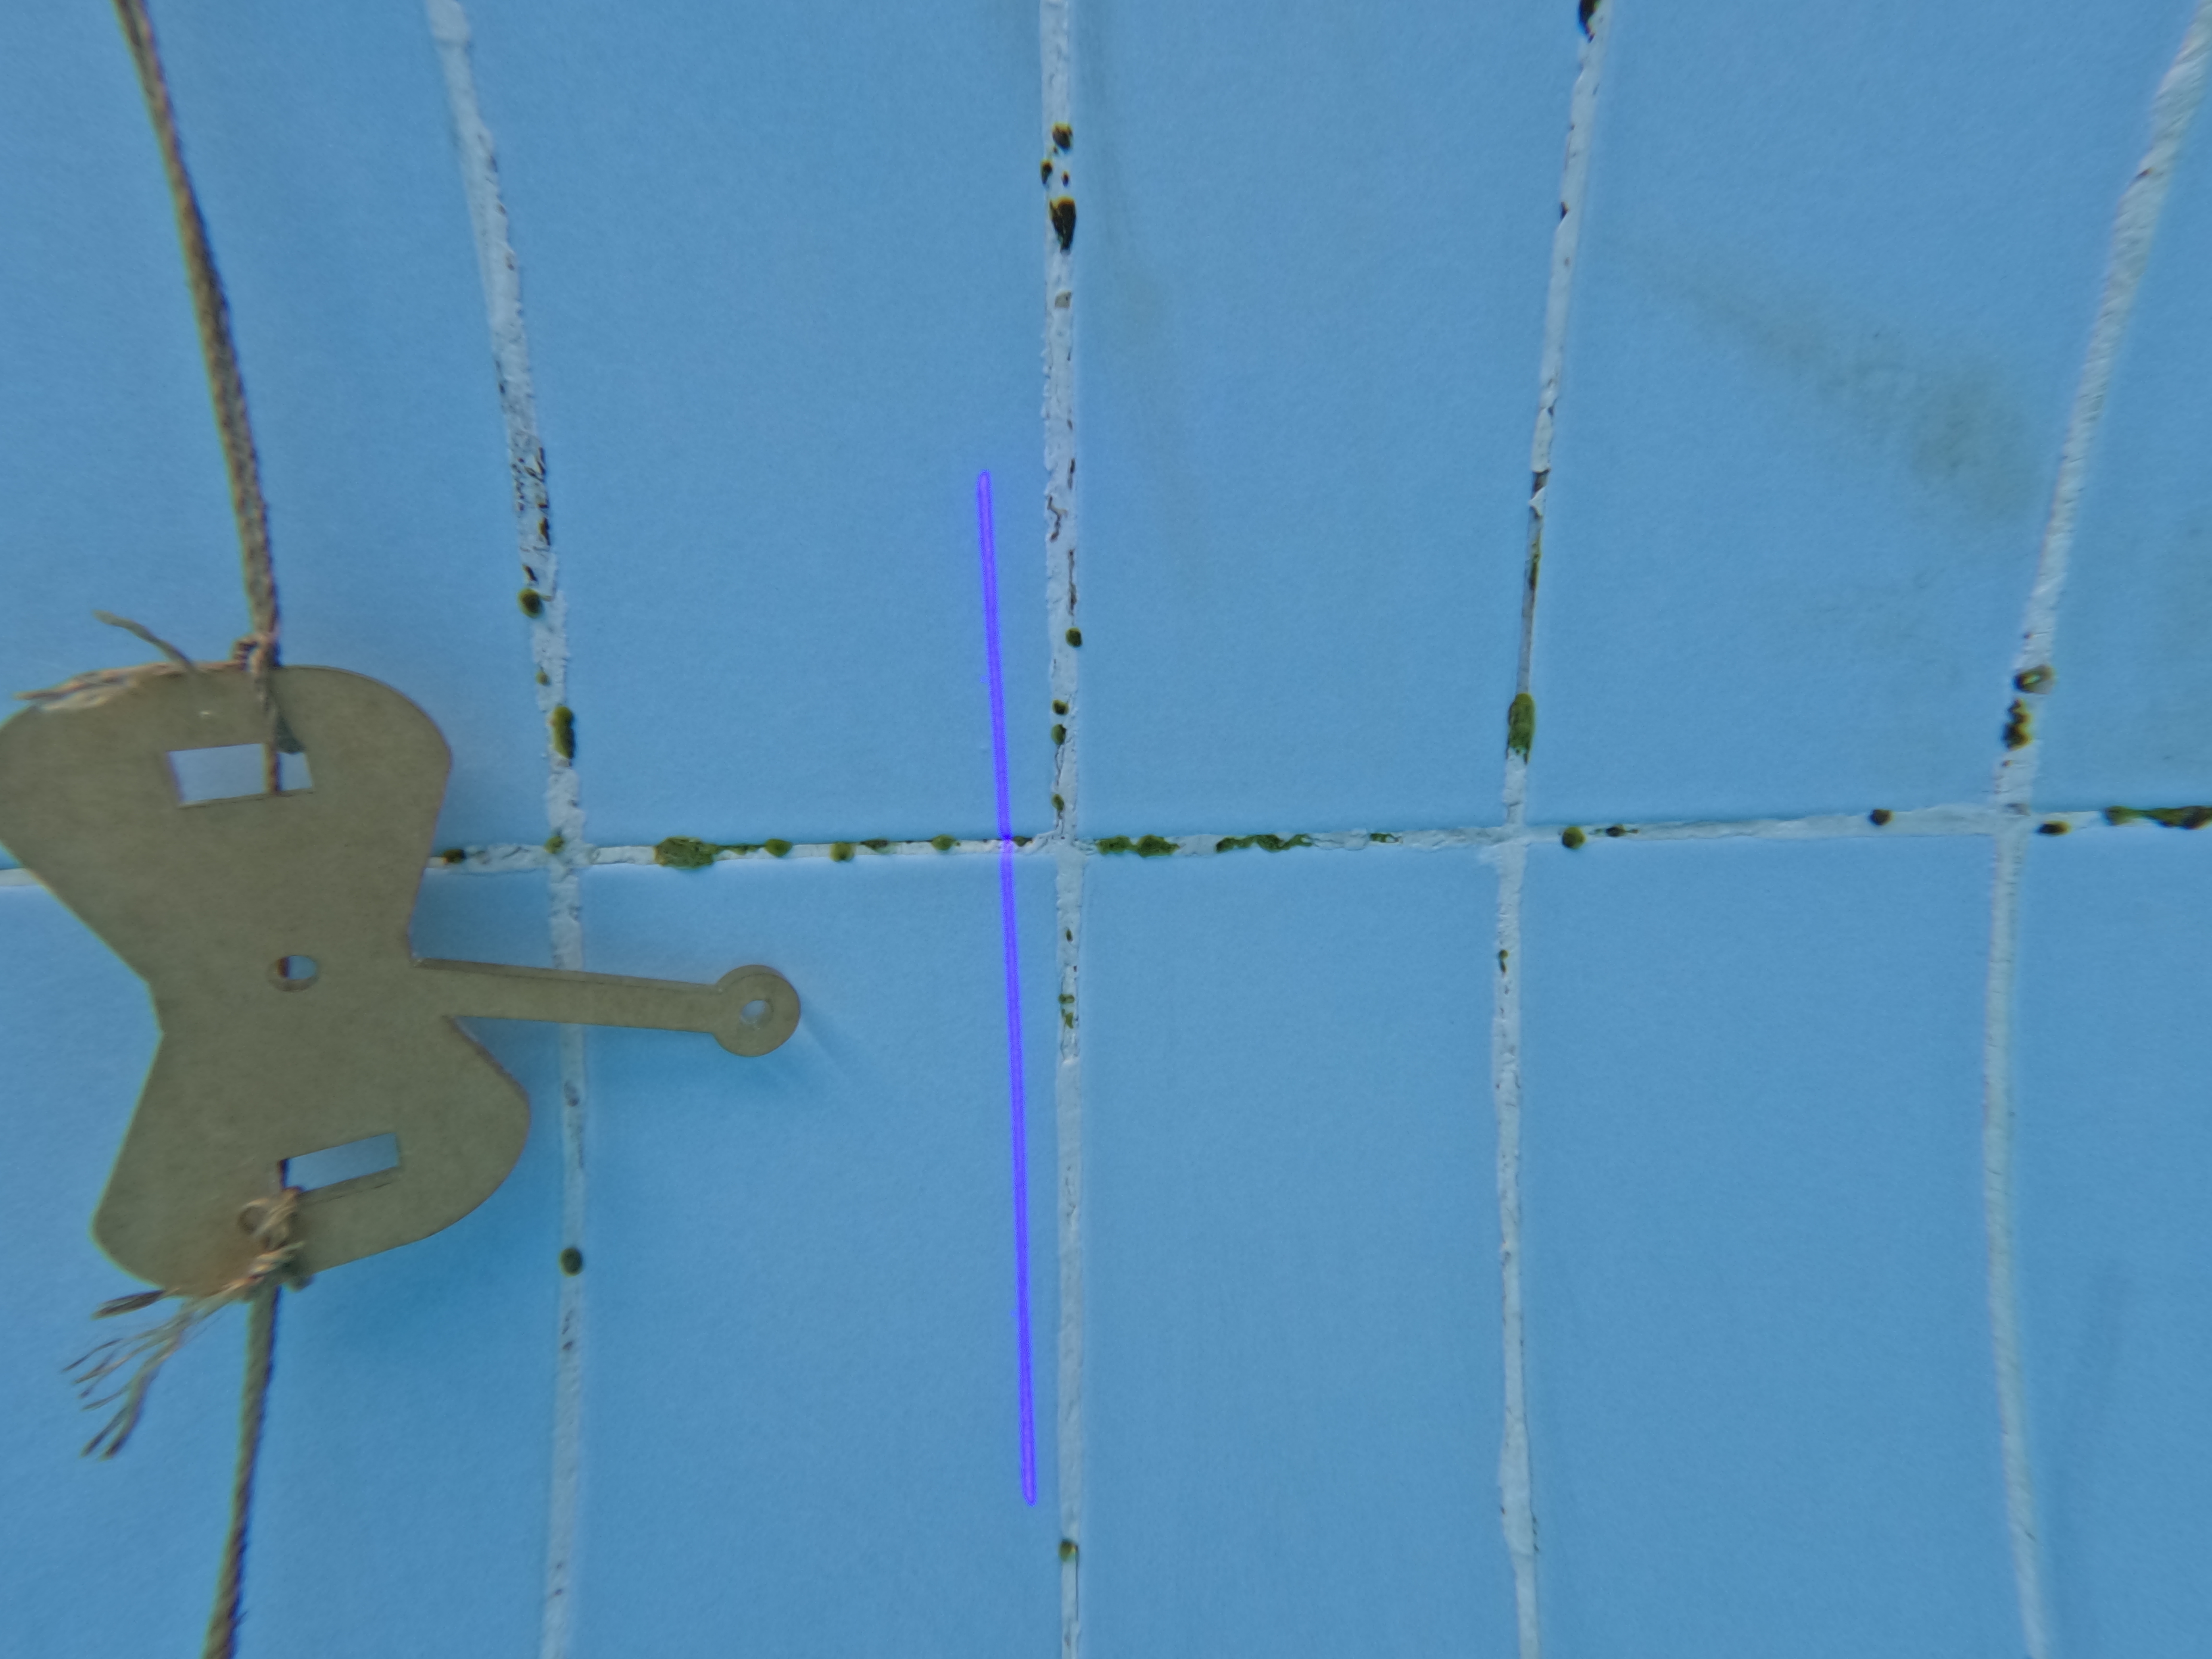

Supplement: Supplementary file 2567 [file G0050865.pdf › Level_2_2/G0050865.pdf]

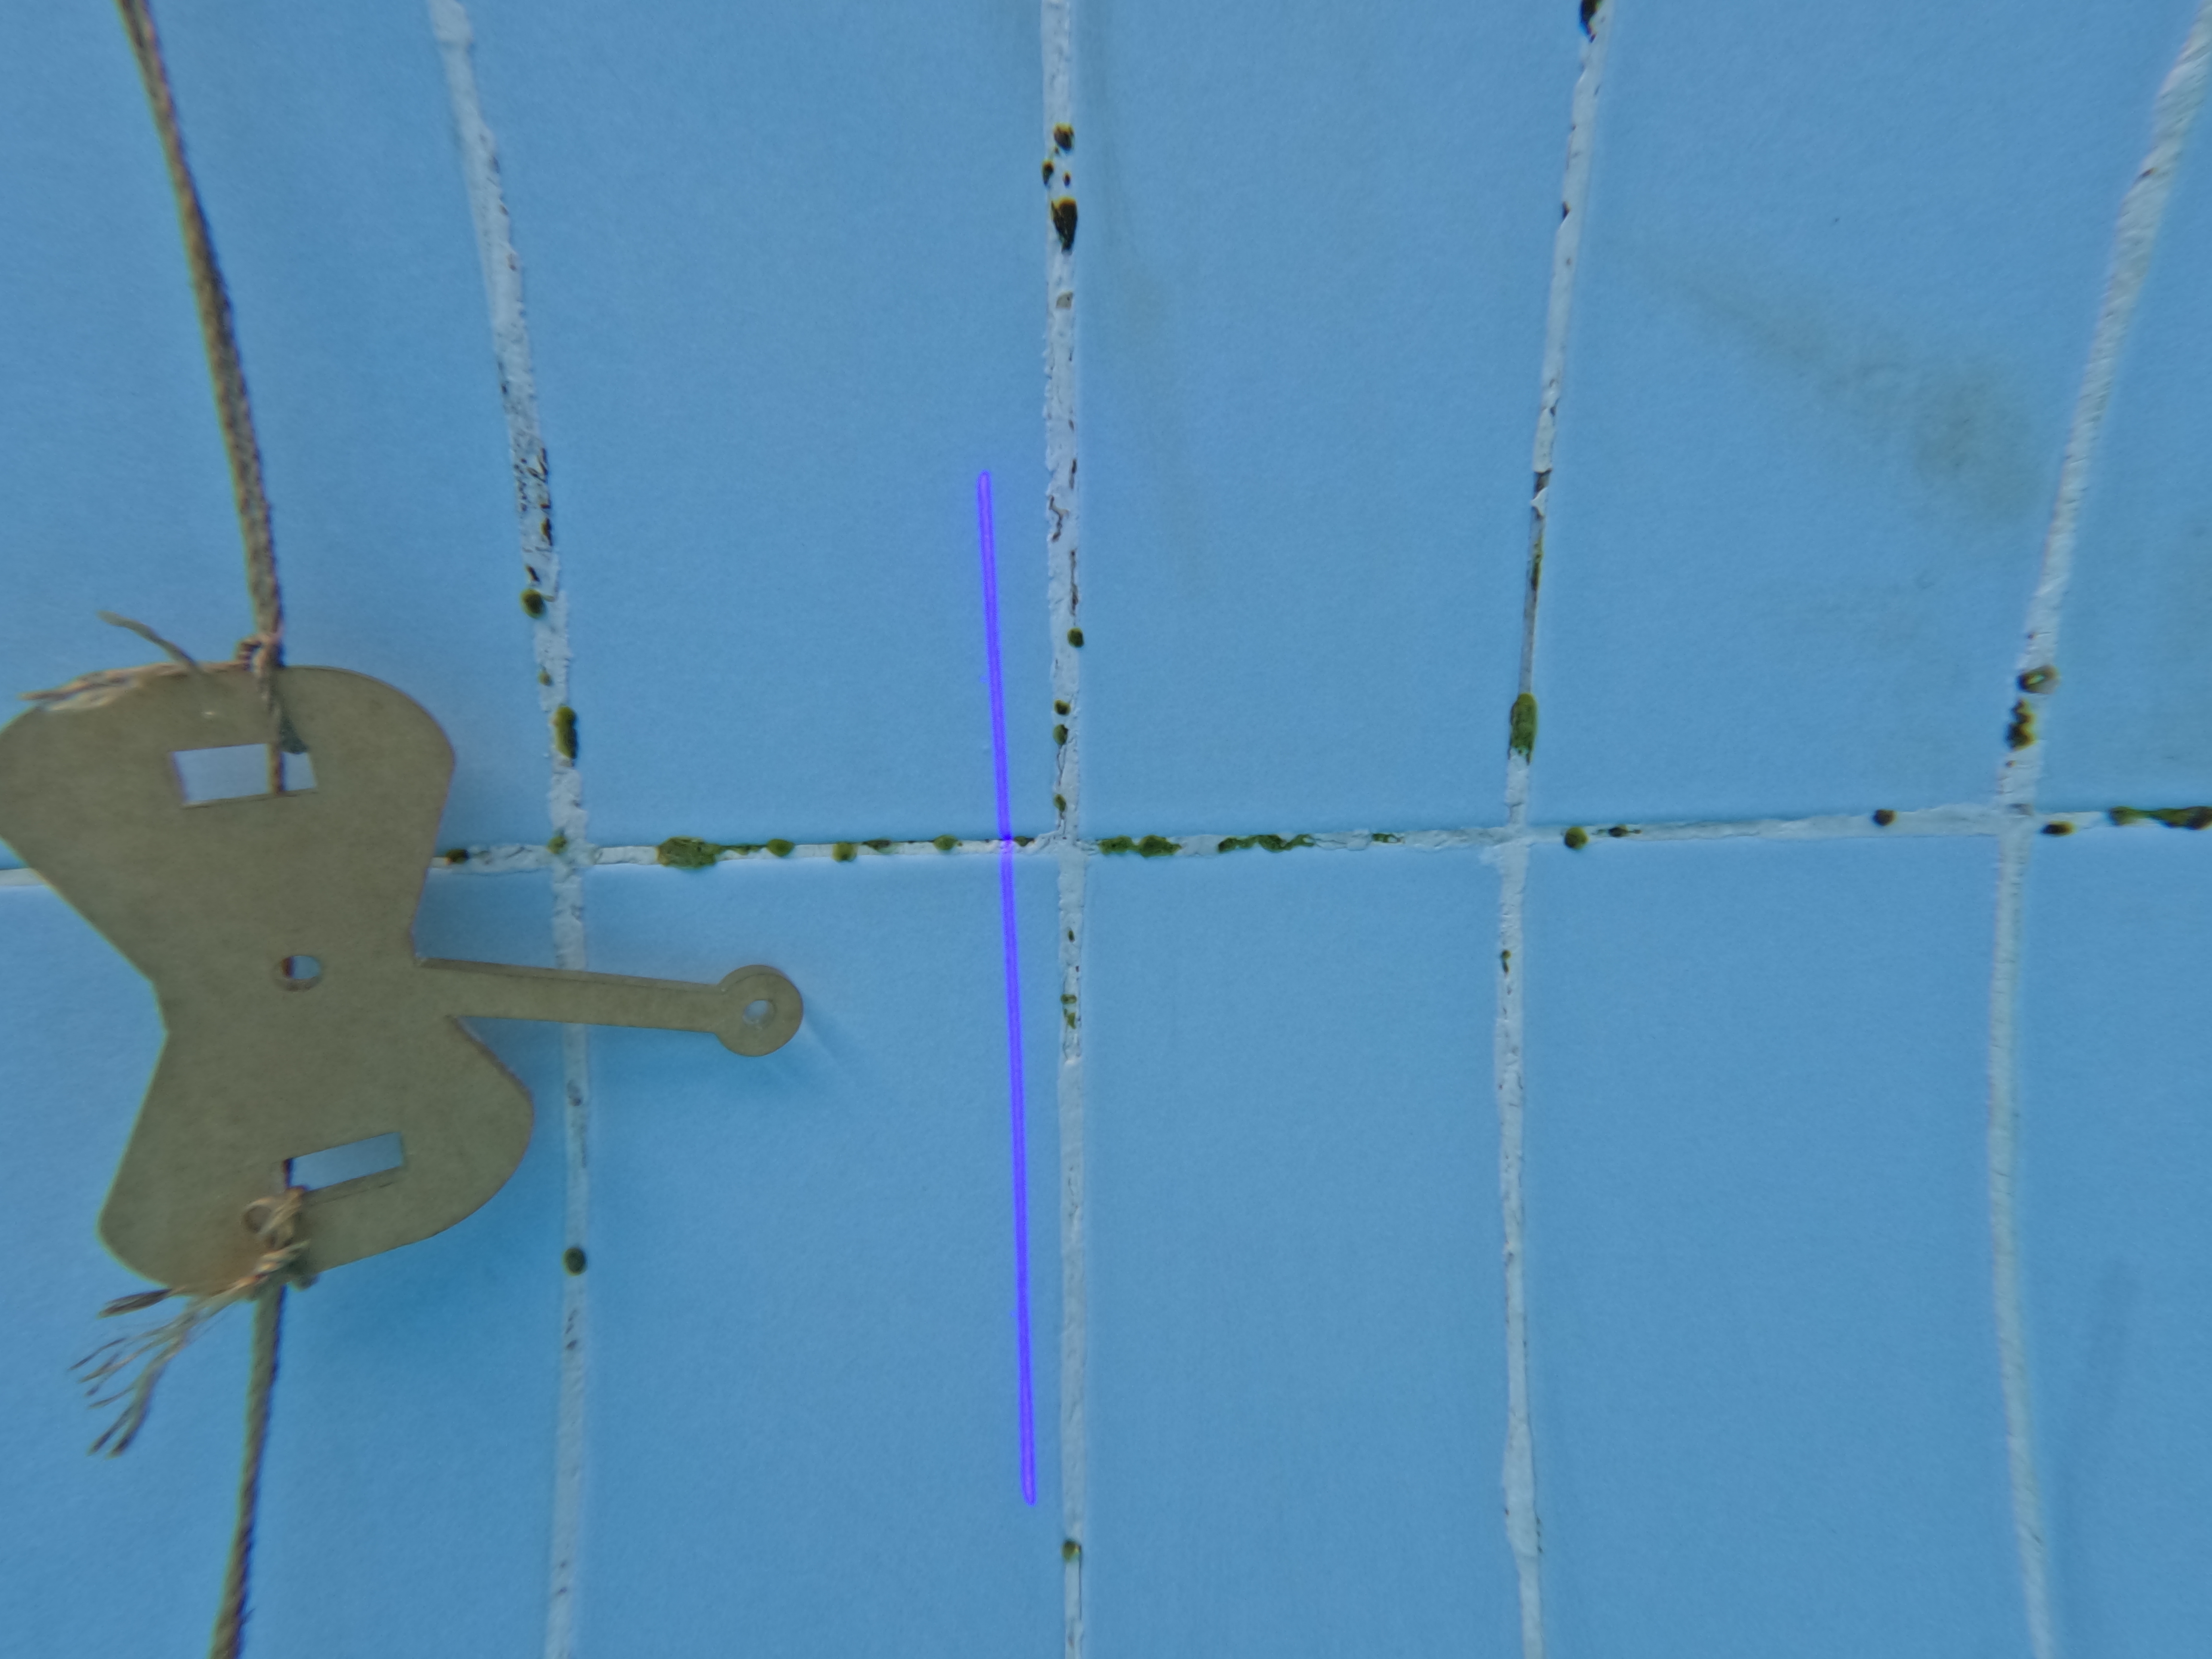

Supplement: Supplementary file 2568 [file G0050866.pdf › Level_2_2/G0050866.pdf]

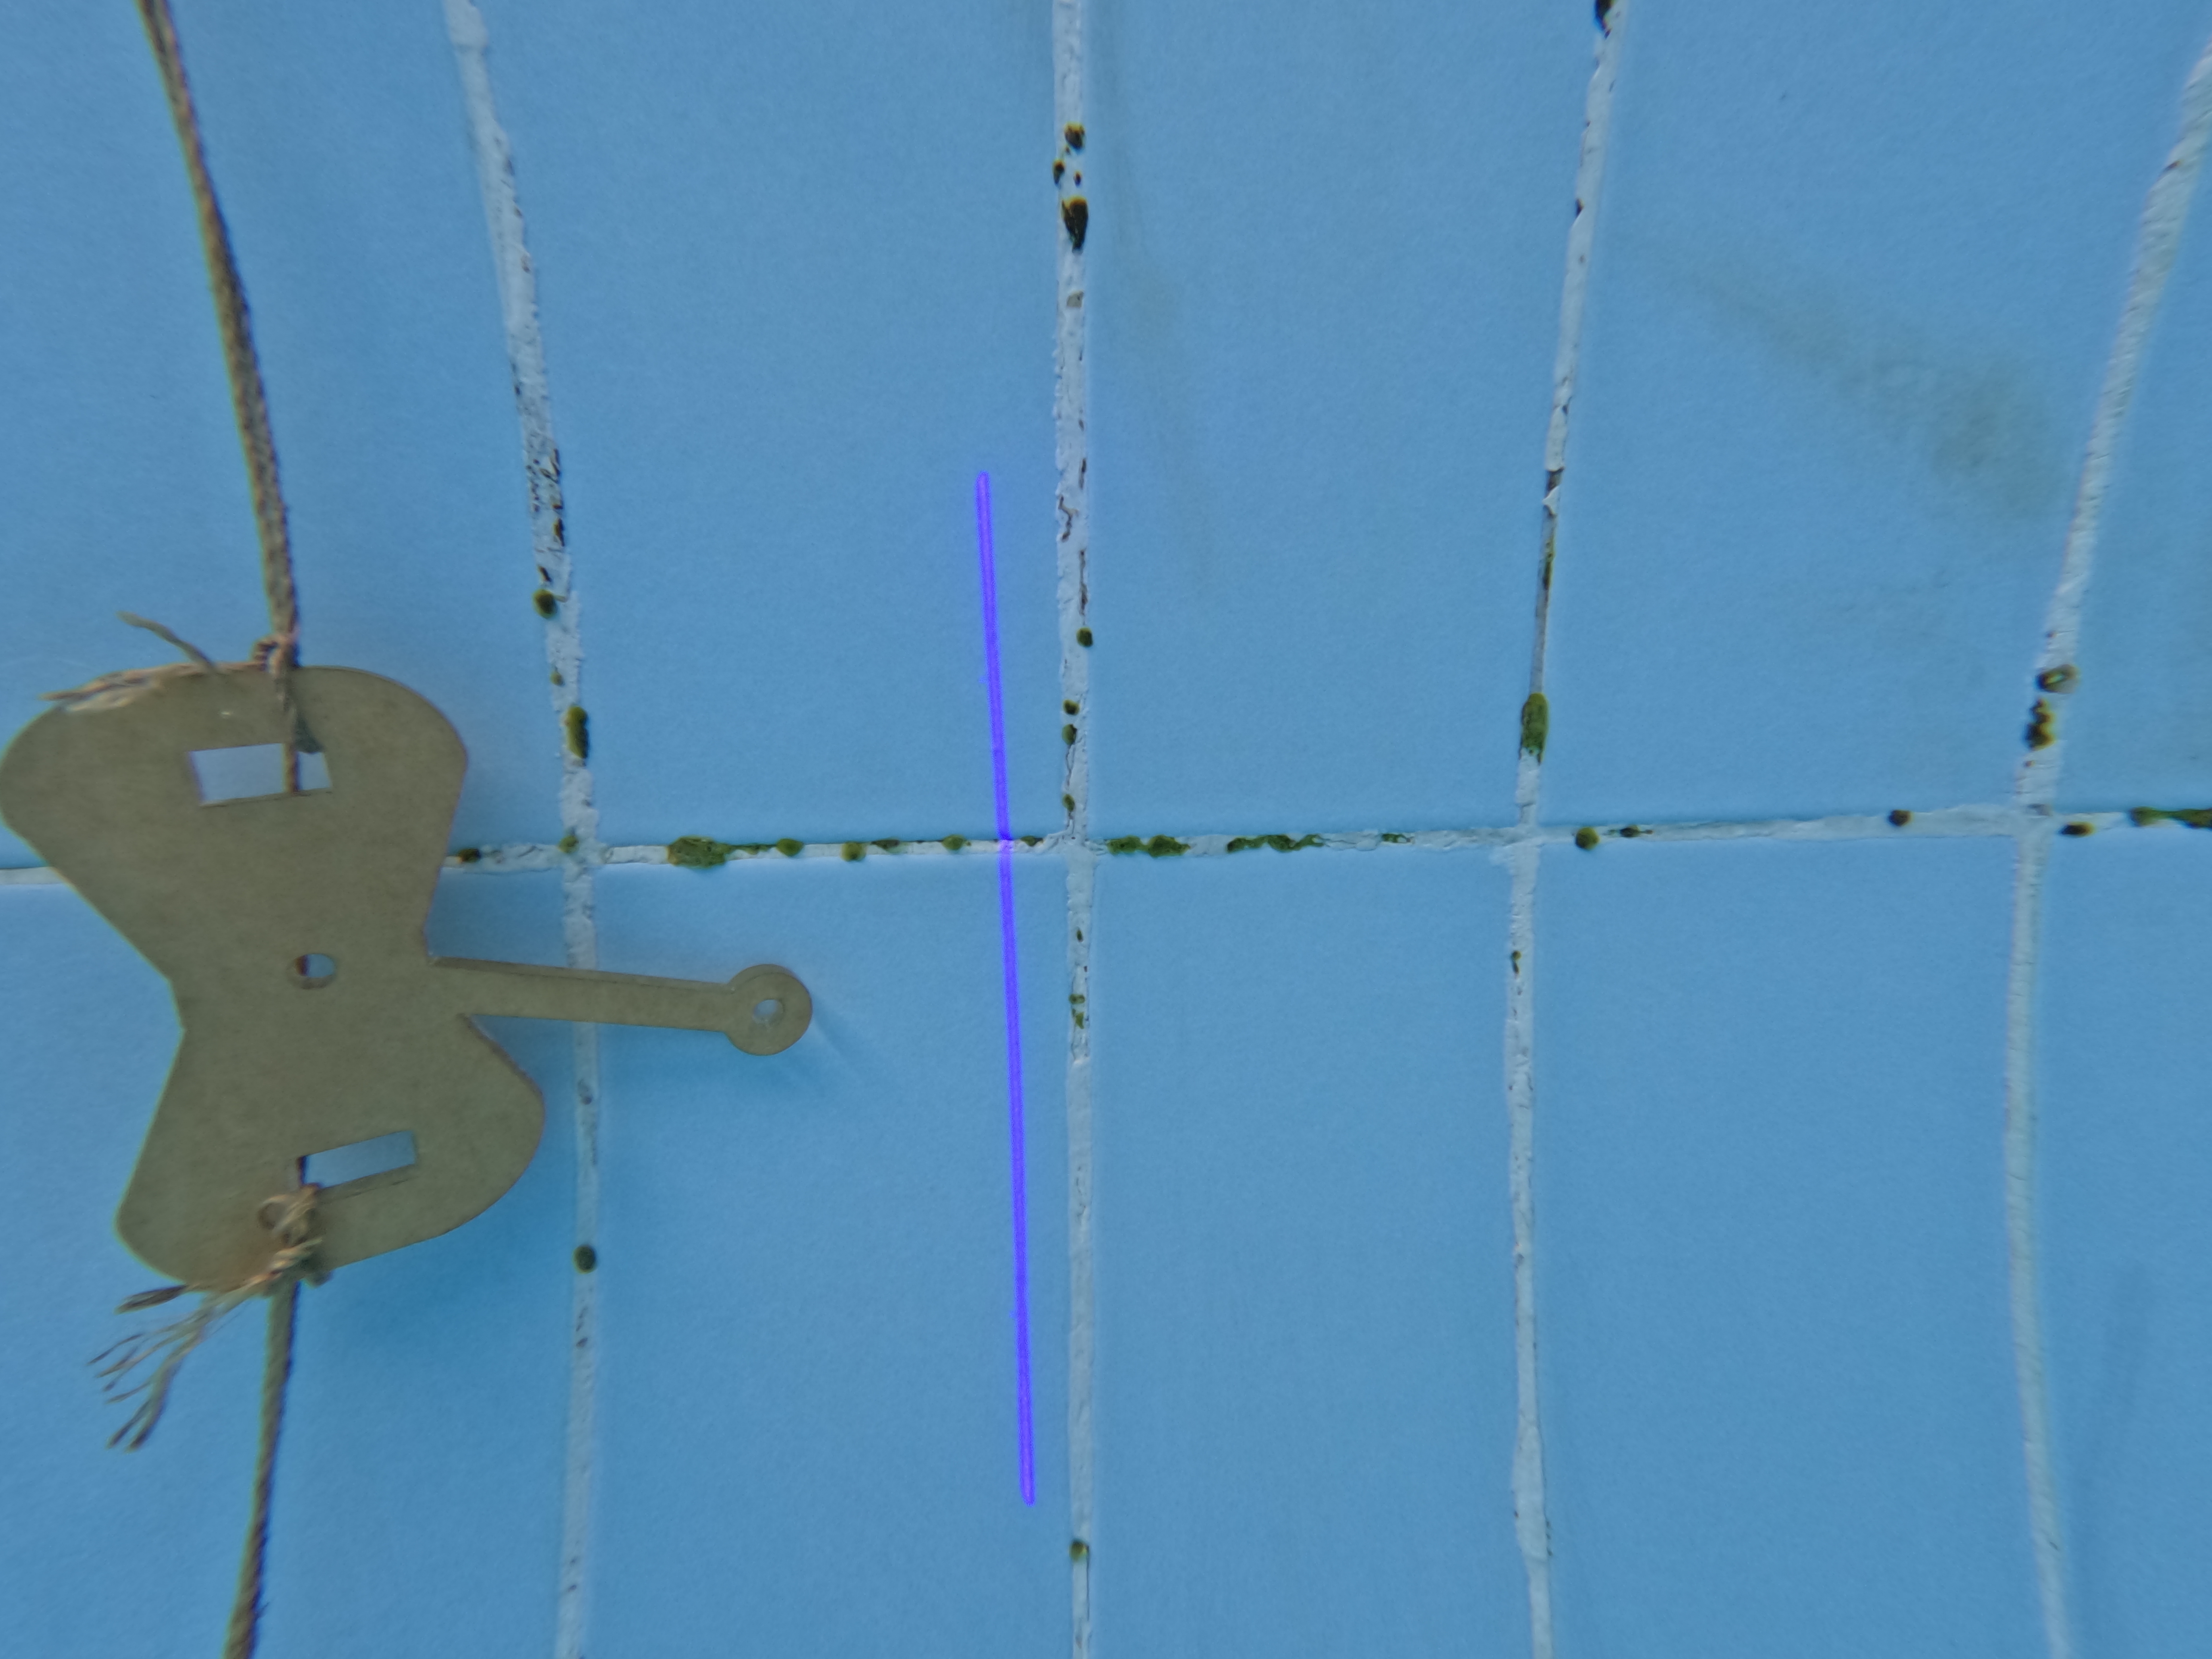

Supplement: Supplementary file 2569 [file G0050867.pdf › Level_2_2/G0050867.pdf]

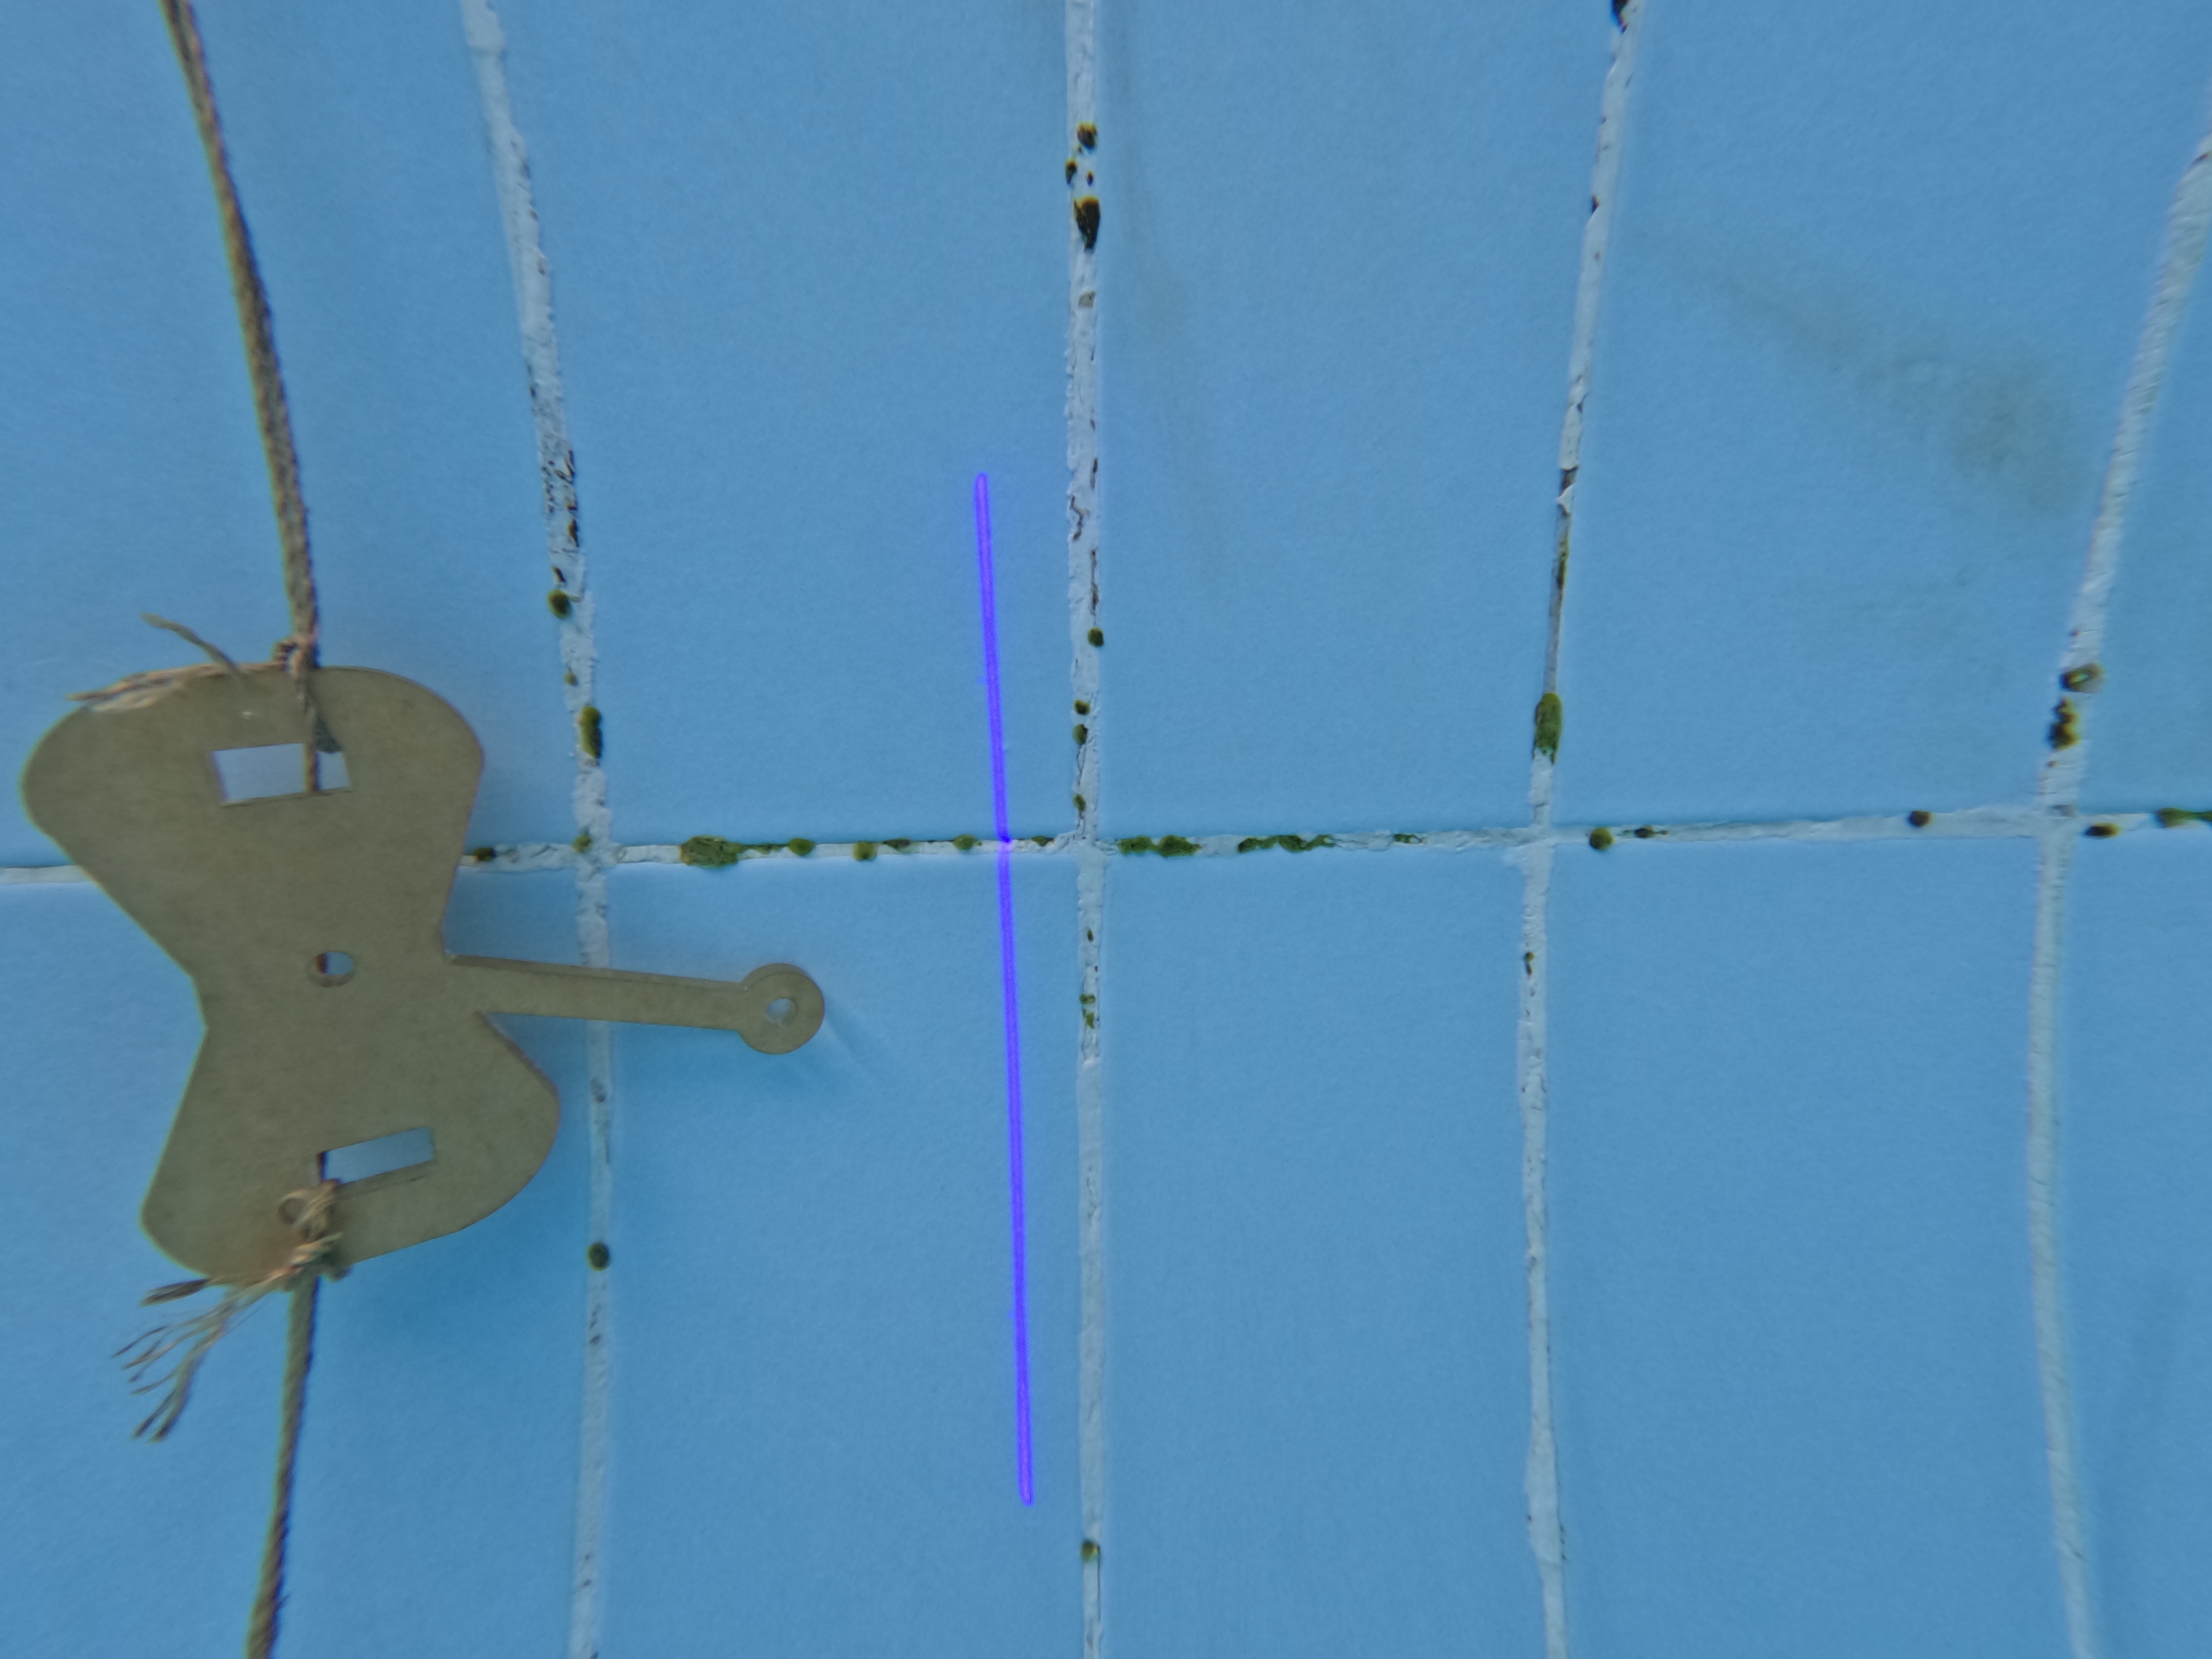

Supplement: Supplementary file 2570 [file G0050868.pdf › Level_2_2/G0050868.pdf]

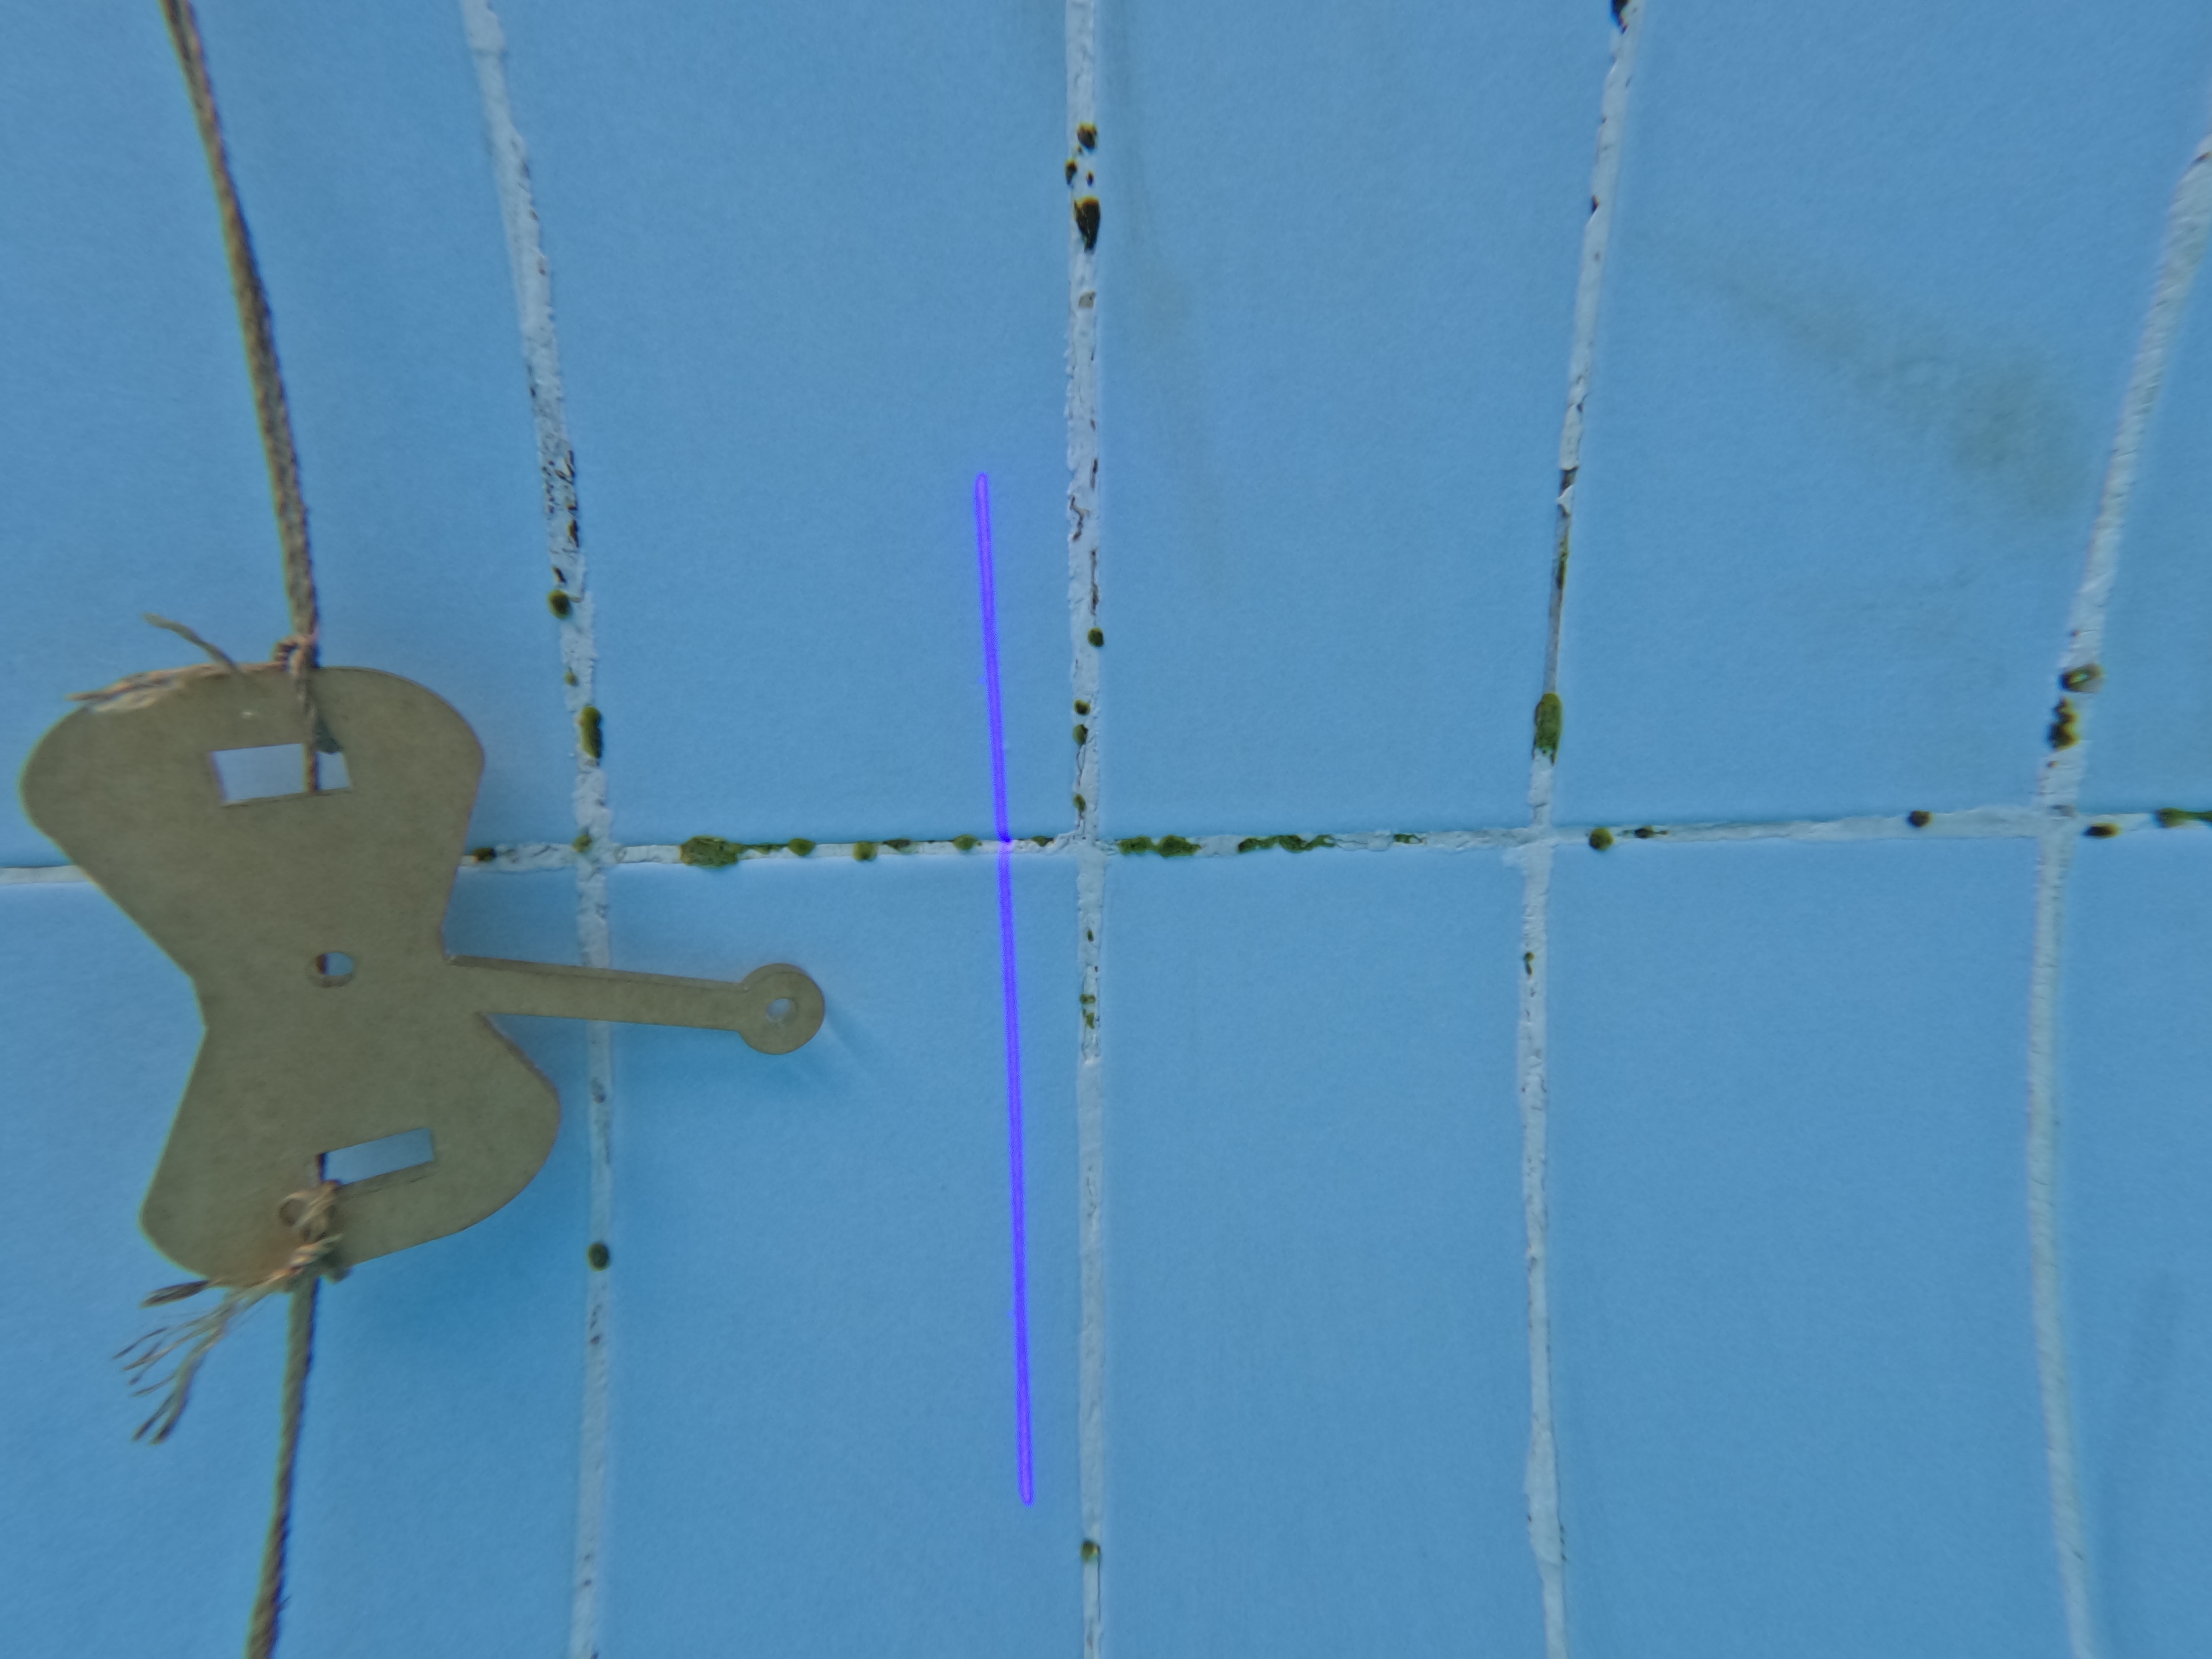

Supplement: Supplementary file 2571 [file G0050869.pdf › Level_2_2/G0050869.pdf]

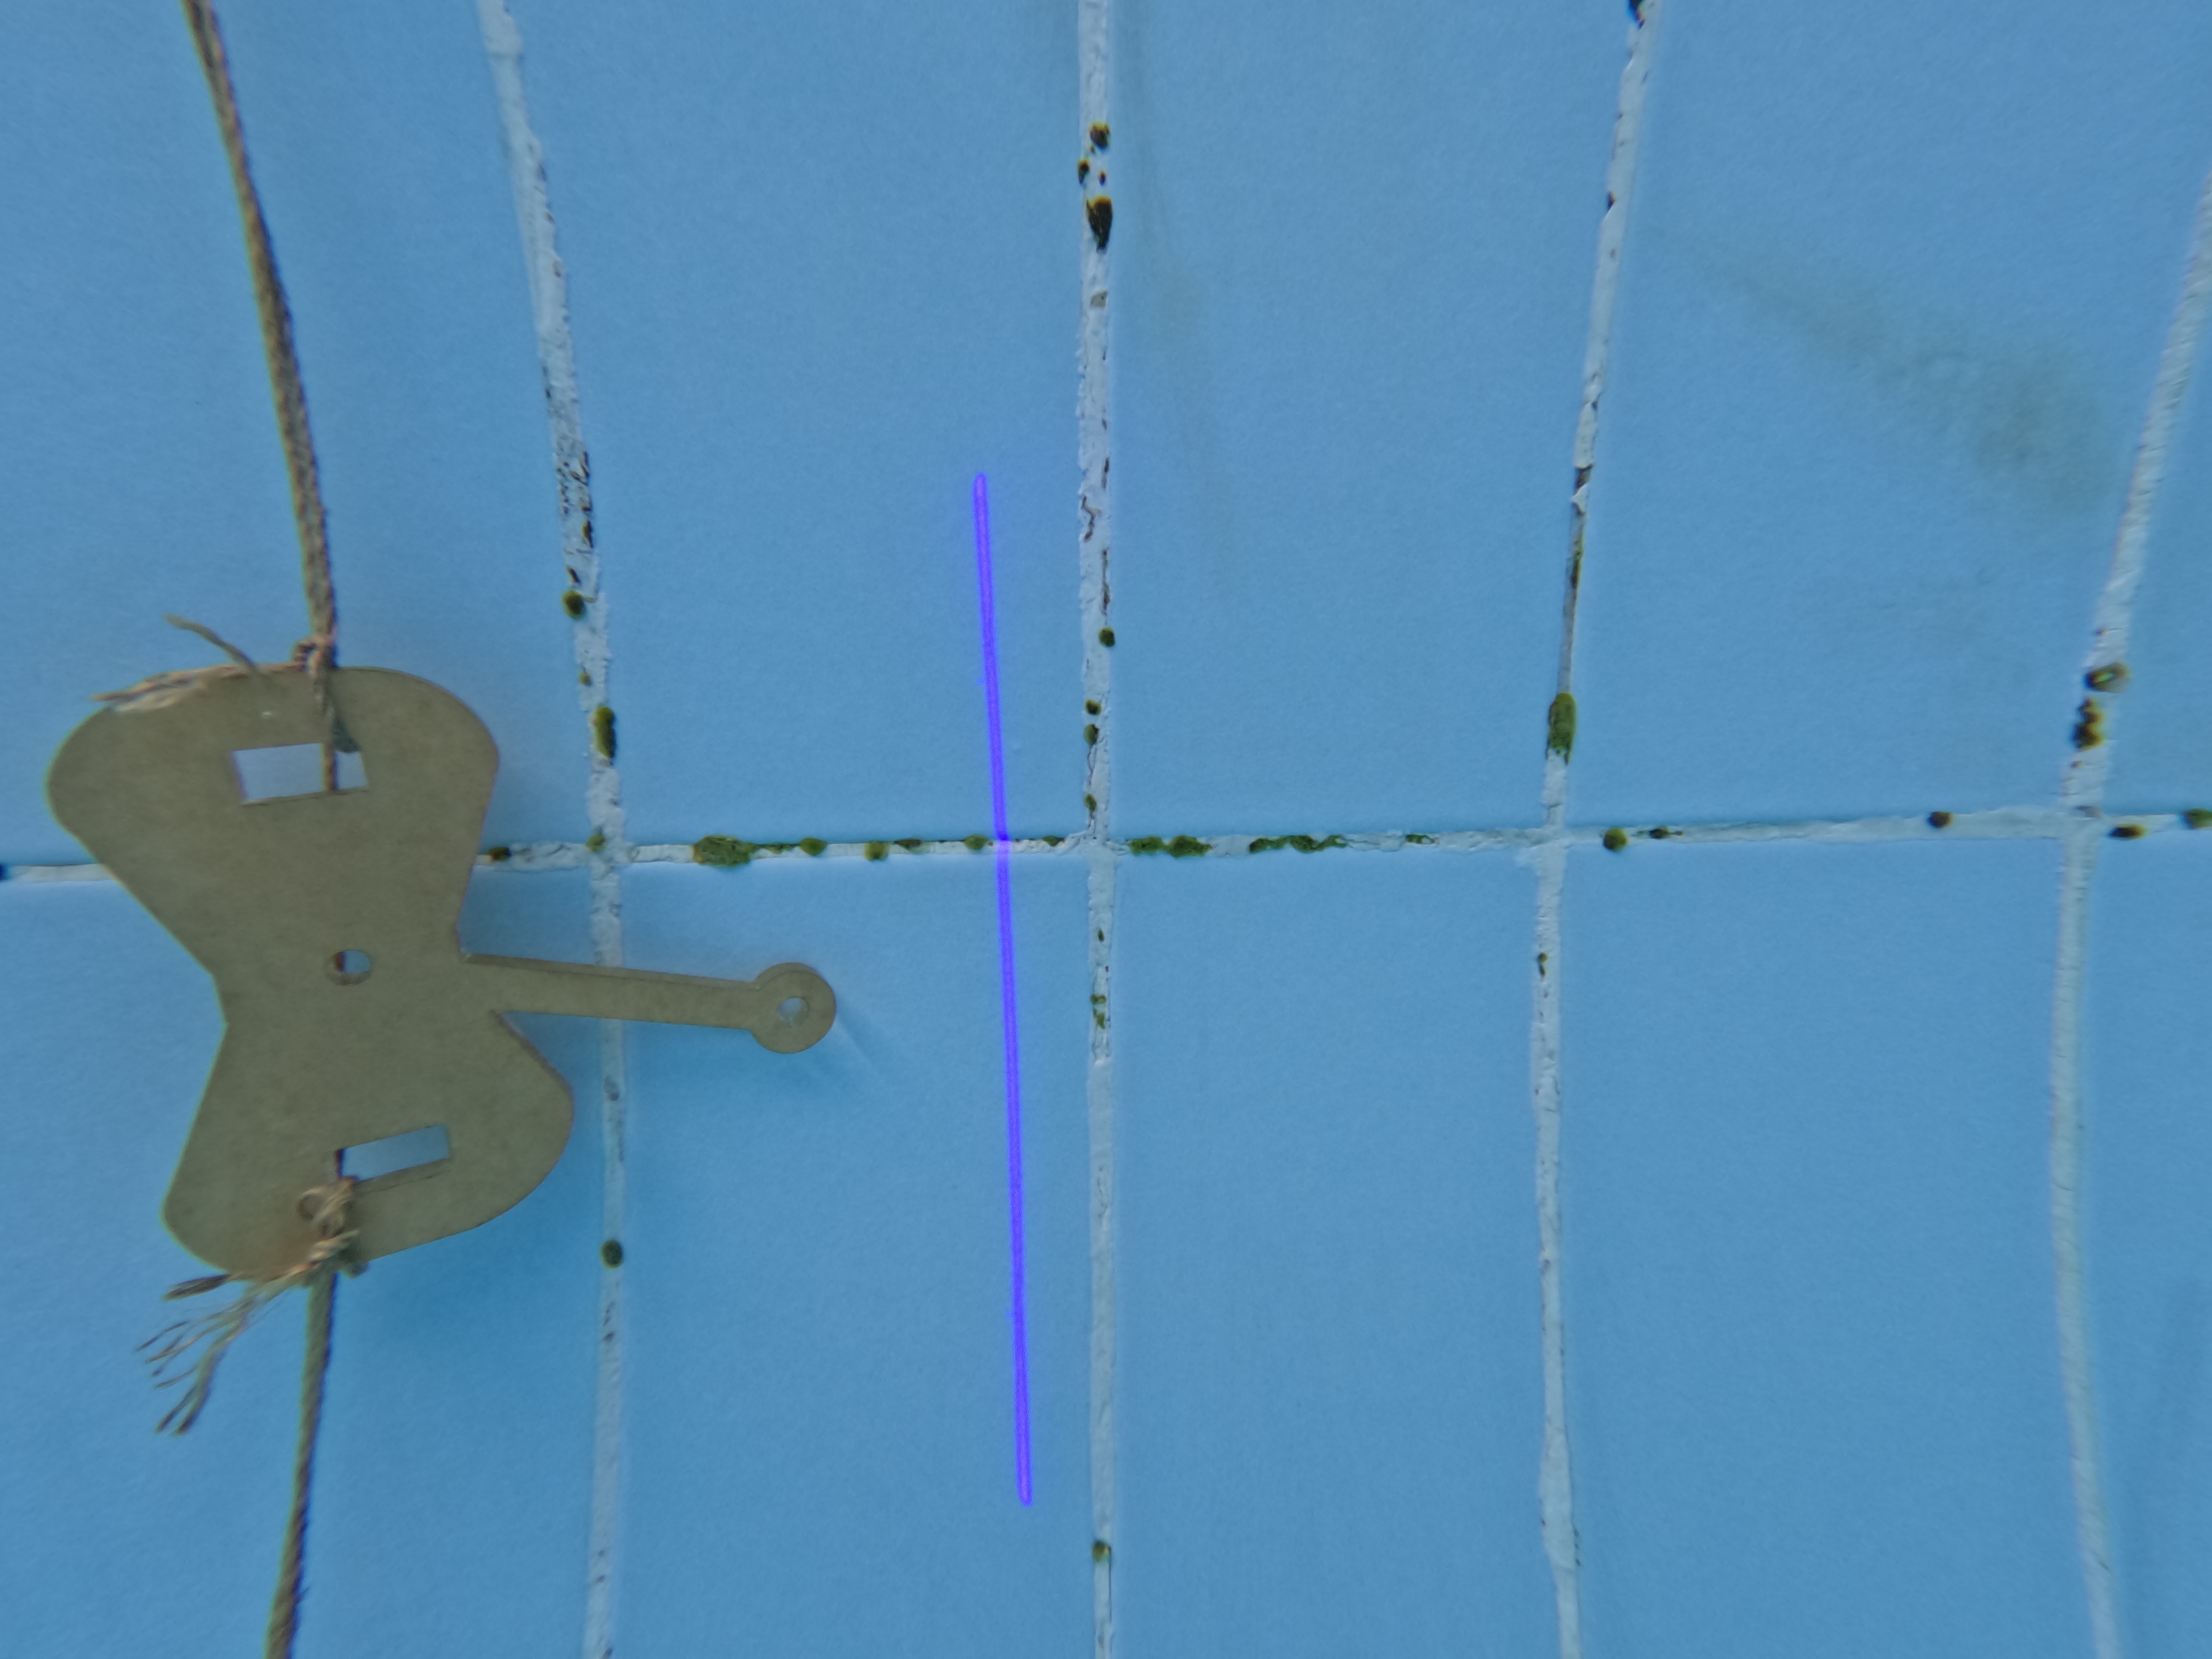

Supplement: Supplementary file 2572 [file G0050870.pdf › Level_2_2/G0050870.pdf]

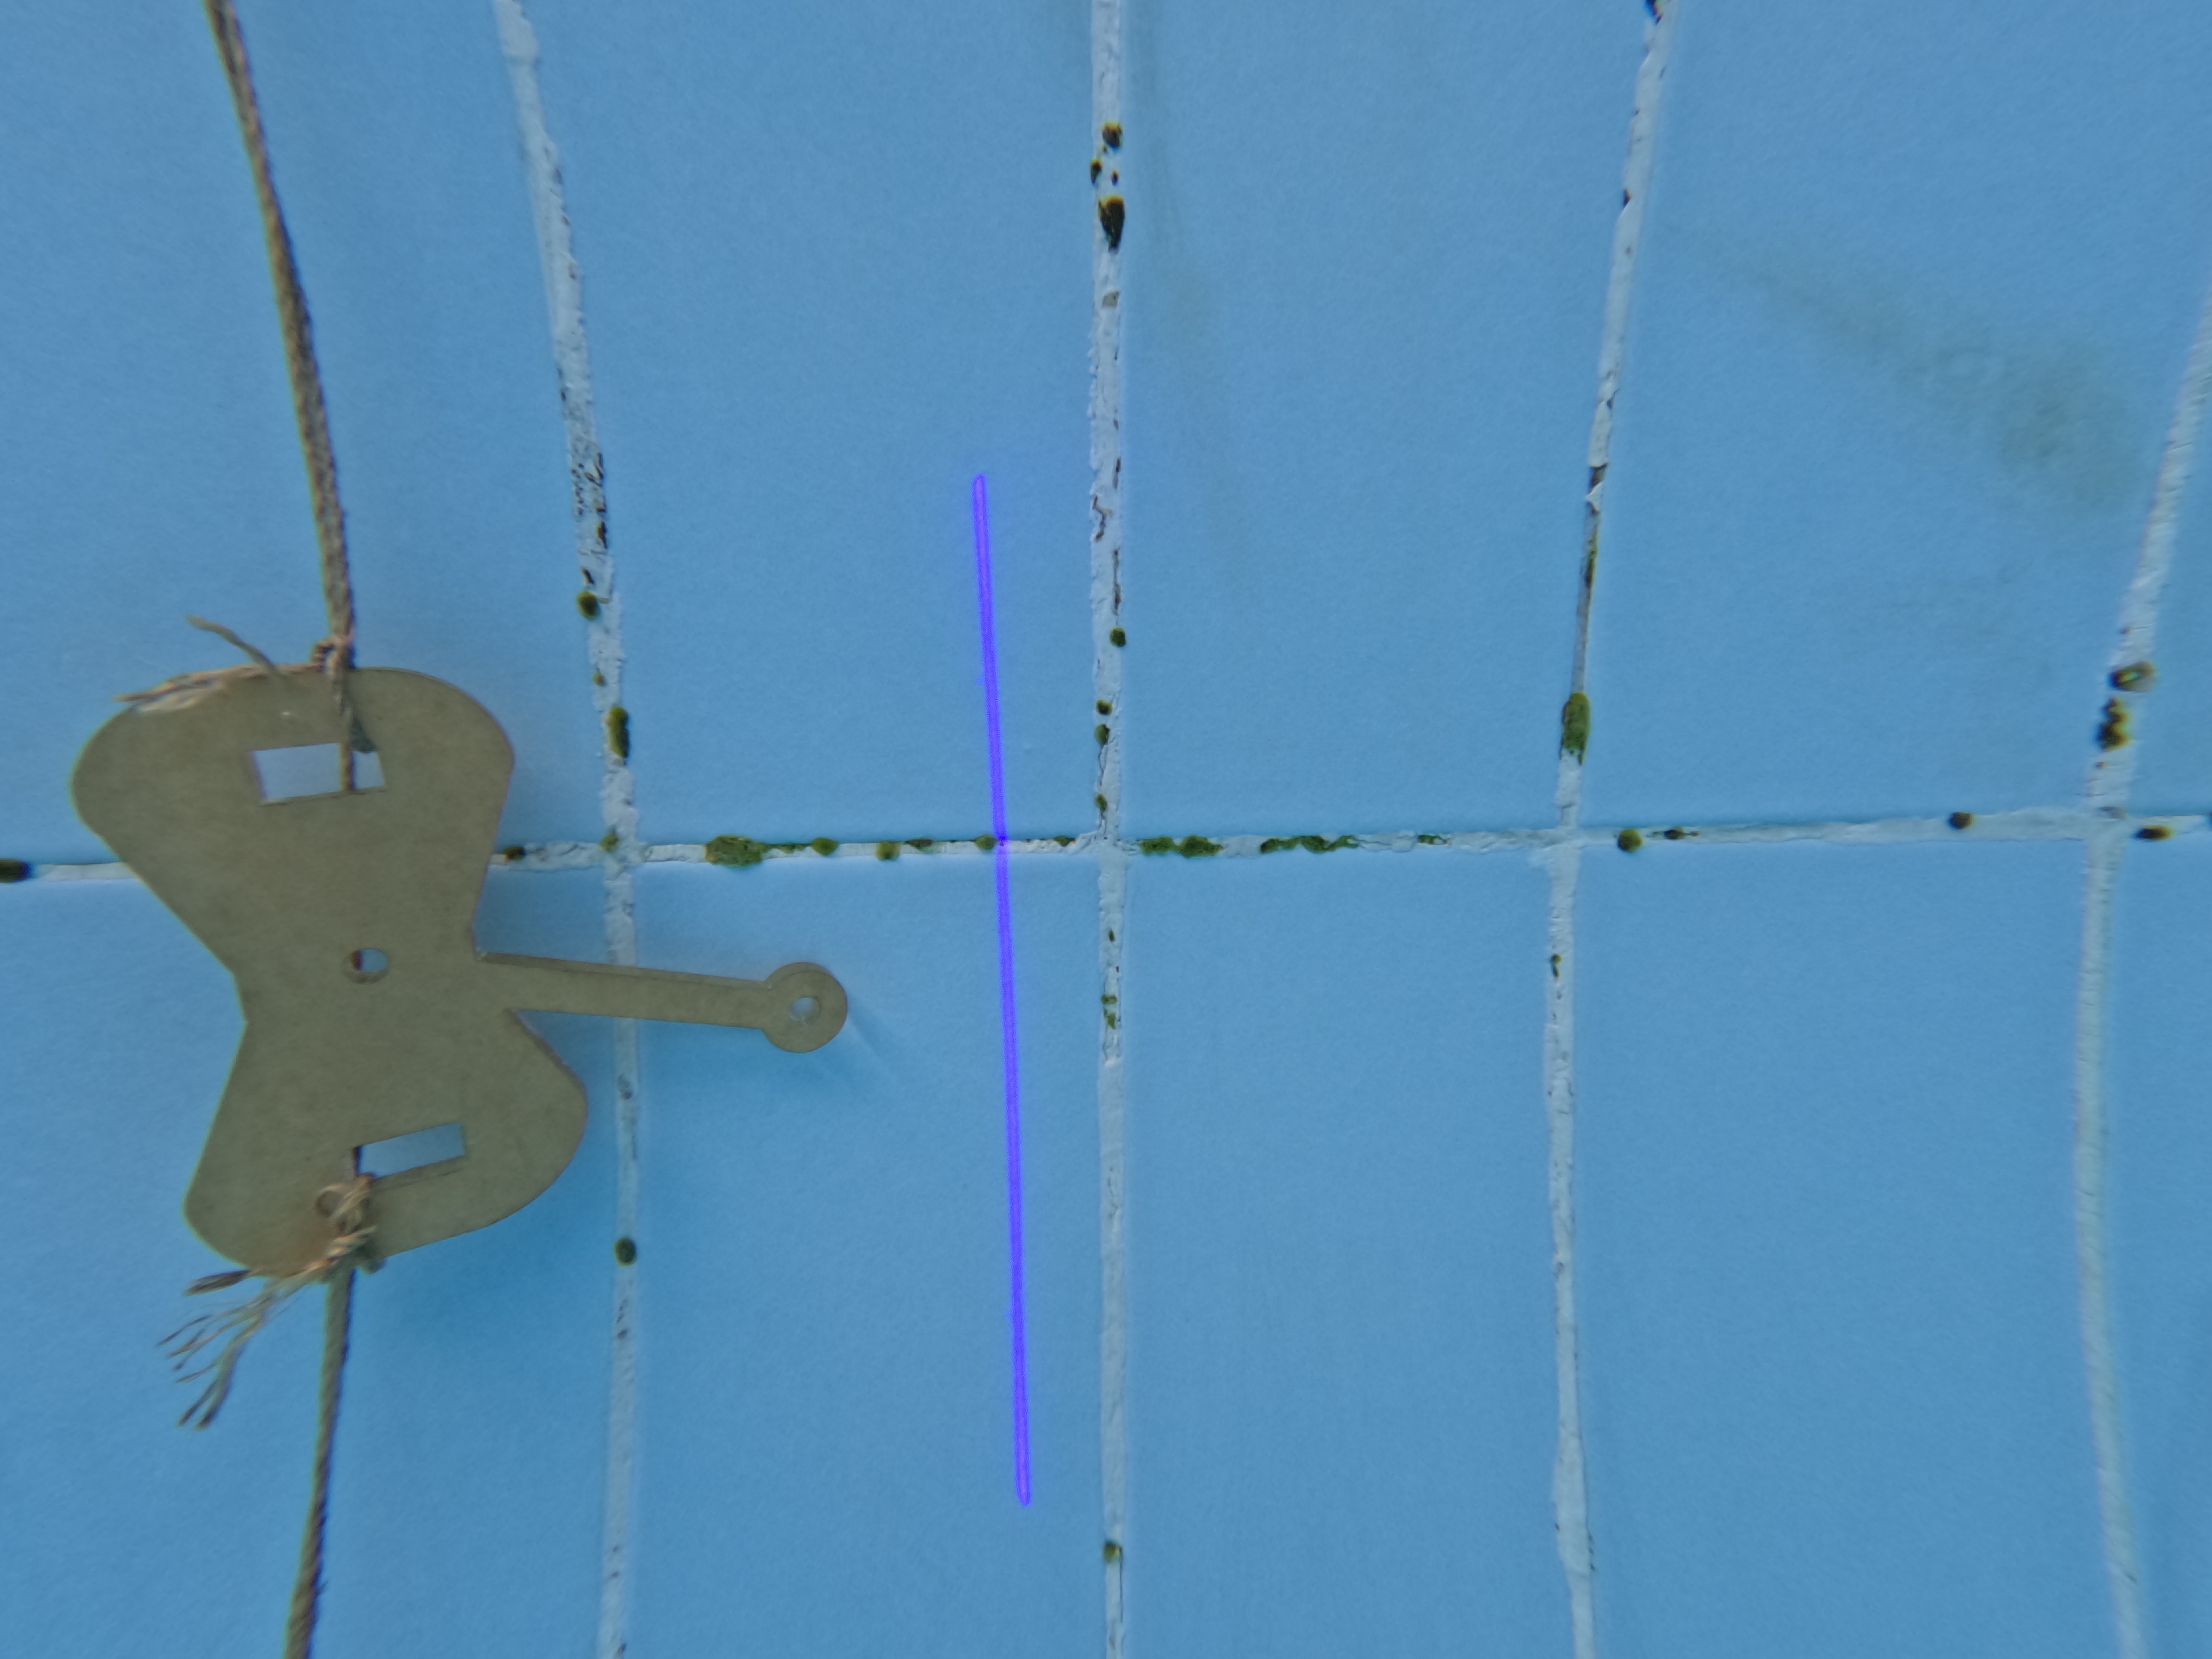

Supplement: Supplementary file 2573 [file G0050871.pdf › Level_2_2/G0050871.pdf]

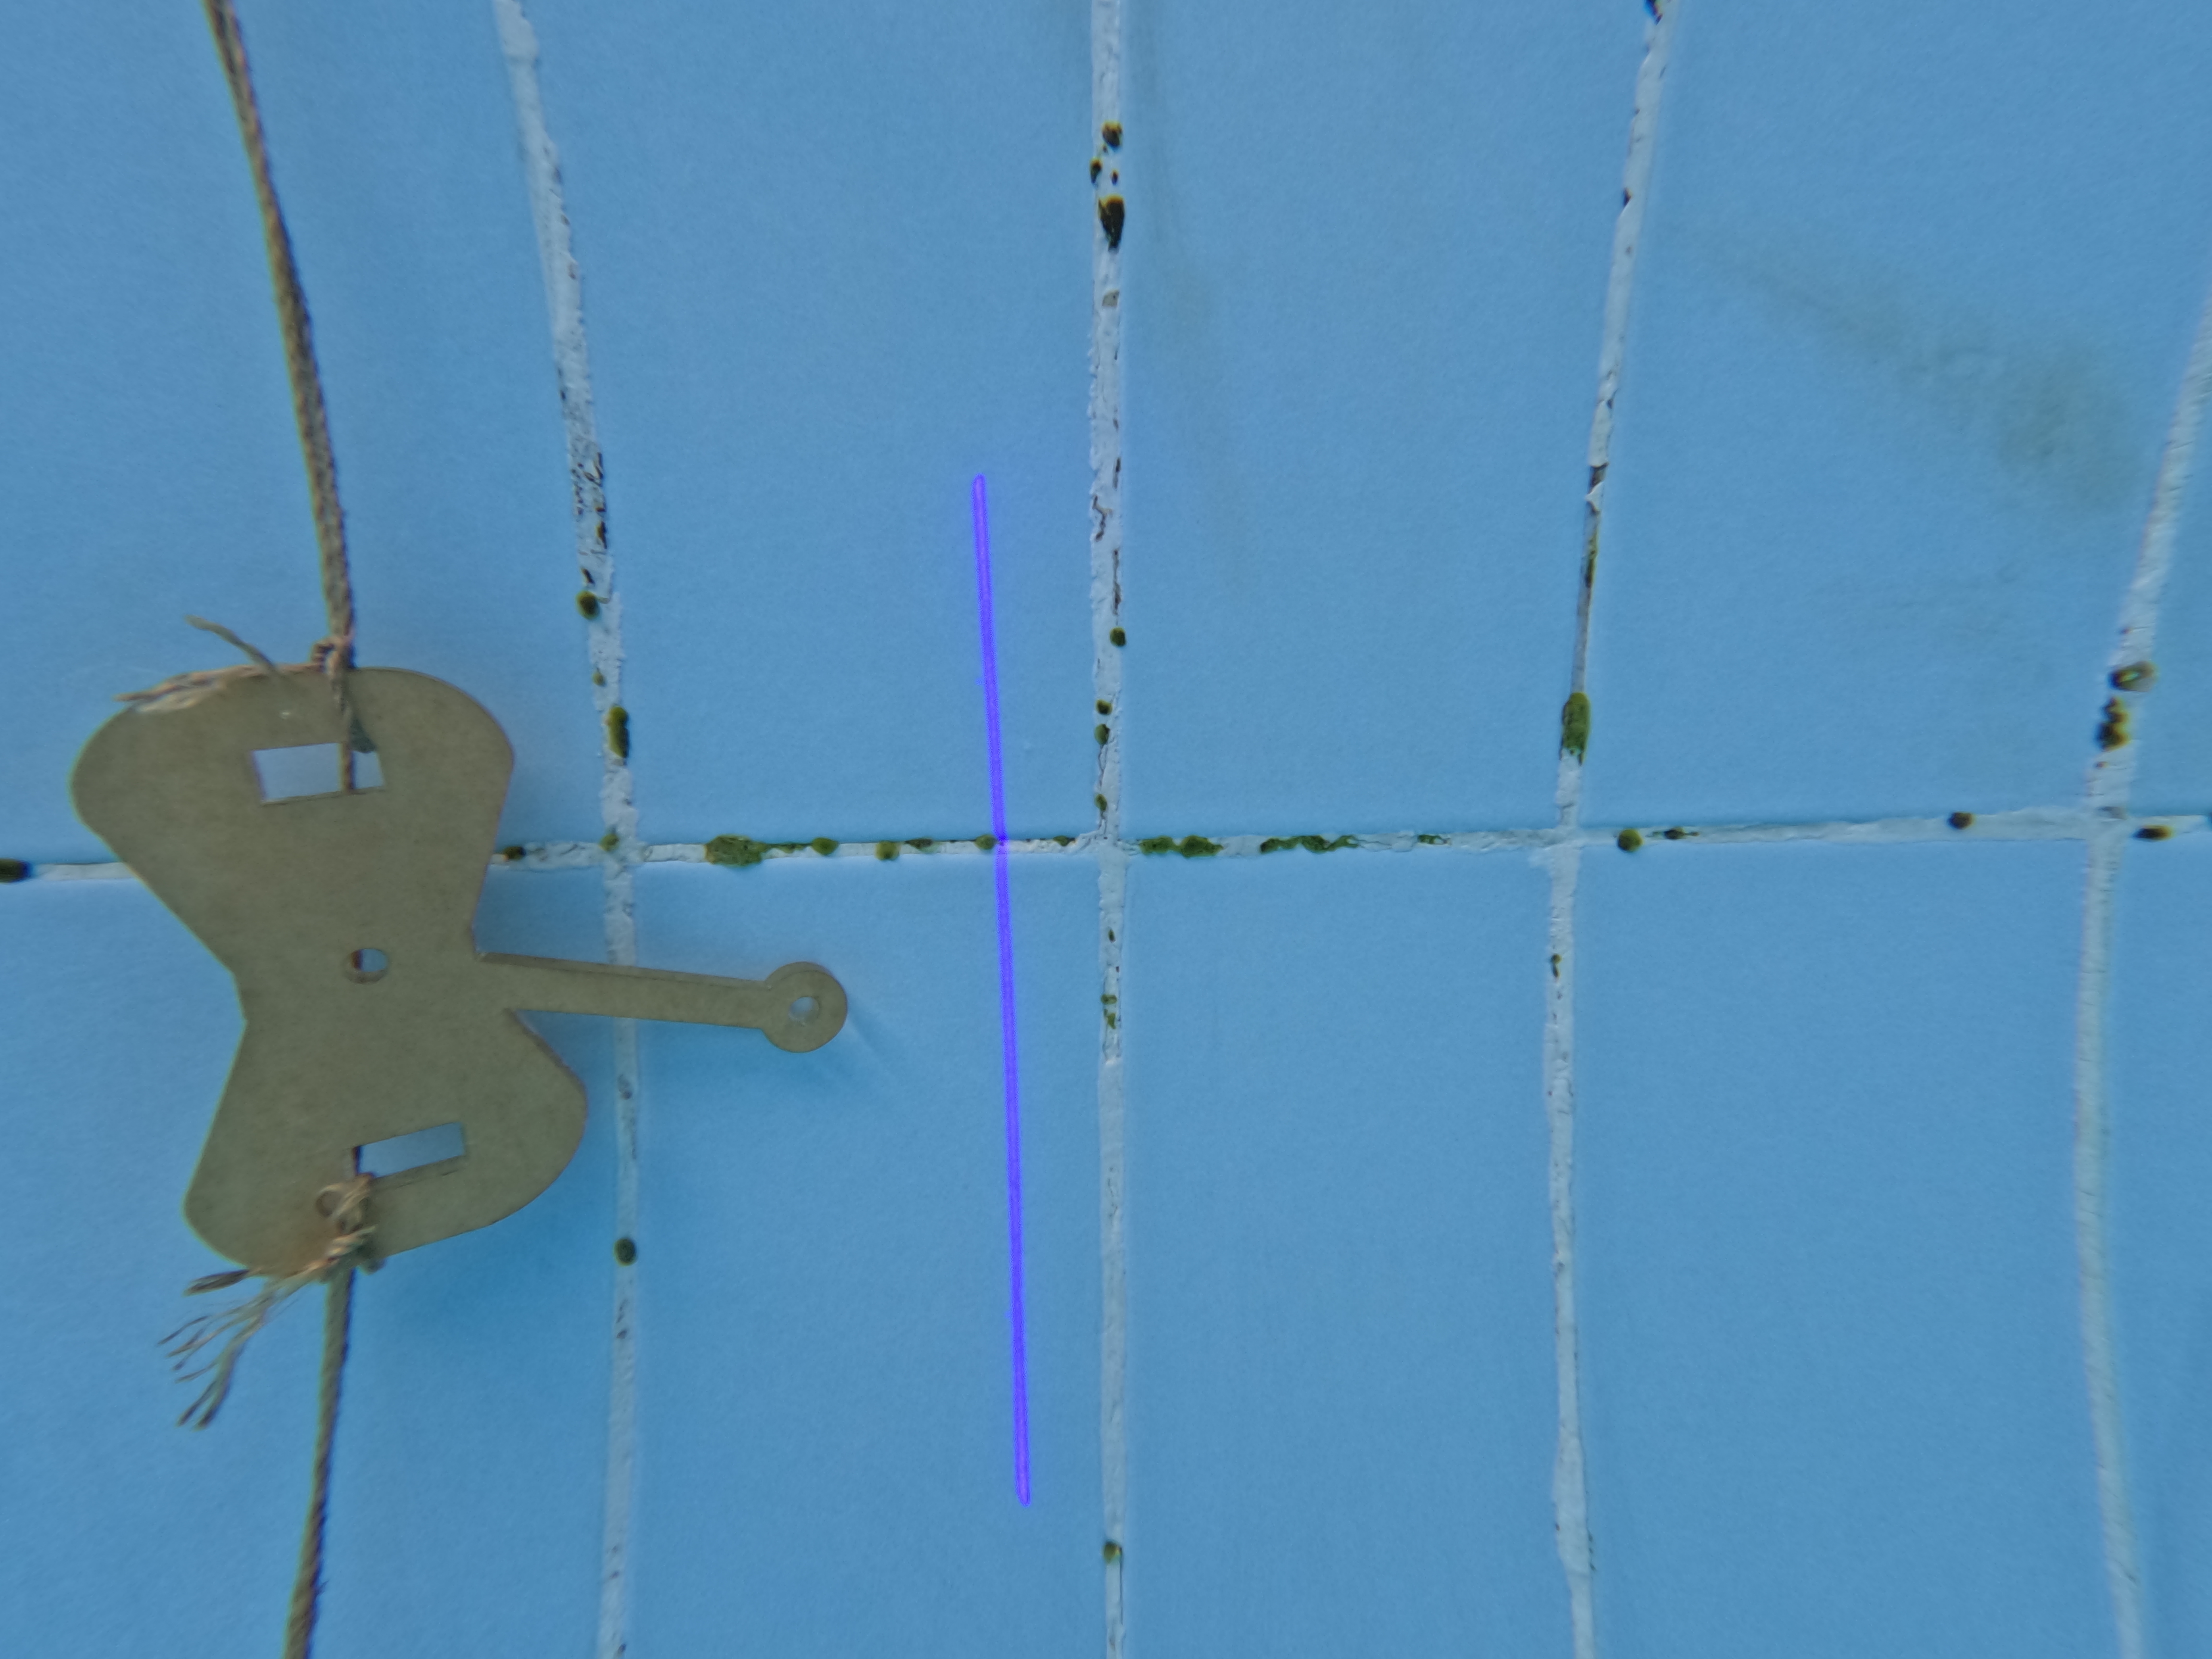

Supplement: Supplementary file 2574 [file G0050872.pdf › Level_2_2/G0050872.pdf]

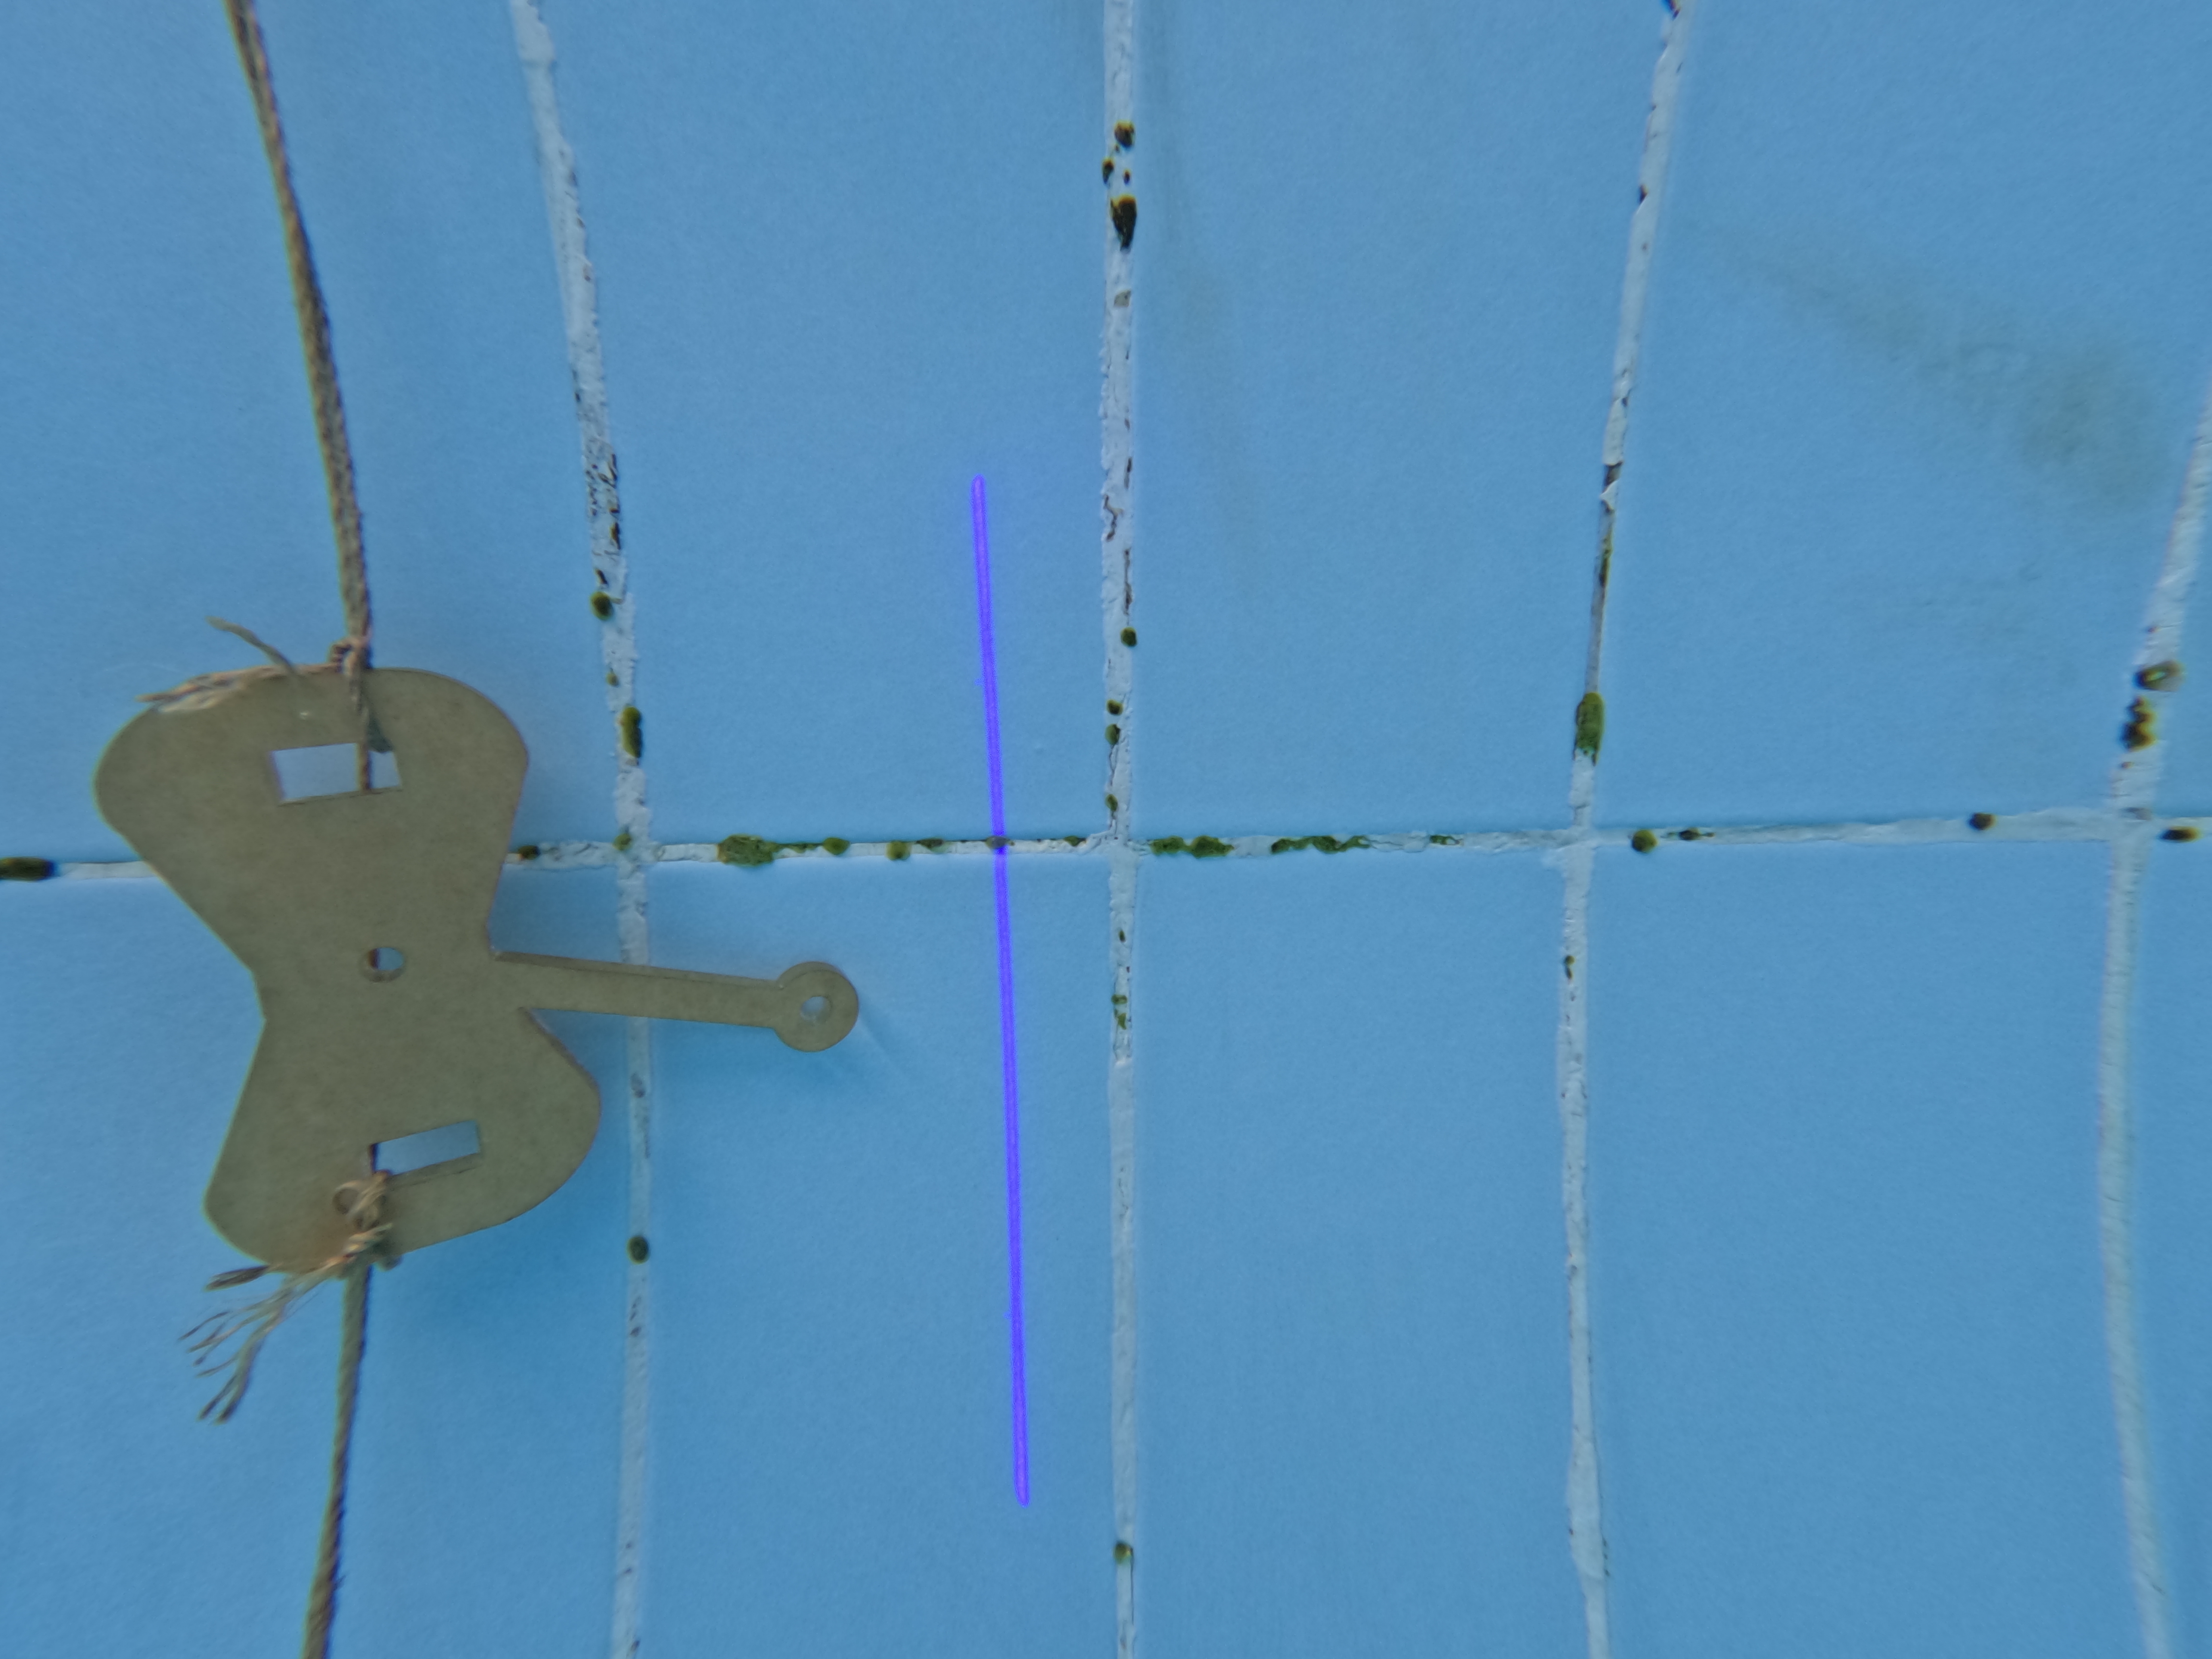

Supplement: Supplementary file 2575 [file G0050873.pdf › Level_2_2/G0050873.pdf]

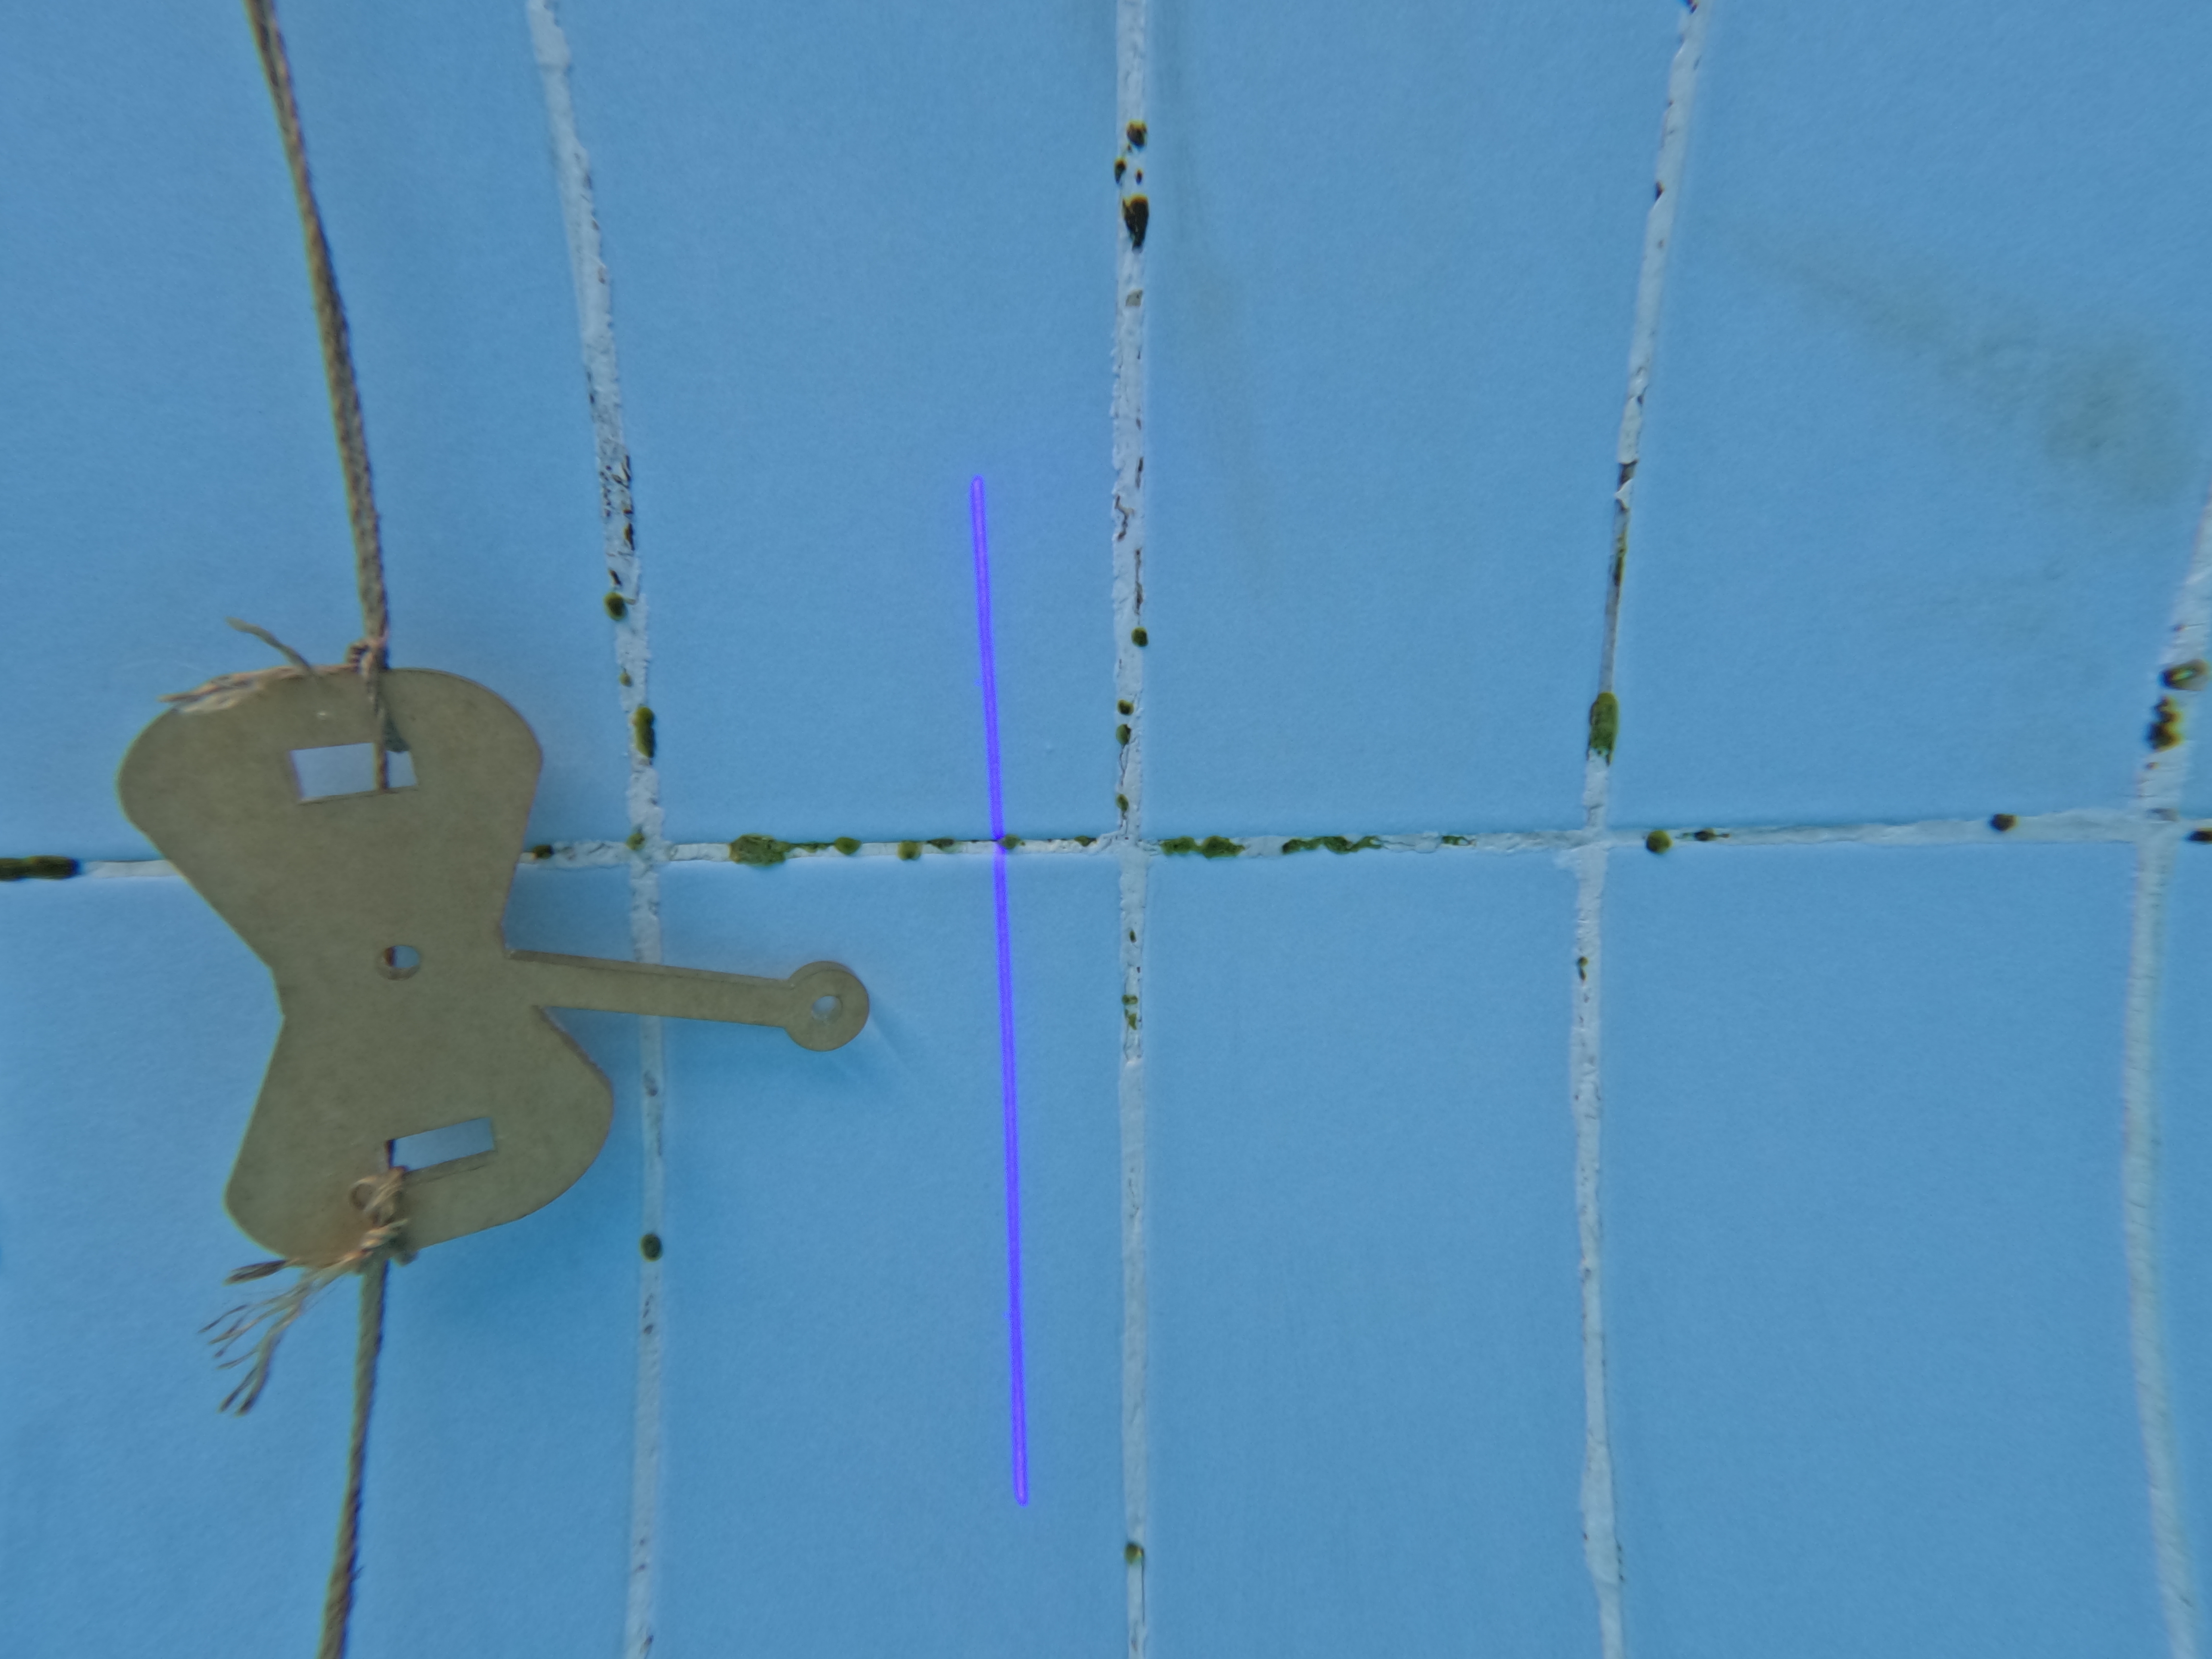

Supplement: Supplementary file 2576 [file G0050874.pdf › Level_2_2/G0050874.pdf]

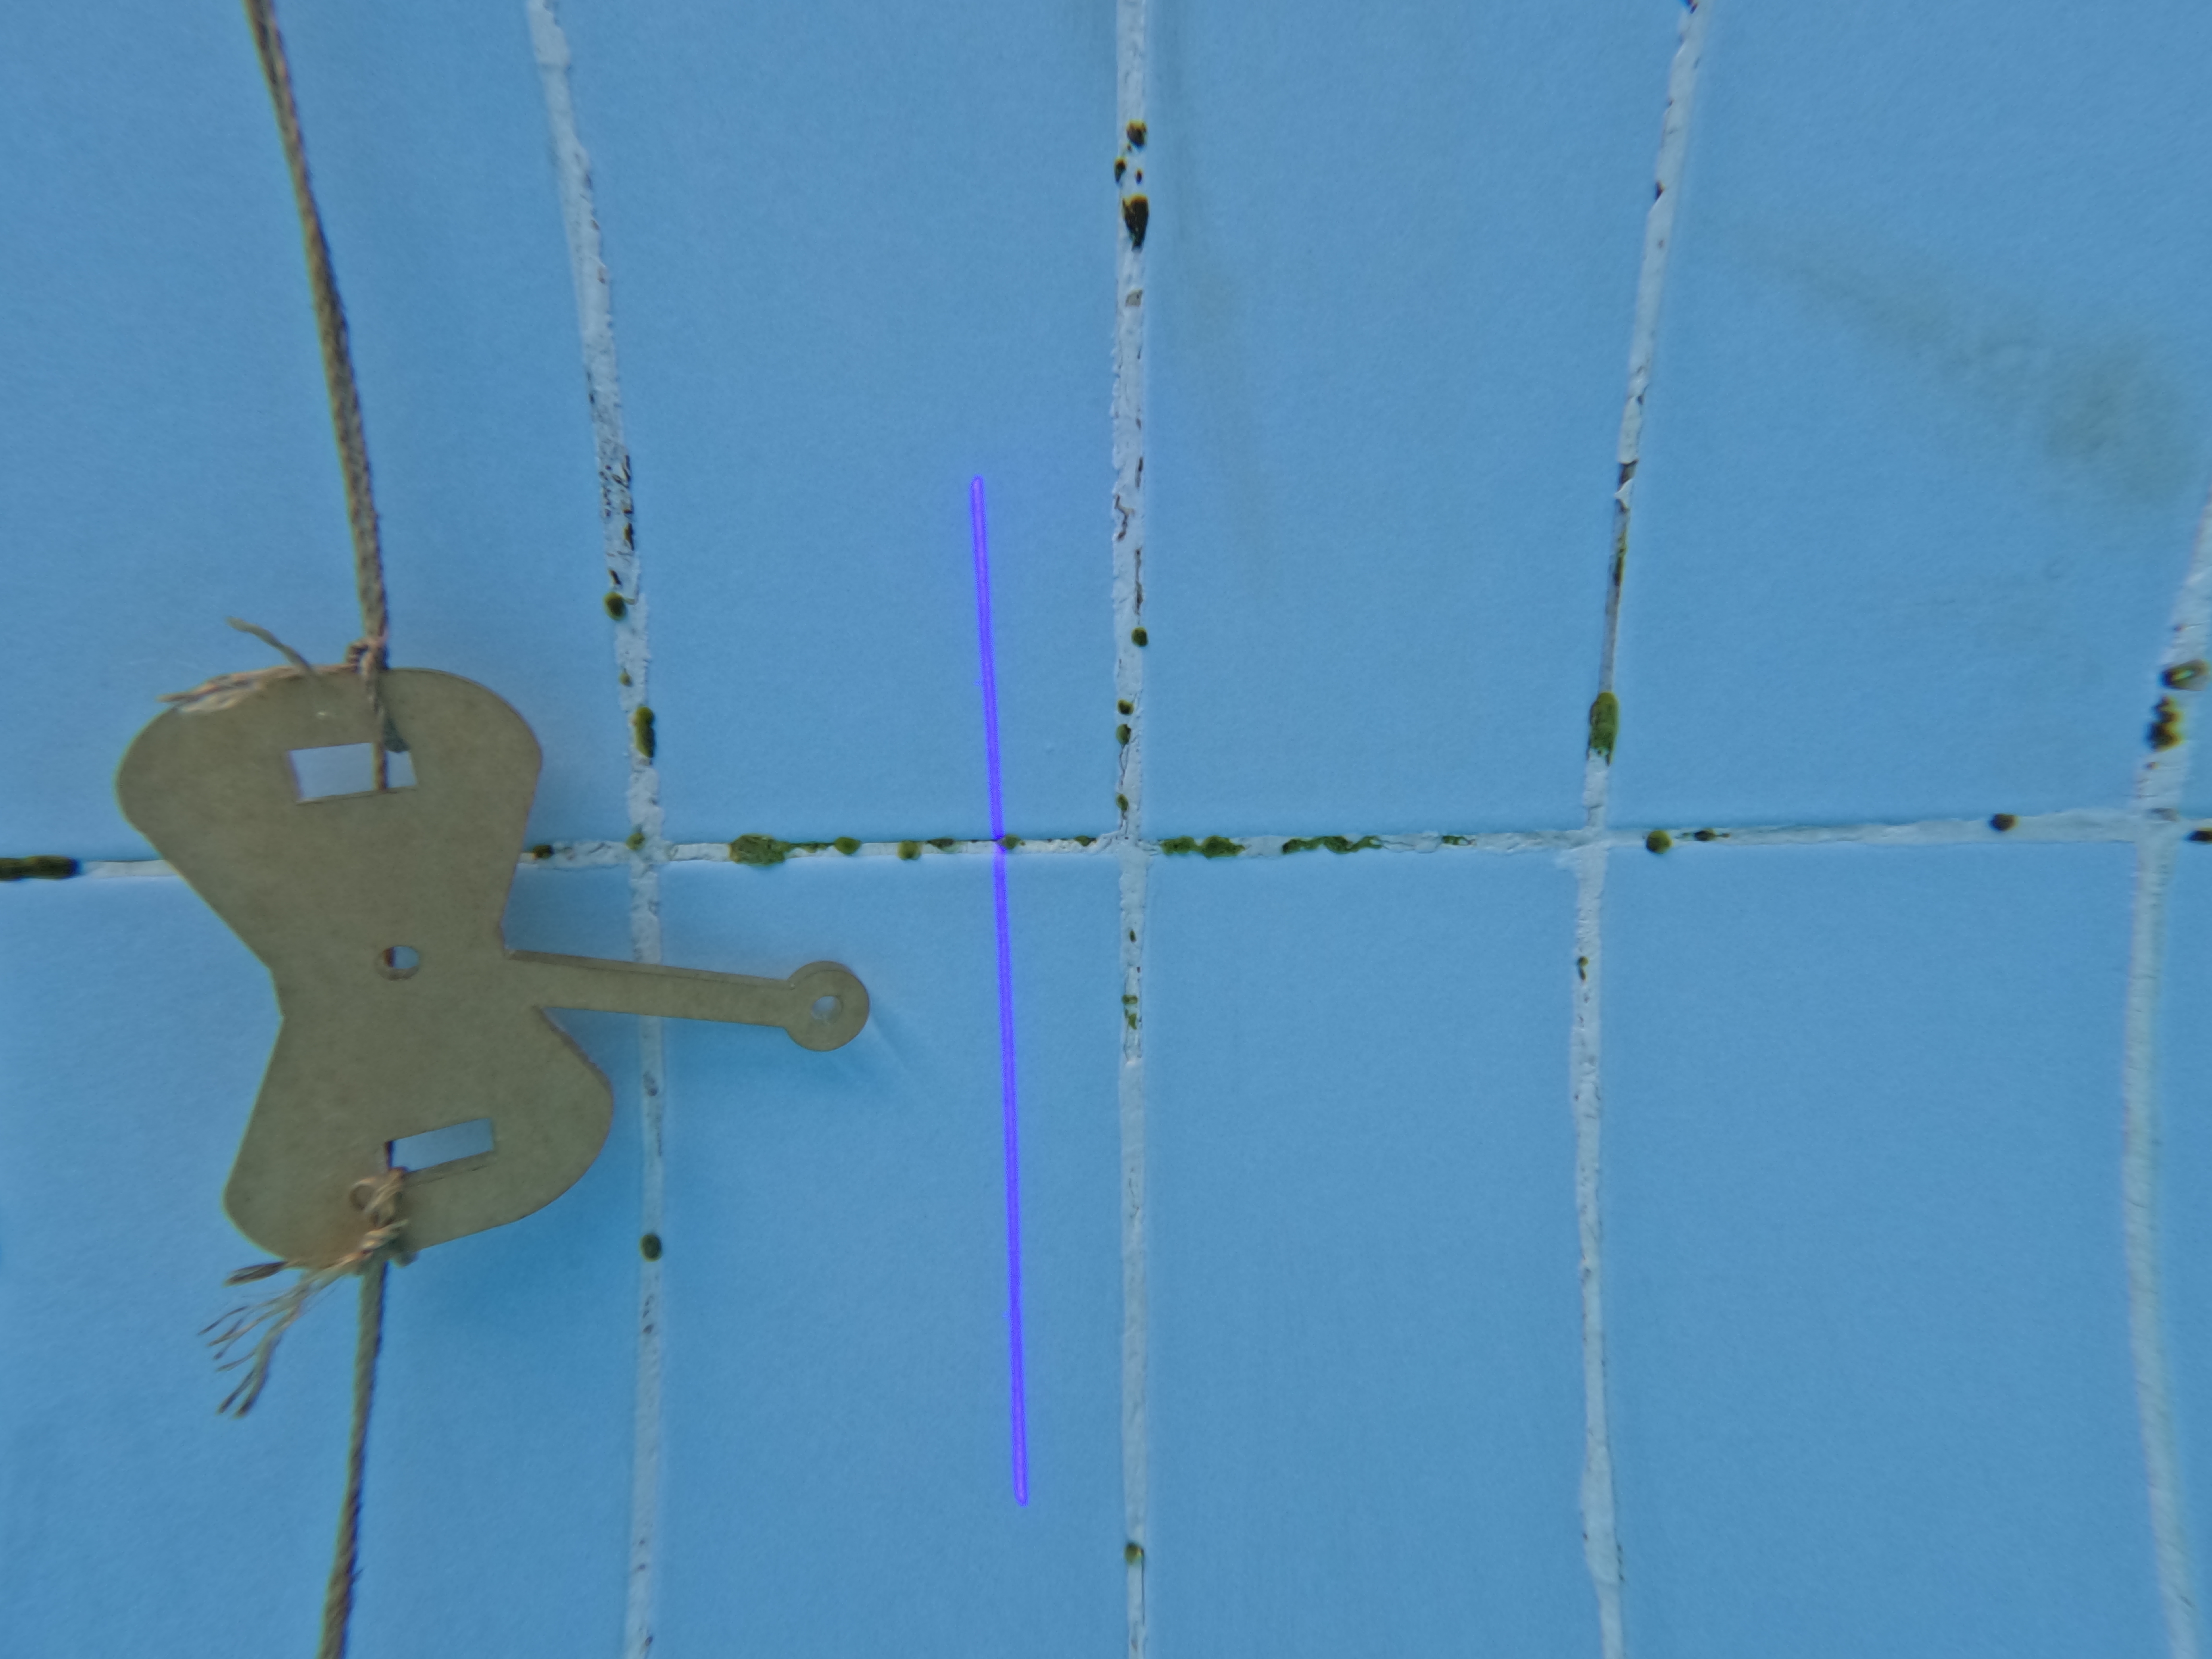

Supplement: Supplementary file 2577 [file G0050875.pdf › Level_2_2/G0050875.pdf]

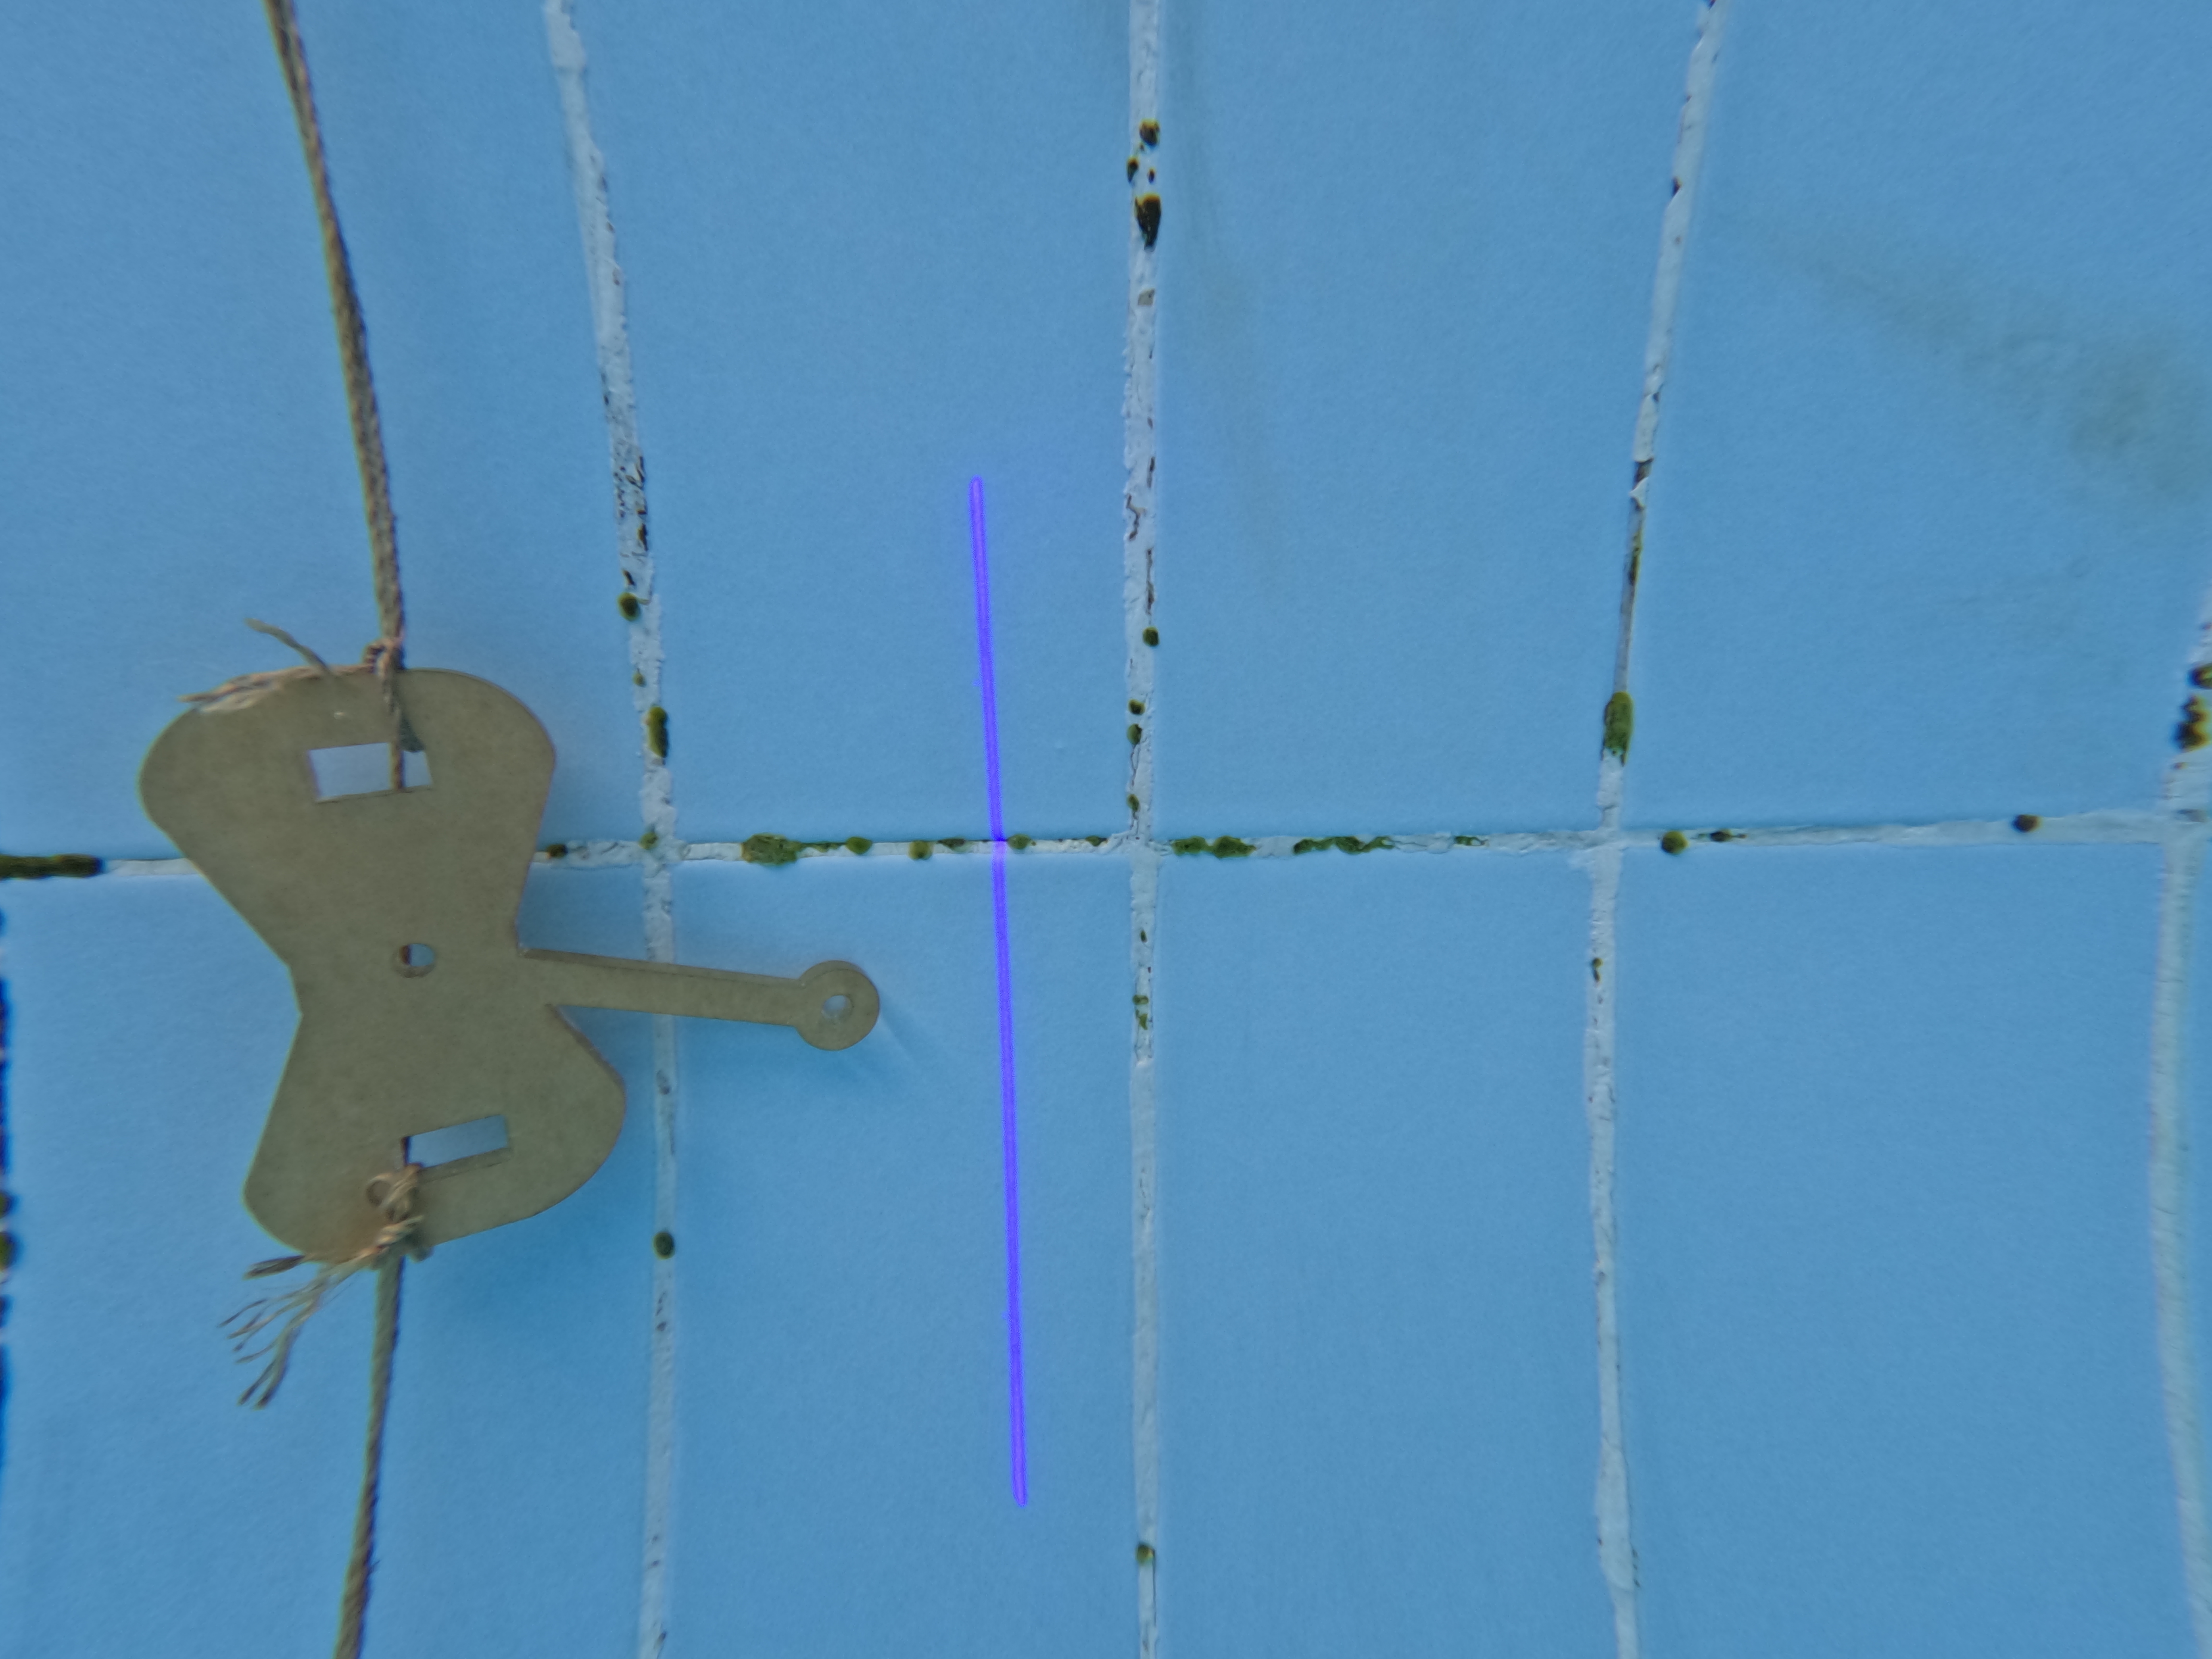

Supplement: Supplementary file 2578 [file G0050876.pdf › Level_2_2/G0050876.pdf]

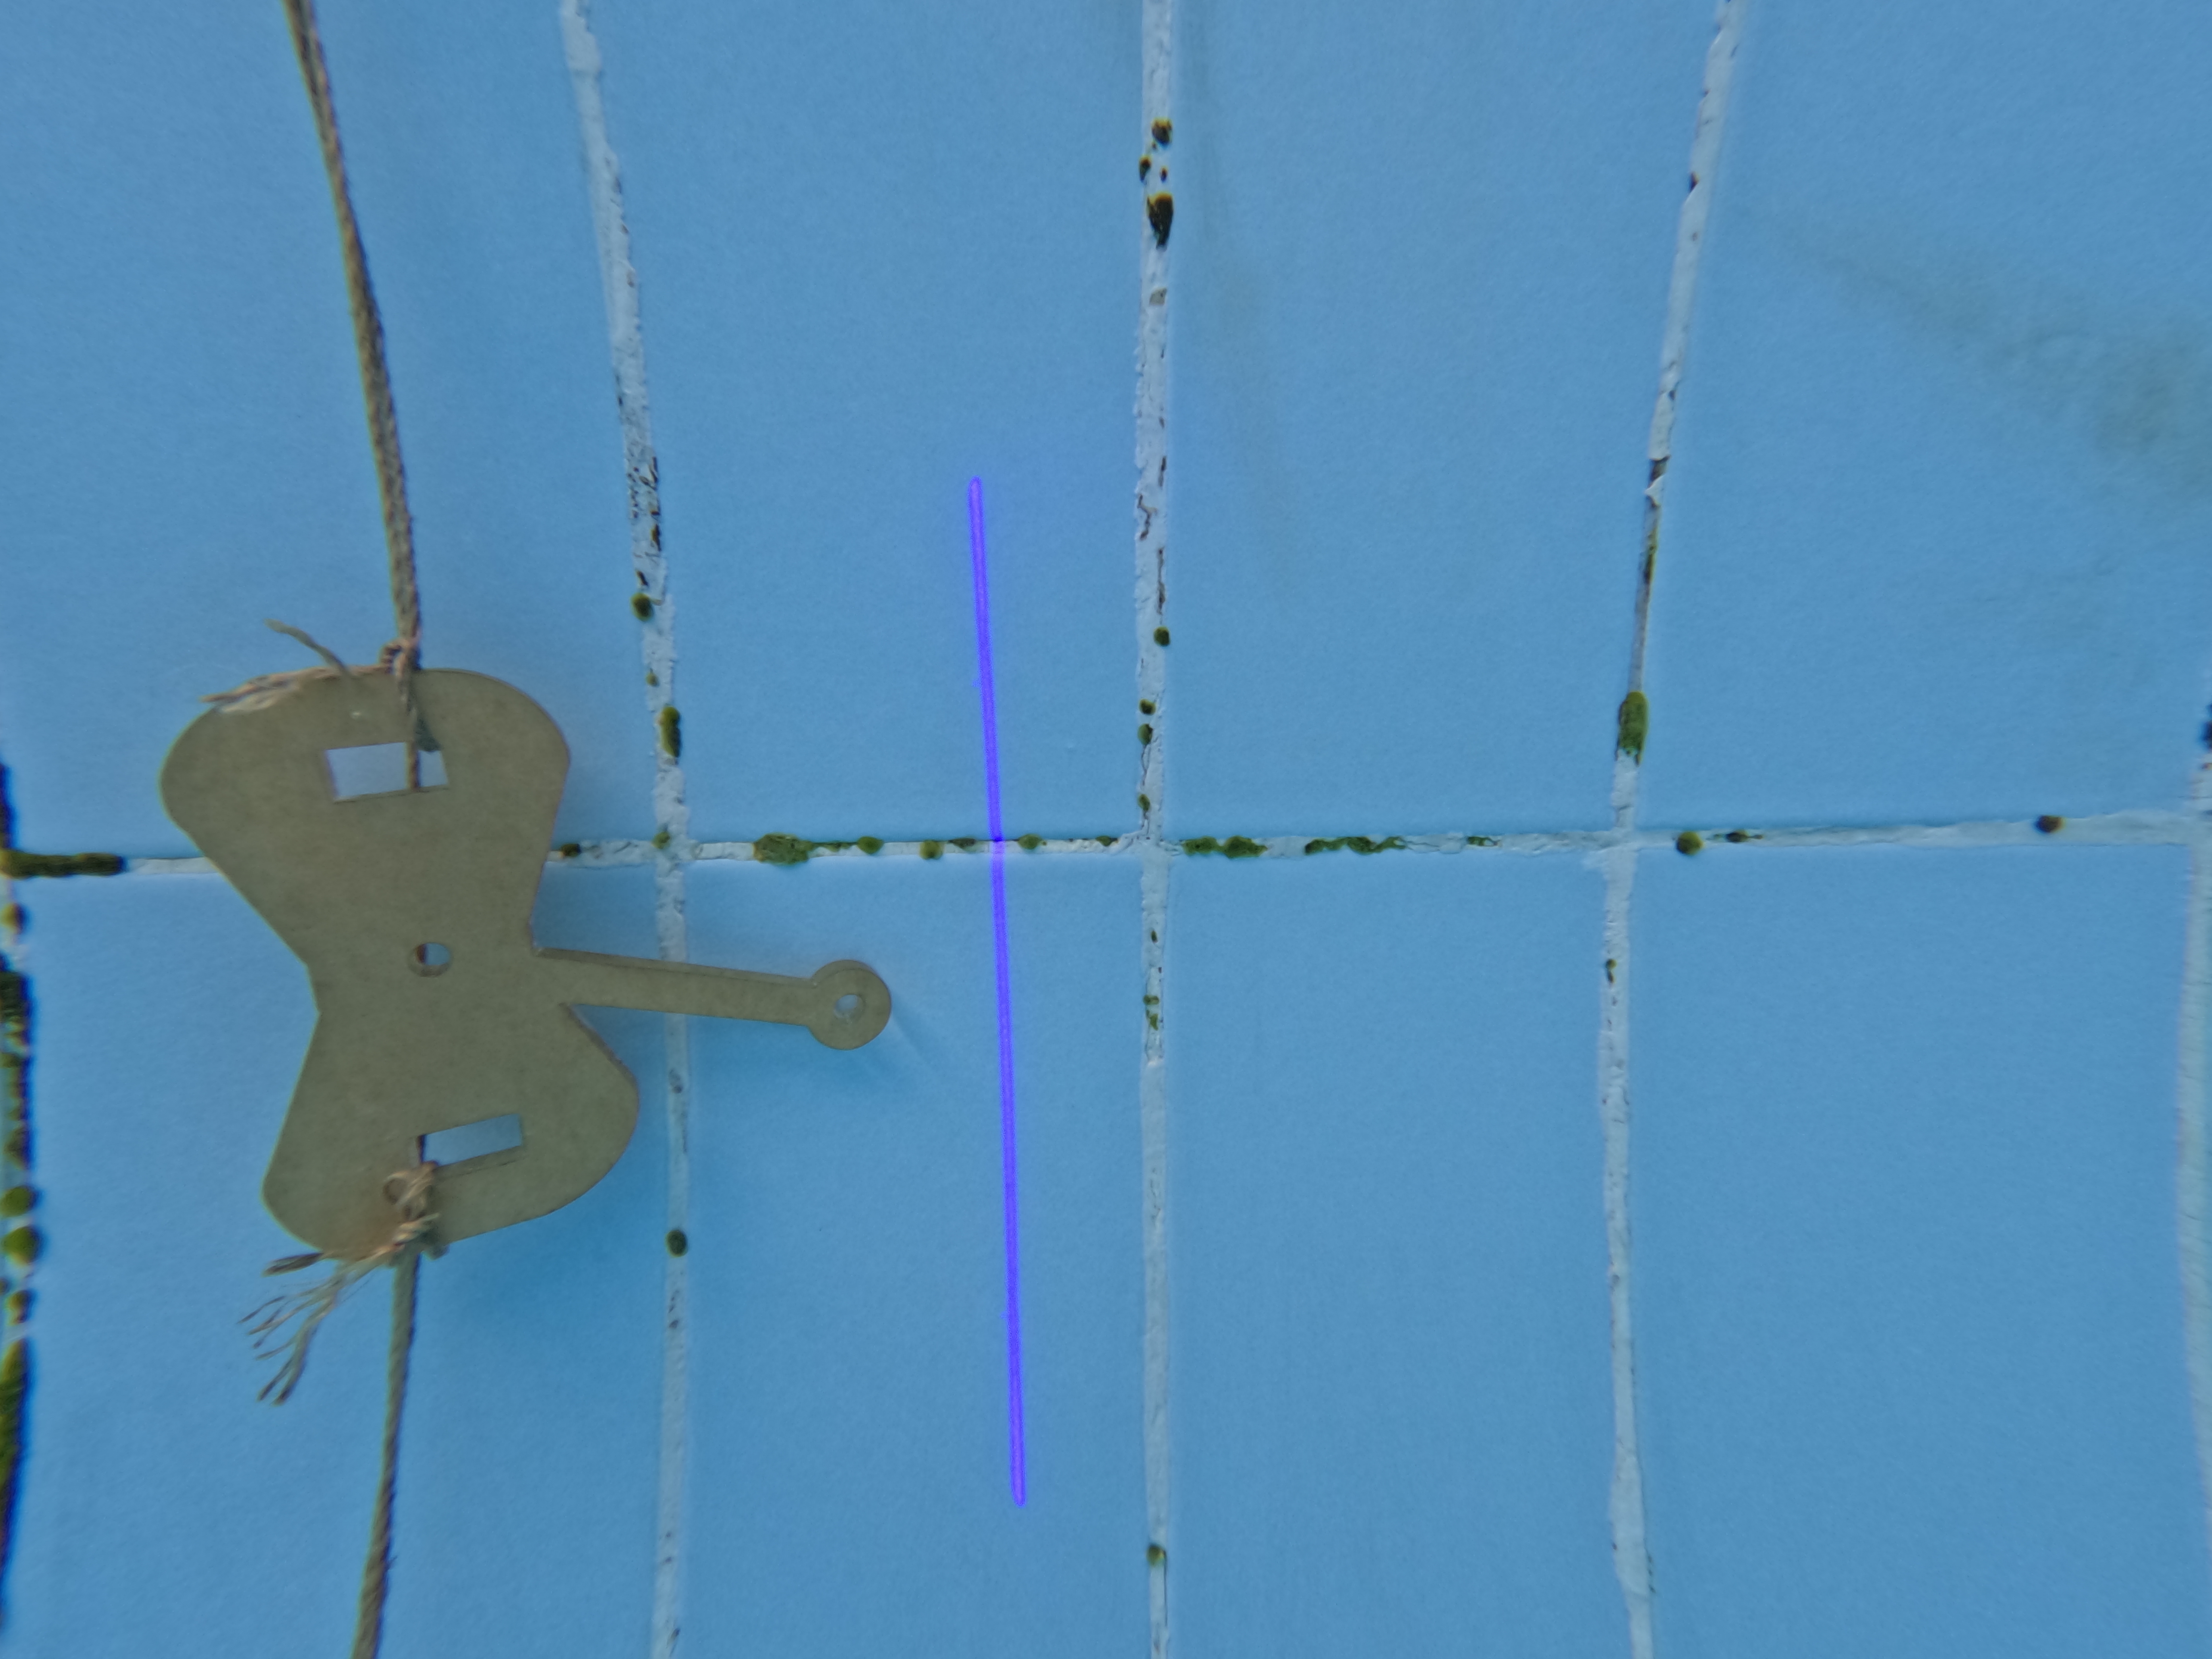

Supplement: Supplementary file 2579 [file G0050877.pdf › Level_2_2/G0050877.pdf]

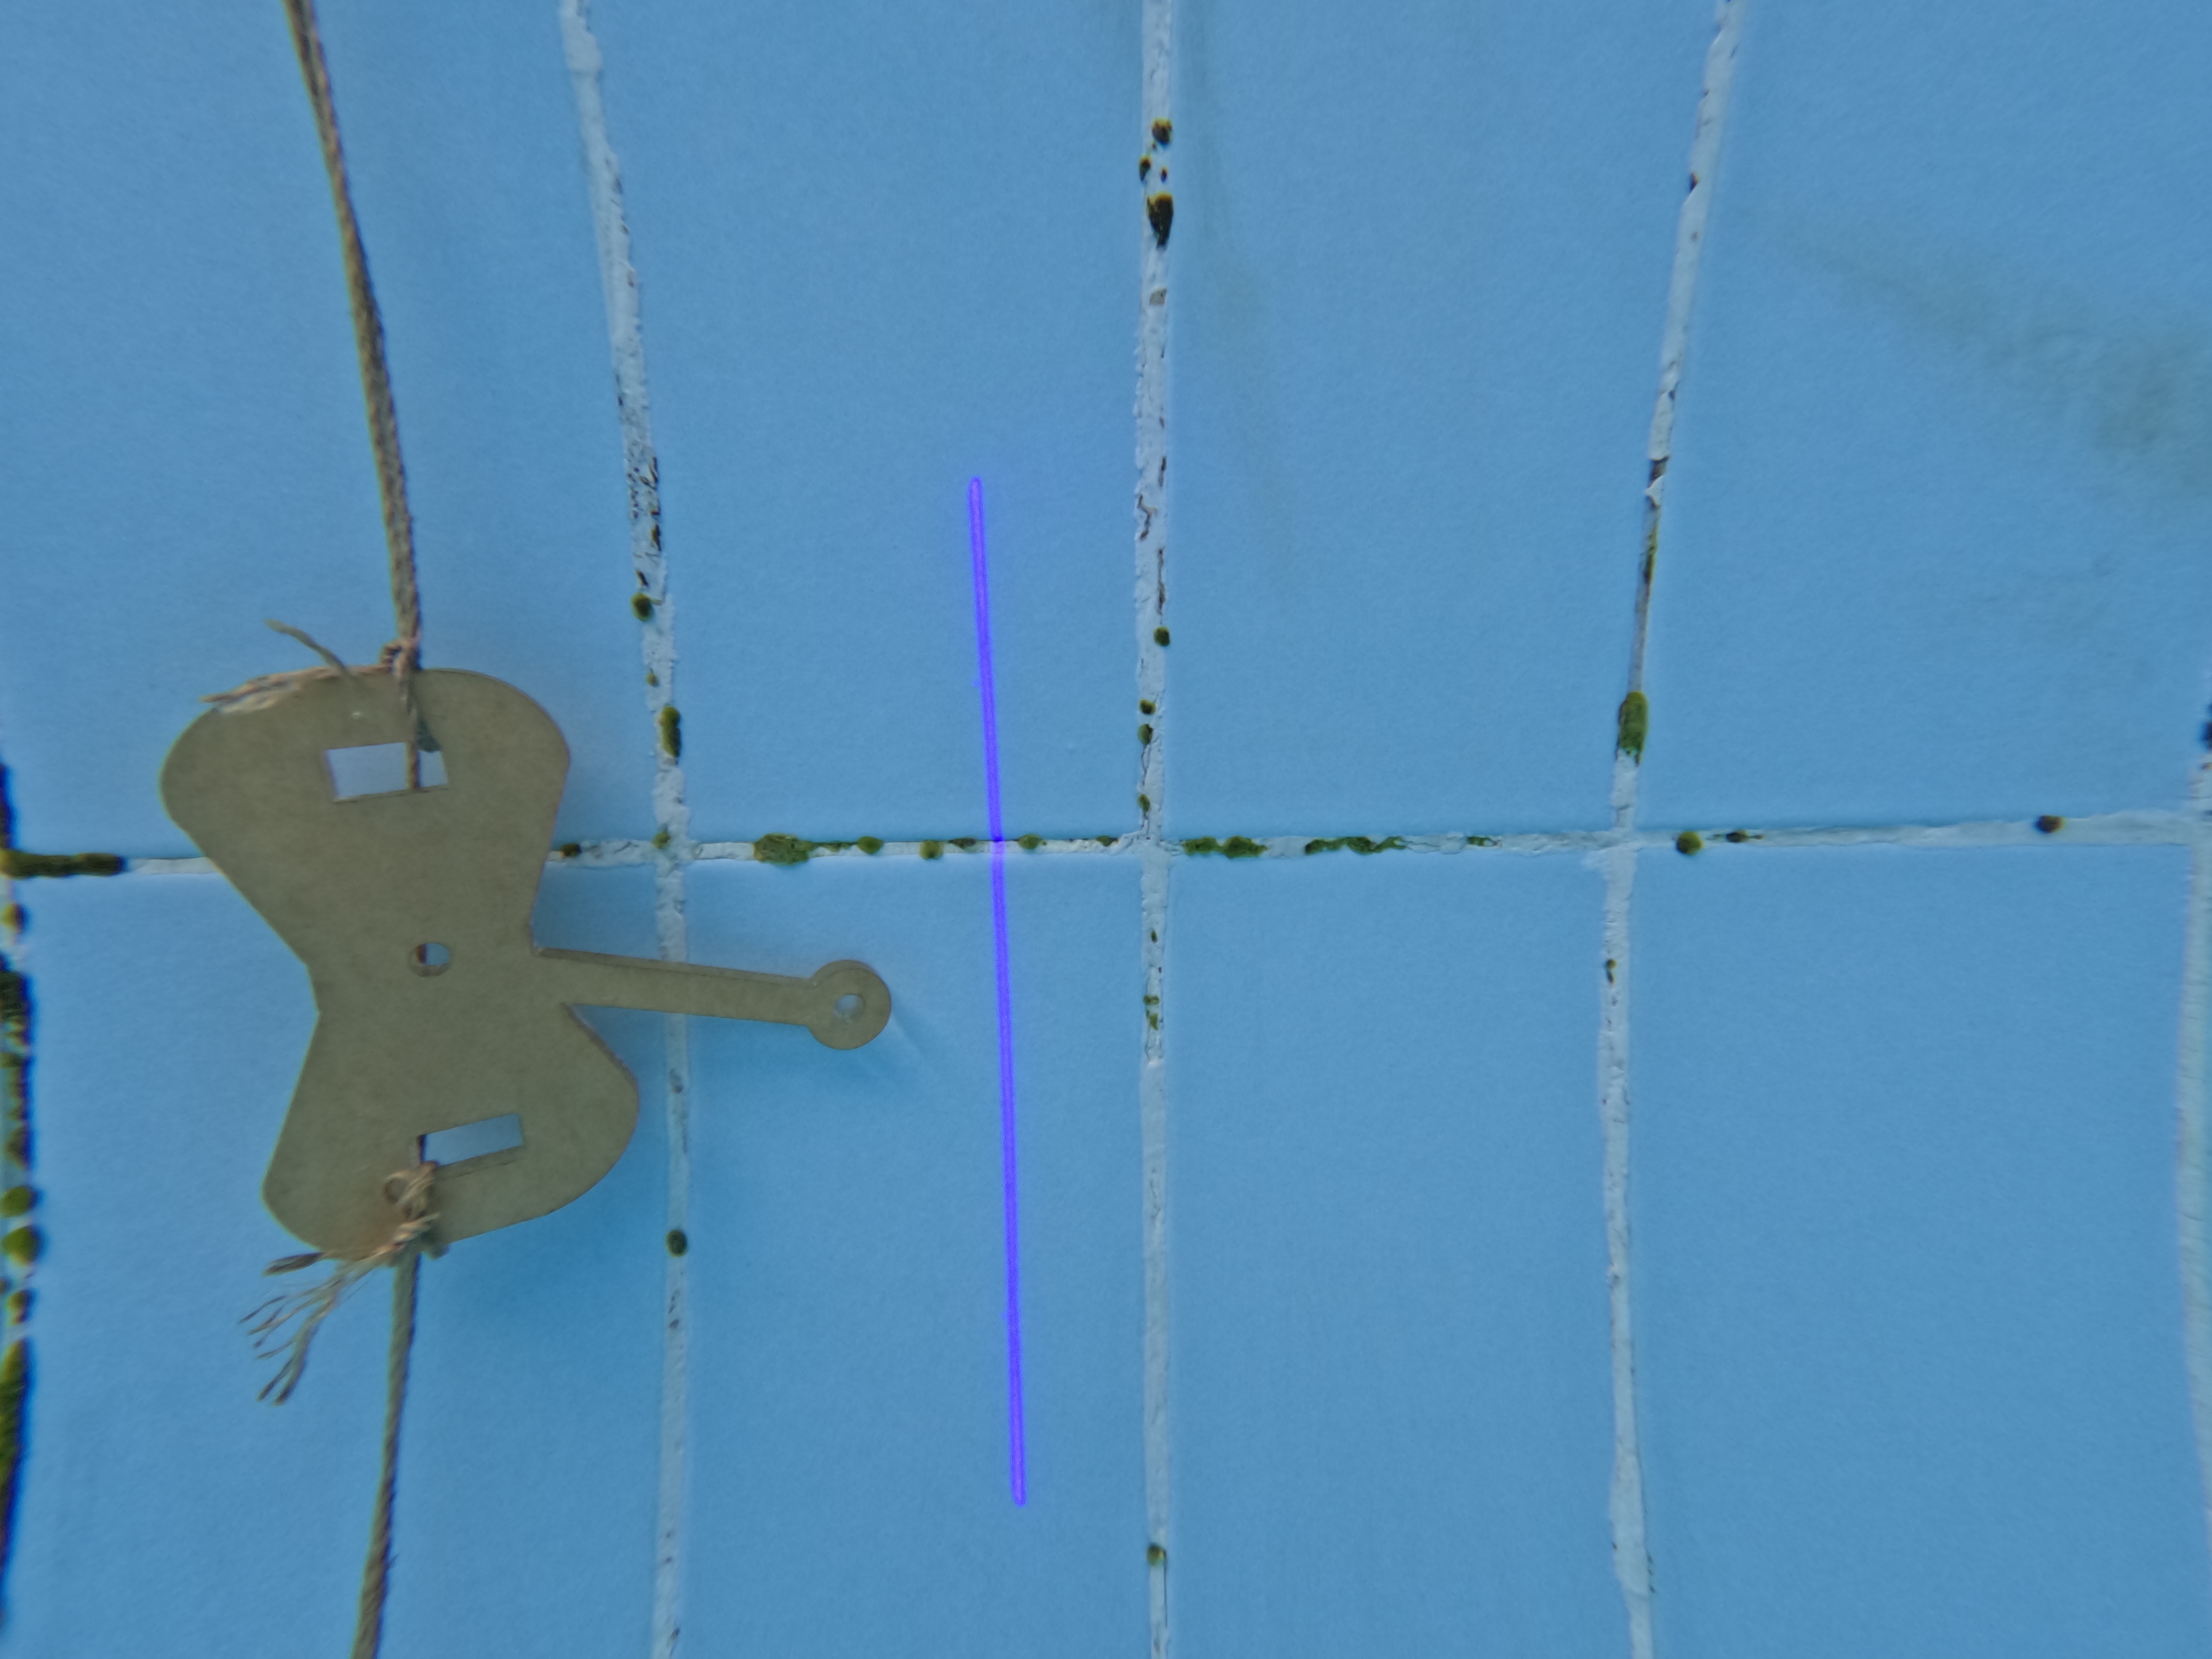

Supplement: Supplementary file 2580 [file G0050878.pdf › Level_2_2/G0050878.pdf]

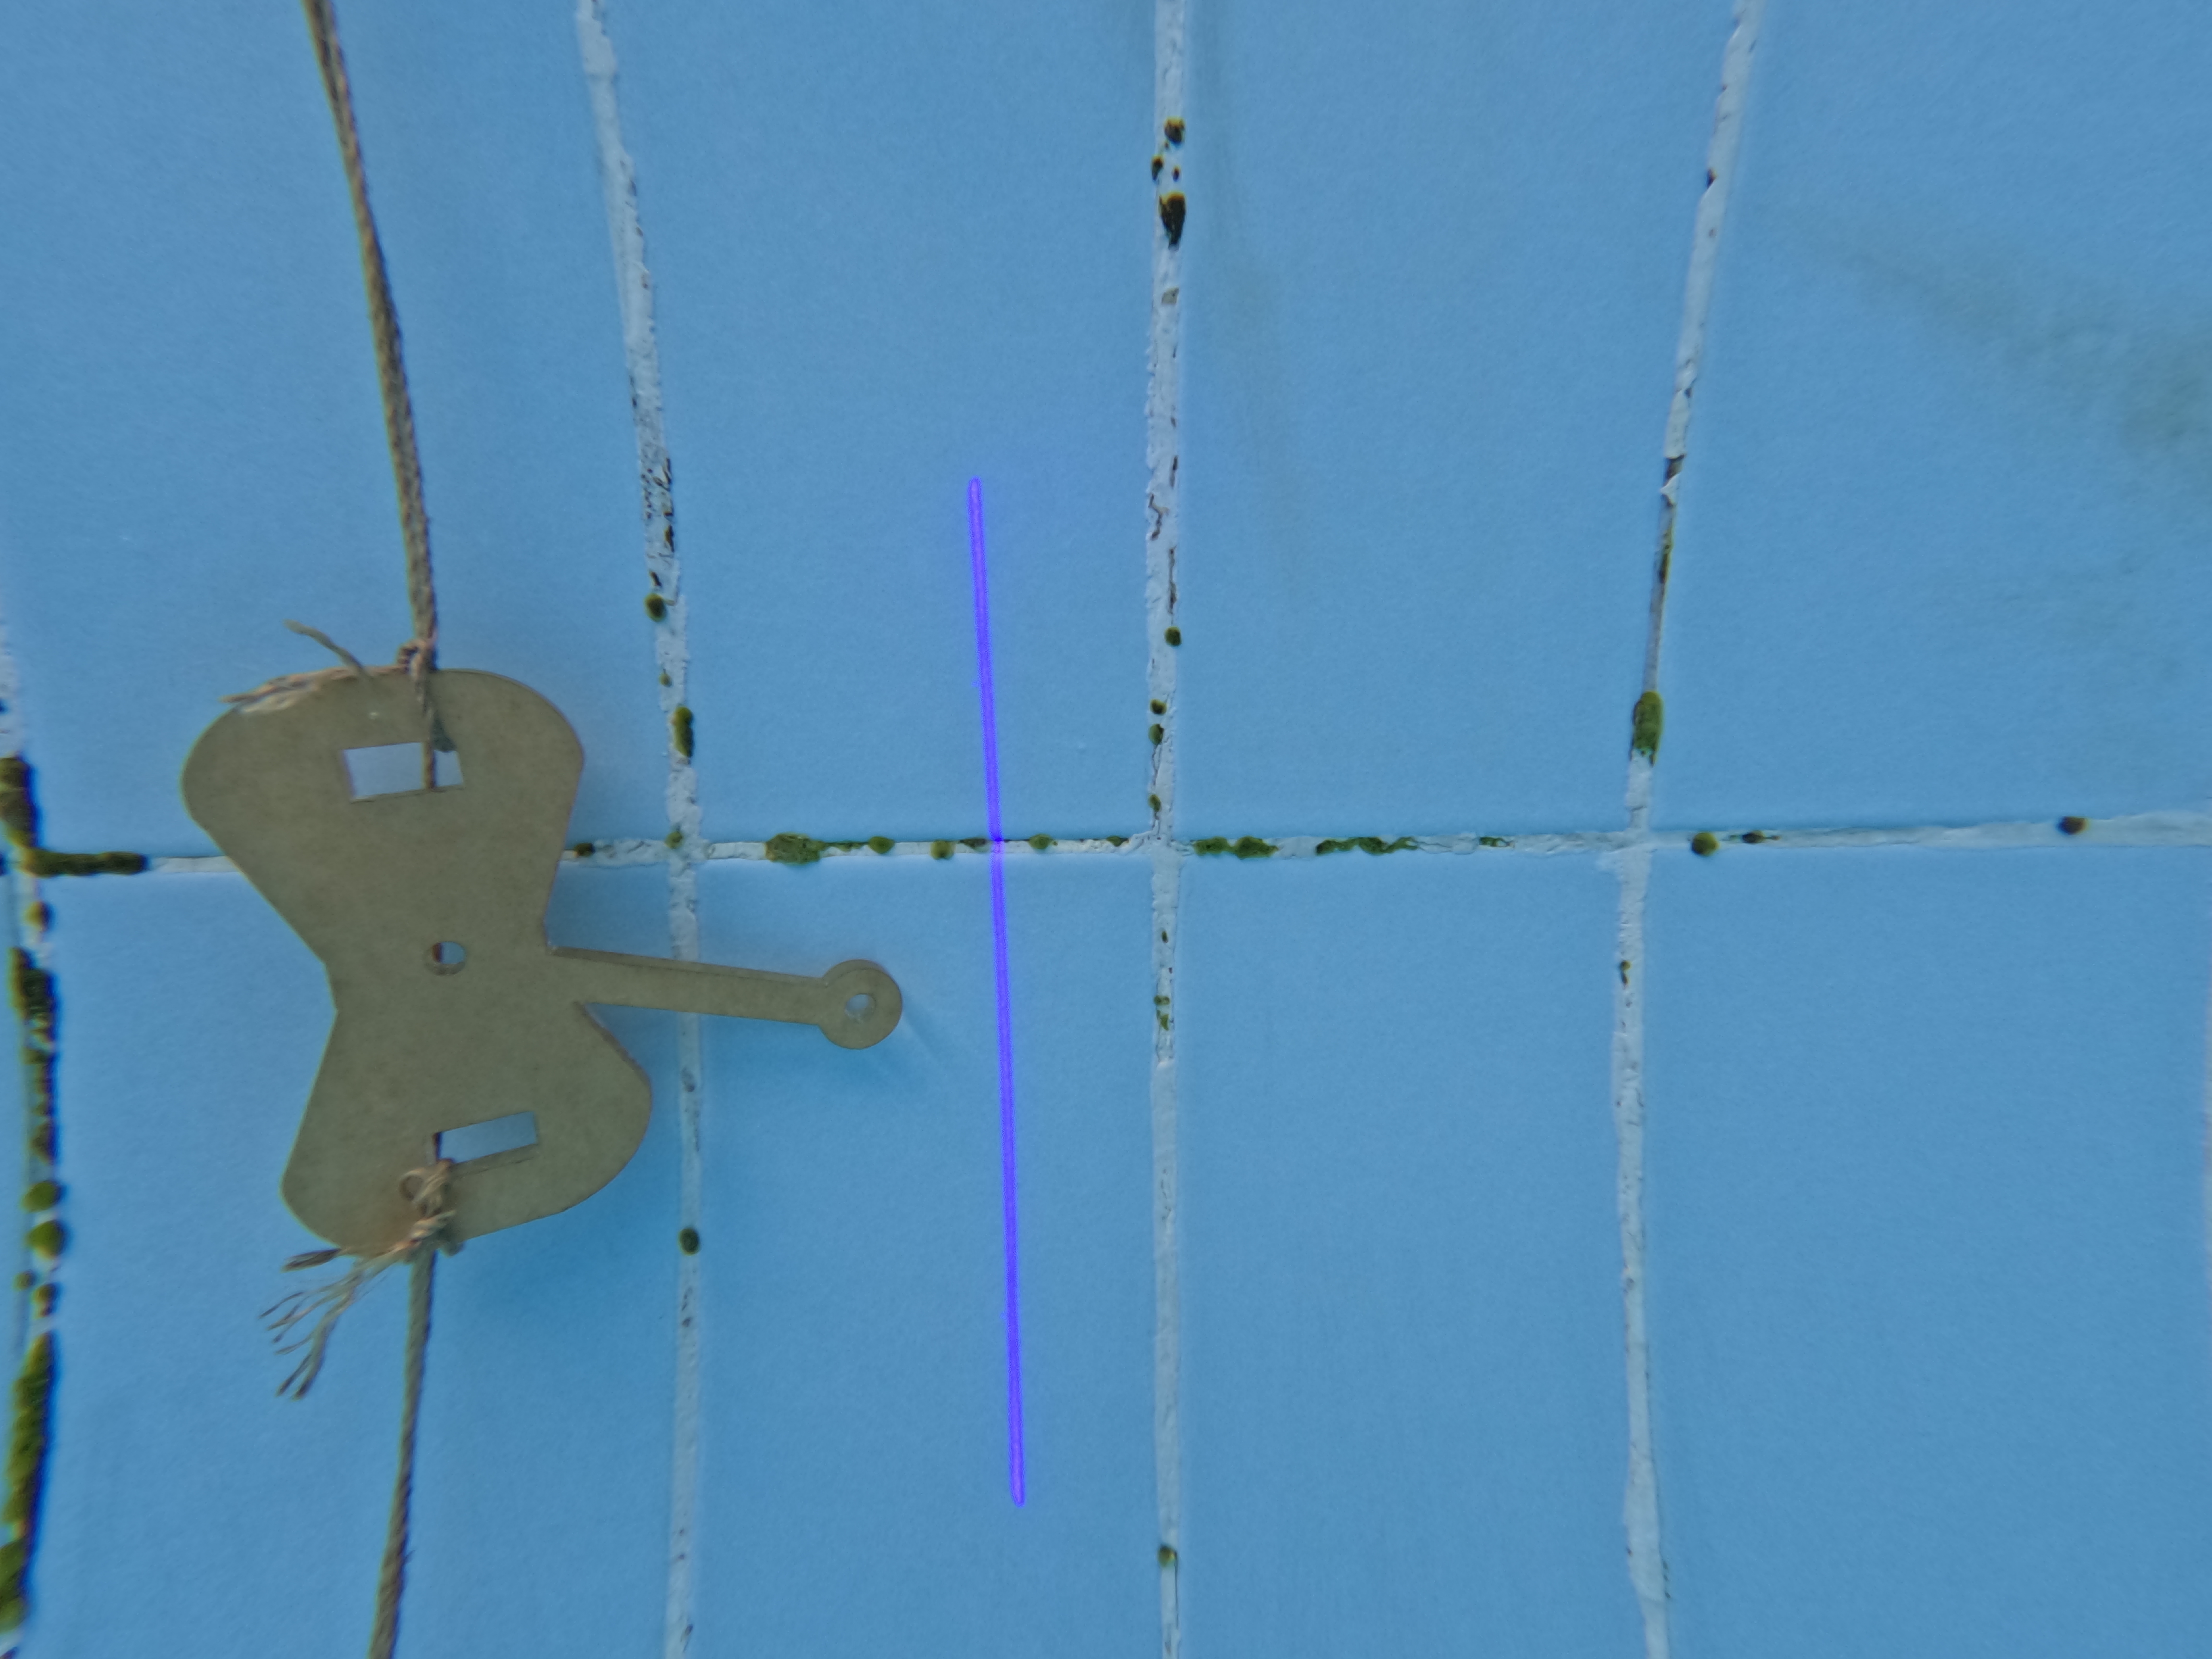

Supplement: Supplementary file 2581 [file G0050879.pdf › Level_2_2/G0050879.pdf]

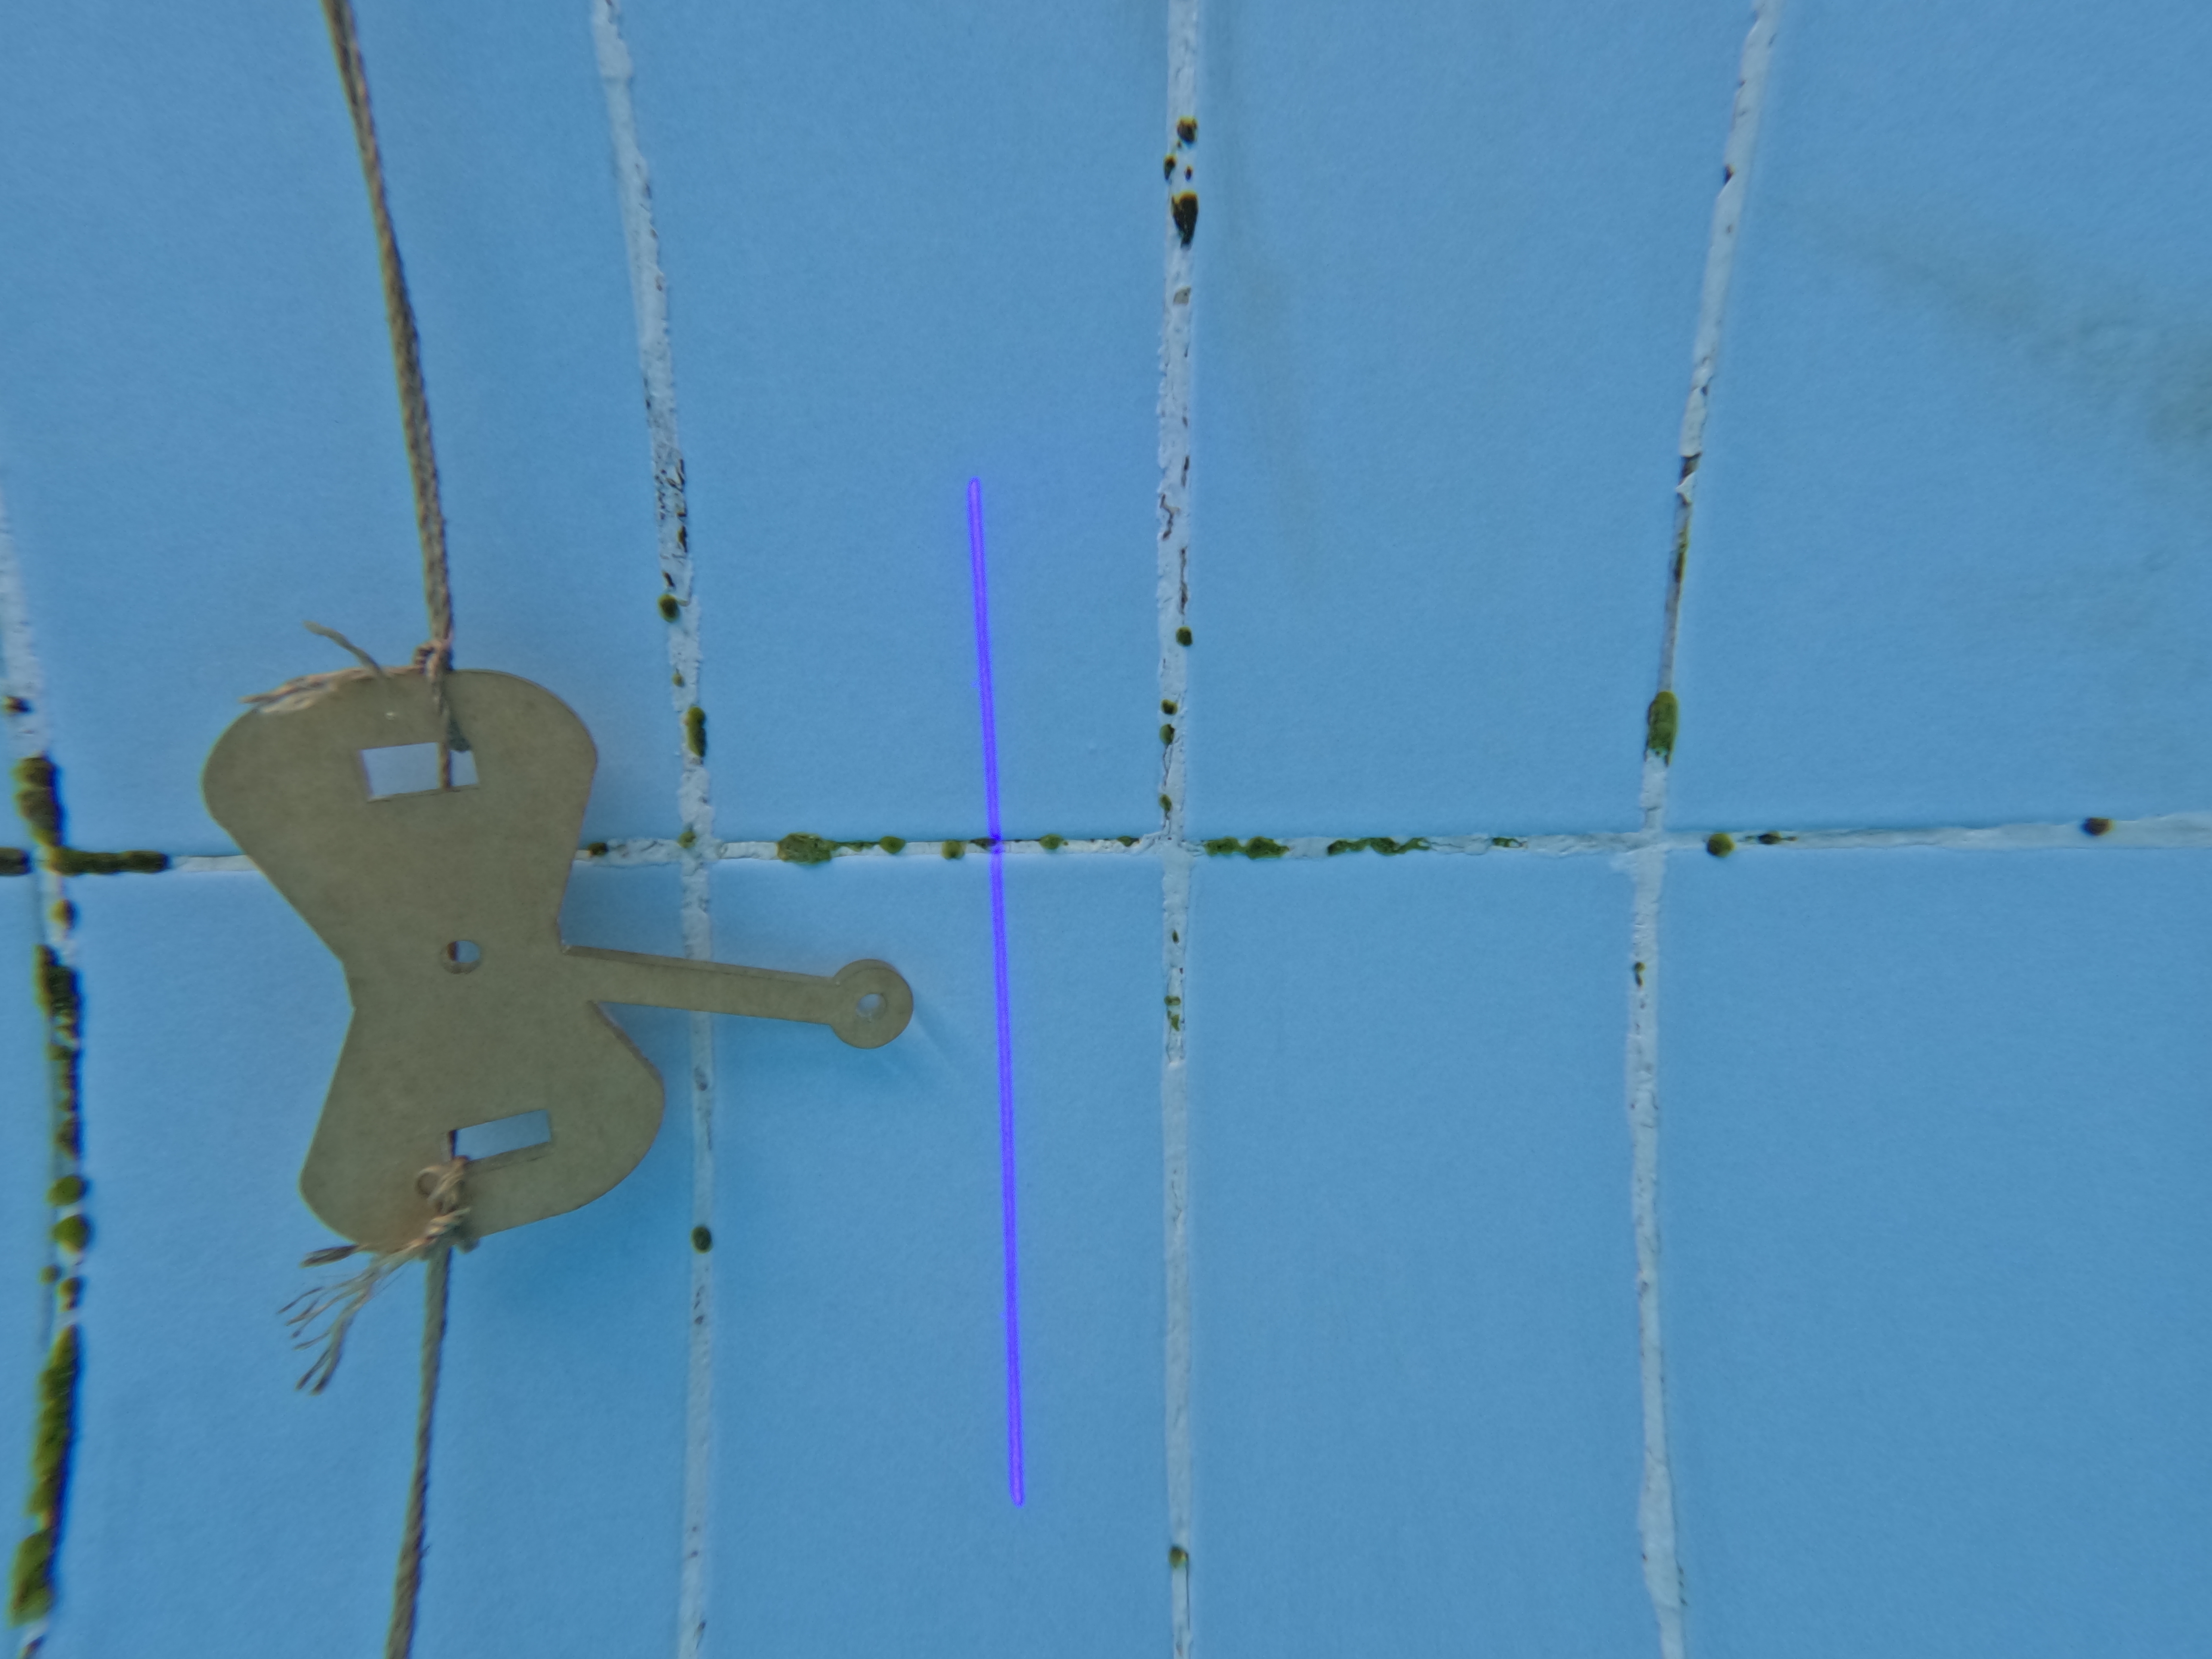

Supplement: Supplementary file 2582 [file G0050880.pdf › Level_2_2/G0050880.pdf]

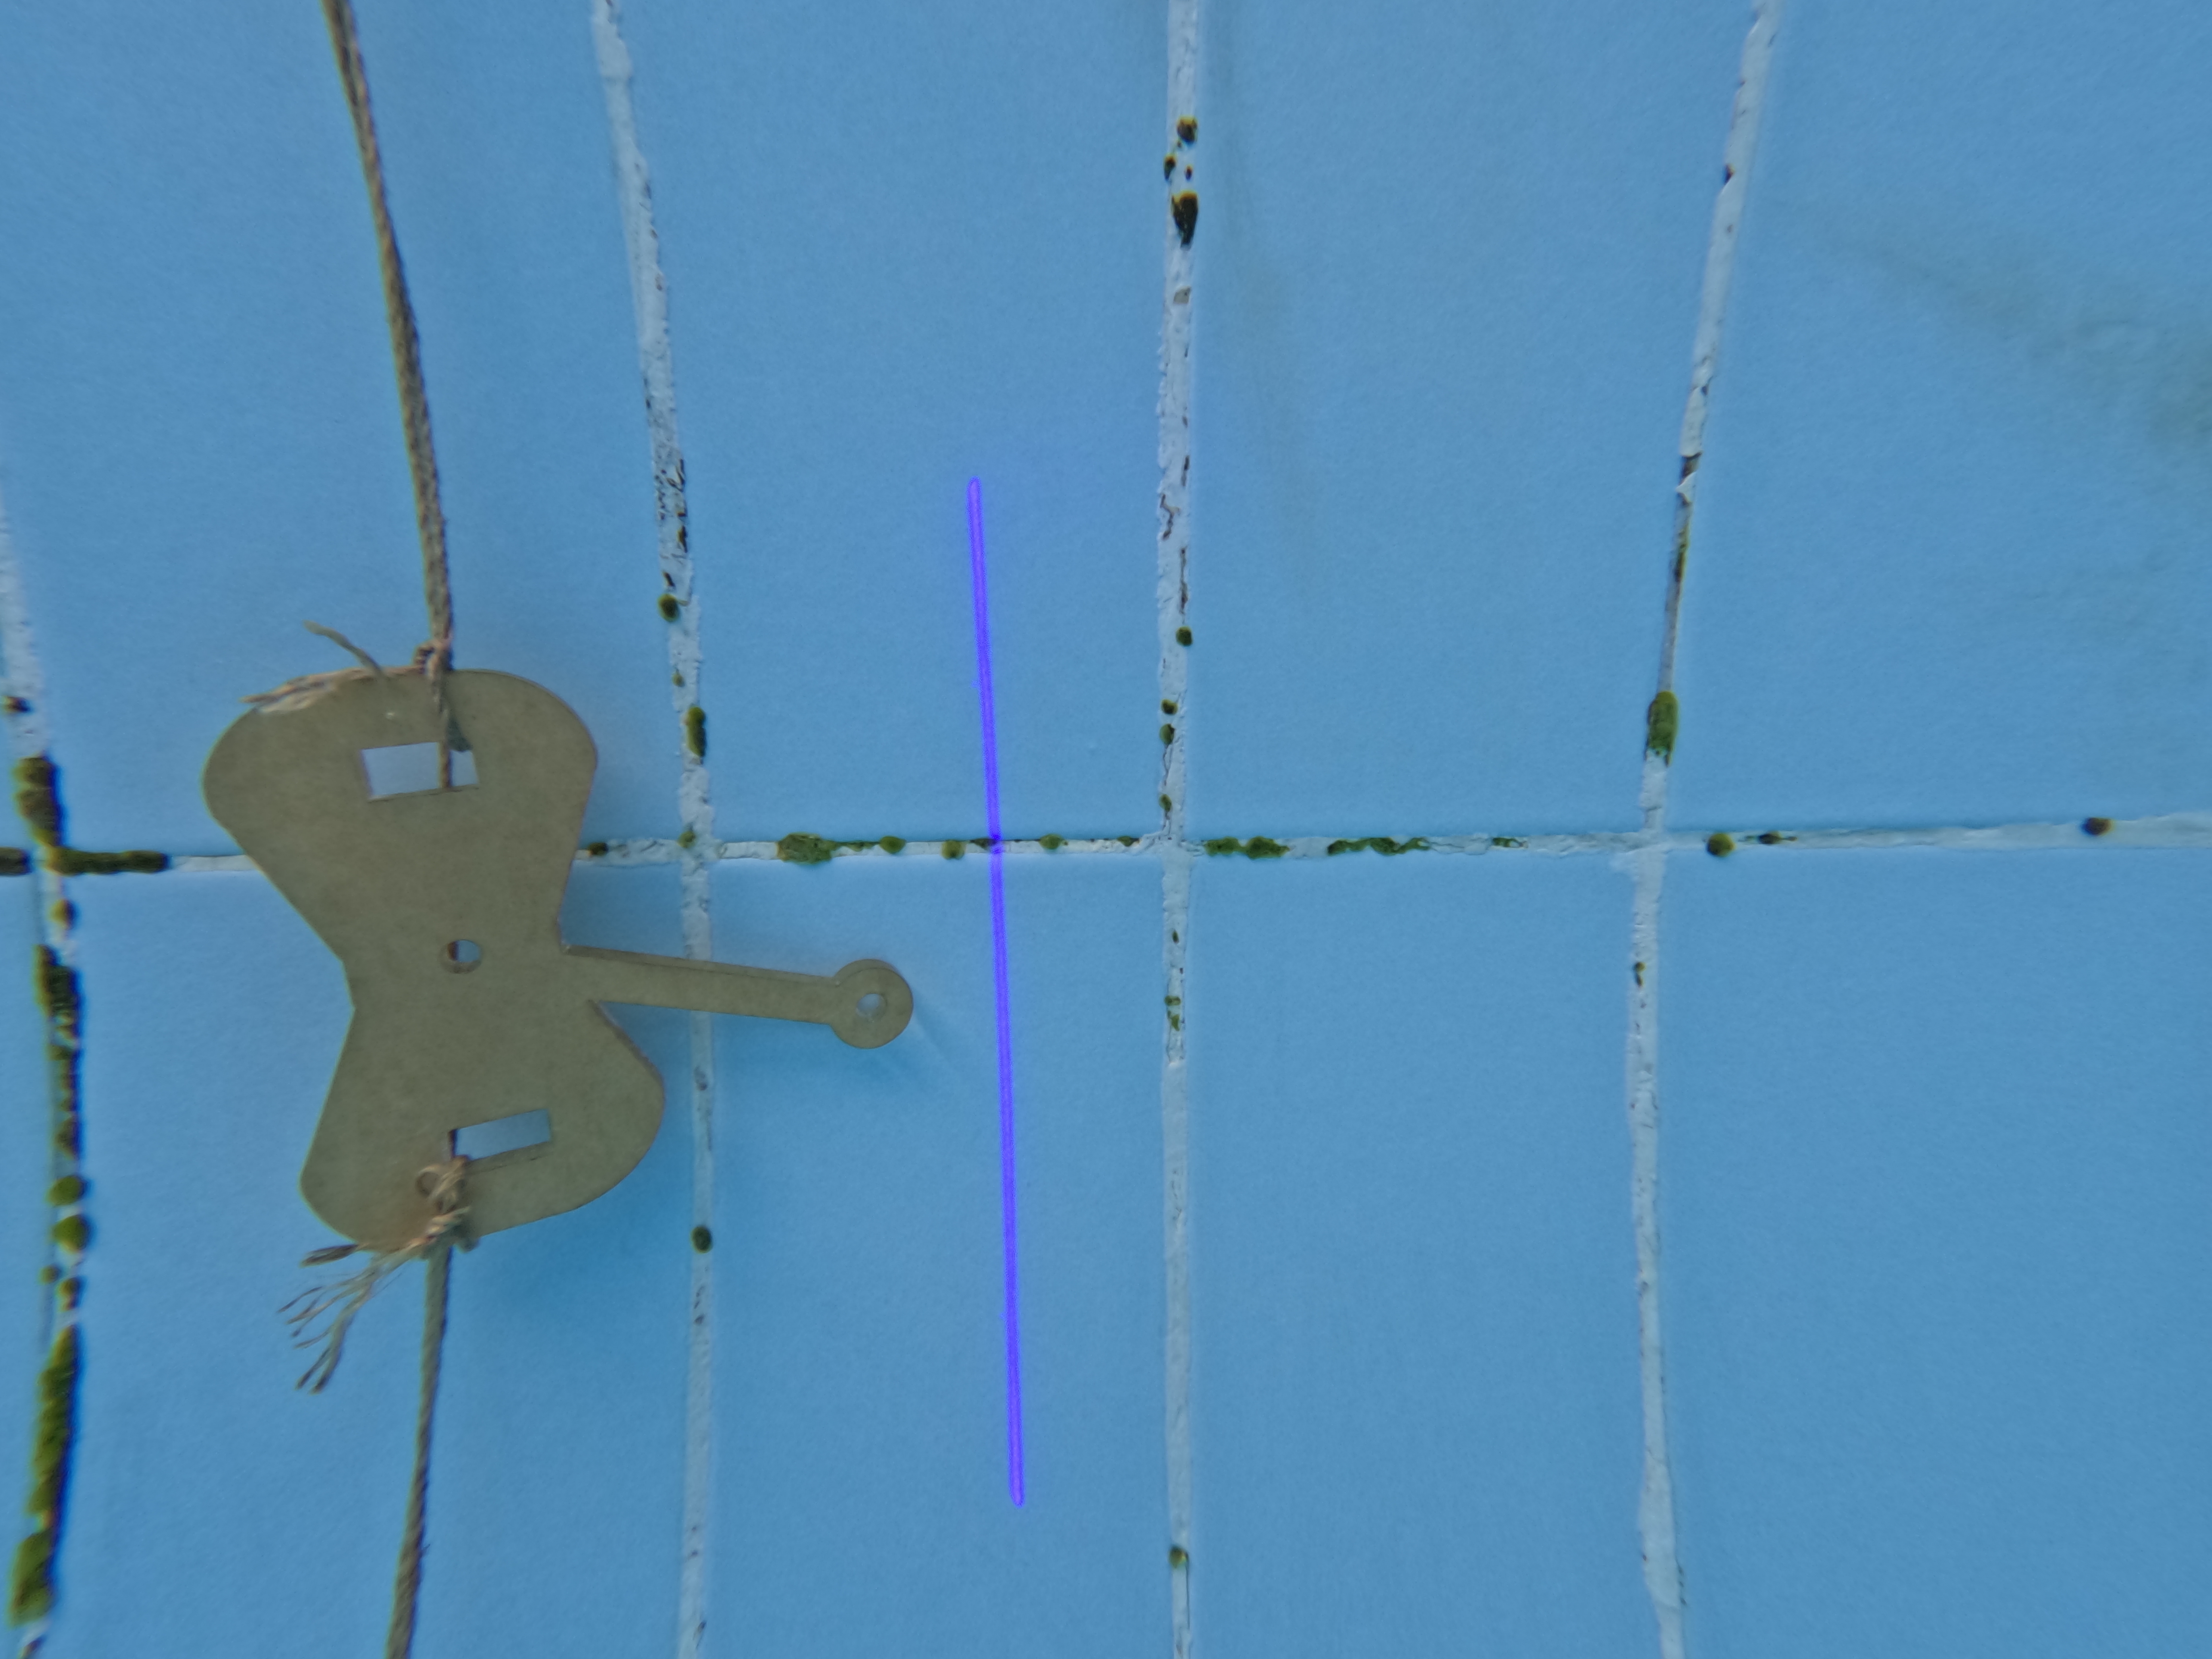

Supplement: Supplementary file 2583 [file G0050881.pdf › Level_2_2/G0050881.pdf]

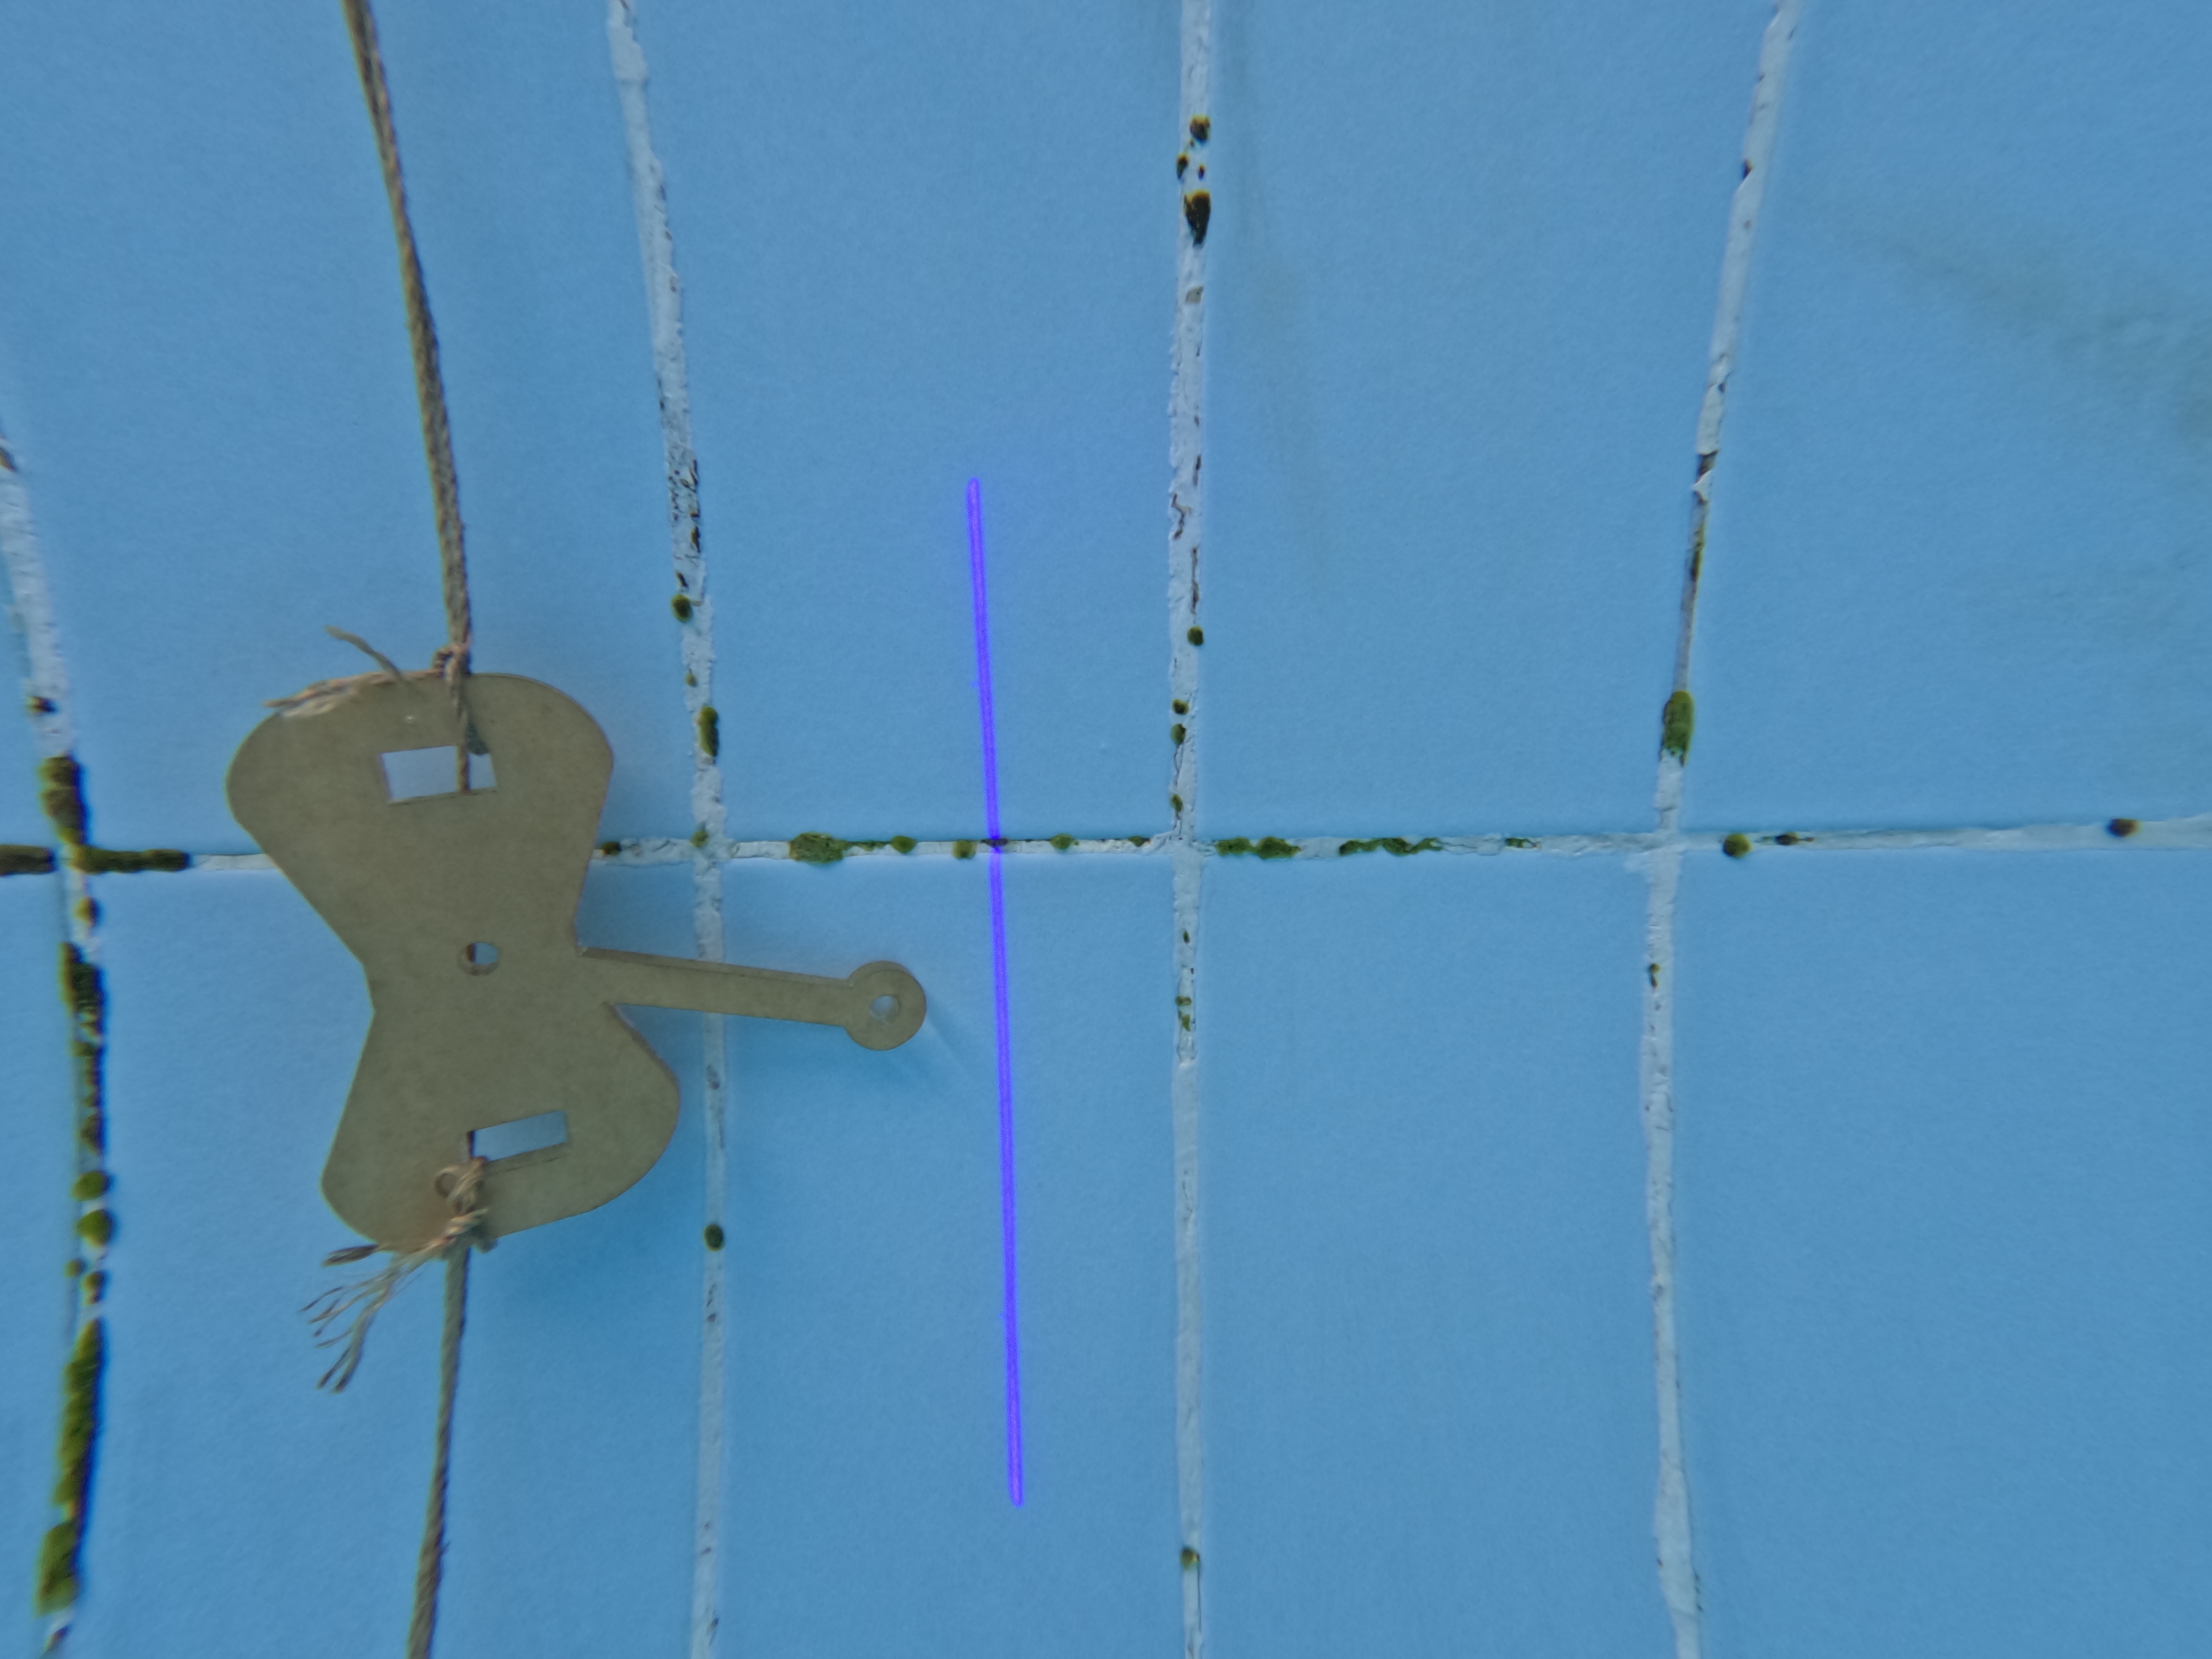

Supplement: Supplementary file 2584 [file G0050882.pdf › Level_2_2/G0050882.pdf]

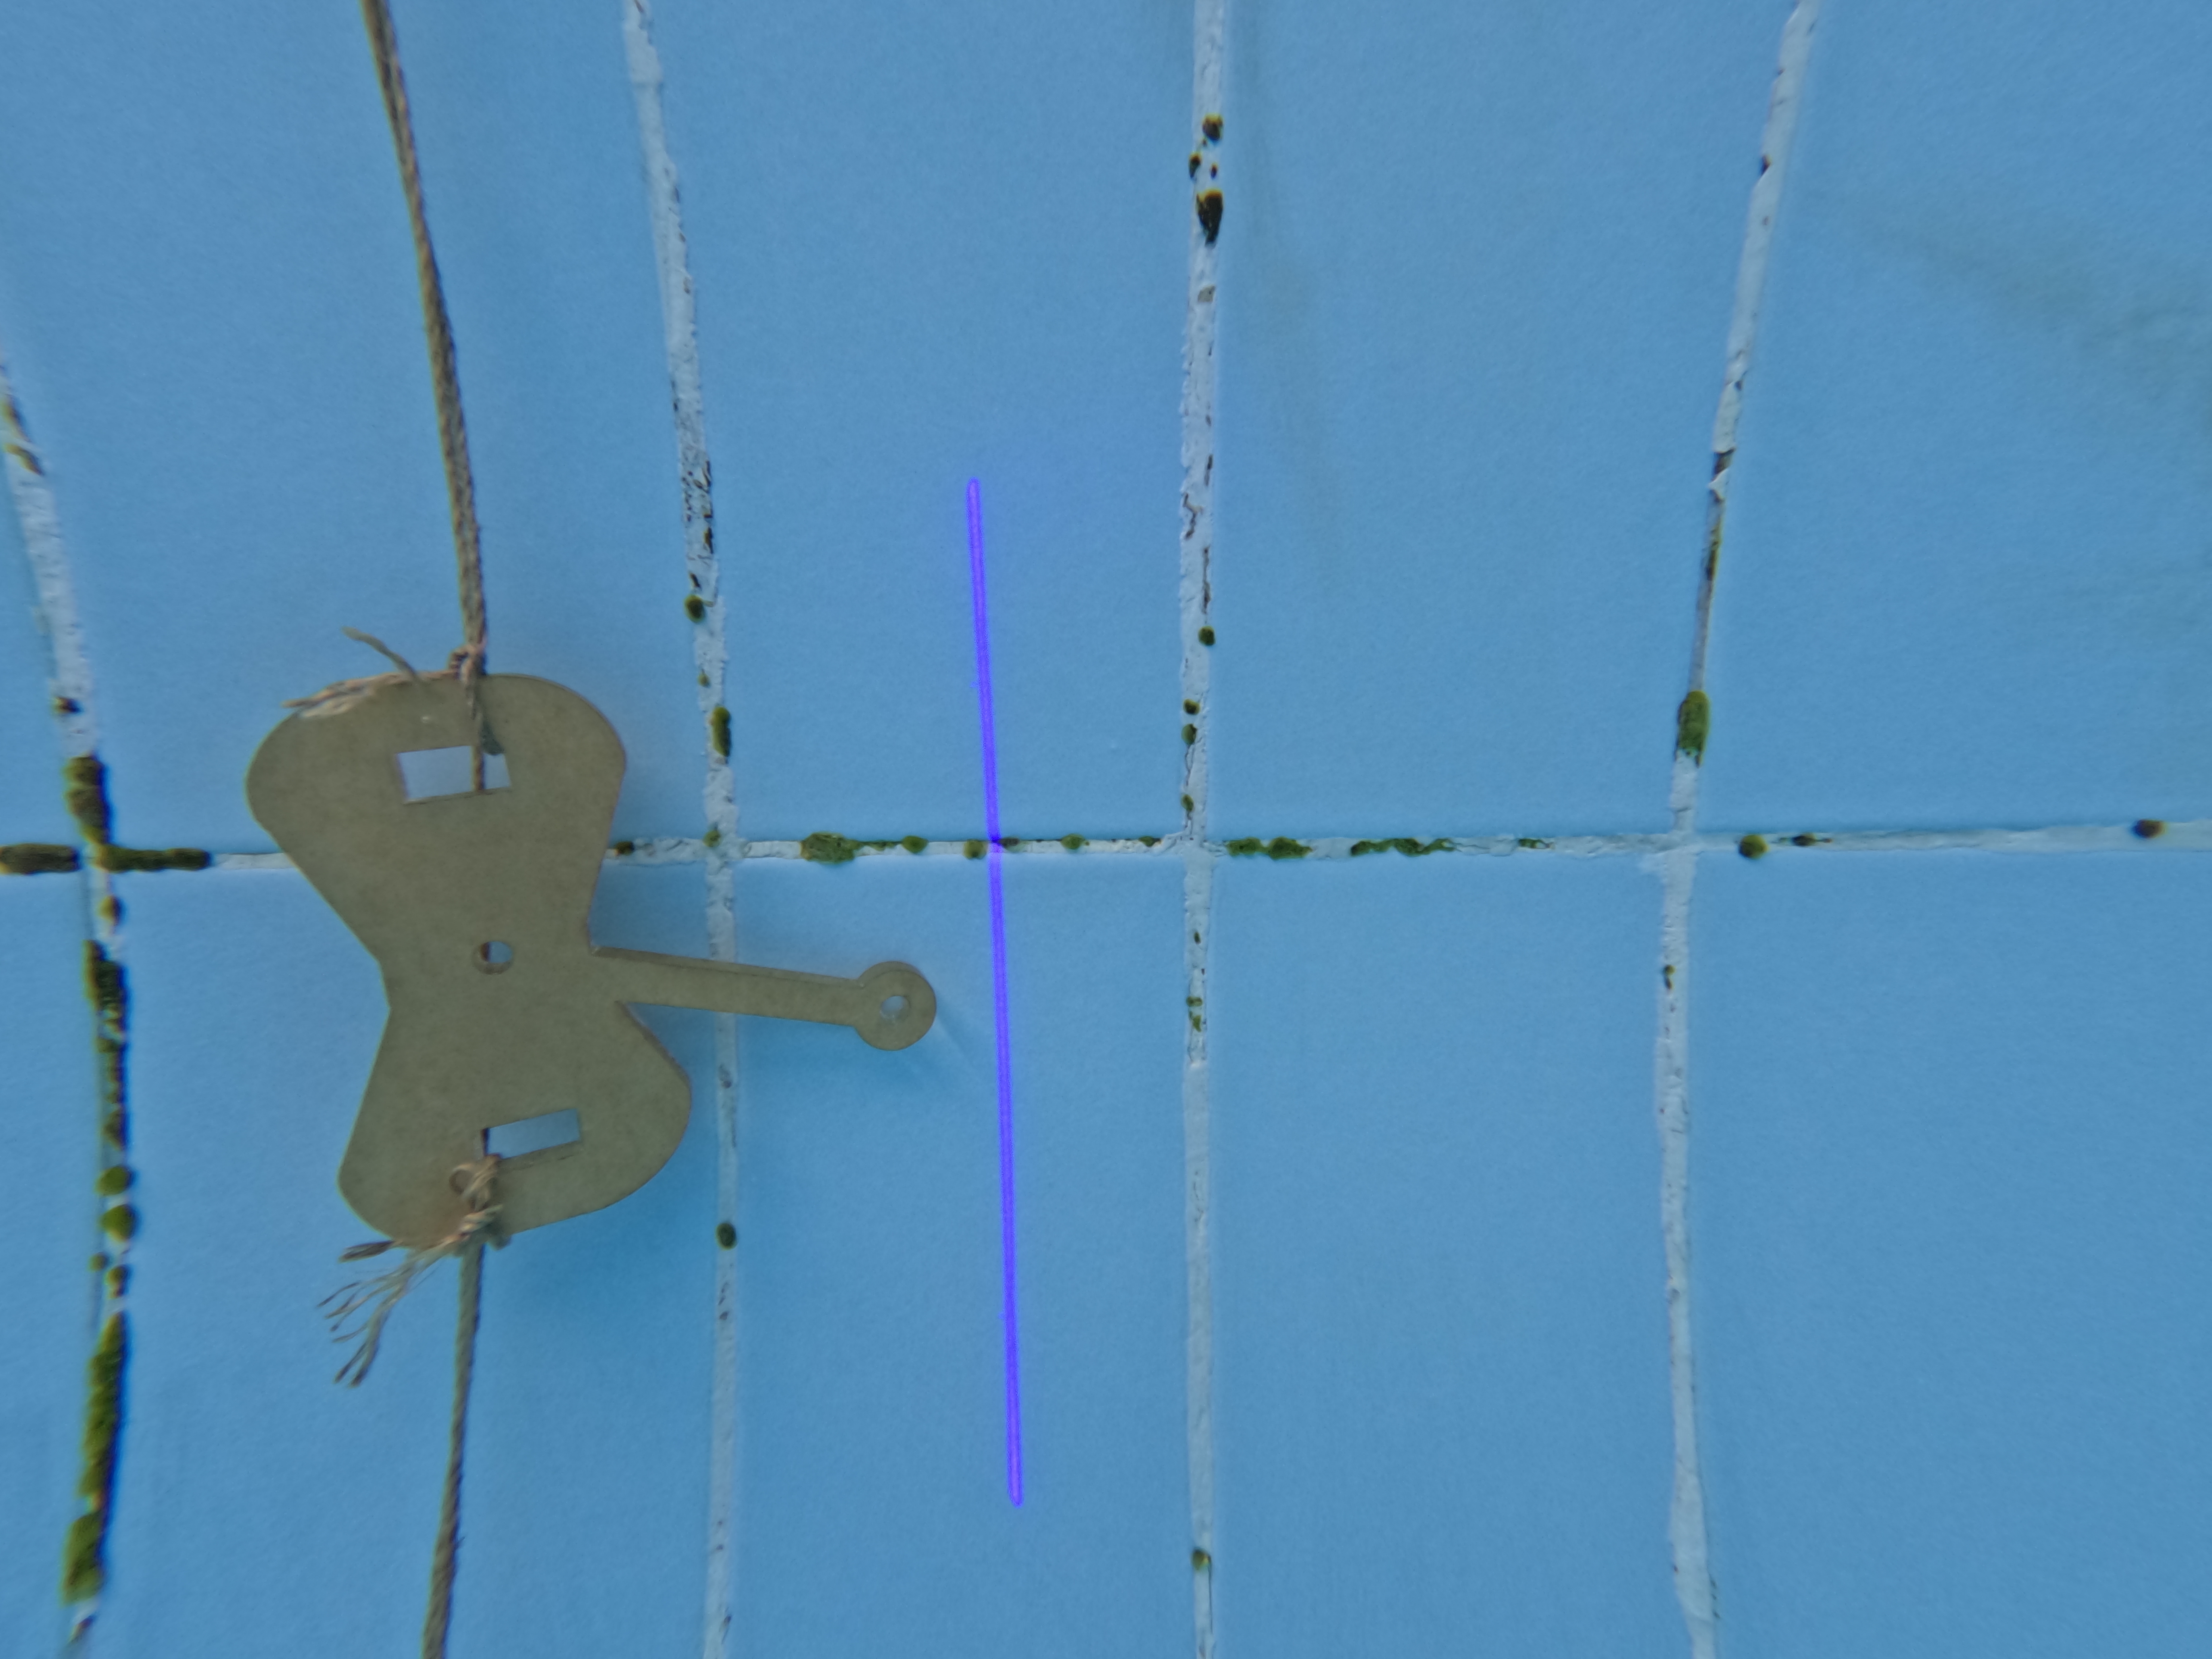

Supplement: Supplementary file 2585 [file G0050883.pdf › Level_2_2/G0050883.pdf]

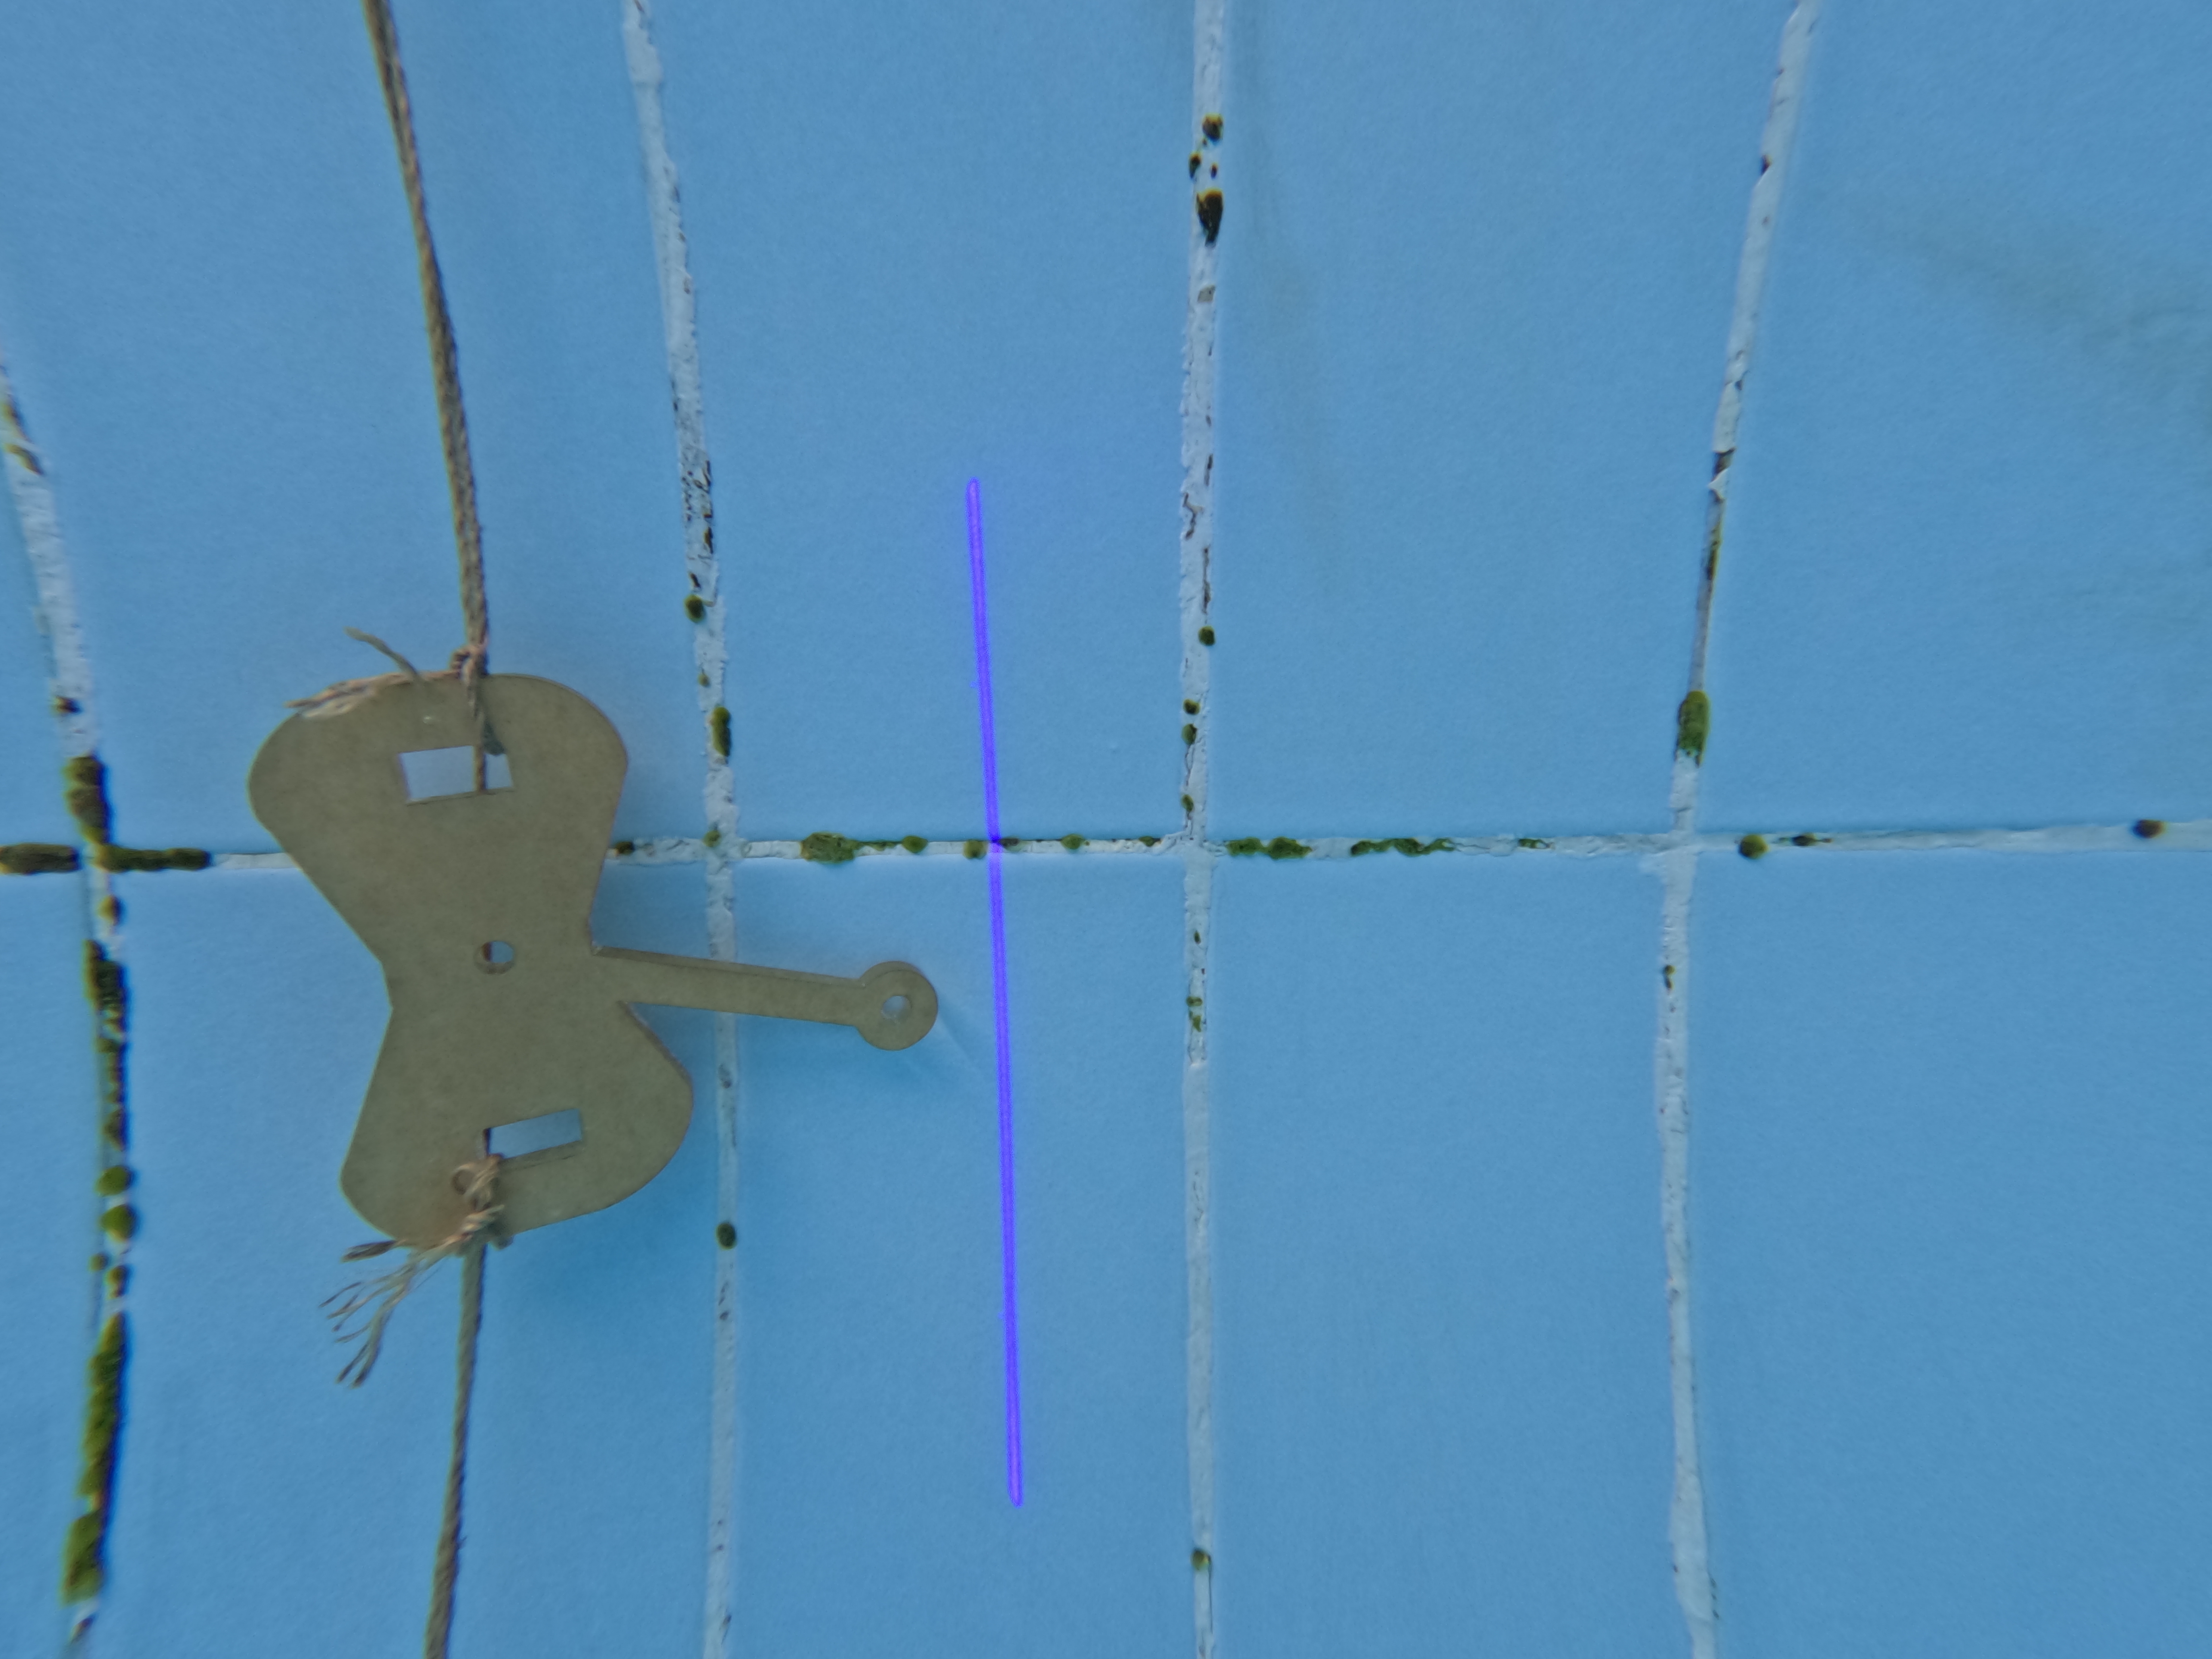

Supplement: Supplementary file 2586 [file G0050884.pdf › Level_2_2/G0050884.pdf]

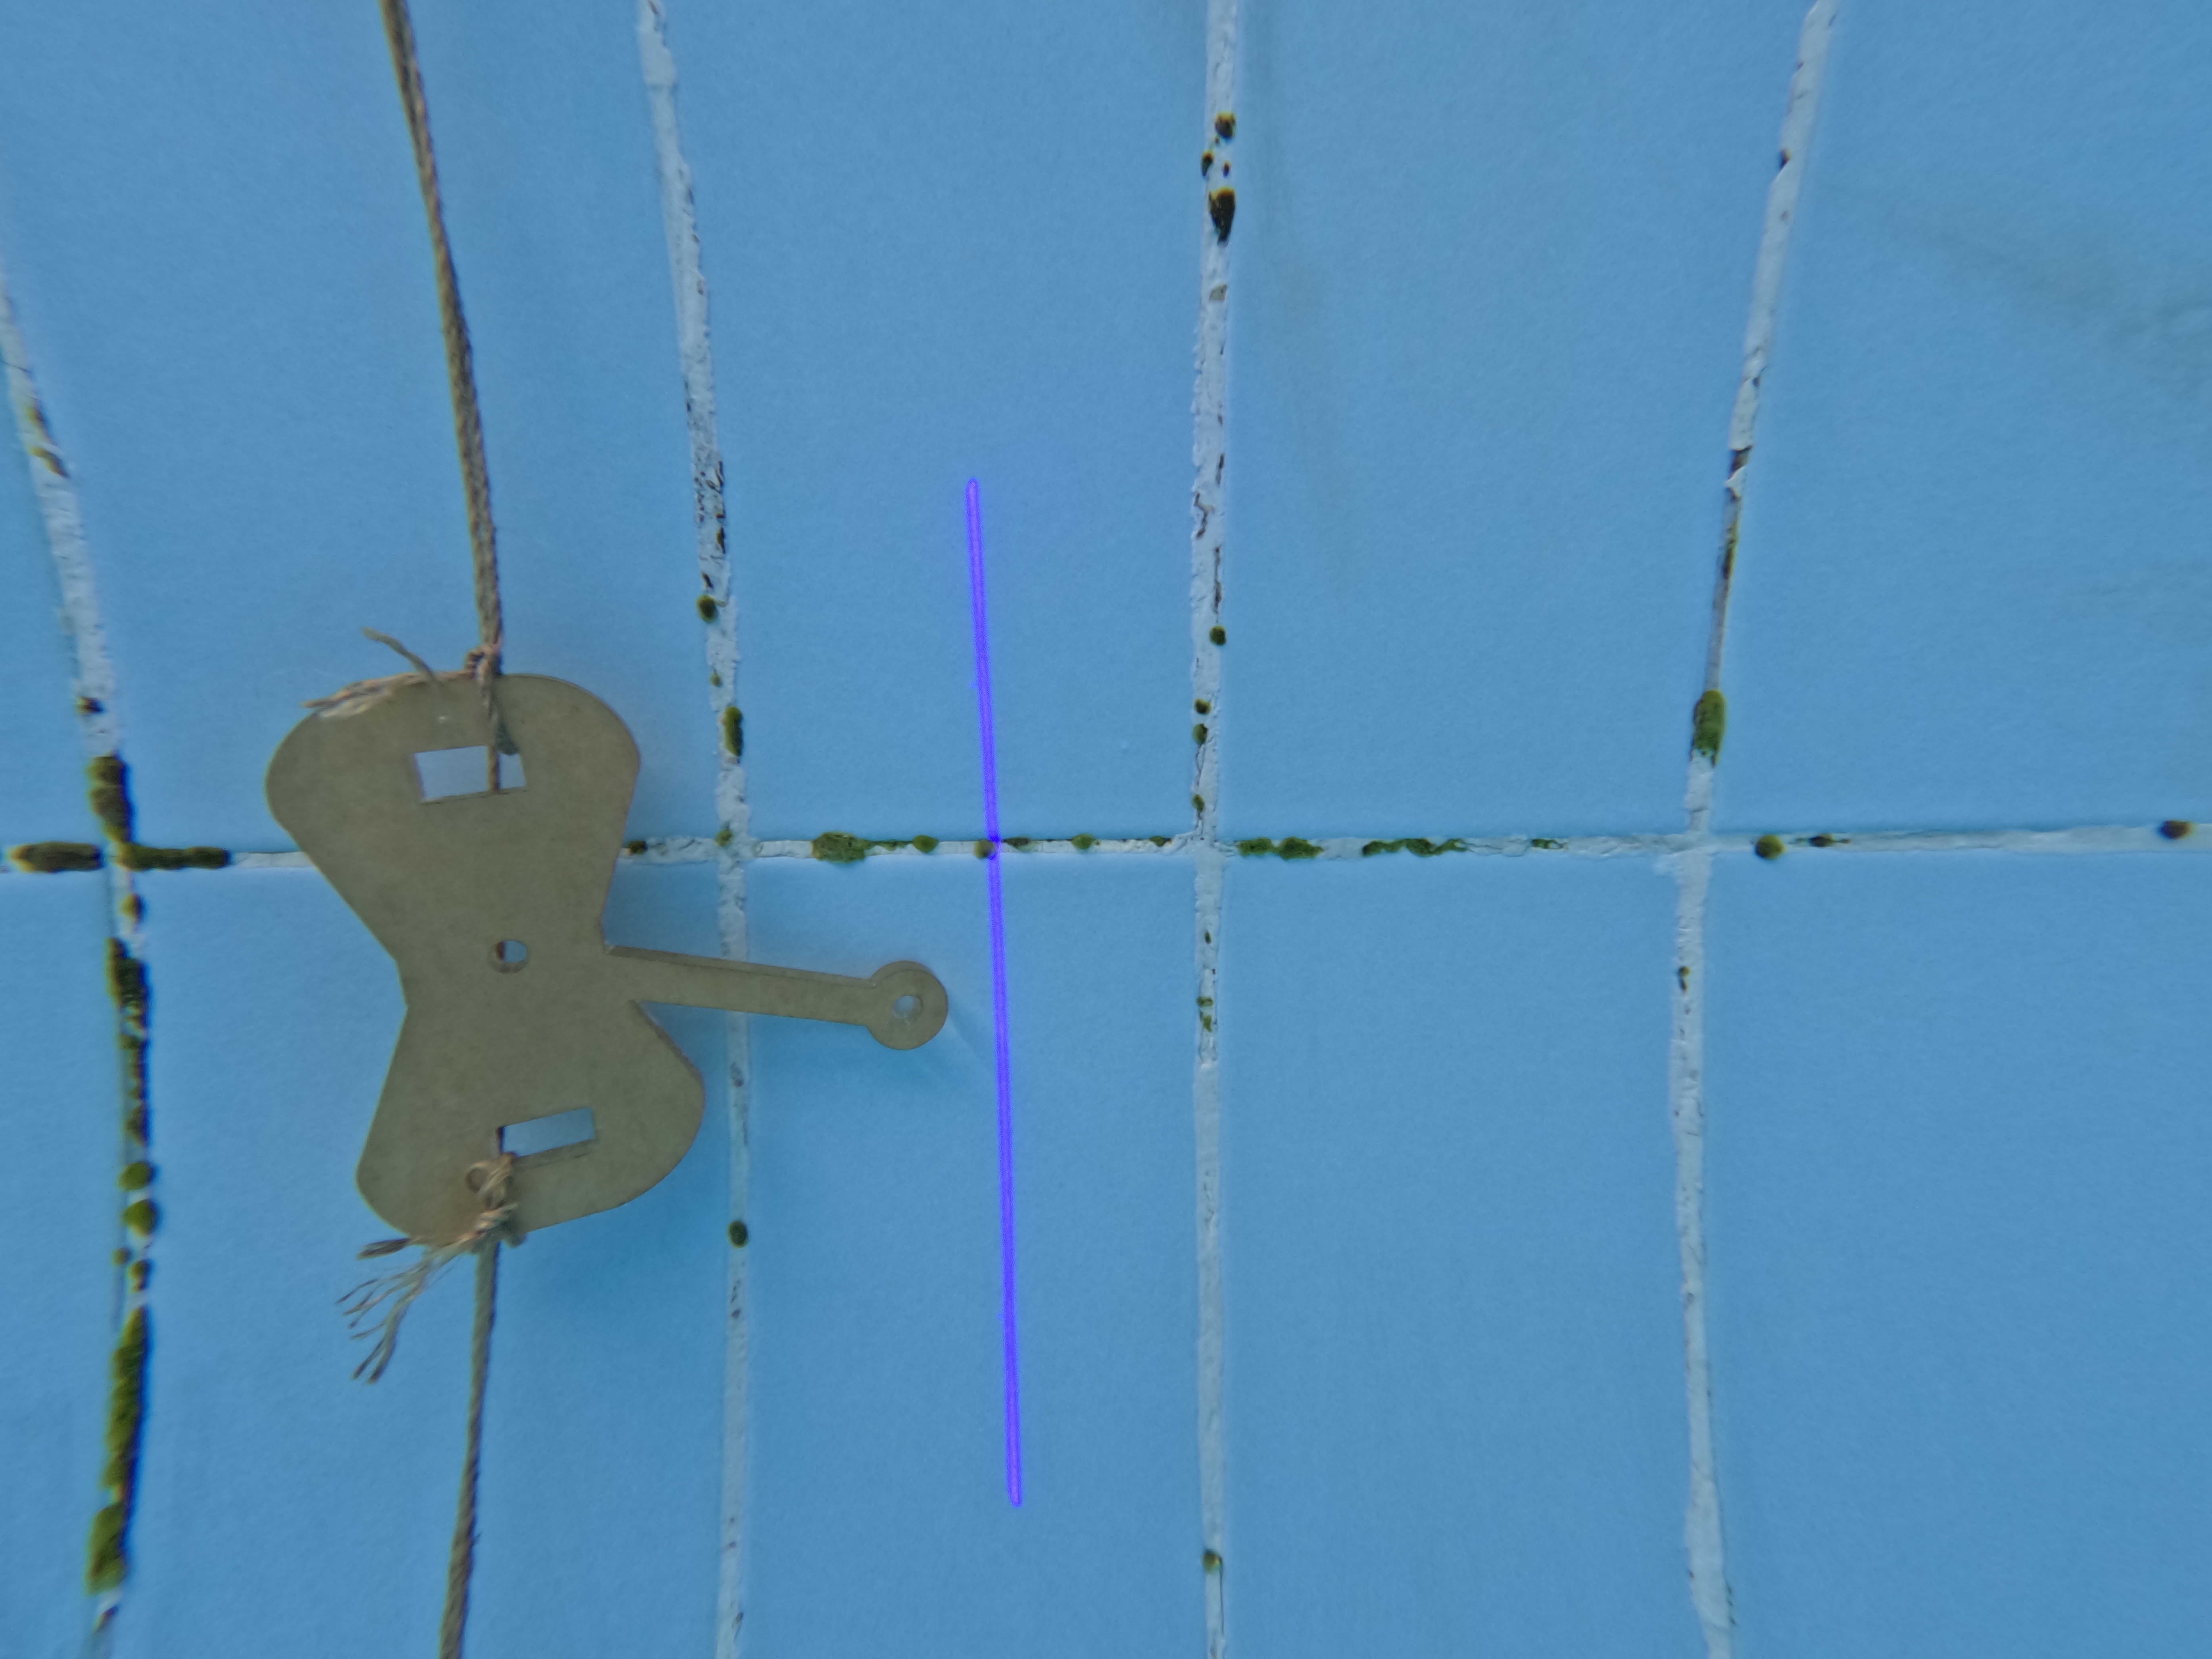

Supplement: Supplementary file 2587 [file G0050885.pdf › Level_2_2/G0050885.pdf]

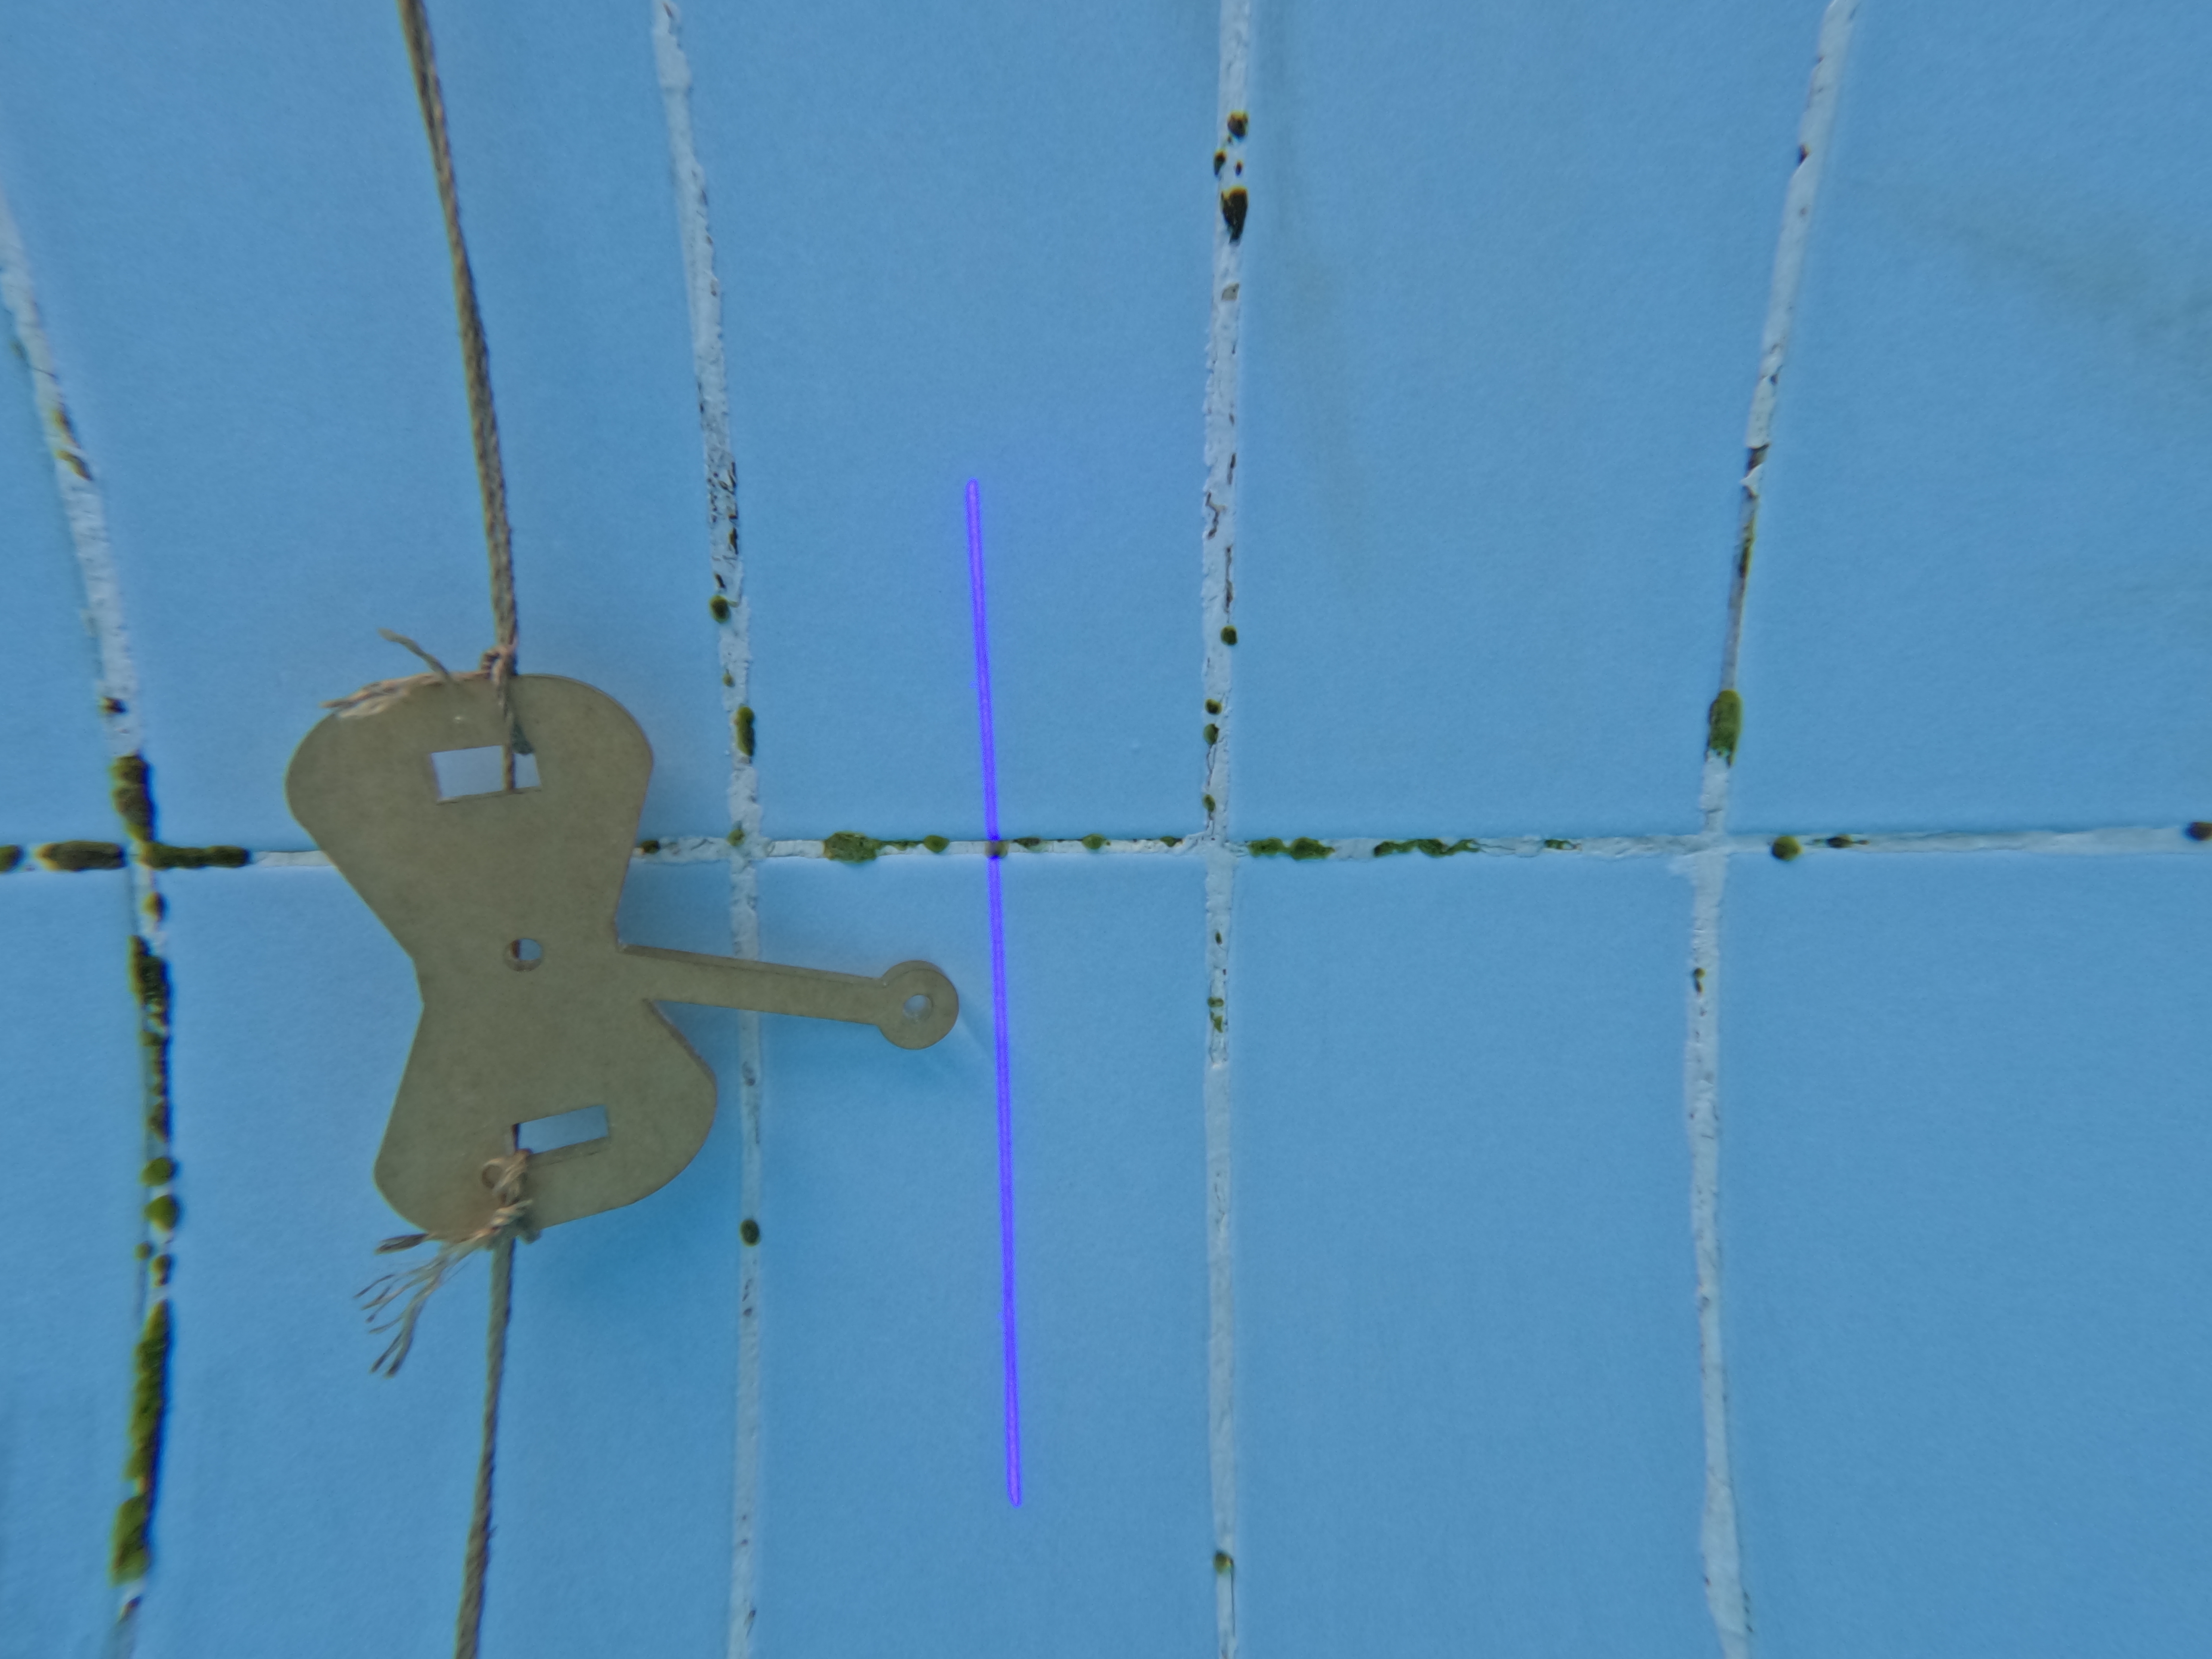

Supplement: Supplementary file 2588 [file G0050886.pdf › Level_2_2/G0050886.pdf]

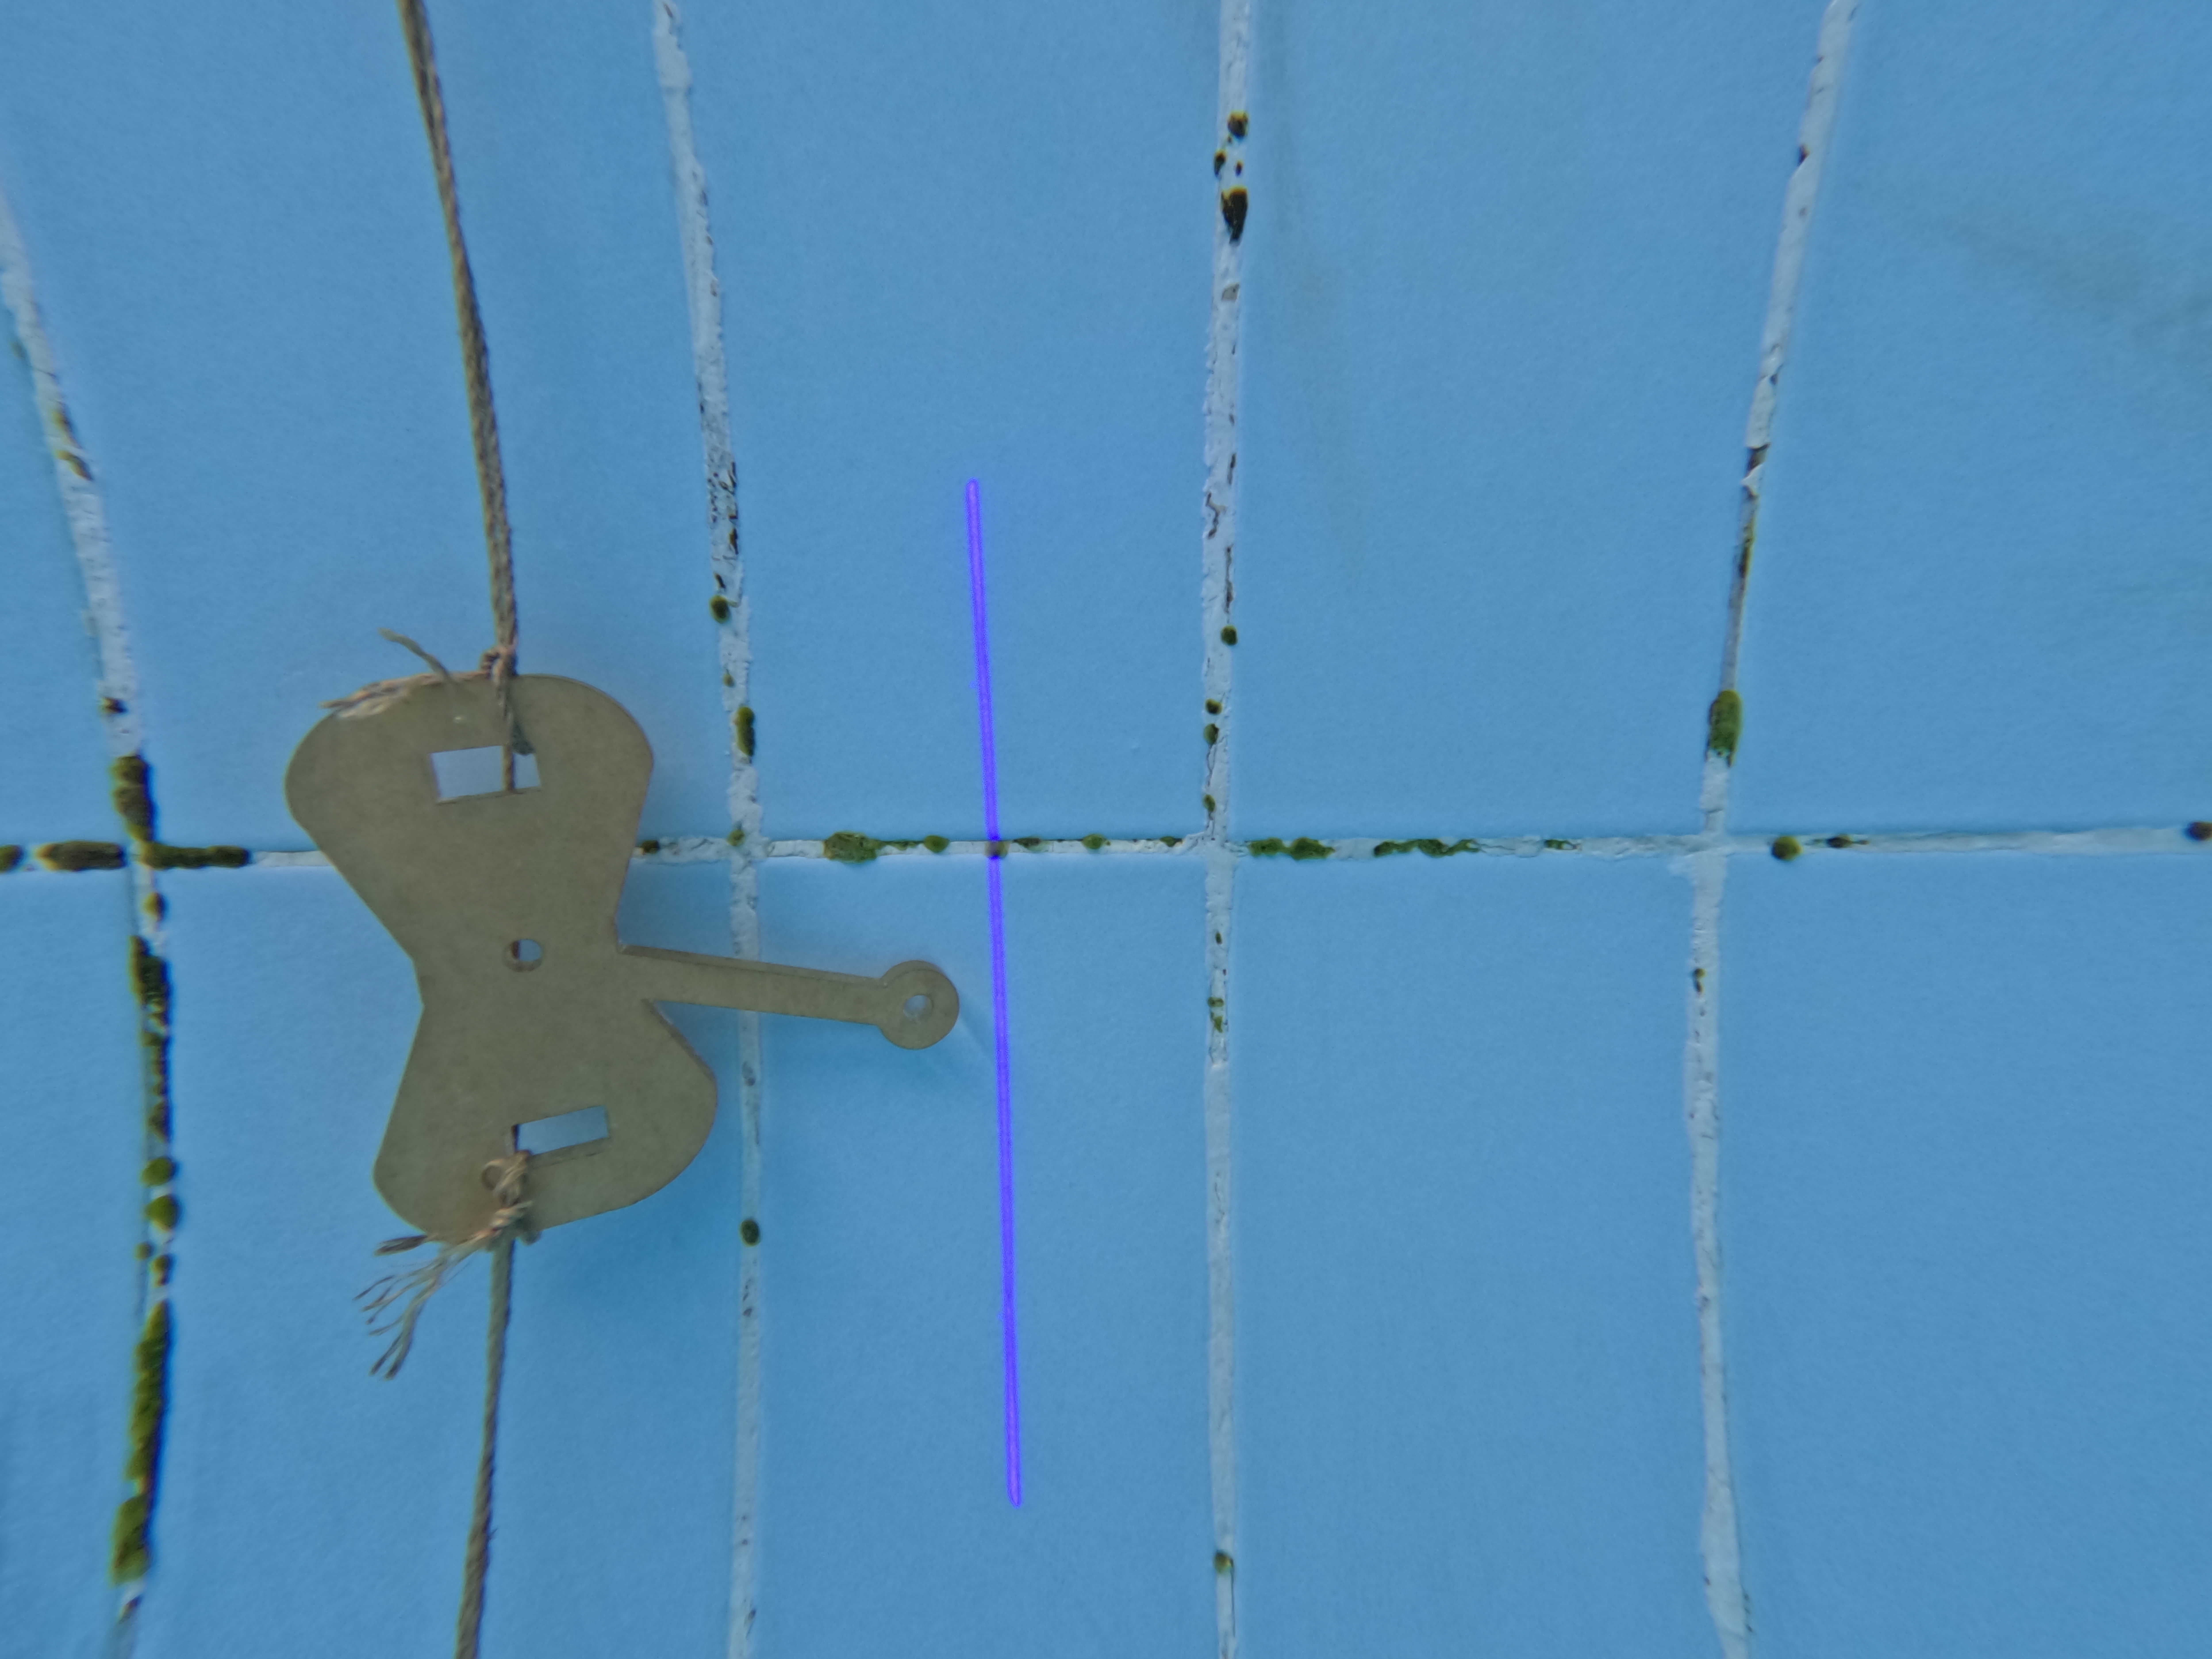

Supplement: Supplementary file 2589 [file G0050887.pdf › Level_2_2/G0050887.pdf]

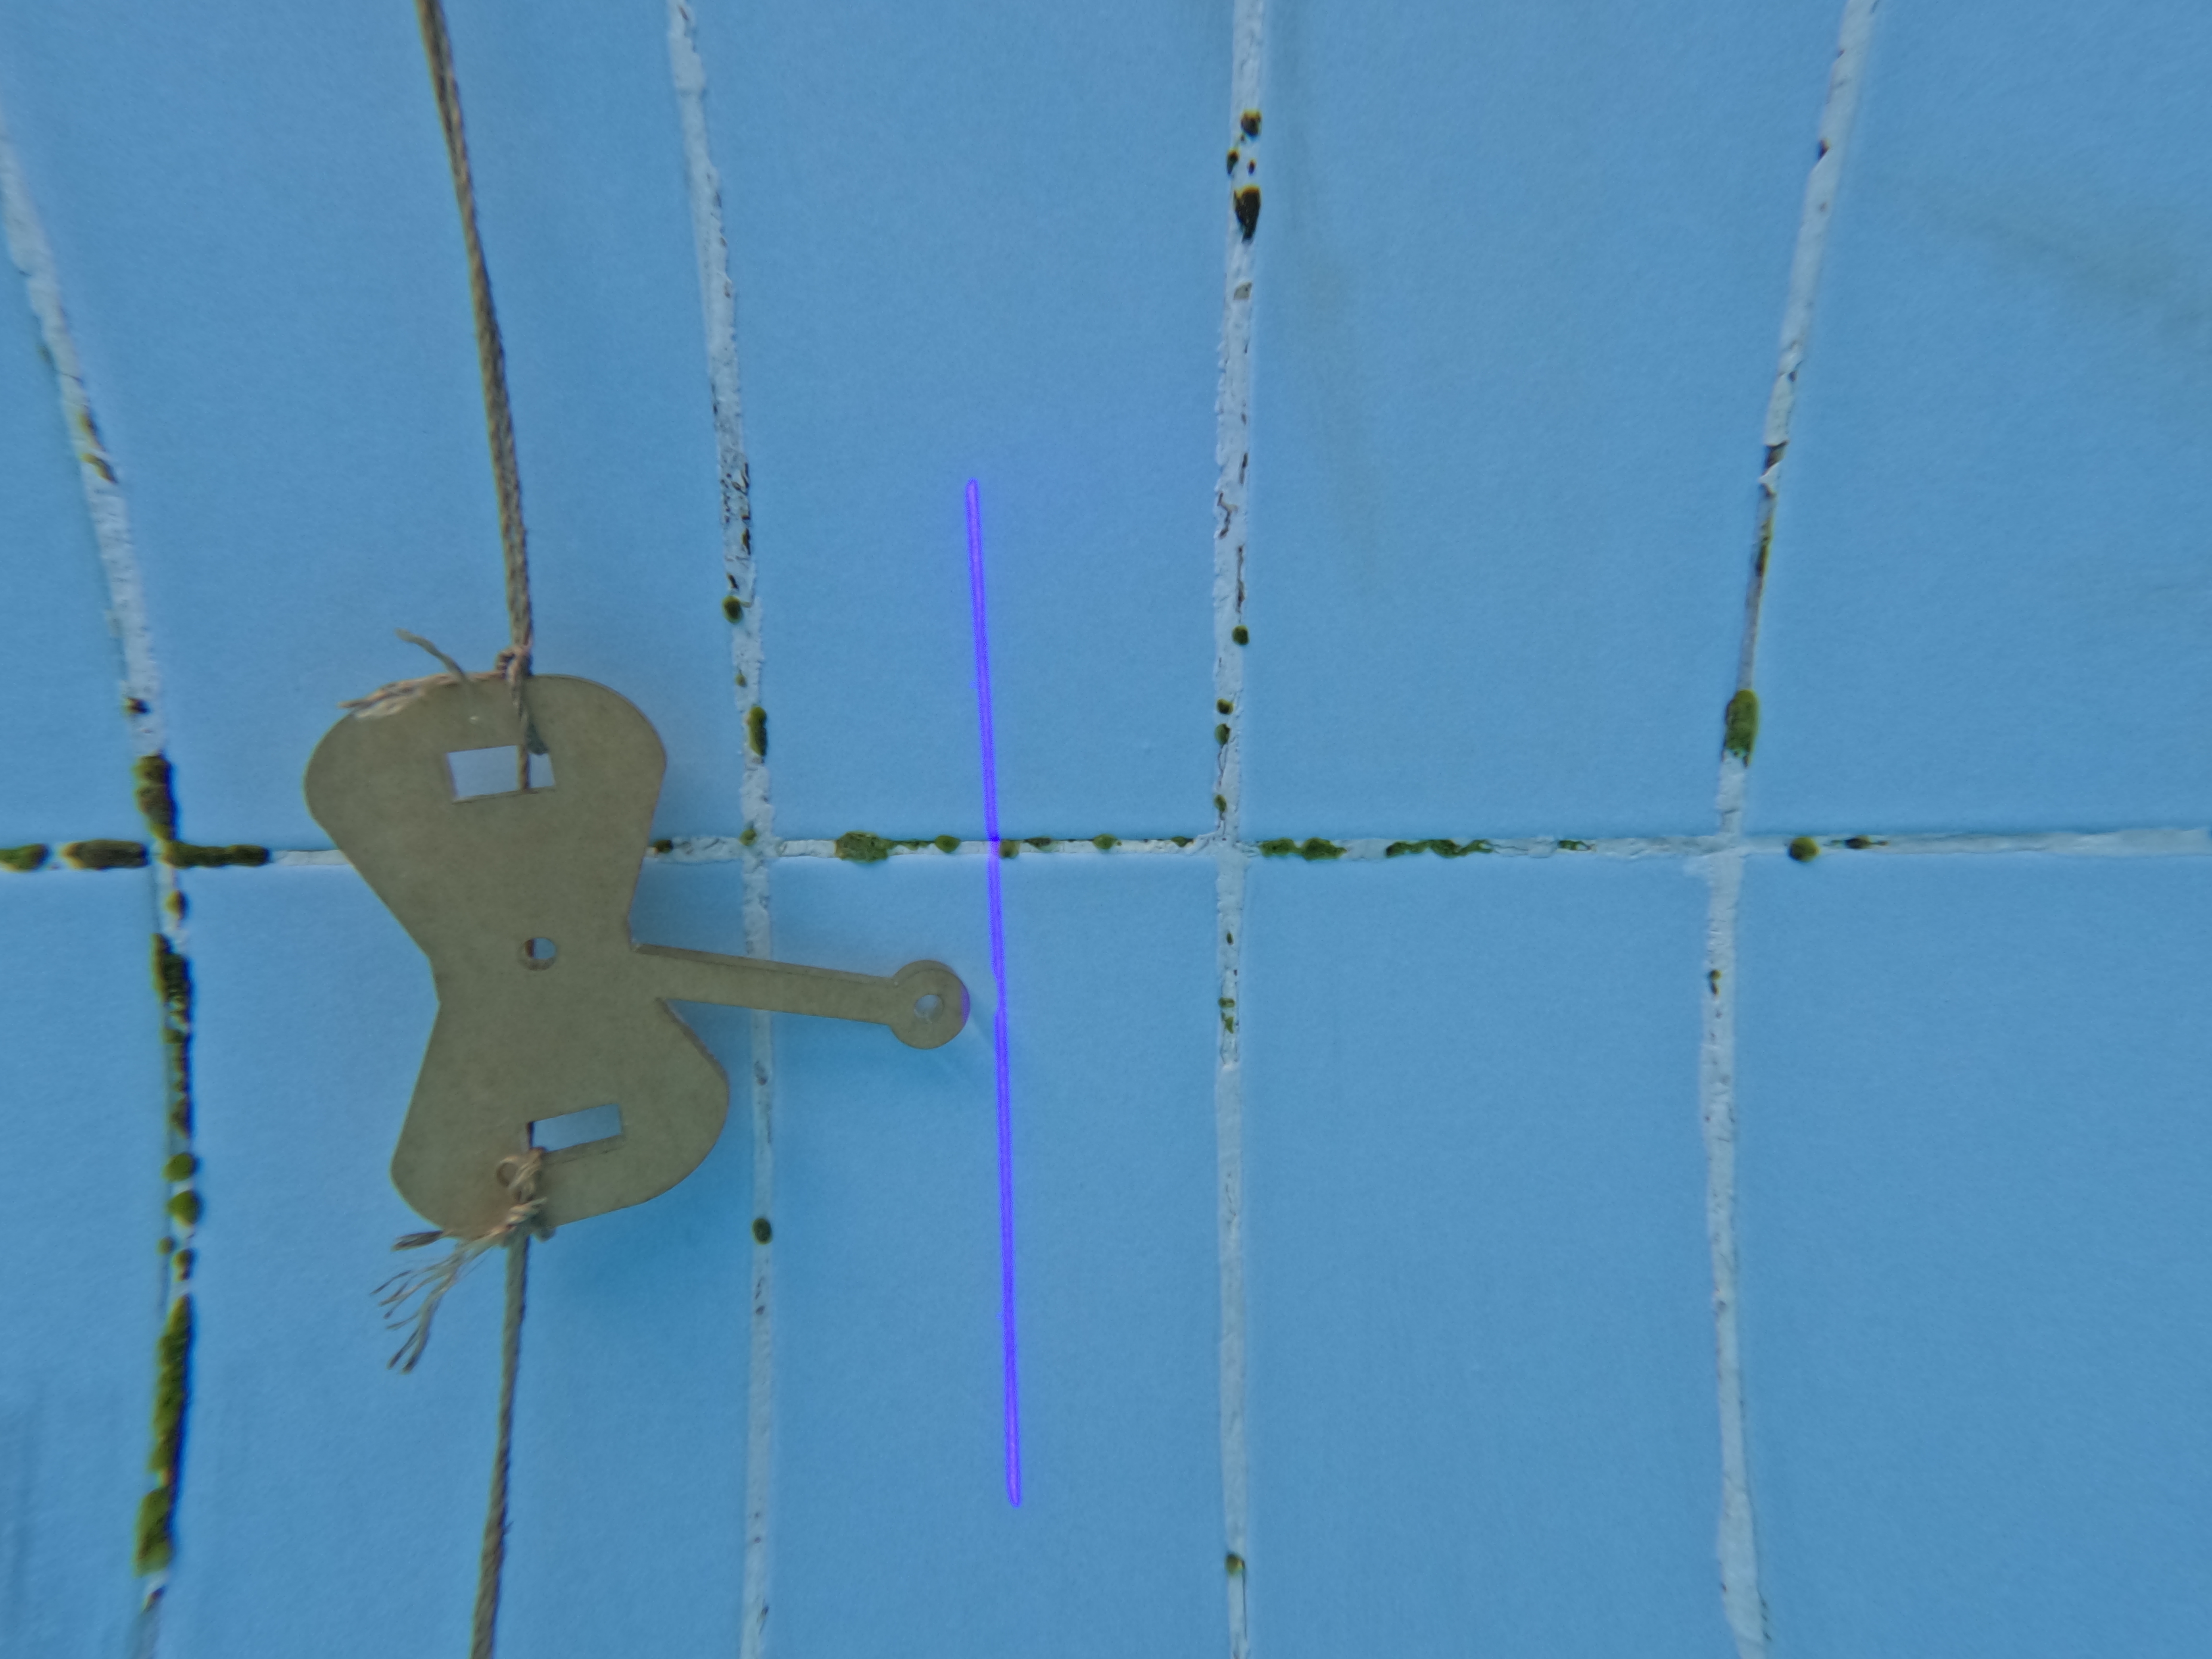

Supplement: Supplementary file 2590 [file G0050888.pdf › Level_2_2/G0050888.pdf]
