# Supplementary figures and images for: 3D reconstruction of shallow sea environment using direct system calibration and faint laser line extraction (part 26 of 35)
Source: Research Square preprint supplement (doi:10.21203/rs.3.rs-5262658/v1), 2024-12-02

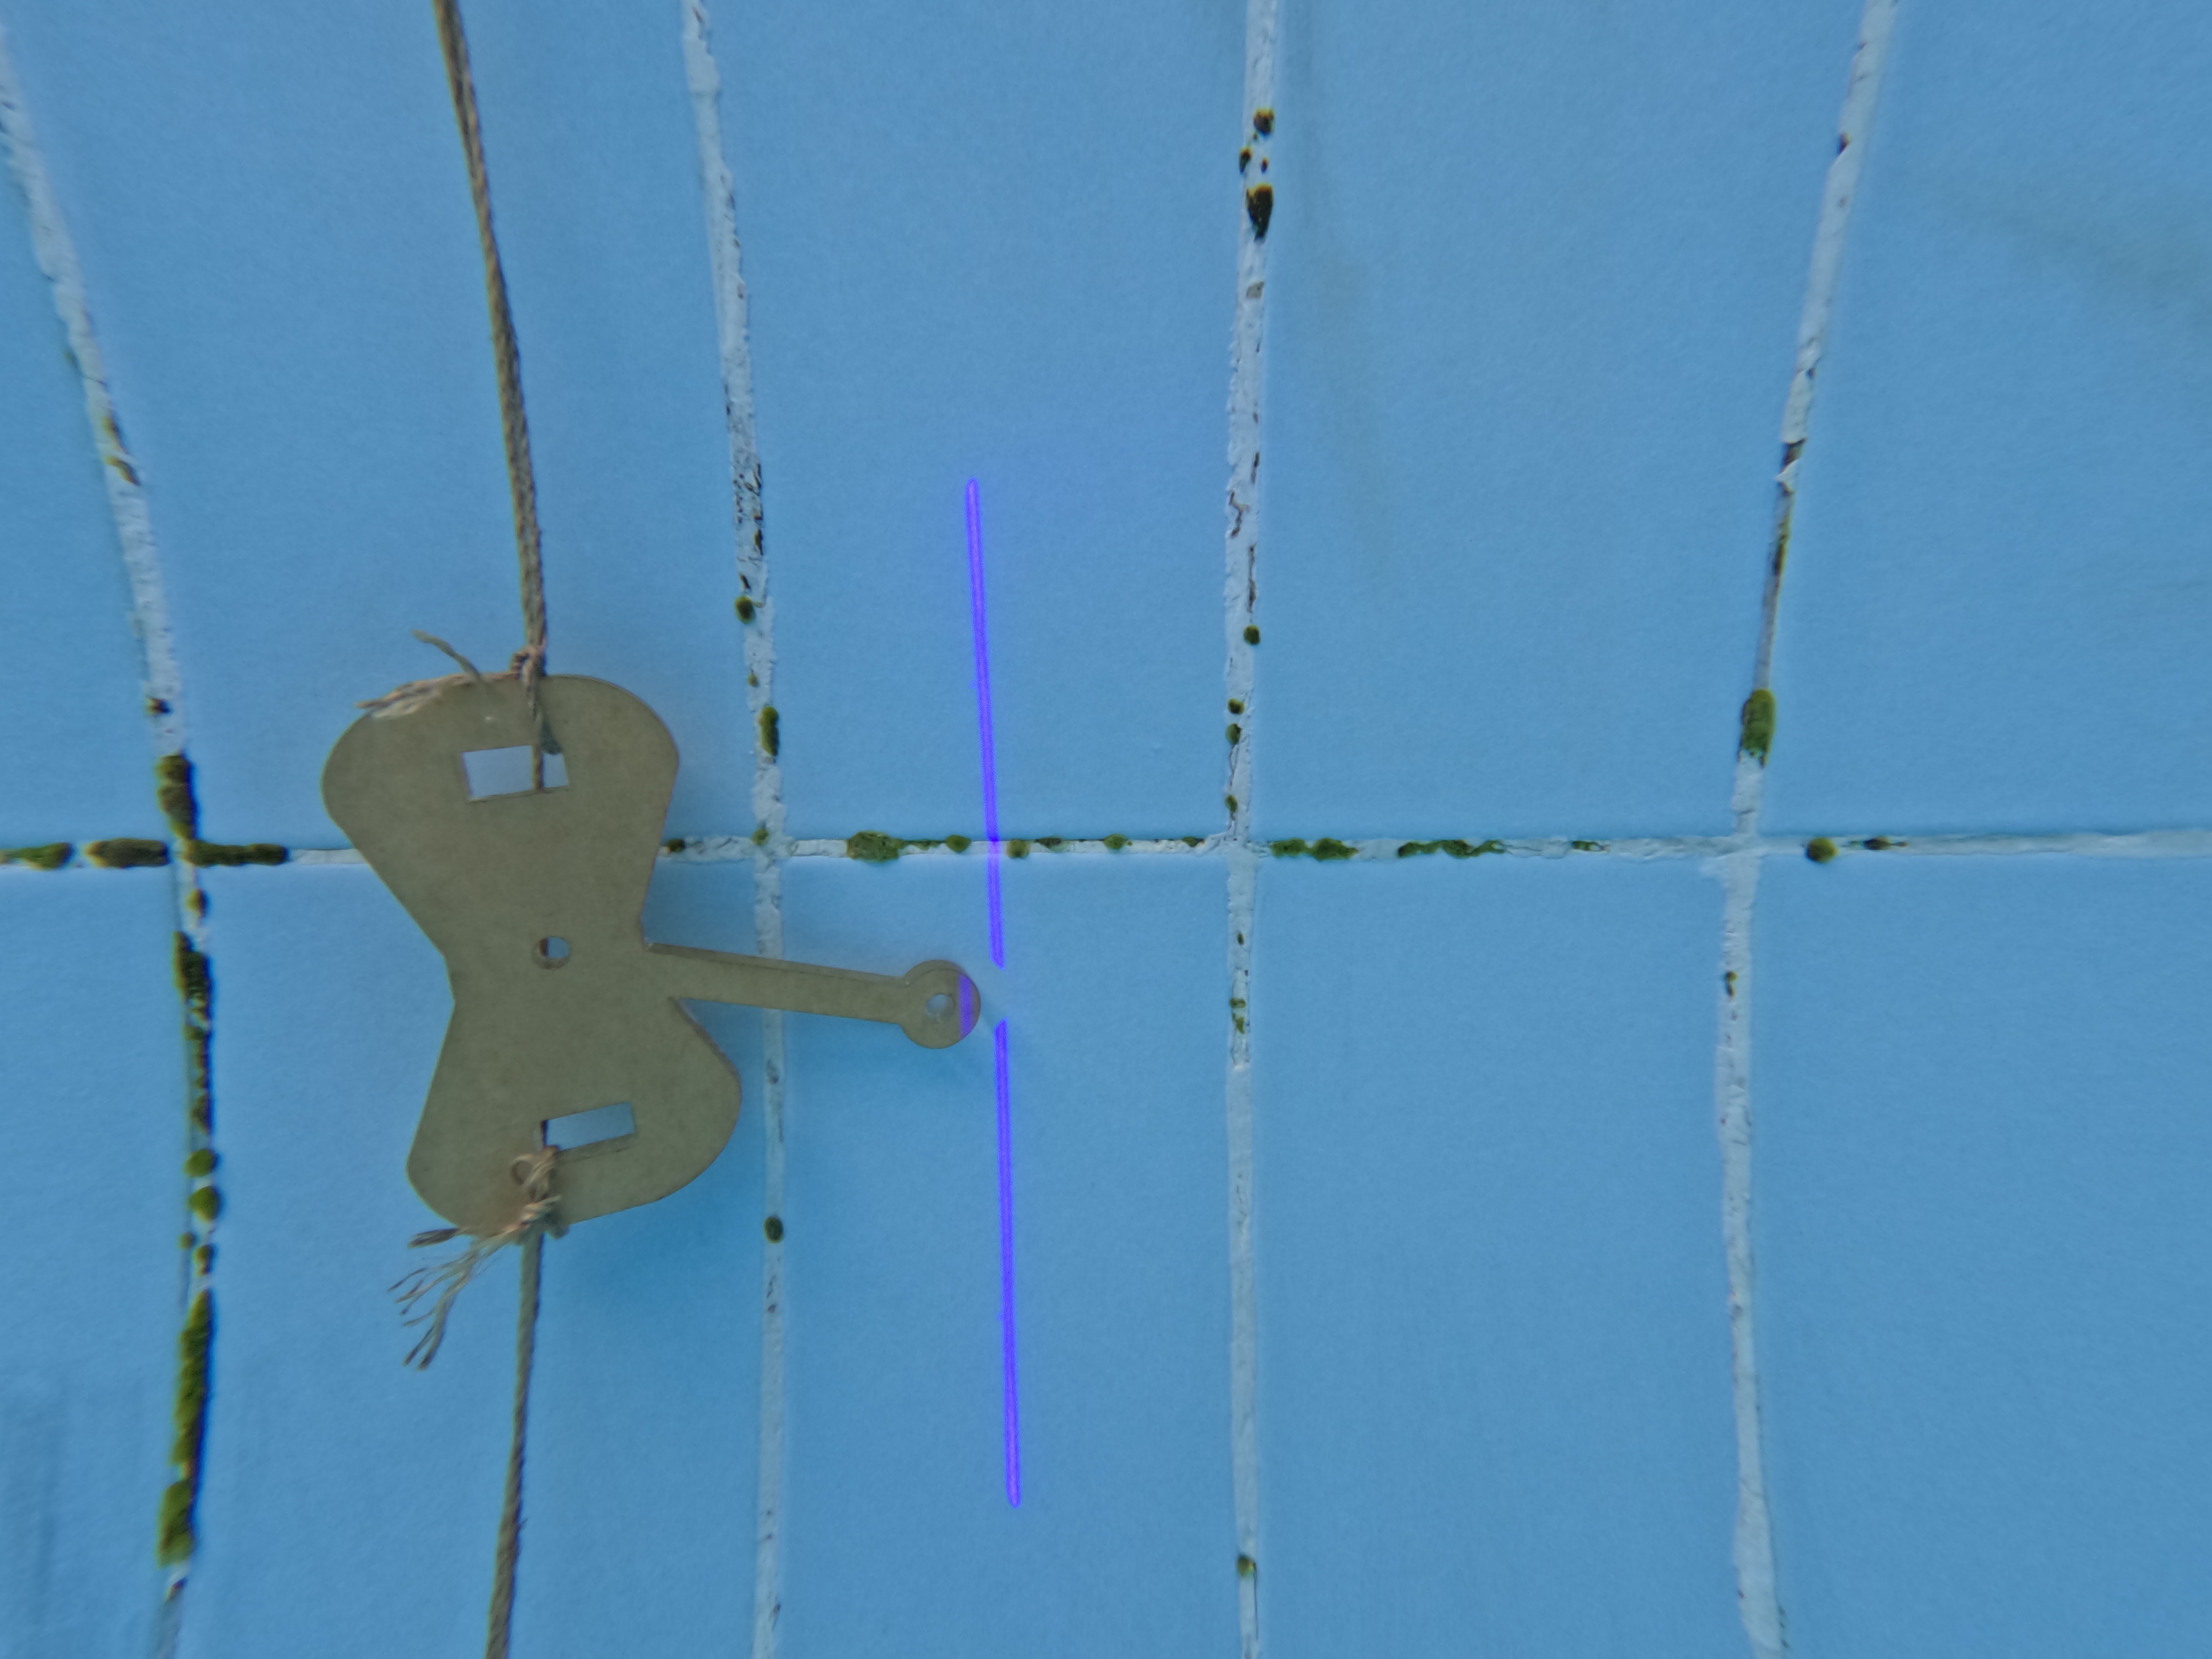

Supplement: Supplementary file 2591 [file G0050889.pdf › Level_2_2/G0050889.pdf]

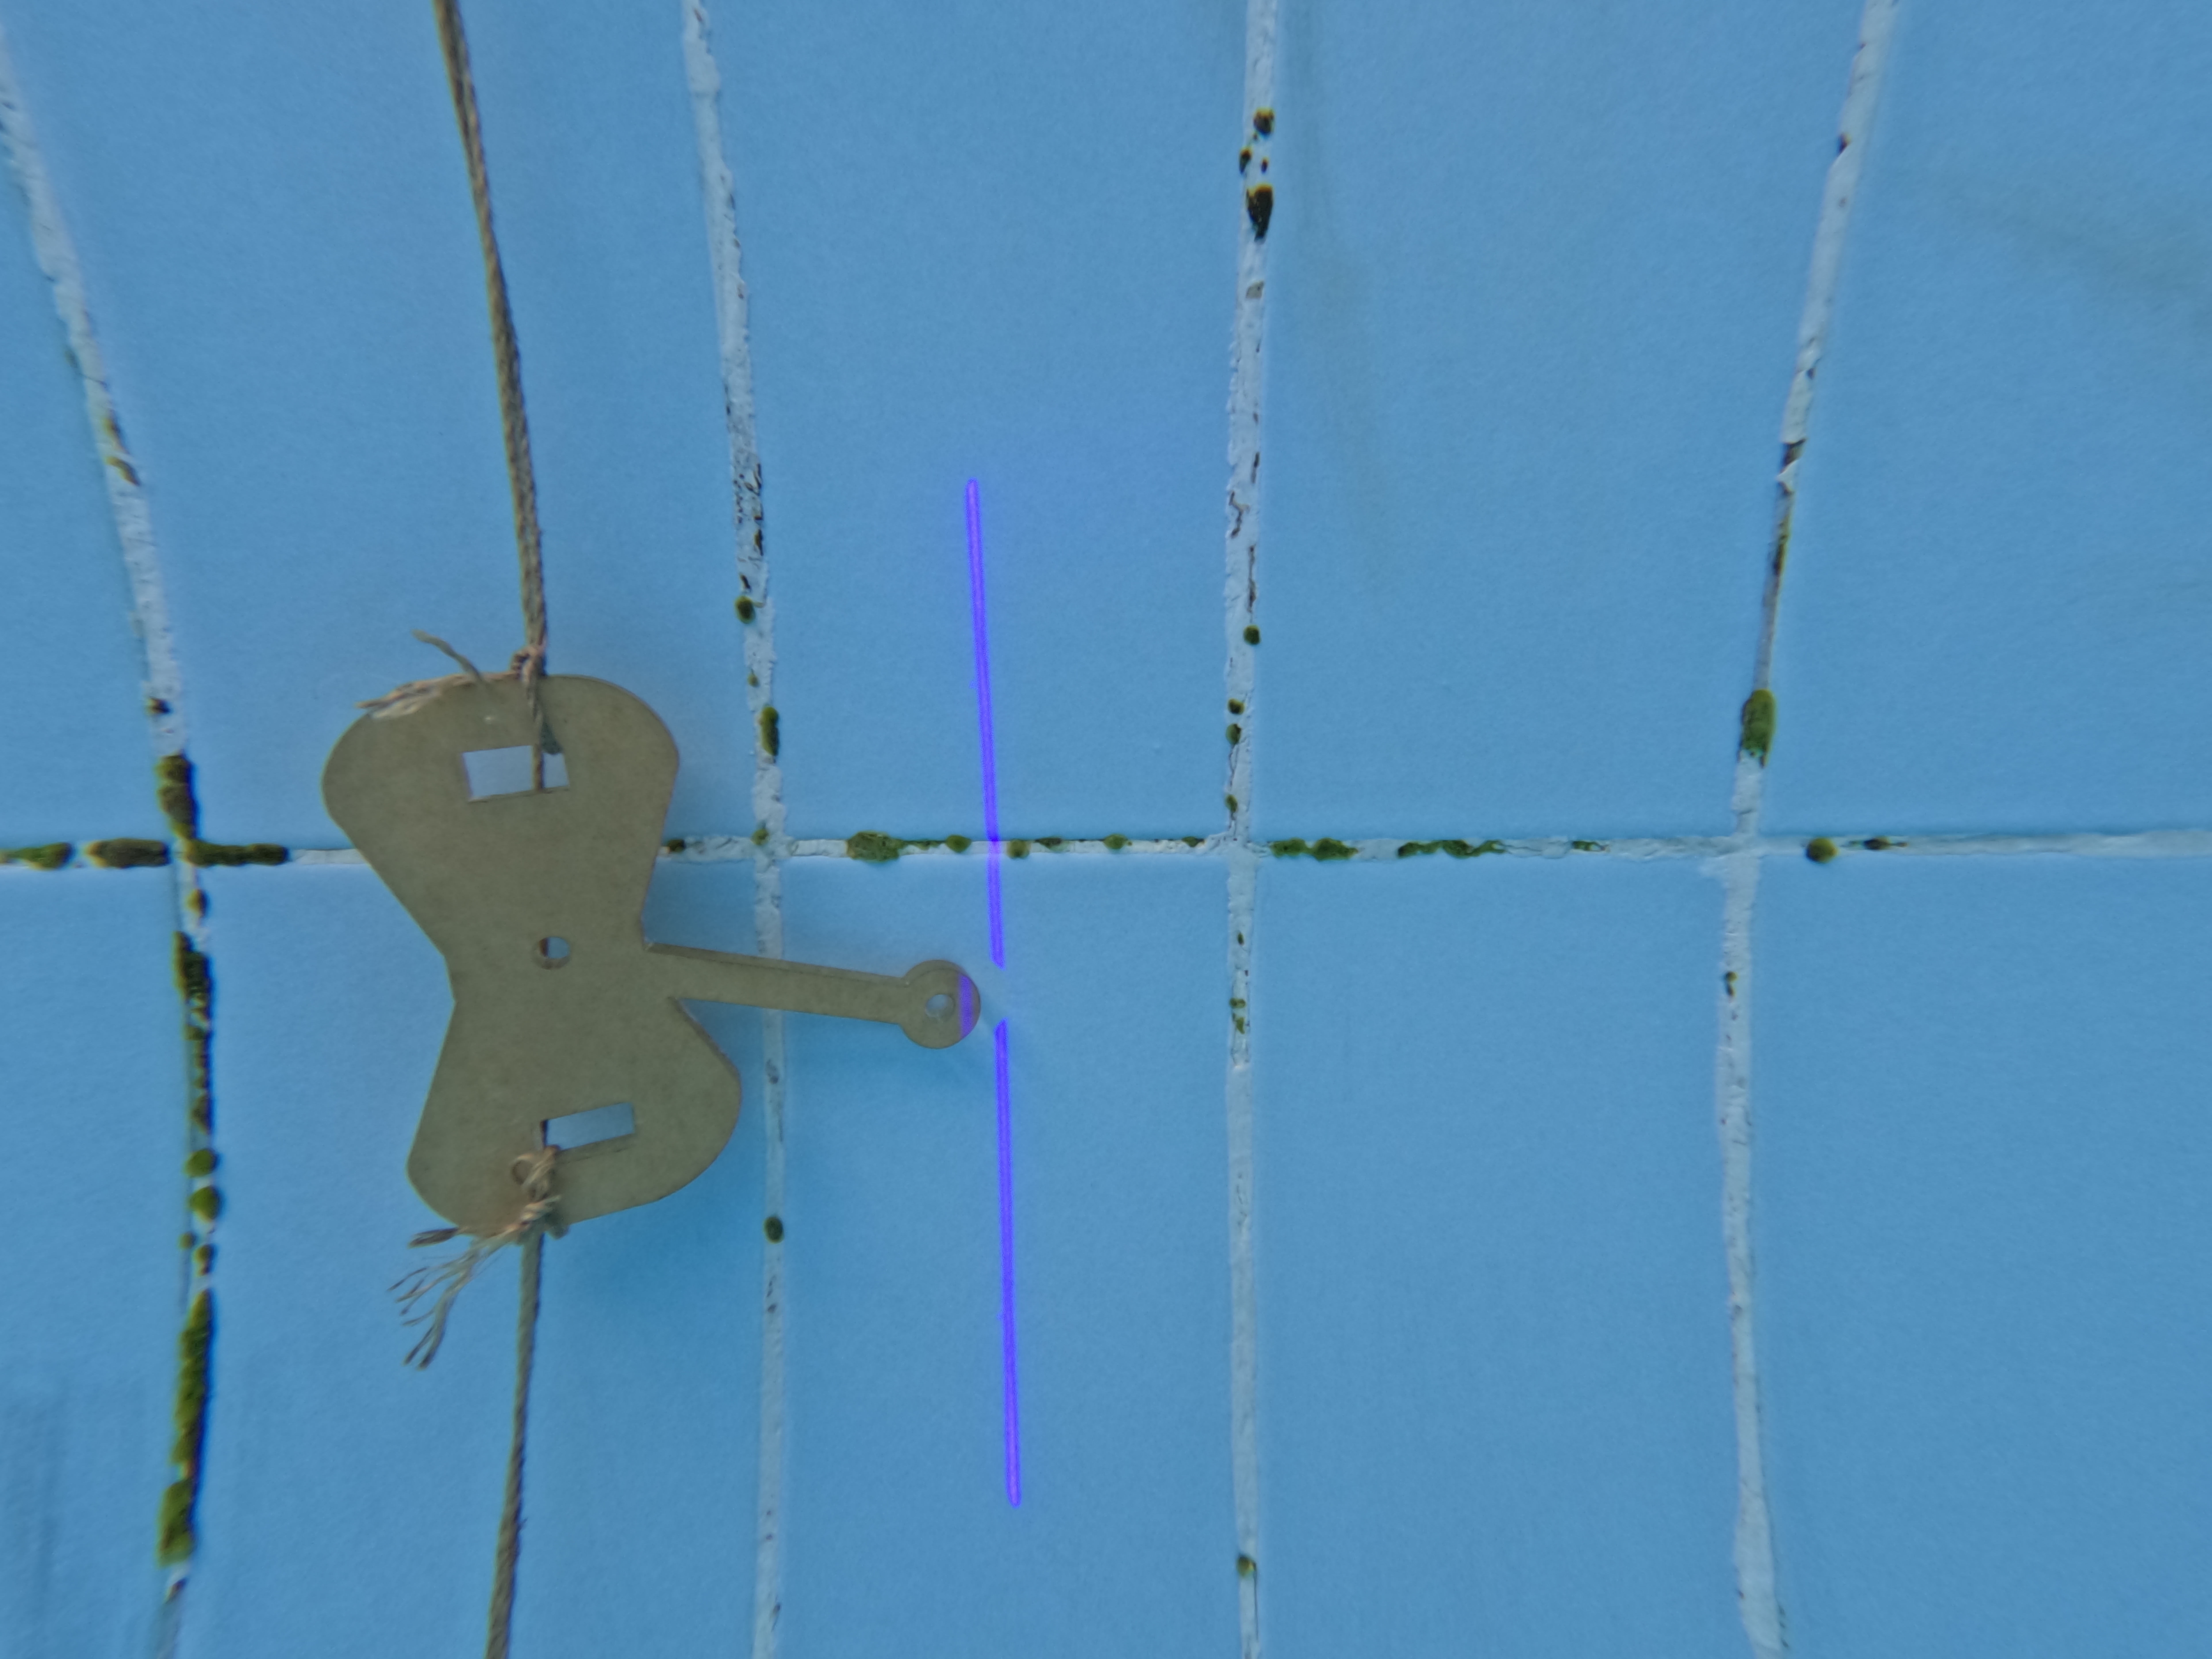

Supplement: Supplementary file 2592 [file G0050890.pdf › Level_2_2/G0050890.pdf]

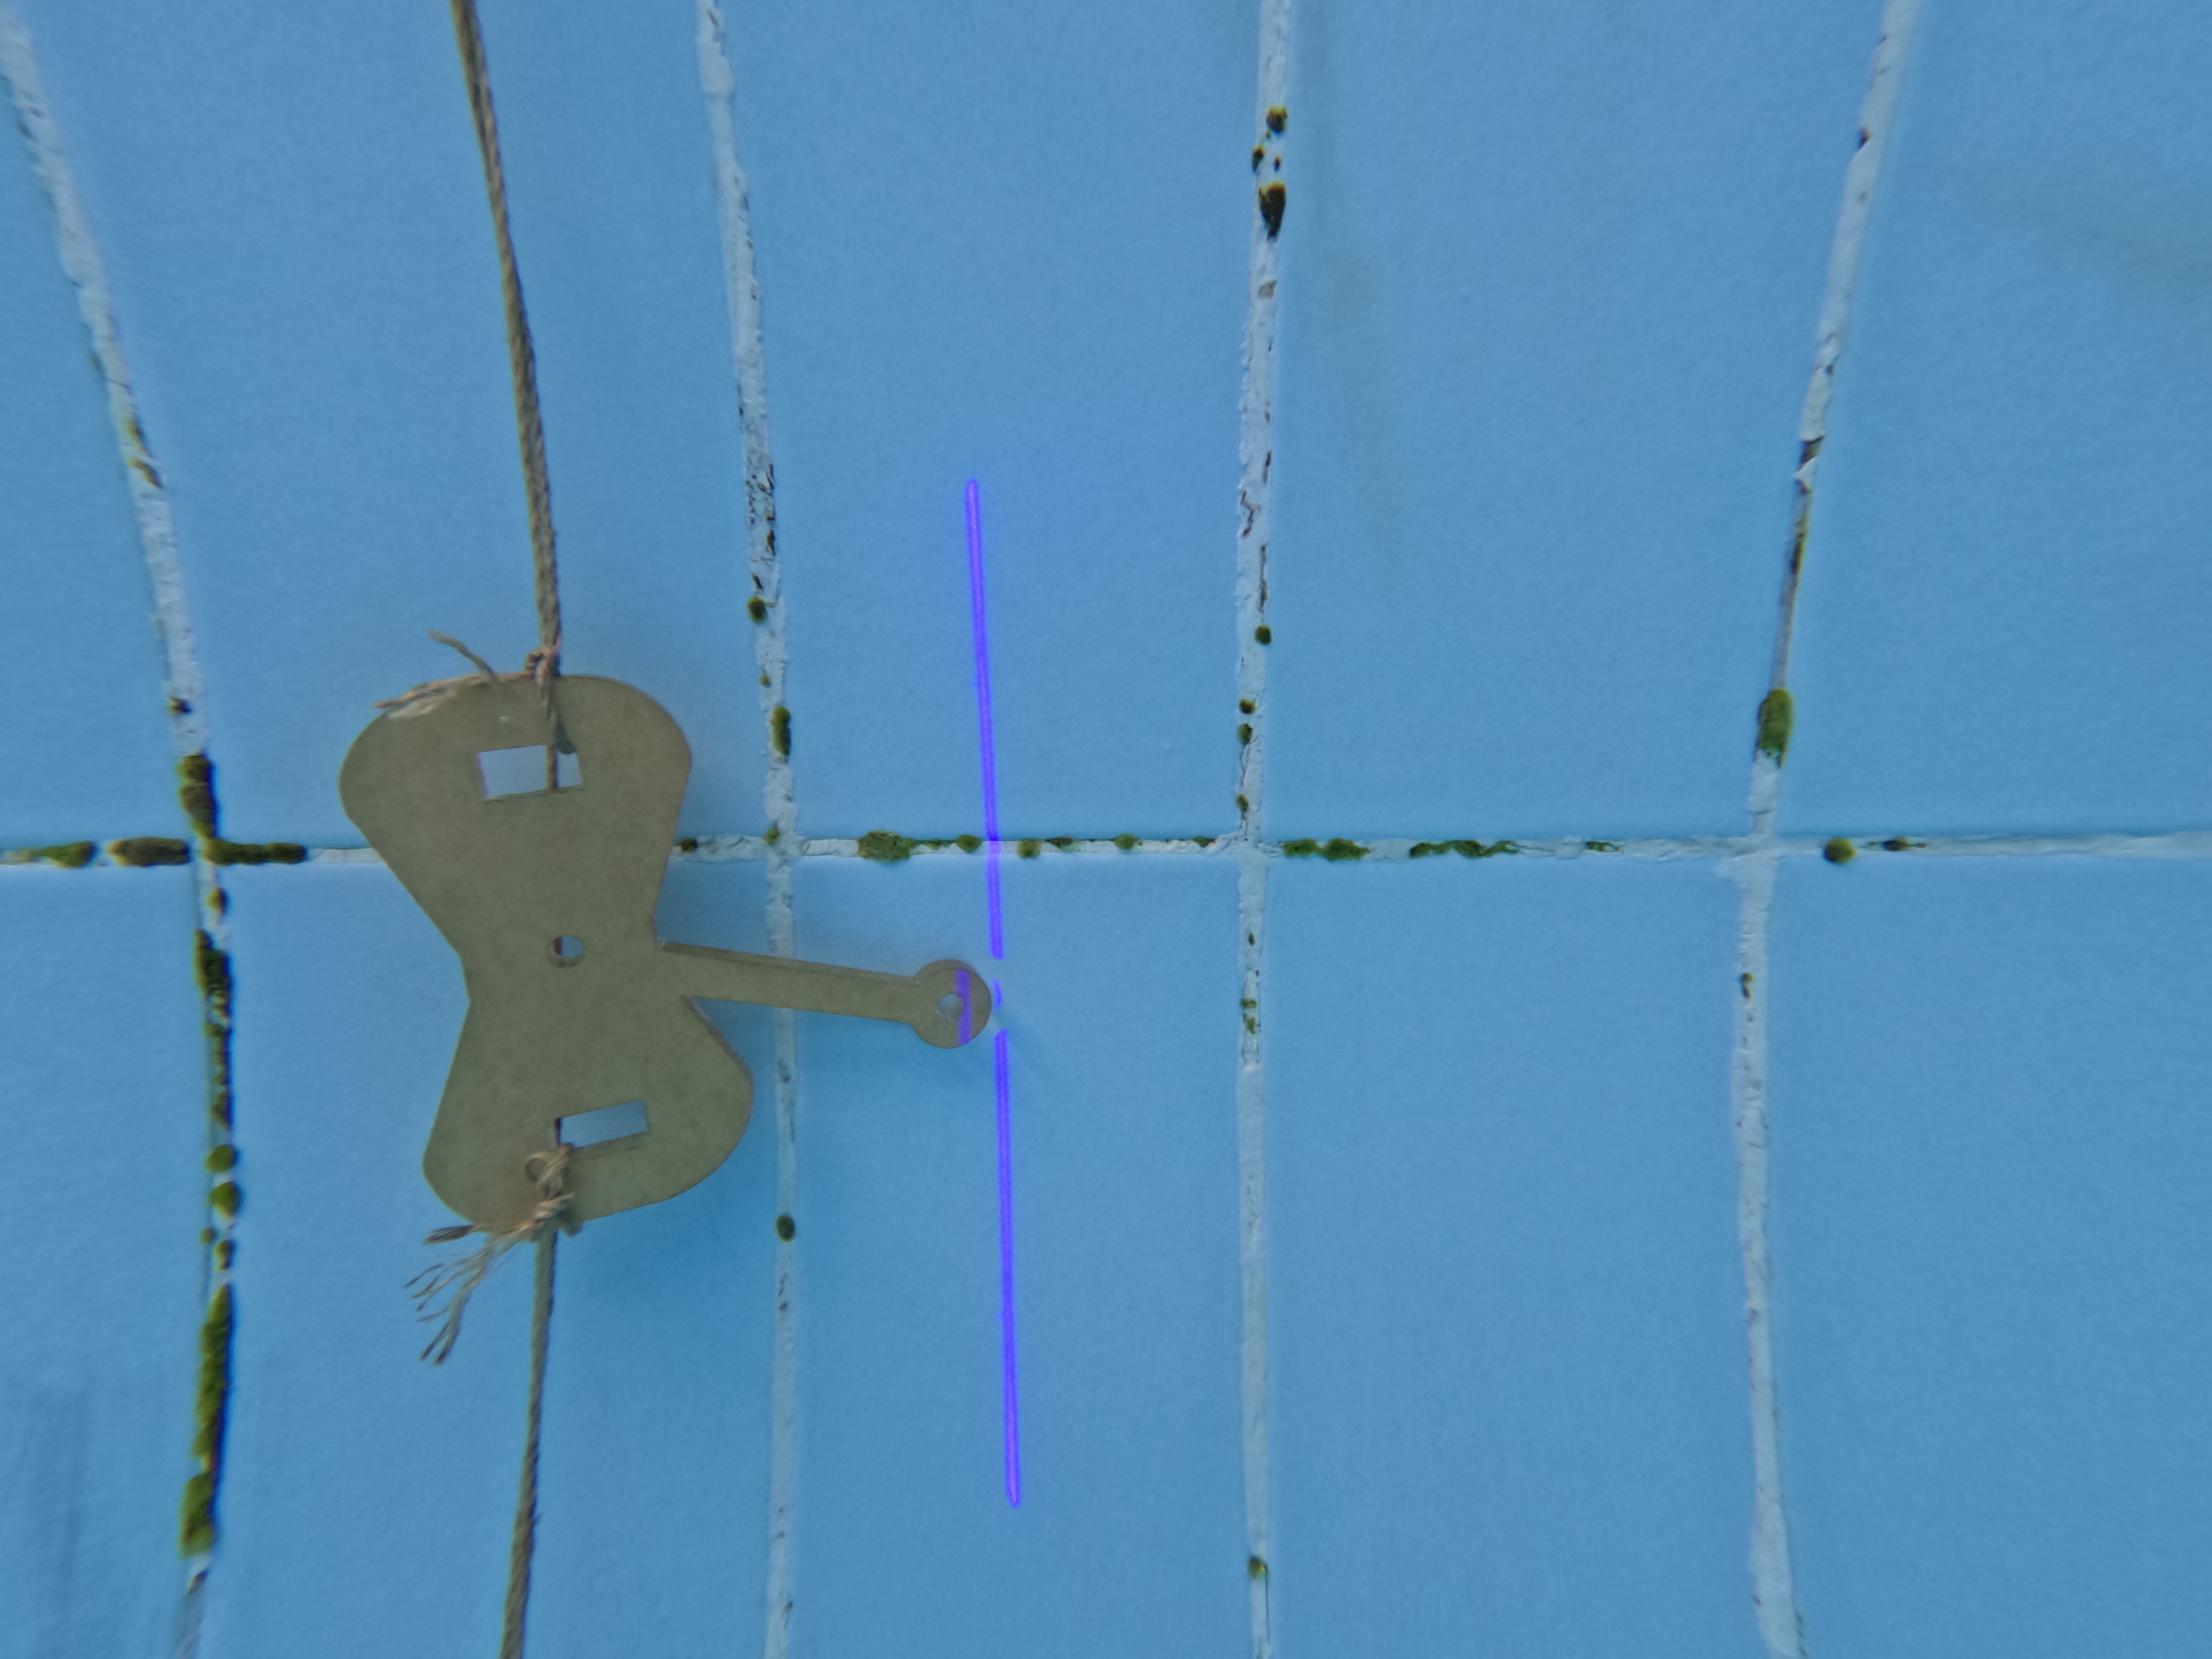

Supplement: Supplementary file 2593 [file G0050891.pdf › Level_2_2/G0050891.pdf]

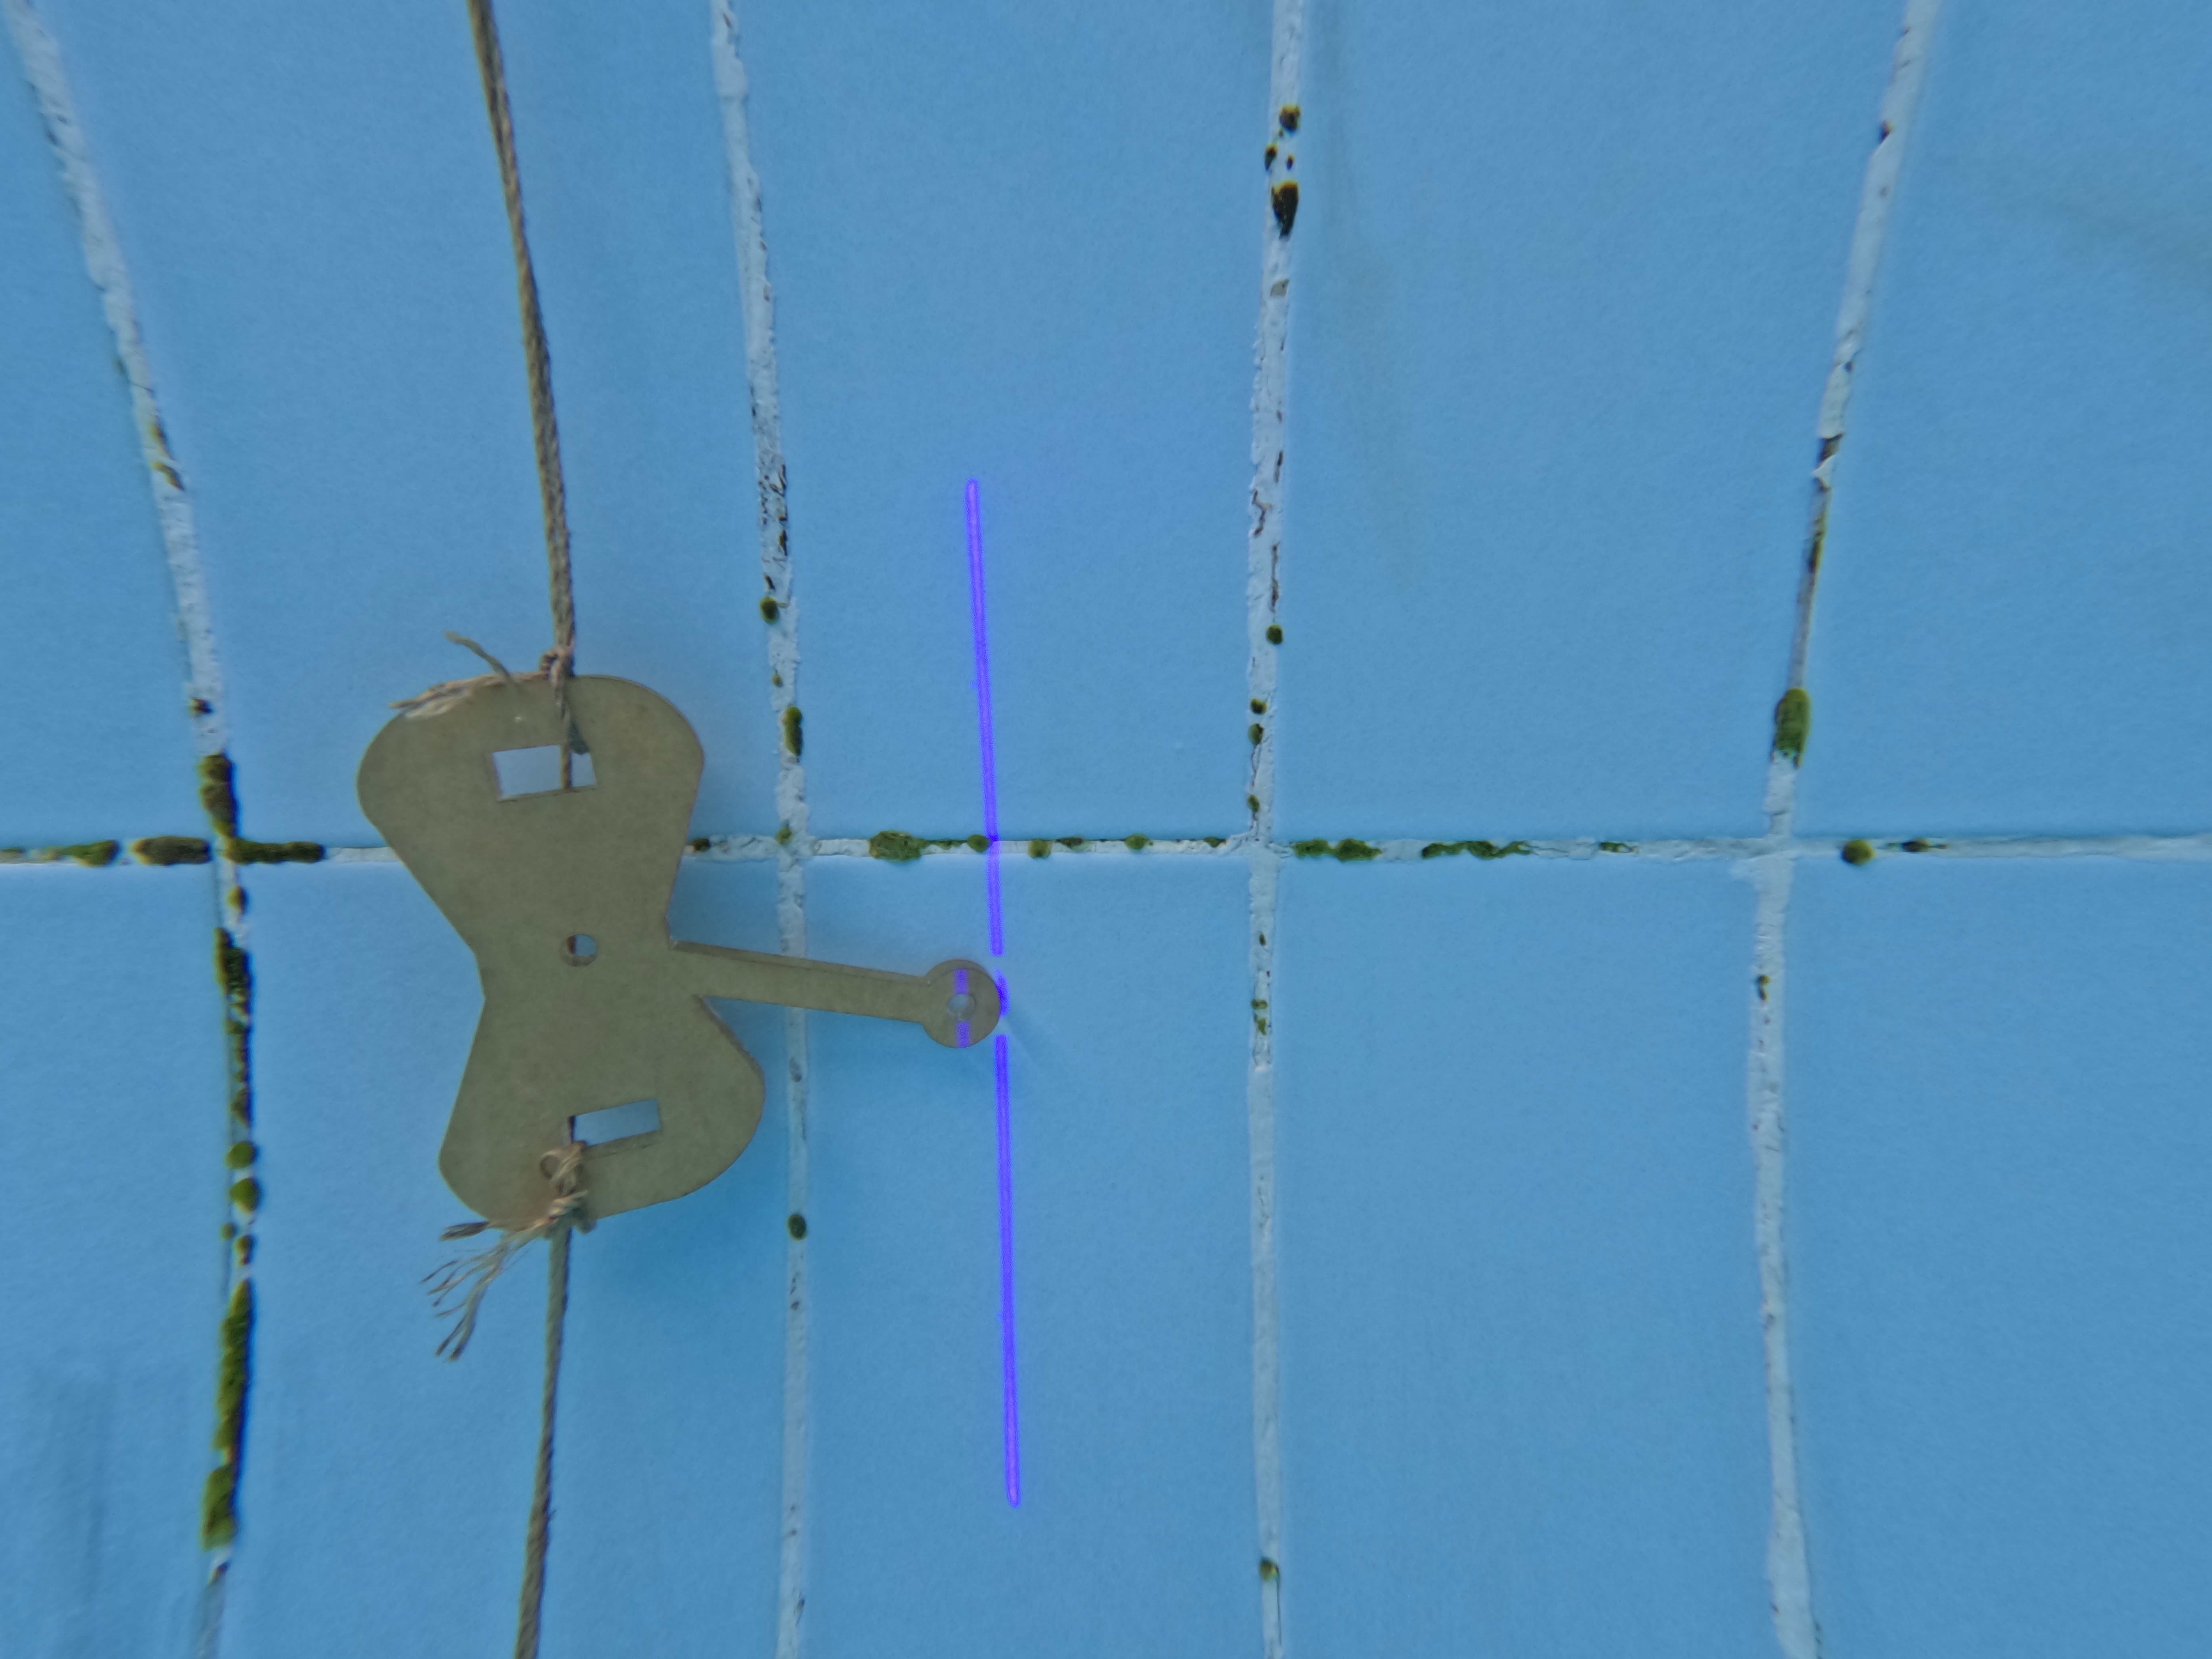

Supplement: Supplementary file 2594 [file G0050892.pdf › Level_2_2/G0050892.pdf]

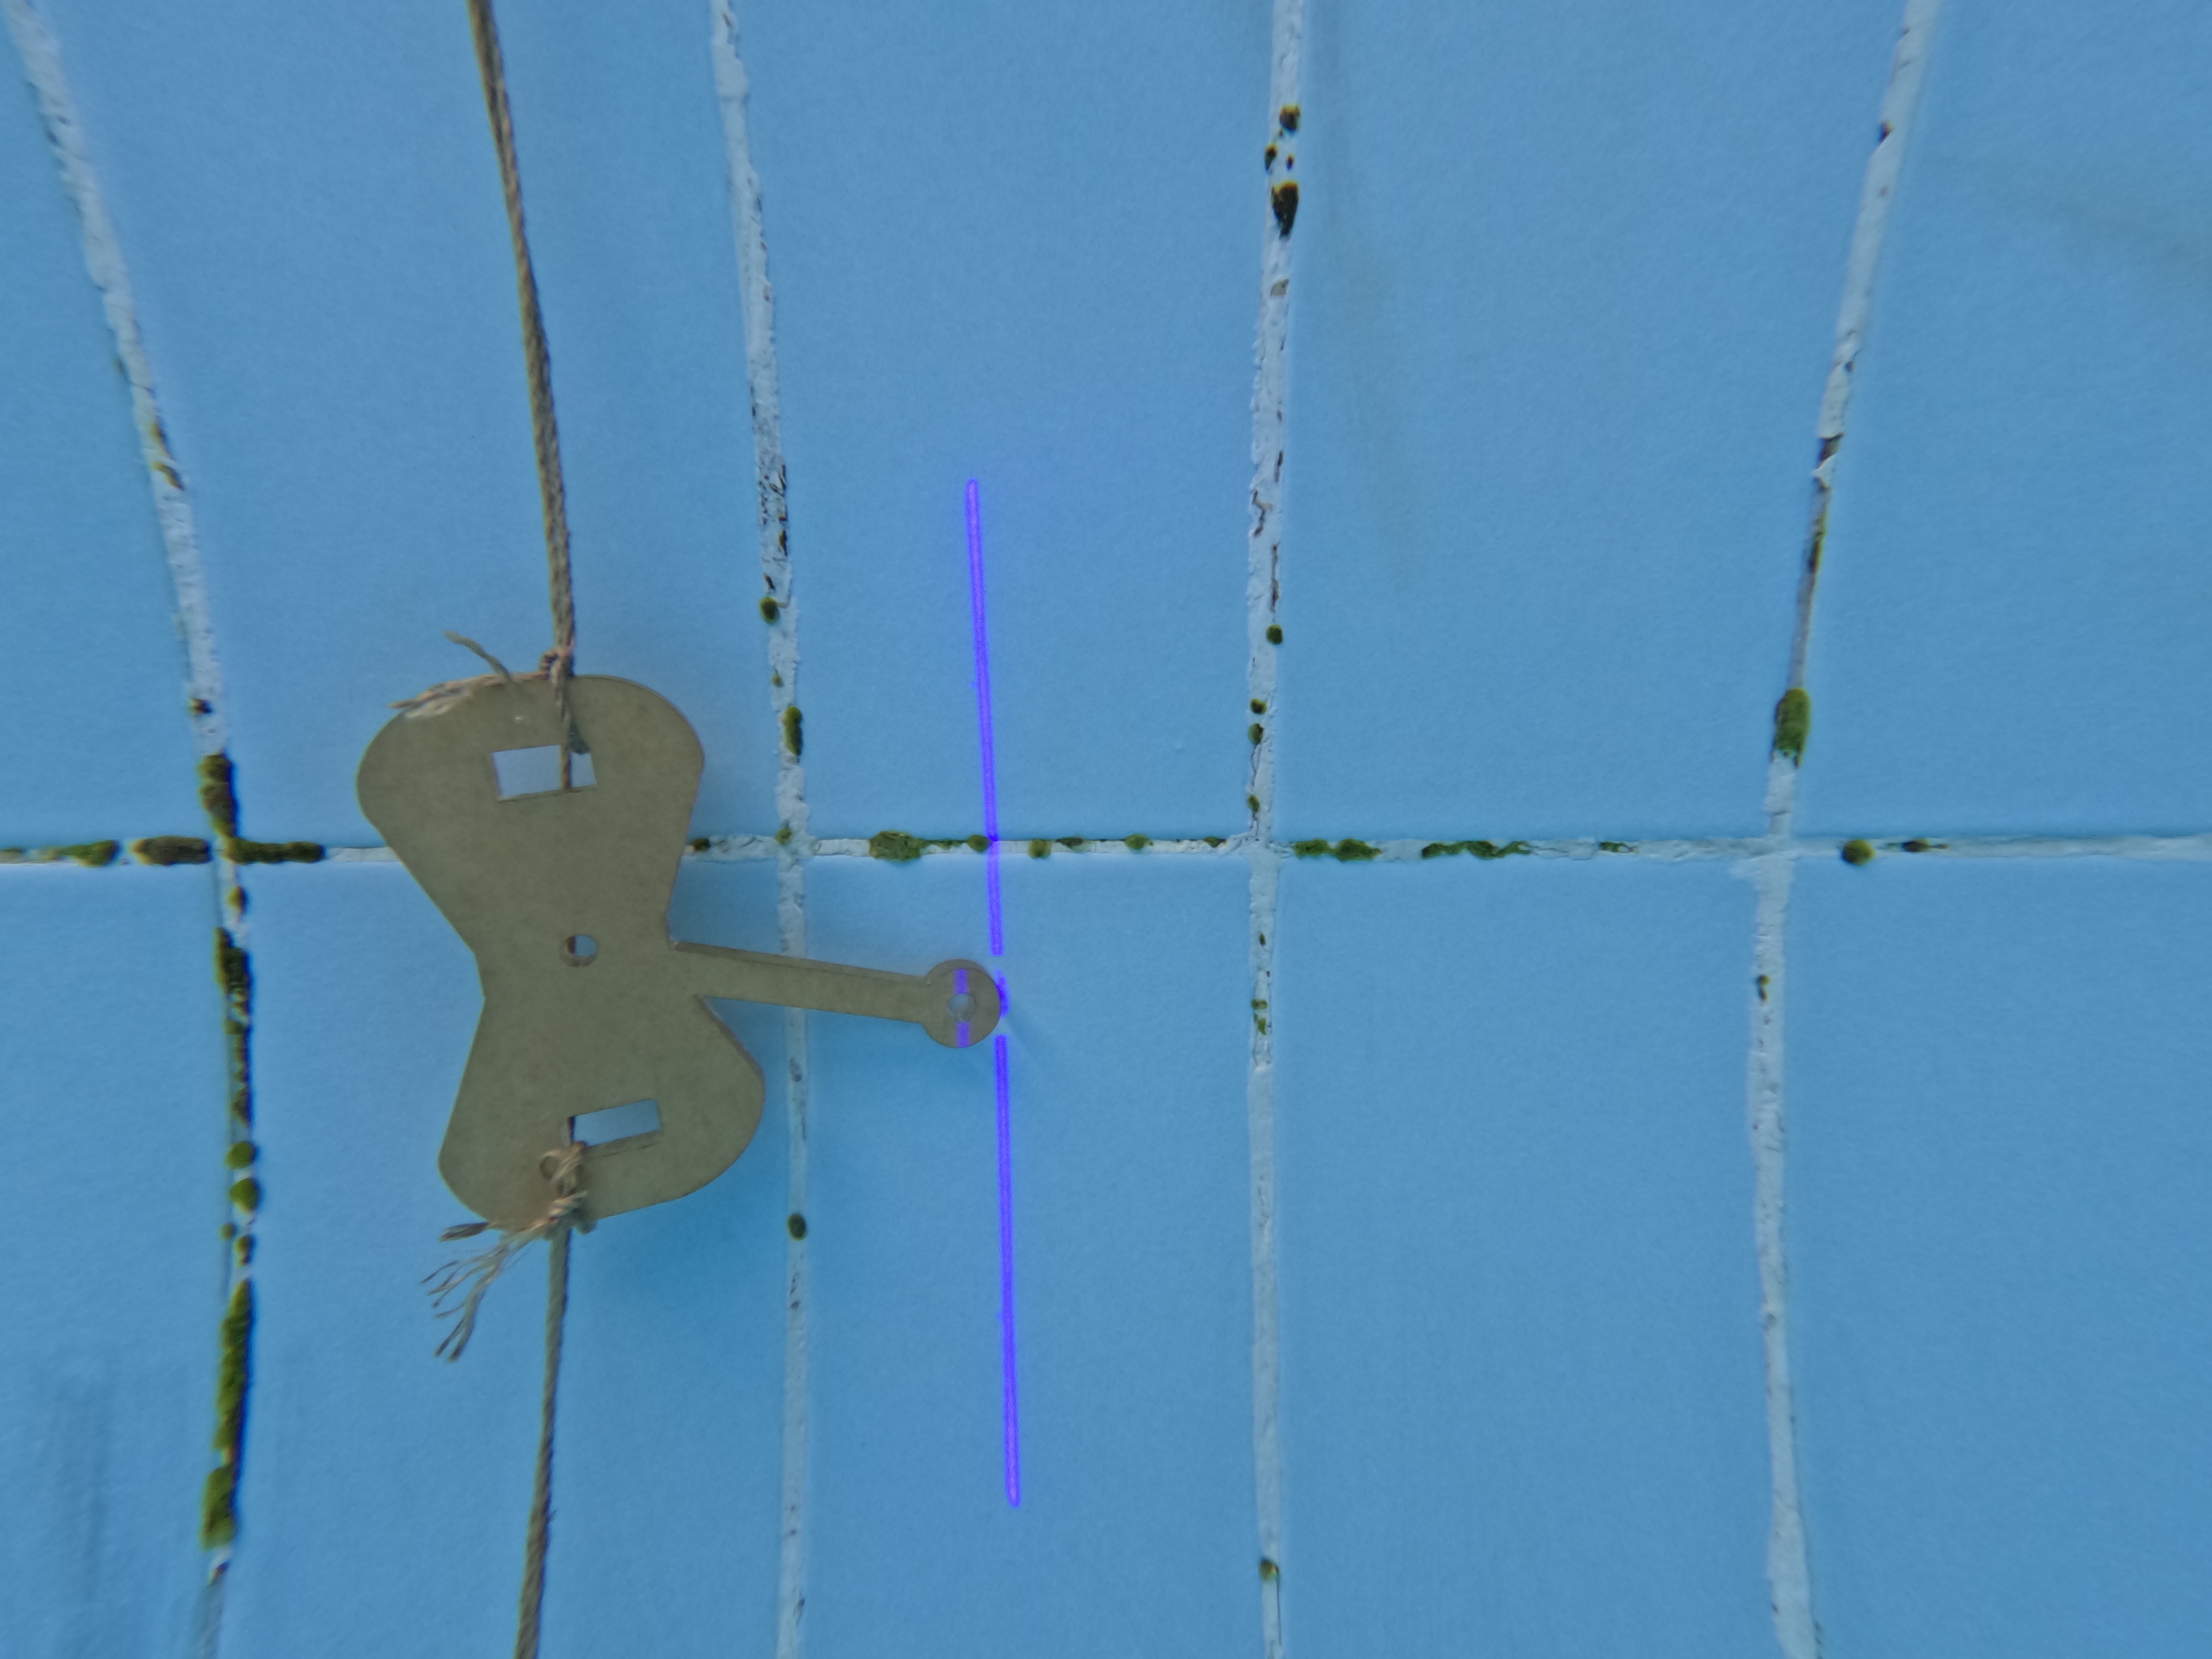

Supplement: Supplementary file 2595 [file G0050893.pdf › Level_2_2/G0050893.pdf]

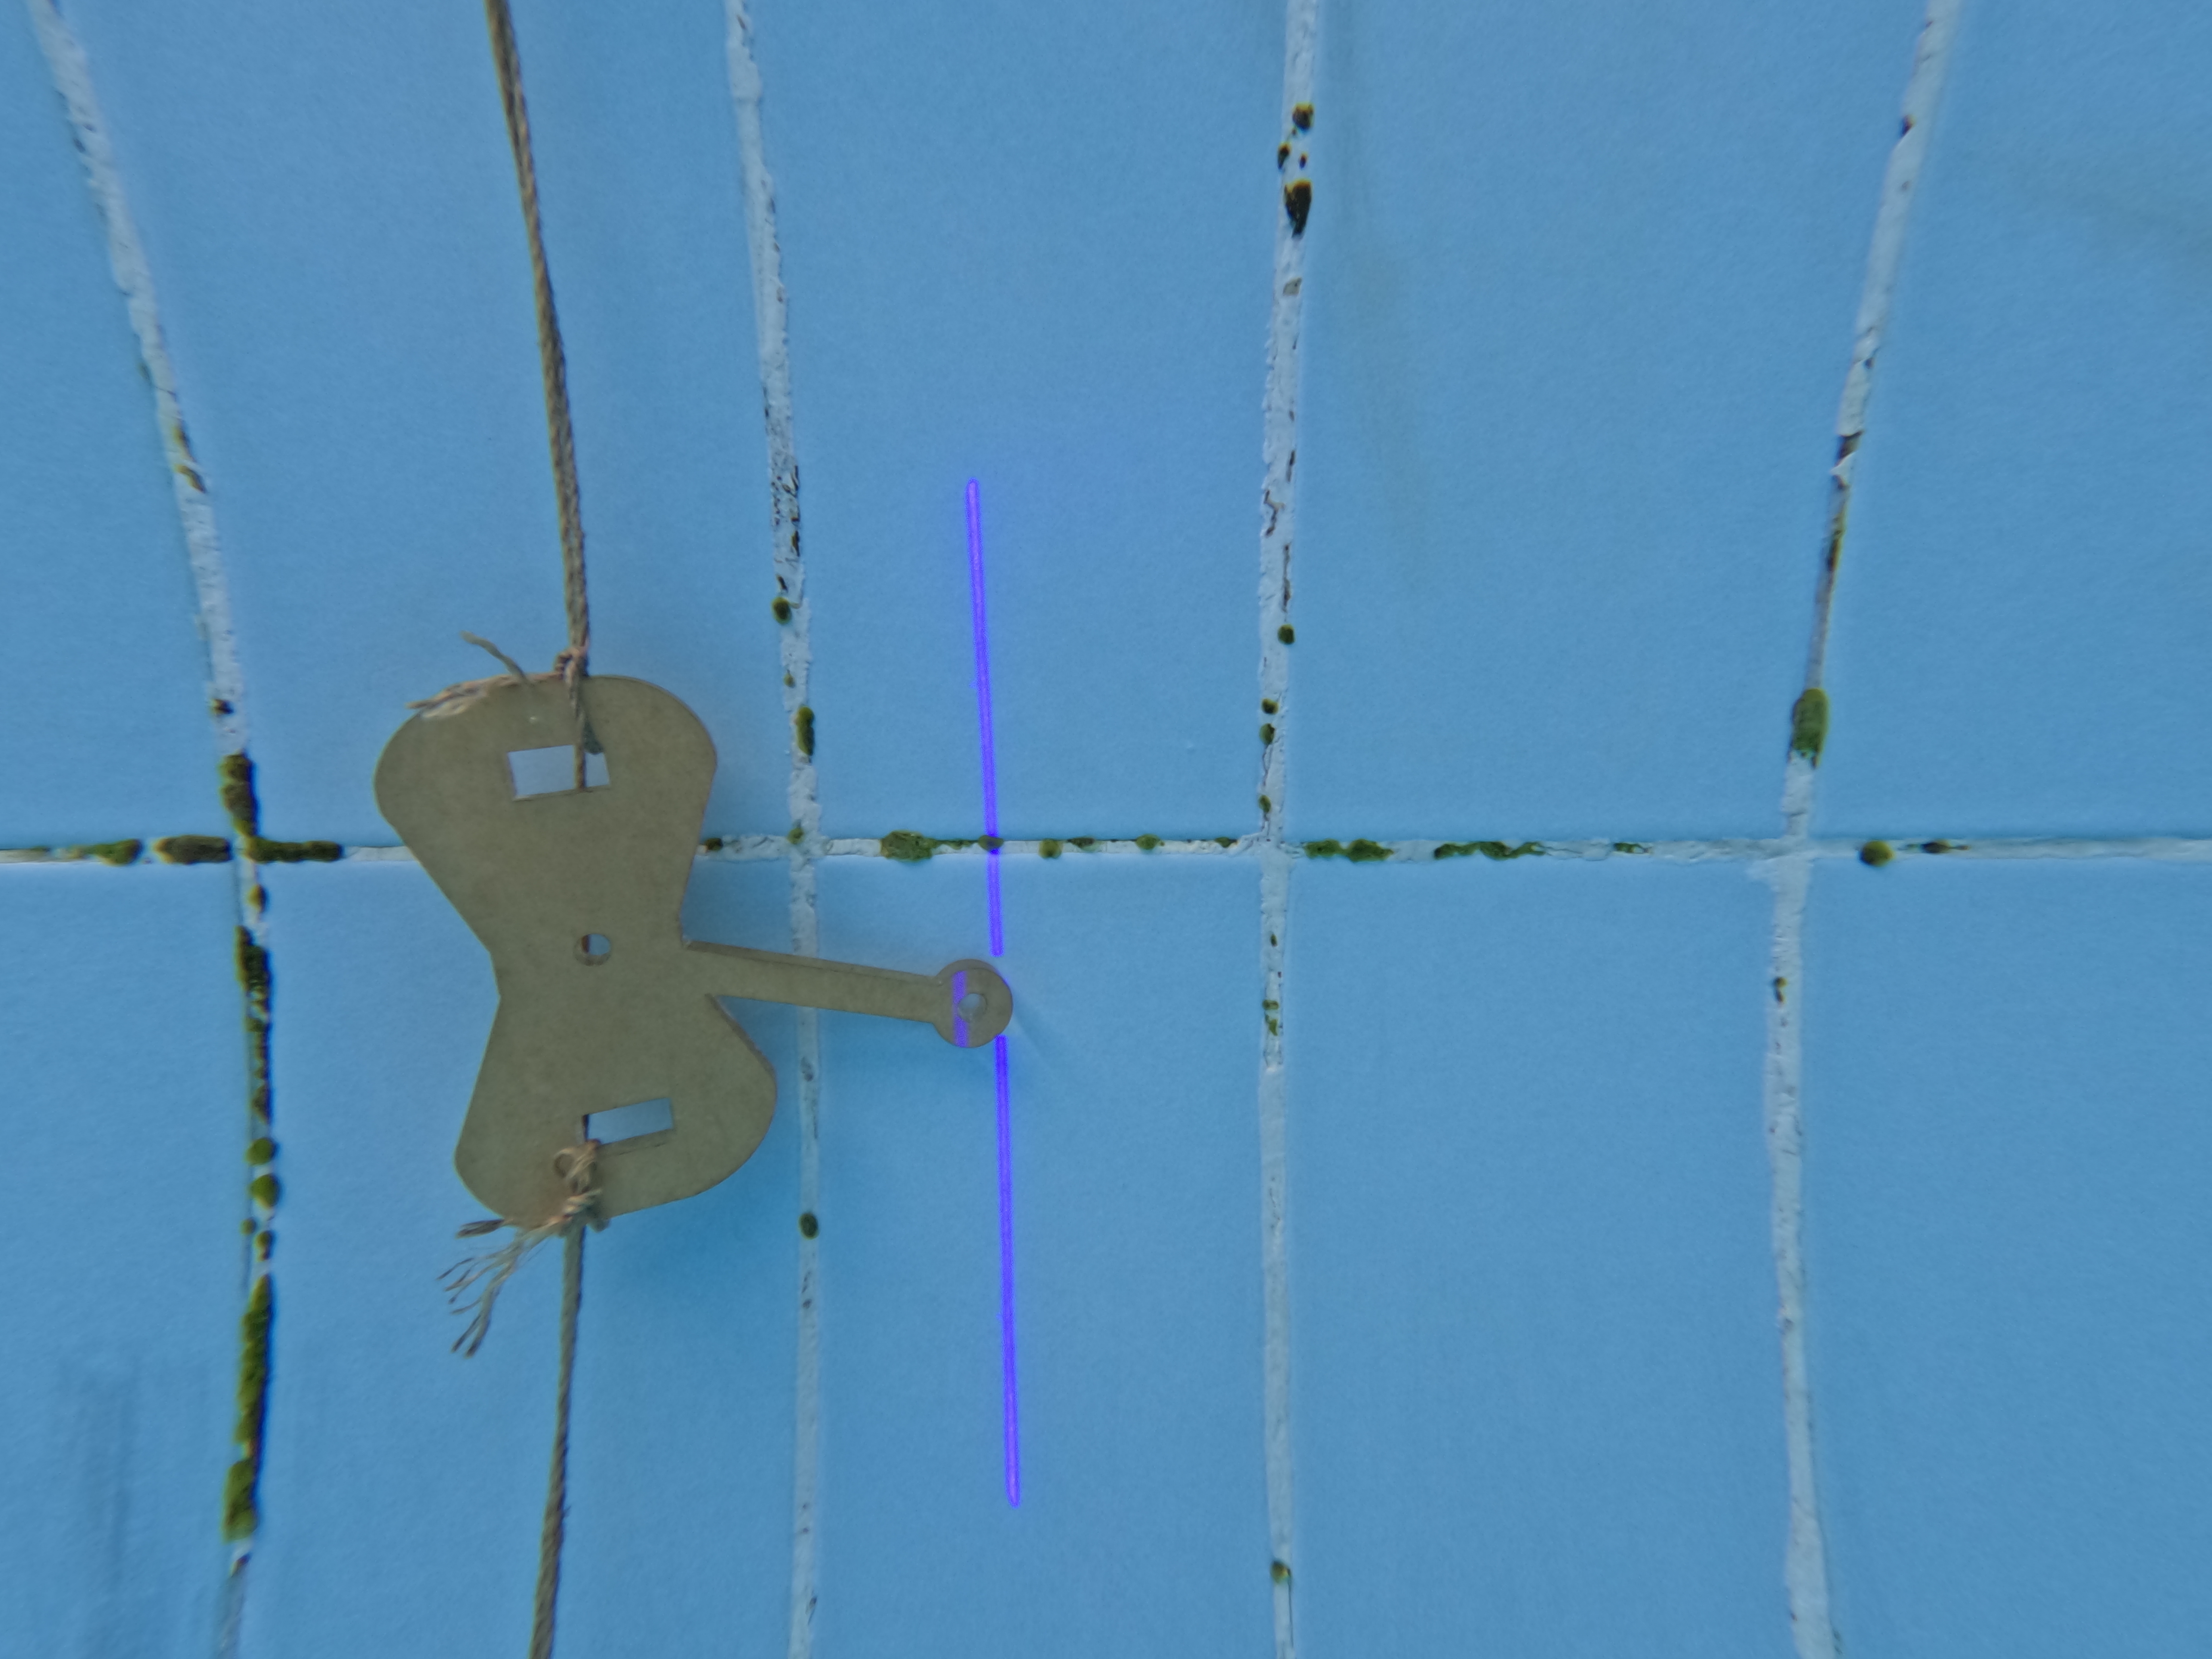

Supplement: Supplementary file 2596 [file G0050894.pdf › Level_2_2/G0050894.pdf]

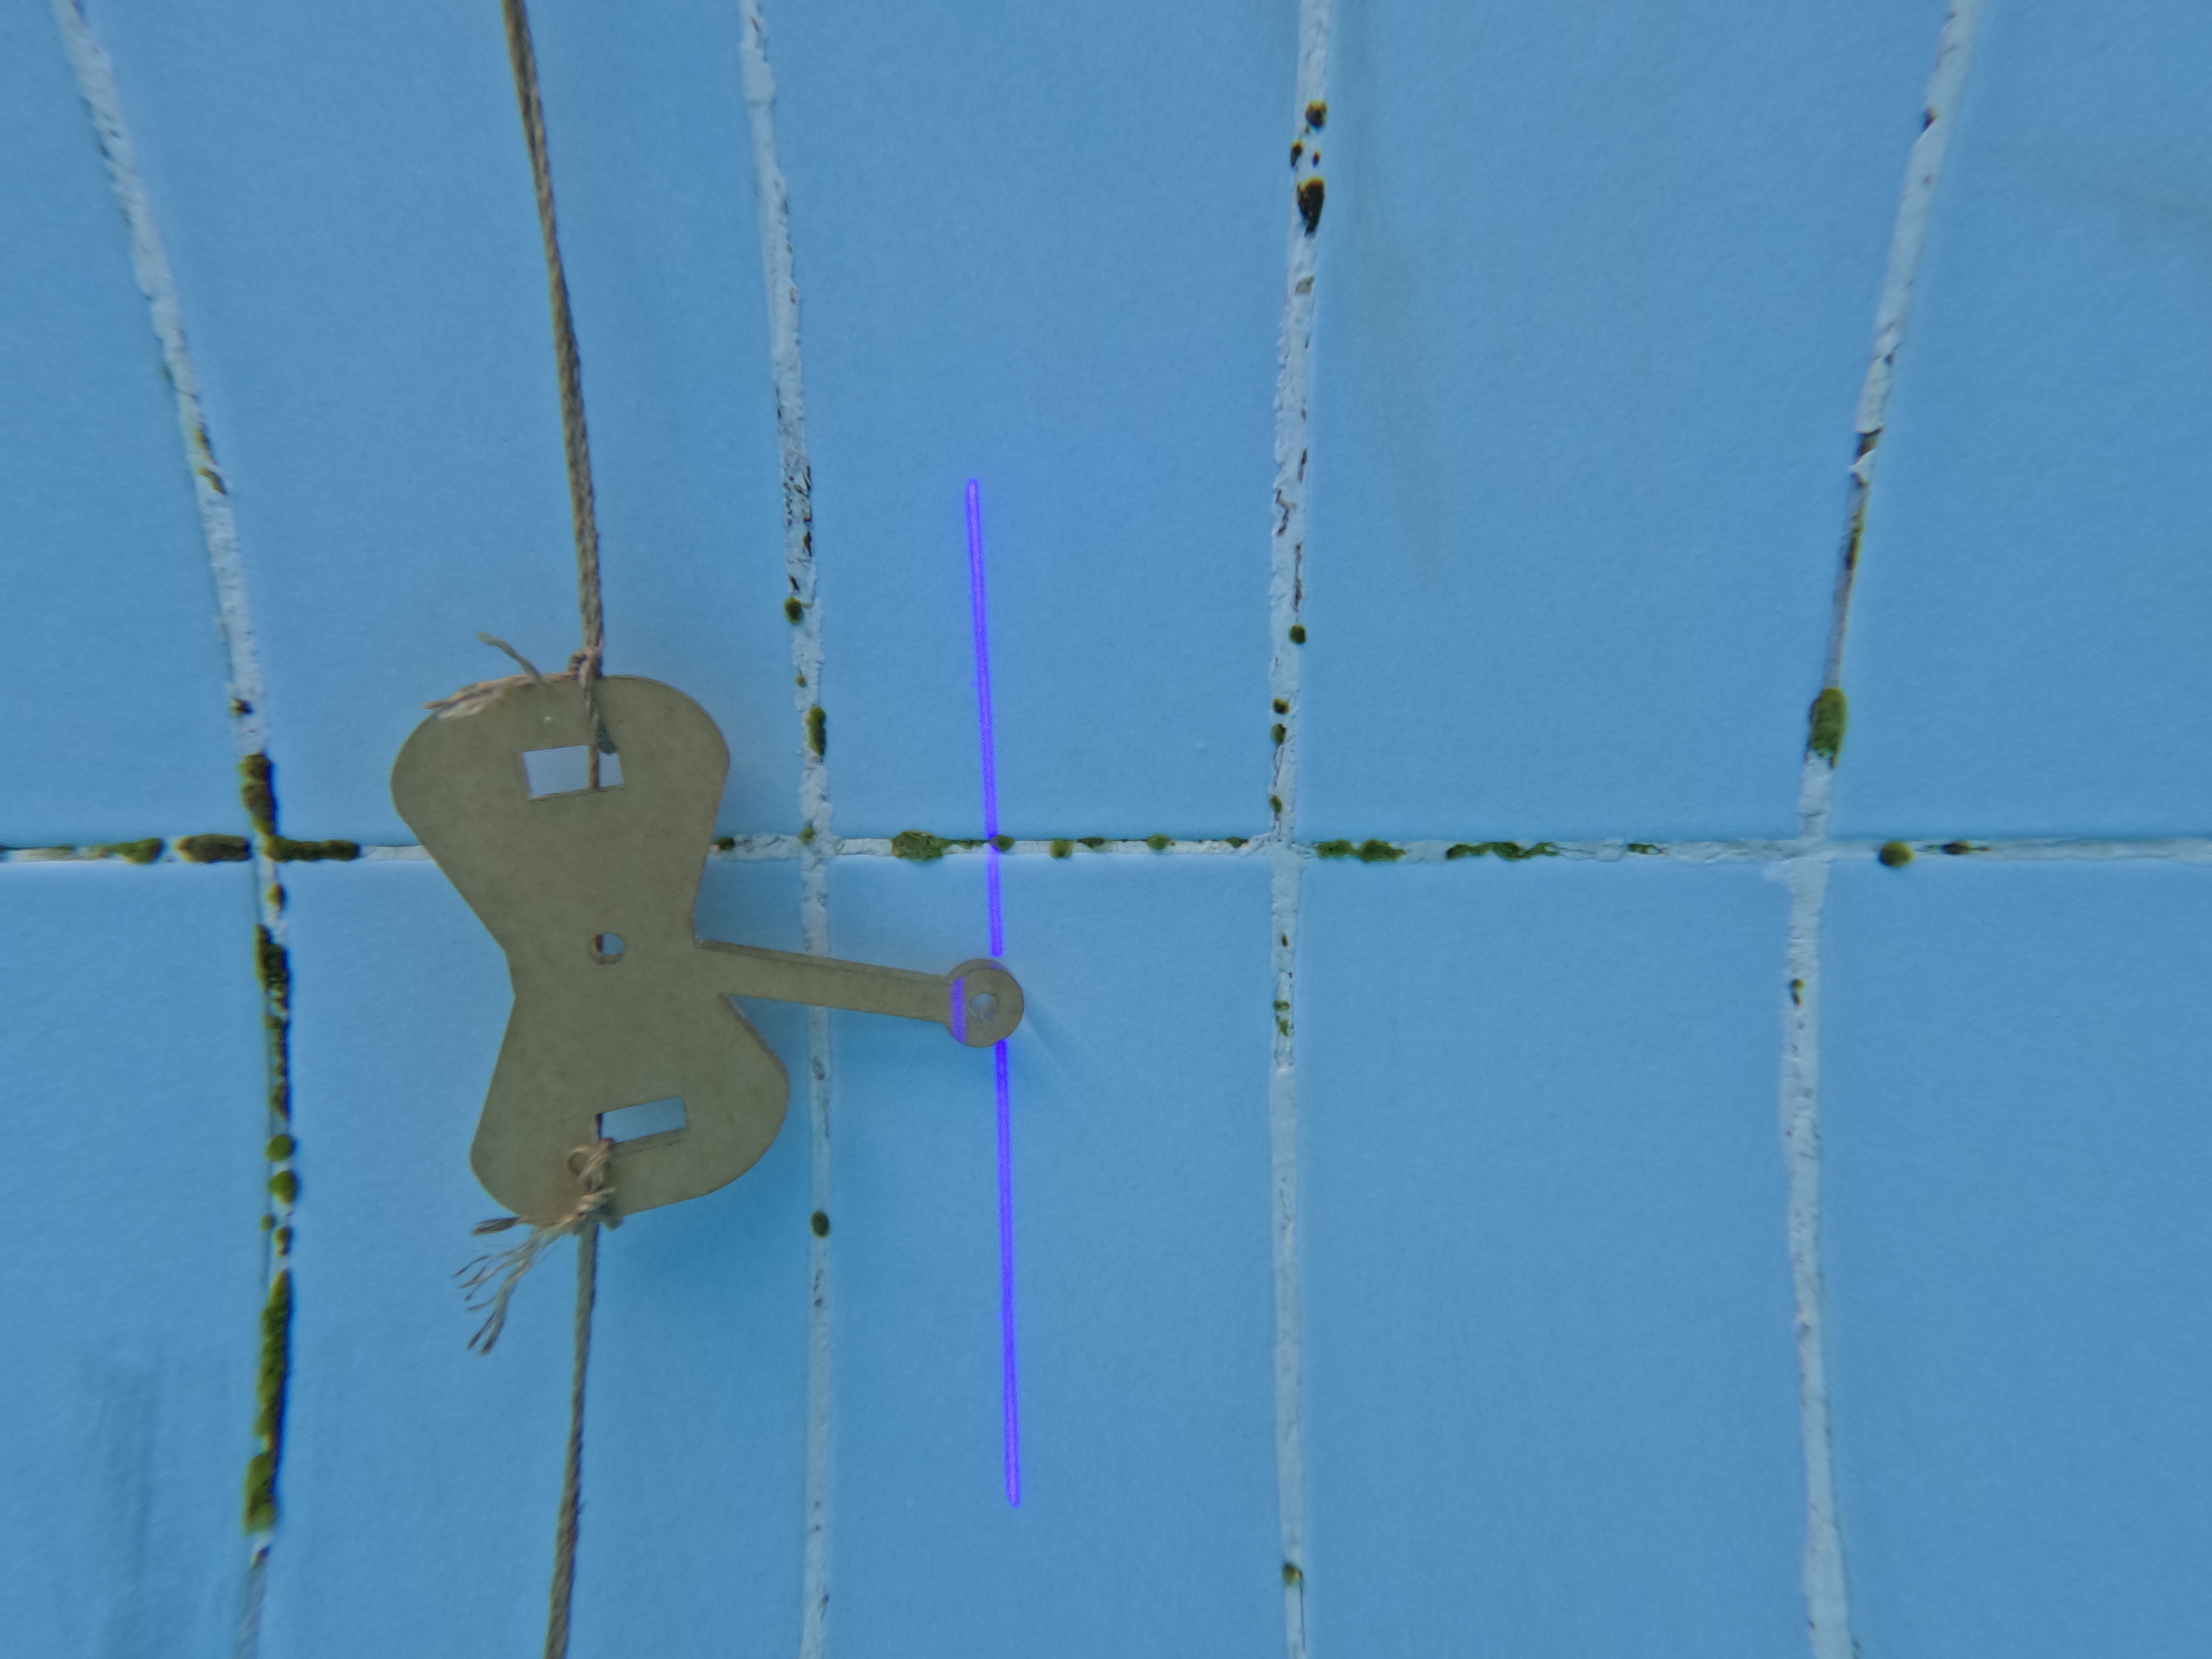

Supplement: Supplementary file 2597 [file G0050895.pdf › Level_2_2/G0050895.pdf]

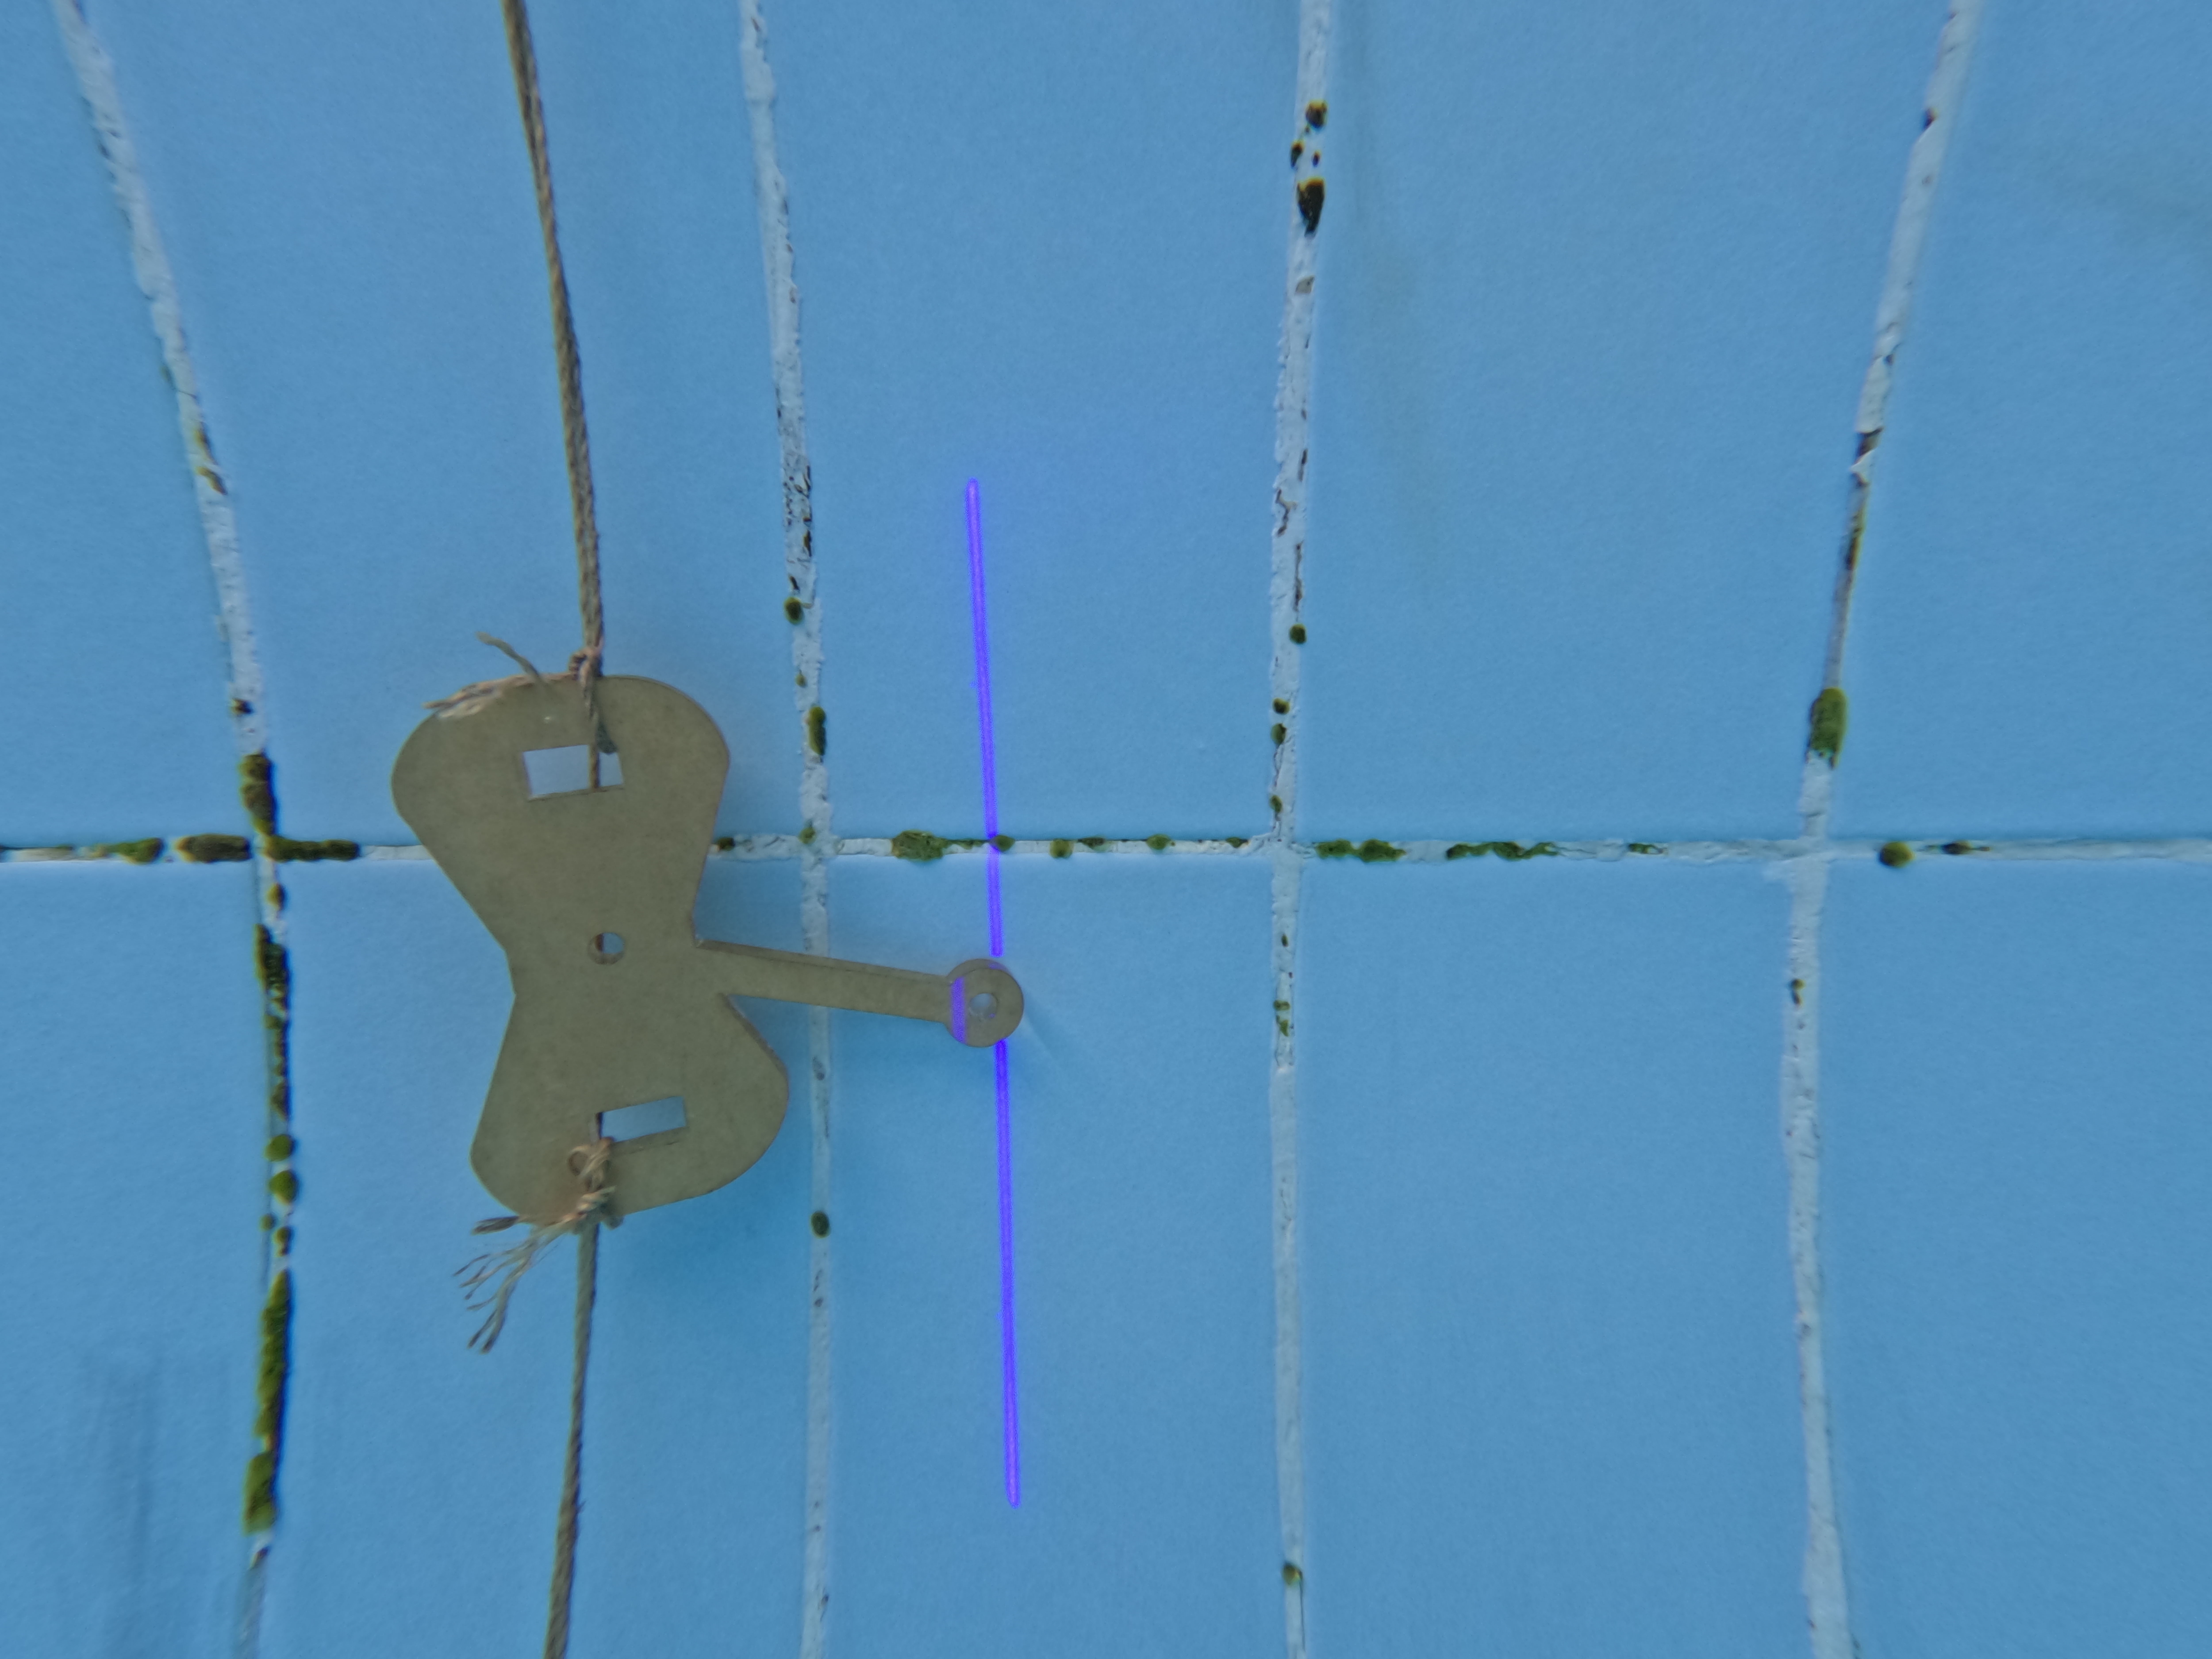

Supplement: Supplementary file 2598 [file G0050896.pdf › Level_2_2/G0050896.pdf]

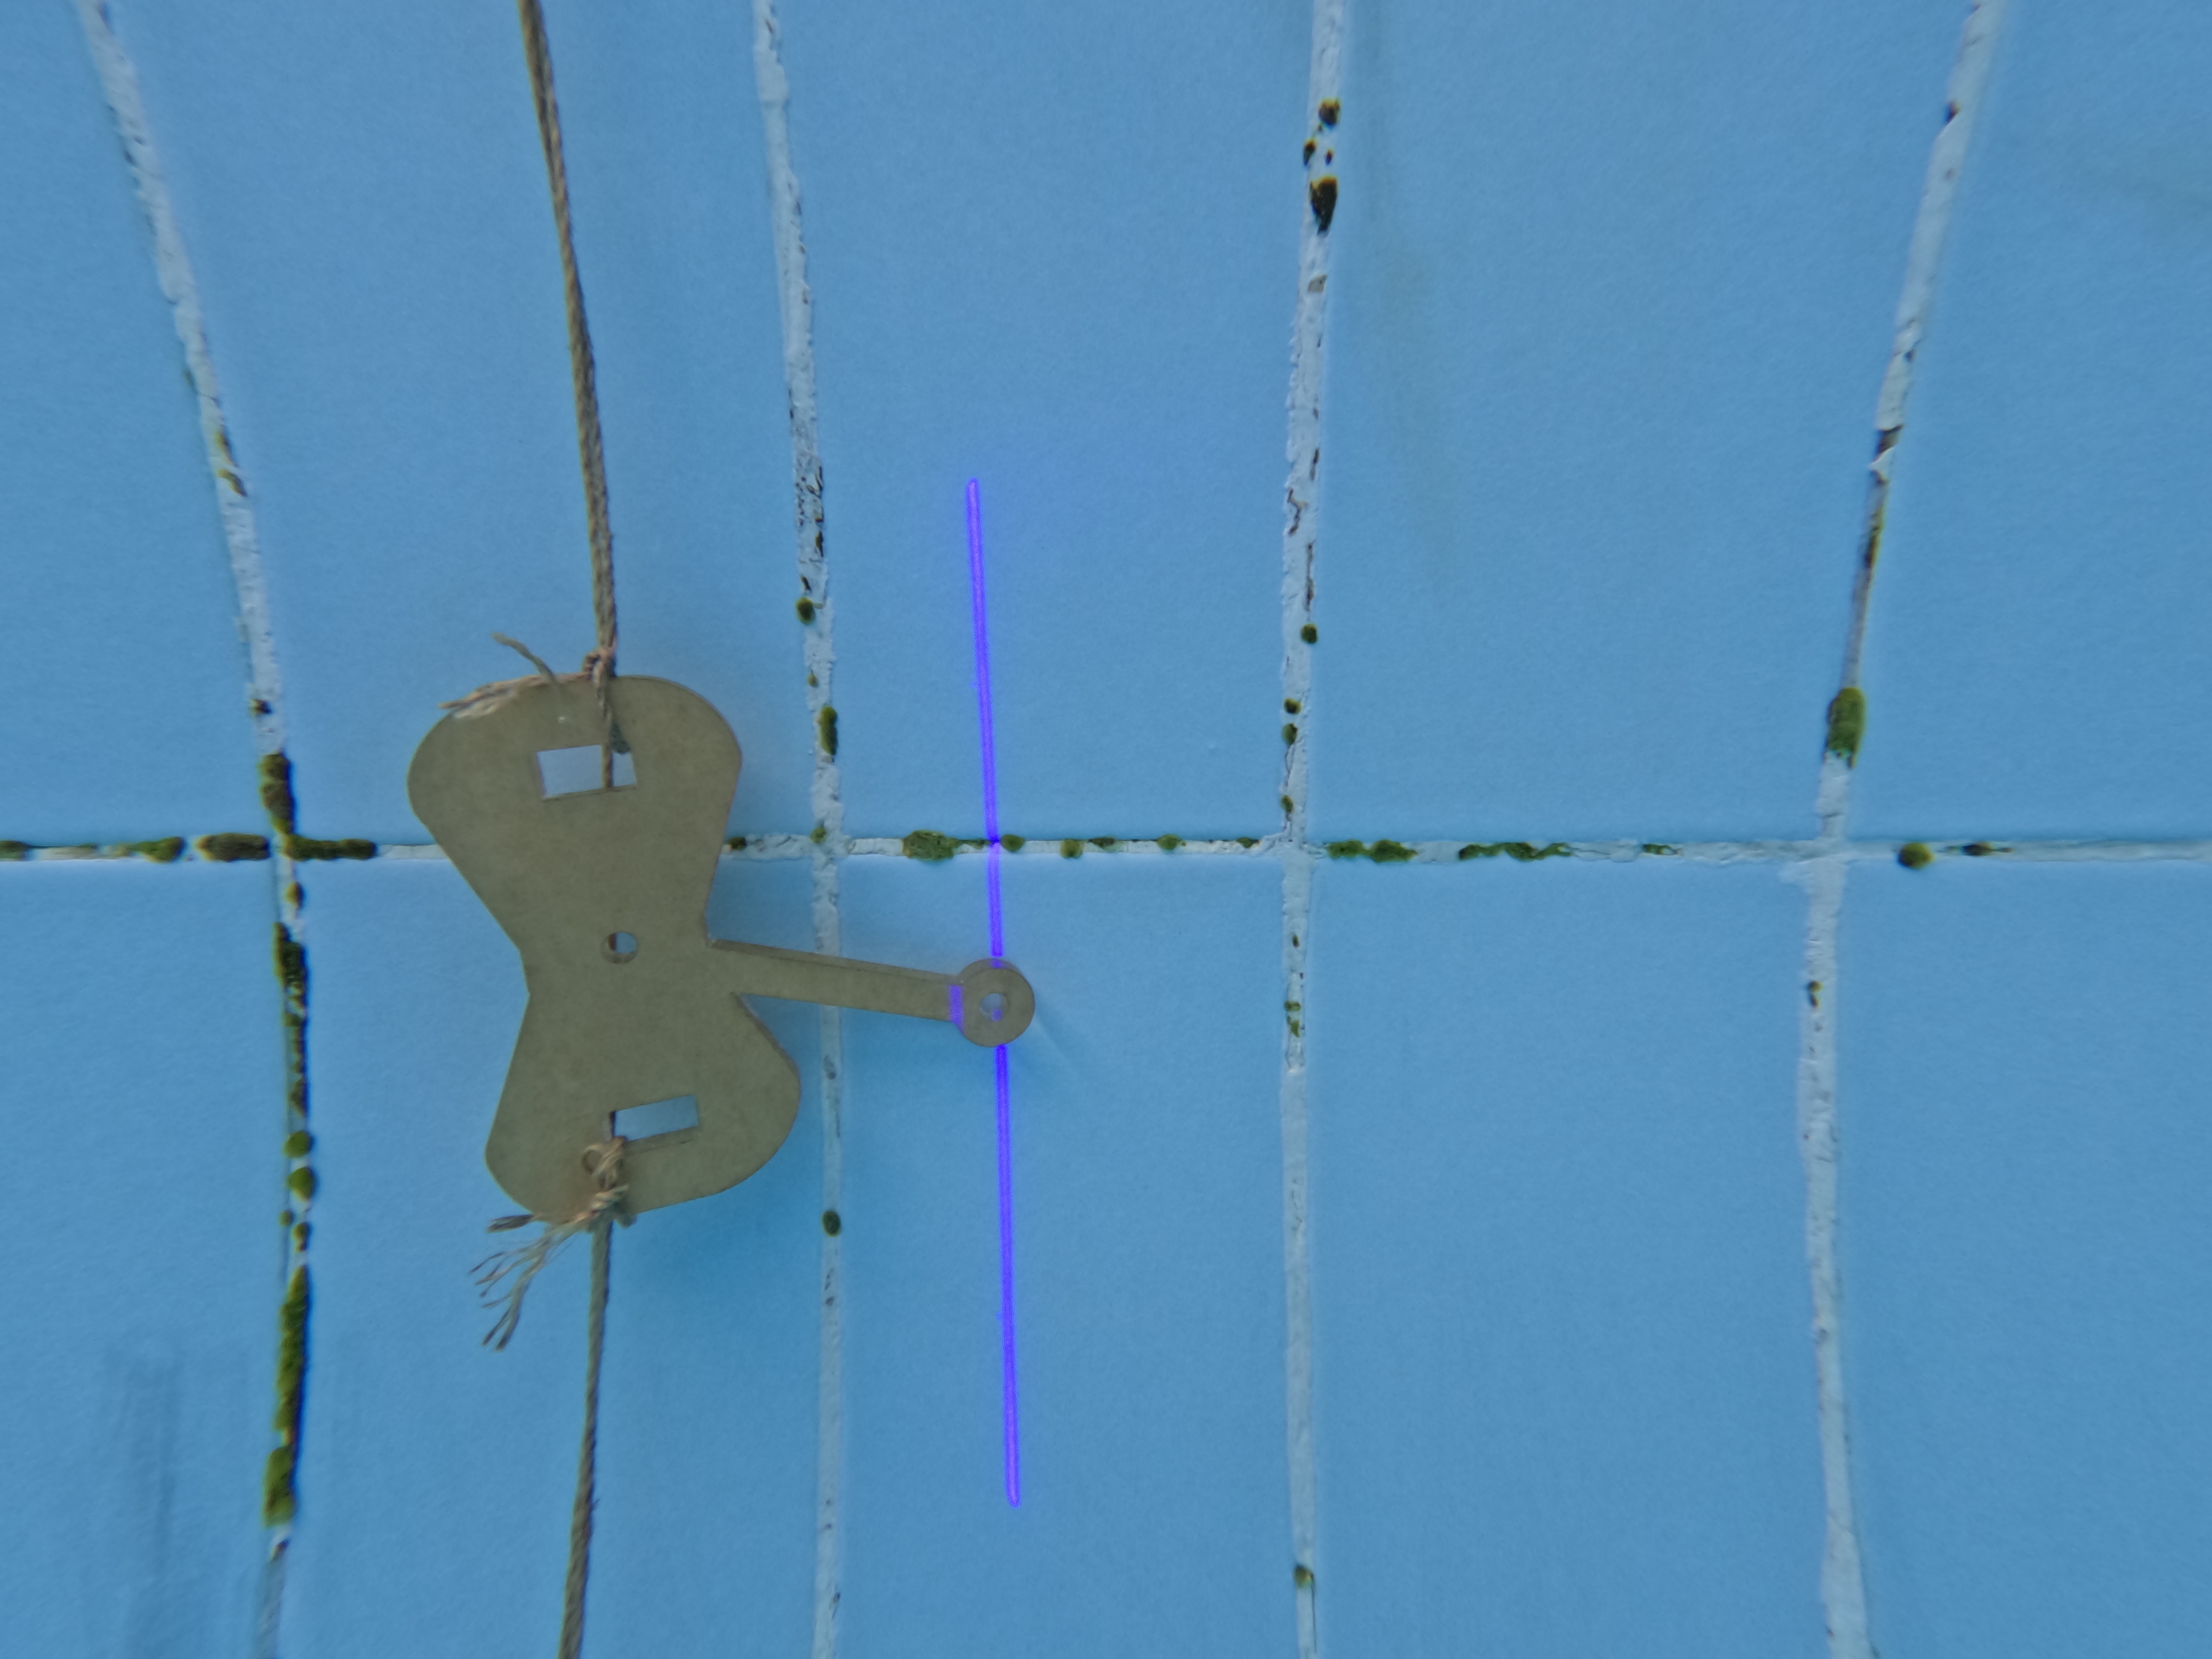

Supplement: Supplementary file 2599 [file G0050897.pdf › Level_2_2/G0050897.pdf]

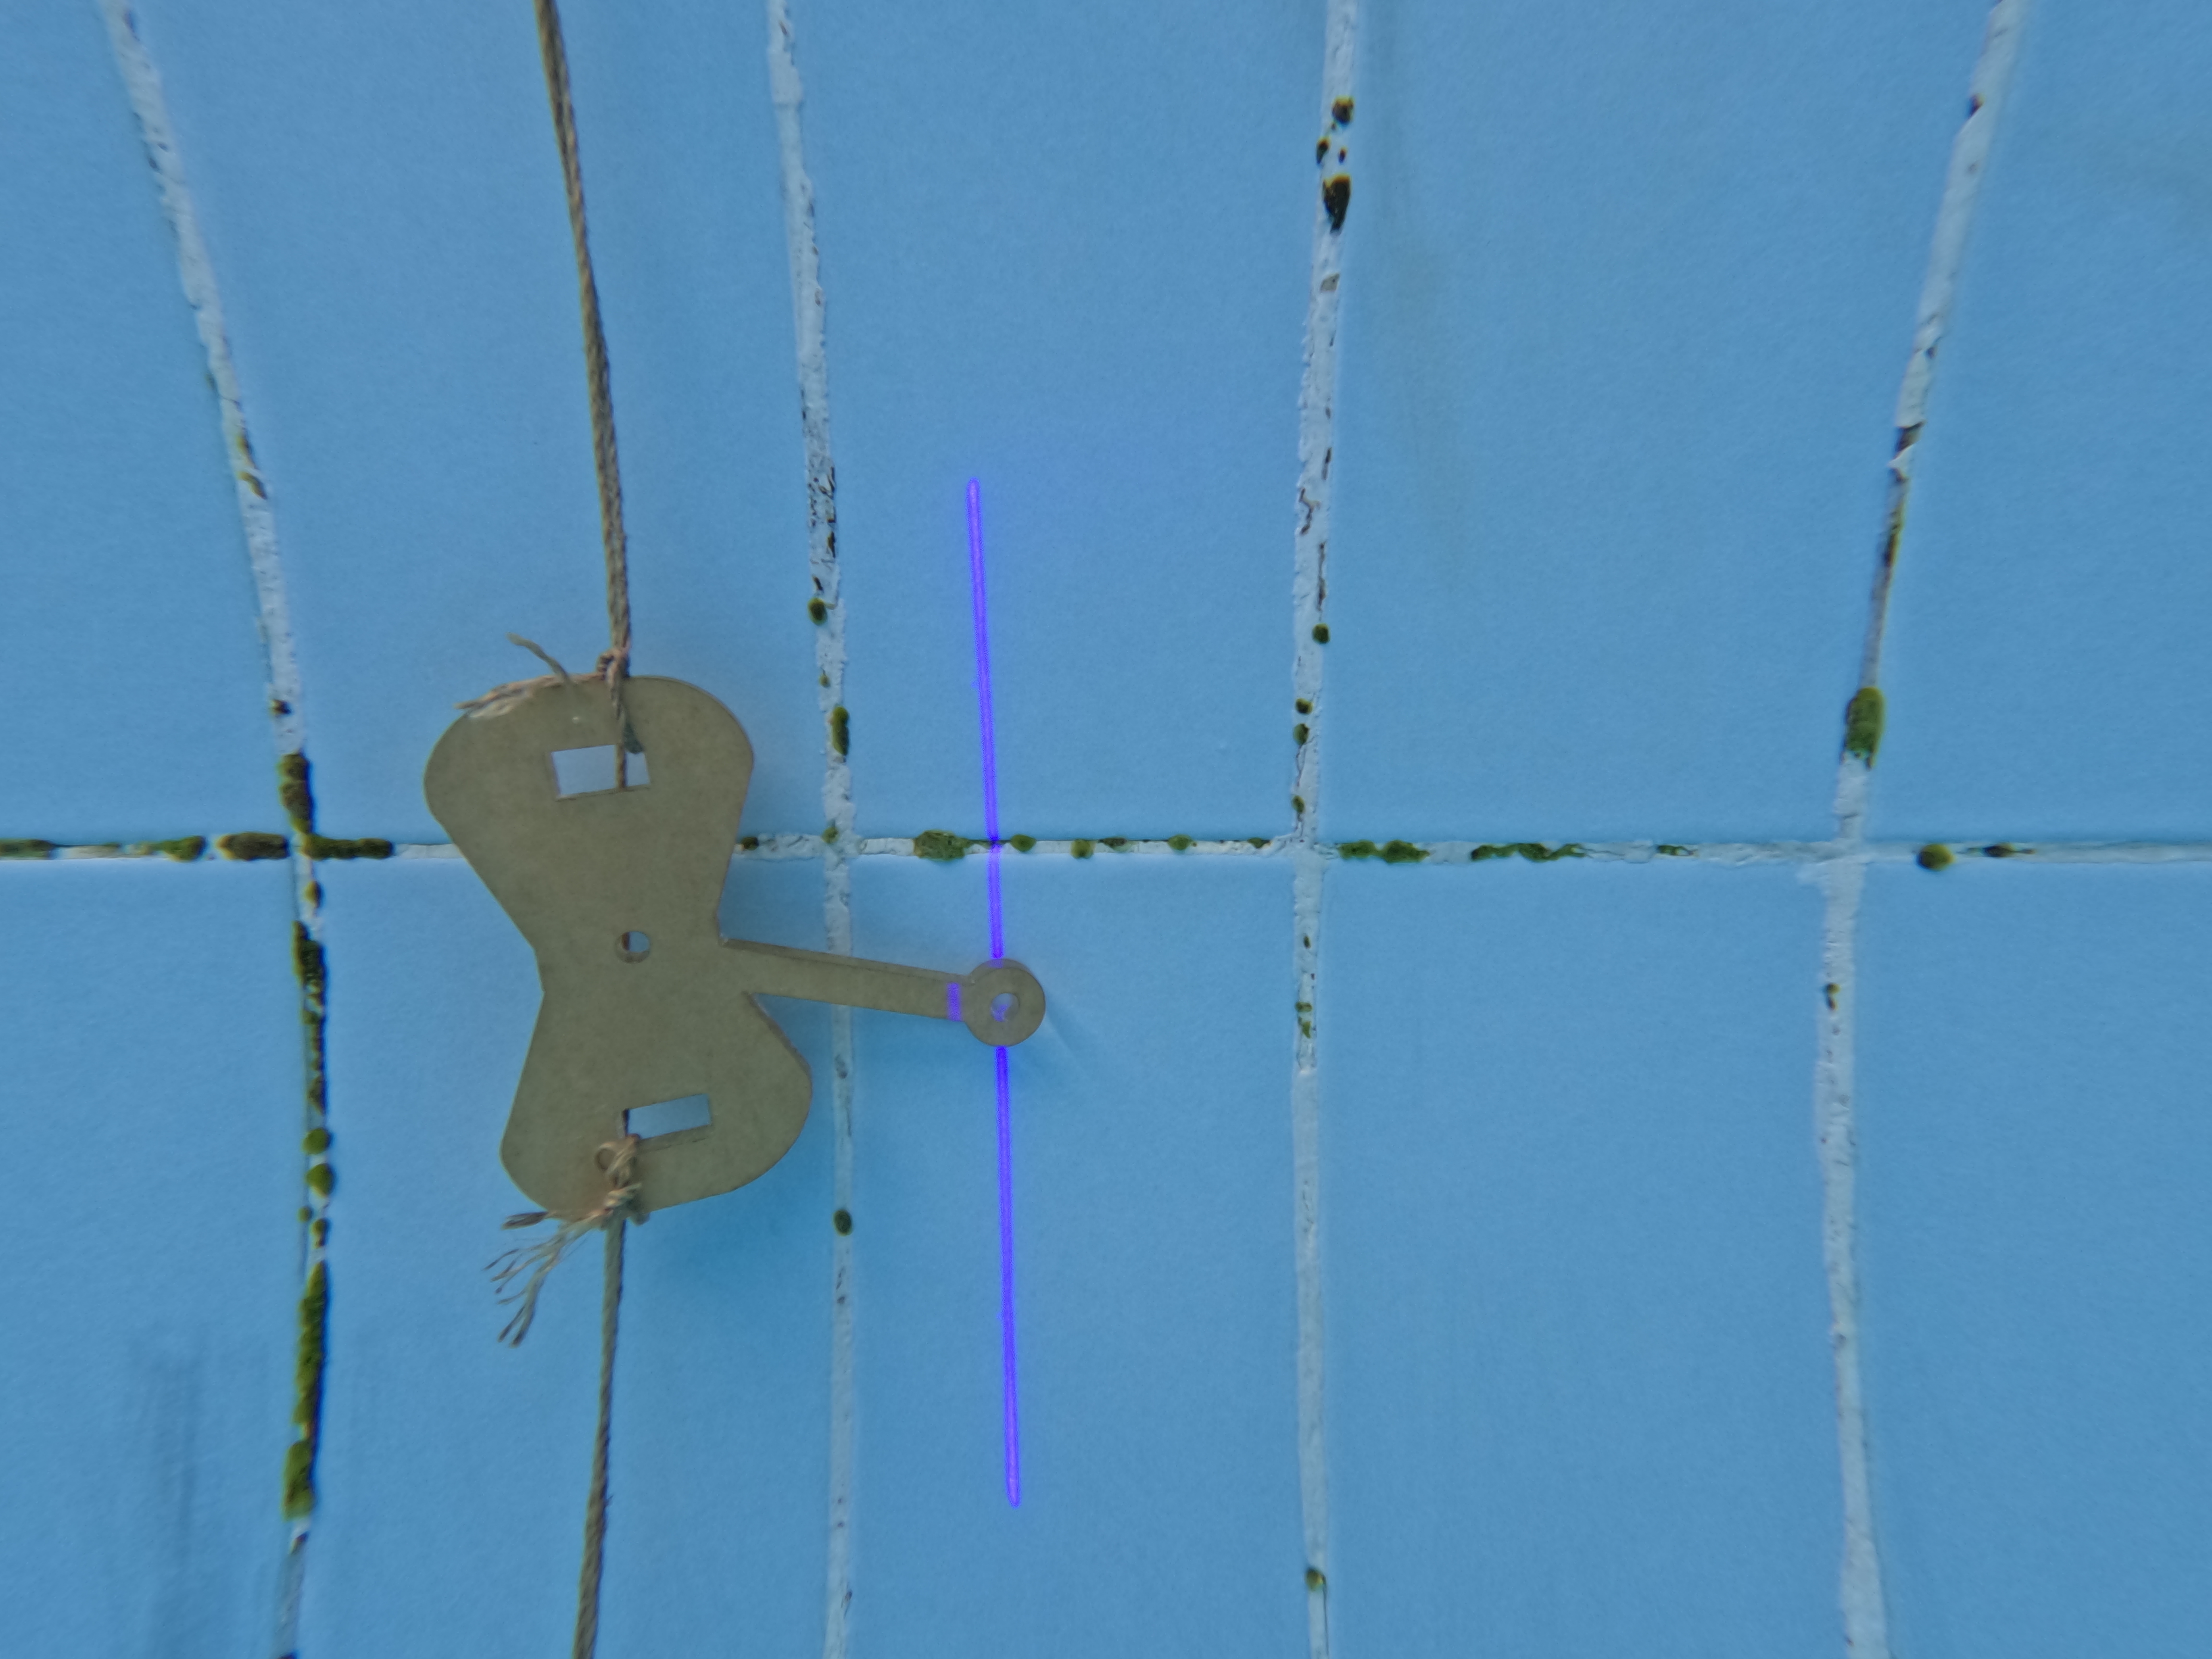

Supplement: Supplementary file 2600 [file G0050898.pdf › Level_2_2/G0050898.pdf]

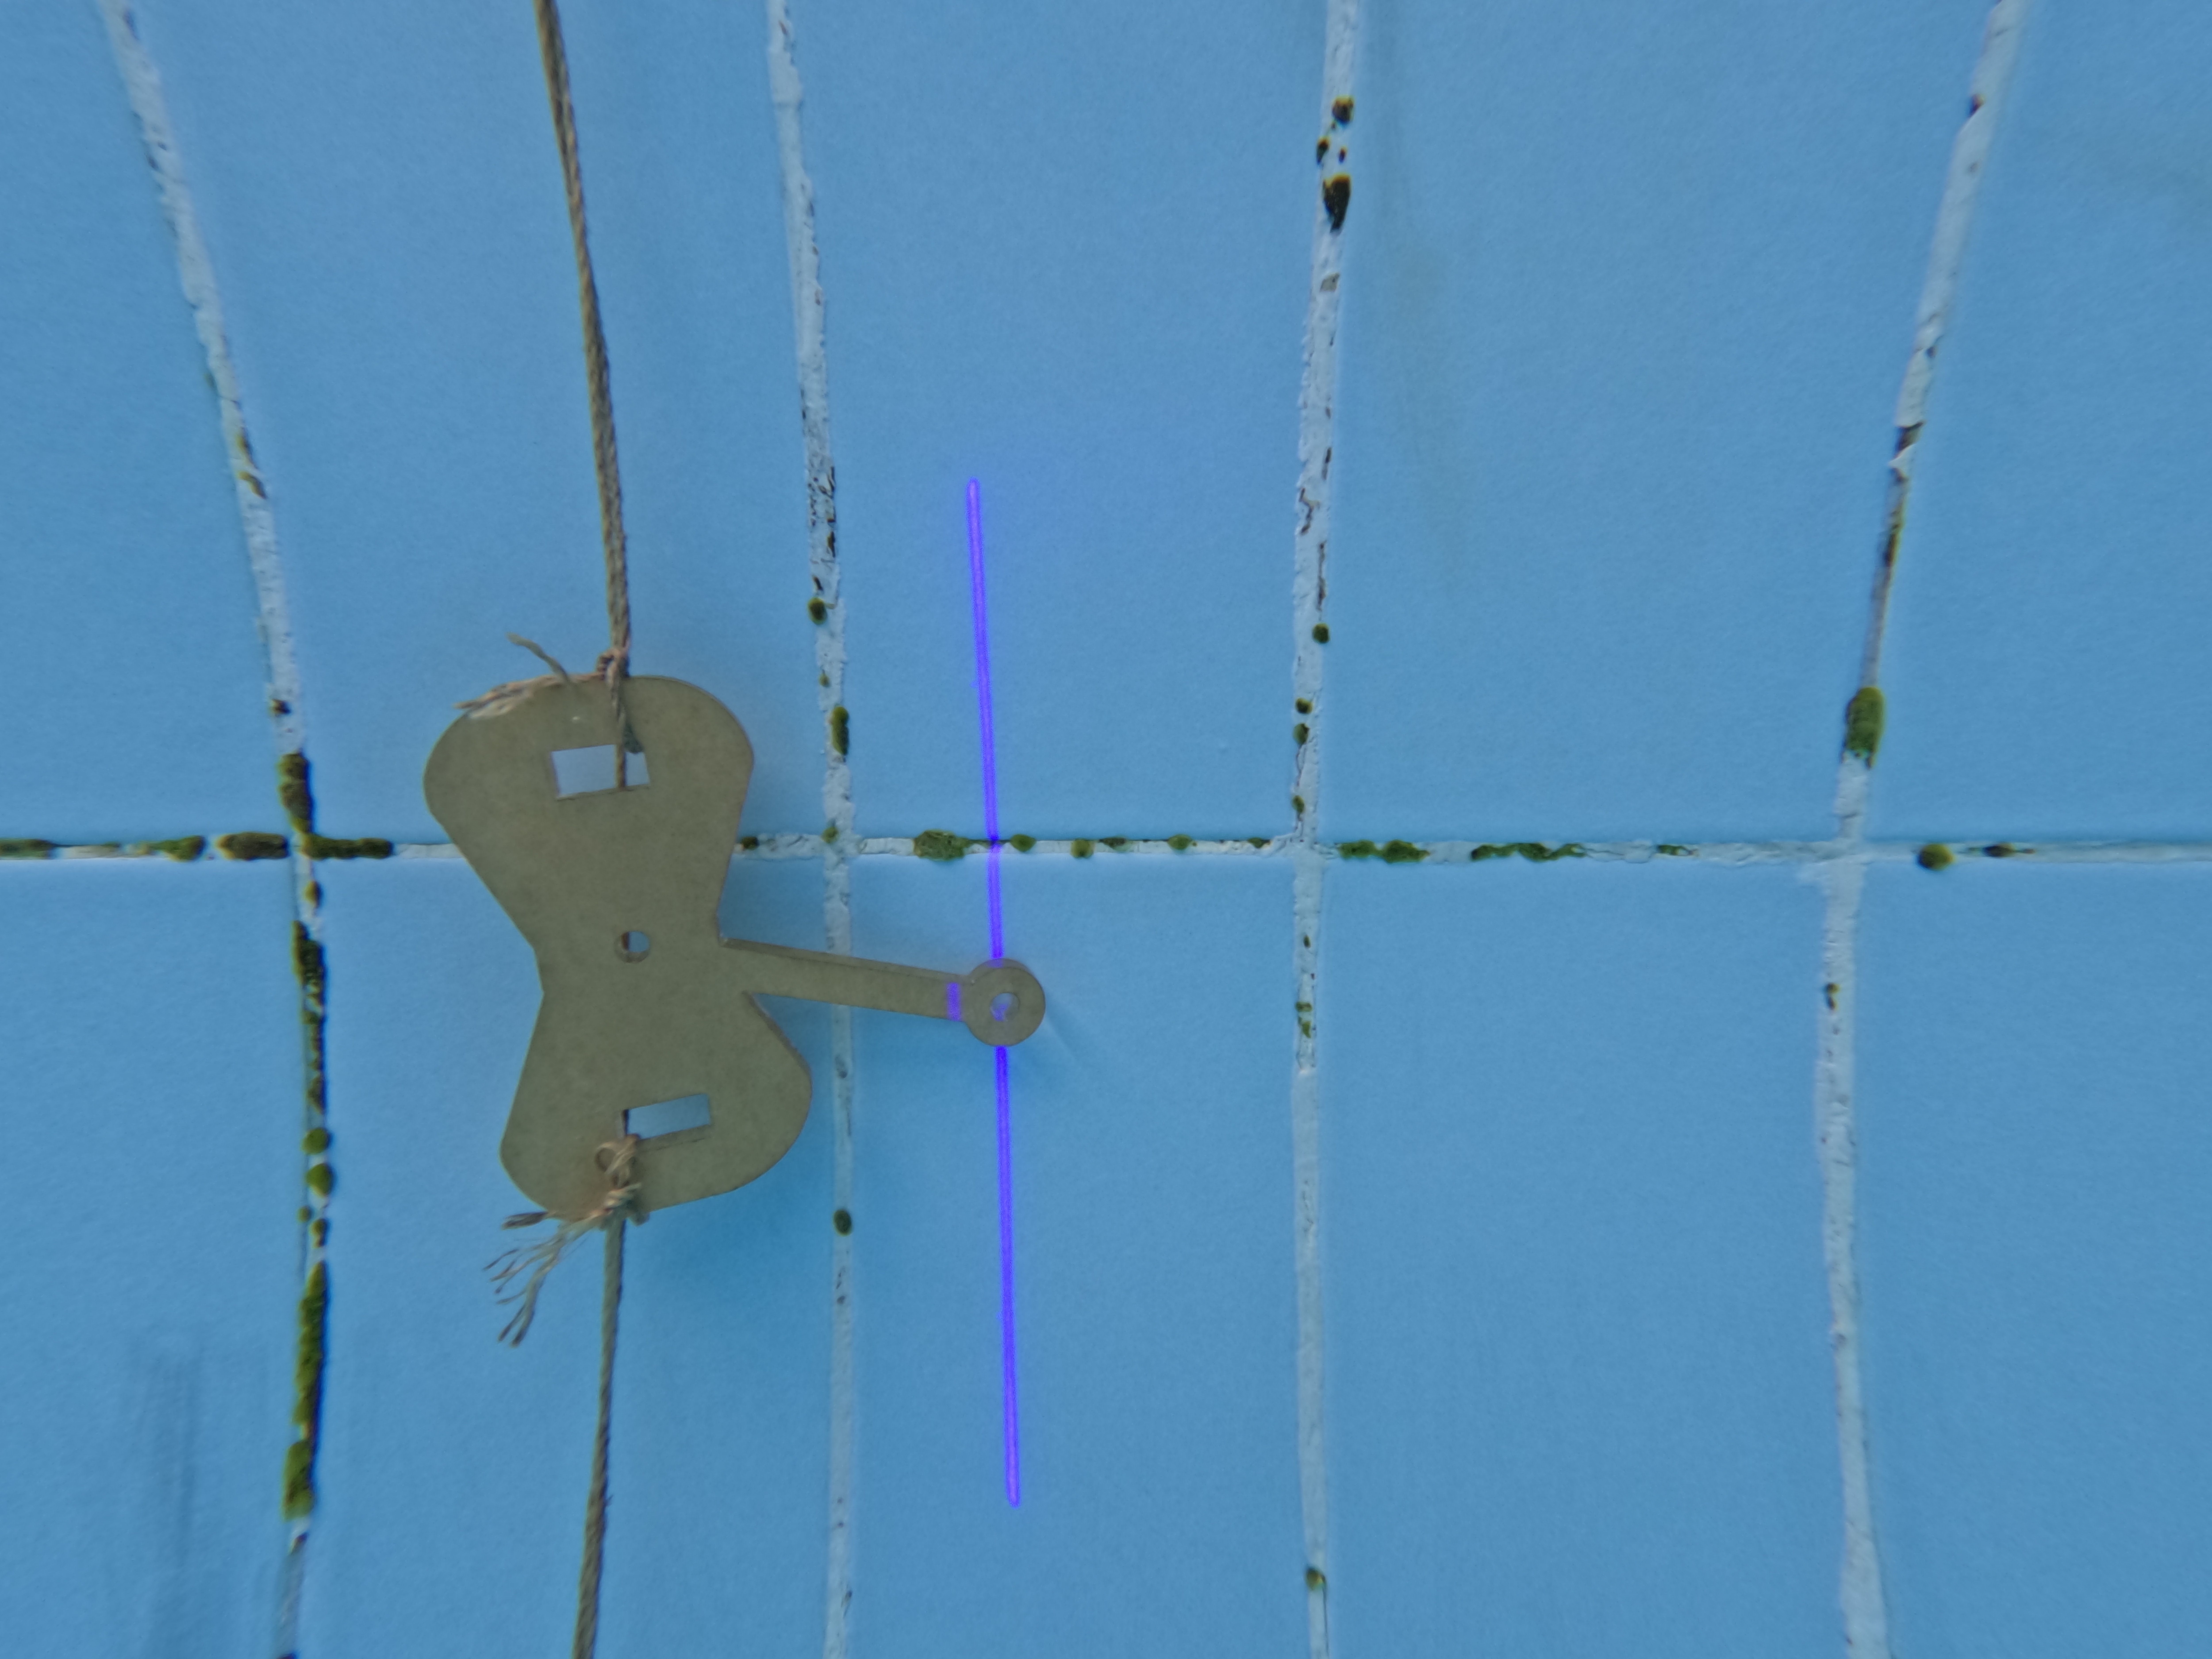

Supplement: Supplementary file 2601 [file G0050899.pdf › Level_2_2/G0050899.pdf]

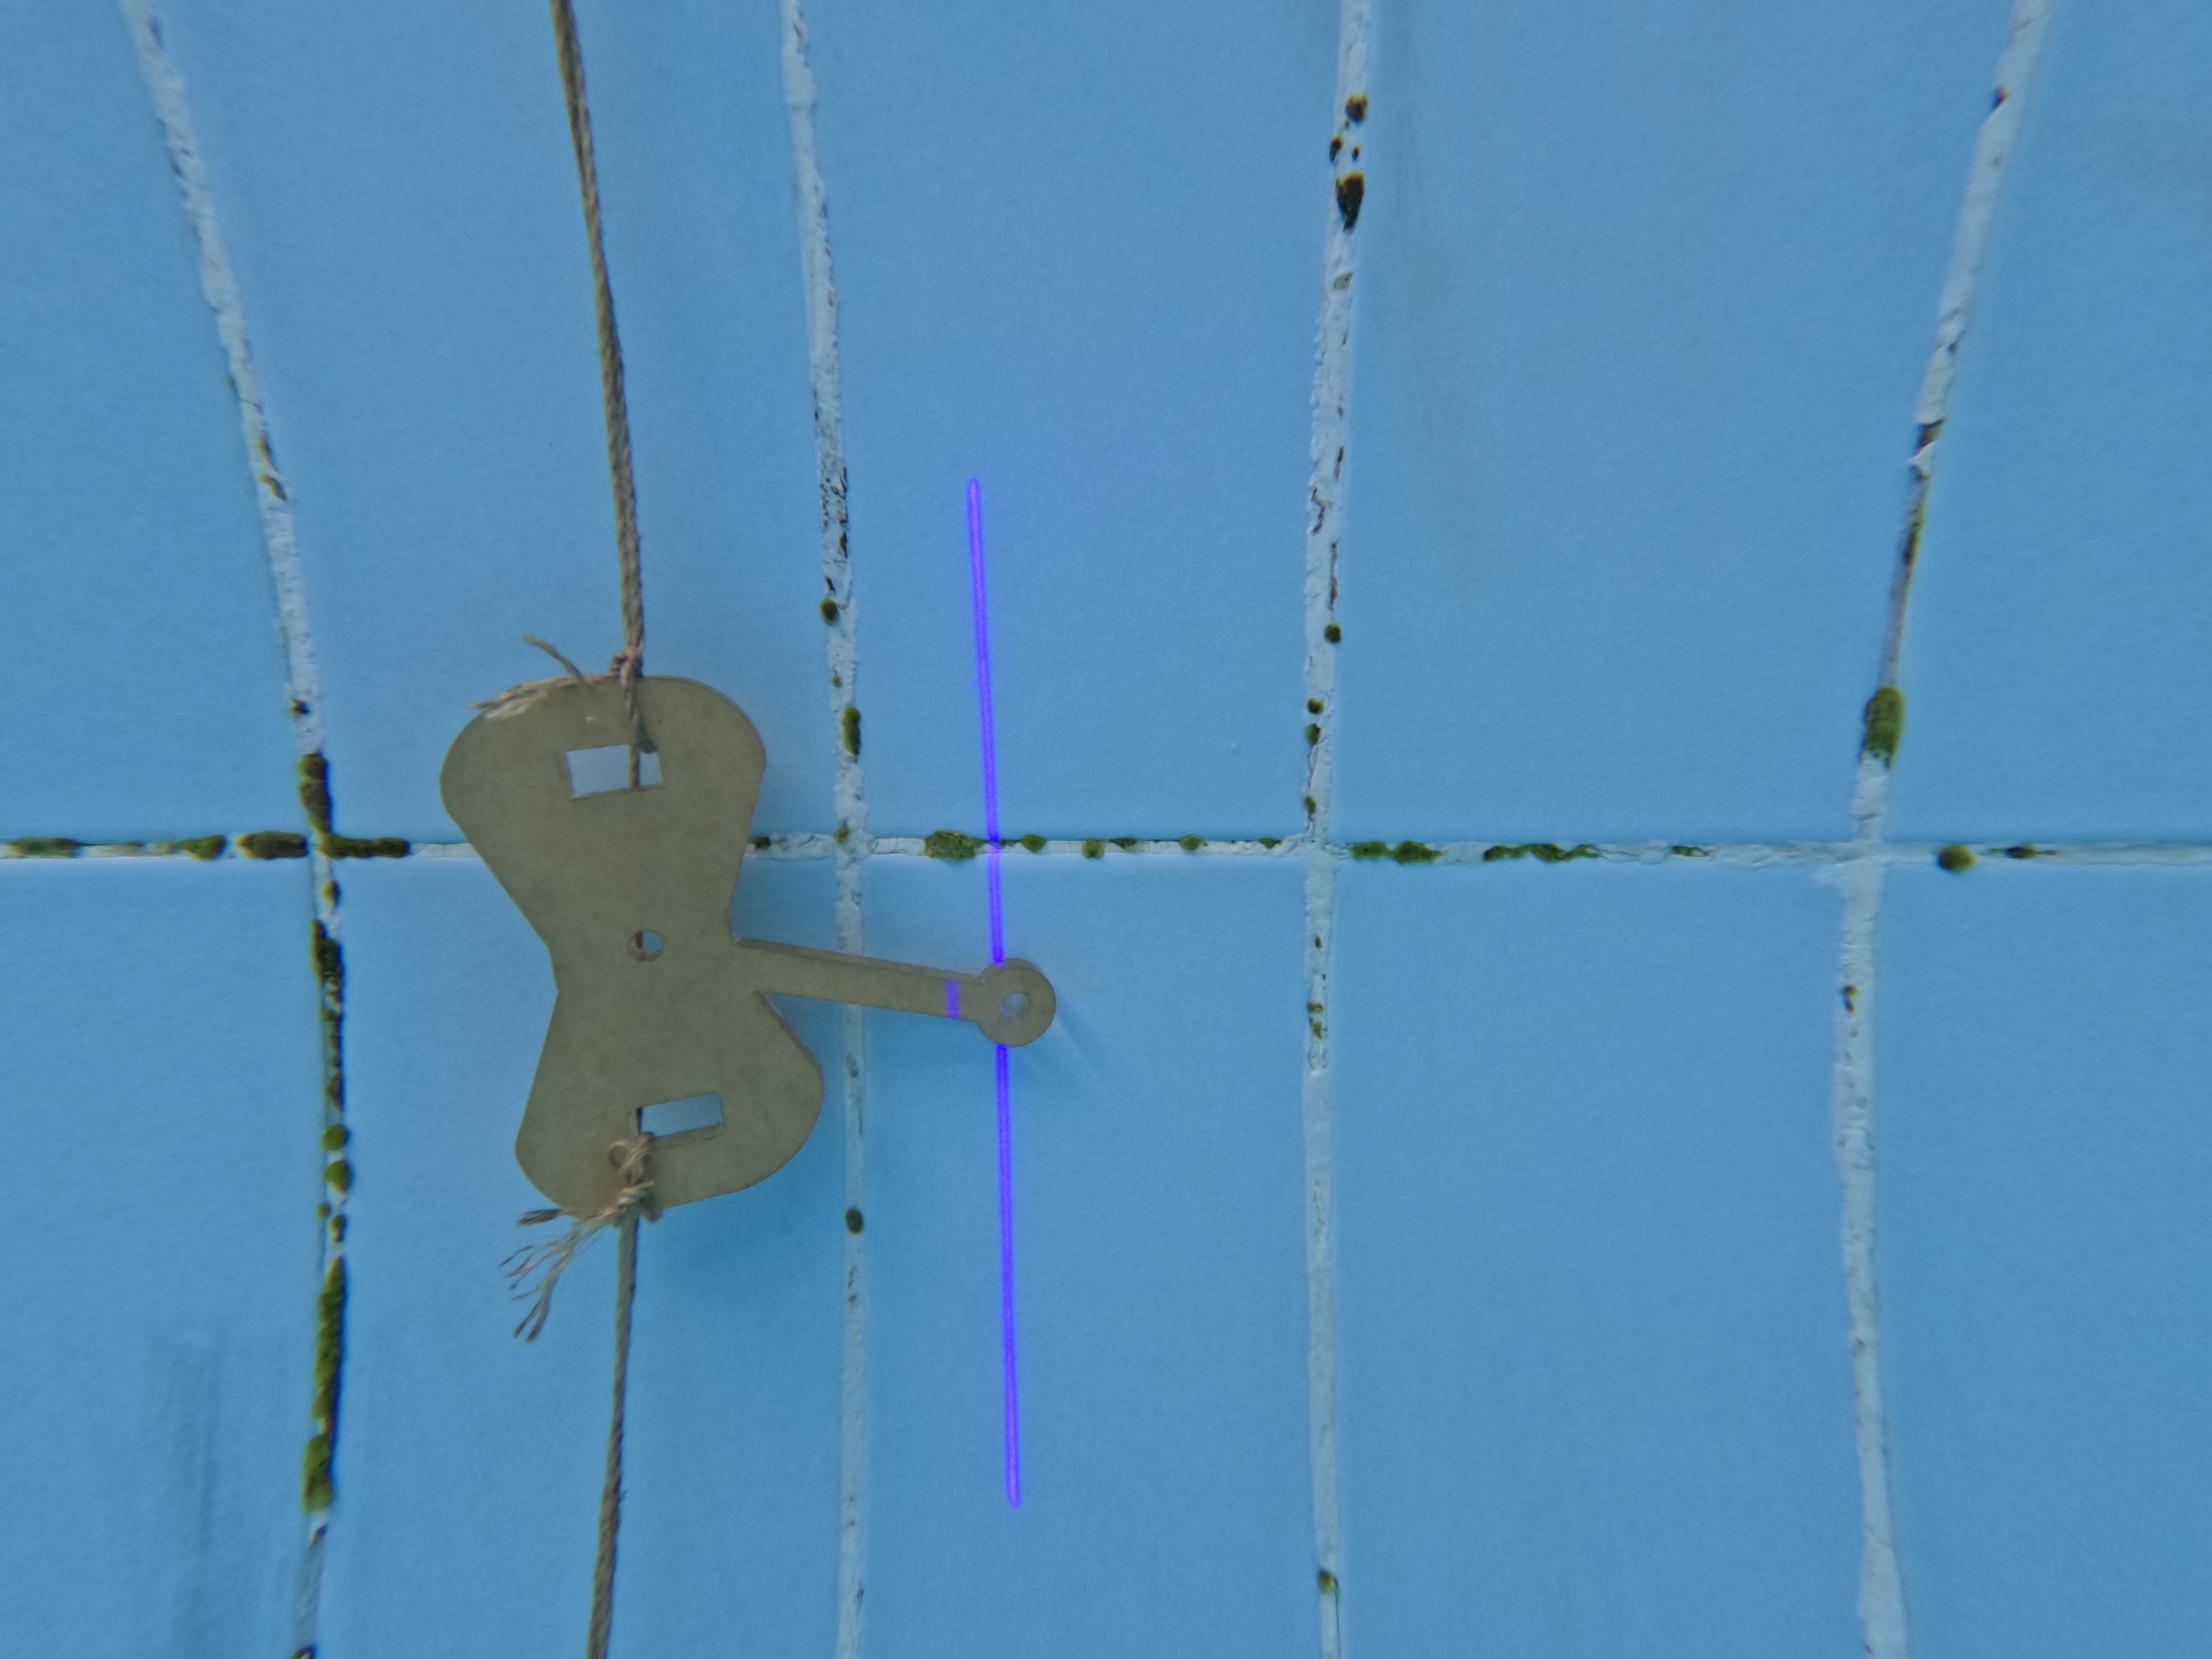

Supplement: Supplementary file 2602 [file G0050900.pdf › Level_2_2/G0050900.pdf]

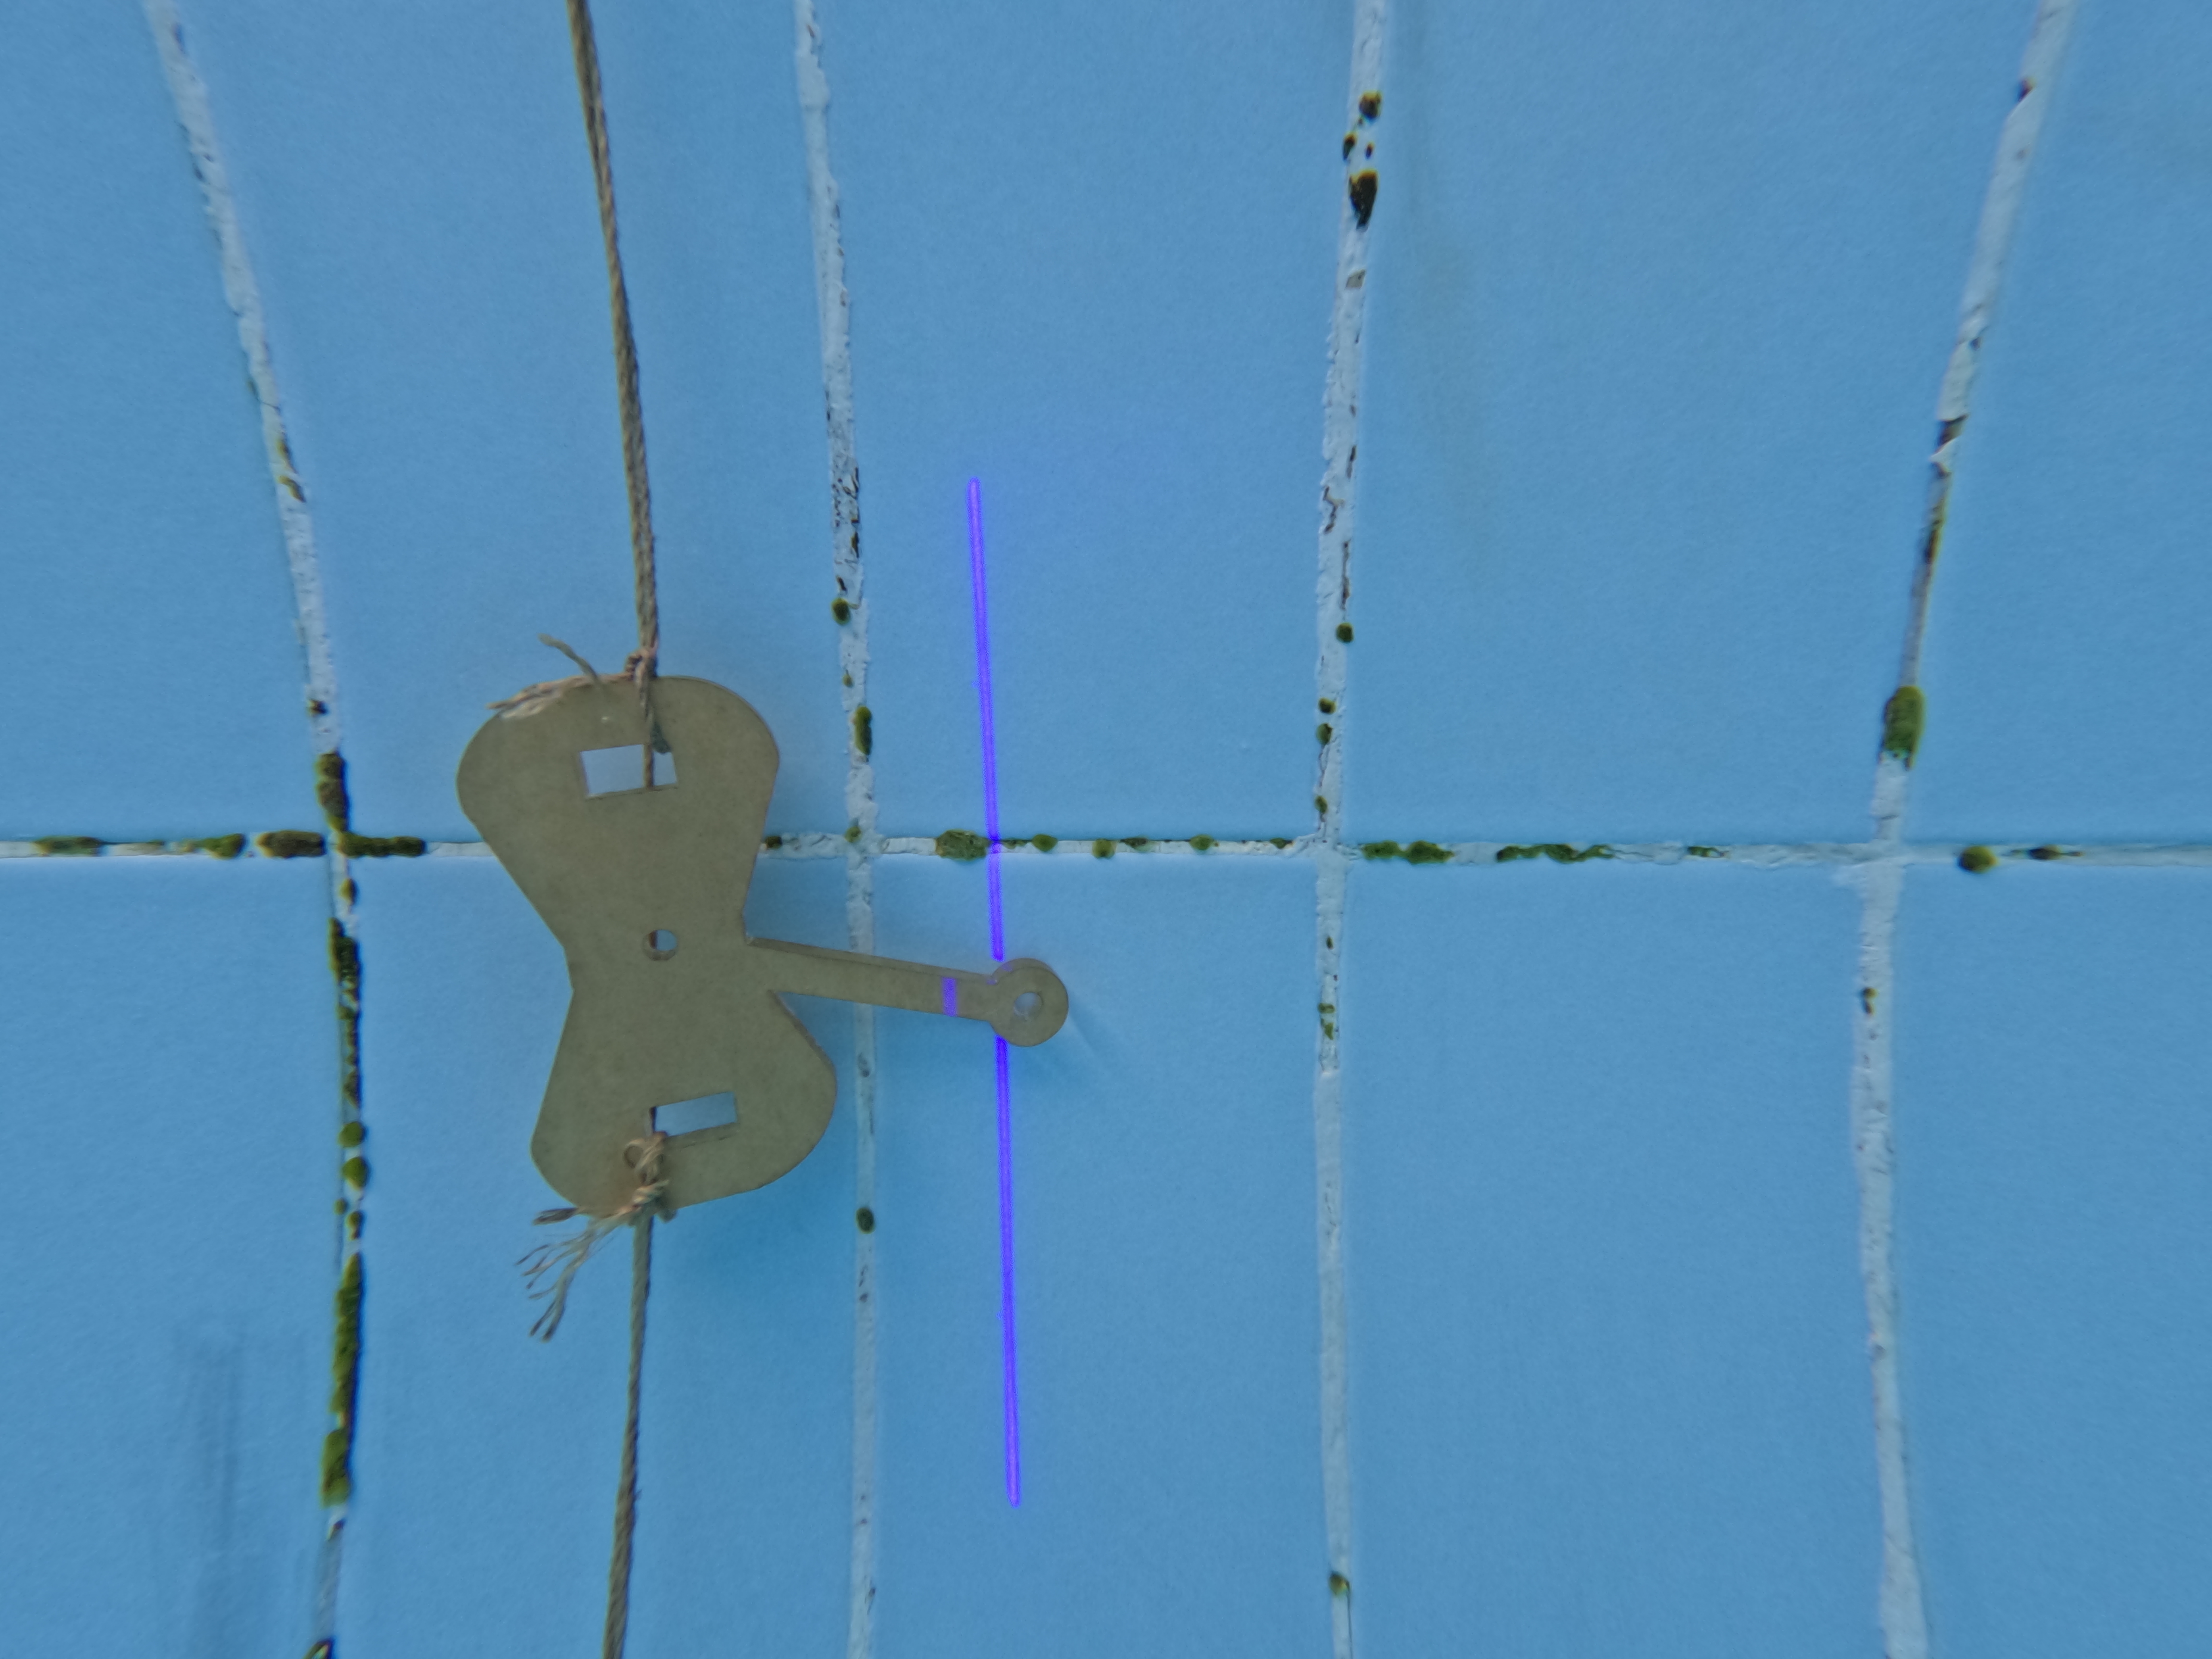

Supplement: Supplementary file 2603 [file G0050901.pdf › Level_2_2/G0050901.pdf]

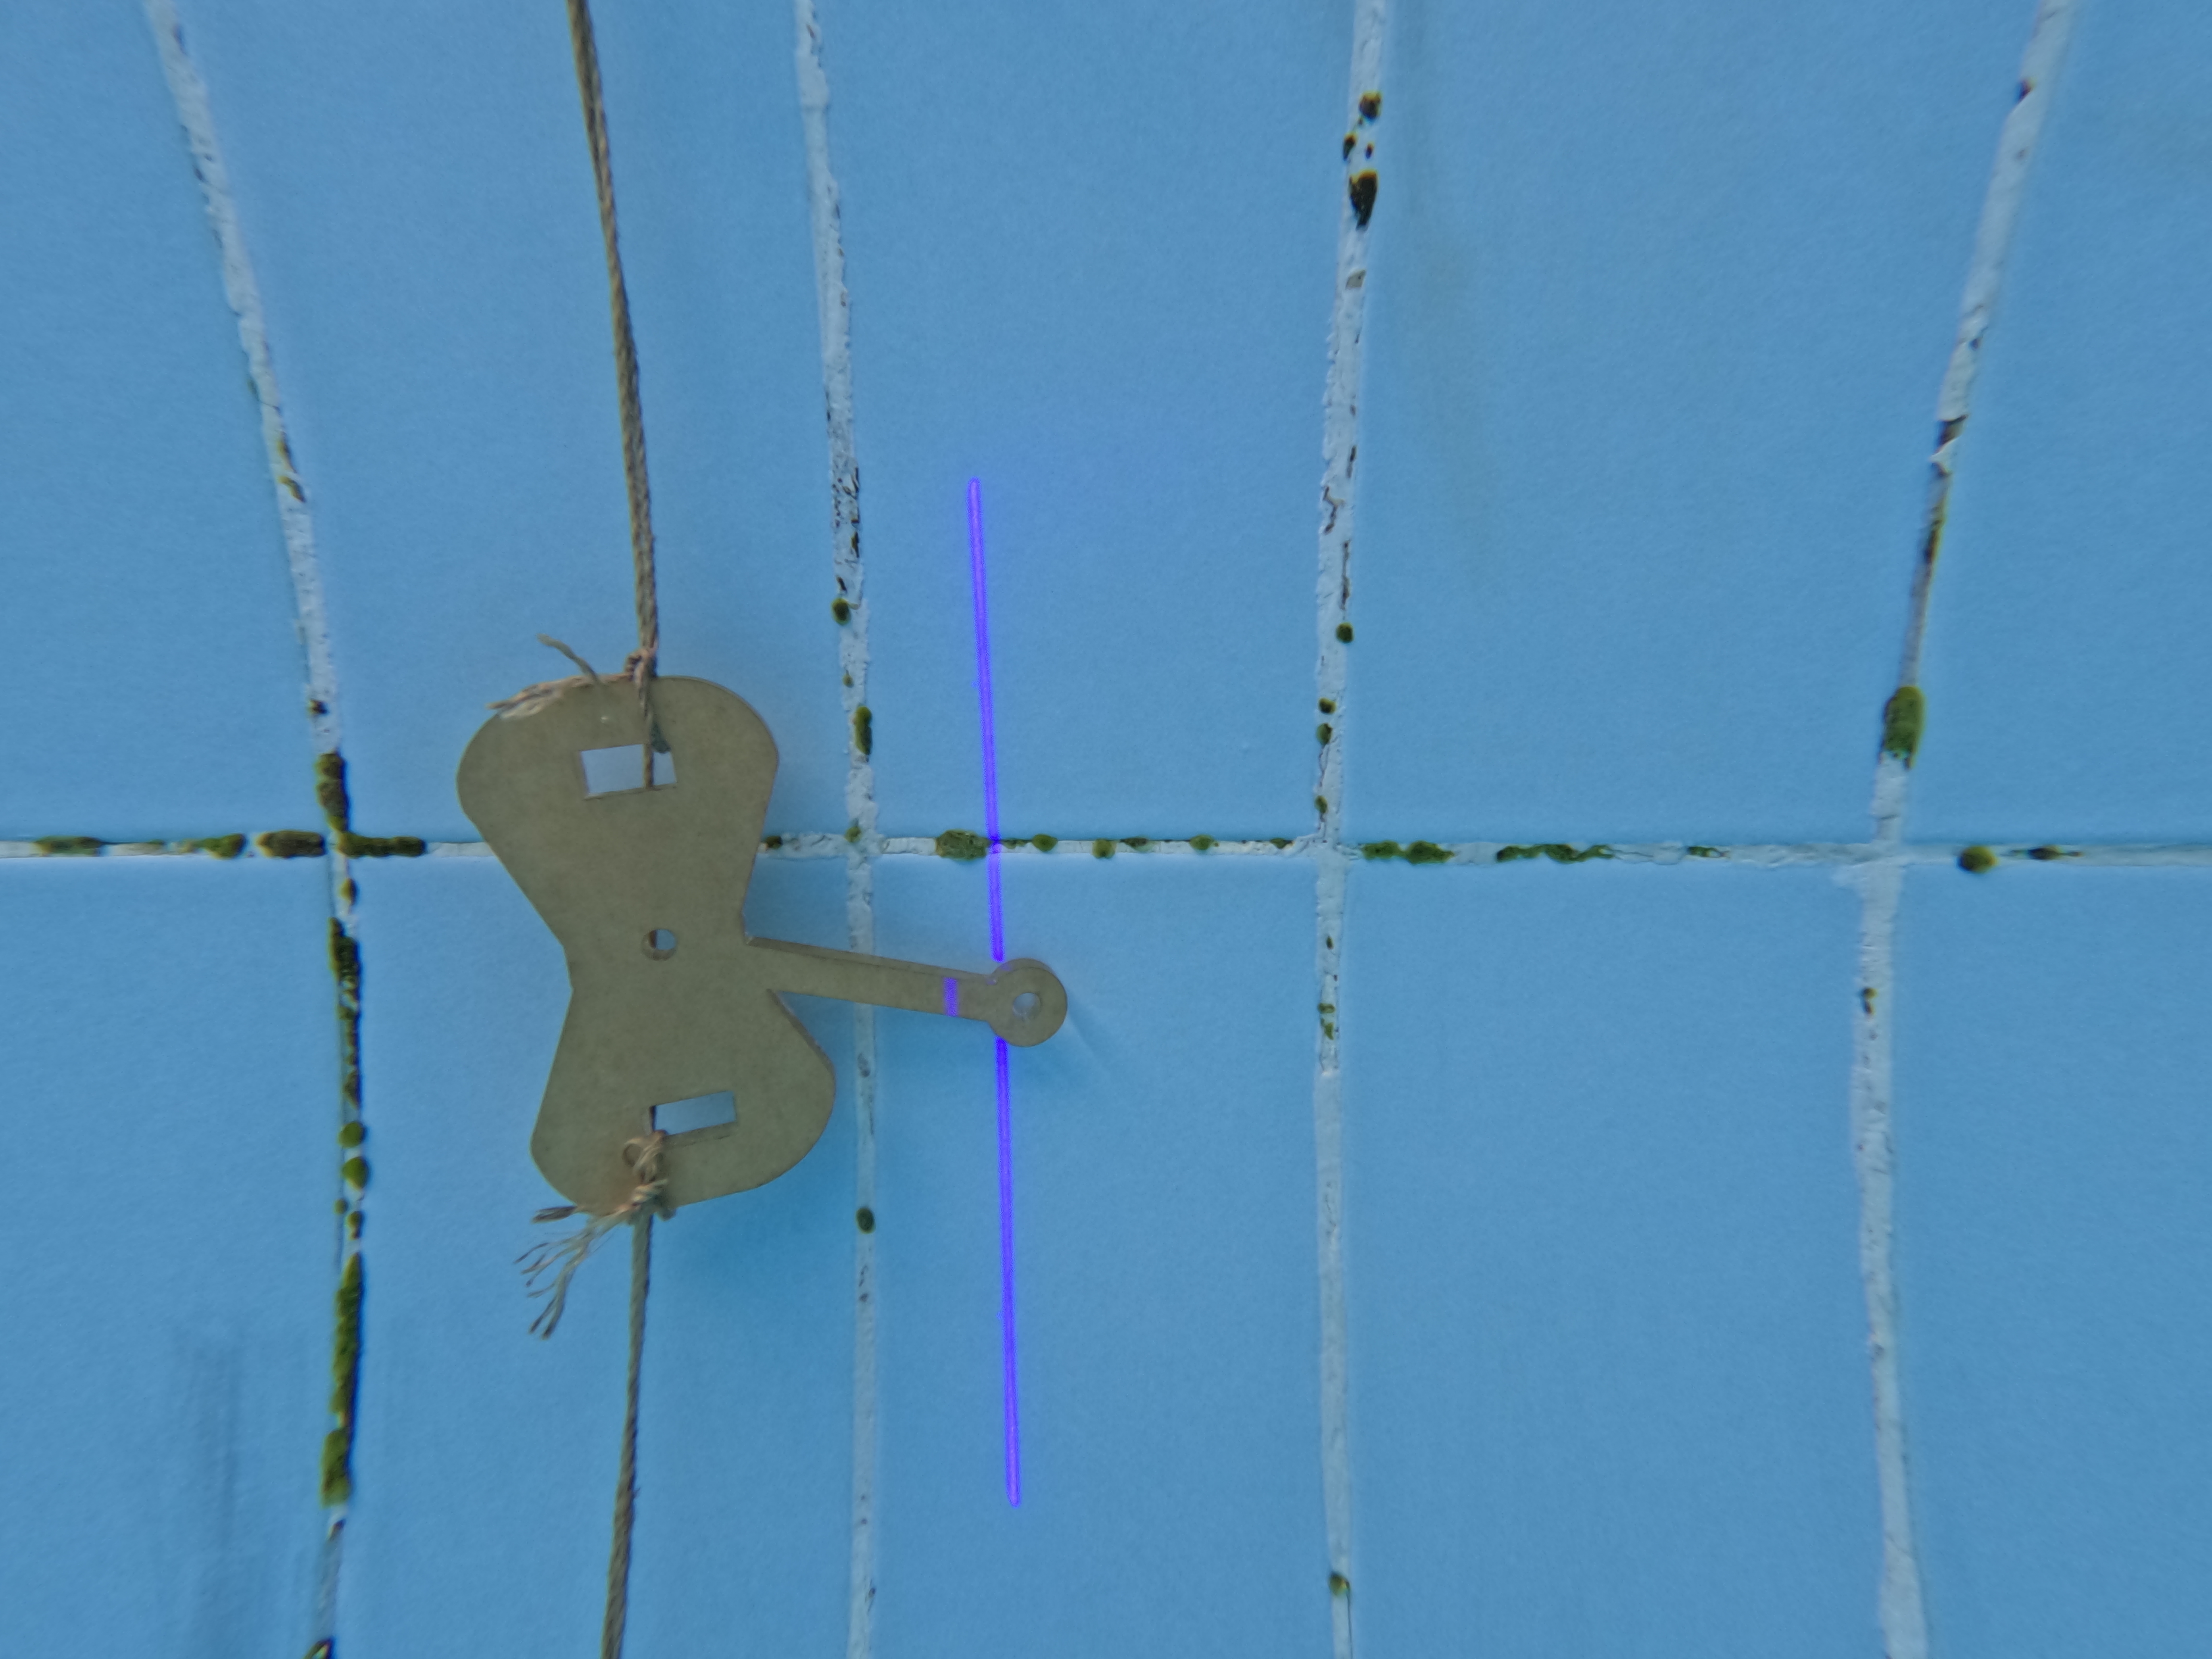

Supplement: Supplementary file 2604 [file G0050902.pdf › Level_2_2/G0050902.pdf]

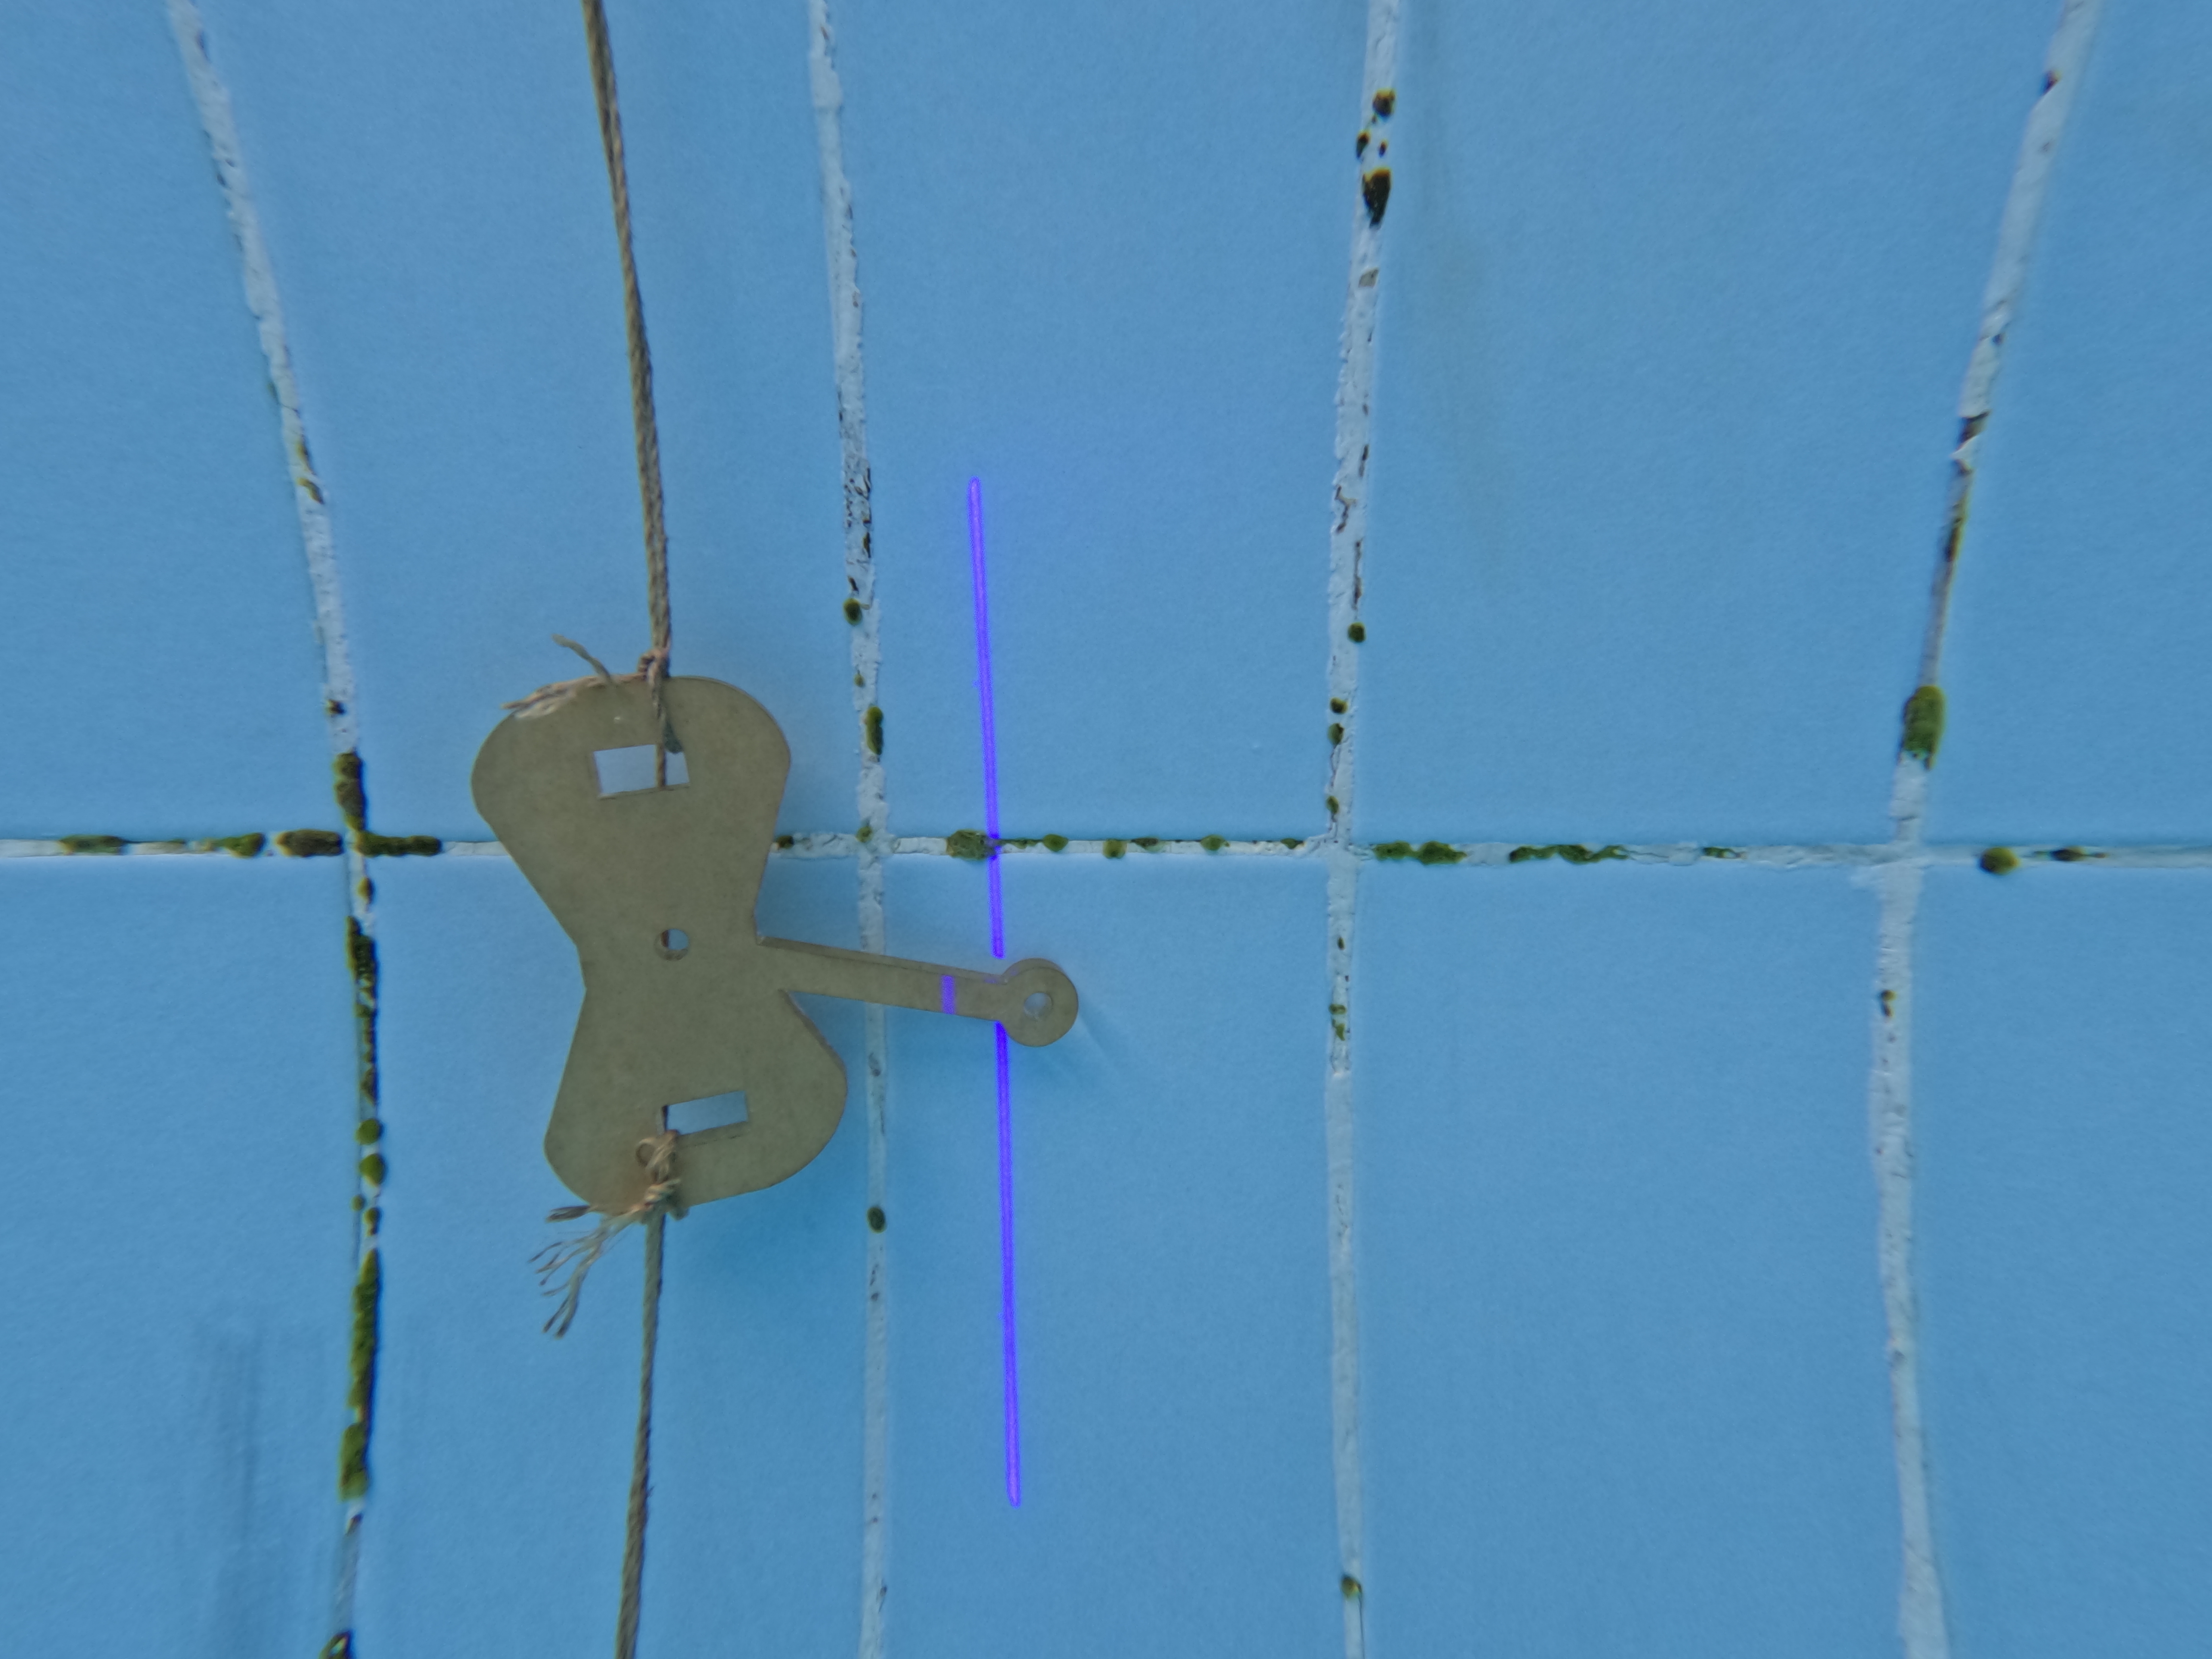

Supplement: Supplementary file 2605 [file G0050903.pdf › Level_2_2/G0050903.pdf]

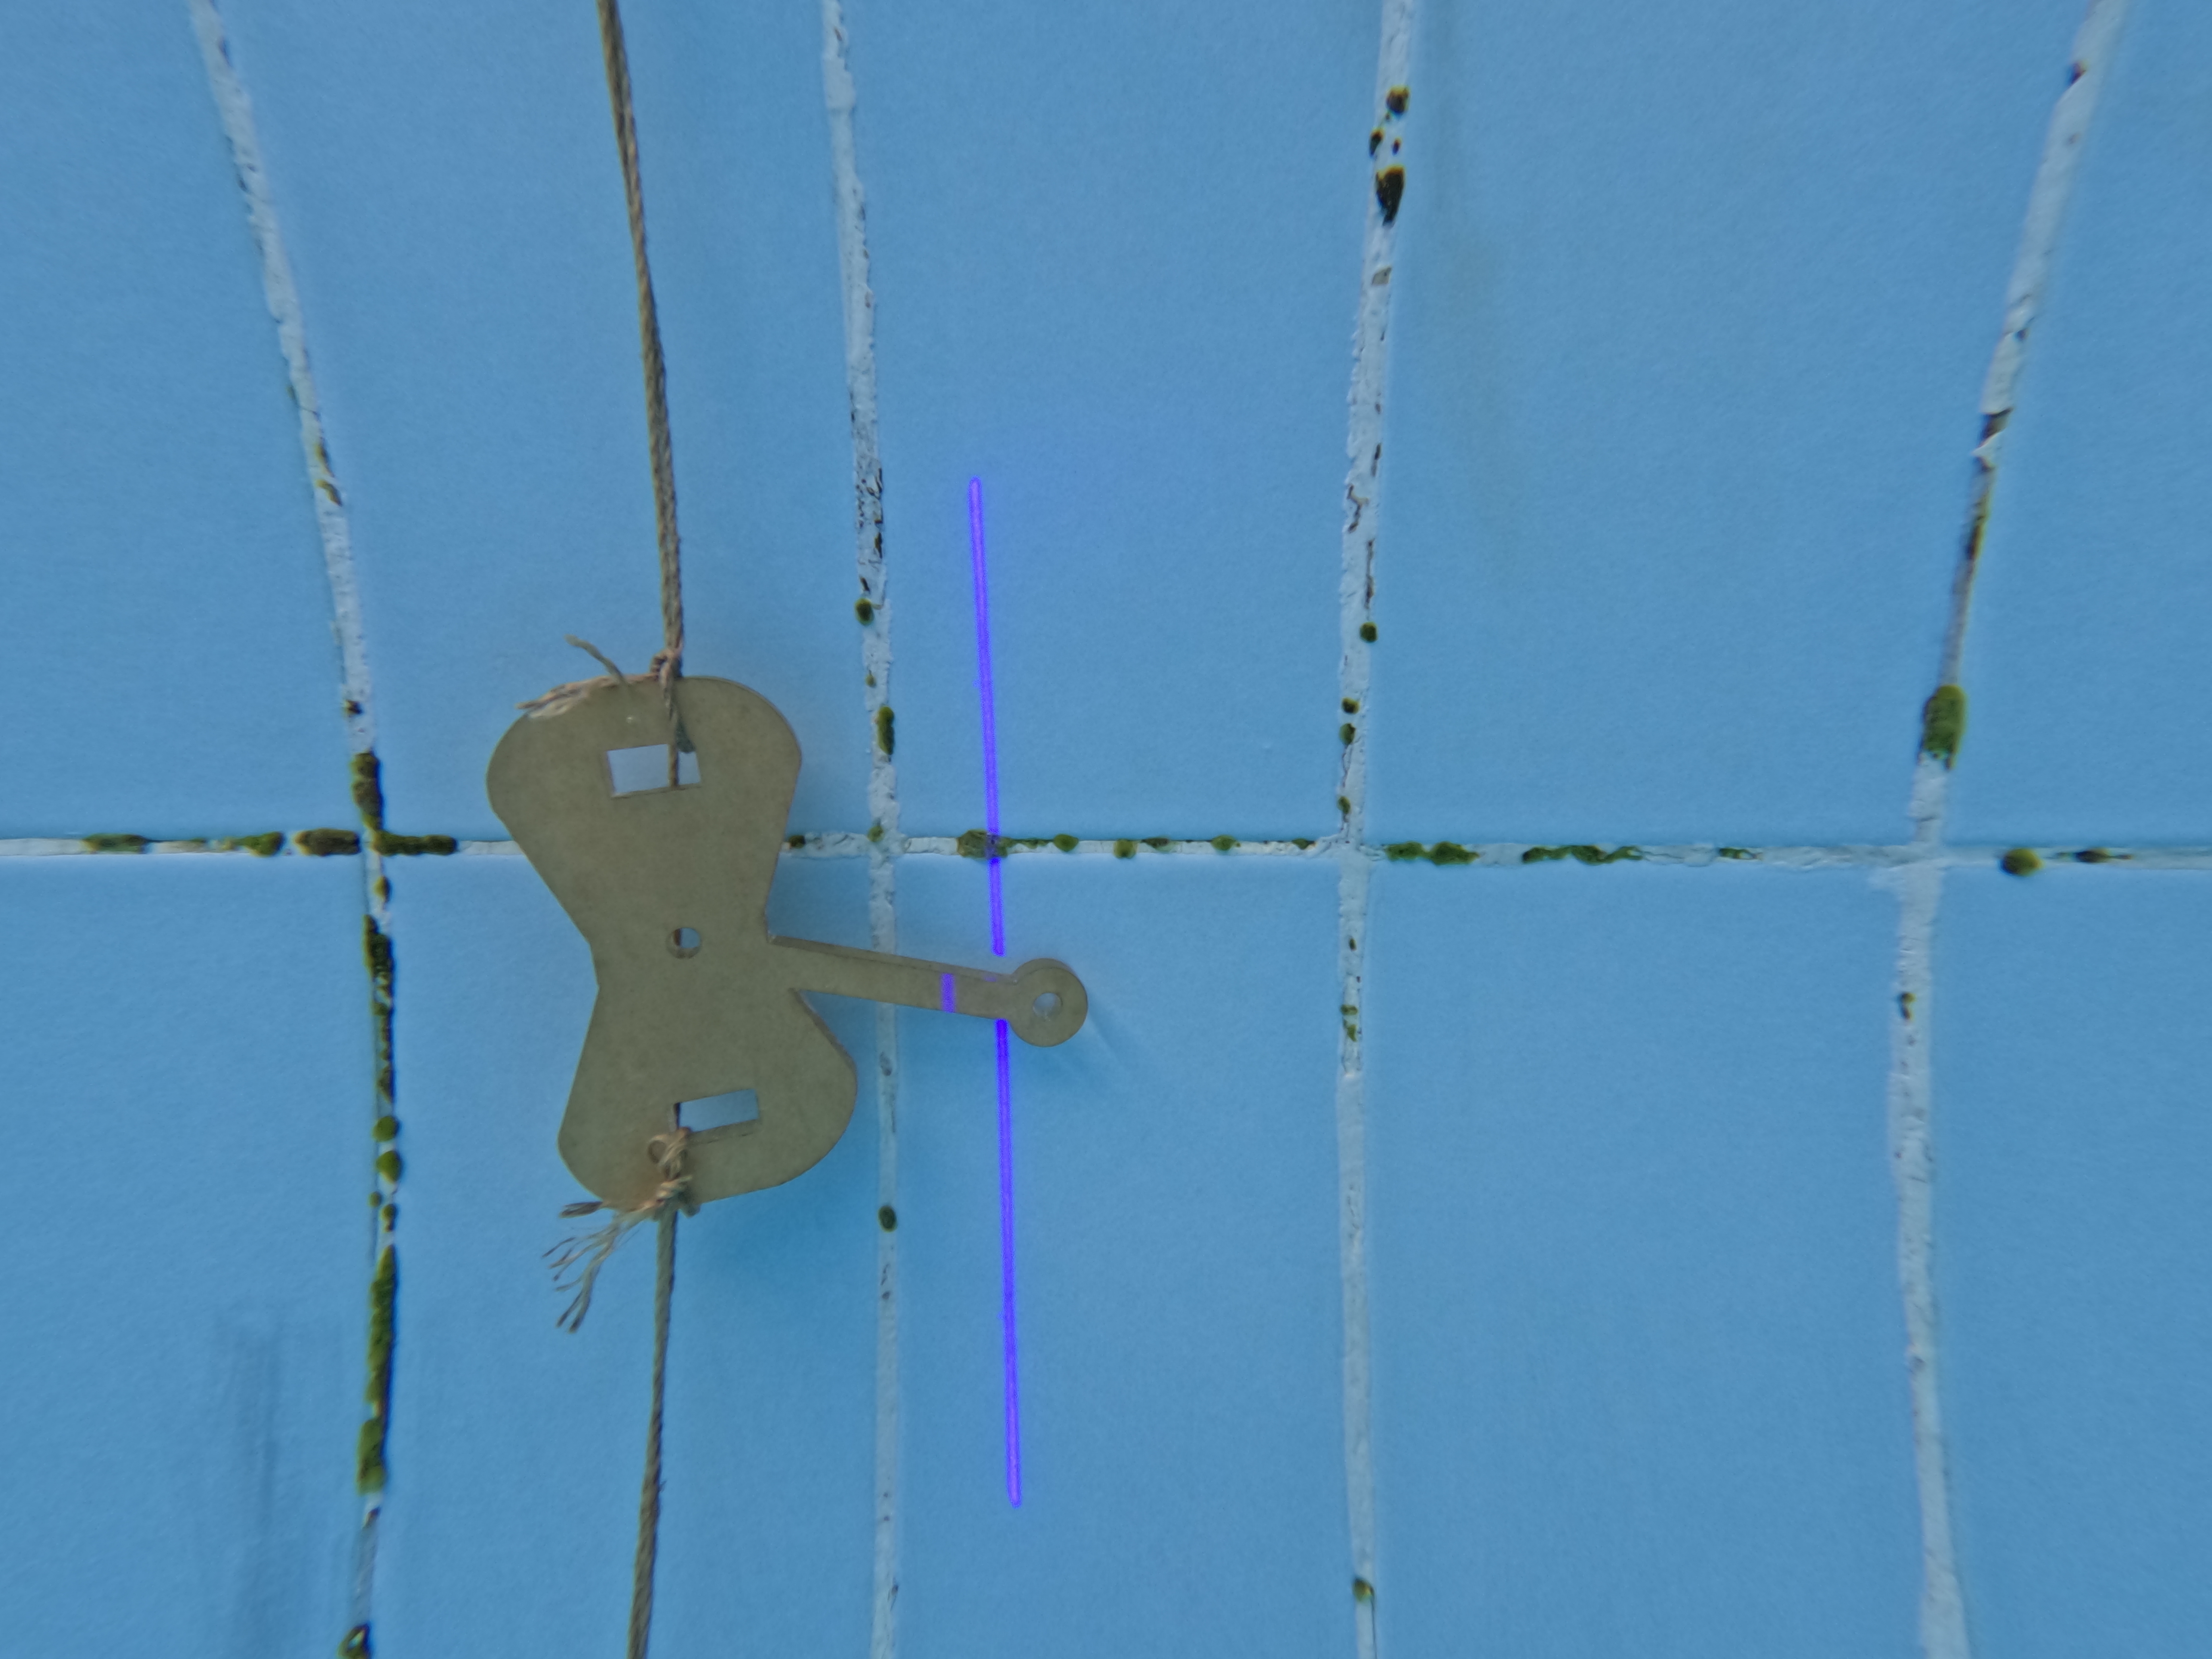

Supplement: Supplementary file 2606 [file G0050904.pdf › Level_2_2/G0050904.pdf]

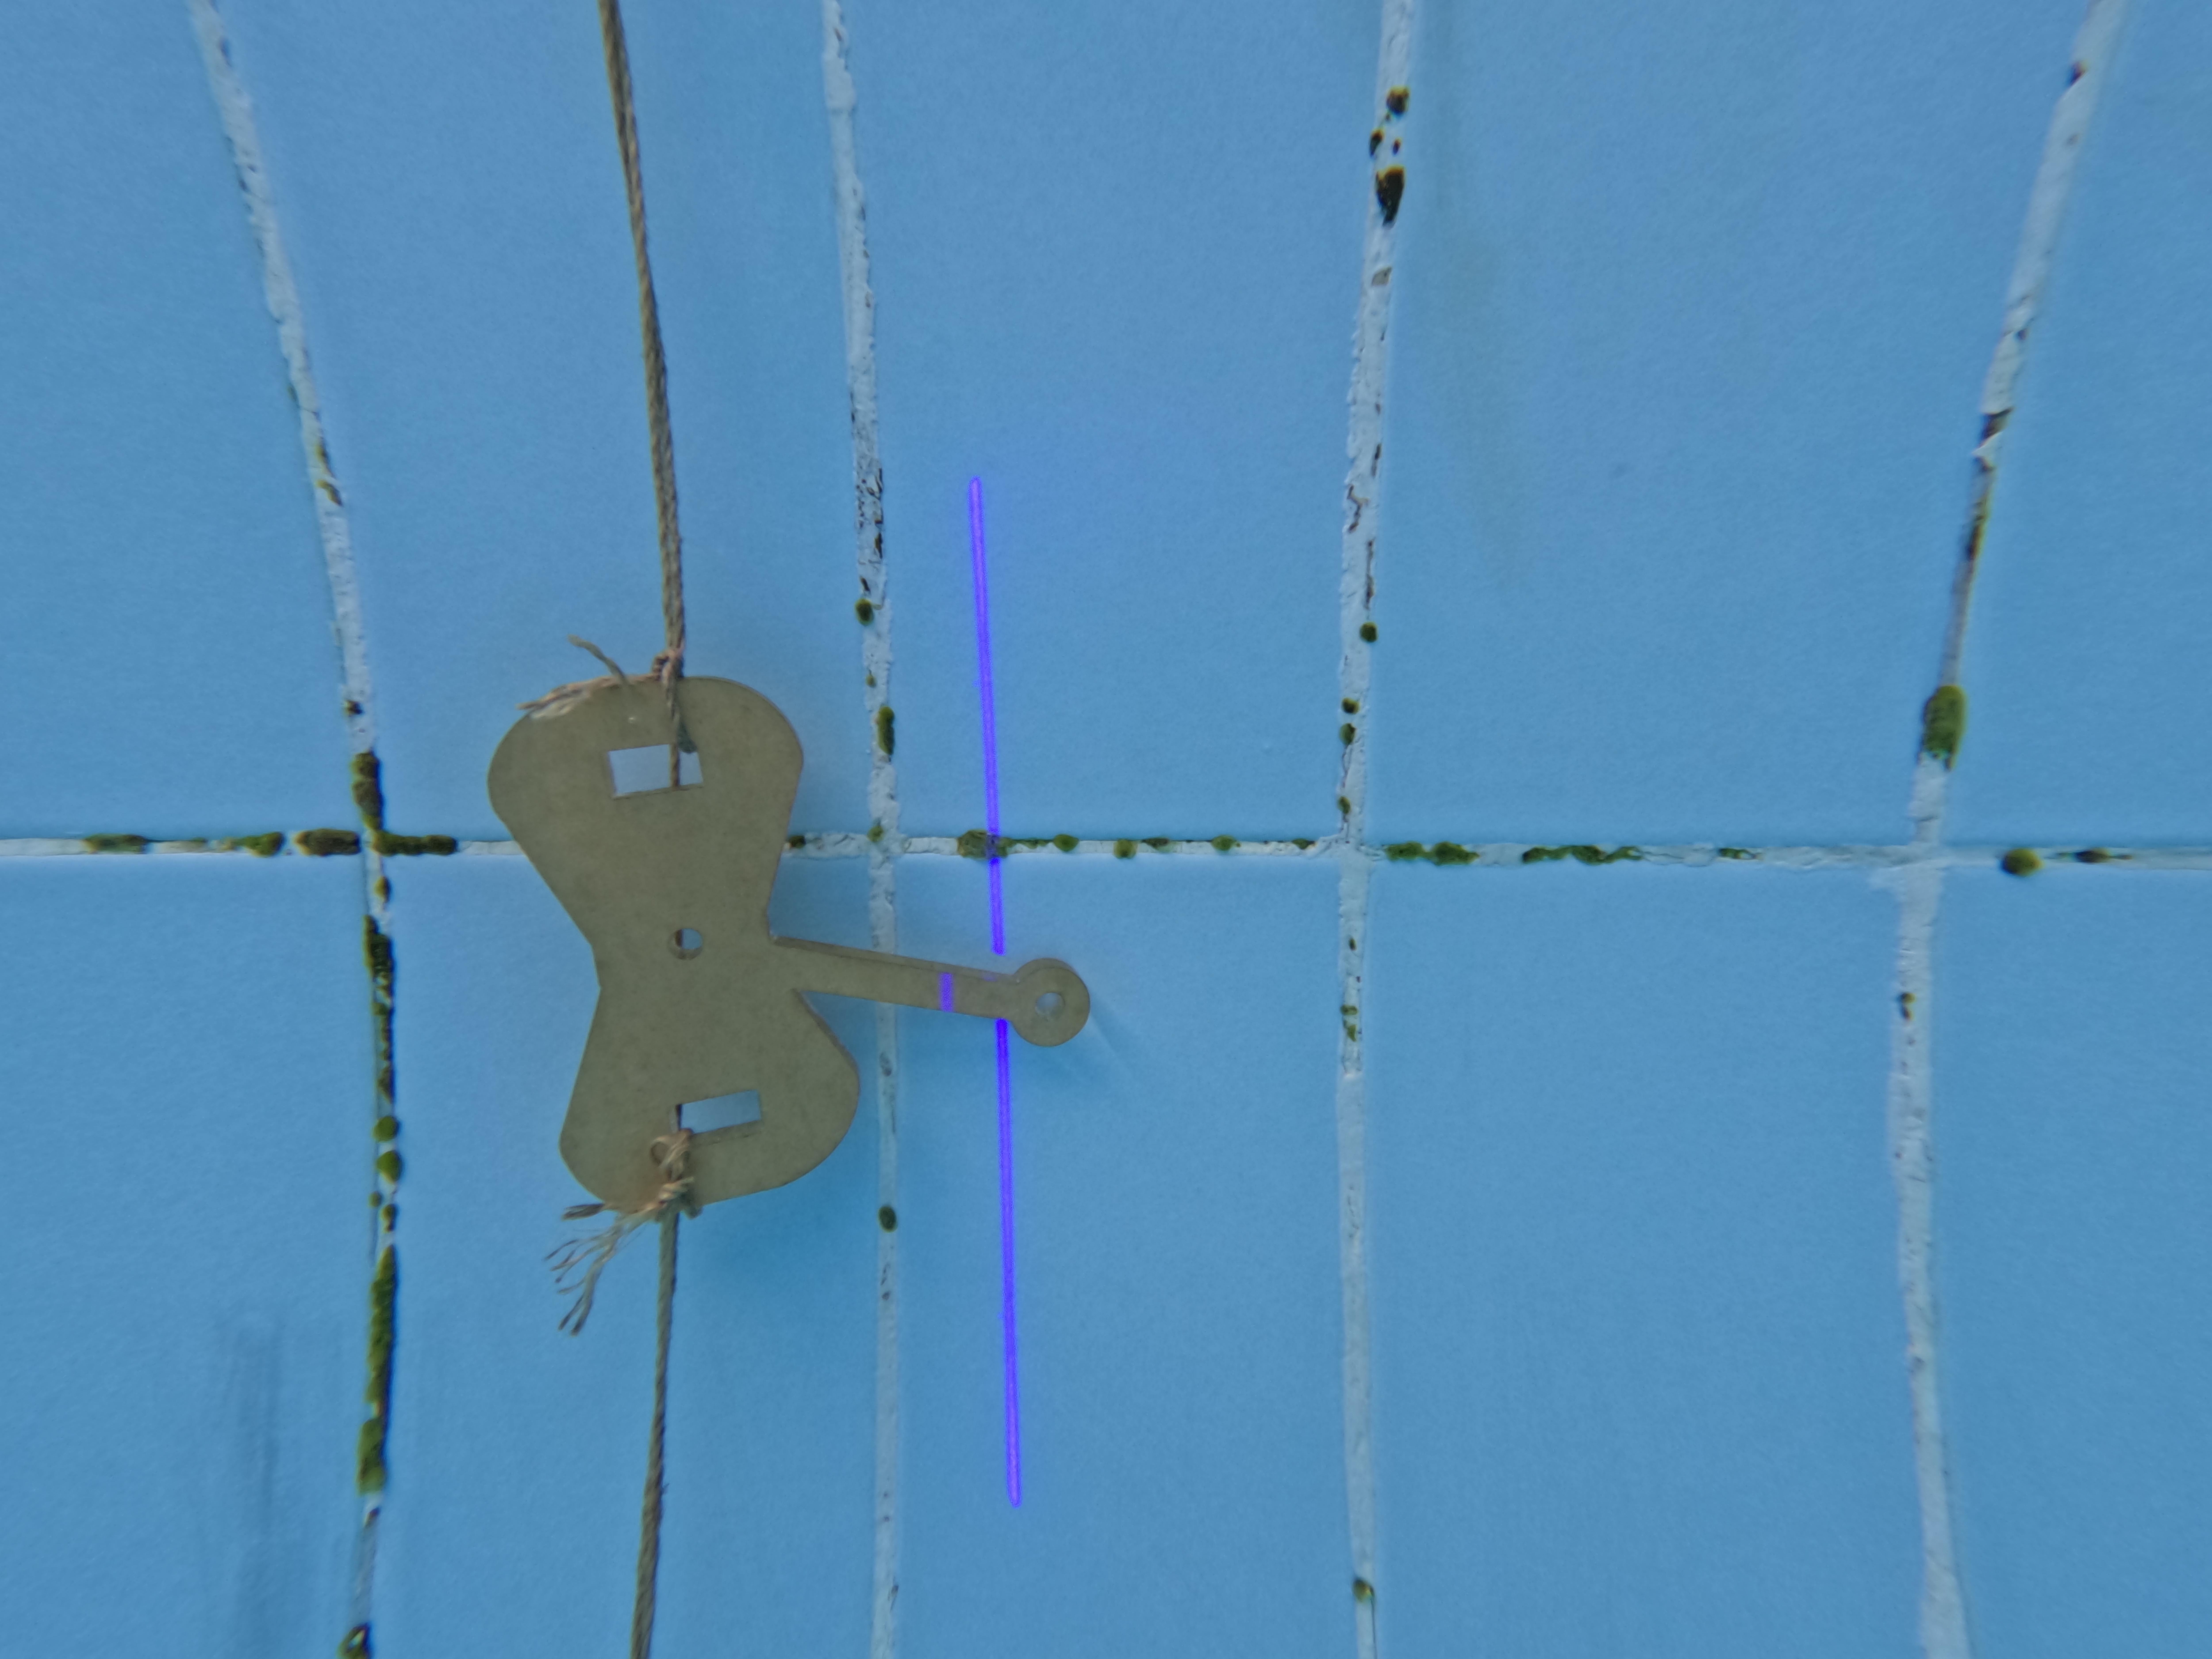

Supplement: Supplementary file 2607 [file G0050905.pdf › Level_2_2/G0050905.pdf]

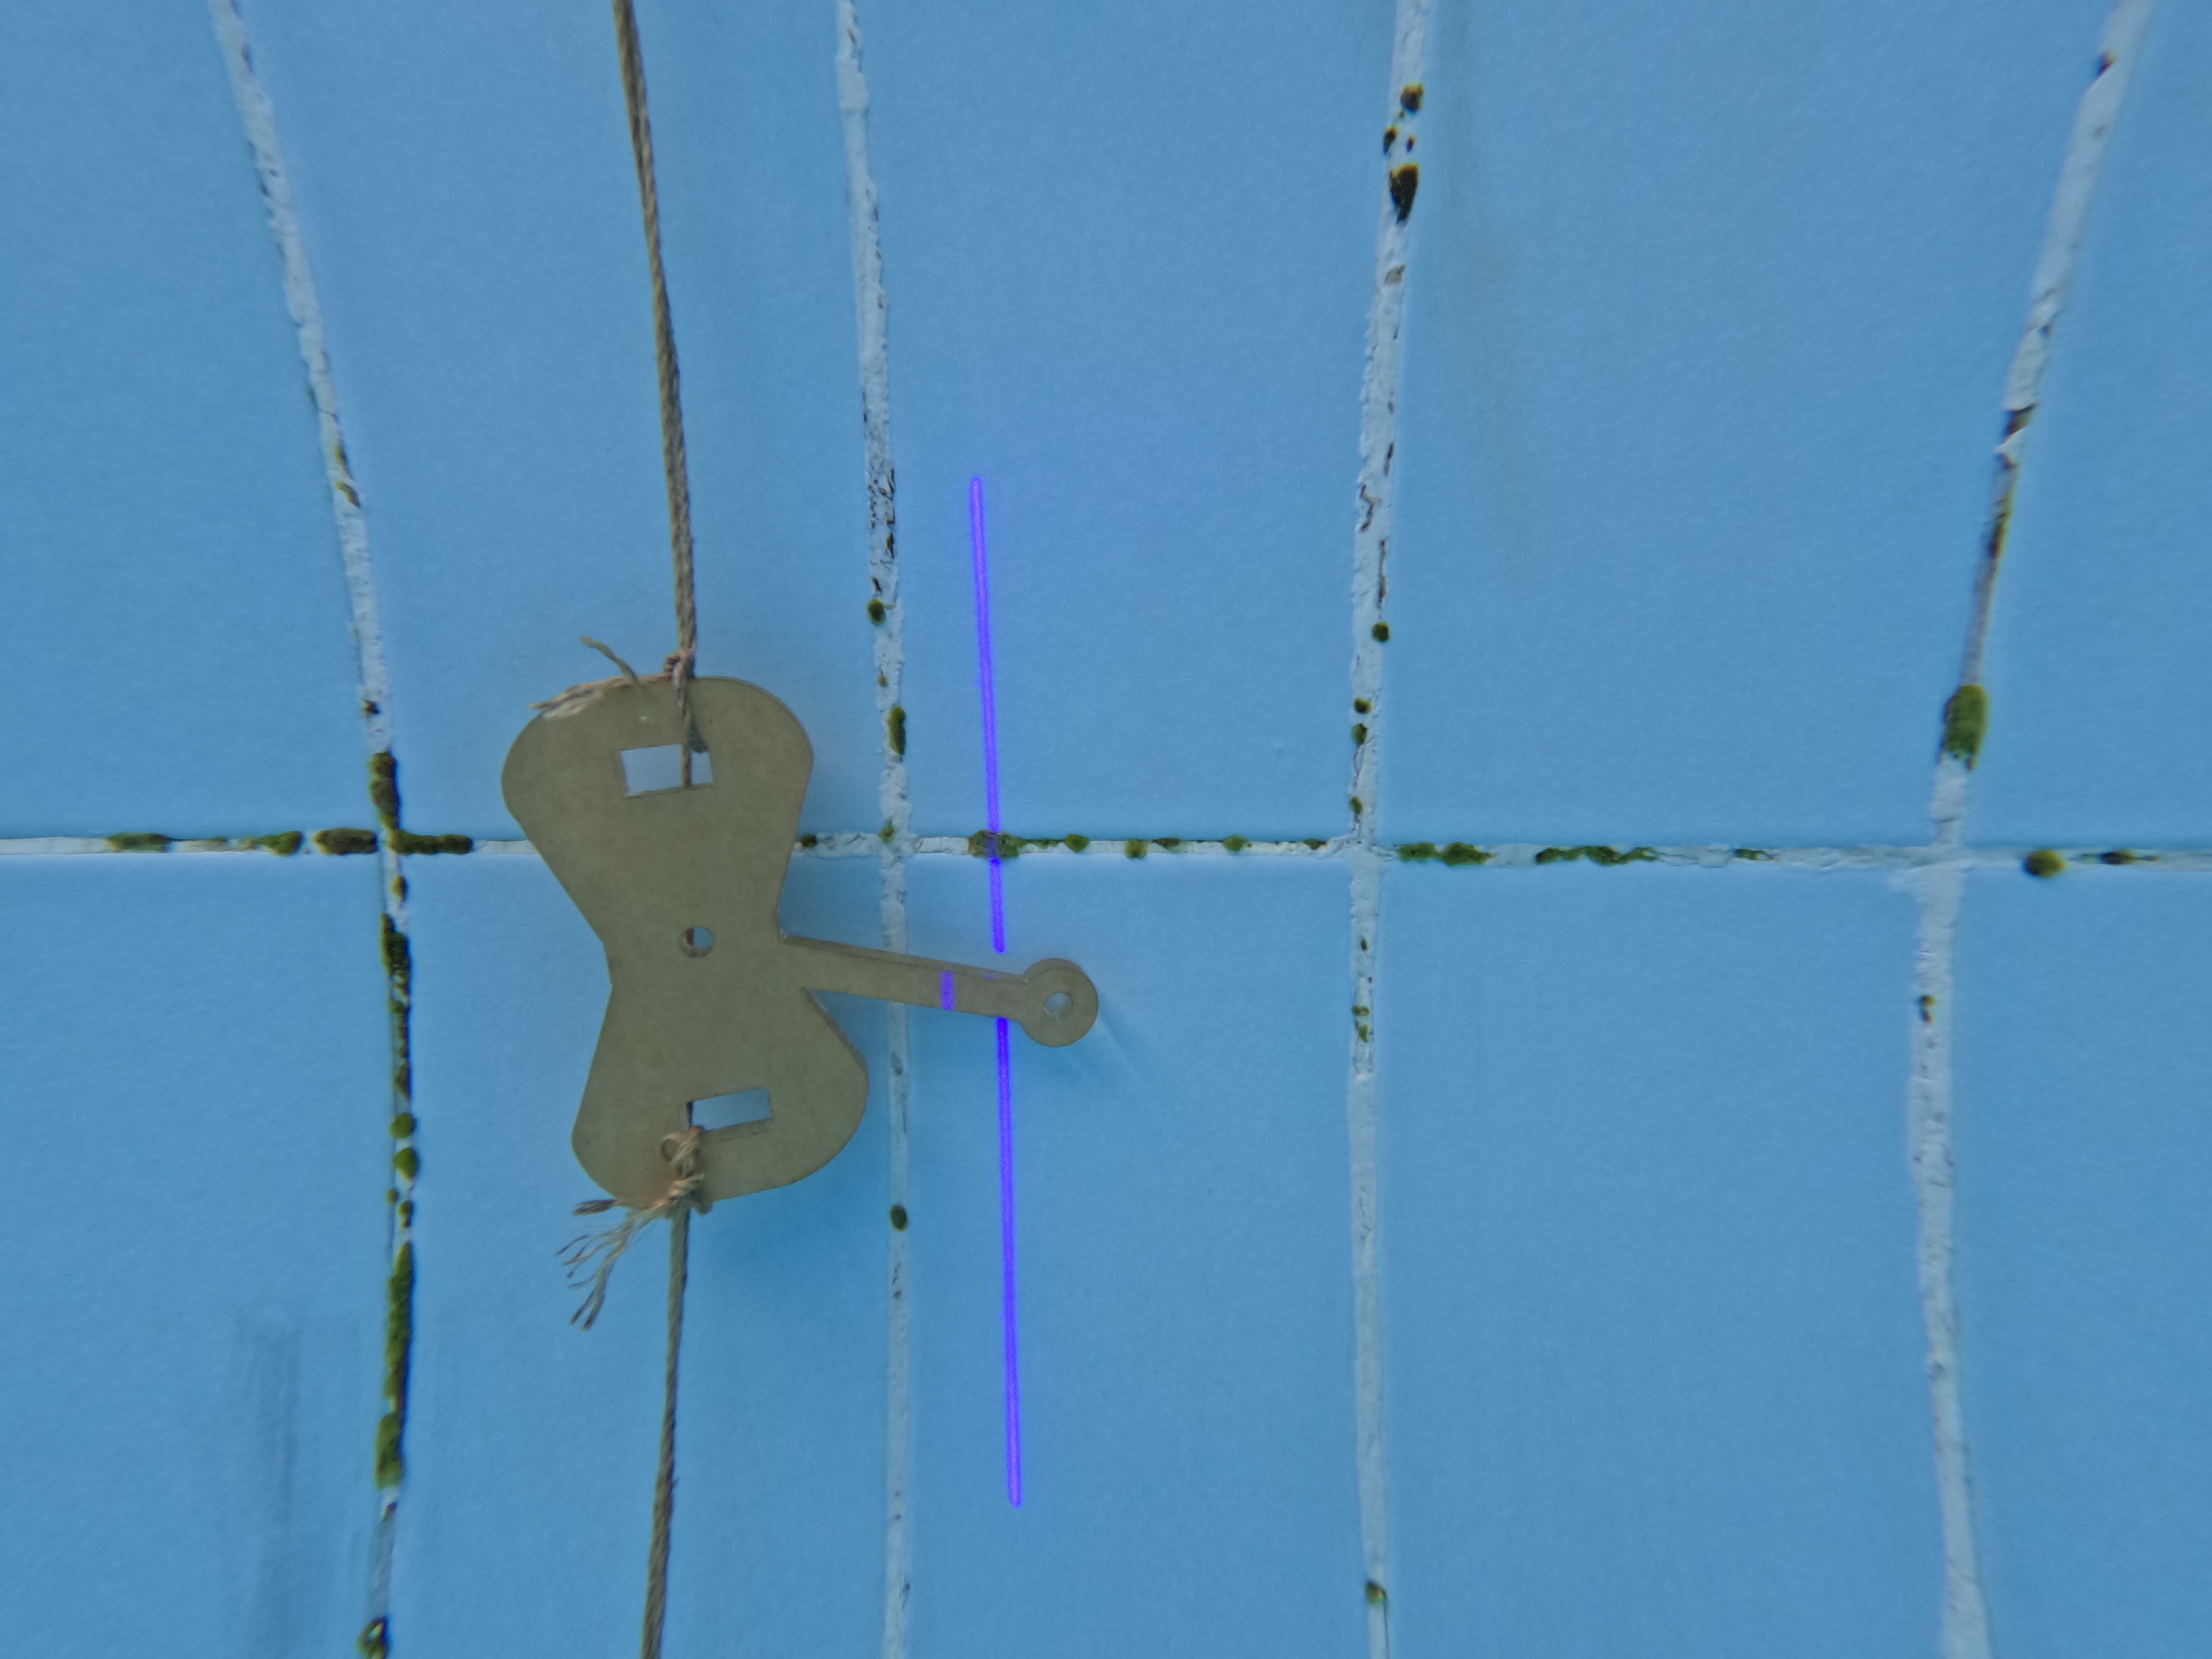

Supplement: Supplementary file 2608 [file G0050906.pdf › Level_2_2/G0050906.pdf]

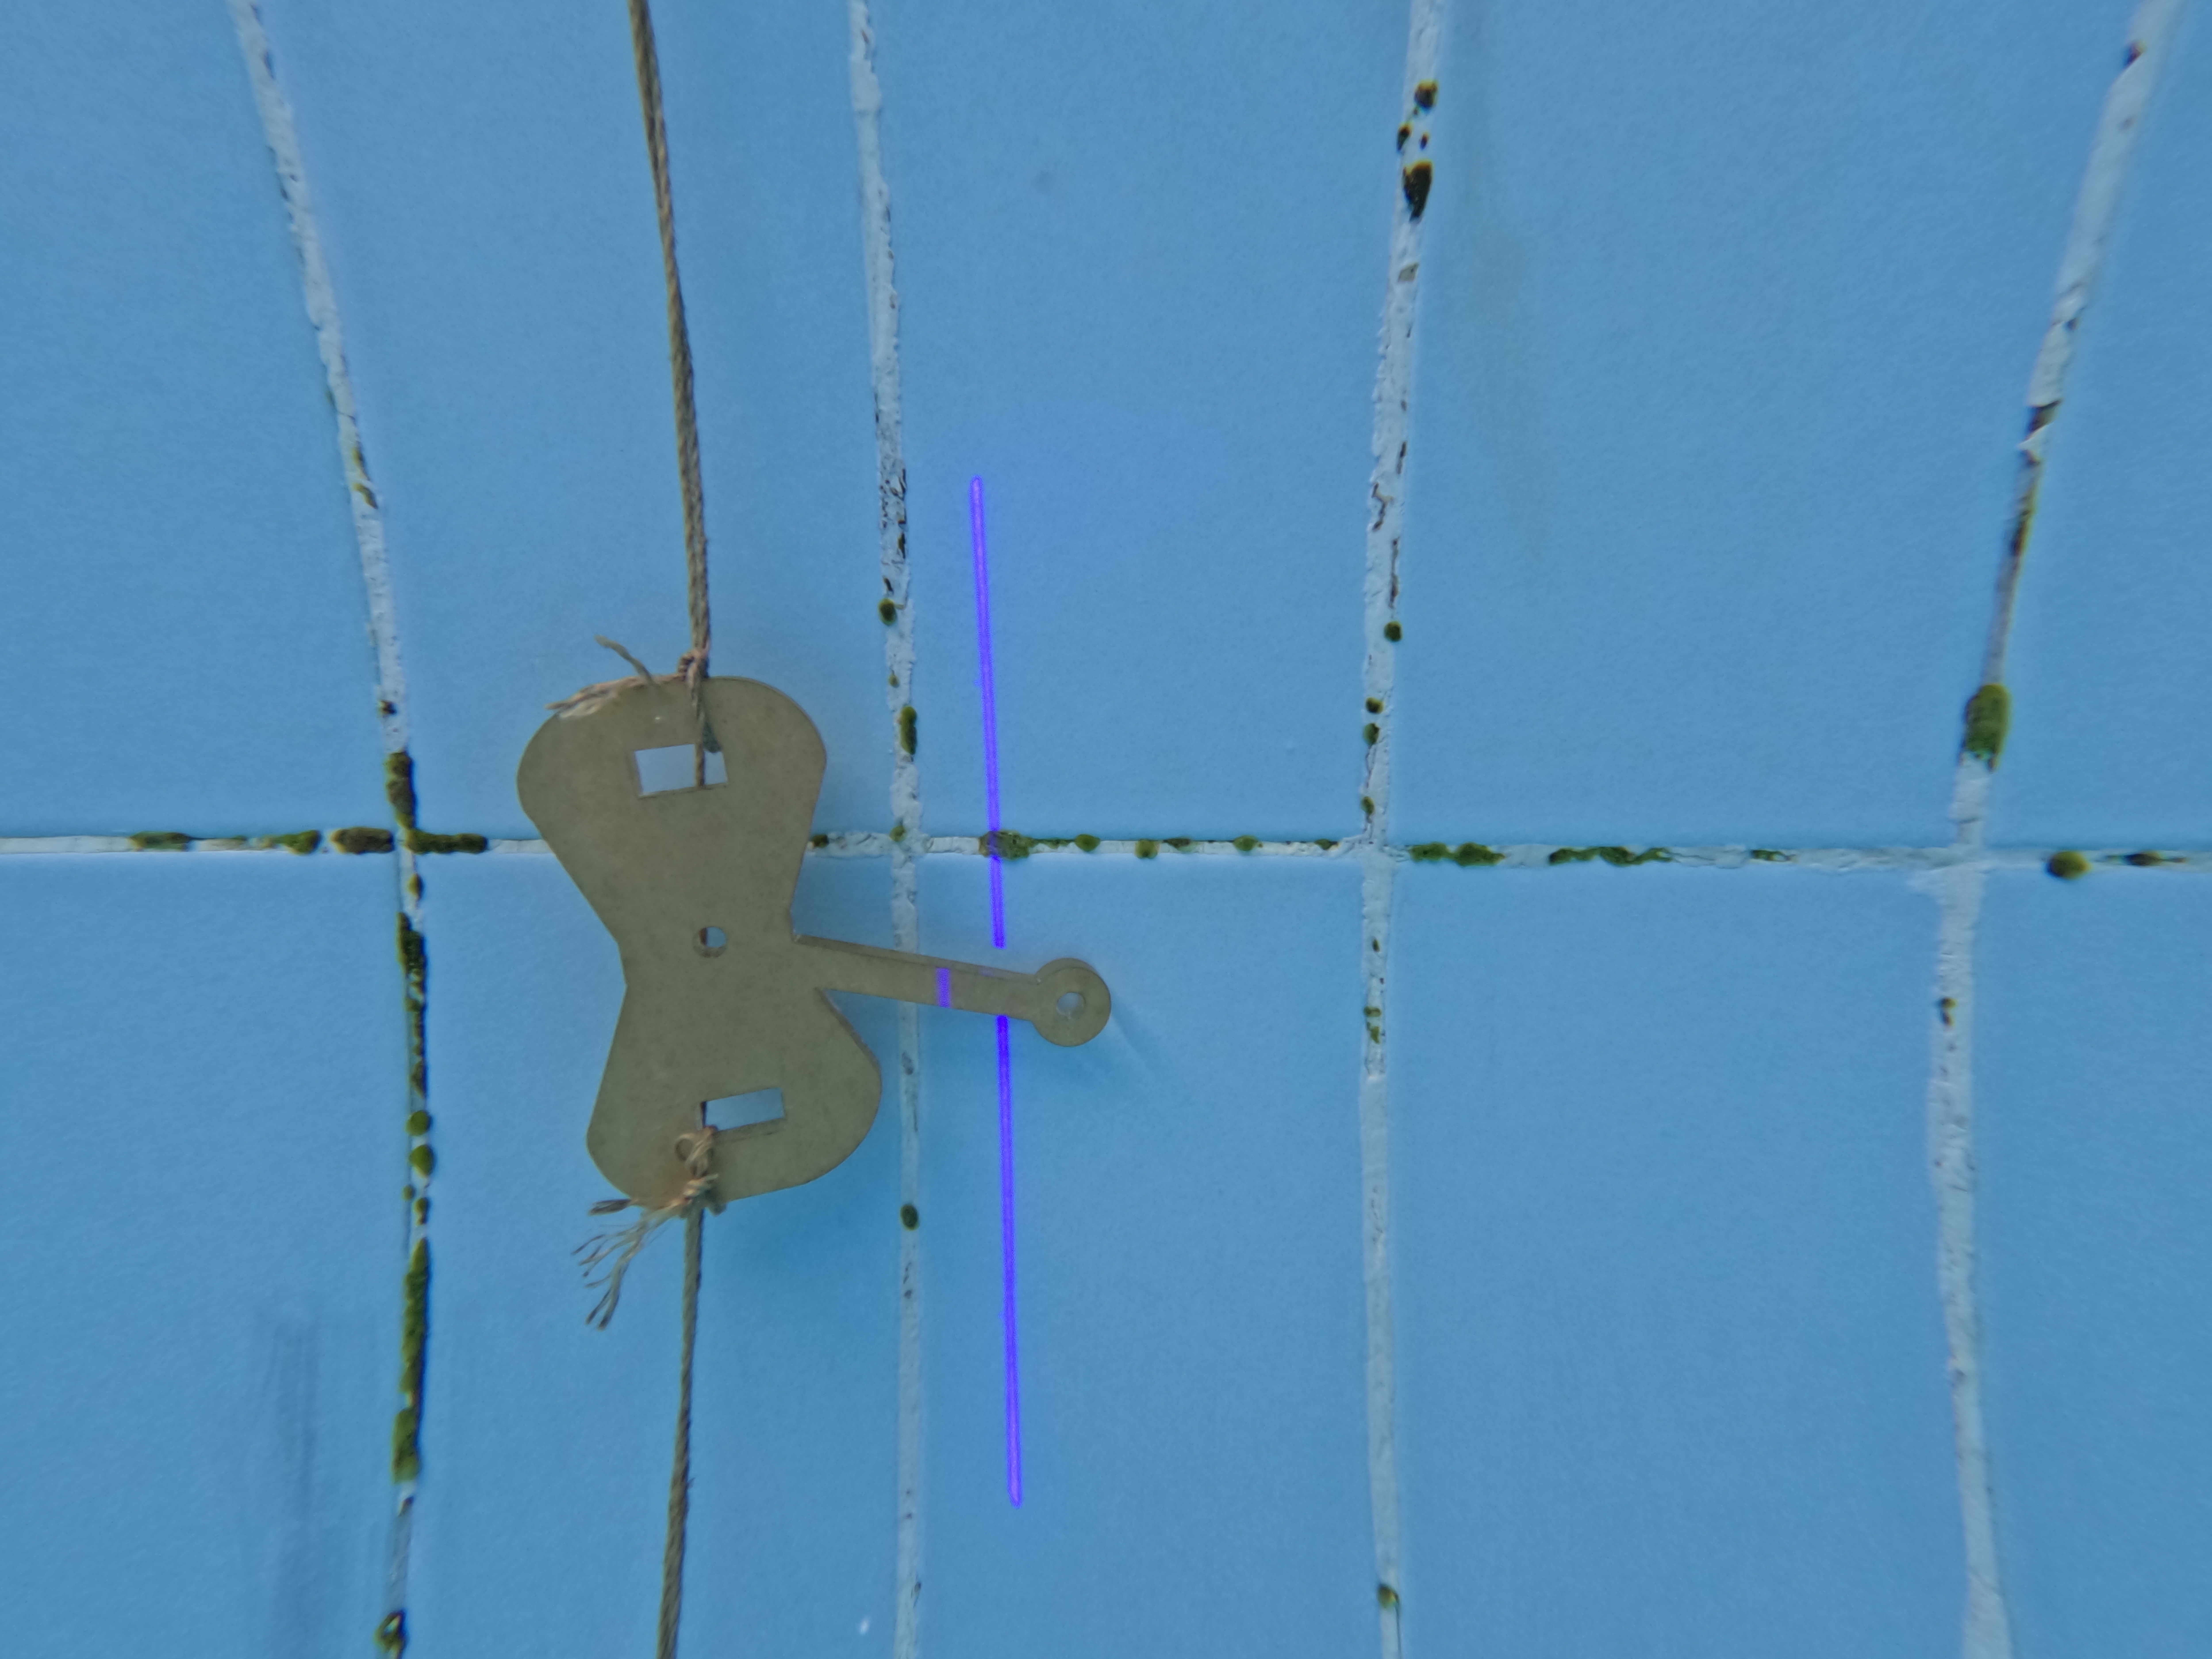

Supplement: Supplementary file 2609 [file G0050907.pdf › Level_2_2/G0050907.pdf]

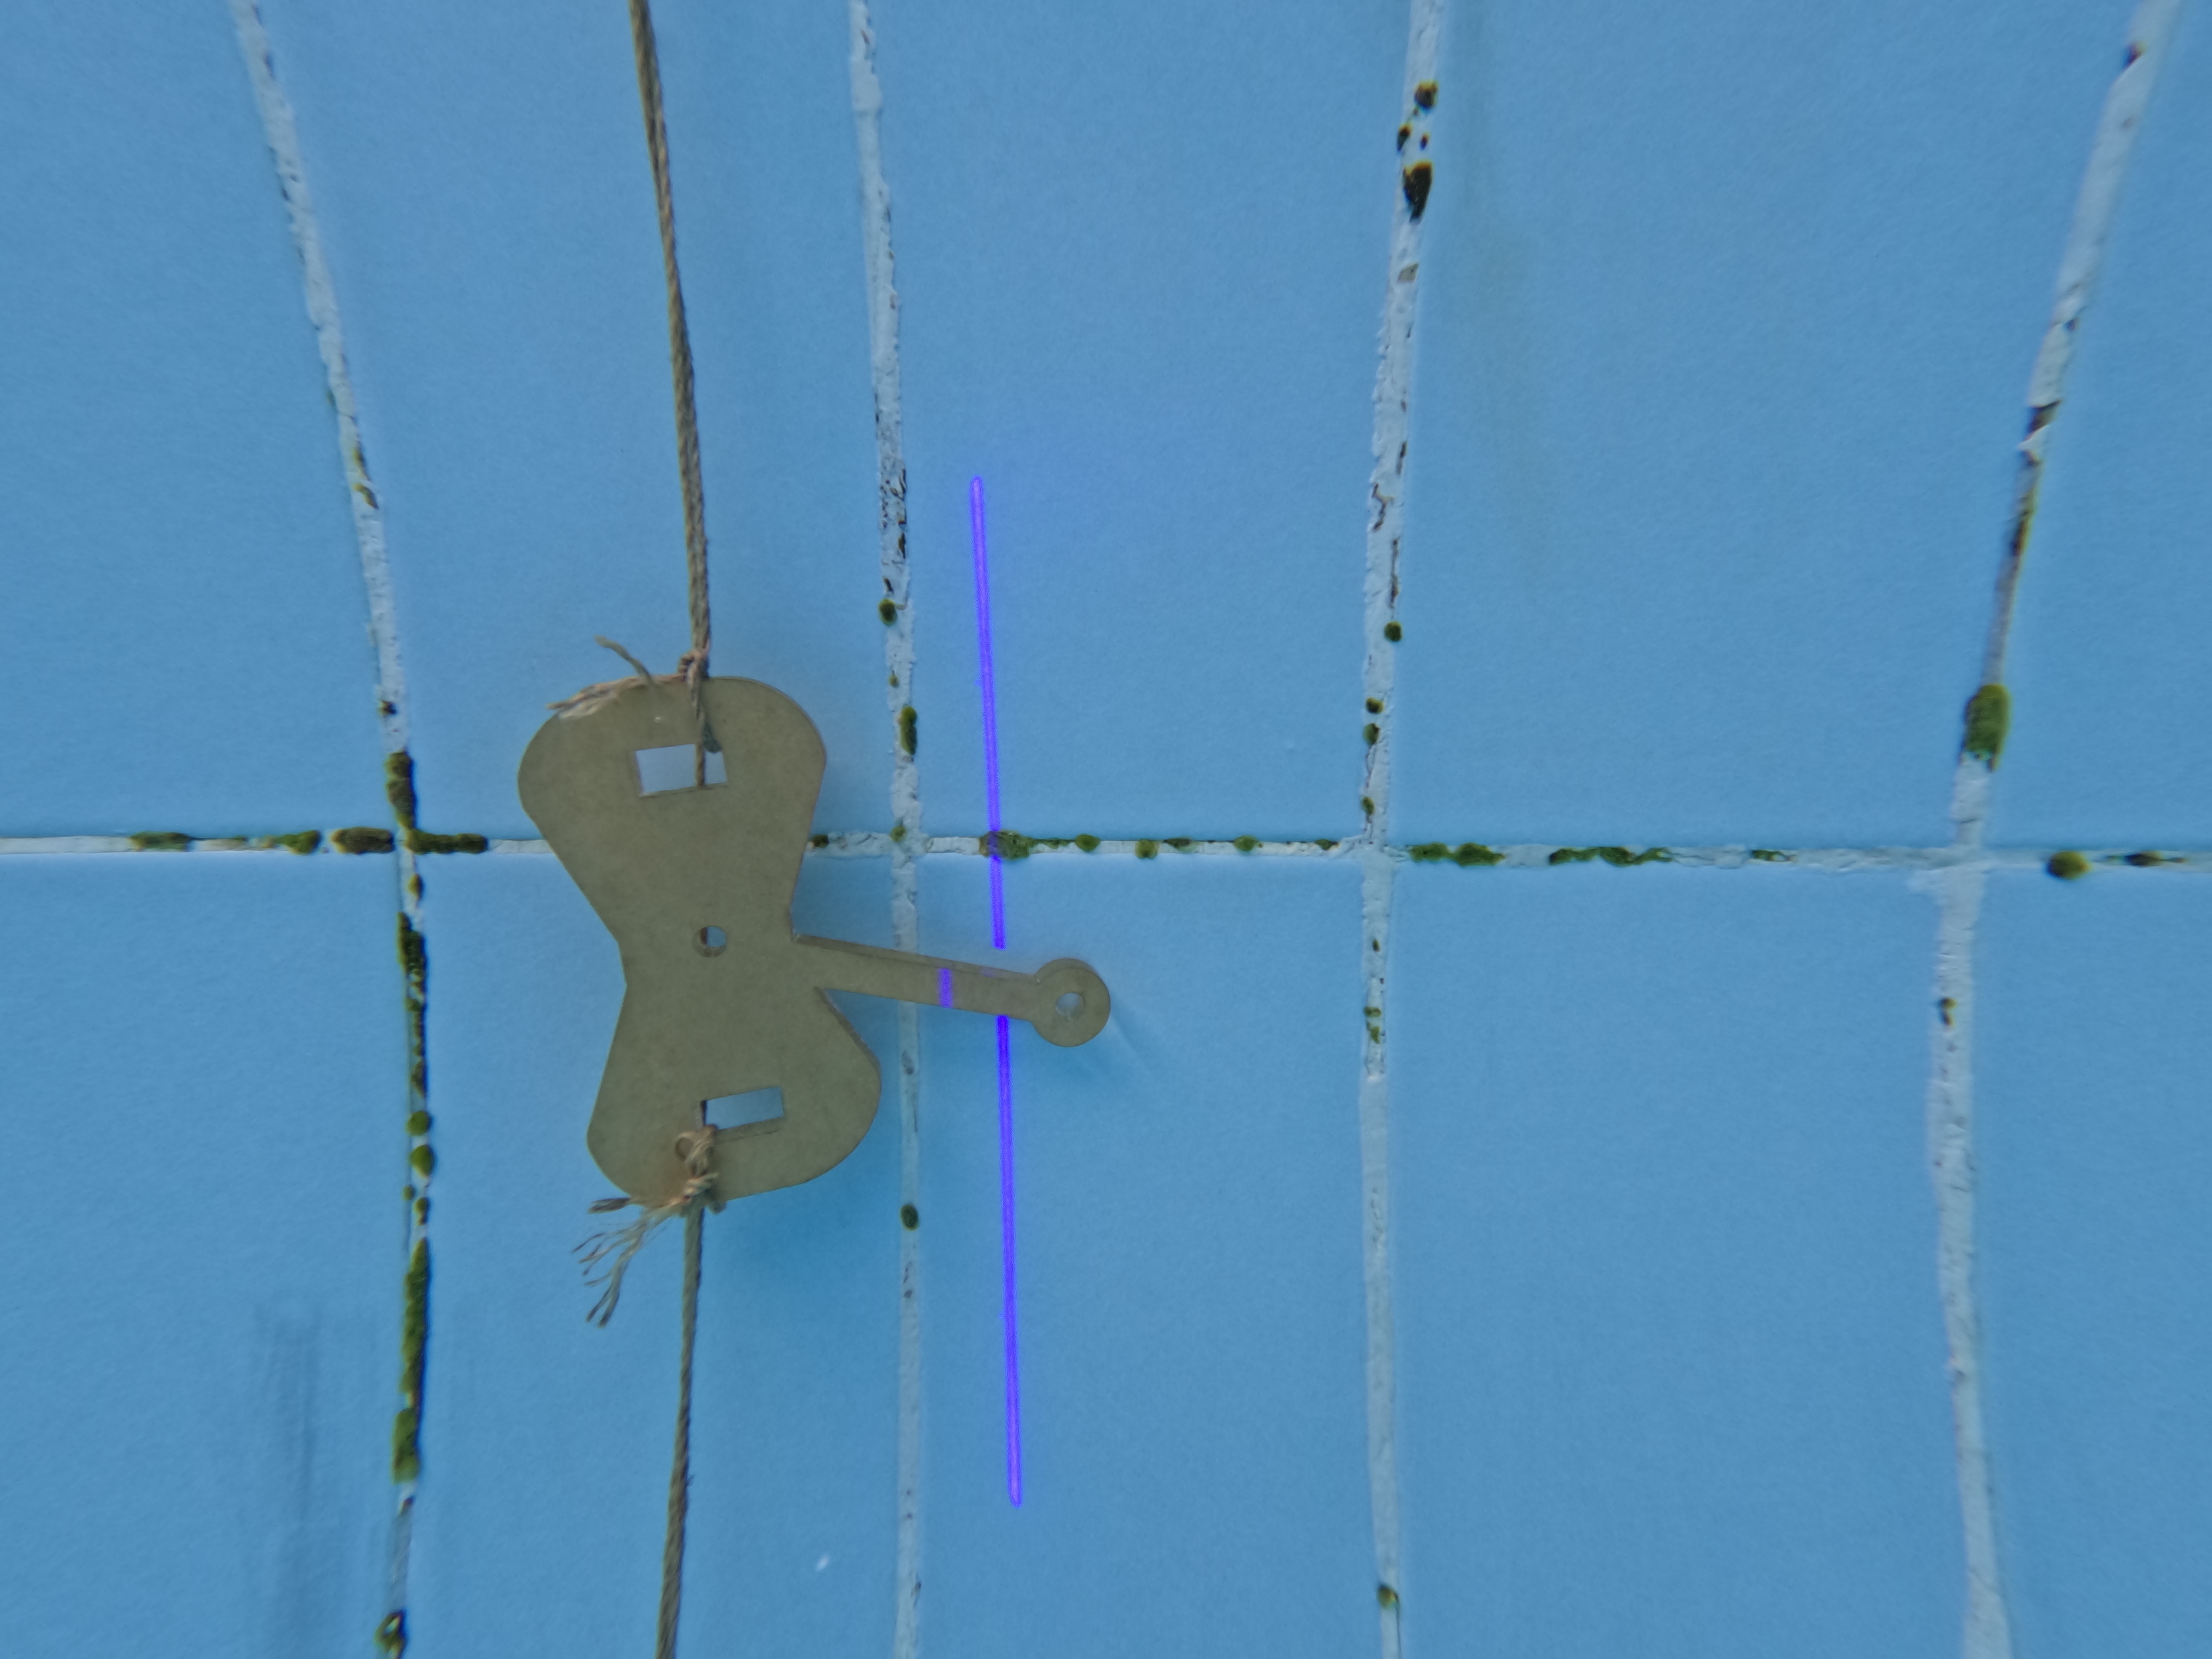

Supplement: Supplementary file 2610 [file G0050908.pdf › Level_2_2/G0050908.pdf]

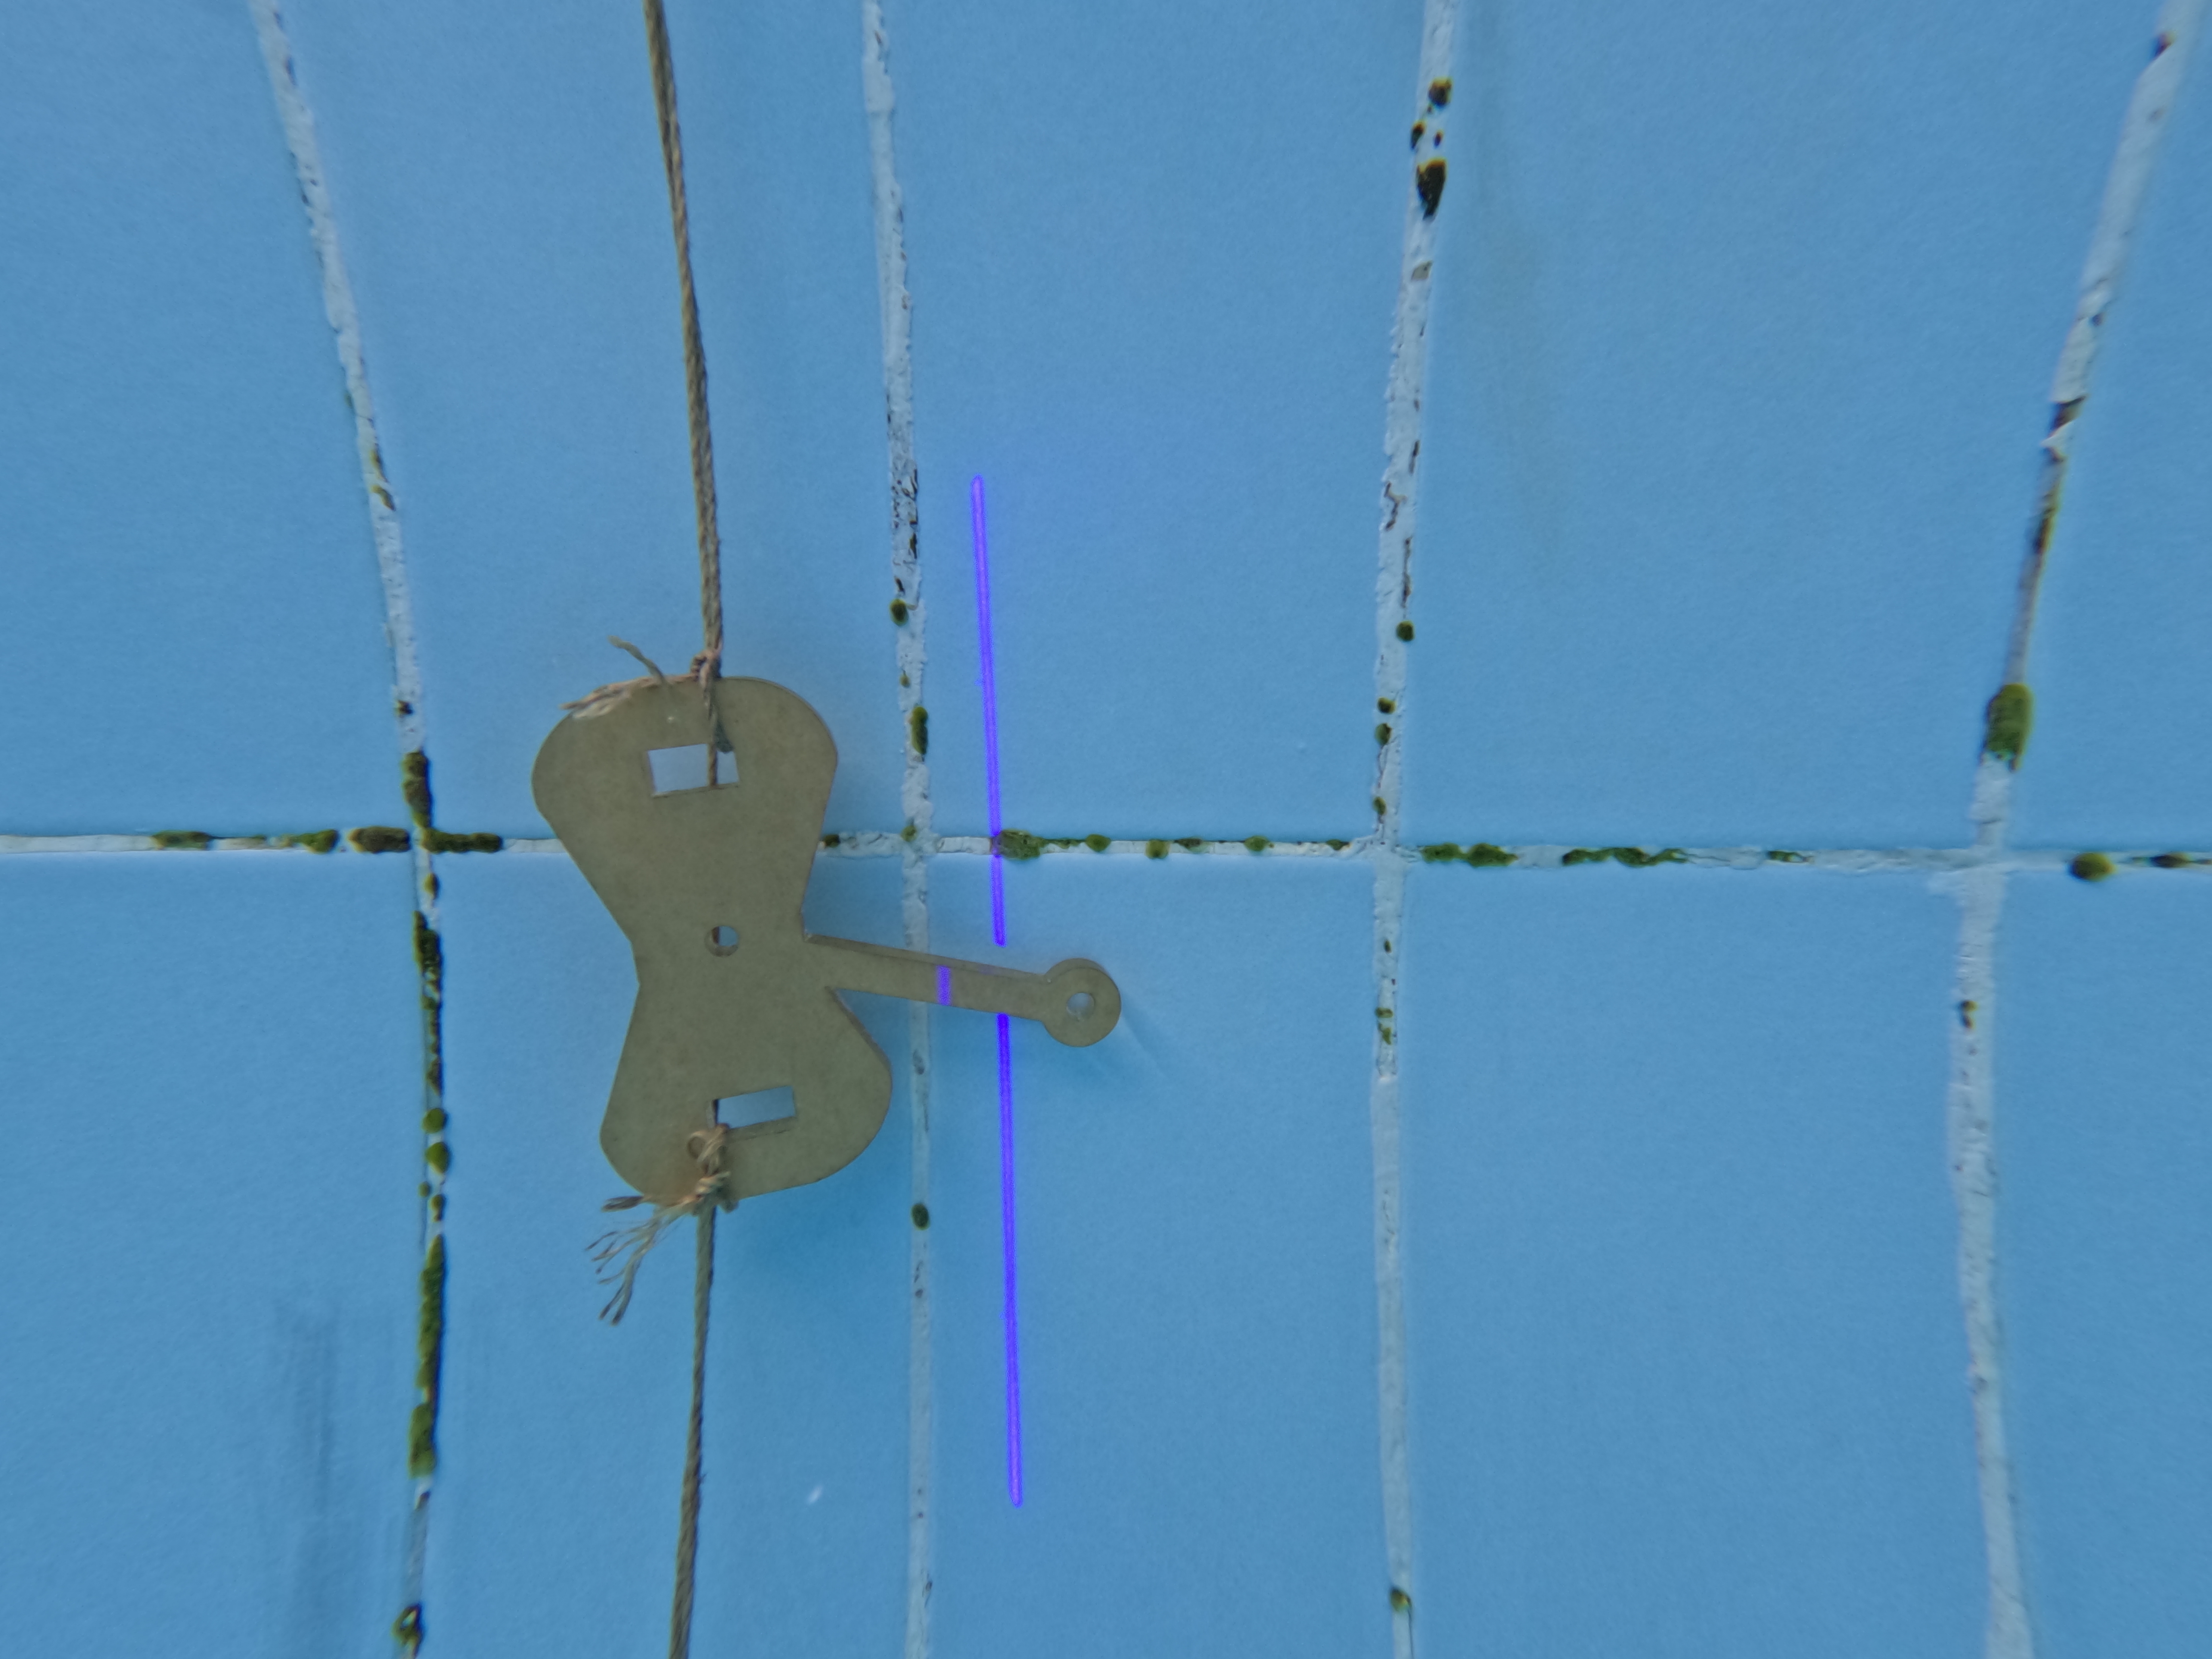

Supplement: Supplementary file 2611 [file G0050909.pdf › Level_2_2/G0050909.pdf]

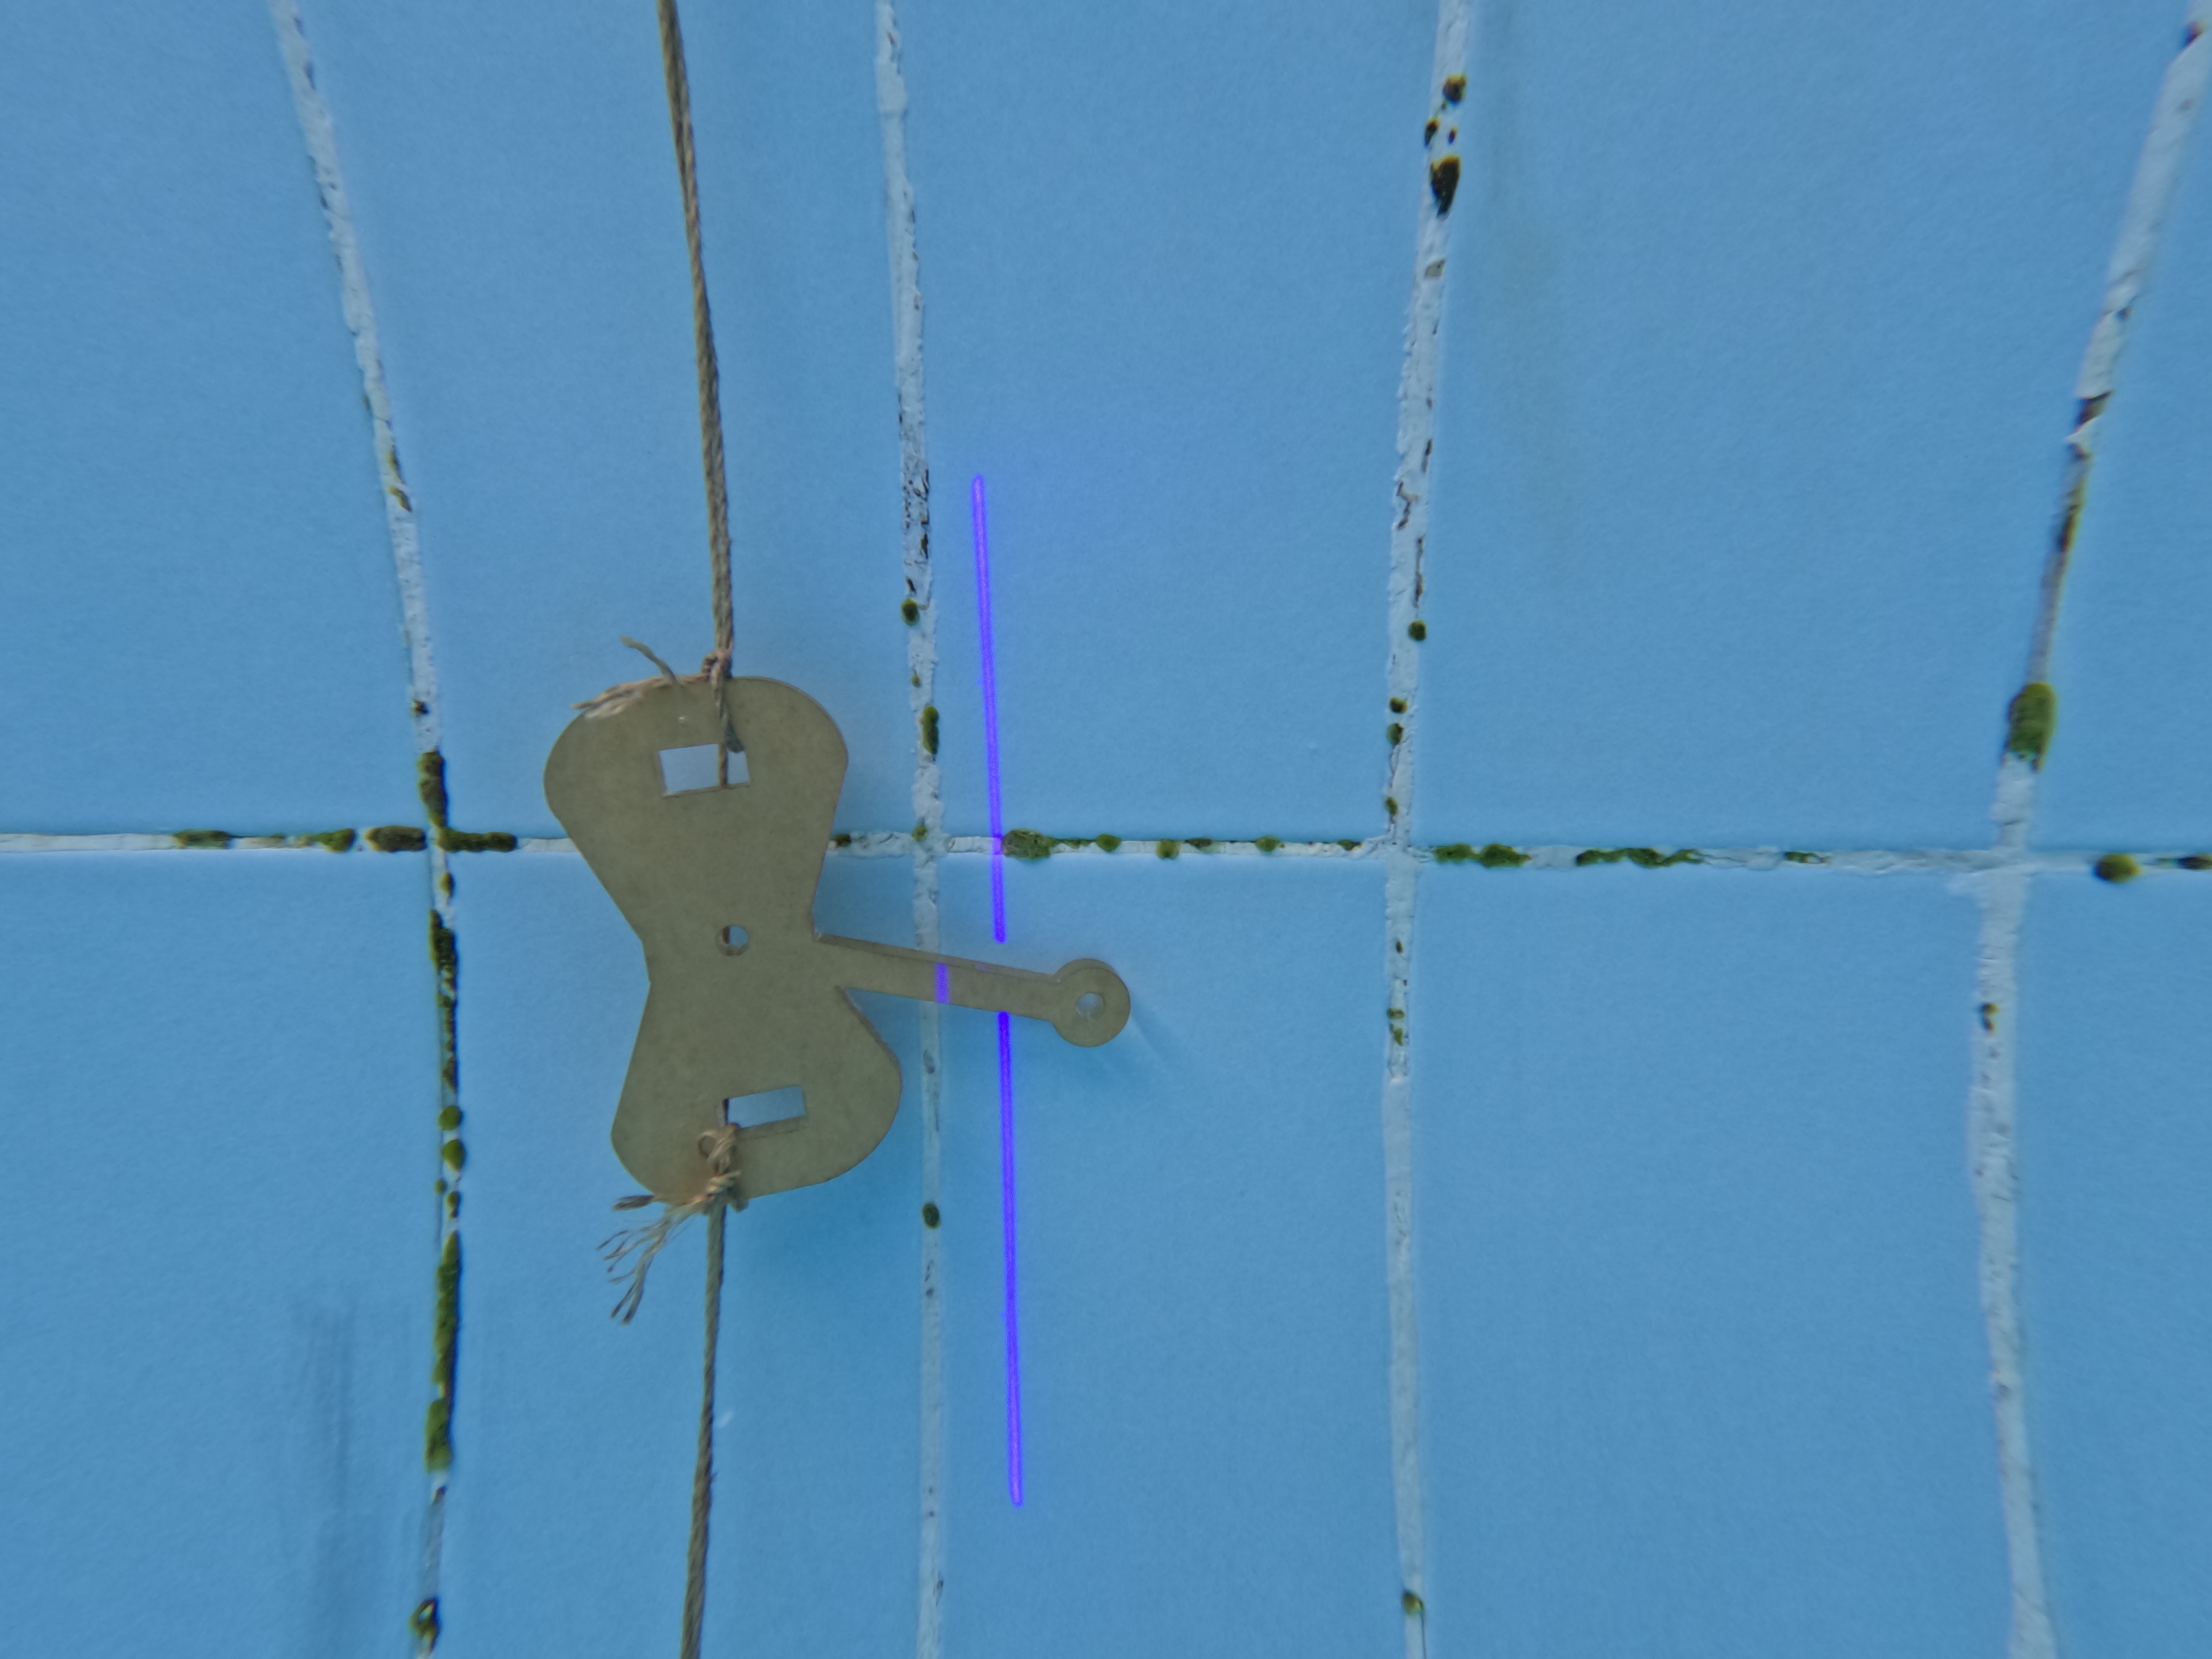

Supplement: Supplementary file 2612 [file G0050910.pdf › Level_2_2/G0050910.pdf]

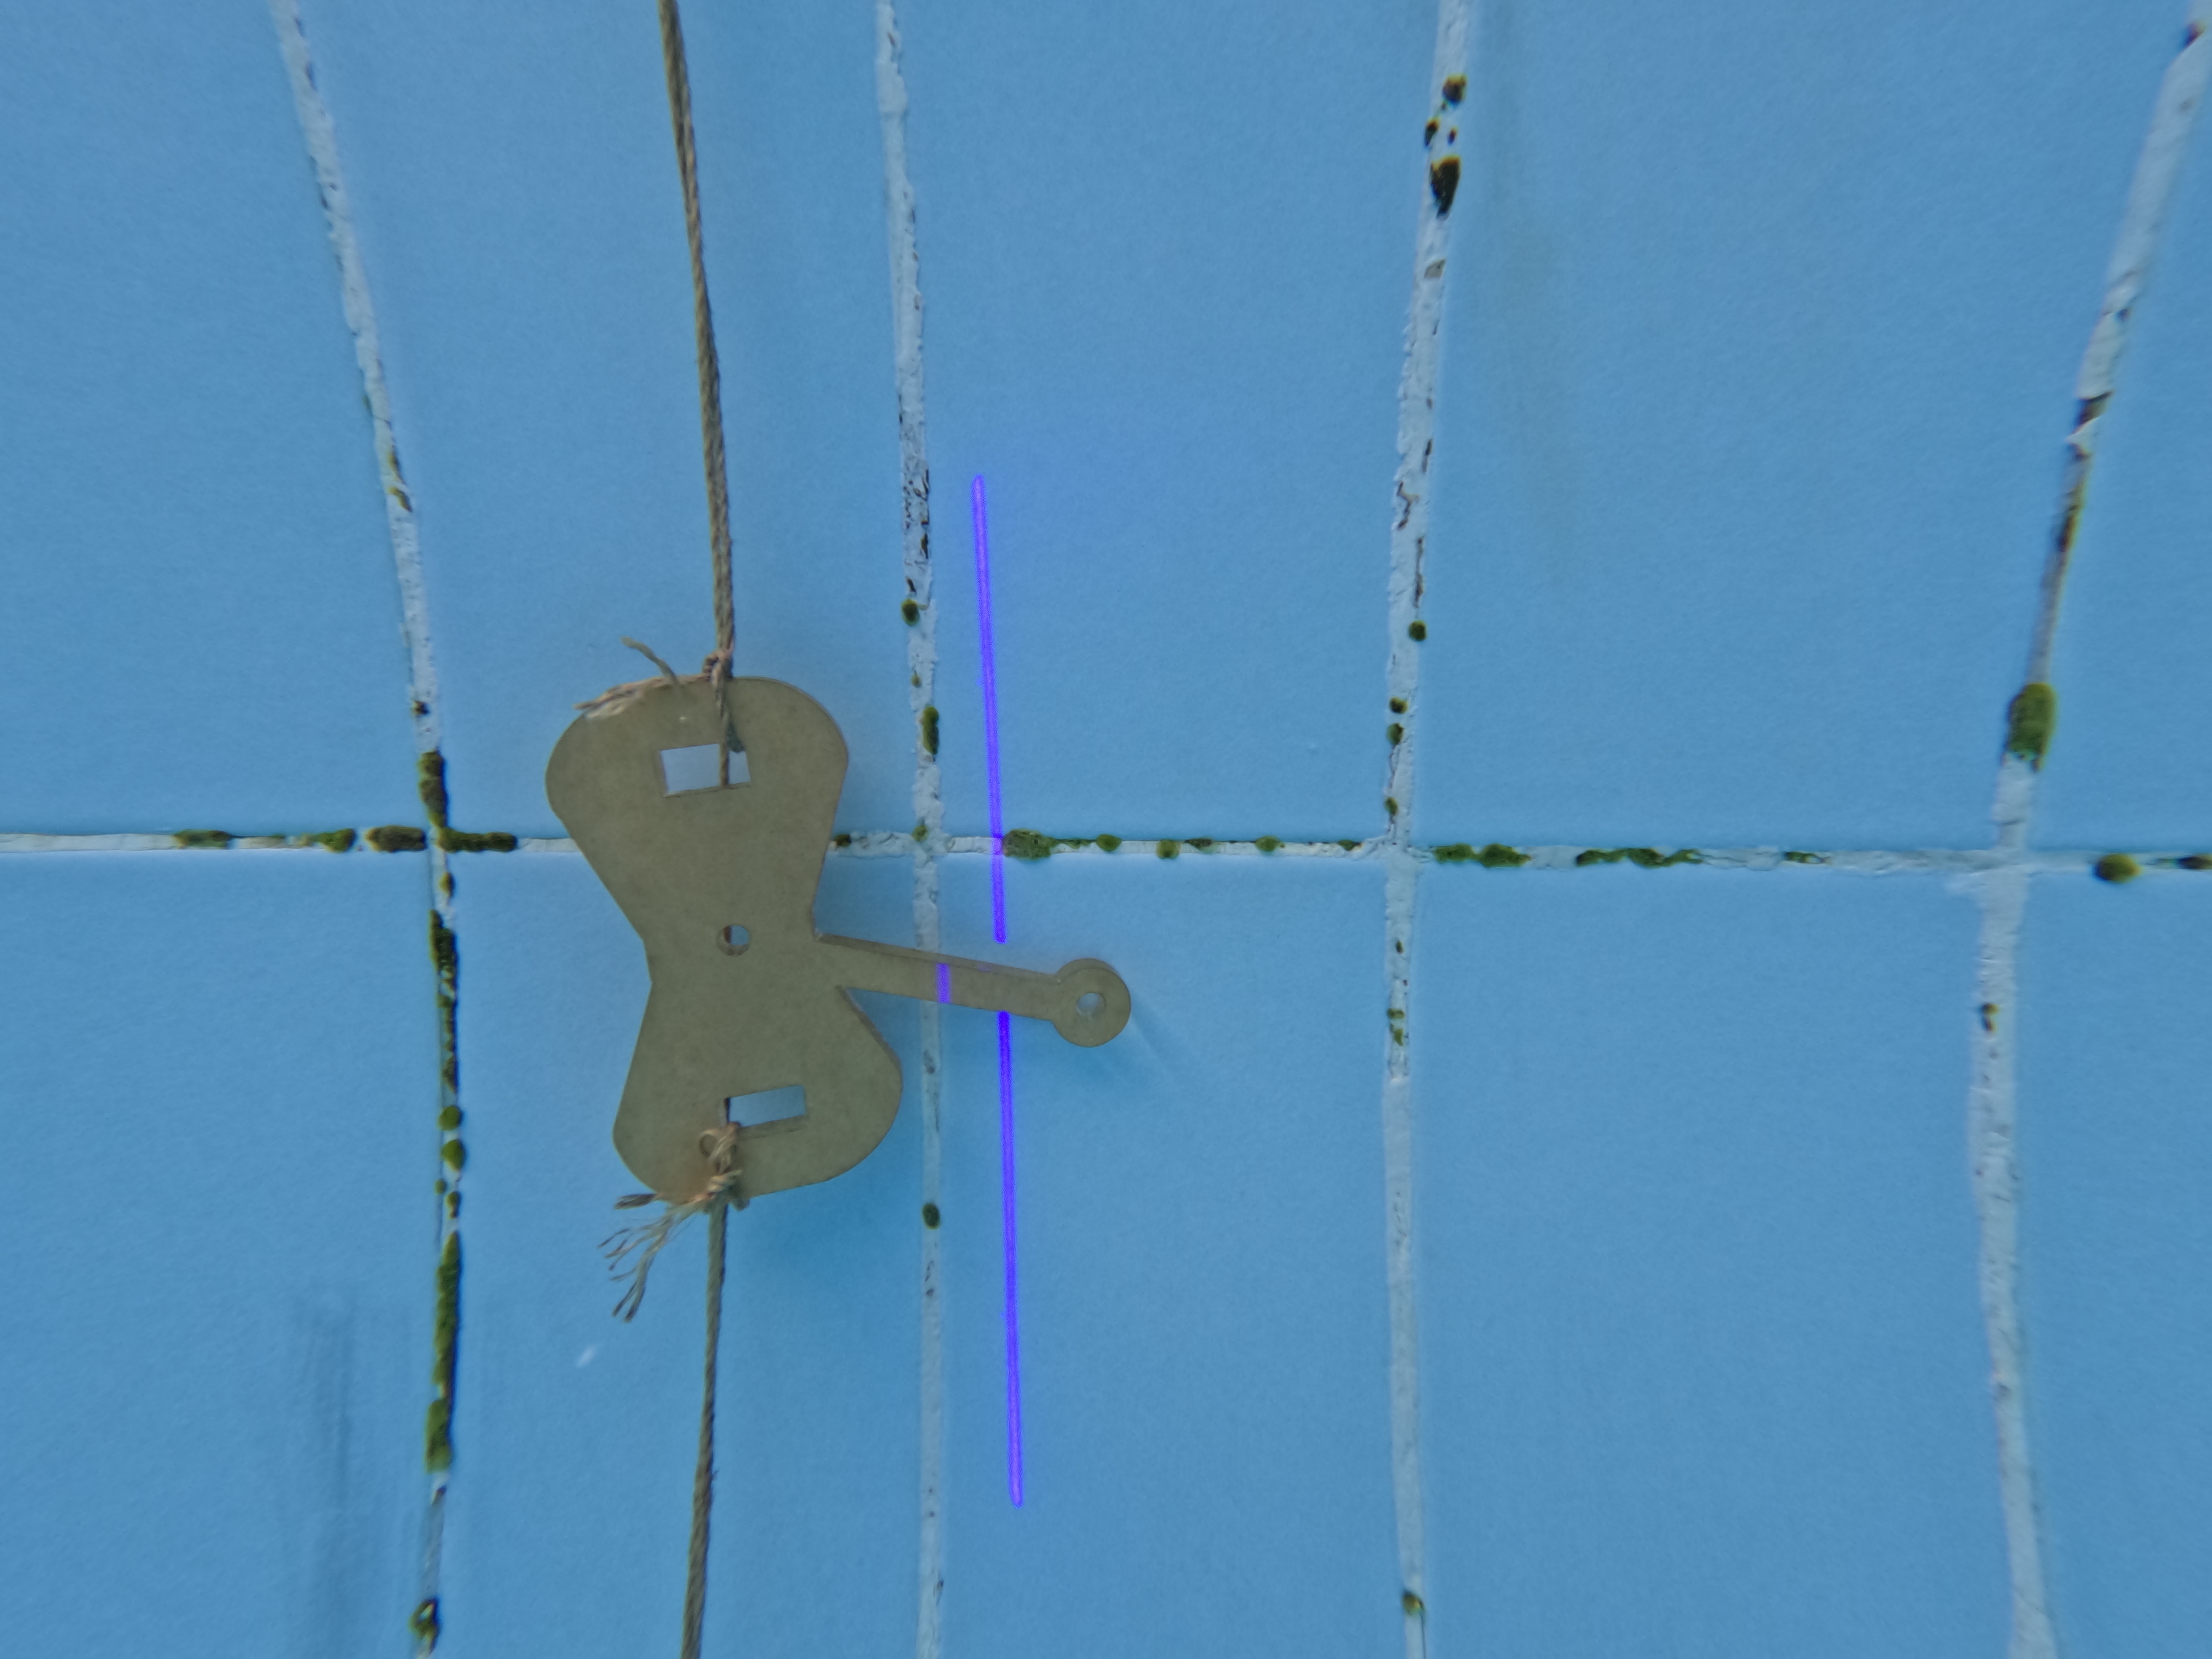

Supplement: Supplementary file 2613 [file G0050911.pdf › Level_2_2/G0050911.pdf]

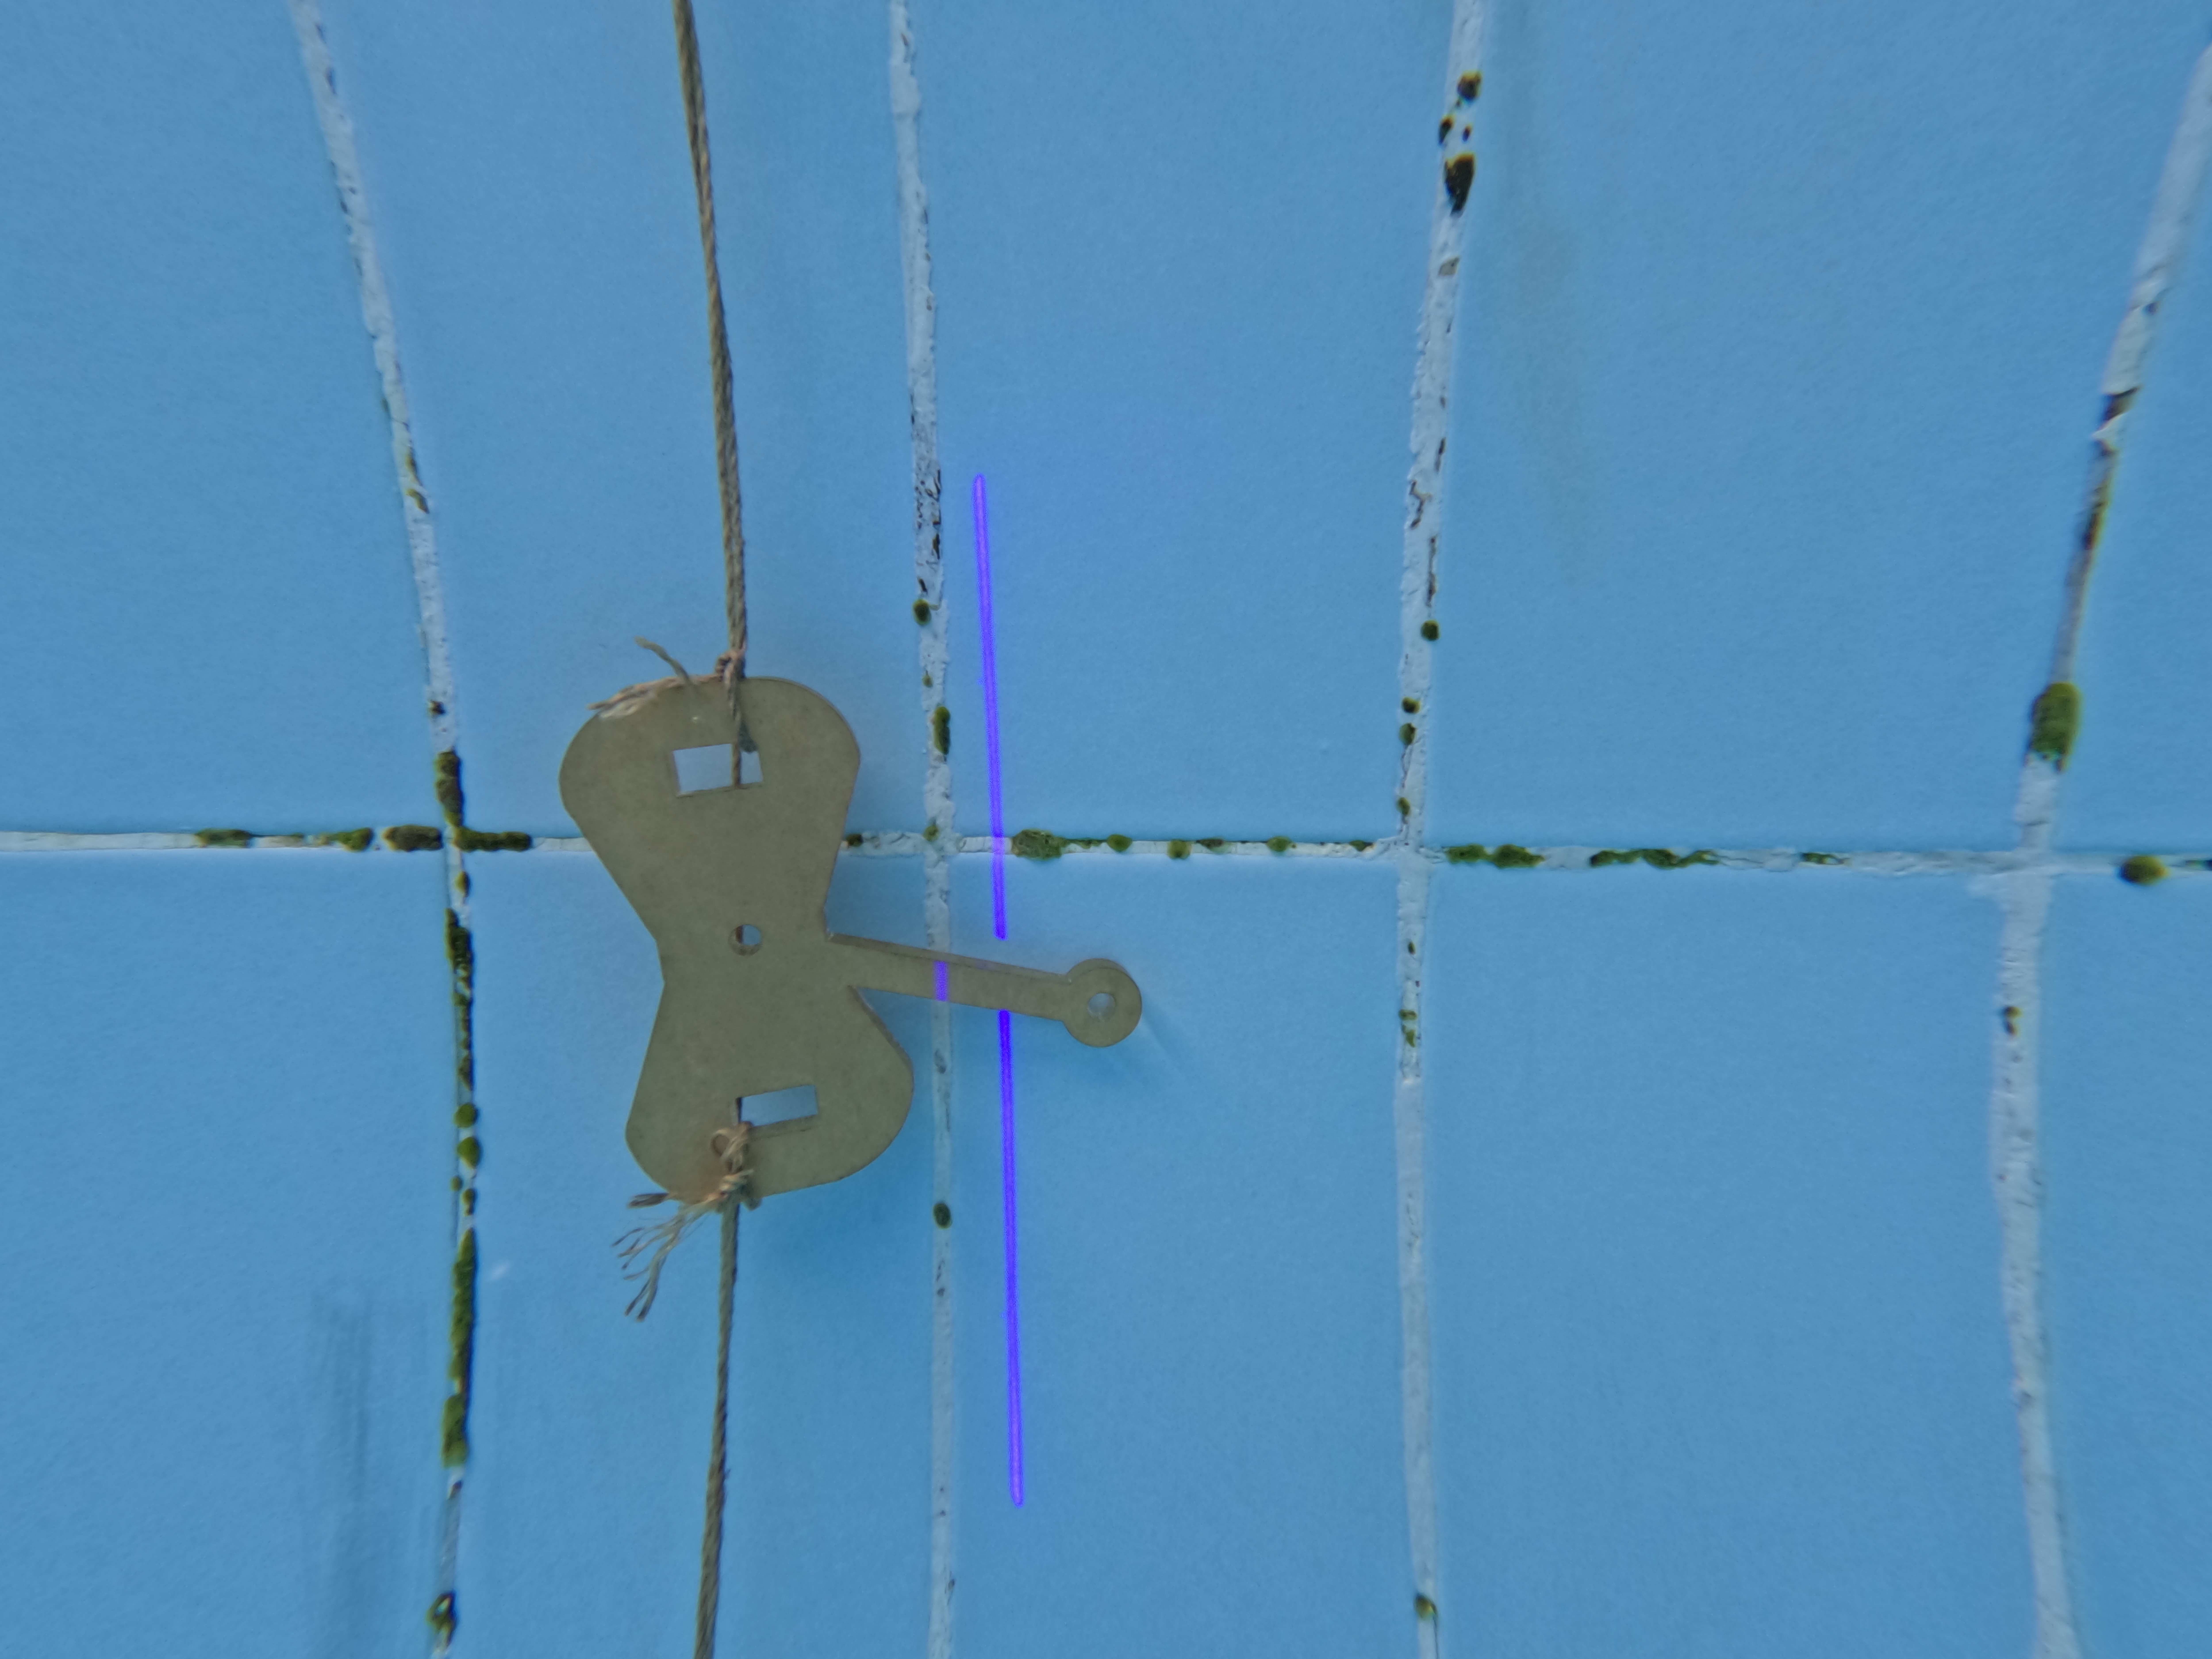

Supplement: Supplementary file 2614 [file G0050912.pdf › Level_2_2/G0050912.pdf]

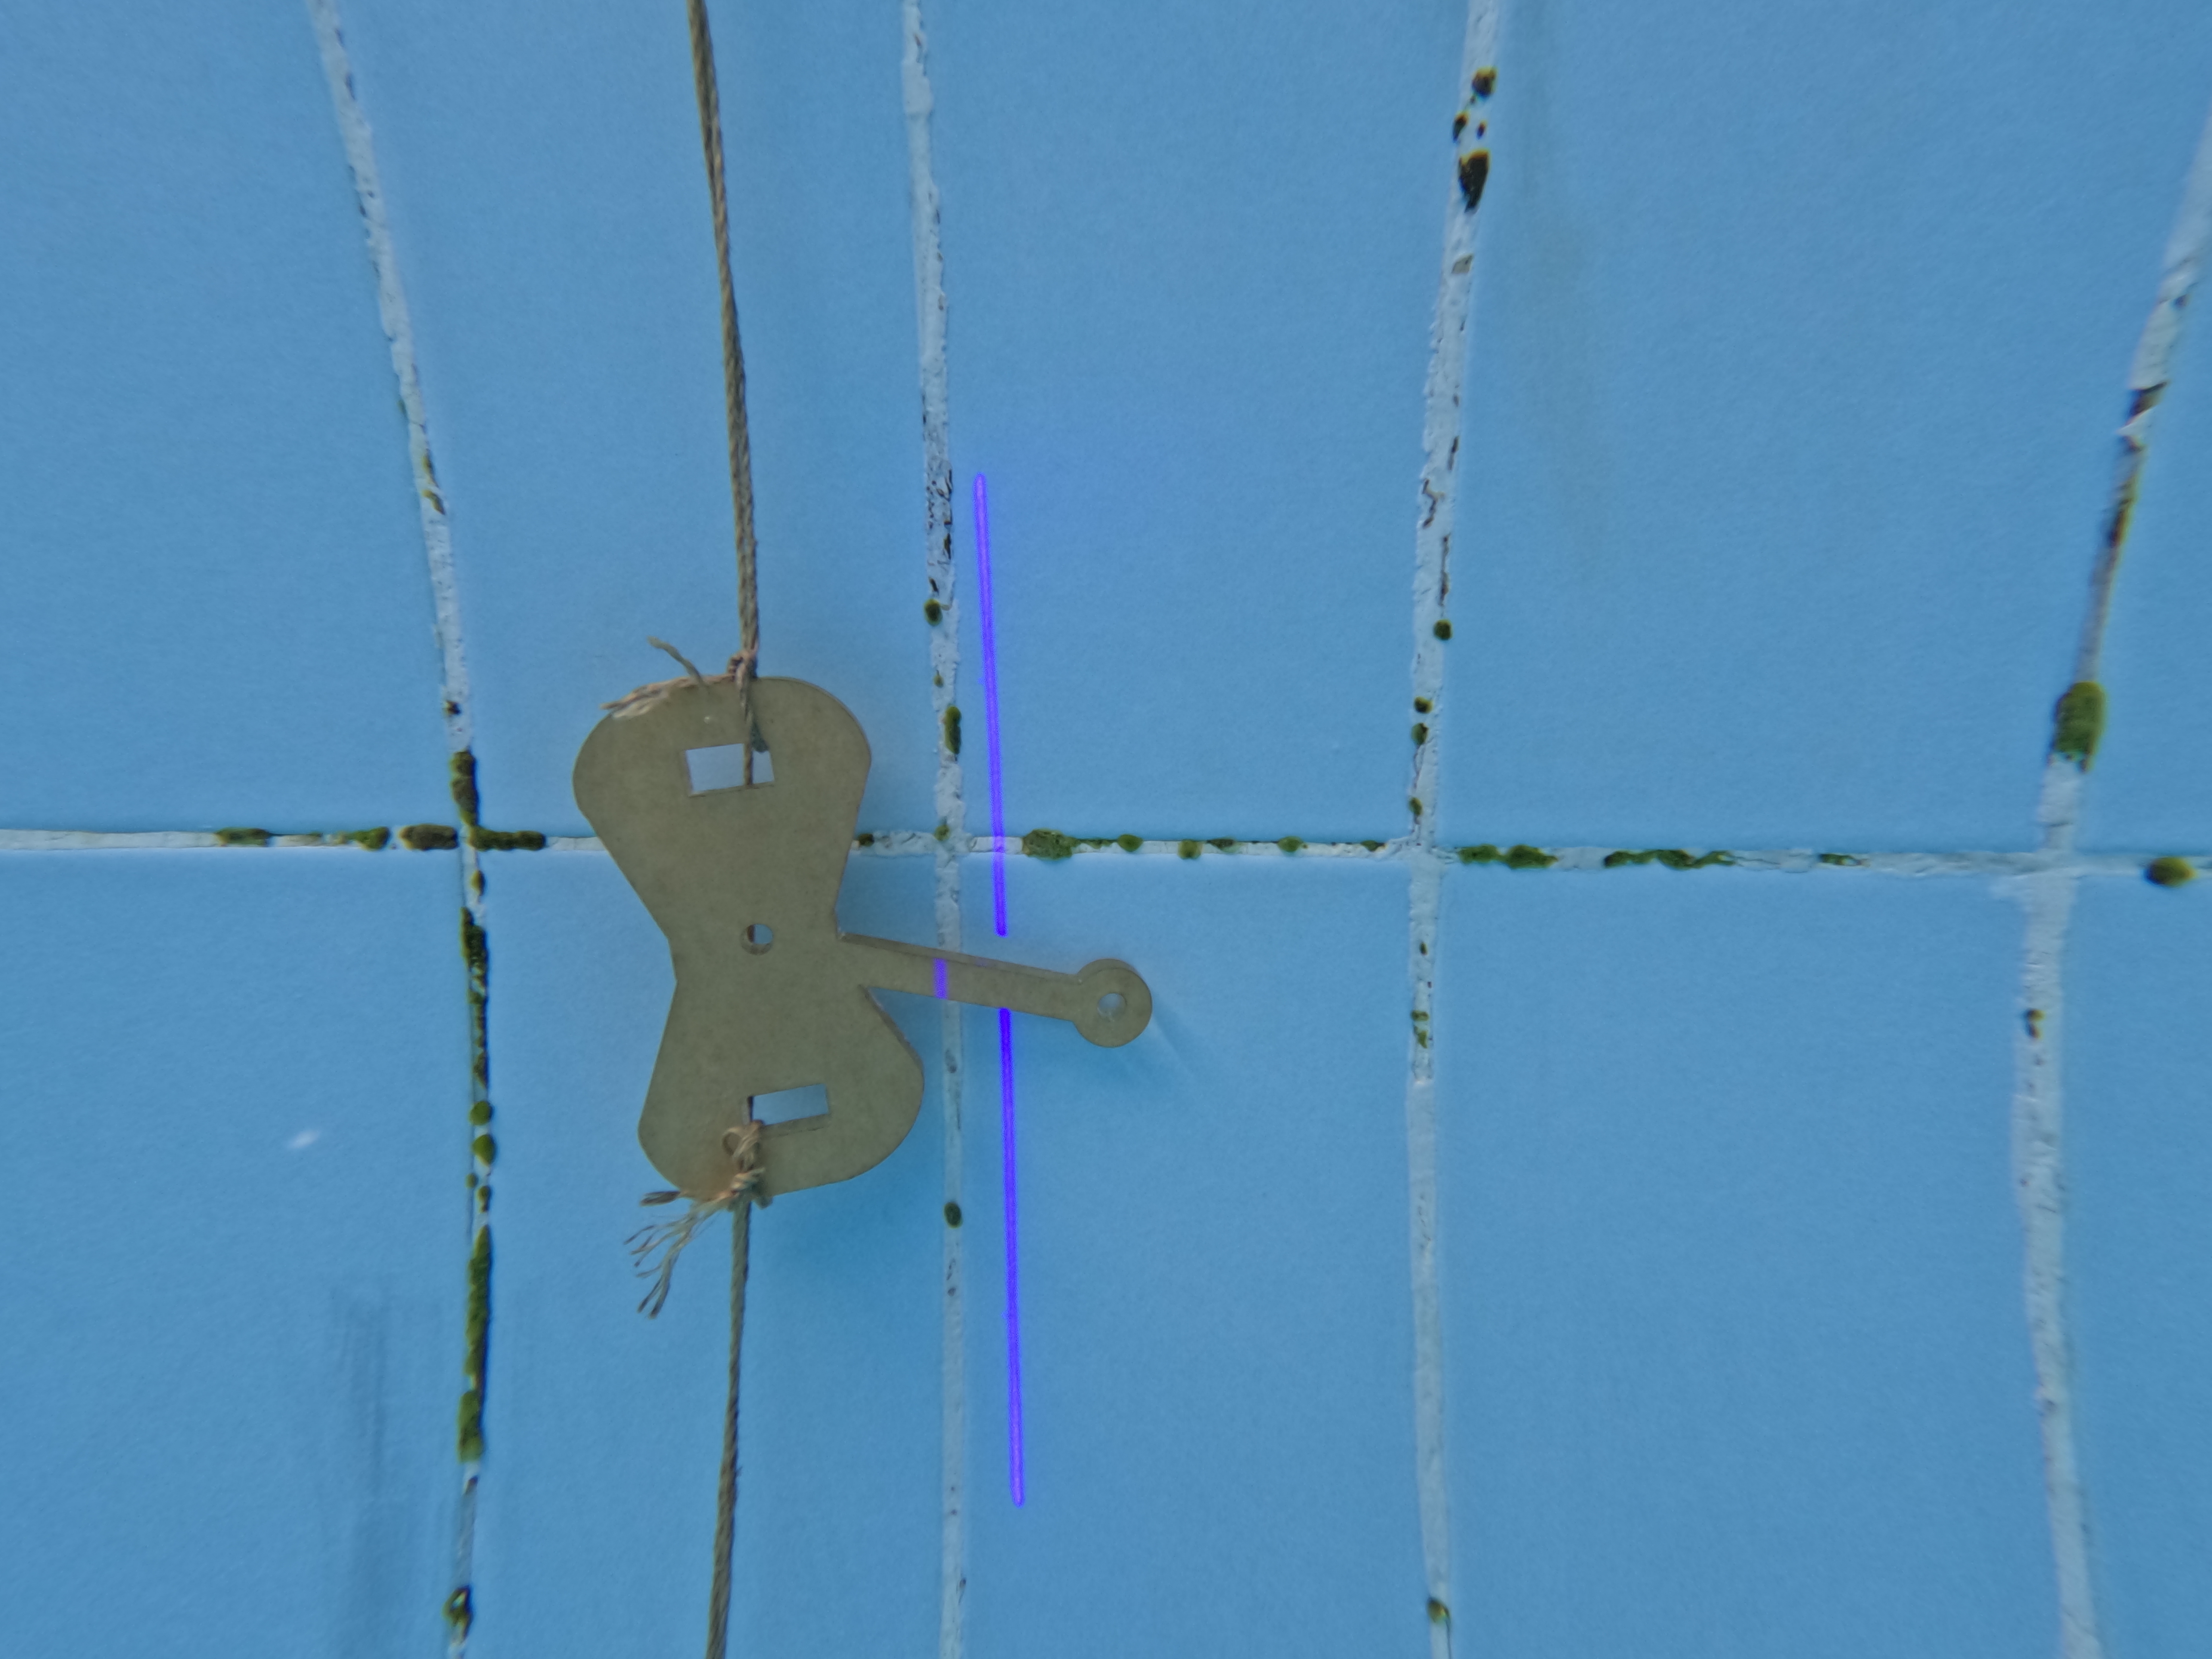

Supplement: Supplementary file 2615 [file G0050913.pdf › Level_2_2/G0050913.pdf]

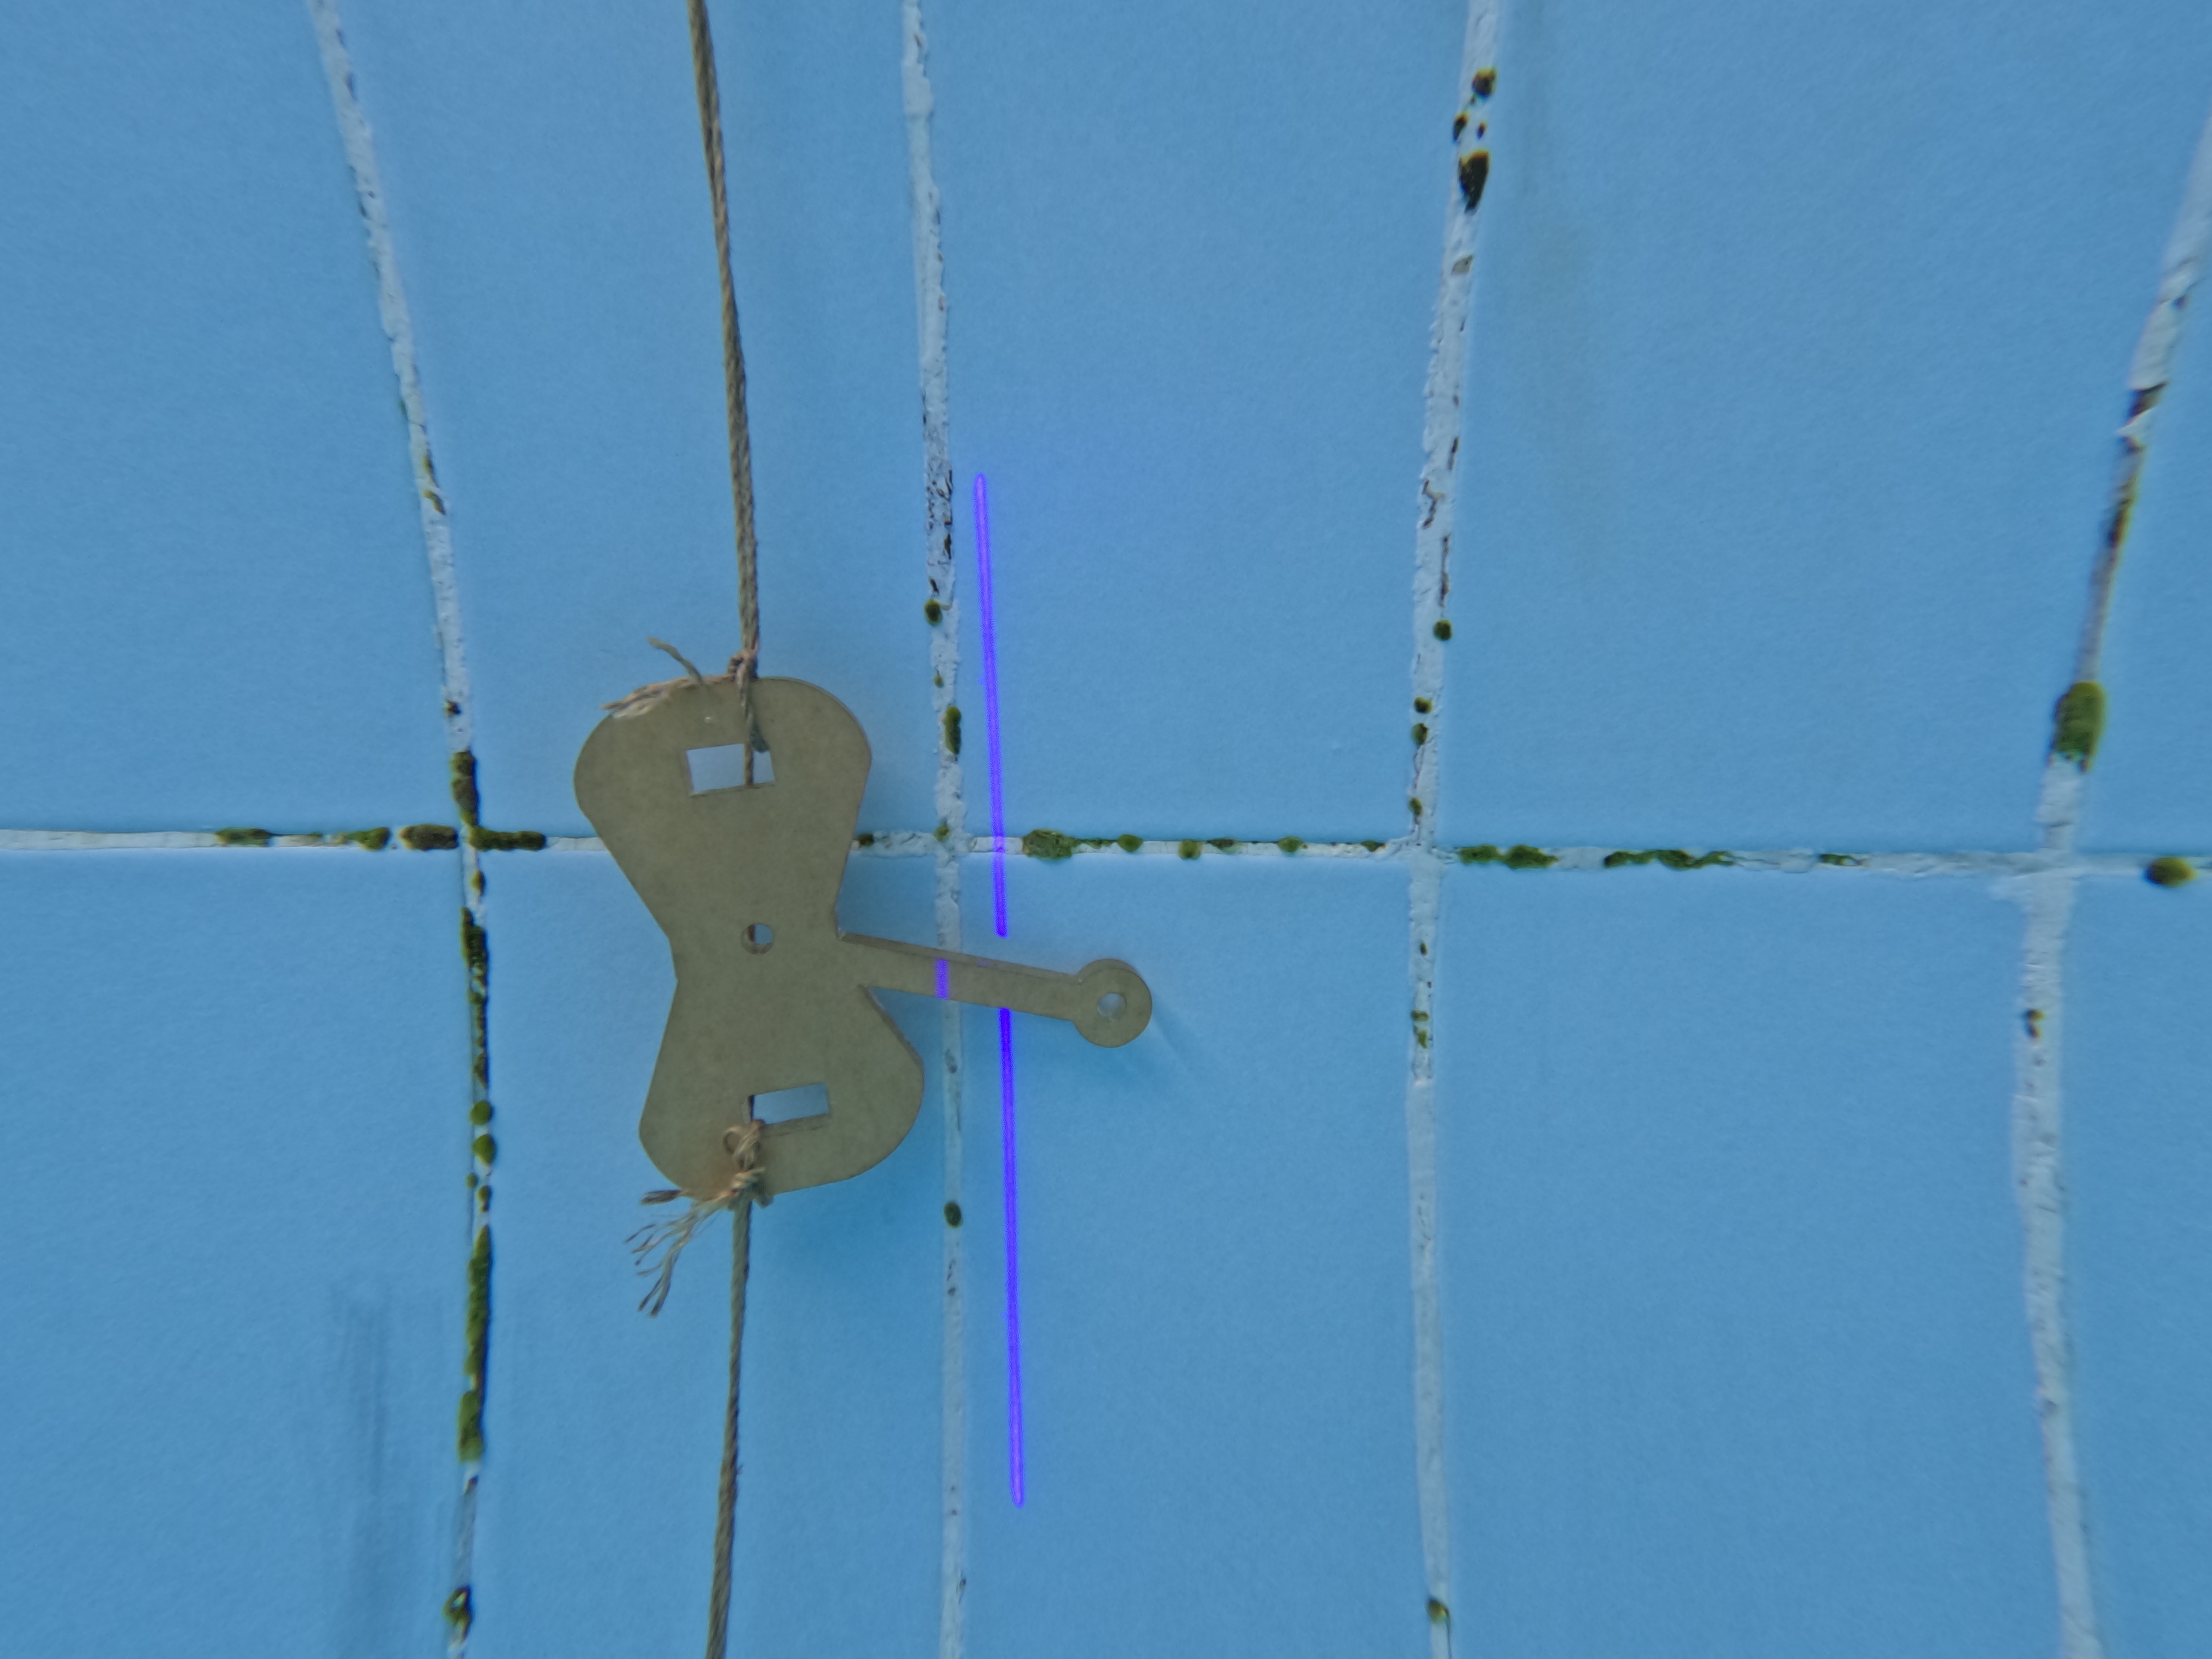

Supplement: Supplementary file 2616 [file G0050914.pdf › Level_2_2/G0050914.pdf]

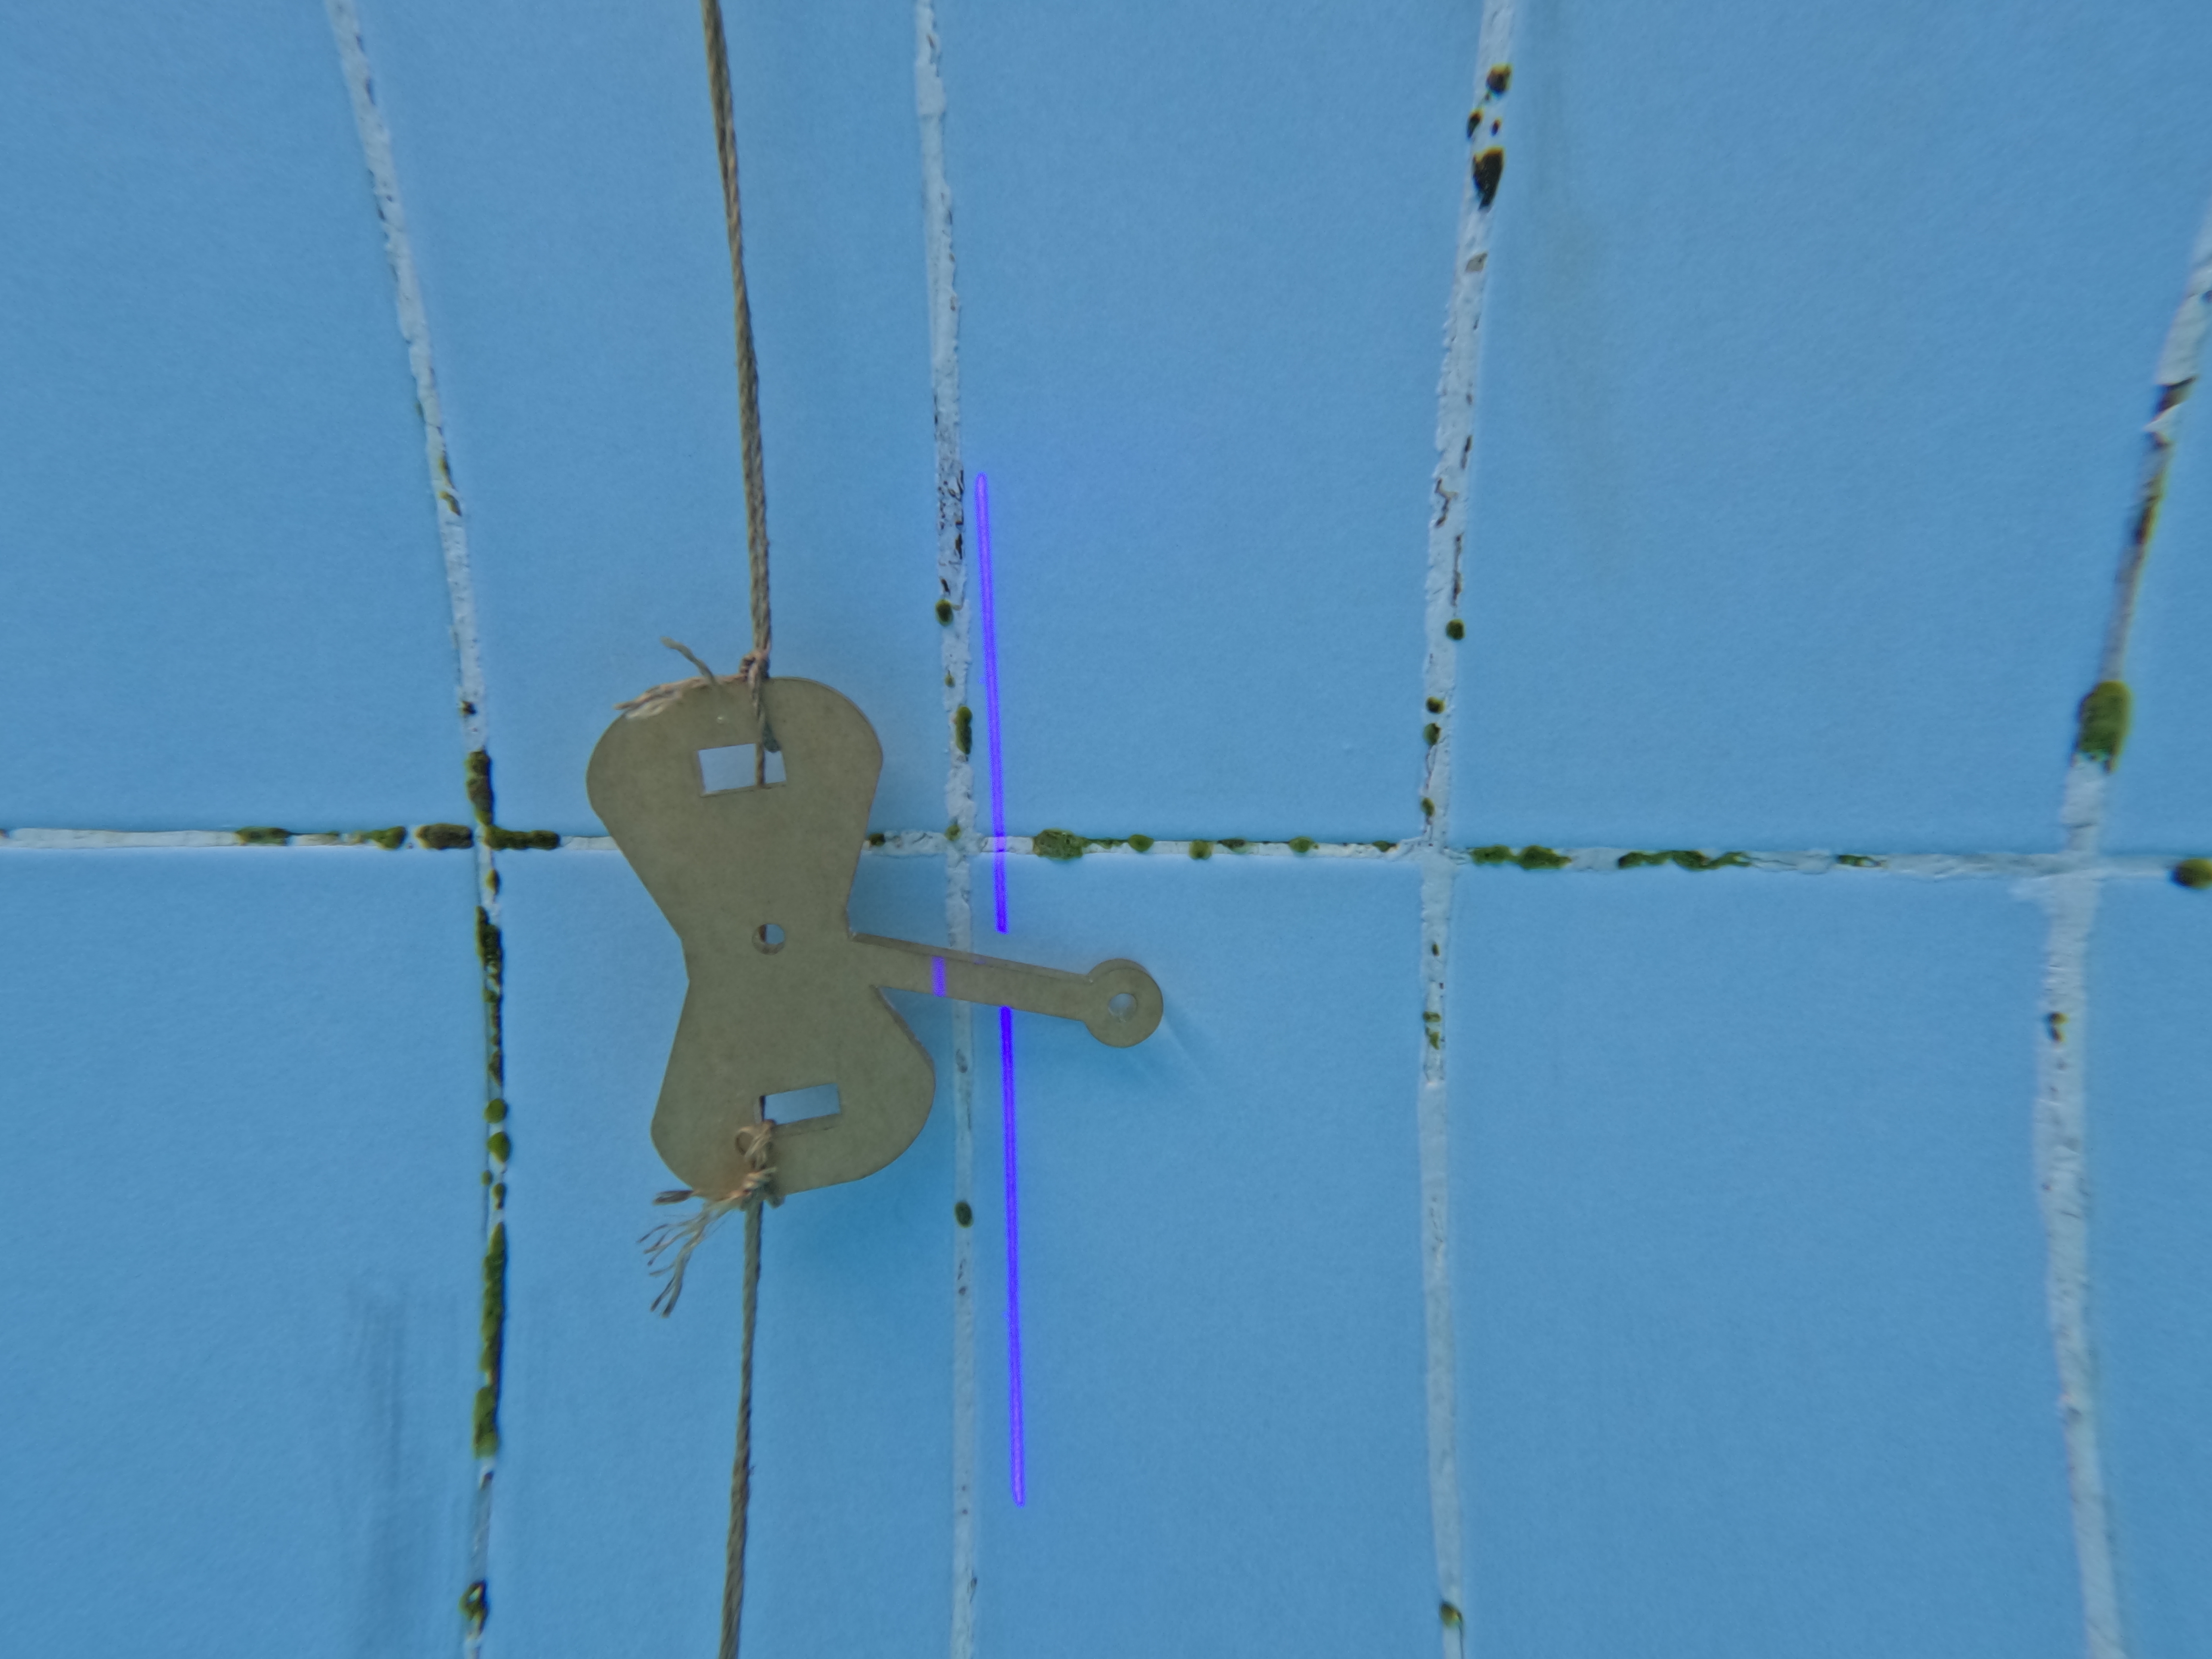

Supplement: Supplementary file 2617 [file G0050915.pdf › Level_2_2/G0050915.pdf]

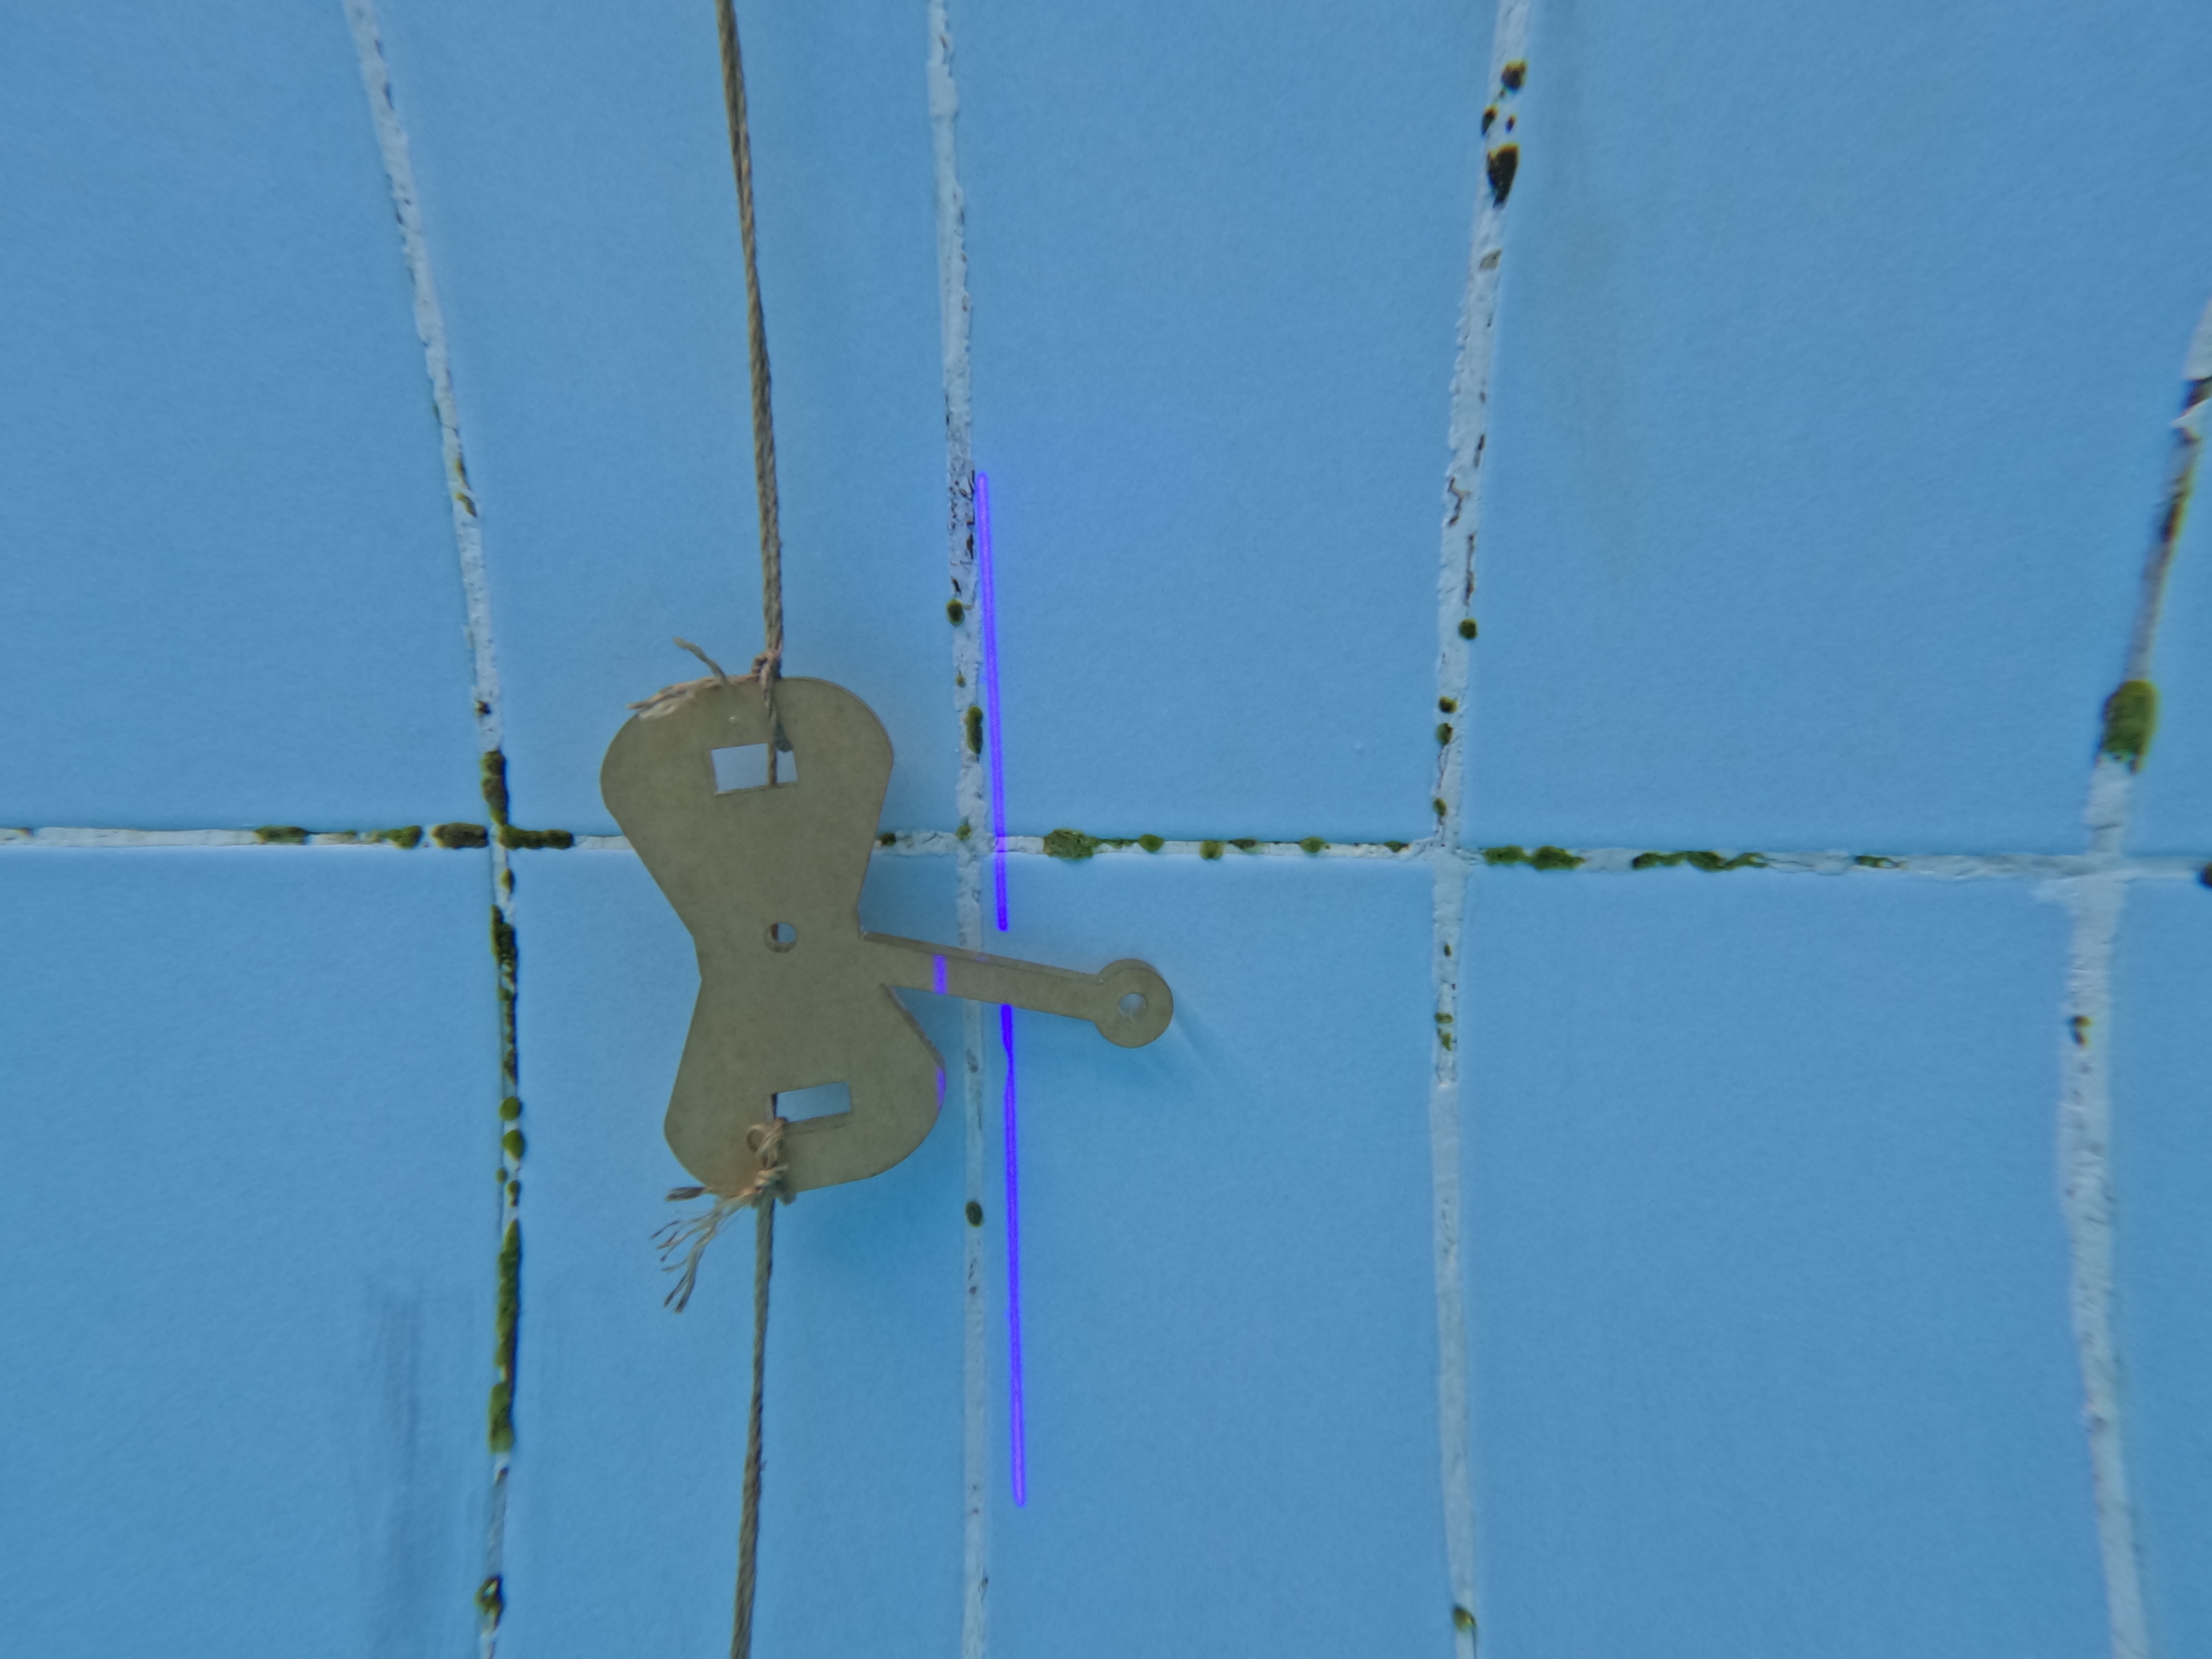

Supplement: Supplementary file 2618 [file G0050916.pdf › Level_2_2/G0050916.pdf]

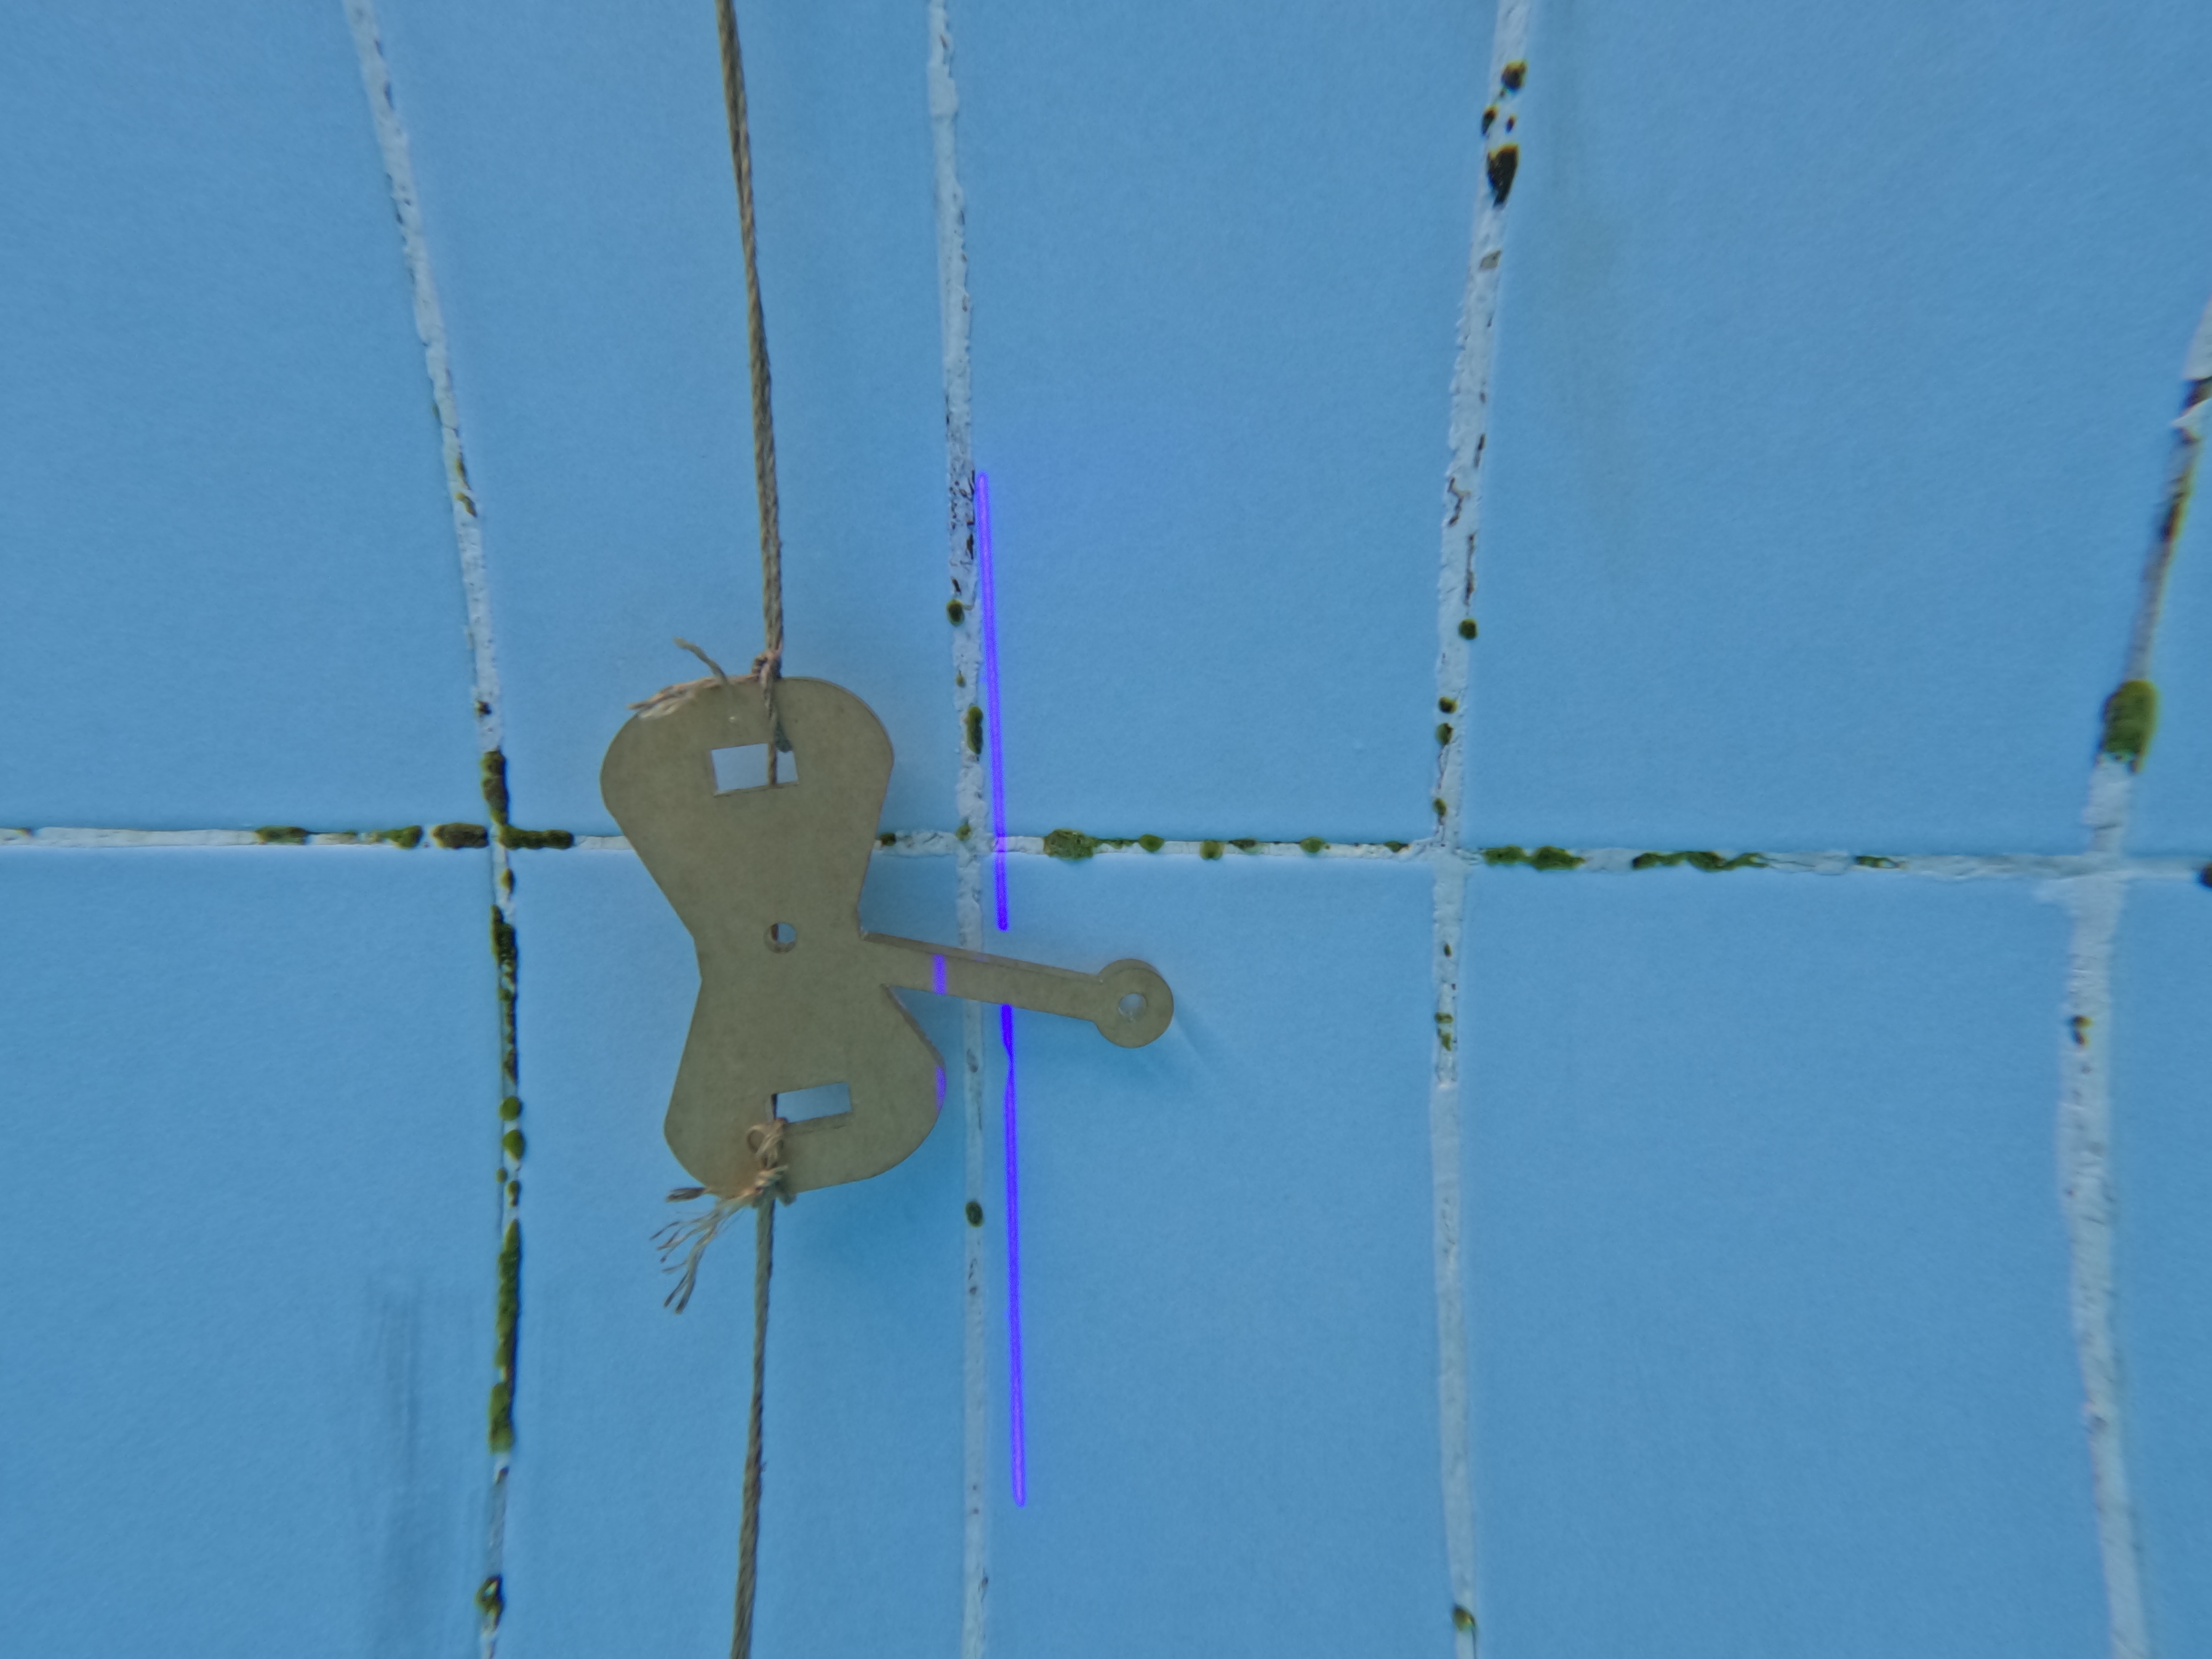

Supplement: Supplementary file 2619 [file G0050917.pdf › Level_2_2/G0050917.pdf]

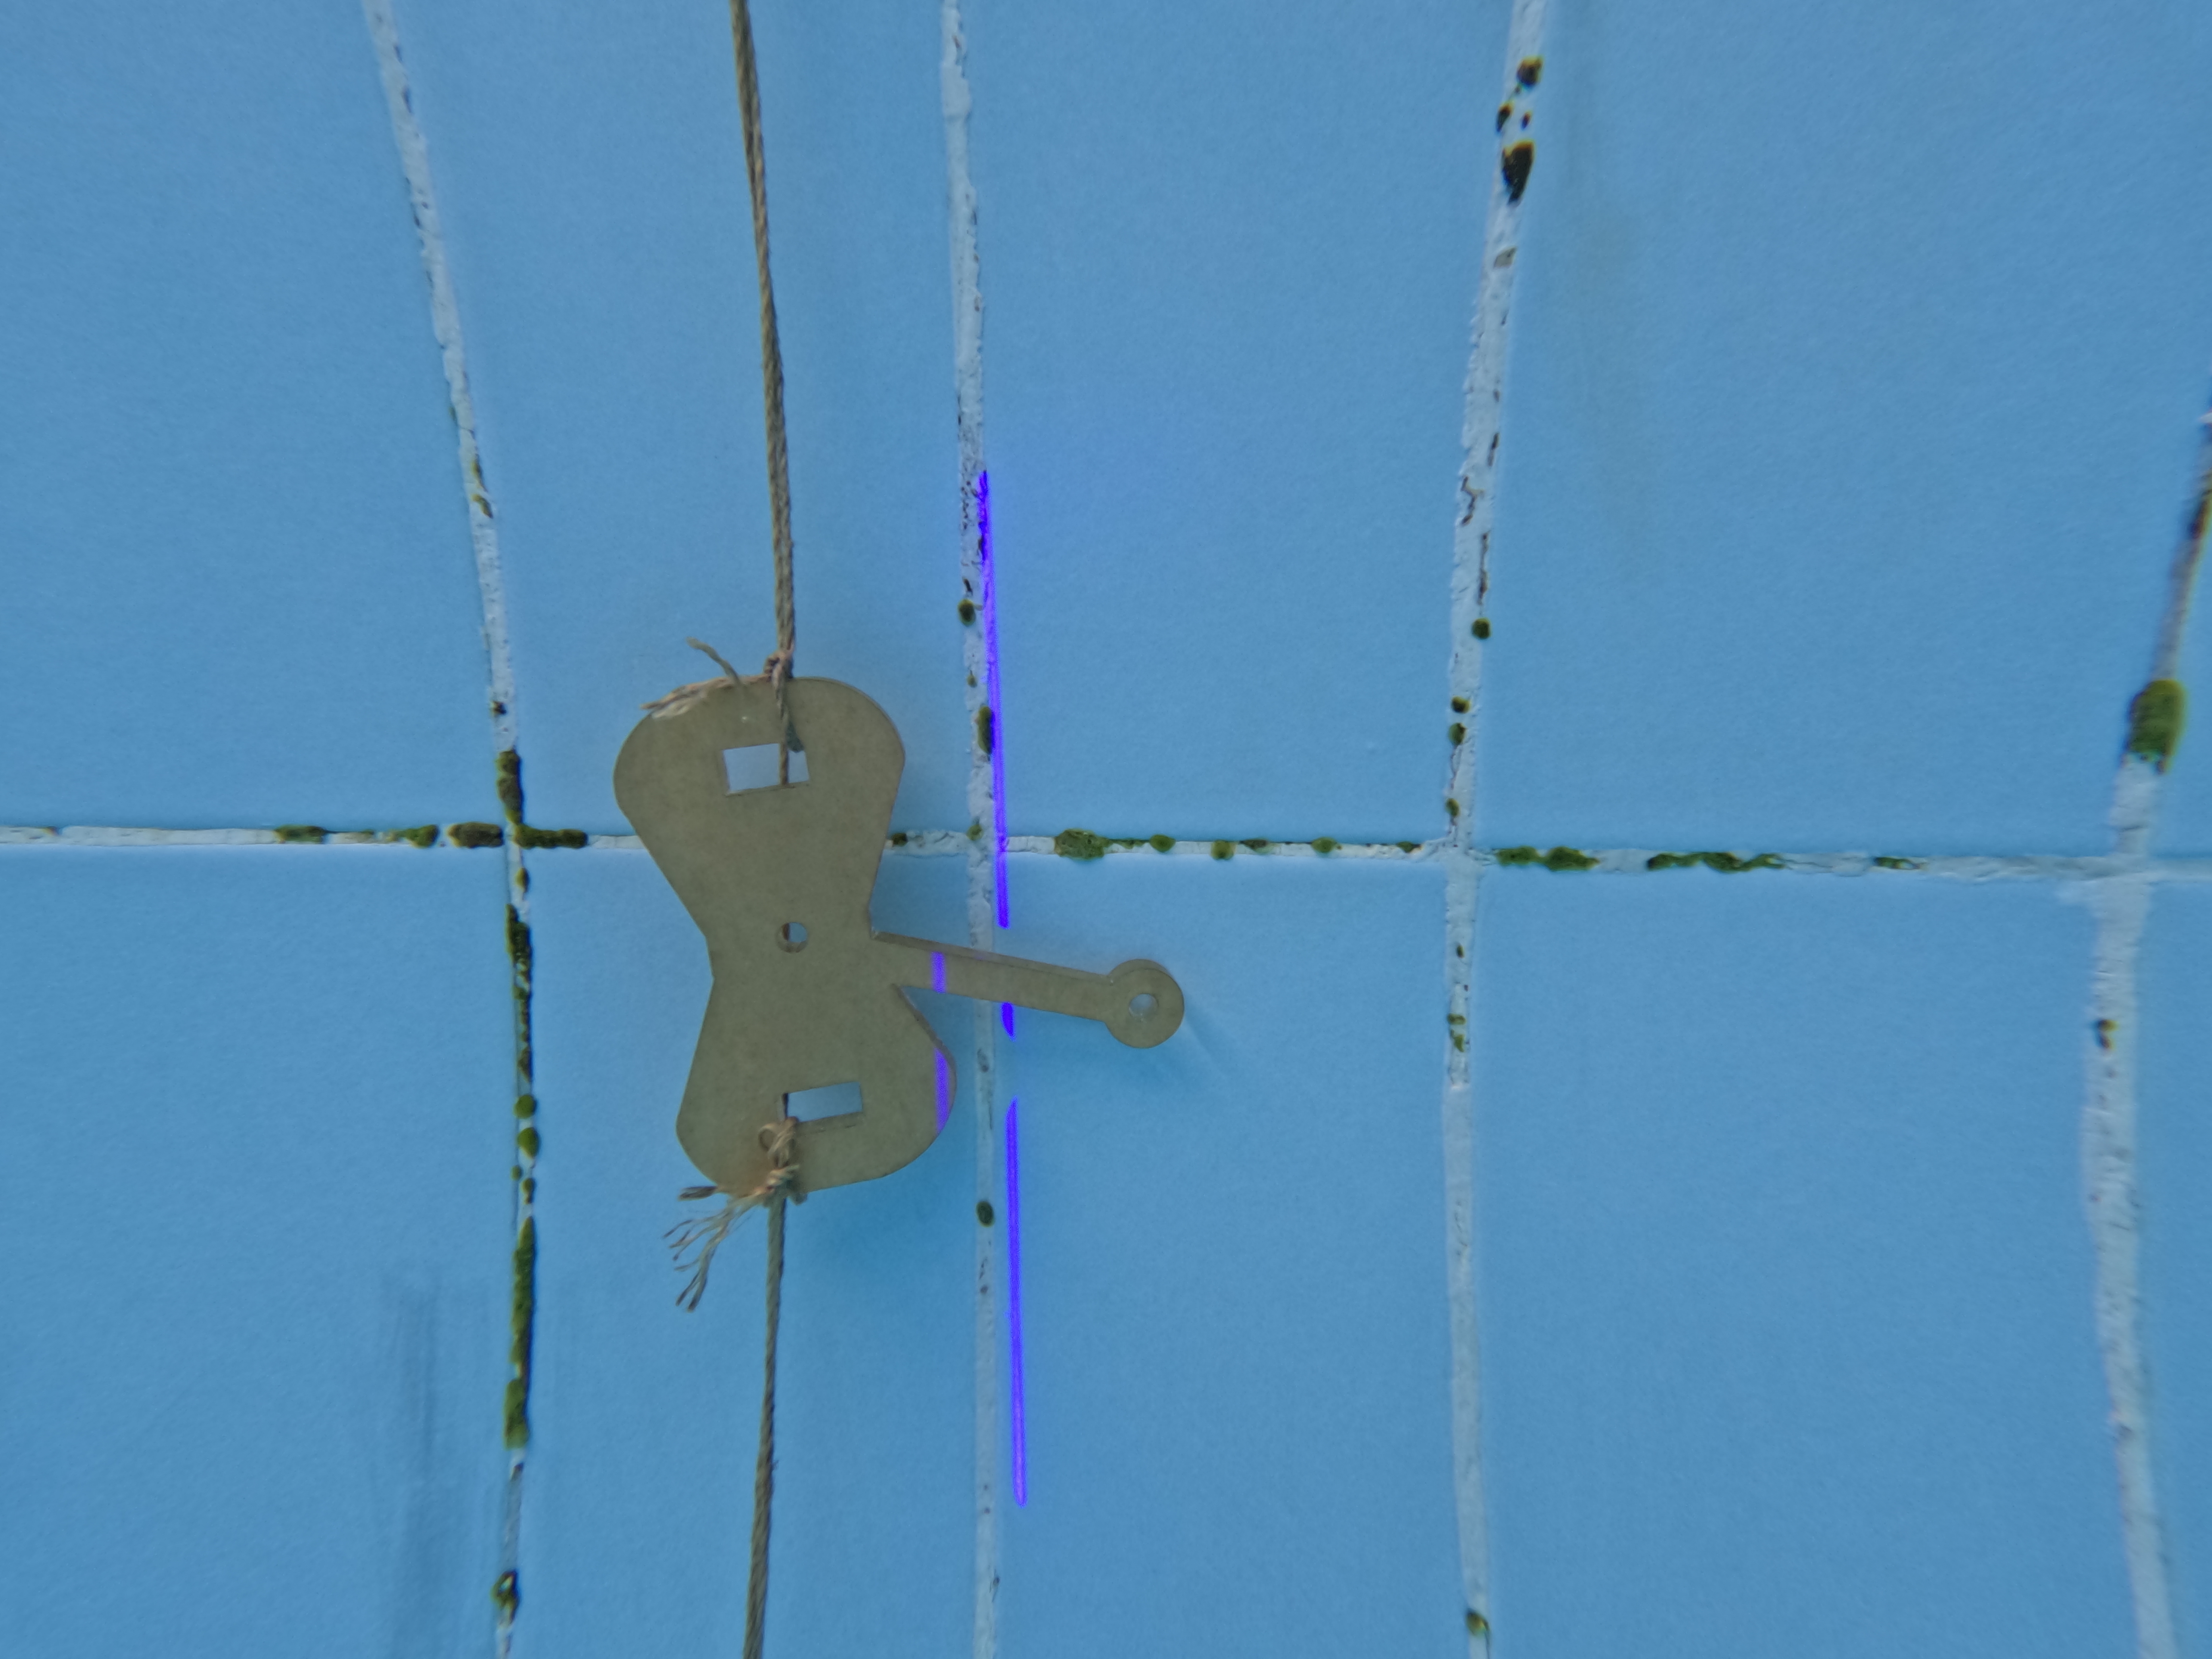

Supplement: Supplementary file 2620 [file G0050918.pdf › Level_2_2/G0050918.pdf]

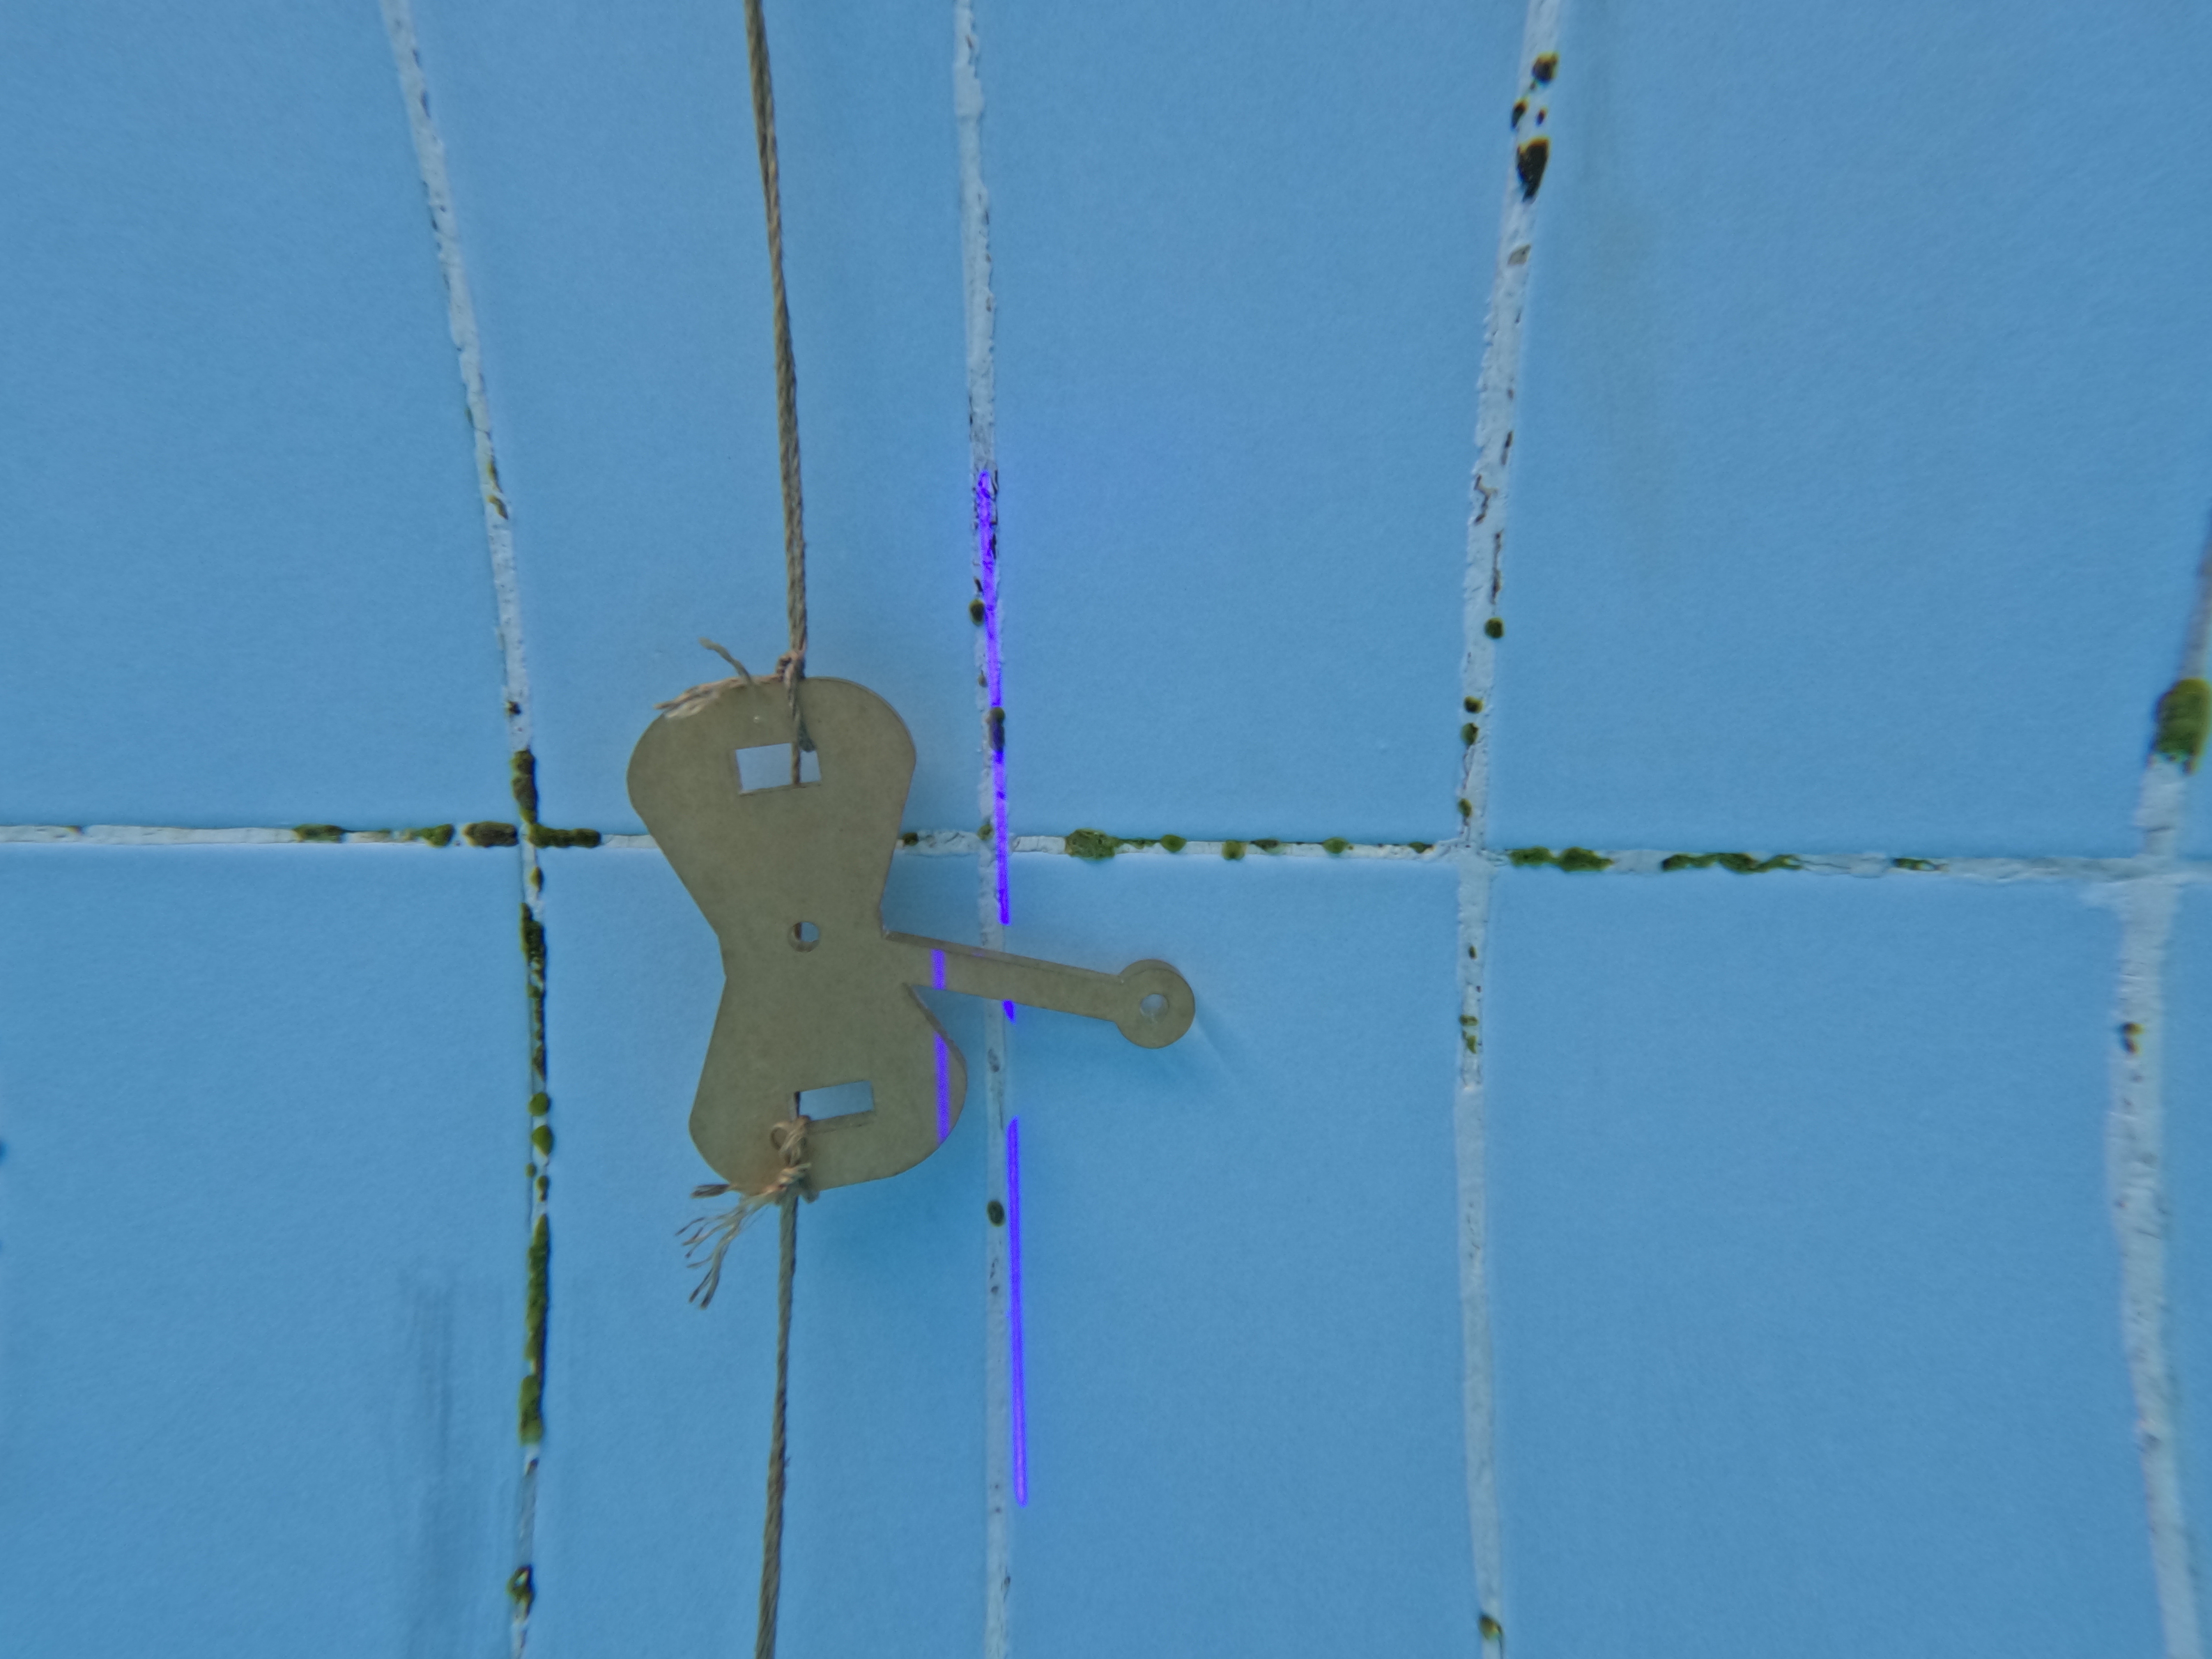

Supplement: Supplementary file 2621 [file G0050919.pdf › Level_2_2/G0050919.pdf]

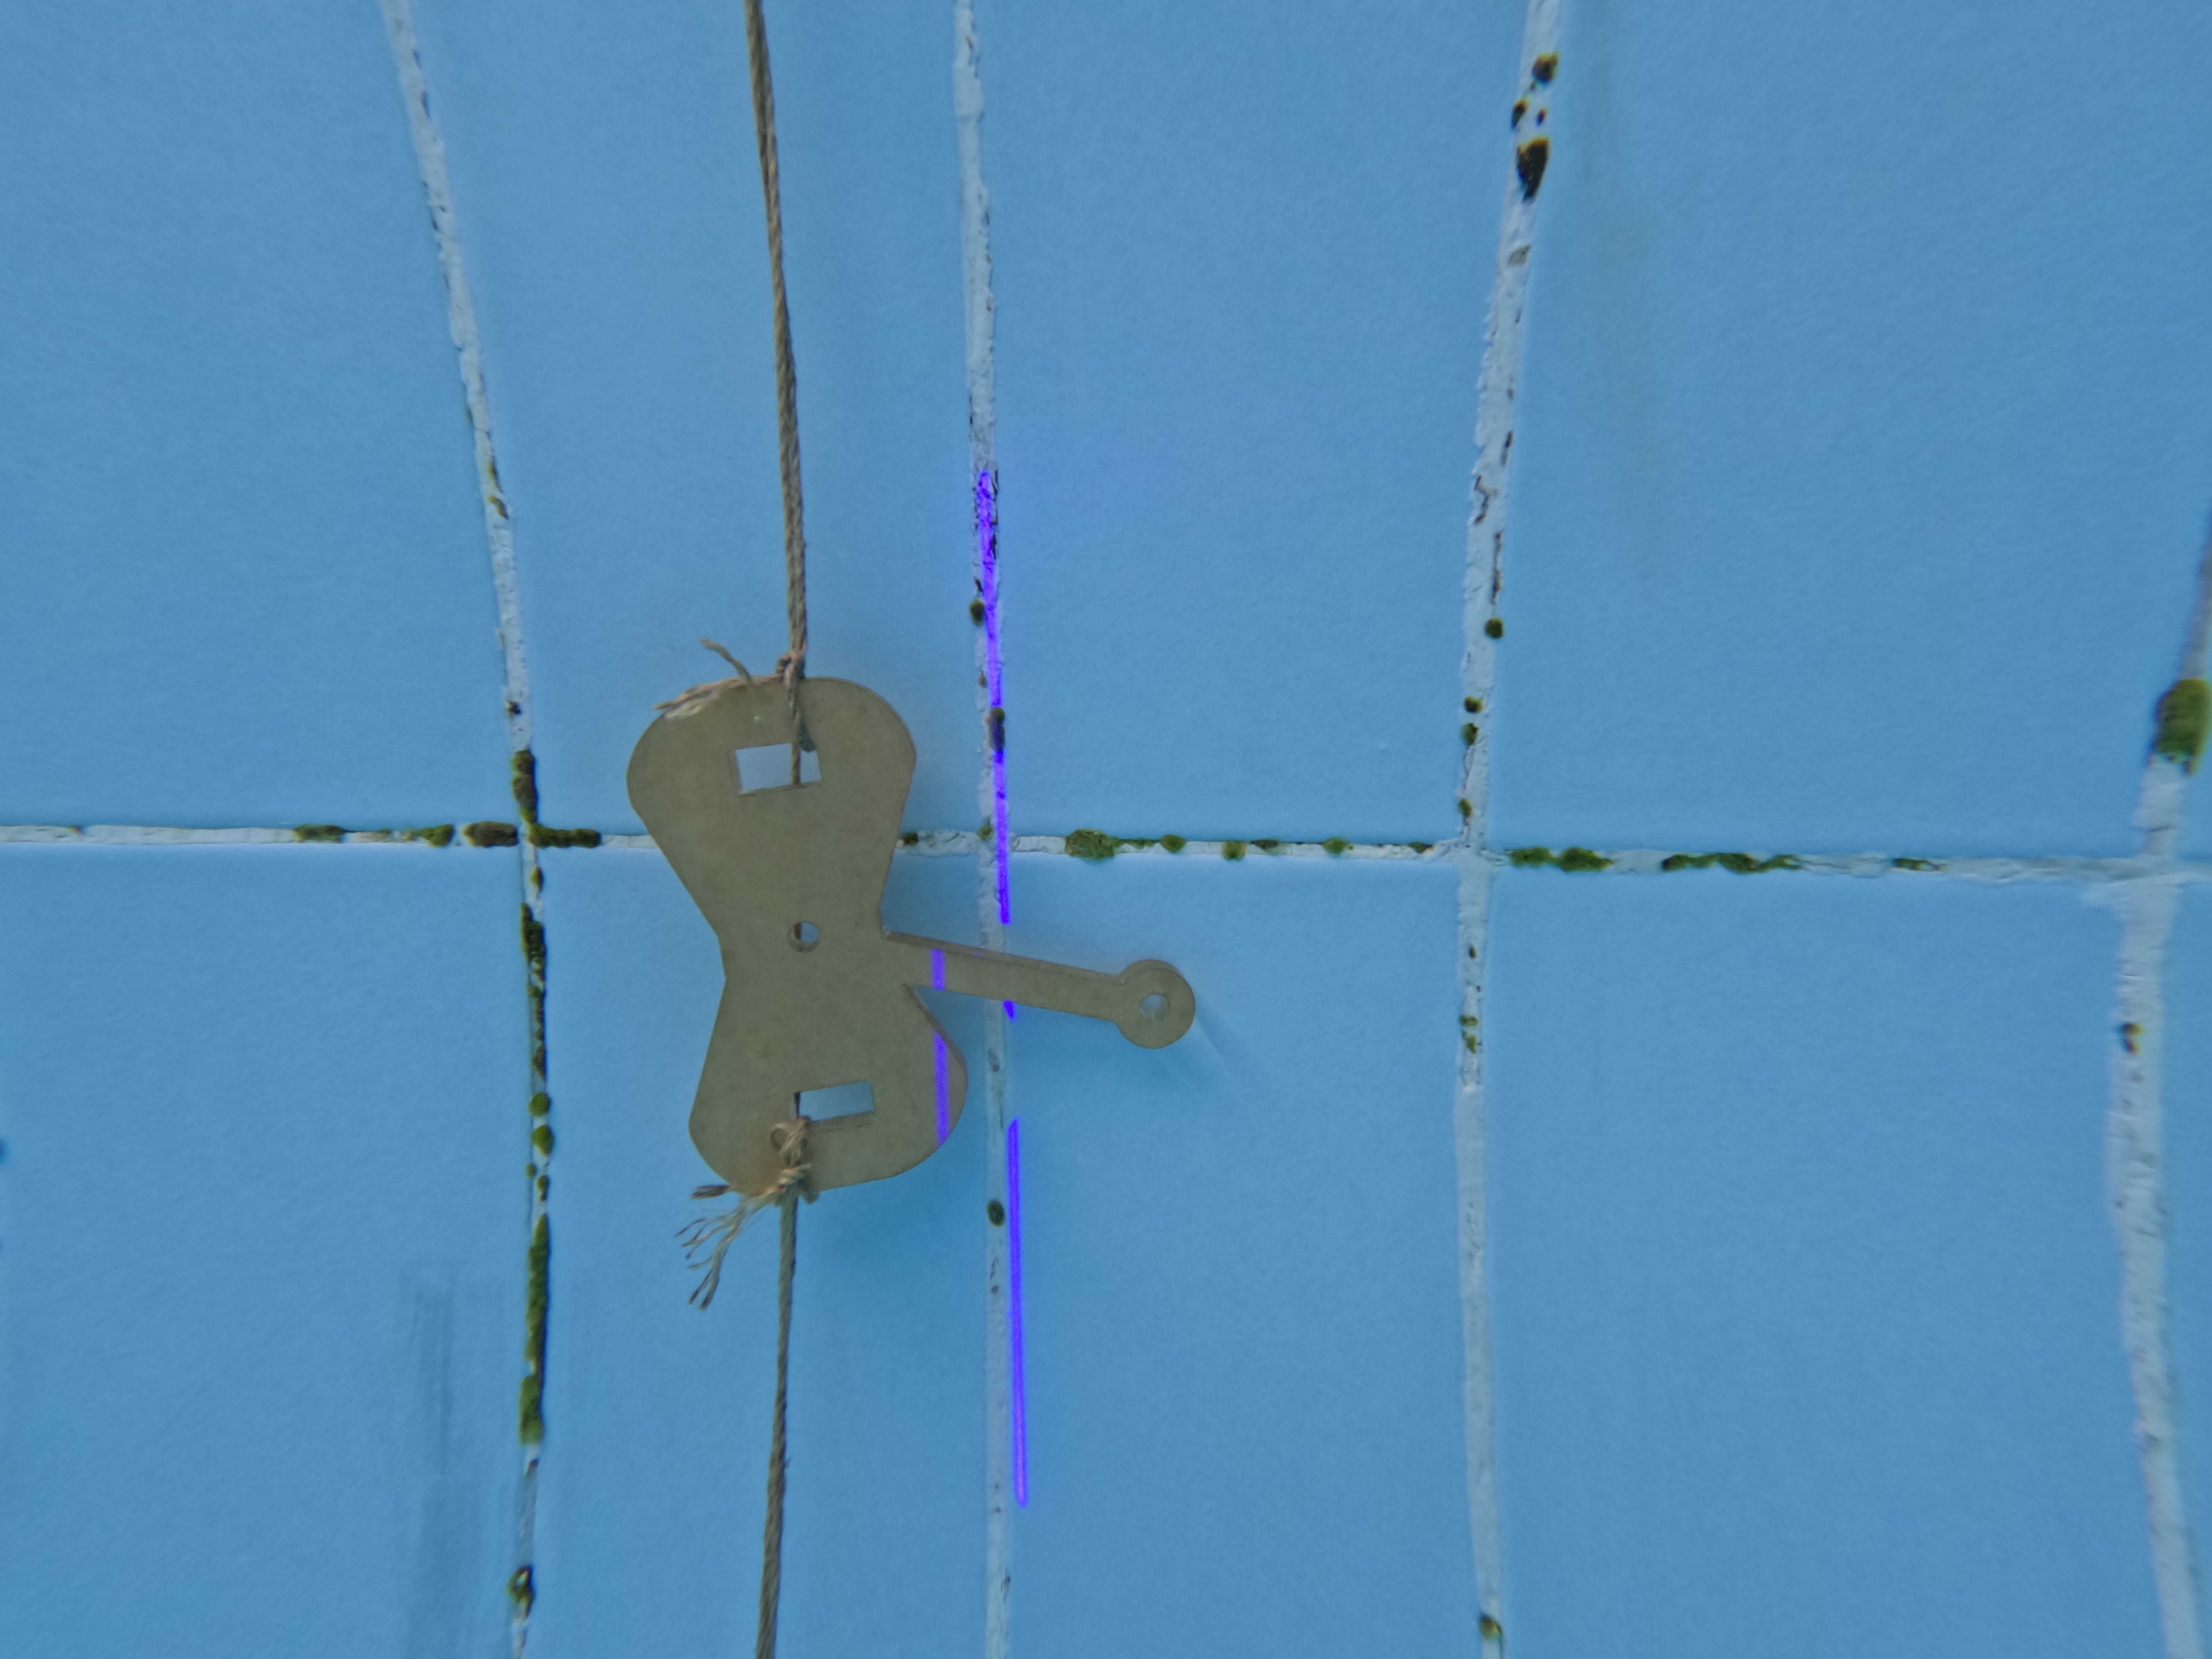

Supplement: Supplementary file 2622 [file G0050920.pdf › Level_2_2/G0050920.pdf]

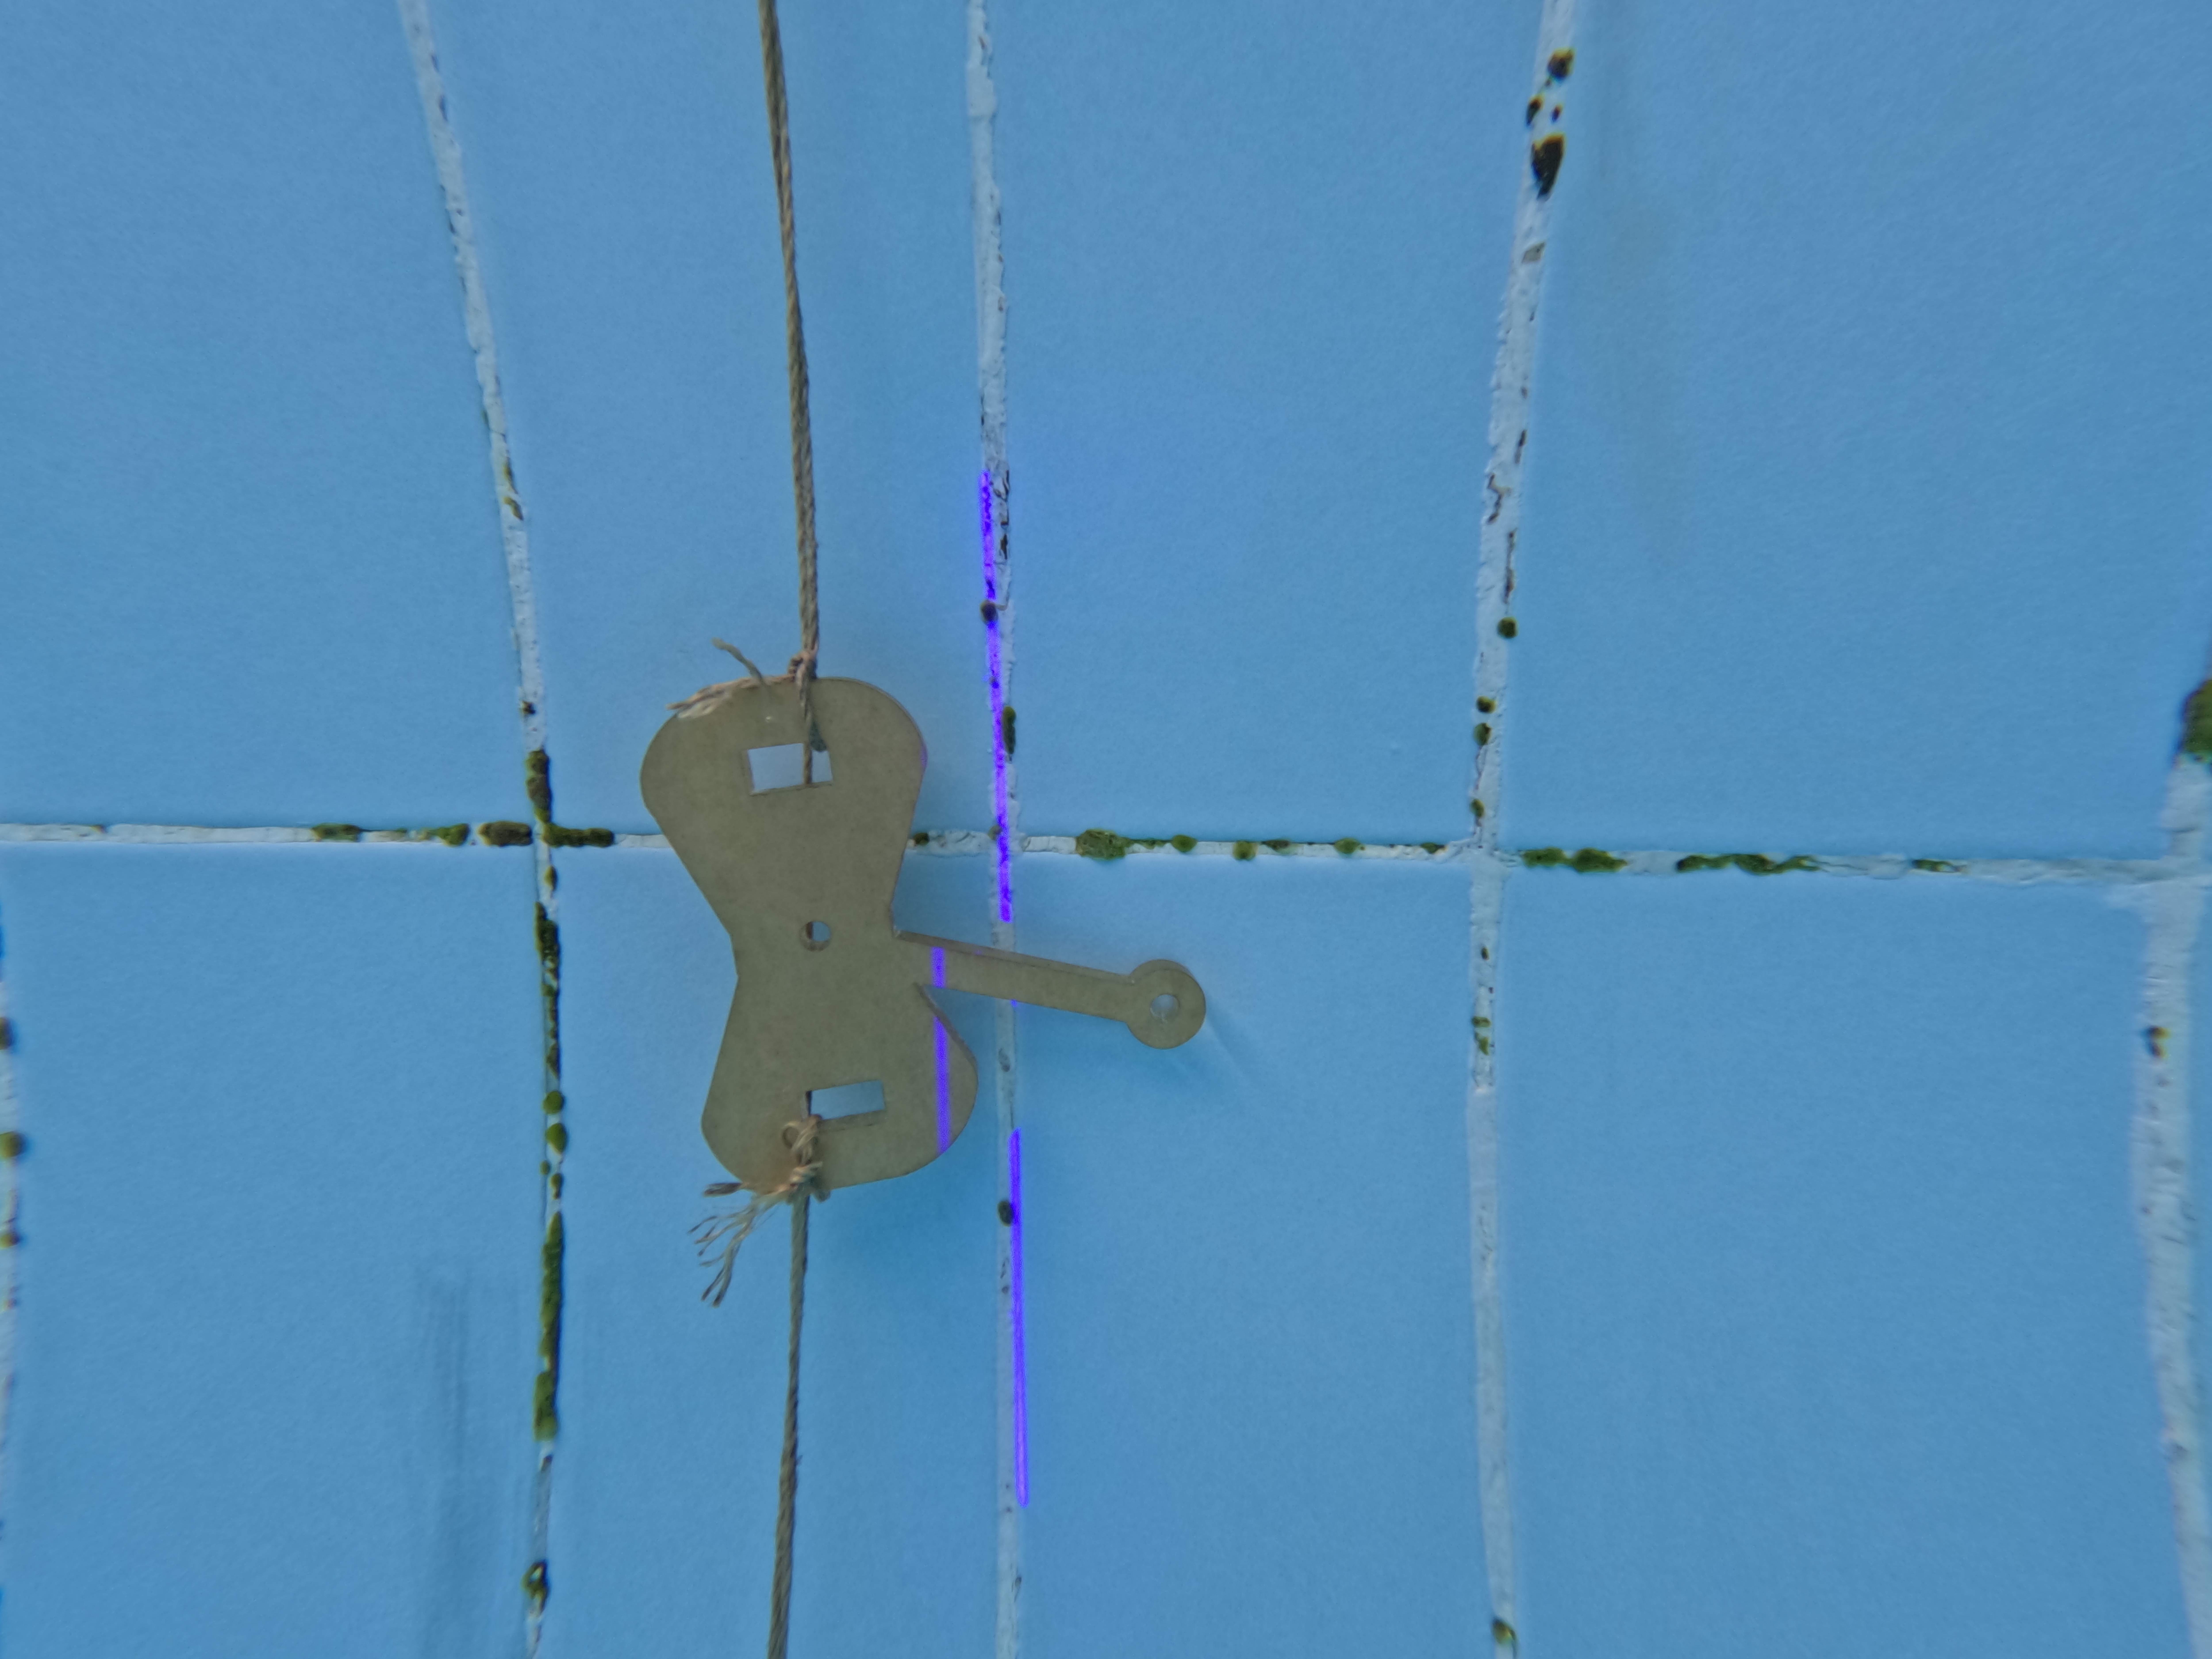

Supplement: Supplementary file 2623 [file G0050921.pdf › Level_2_2/G0050921.pdf]

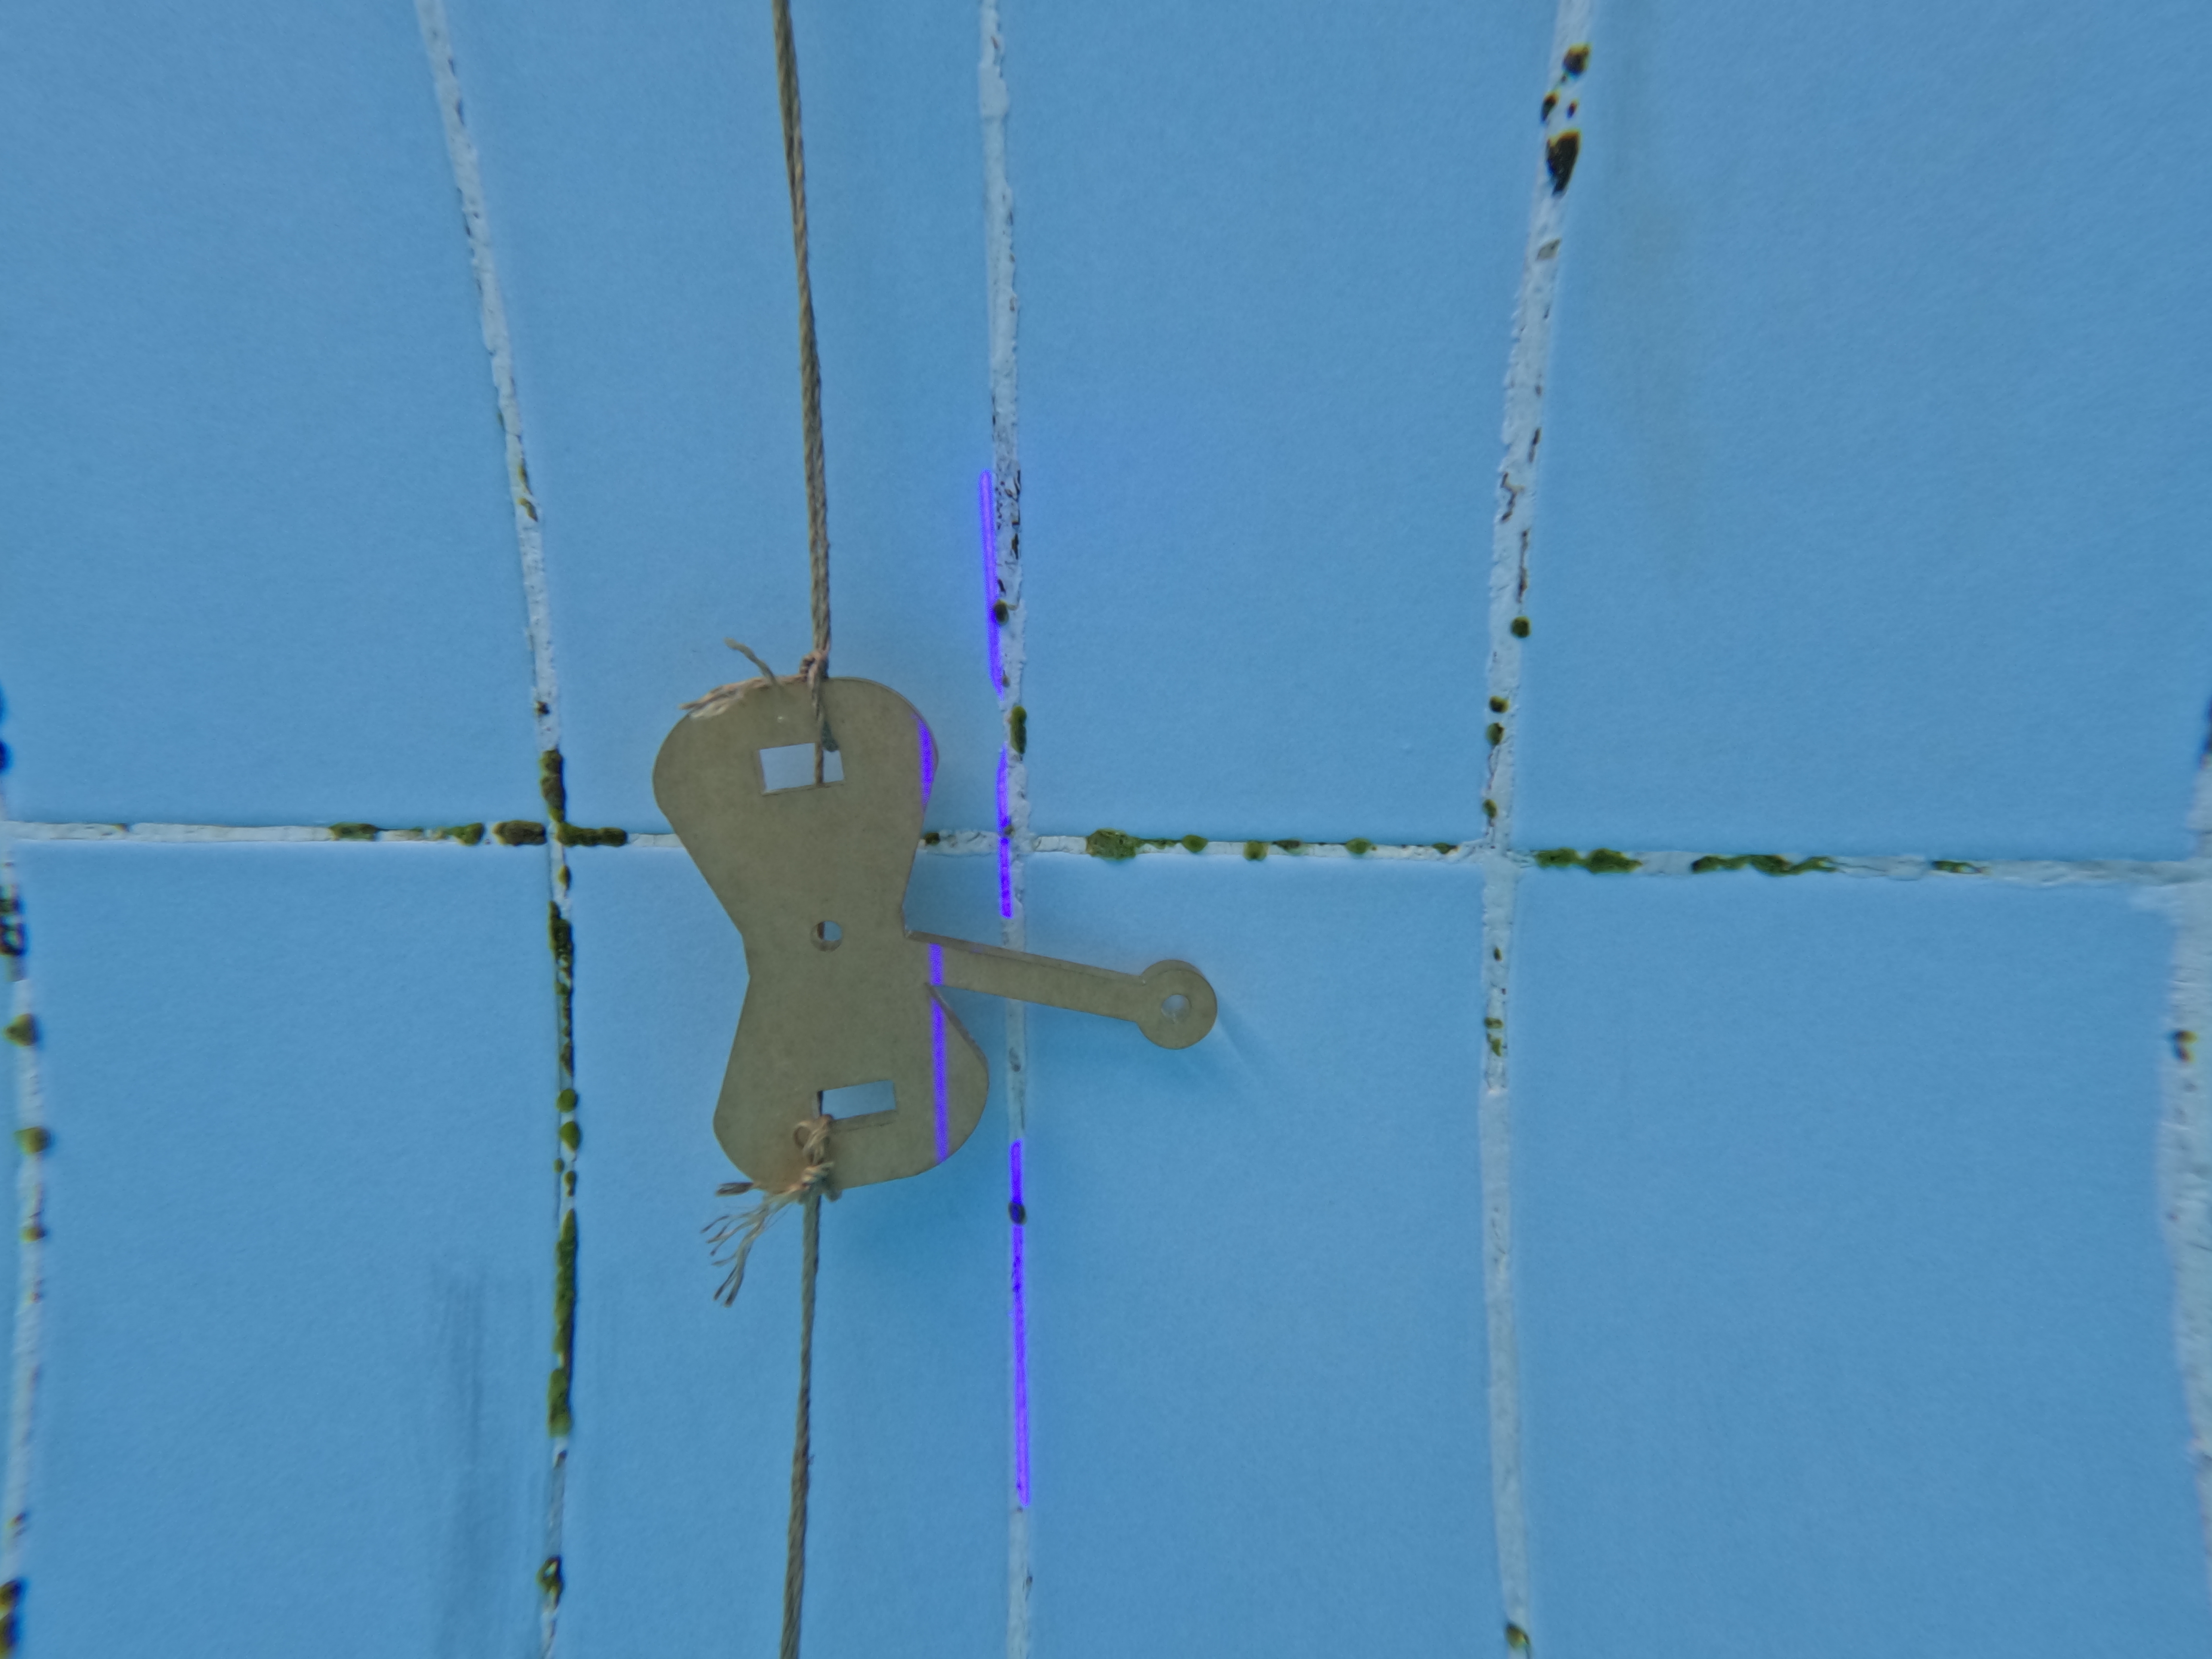

Supplement: Supplementary file 2624 [file G0050922.pdf › Level_2_2/G0050922.pdf]

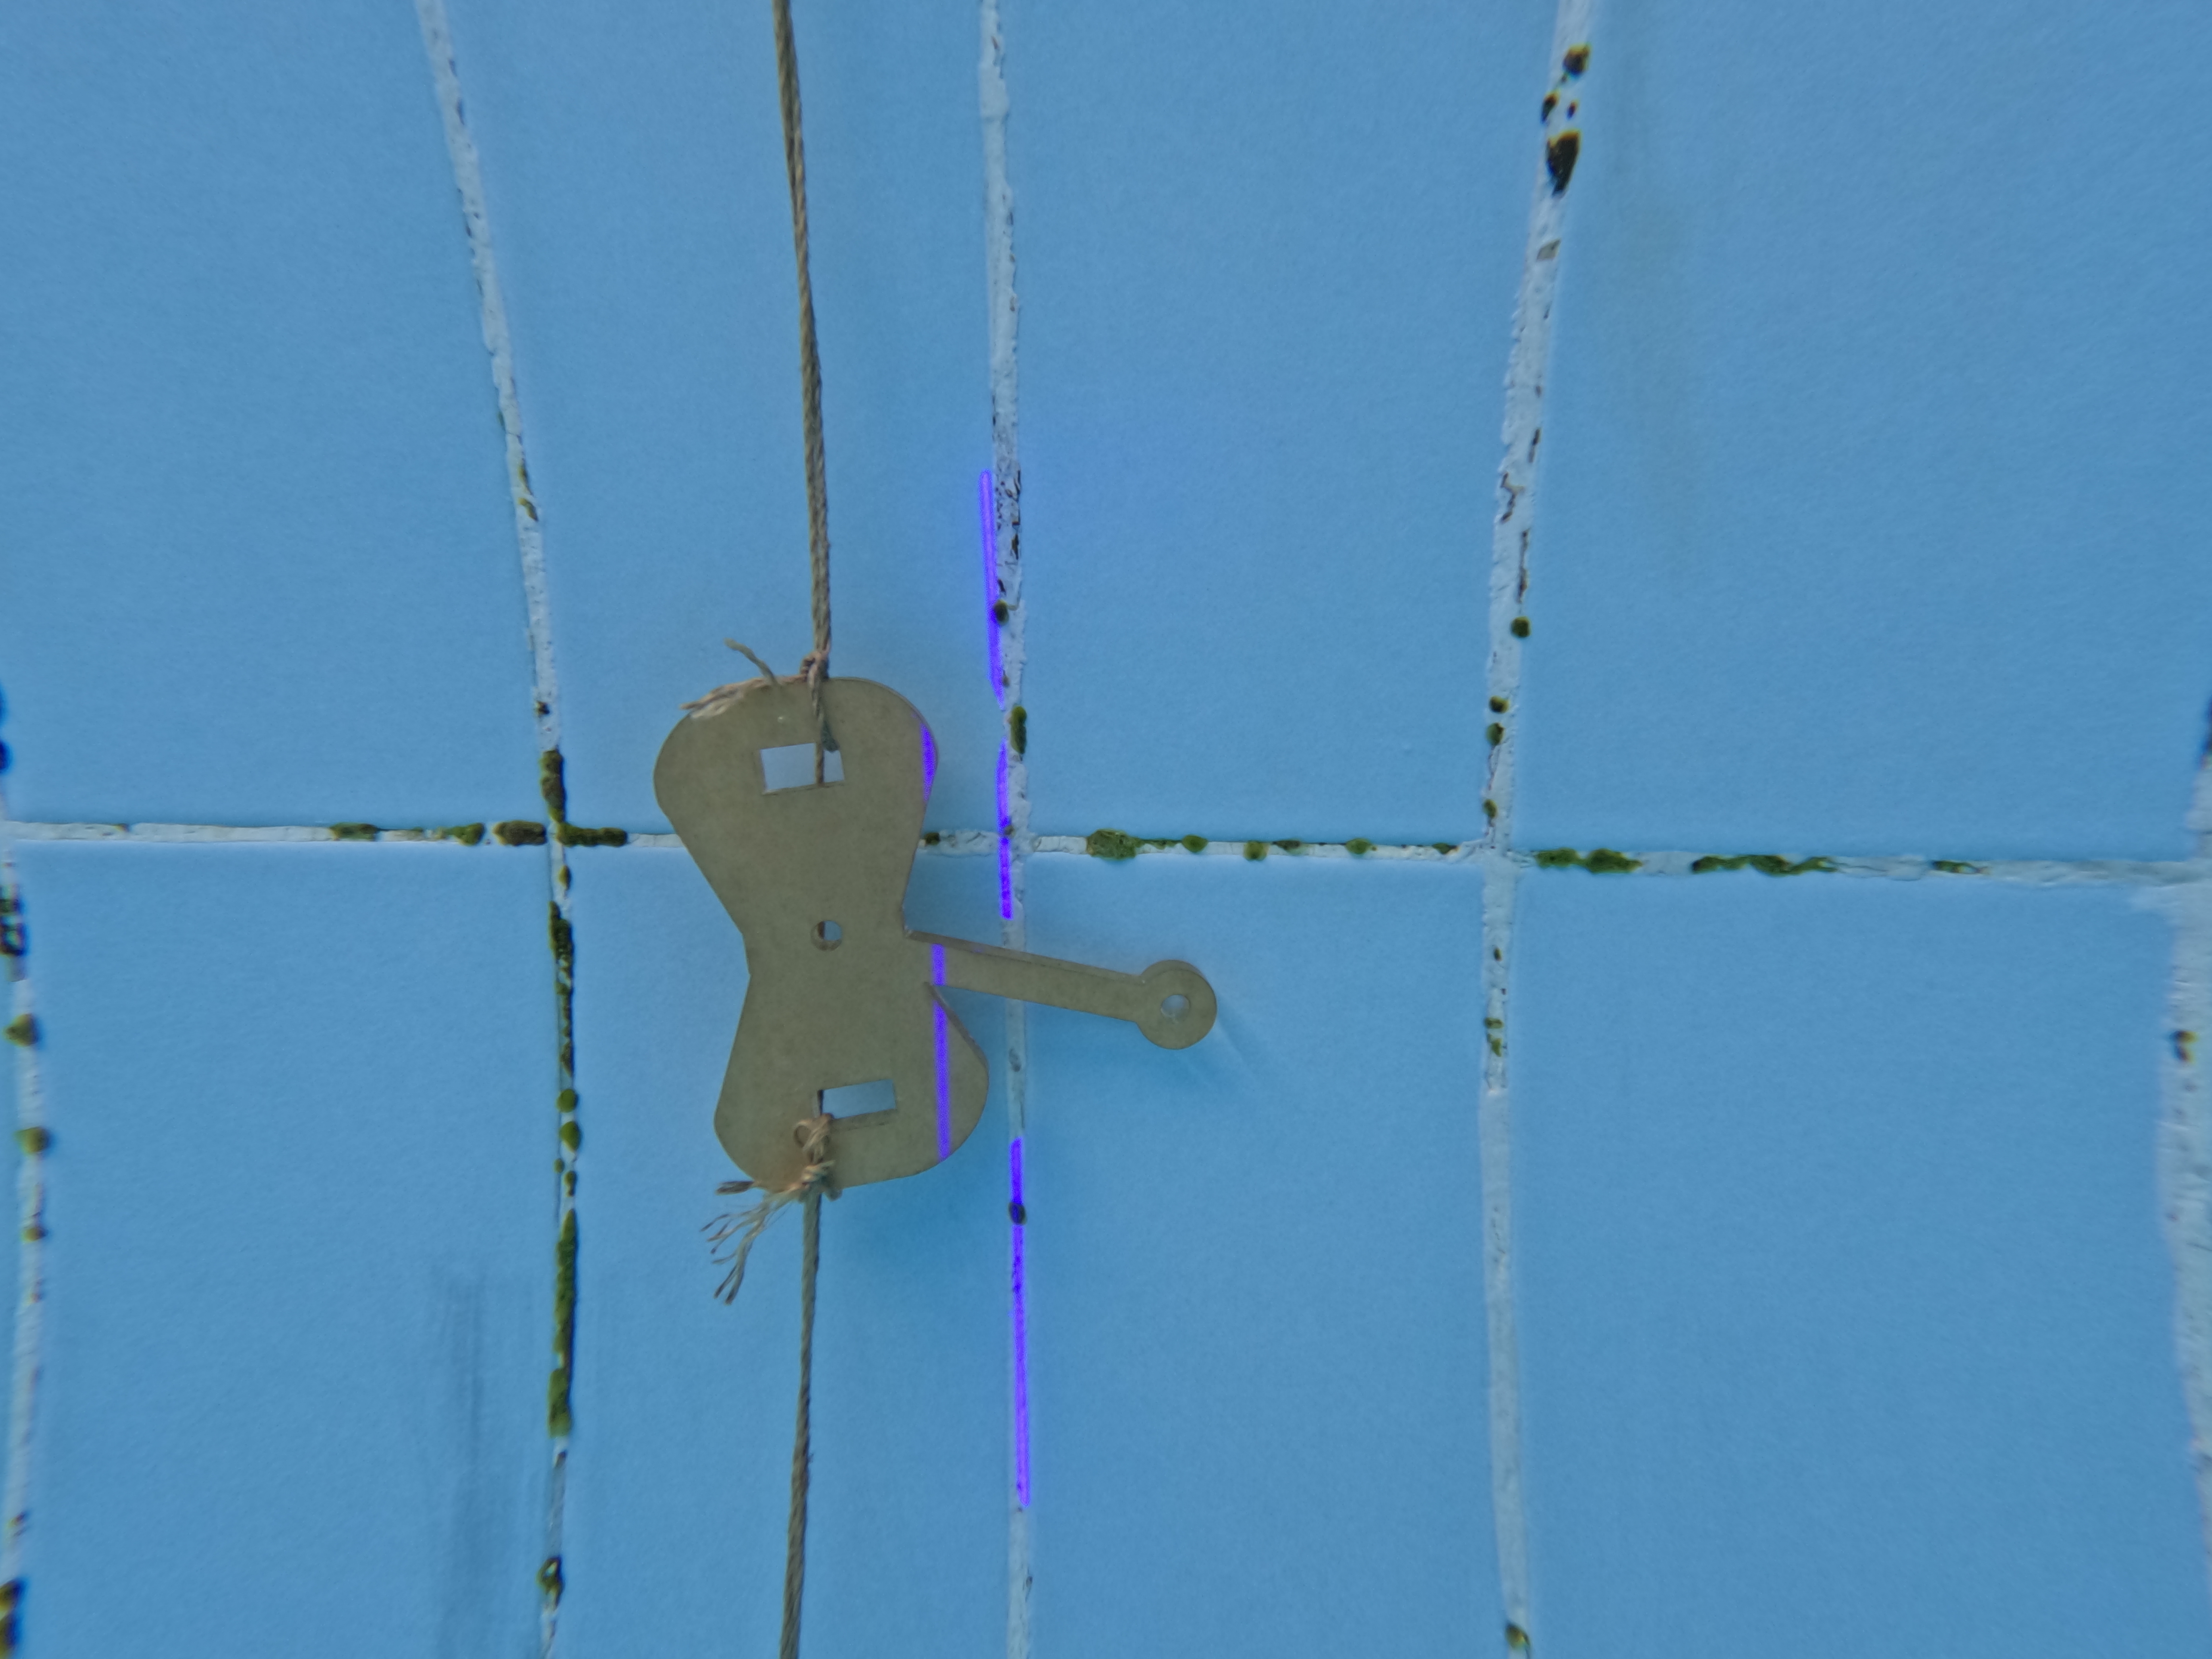

Supplement: Supplementary file 2625 [file G0050923.pdf › Level_2_2/G0050923.pdf]

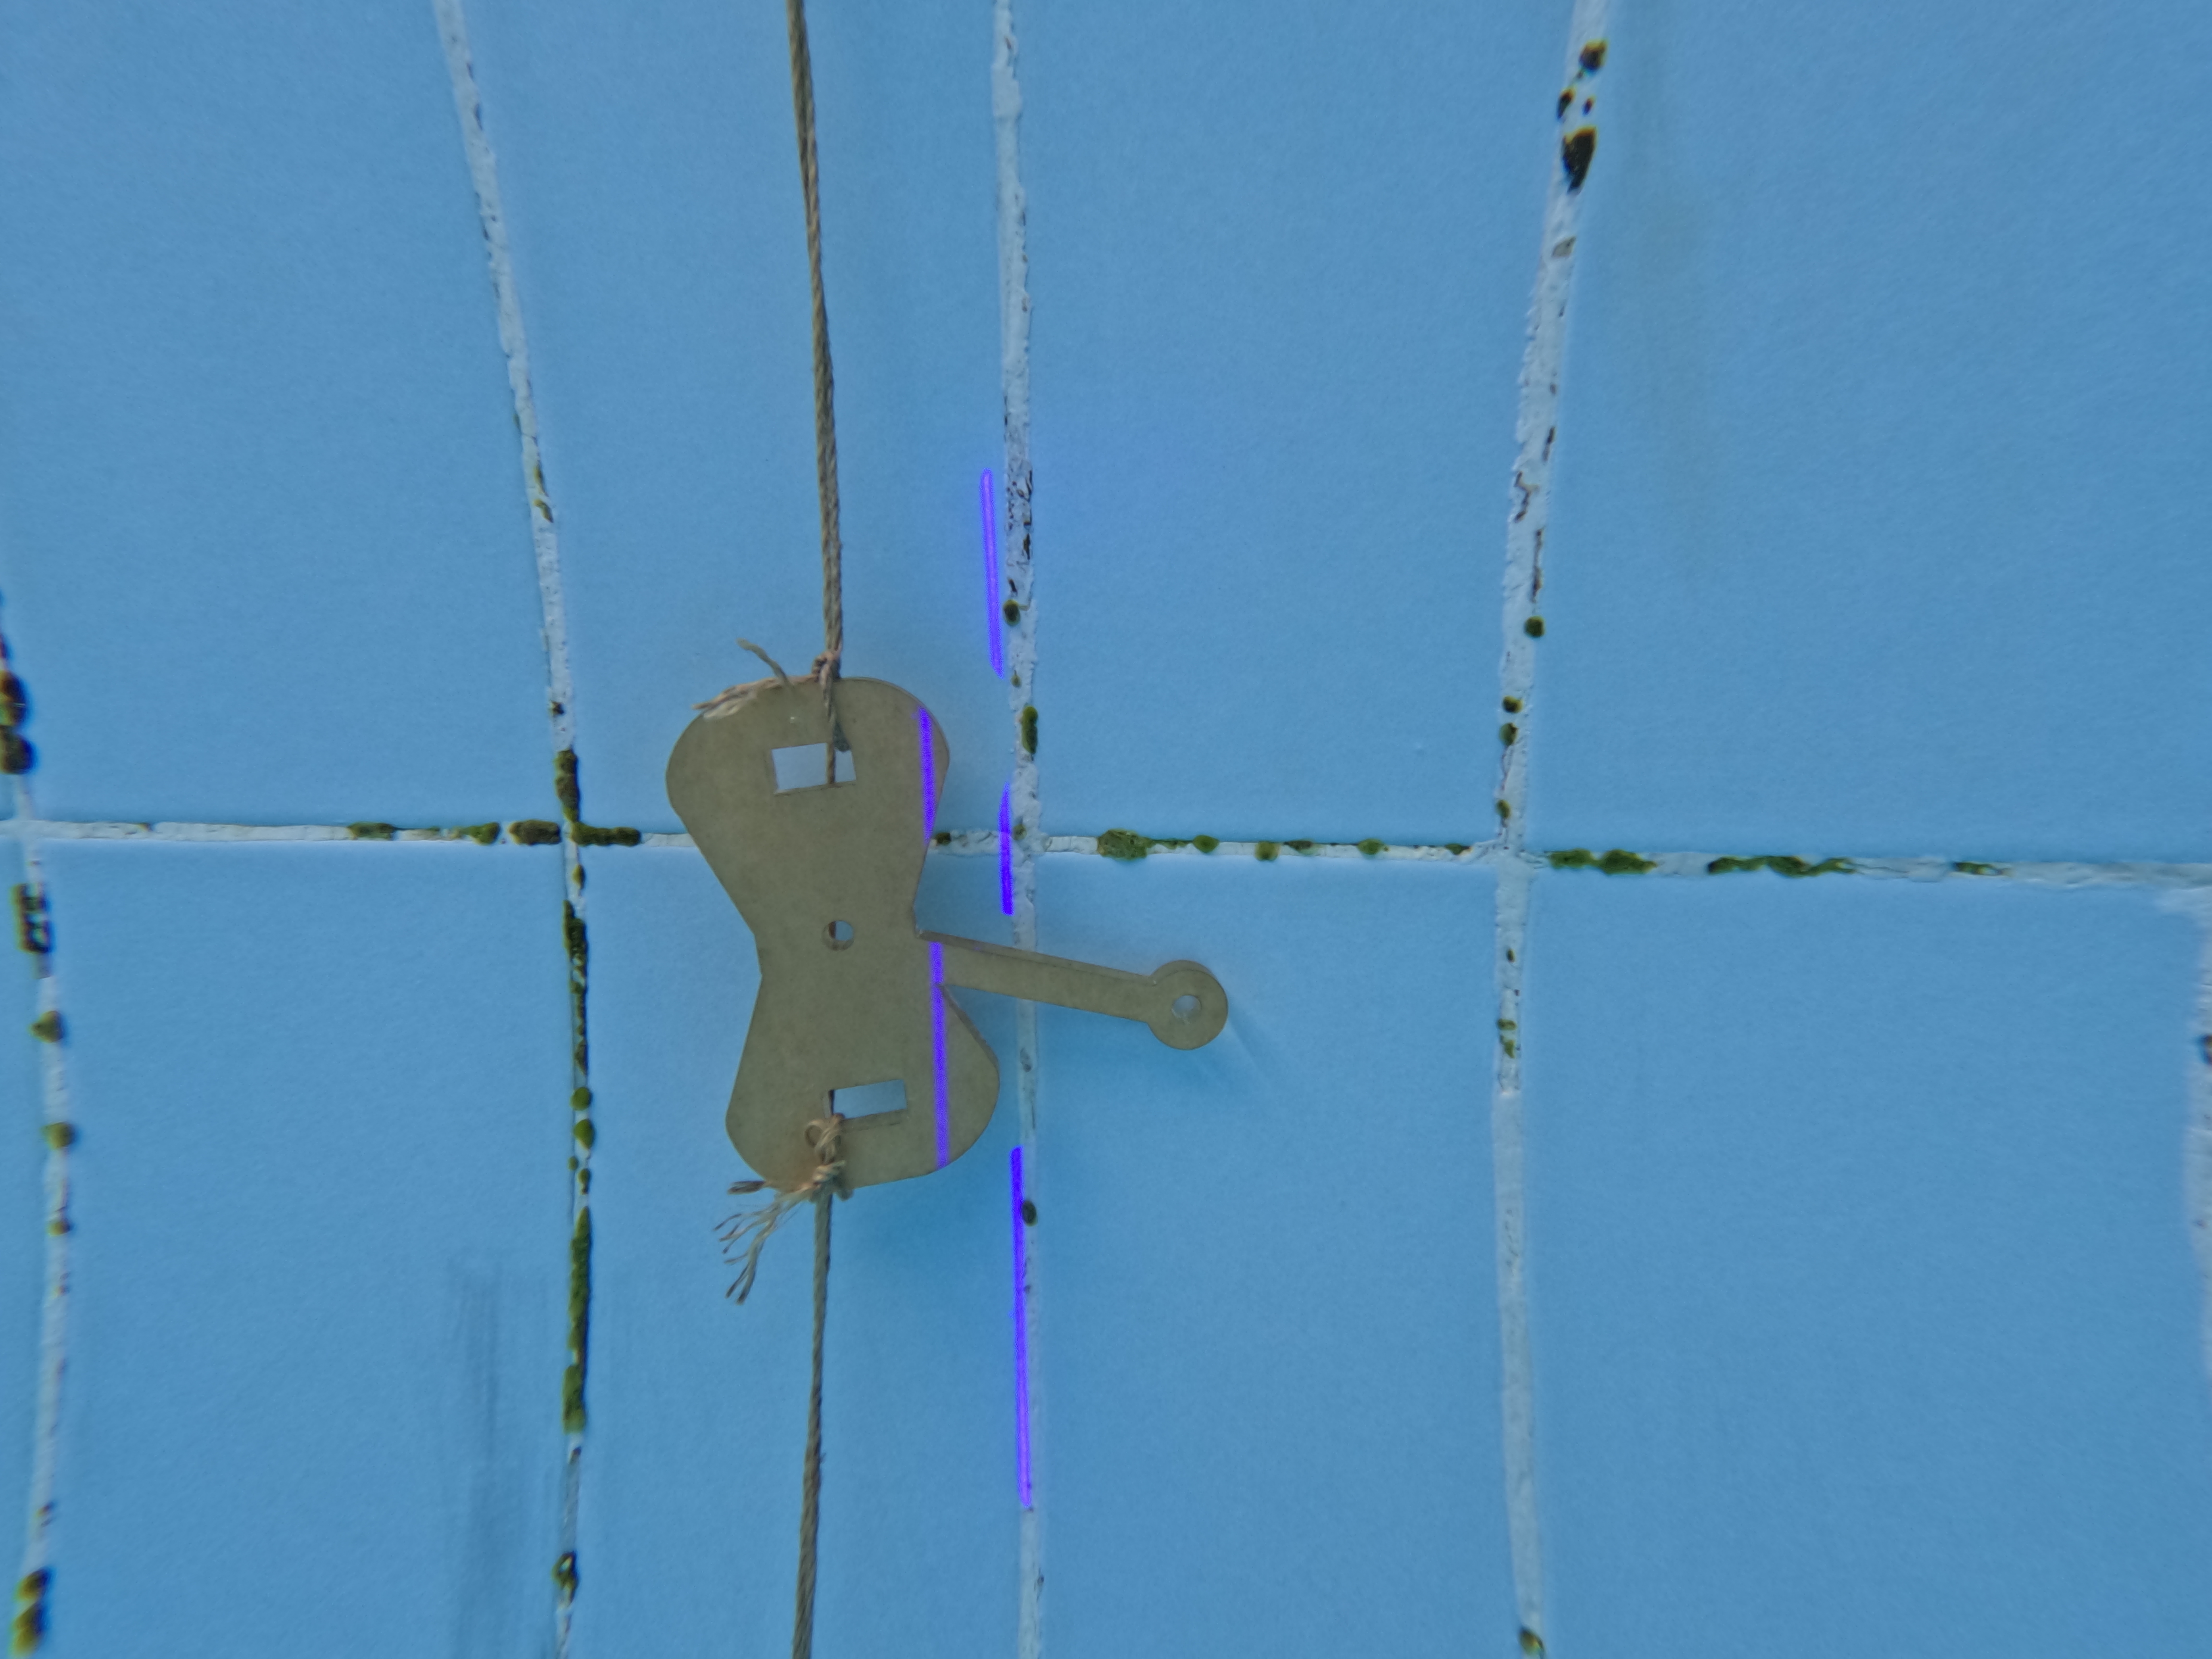

Supplement: Supplementary file 2626 [file G0050924.pdf › Level_2_2/G0050924.pdf]

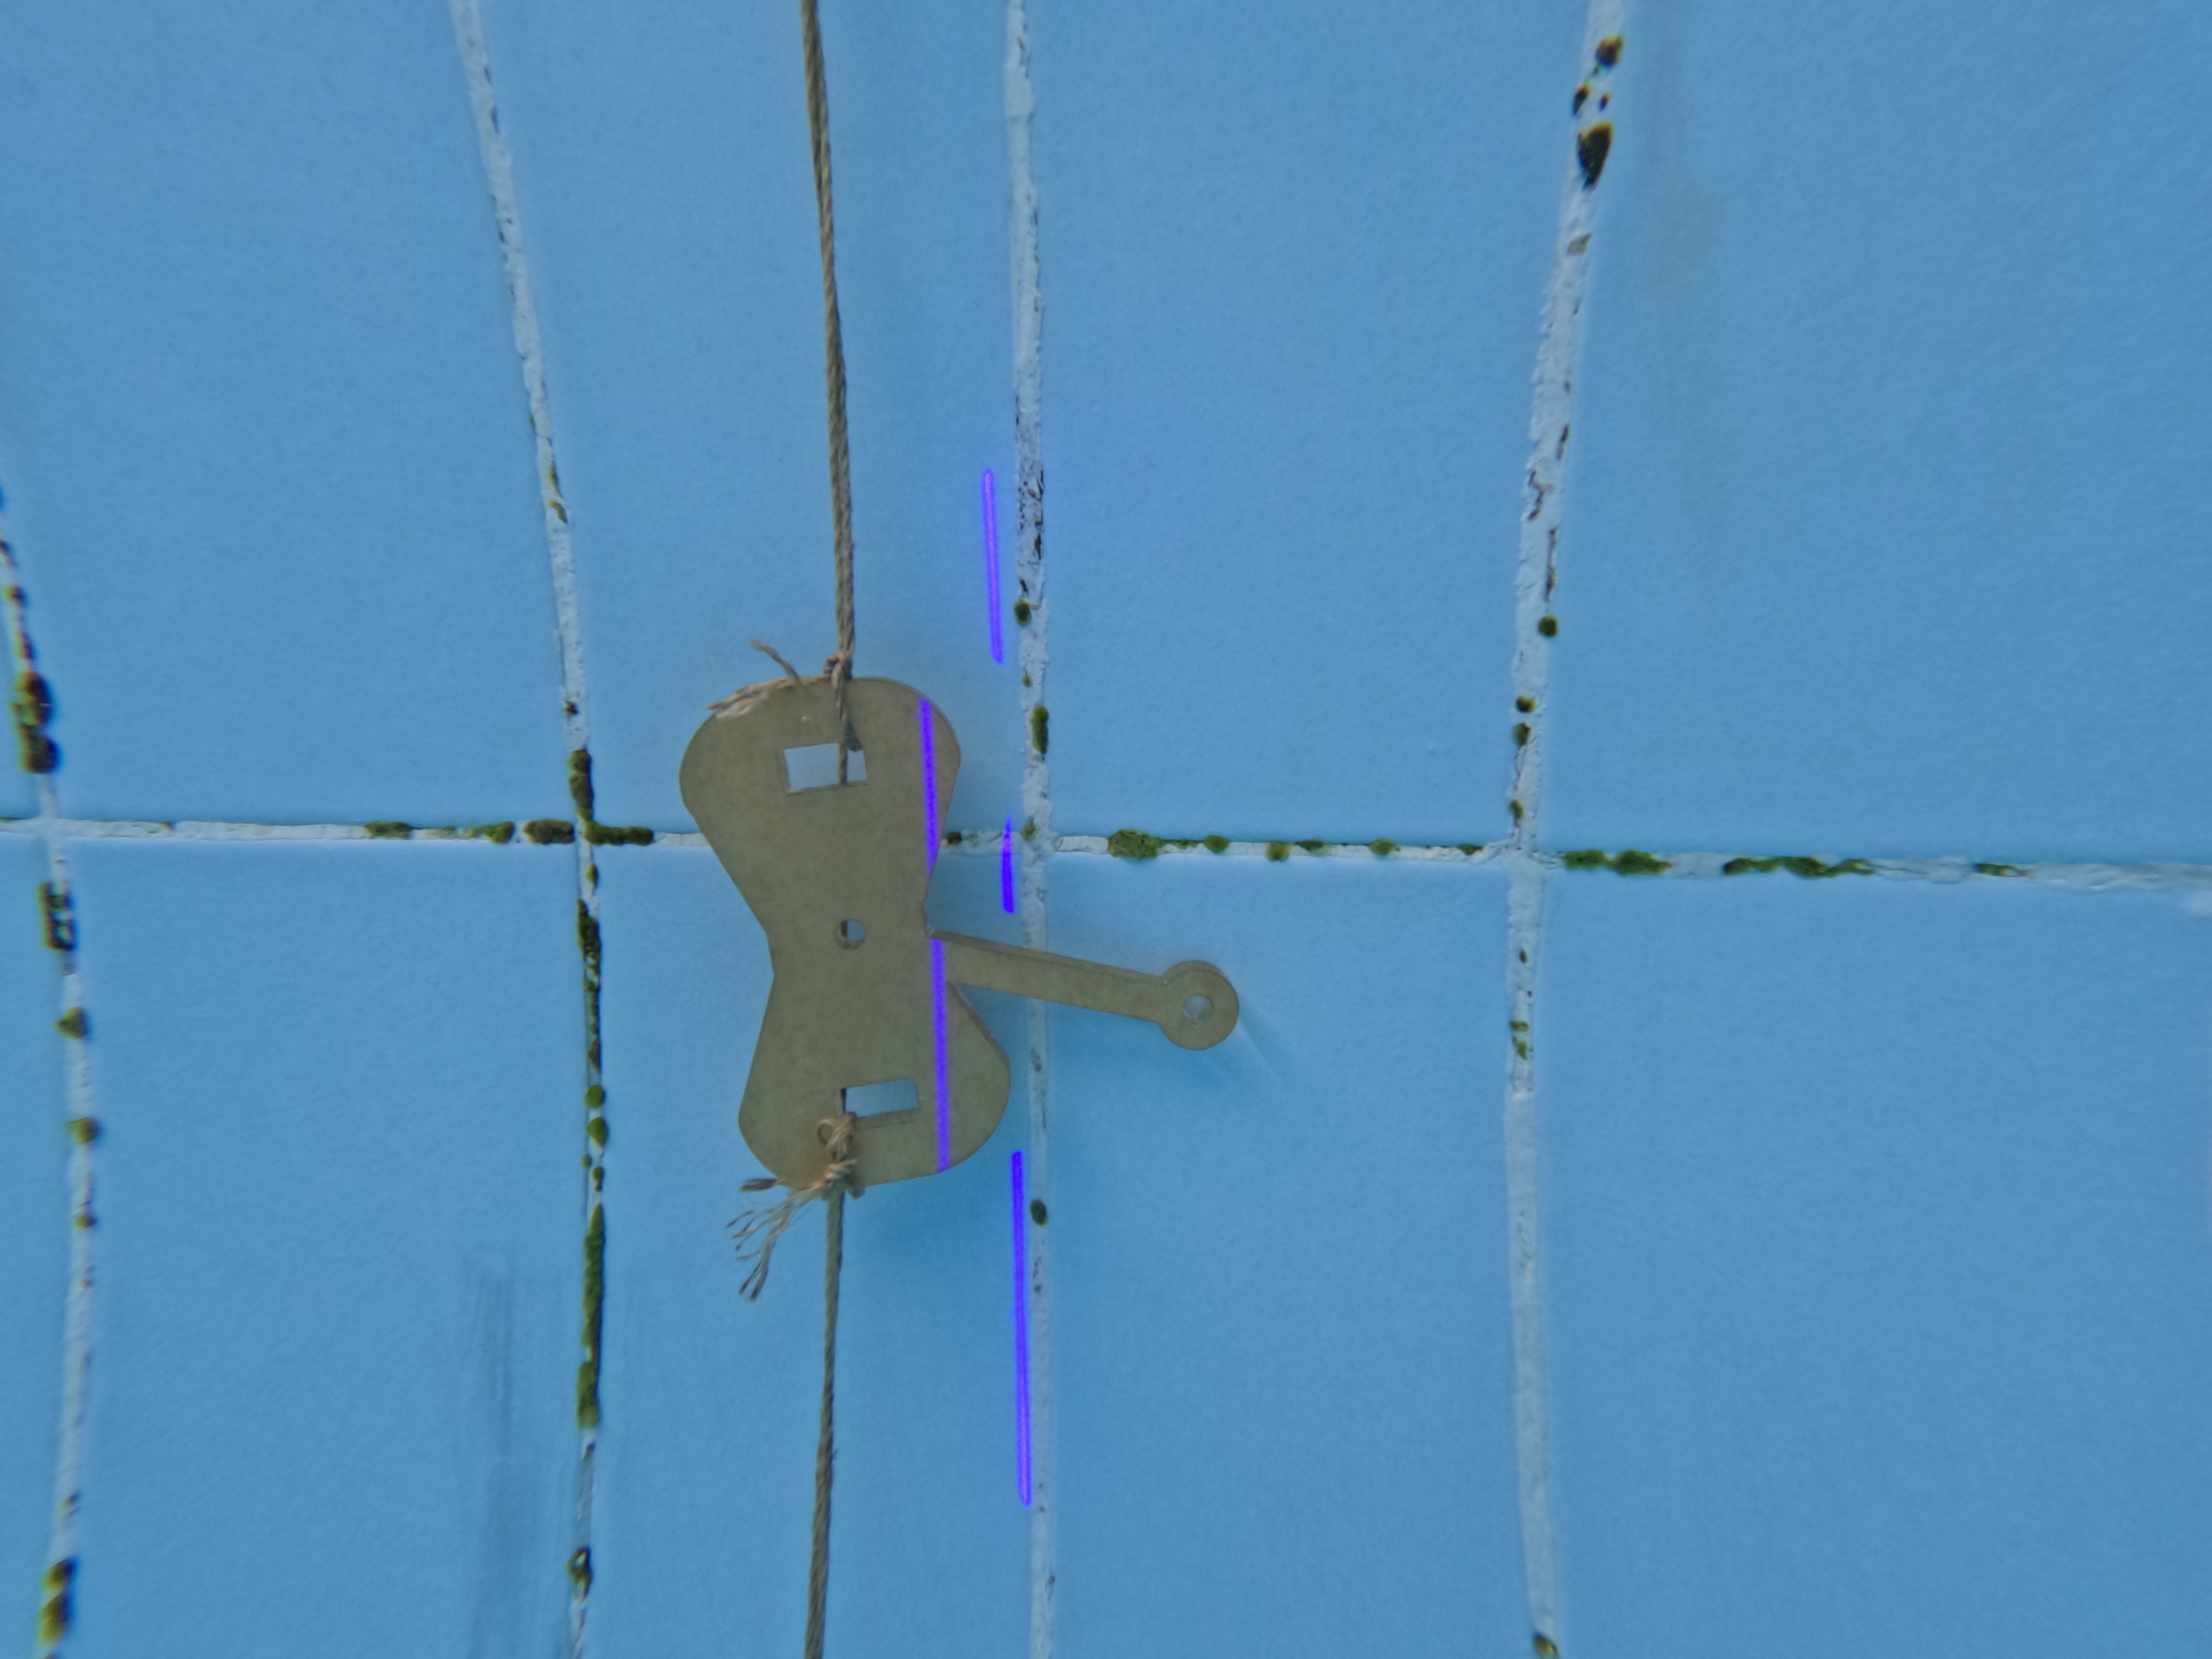

Supplement: Supplementary file 2627 [file G0050925.pdf › Level_2_2/G0050925.pdf]

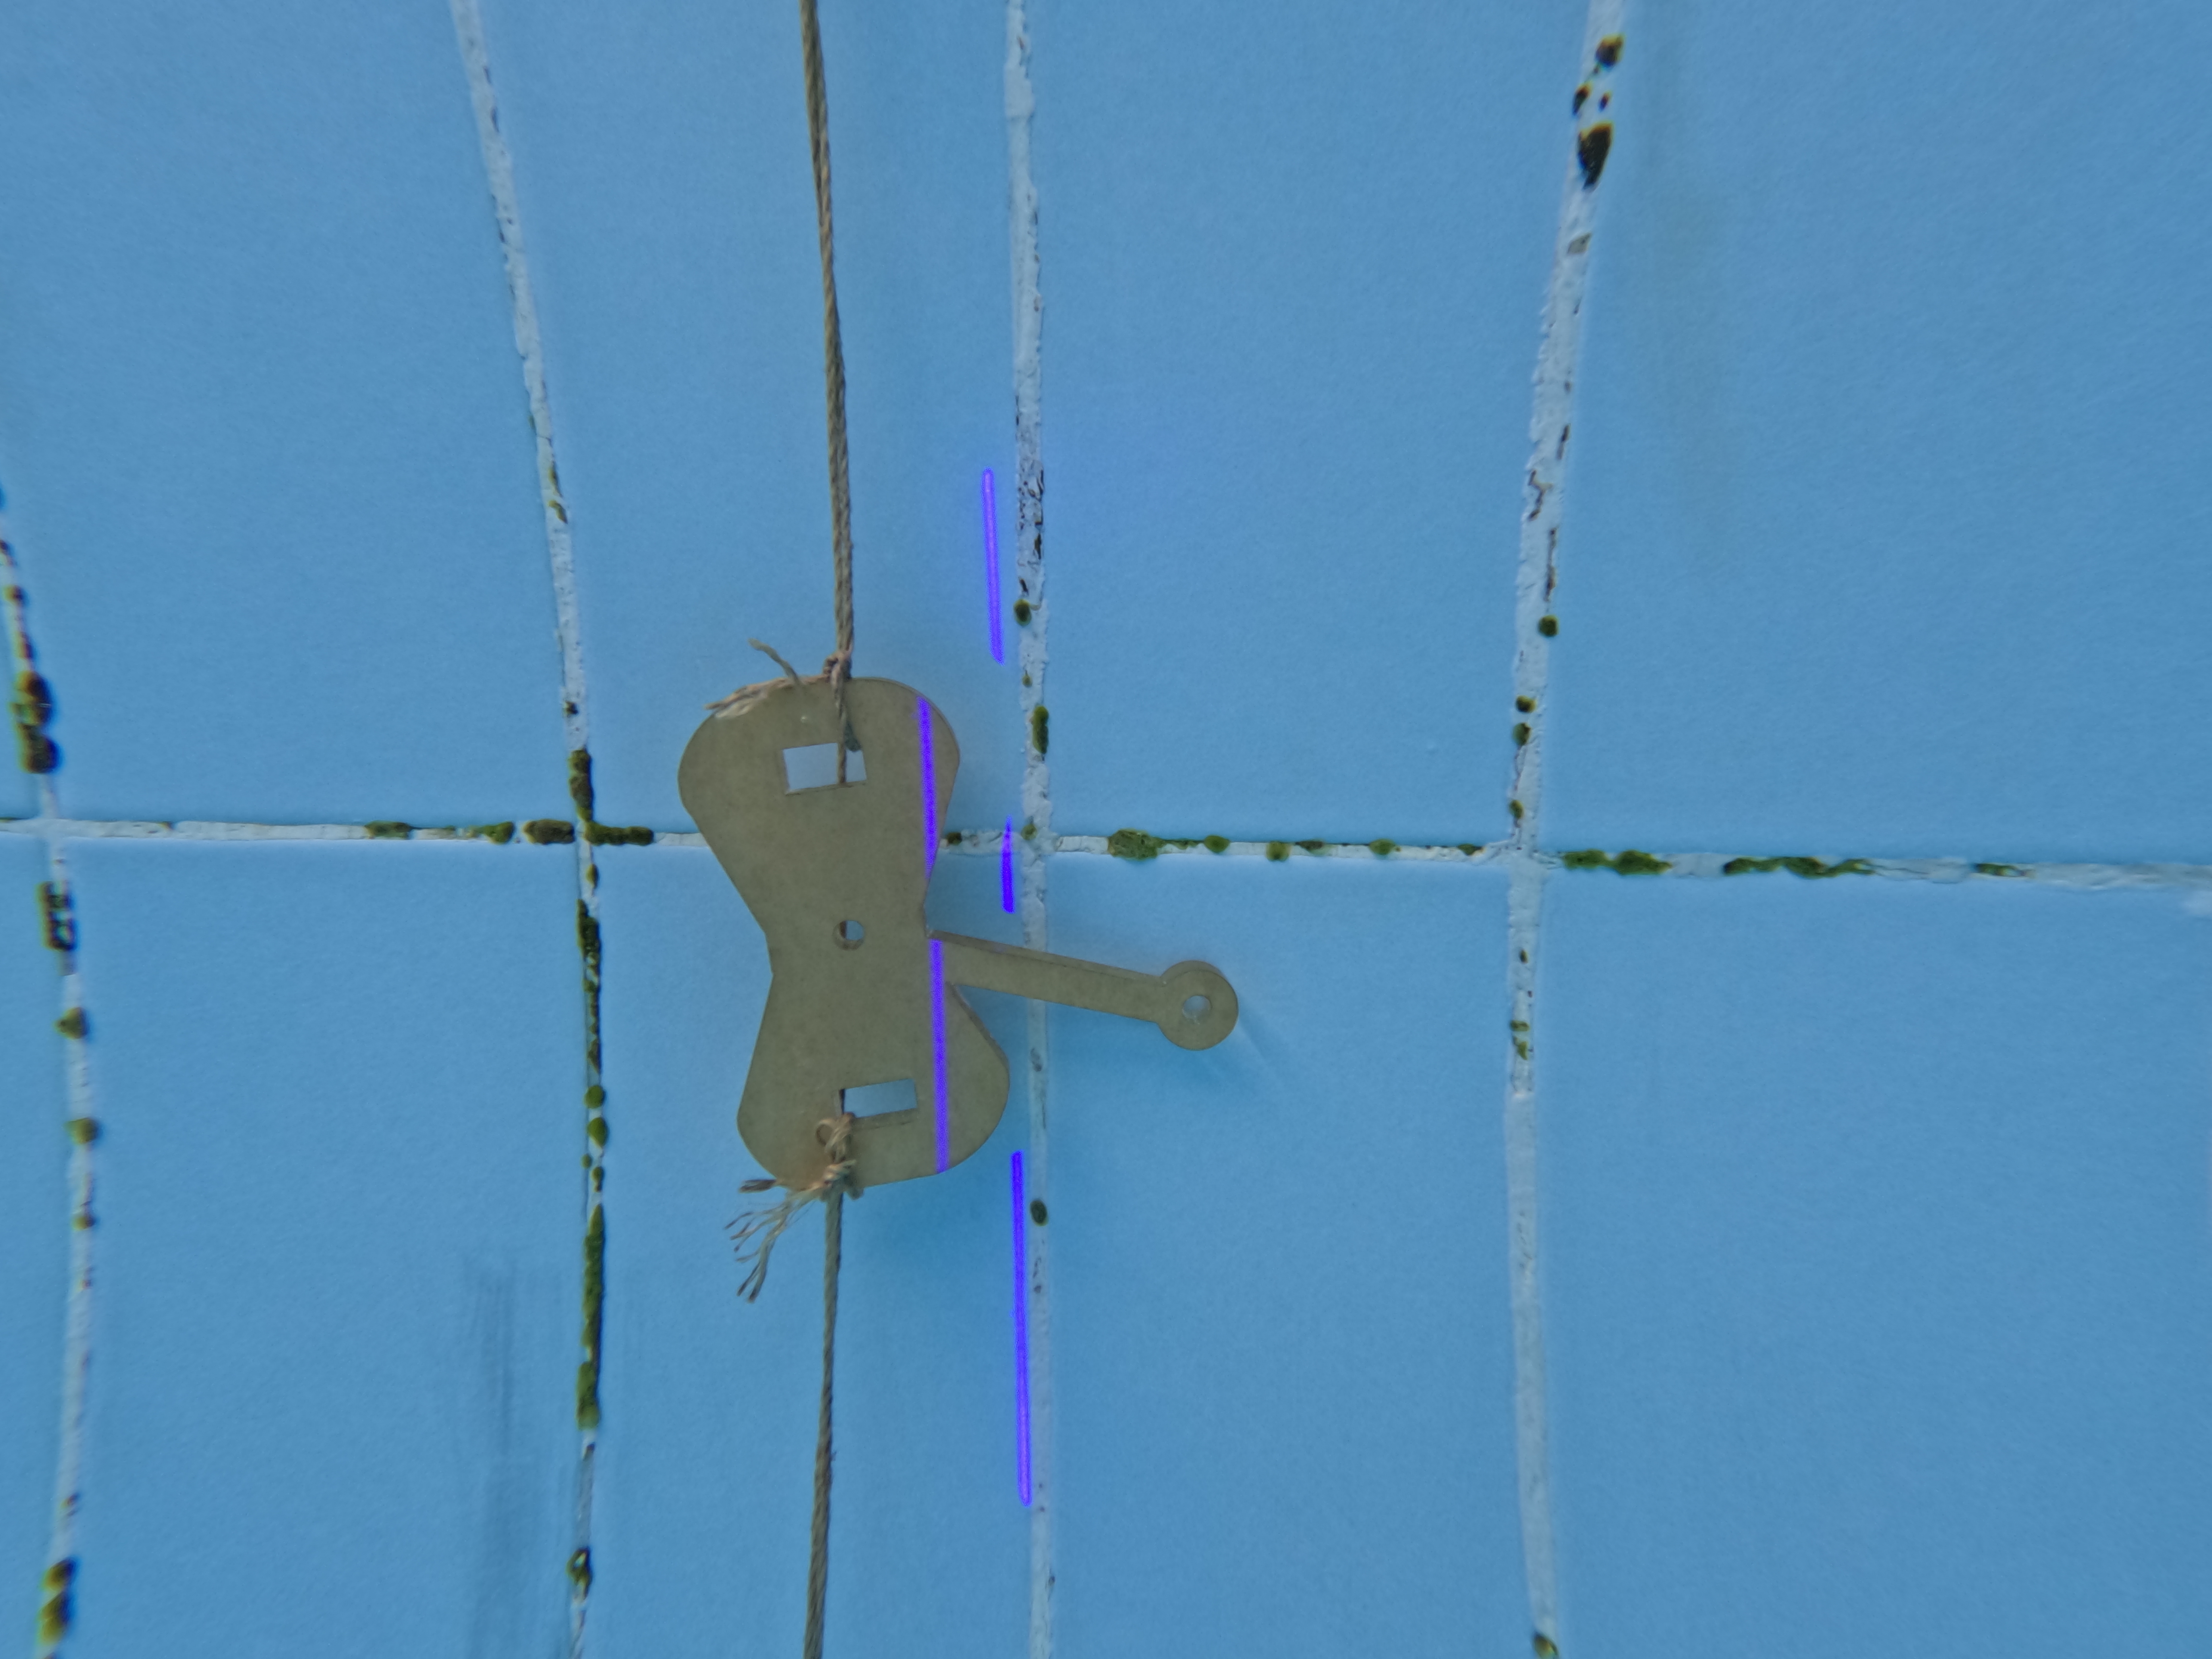

Supplement: Supplementary file 2628 [file G0050926.pdf › Level_2_2/G0050926.pdf]

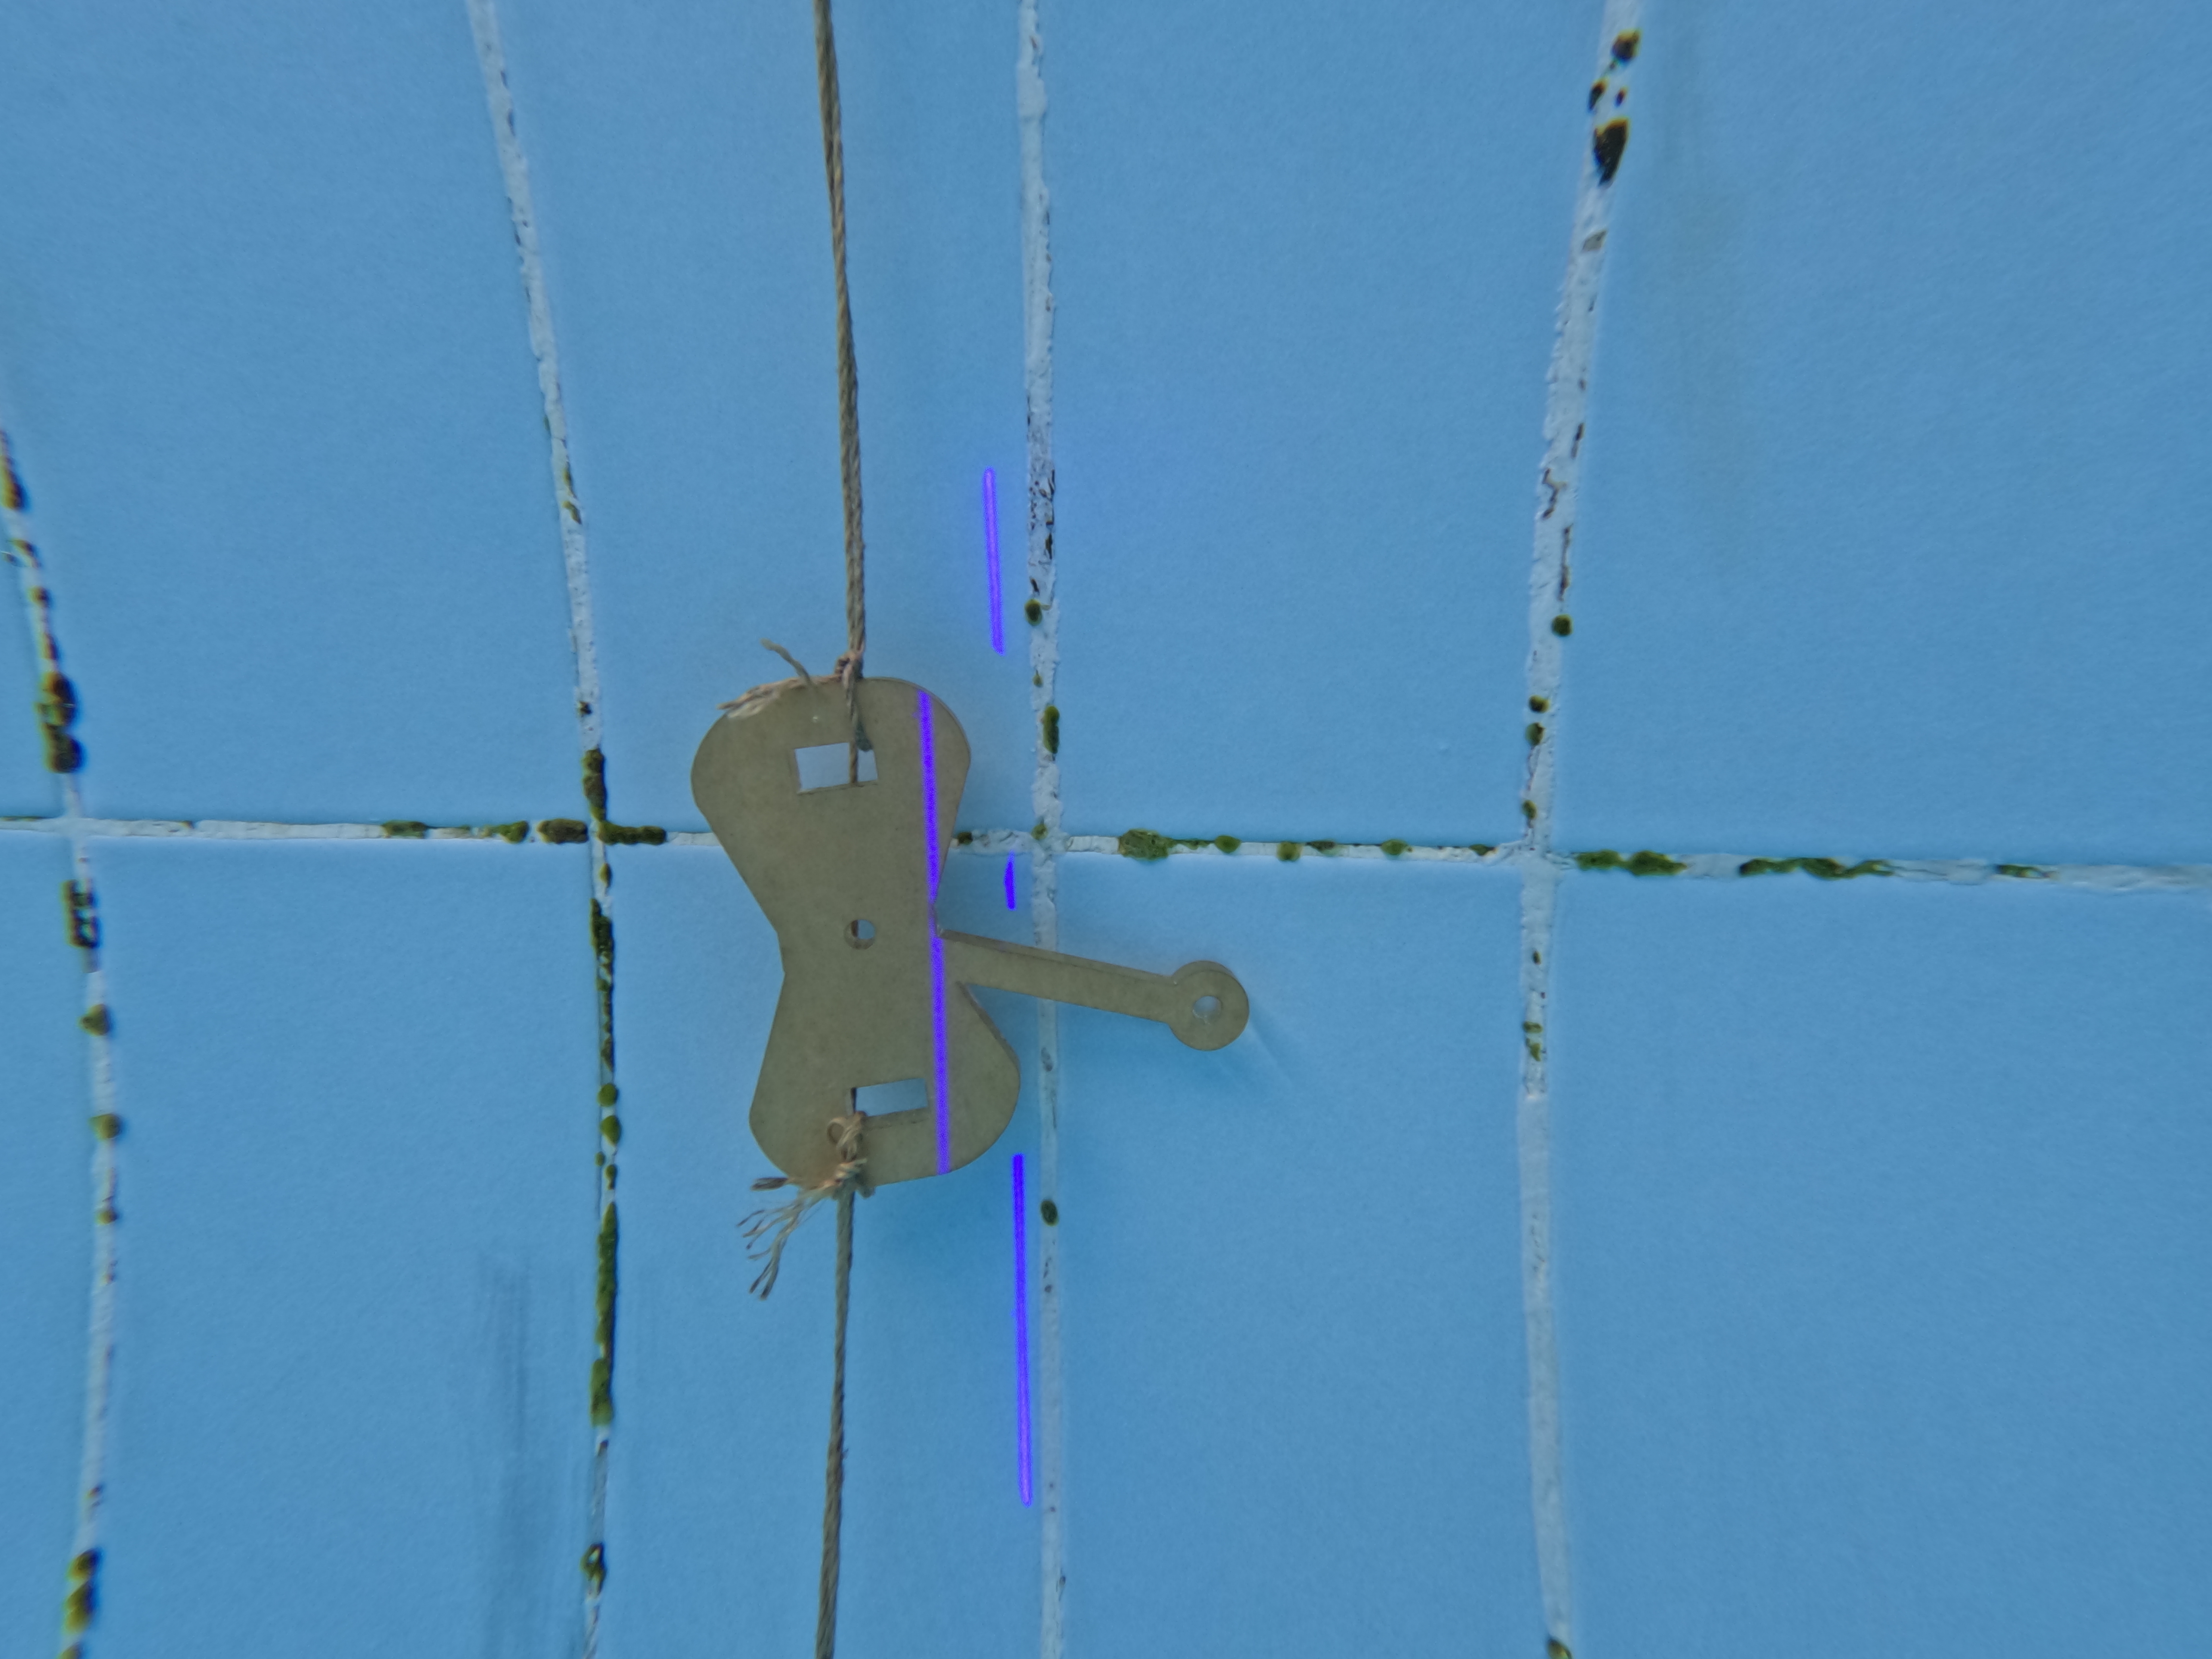

Supplement: Supplementary file 2629 [file G0050927.pdf › Level_2_2/G0050927.pdf]

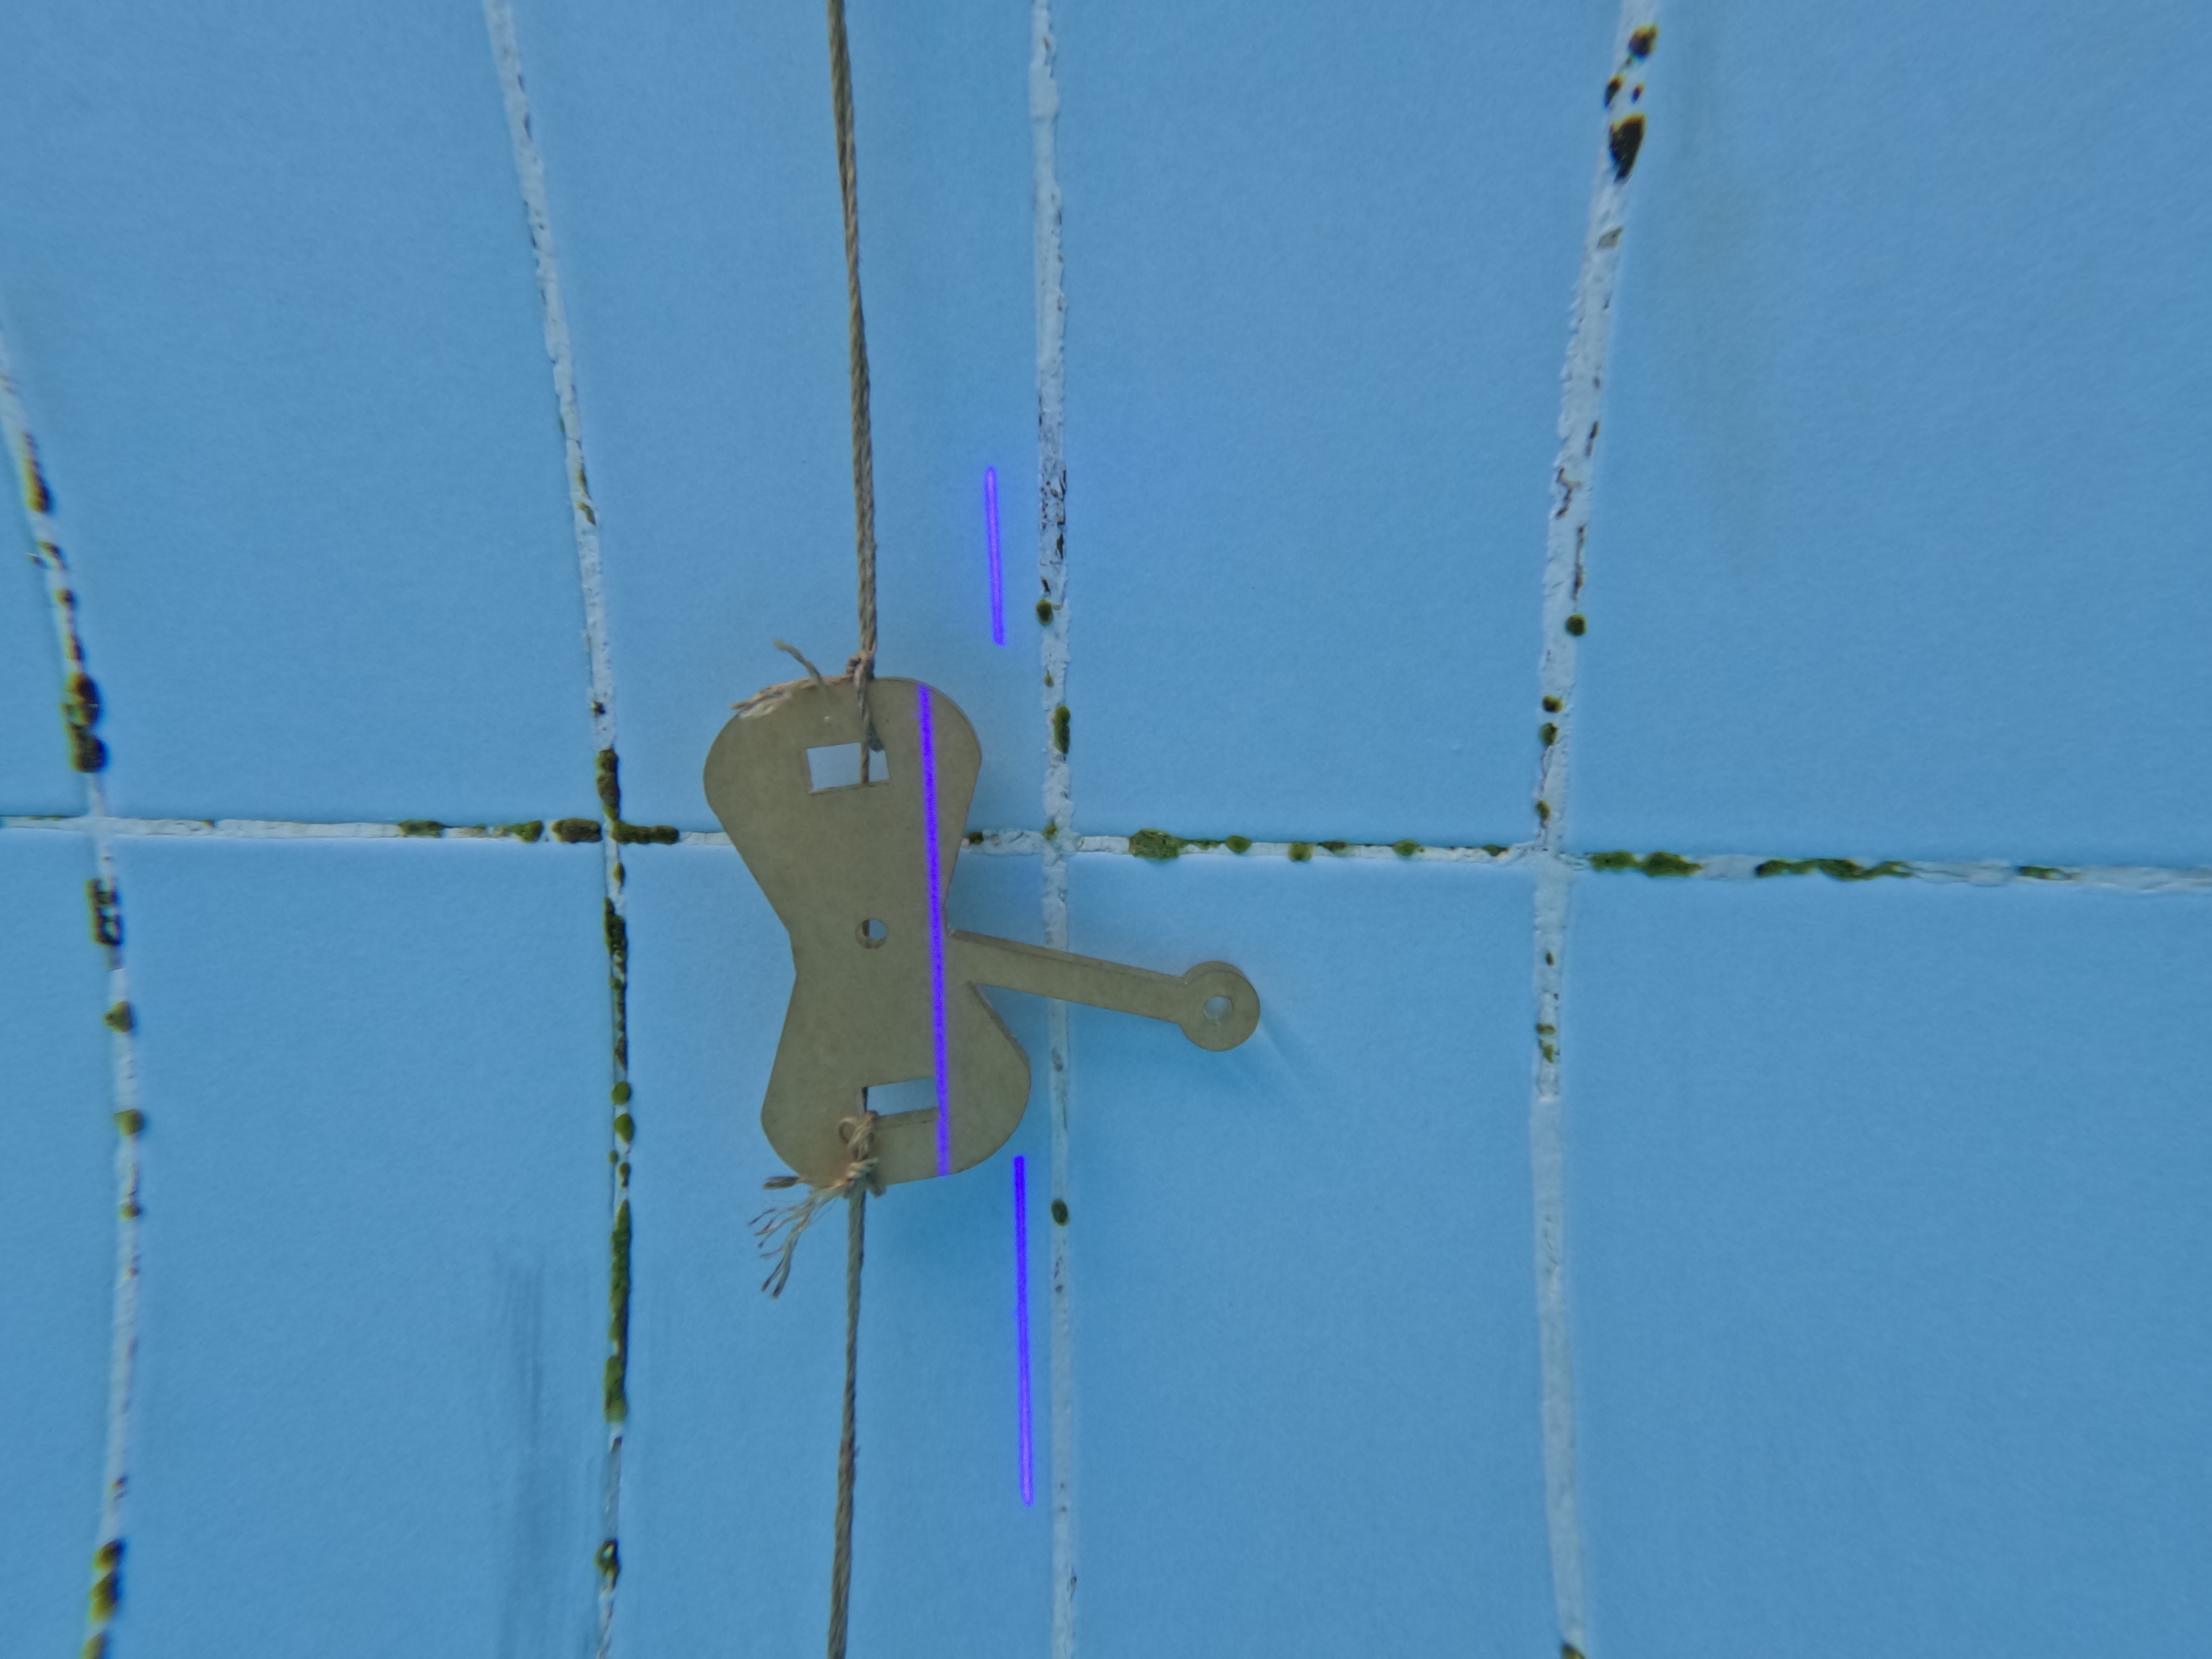

Supplement: Supplementary file 2630 [file G0050928.pdf › Level_2_2/G0050928.pdf]

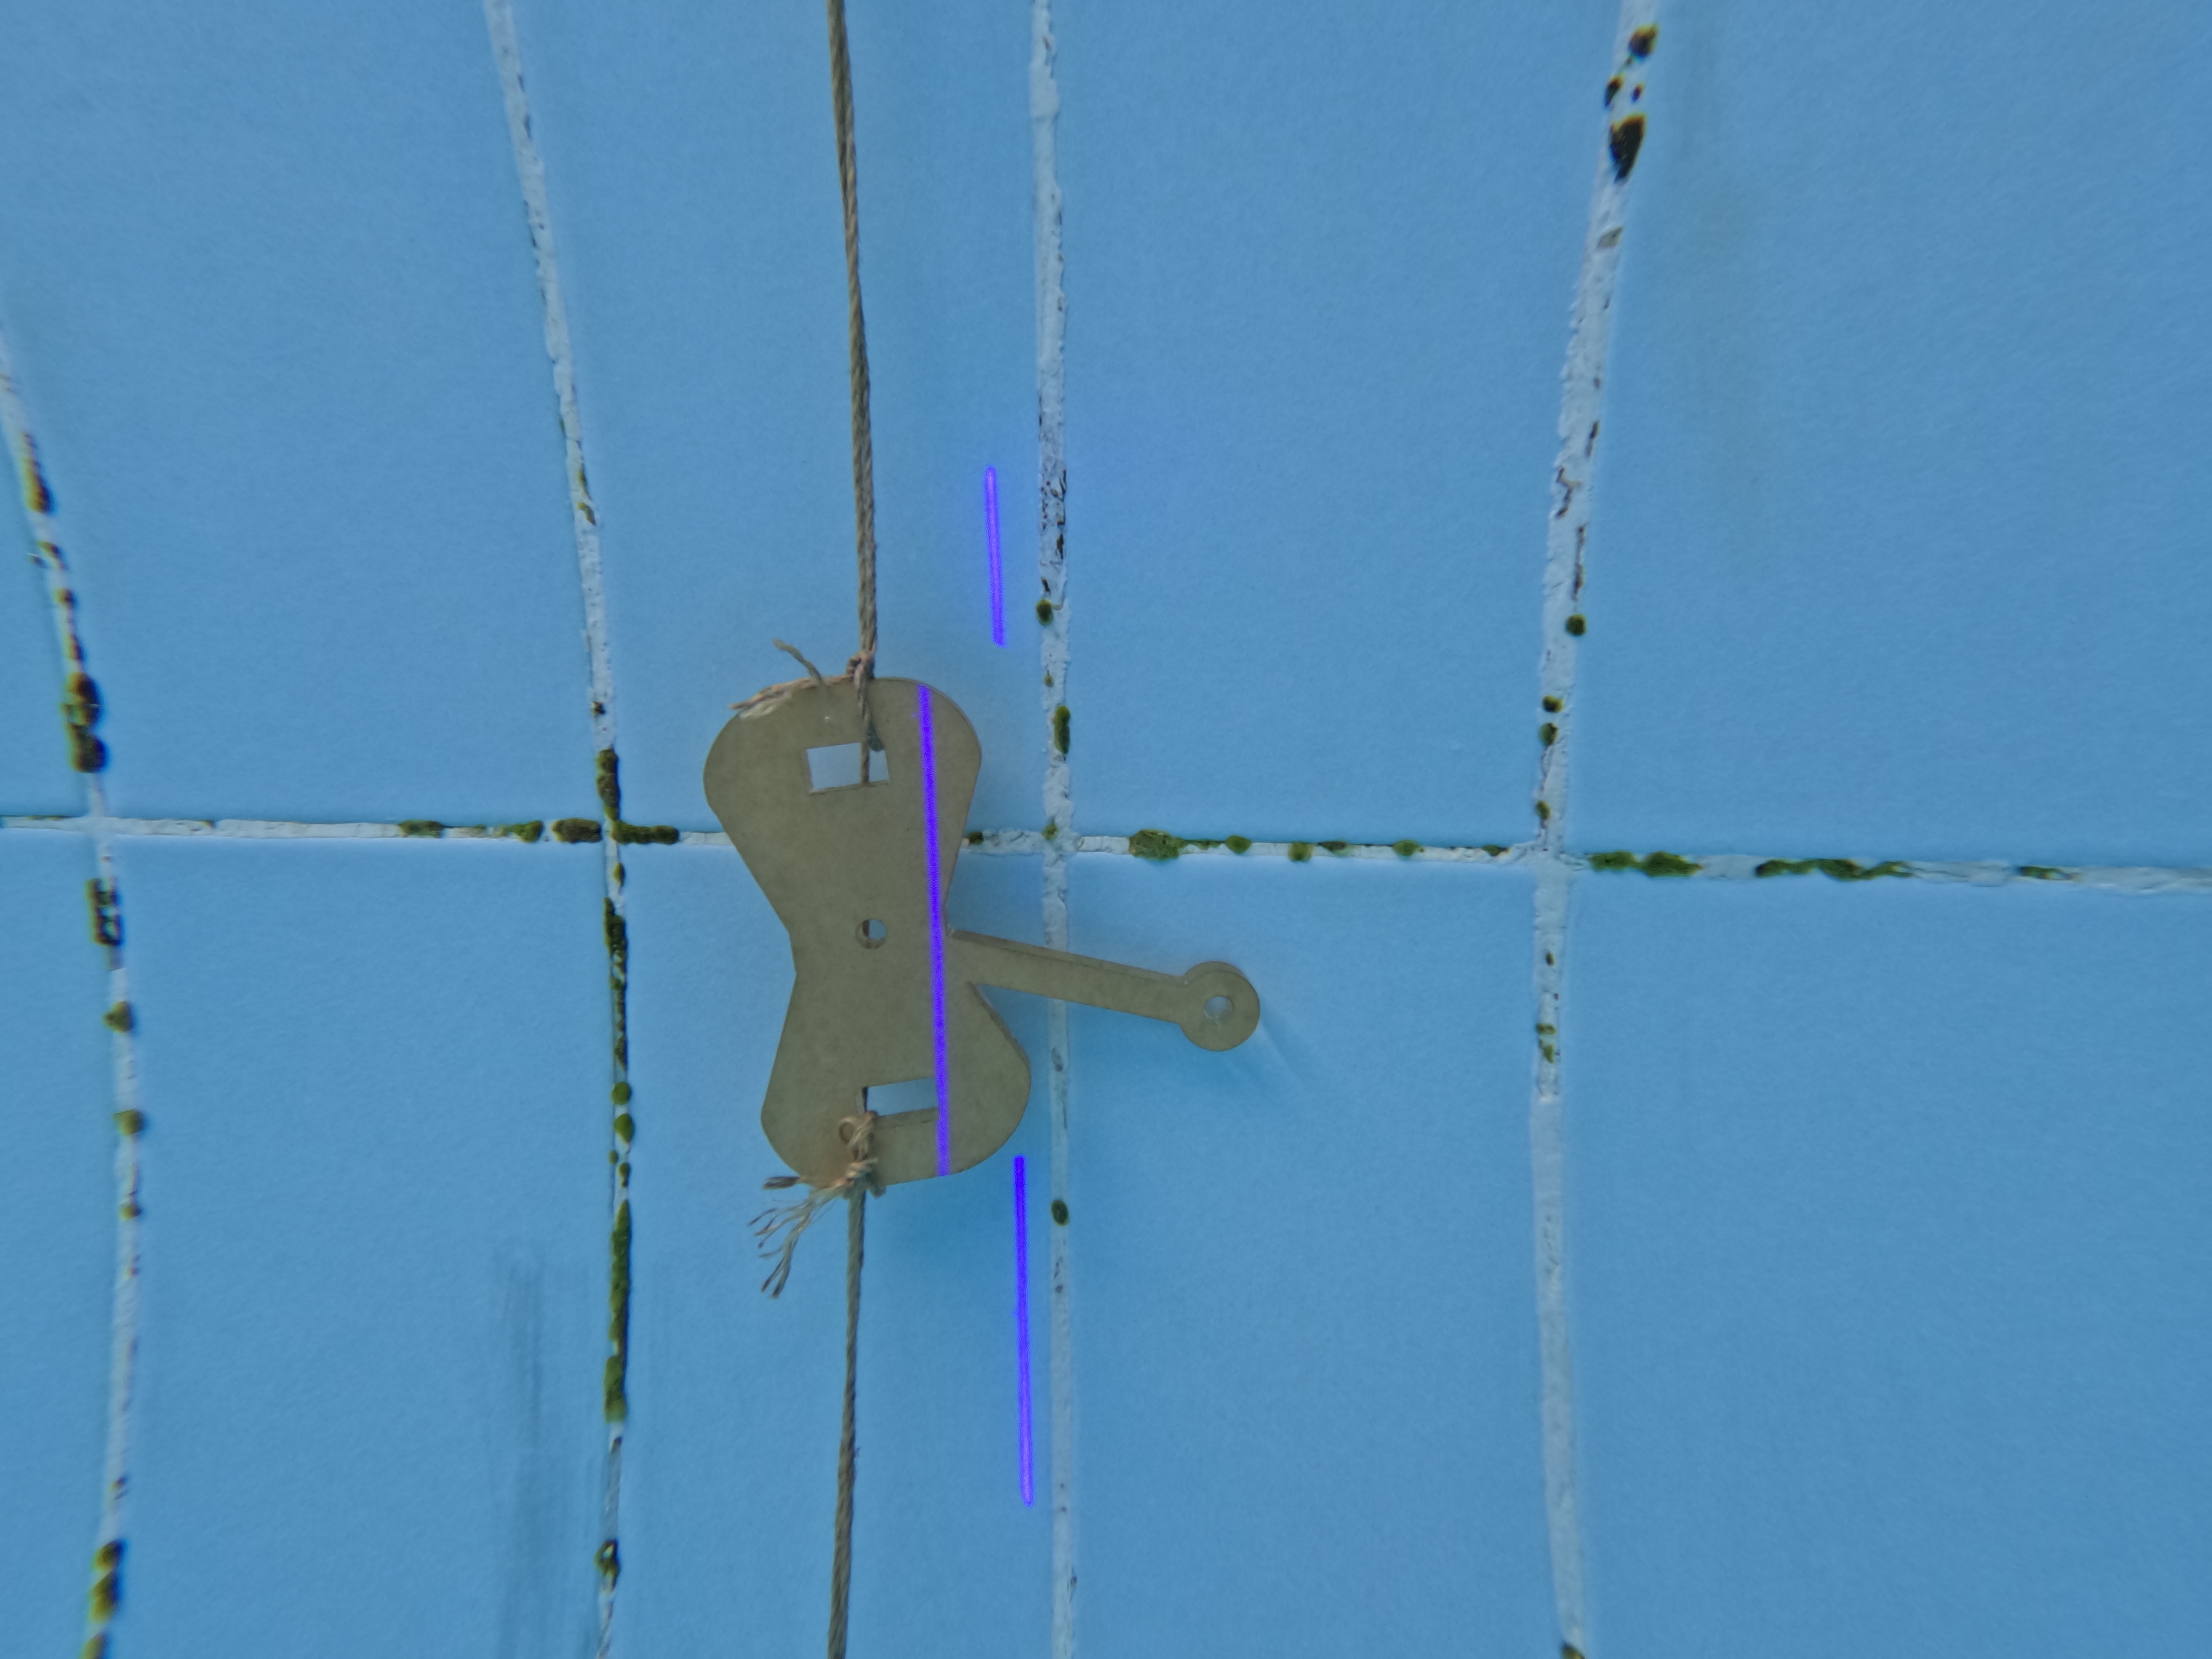

Supplement: Supplementary file 2631 [file G0050929.pdf › Level_2_2/G0050929.pdf]

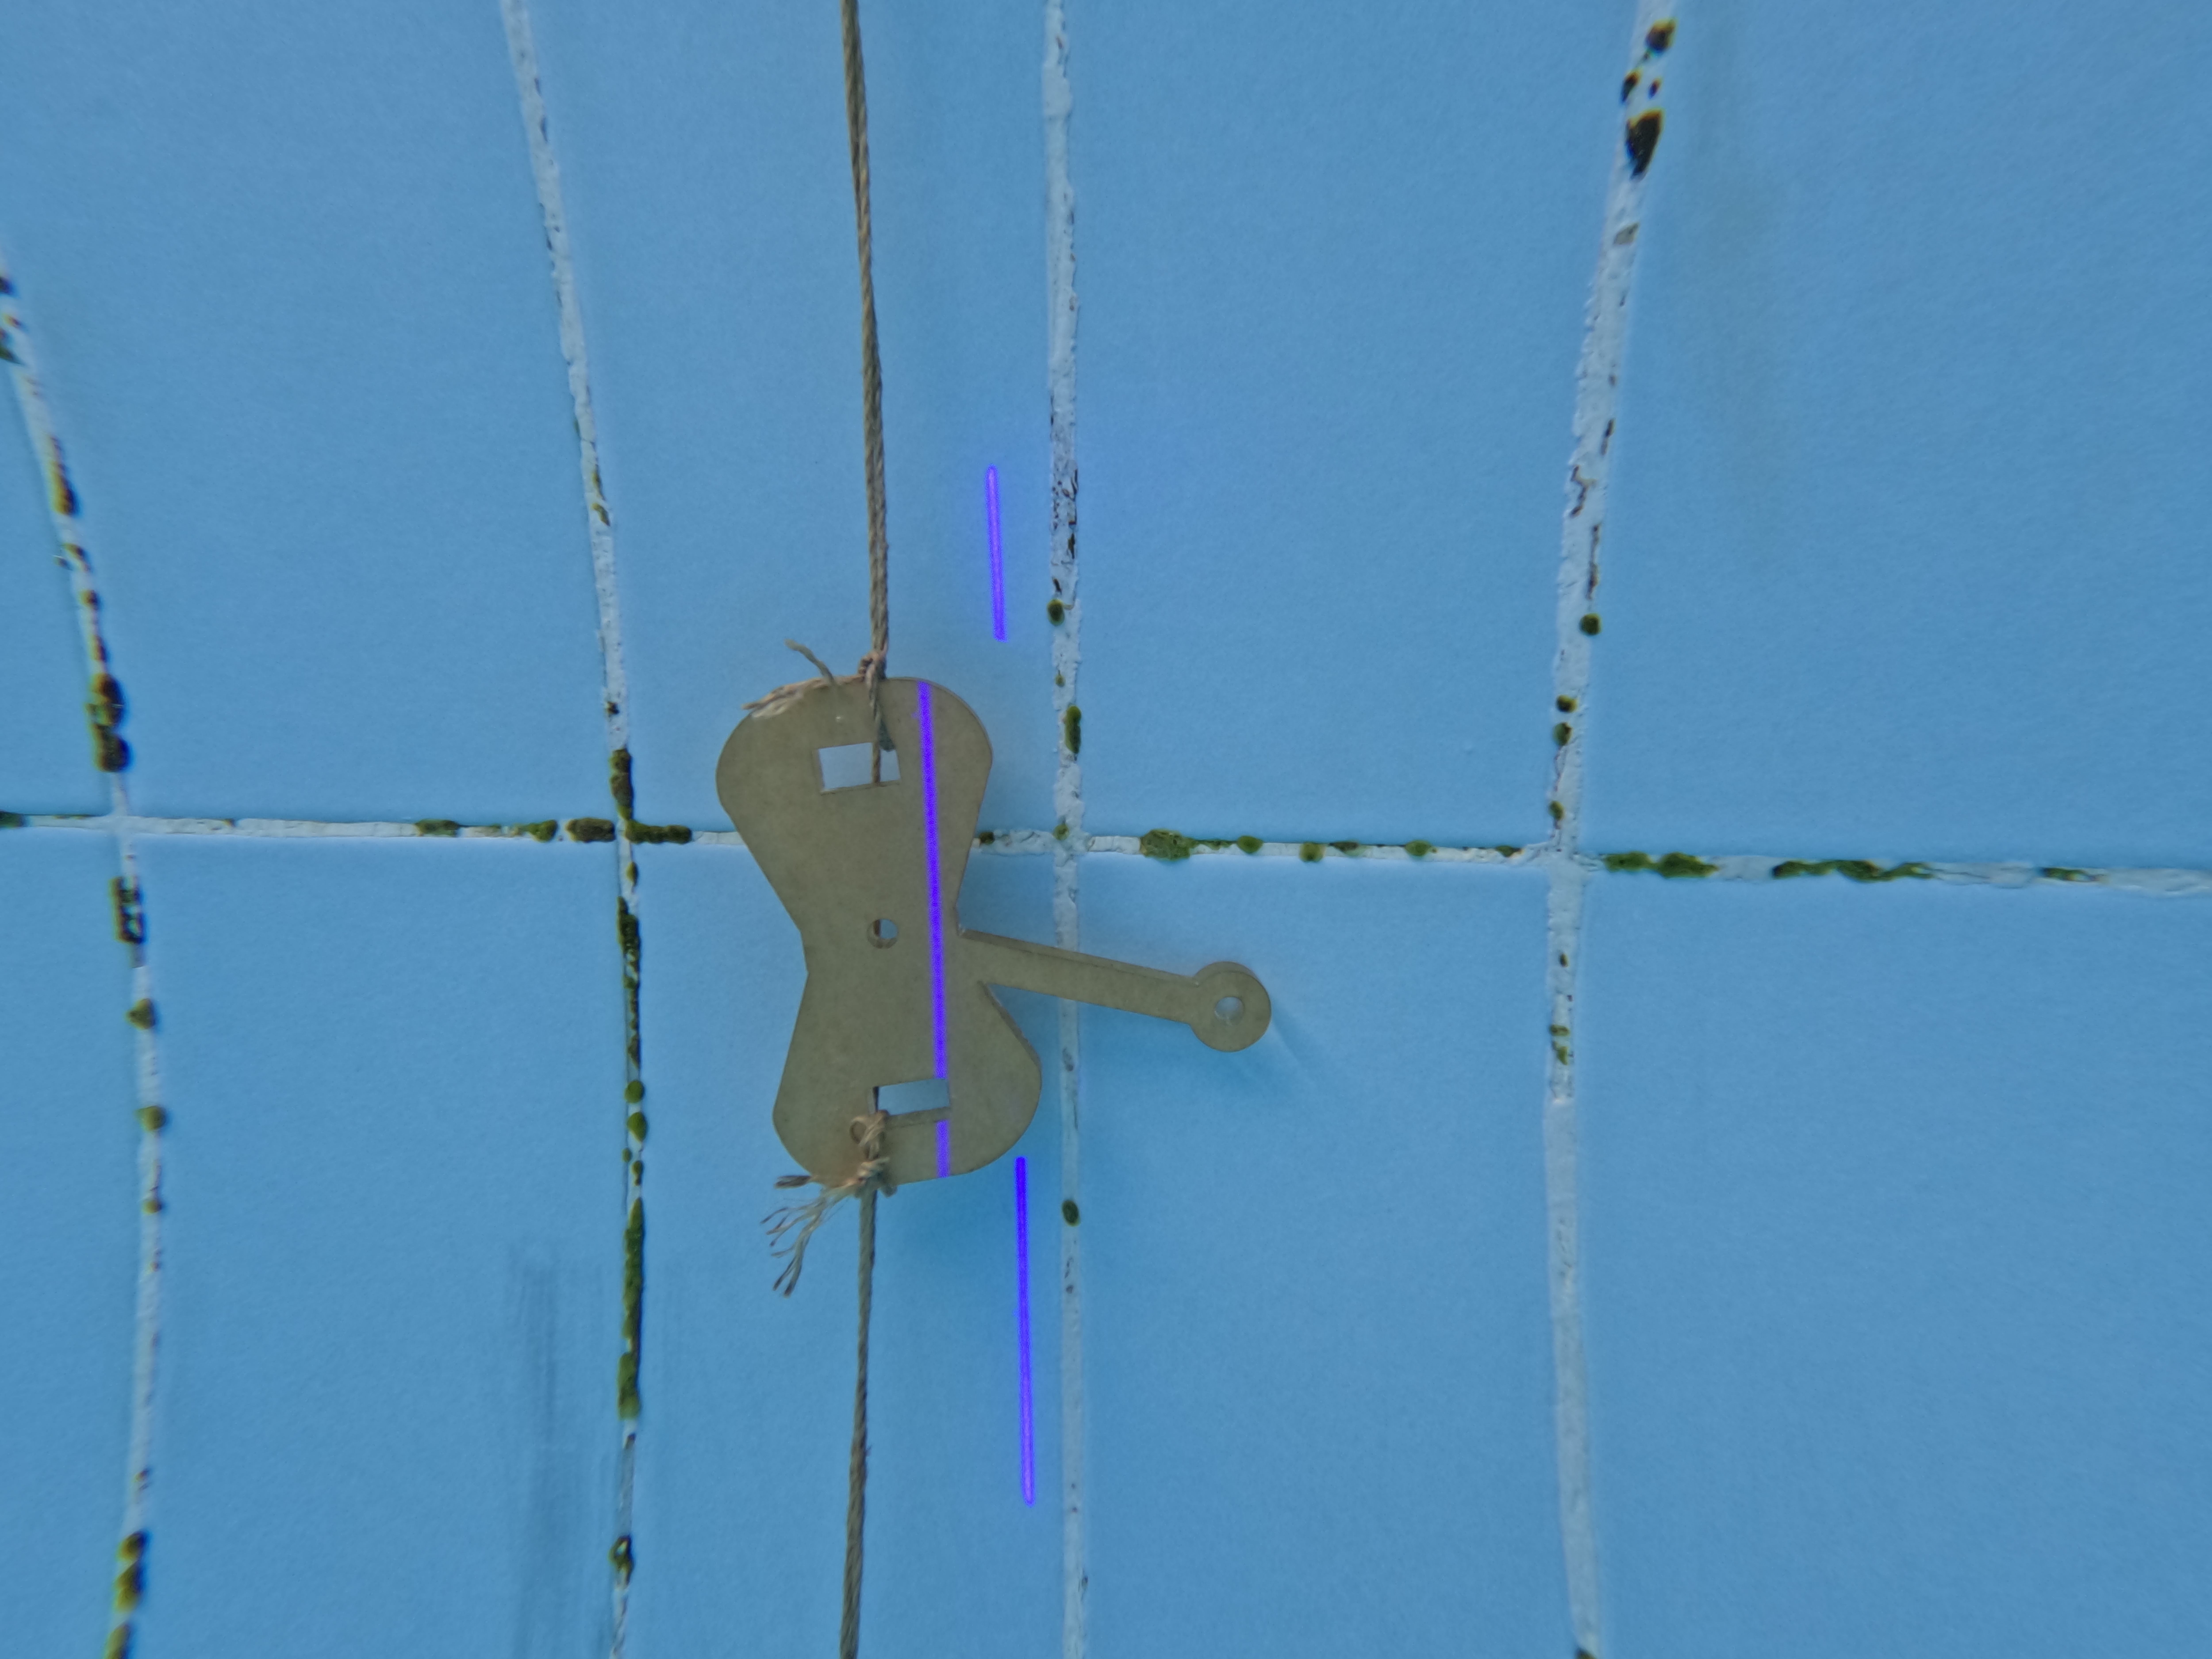

Supplement: Supplementary file 2632 [file G0050930.pdf › Level_2_2/G0050930.pdf]

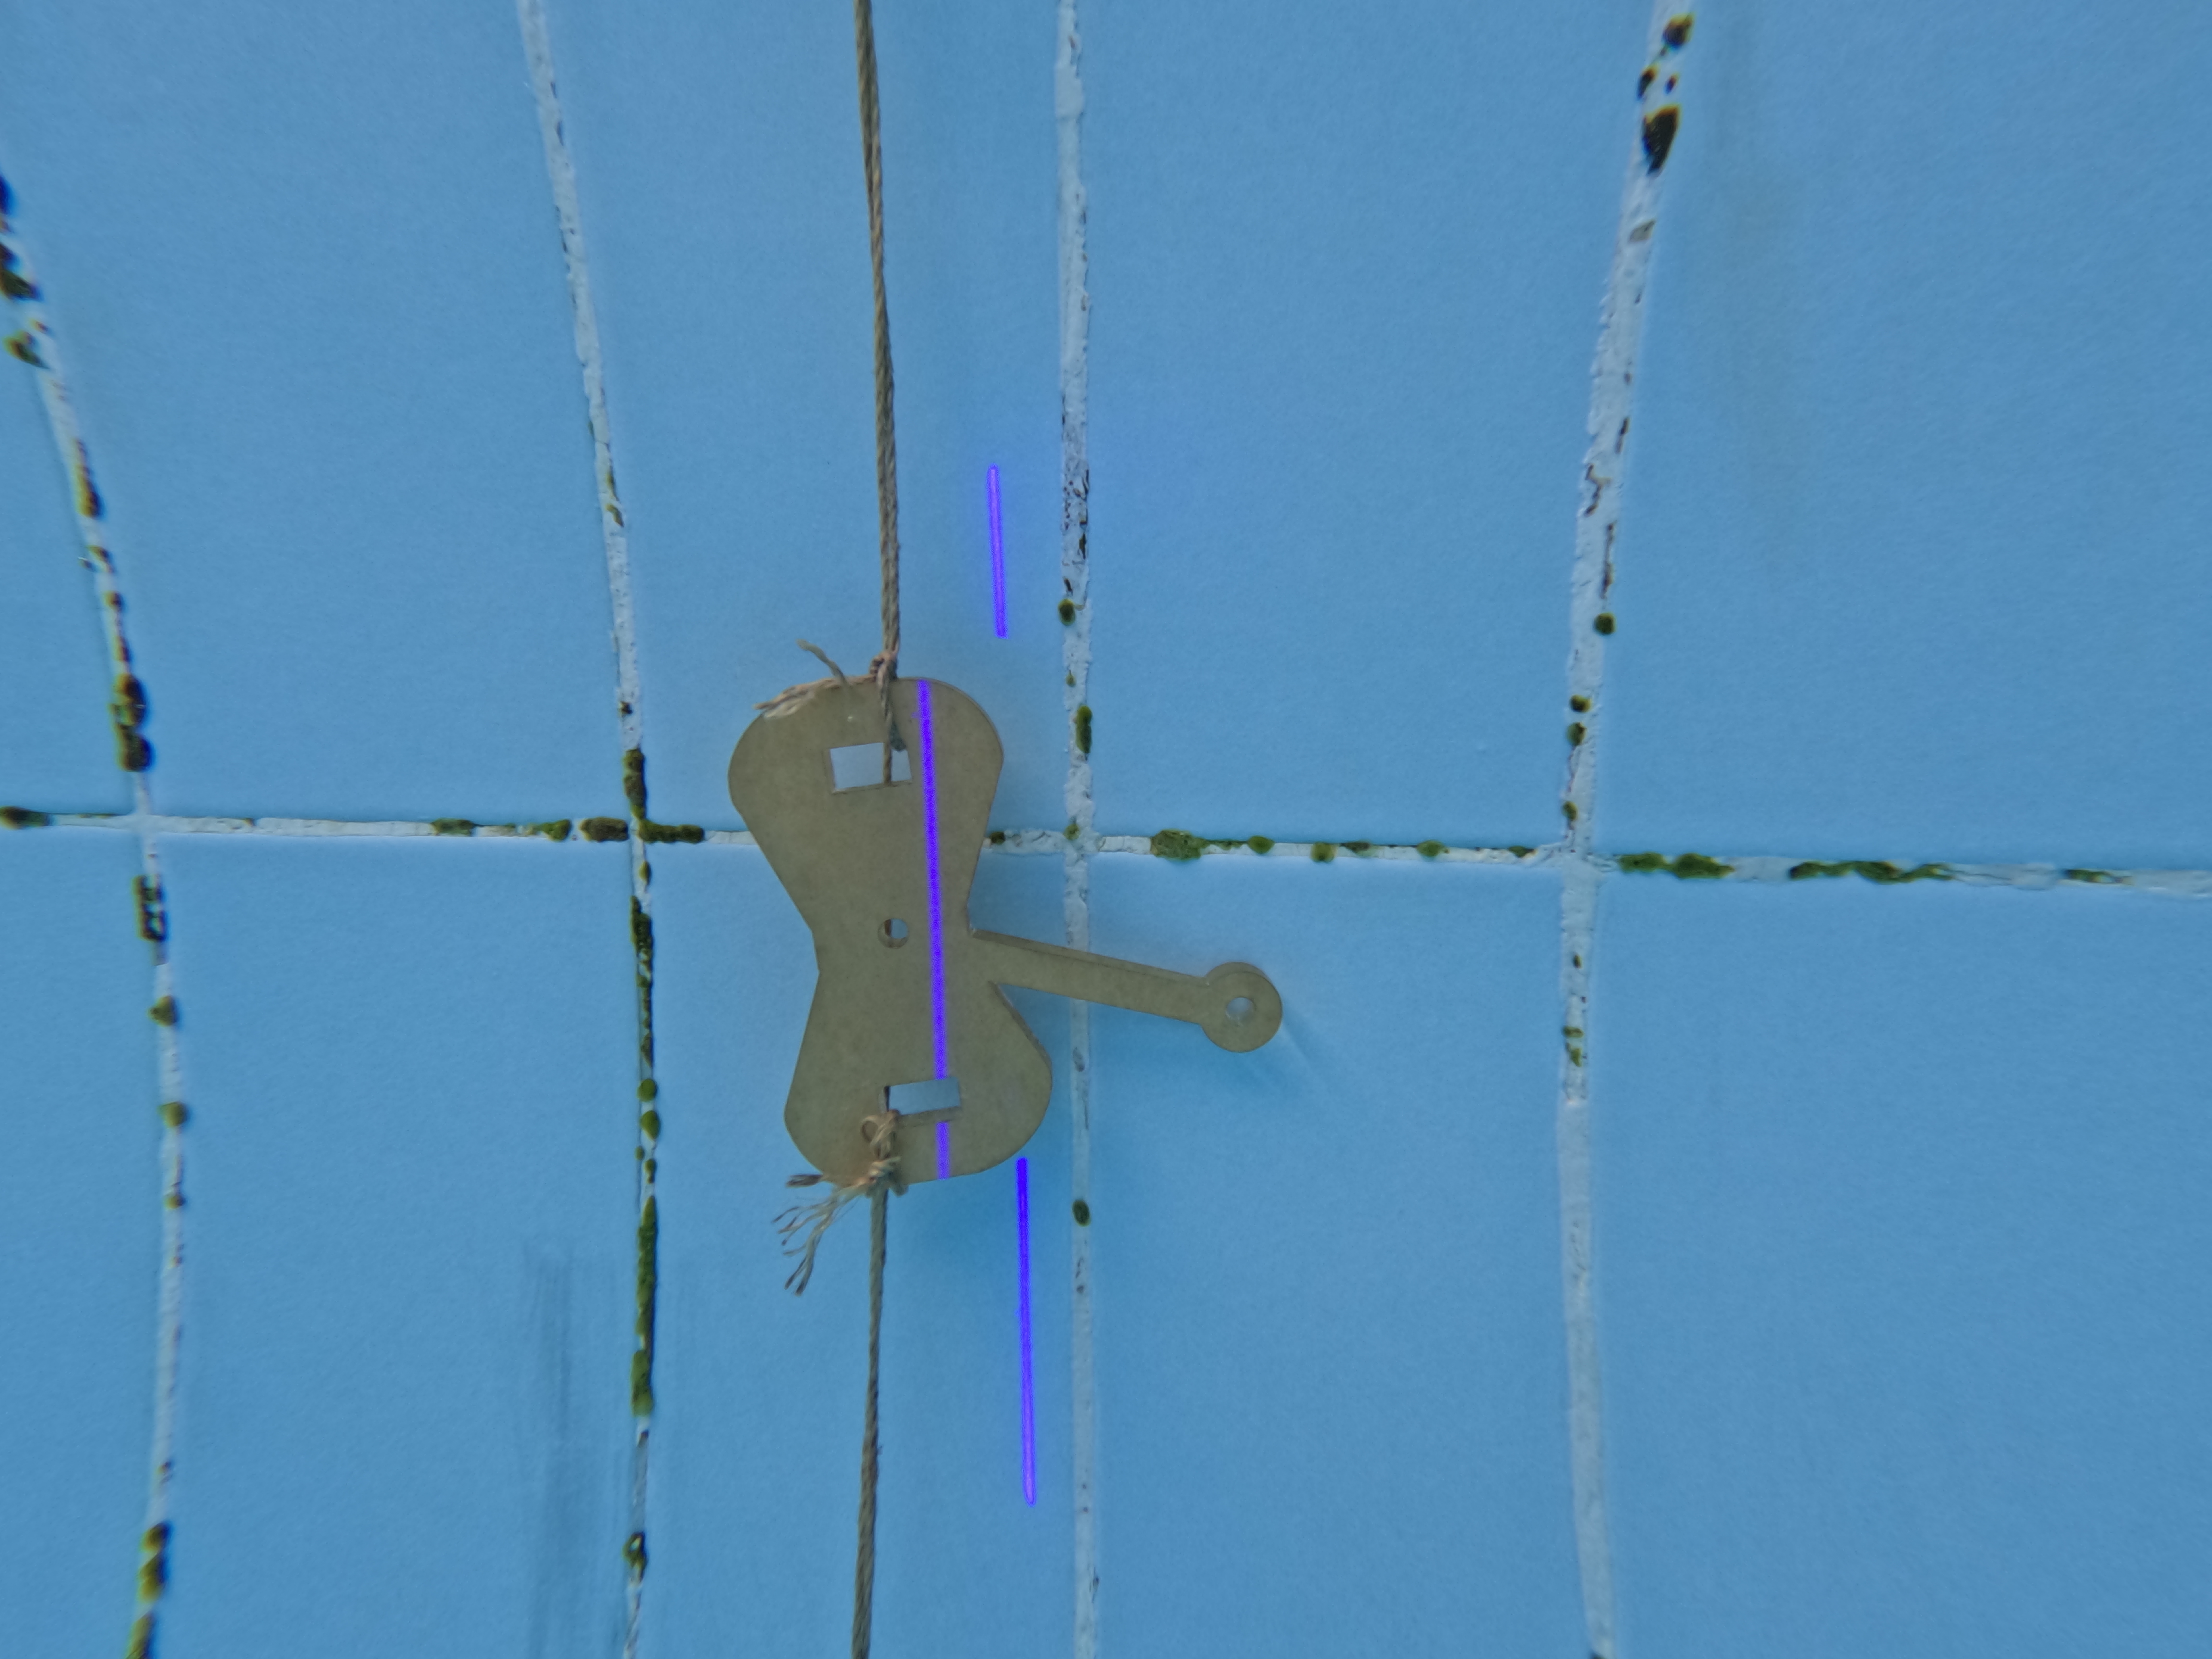

Supplement: Supplementary file 2633 [file G0050931.pdf › Level_2_2/G0050931.pdf]

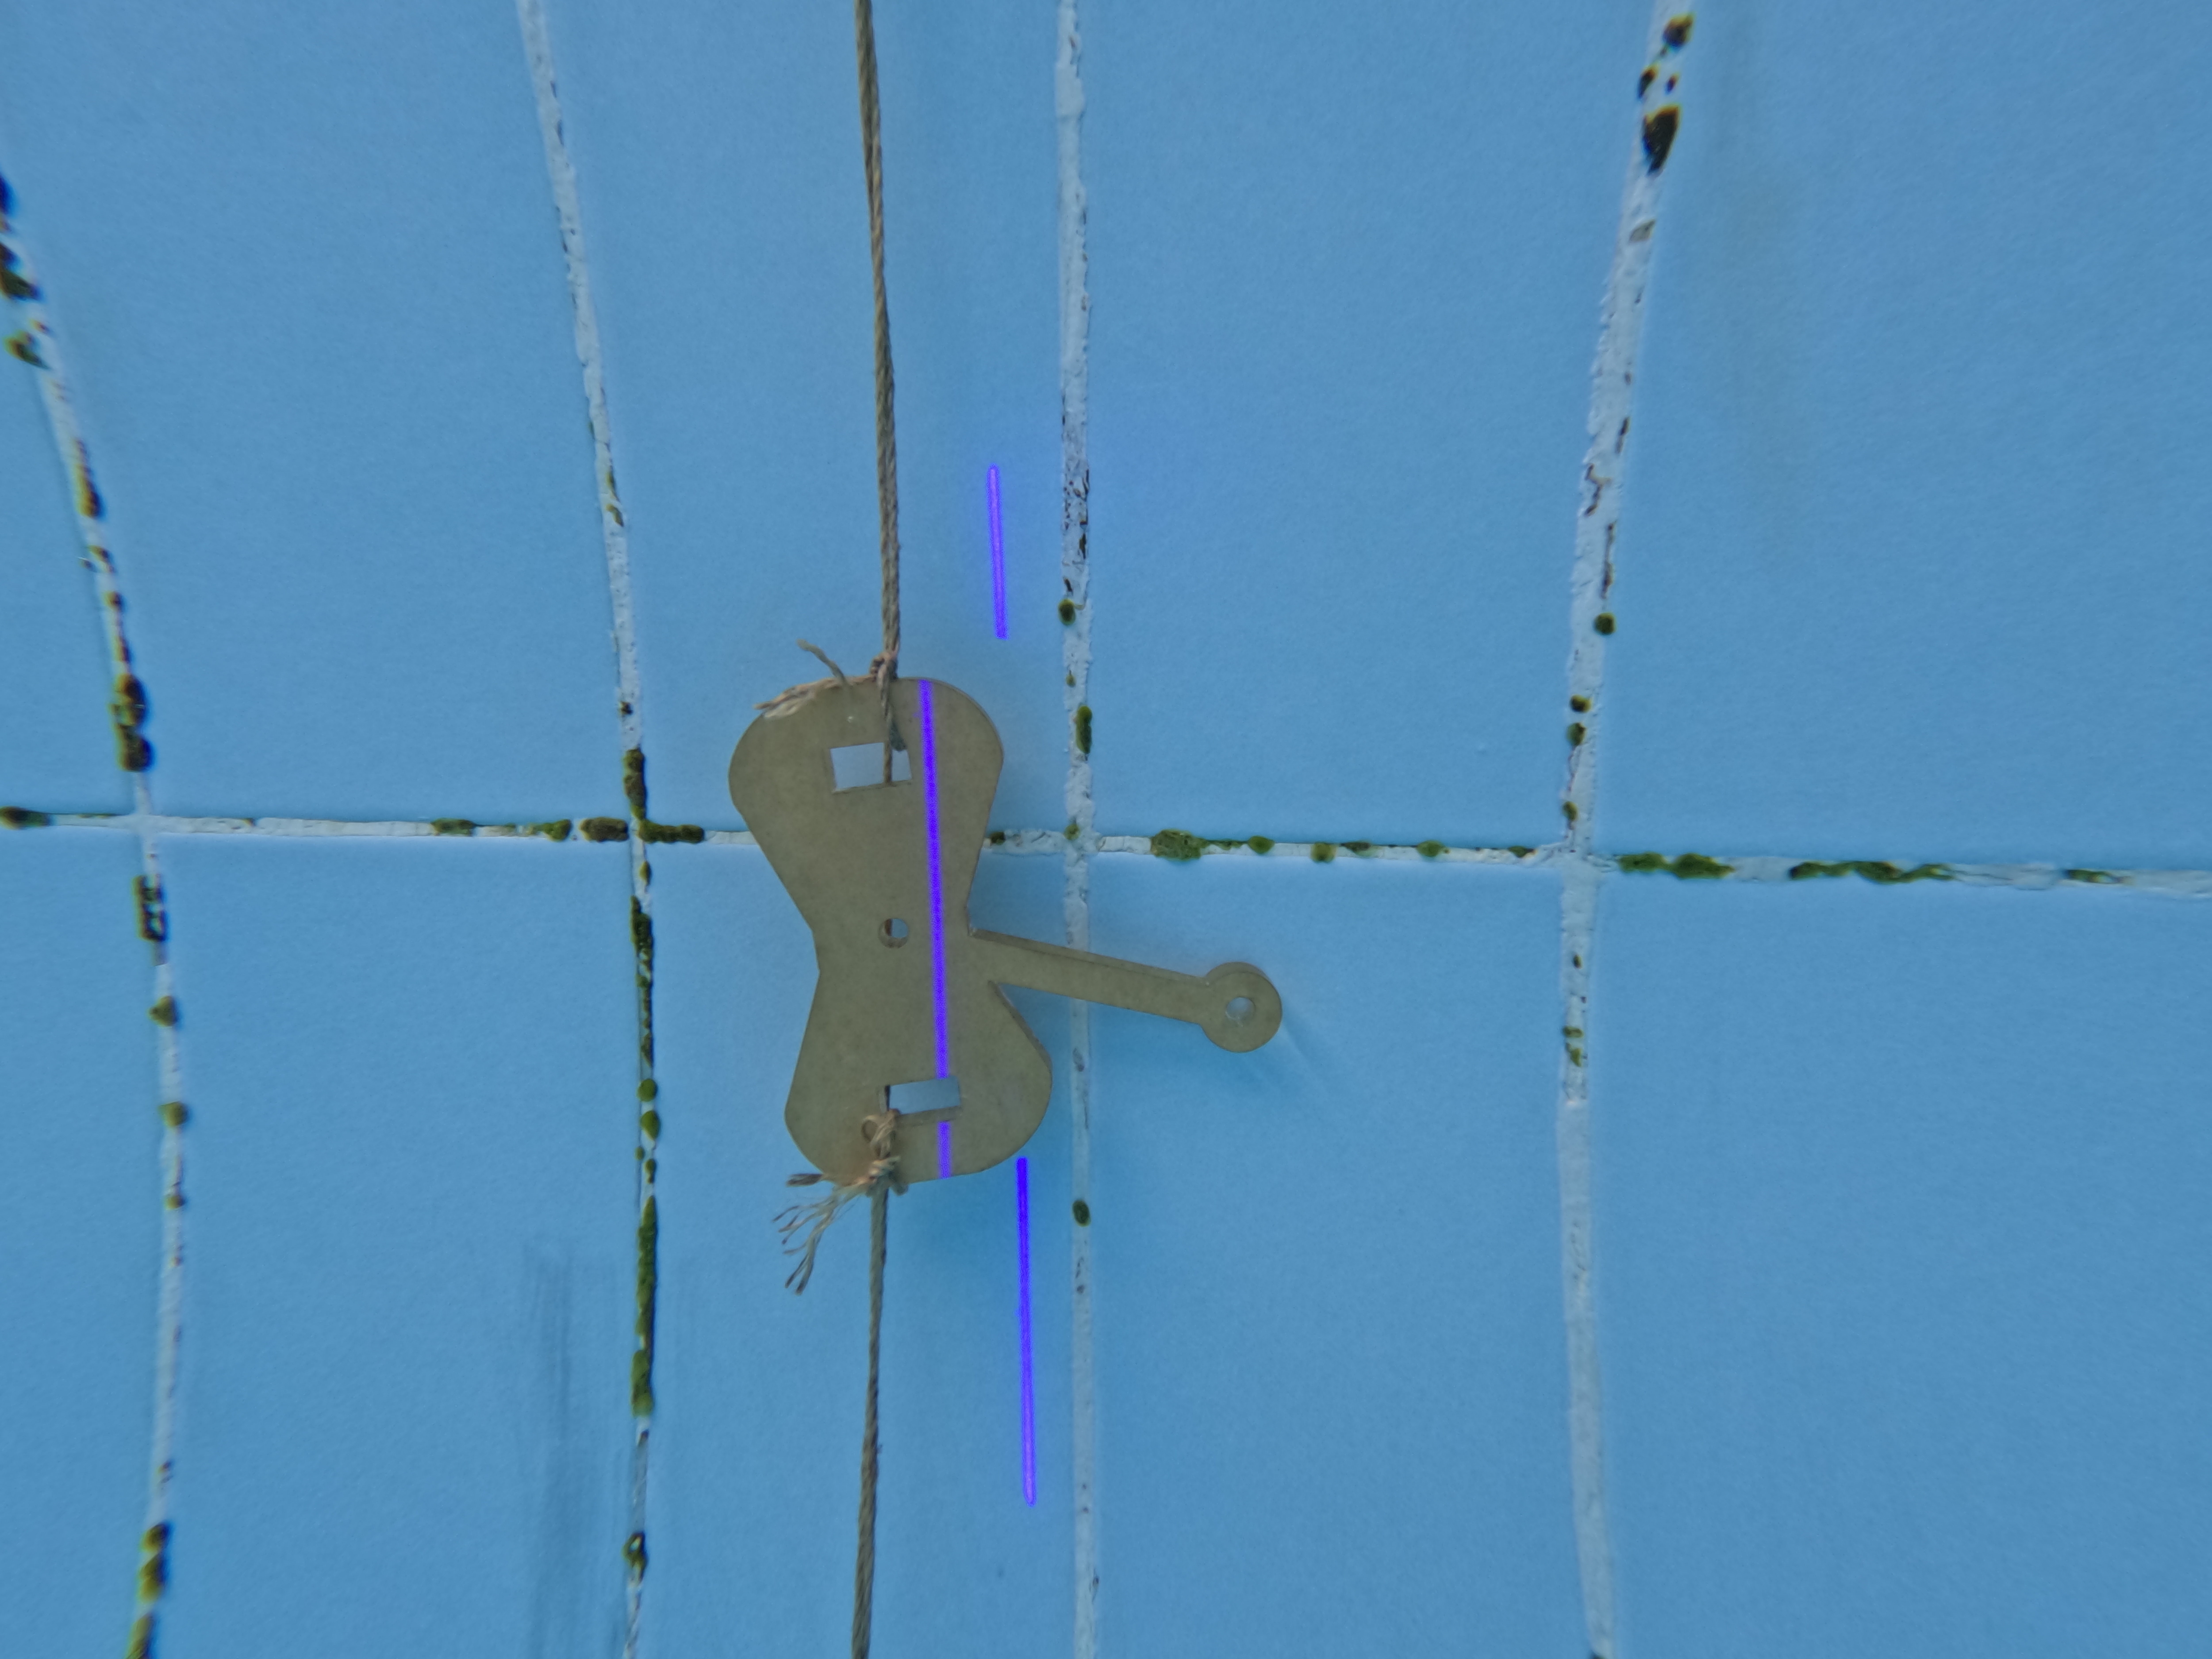

Supplement: Supplementary file 2634 [file G0050932.pdf › Level_2_2/G0050932.pdf]

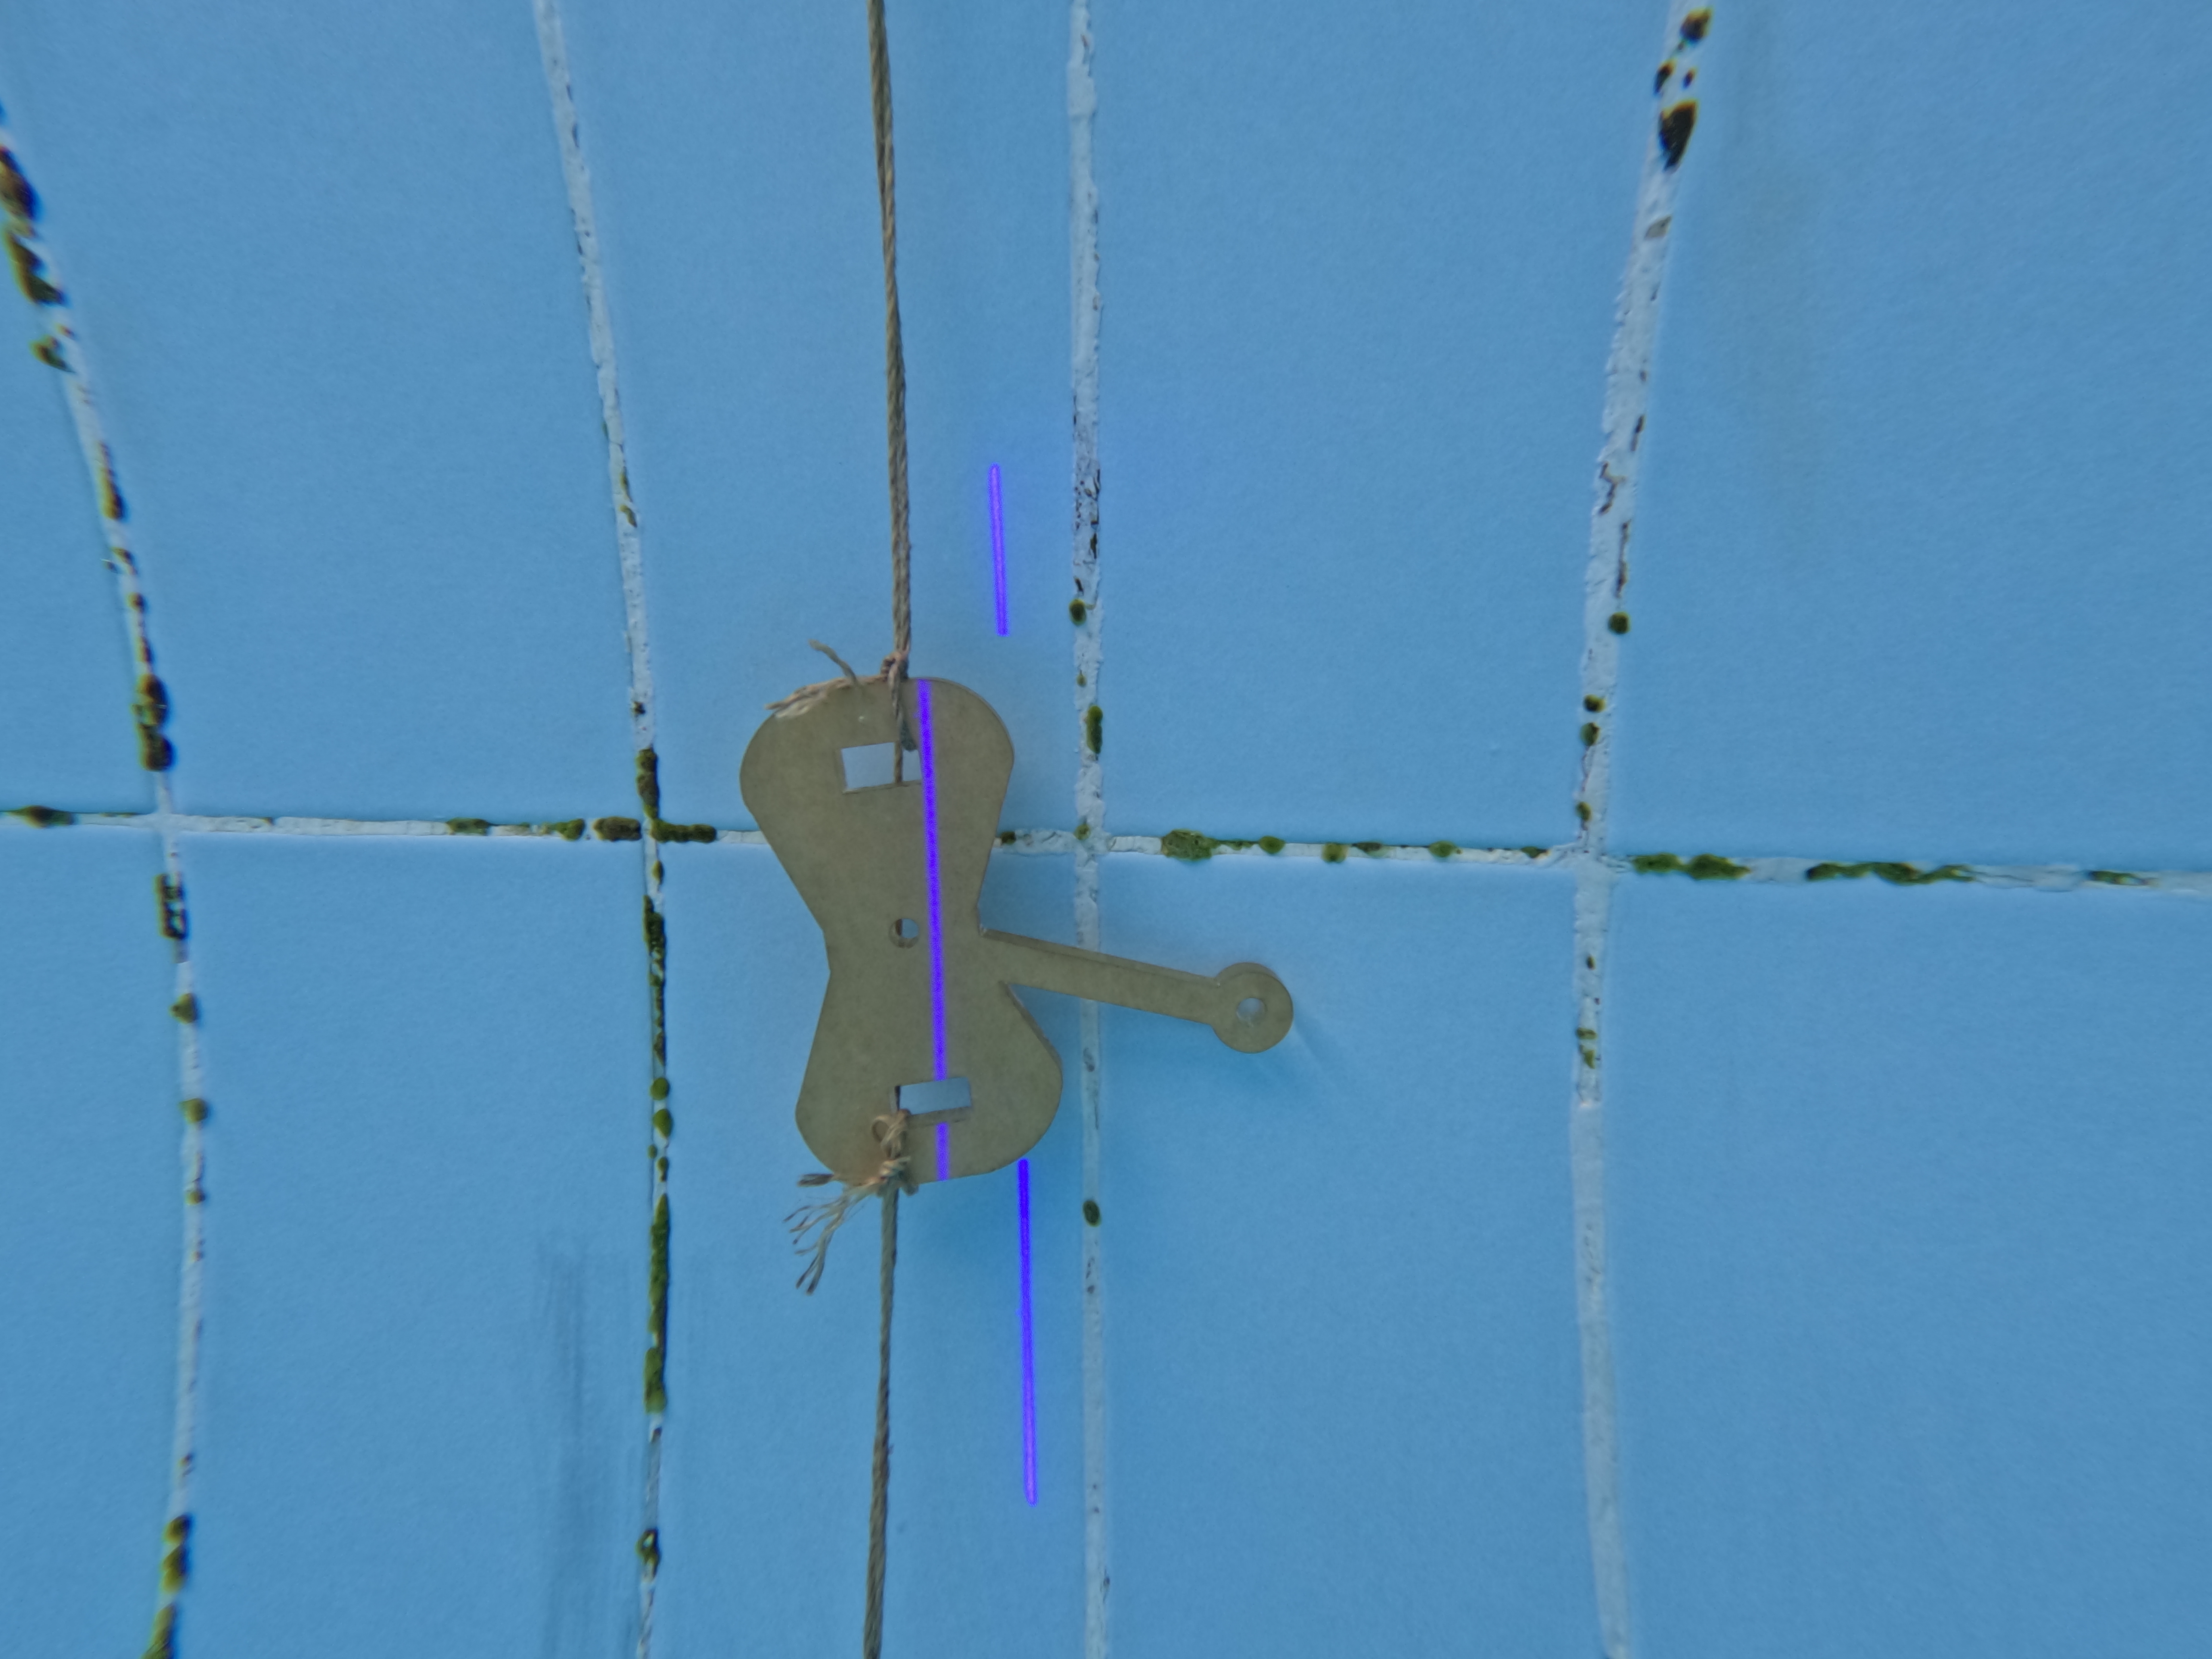

Supplement: Supplementary file 2635 [file G0050933.pdf › Level_2_2/G0050933.pdf]

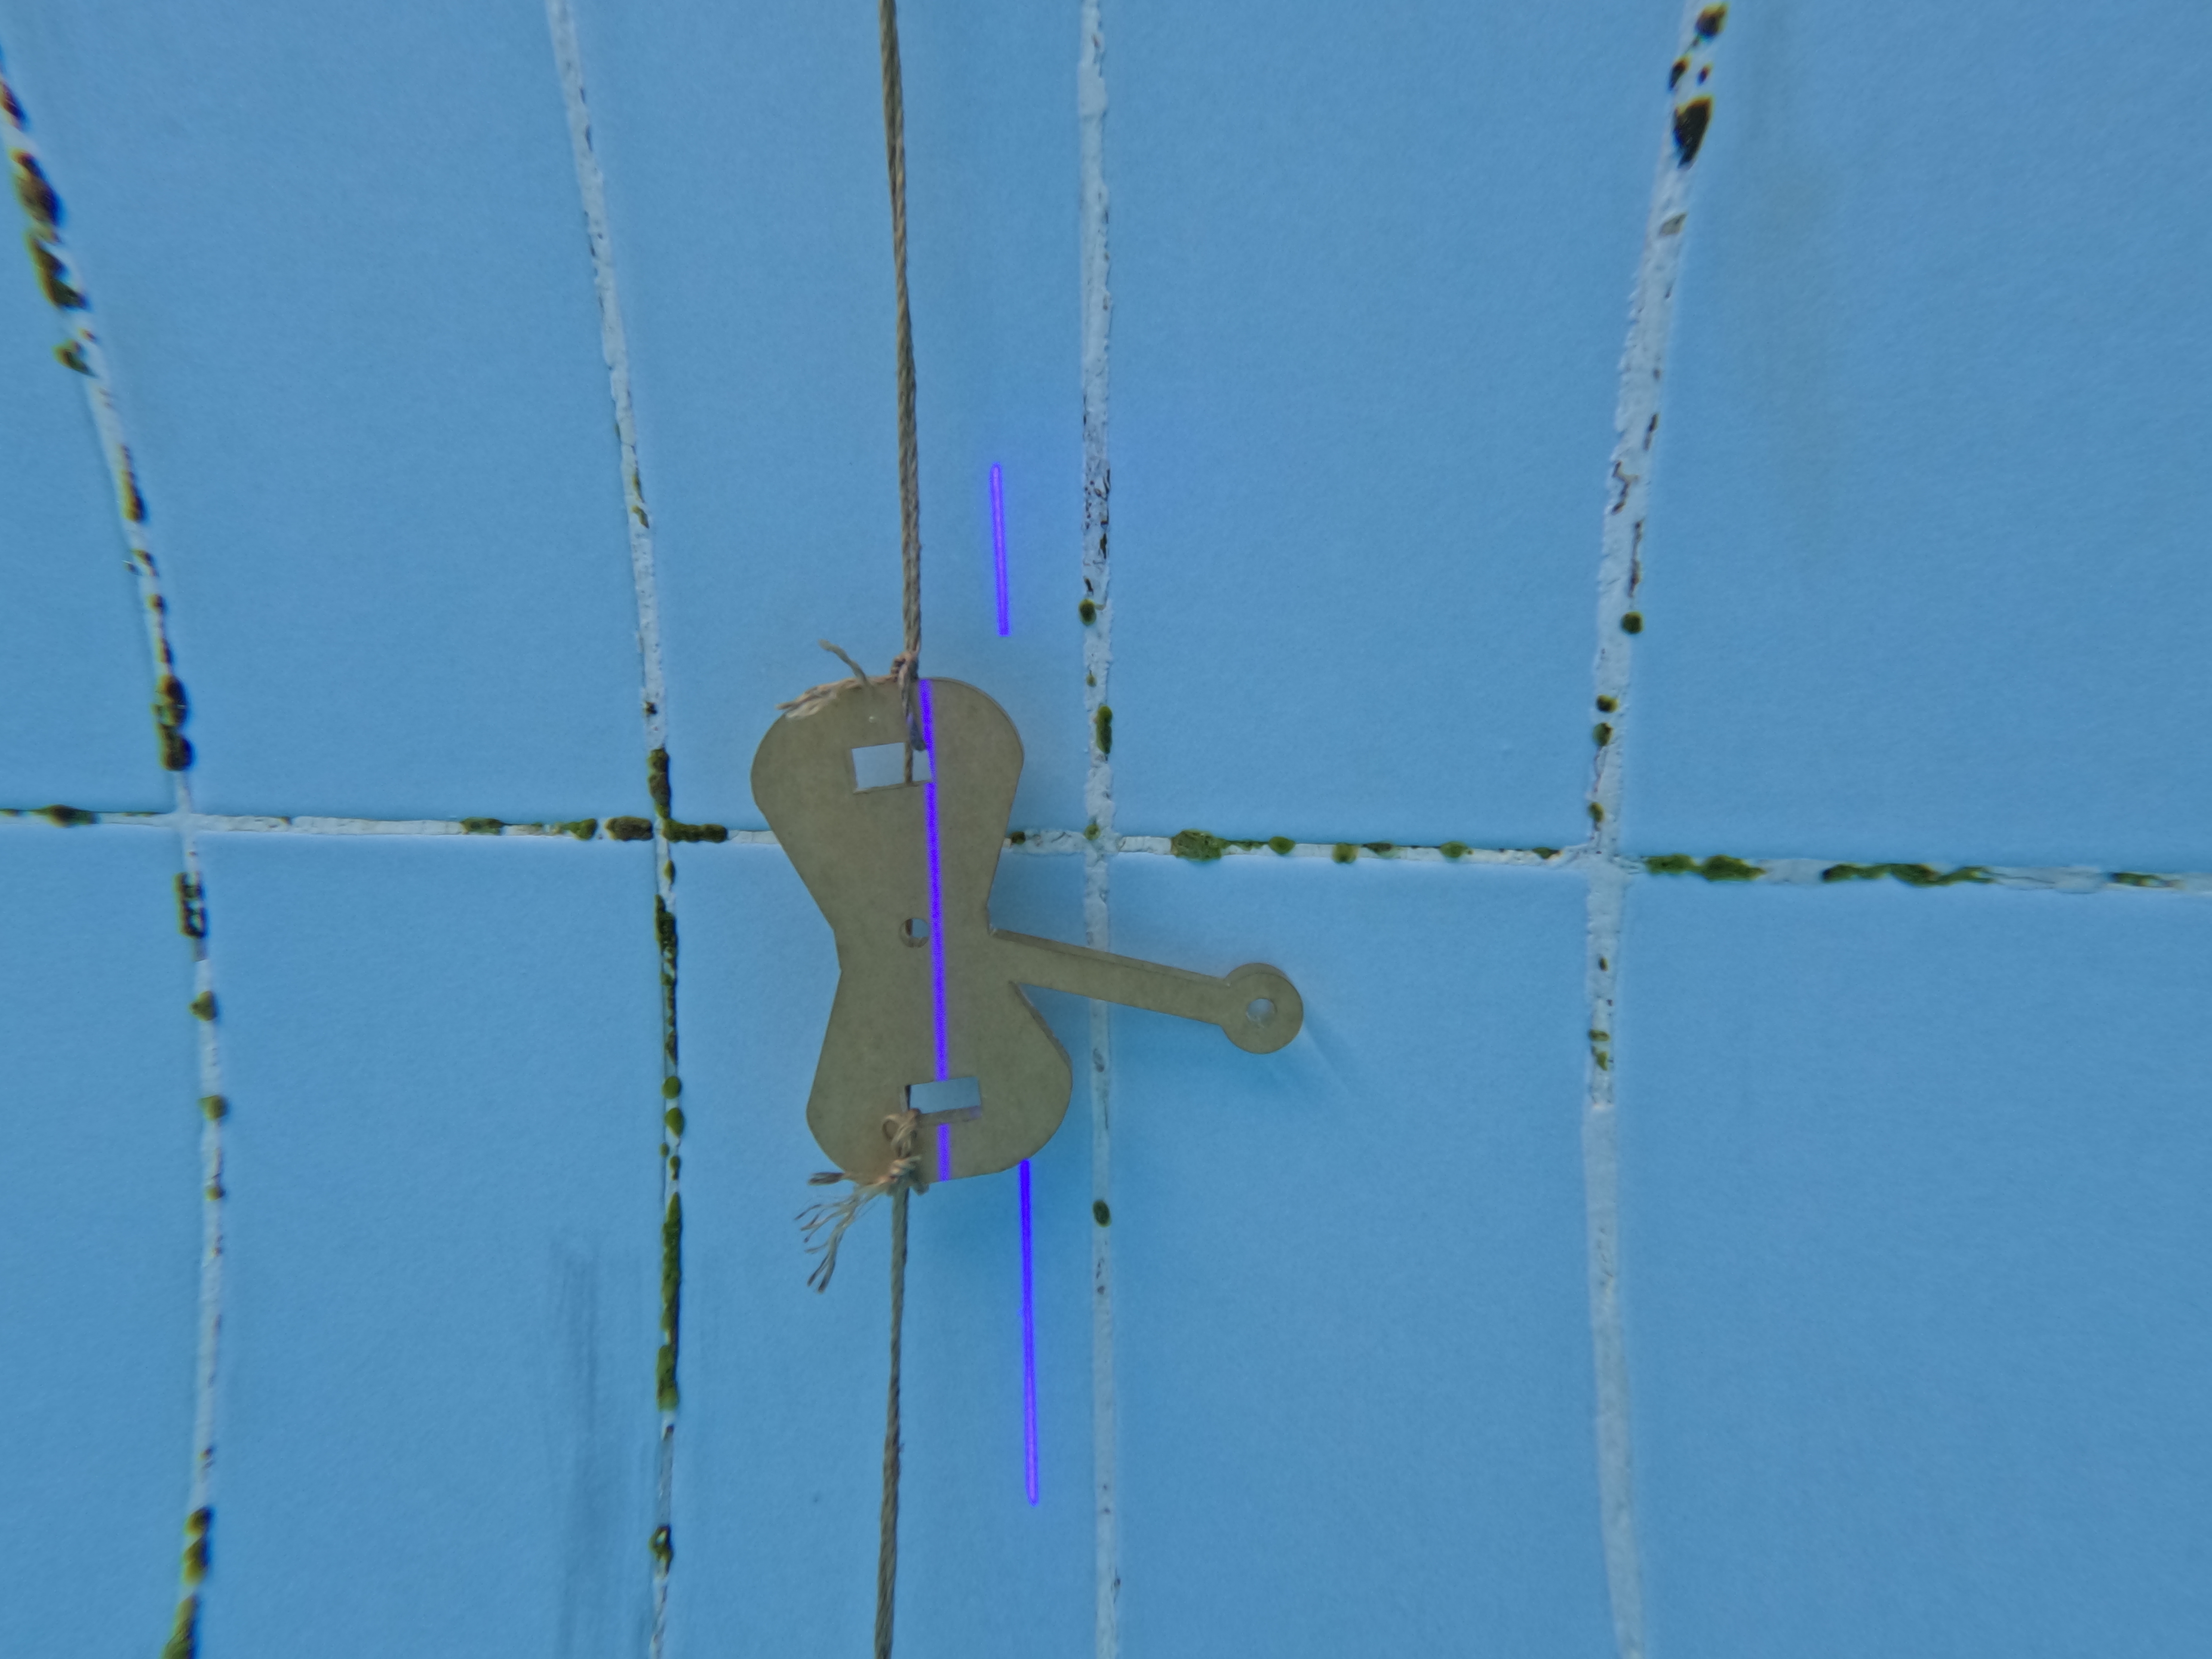

Supplement: Supplementary file 2636 [file G0050934.pdf › Level_2_2/G0050934.pdf]

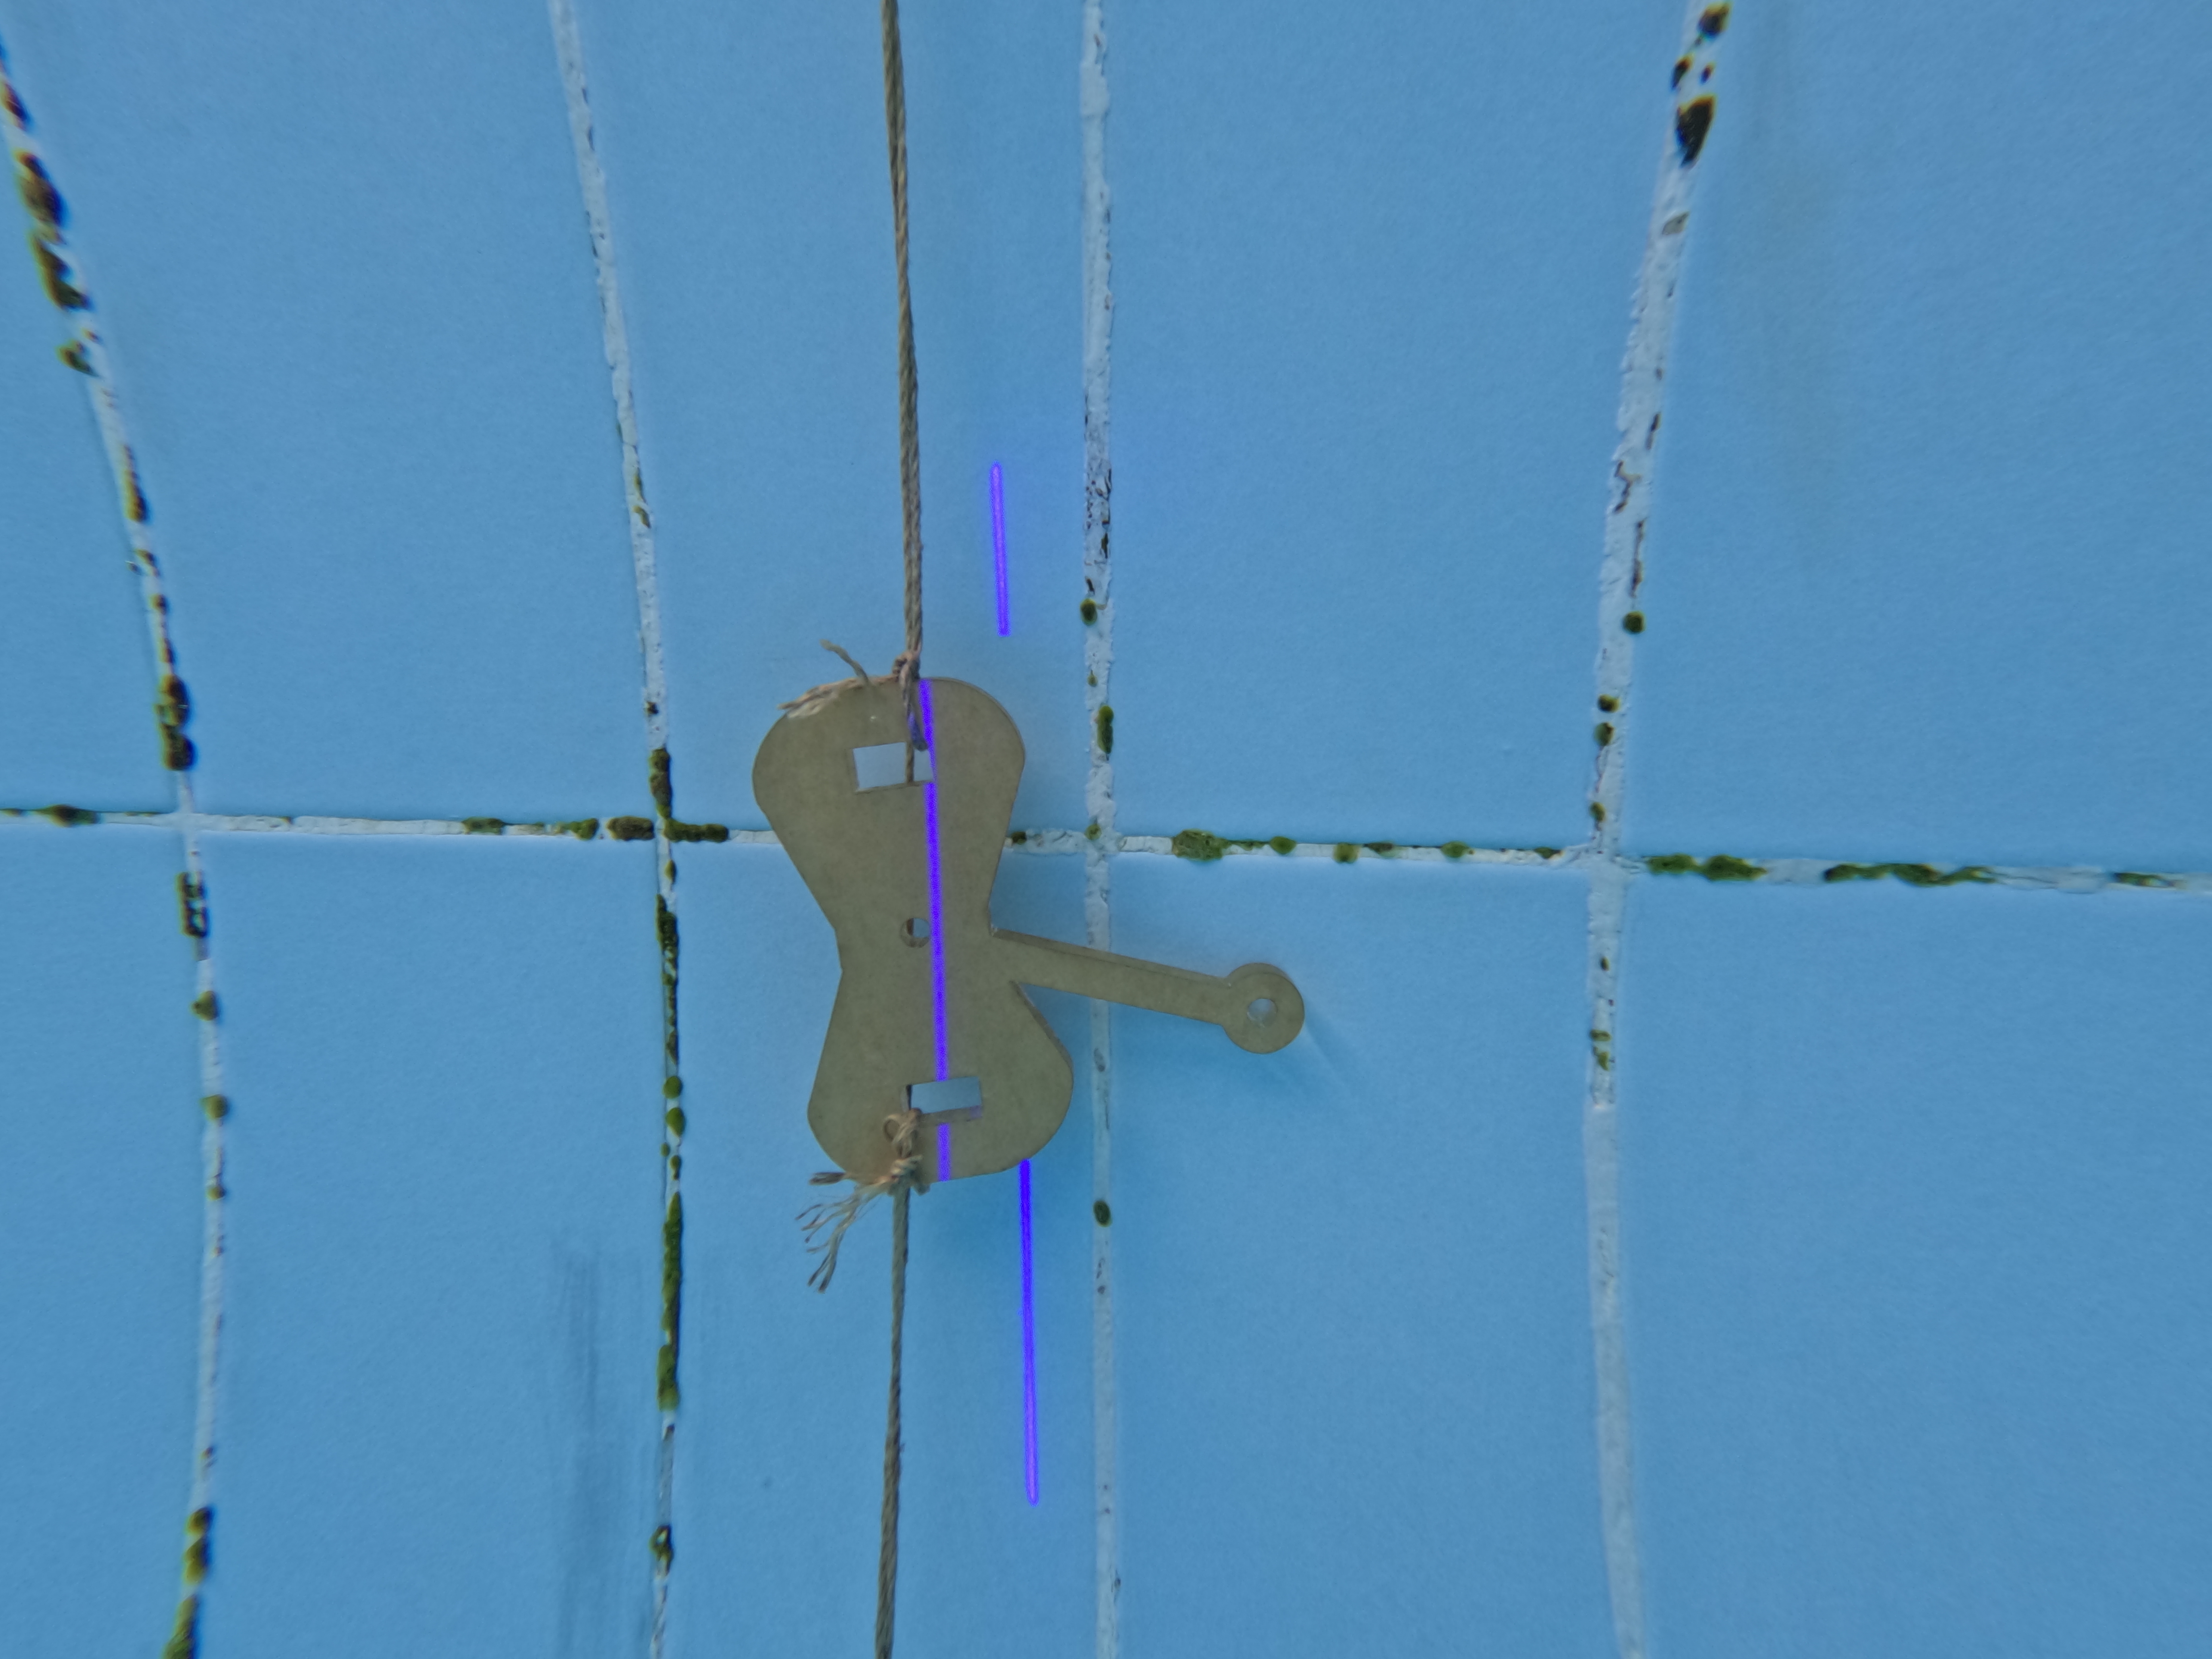

Supplement: Supplementary file 2637 [file G0050935.pdf › Level_2_2/G0050935.pdf]

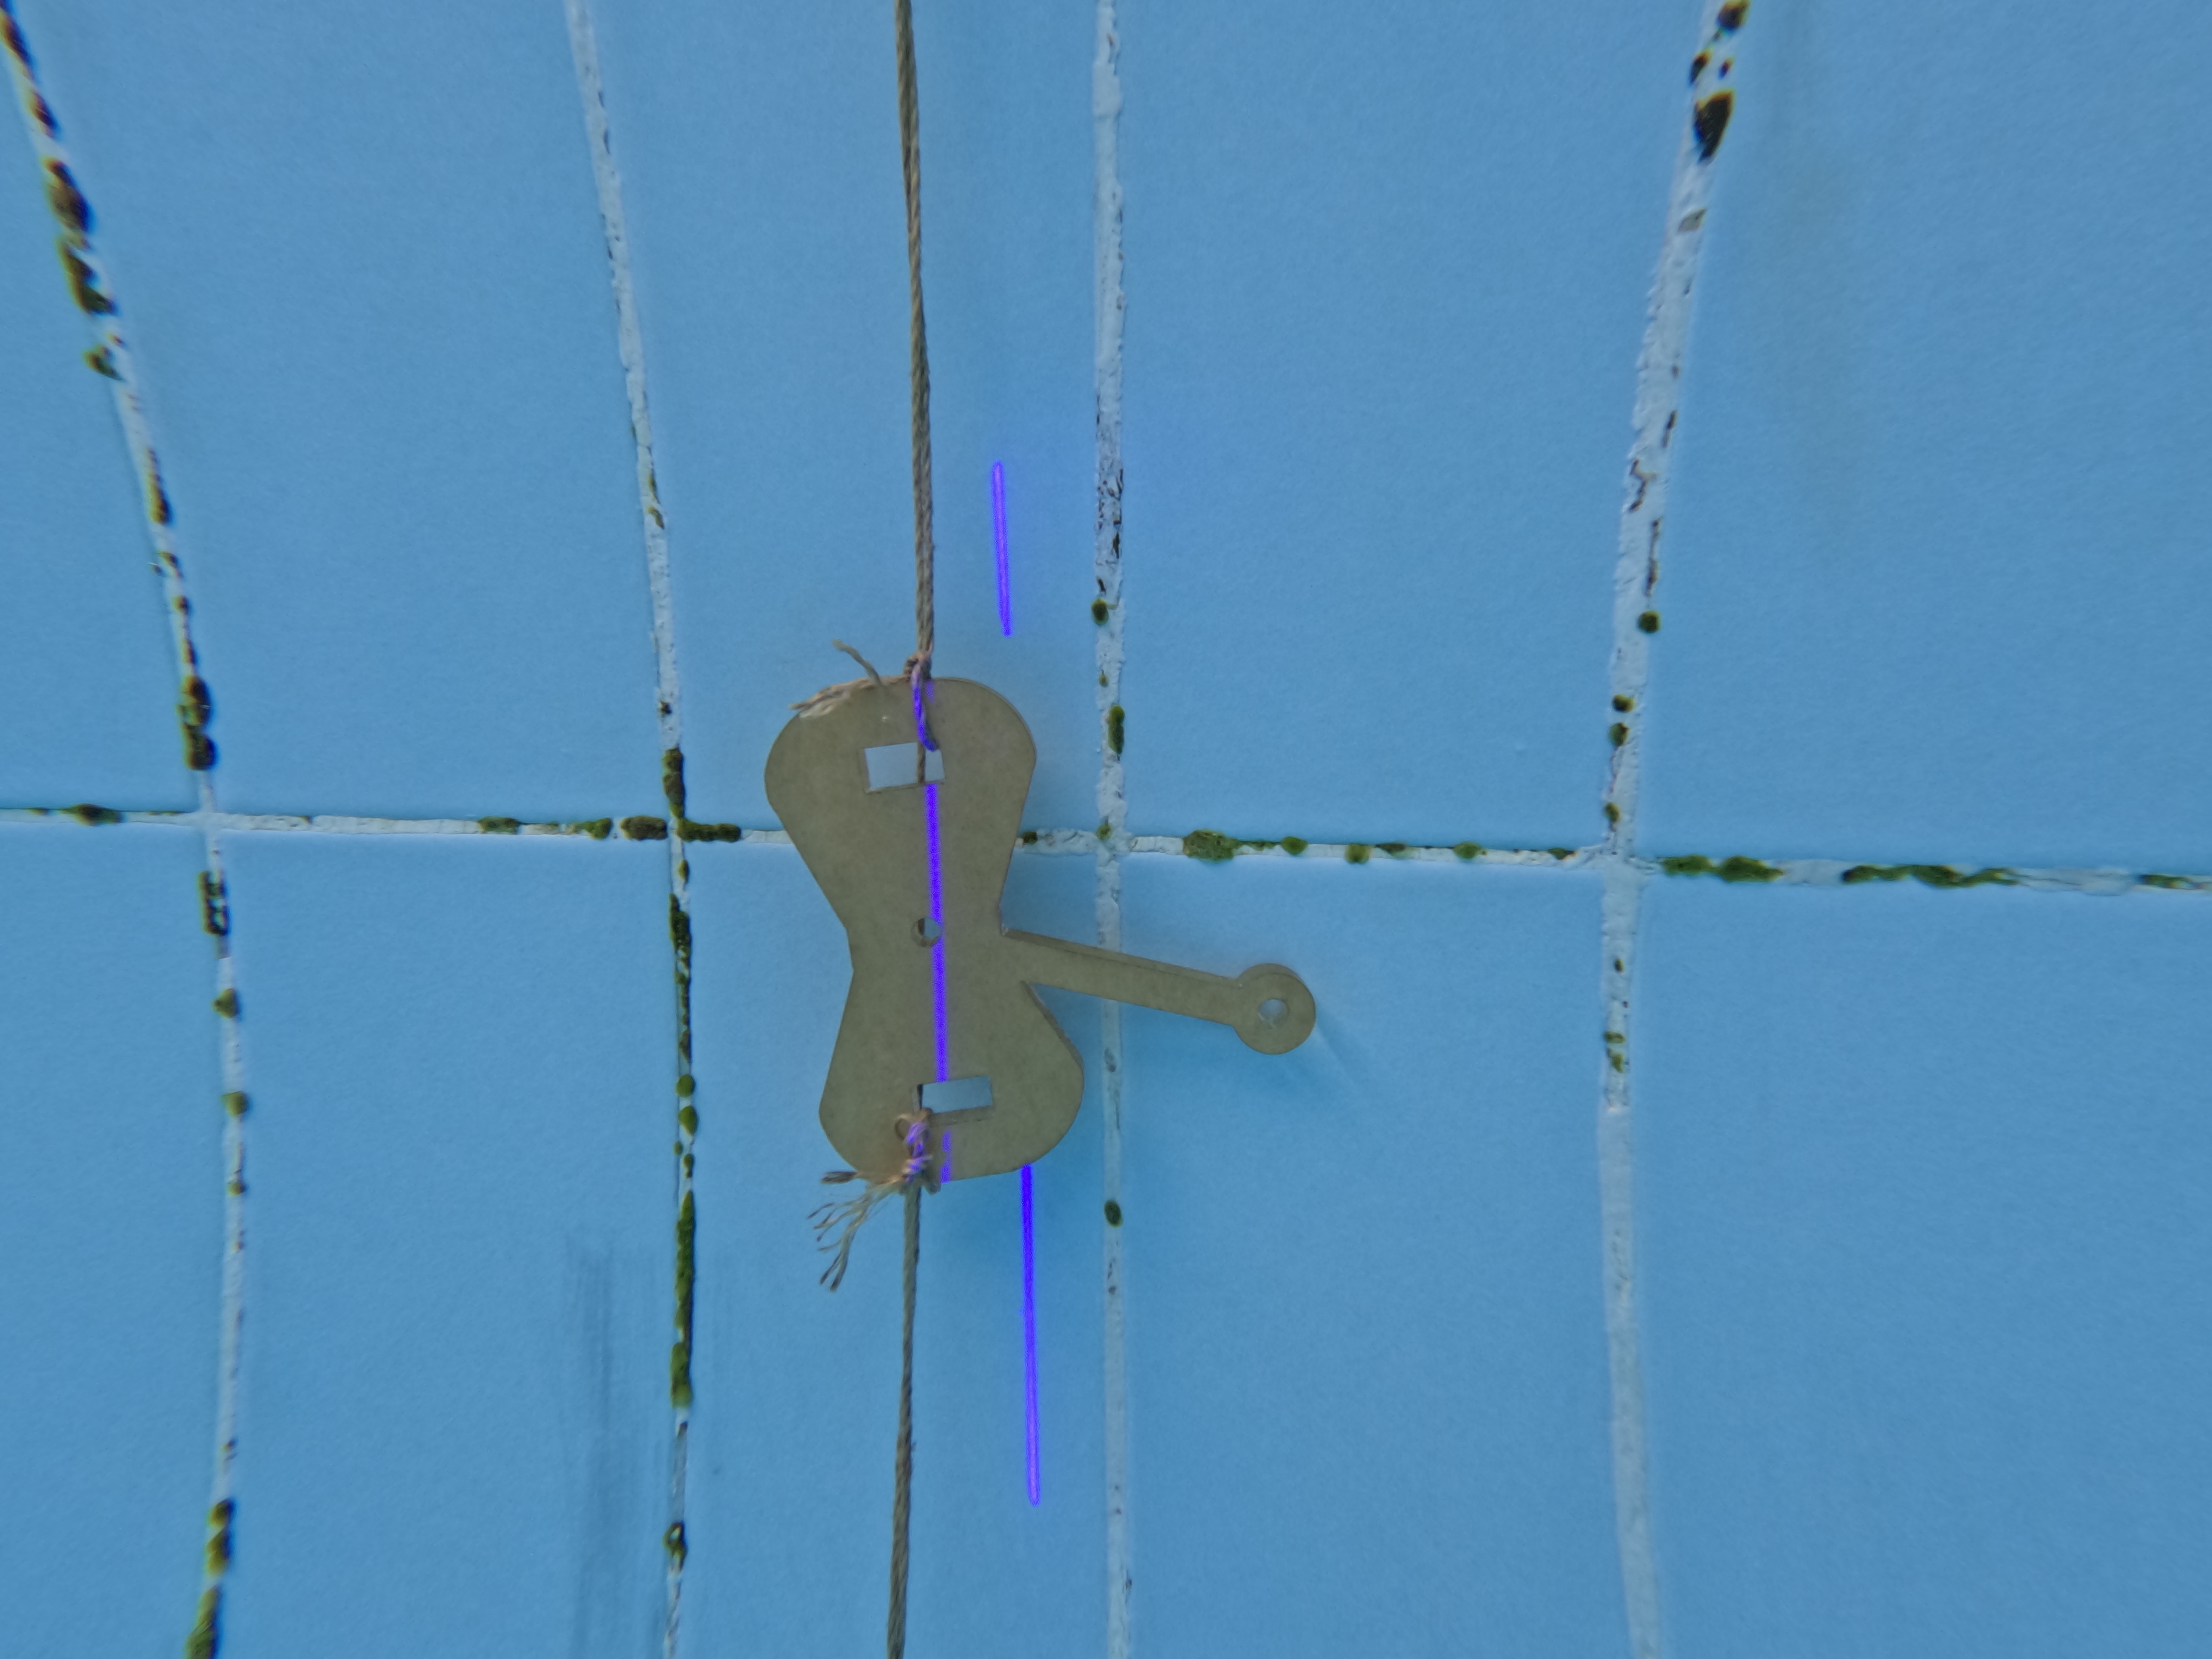

Supplement: Supplementary file 2638 [file G0050936.pdf › Level_2_2/G0050936.pdf]

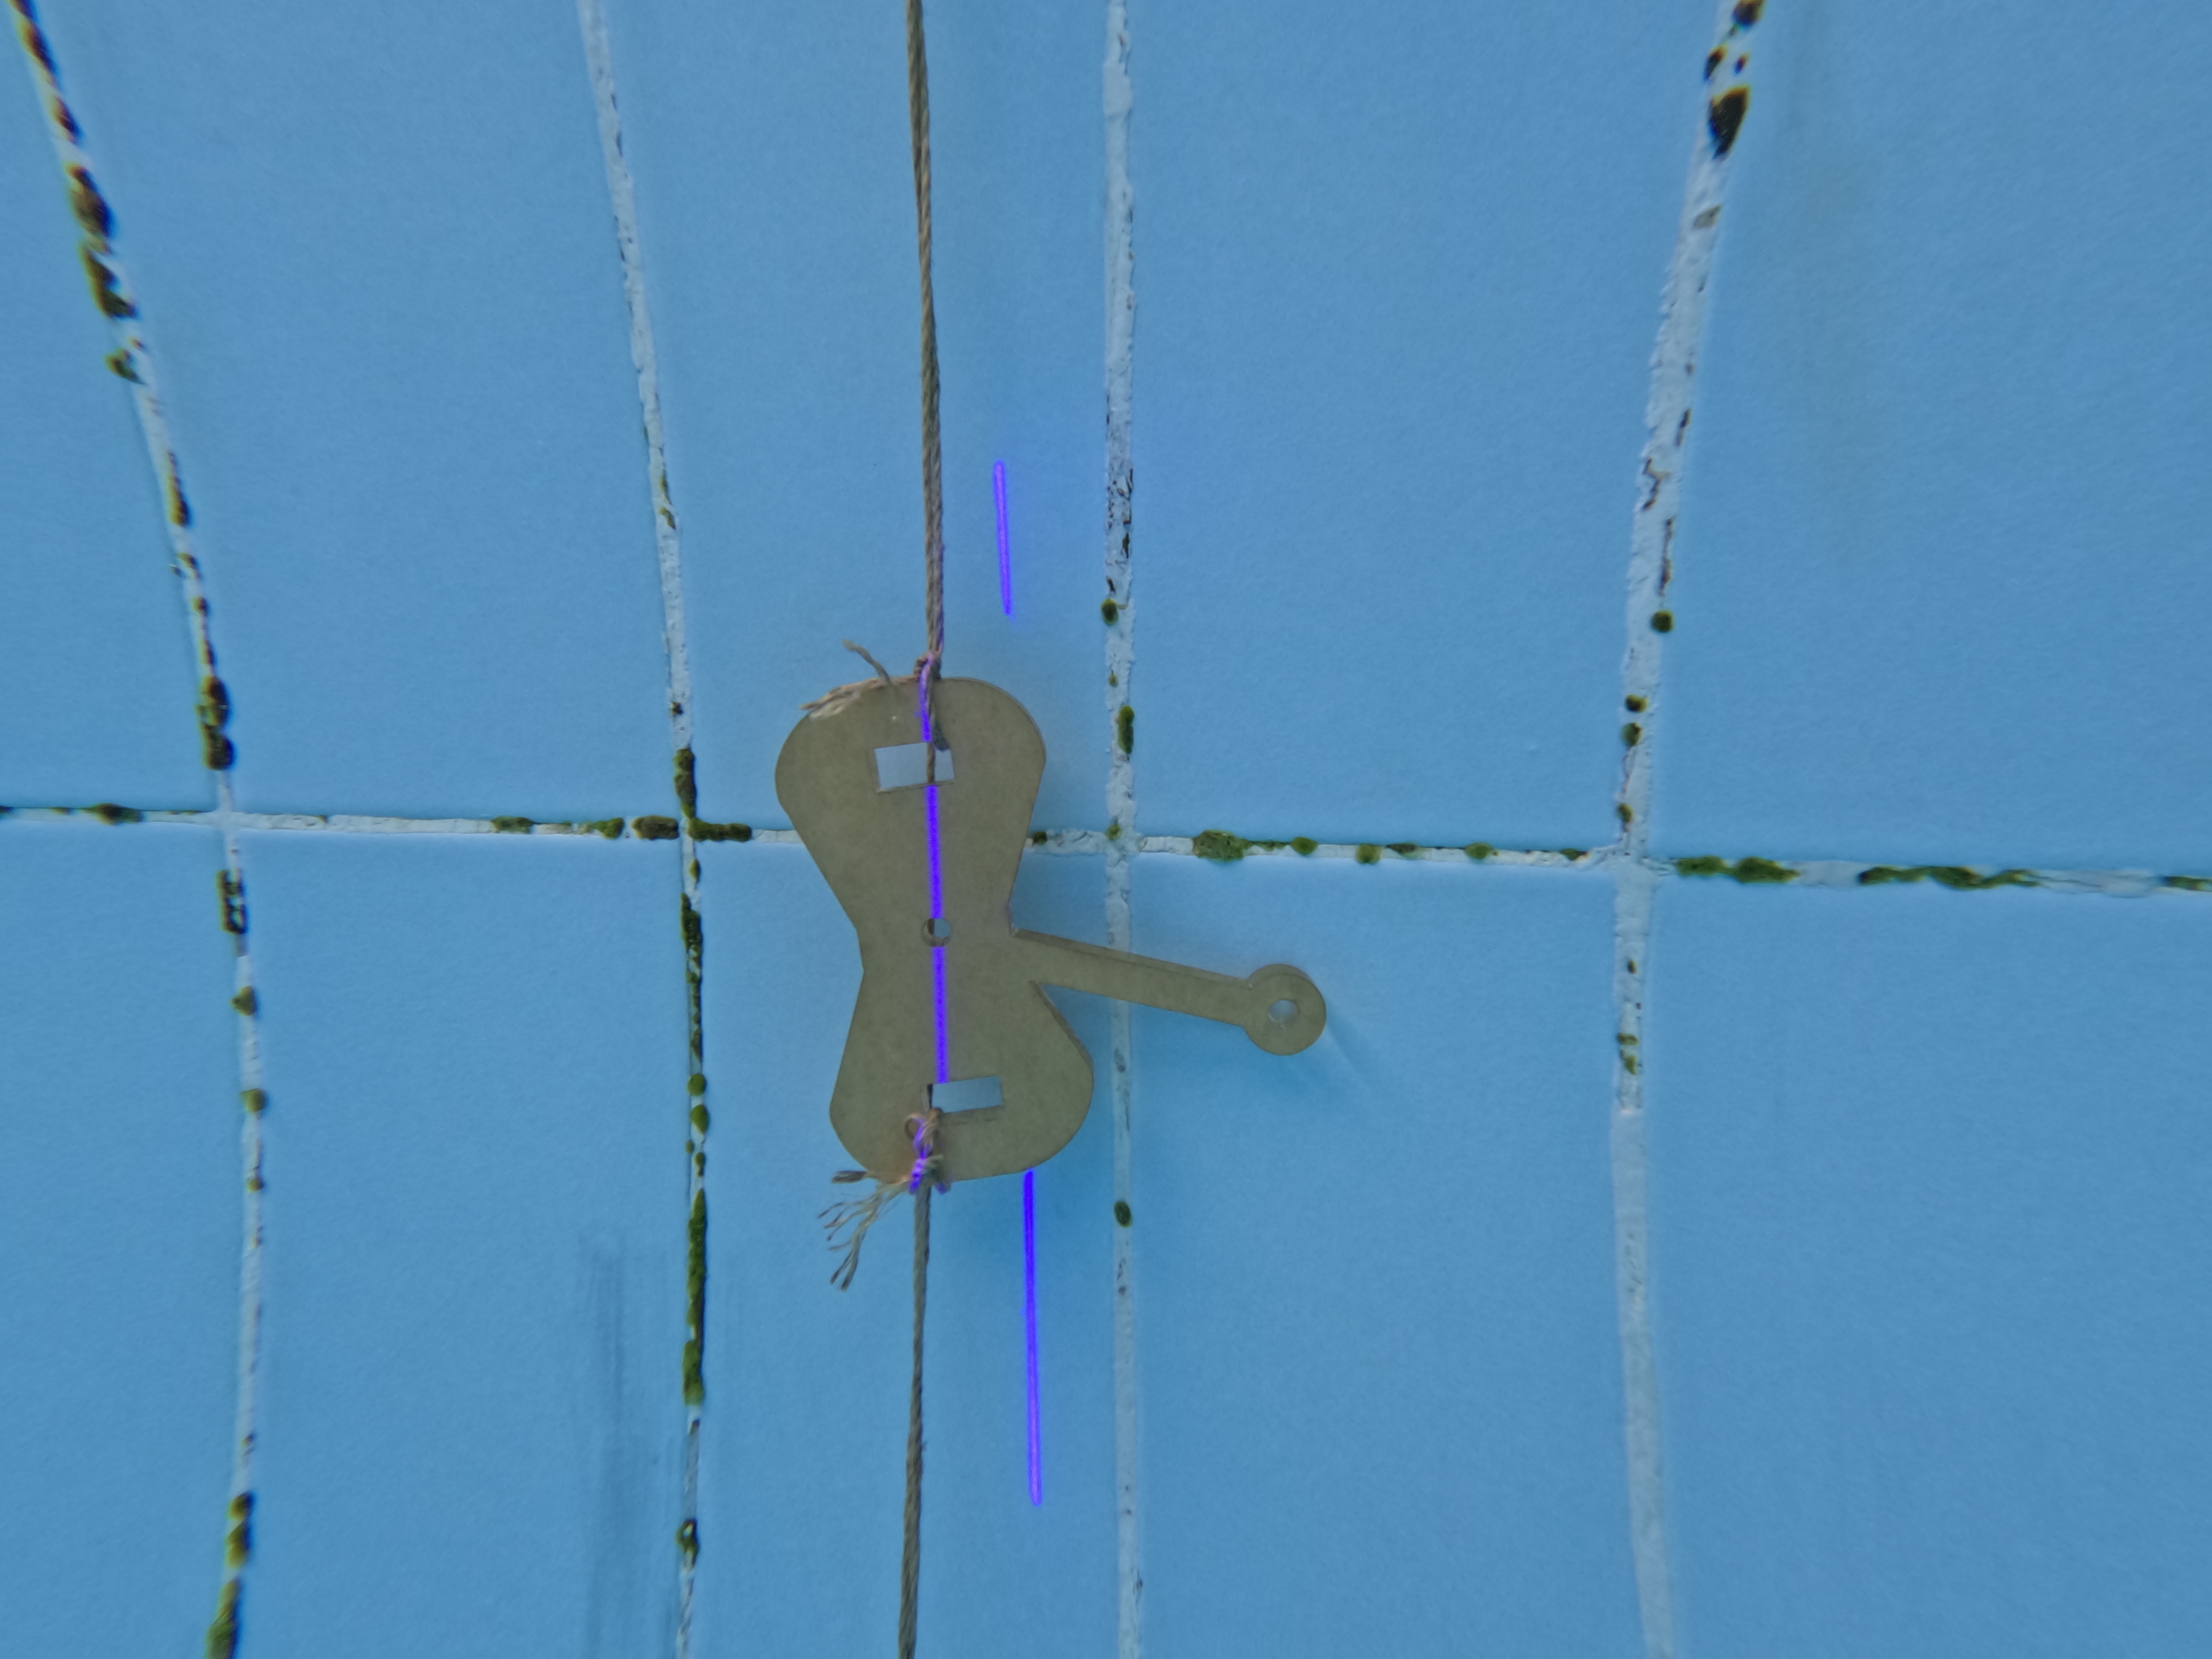

Supplement: Supplementary file 2639 [file G0050937.pdf › Level_2_2/G0050937.pdf]

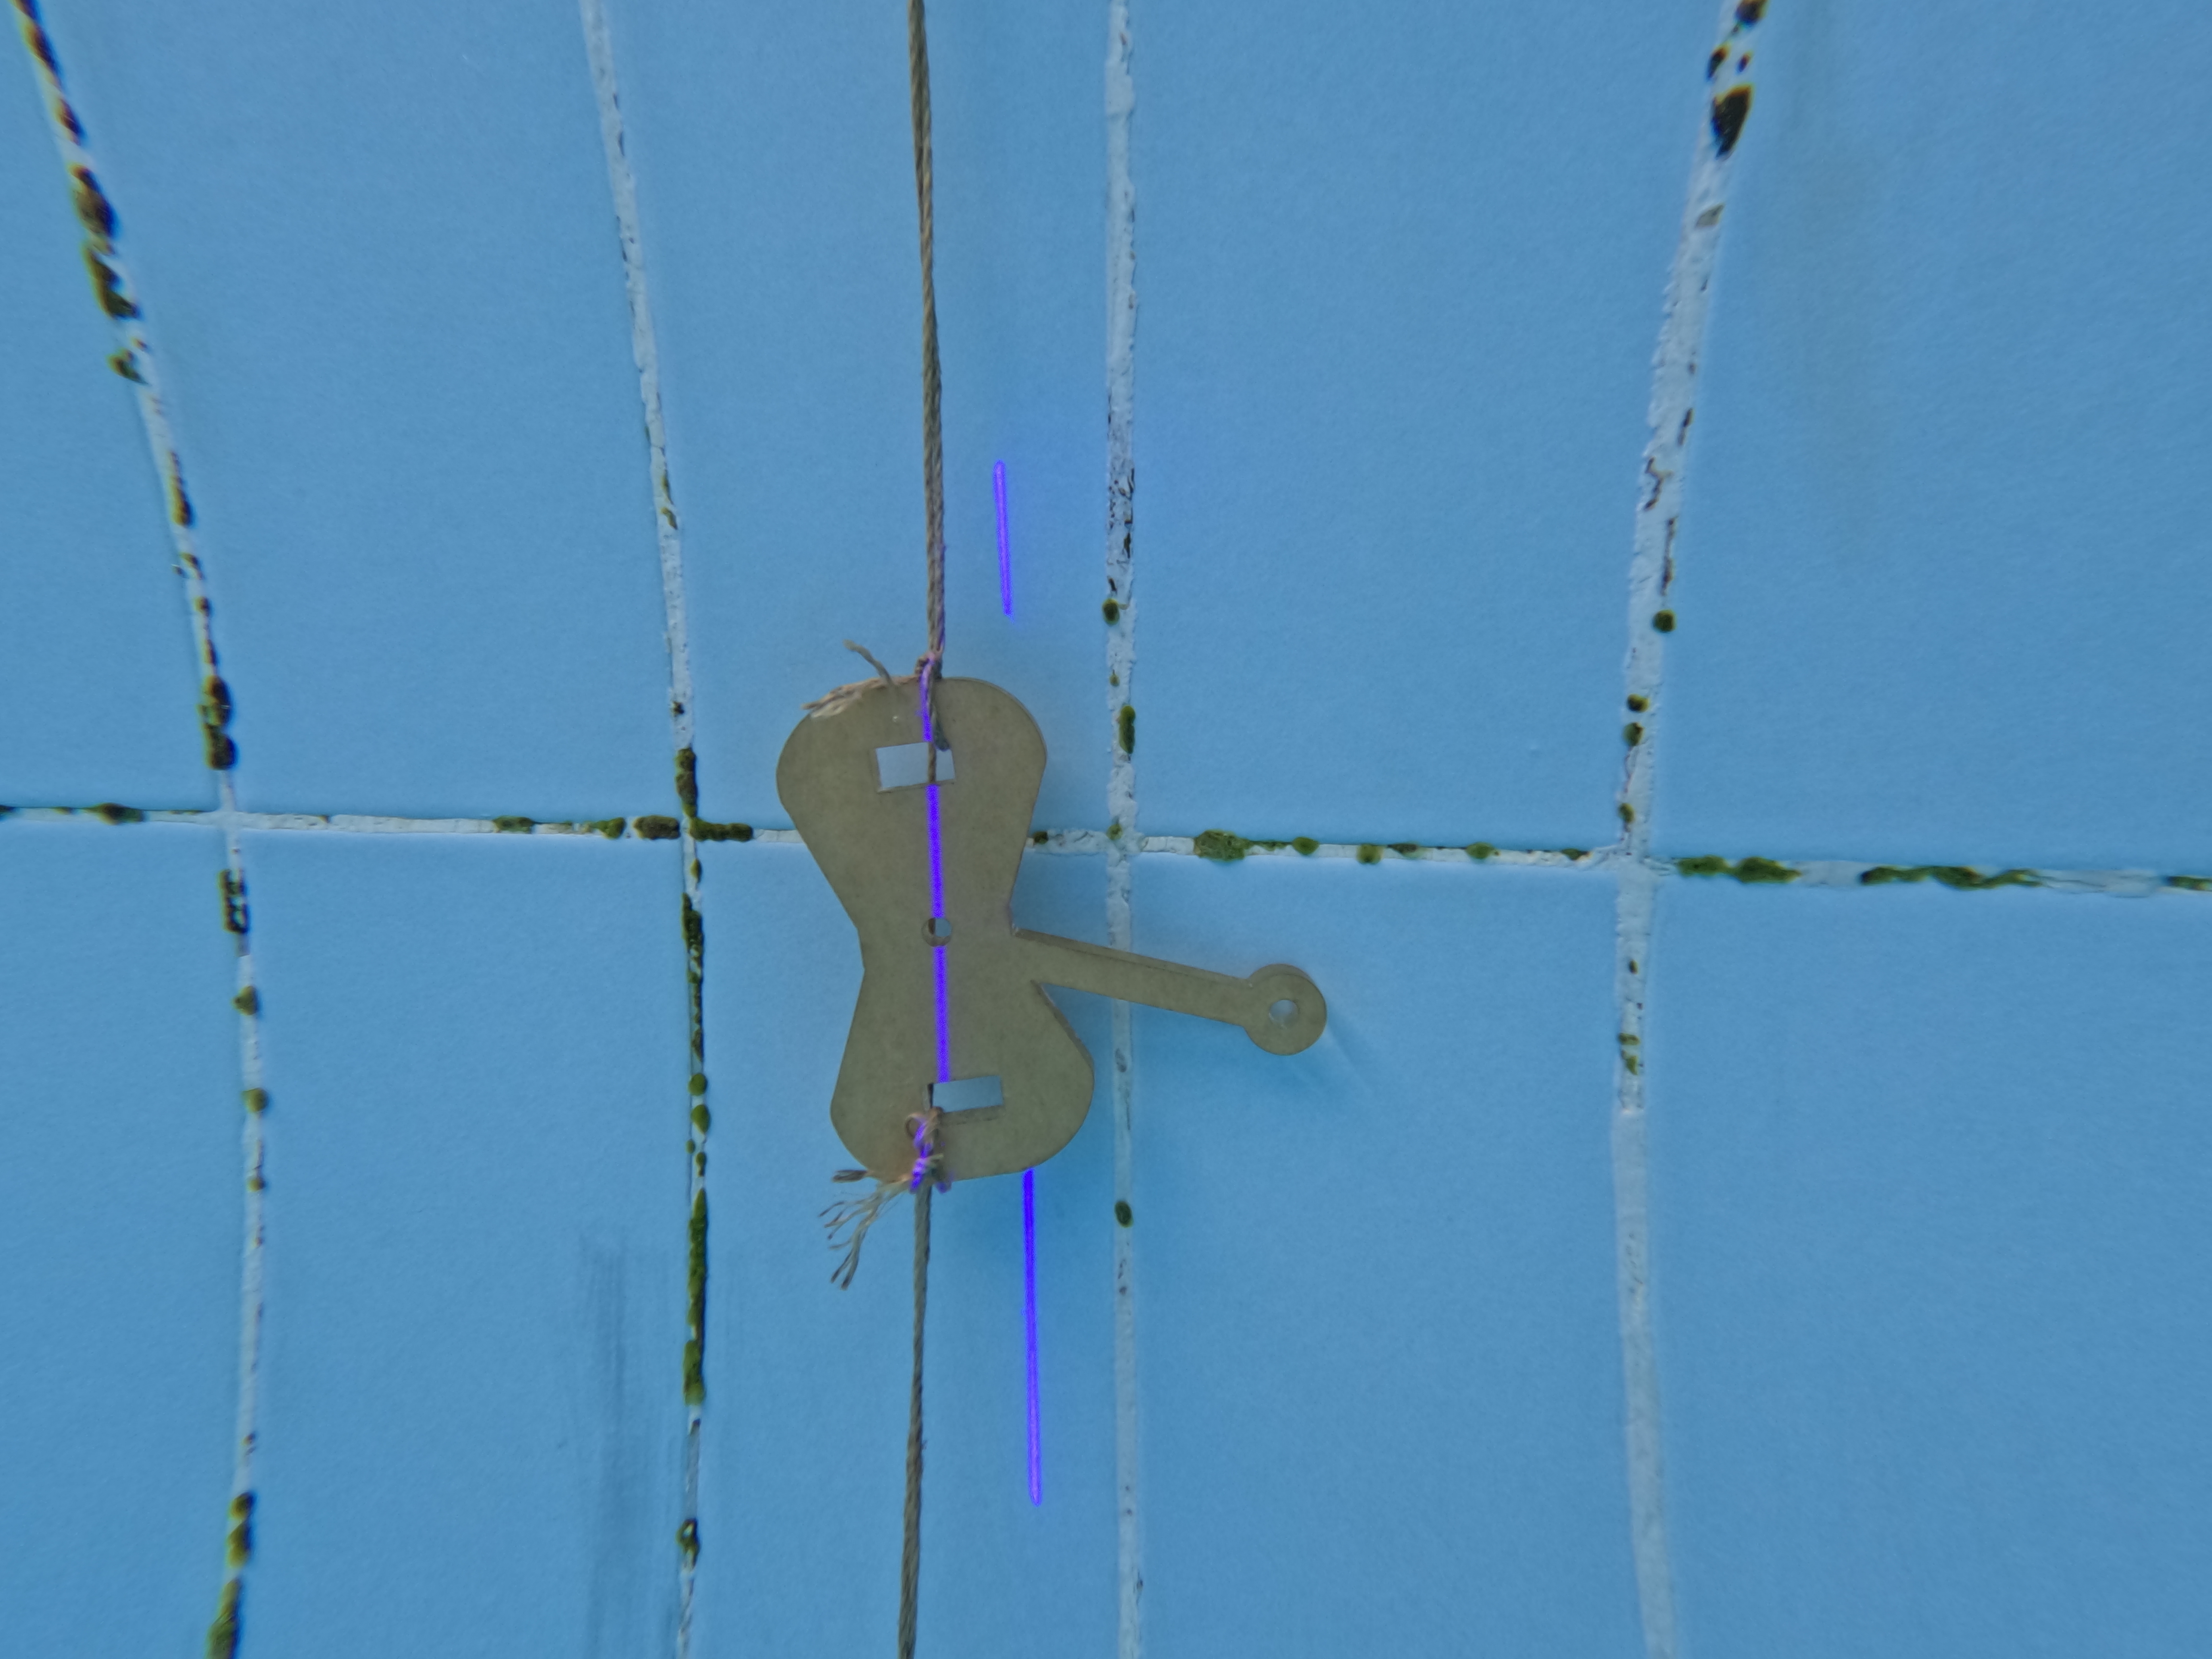

Supplement: Supplementary file 2640 [file G0050938.pdf › Level_2_2/G0050938.pdf]

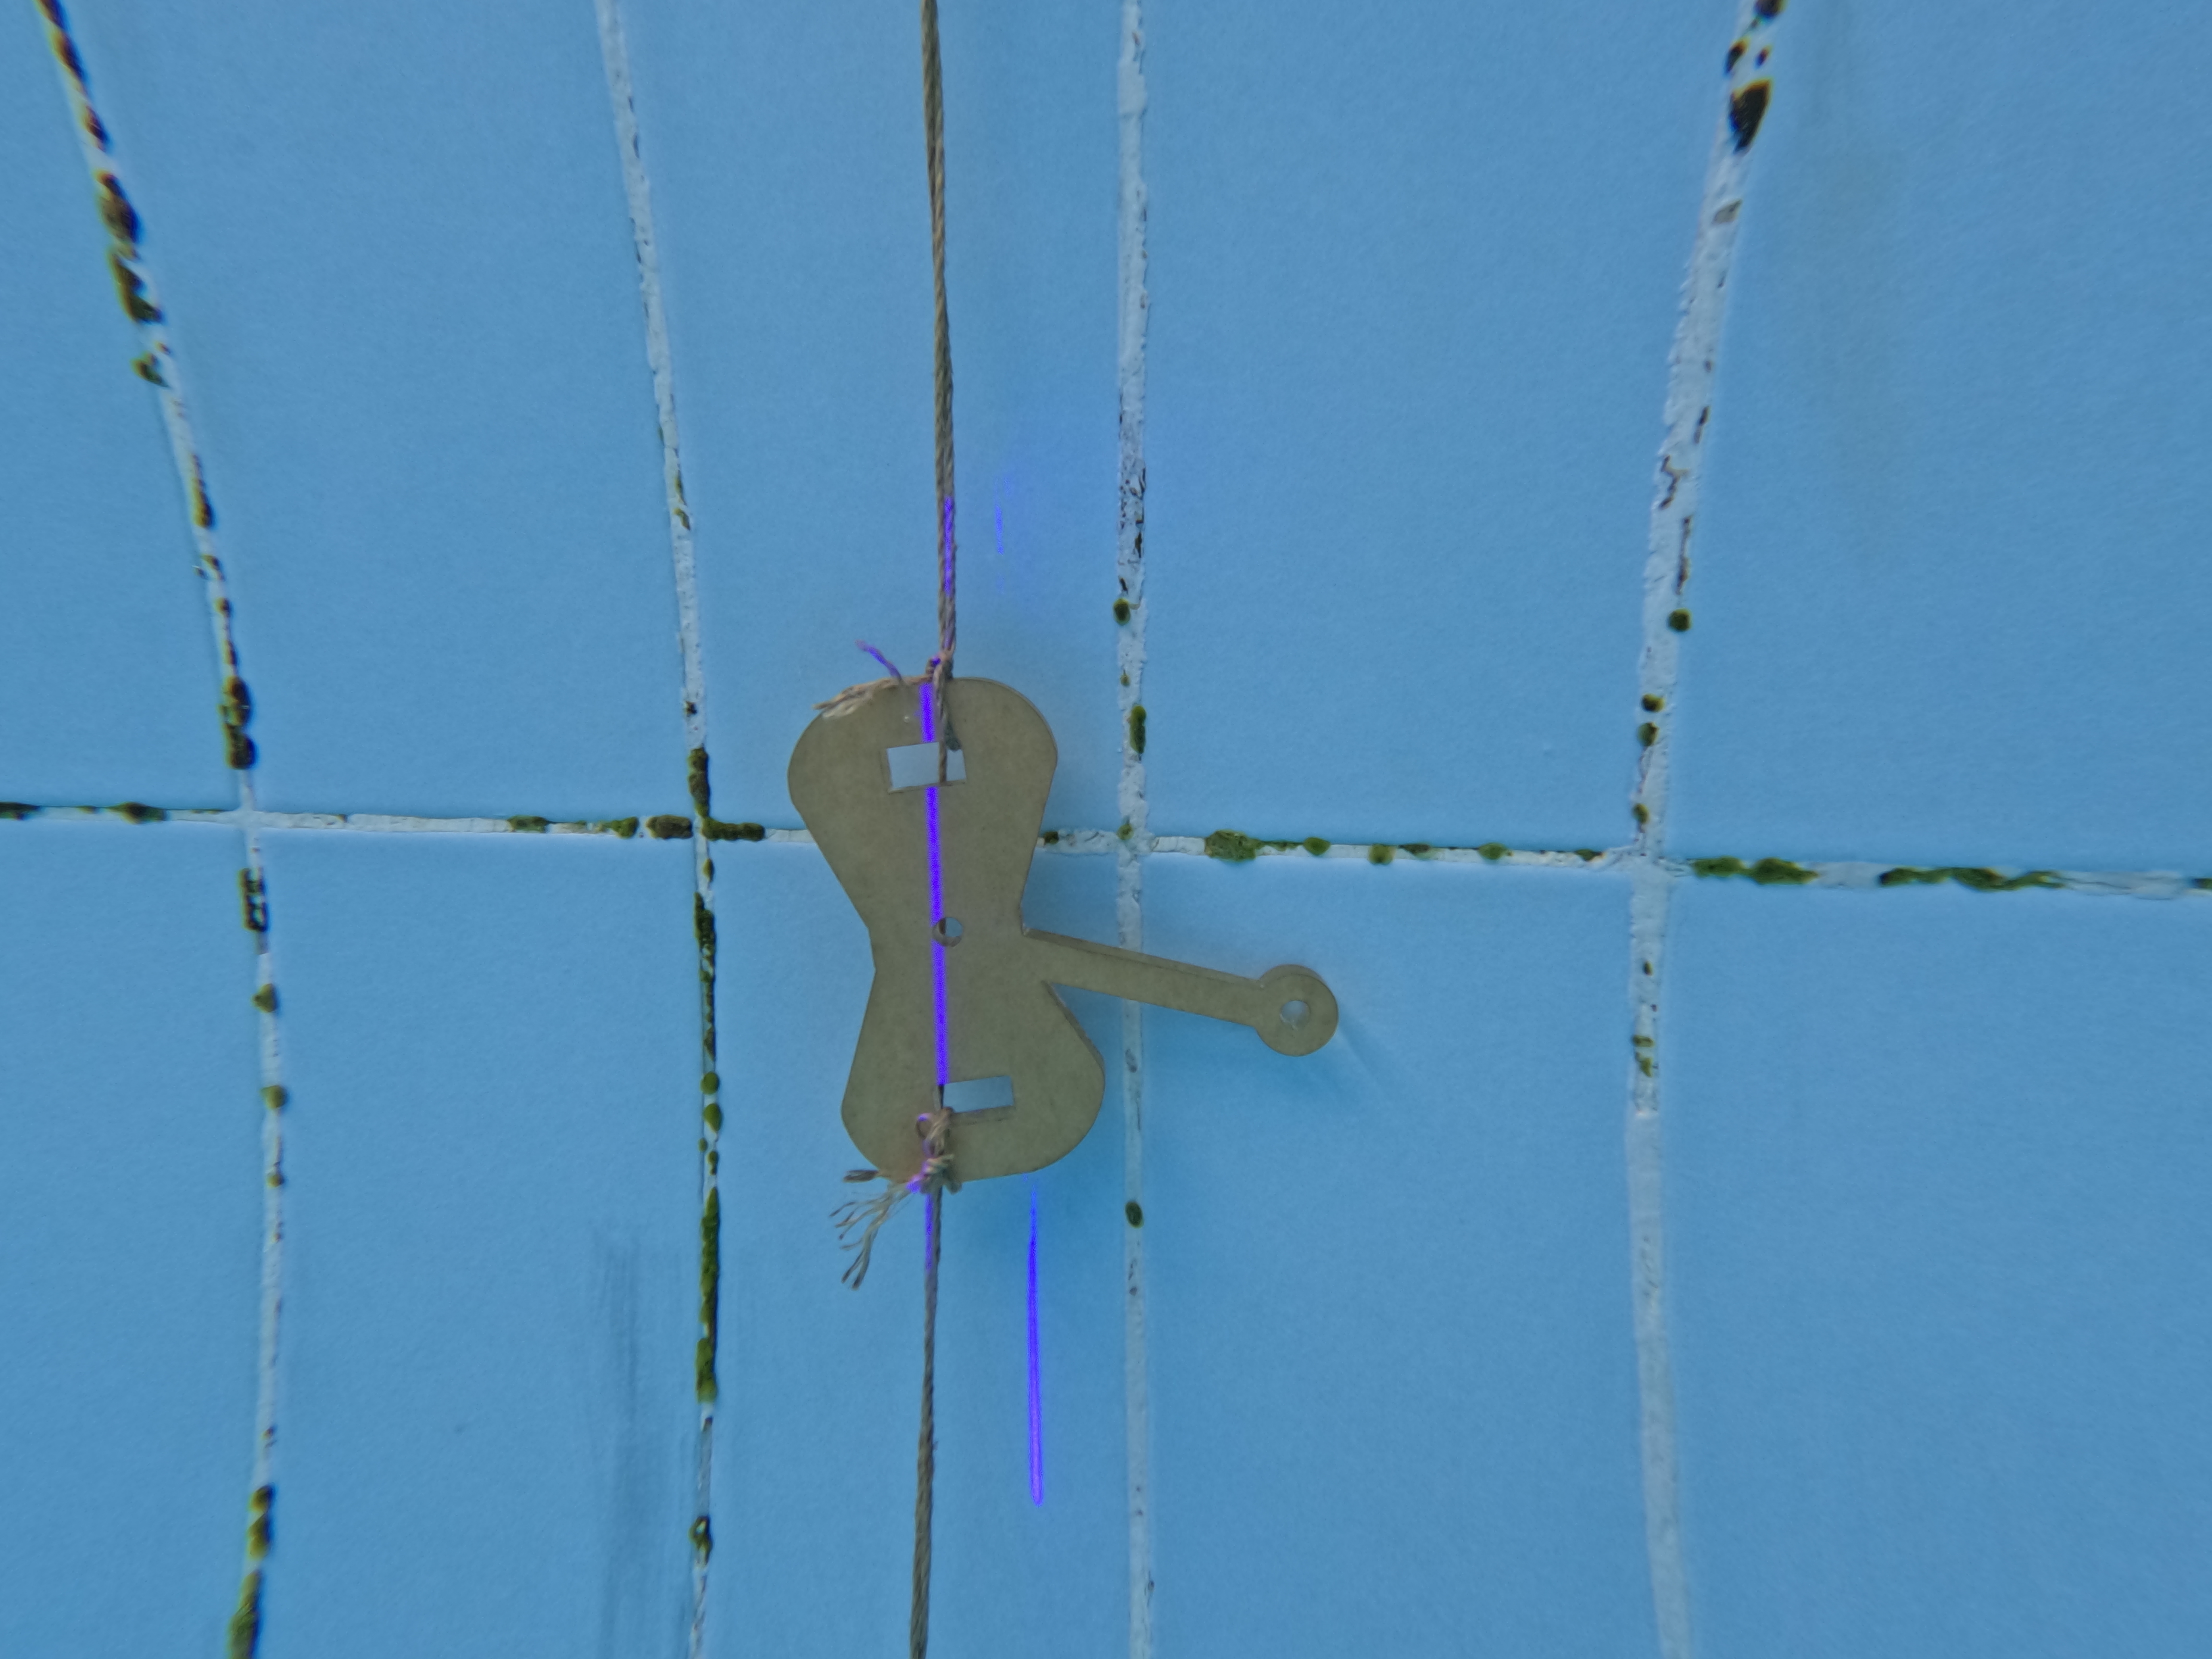

Supplement: Supplementary file 2641 [file G0050939.pdf › Level_2_2/G0050939.pdf]

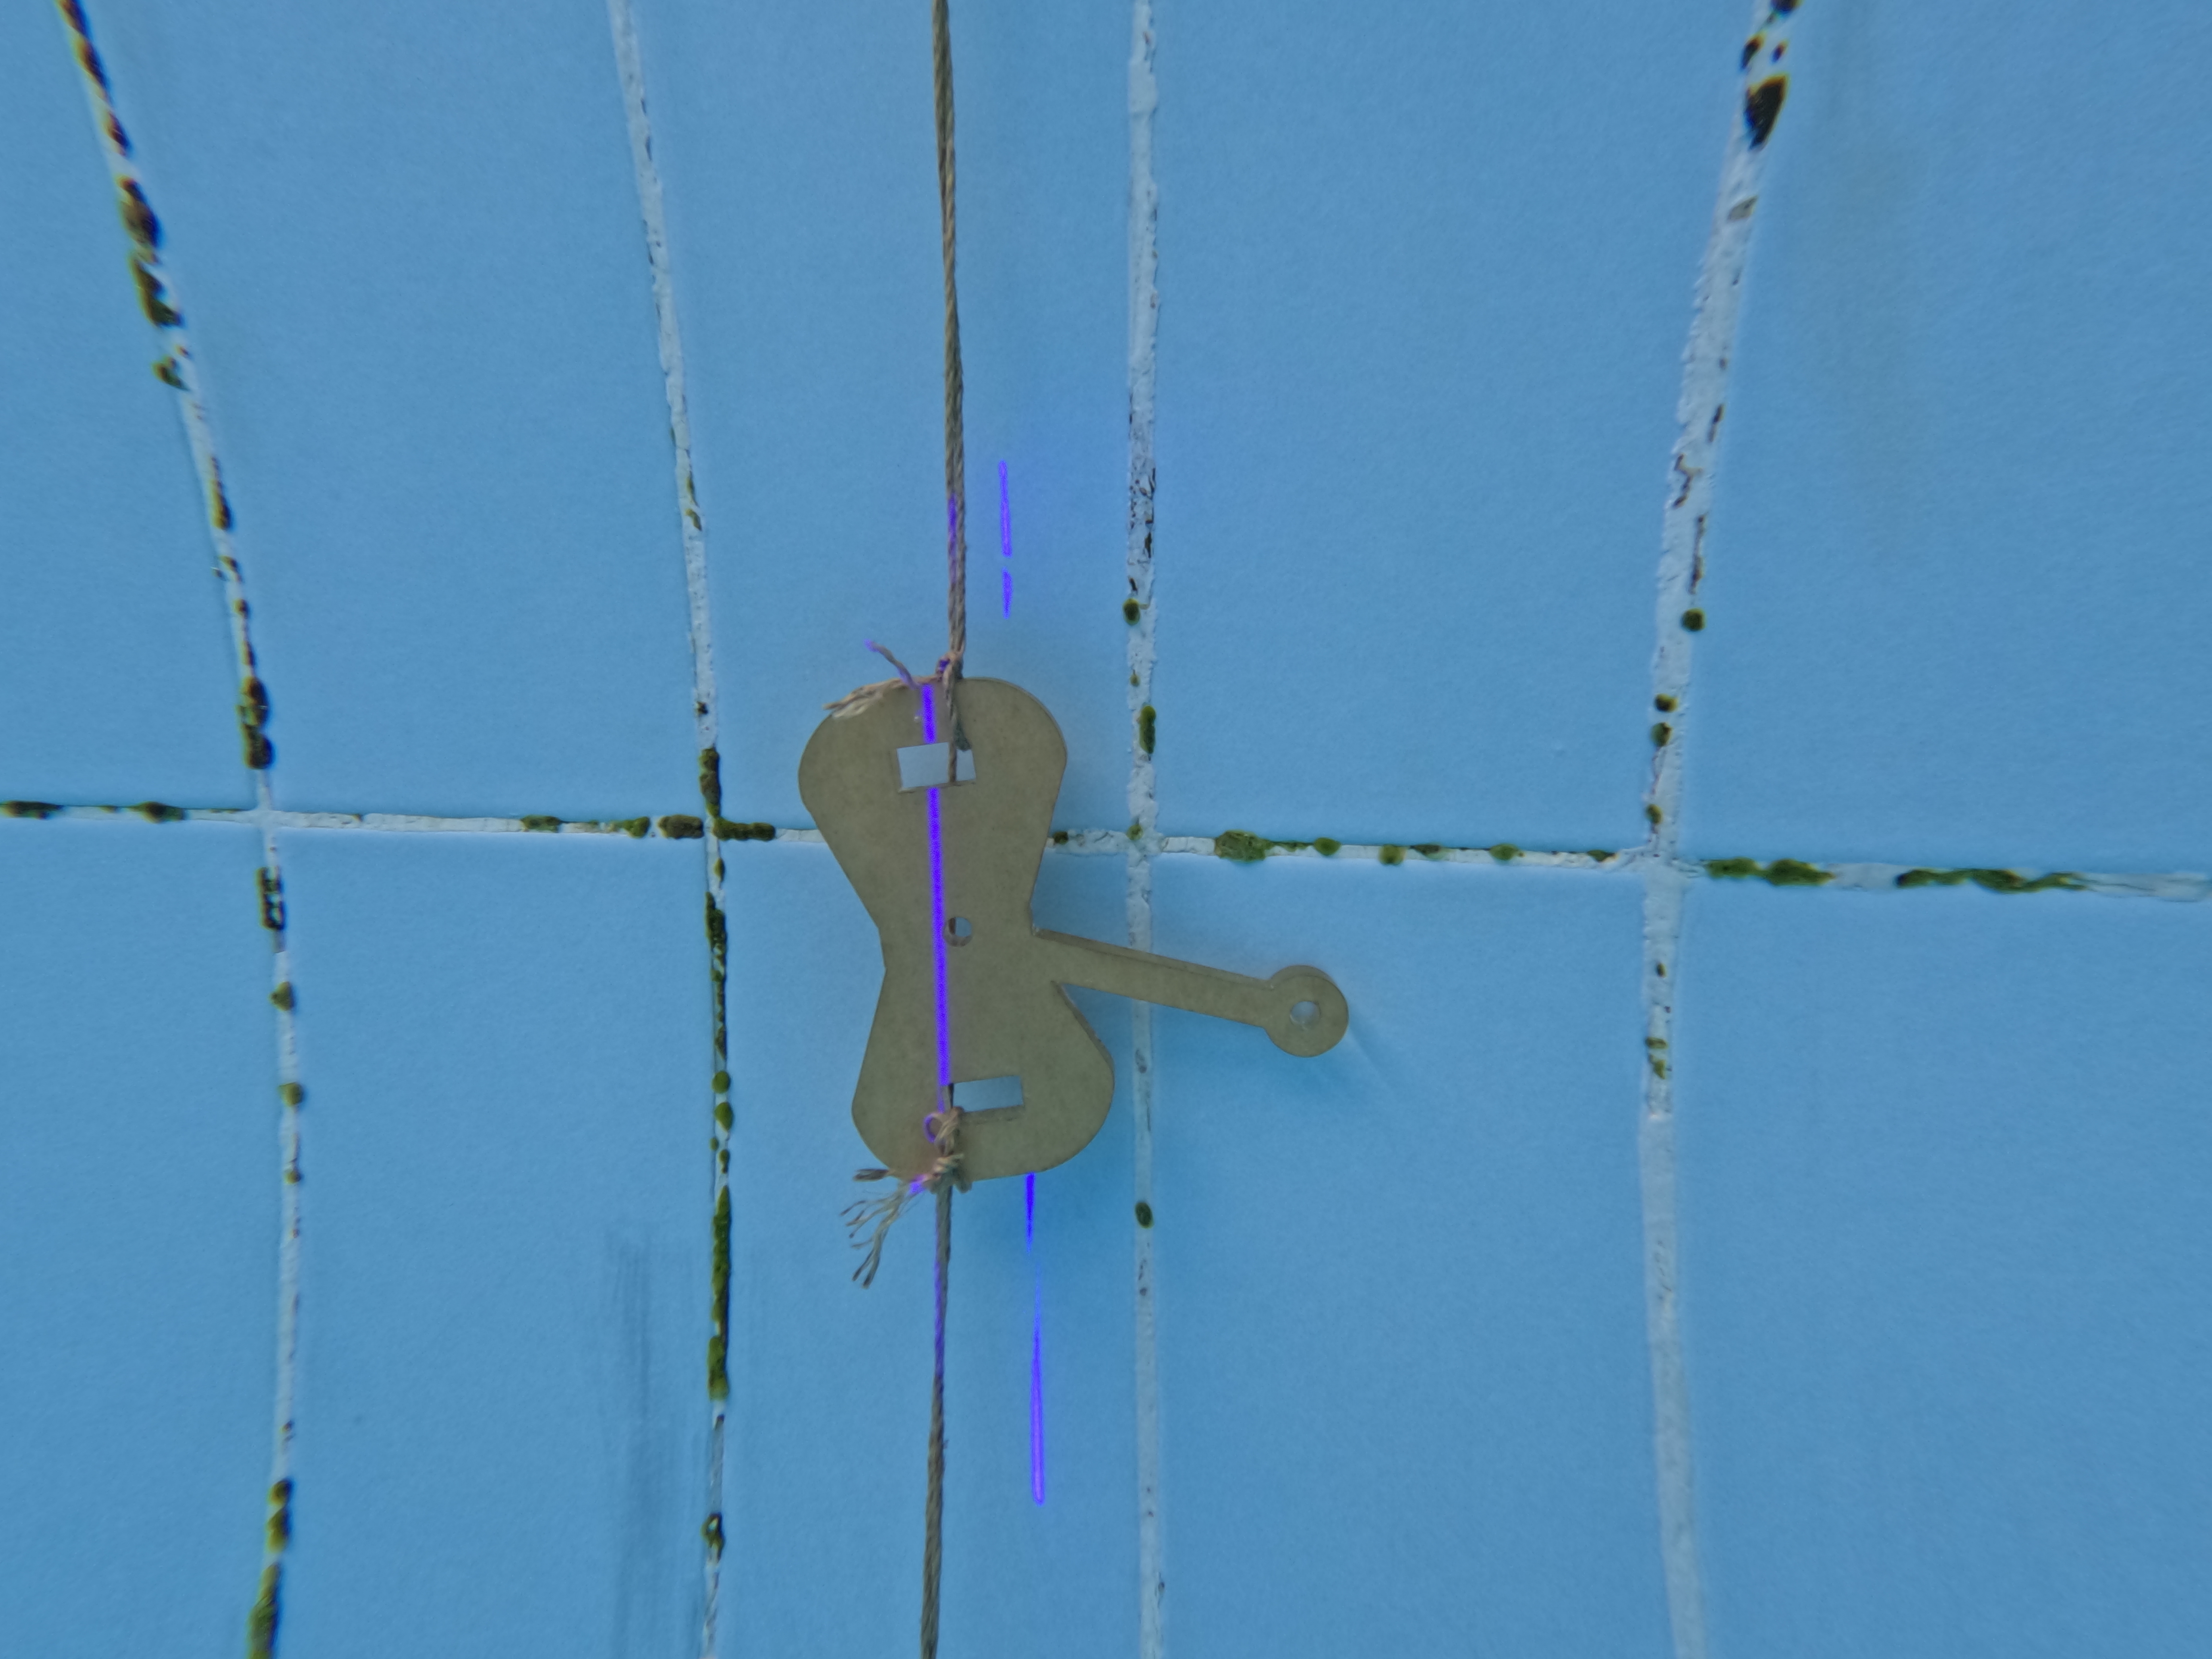

Supplement: Supplementary file 2642 [file G0050940.pdf › Level_2_2/G0050940.pdf]

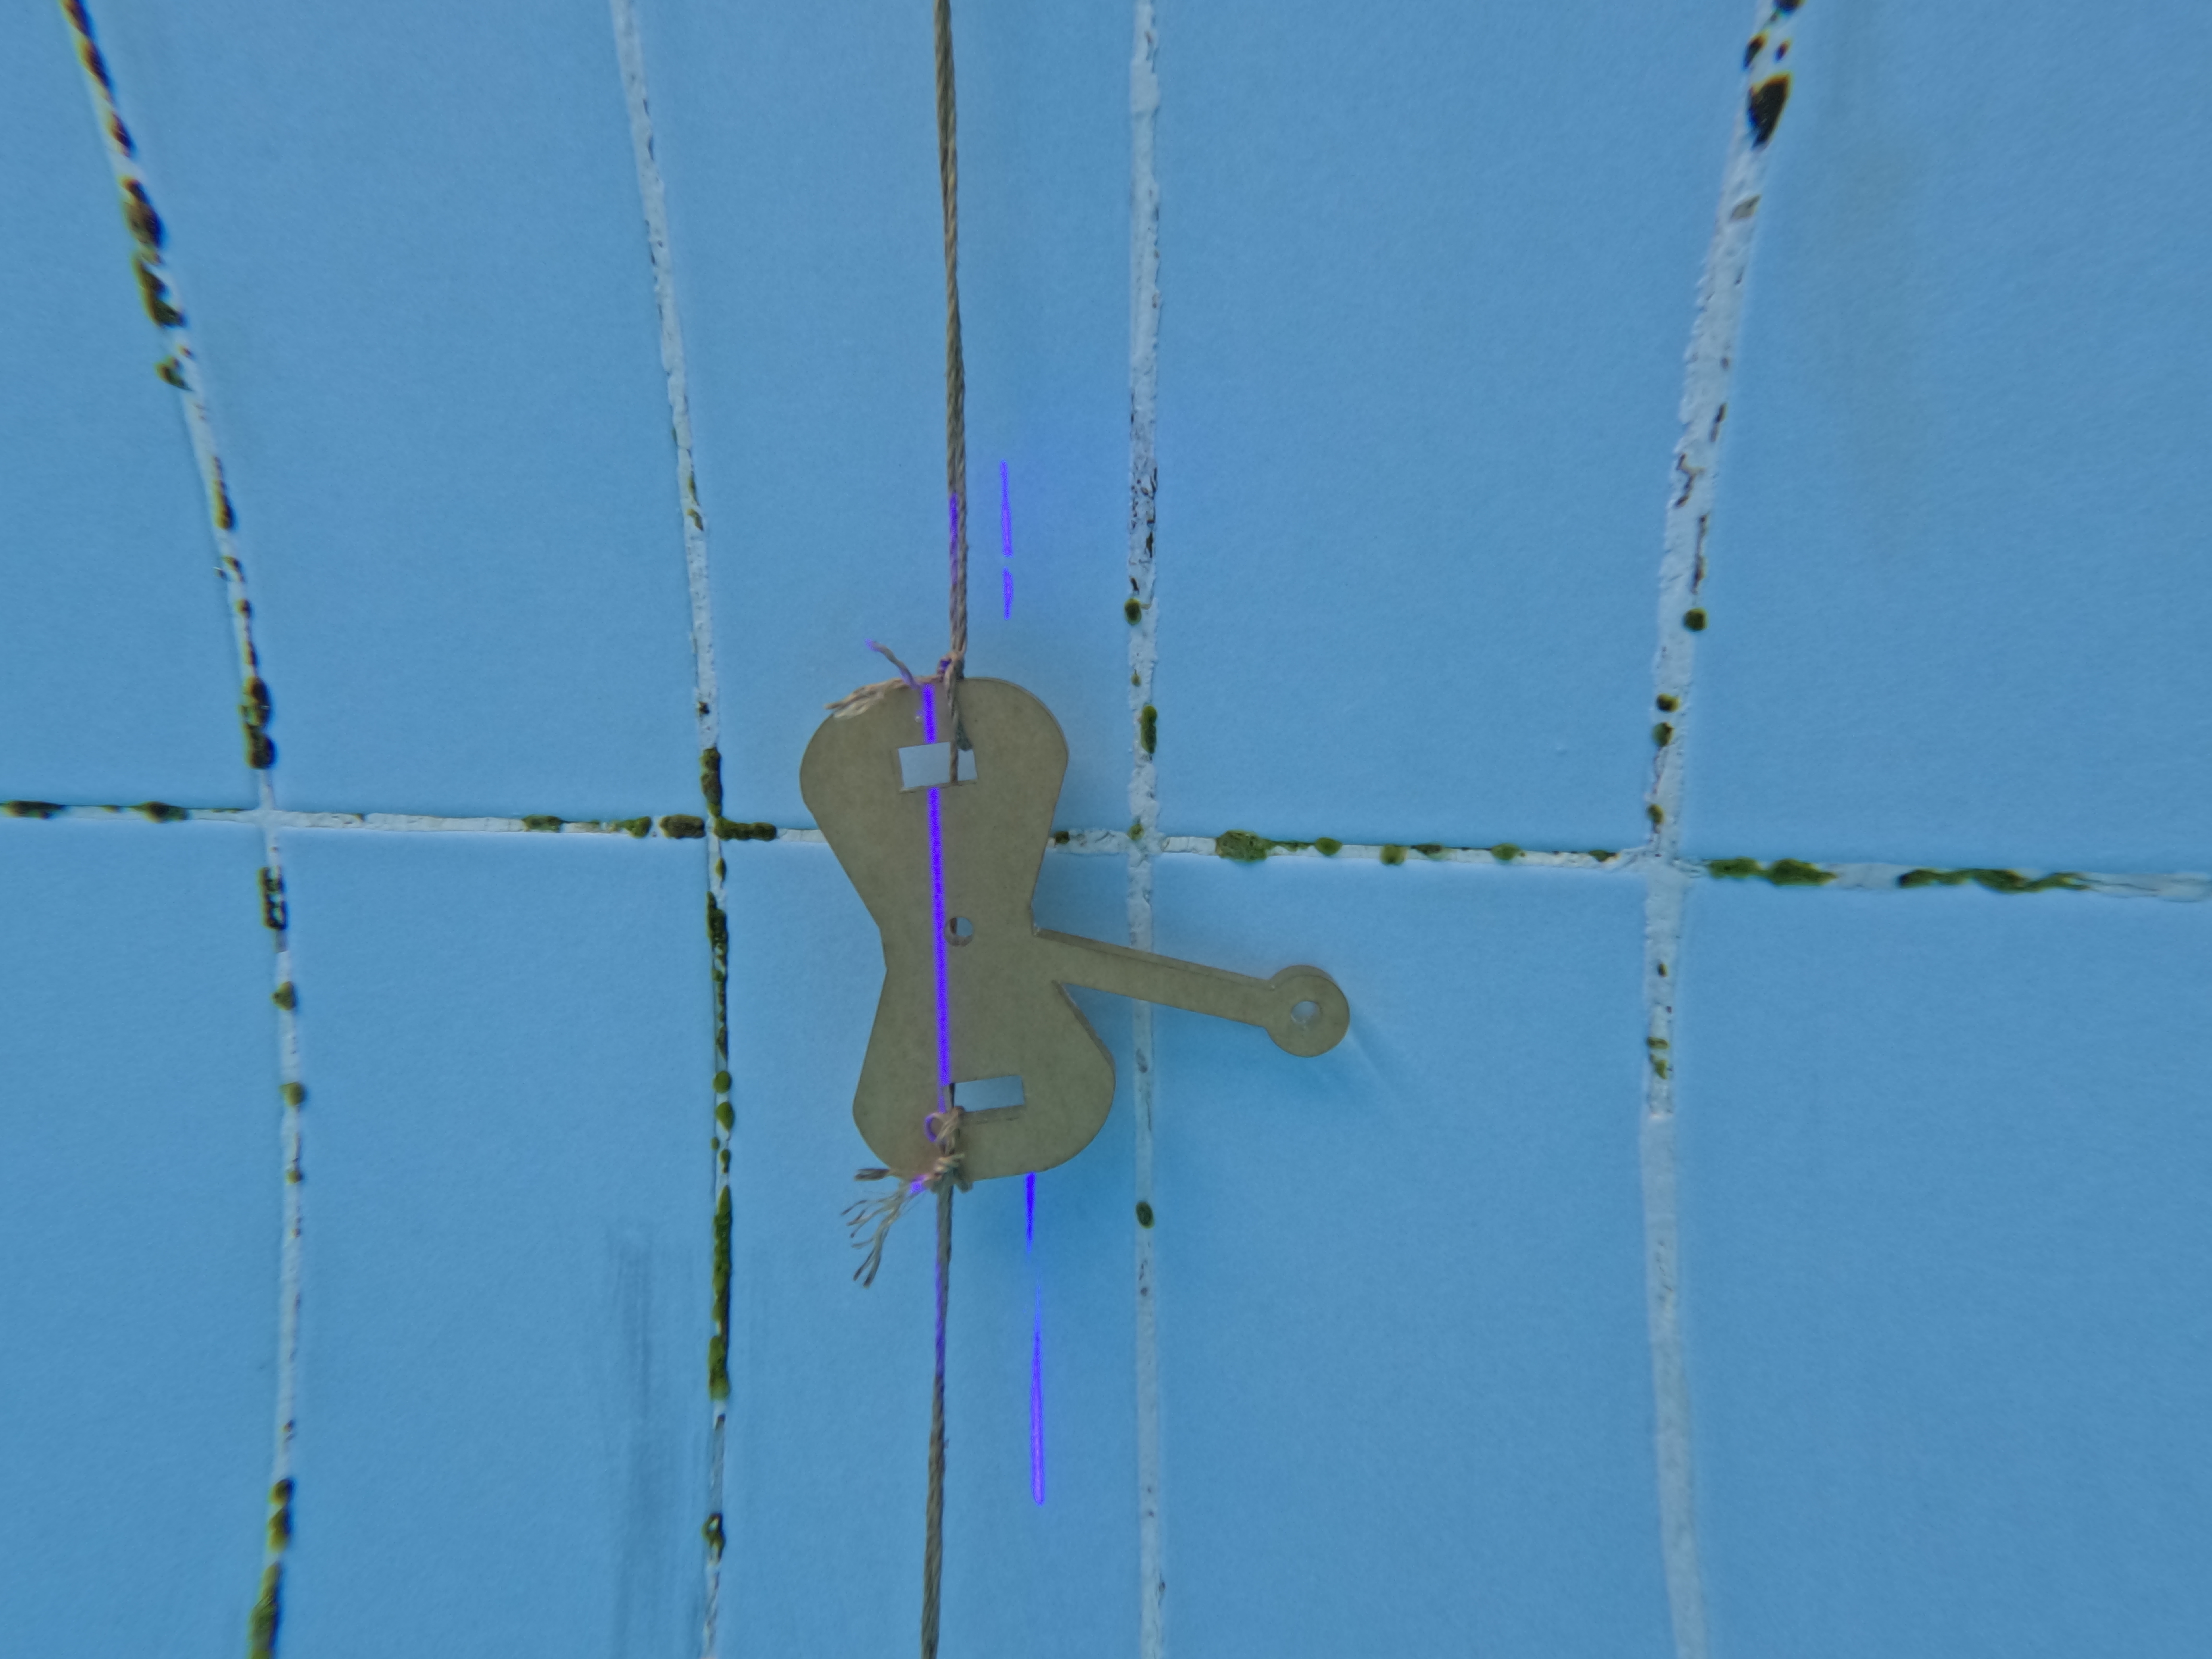

Supplement: Supplementary file 2643 [file G0050941.pdf › Level_2_2/G0050941.pdf]

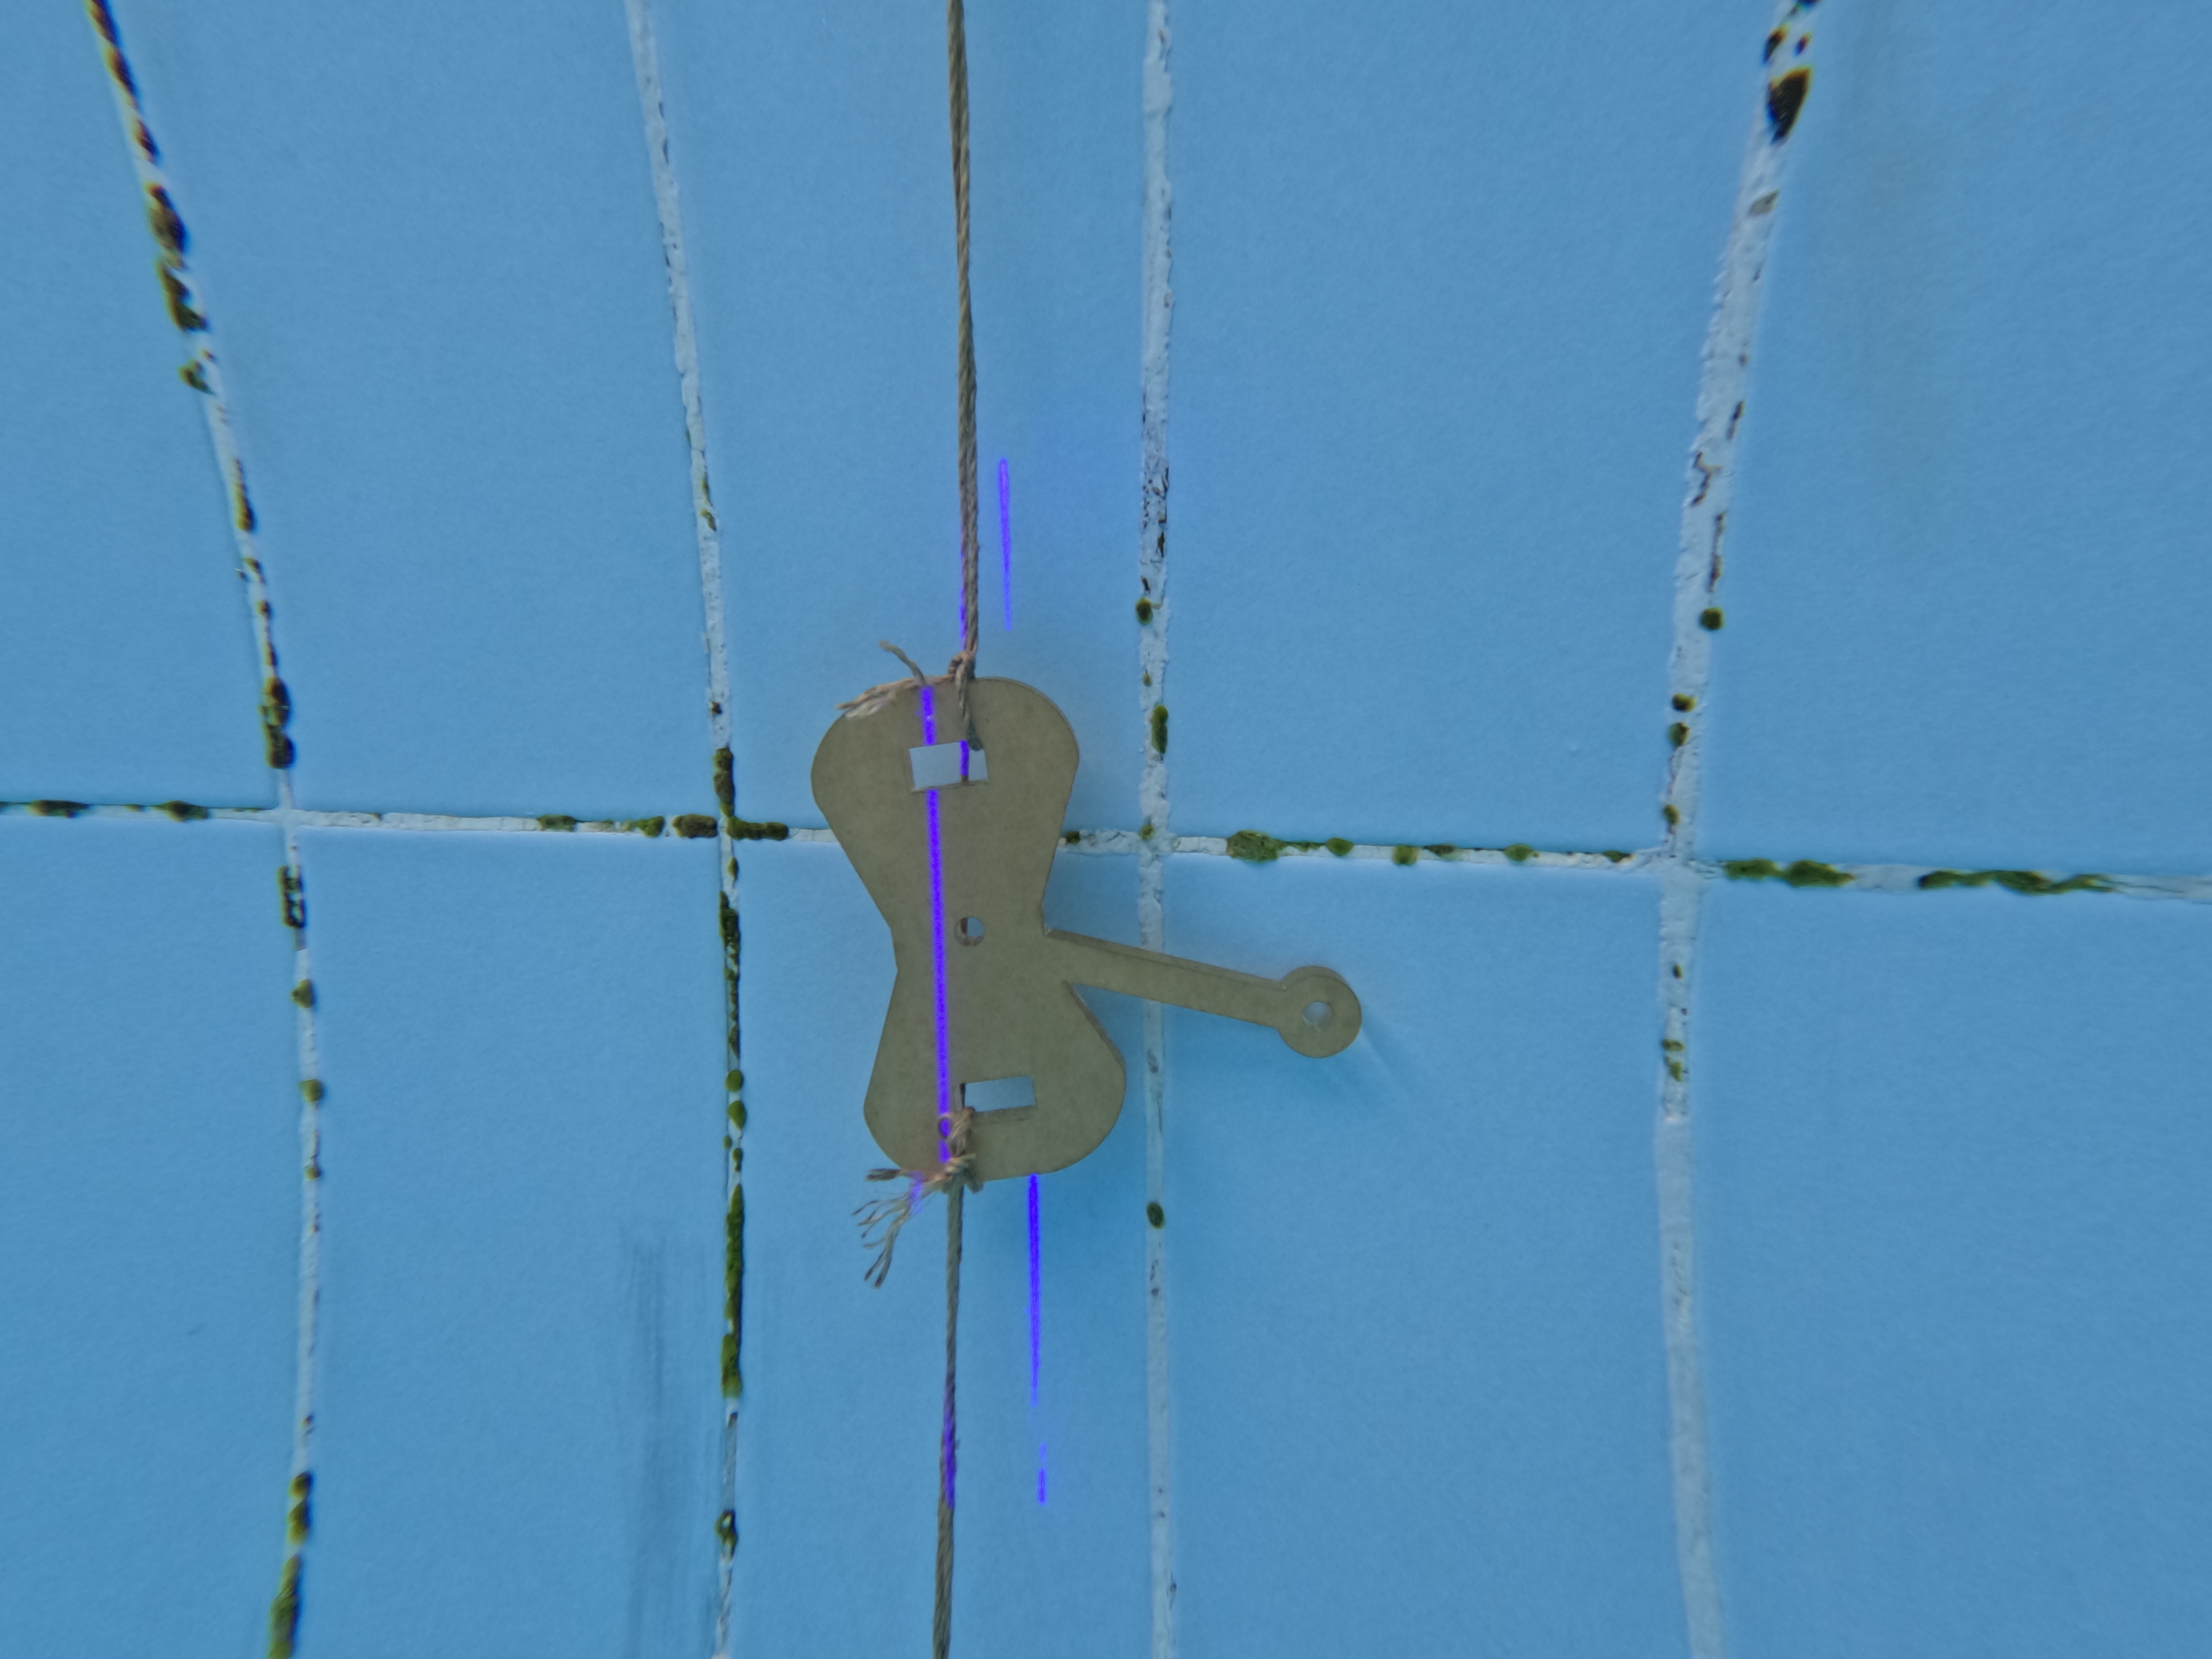

Supplement: Supplementary file 2644 [file G0050942.pdf › Level_2_2/G0050942.pdf]

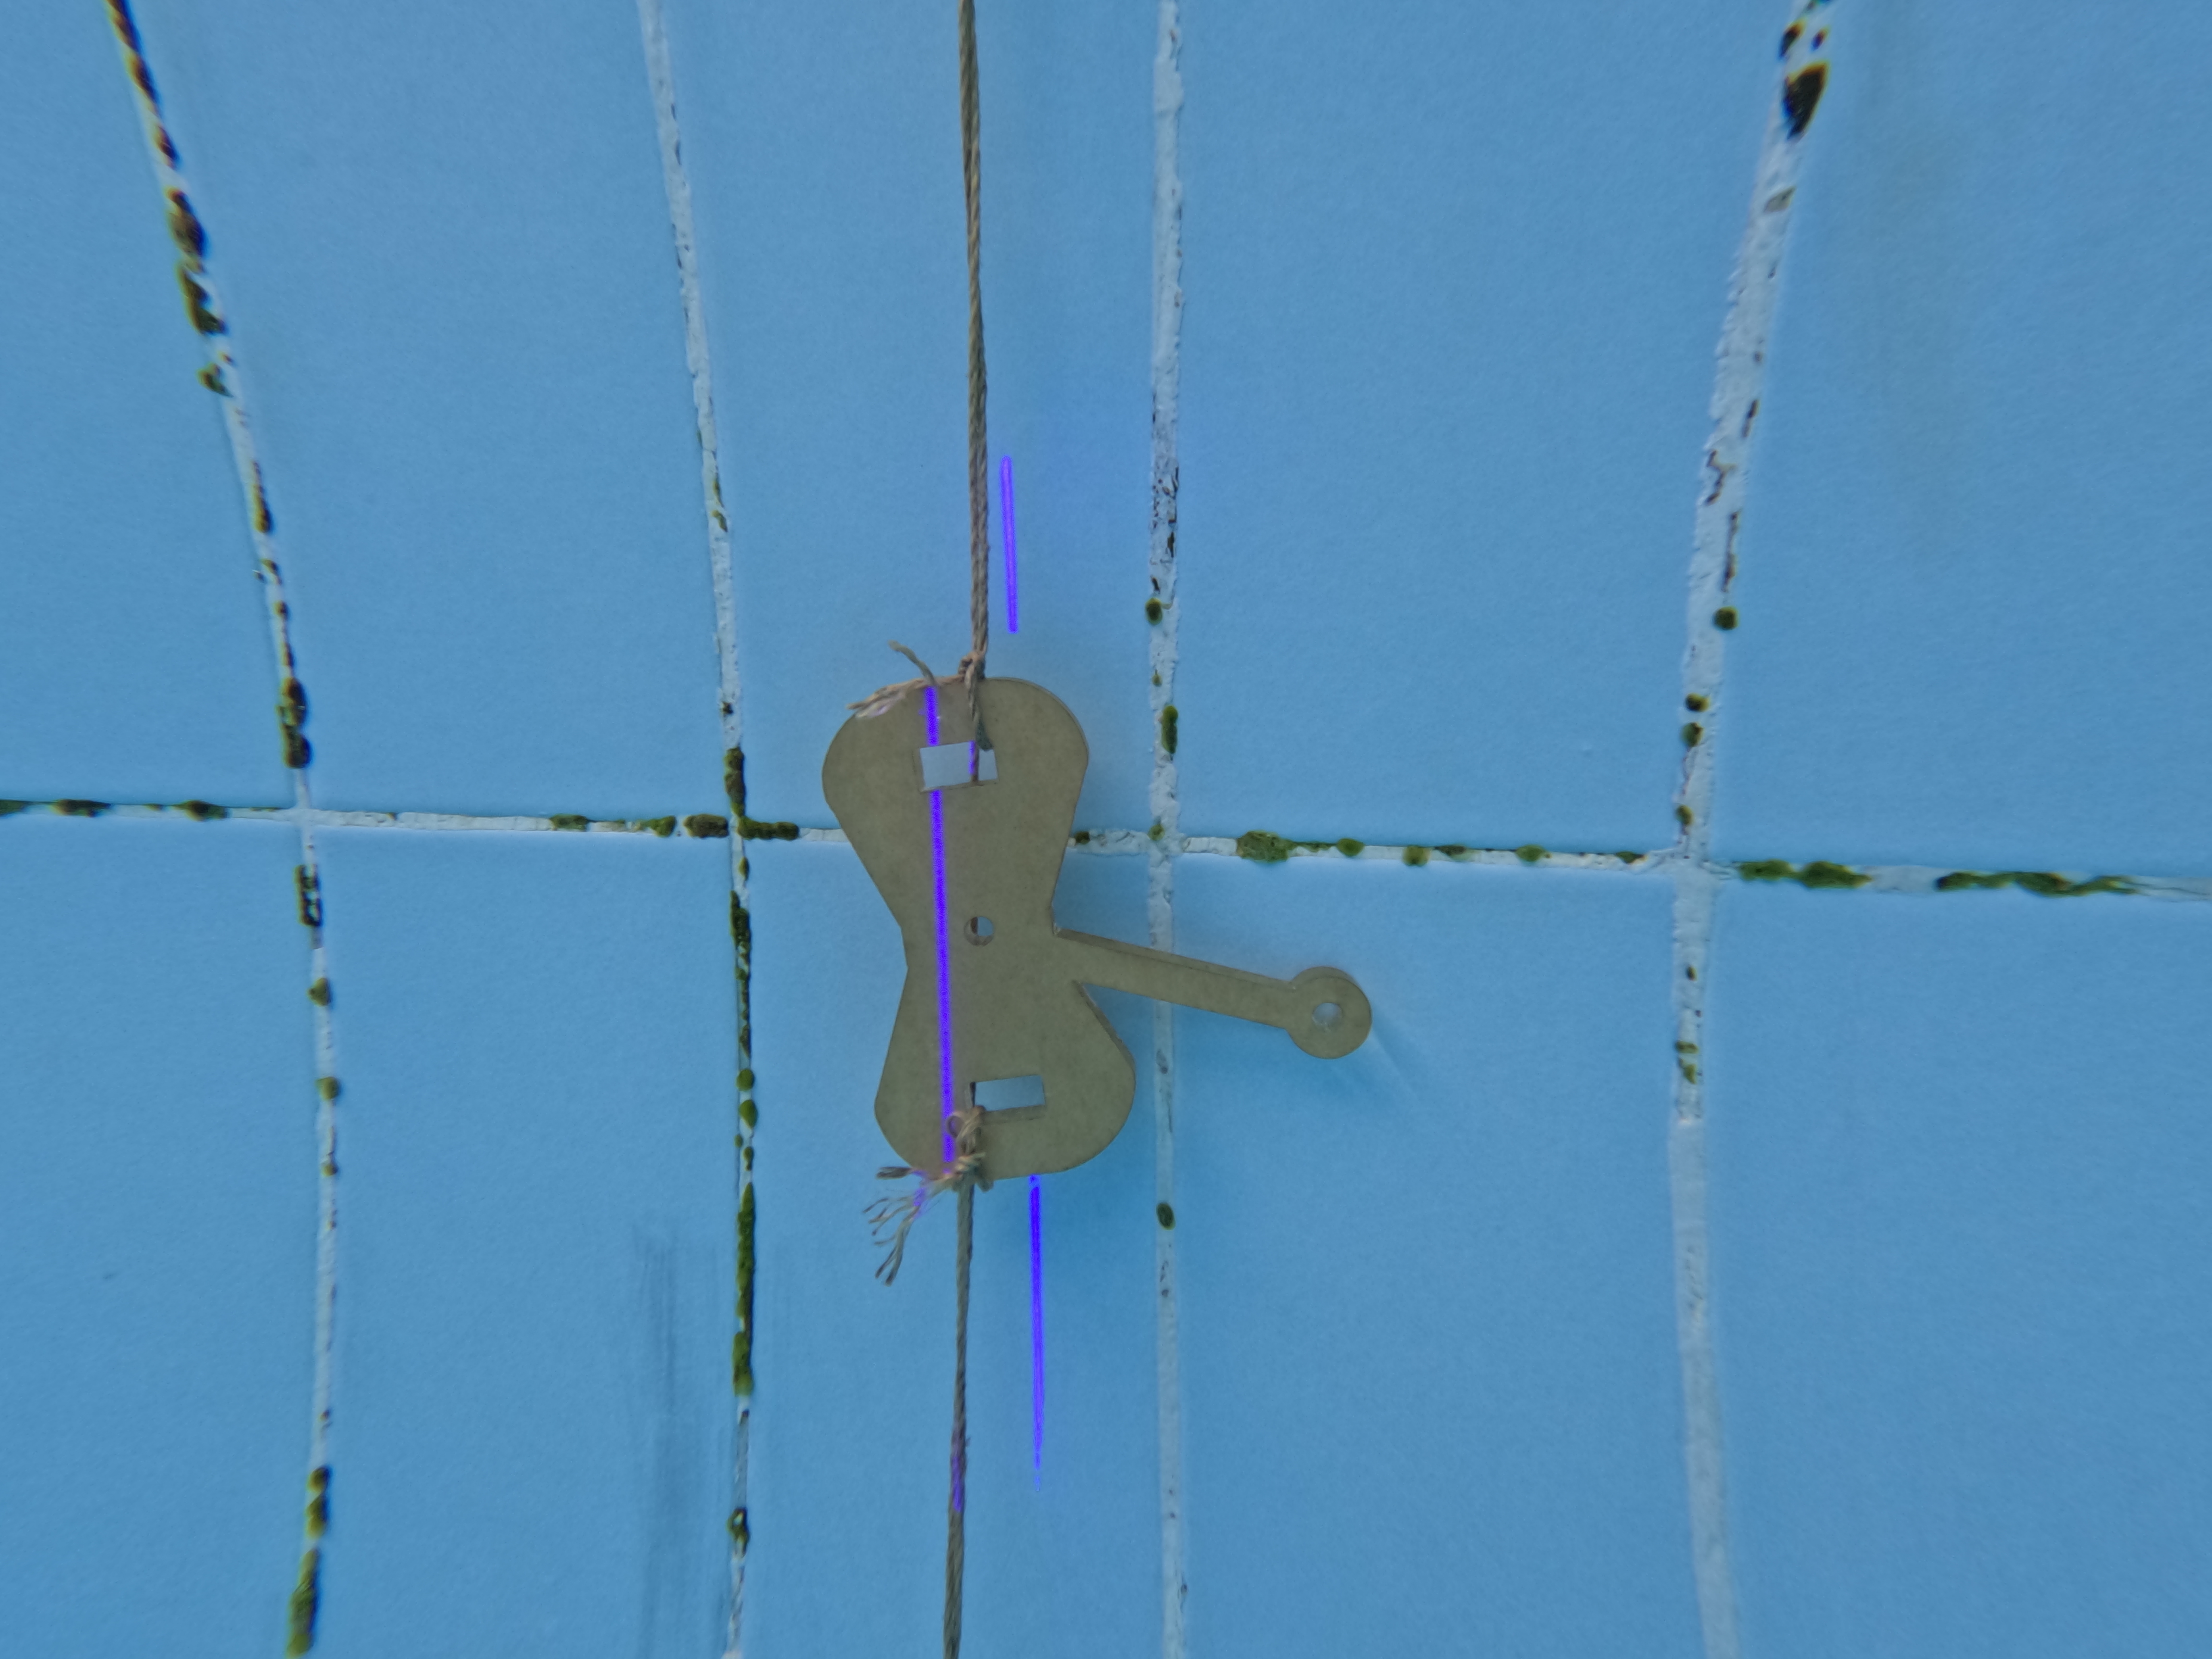

Supplement: Supplementary file 2645 [file G0050943.pdf › Level_2_2/G0050943.pdf]

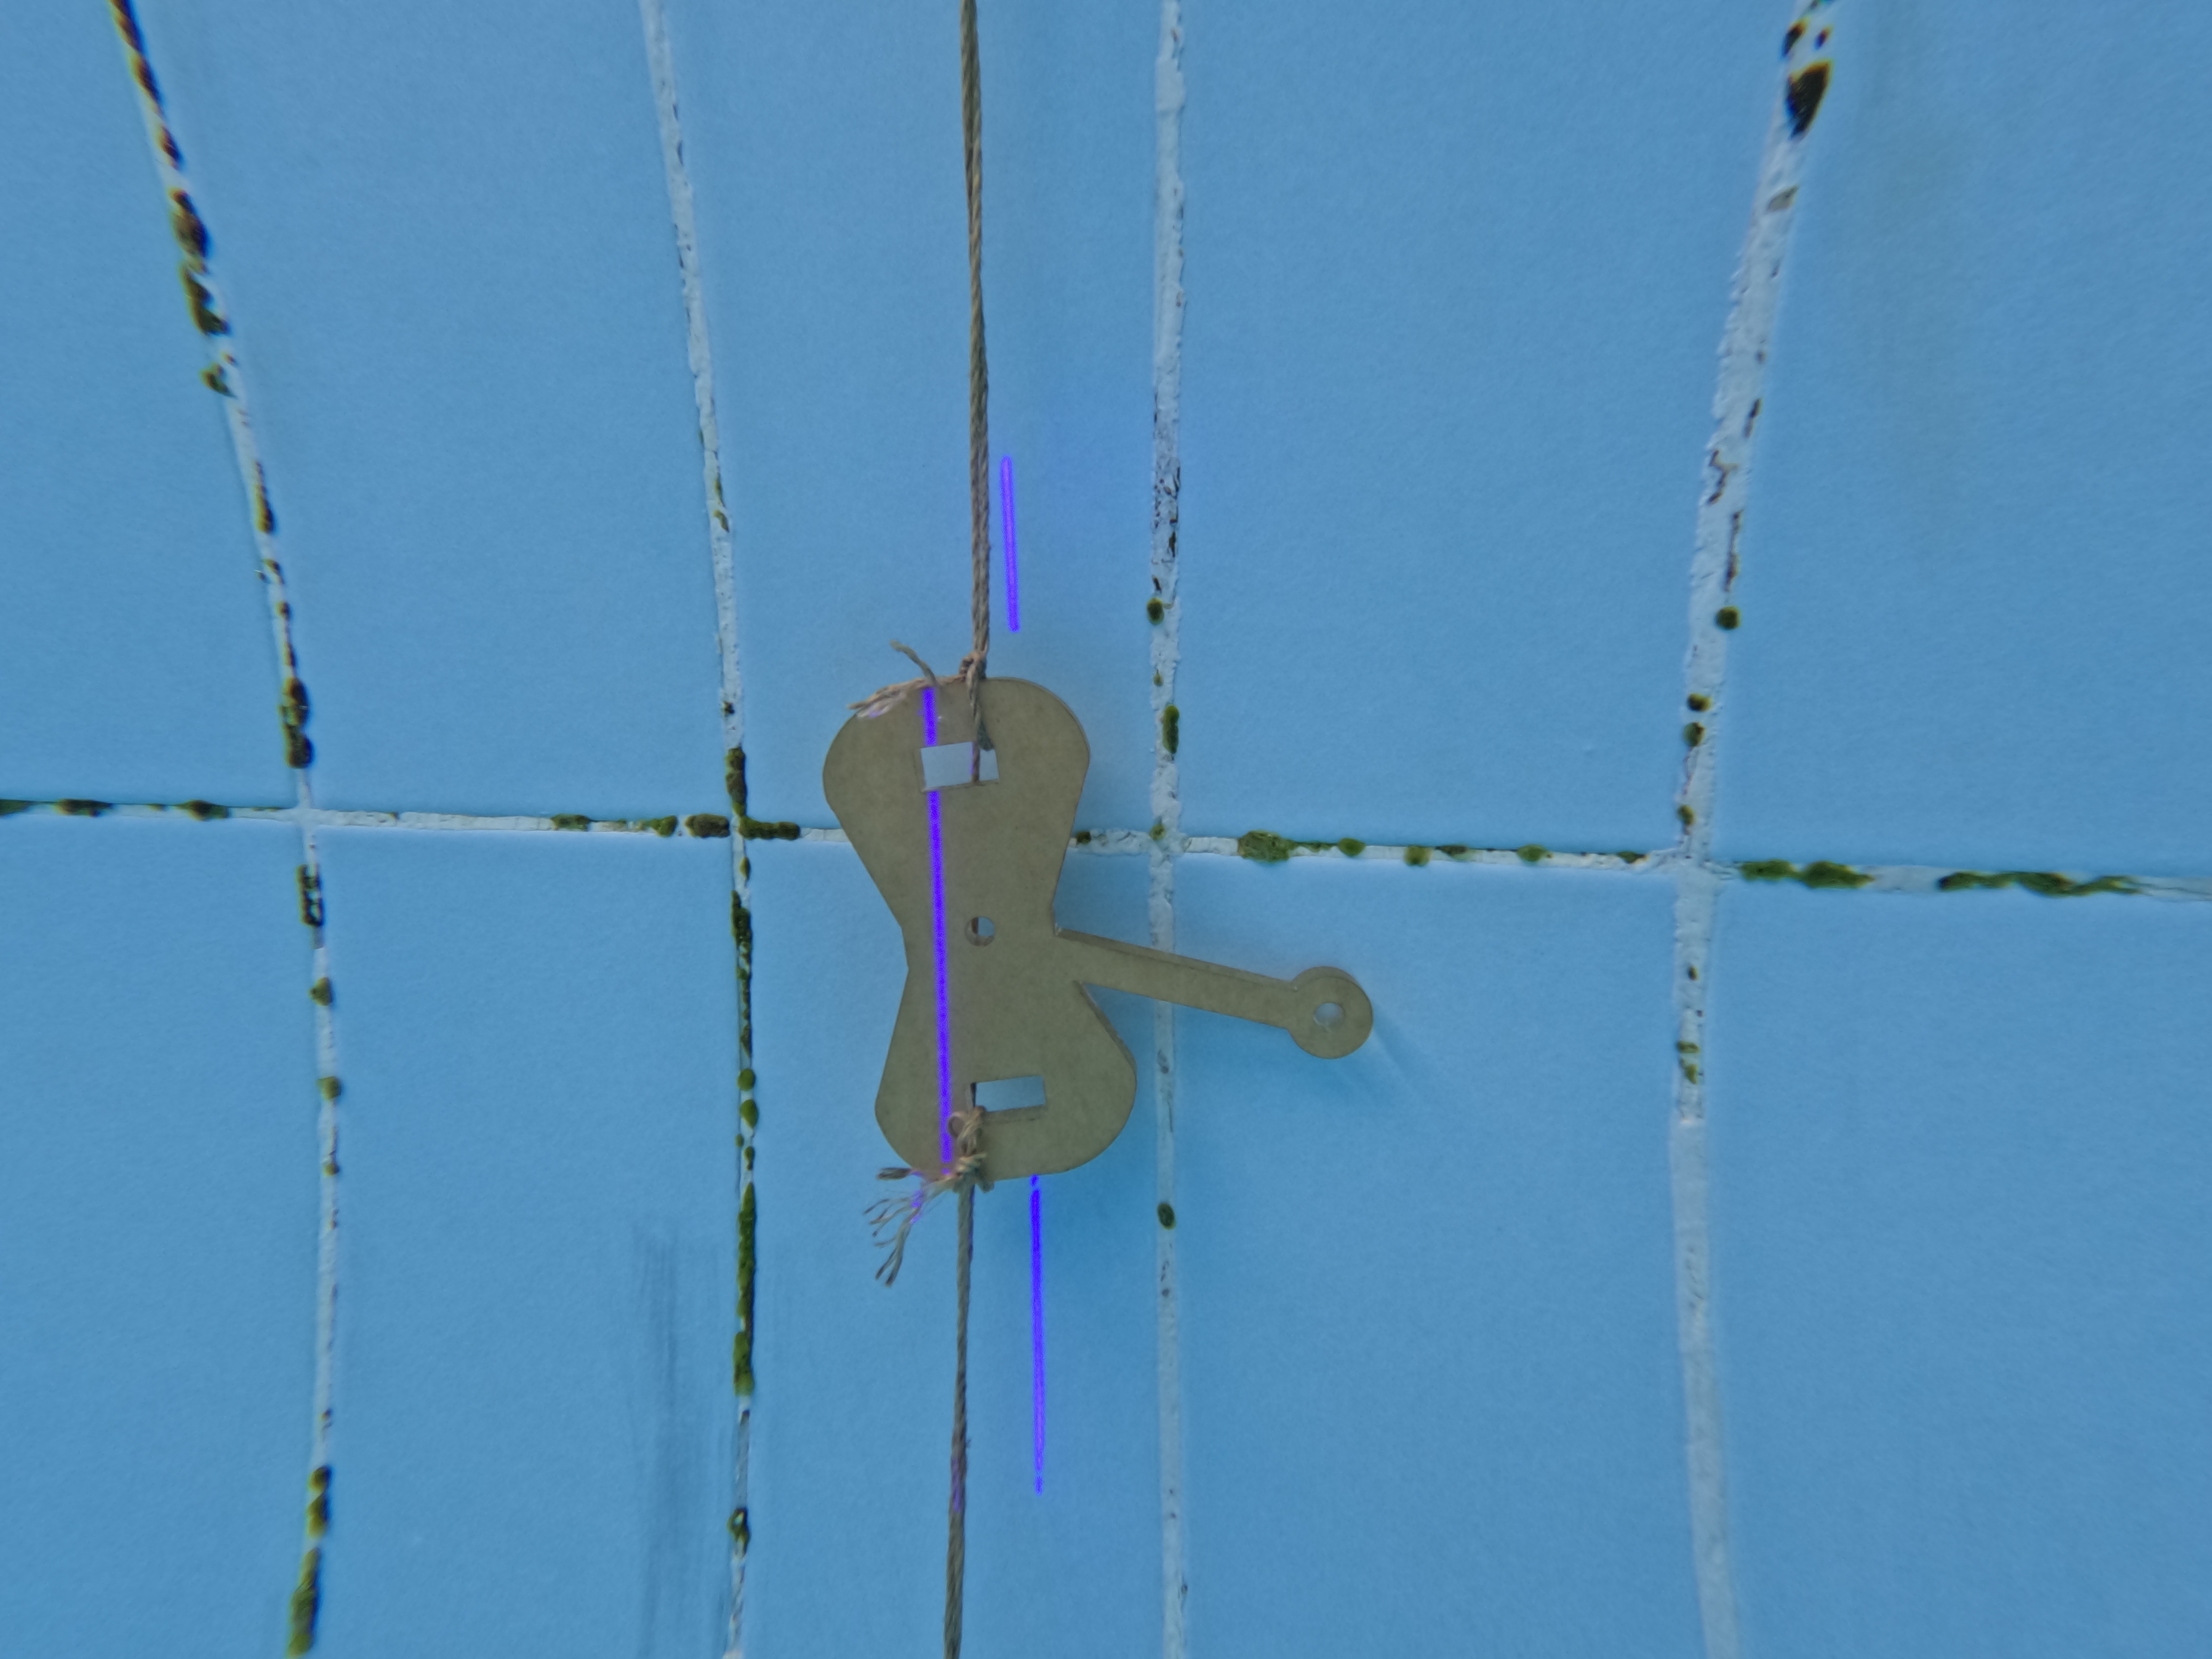

Supplement: Supplementary file 2646 [file G0050944.pdf › Level_2_2/G0050944.pdf]

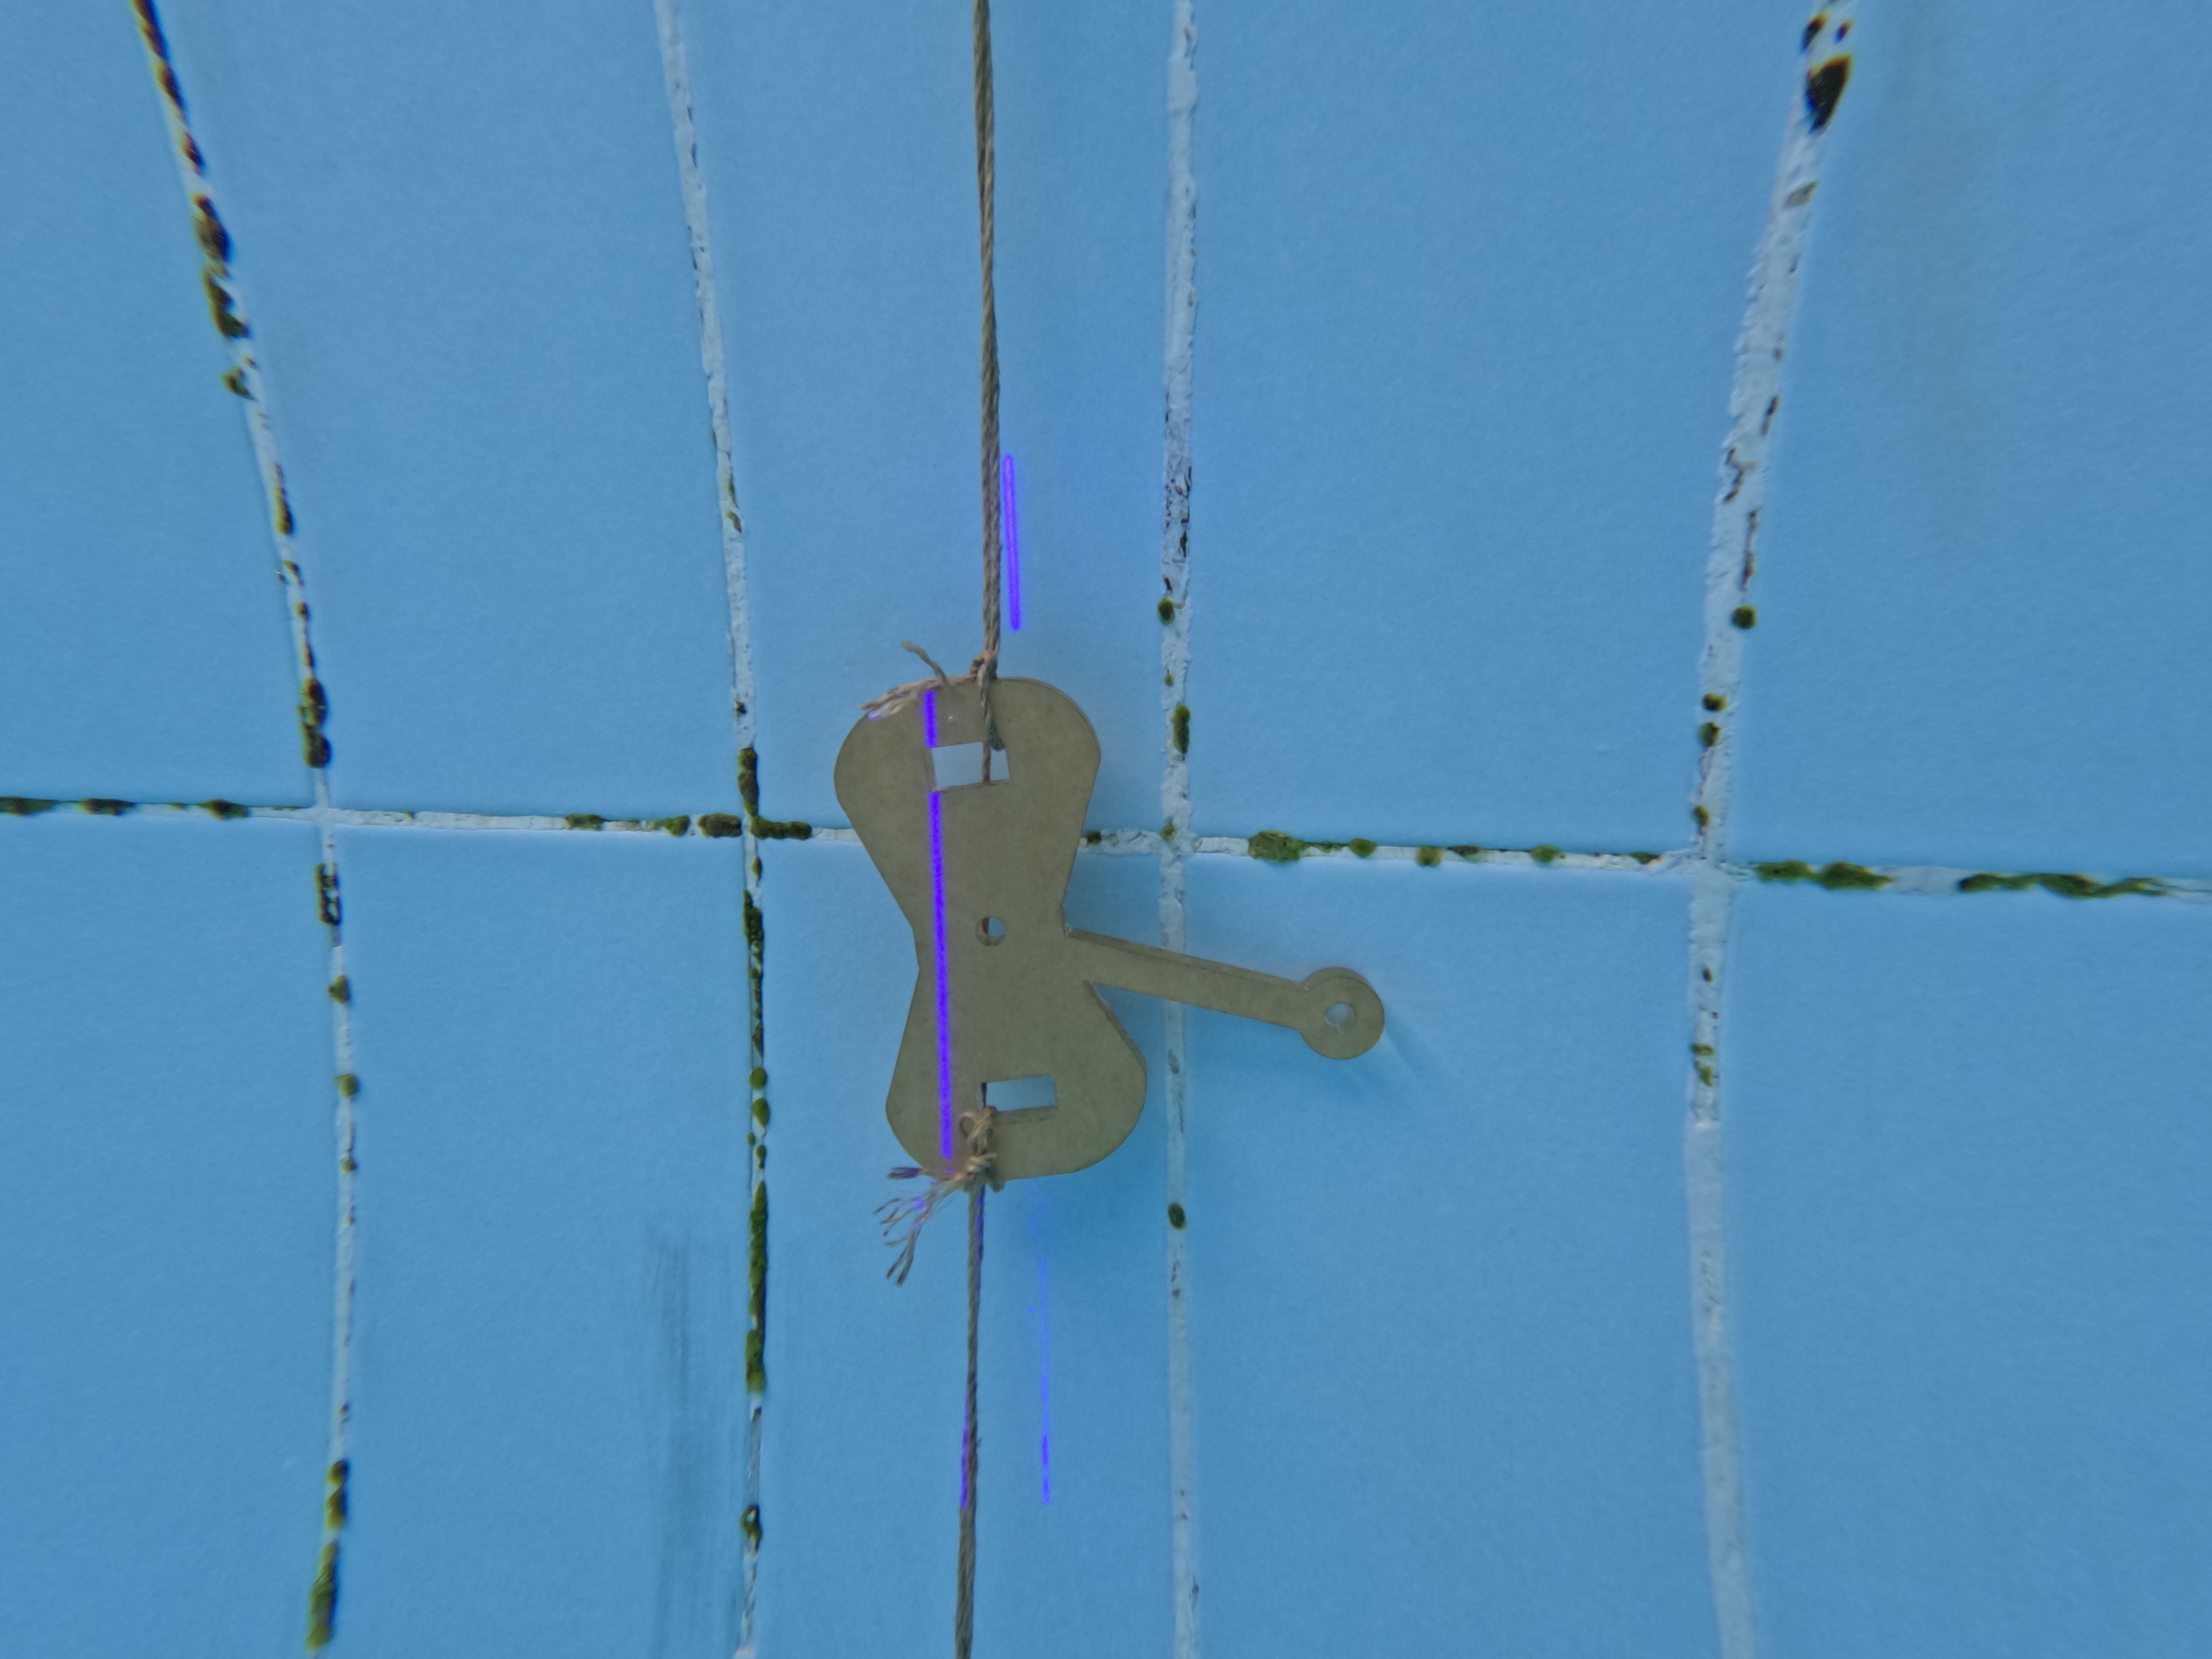

Supplement: Supplementary file 2647 [file G0050945.pdf › Level_2_2/G0050945.pdf]

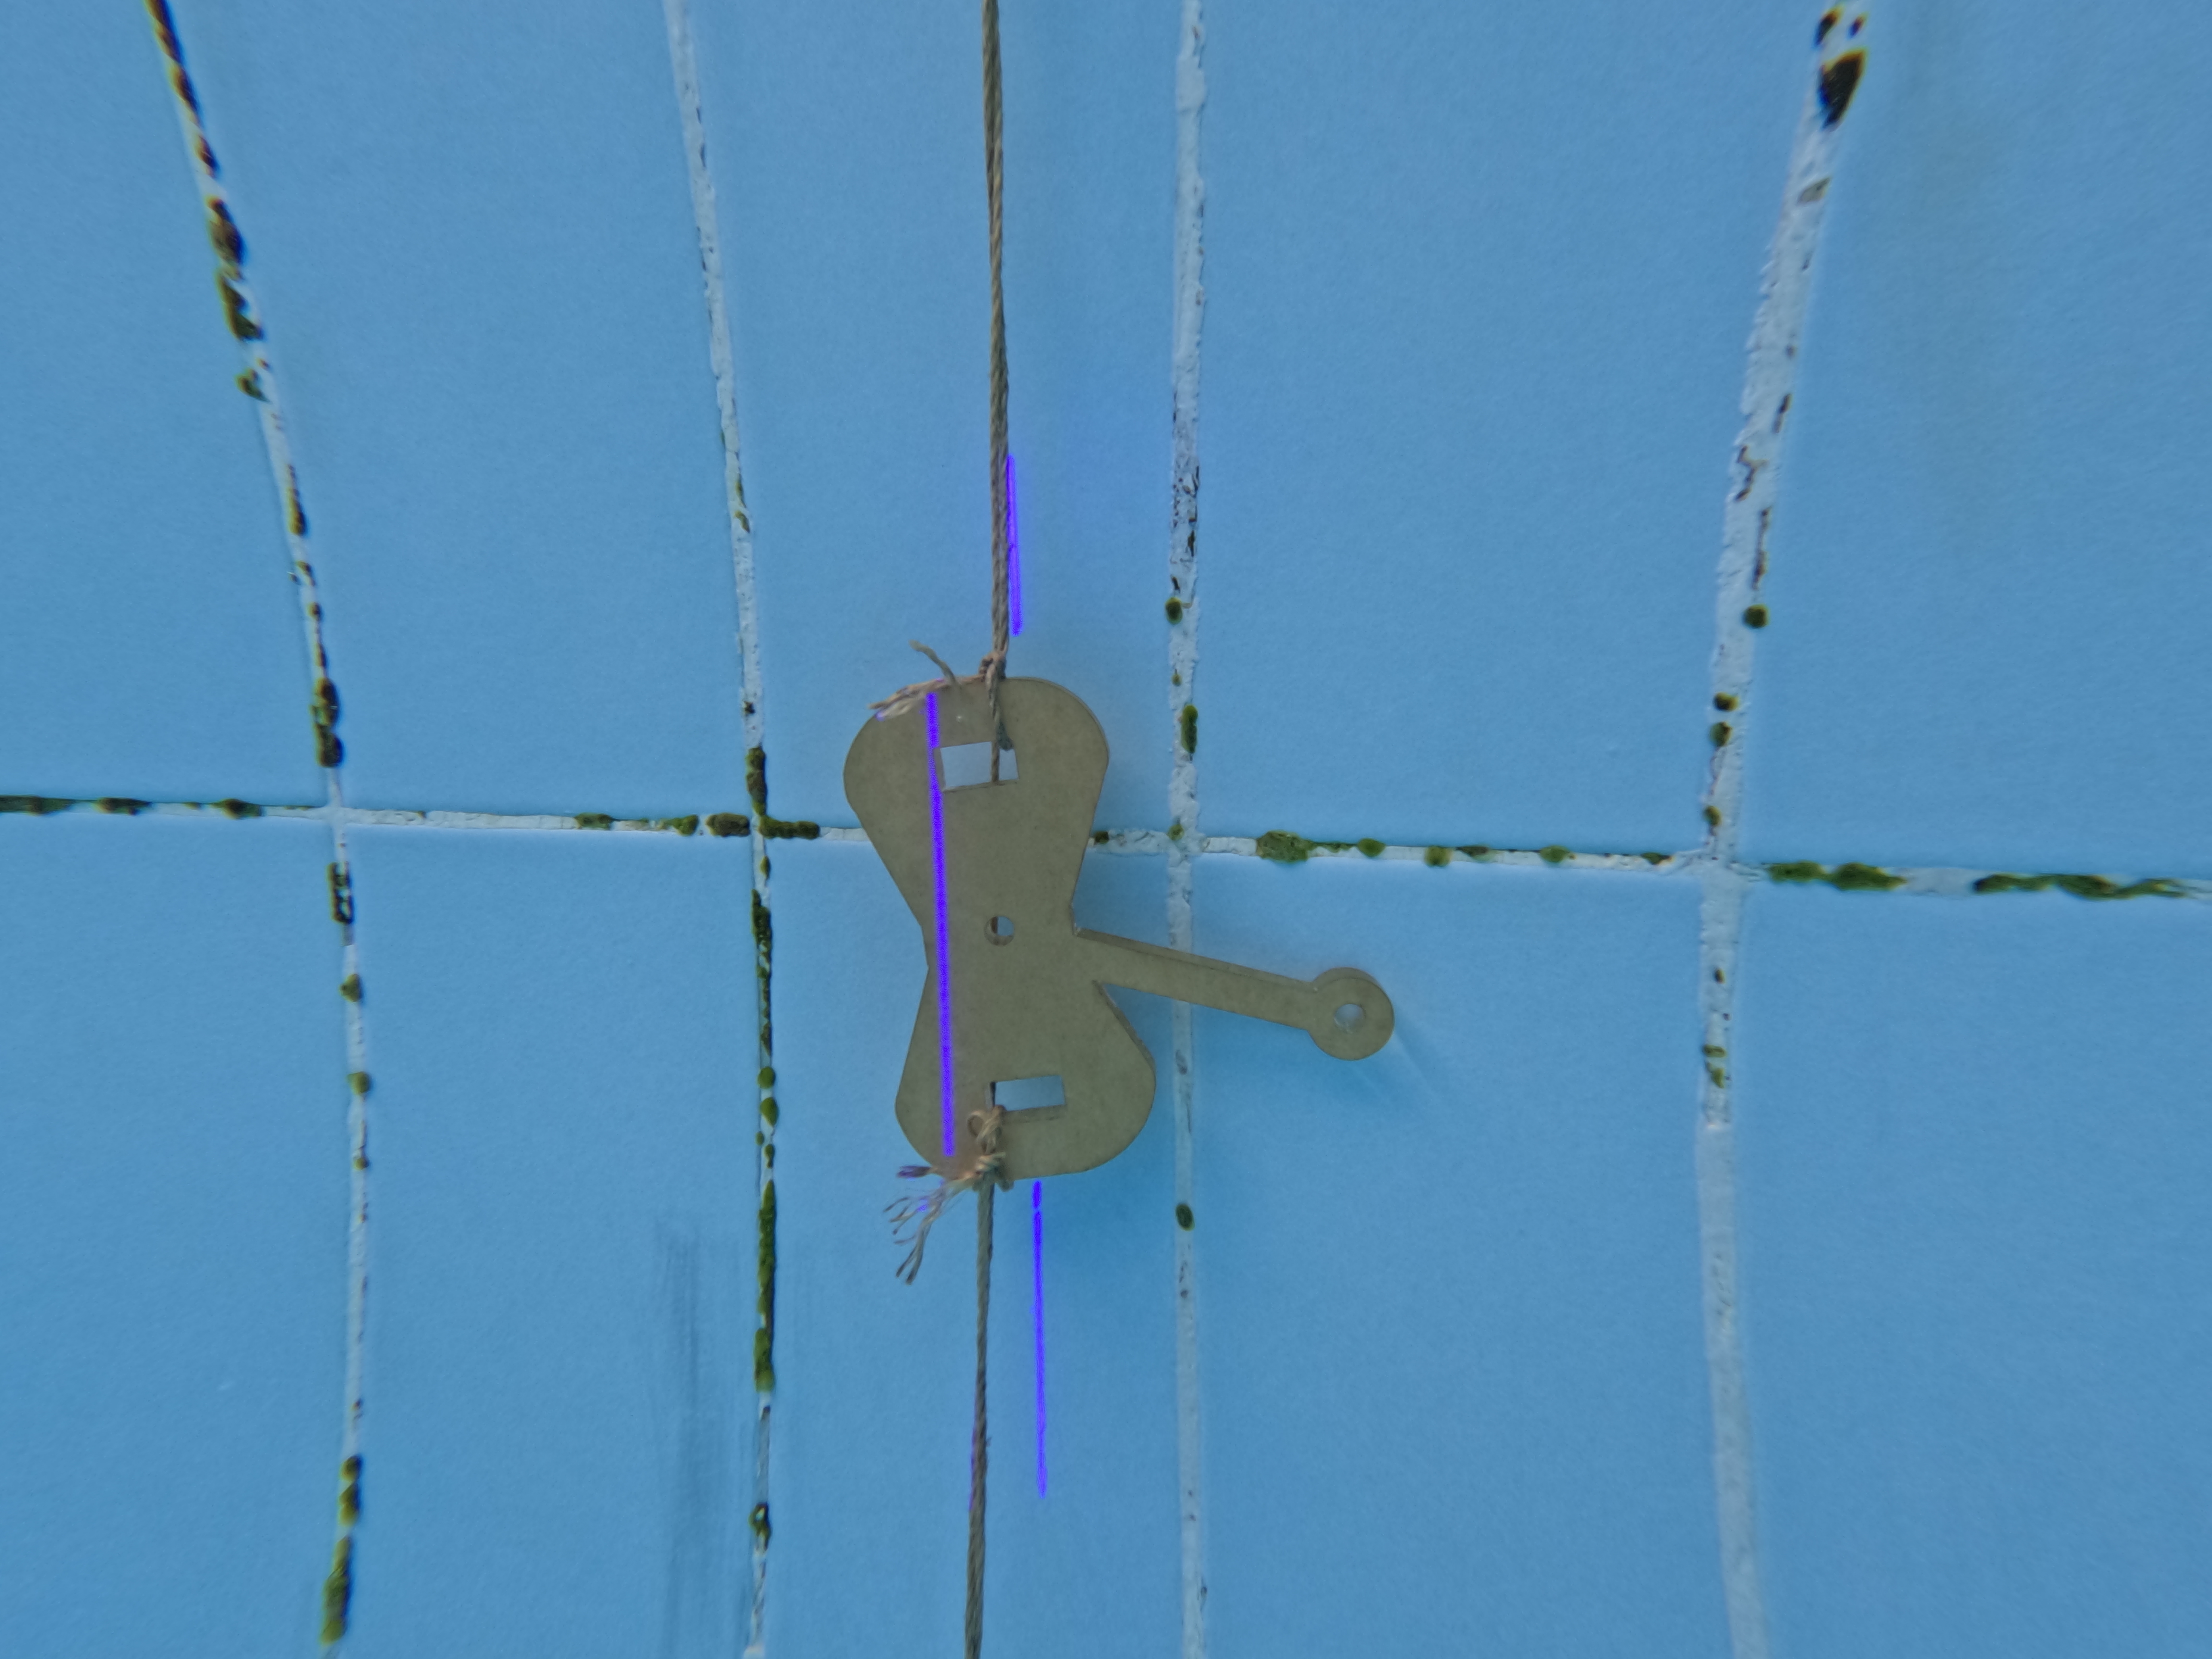

Supplement: Supplementary file 2648 [file G0050946.pdf › Level_2_2/G0050946.pdf]

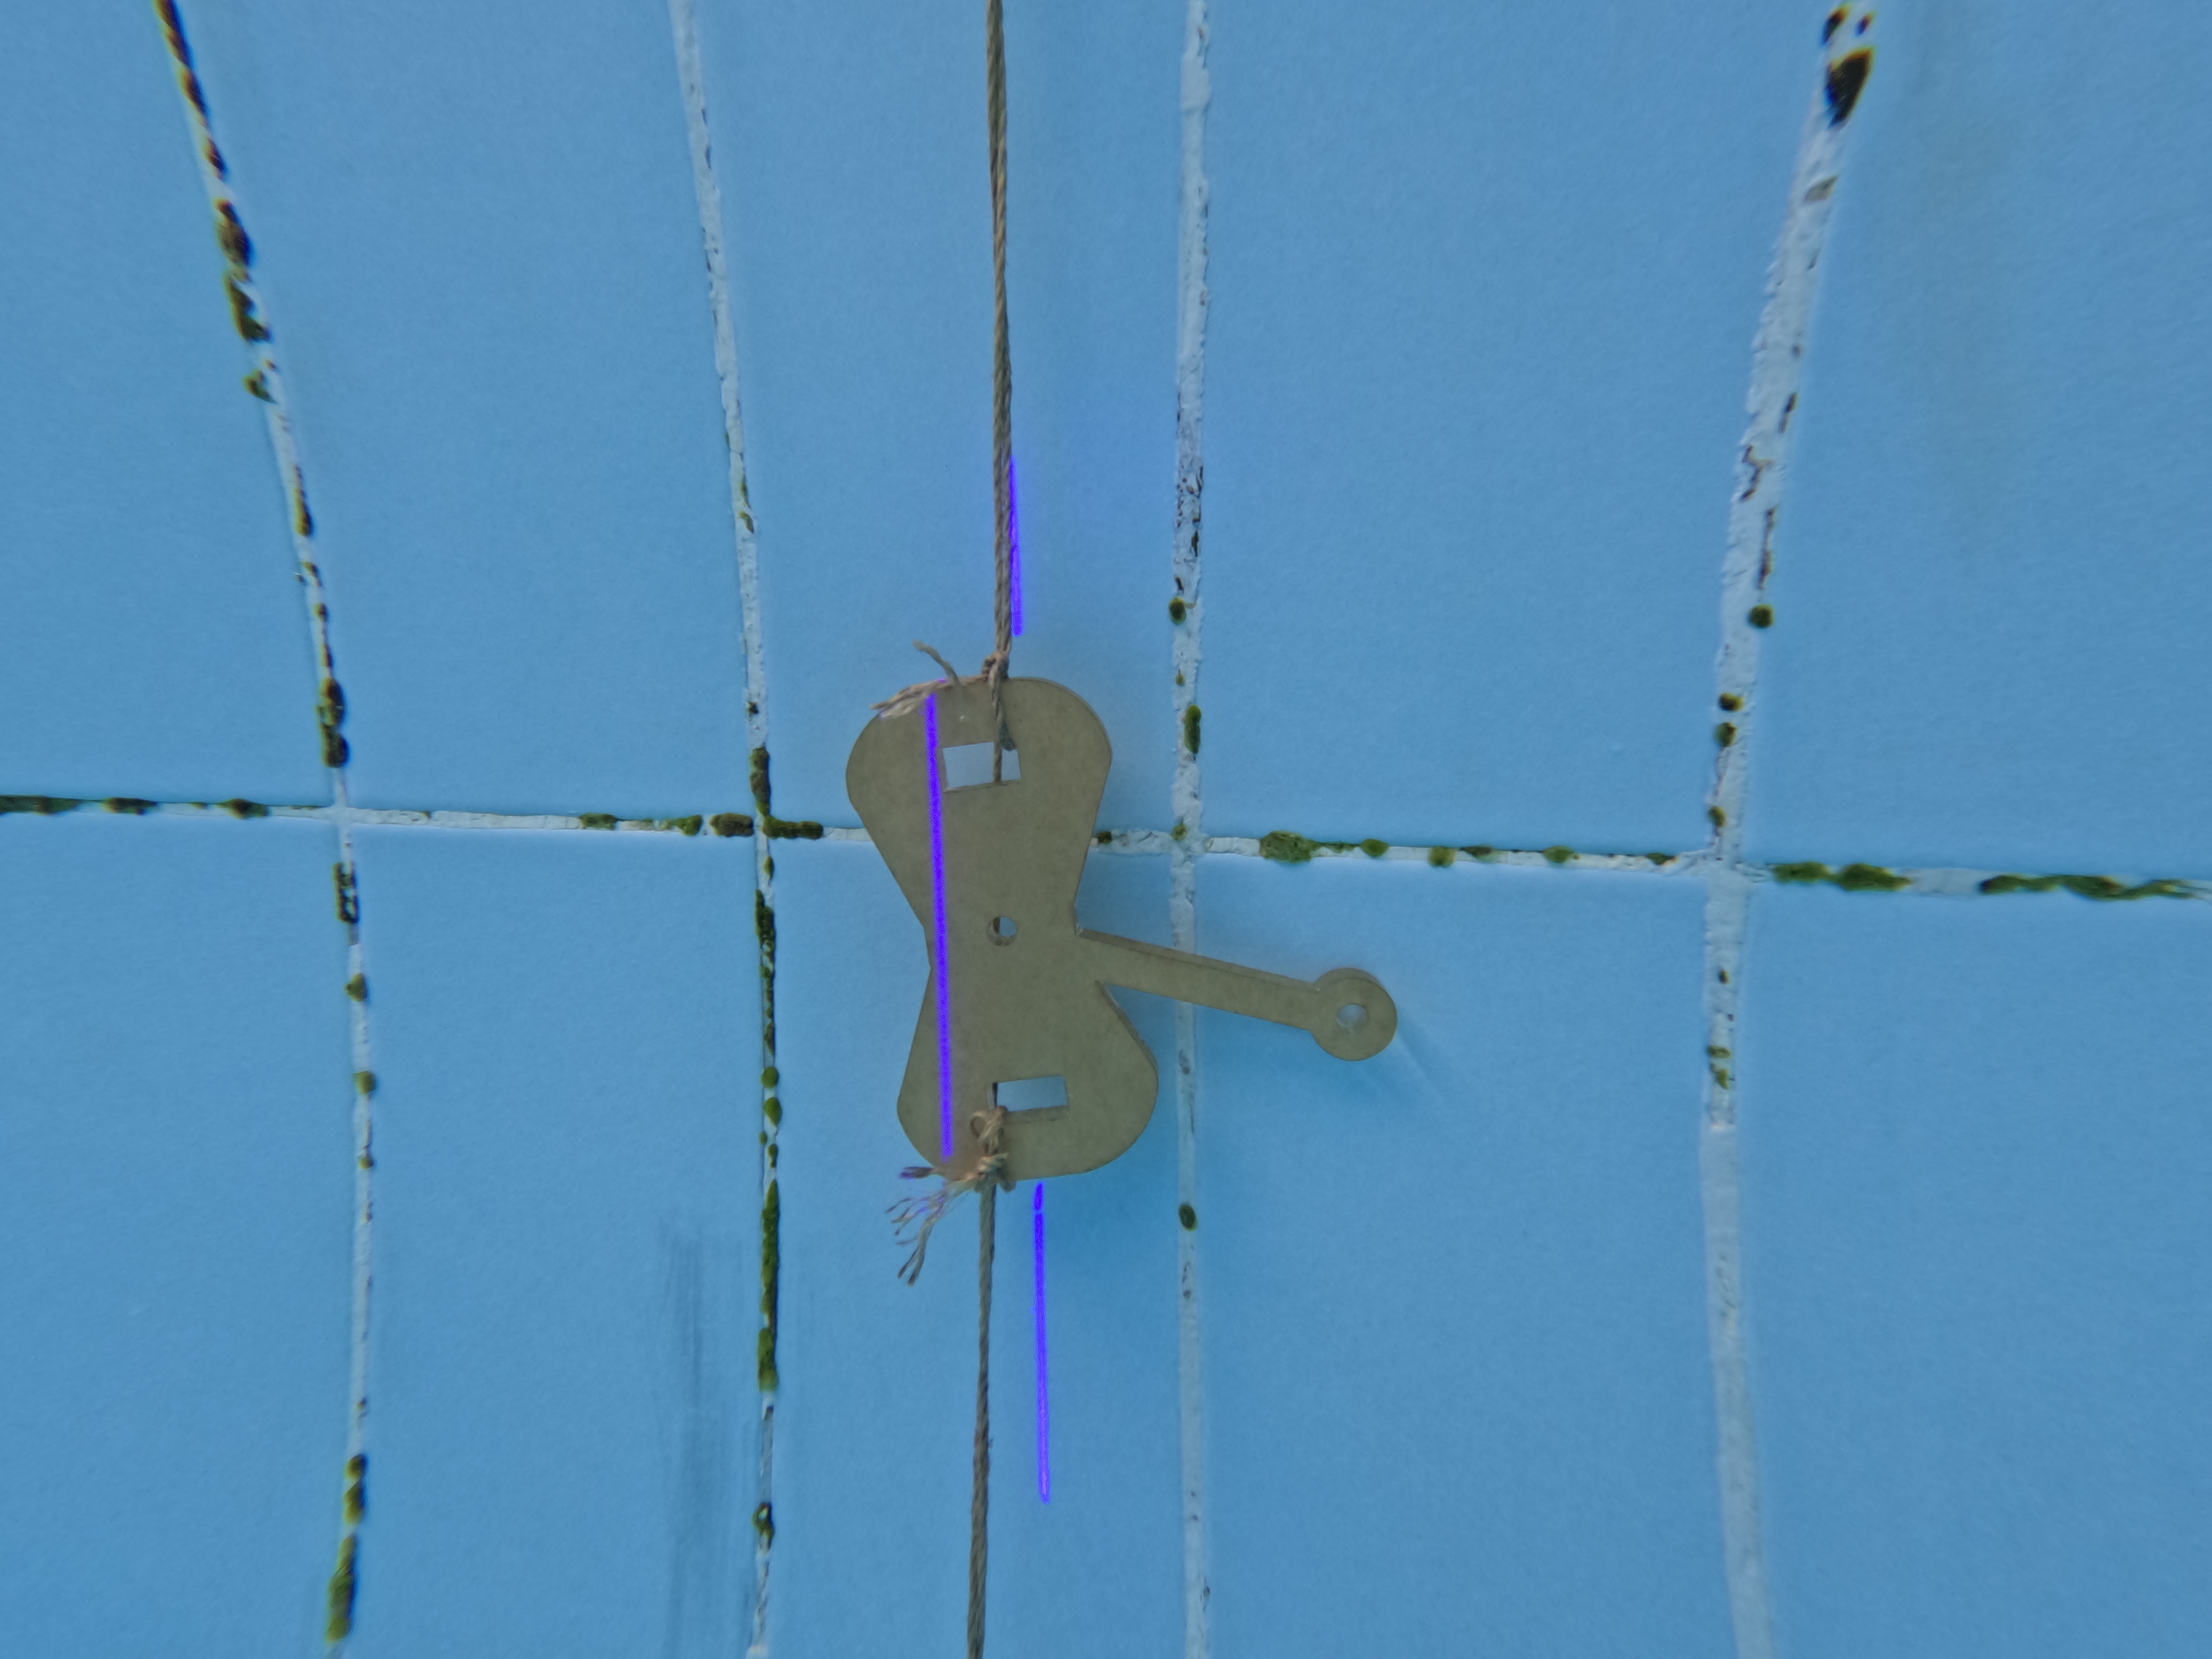

Supplement: Supplementary file 2649 [file G0050947.pdf › Level_2_2/G0050947.pdf]

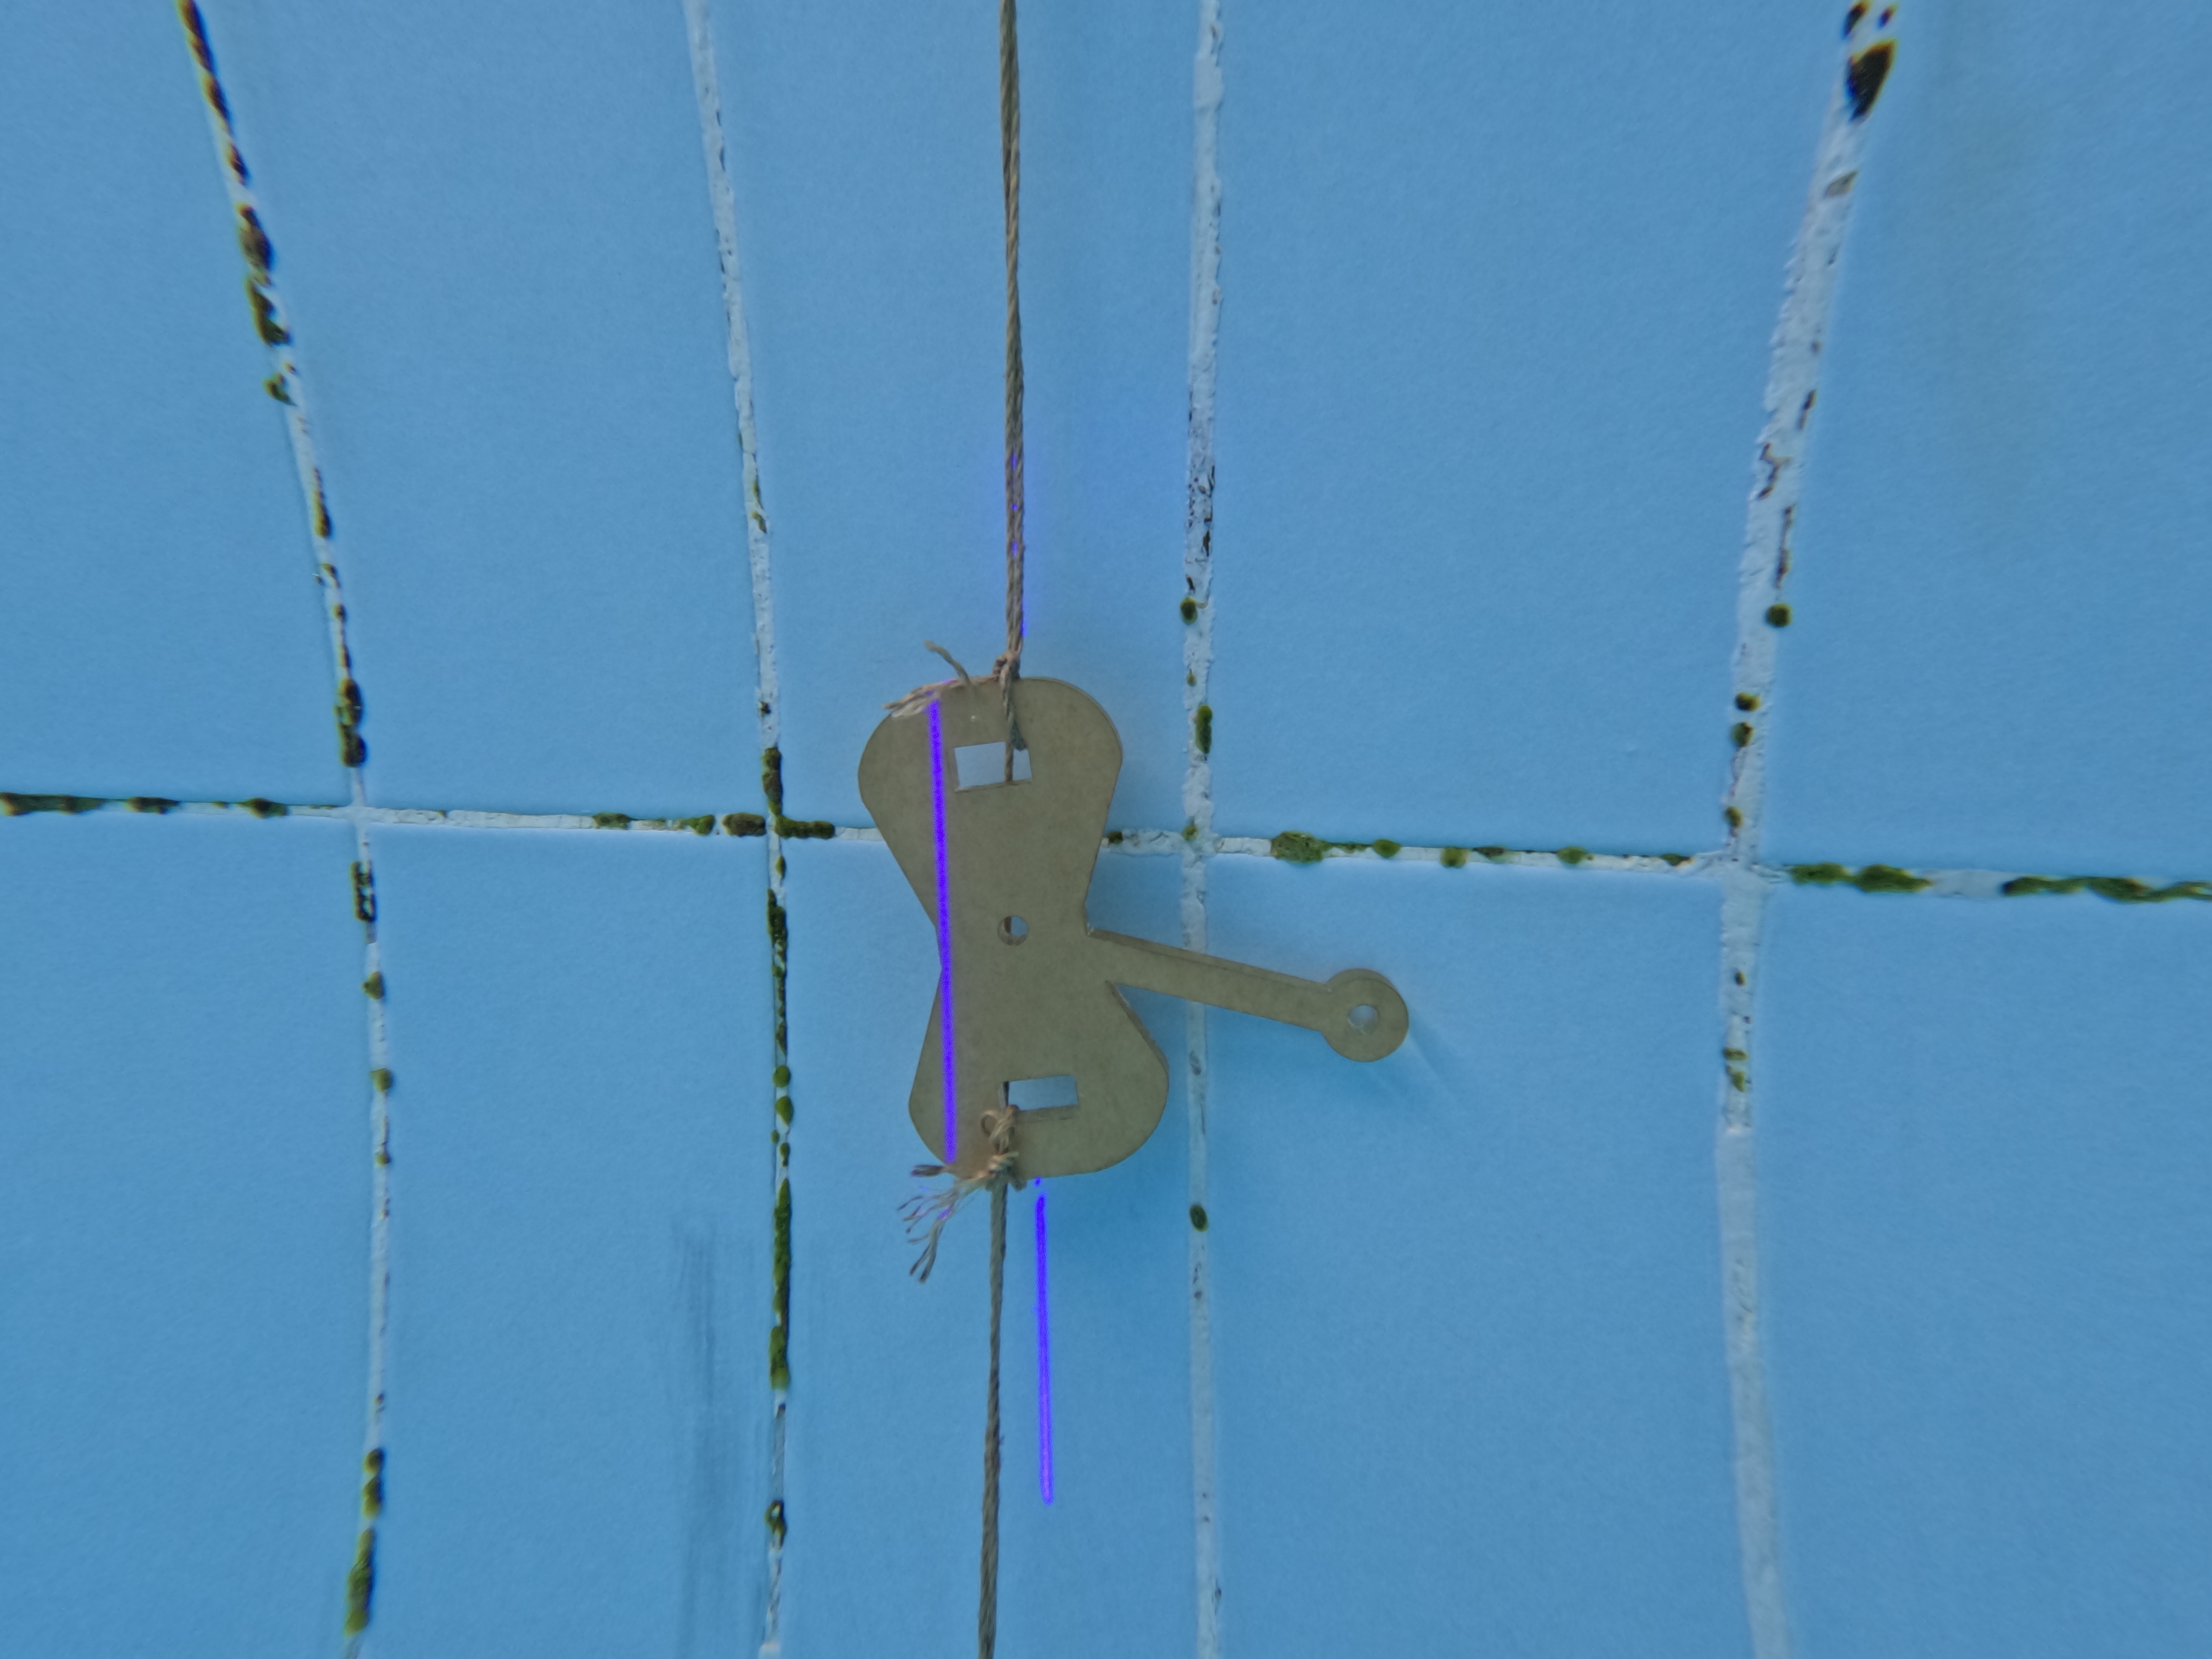

Supplement: Supplementary file 2650 [file G0050948.pdf › Level_2_2/G0050948.pdf]

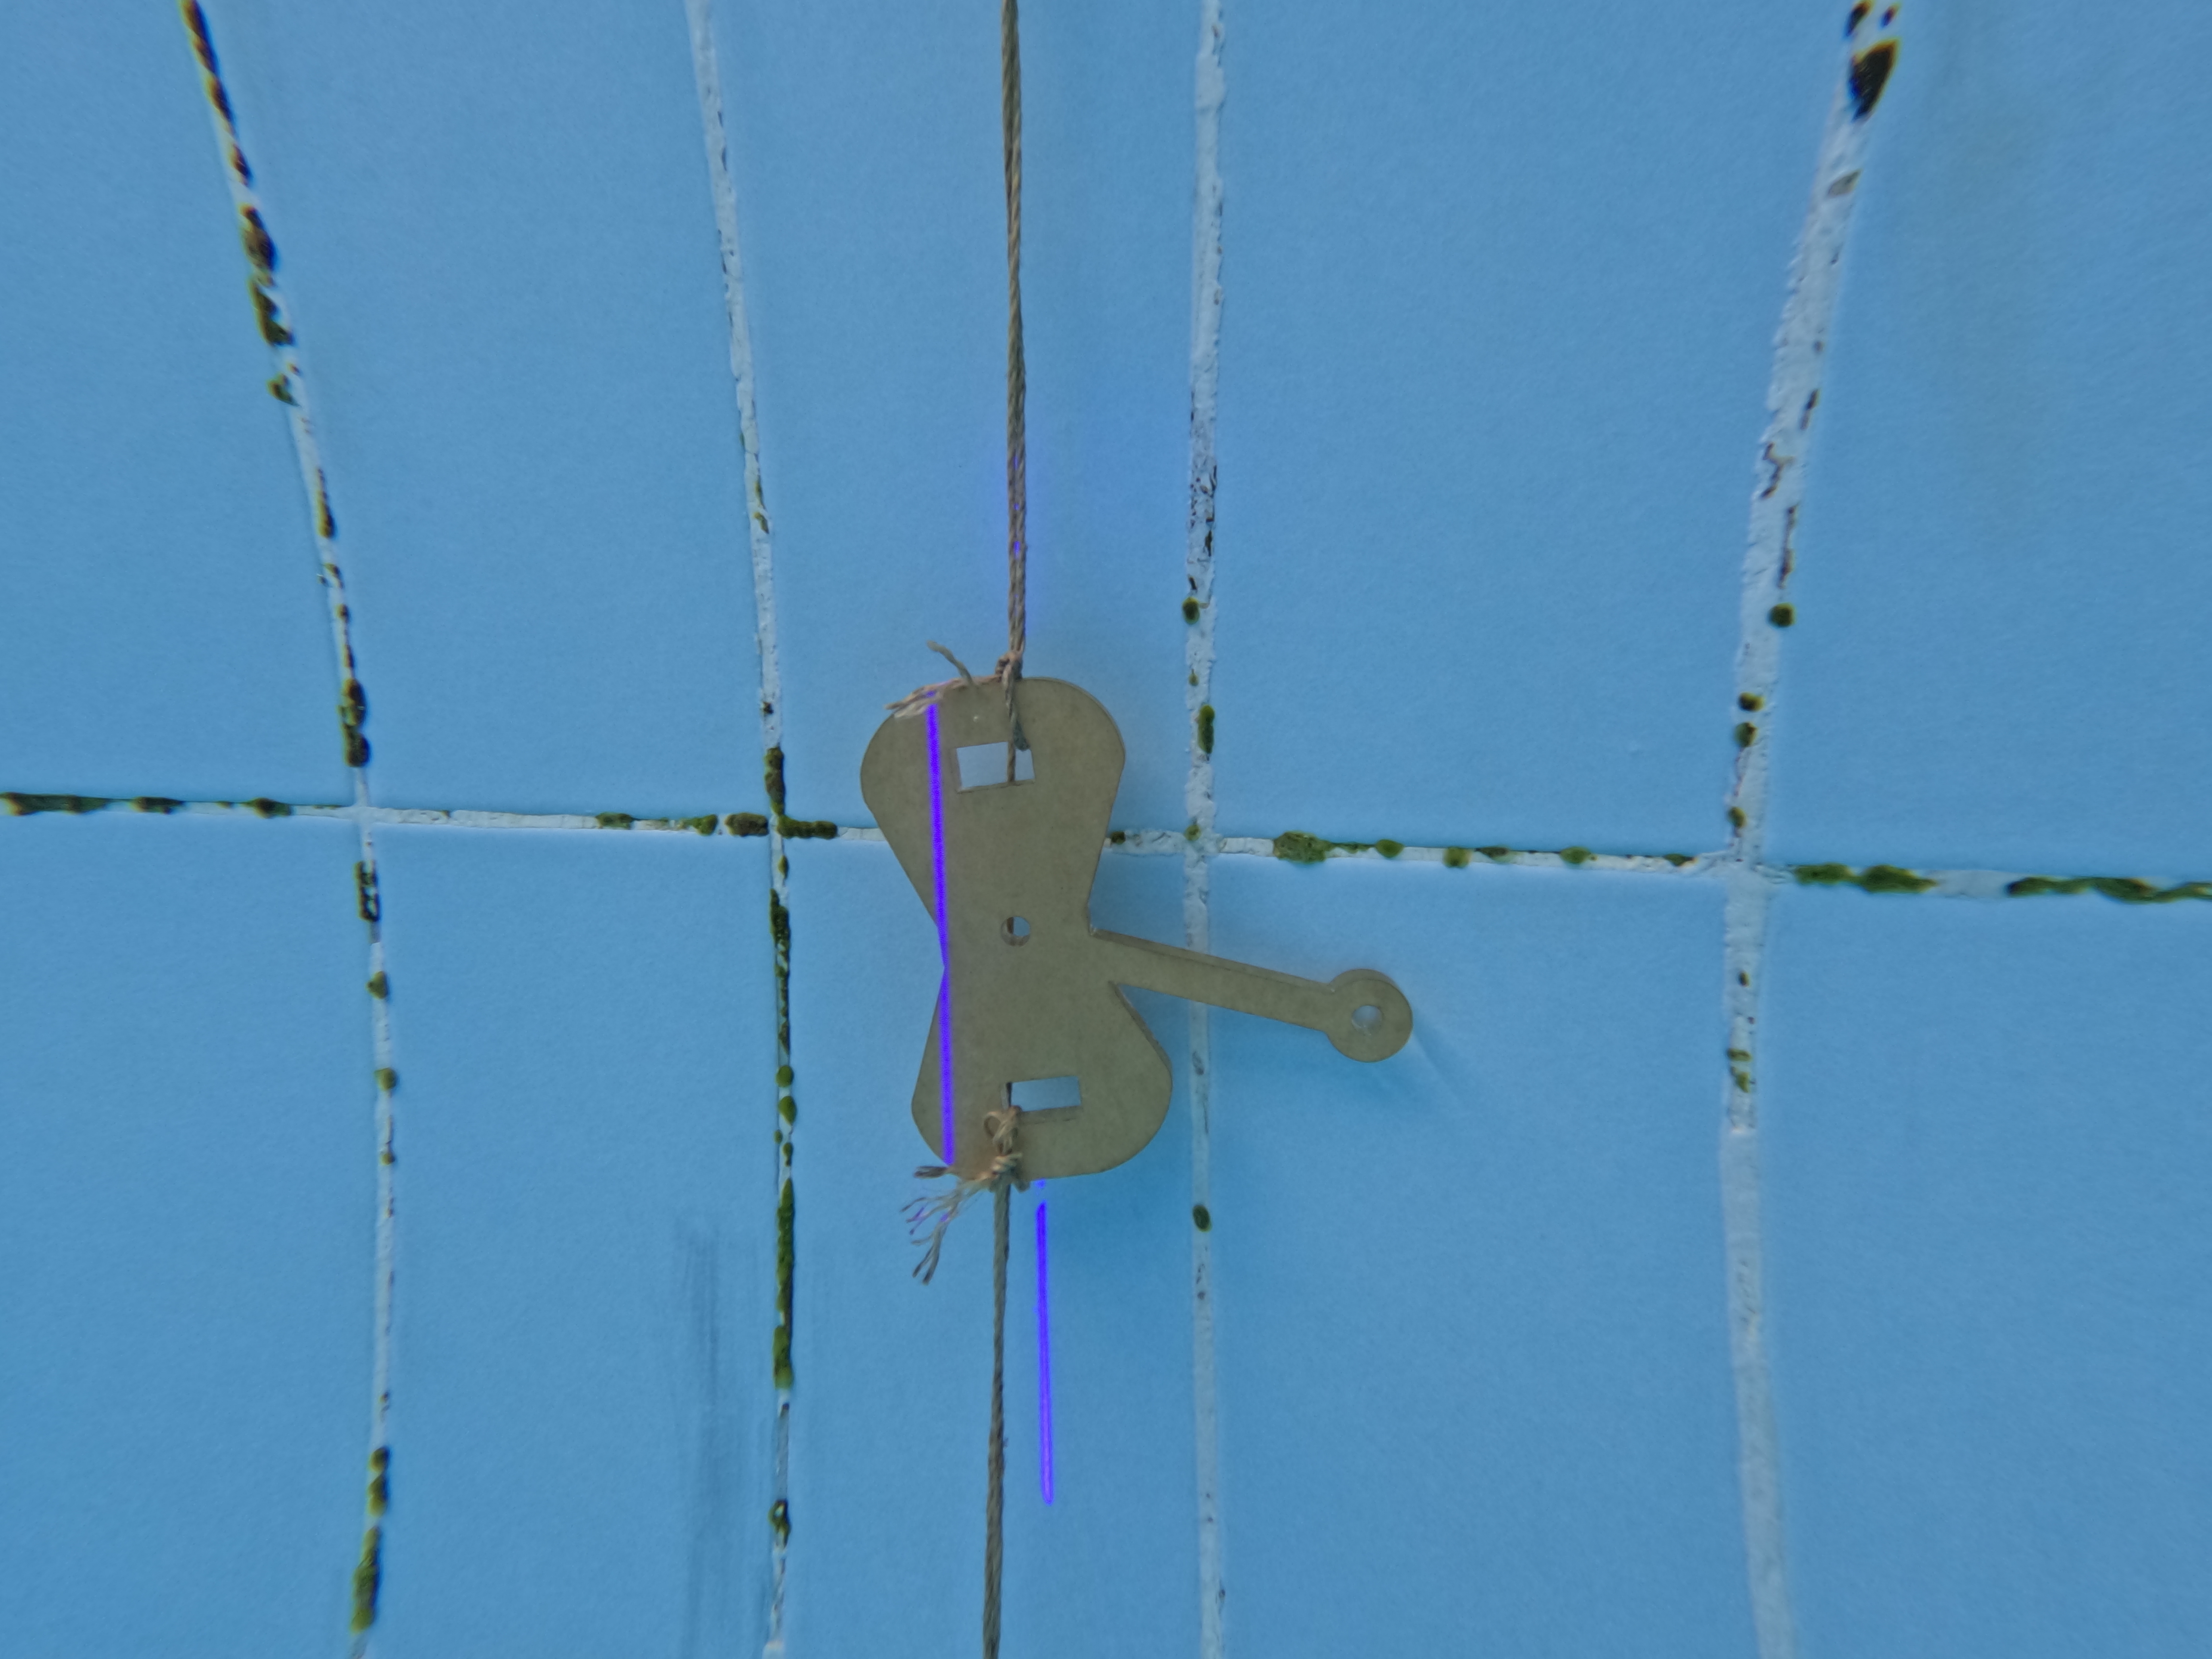

Supplement: Supplementary file 2651 [file G0050949.pdf › Level_2_2/G0050949.pdf]

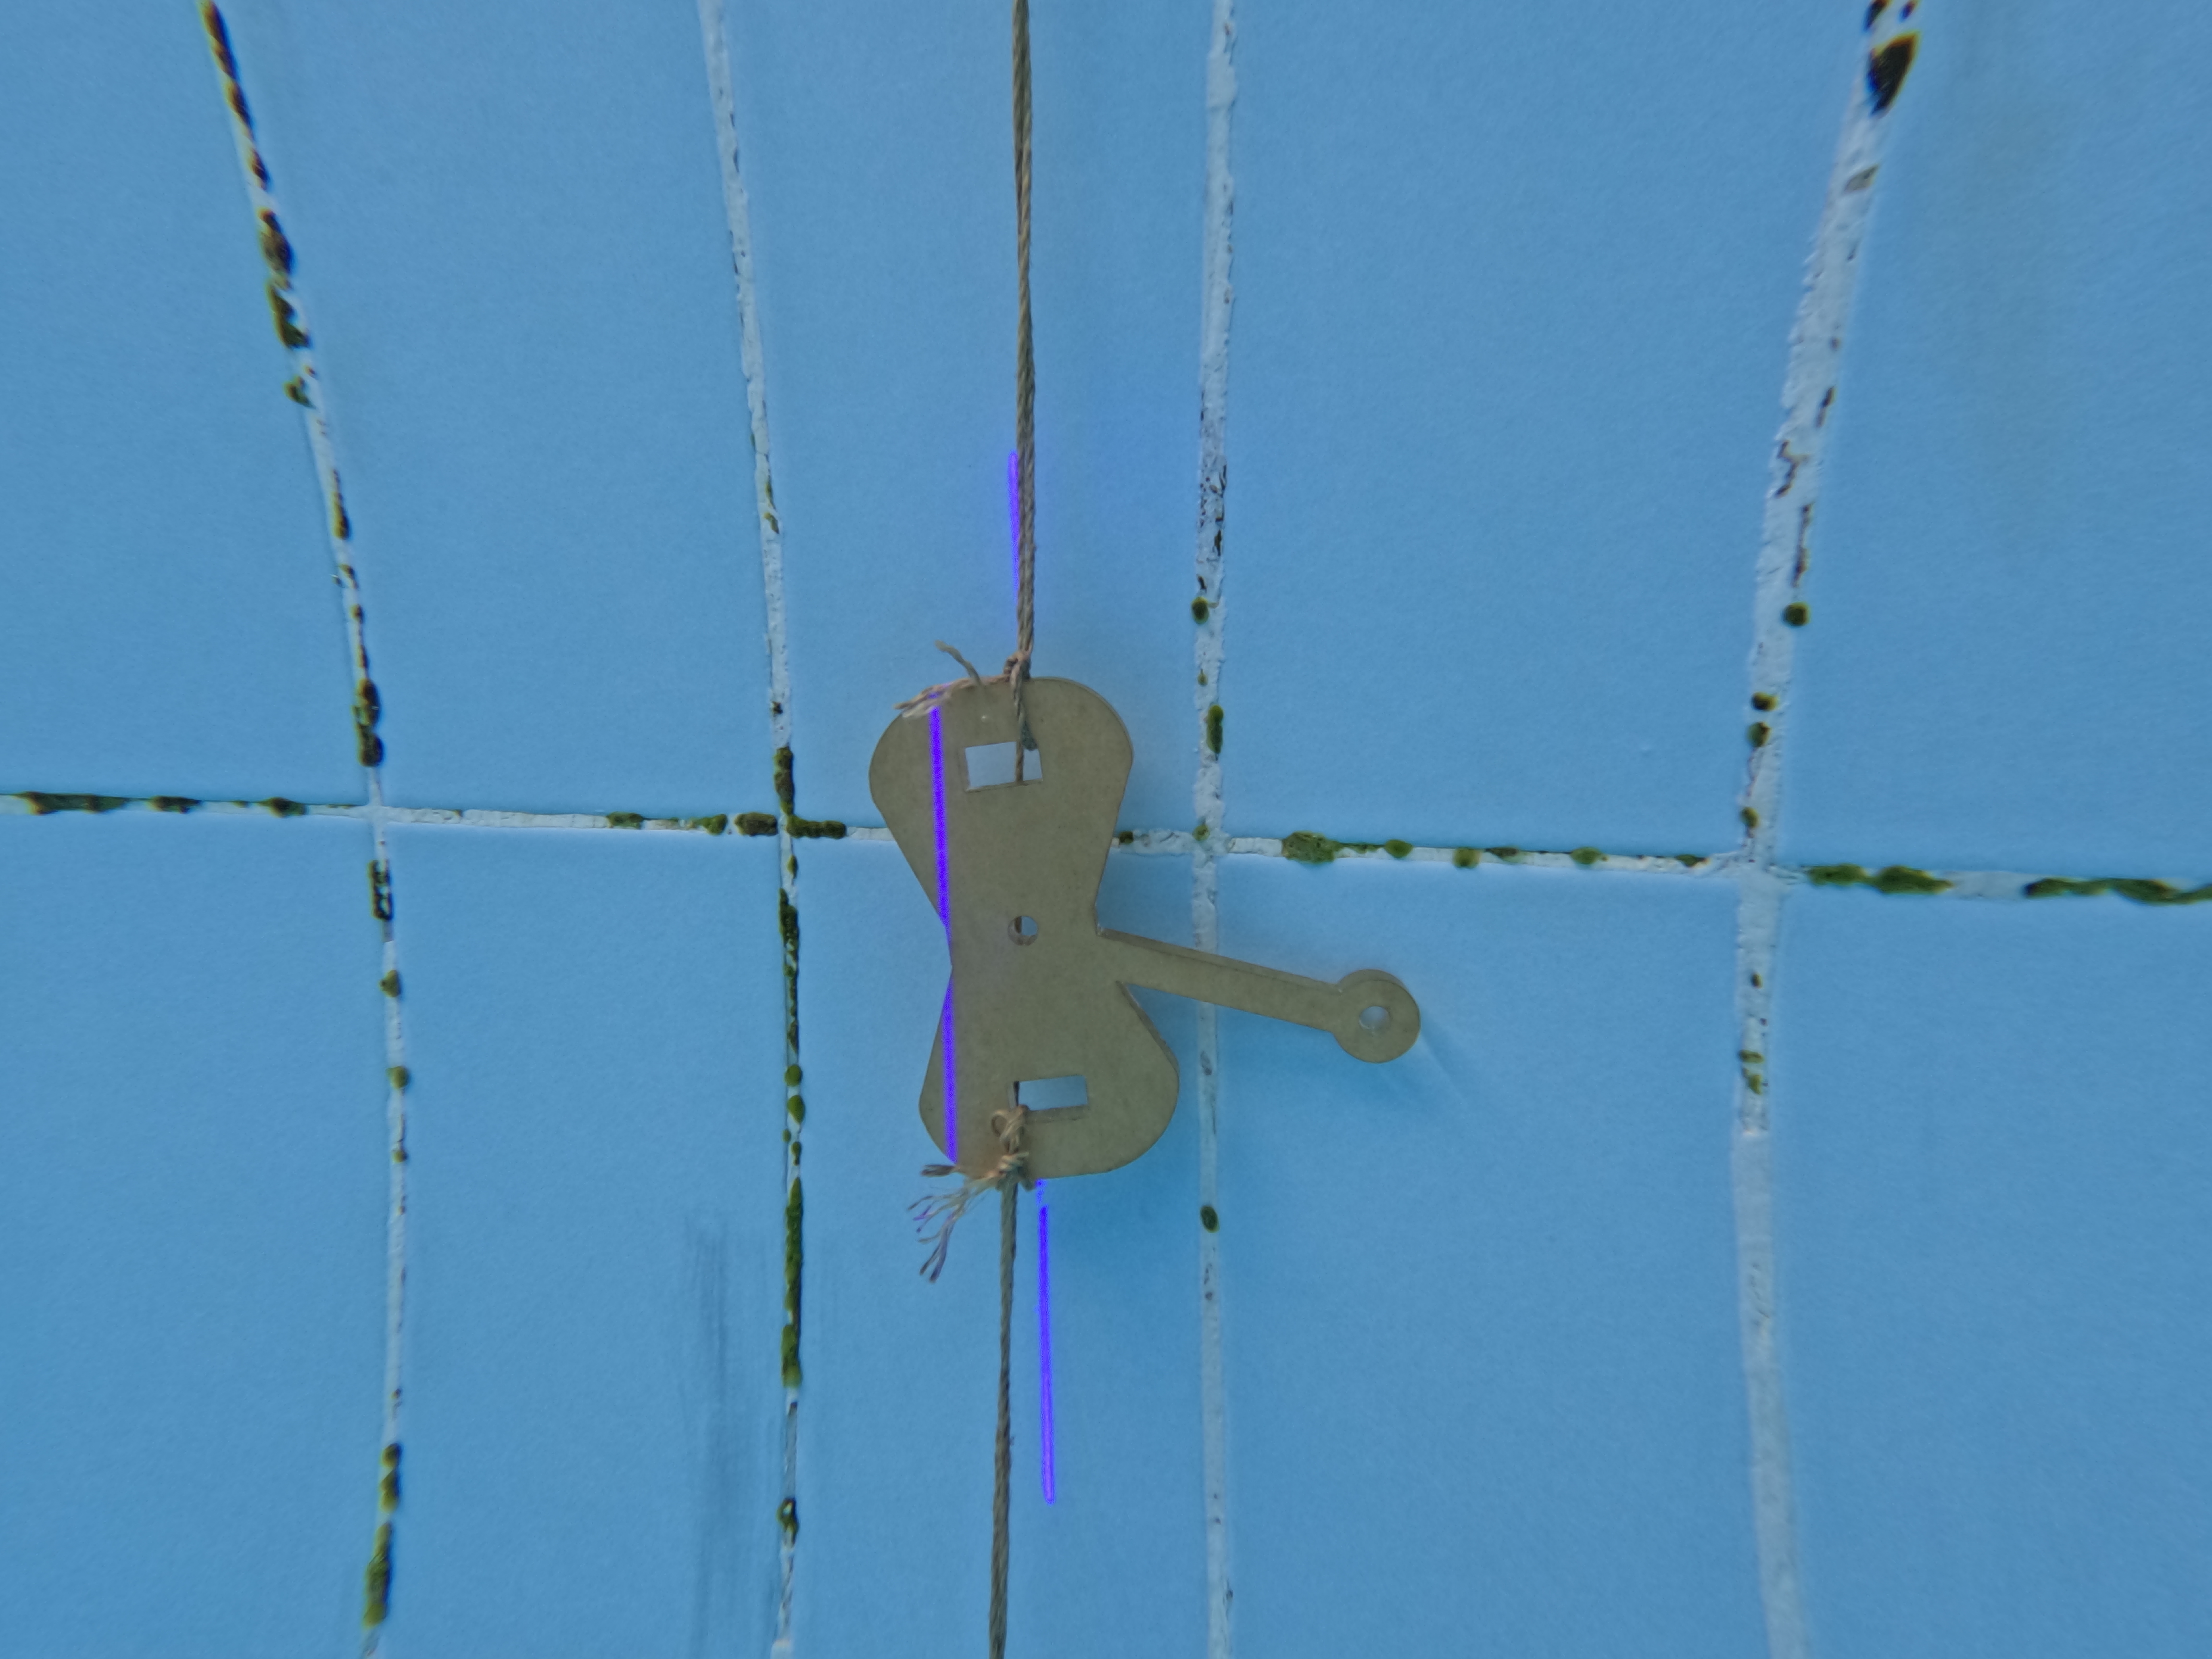

Supplement: Supplementary file 2652 [file G0050950.pdf › Level_2_2/G0050950.pdf]

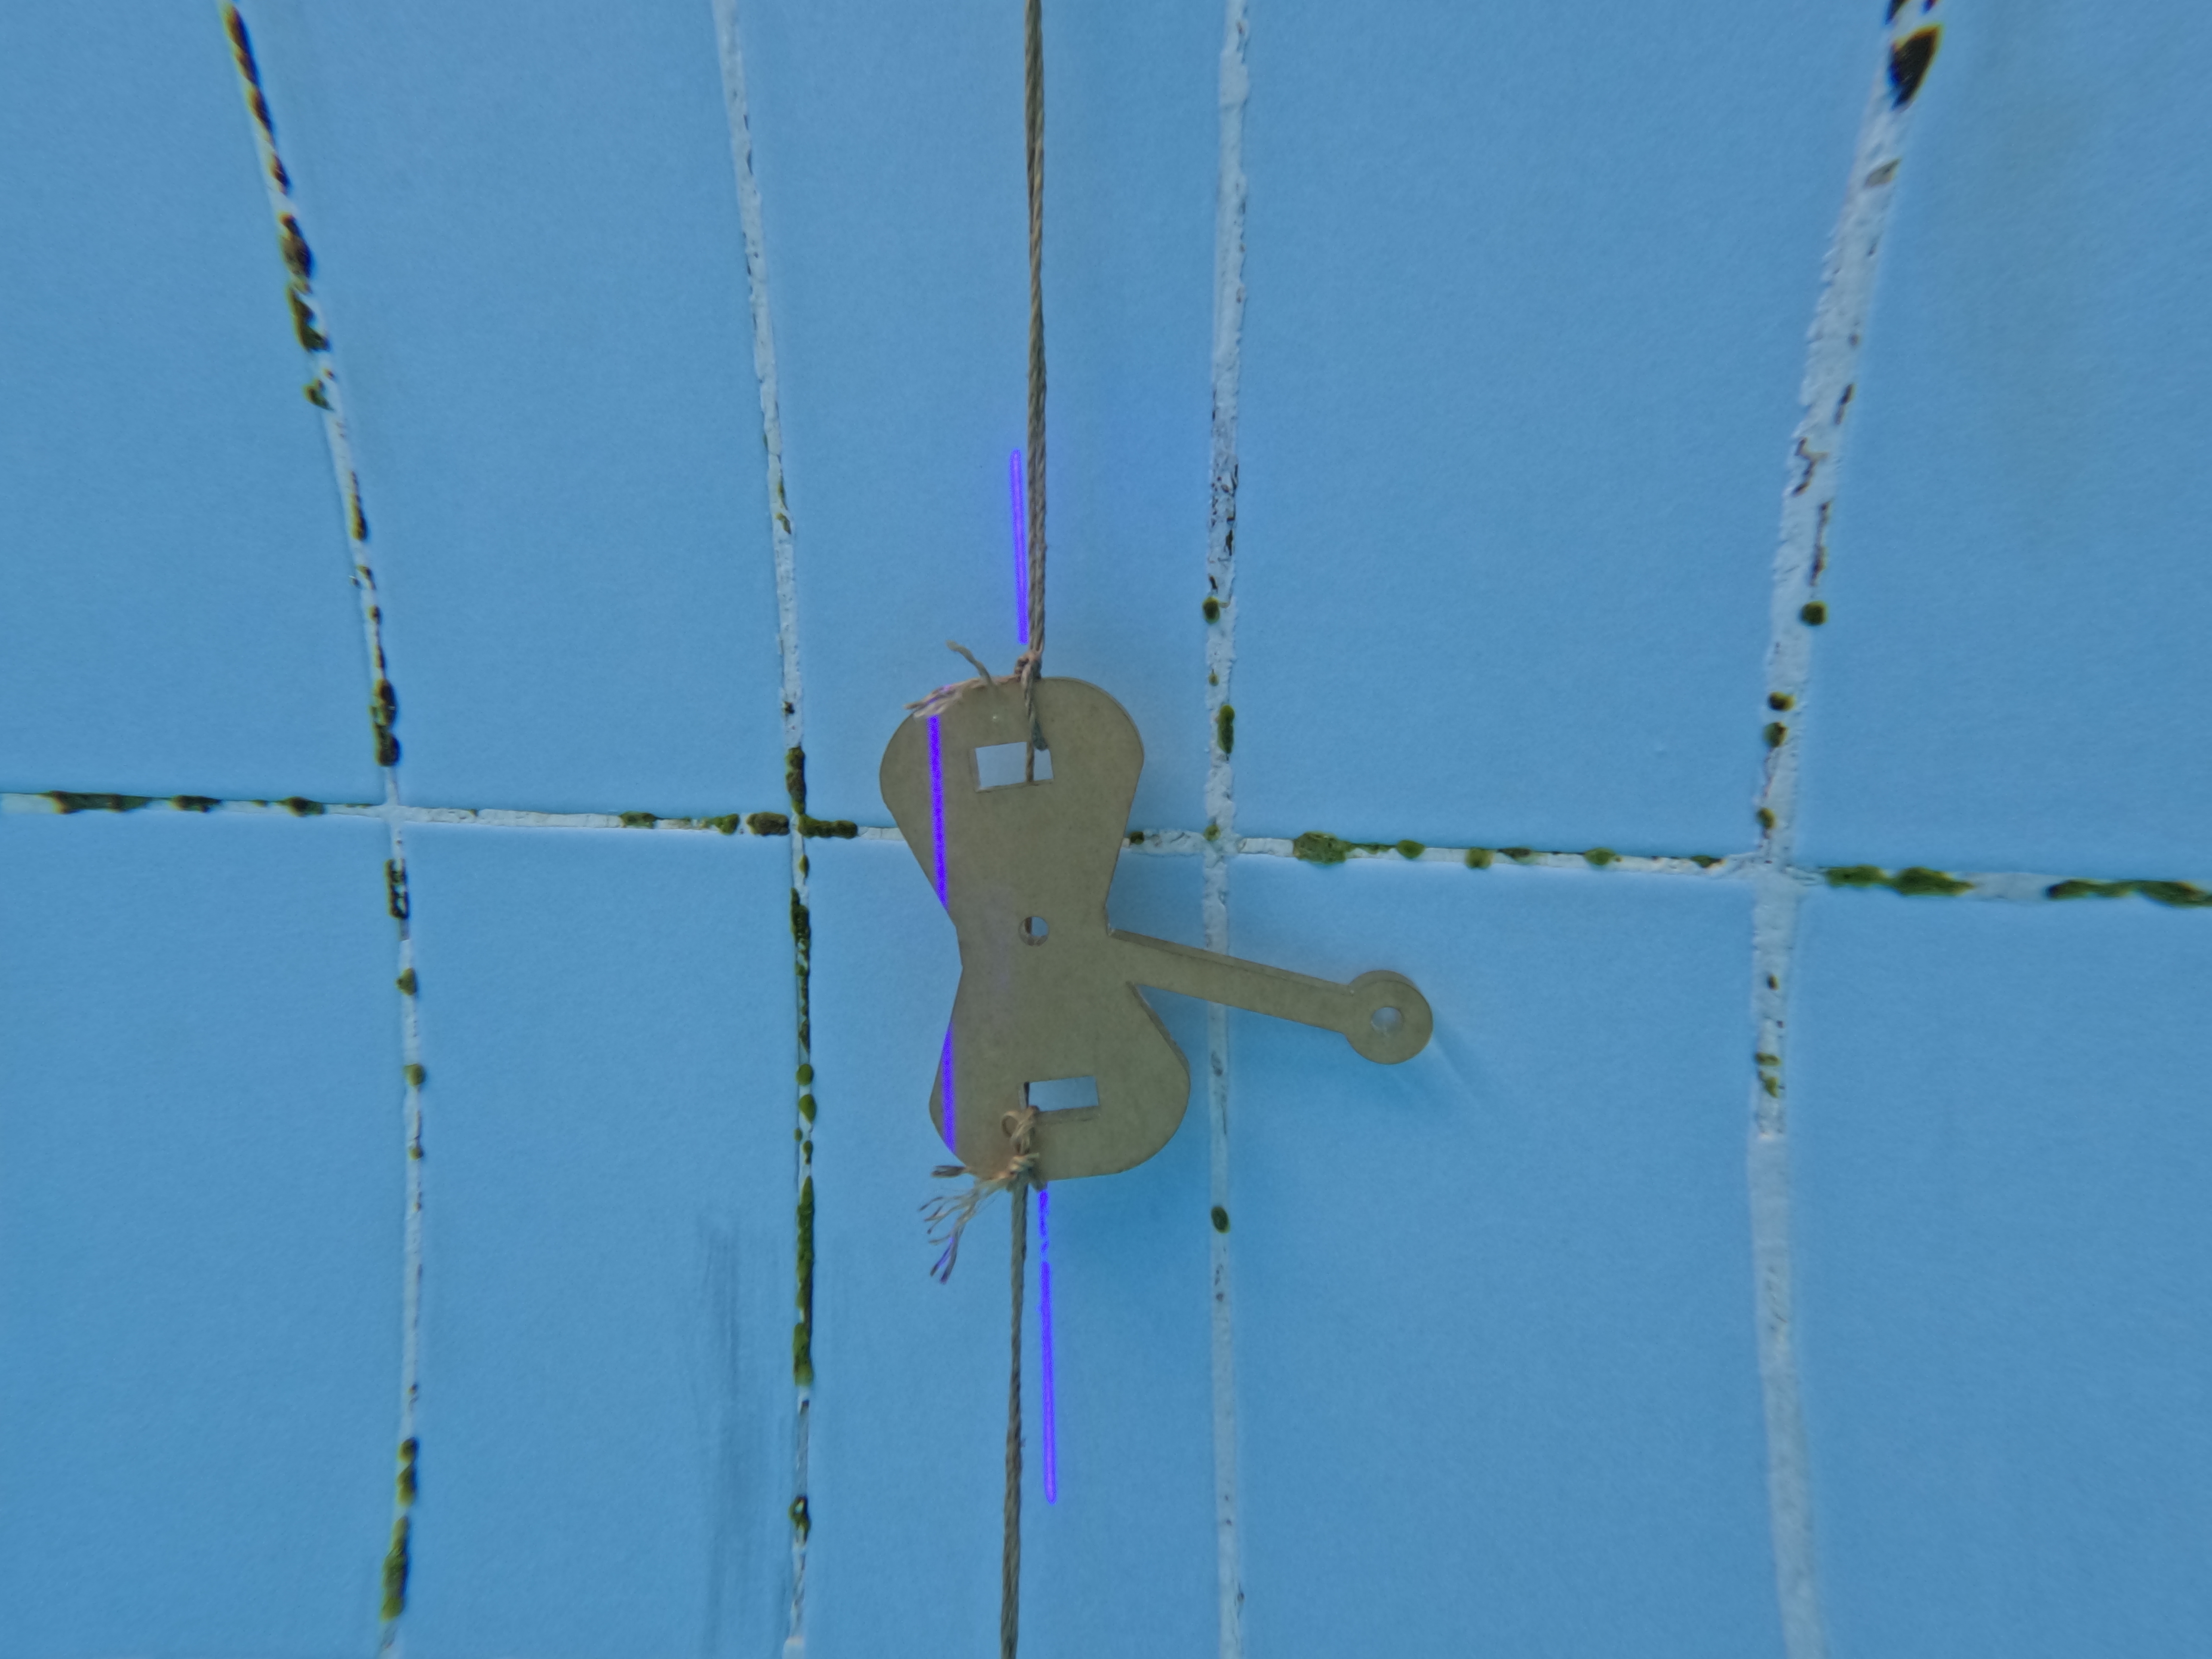

Supplement: Supplementary file 2653 [file G0050951.pdf › Level_2_2/G0050951.pdf]

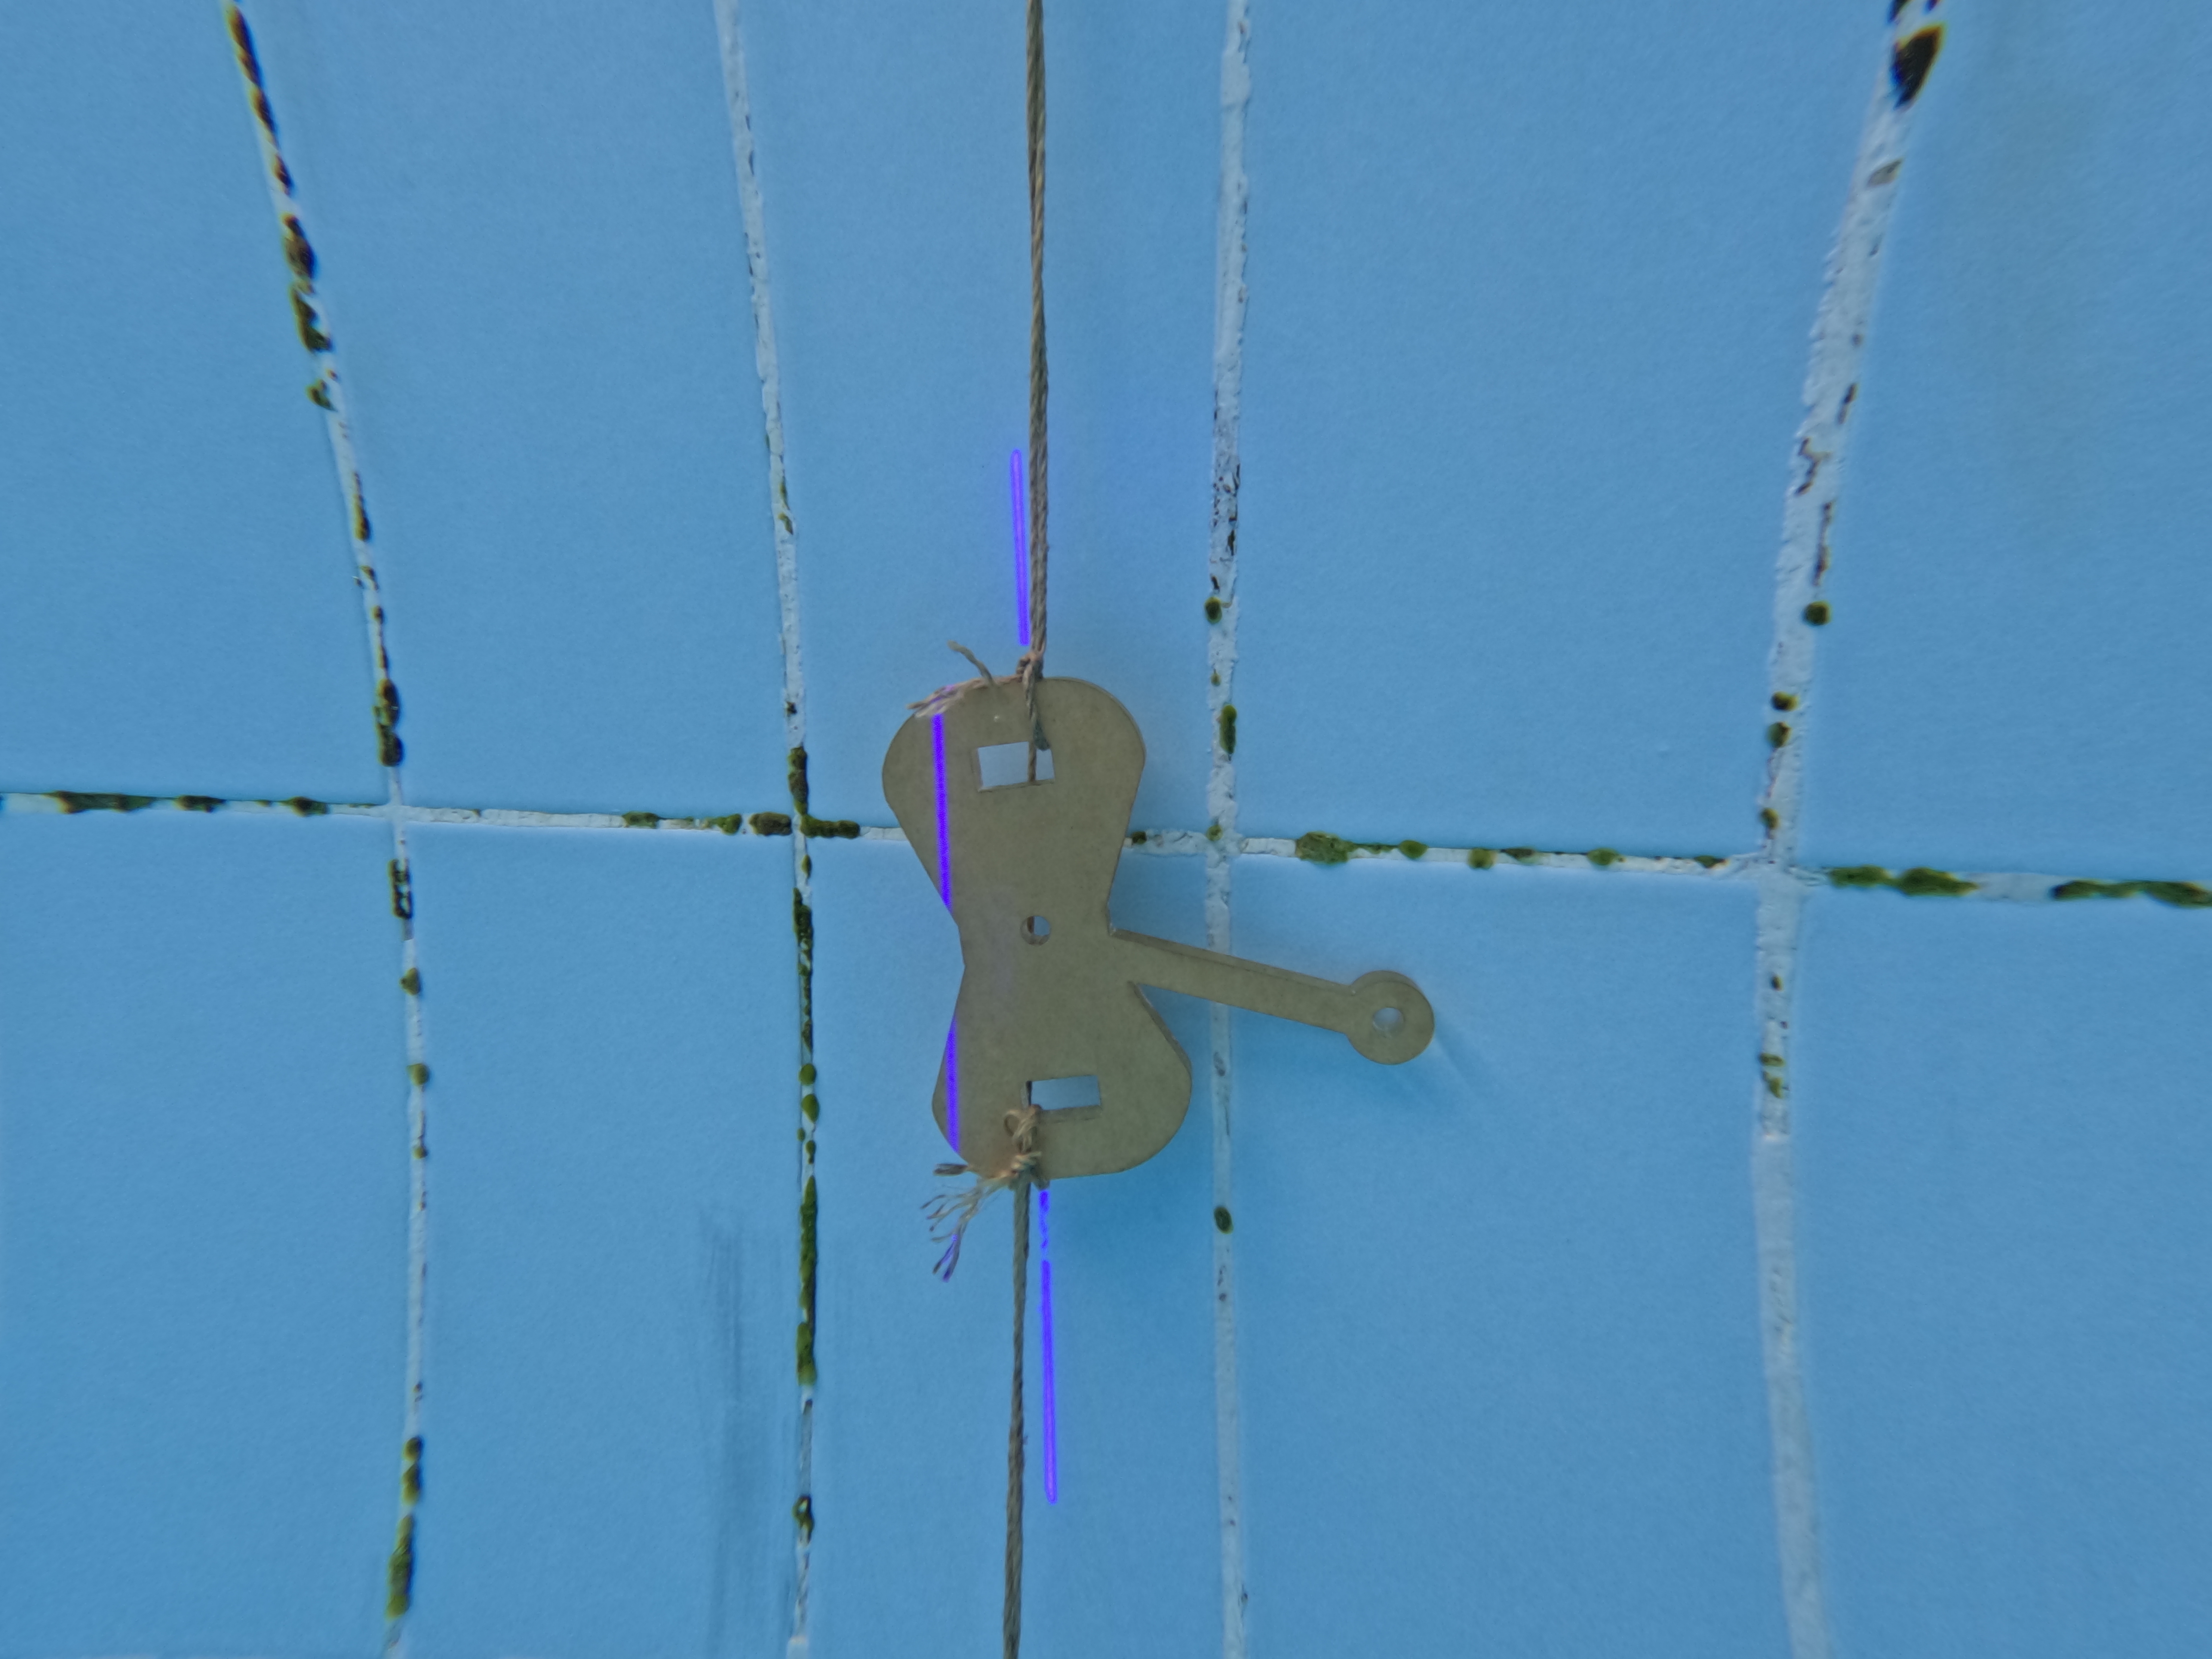

Supplement: Supplementary file 2654 [file G0050952.pdf › Level_2_2/G0050952.pdf]

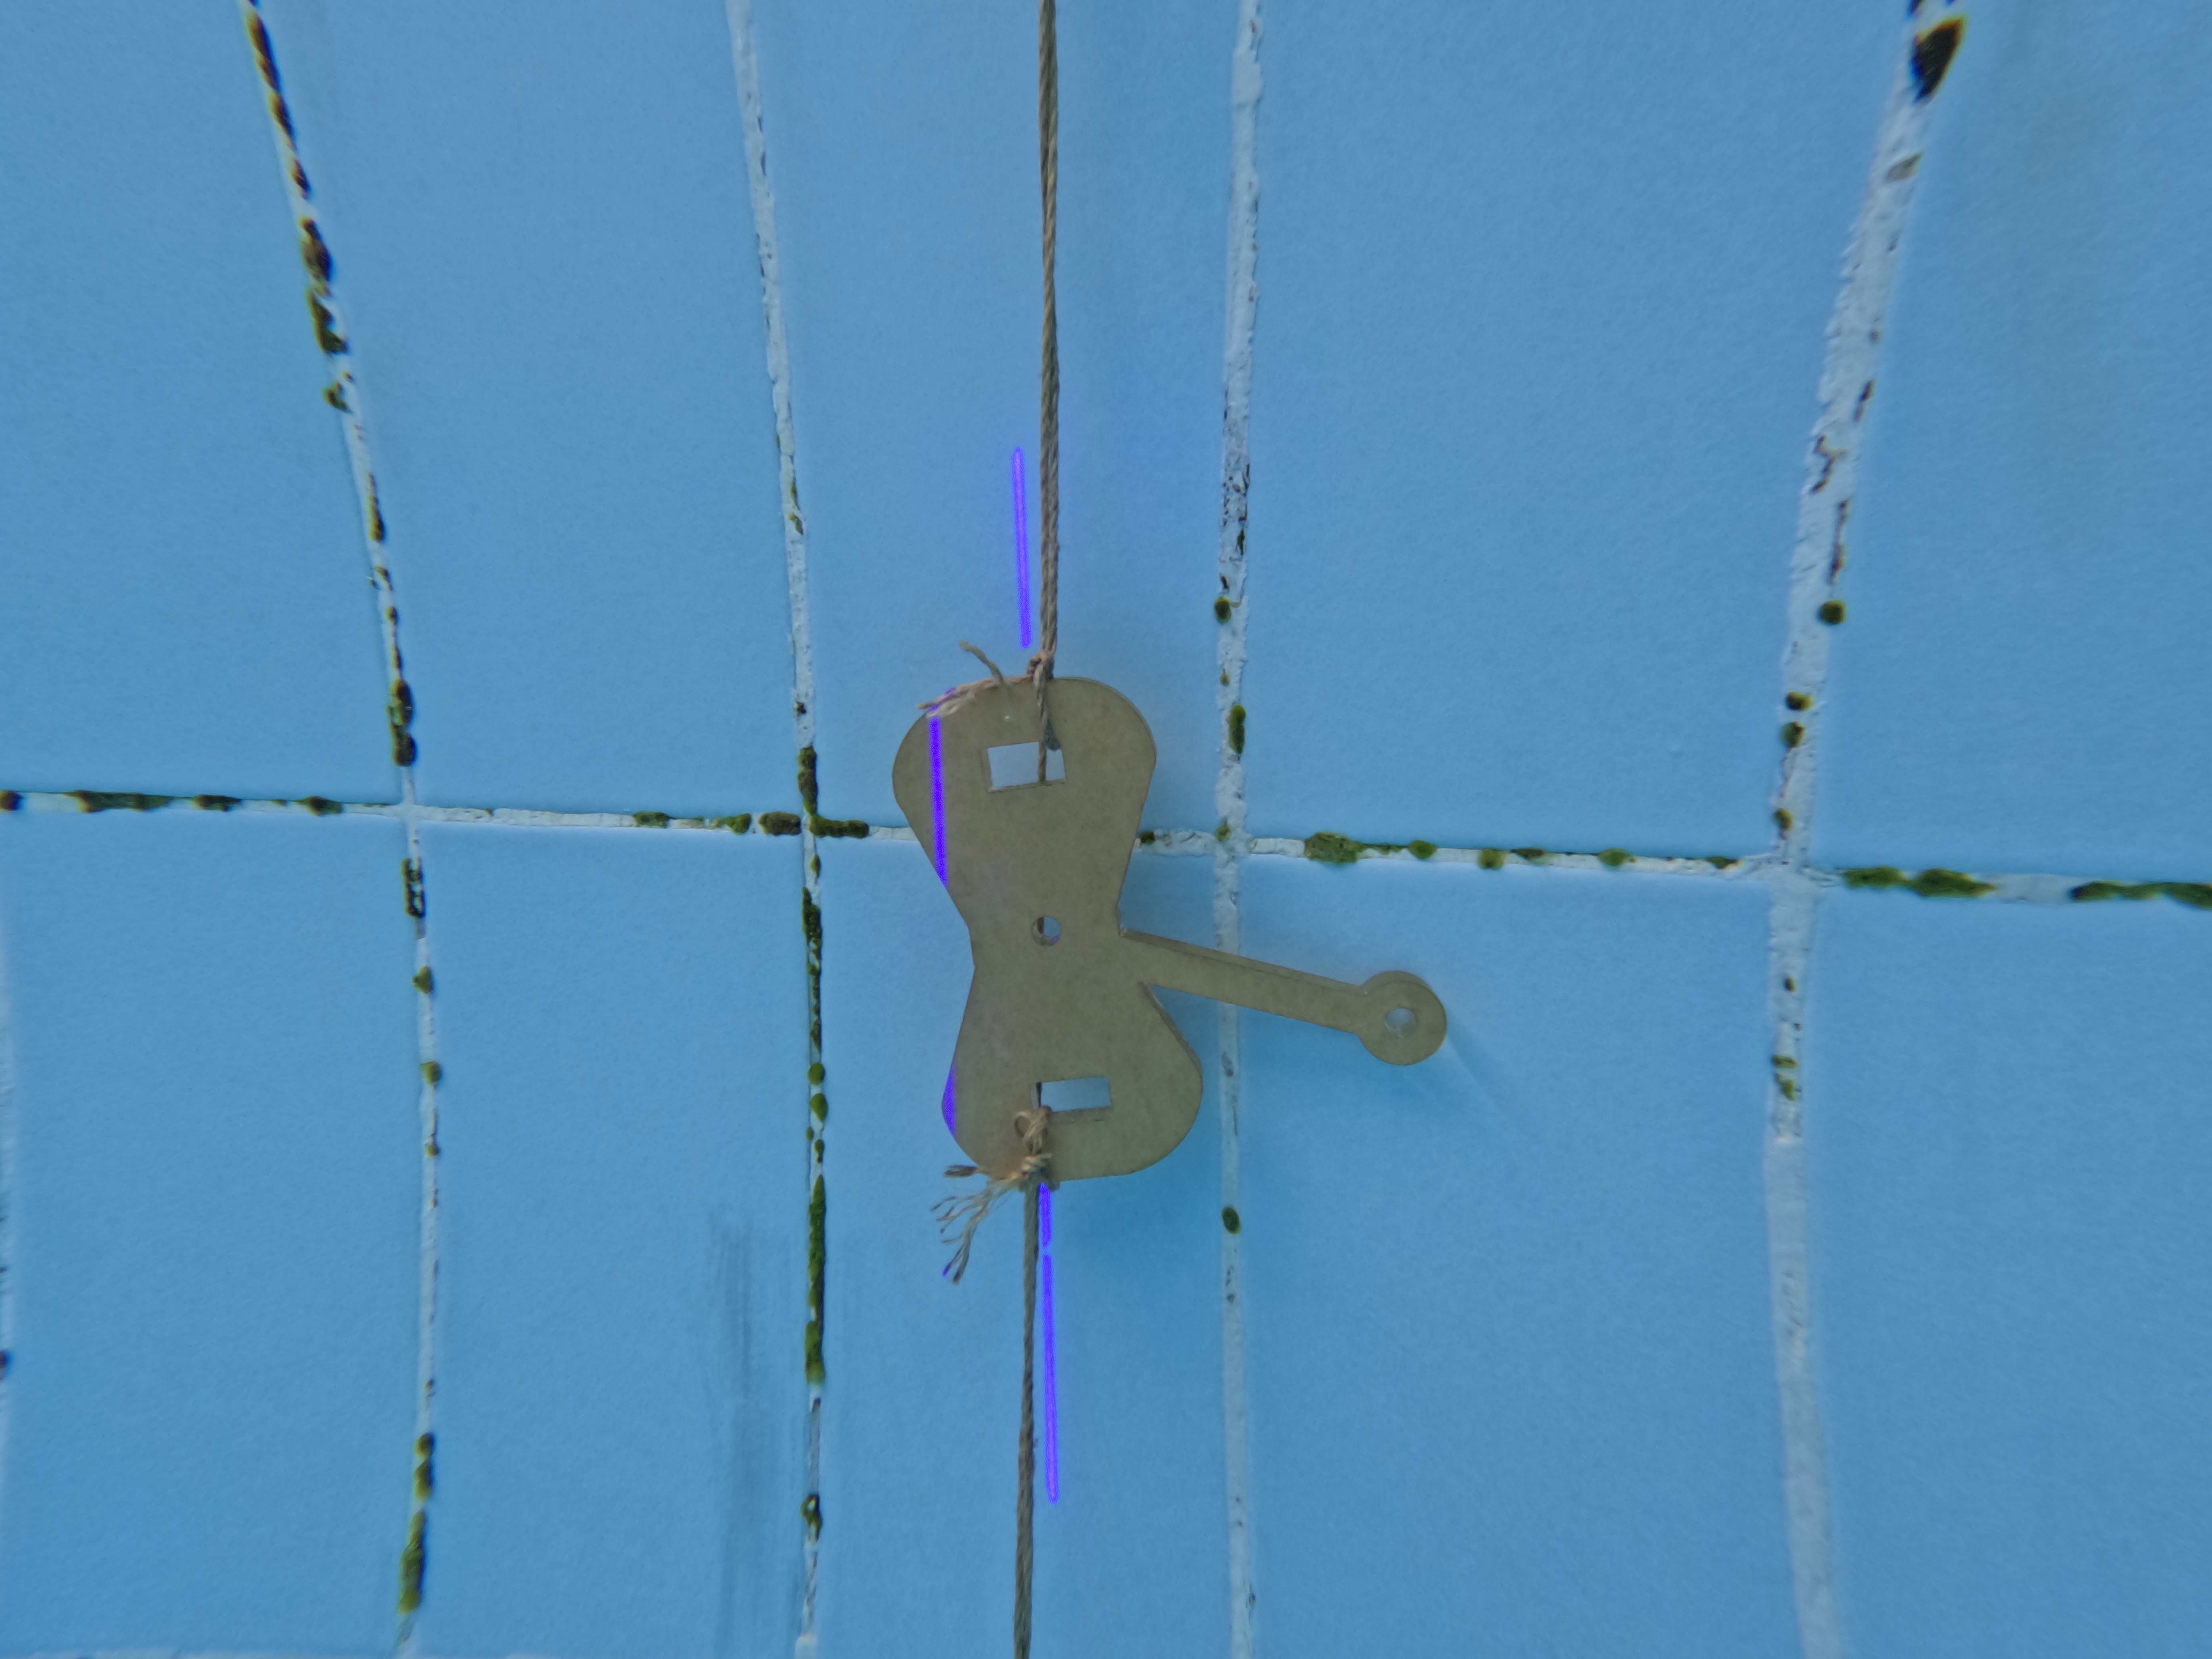

Supplement: Supplementary file 2655 [file G0050953.pdf › Level_2_2/G0050953.pdf]

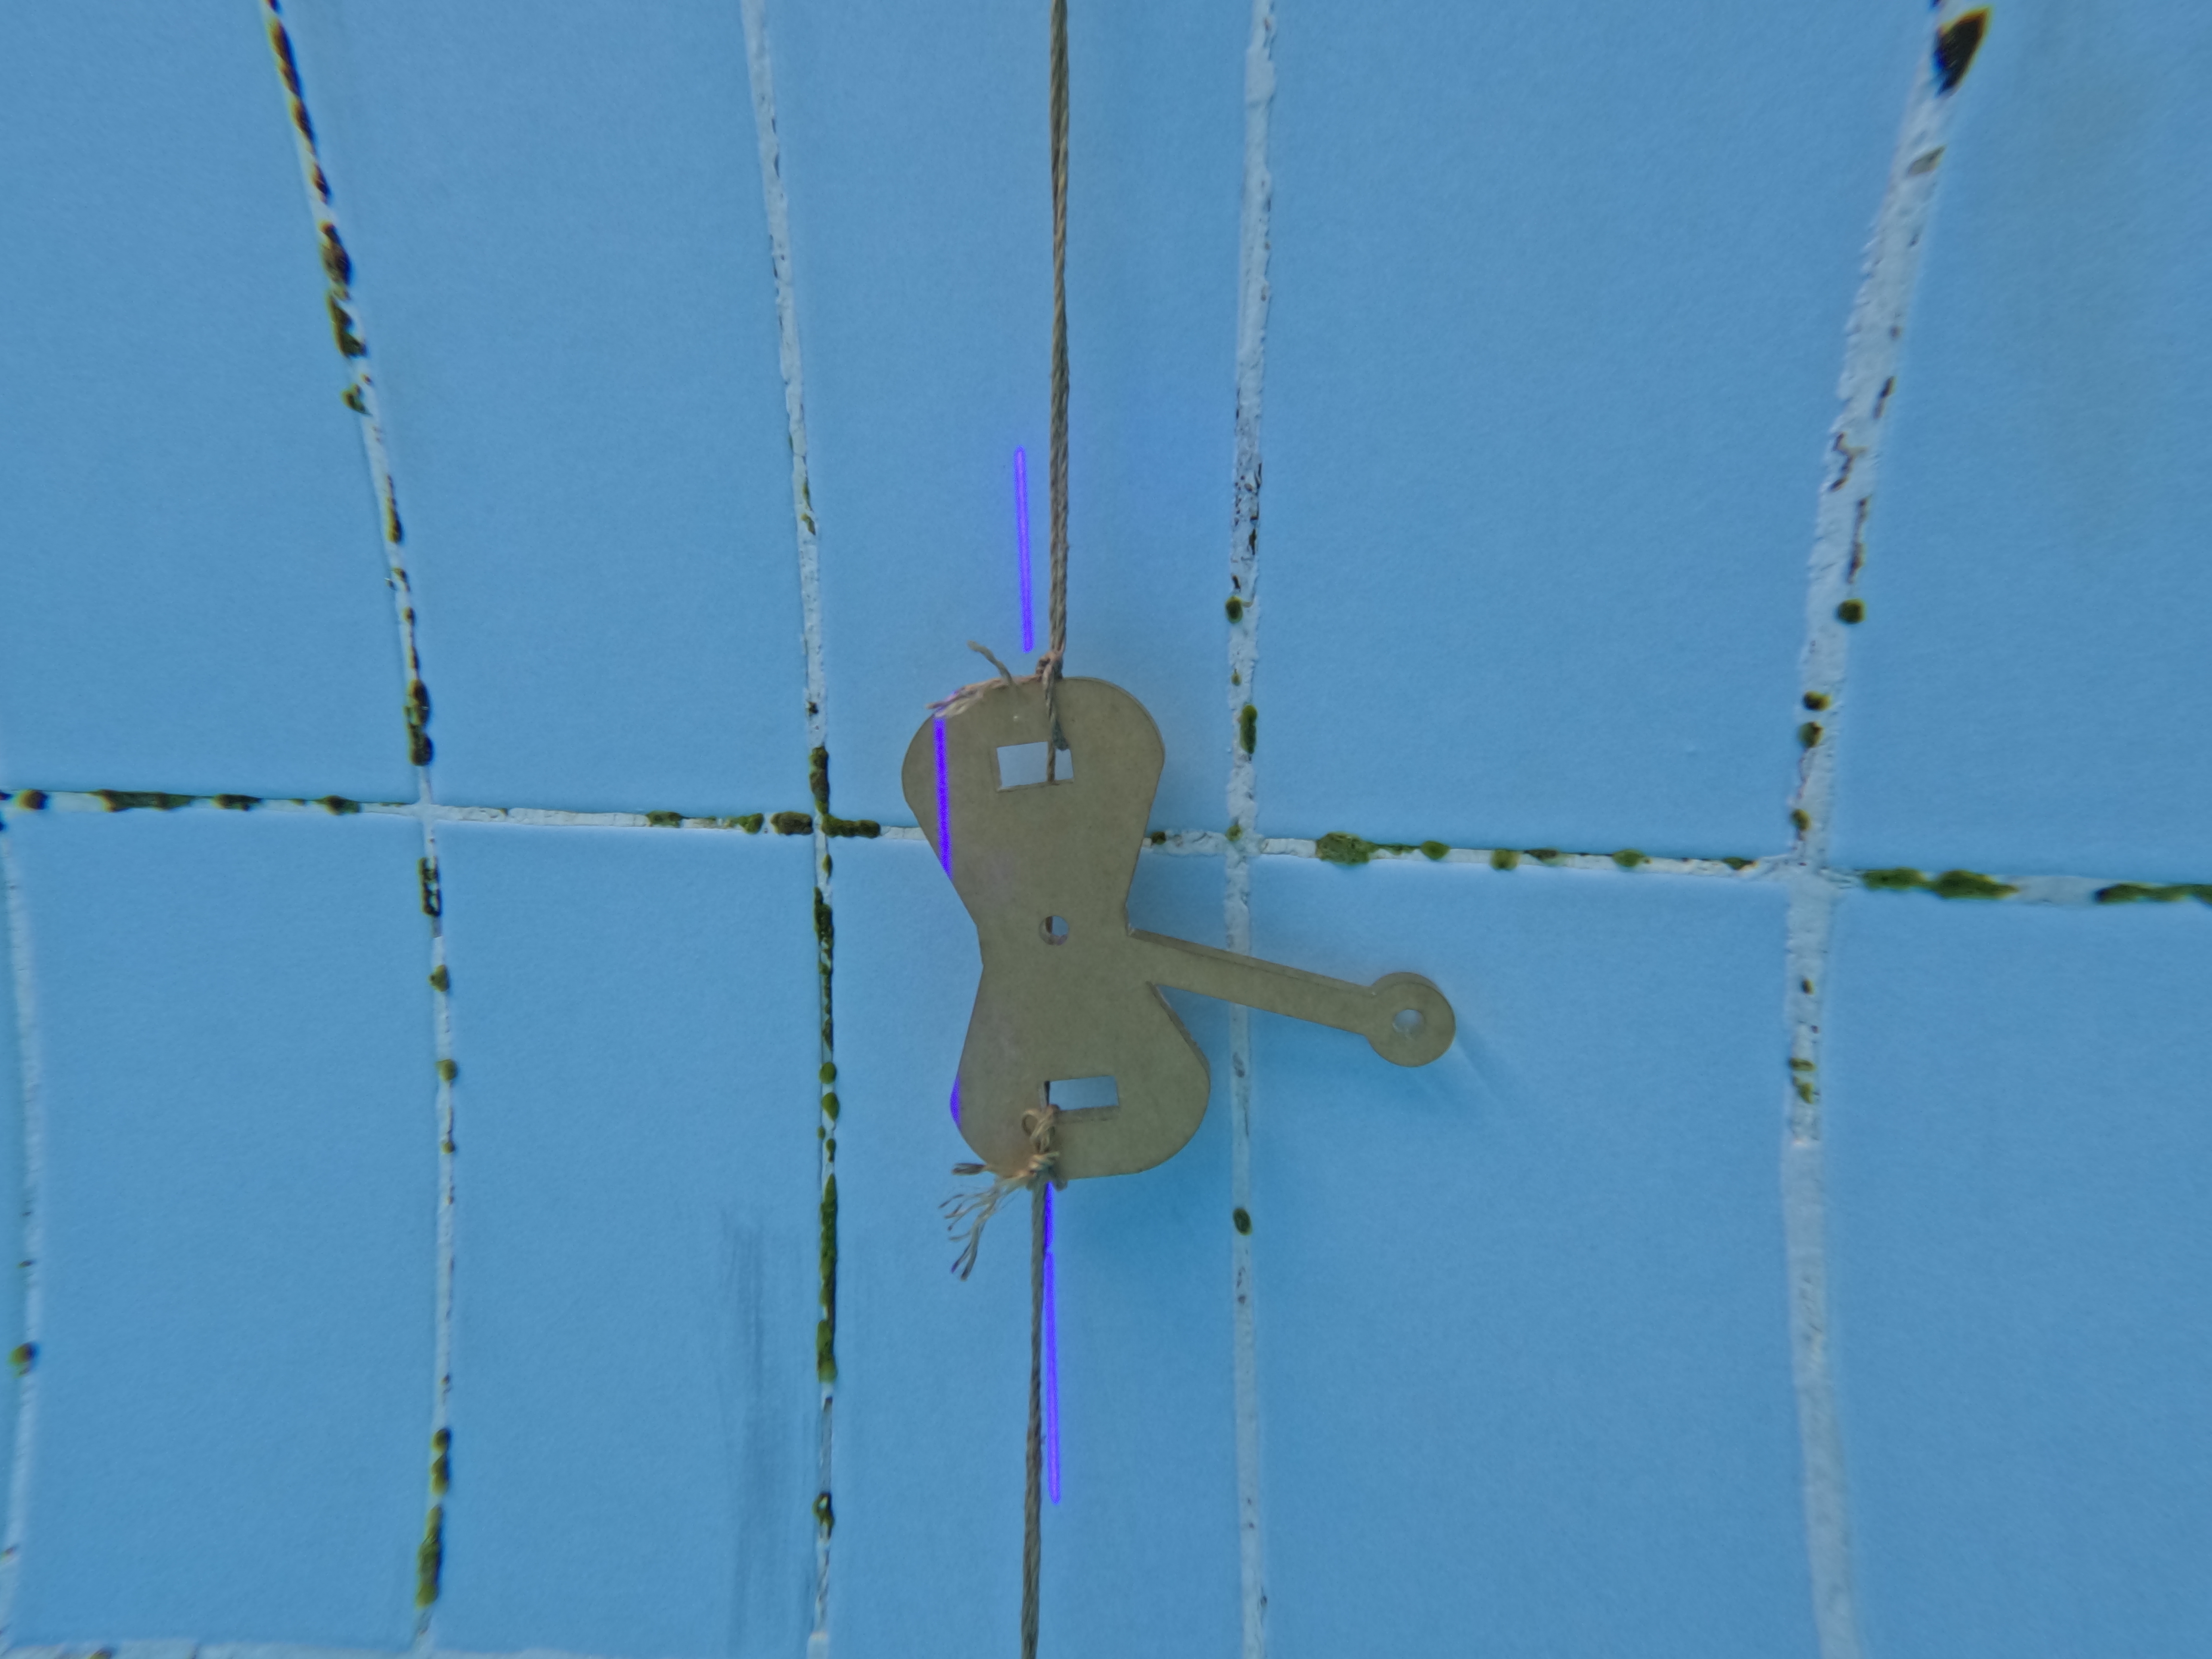

Supplement: Supplementary file 2656 [file G0050954.pdf › Level_2_2/G0050954.pdf]

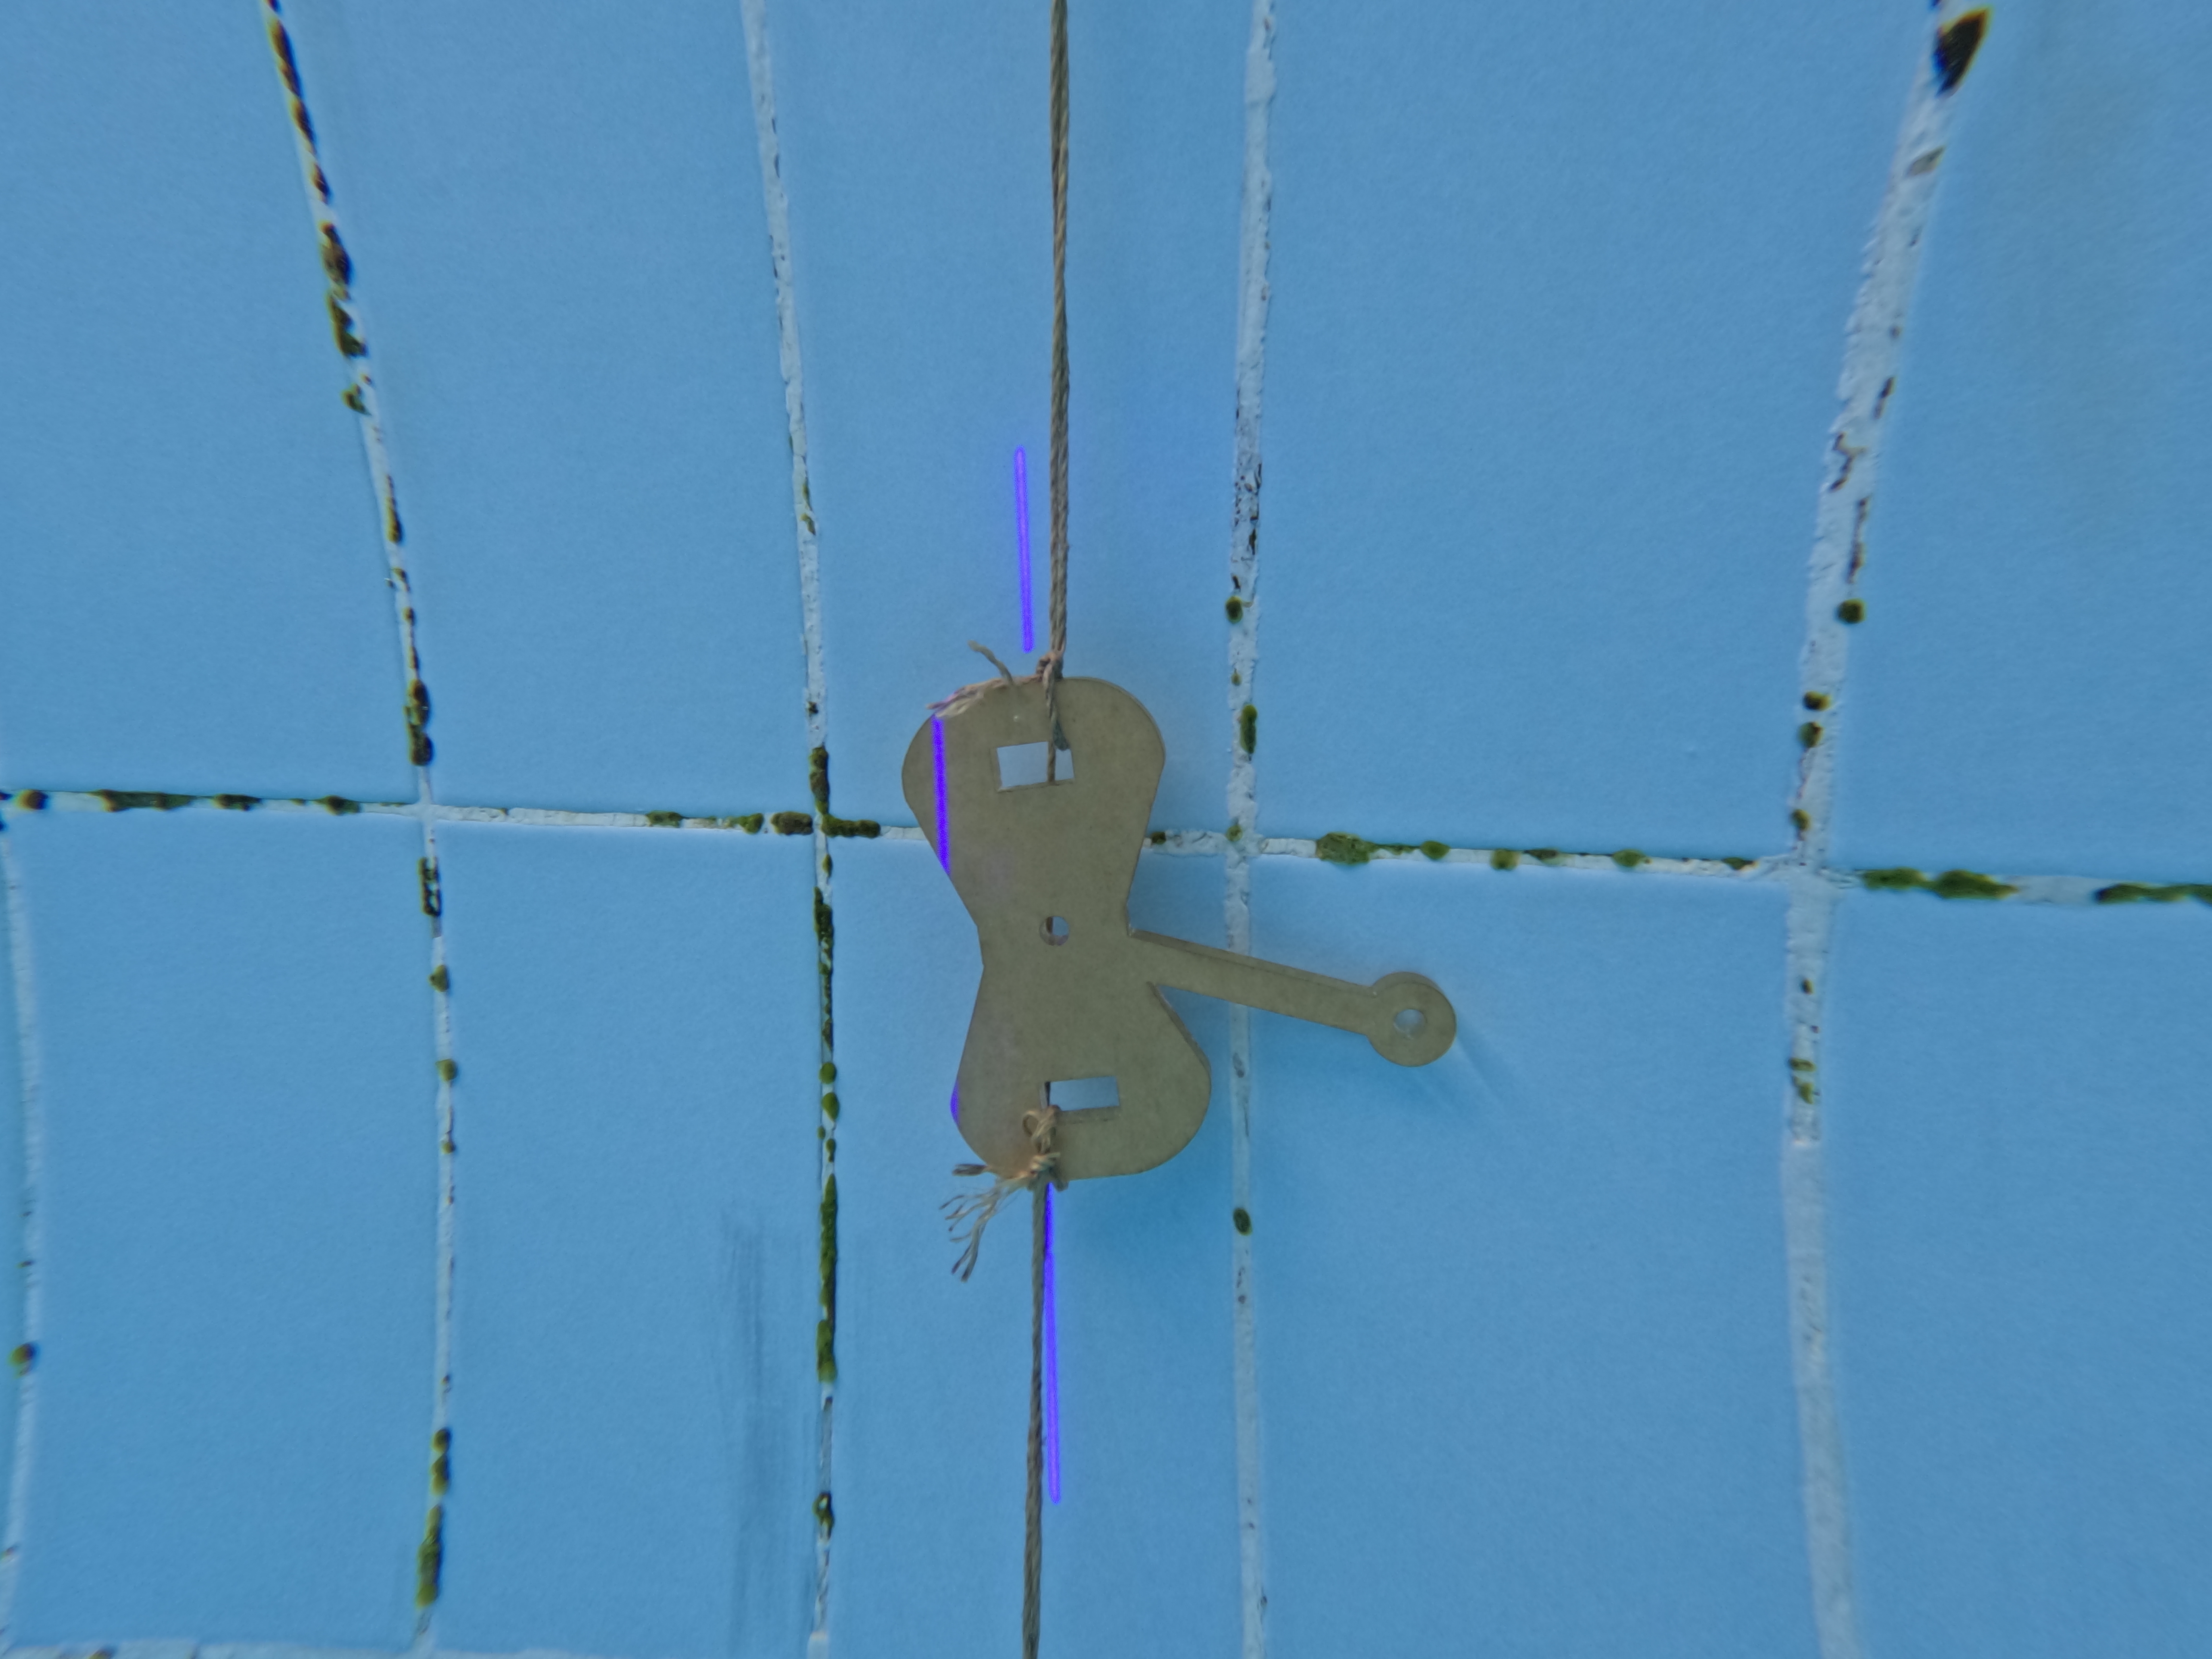

Supplement: Supplementary file 2657 [file G0050955.pdf › Level_2_2/G0050955.pdf]

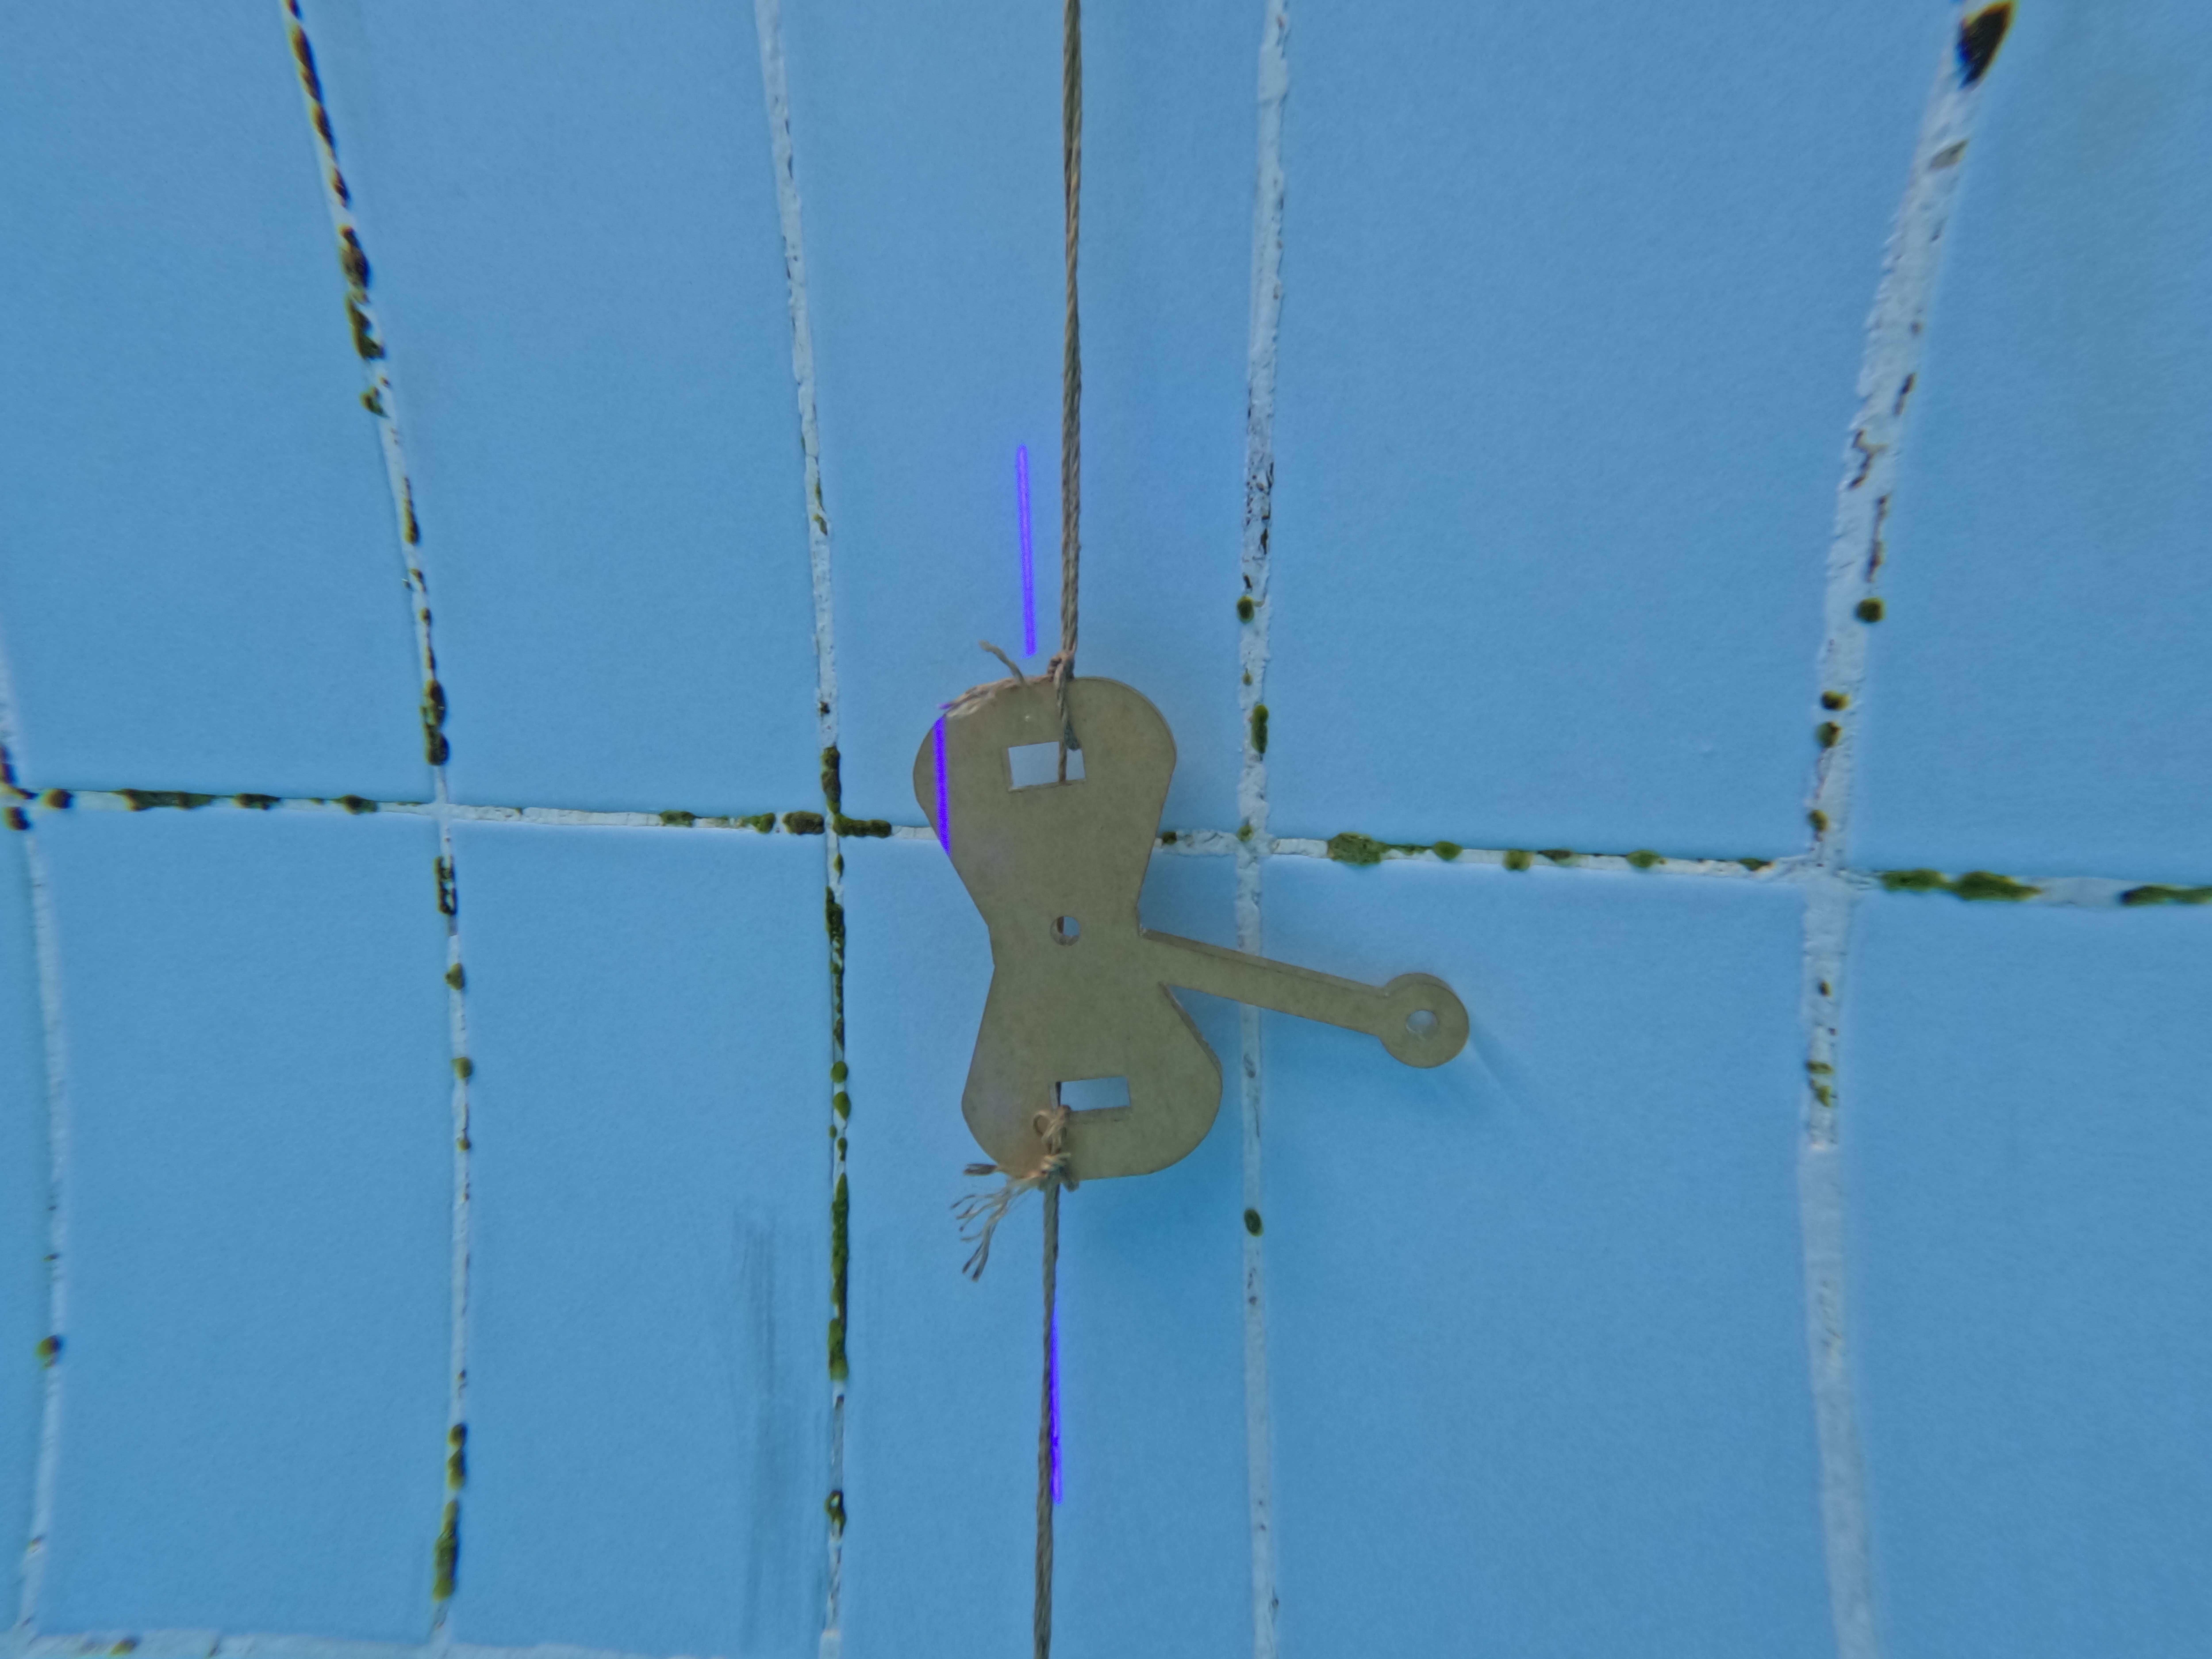

Supplement: Supplementary file 2658 [file G0050956.pdf › Level_2_2/G0050956.pdf]

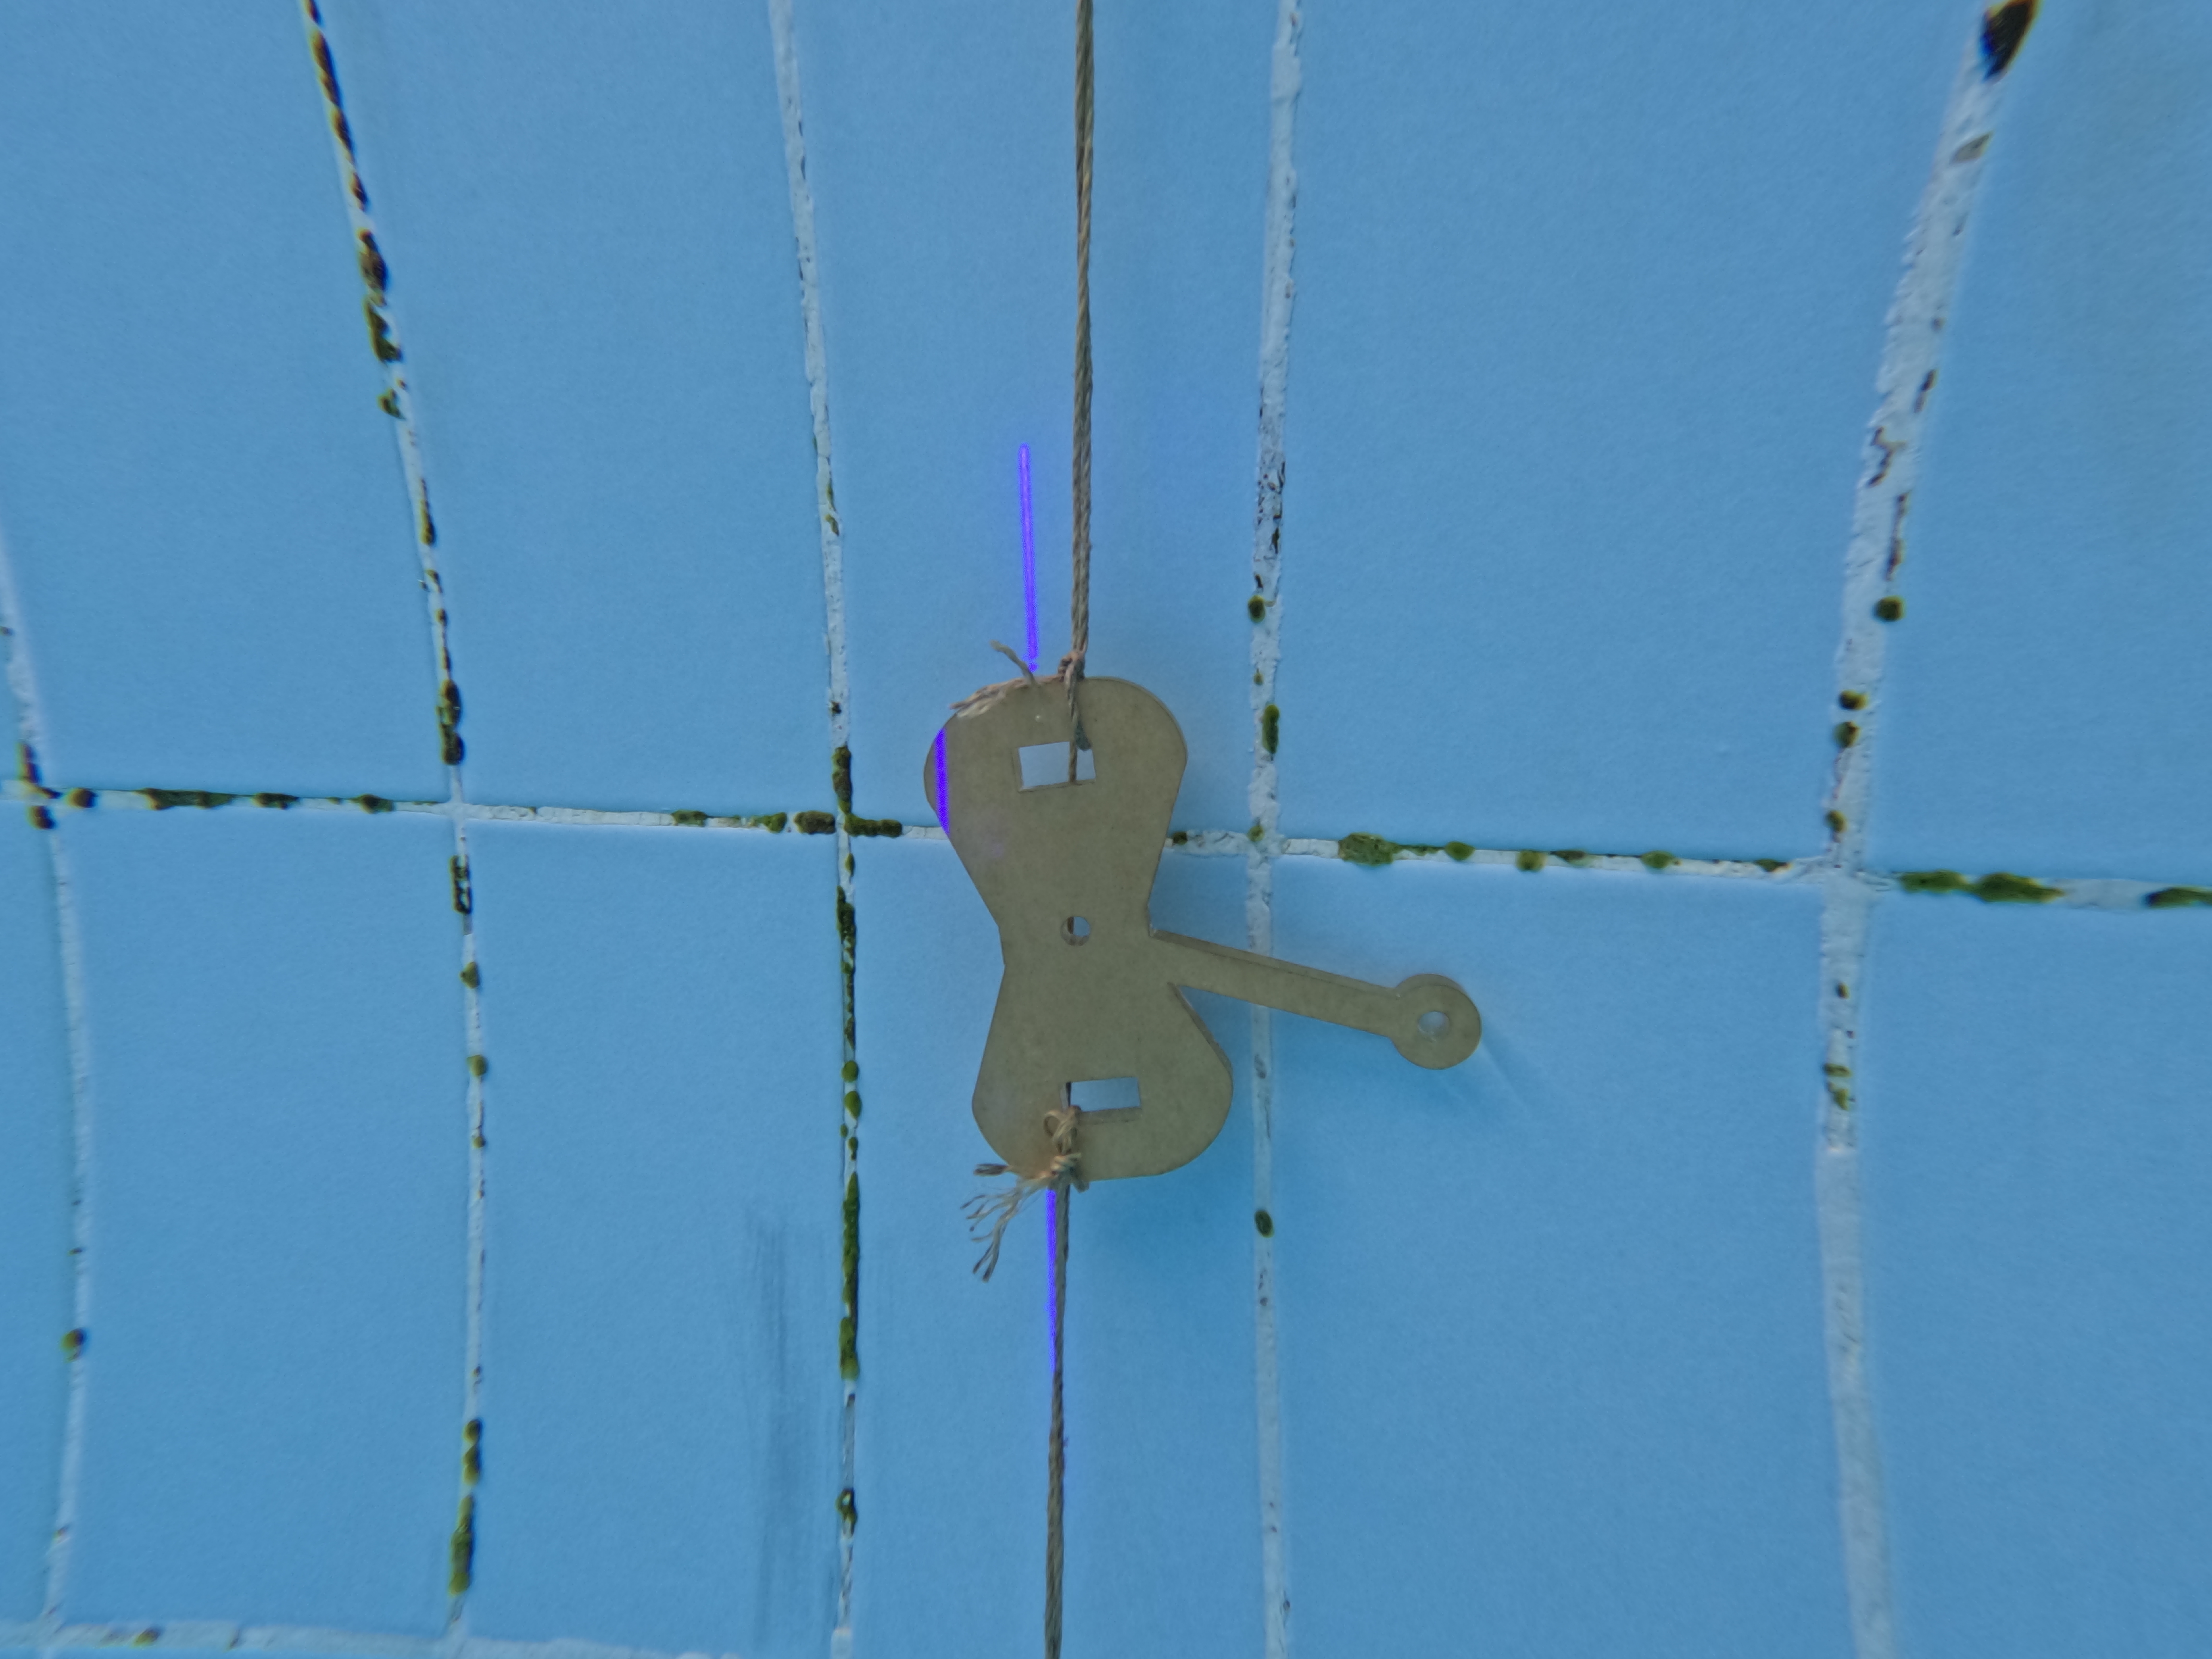

Supplement: Supplementary file 2659 [file G0050957.pdf › Level_2_2/G0050957.pdf]

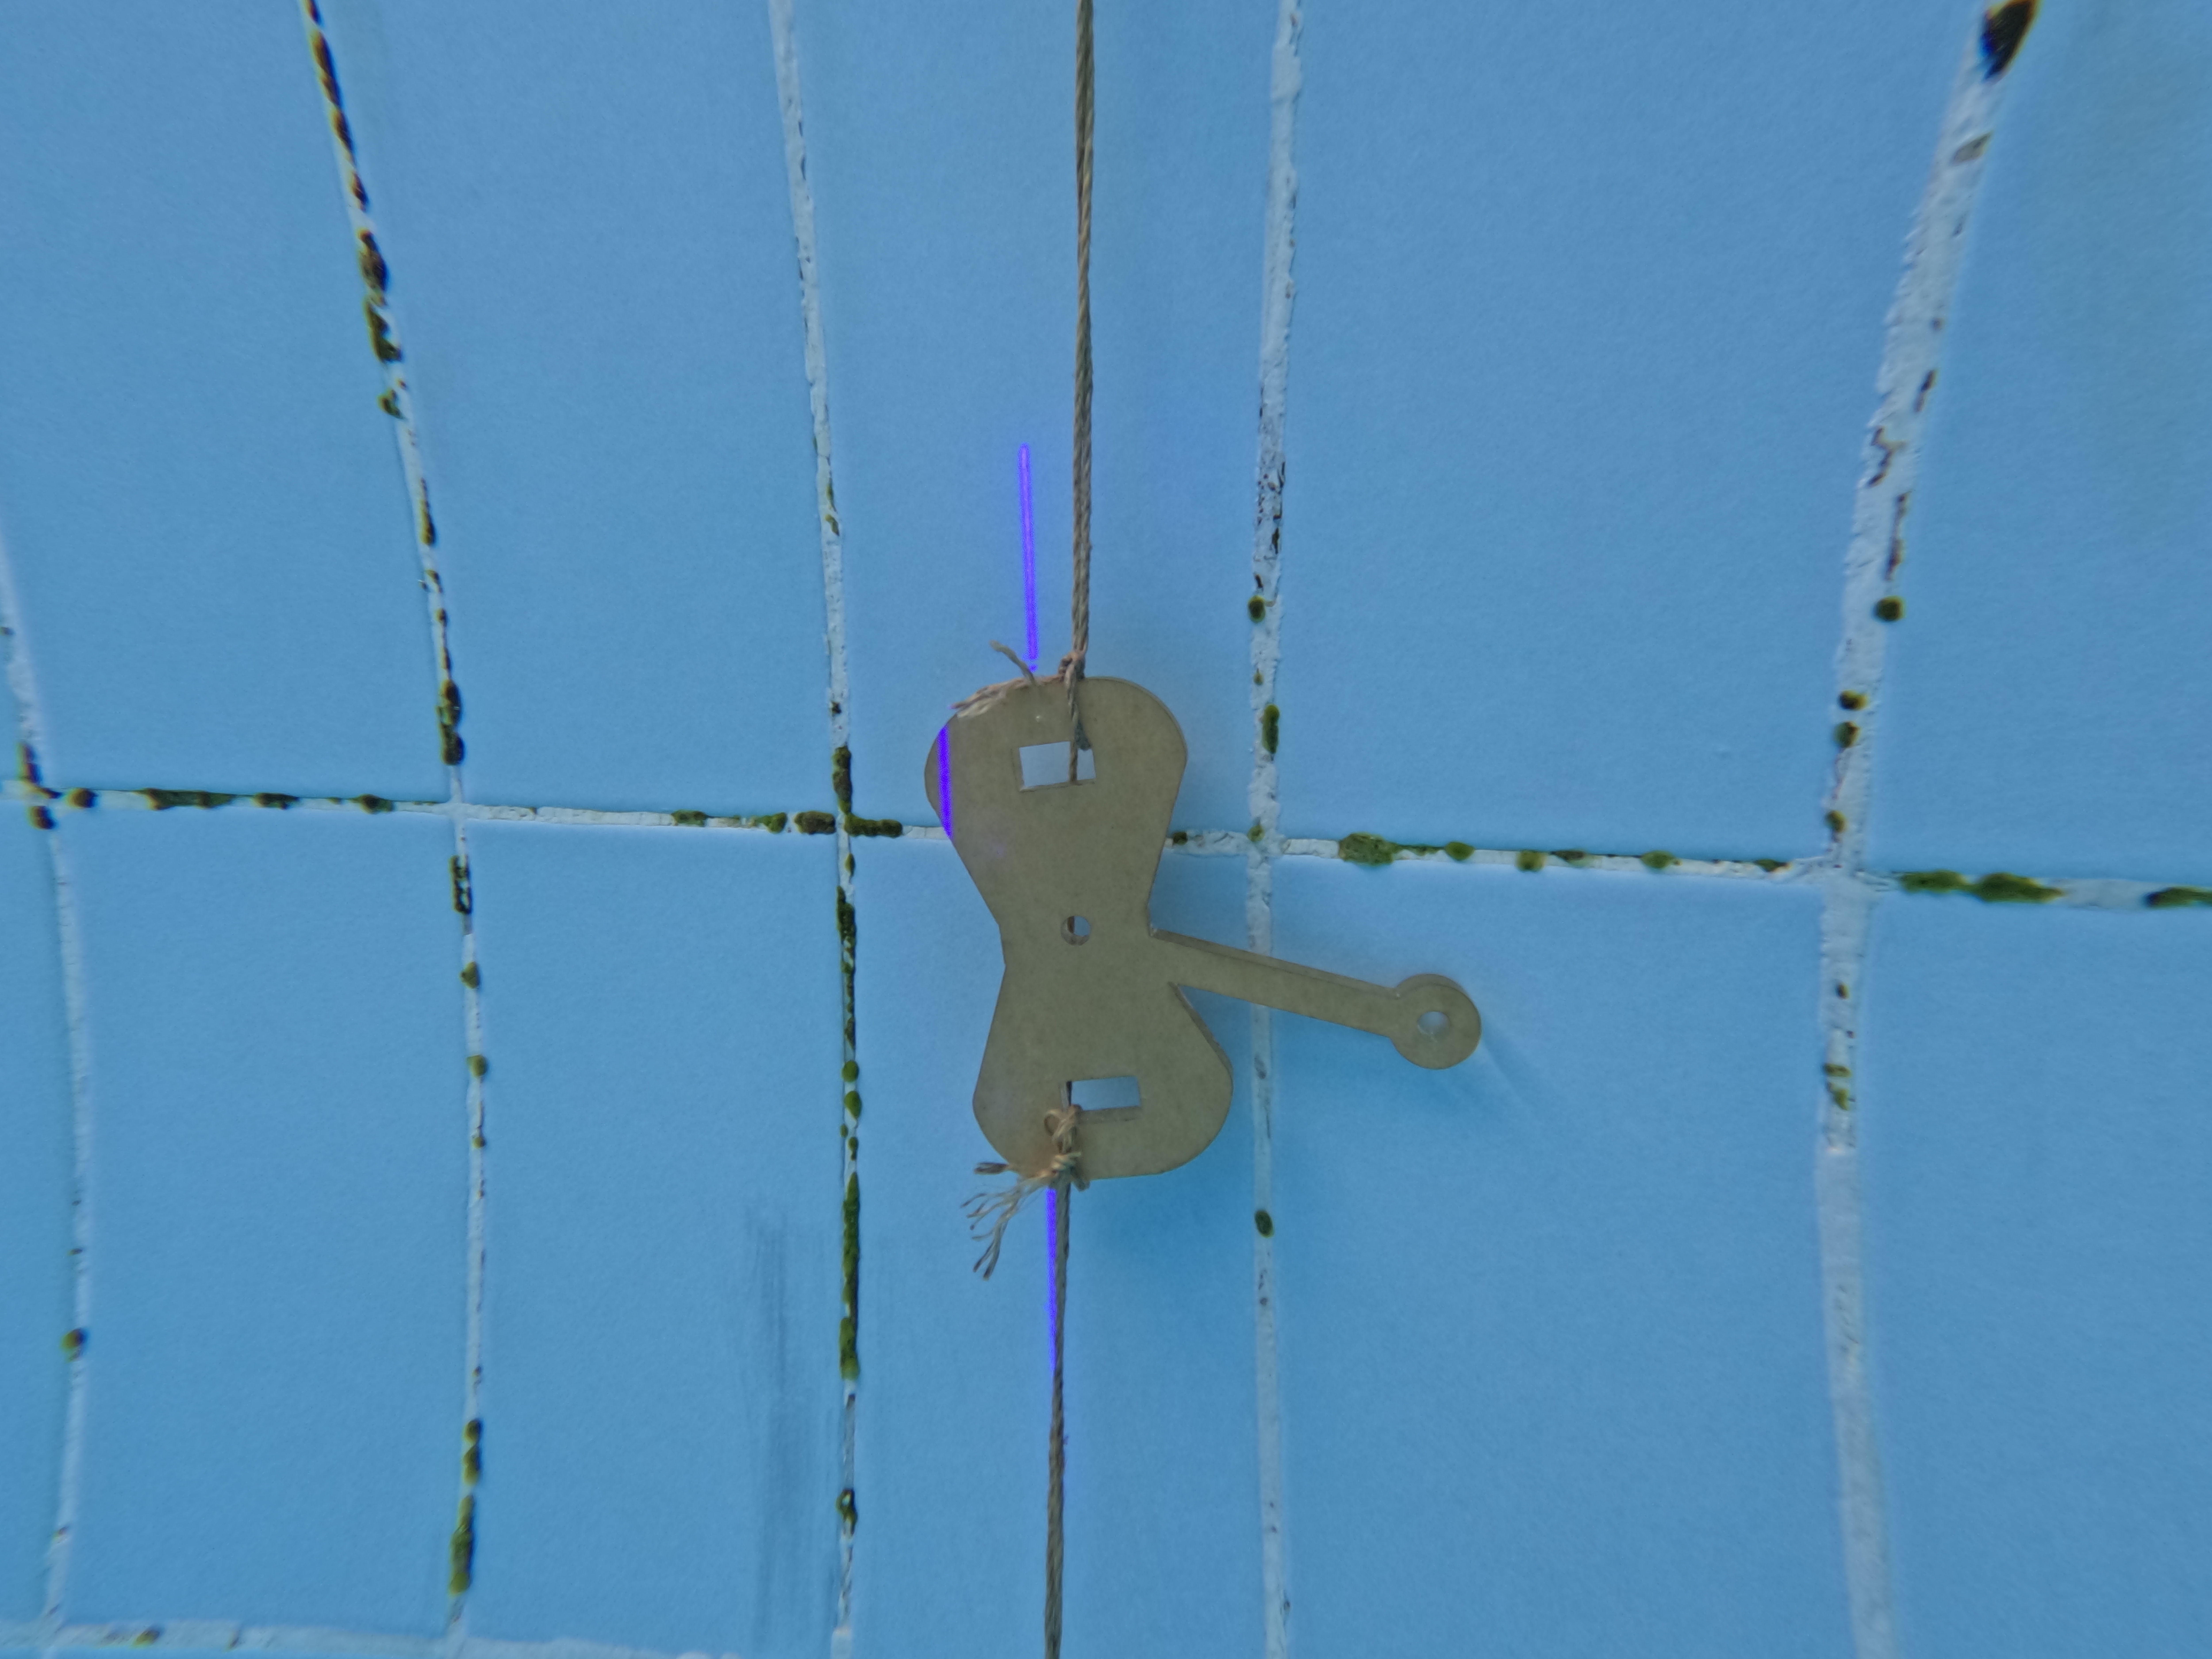

Supplement: Supplementary file 2660 [file G0050958.pdf › Level_2_2/G0050958.pdf]

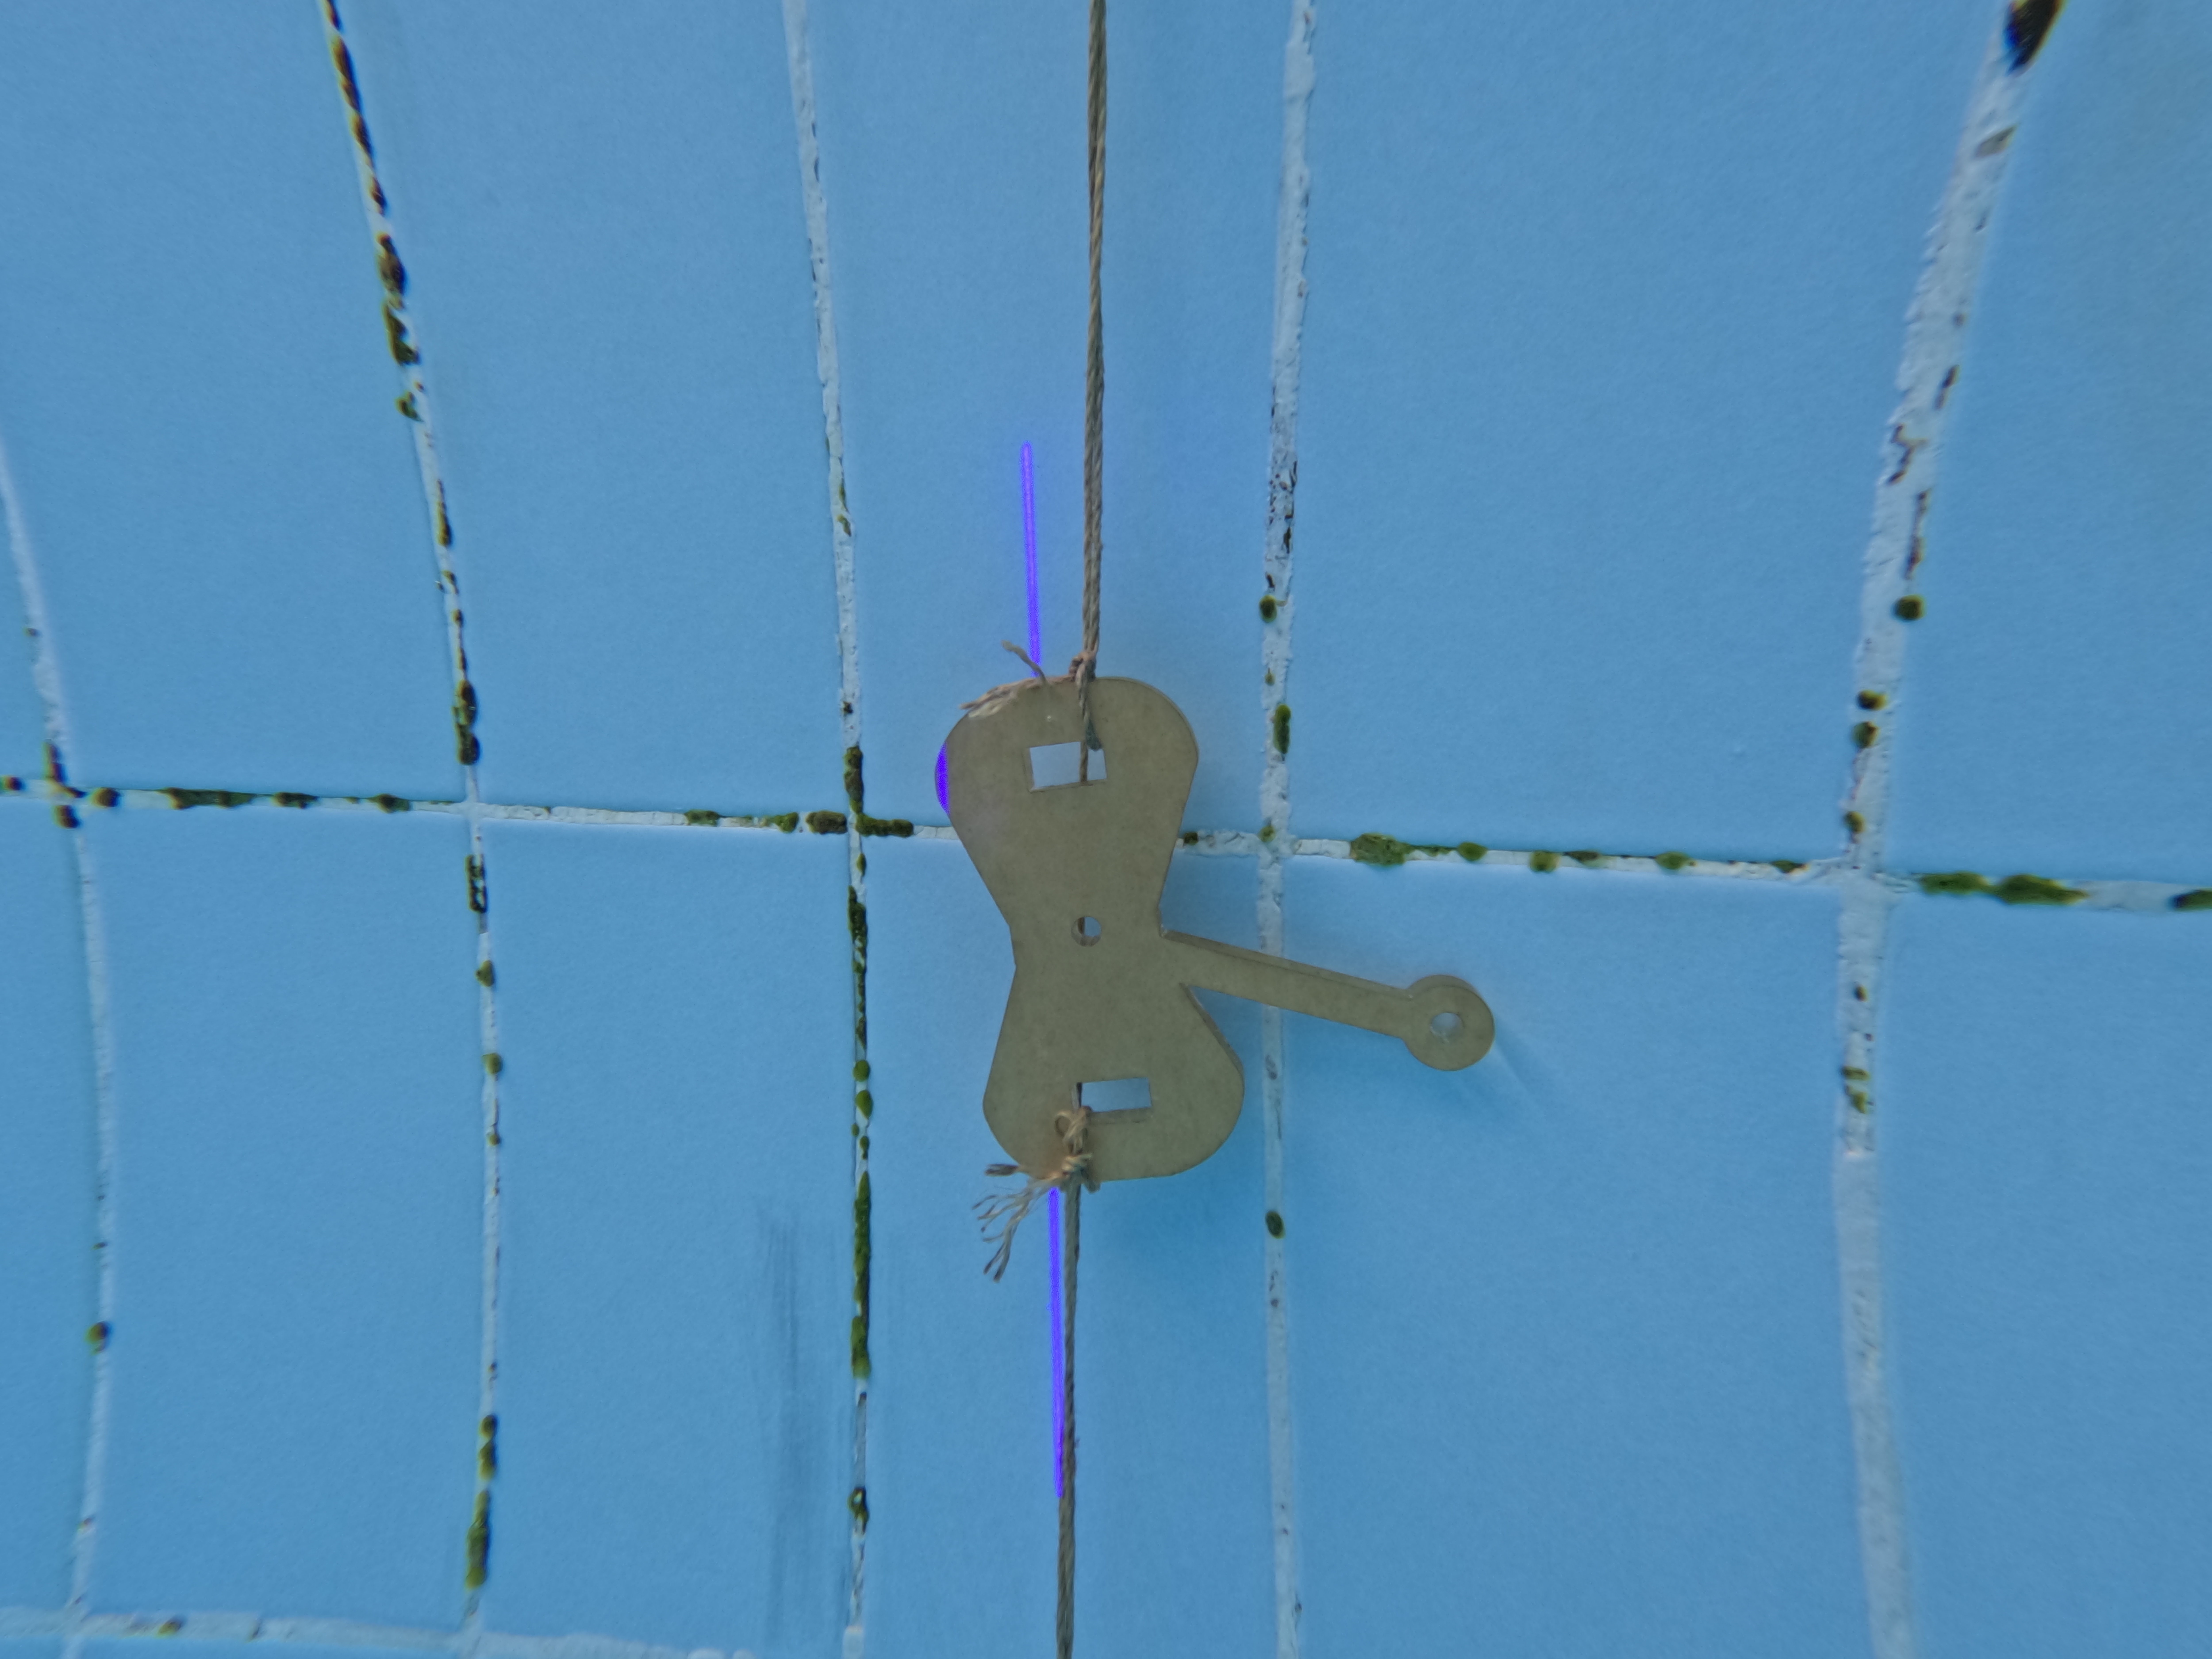

Supplement: Supplementary file 2661 [file G0050959.pdf › Level_2_2/G0050959.pdf]

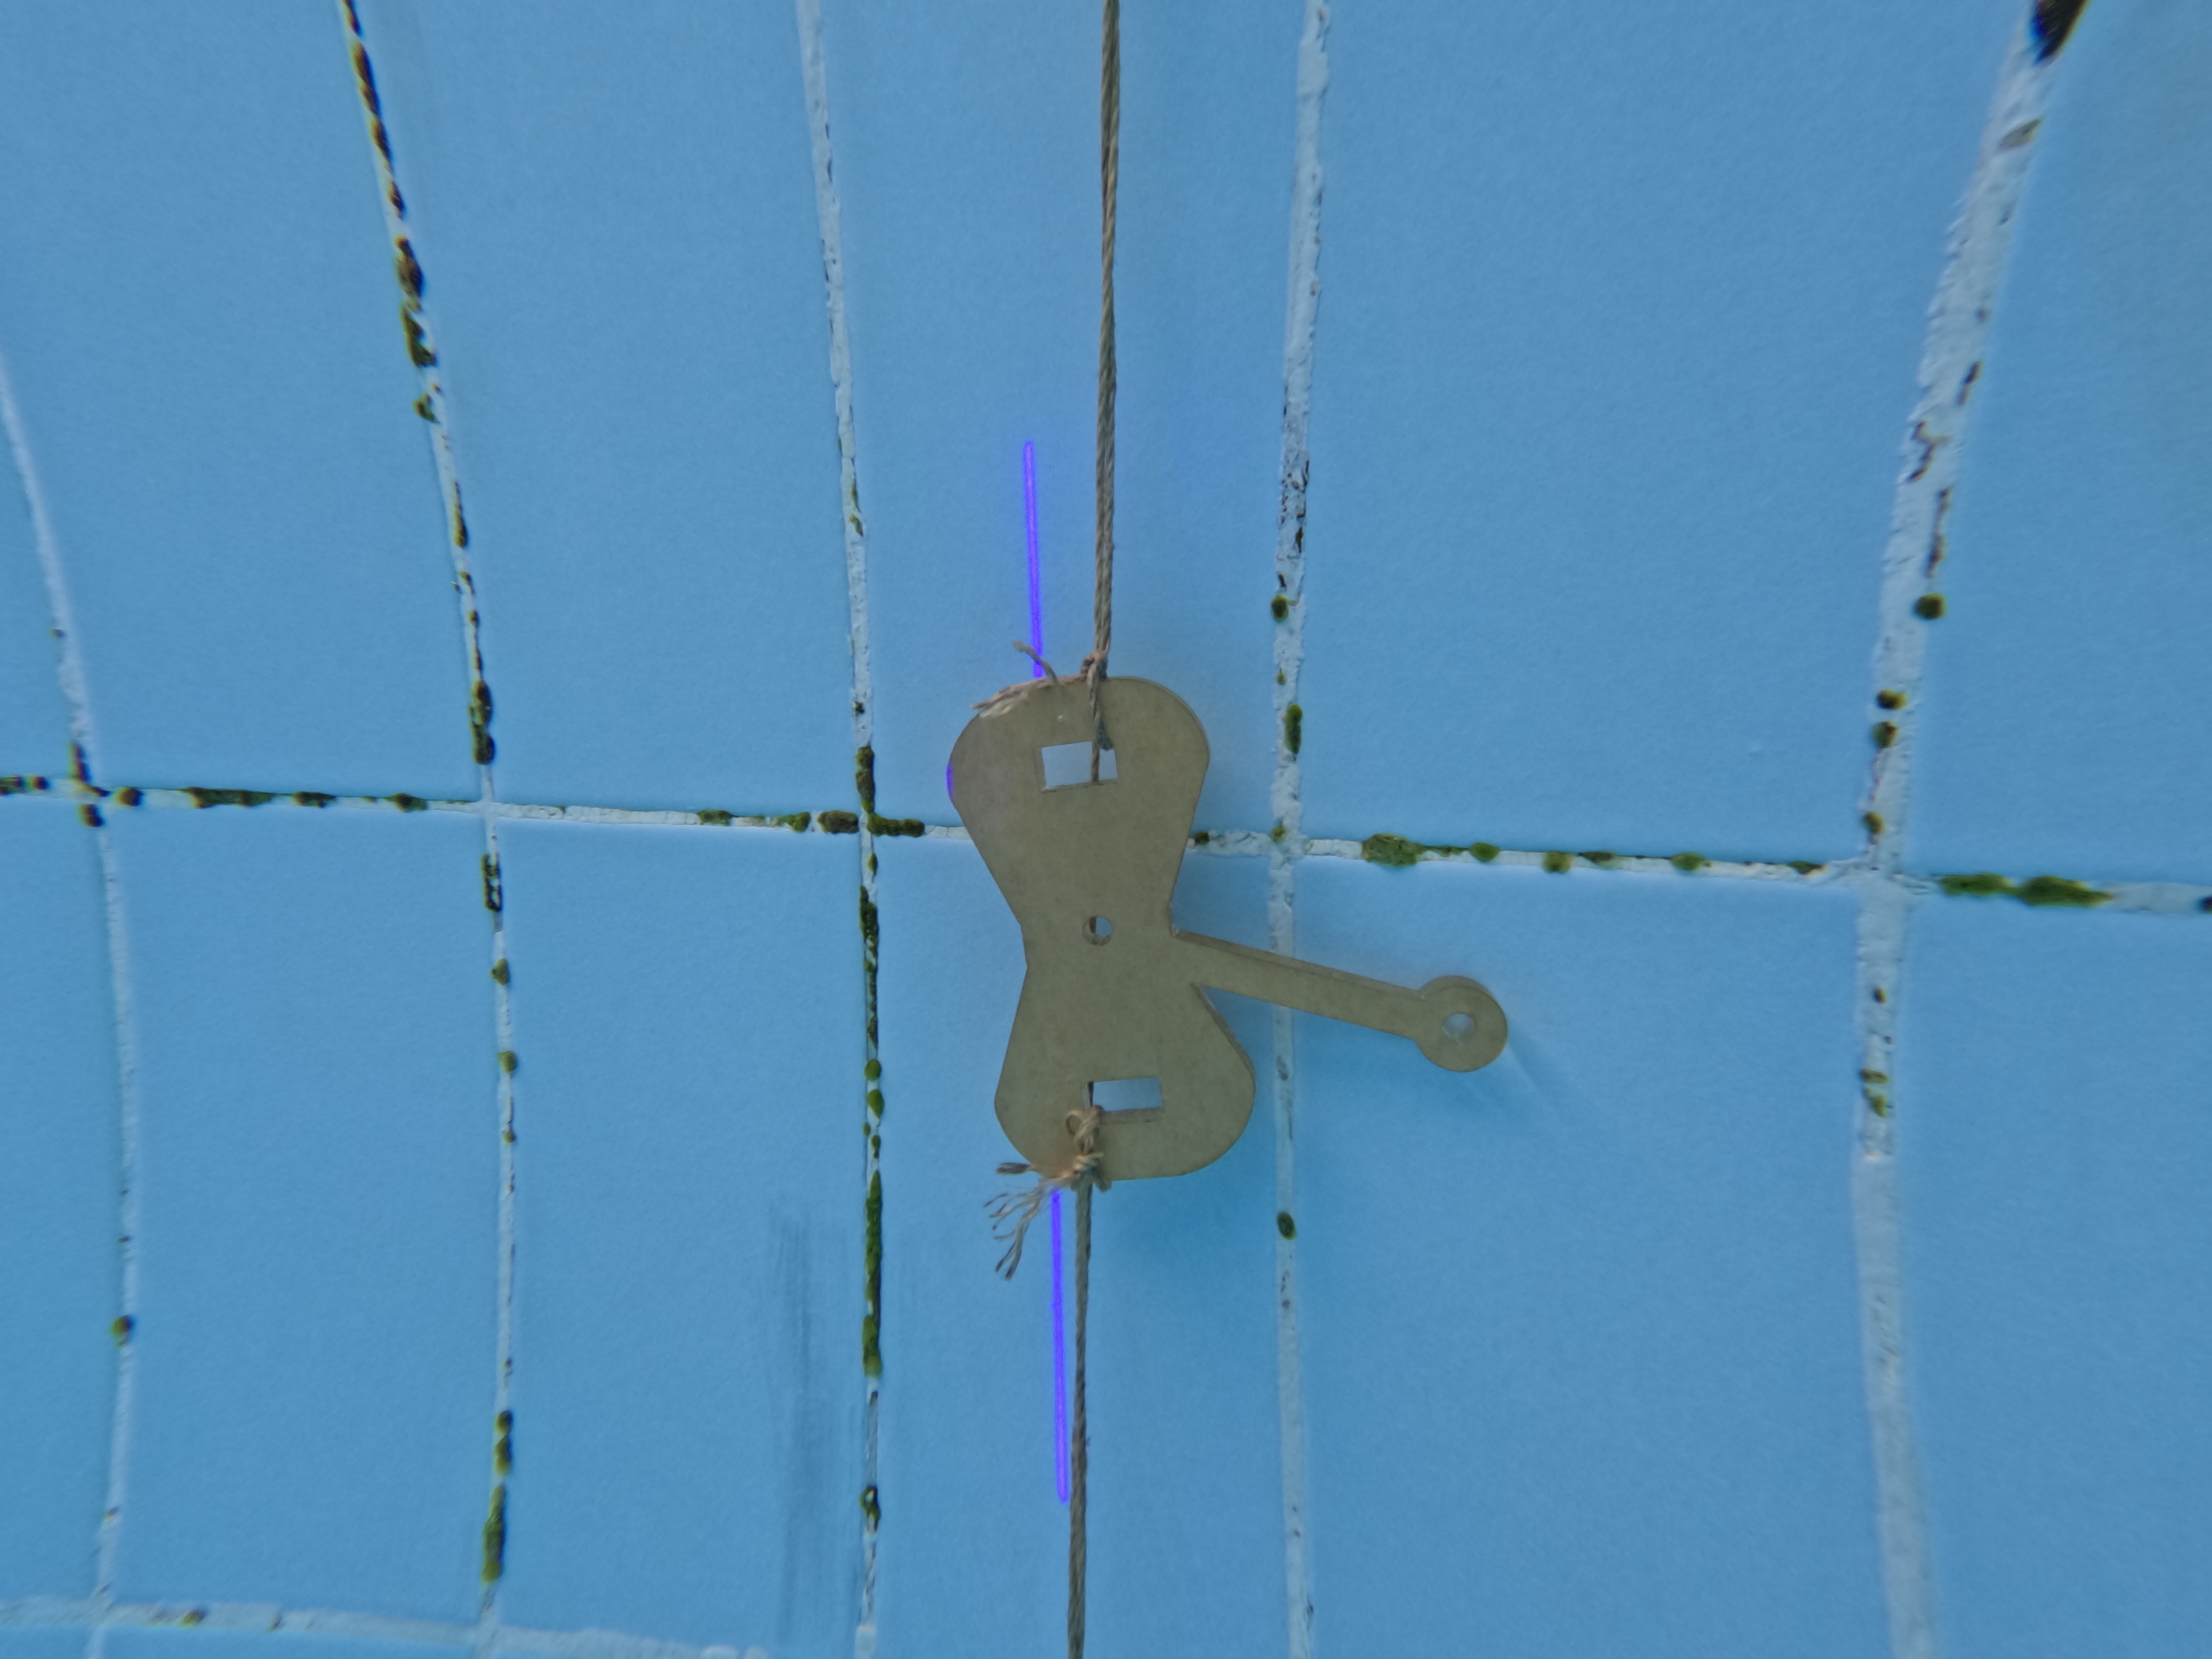

Supplement: Supplementary file 2662 [file G0050960.pdf › Level_2_2/G0050960.pdf]

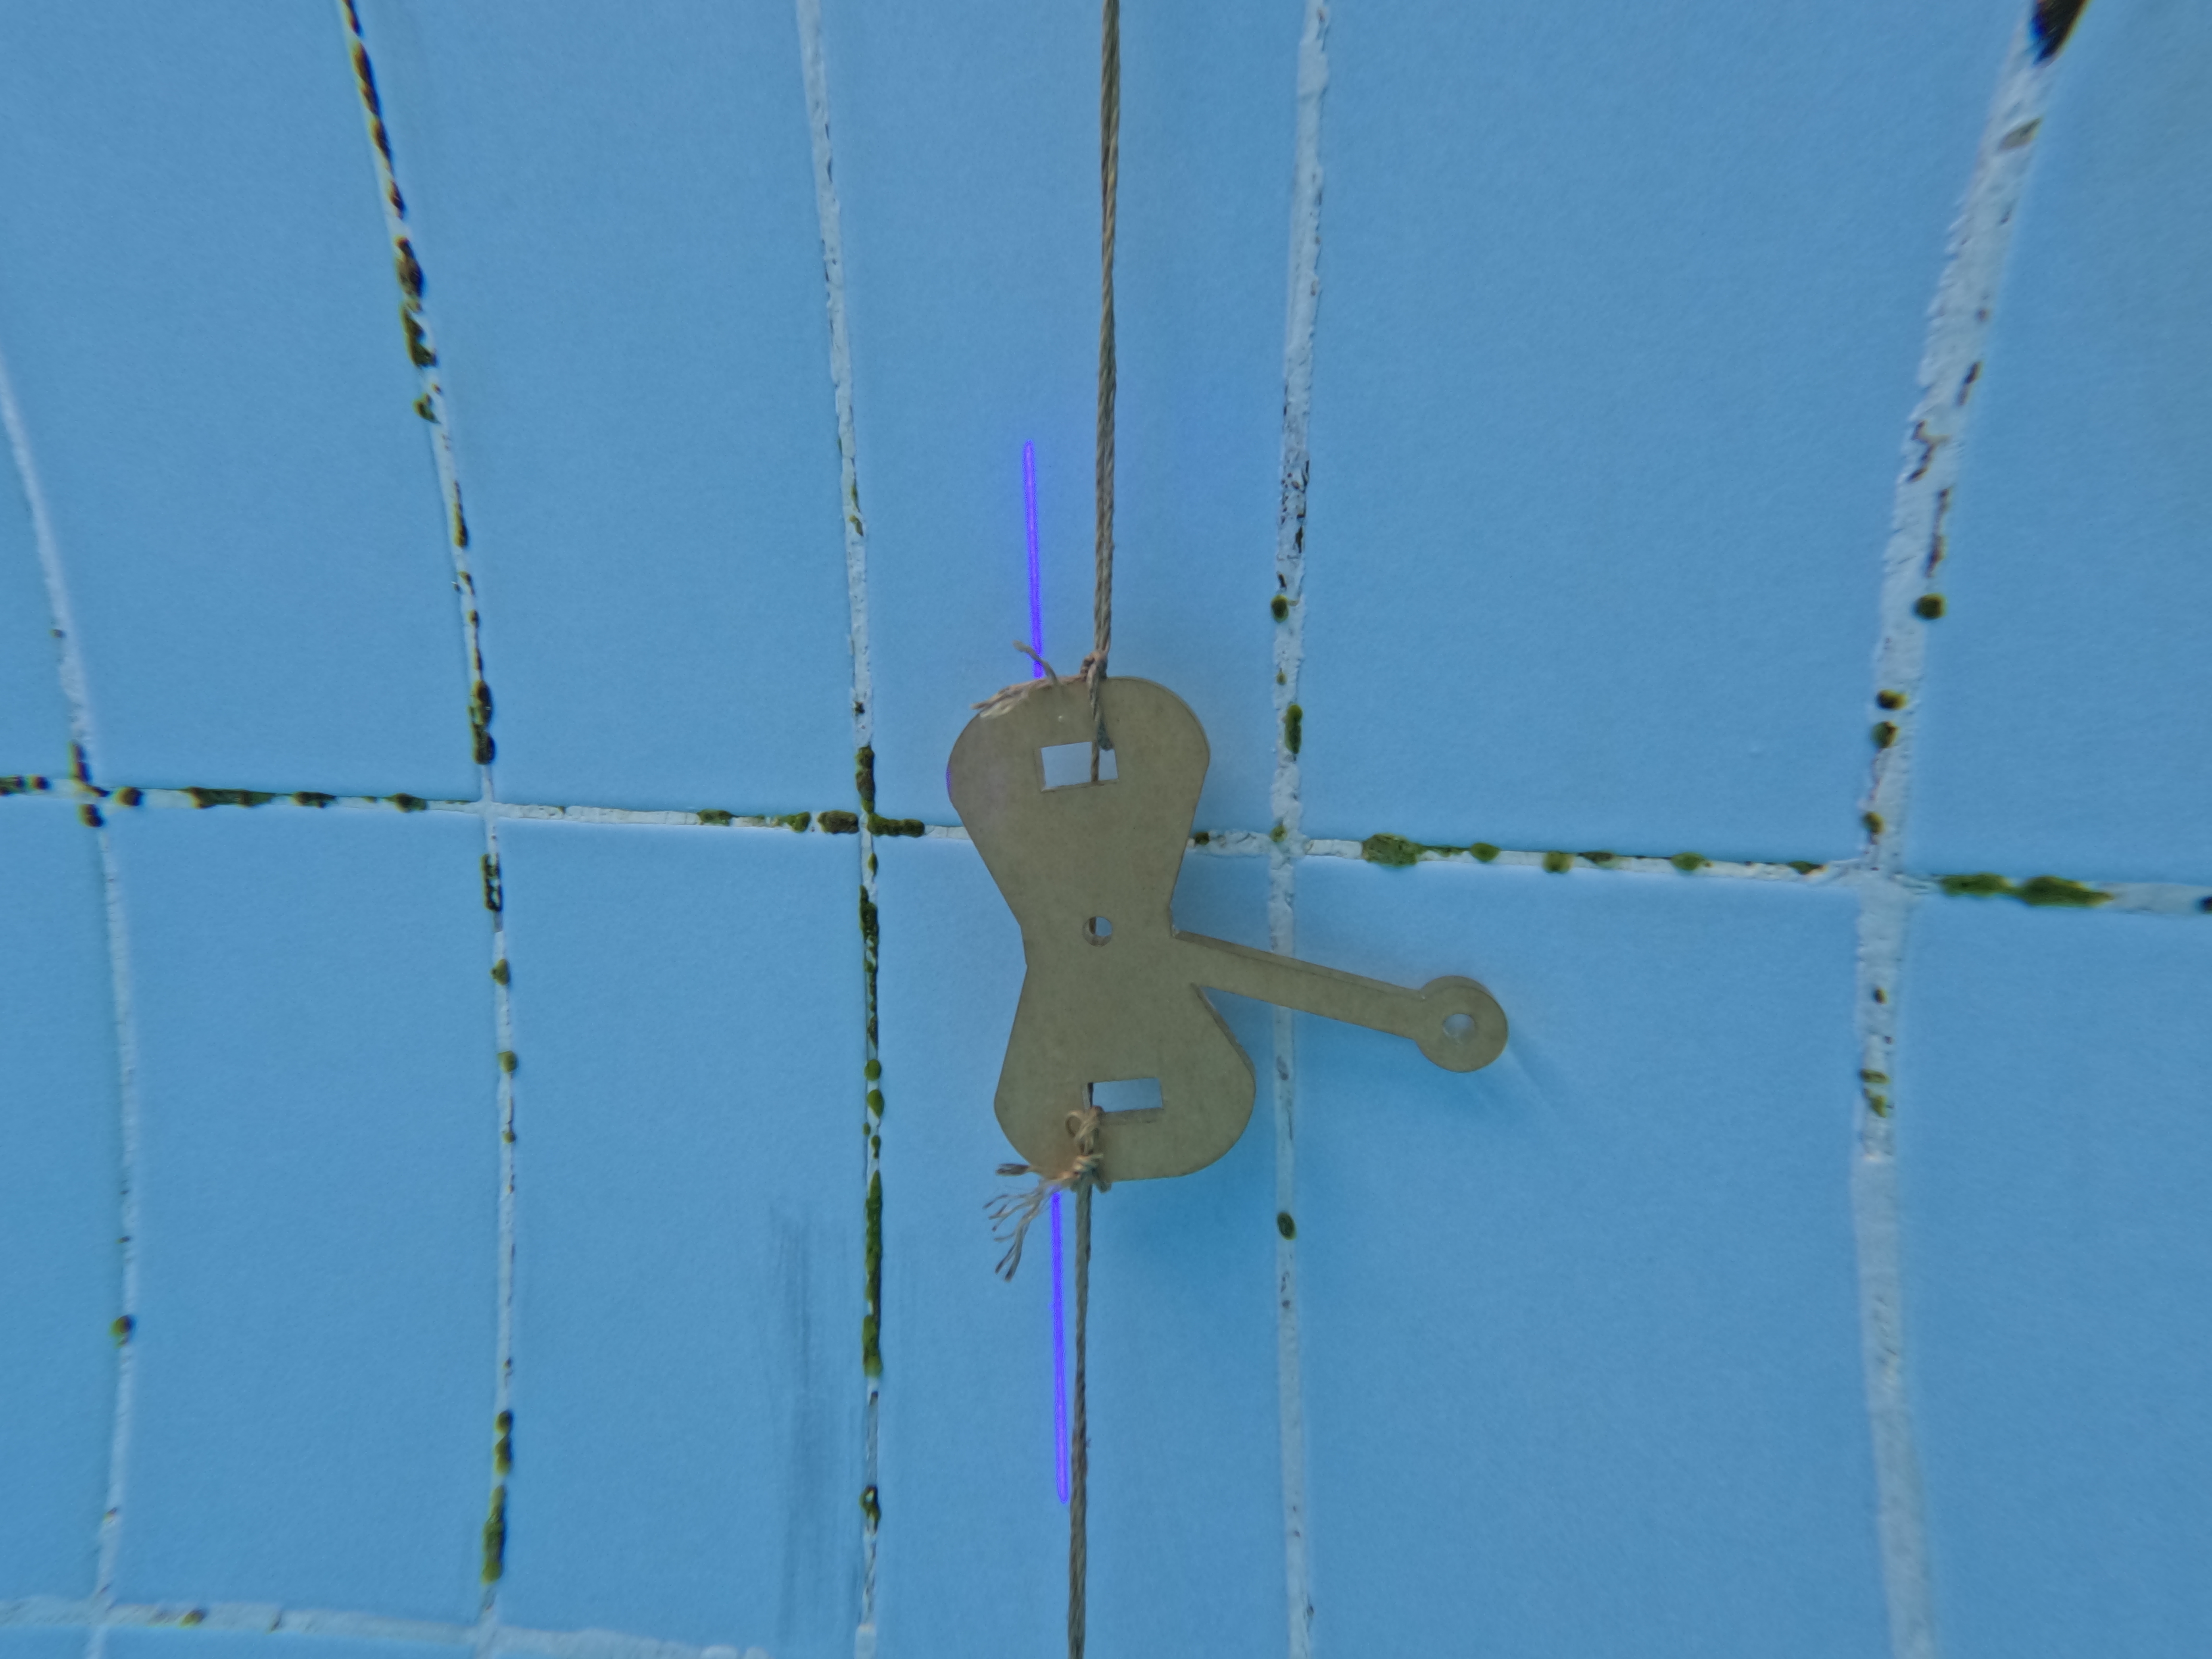

Supplement: Supplementary file 2663 [file G0050961.pdf › Level_2_2/G0050961.pdf]

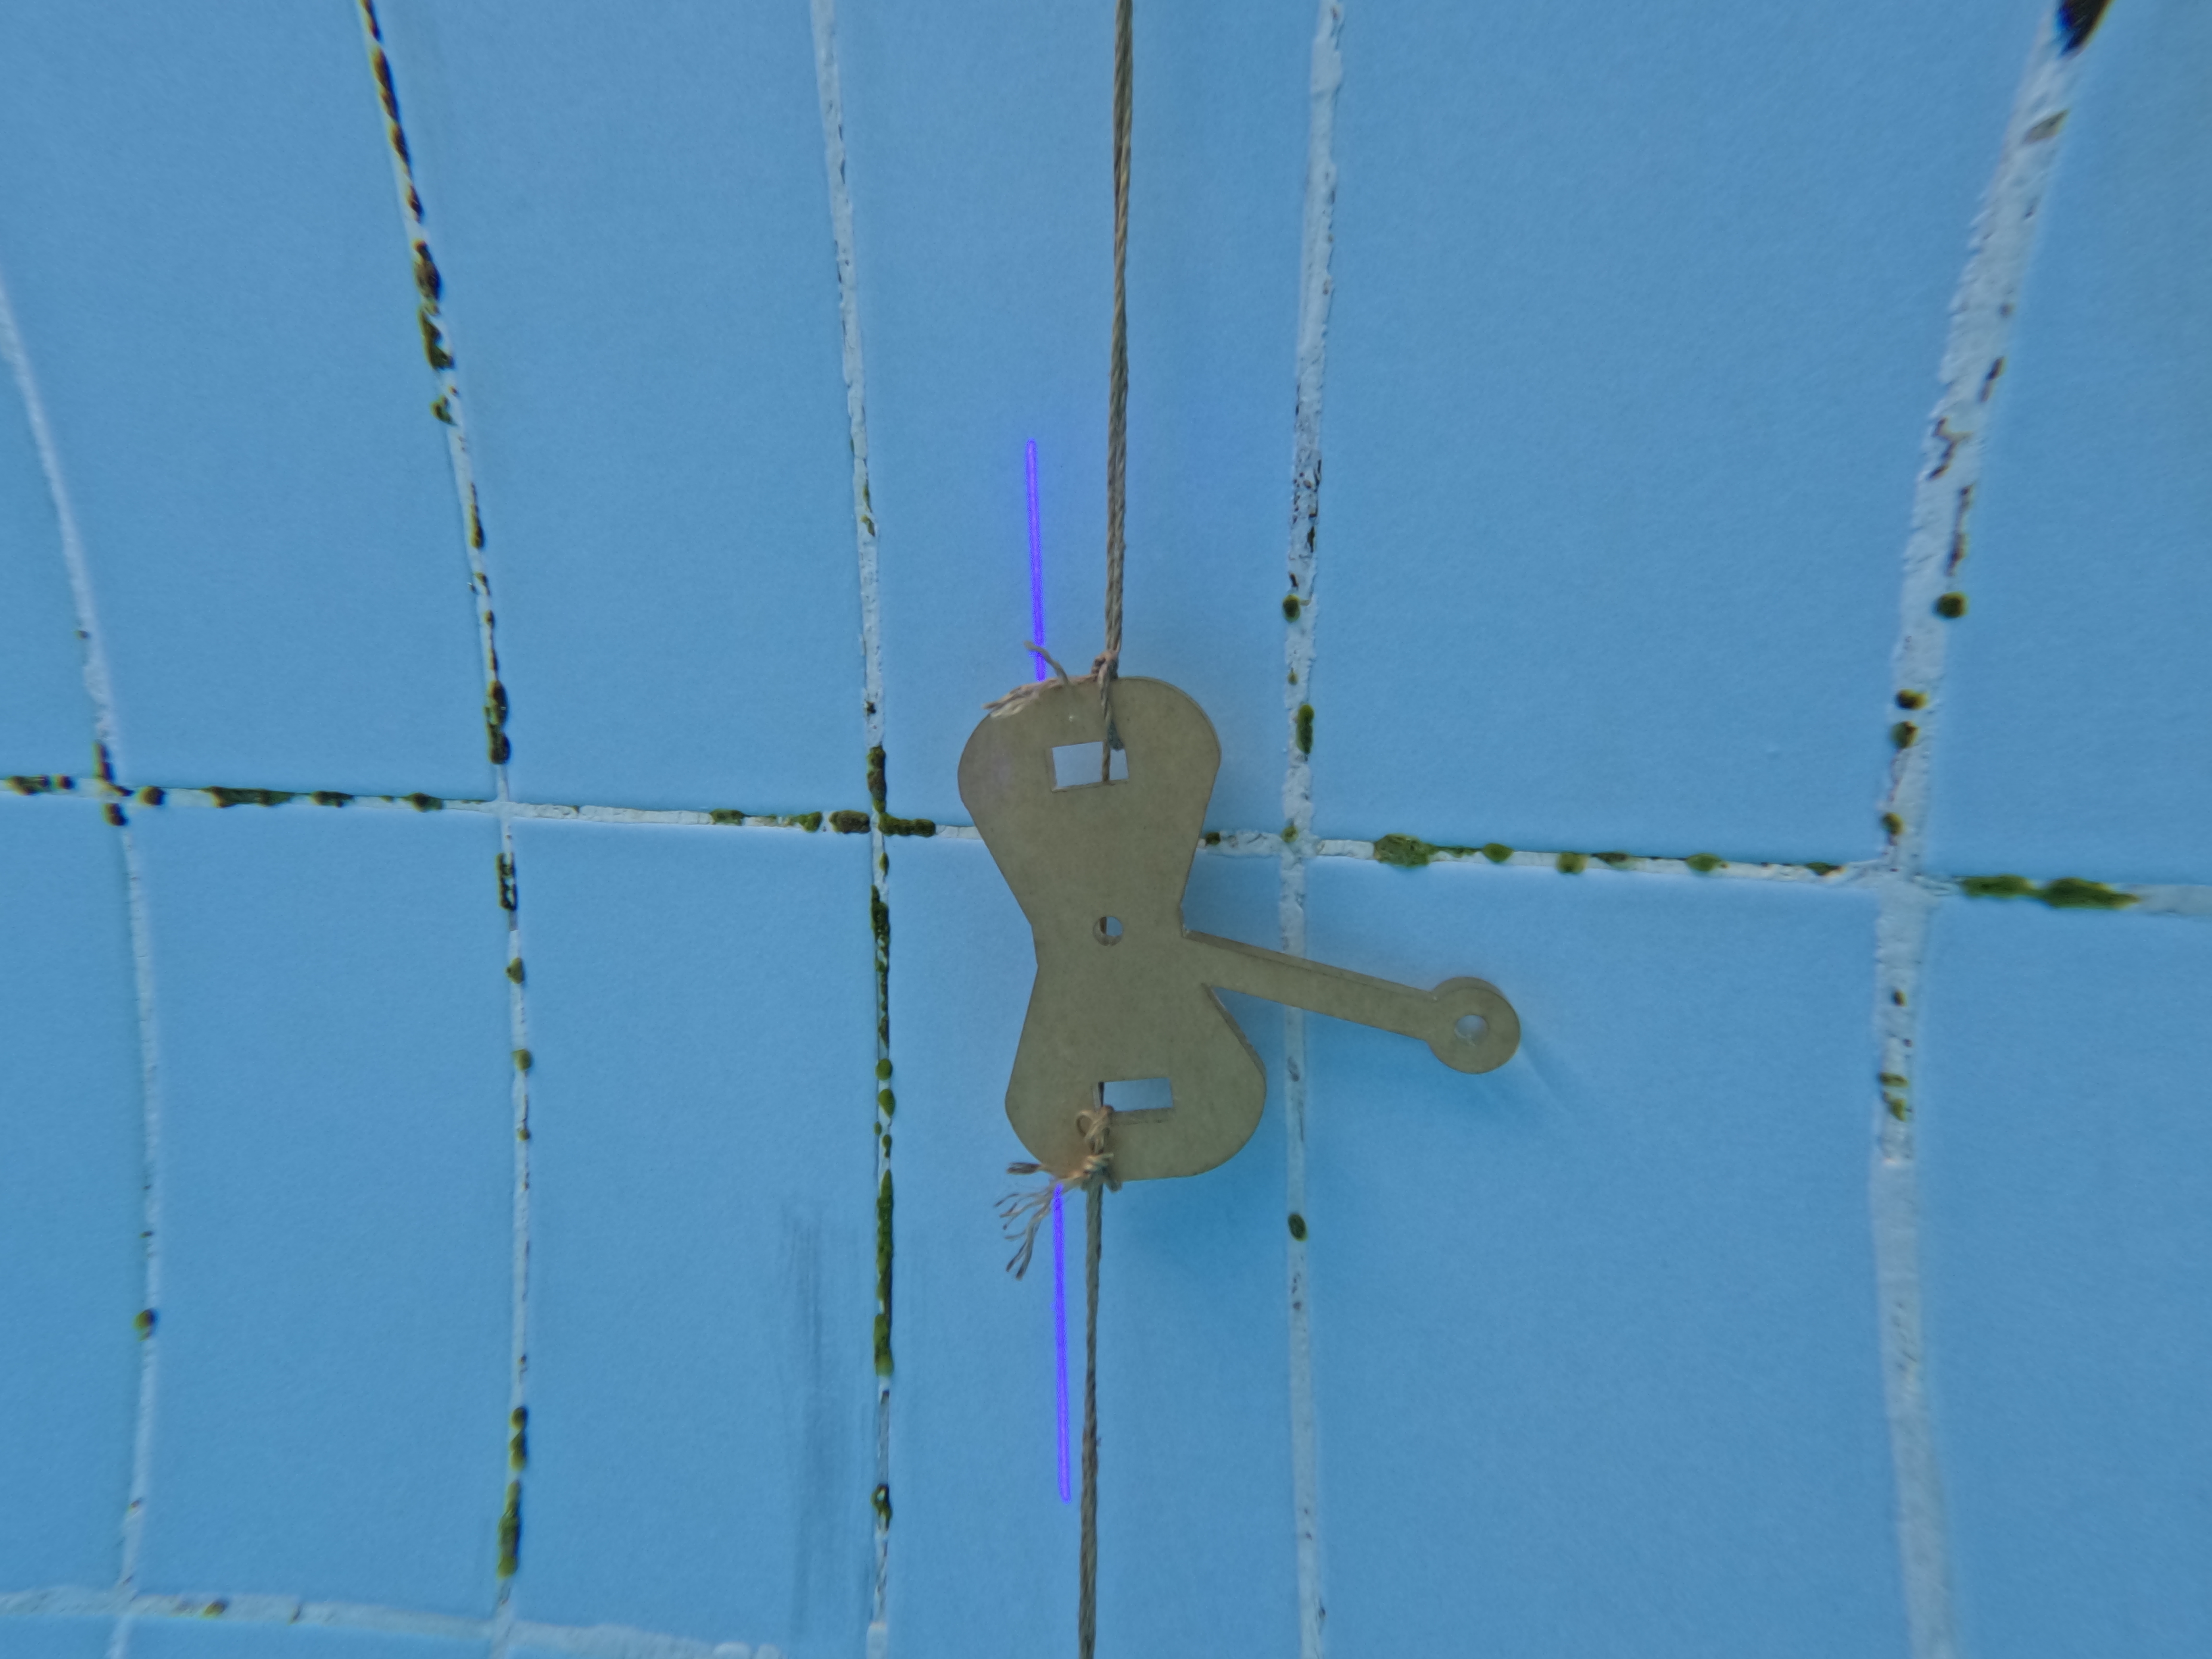

Supplement: Supplementary file 2664 [file G0050962.pdf › Level_2_2/G0050962.pdf]

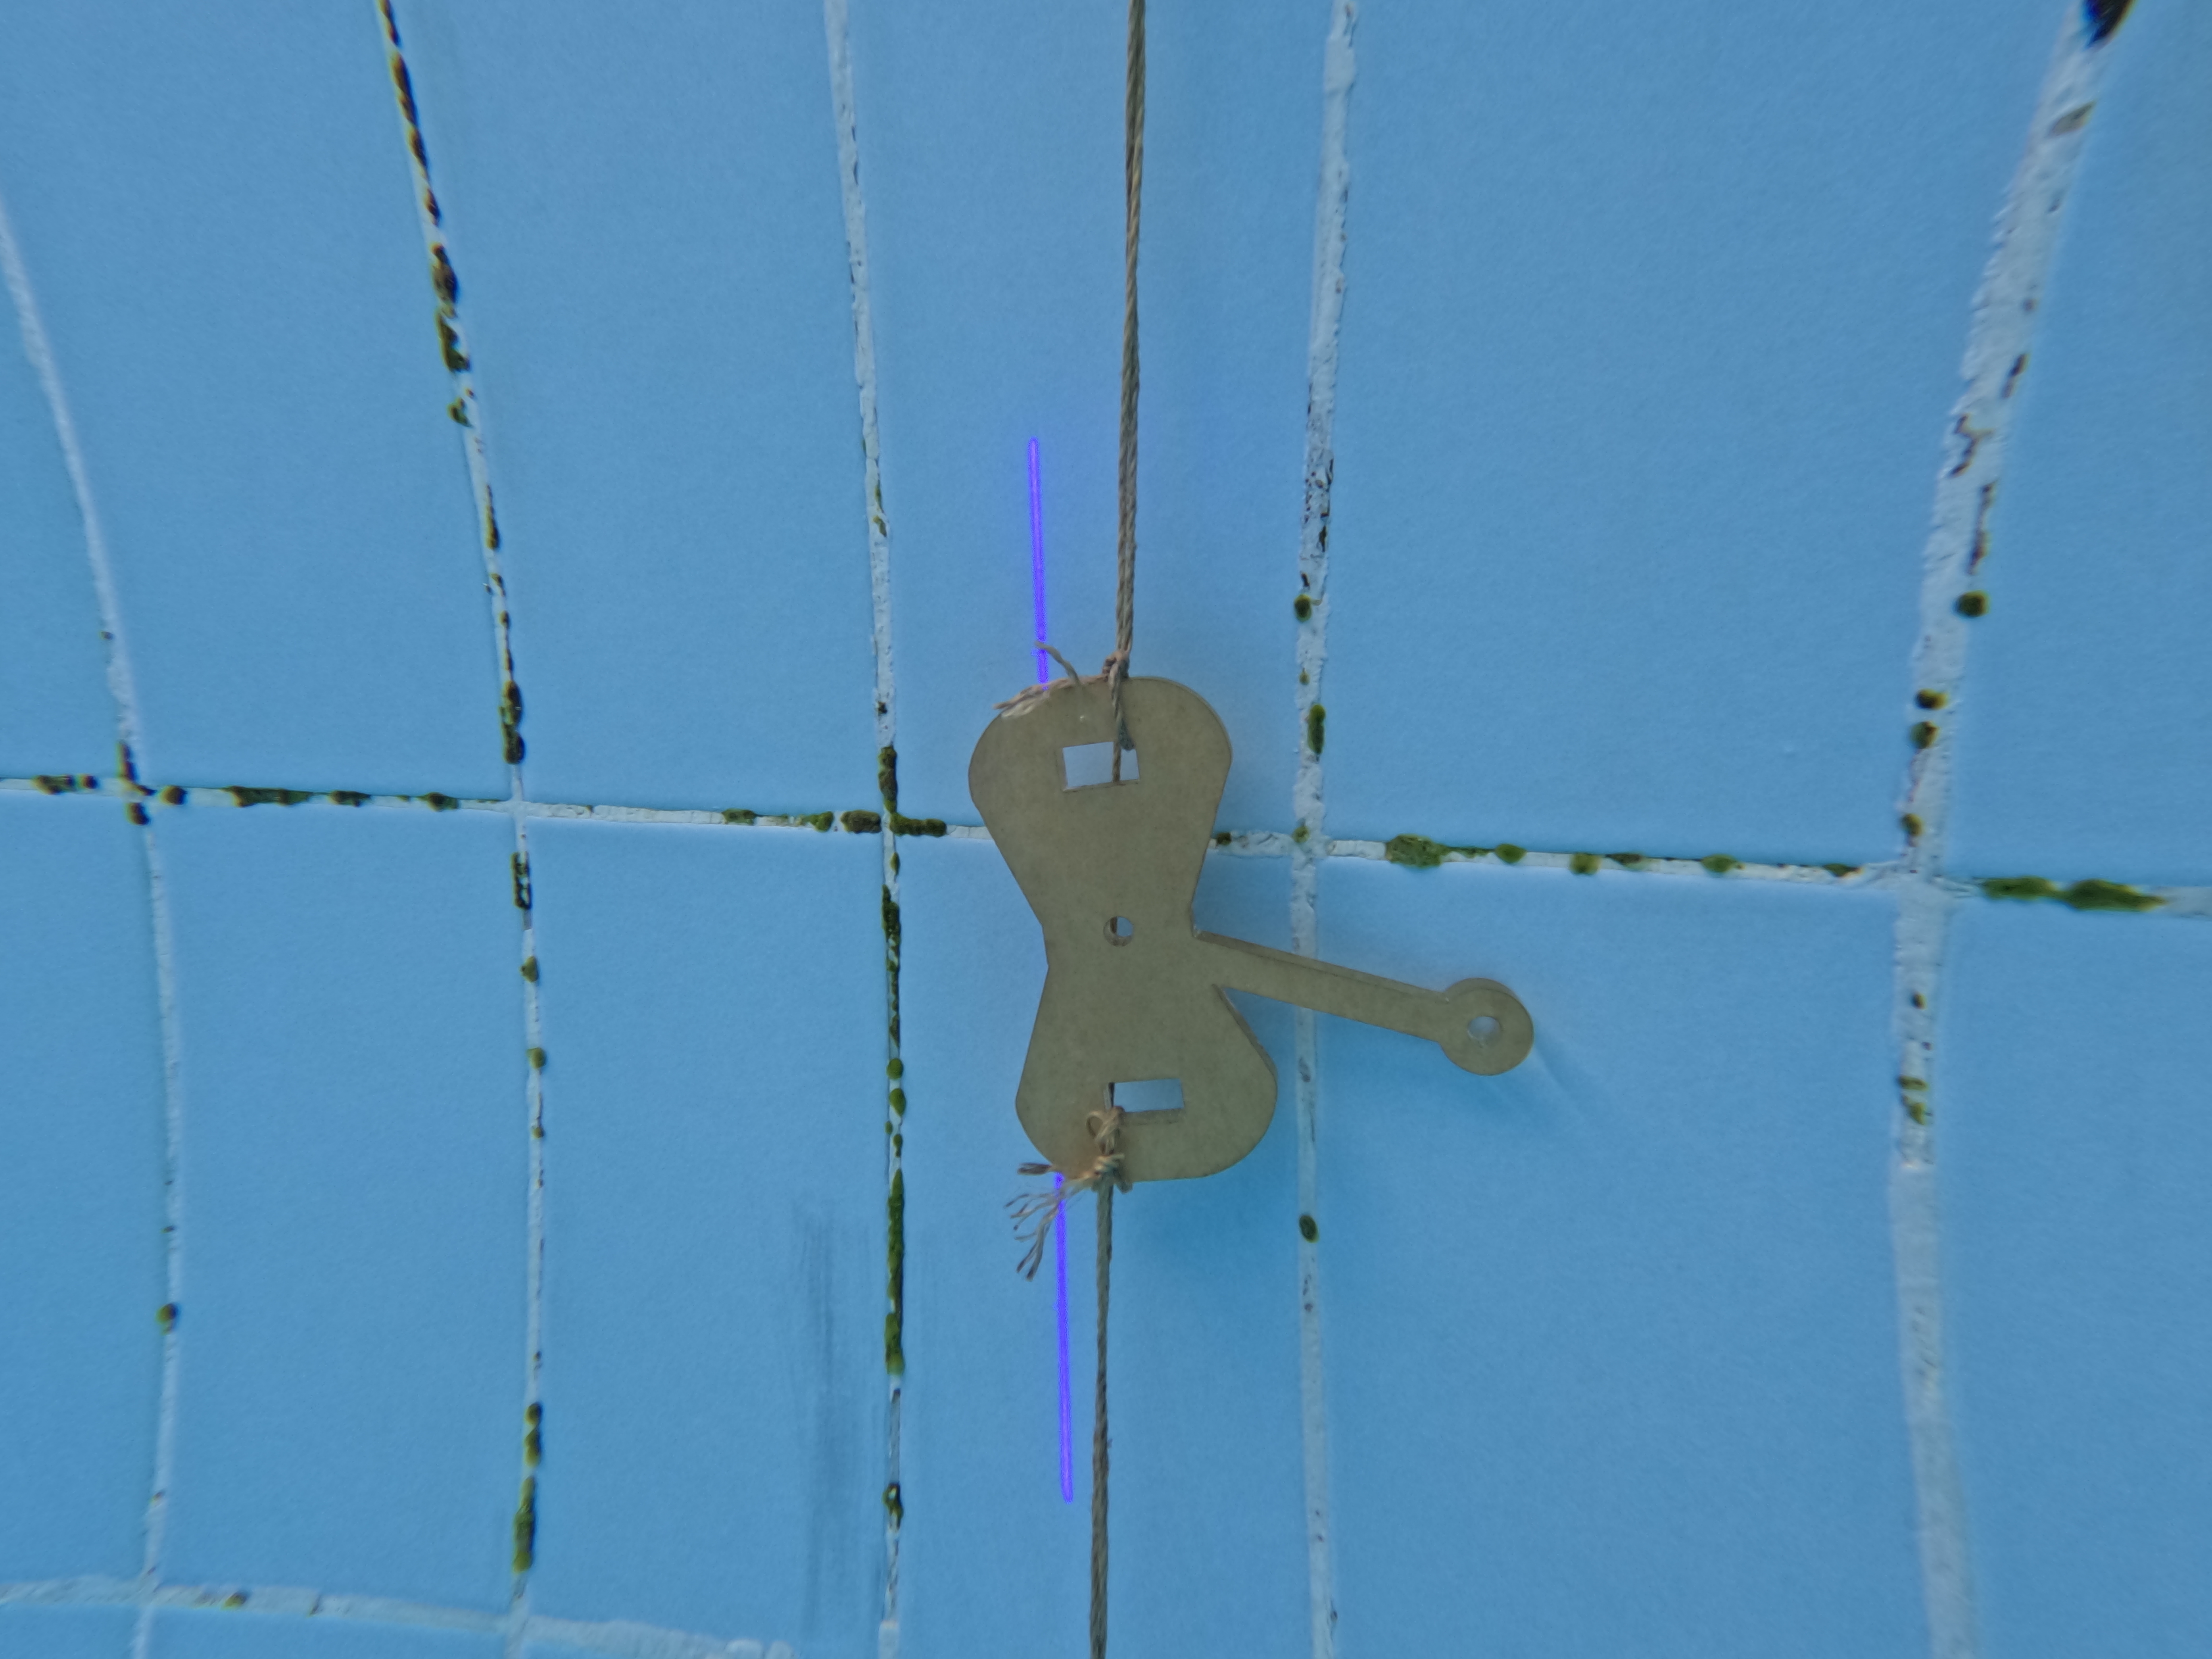

Supplement: Supplementary file 2665 [file G0050963.pdf › Level_2_2/G0050963.pdf]

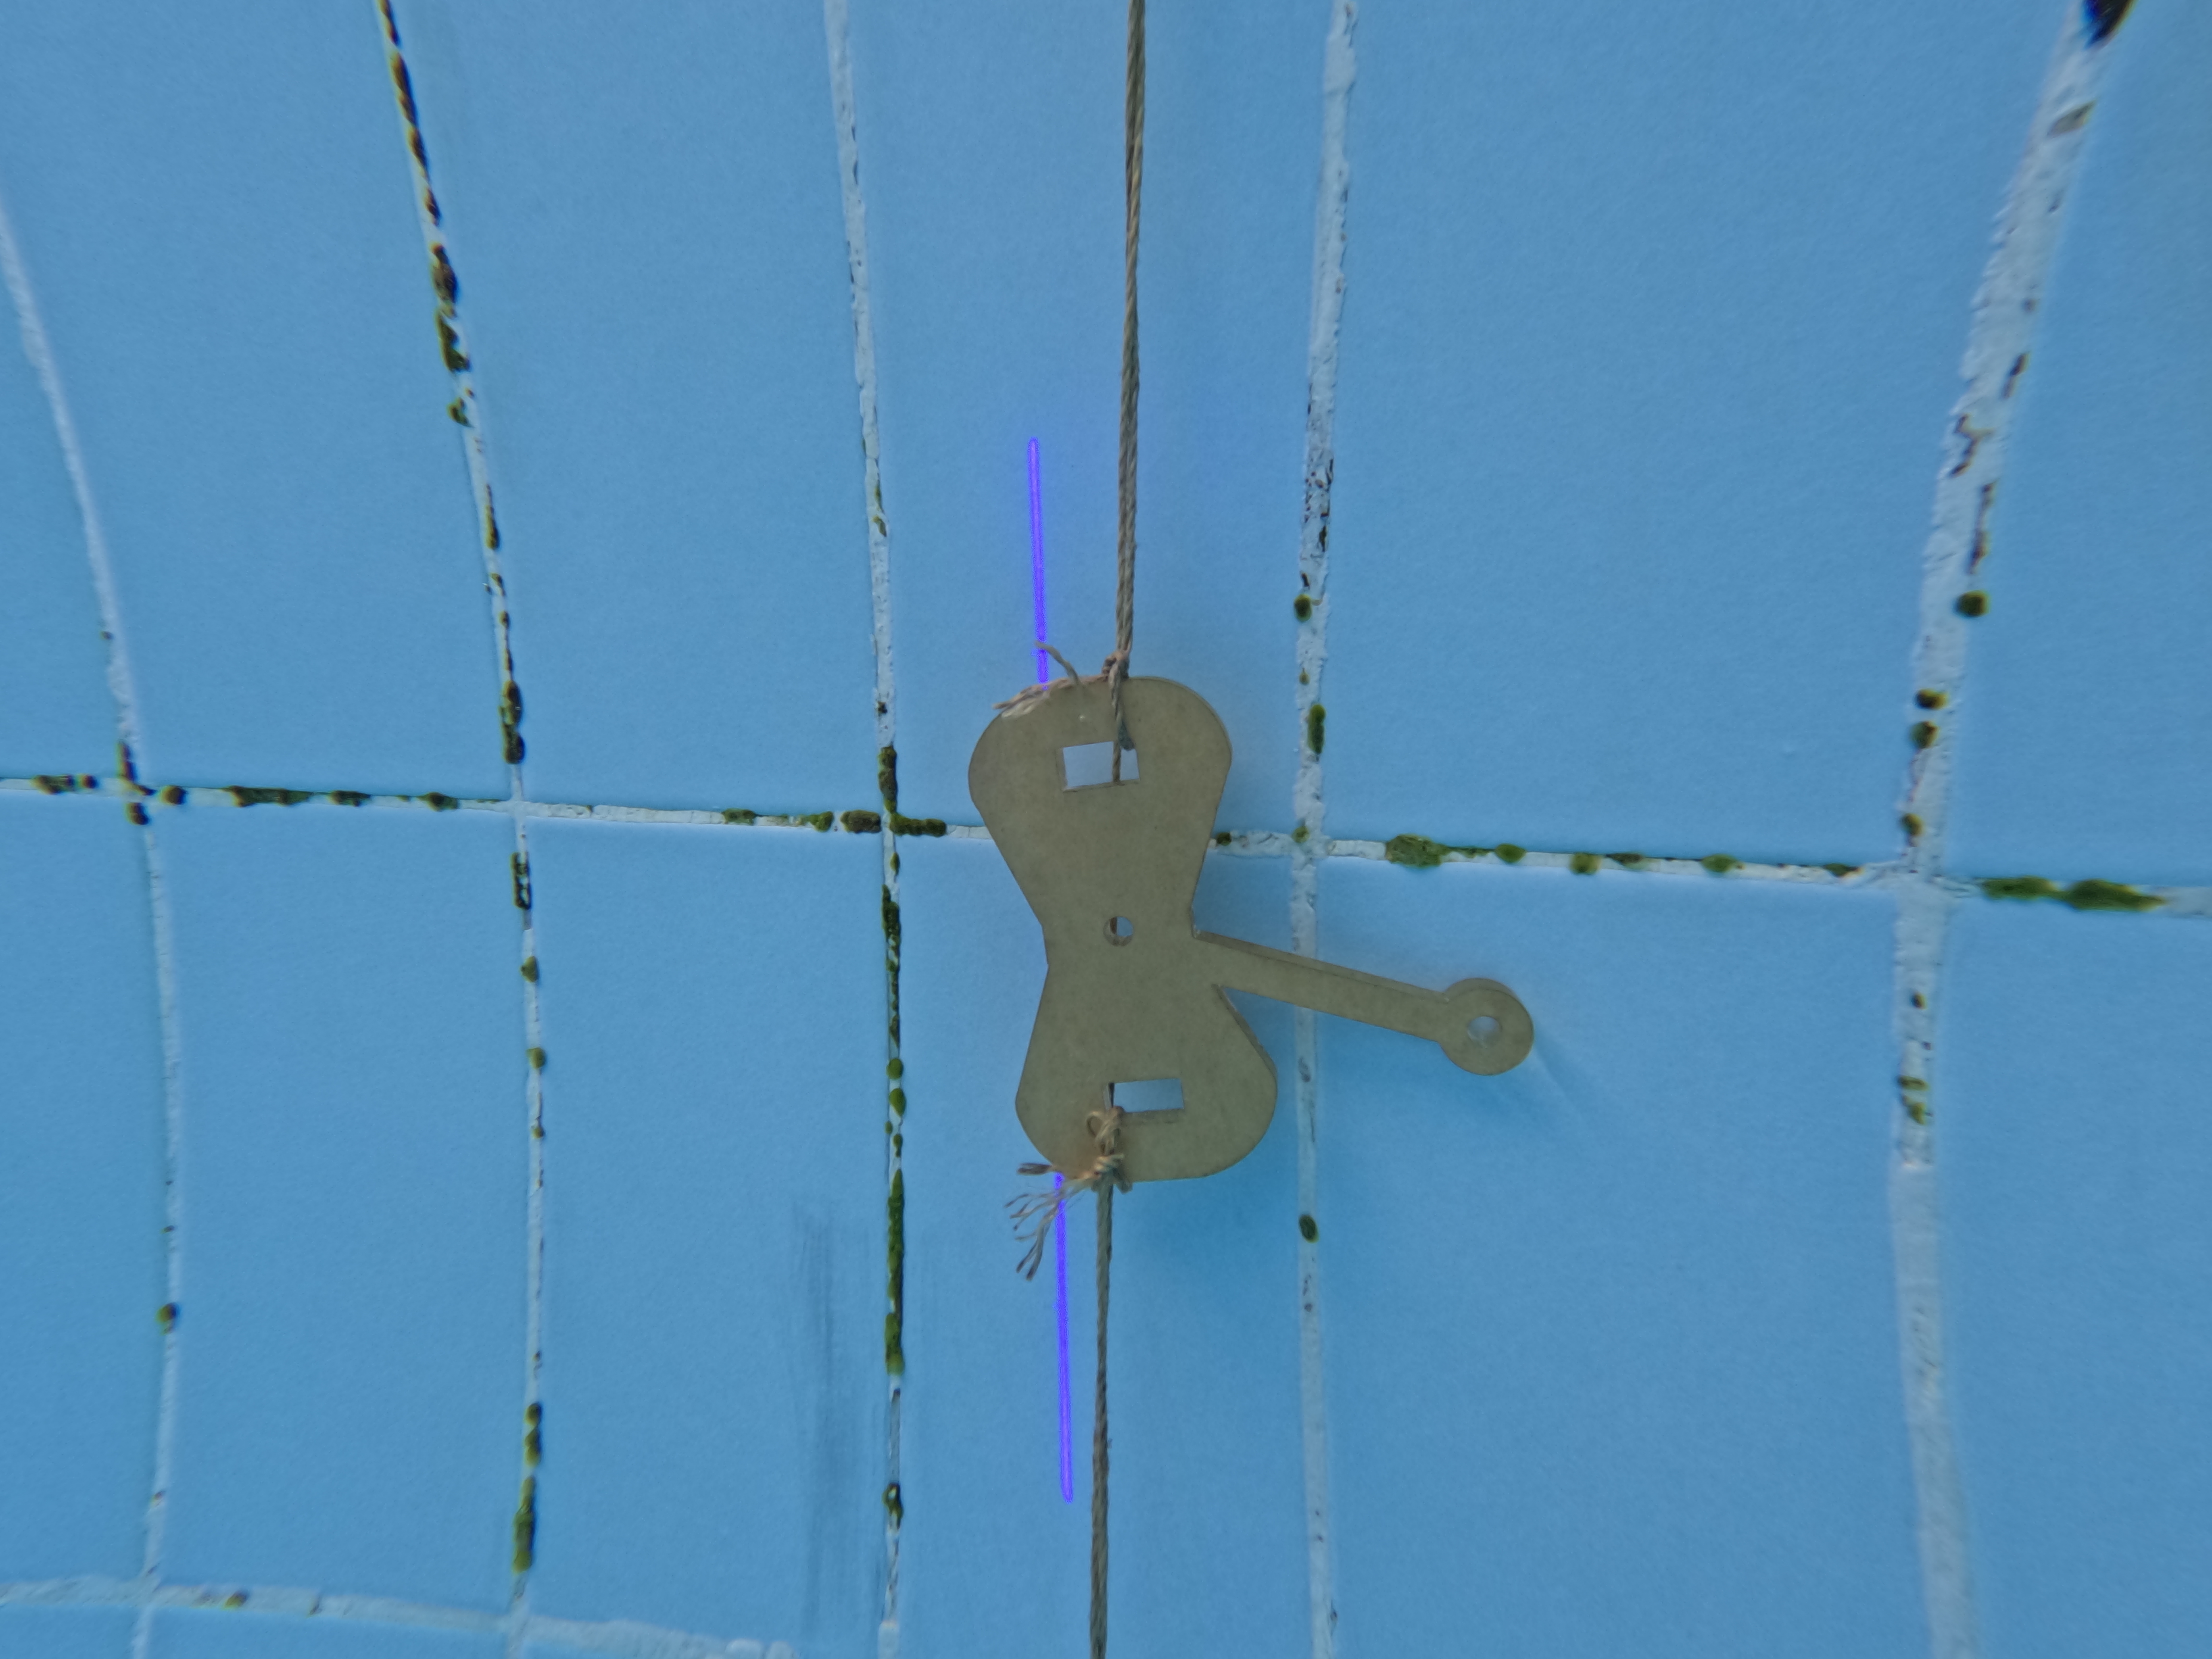

Supplement: Supplementary file 2666 [file G0050964.pdf › Level_2_2/G0050964.pdf]

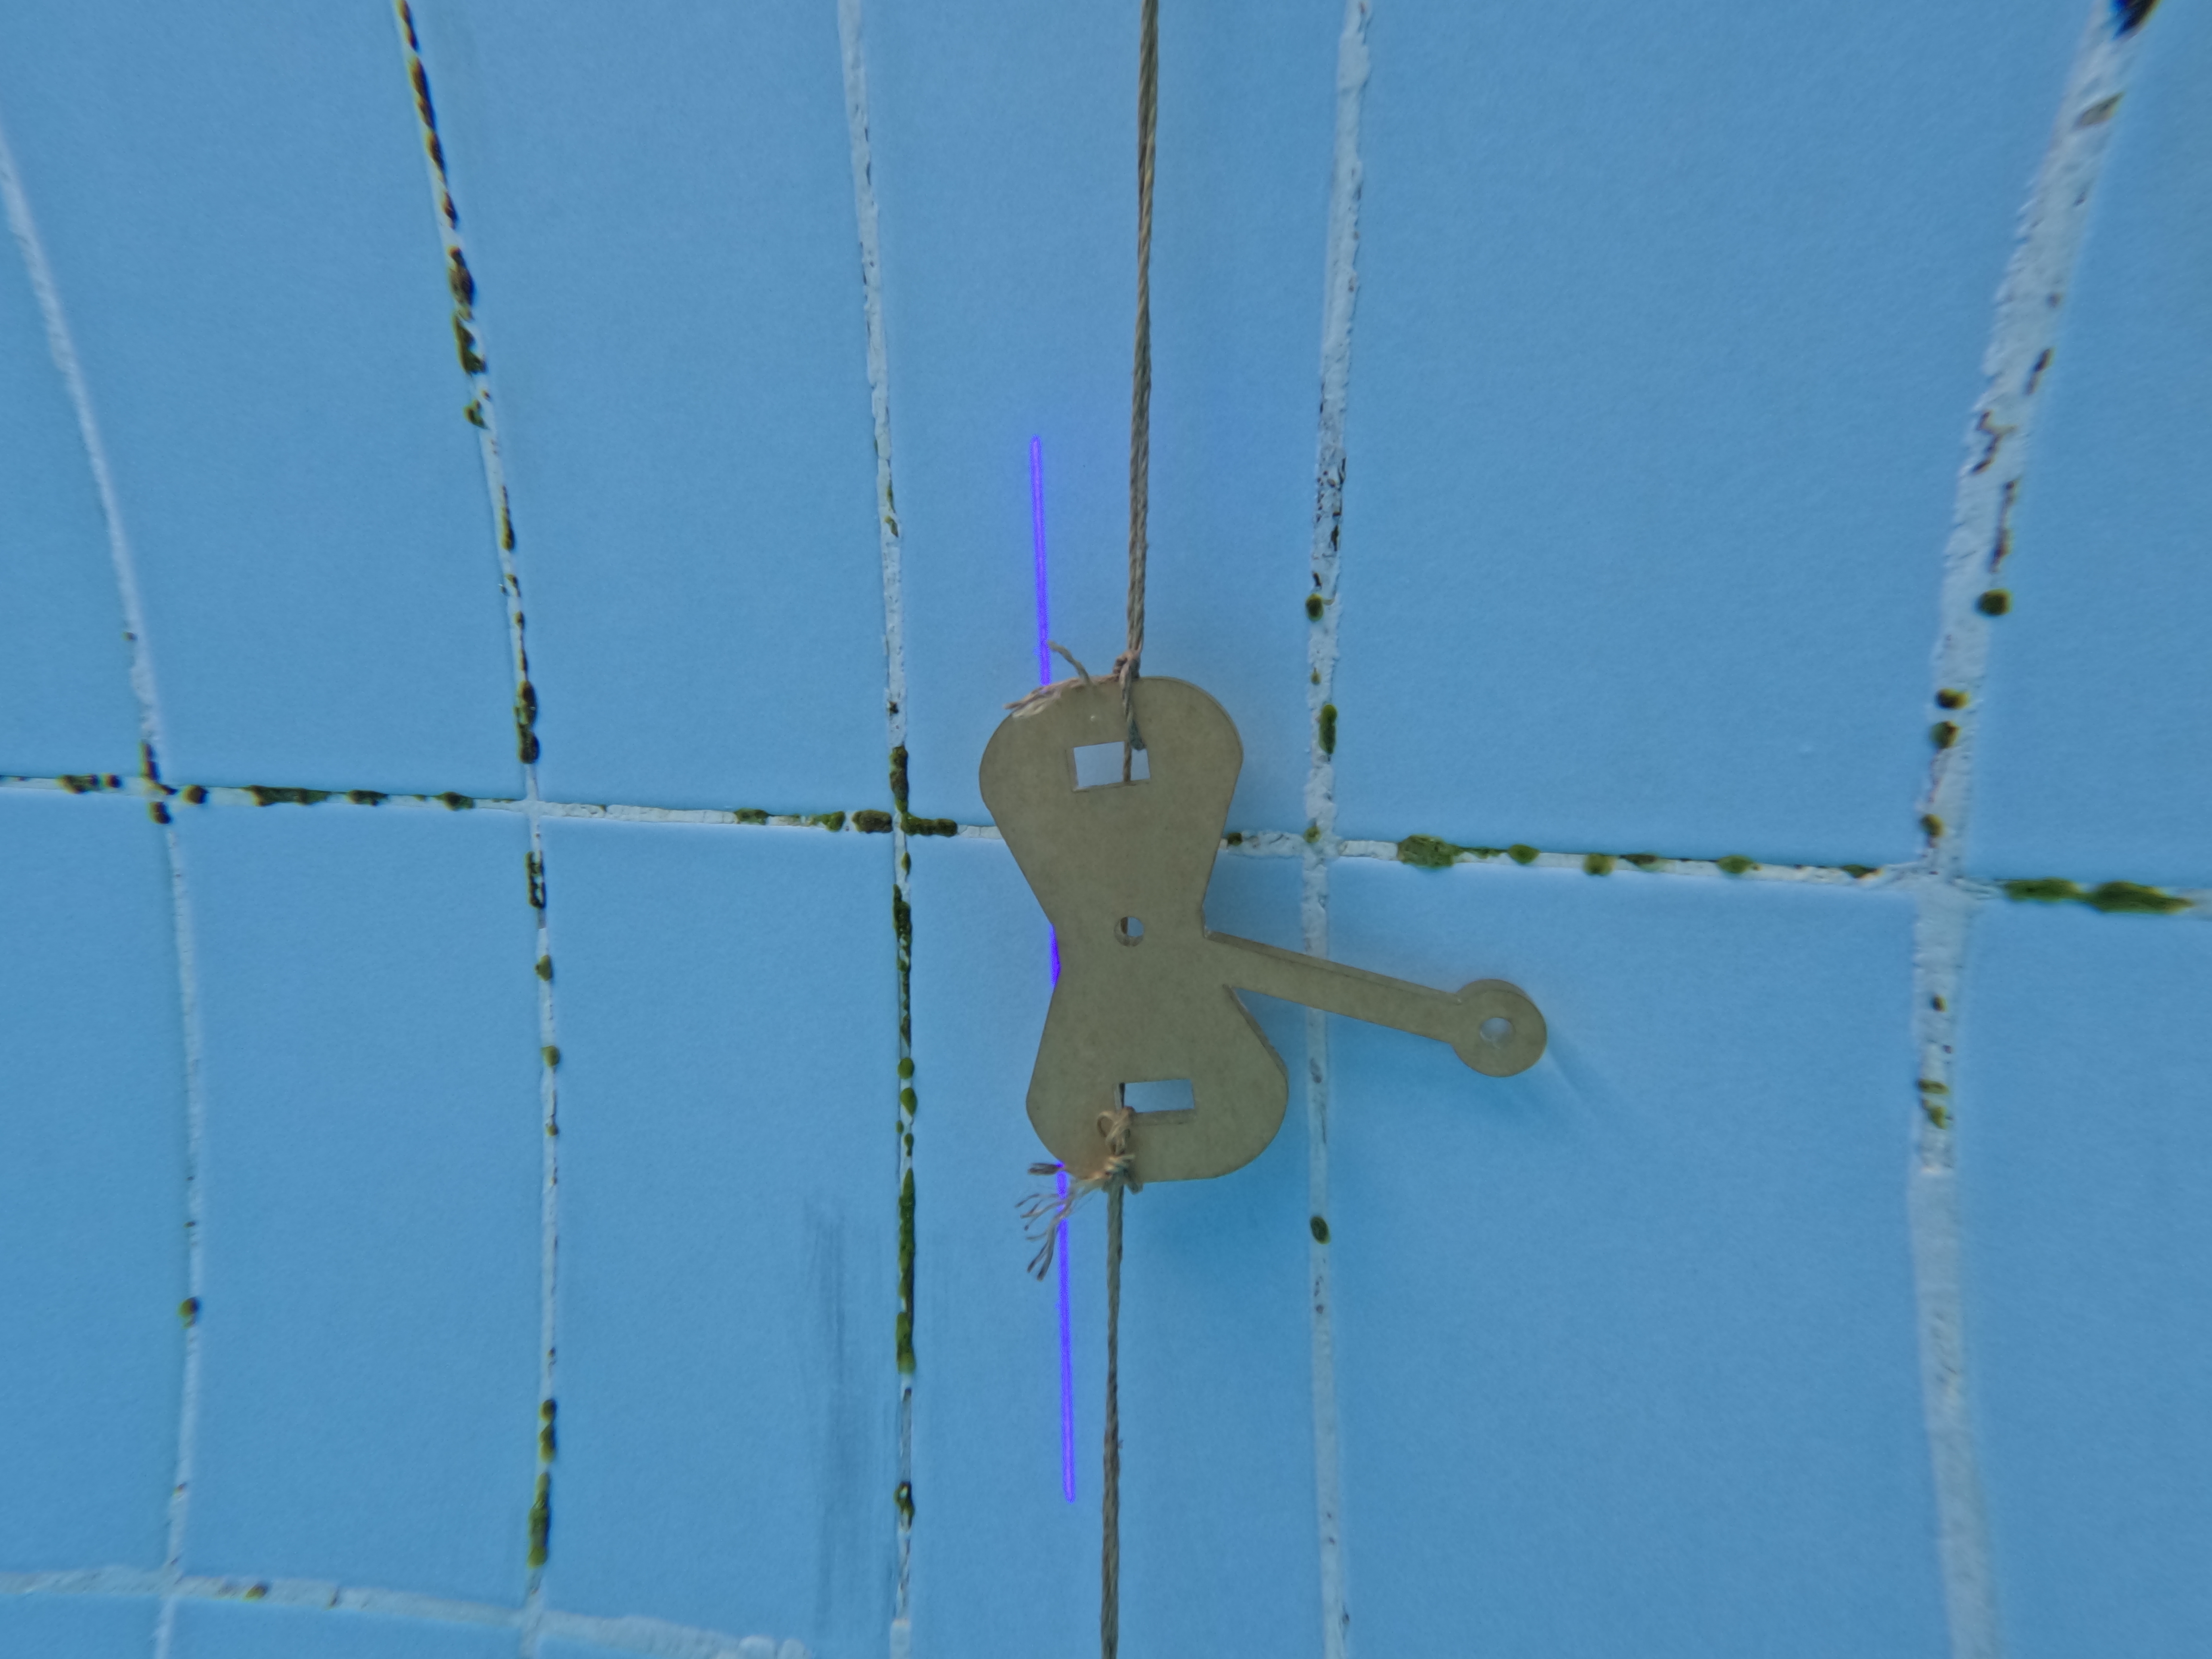

Supplement: Supplementary file 2667 [file G0050965.pdf › Level_2_2/G0050965.pdf]

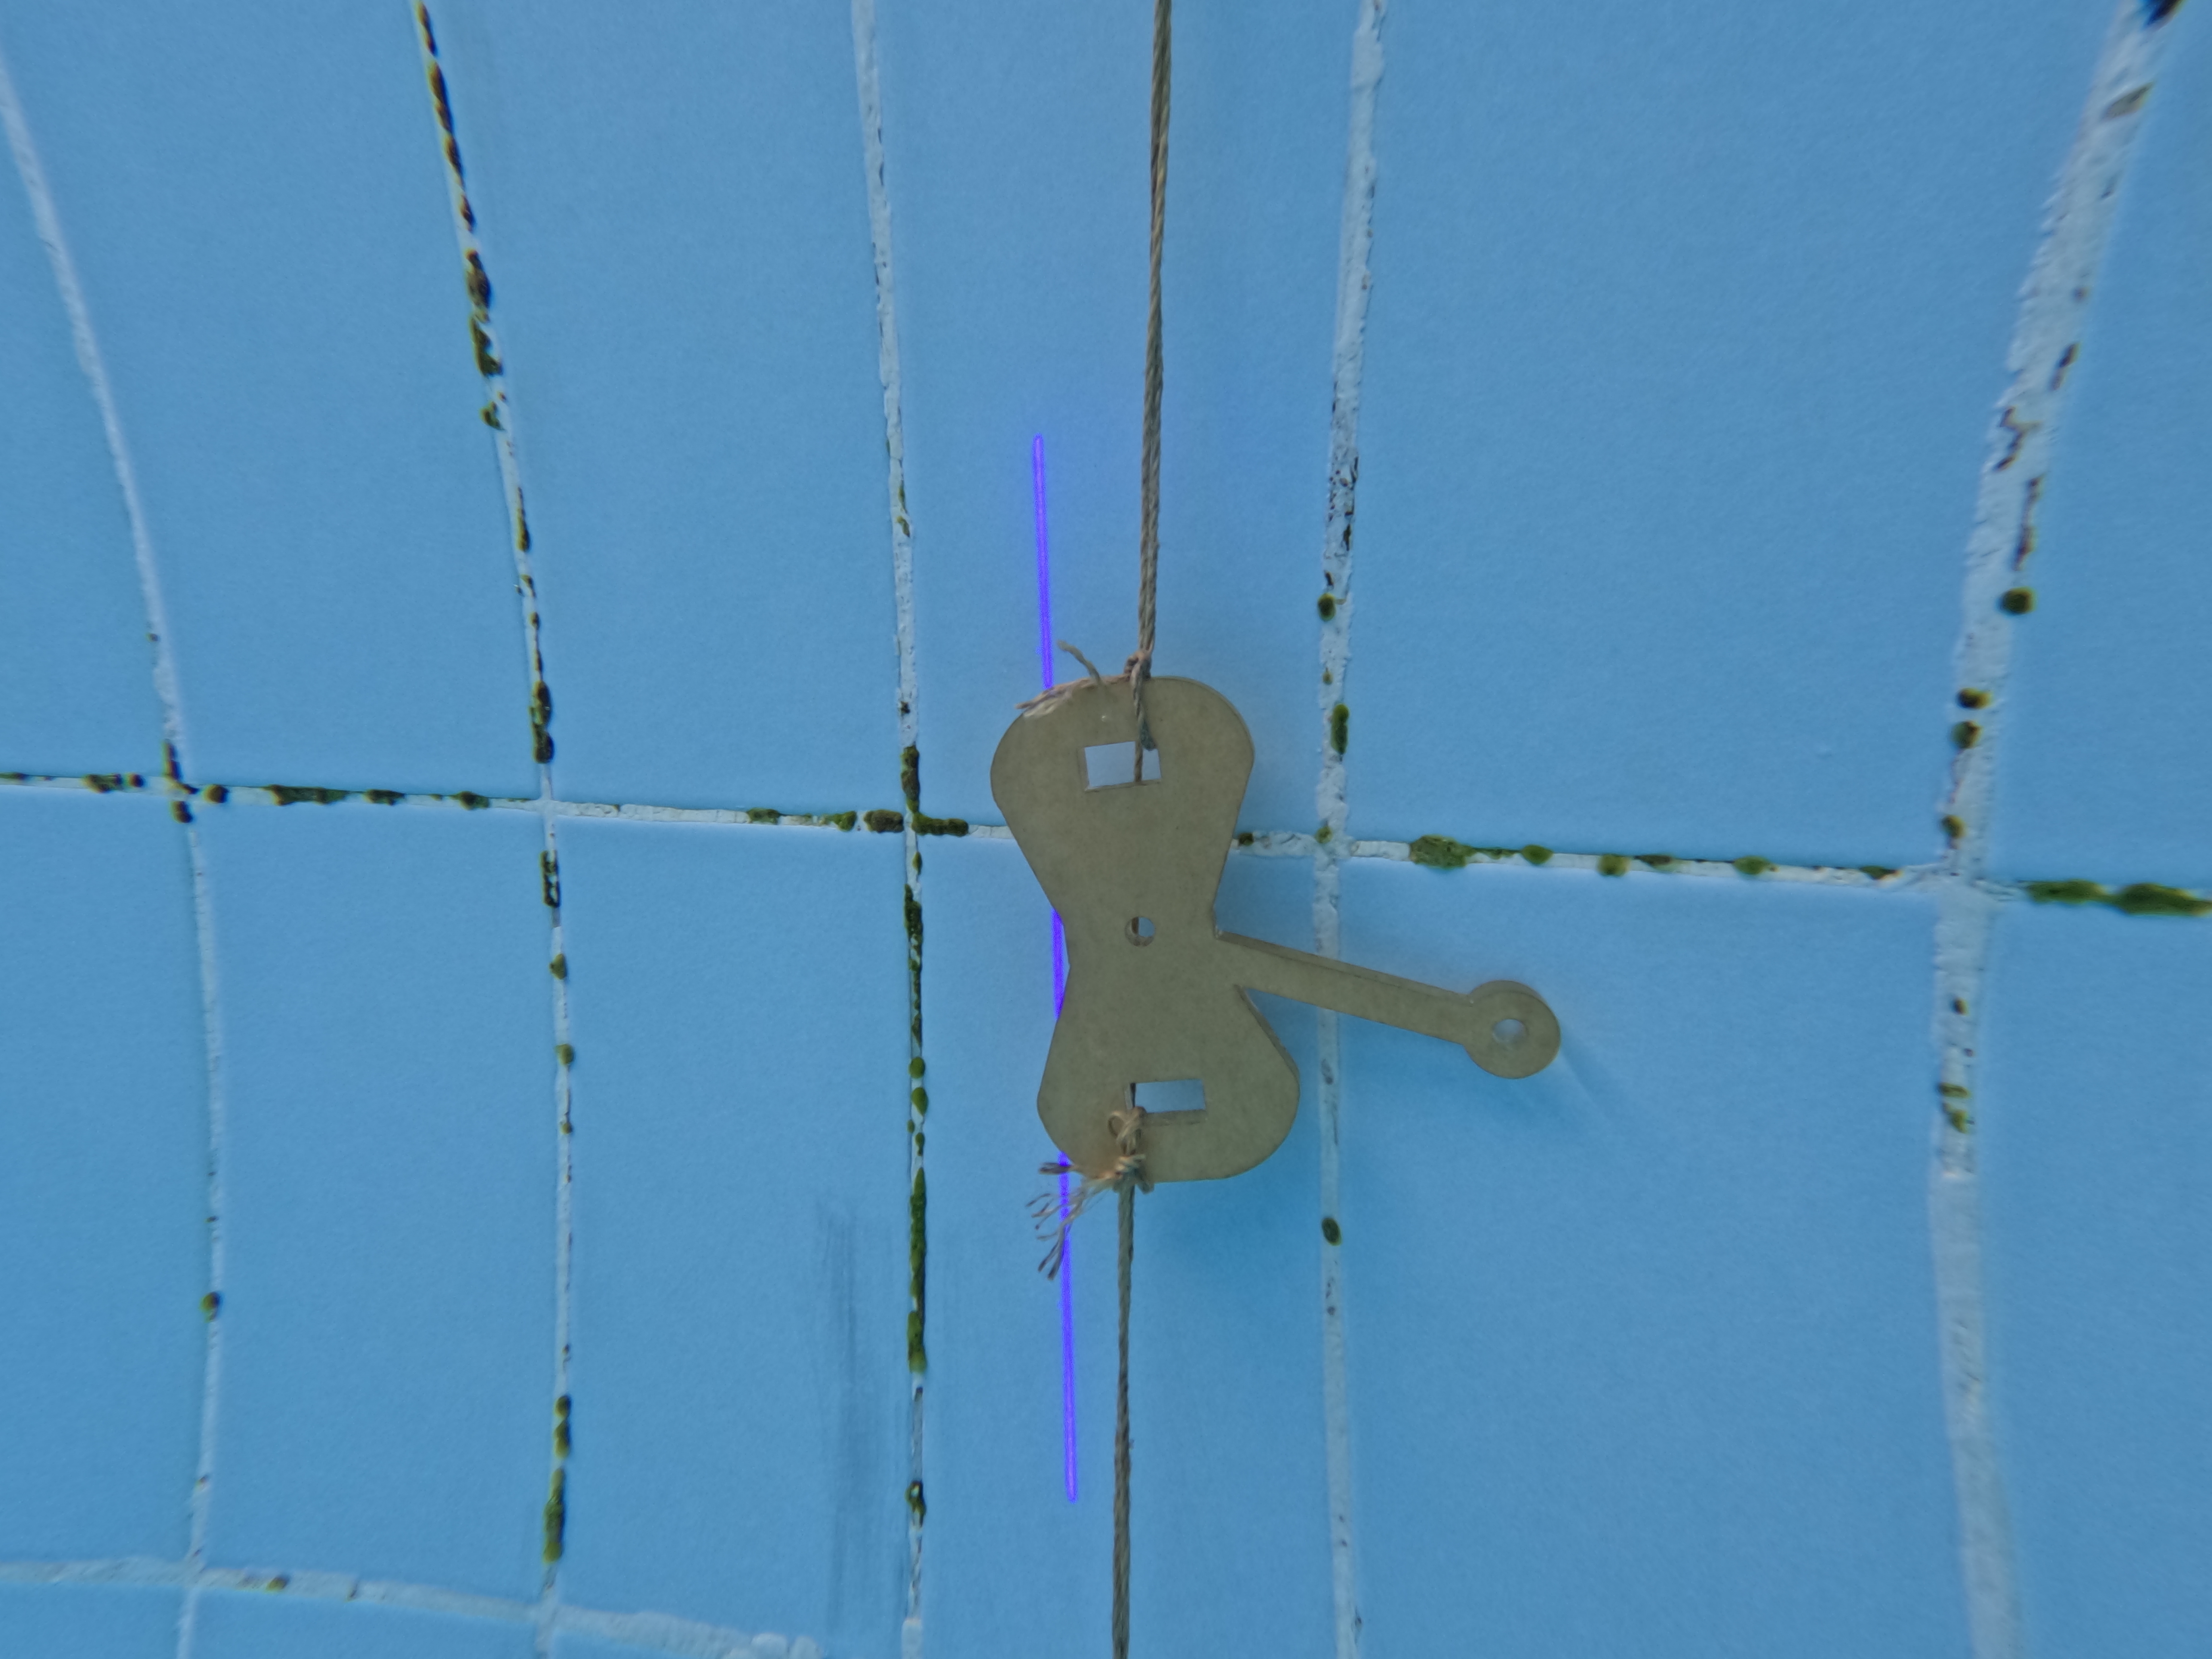

Supplement: Supplementary file 2668 [file G0050966.pdf › Level_2_2/G0050966.pdf]

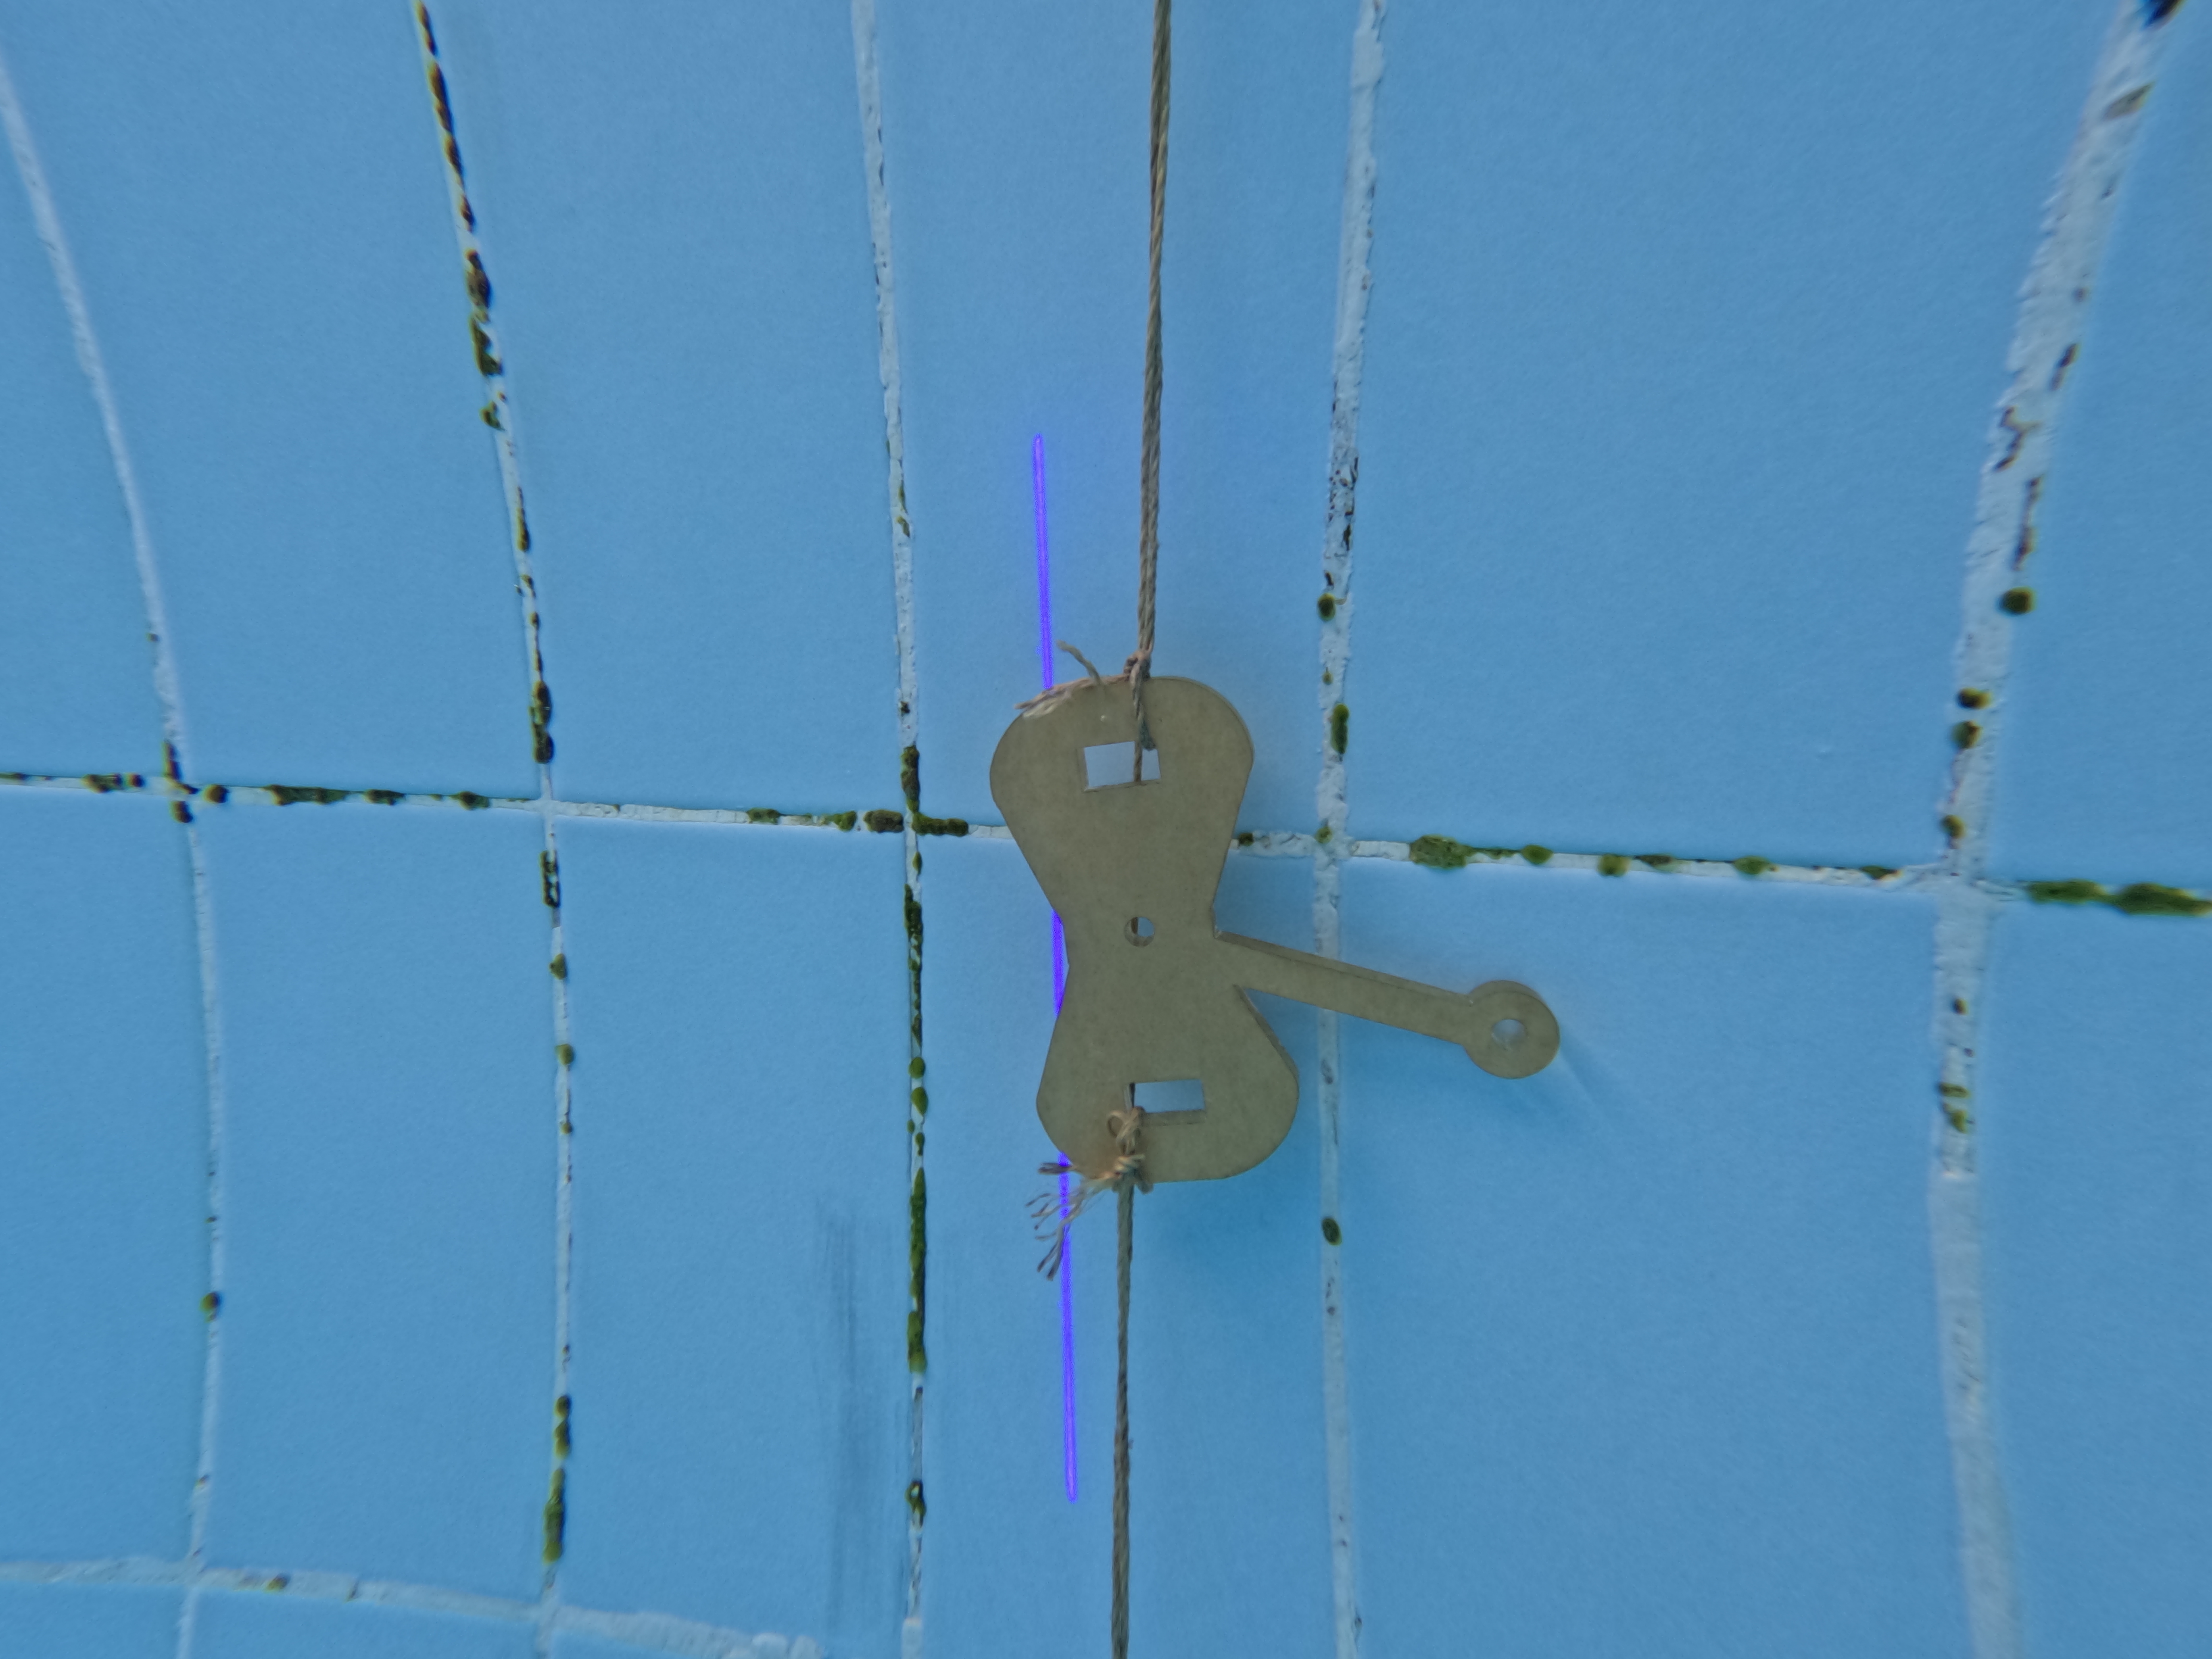

Supplement: Supplementary file 2669 [file G0050967.pdf › Level_2_2/G0050967.pdf]

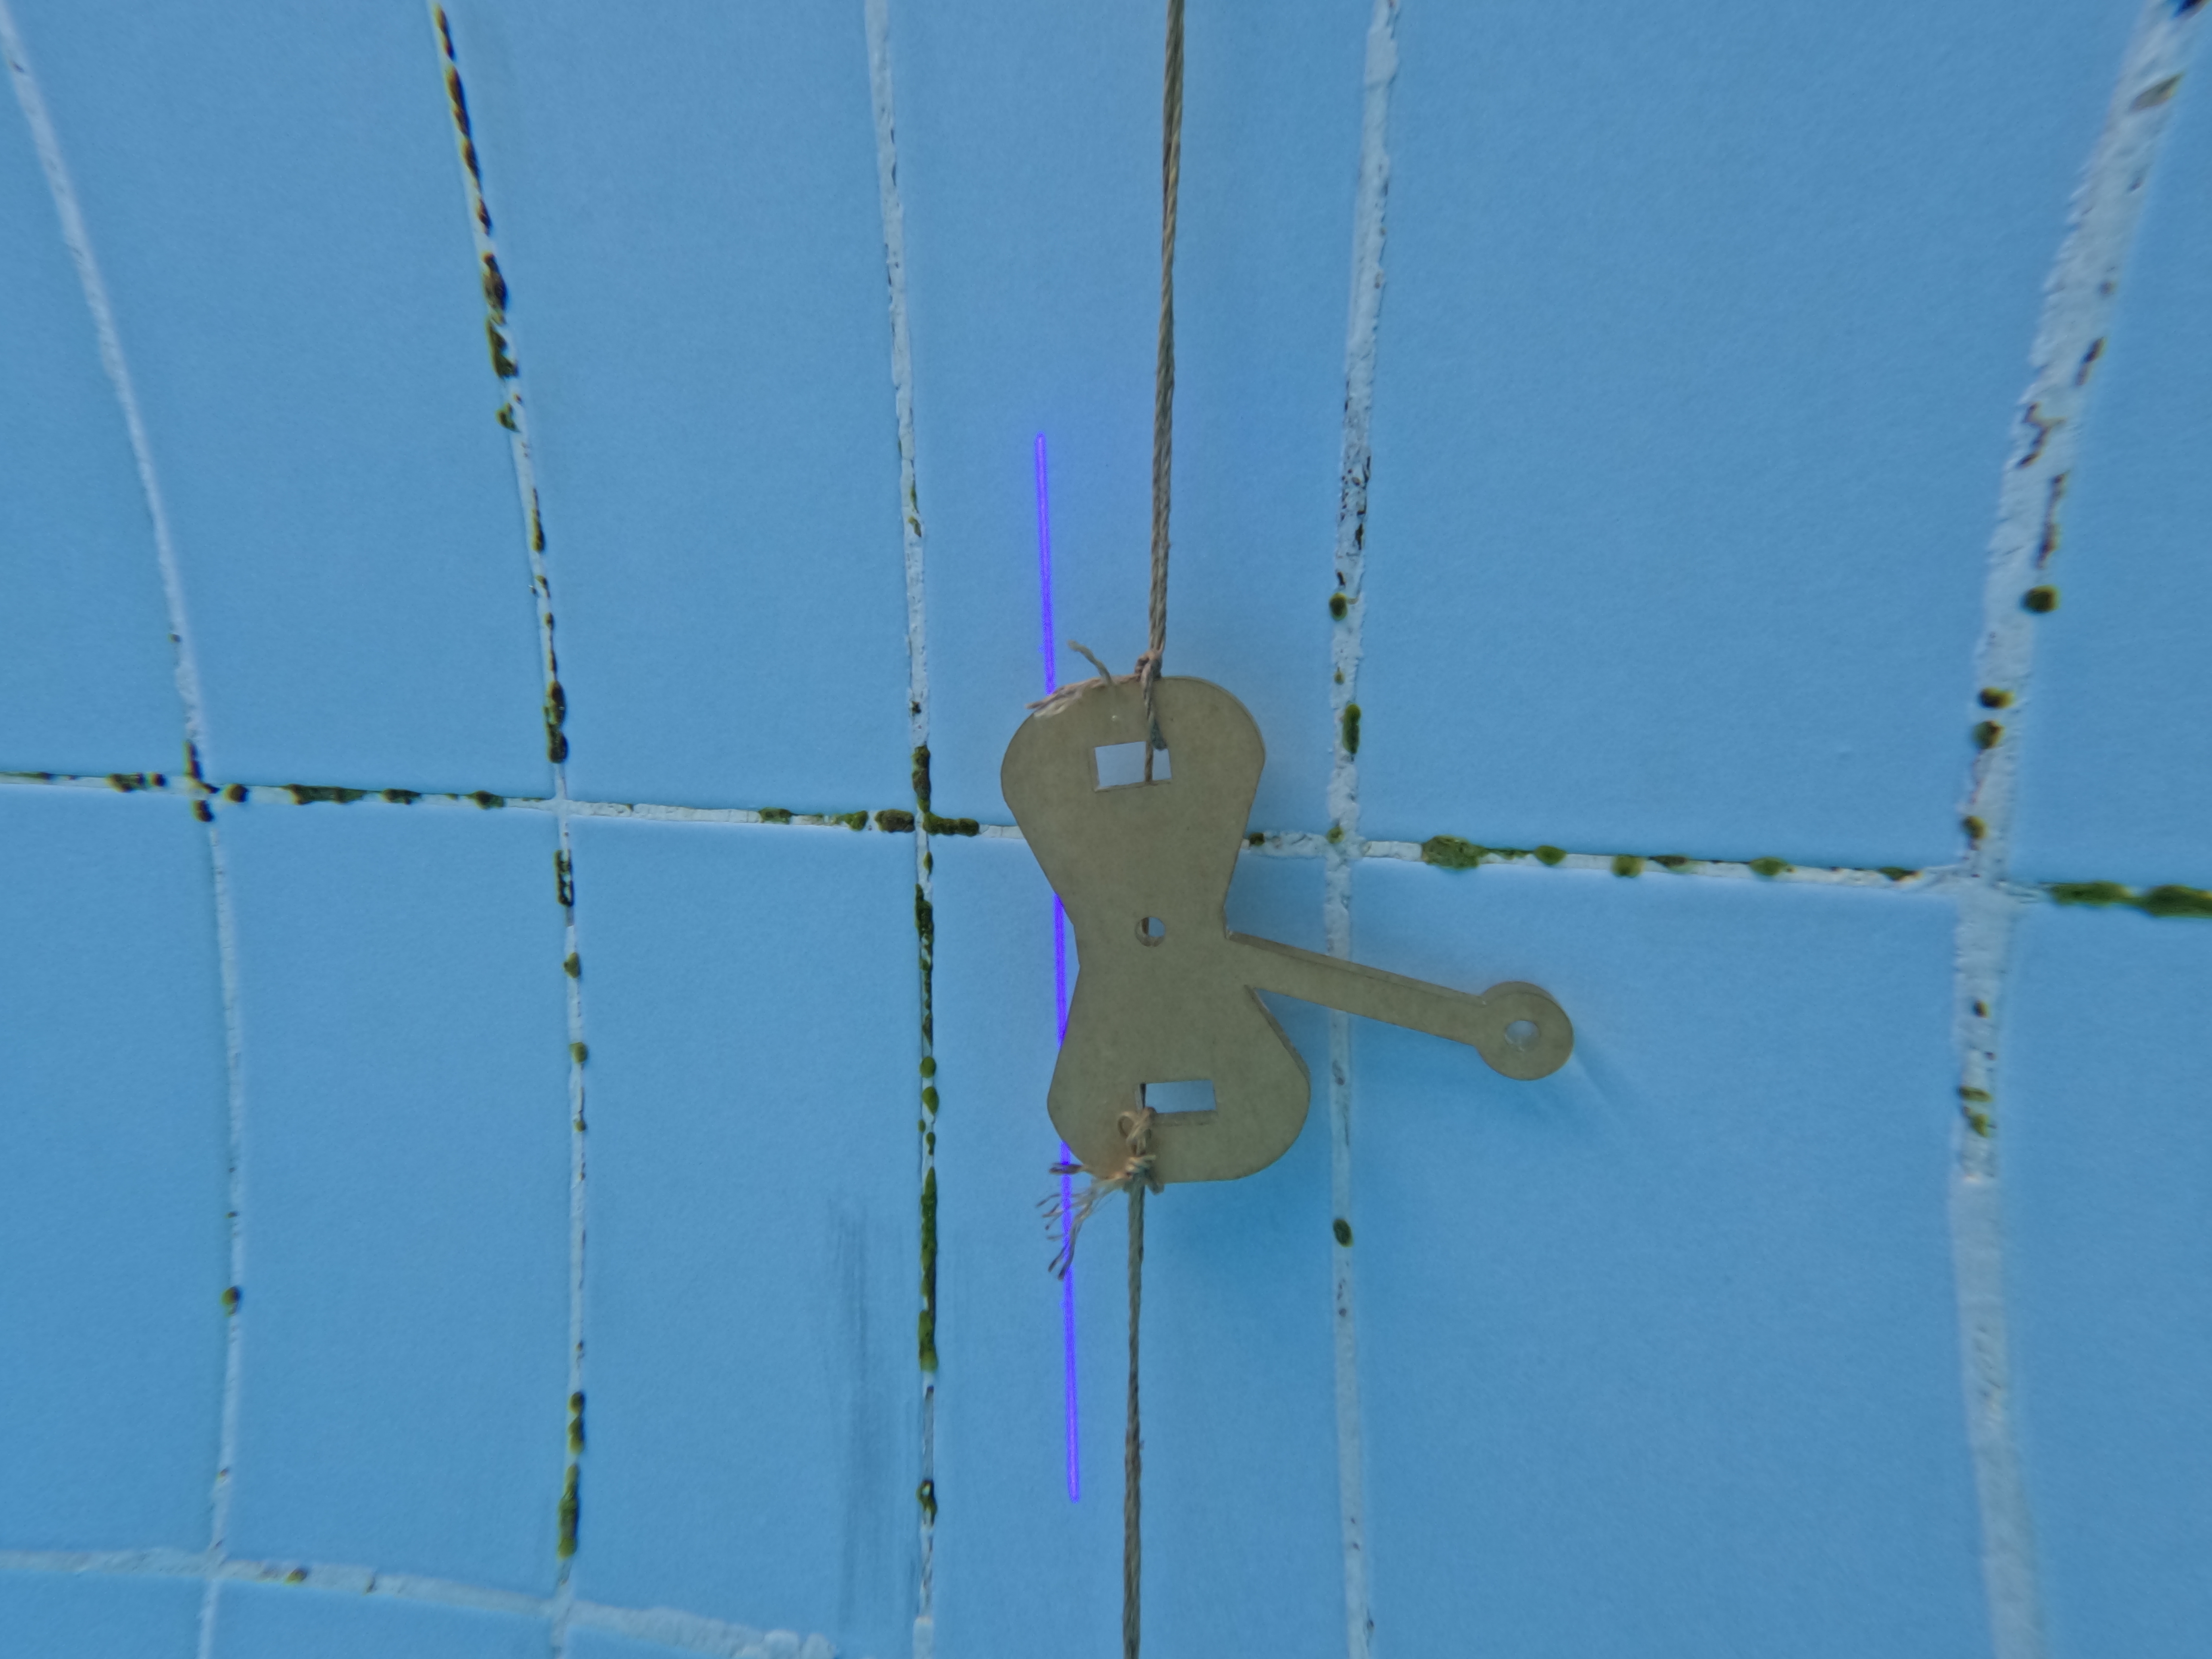

Supplement: Supplementary file 2670 [file G0050968.pdf › Level_2_2/G0050968.pdf]

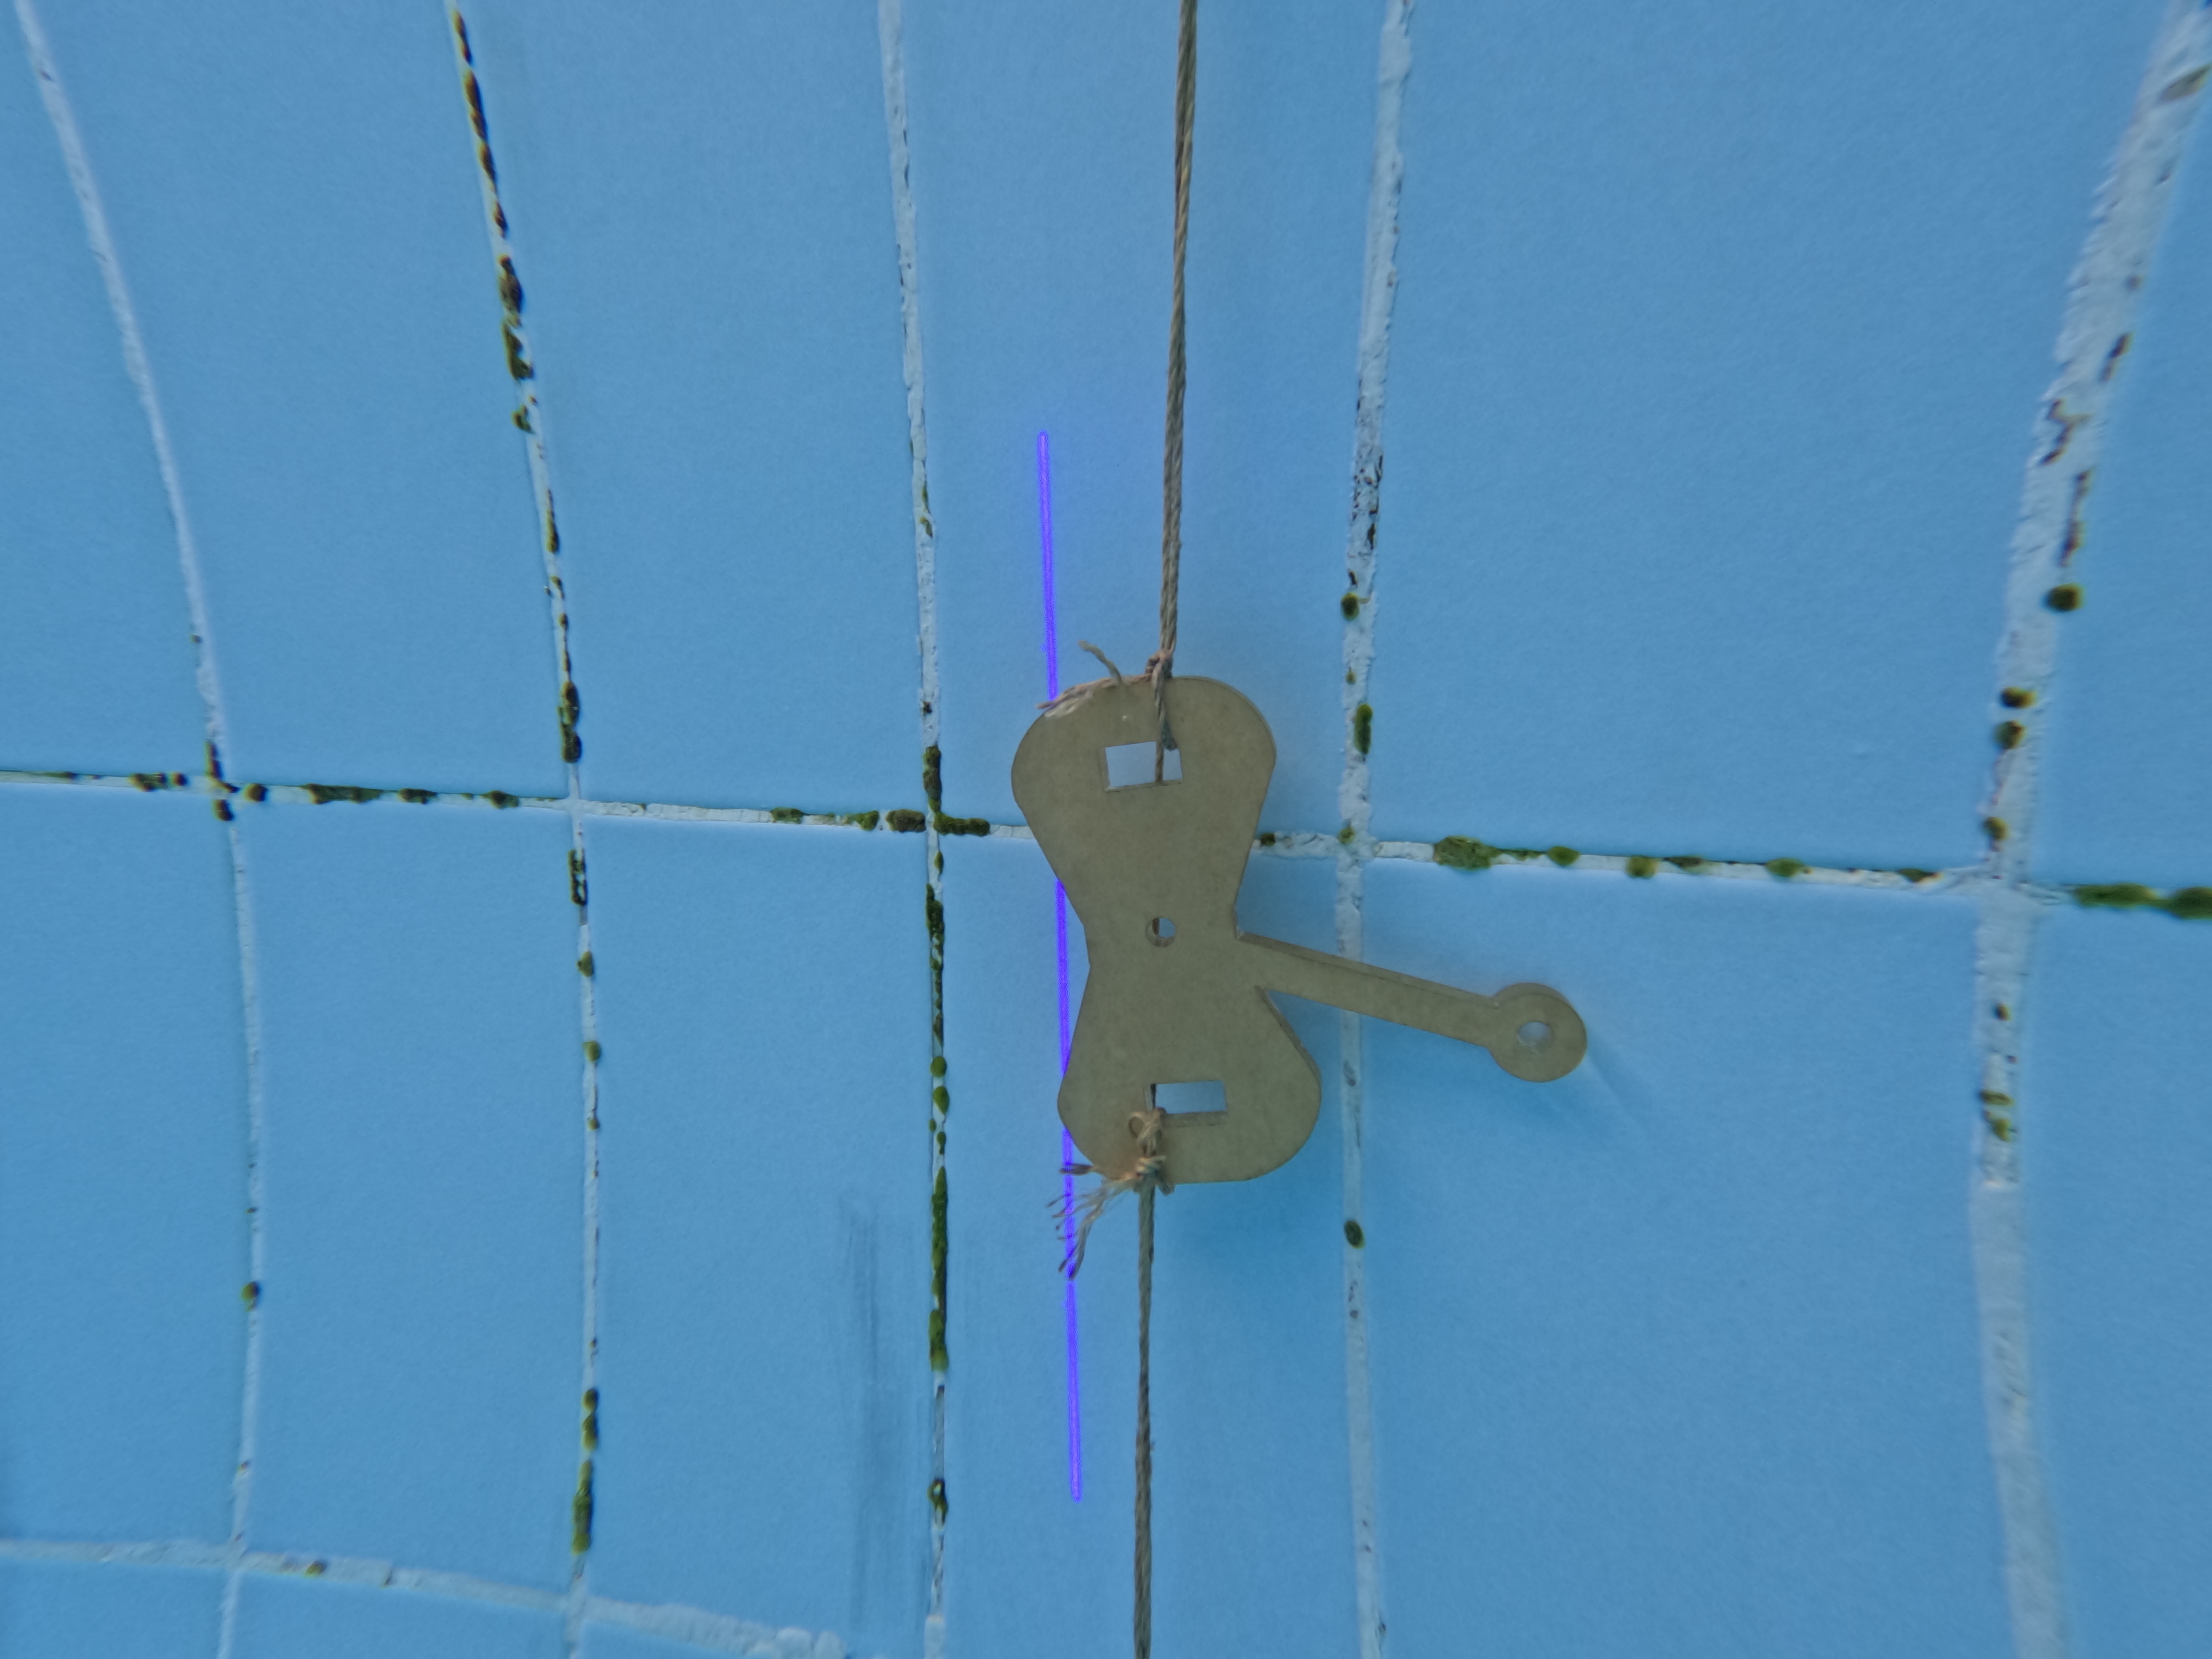

Supplement: Supplementary file 2671 [file G0050969.pdf › Level_2_2/G0050969.pdf]

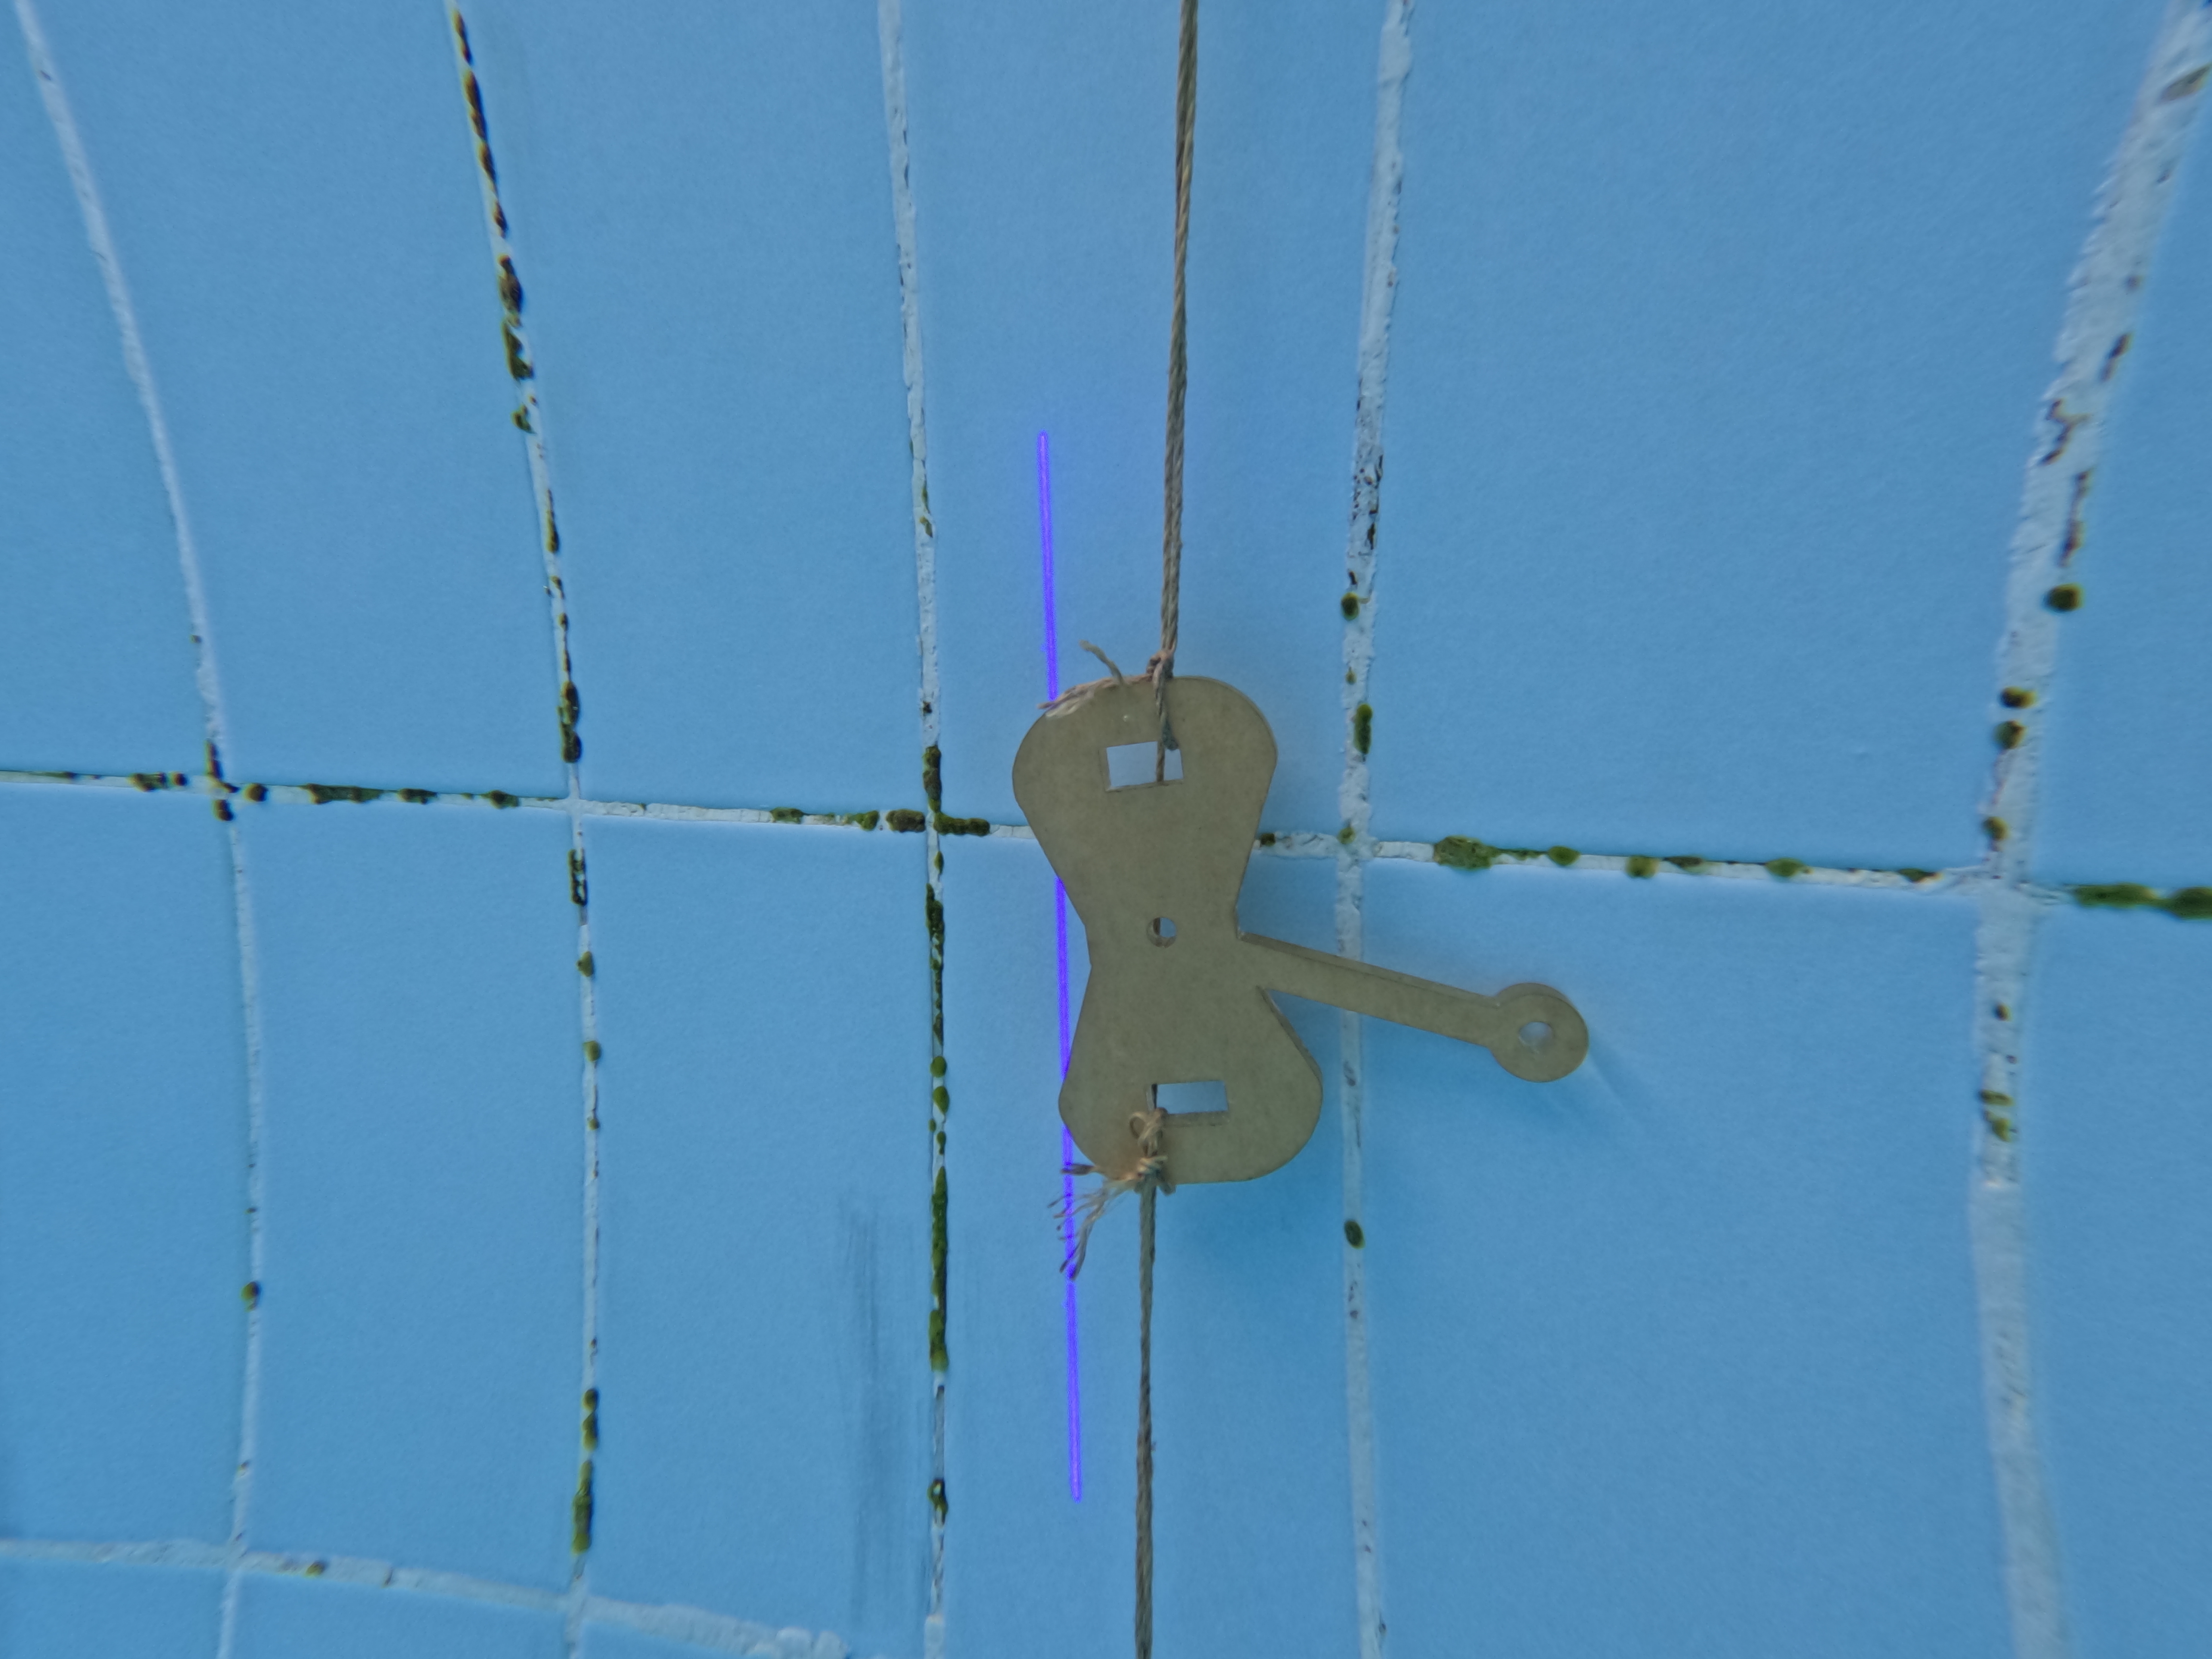

Supplement: Supplementary file 2672 [file G0050970.pdf › Level_2_2/G0050970.pdf]

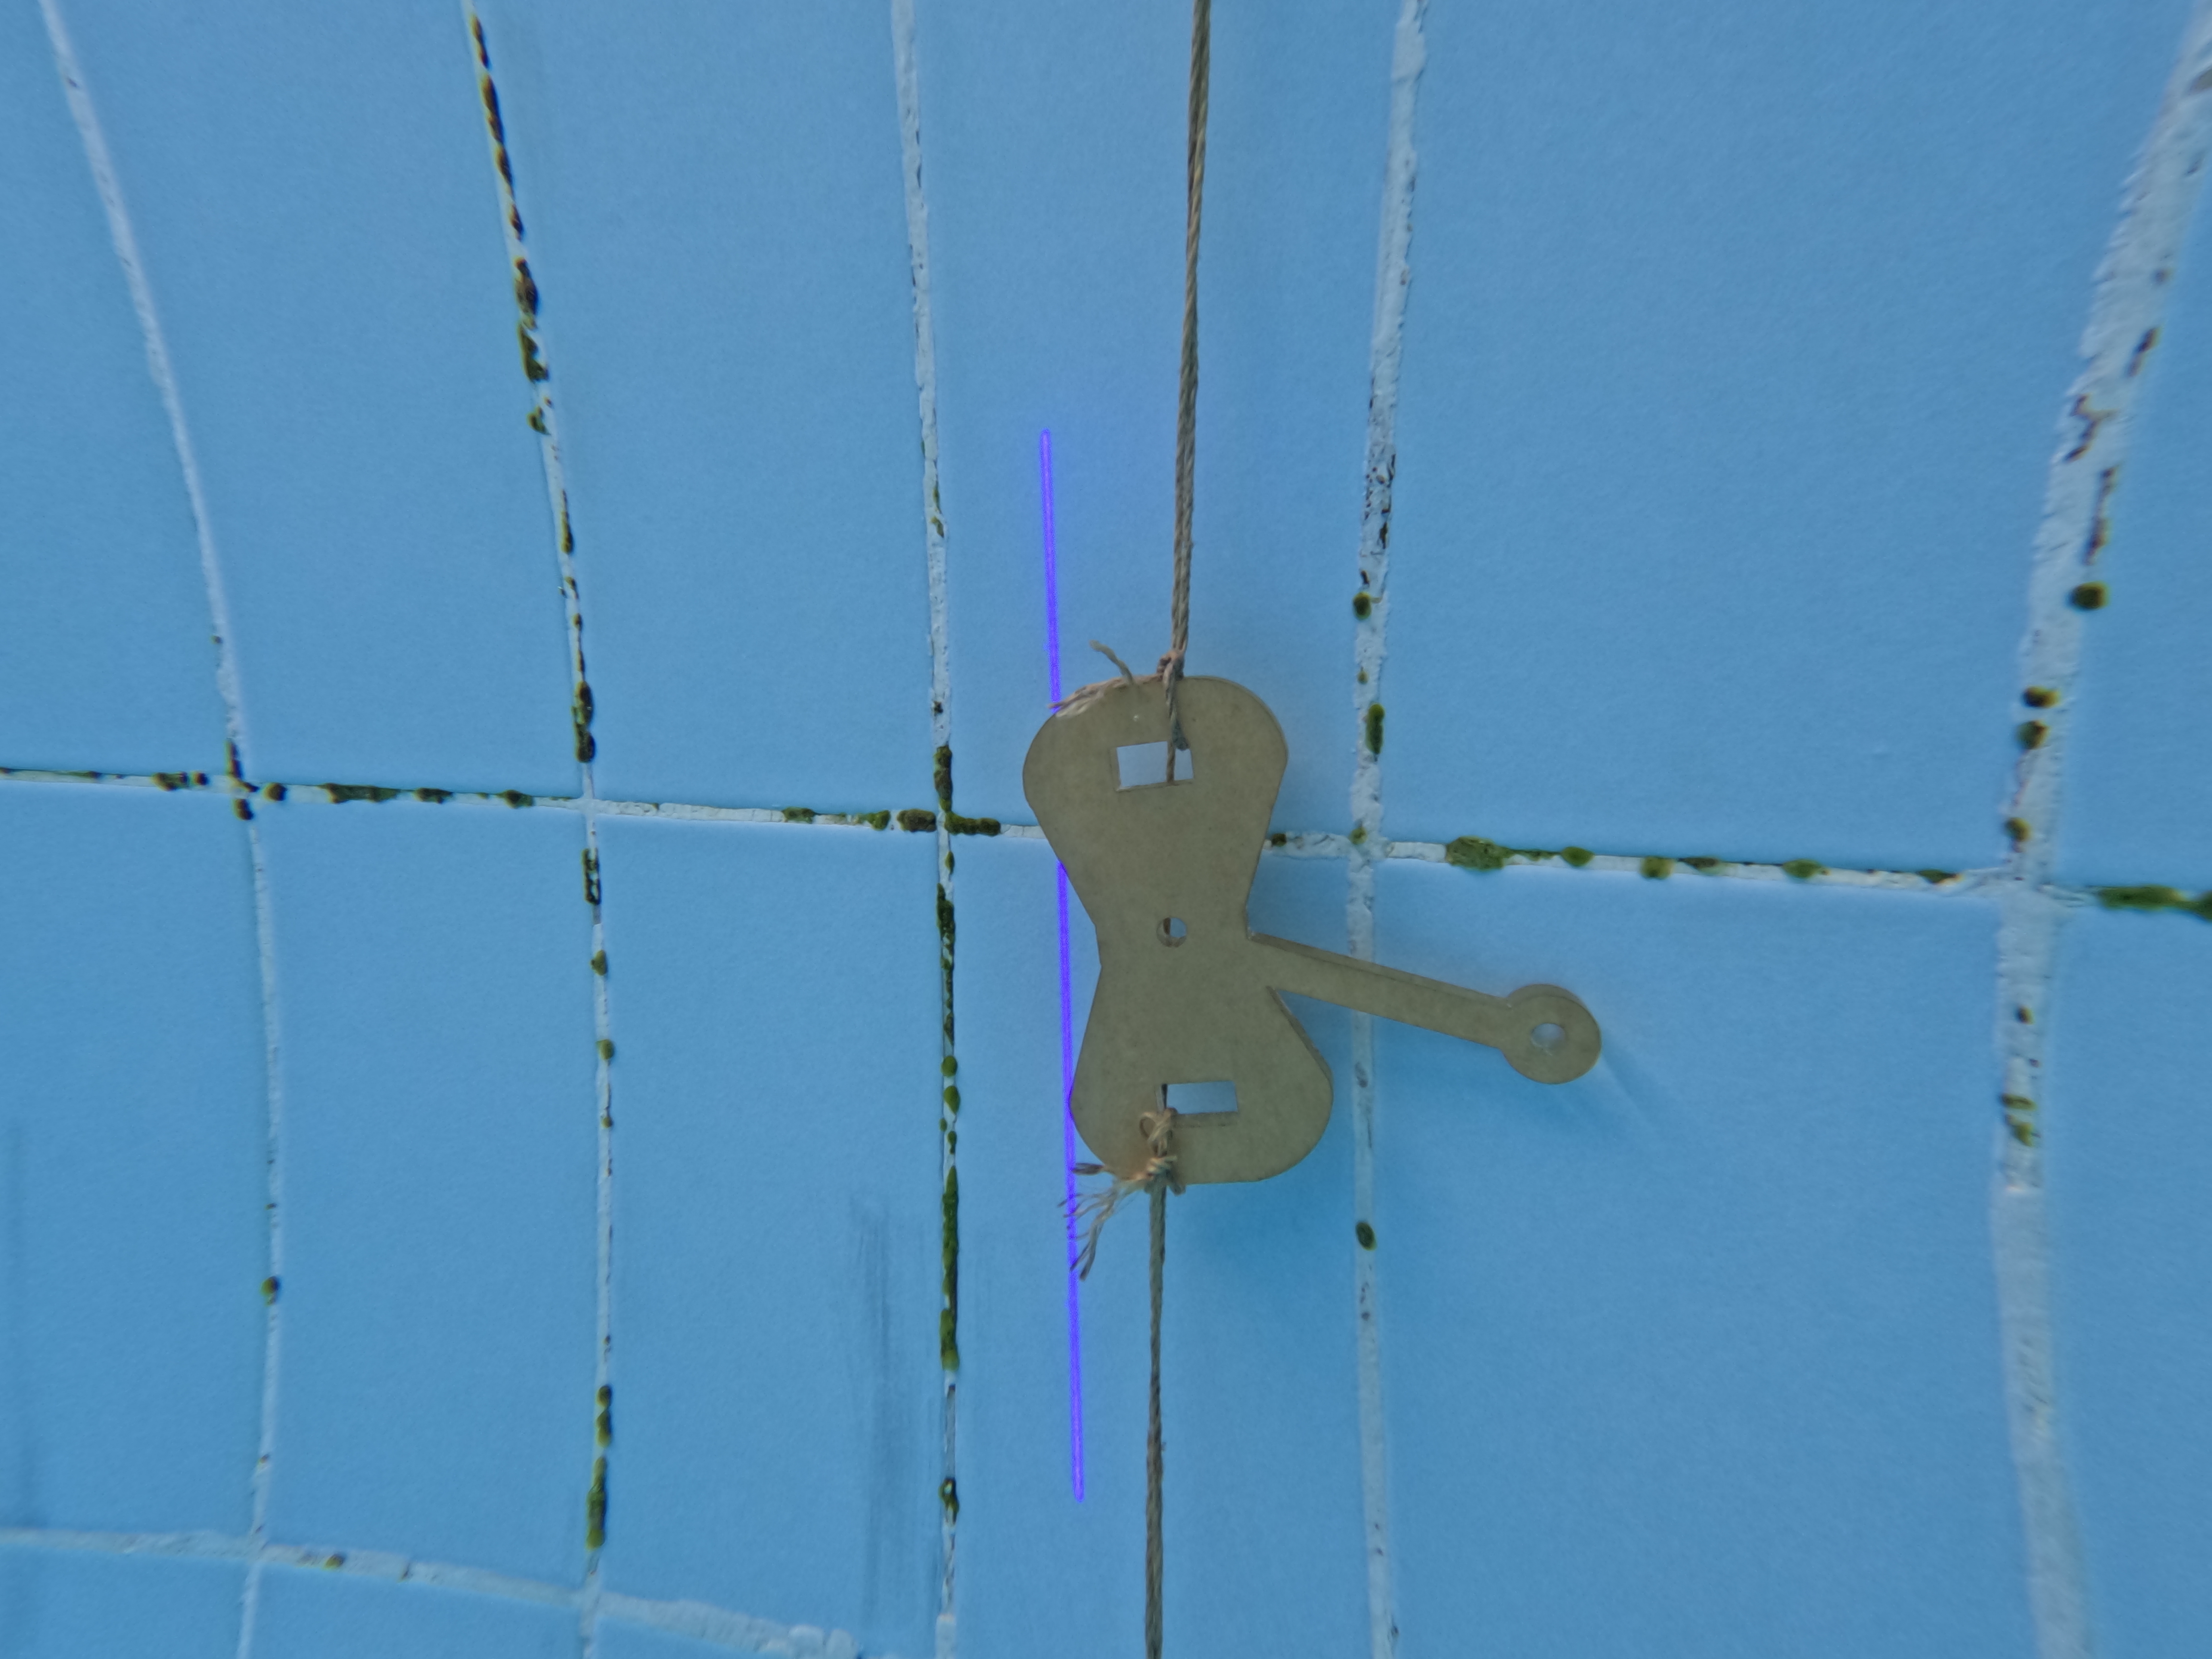

Supplement: Supplementary file 2673 [file G0050971.pdf › Level_2_2/G0050971.pdf]

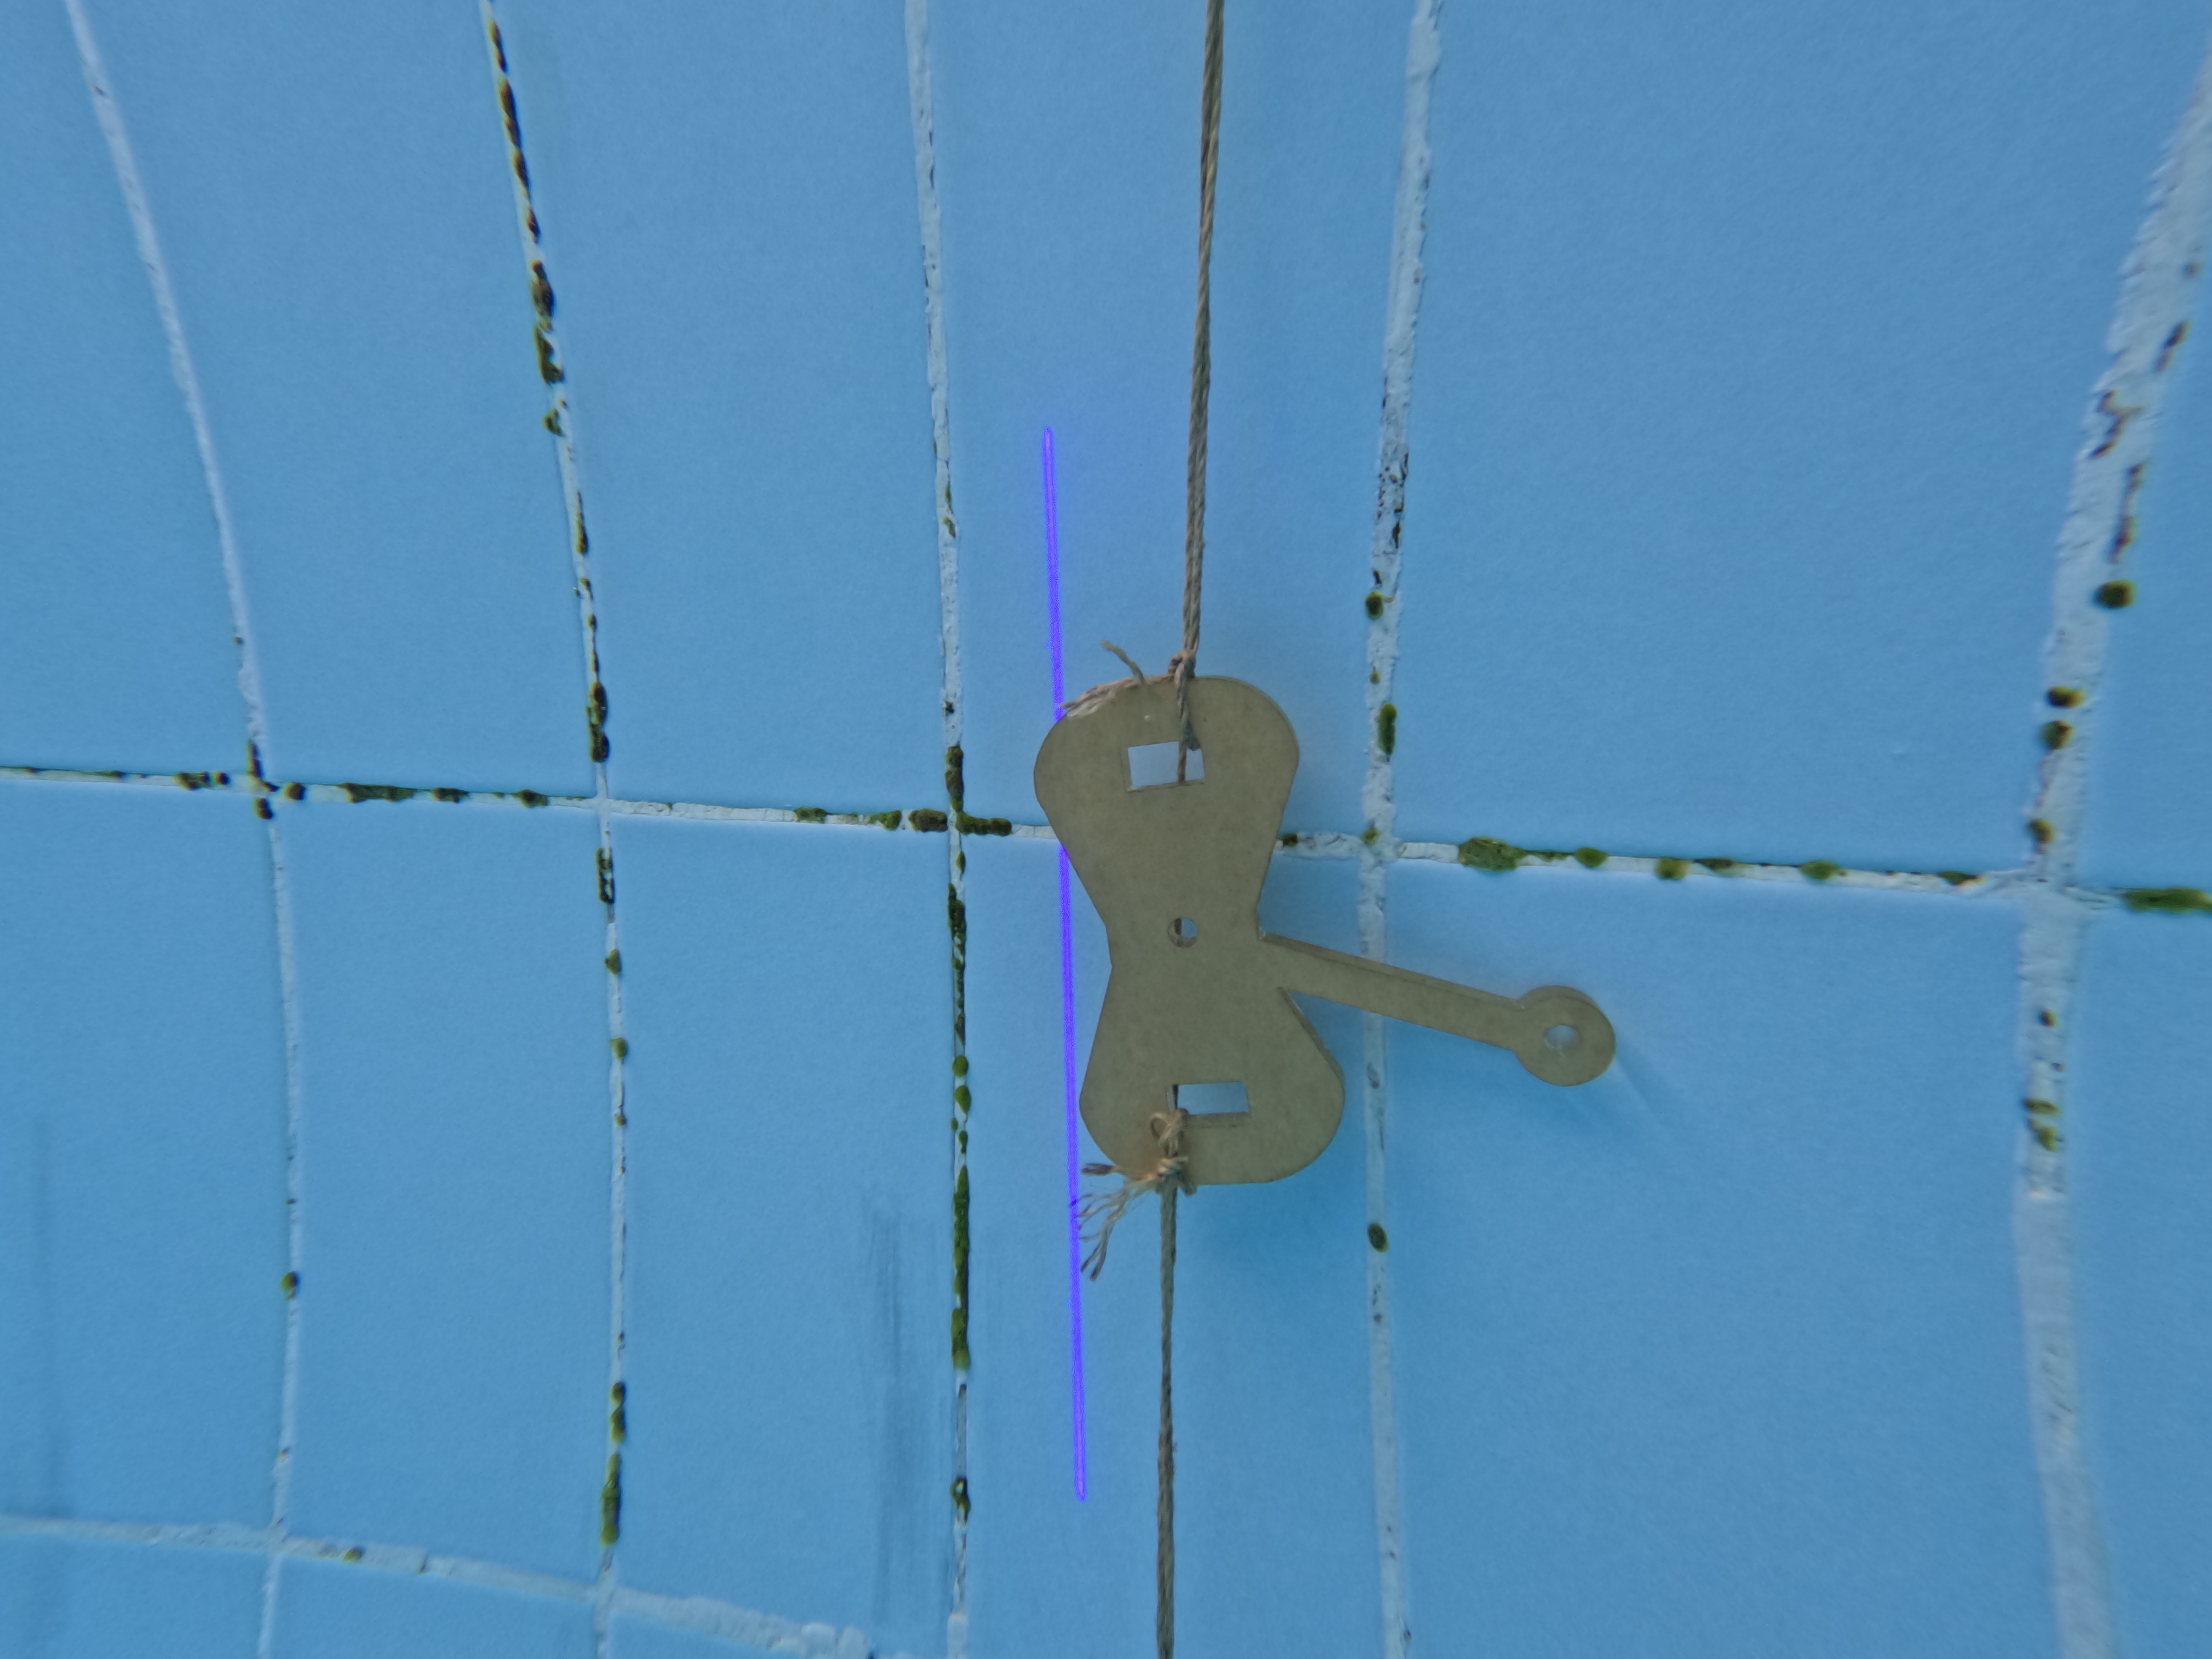

Supplement: Supplementary file 2674 [file G0050972.pdf › Level_2_2/G0050972.pdf]

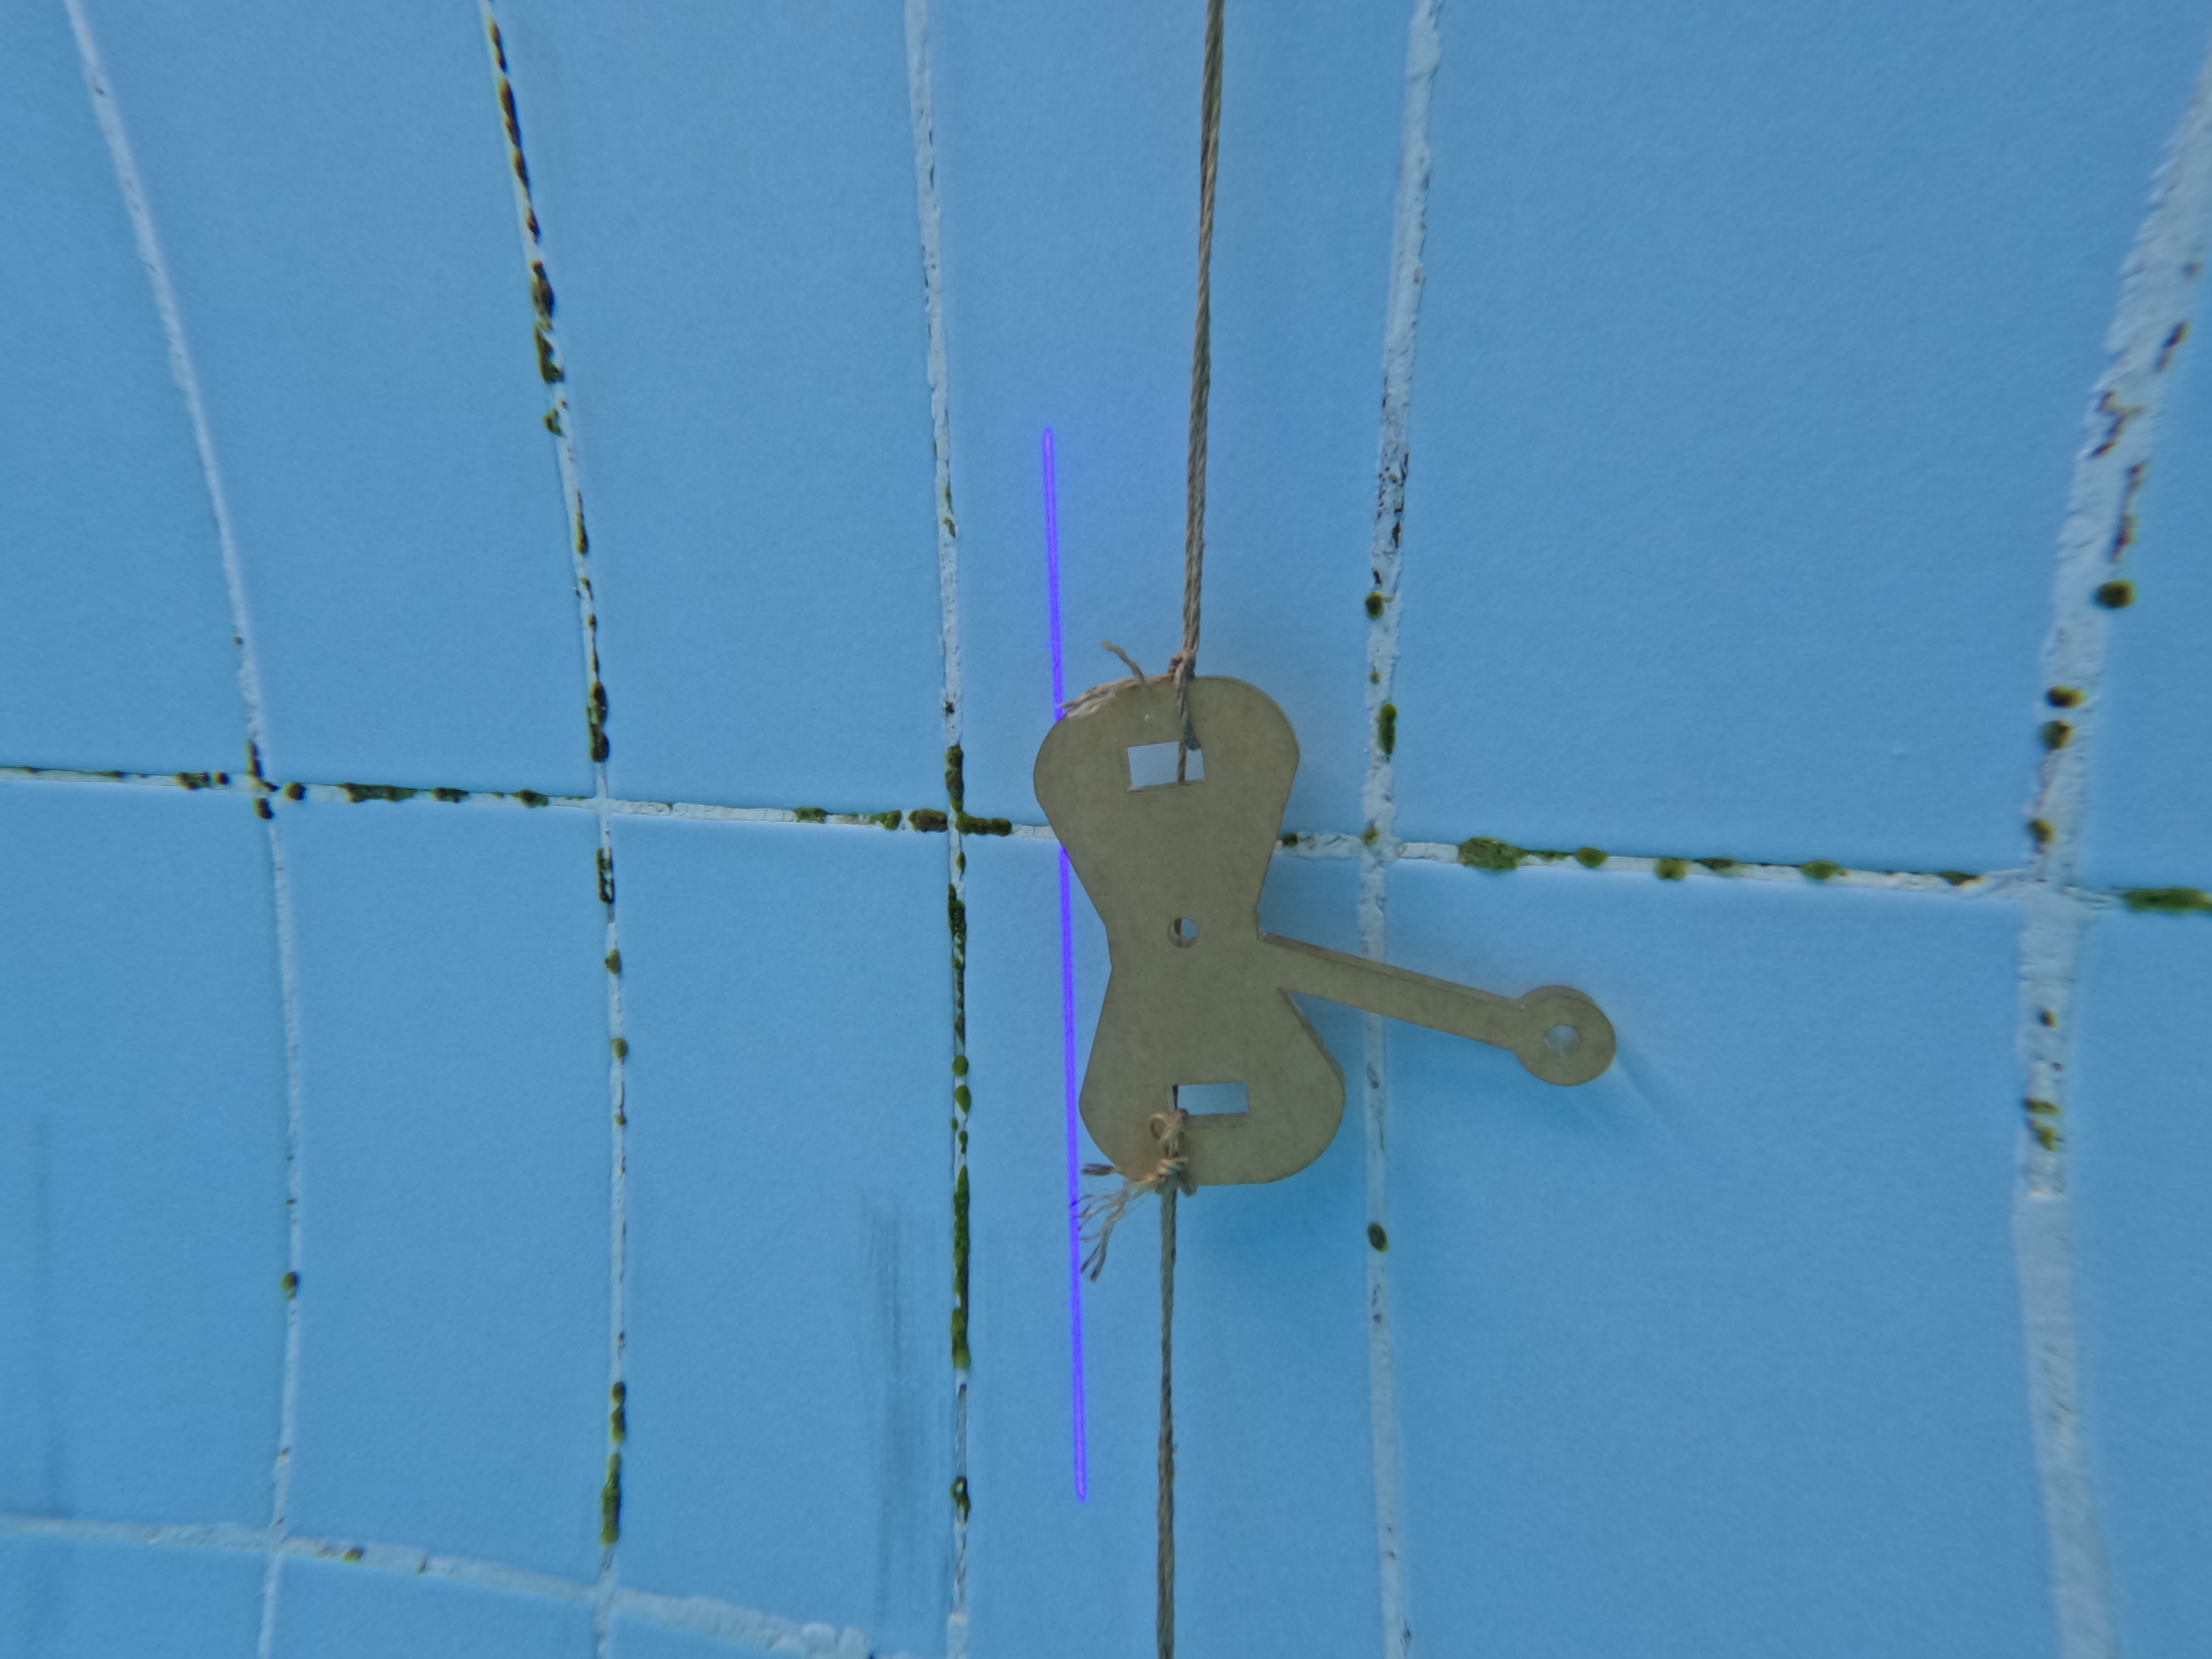

Supplement: Supplementary file 2675 [file G0050973.pdf › Level_2_2/G0050973.pdf]

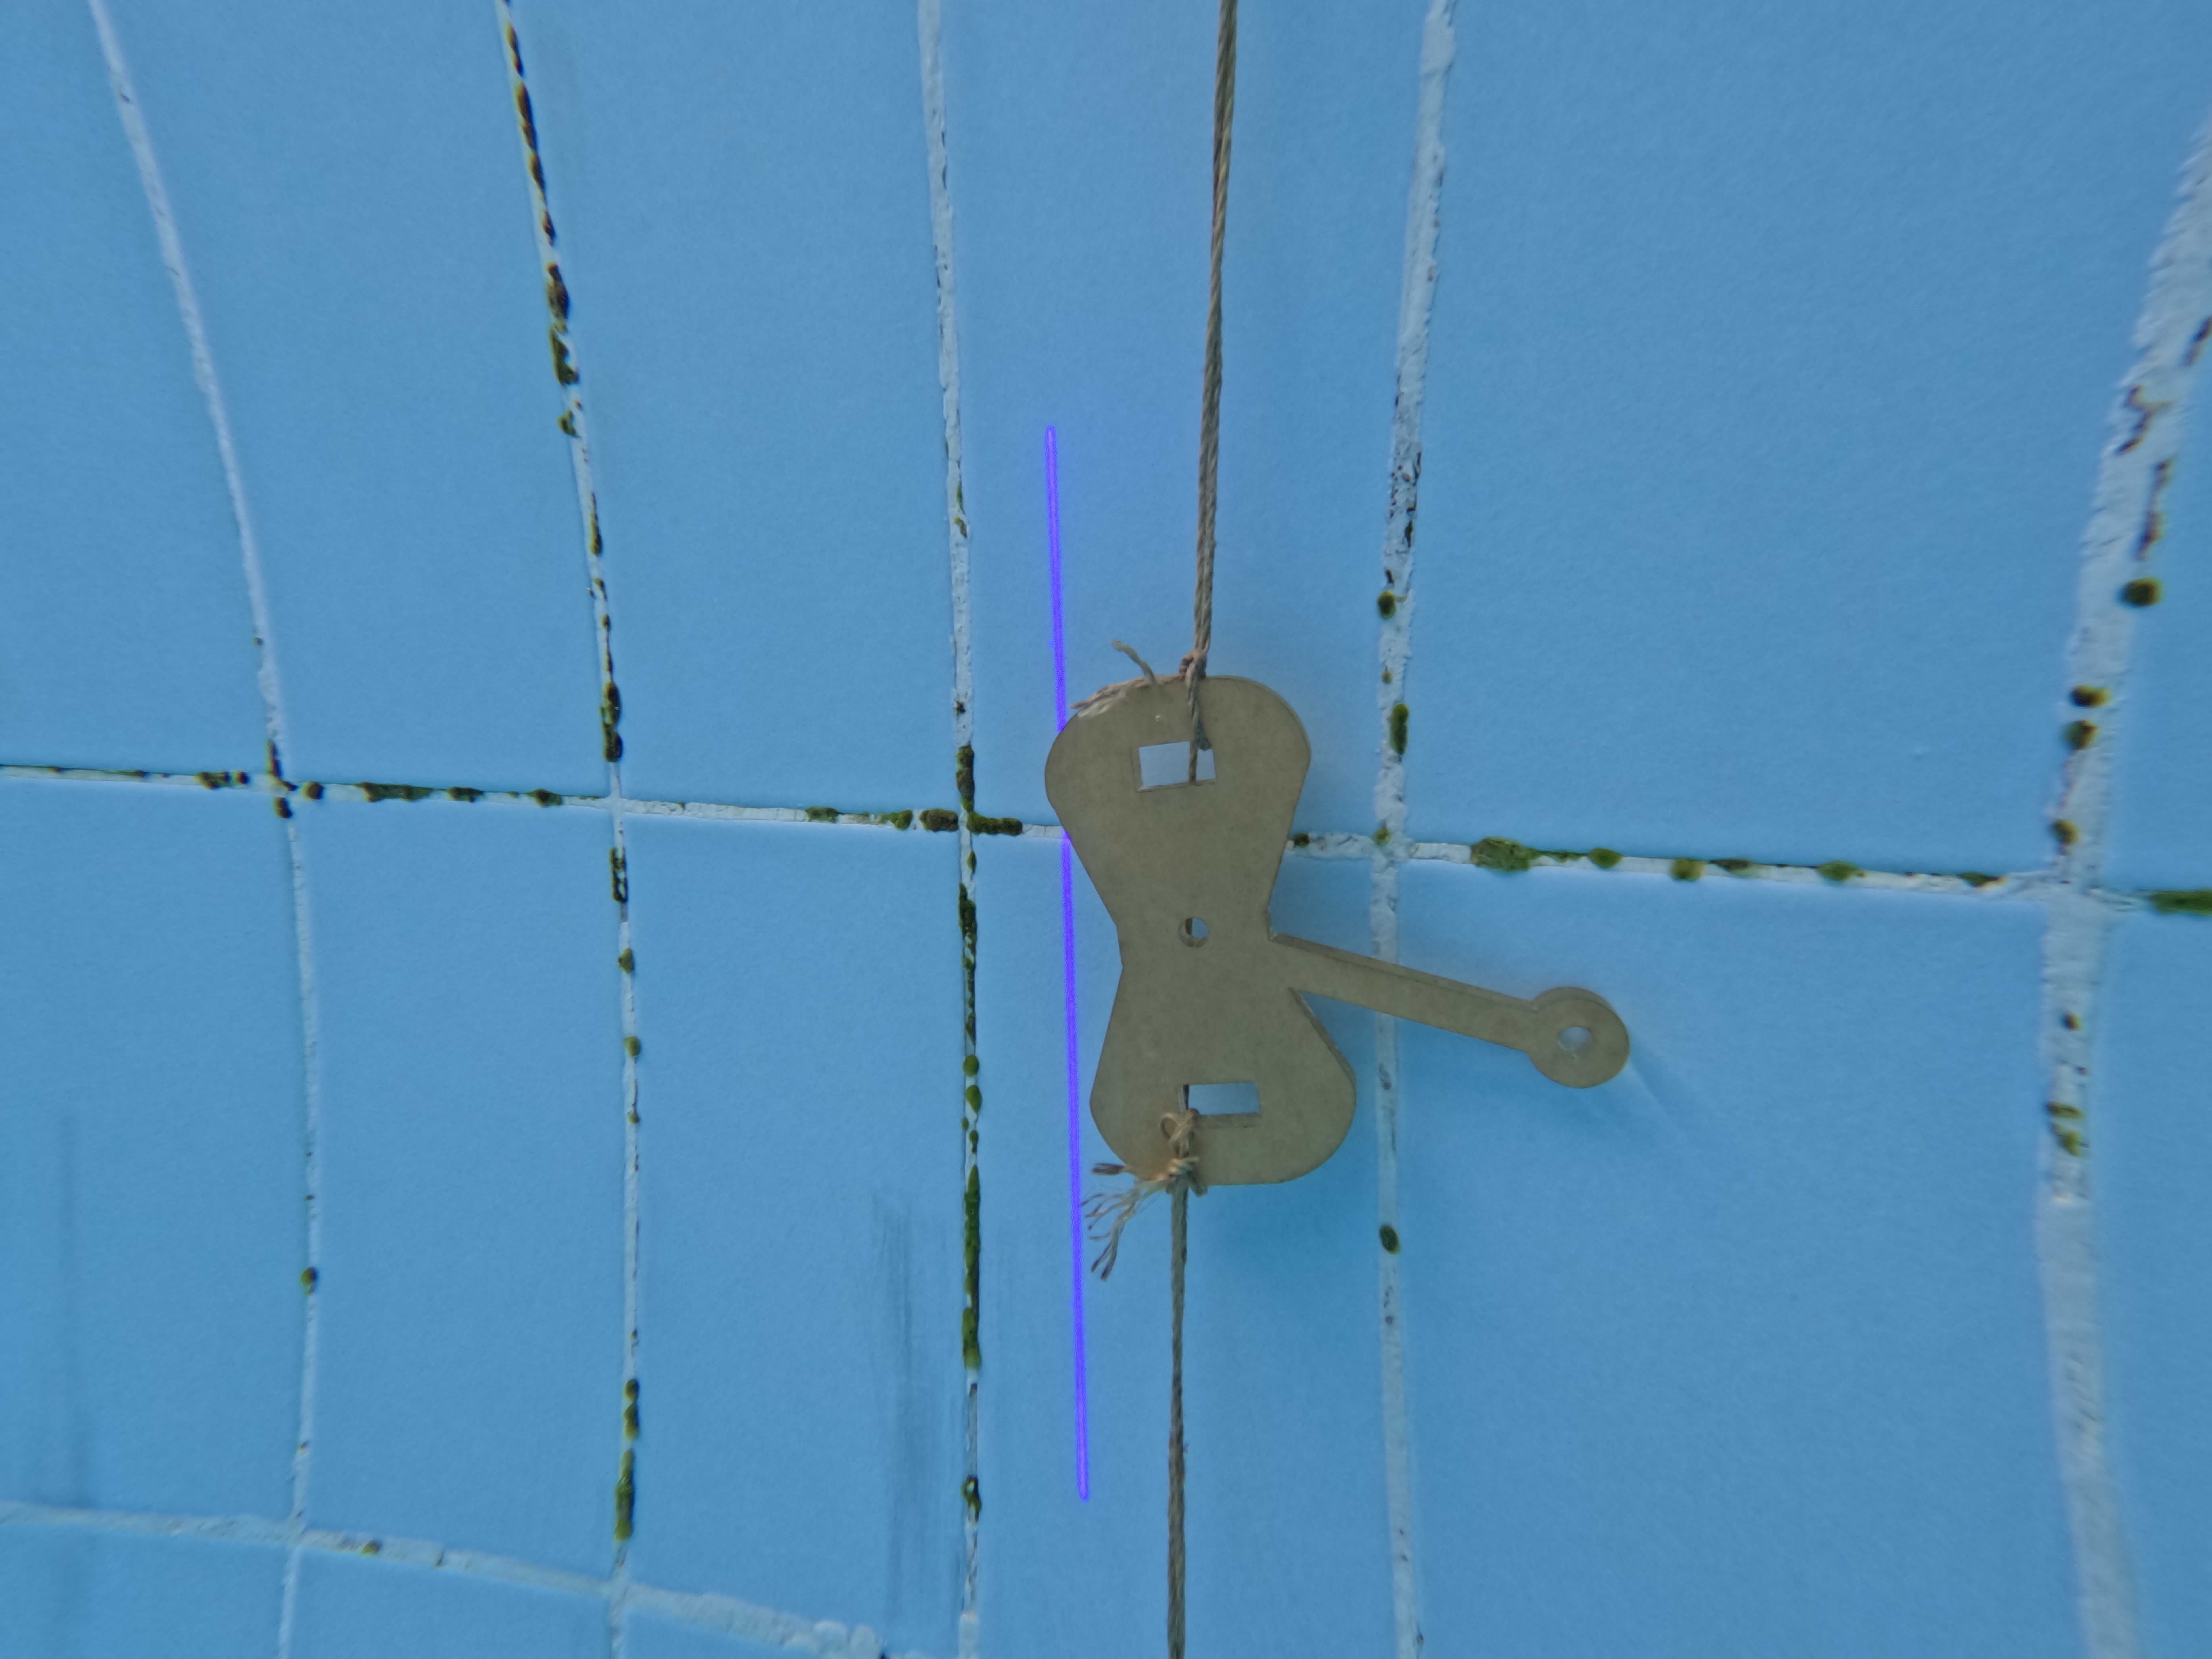

Supplement: Supplementary file 2676 [file G0050974.pdf › Level_2_2/G0050974.pdf]

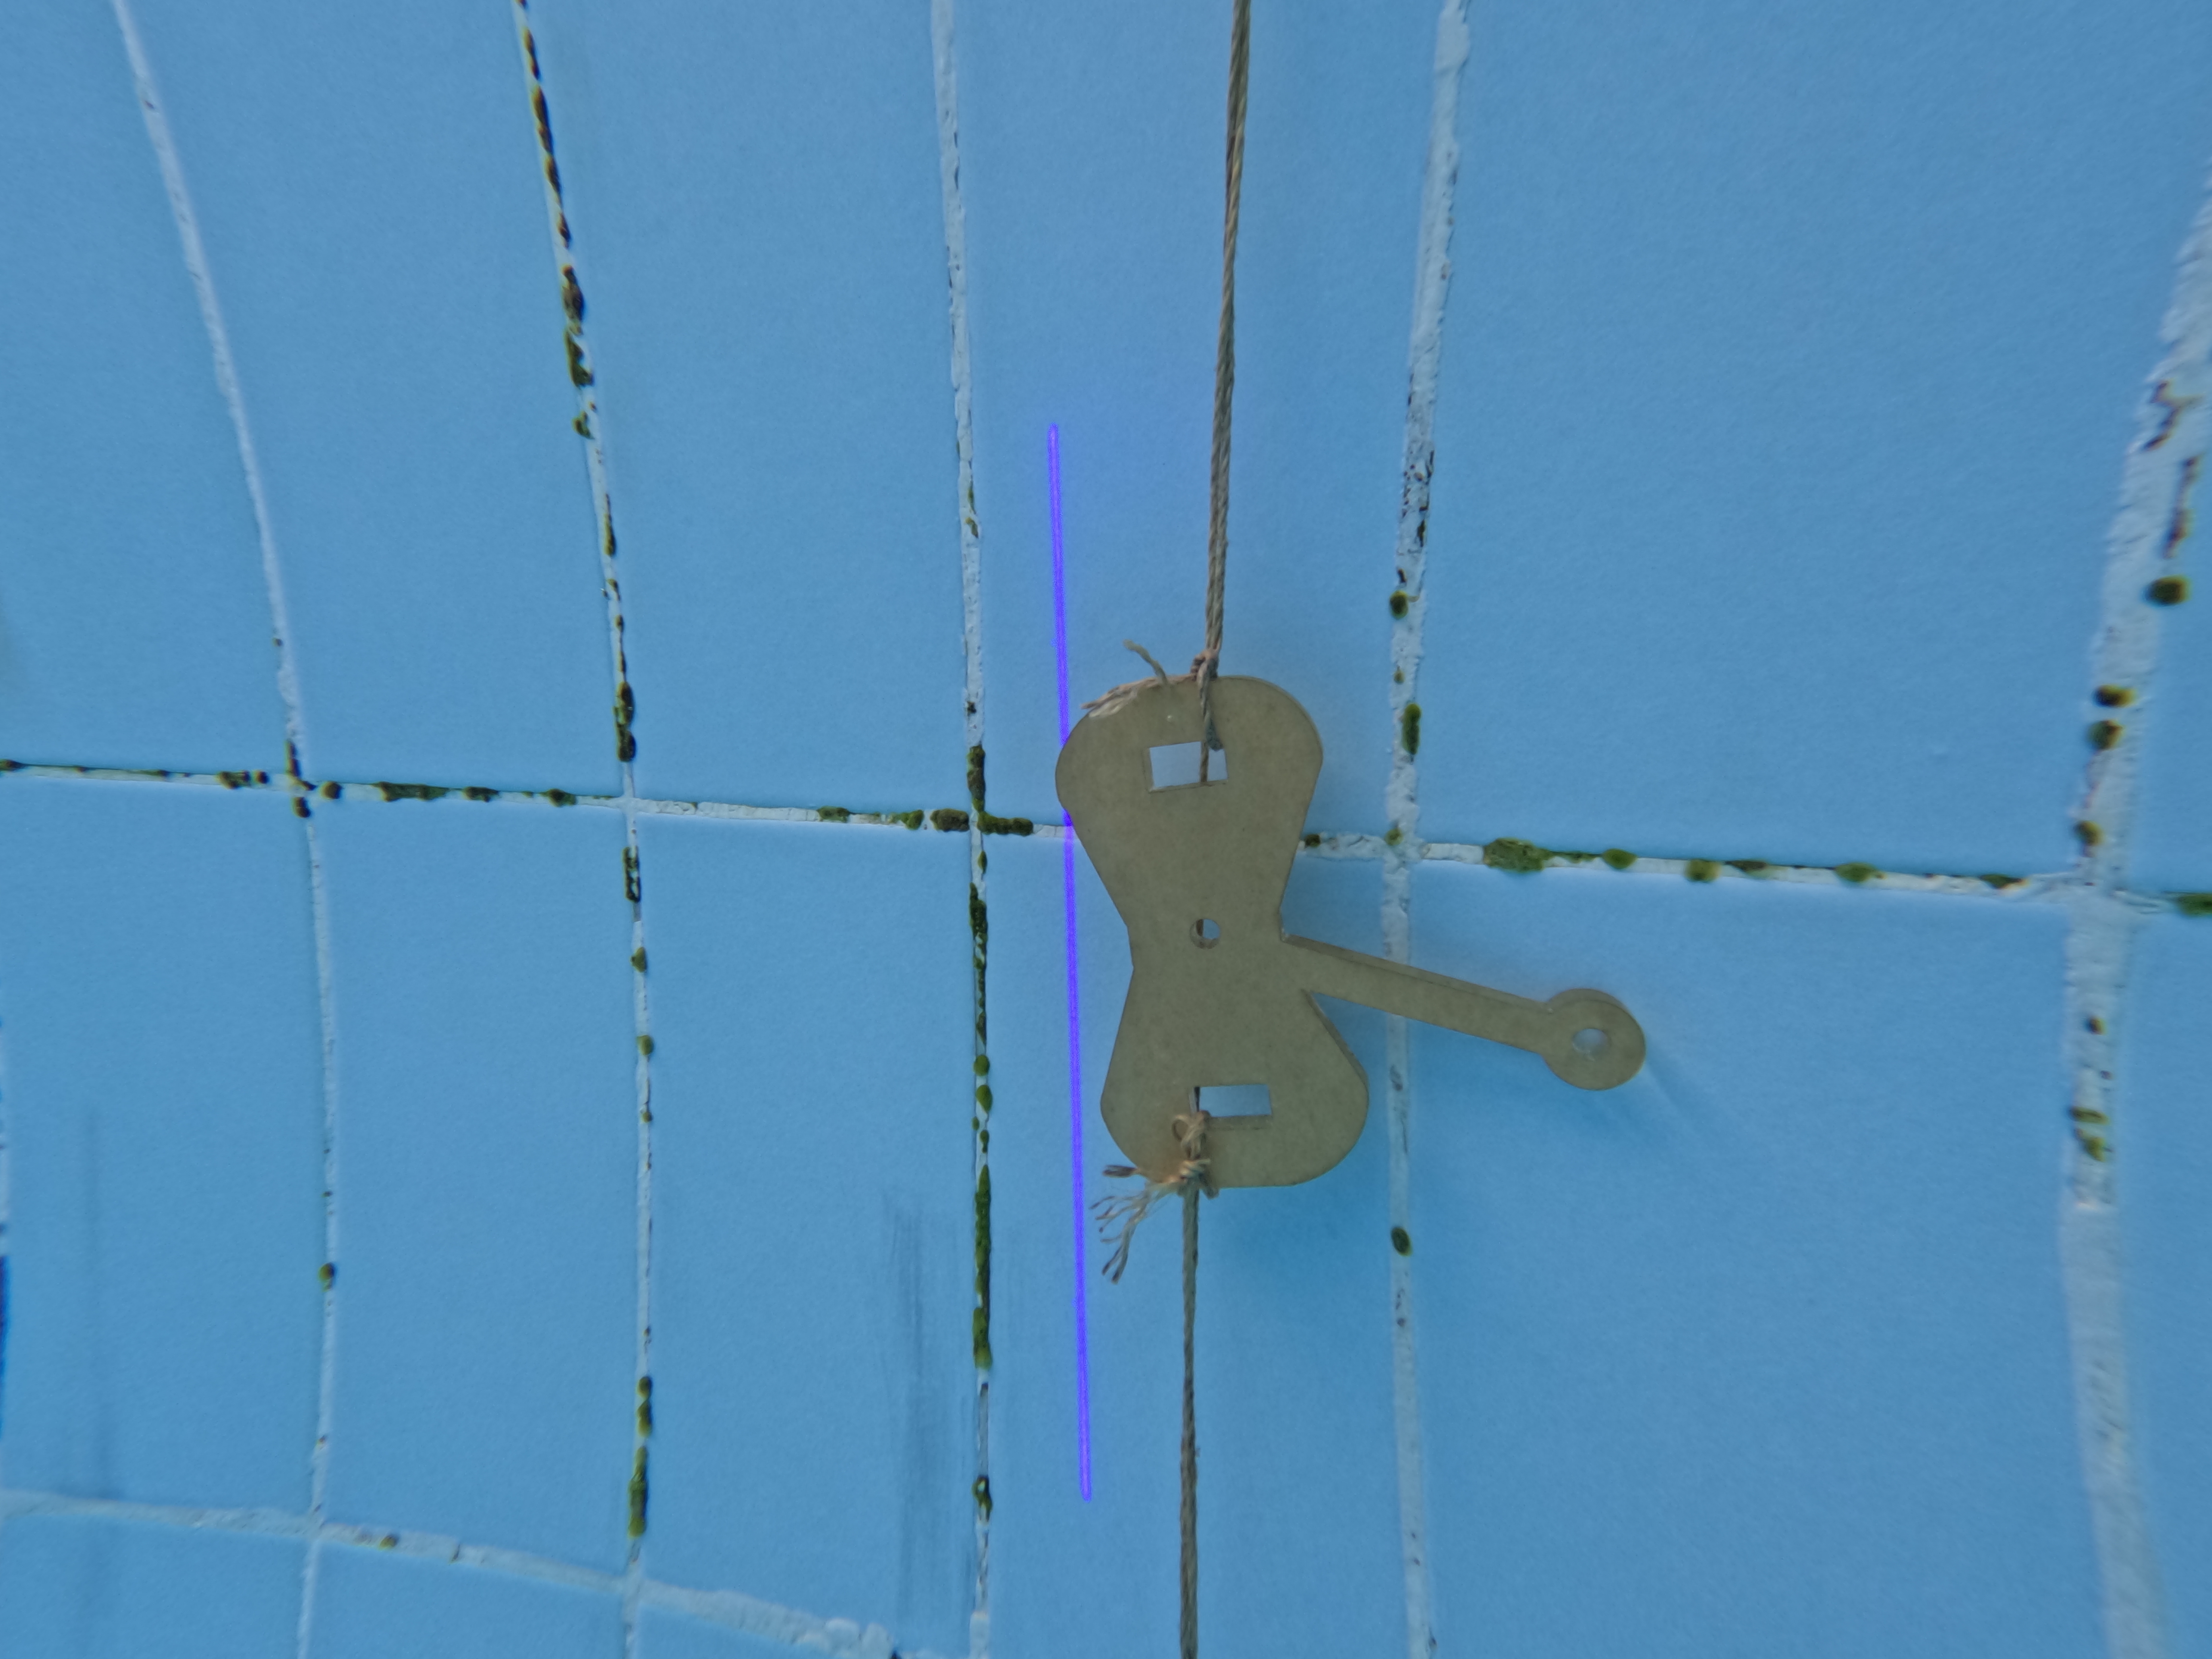

Supplement: Supplementary file 2677 [file G0050975.pdf › Level_2_2/G0050975.pdf]

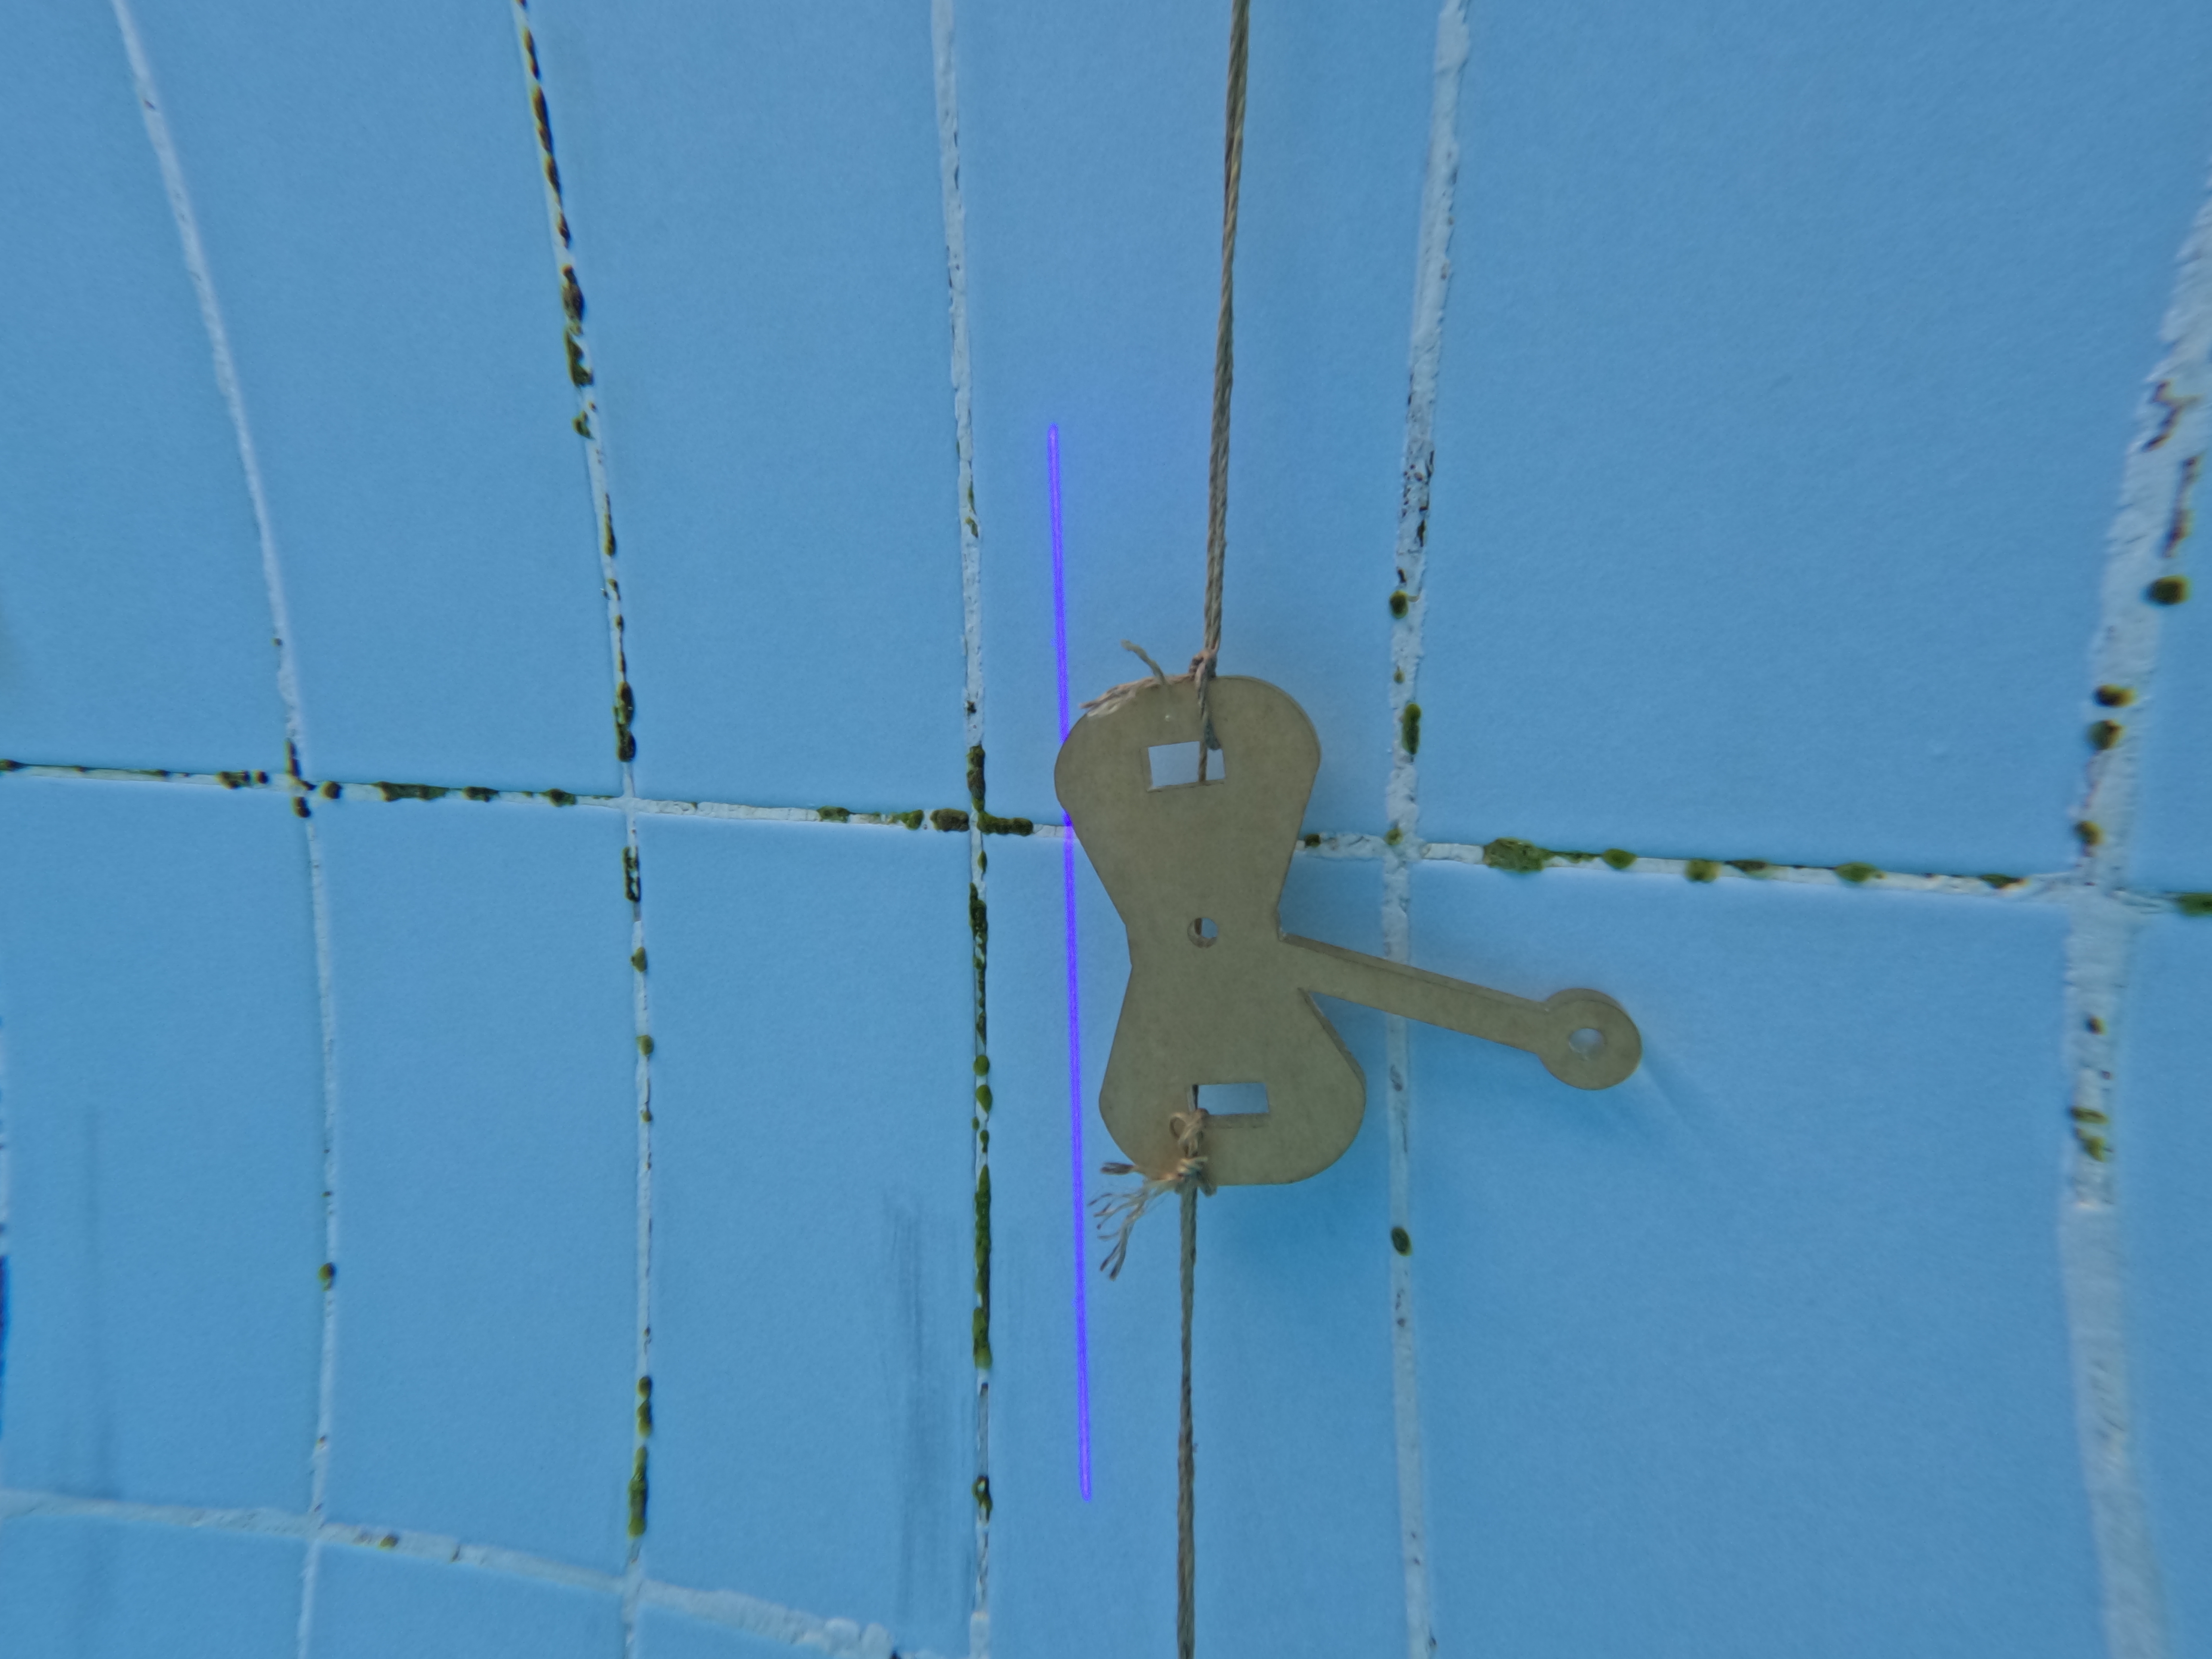

Supplement: Supplementary file 2678 [file G0050976.pdf › Level_2_2/G0050976.pdf]

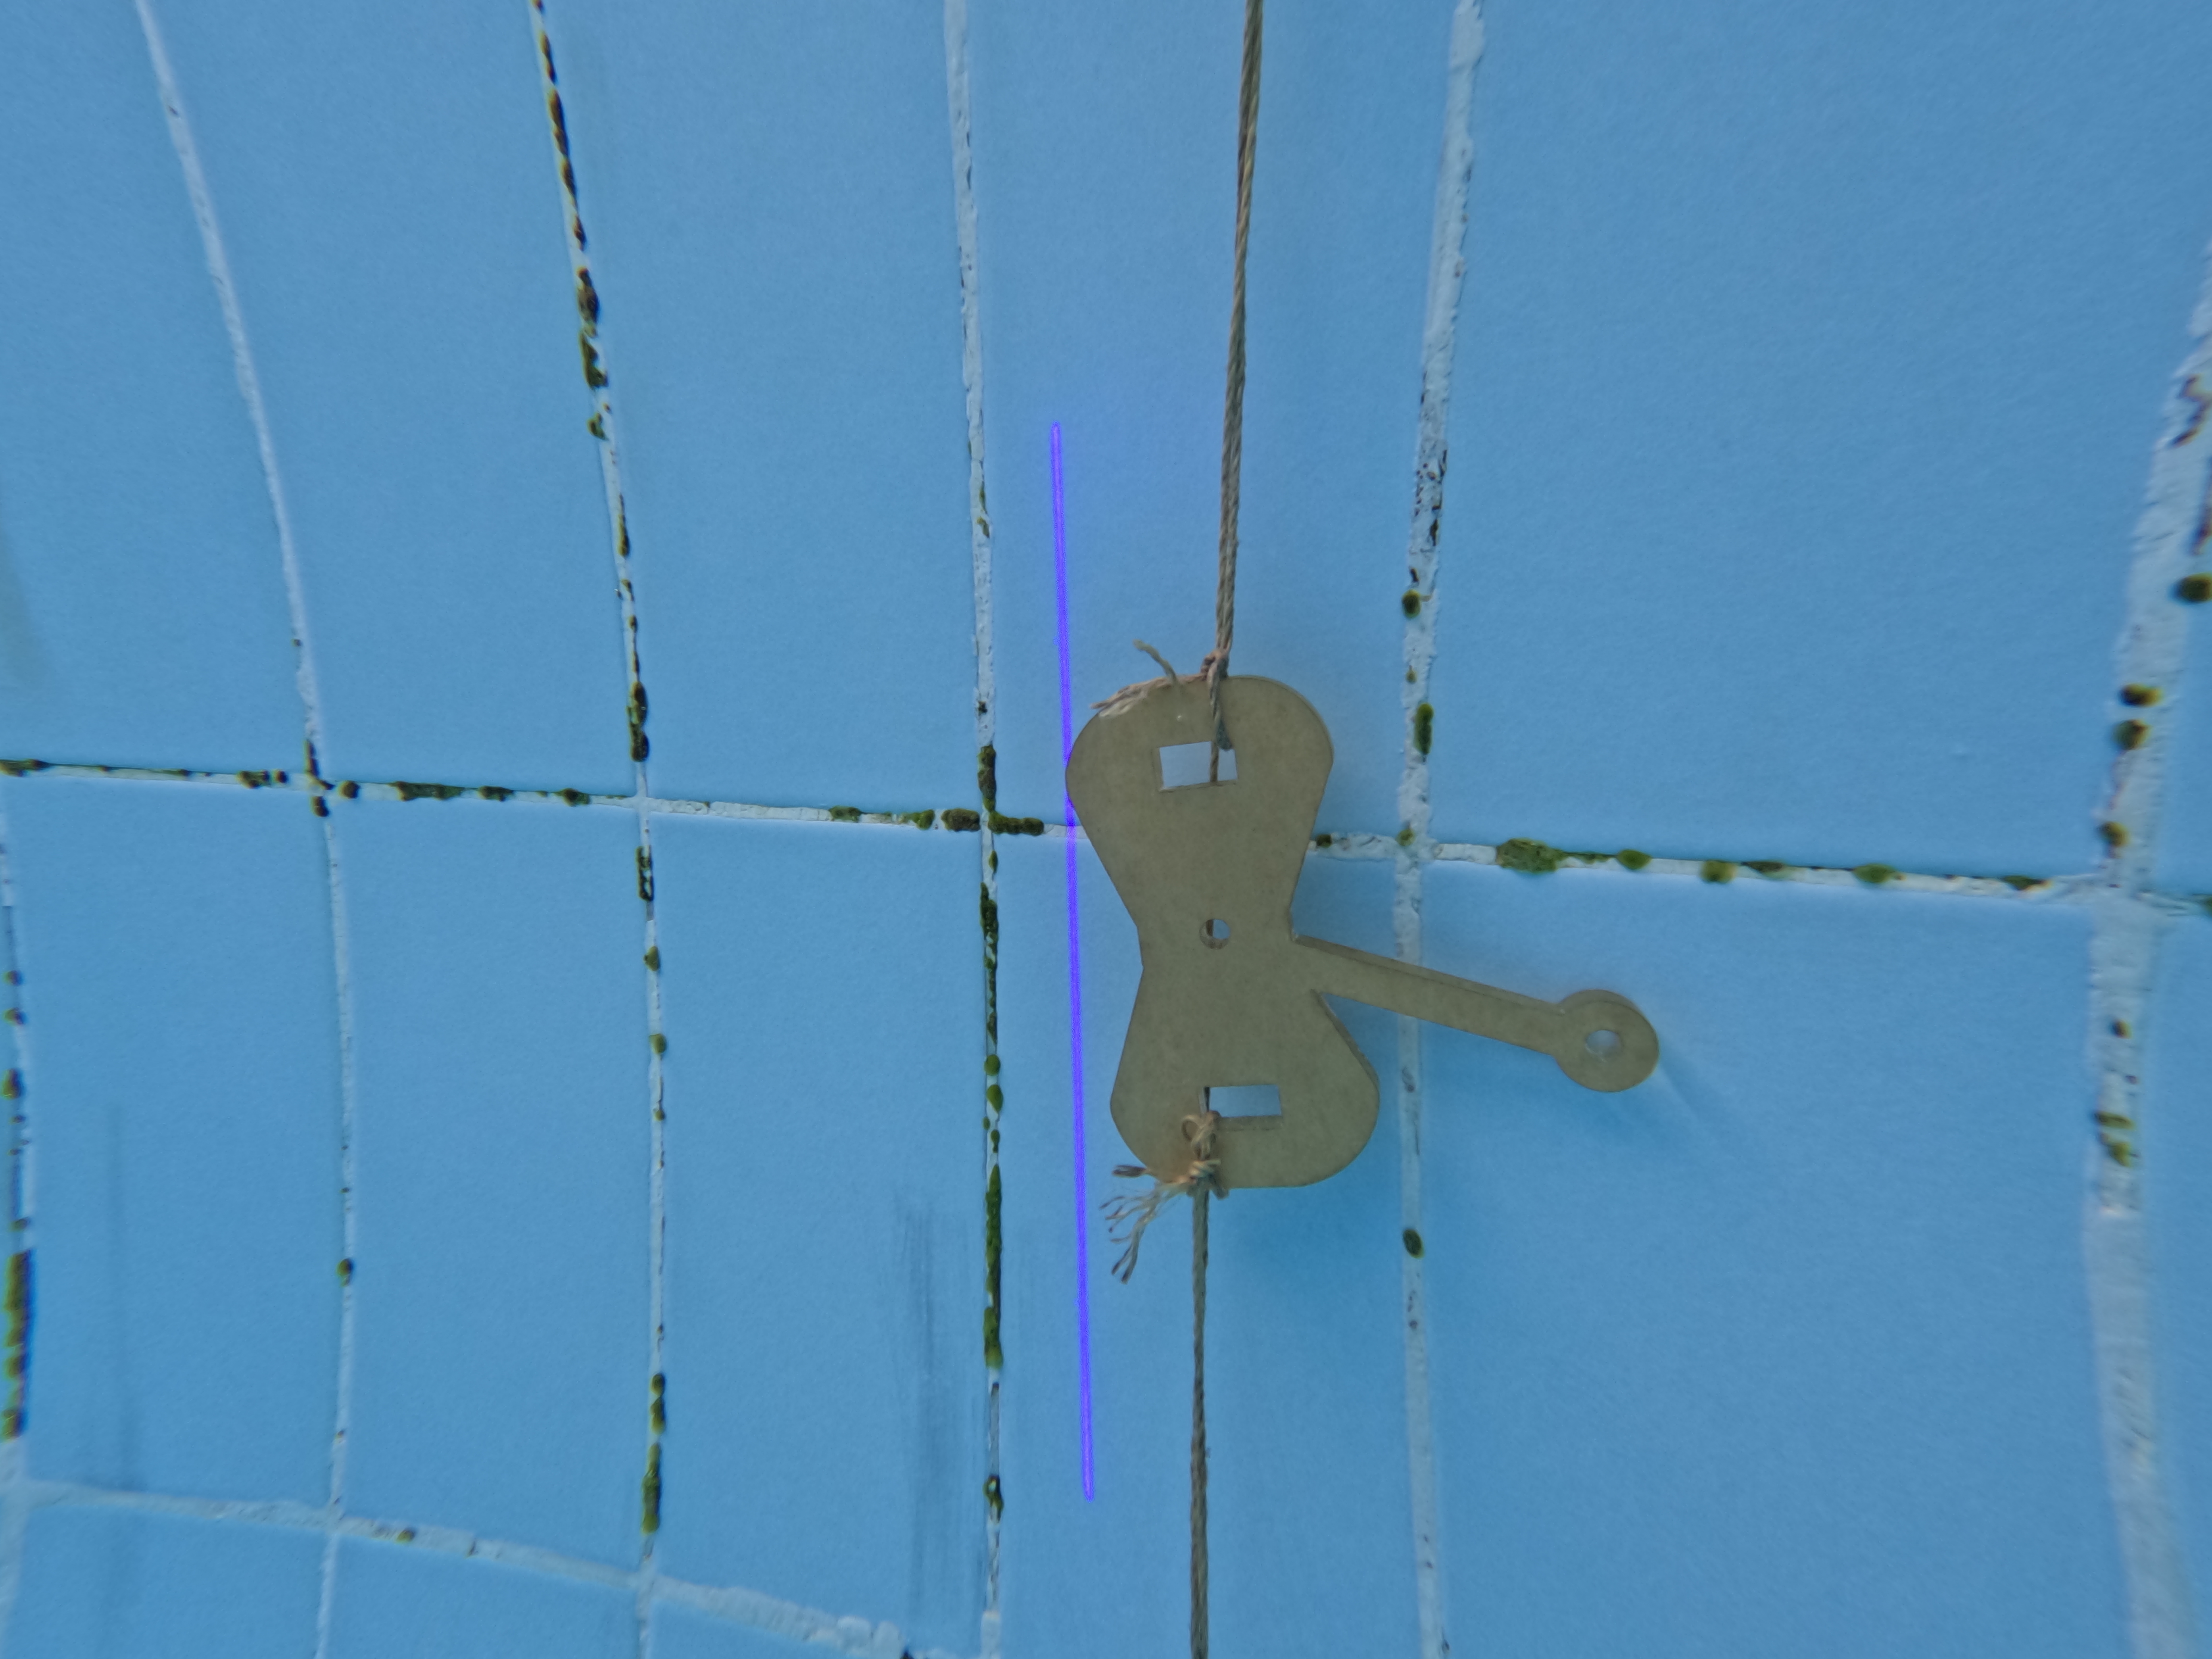

Supplement: Supplementary file 2679 [file G0050977.pdf › Level_2_2/G0050977.pdf]

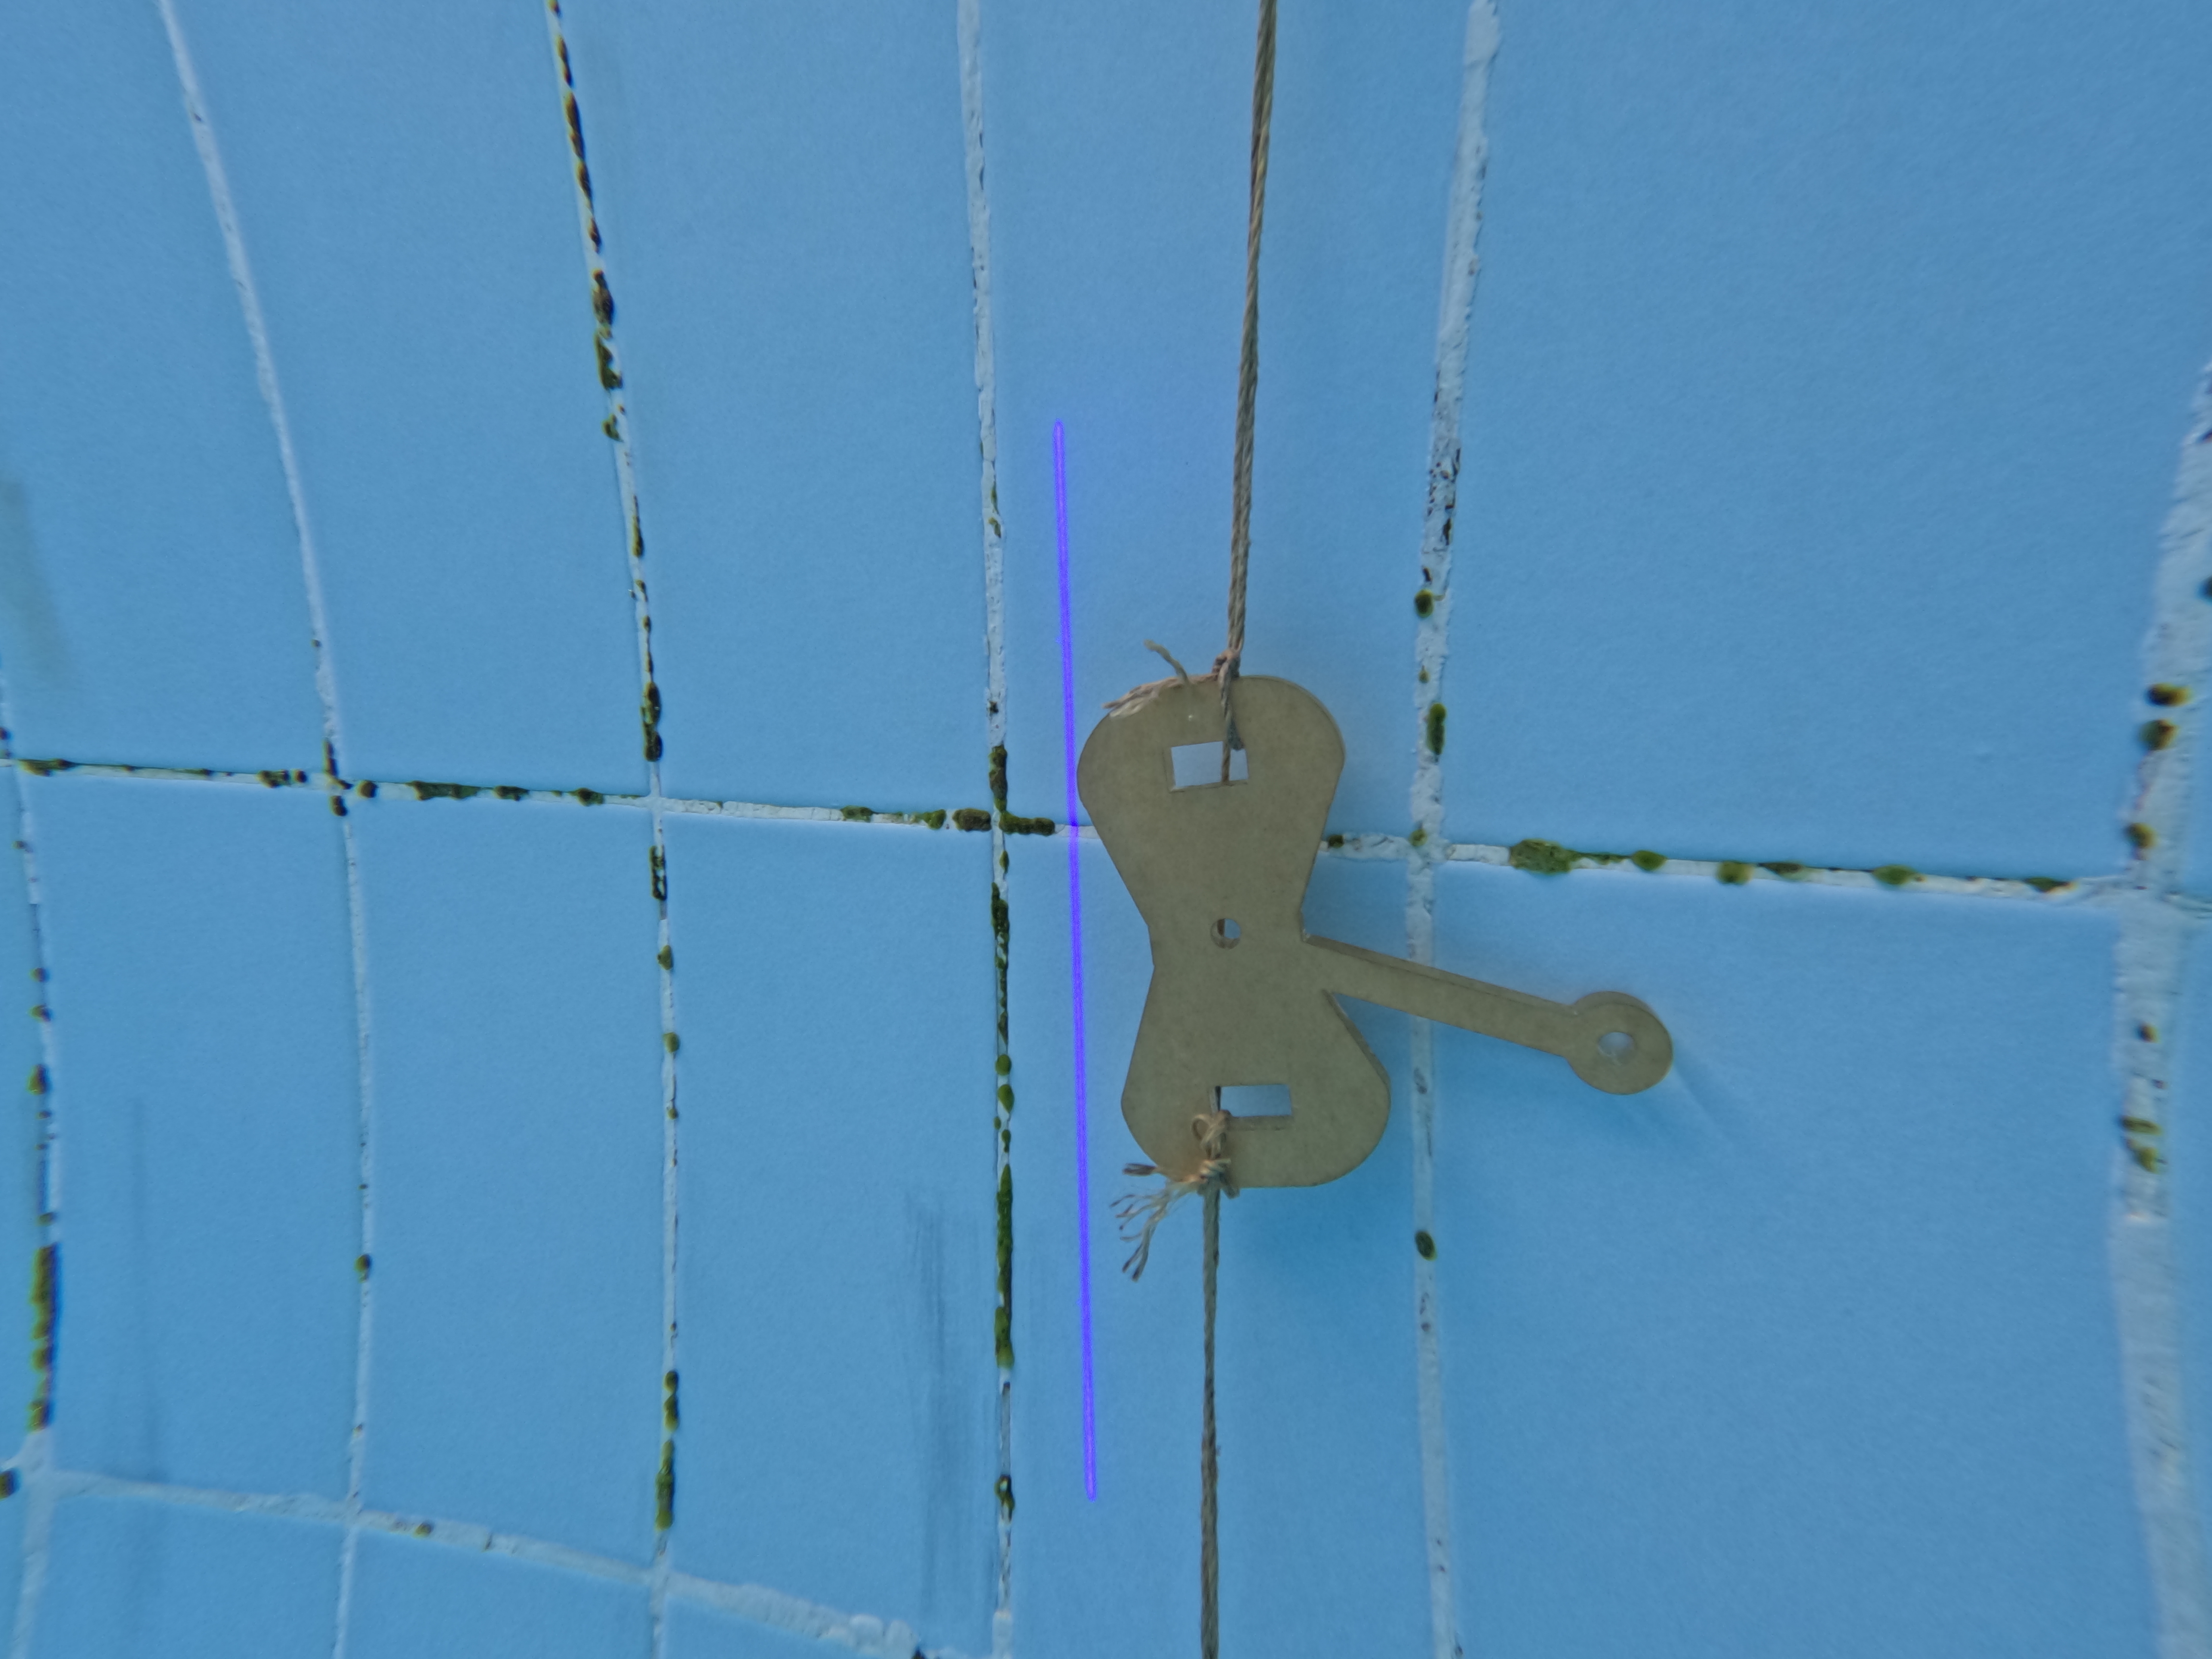

Supplement: Supplementary file 2680 [file G0050978.pdf › Level_2_2/G0050978.pdf]

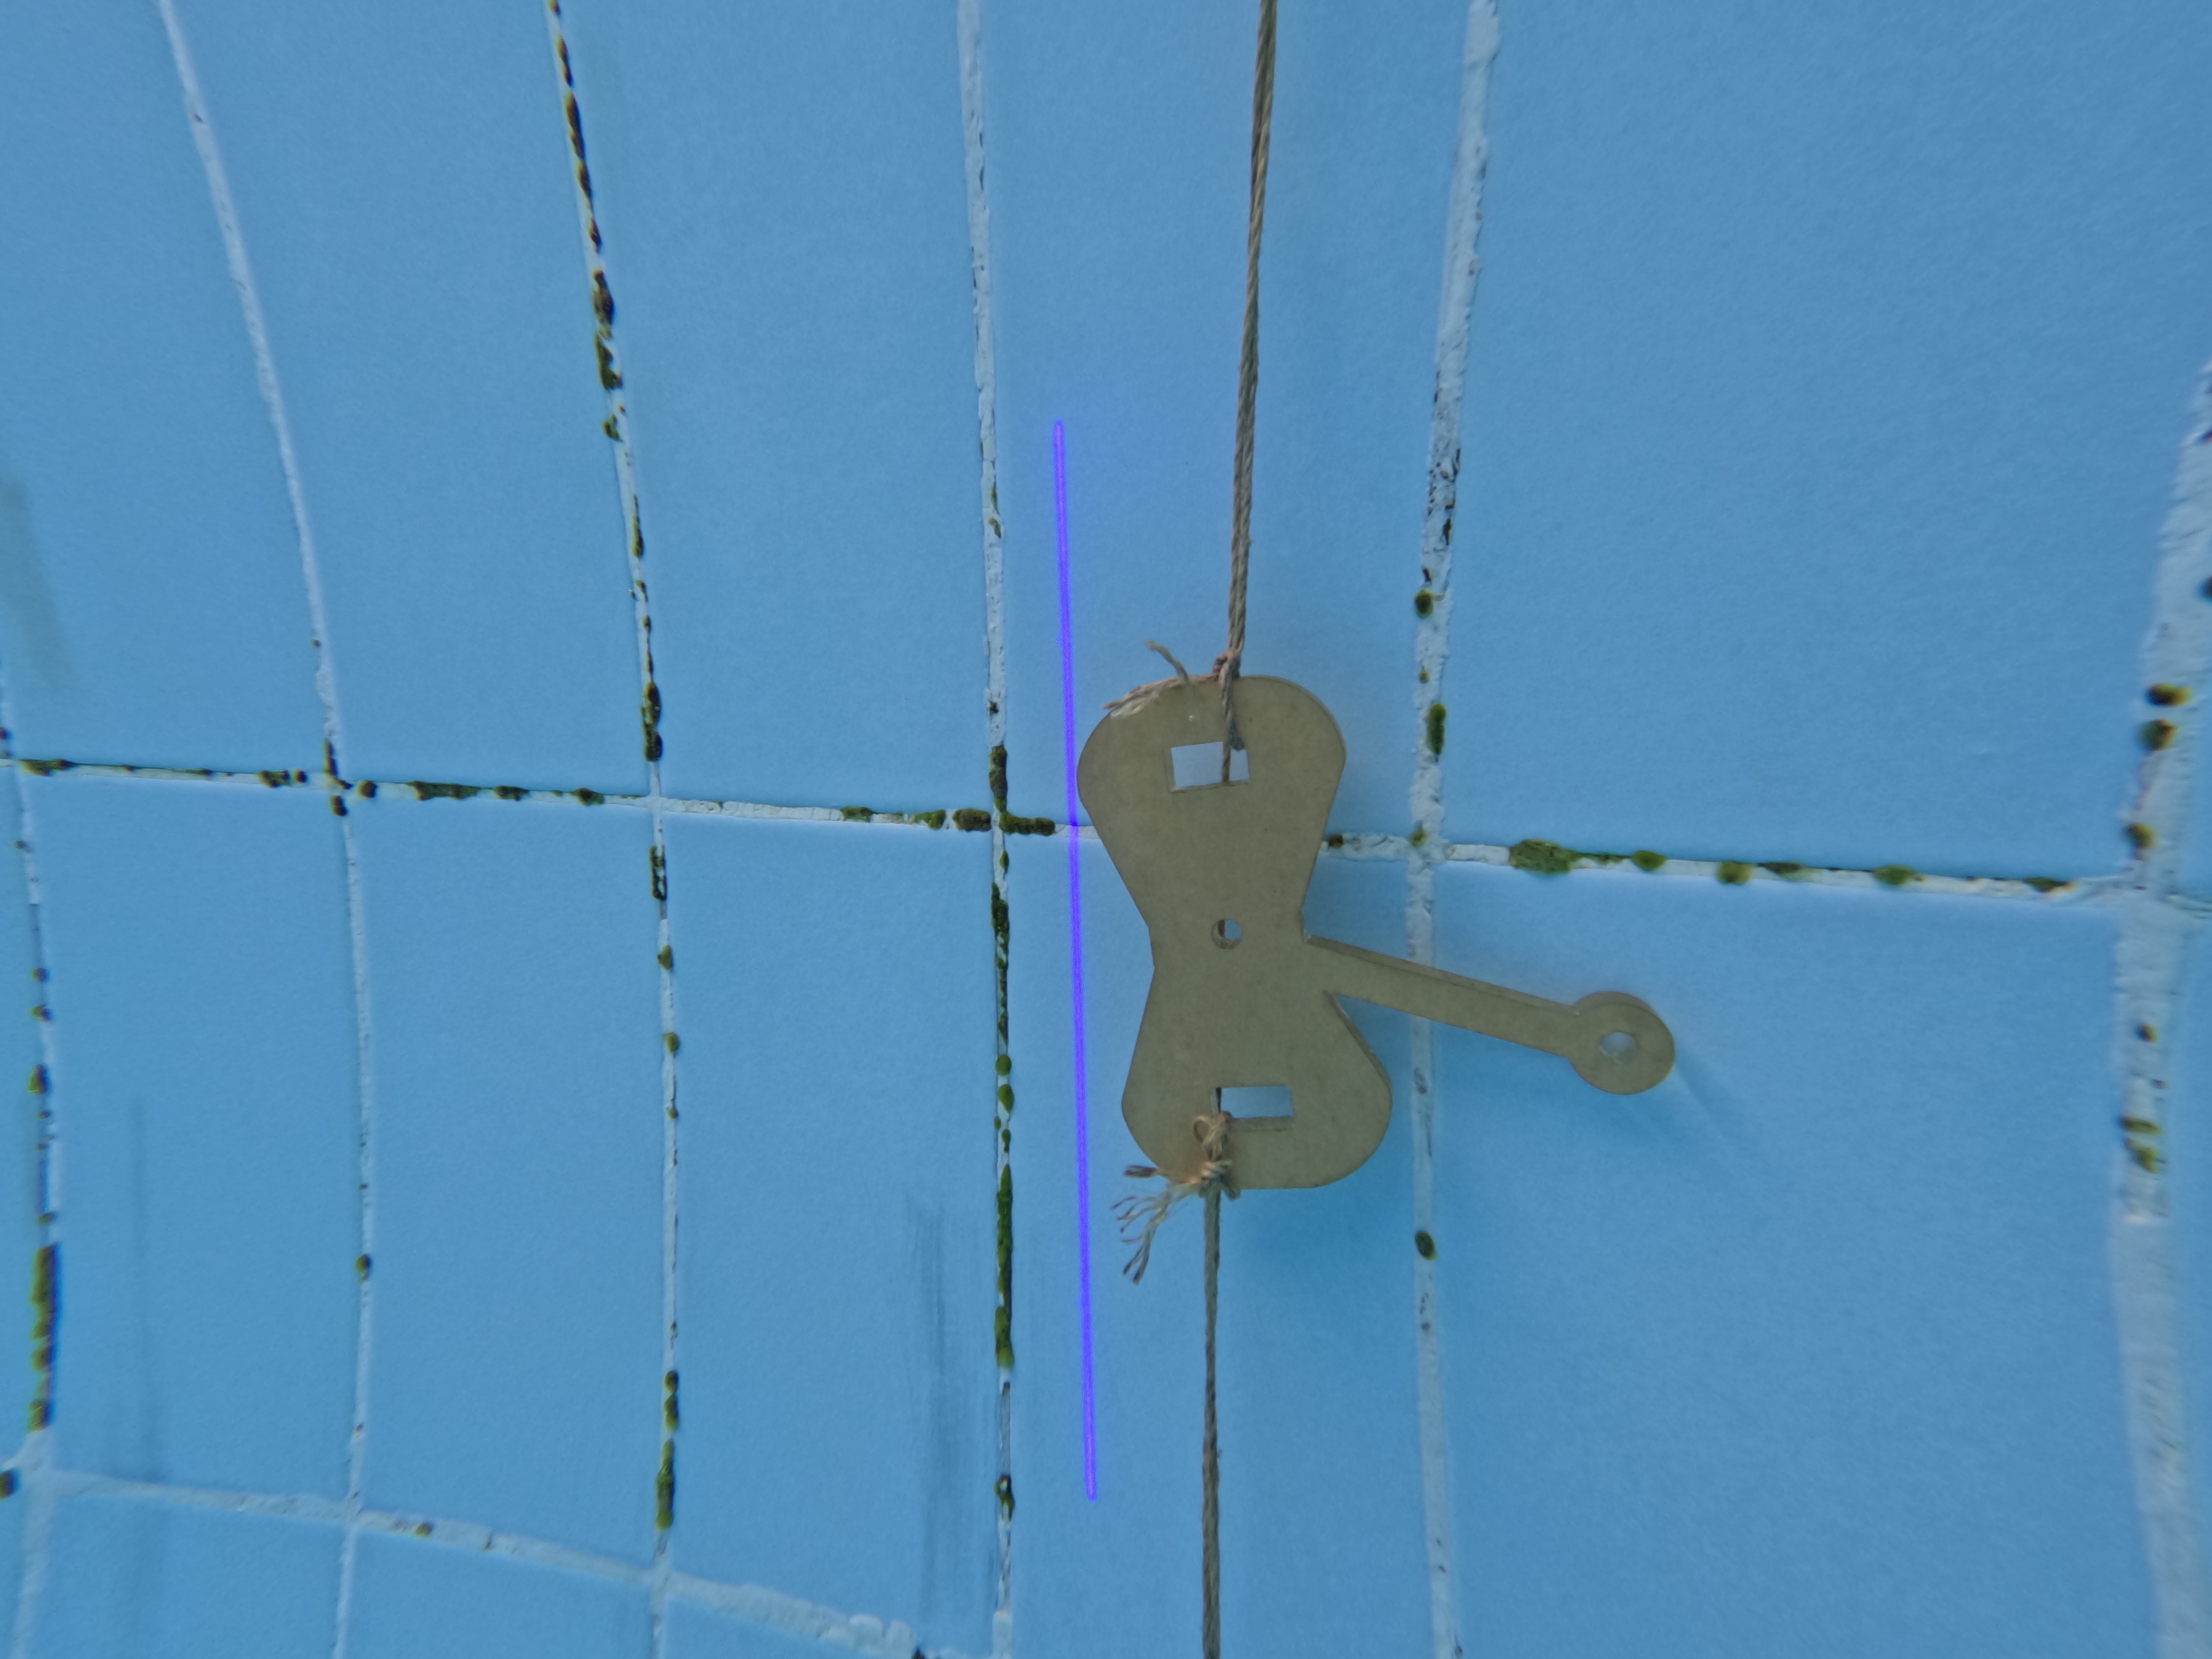

Supplement: Supplementary file 2681 [file G0050979.pdf › Level_2_2/G0050979.pdf]

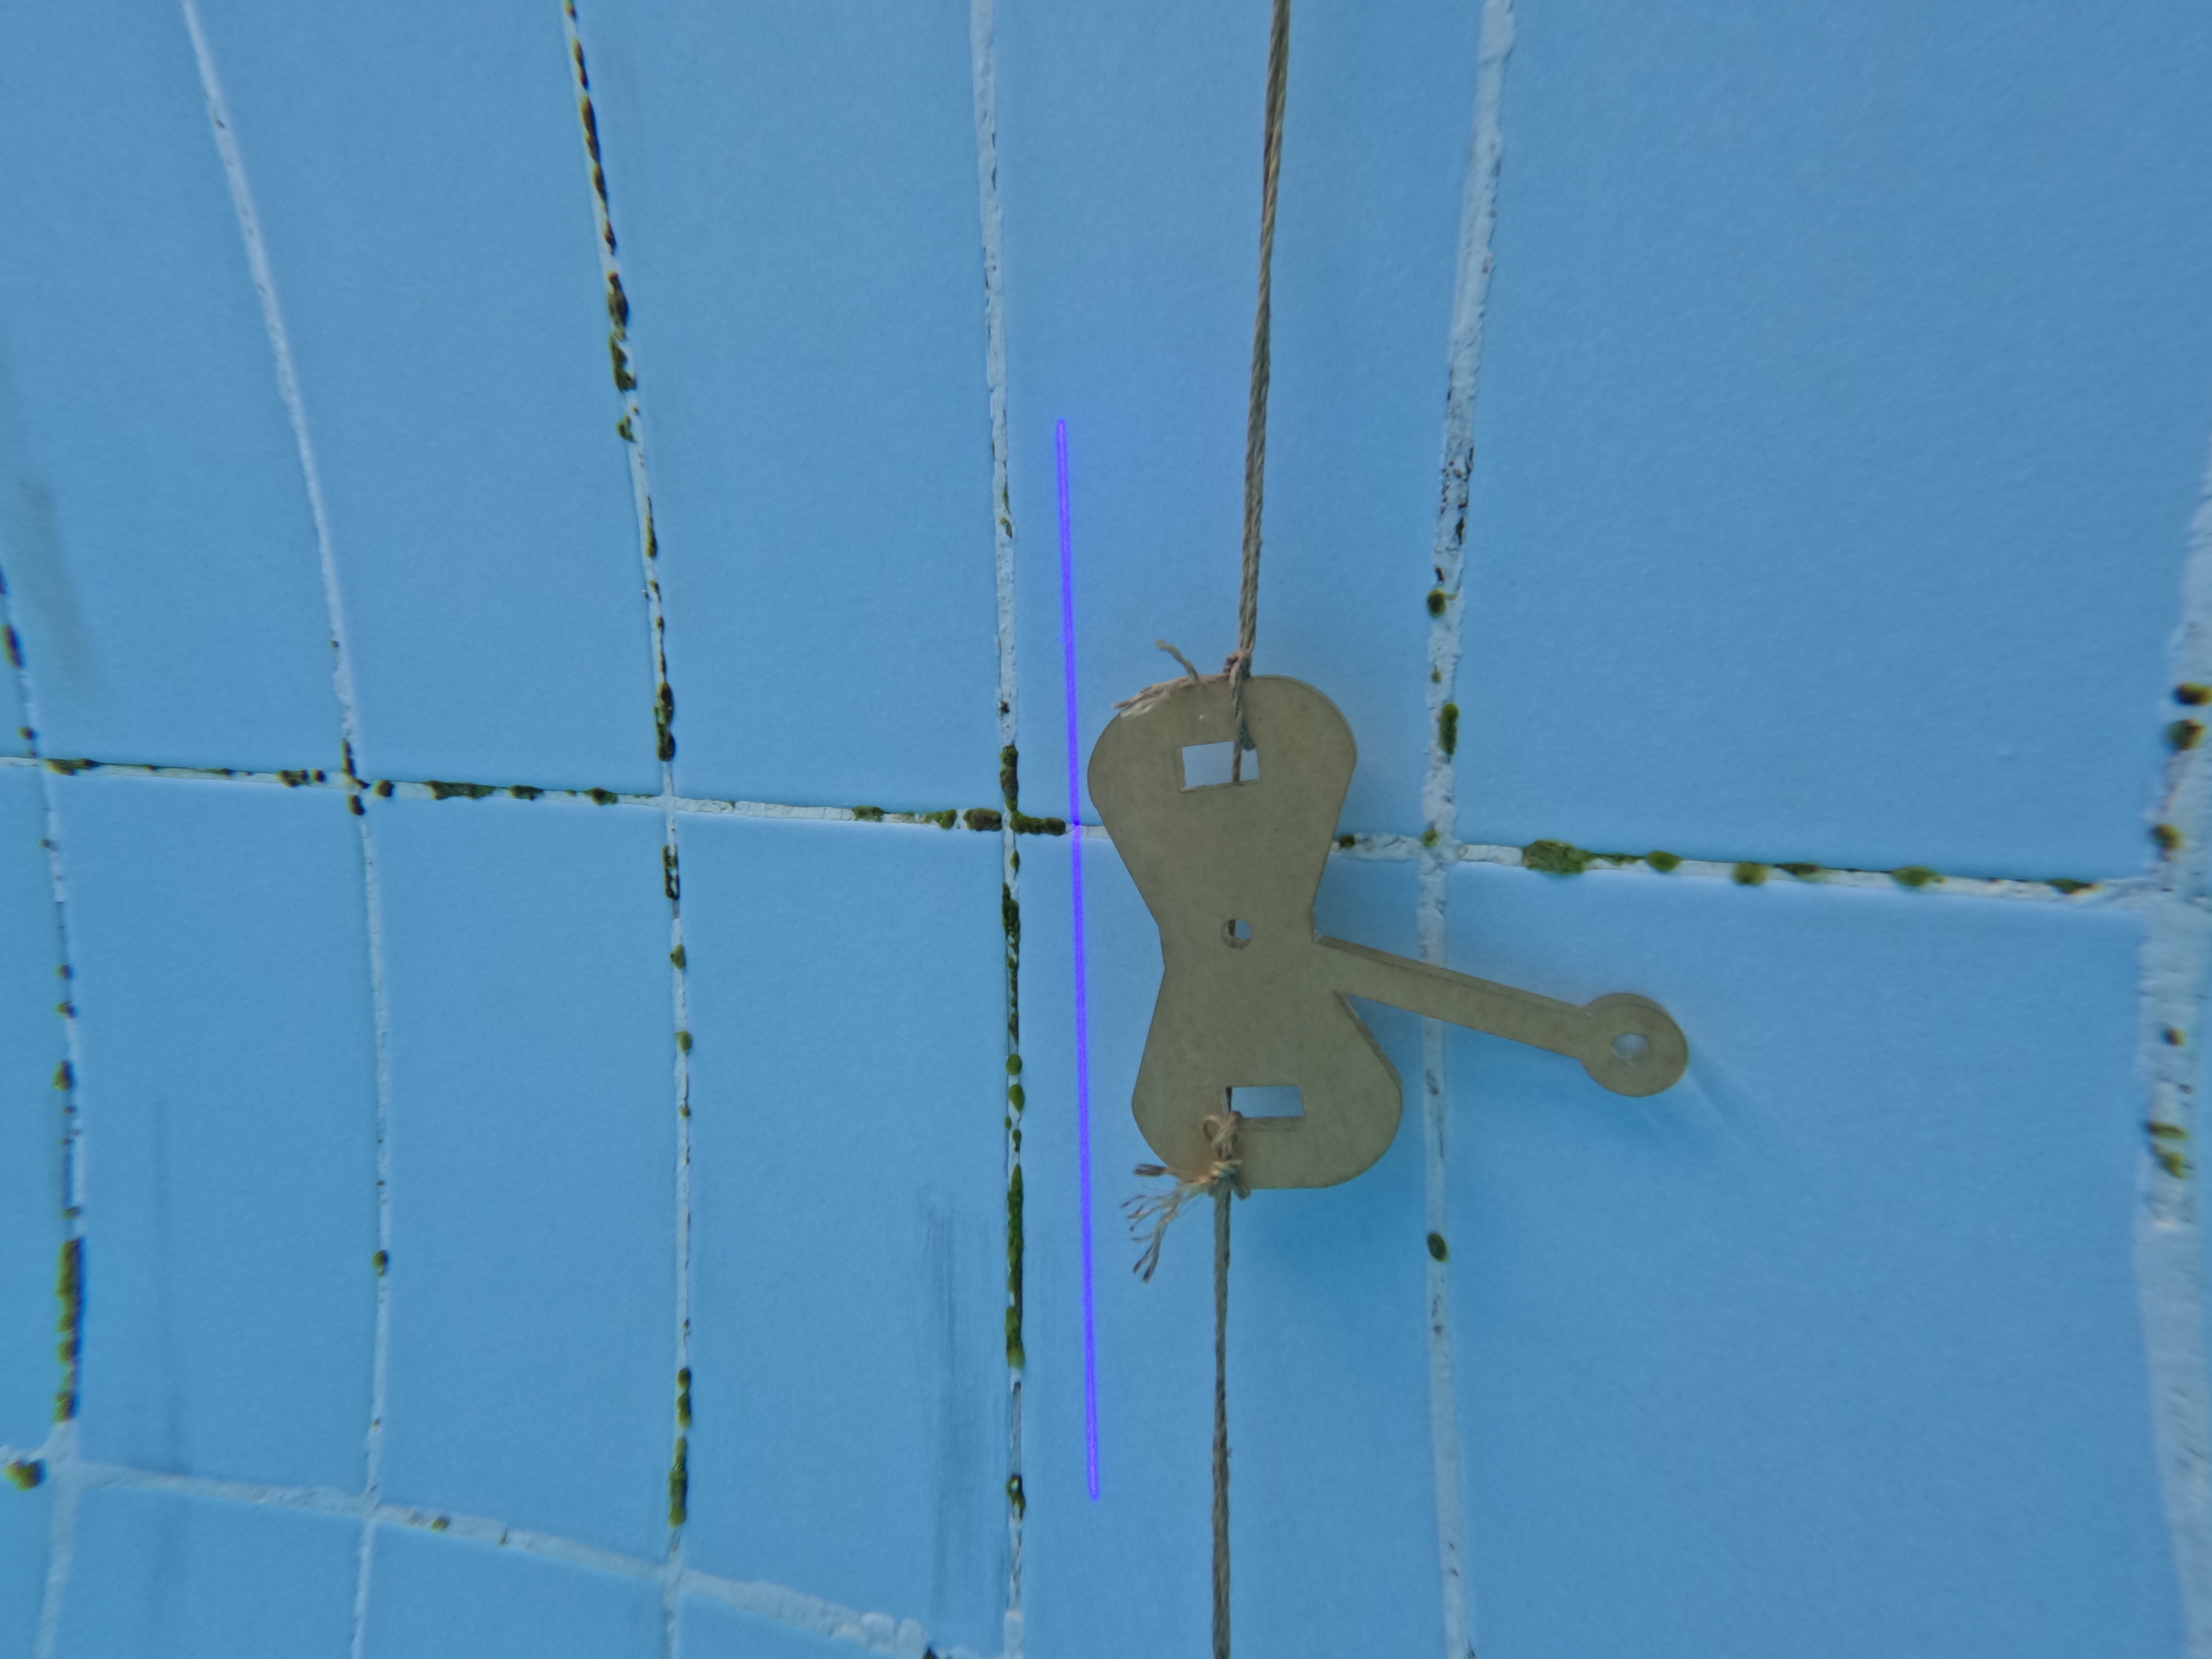

Supplement: Supplementary file 2682 [file G0050980.pdf › Level_2_2/G0050980.pdf]

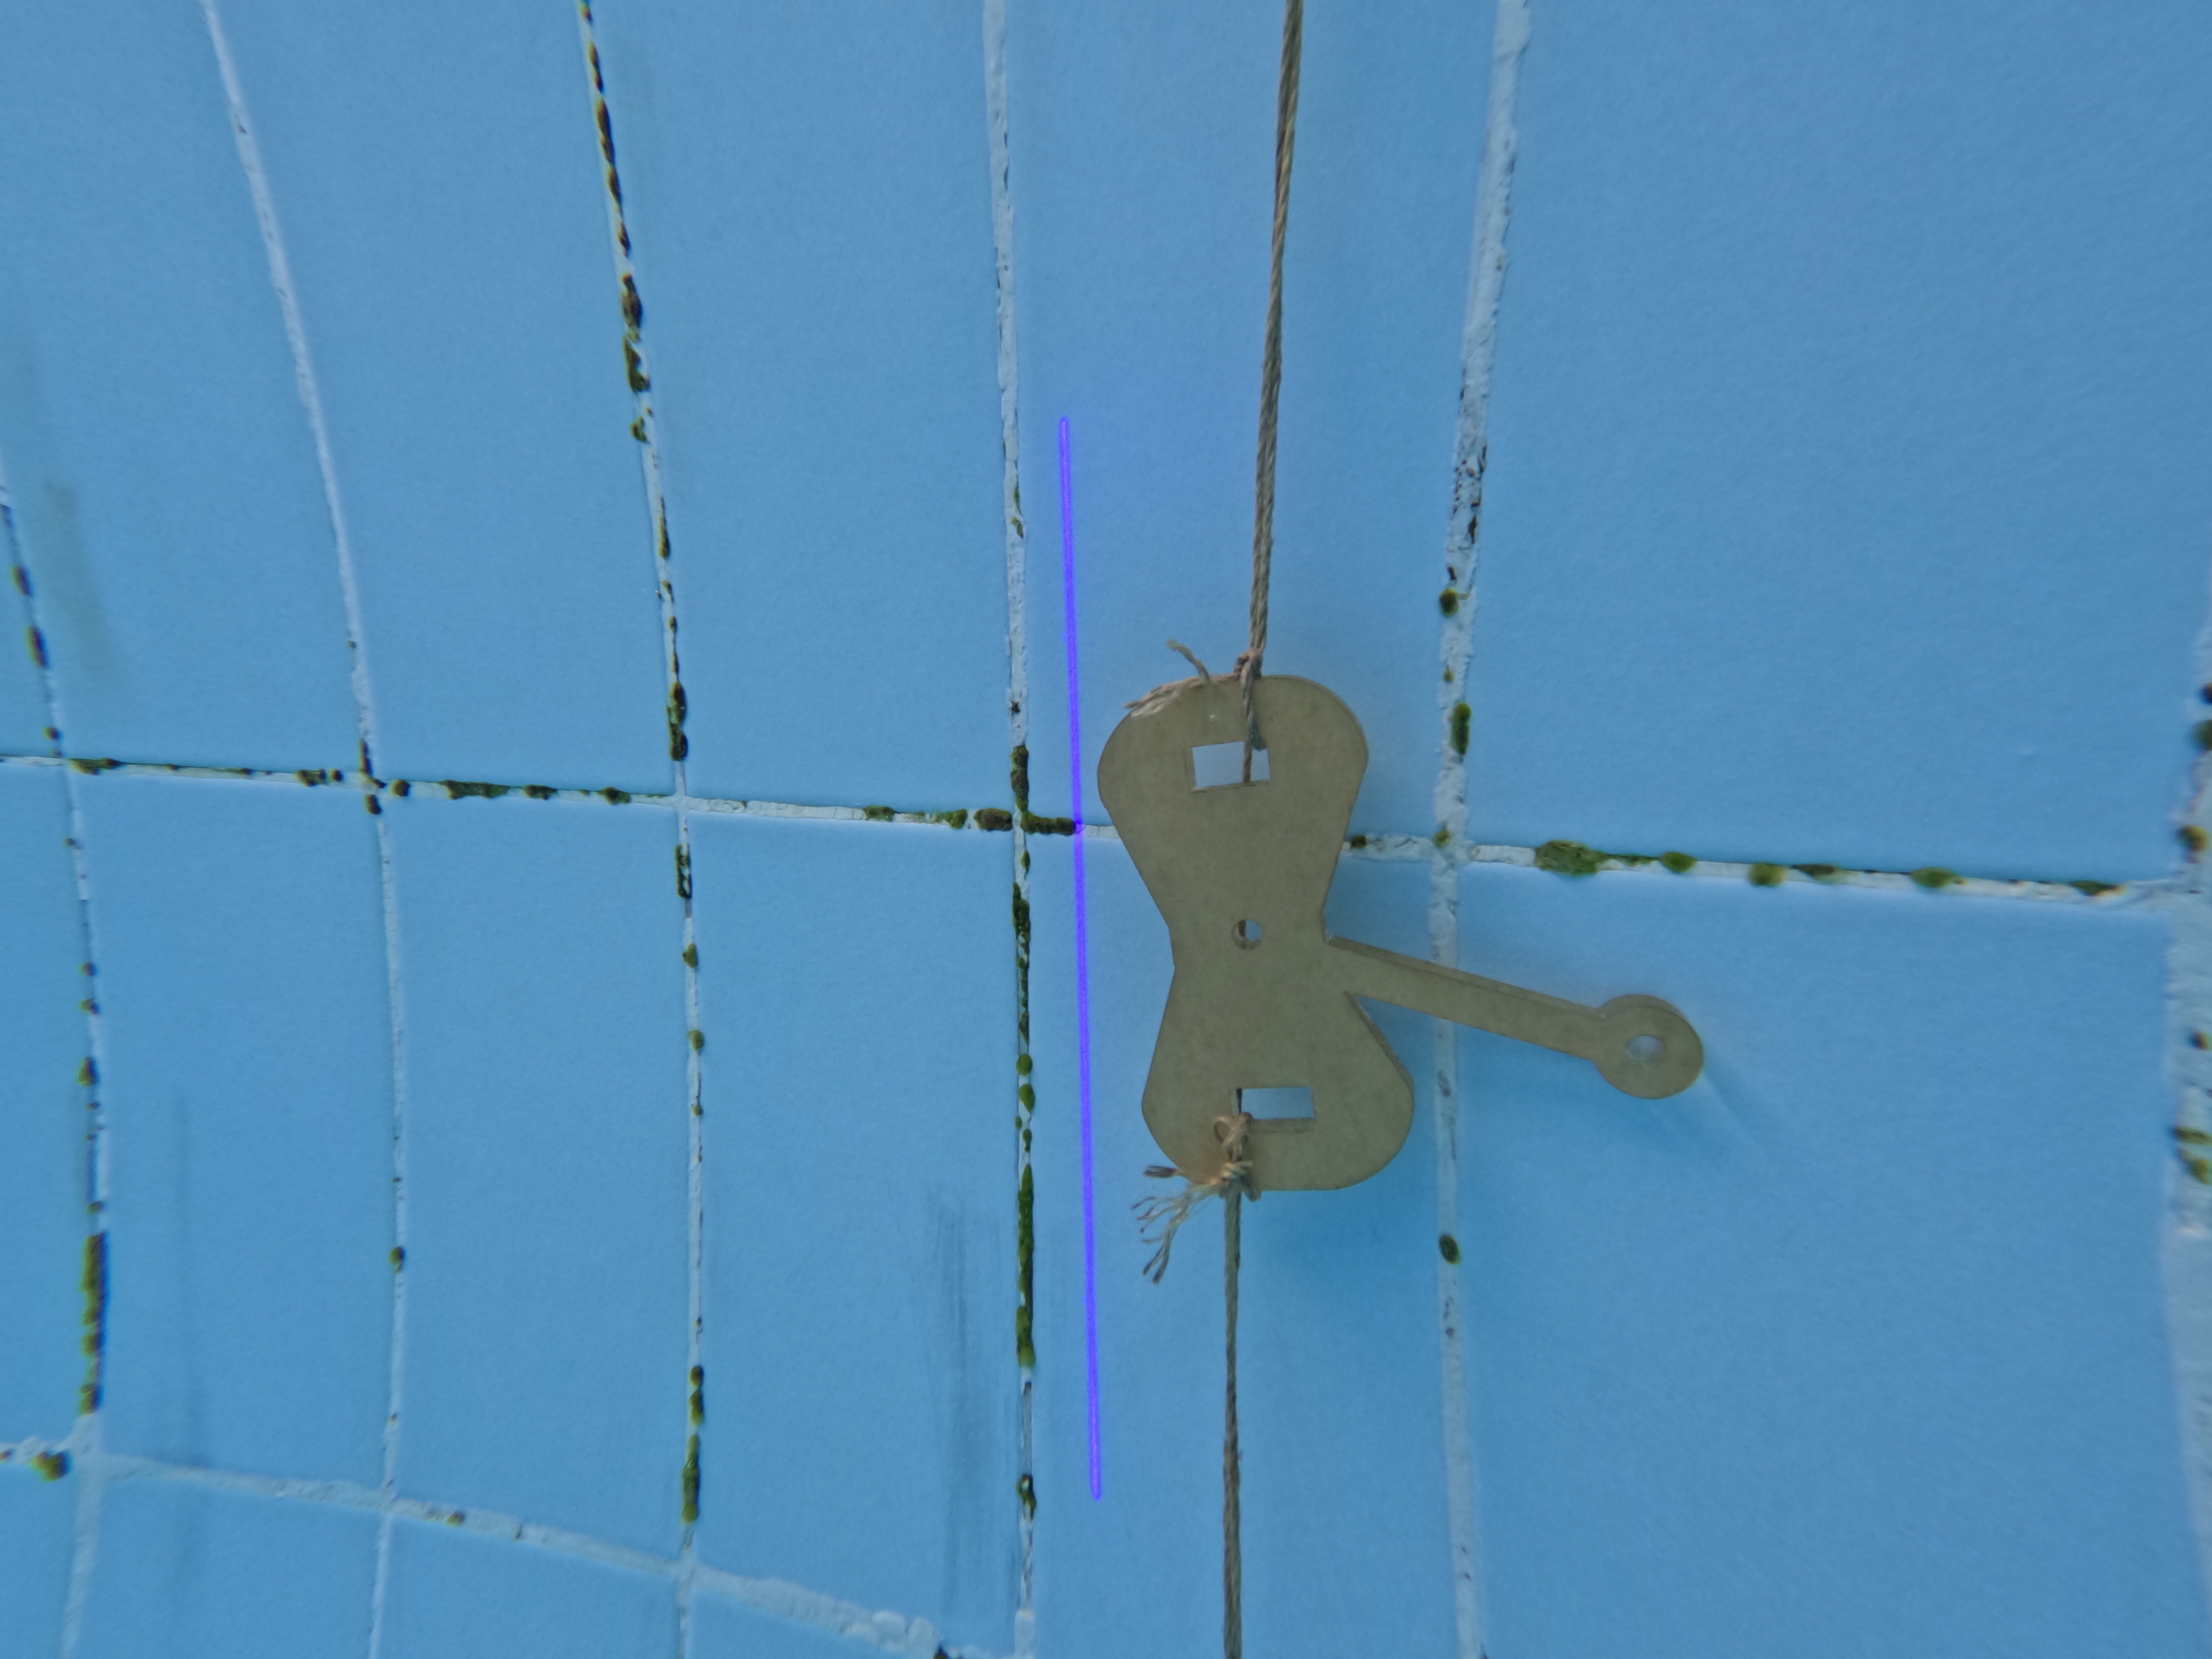

Supplement: Supplementary file 2683 [file G0050981.pdf › Level_2_2/G0050981.pdf]

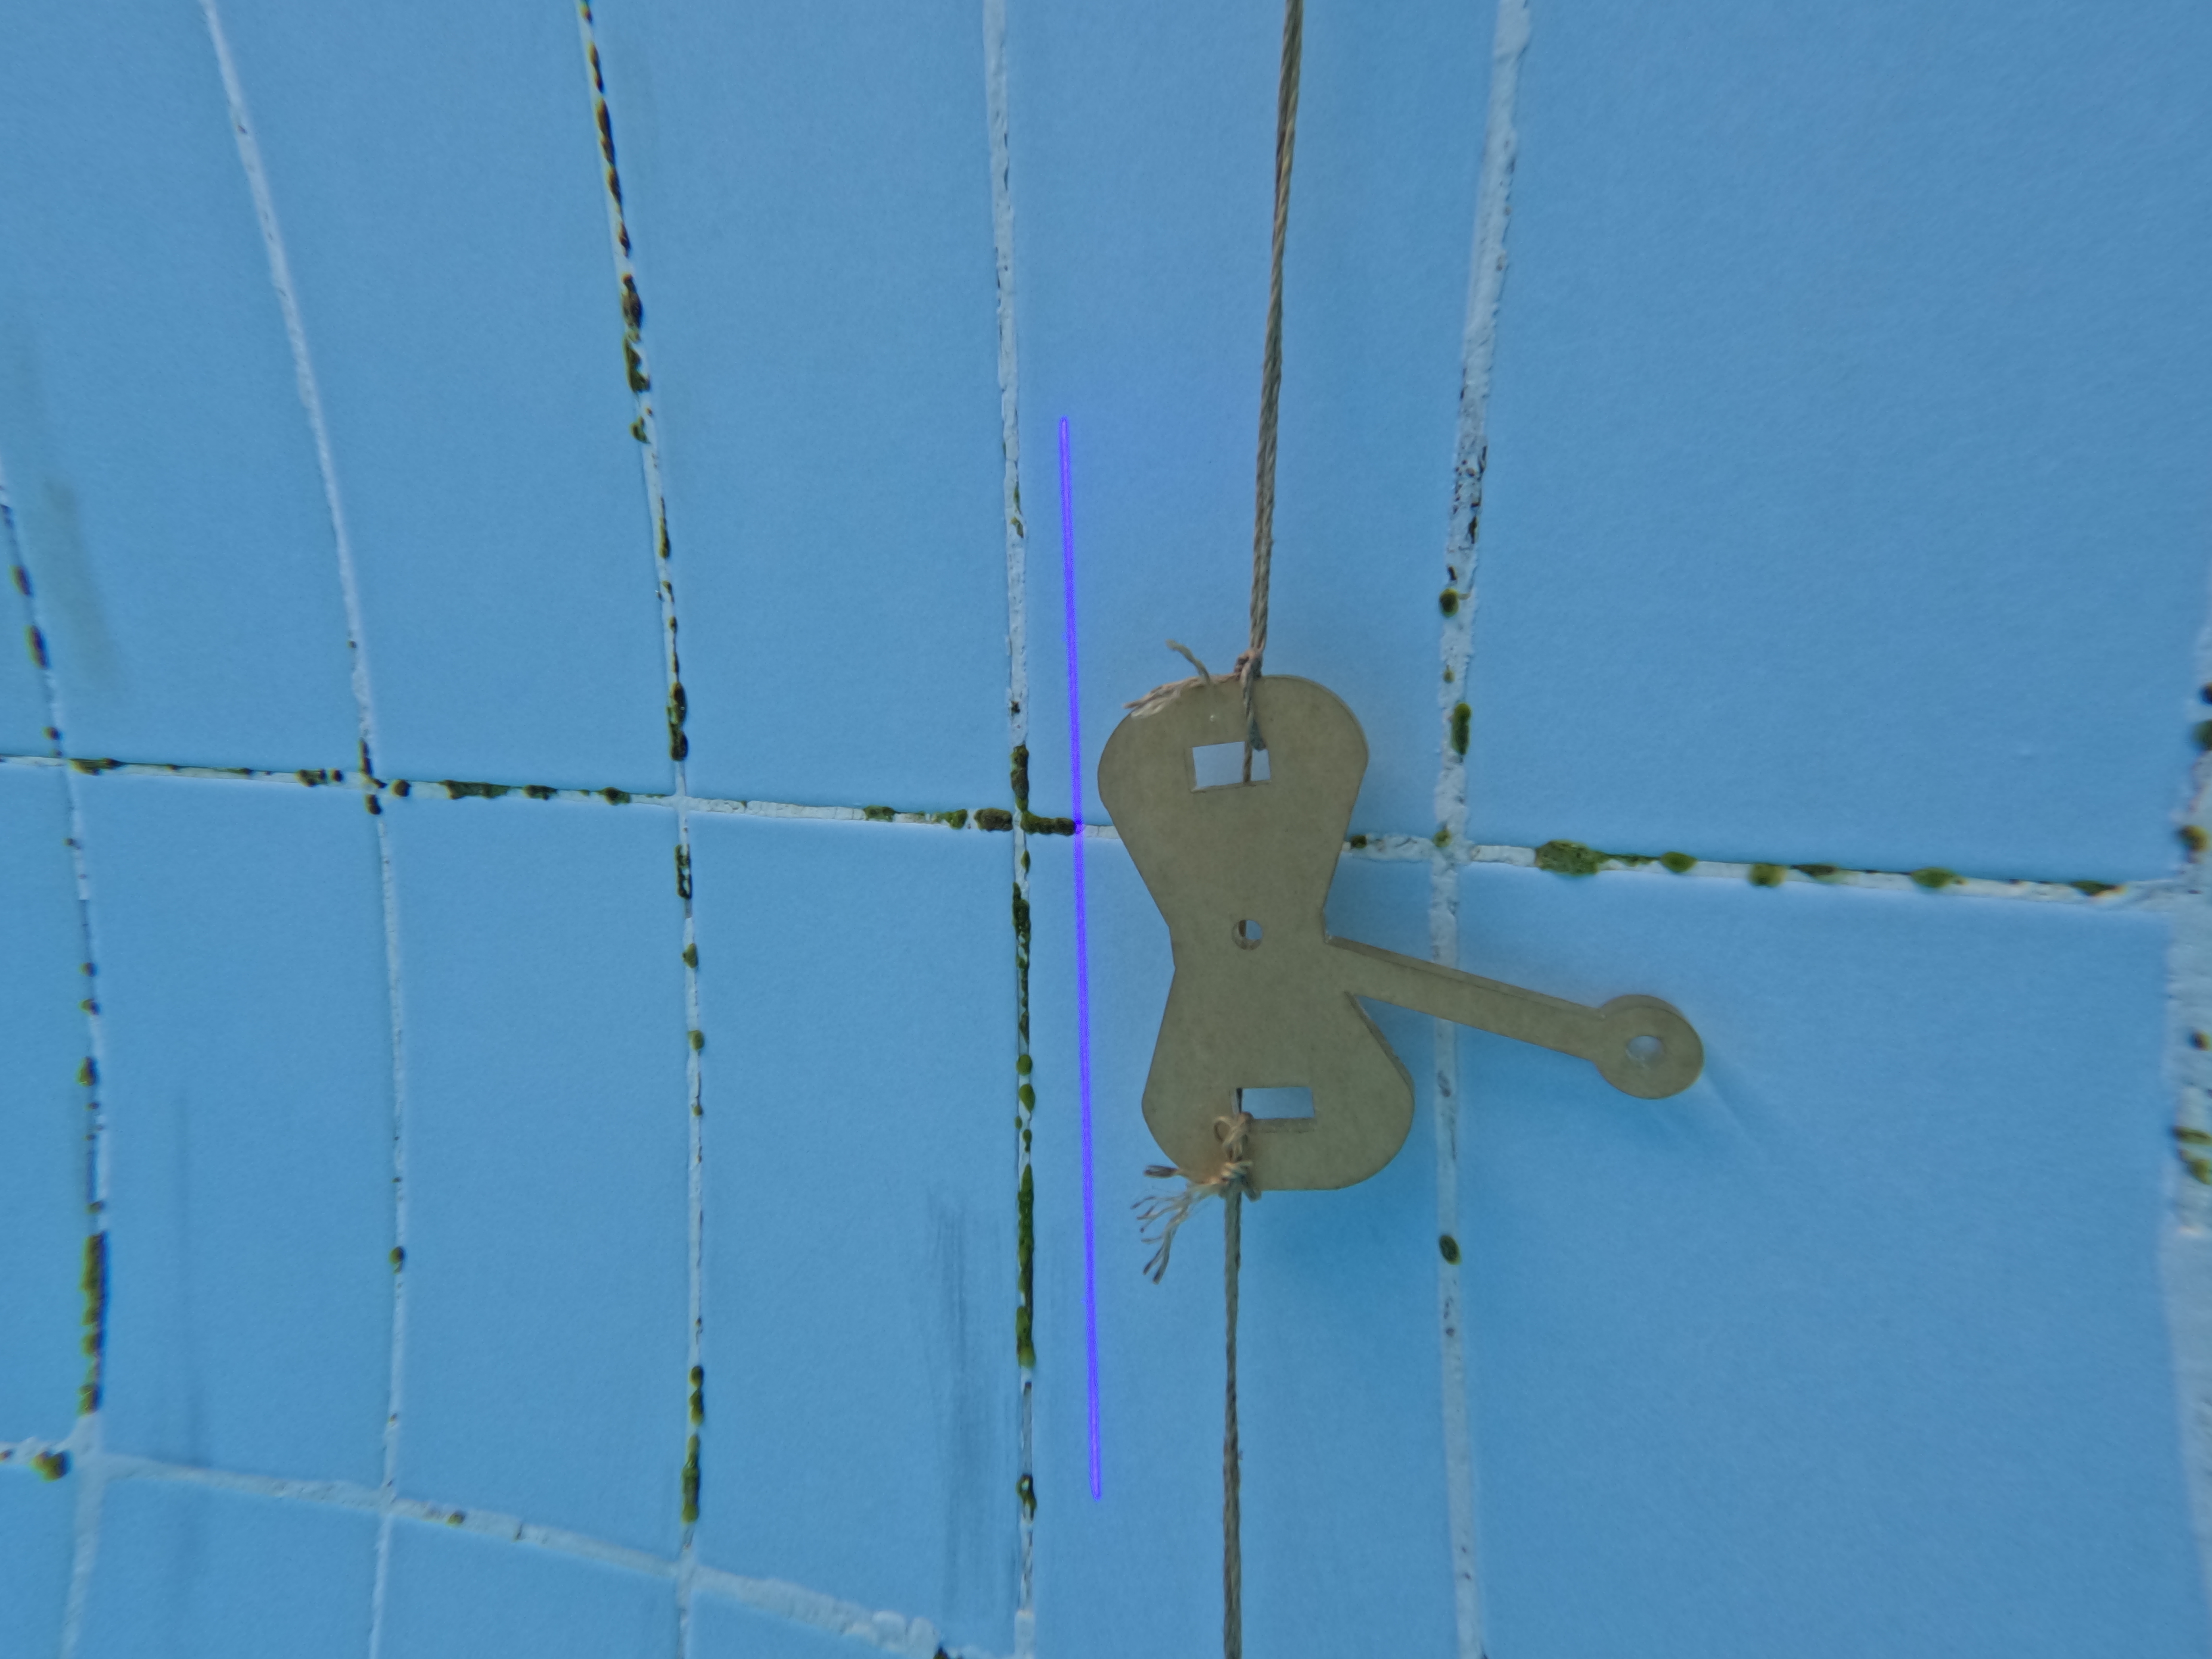

Supplement: Supplementary file 2684 [file G0050982.pdf › Level_2_2/G0050982.pdf]

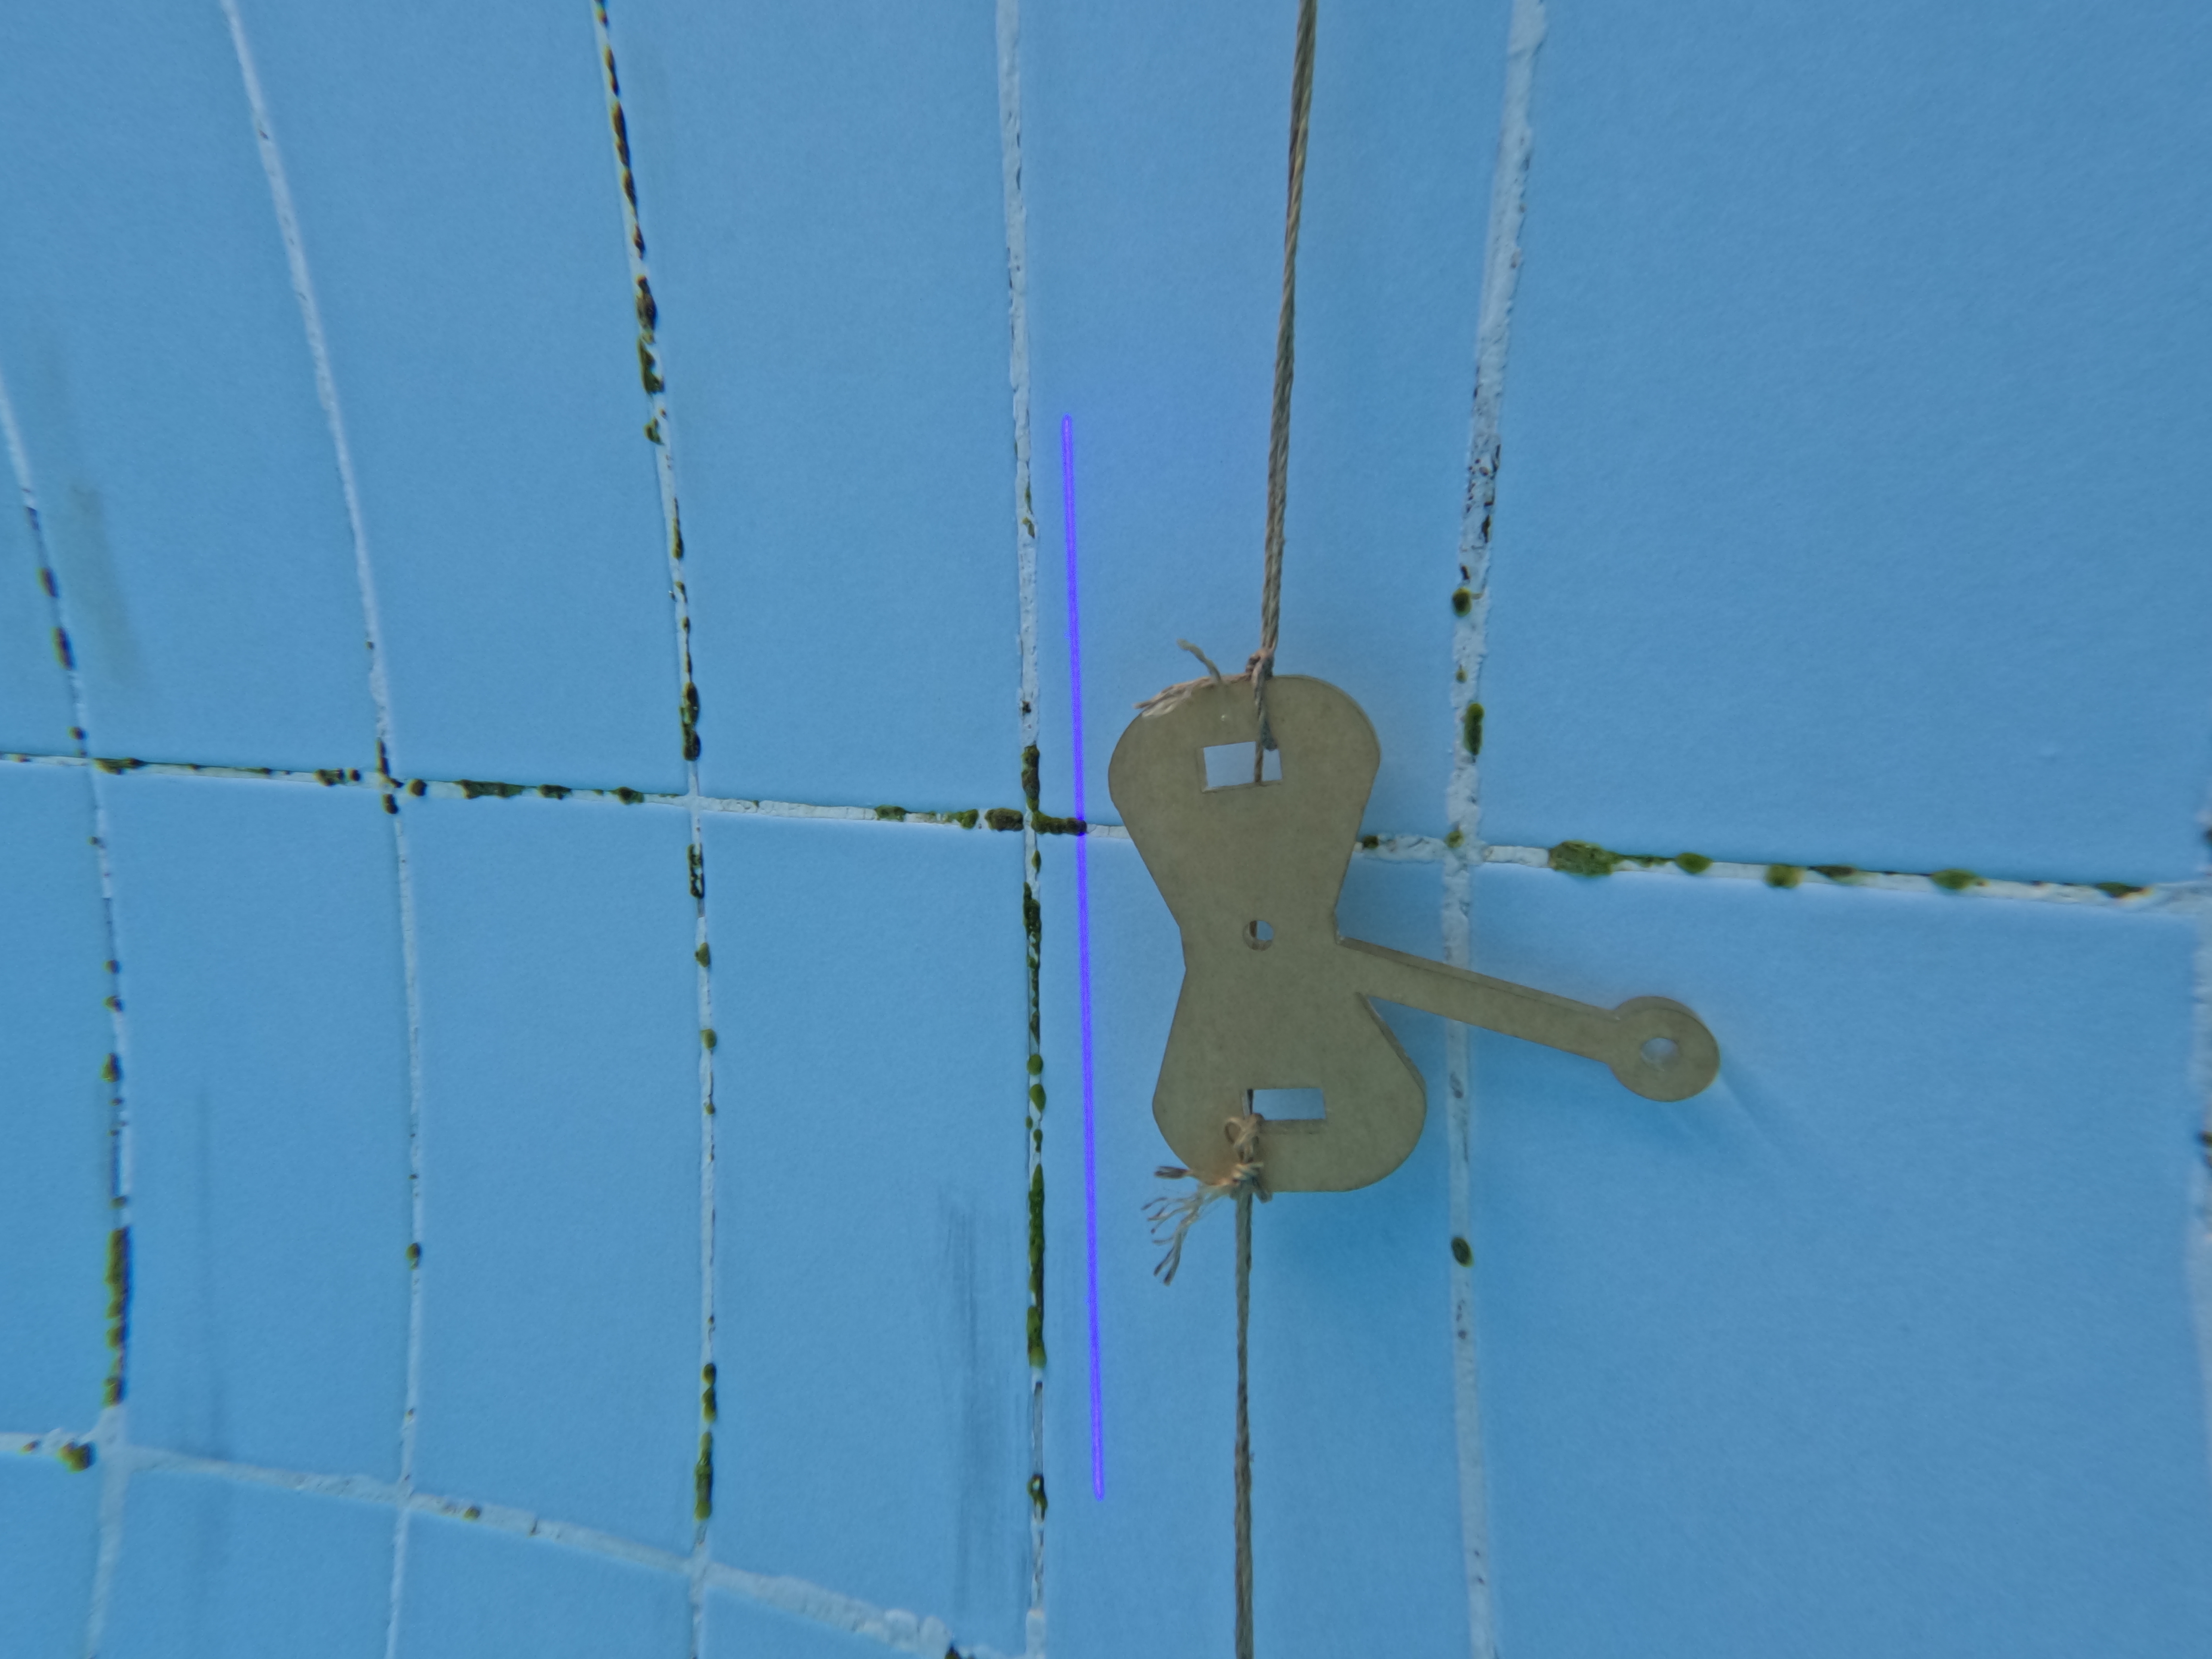

Supplement: Supplementary file 2685 [file G0050983.pdf › Level_2_2/G0050983.pdf]

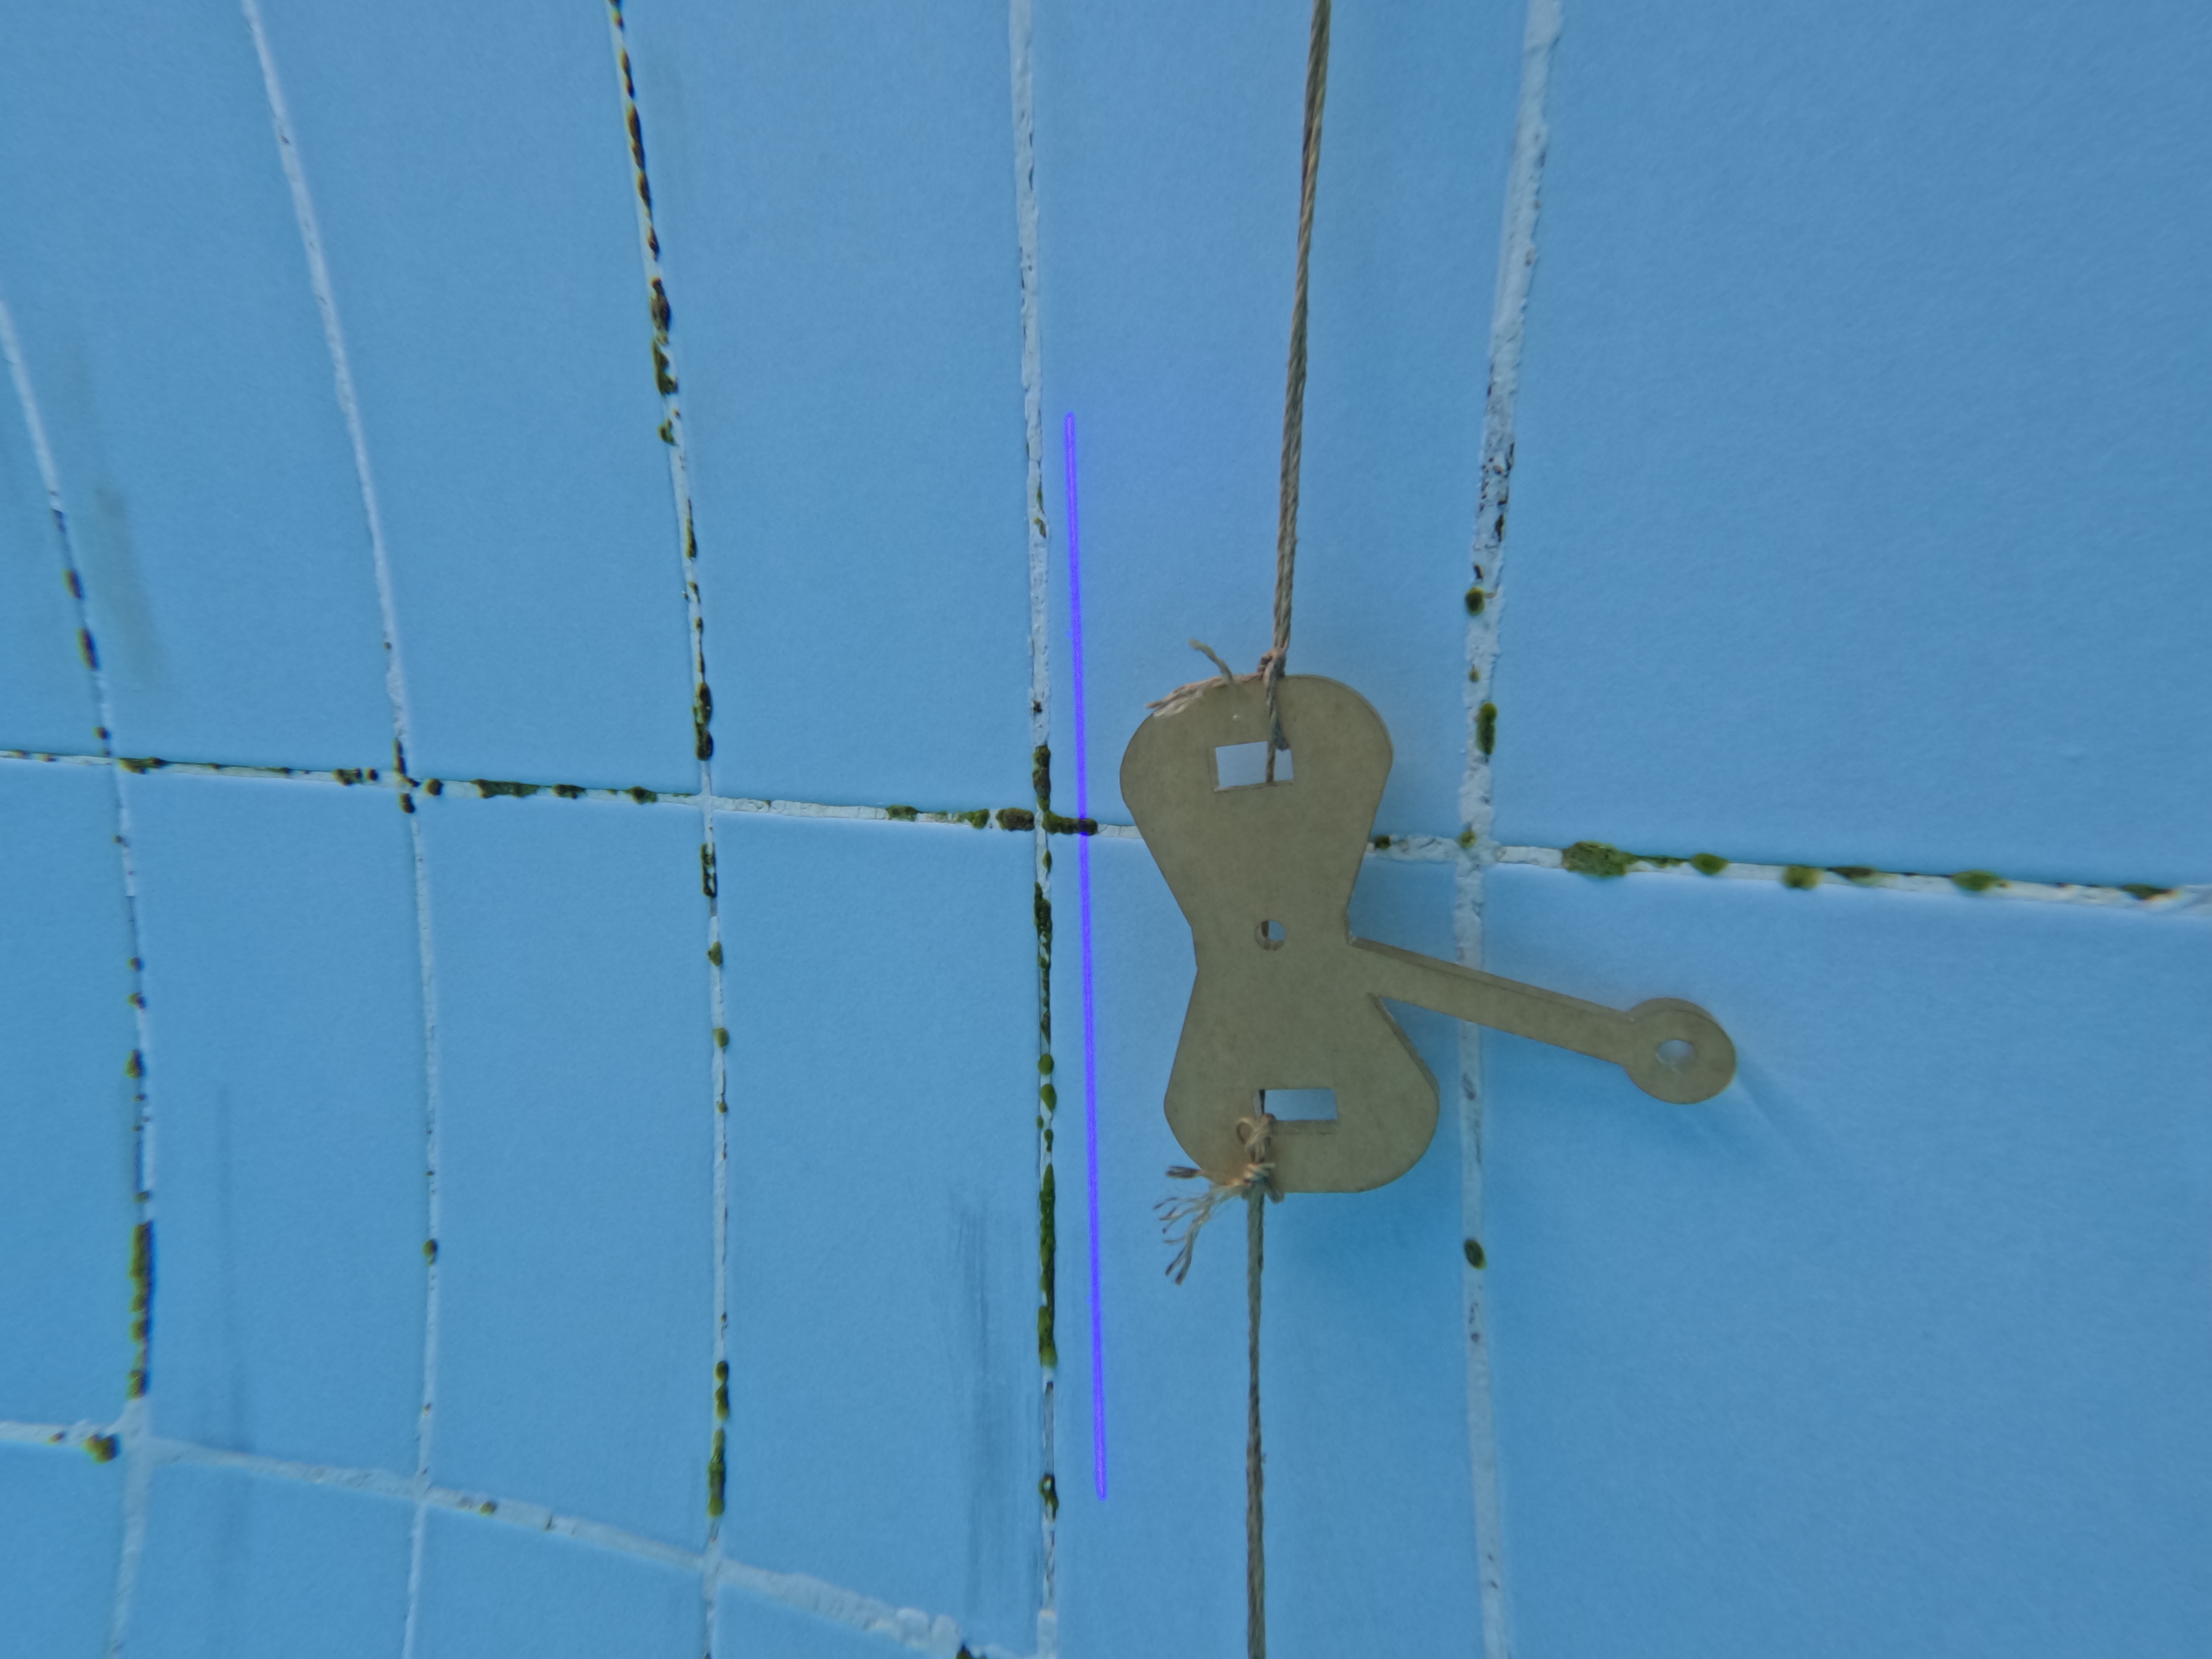

Supplement: Supplementary file 2686 [file G0050984.pdf › Level_2_2/G0050984.pdf]

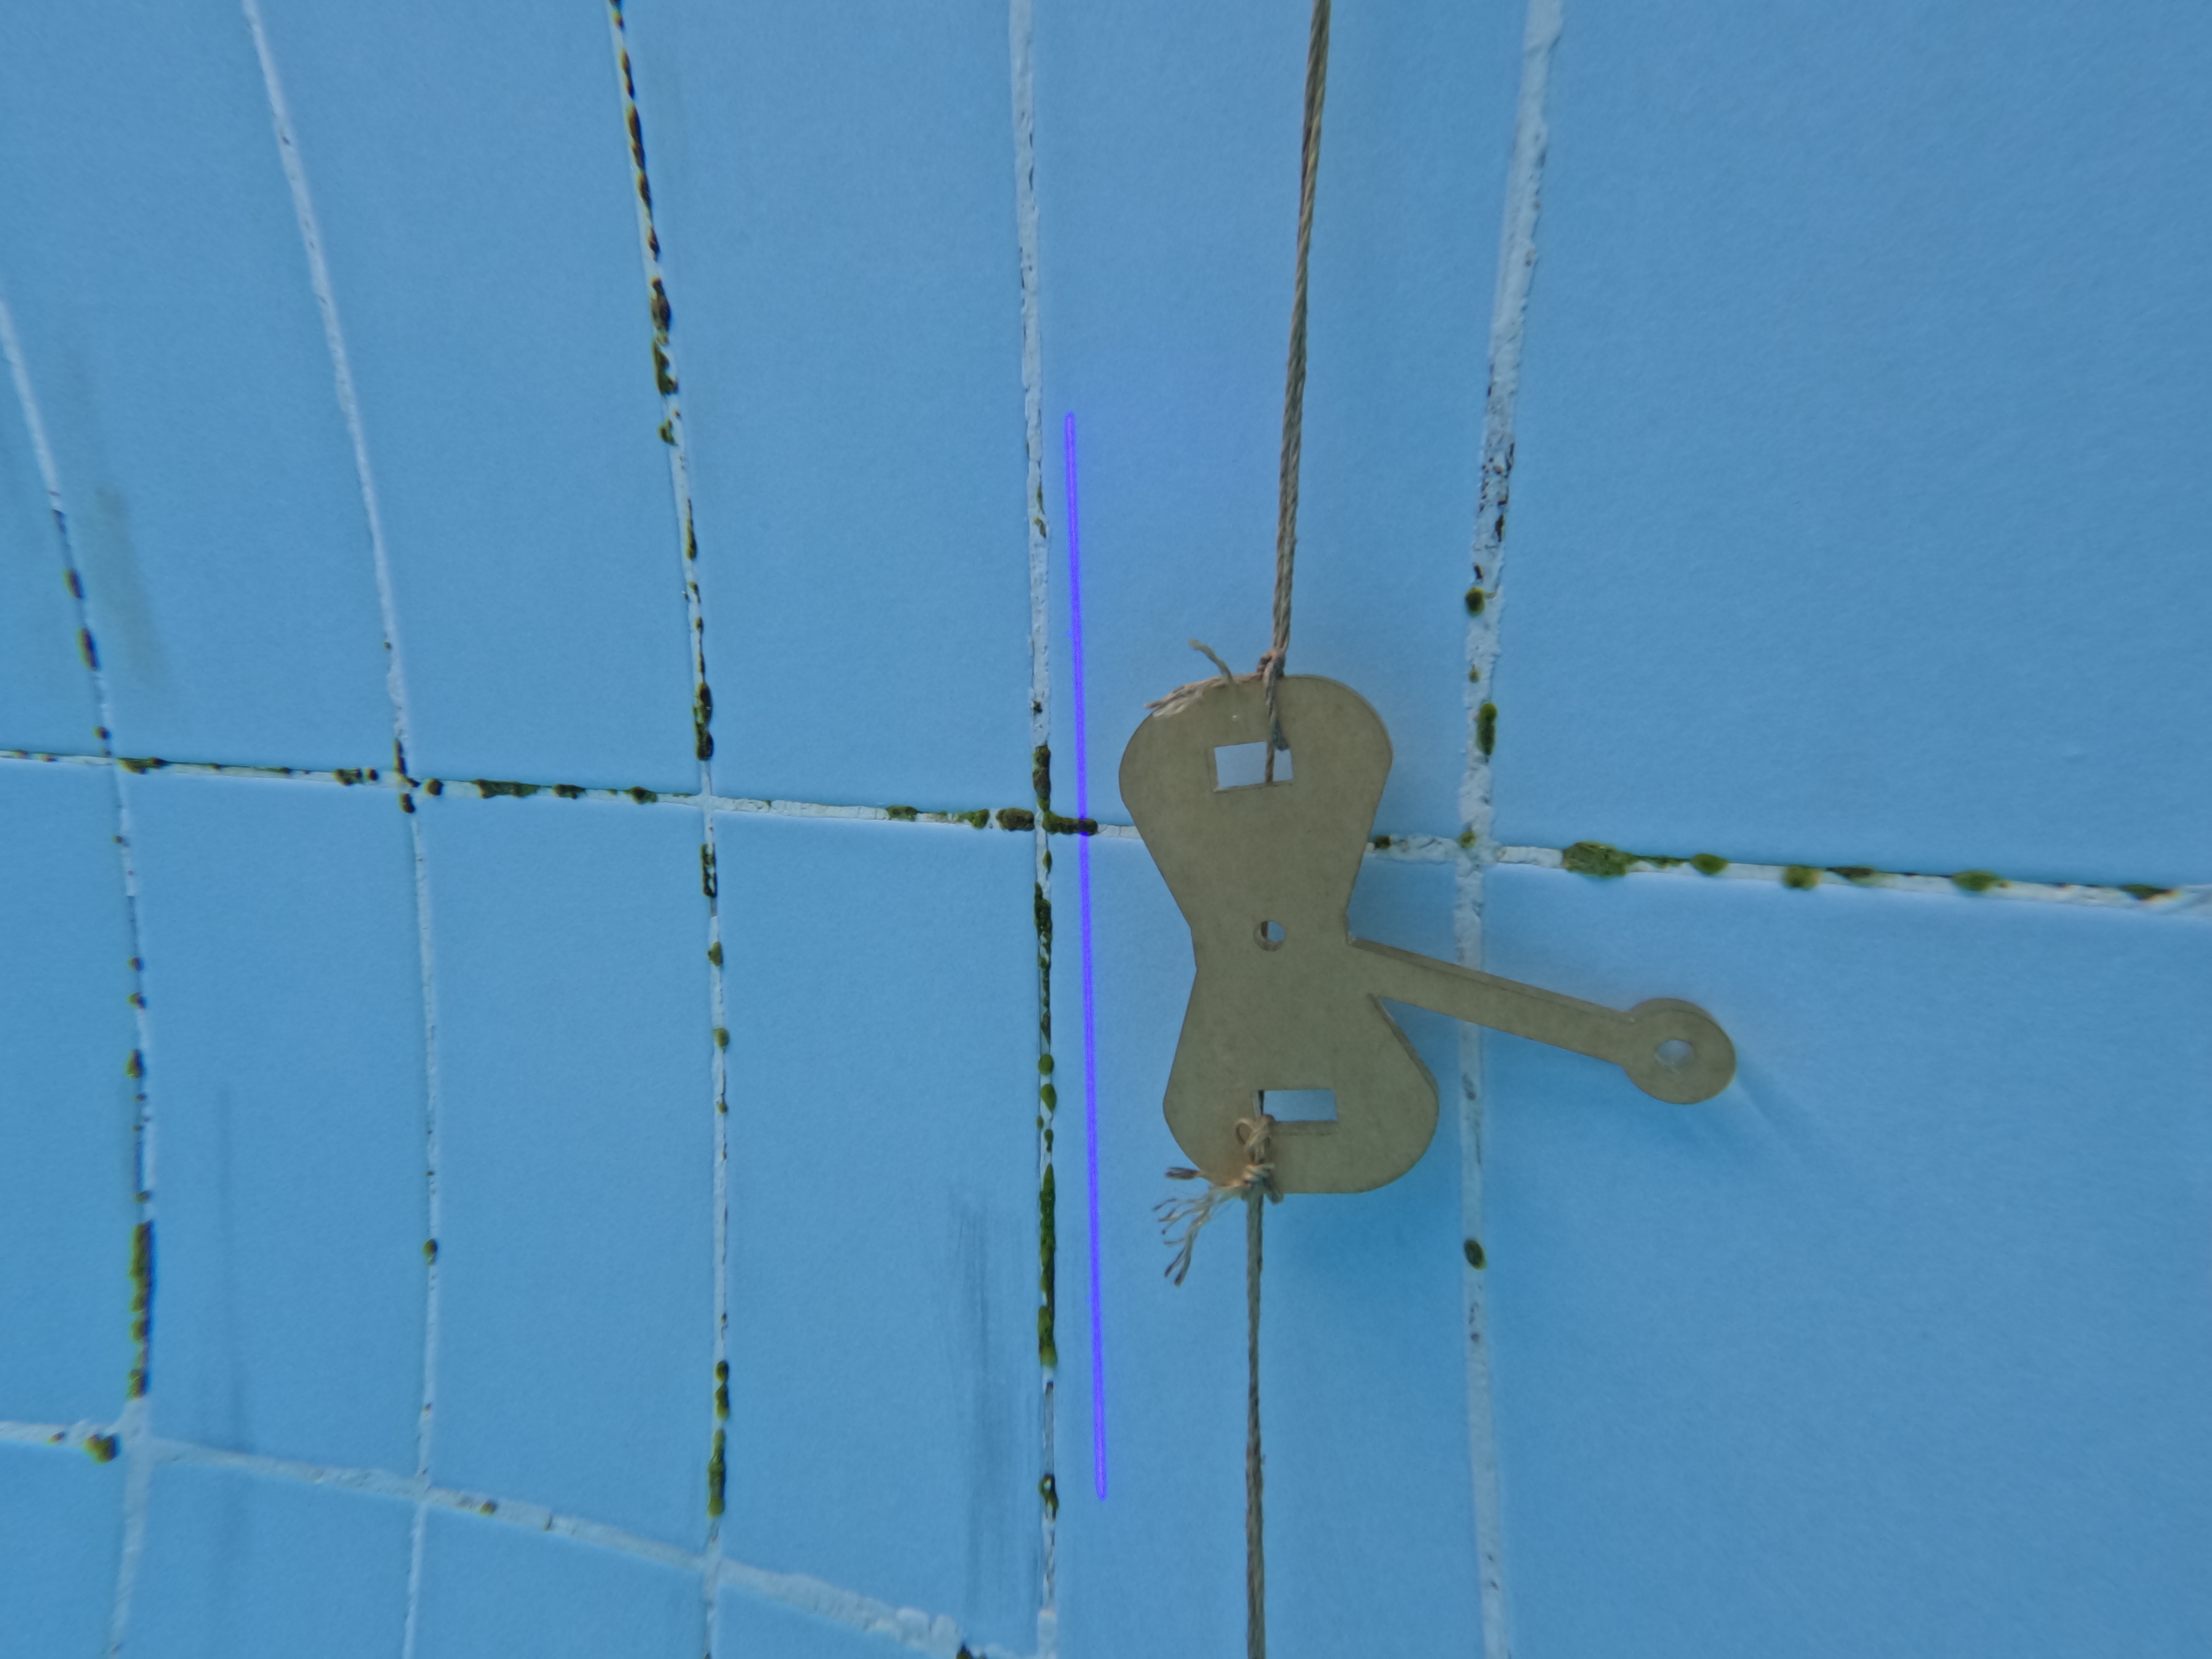

Supplement: Supplementary file 2687 [file G0050985.pdf › Level_2_2/G0050985.pdf]

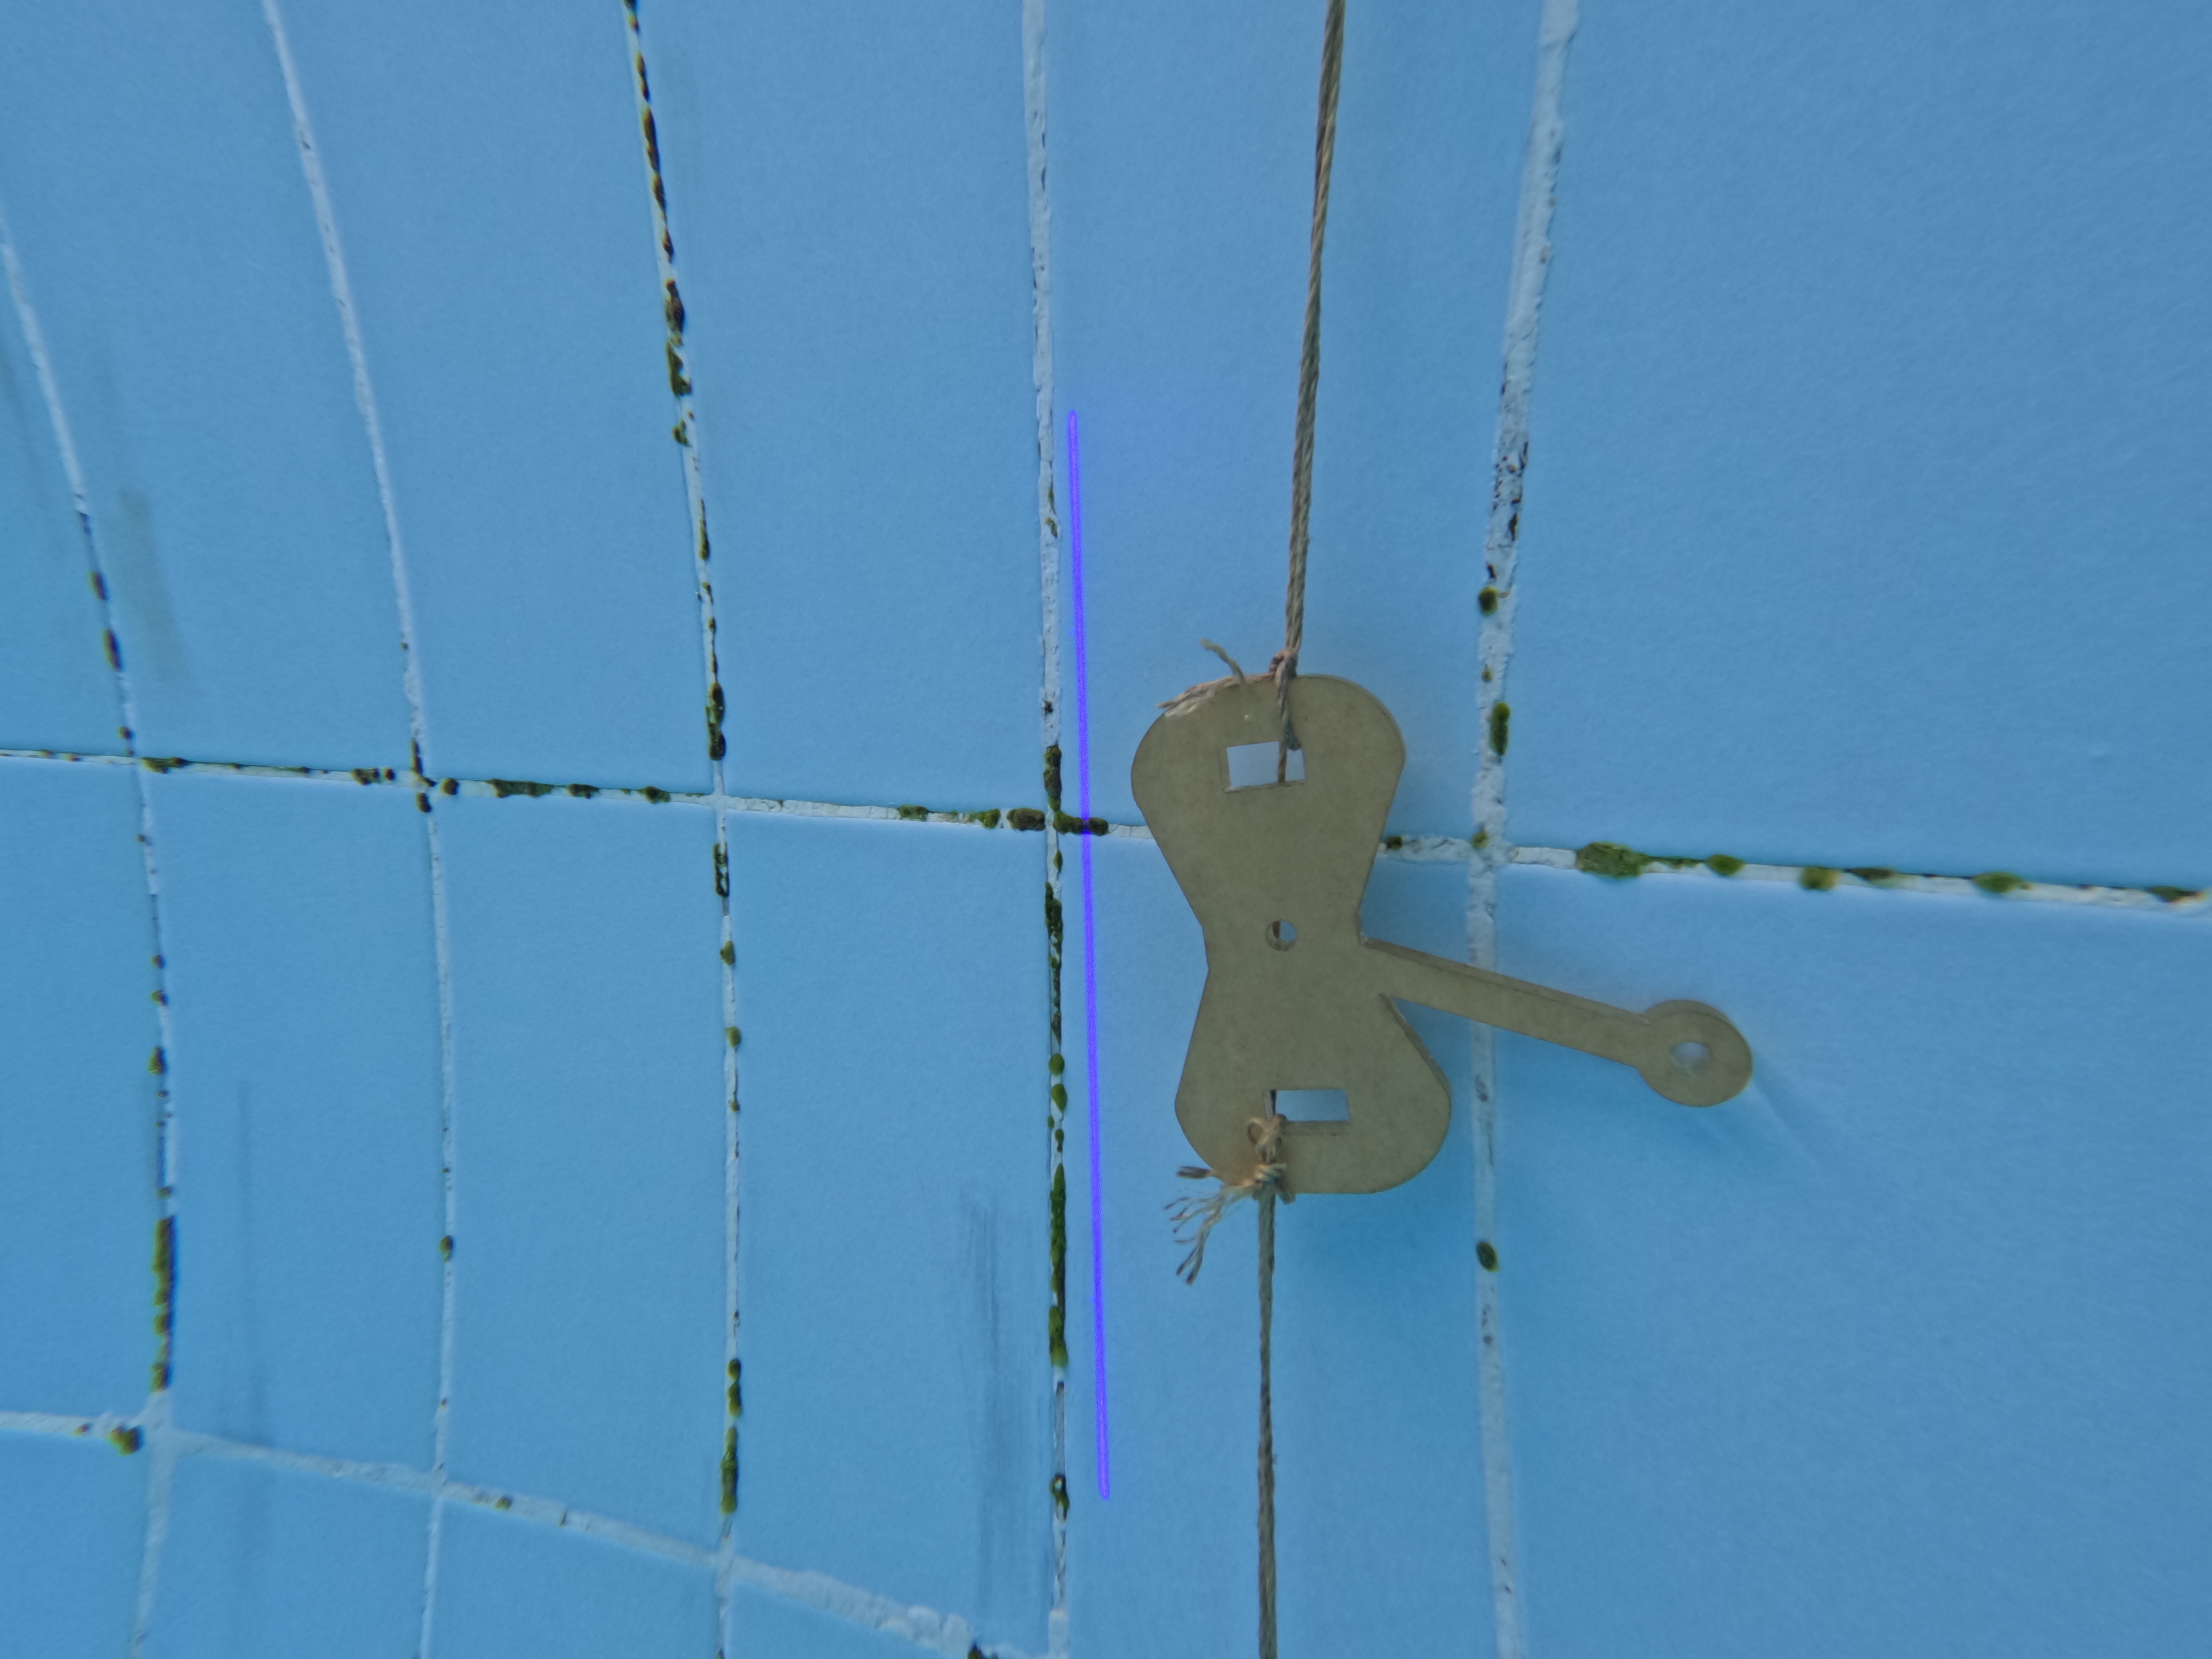

Supplement: Supplementary file 2688 [file G0050986.pdf › Level_2_2/G0050986.pdf]

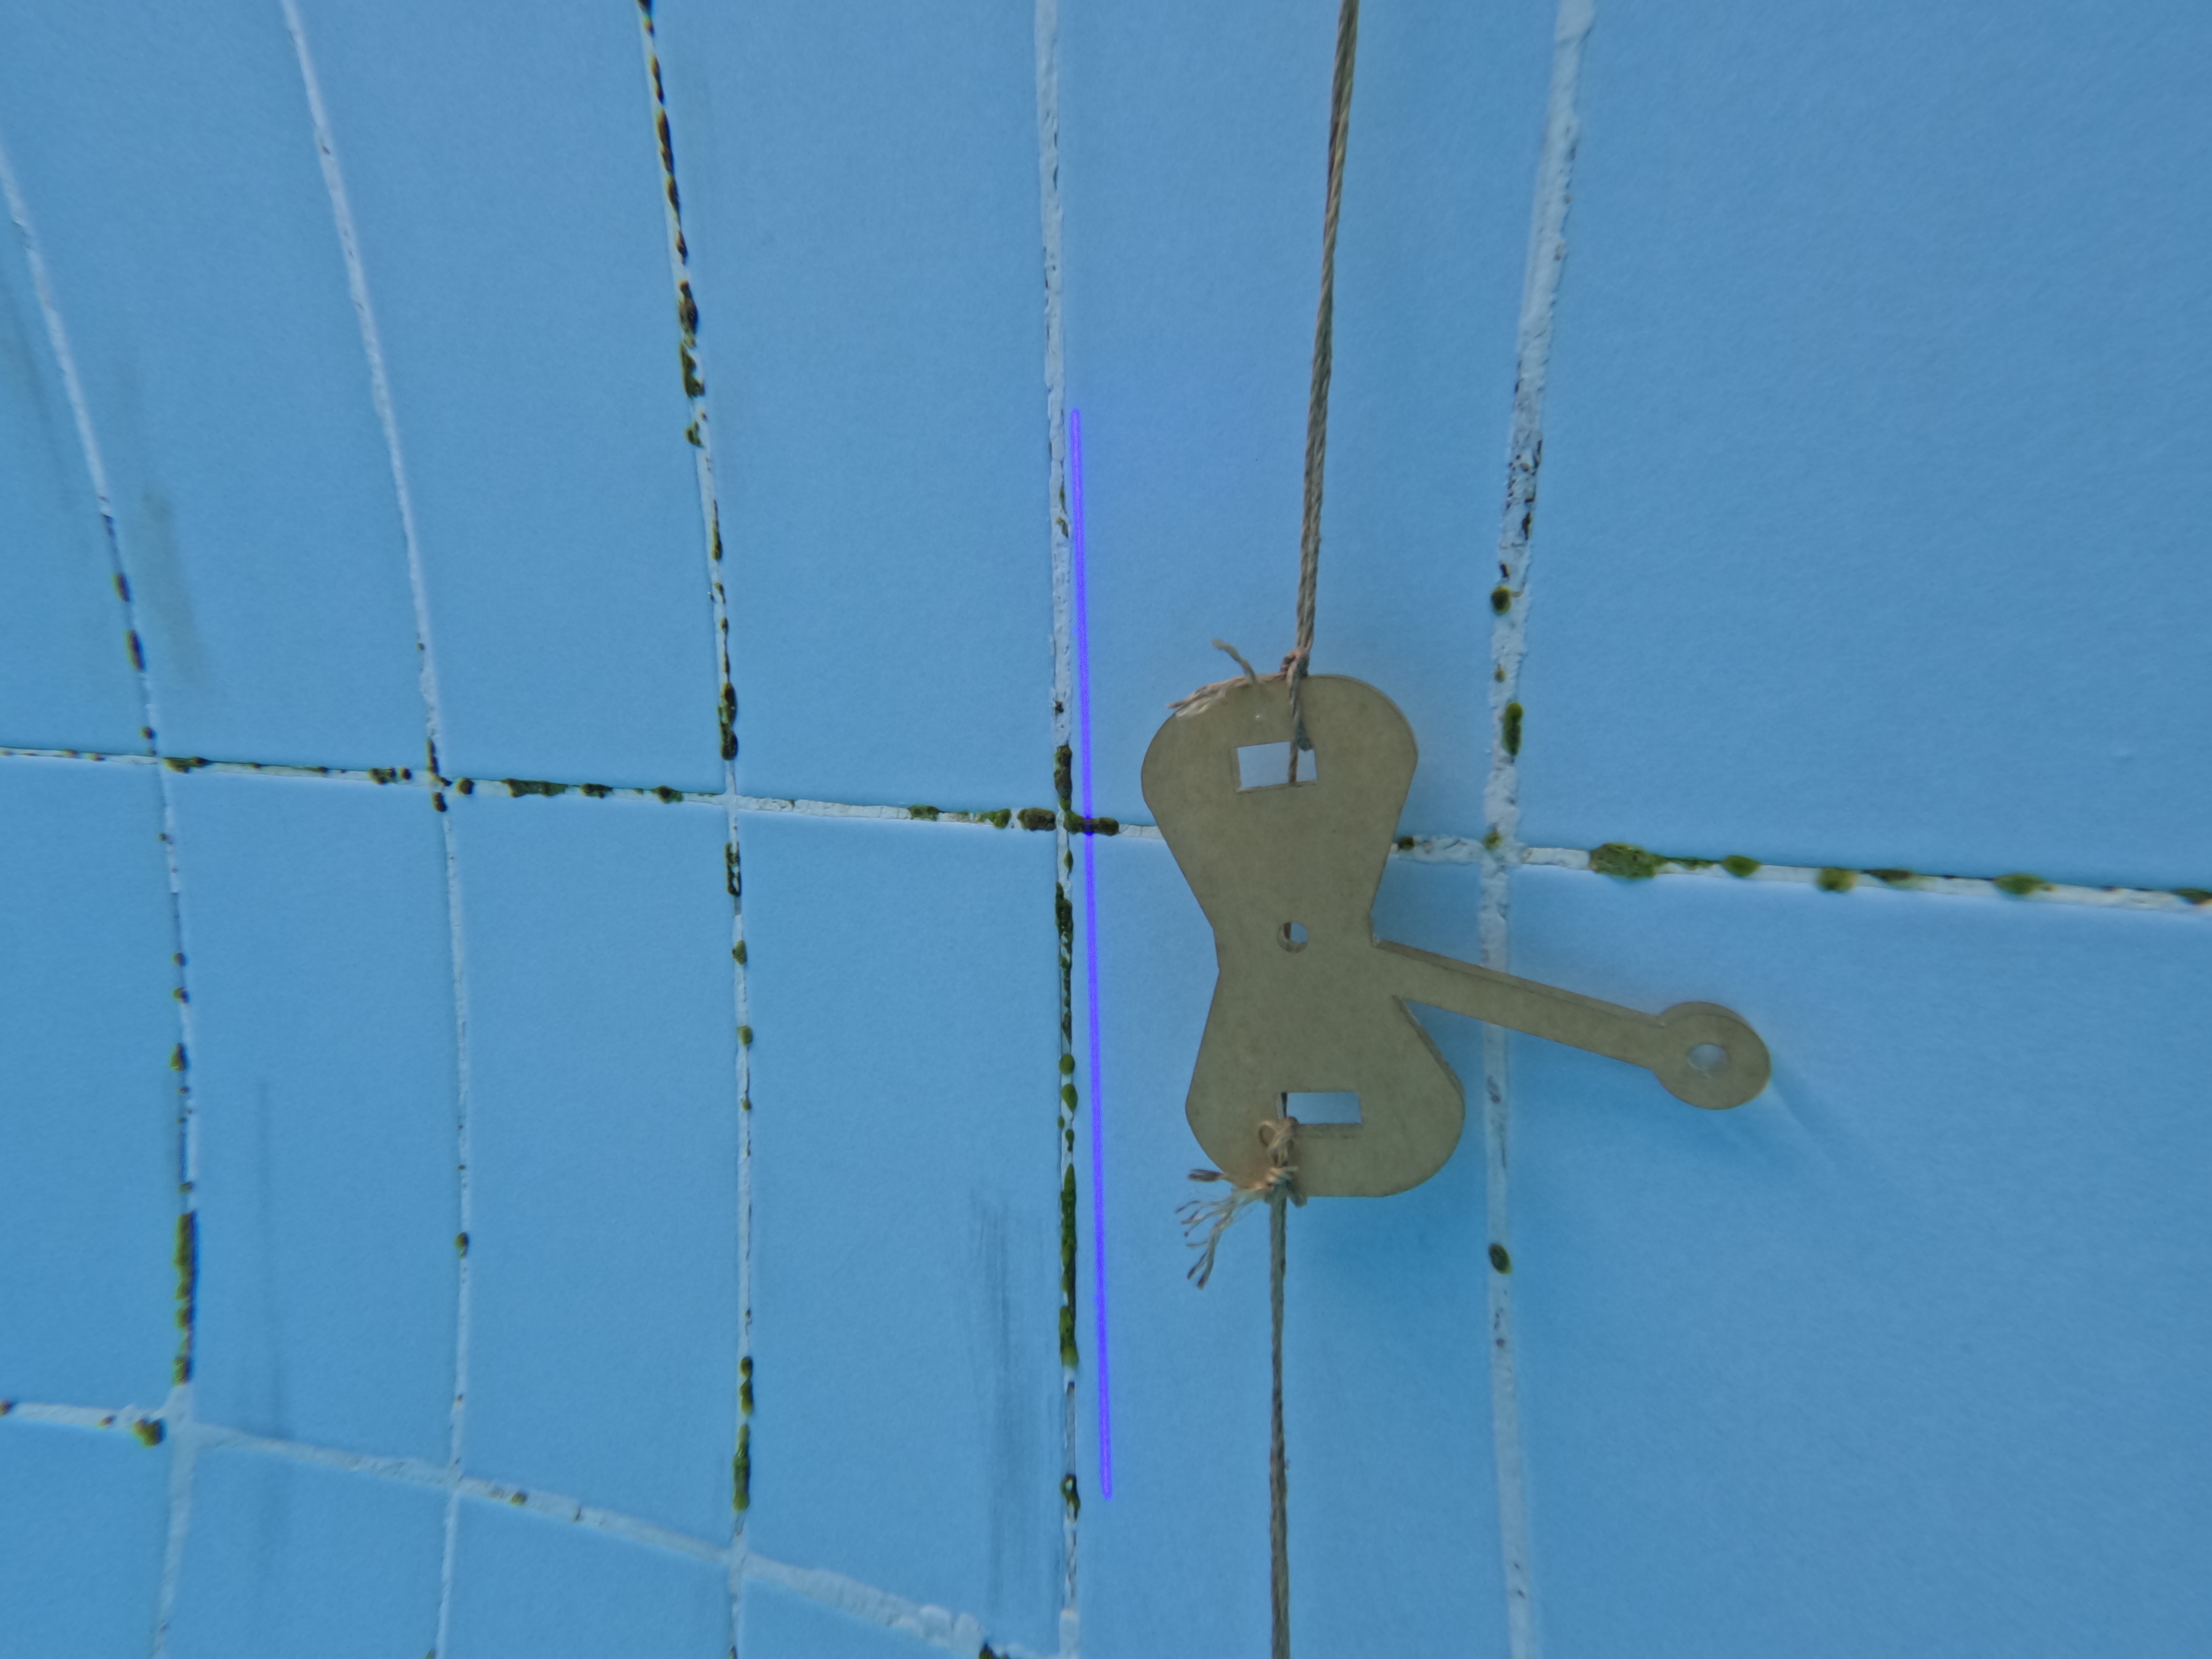

Supplement: Supplementary file 2689 [file G0050987.pdf › Level_2_2/G0050987.pdf]

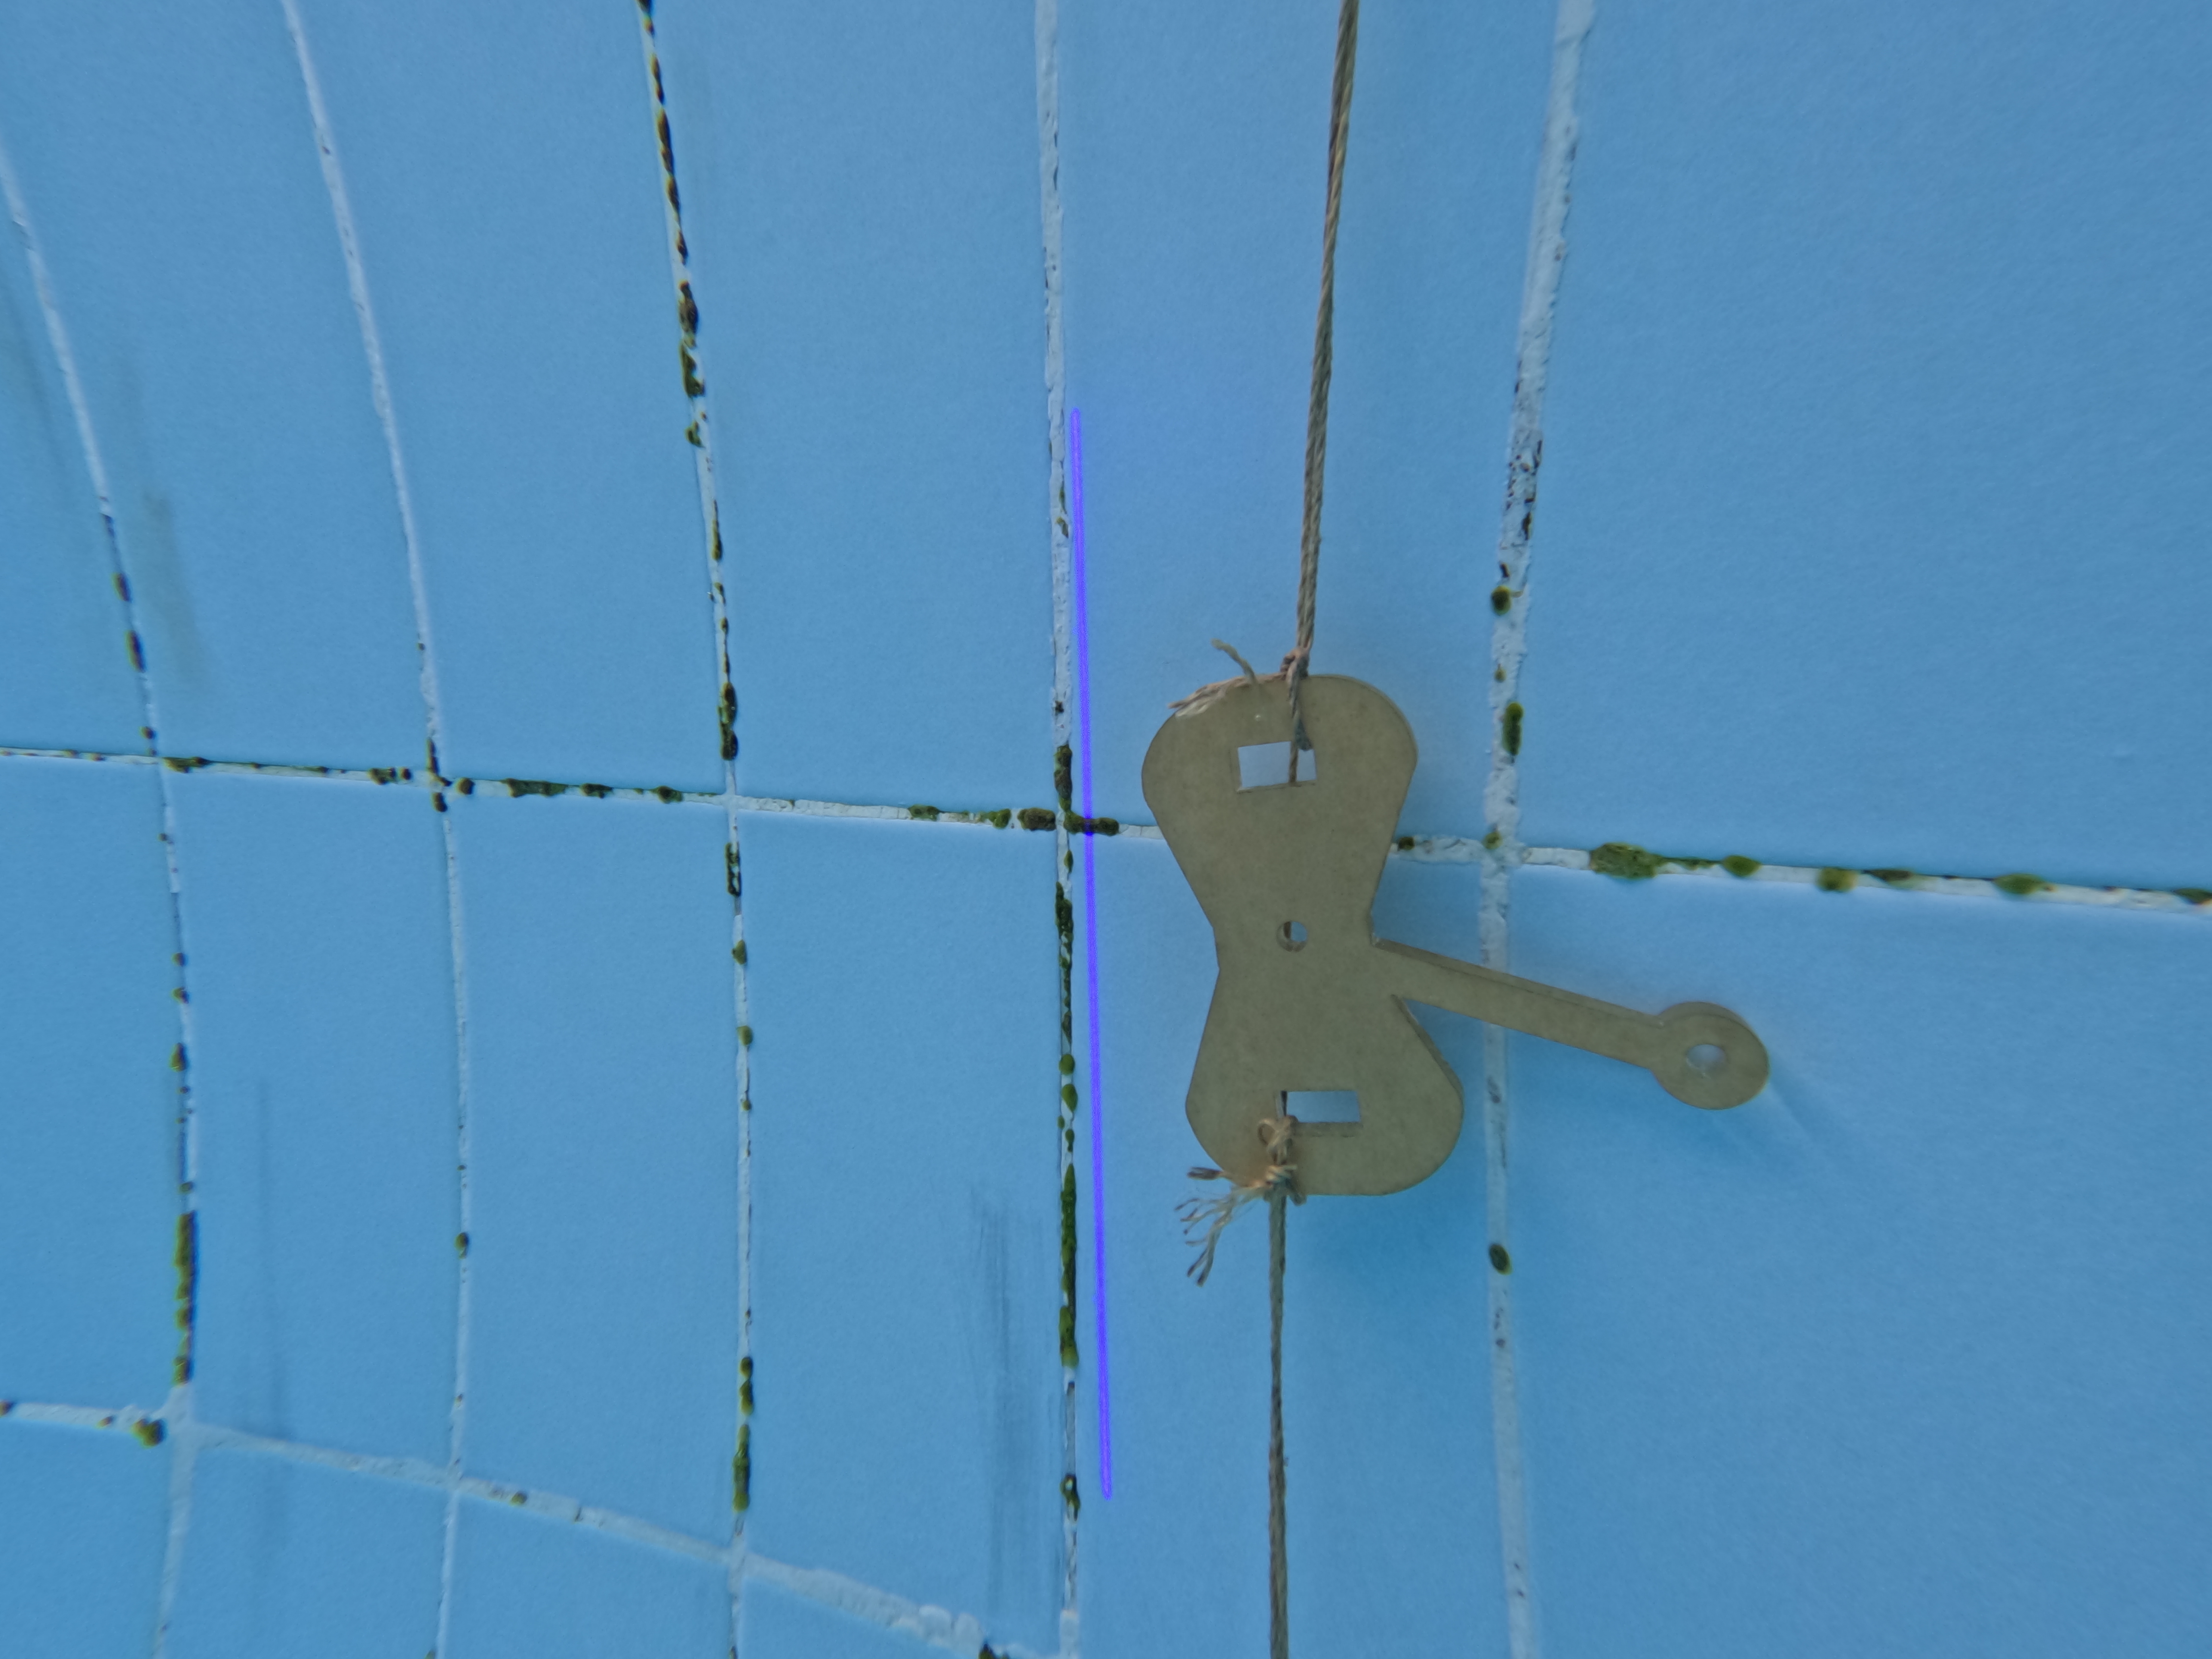

Supplement: Supplementary file 2690 [file G0050988.pdf › Level_2_2/G0050988.pdf]
