# Supplementary figures and images for: 3D reconstruction of shallow sea environment using direct system calibration and faint laser line extraction (part 27 of 35)
Source: Research Square preprint supplement (doi:10.21203/rs.3.rs-5262658/v1), 2024-12-02

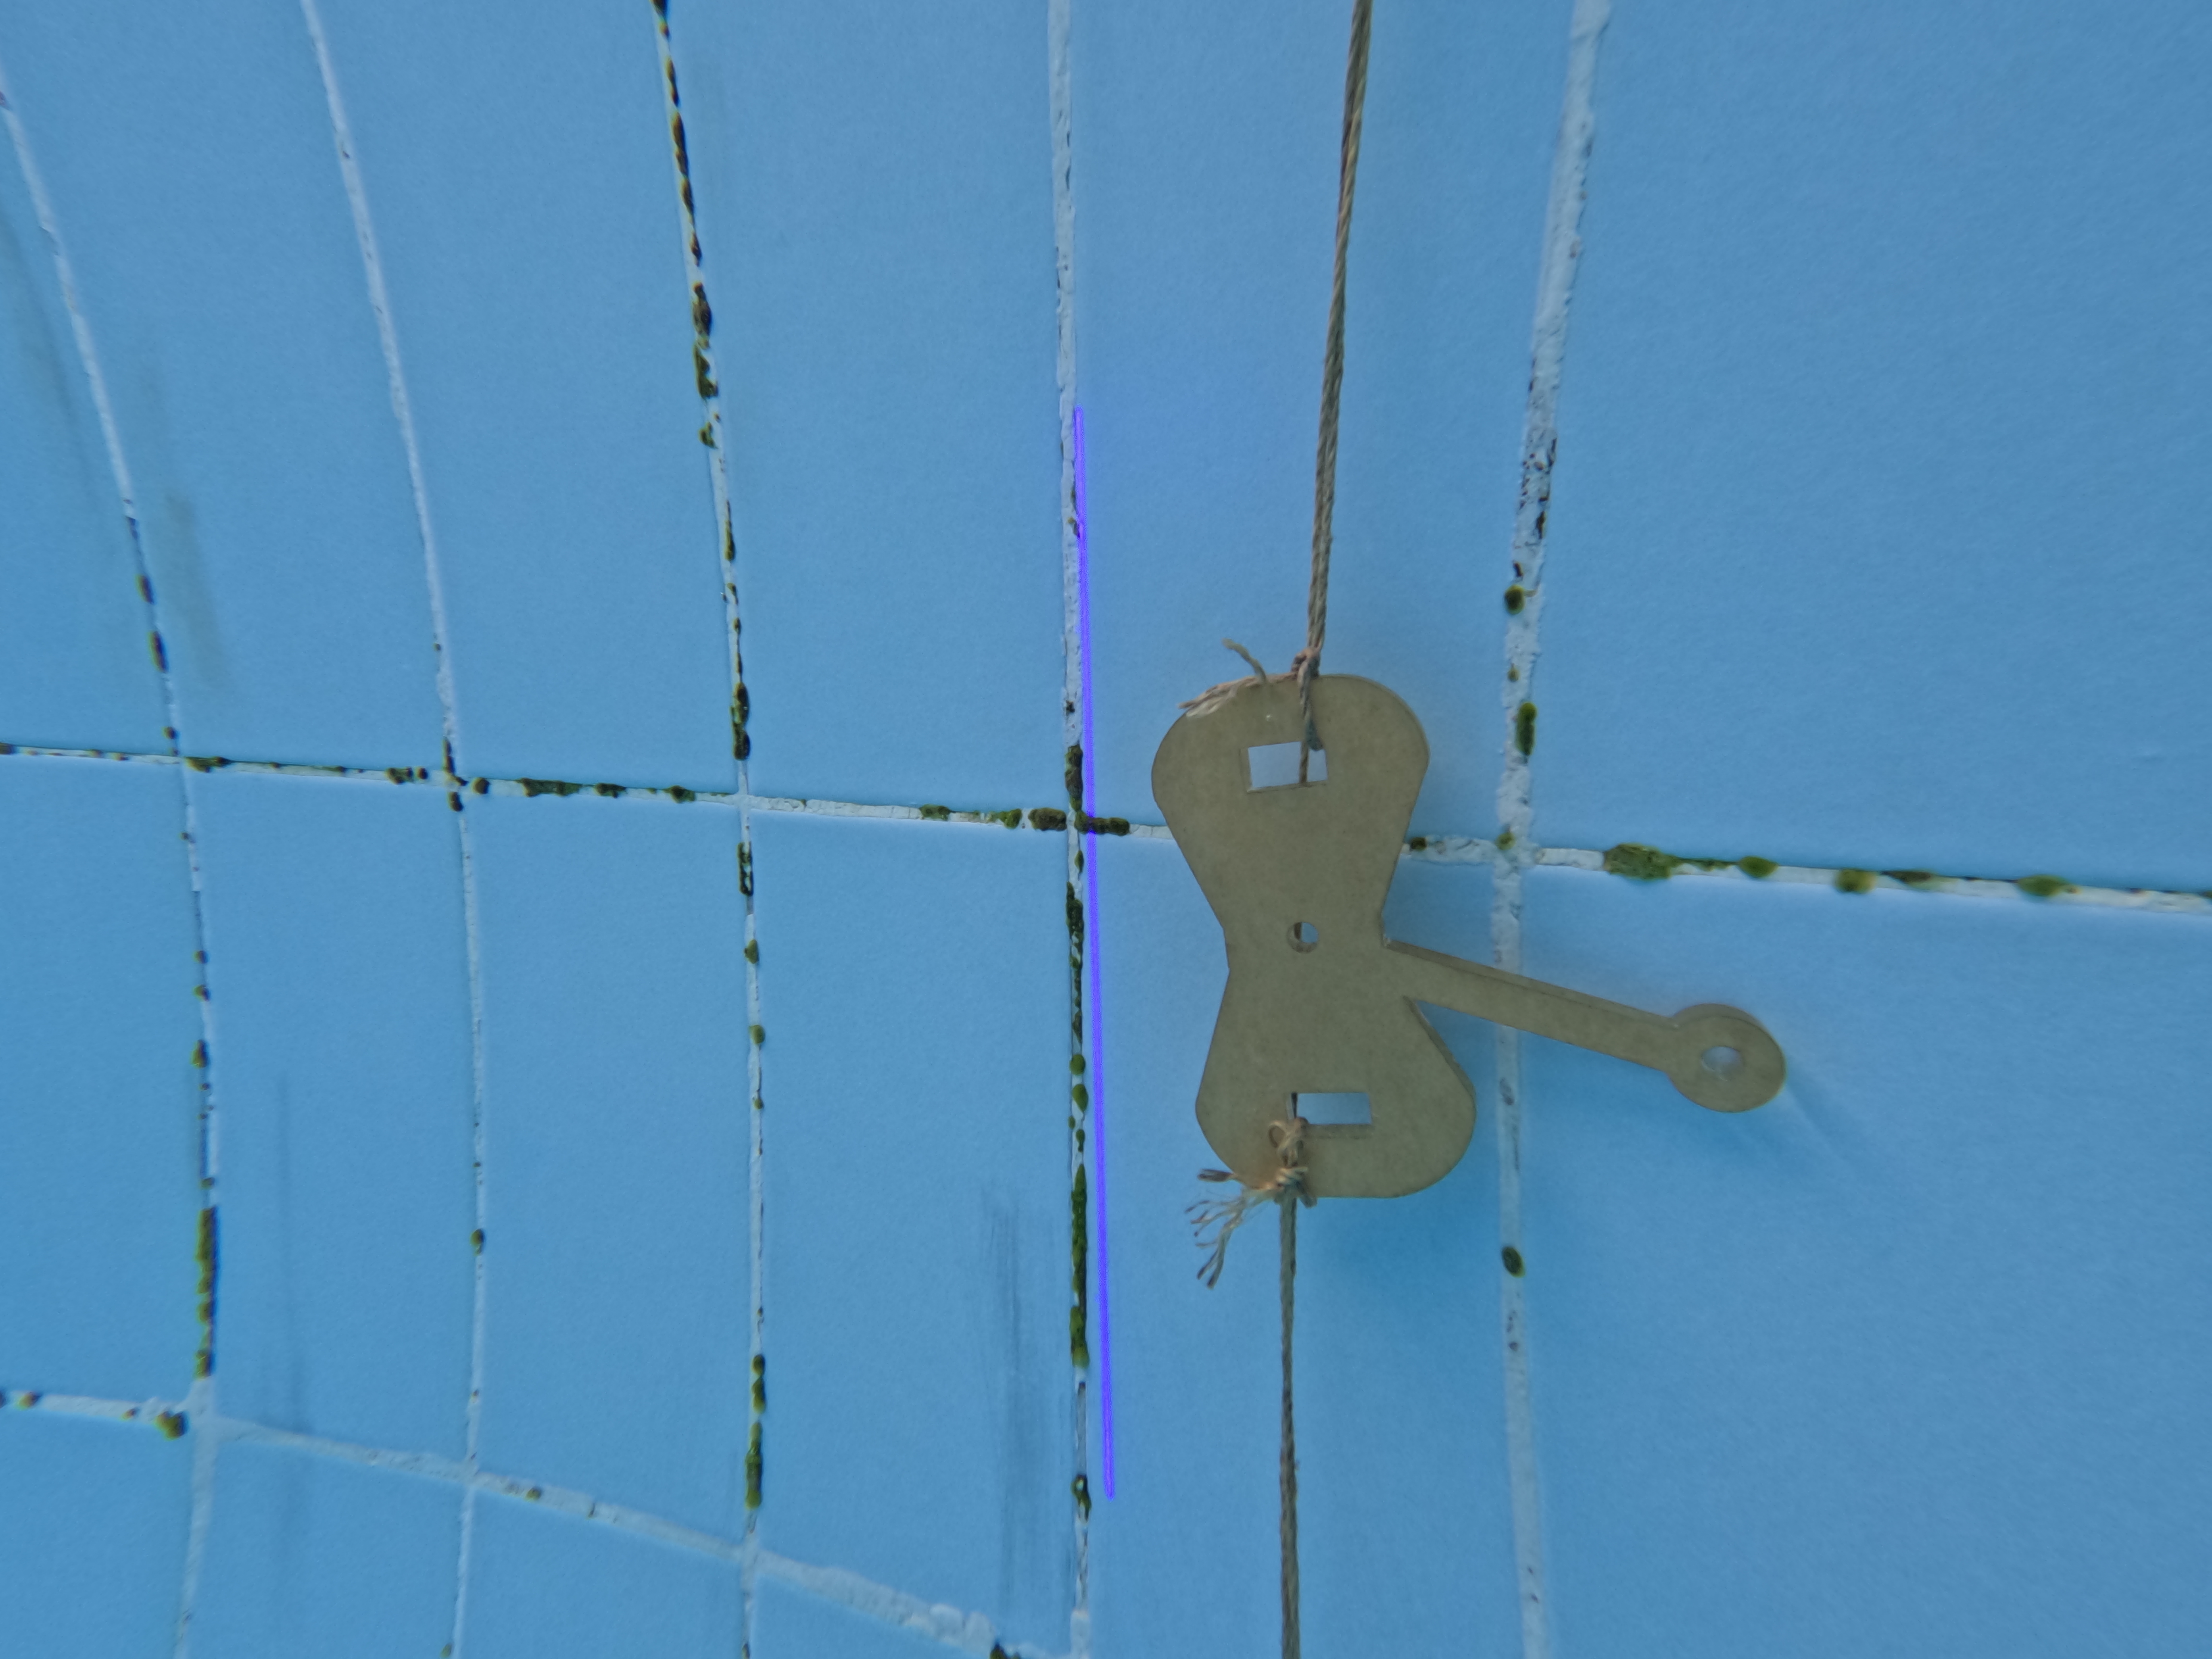

Supplement: Supplementary file 2691 [file G0050989.pdf › Level_2_2/G0050989.pdf]

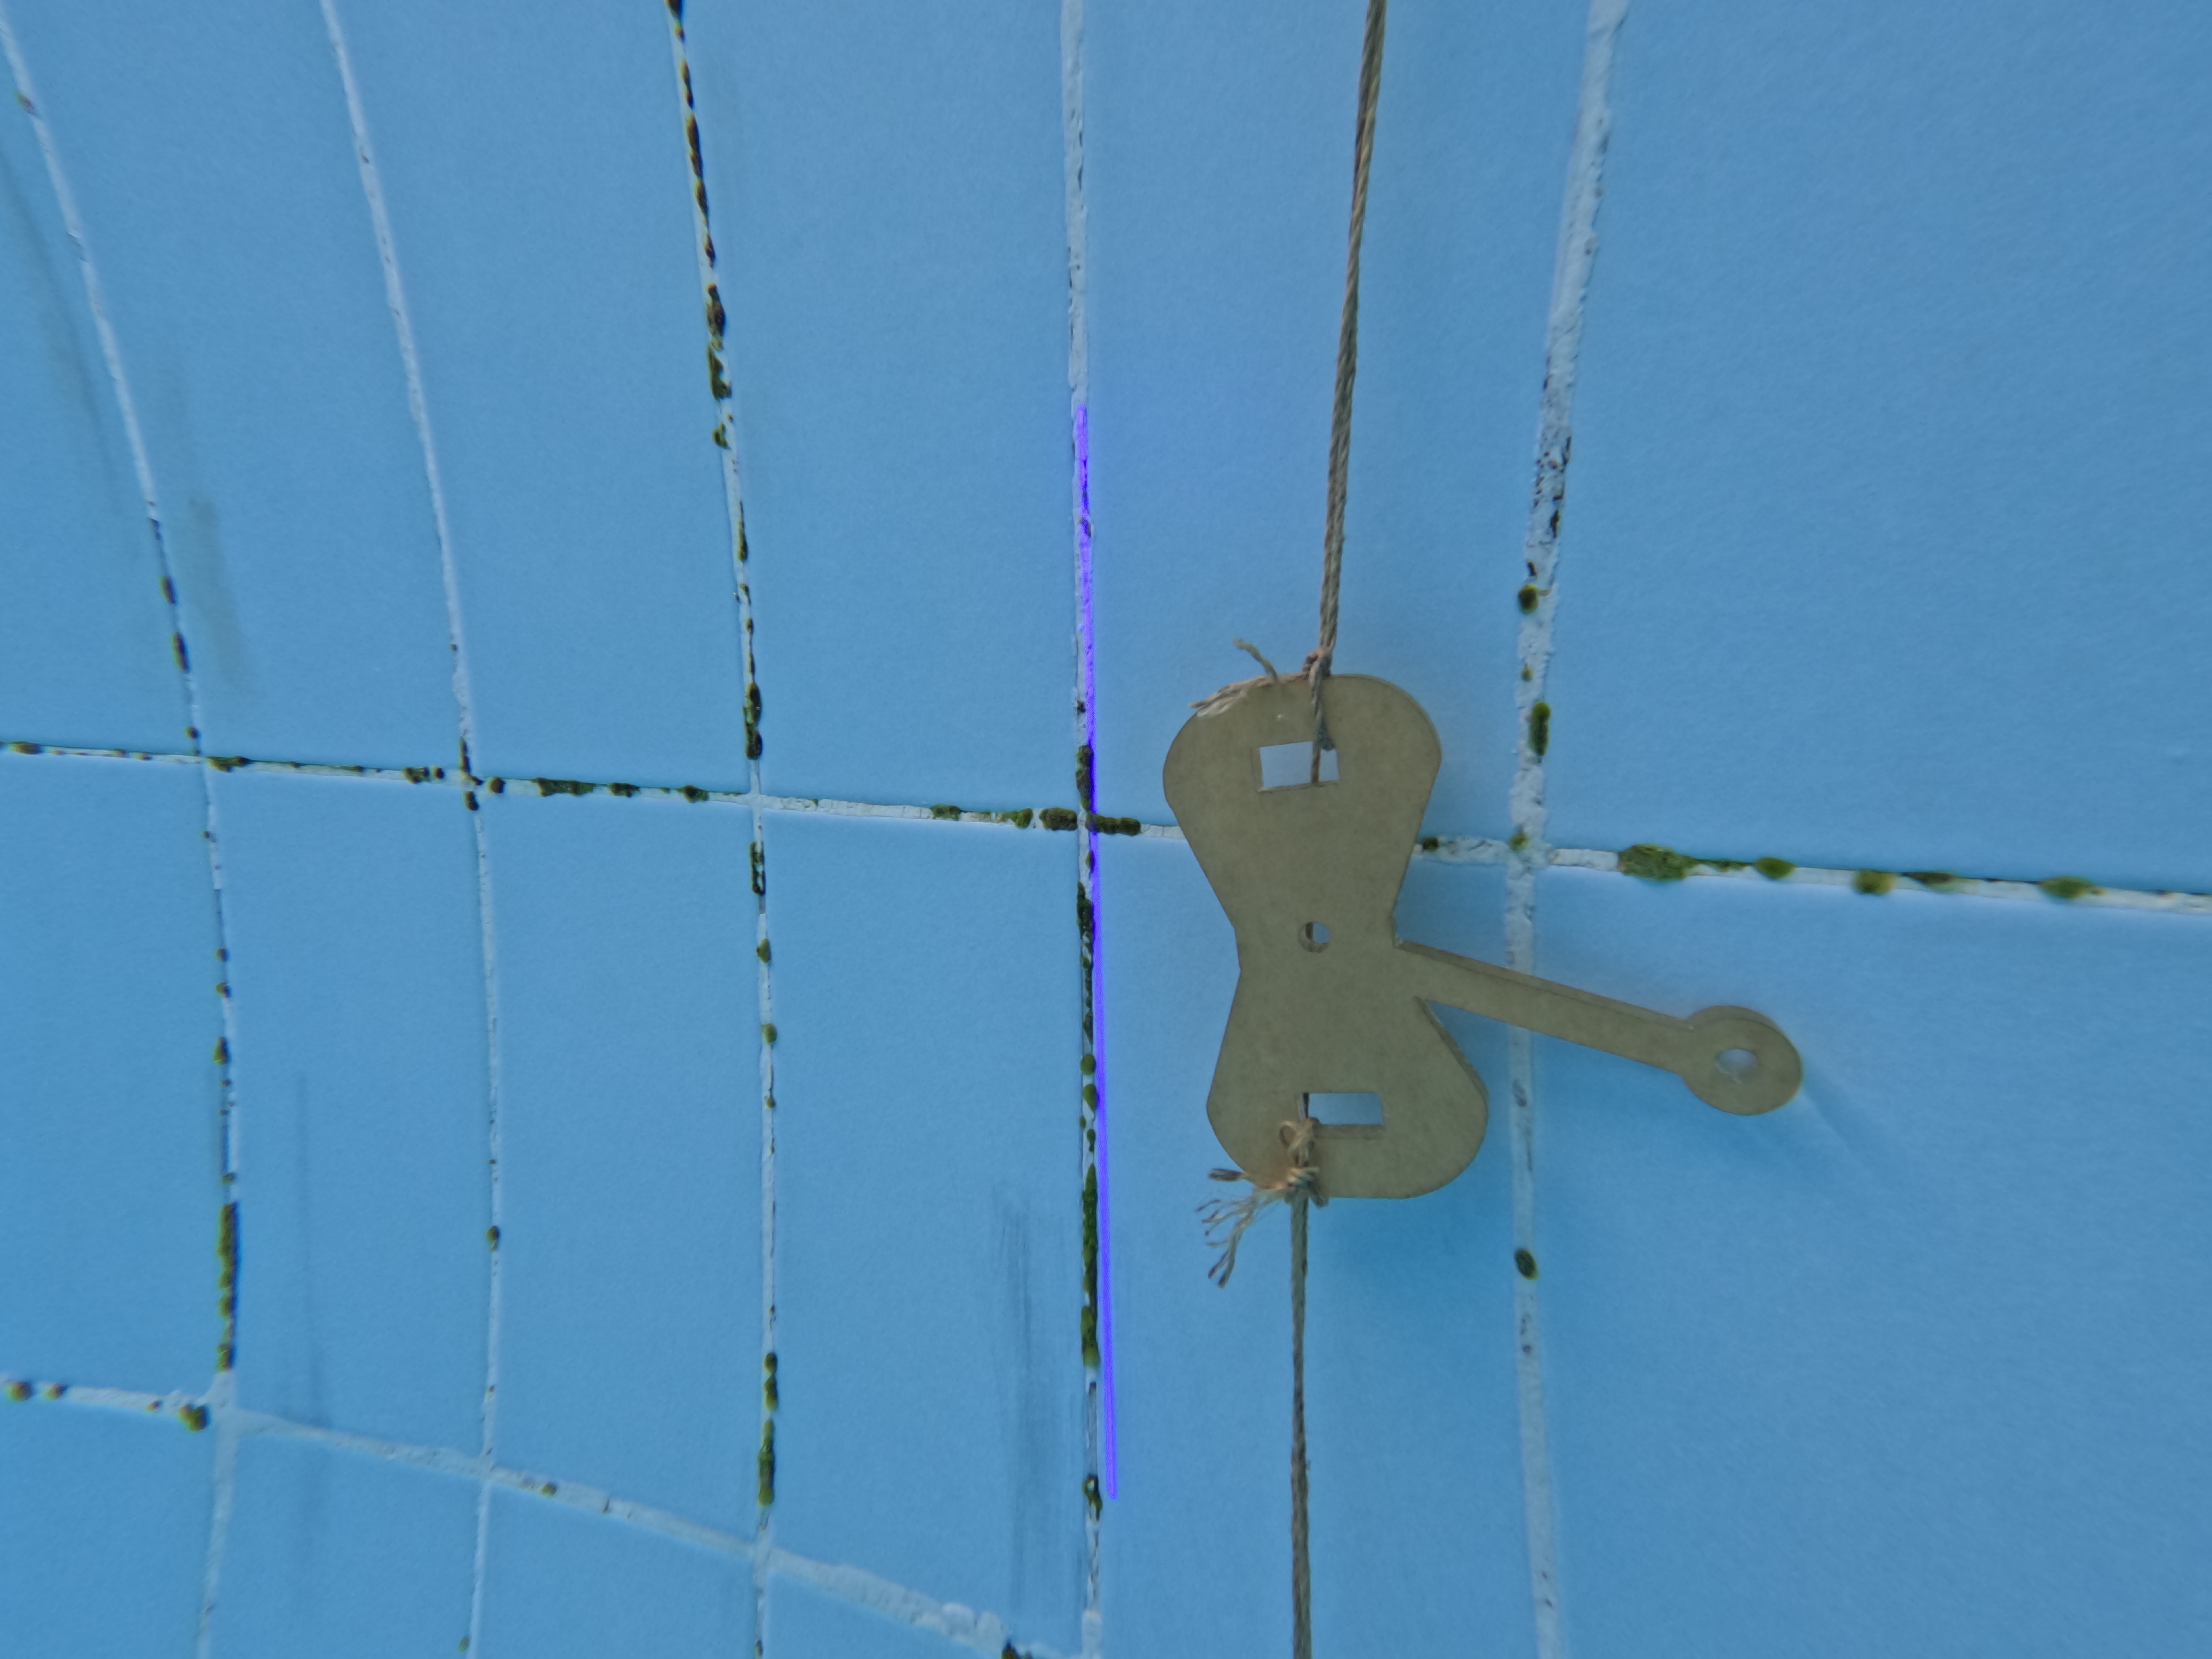

Supplement: Supplementary file 2692 [file G0050990.pdf › Level_2_2/G0050990.pdf]

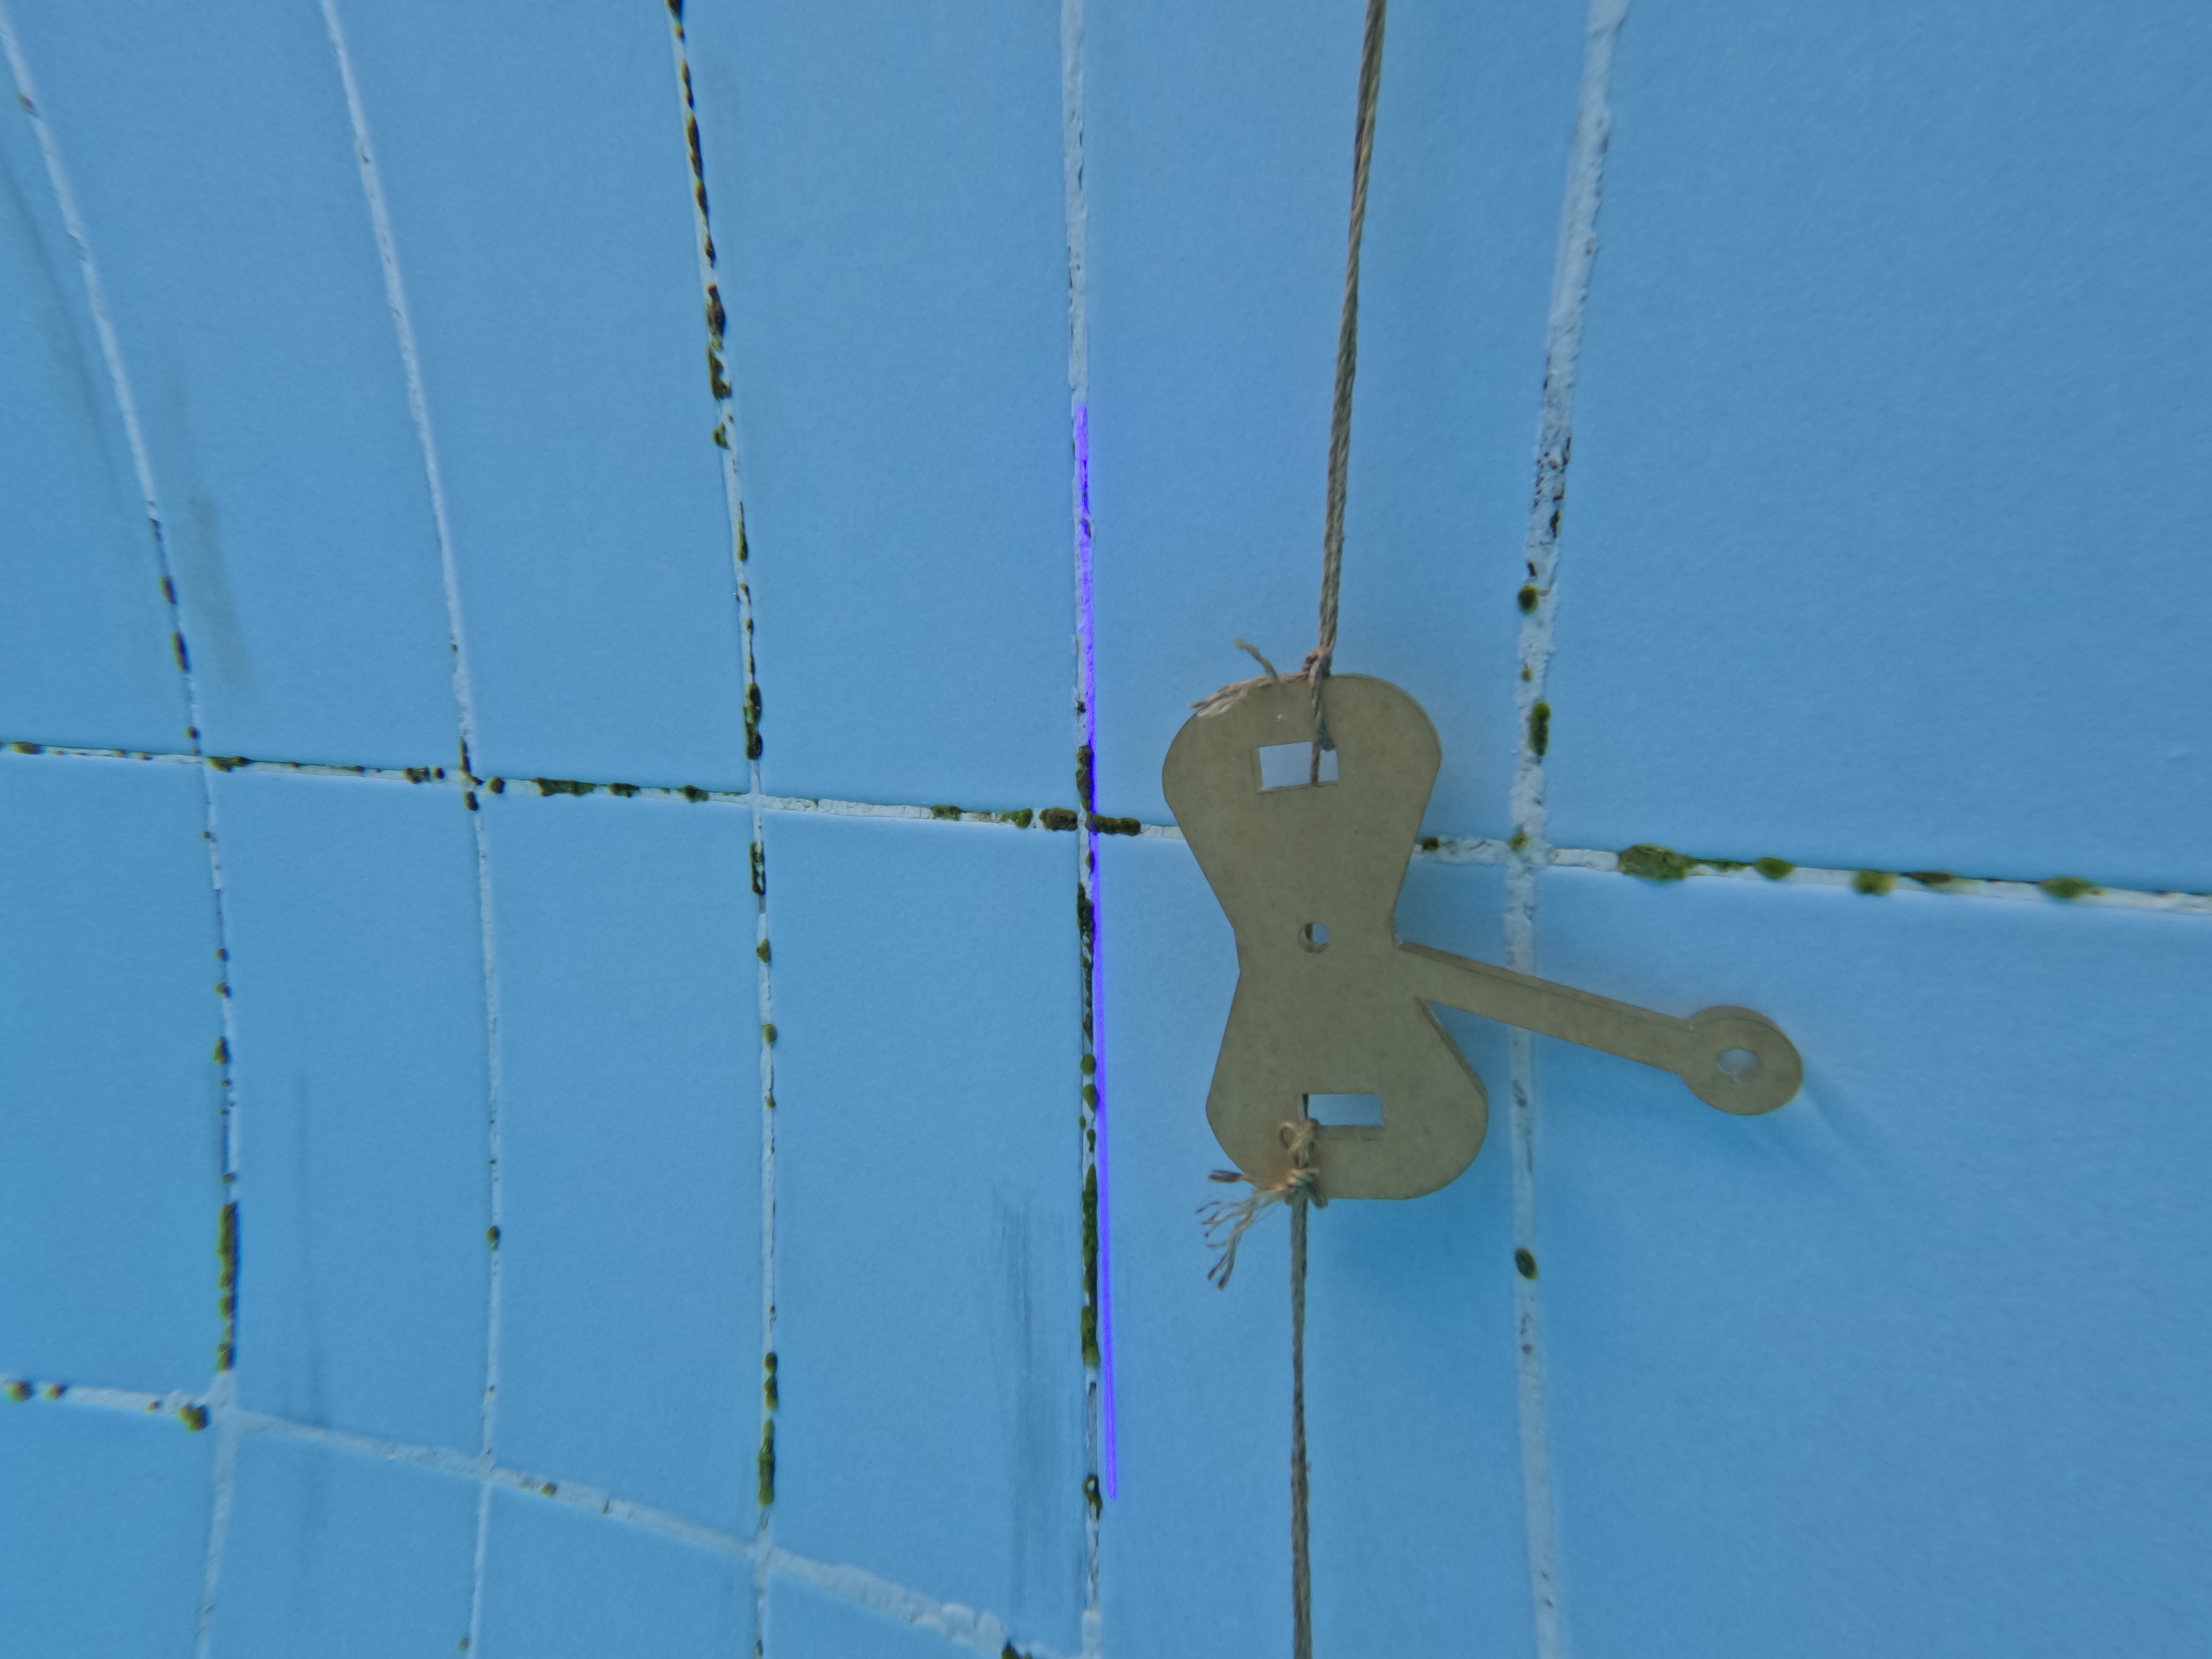

Supplement: Supplementary file 2693 [file G0050991.pdf › Level_2_2/G0050991.pdf]

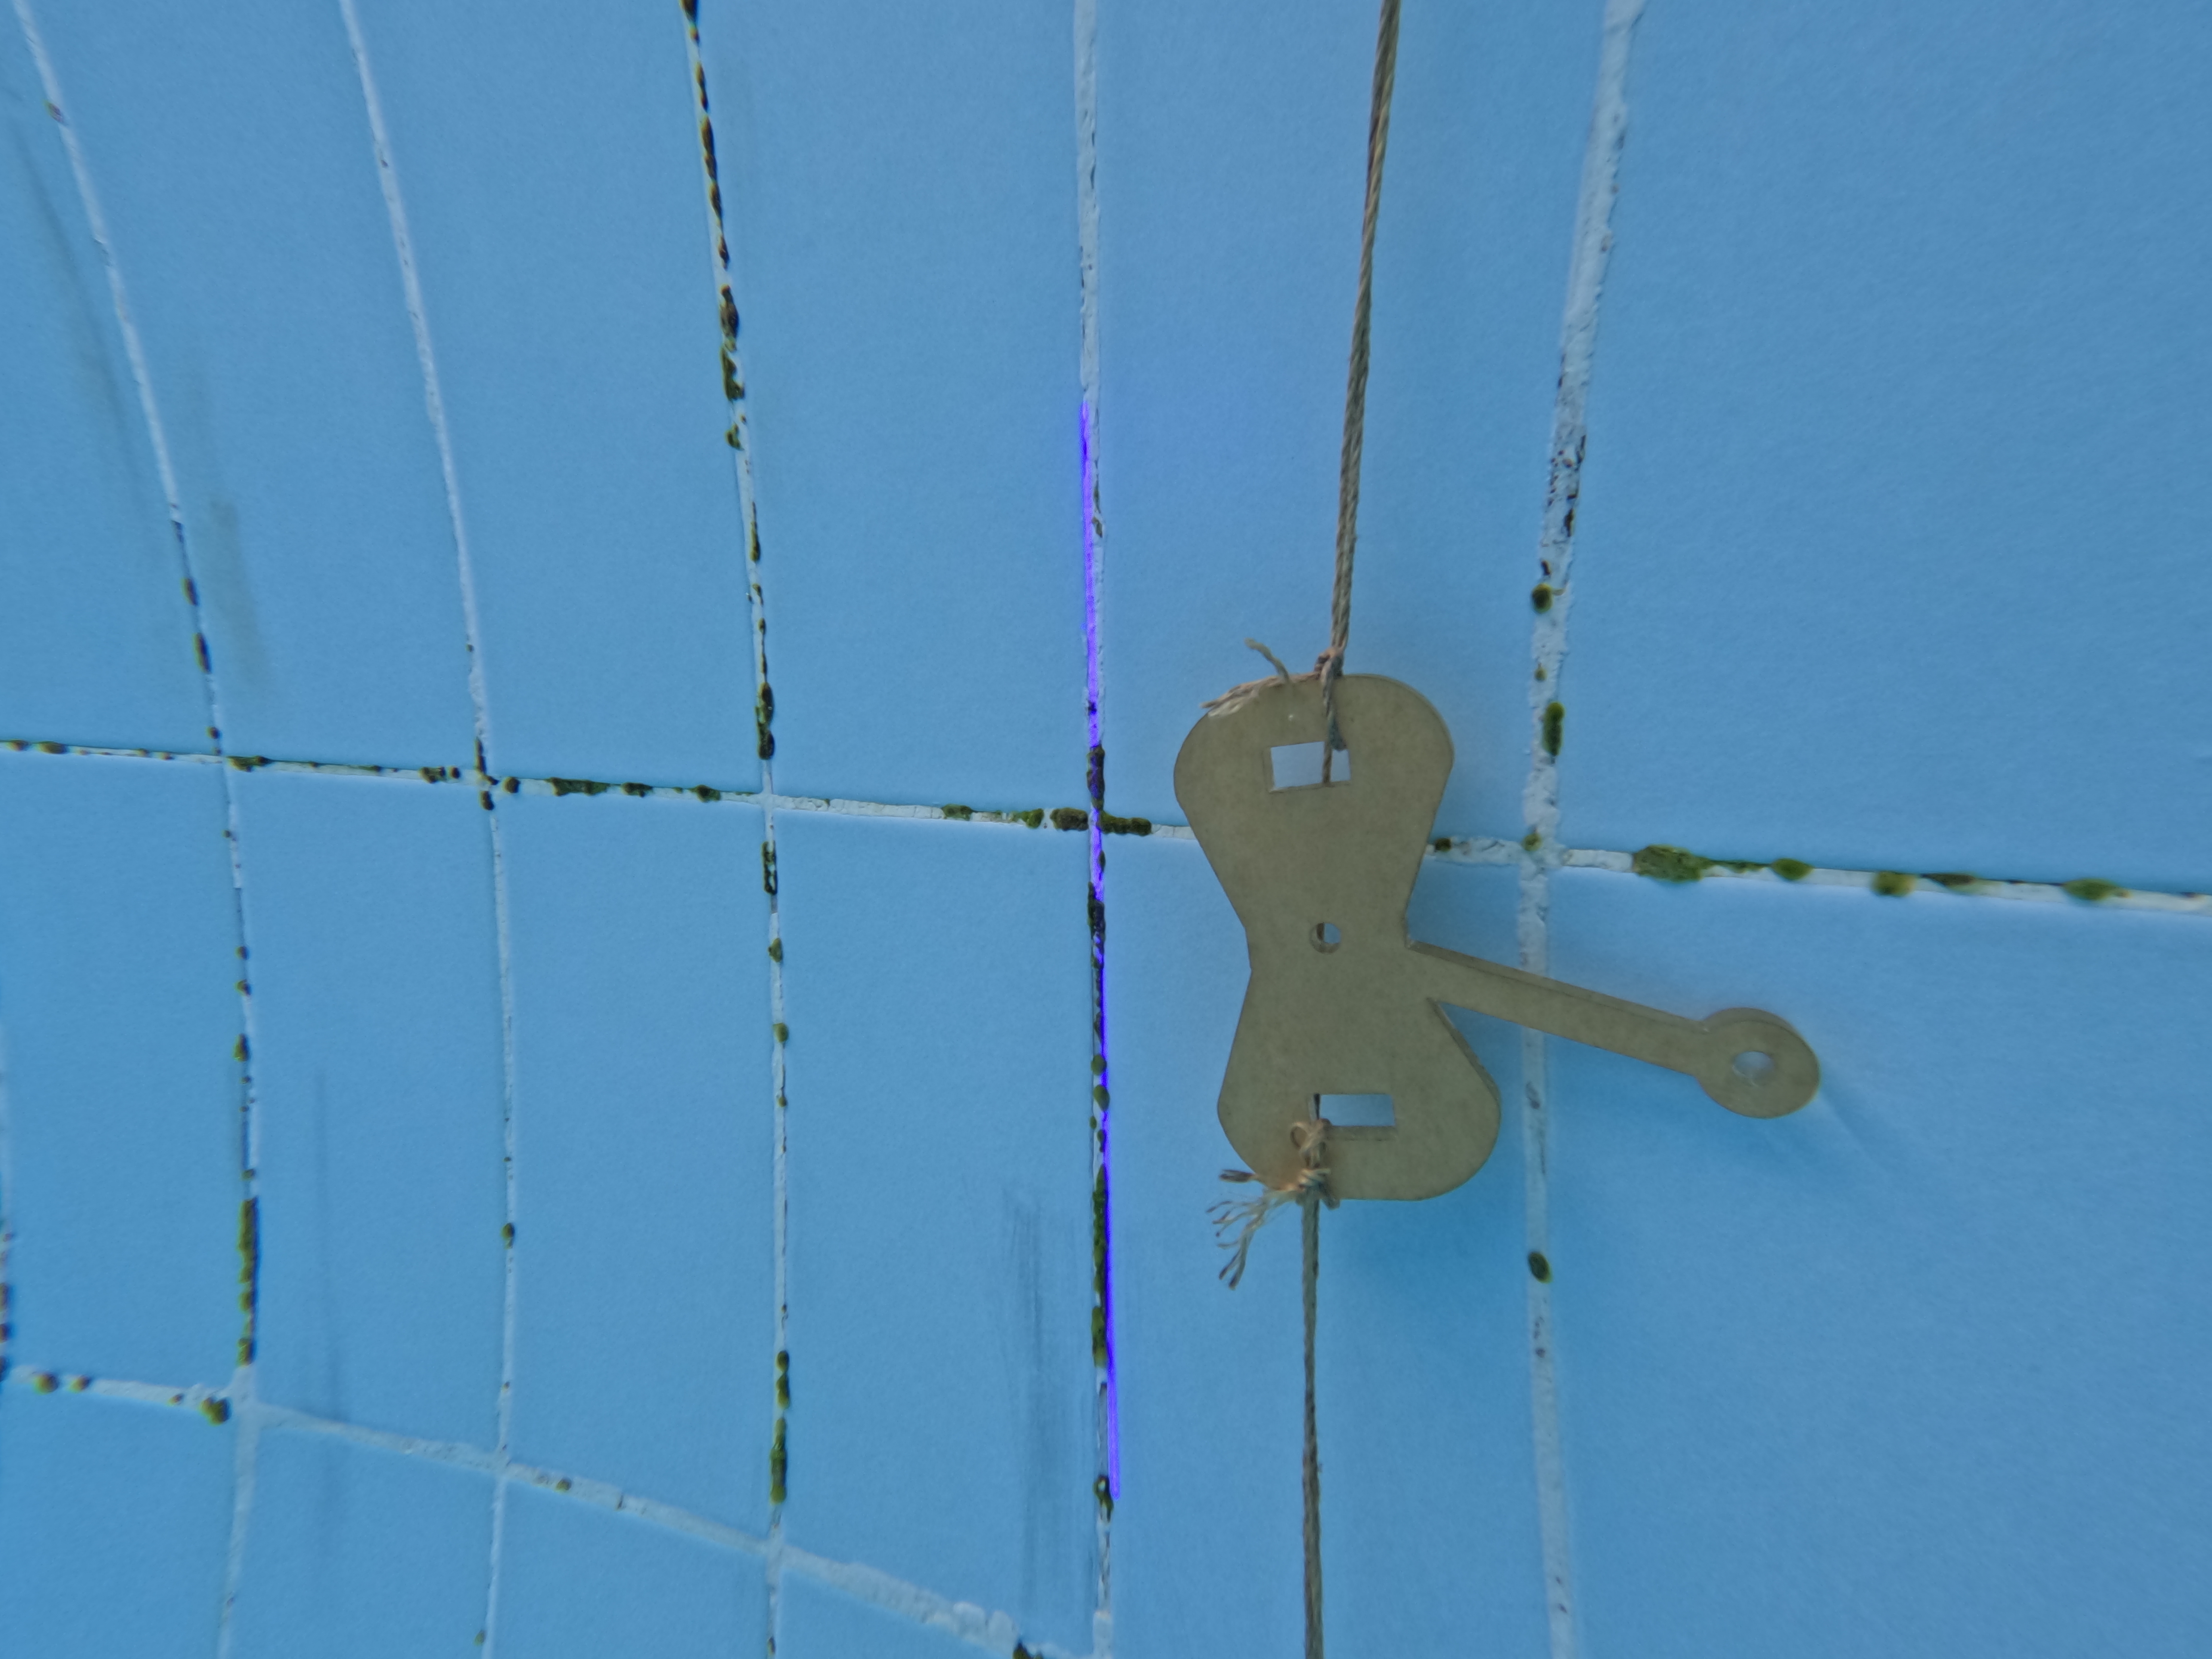

Supplement: Supplementary file 2694 [file G0050992.pdf › Level_2_2/G0050992.pdf]

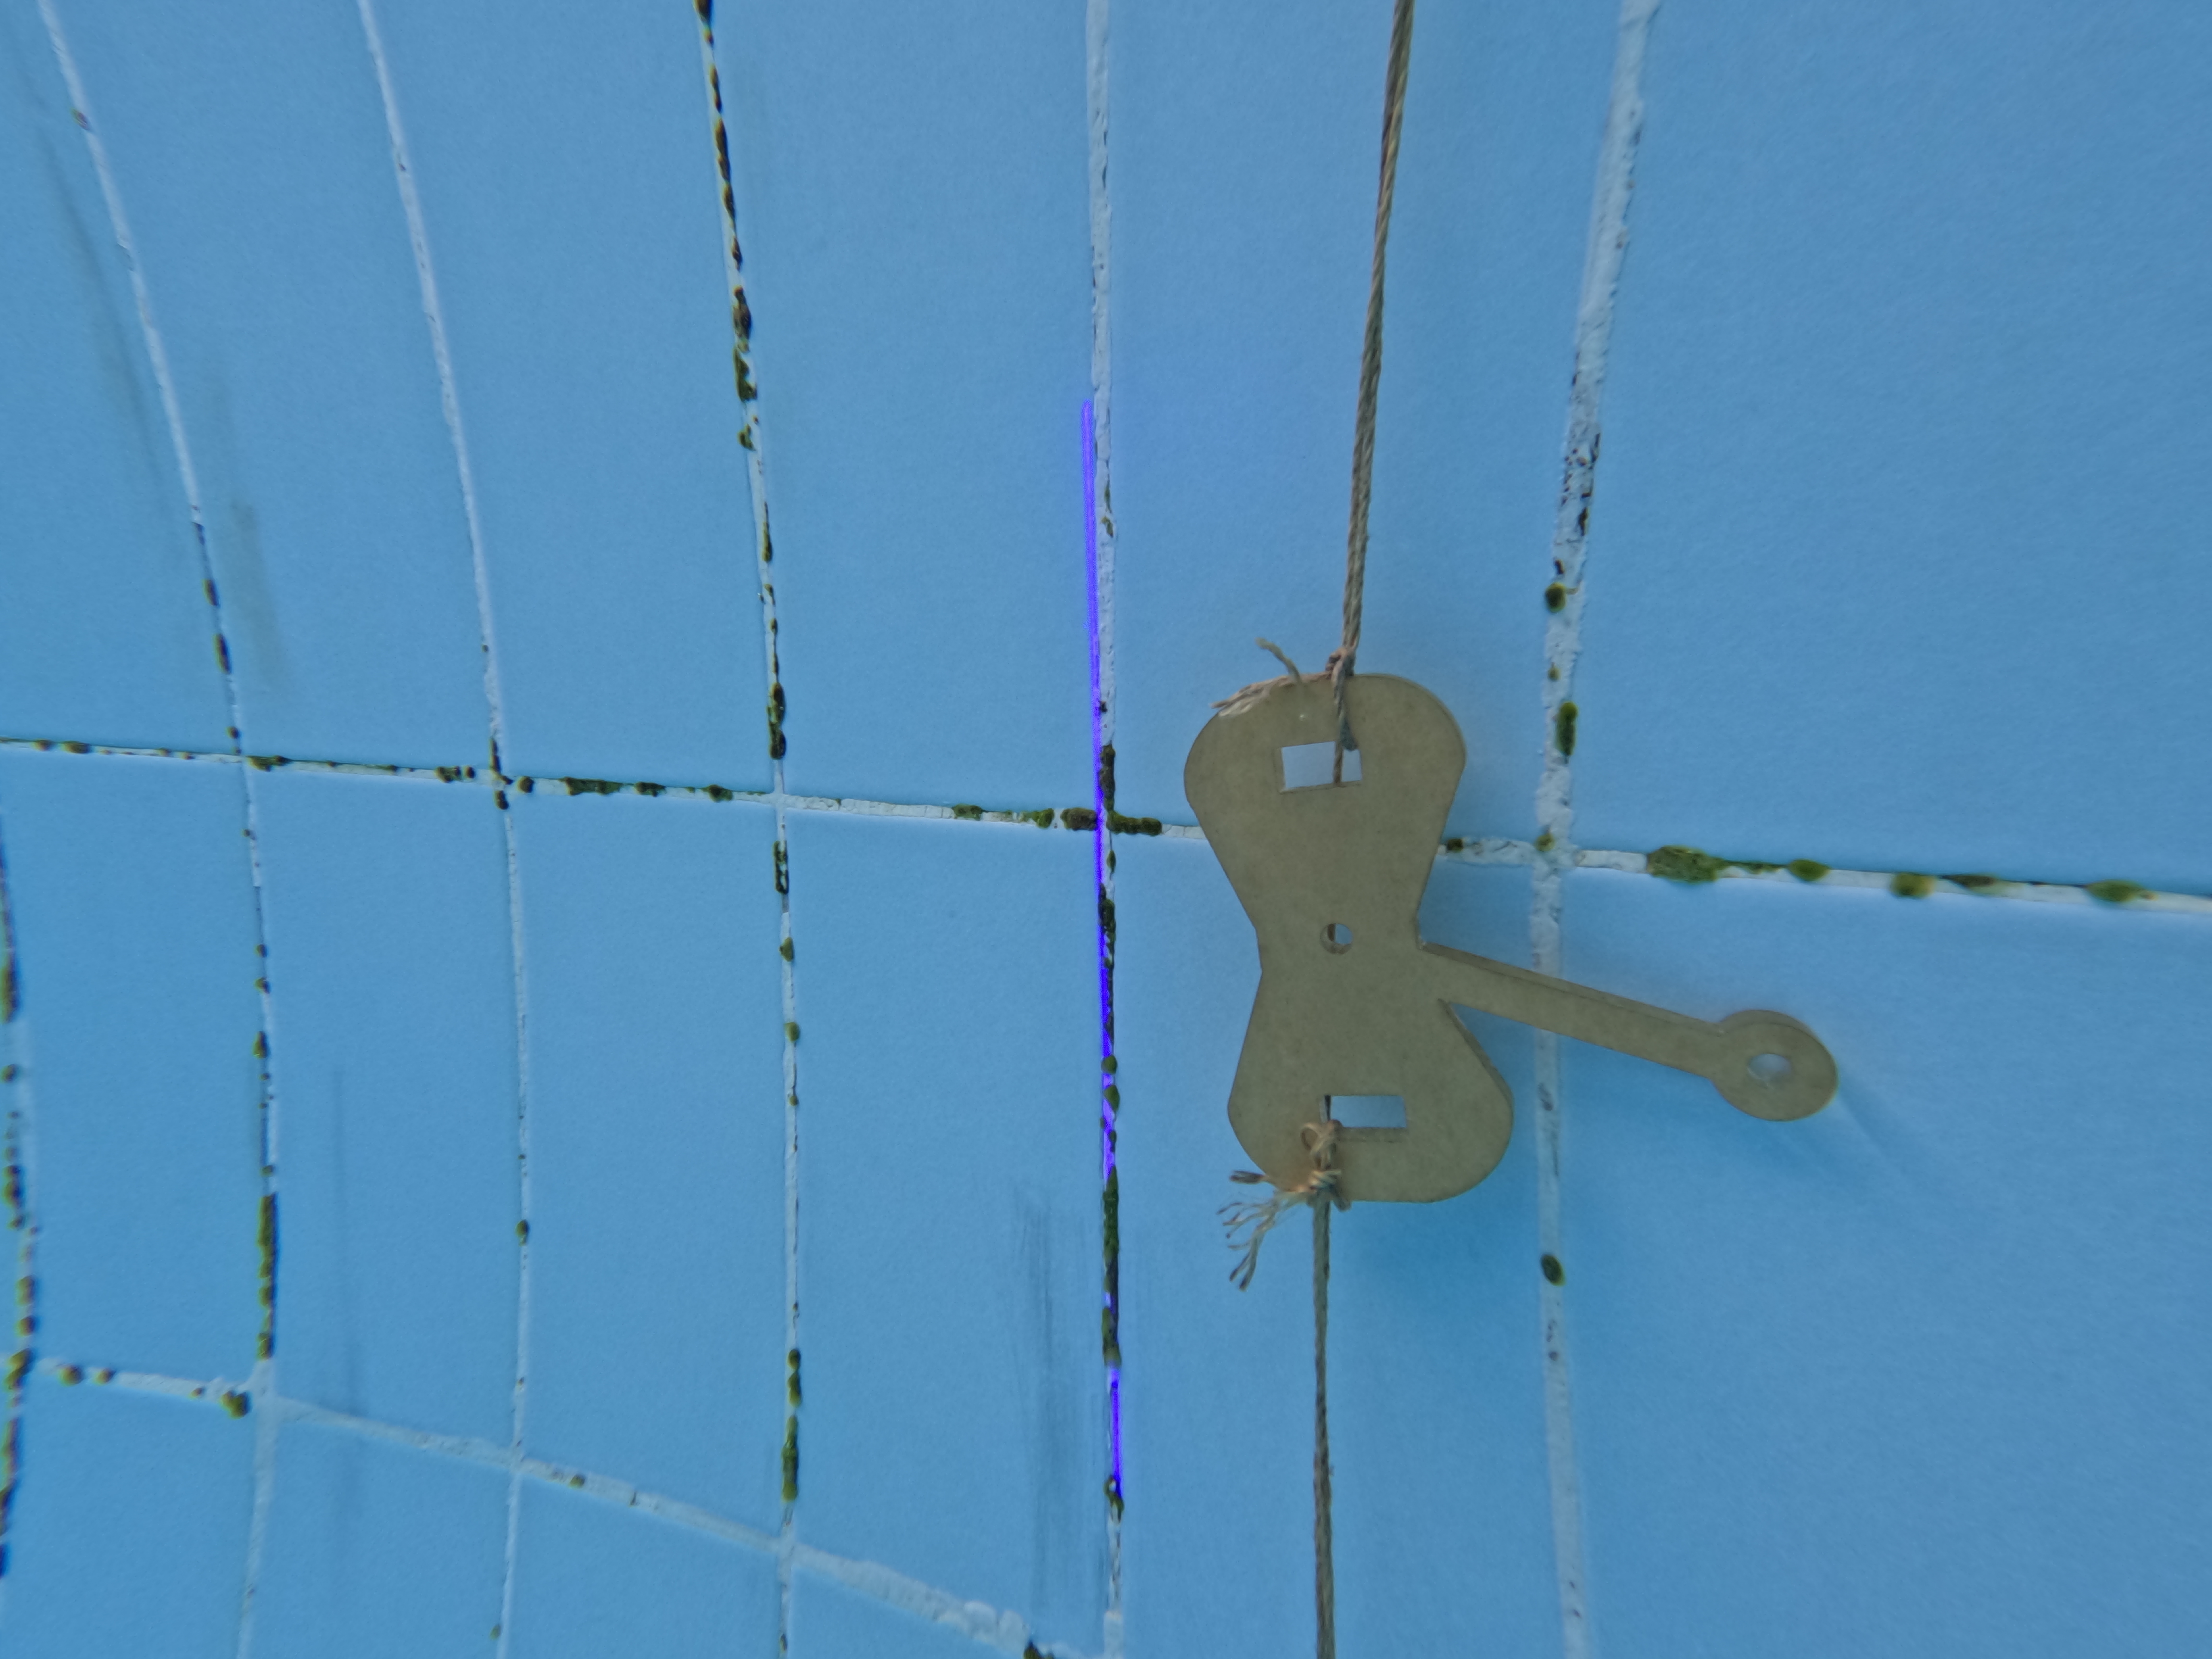

Supplement: Supplementary file 2695 [file G0050993.pdf › Level_2_2/G0050993.pdf]

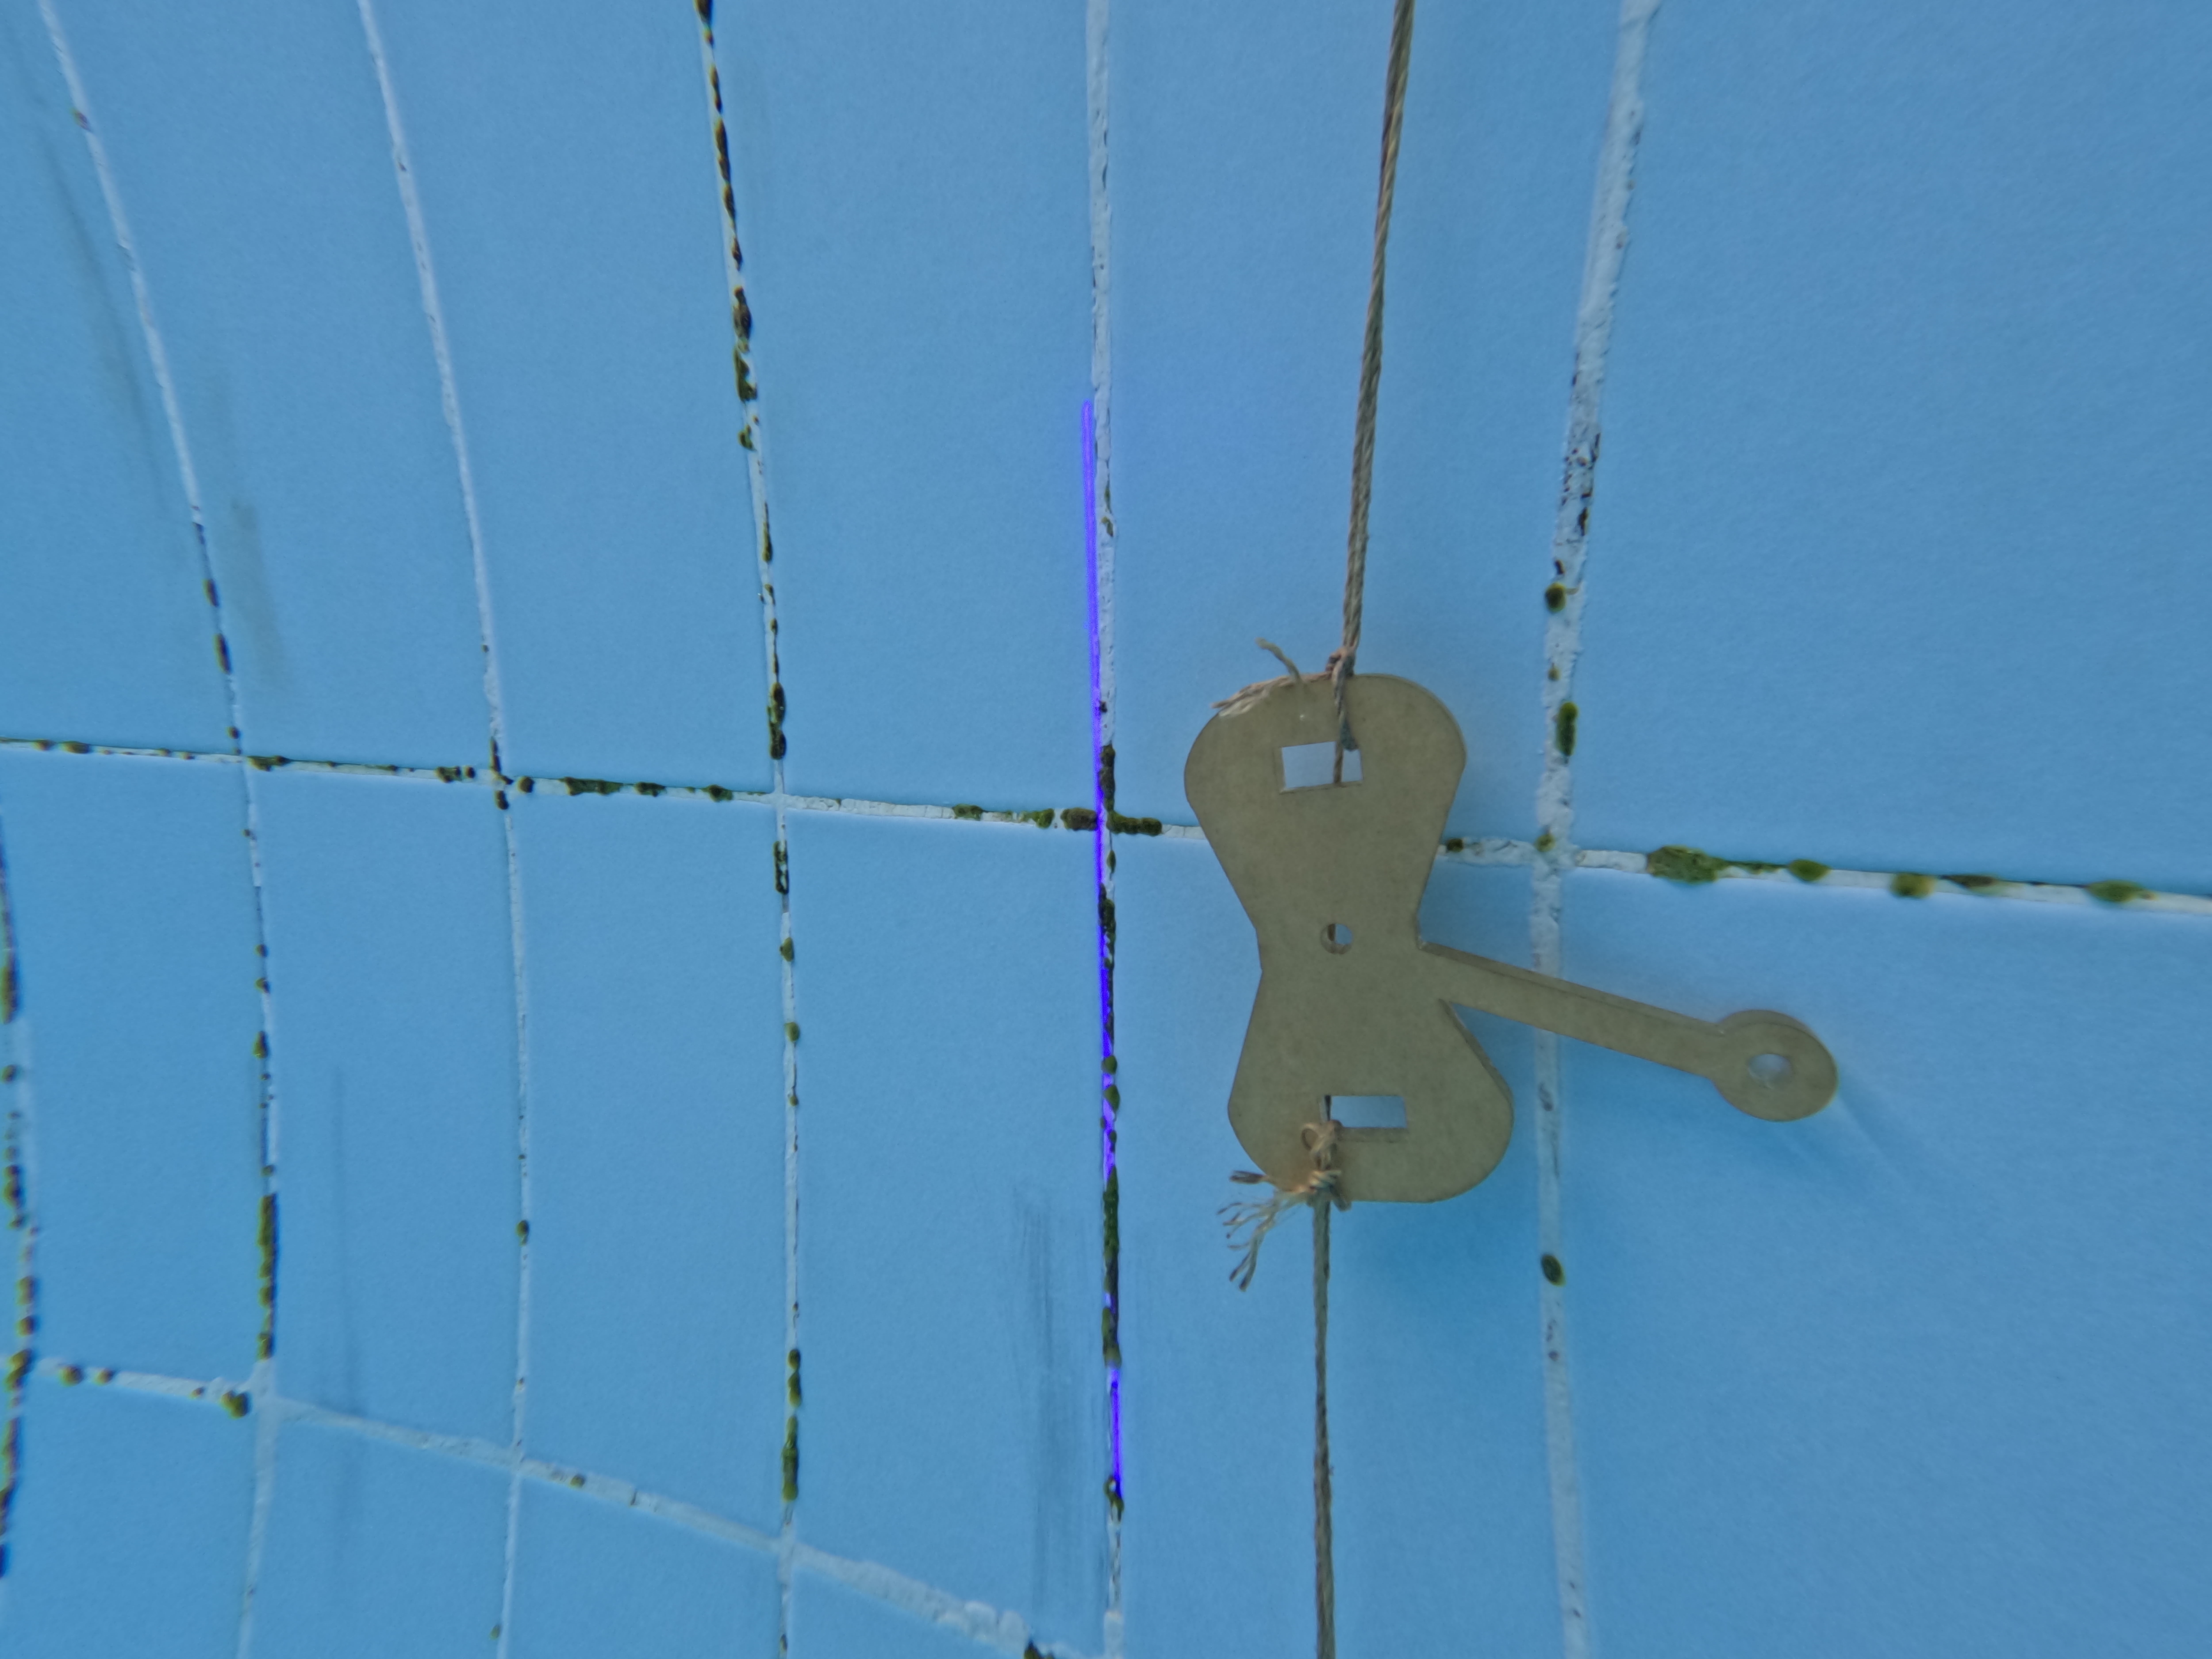

Supplement: Supplementary file 2696 [file G0050994.pdf › Level_2_2/G0050994.pdf]

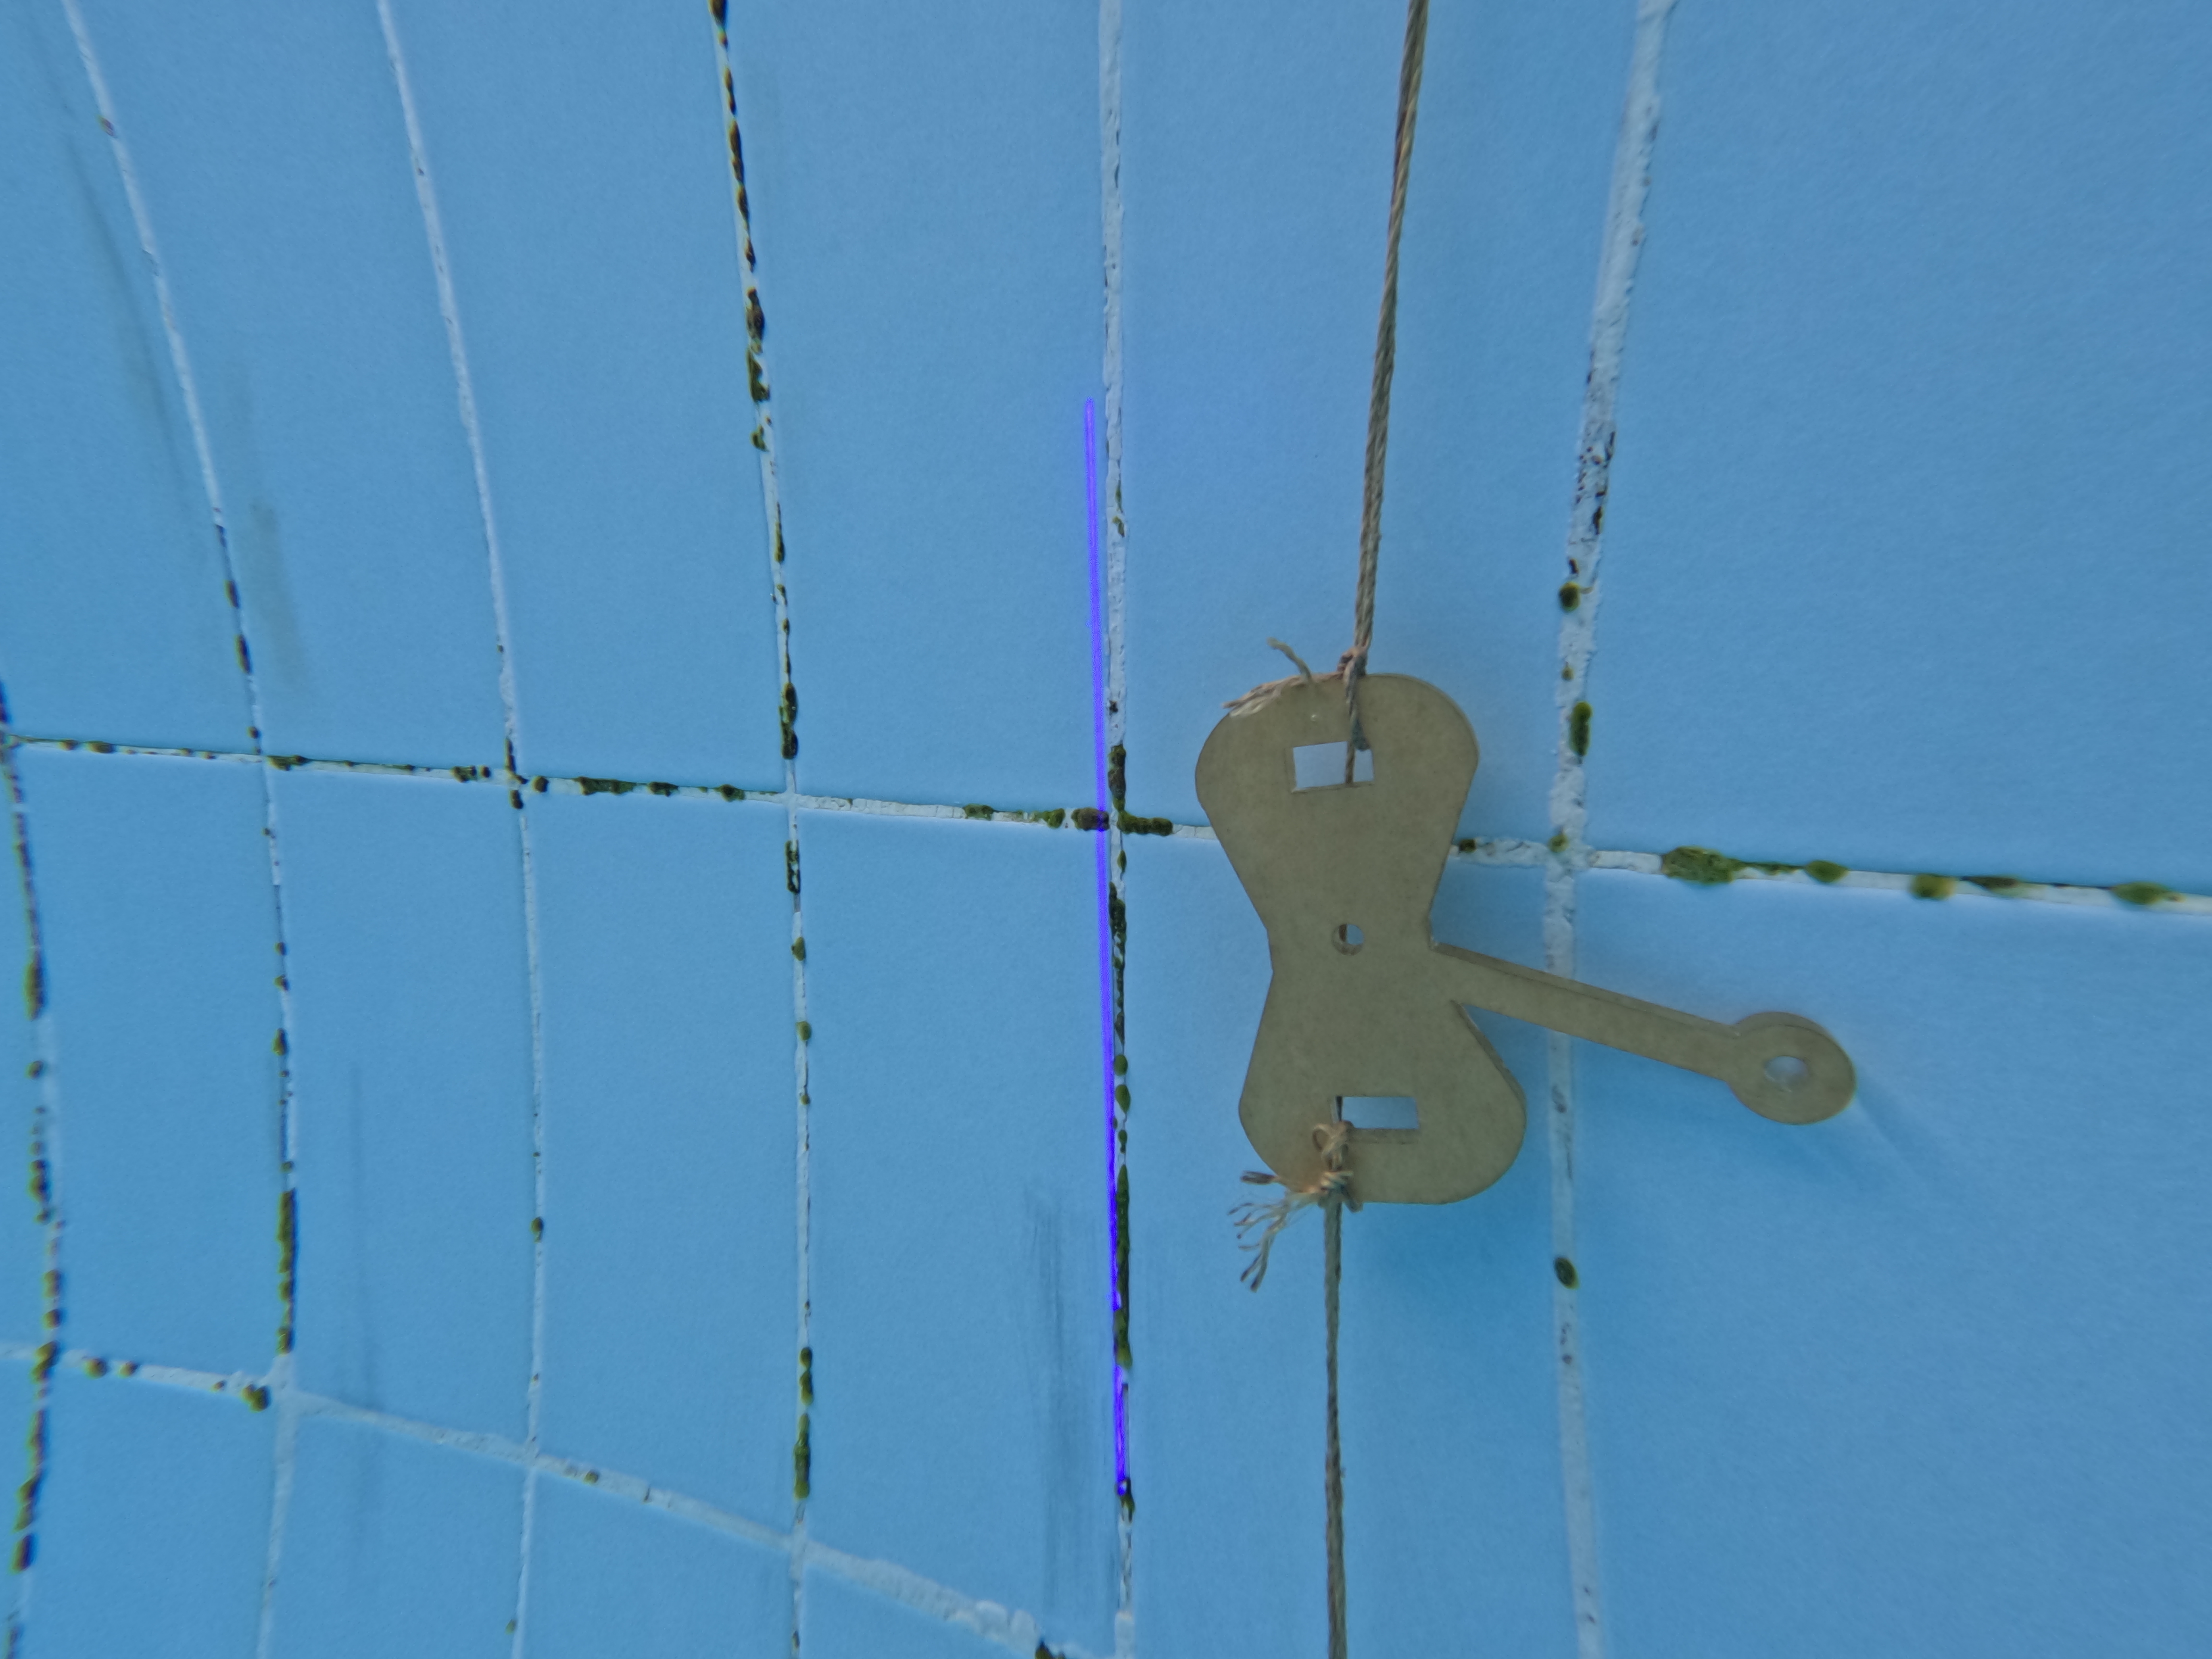

Supplement: Supplementary file 2697 [file G0050995.pdf › Level_2_2/G0050995.pdf]

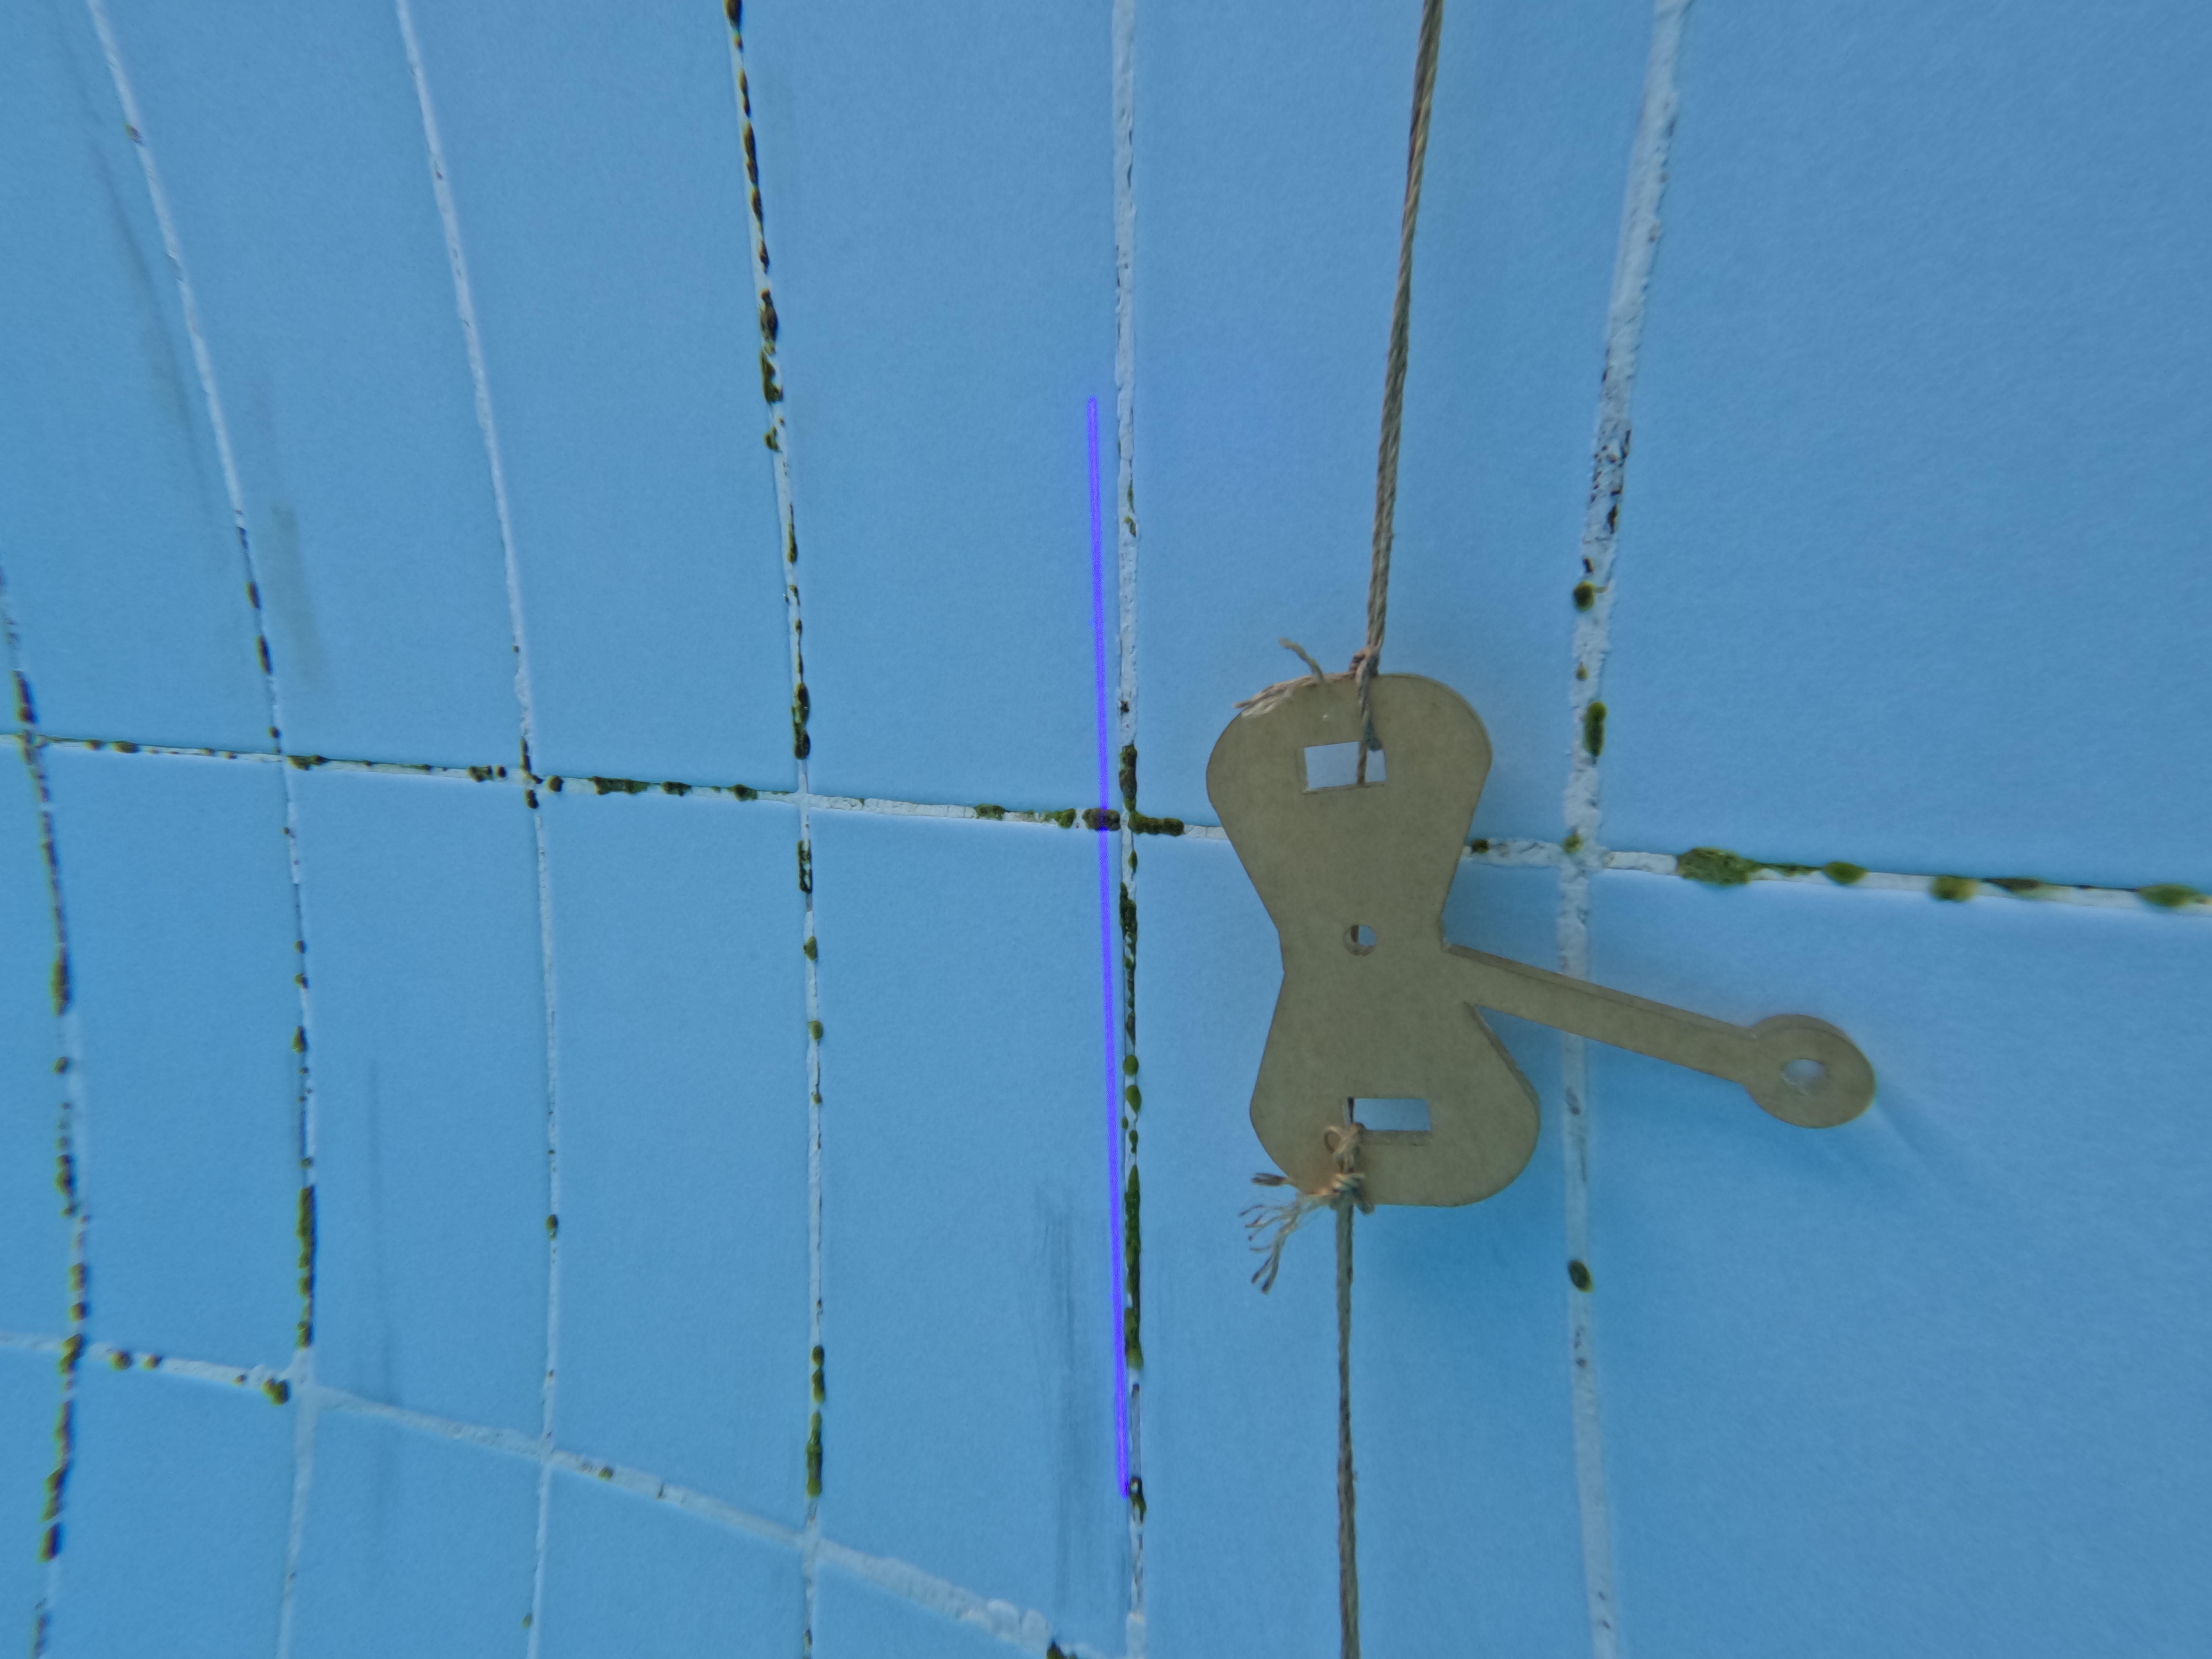

Supplement: Supplementary file 2698 [file G0050996.pdf › Level_2_2/G0050996.pdf]

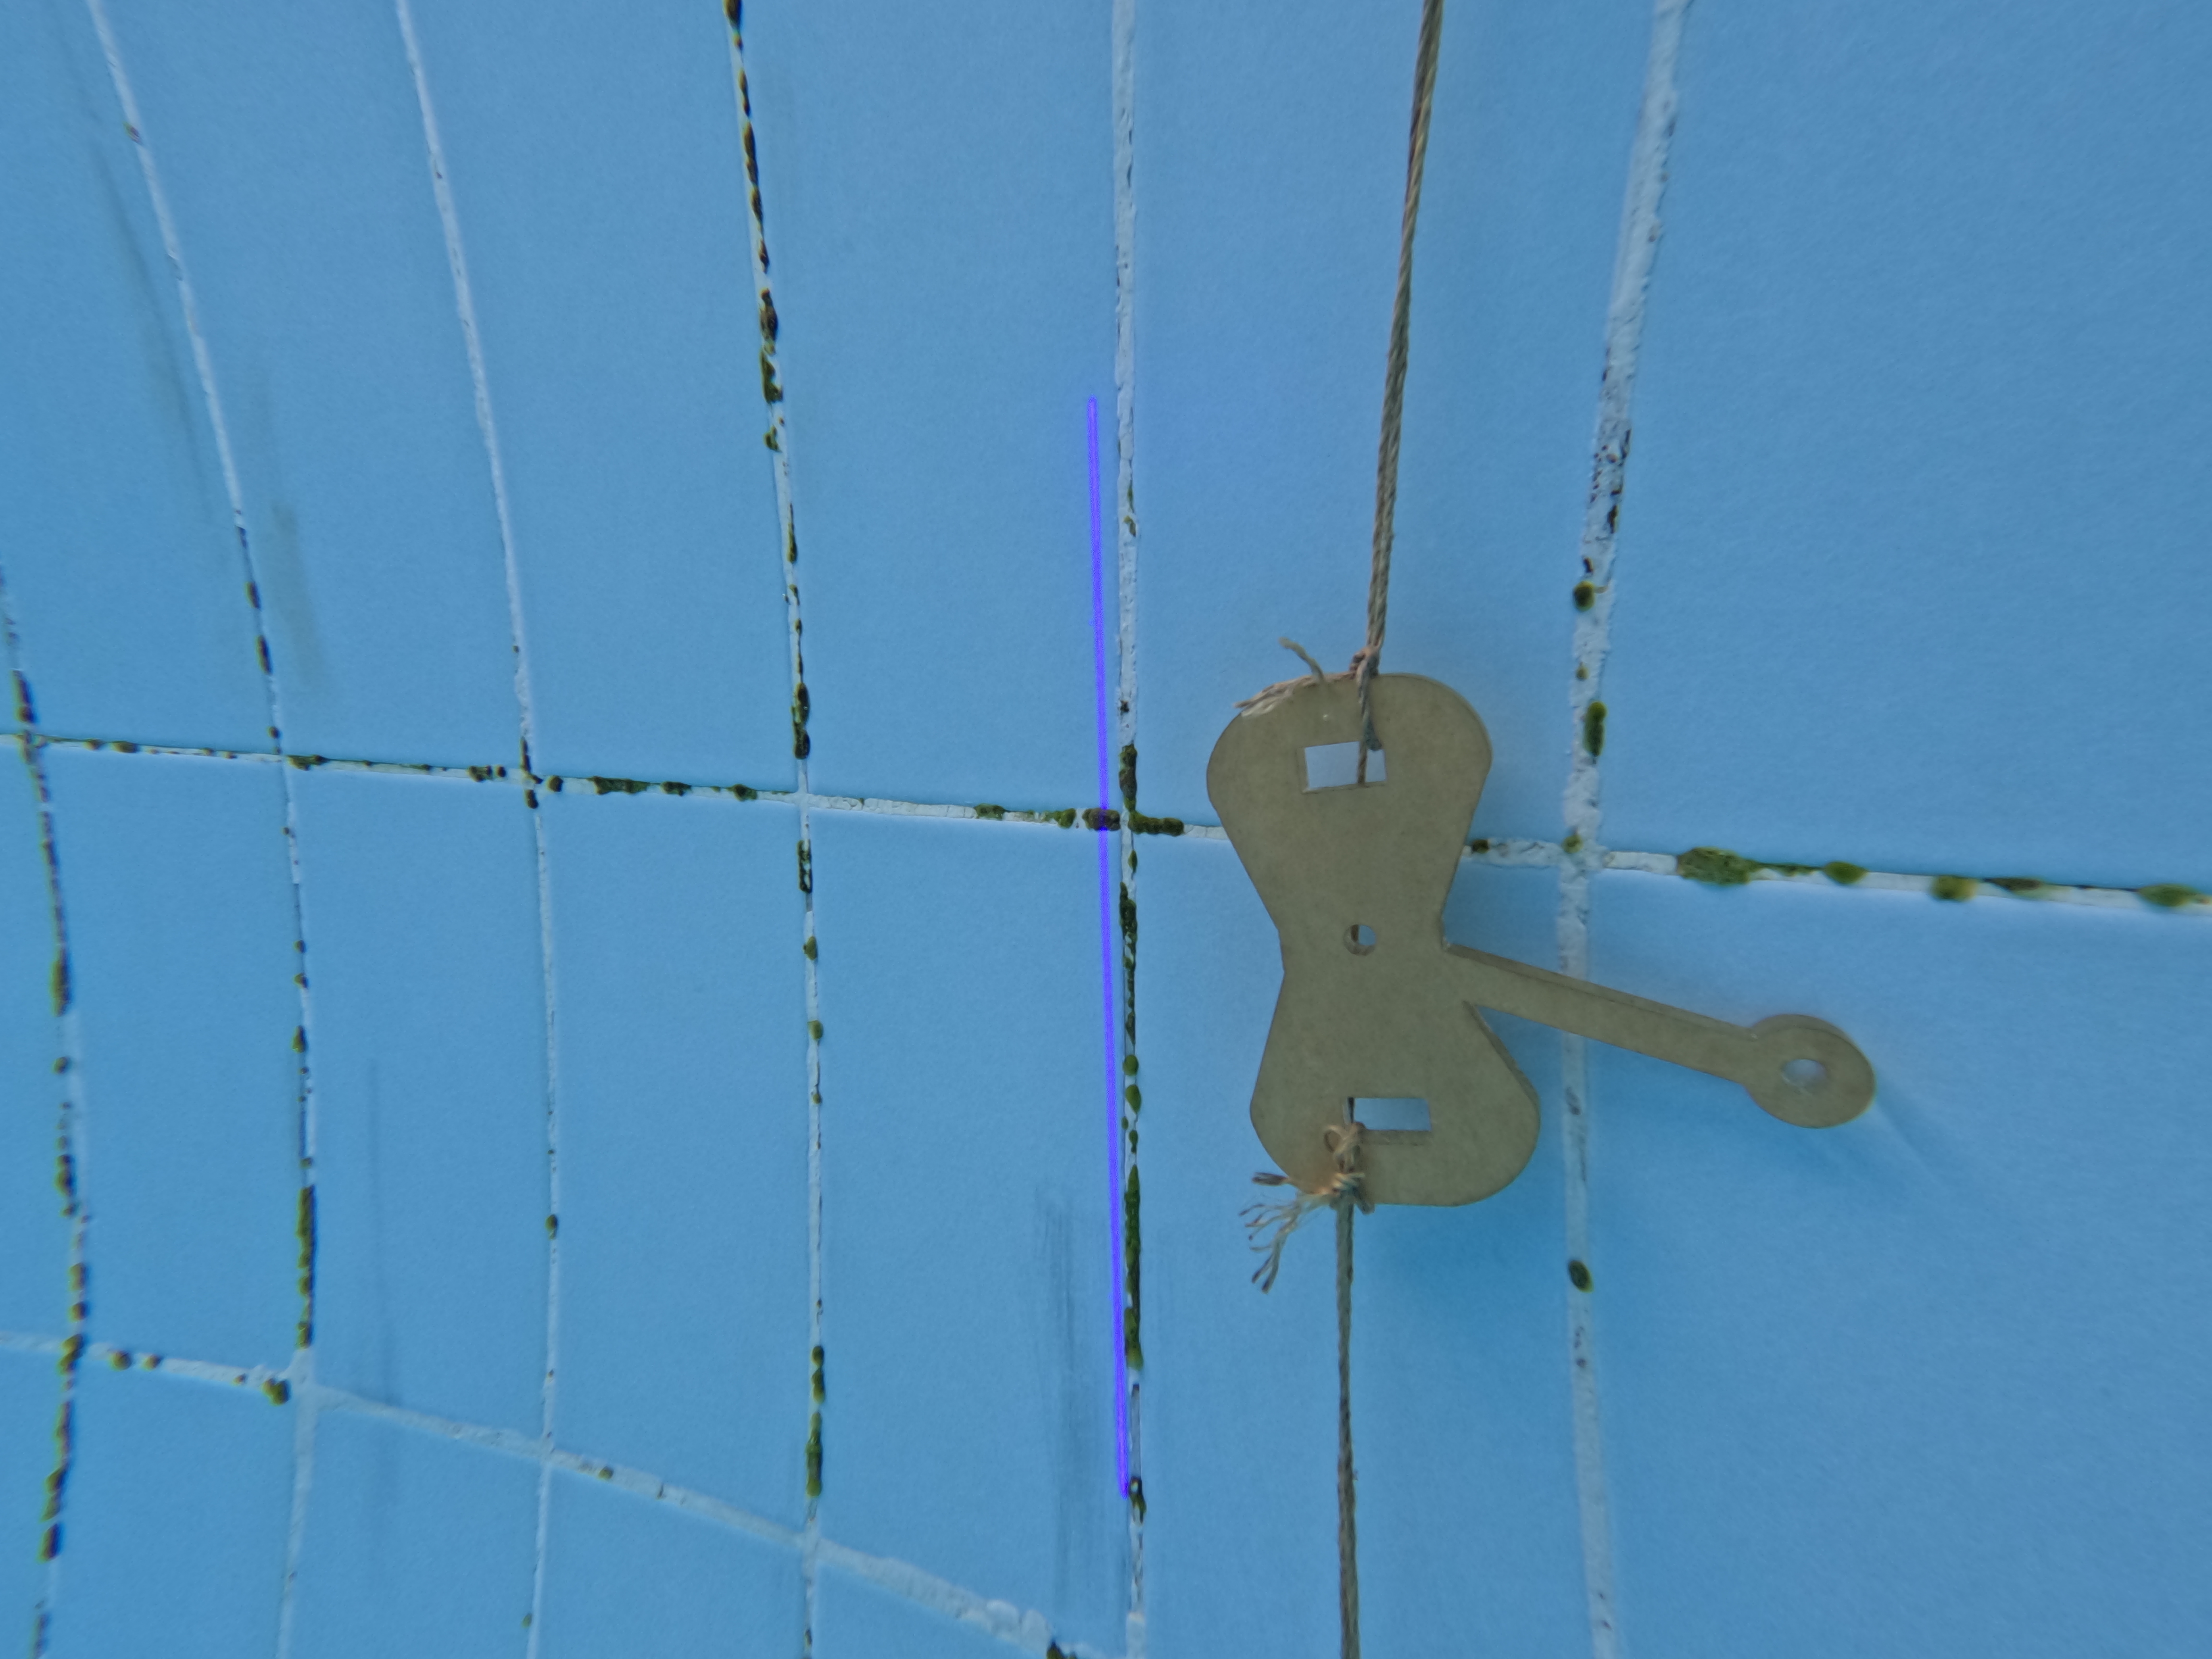

Supplement: Supplementary file 2699 [file G0050997.pdf › Level_2_2/G0050997.pdf]

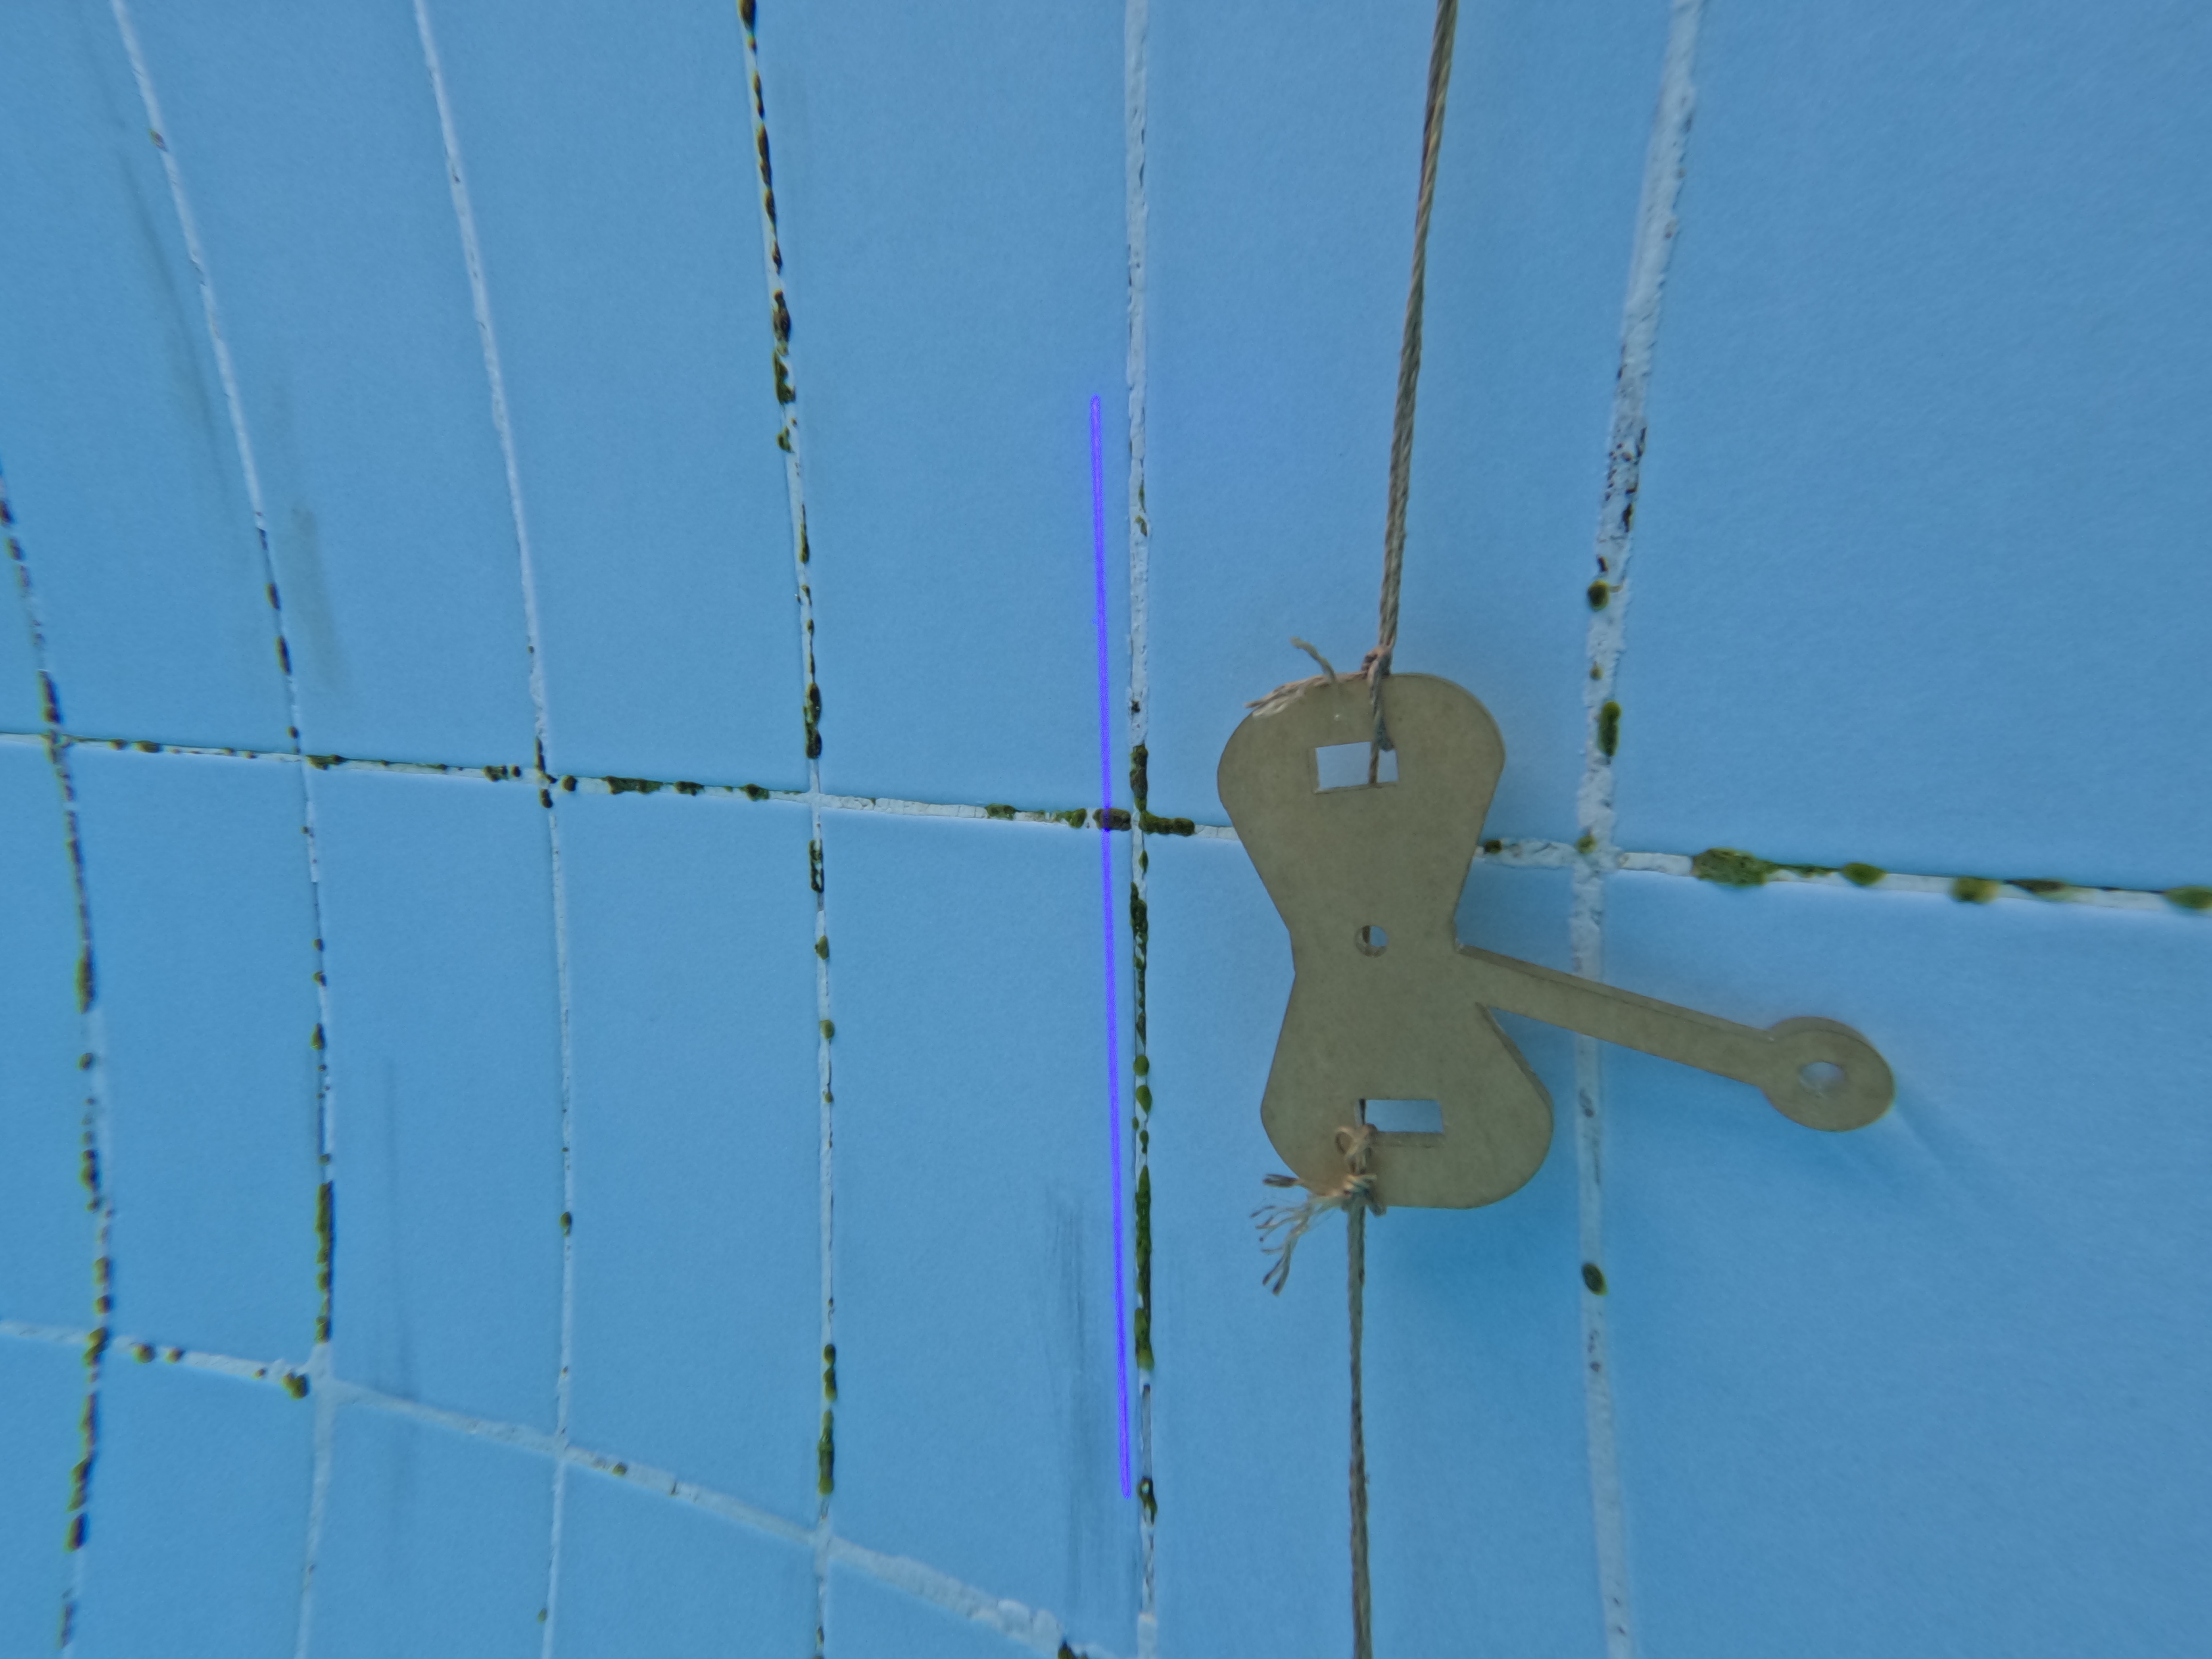

Supplement: Supplementary file 2700 [file G0050998.pdf › Level_2_2/G0050998.pdf]

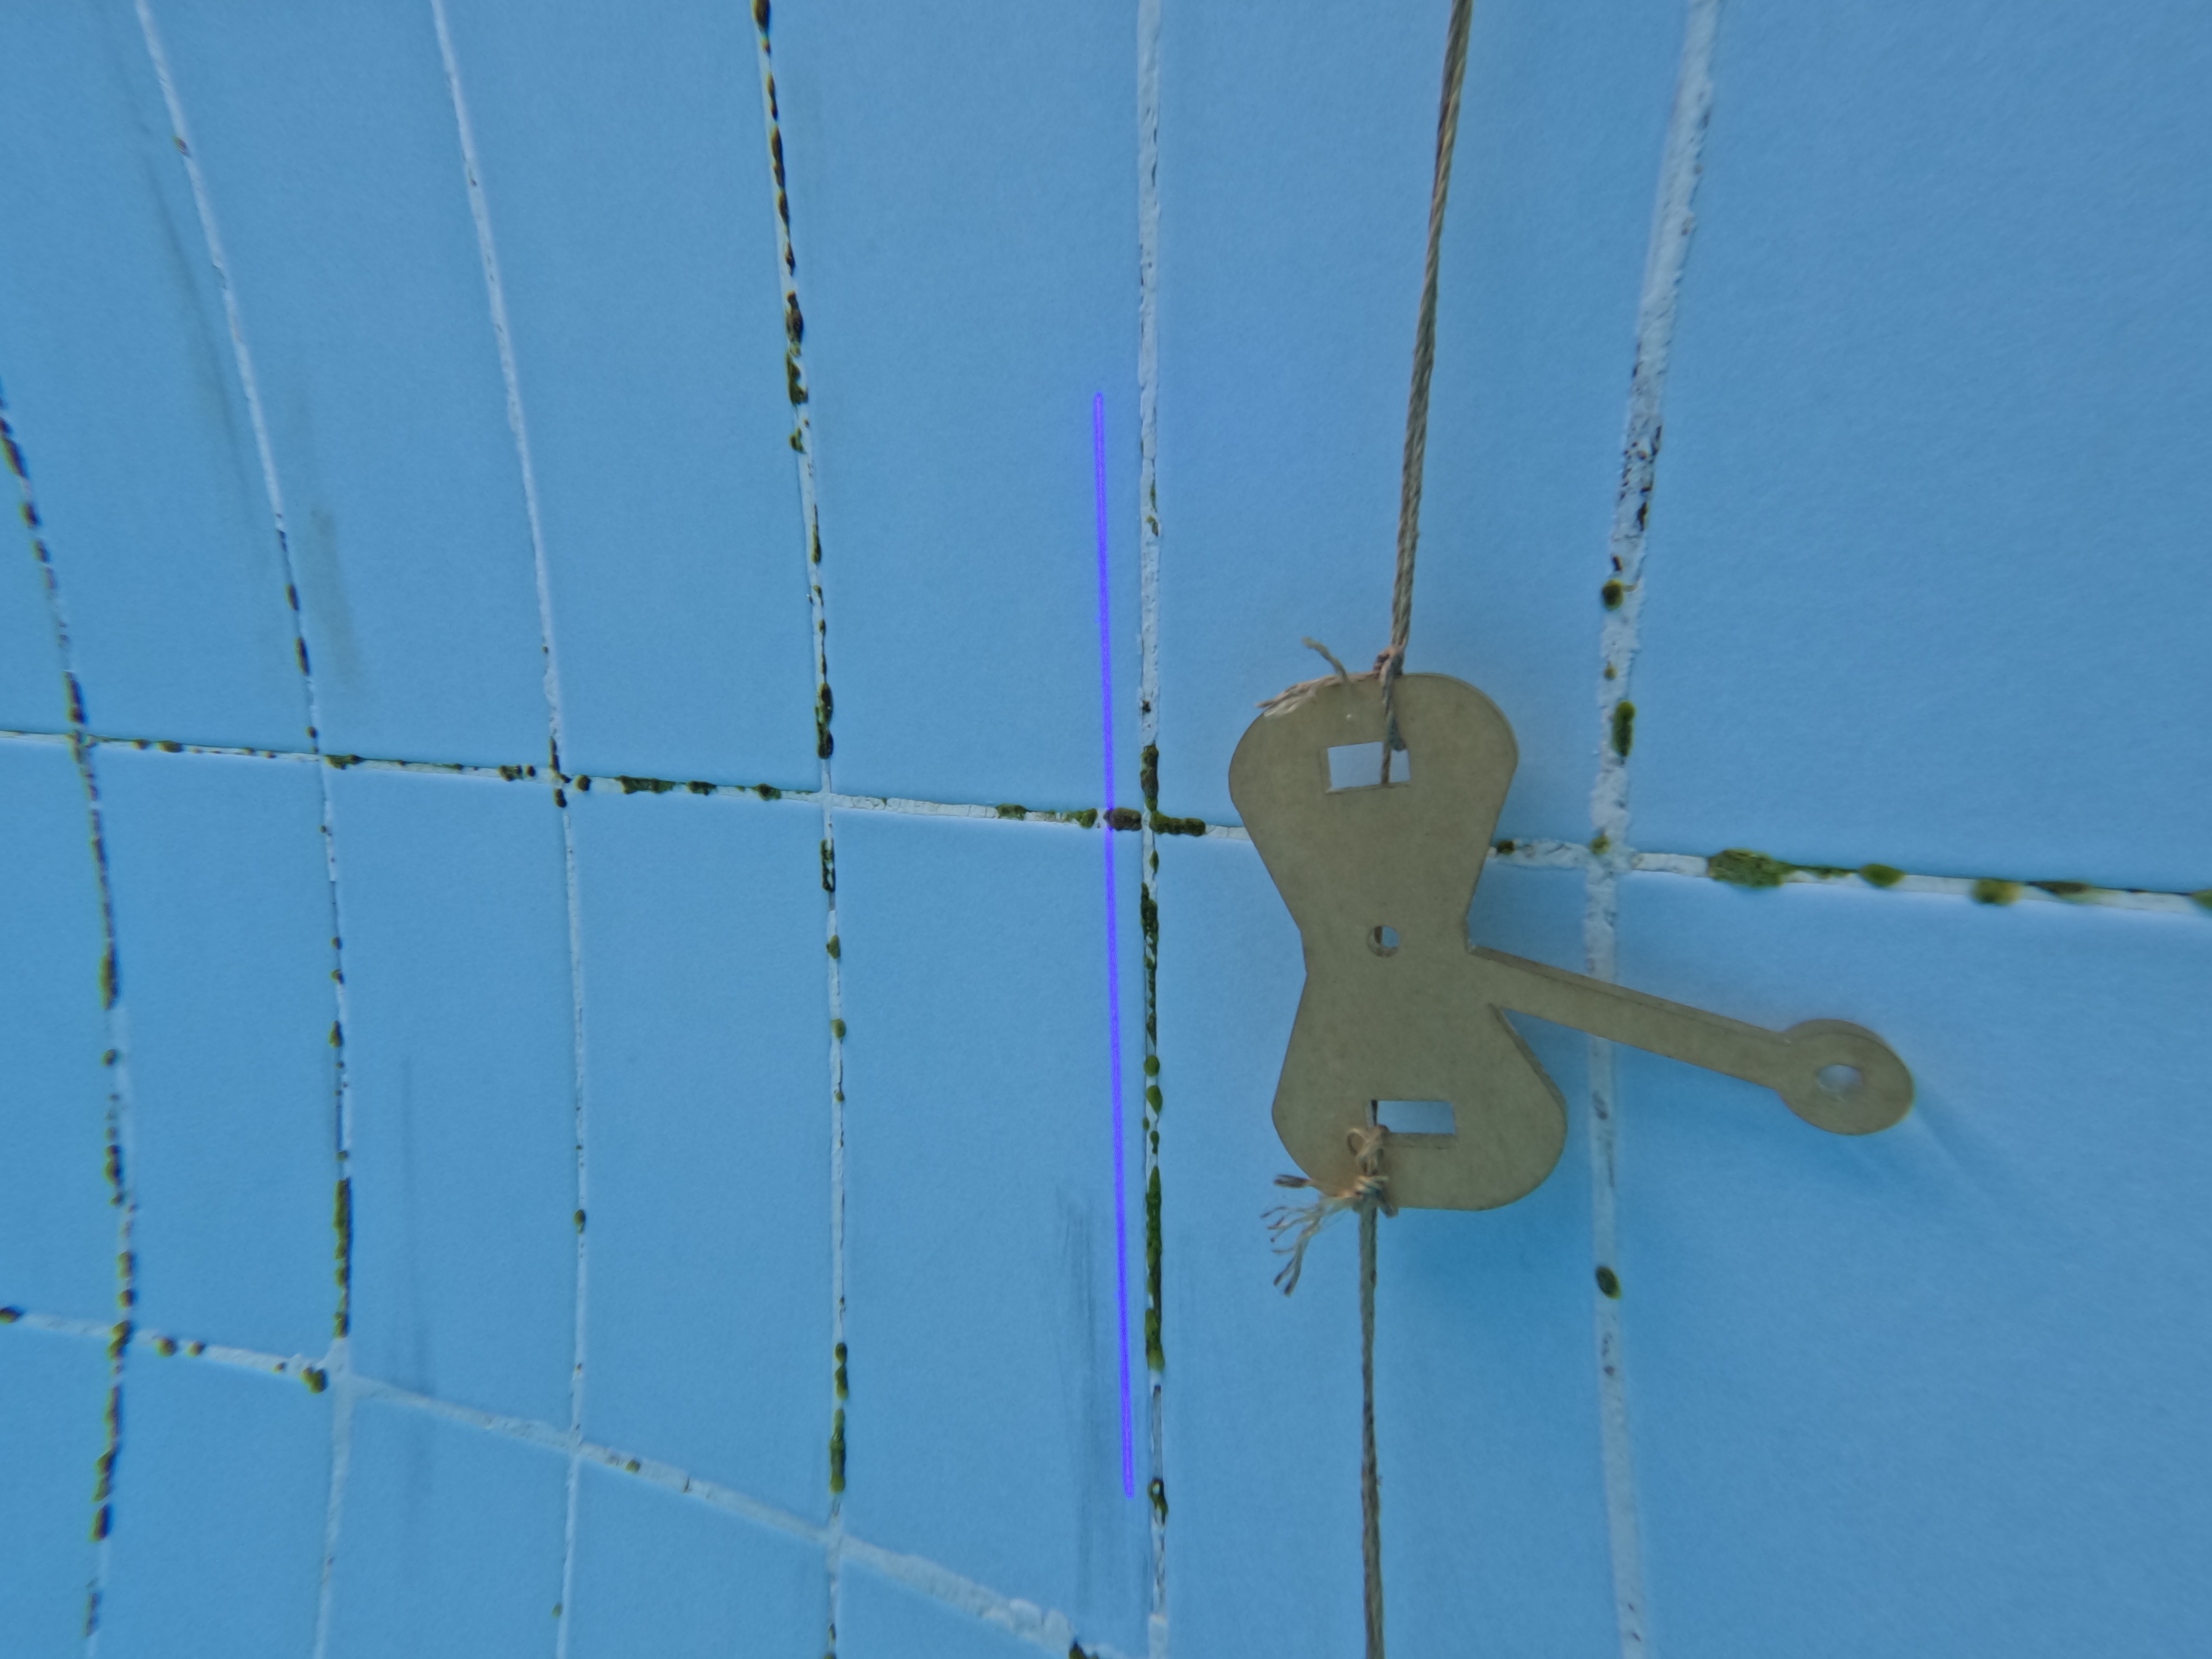

Supplement: Supplementary file 2701 [file G0050999.pdf › Level_2_2/G0050999.pdf]

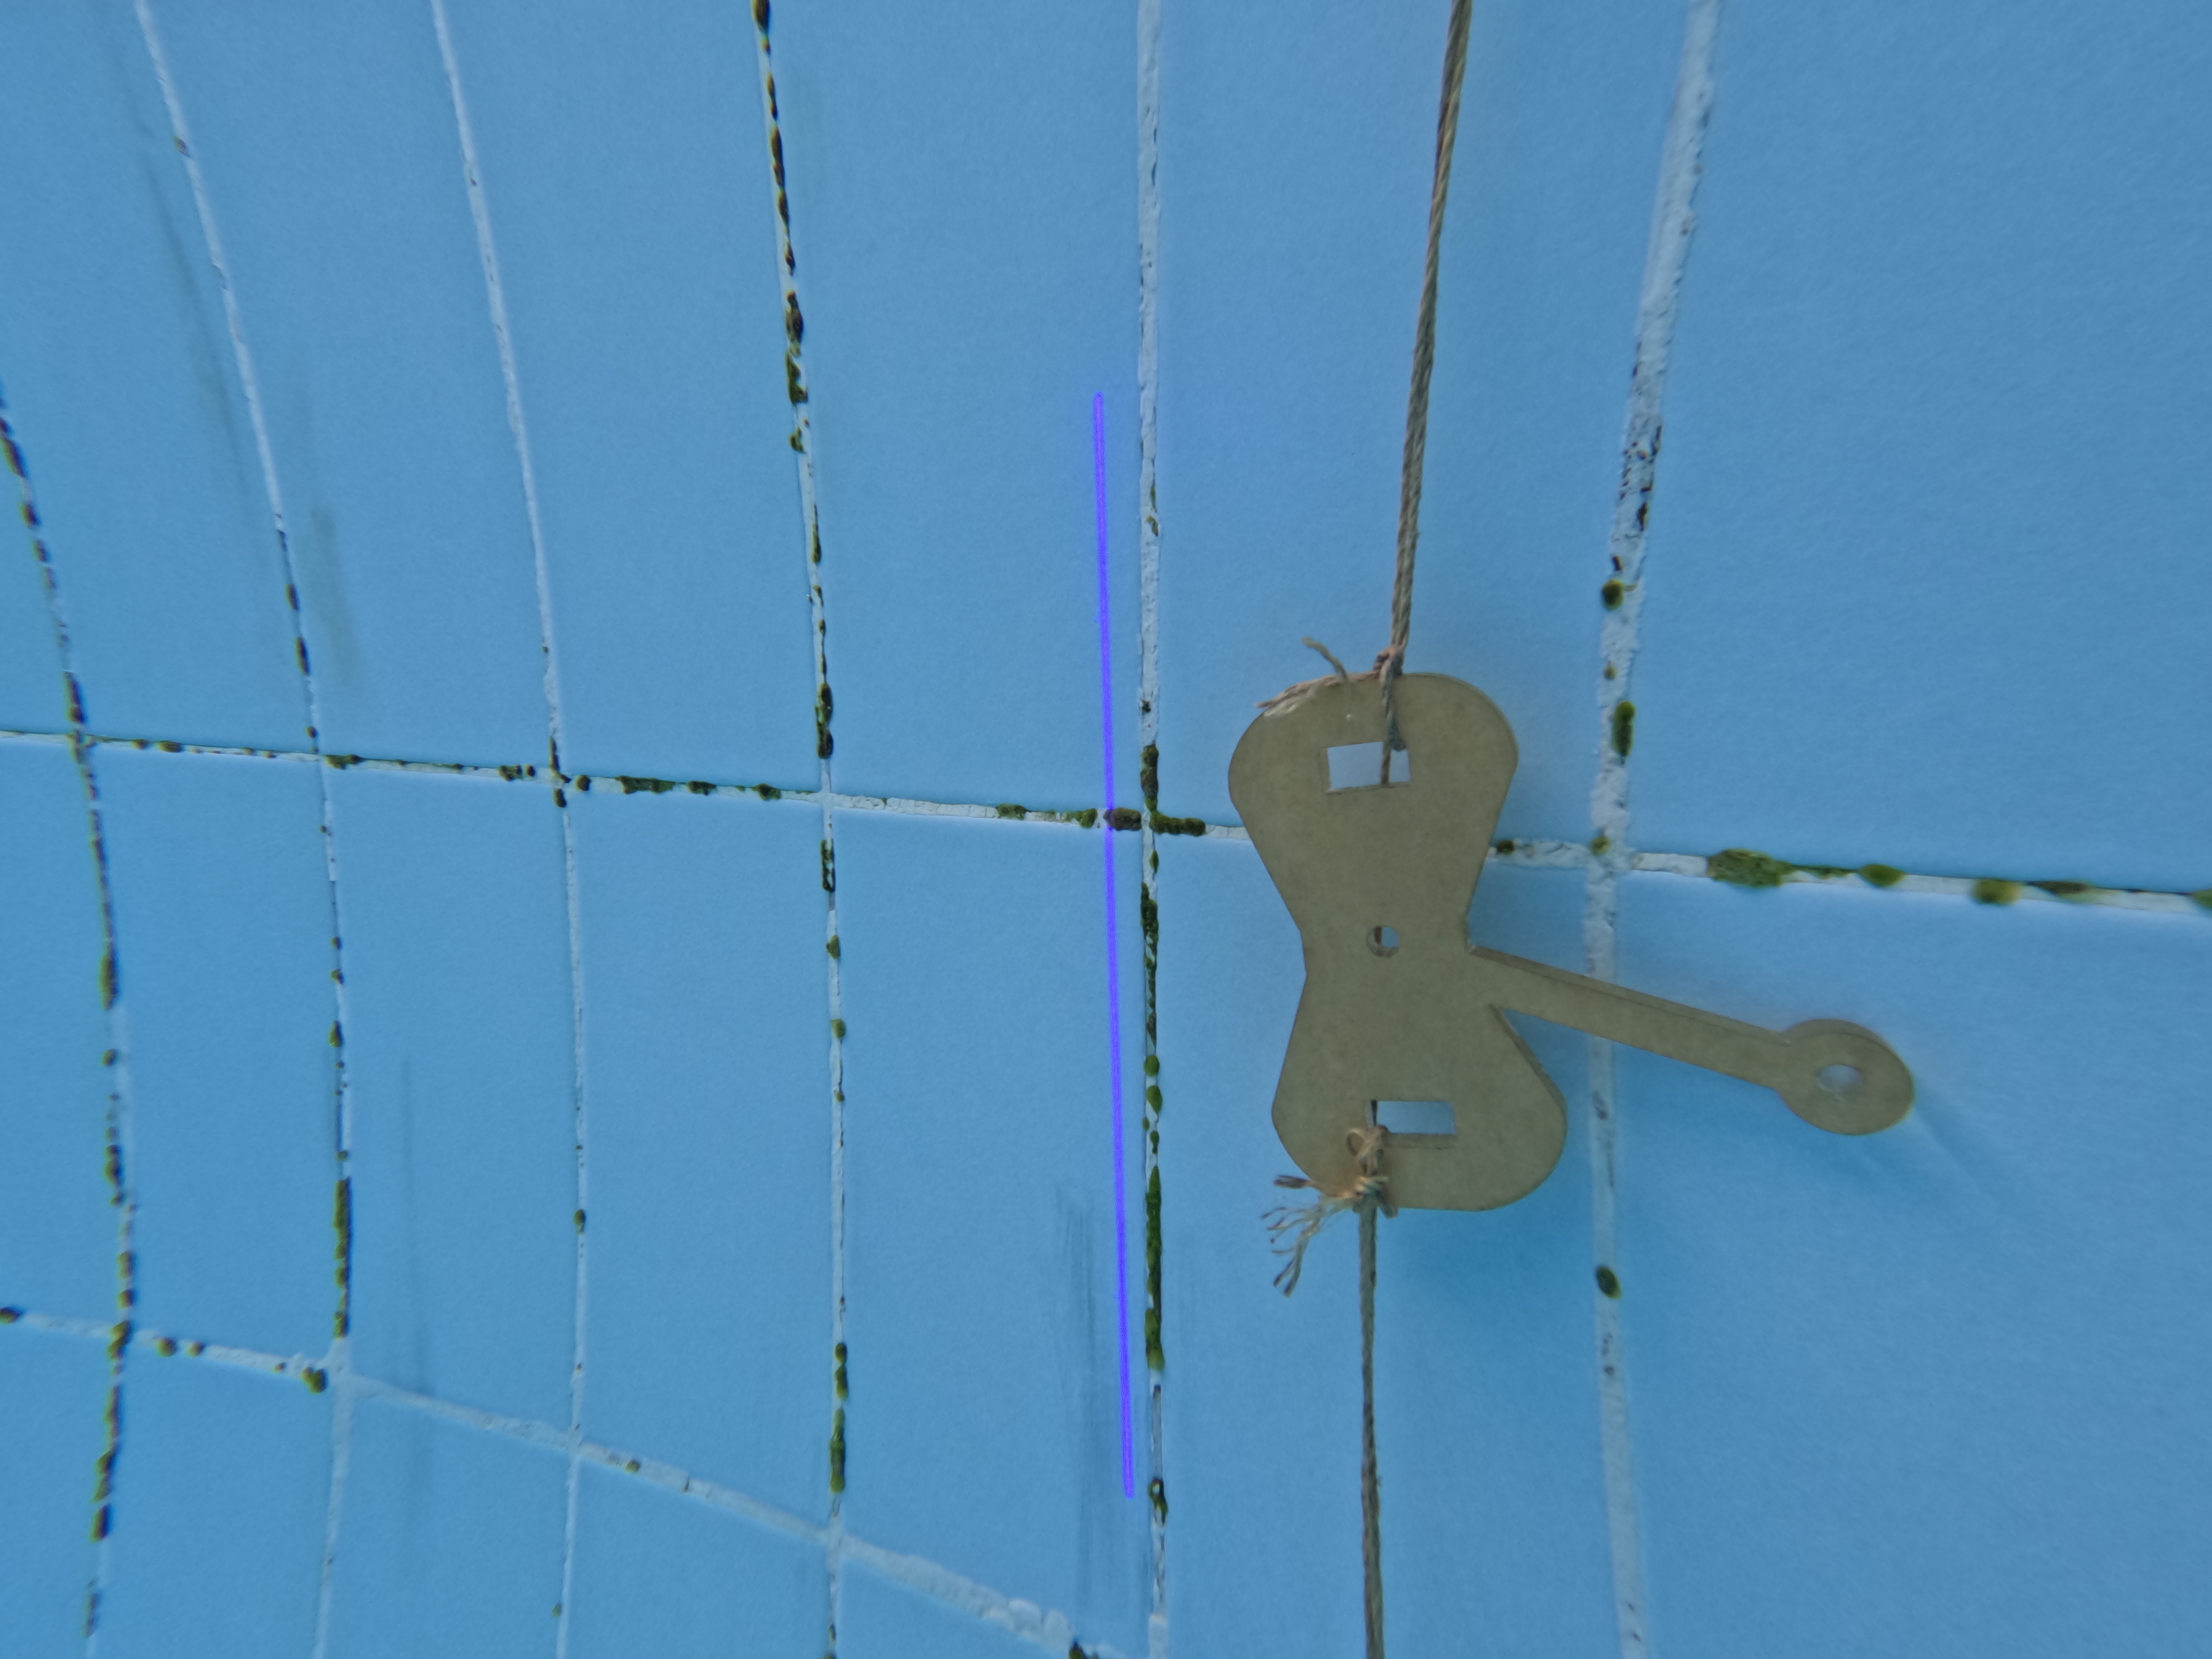

Supplement: Supplementary file 2702 [file G0051000.pdf › Level_2_2/G0051000.pdf]

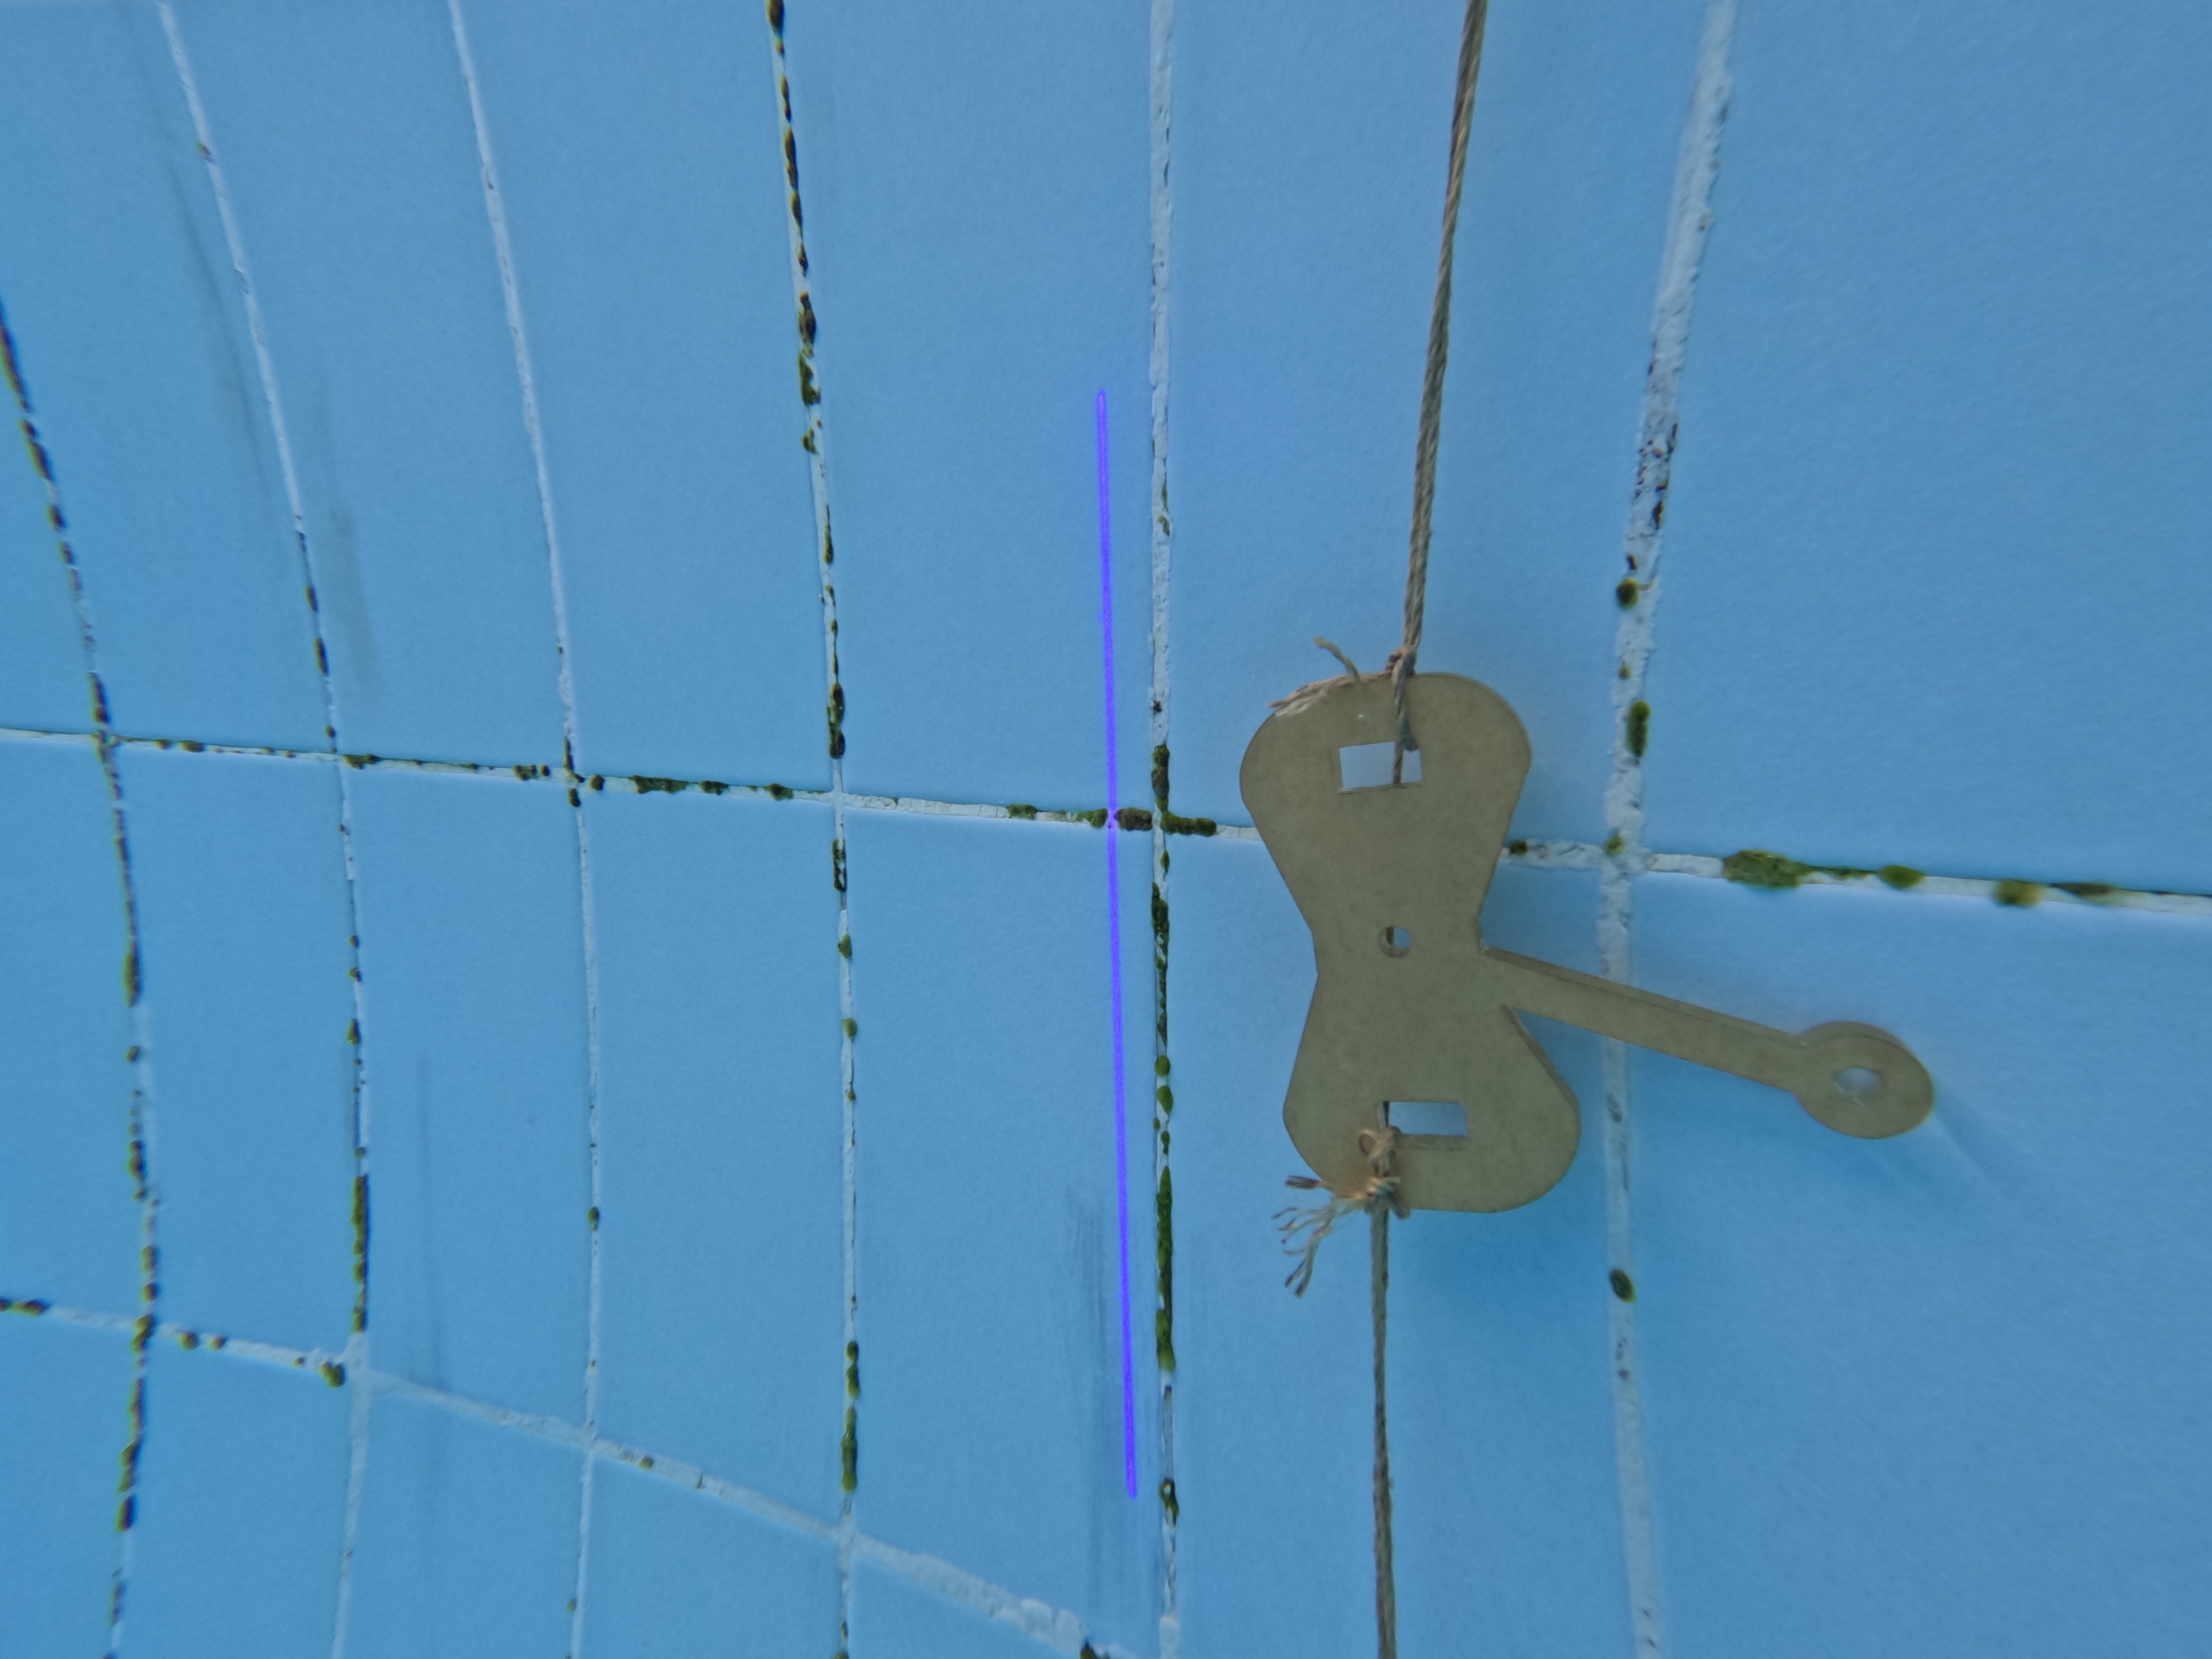

Supplement: Supplementary file 2703 [file G0051001.pdf › Level_2_2/G0051001.pdf]

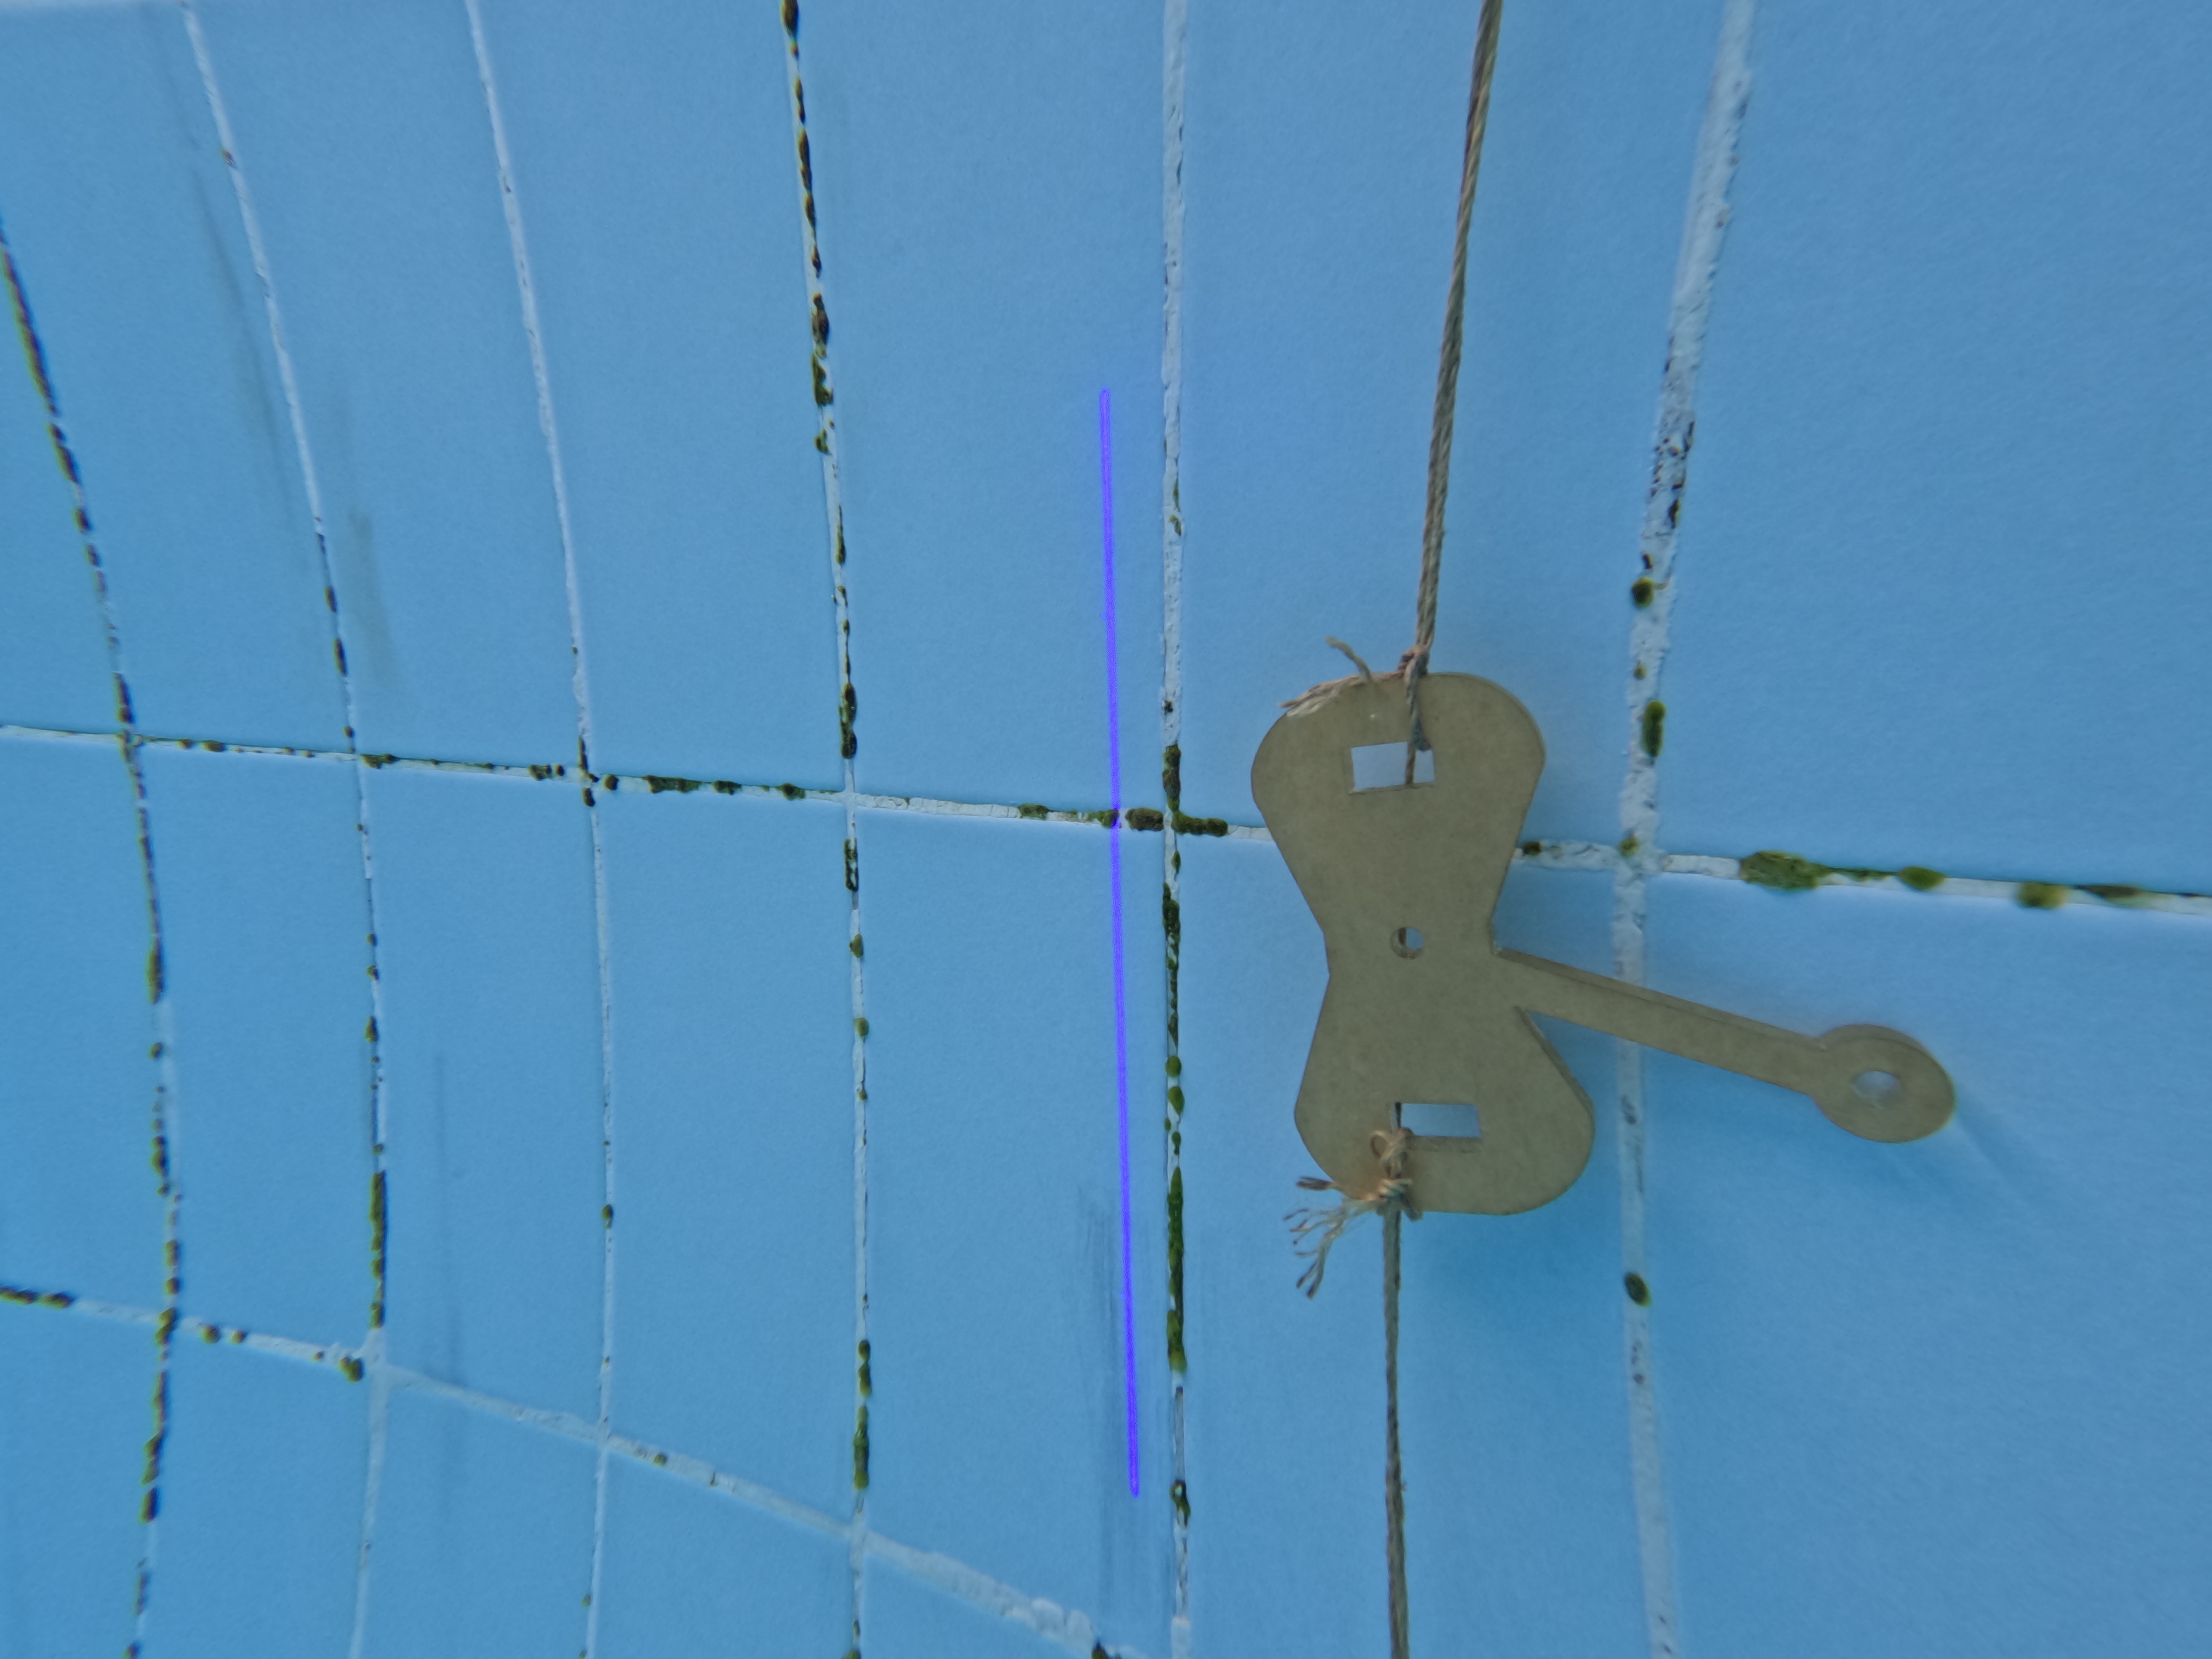

Supplement: Supplementary file 2704 [file G0051002.pdf › Level_2_2/G0051002.pdf]

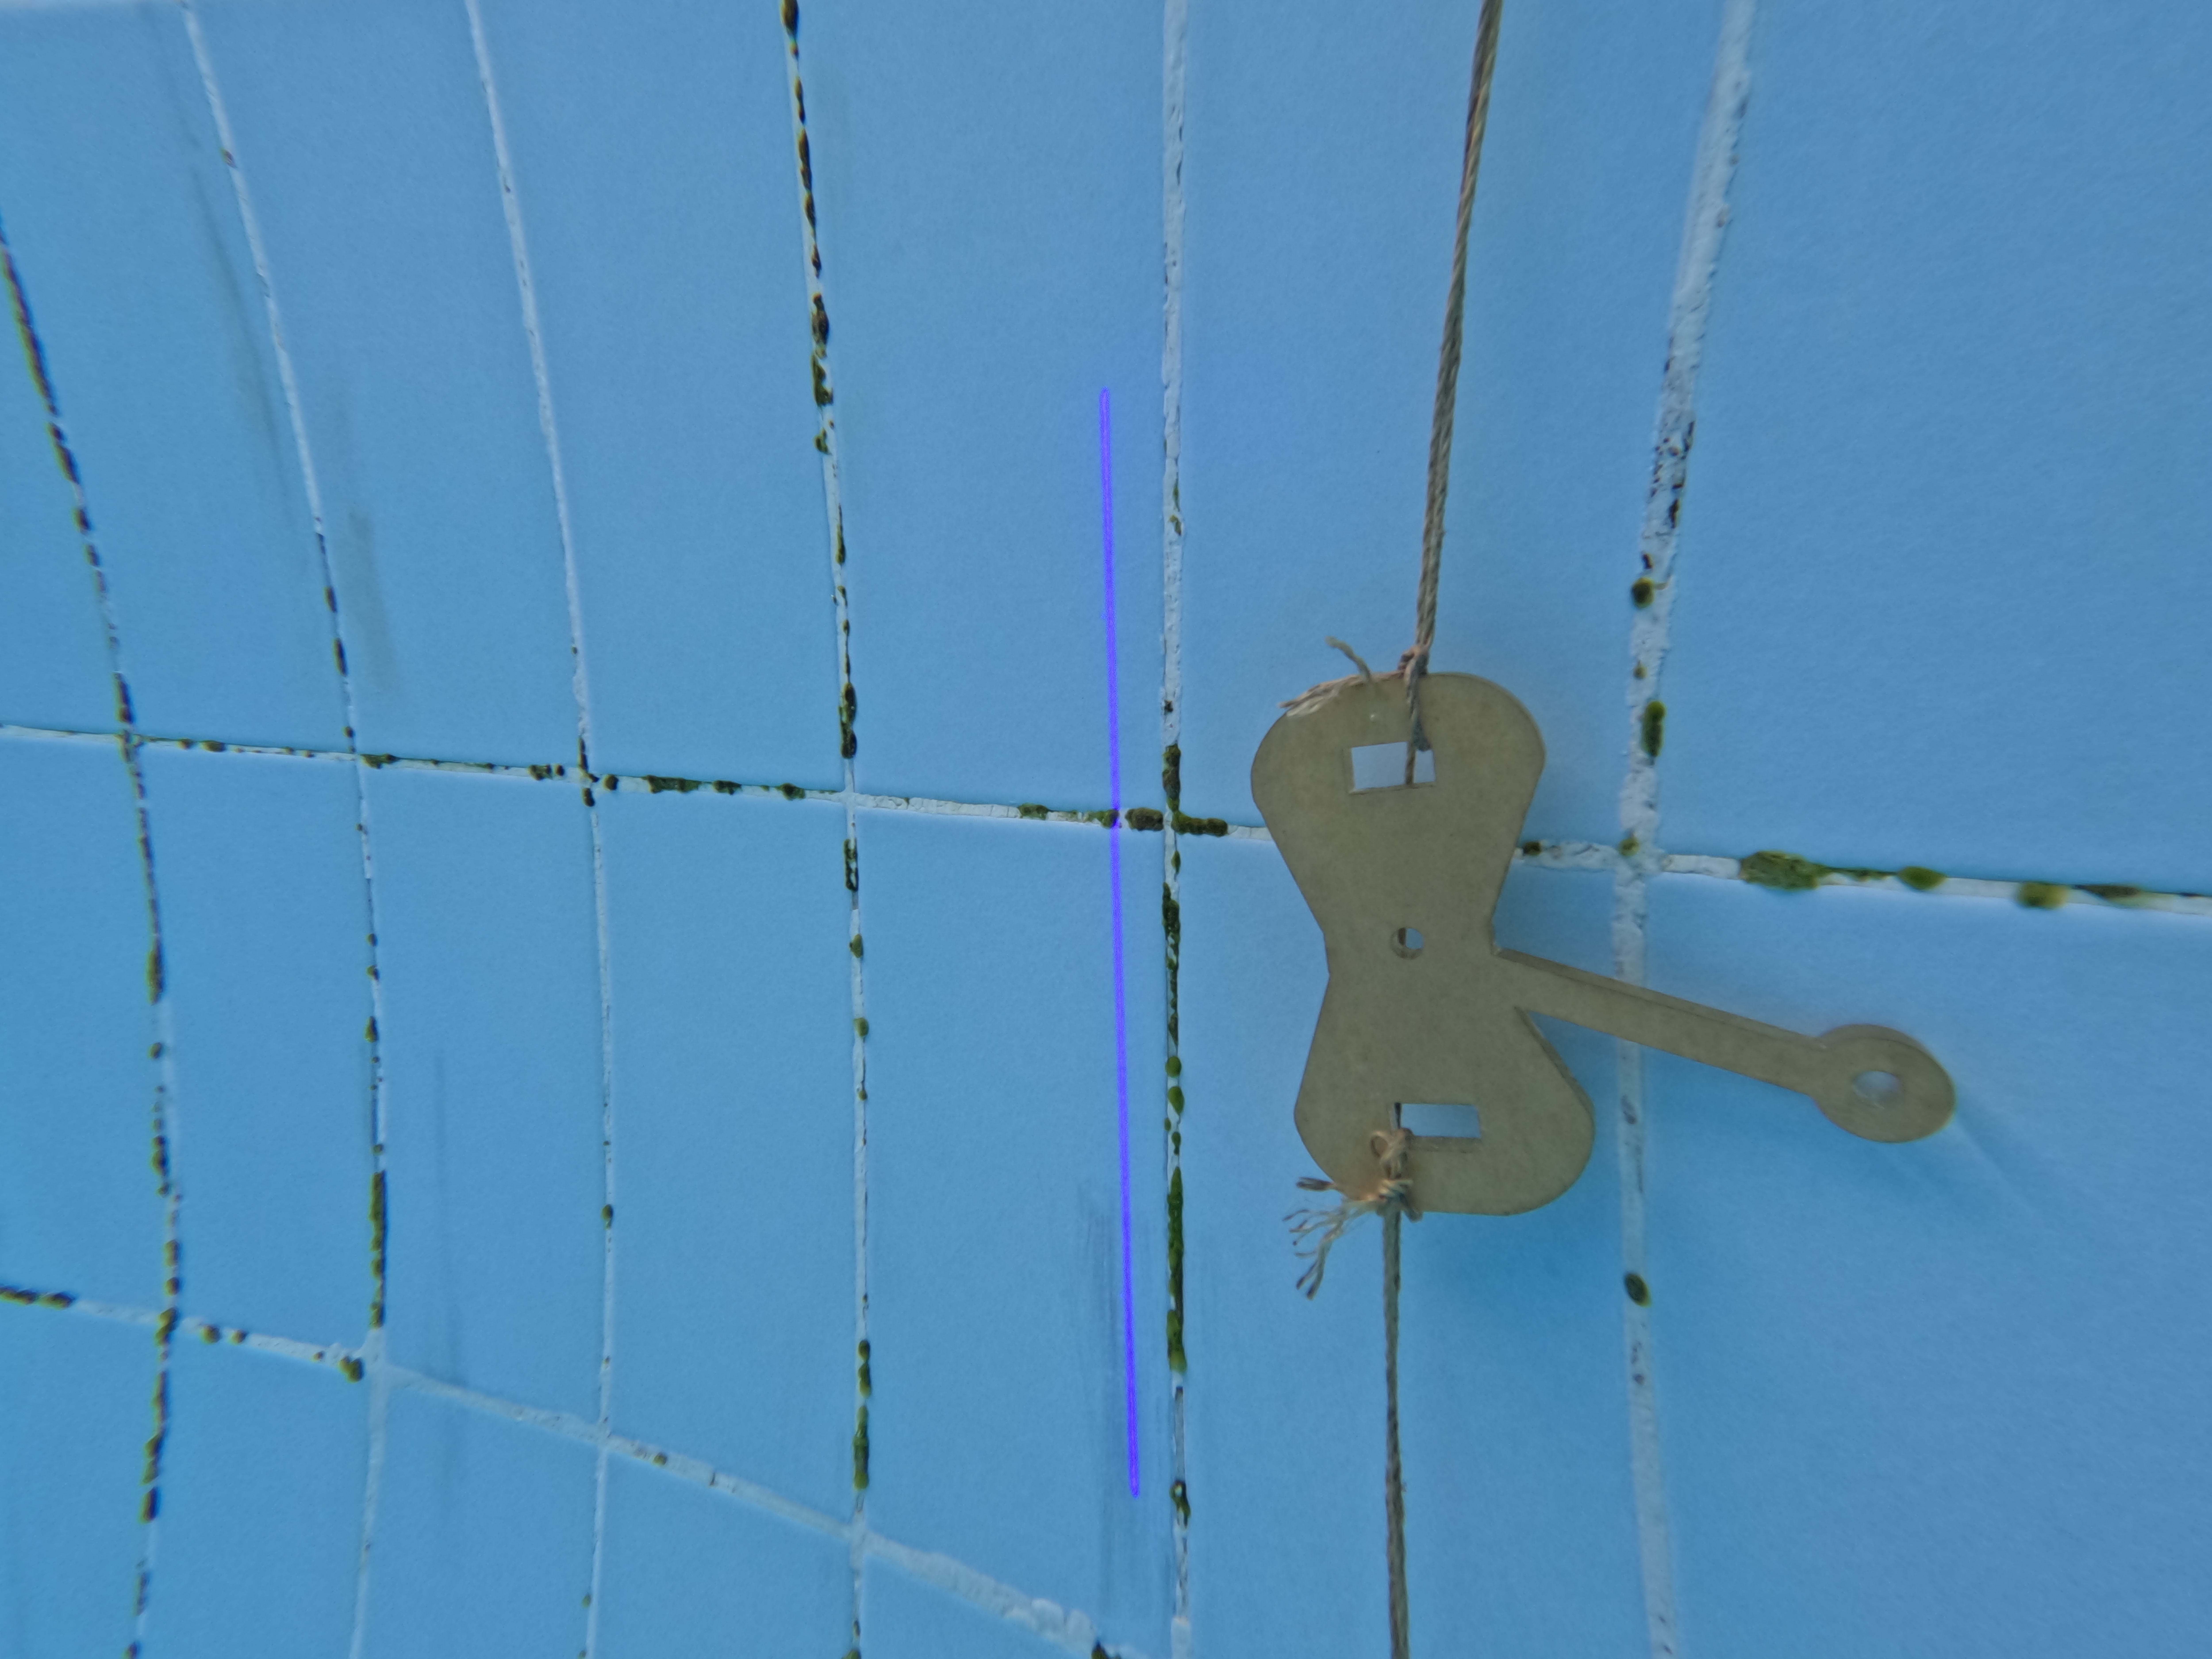

Supplement: Supplementary file 2705 [file G0051003.pdf › Level_2_2/G0051003.pdf]

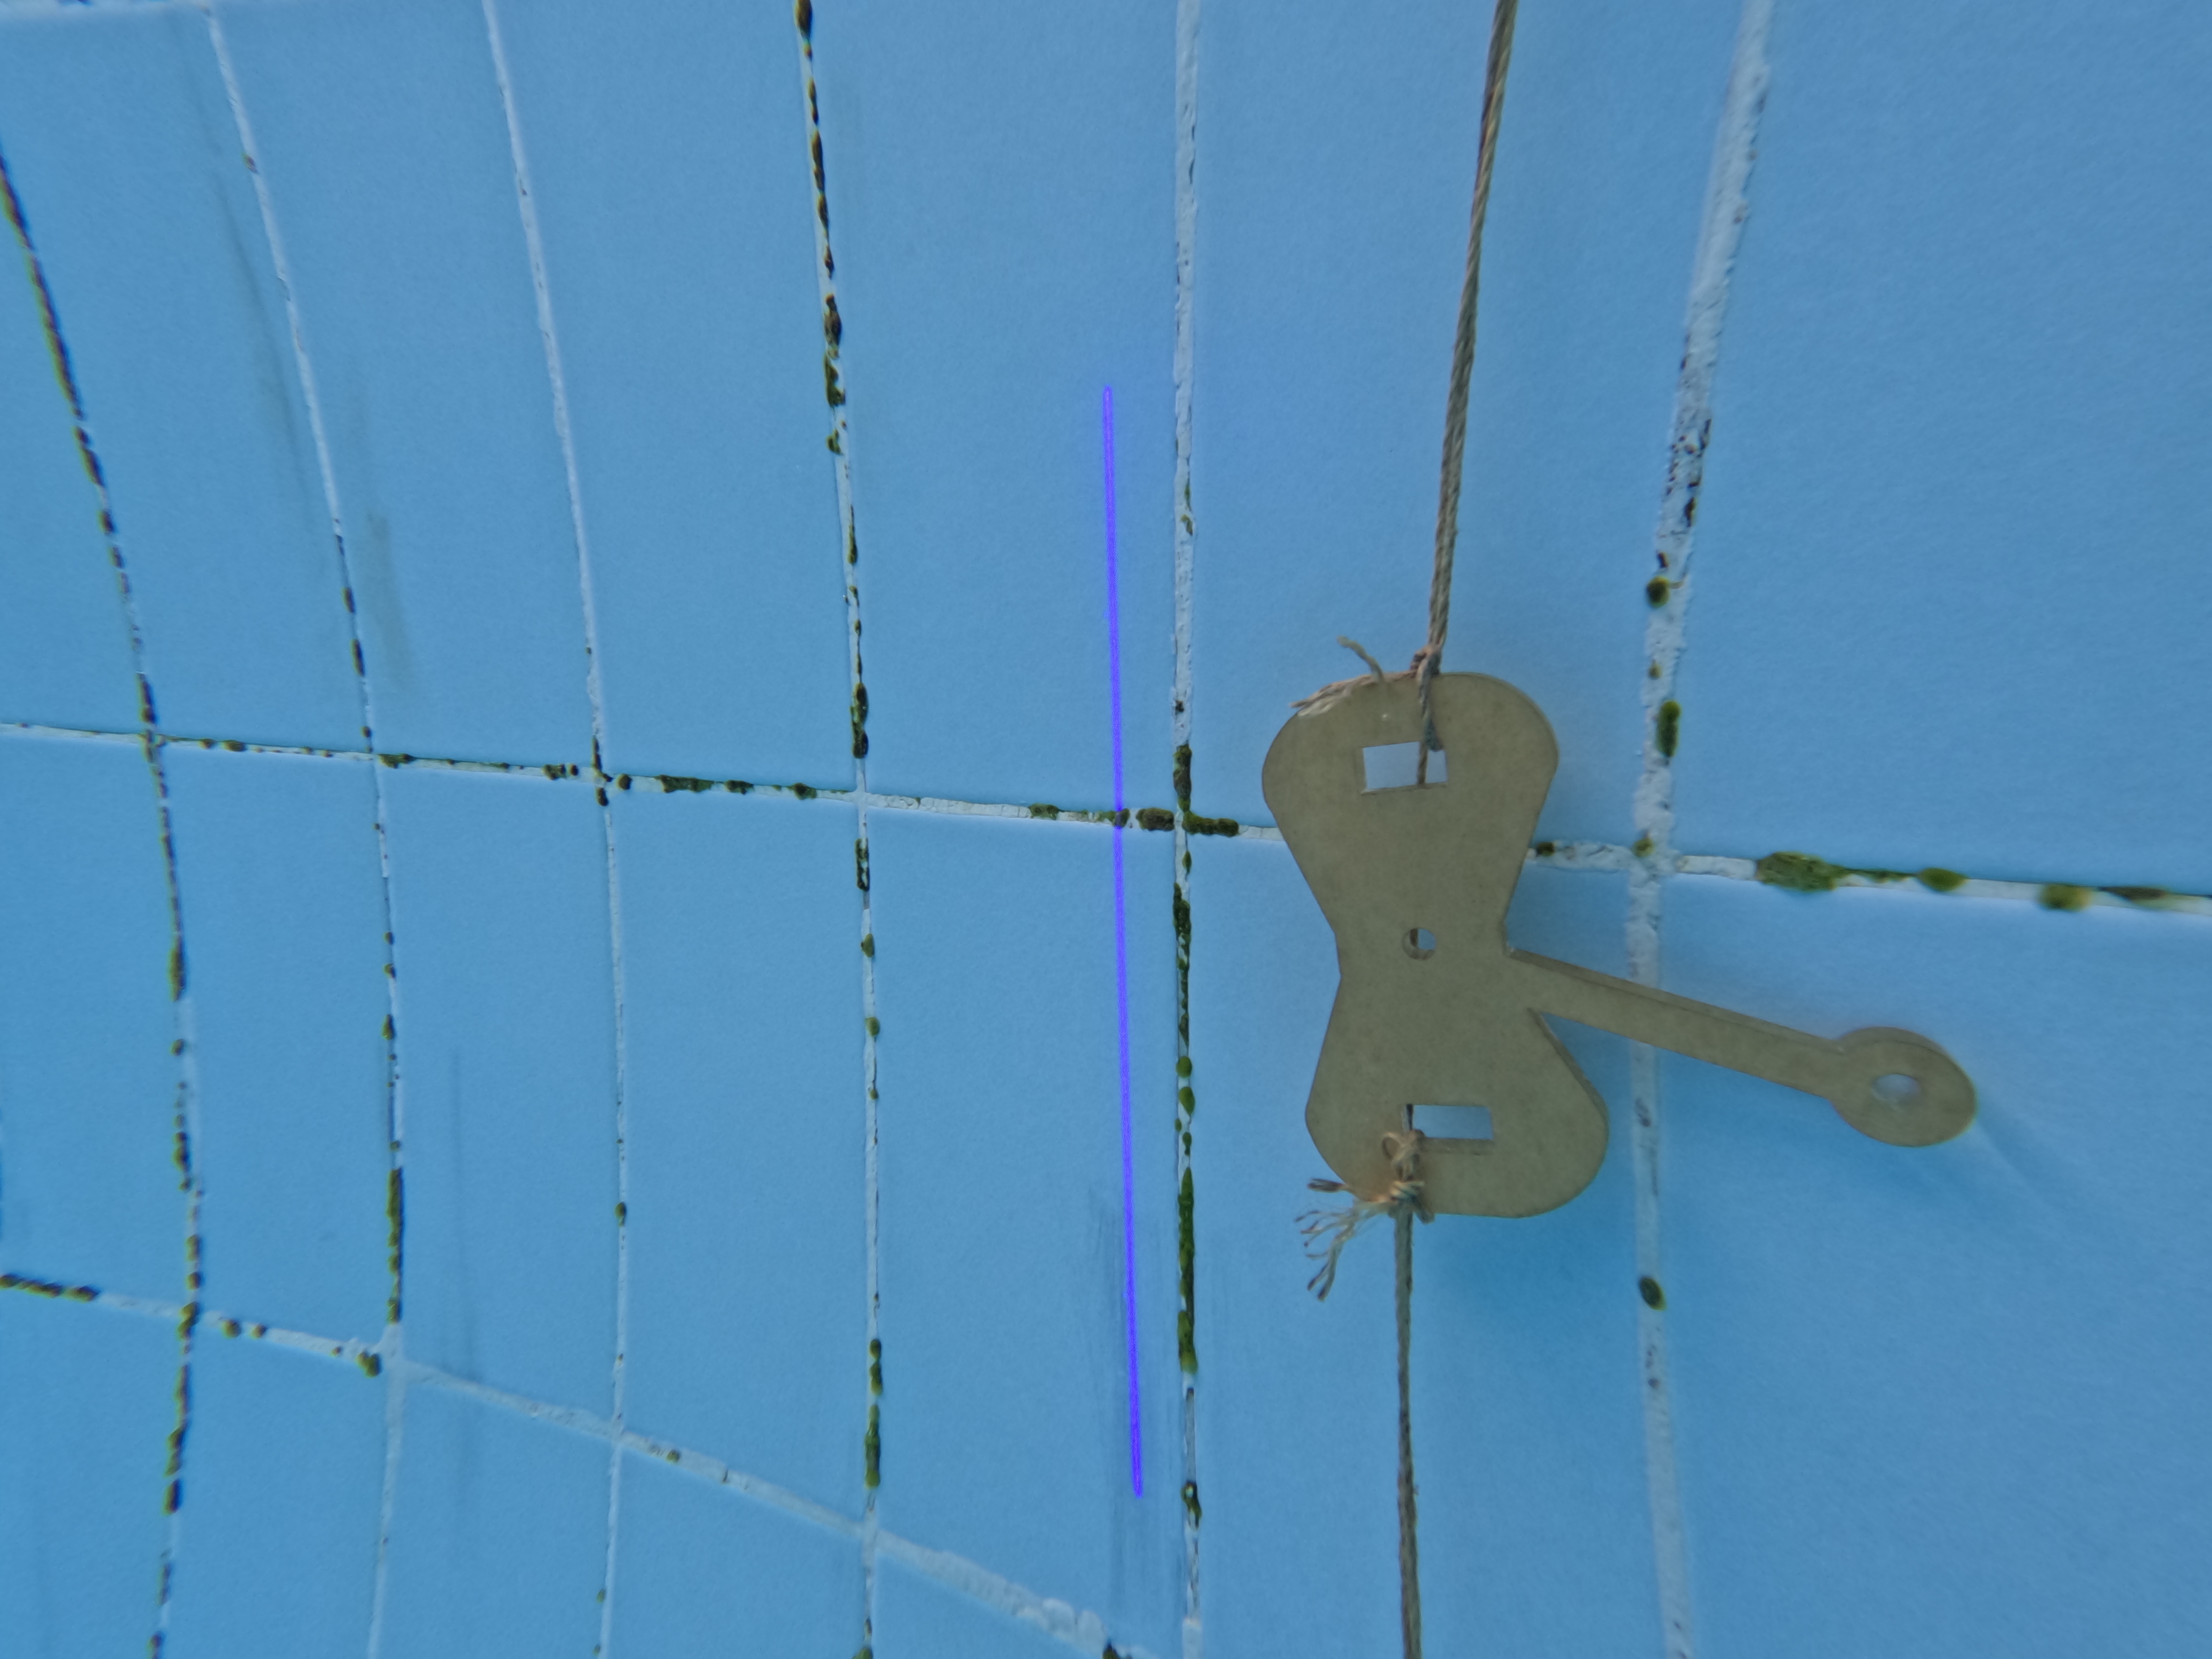

Supplement: Supplementary file 2706 [file G0051004.pdf › Level_2_2/G0051004.pdf]

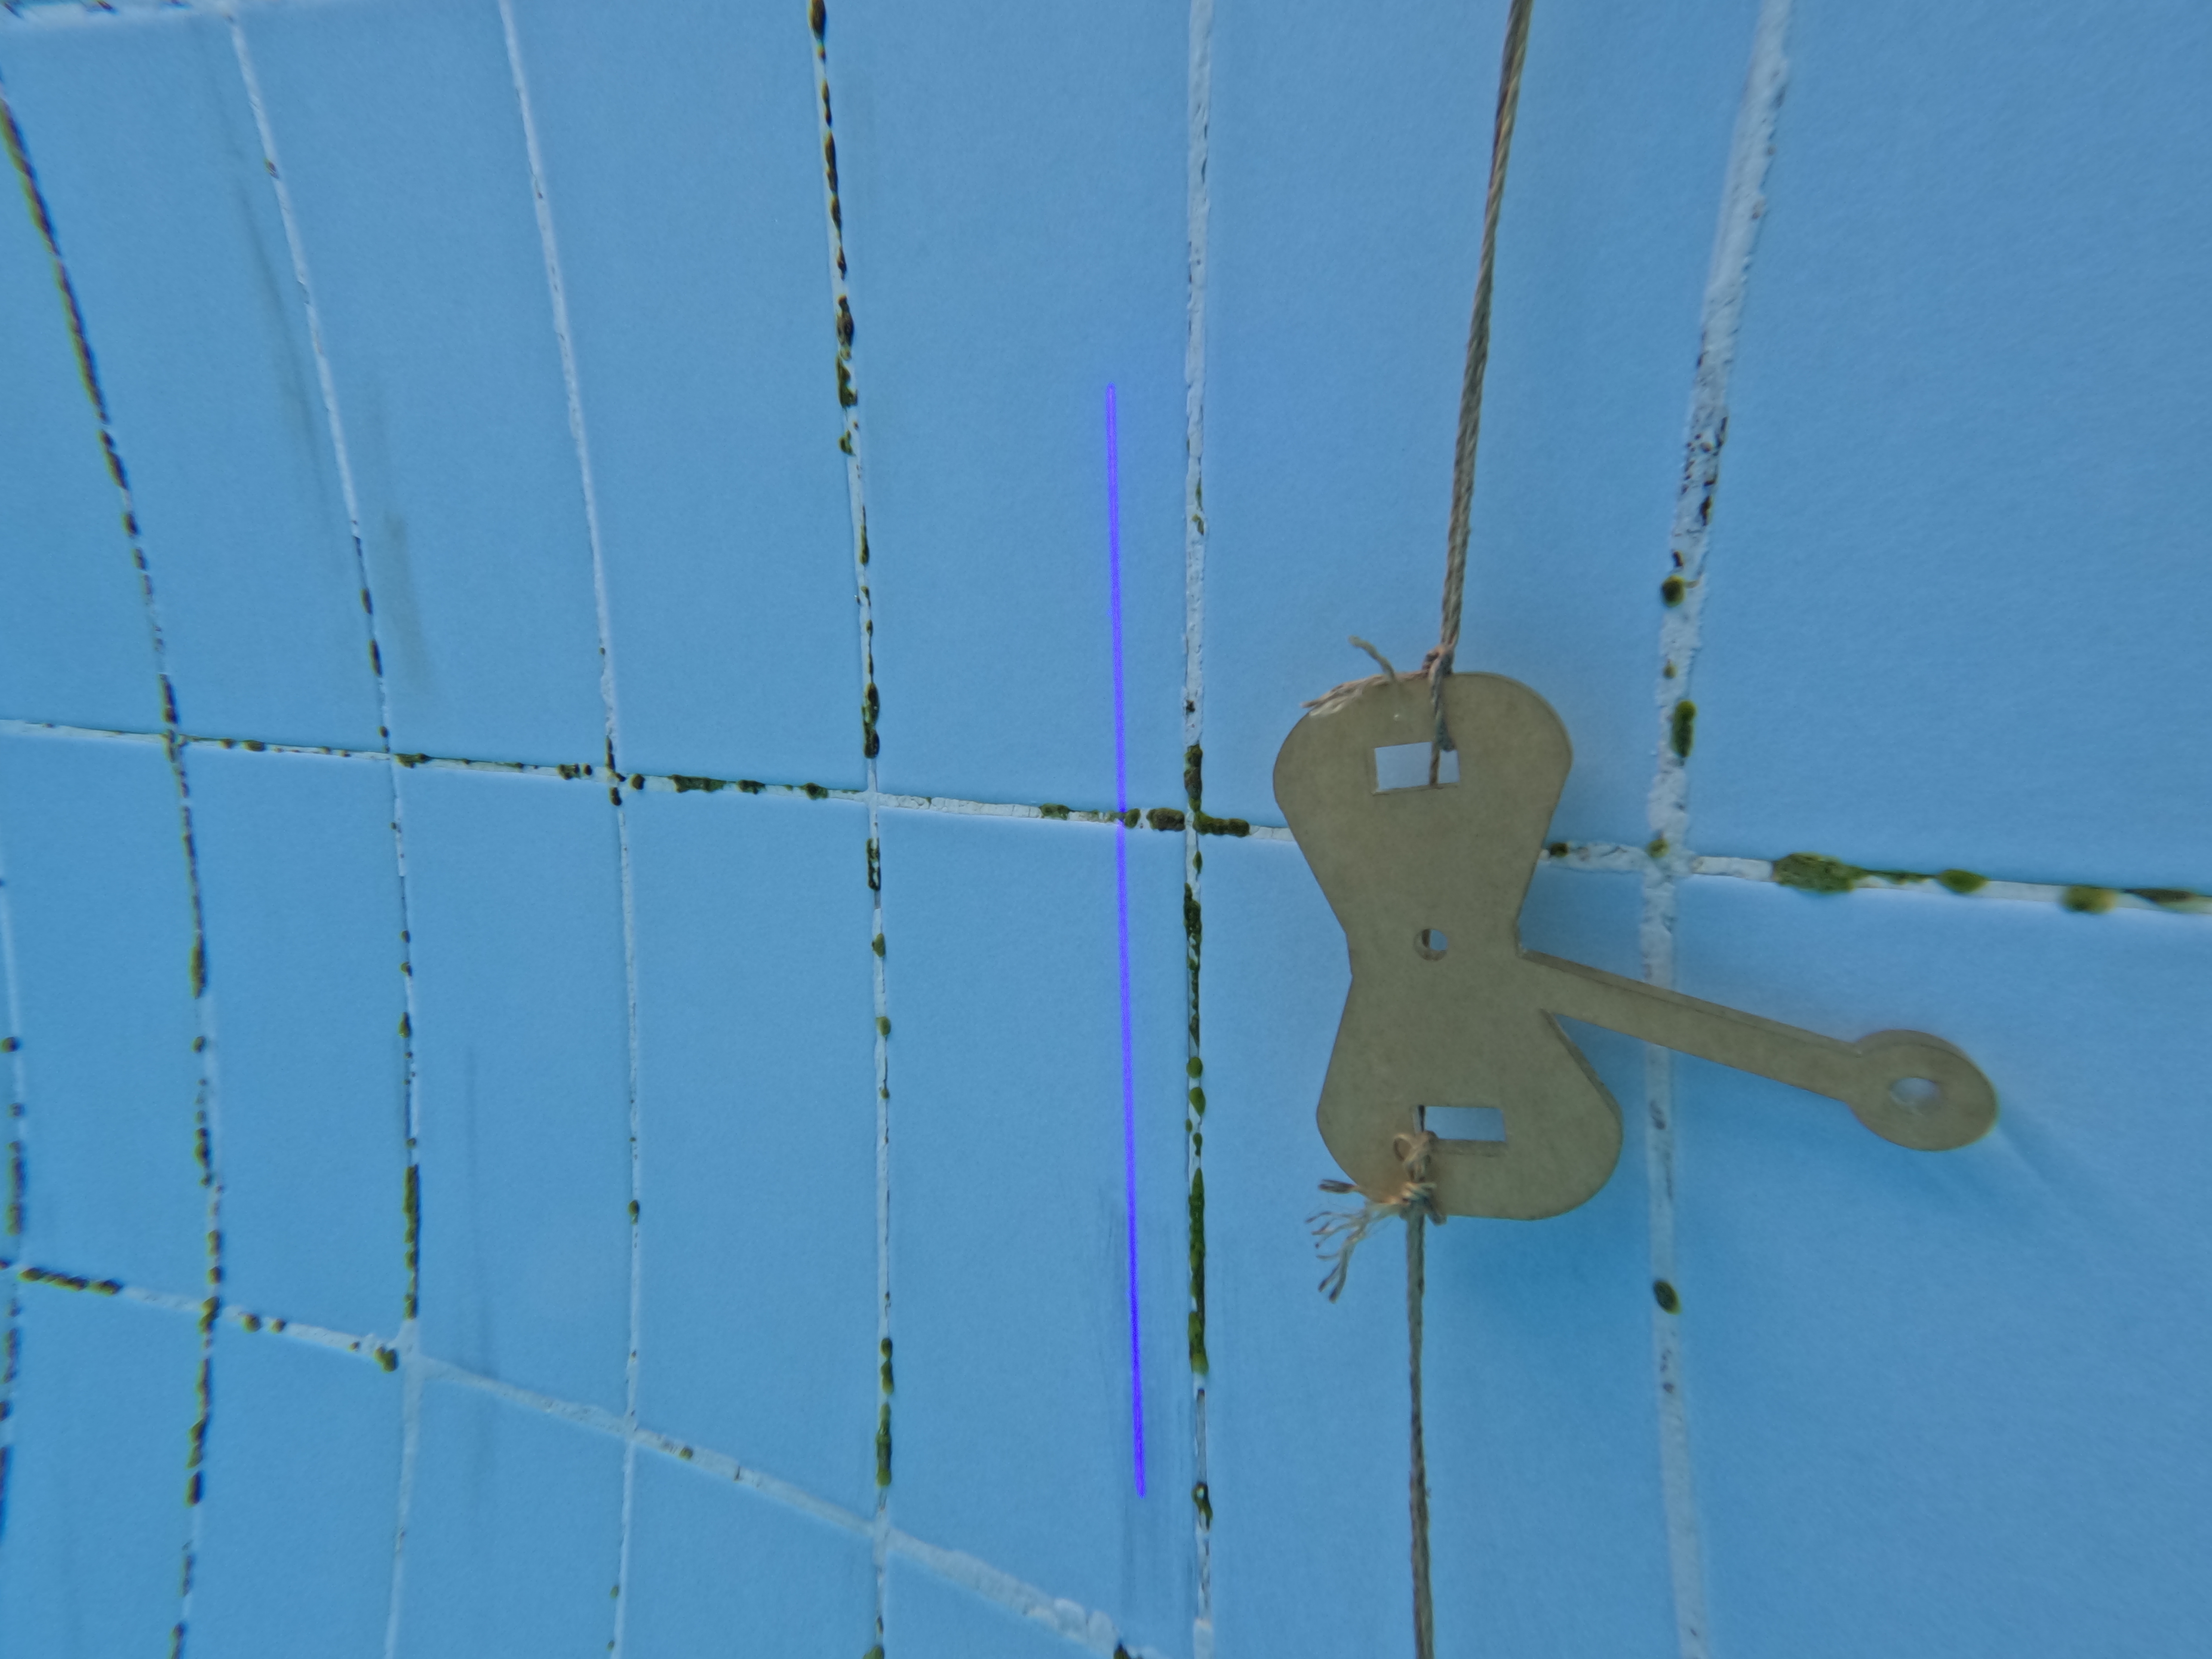

Supplement: Supplementary file 2707 [file G0051005.pdf › Level_2_2/G0051005.pdf]

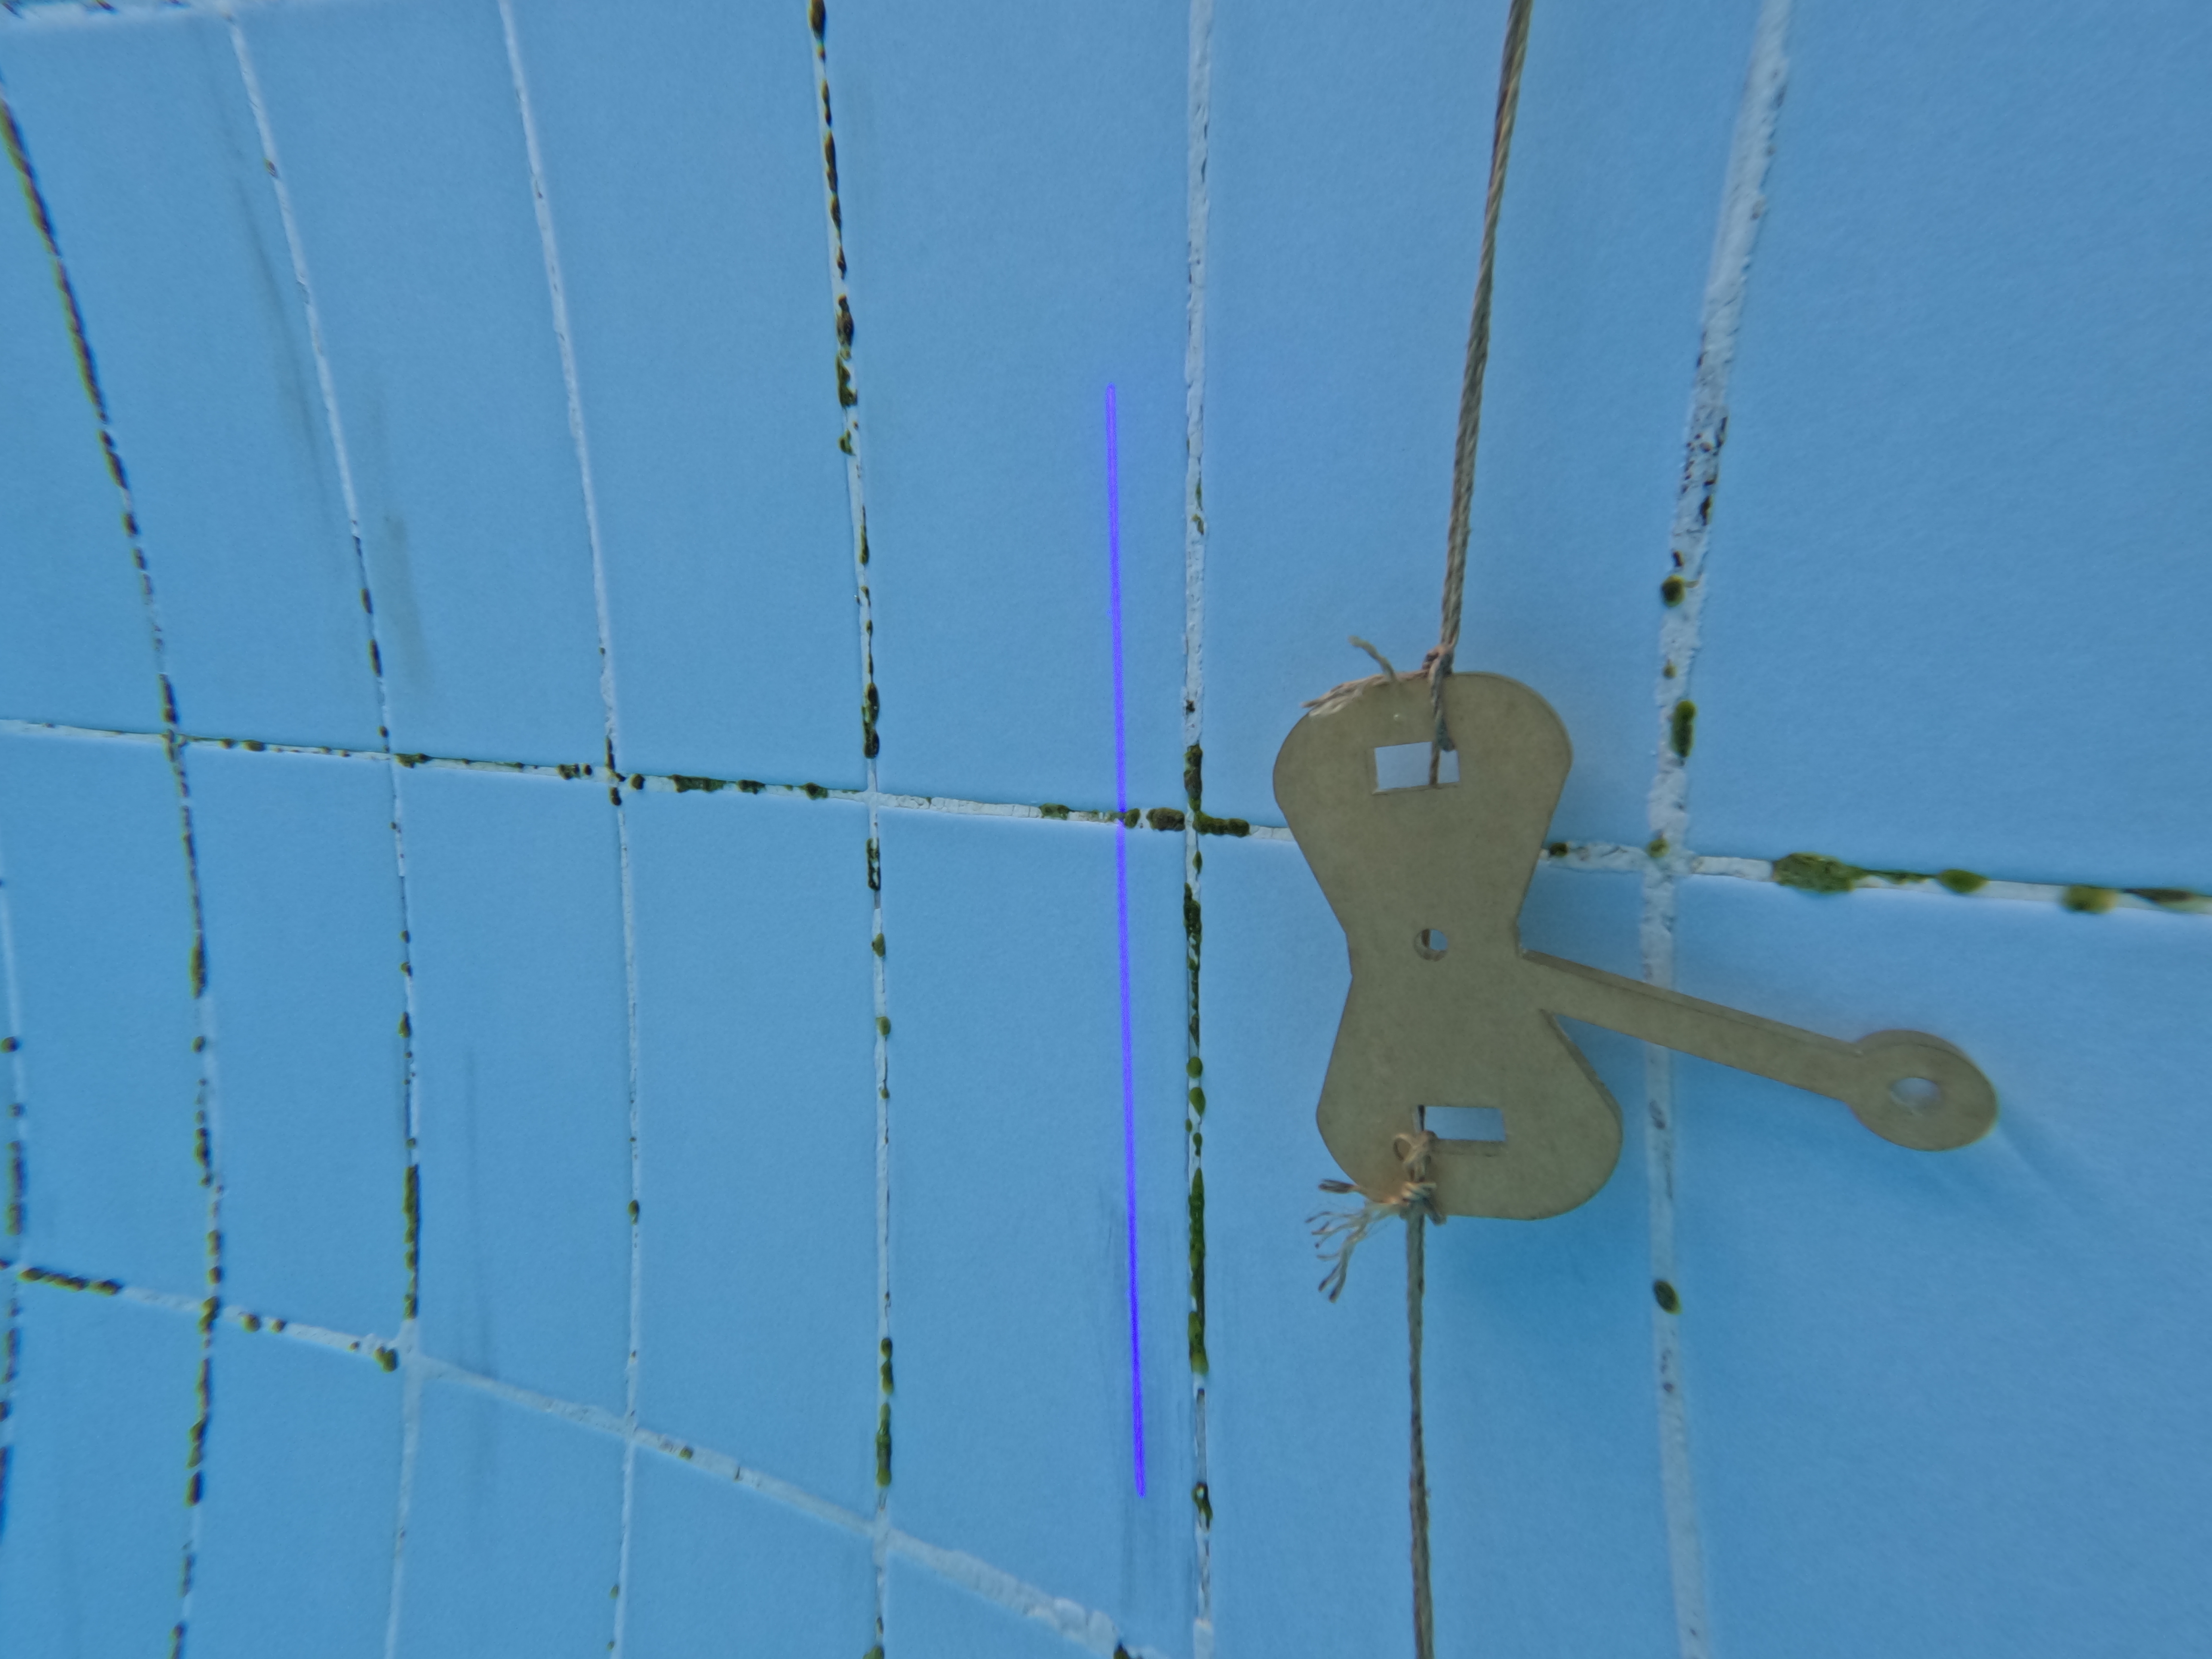

Supplement: Supplementary file 2708 [file G0051006.pdf › Level_2_2/G0051006.pdf]

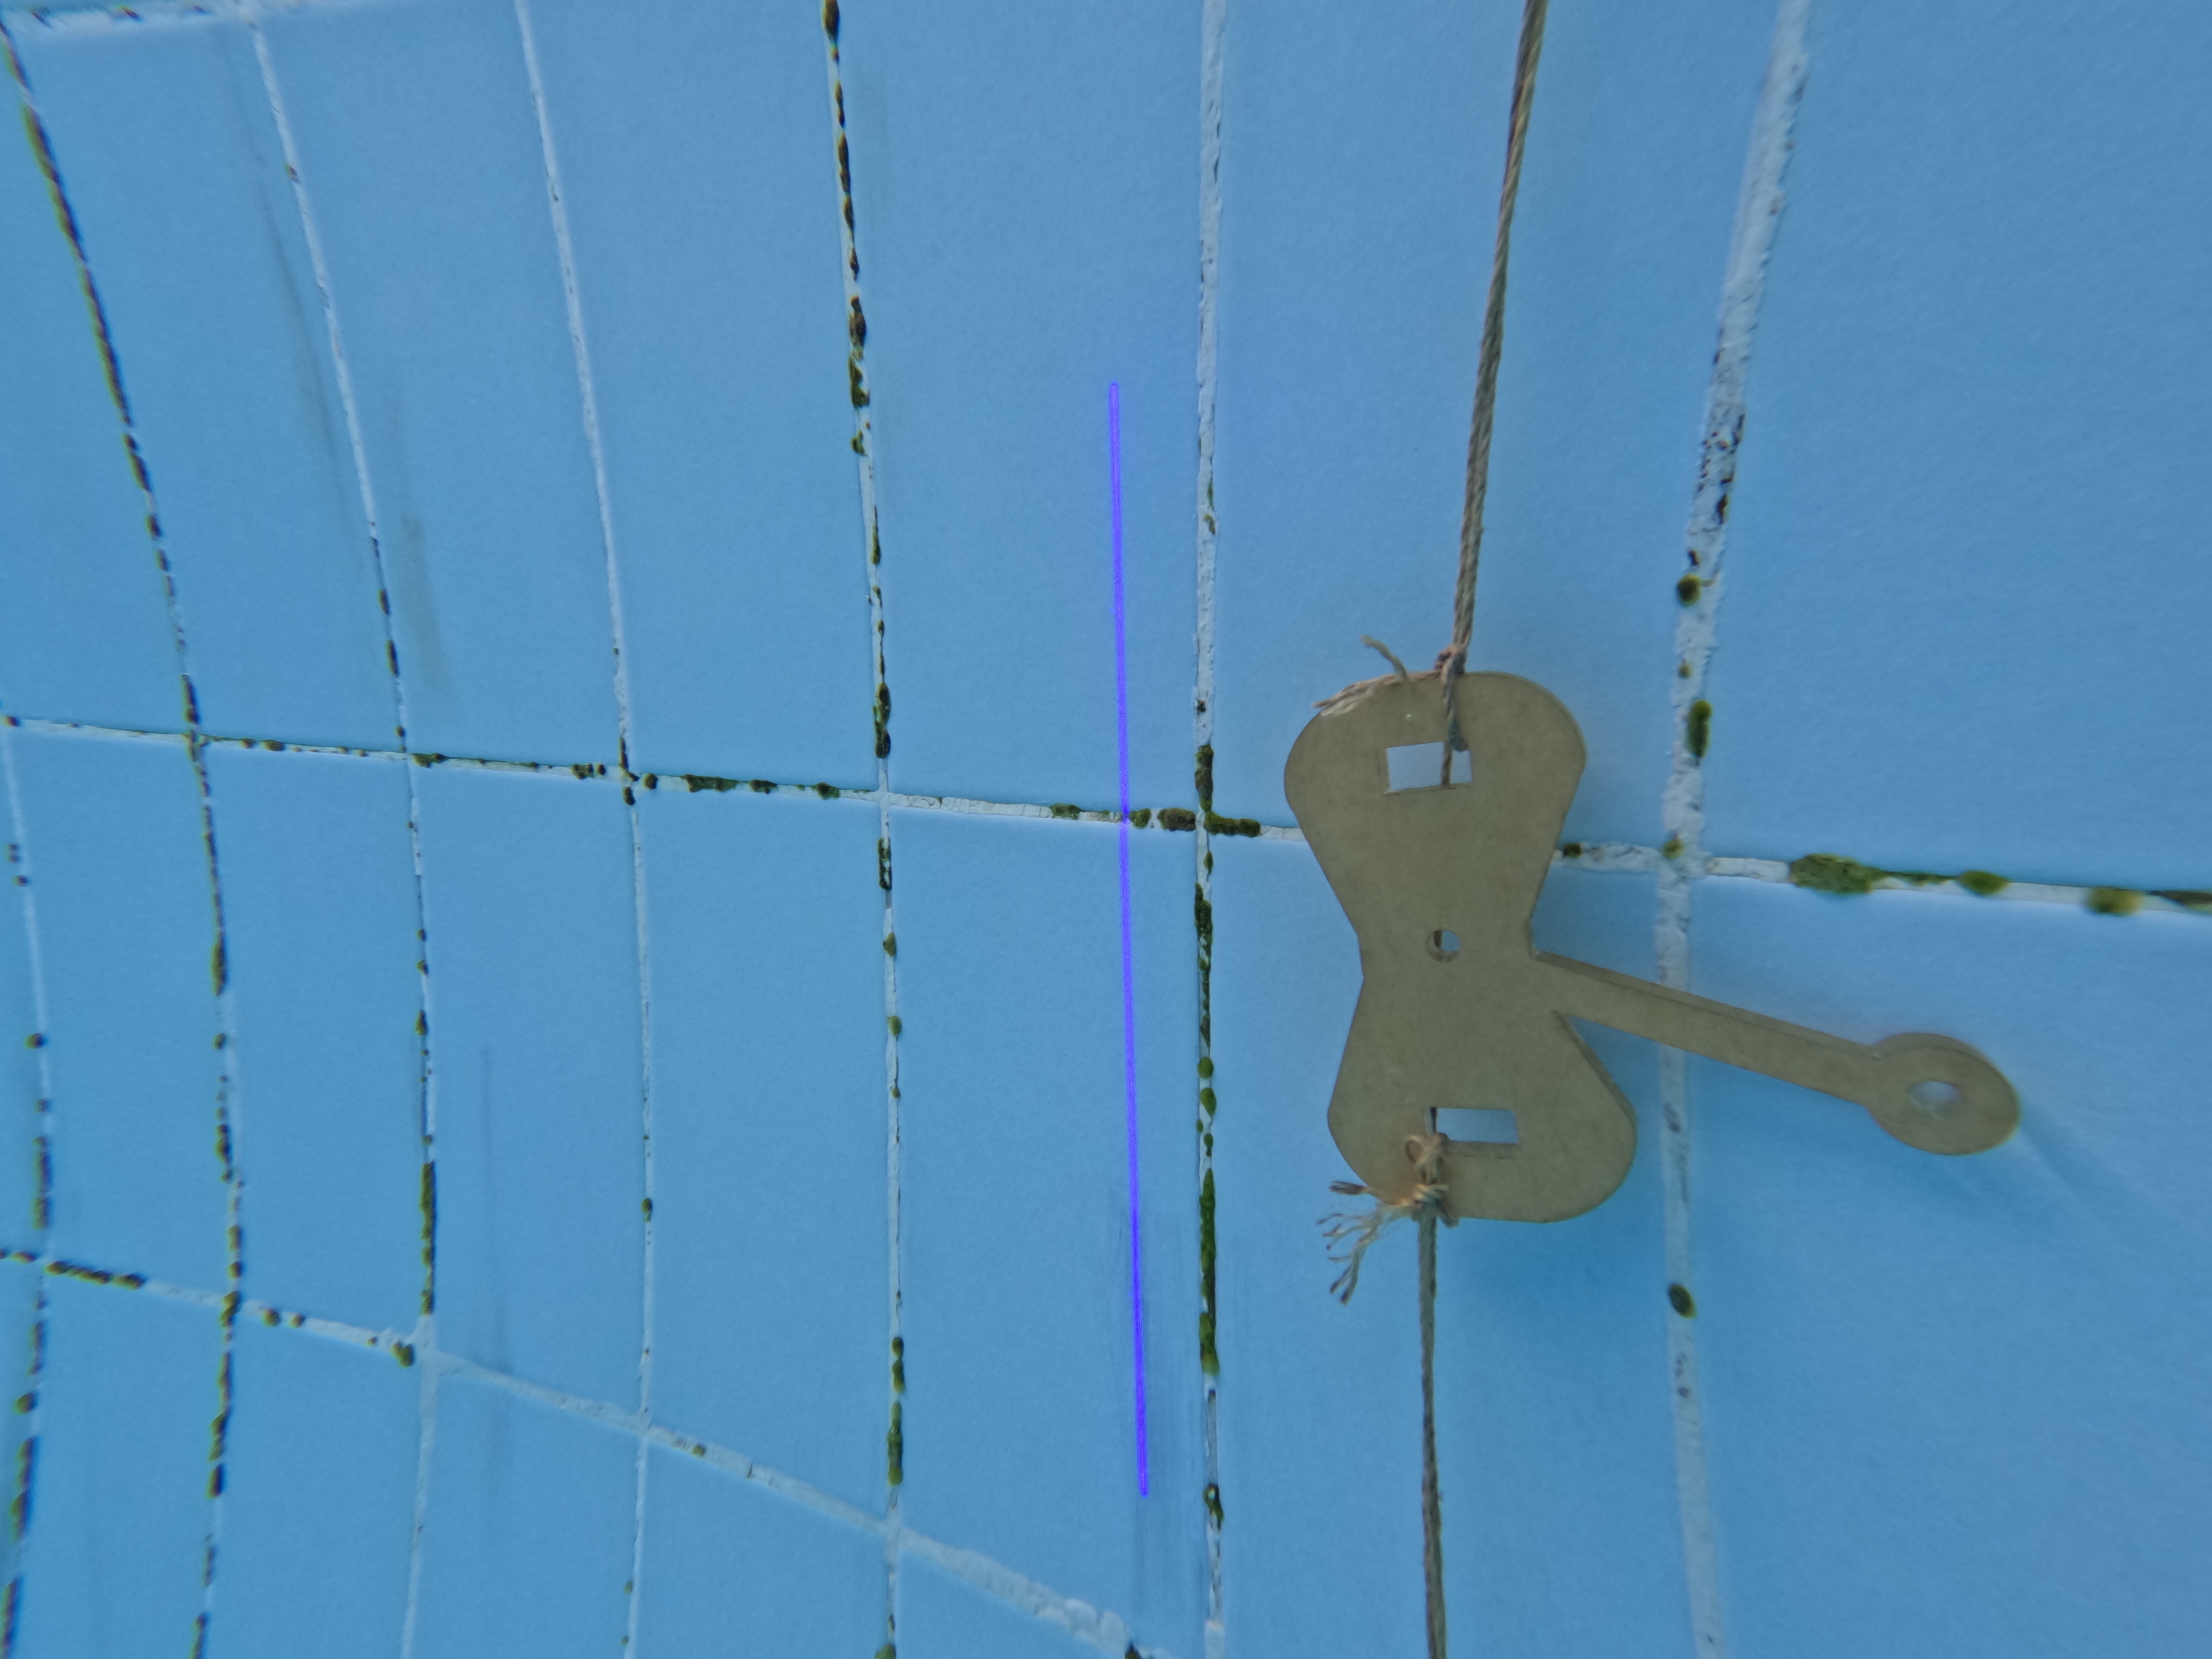

Supplement: Supplementary file 2709 [file G0051007.pdf › Level_2_2/G0051007.pdf]

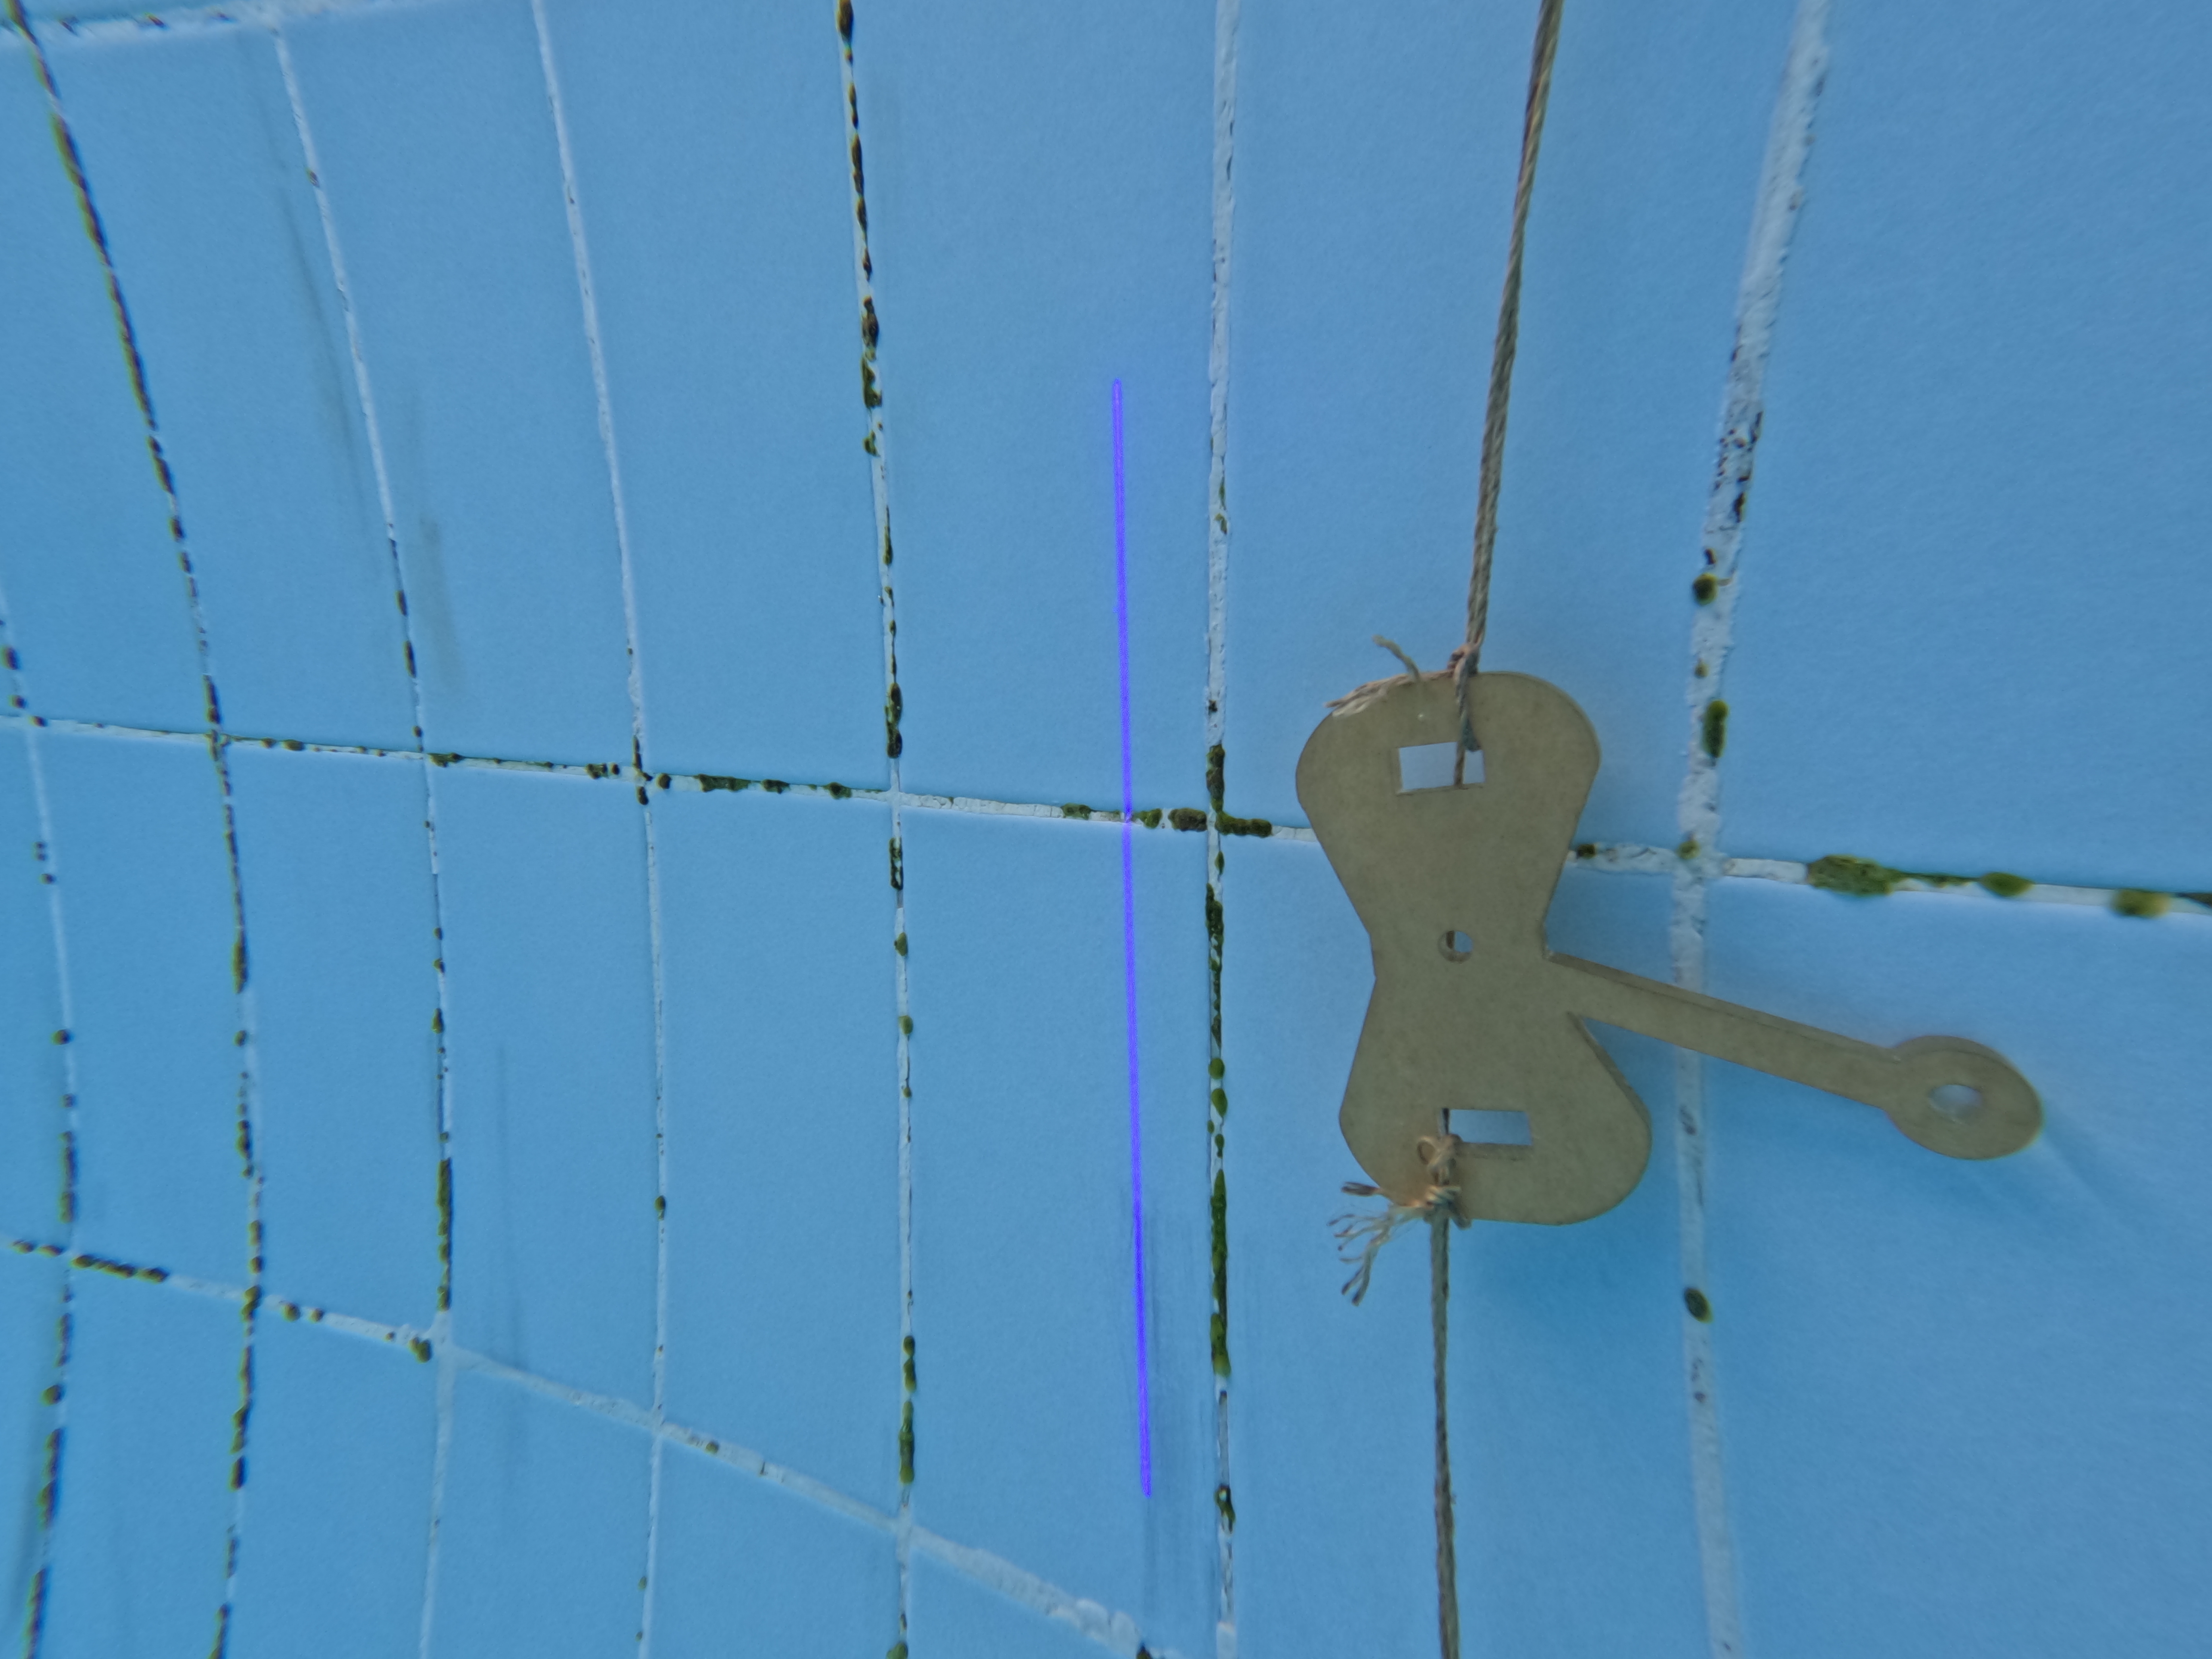

Supplement: Supplementary file 2710 [file G0051008.pdf › Level_2_2/G0051008.pdf]

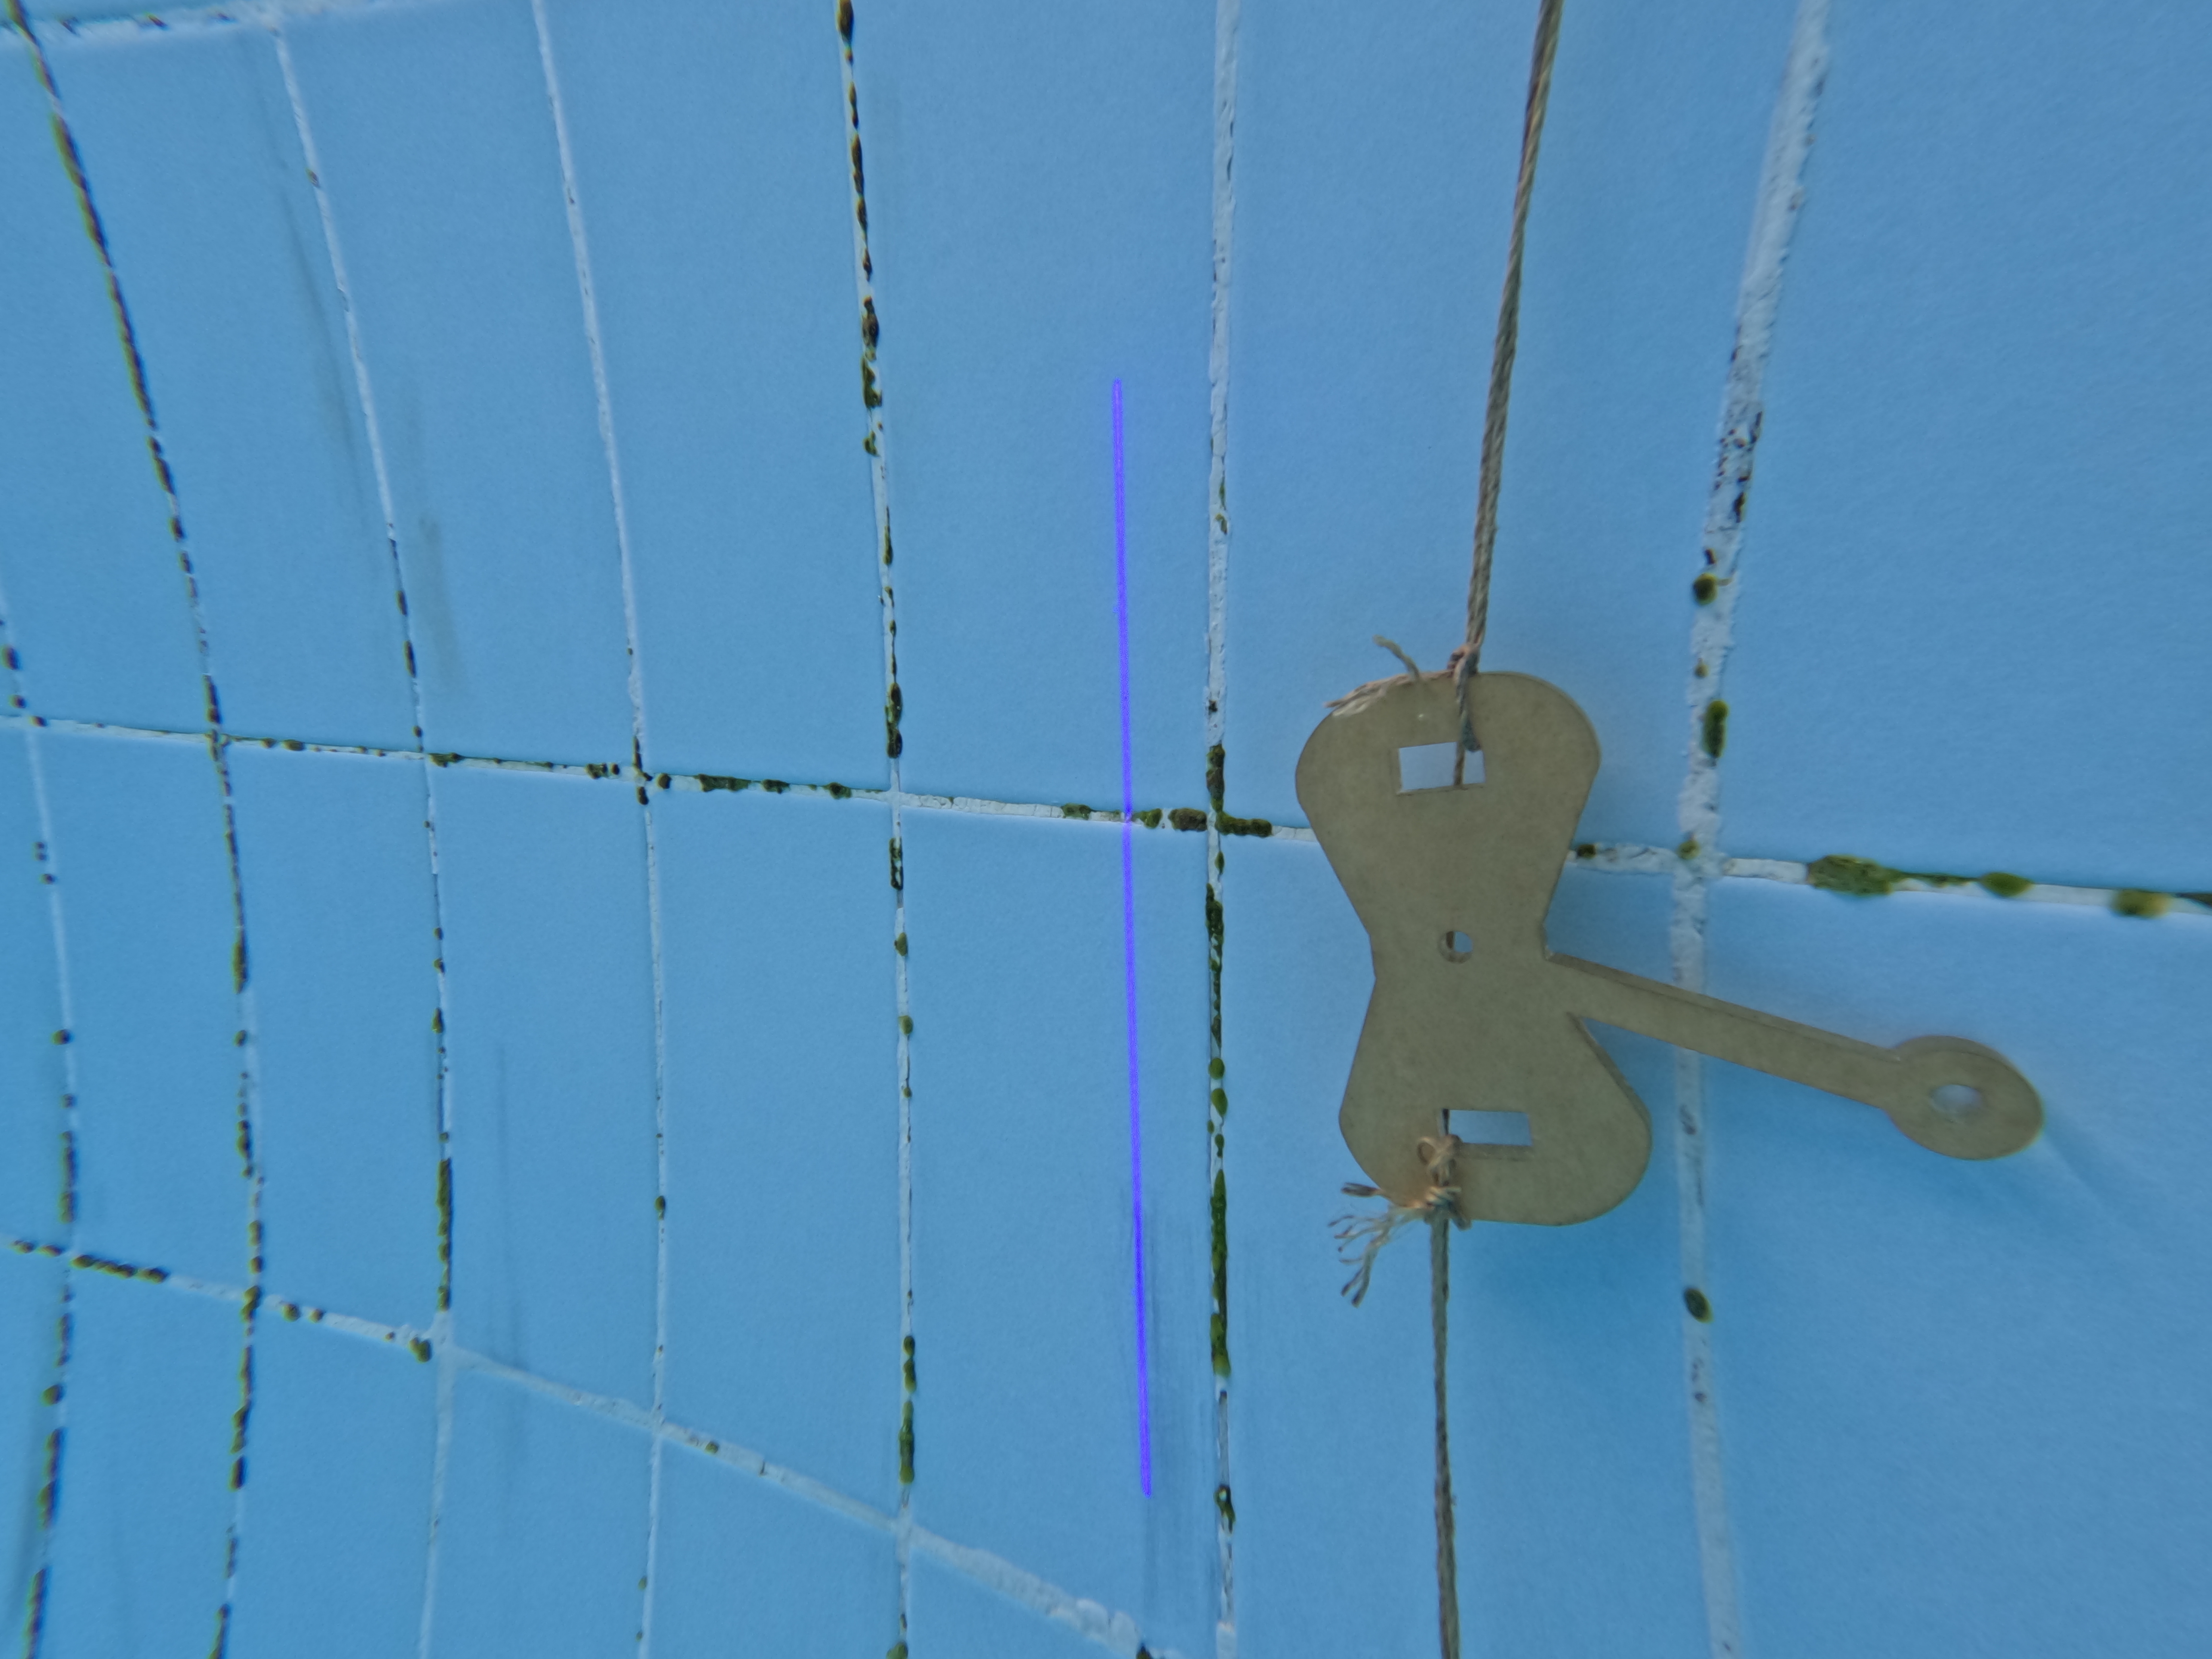

Supplement: Supplementary file 2711 [file G0051009.pdf › Level_2_2/G0051009.pdf]

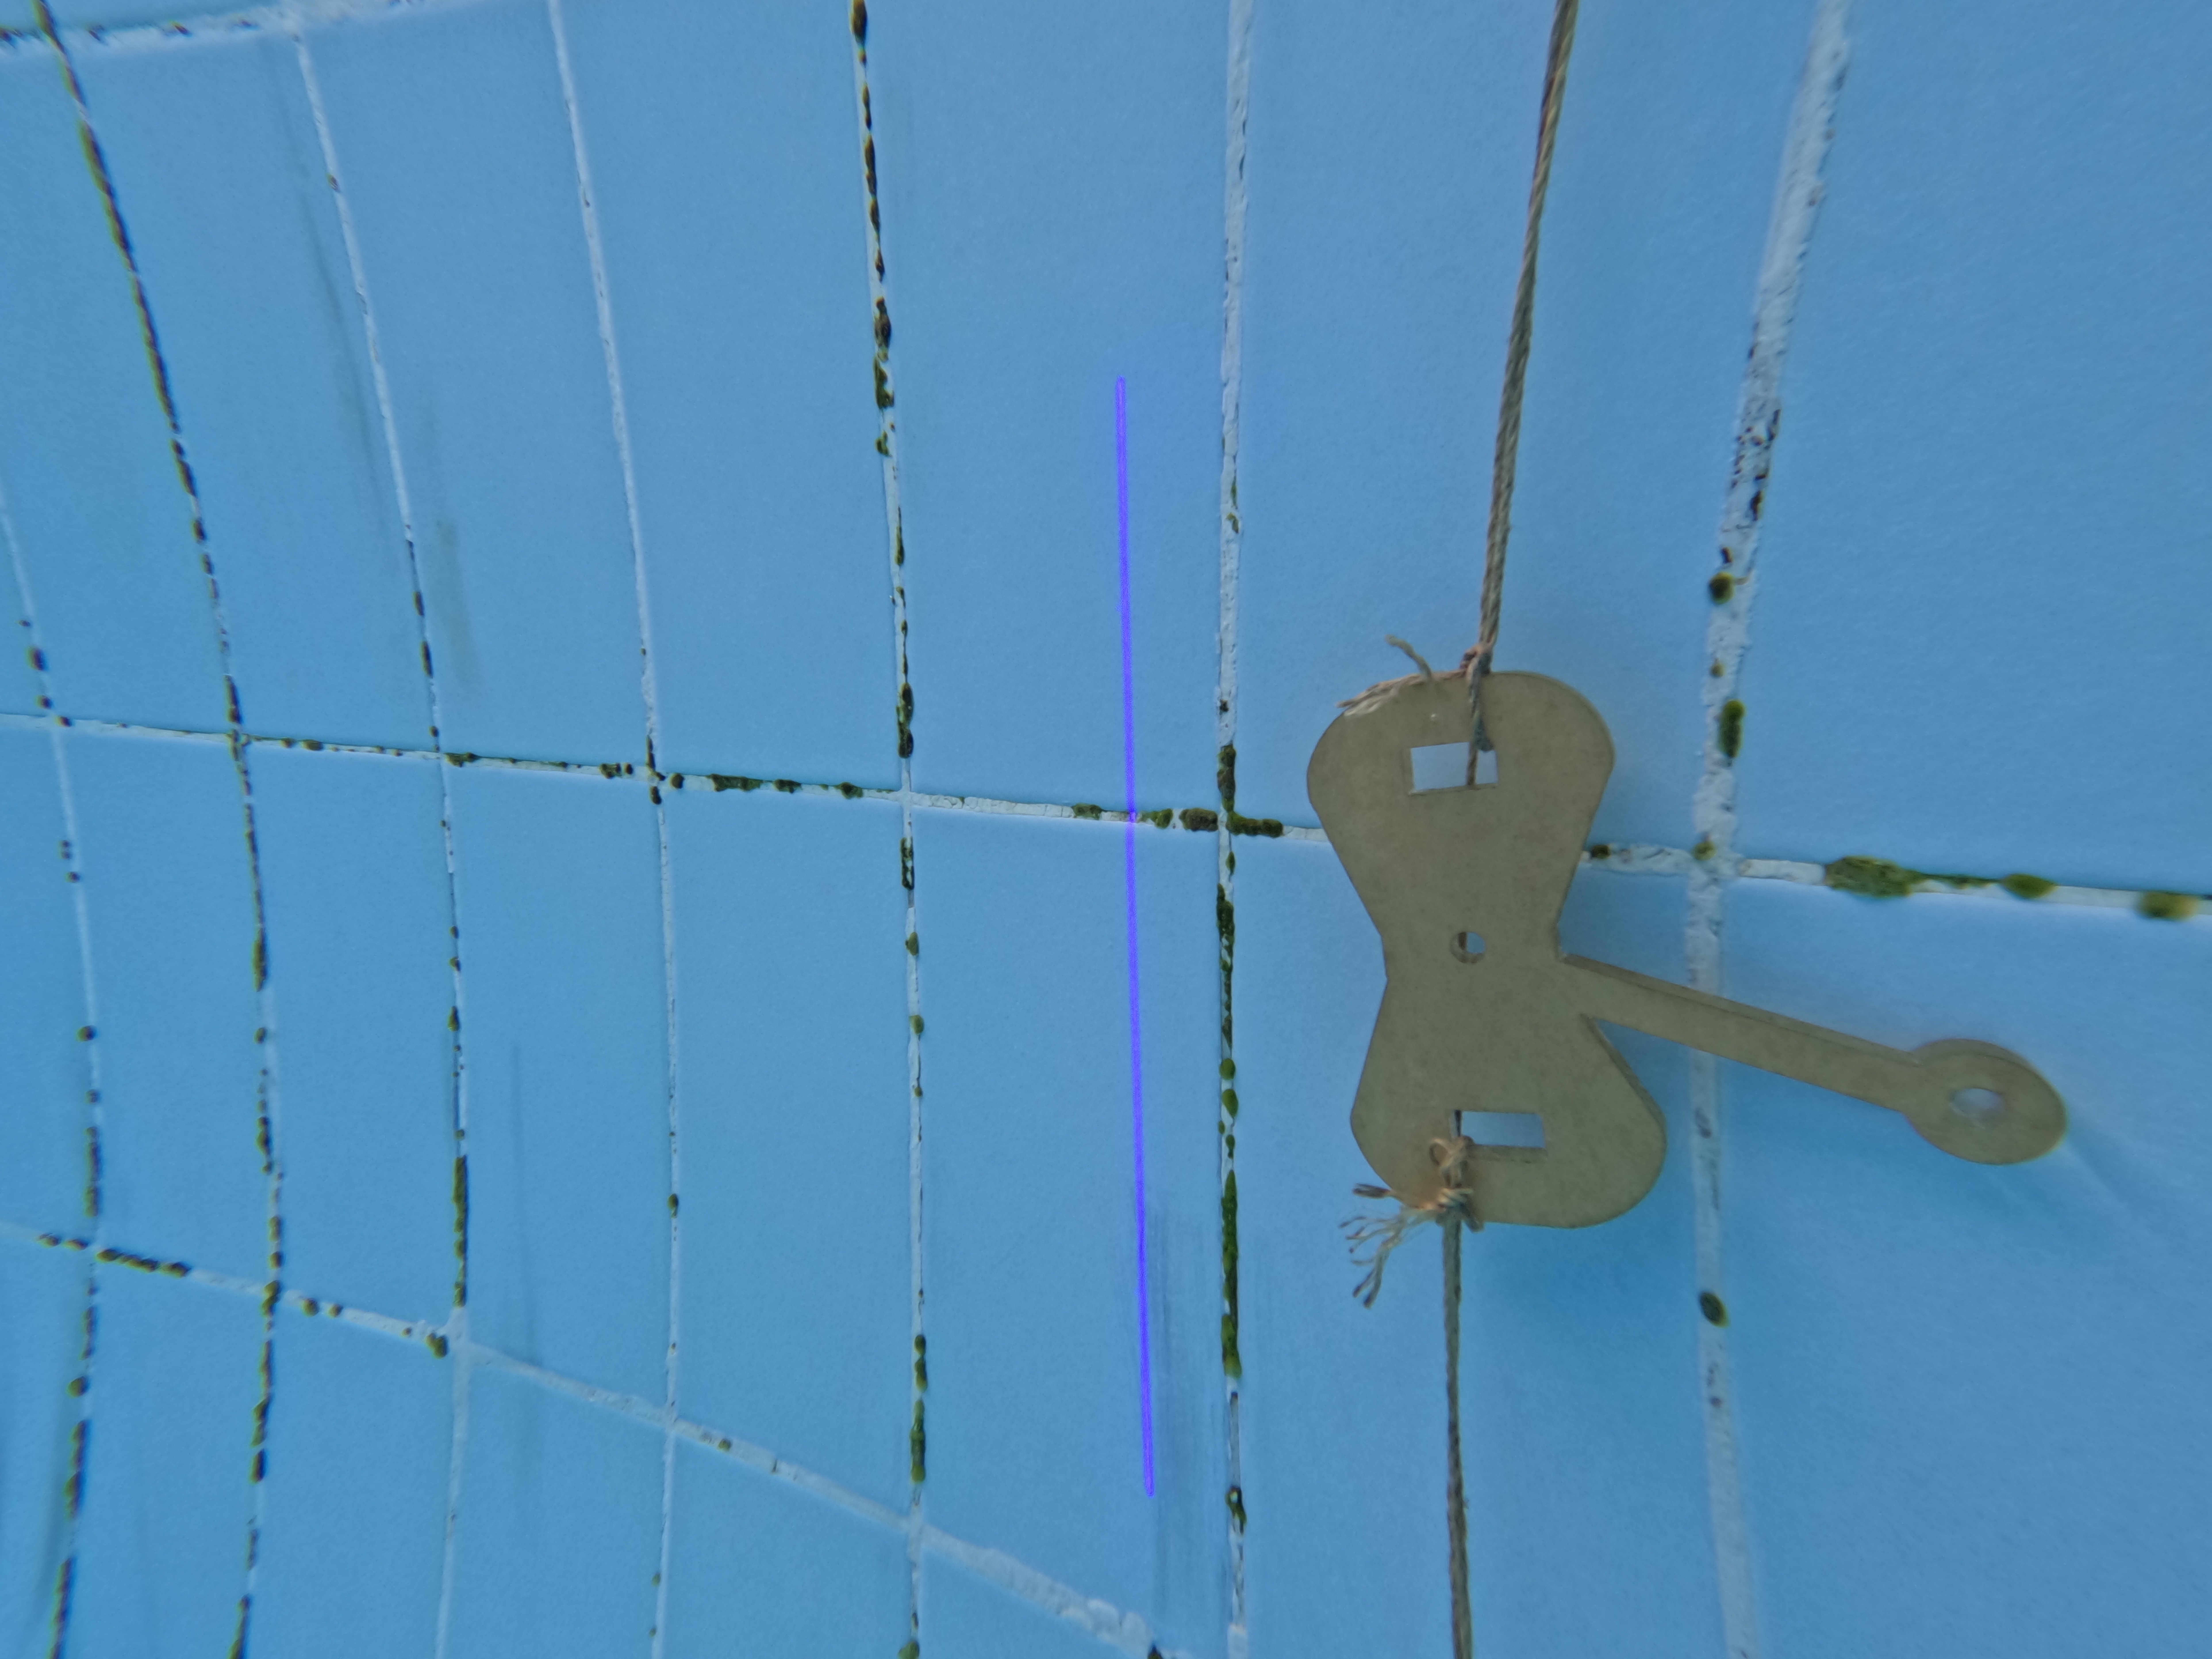

Supplement: Supplementary file 2712 [file G0051010.pdf › Level_2_2/G0051010.pdf]

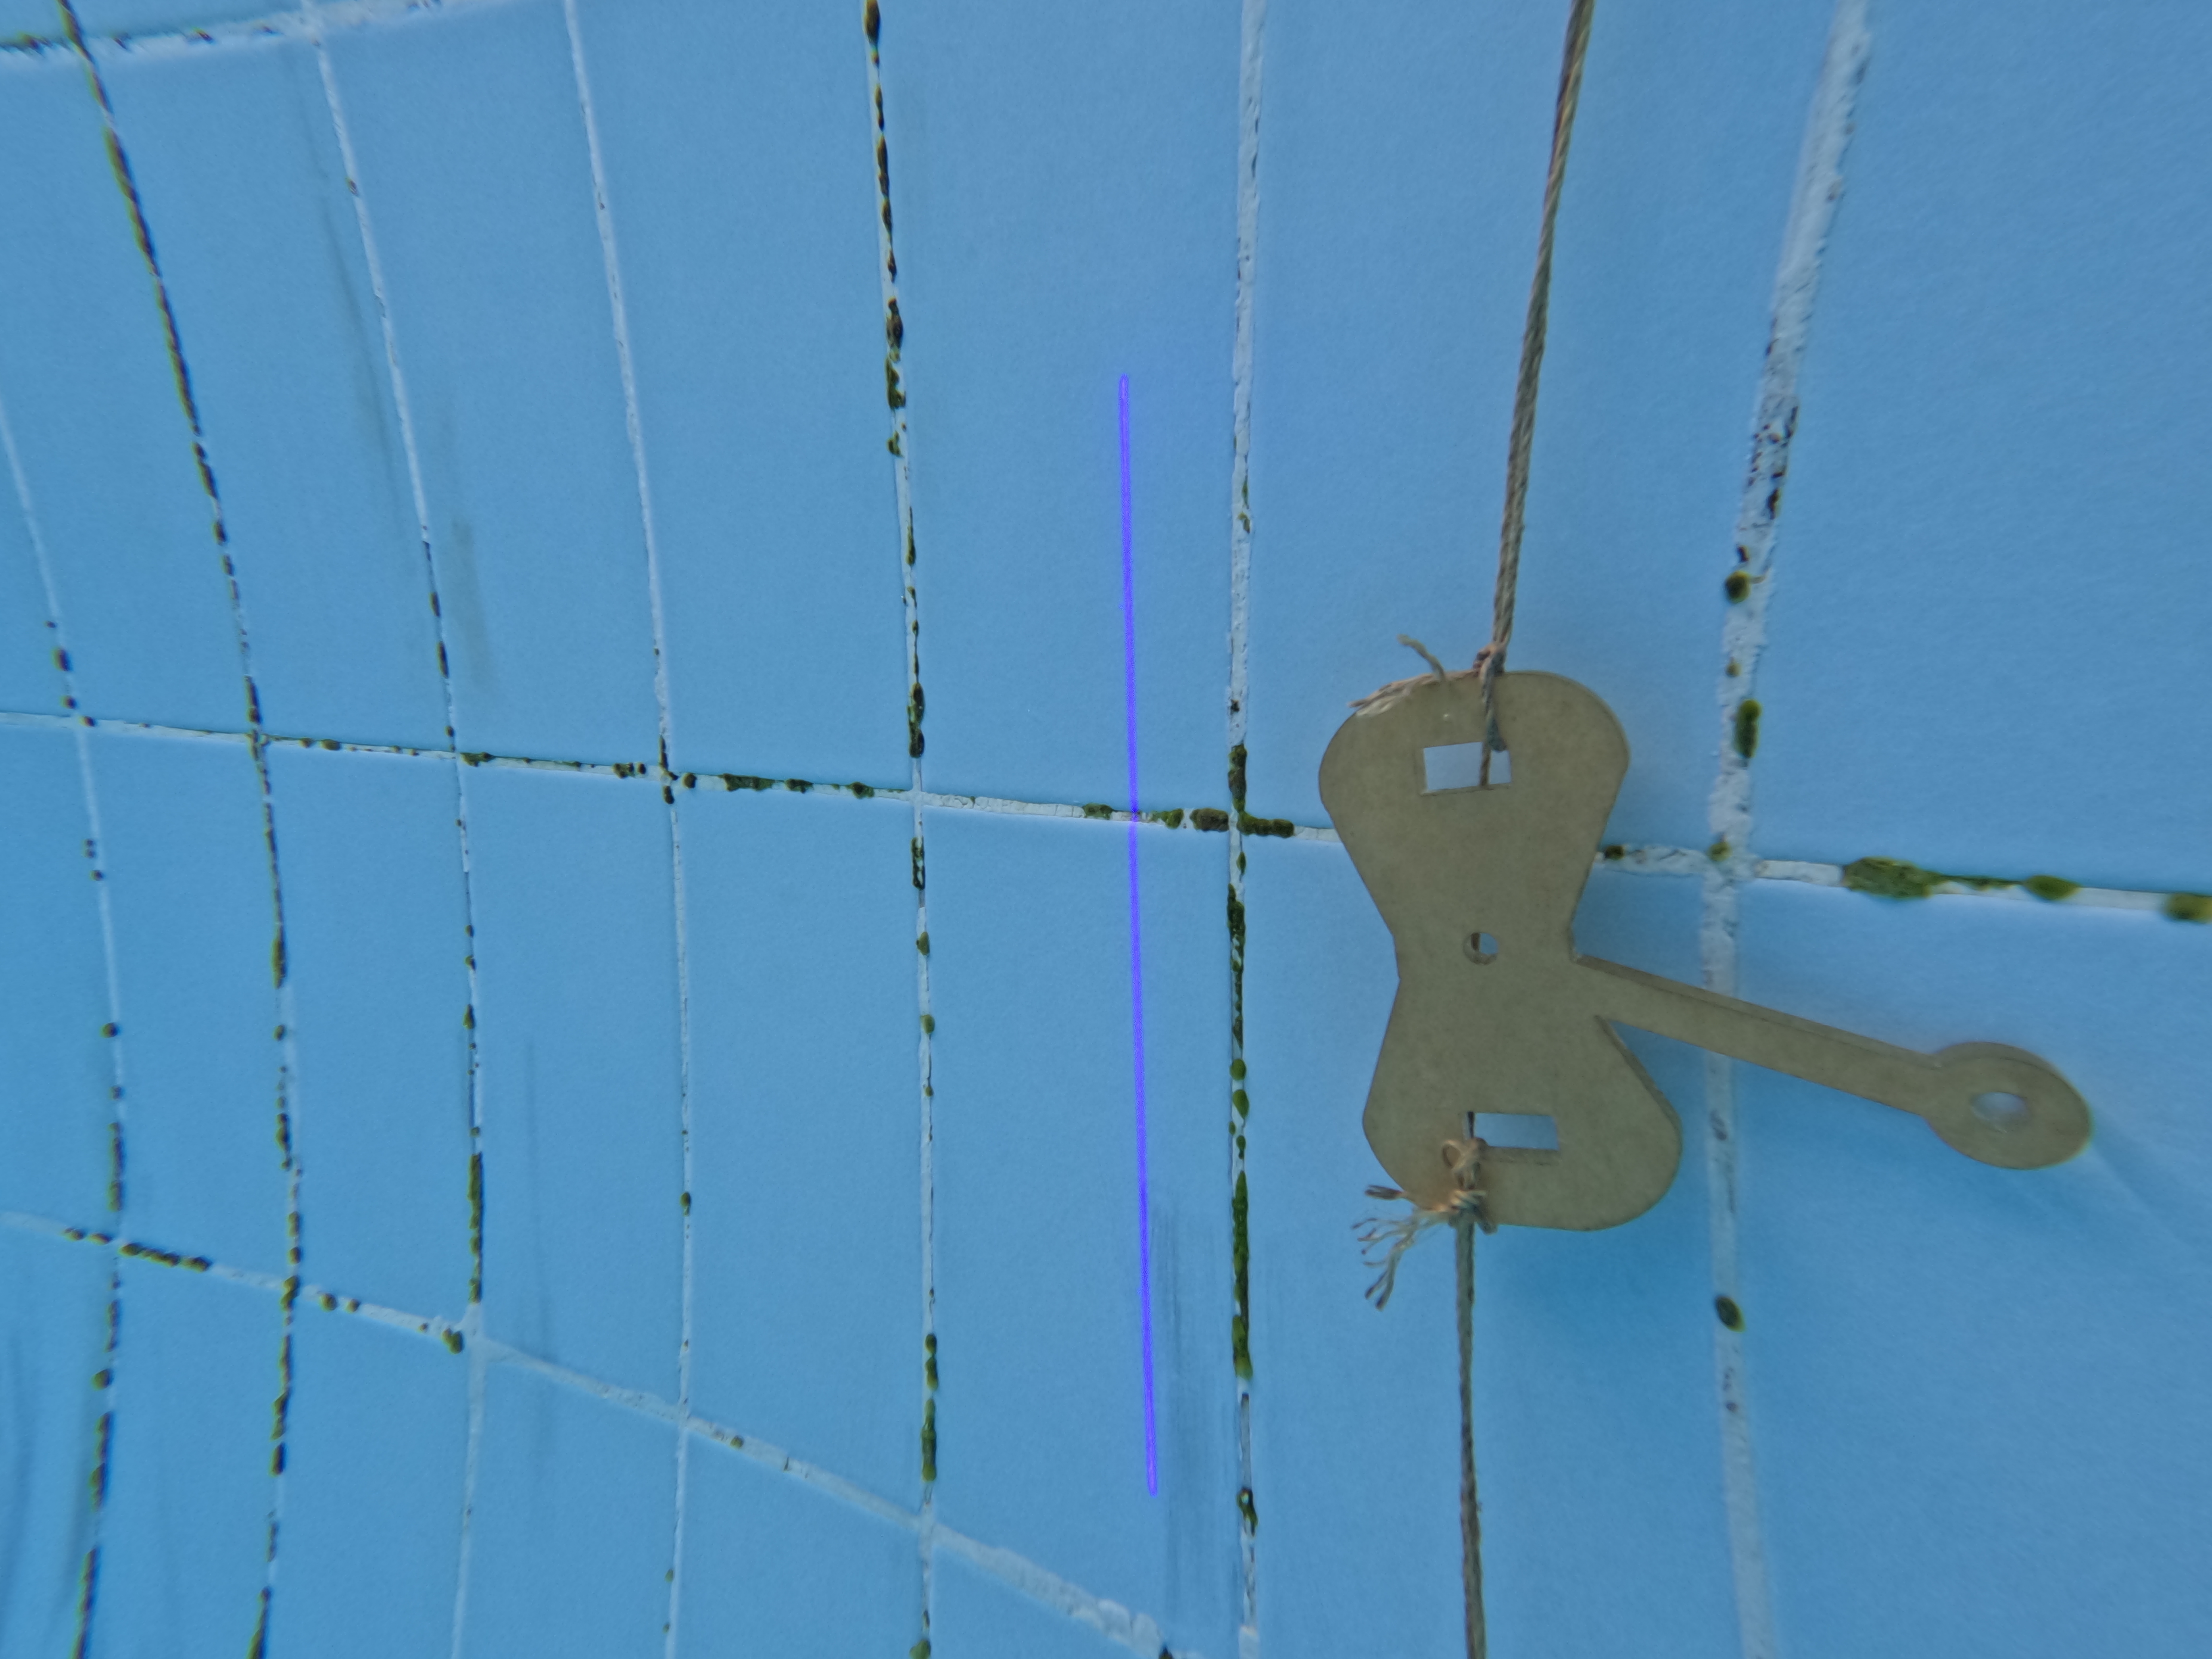

Supplement: Supplementary file 2713 [file G0051011.pdf › Level_2_2/G0051011.pdf]

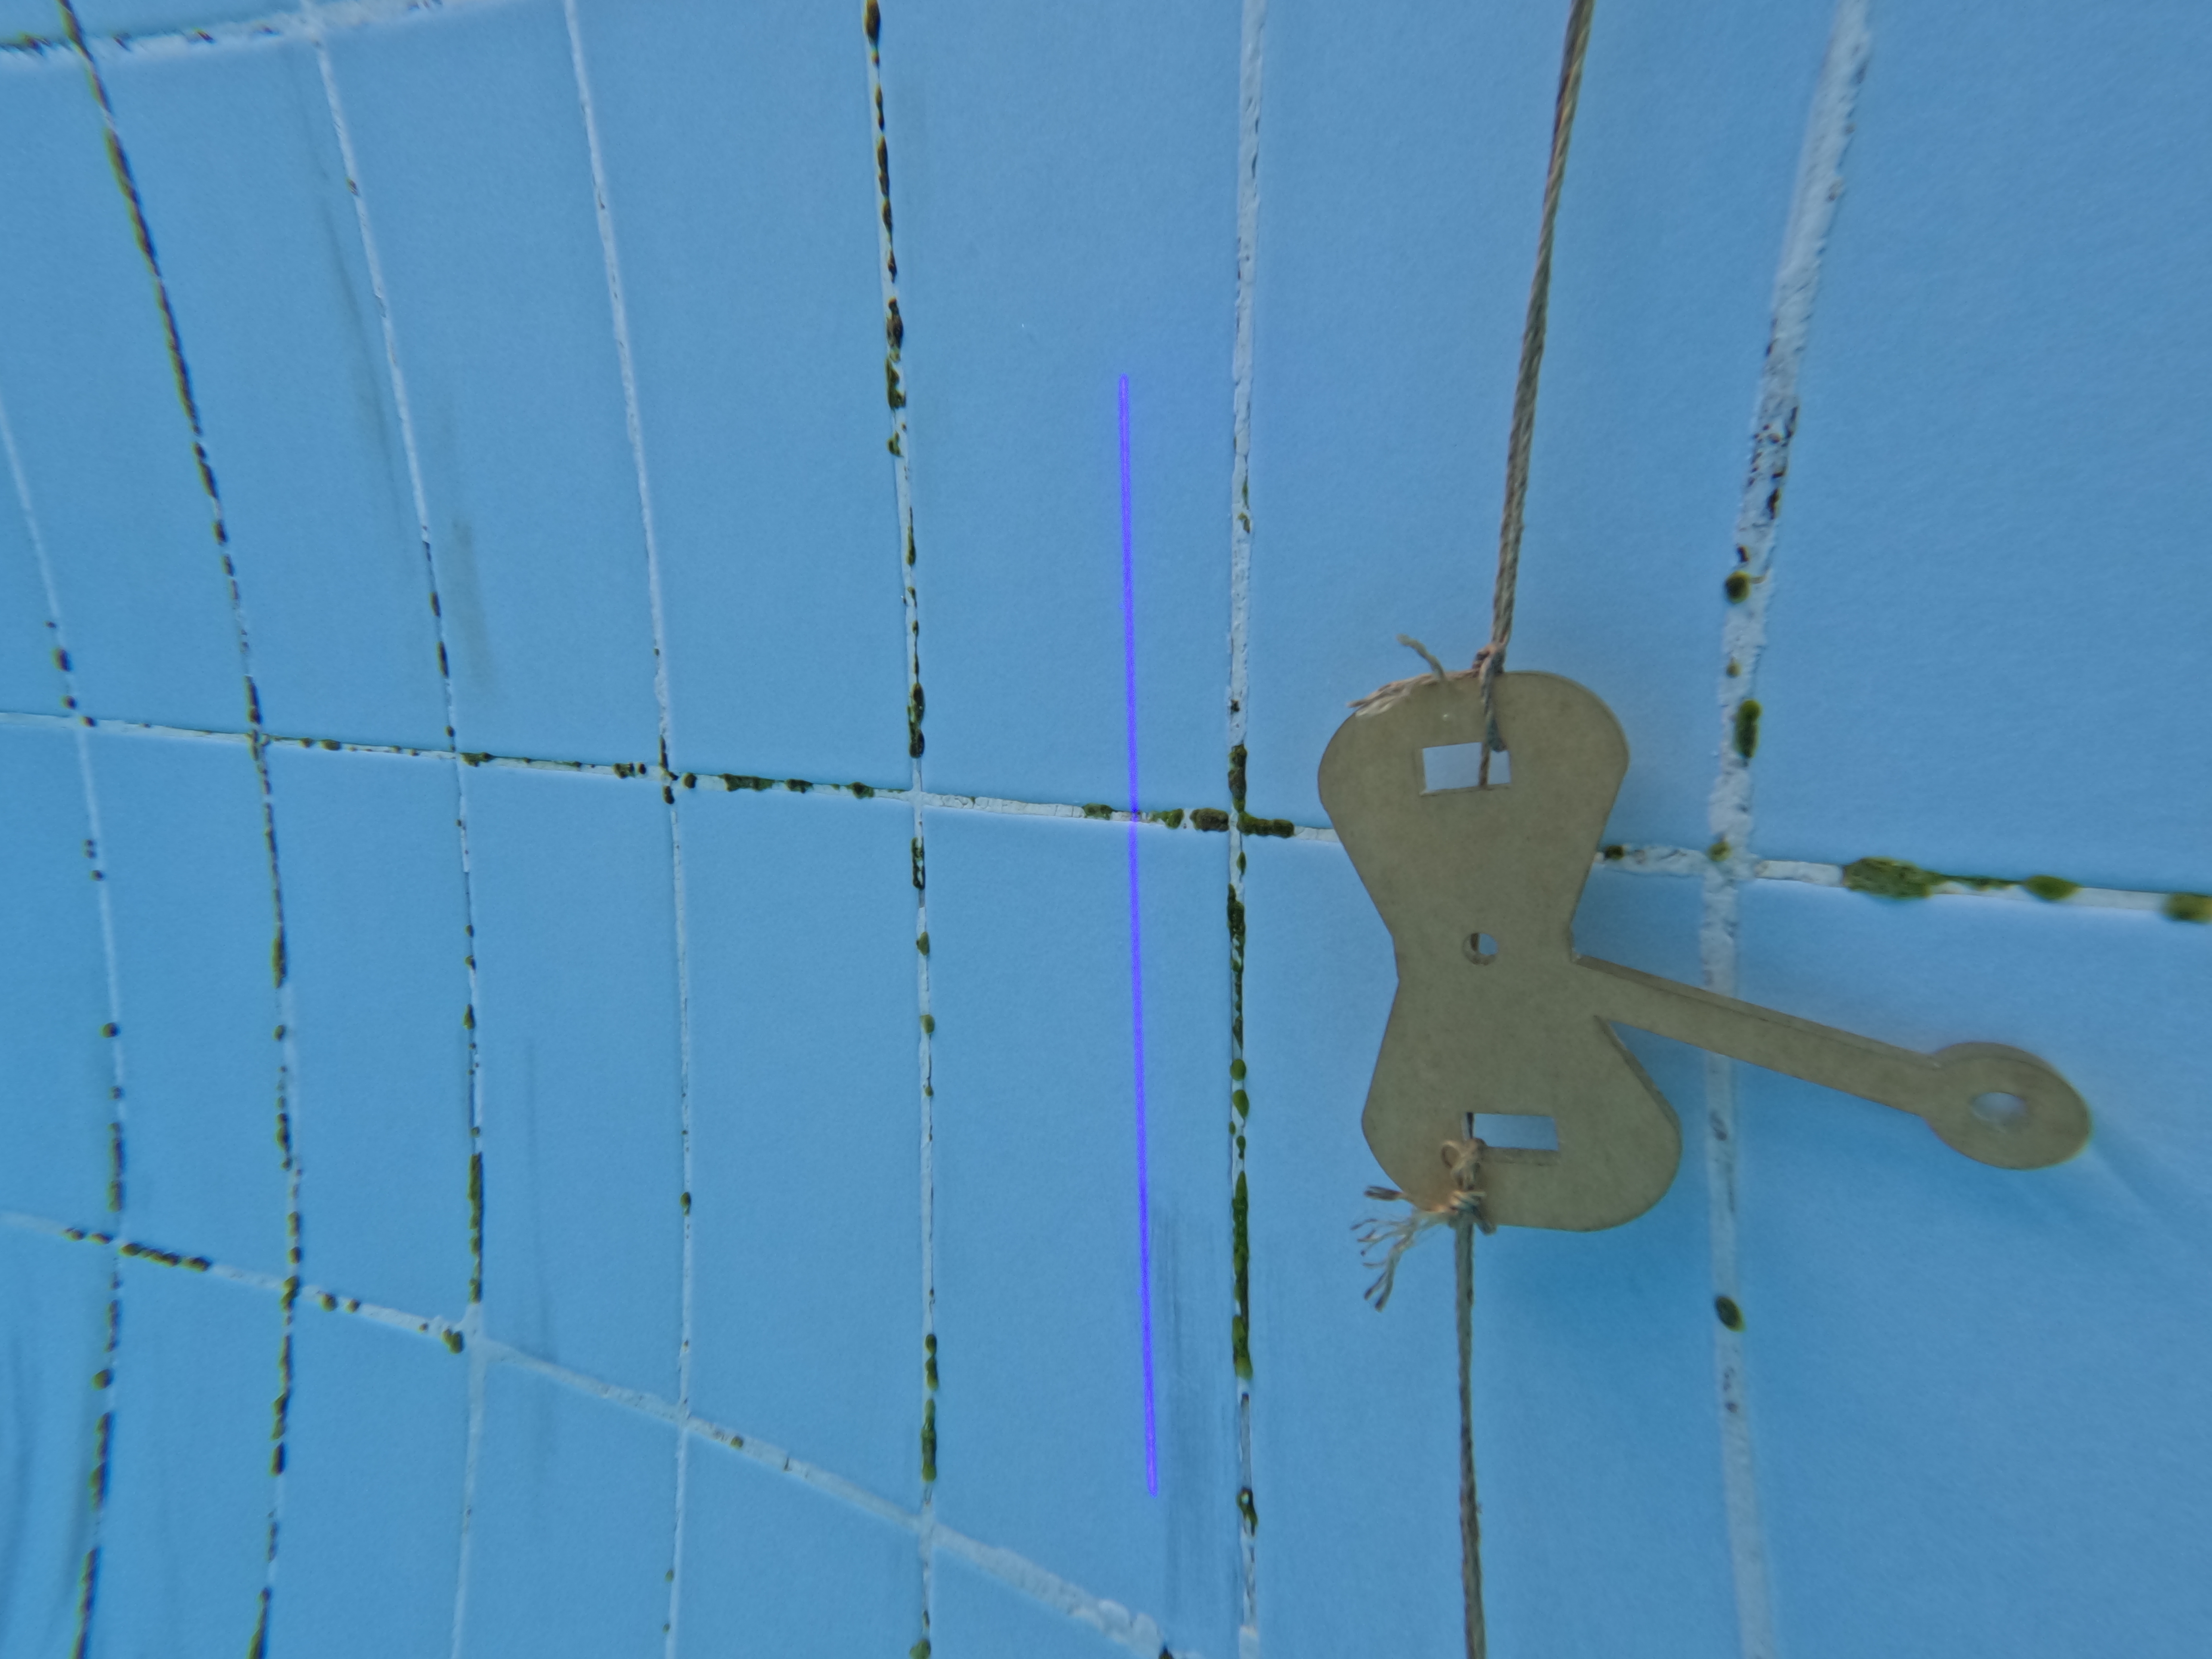

Supplement: Supplementary file 2714 [file G0051012.pdf › Level_2_2/G0051012.pdf]

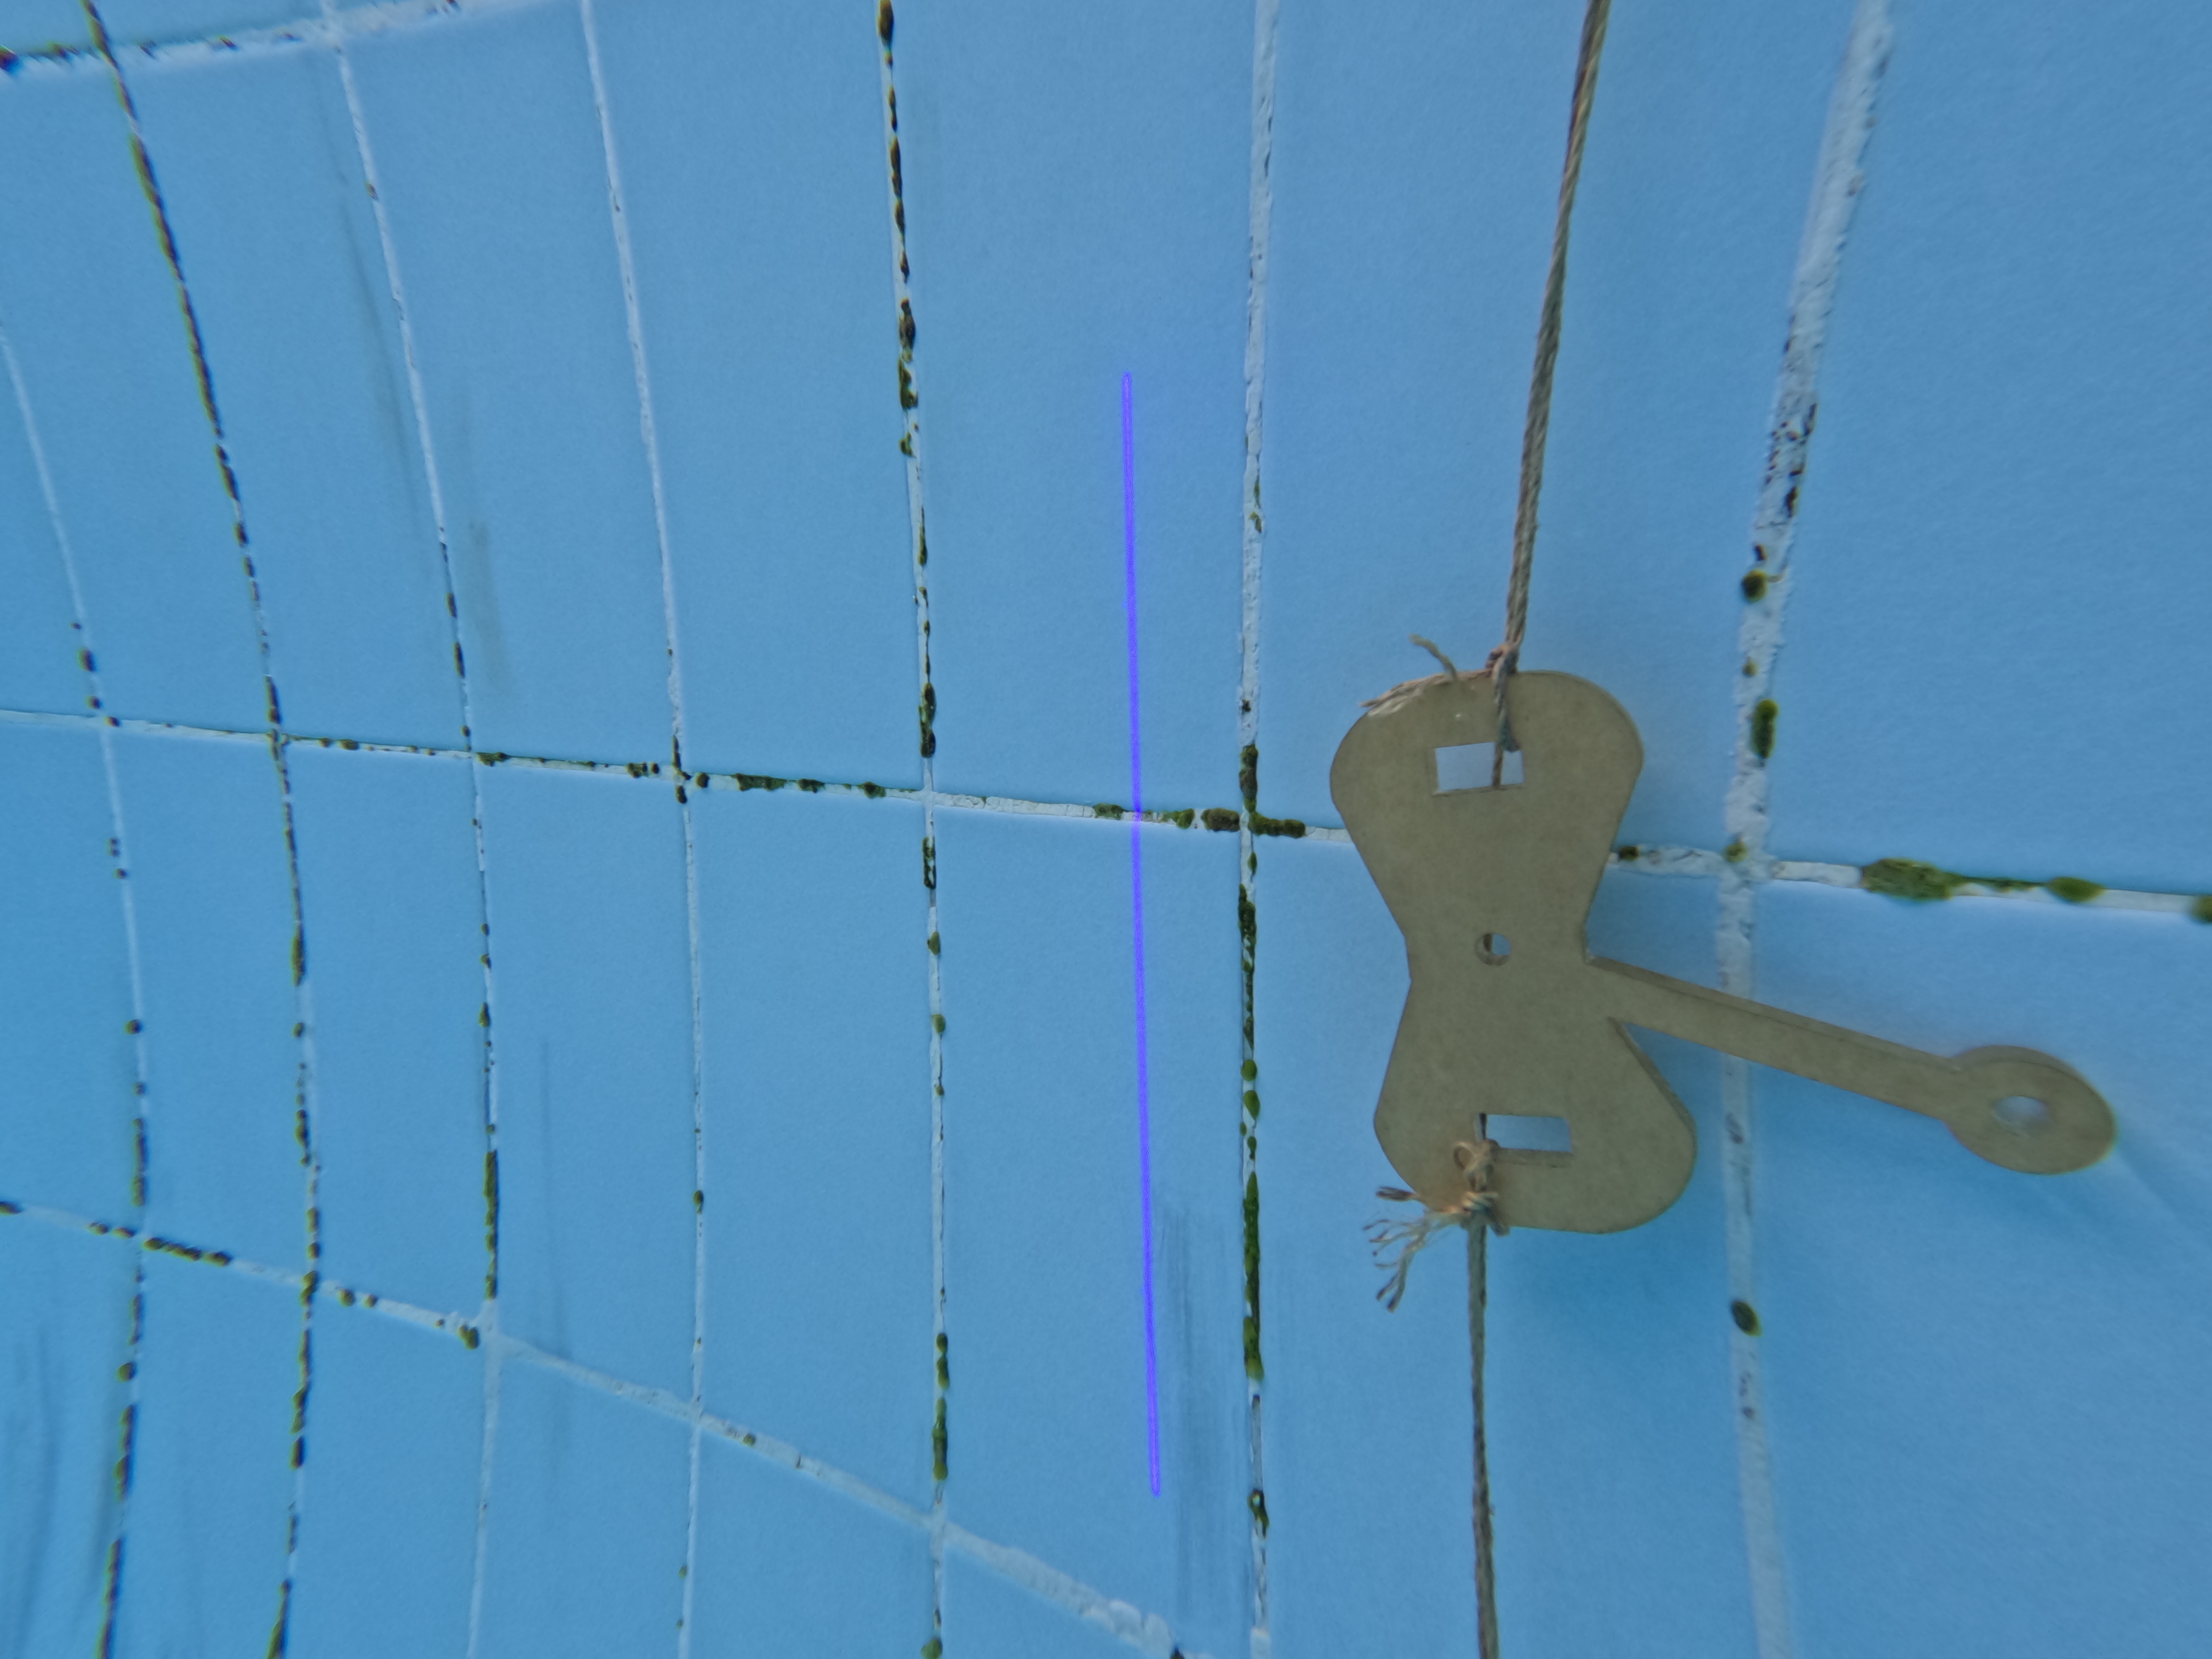

Supplement: Supplementary file 2715 [file G0051013.pdf › Level_2_2/G0051013.pdf]

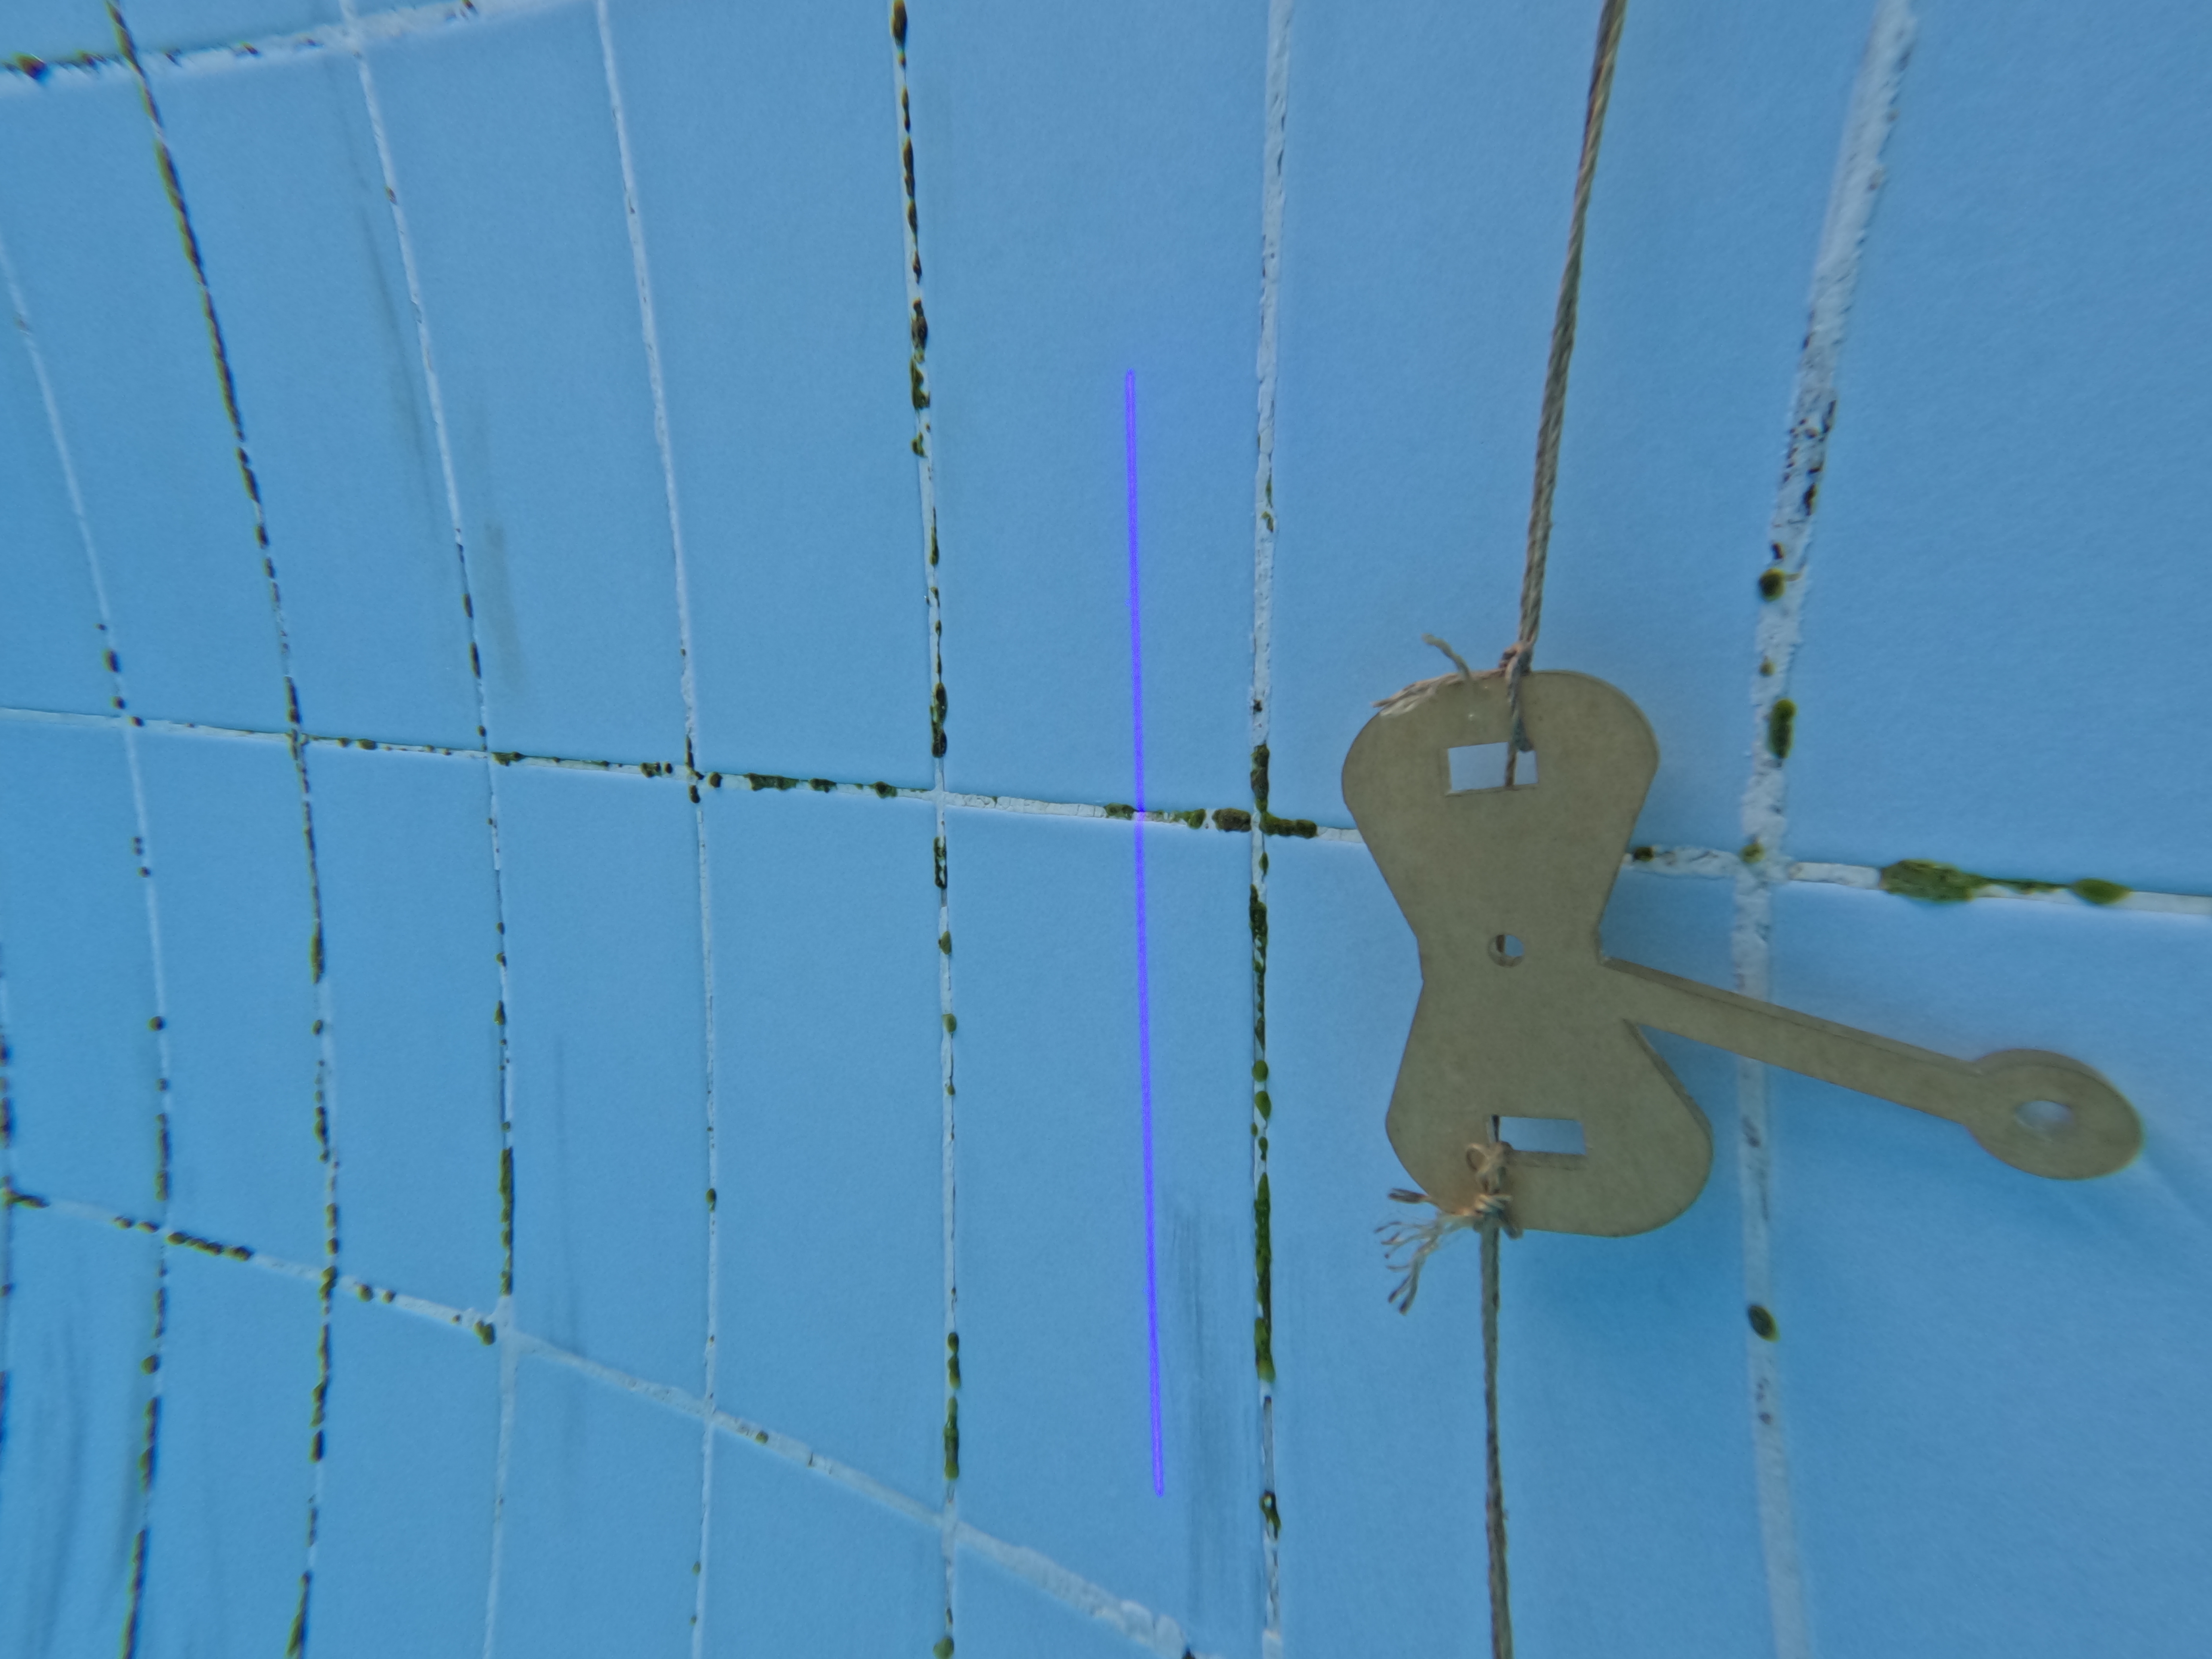

Supplement: Supplementary file 2716 [file G0051014.pdf › Level_2_2/G0051014.pdf]

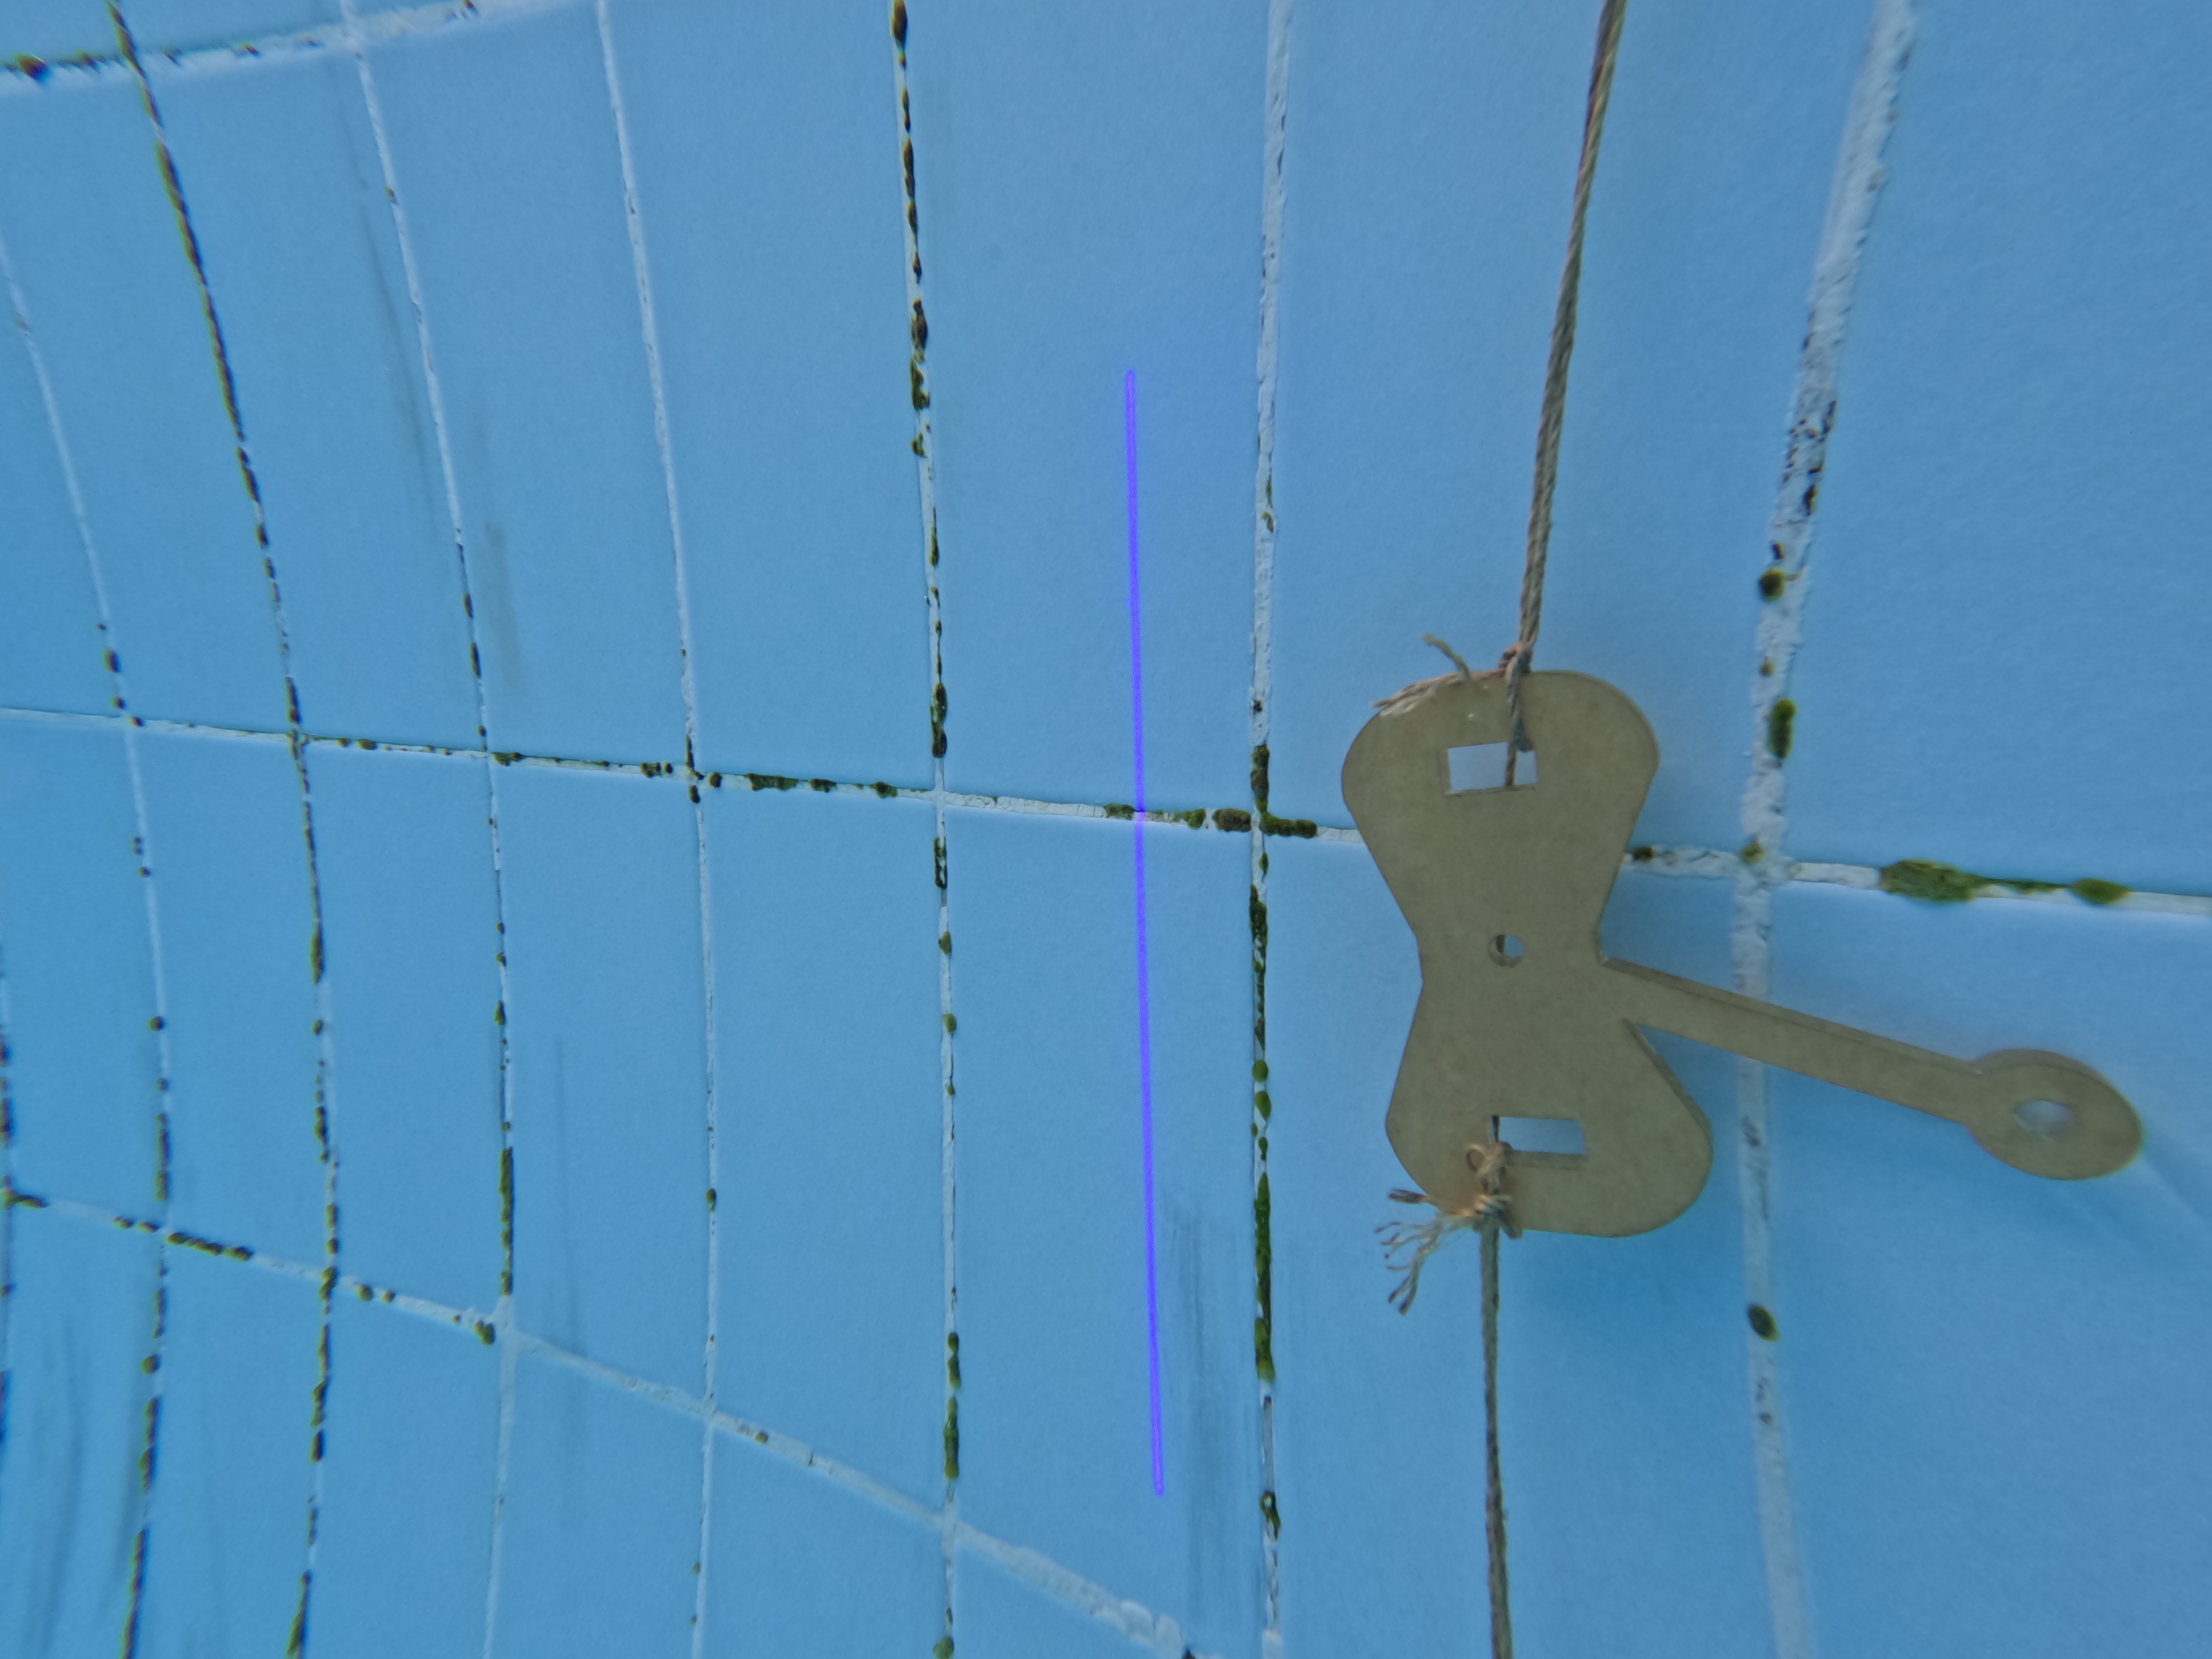

Supplement: Supplementary file 2717 [file G0051015.pdf › Level_2_2/G0051015.pdf]

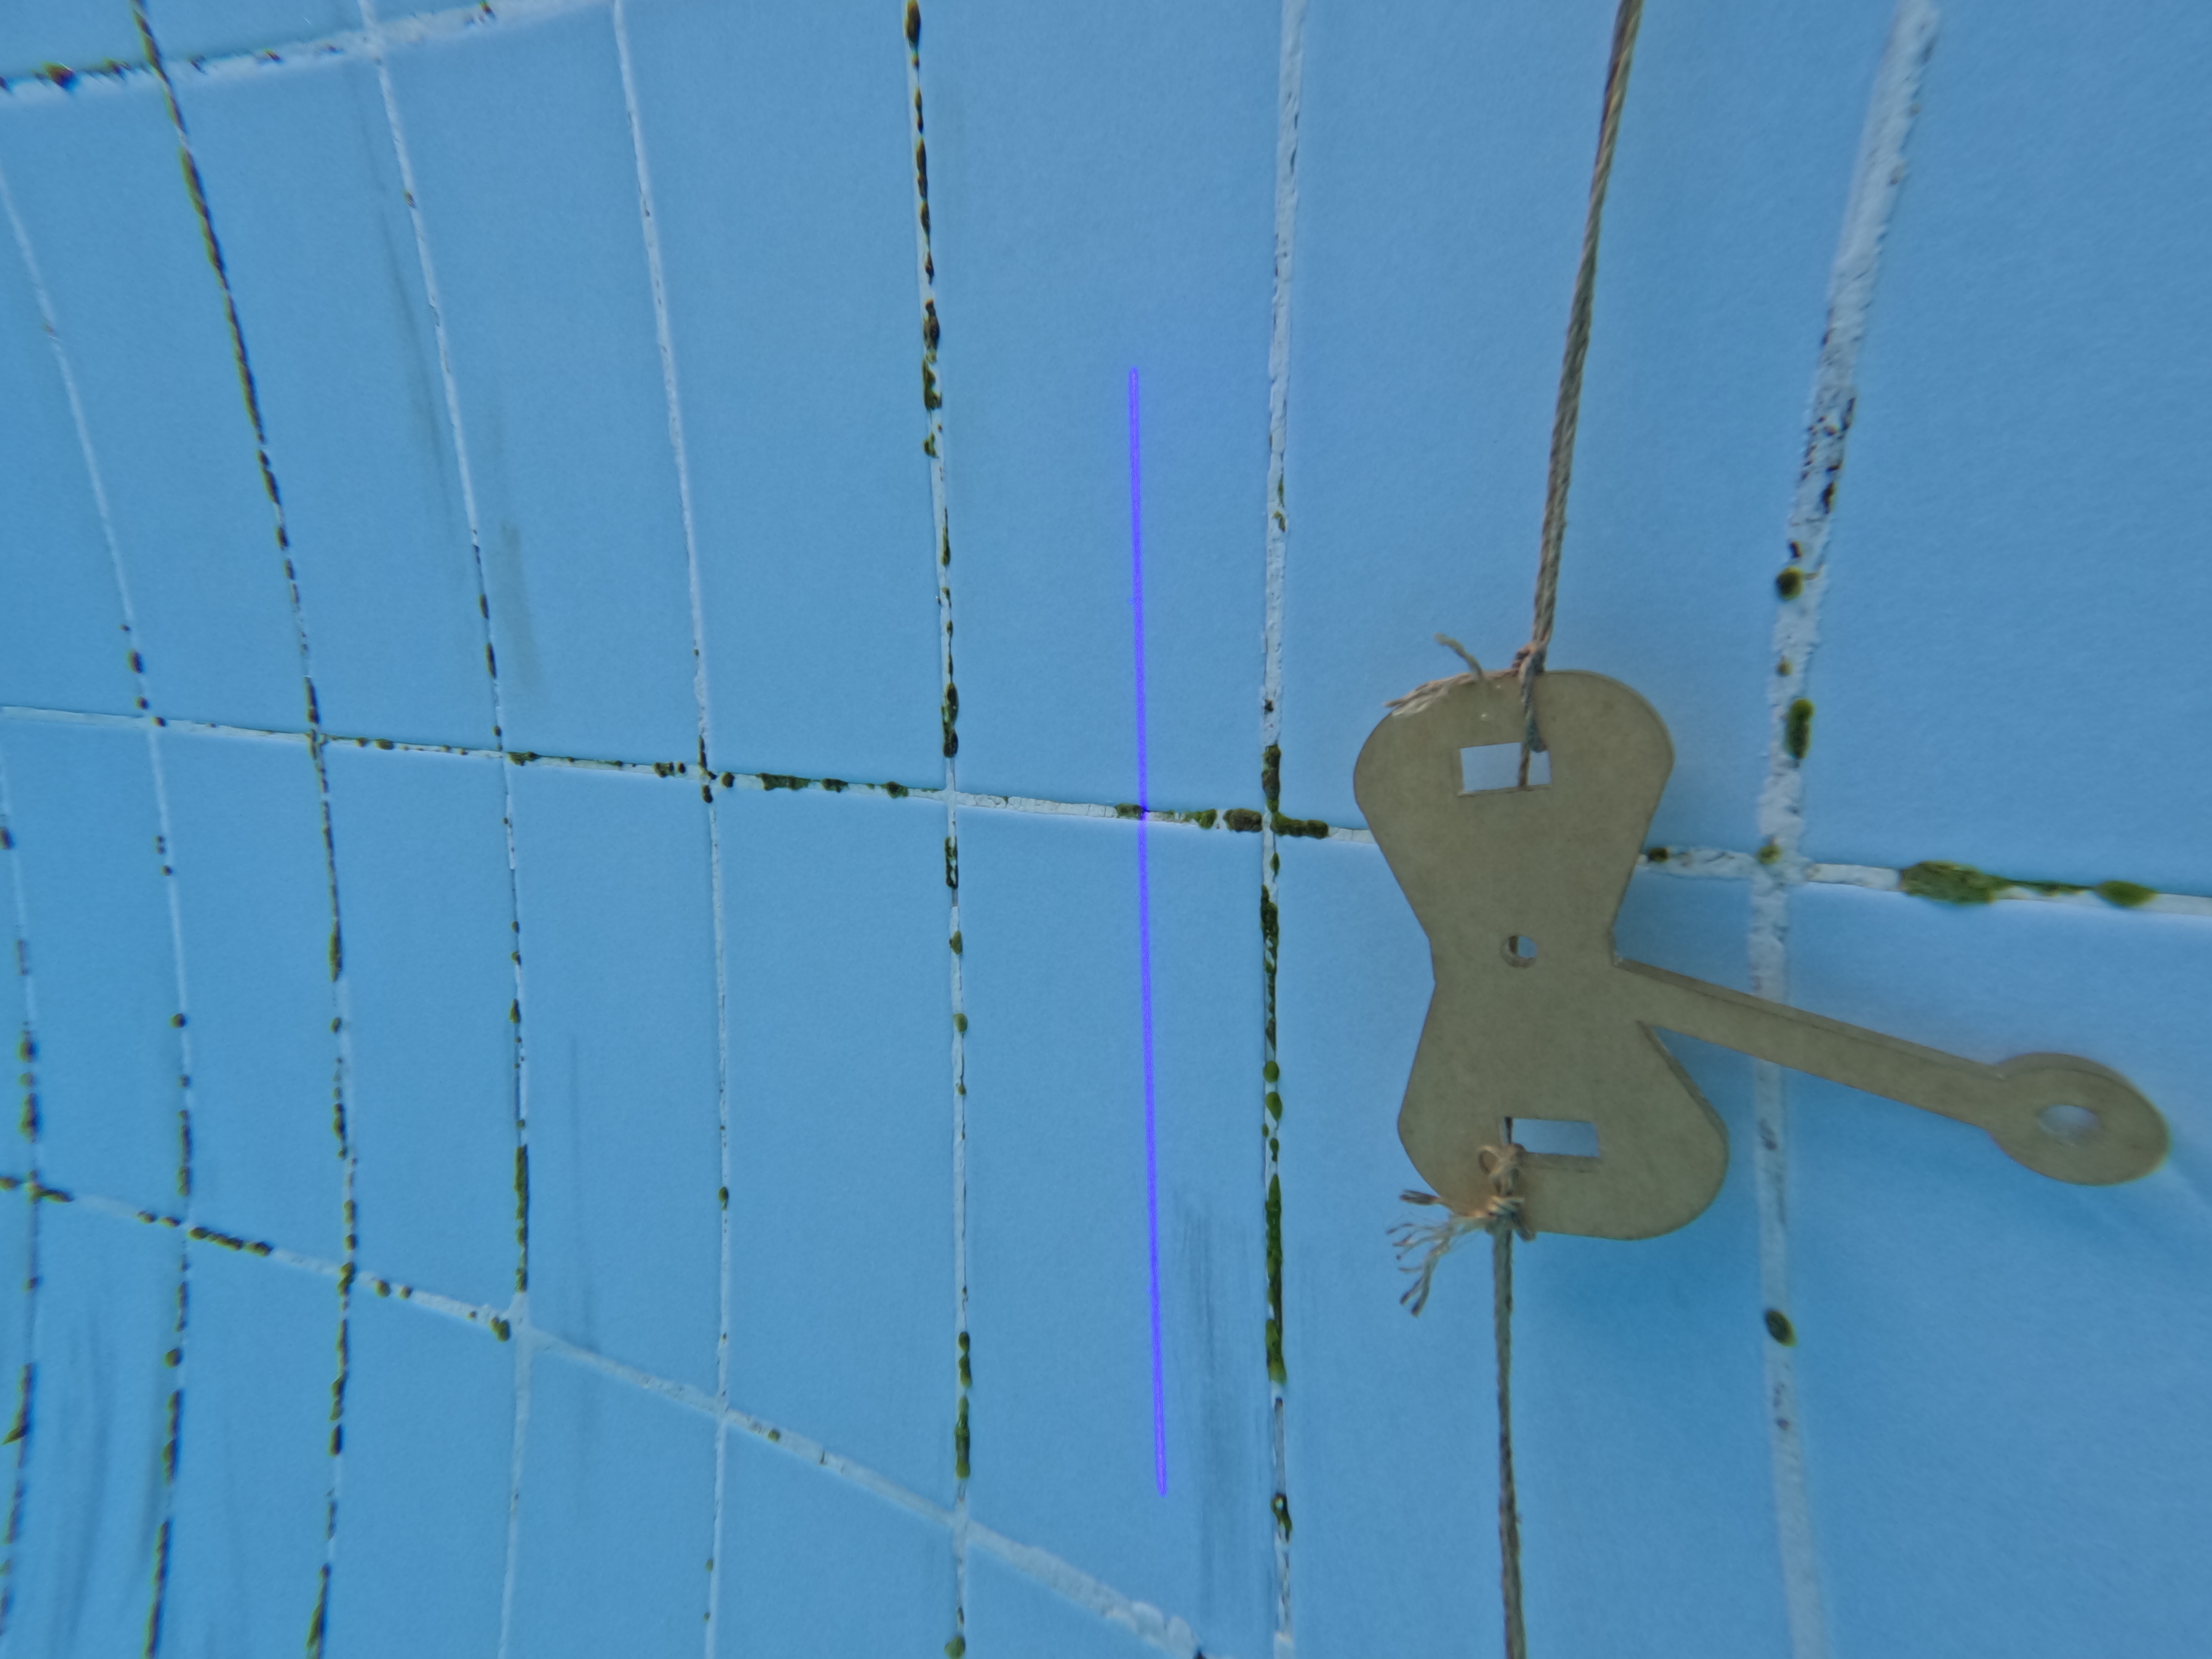

Supplement: Supplementary file 2718 [file G0051016.pdf › Level_2_2/G0051016.pdf]

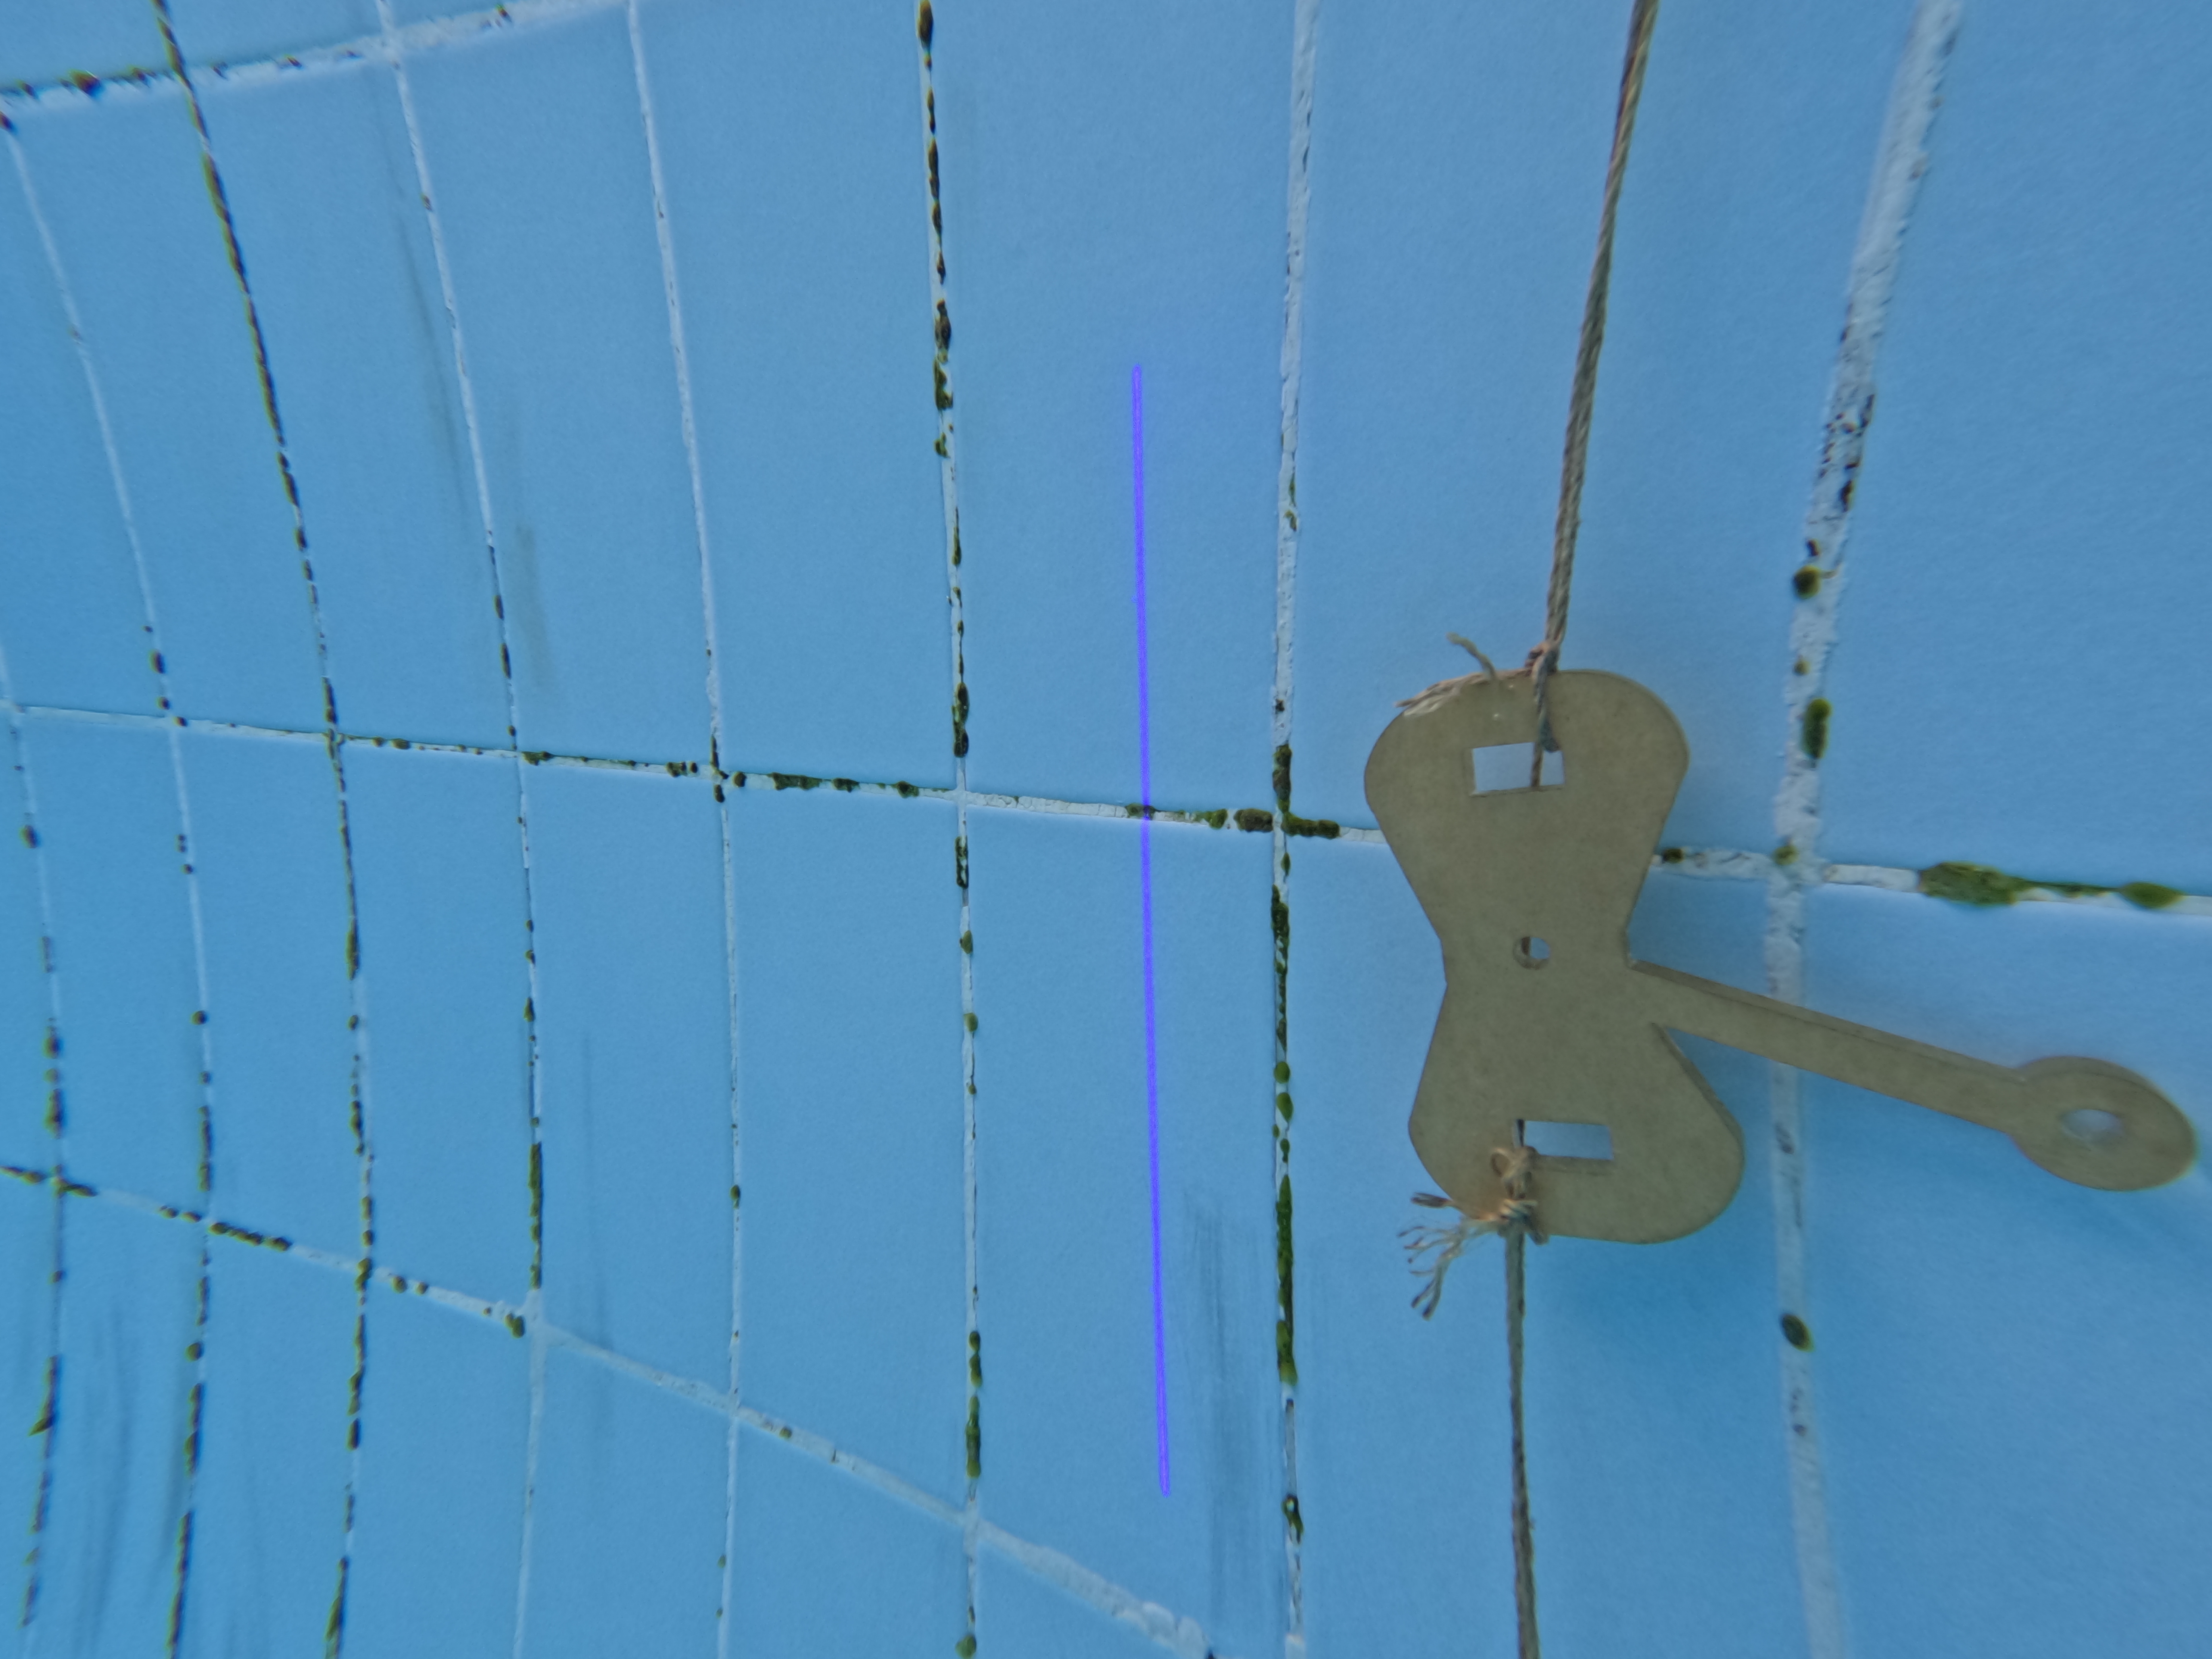

Supplement: Supplementary file 2719 [file G0051017.pdf › Level_2_2/G0051017.pdf]

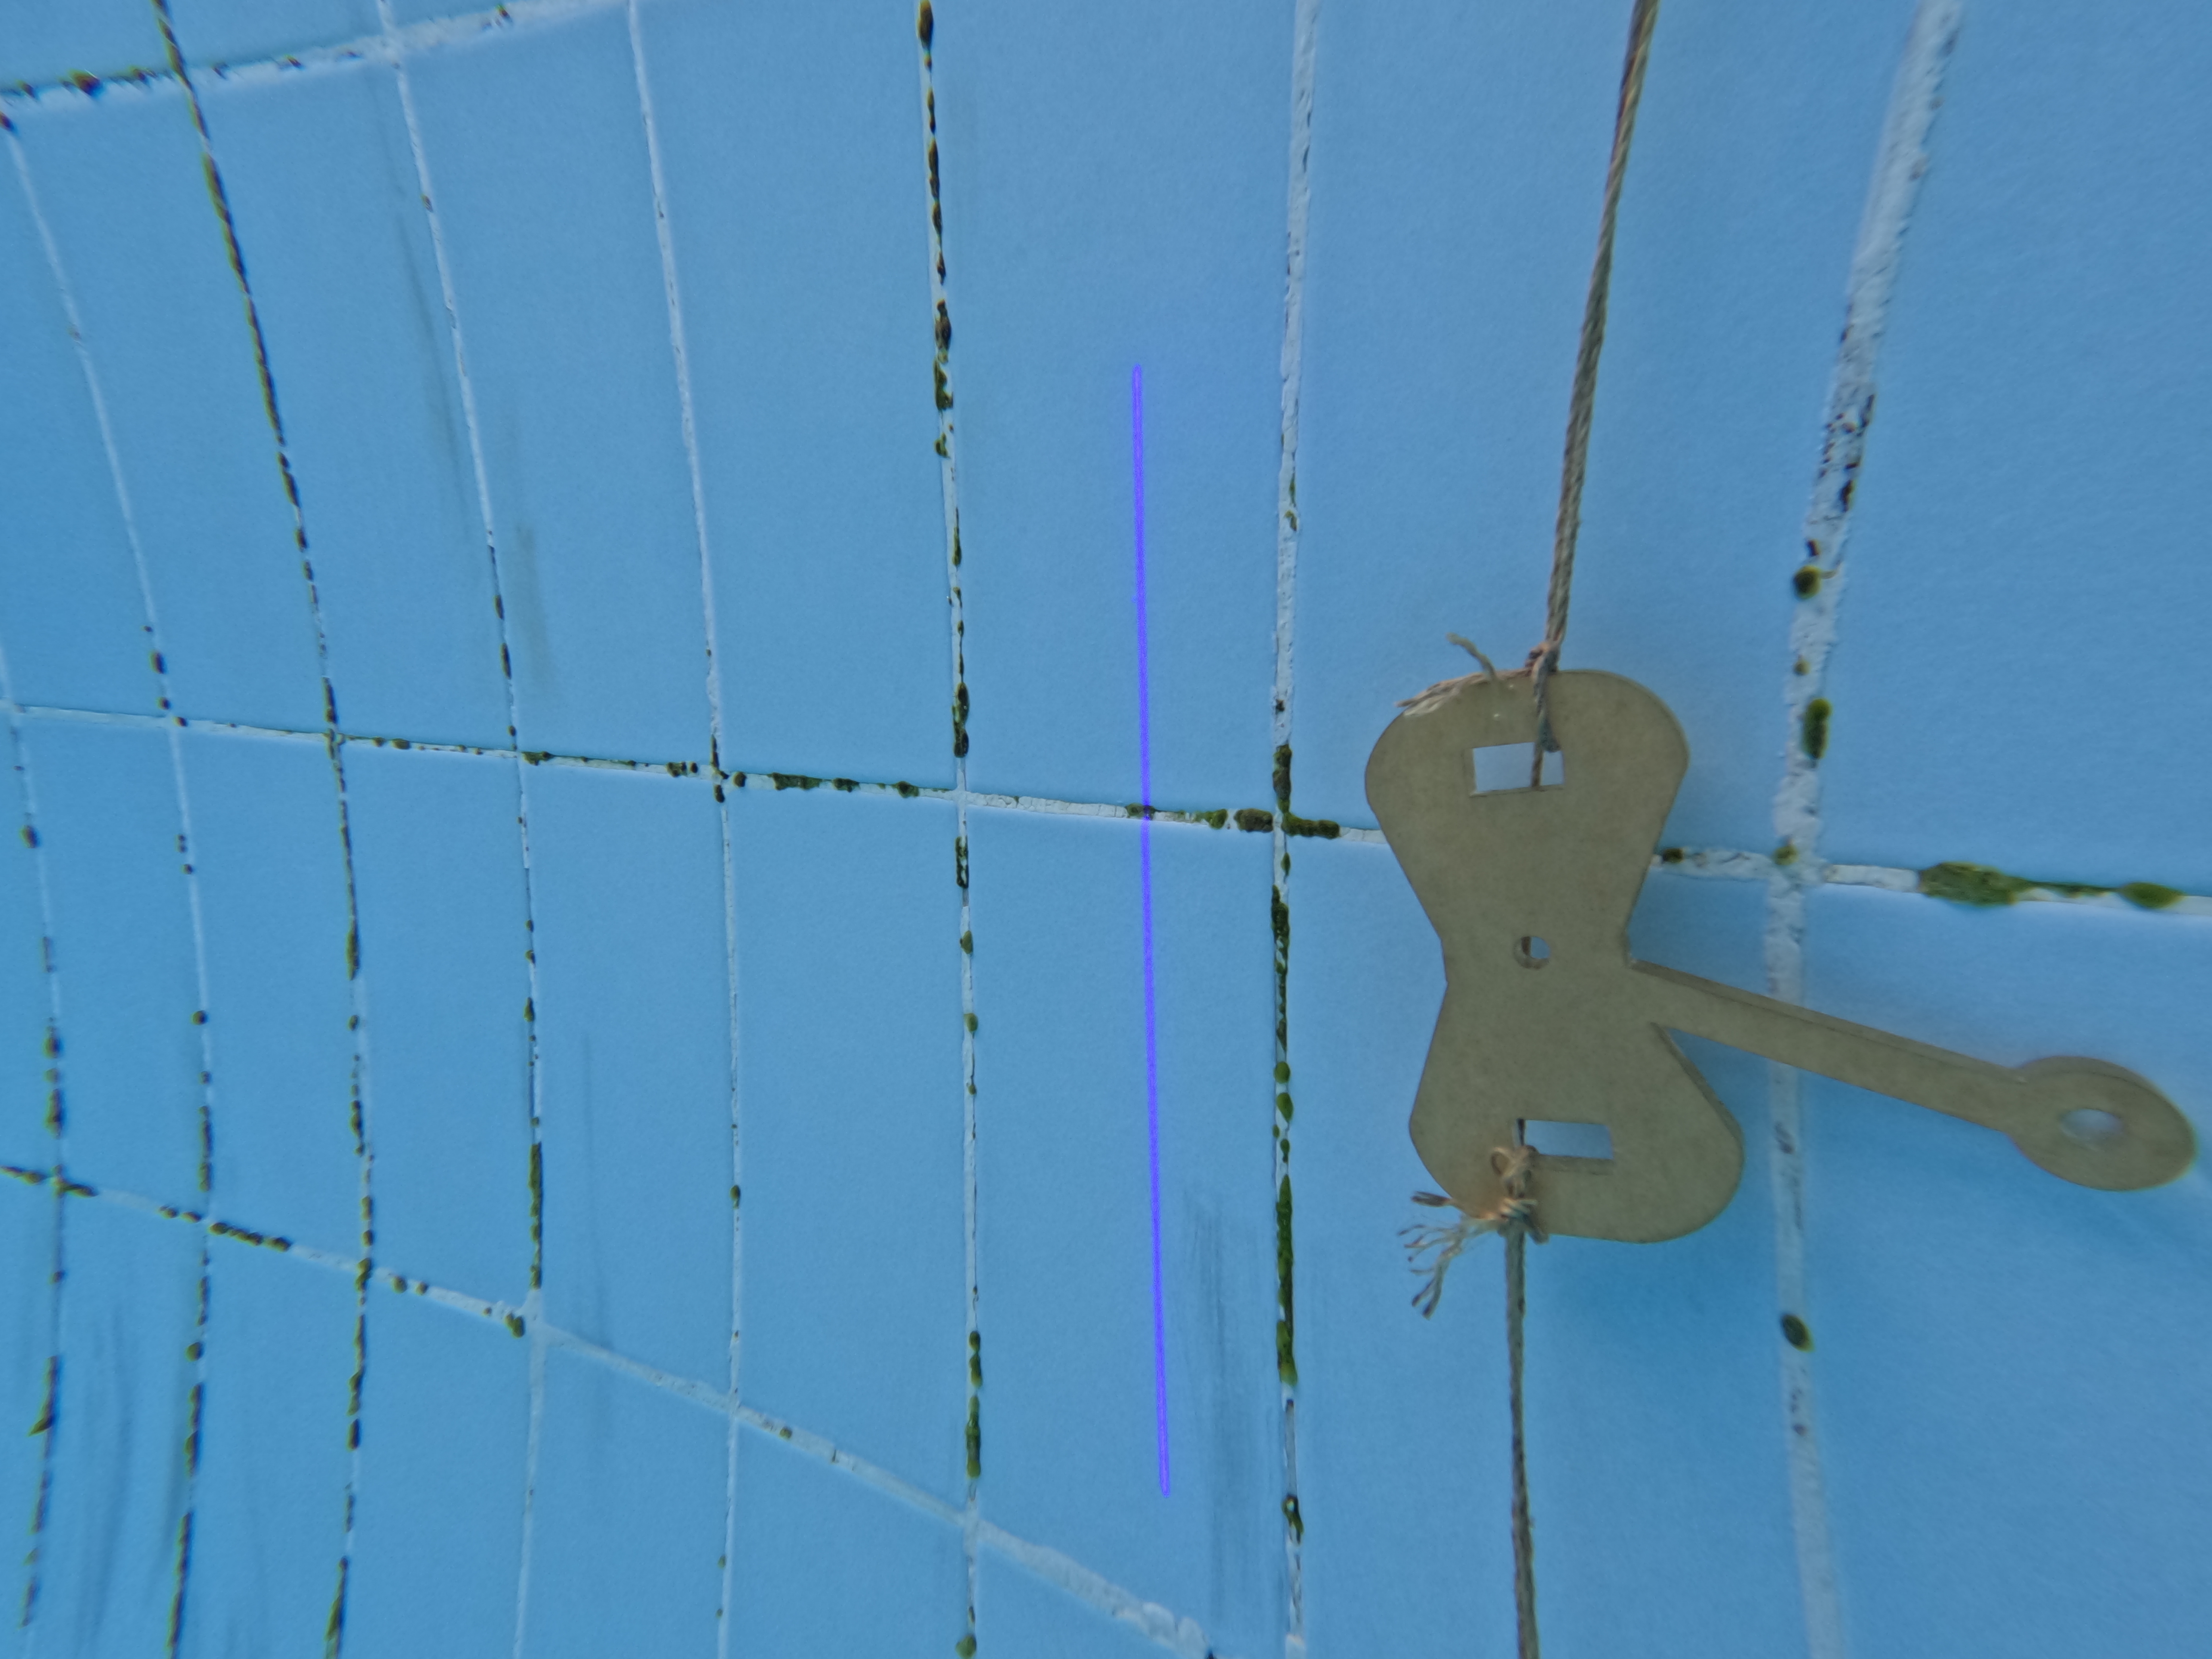

Supplement: Supplementary file 2720 [file G0051018.pdf › Level_2_2/G0051018.pdf]

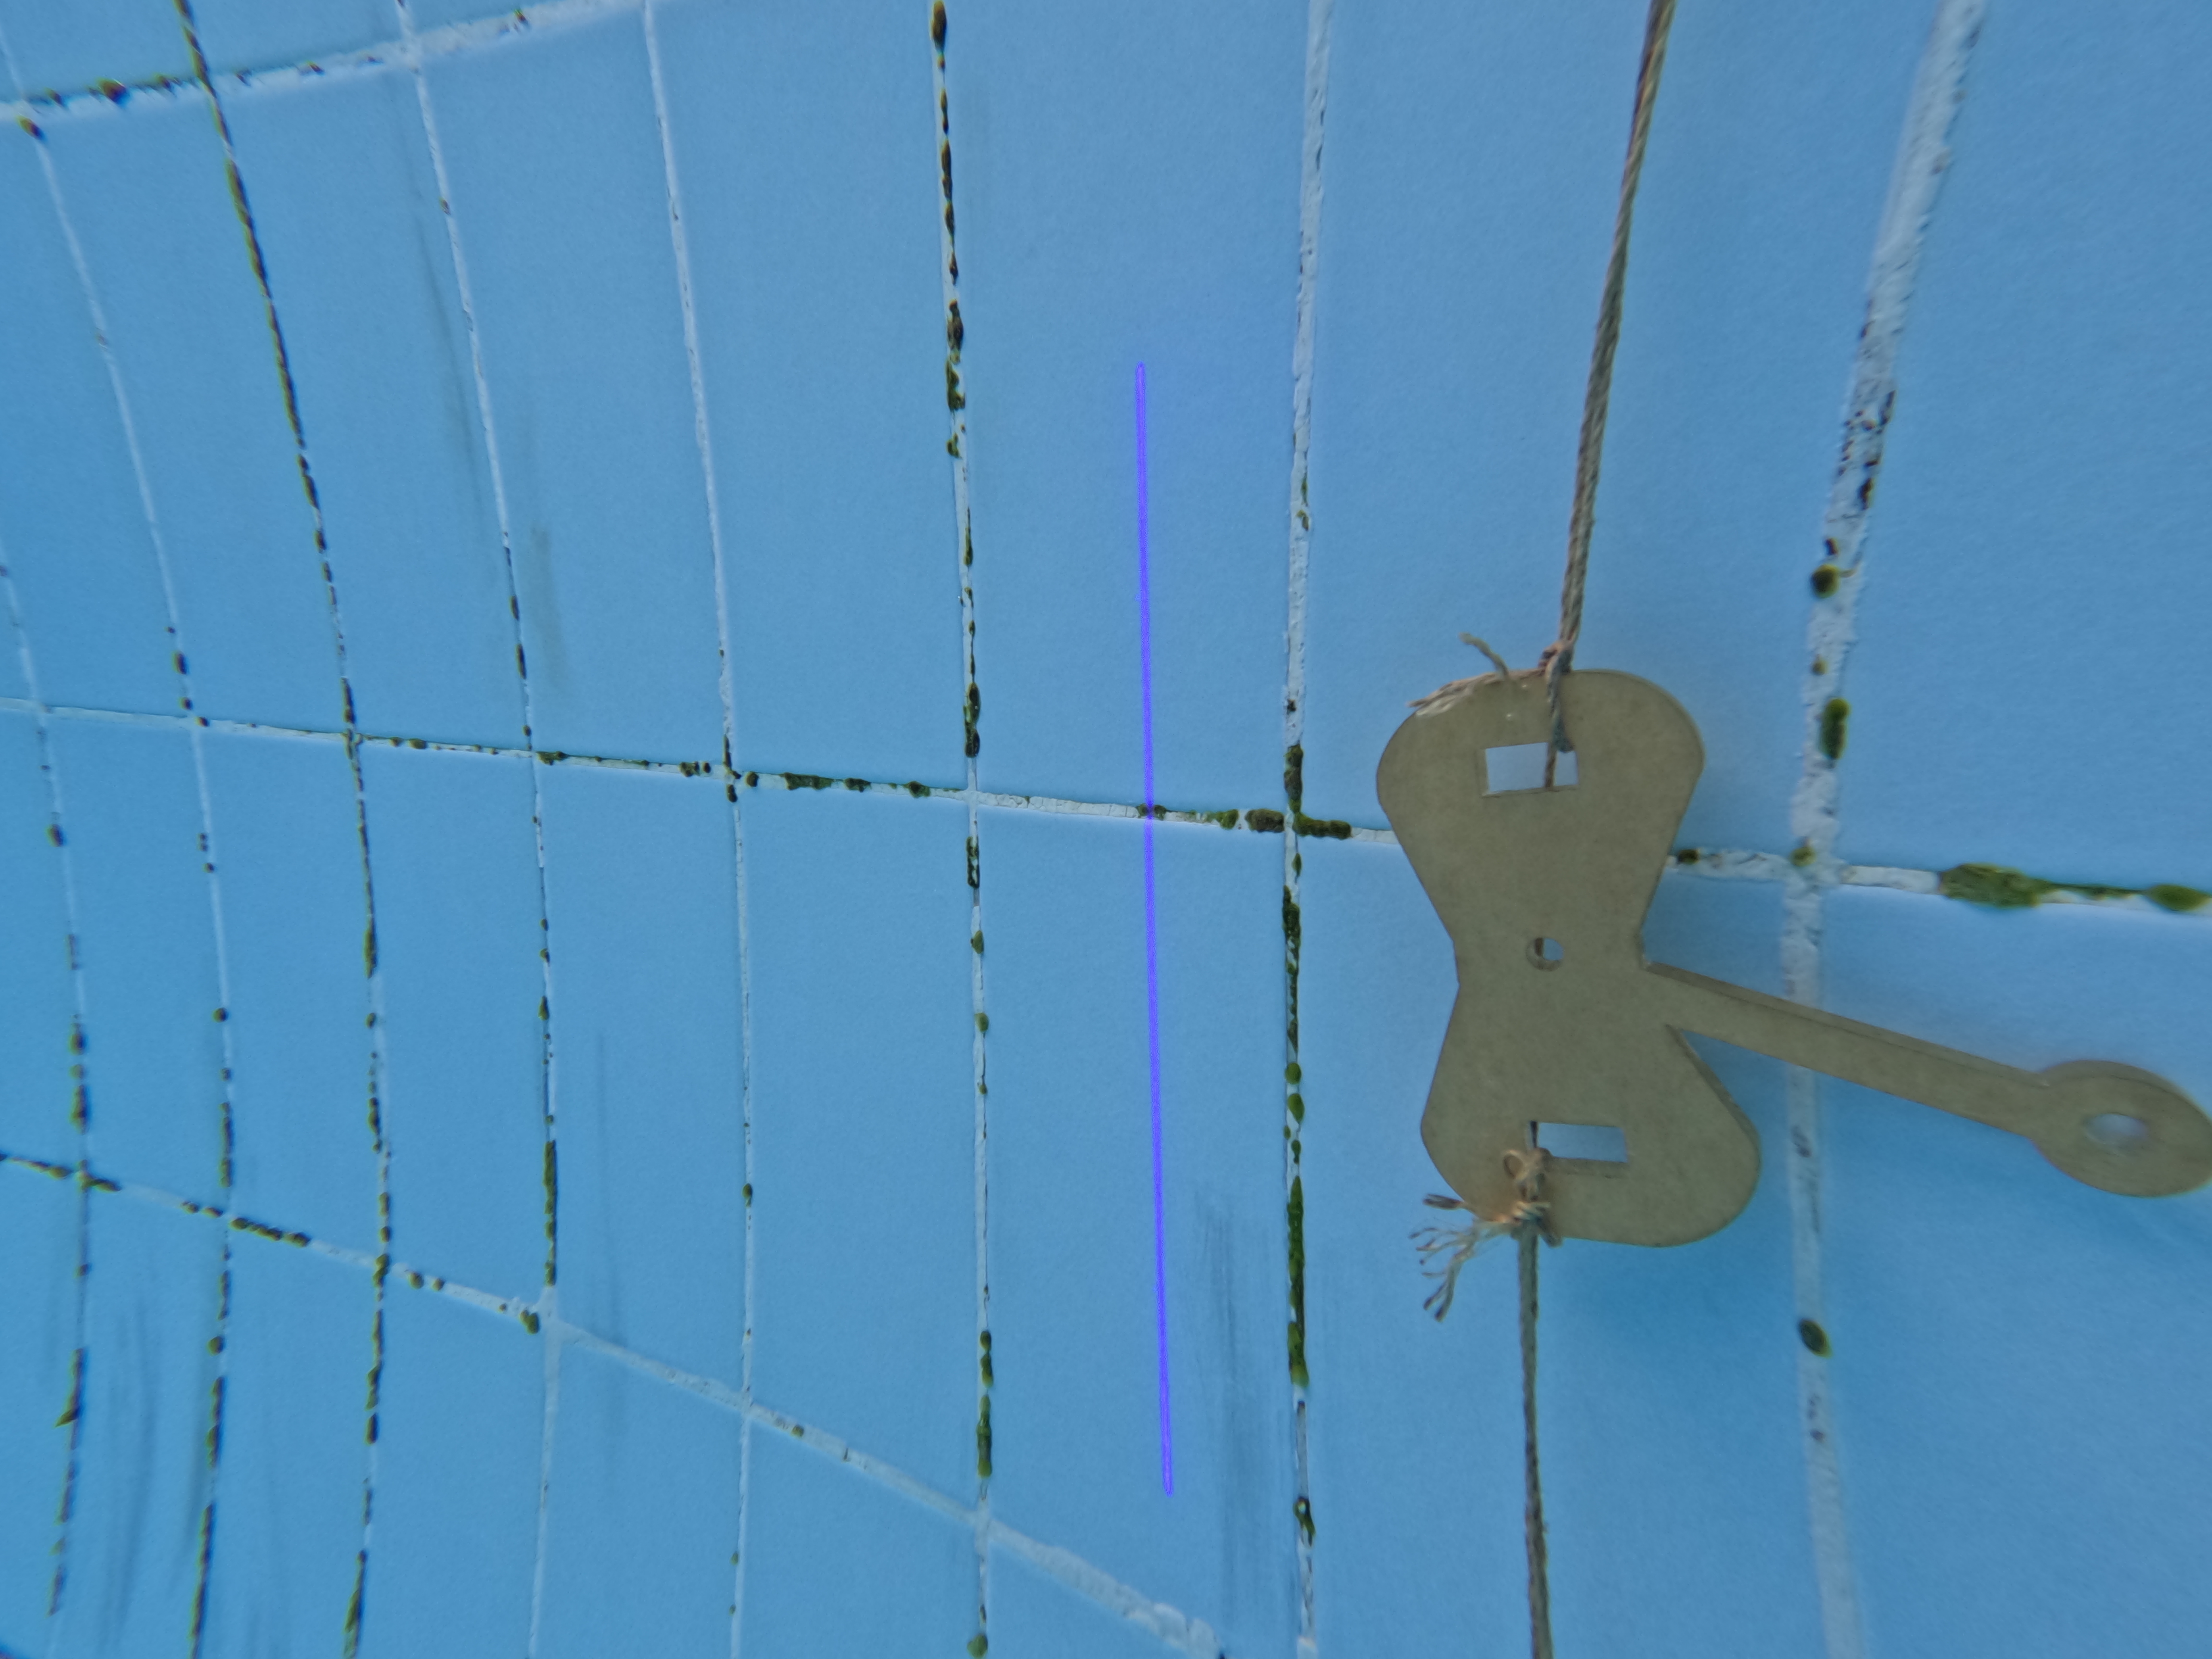

Supplement: Supplementary file 2721 [file G0051019.pdf › Level_2_2/G0051019.pdf]

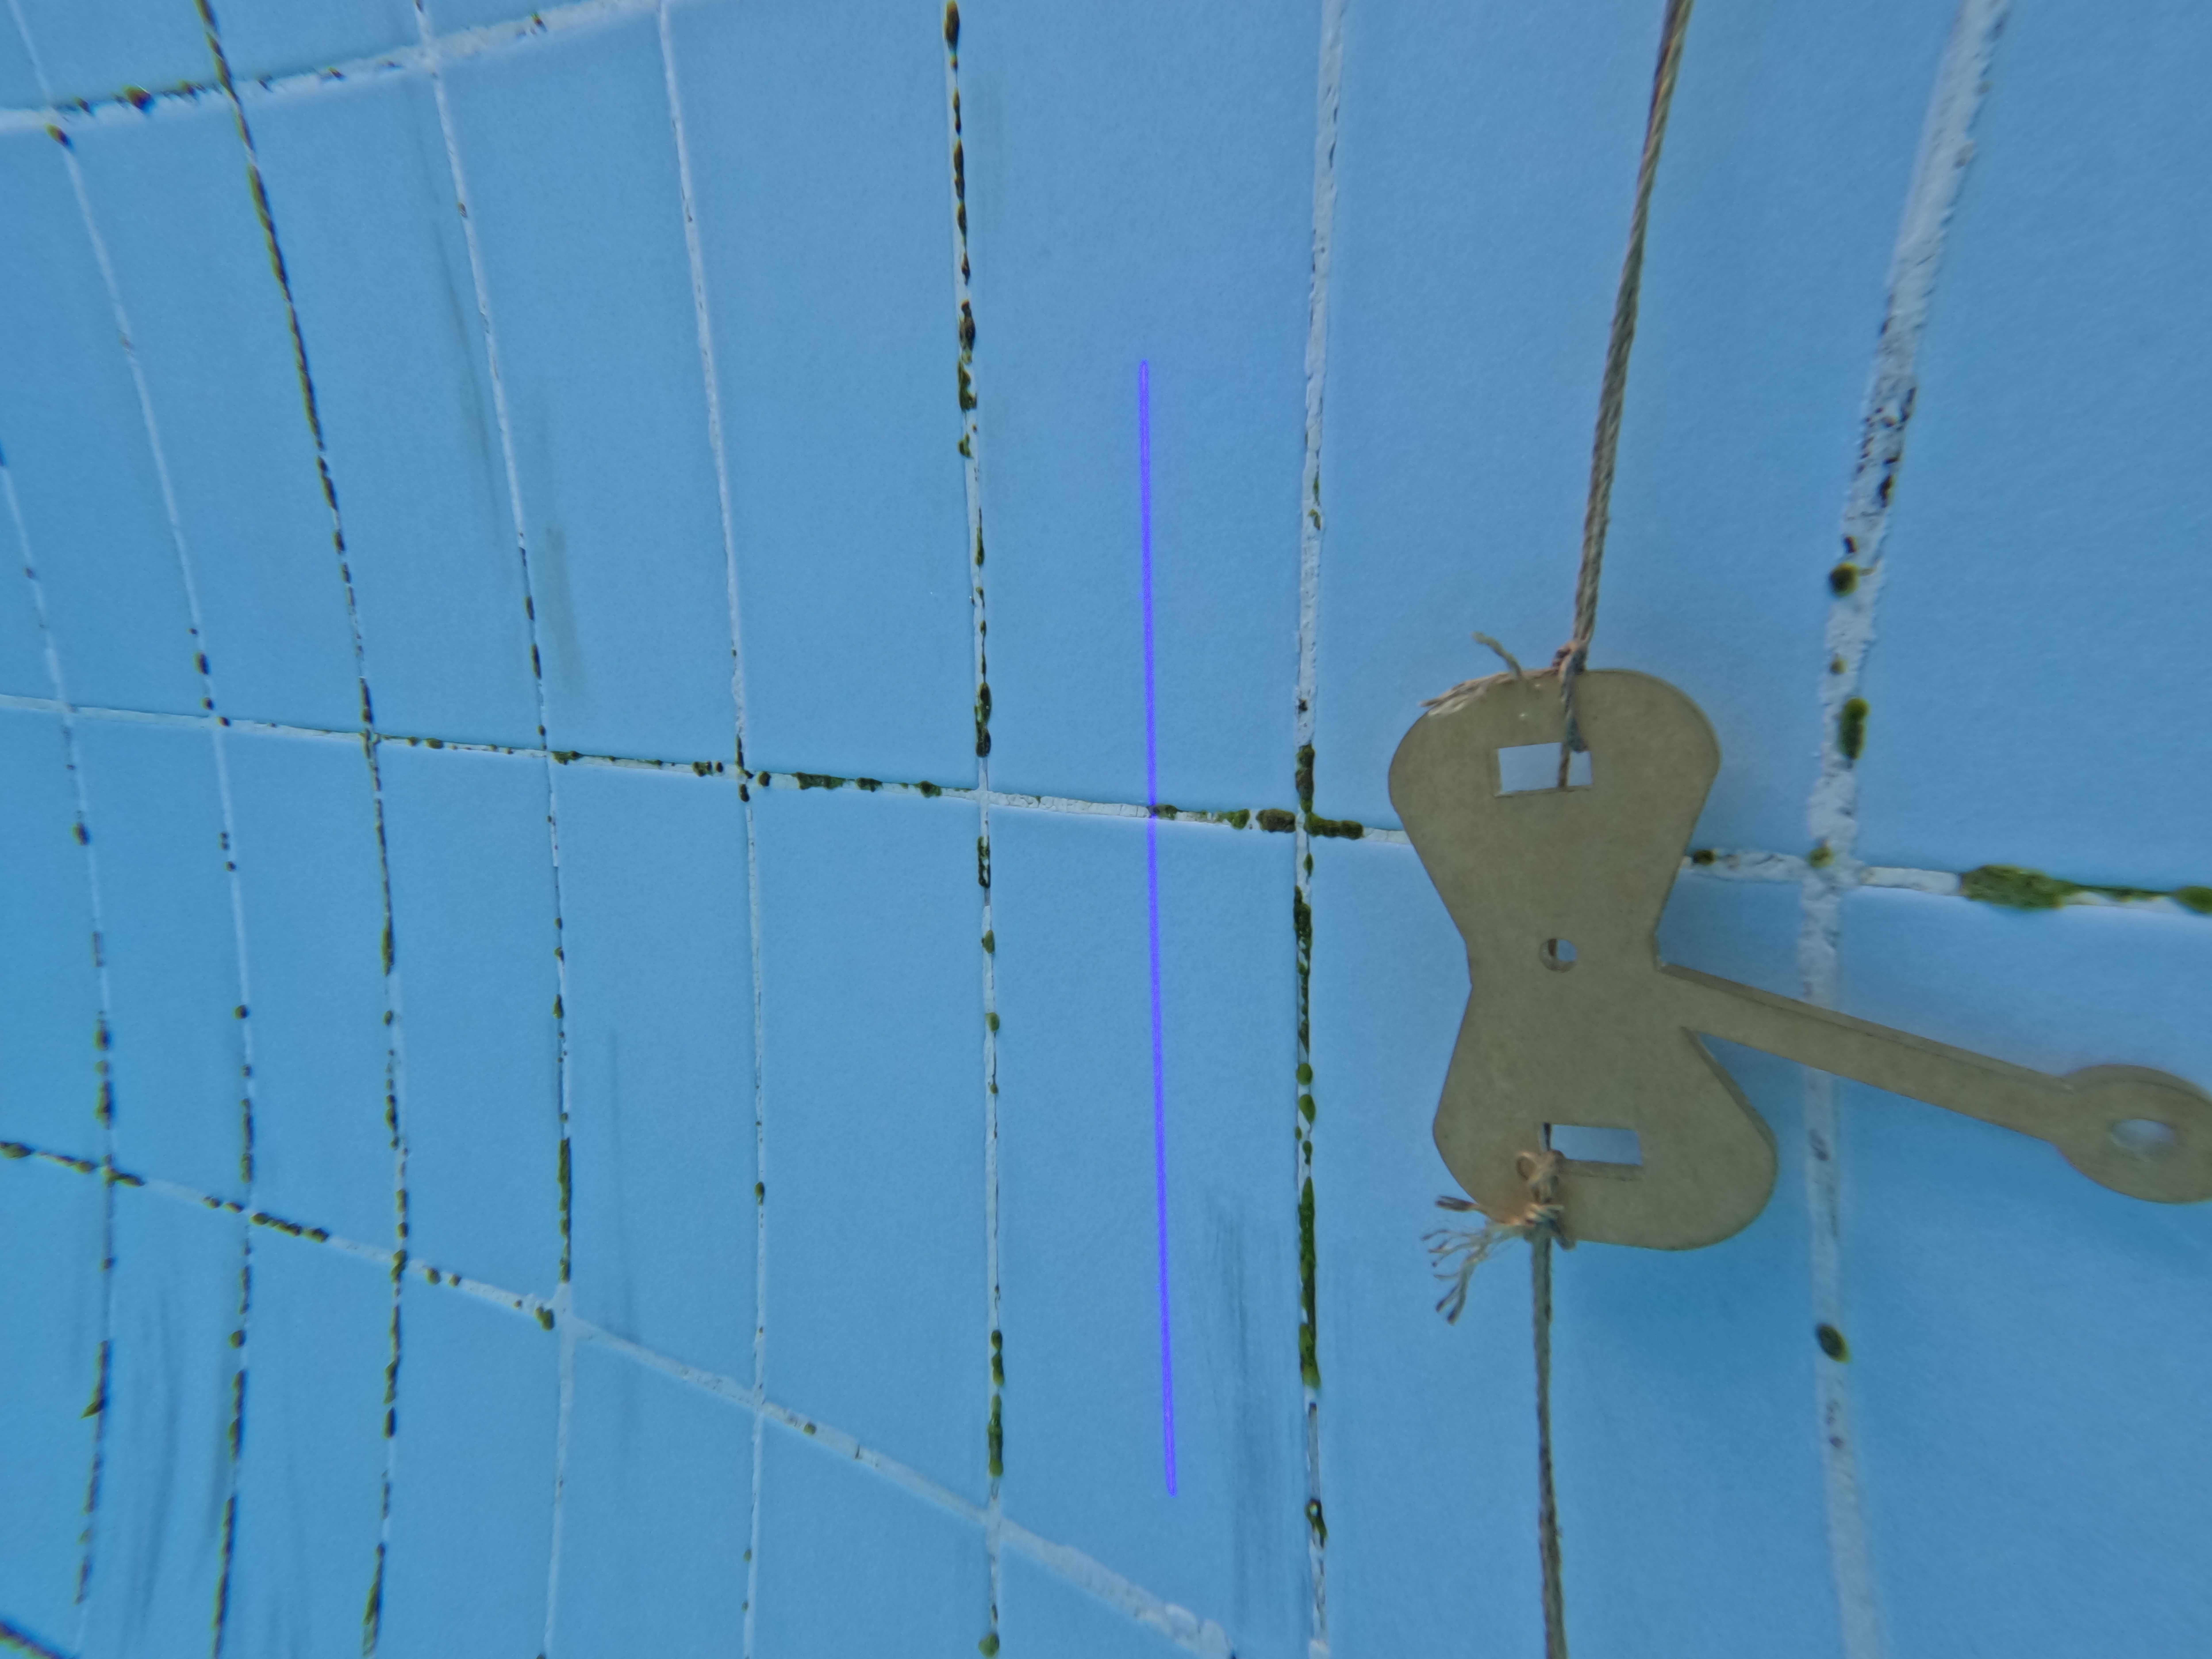

Supplement: Supplementary file 2722 [file G0051020.pdf › Level_2_2/G0051020.pdf]

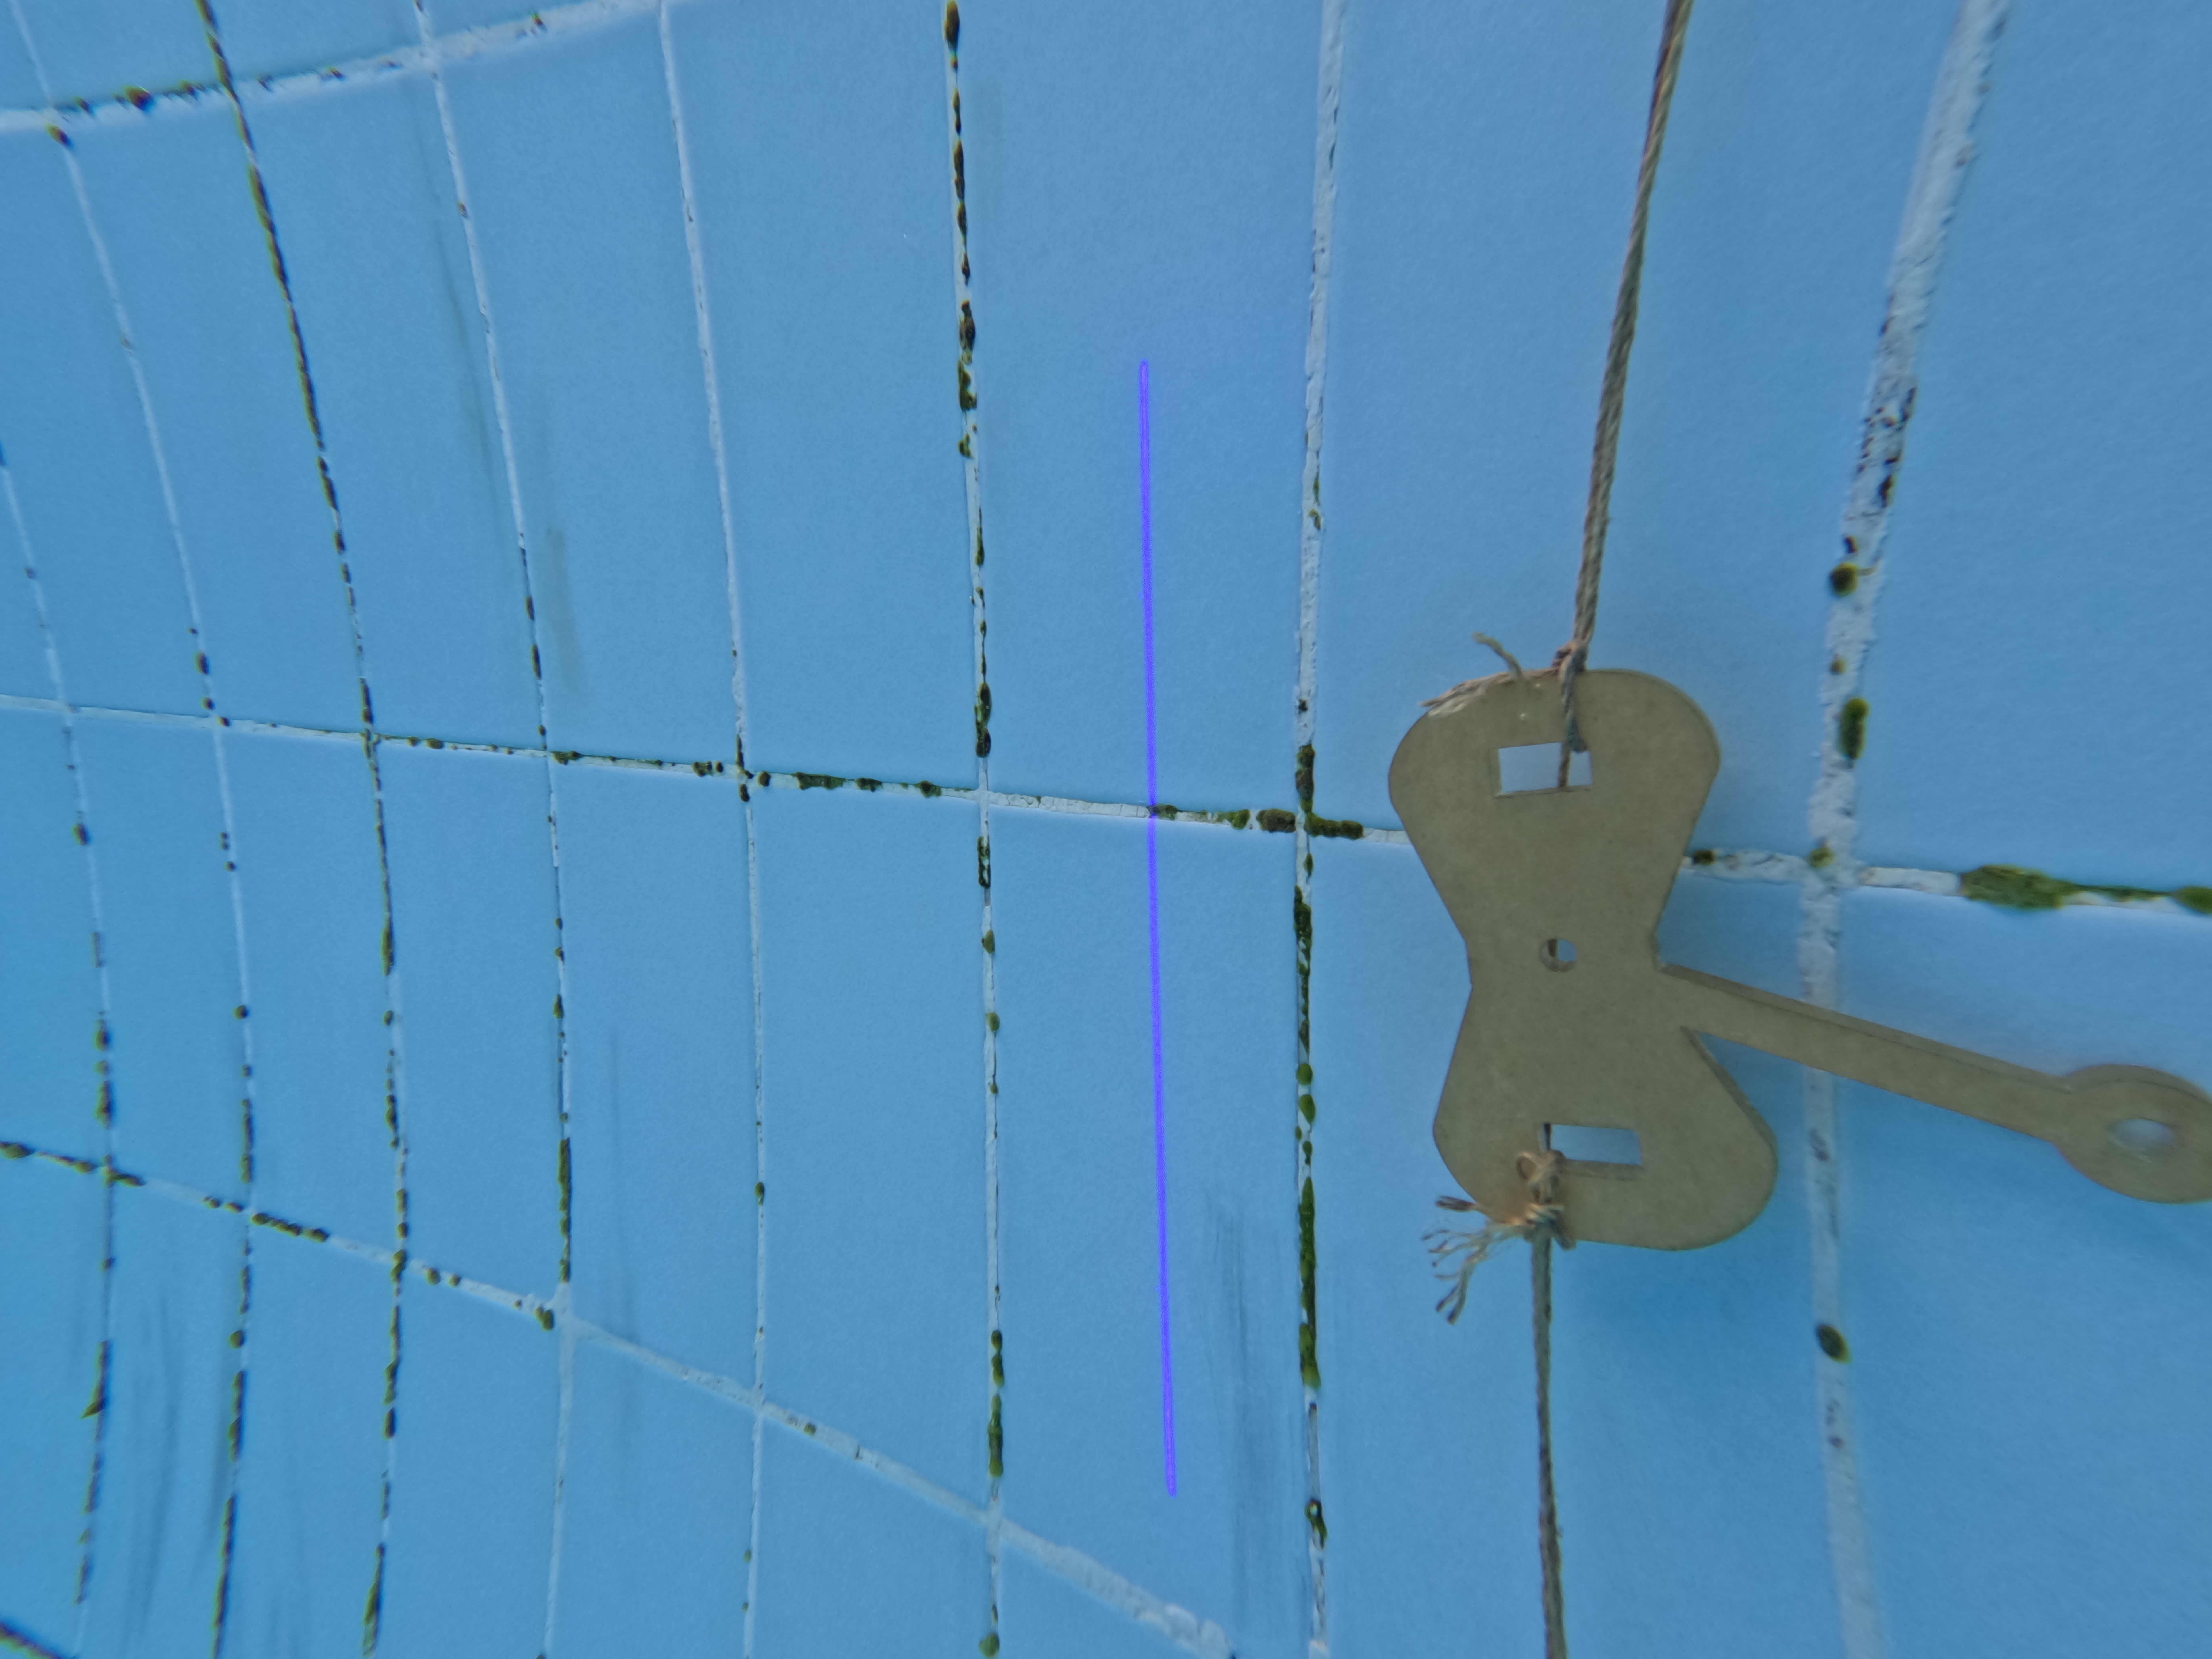

Supplement: Supplementary file 2723 [file G0051021.pdf › Level_2_2/G0051021.pdf]

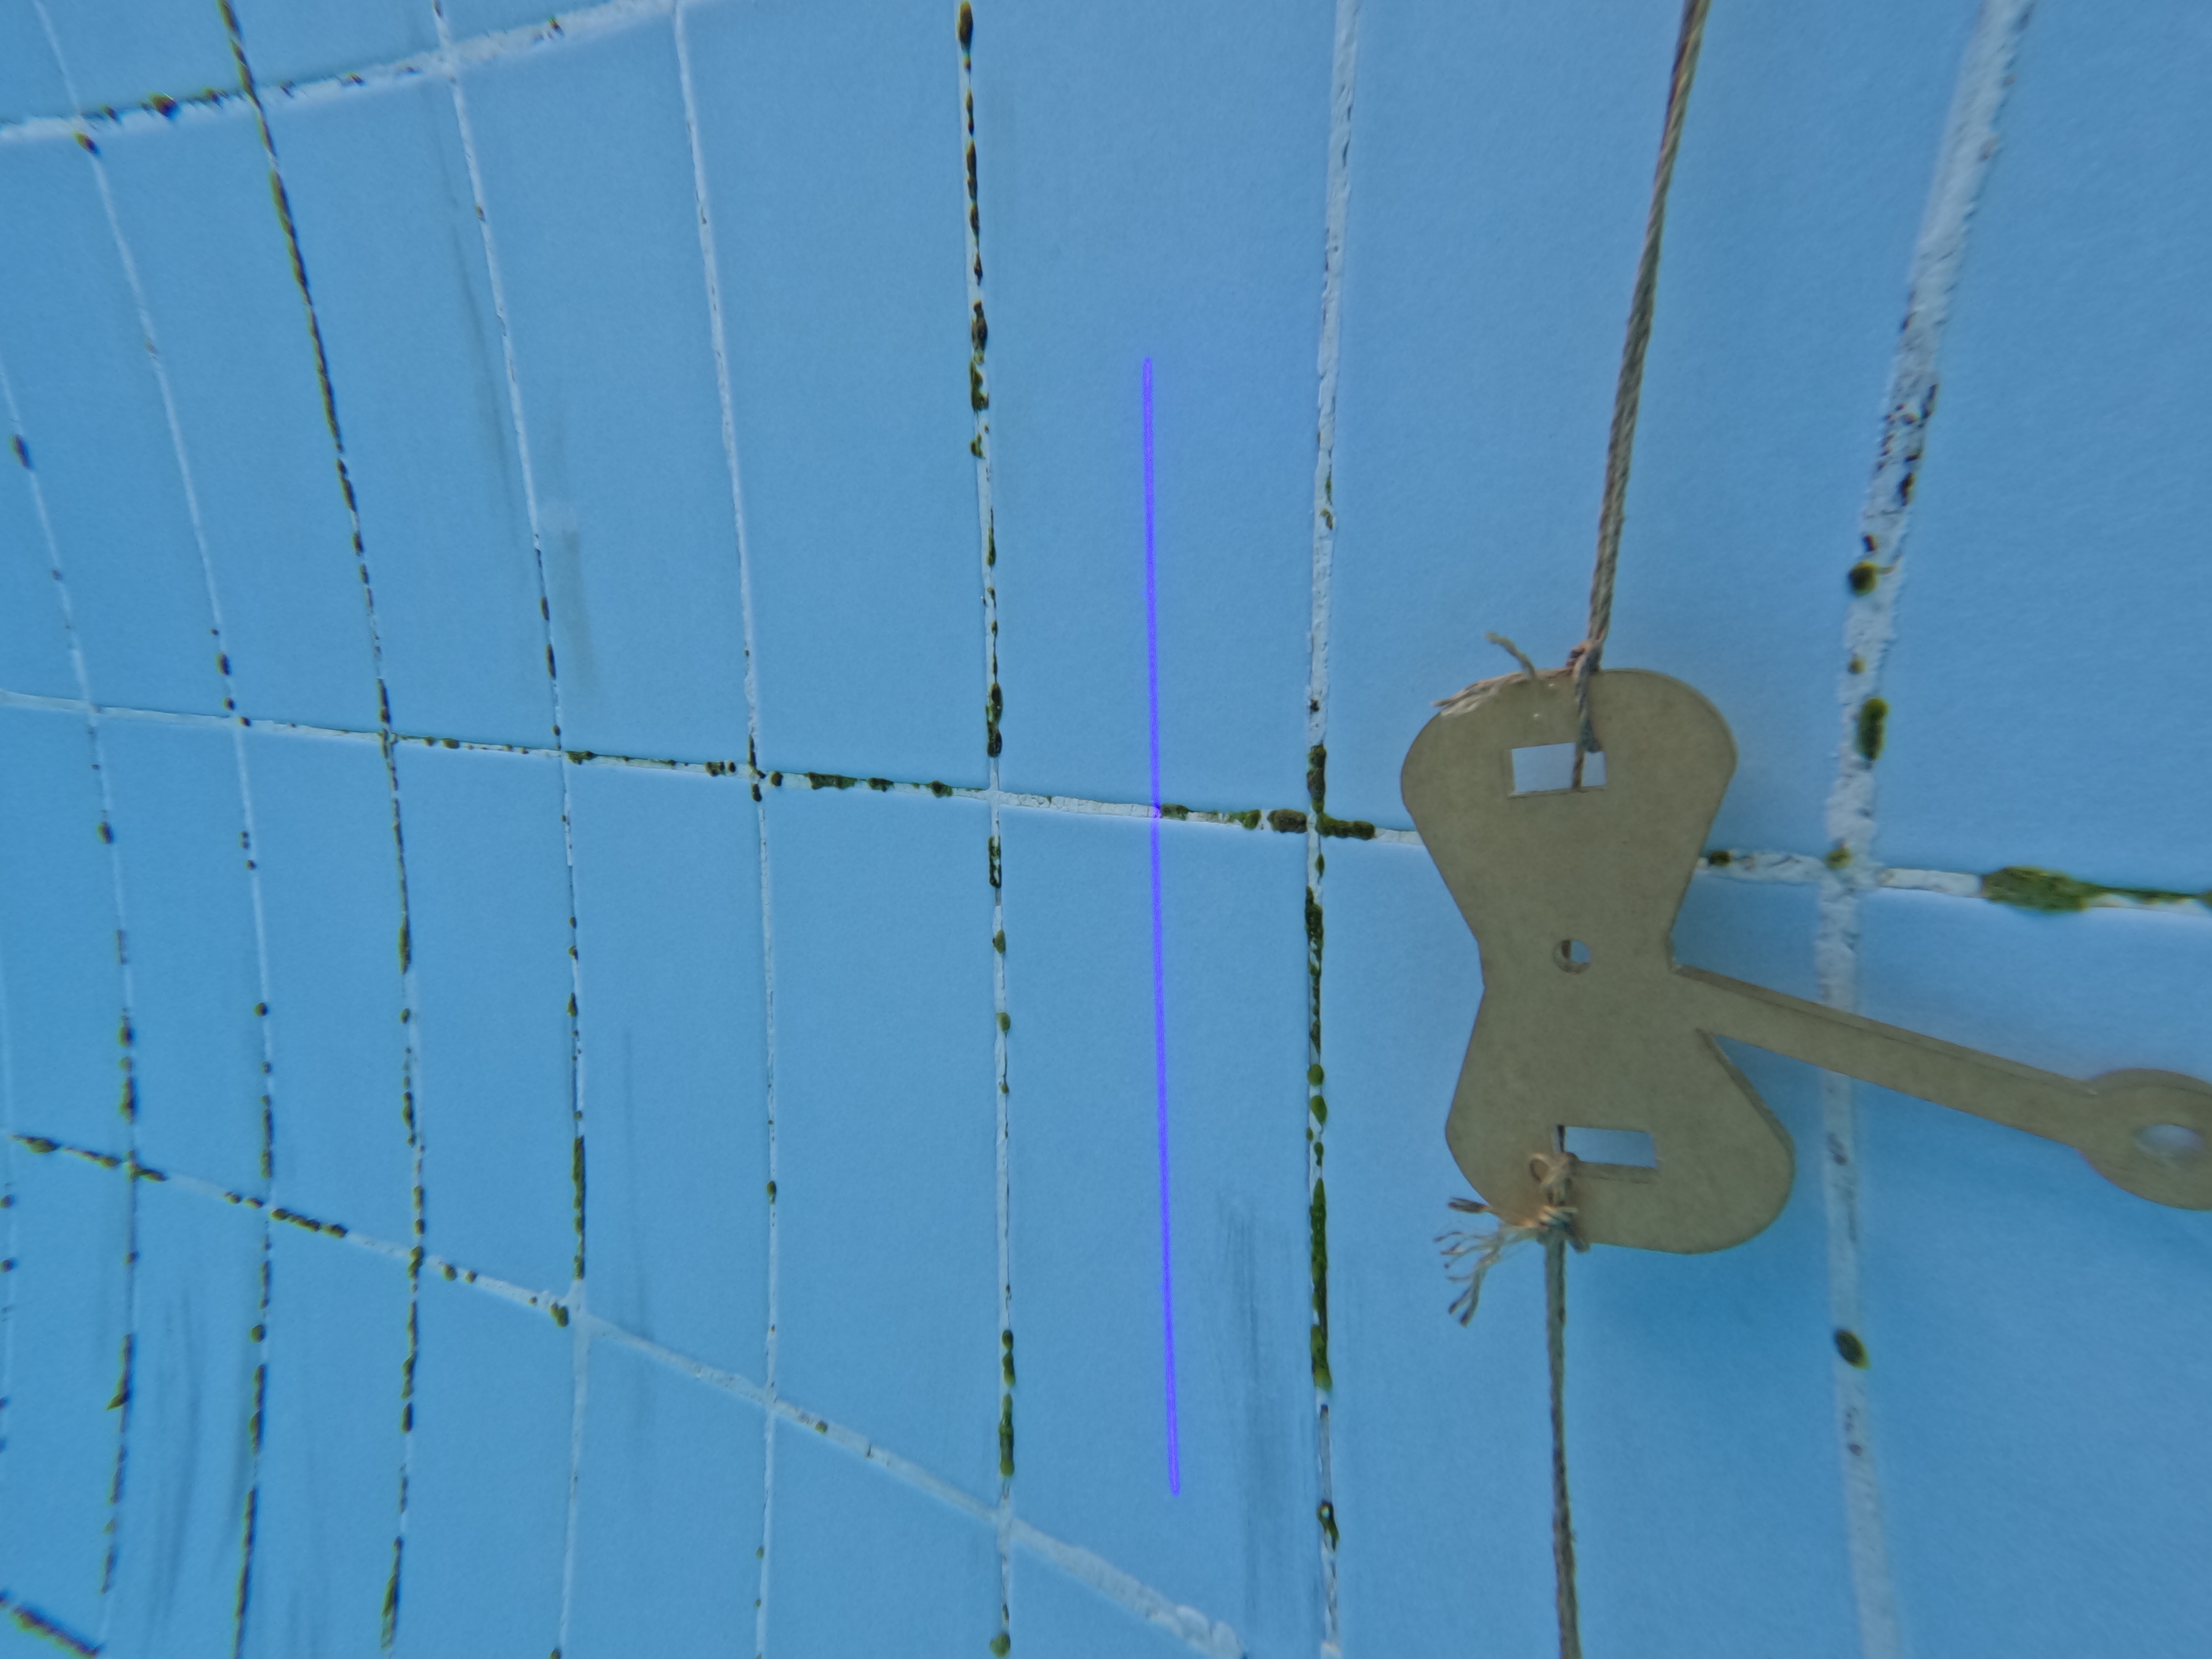

Supplement: Supplementary file 2724 [file G0051022.pdf › Level_2_2/G0051022.pdf]

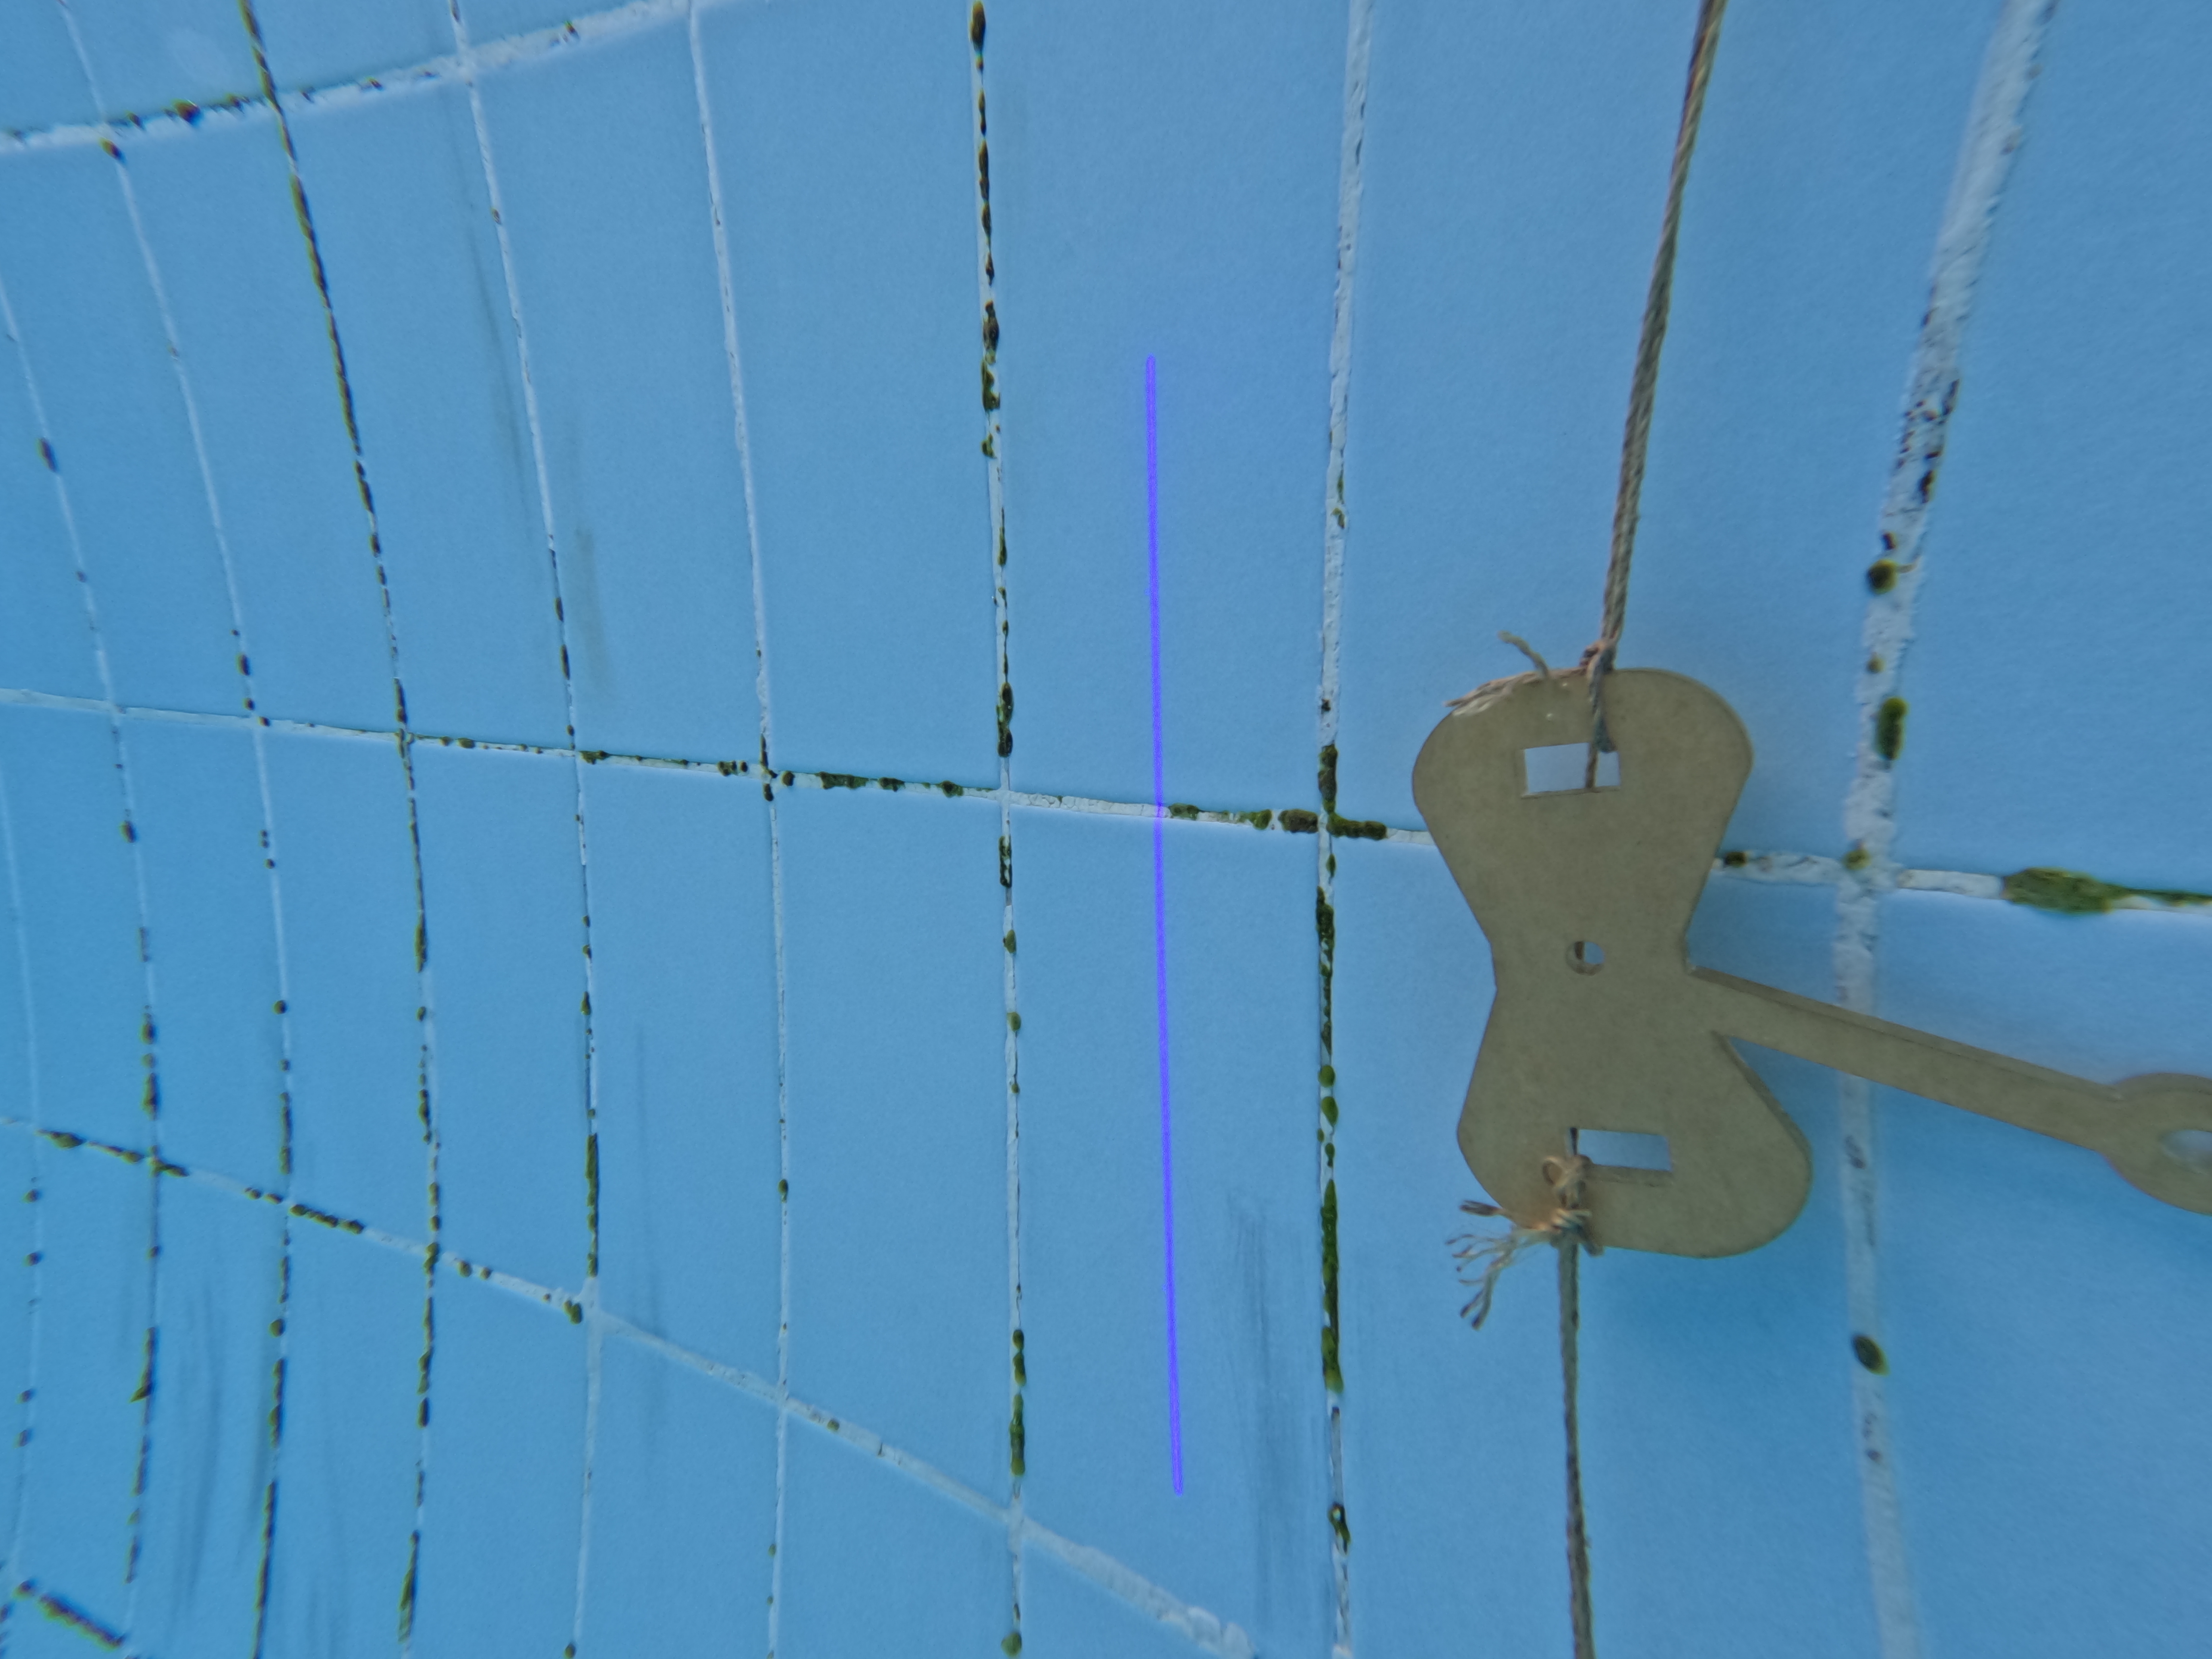

Supplement: Supplementary file 2725 [file G0051023.pdf › Level_2_2/G0051023.pdf]

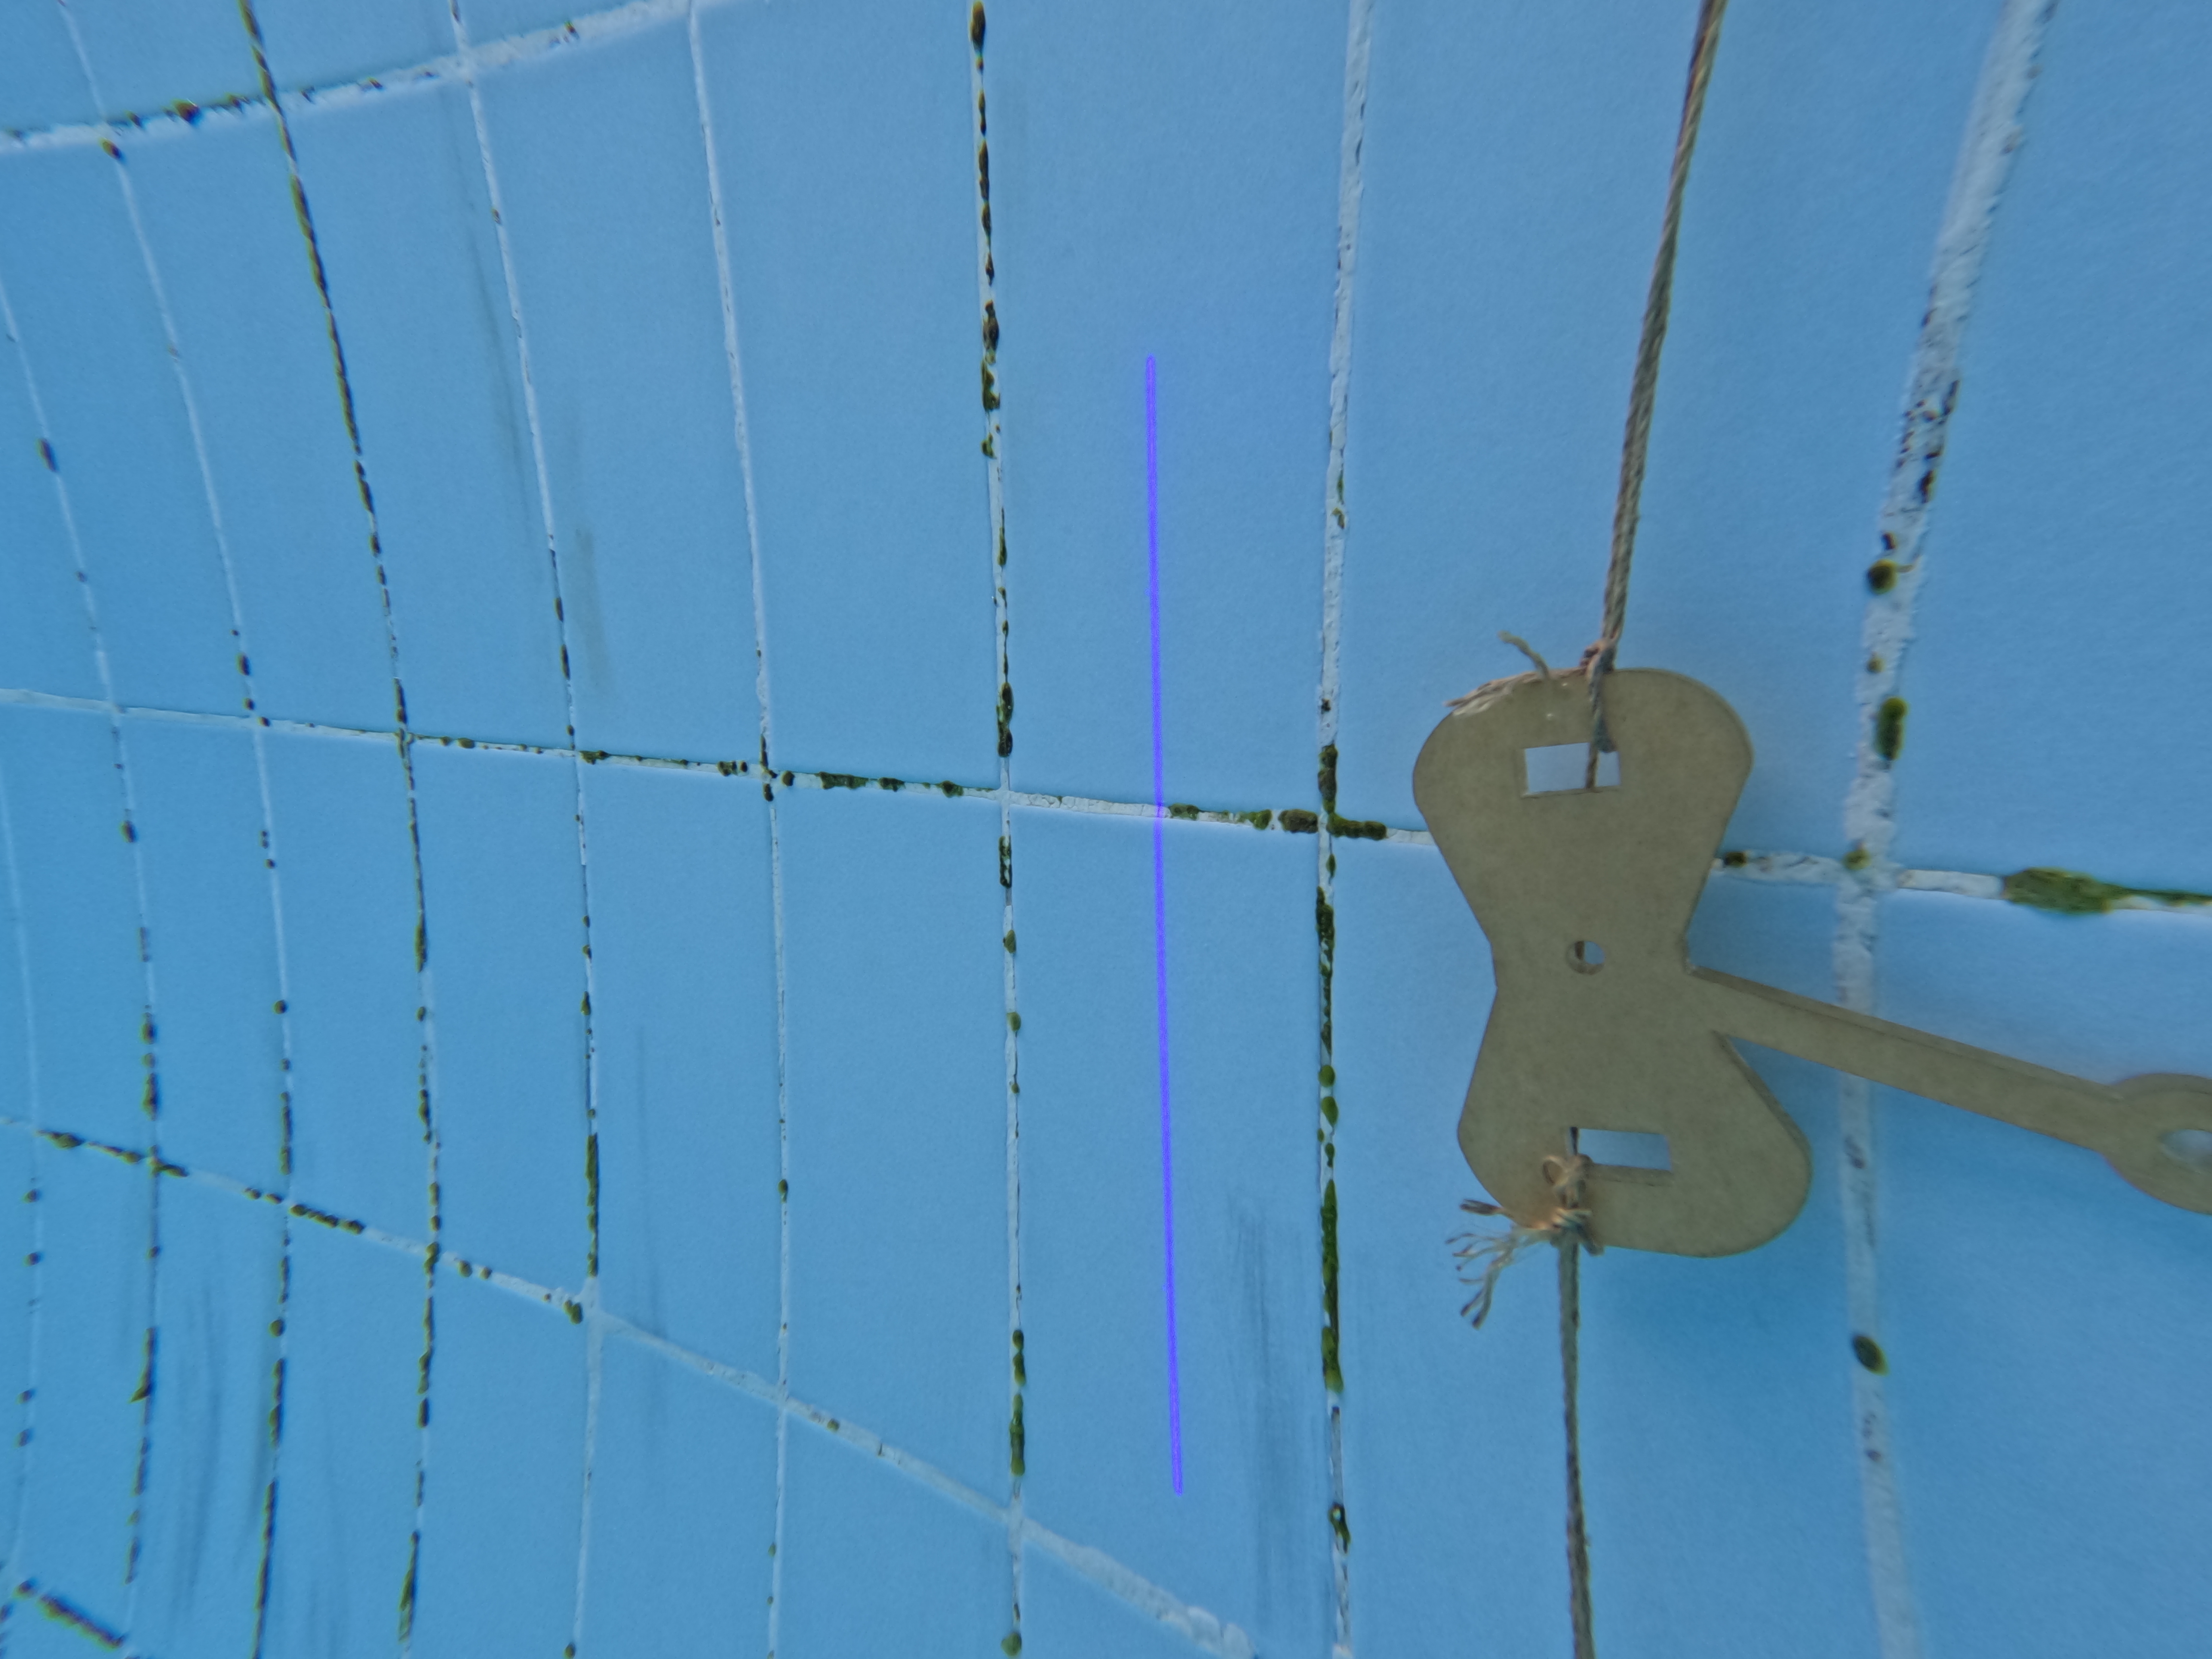

Supplement: Supplementary file 2726 [file G0051024.pdf › Level_2_2/G0051024.pdf]

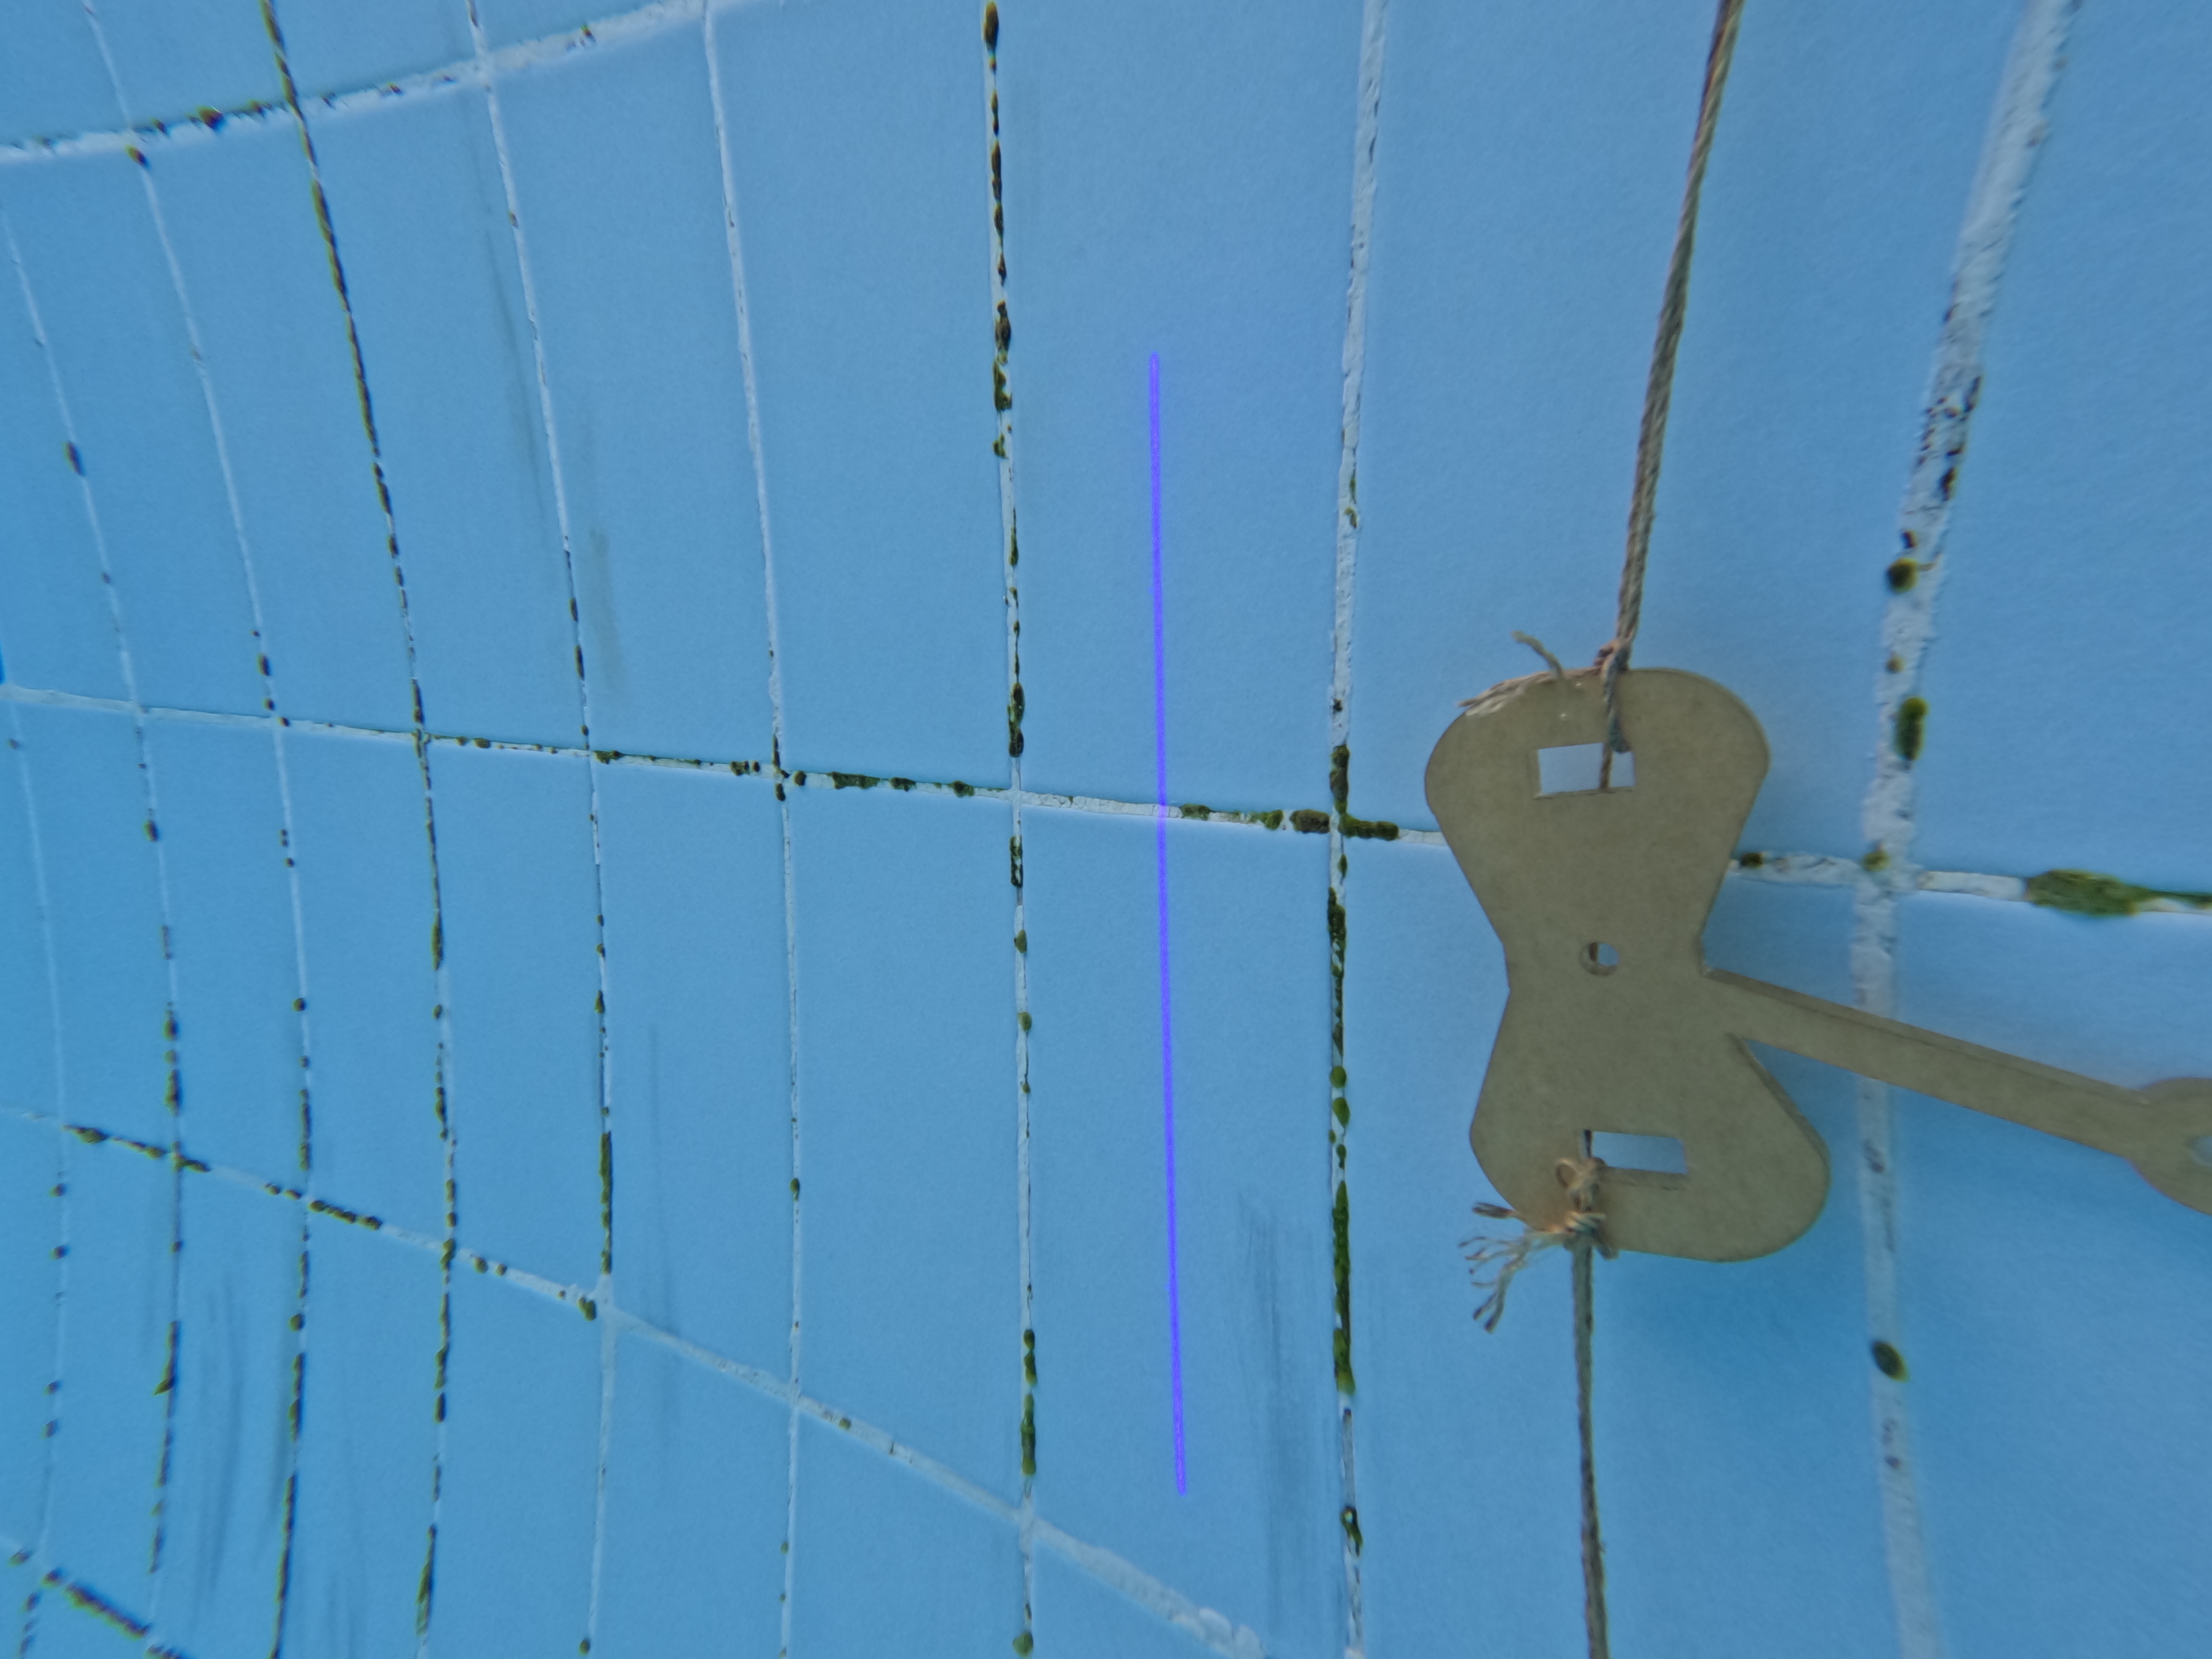

Supplement: Supplementary file 2727 [file G0051025.pdf › Level_2_2/G0051025.pdf]

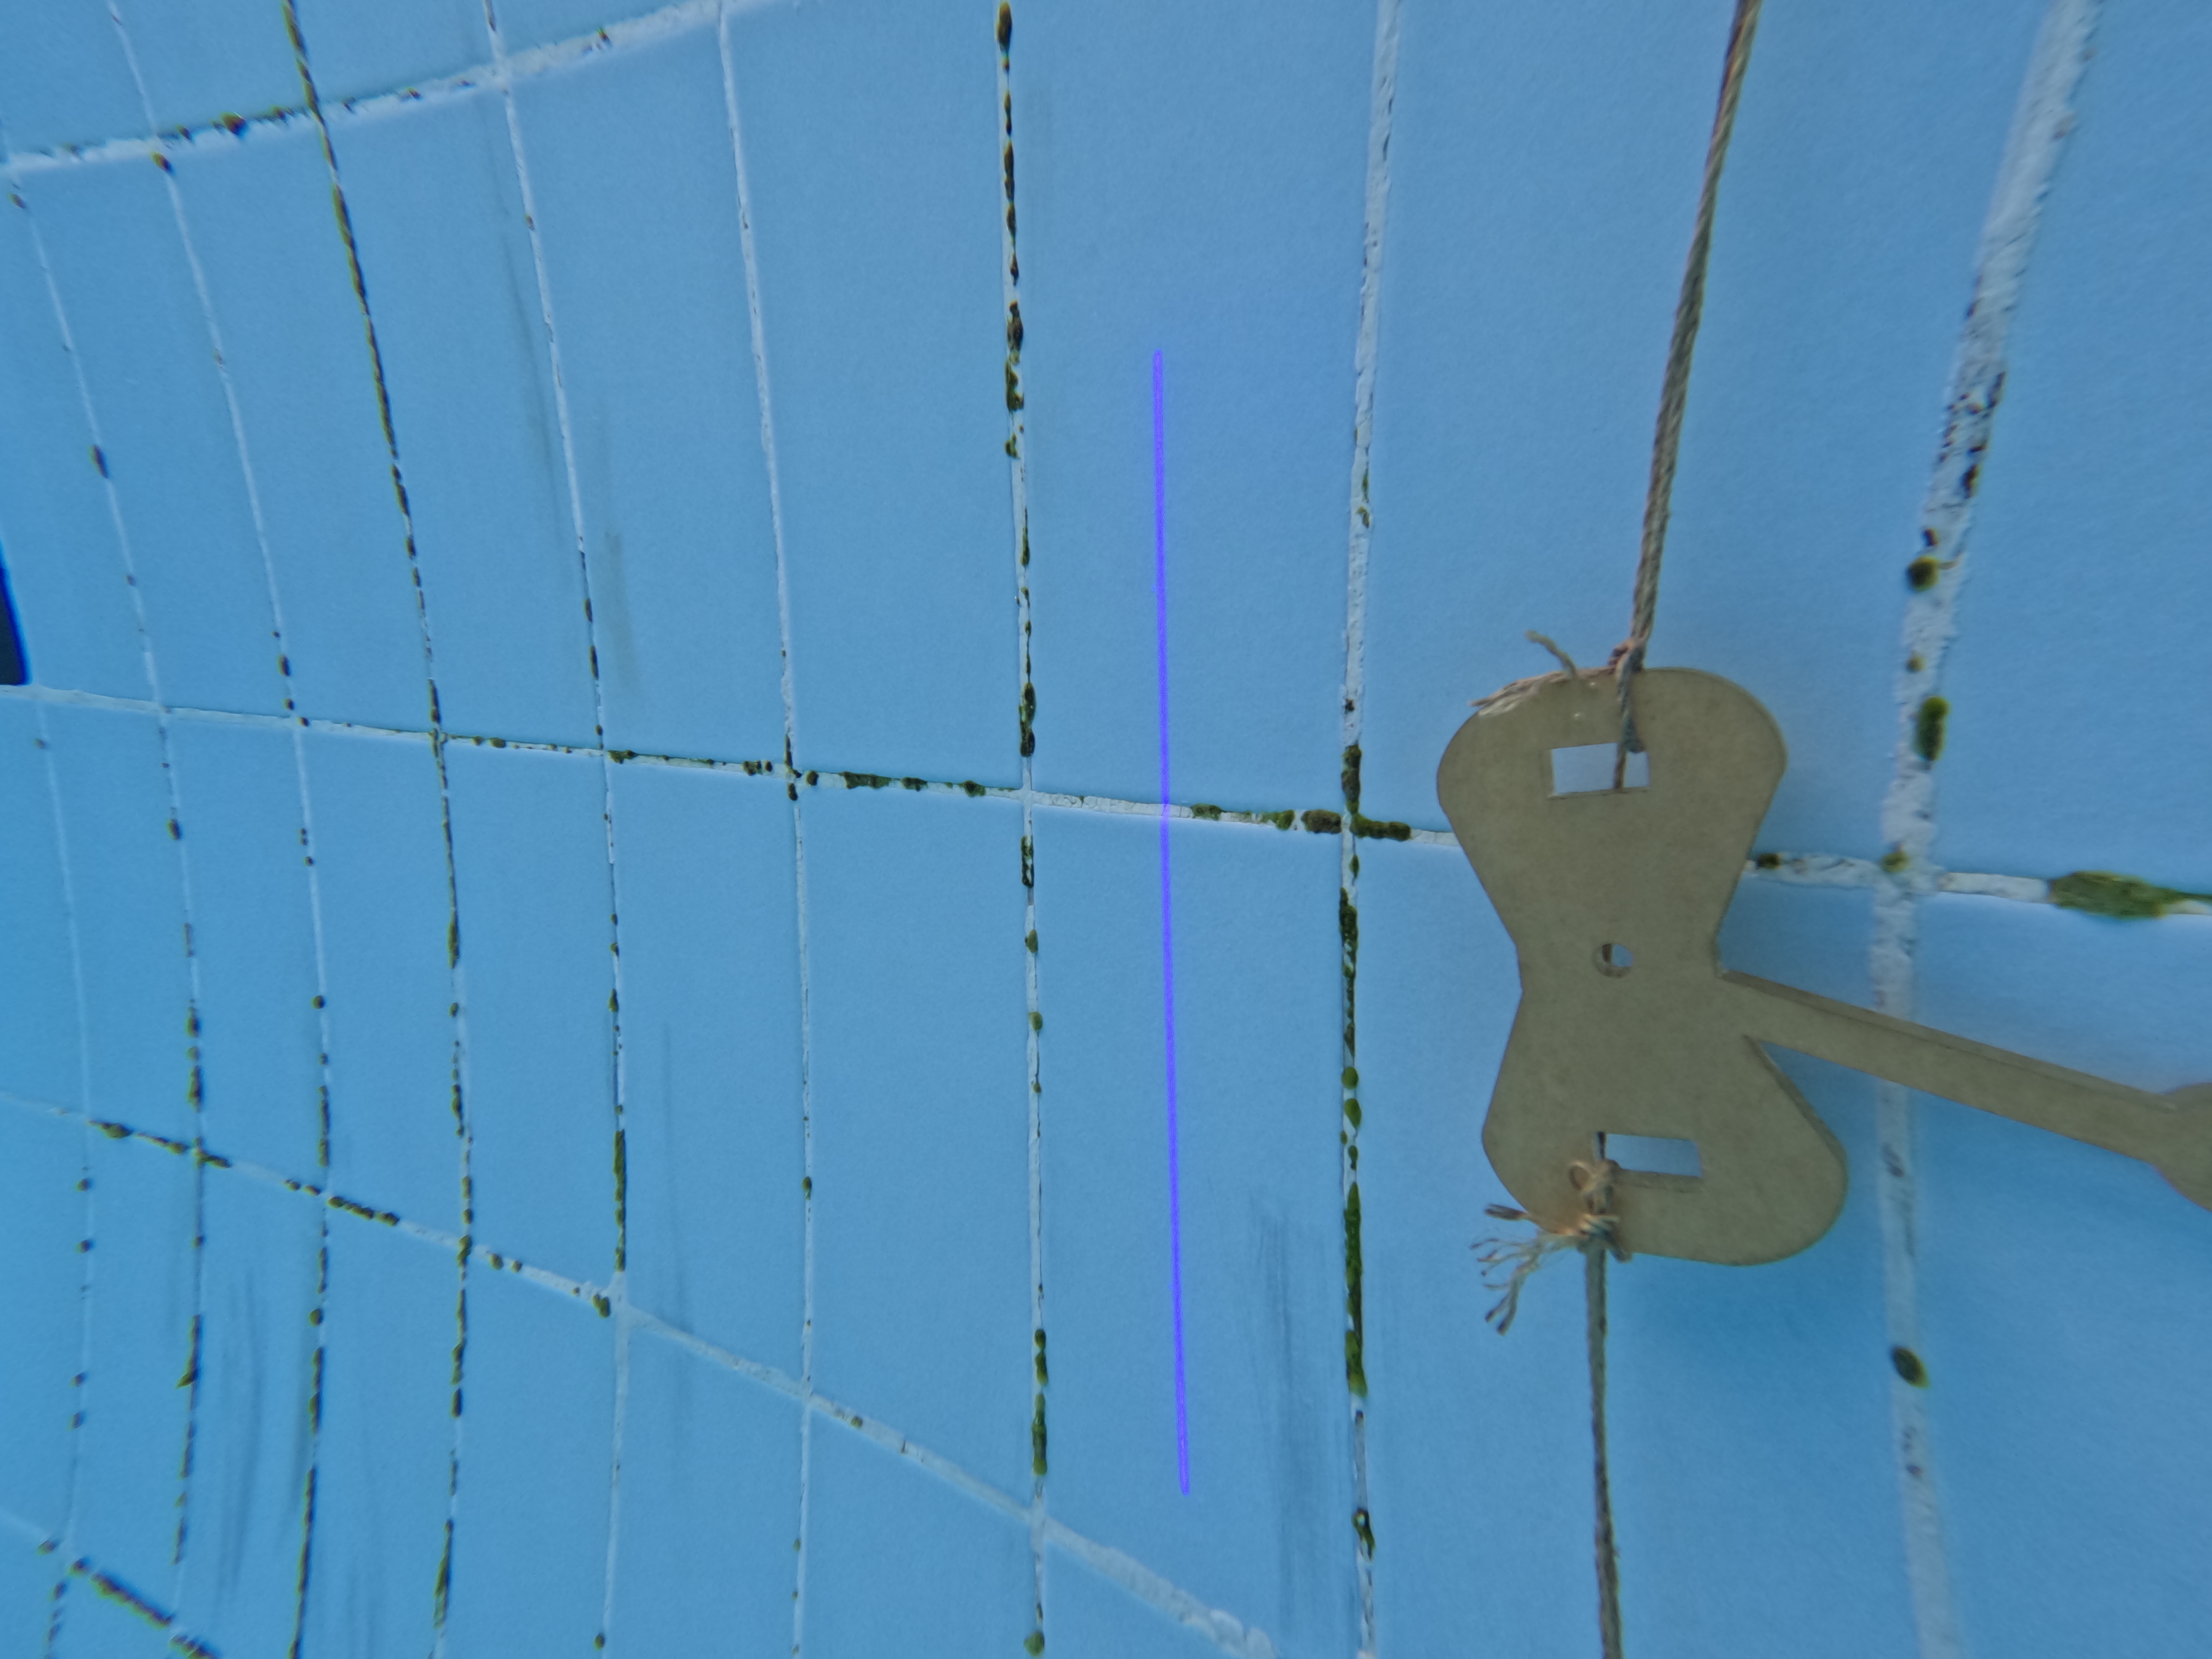

Supplement: Supplementary file 2728 [file G0051026.pdf › Level_2_2/G0051026.pdf]

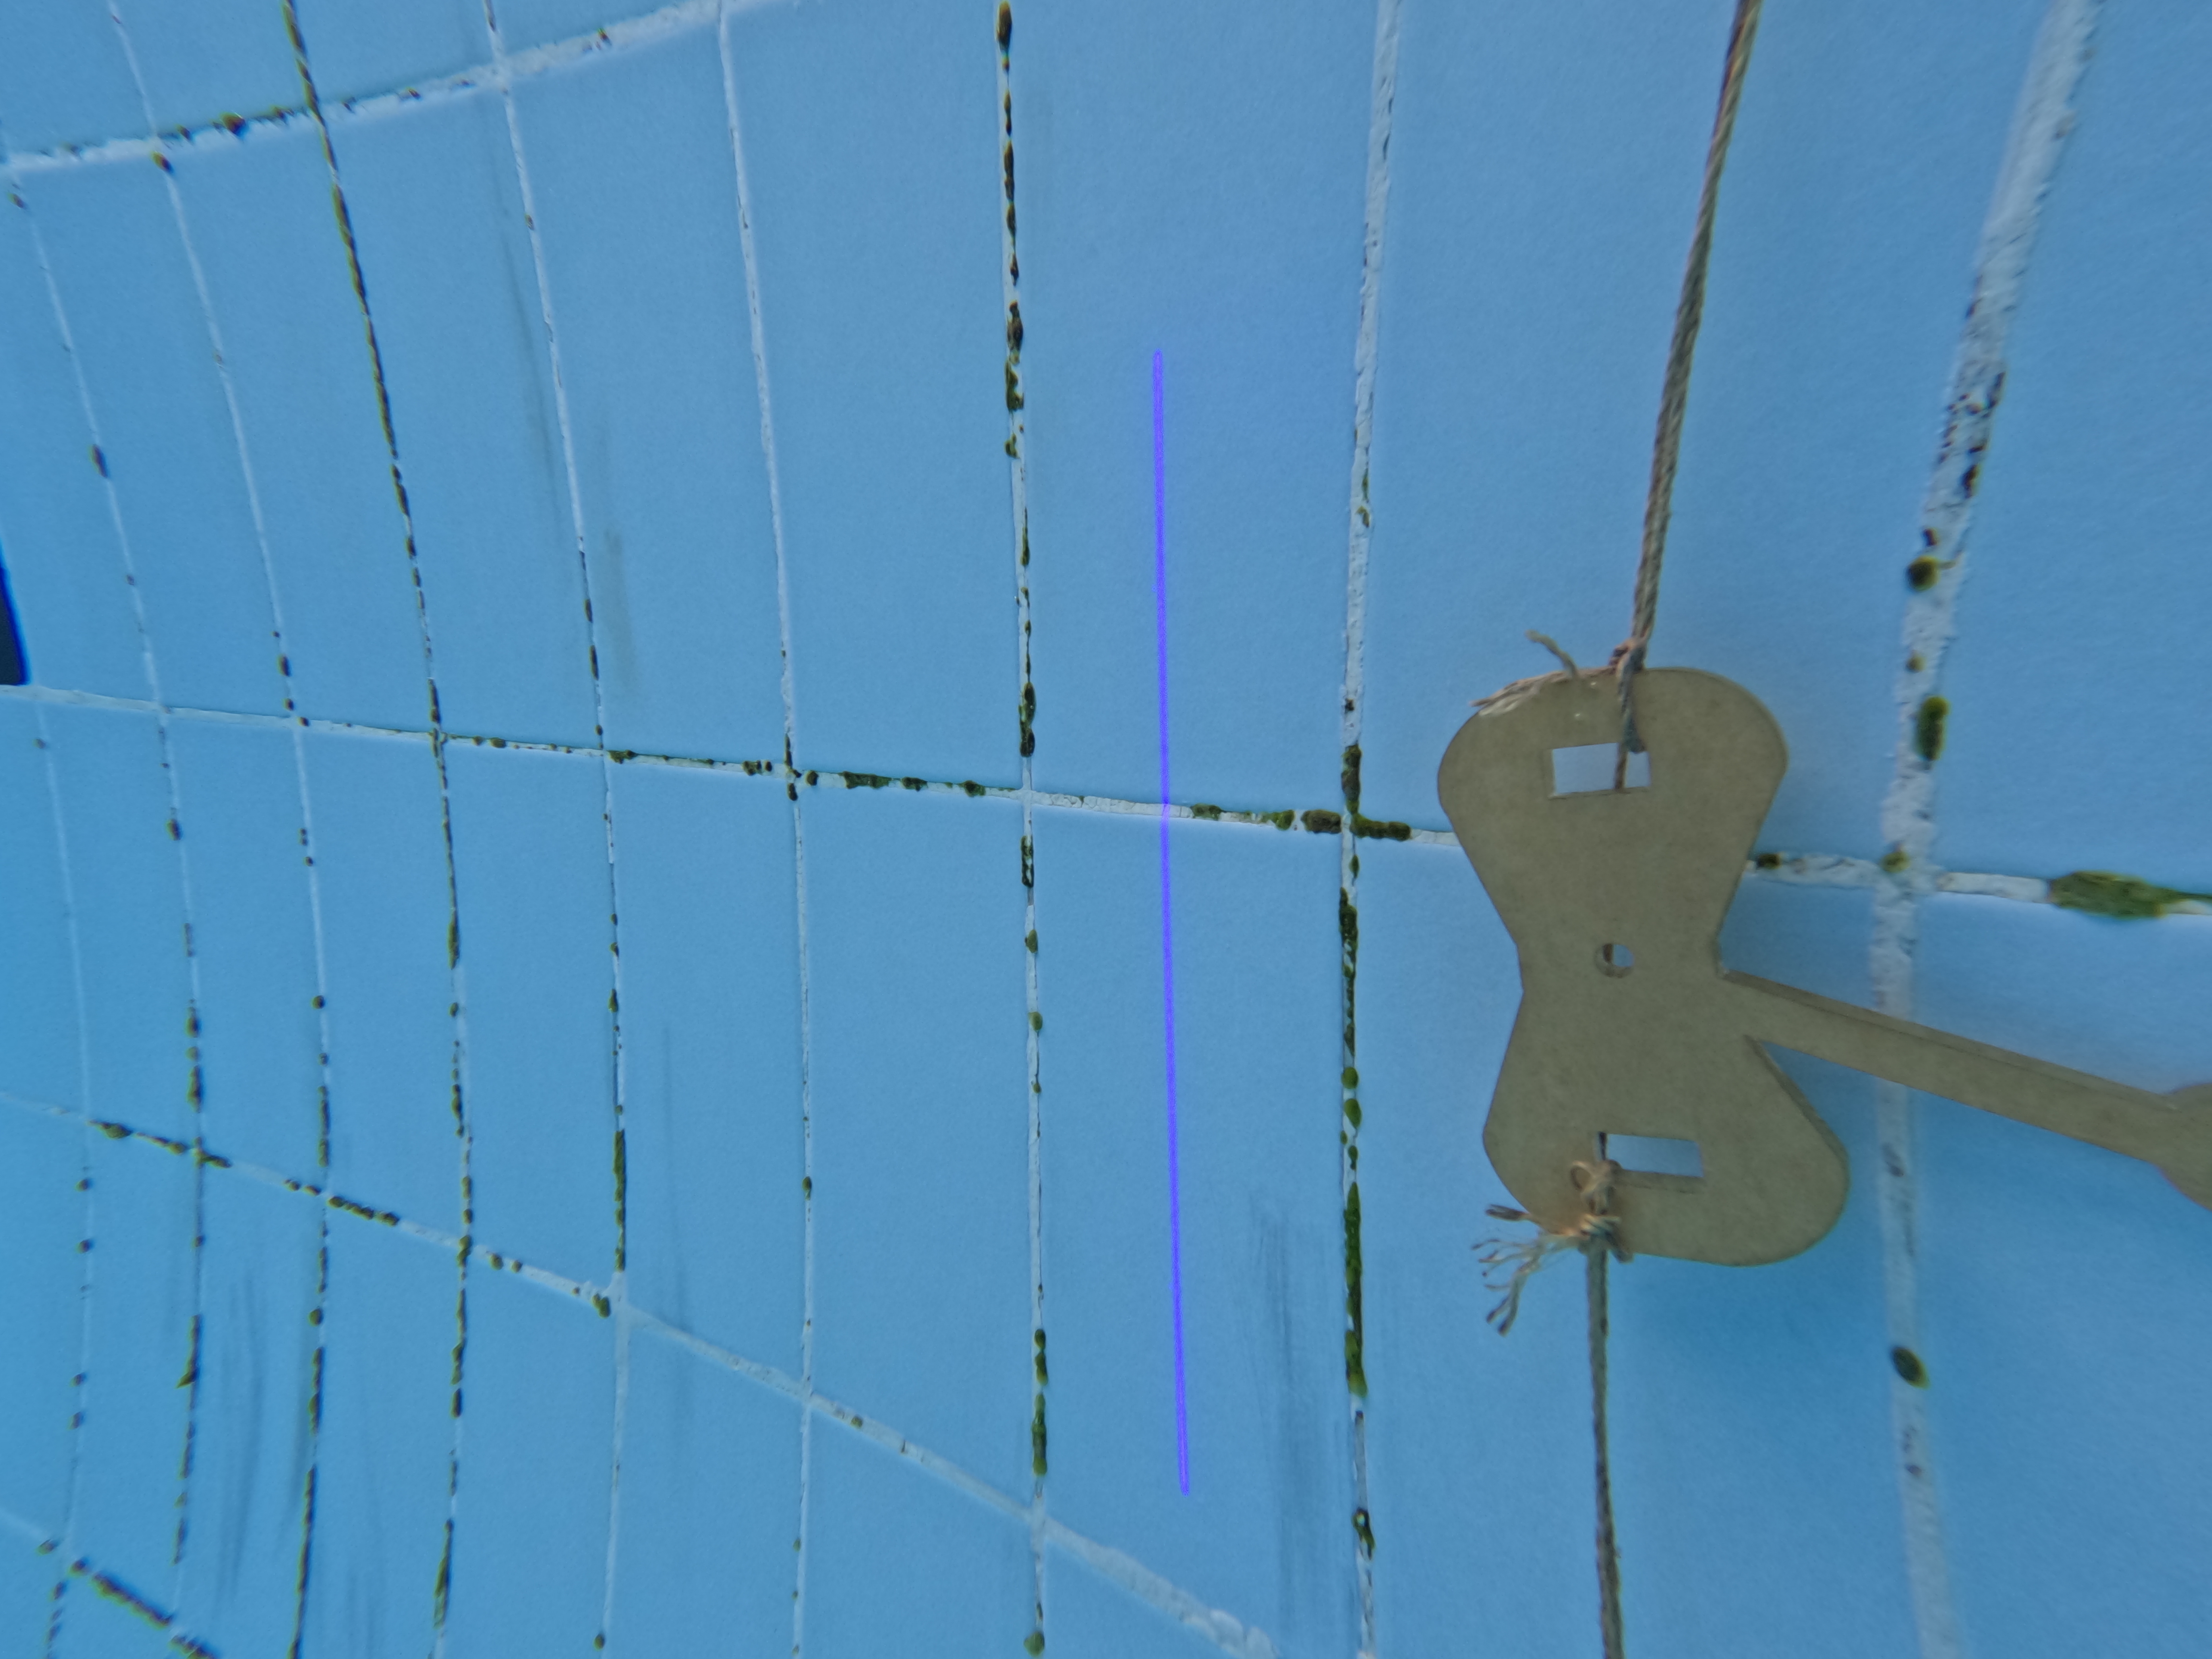

Supplement: Supplementary file 2729 [file G0051027.pdf › Level_2_2/G0051027.pdf]

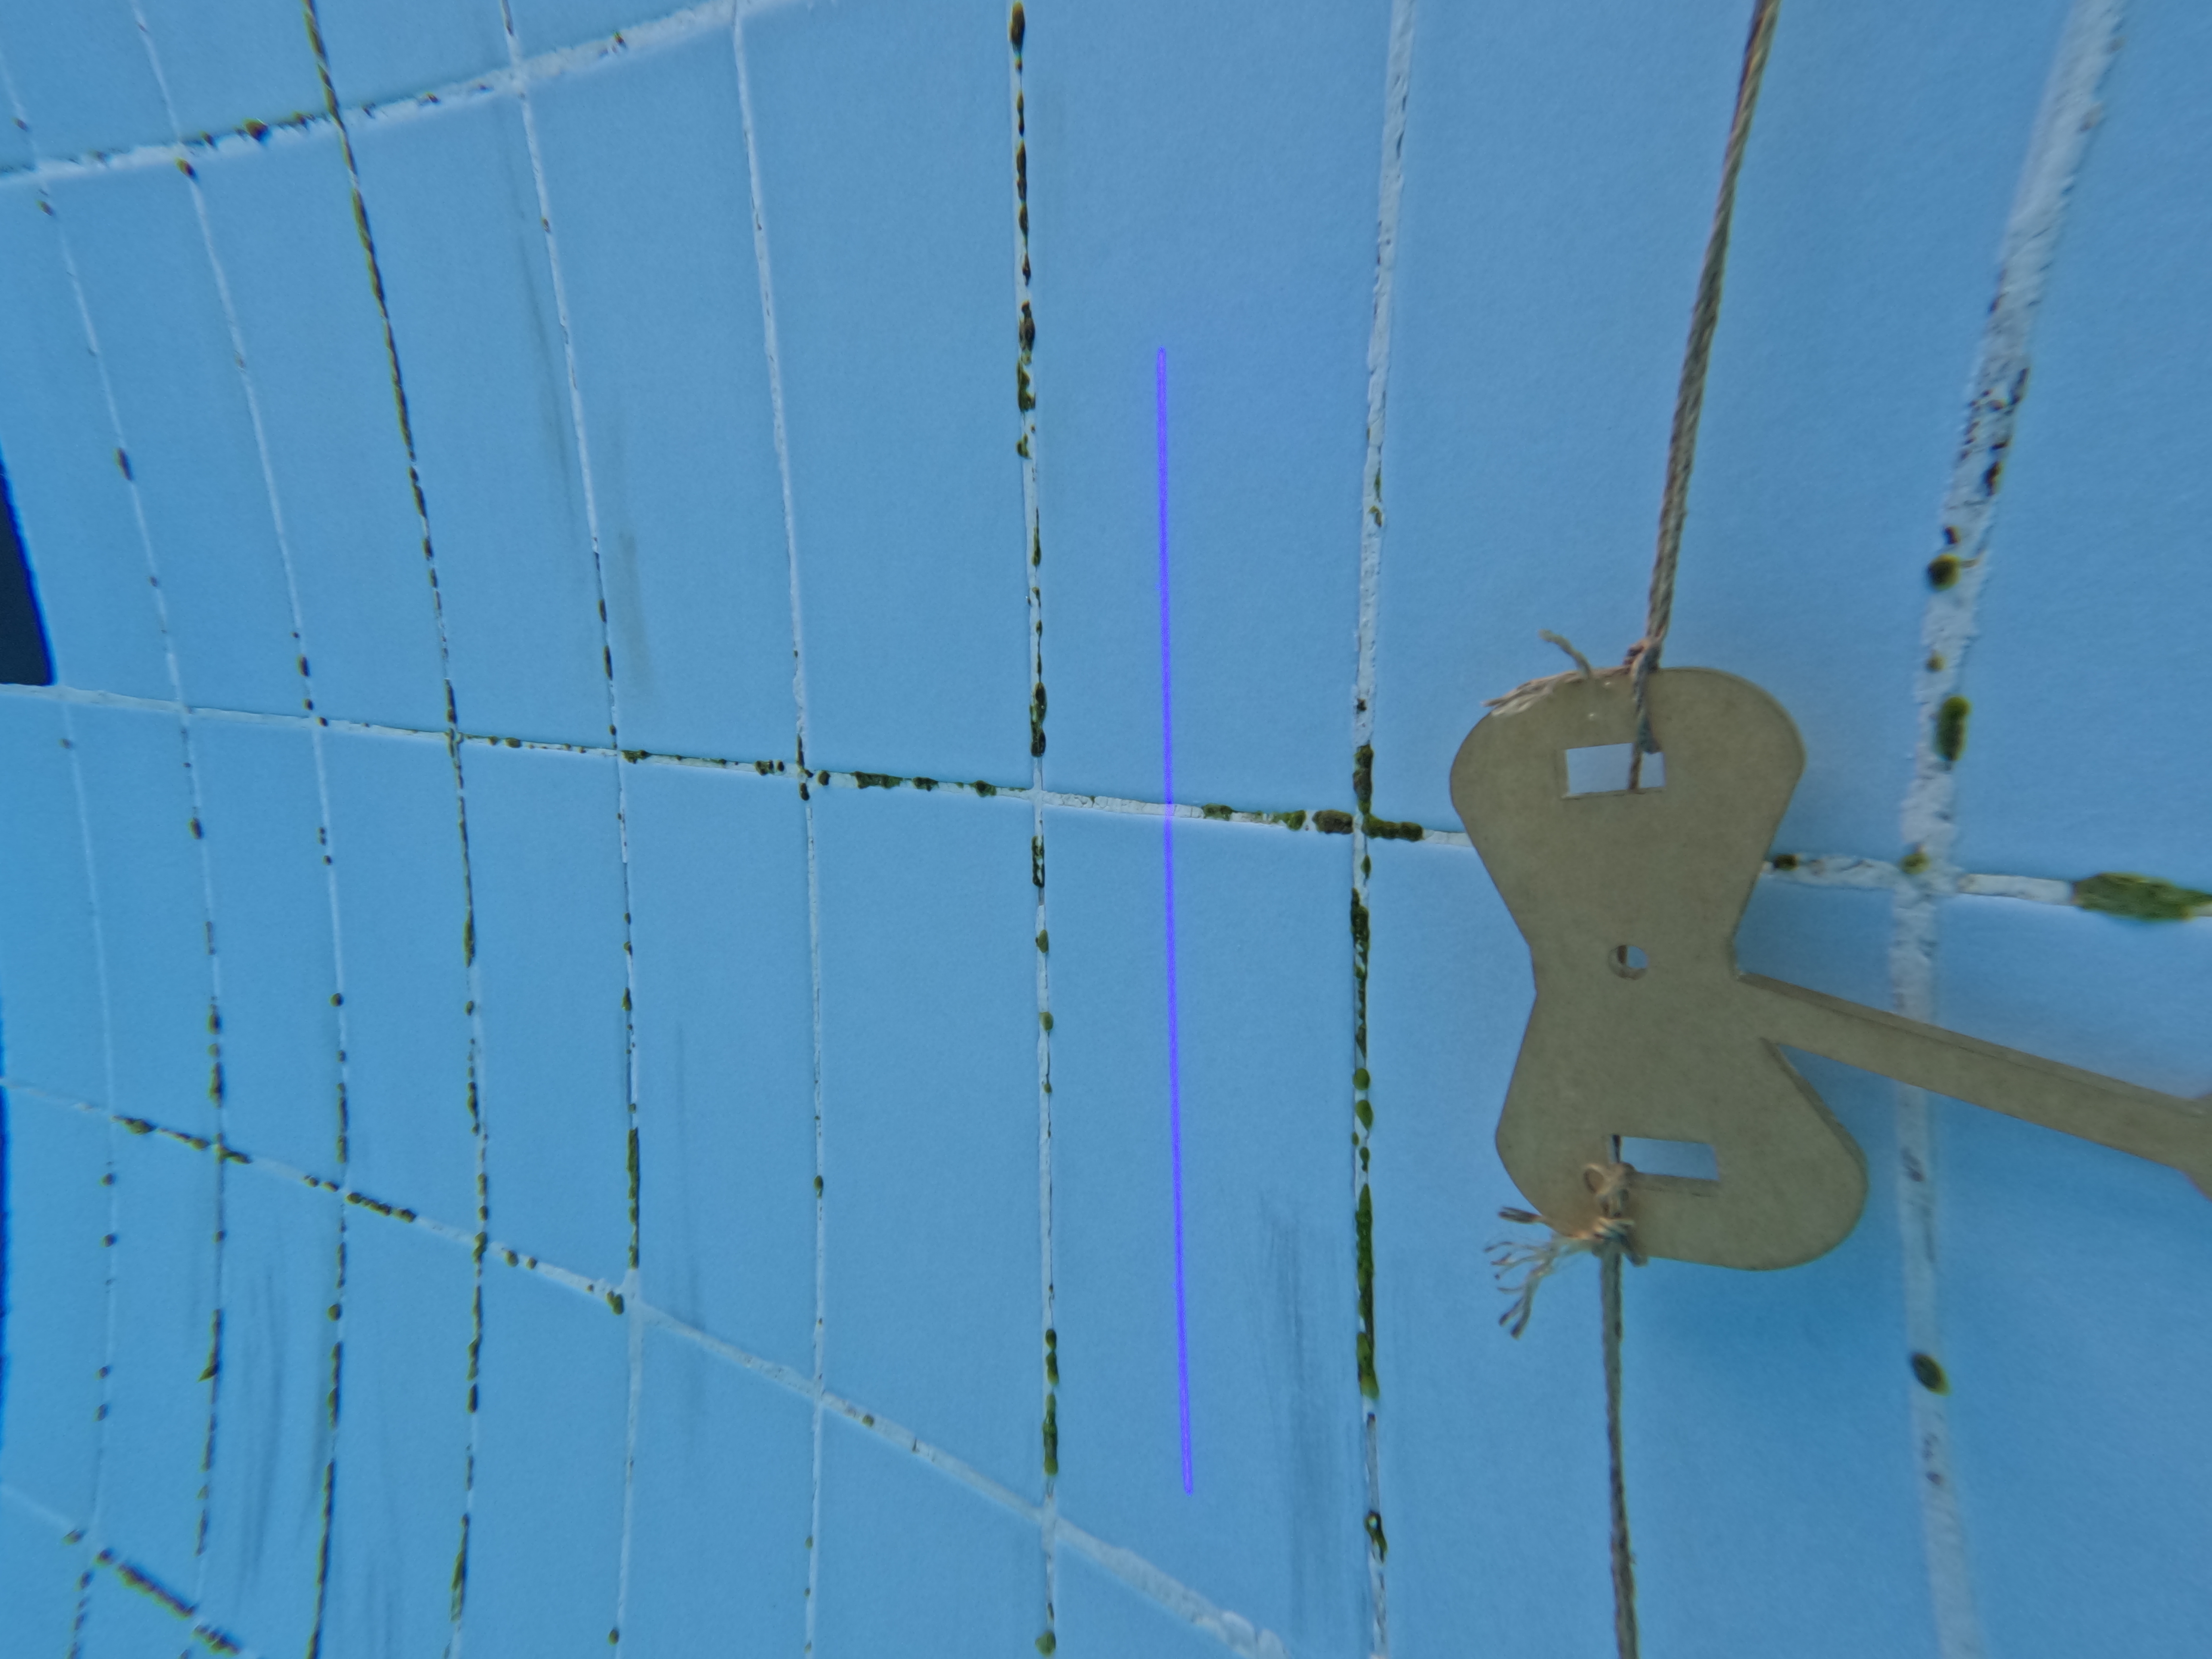

Supplement: Supplementary file 2730 [file G0051028.pdf › Level_2_2/G0051028.pdf]

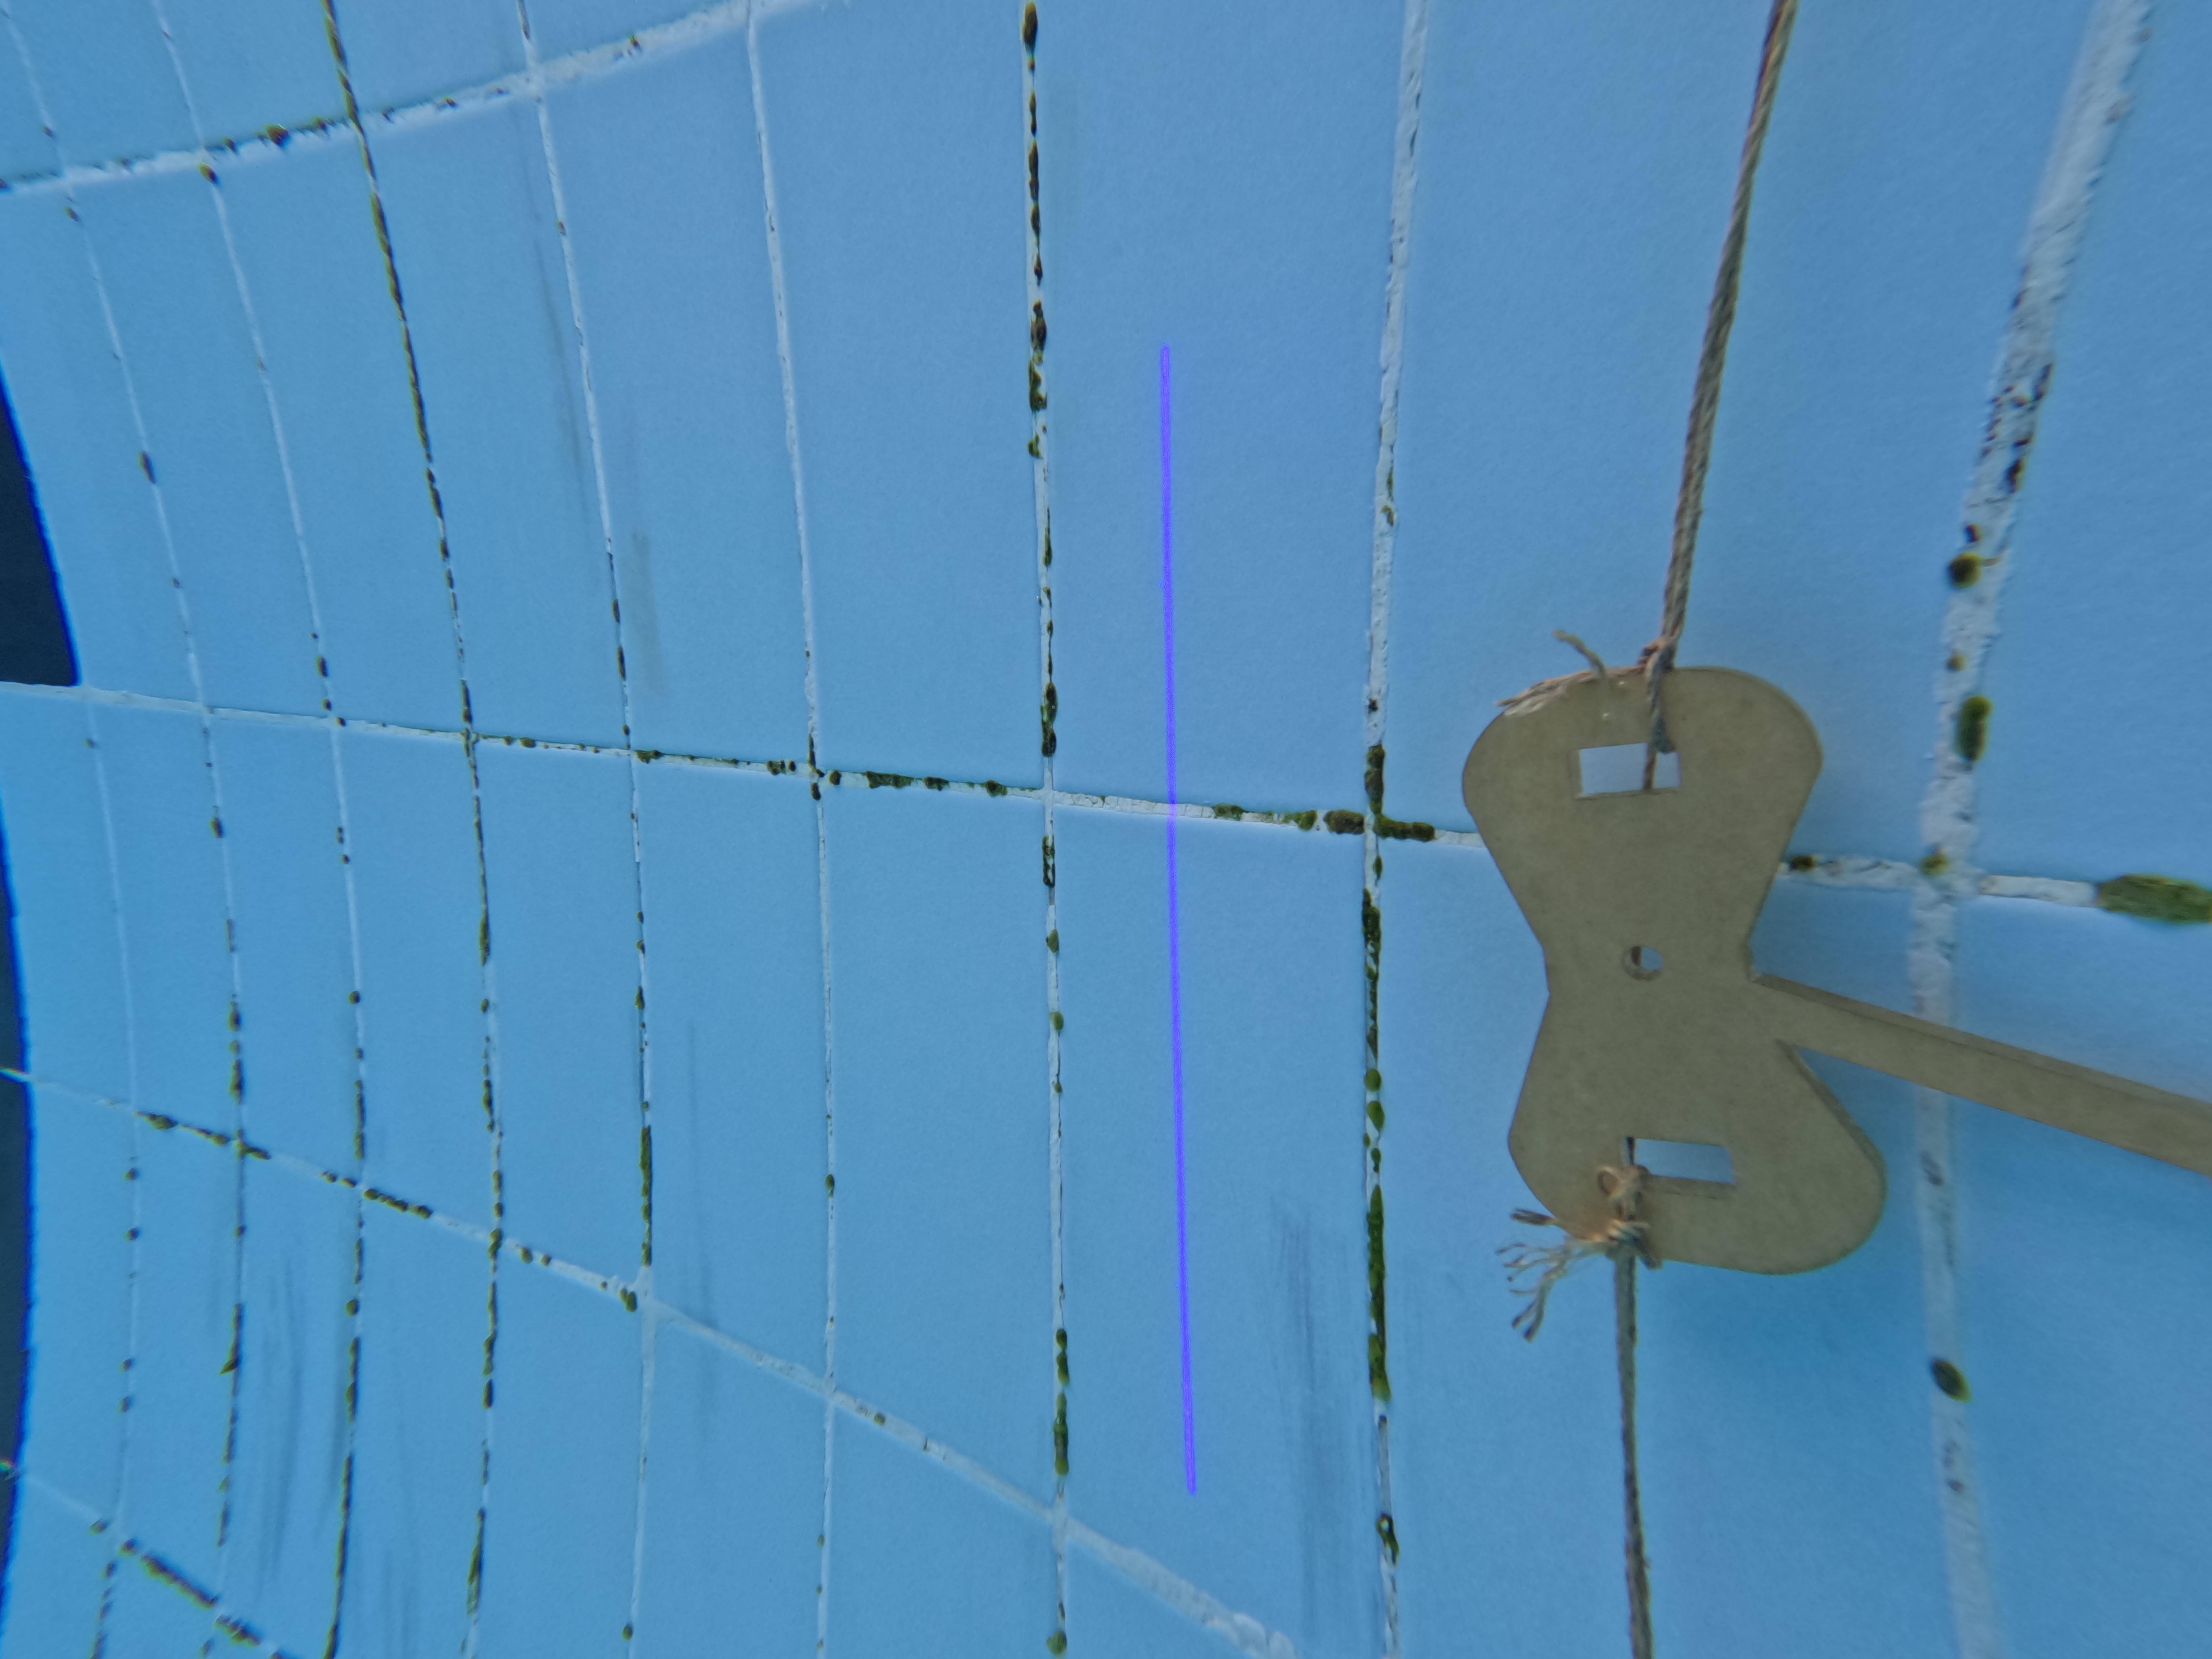

Supplement: Supplementary file 2731 [file G0051029.pdf › Level_2_2/G0051029.pdf]

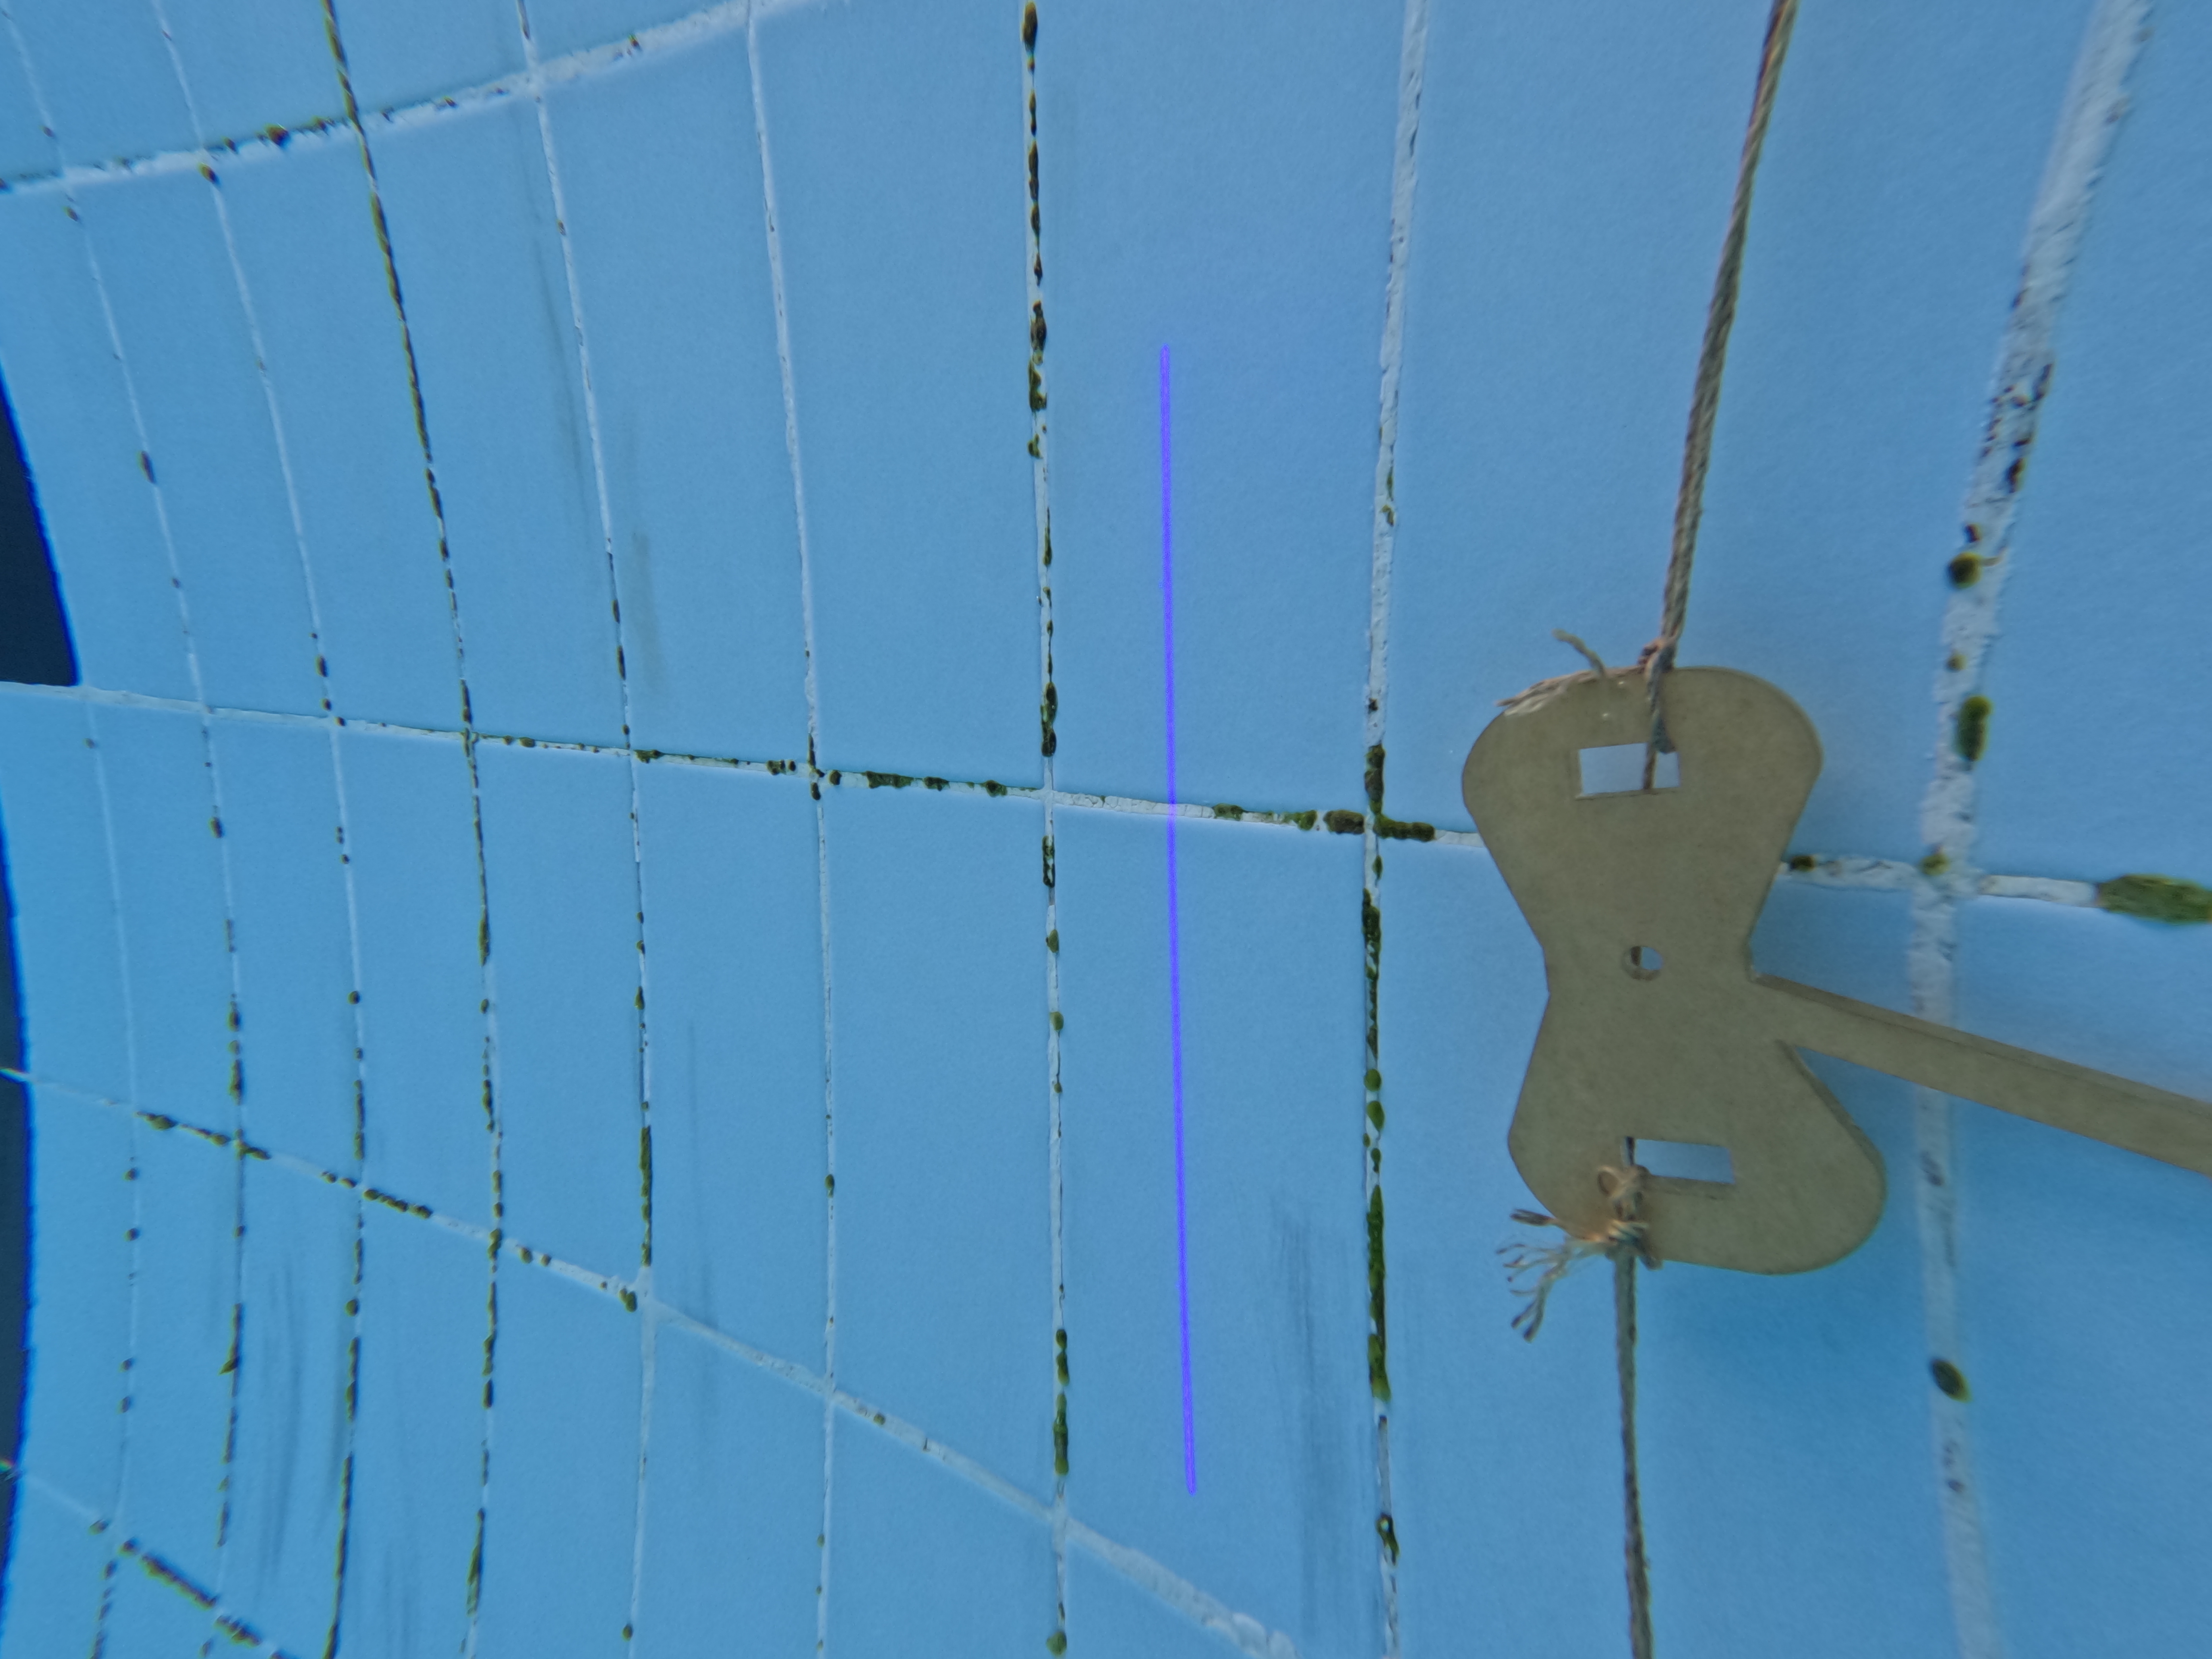

Supplement: Supplementary file 2732 [file G0051030.pdf › Level_2_2/G0051030.pdf]

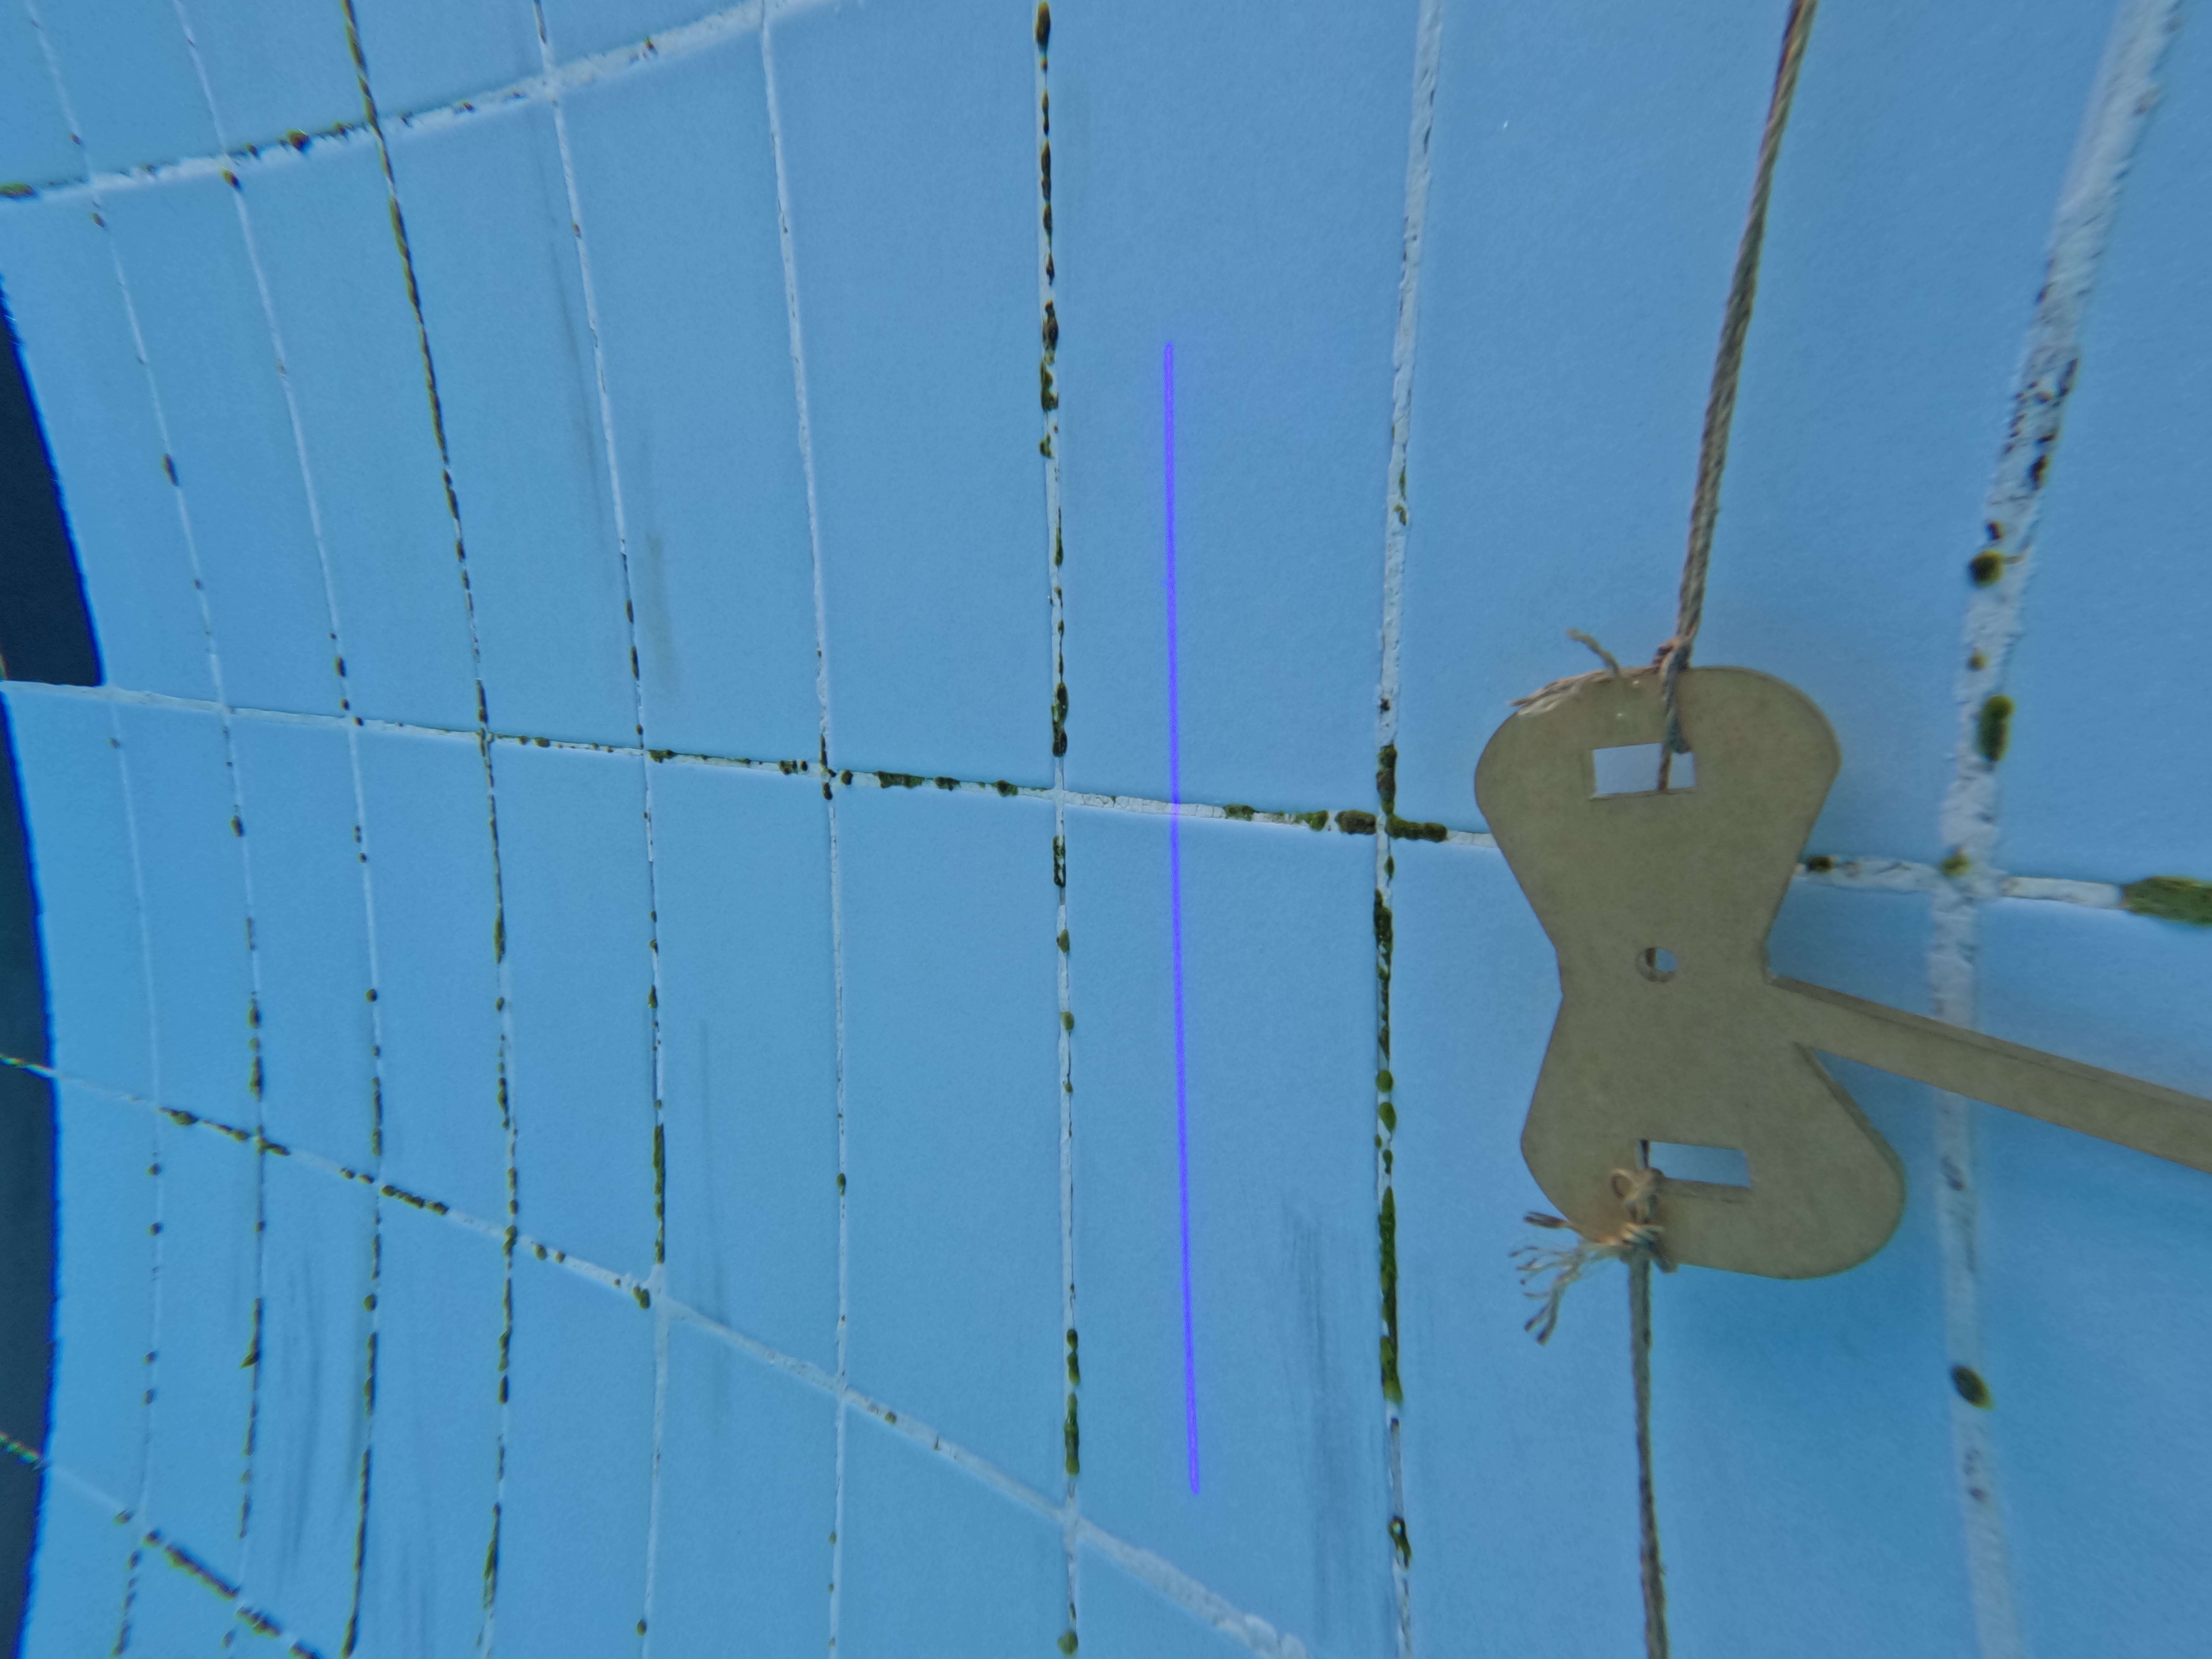

Supplement: Supplementary file 2733 [file G0051031.pdf › Level_2_2/G0051031.pdf]

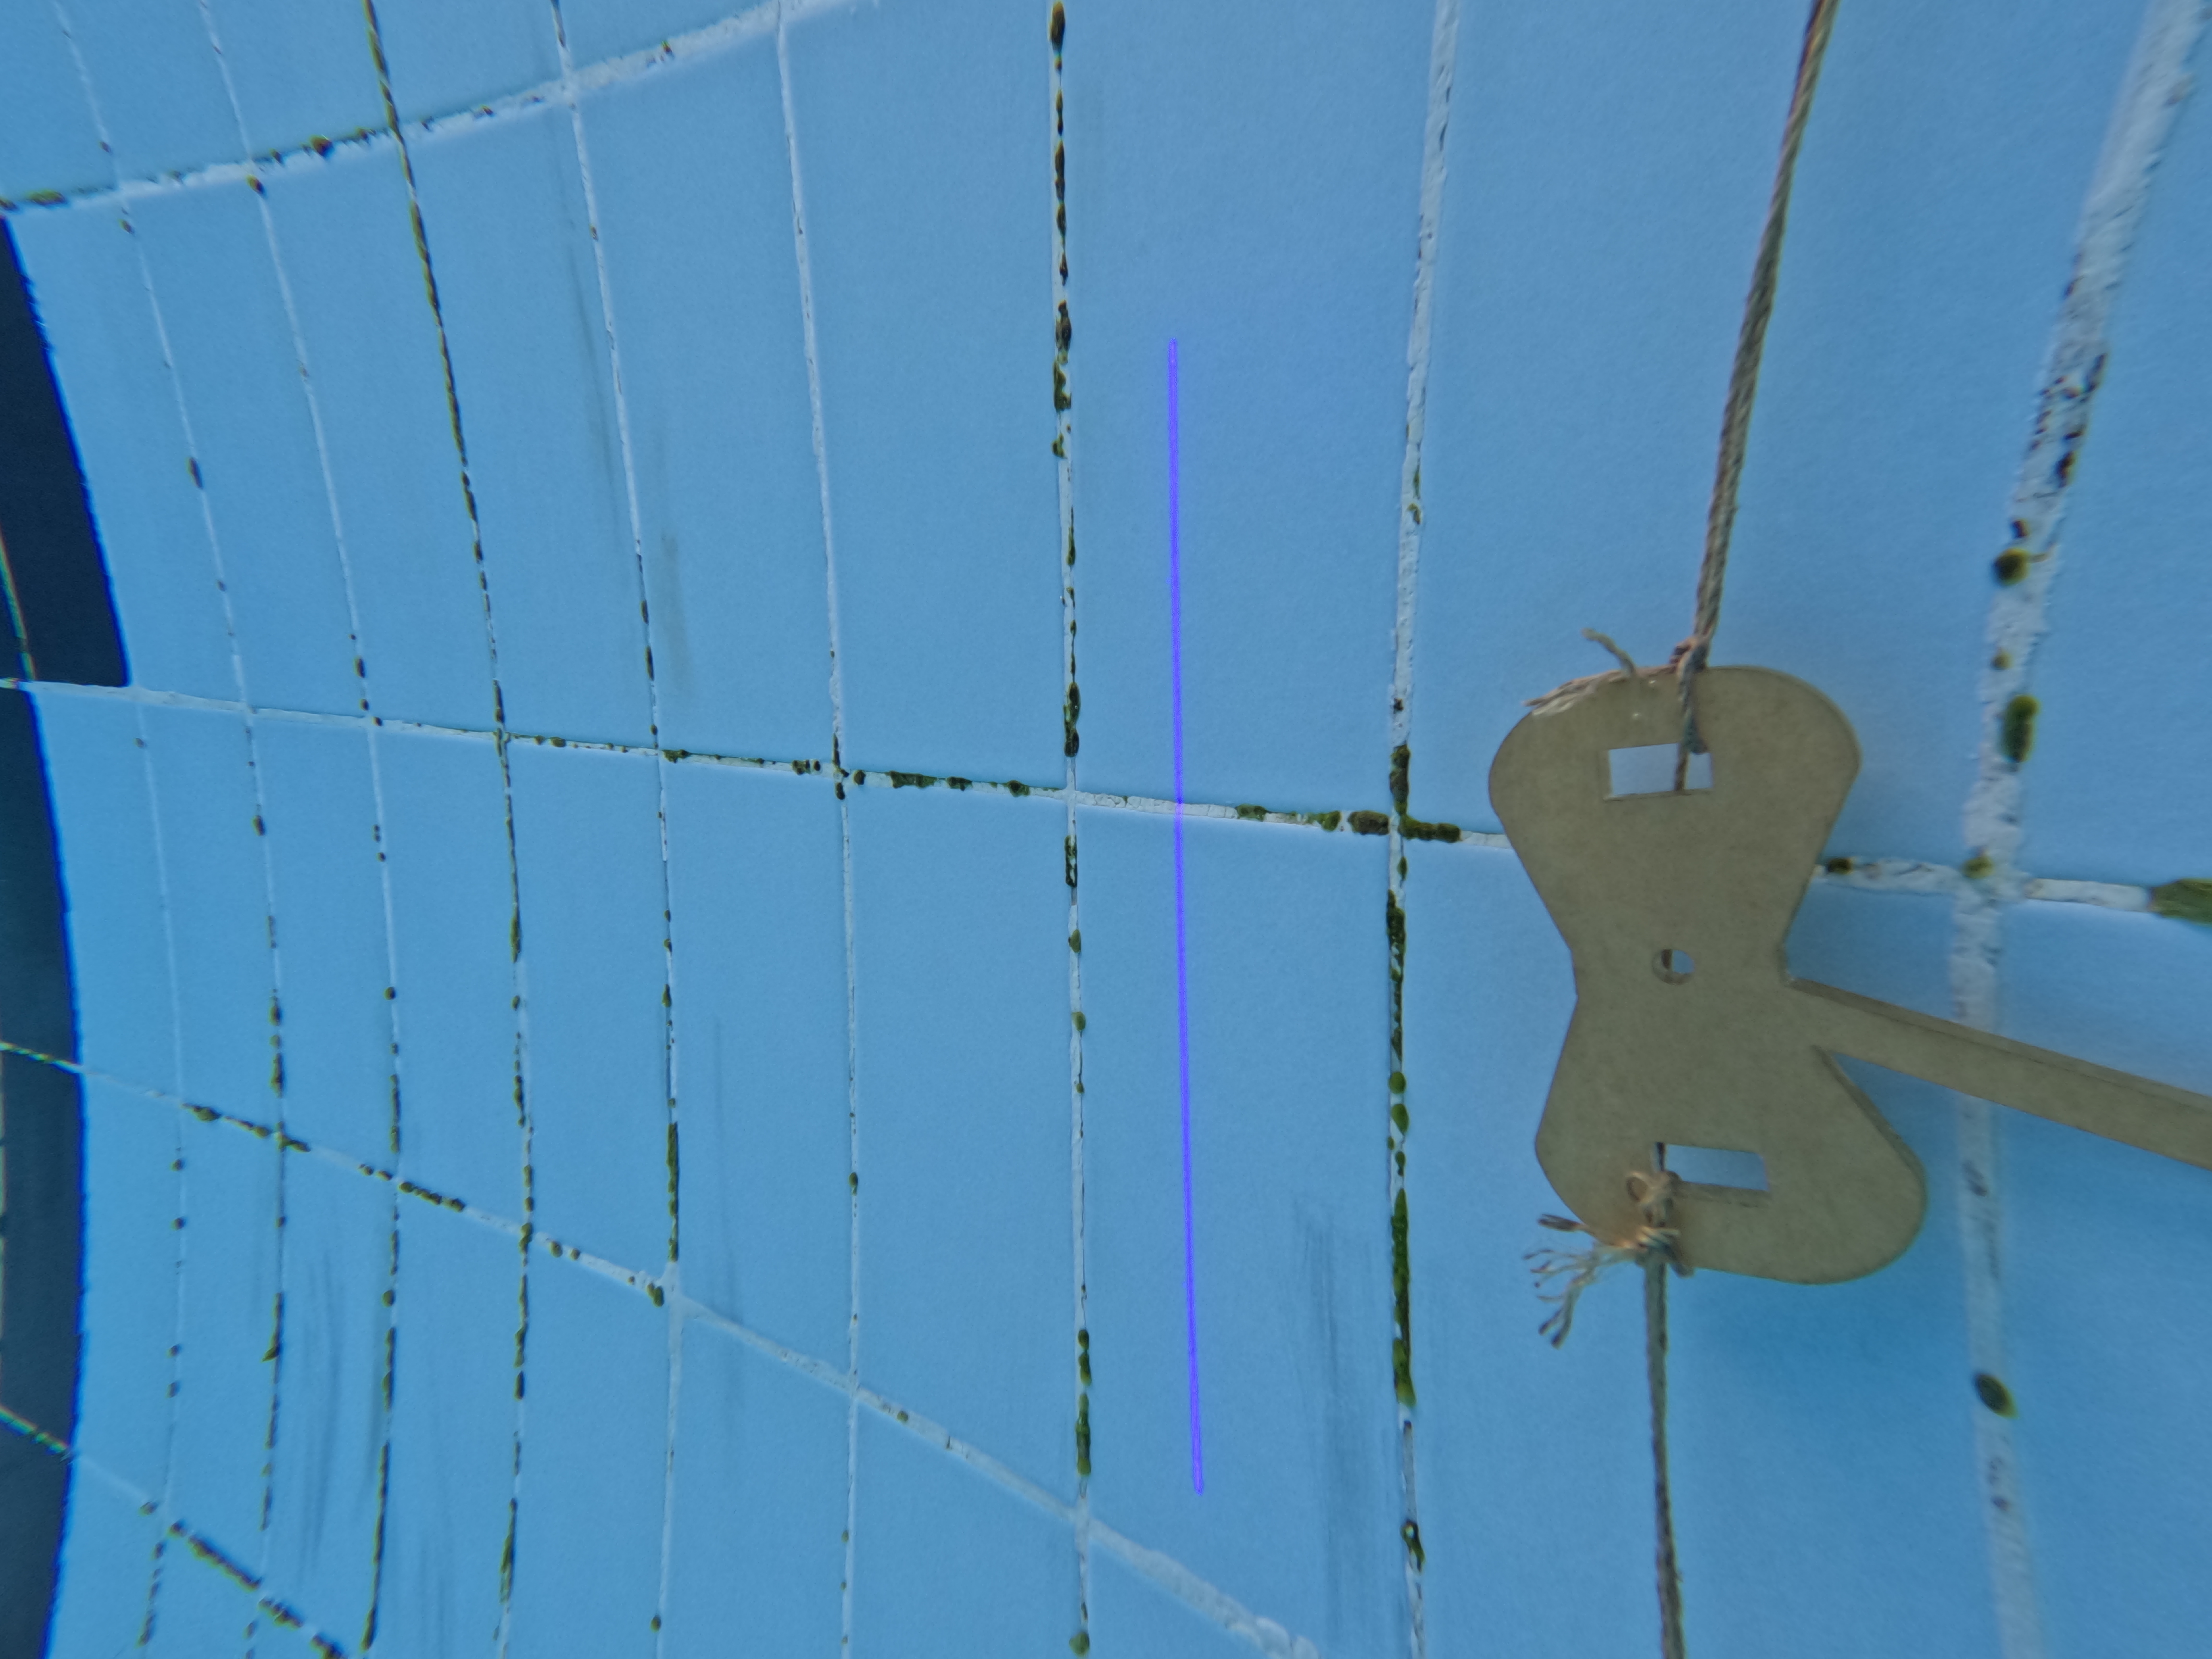

Supplement: Supplementary file 2734 [file G0051032.pdf › Level_2_2/G0051032.pdf]

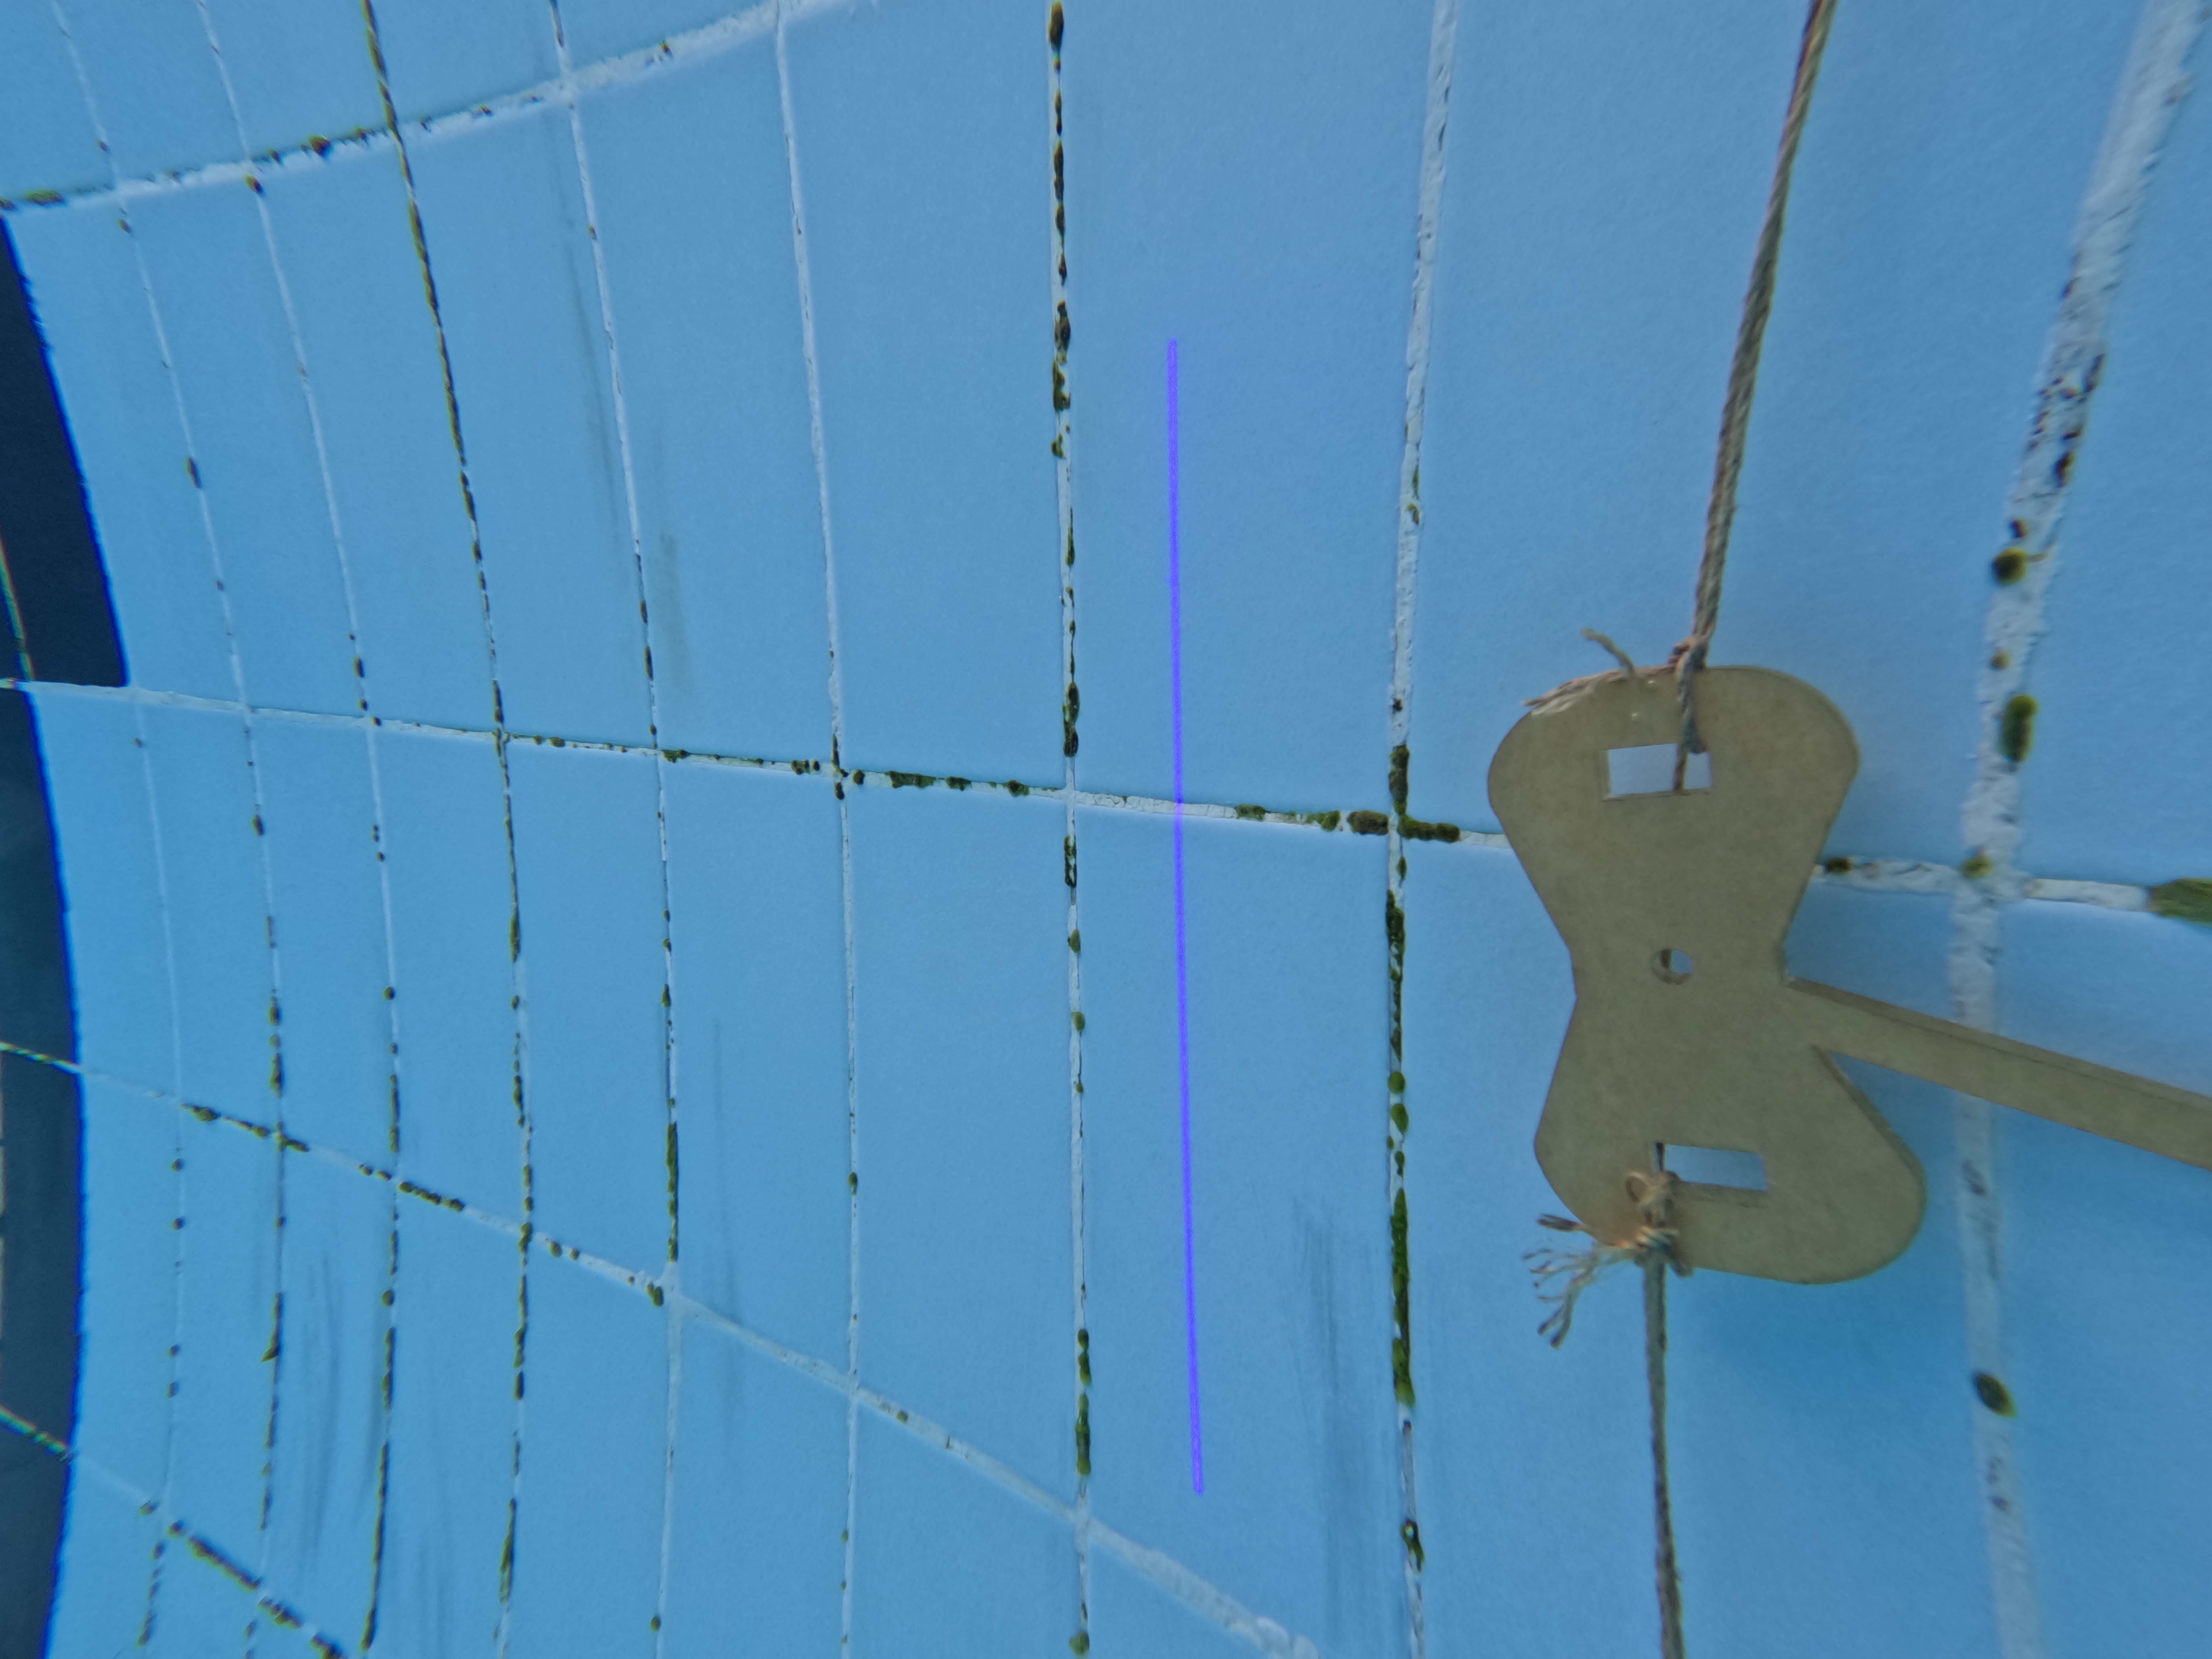

Supplement: Supplementary file 2735 [file G0051033.pdf › Level_2_2/G0051033.pdf]

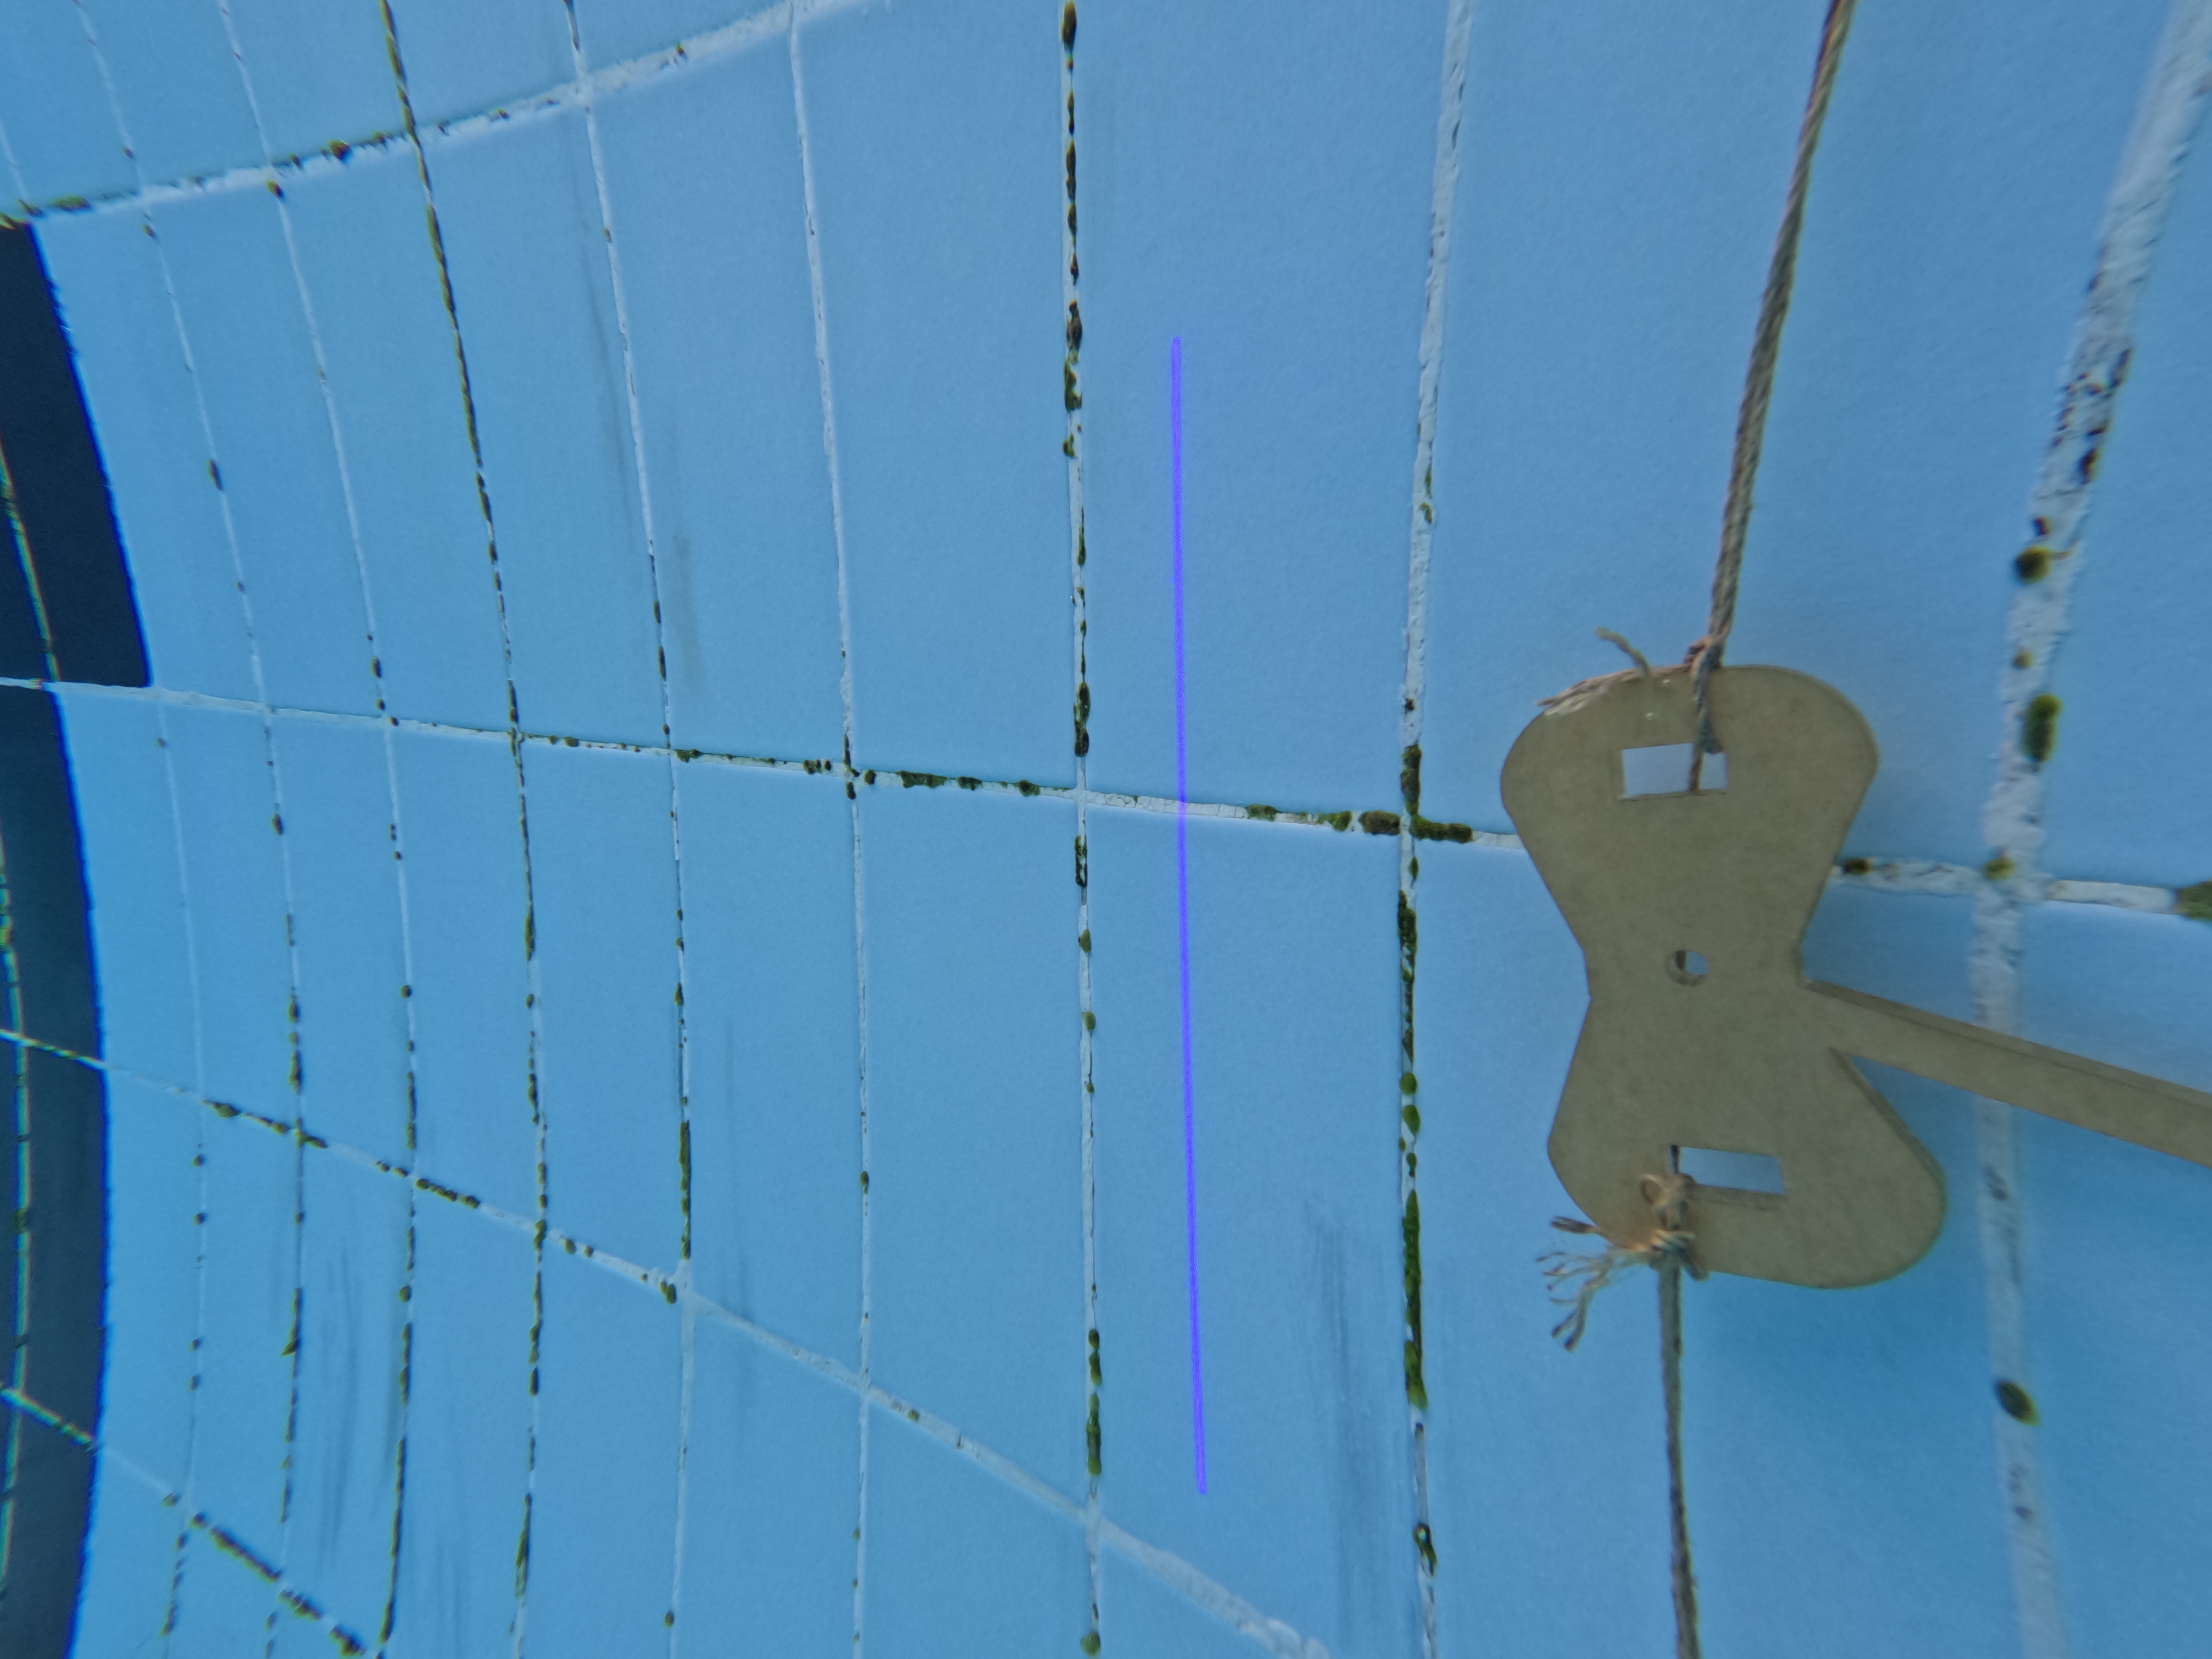

Supplement: Supplementary file 2736 [file G0051034.pdf › Level_2_2/G0051034.pdf]

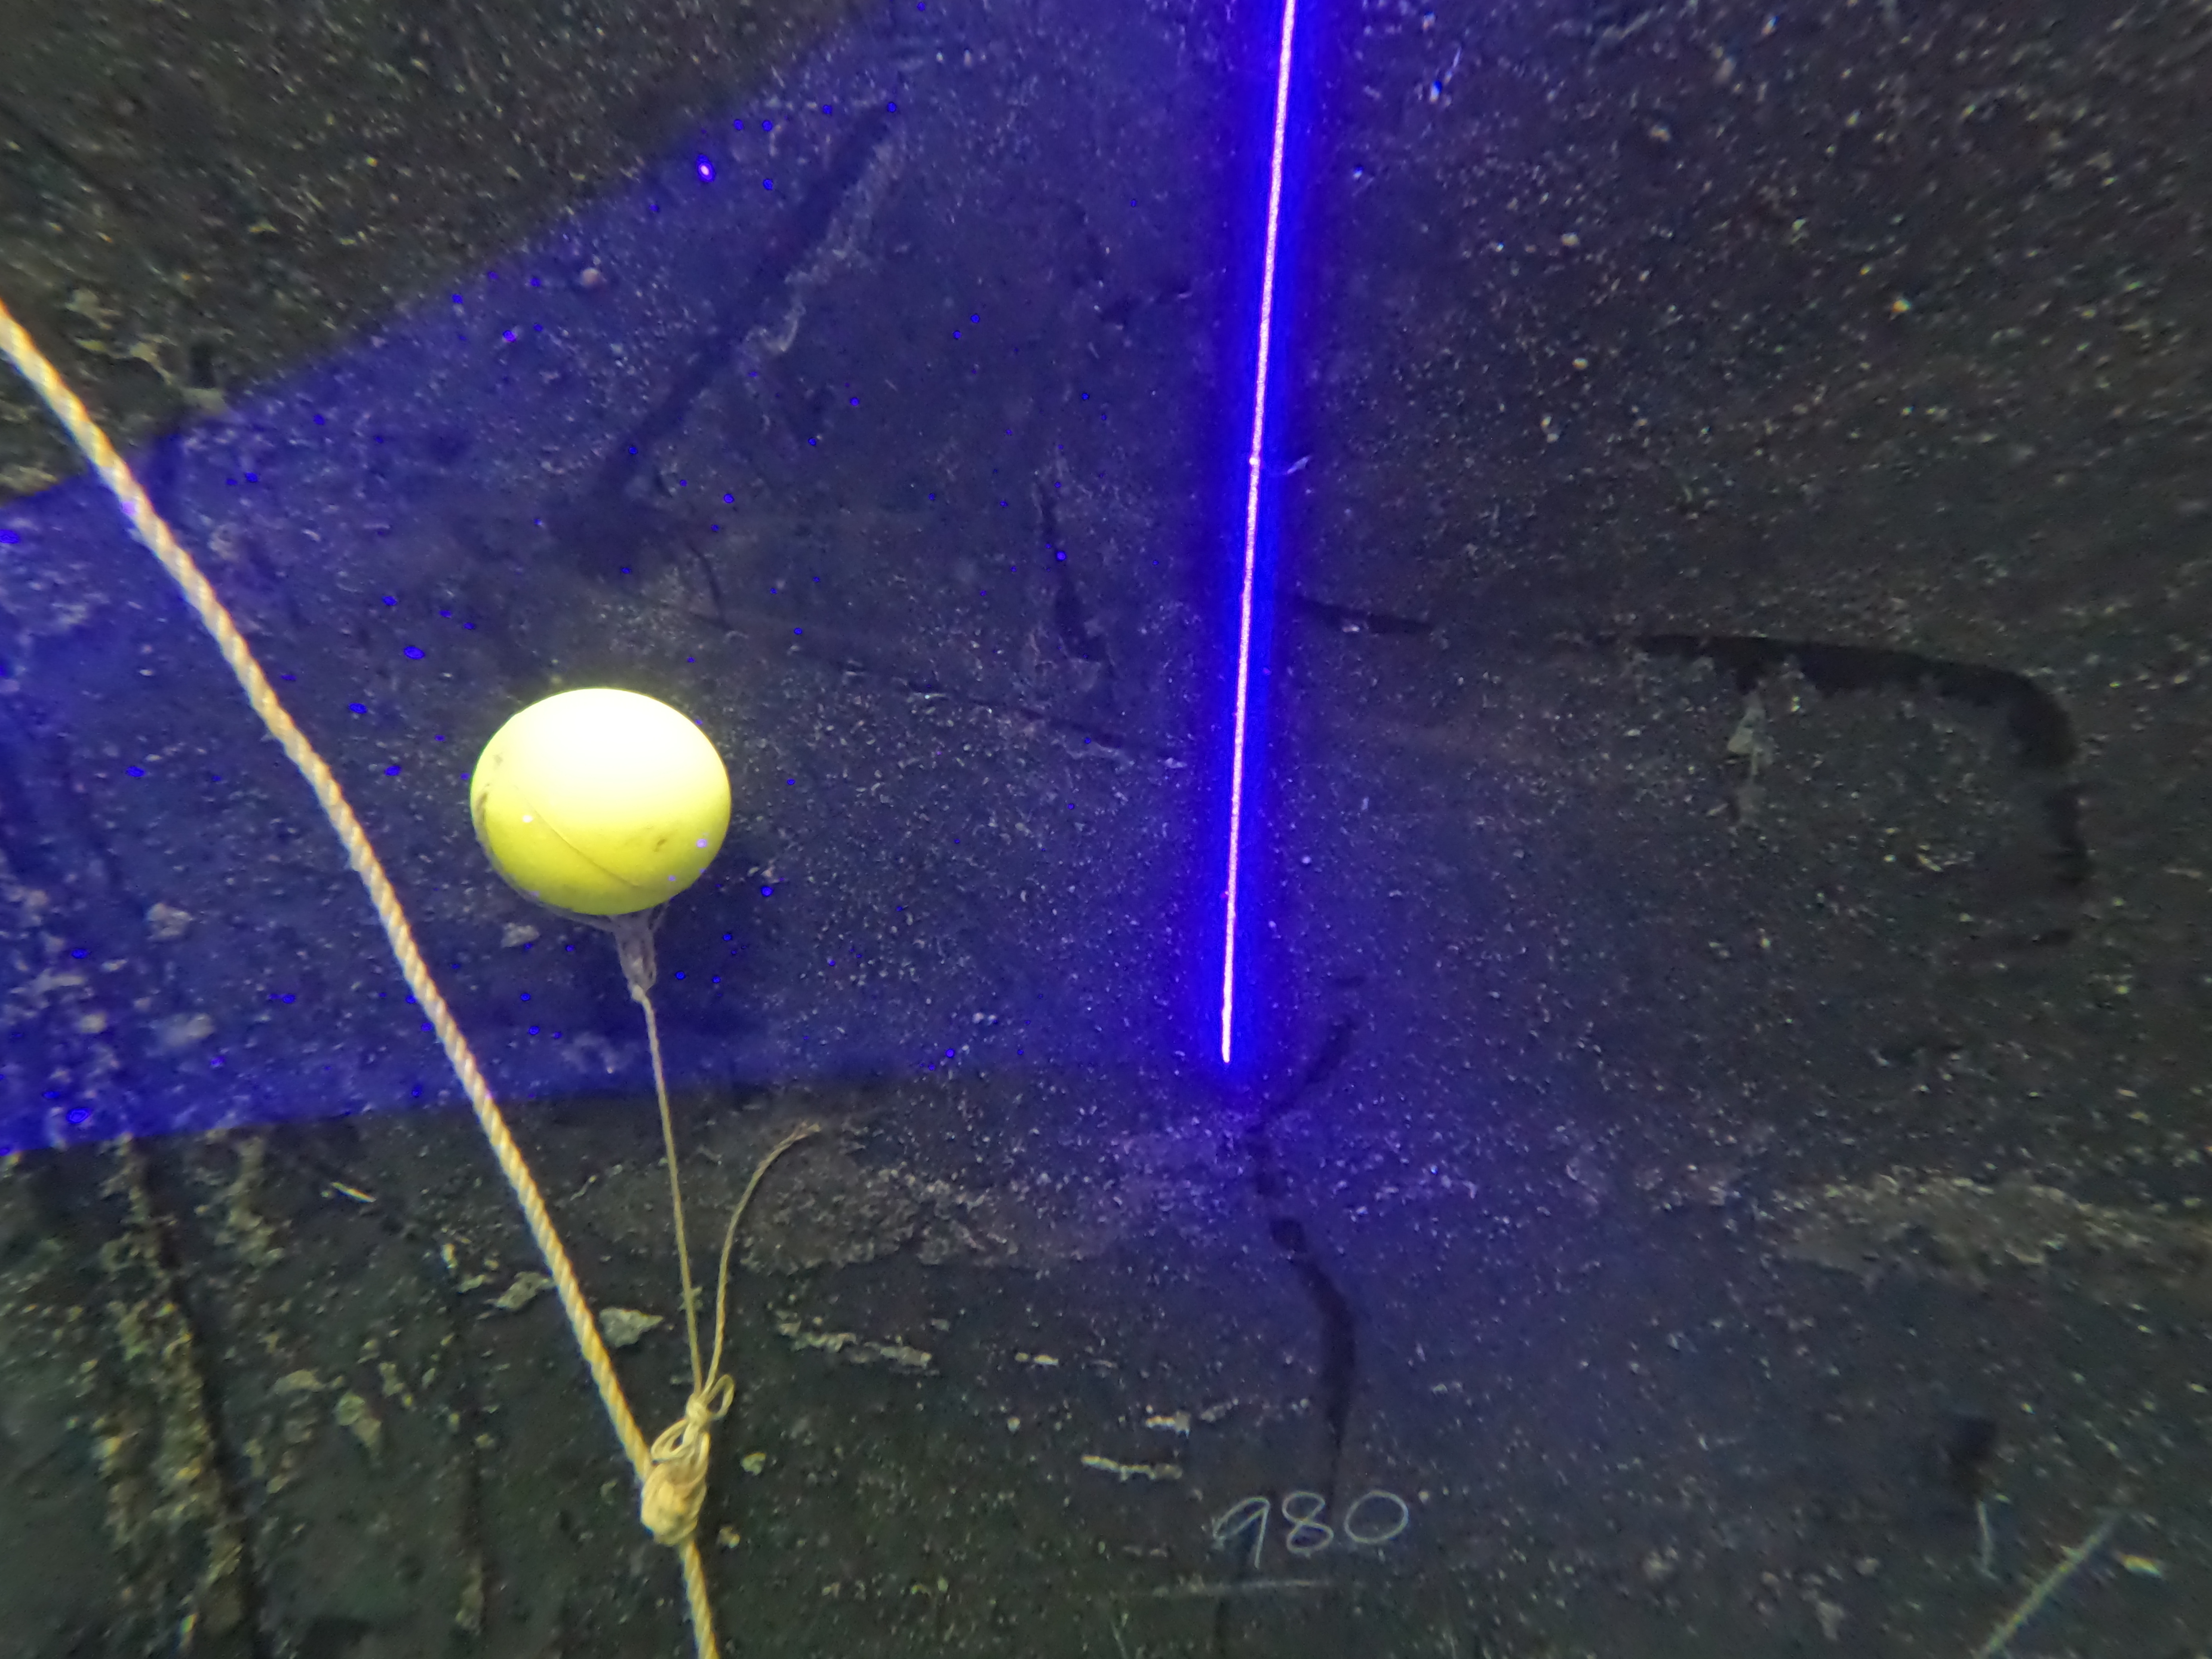

980

Supplement: Supplementary file 2737 [file G0030237.pdf › 2/G0030237.pdf]

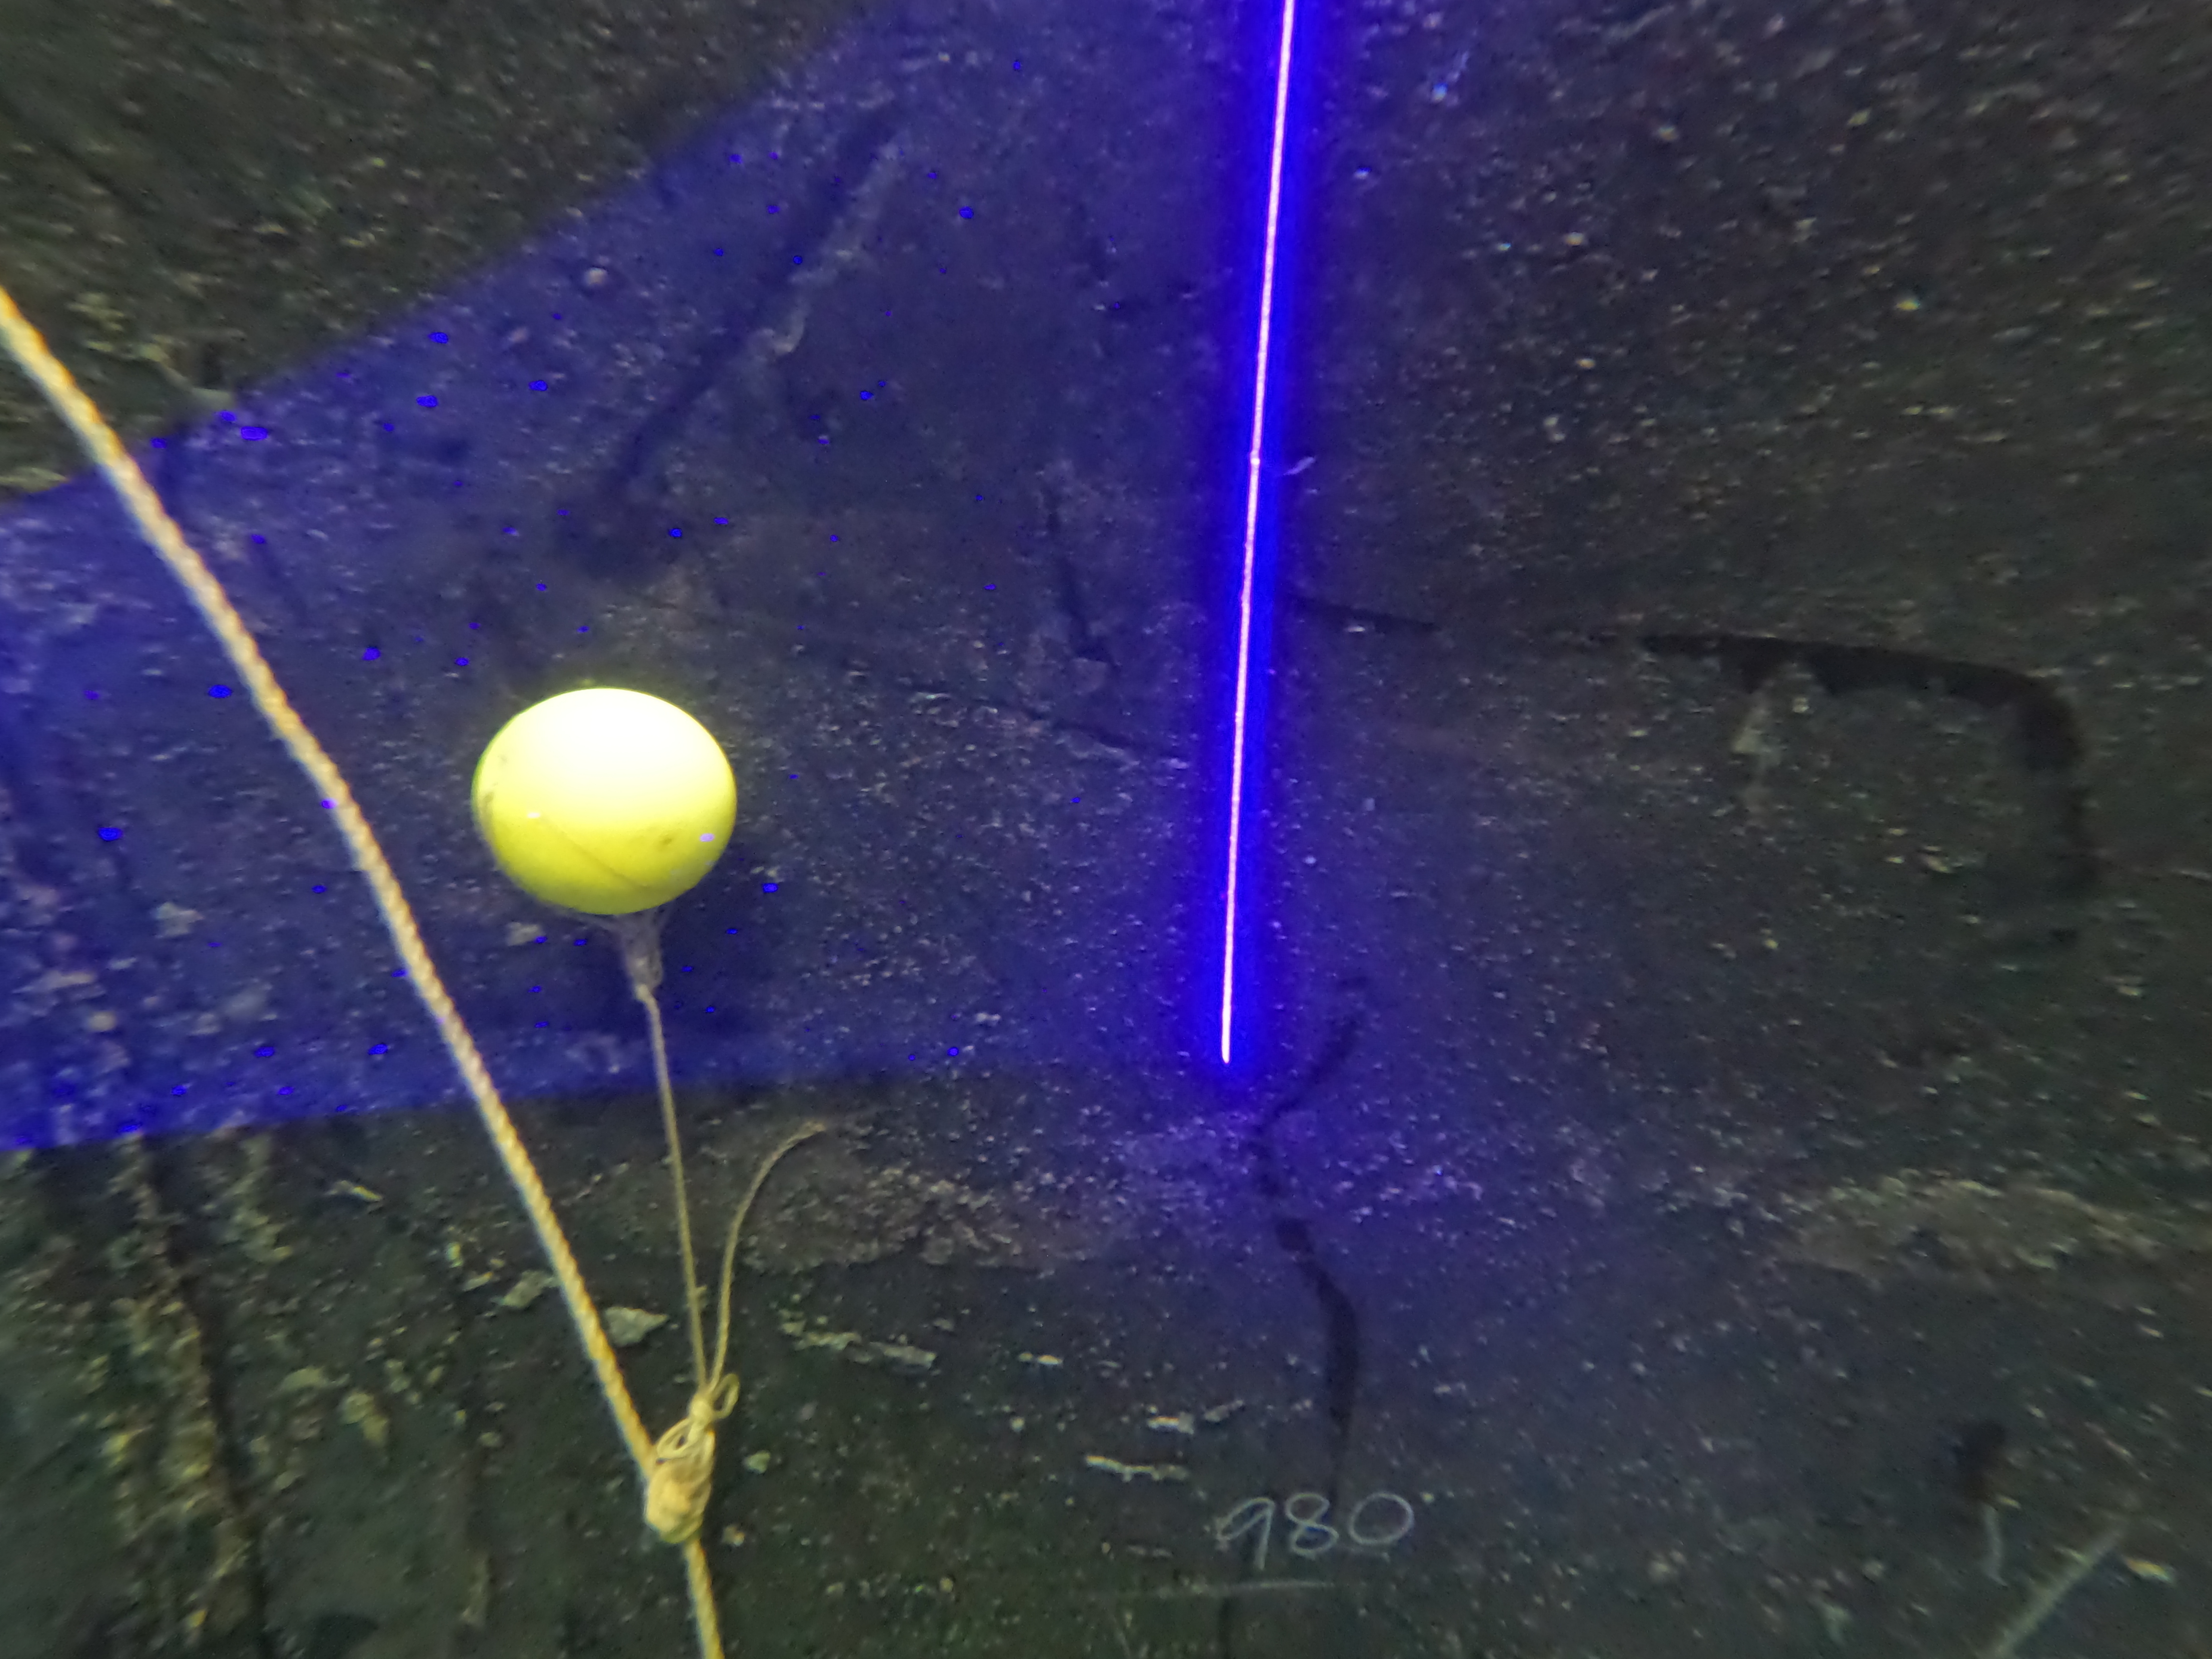

980

Supplement: Supplementary file 2738 [file G0030238.pdf › 2/G0030238.pdf]

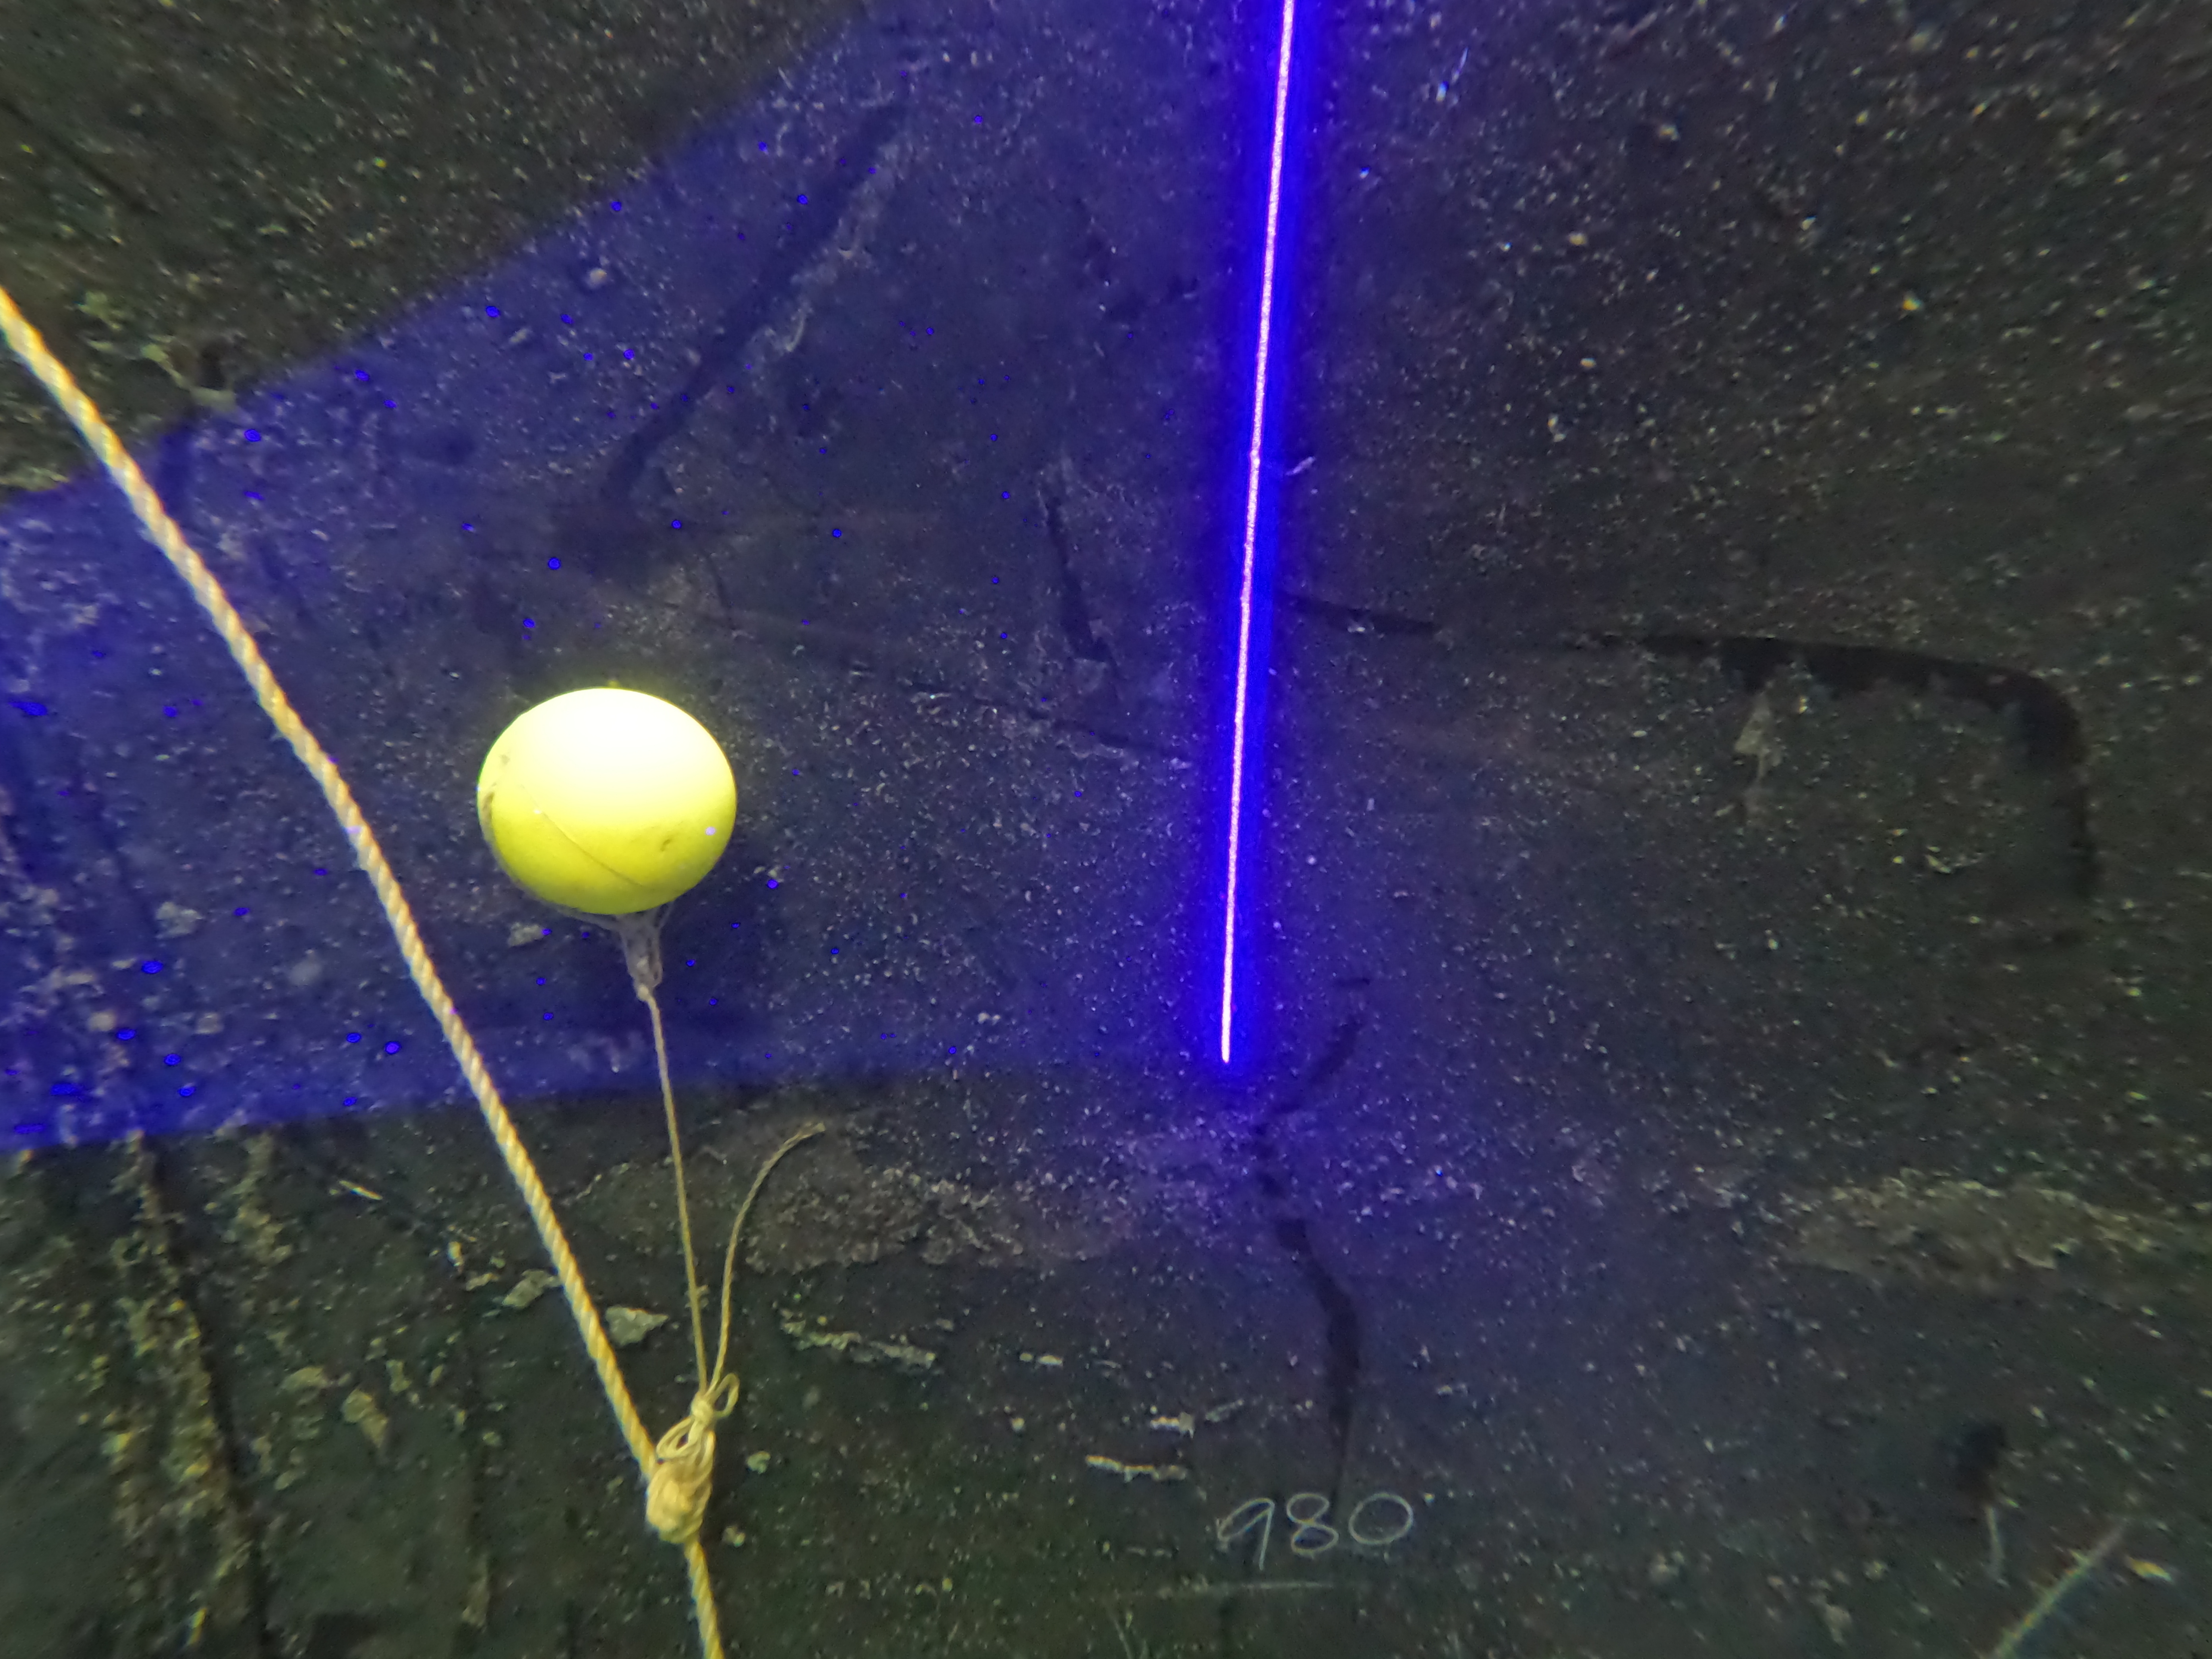

980

Supplement: Supplementary file 2739 [file G0030239.pdf › 2/G0030239.pdf]

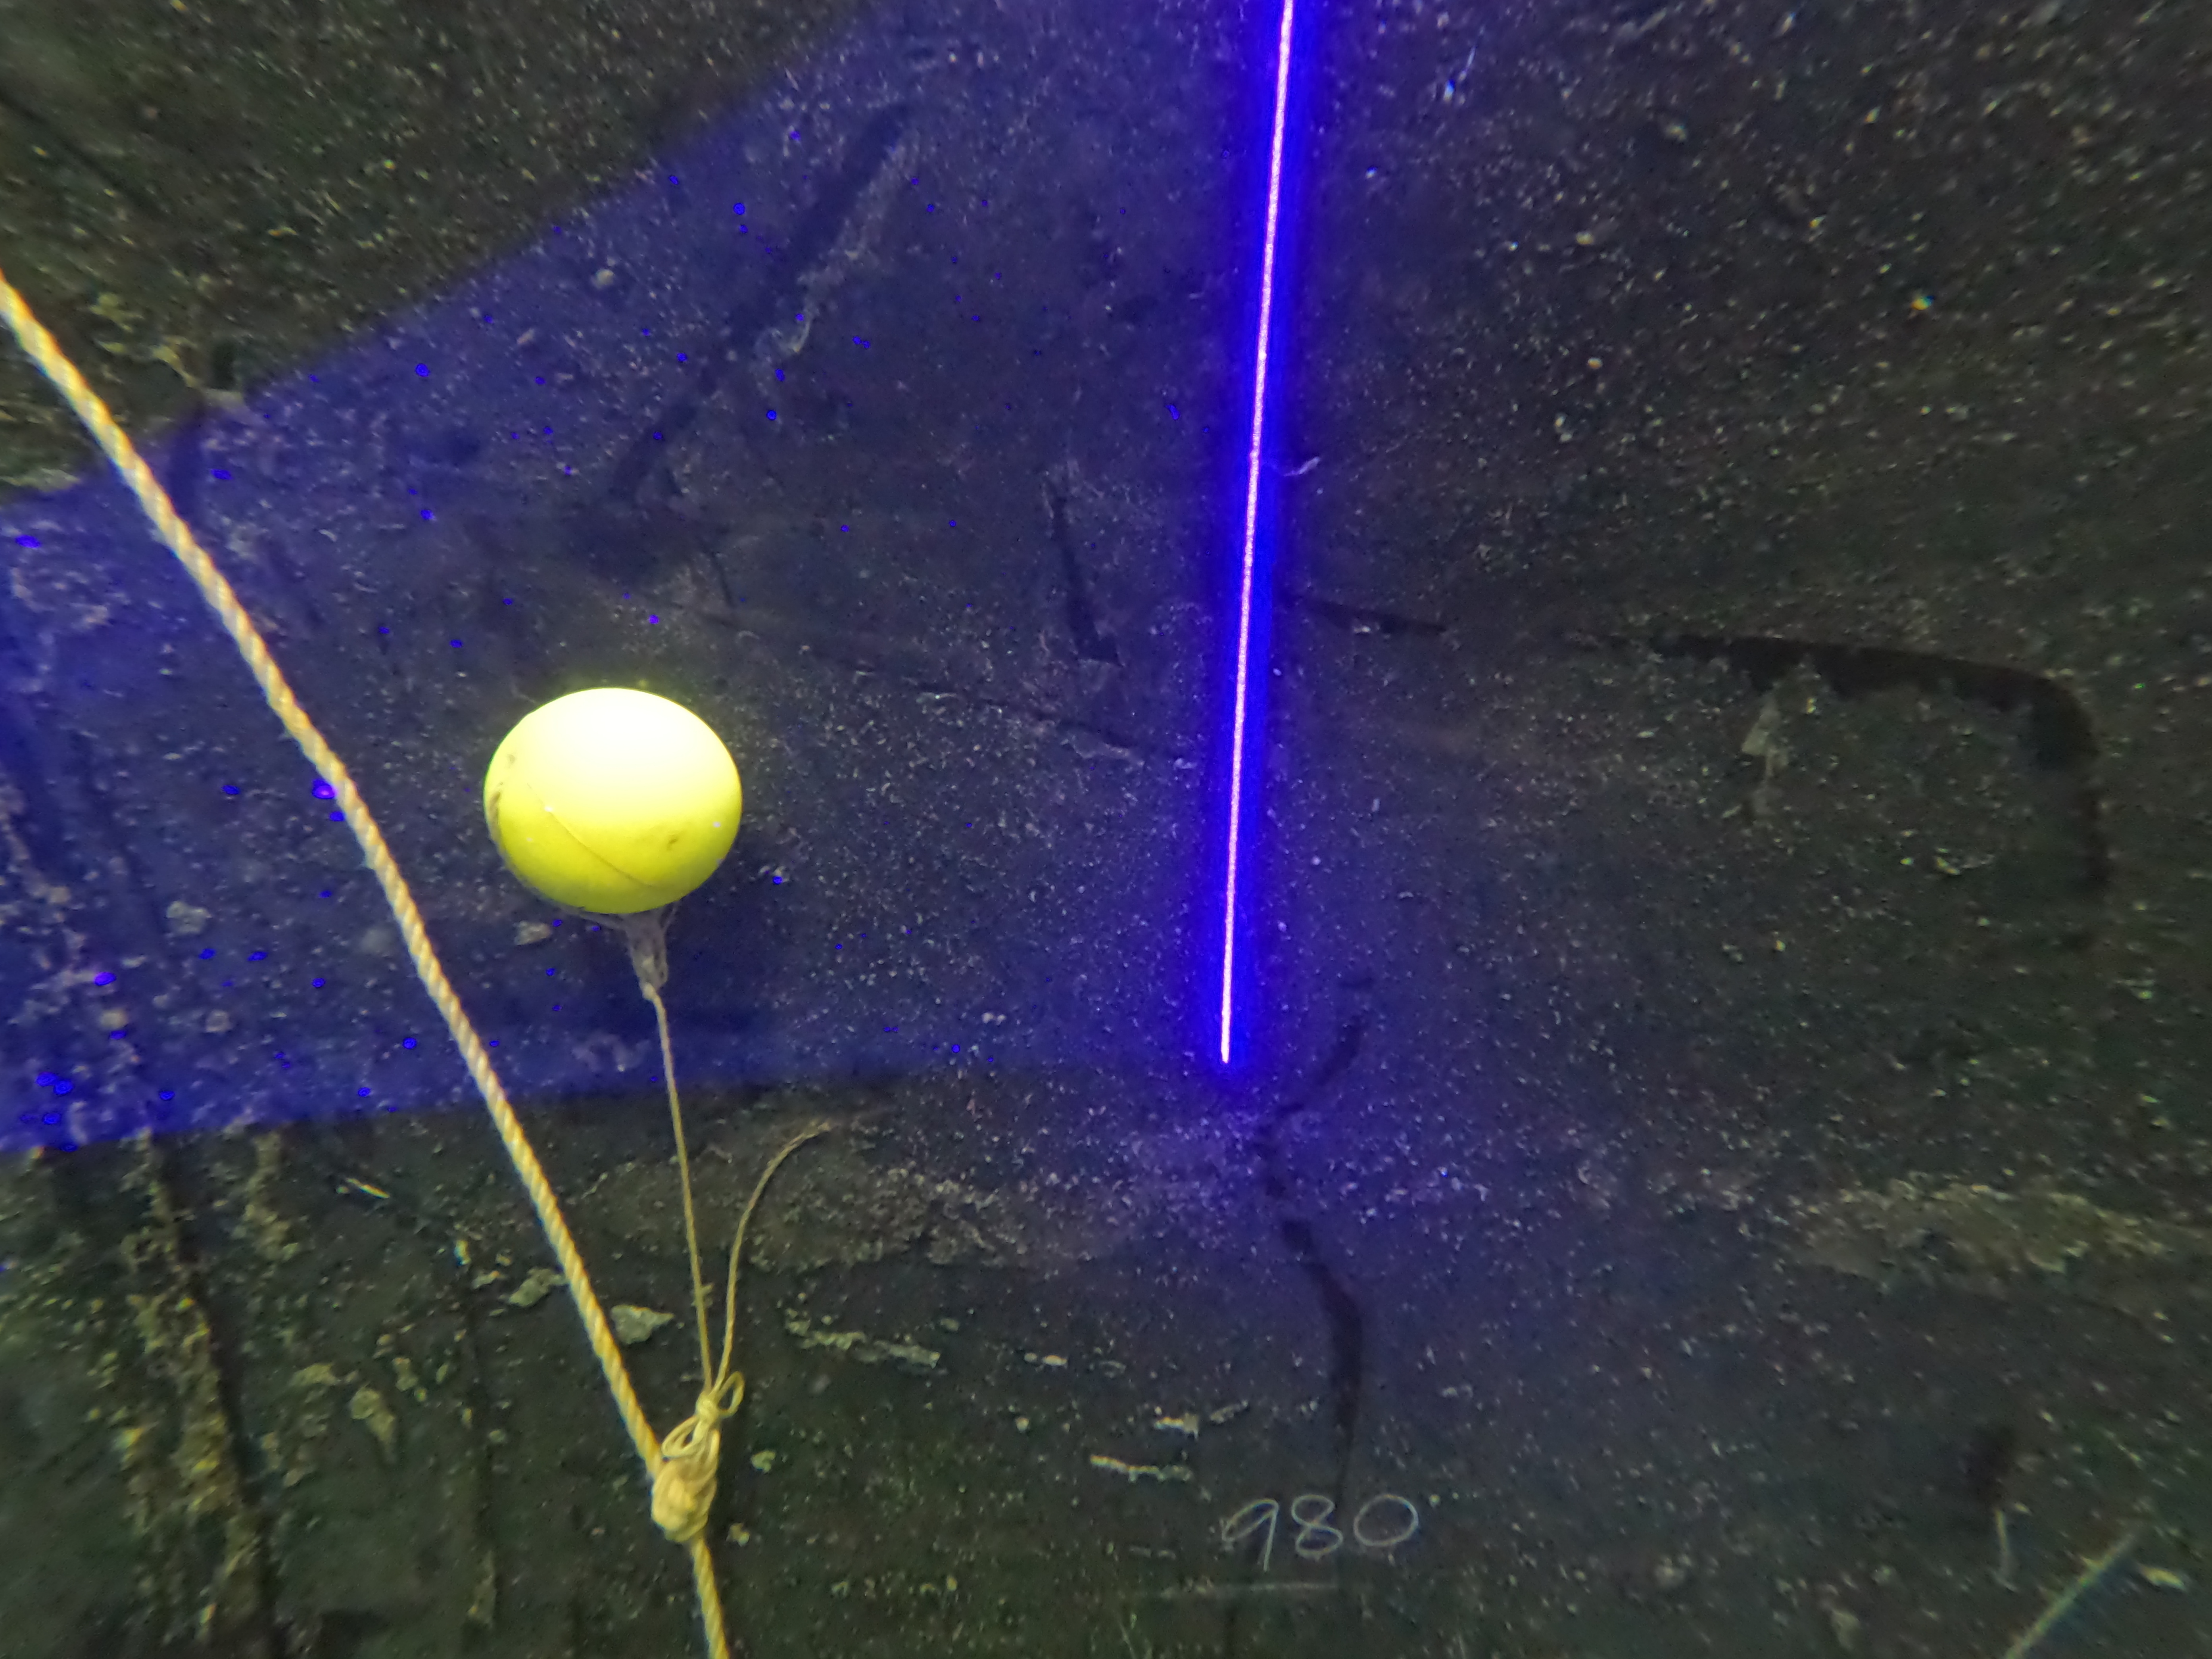

980

Supplement: Supplementary file 2740 [file G0030240.pdf › 2/G0030240.pdf]

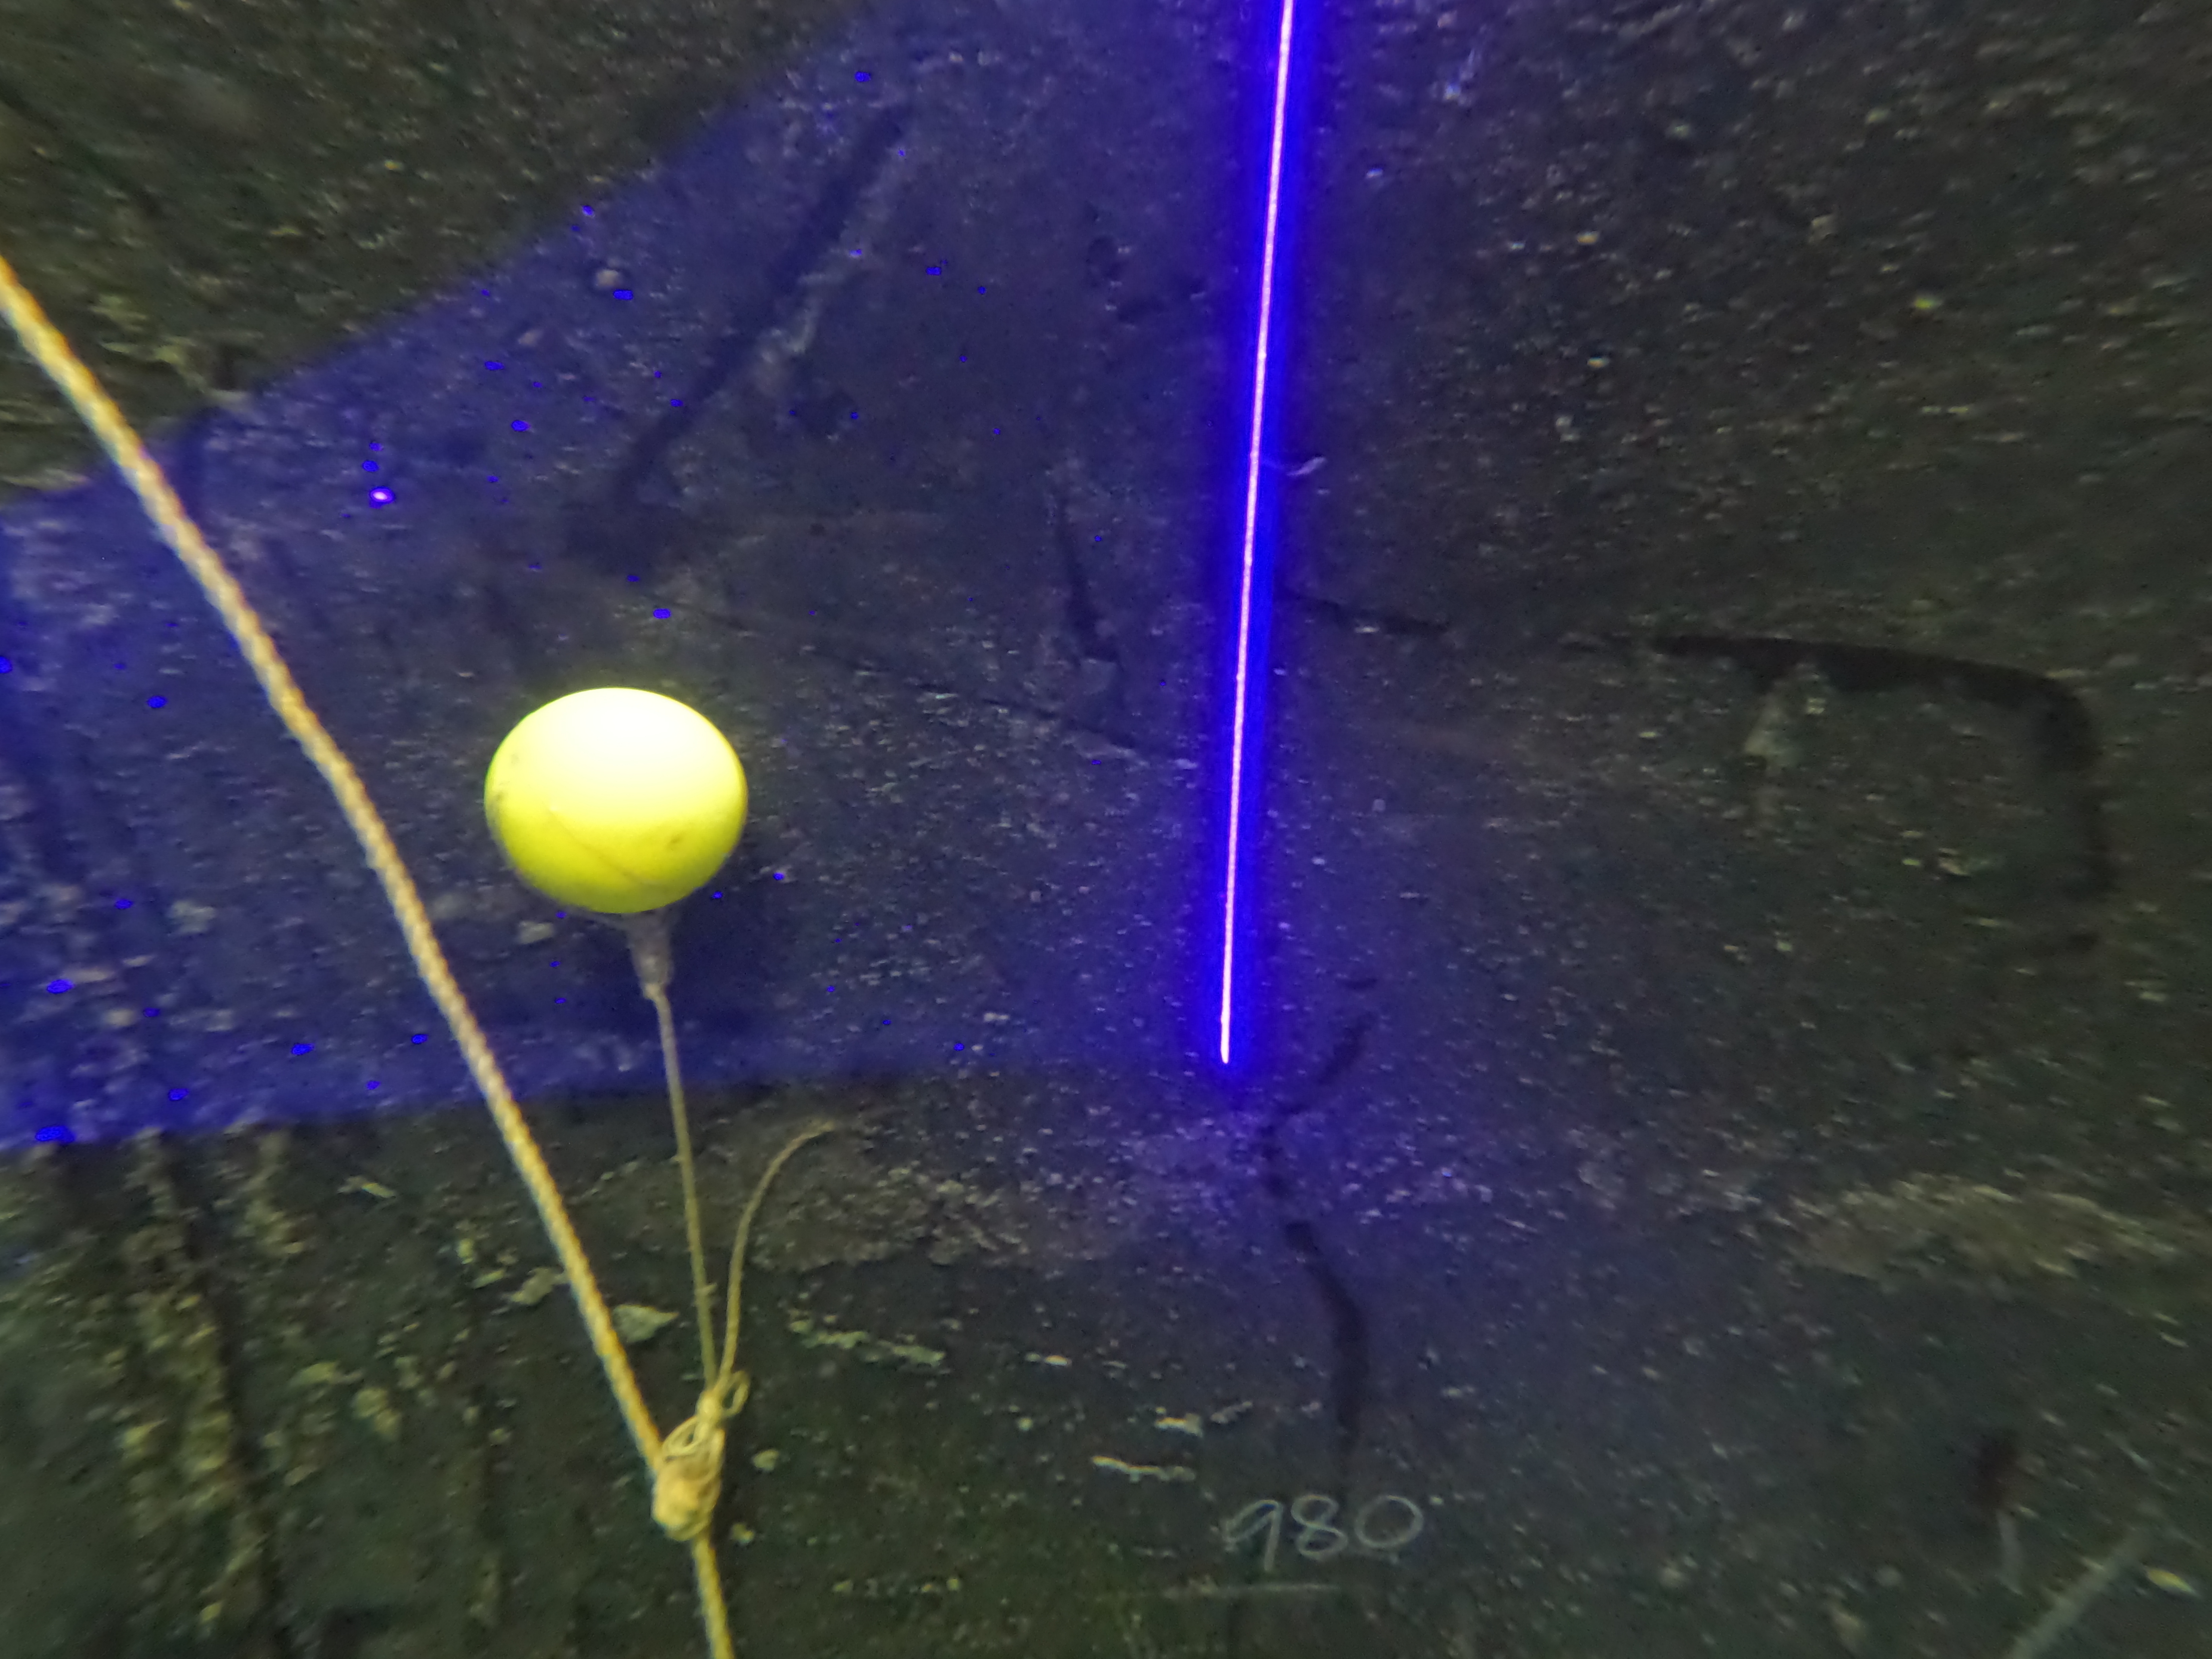

980

Supplement: Supplementary file 2741 [file G0030241.pdf › 2/G0030241.pdf]

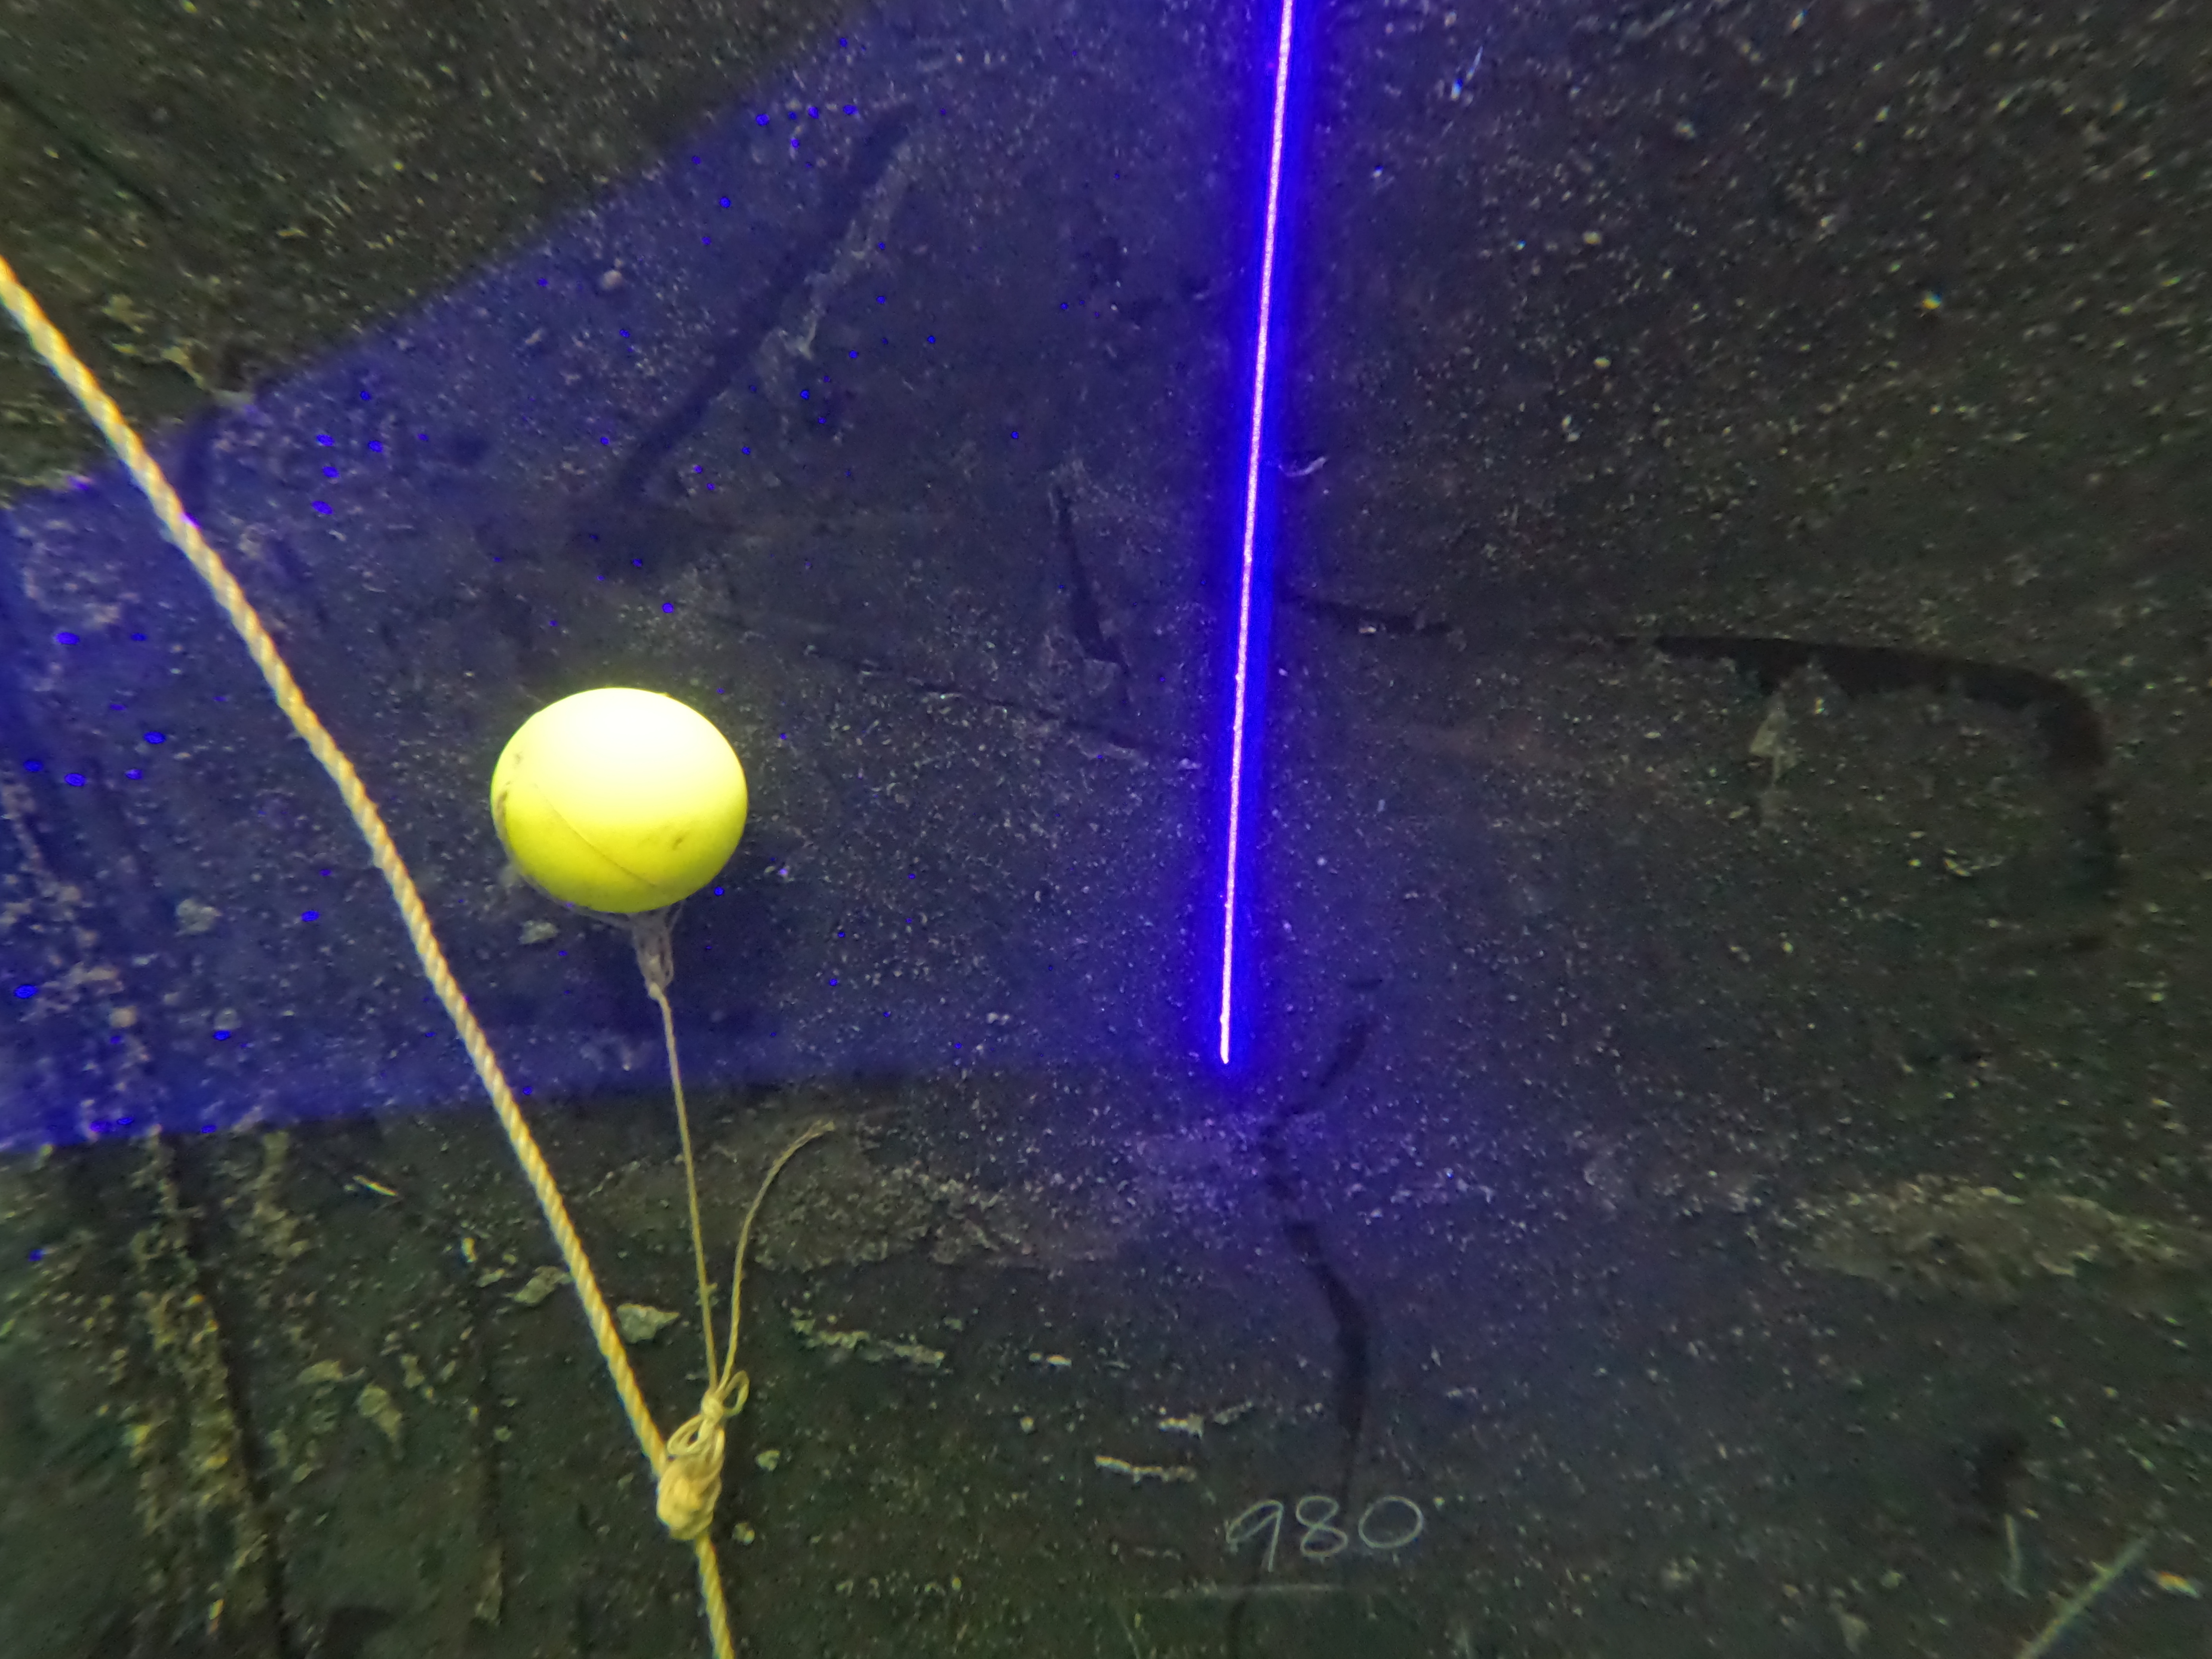

980

Supplement: Supplementary file 2742 [file G0030242.pdf › 2/G0030242.pdf]

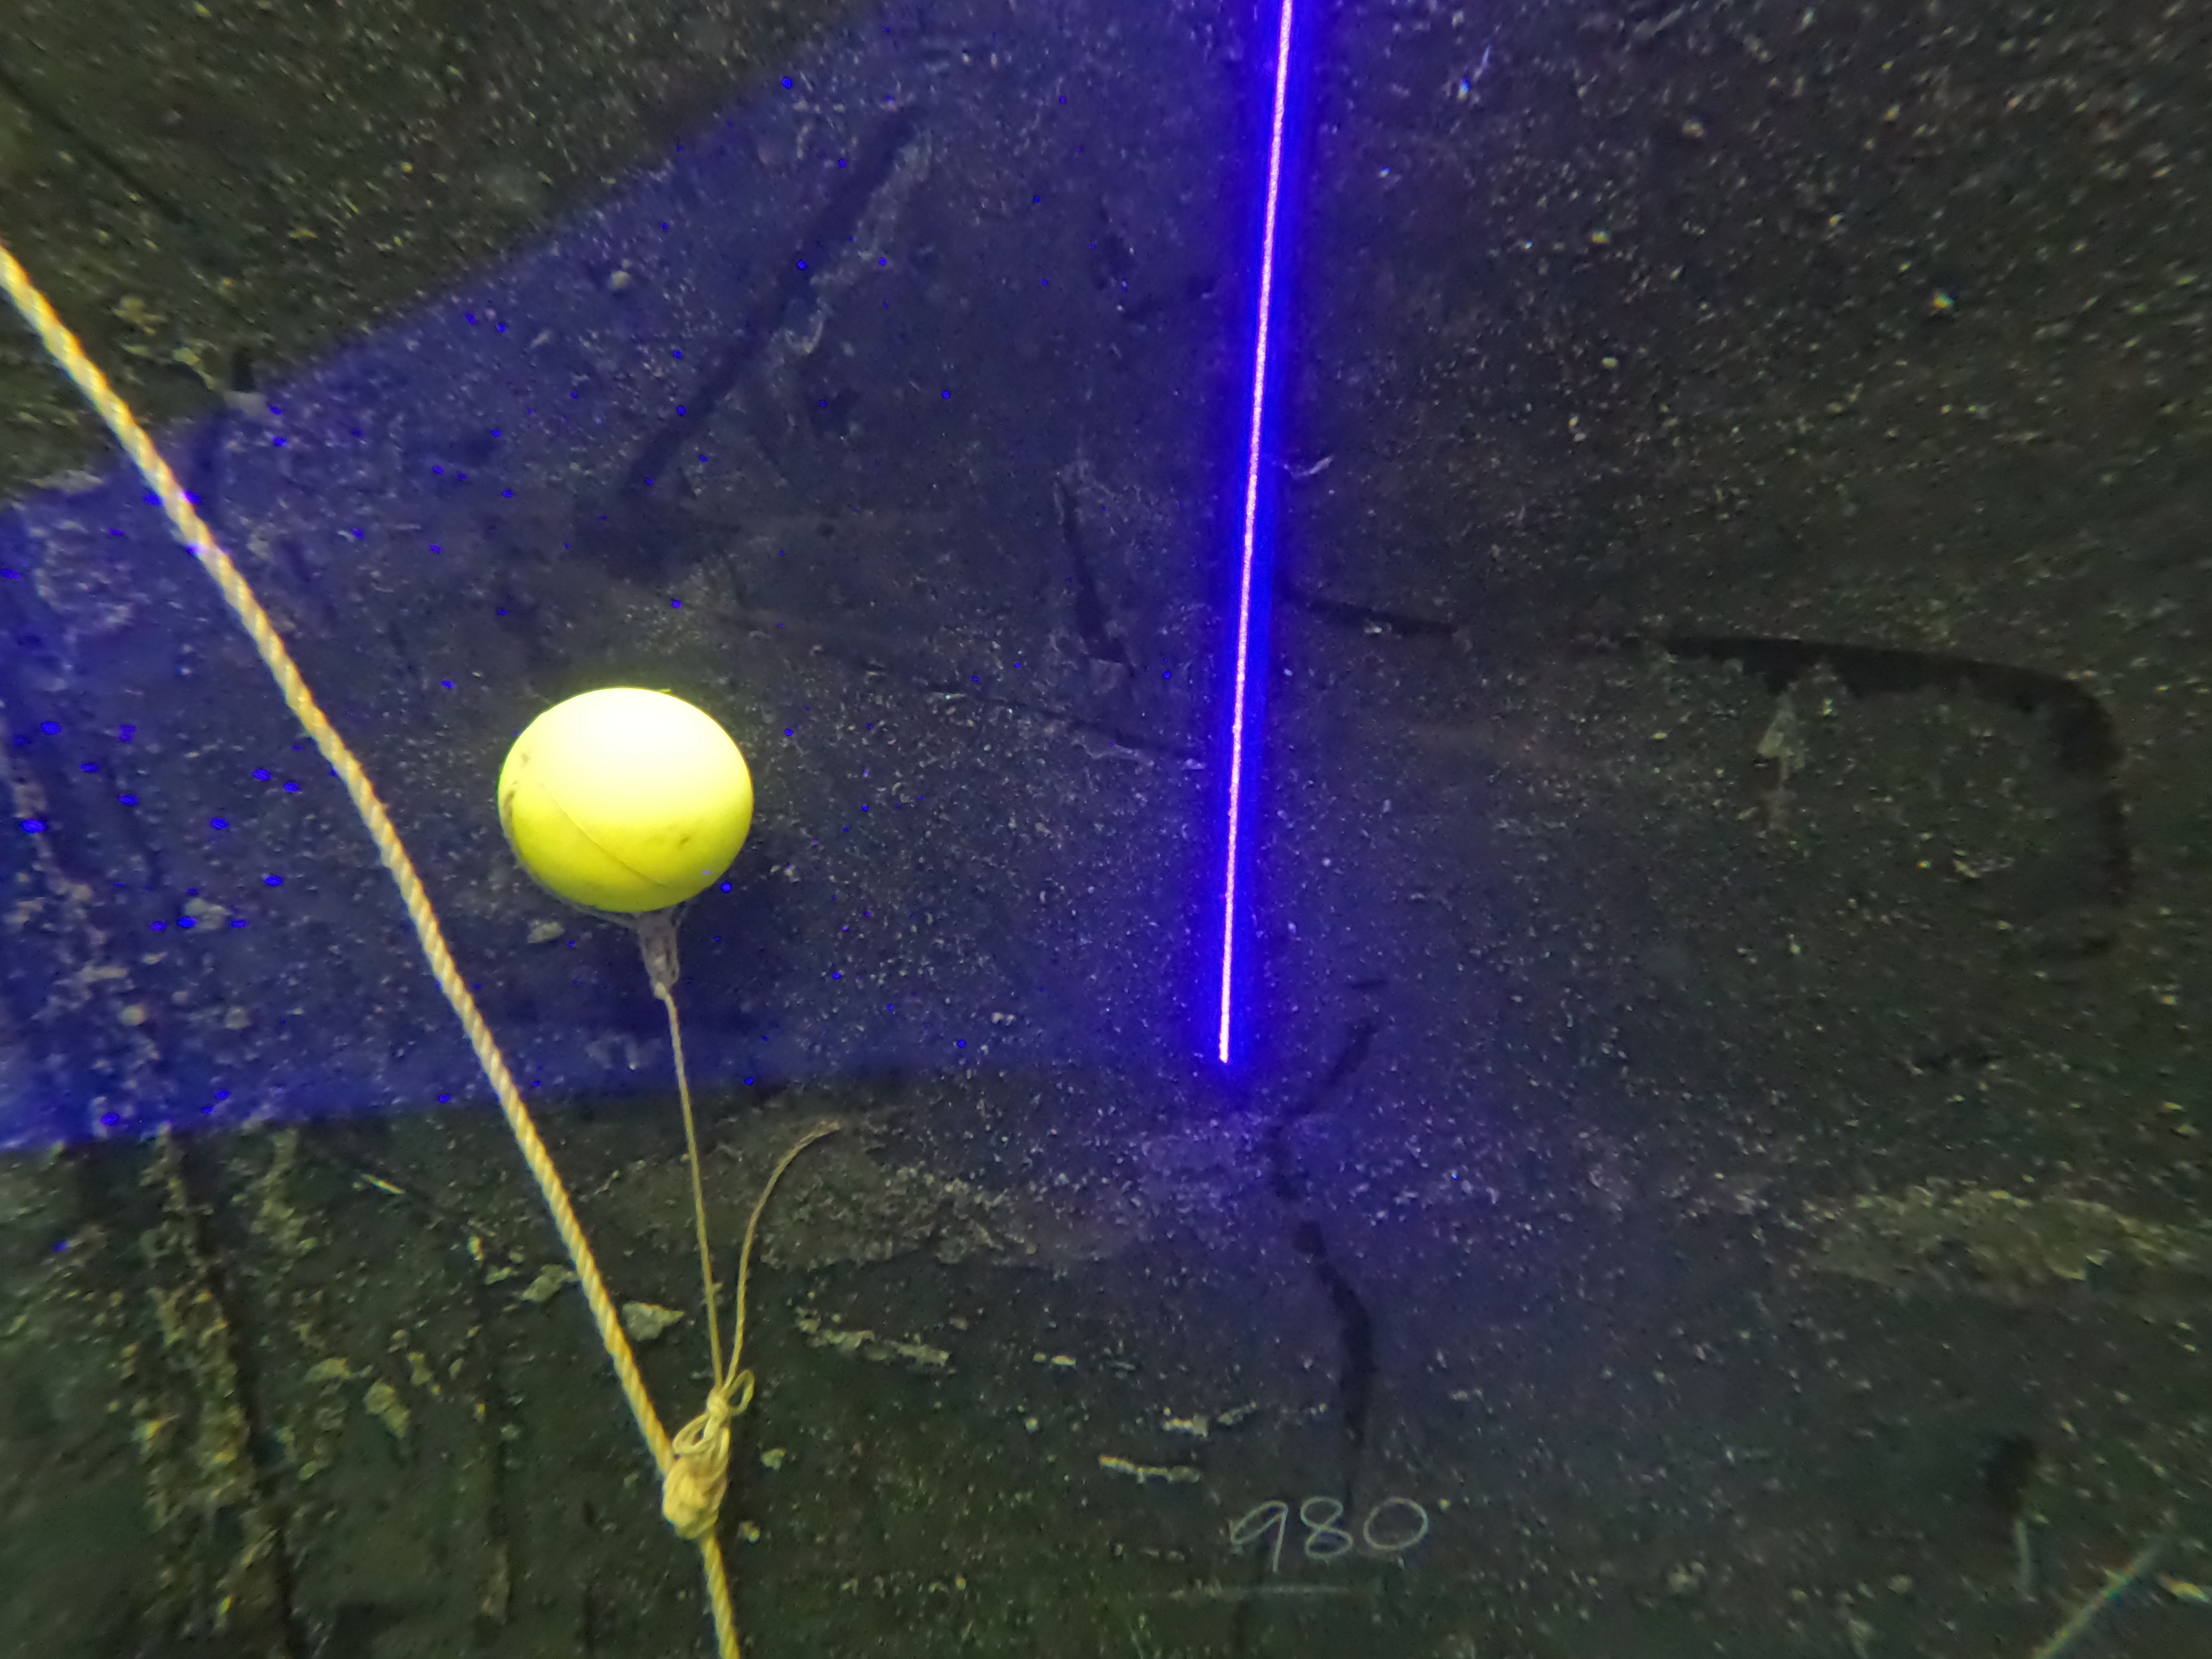

980

Supplement: Supplementary file 2743 [file G0030243.pdf › 2/G0030243.pdf]

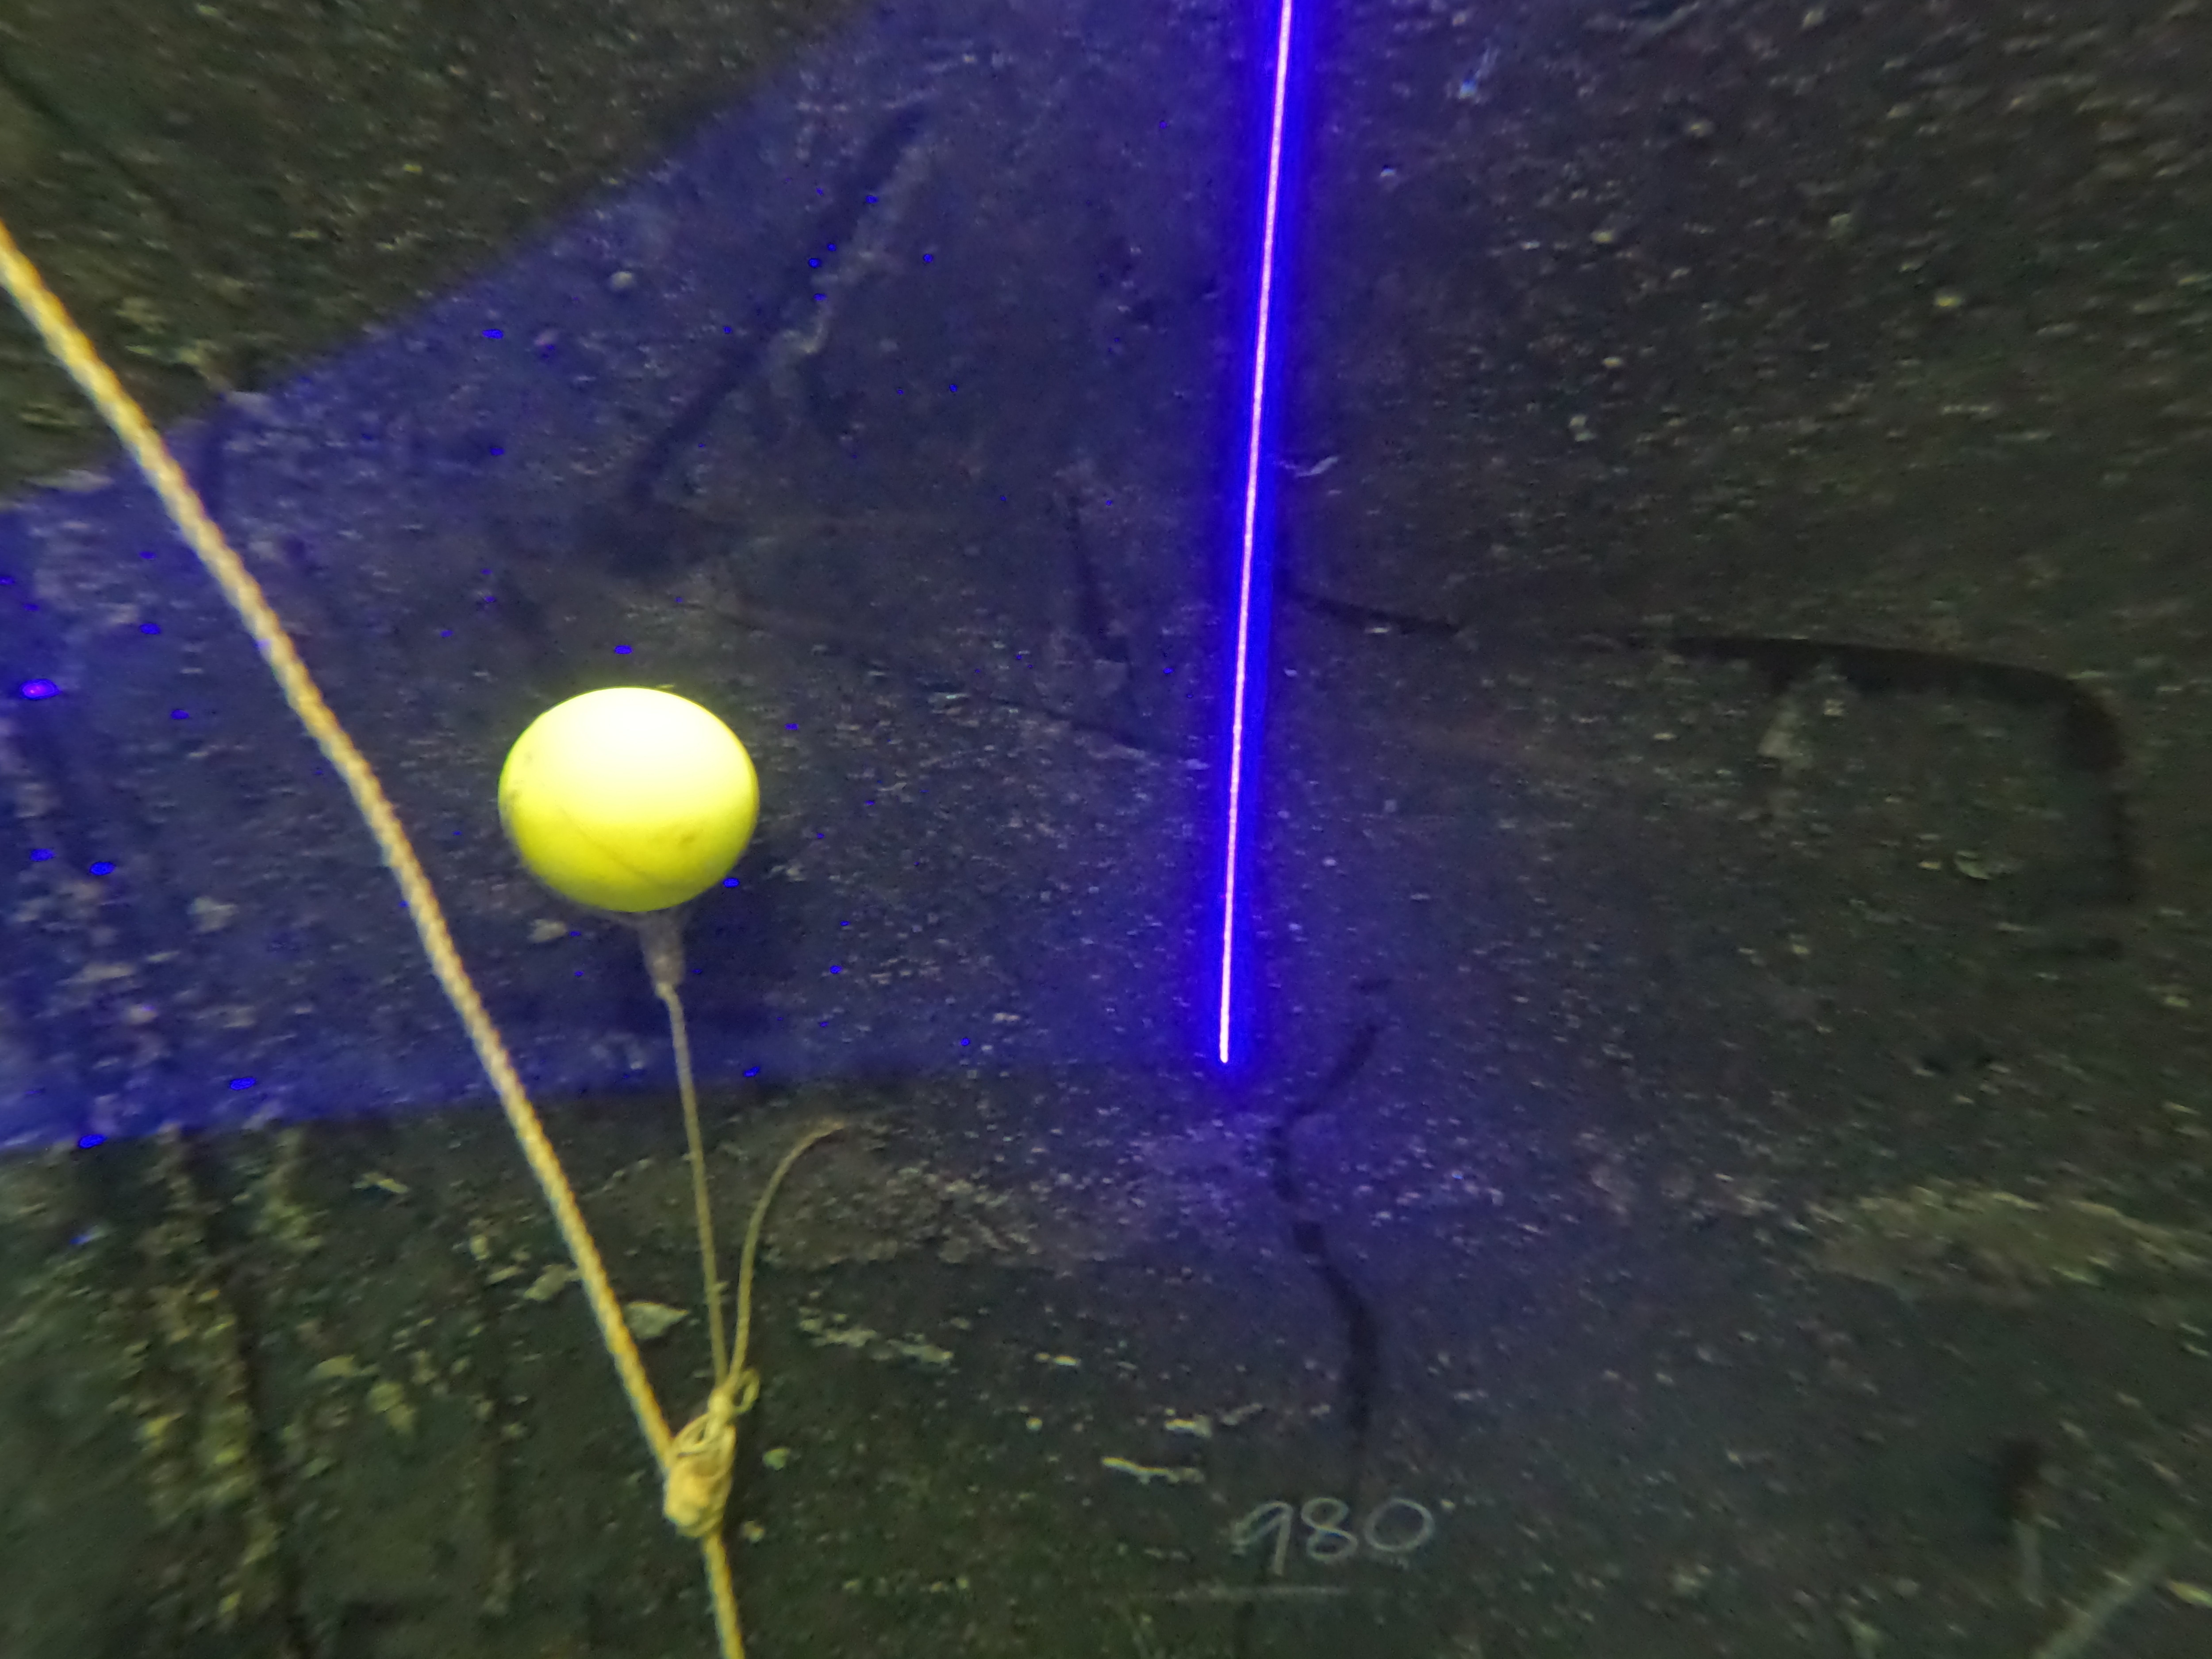

980

Supplement: Supplementary file 2744 [file G0030244.pdf › 2/G0030244.pdf]

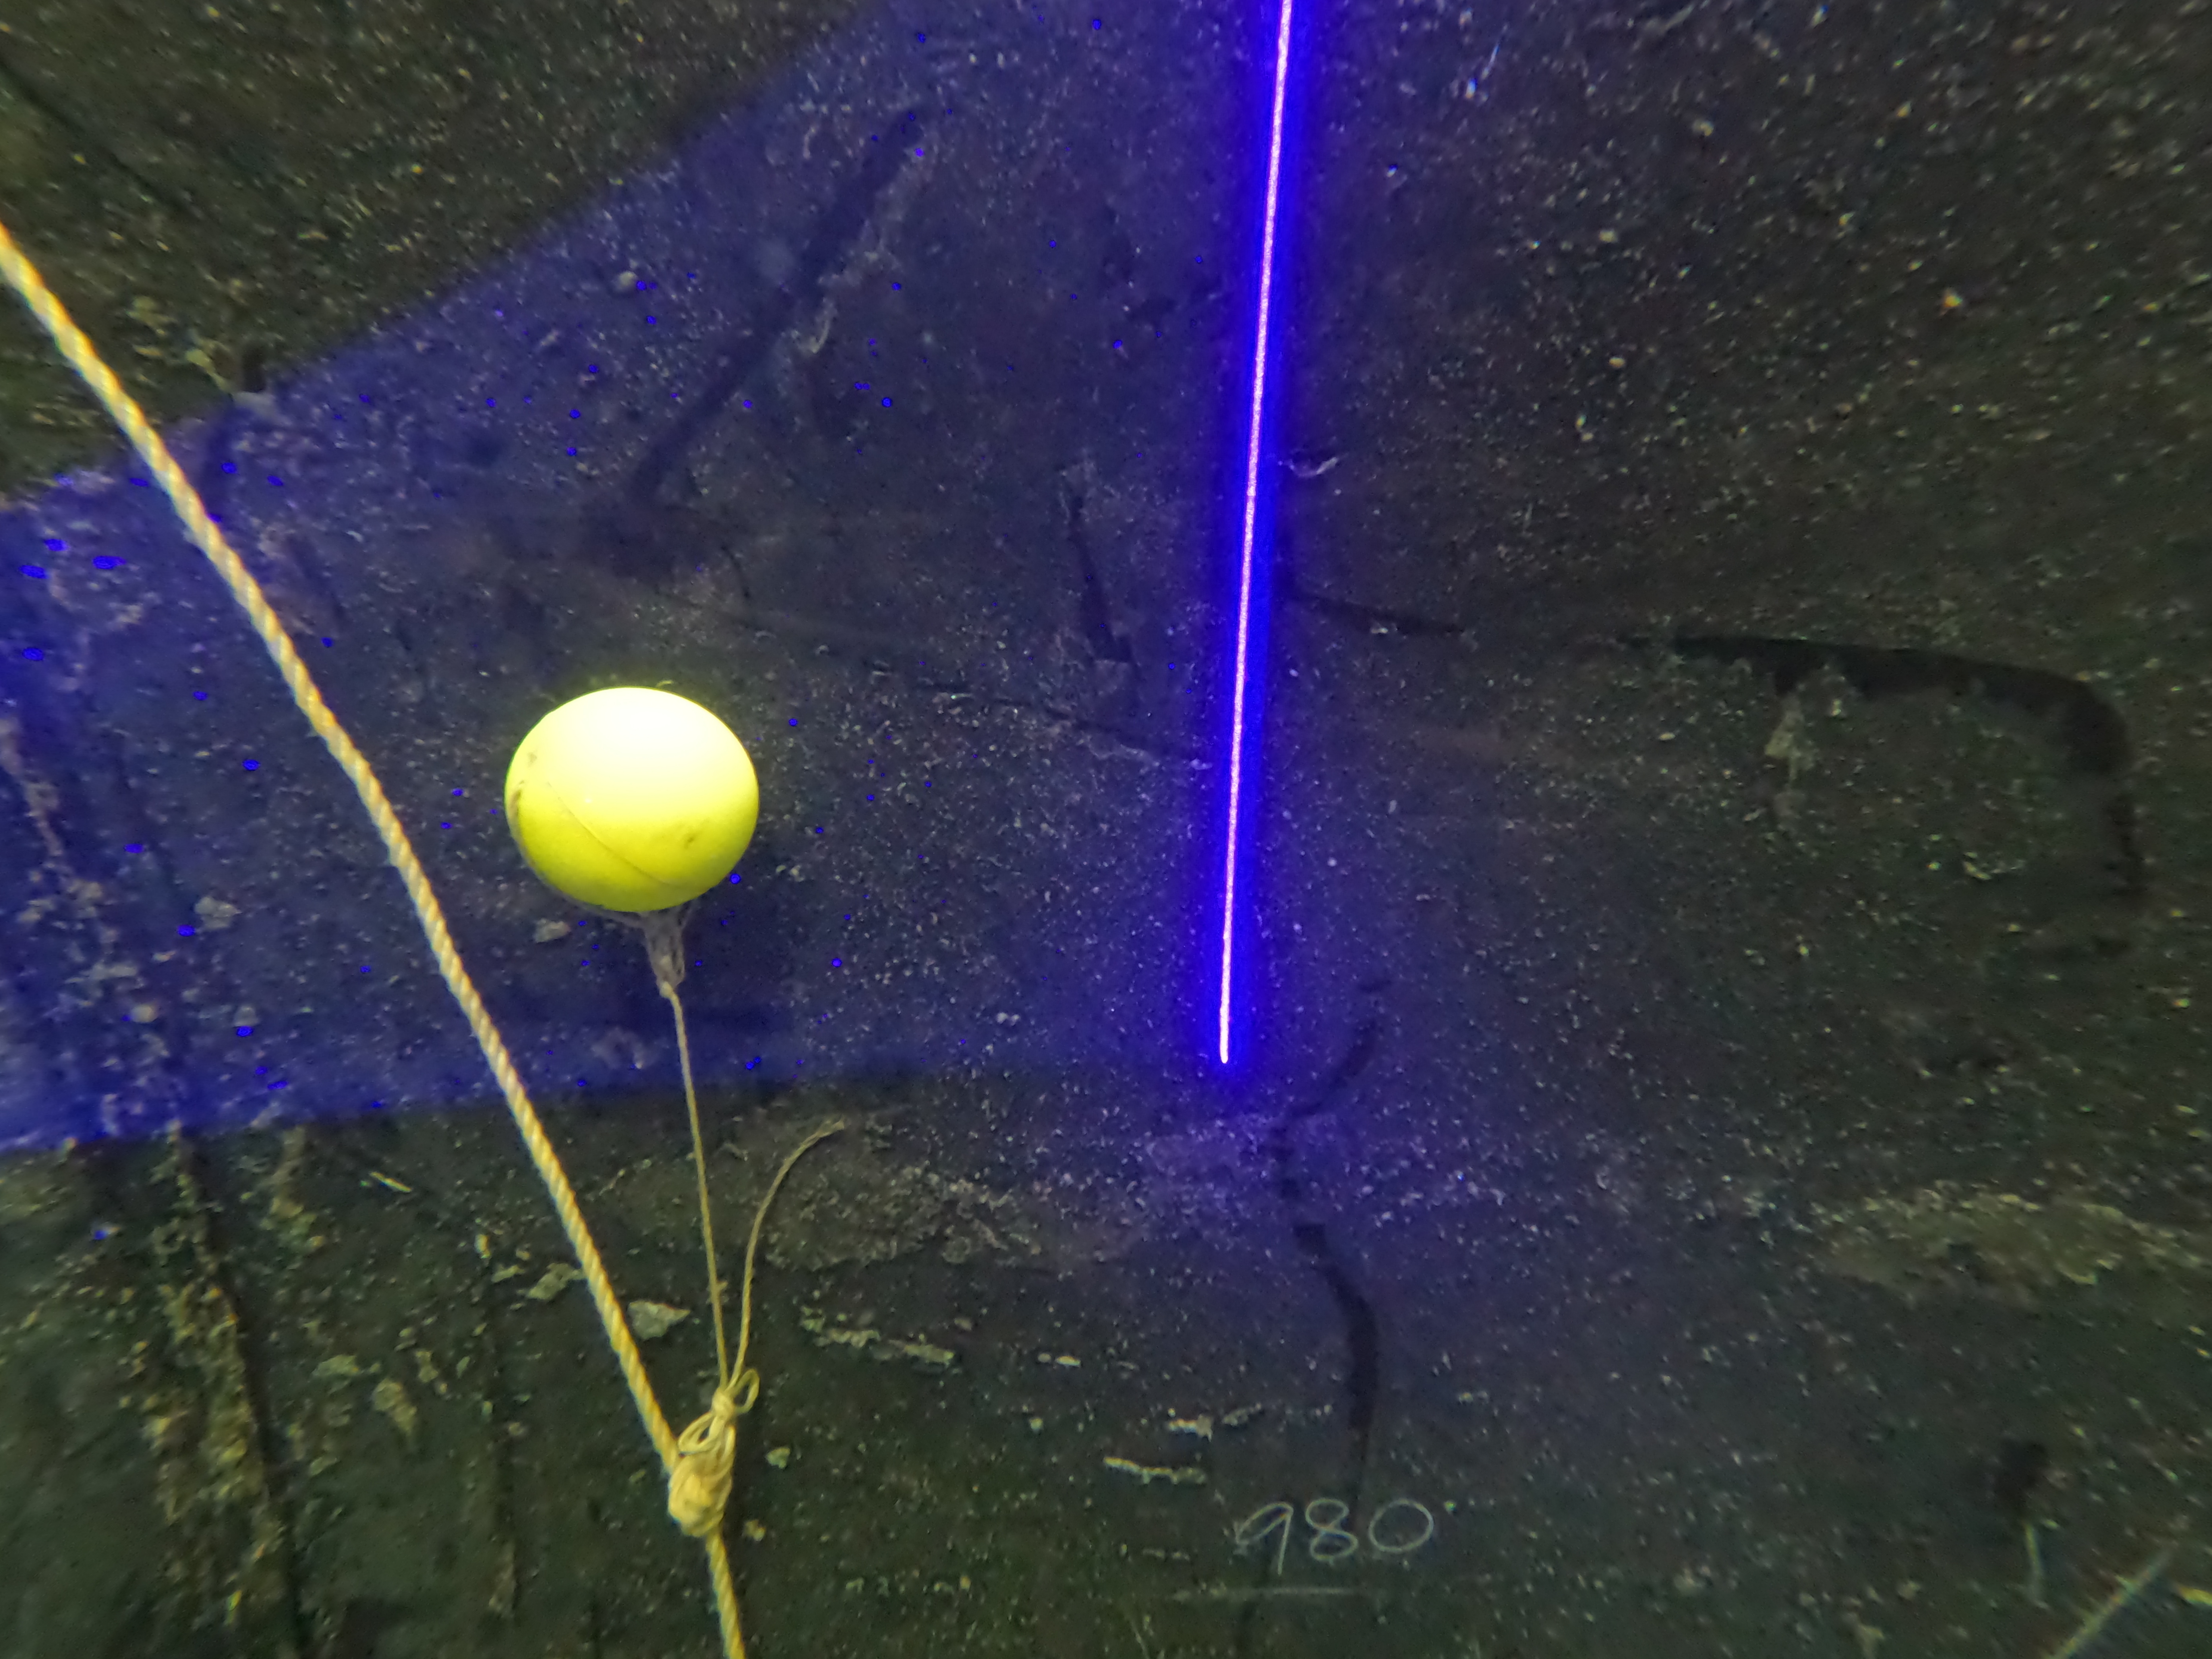

980

Supplement: Supplementary file 2745 [file G0030245.pdf › 2/G0030245.pdf]

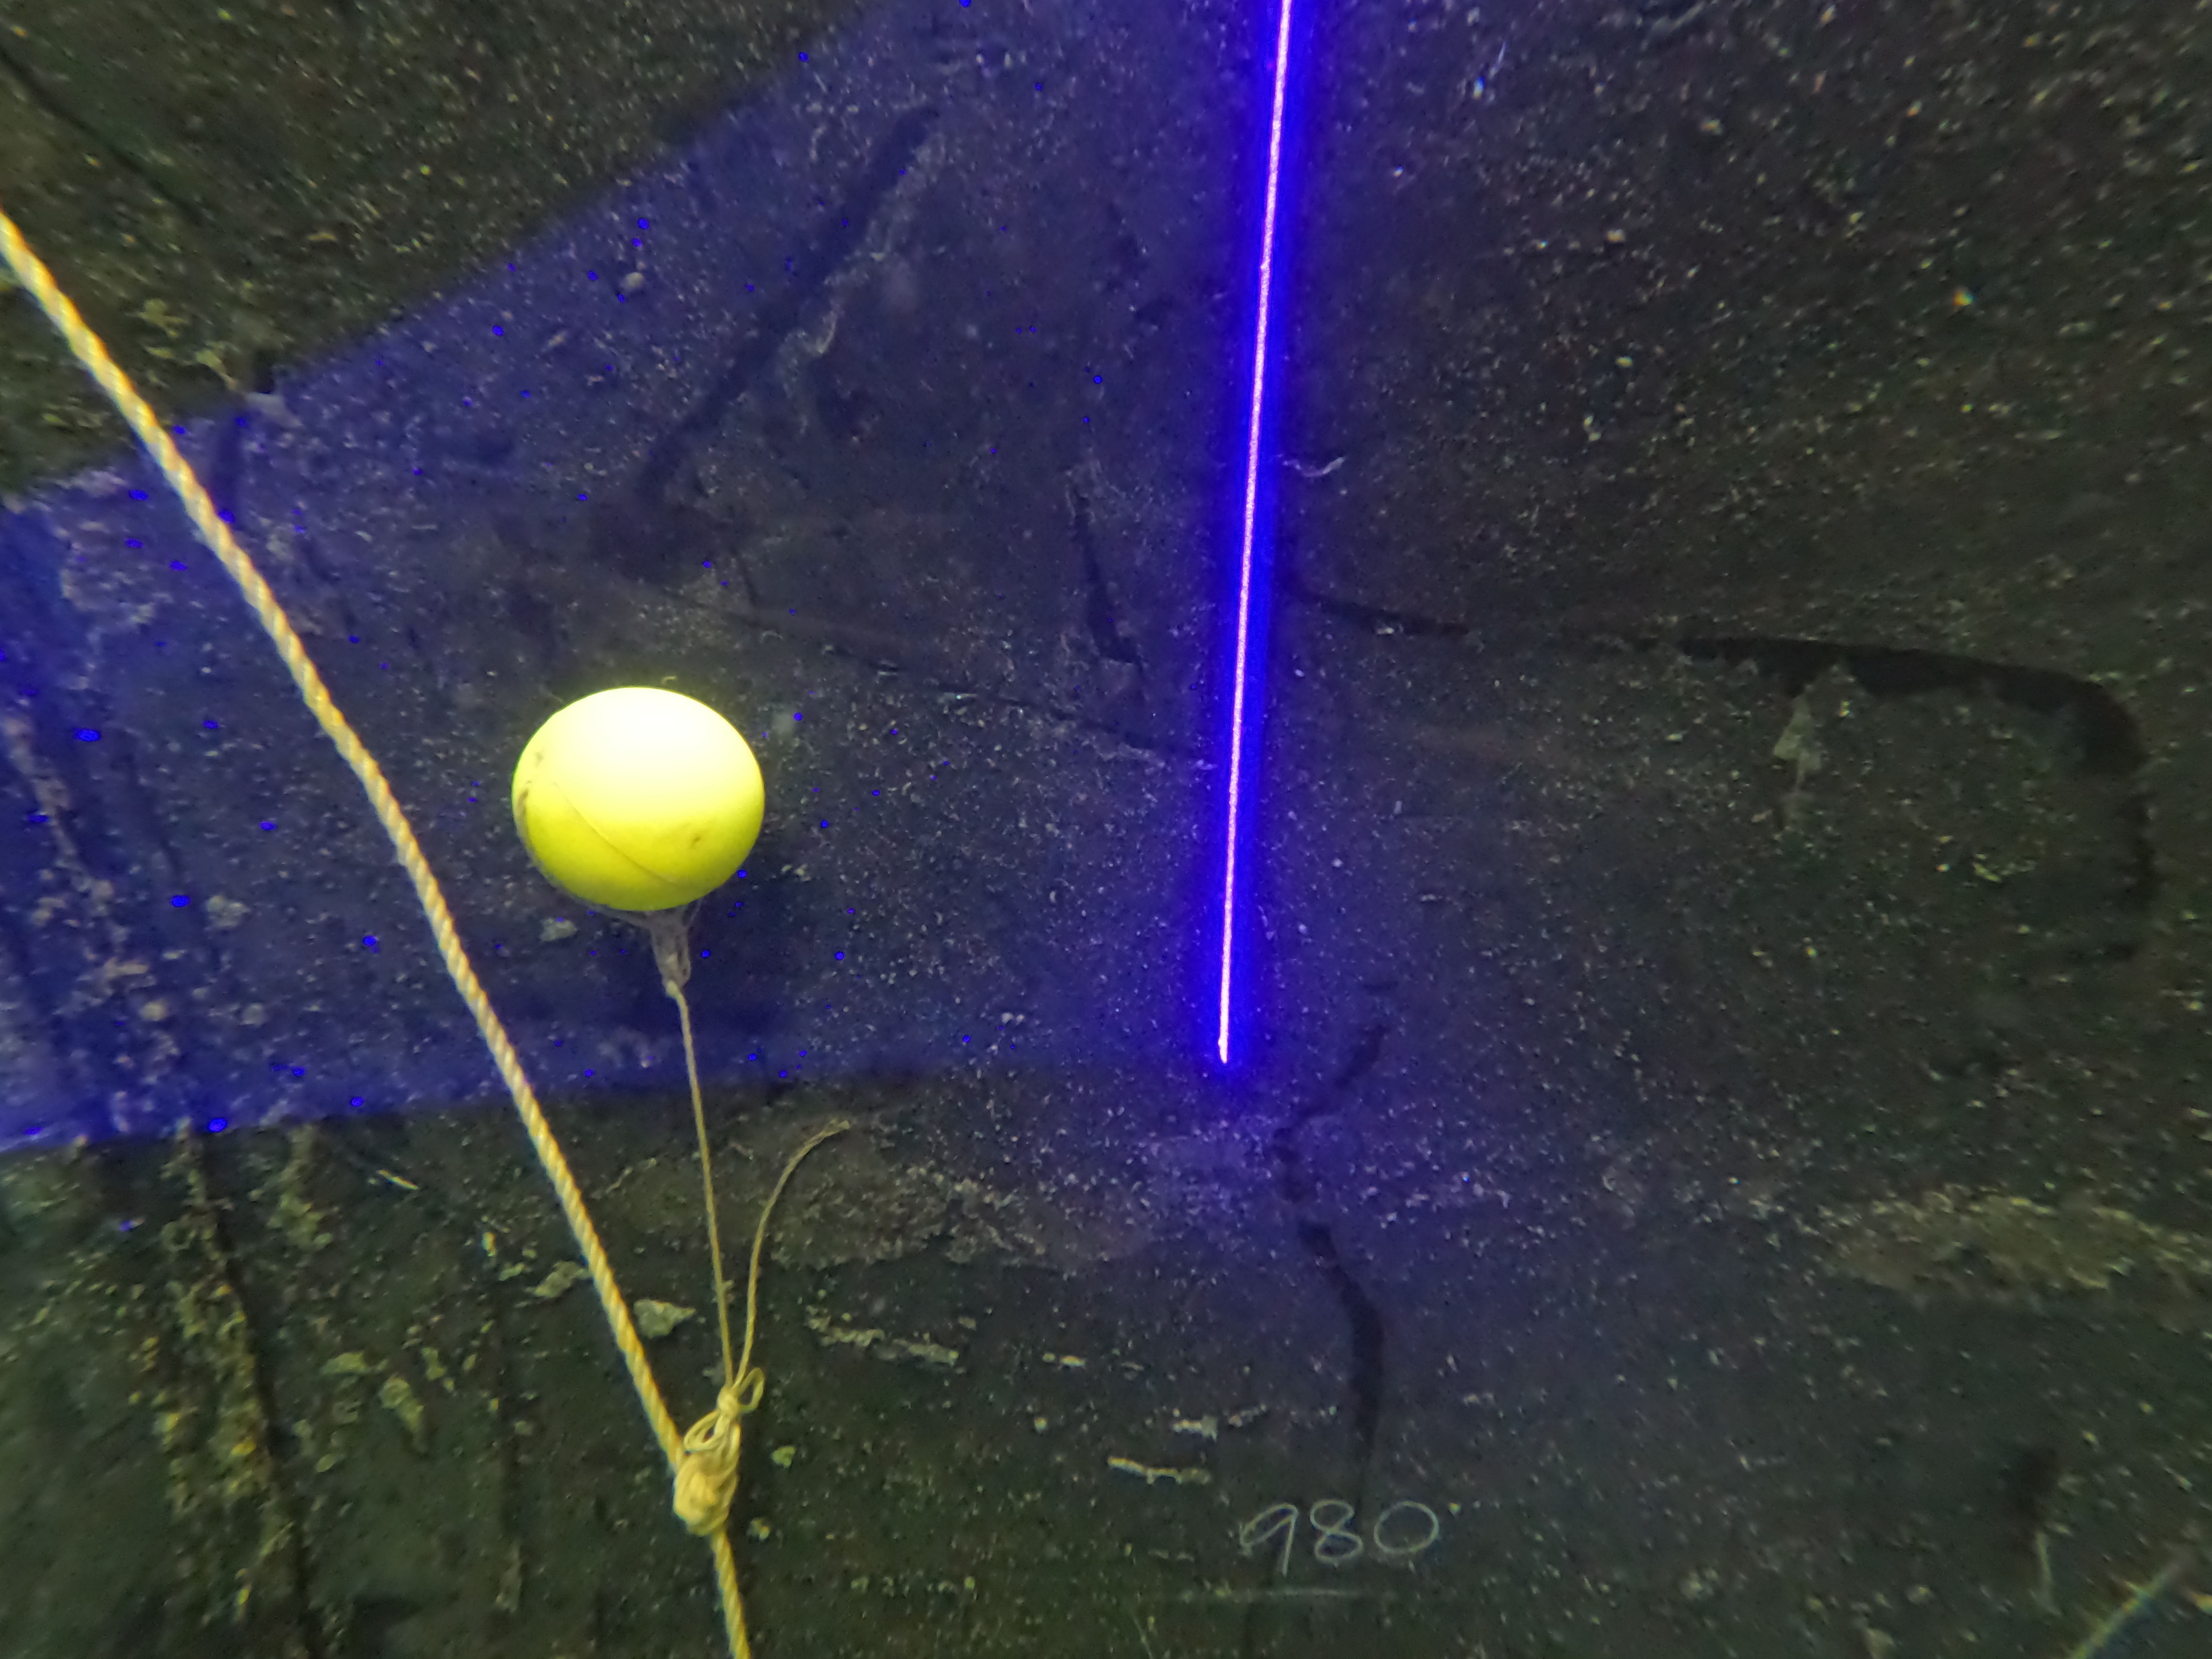

980

Supplement: Supplementary file 2746 [file G0030246.pdf › 2/G0030246.pdf]

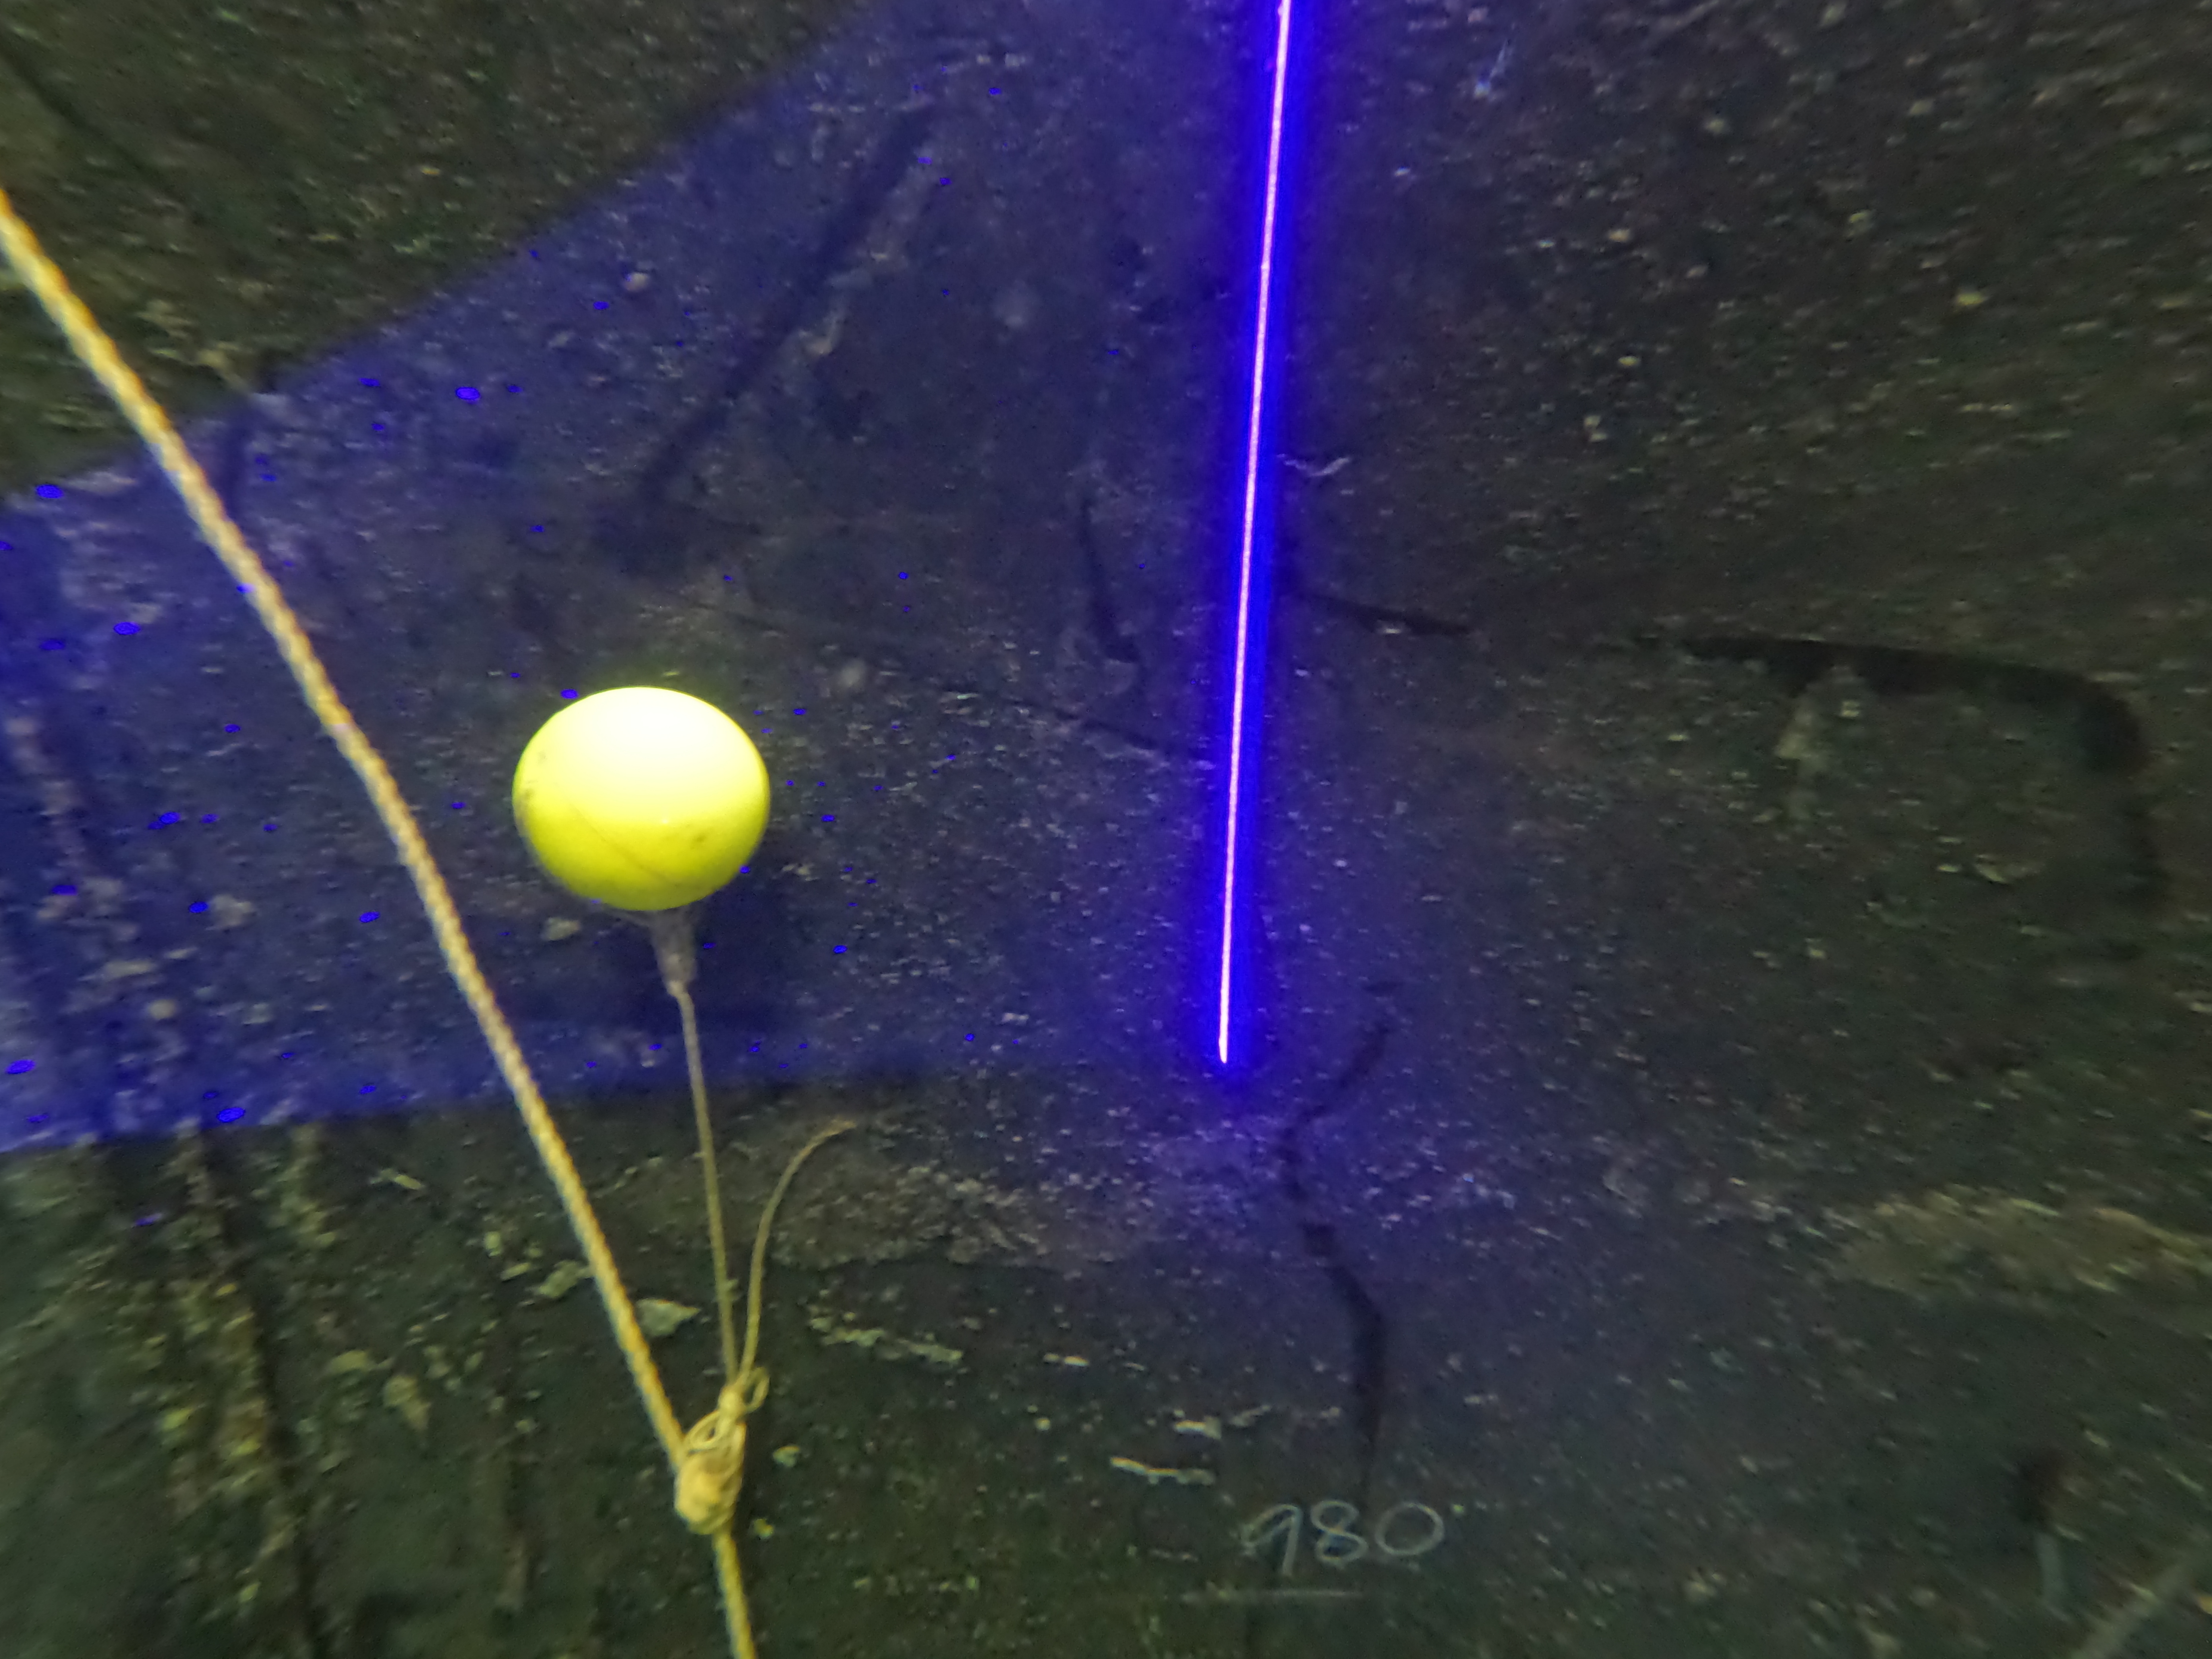

980

Supplement: Supplementary file 2747 [file G0030247.pdf › 2/G0030247.pdf]

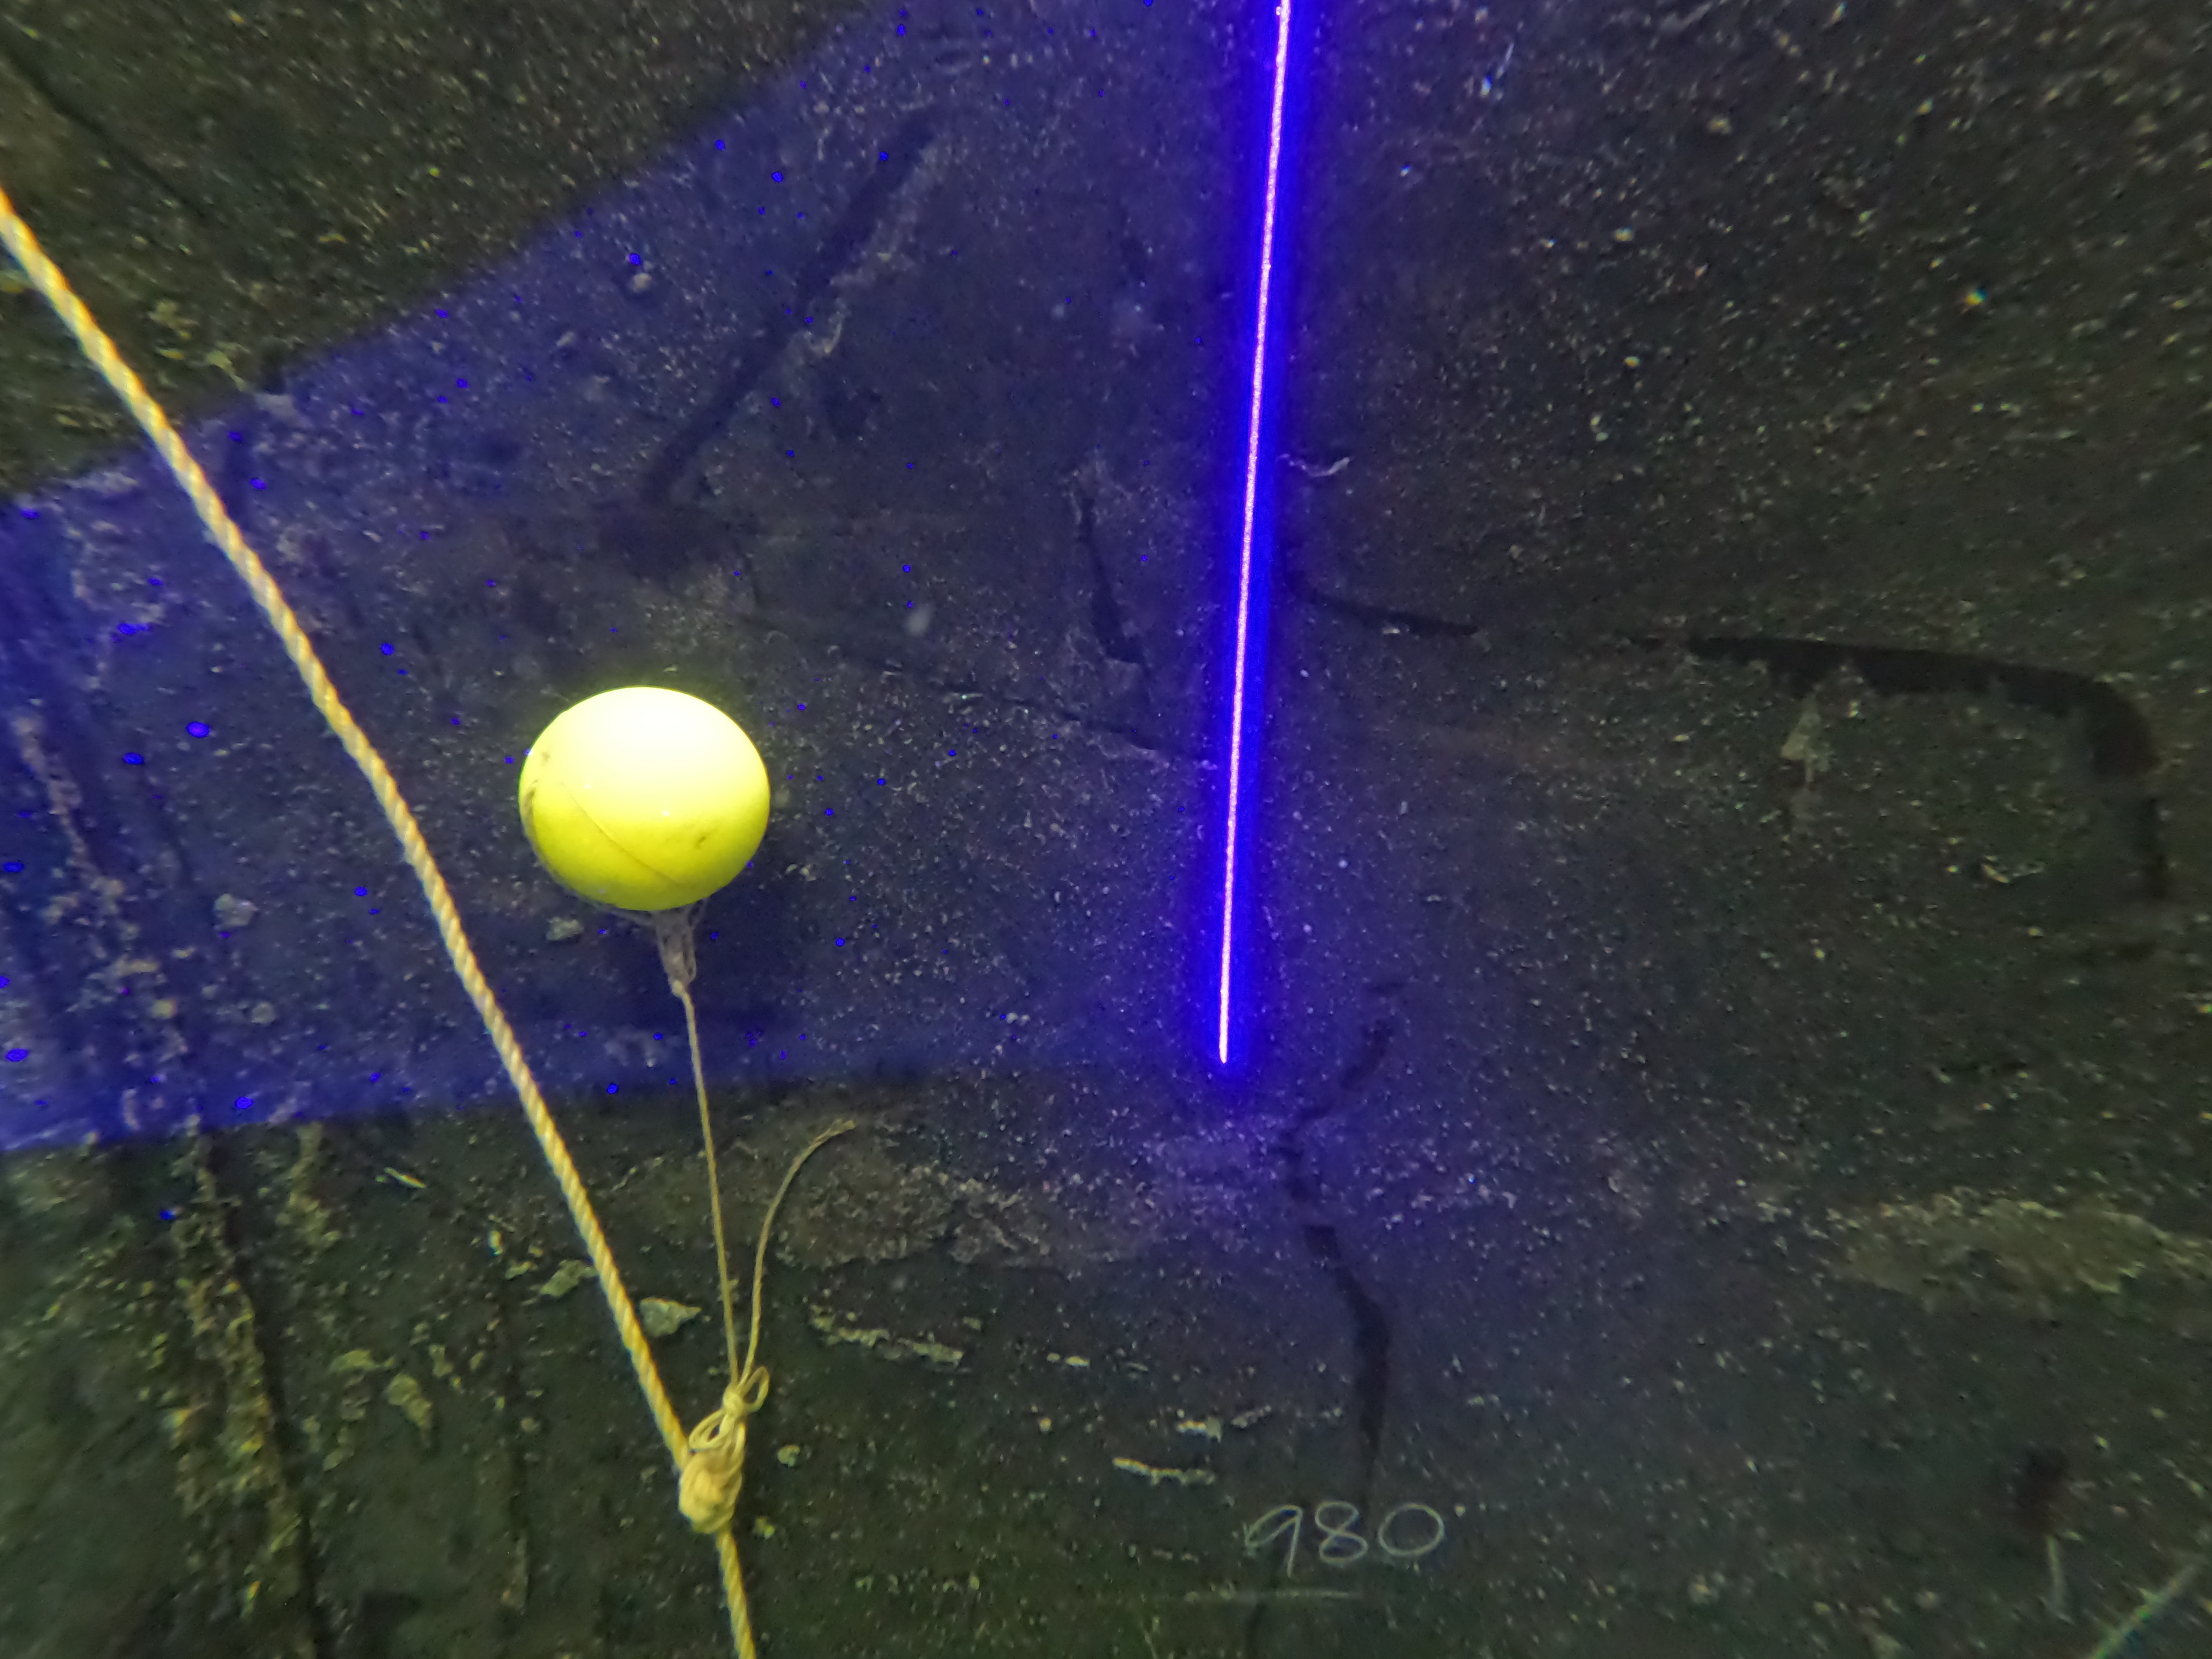

980

Supplement: Supplementary file 2748 [file G0030248.pdf › 2/G0030248.pdf]

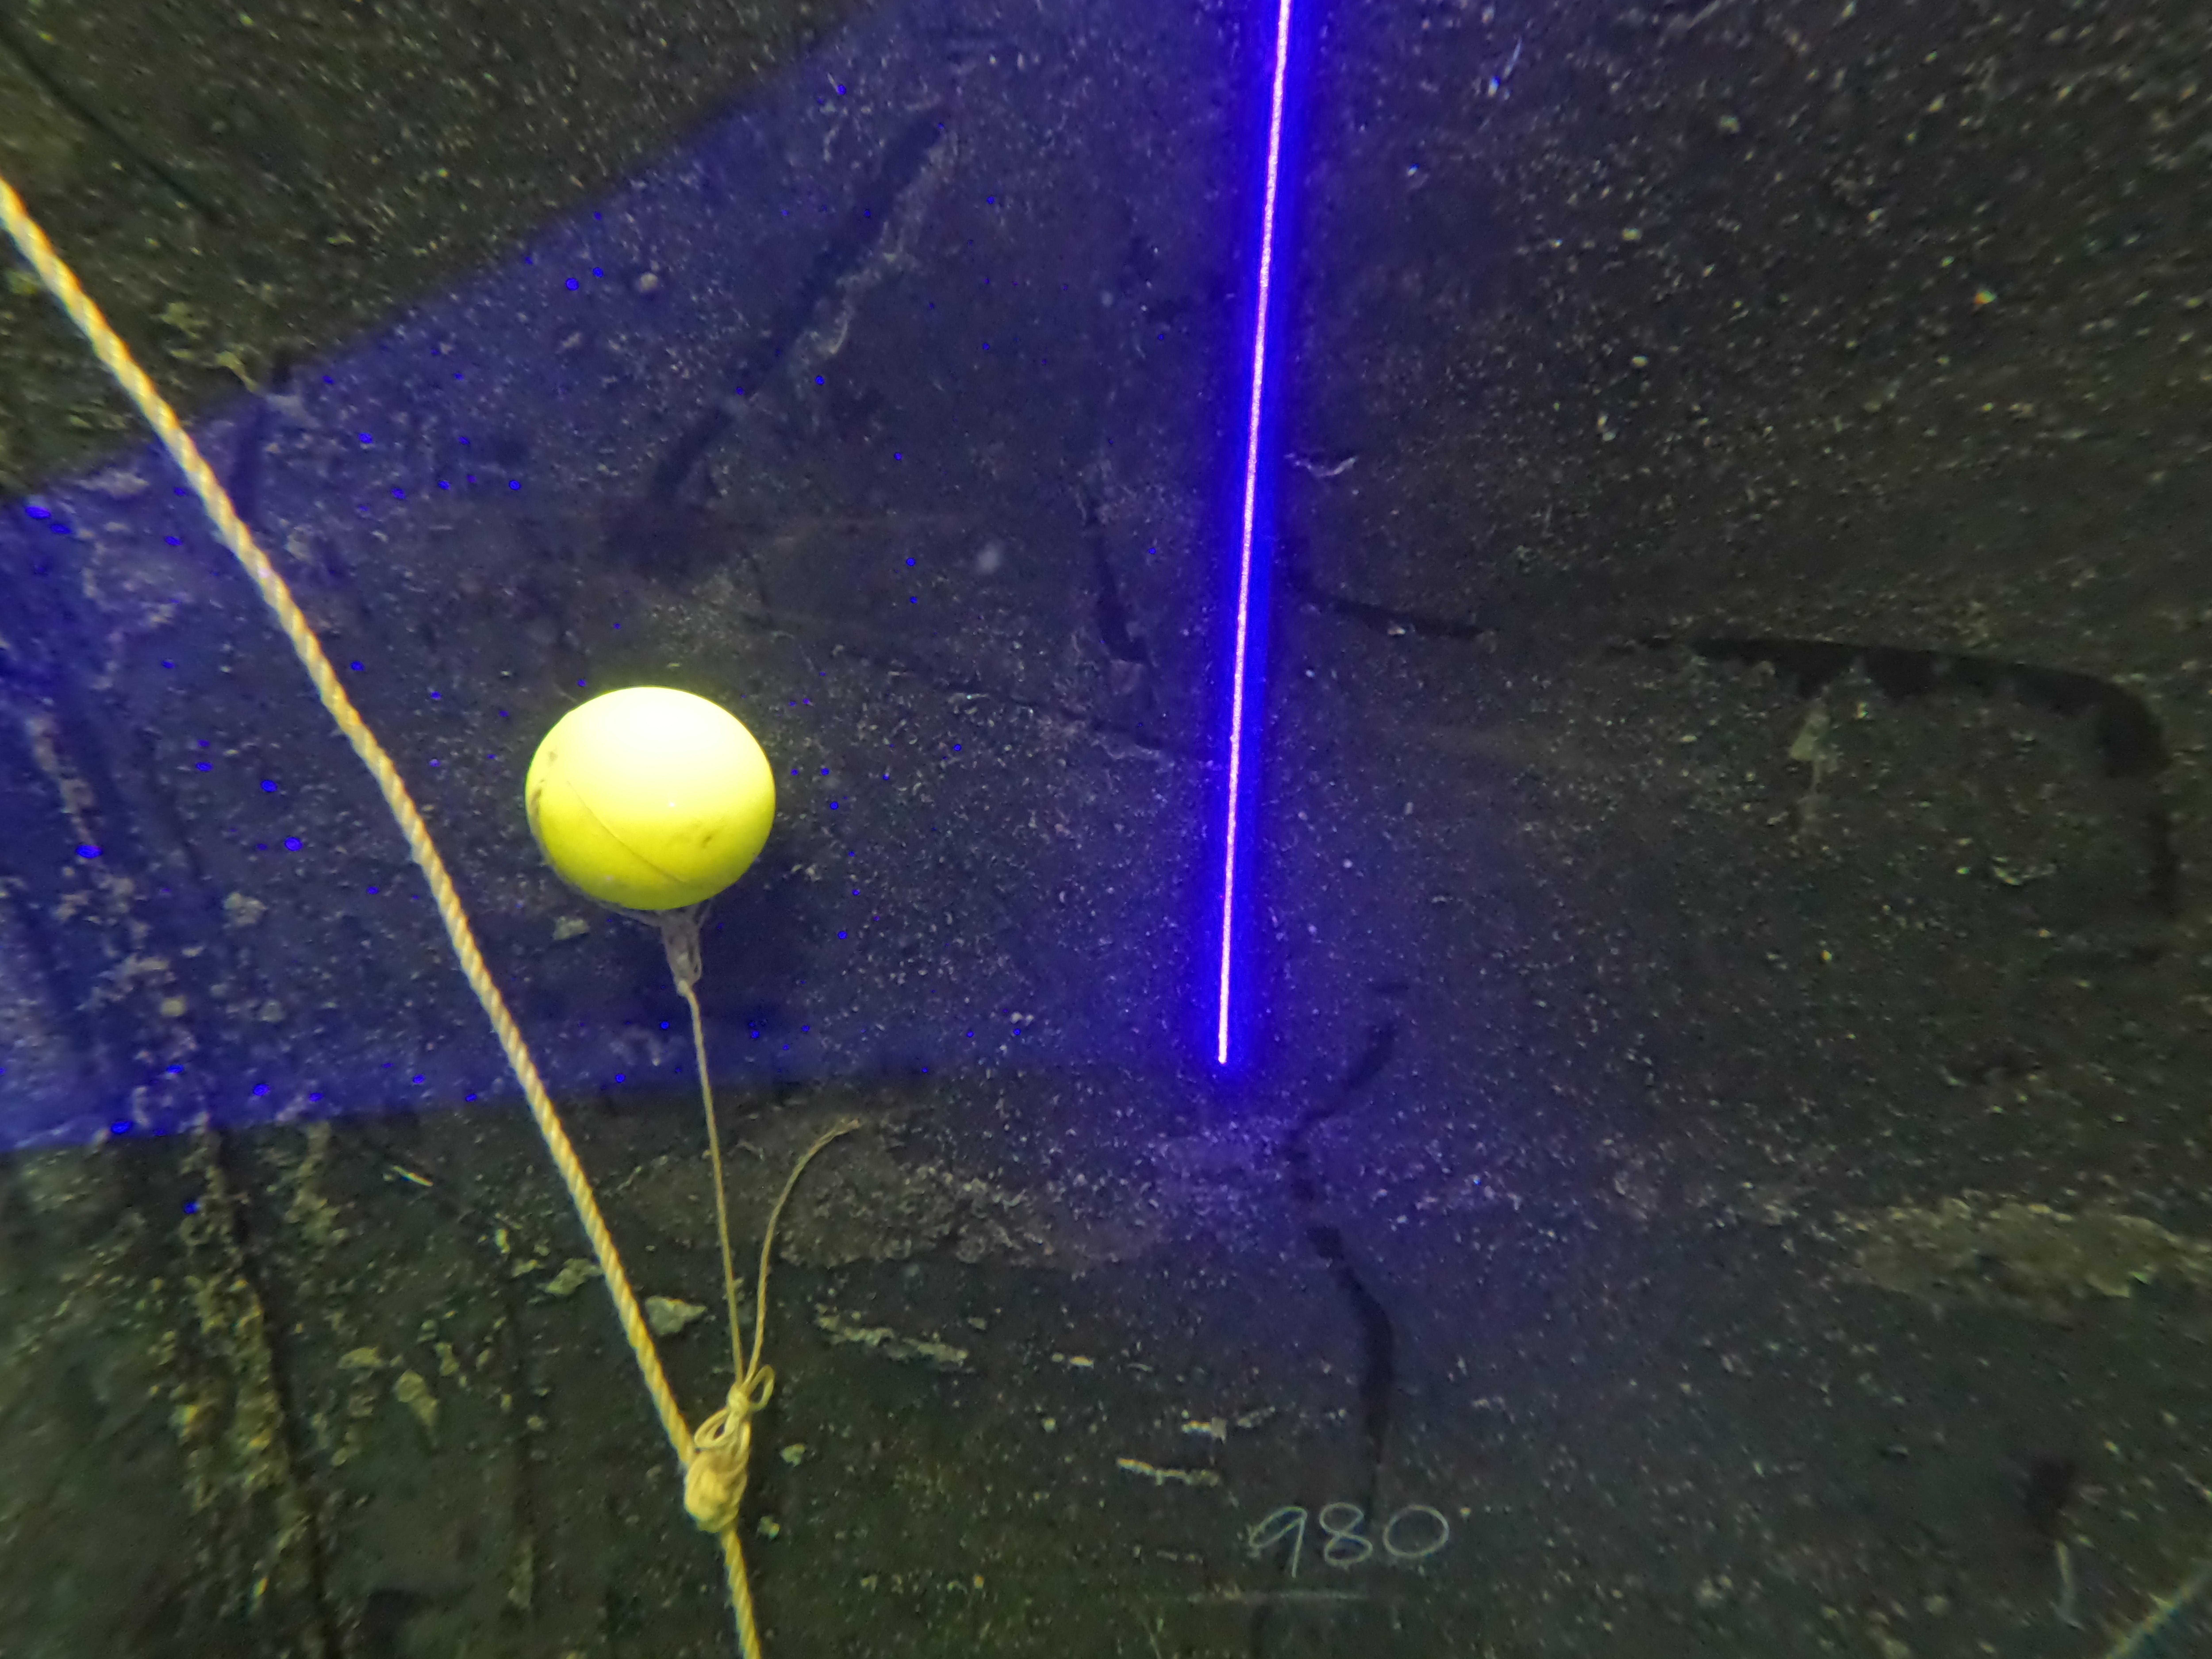

980

Supplement: Supplementary file 2749 [file G0030249.pdf › 2/G0030249.pdf]

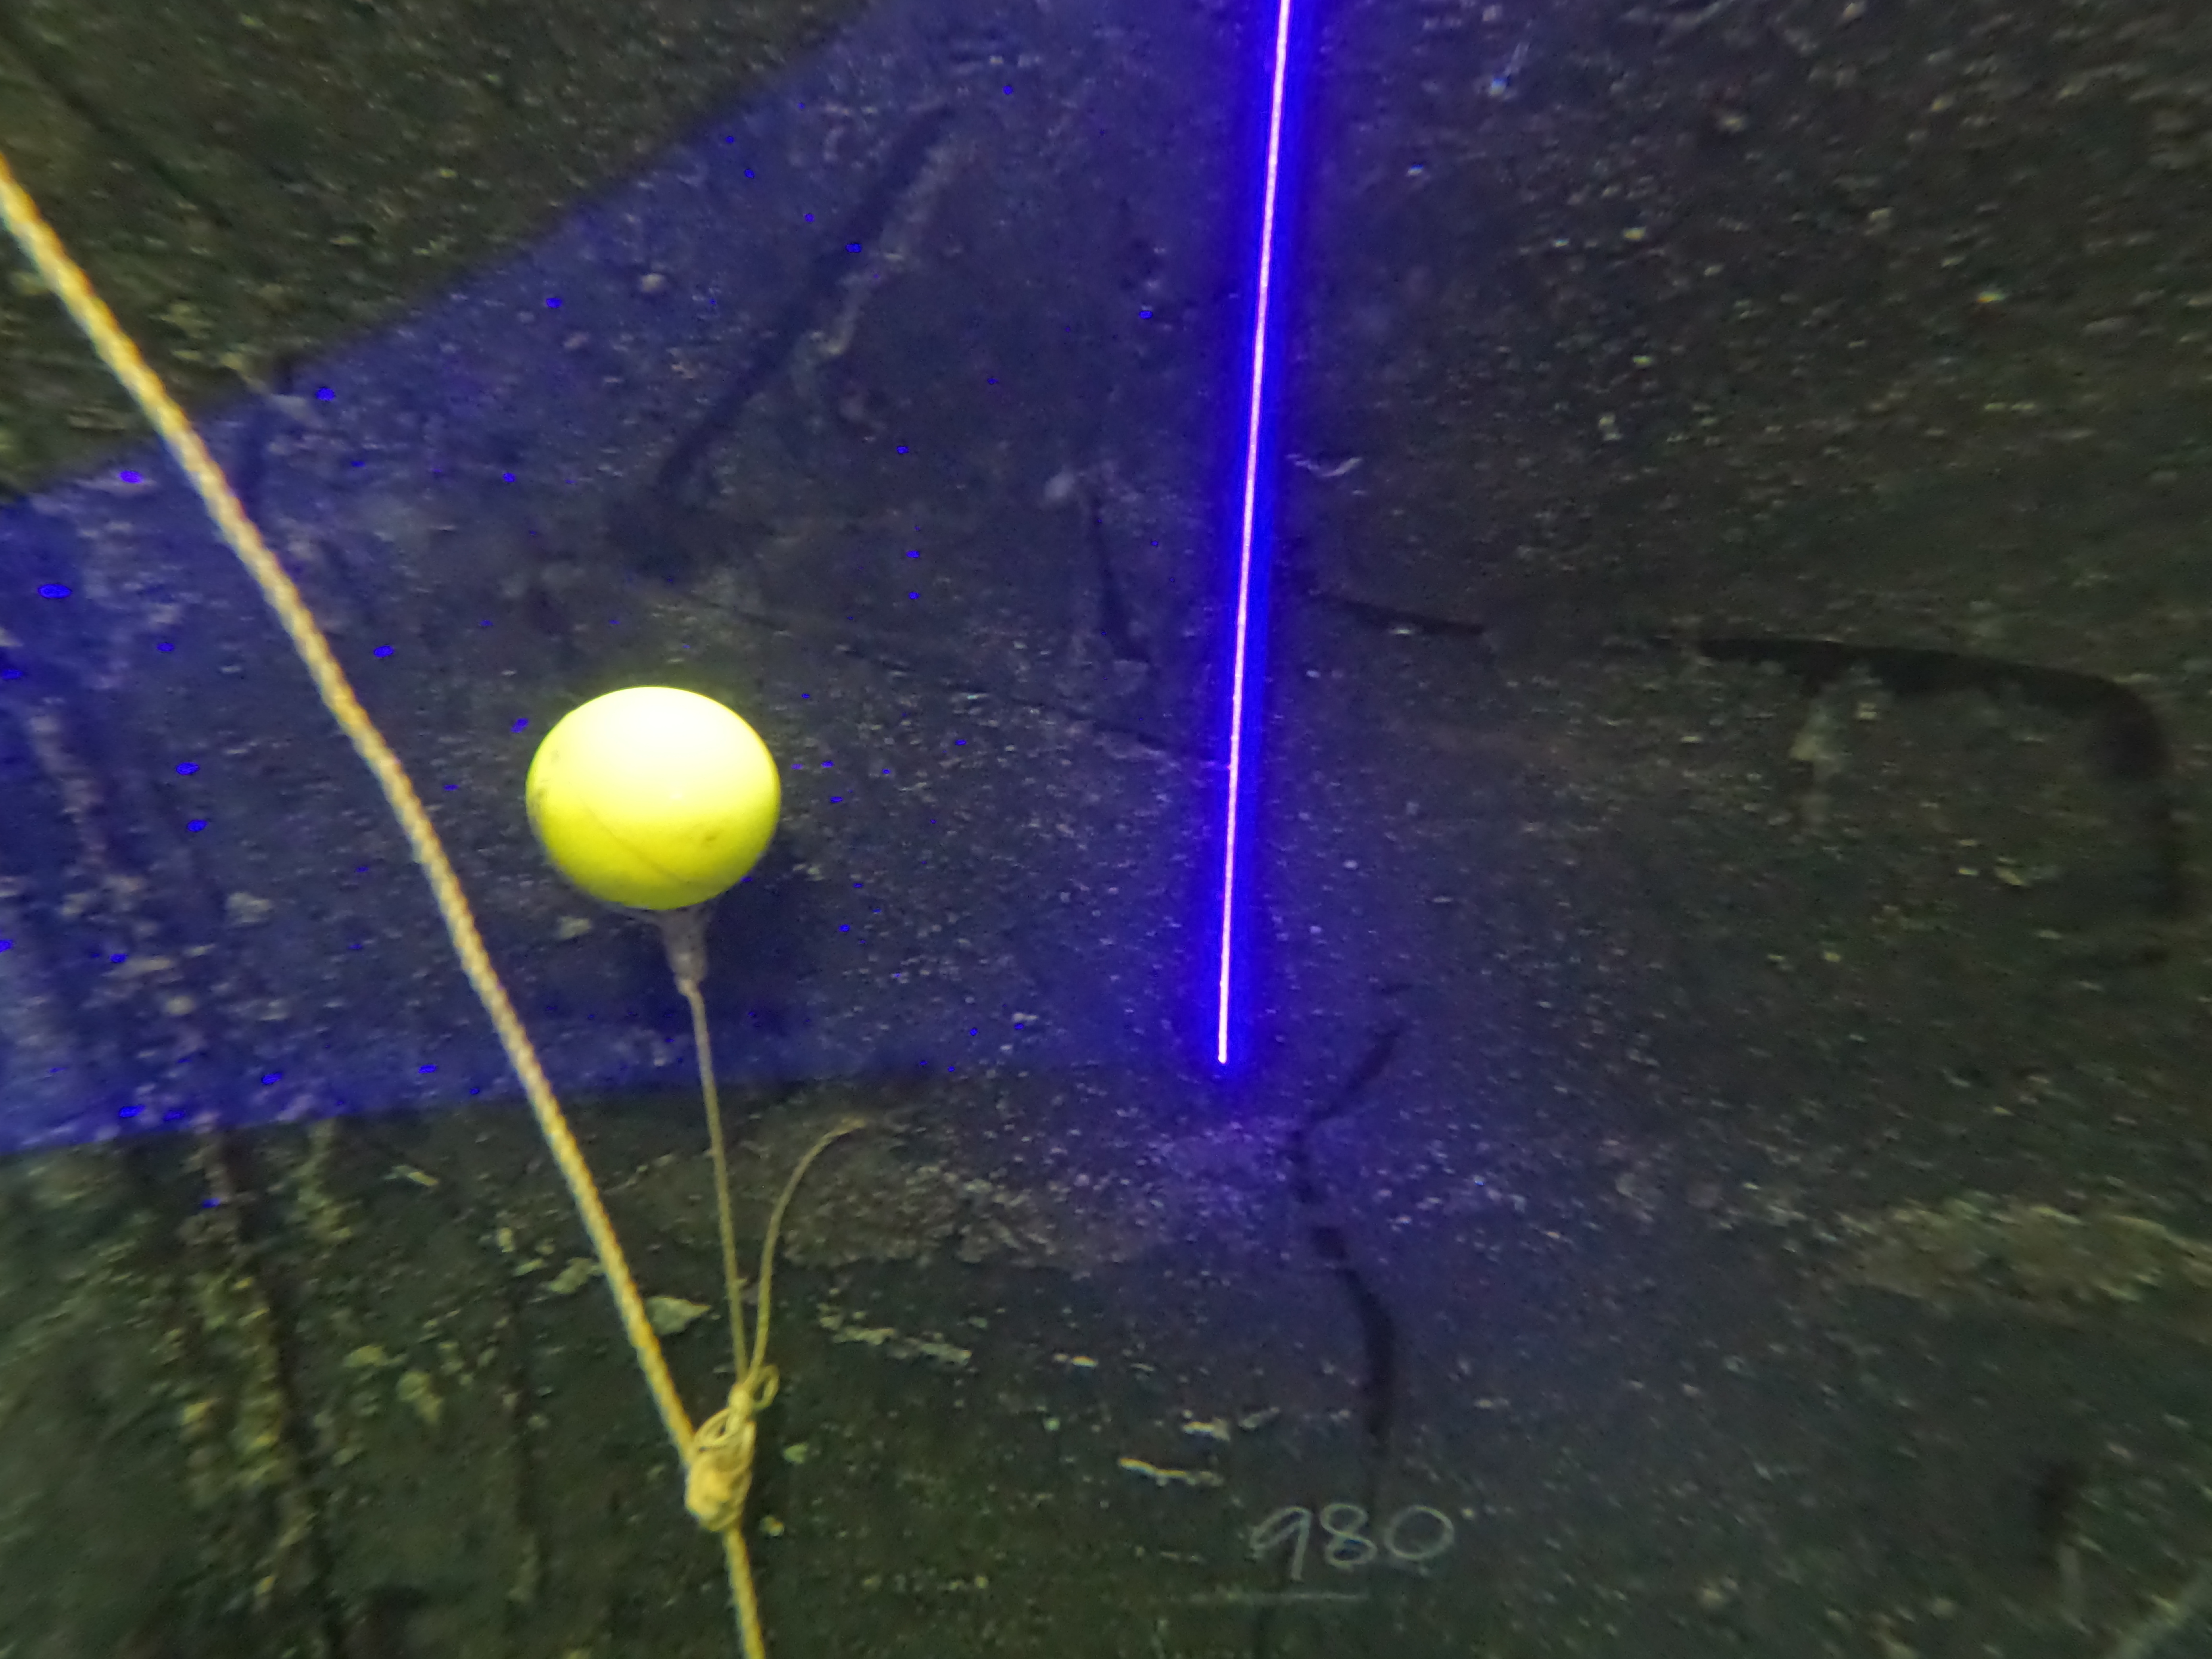

980

Supplement: Supplementary file 2750 [file G0030250.pdf › 2/G0030250.pdf]

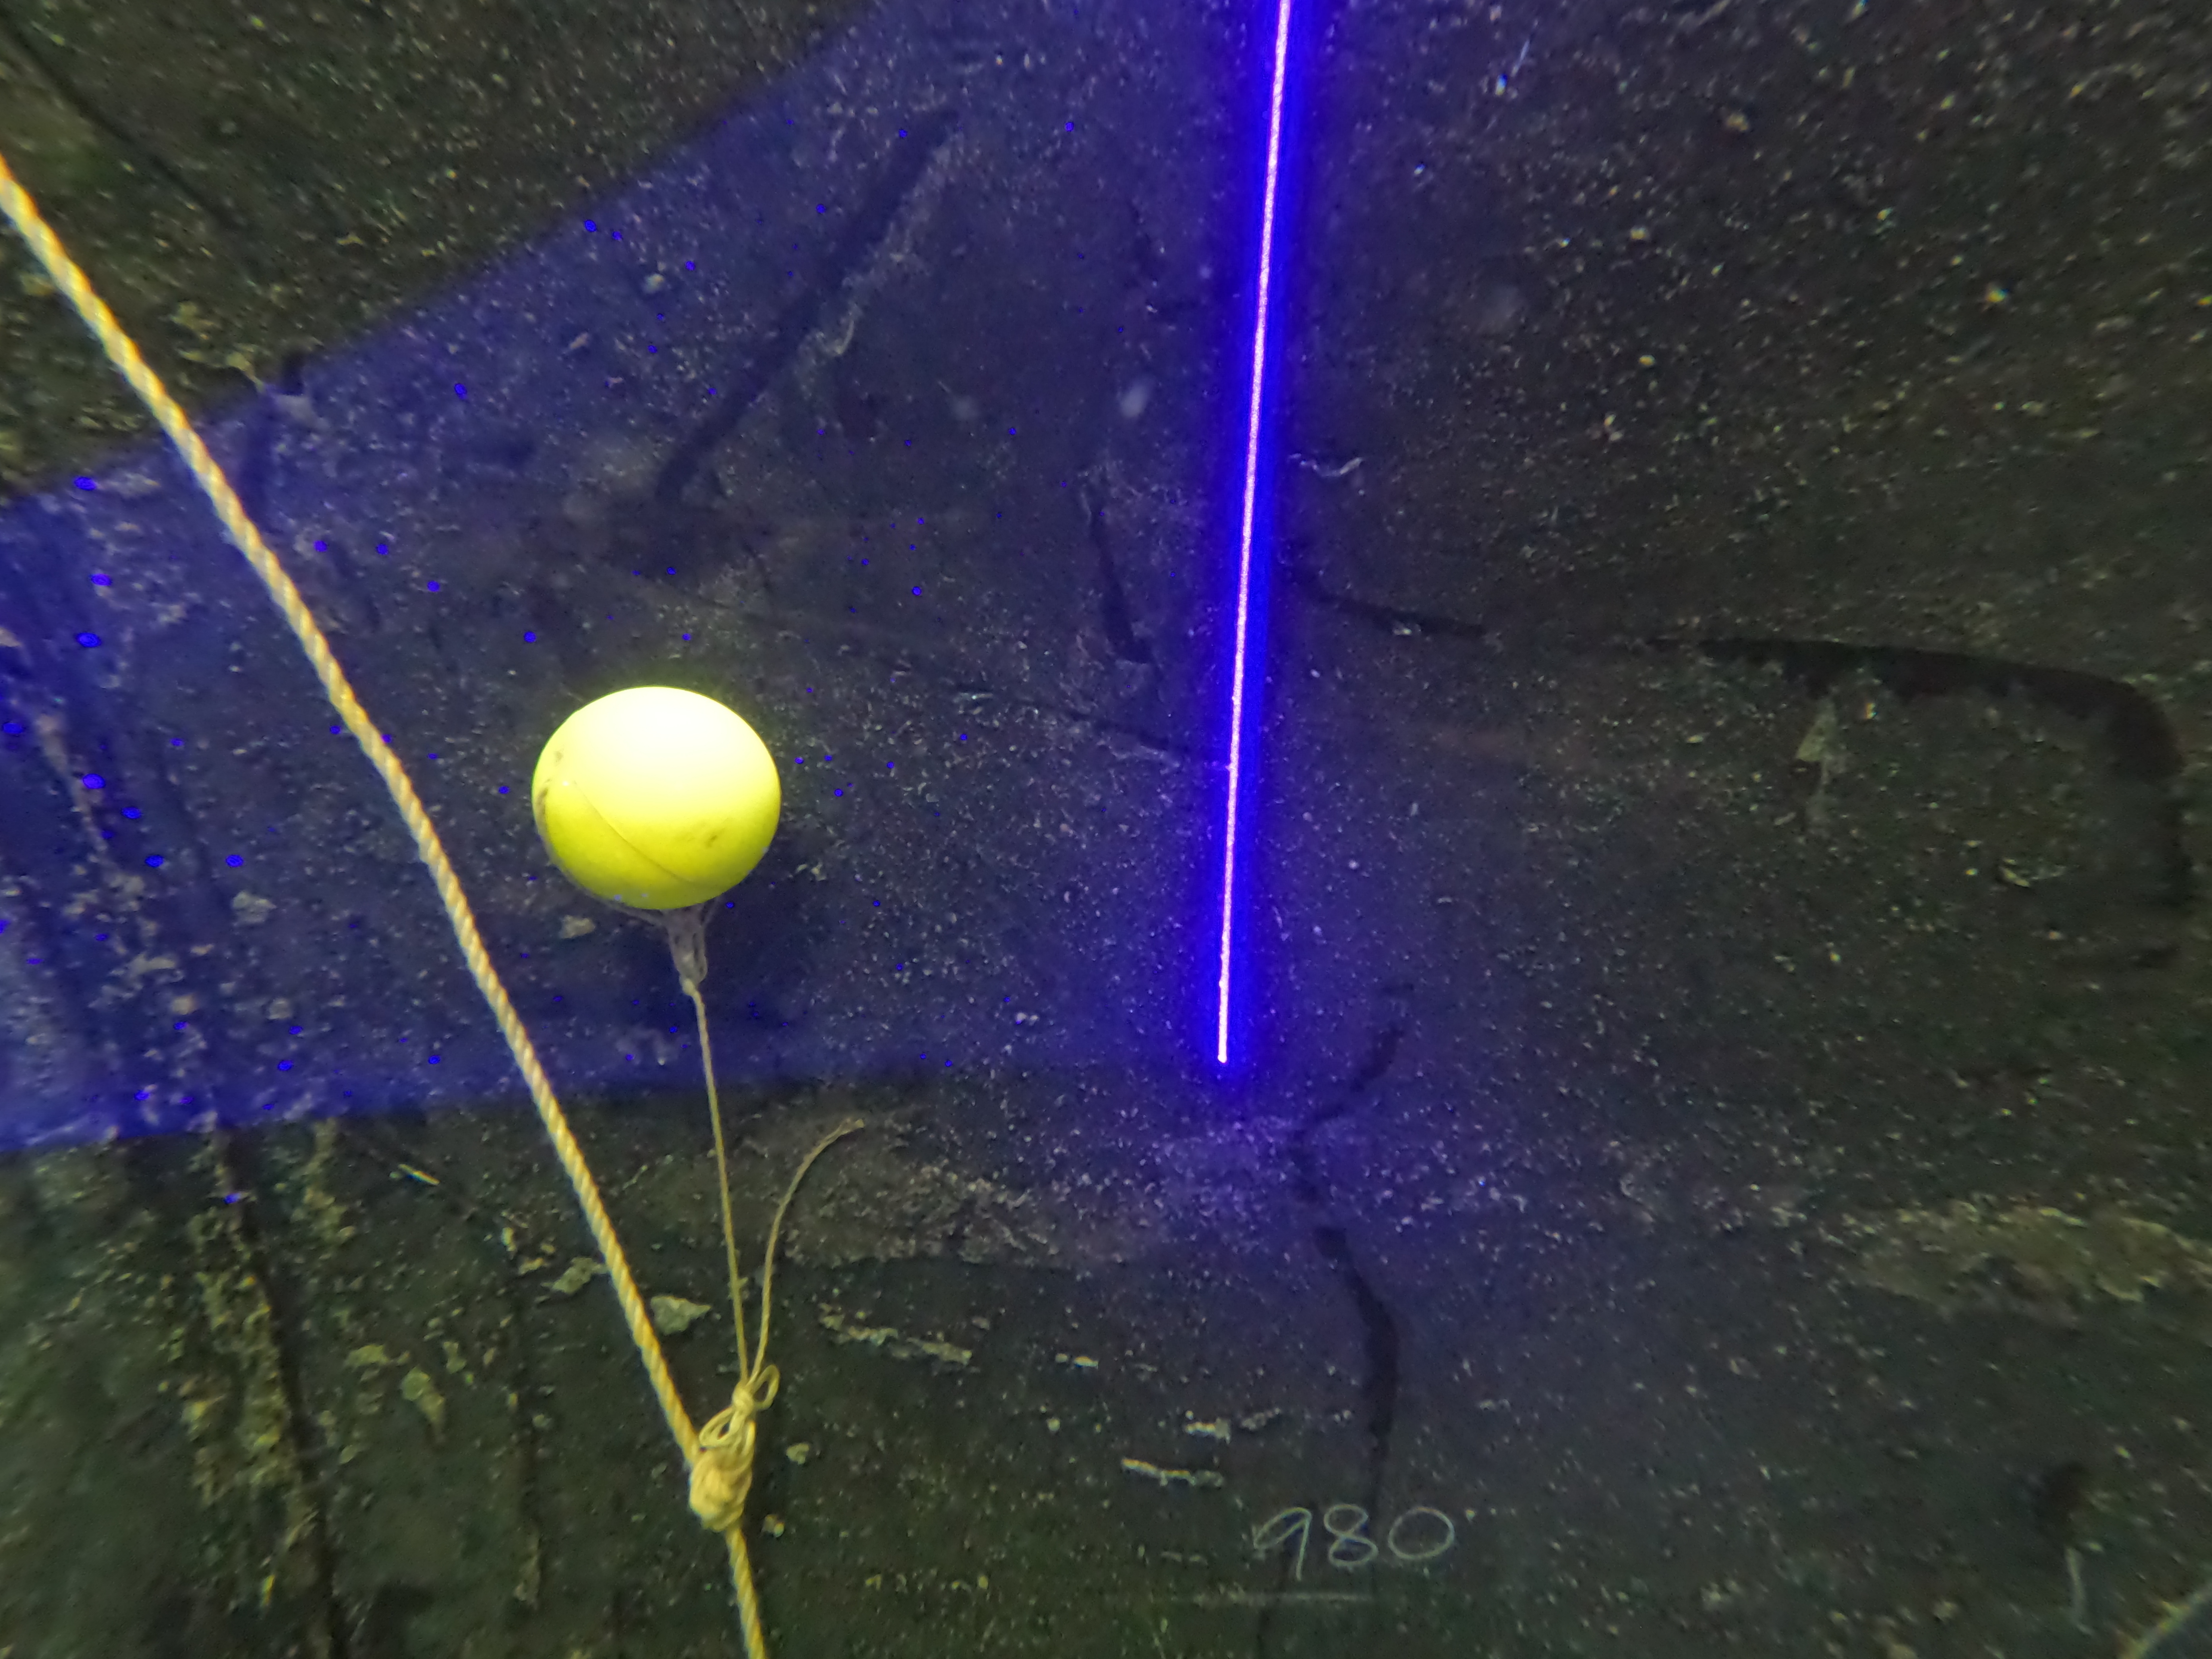

980

Supplement: Supplementary file 2751 [file G0030251.pdf › 2/G0030251.pdf]

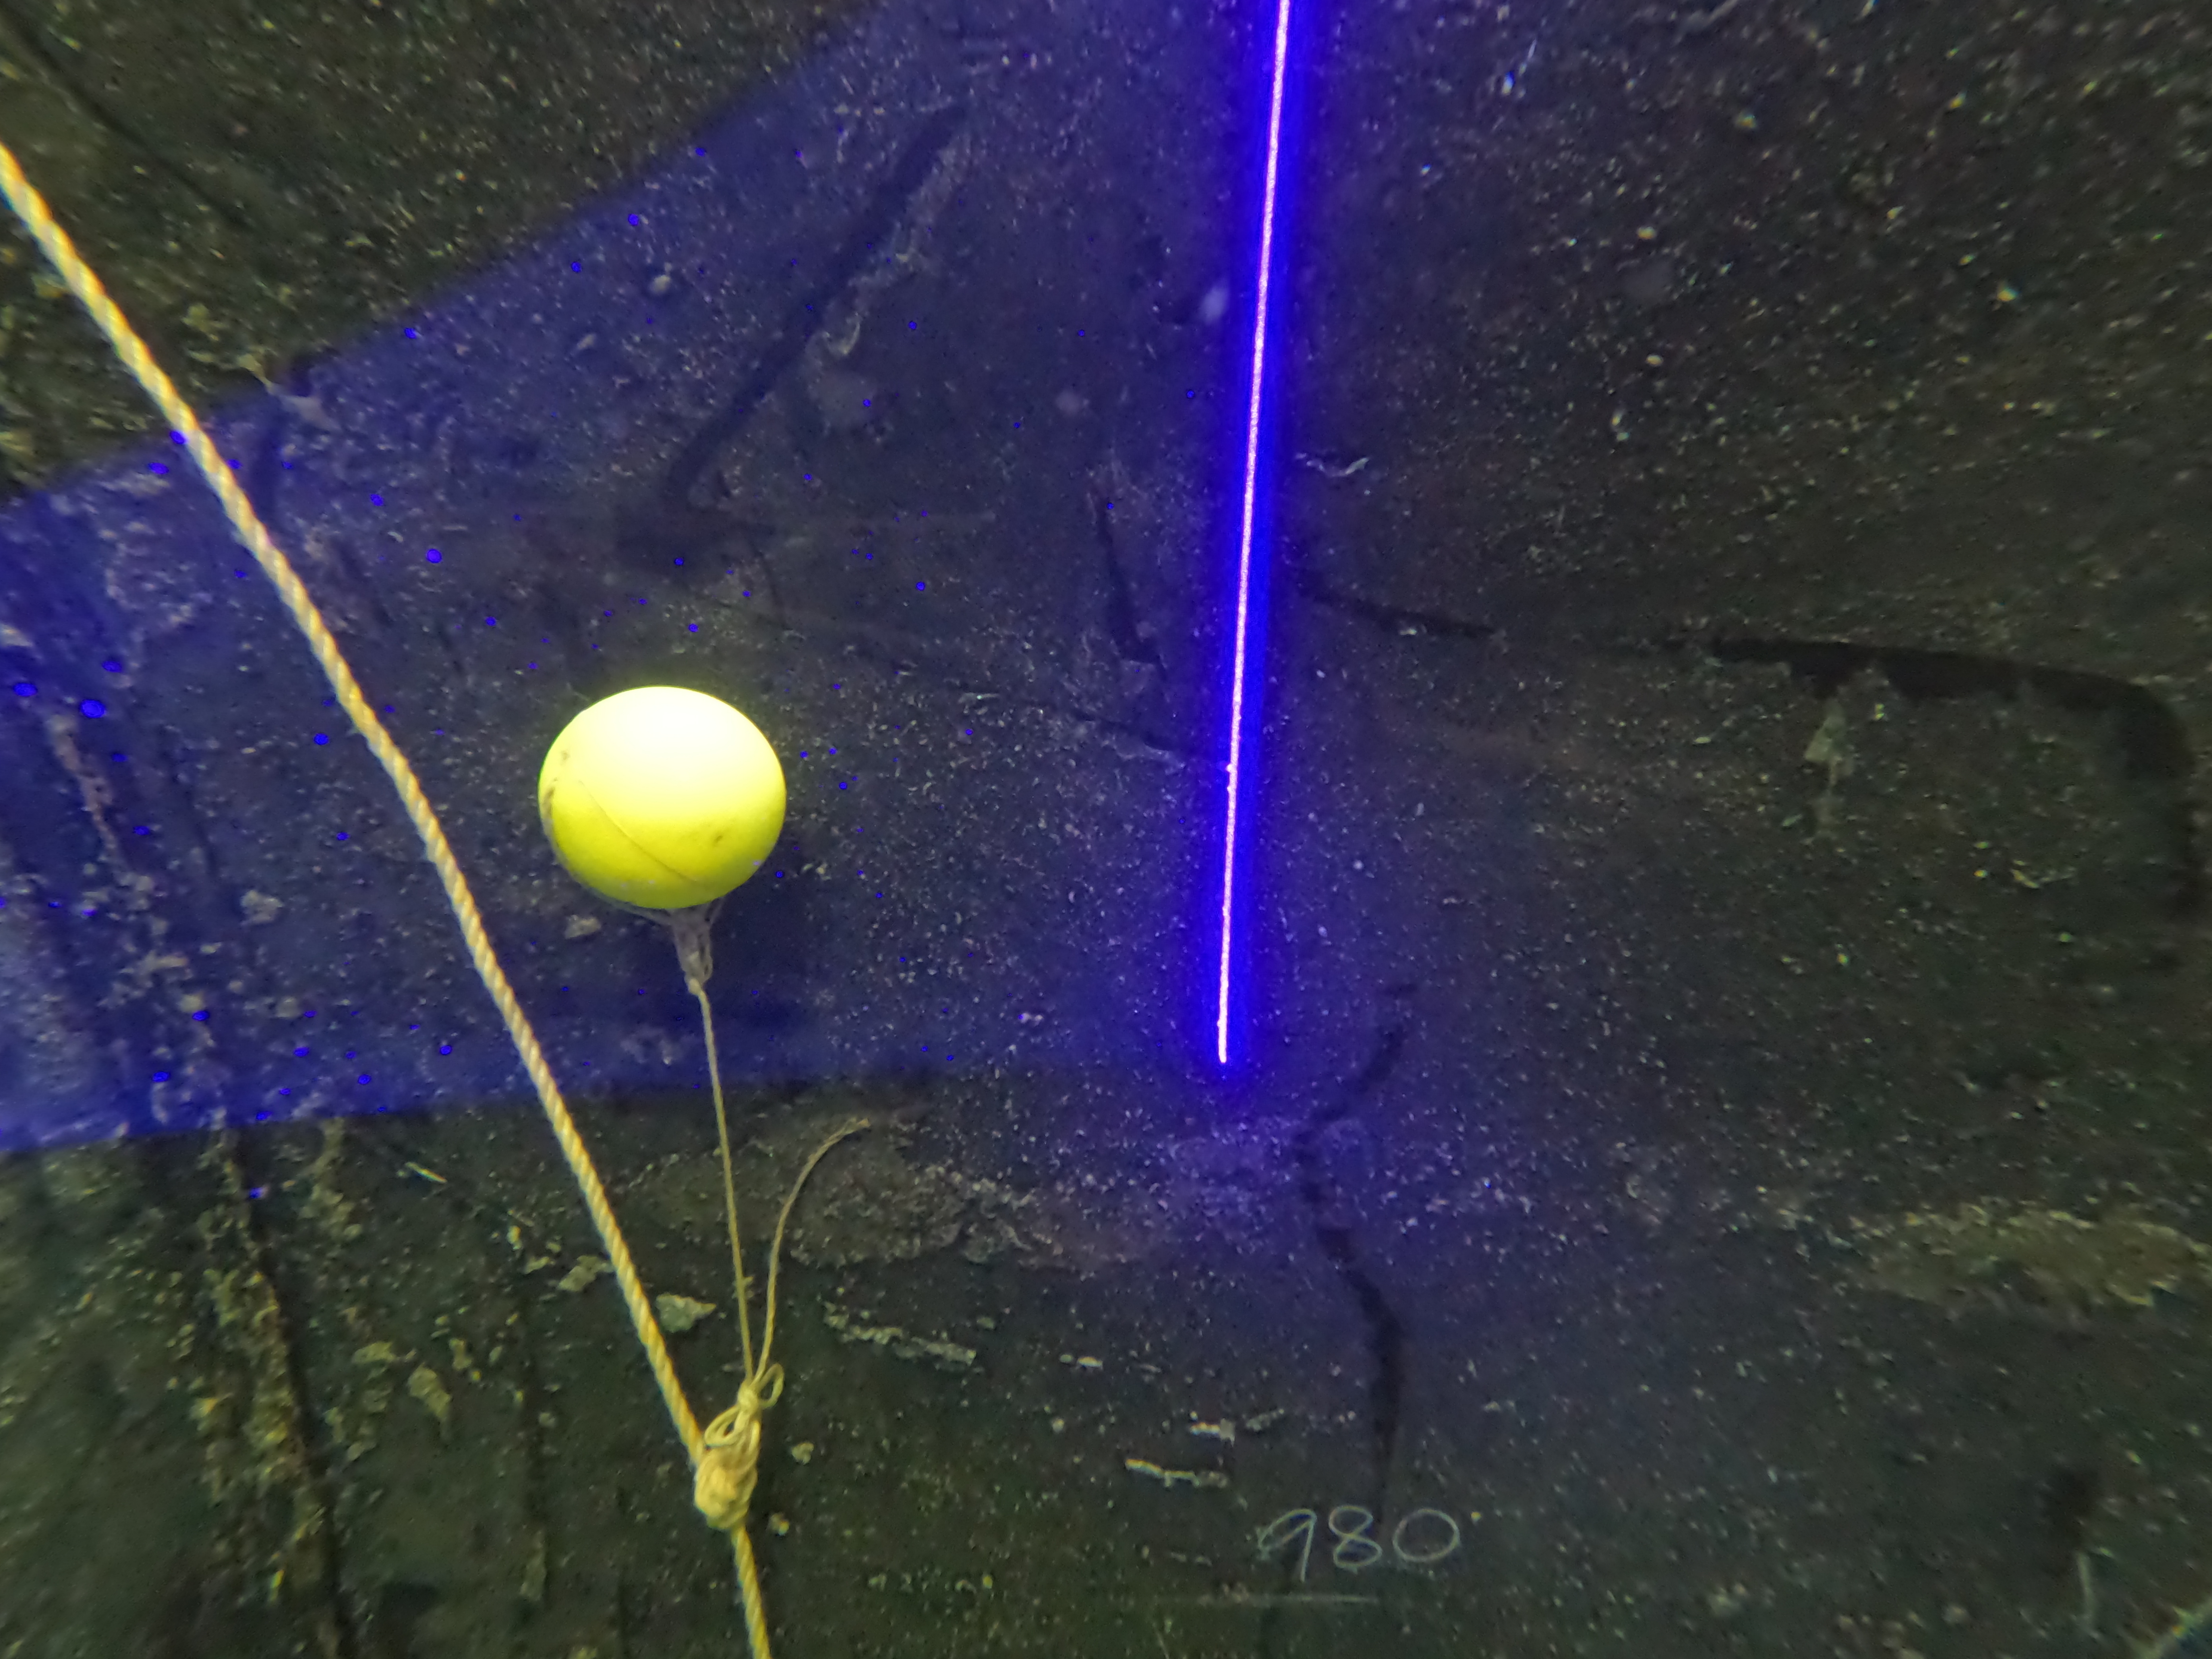

980

Supplement: Supplementary file 2752 [file G0030252.pdf › 2/G0030252.pdf]

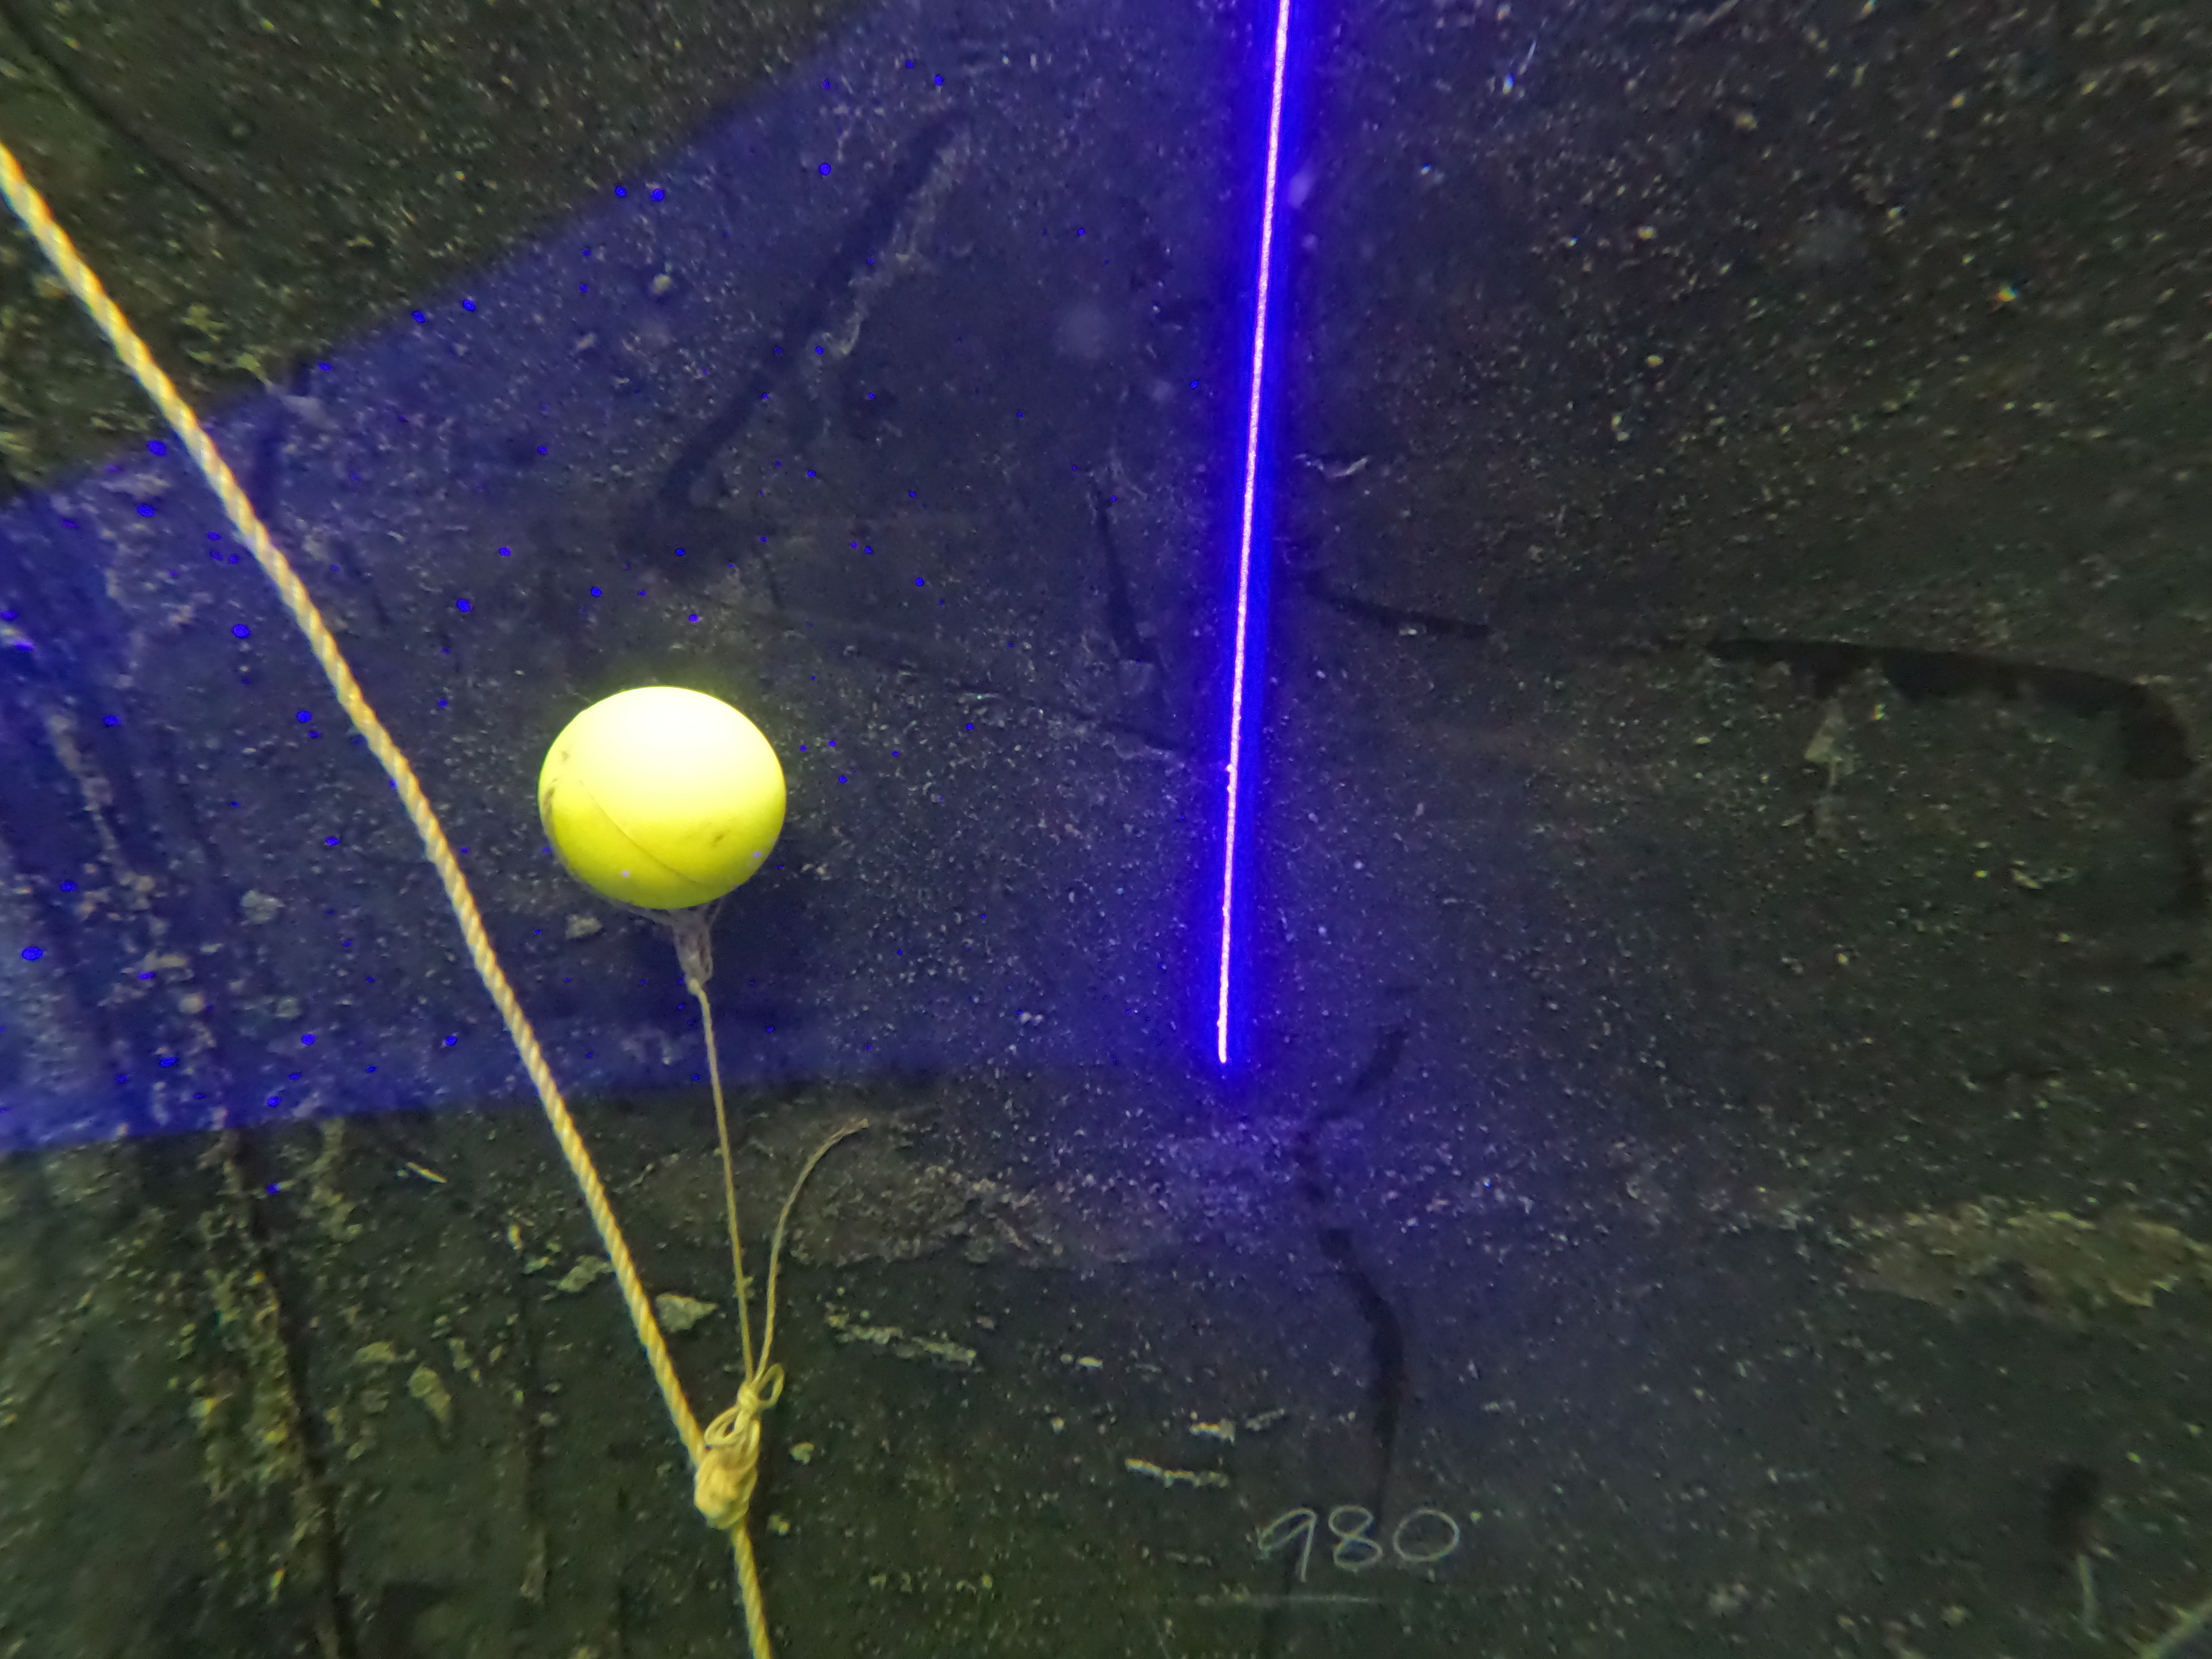

980

Supplement: Supplementary file 2753 [file G0030253.pdf › 2/G0030253.pdf]

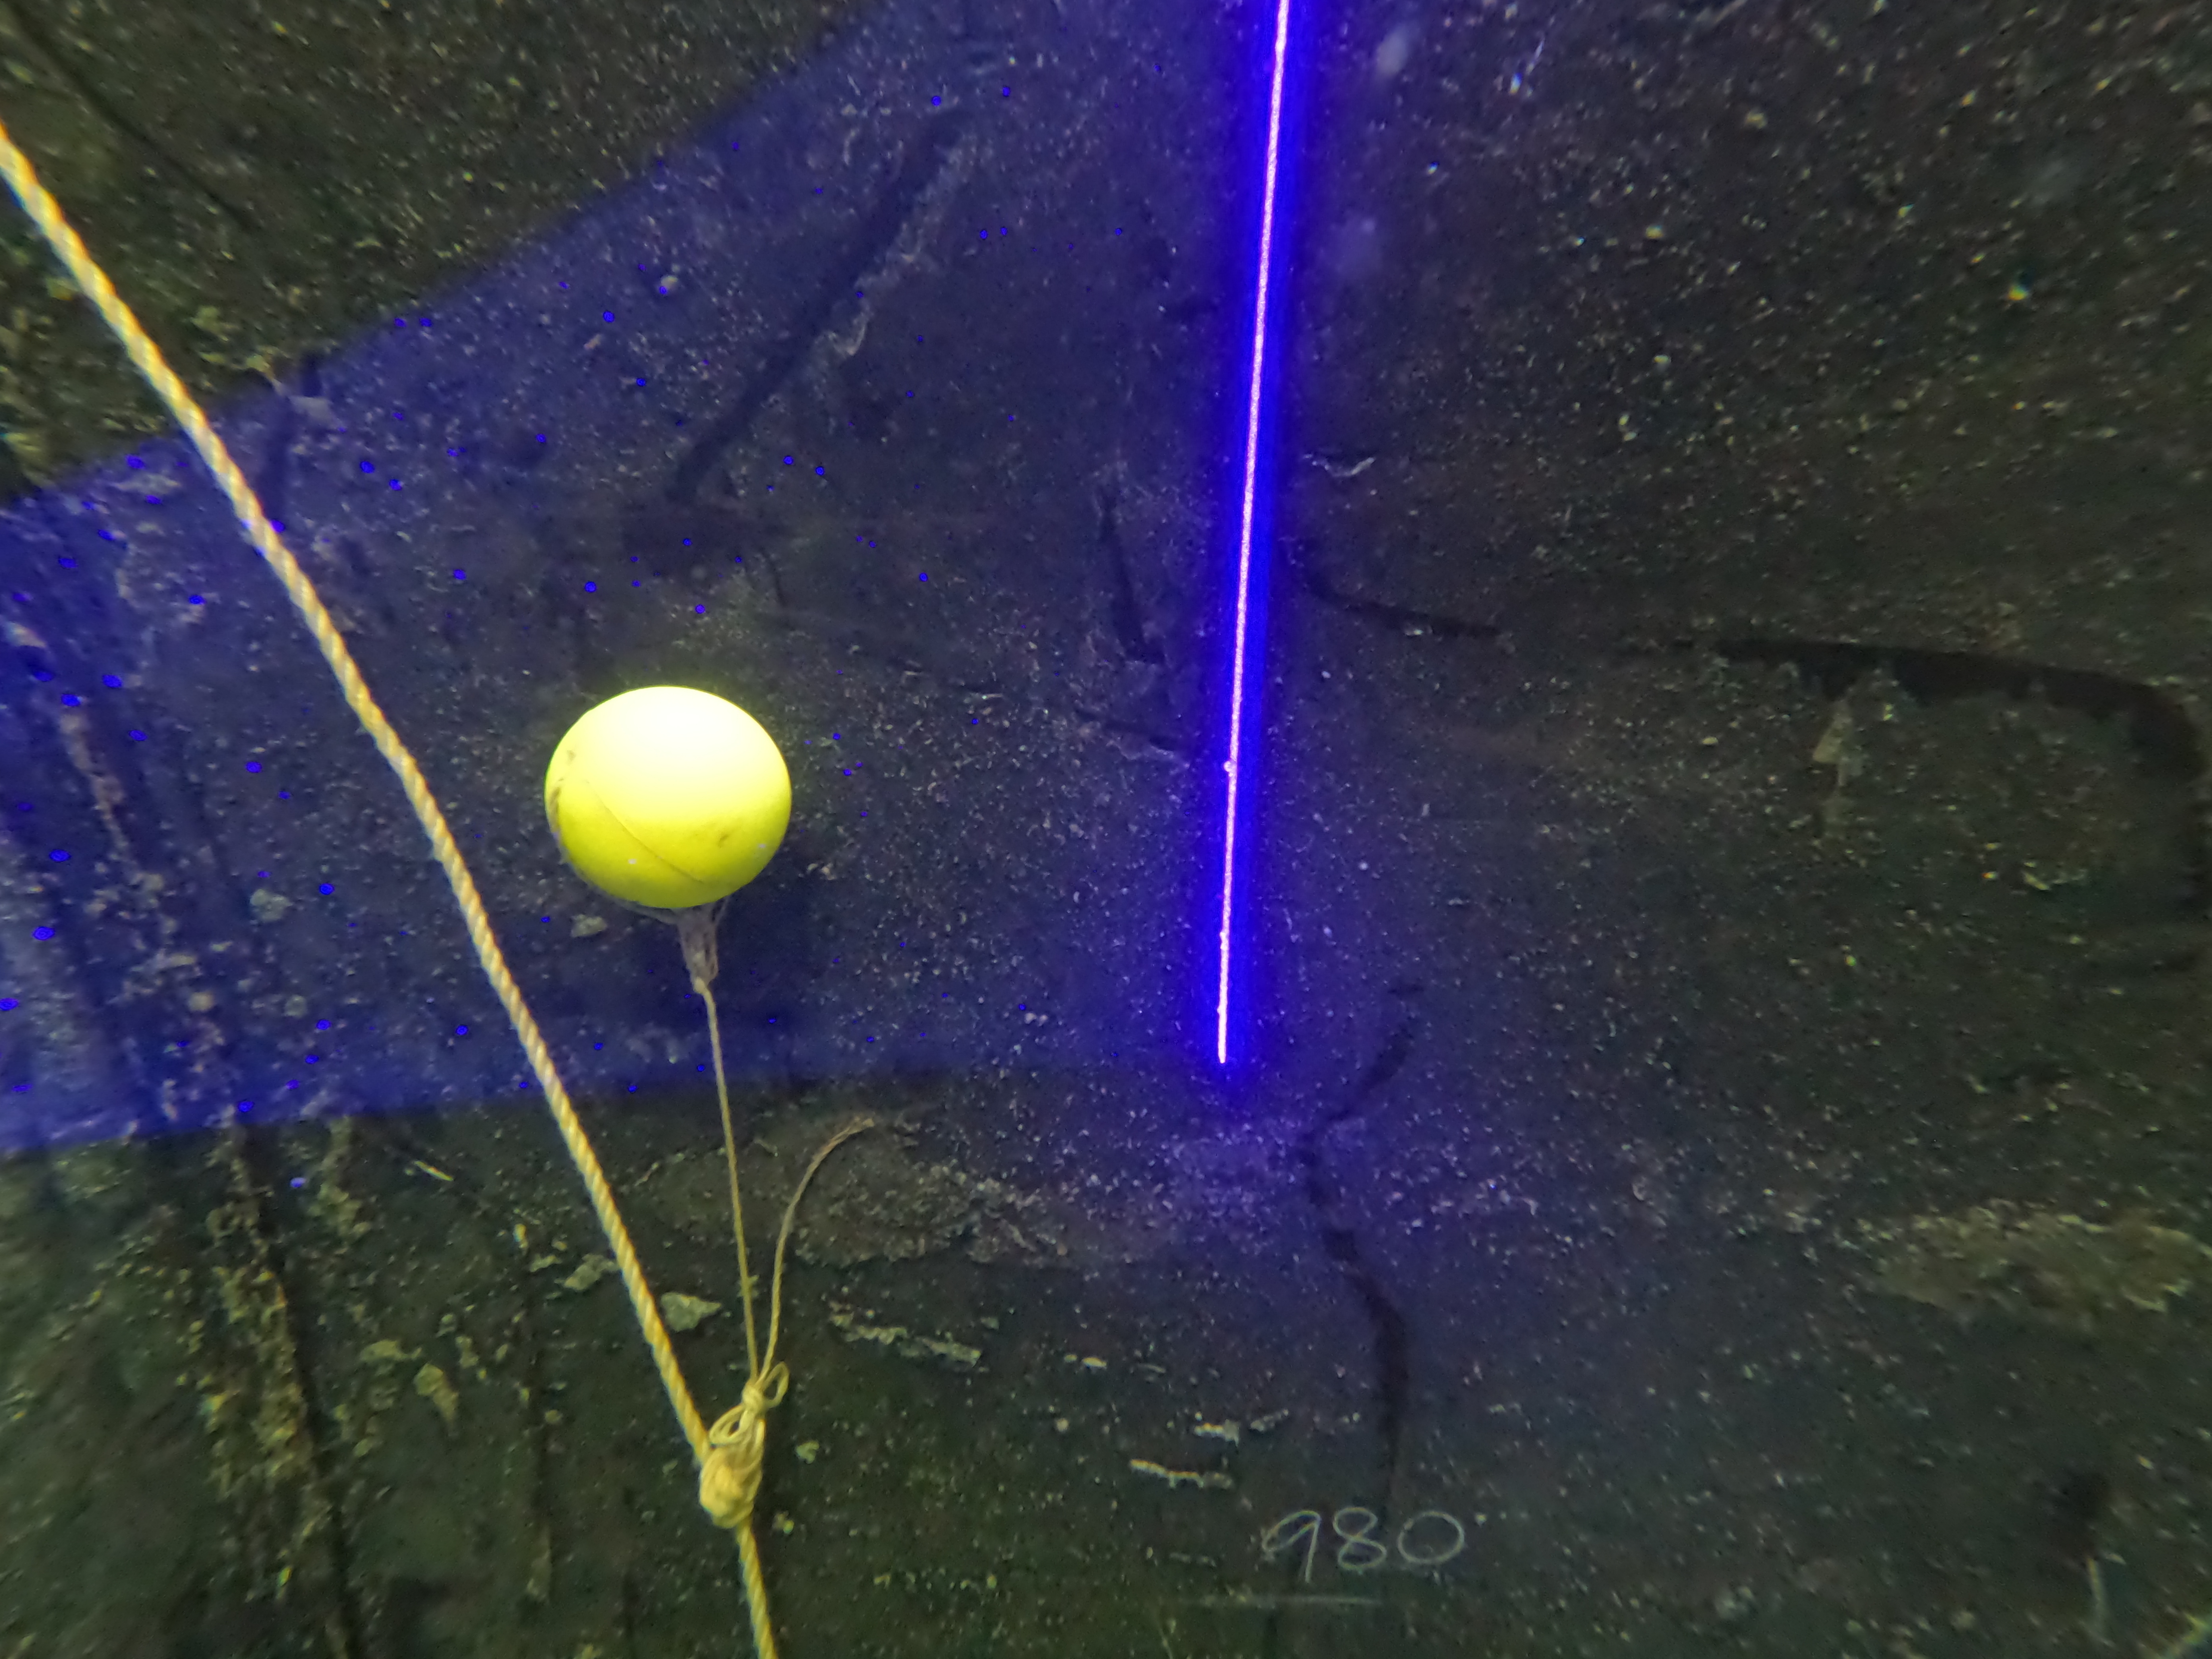

980

Supplement: Supplementary file 2754 [file G0030254.pdf › 2/G0030254.pdf]

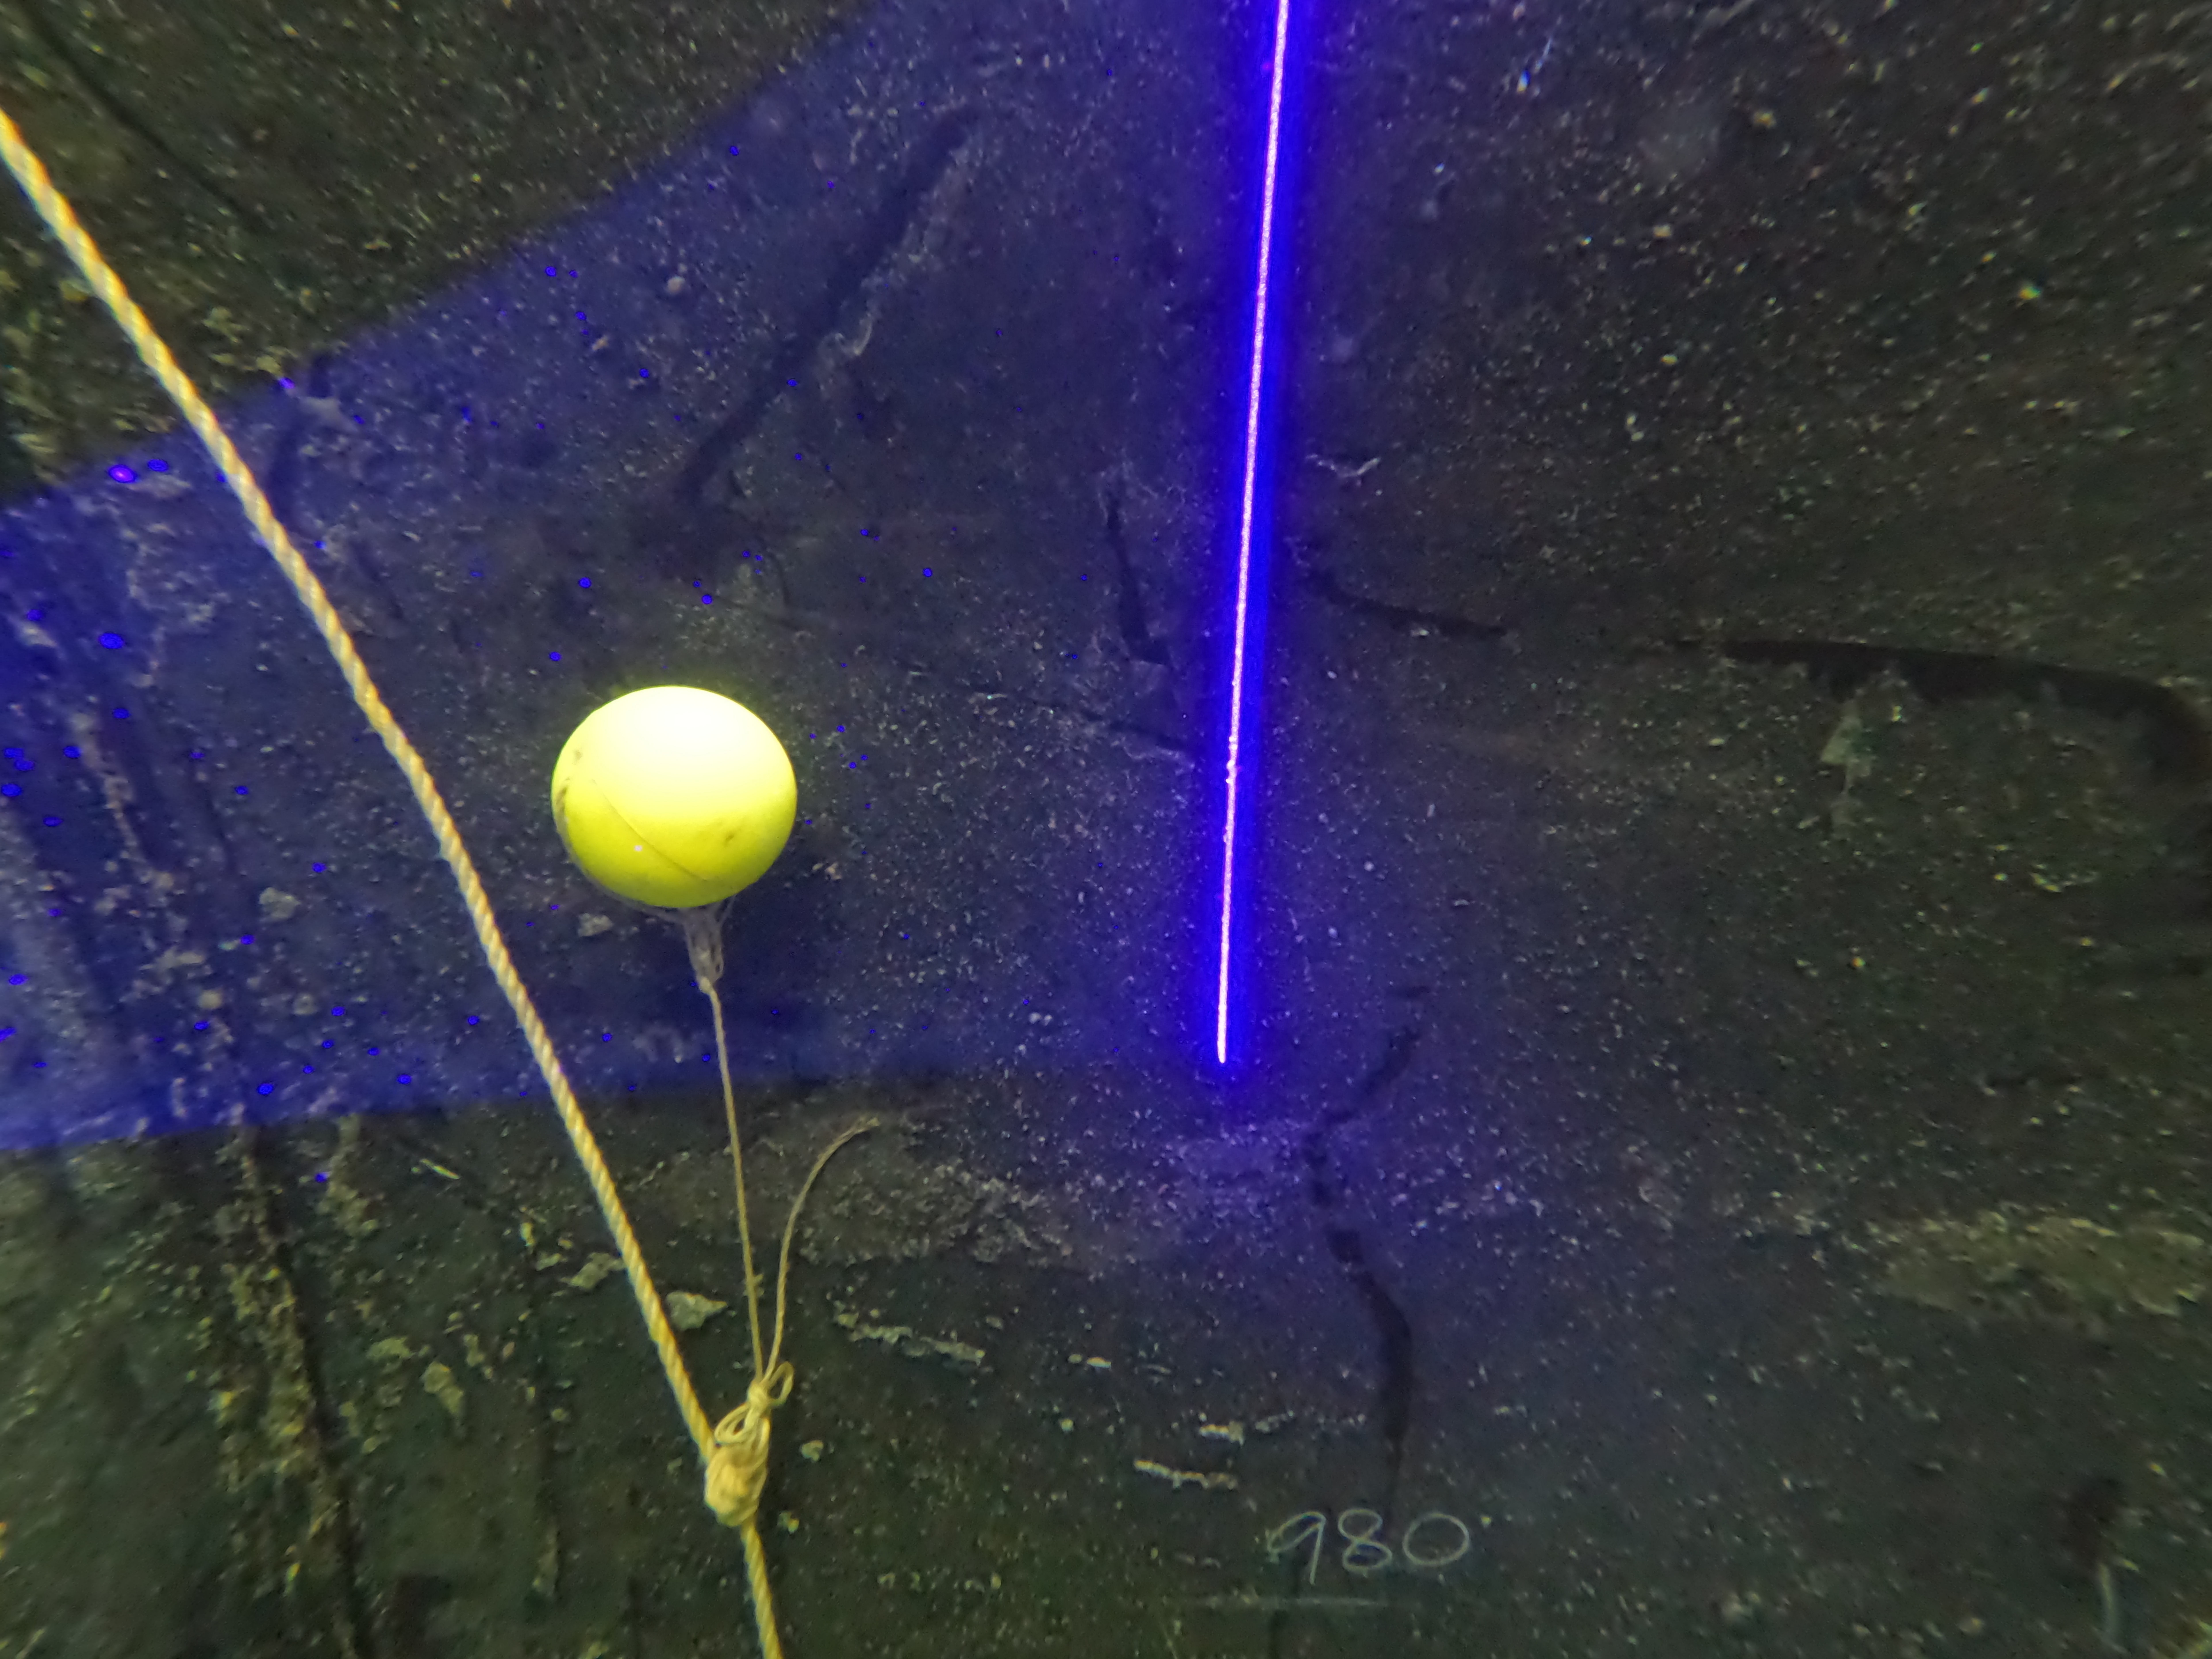

980

Supplement: Supplementary file 2755 [file G0030255.pdf › 2/G0030255.pdf]

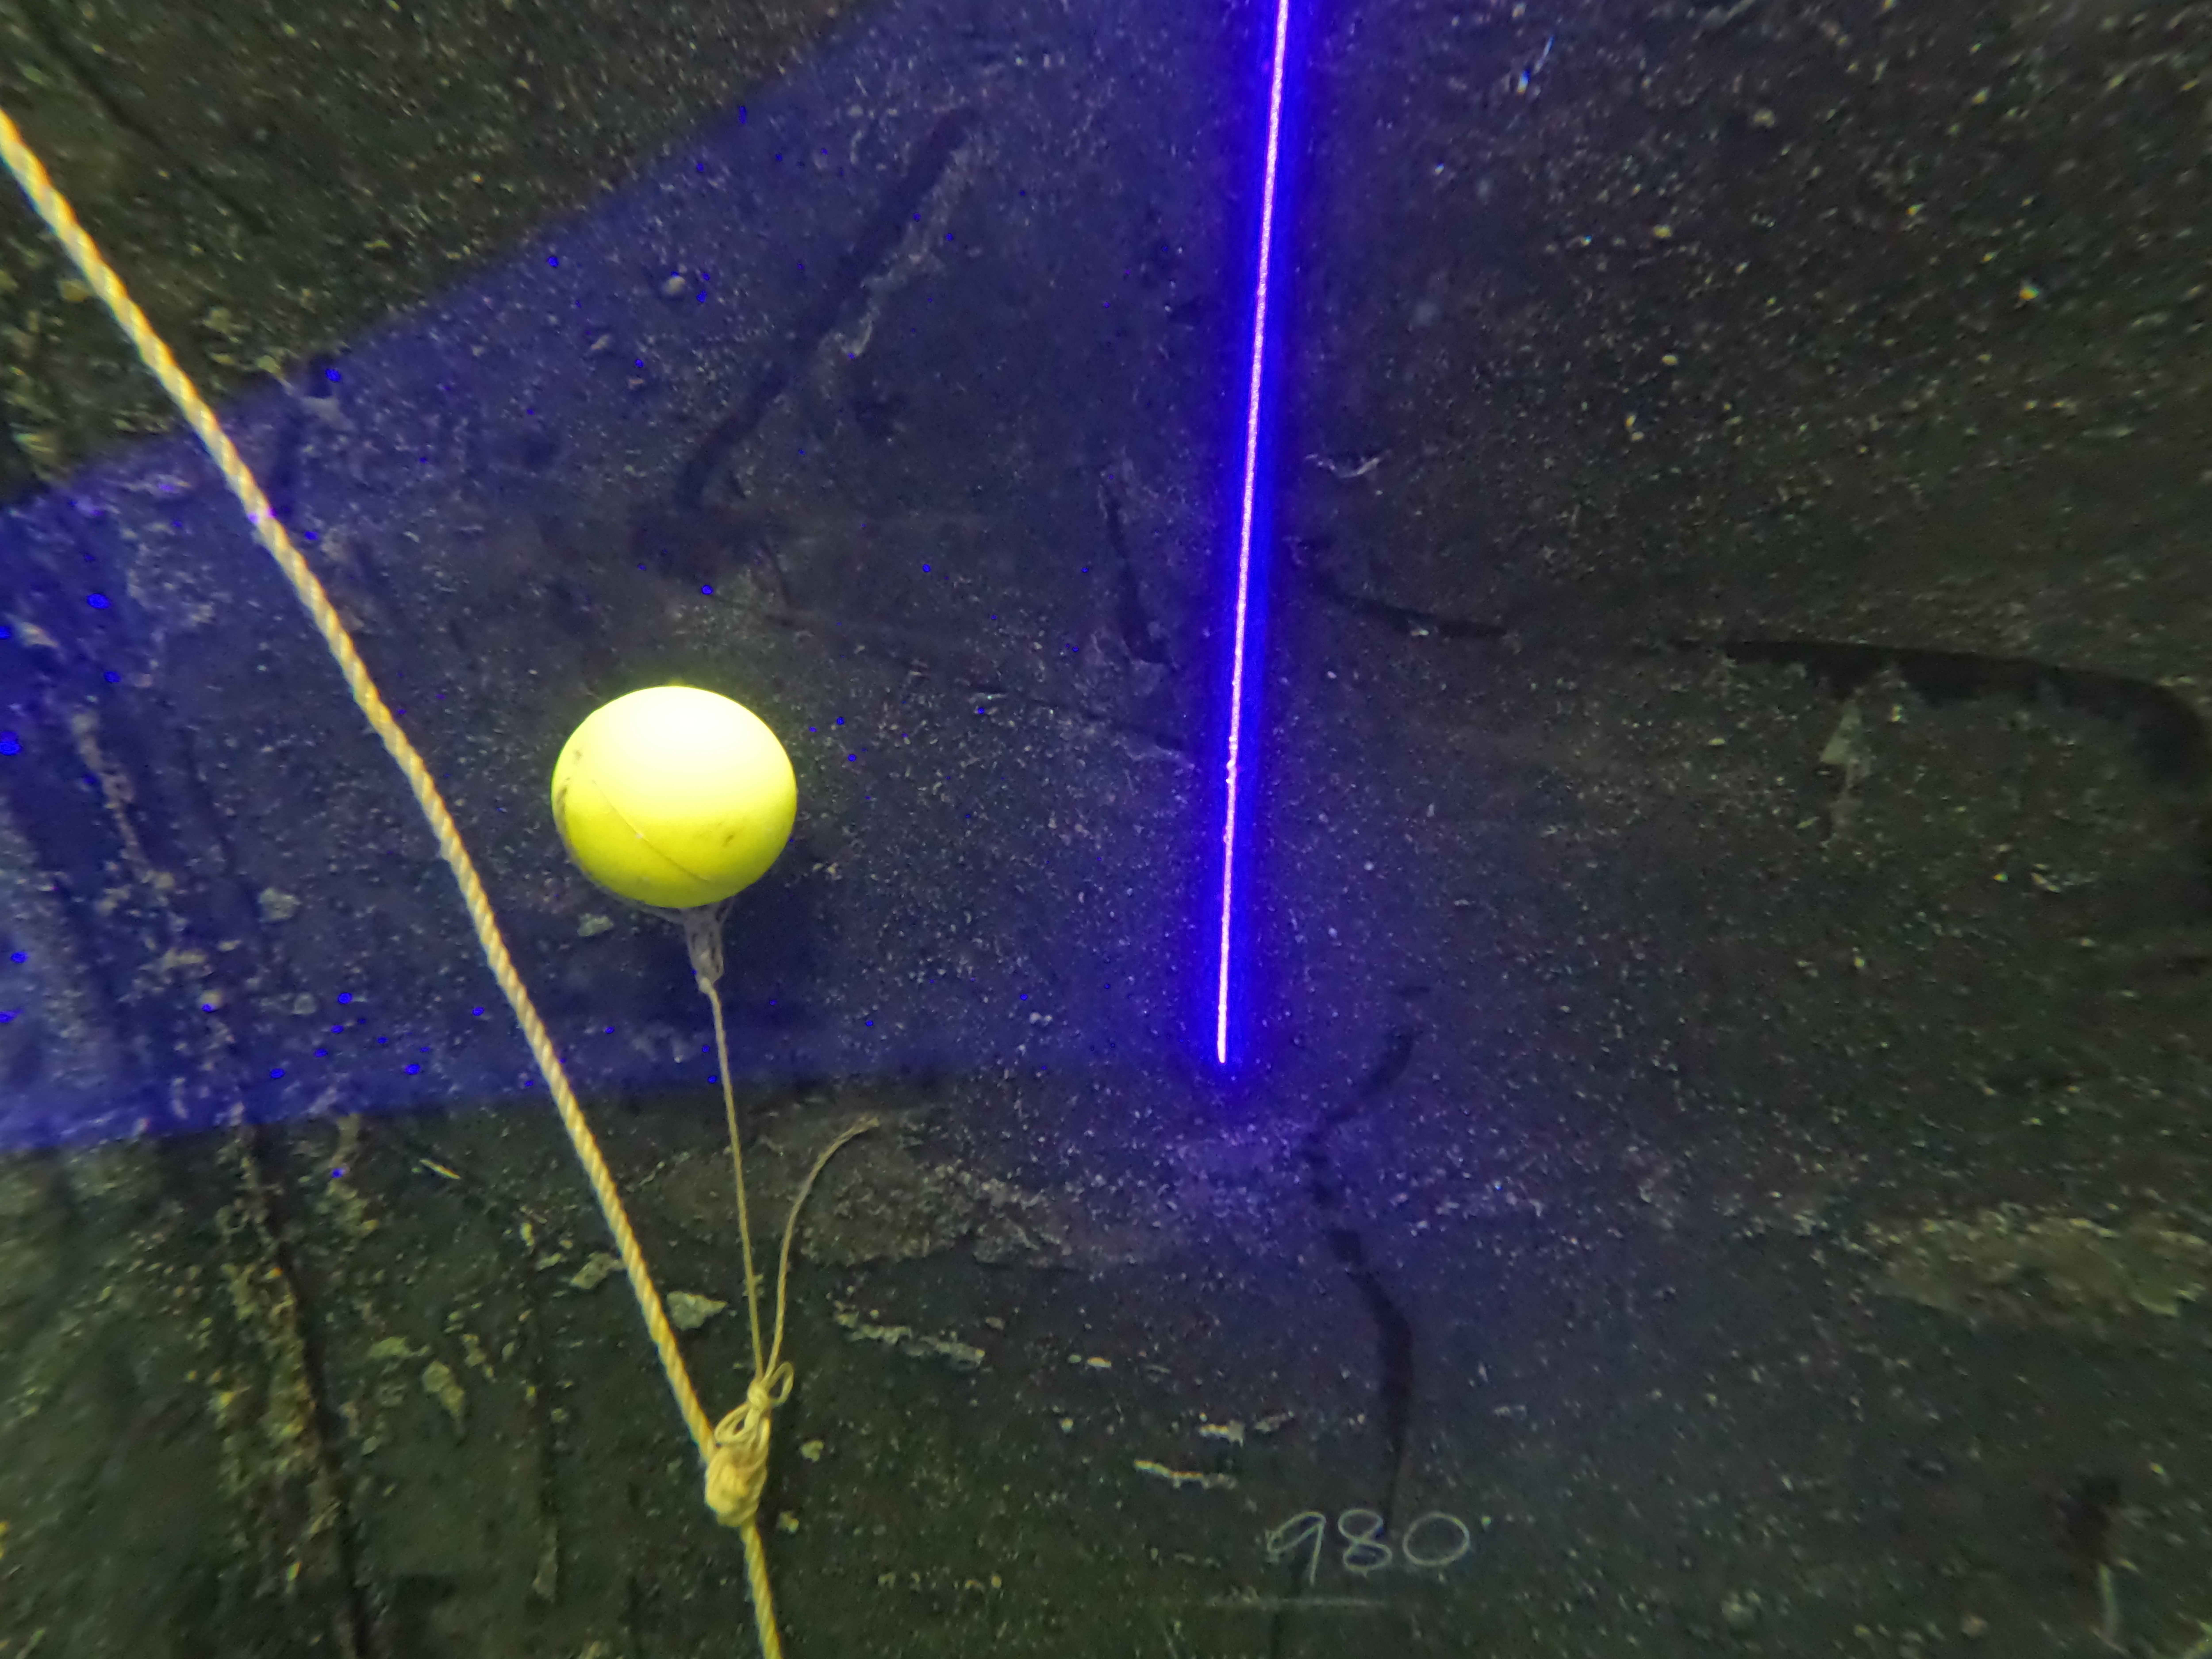

980

Supplement: Supplementary file 2756 [file G0030256.pdf › 2/G0030256.pdf]

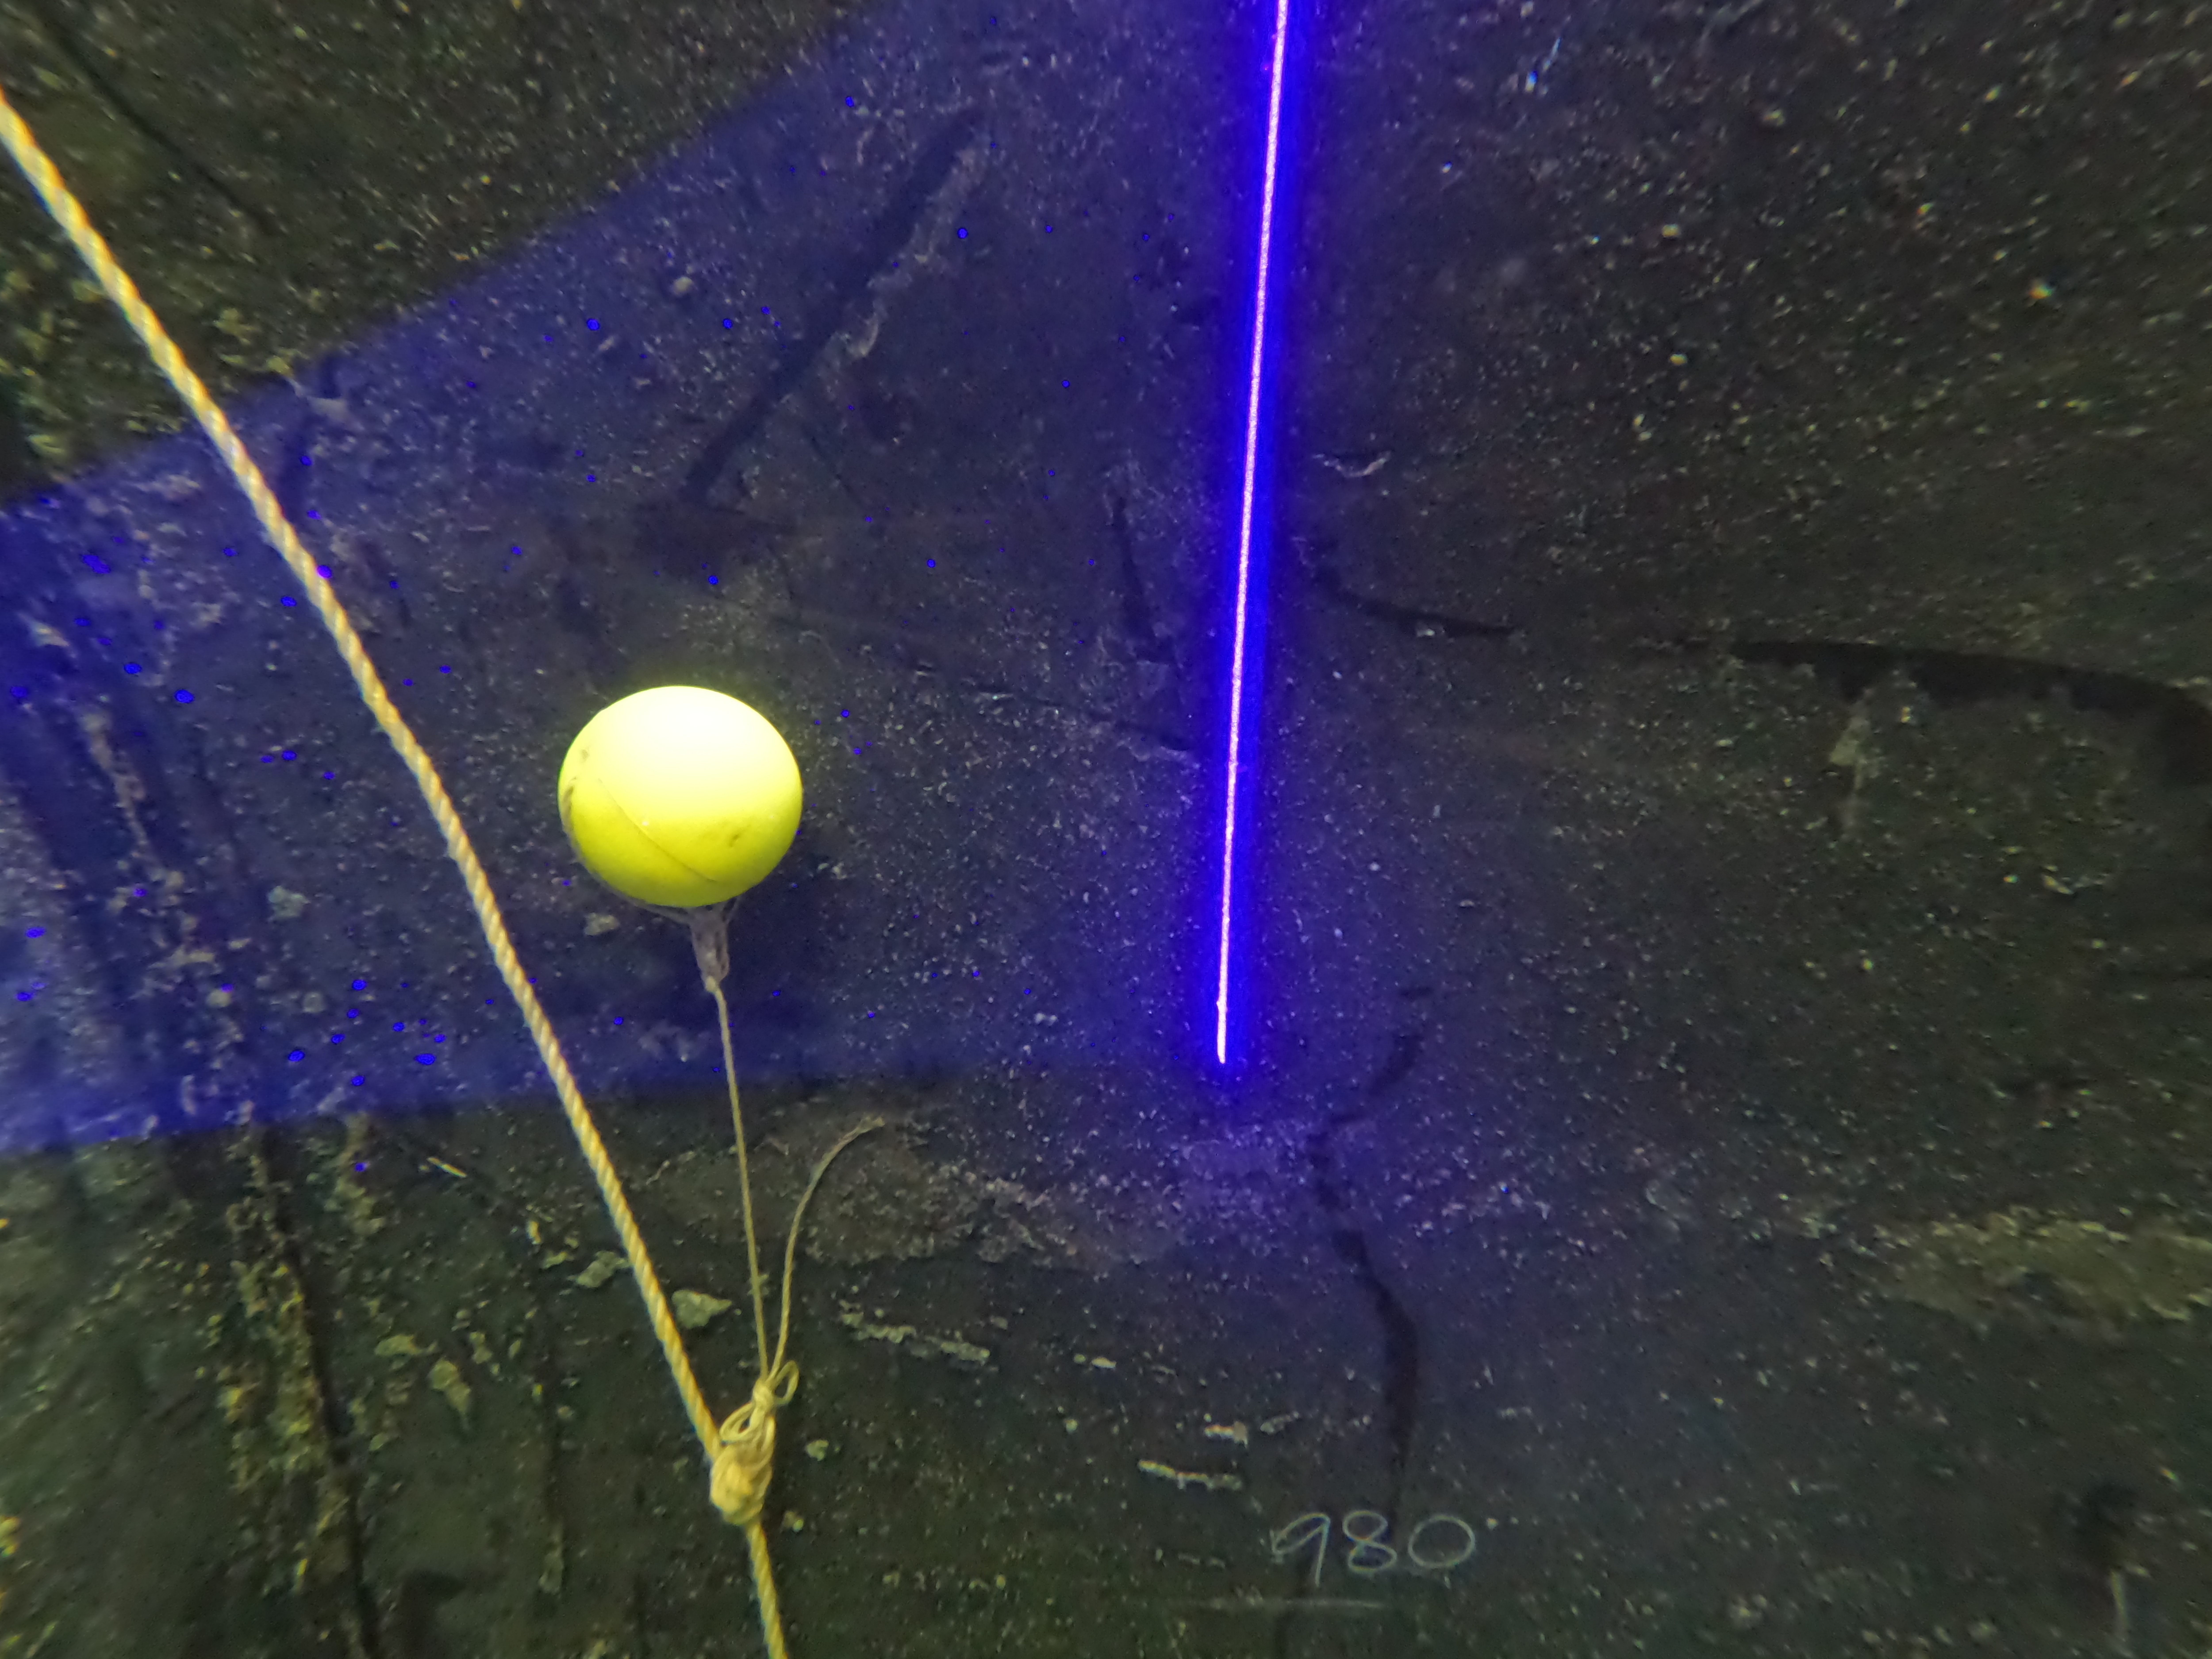

980

Supplement: Supplementary file 2757 [file G0030257.pdf › 2/G0030257.pdf]

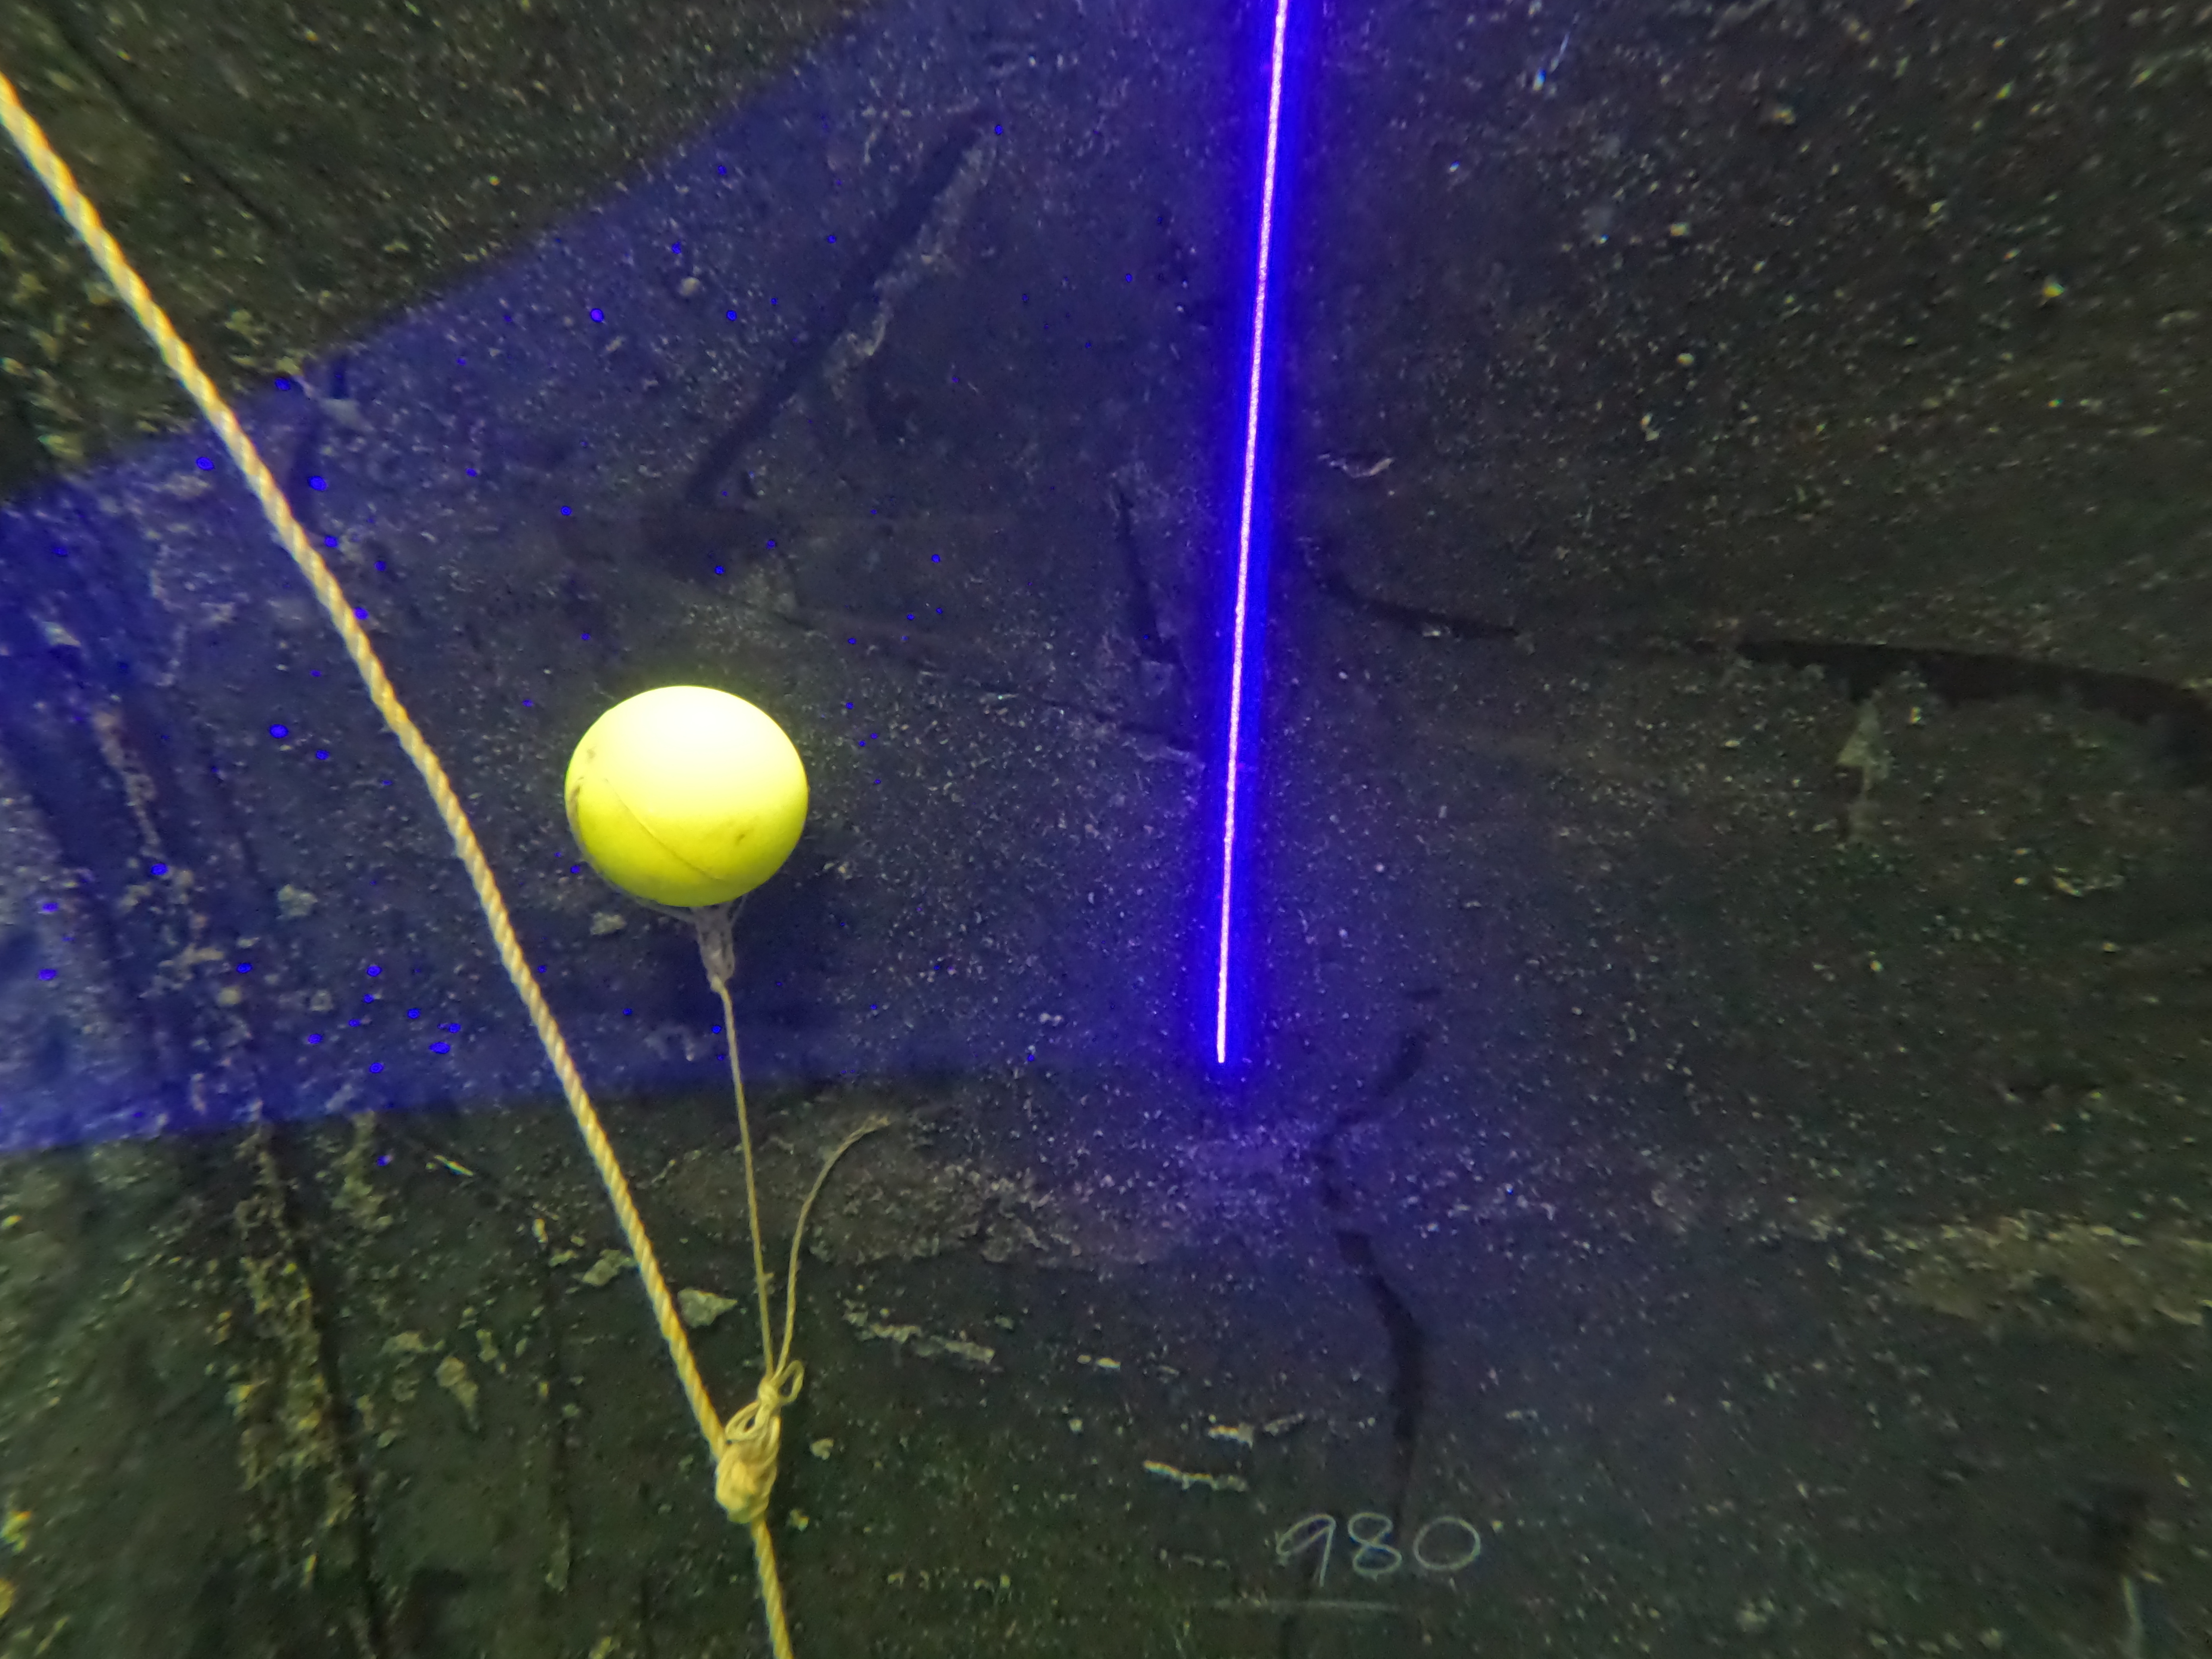

980

Supplement: Supplementary file 2758 [file G0030258.pdf › 2/G0030258.pdf]

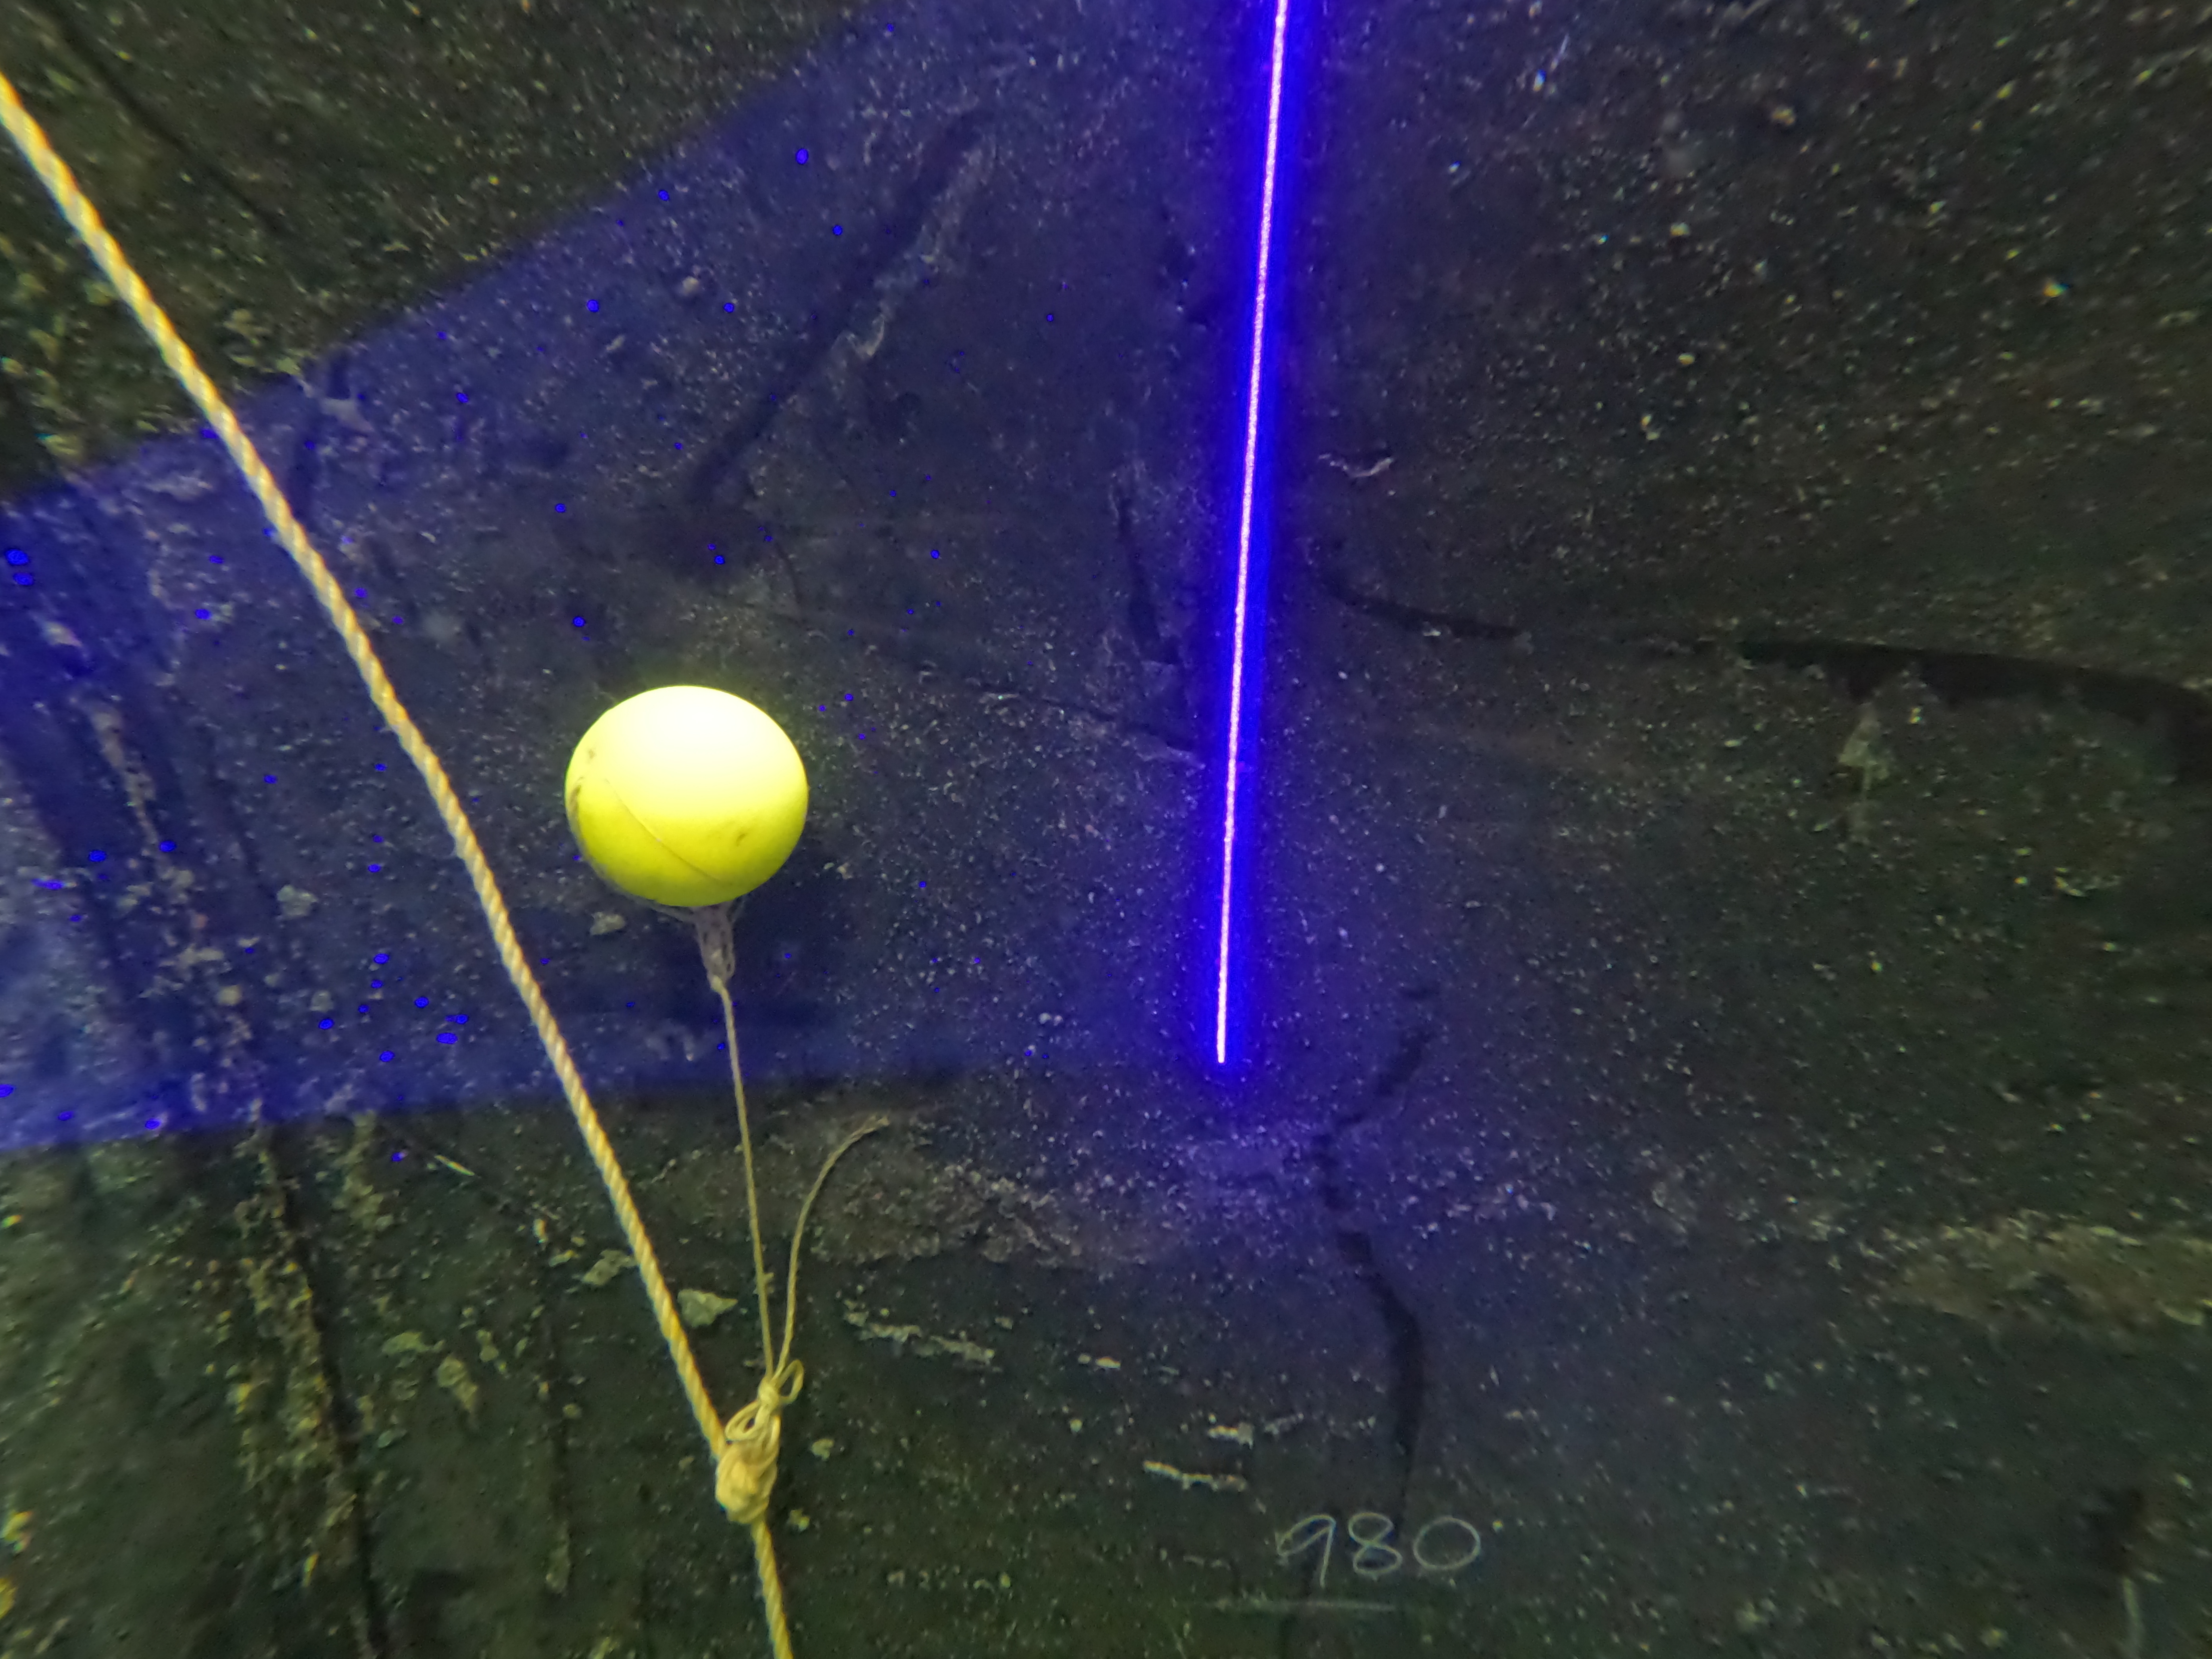

980

Supplement: Supplementary file 2759 [file G0030259.pdf › 2/G0030259.pdf]

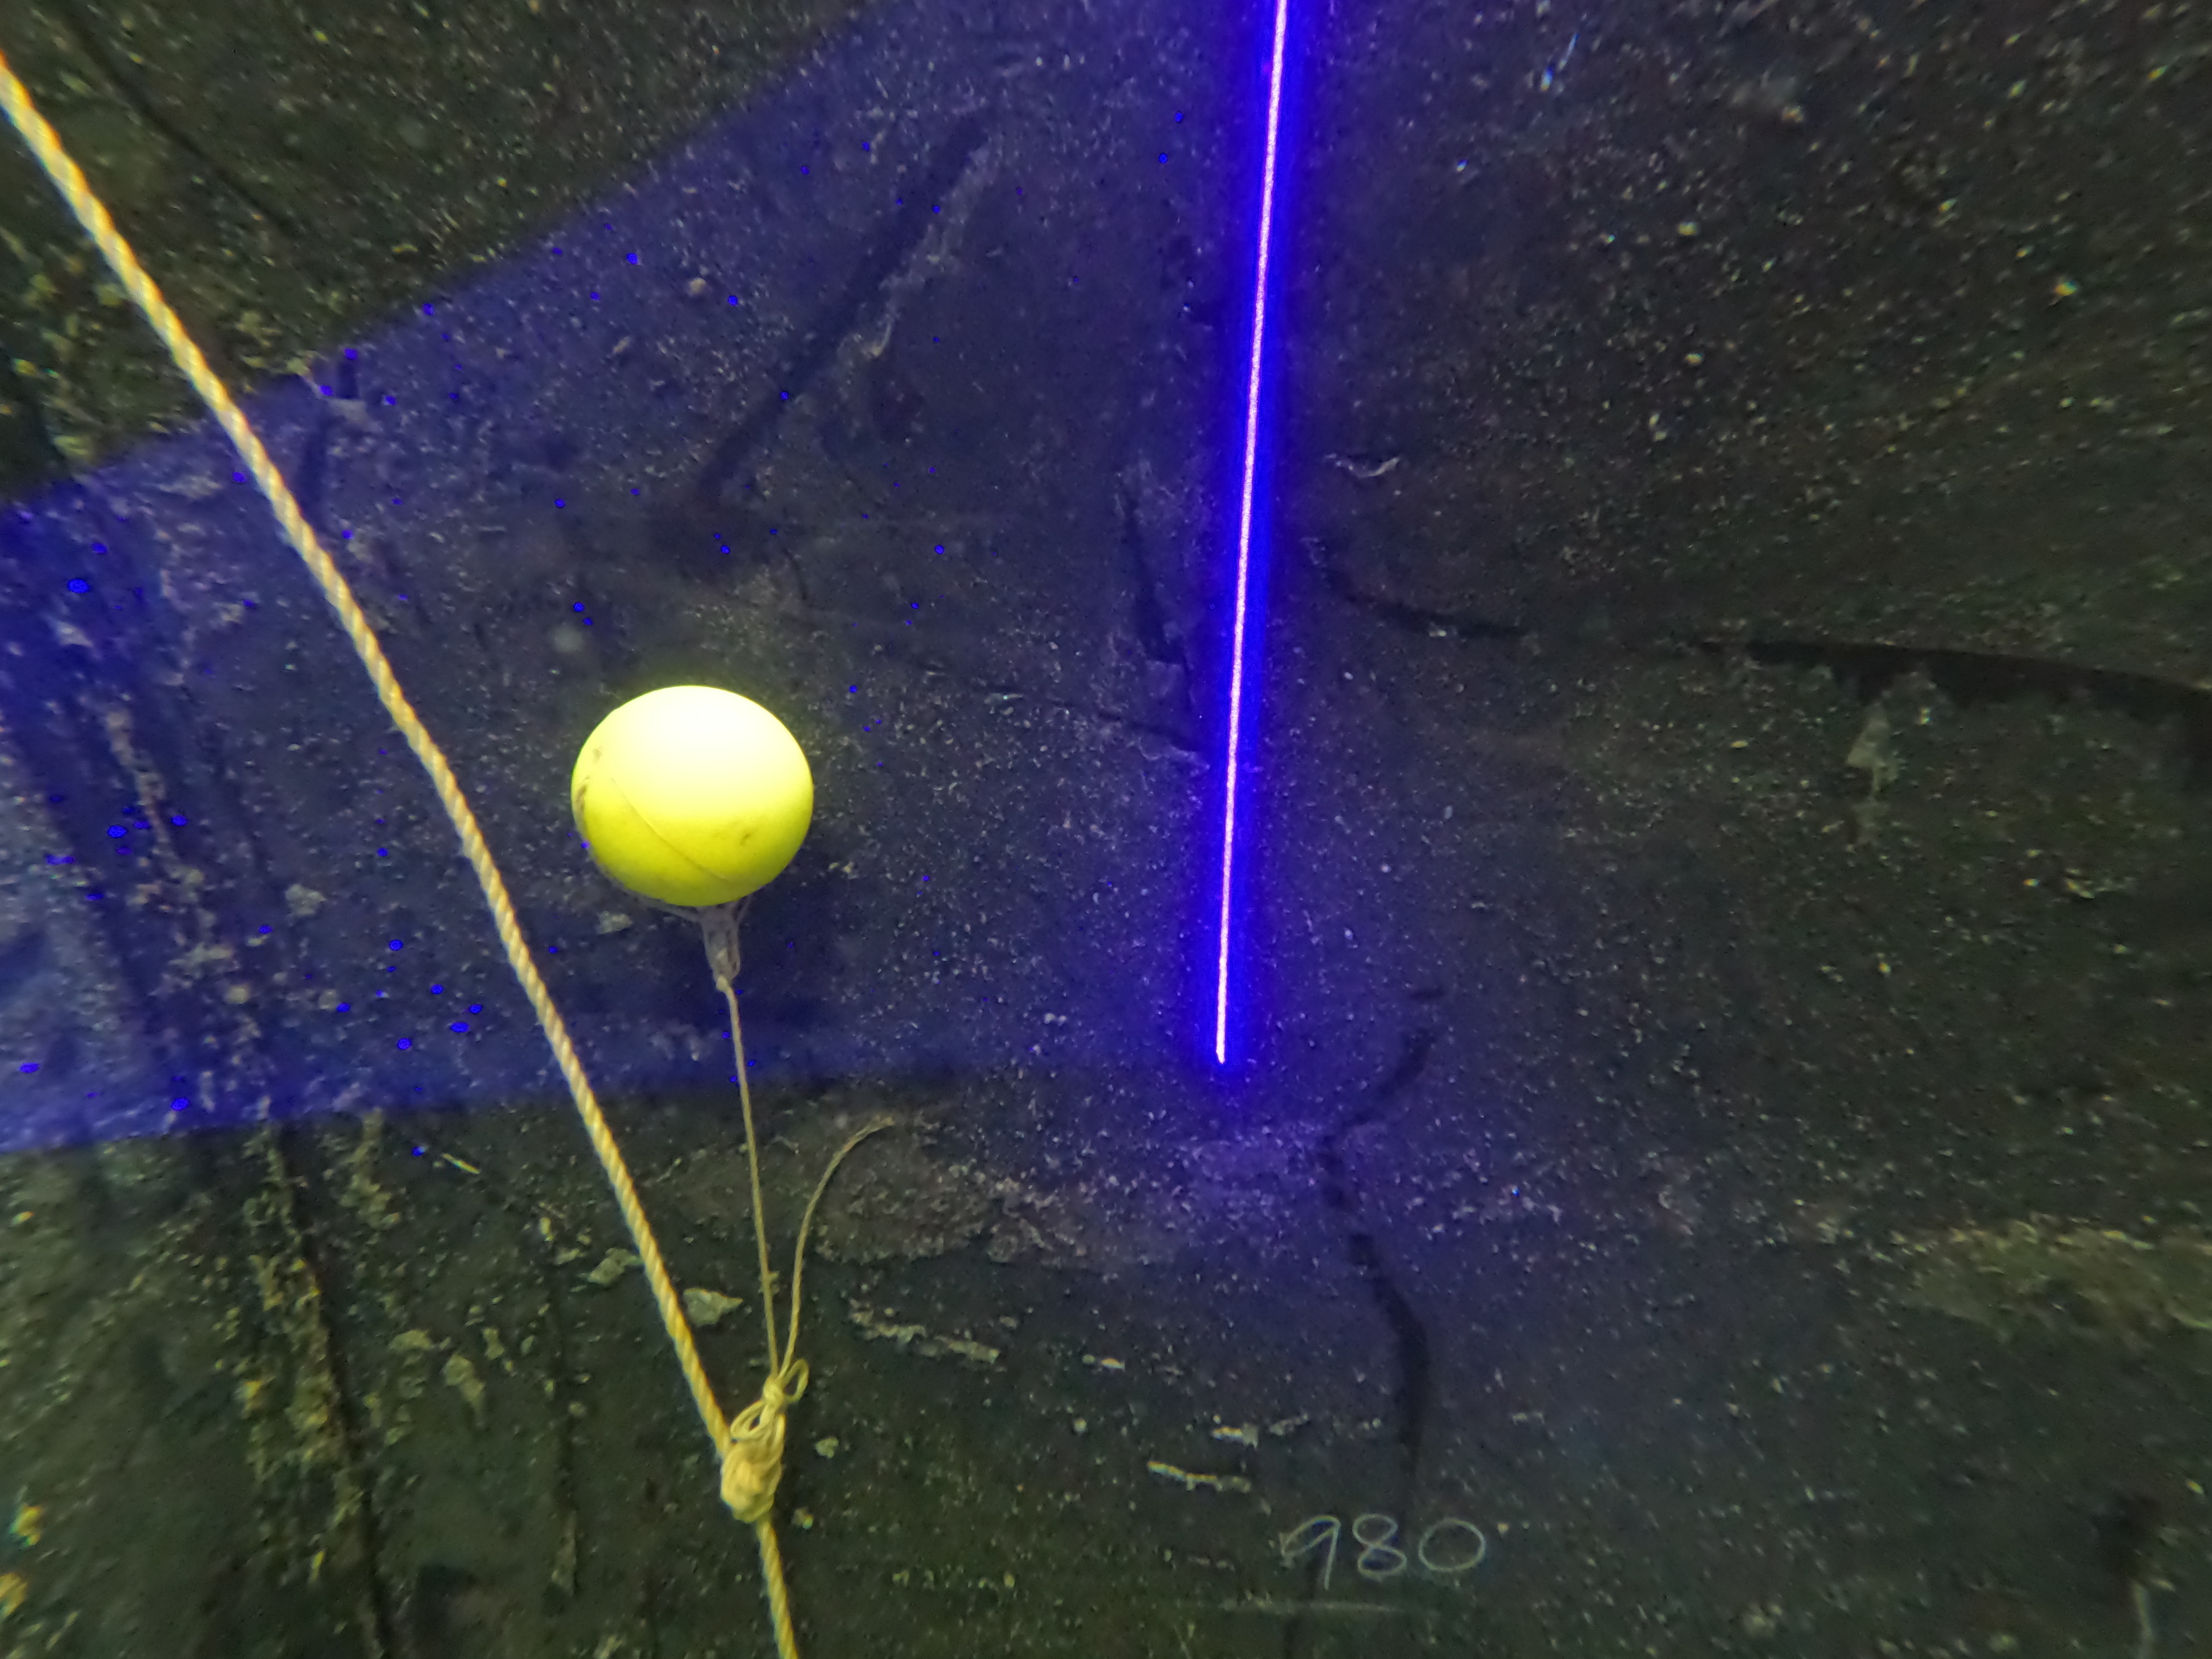

980

Supplement: Supplementary file 2760 [file G0030260.pdf › 2/G0030260.pdf]

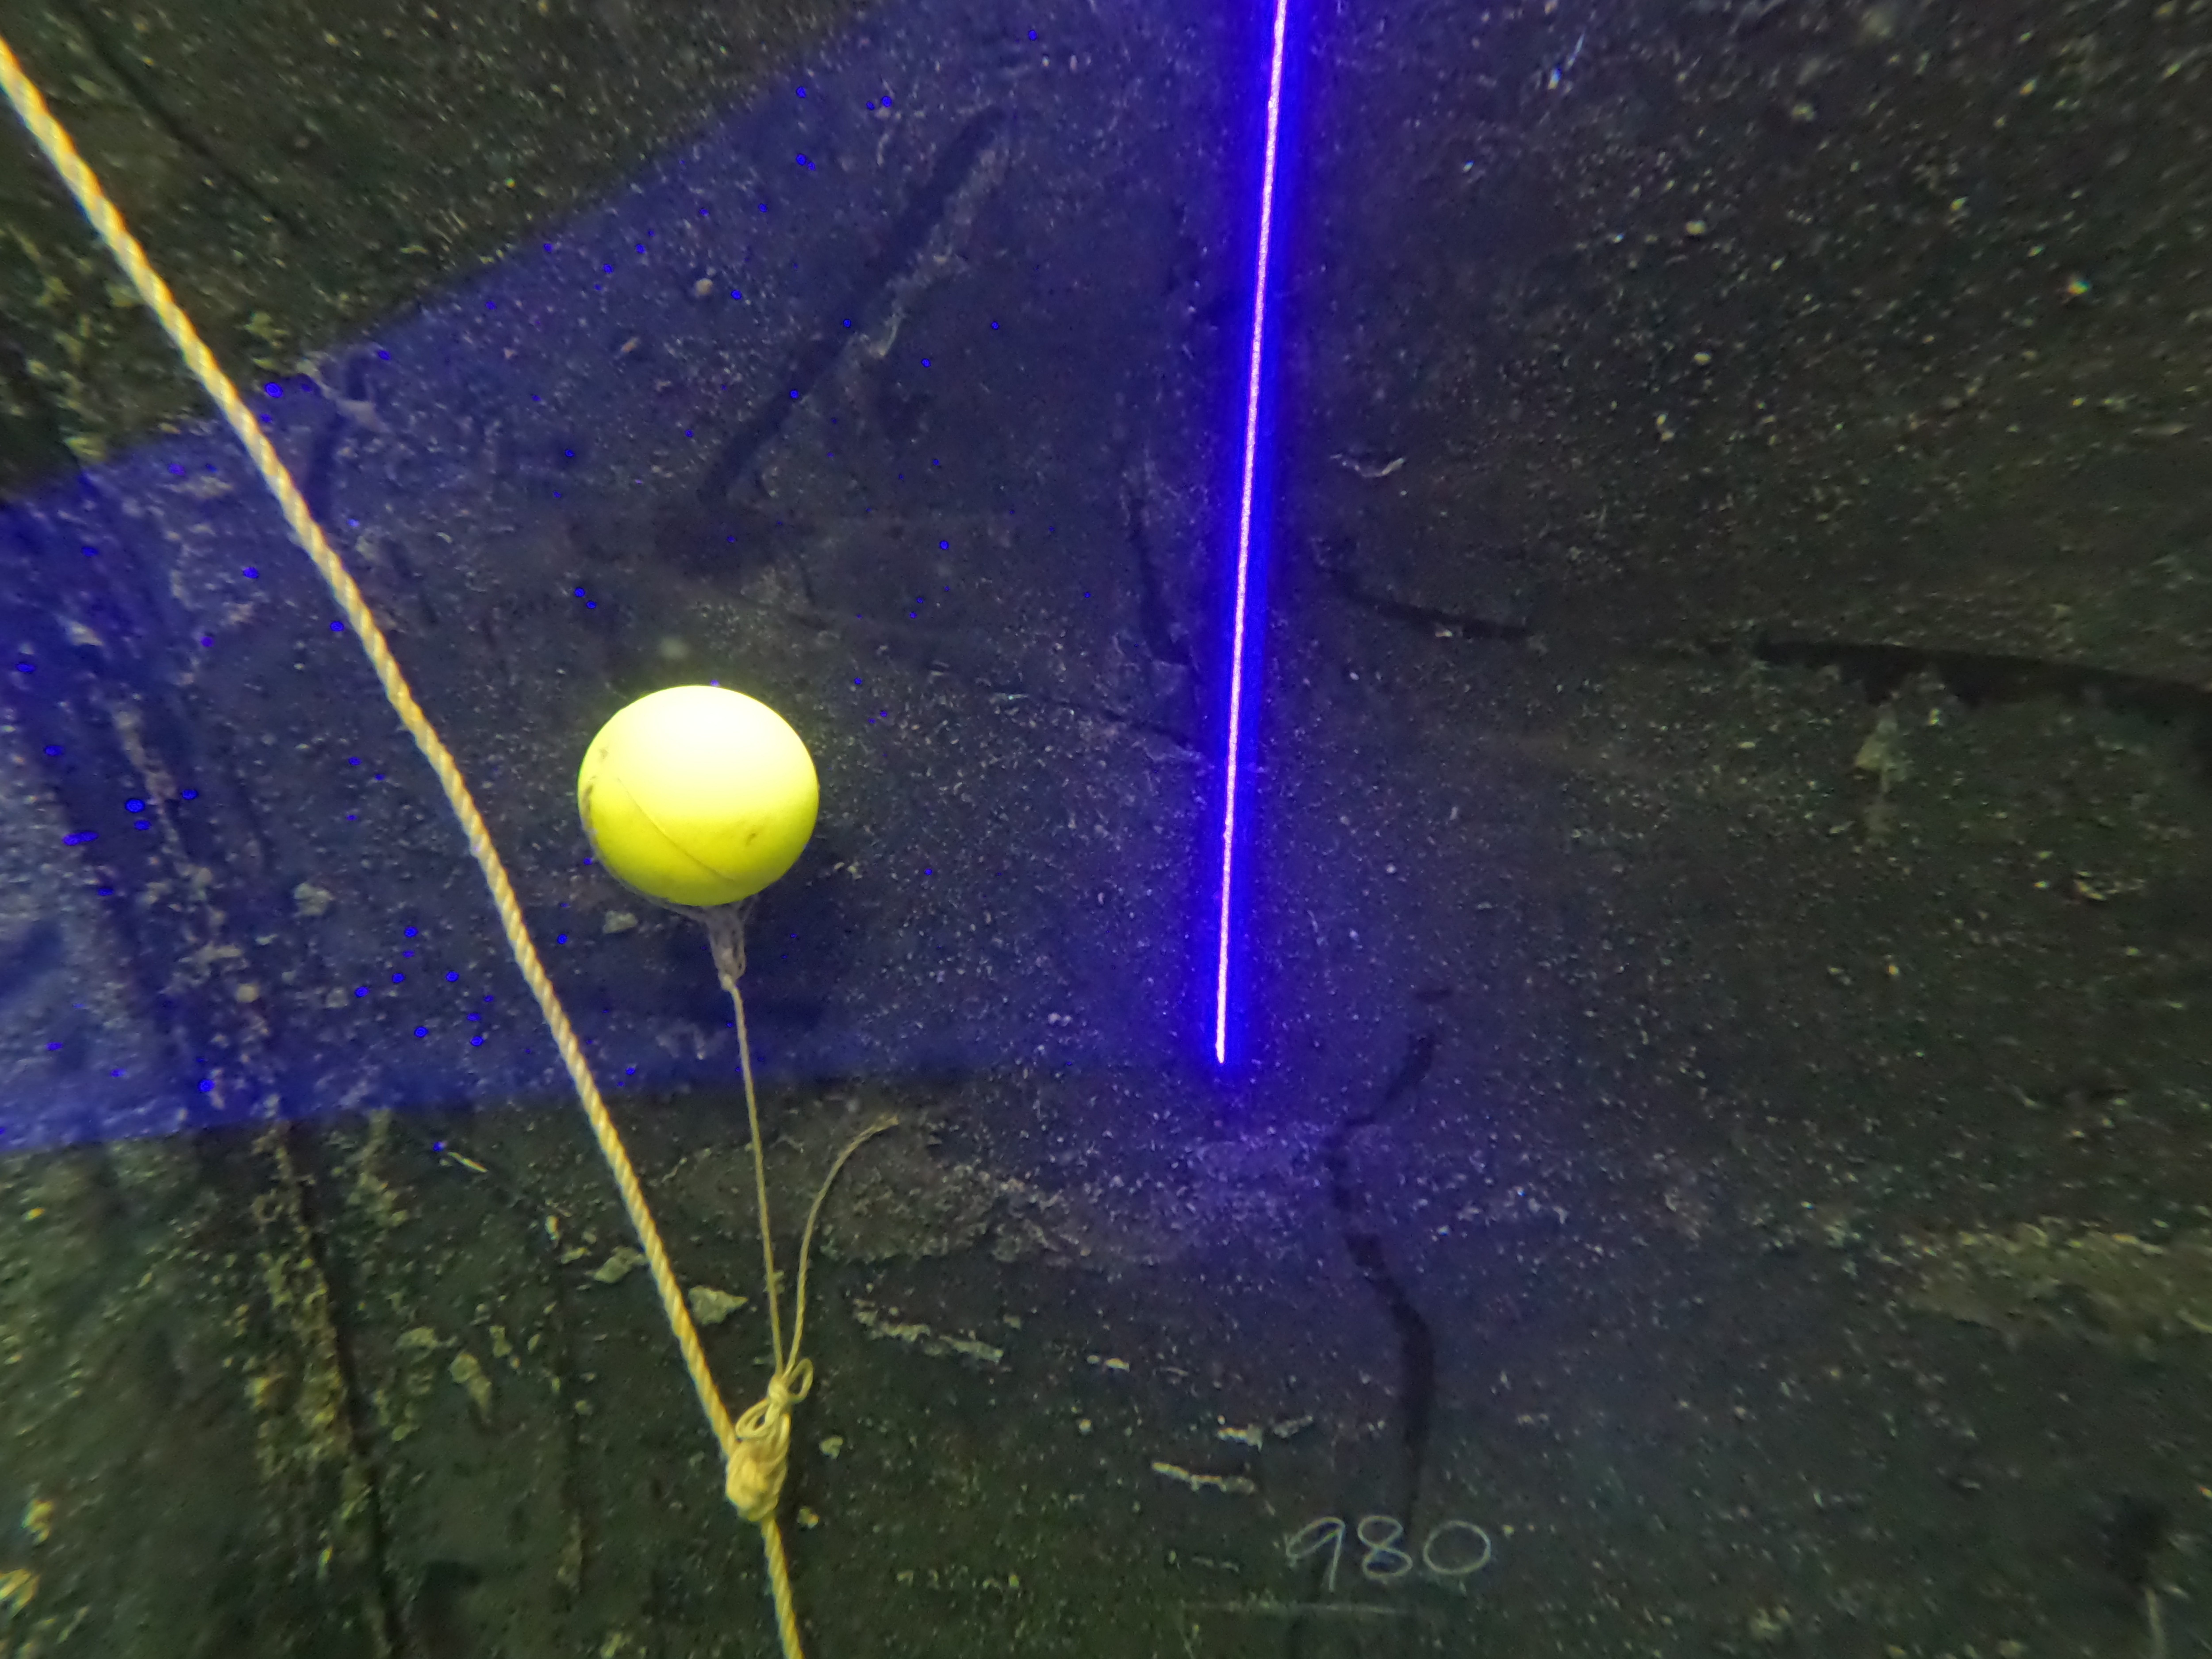

980

Supplement: Supplementary file 2761 [file G0030261.pdf › 2/G0030261.pdf]

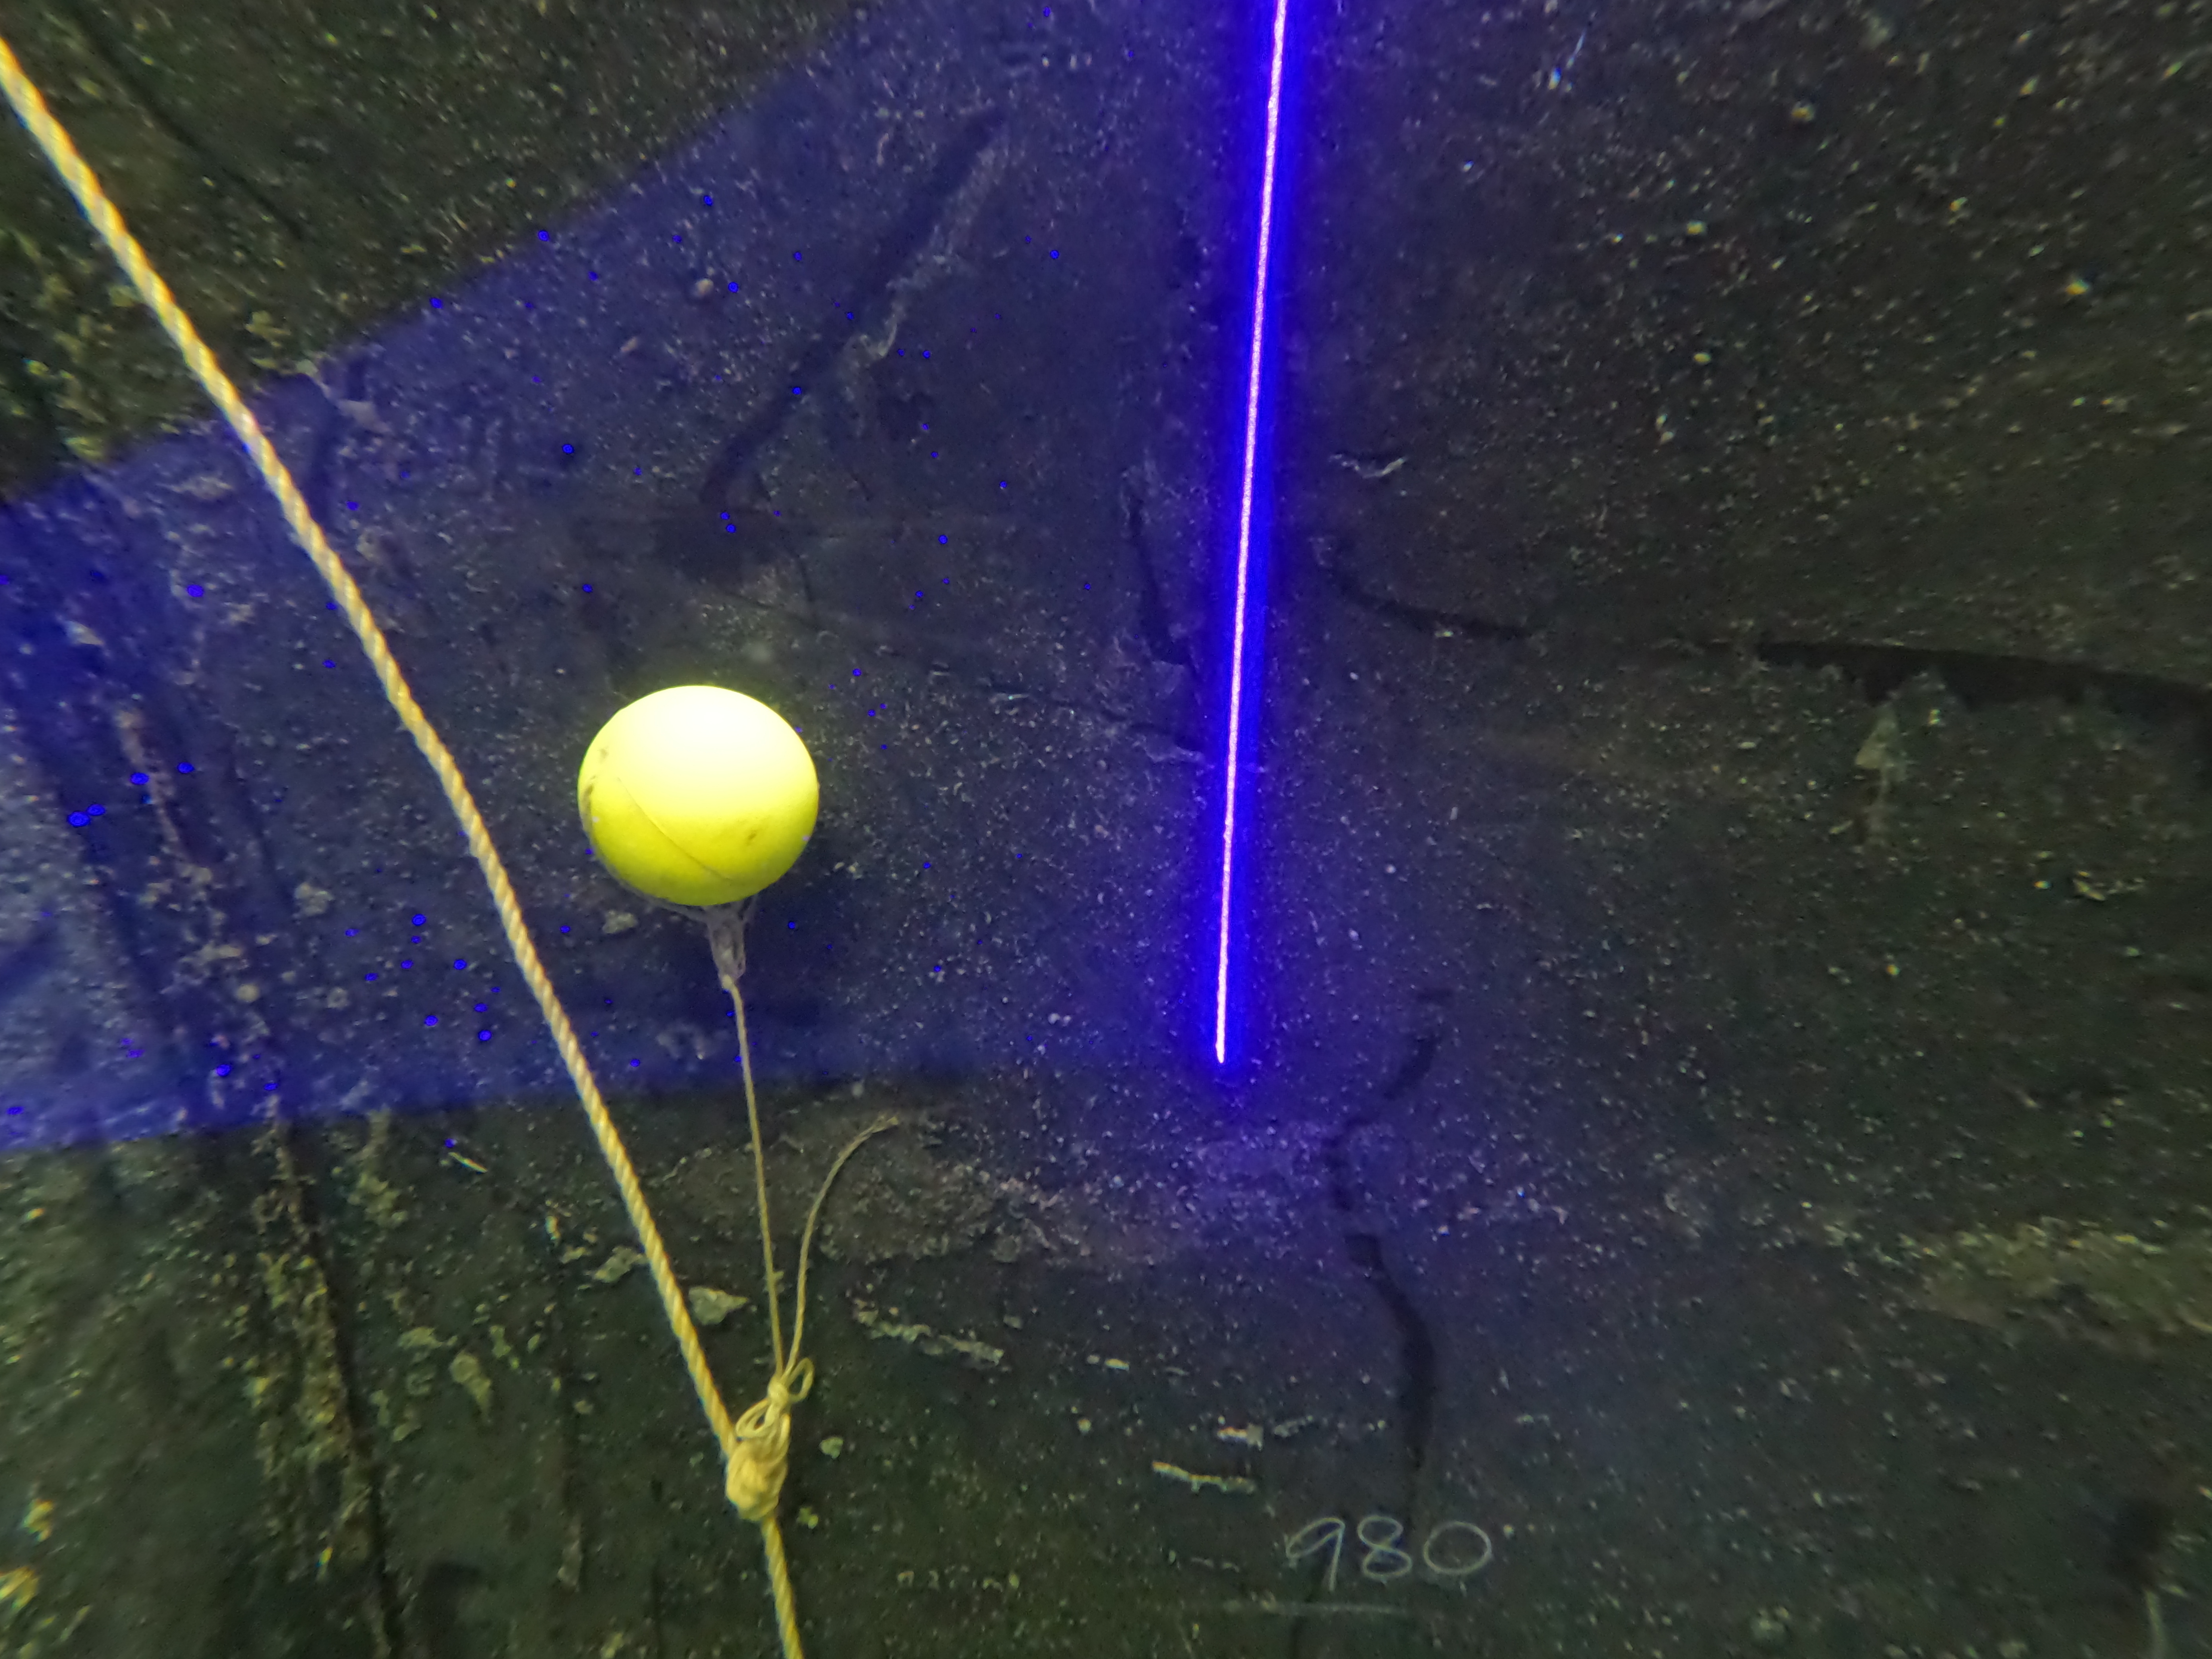

980

Supplement: Supplementary file 2762 [file G0030262.pdf › 2/G0030262.pdf]

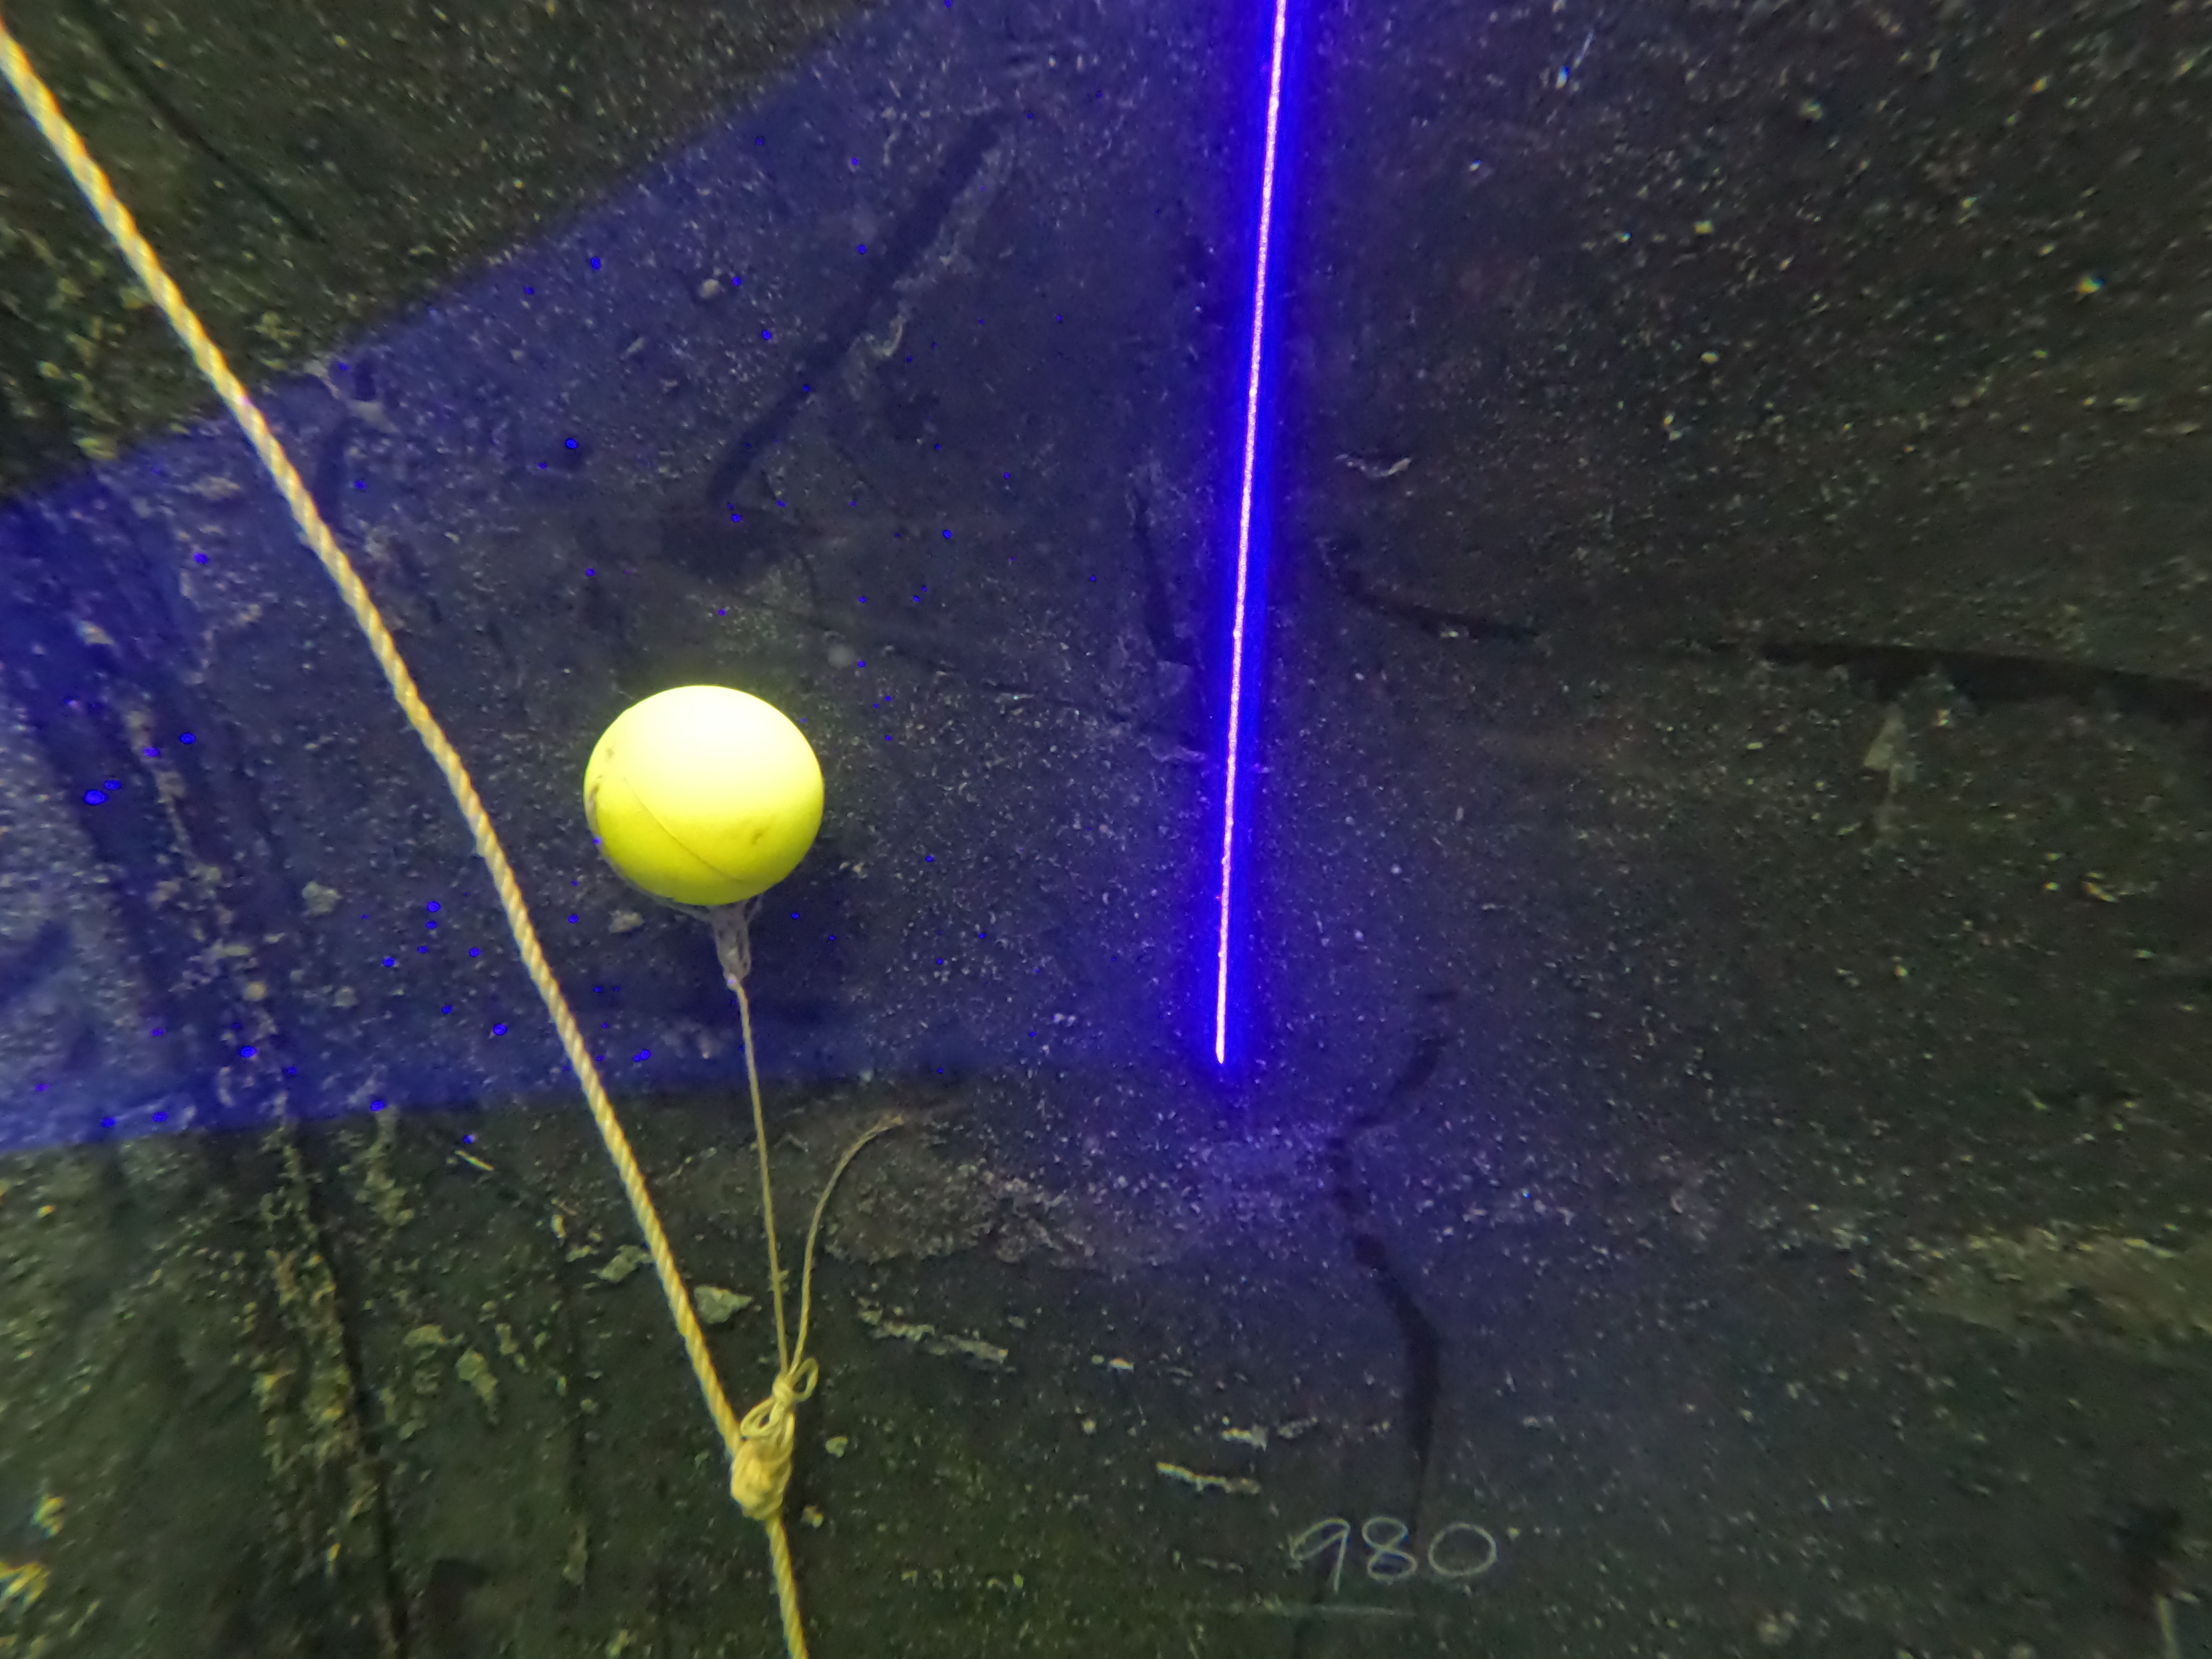

980

Supplement: Supplementary file 2763 [file G0030263.pdf › 2/G0030263.pdf]

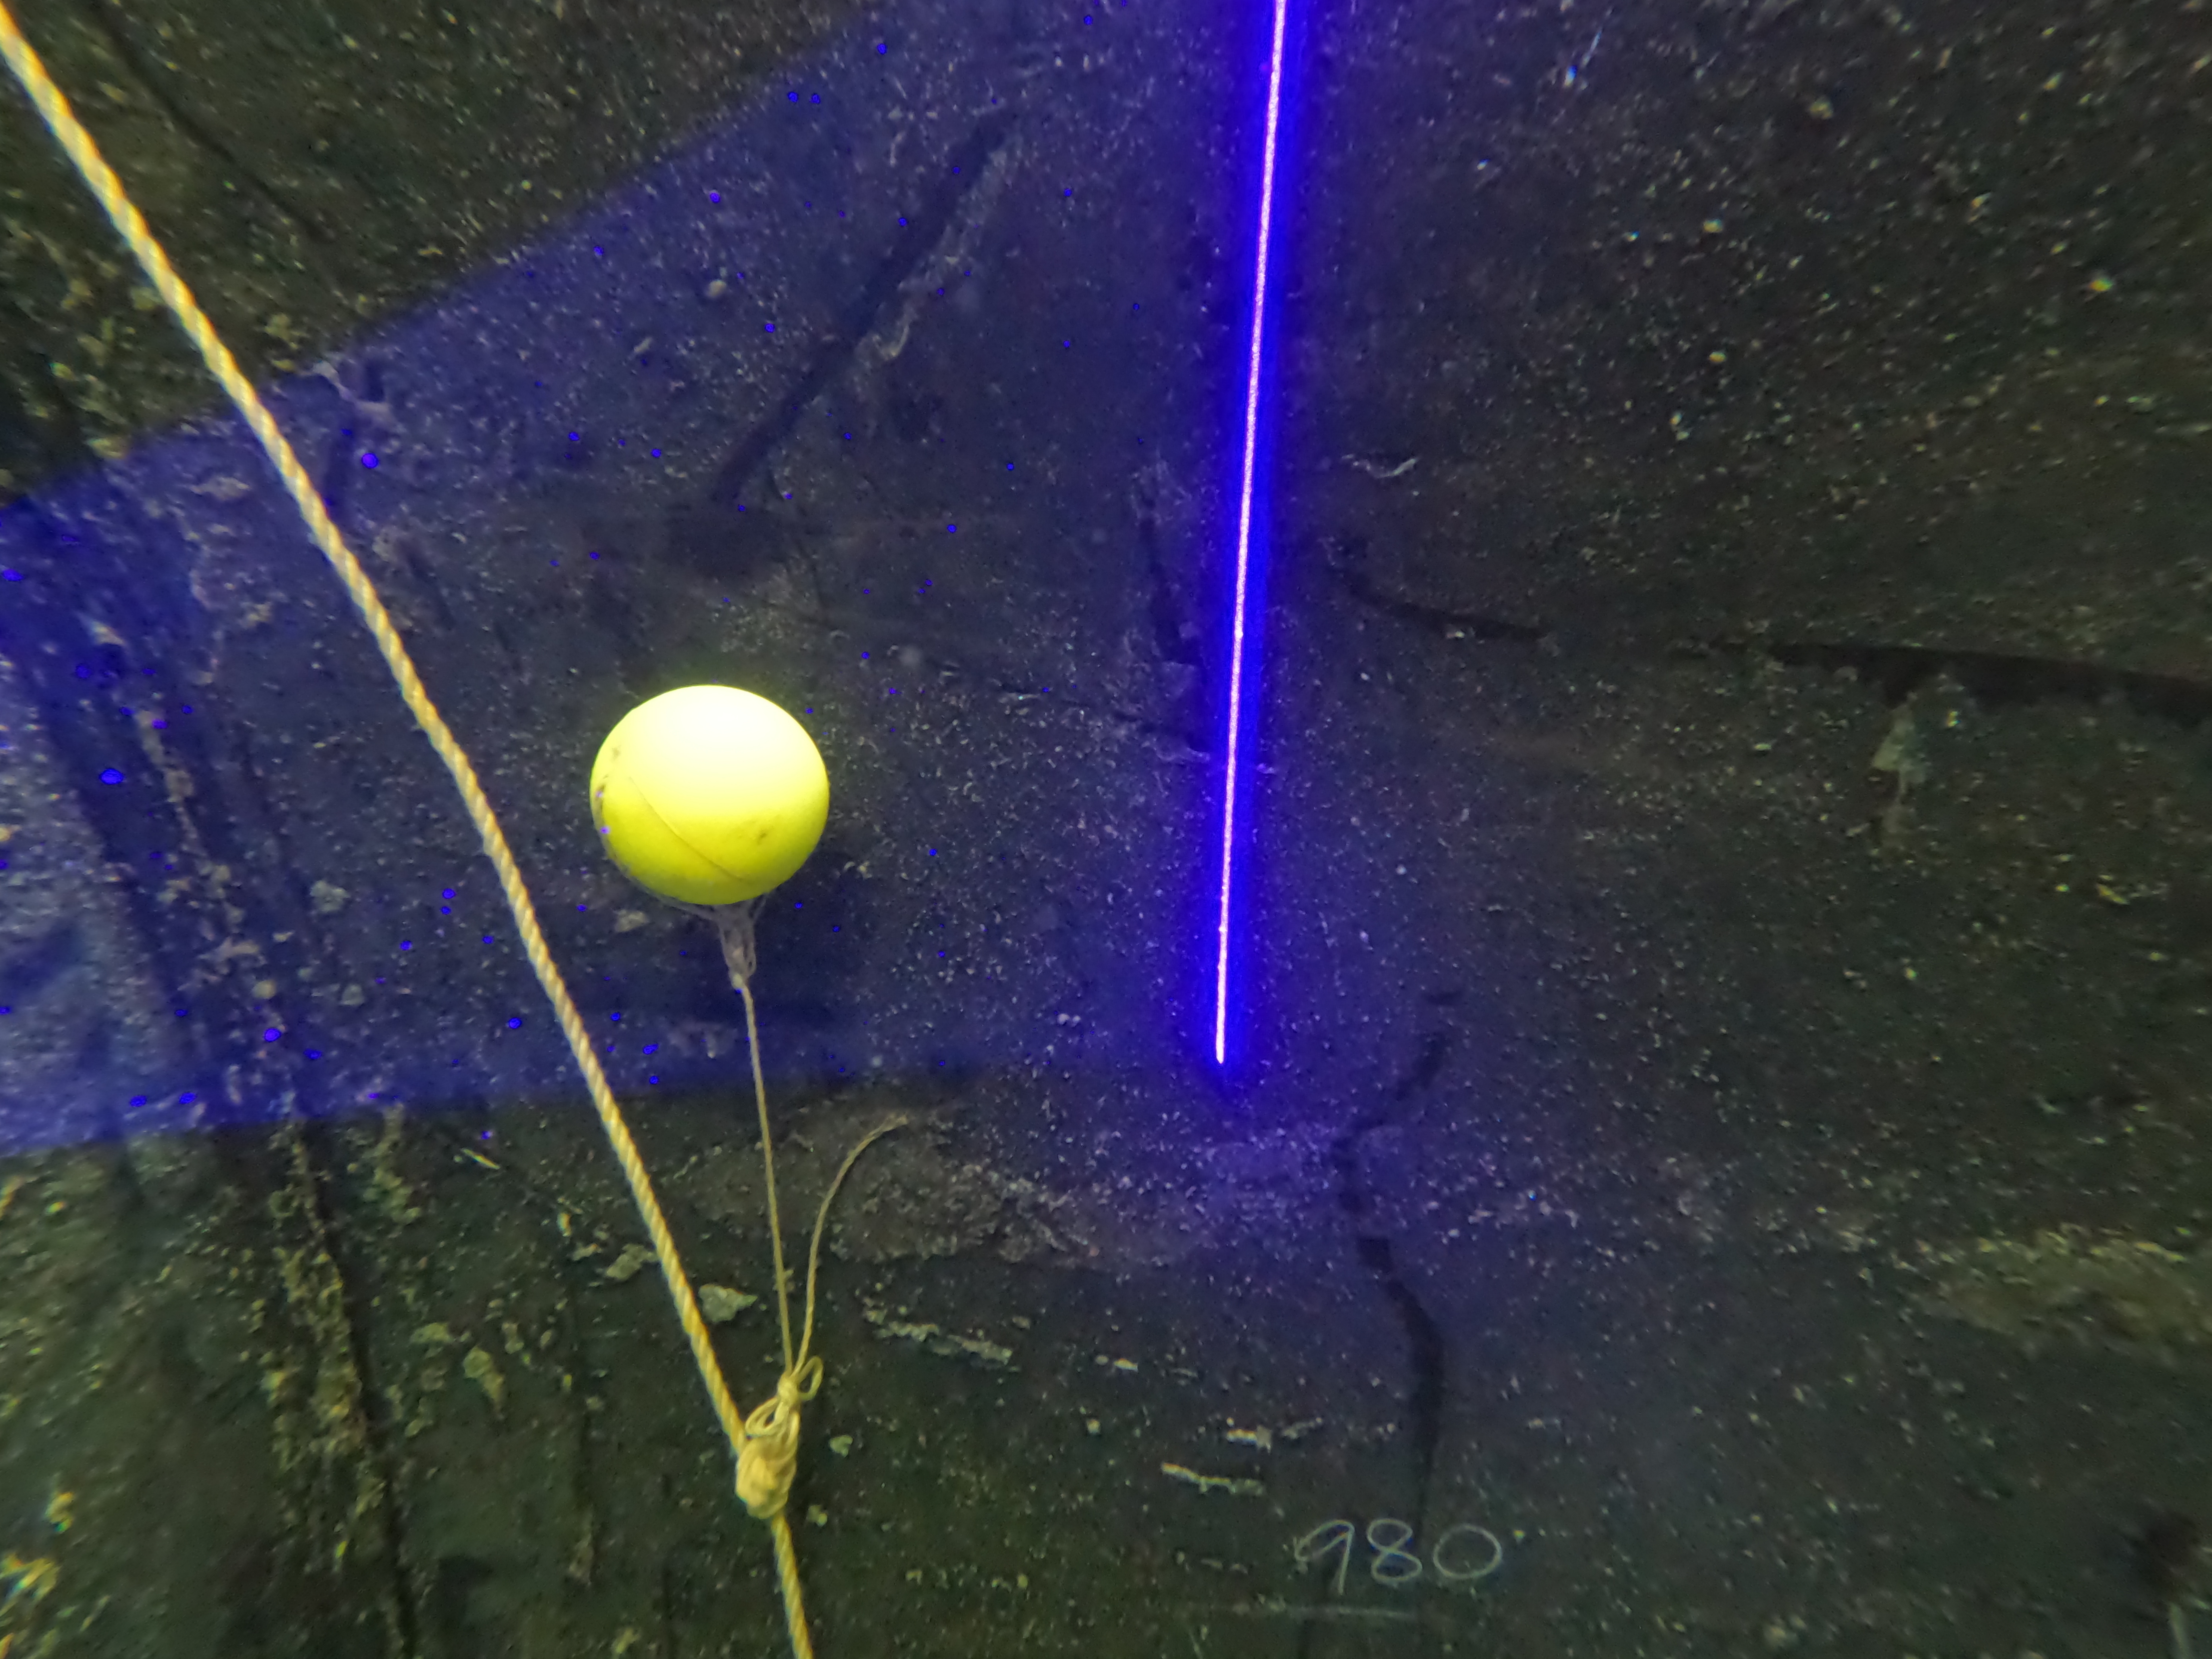

980

Supplement: Supplementary file 2764 [file G0030264.pdf › 2/G0030264.pdf]

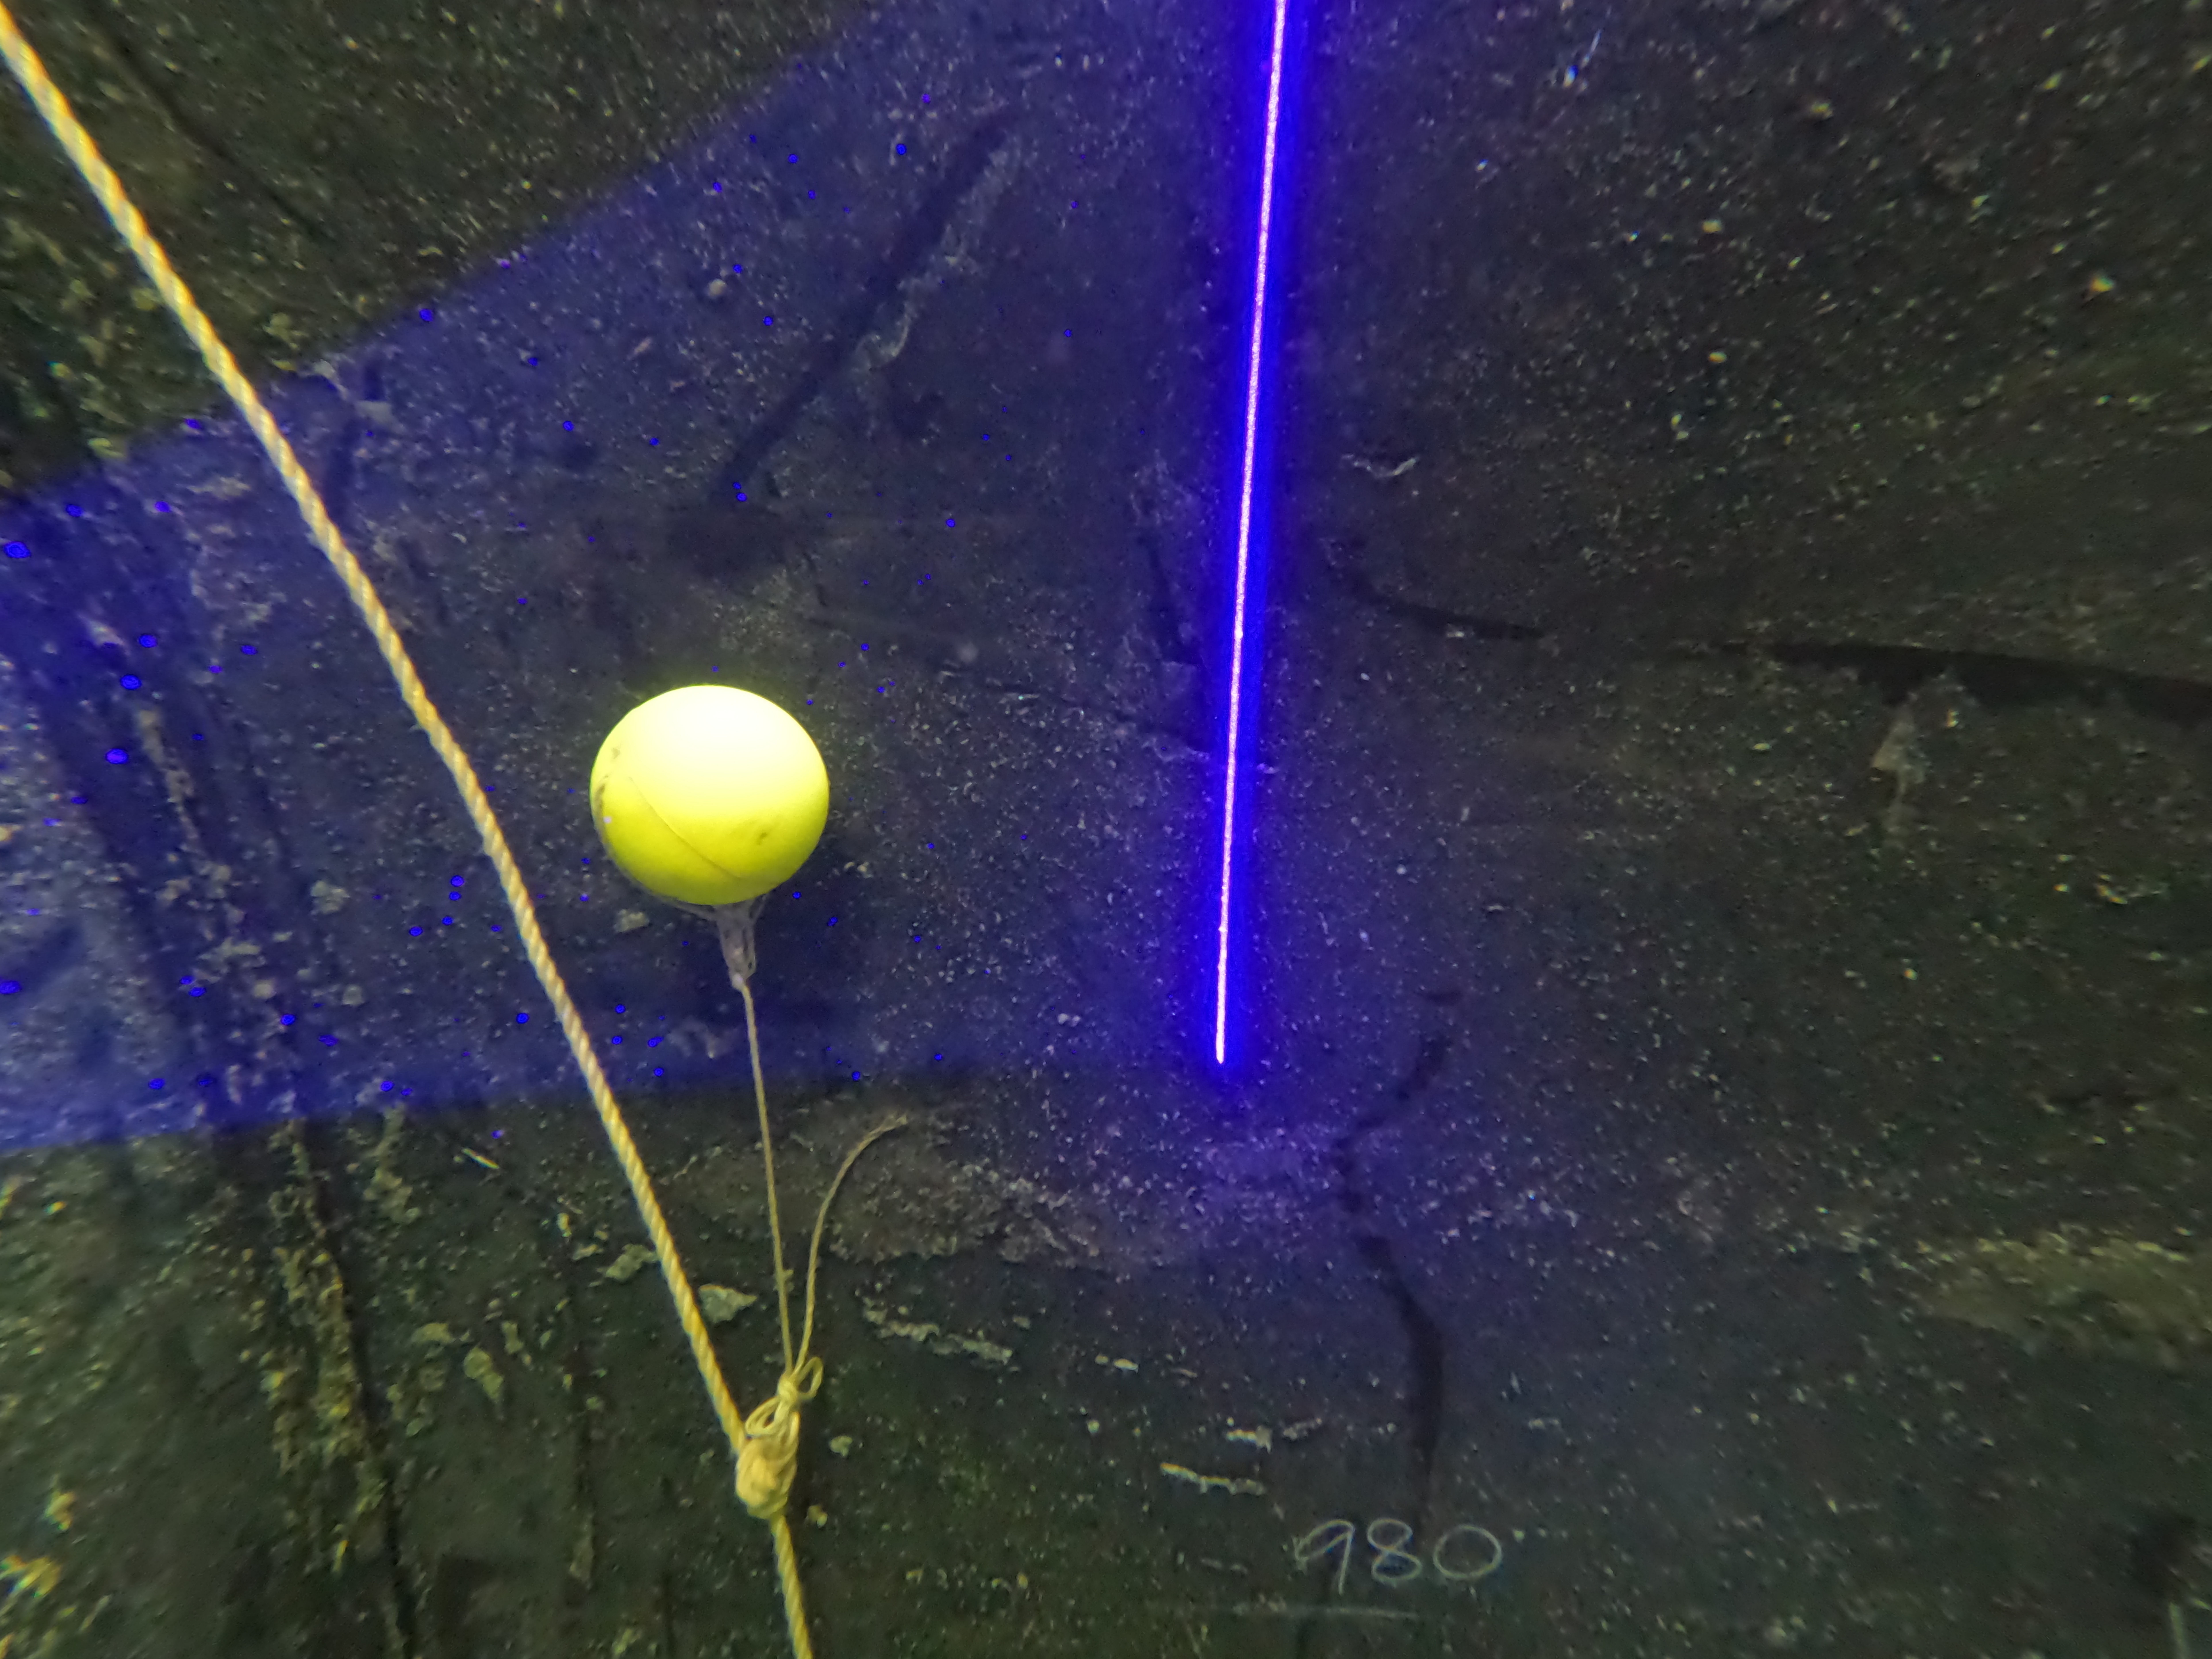

980

Supplement: Supplementary file 2765 [file G0030265.pdf › 2/G0030265.pdf]

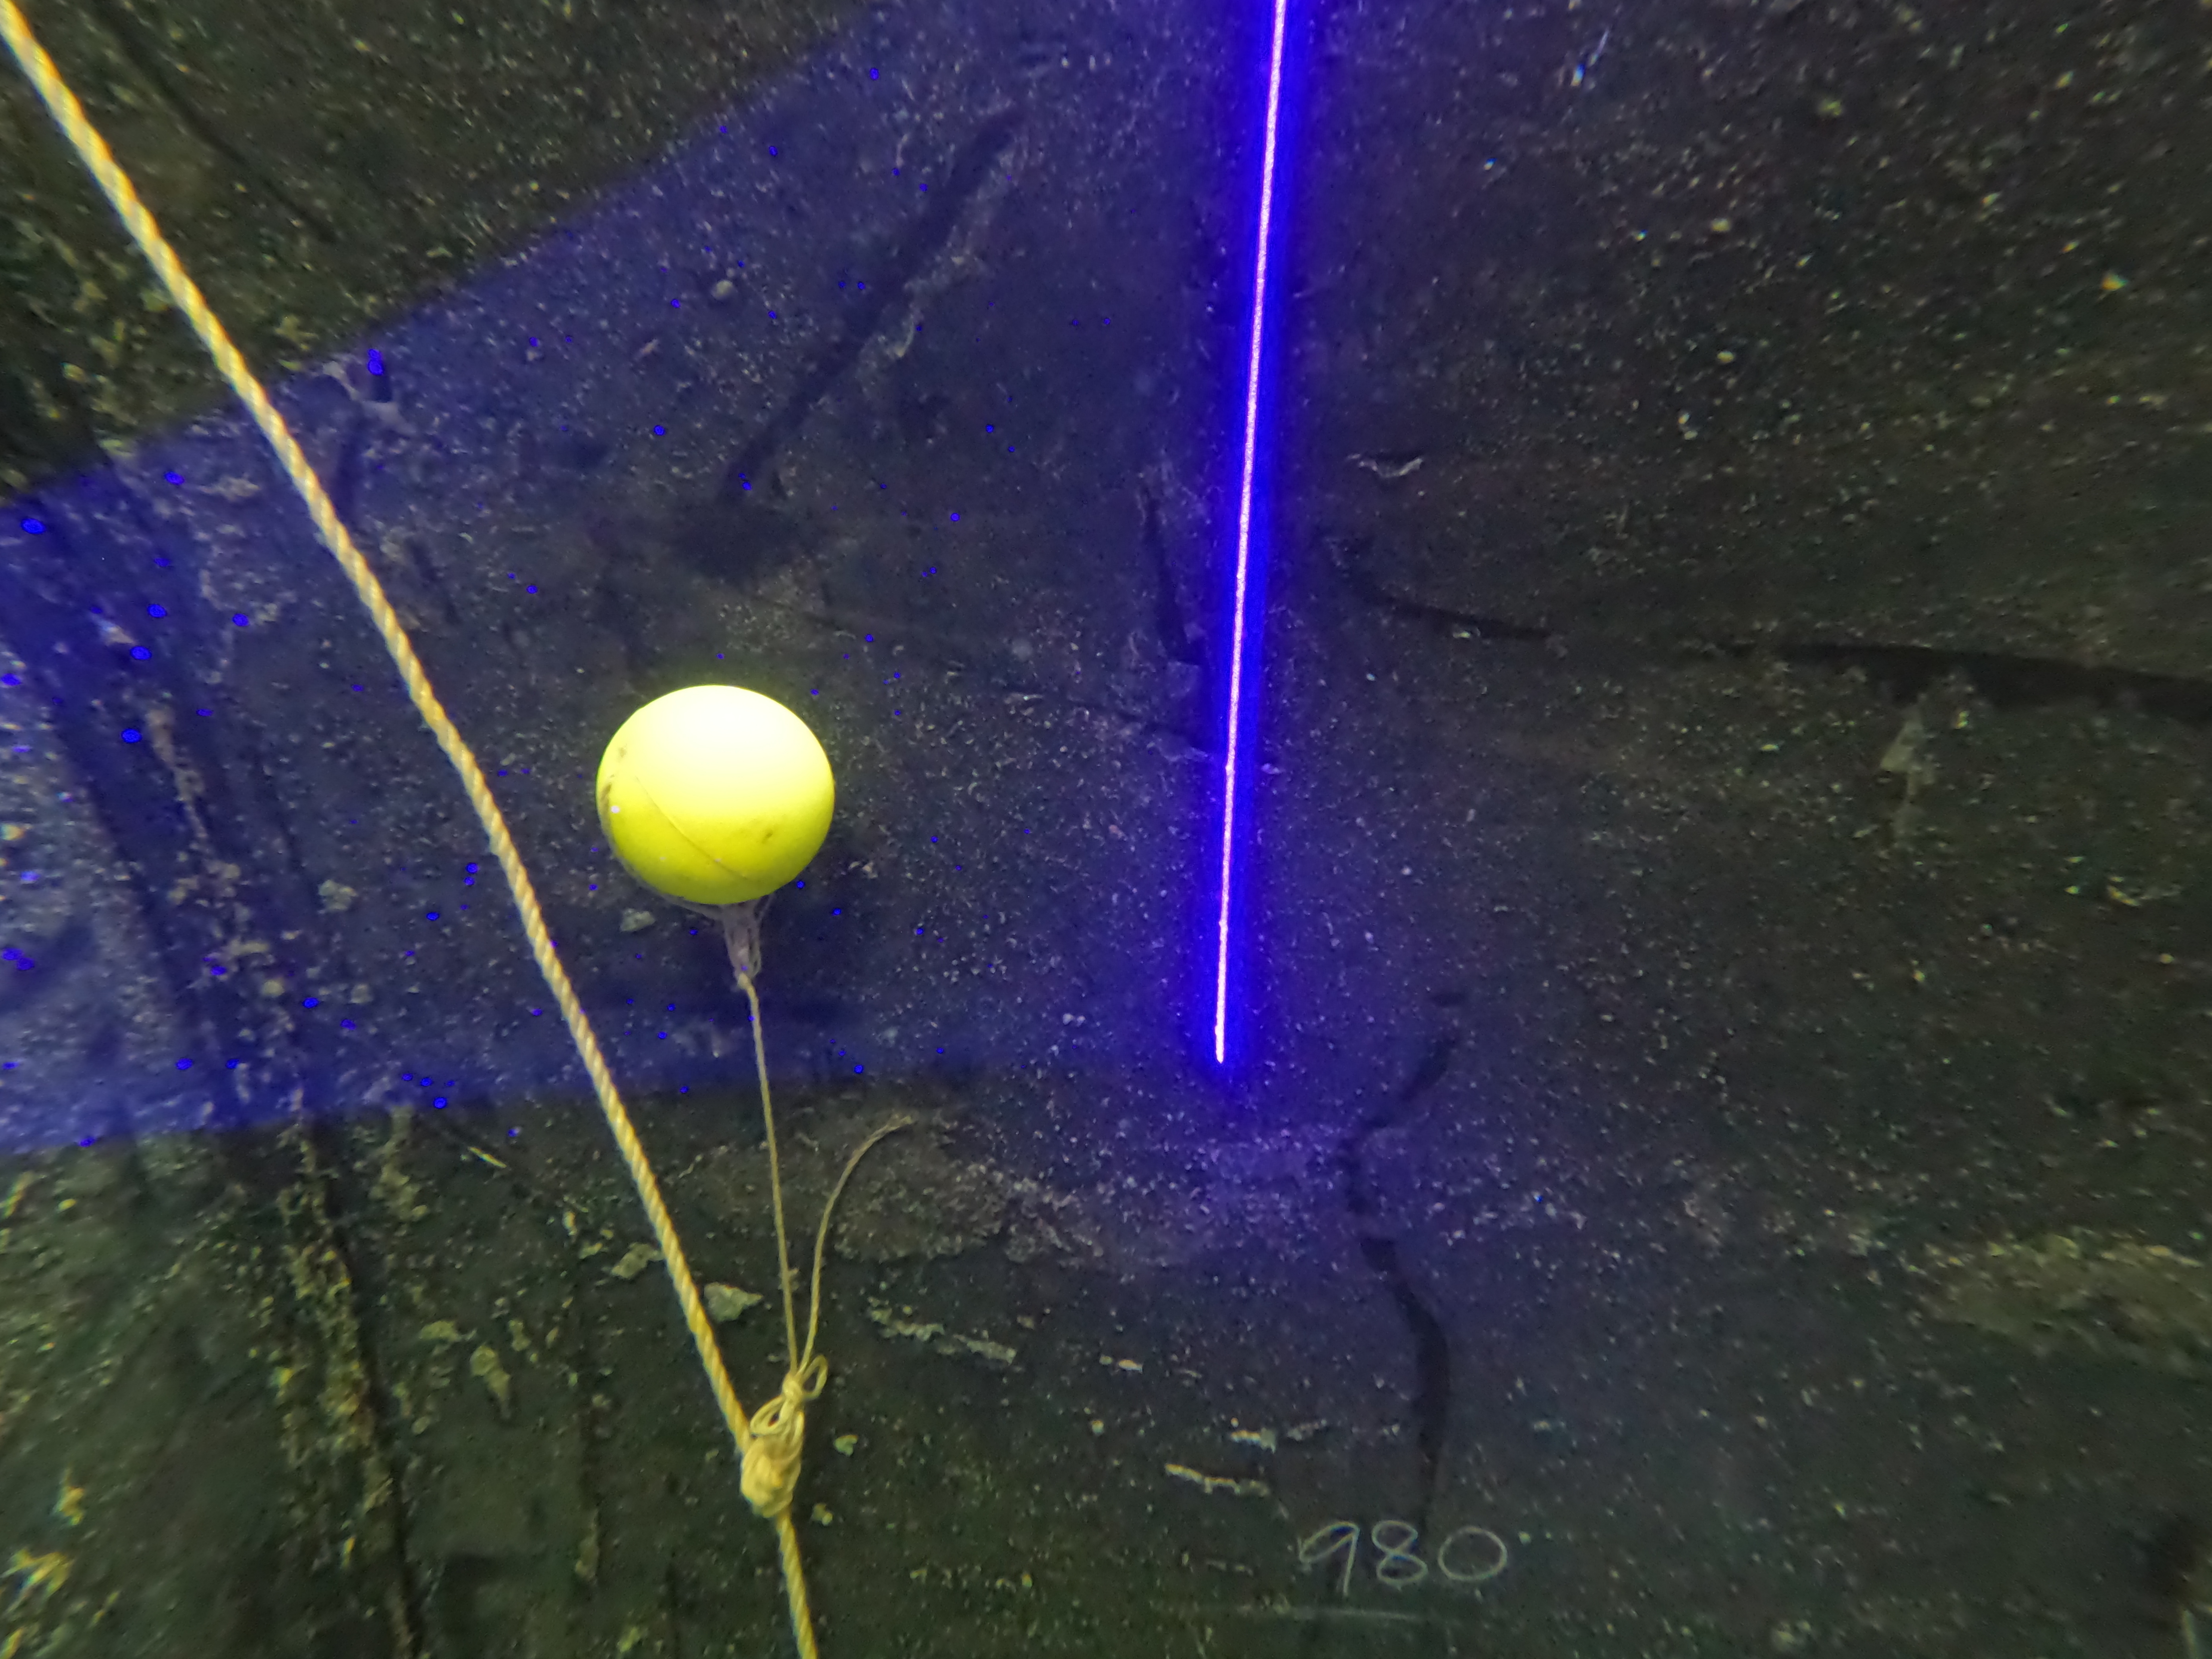

980

Supplement: Supplementary file 2766 [file G0030266.pdf › 2/G0030266.pdf]

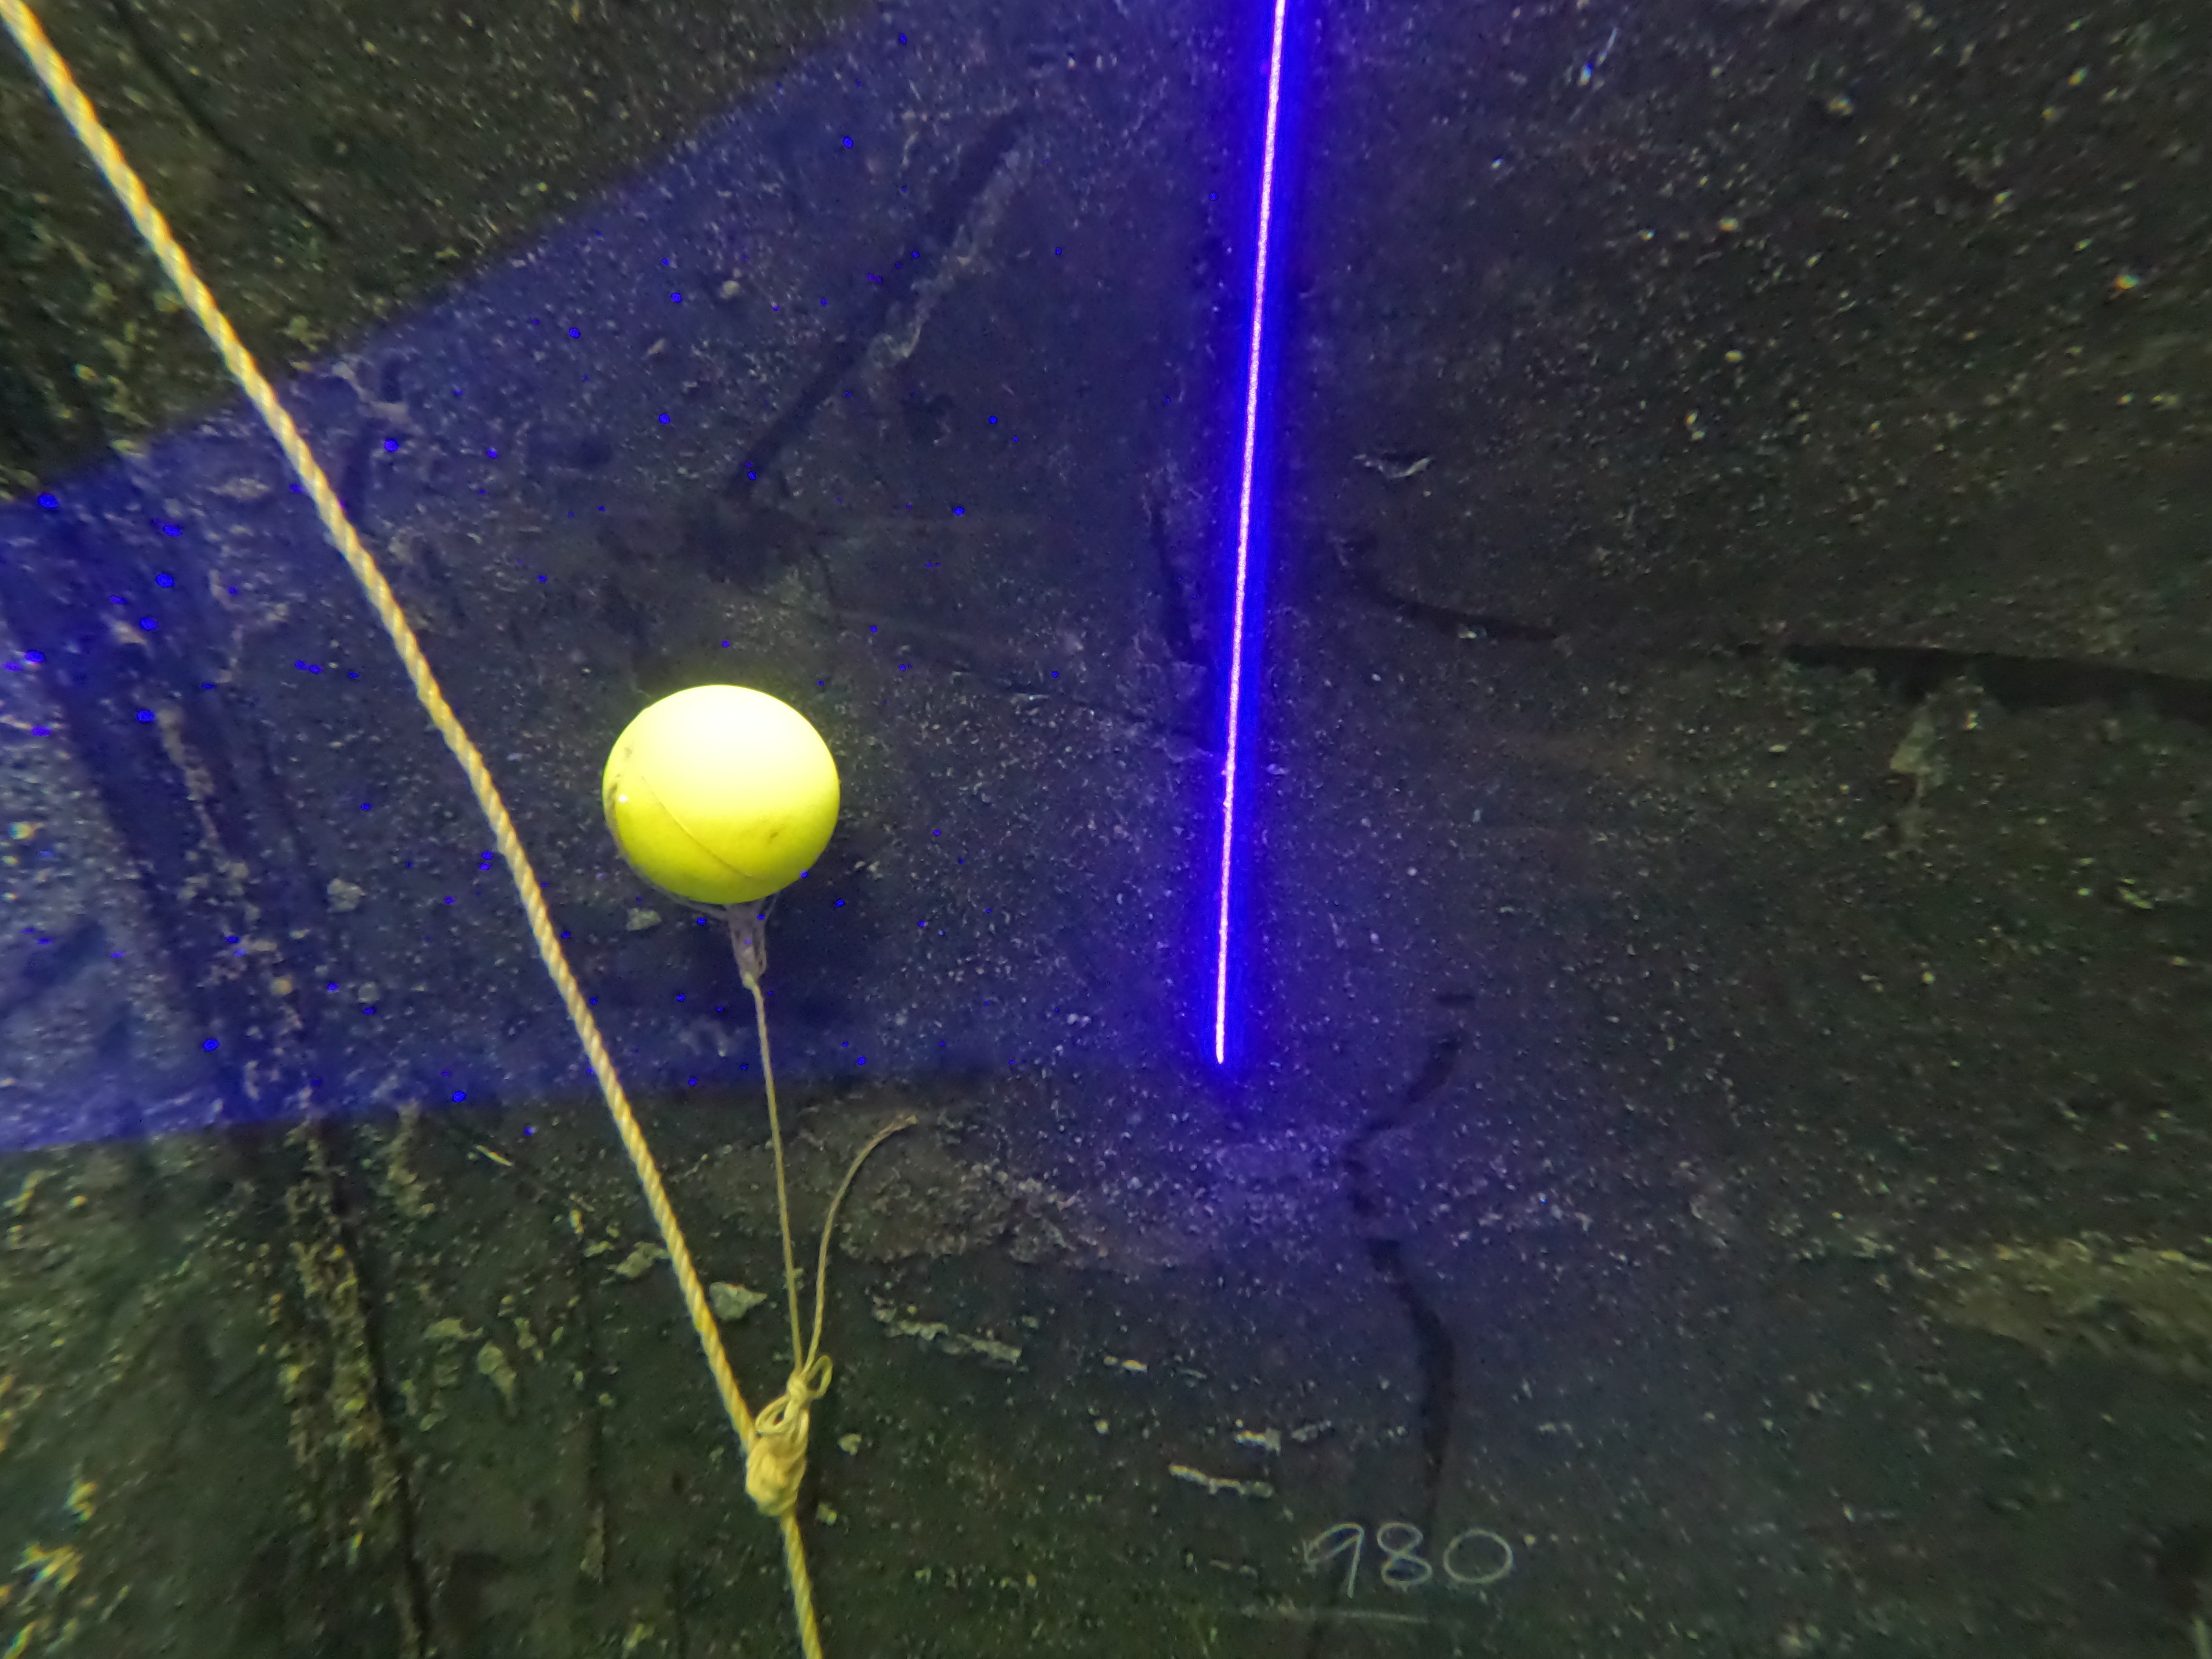

980

Supplement: Supplementary file 2767 [file G0030267.pdf › 2/G0030267.pdf]

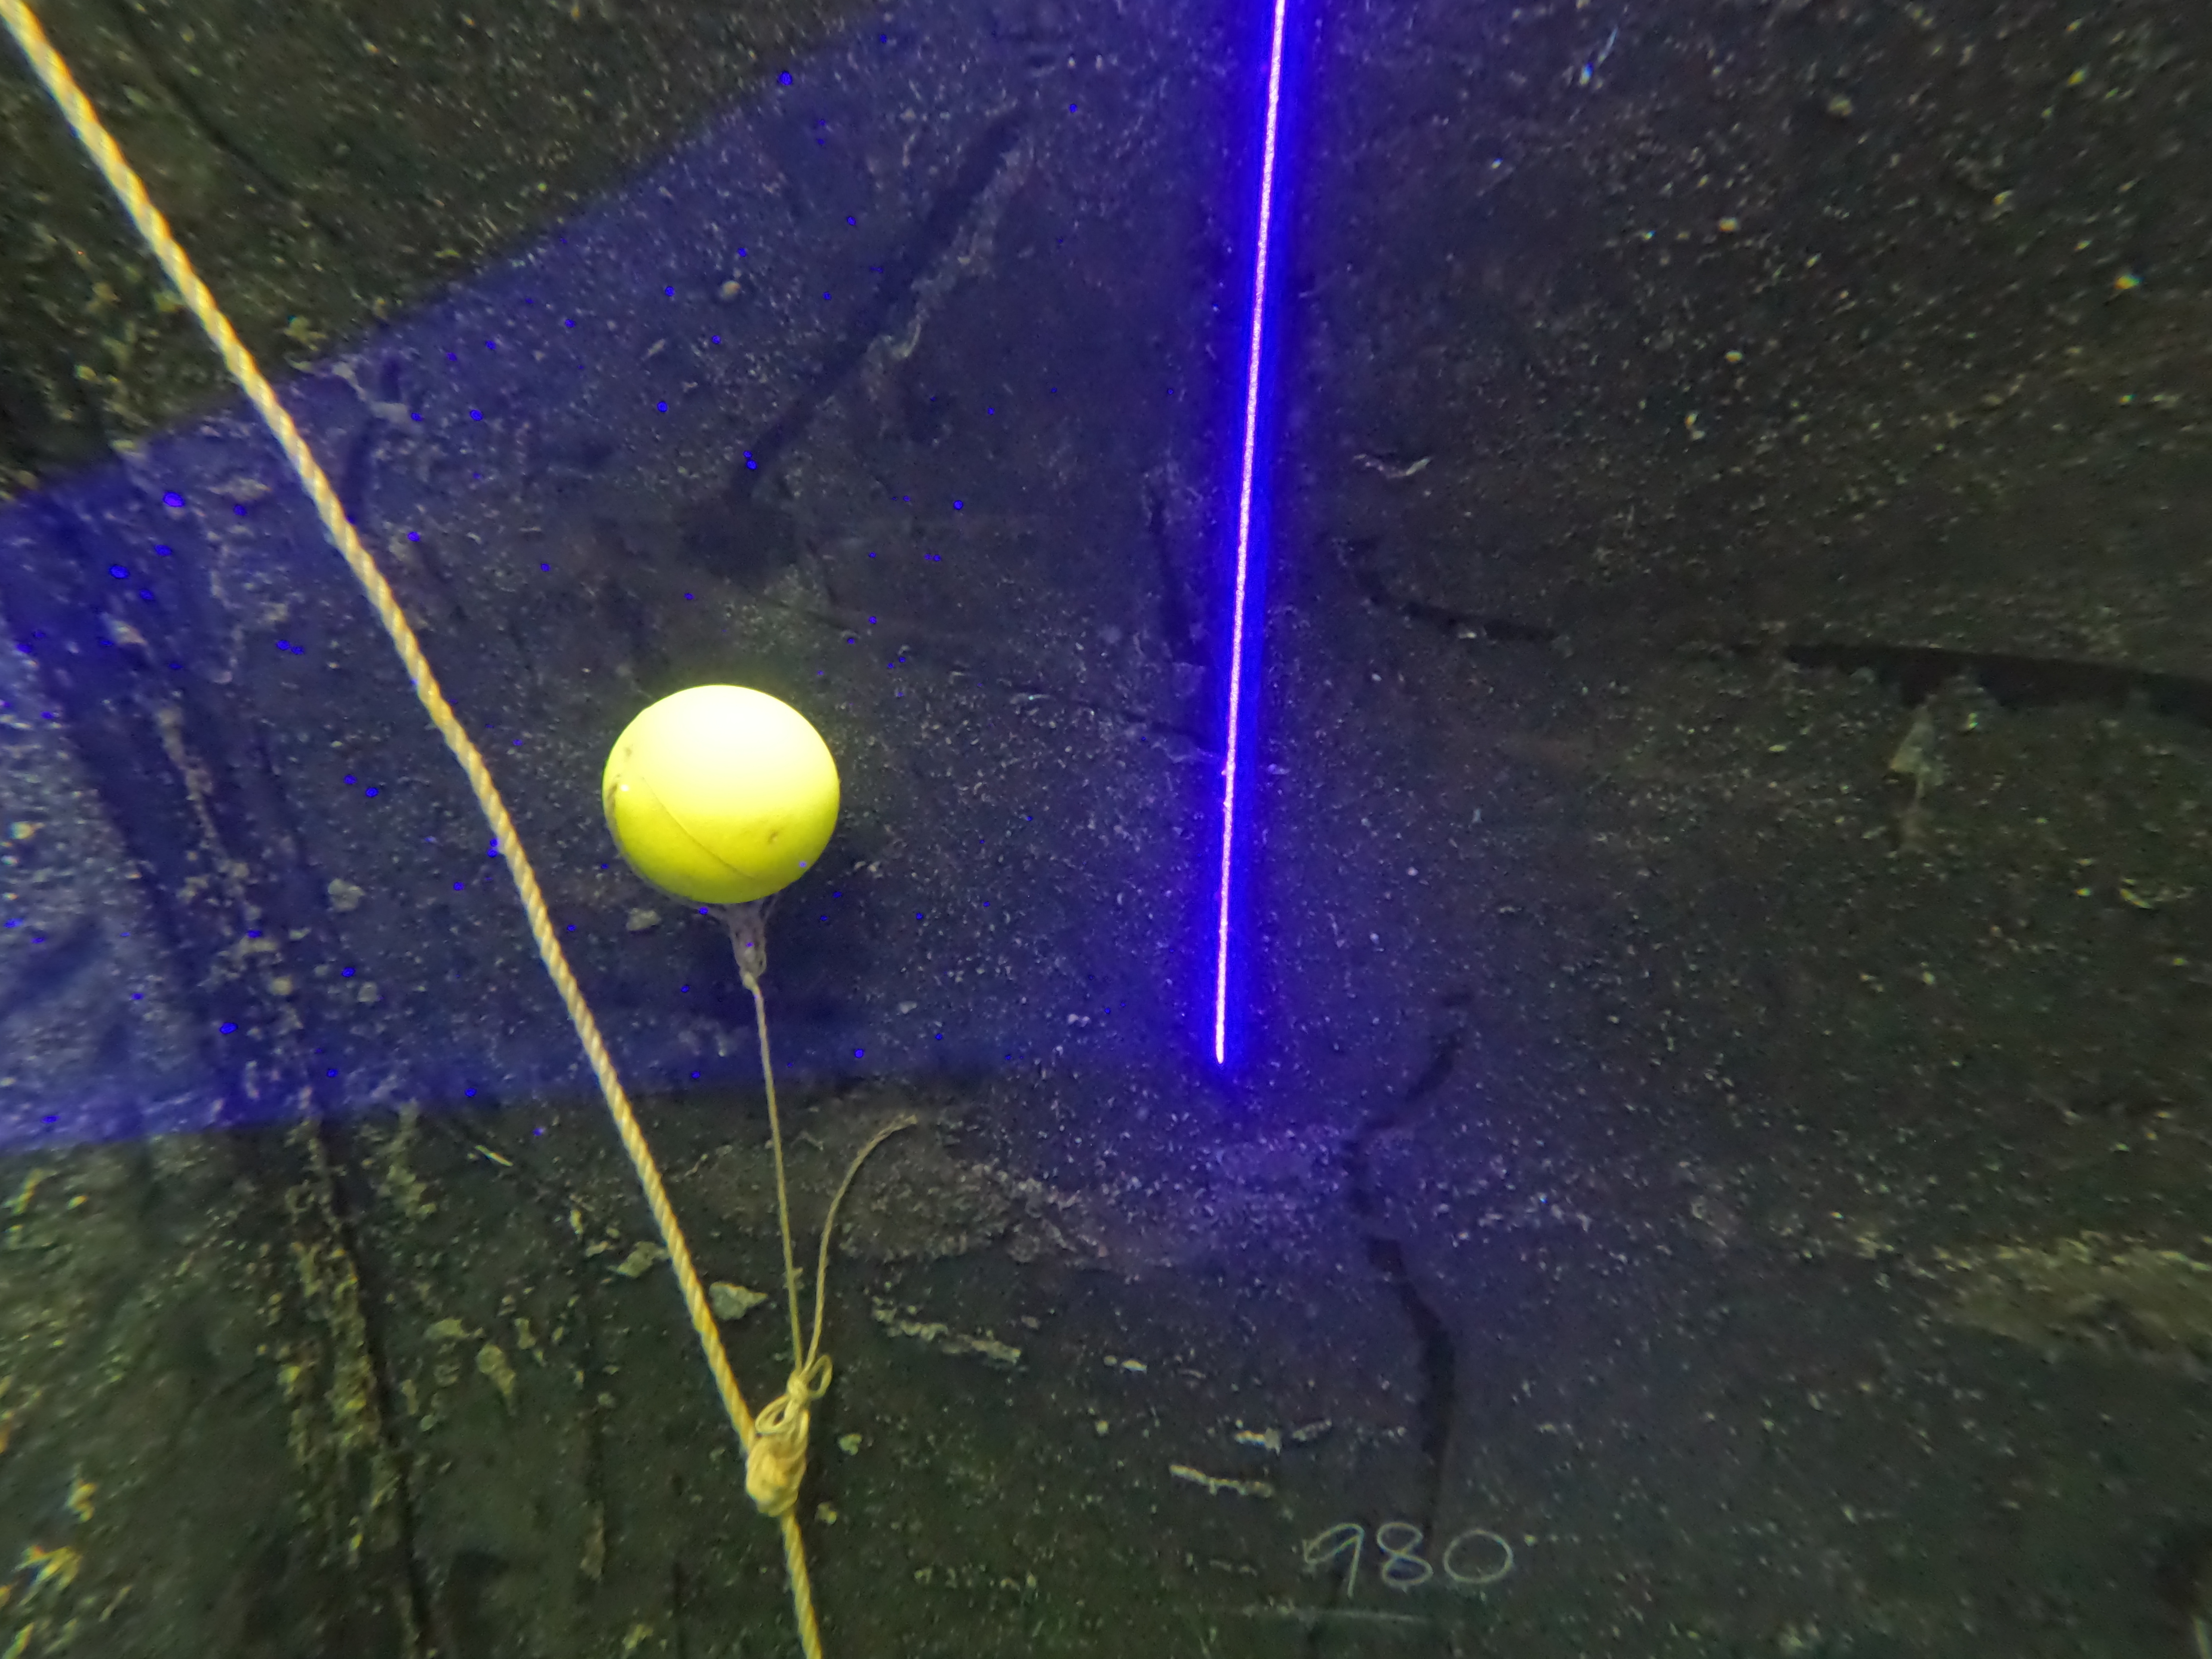

980

Supplement: Supplementary file 2768 [file G0030268.pdf › 2/G0030268.pdf]

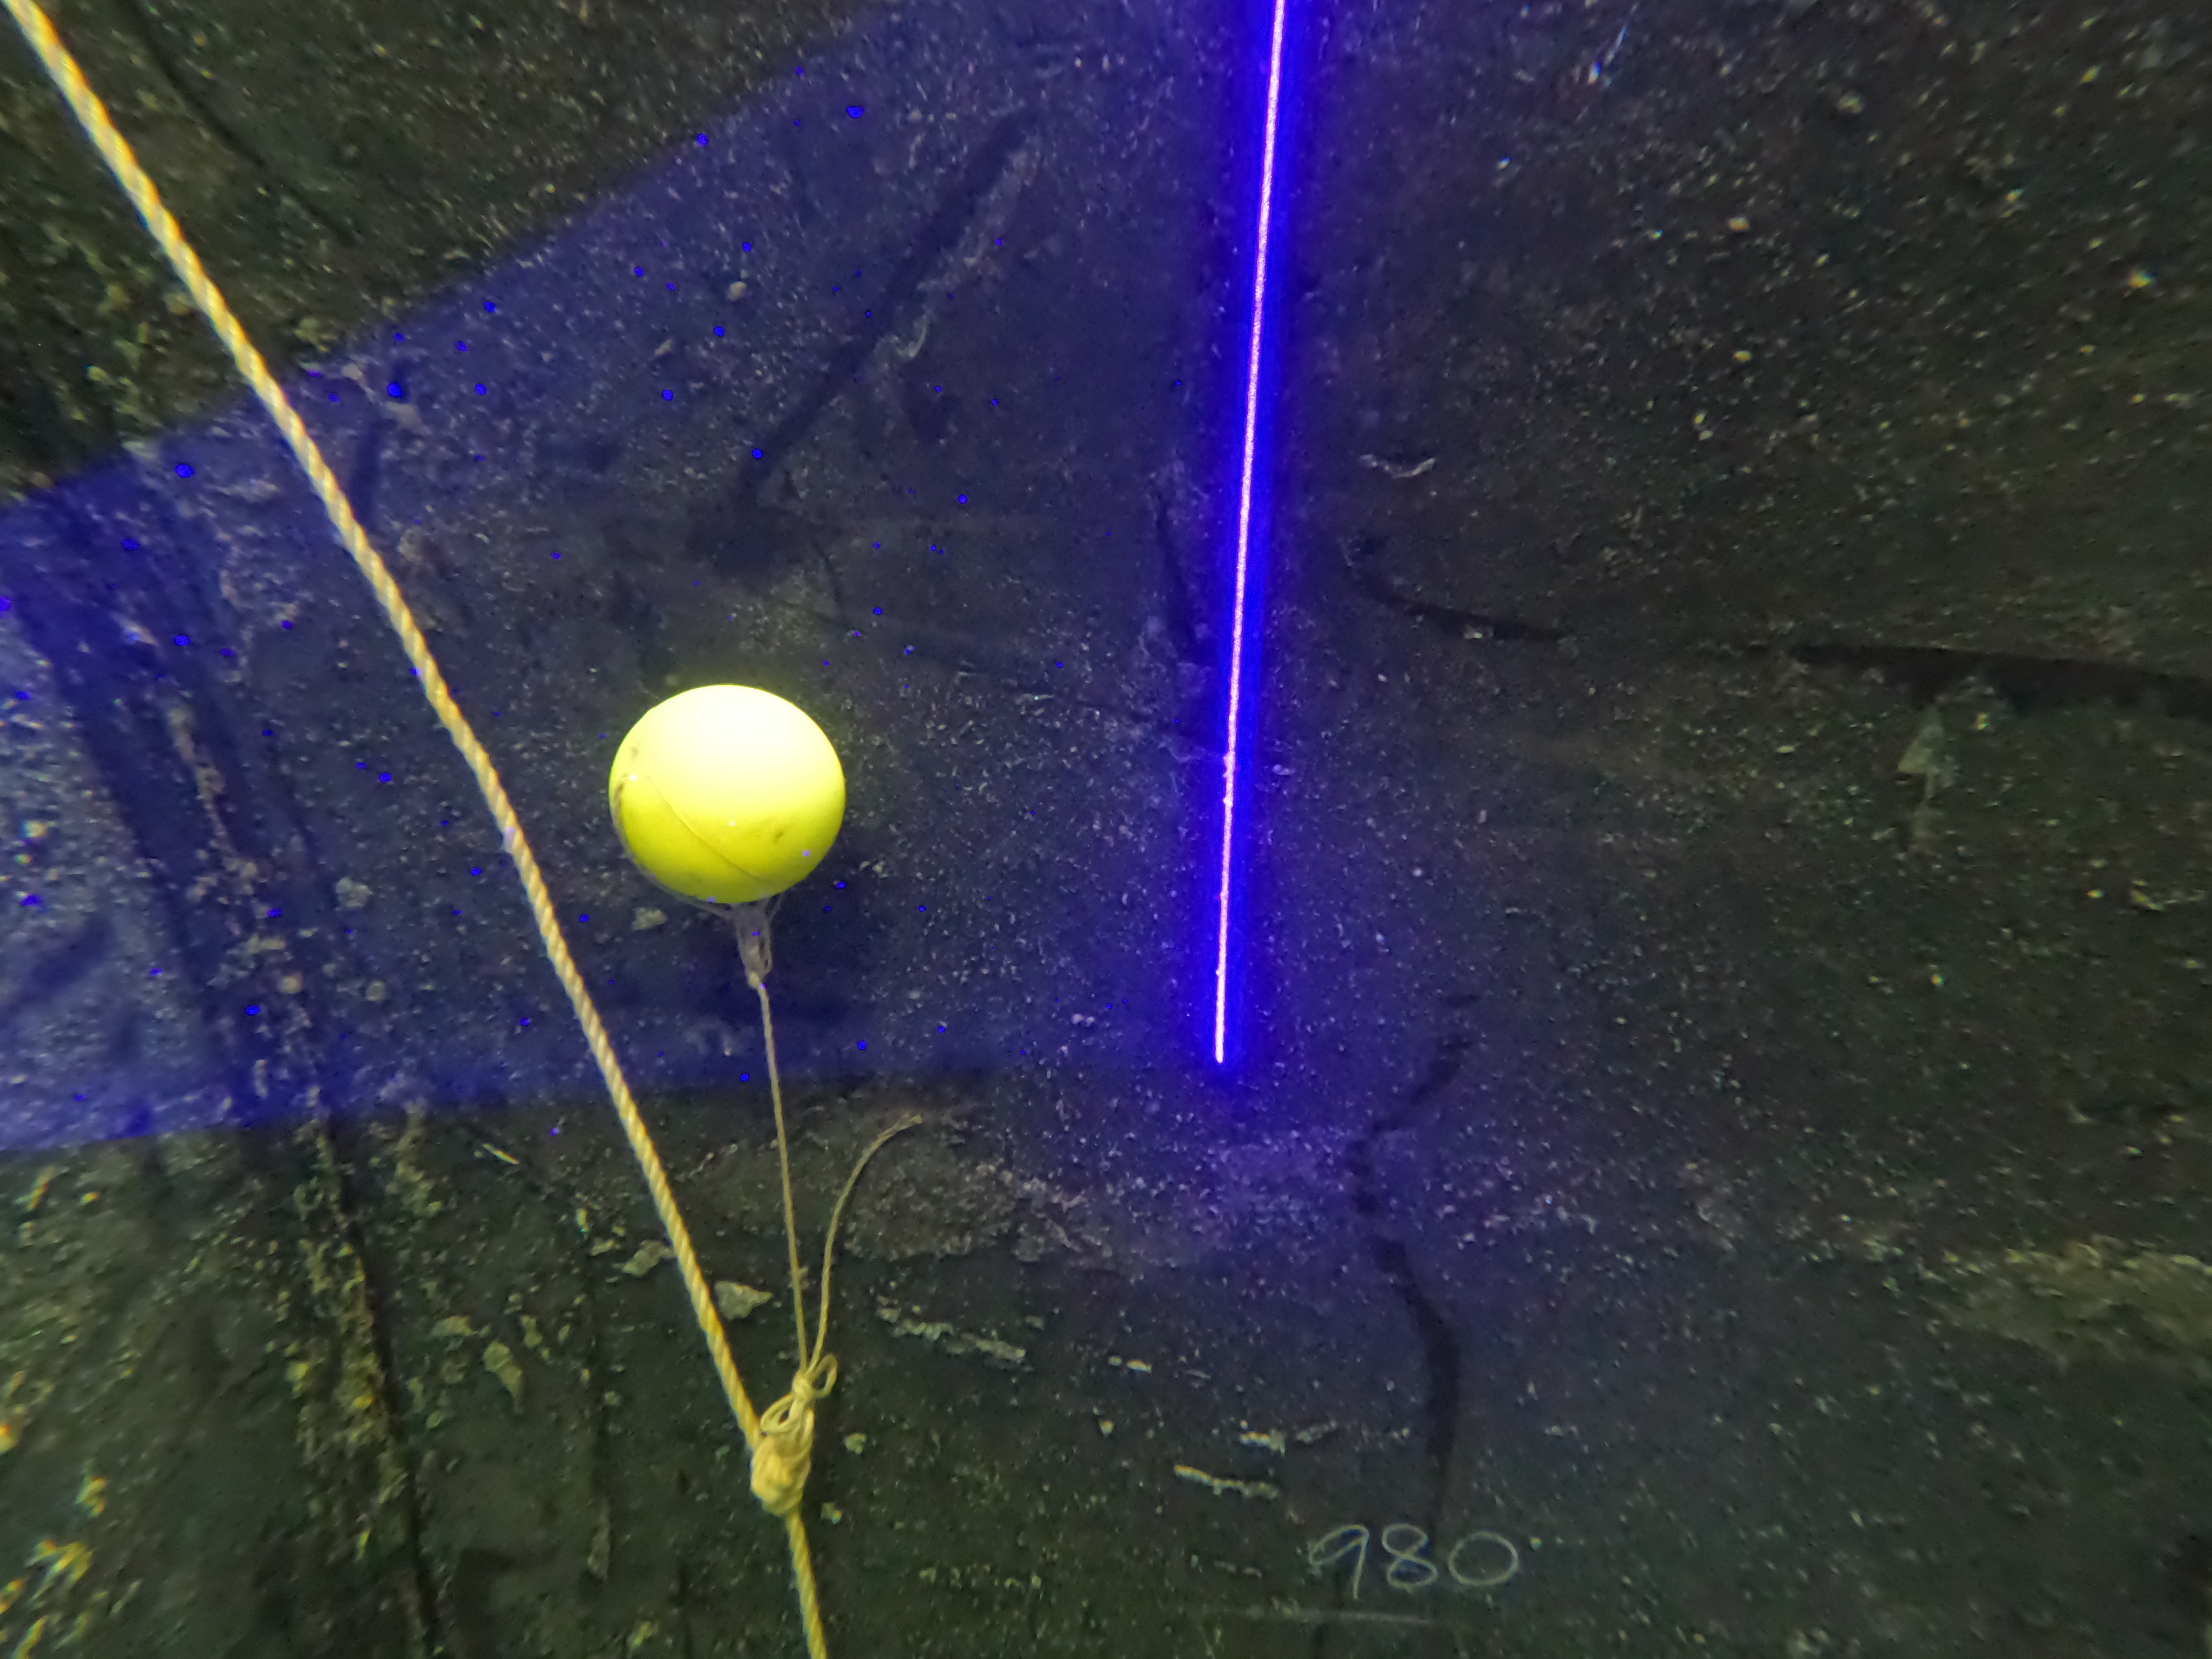

980

Supplement: Supplementary file 2769 [file G0030269.pdf › 2/G0030269.pdf]

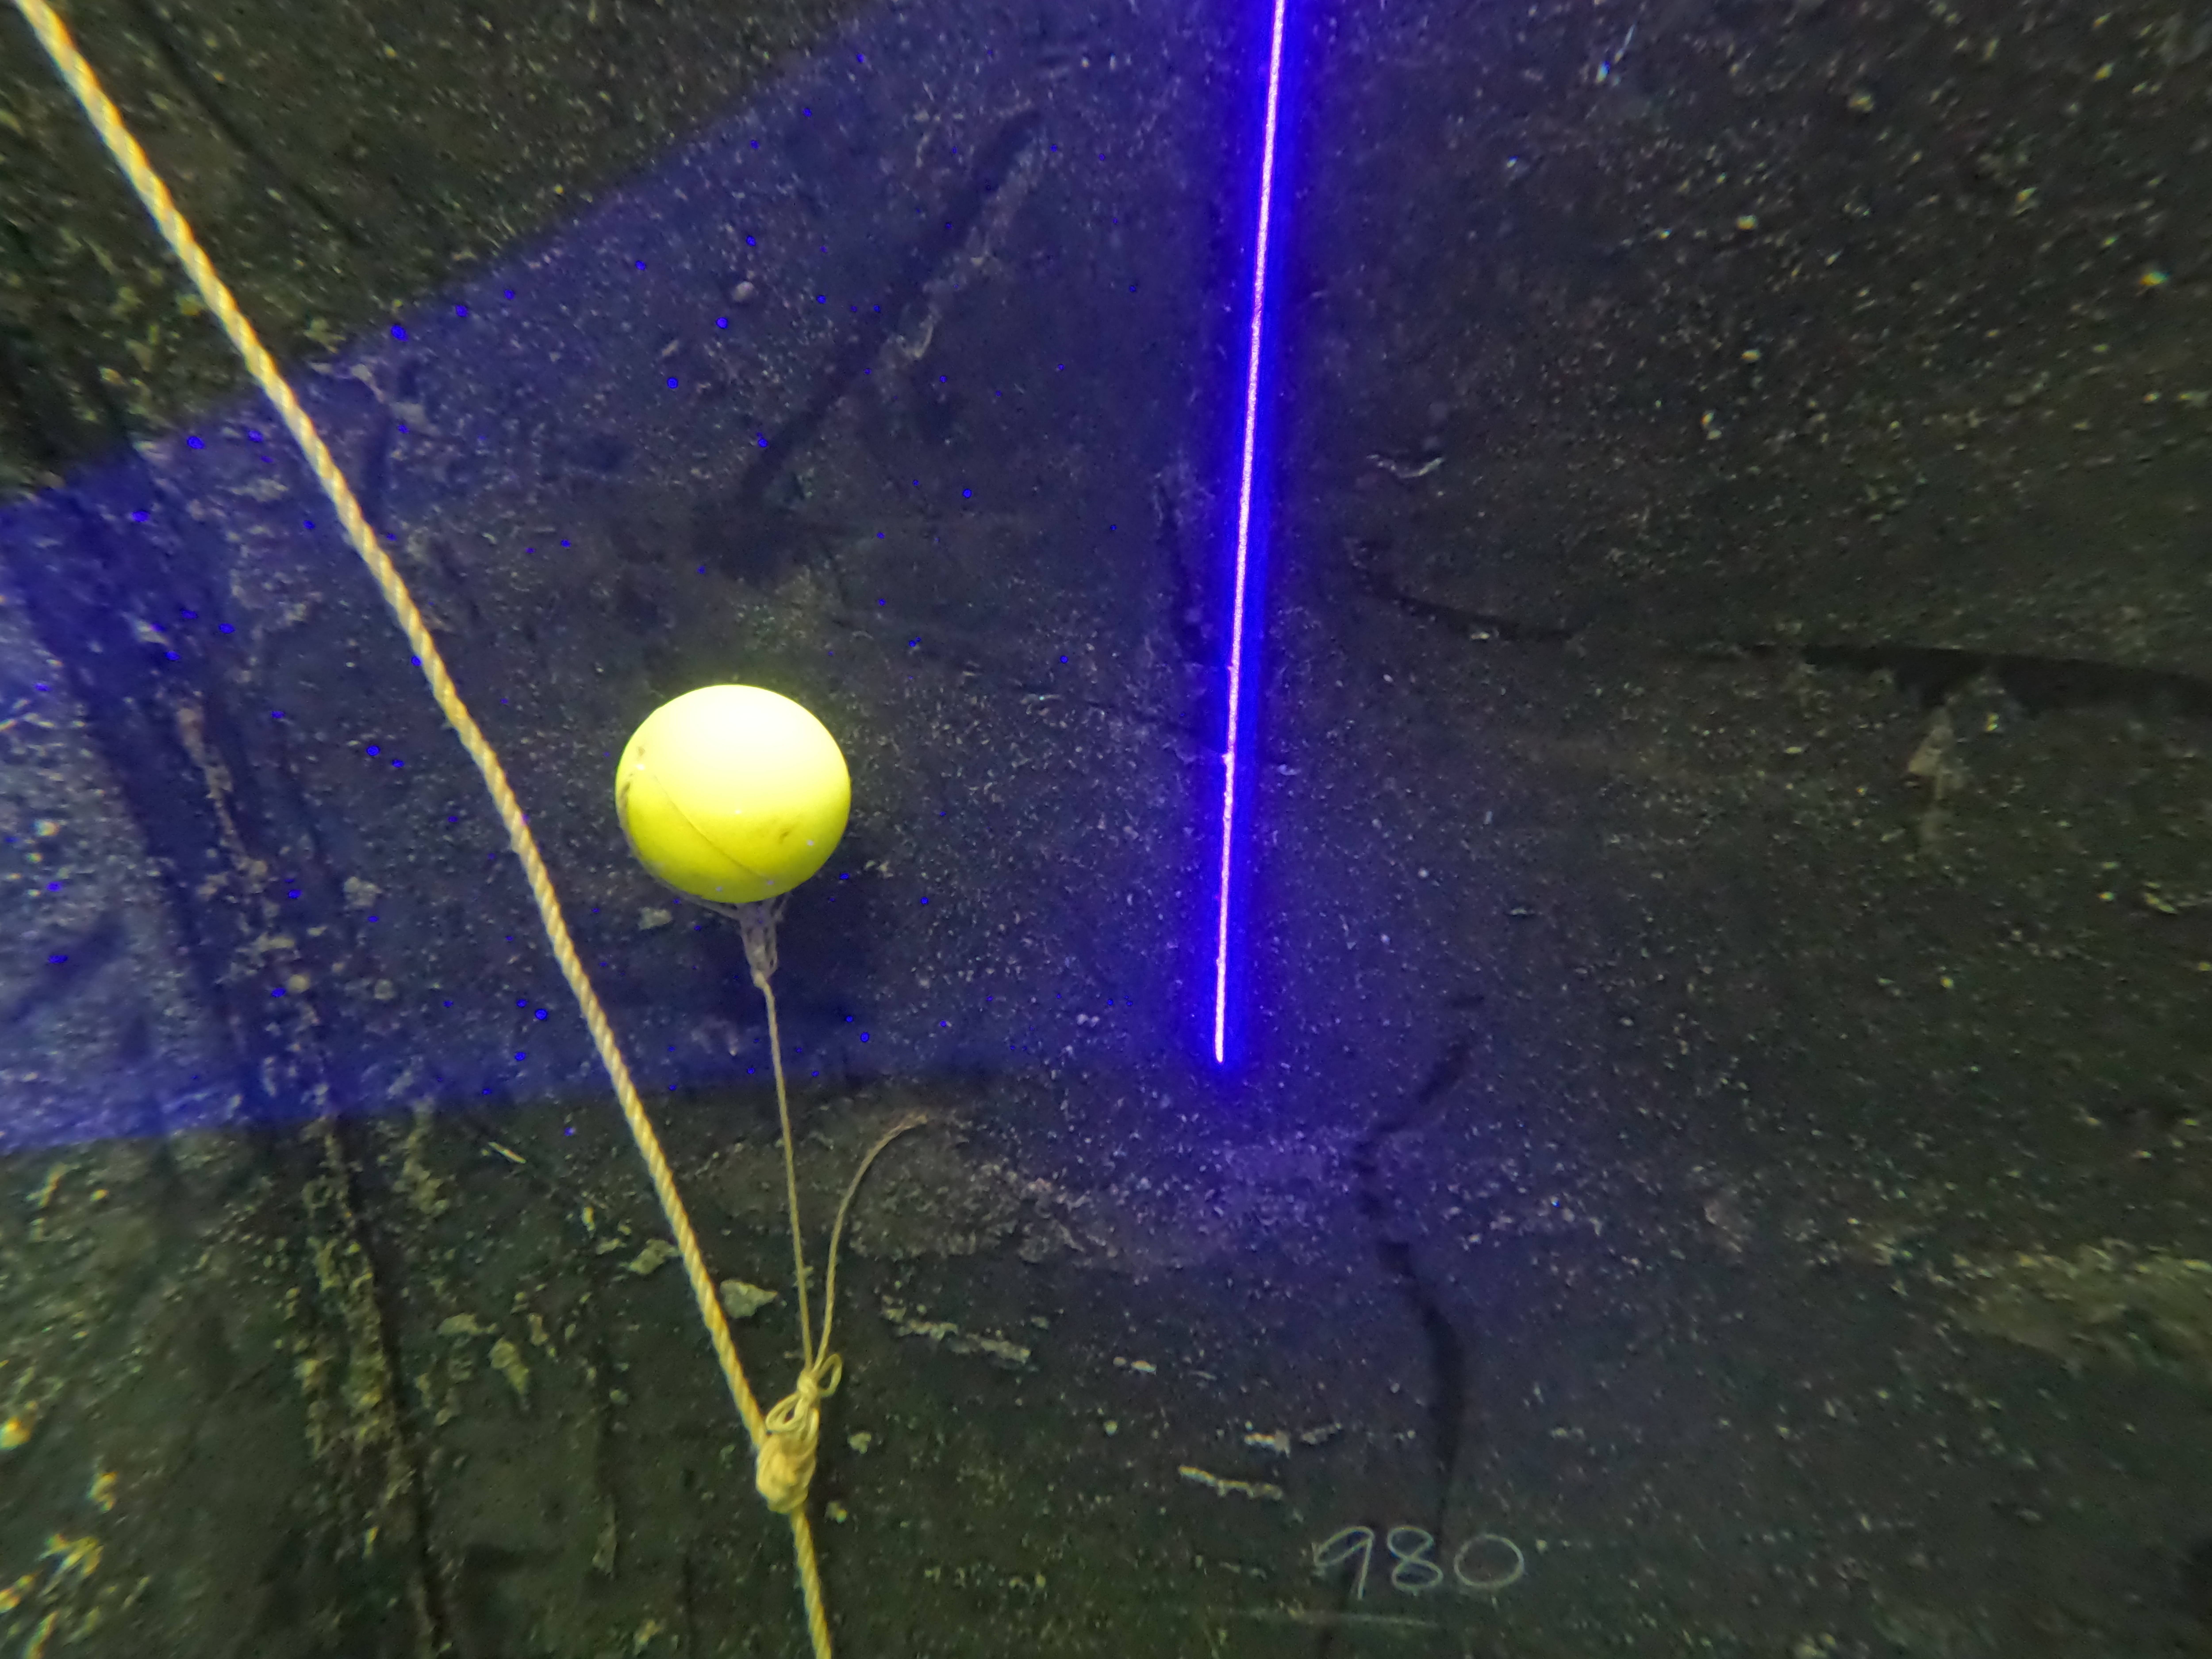

980

Supplement: Supplementary file 2770 [file G0030270.pdf › 2/G0030270.pdf]

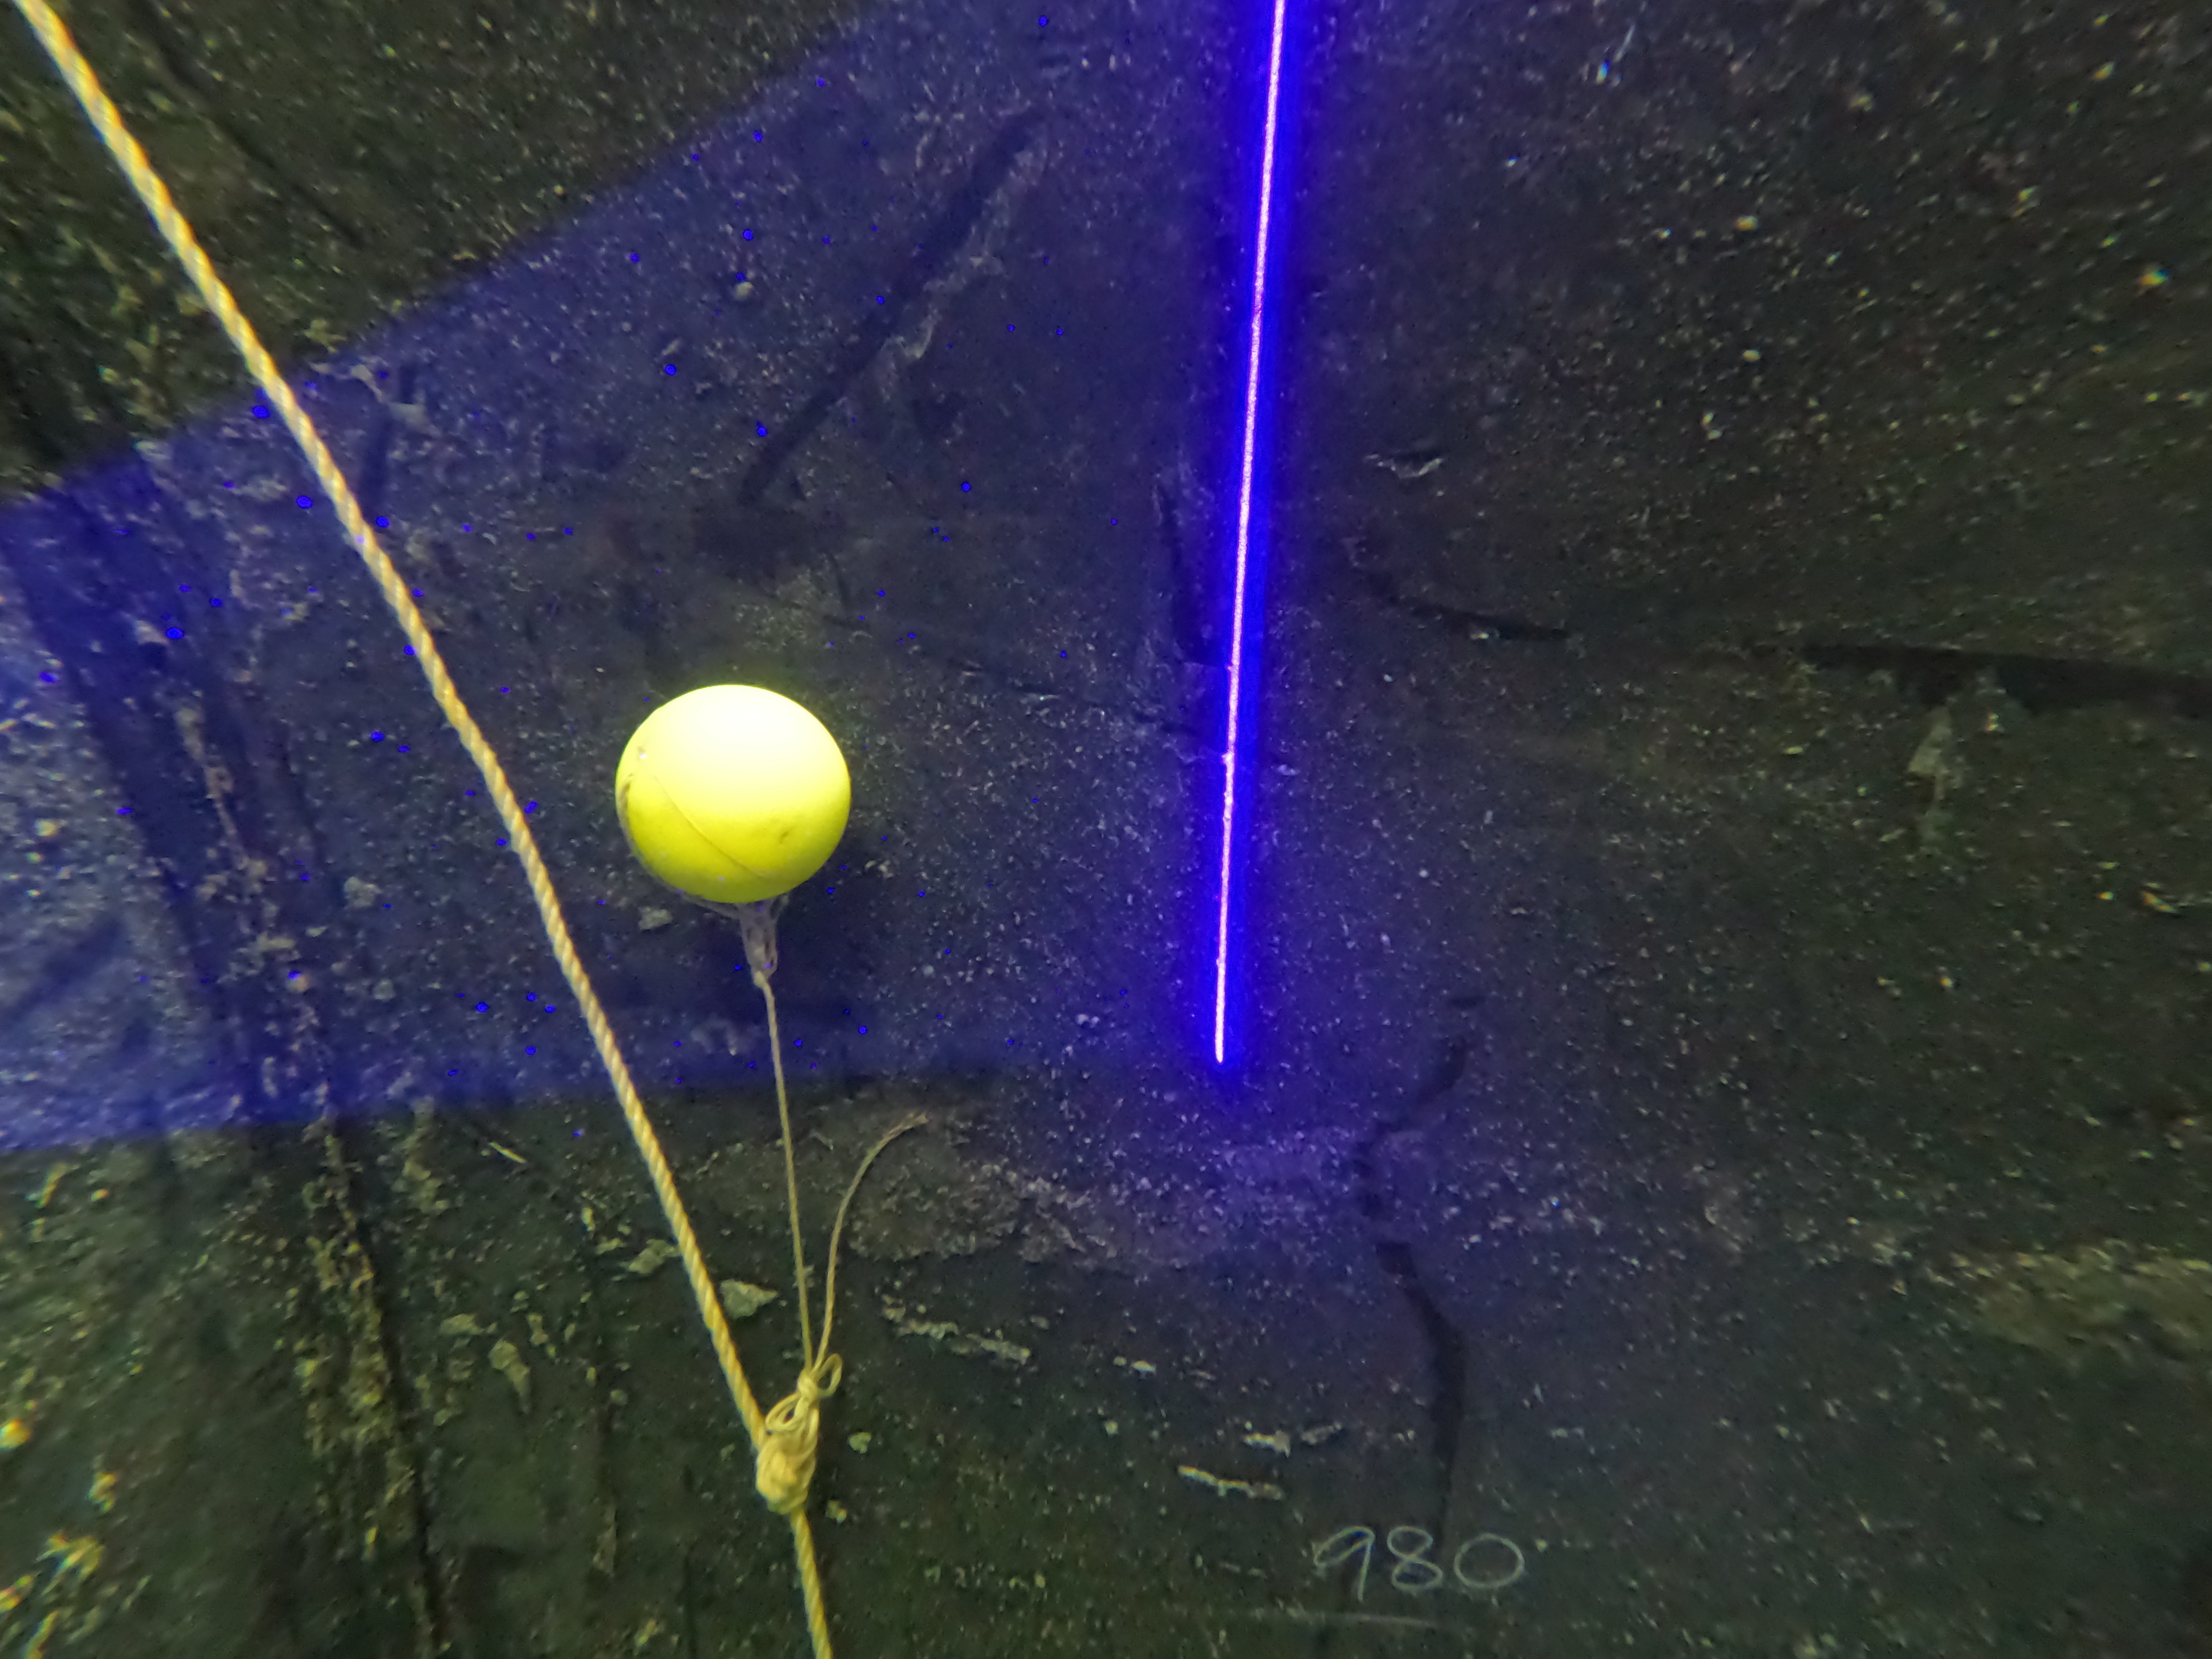

980

Supplement: Supplementary file 2771 [file G0030271.pdf › 2/G0030271.pdf]

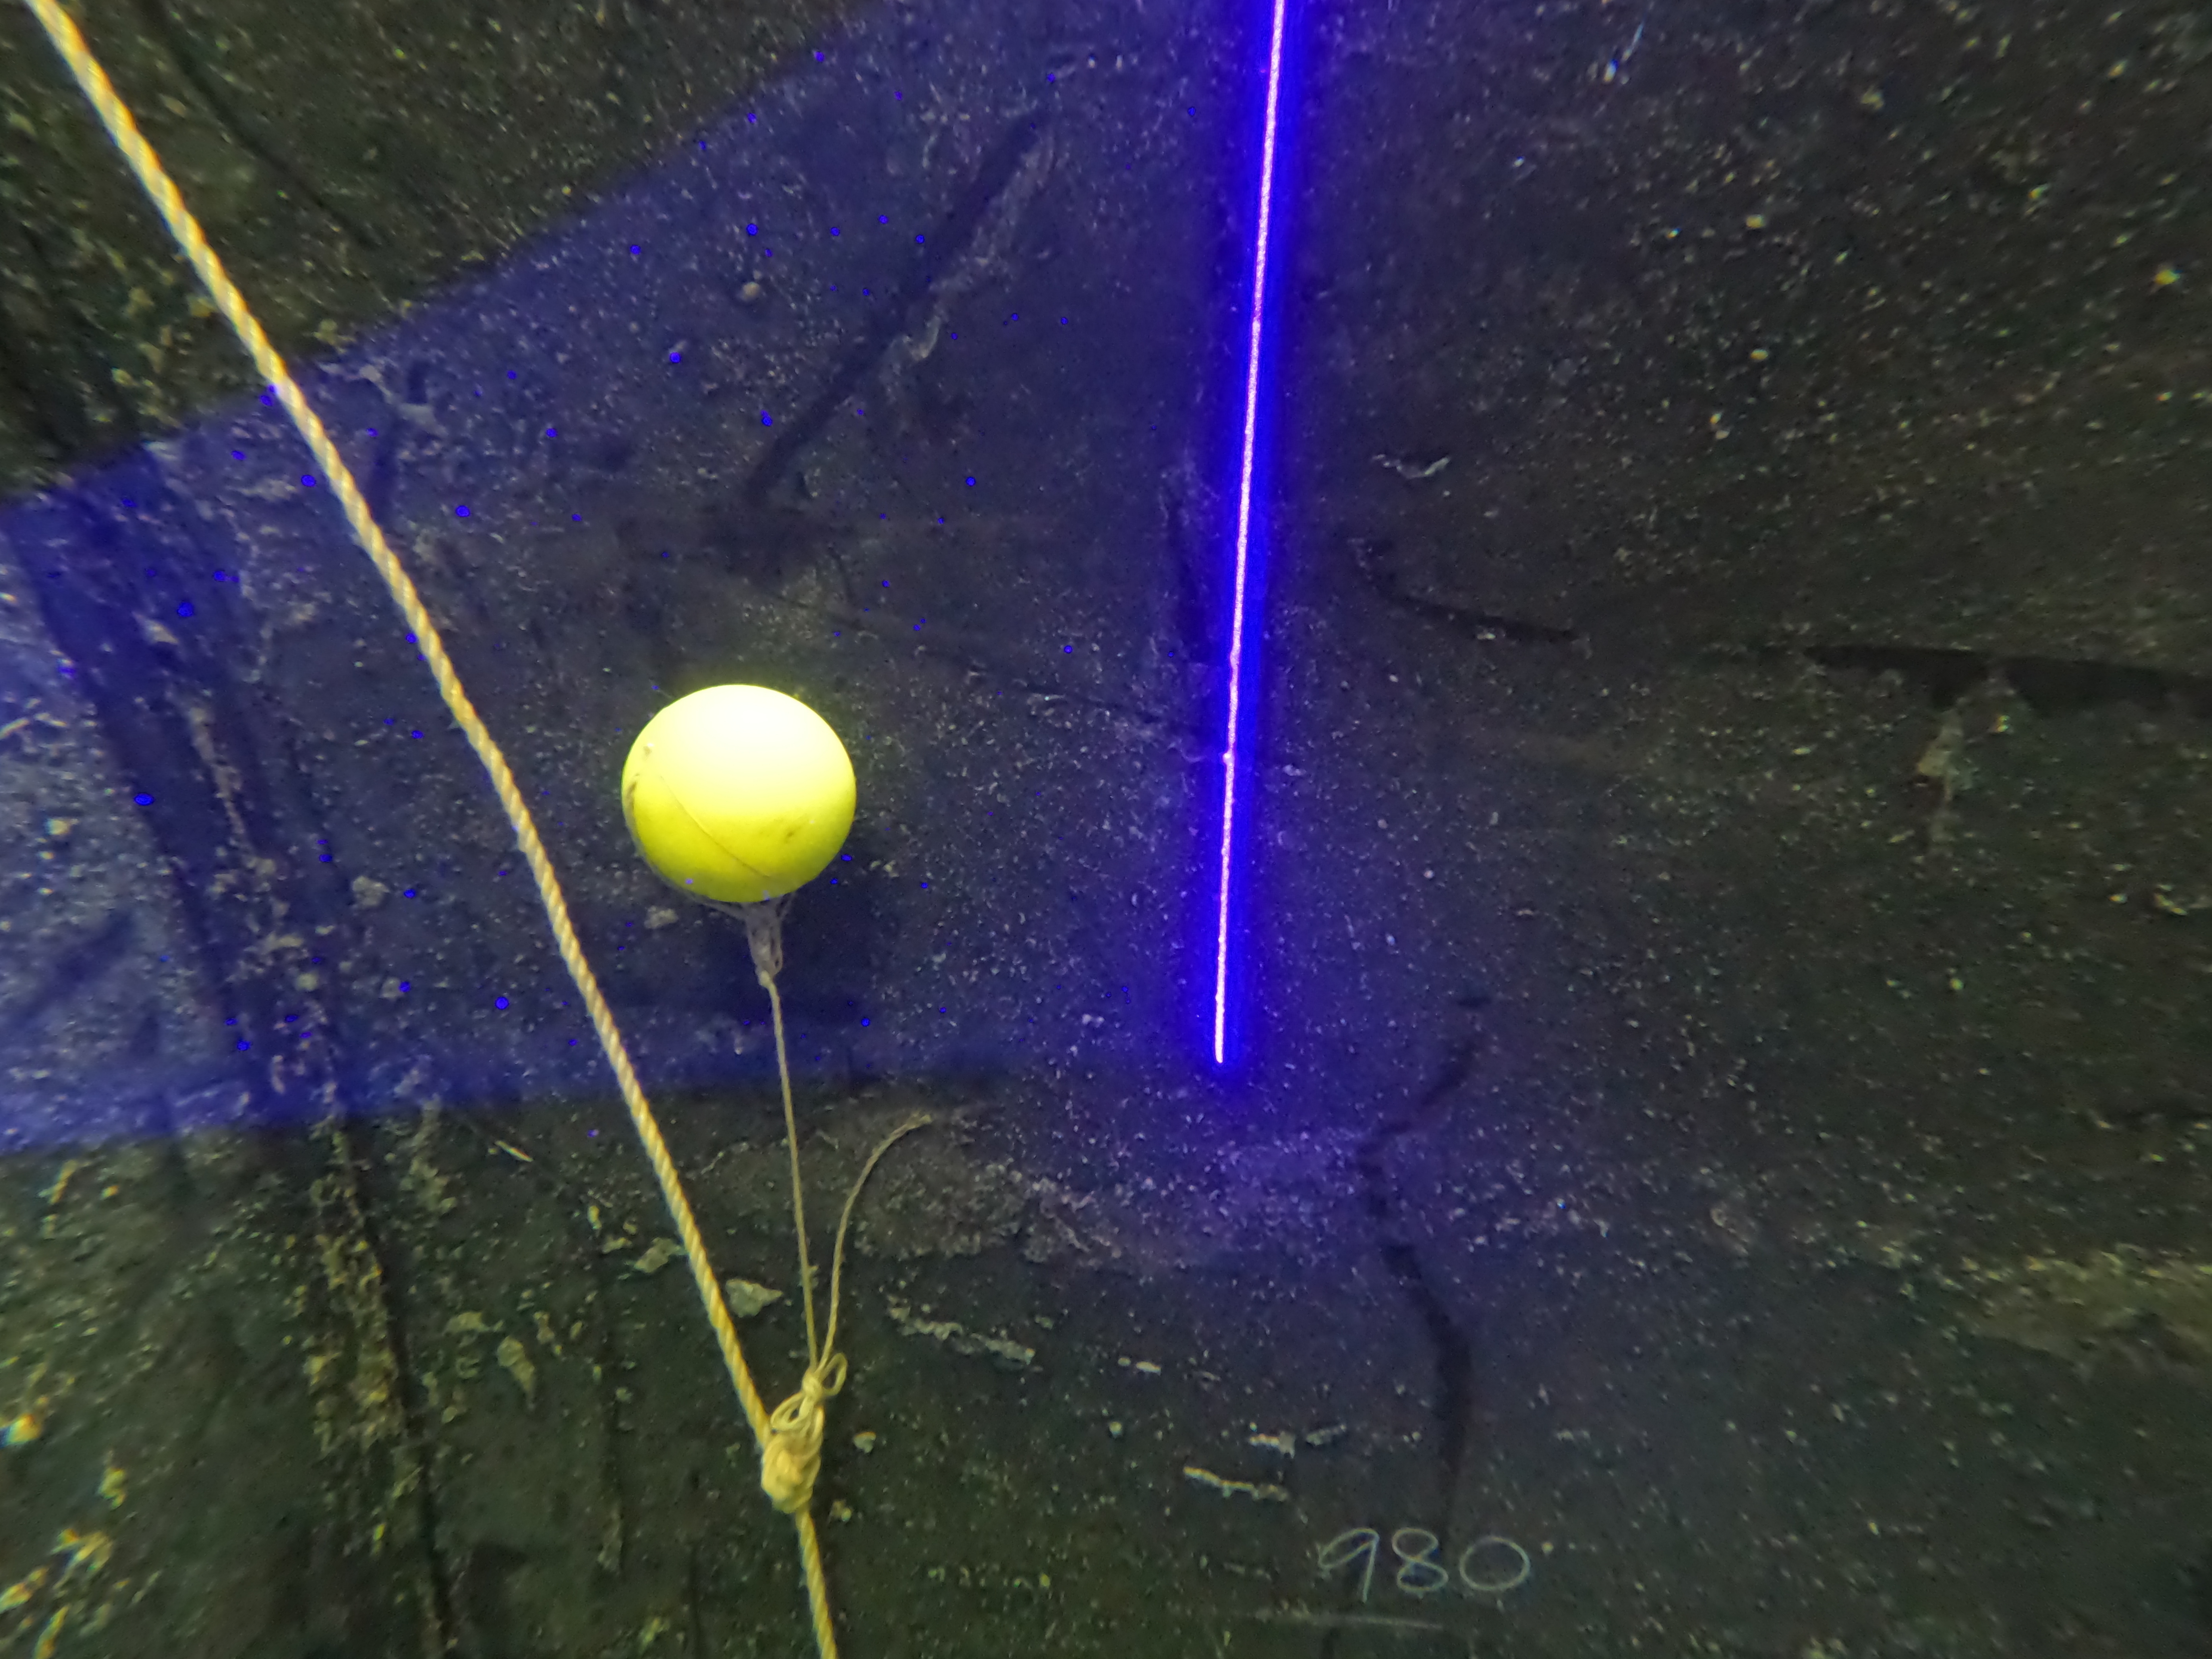

980

Supplement: Supplementary file 2772 [file G0030272.pdf › 2/G0030272.pdf]

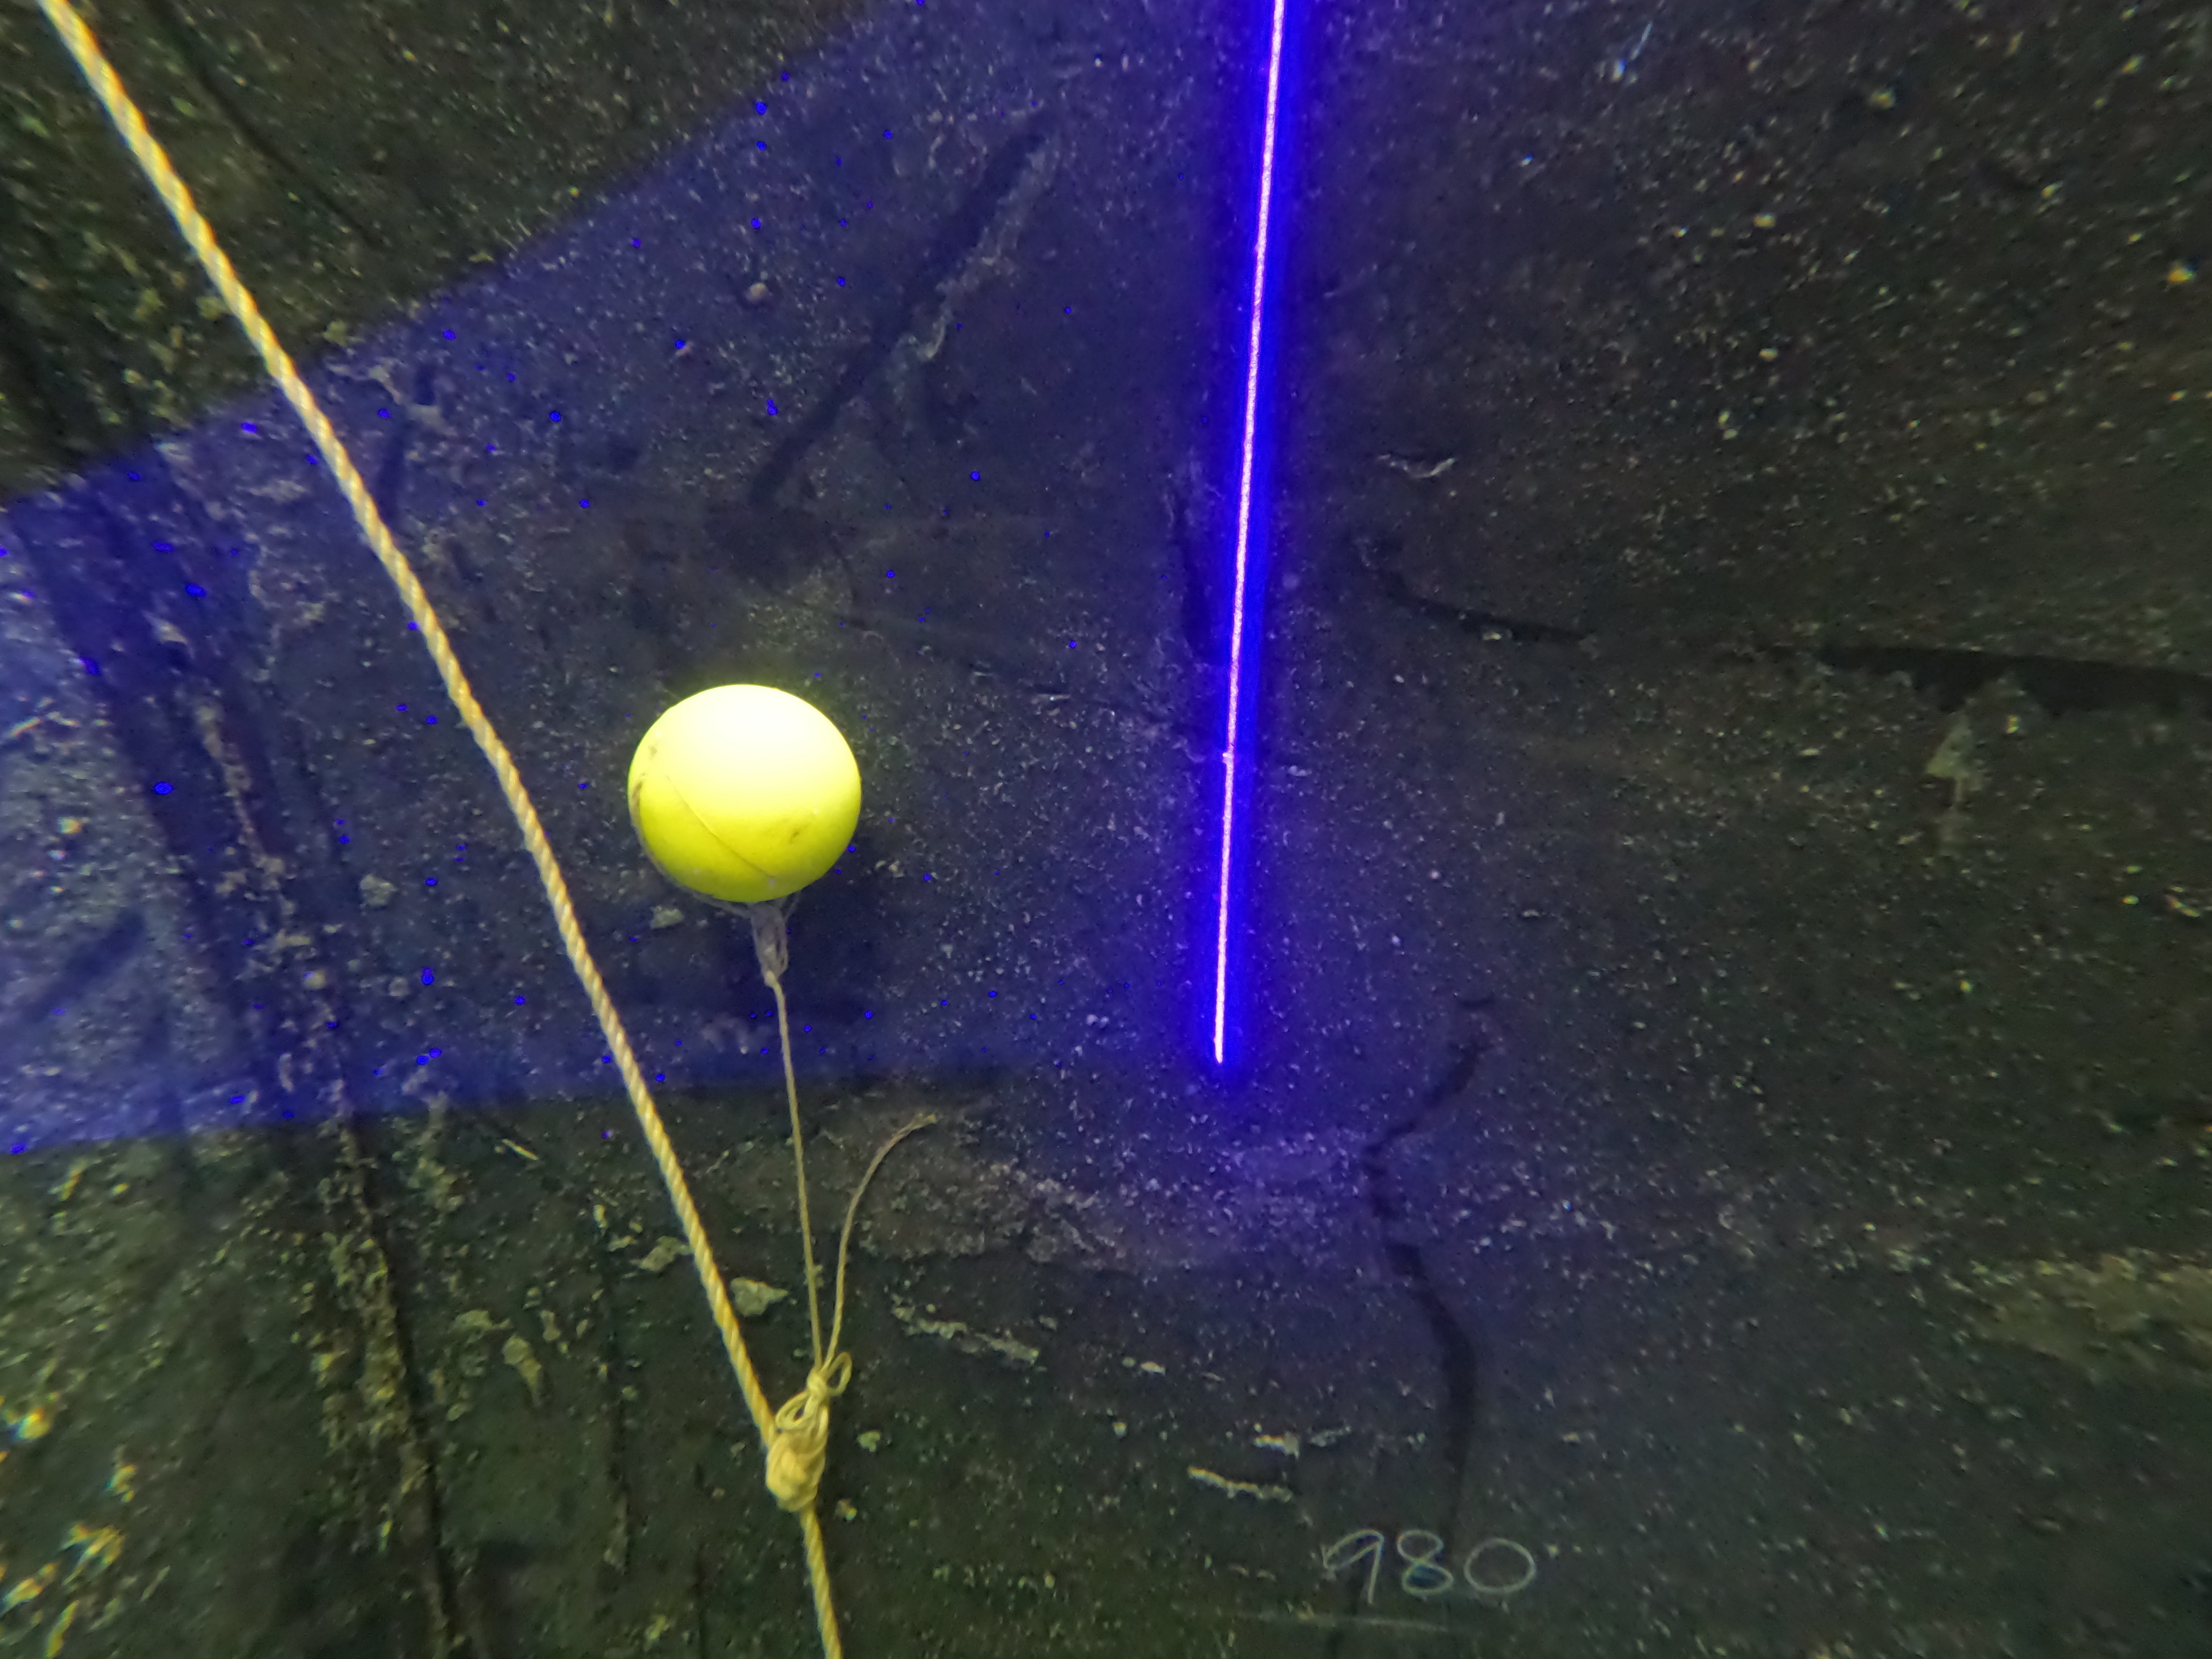

980

Supplement: Supplementary file 2773 [file G0030273.pdf › 2/G0030273.pdf]

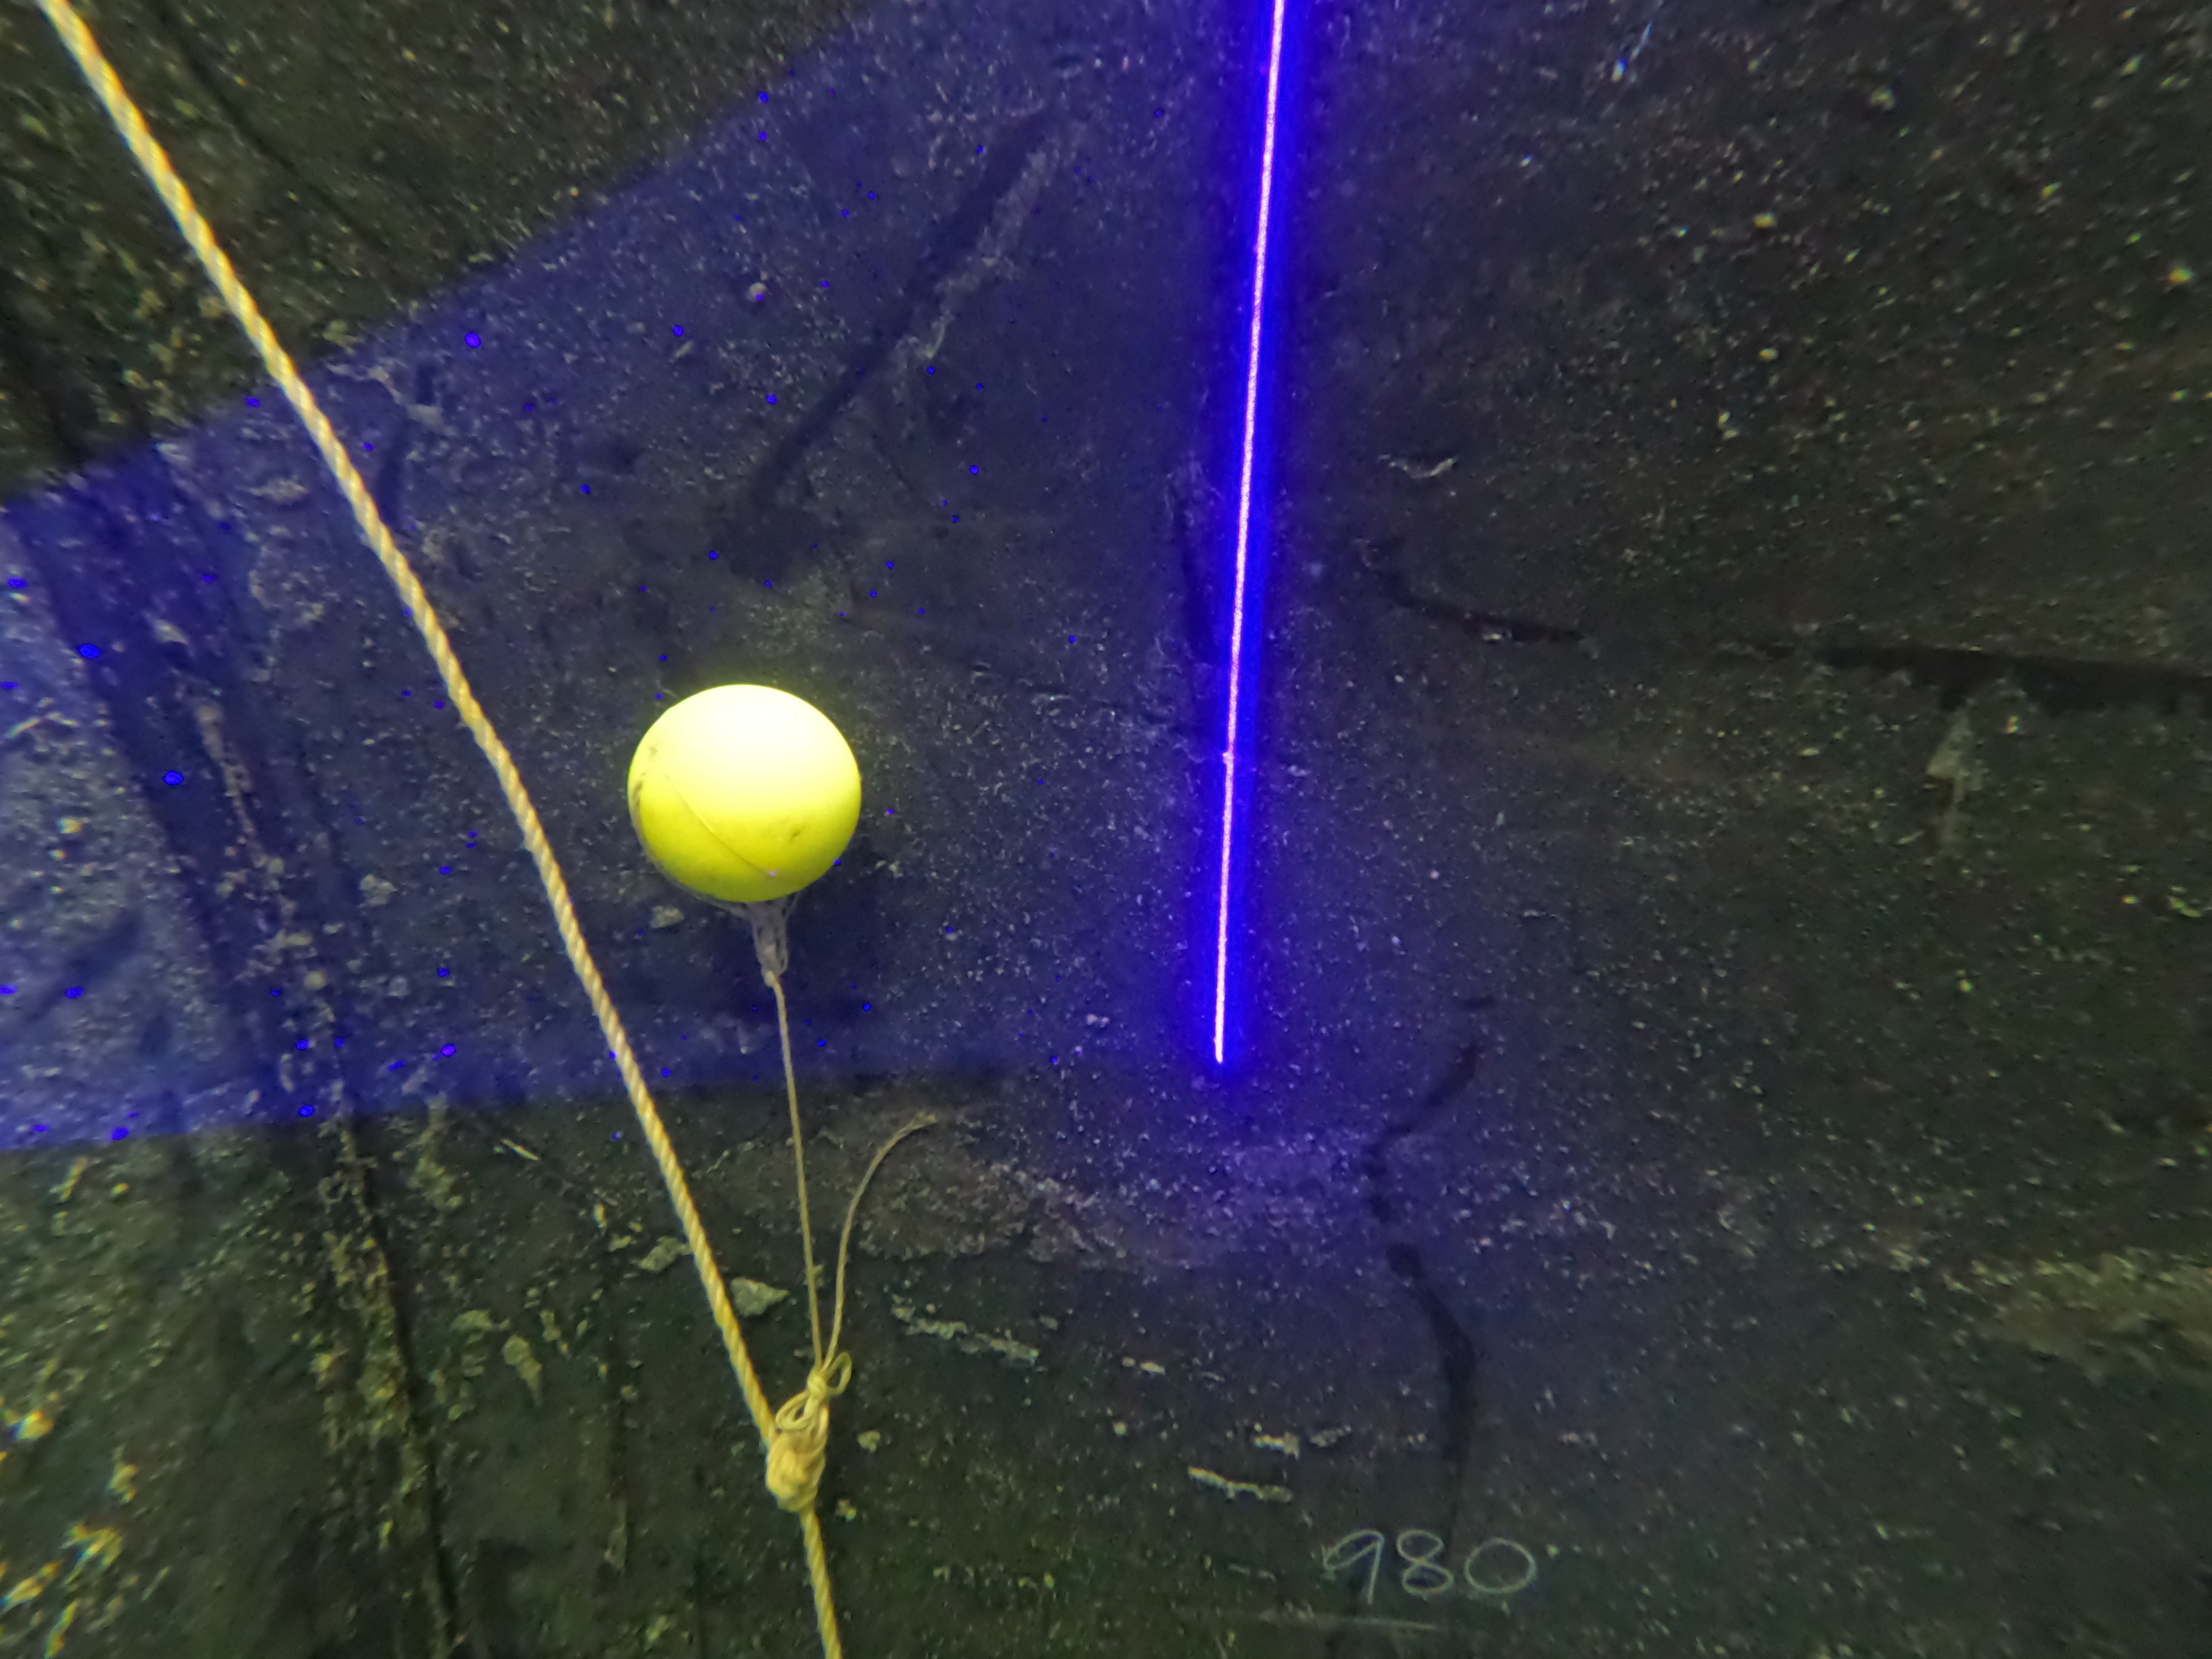

980

Supplement: Supplementary file 2774 [file G0030274.pdf › 2/G0030274.pdf]

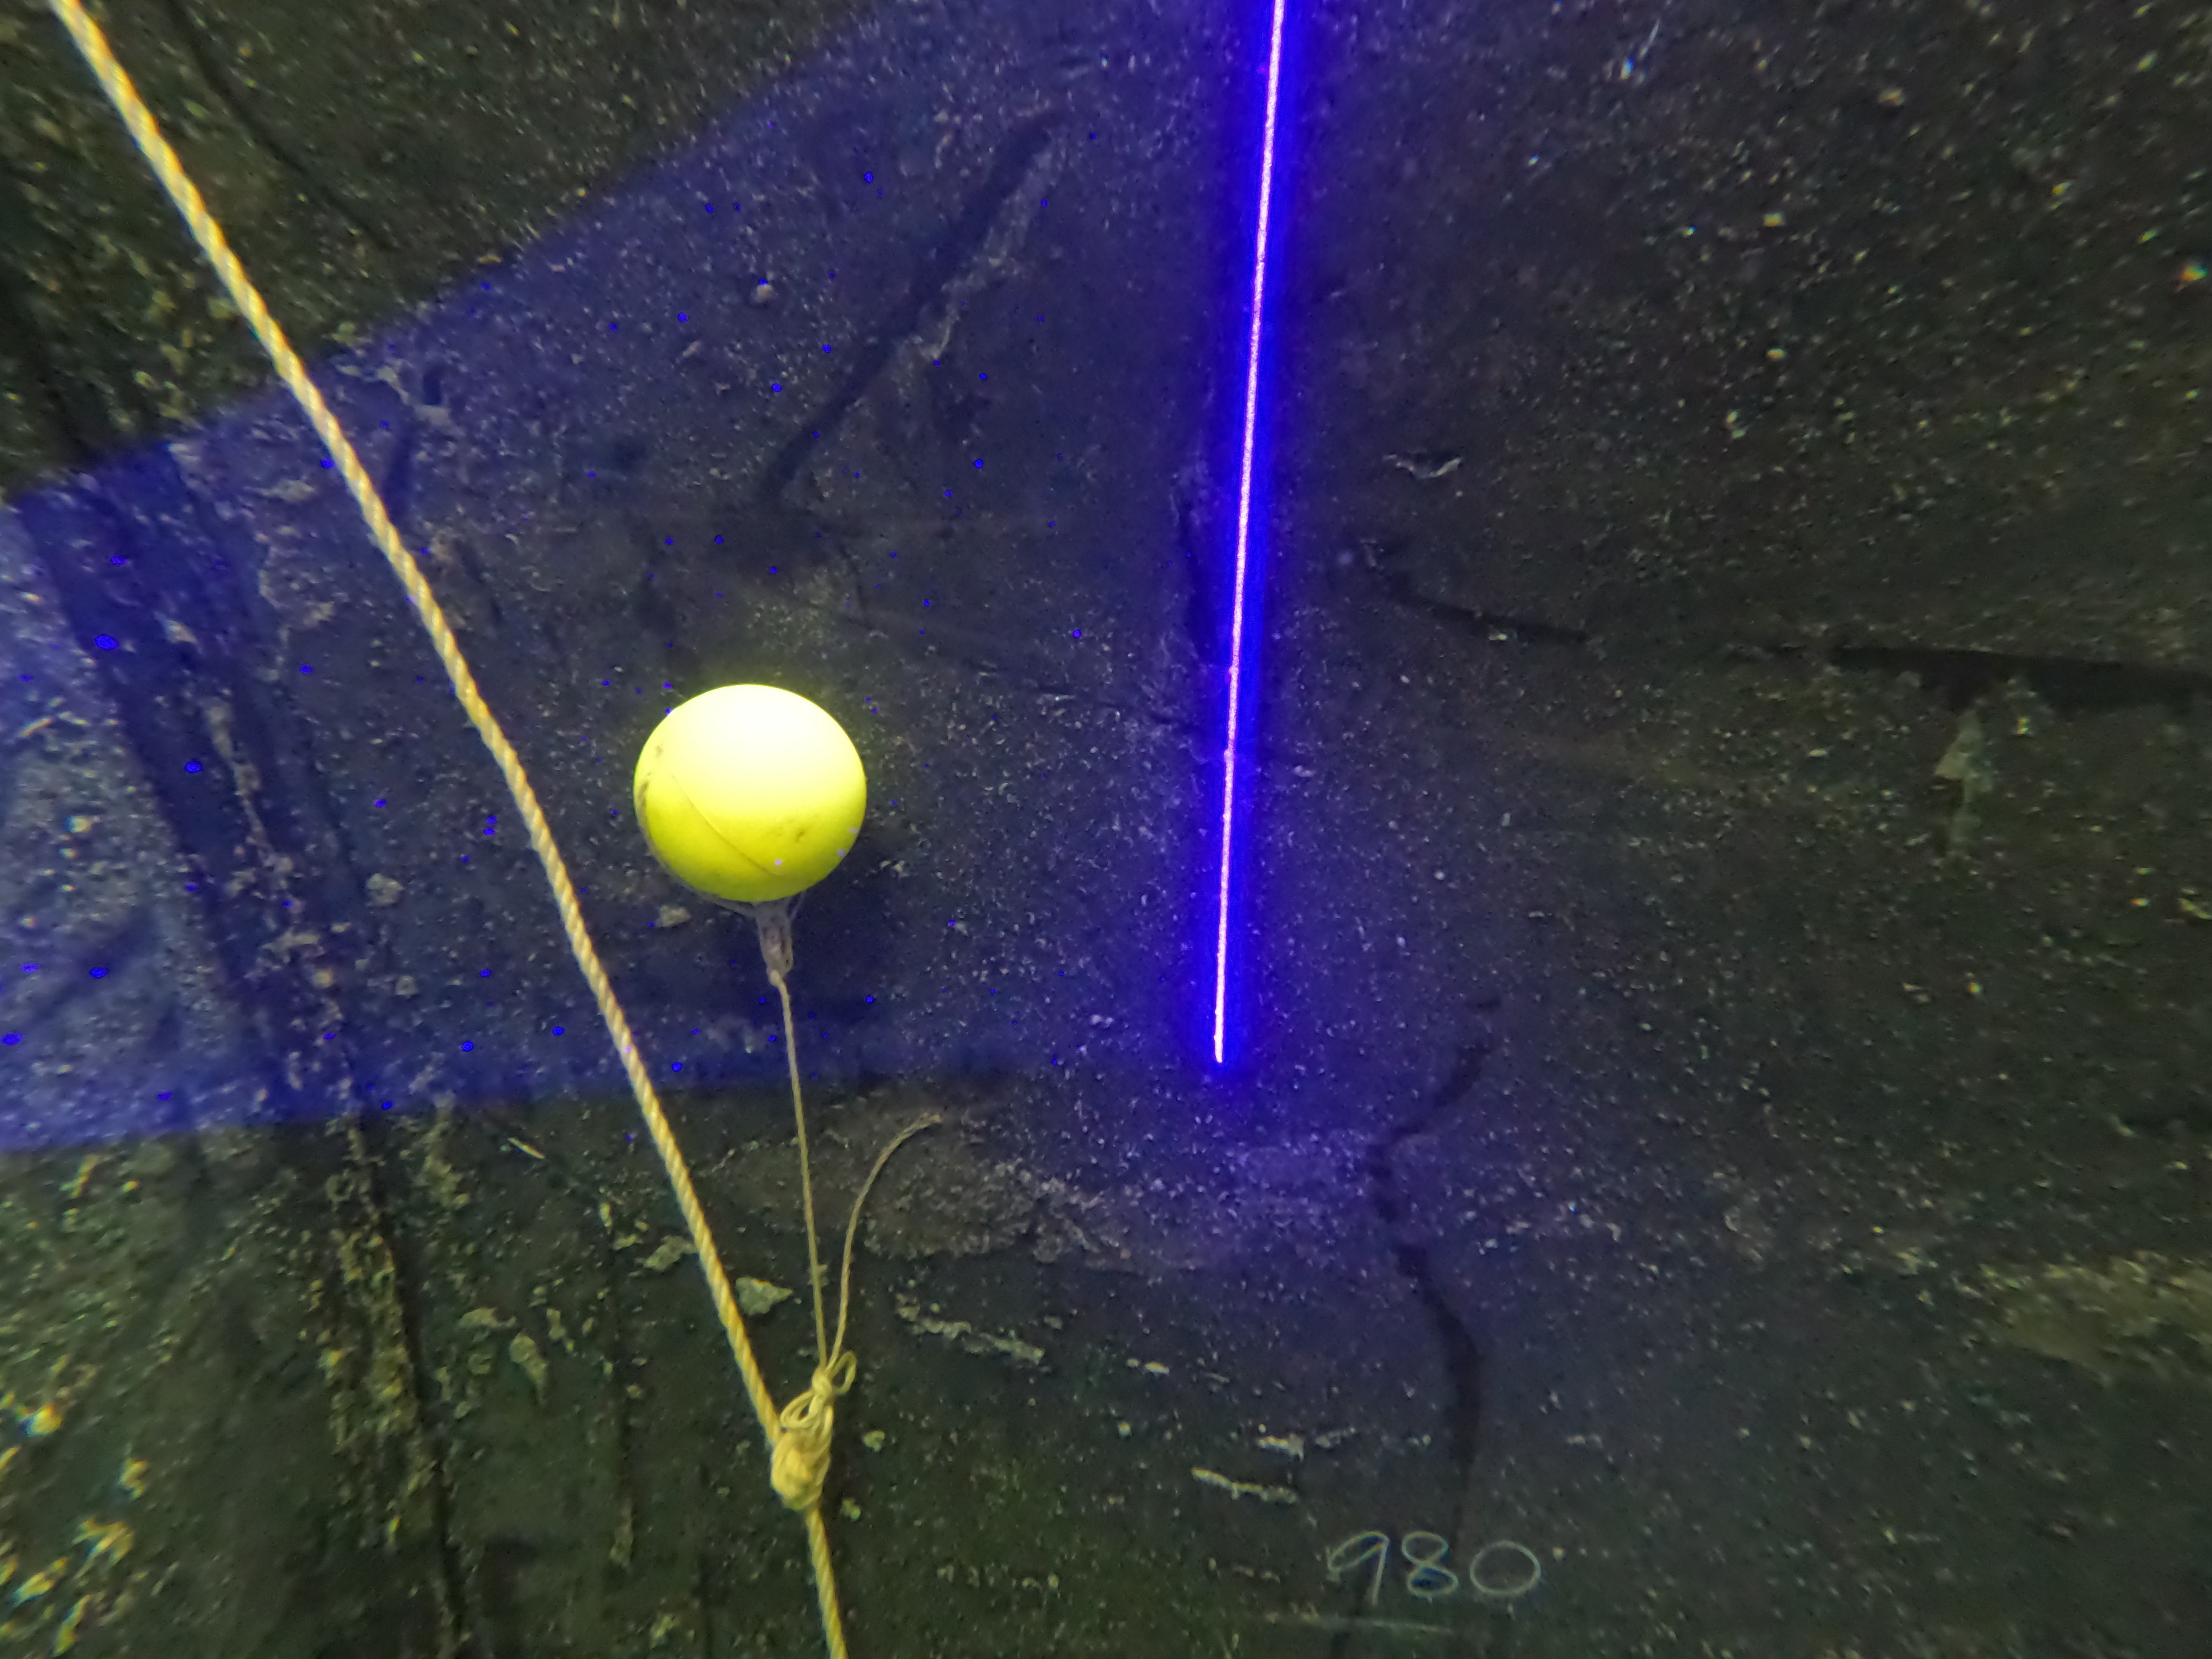

980

Supplement: Supplementary file 2775 [file G0030275.pdf › 2/G0030275.pdf]

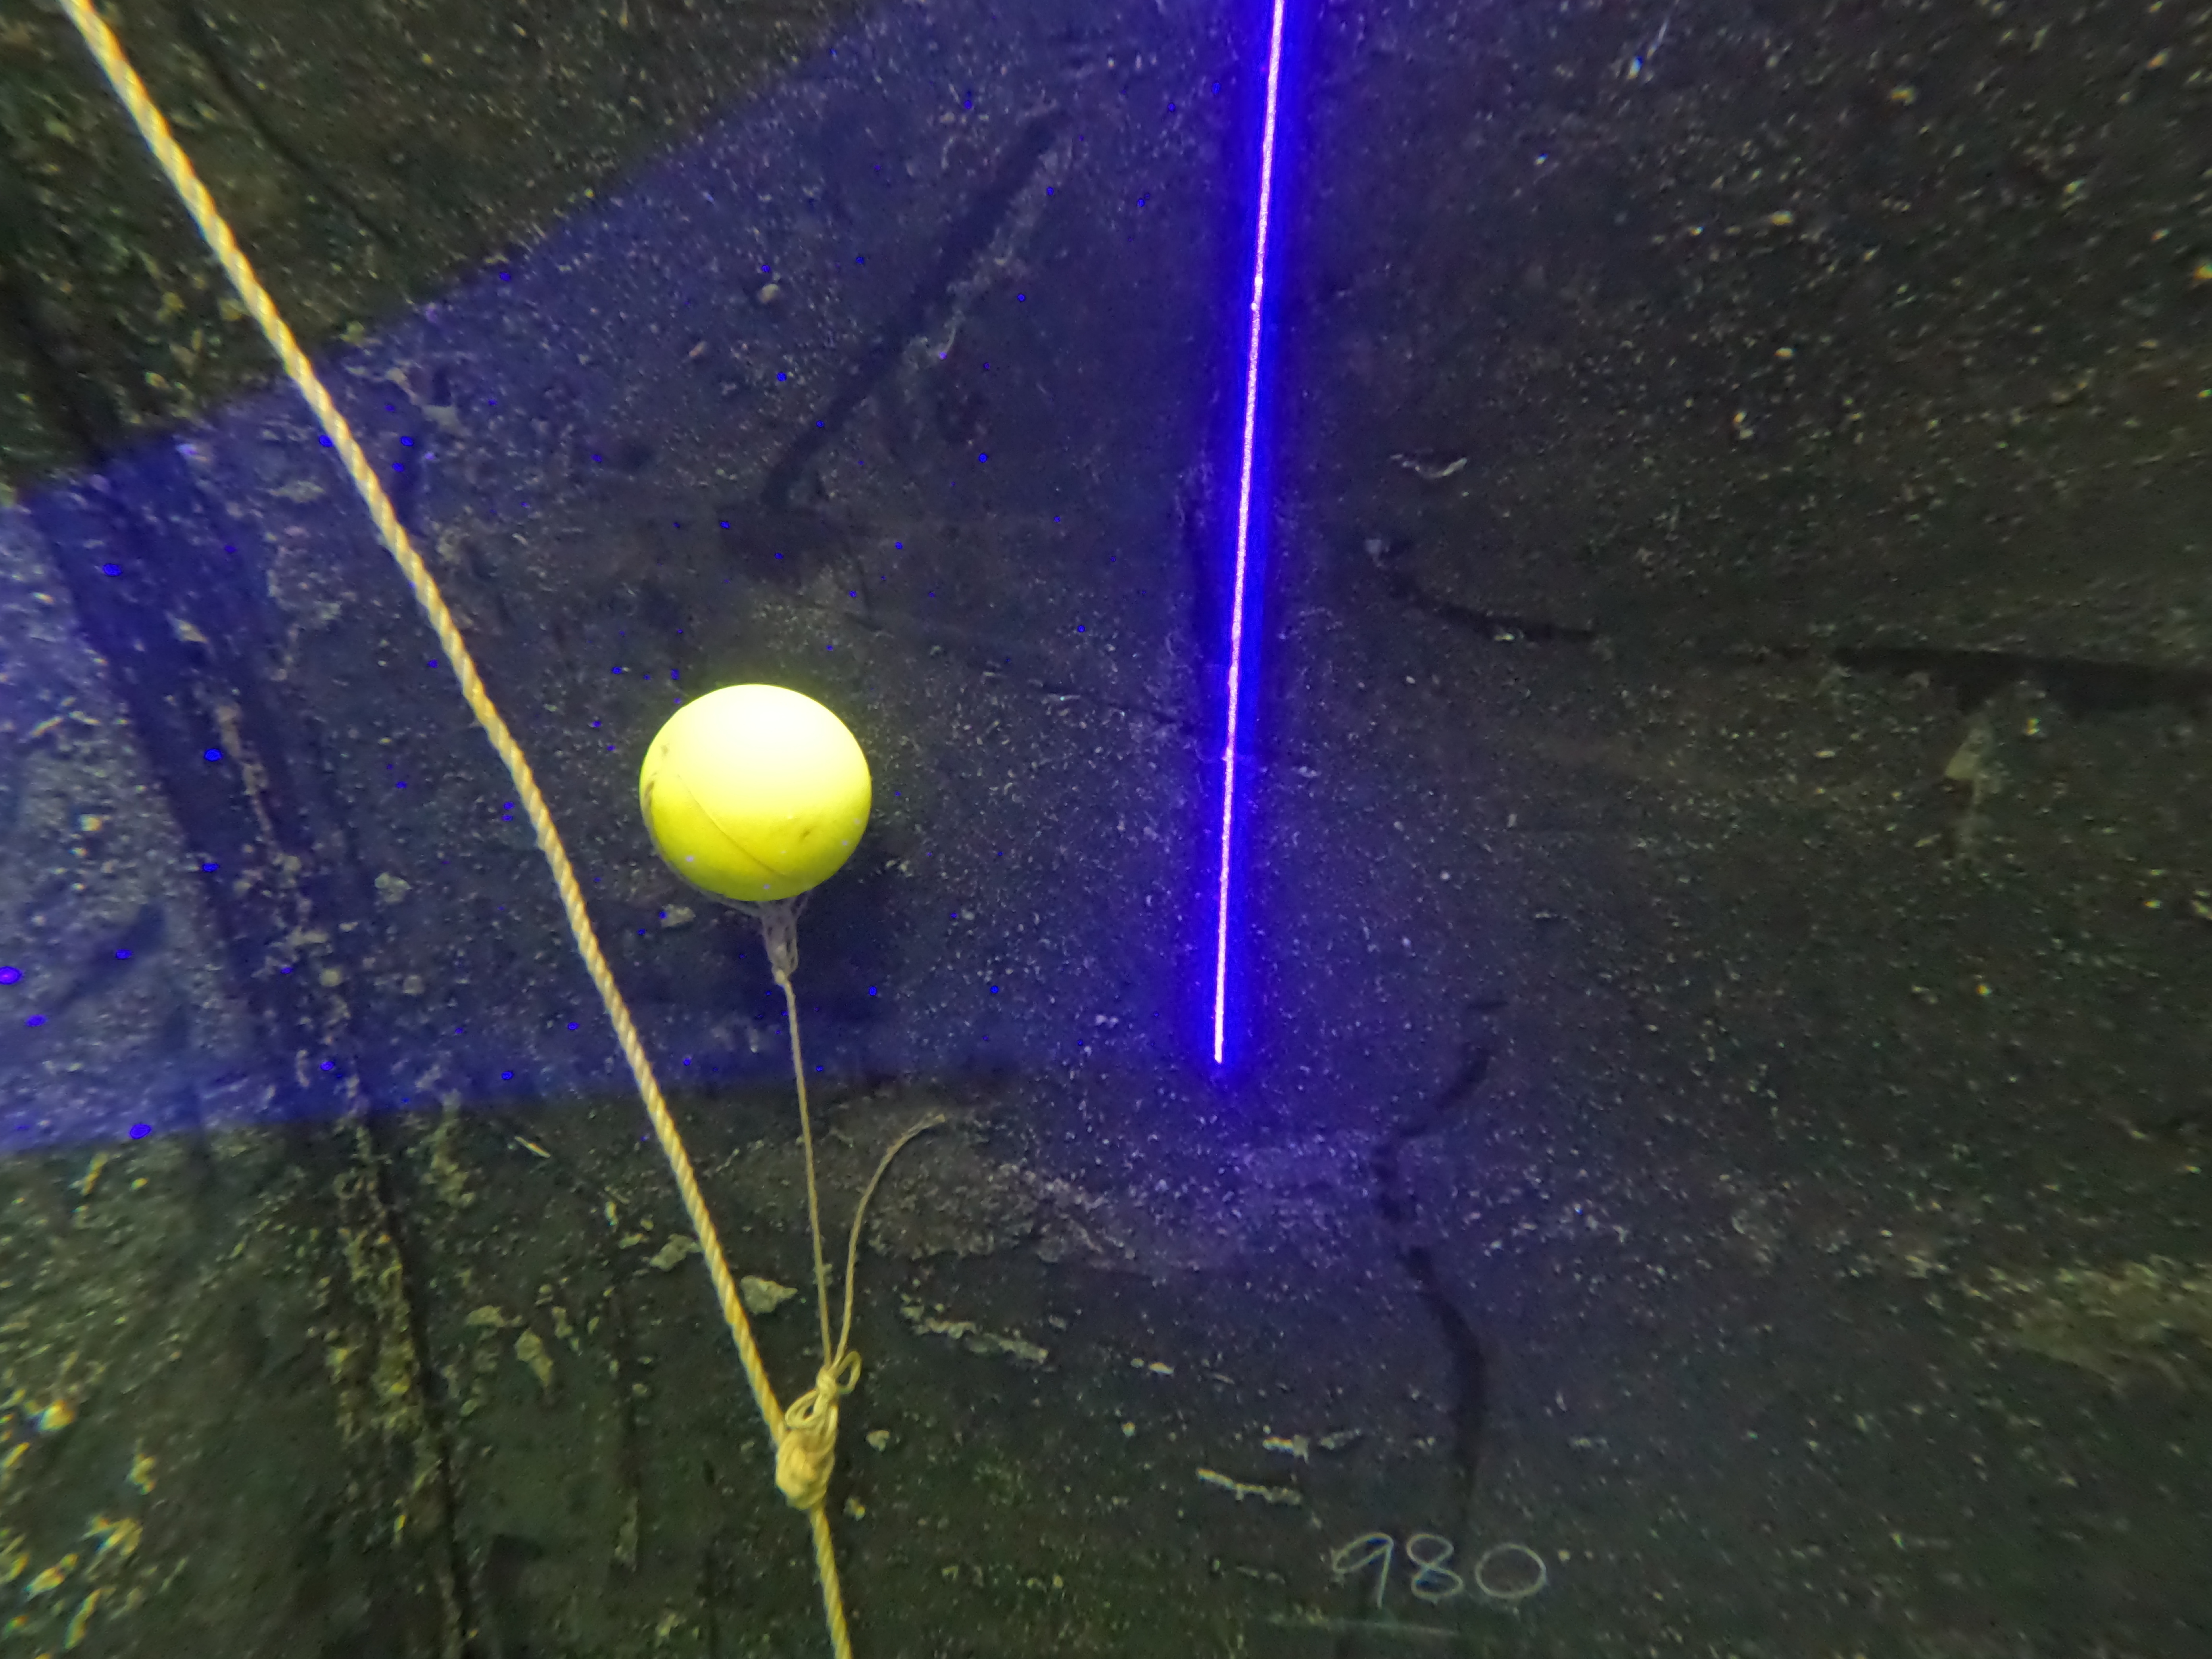

980

Supplement: Supplementary file 2776 [file G0030276.pdf › 2/G0030276.pdf]

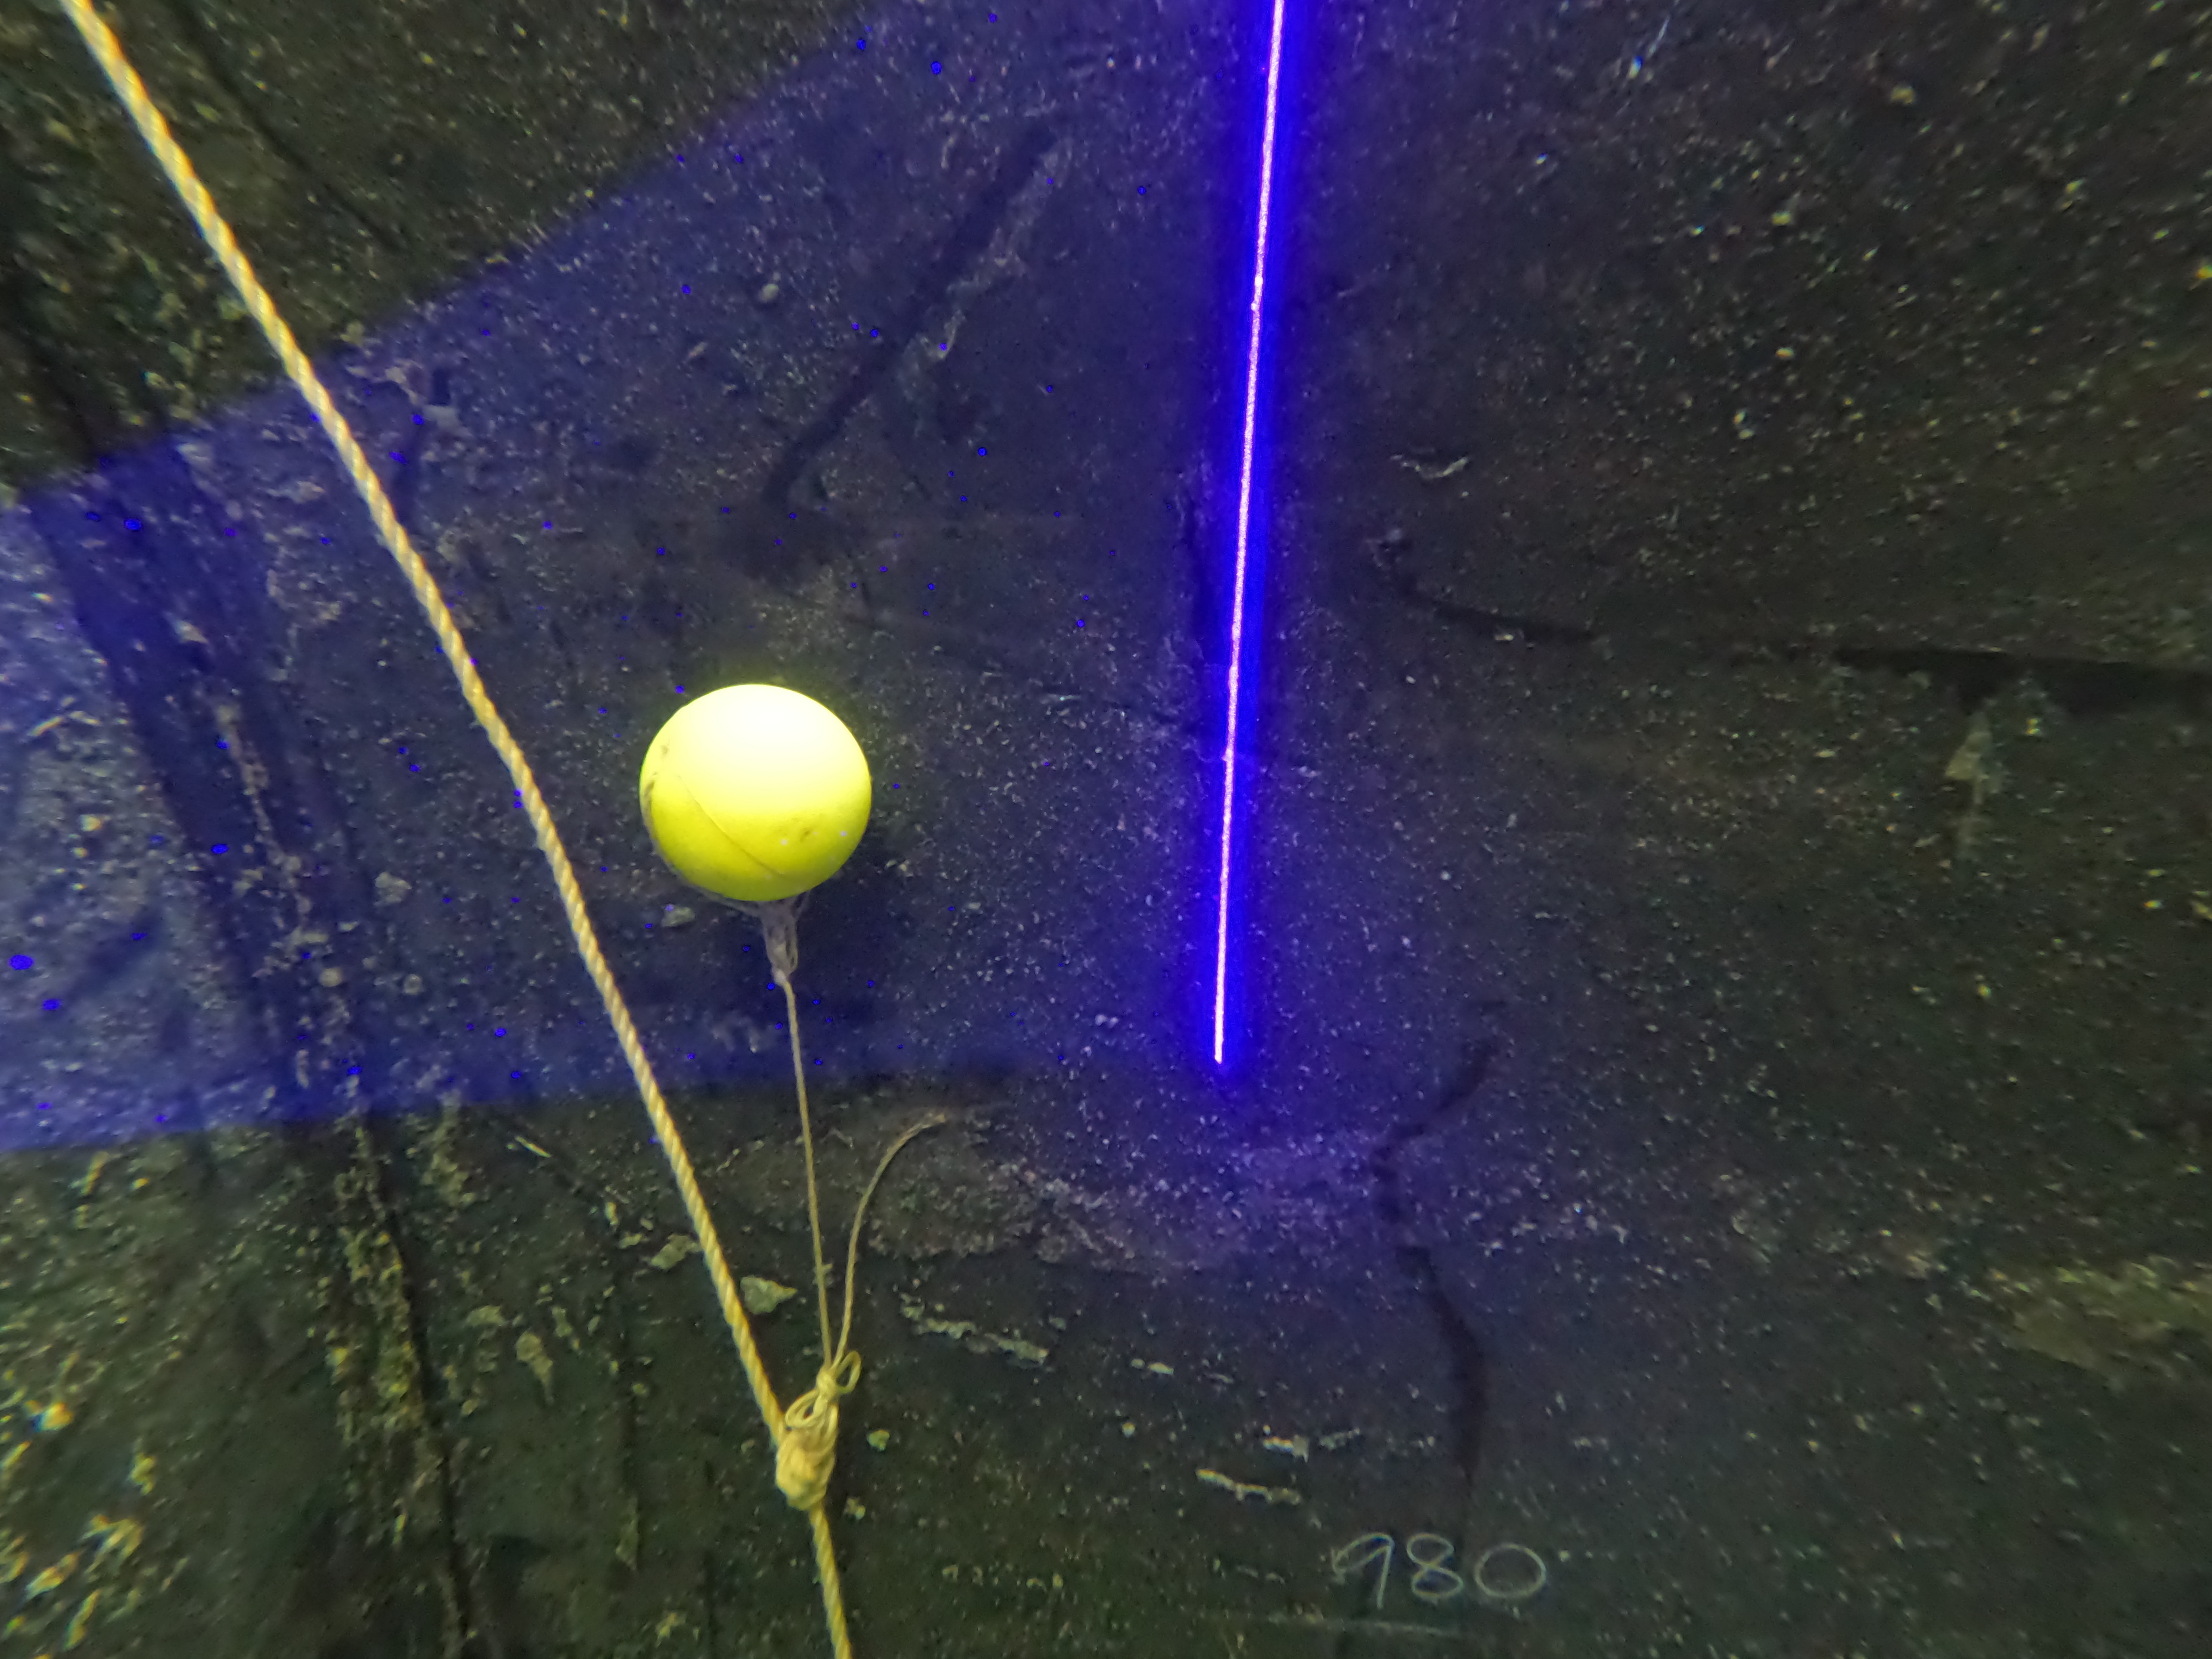

980

Supplement: Supplementary file 2777 [file G0030277.pdf › 2/G0030277.pdf]

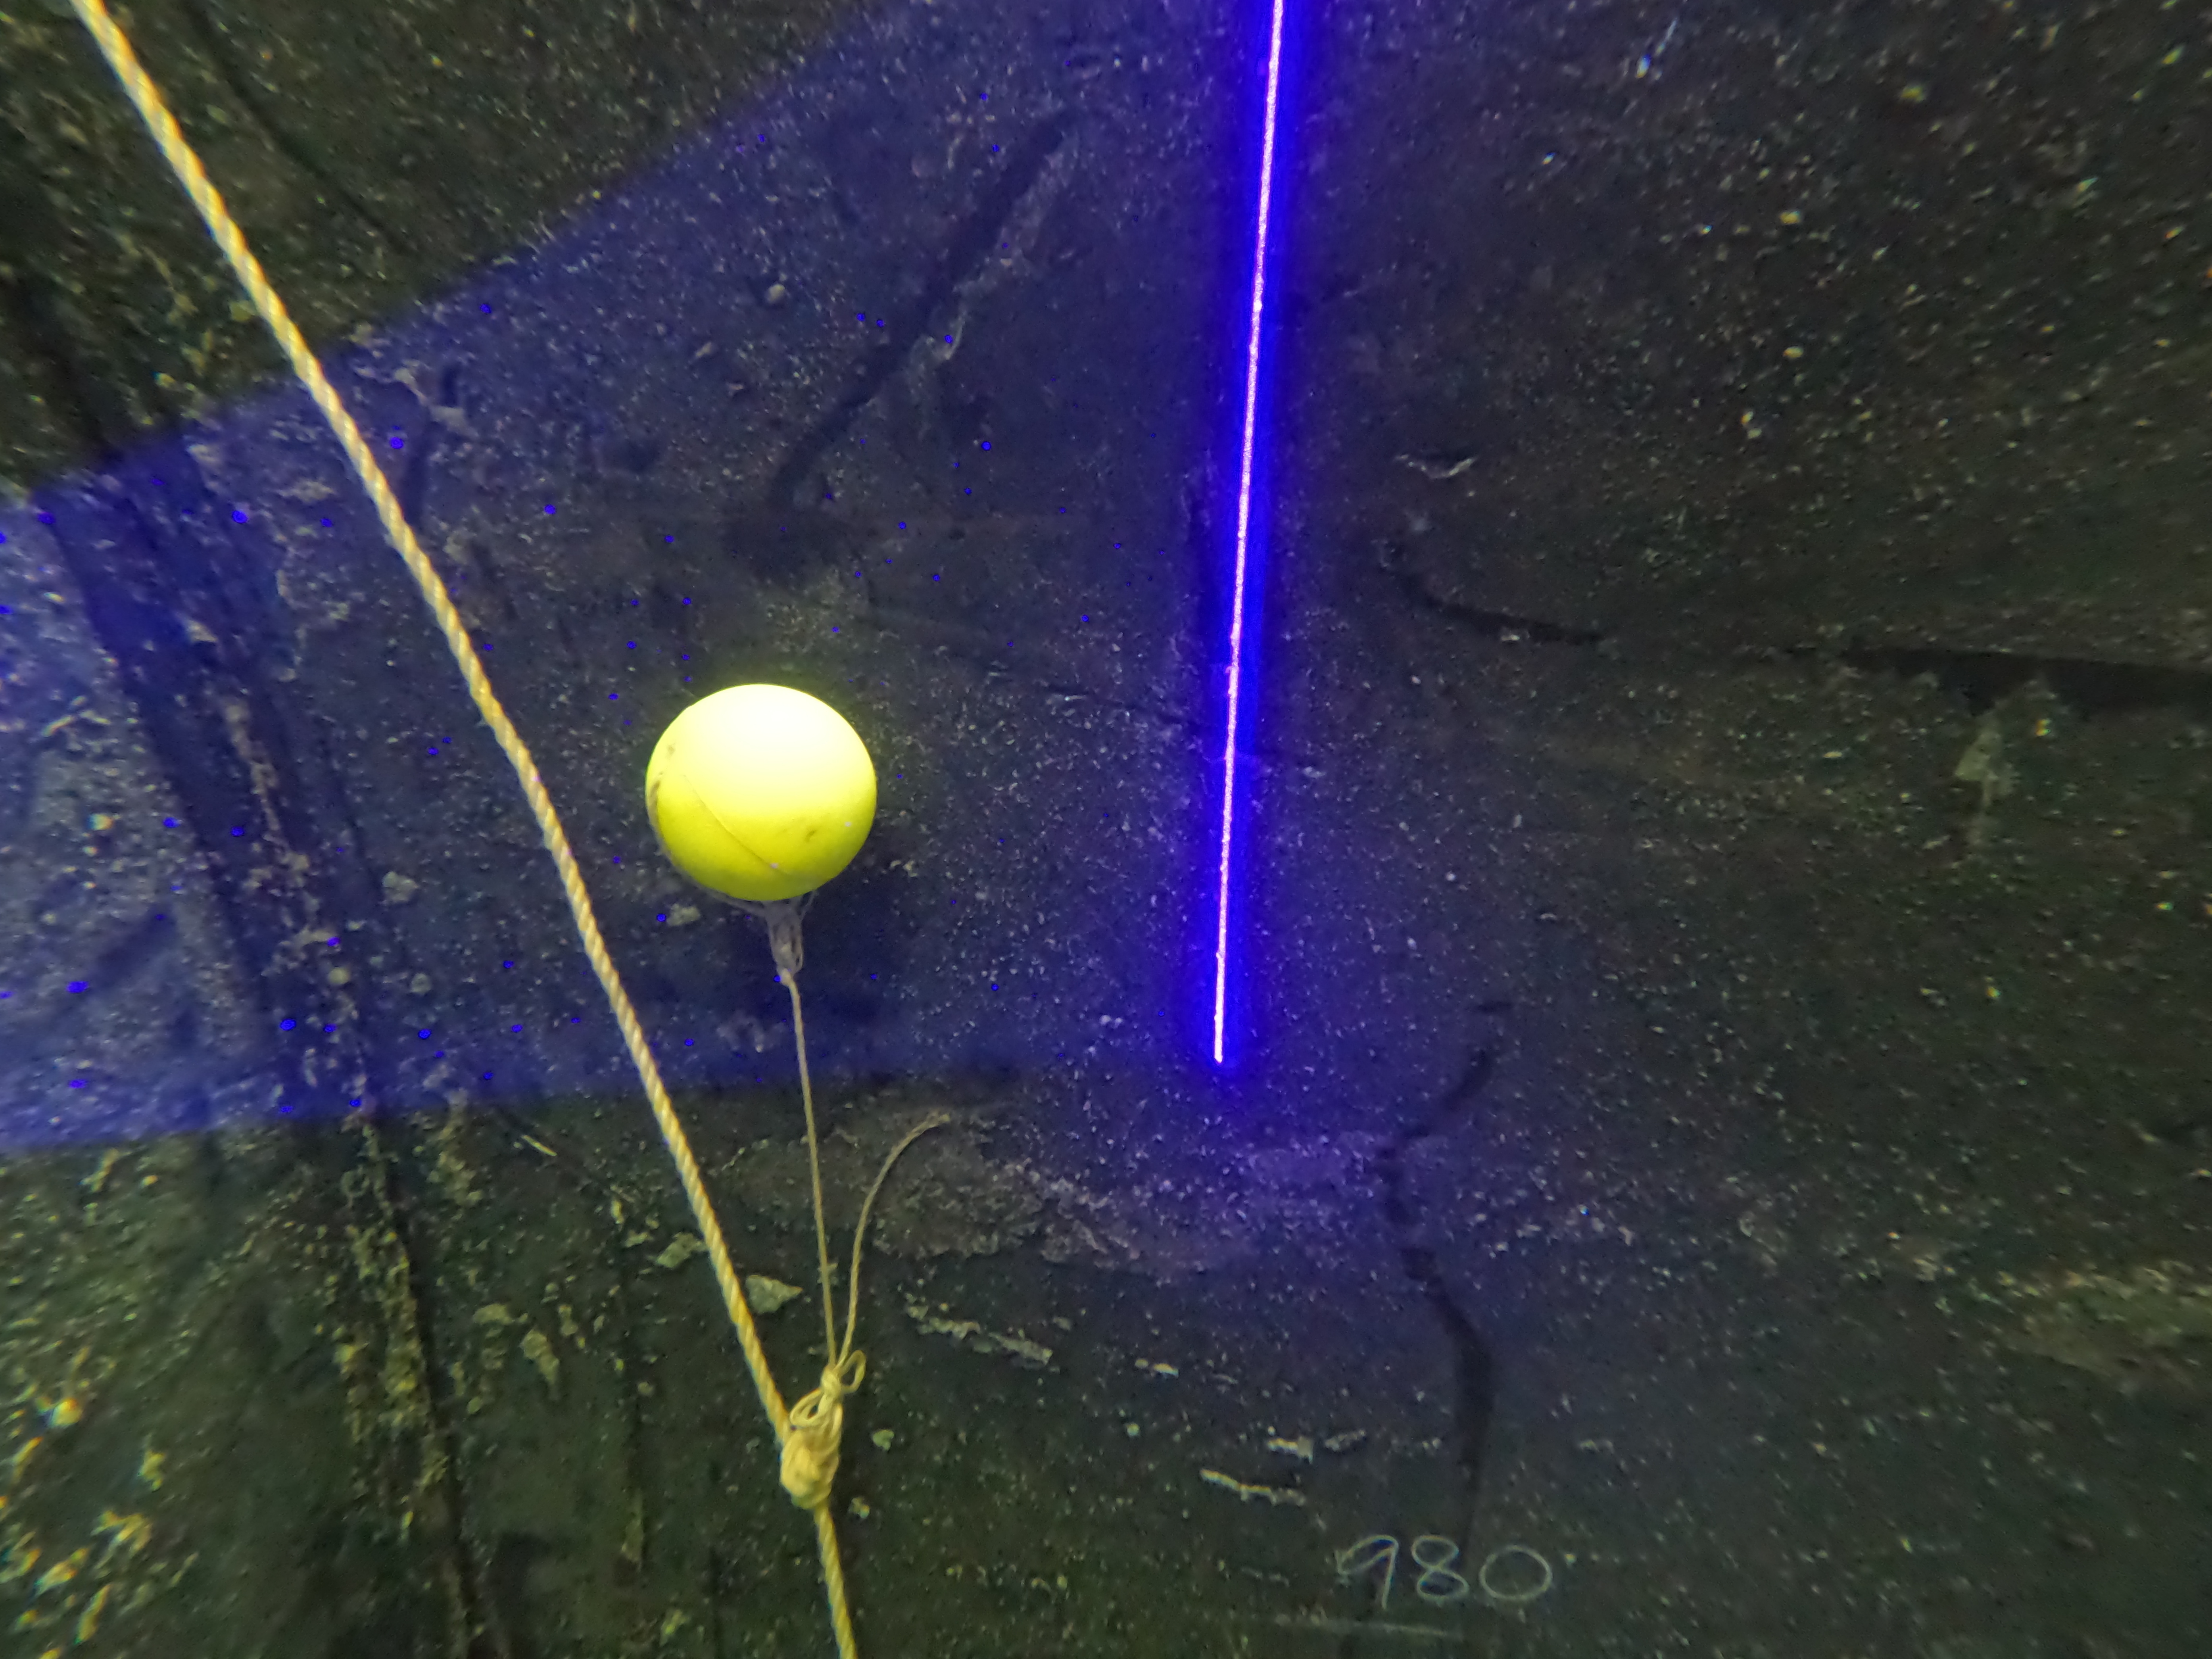

980

Supplement: Supplementary file 2778 [file G0030278.pdf › 2/G0030278.pdf]

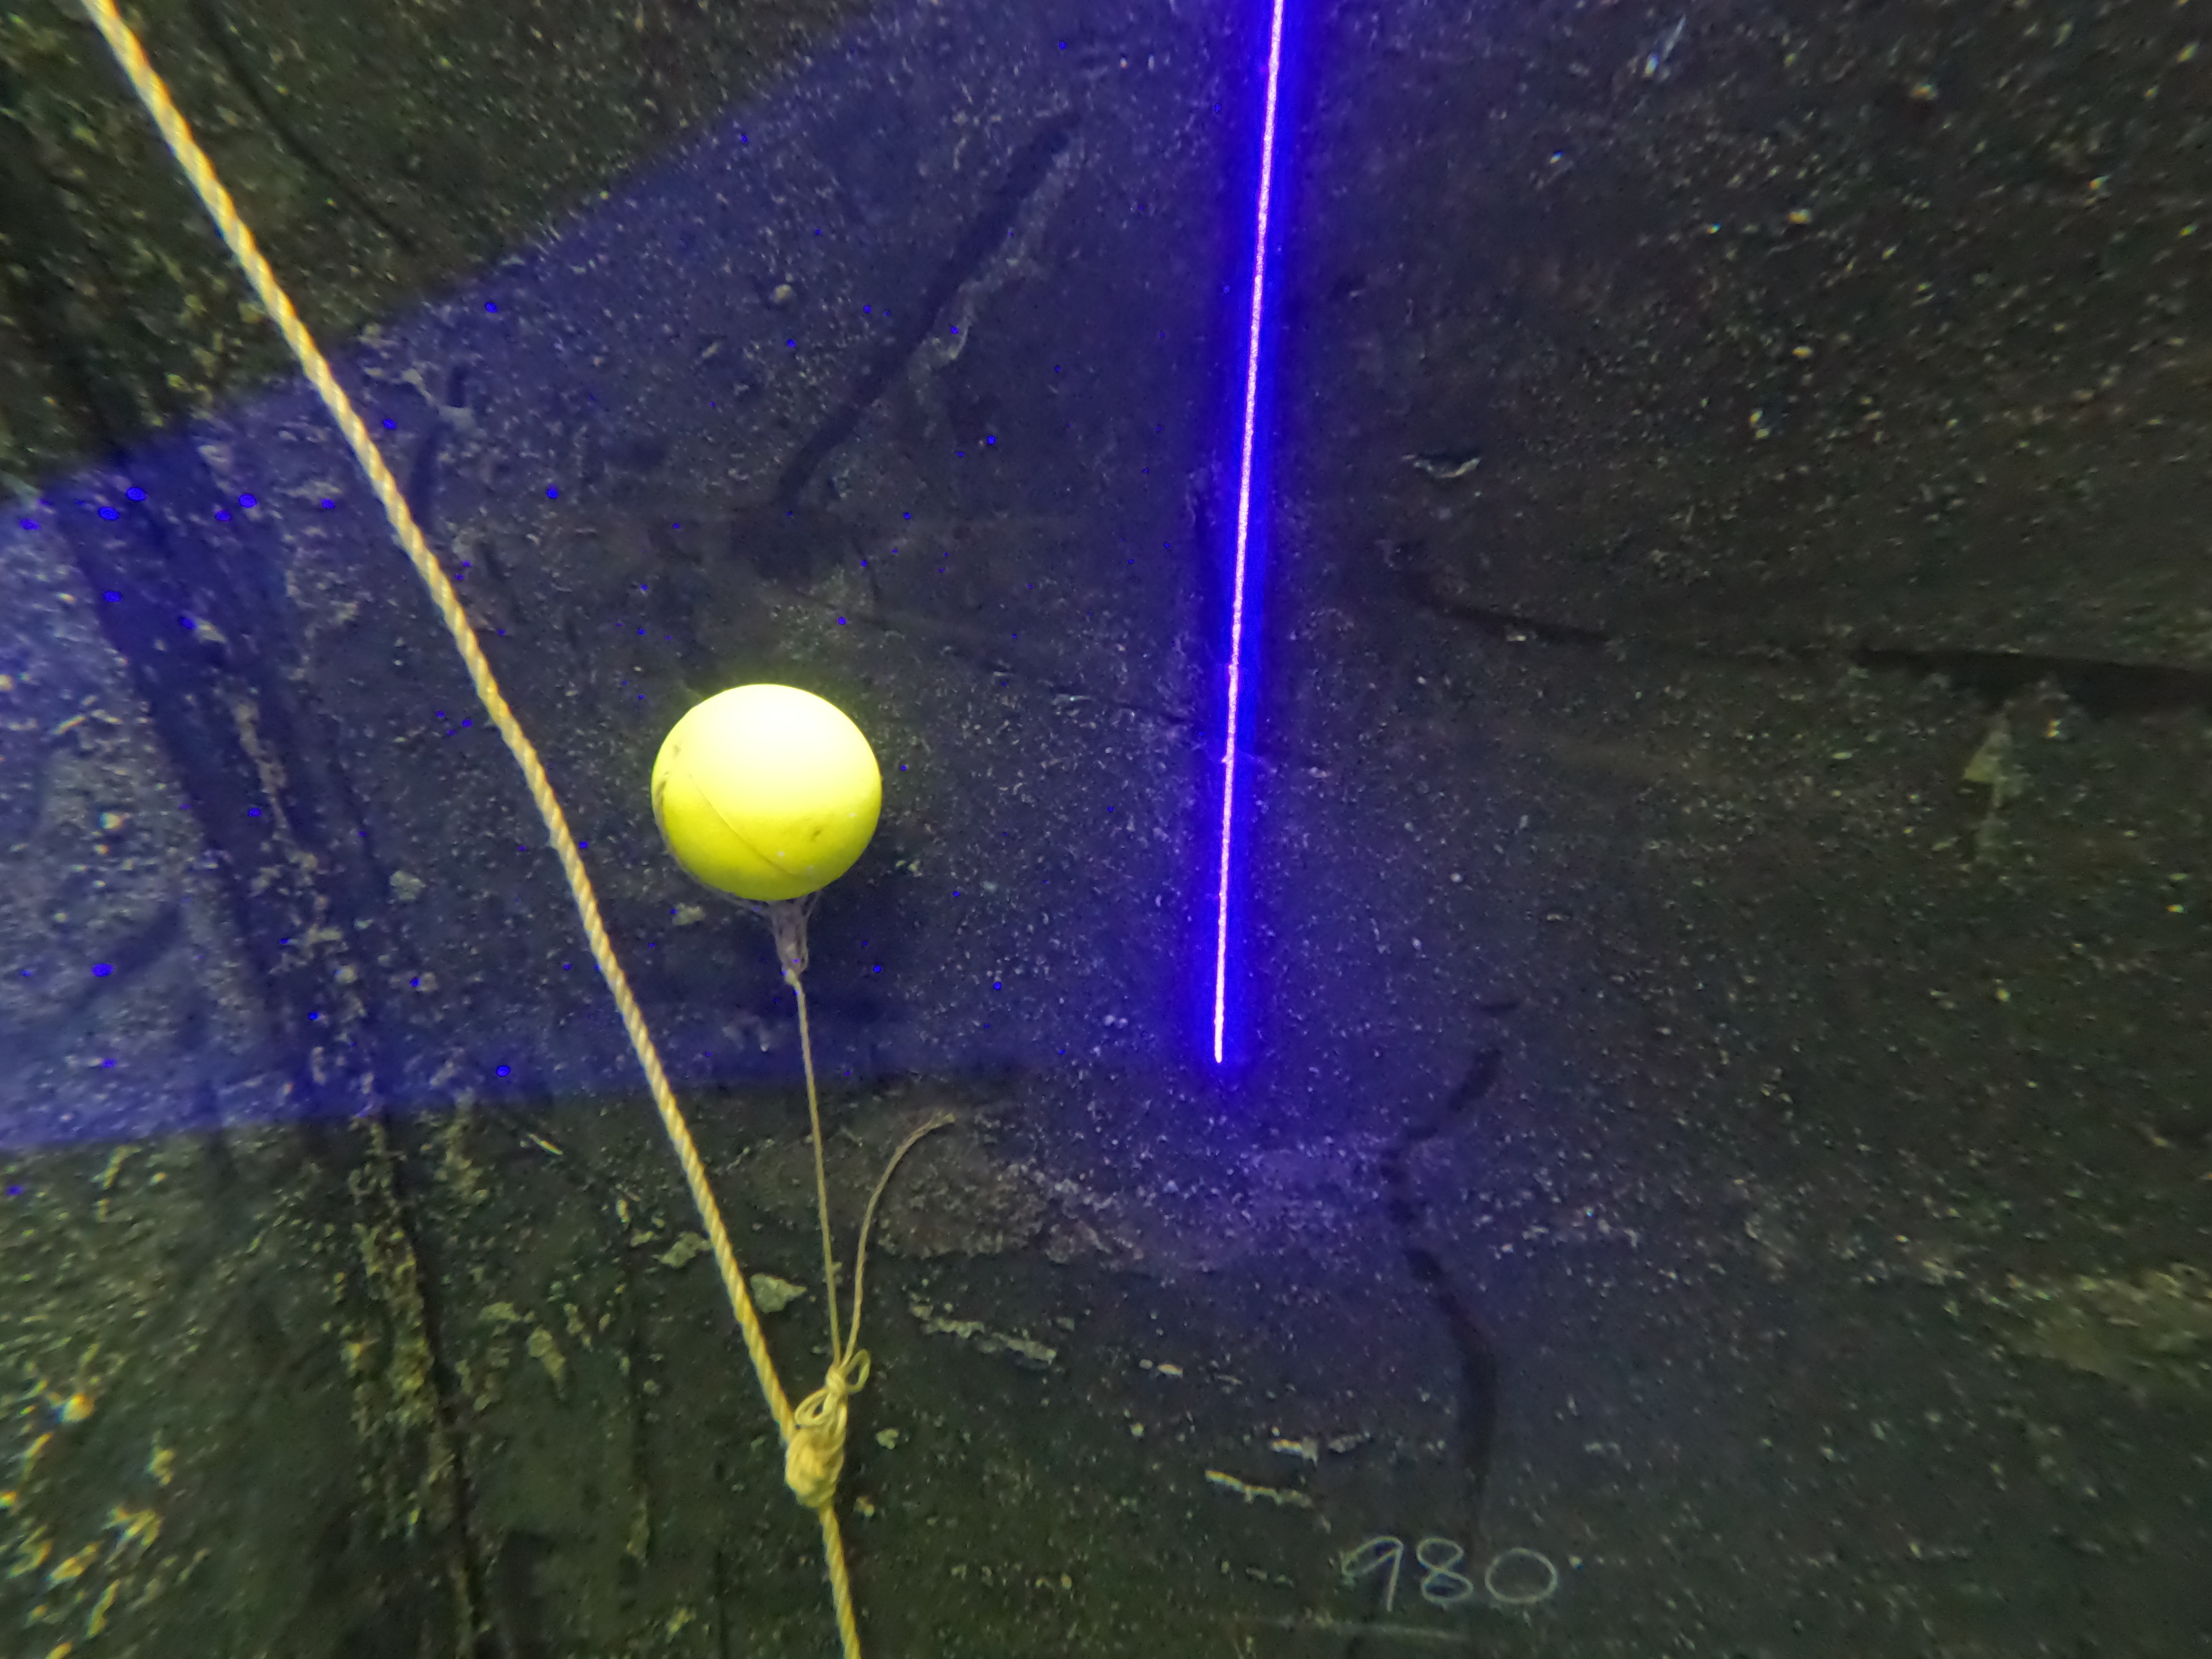

980

Supplement: Supplementary file 2779 [file G0030279.pdf › 2/G0030279.pdf]

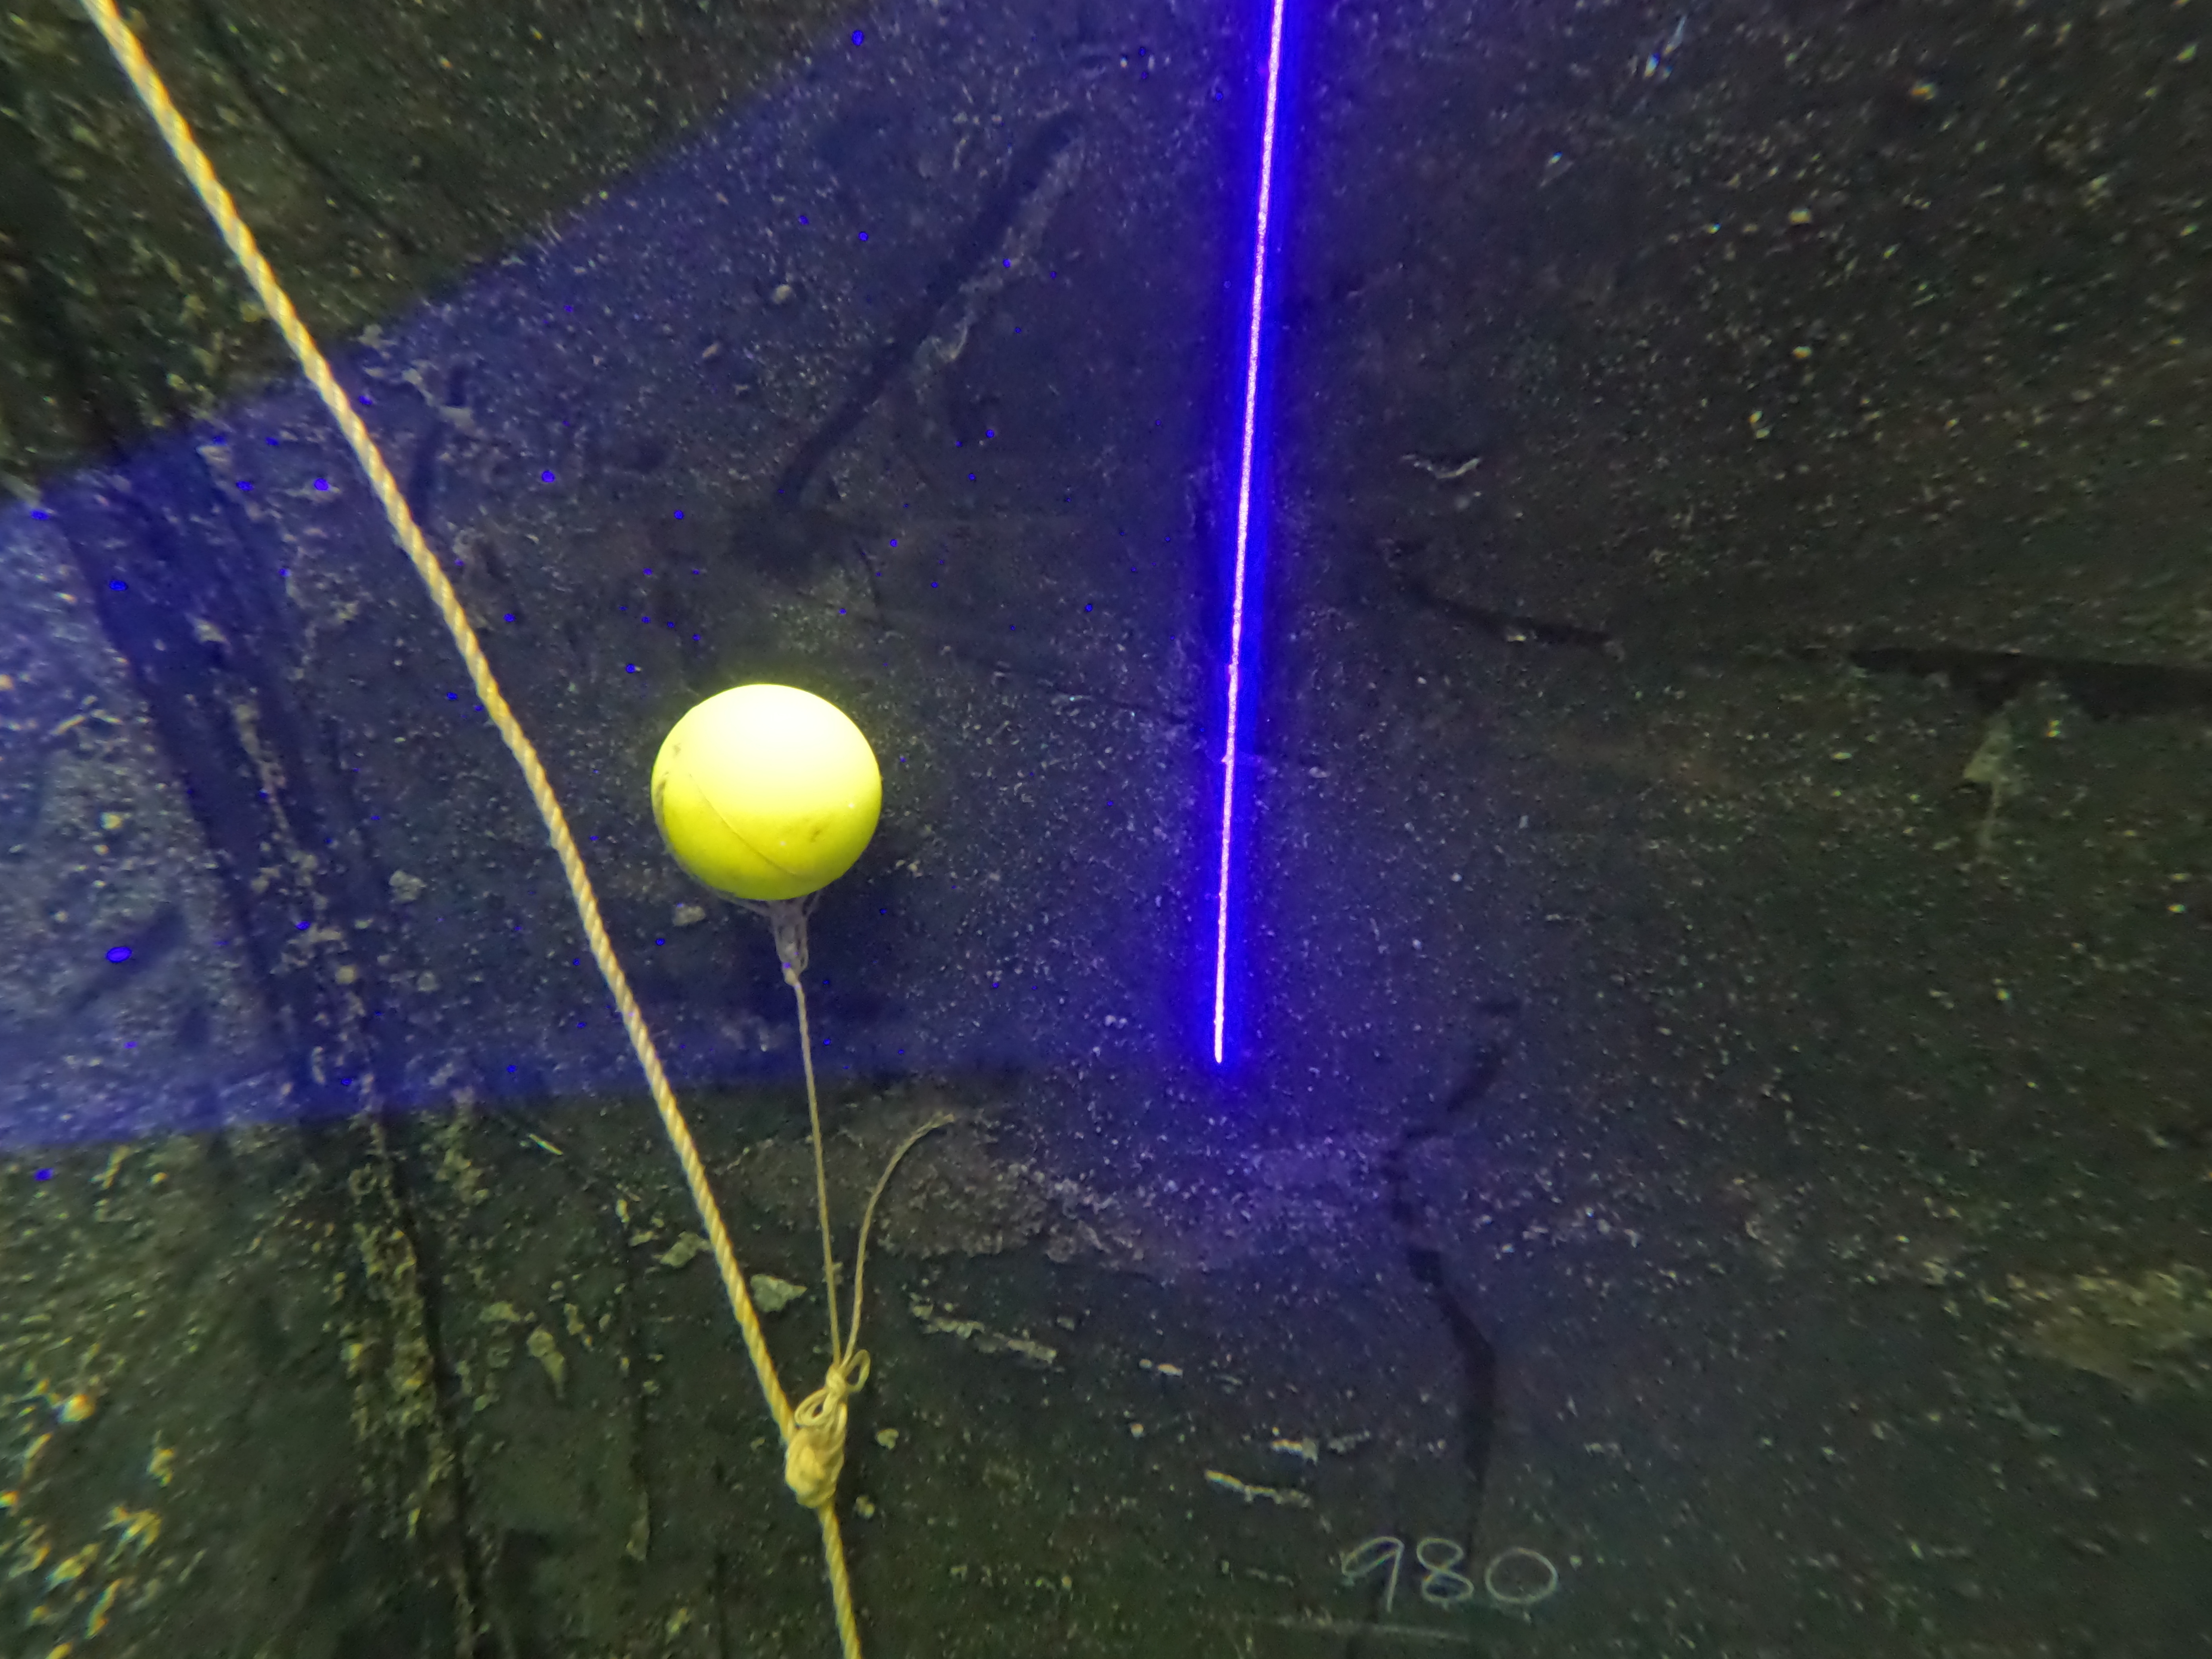

980

Supplement: Supplementary file 2780 [file G0030280.pdf › 2/G0030280.pdf]

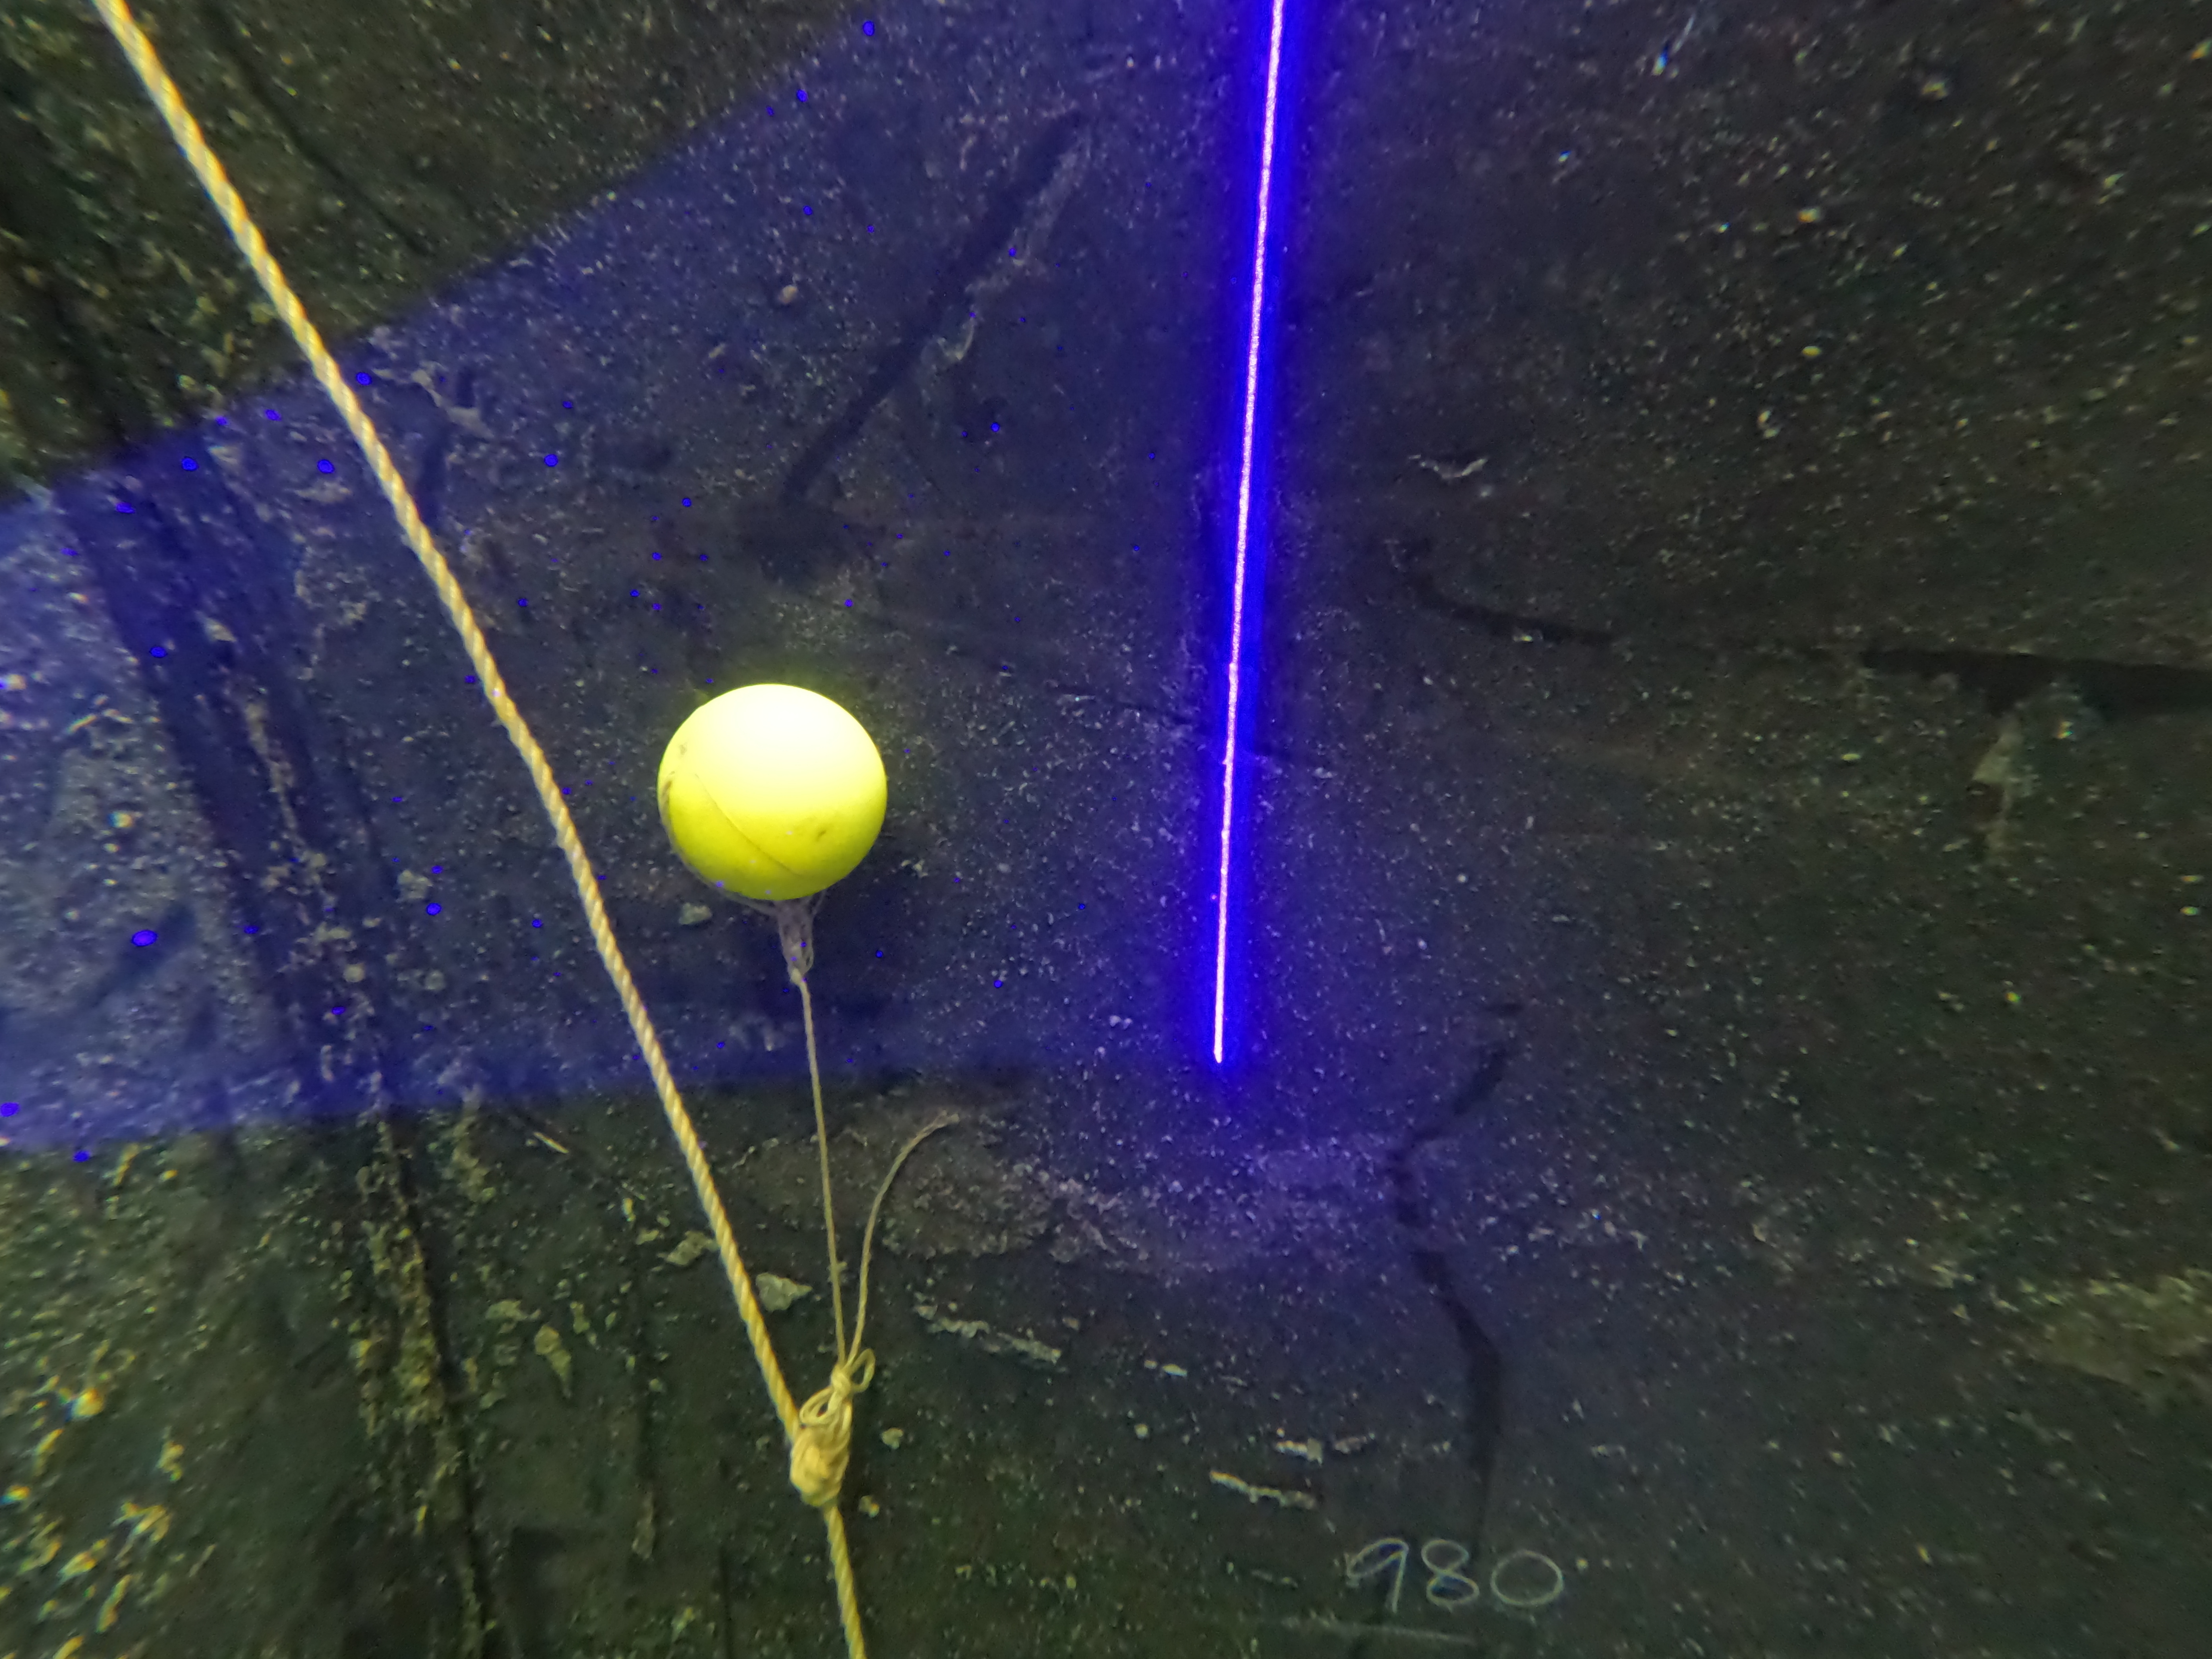

980

Supplement: Supplementary file 2781 [file G0030281.pdf › 2/G0030281.pdf]

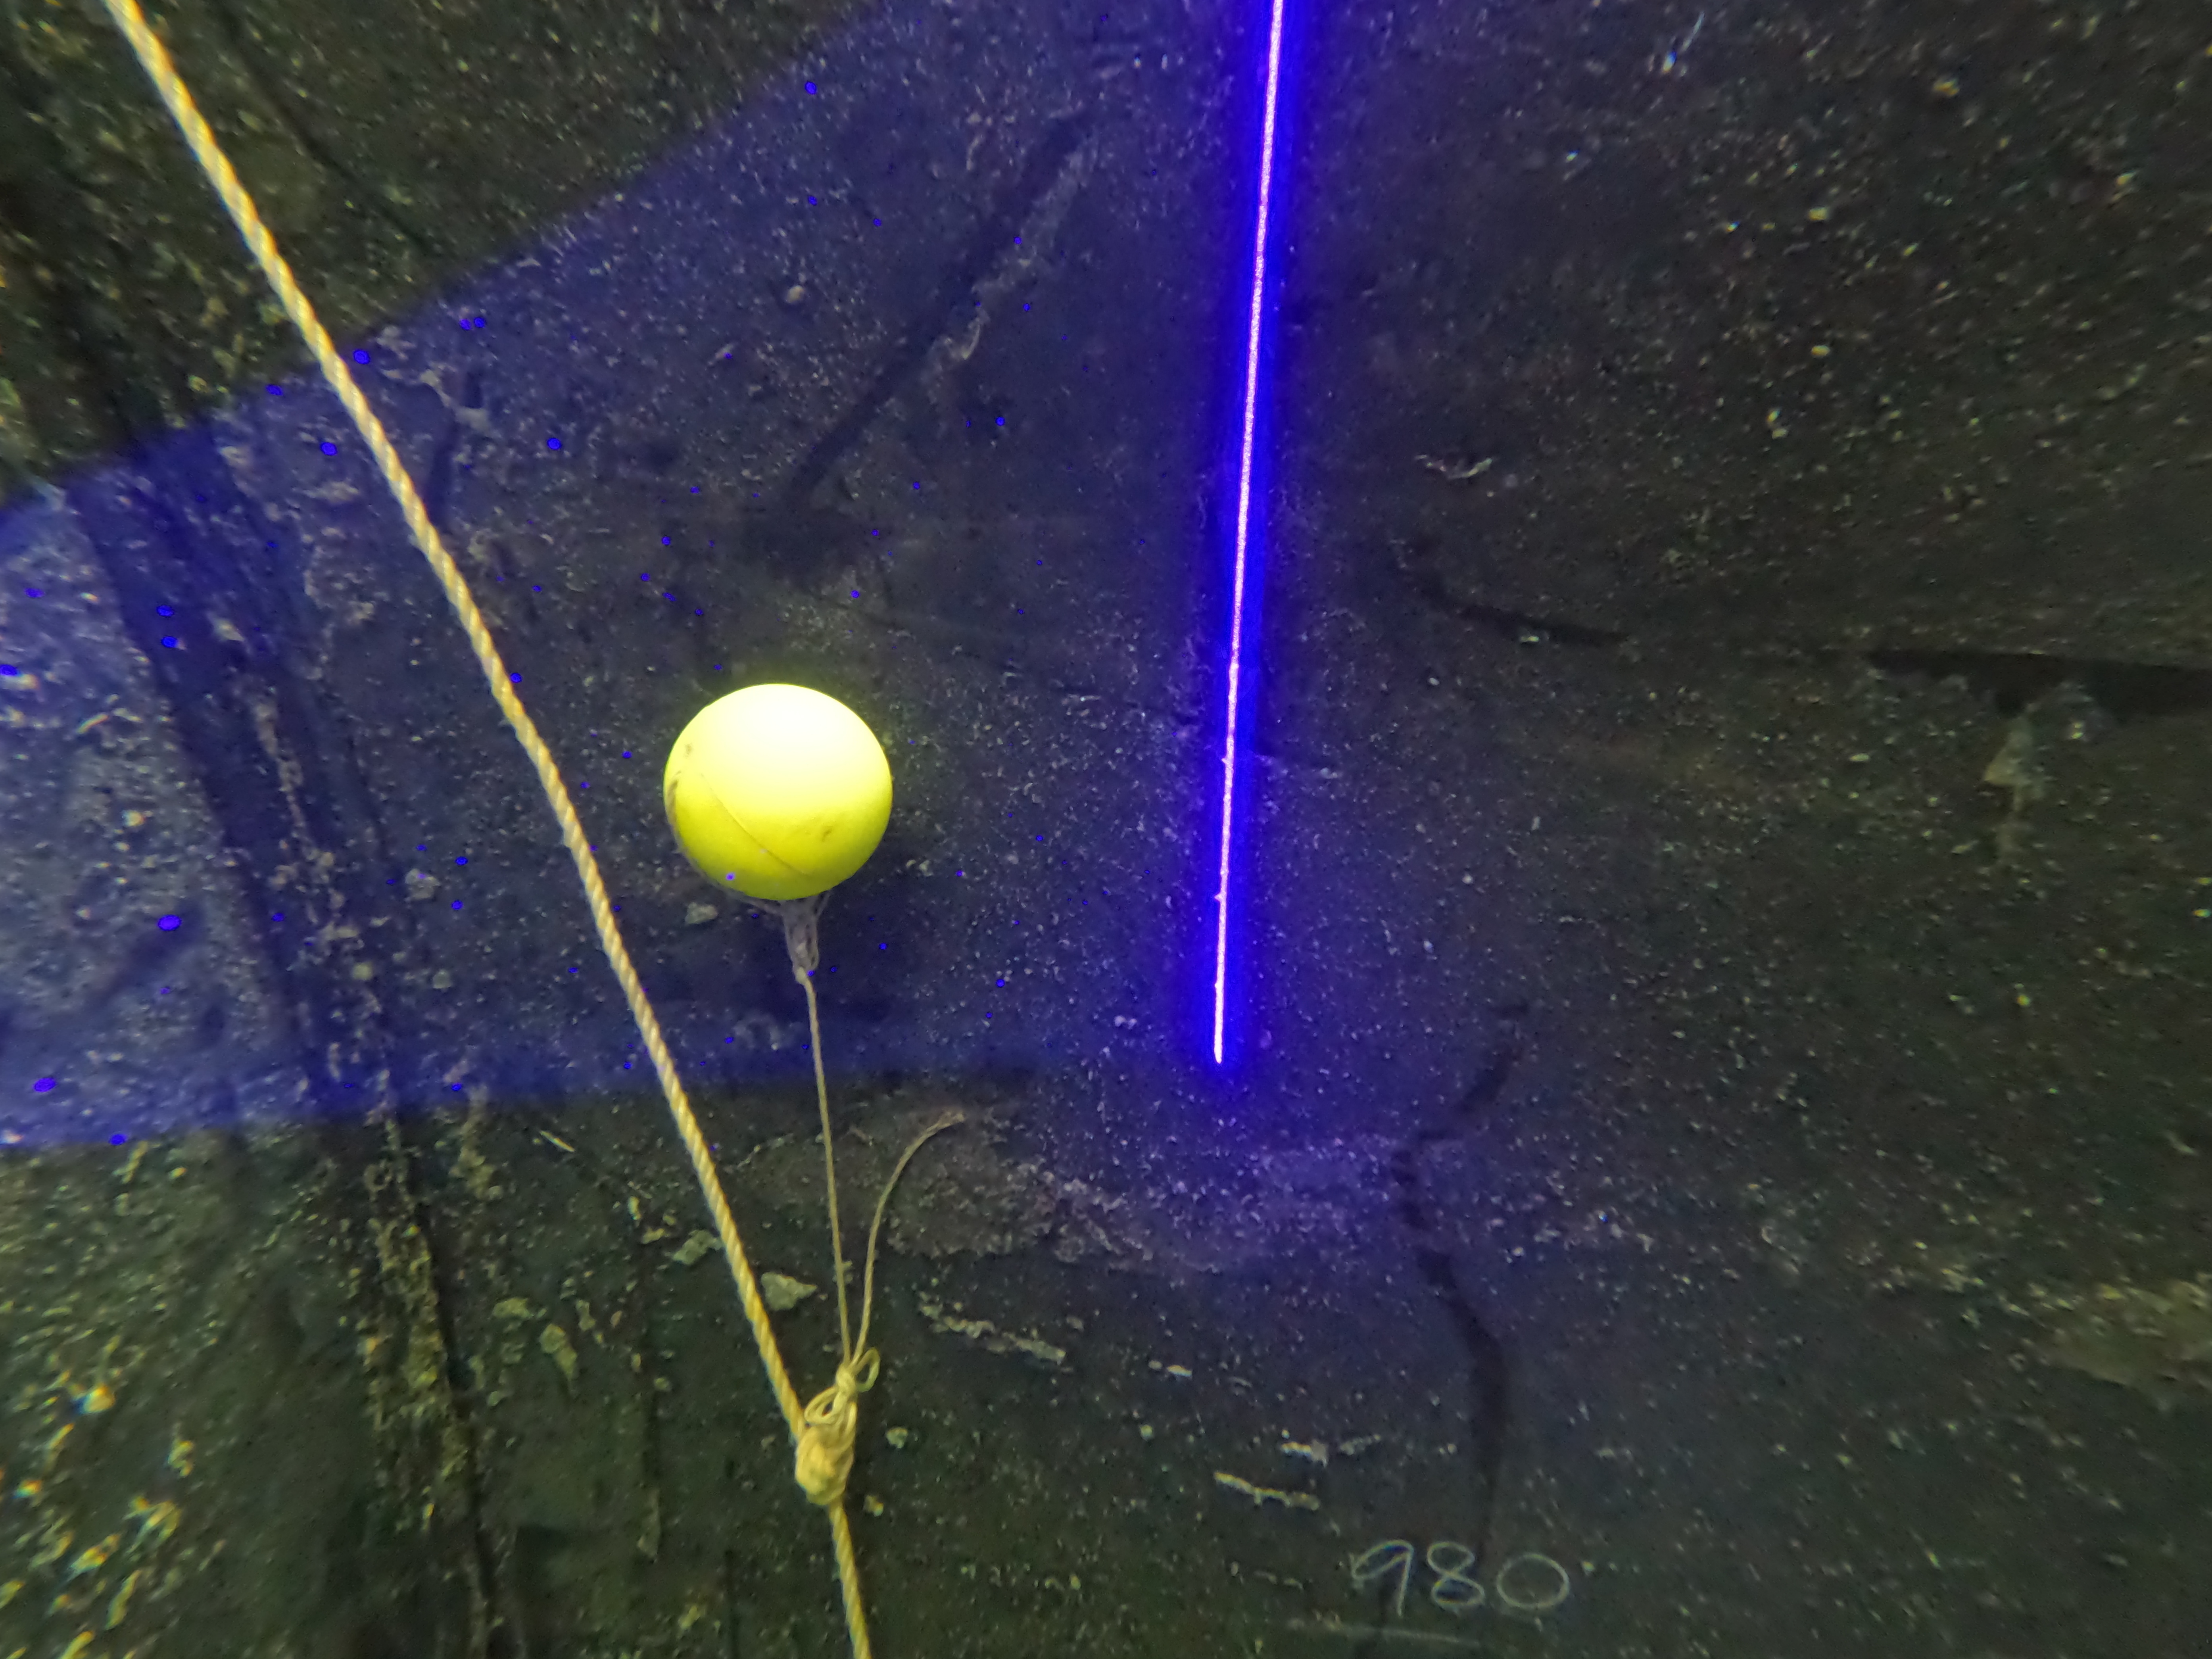

980

Supplement: Supplementary file 2782 [file G0030282.pdf › 2/G0030282.pdf]

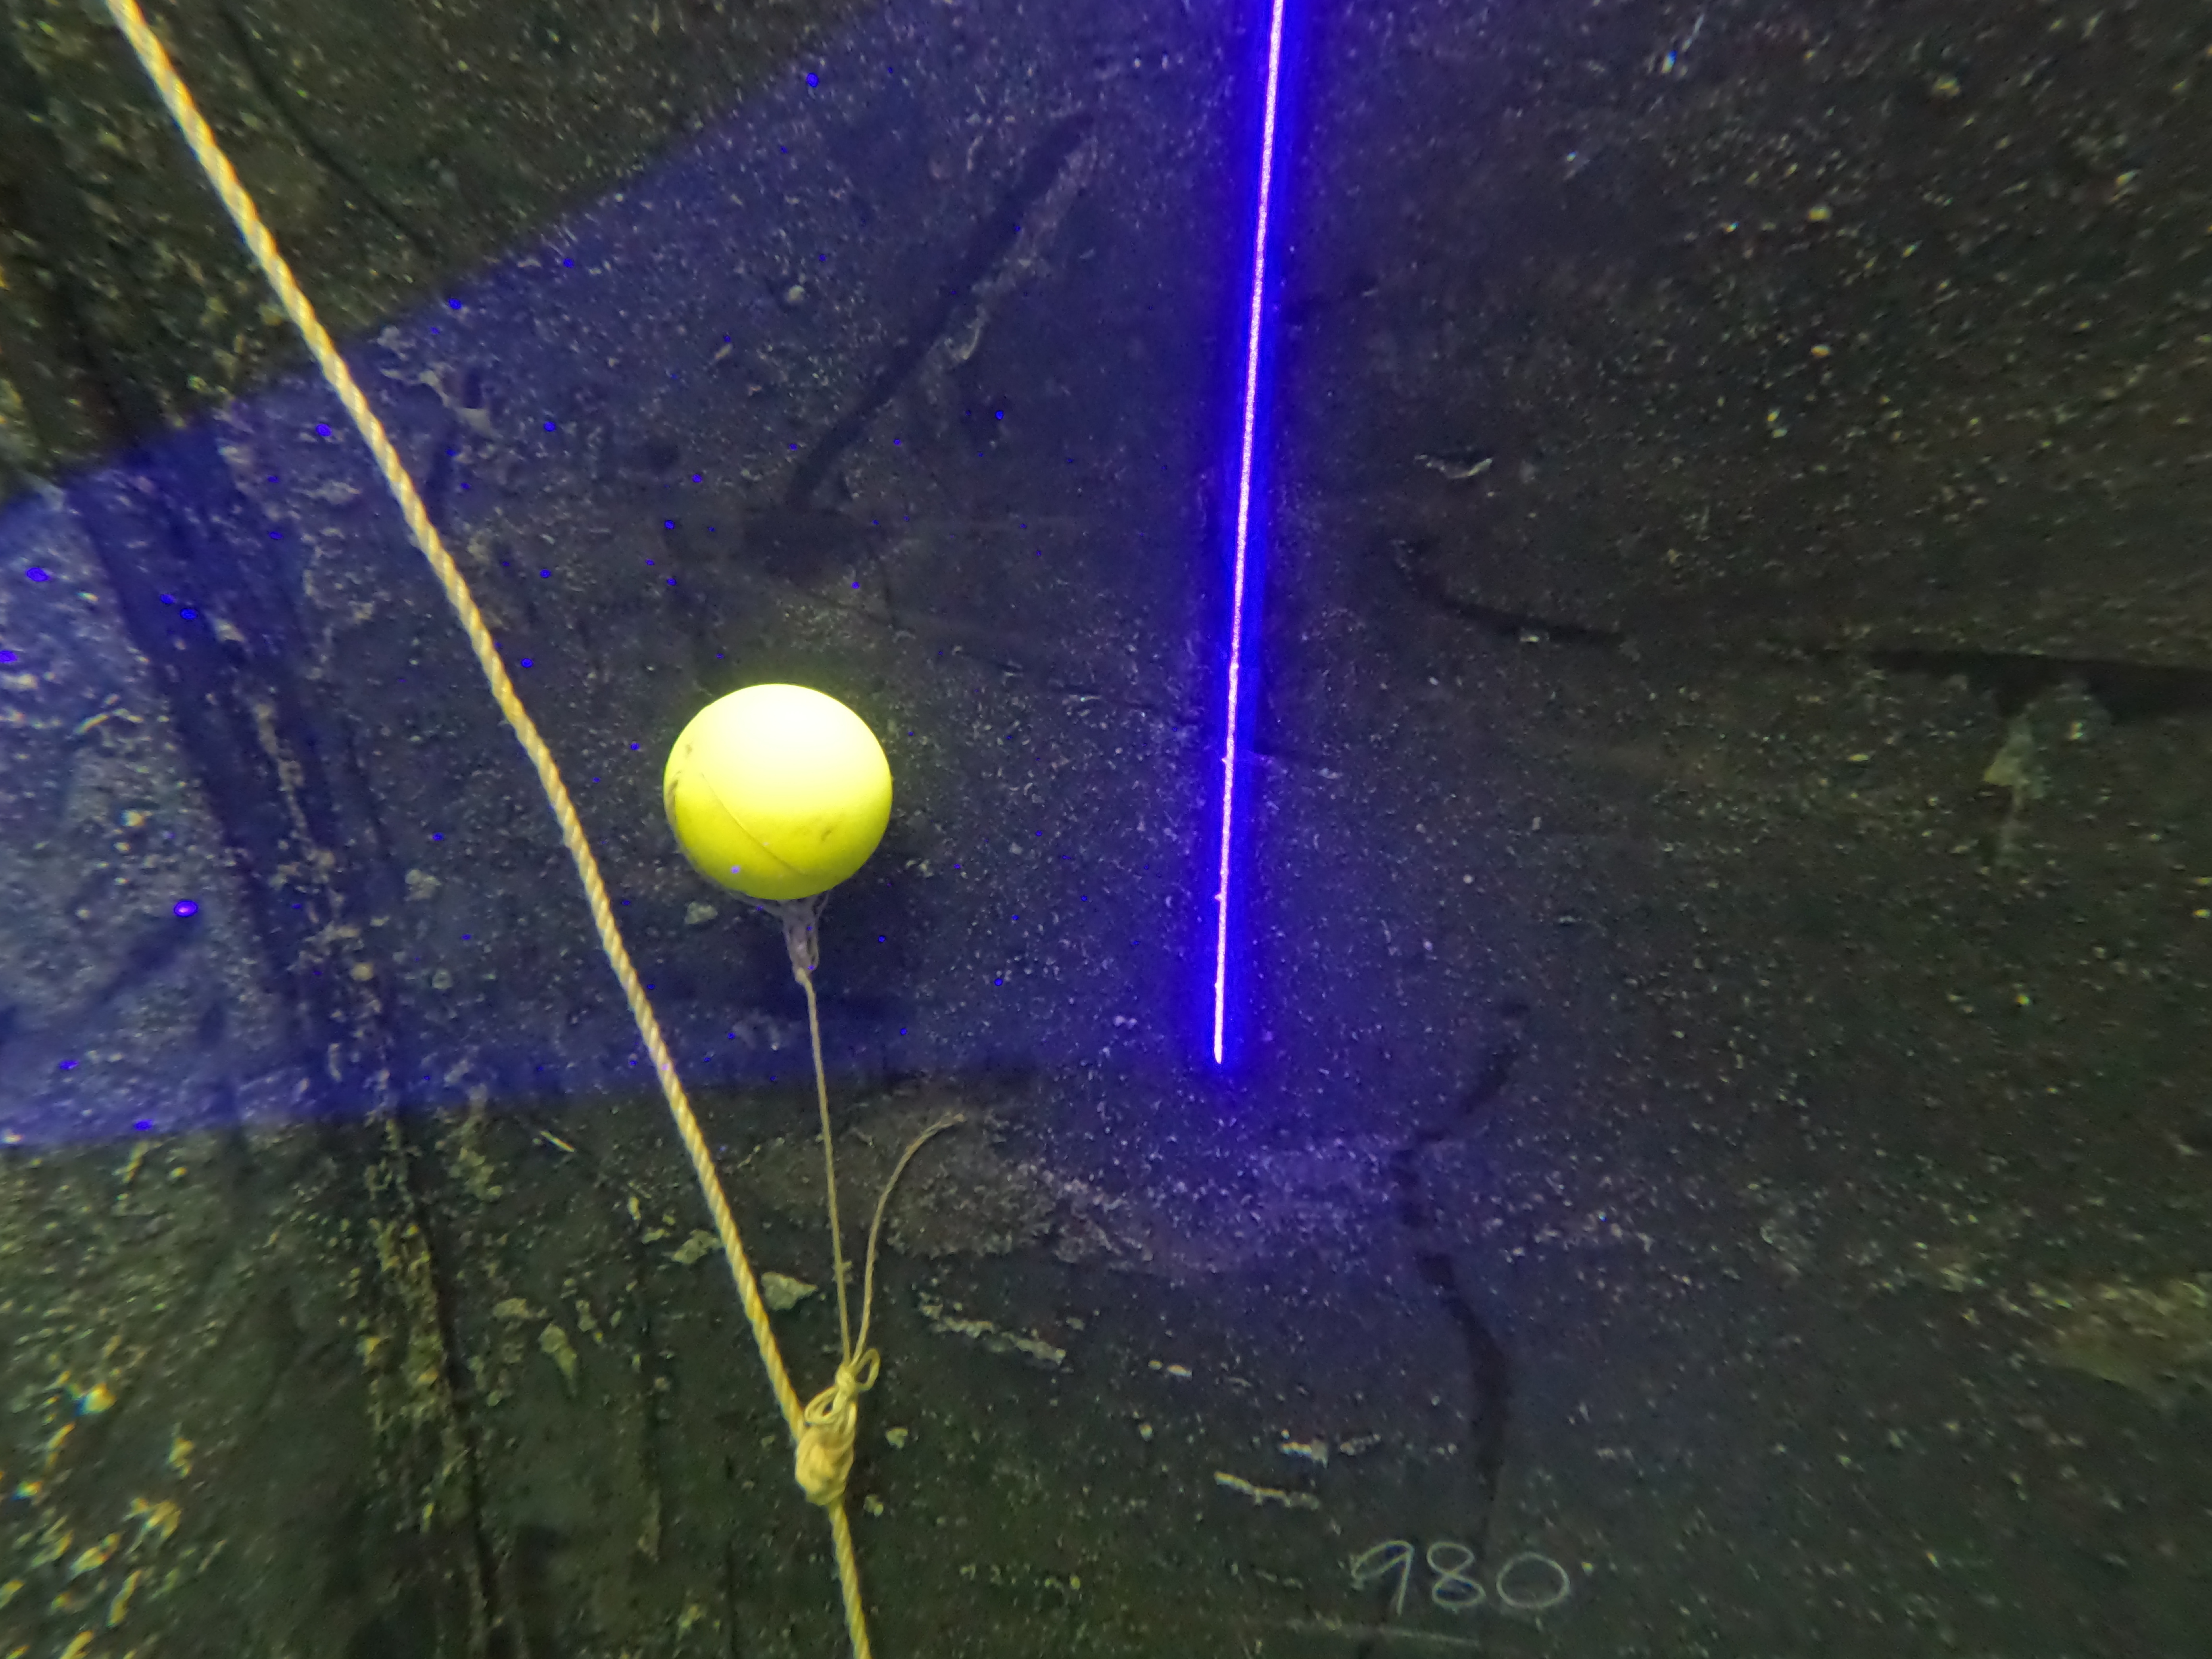

980

Supplement: Supplementary file 2783 [file G0030283.pdf › 2/G0030283.pdf]

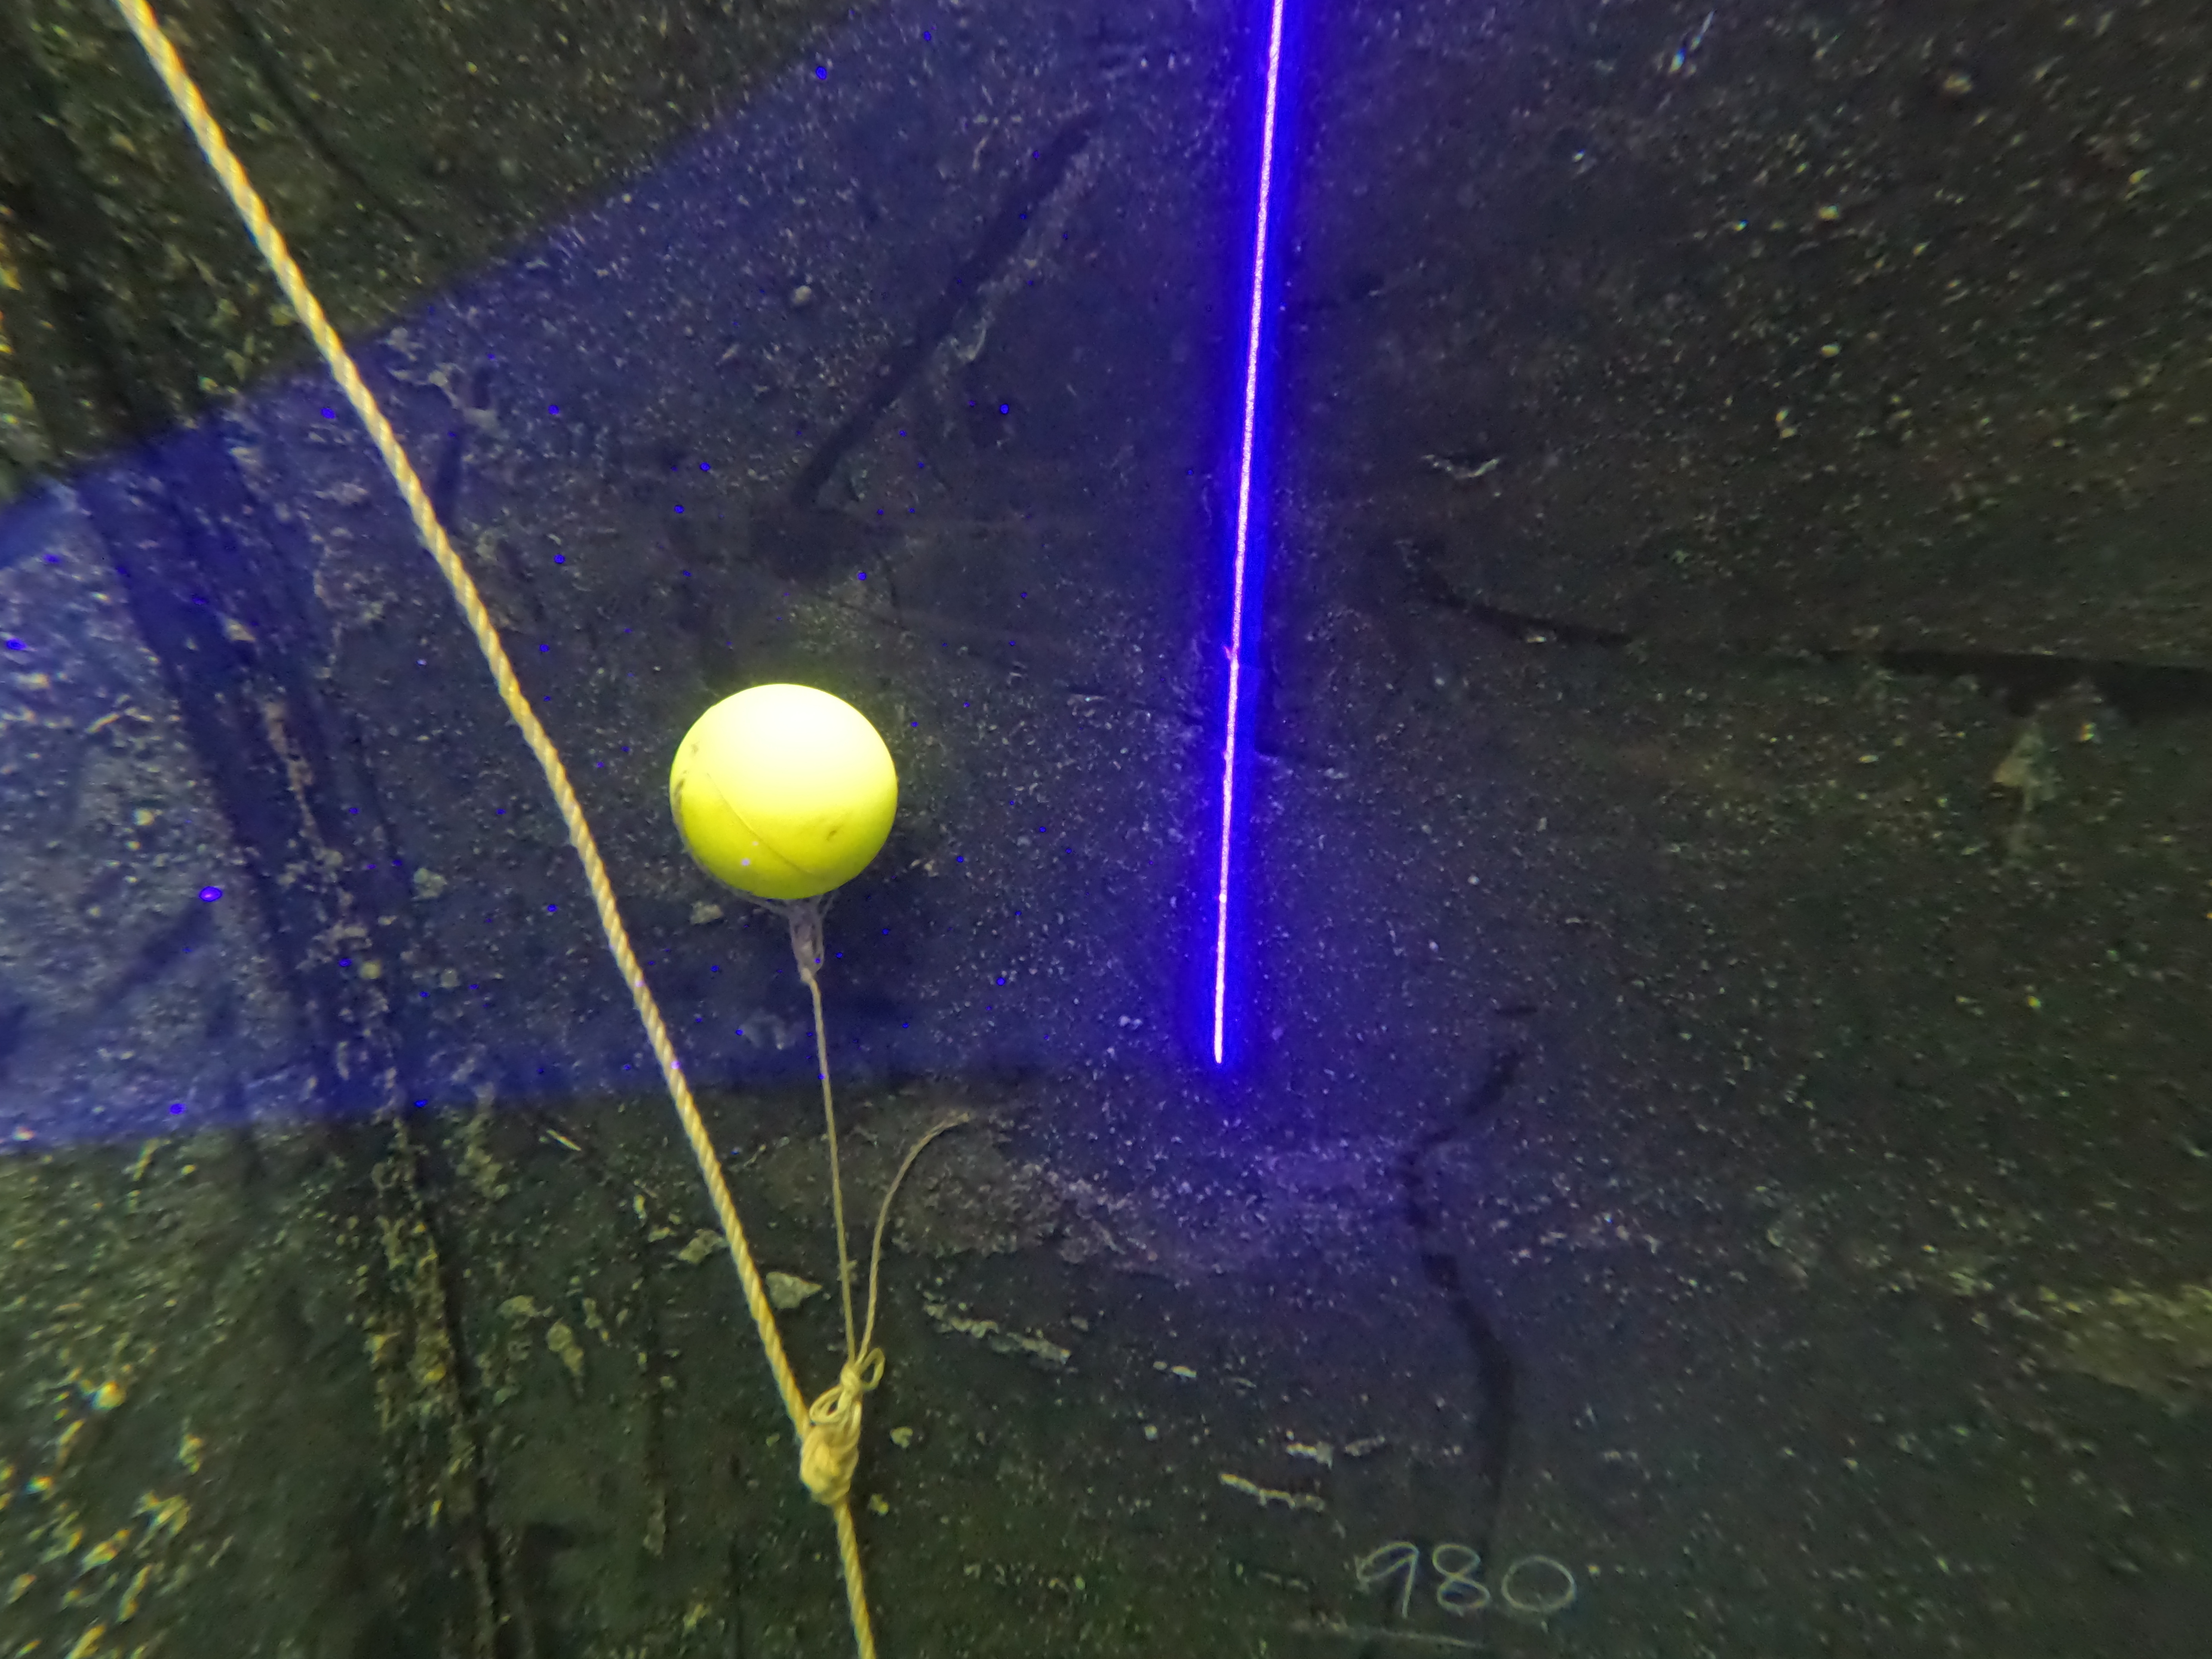

980

Supplement: Supplementary file 2784 [file G0030284.pdf › 2/G0030284.pdf]

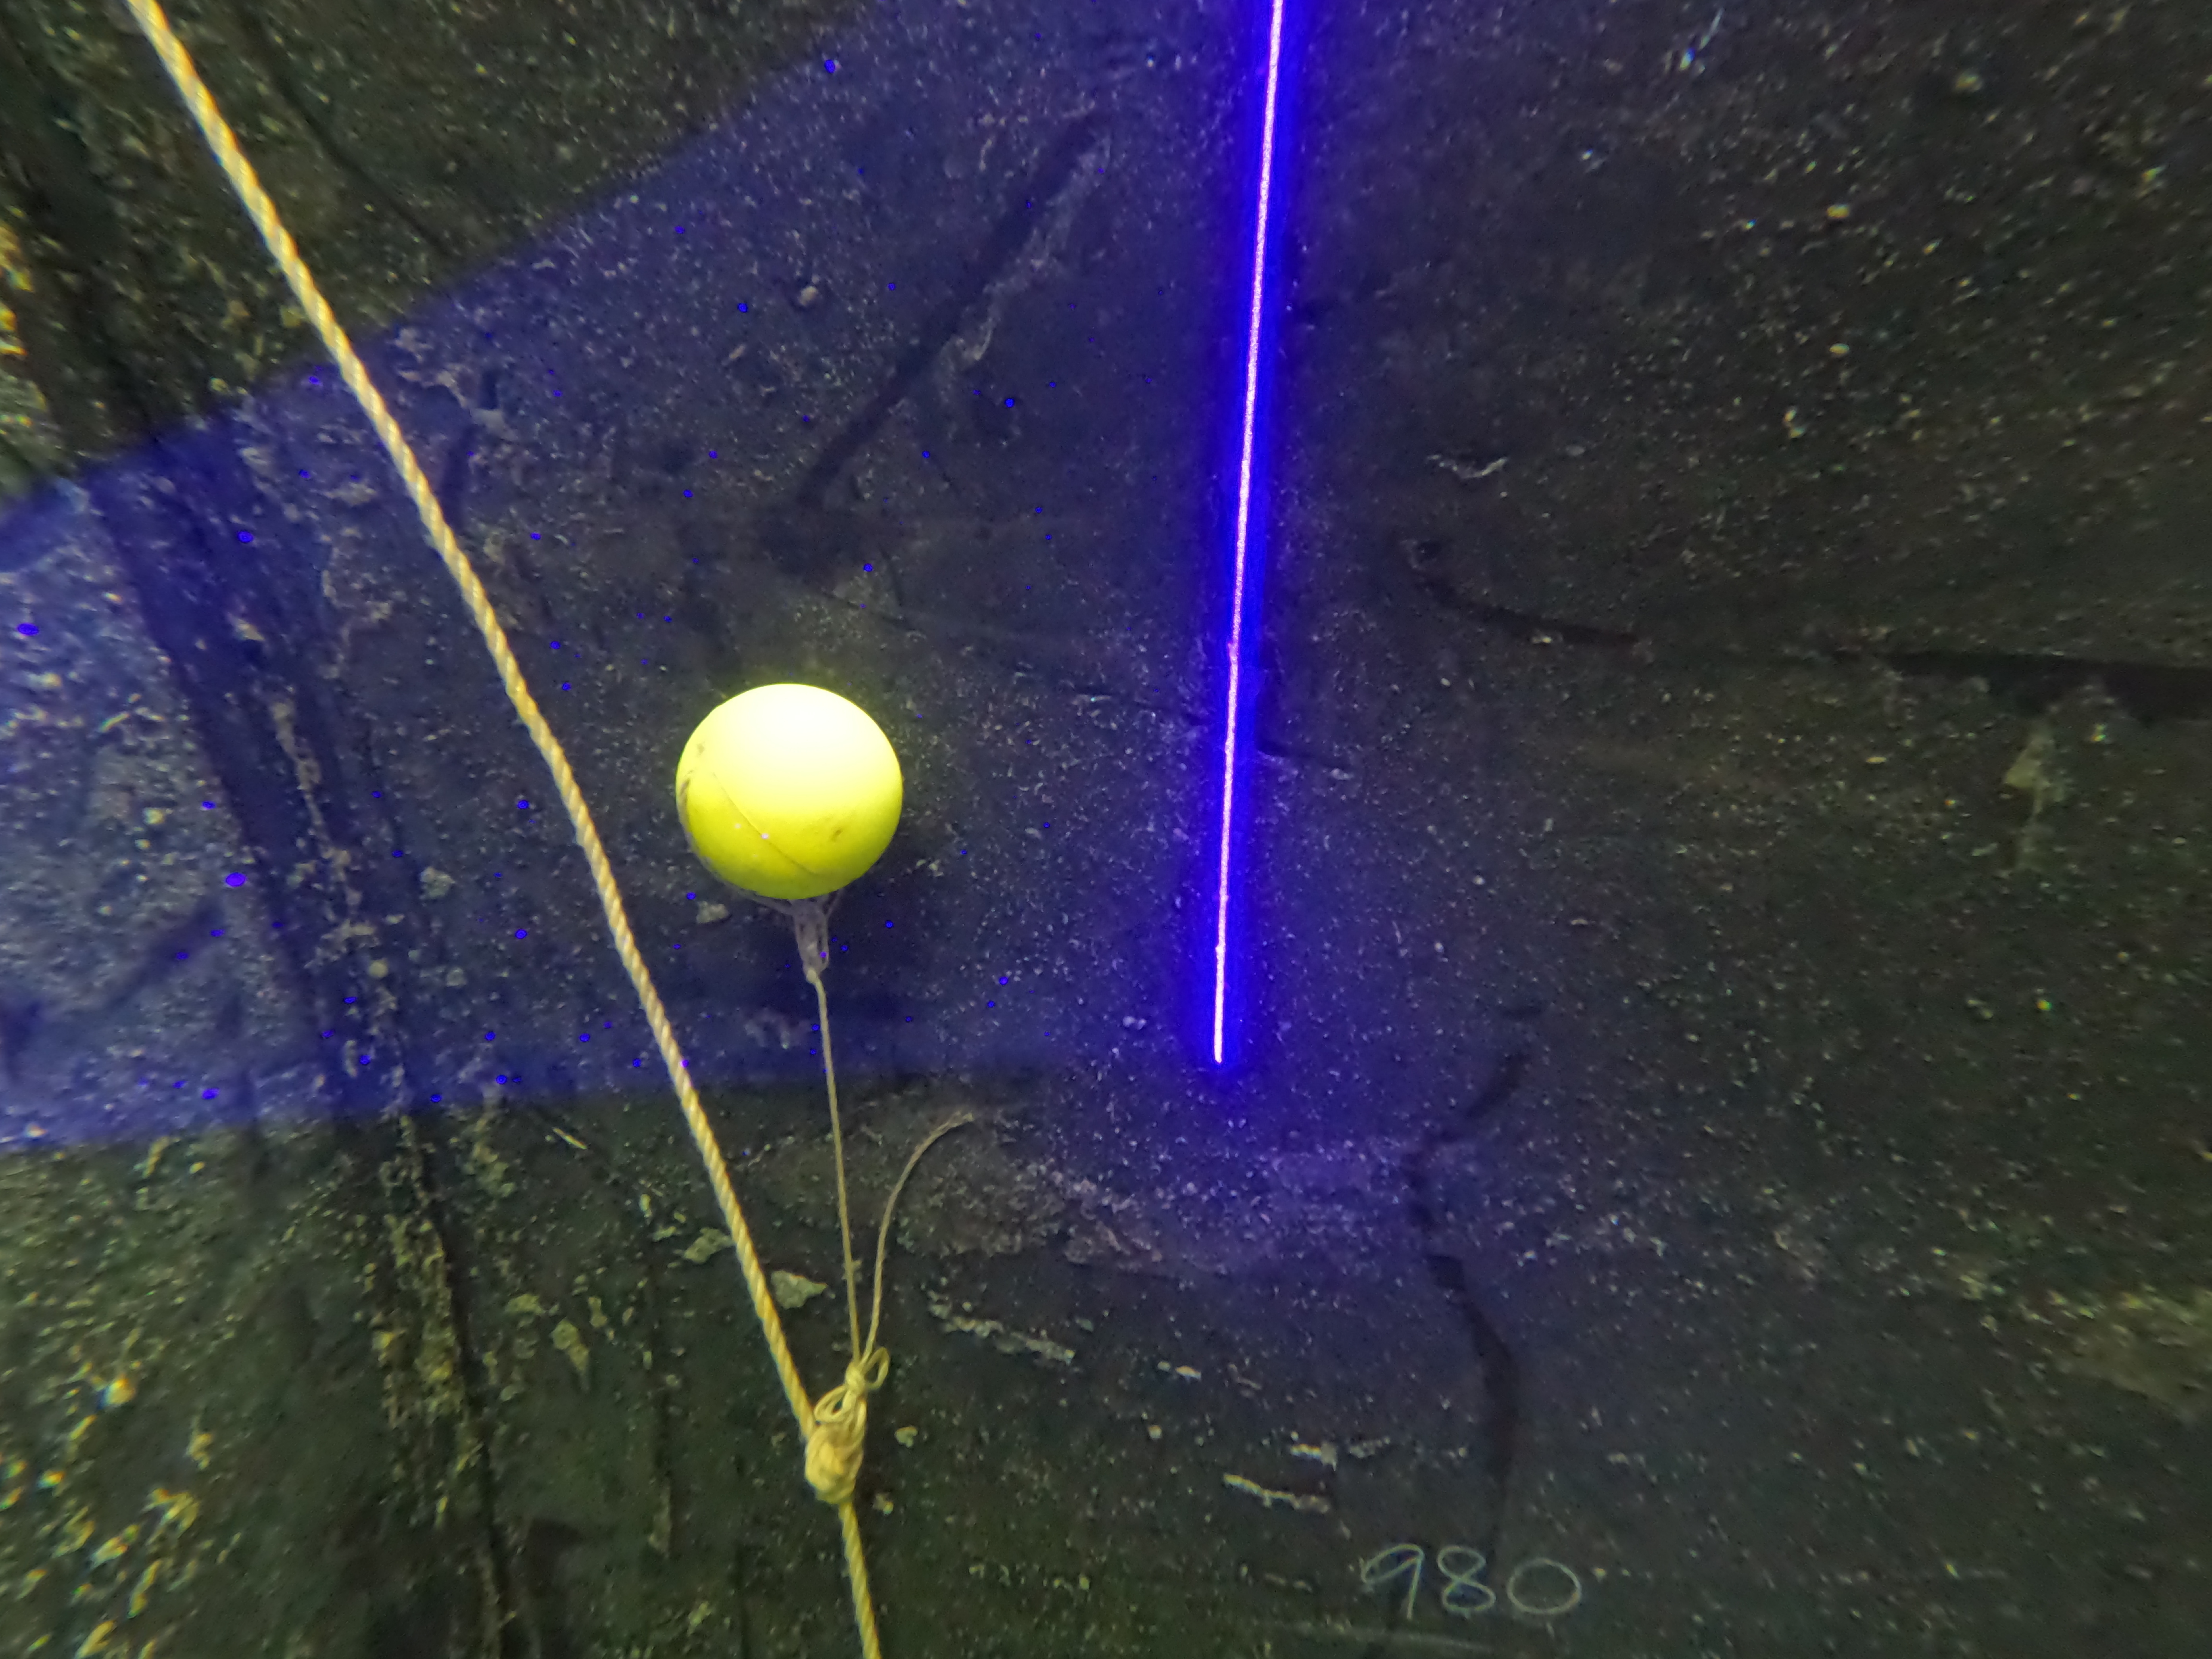

980

Supplement: Supplementary file 2785 [file G0030285.pdf › 2/G0030285.pdf]

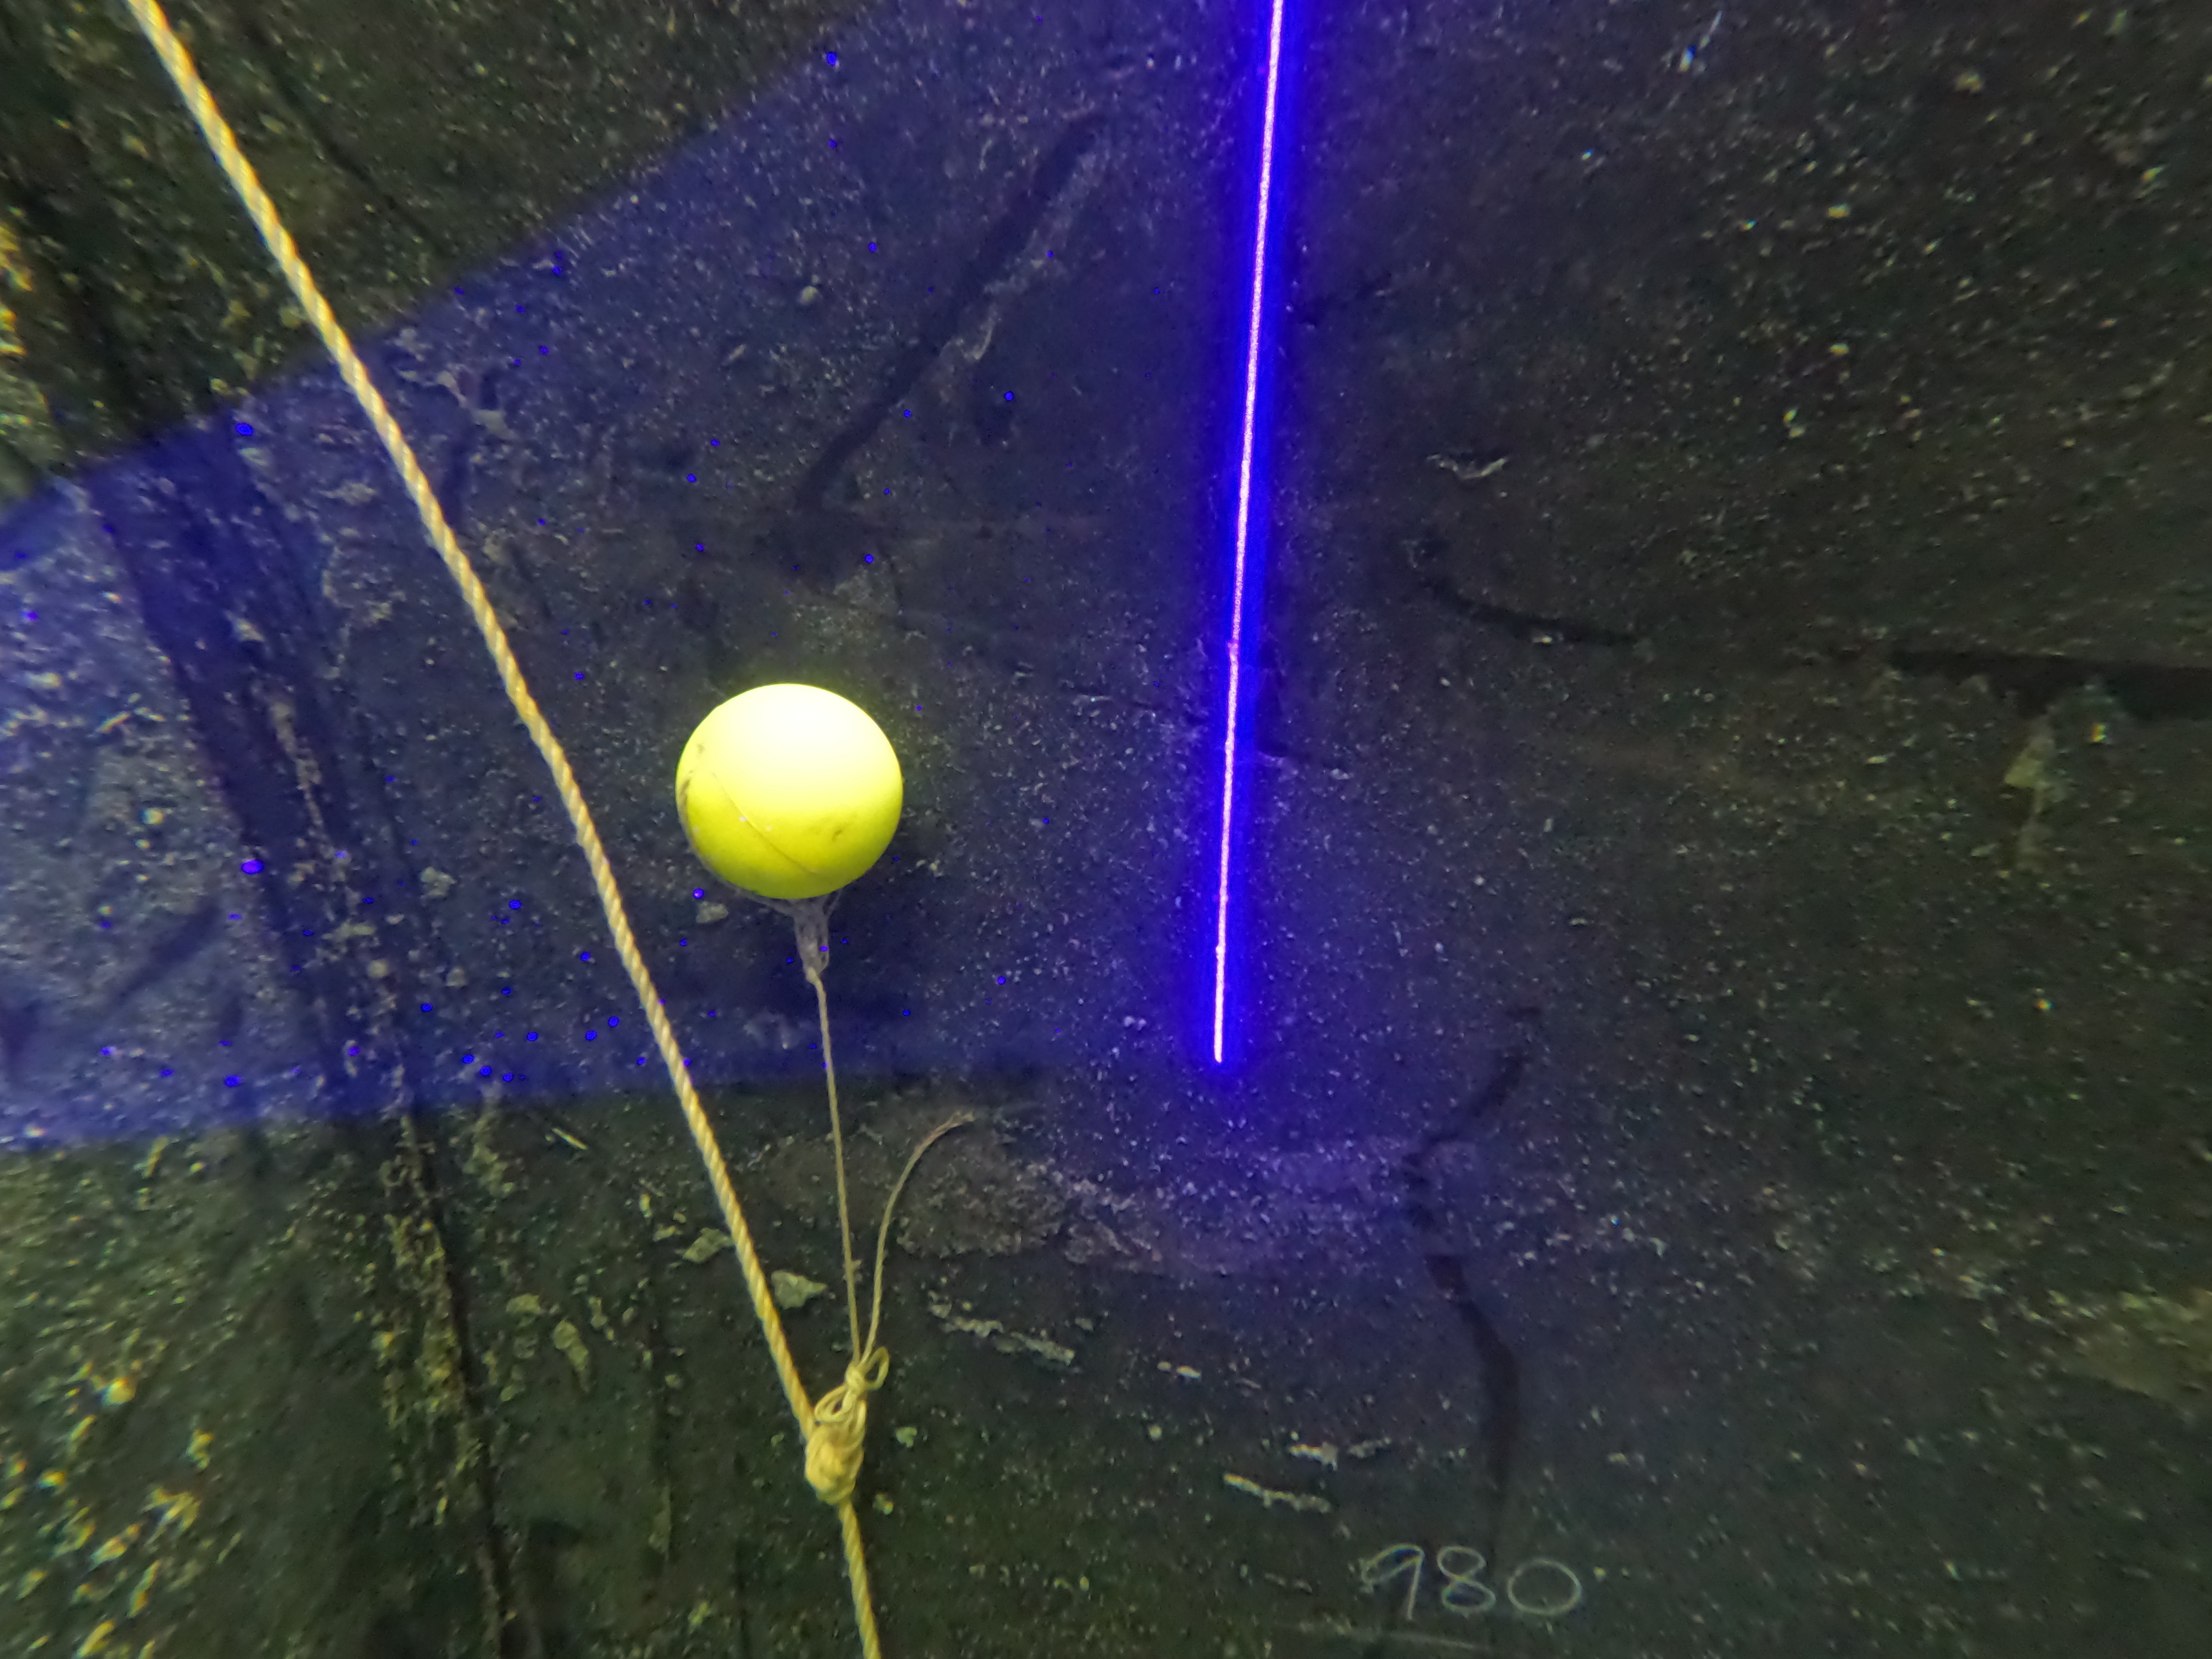

980

Supplement: Supplementary file 2786 [file G0030286.pdf › 2/G0030286.pdf]

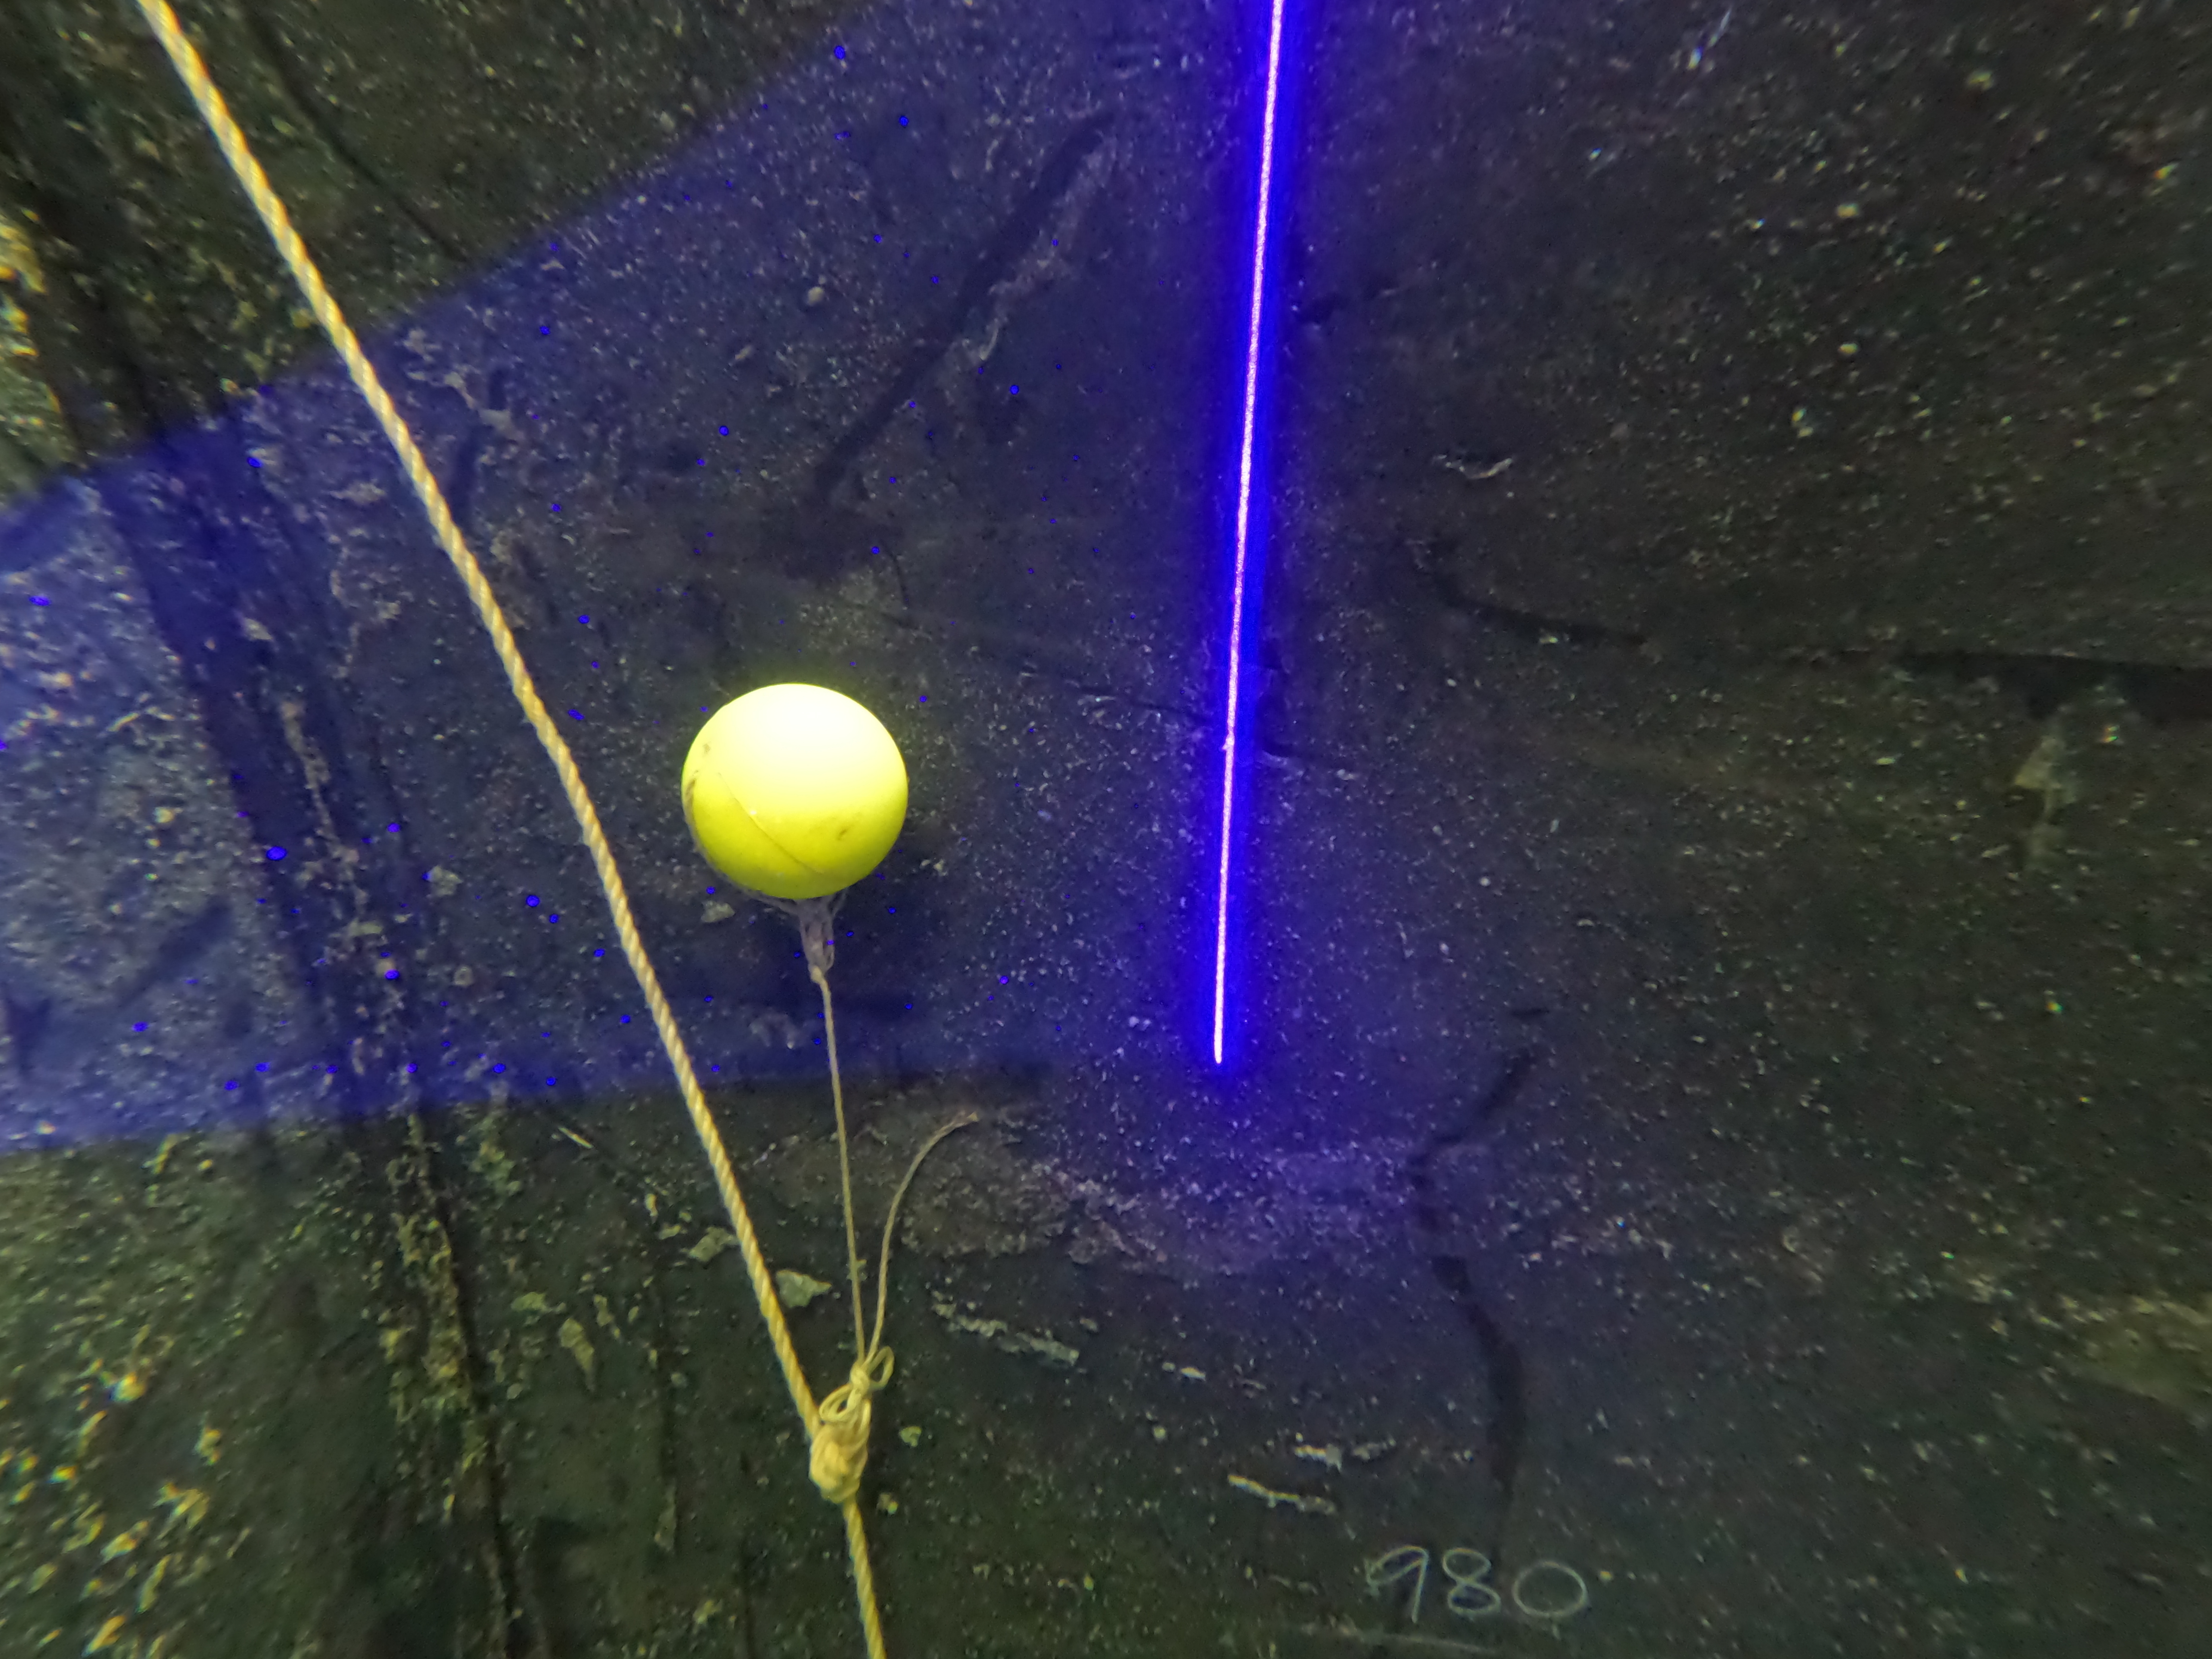

980

Supplement: Supplementary file 2787 [file G0030287.pdf › 2/G0030287.pdf]

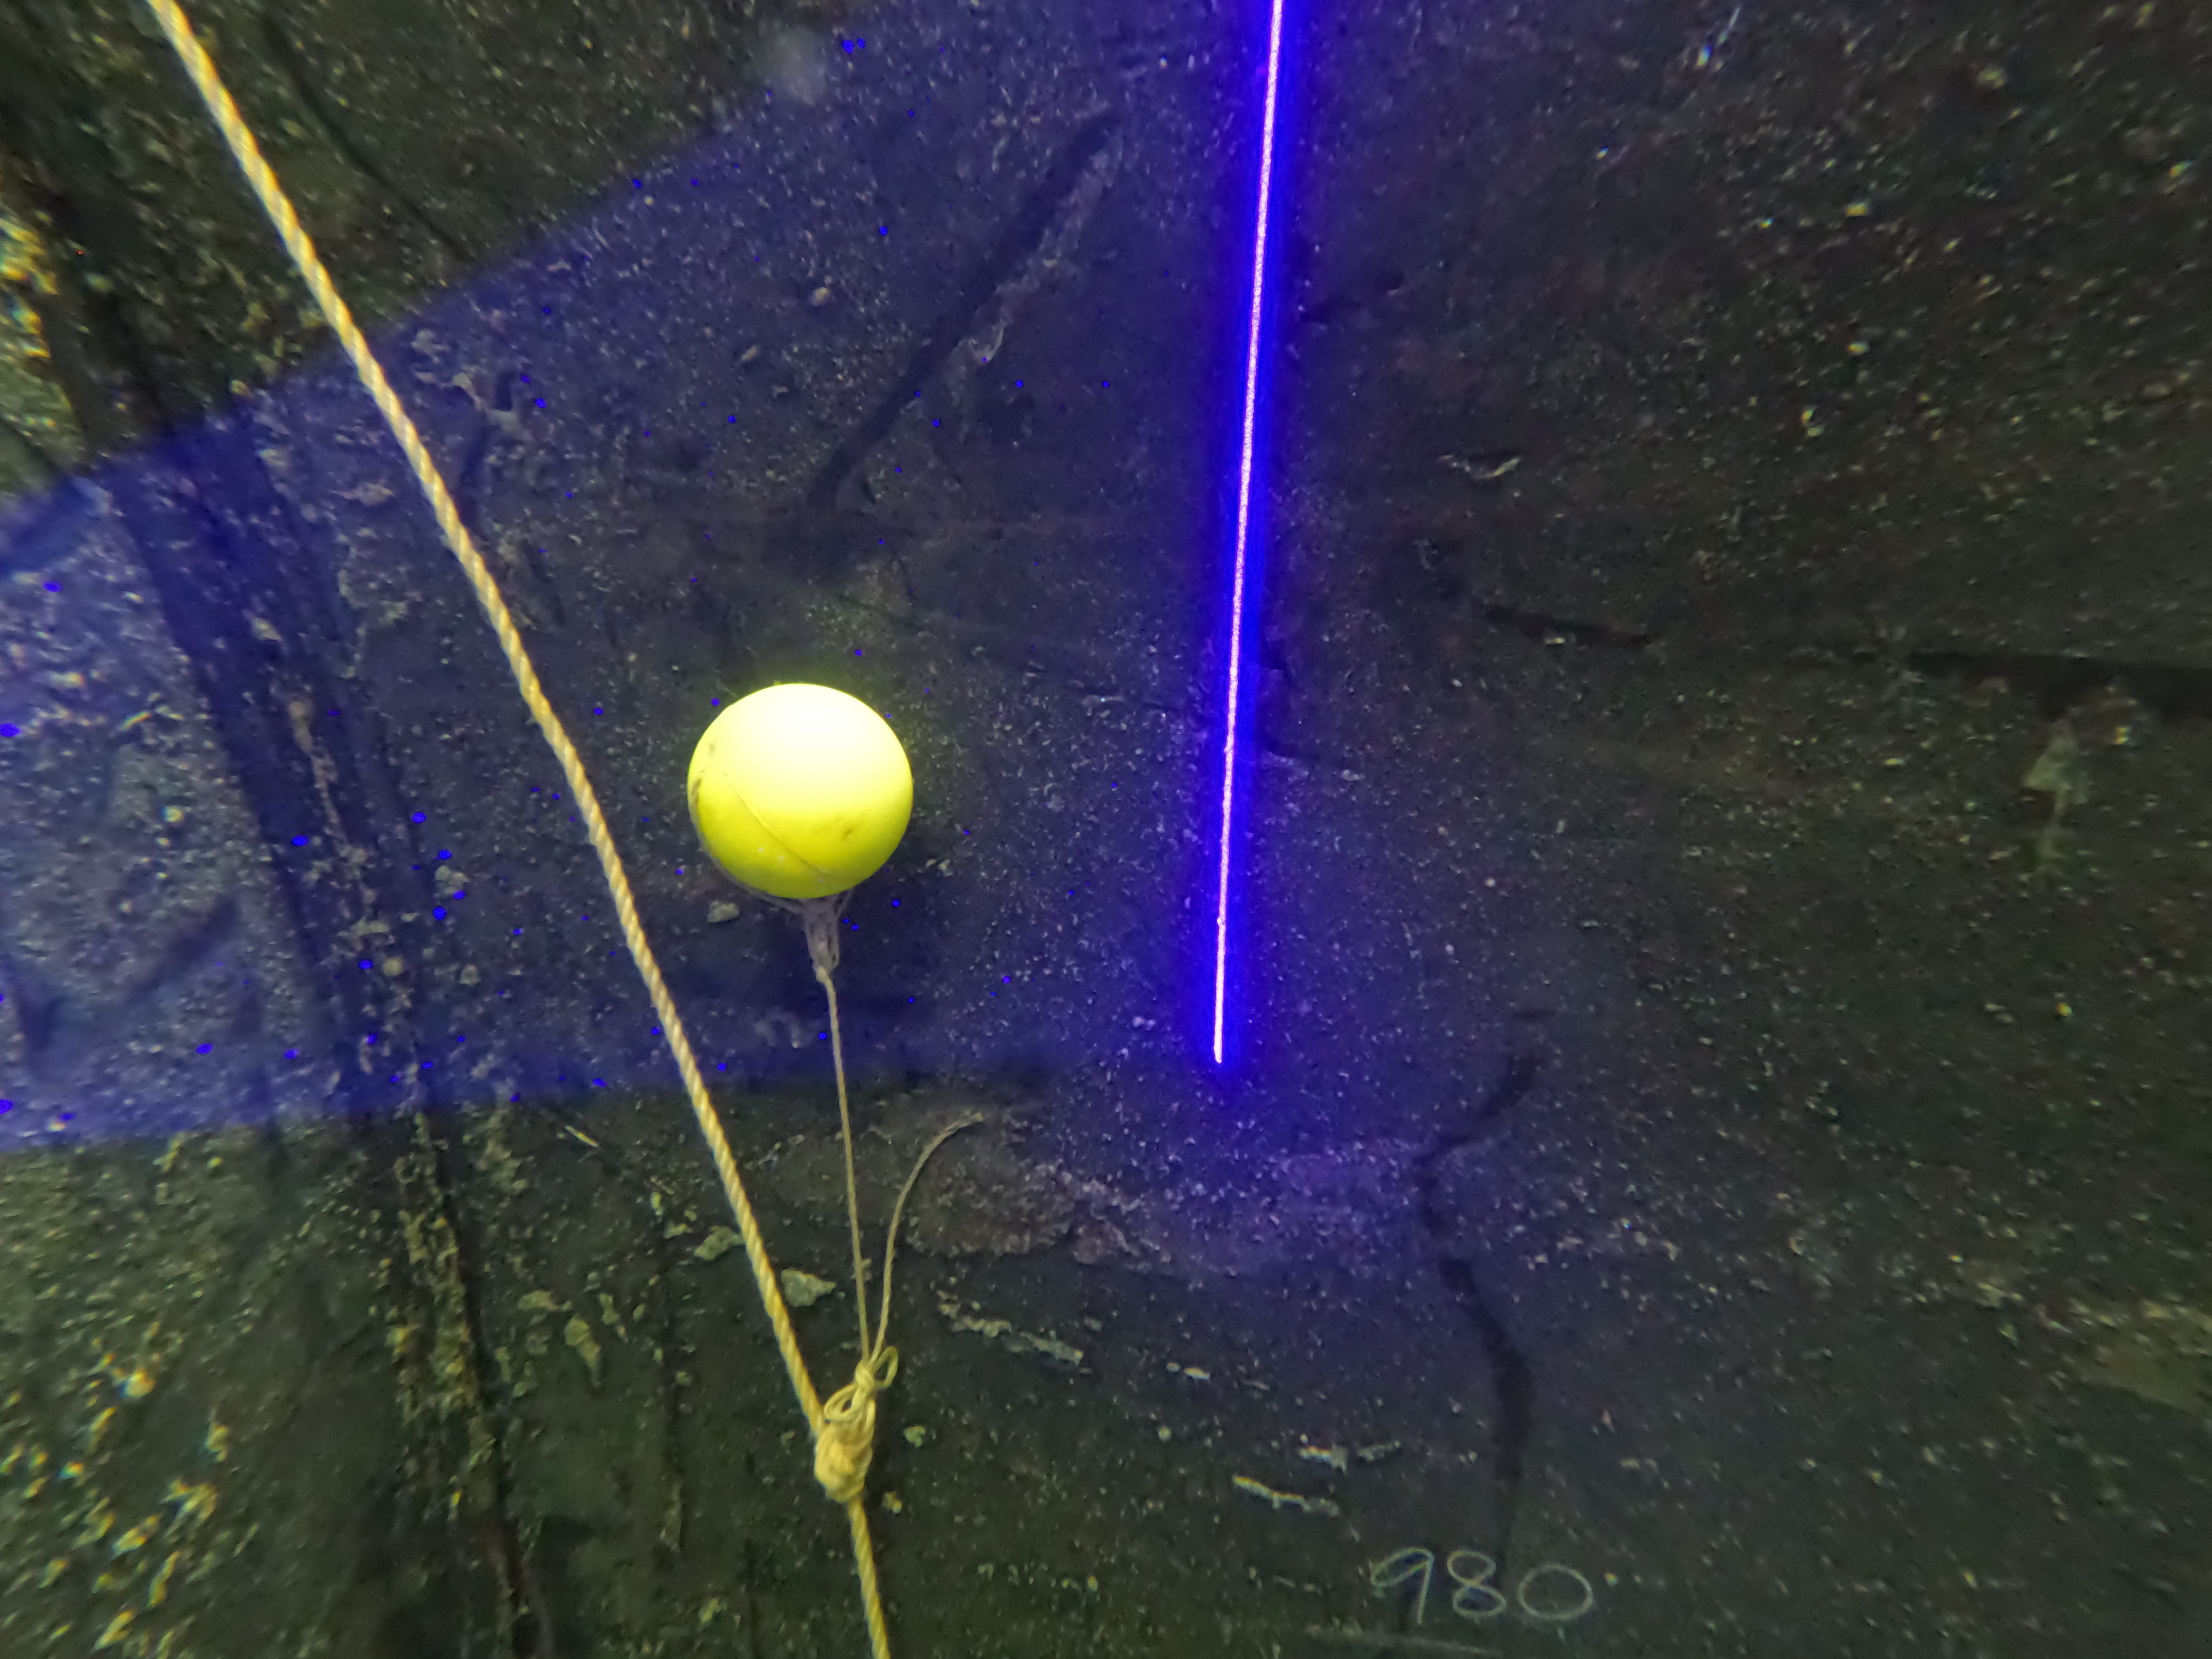

980

Supplement: Supplementary file 2788 [file G0030288.pdf › 2/G0030288.pdf]

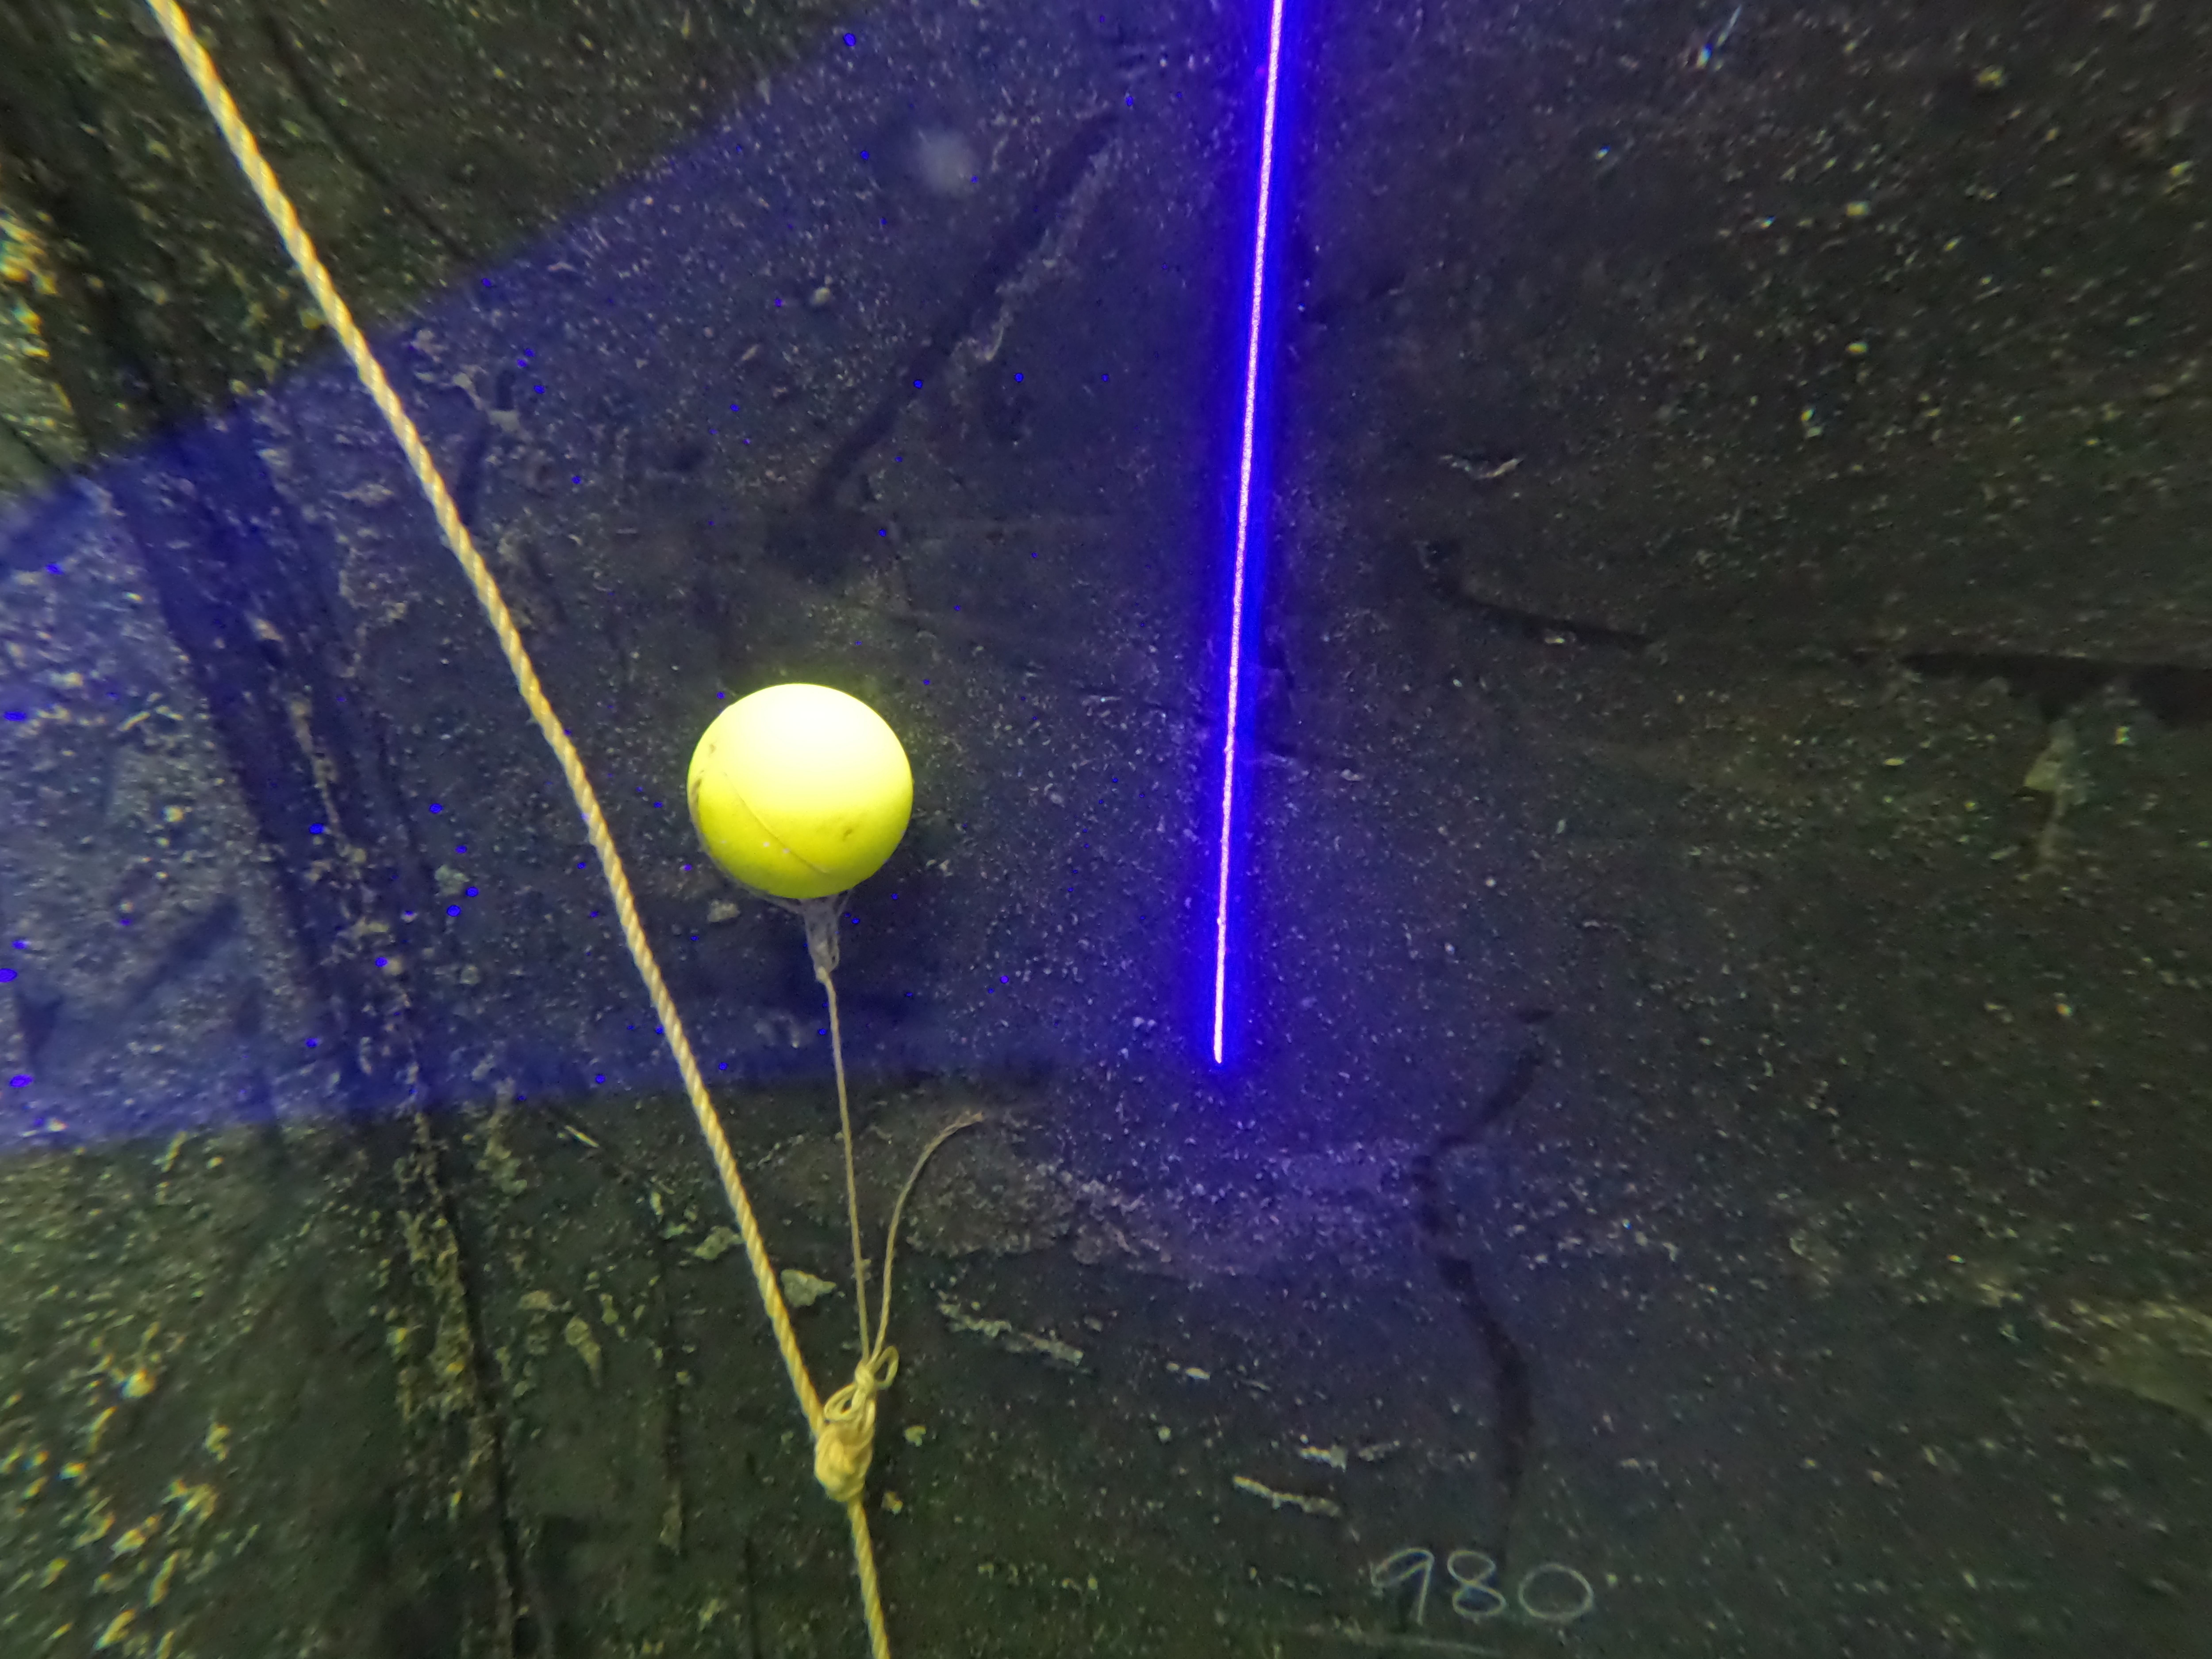

980

Supplement: Supplementary file 2789 [file G0030289.pdf › 2/G0030289.pdf]

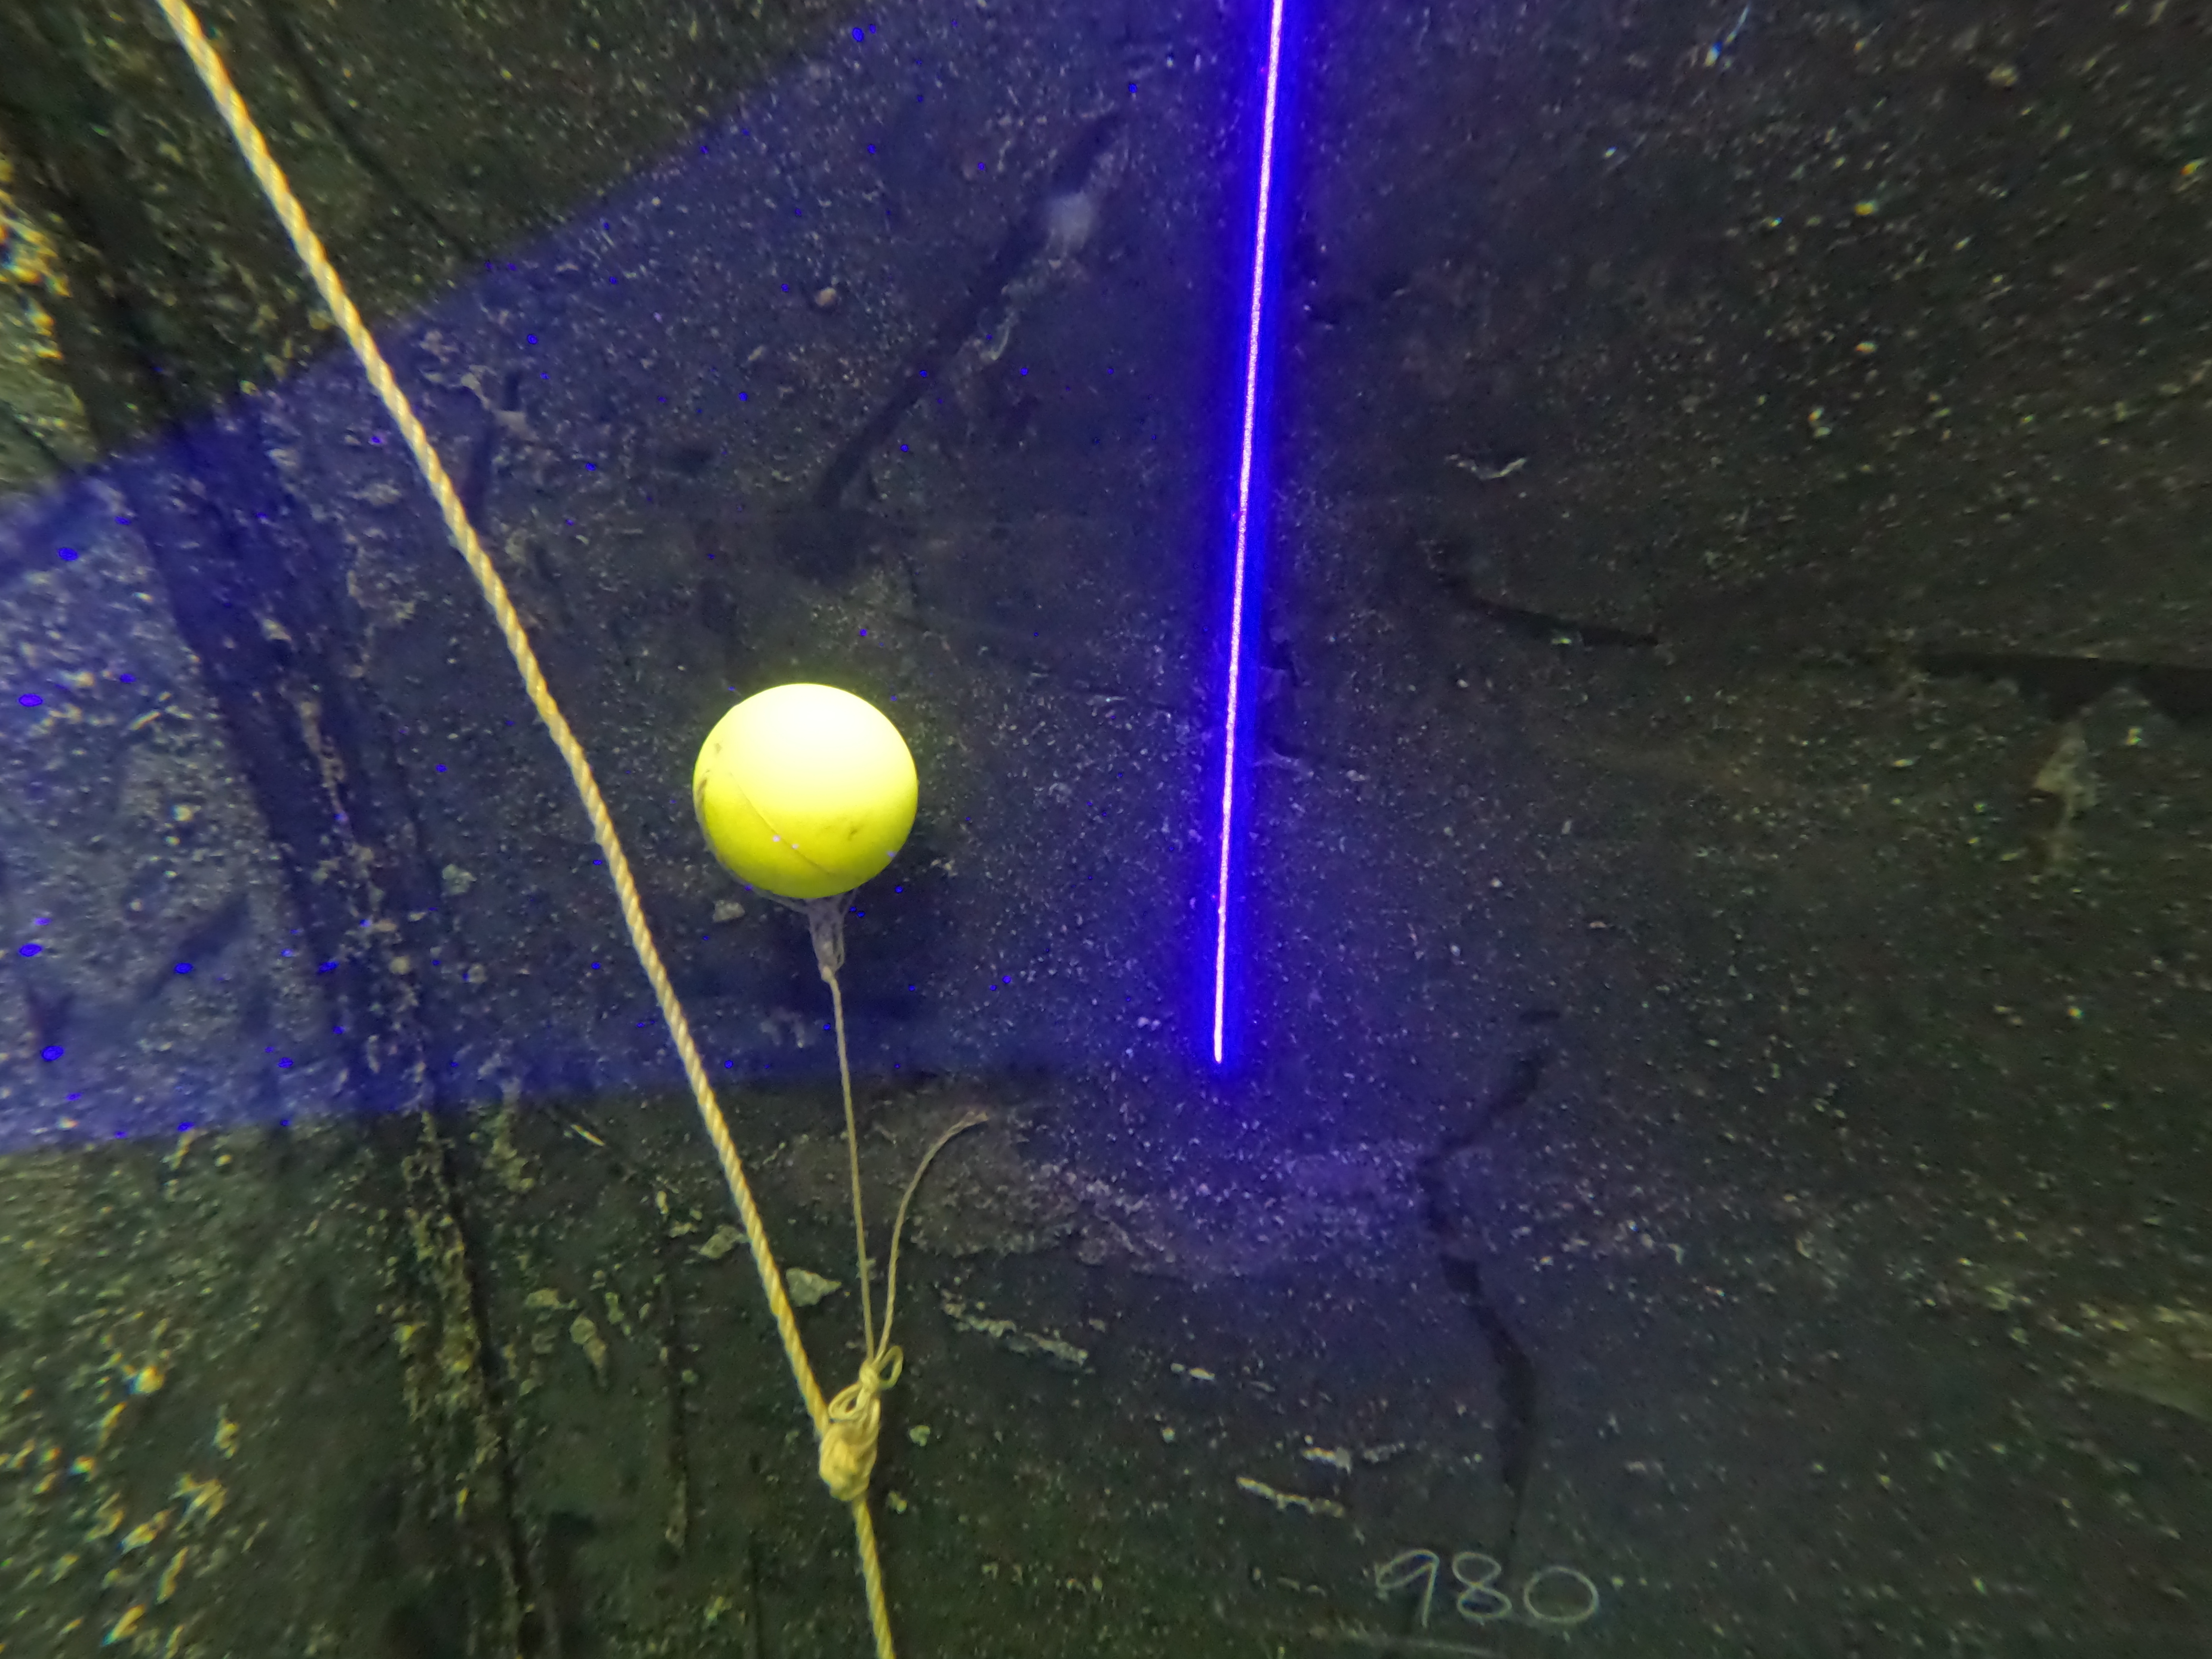

980

Supplement: Supplementary file 2790 [file G0030290.pdf › 2/G0030290.pdf]
