# Supplementary figures and images for: 3D reconstruction of shallow sea environment using direct system calibration and faint laser line extraction (part 28 of 35)
Source: Research Square preprint supplement (doi:10.21203/rs.3.rs-5262658/v1), 2024-12-02

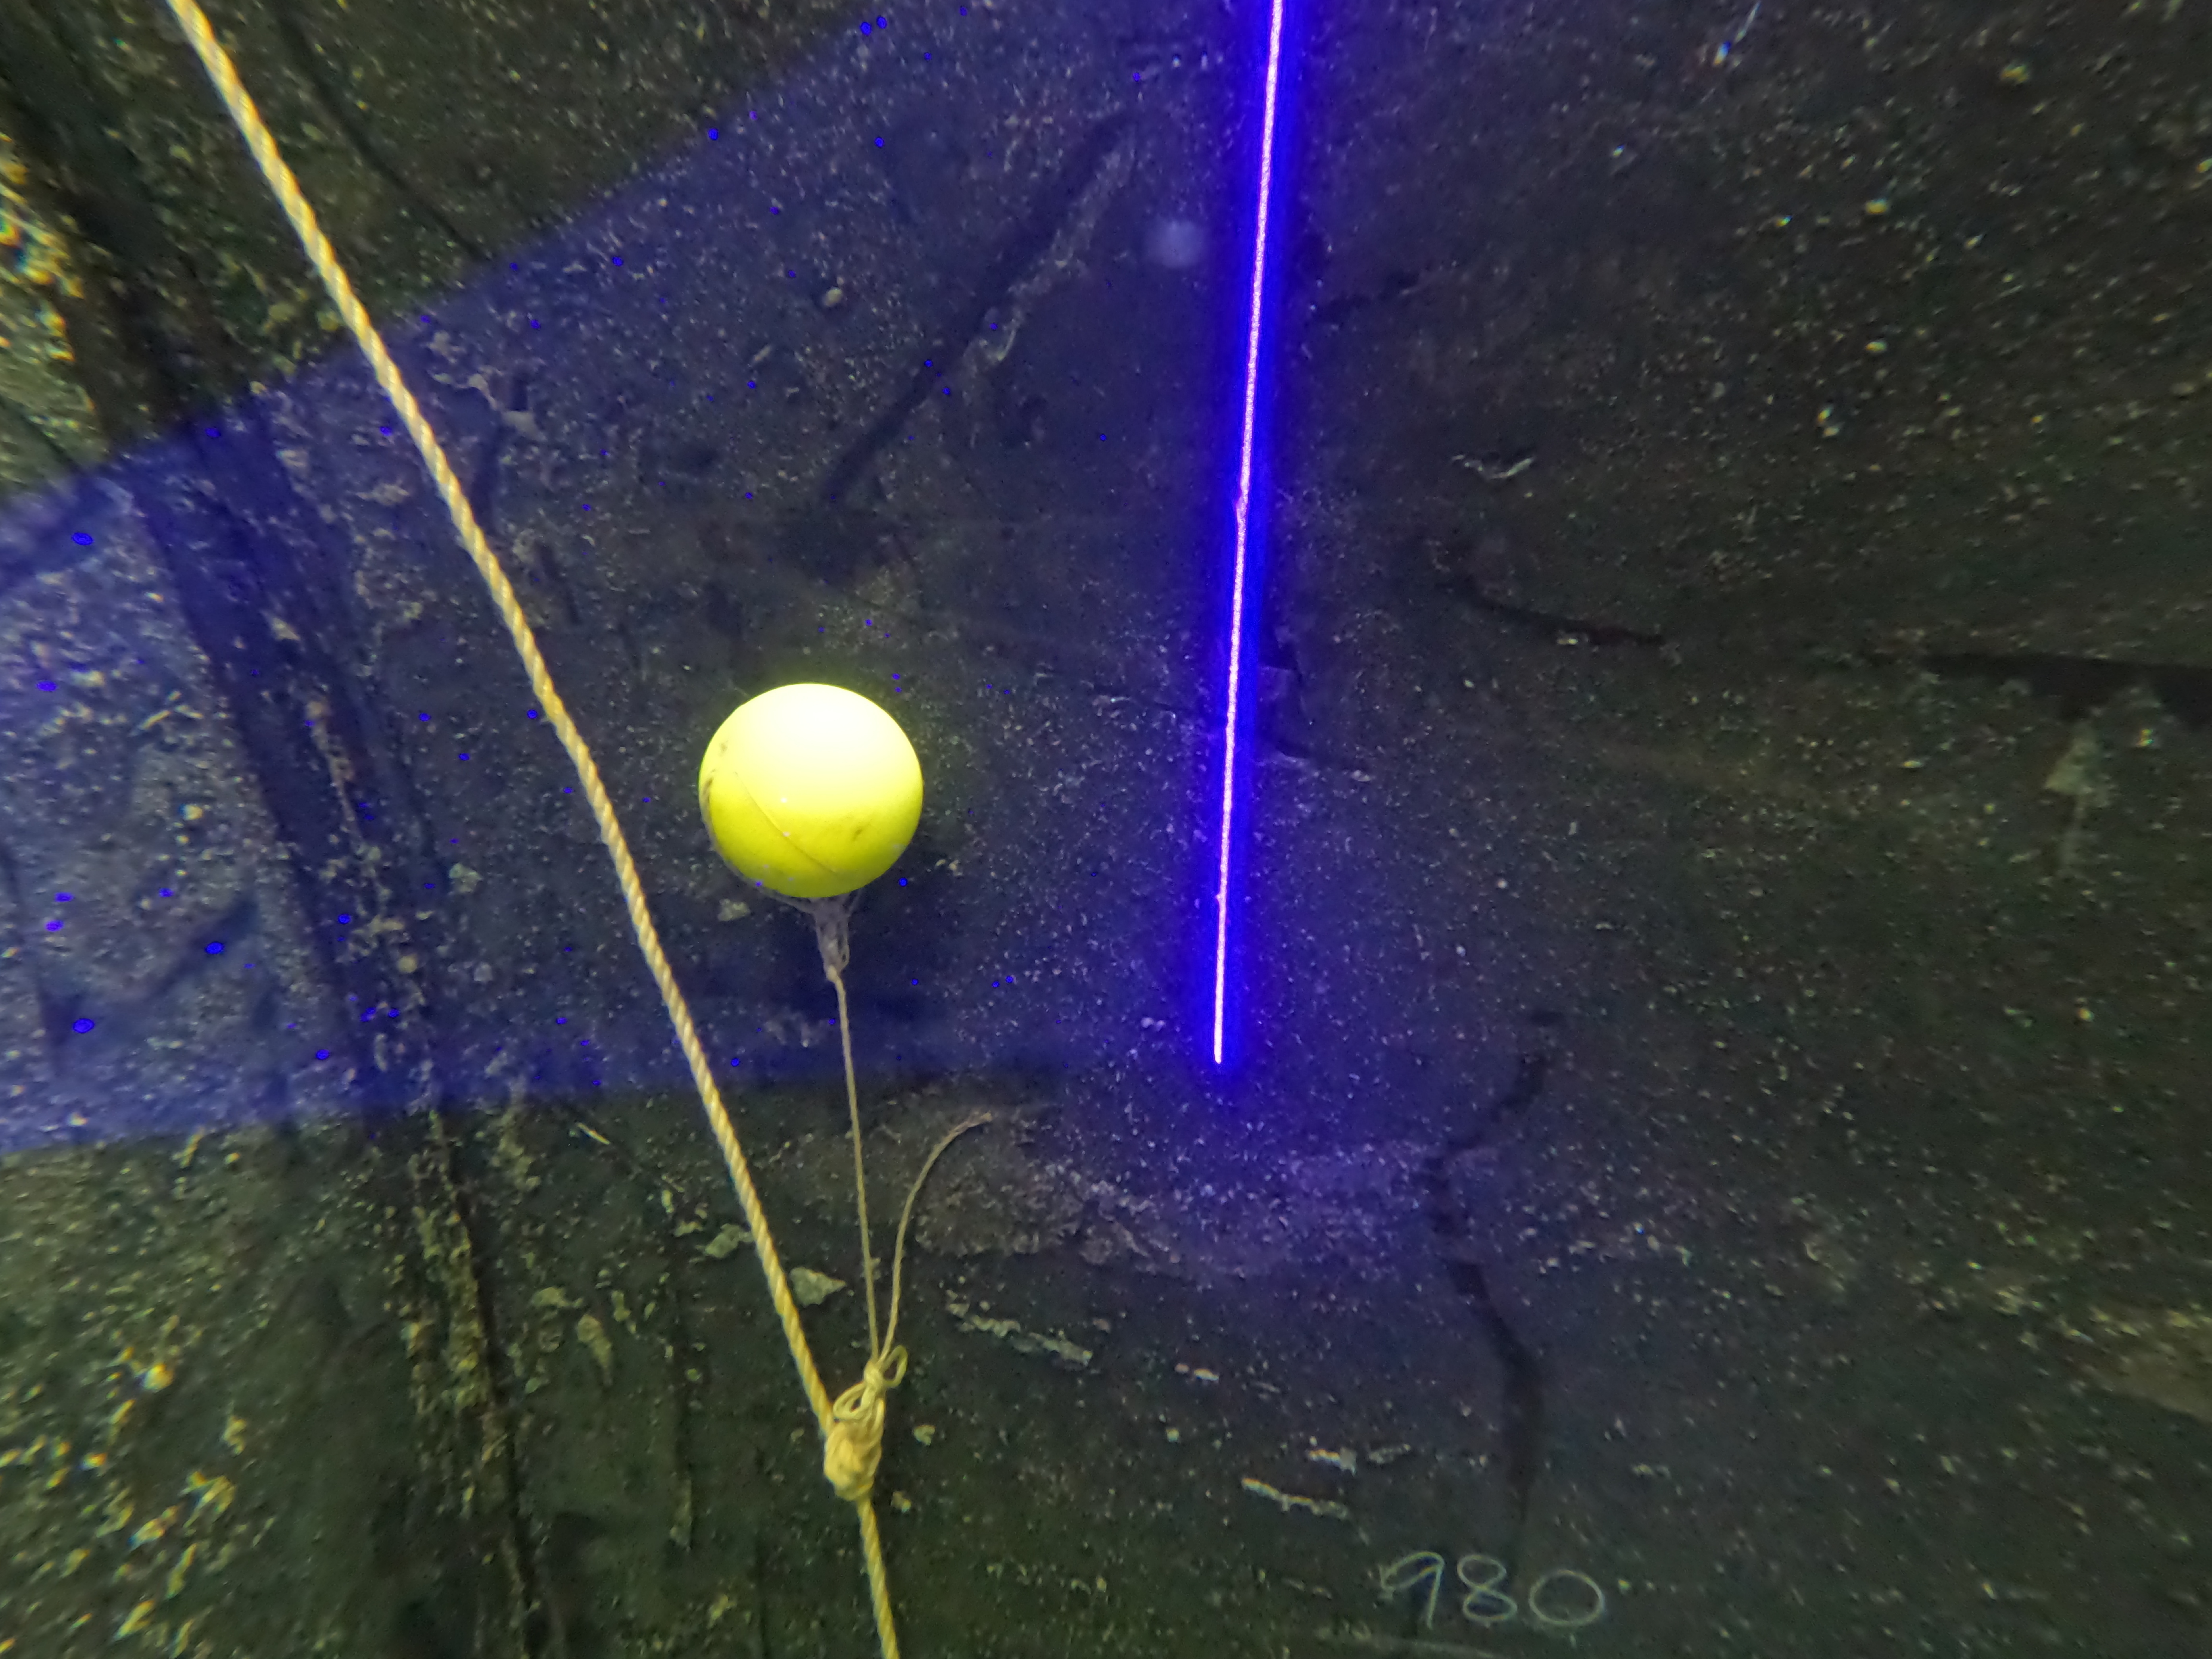

980

Supplement: Supplementary file 2791 [file G0030291.pdf › 2/G0030291.pdf]

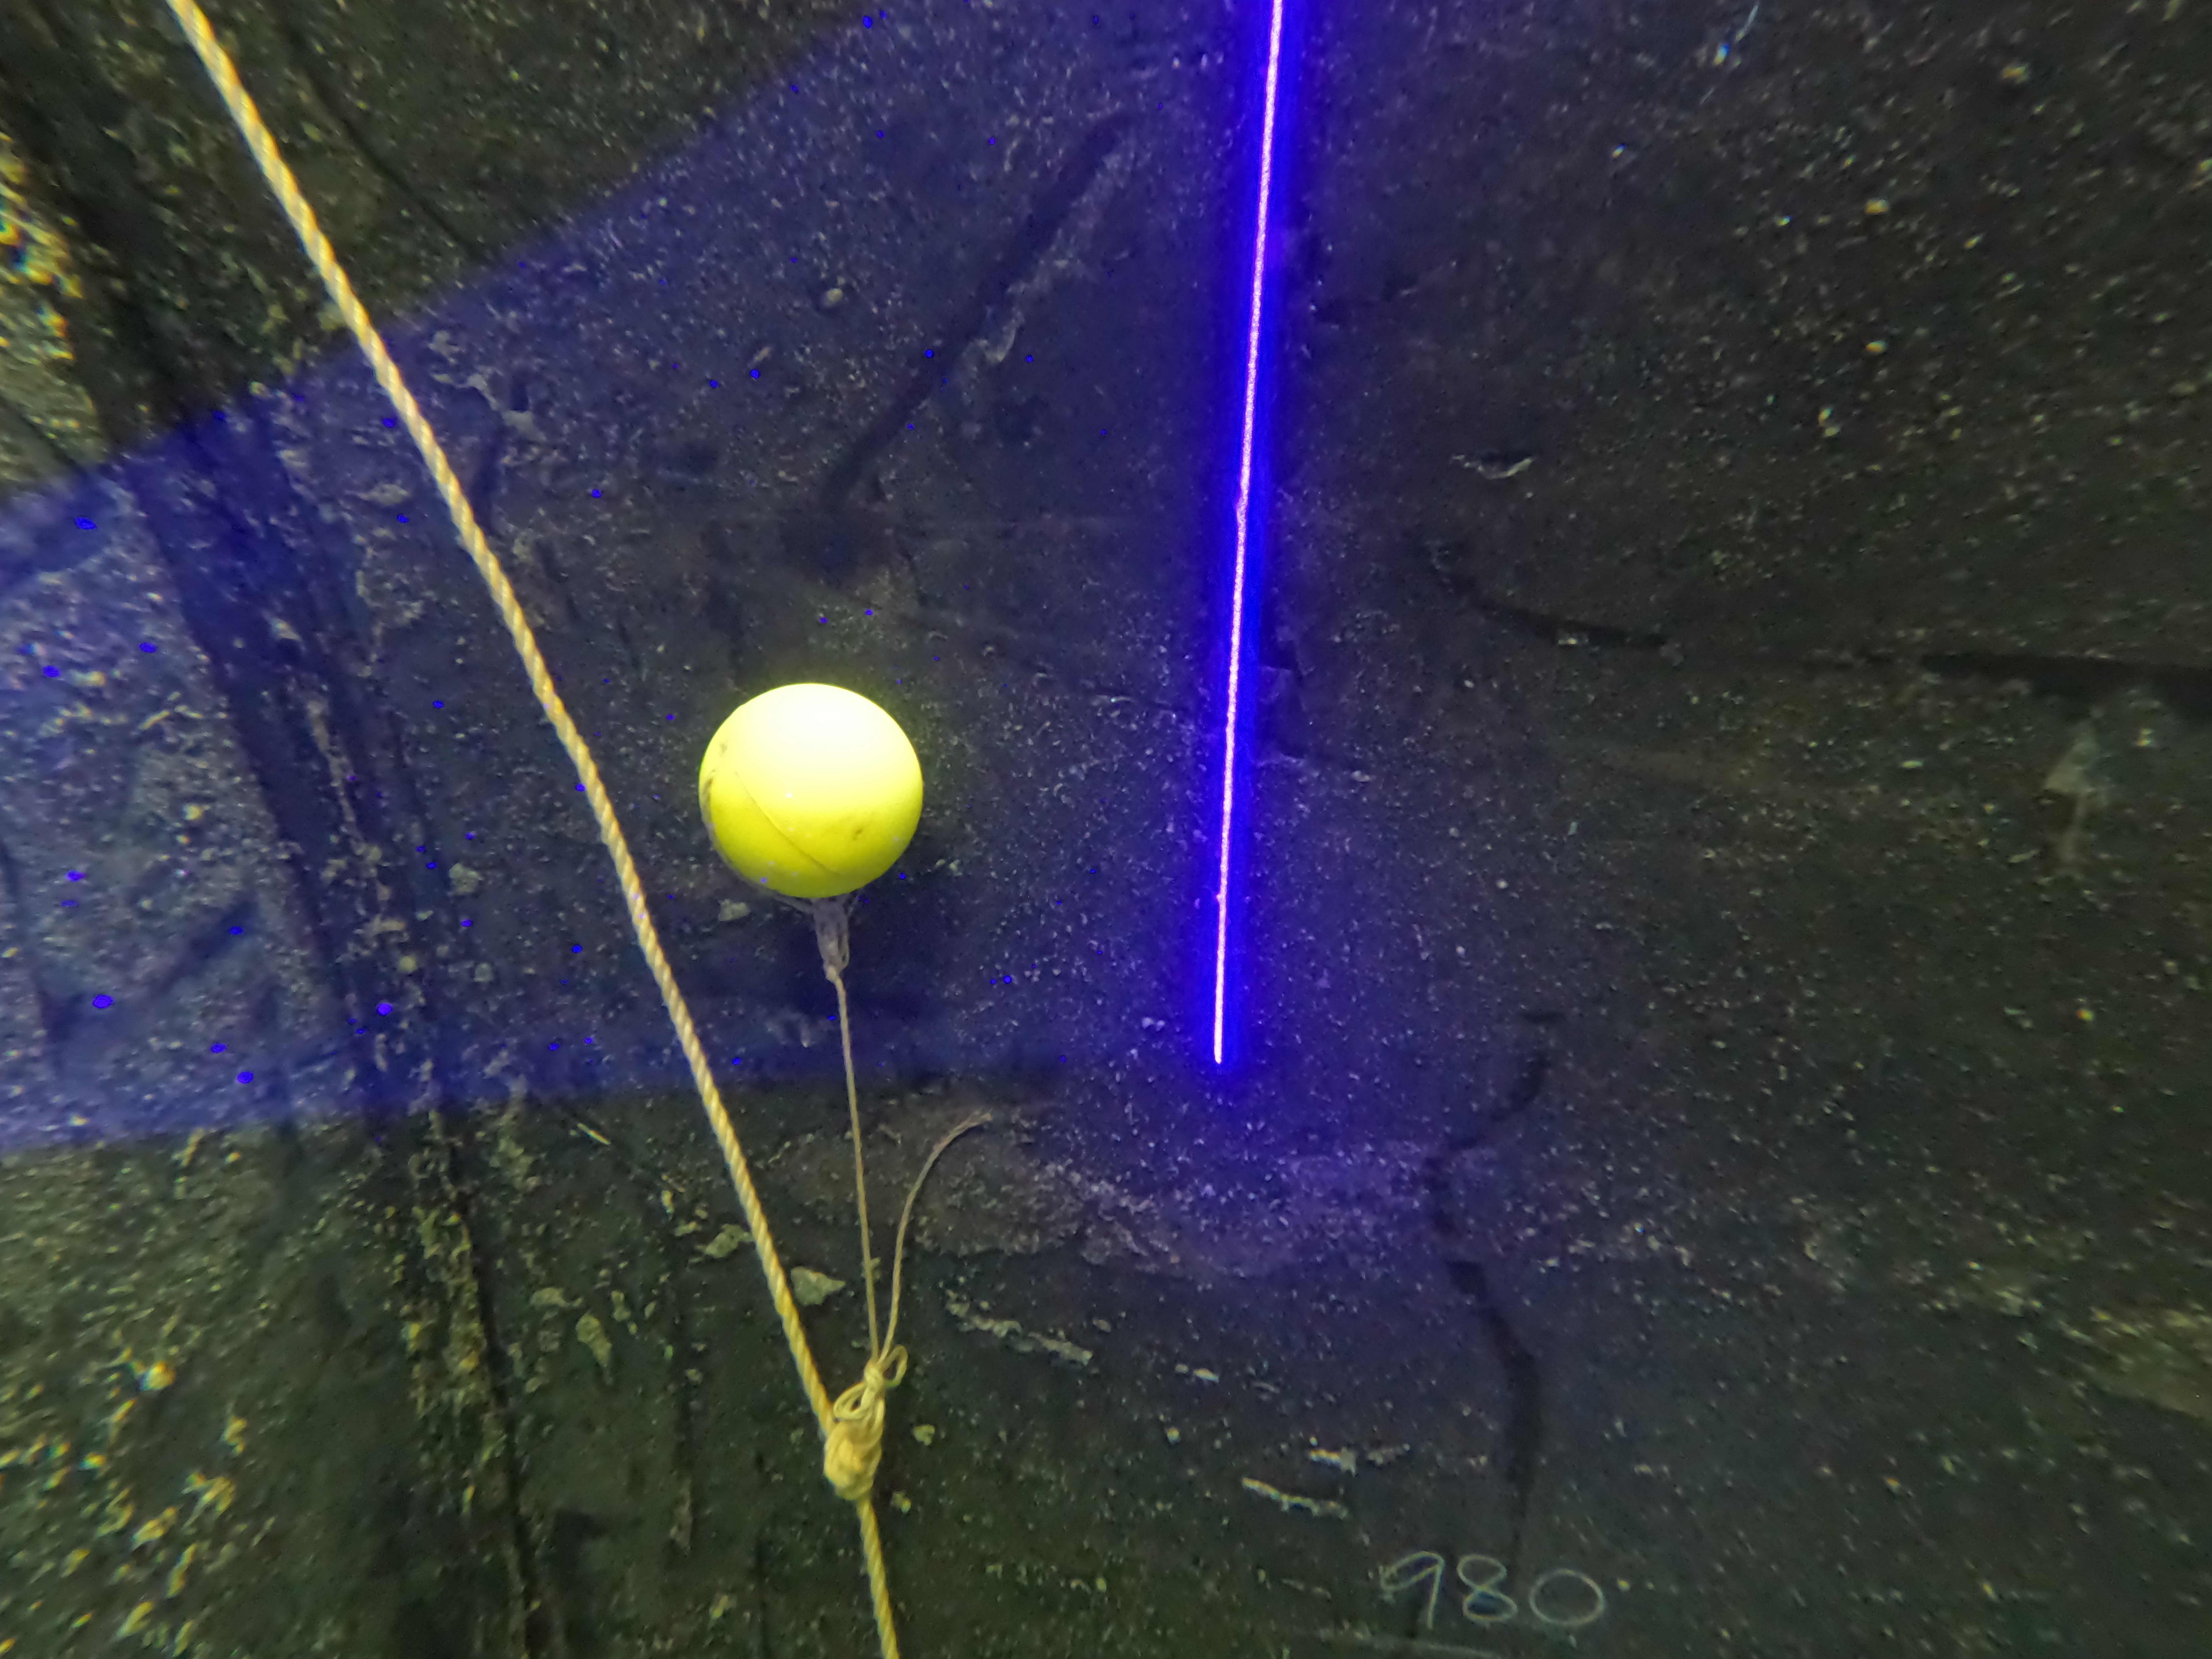

980

Supplement: Supplementary file 2792 [file G0030292.pdf › 2/G0030292.pdf]

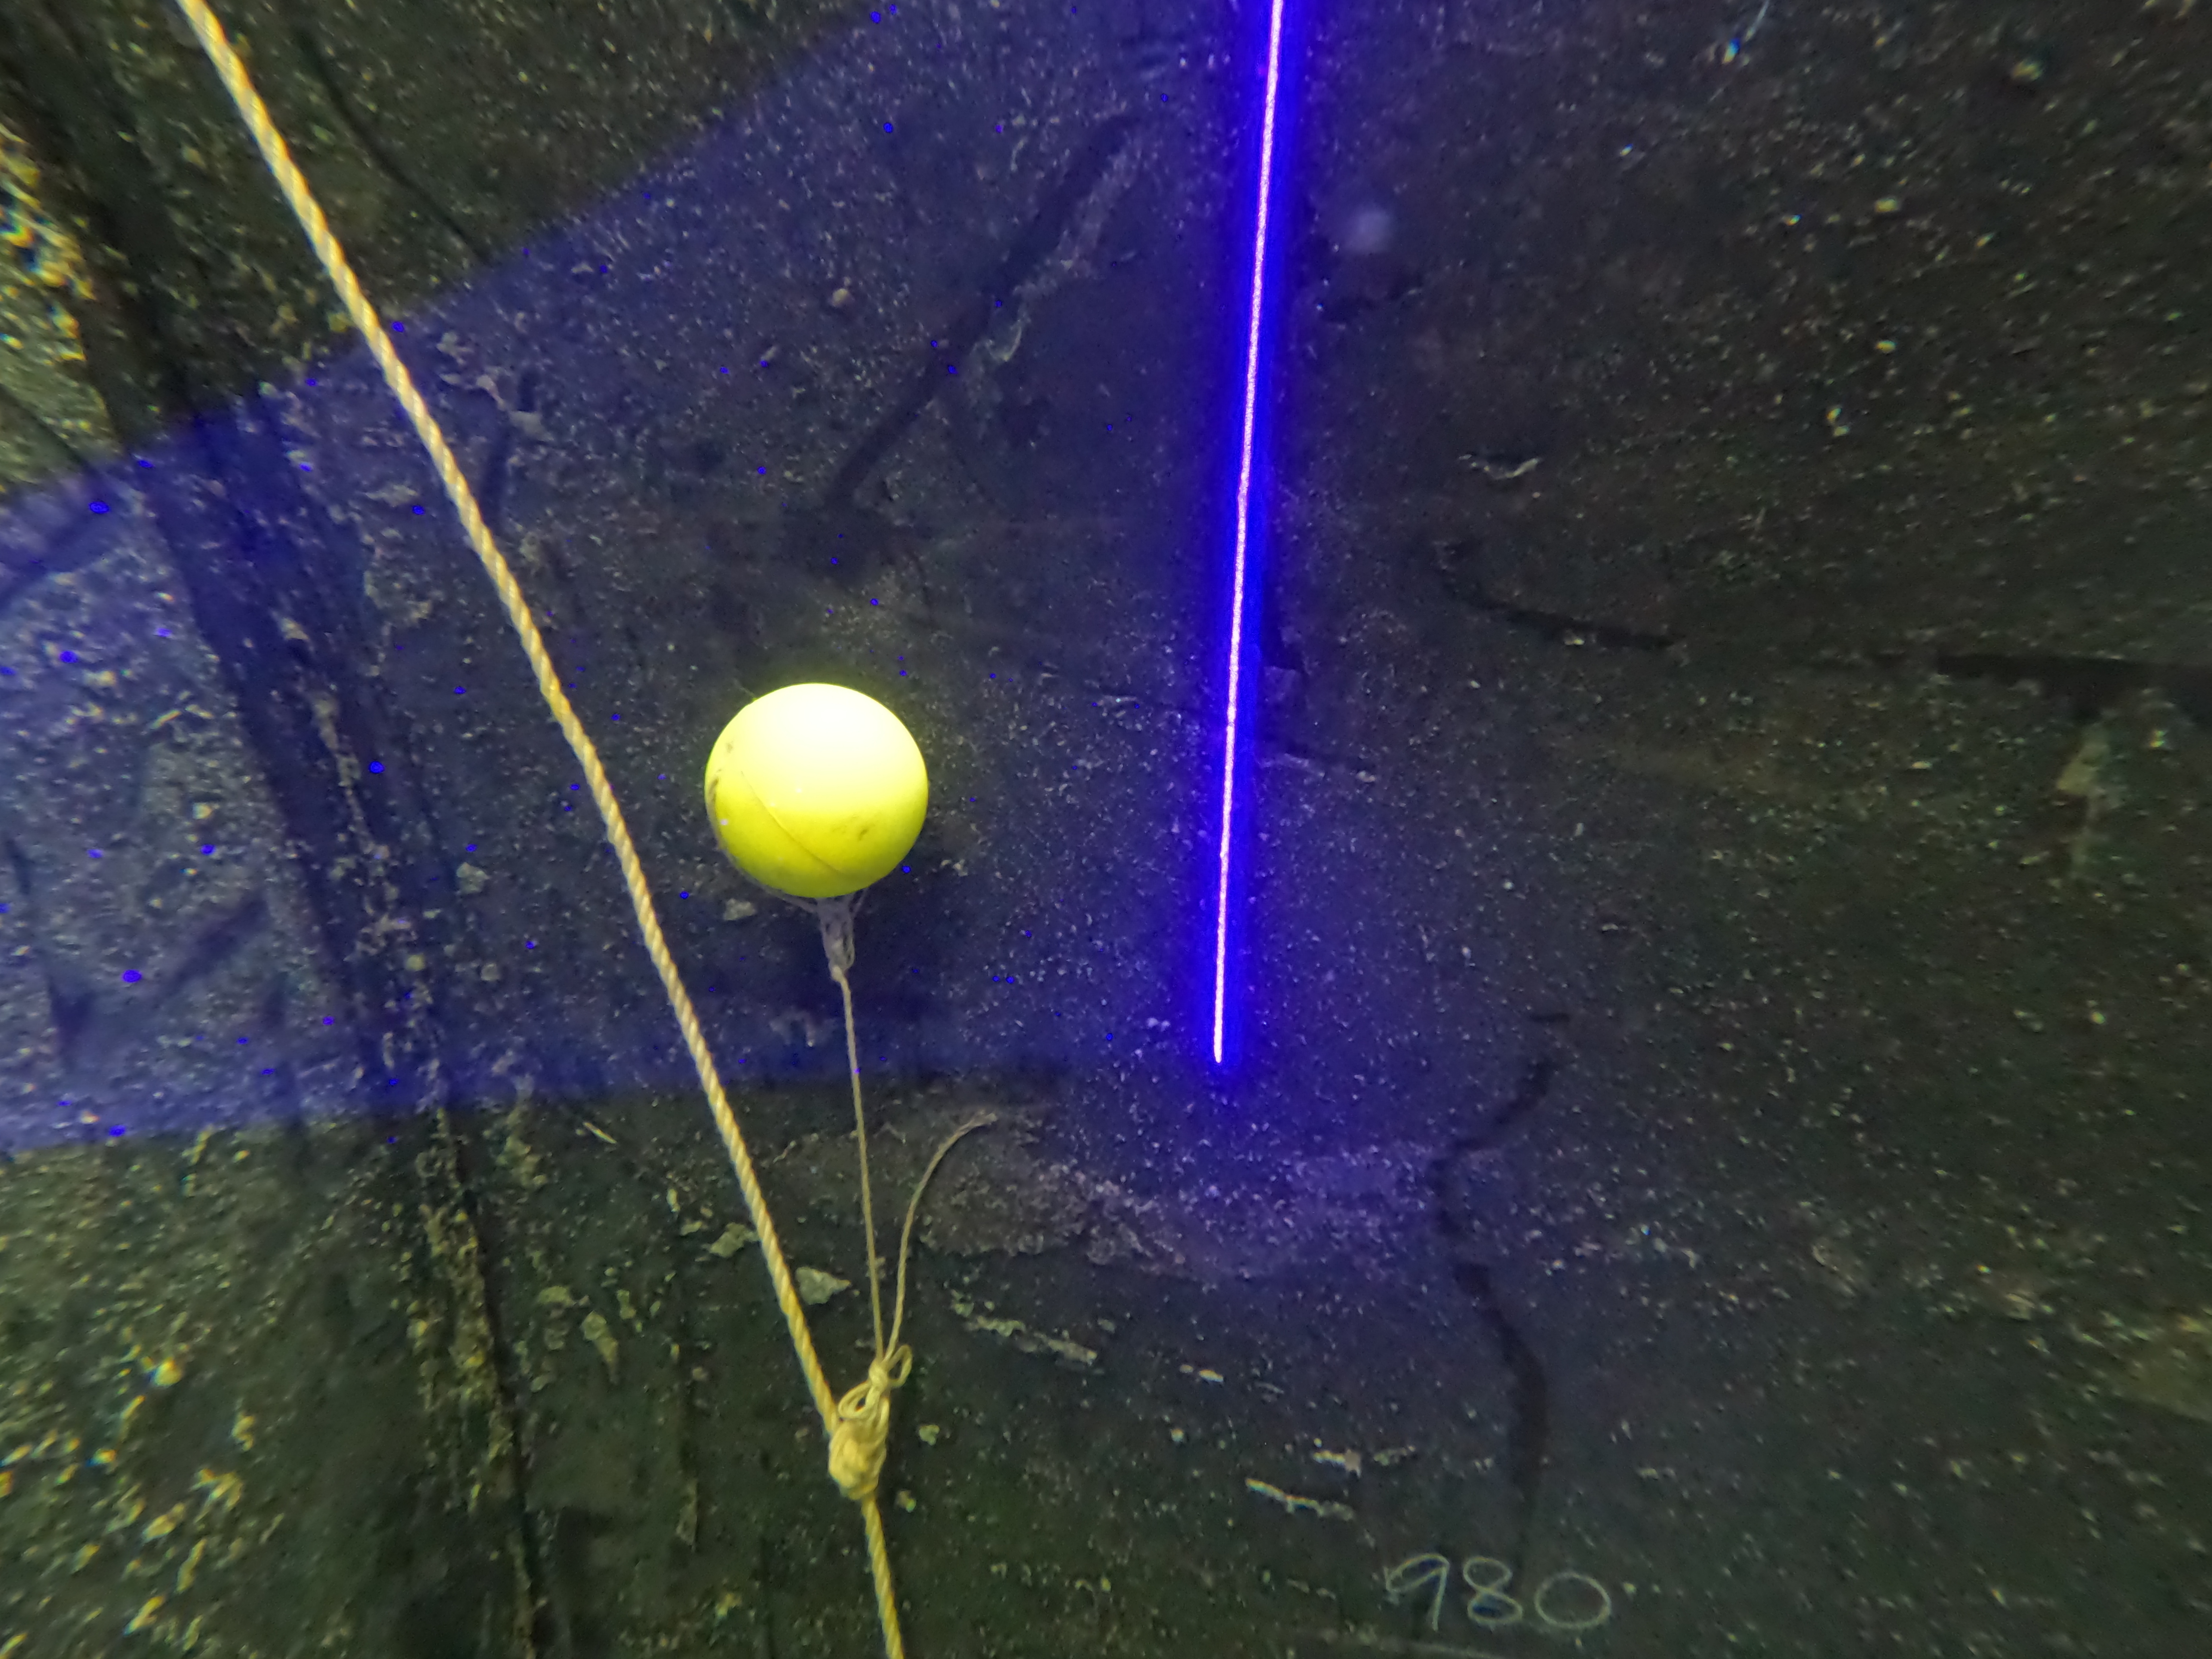

980

Supplement: Supplementary file 2793 [file G0030293.pdf › 2/G0030293.pdf]

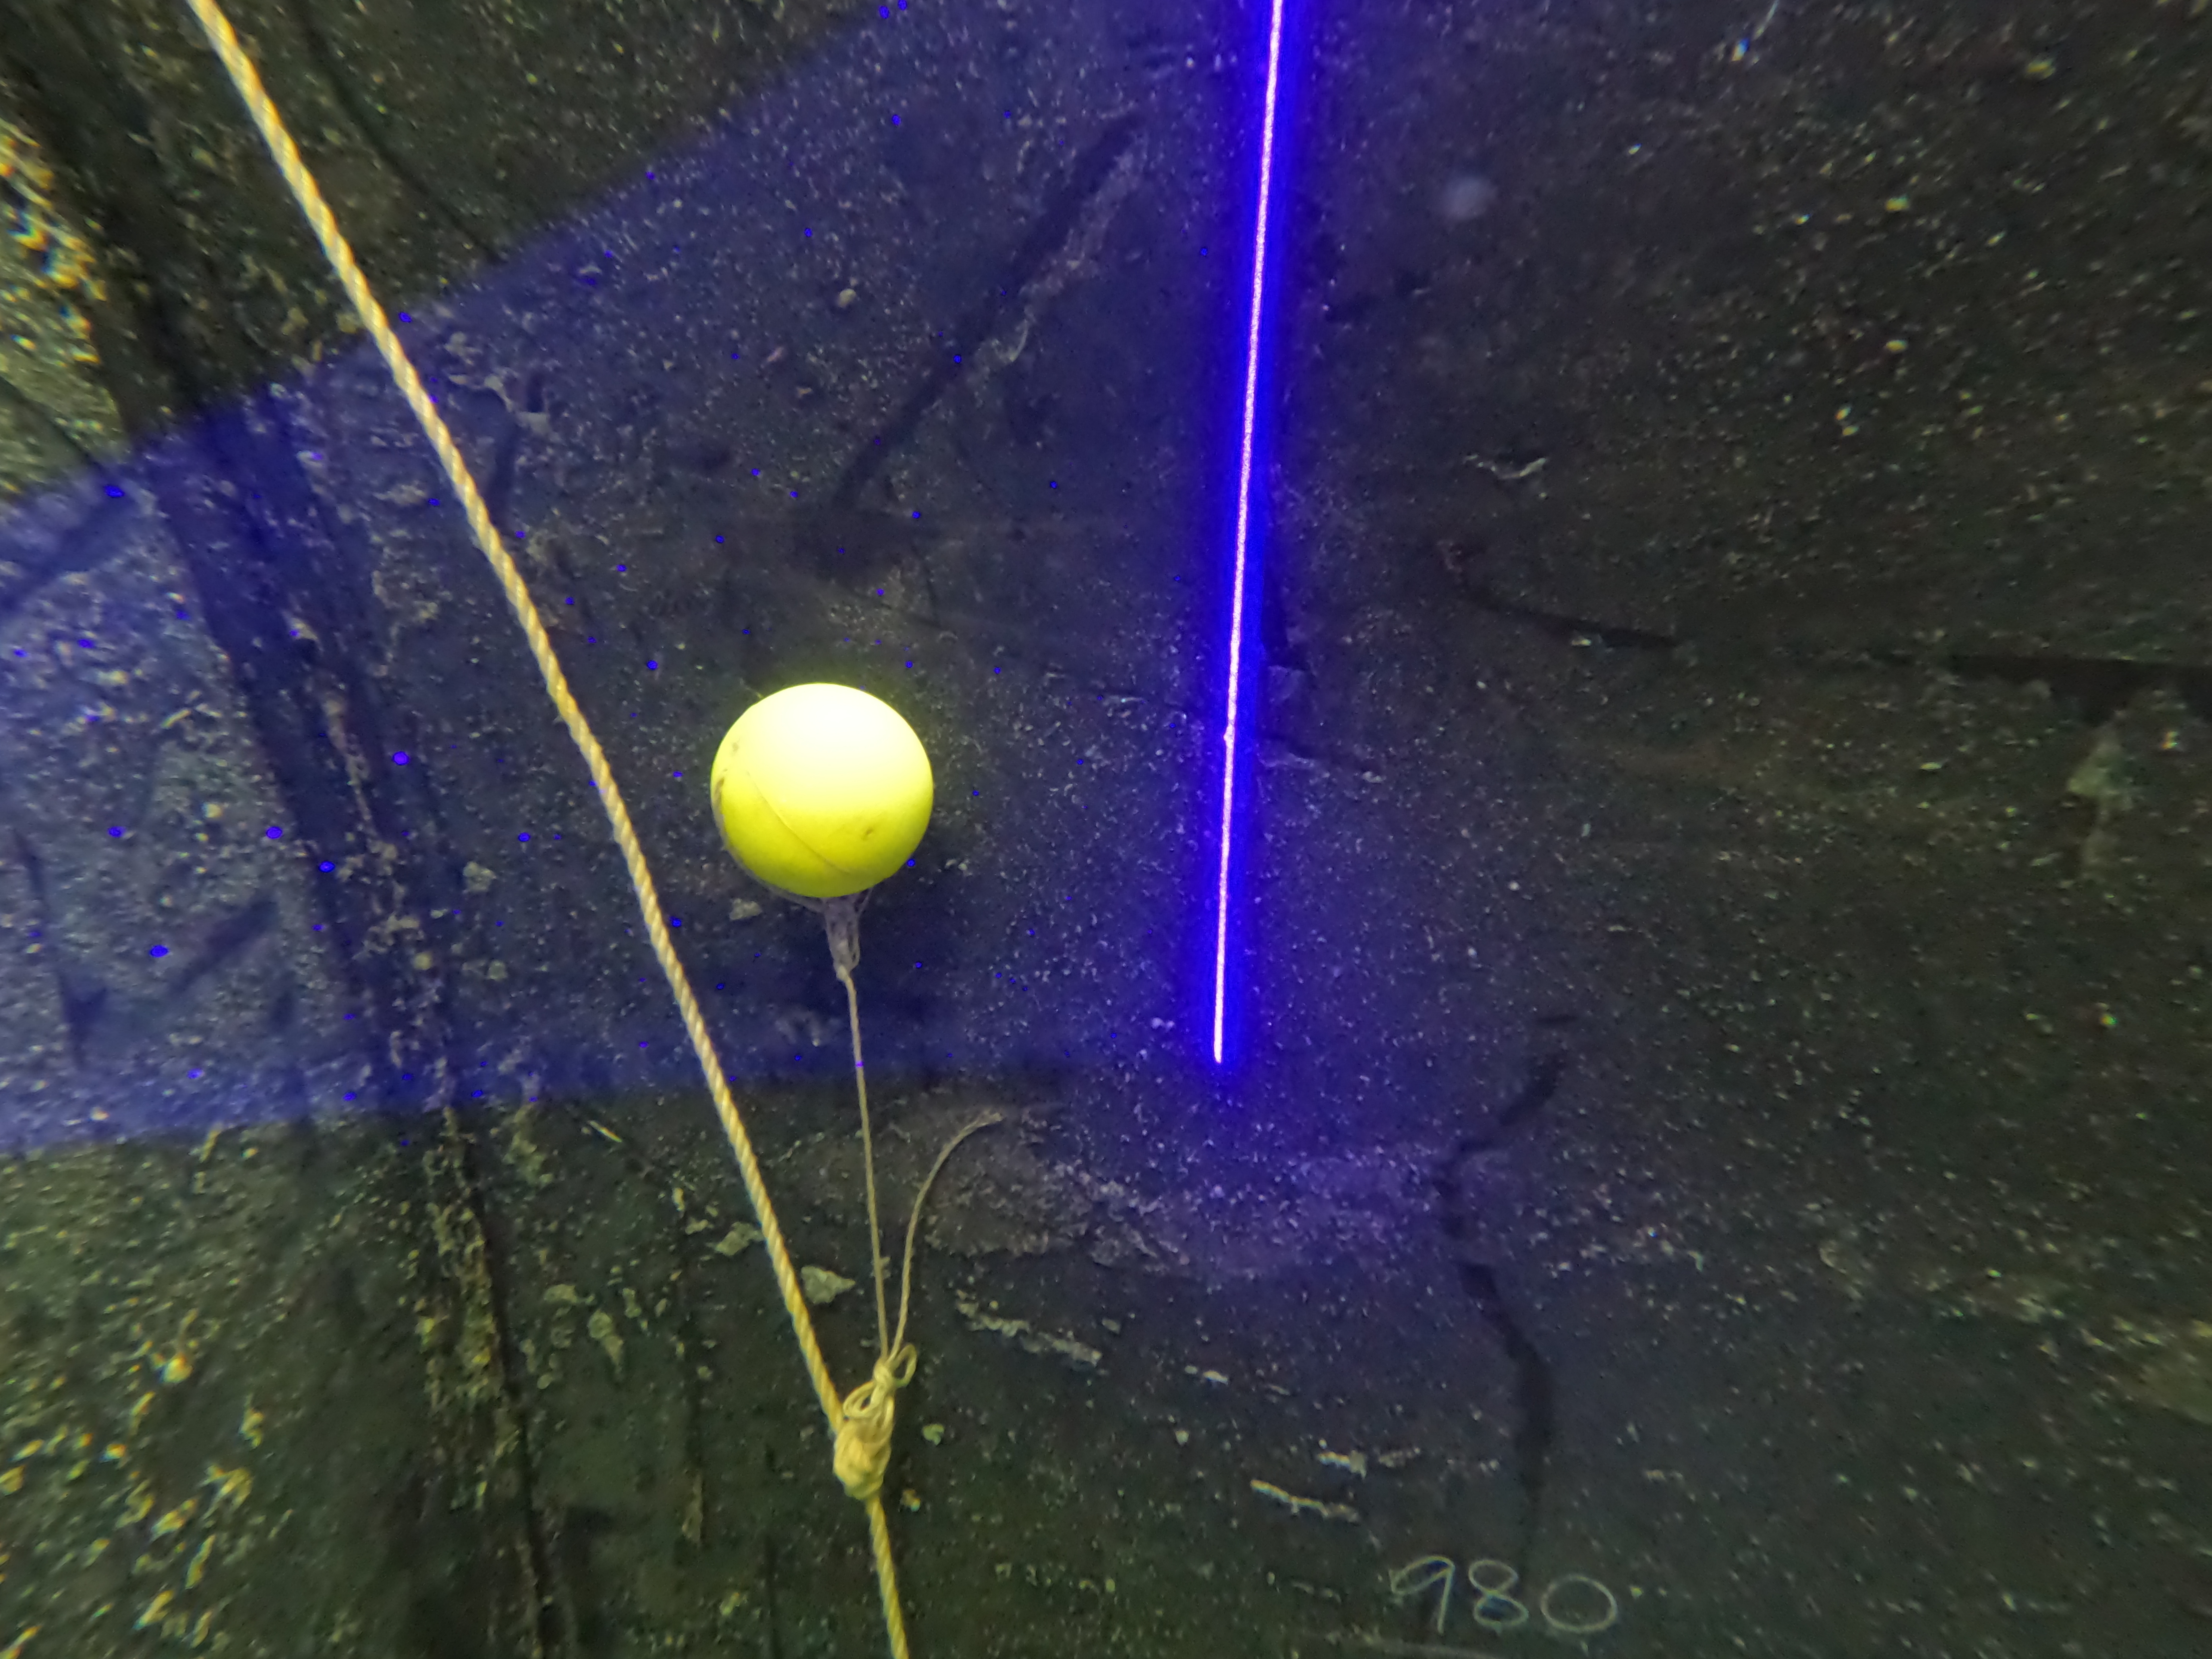

980

Supplement: Supplementary file 2794 [file G0030294.pdf › 2/G0030294.pdf]

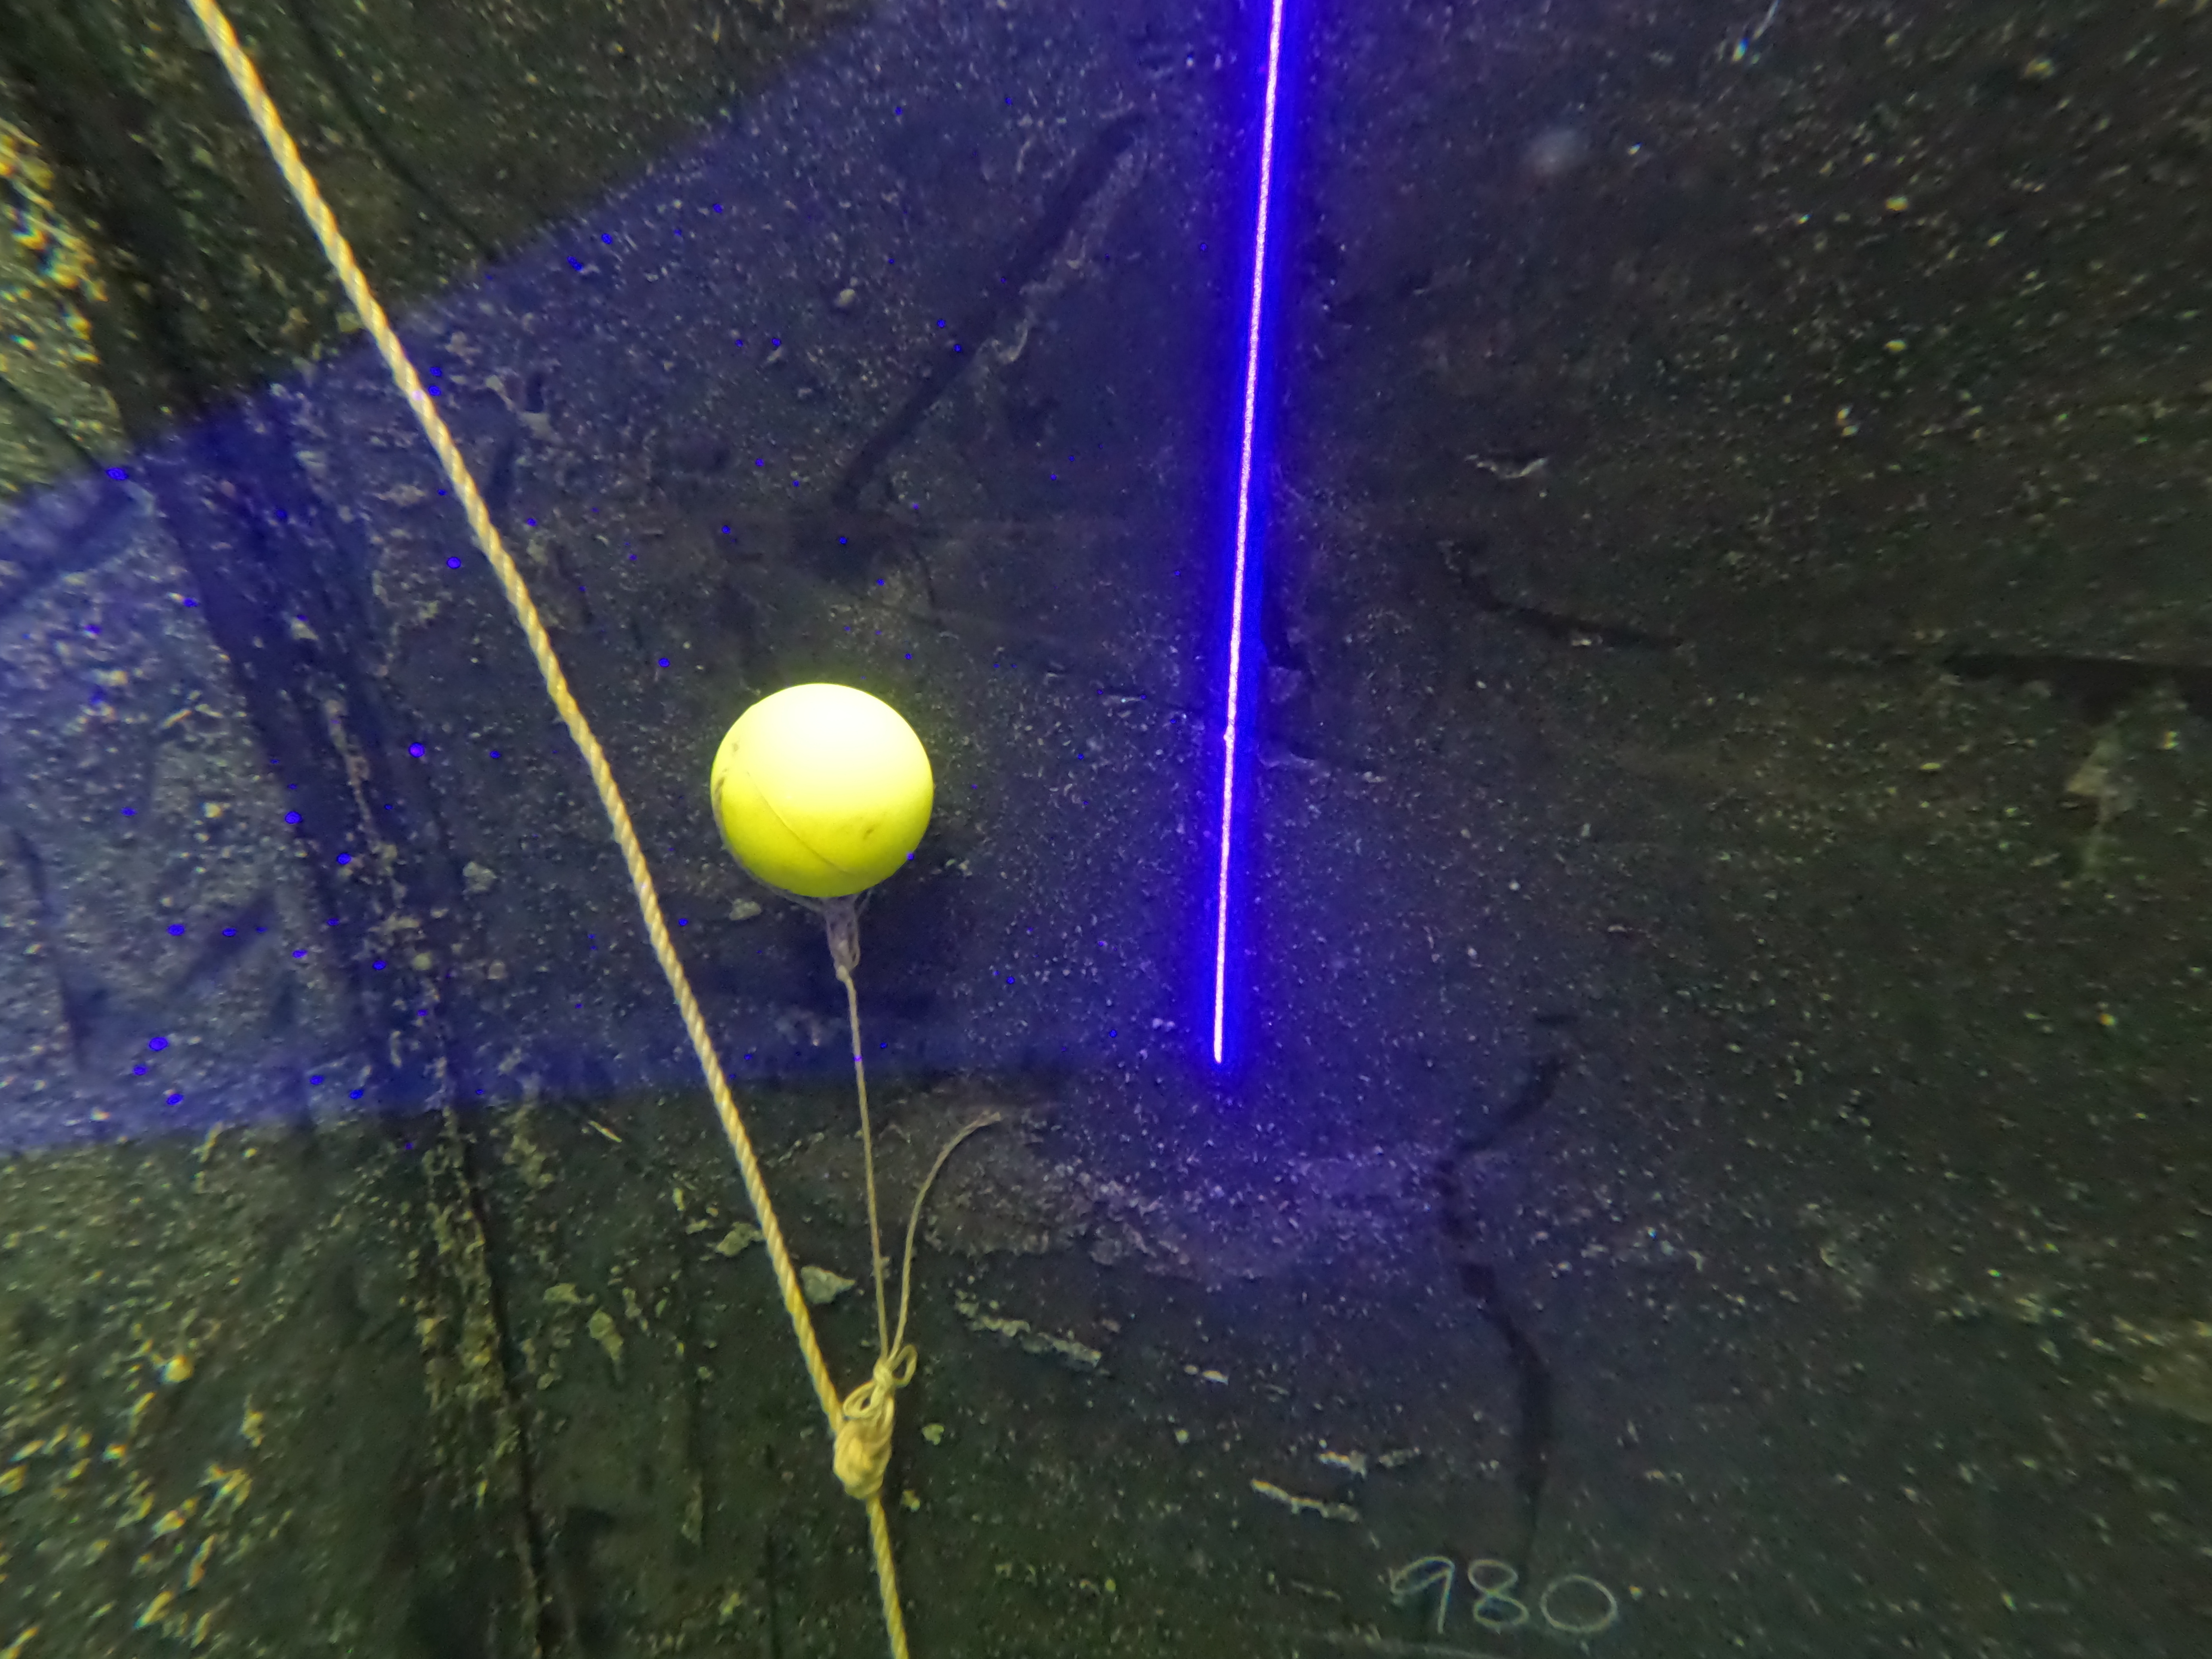

980

Supplement: Supplementary file 2795 [file G0030295.pdf › 2/G0030295.pdf]

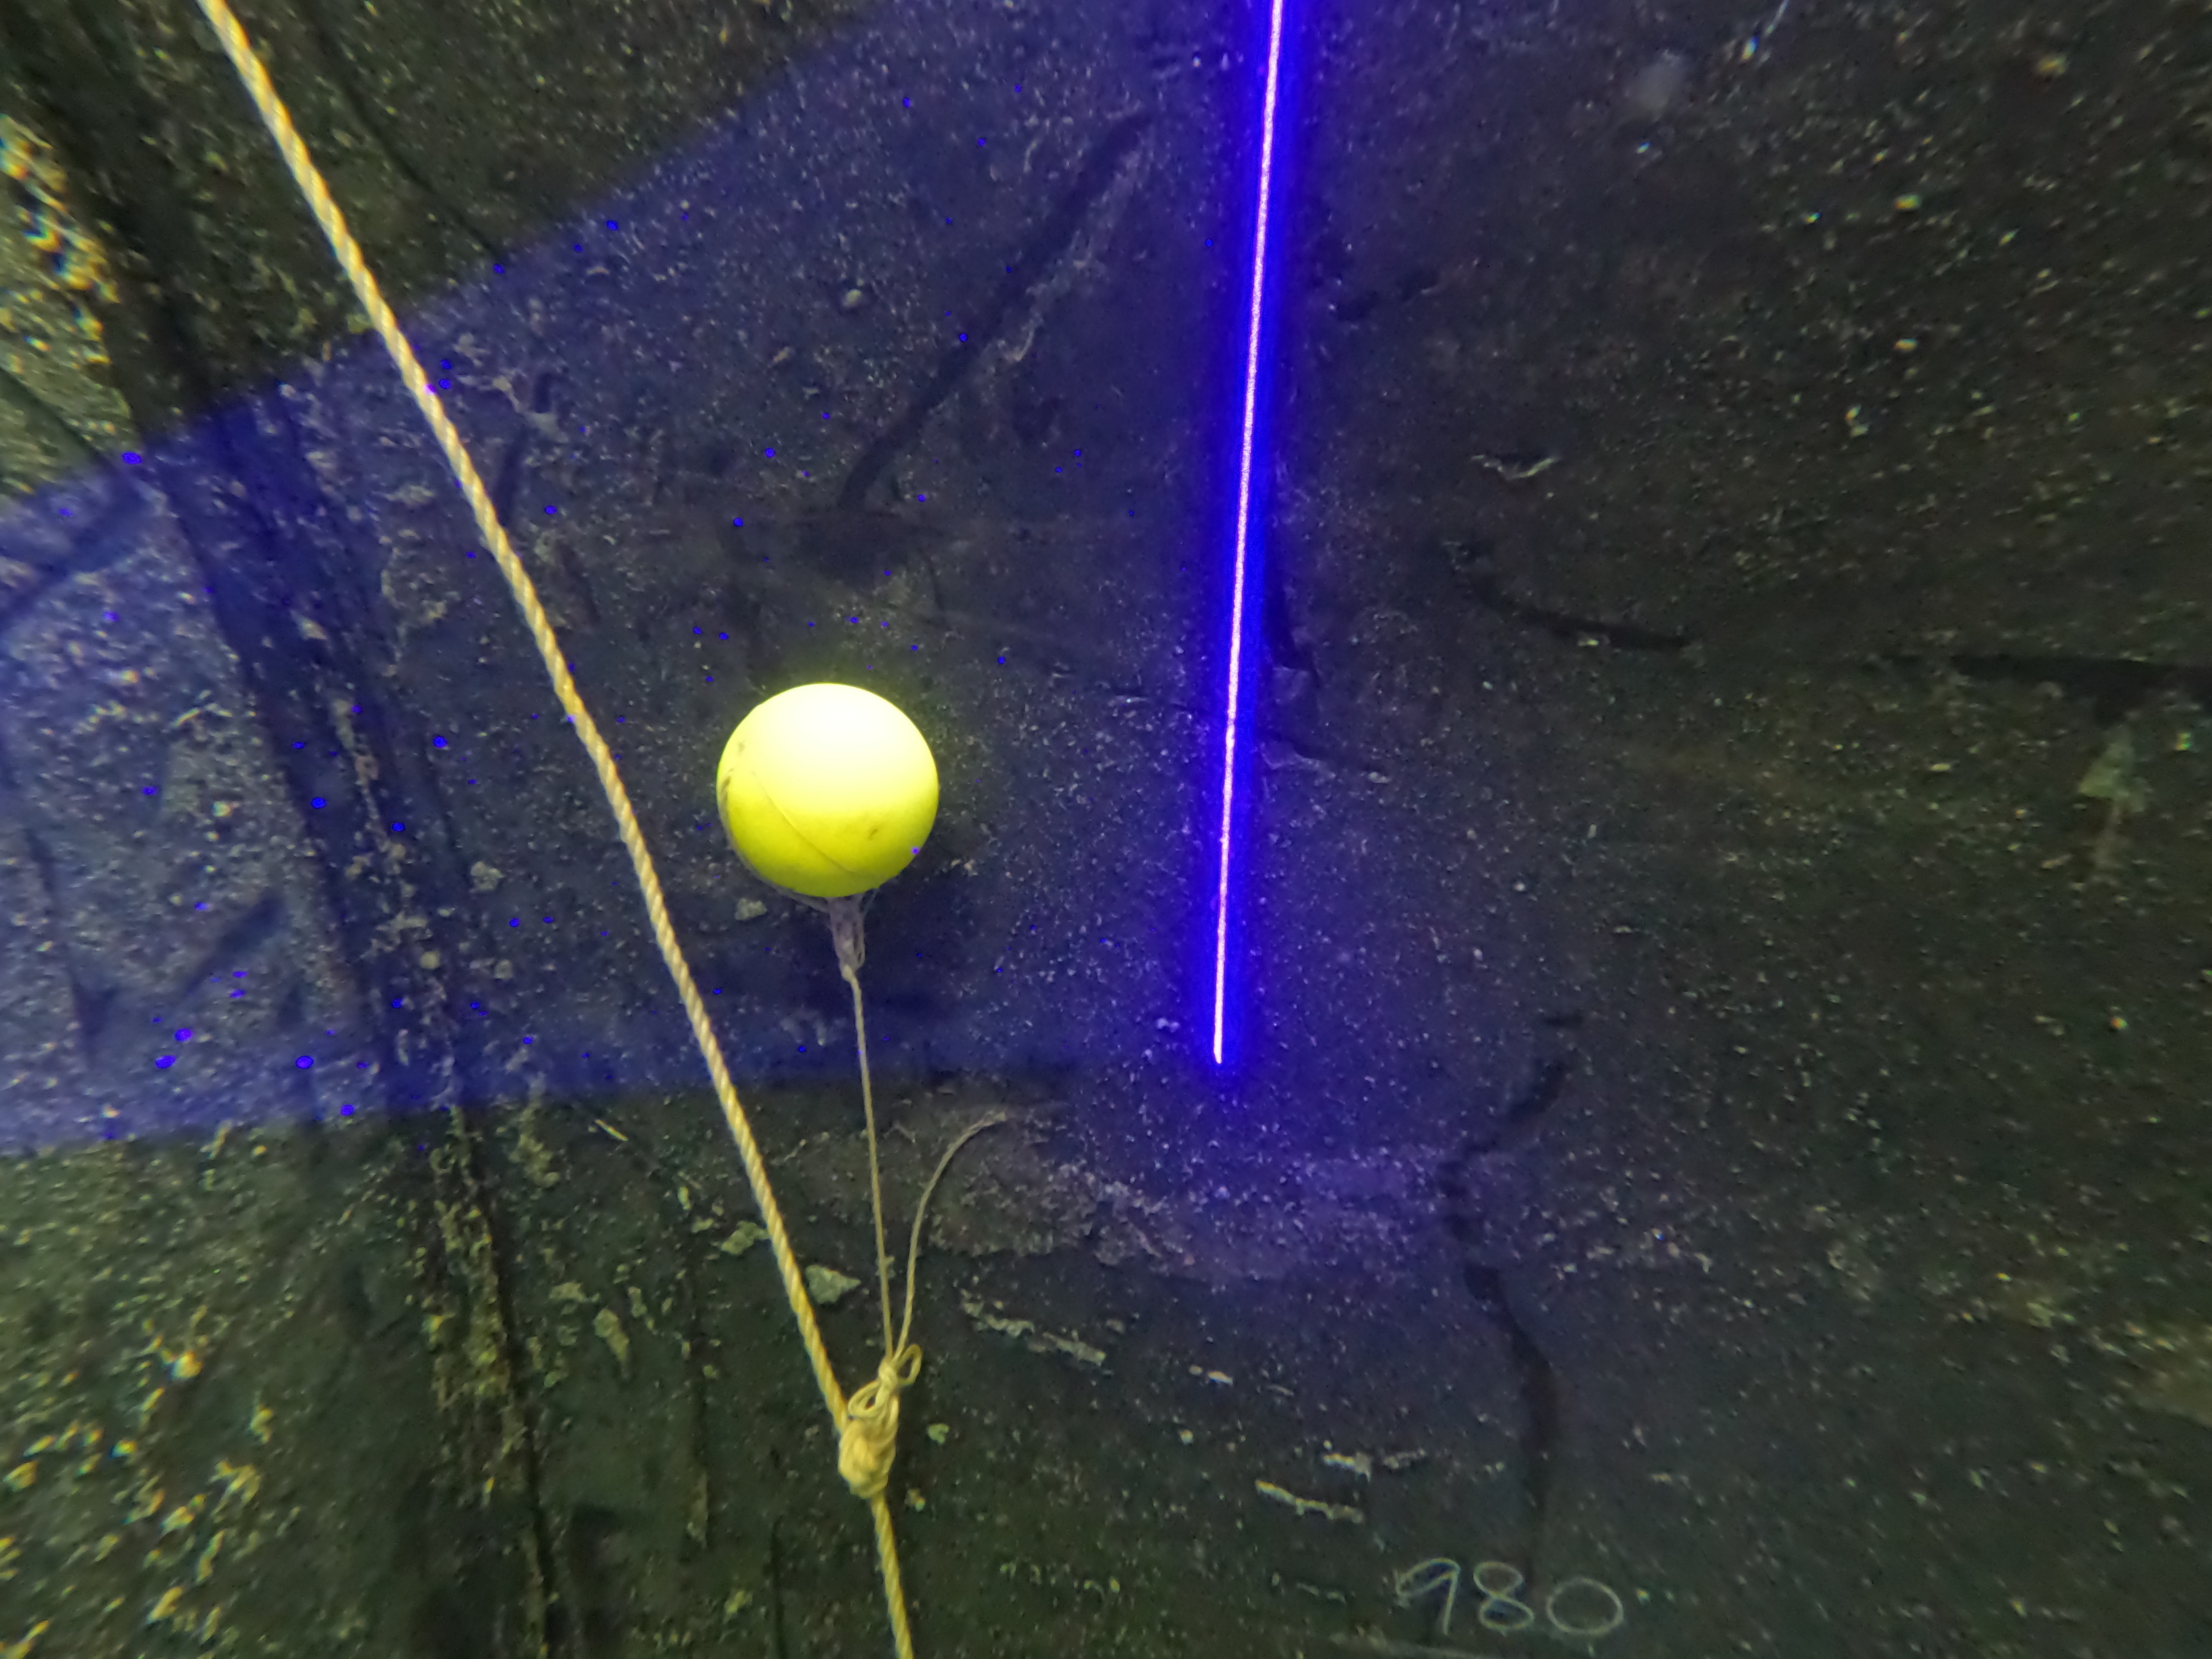

980

Supplement: Supplementary file 2796 [file G0030296.pdf › 2/G0030296.pdf]

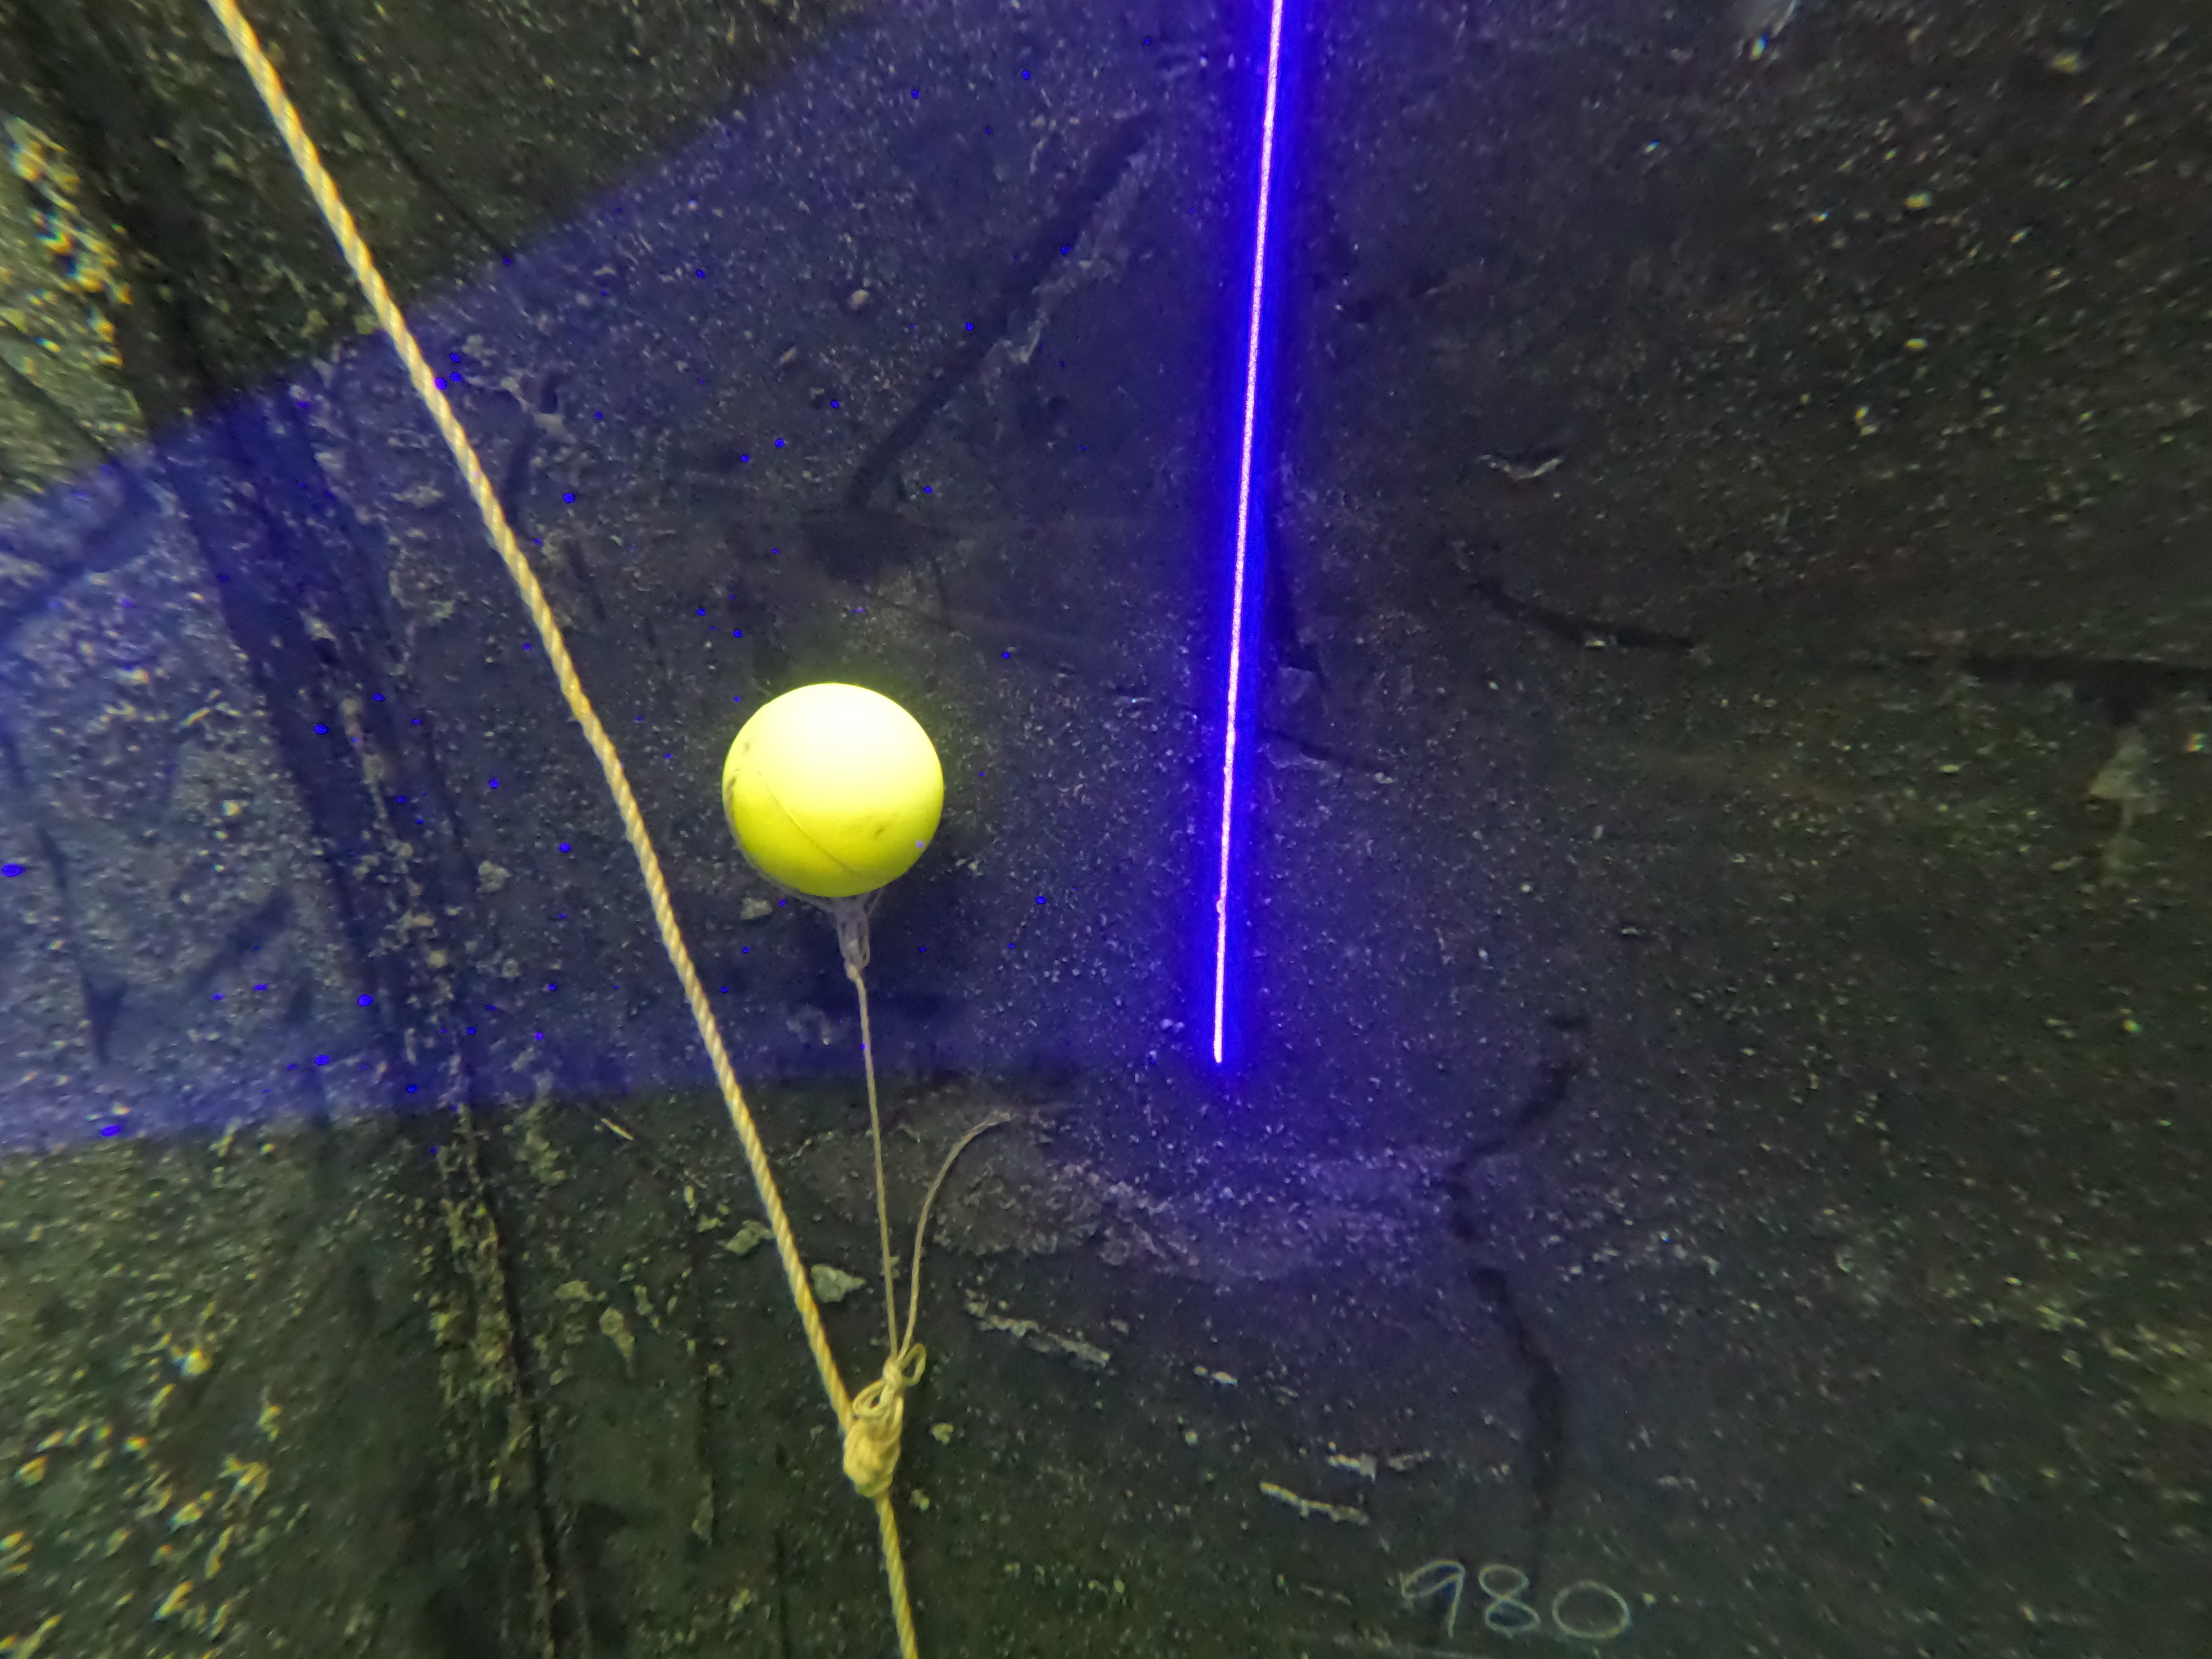

980

Supplement: Supplementary file 2797 [file G0030297.pdf › 2/G0030297.pdf]

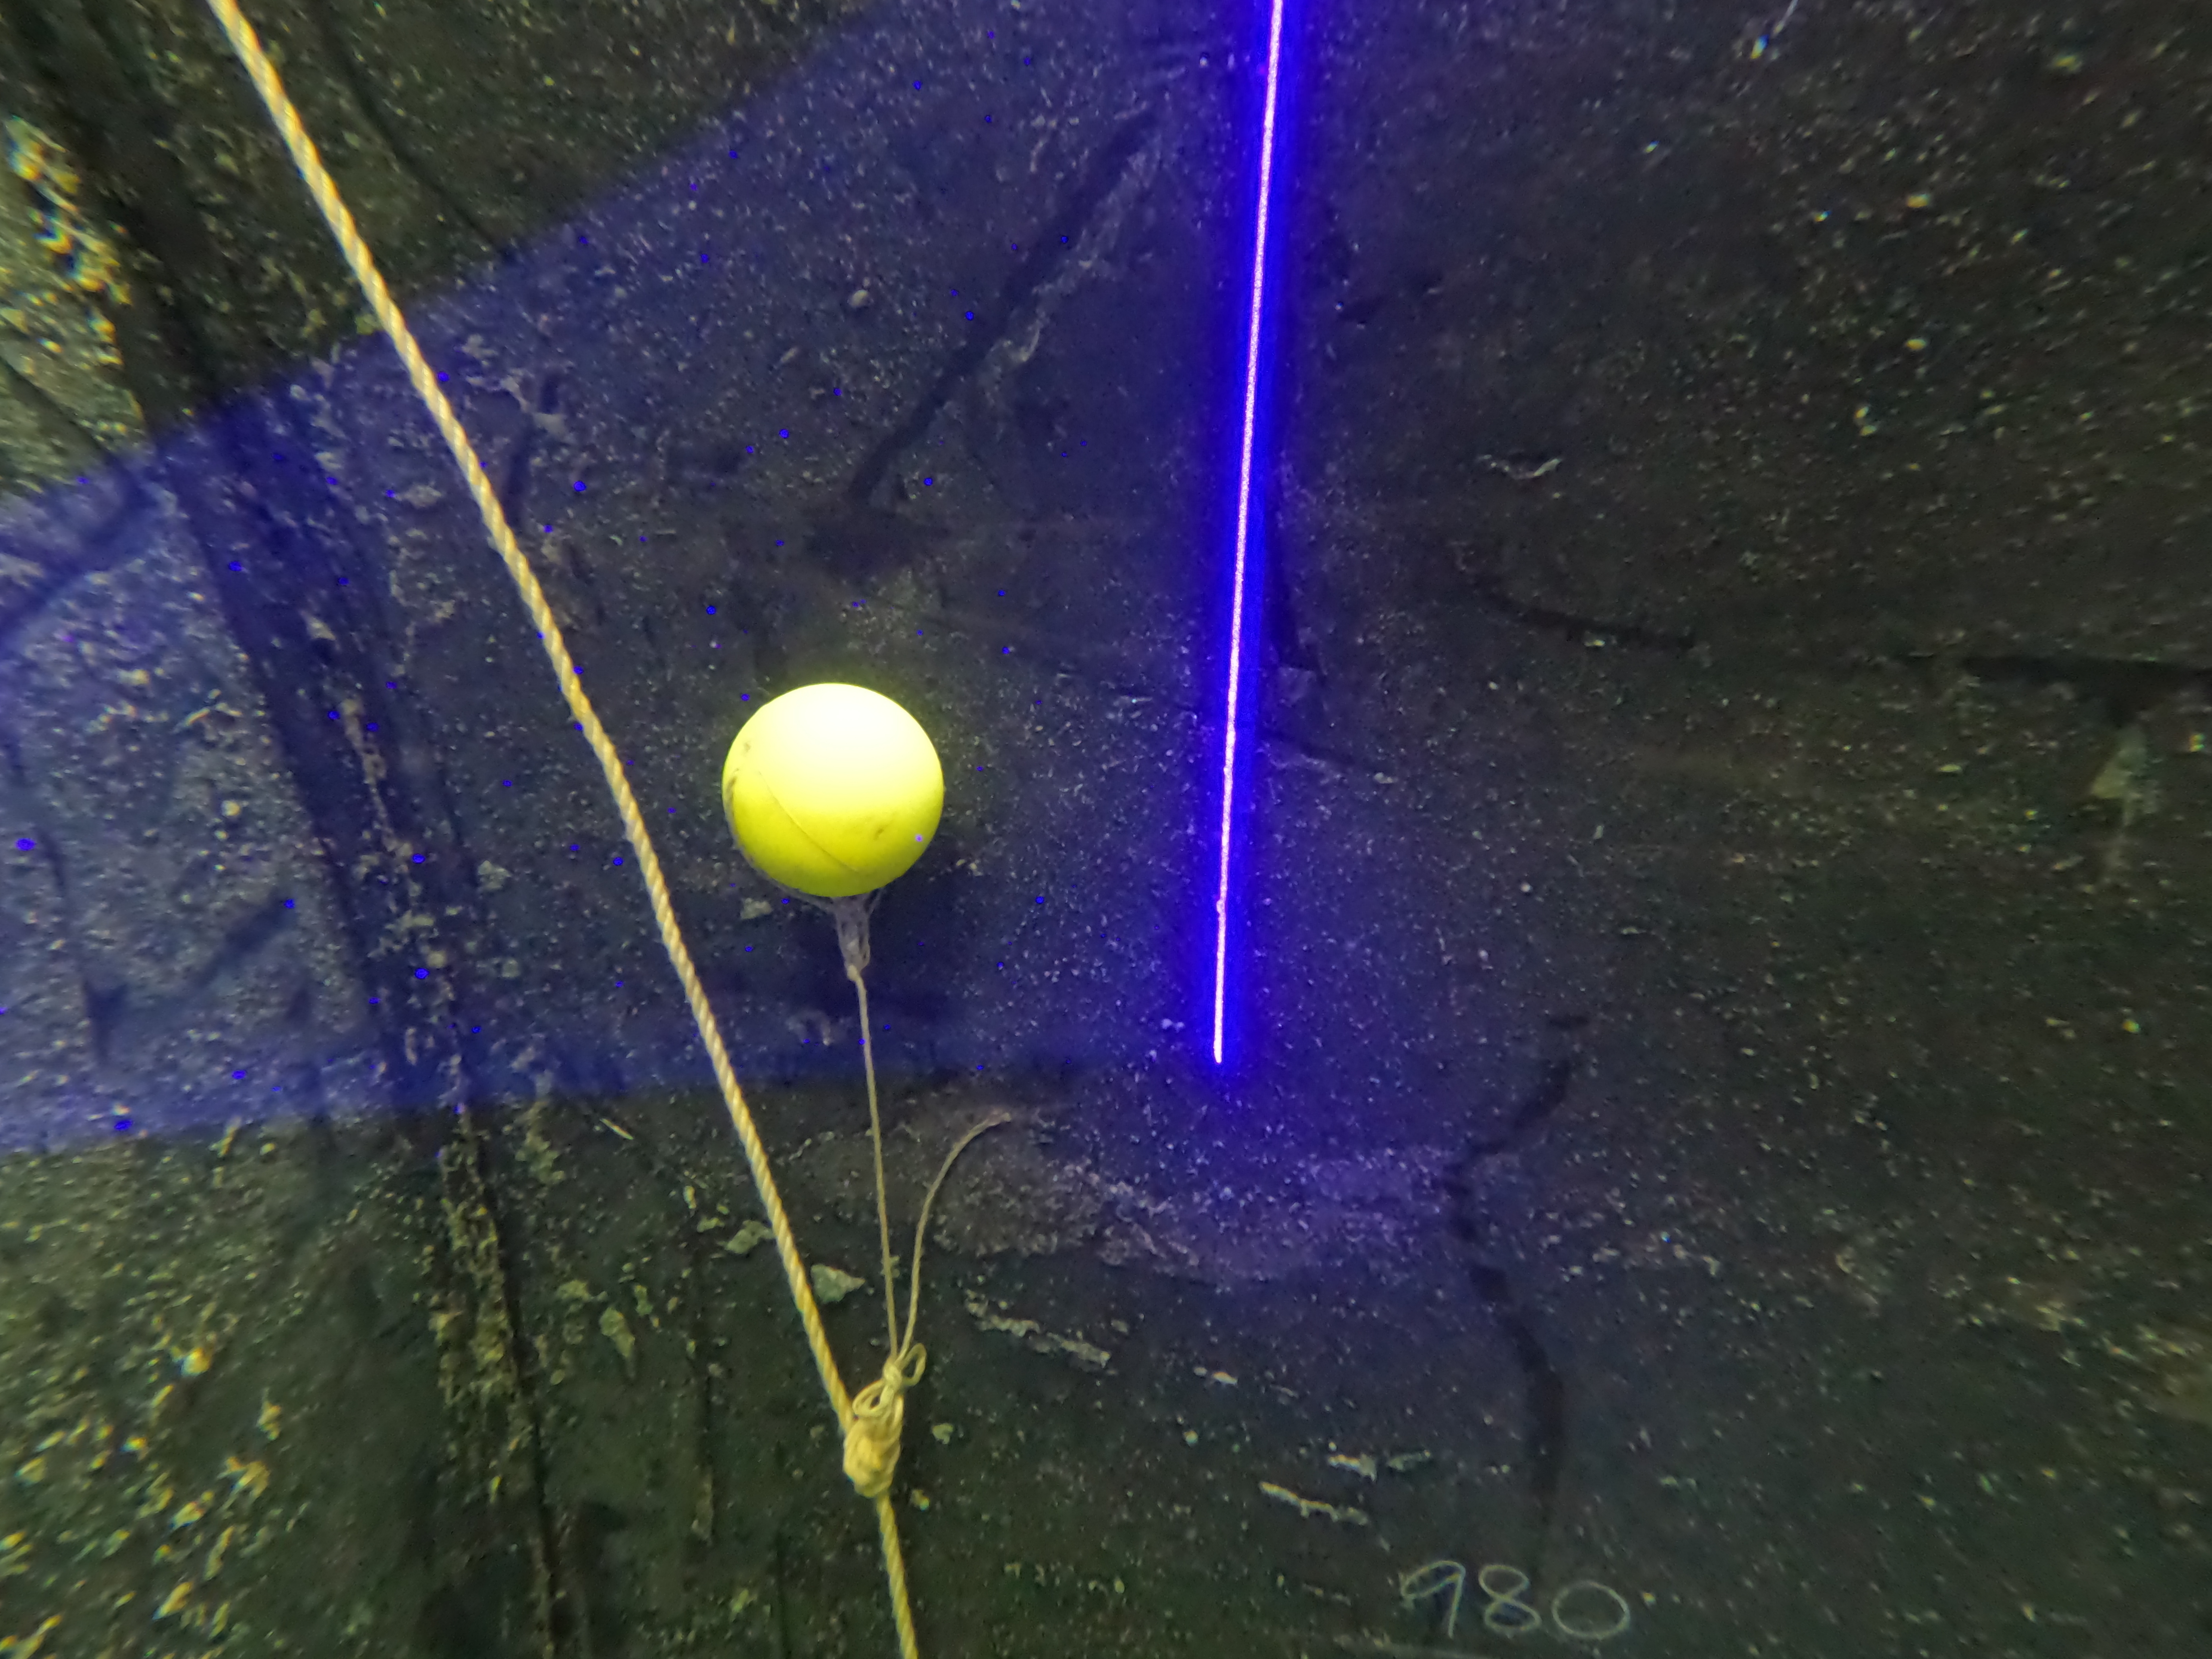

980

Supplement: Supplementary file 2798 [file G0030298.pdf › 2/G0030298.pdf]

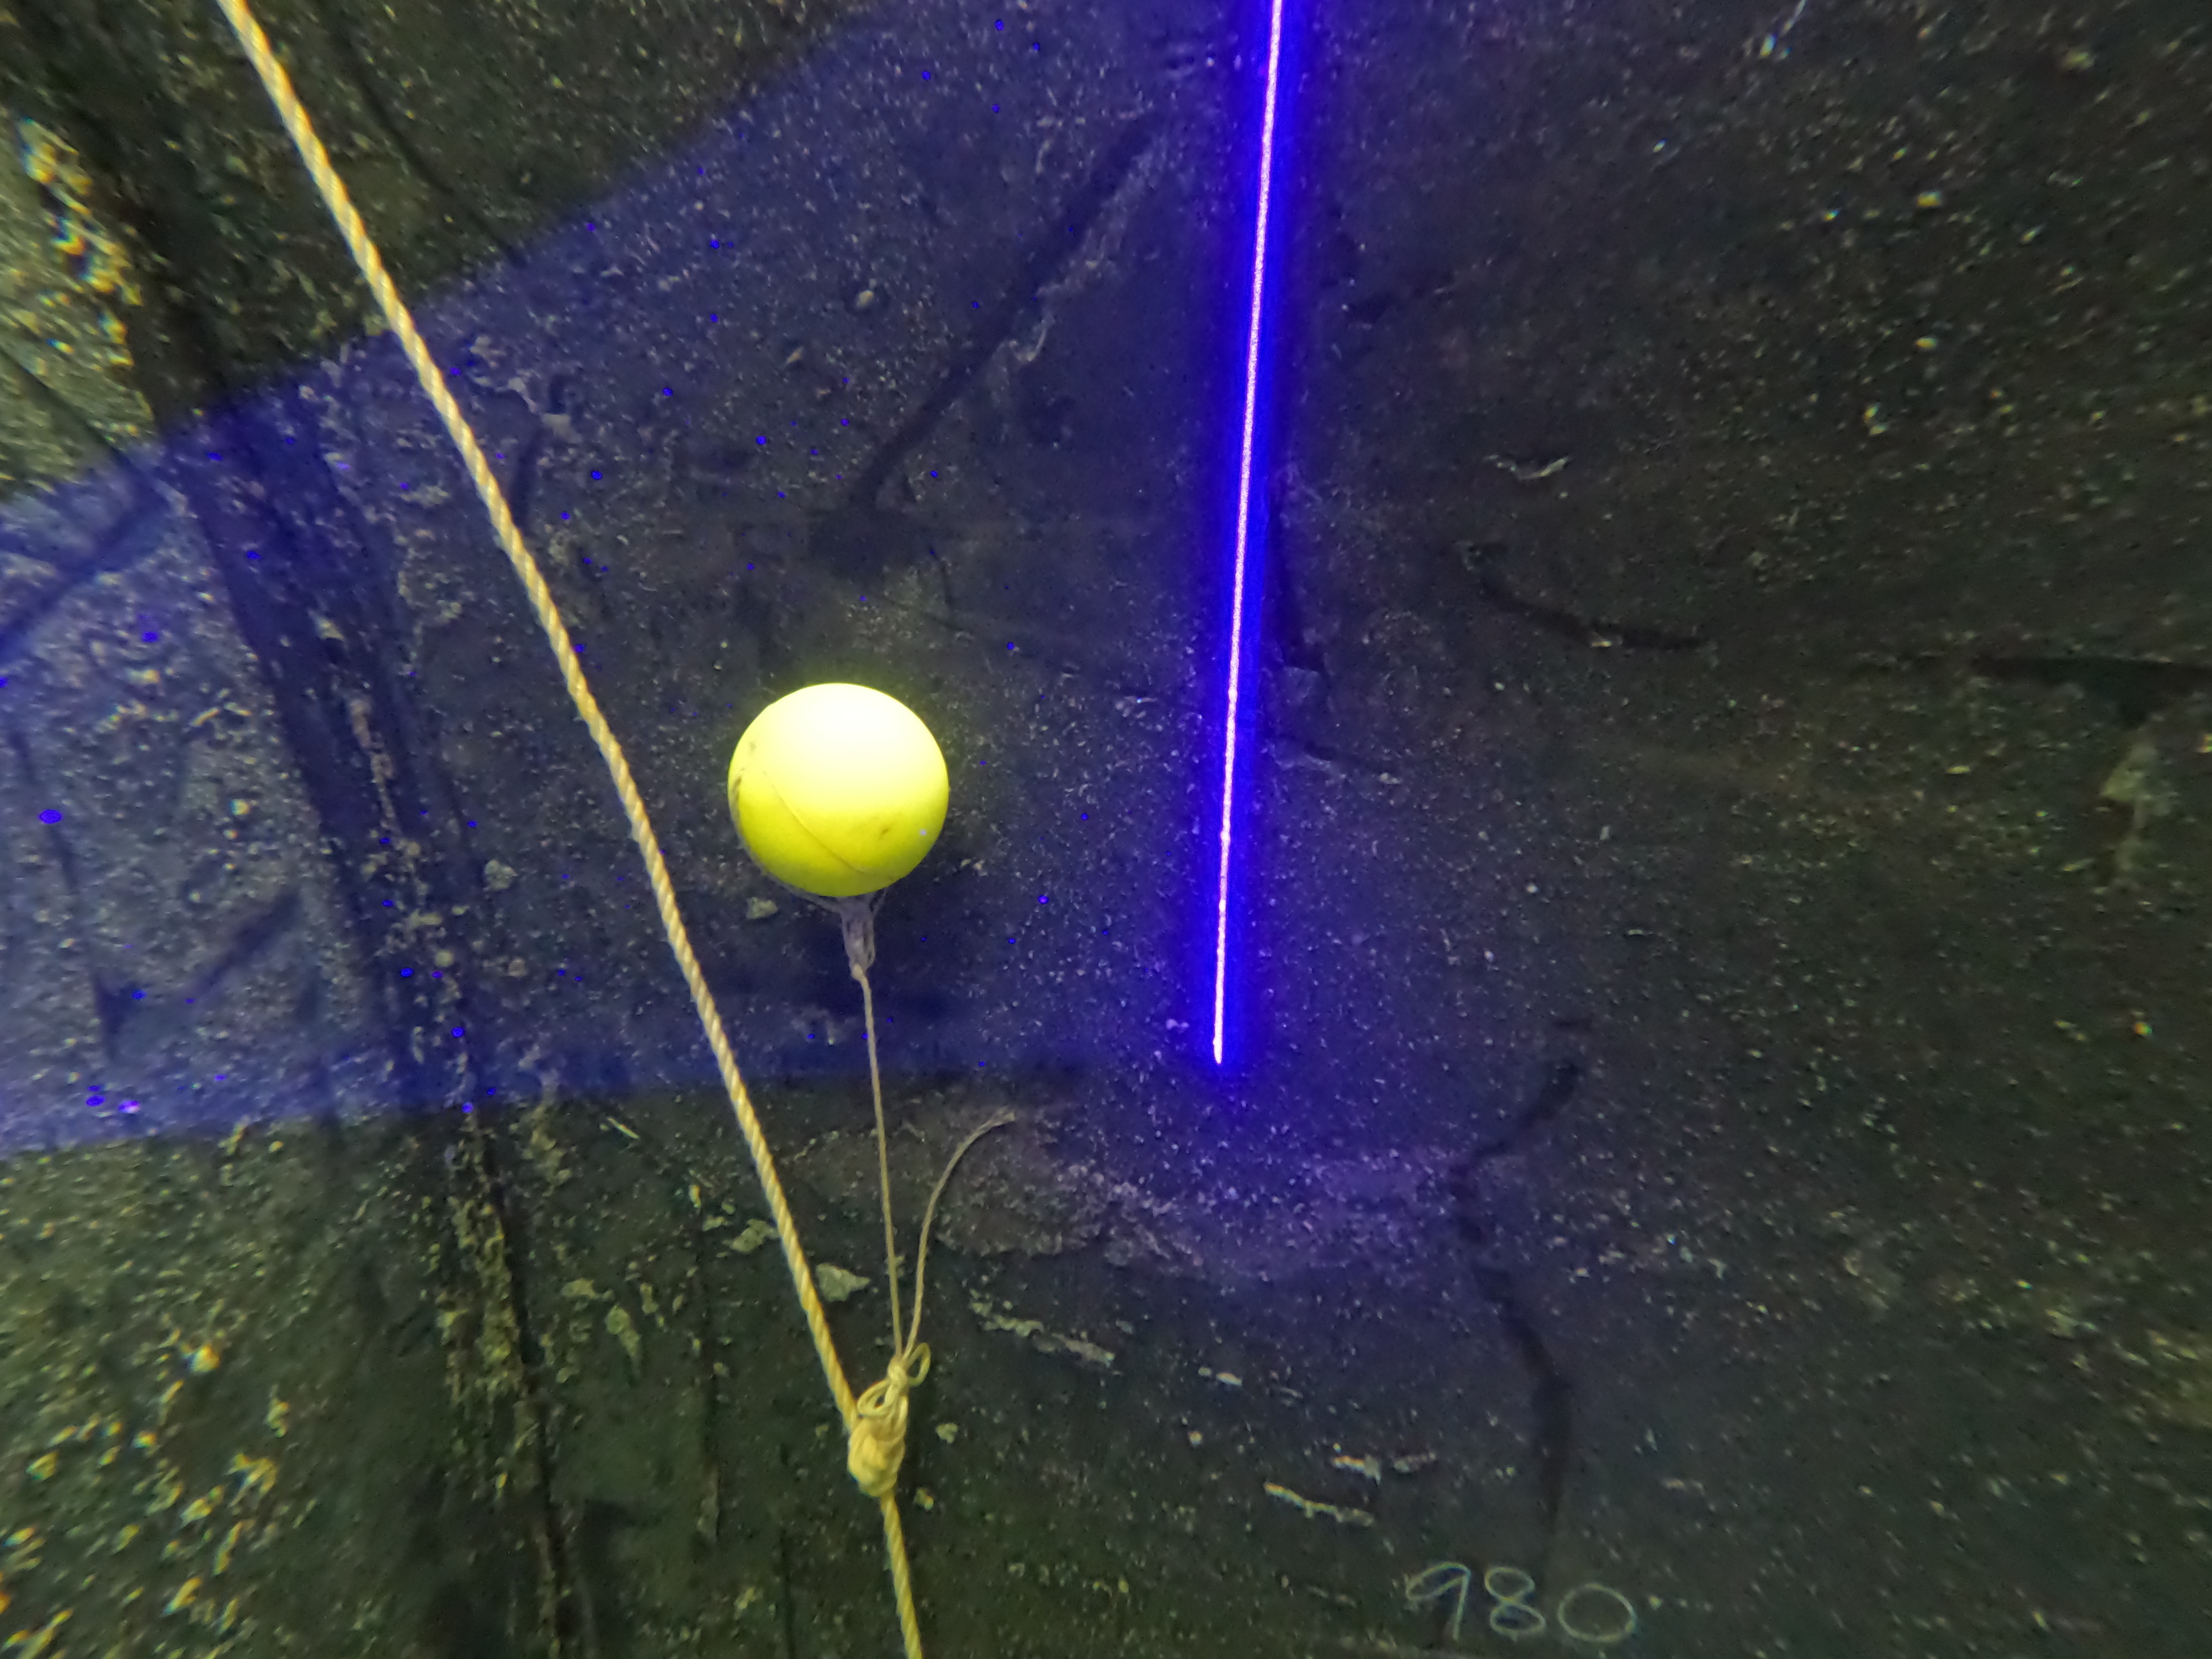

980

Supplement: Supplementary file 2799 [file G0030299.pdf › 2/G0030299.pdf]

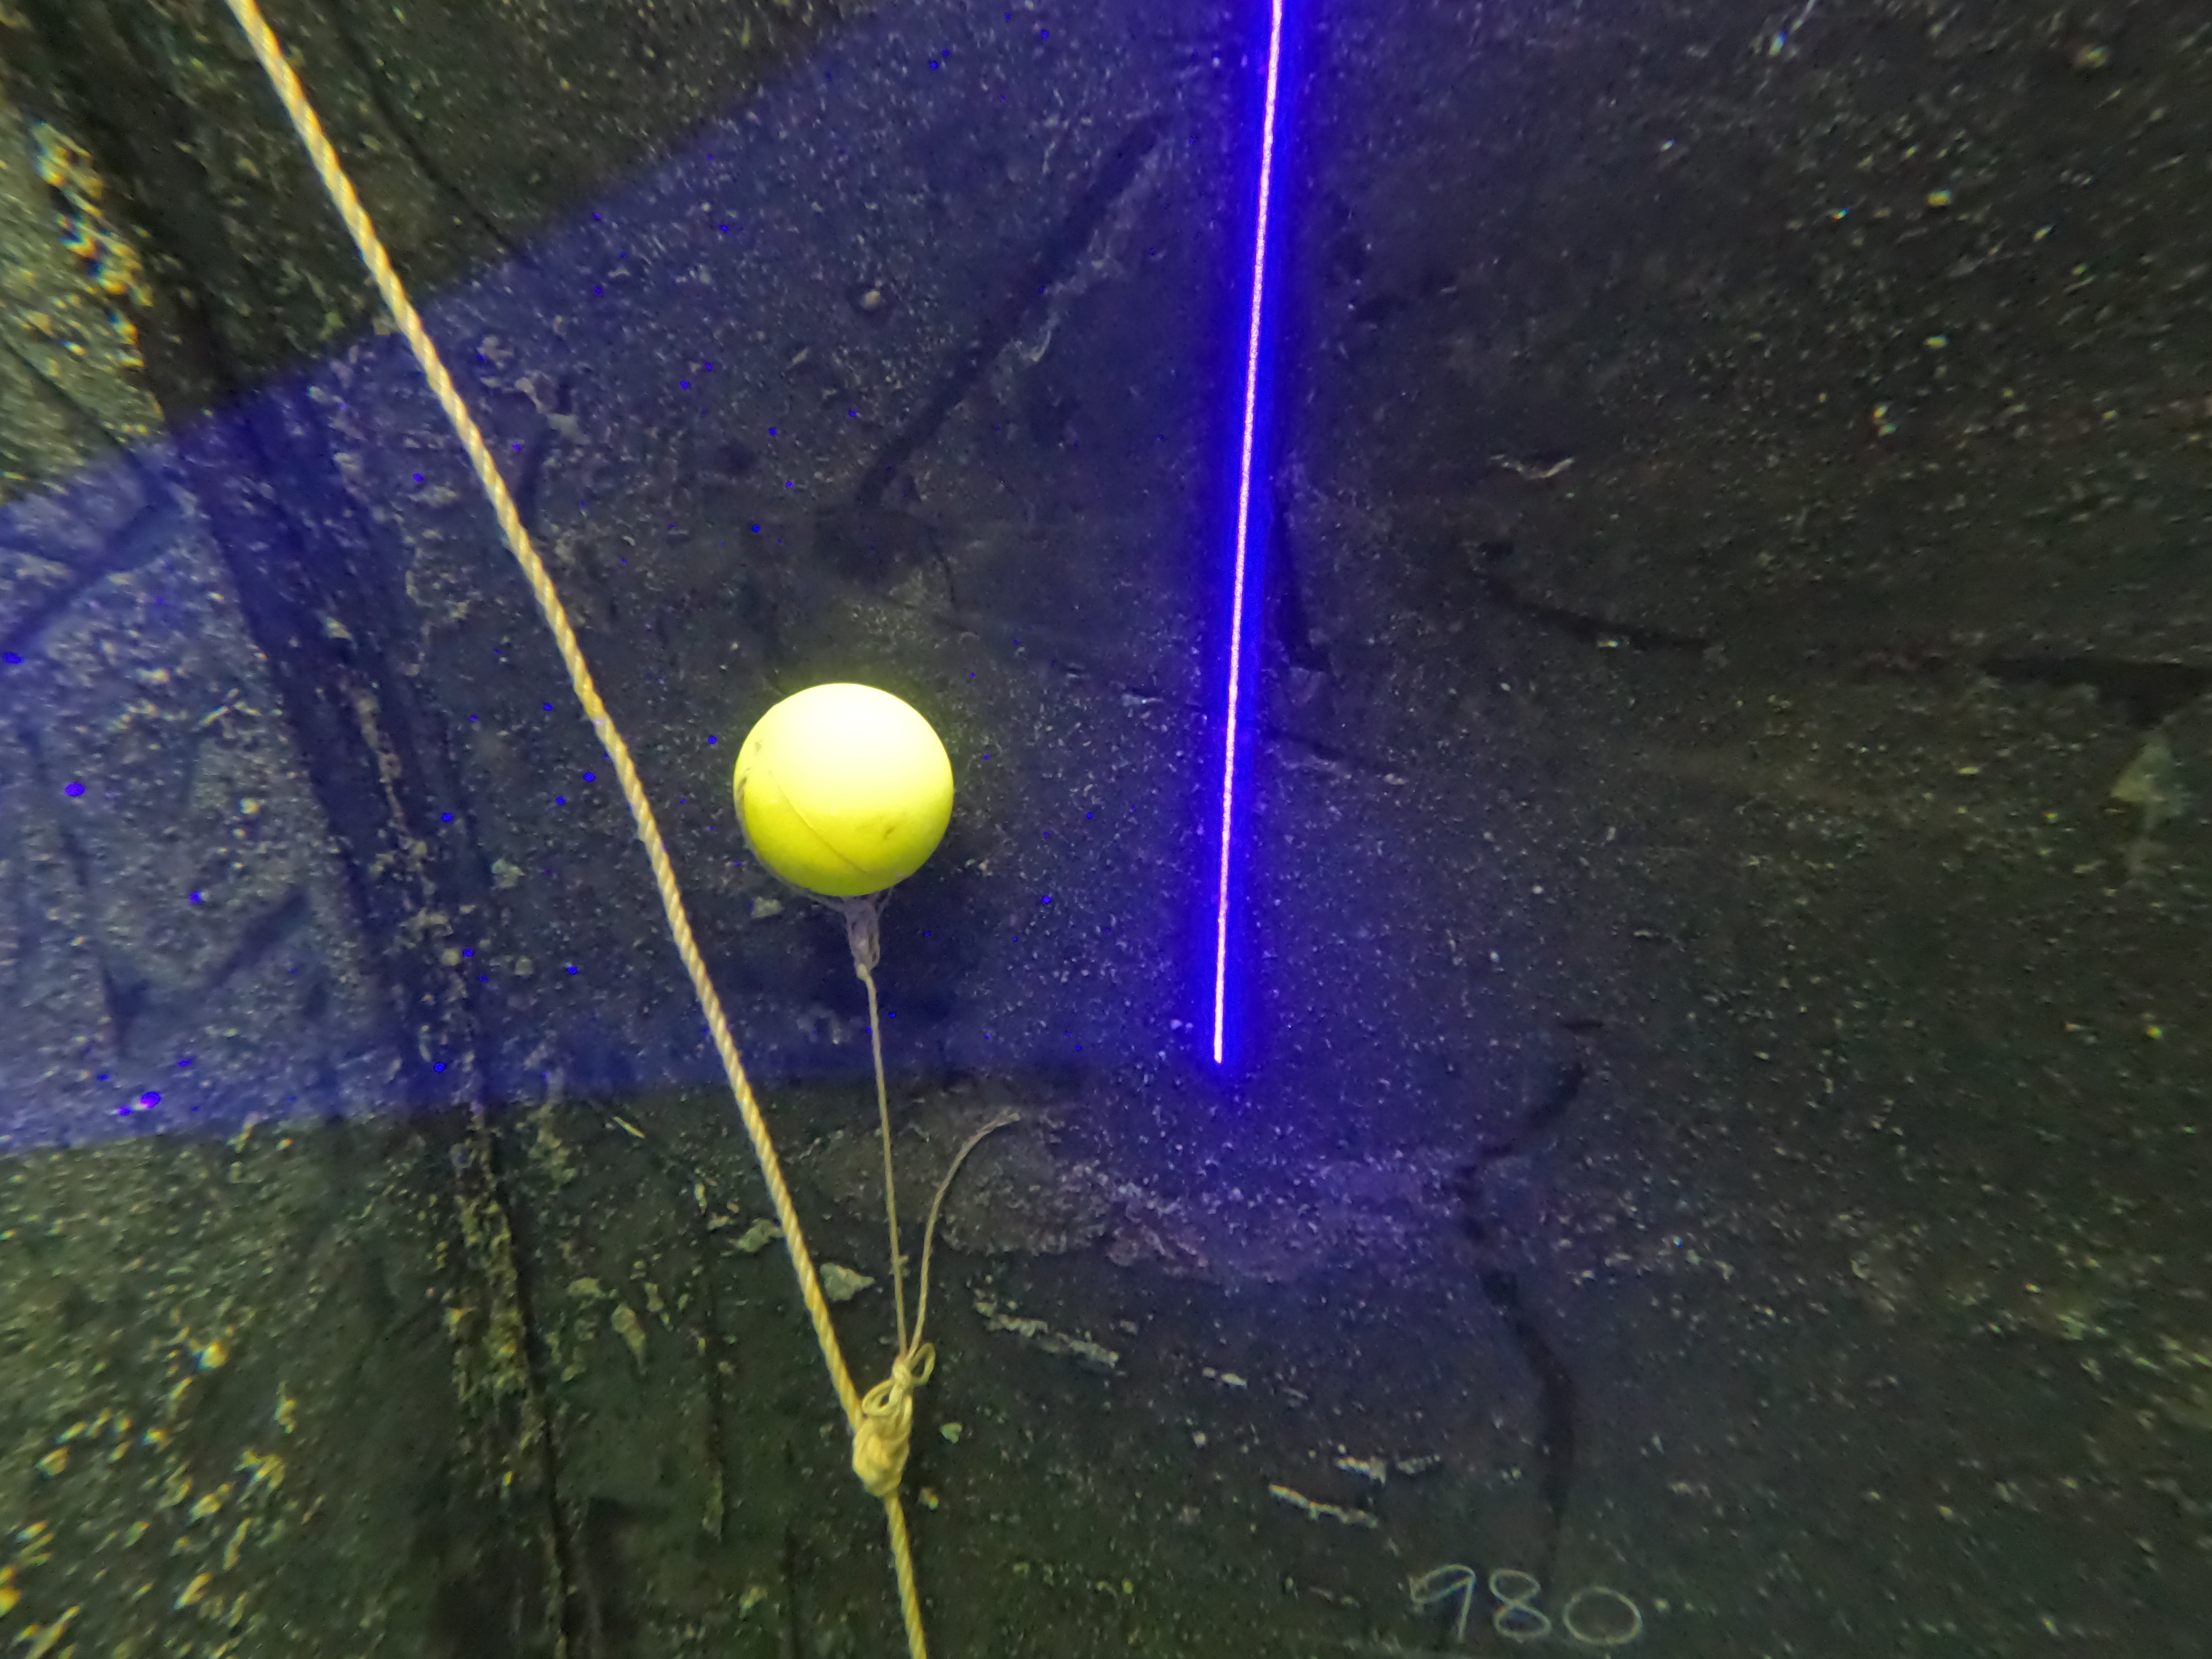

980

Supplement: Supplementary file 2800 [file G0030300.pdf › 2/G0030300.pdf]

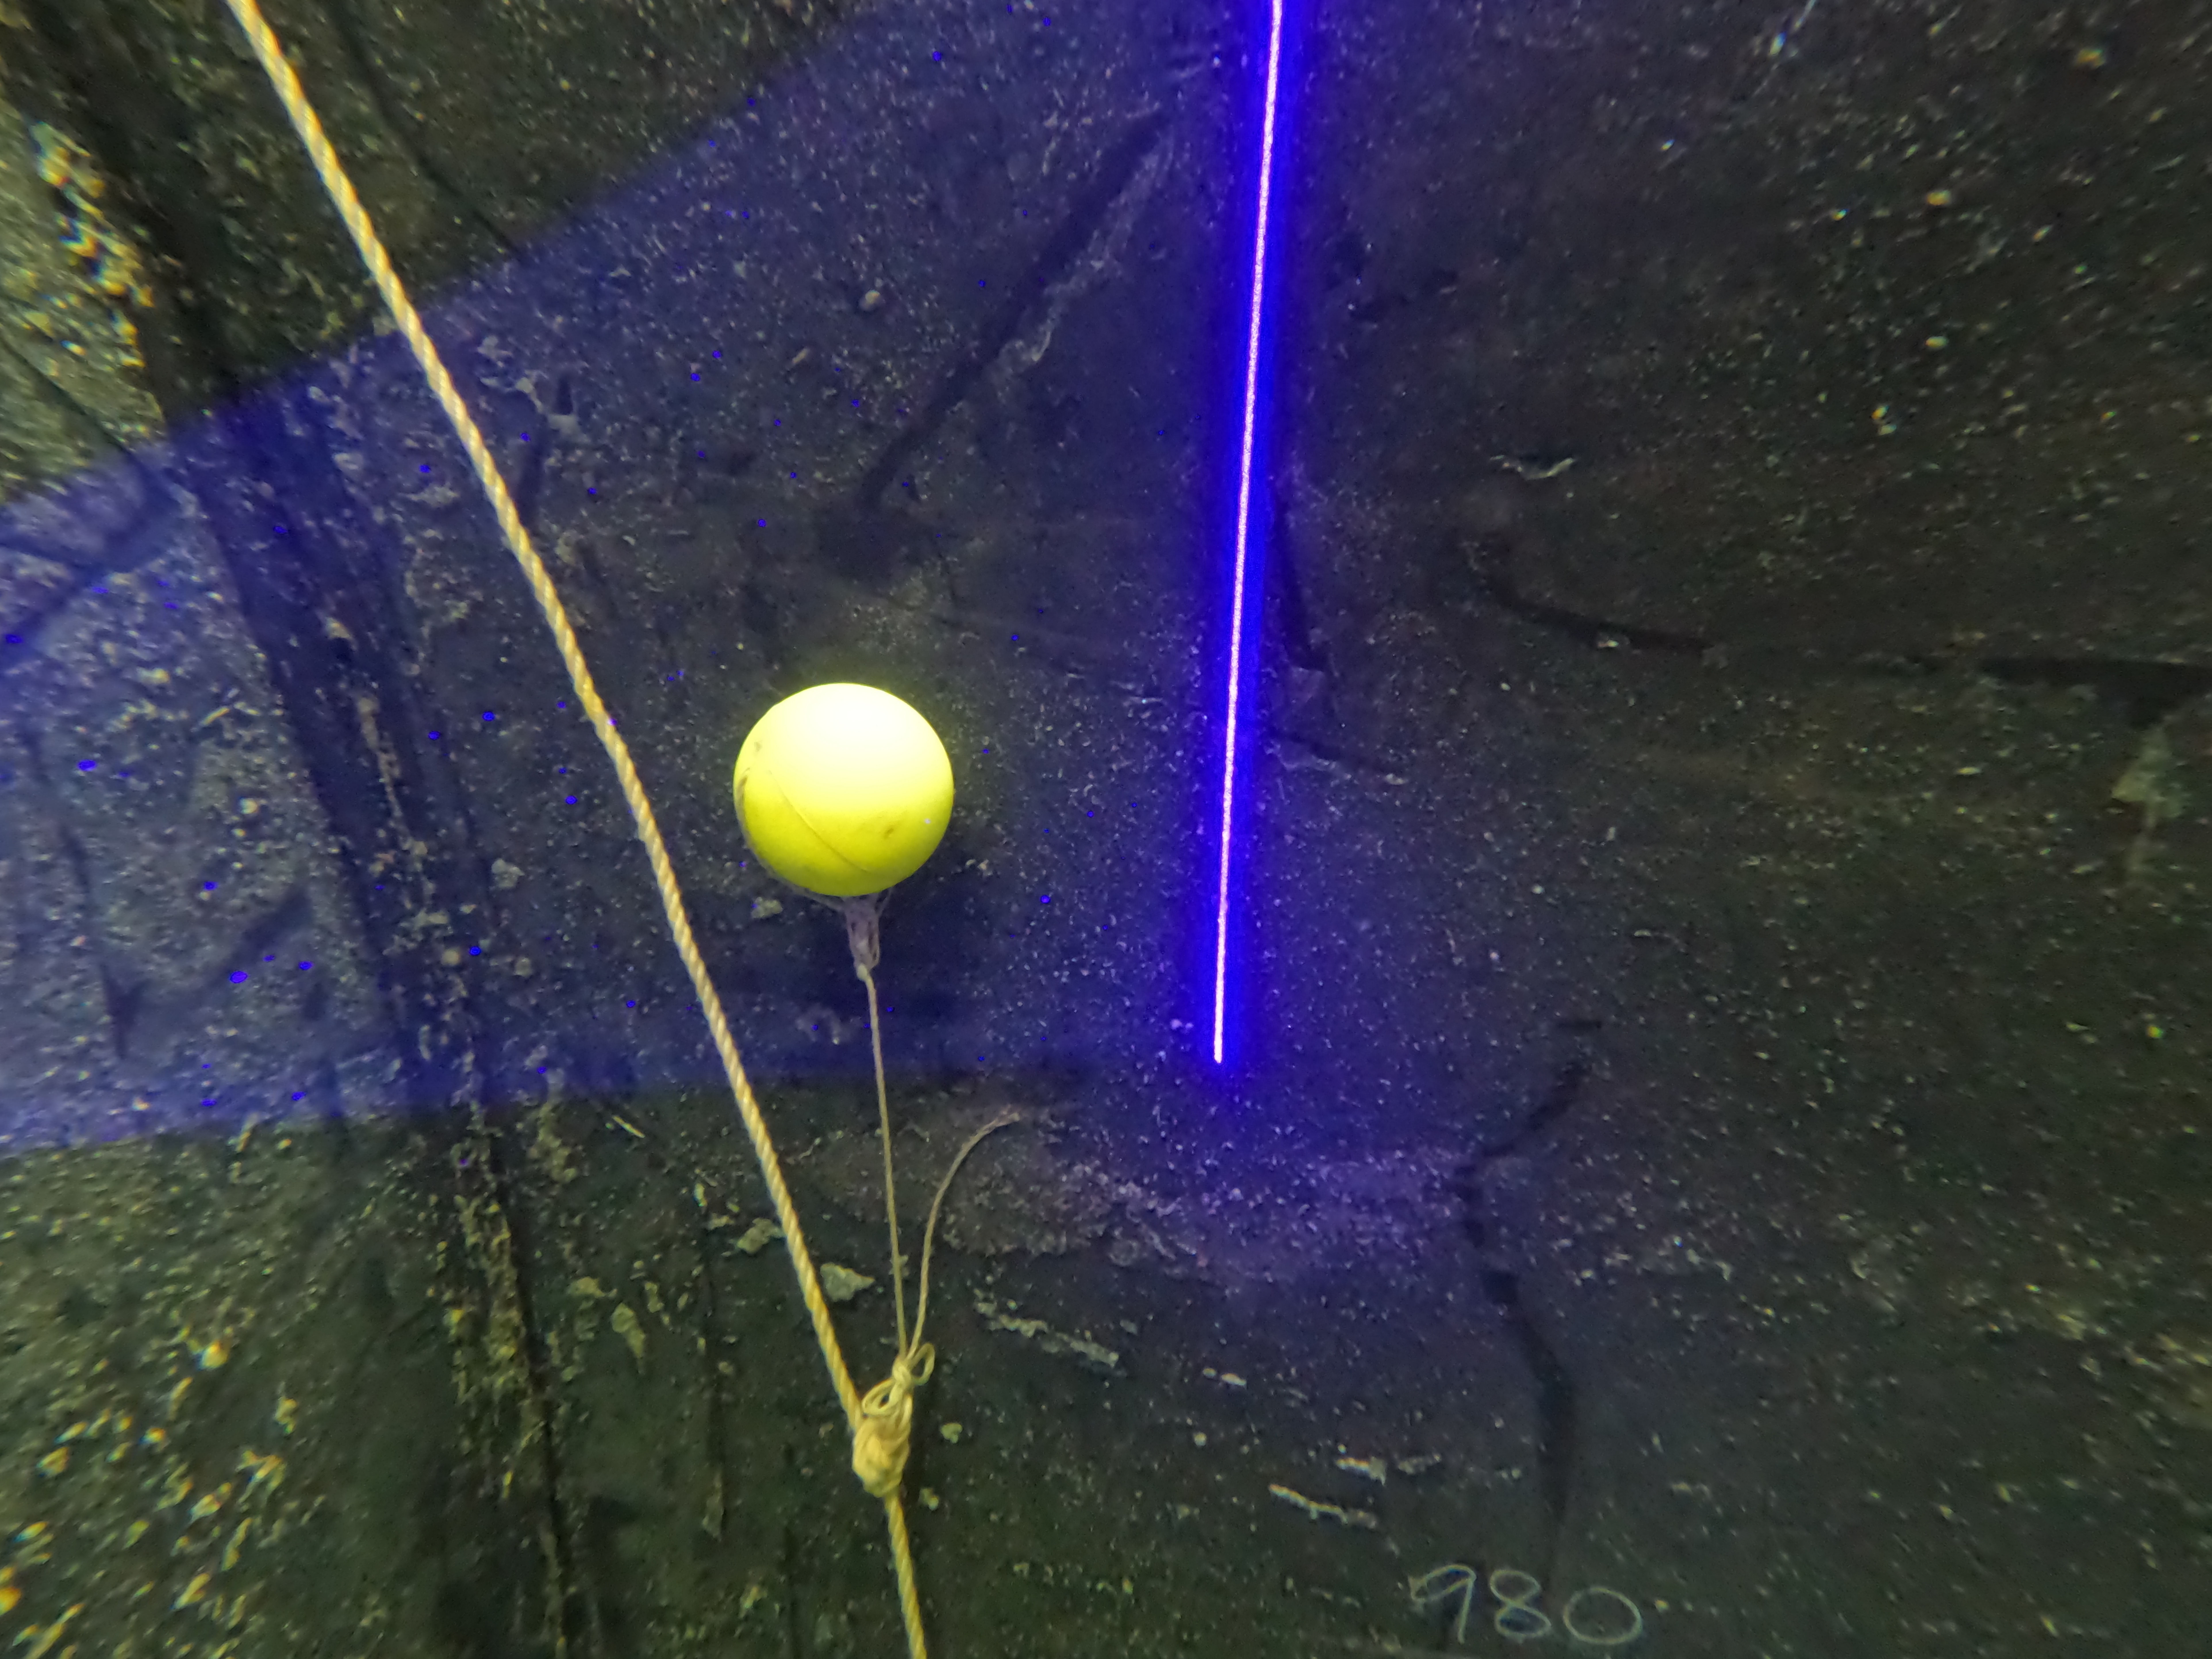

980

Supplement: Supplementary file 2801 [file G0030301.pdf › 2/G0030301.pdf]

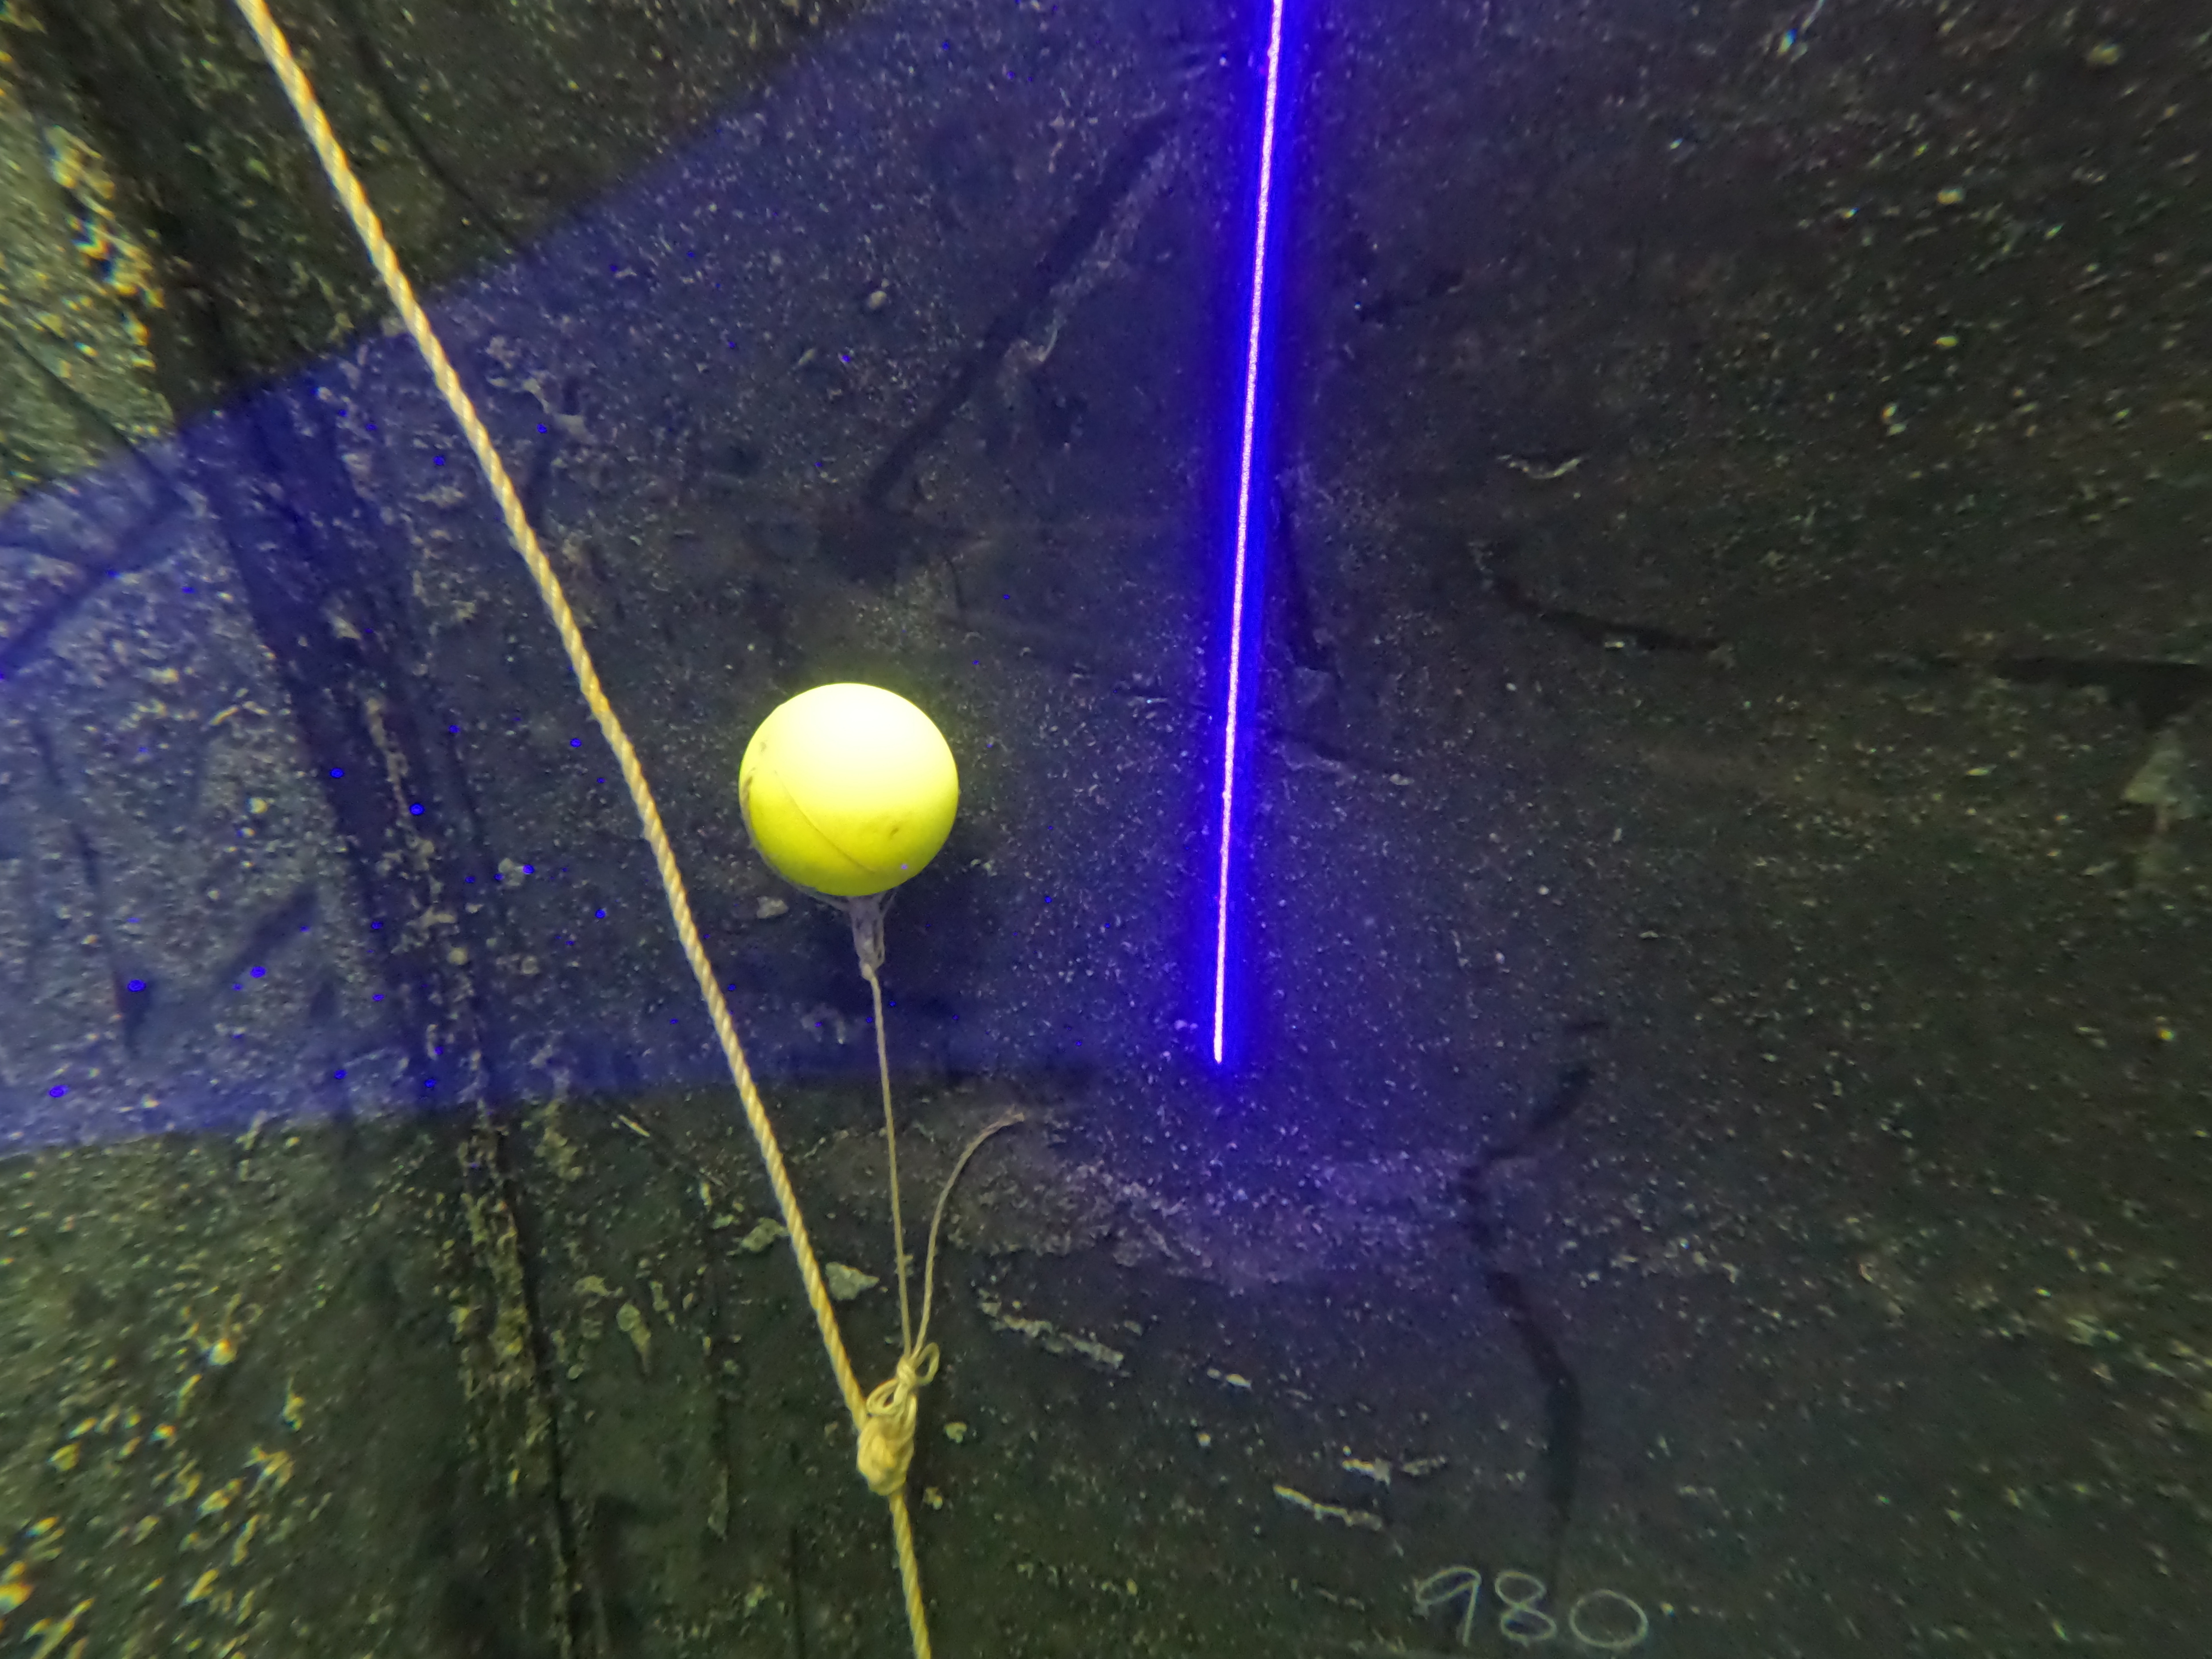

980

Supplement: Supplementary file 2802 [file G0030302.pdf › 2/G0030302.pdf]

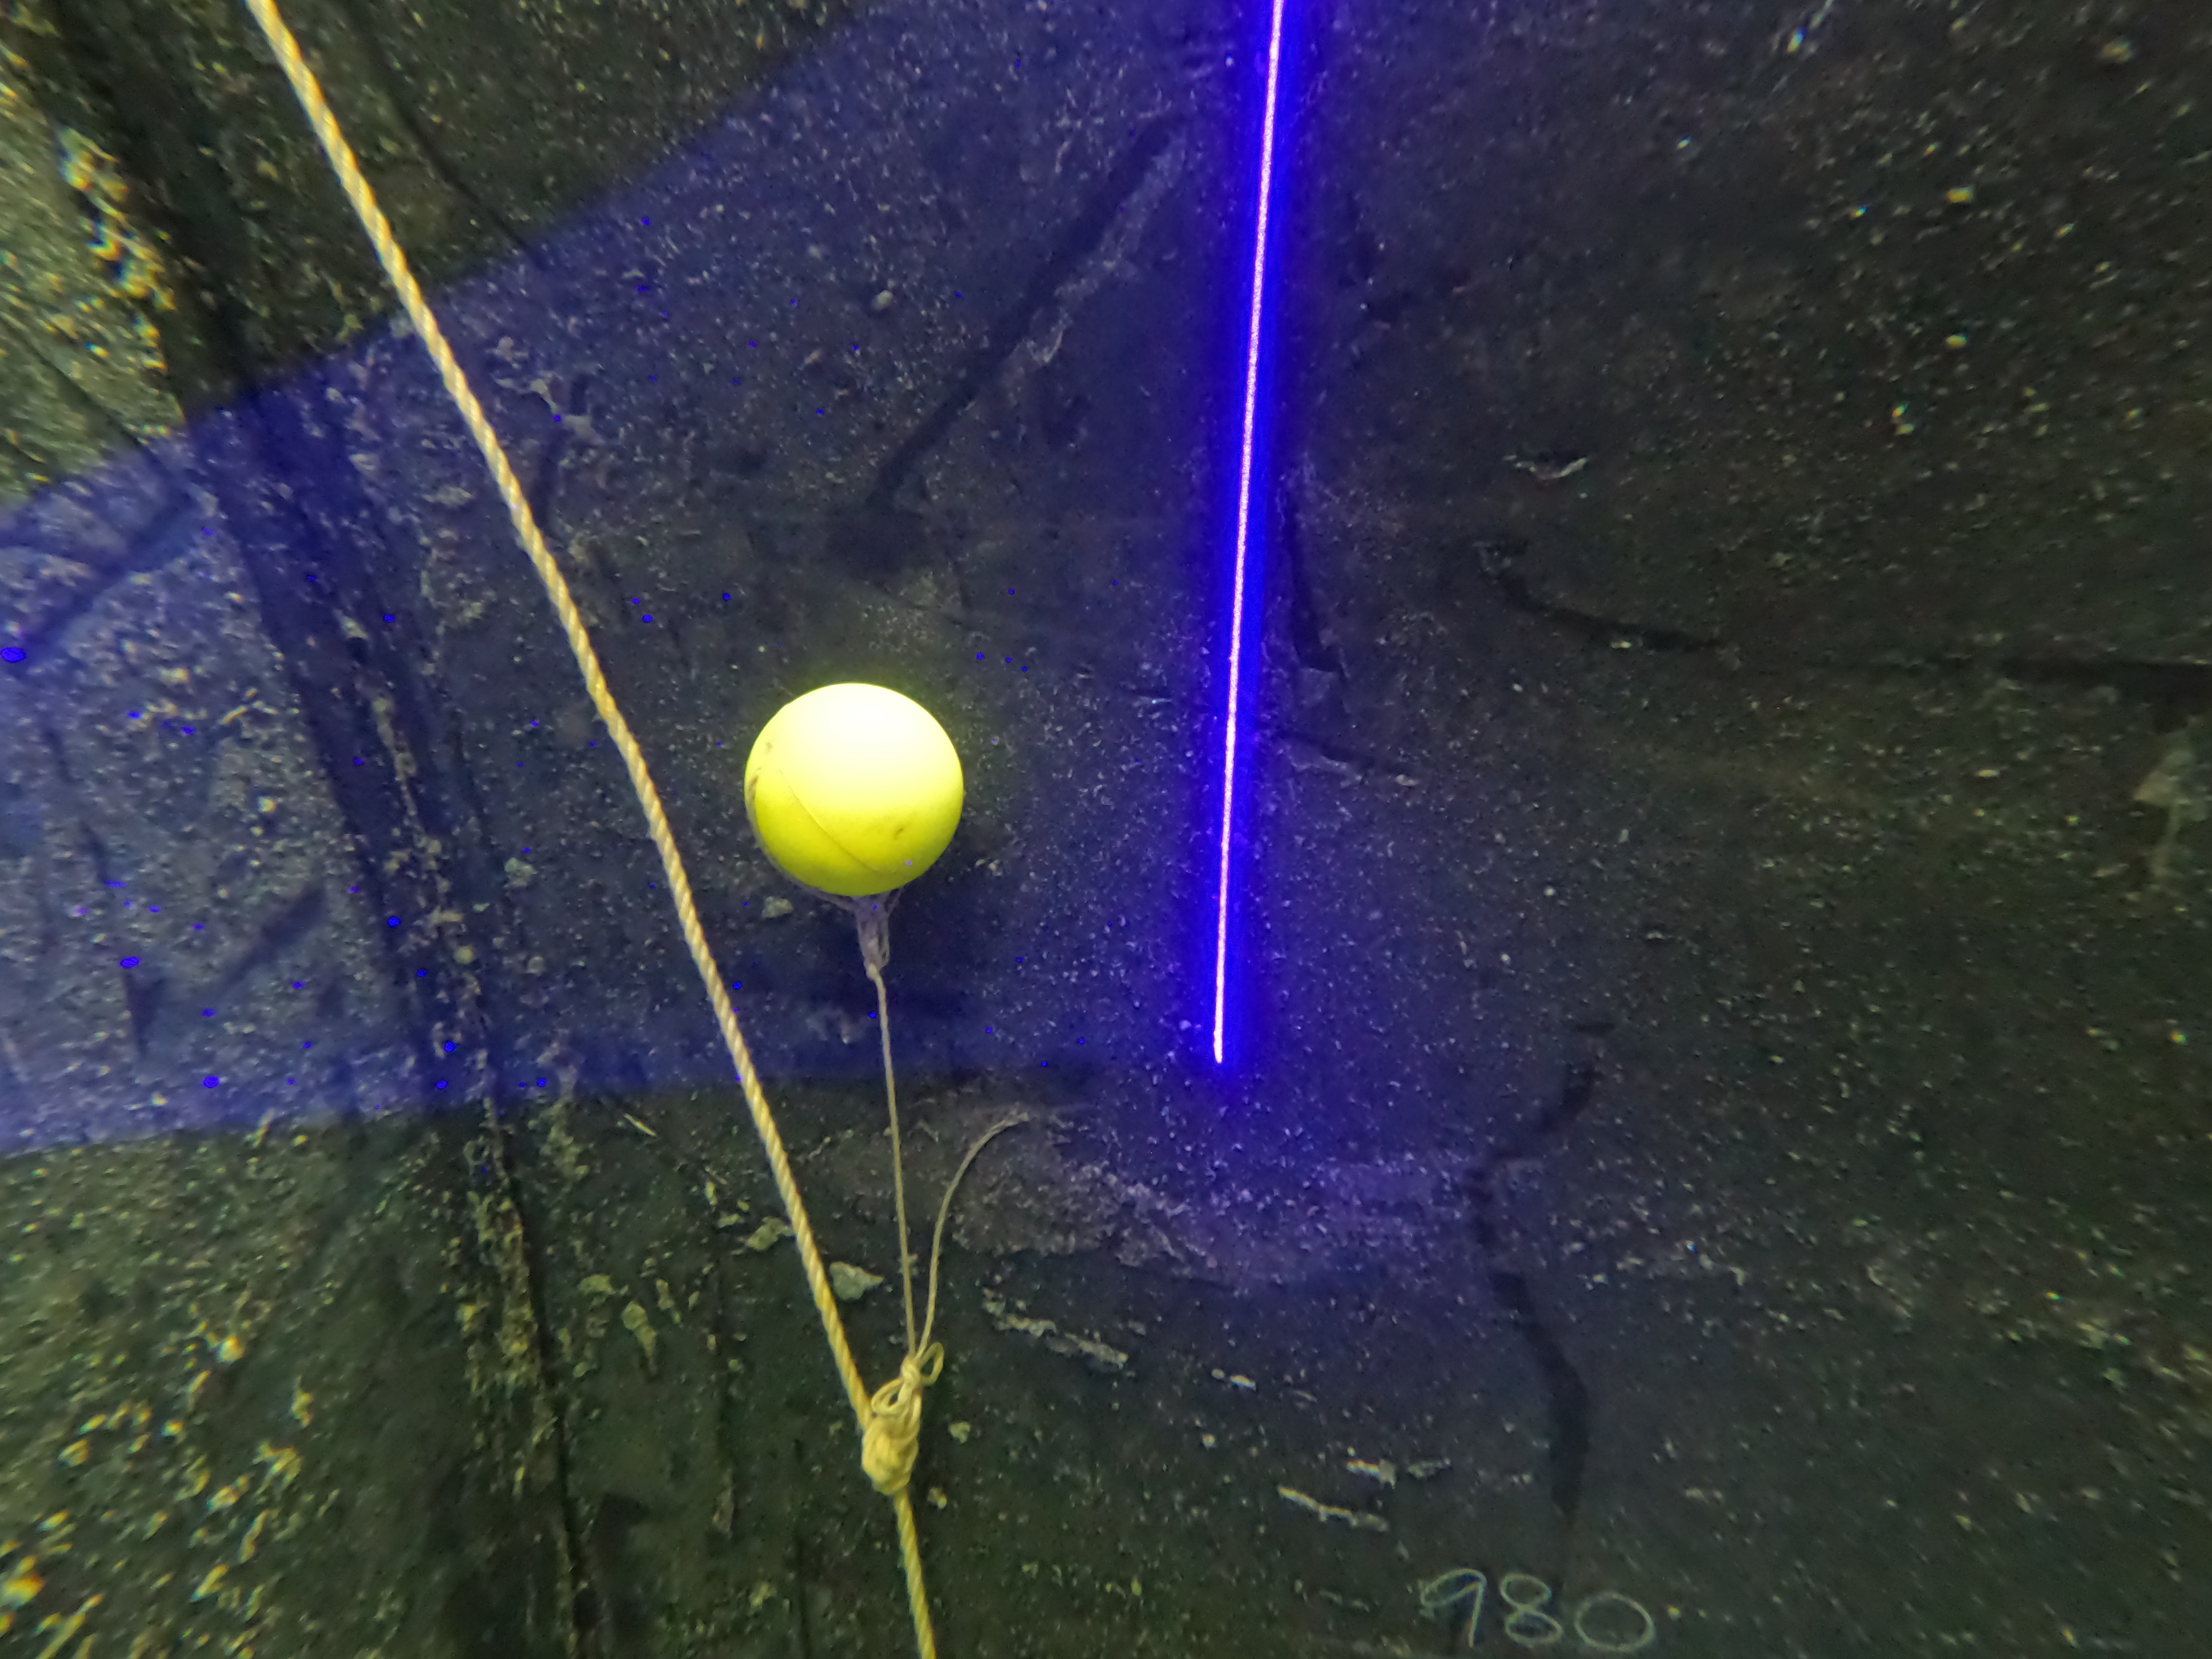

980

Supplement: Supplementary file 2803 [file G0030303.pdf › 2/G0030303.pdf]

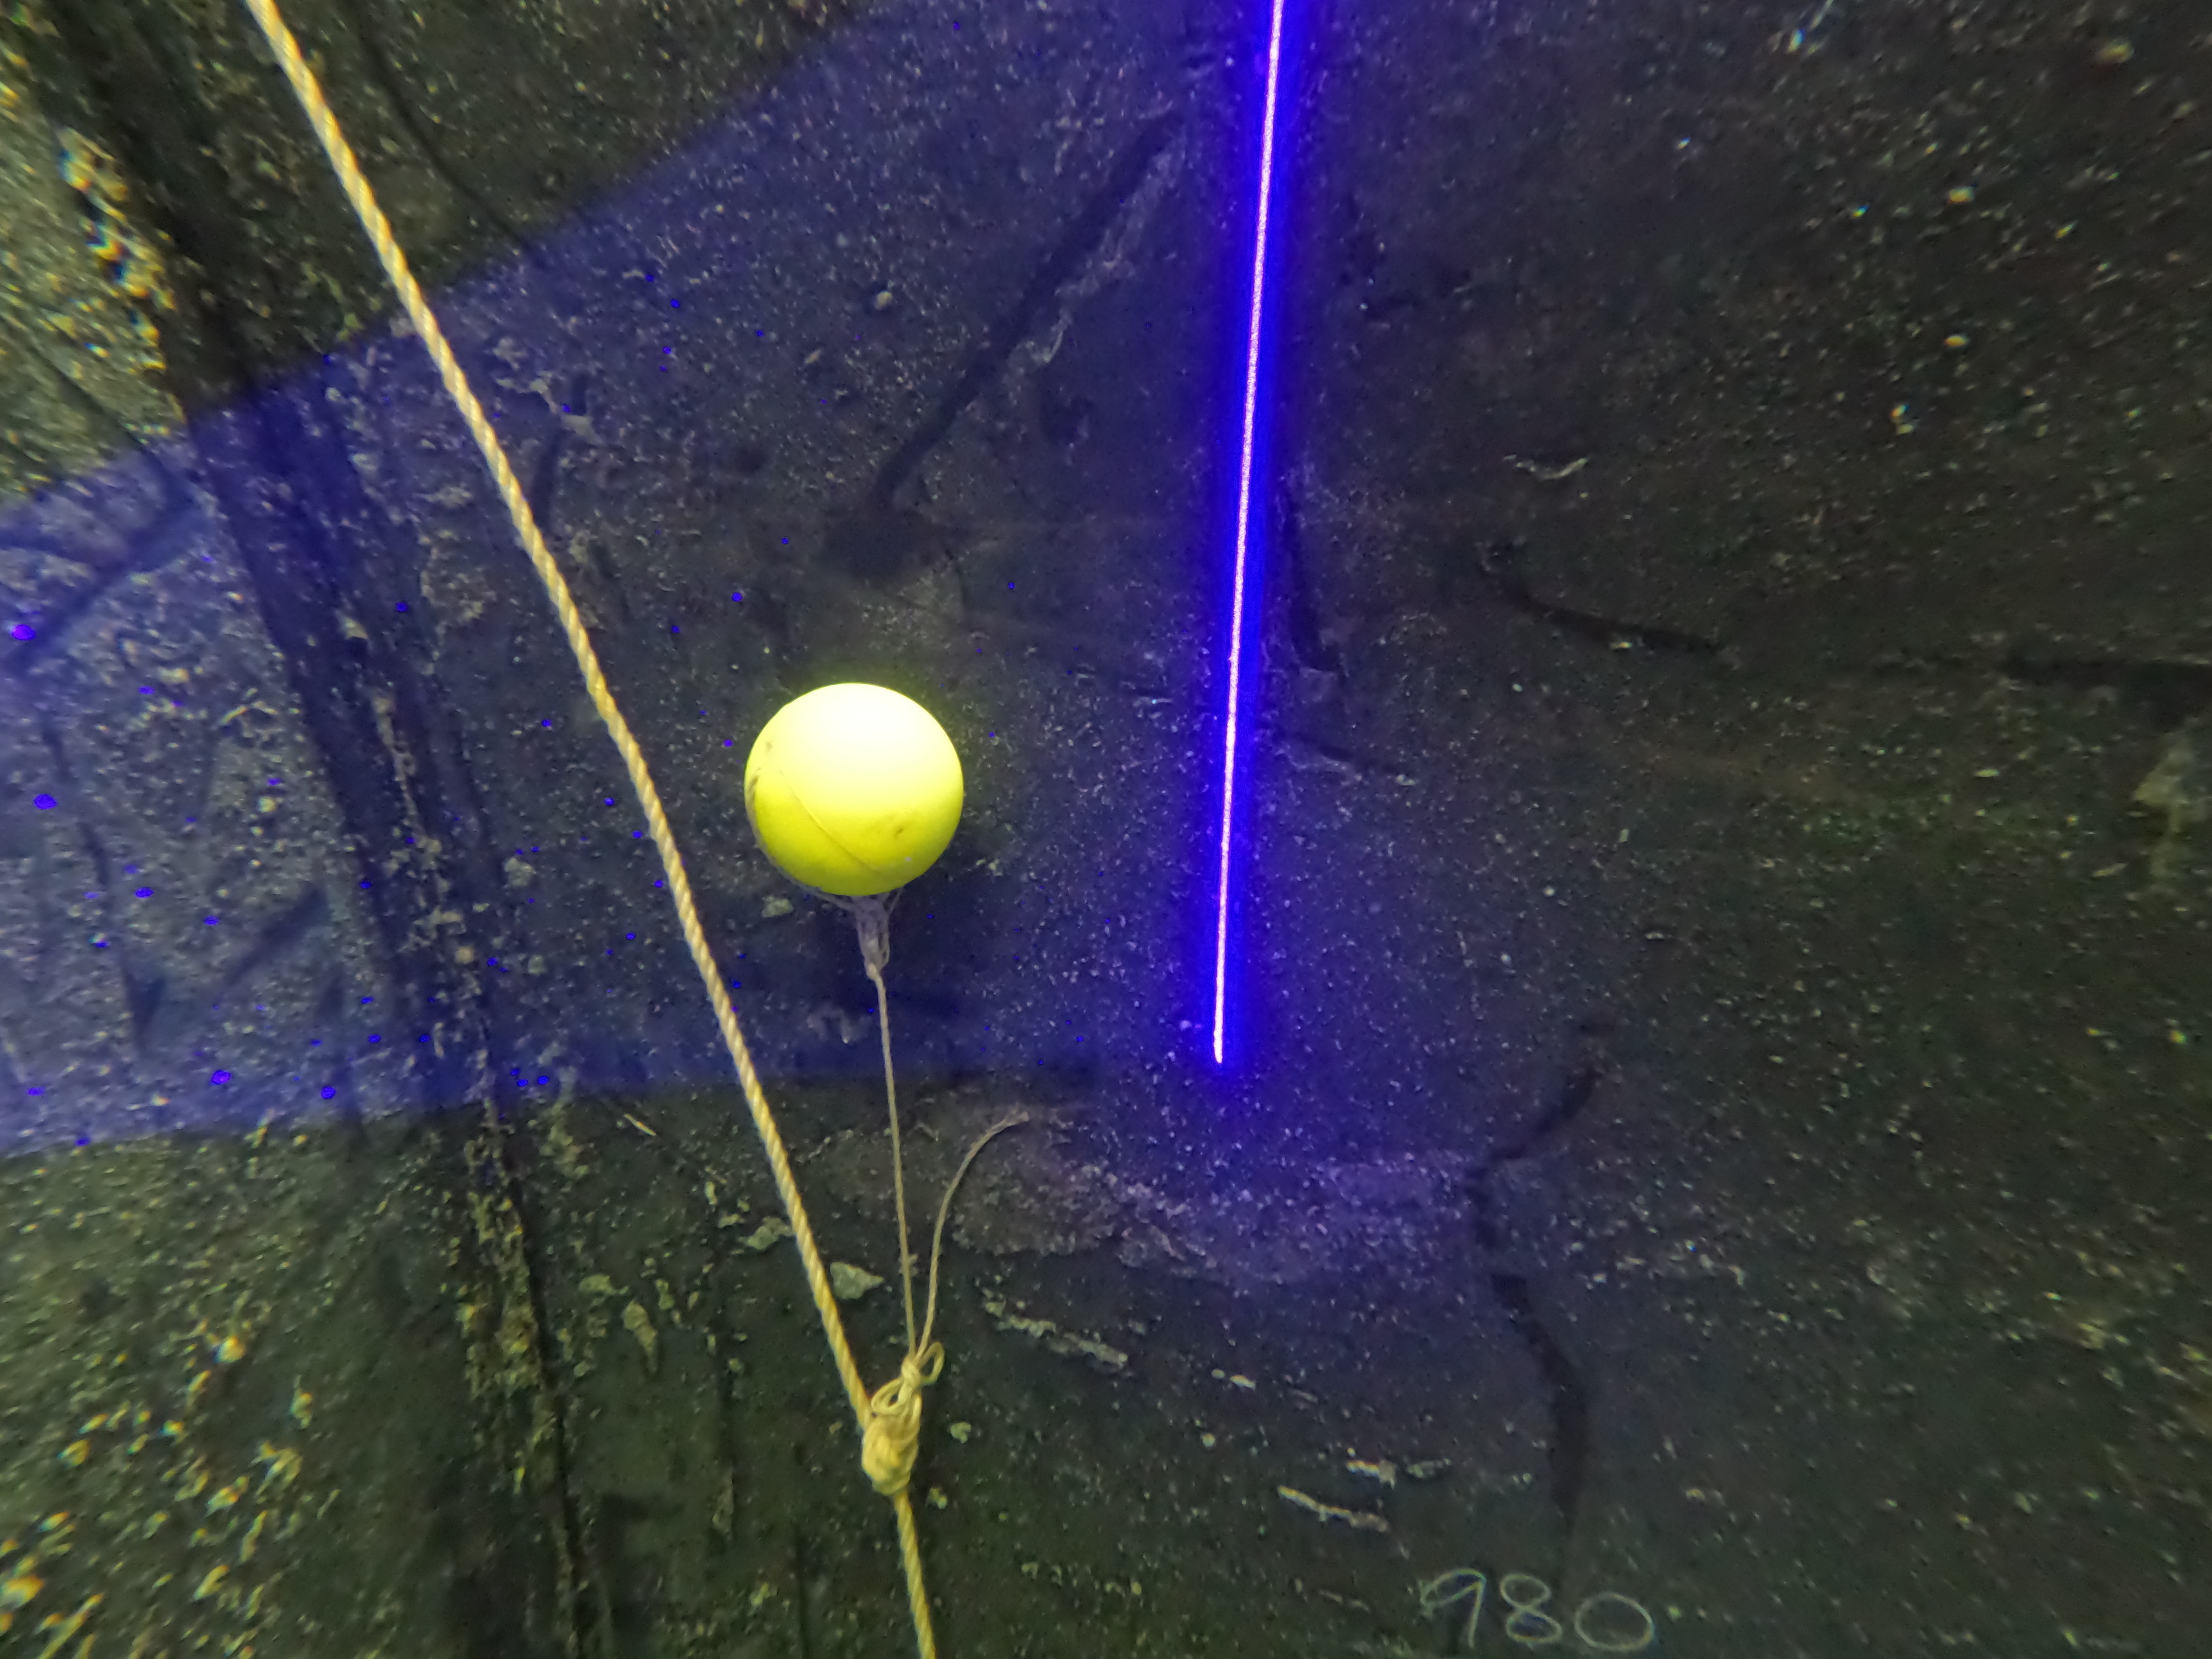

980

Supplement: Supplementary file 2804 [file G0030304.pdf › 2/G0030304.pdf]

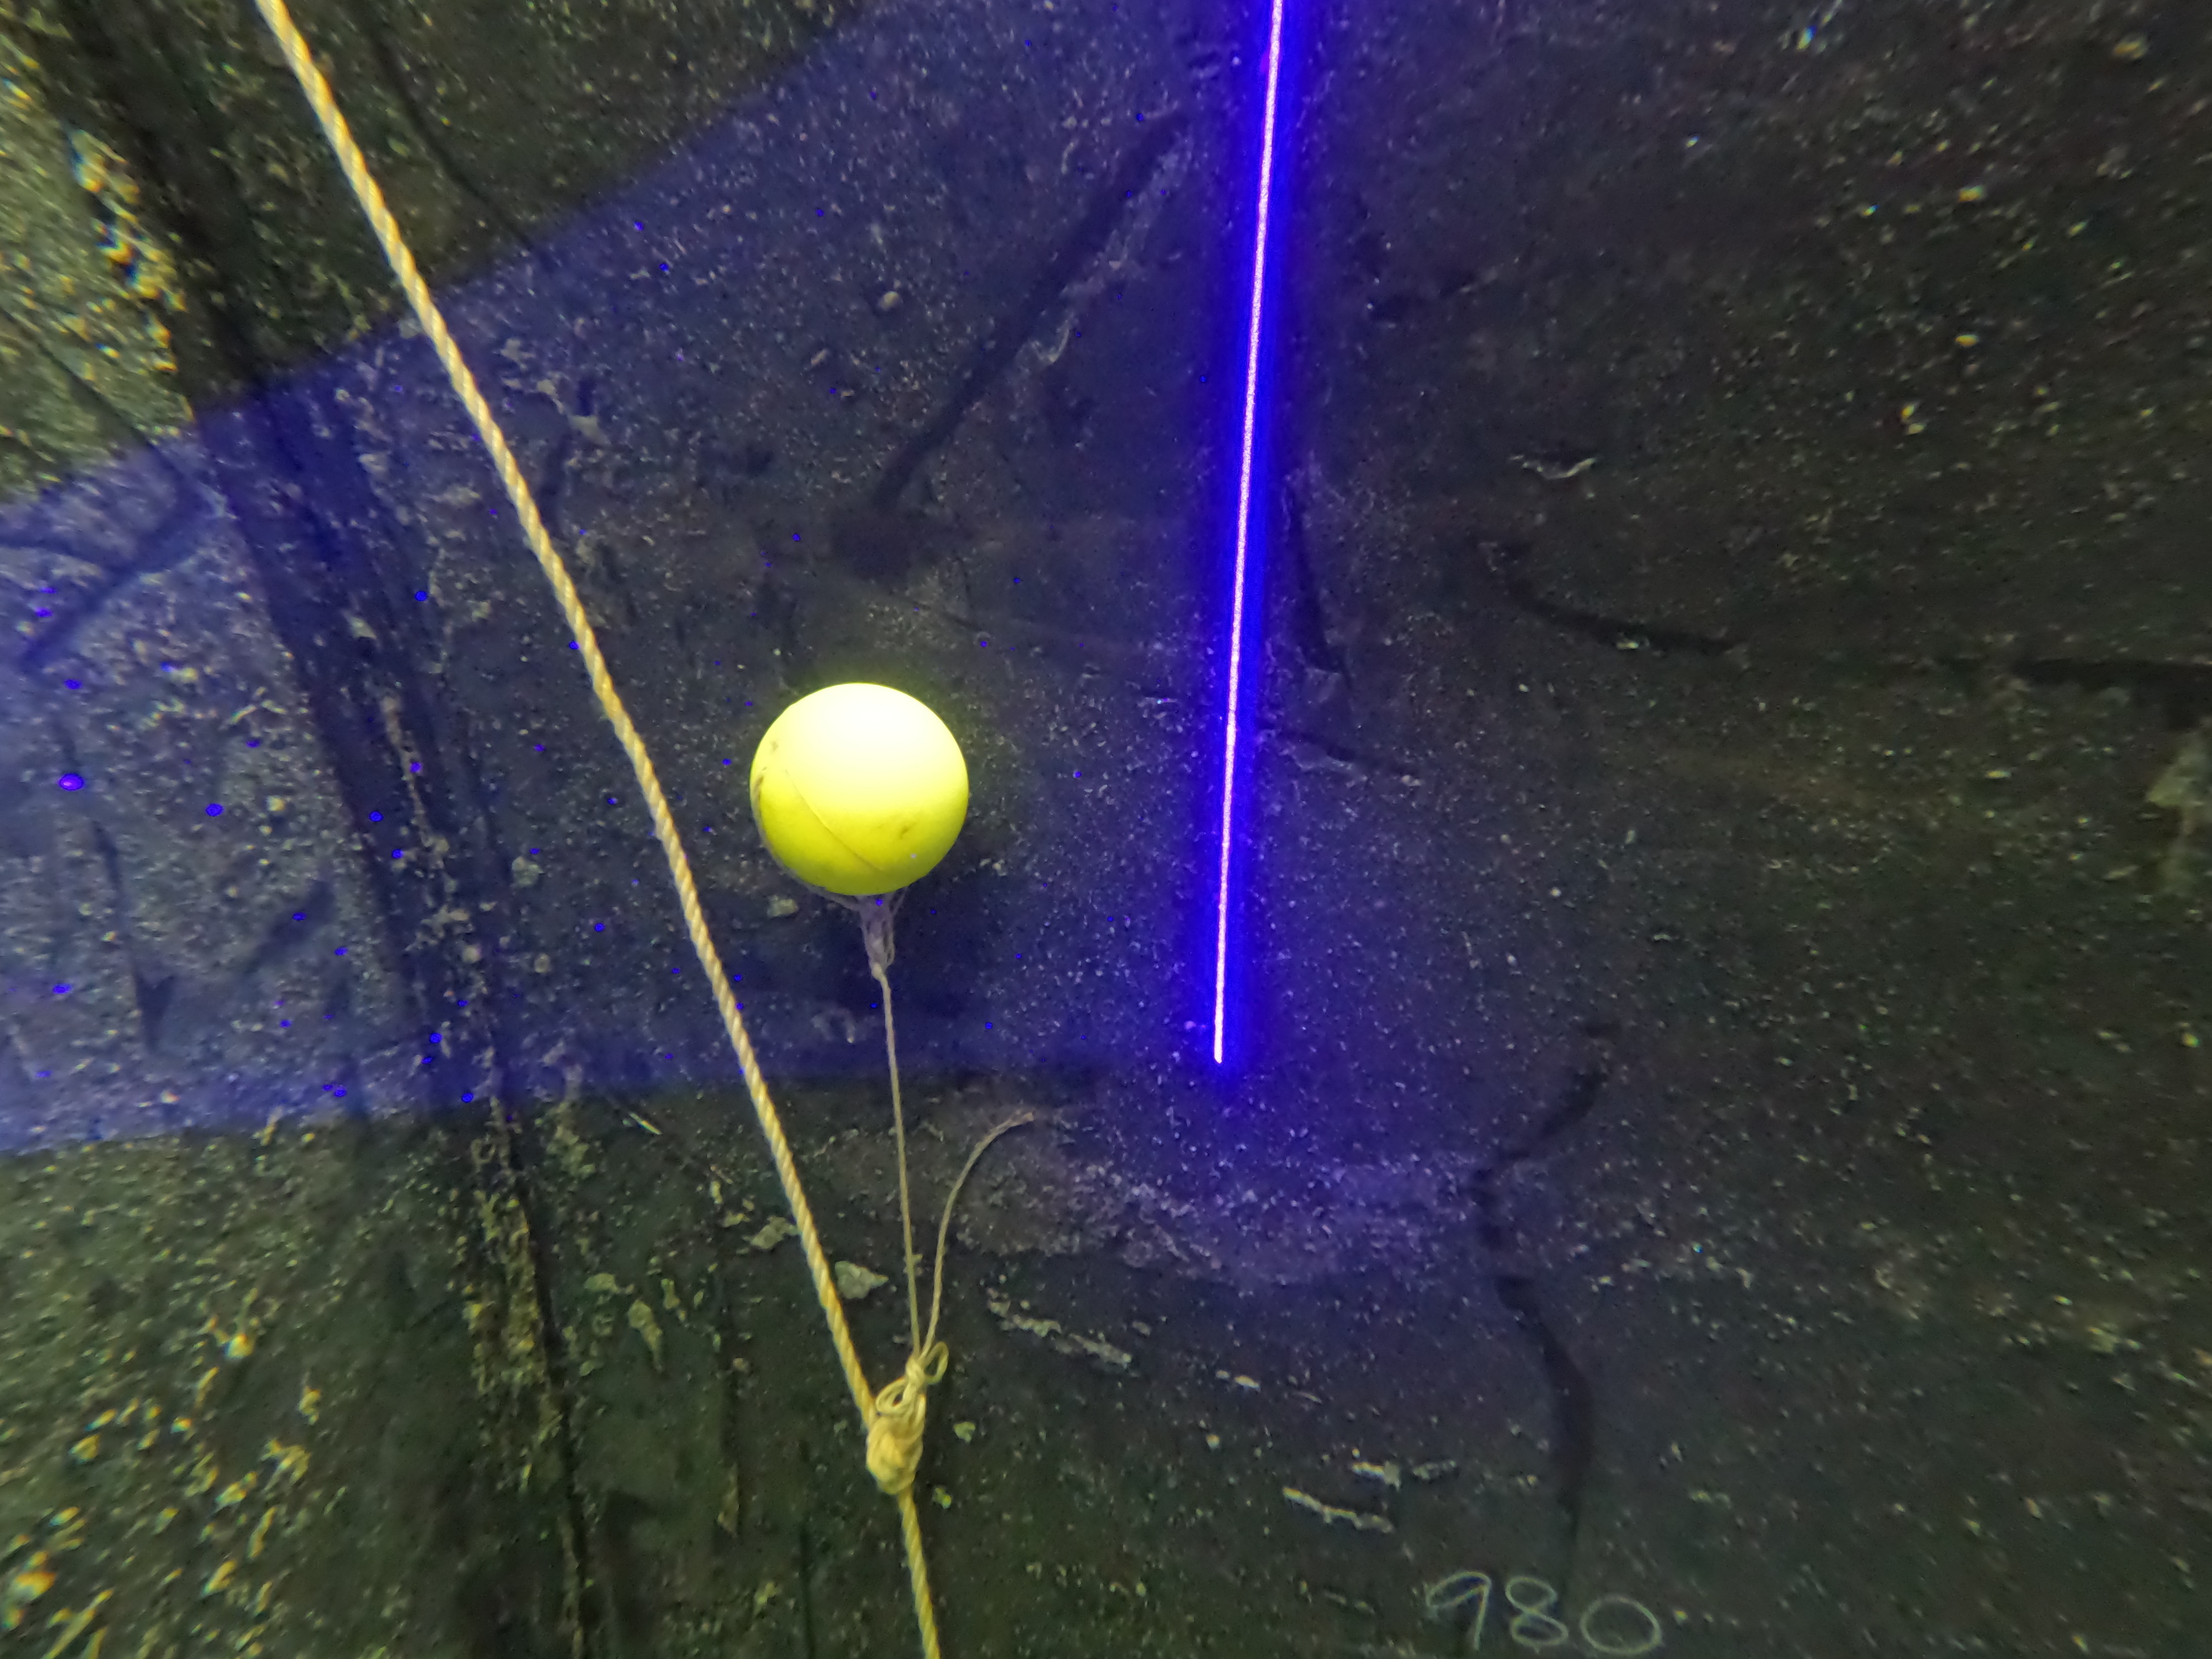

980

Supplement: Supplementary file 2805 [file G0030305.pdf › 2/G0030305.pdf]

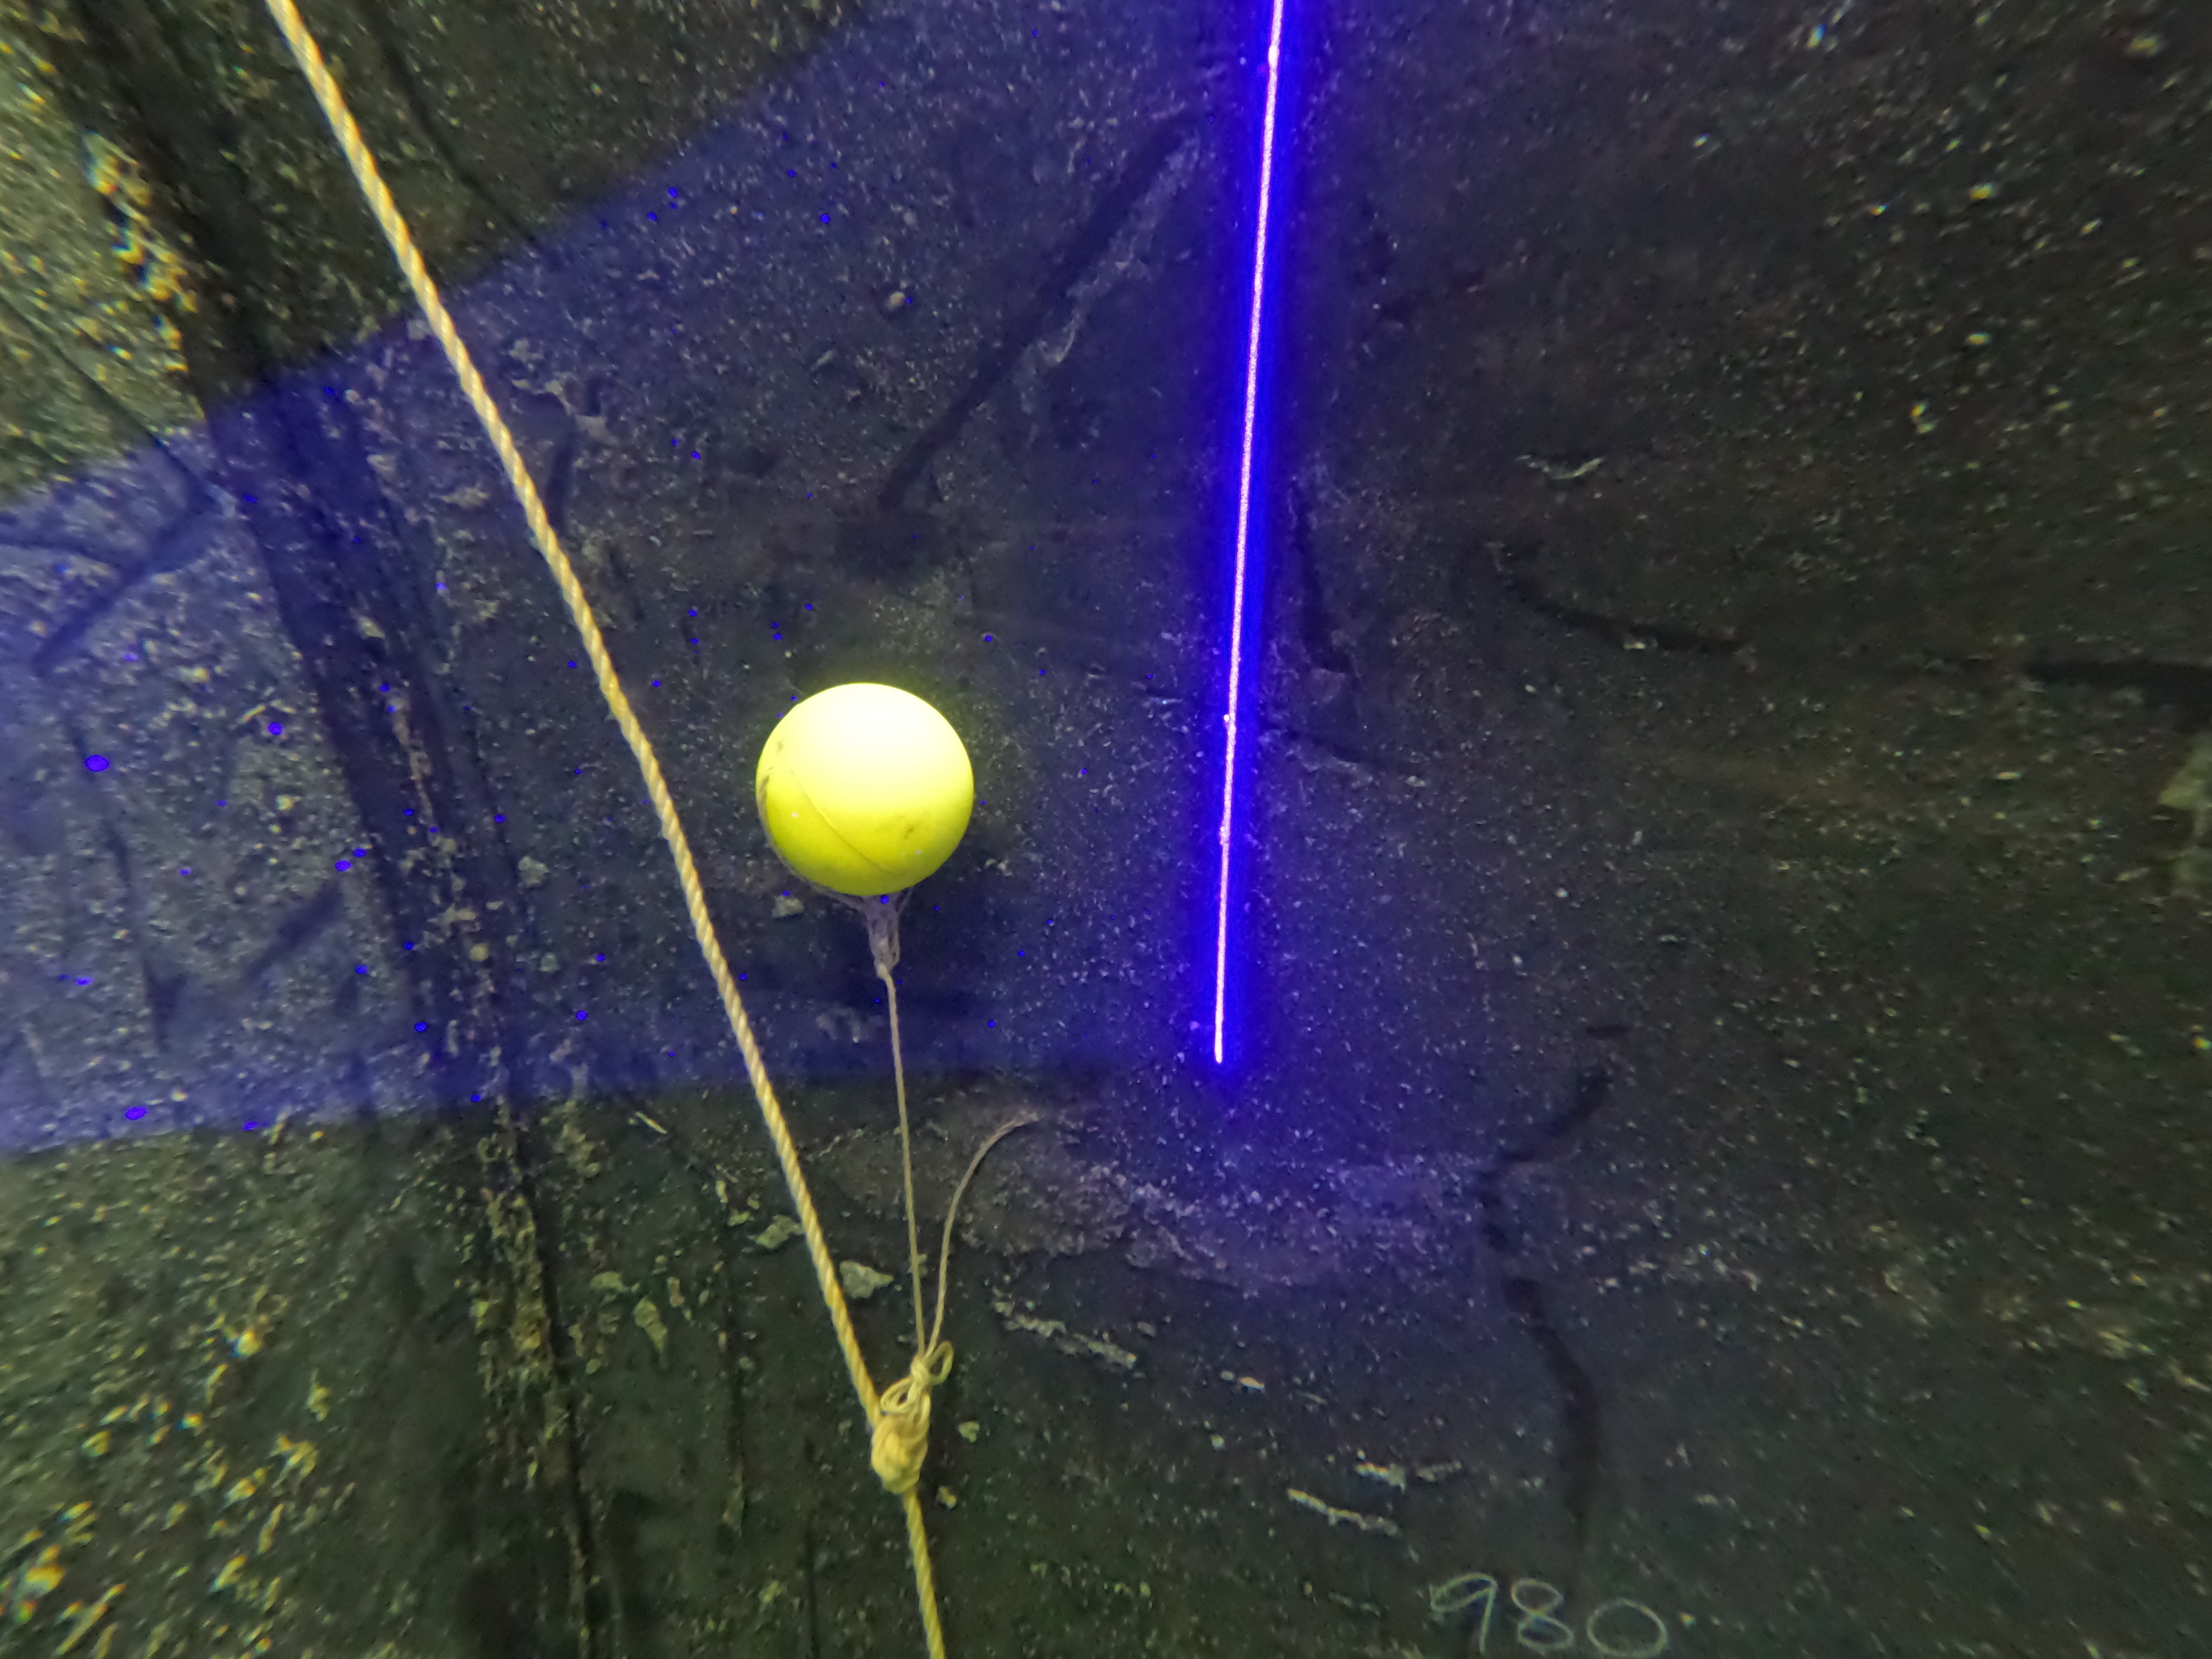

980

Supplement: Supplementary file 2806 [file G0030306.pdf › 2/G0030306.pdf]

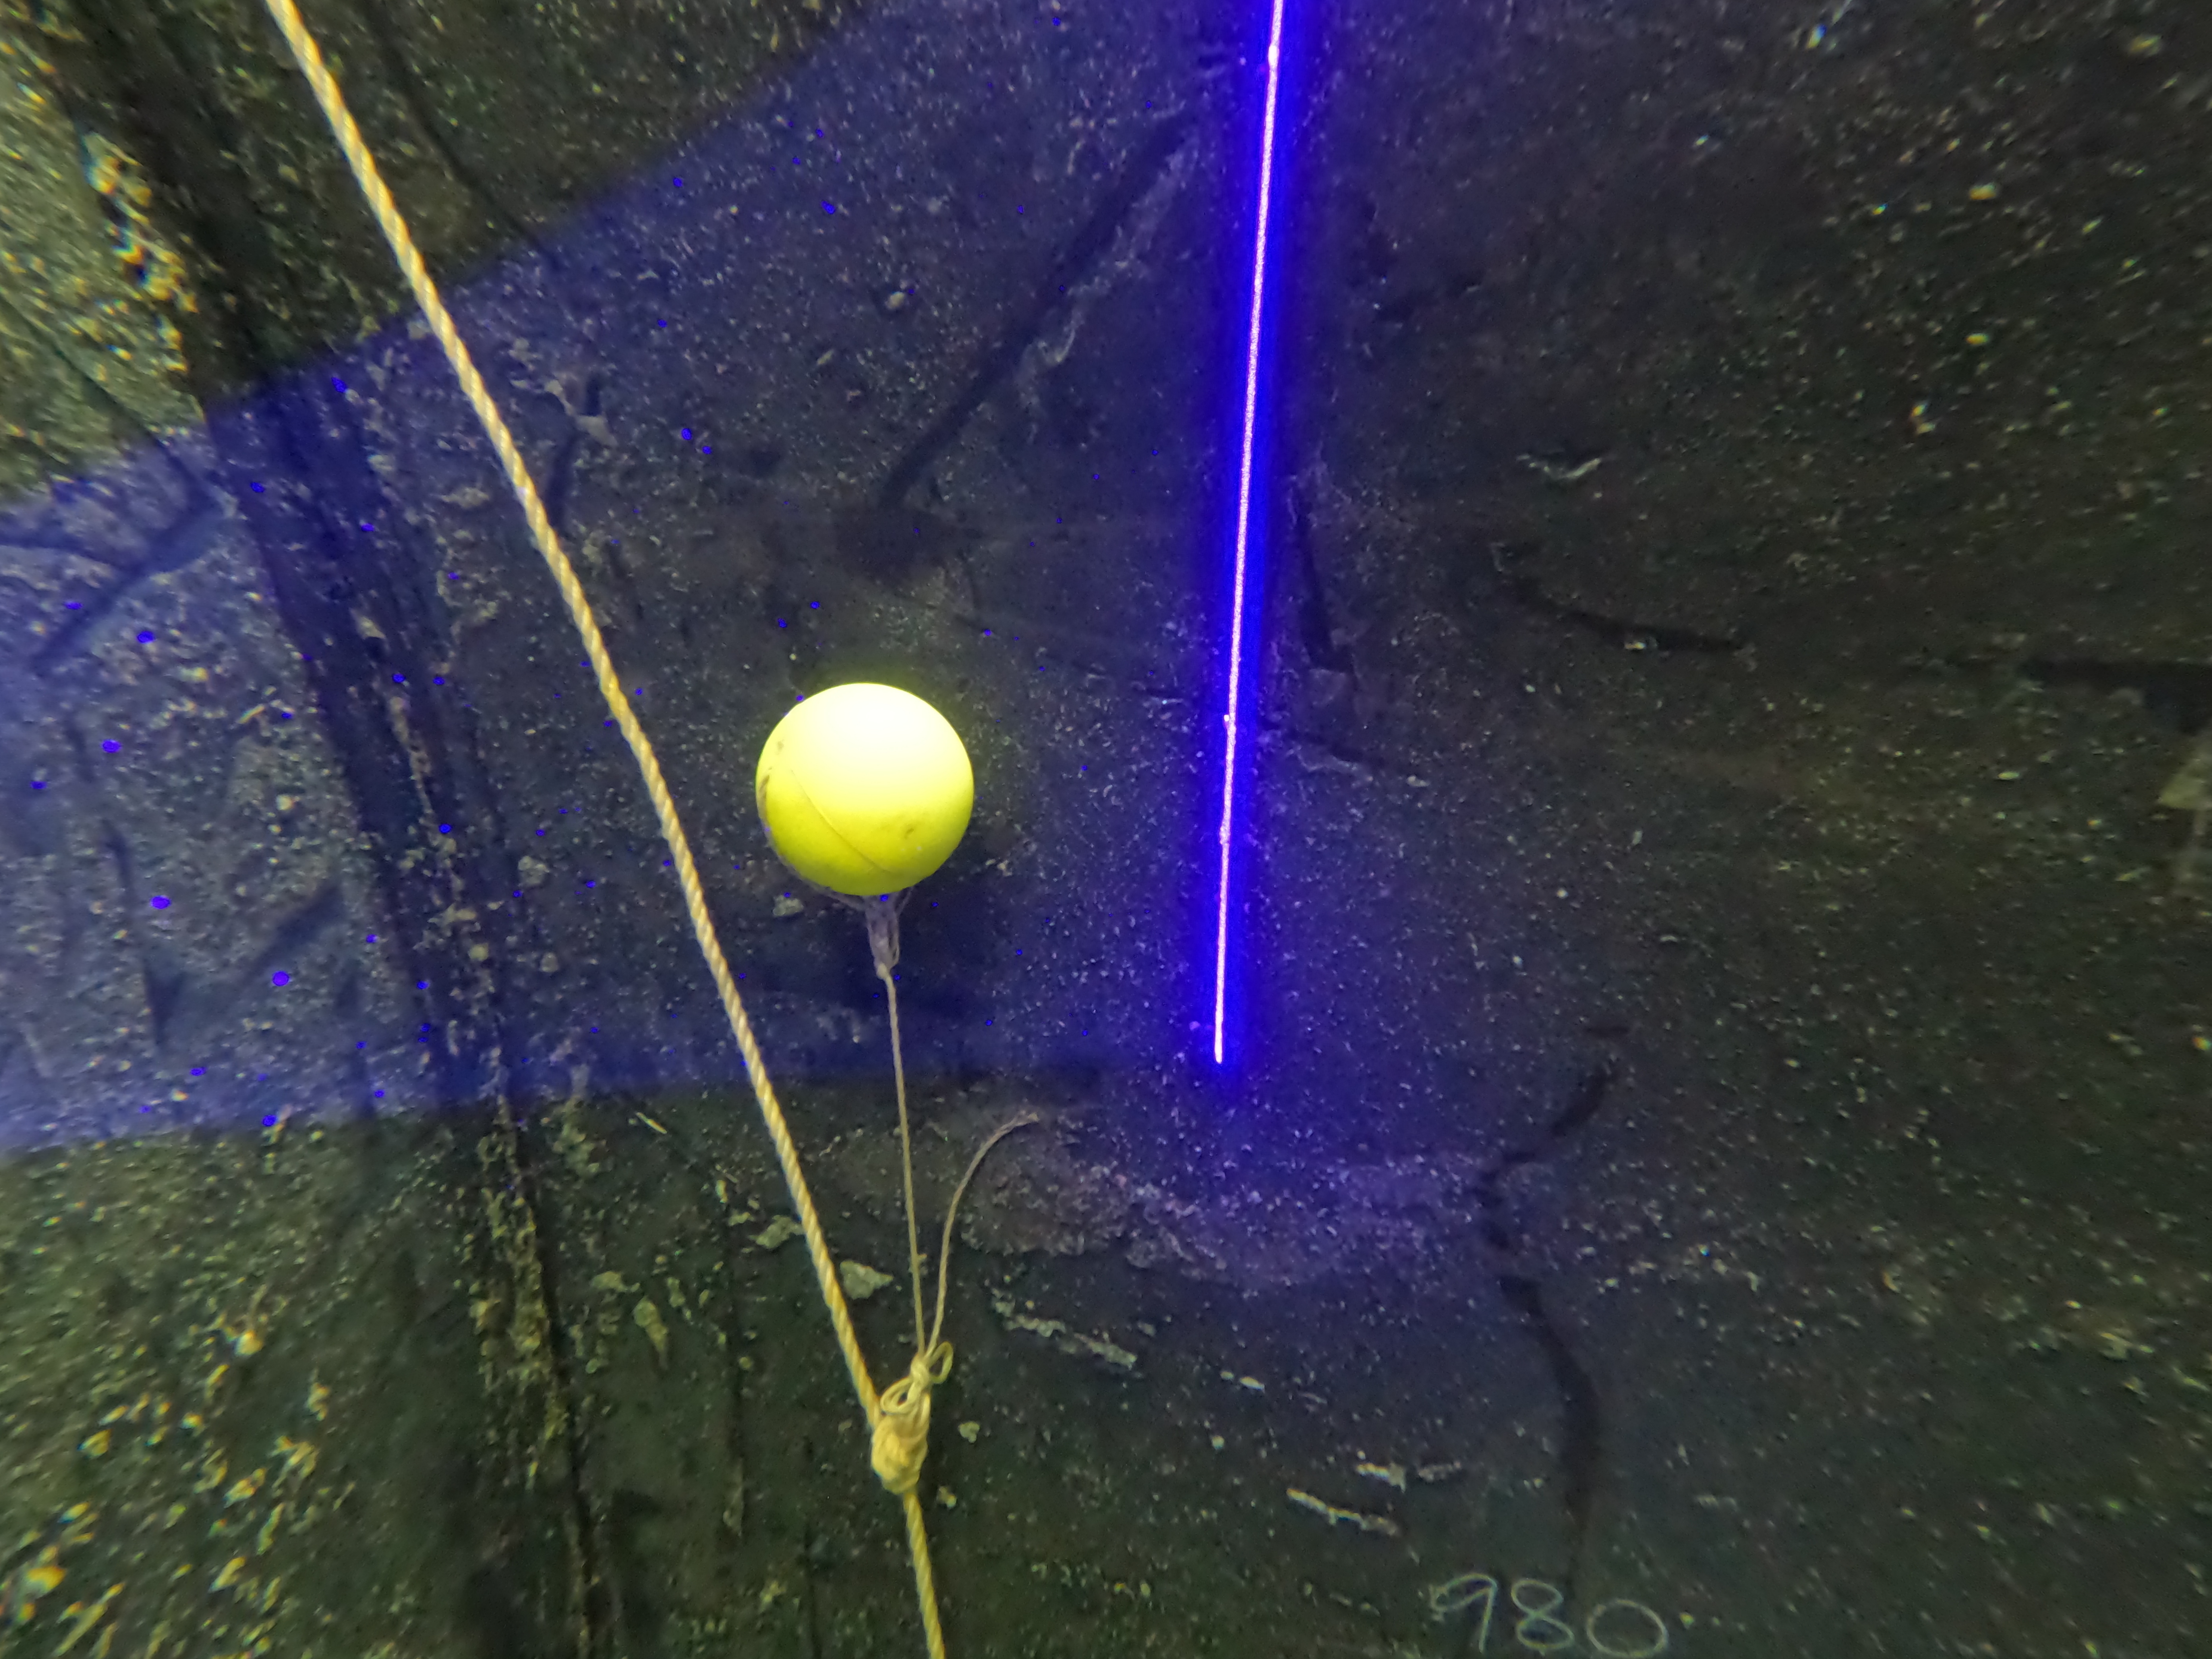

980

Supplement: Supplementary file 2807 [file G0030307.pdf › 2/G0030307.pdf]

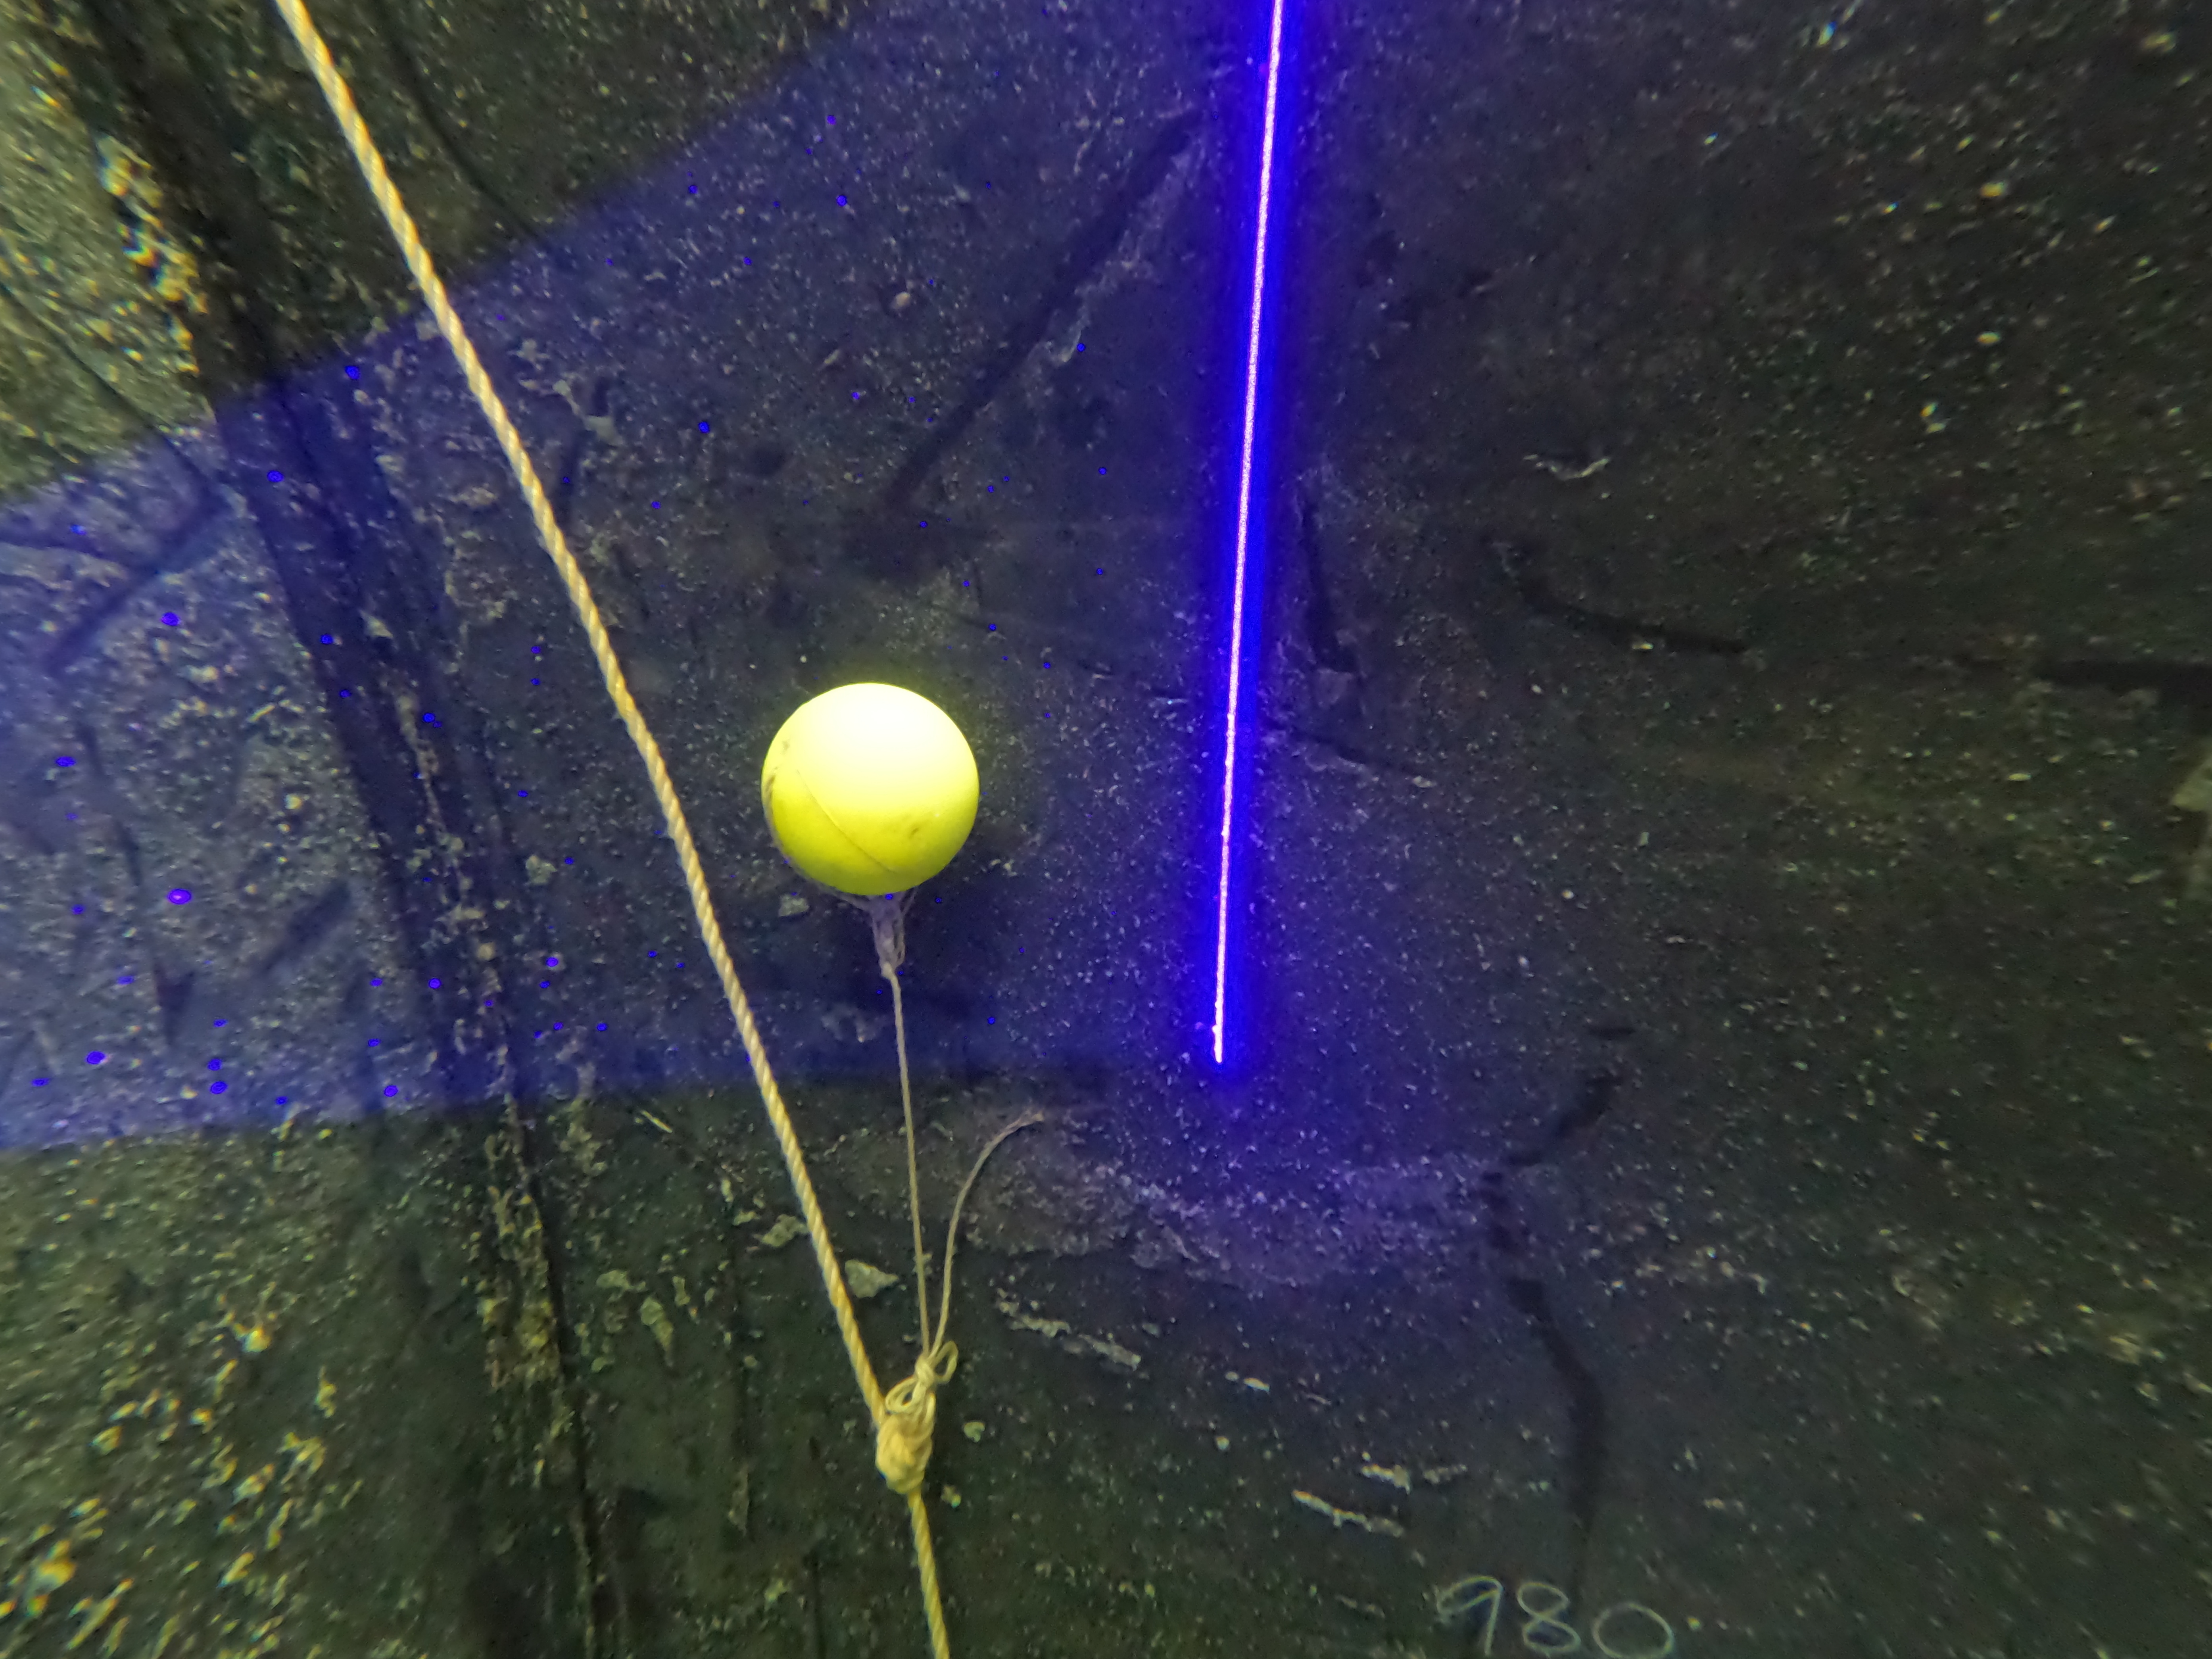

980

Supplement: Supplementary file 2808 [file G0030308.pdf › 2/G0030308.pdf]

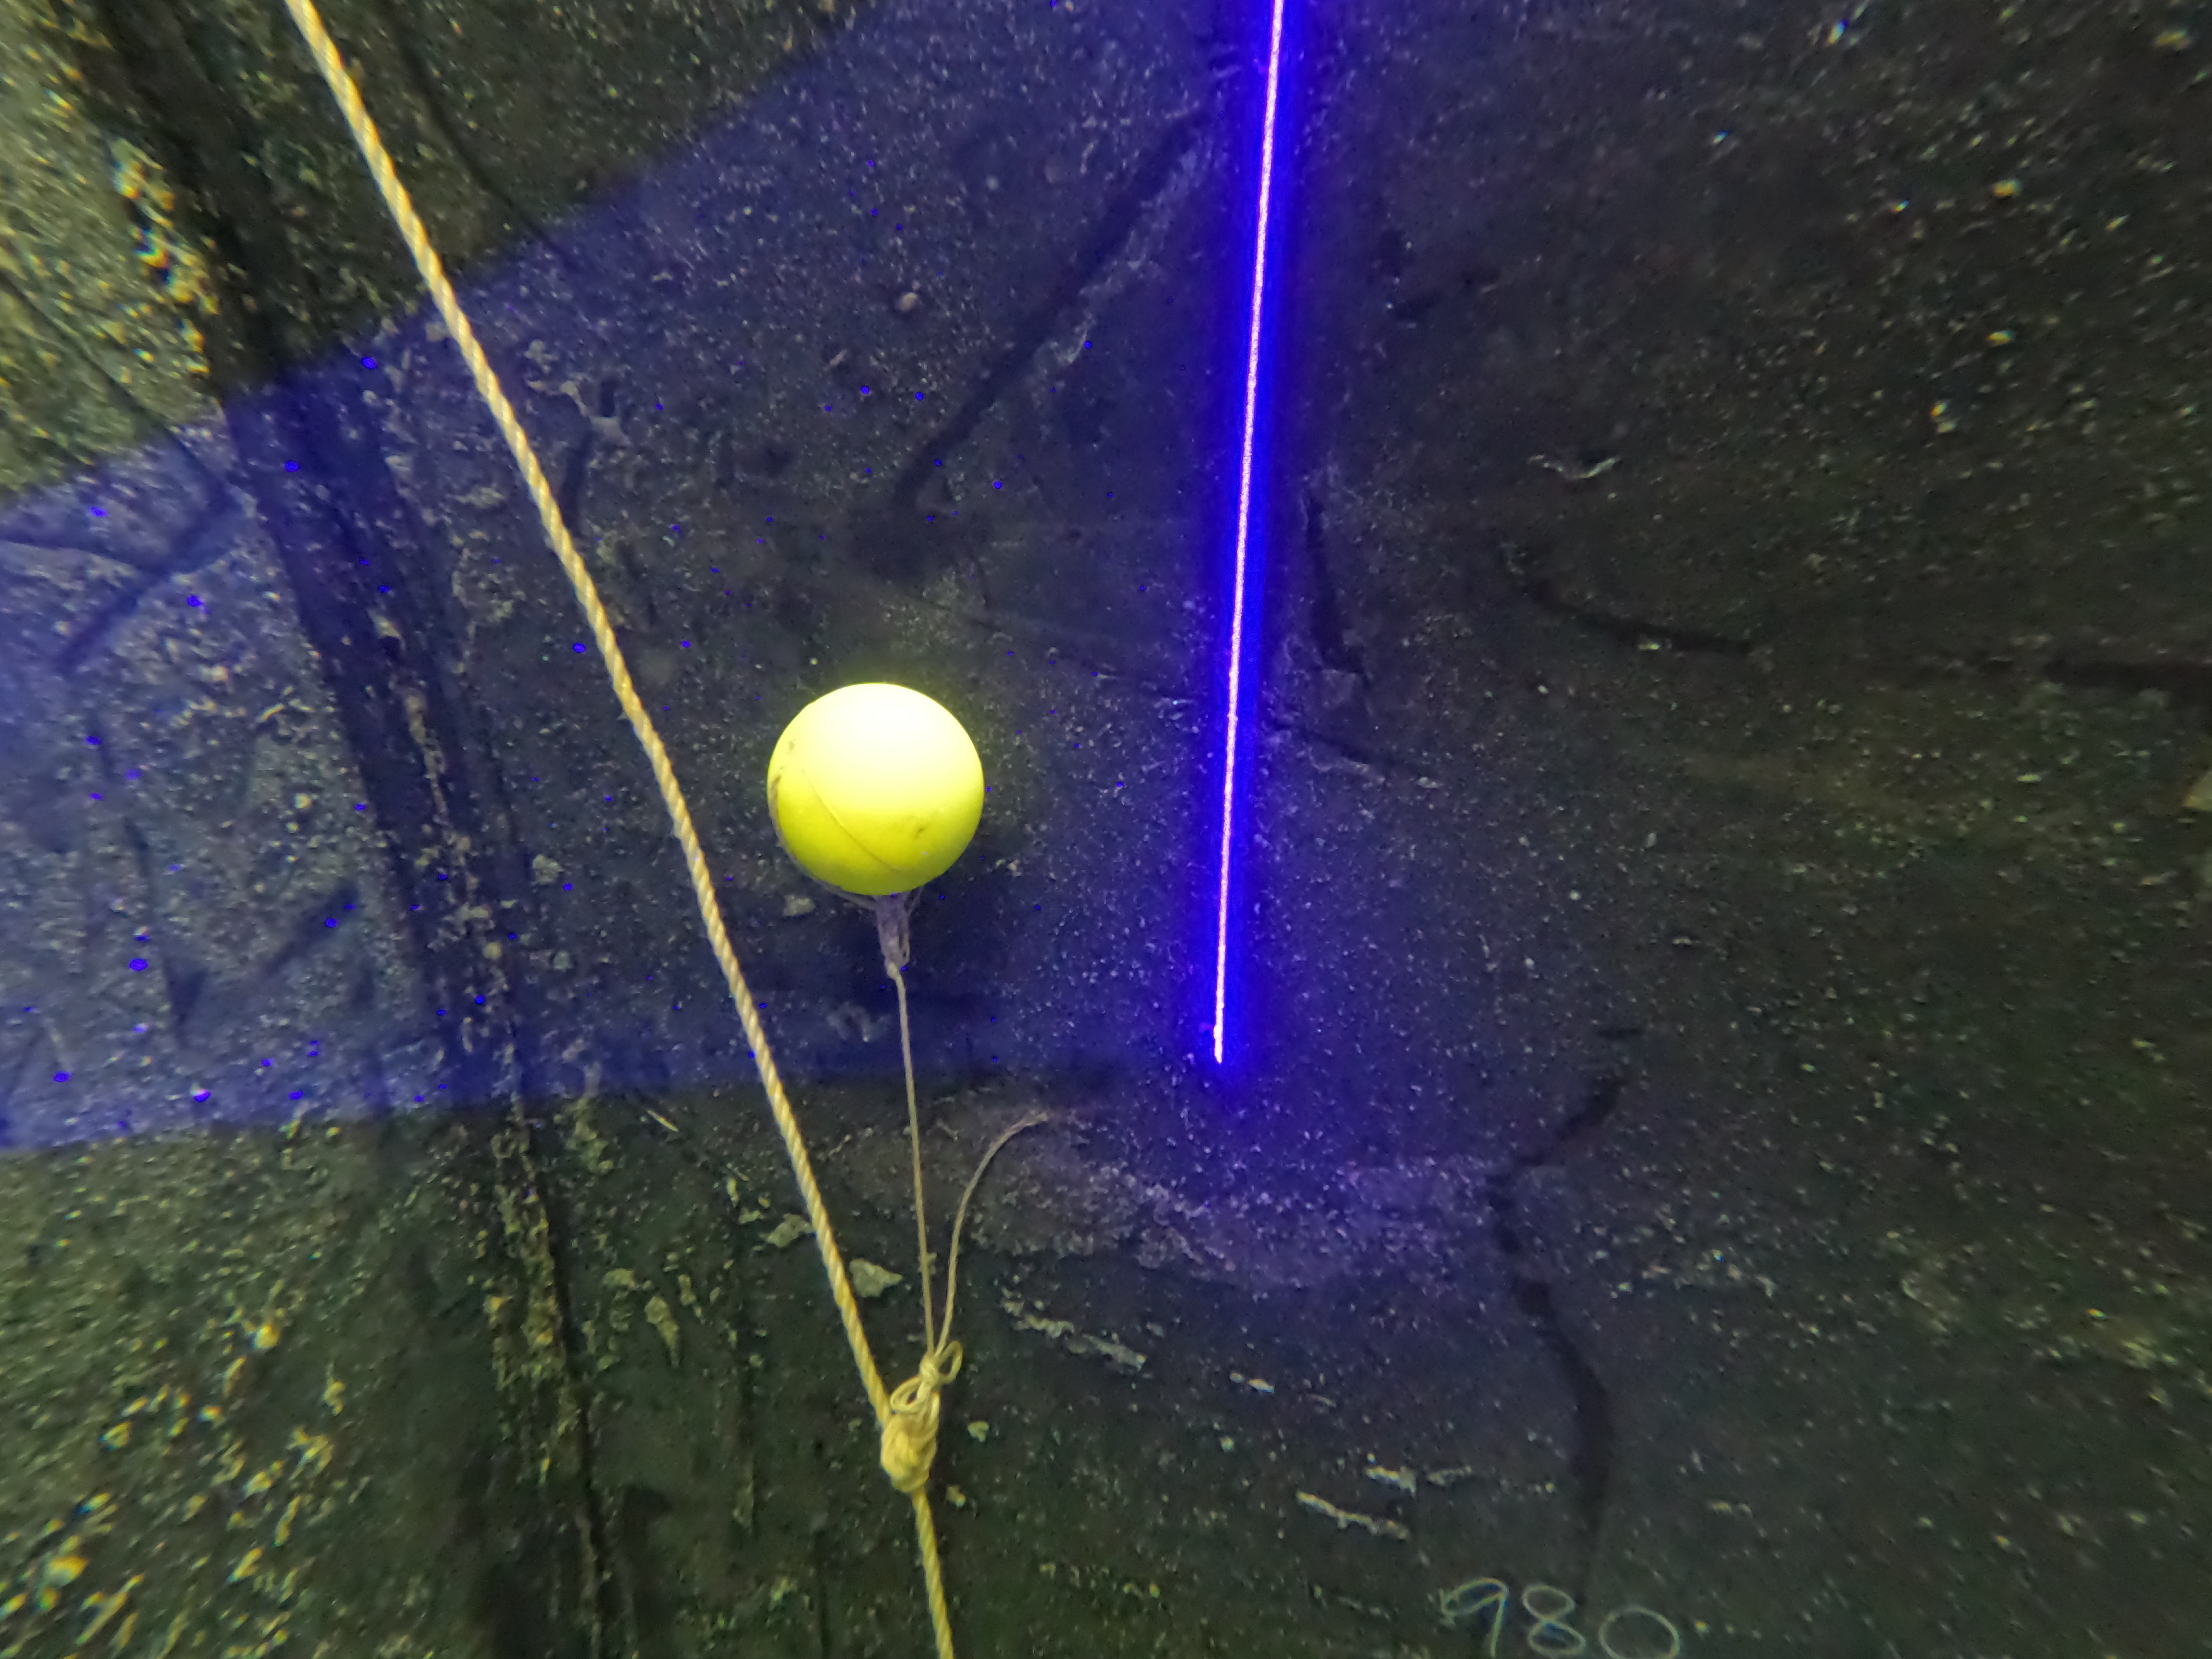

980

Supplement: Supplementary file 2809 [file G0030309.pdf › 2/G0030309.pdf]

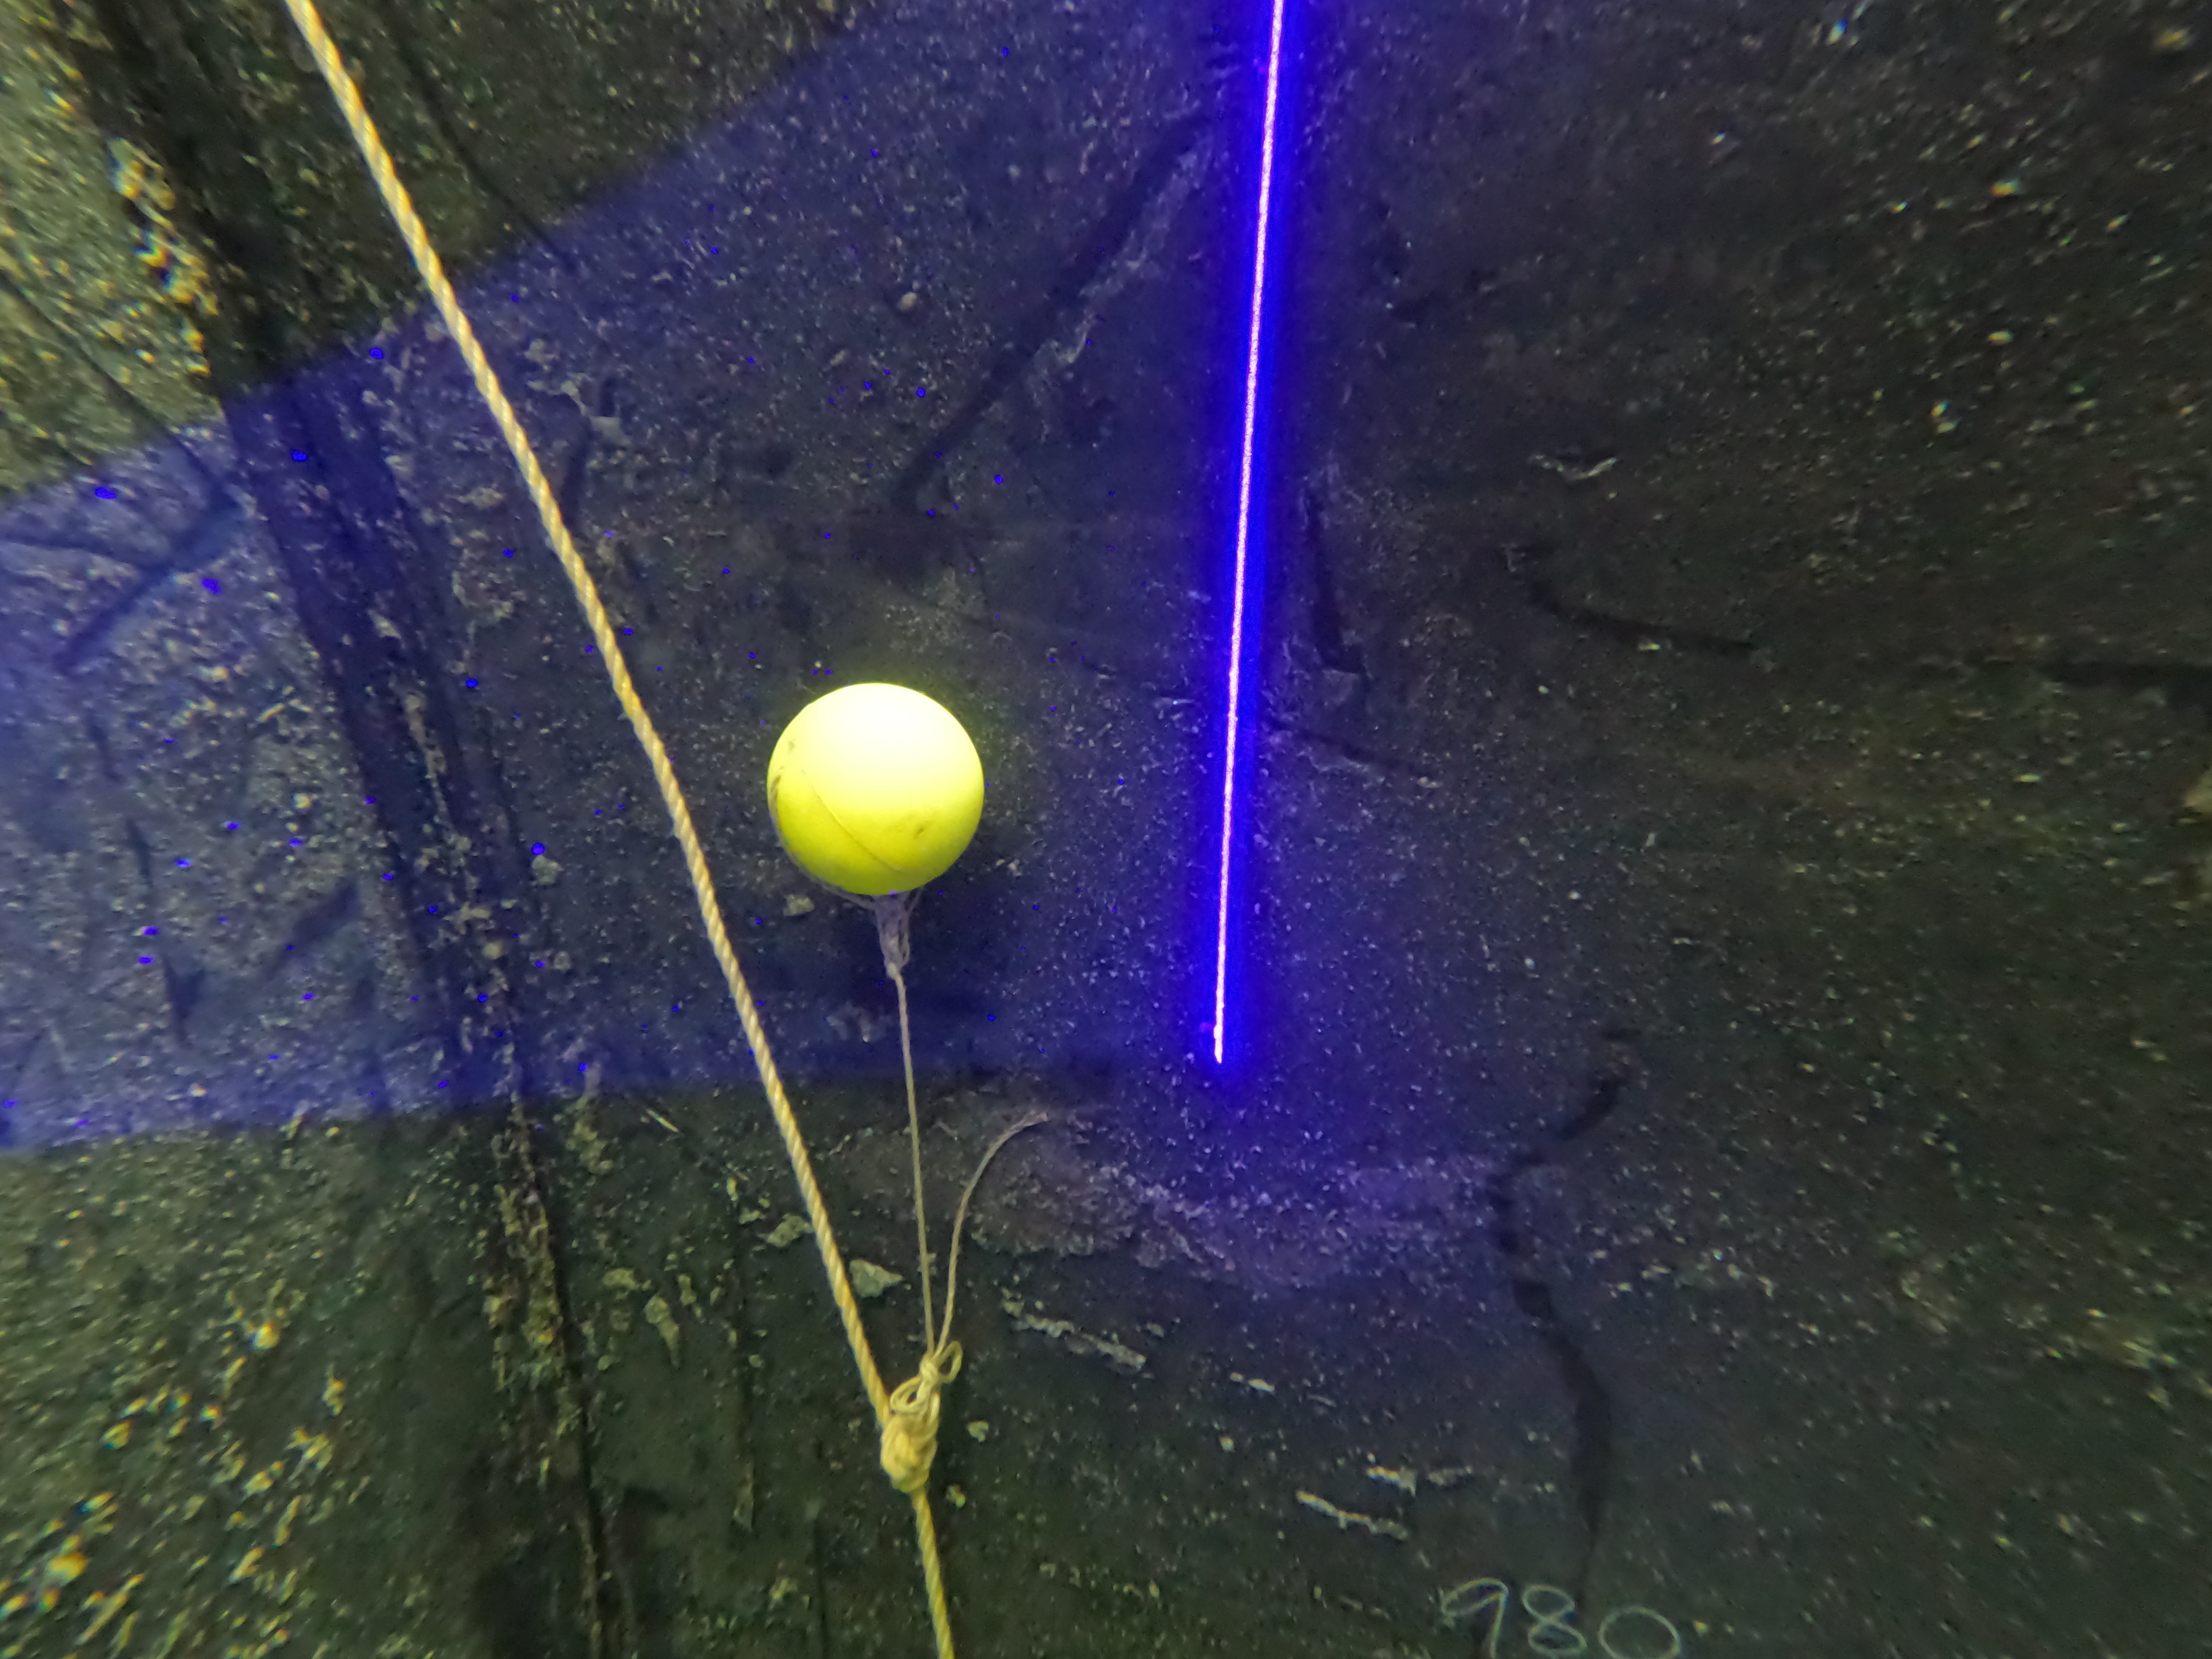

980

Supplement: Supplementary file 2810 [file G0030310.pdf › 2/G0030310.pdf]

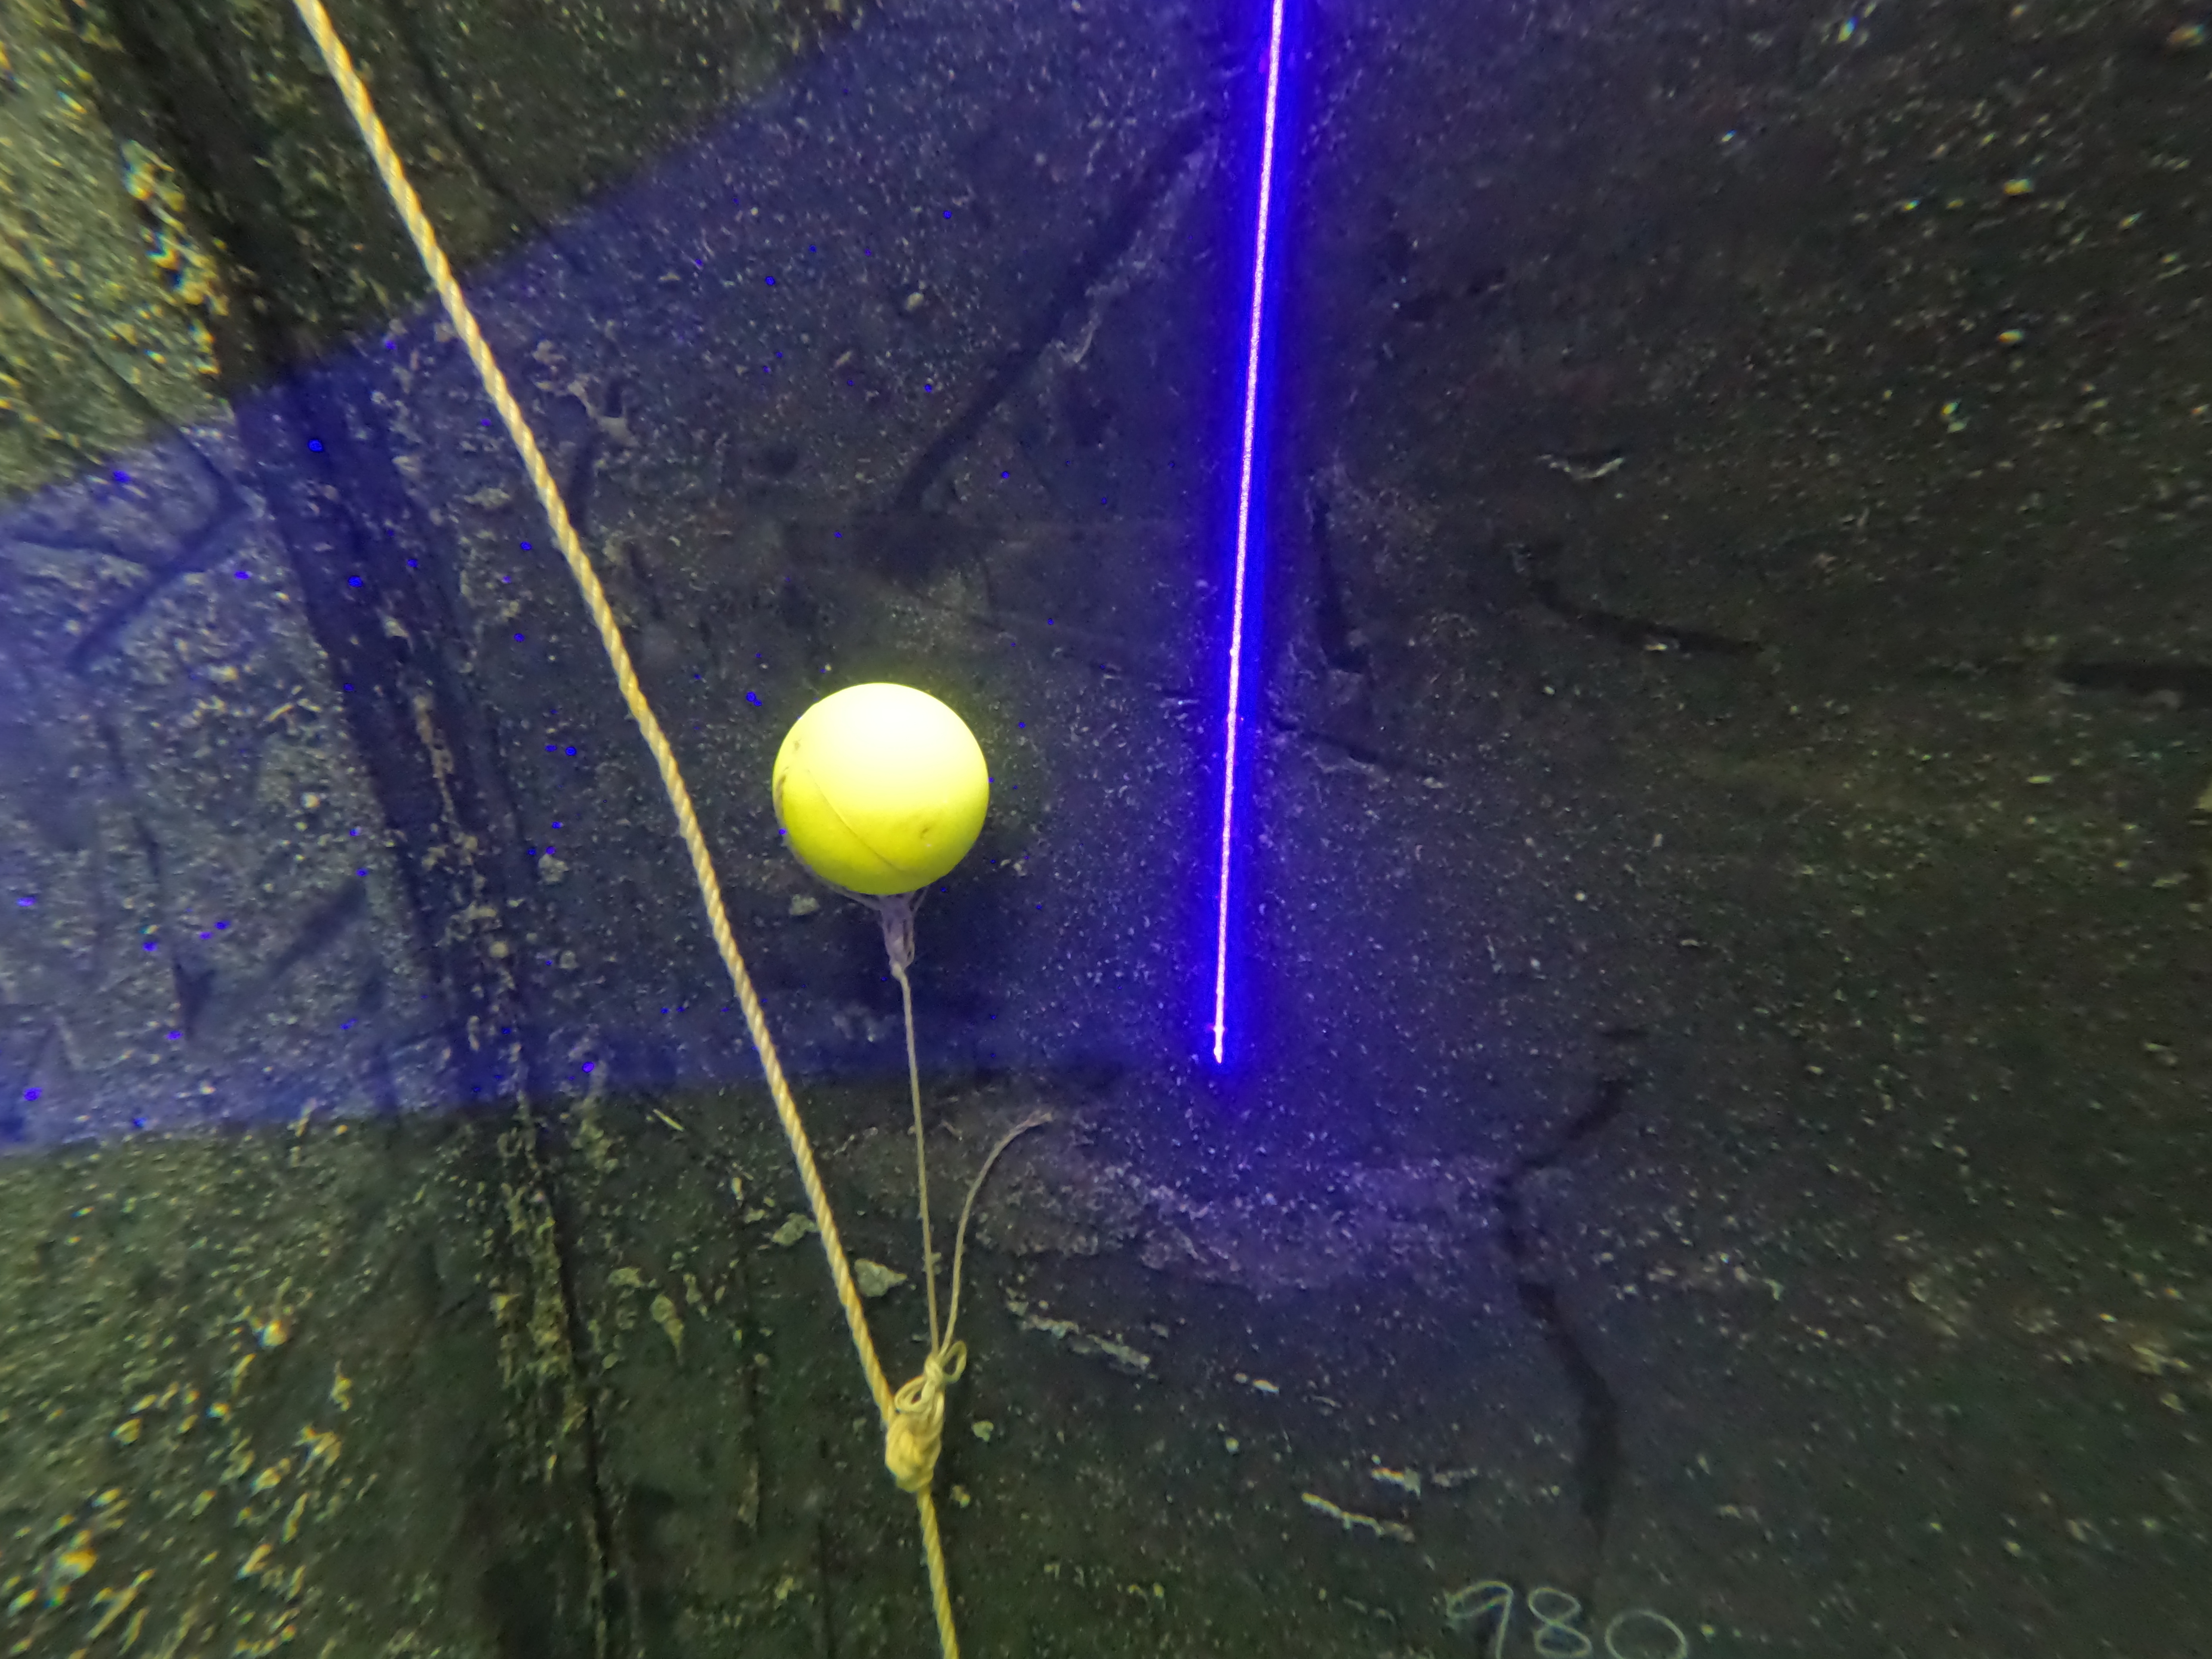

980

Supplement: Supplementary file 2811 [file G0030311.pdf › 2/G0030311.pdf]

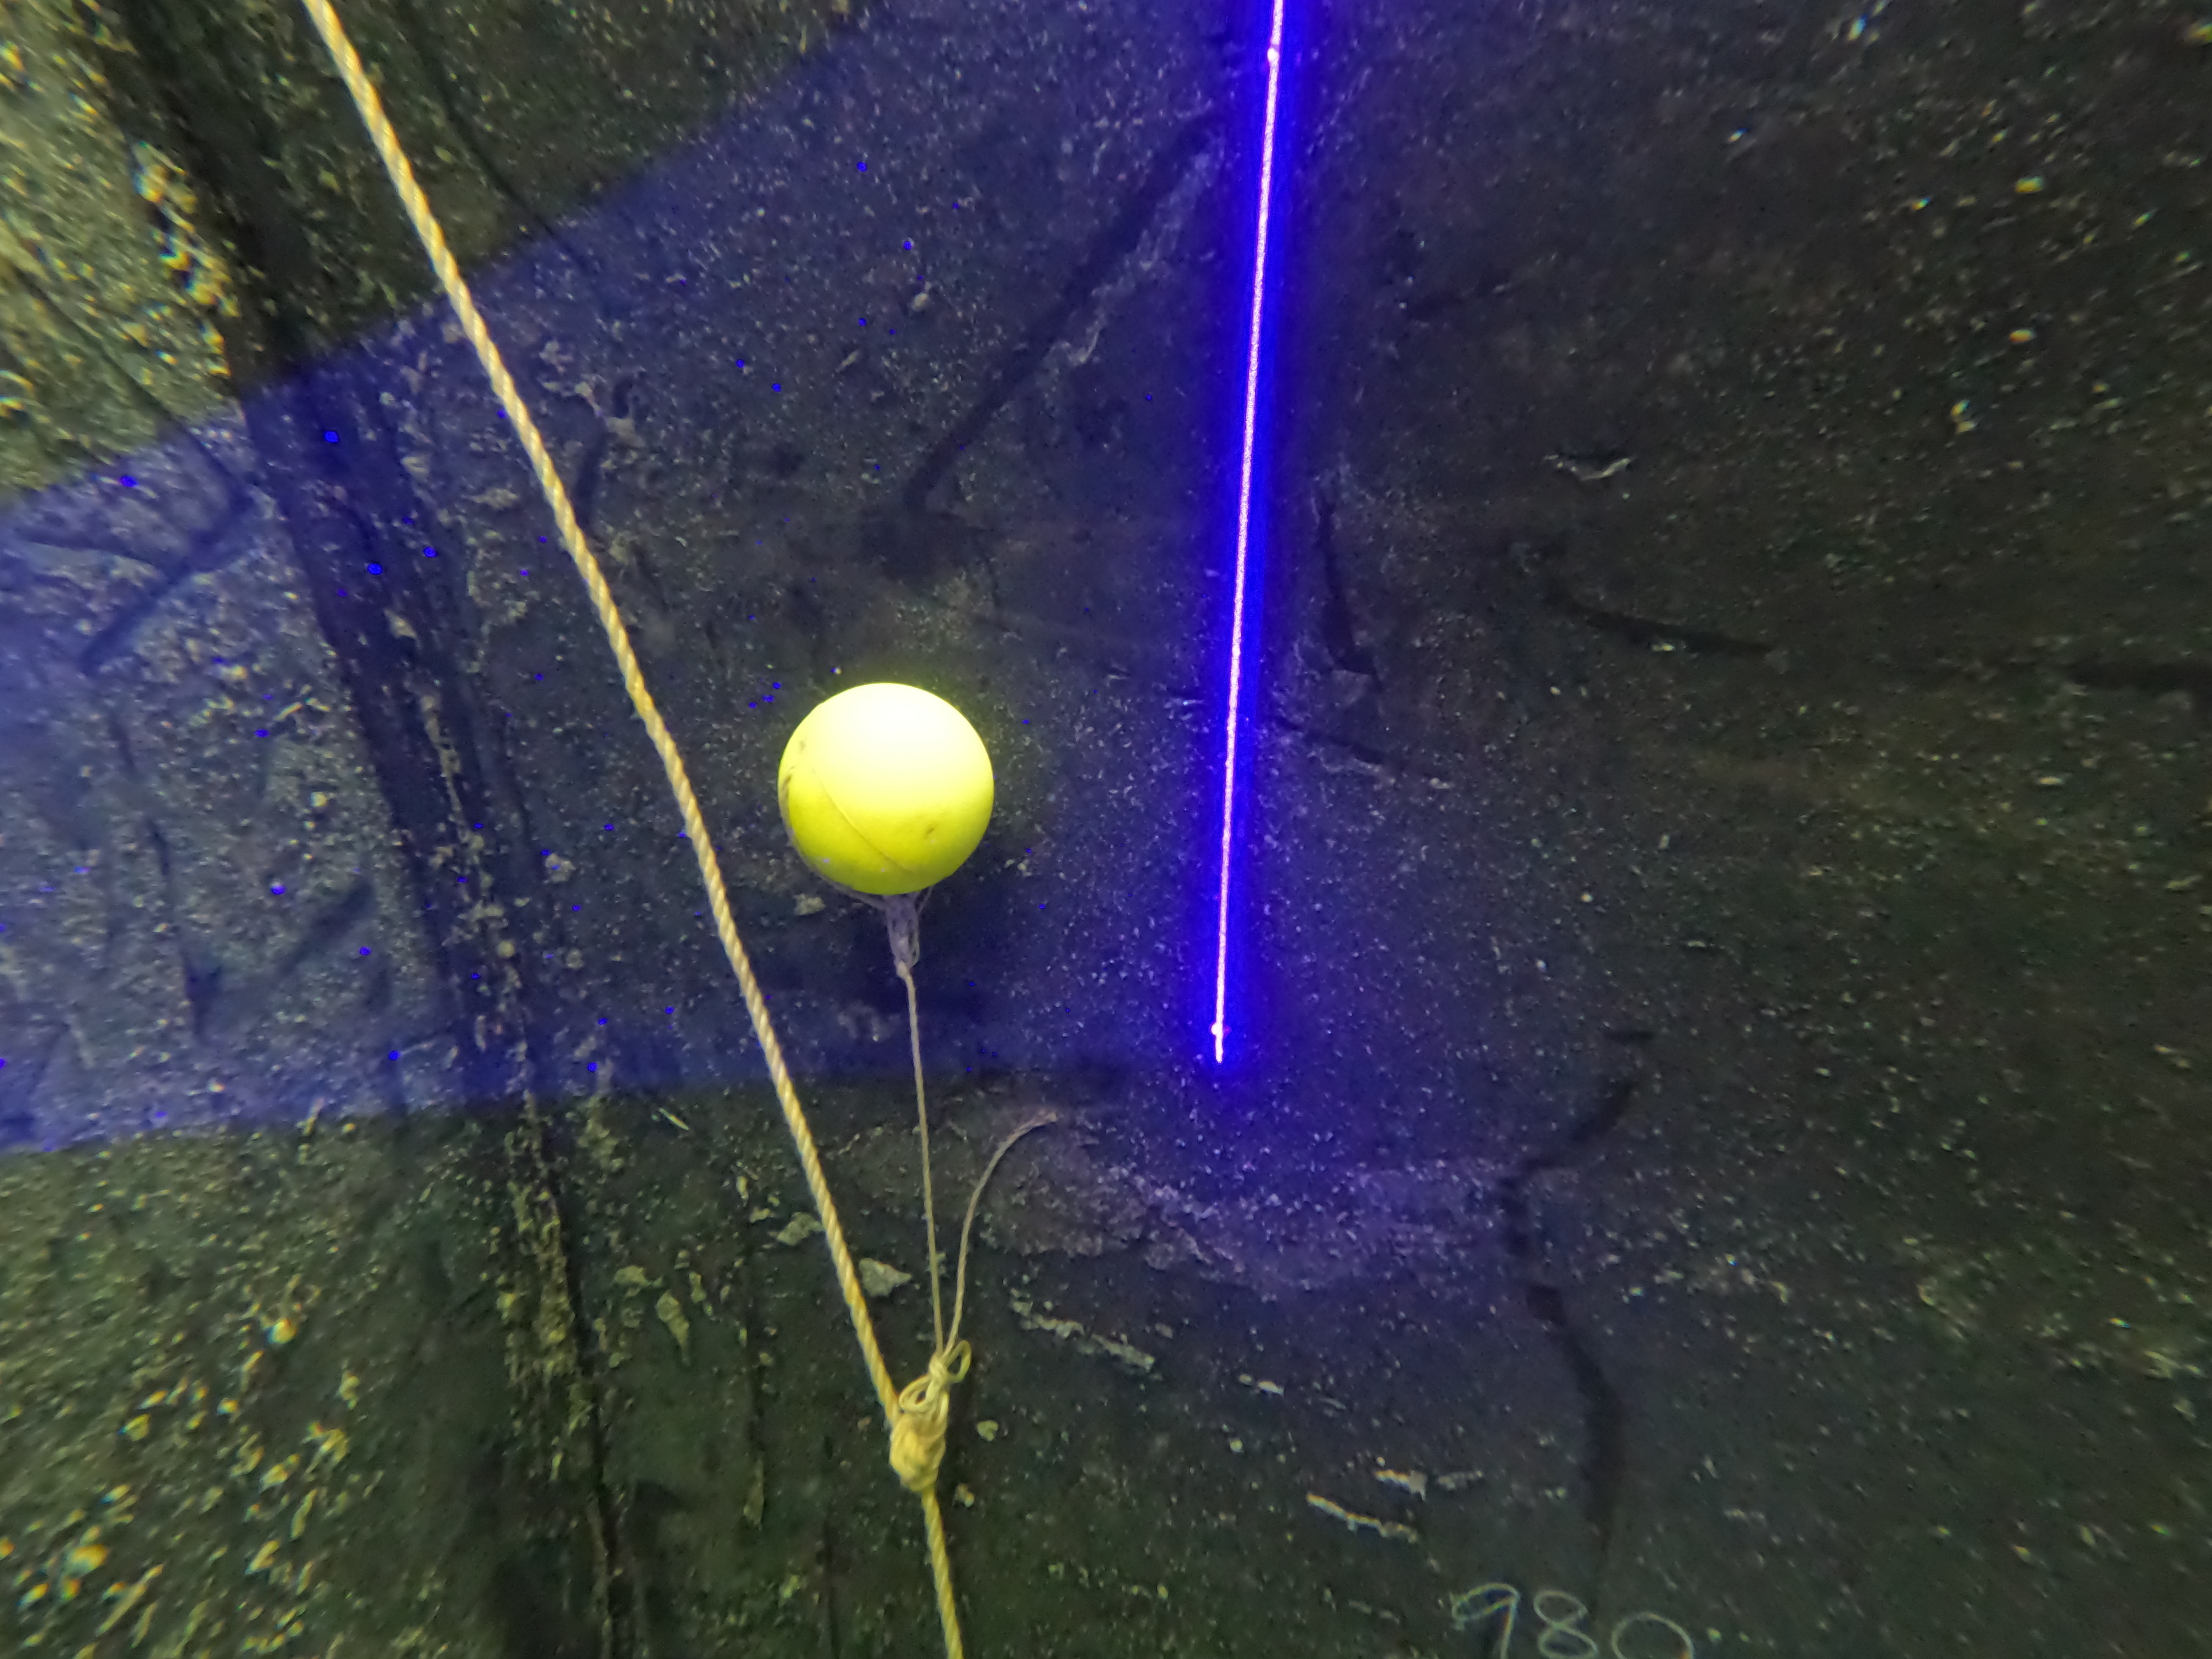

980

Supplement: Supplementary file 2812 [file G0030312.pdf › 2/G0030312.pdf]

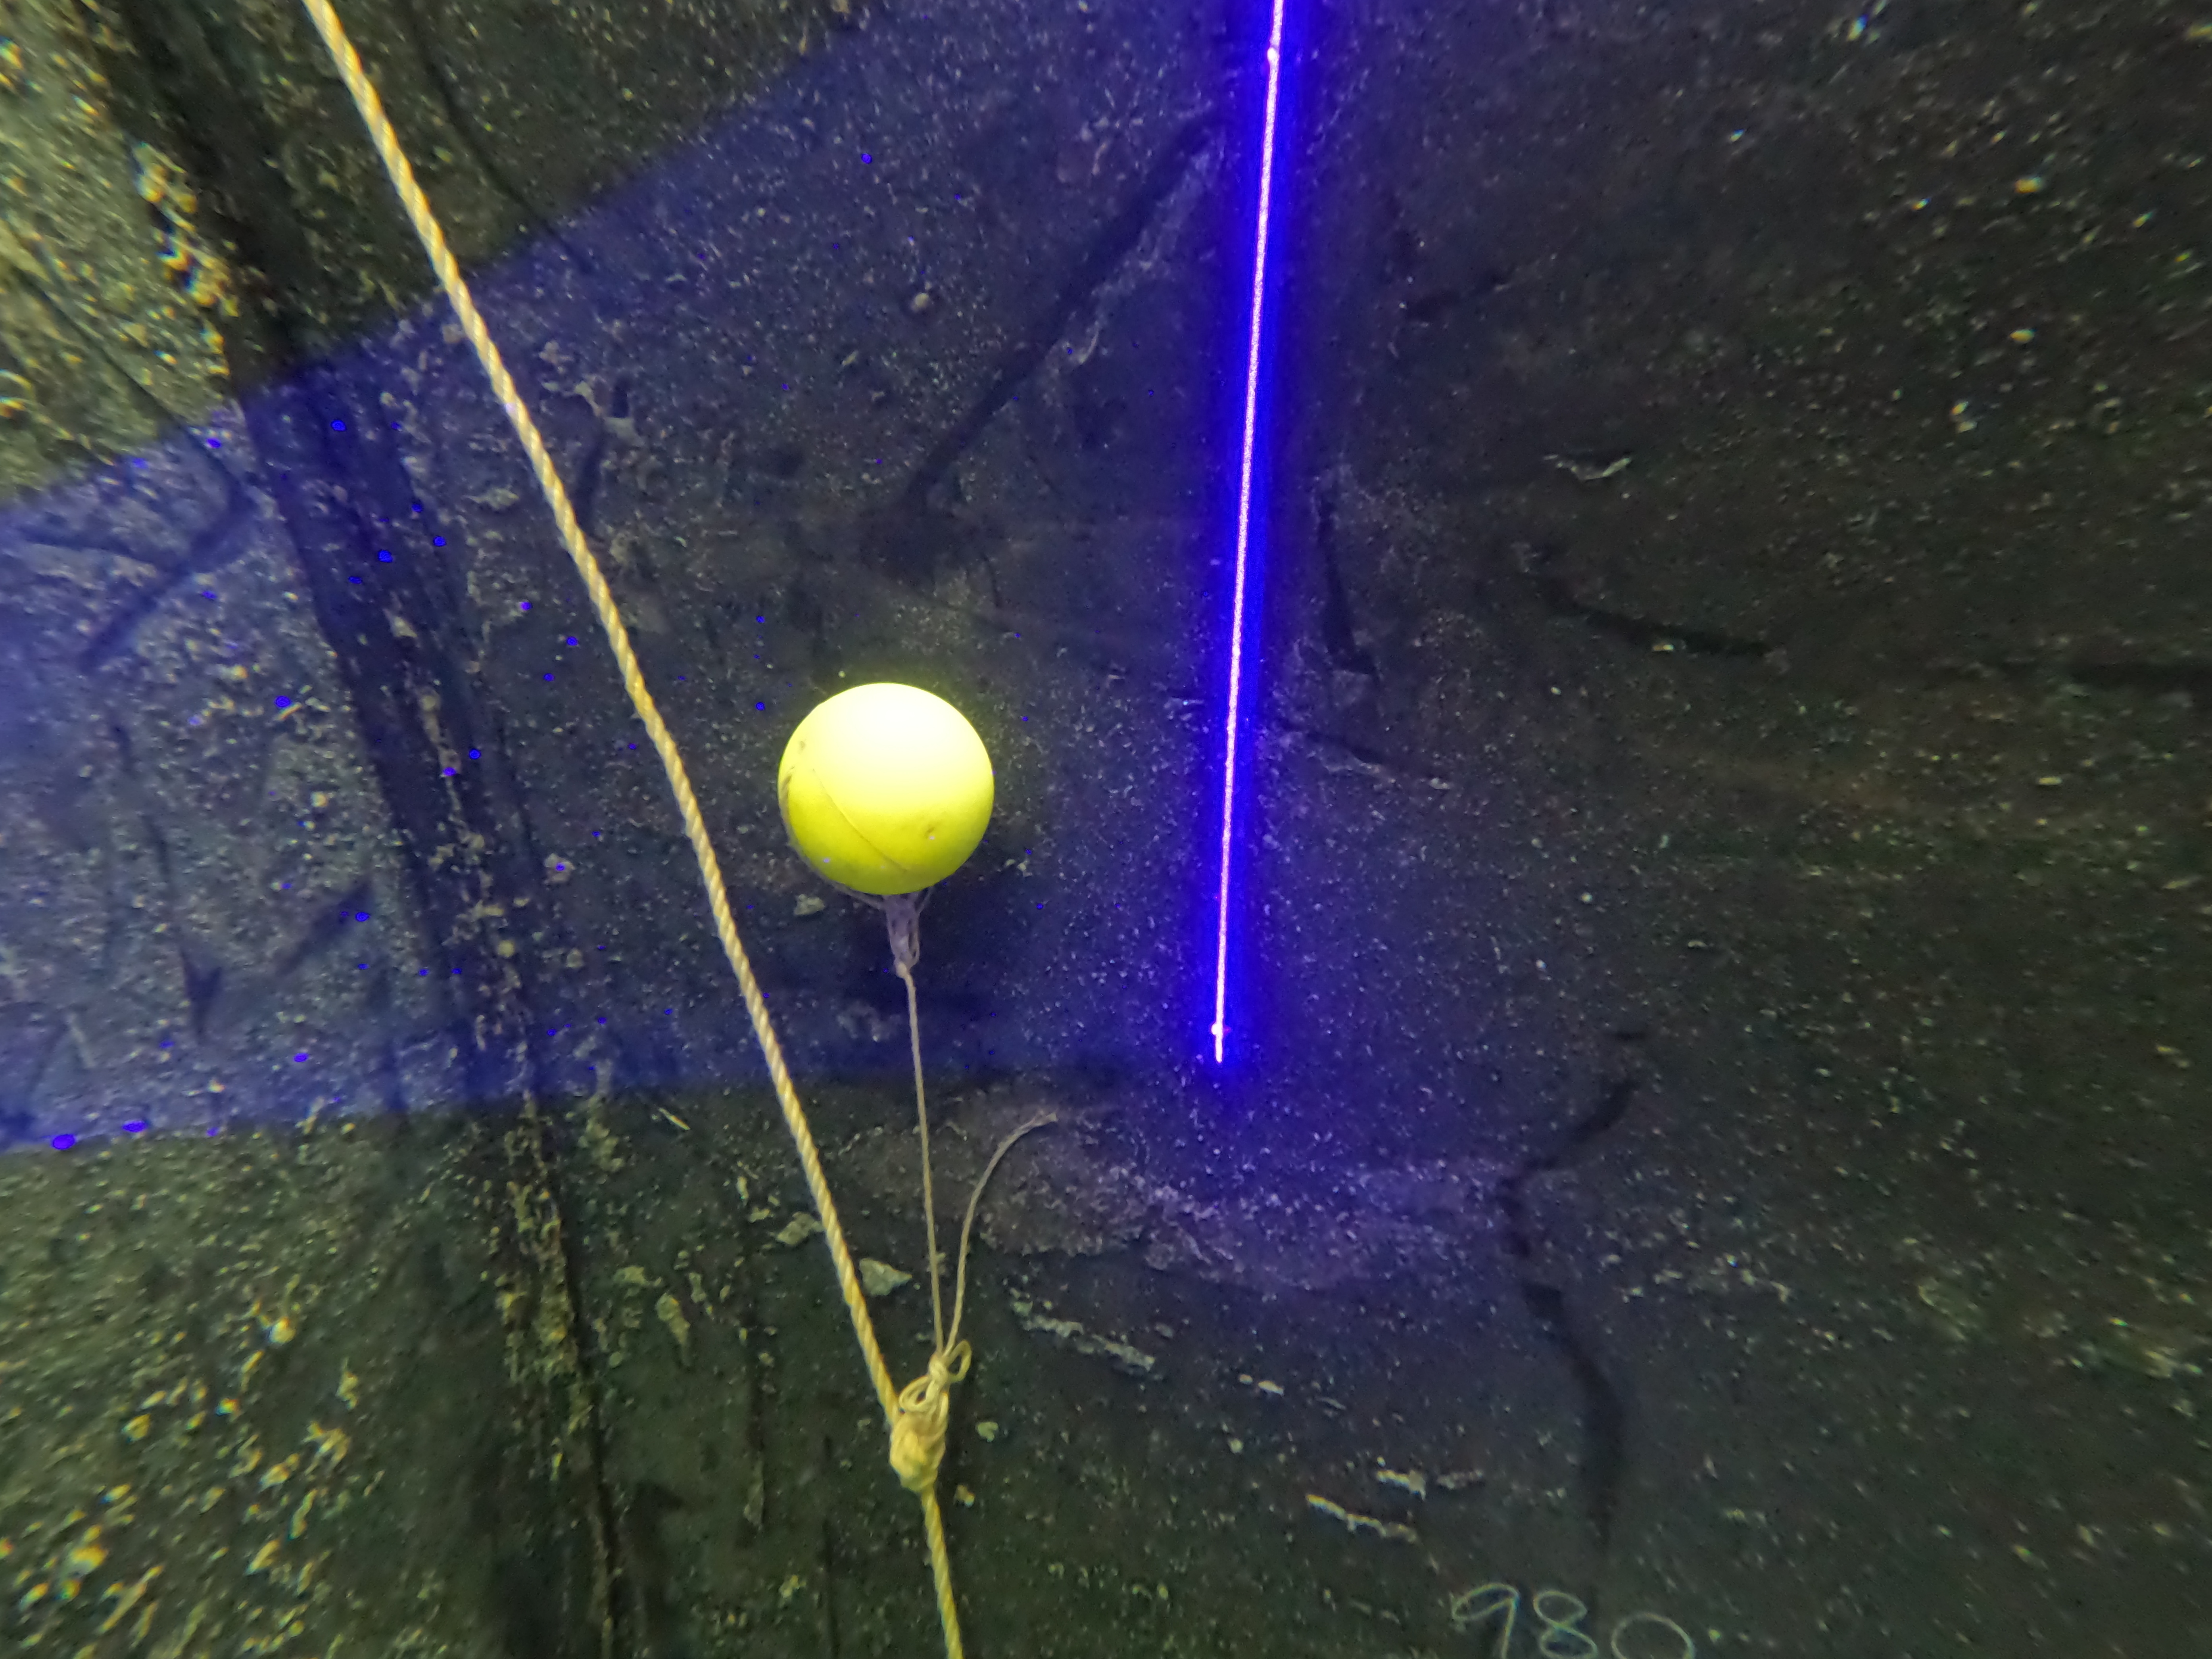

980

Supplement: Supplementary file 2813 [file G0030313.pdf › 2/G0030313.pdf]

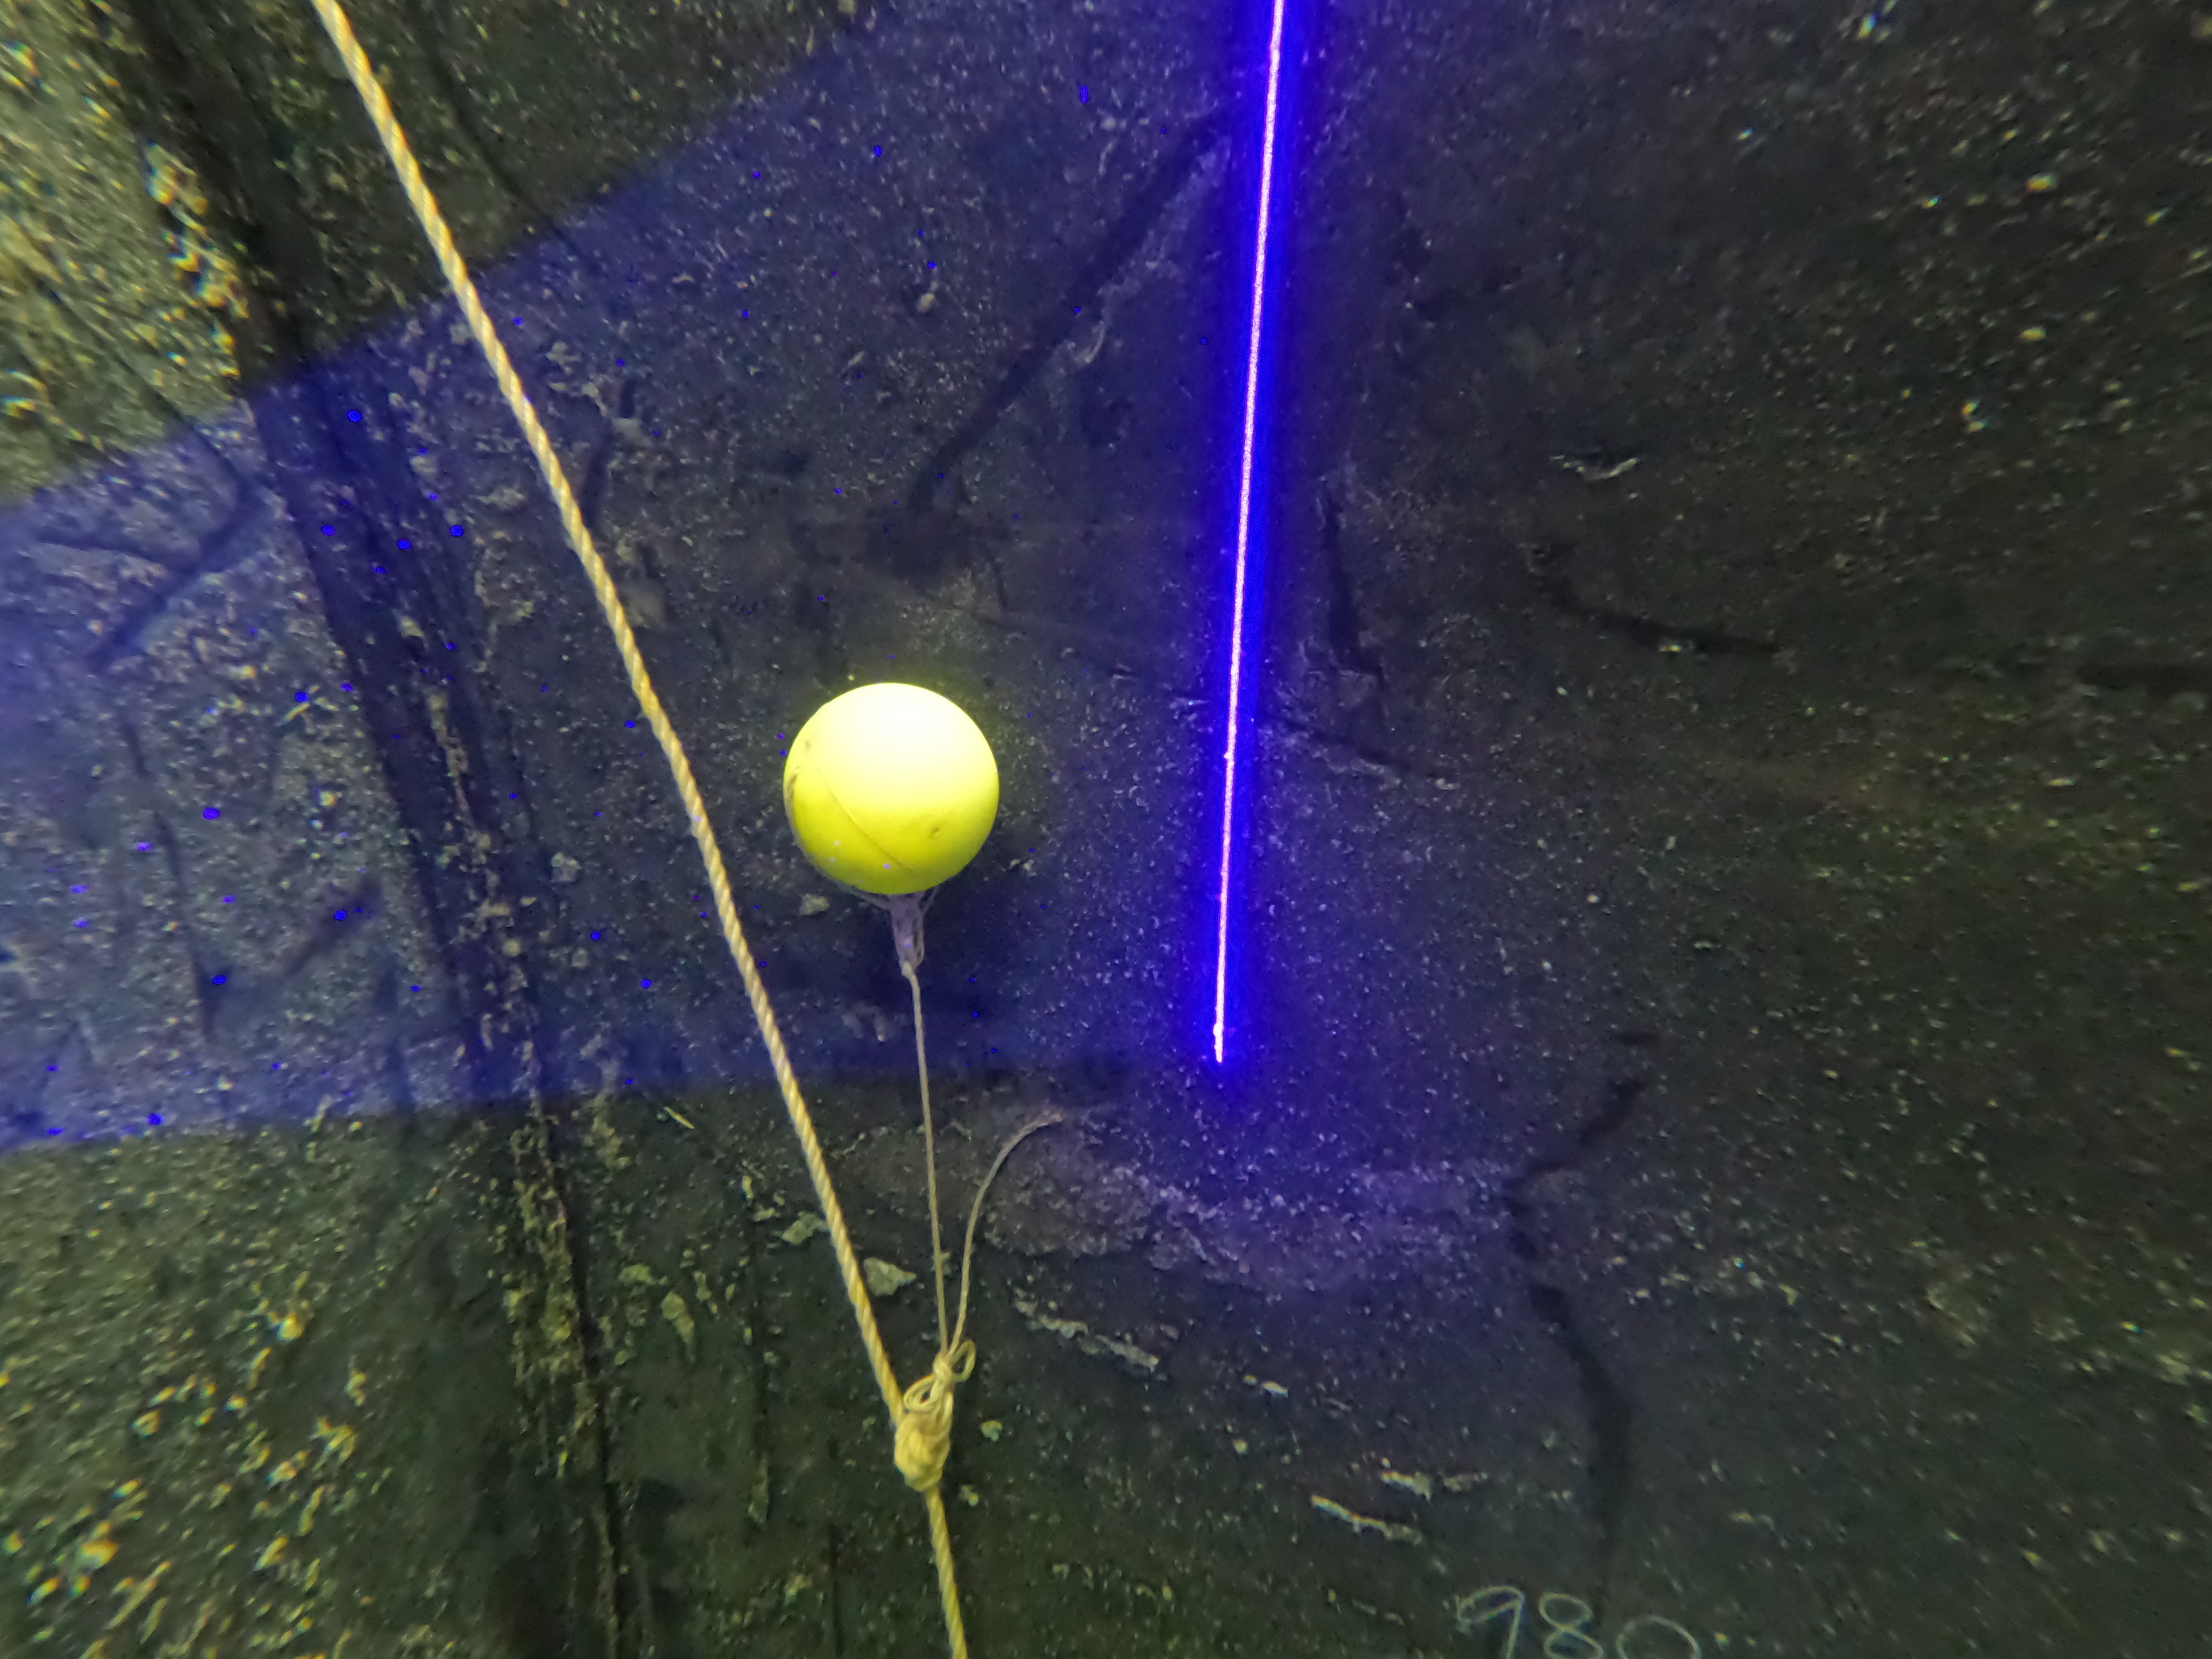

980

Supplement: Supplementary file 2814 [file G0030314.pdf › 2/G0030314.pdf]

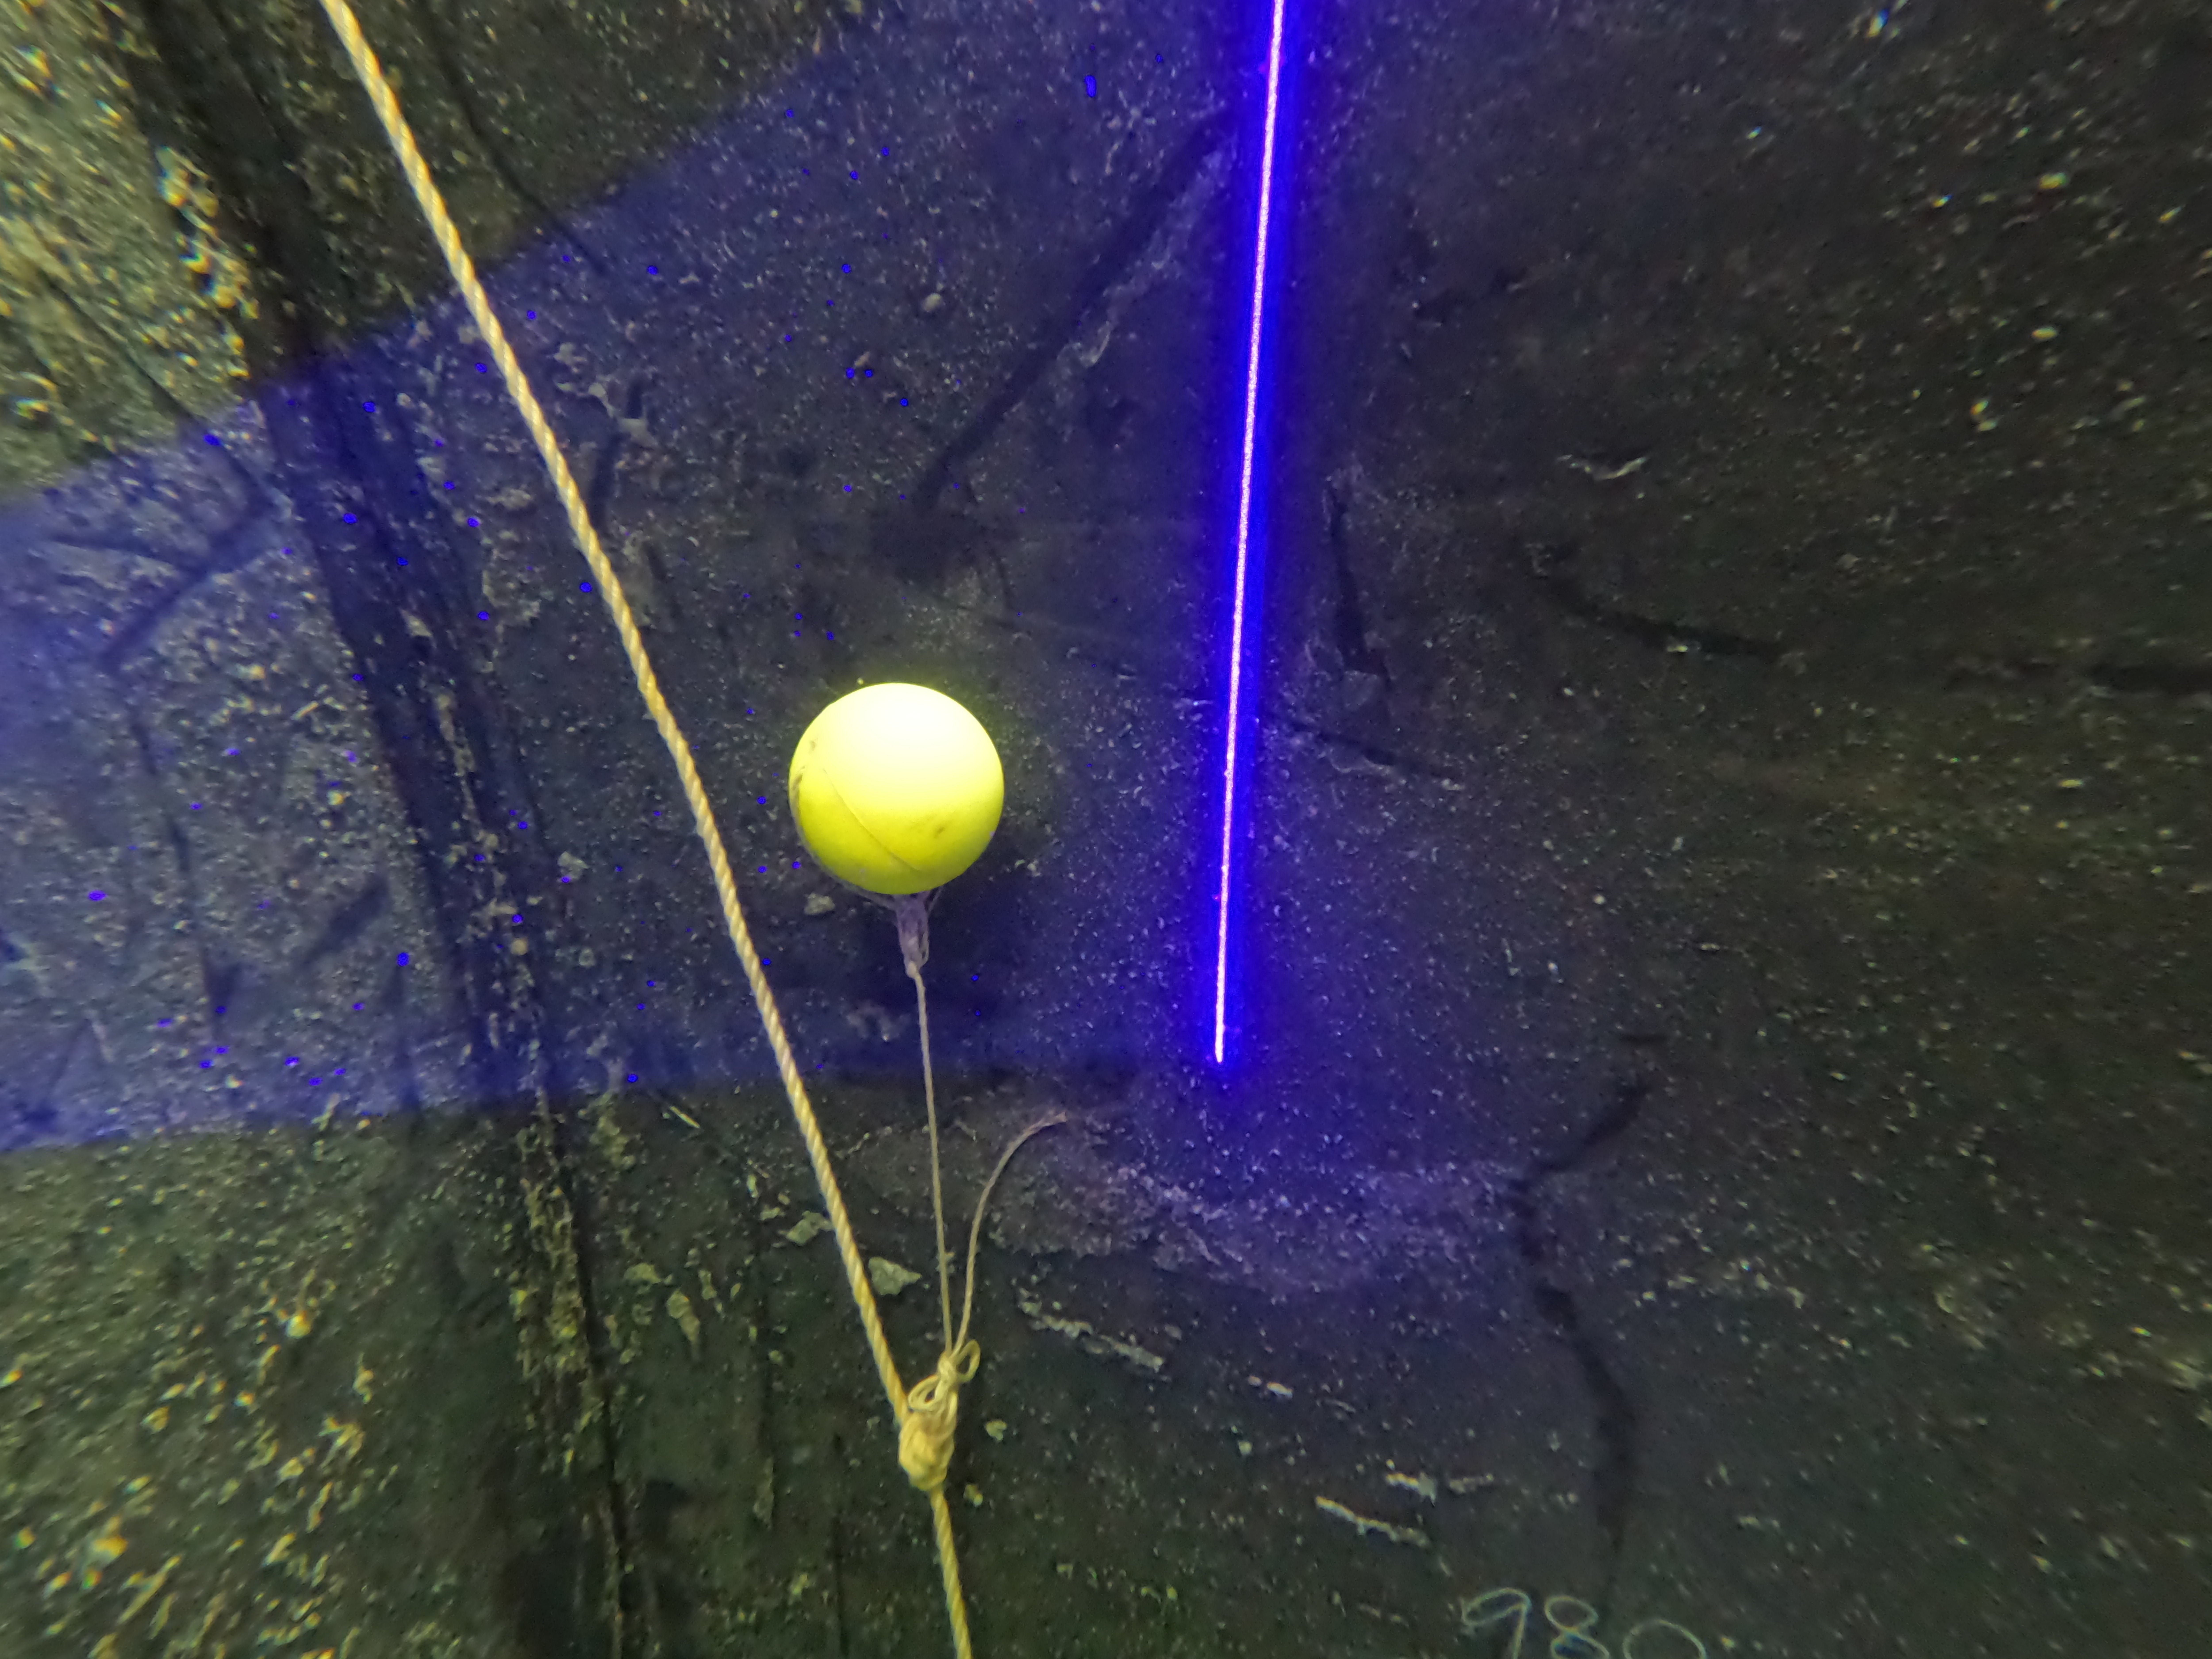

980

Supplement: Supplementary file 2815 [file G0030315.pdf › 2/G0030315.pdf]

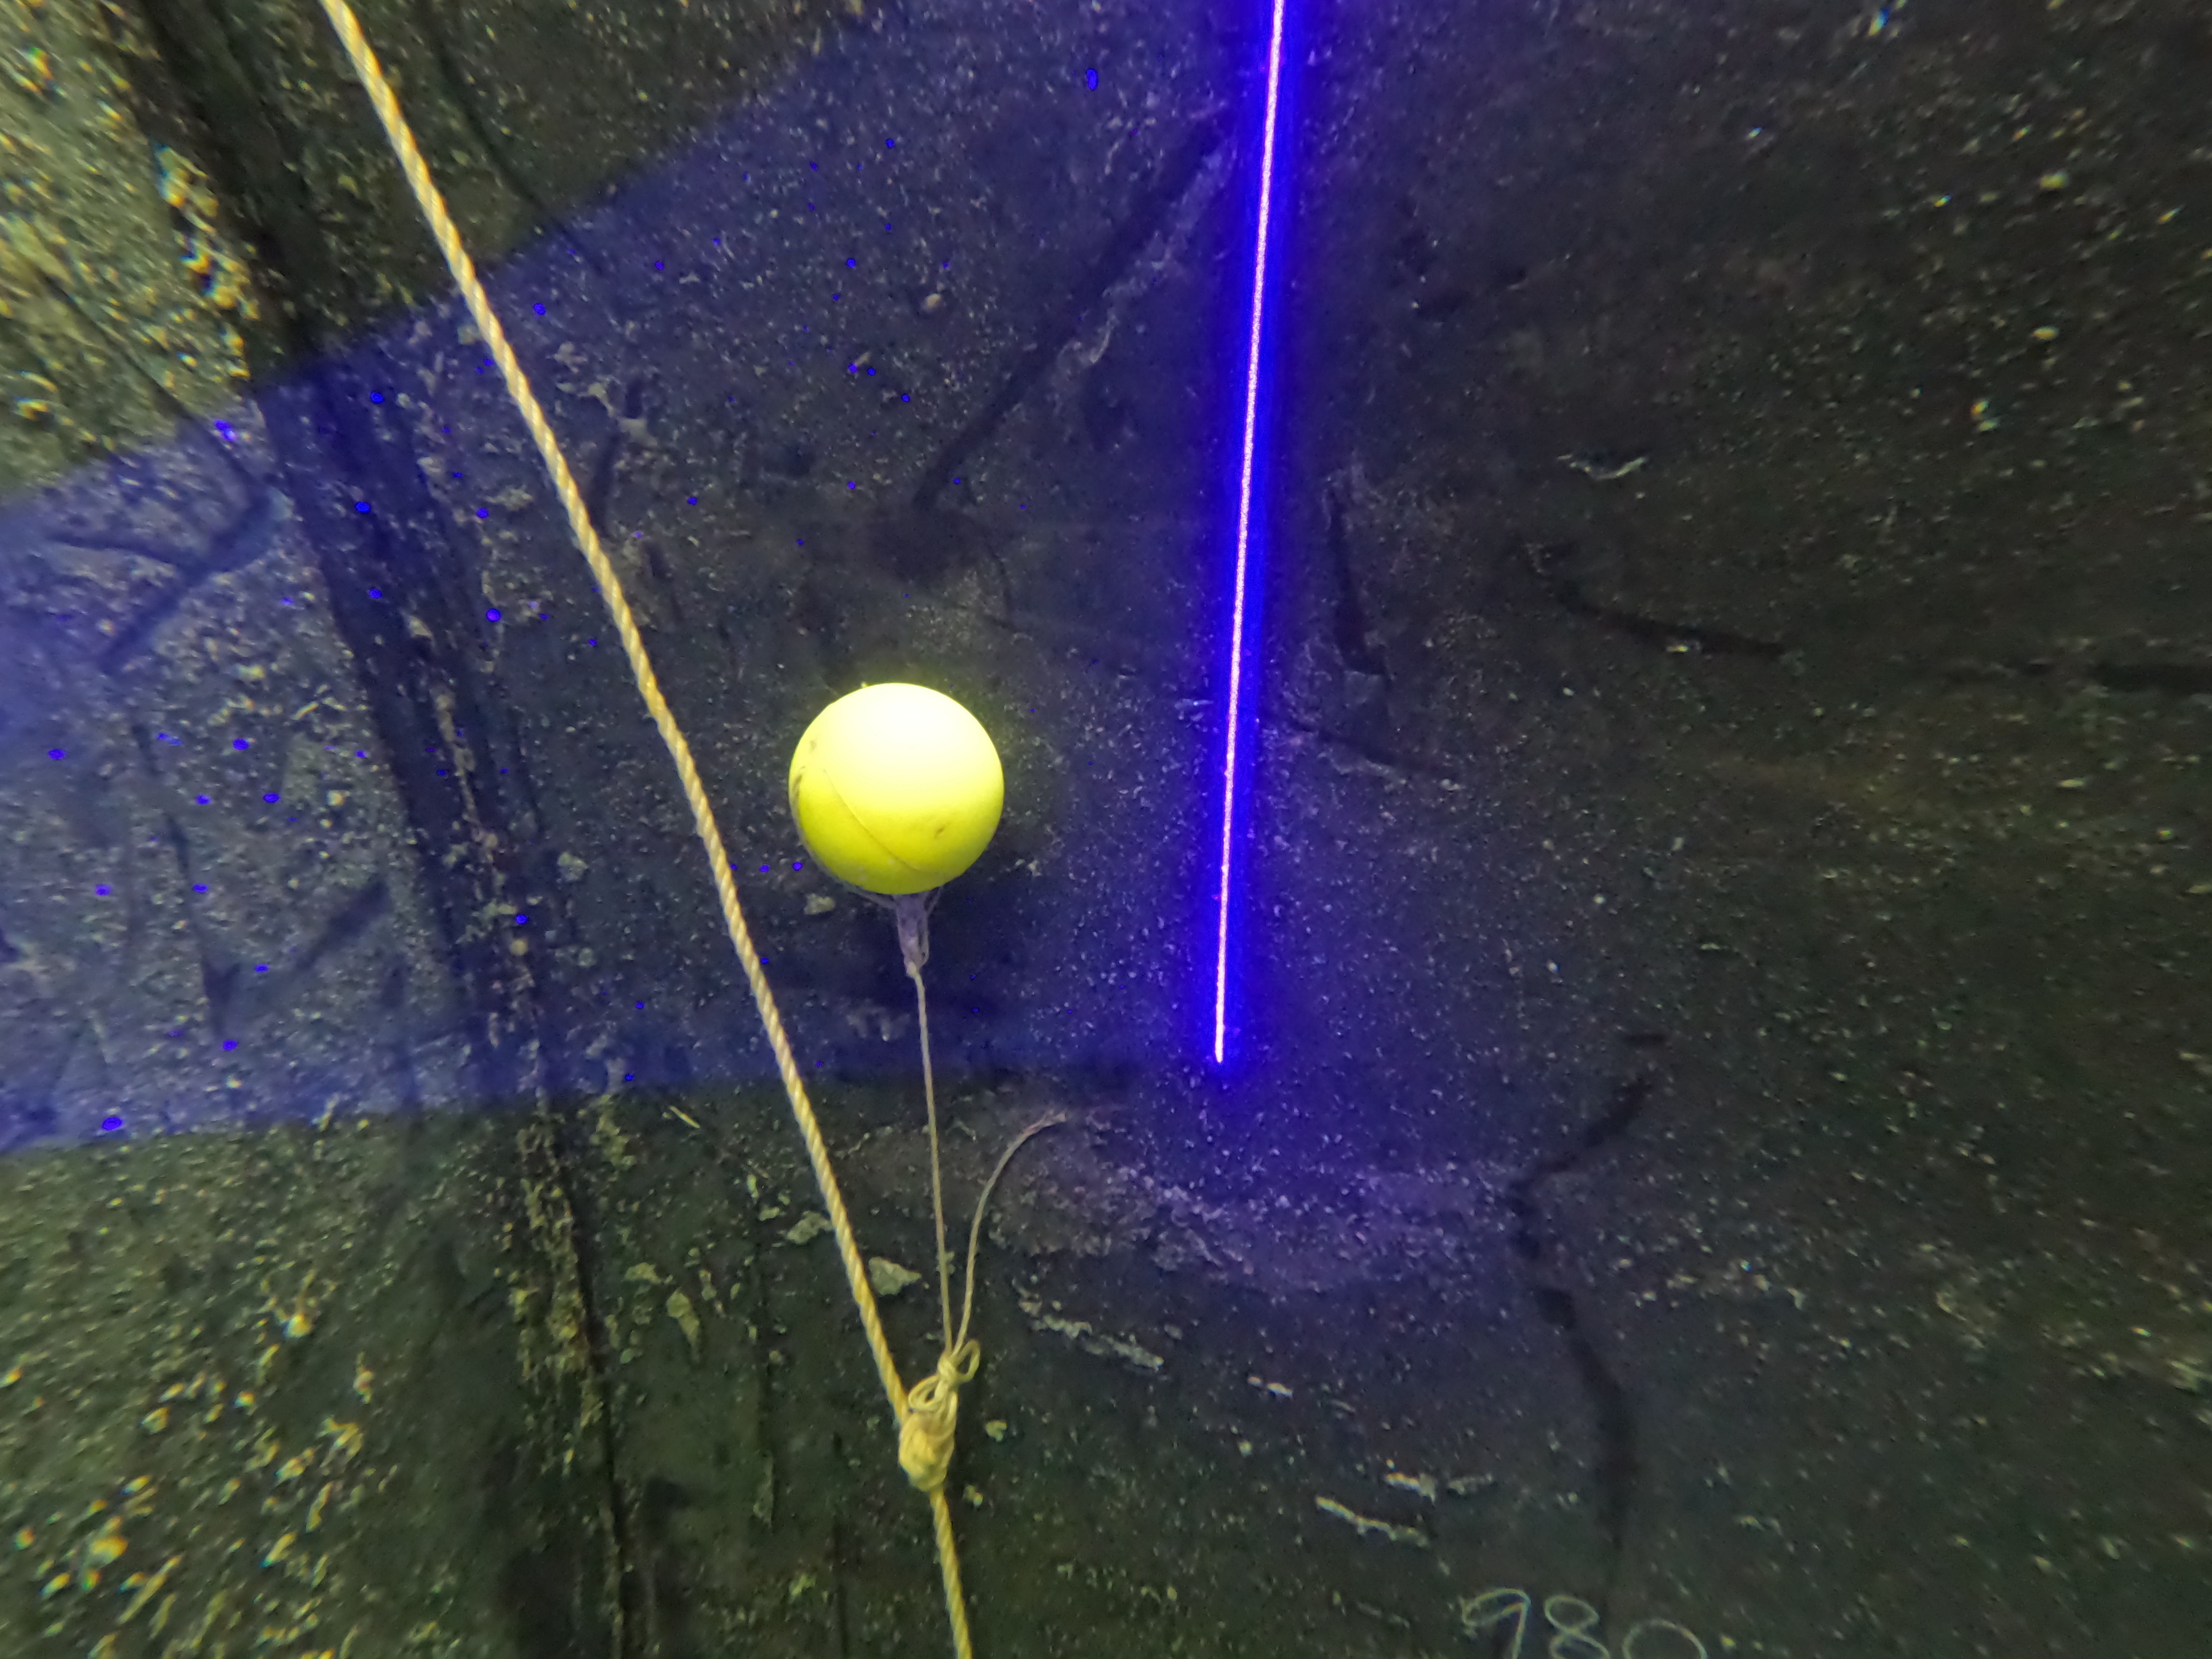

980

Supplement: Supplementary file 2816 [file G0030316.pdf › 2/G0030316.pdf]

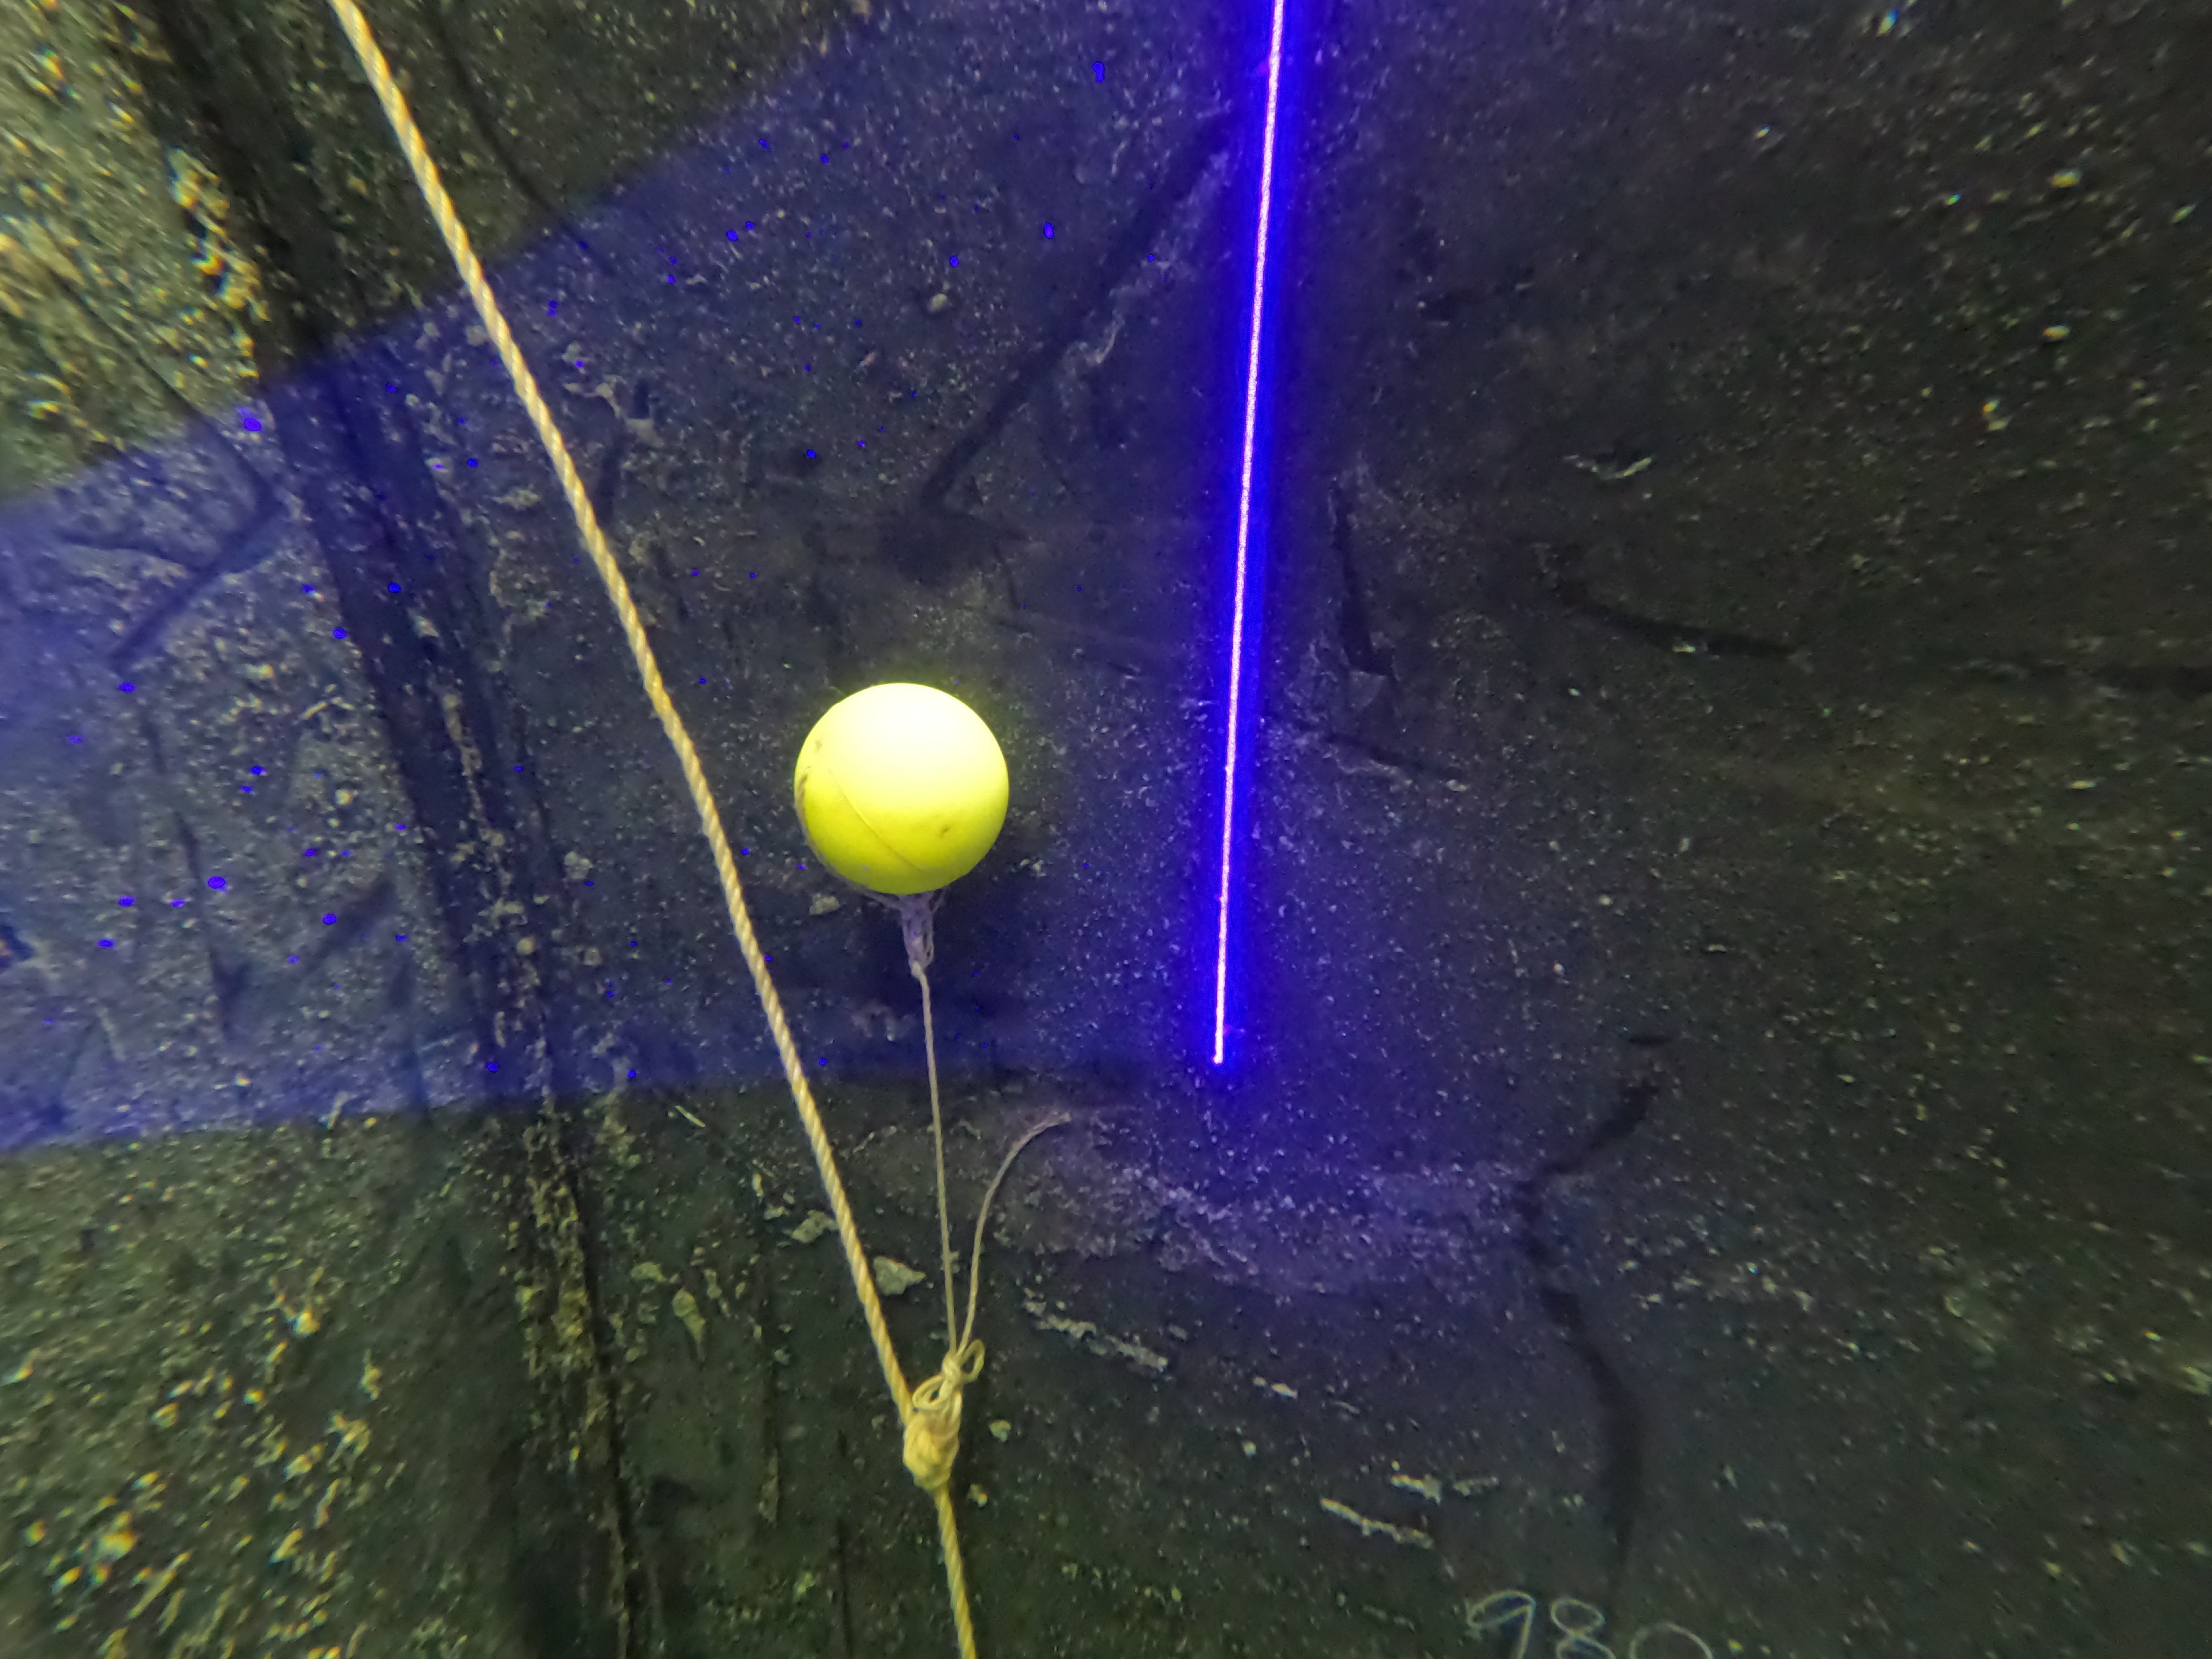

980

Supplement: Supplementary file 2817 [file G0030317.pdf › 2/G0030317.pdf]

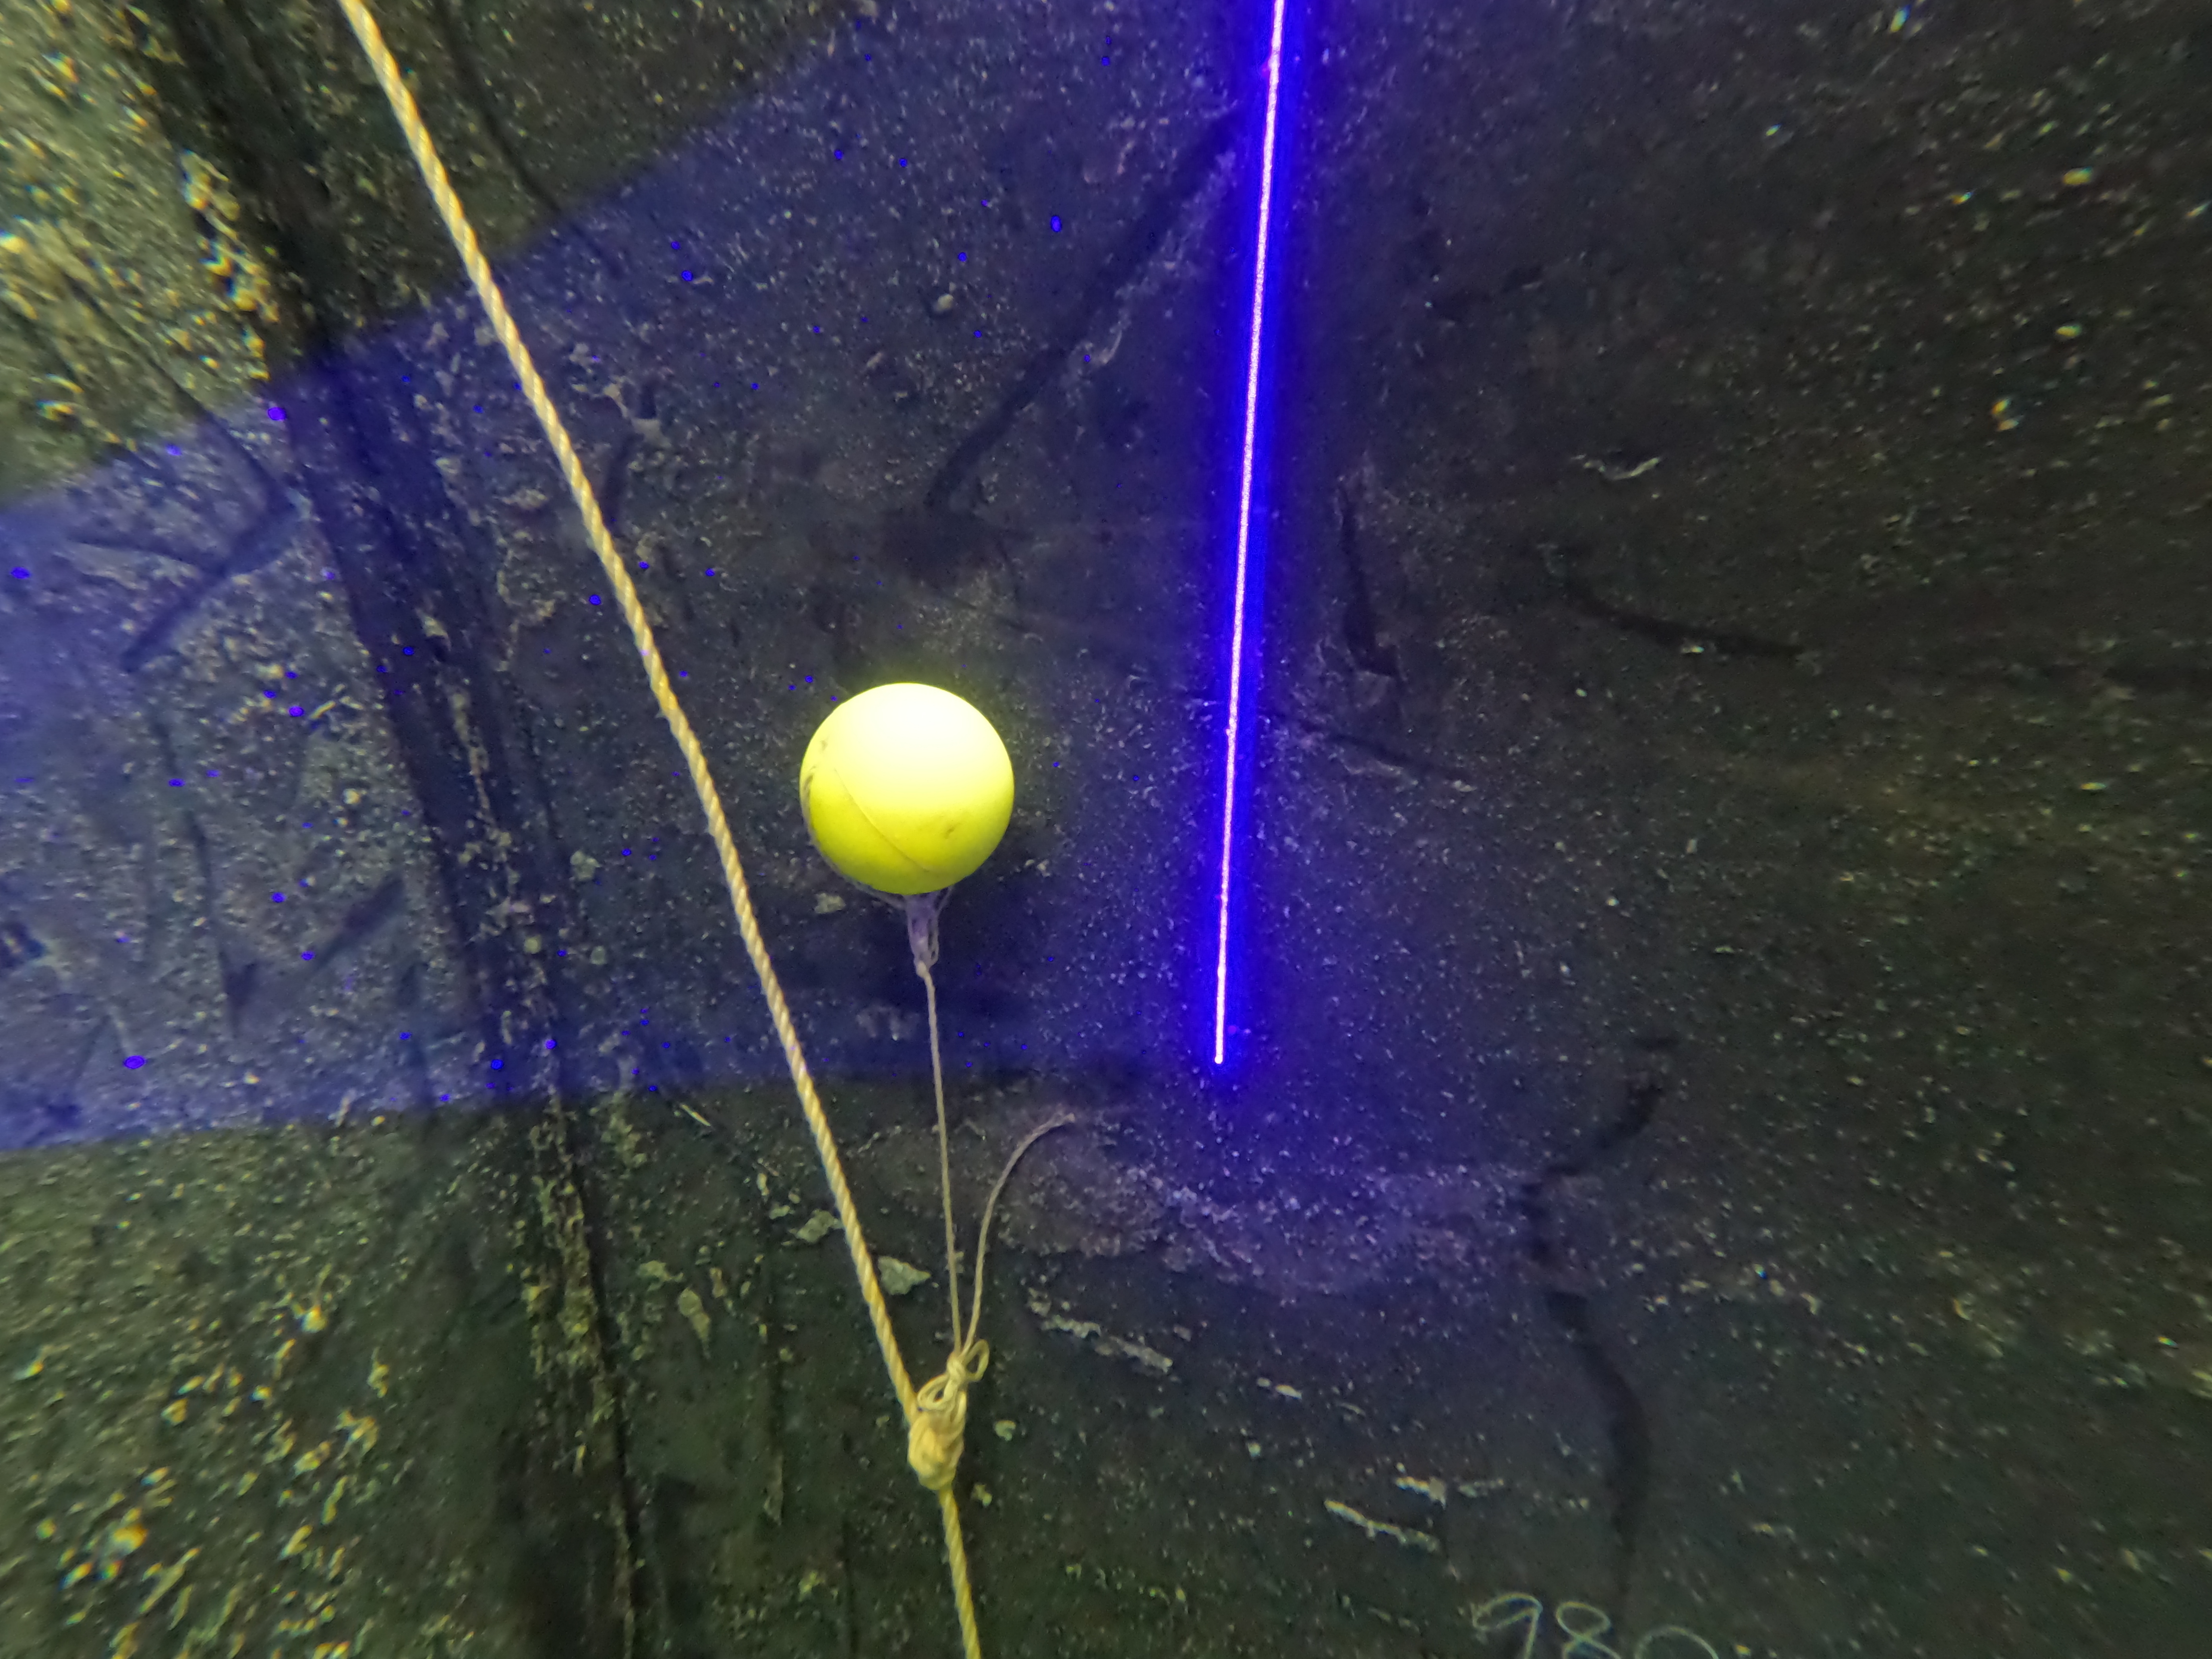

980

Supplement: Supplementary file 2818 [file G0030318.pdf › 2/G0030318.pdf]

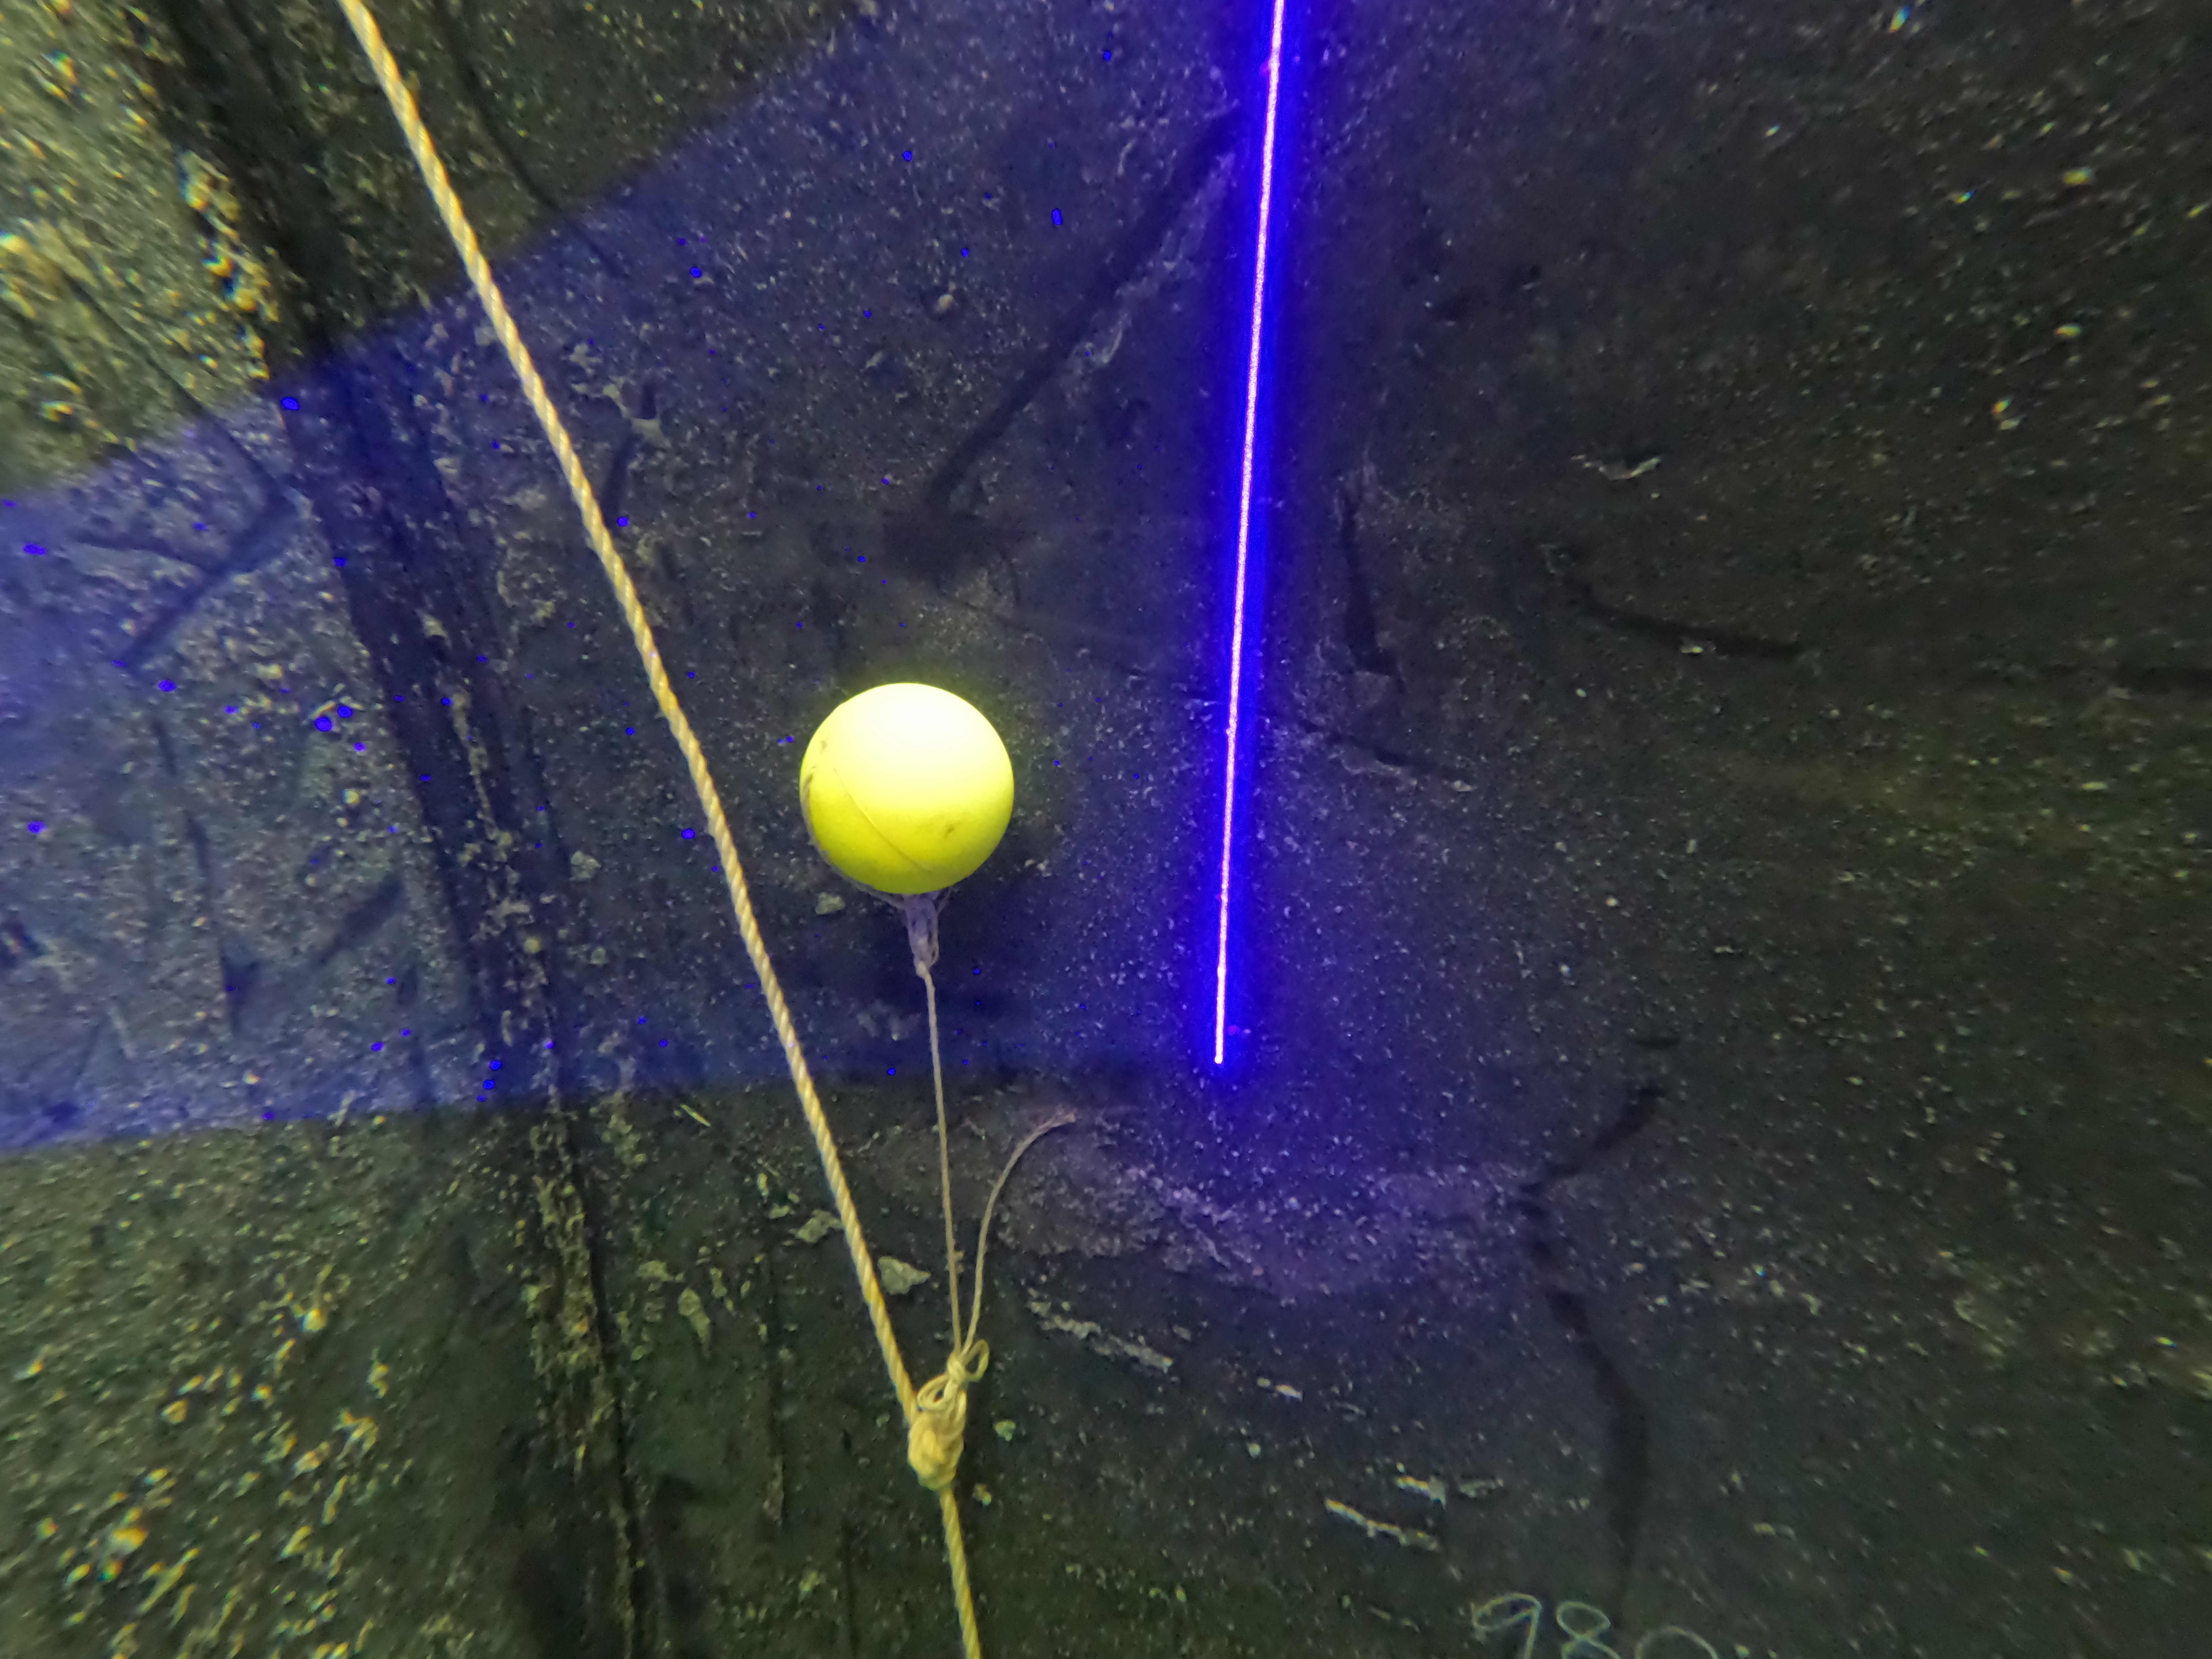

980

Supplement: Supplementary file 2819 [file G0030319.pdf › 2/G0030319.pdf]

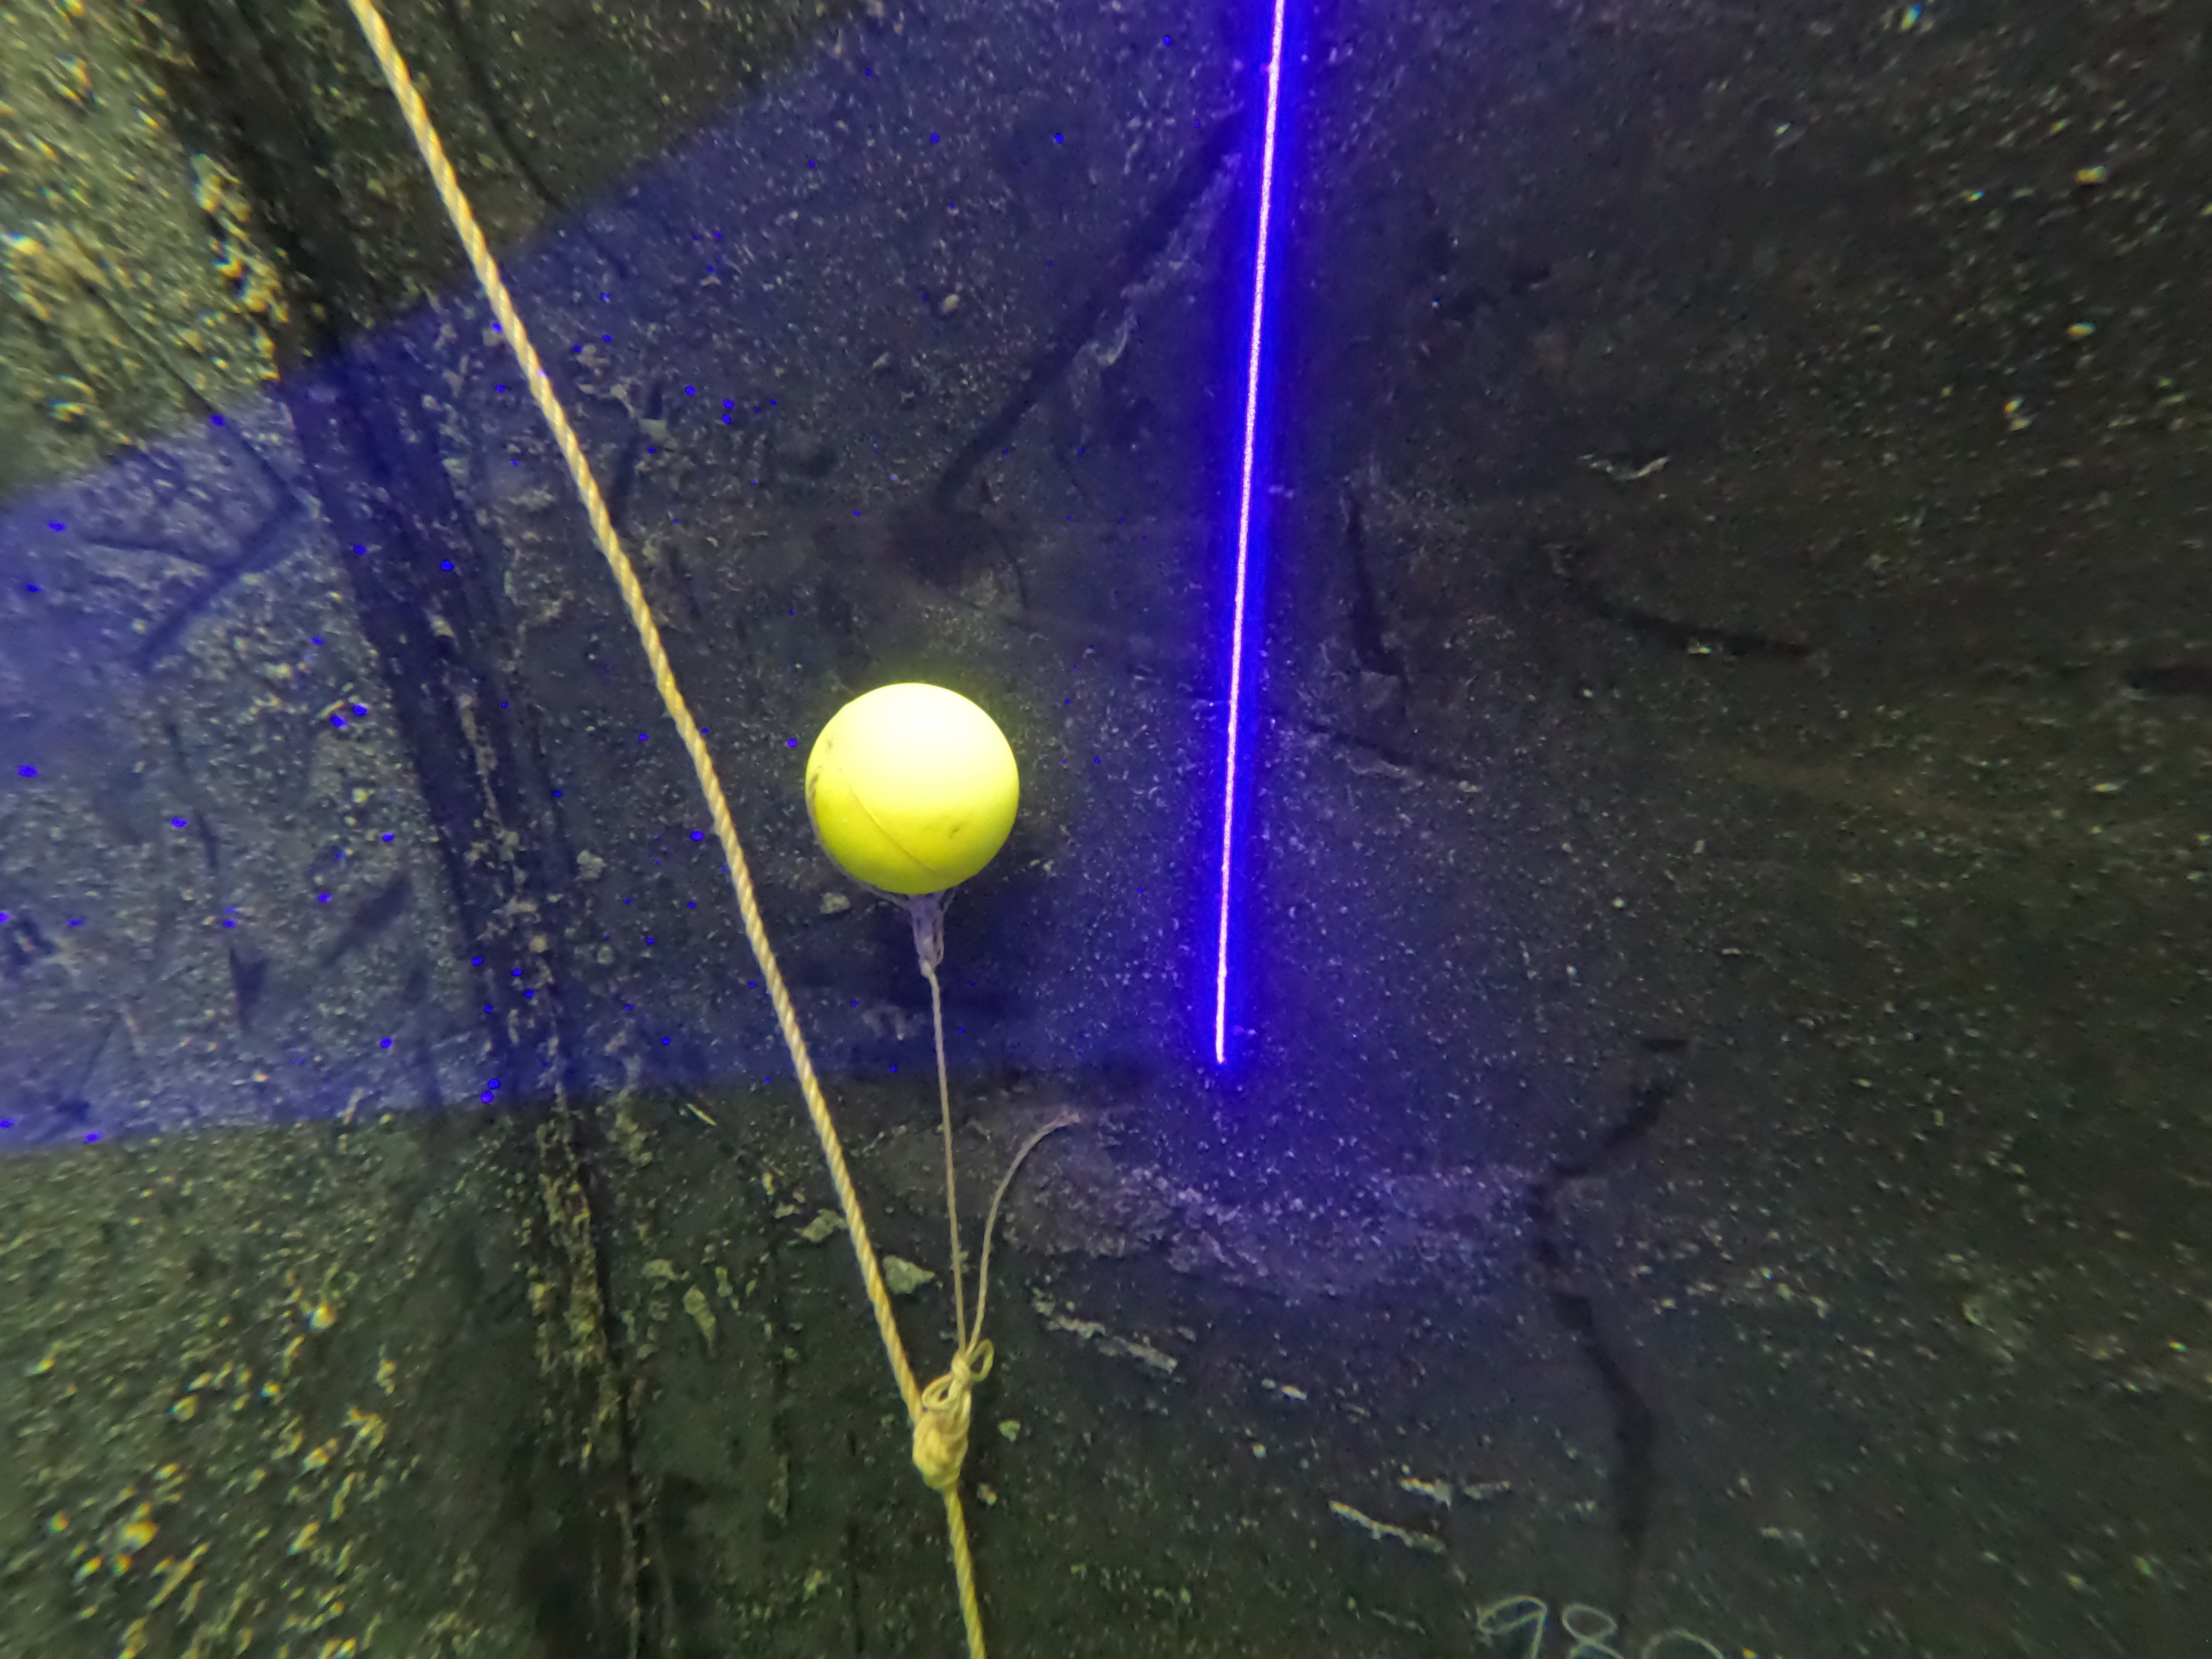

980

Supplement: Supplementary file 2820 [file G0030320.pdf › 2/G0030320.pdf]

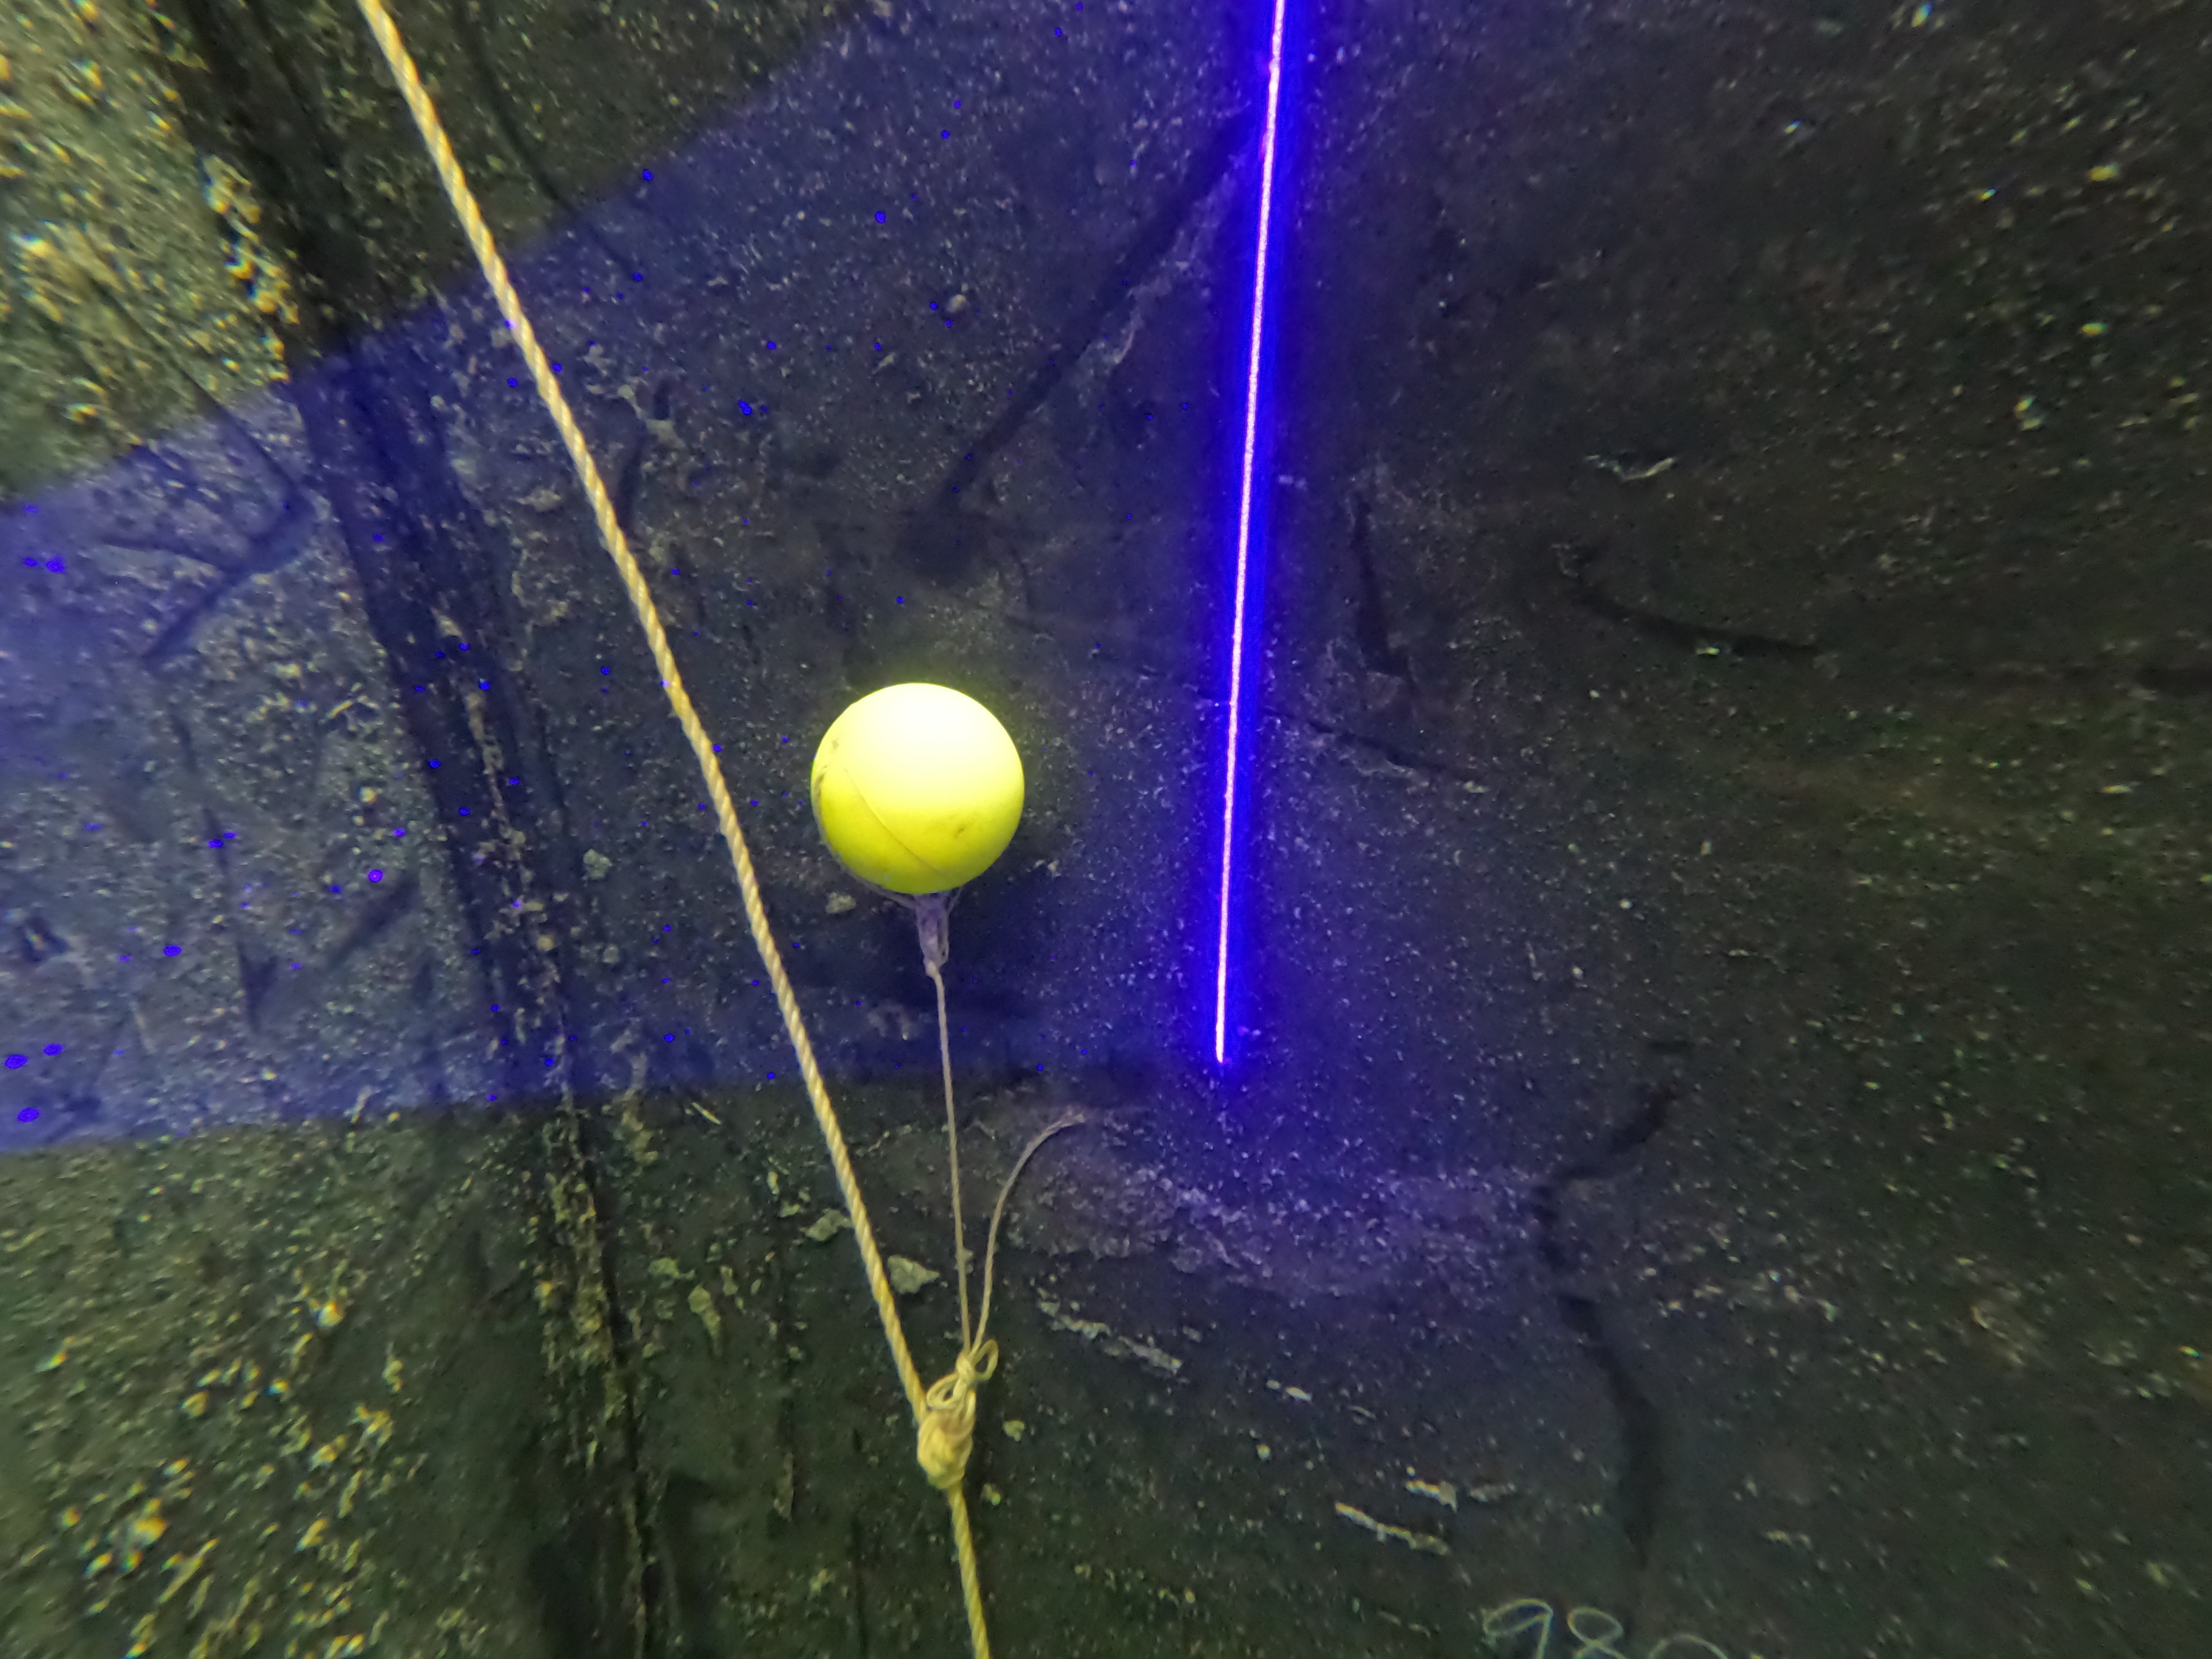

Supplement: Supplementary file 2821 [file G0030321.pdf › 2/G0030321.pdf]

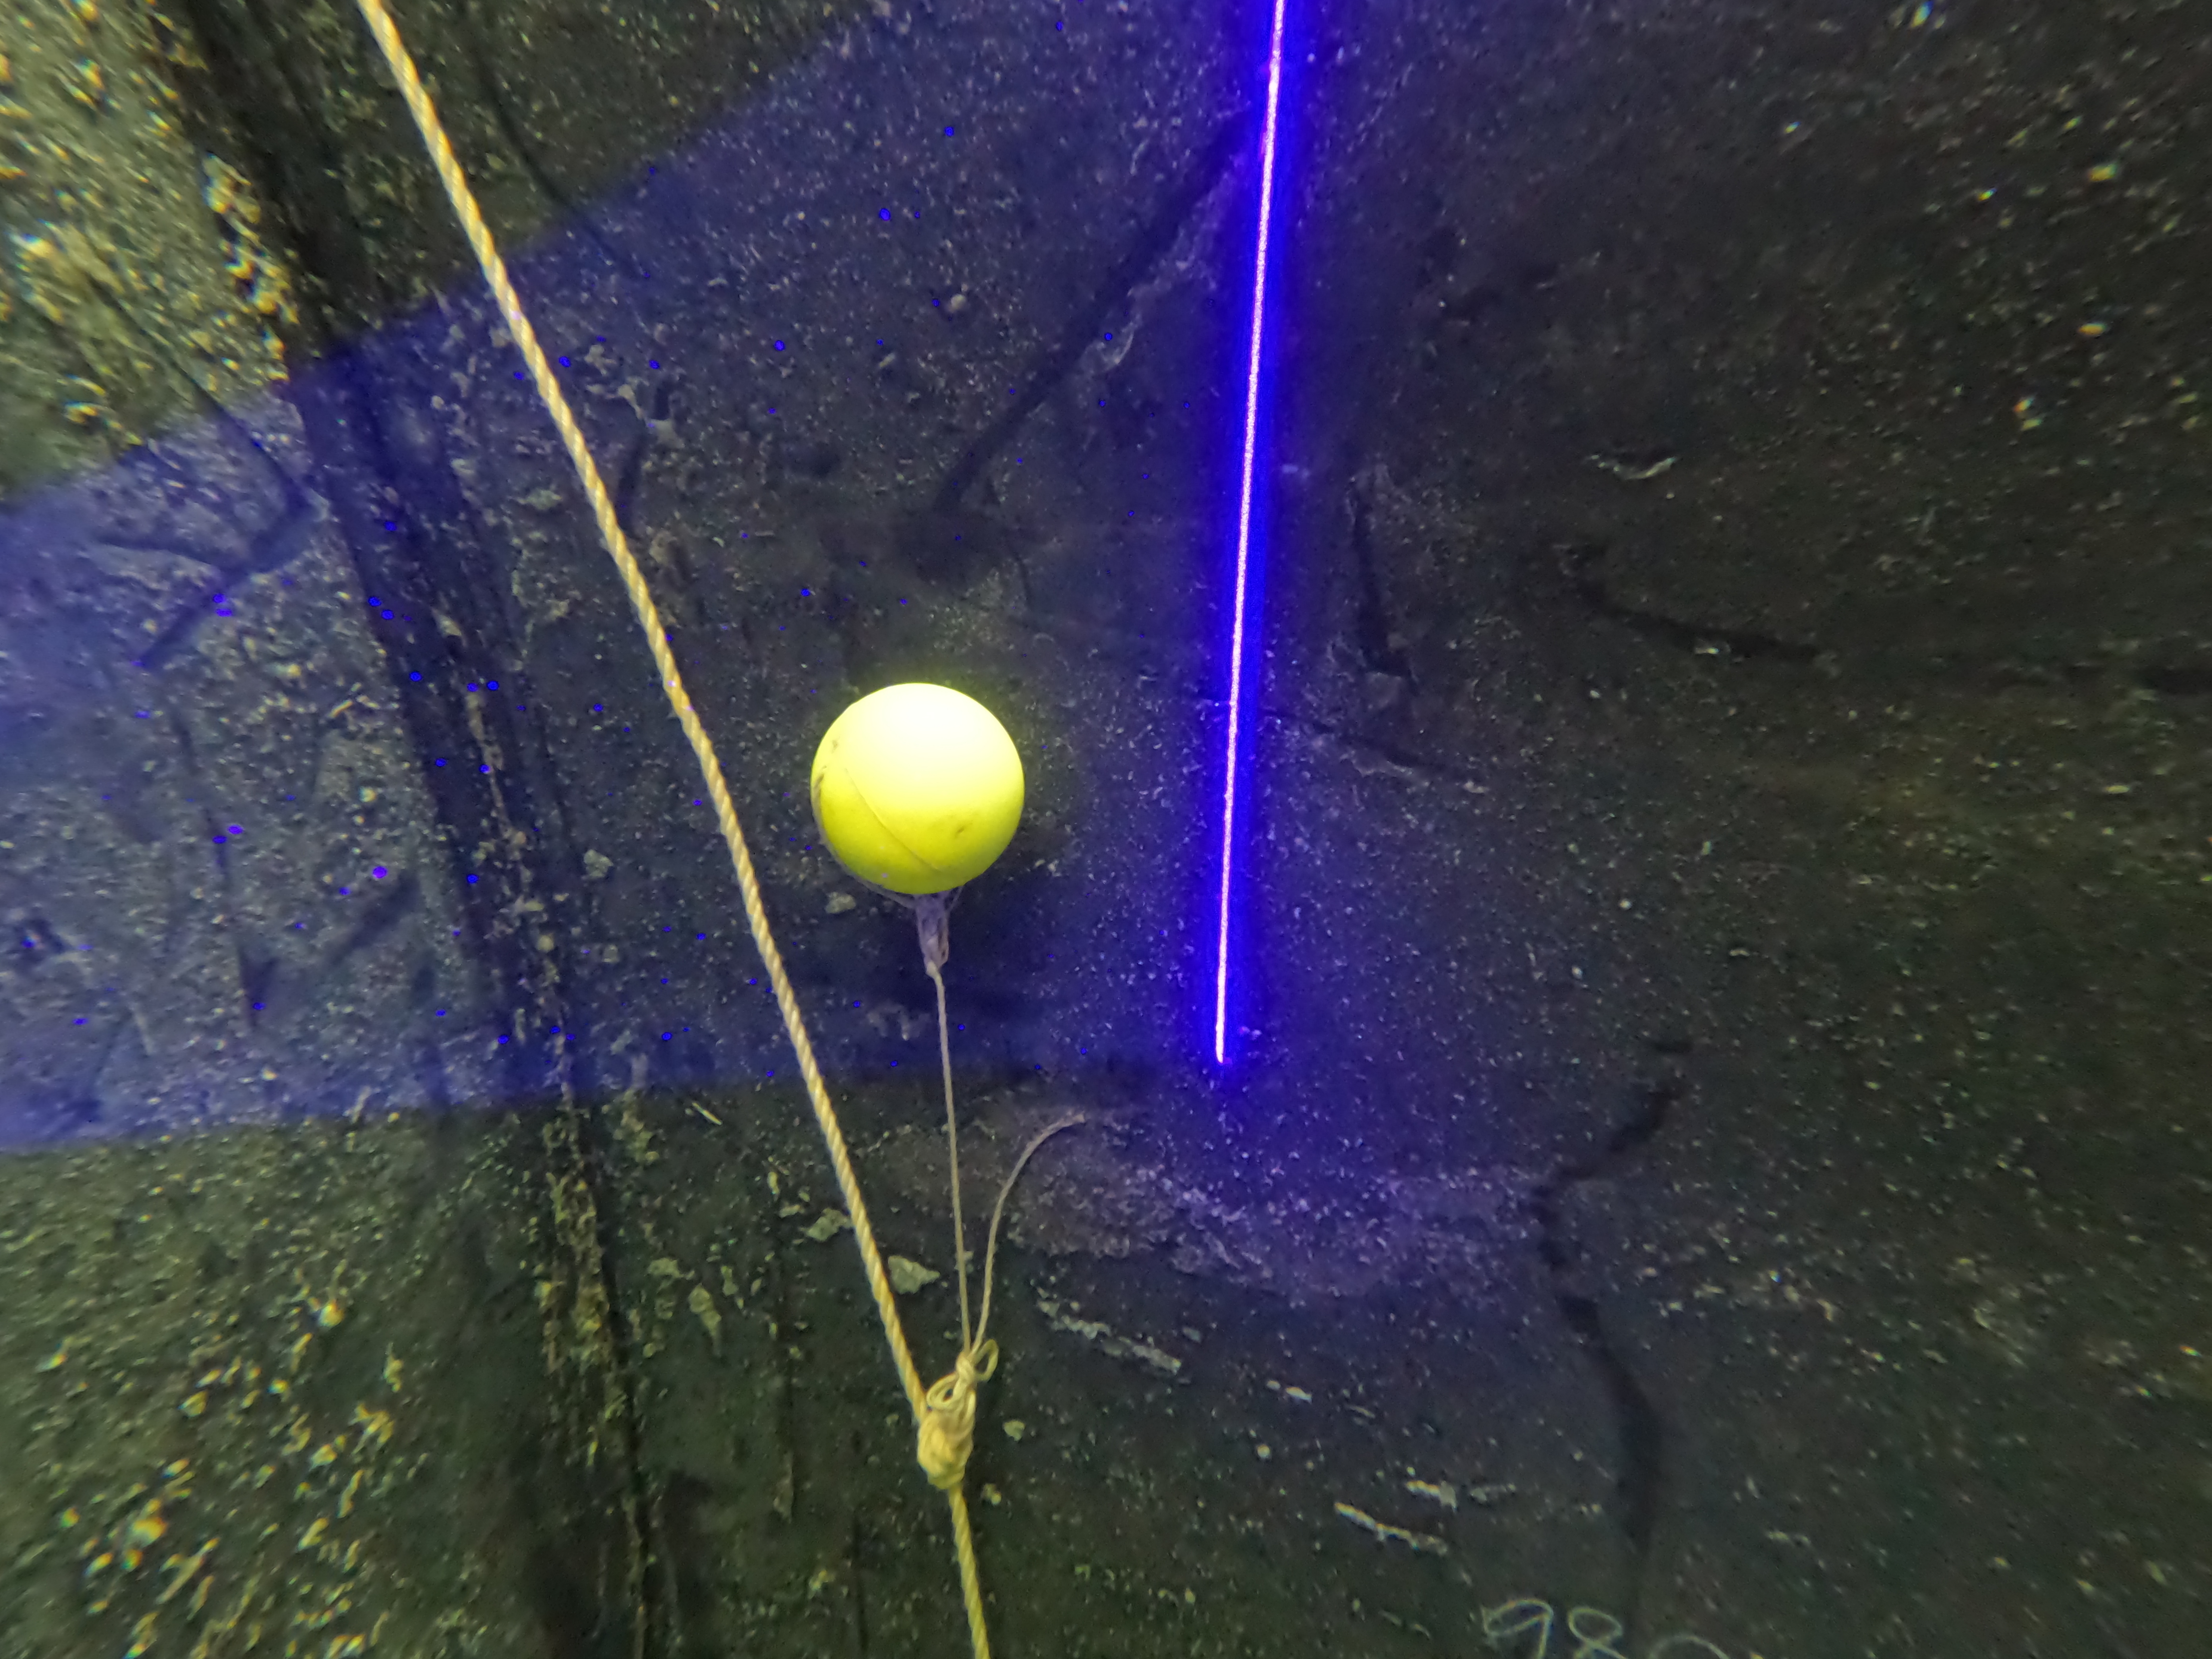

Supplement: Supplementary file 2822 [file G0030322.pdf › 2/G0030322.pdf]

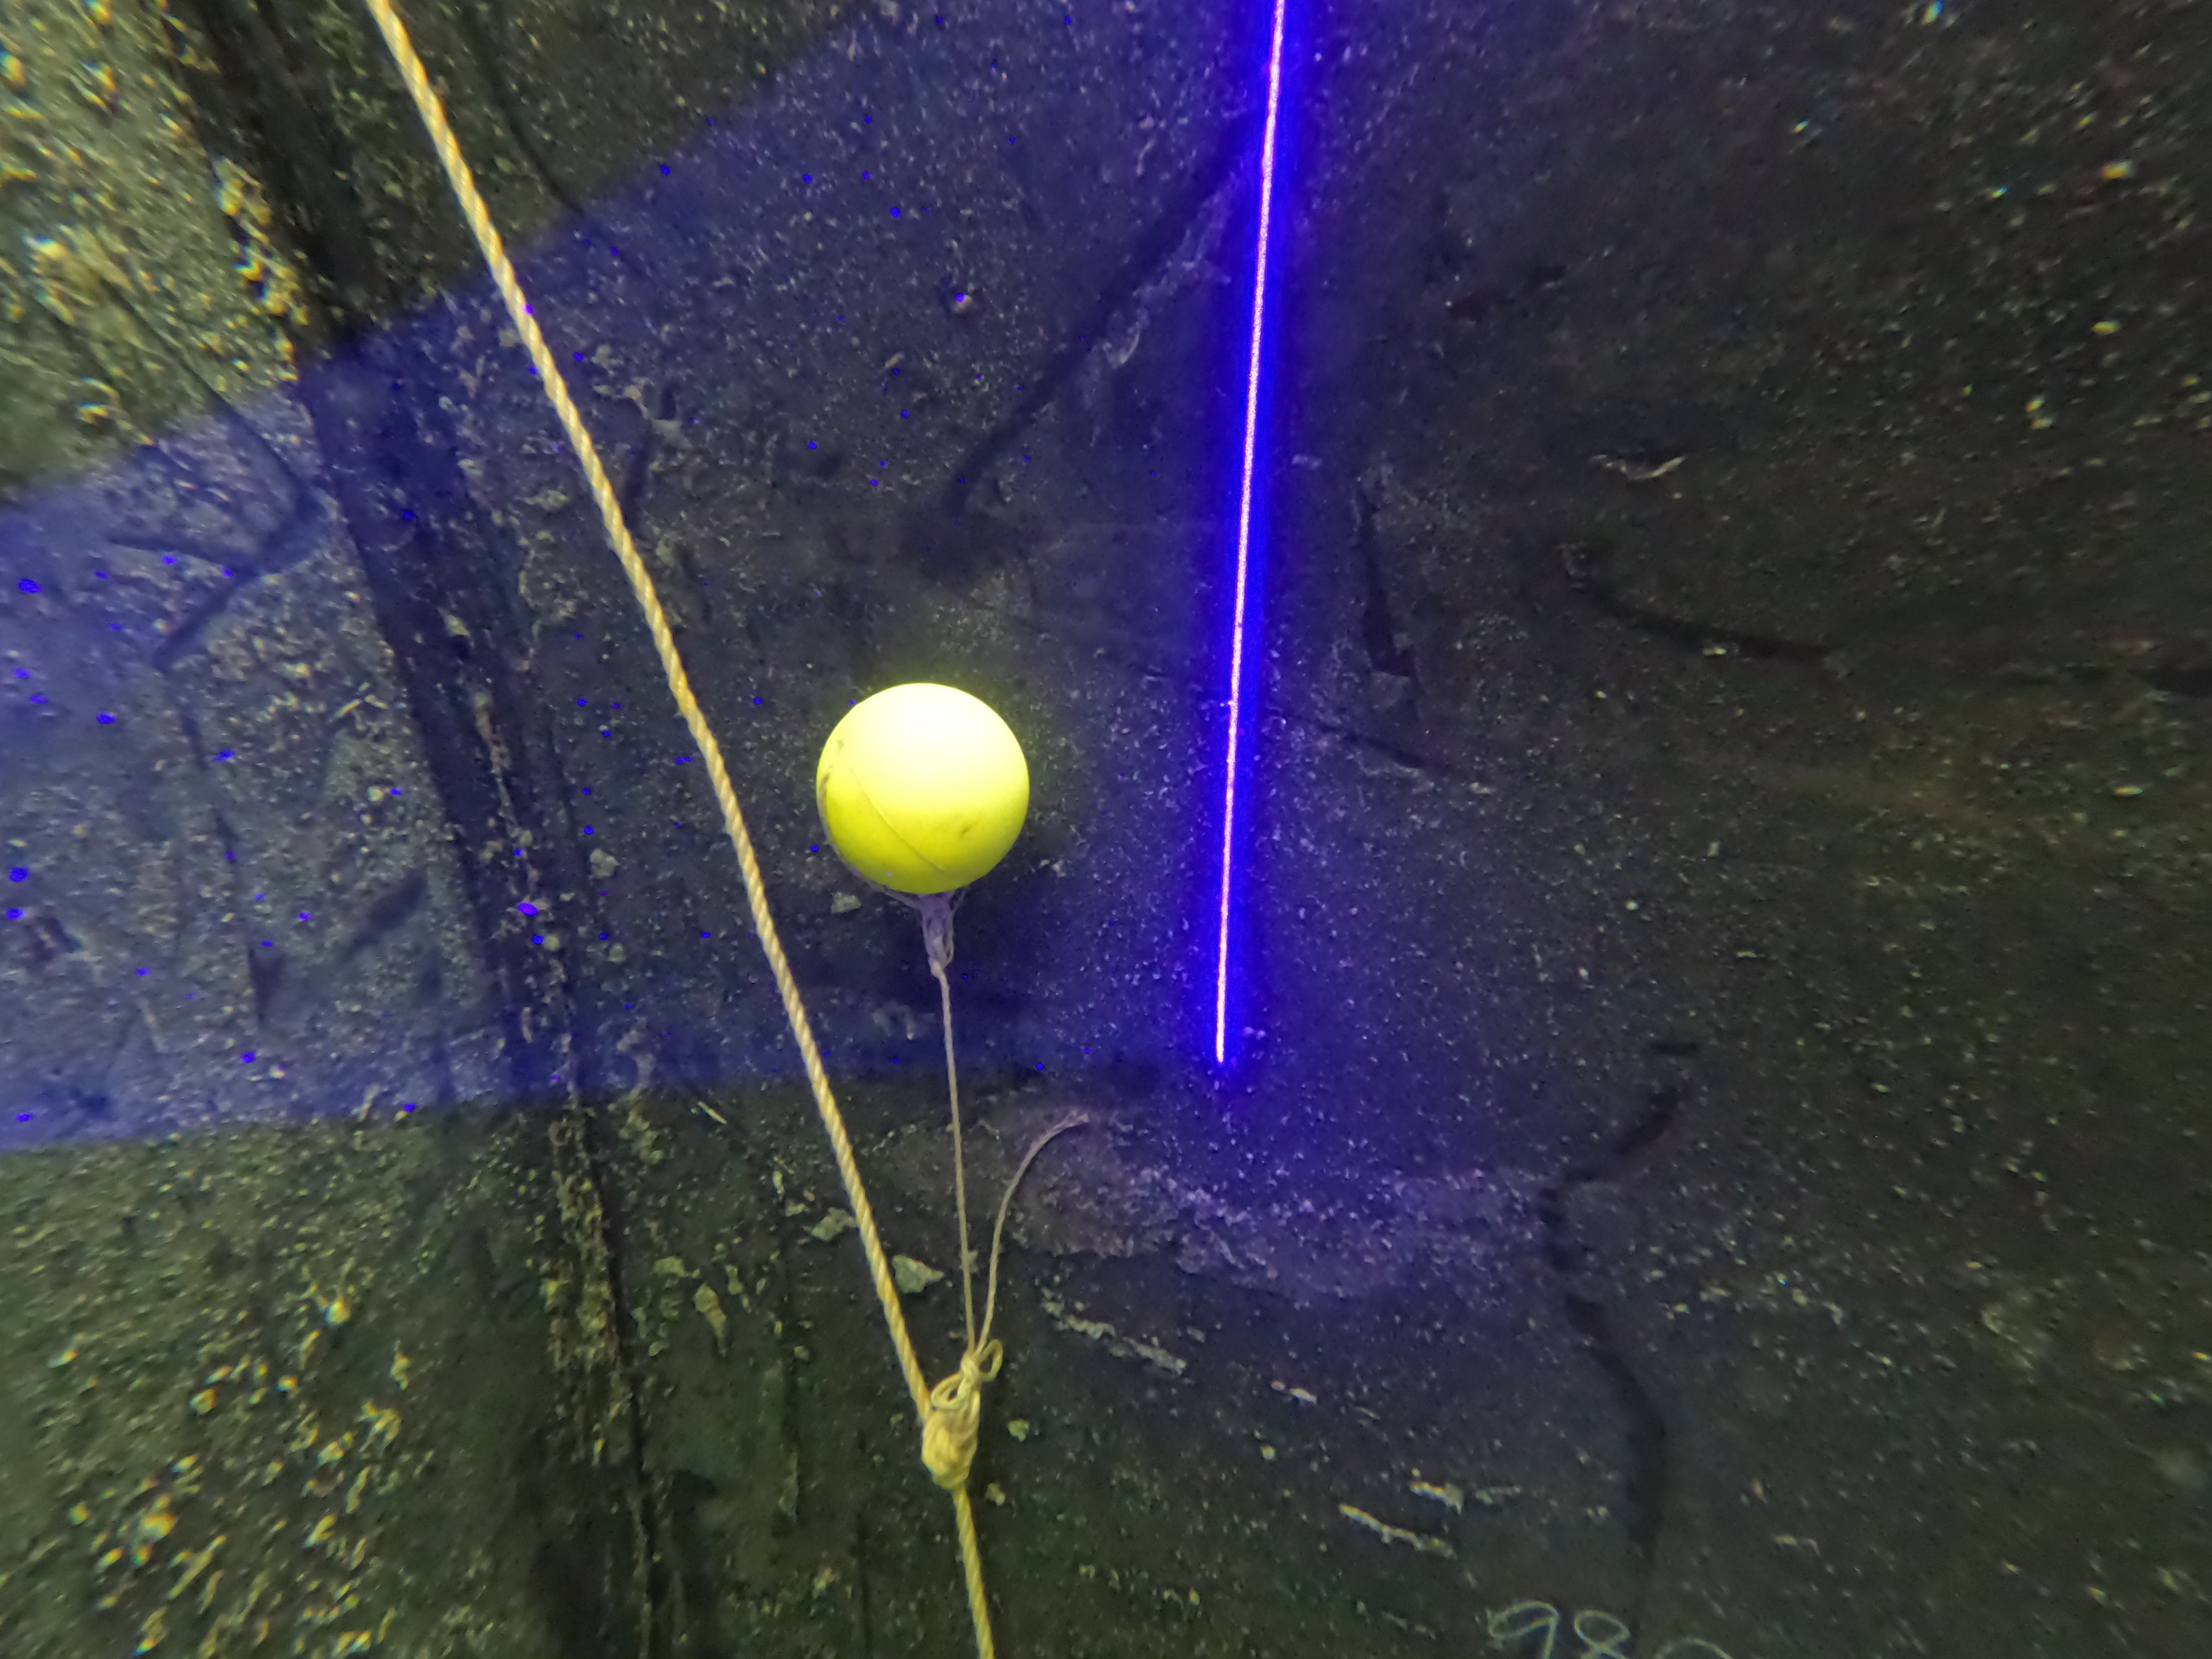

980

Supplement: Supplementary file 2823 [file G0030323.pdf › 2/G0030323.pdf]

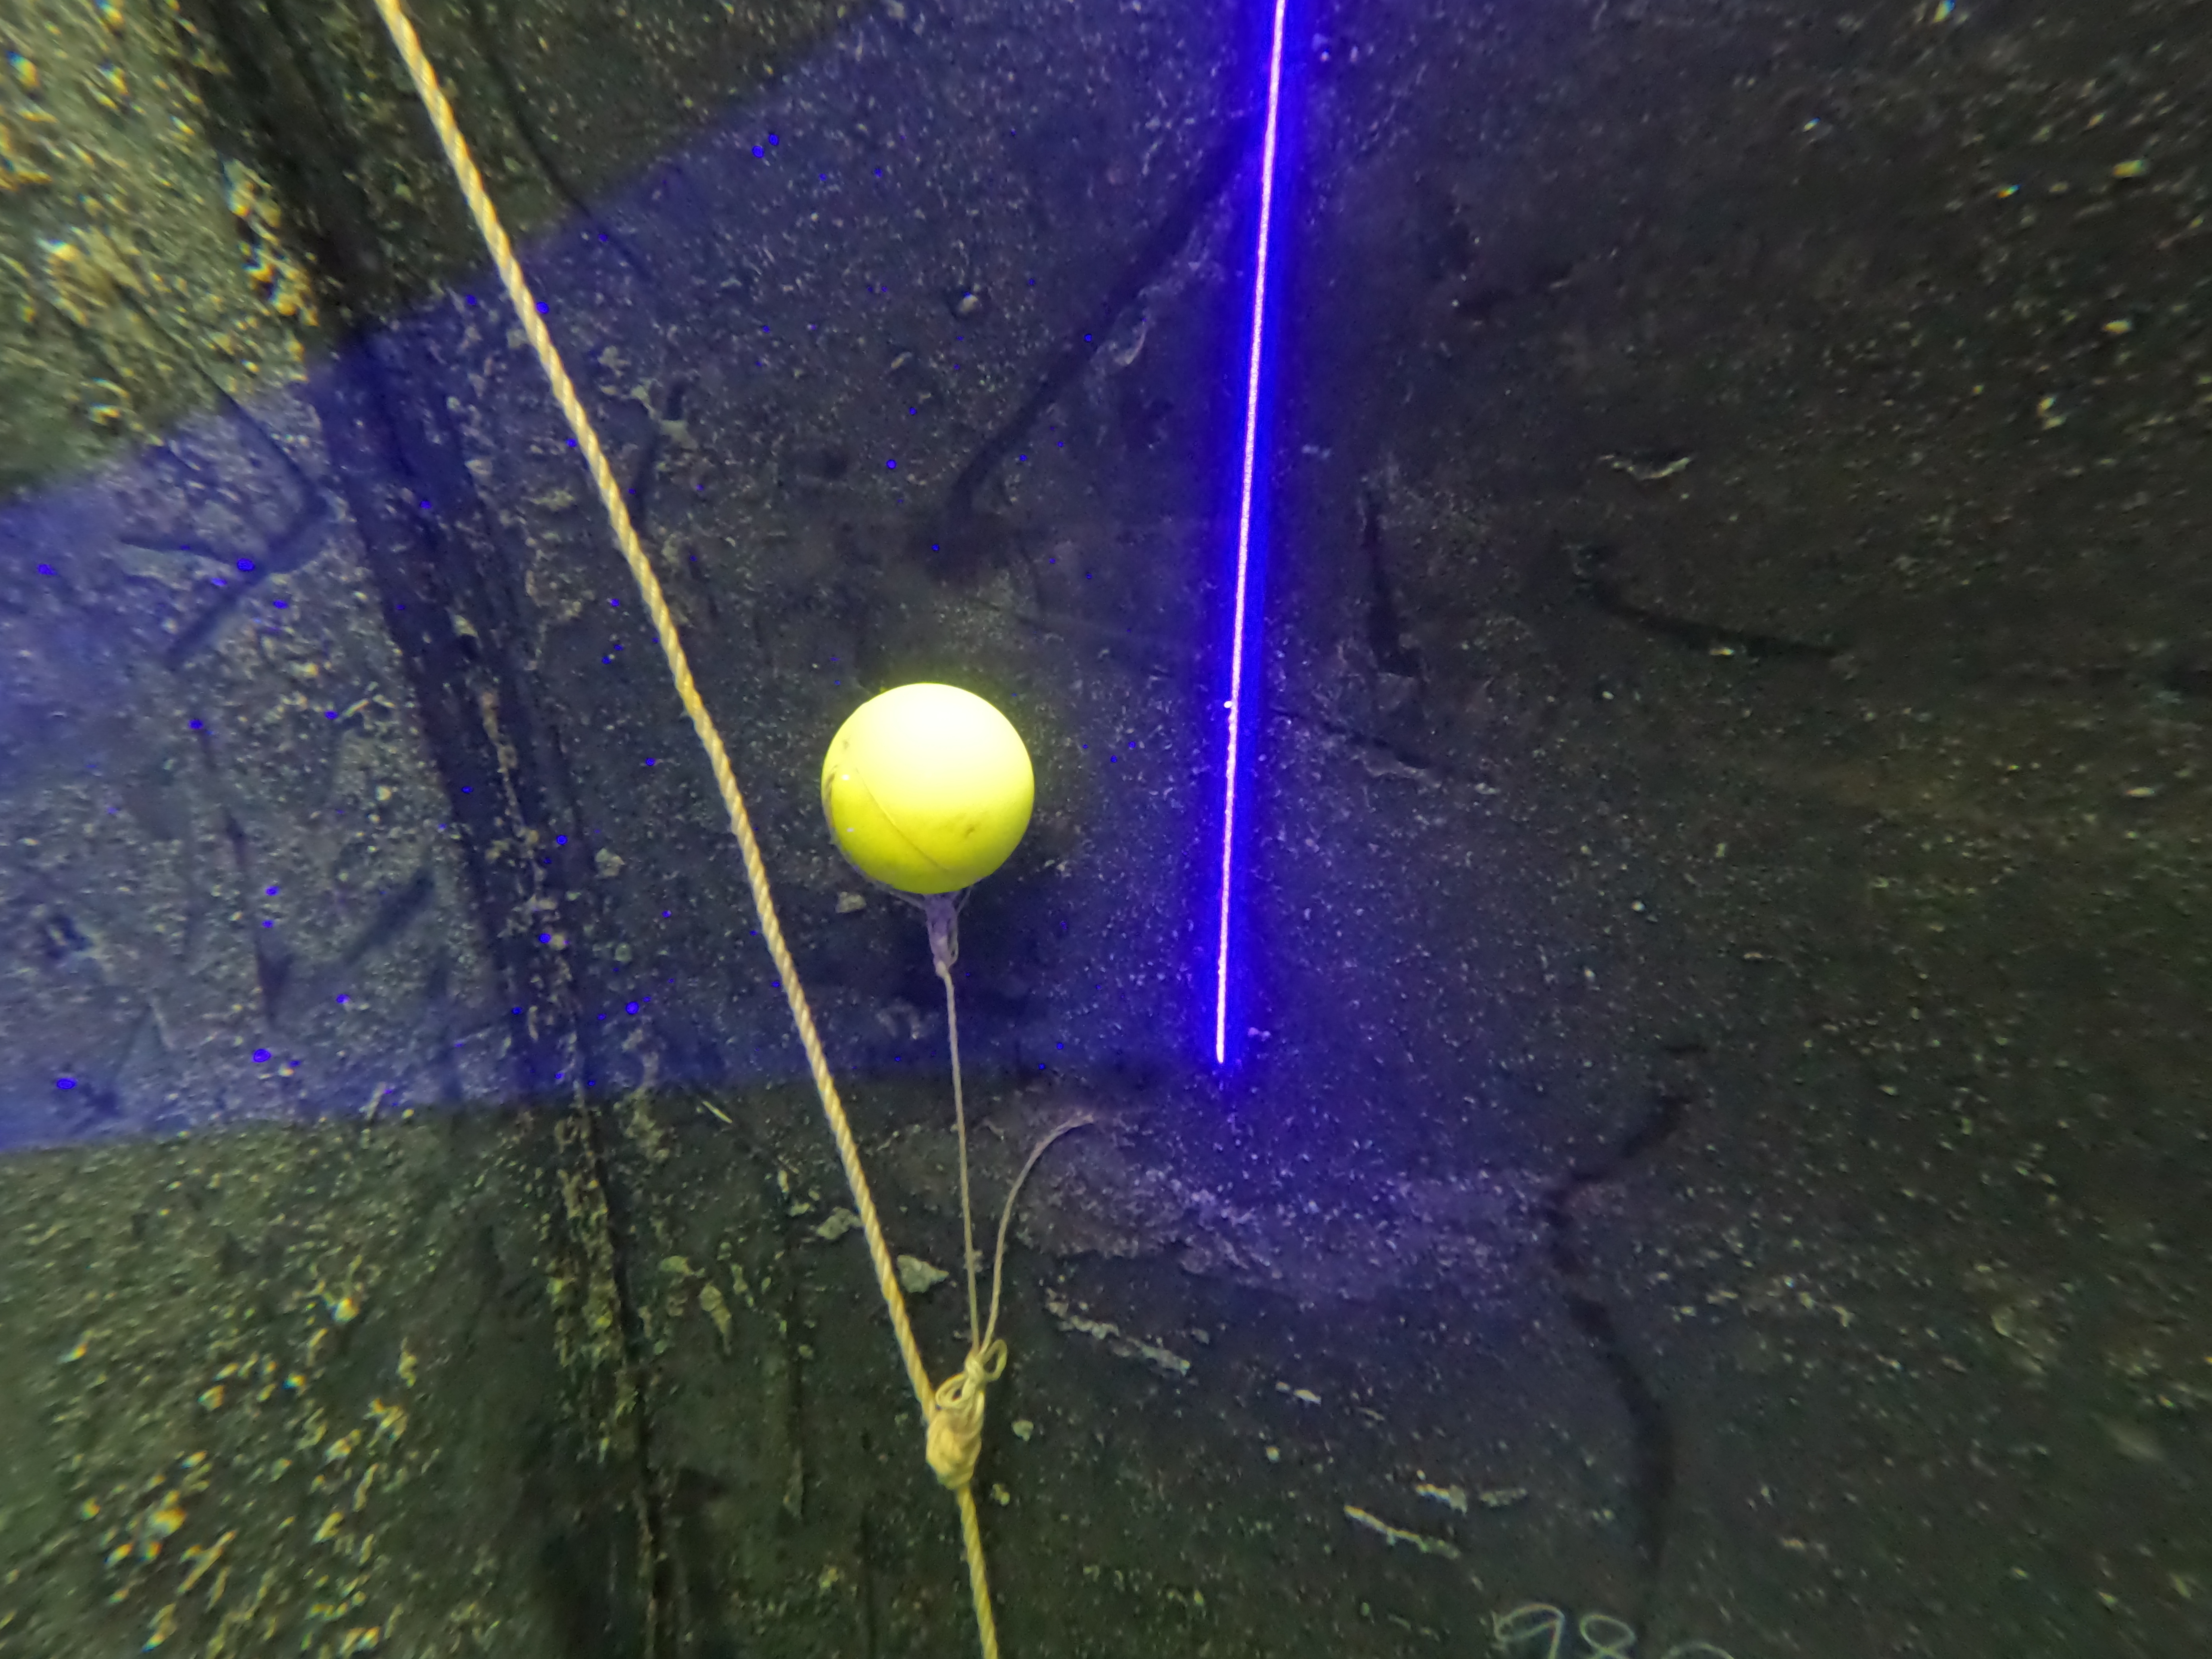

Supplement: Supplementary file 2824 [file G0030324.pdf › 2/G0030324.pdf]

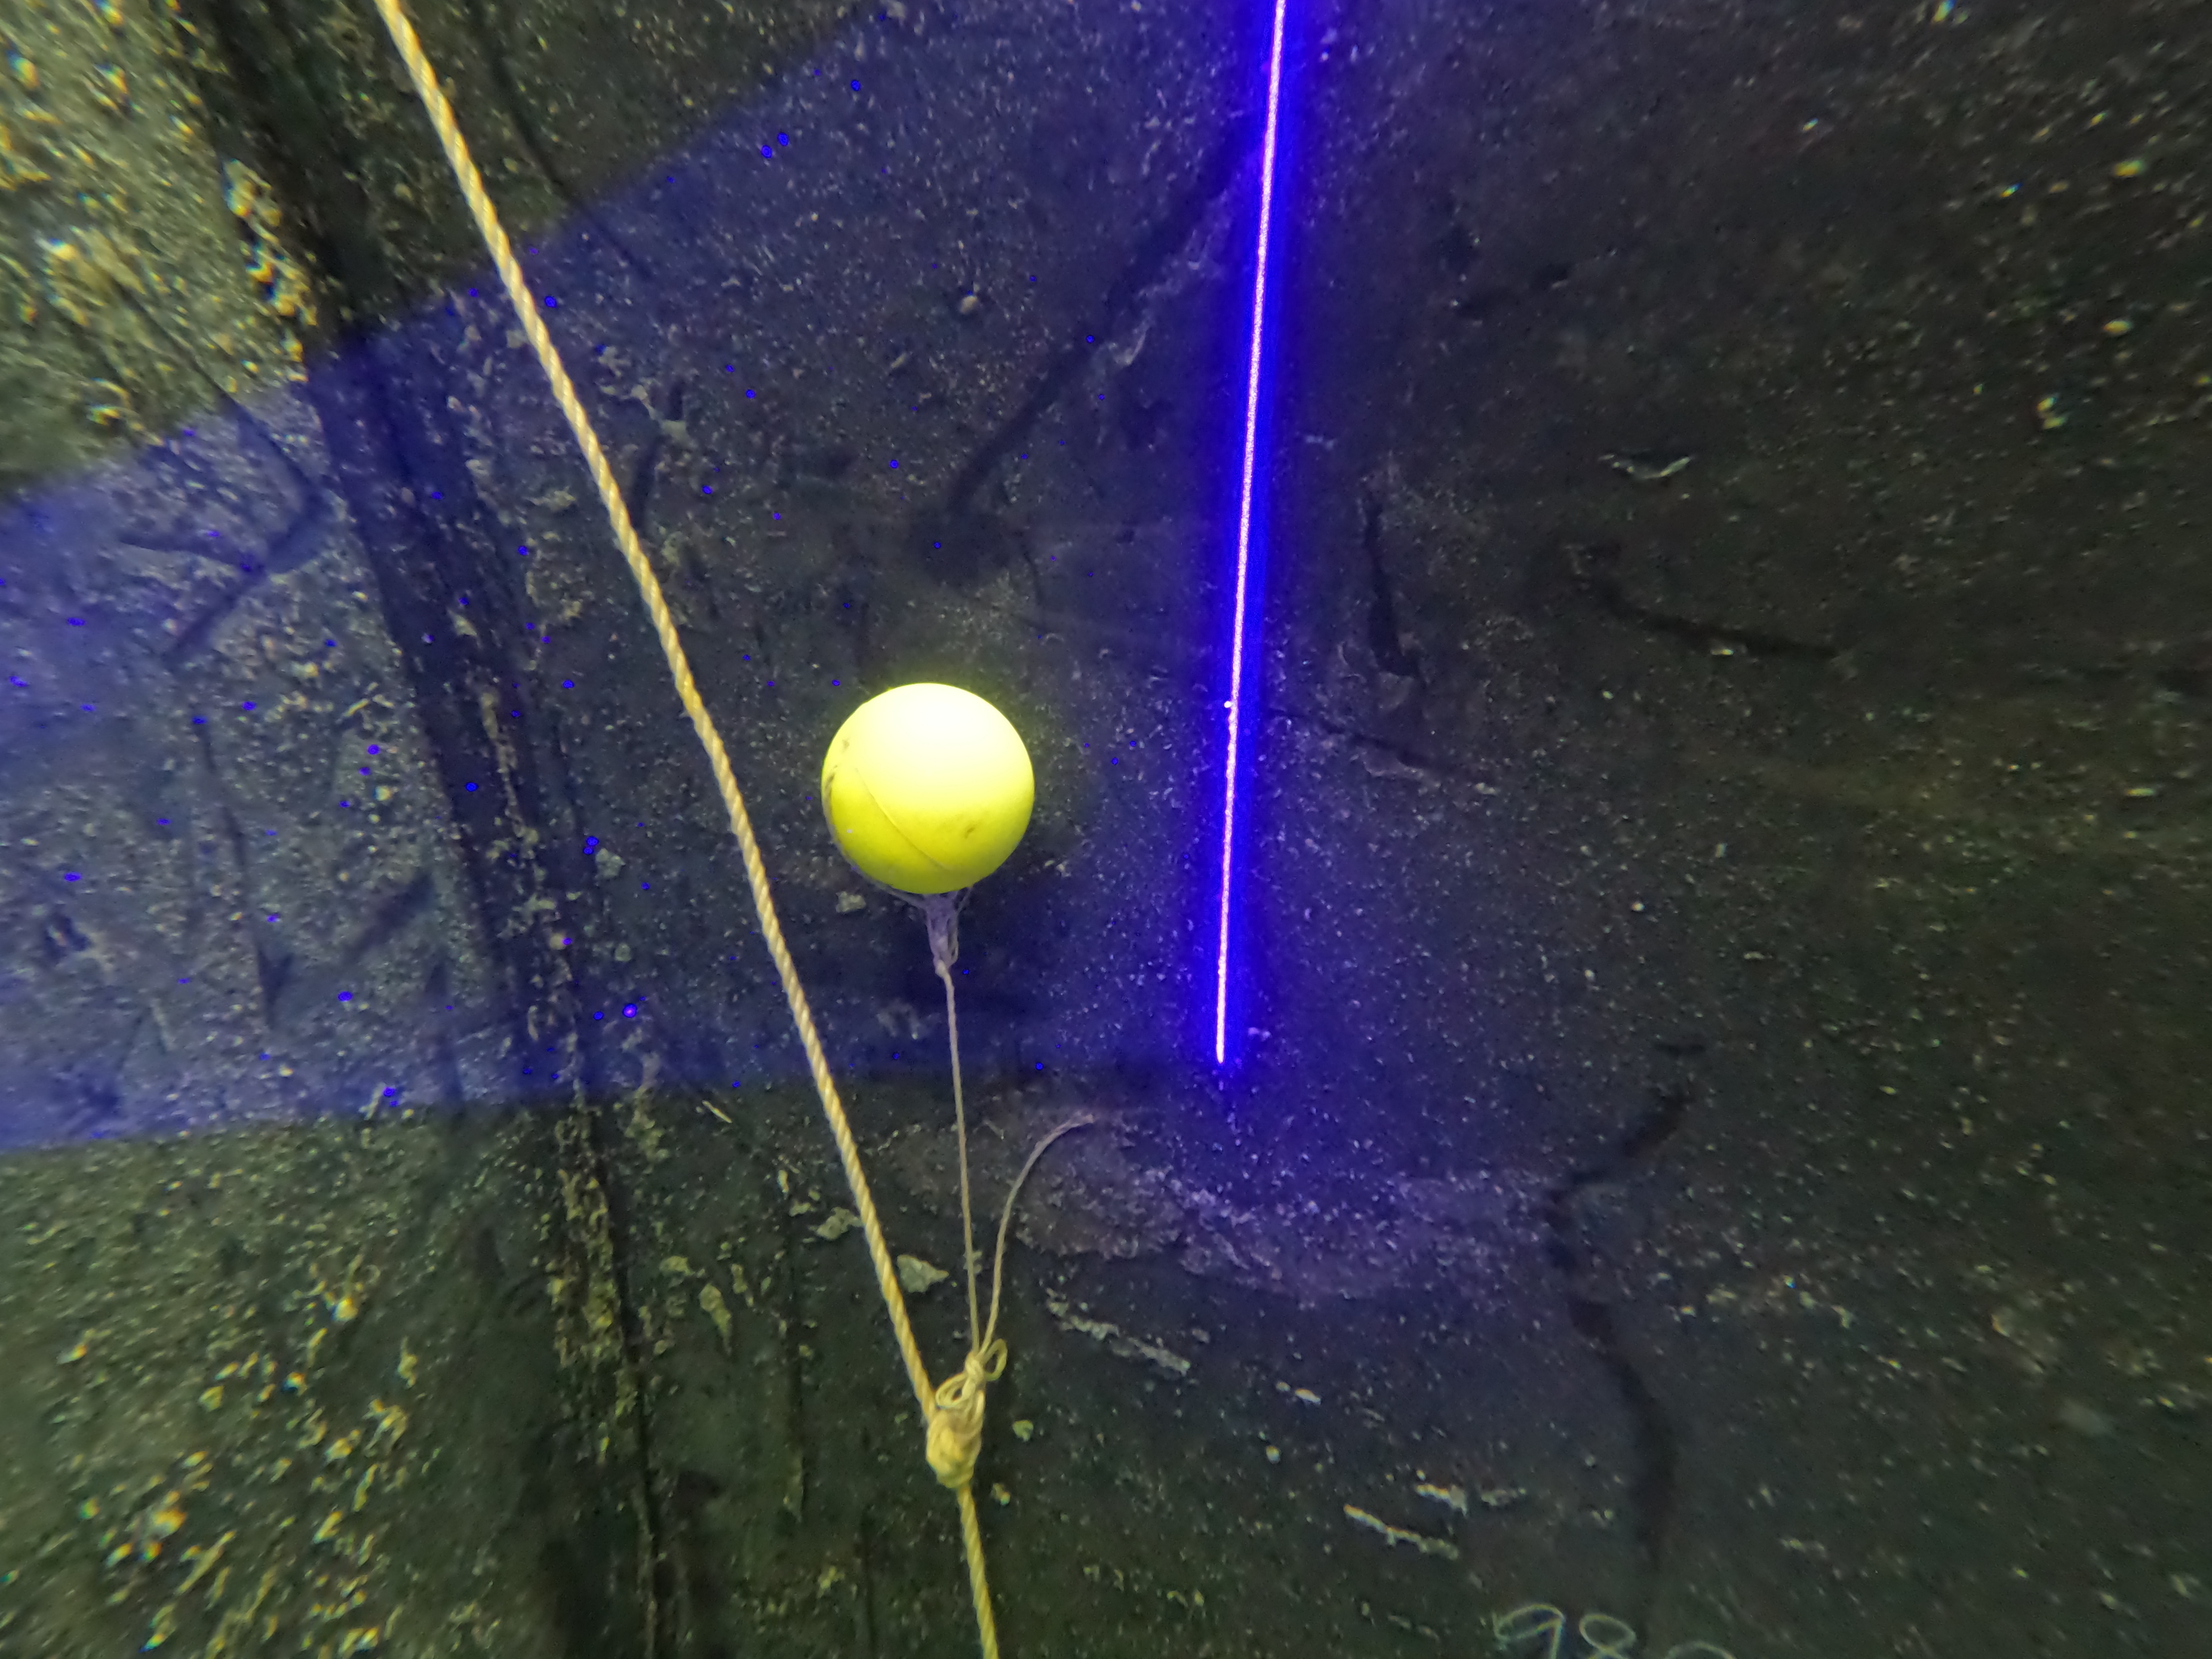

Supplement: Supplementary file 2825 [file G0030325.pdf › 2/G0030325.pdf]

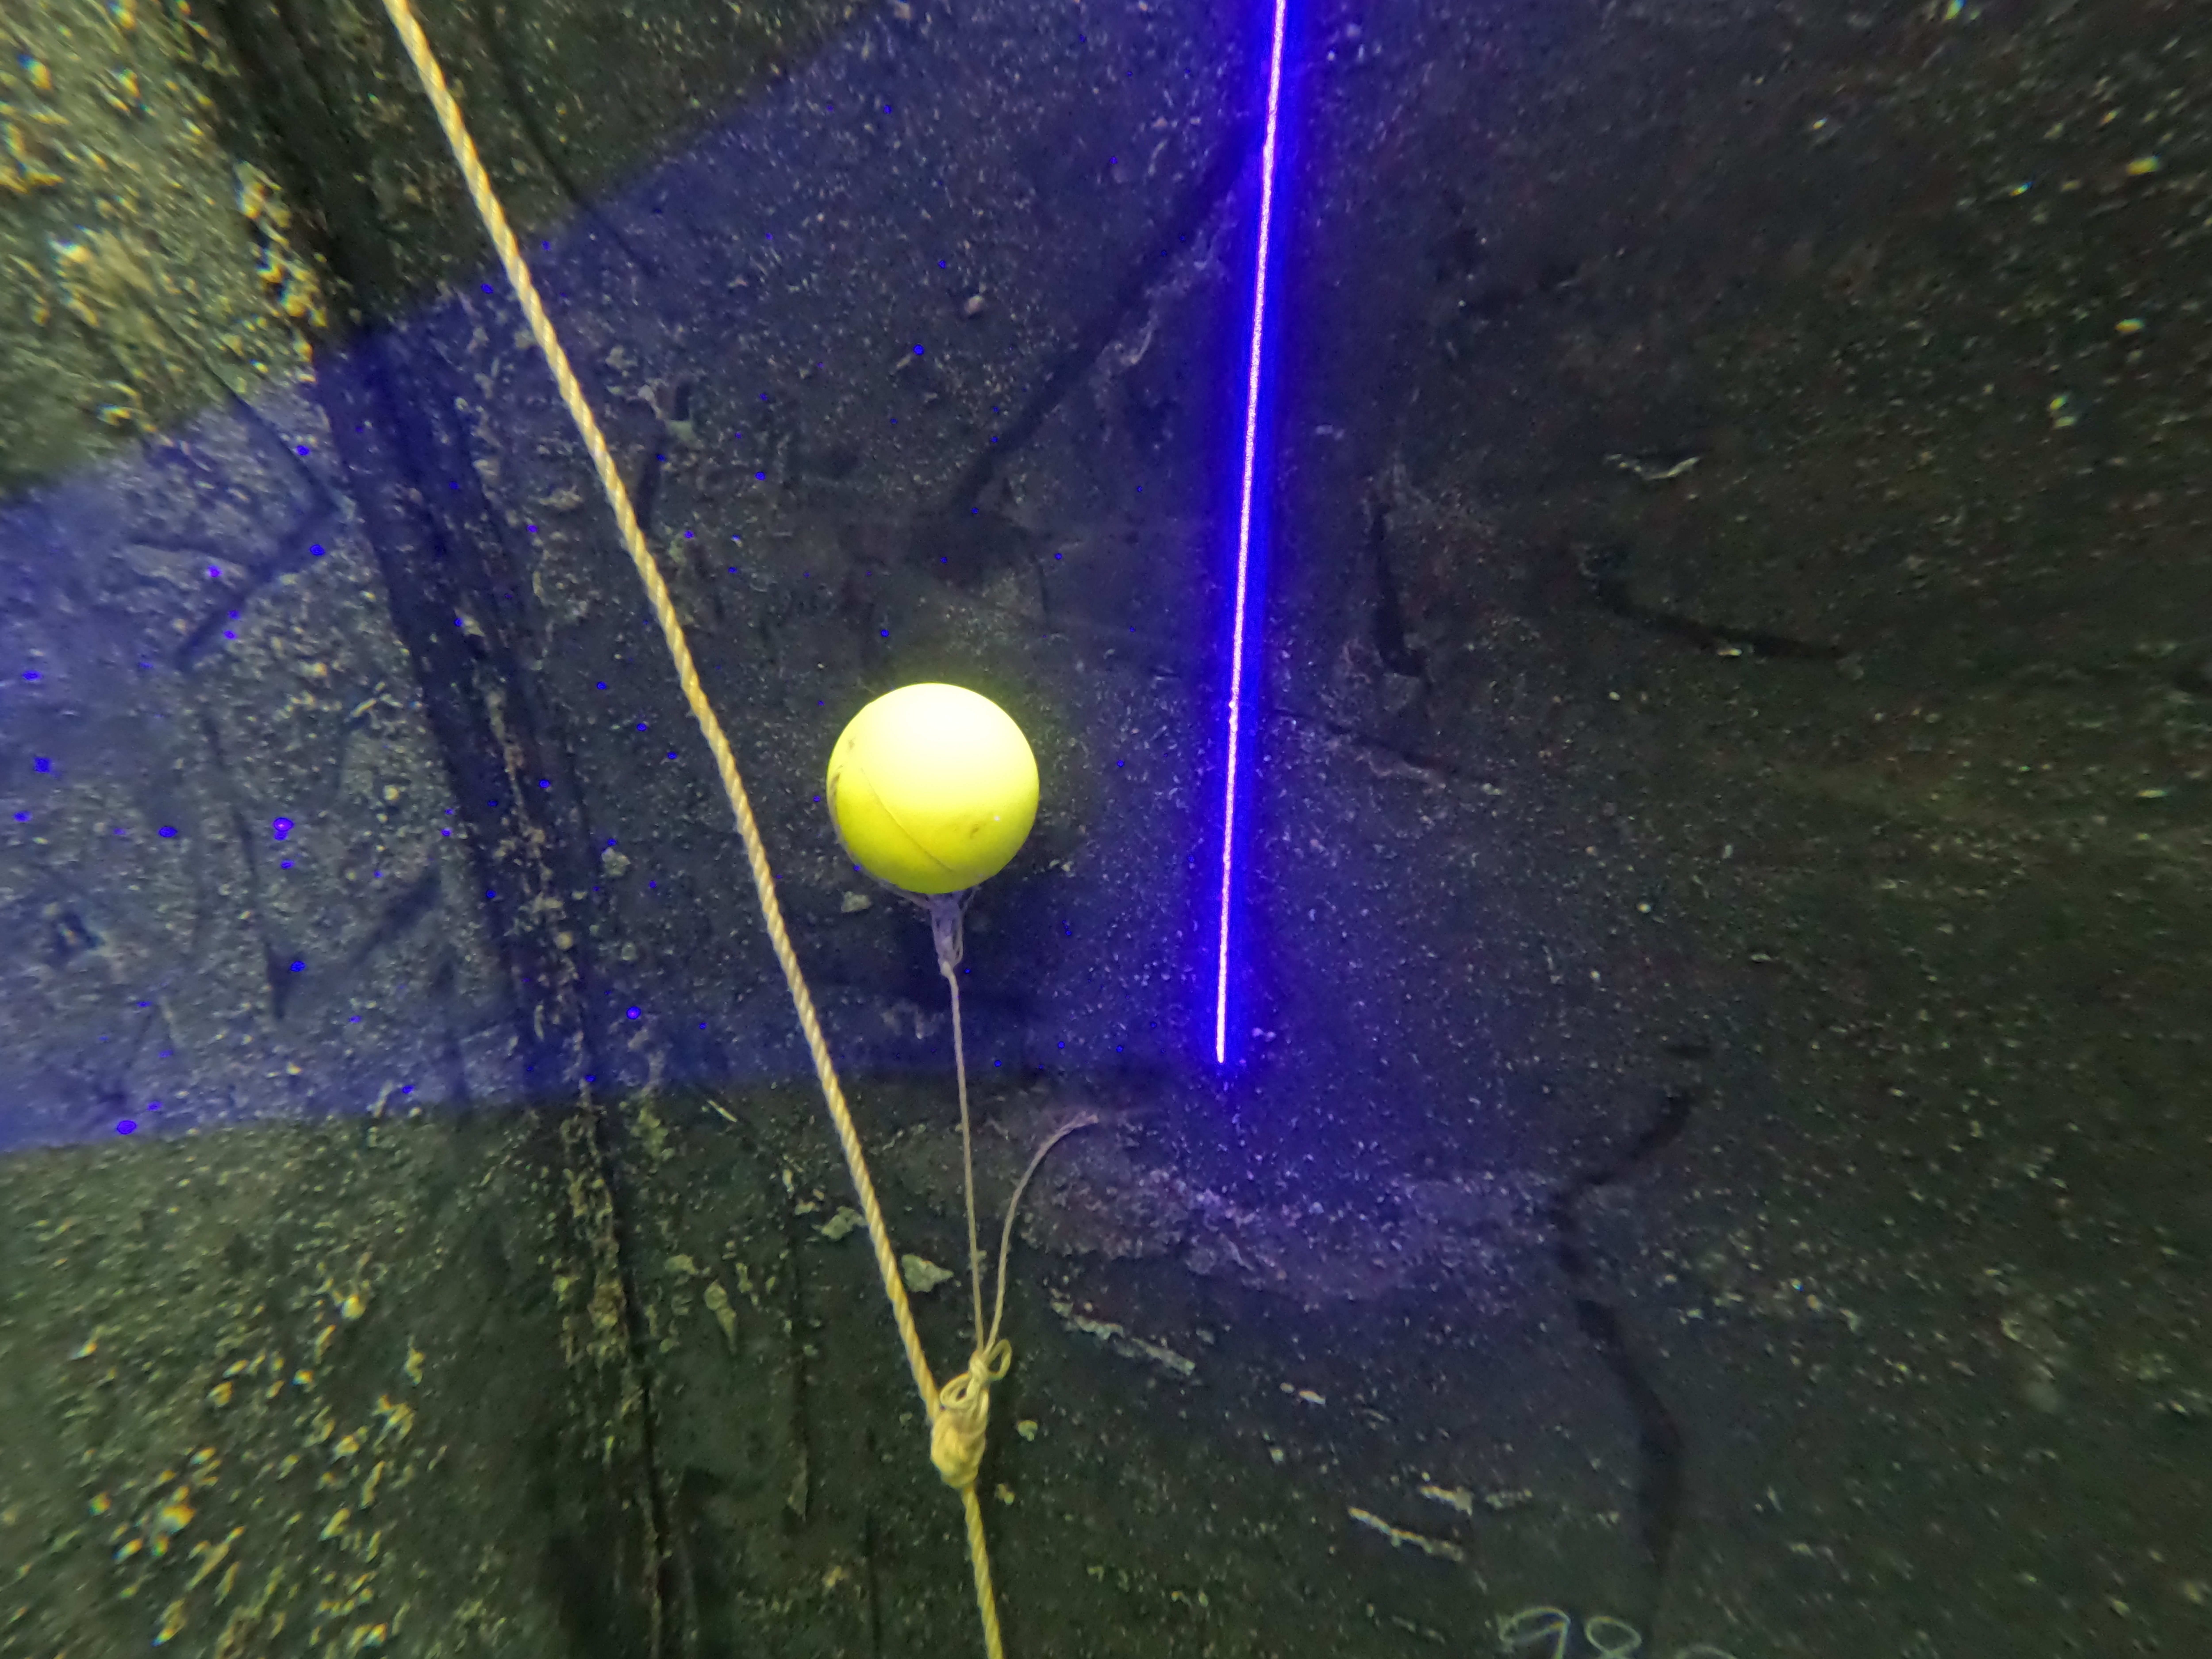

Supplement: Supplementary file 2826 [file G0030326.pdf › 2/G0030326.pdf]

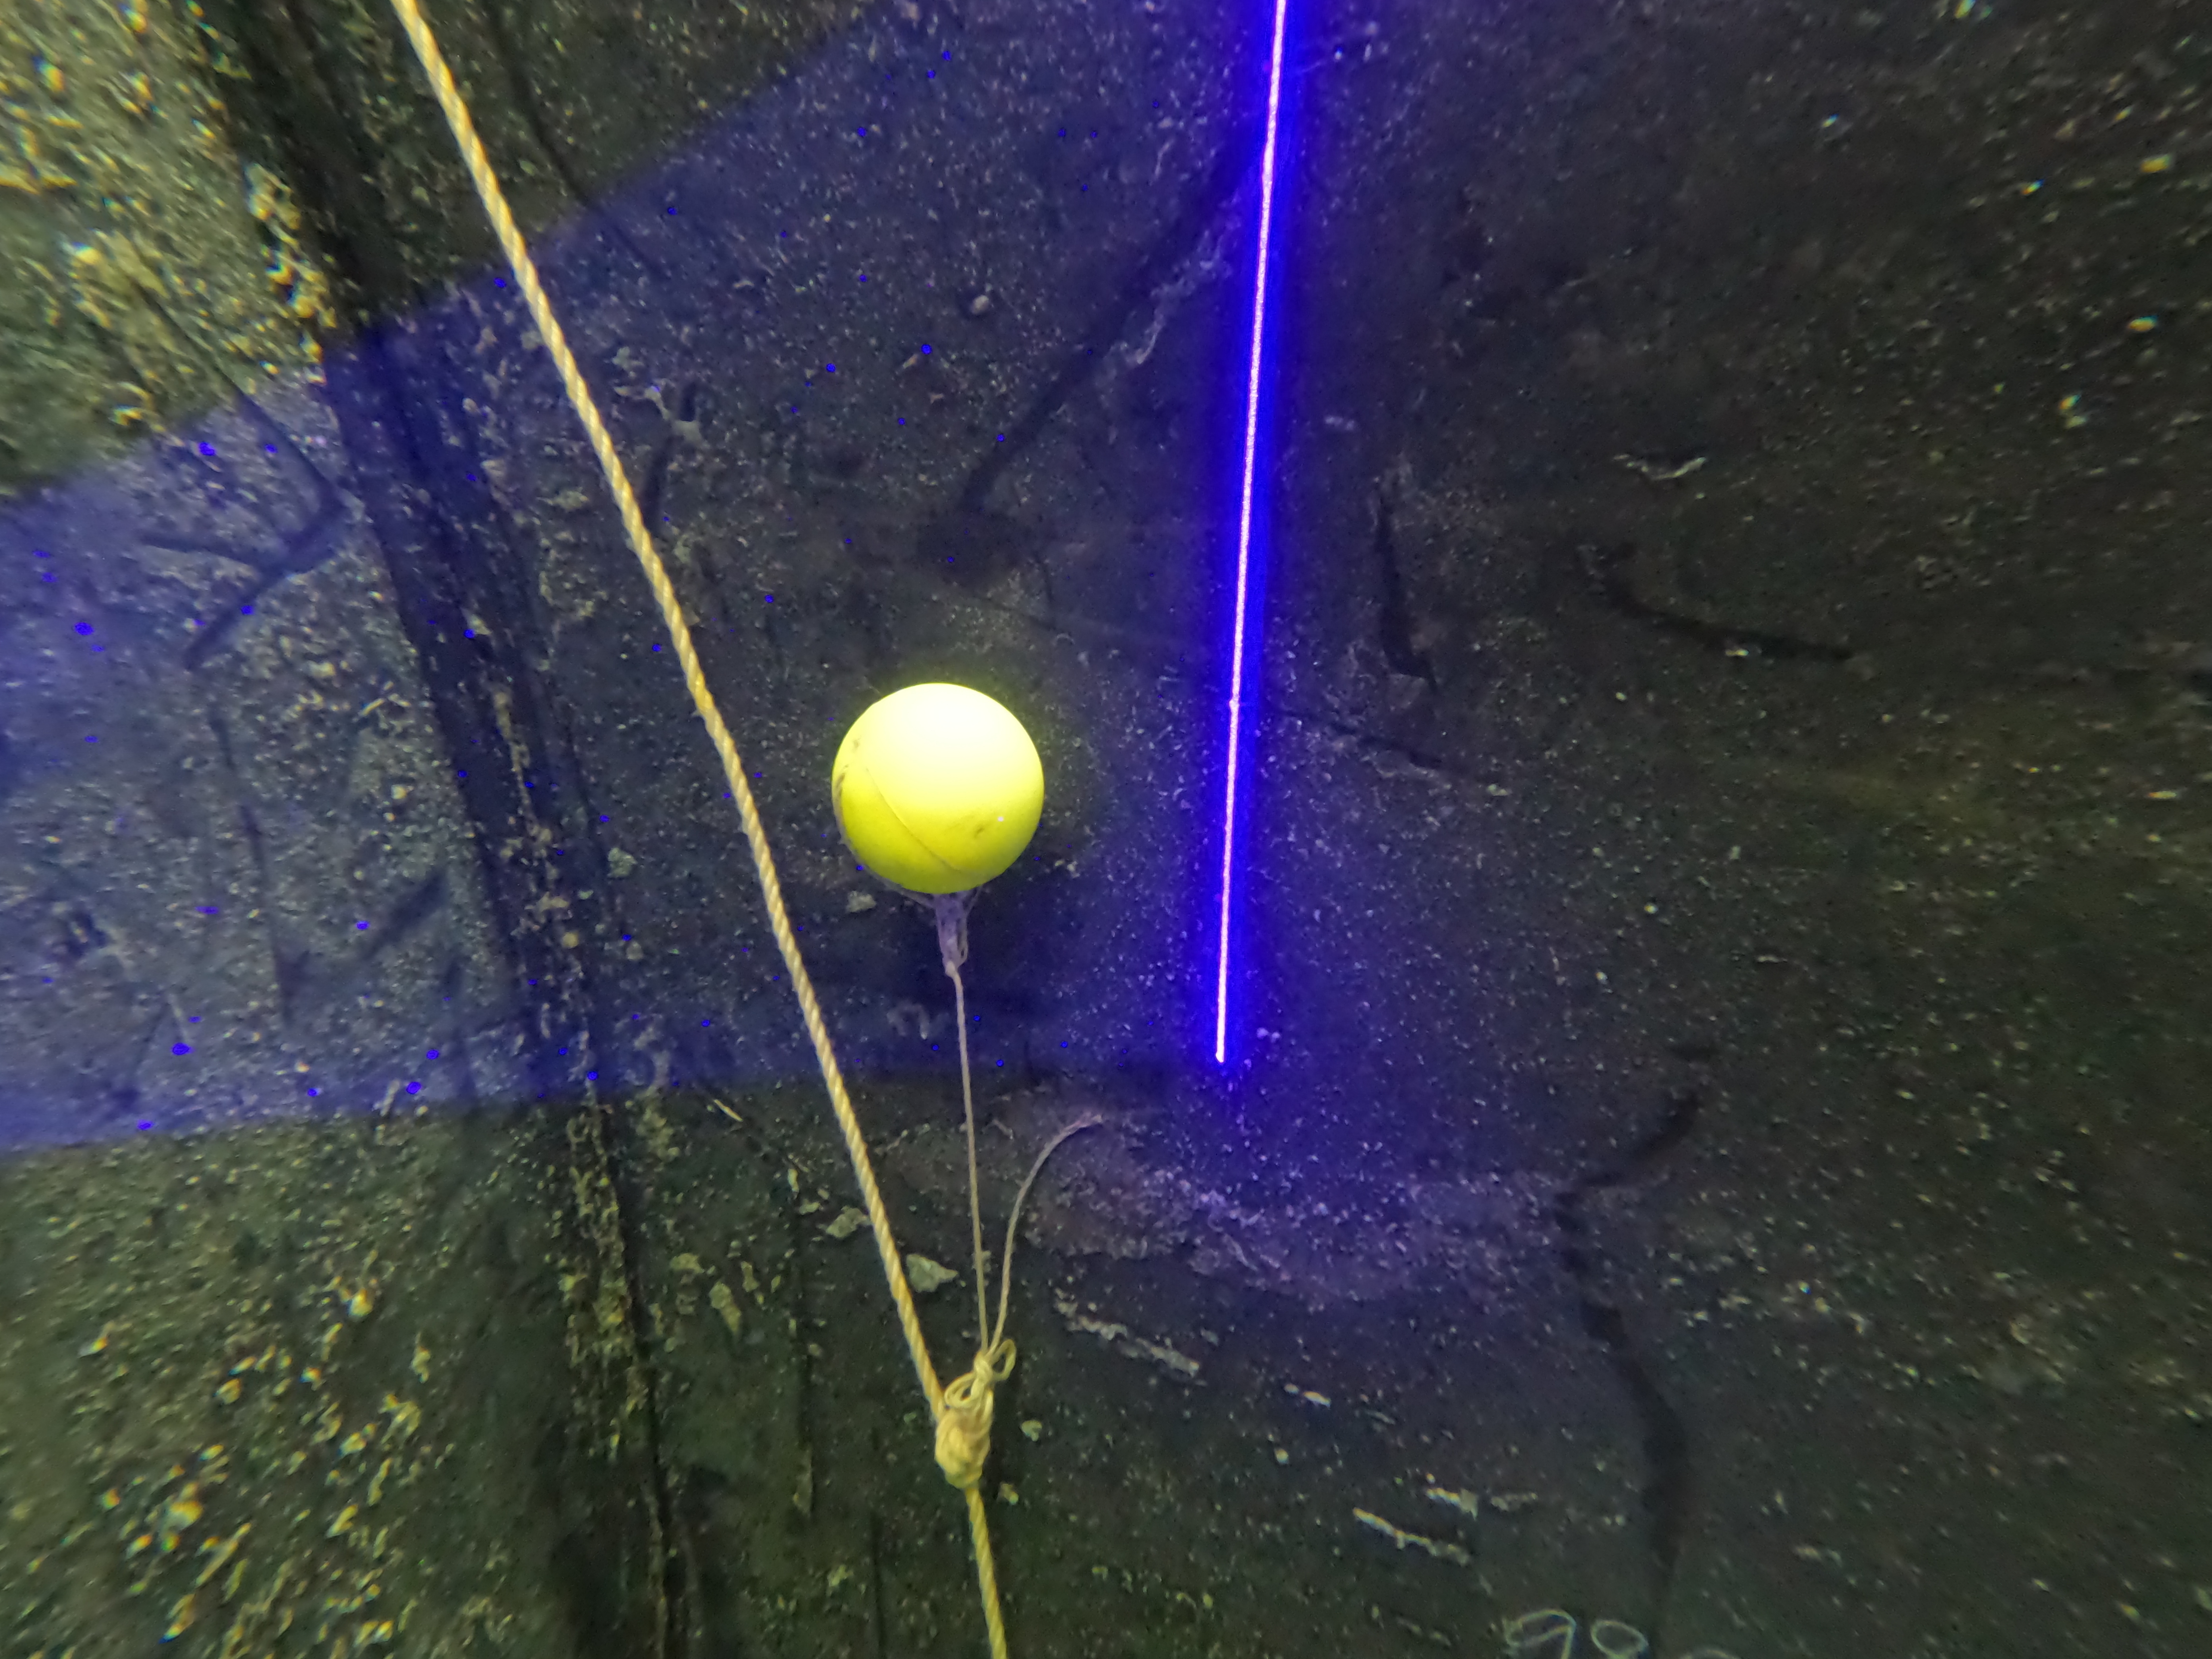

Supplement: Supplementary file 2827 [file G0030327.pdf › 2/G0030327.pdf]

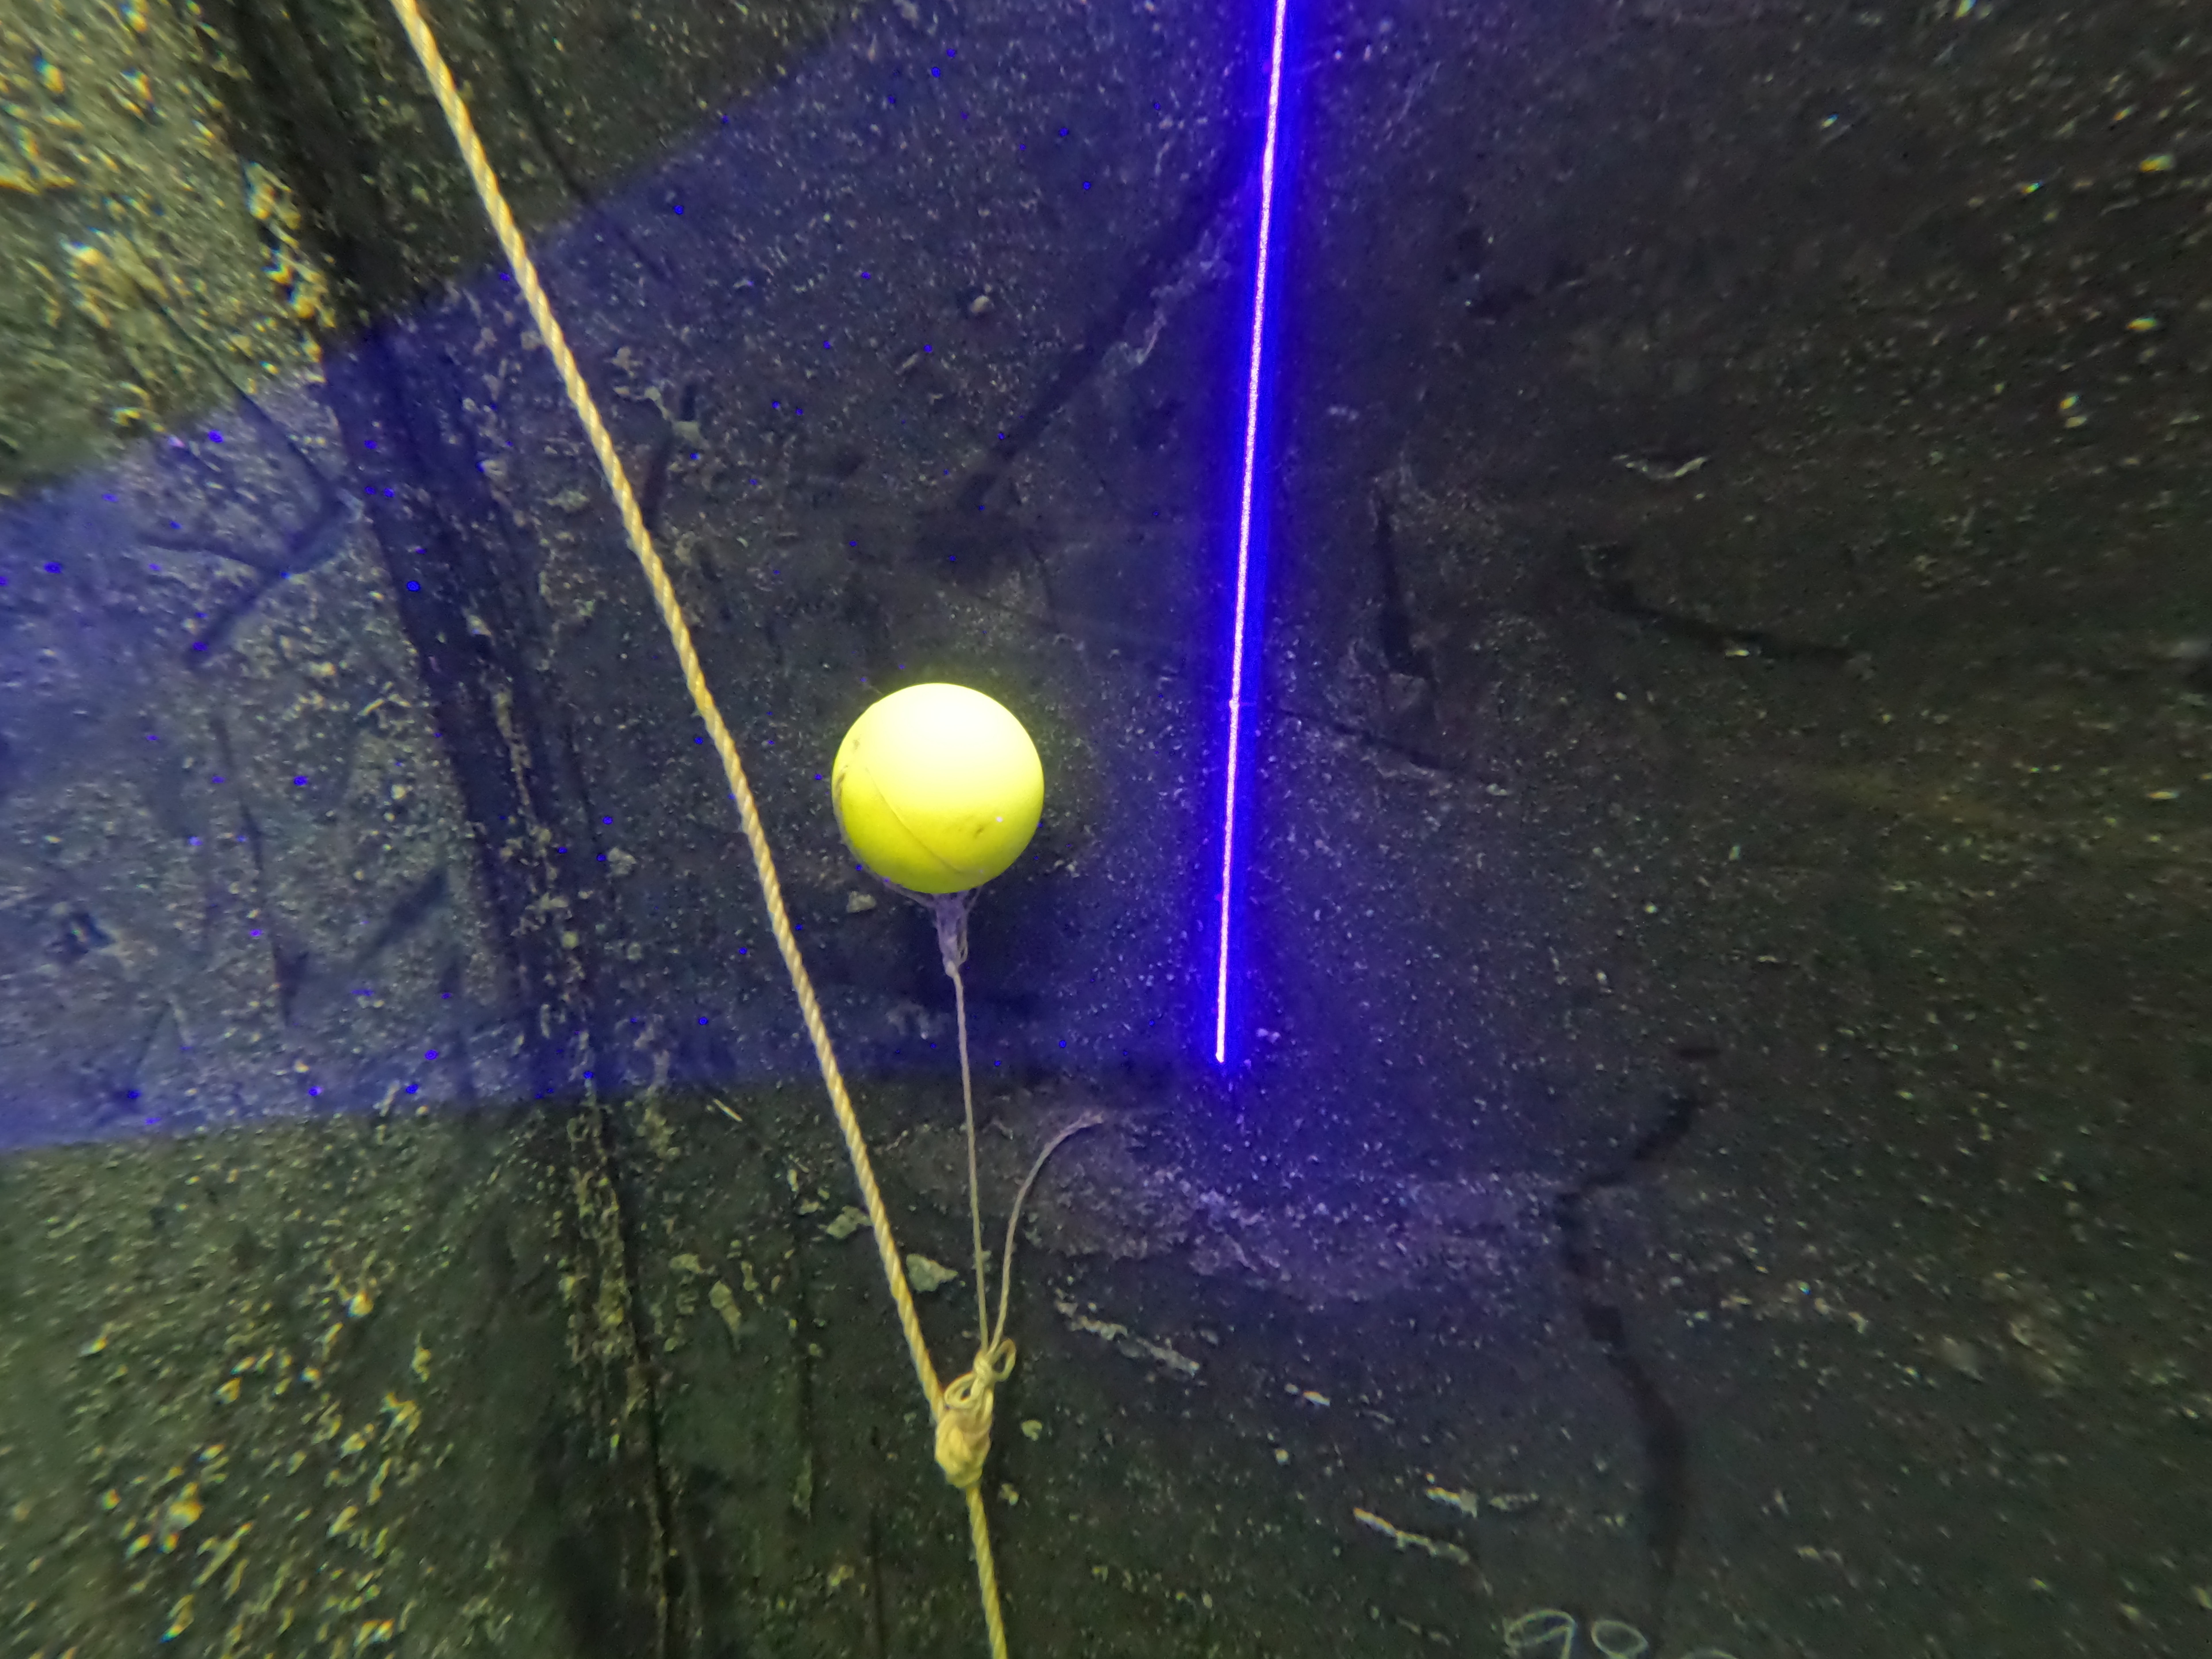

Supplement: Supplementary file 2828 [file G0030328.pdf › 2/G0030328.pdf]

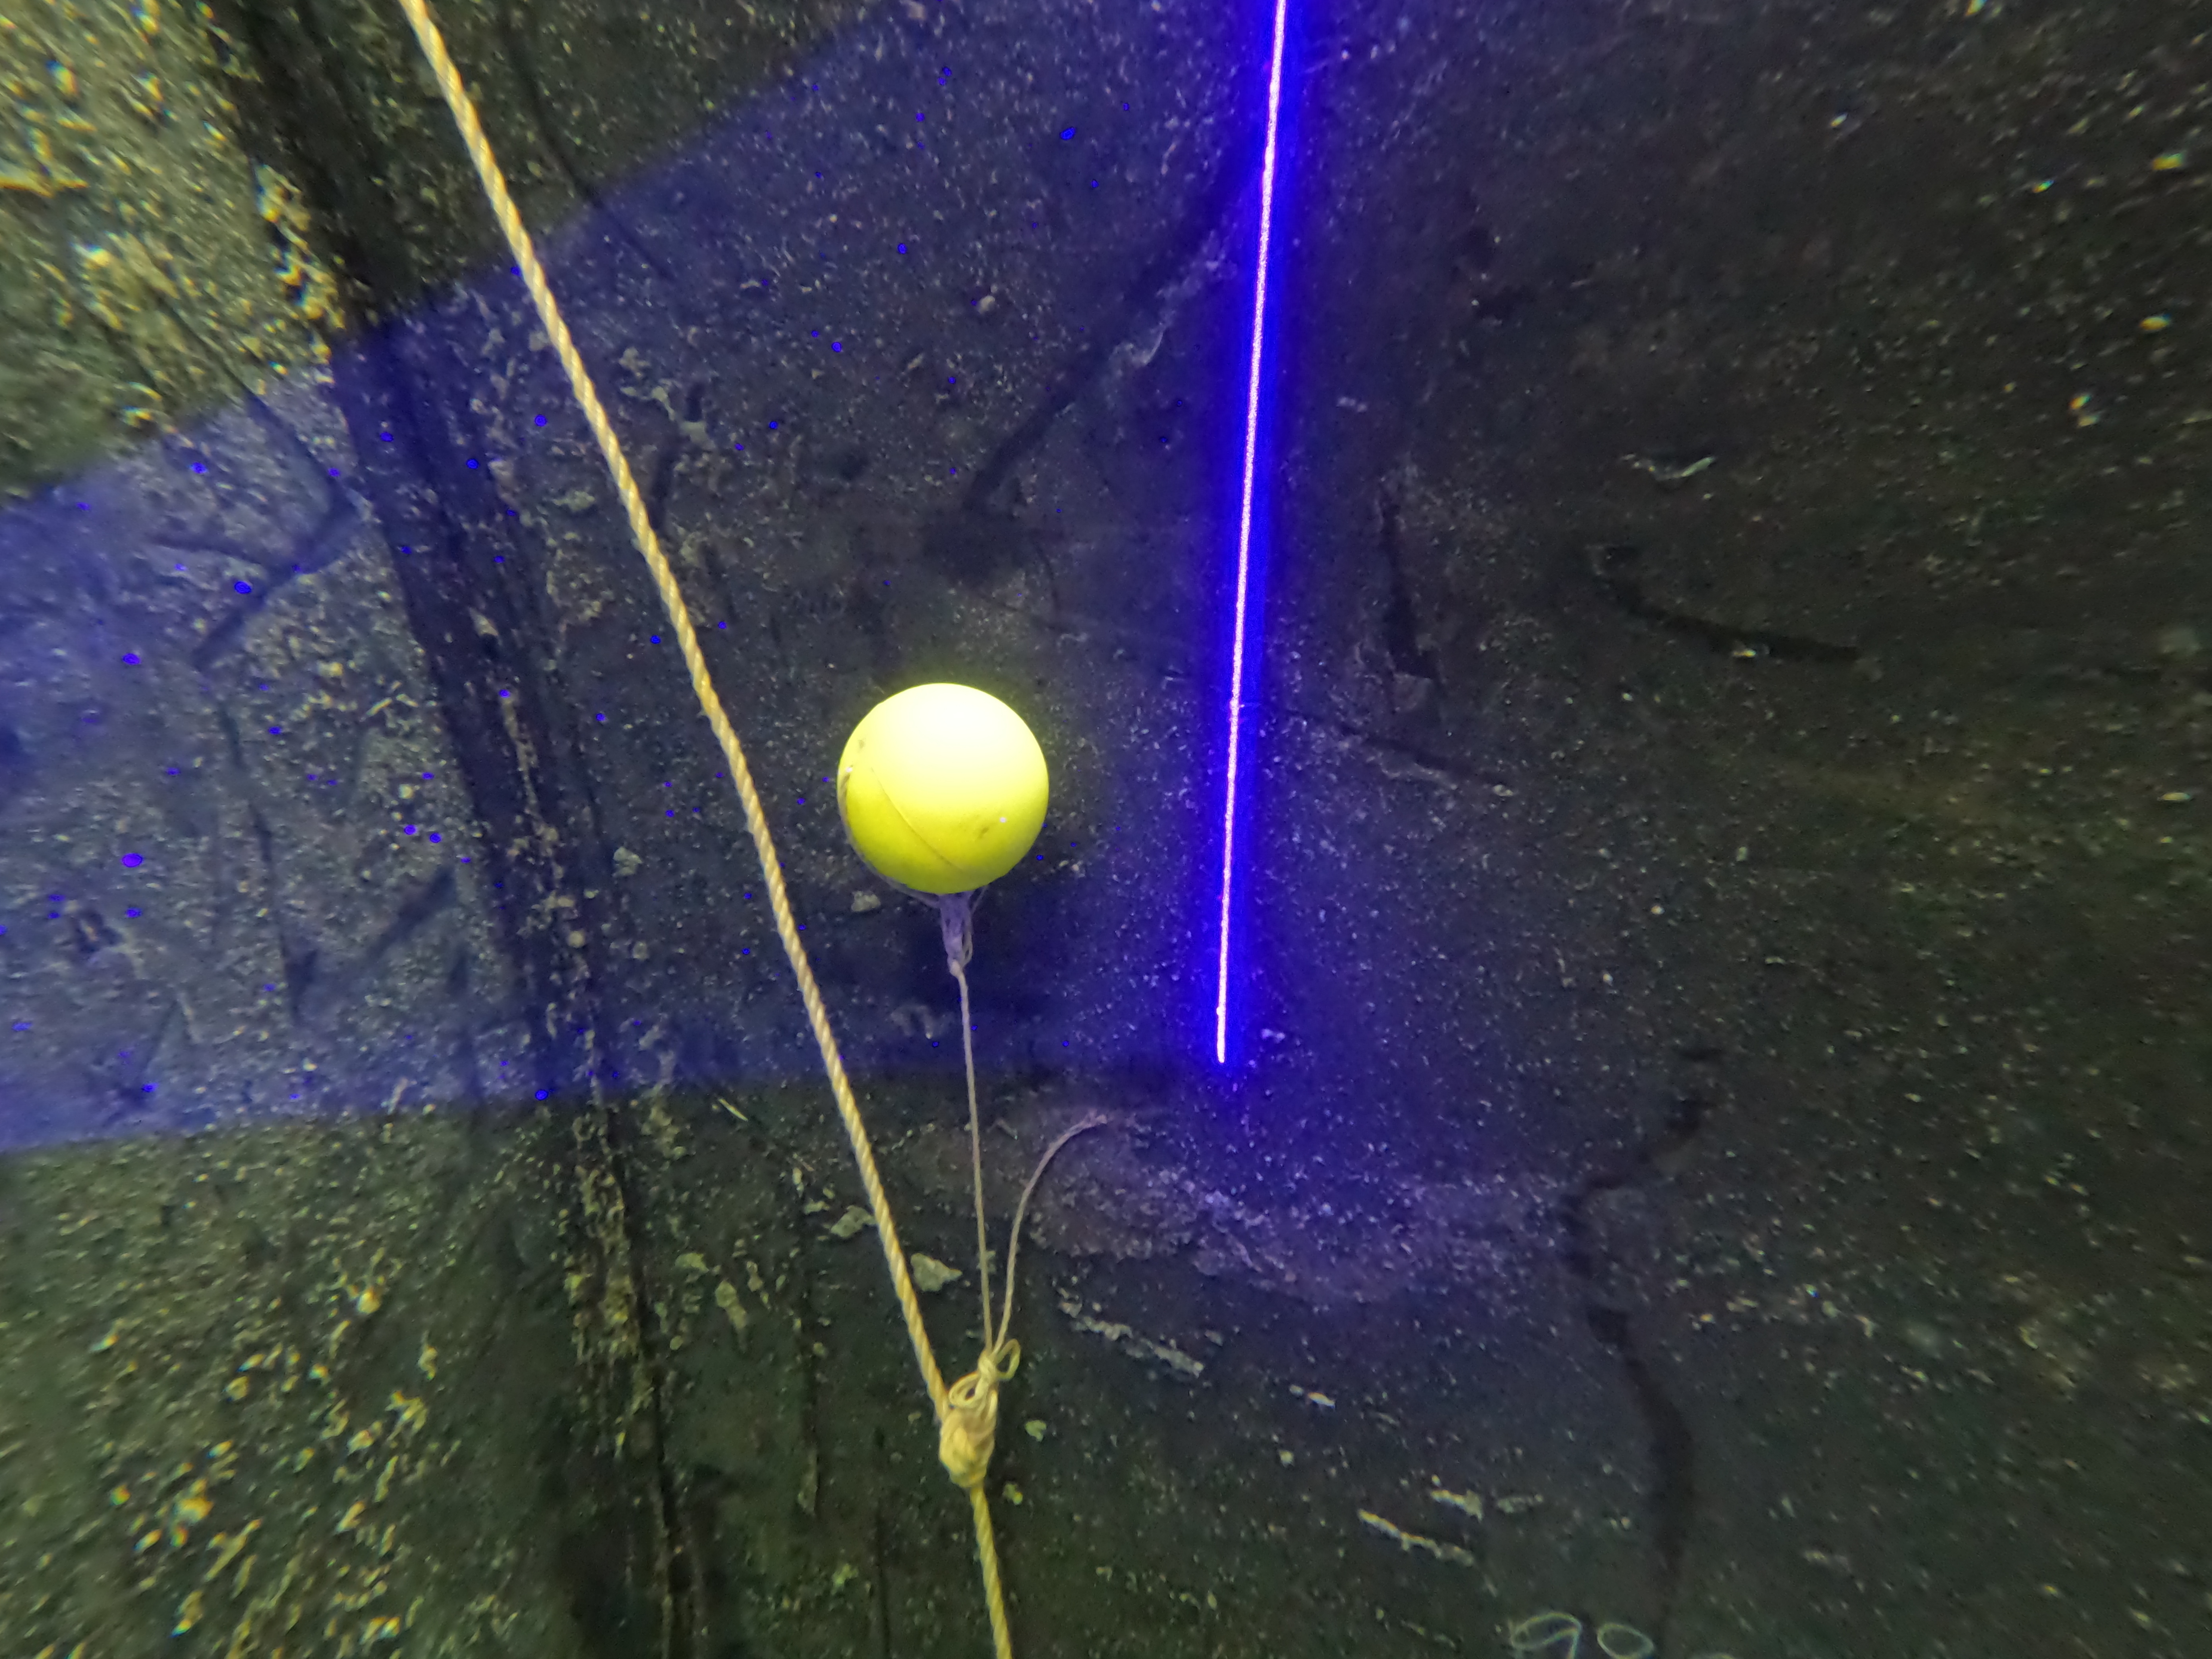

Supplement: Supplementary file 2829 [file G0030329.pdf › 2/G0030329.pdf]

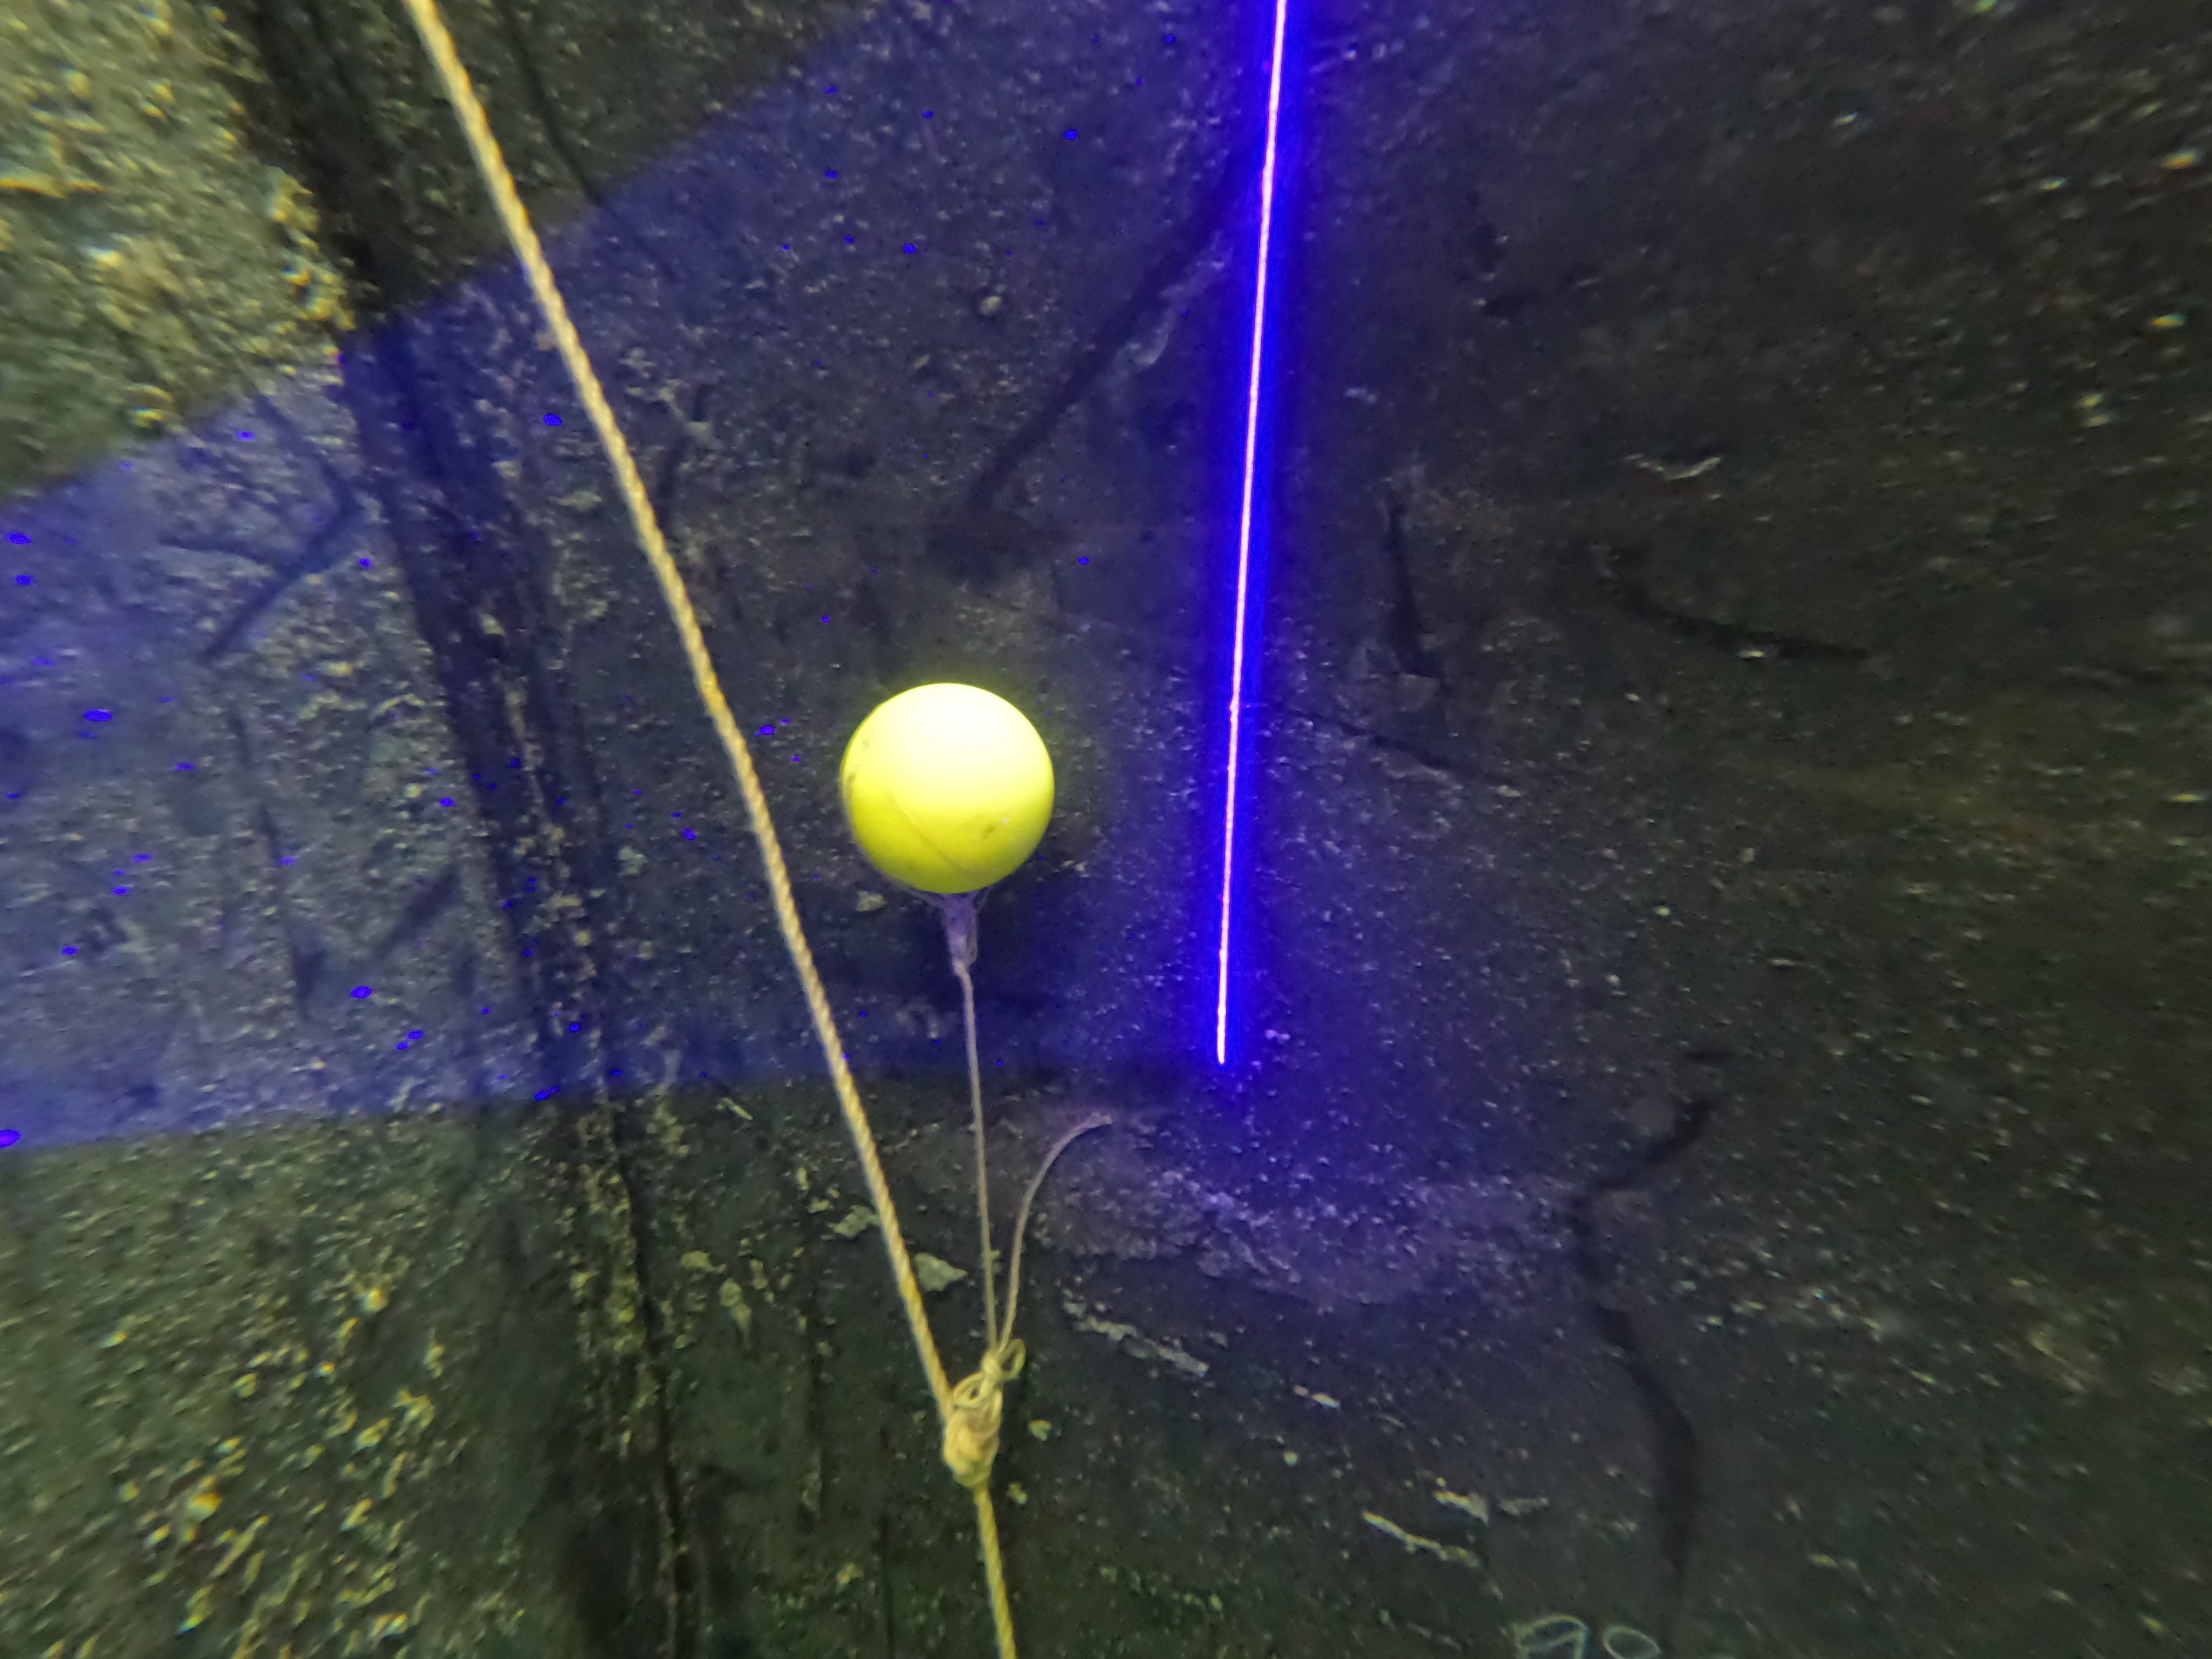

Supplement: Supplementary file 2830 [file G0030330.pdf › 2/G0030330.pdf]

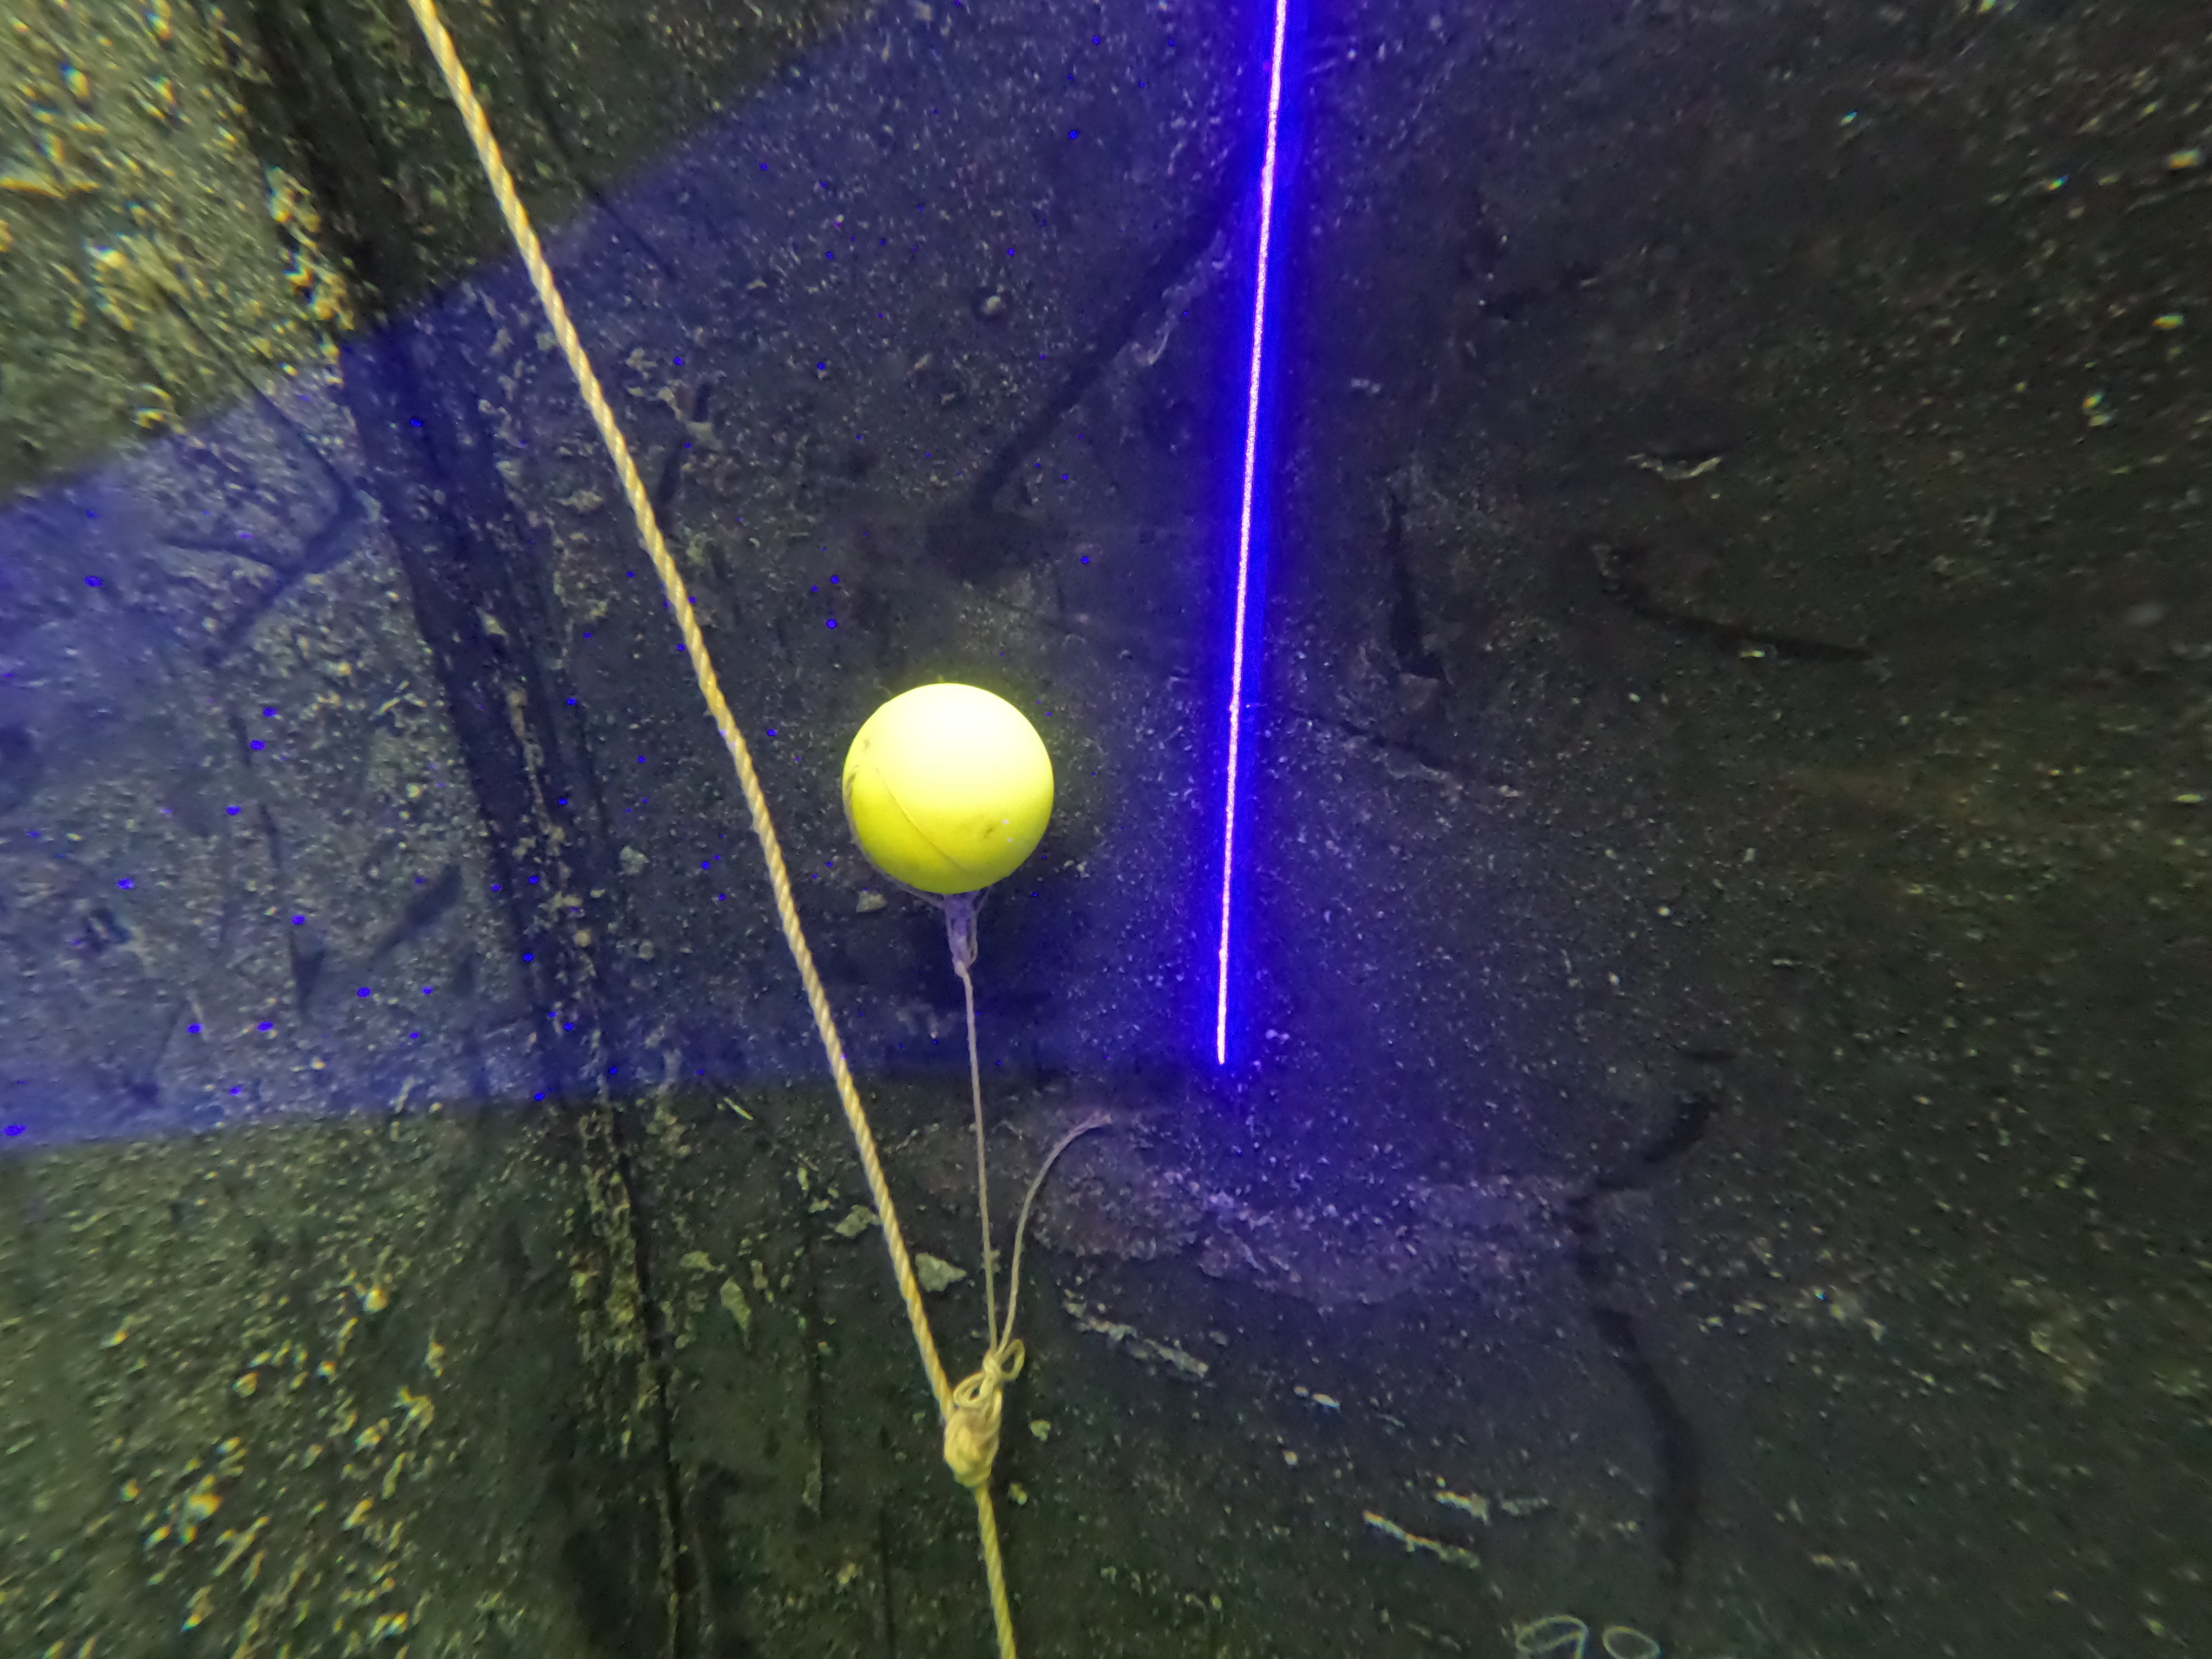

Supplement: Supplementary file 2831 [file G0030331.pdf › 2/G0030331.pdf]

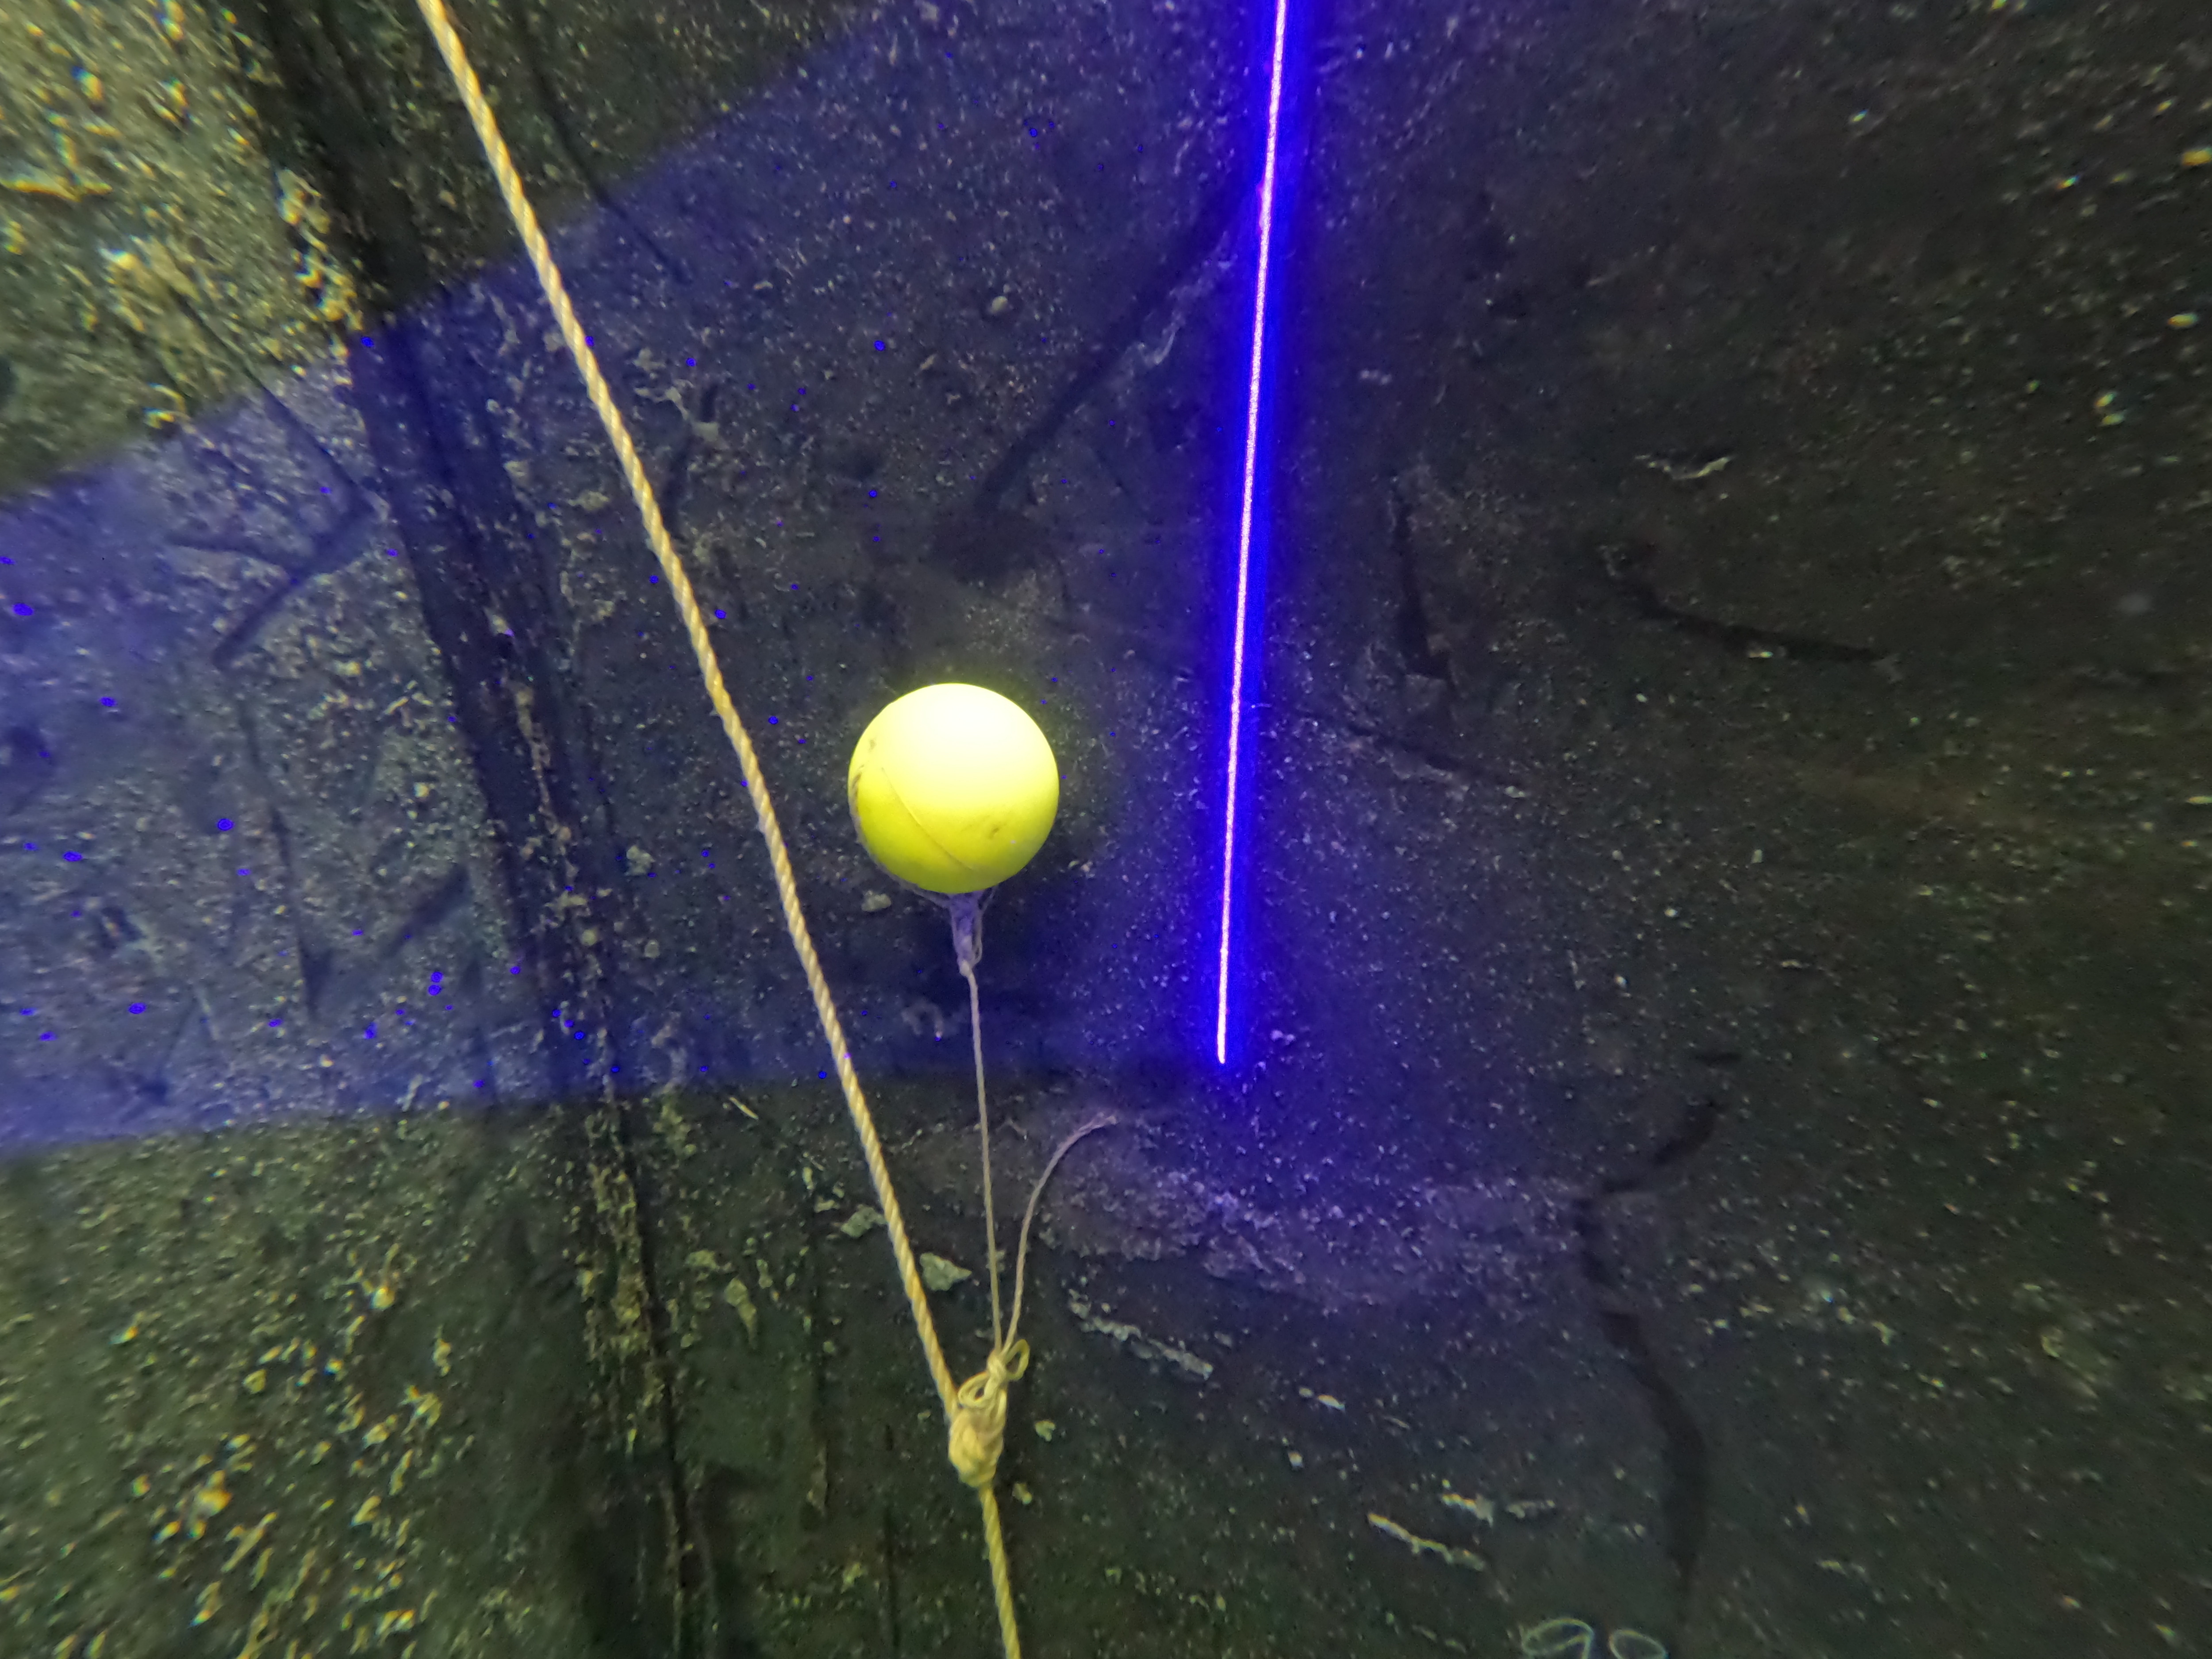

Supplement: Supplementary file 2832 [file G0030332.pdf › 2/G0030332.pdf]

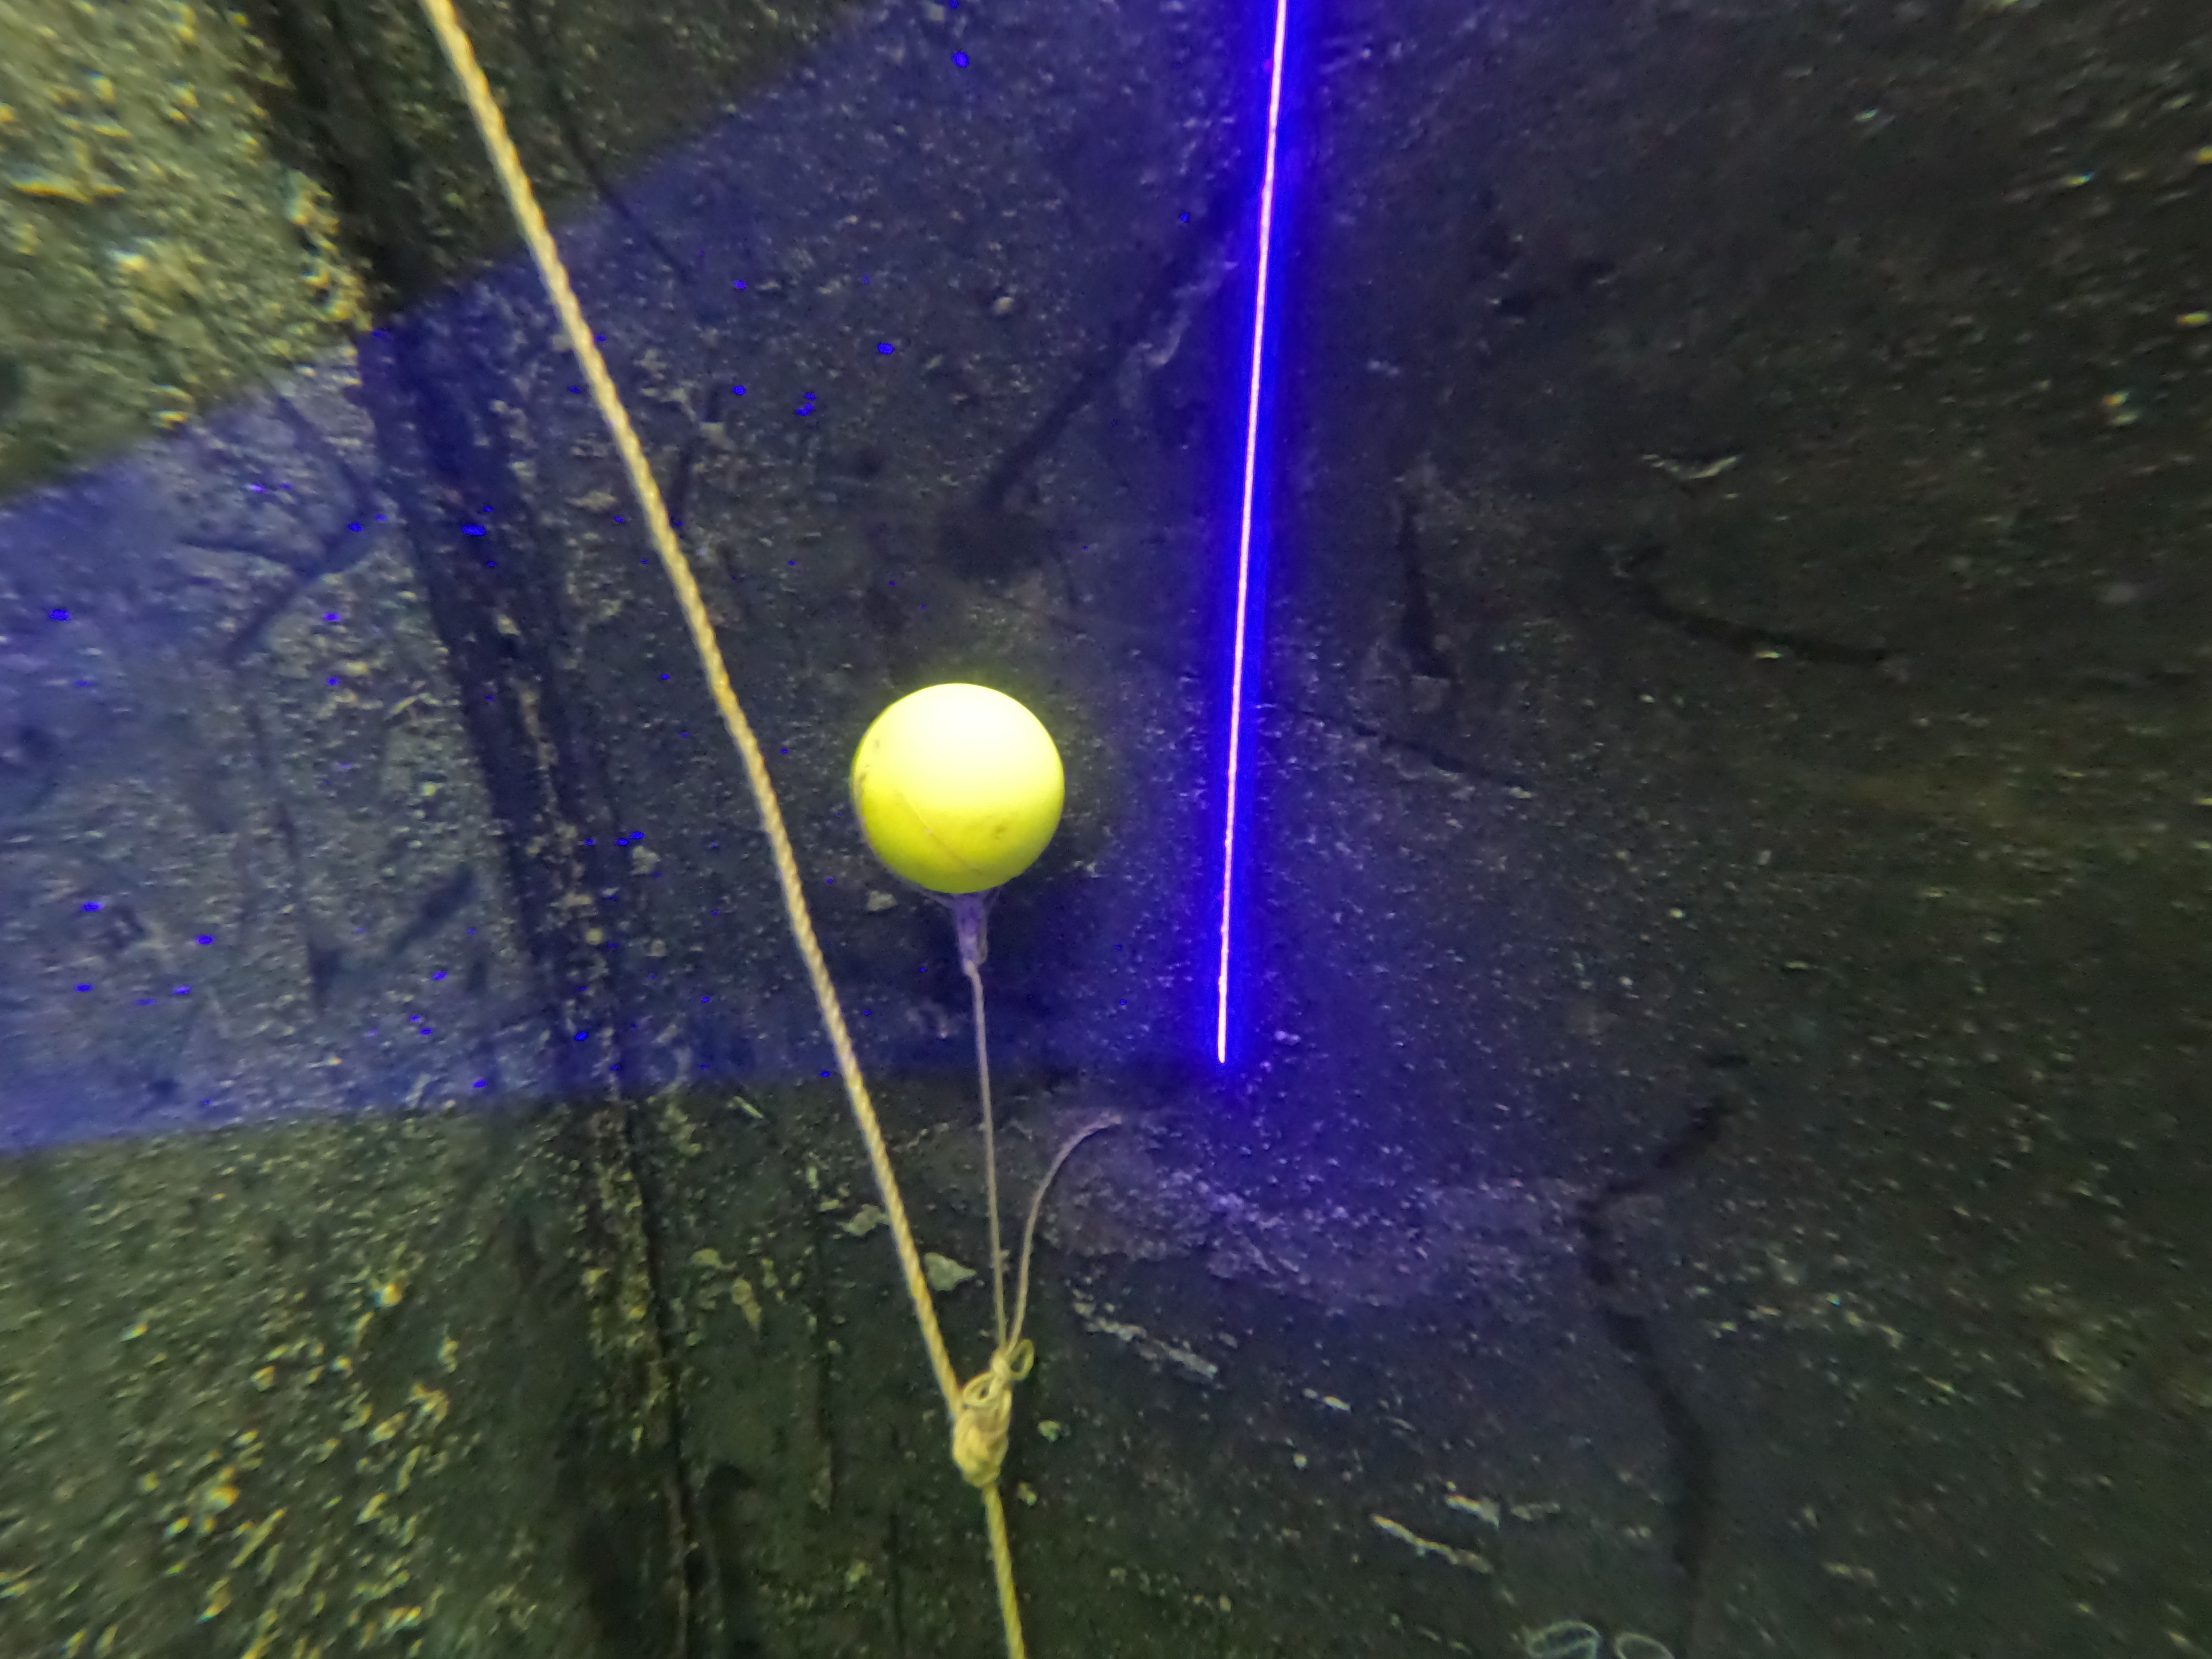

Supplement: Supplementary file 2833 [file G0030333.pdf › 2/G0030333.pdf]

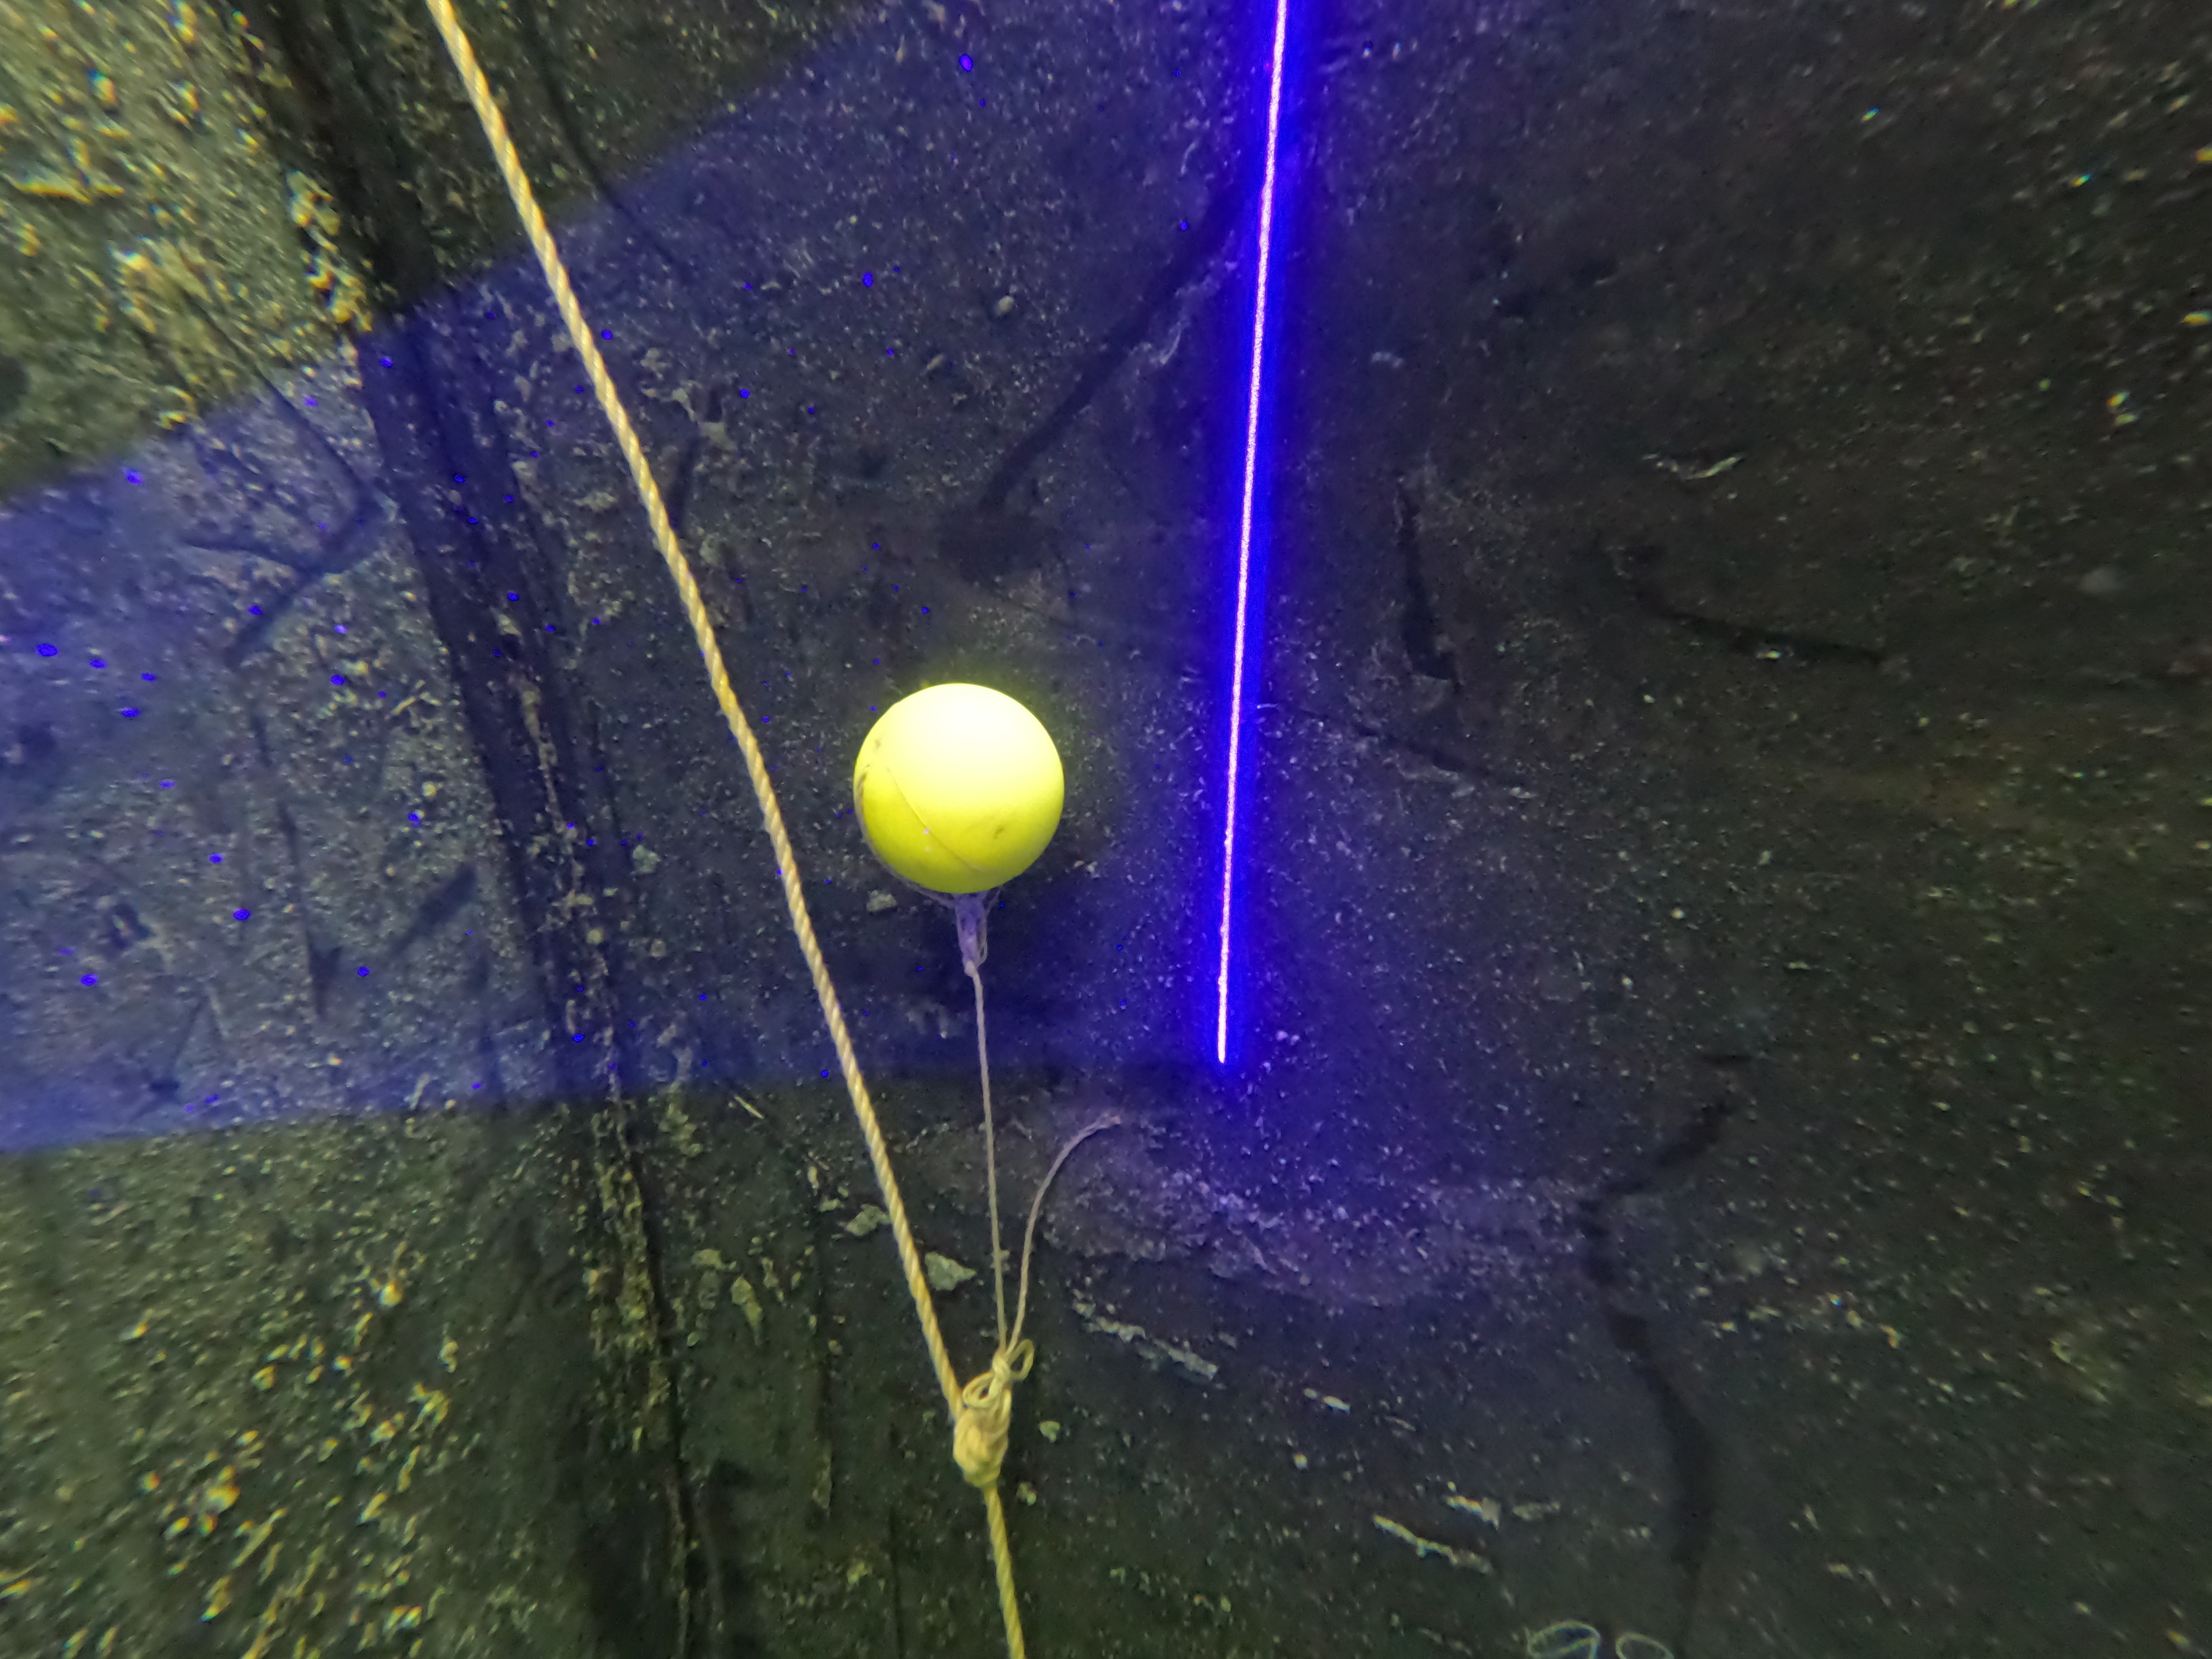

Supplement: Supplementary file 2834 [file G0030334.pdf › 2/G0030334.pdf]

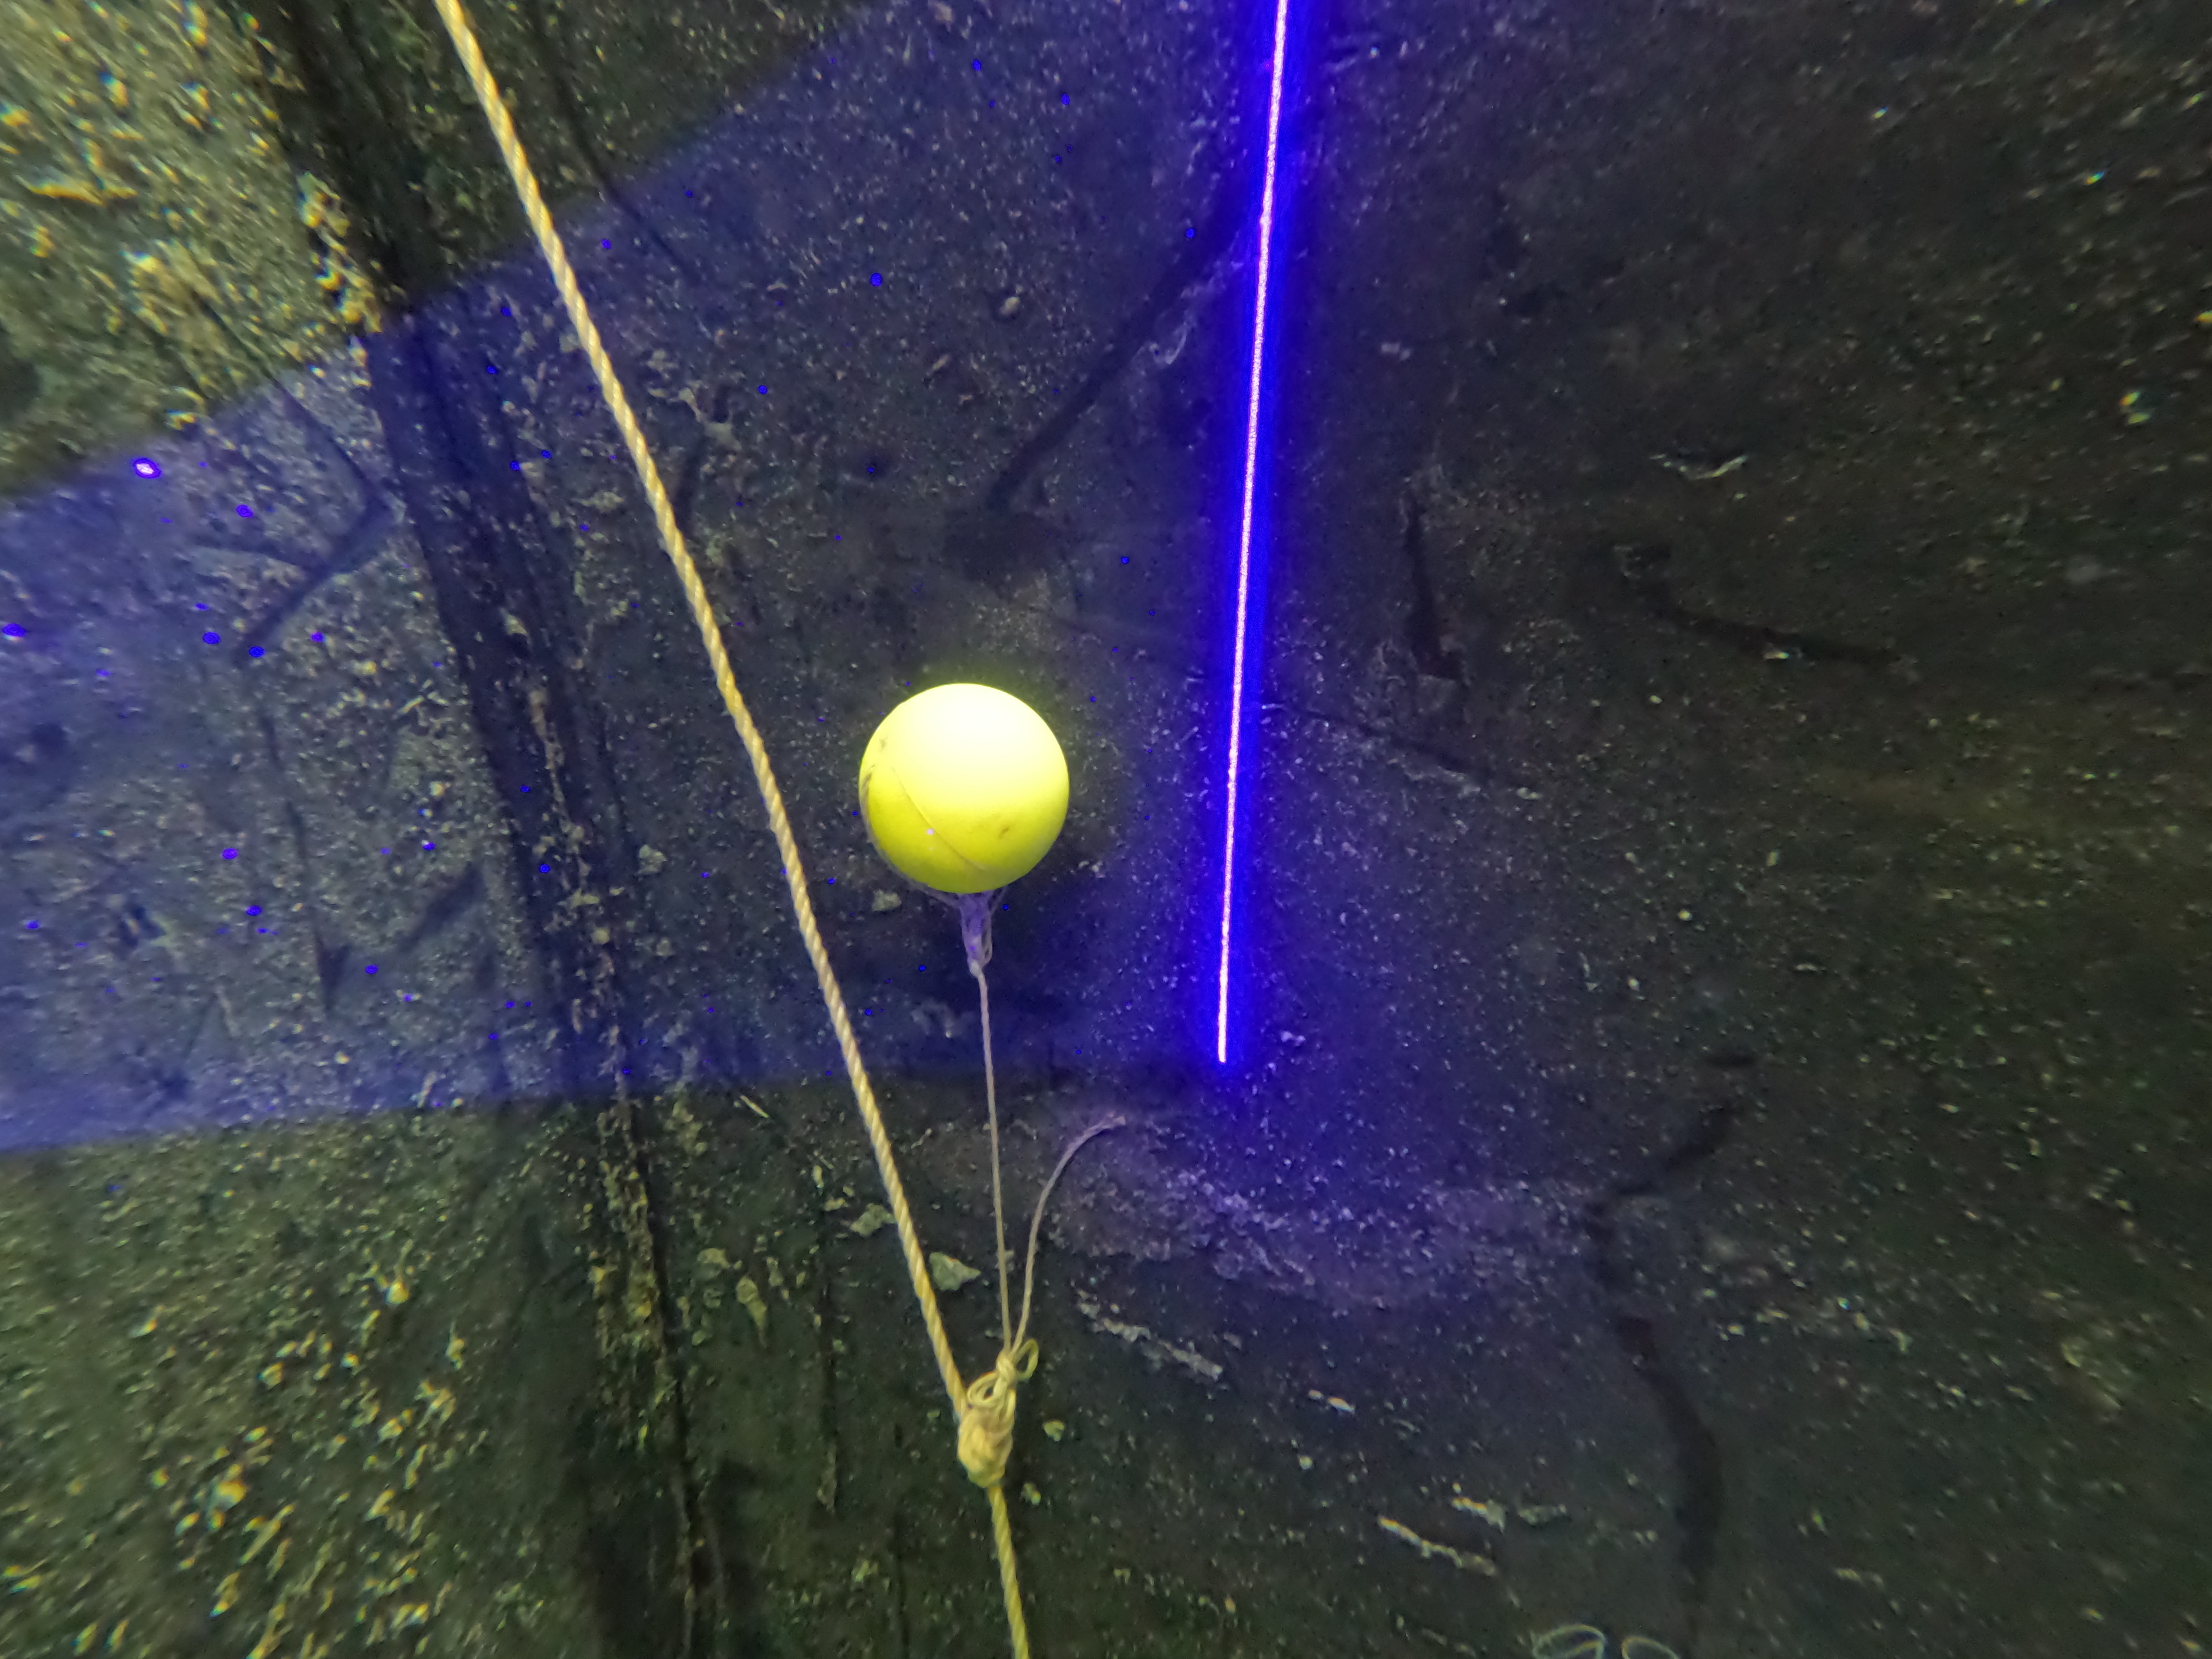

Supplement: Supplementary file 2835 [file G0030335.pdf › 2/G0030335.pdf]

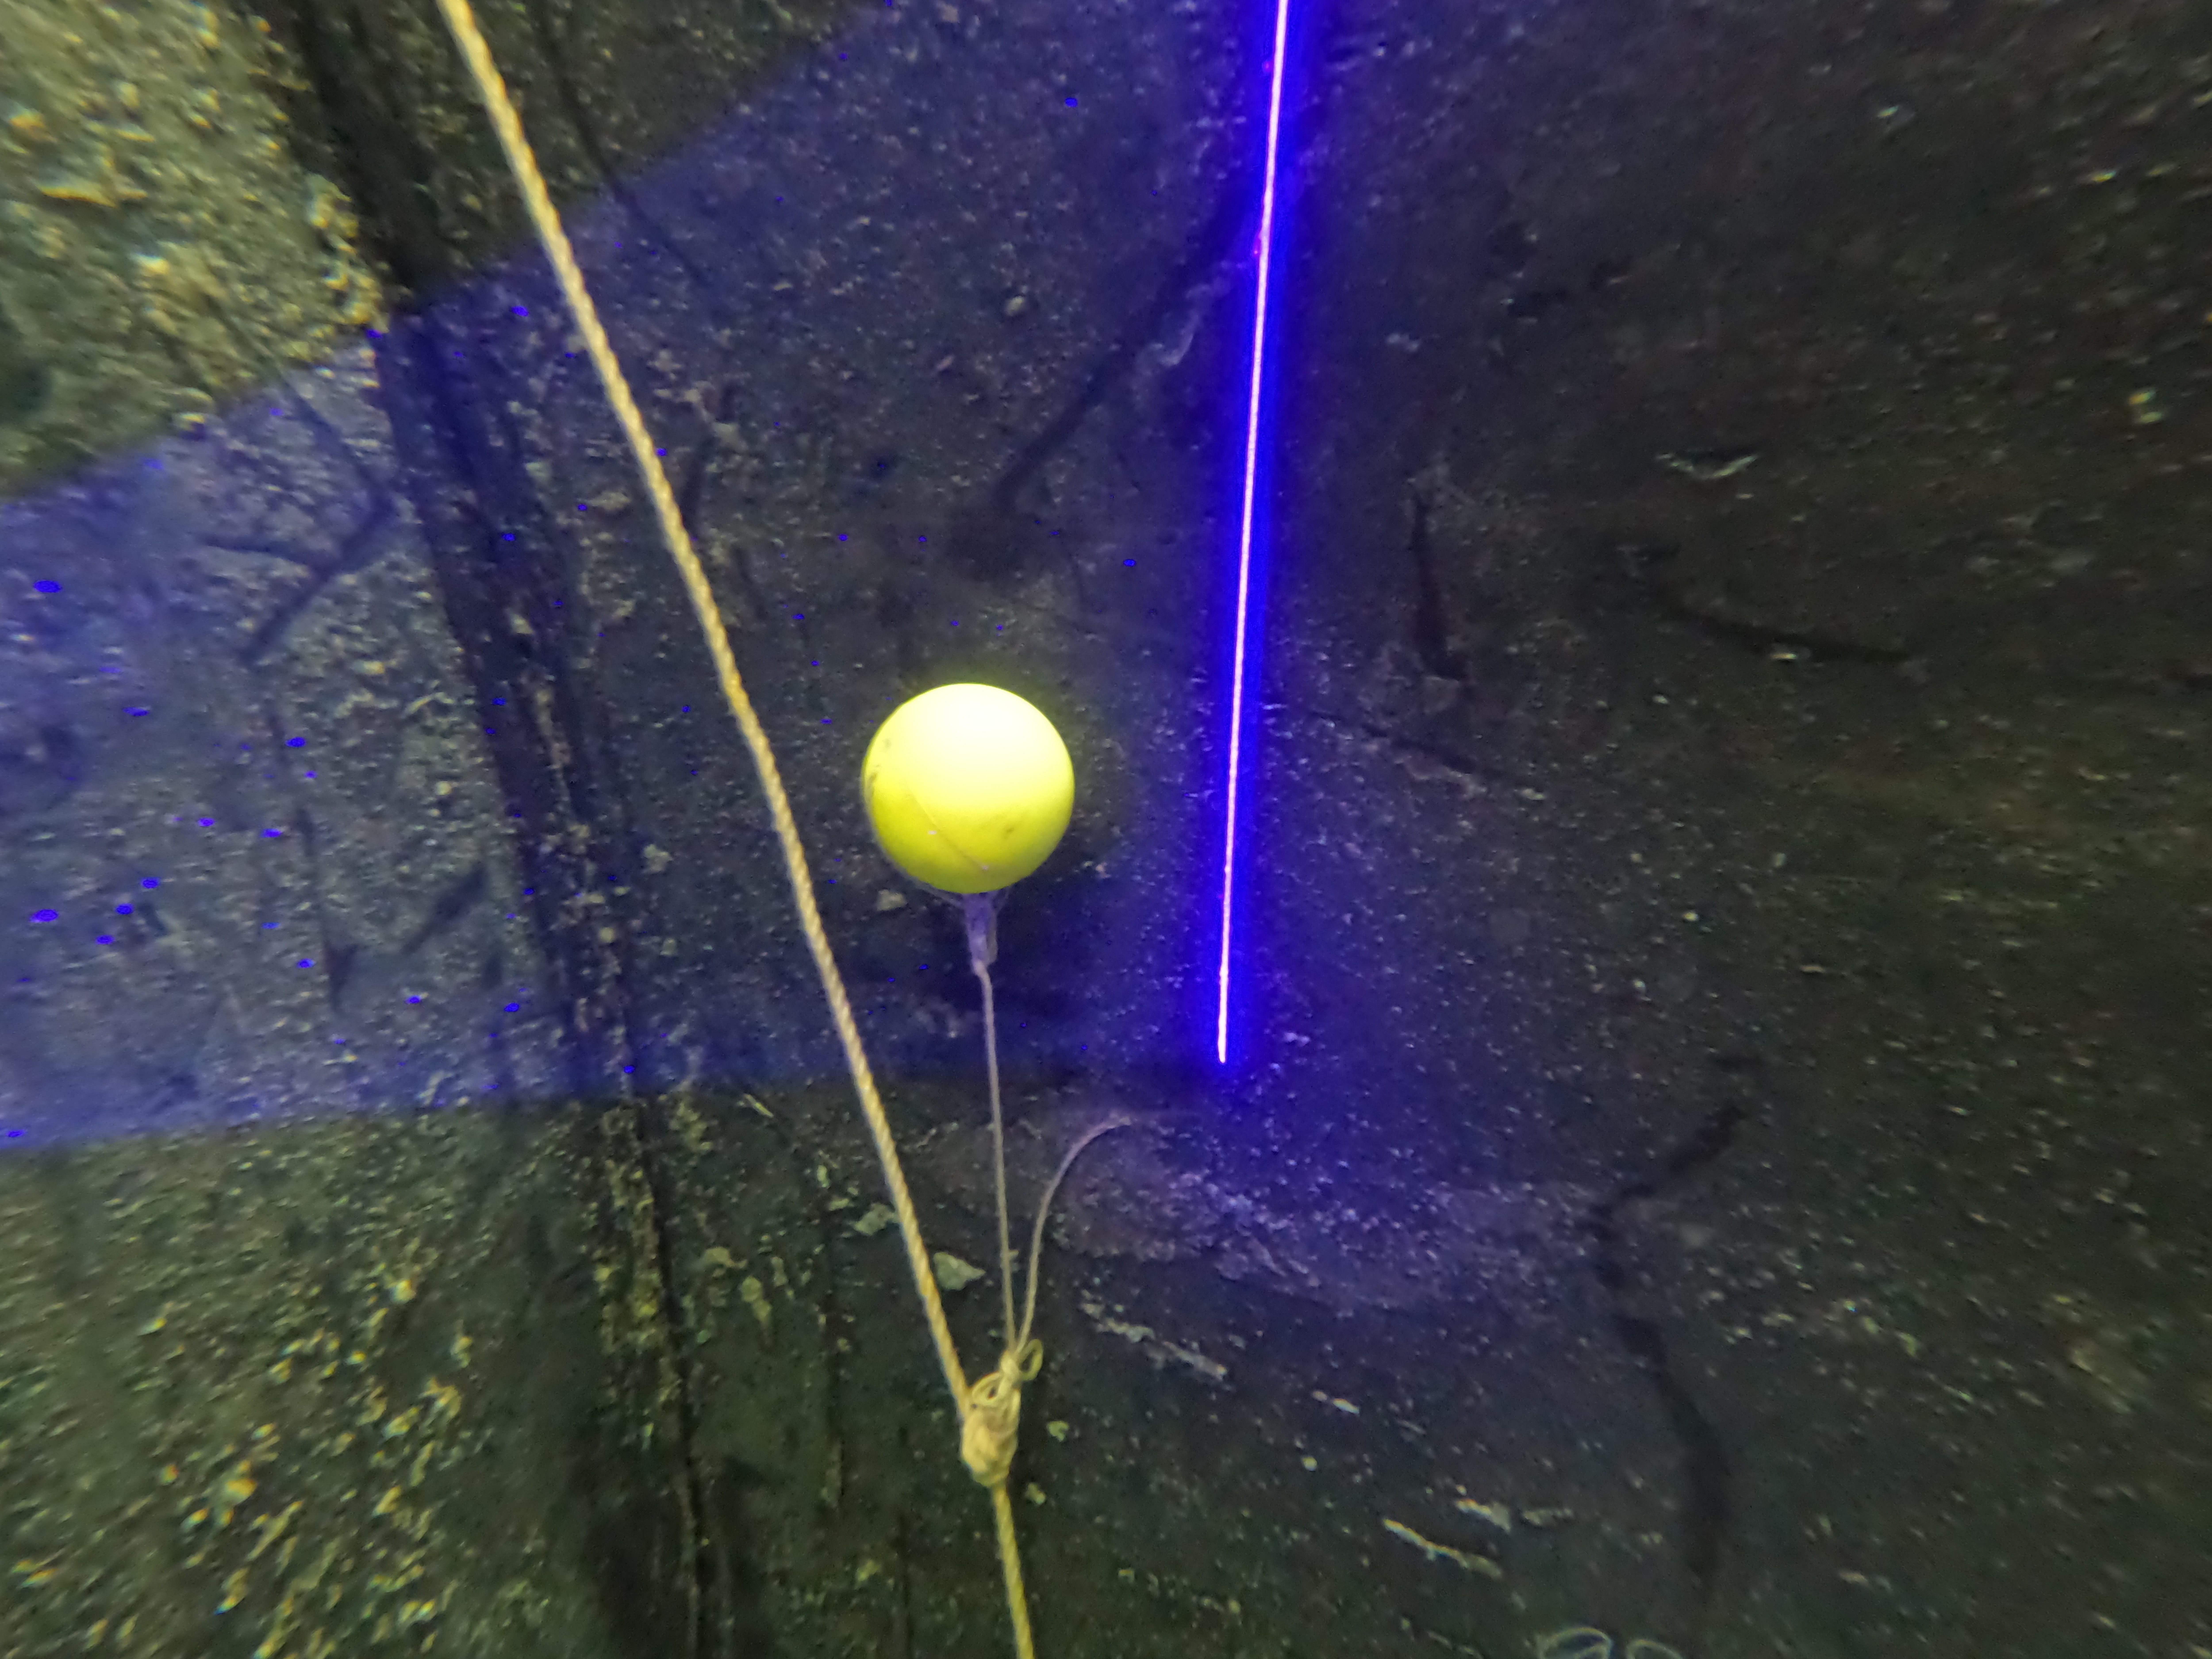

Supplement: Supplementary file 2836 [file G0030336.pdf › 2/G0030336.pdf]

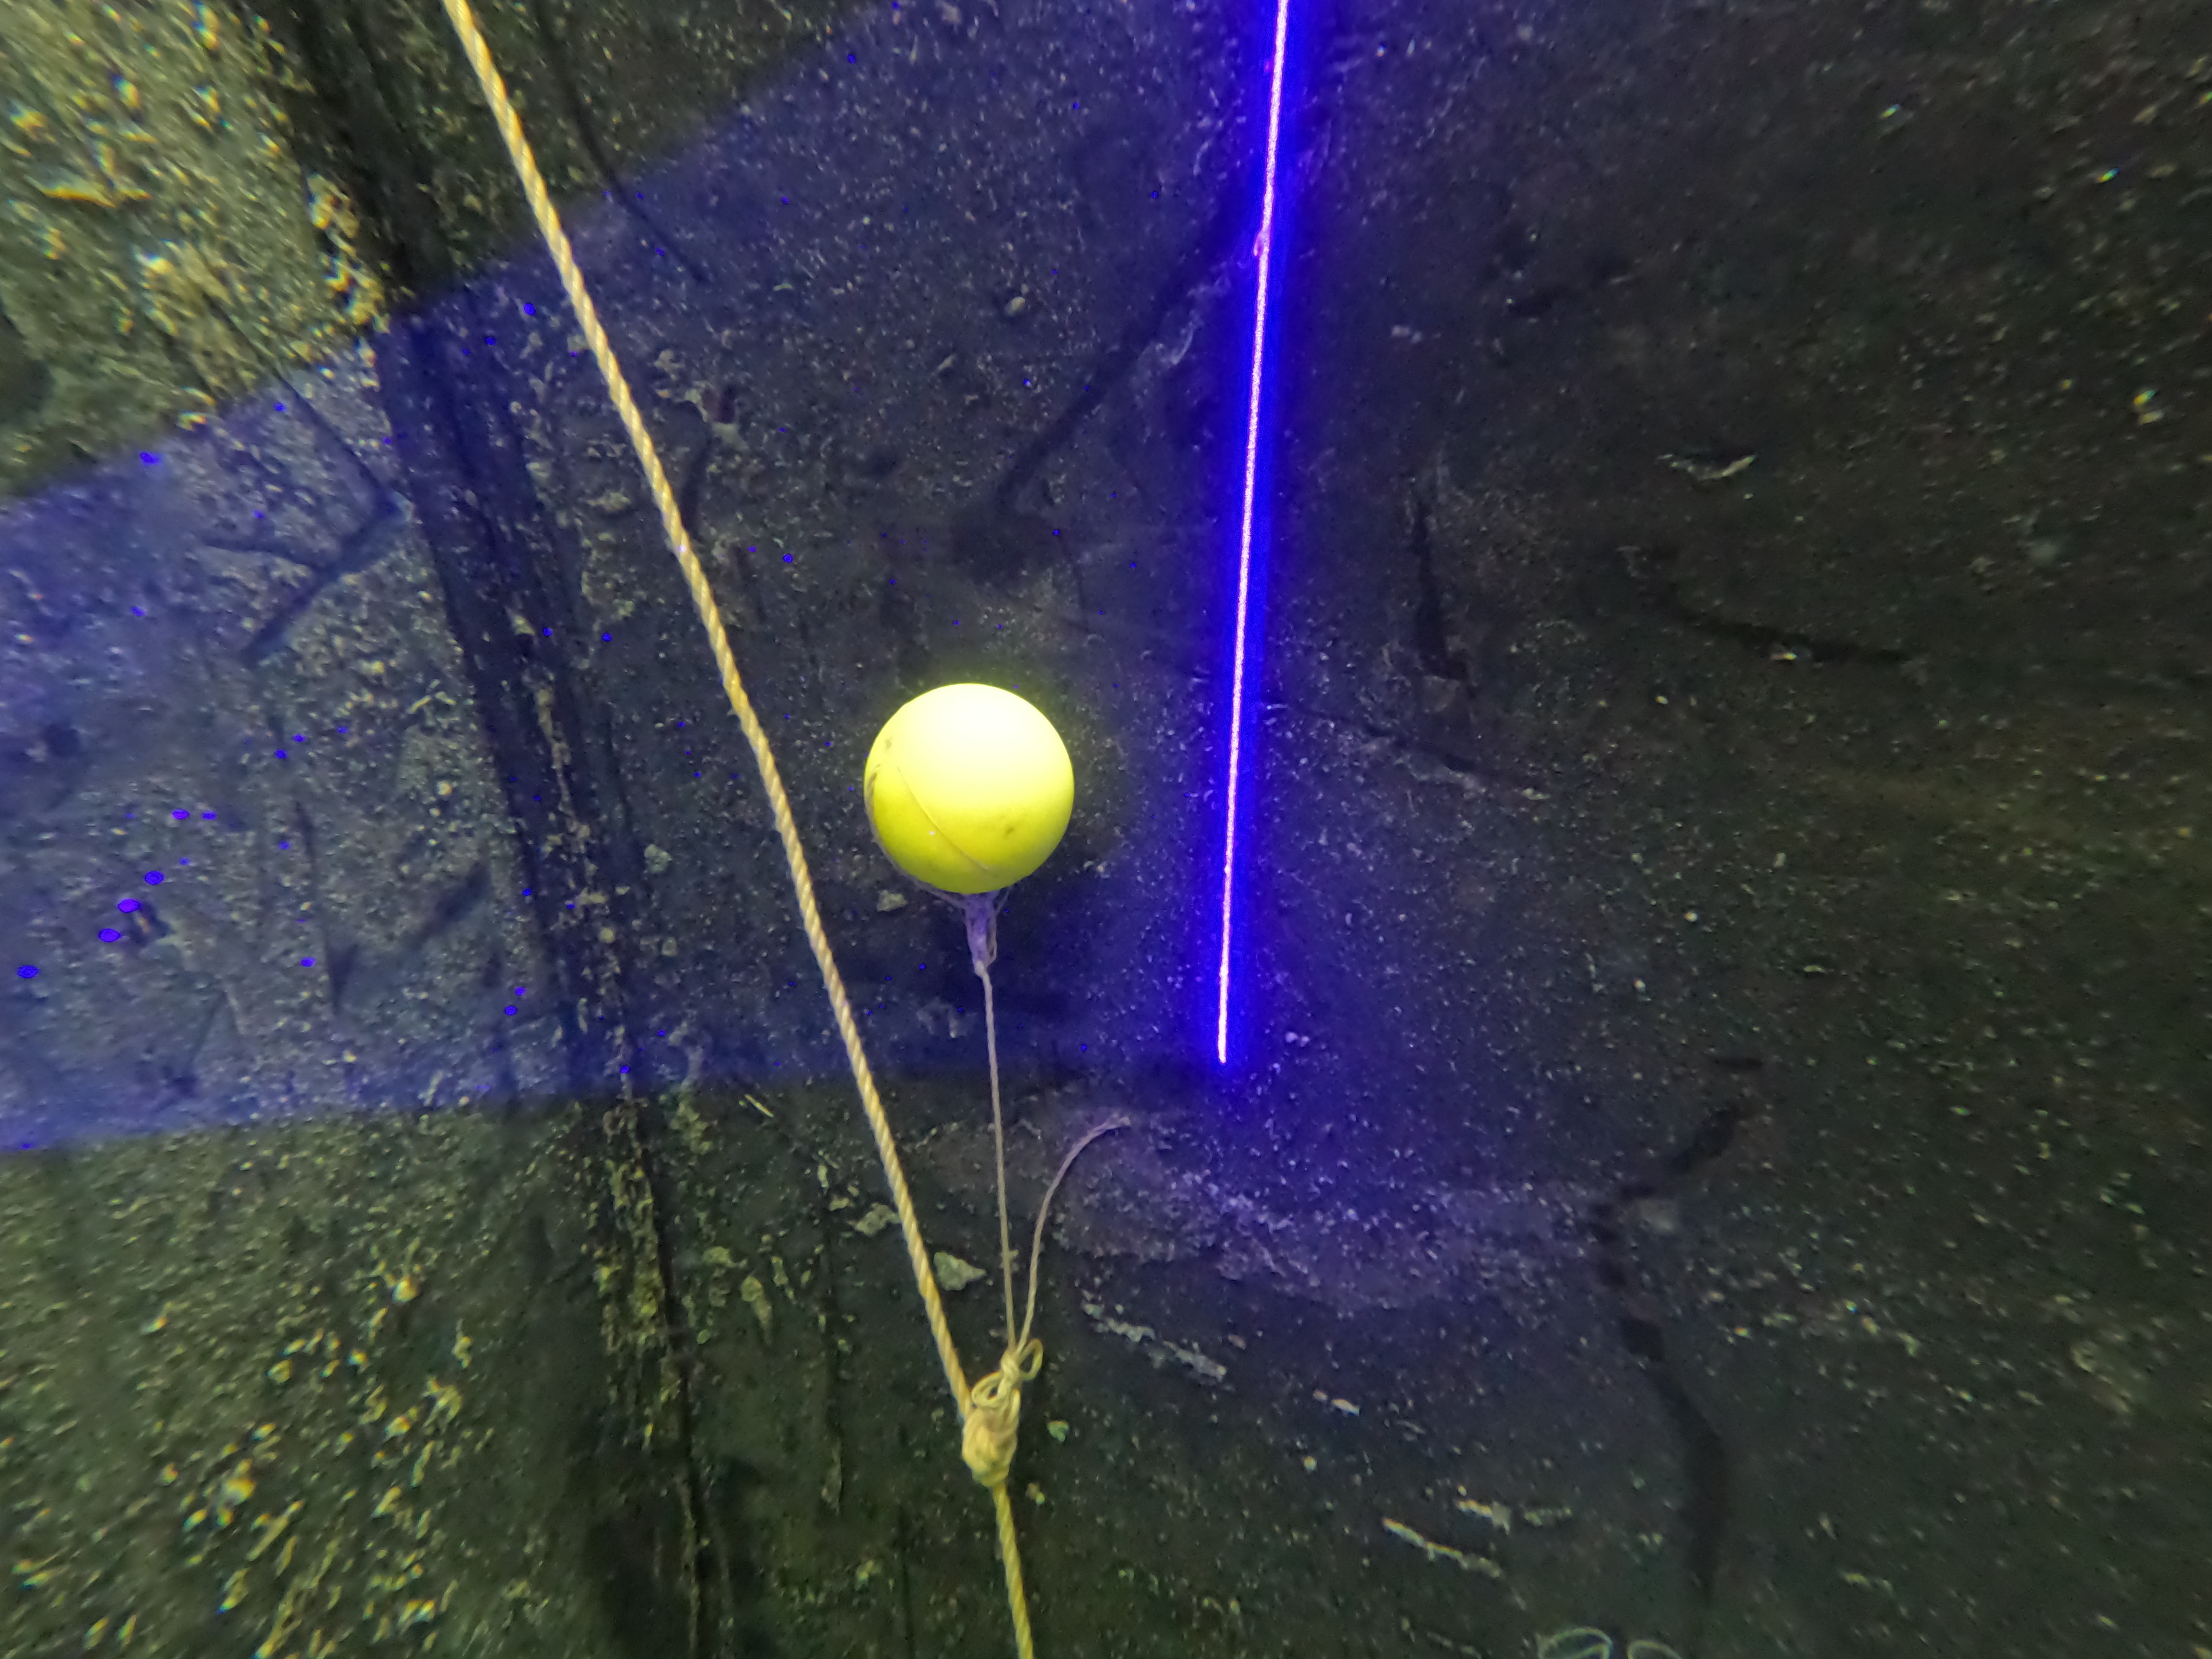

Supplement: Supplementary file 2837 [file G0030337.pdf › 2/G0030337.pdf]

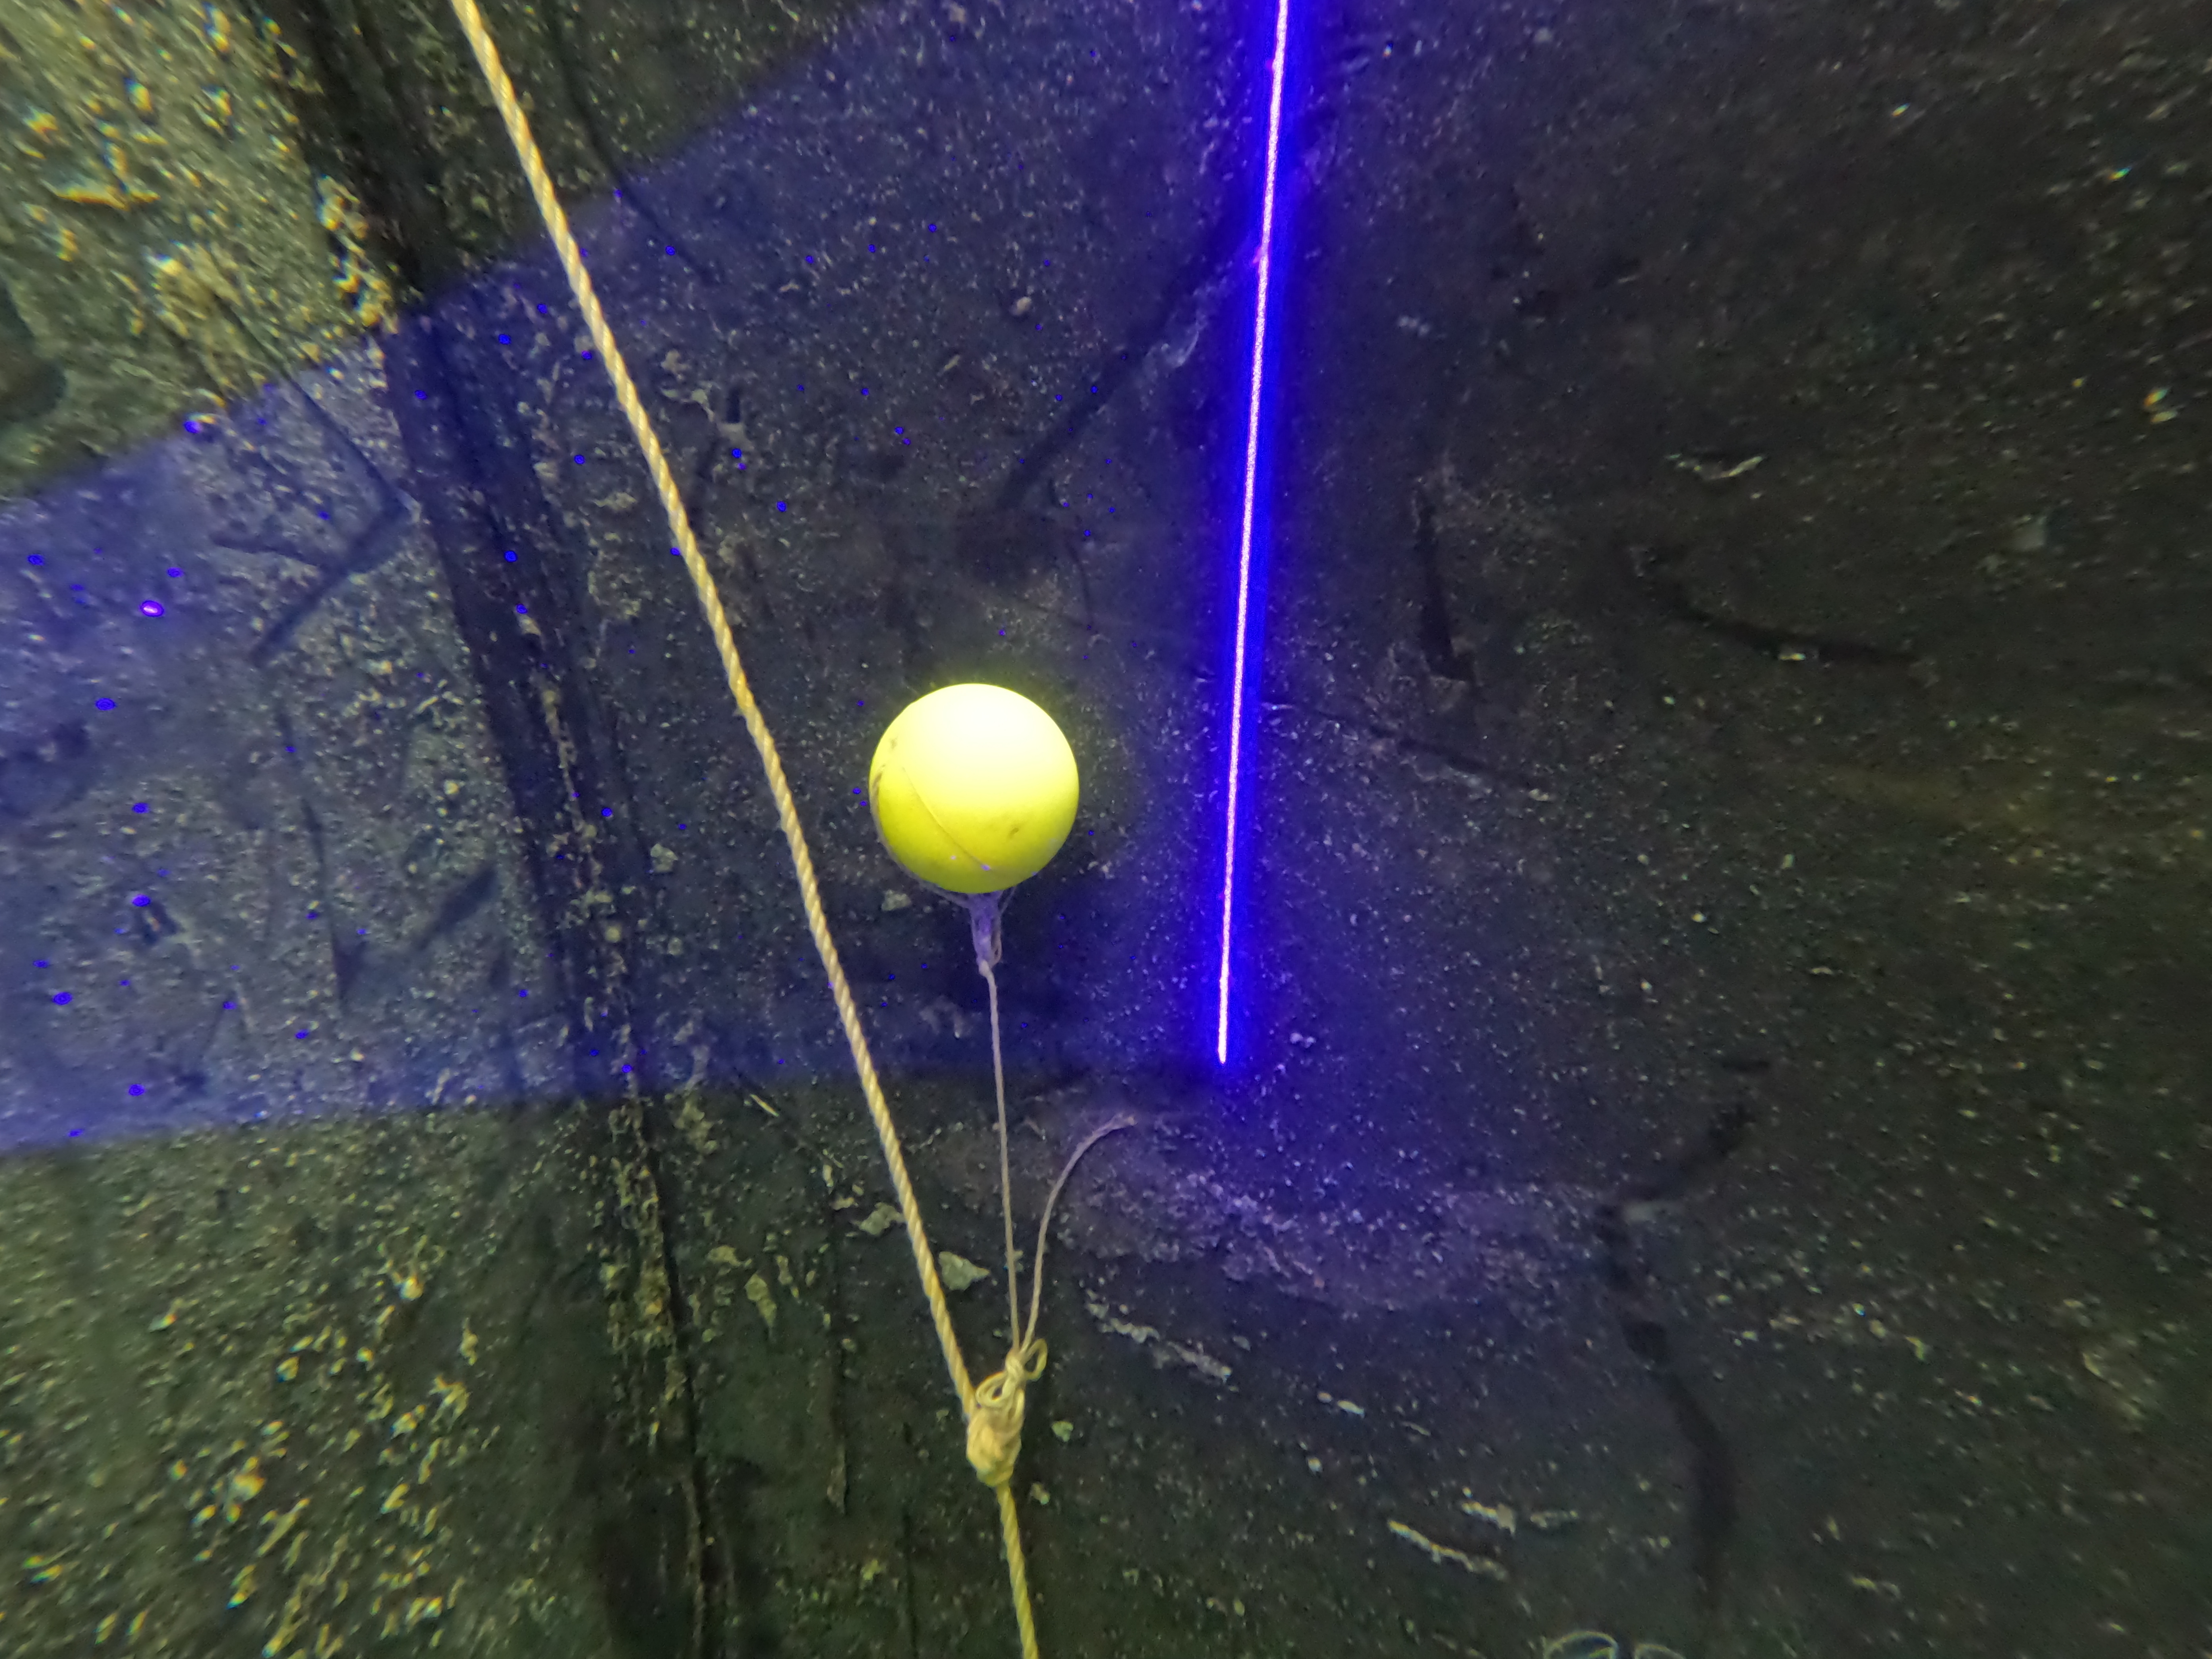

Supplement: Supplementary file 2838 [file G0030338.pdf › 2/G0030338.pdf]

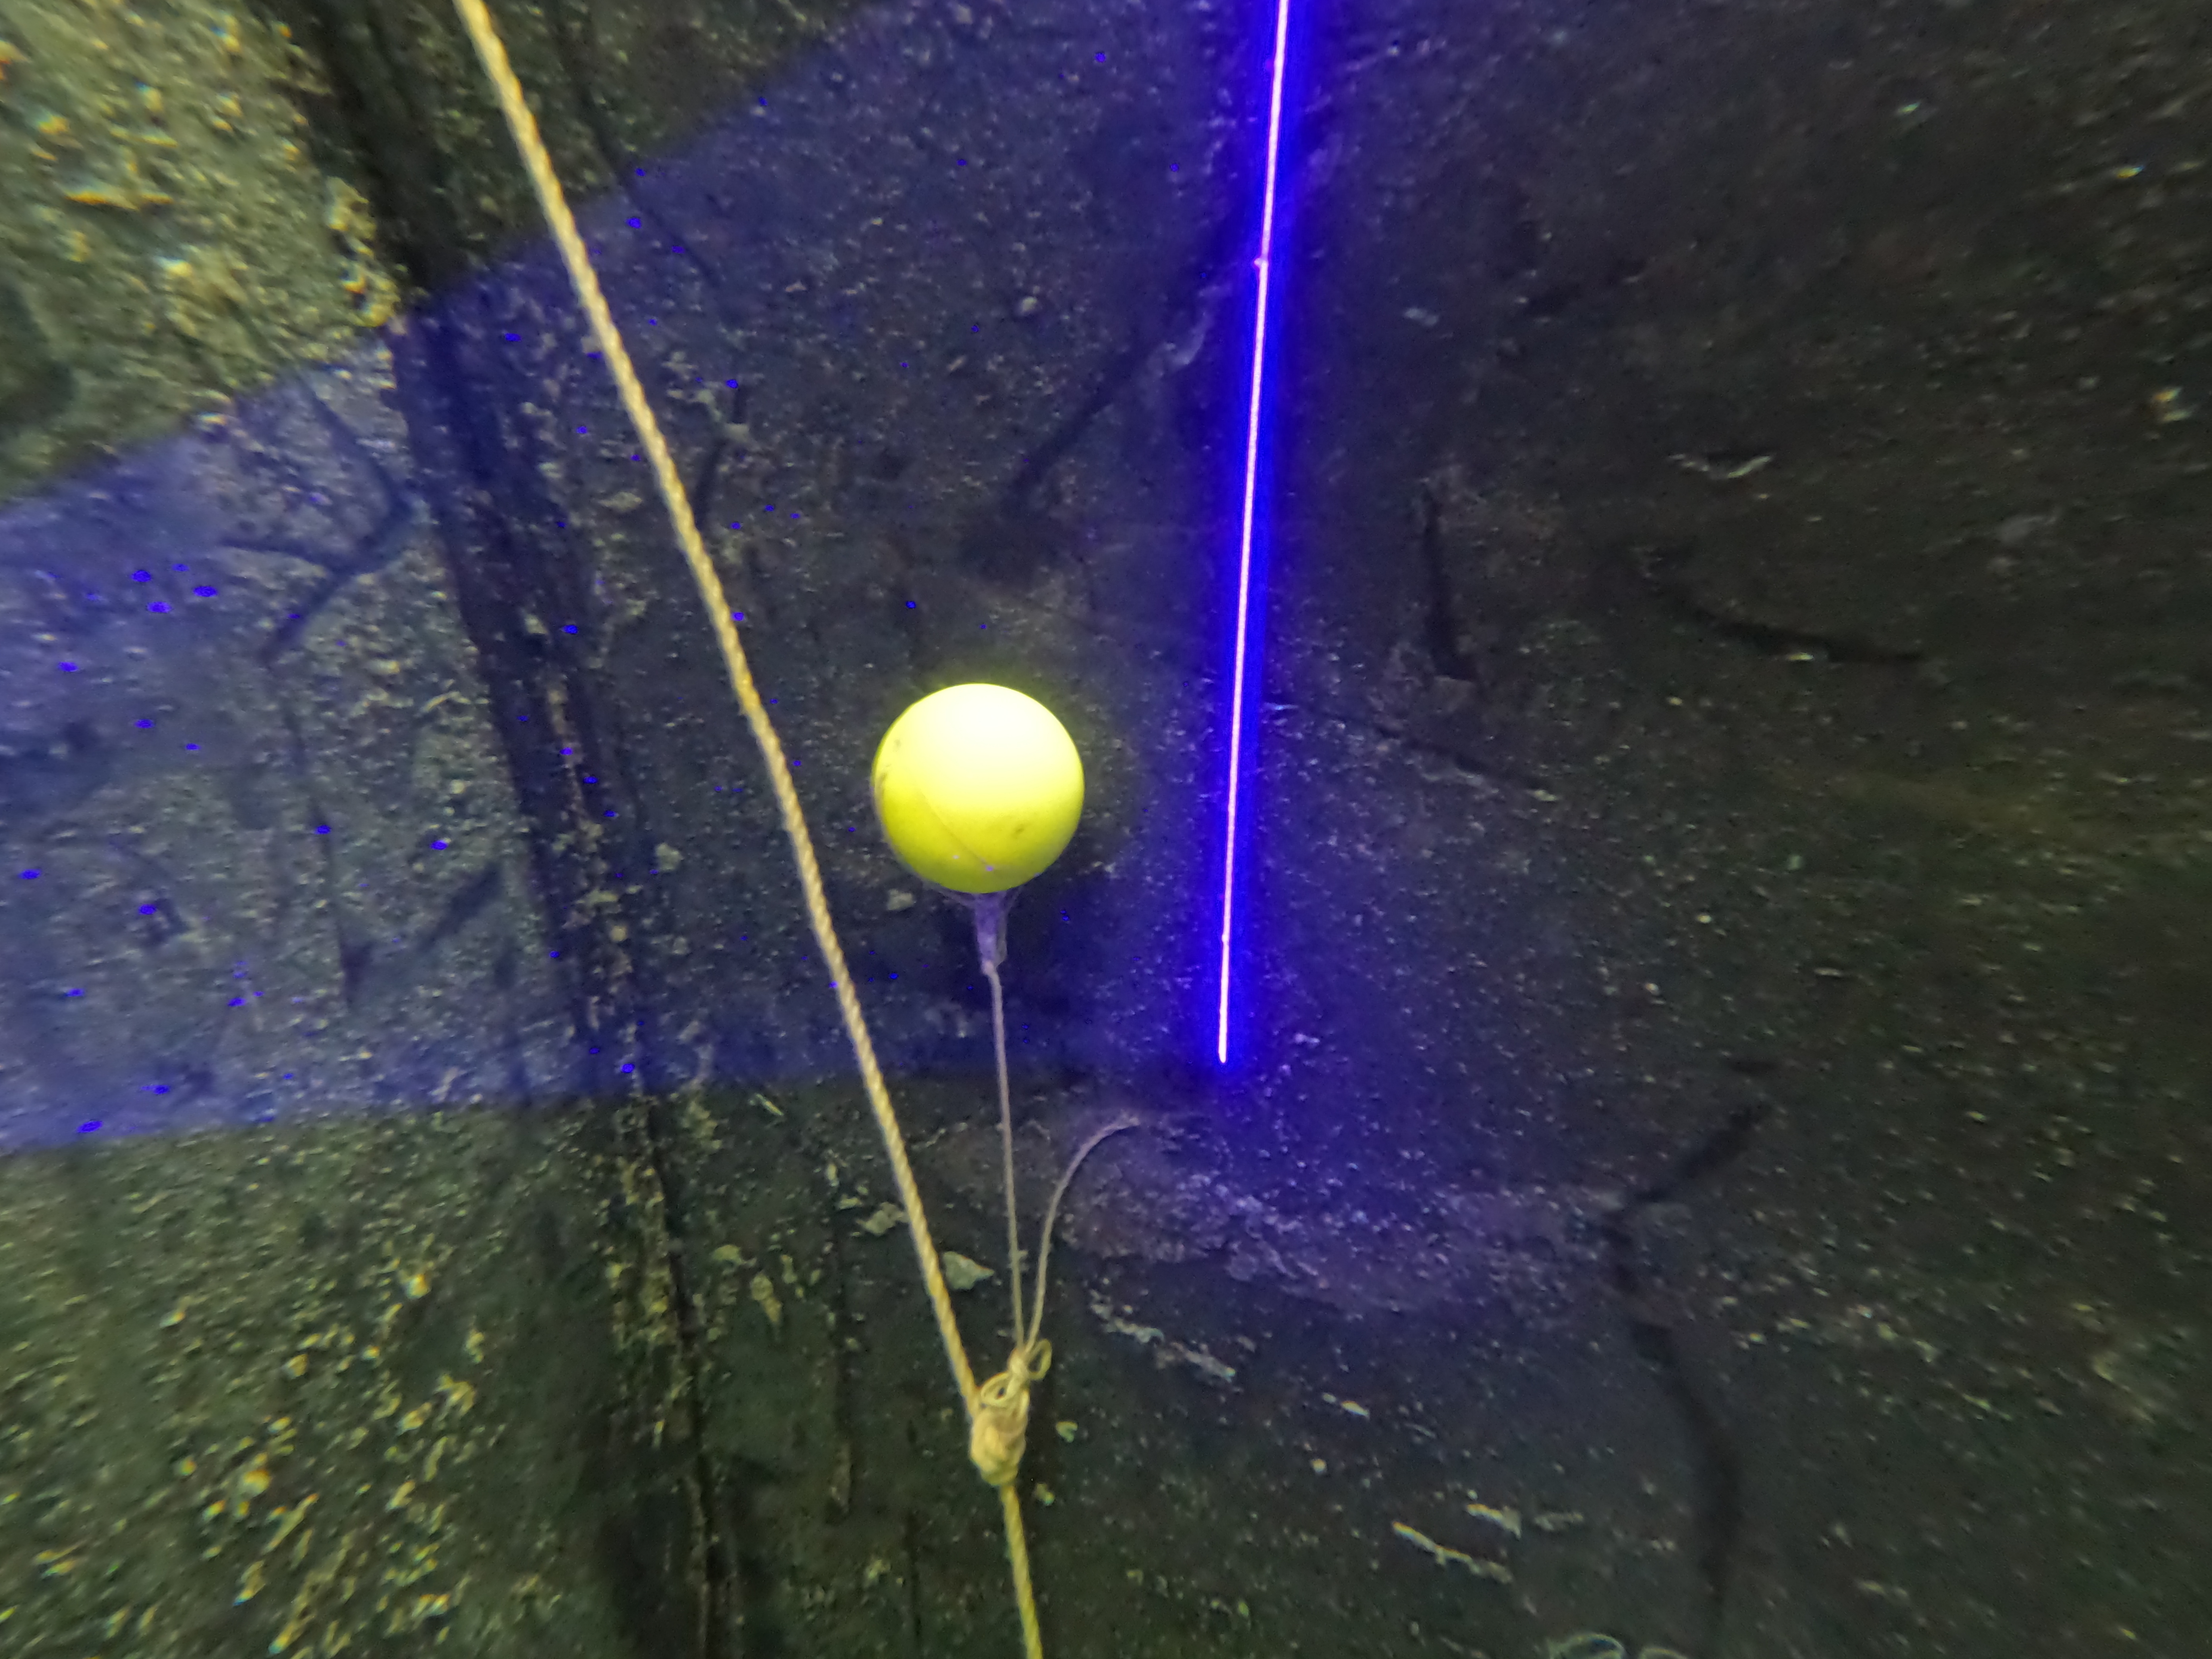

Supplement: Supplementary file 2839 [file G0030339.pdf › 2/G0030339.pdf]

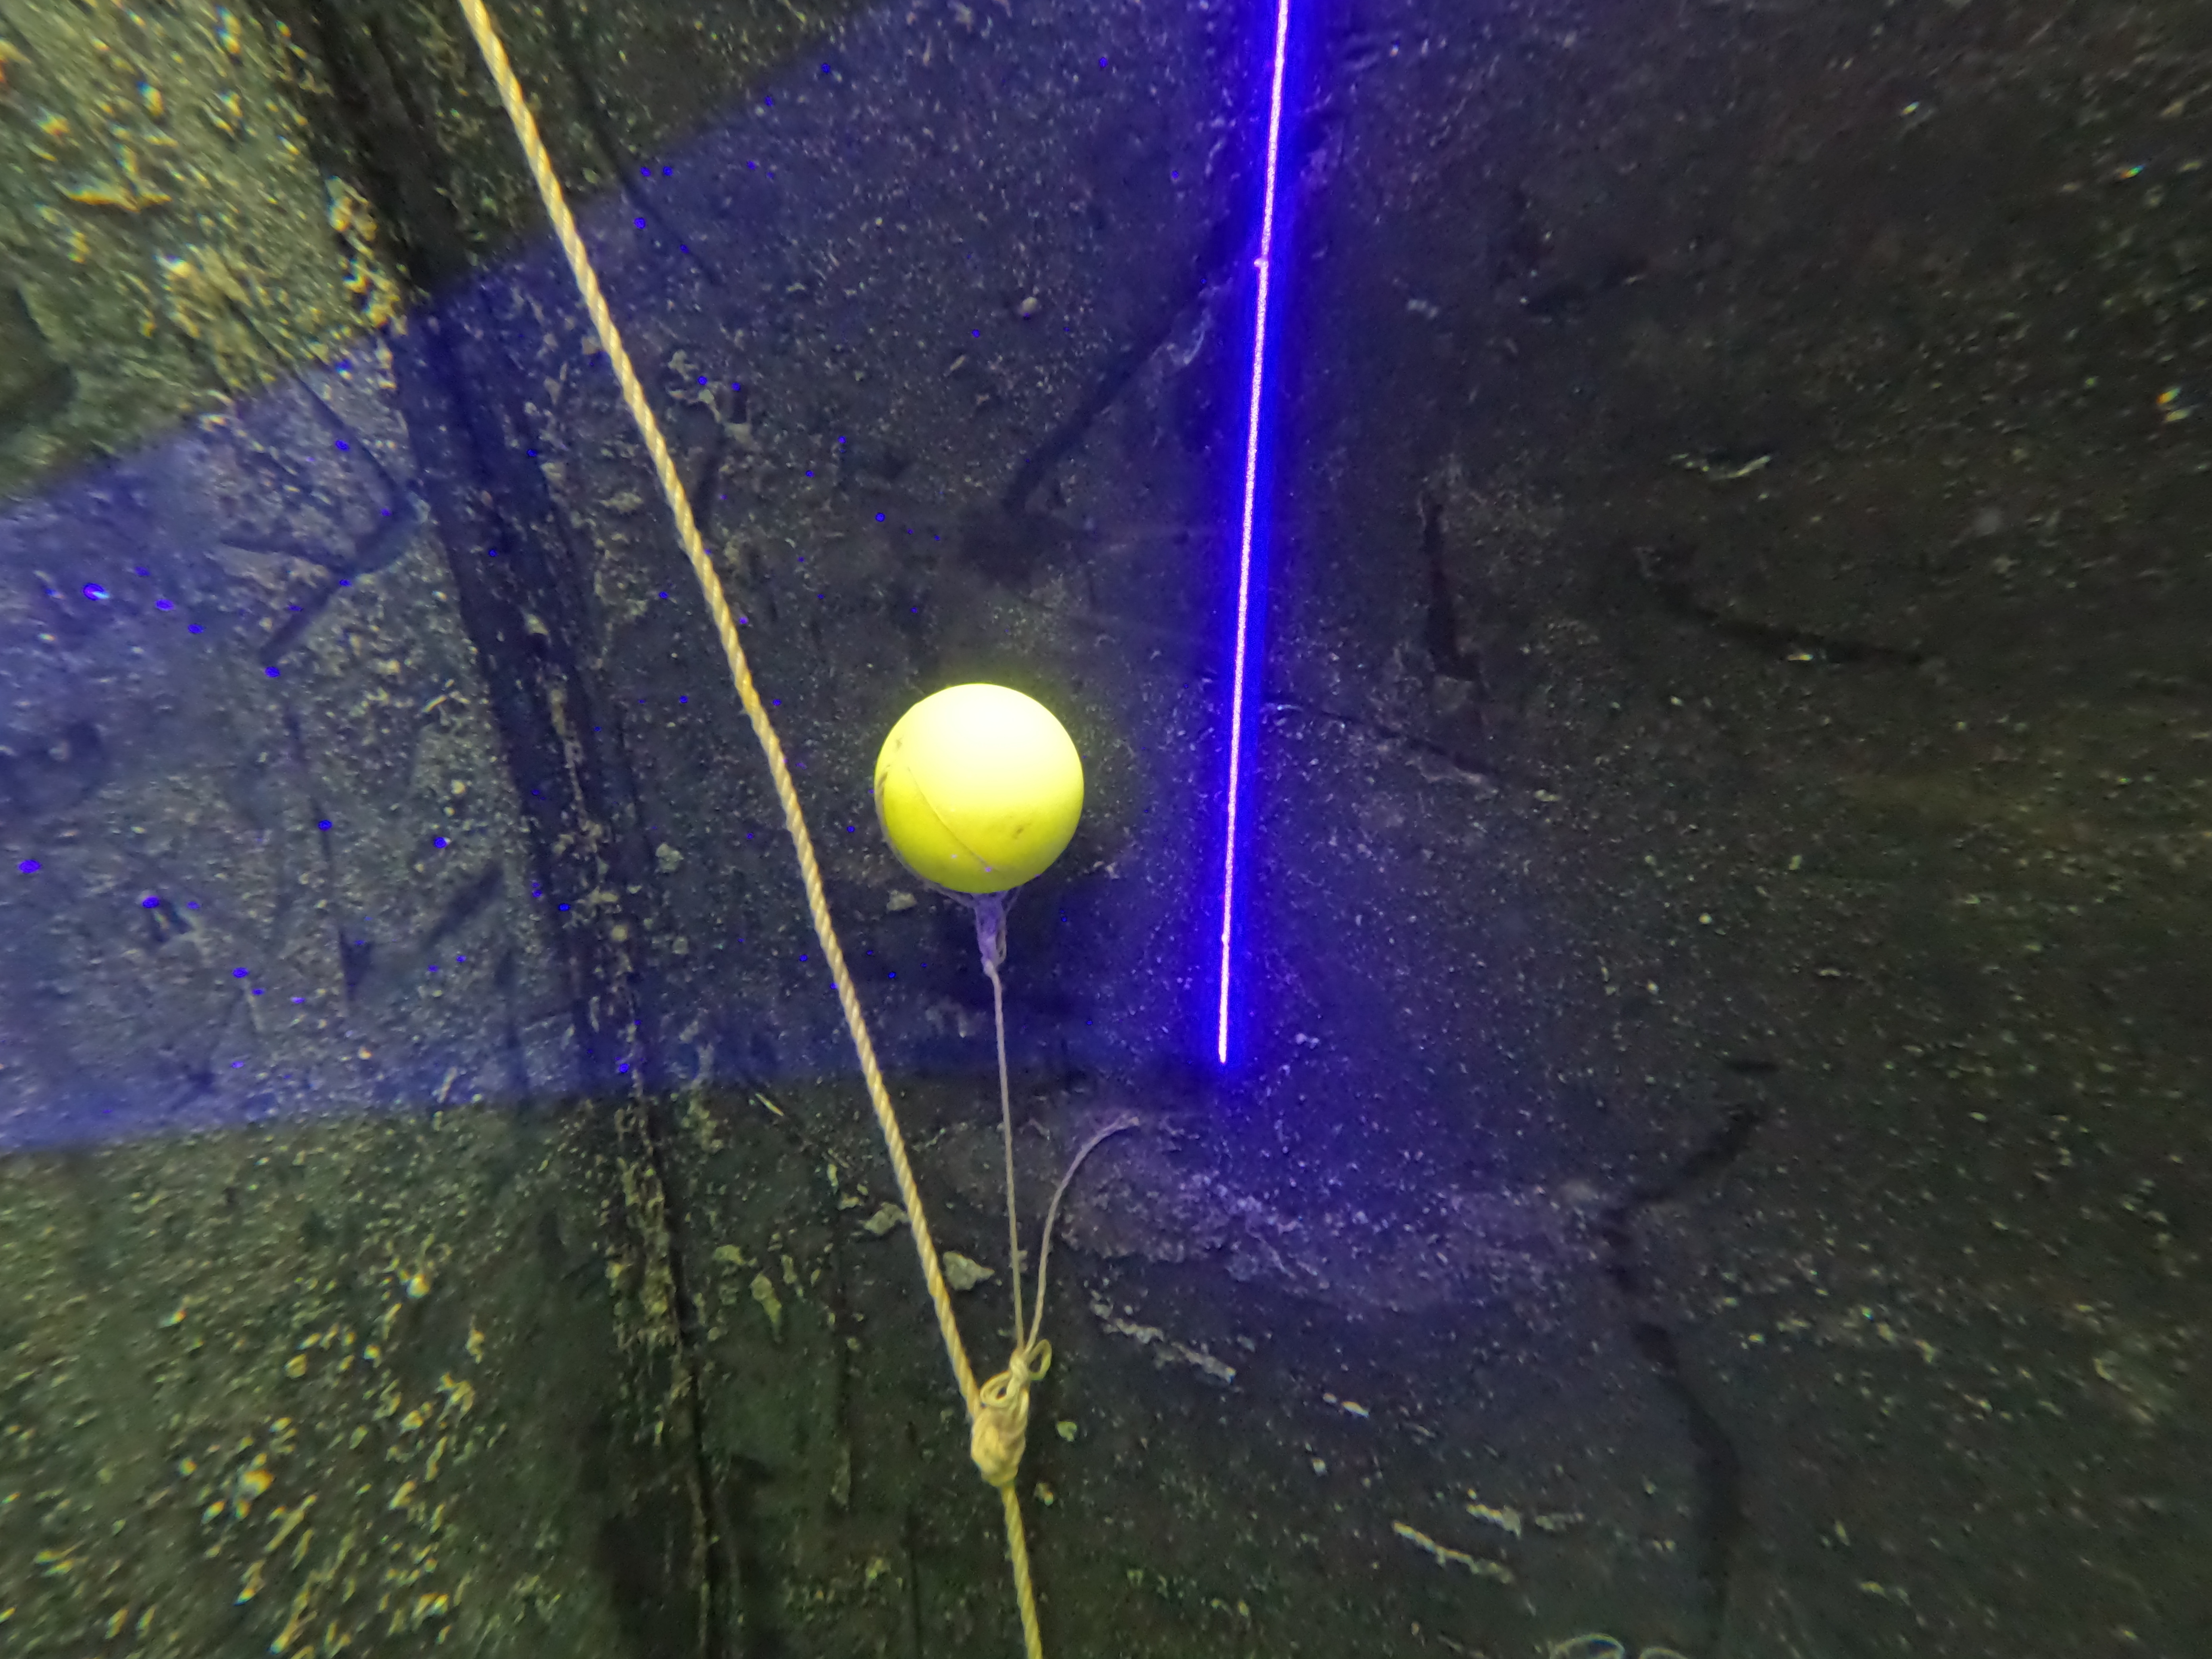

Supplement: Supplementary file 2840 [file G0030340.pdf › 2/G0030340.pdf]

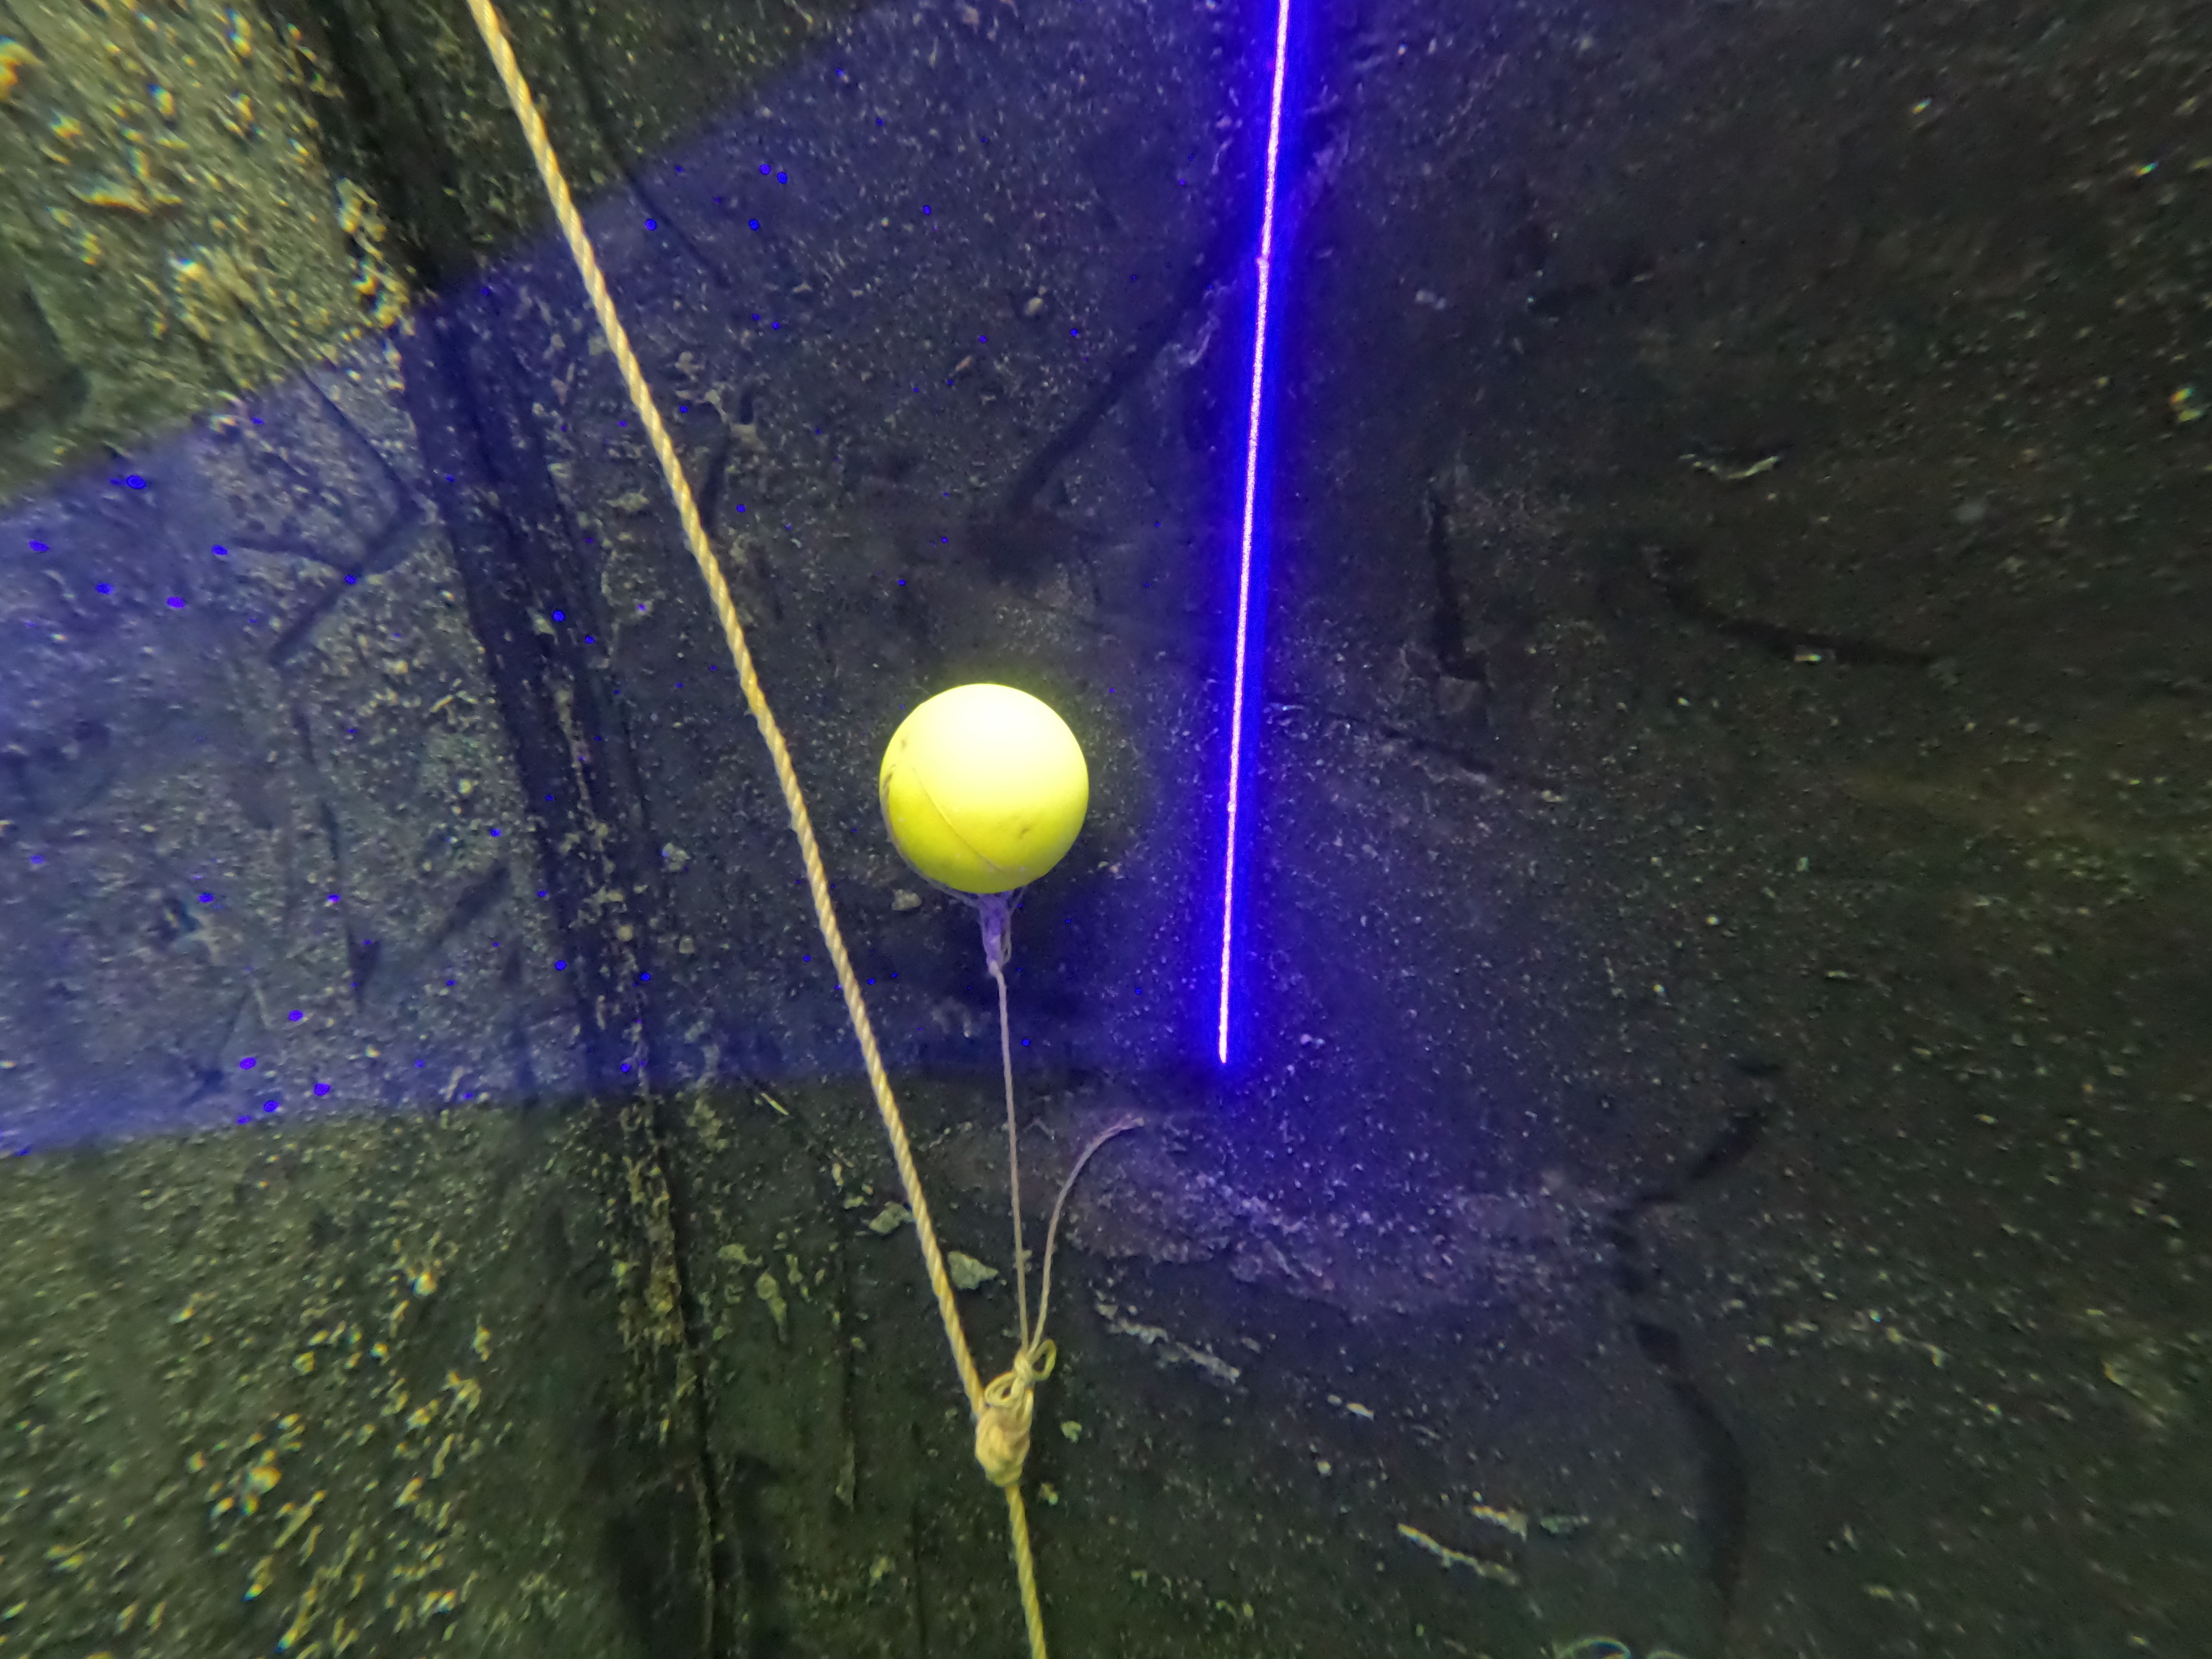

Supplement: Supplementary file 2841 [file G0030341.pdf › 2/G0030341.pdf]

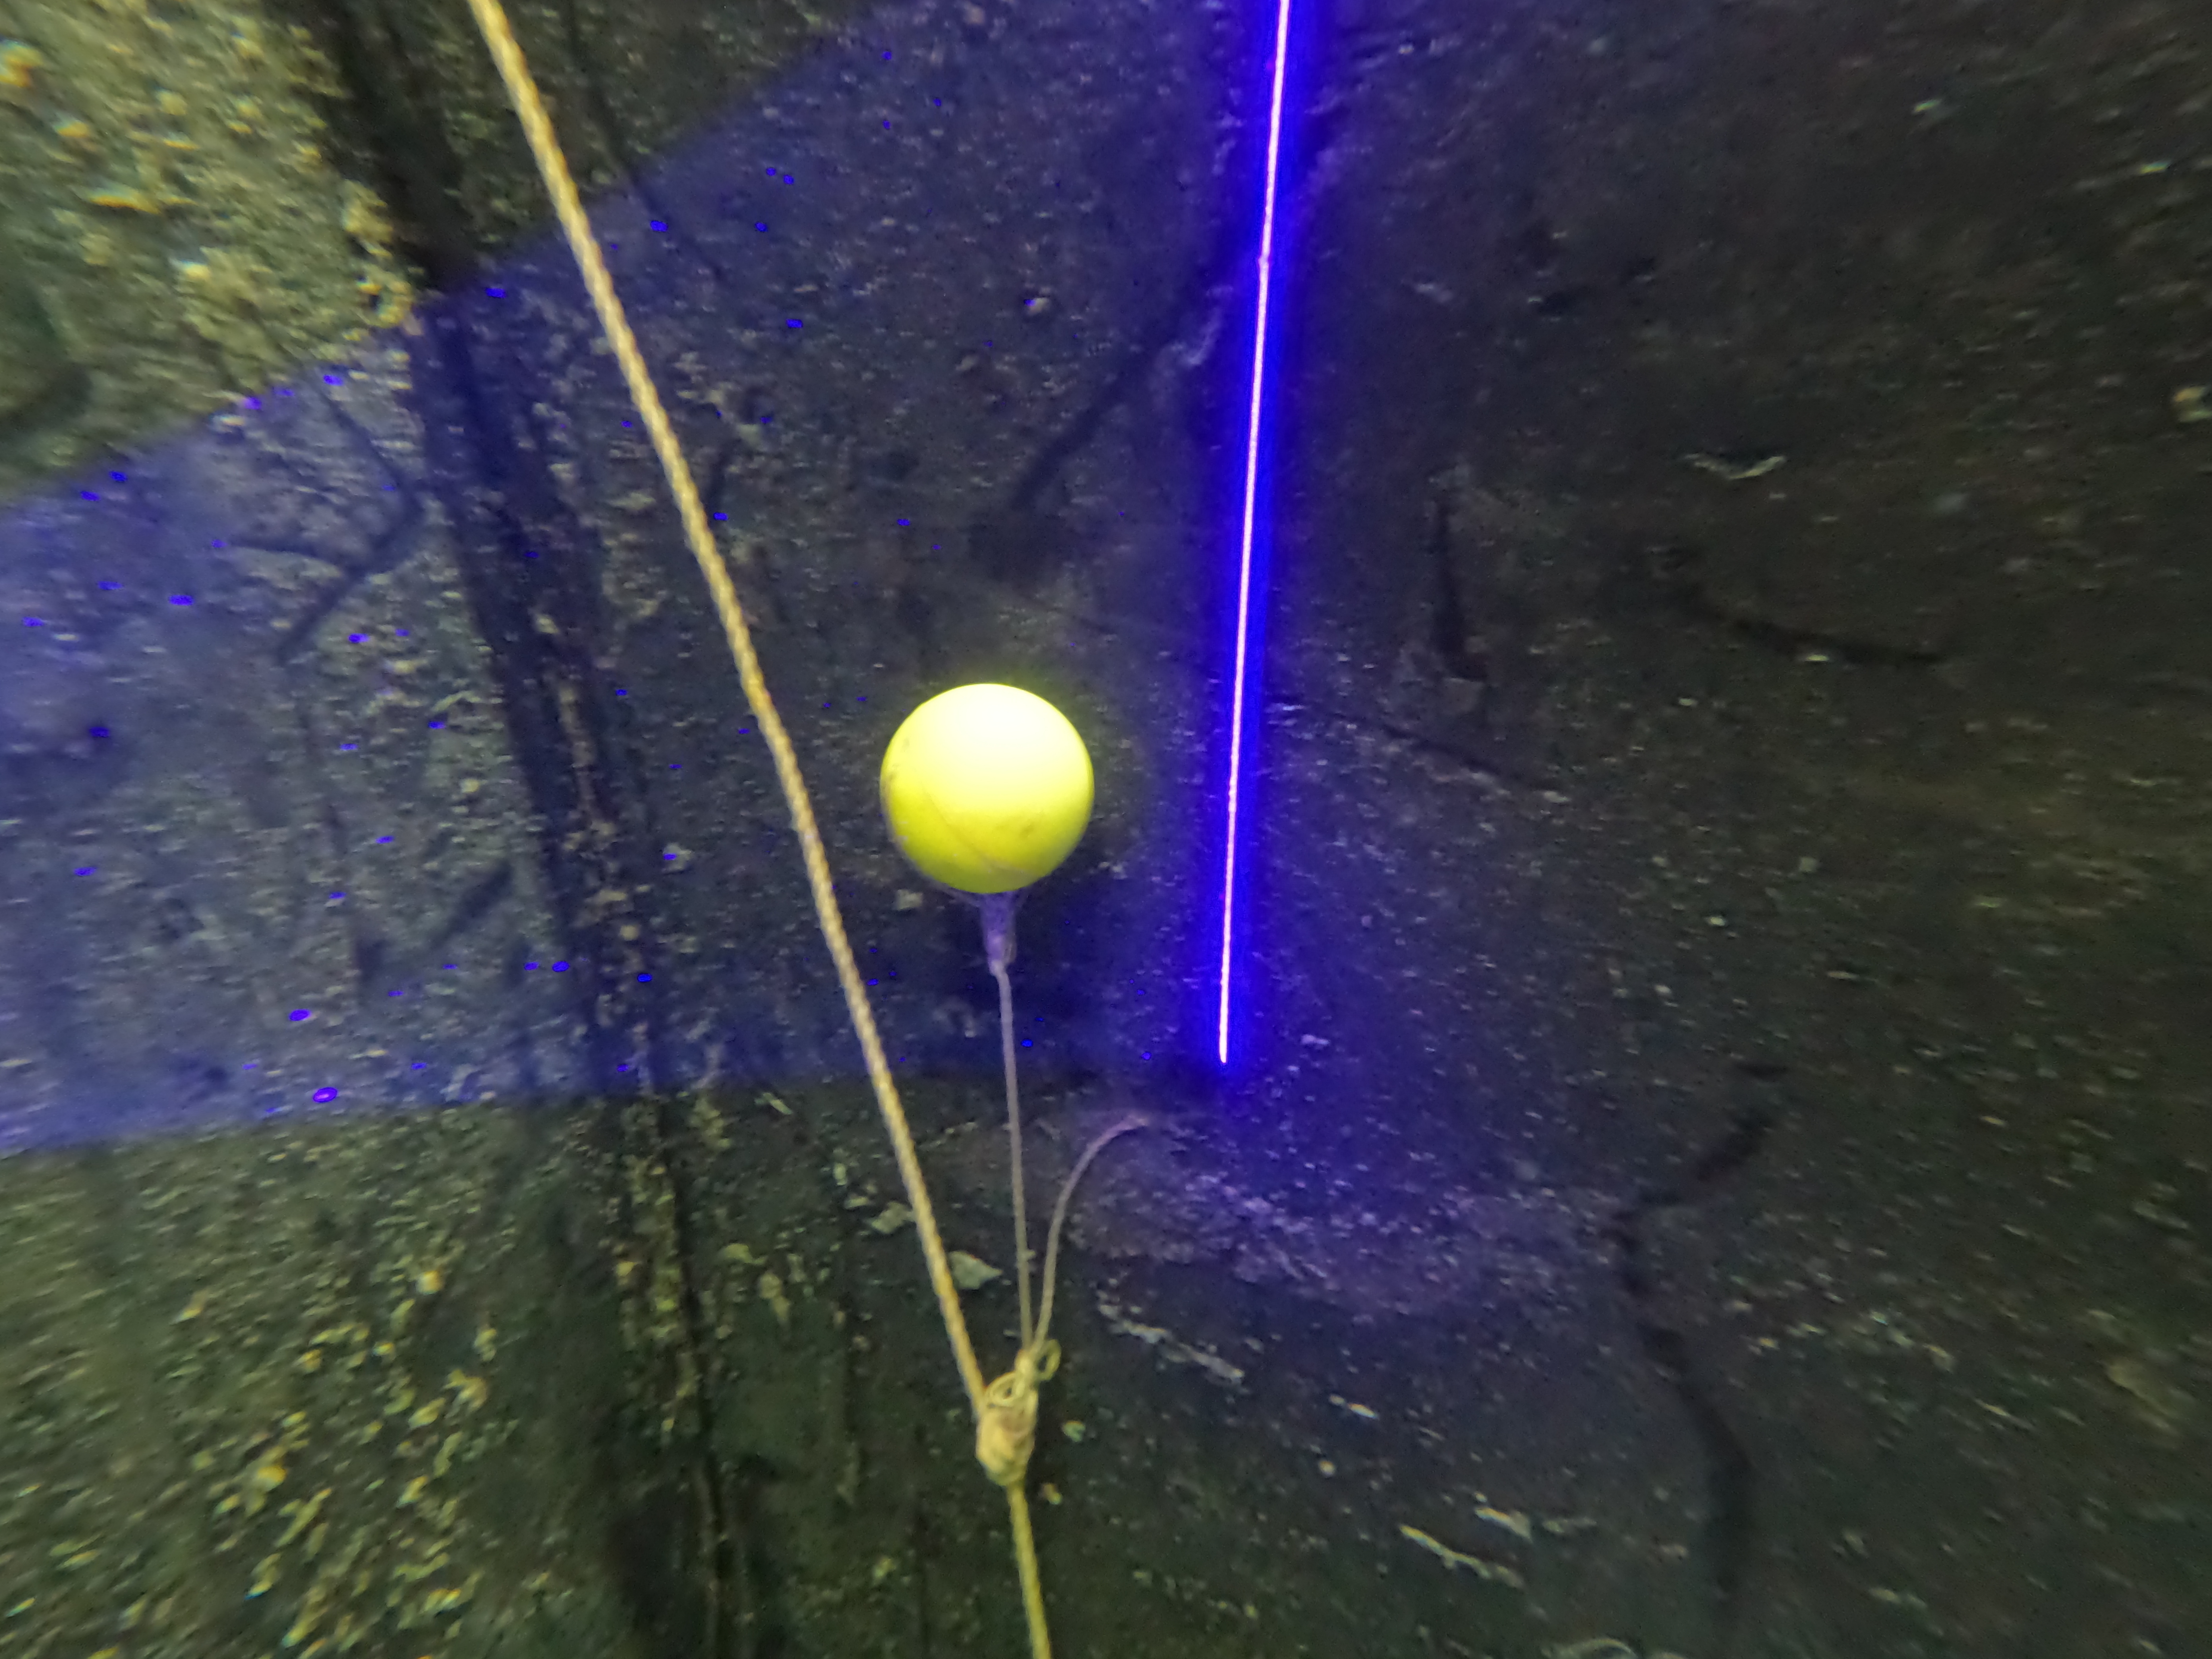

Supplement: Supplementary file 2842 [file G0030342.pdf › 2/G0030342.pdf]

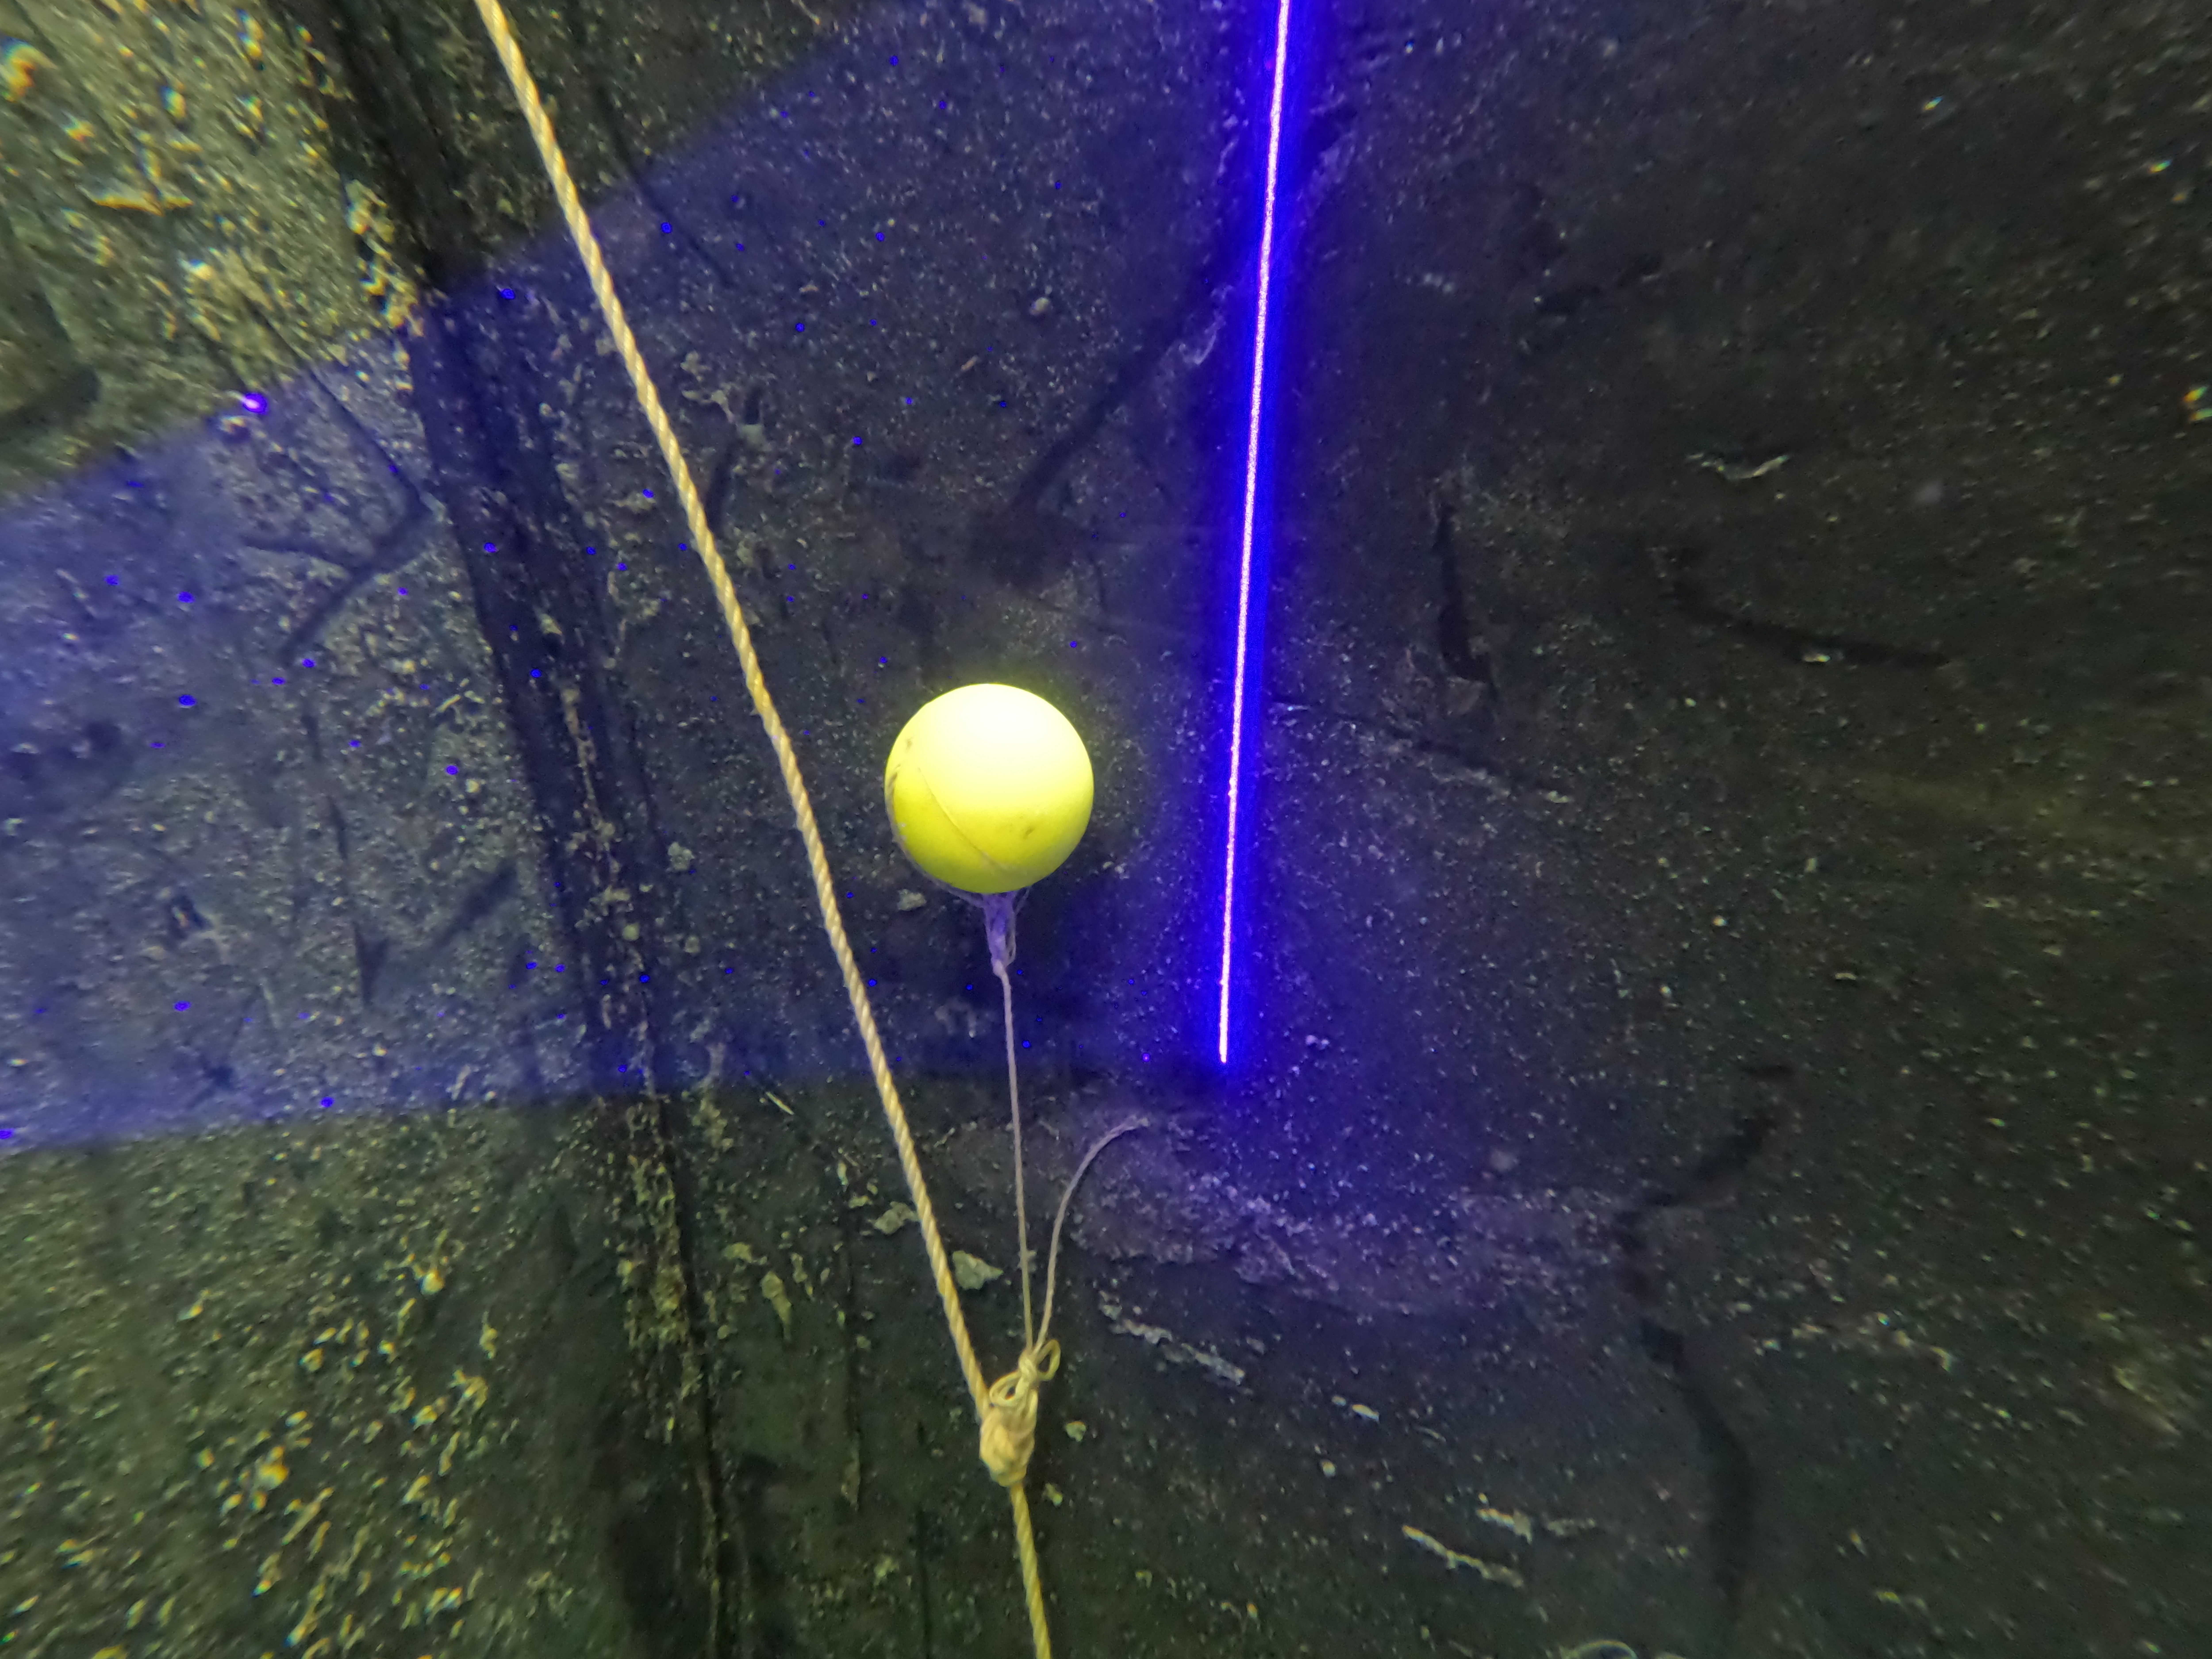

Supplement: Supplementary file 2843 [file G0030343.pdf › 2/G0030343.pdf]

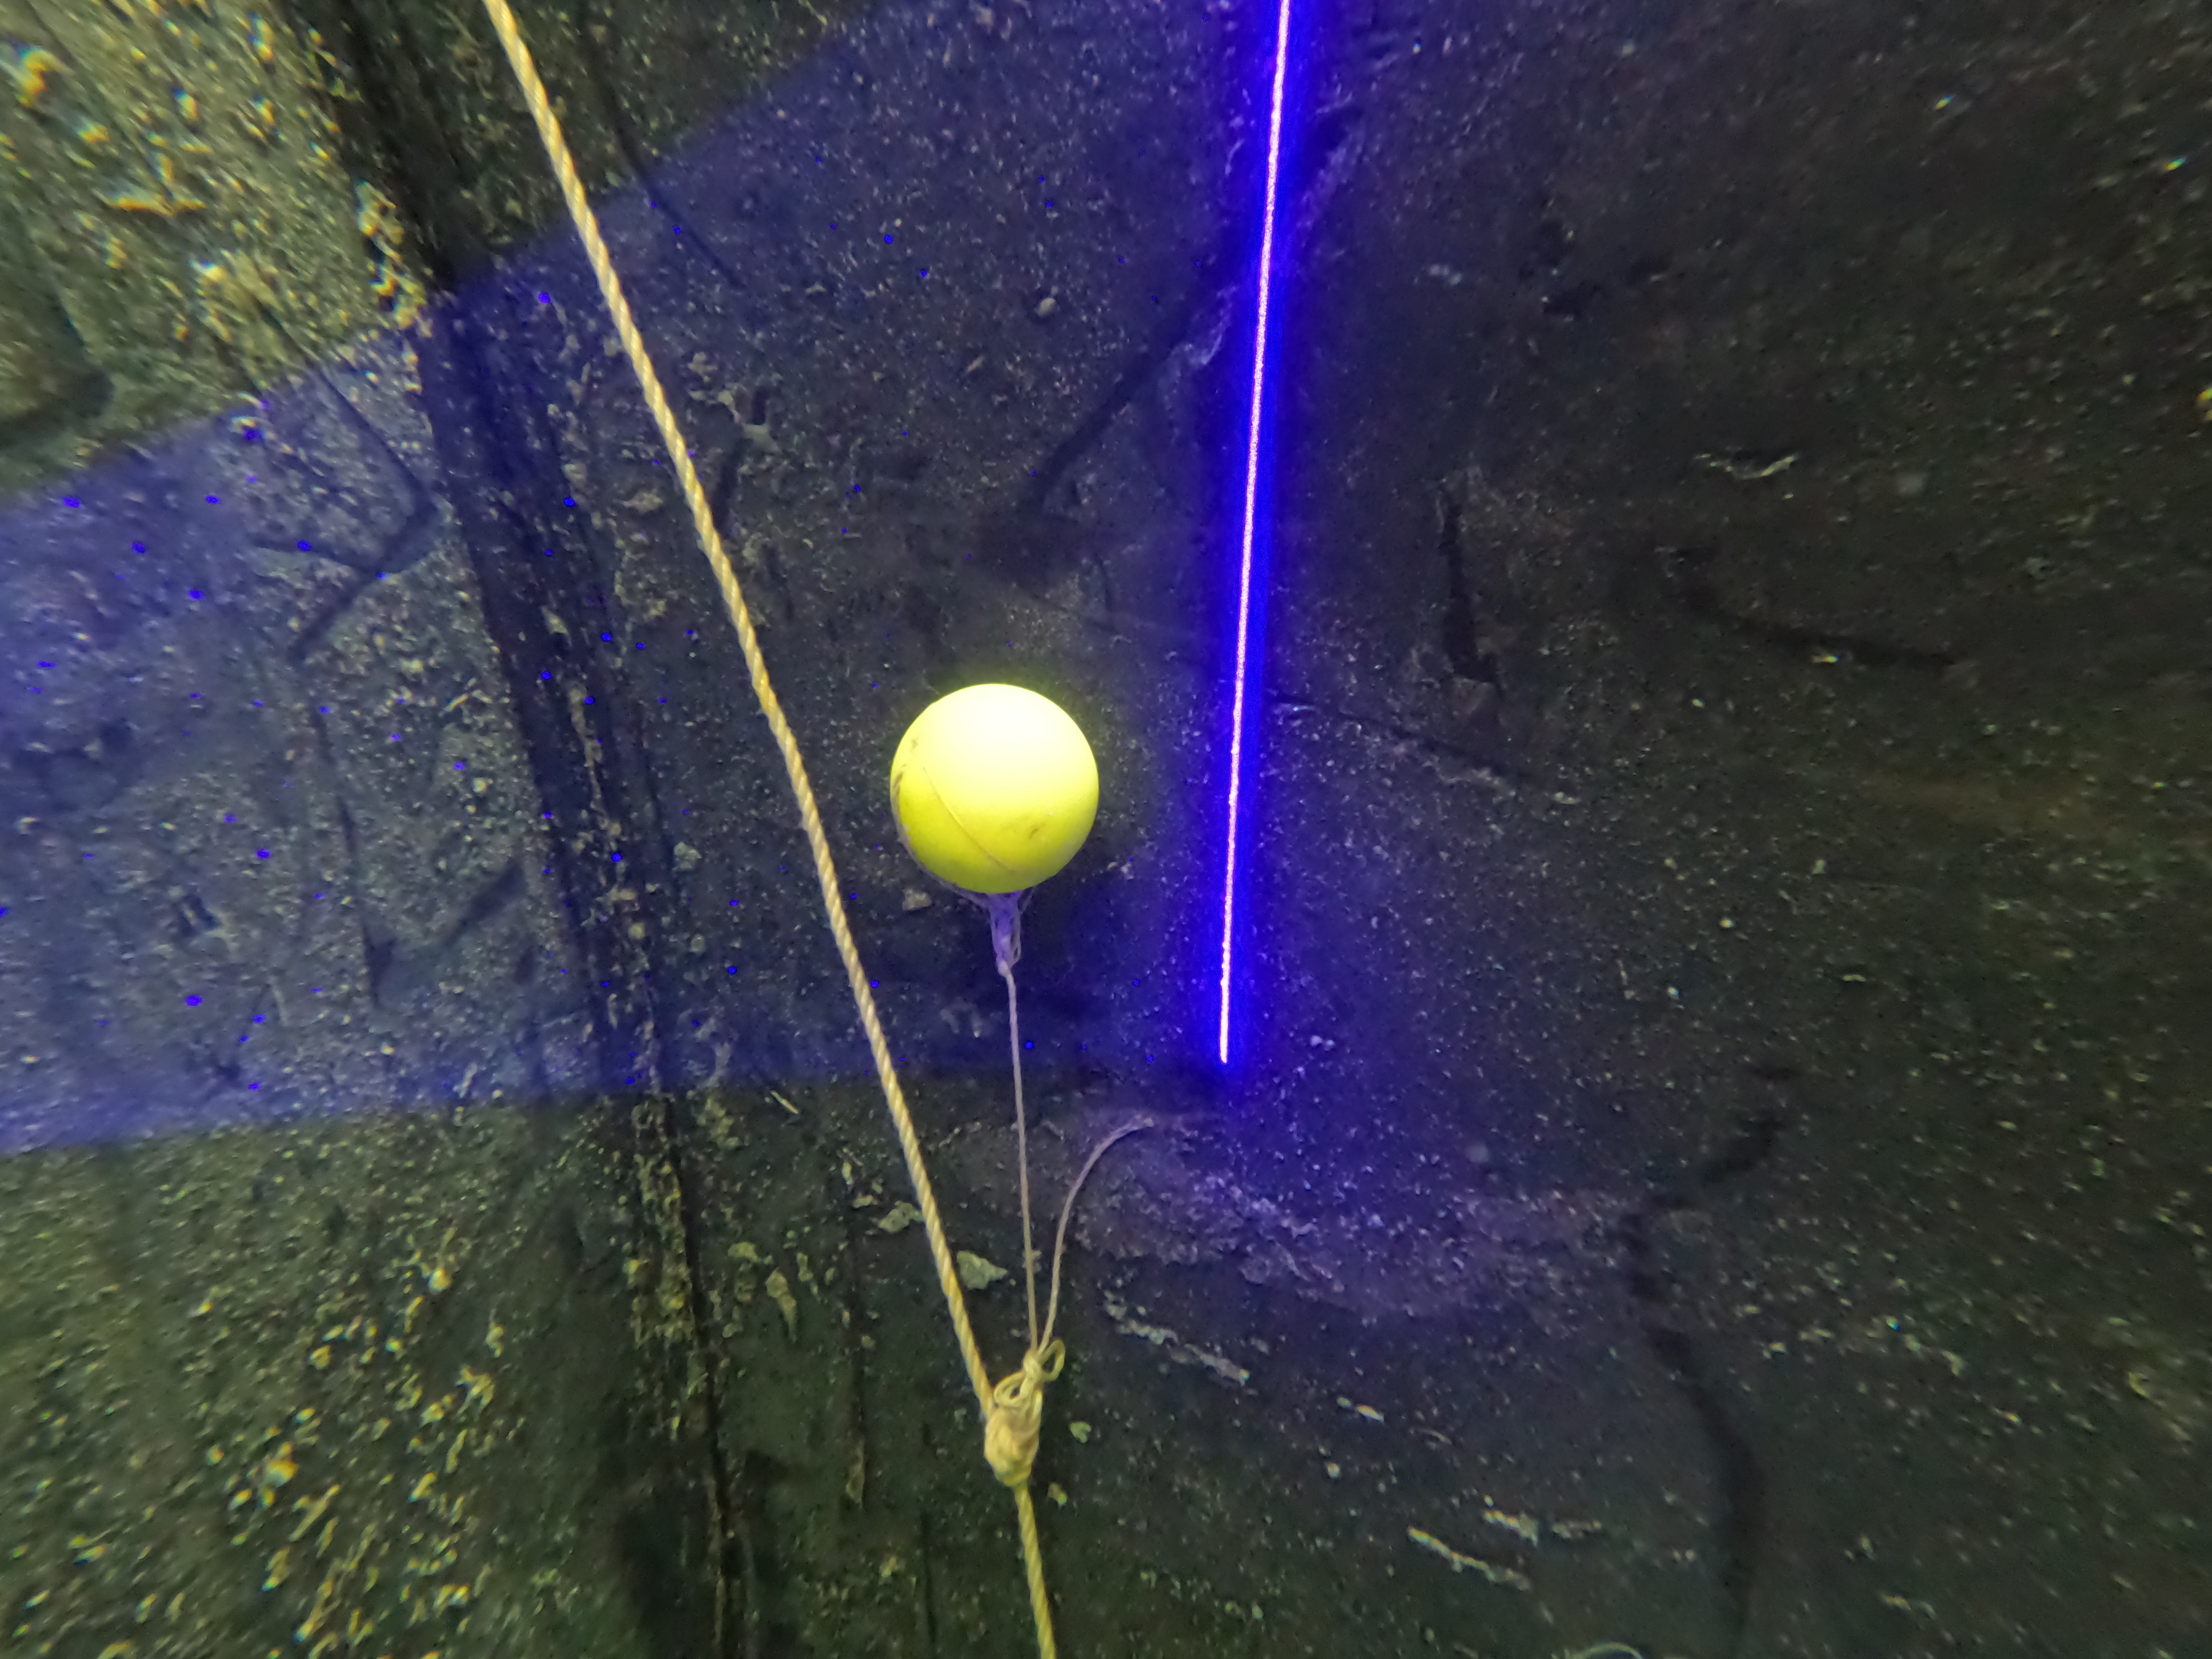

Supplement: Supplementary file 2844 [file G0030344.pdf › 2/G0030344.pdf]

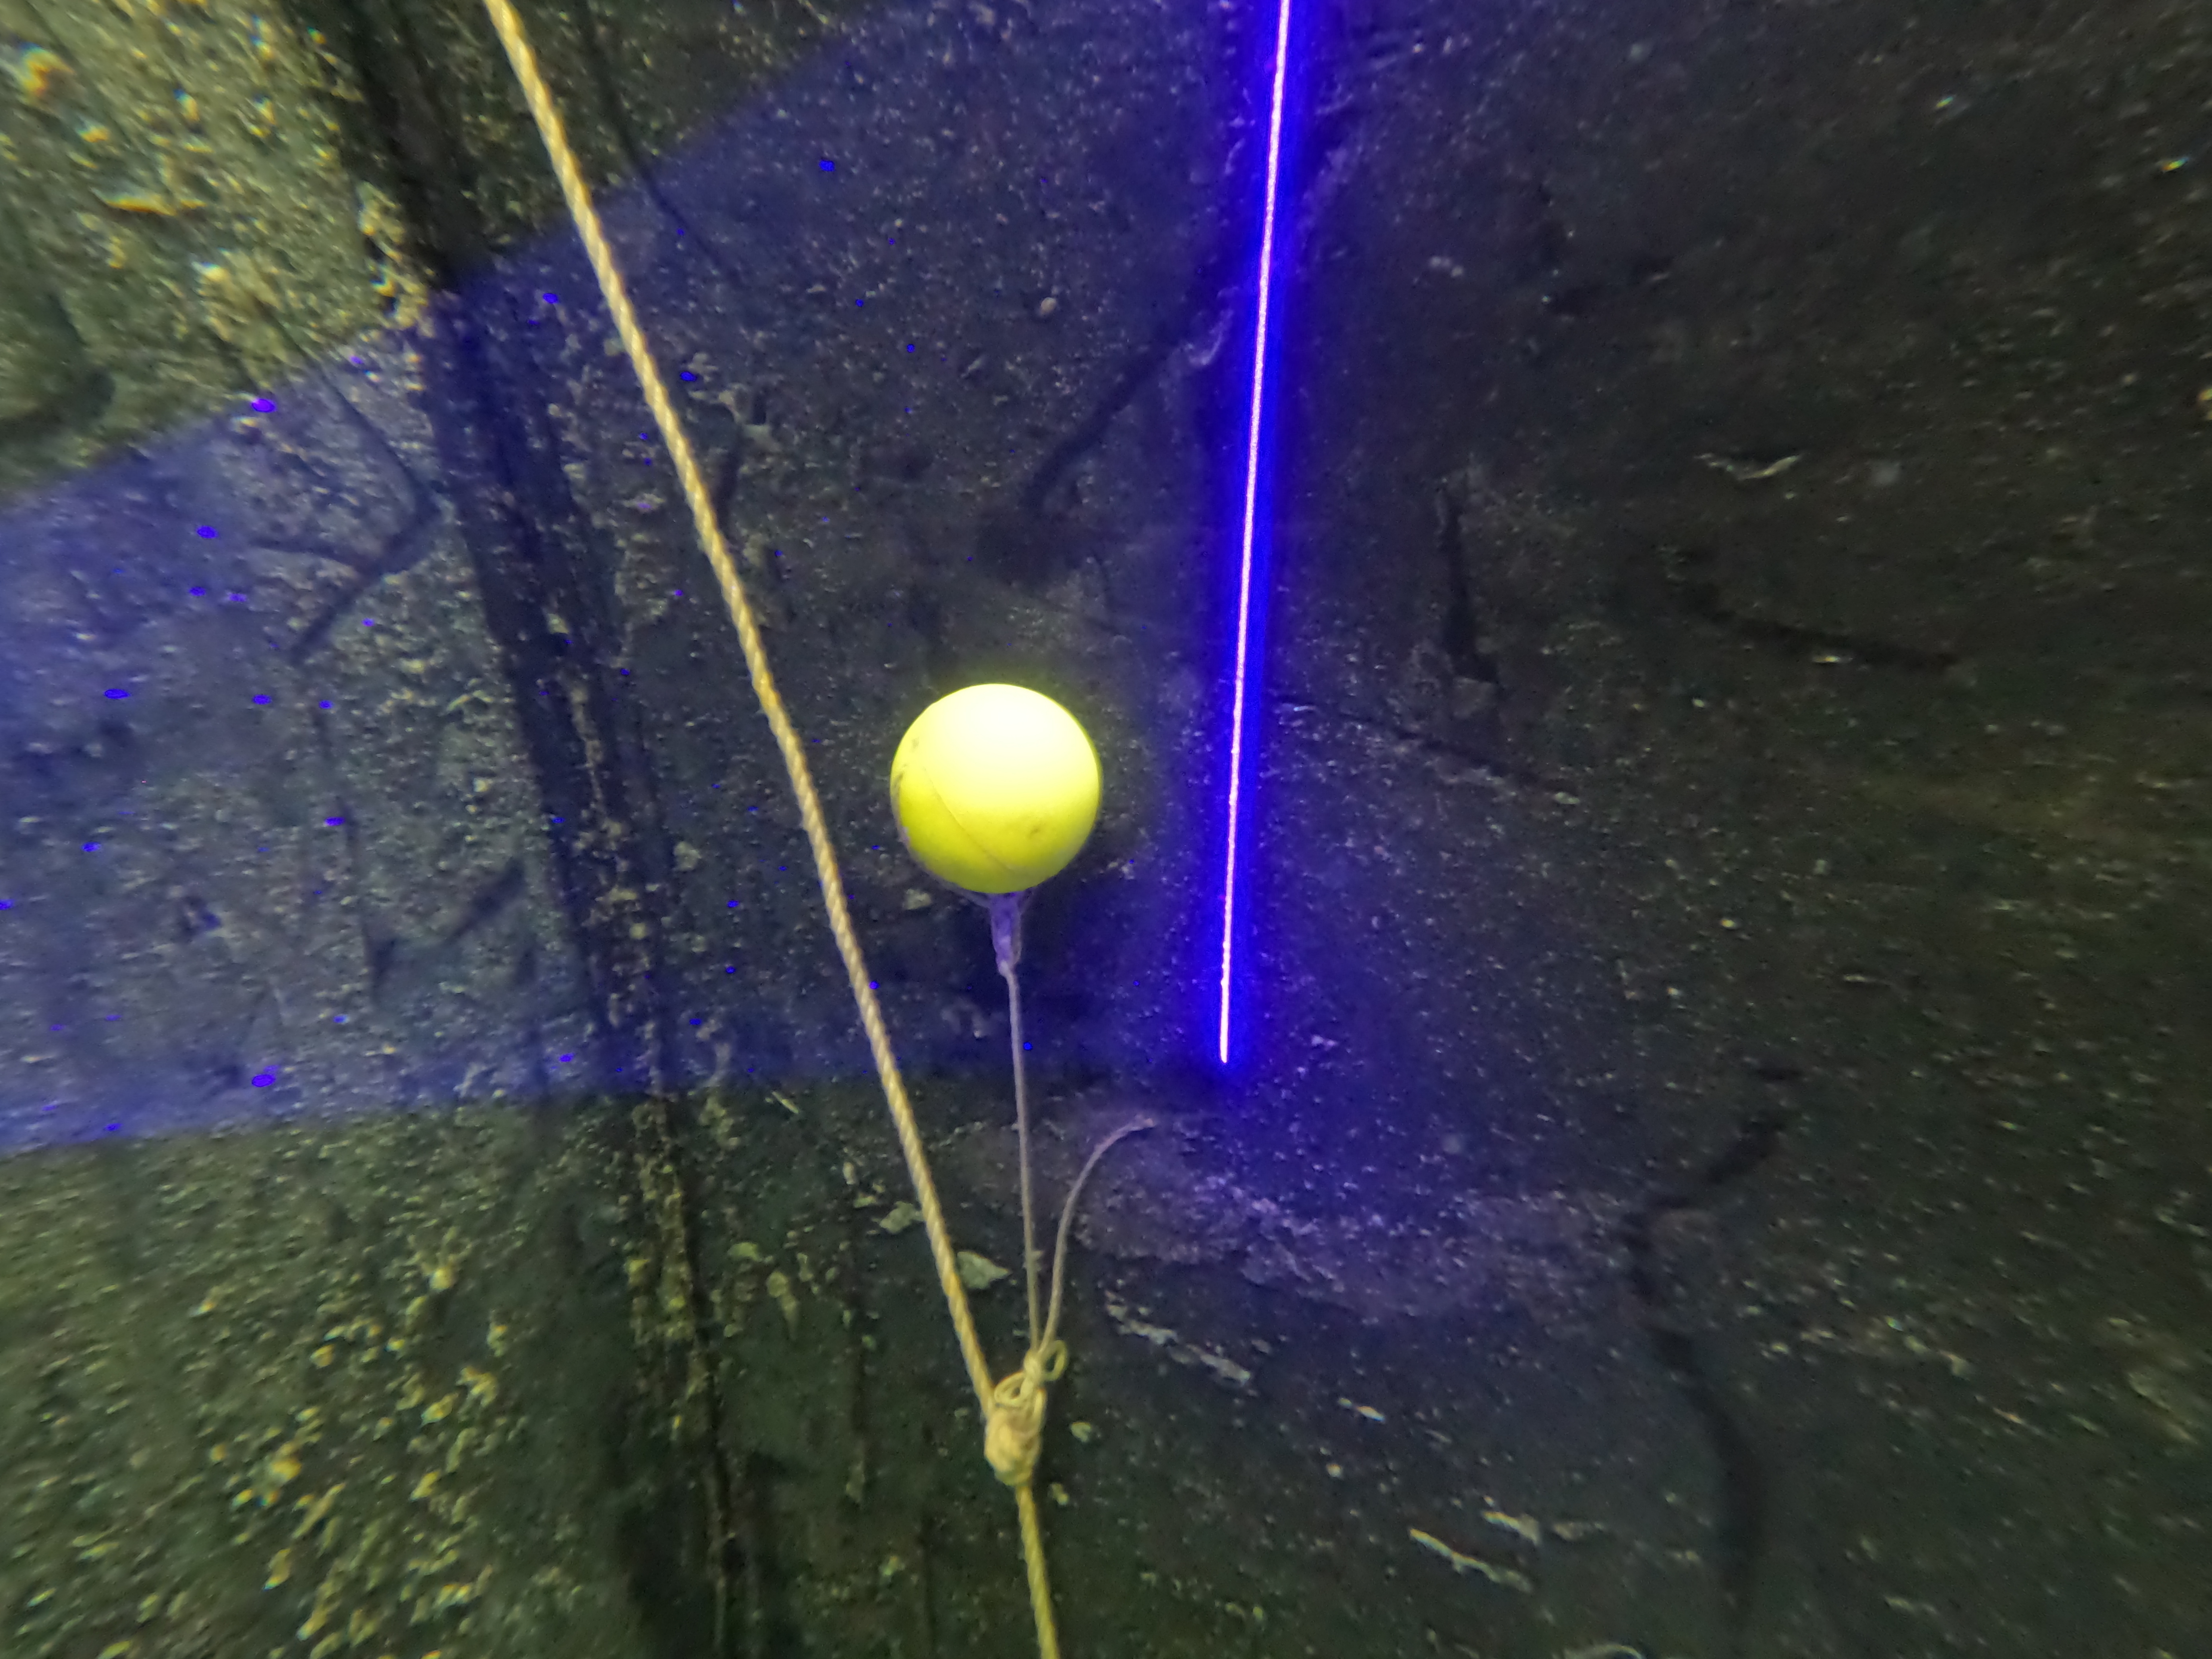

Supplement: Supplementary file 2845 [file G0030345.pdf › 2/G0030345.pdf]

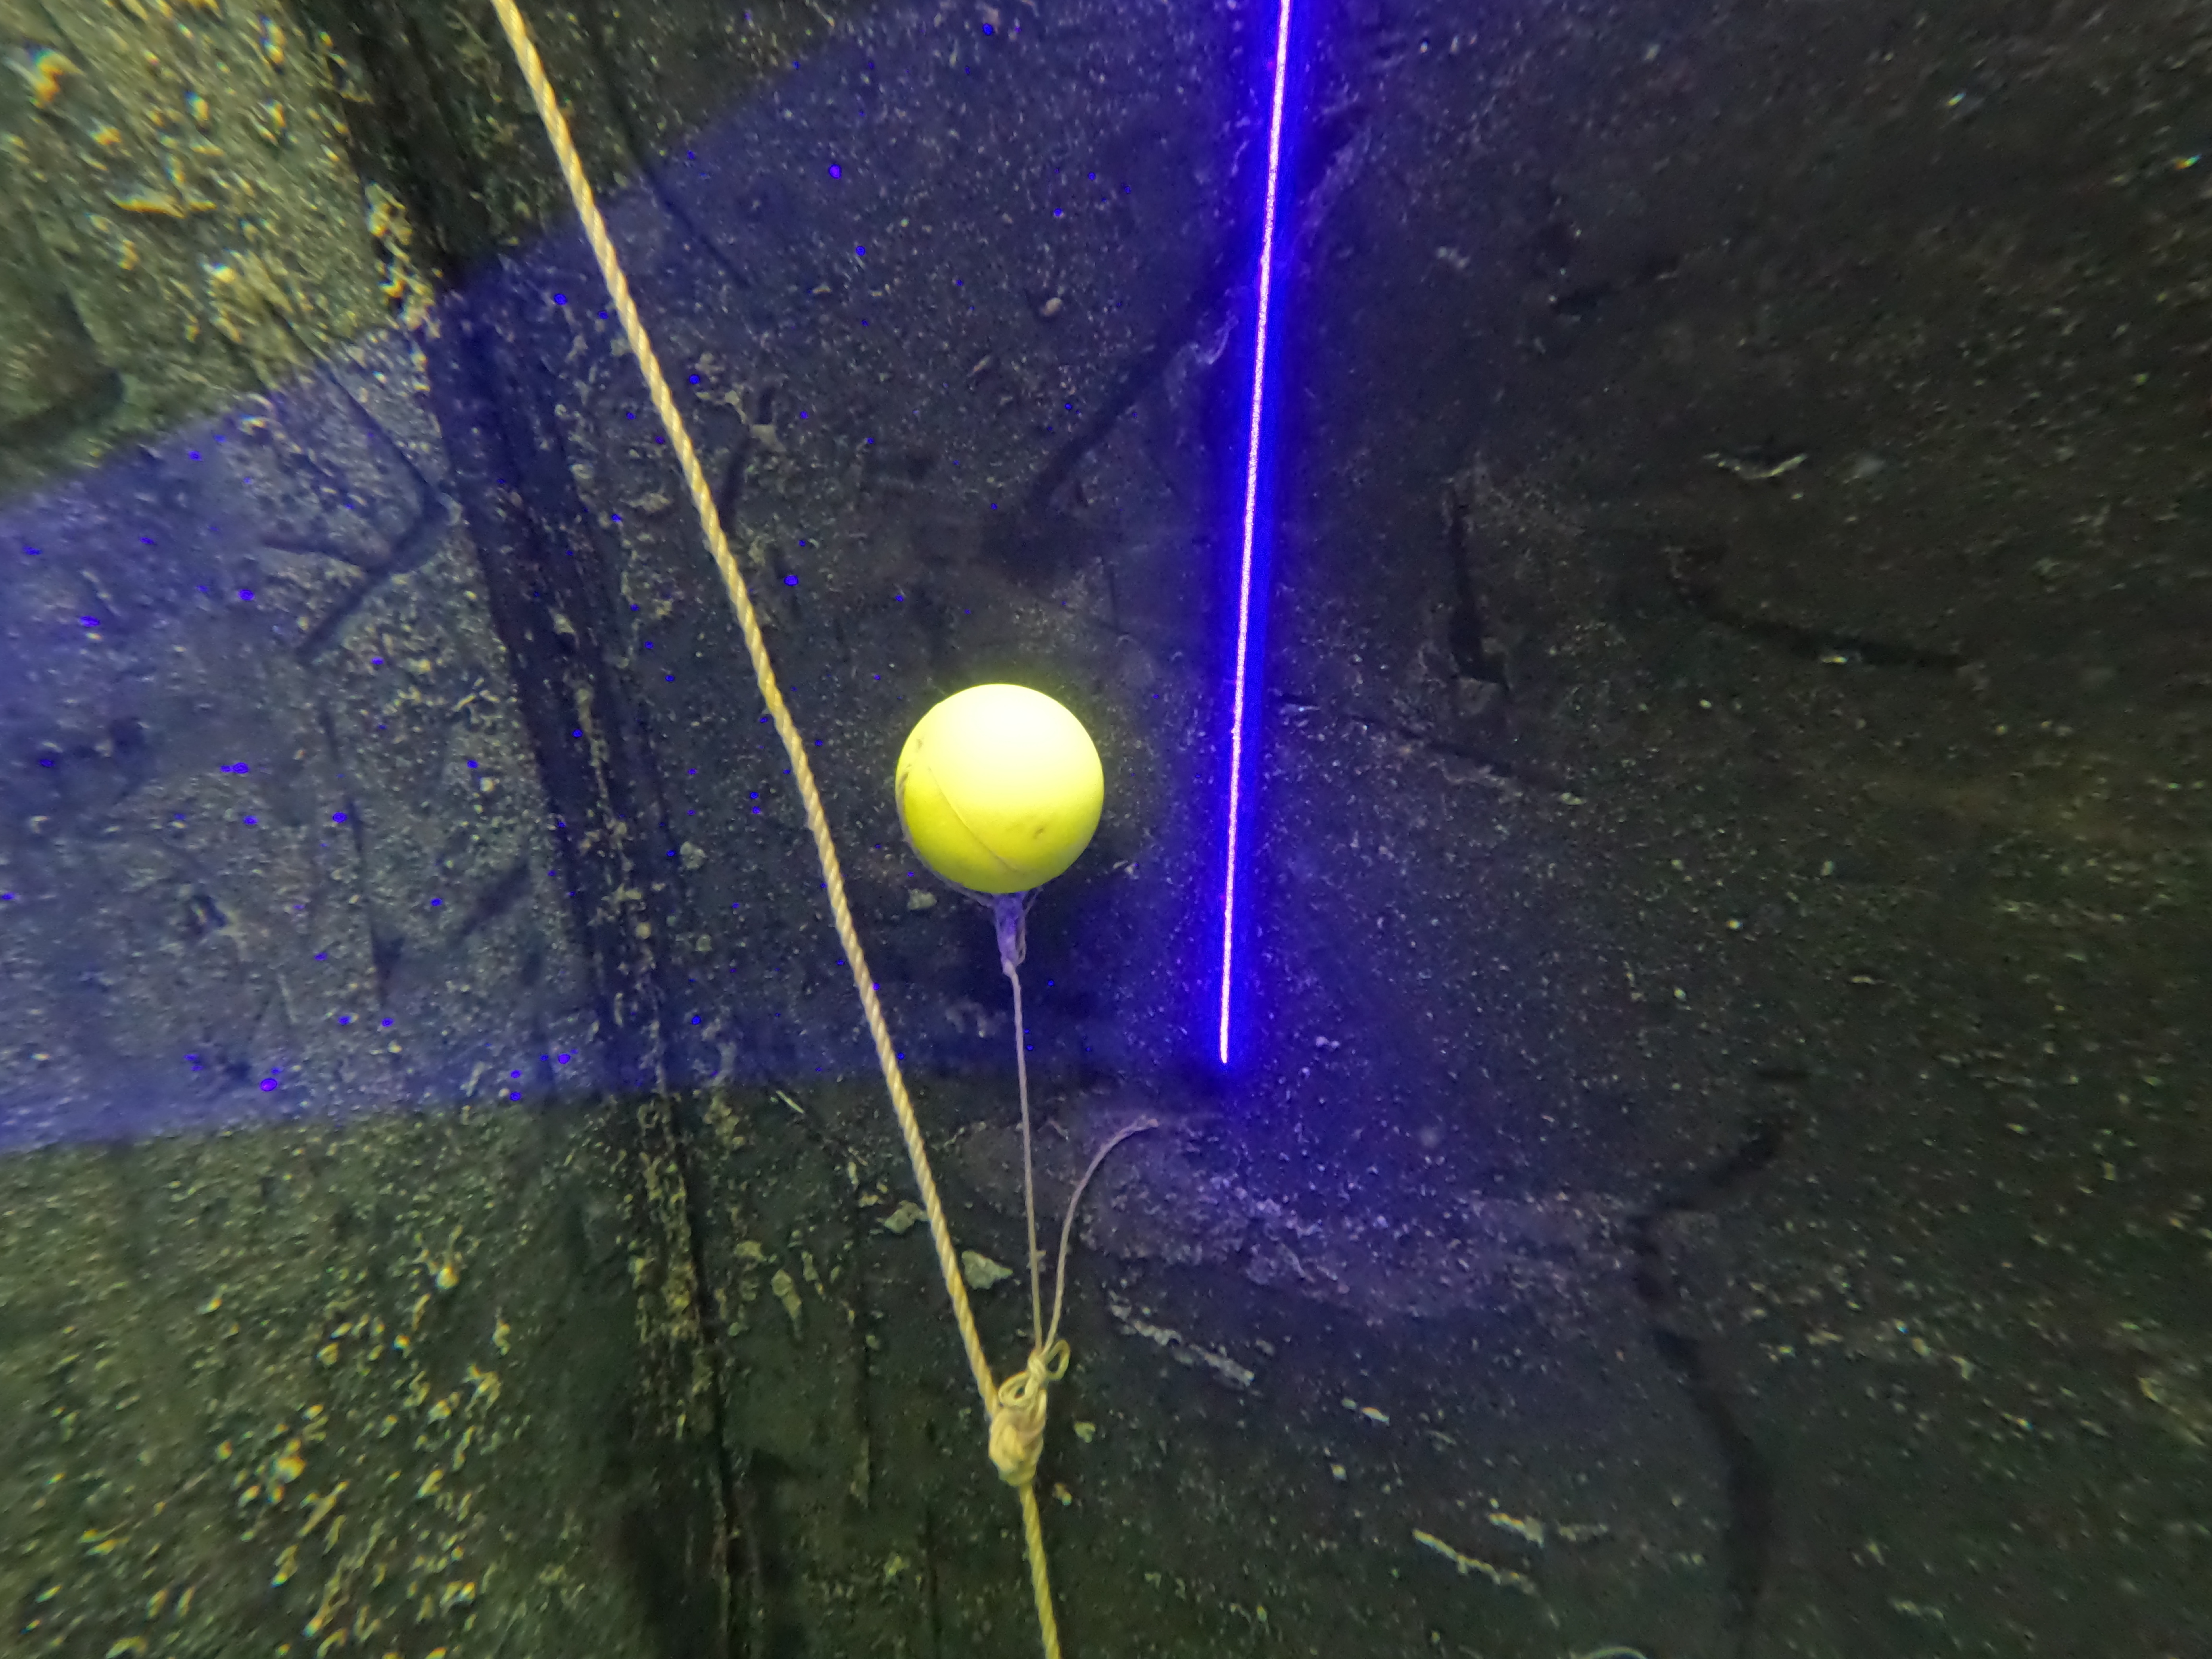

Supplement: Supplementary file 2846 [file G0030346.pdf › 2/G0030346.pdf]

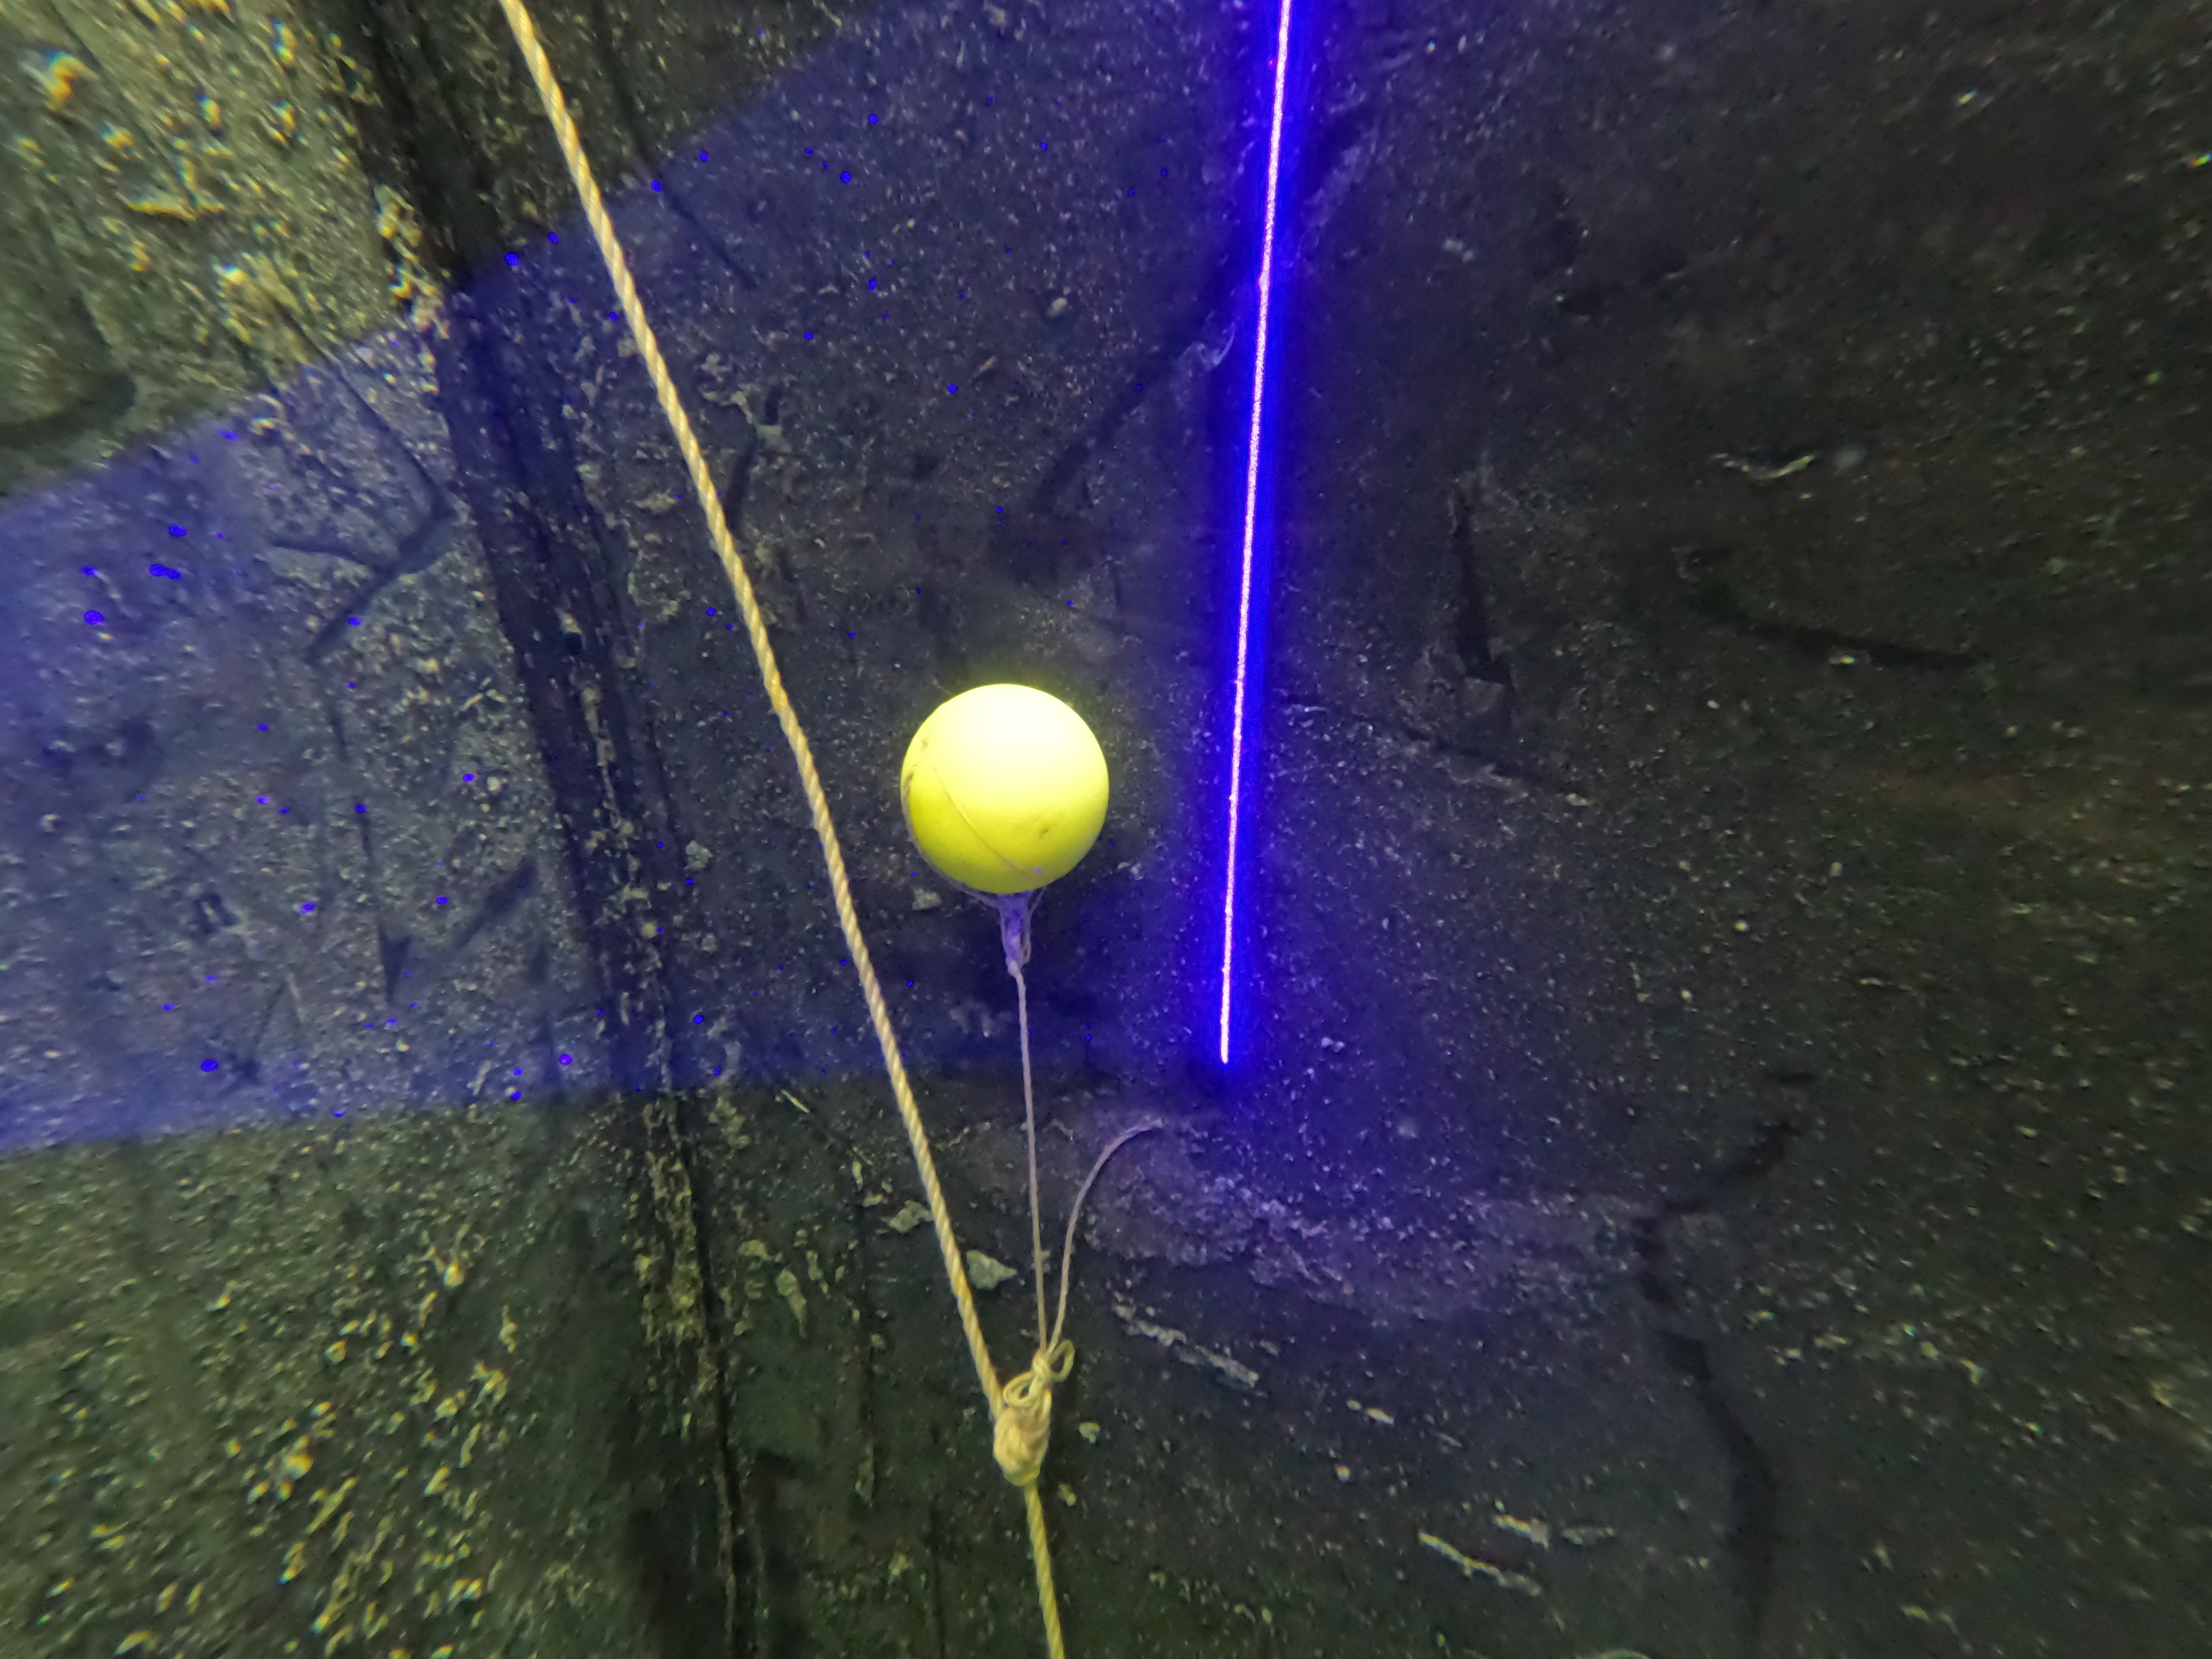

Supplement: Supplementary file 2847 [file G0030347.pdf › 2/G0030347.pdf]

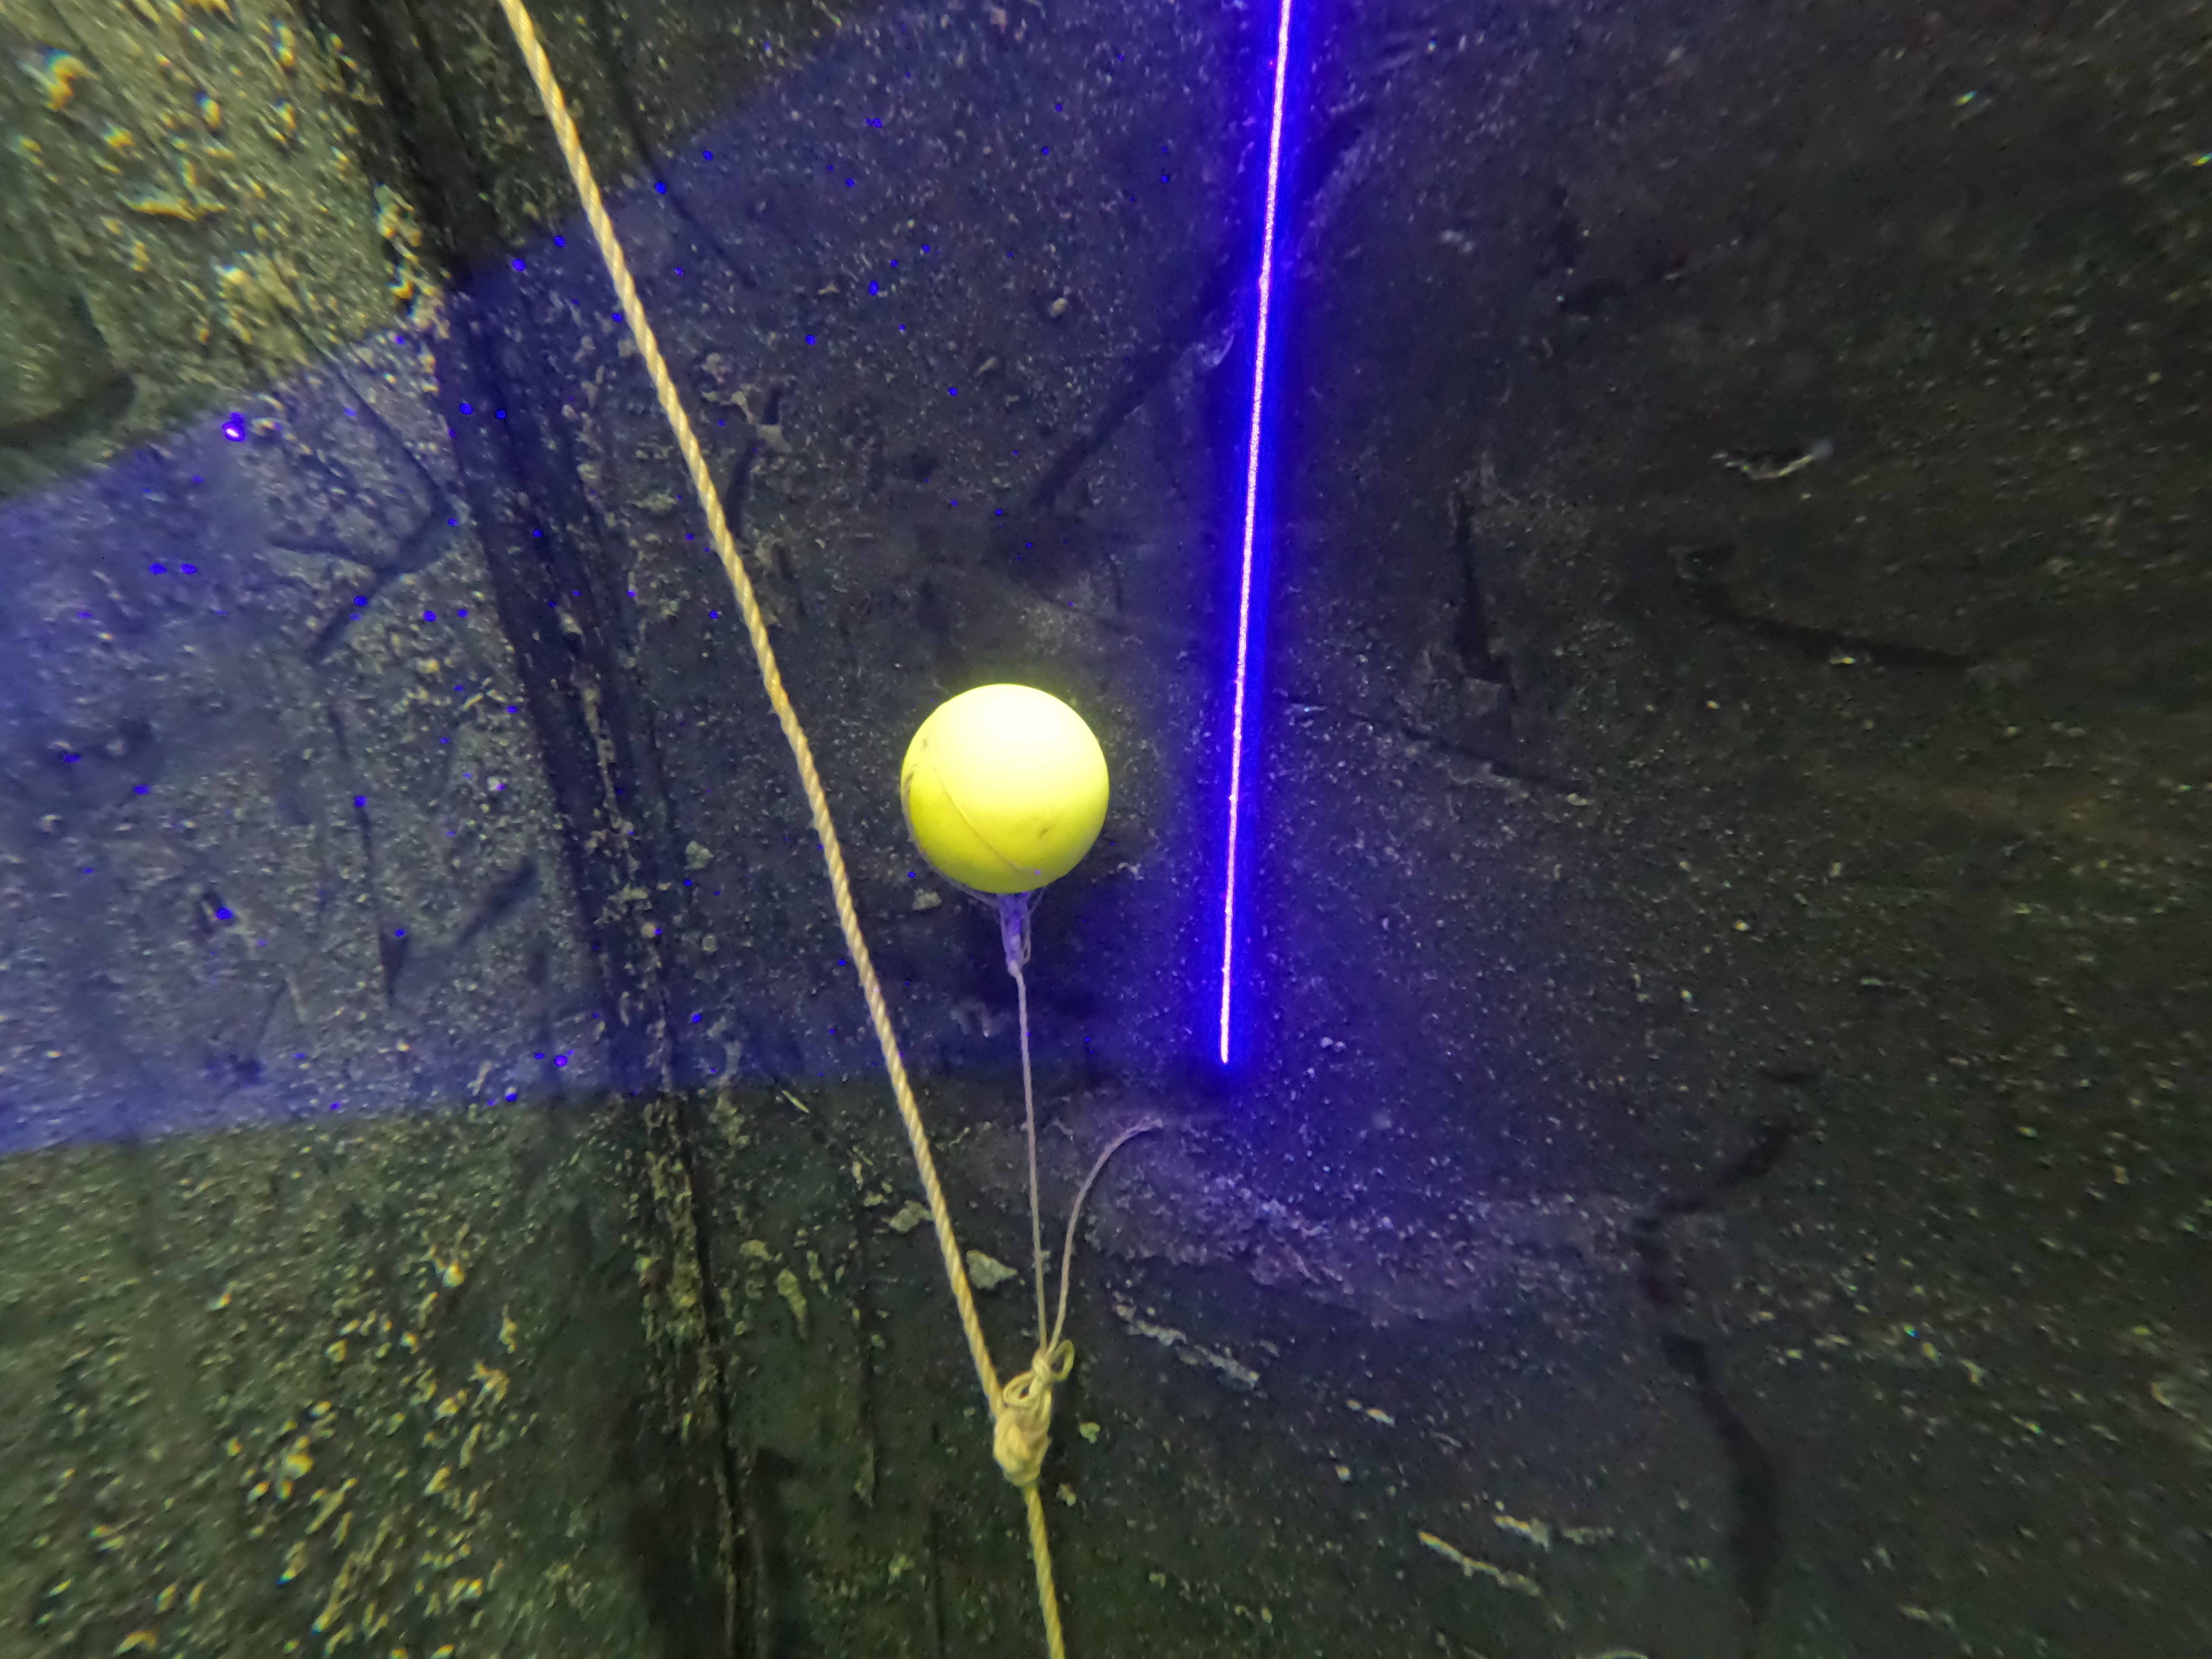

Supplement: Supplementary file 2848 [file G0030348.pdf › 2/G0030348.pdf]

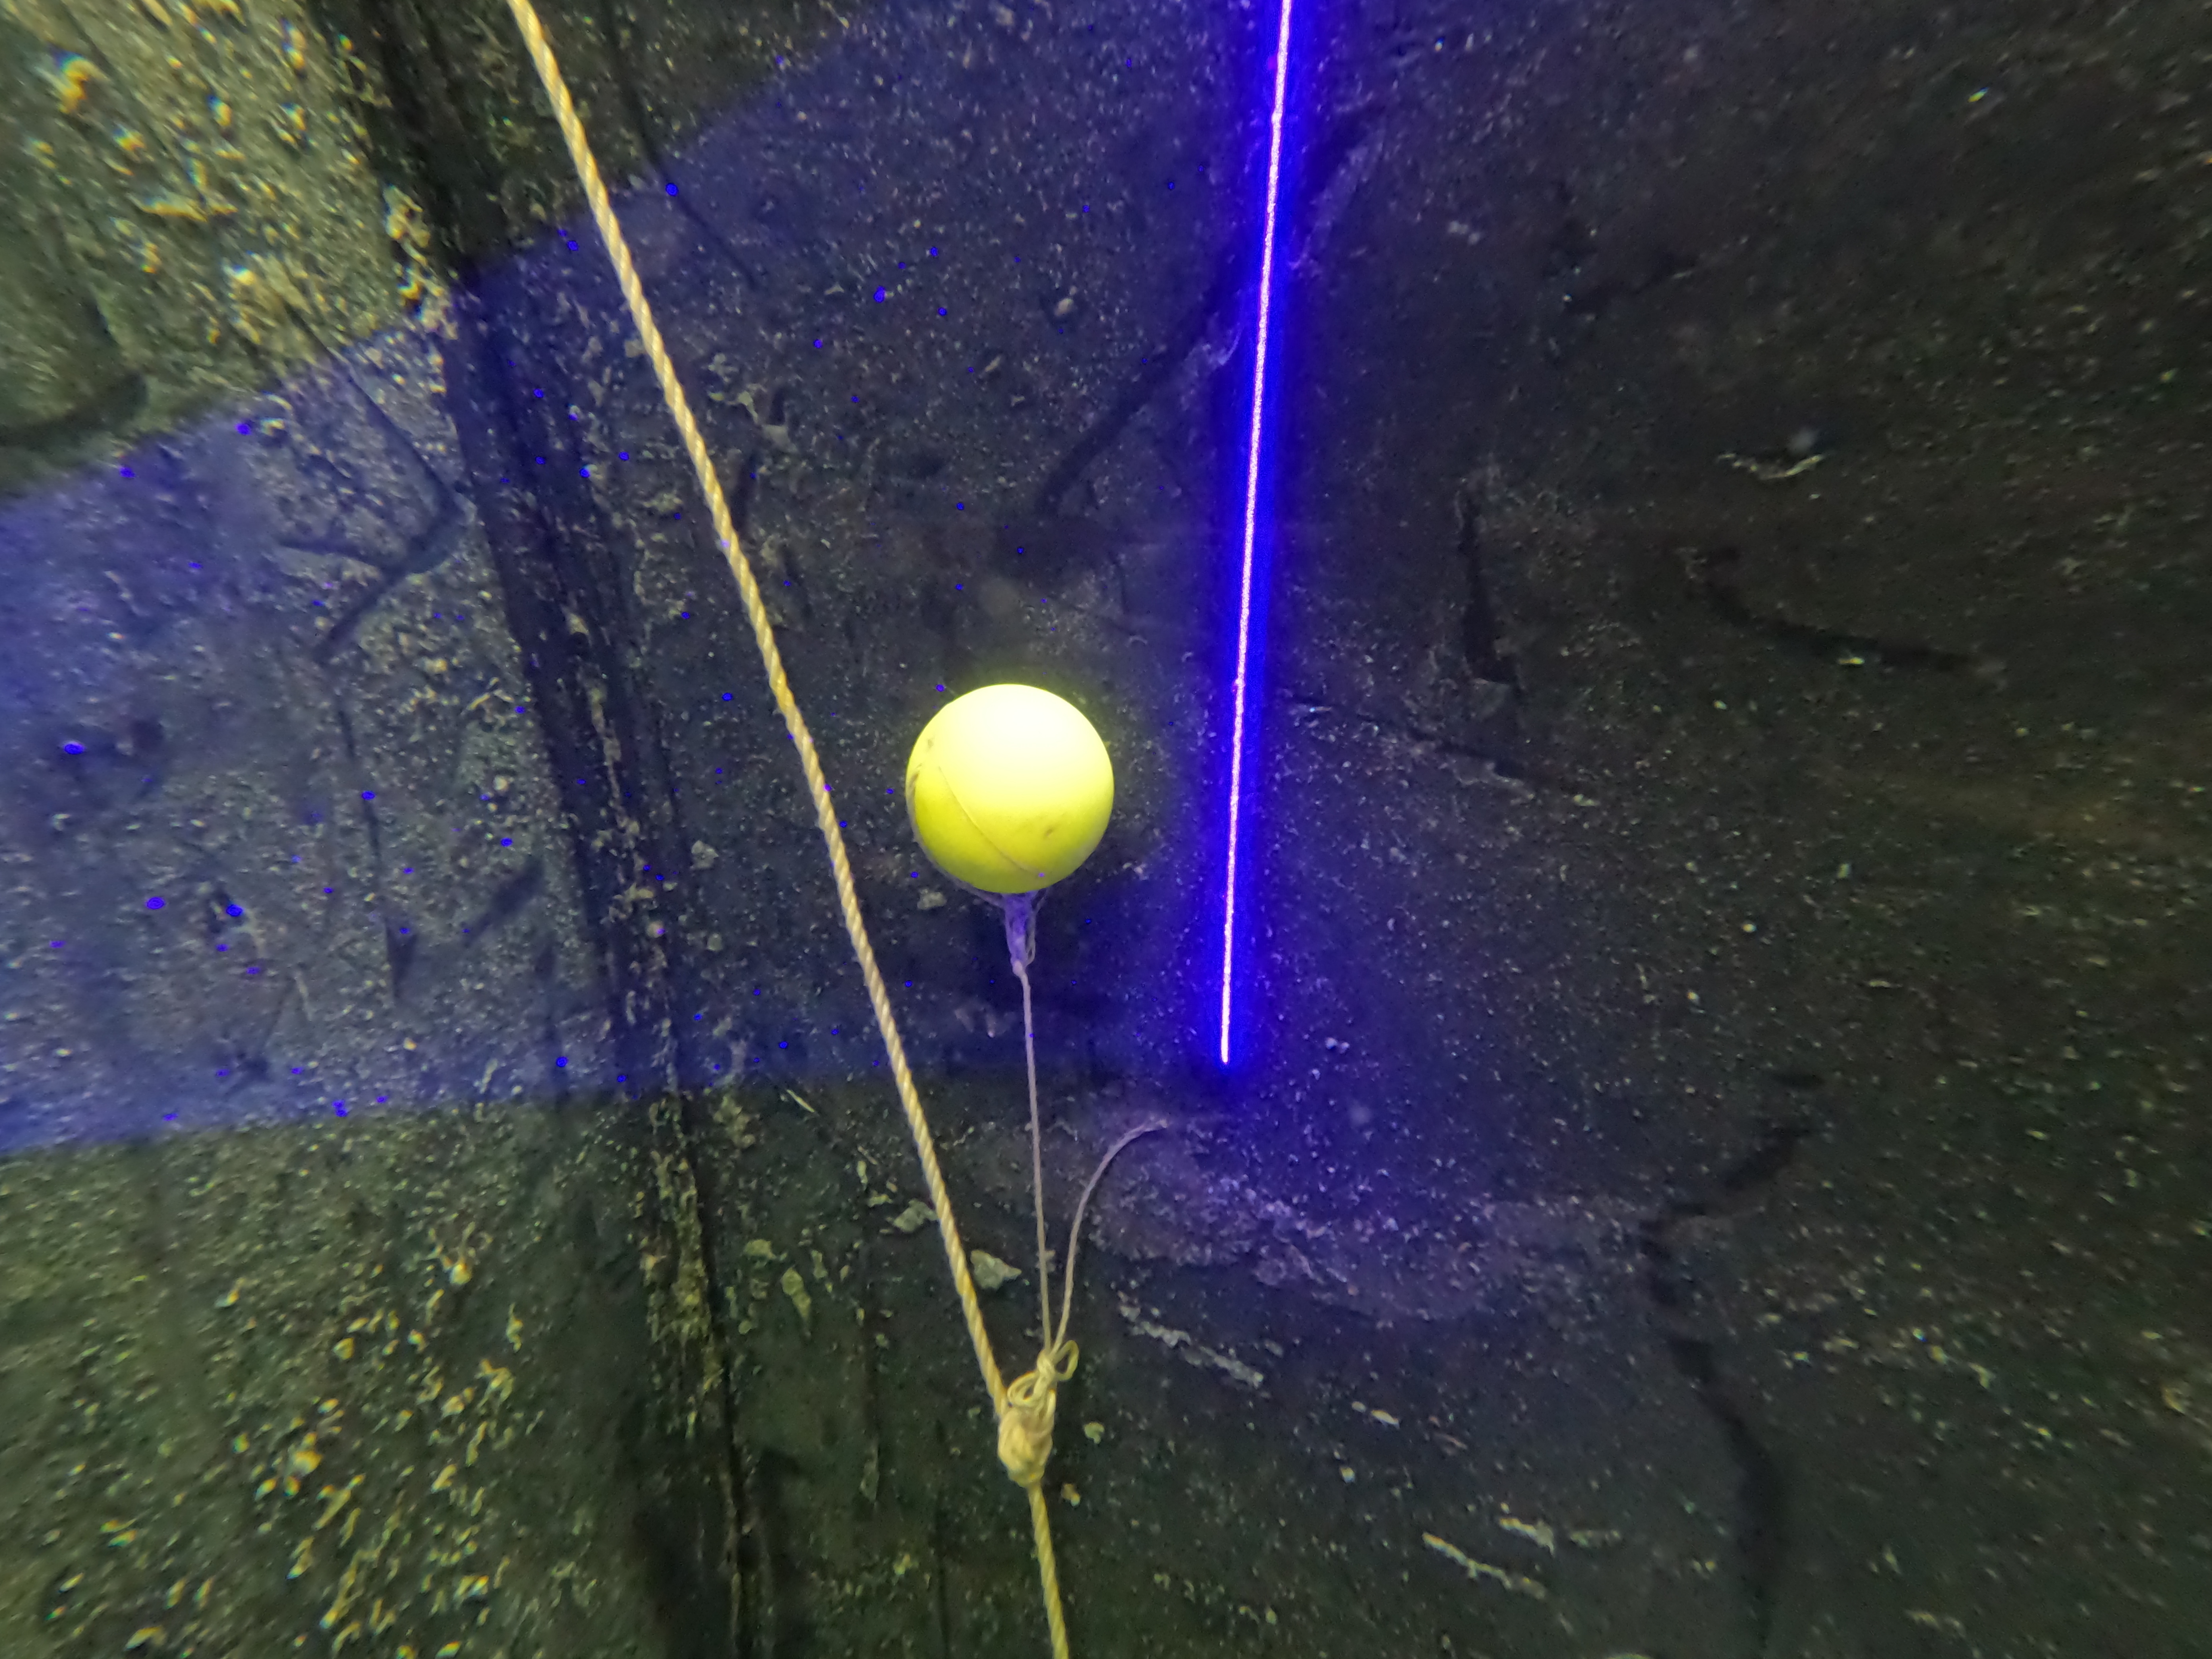

Supplement: Supplementary file 2849 [file G0030349.pdf › 2/G0030349.pdf]

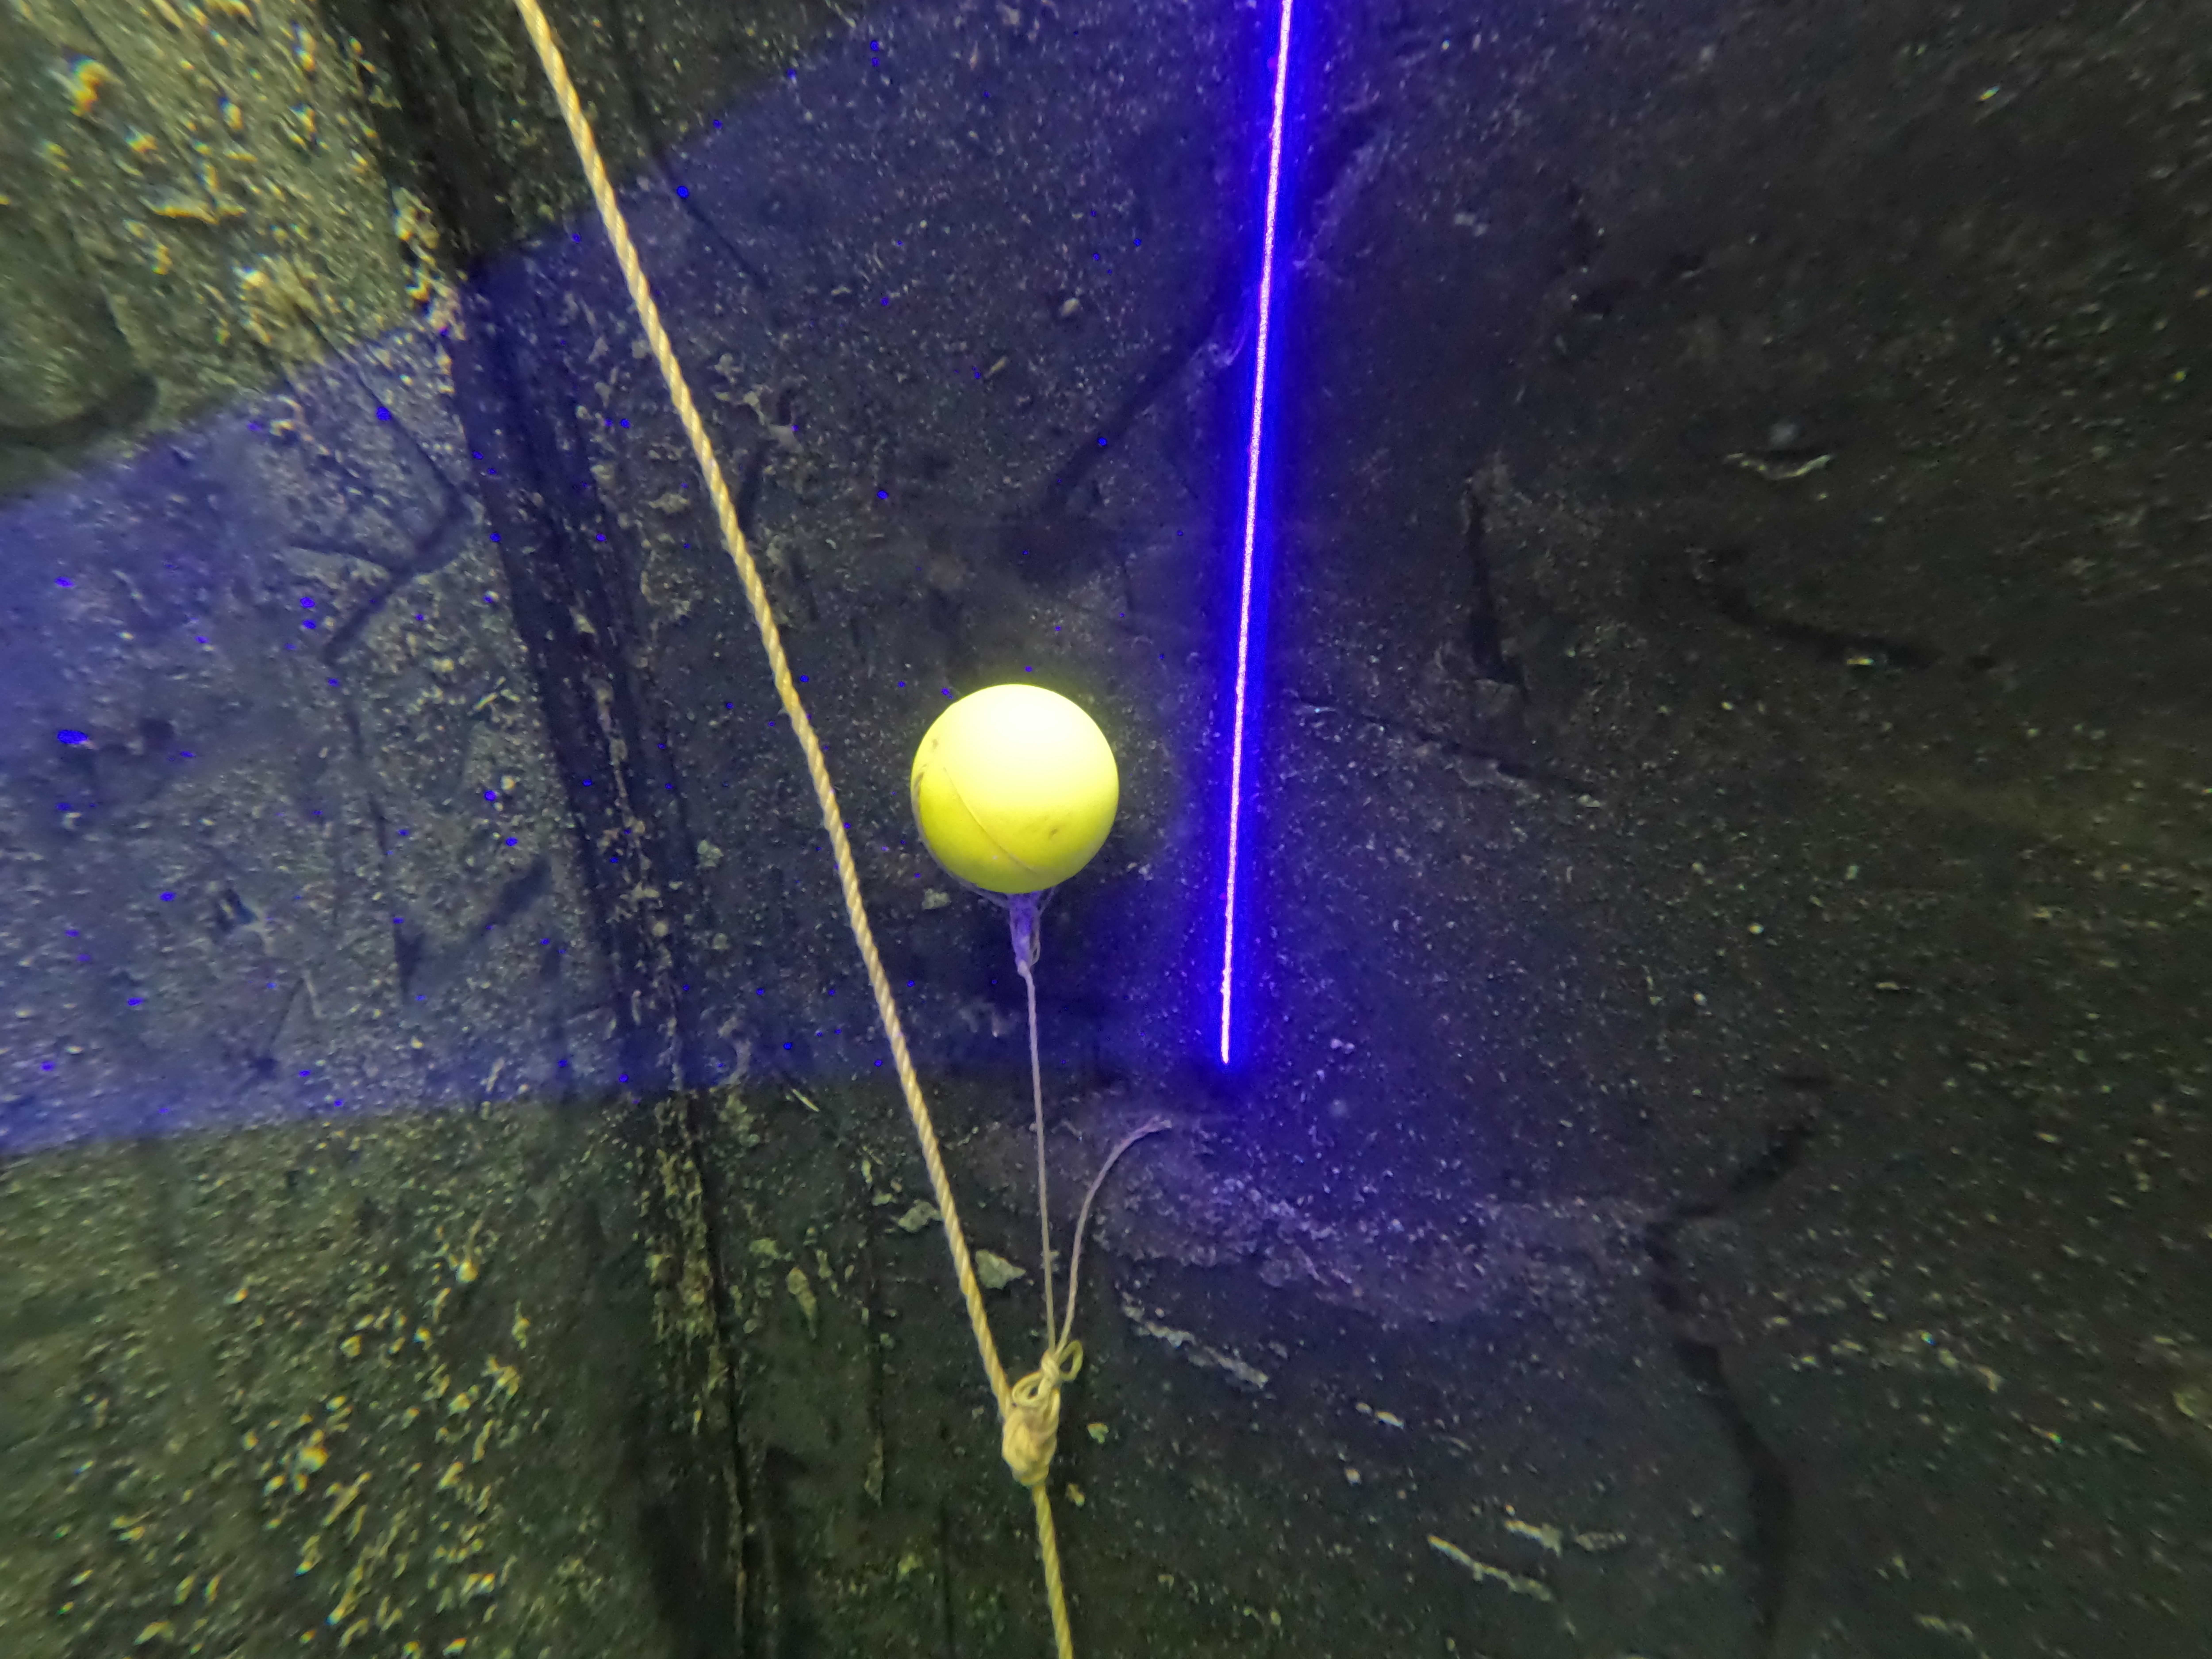

Supplement: Supplementary file 2850 [file G0030350.pdf › 2/G0030350.pdf]

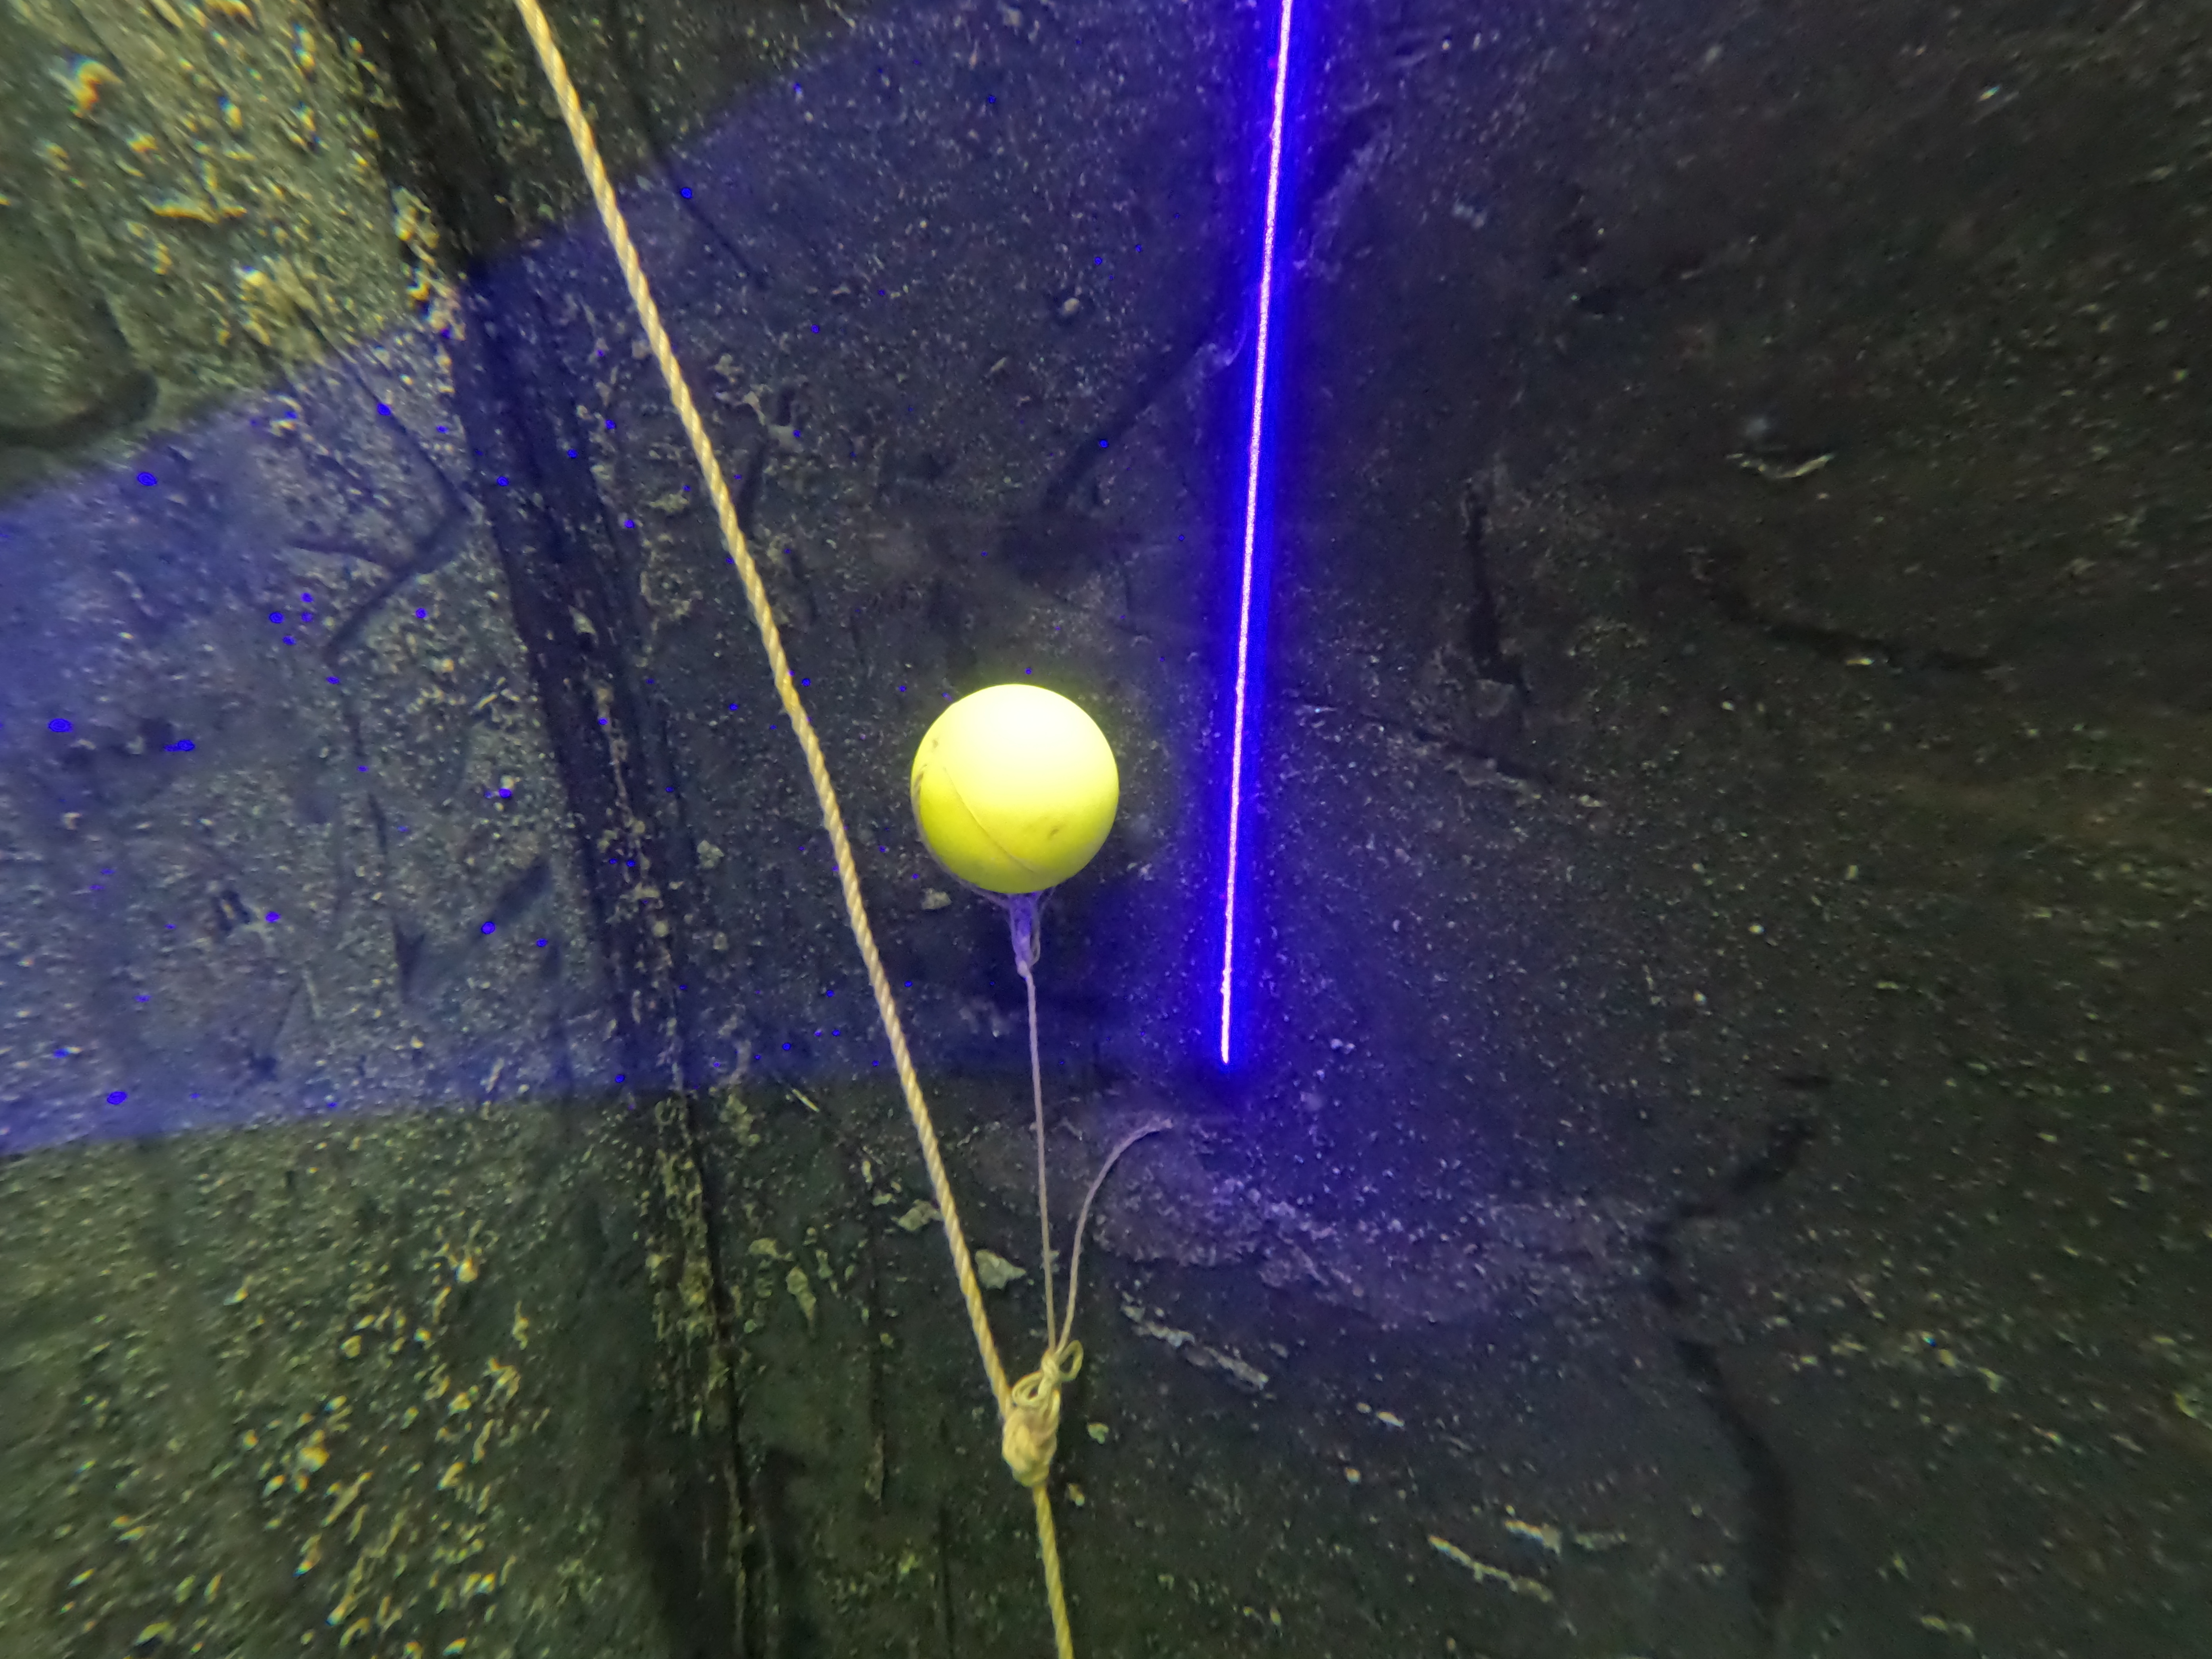

Supplement: Supplementary file 2851 [file G0030351.pdf › 2/G0030351.pdf]

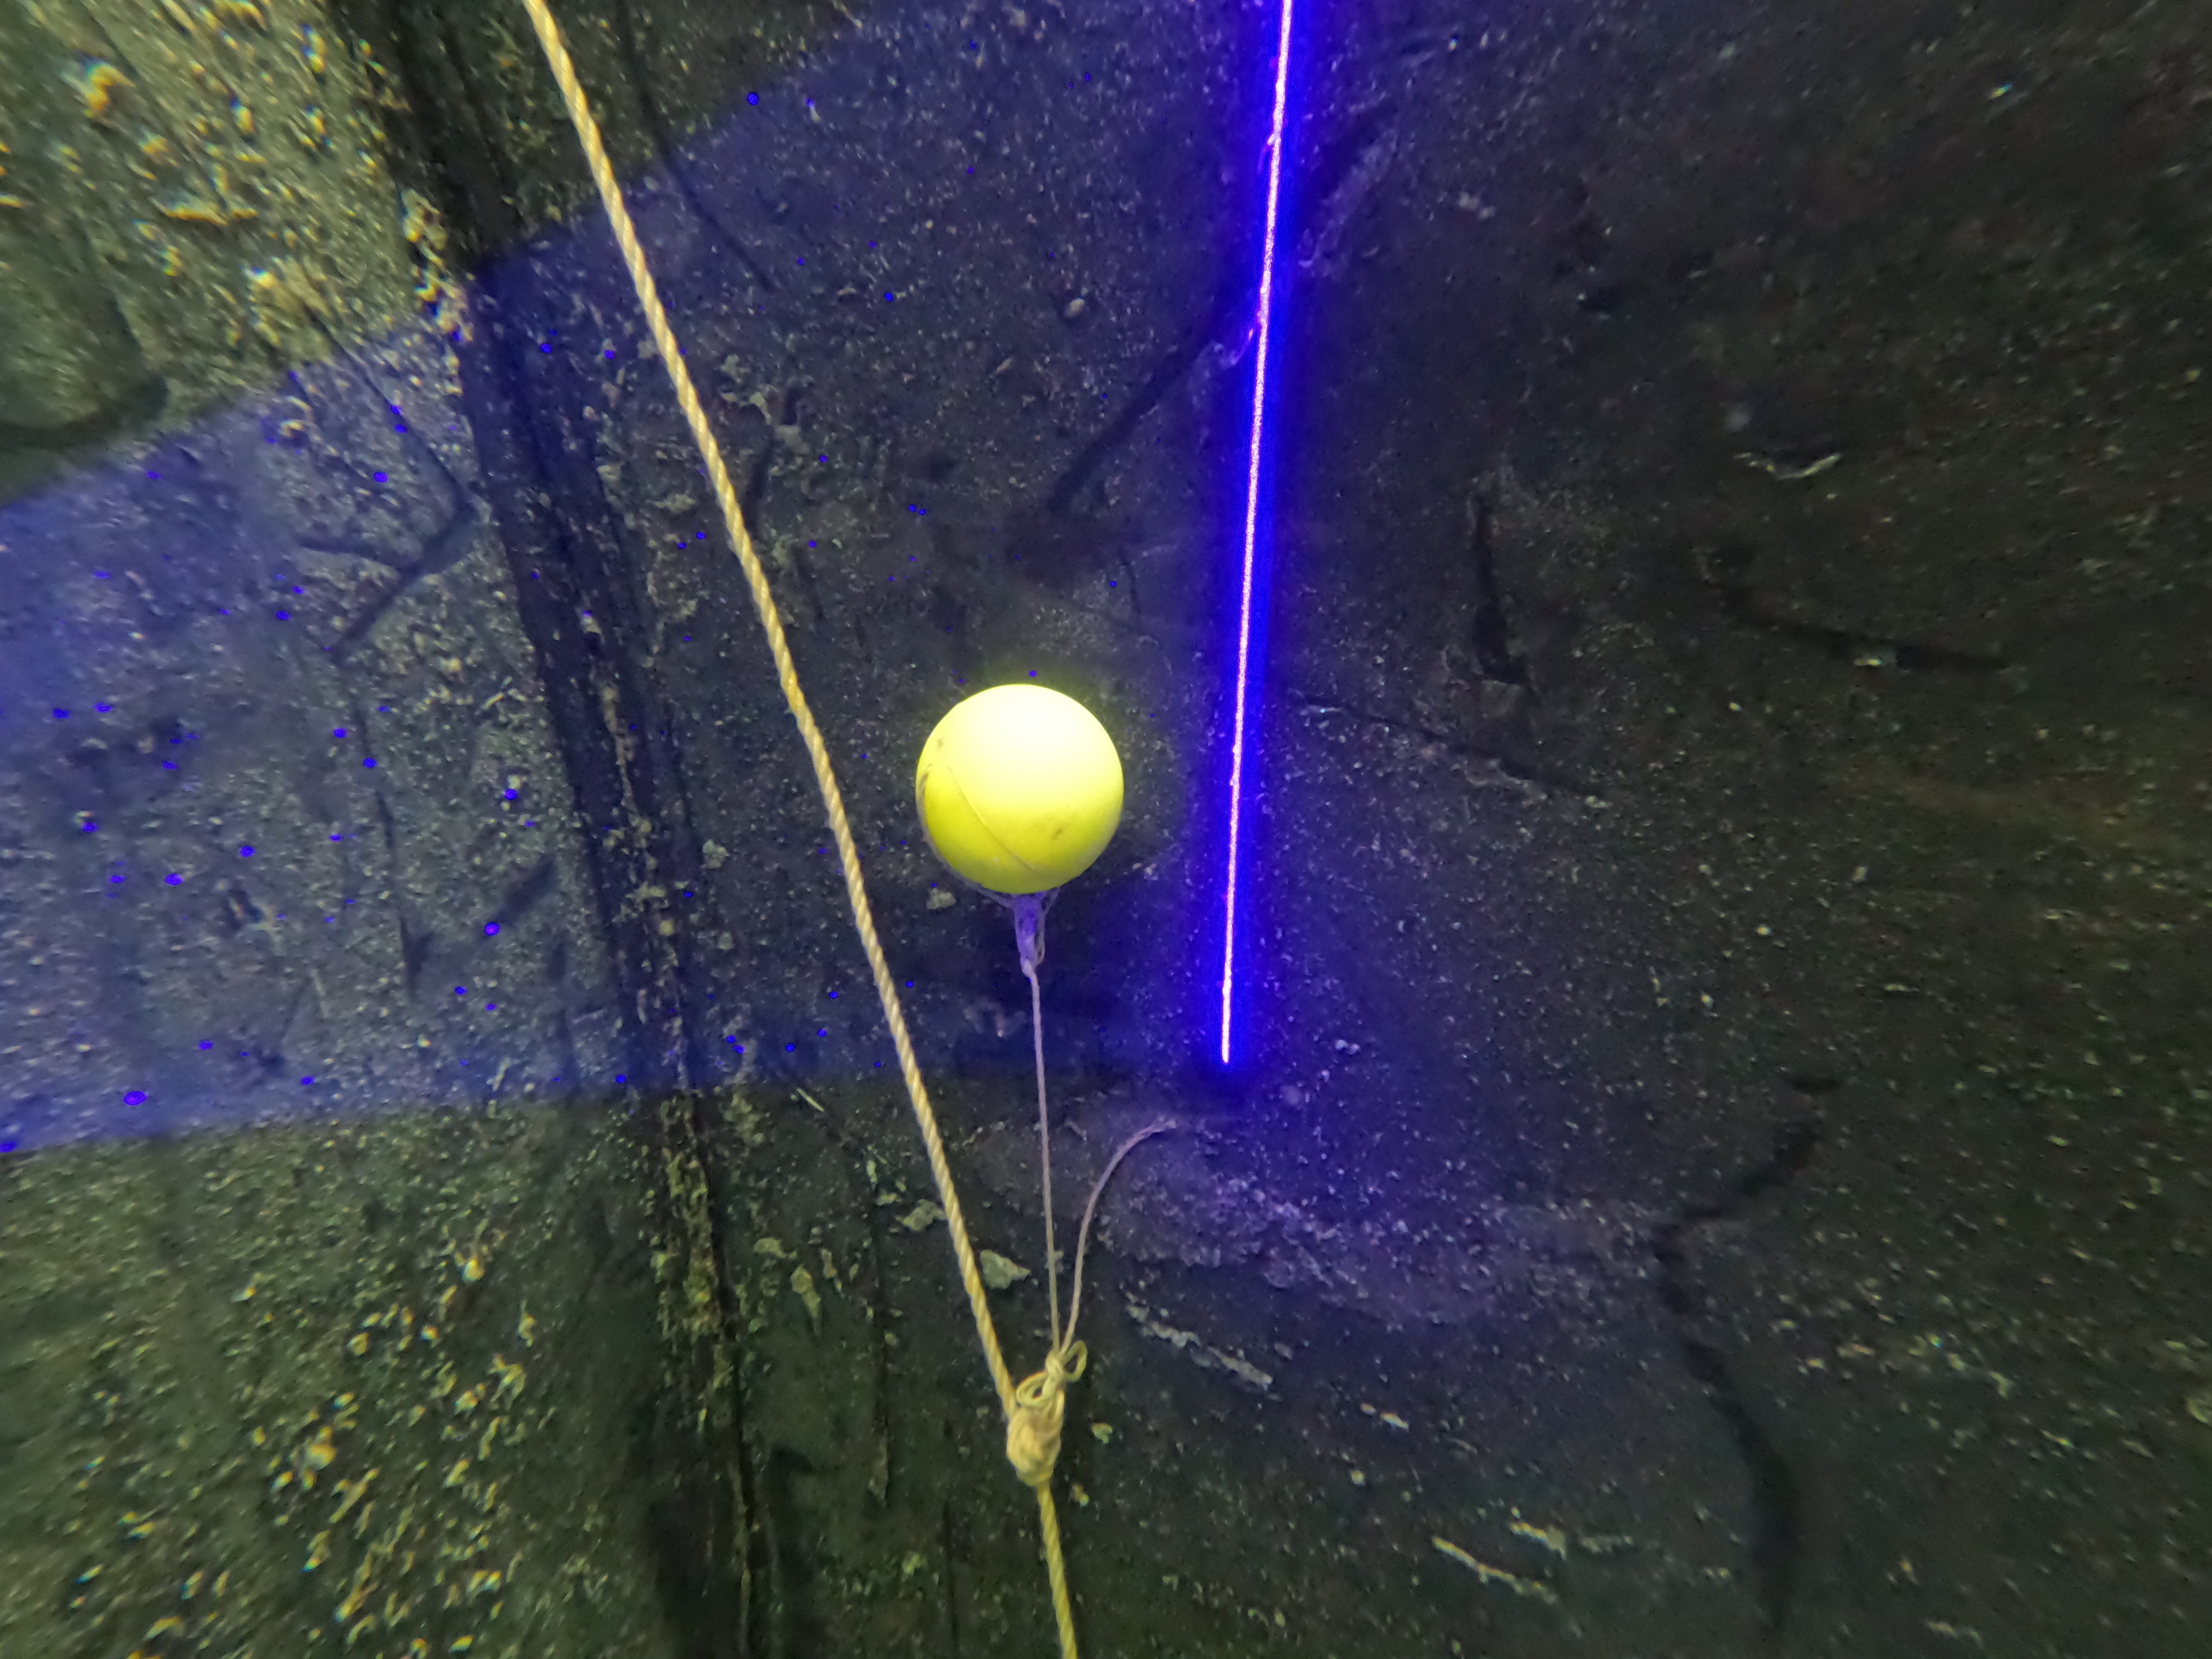

Supplement: Supplementary file 2852 [file G0030352.pdf › 2/G0030352.pdf]

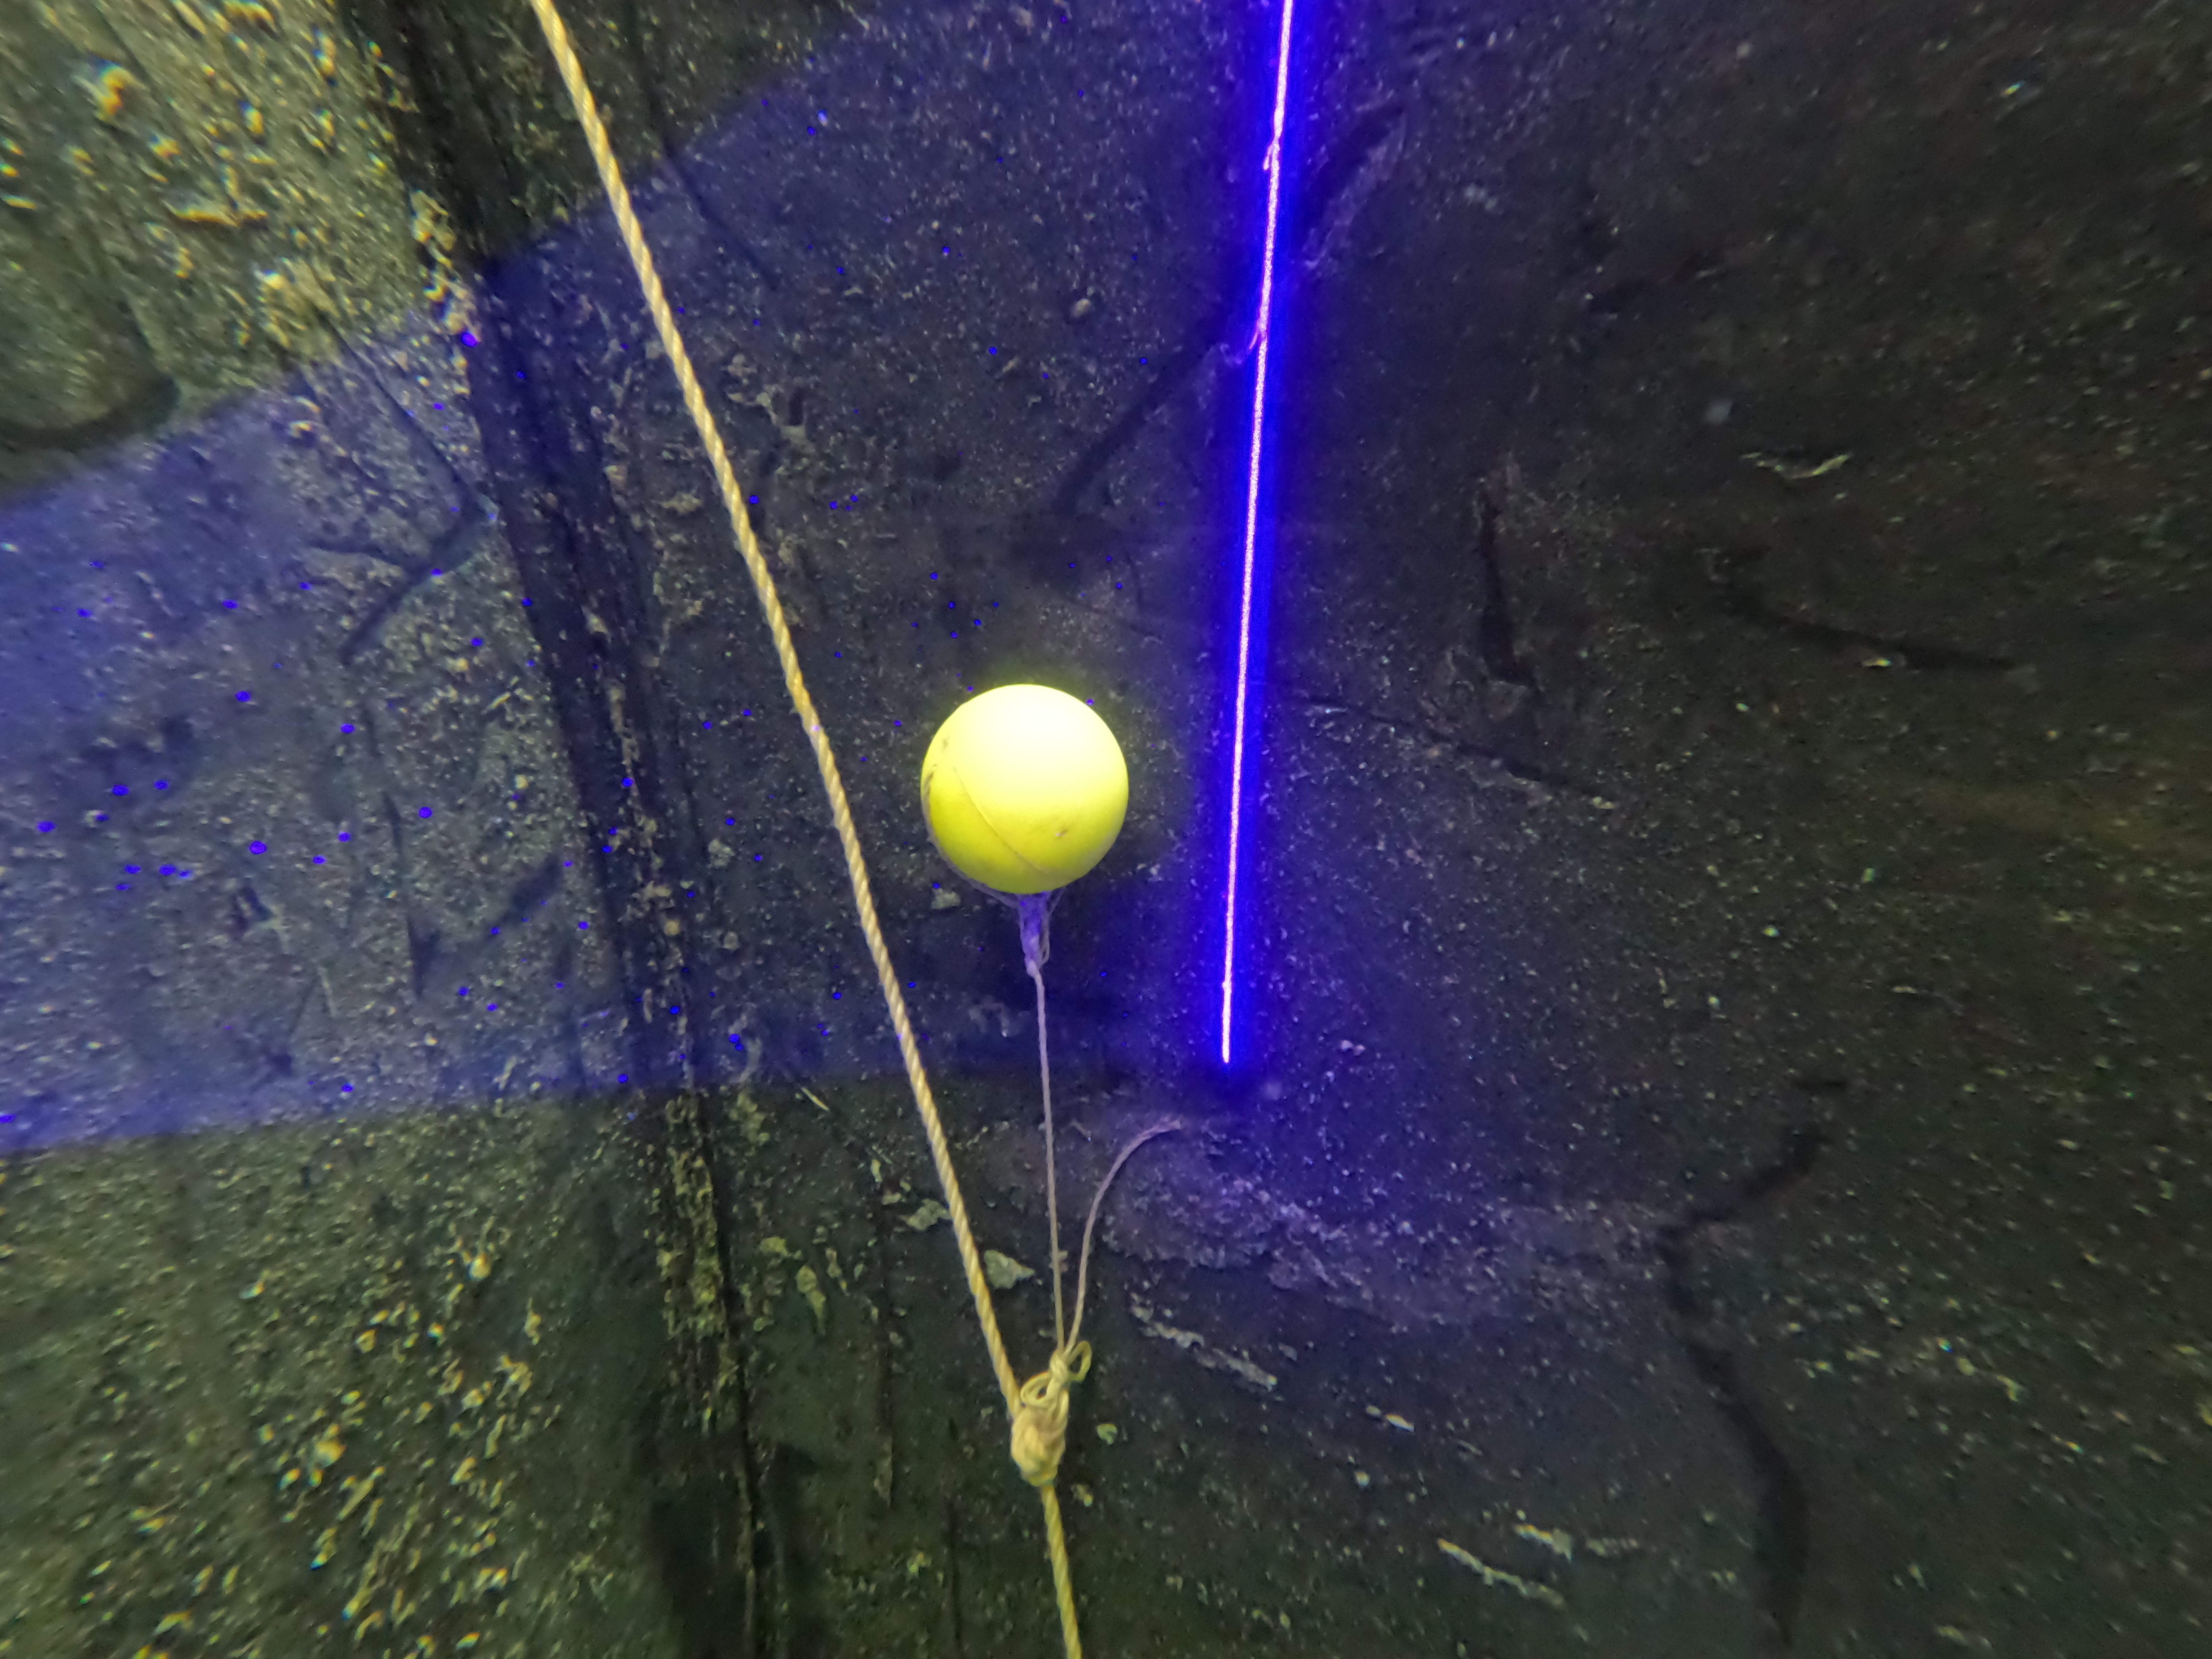

Supplement: Supplementary file 2853 [file G0030353.pdf › 2/G0030353.pdf]

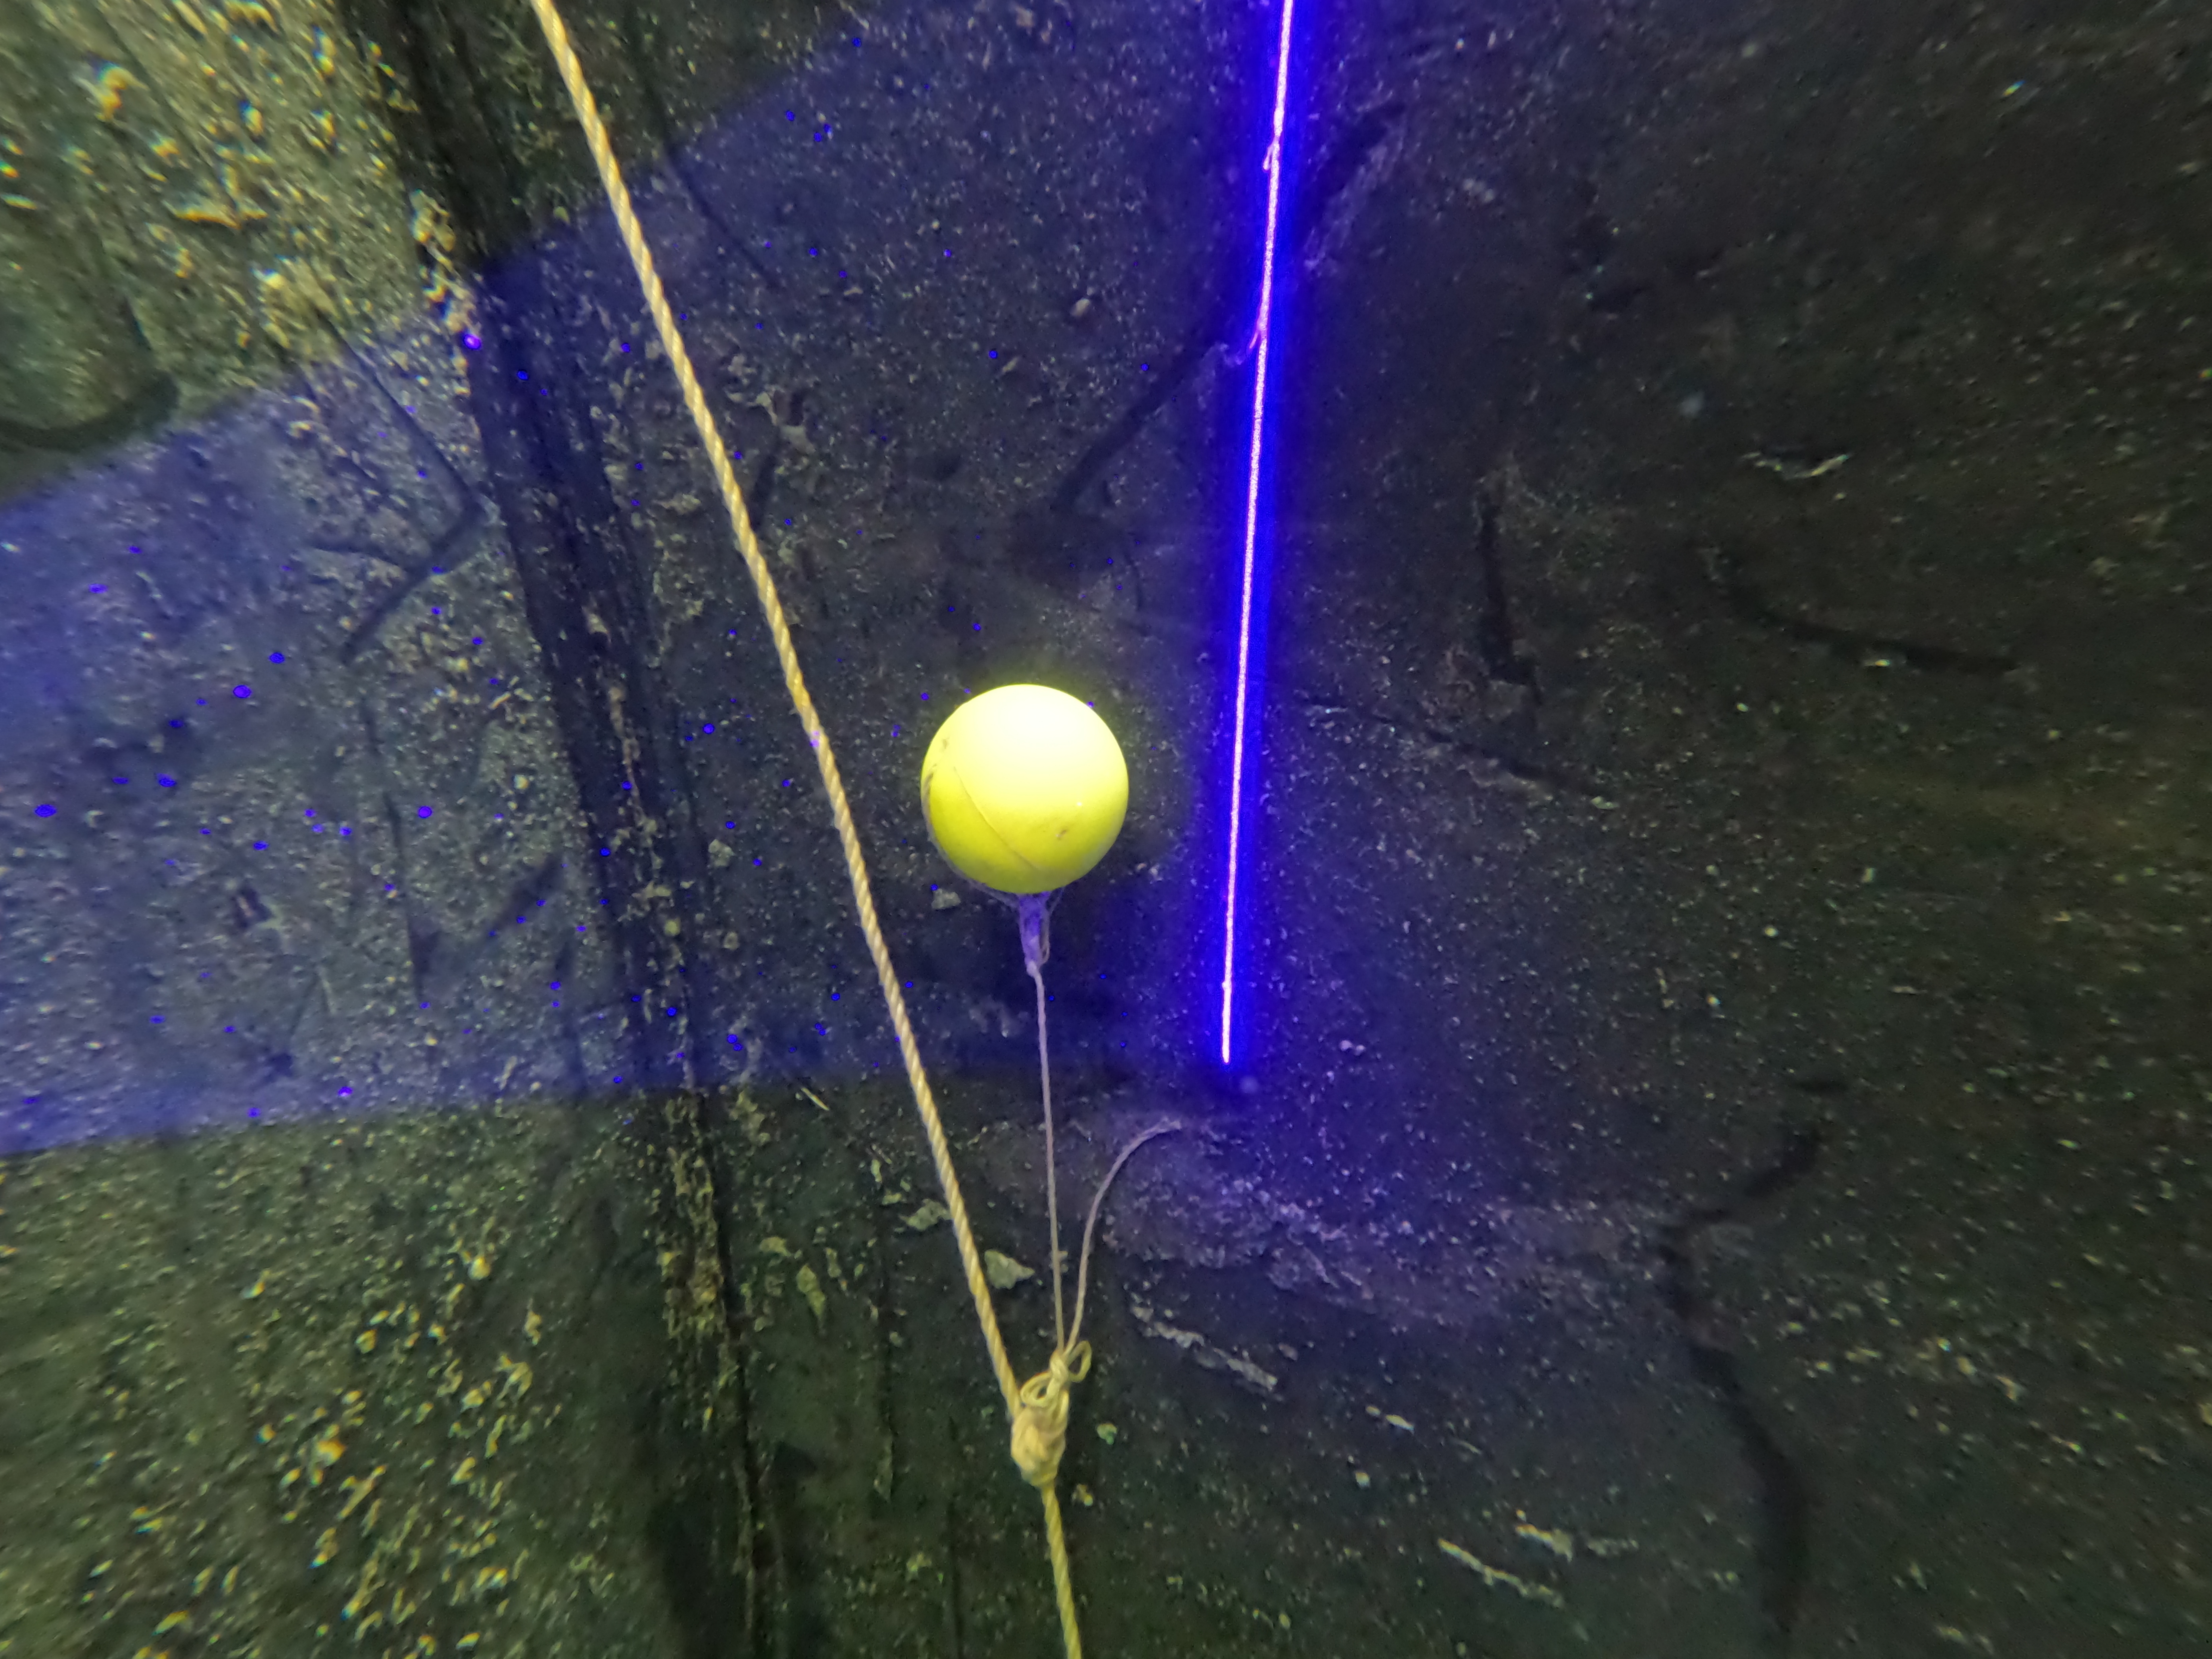

Supplement: Supplementary file 2854 [file G0030354.pdf › 2/G0030354.pdf]

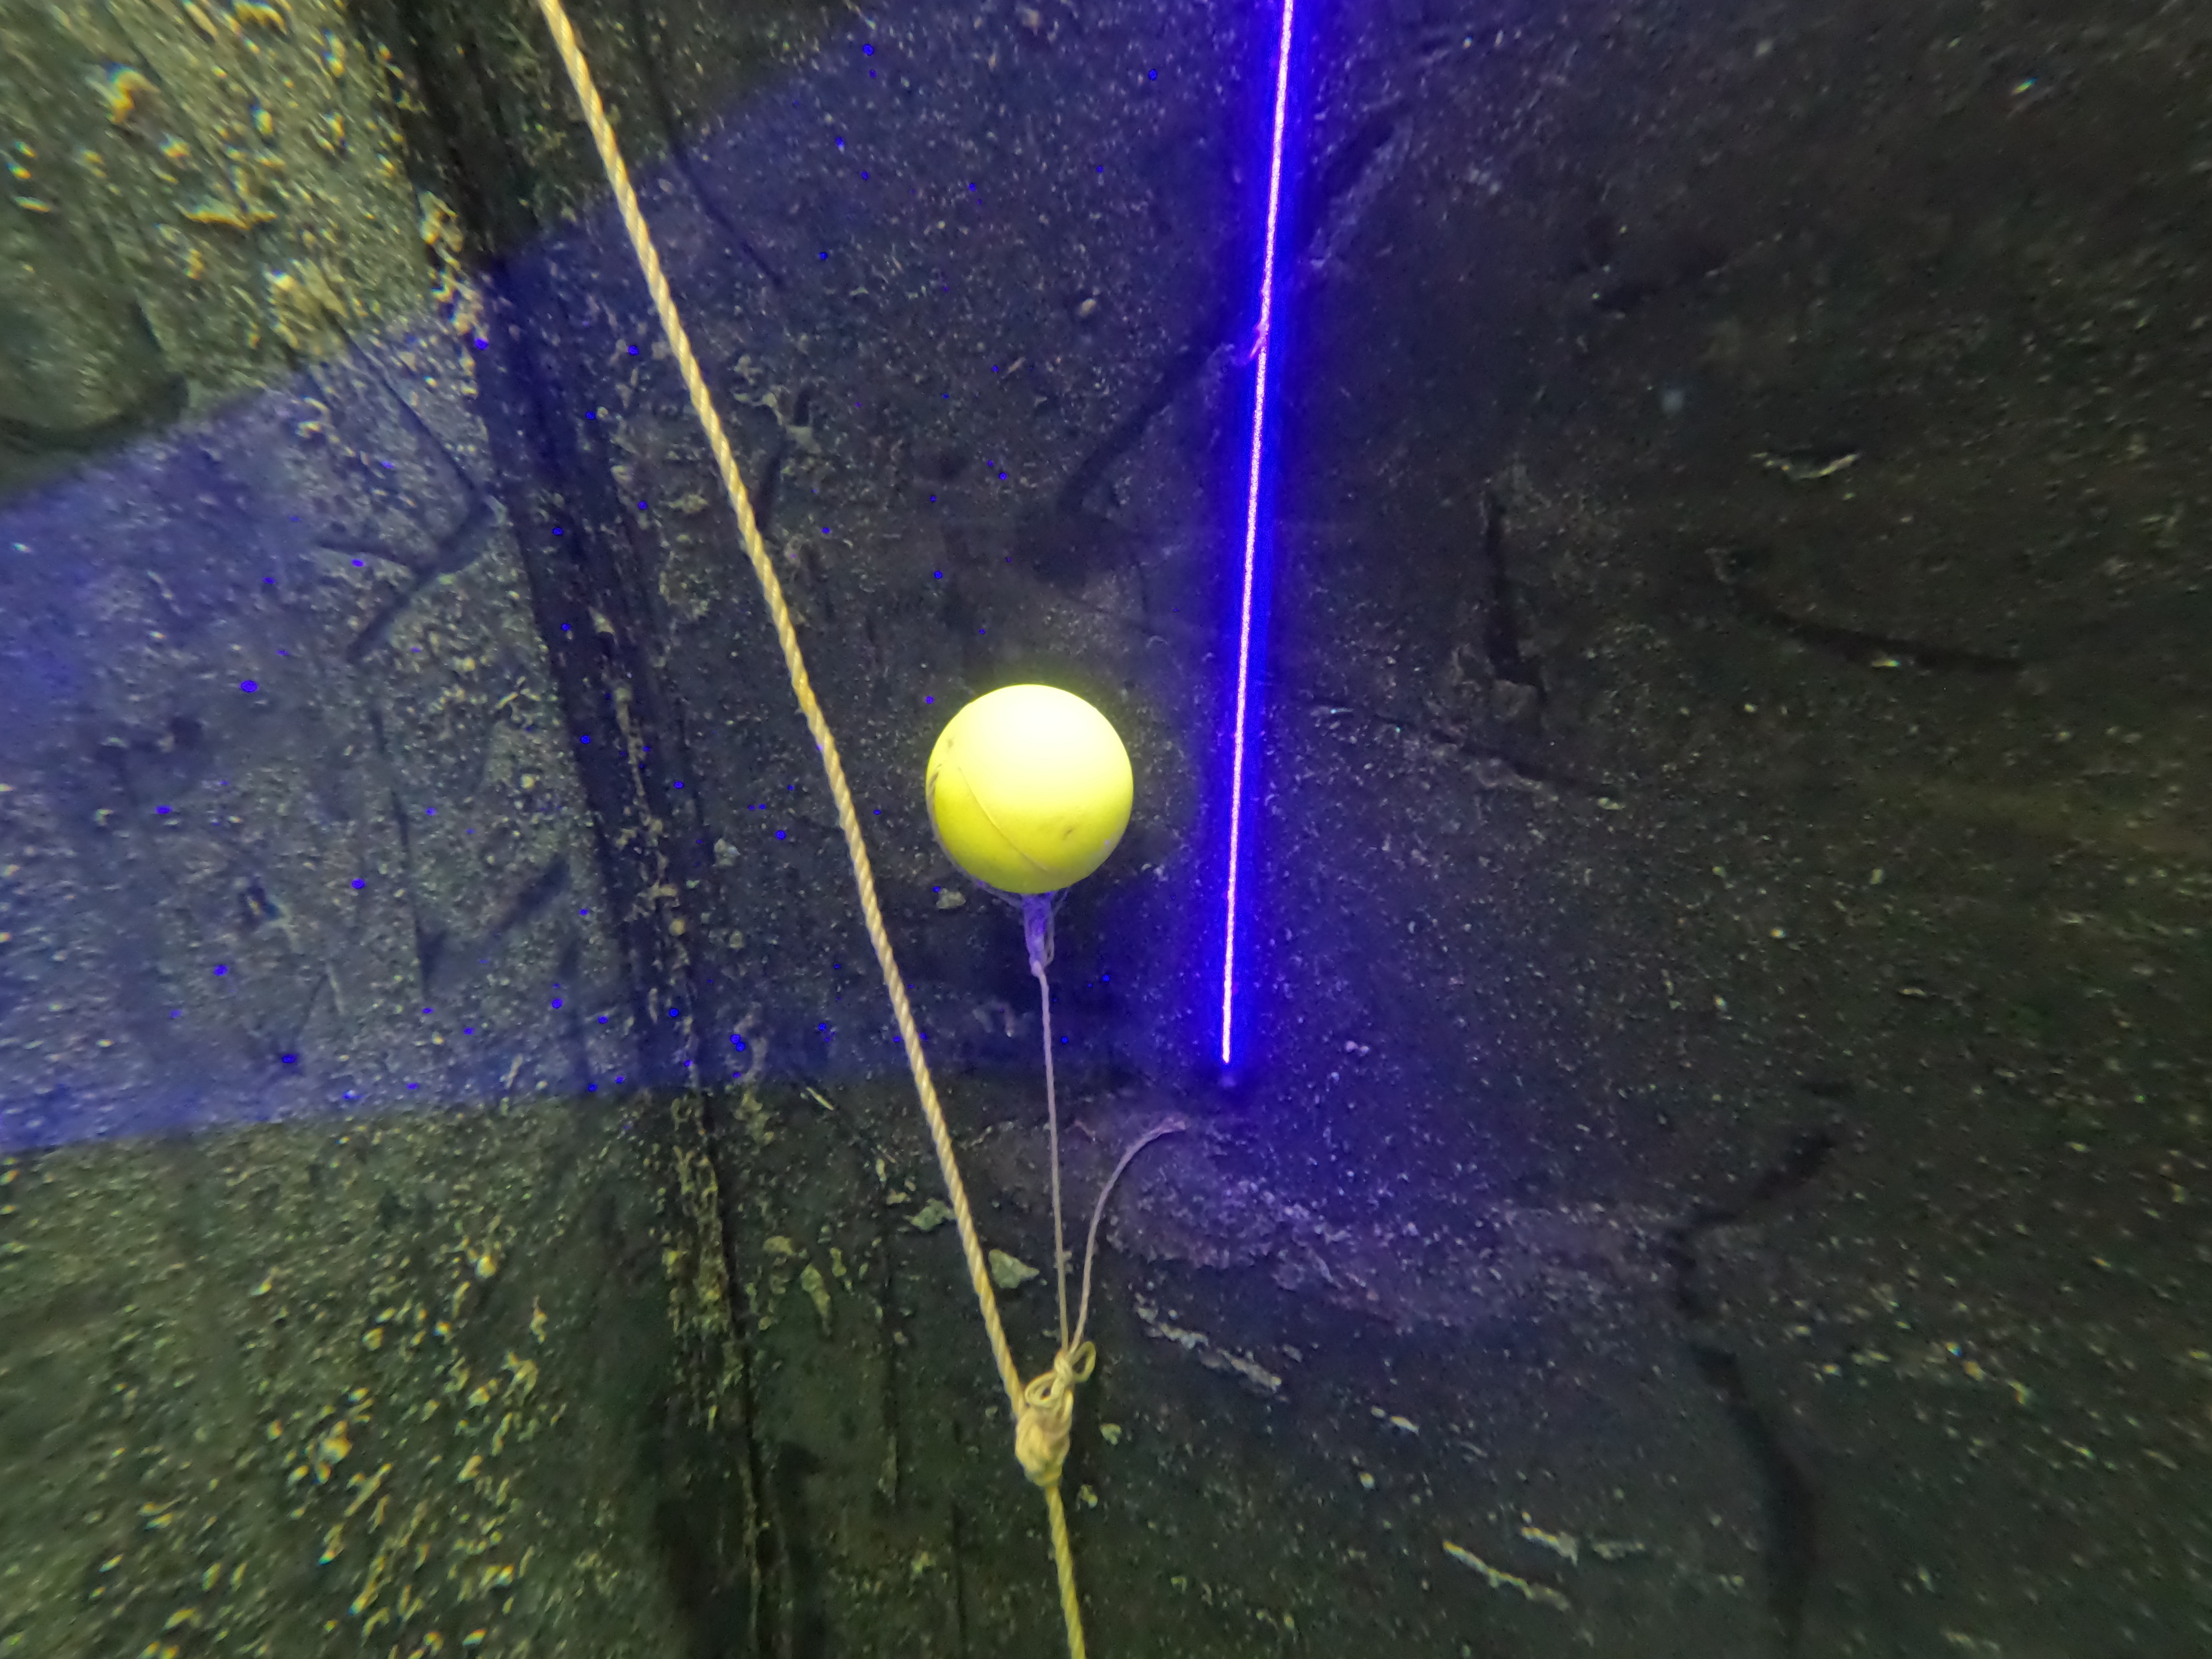

Supplement: Supplementary file 2855 [file G0030355.pdf › 2/G0030355.pdf]

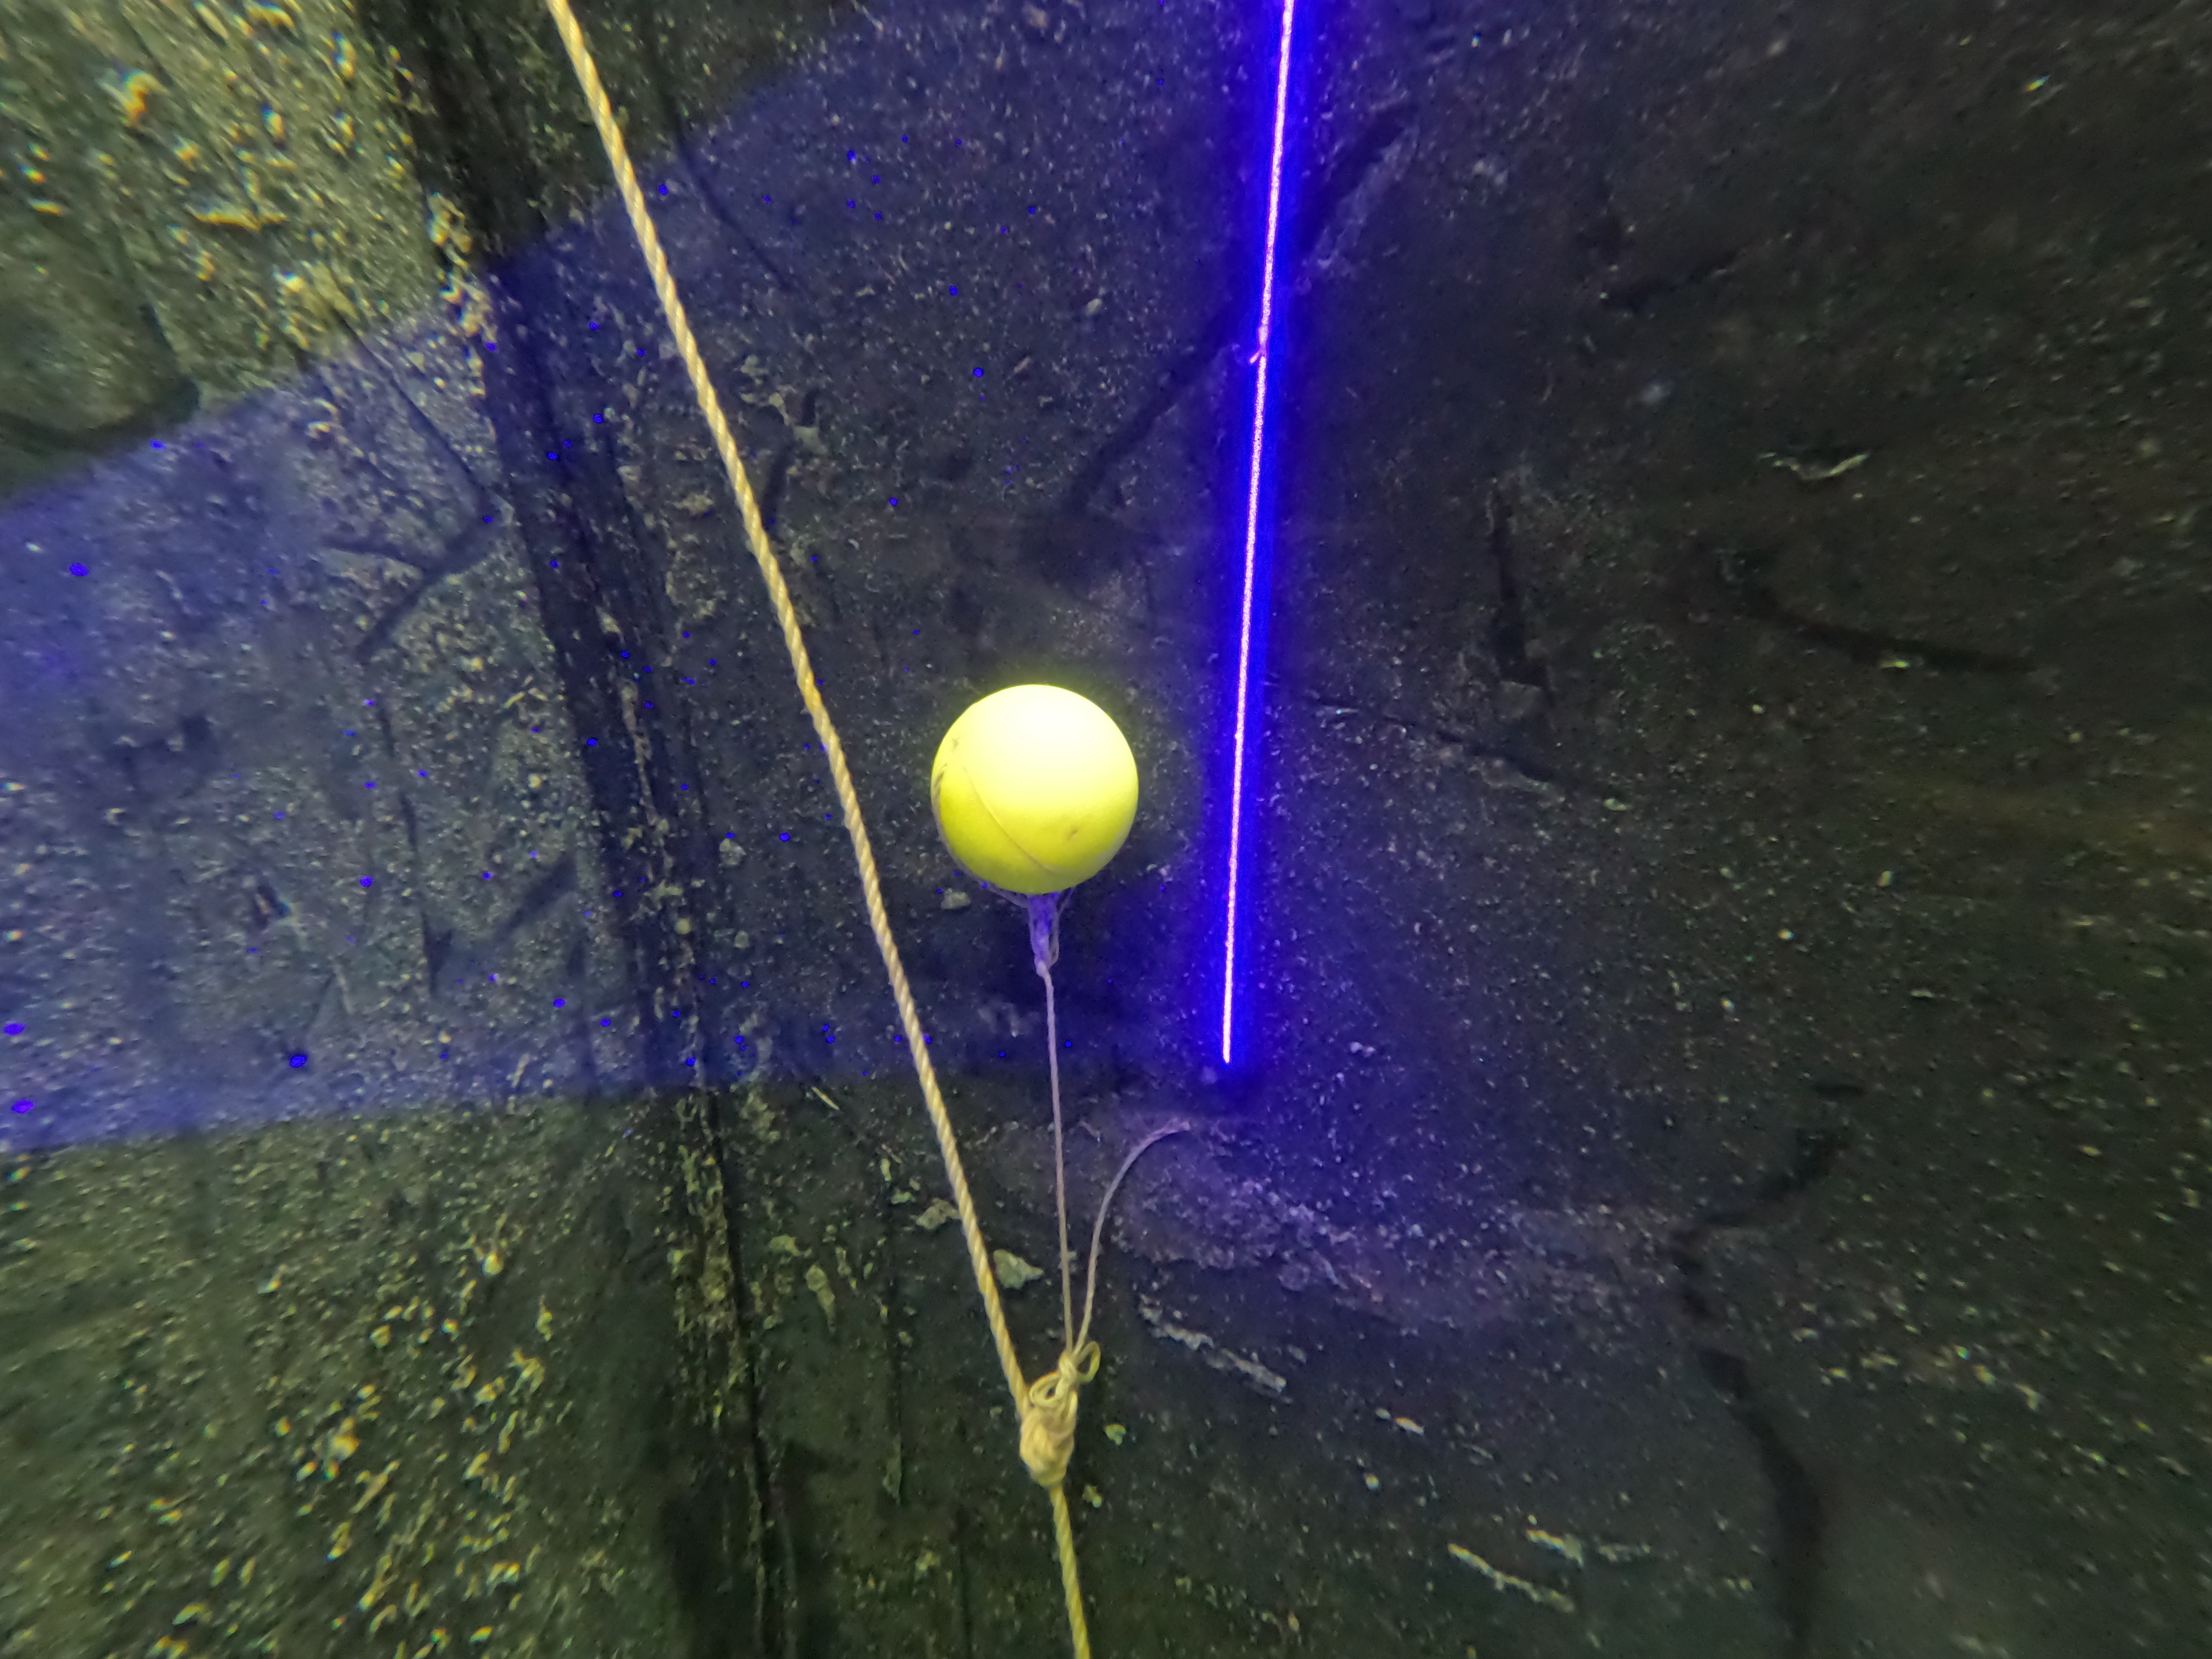

Supplement: Supplementary file 2856 [file G0030356.pdf › 2/G0030356.pdf]

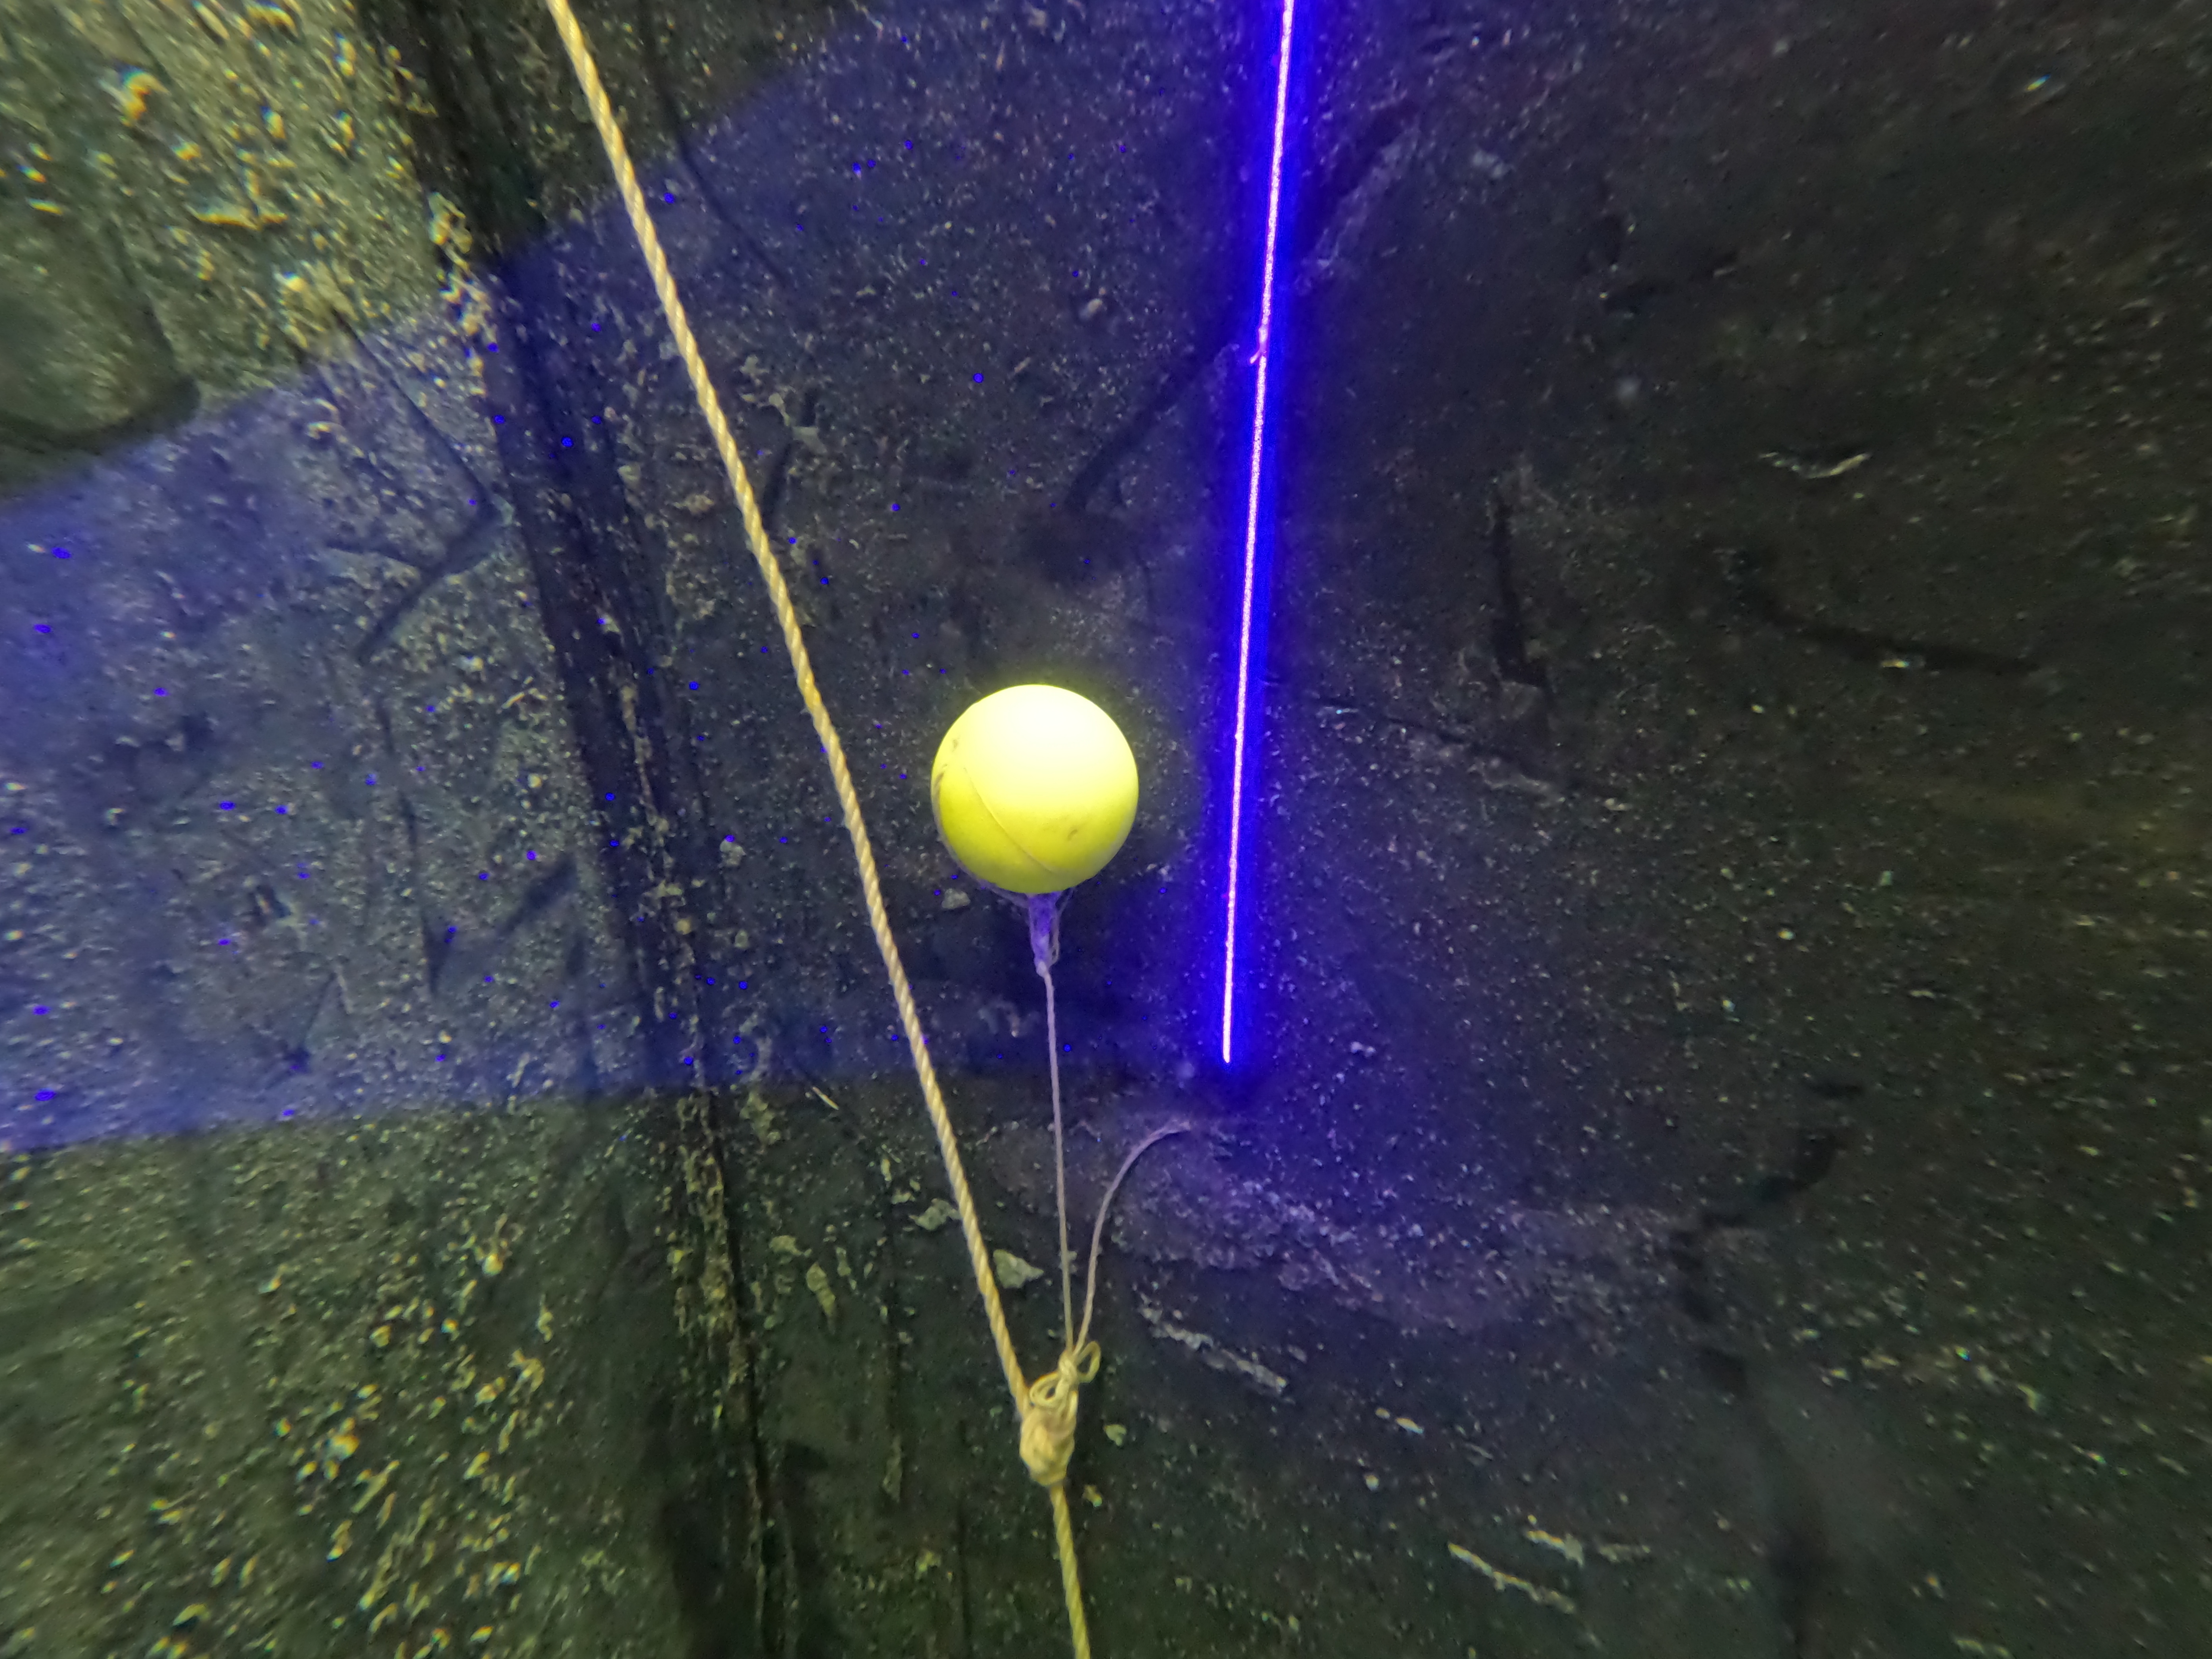

Supplement: Supplementary file 2857 [file G0030357.pdf › 2/G0030357.pdf]

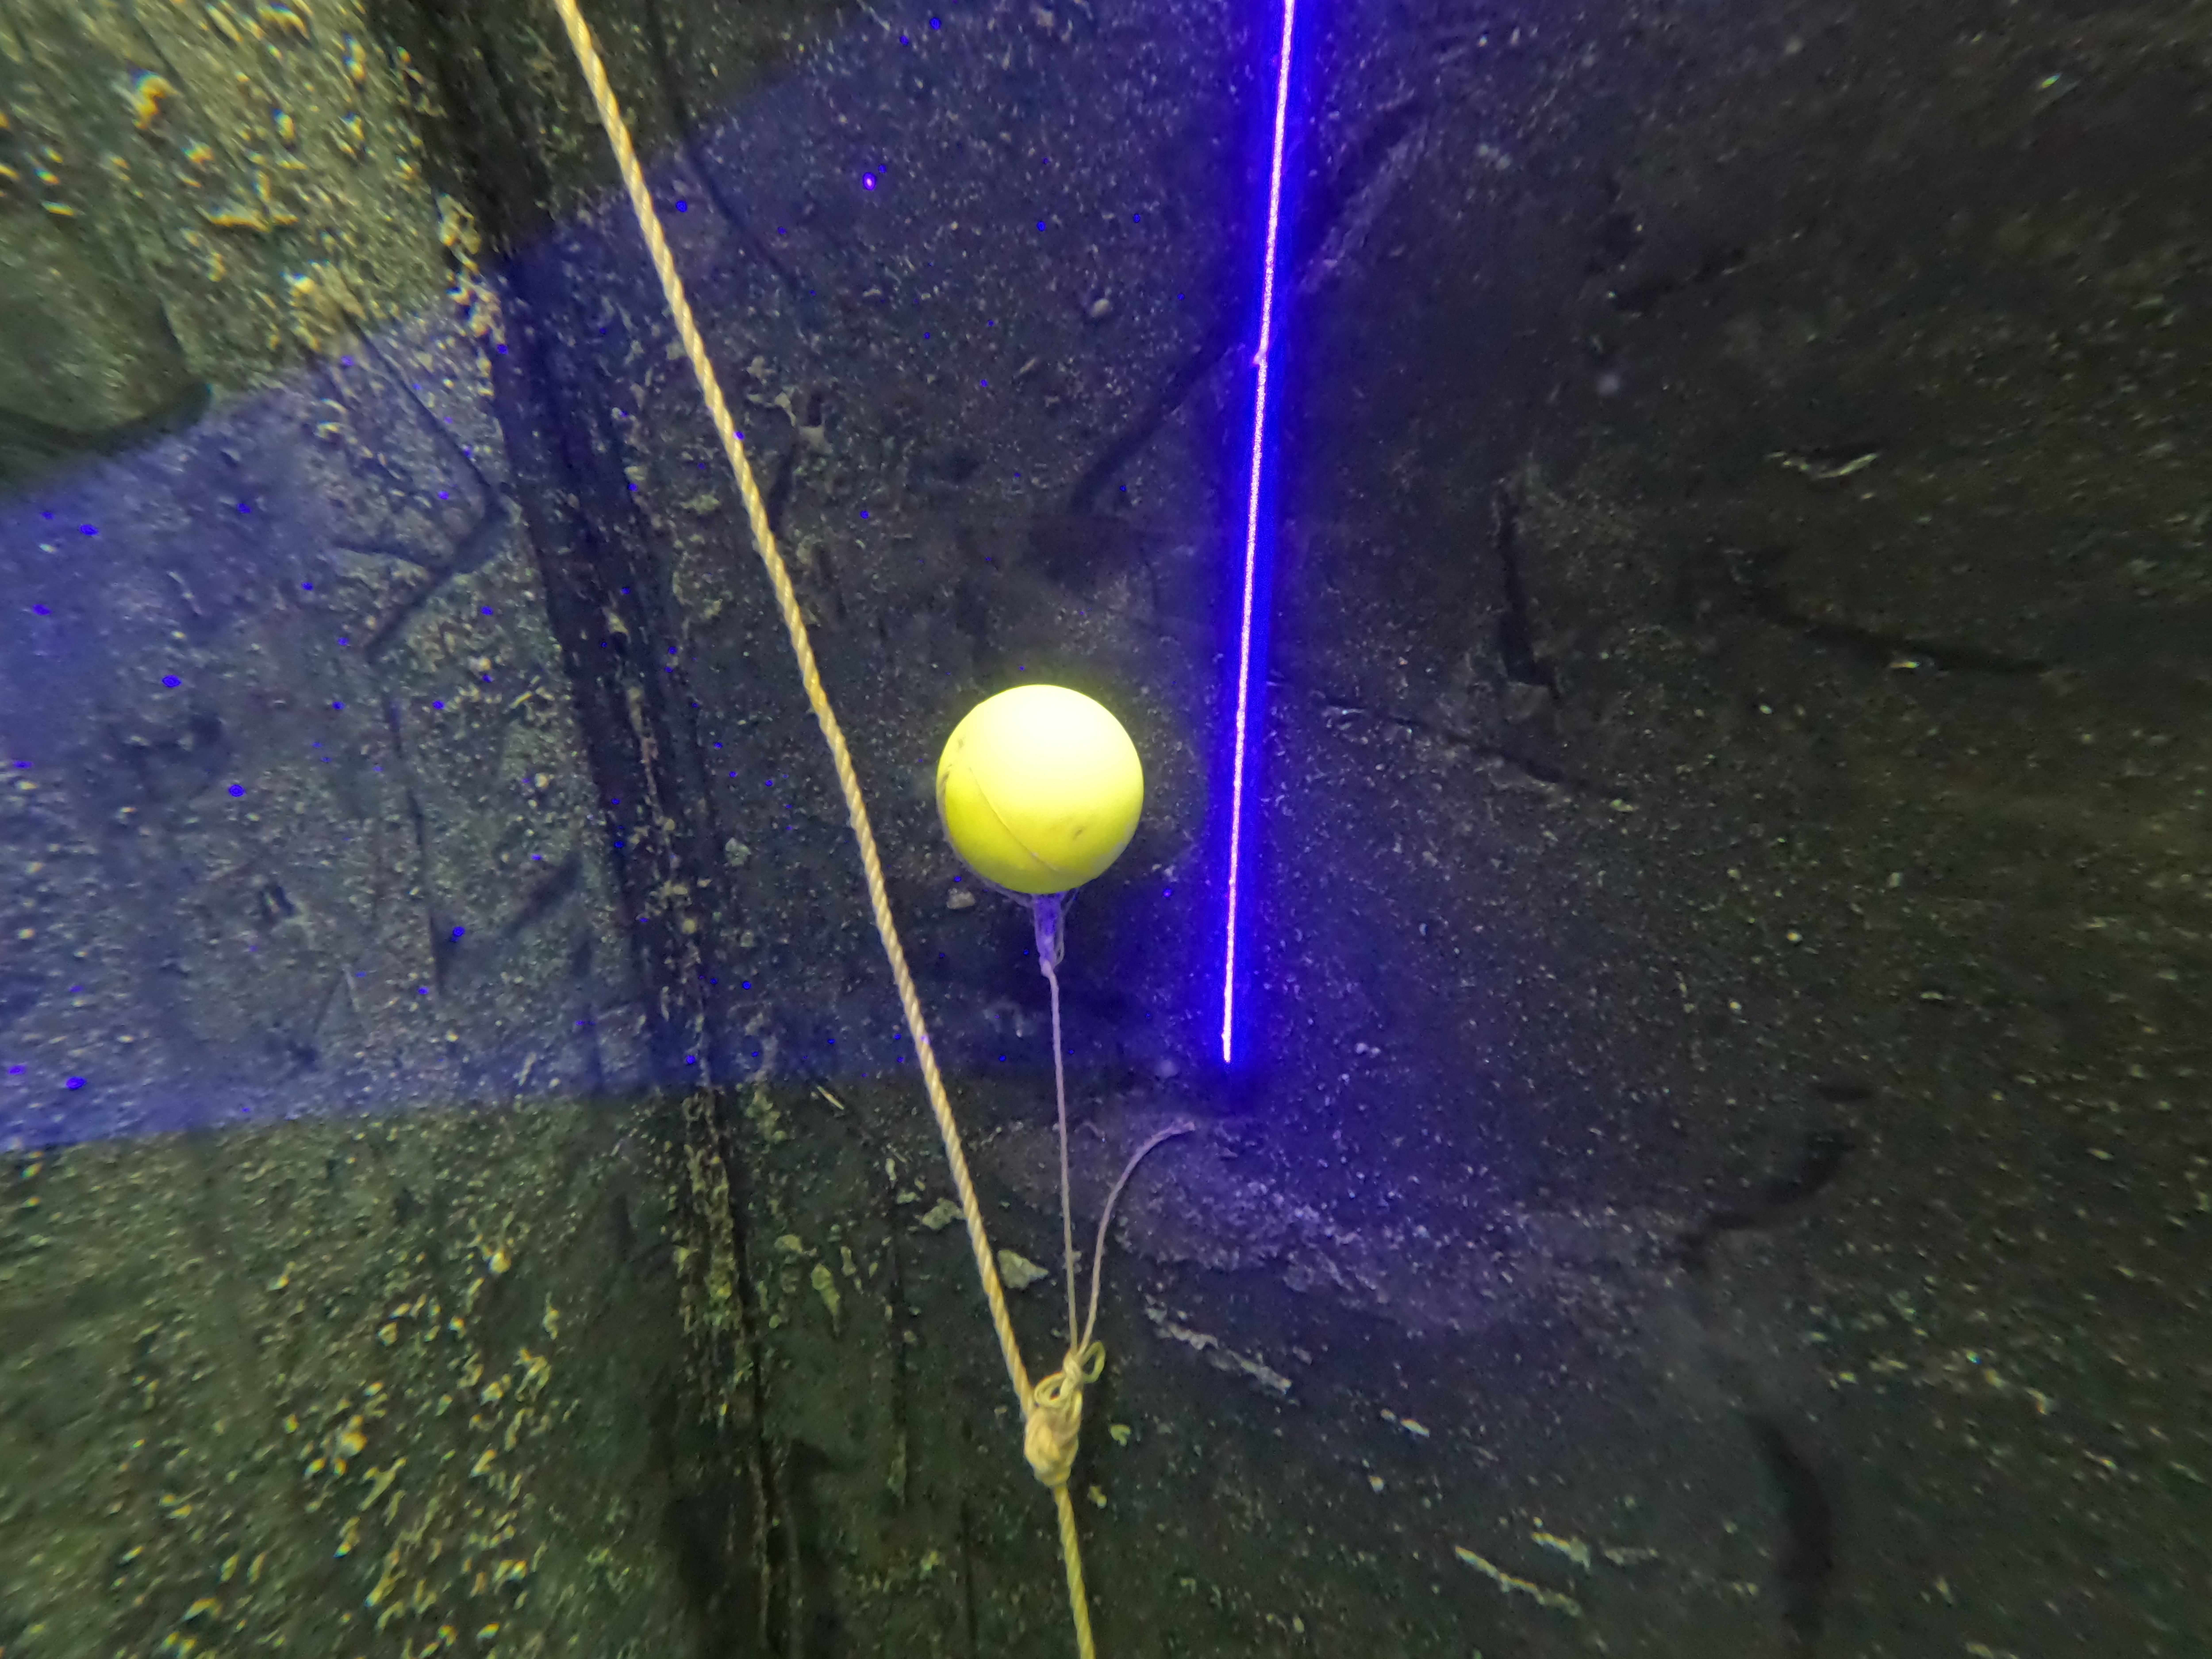

Supplement: Supplementary file 2858 [file G0030358.pdf › 2/G0030358.pdf]

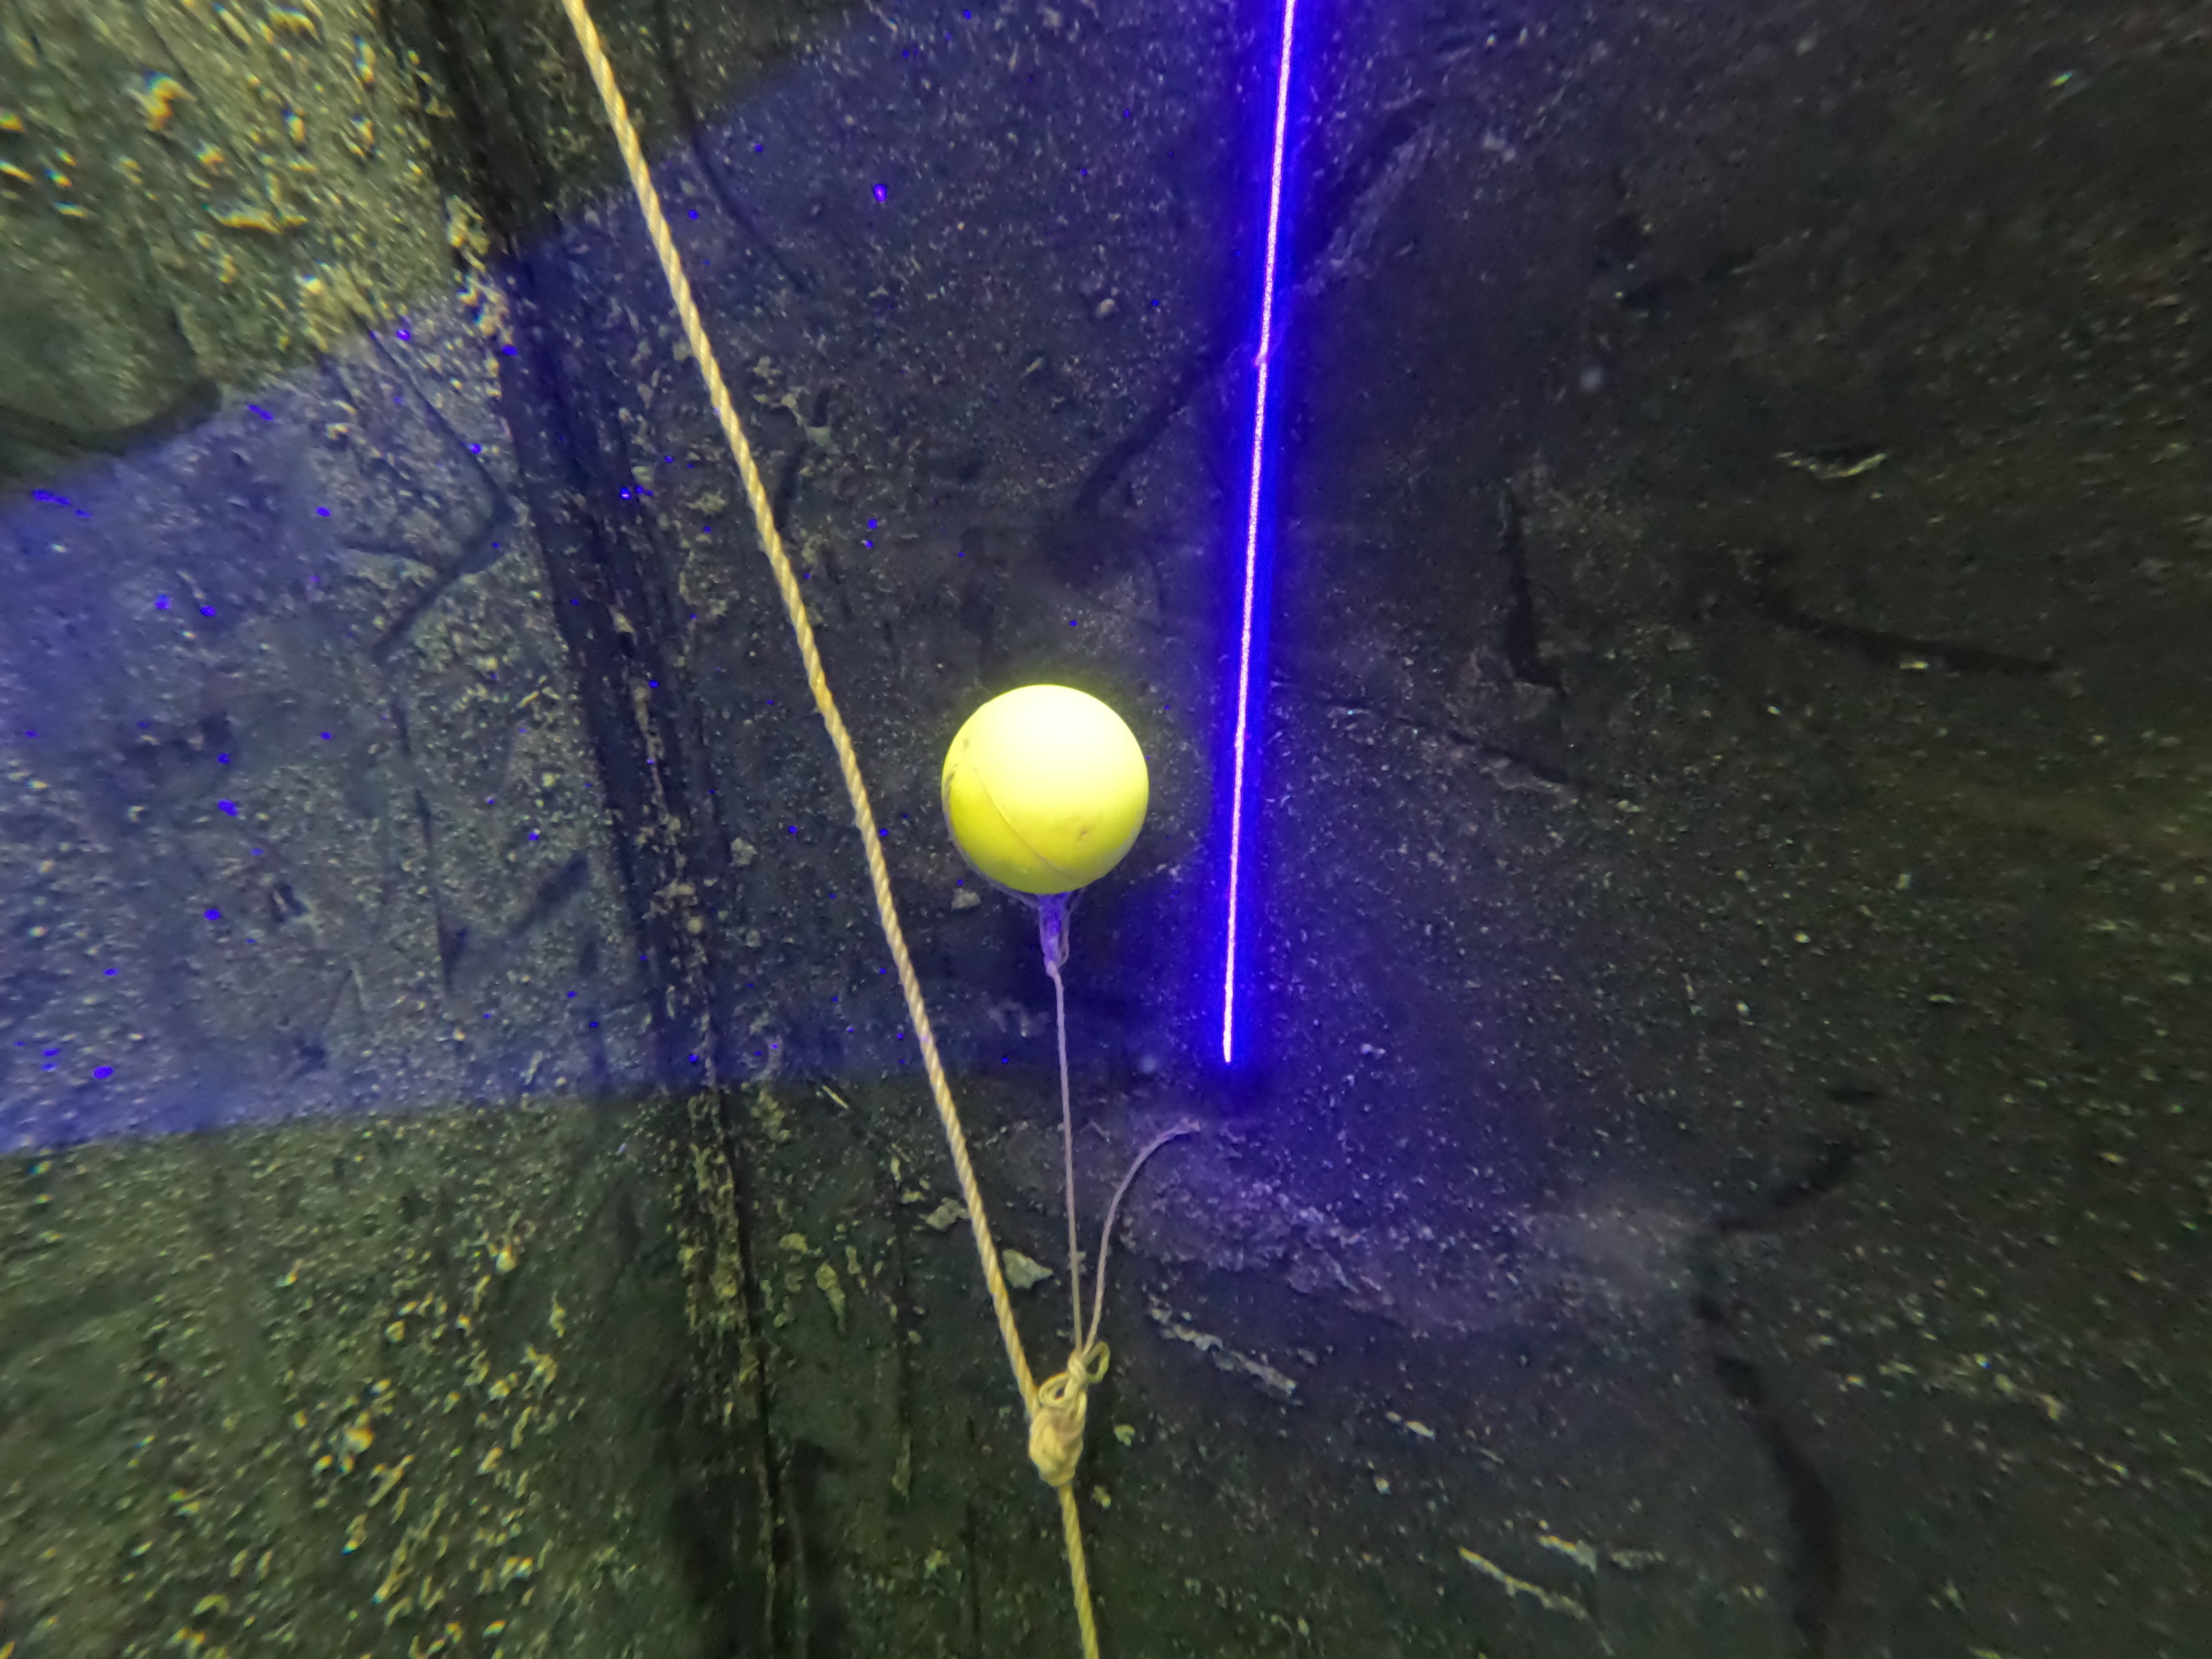

Supplement: Supplementary file 2859 [file G0030359.pdf › 2/G0030359.pdf]

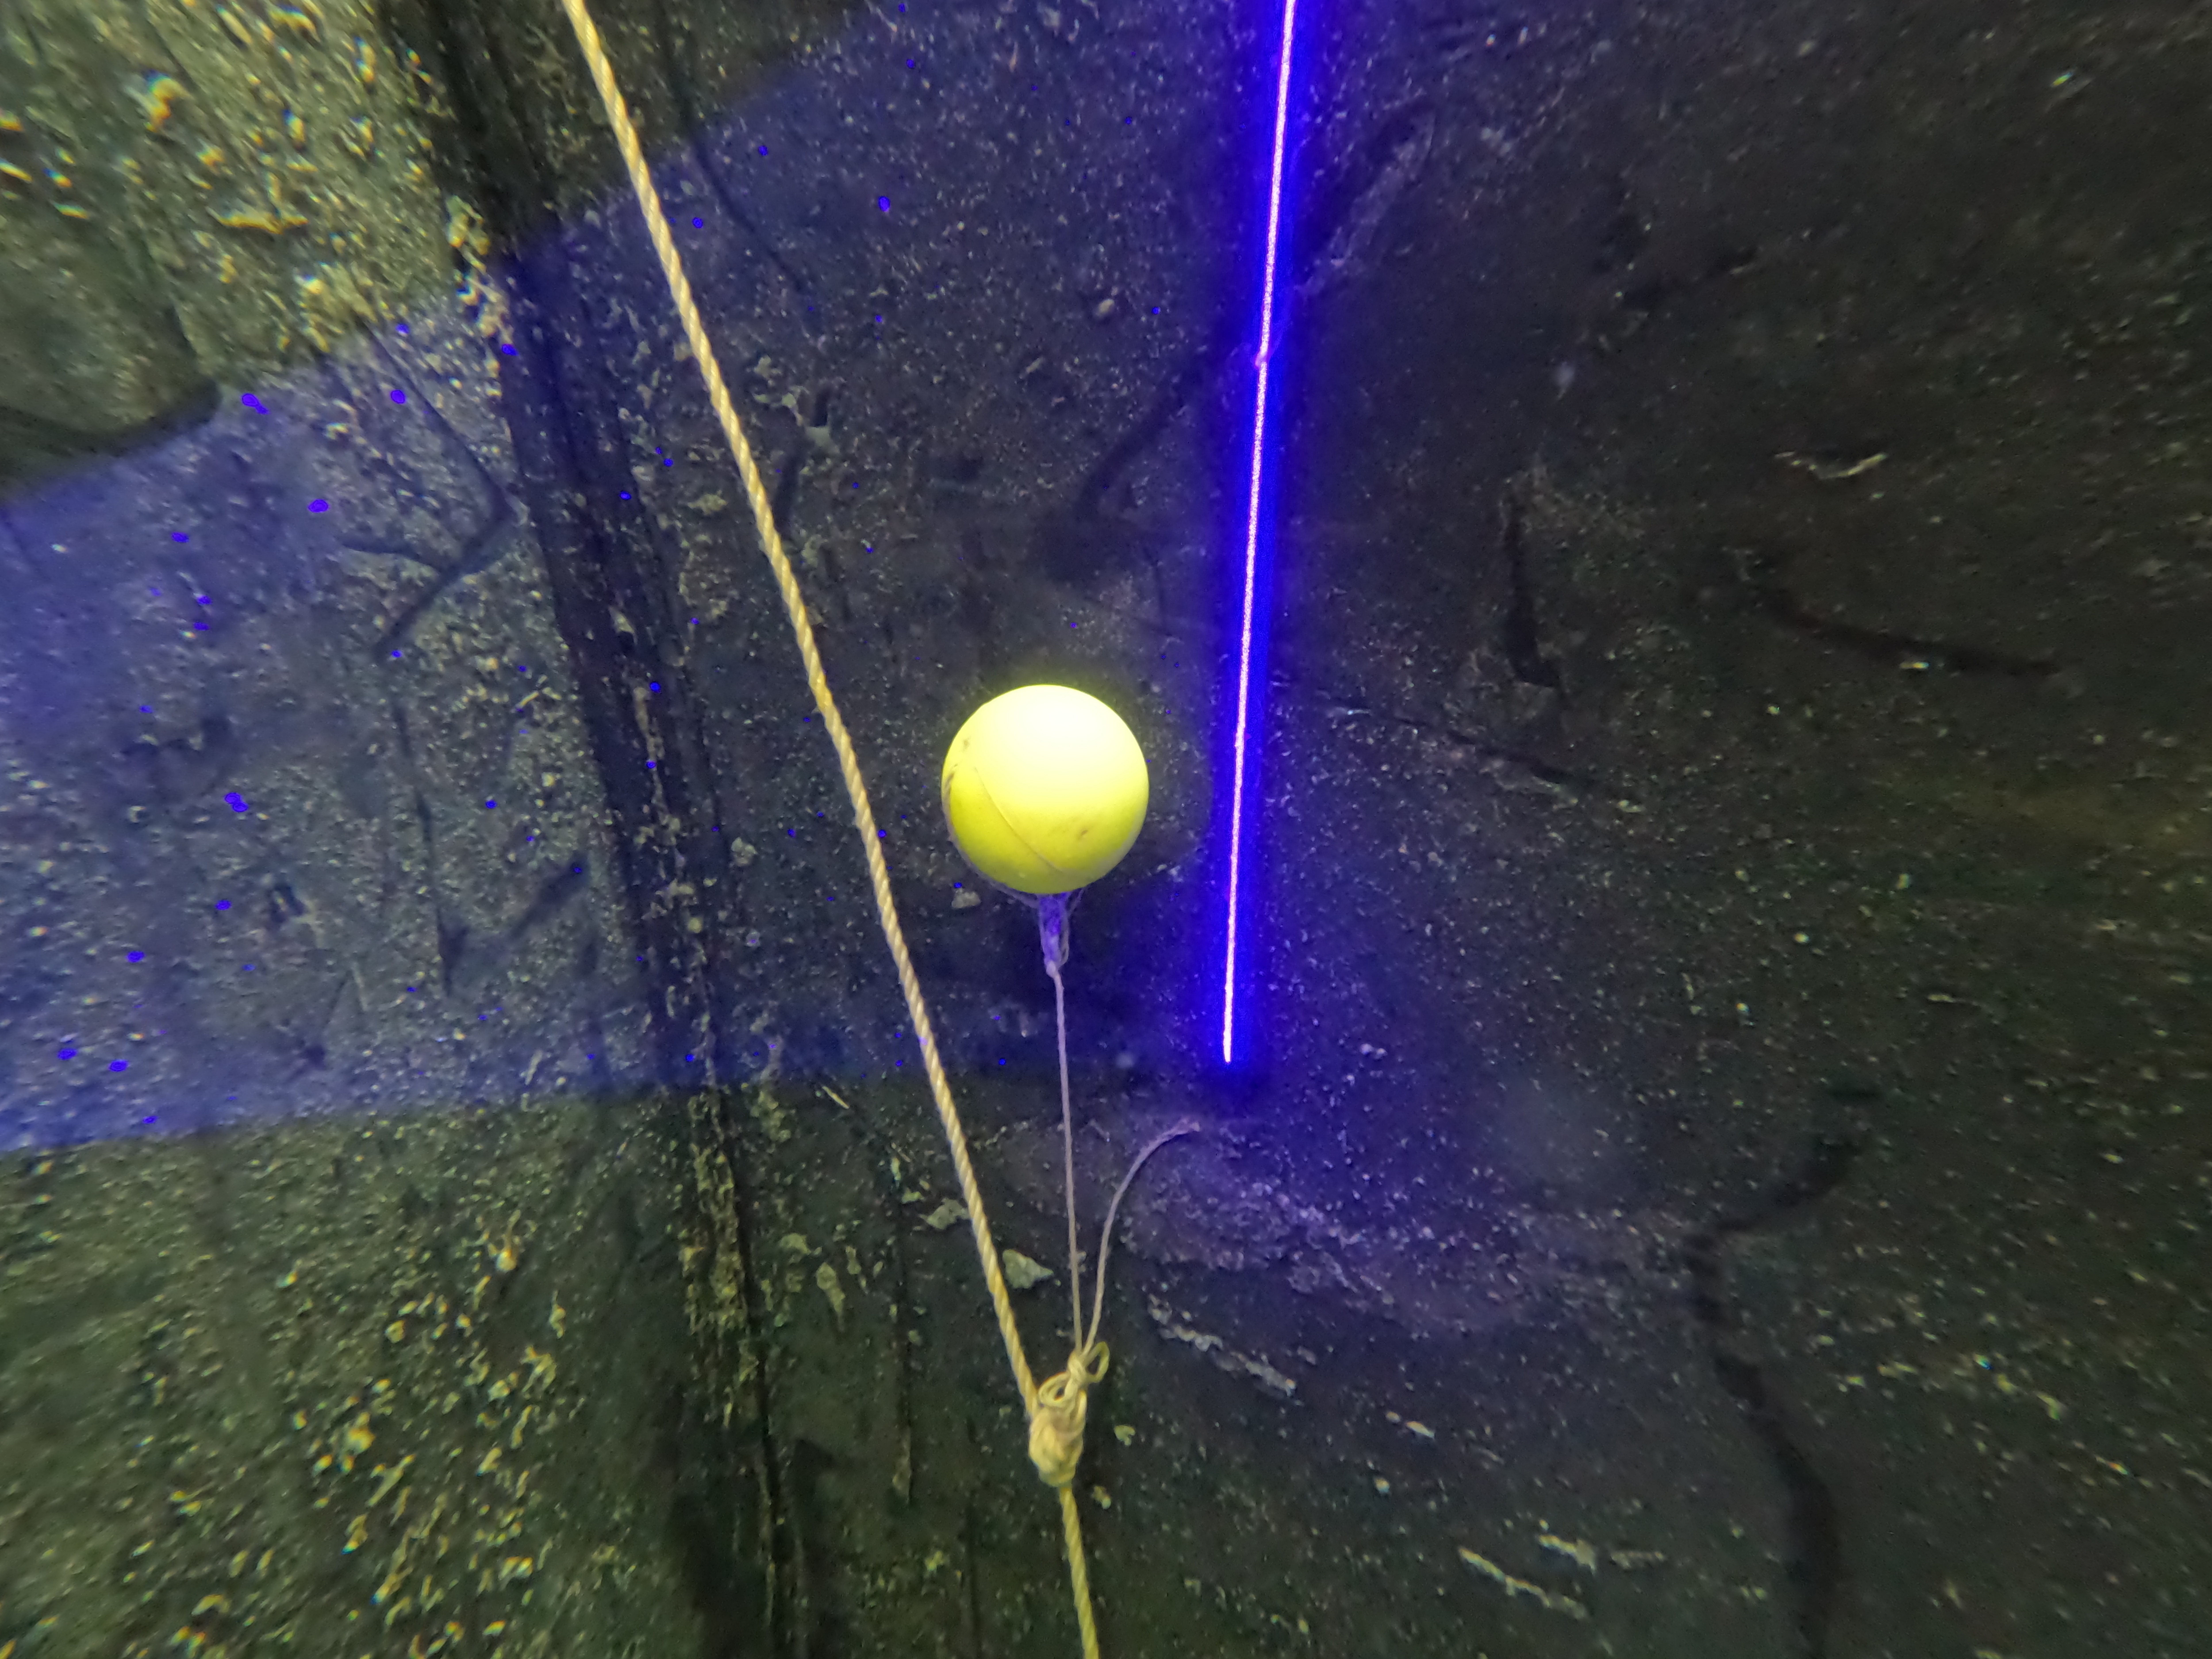

Supplement: Supplementary file 2860 [file G0030360.pdf › 2/G0030360.pdf]

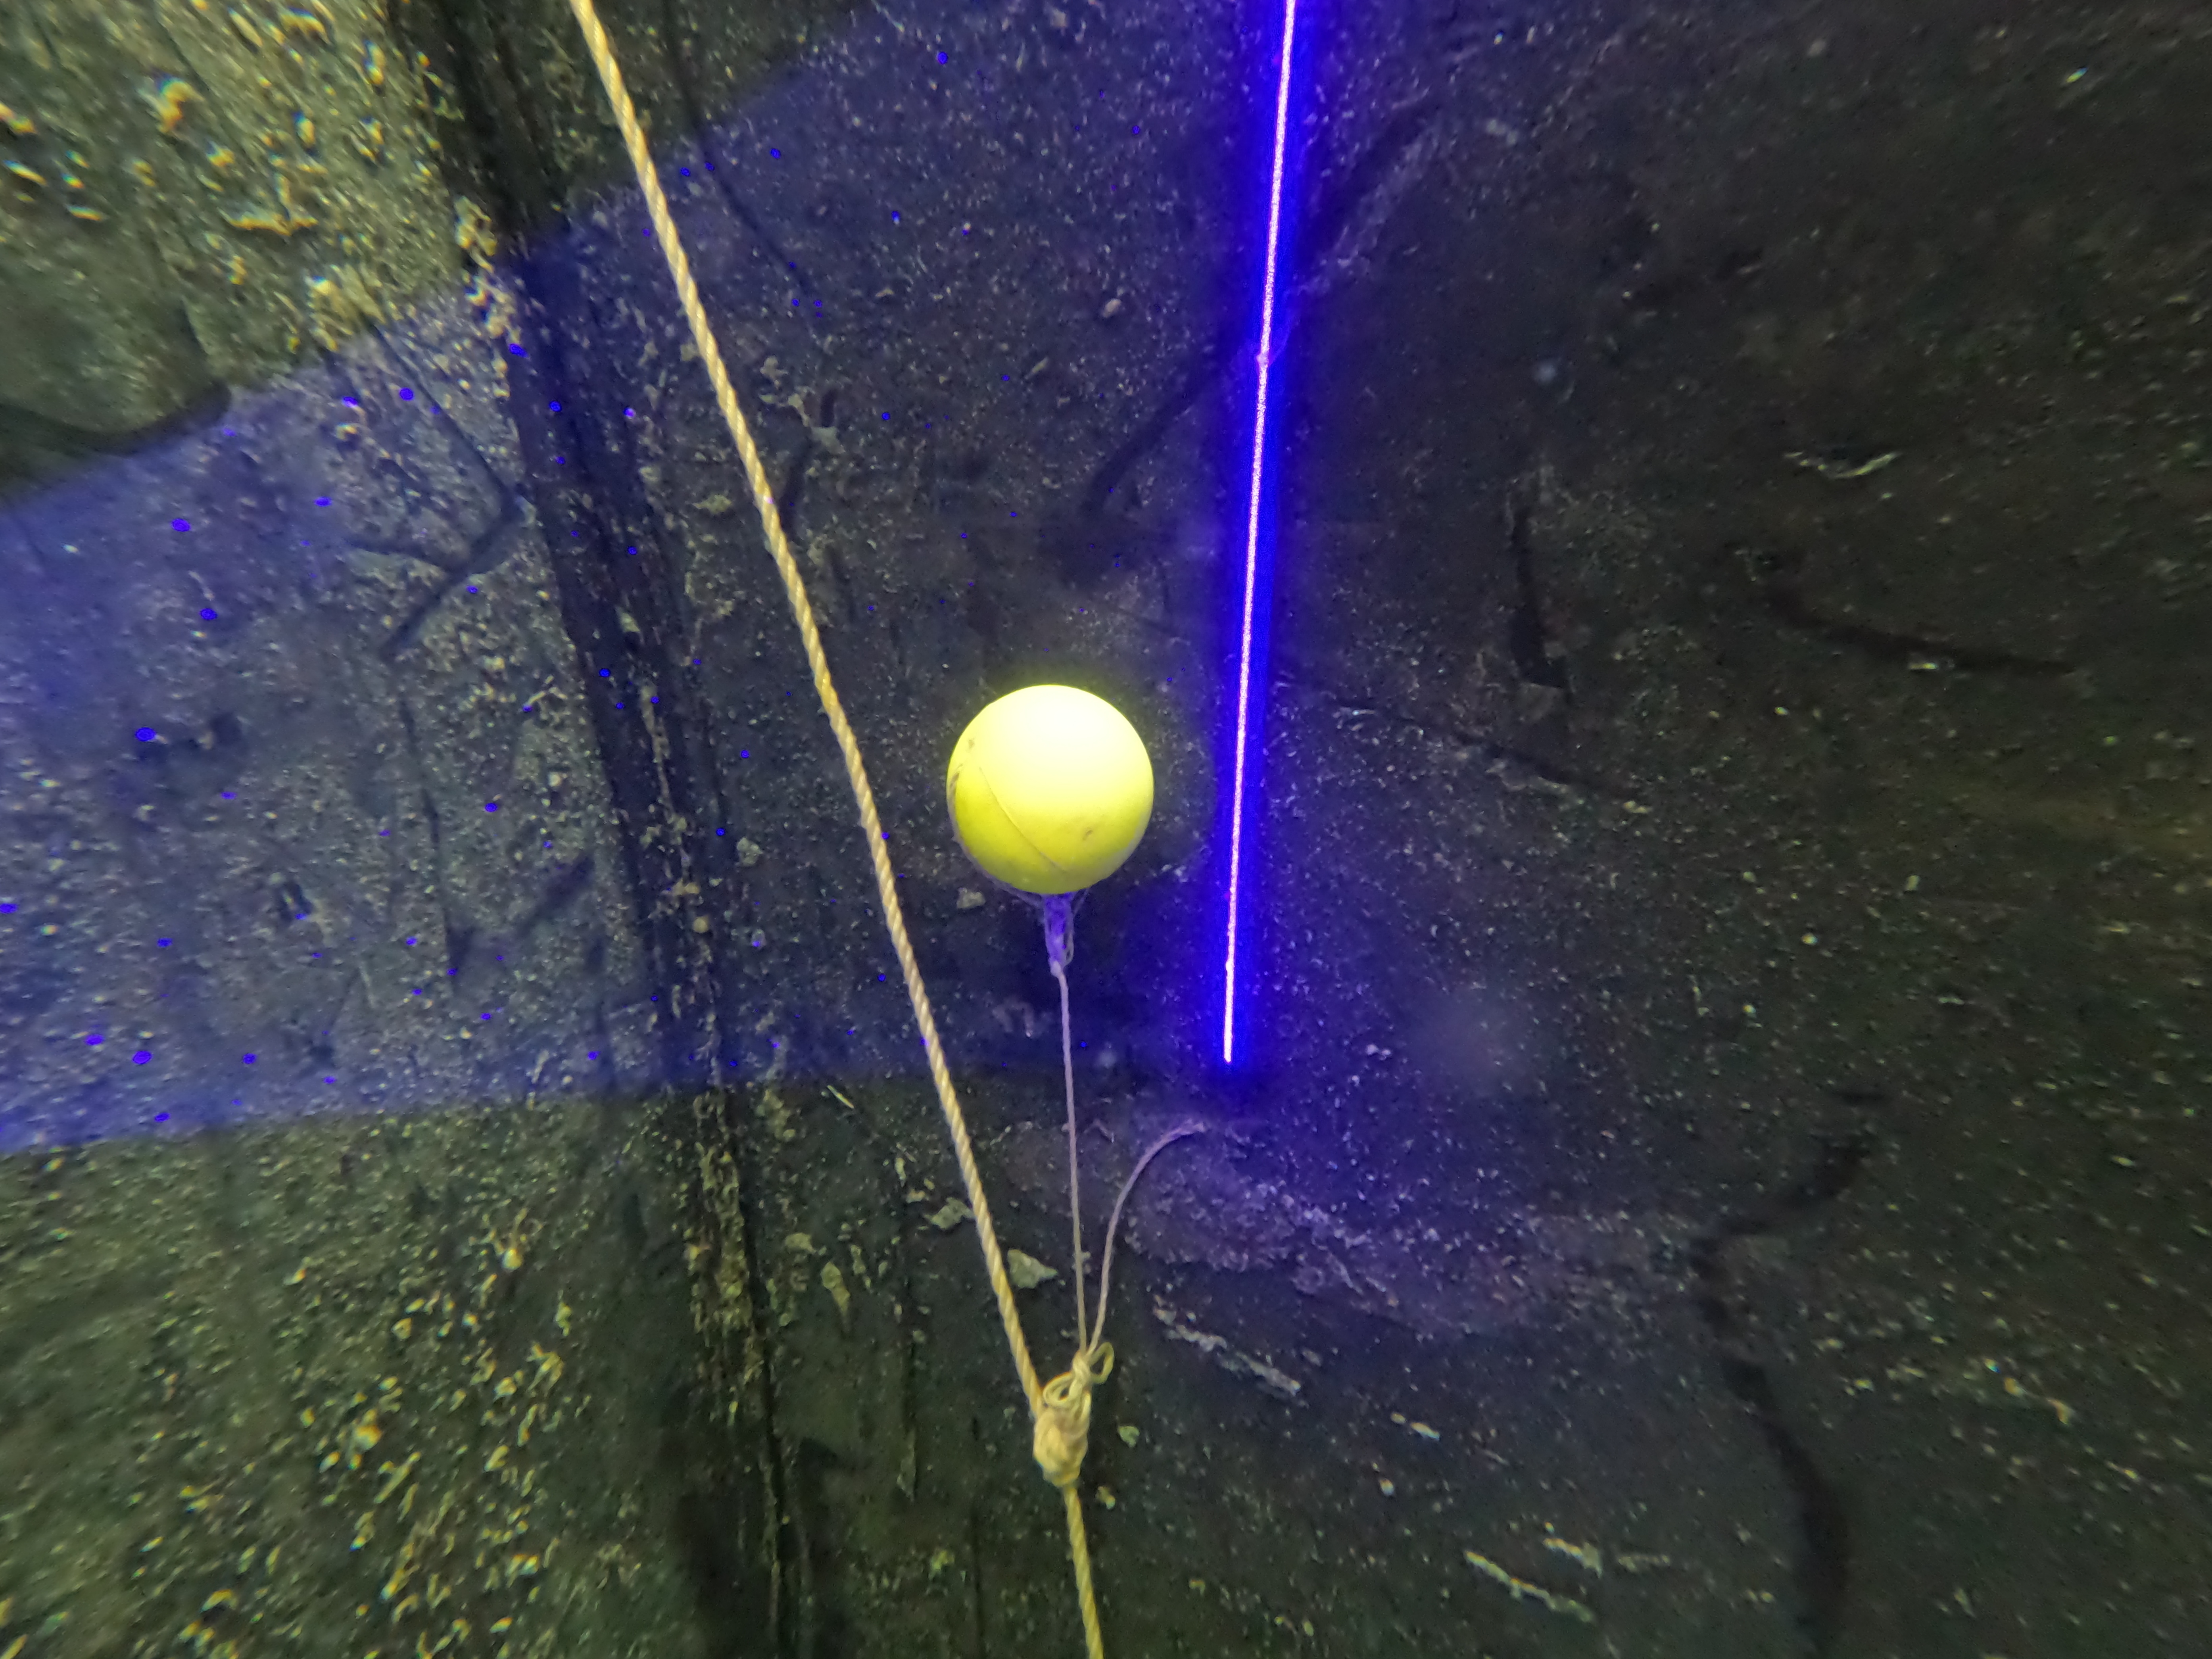

Supplement: Supplementary file 2861 [file G0030361.pdf › 2/G0030361.pdf]

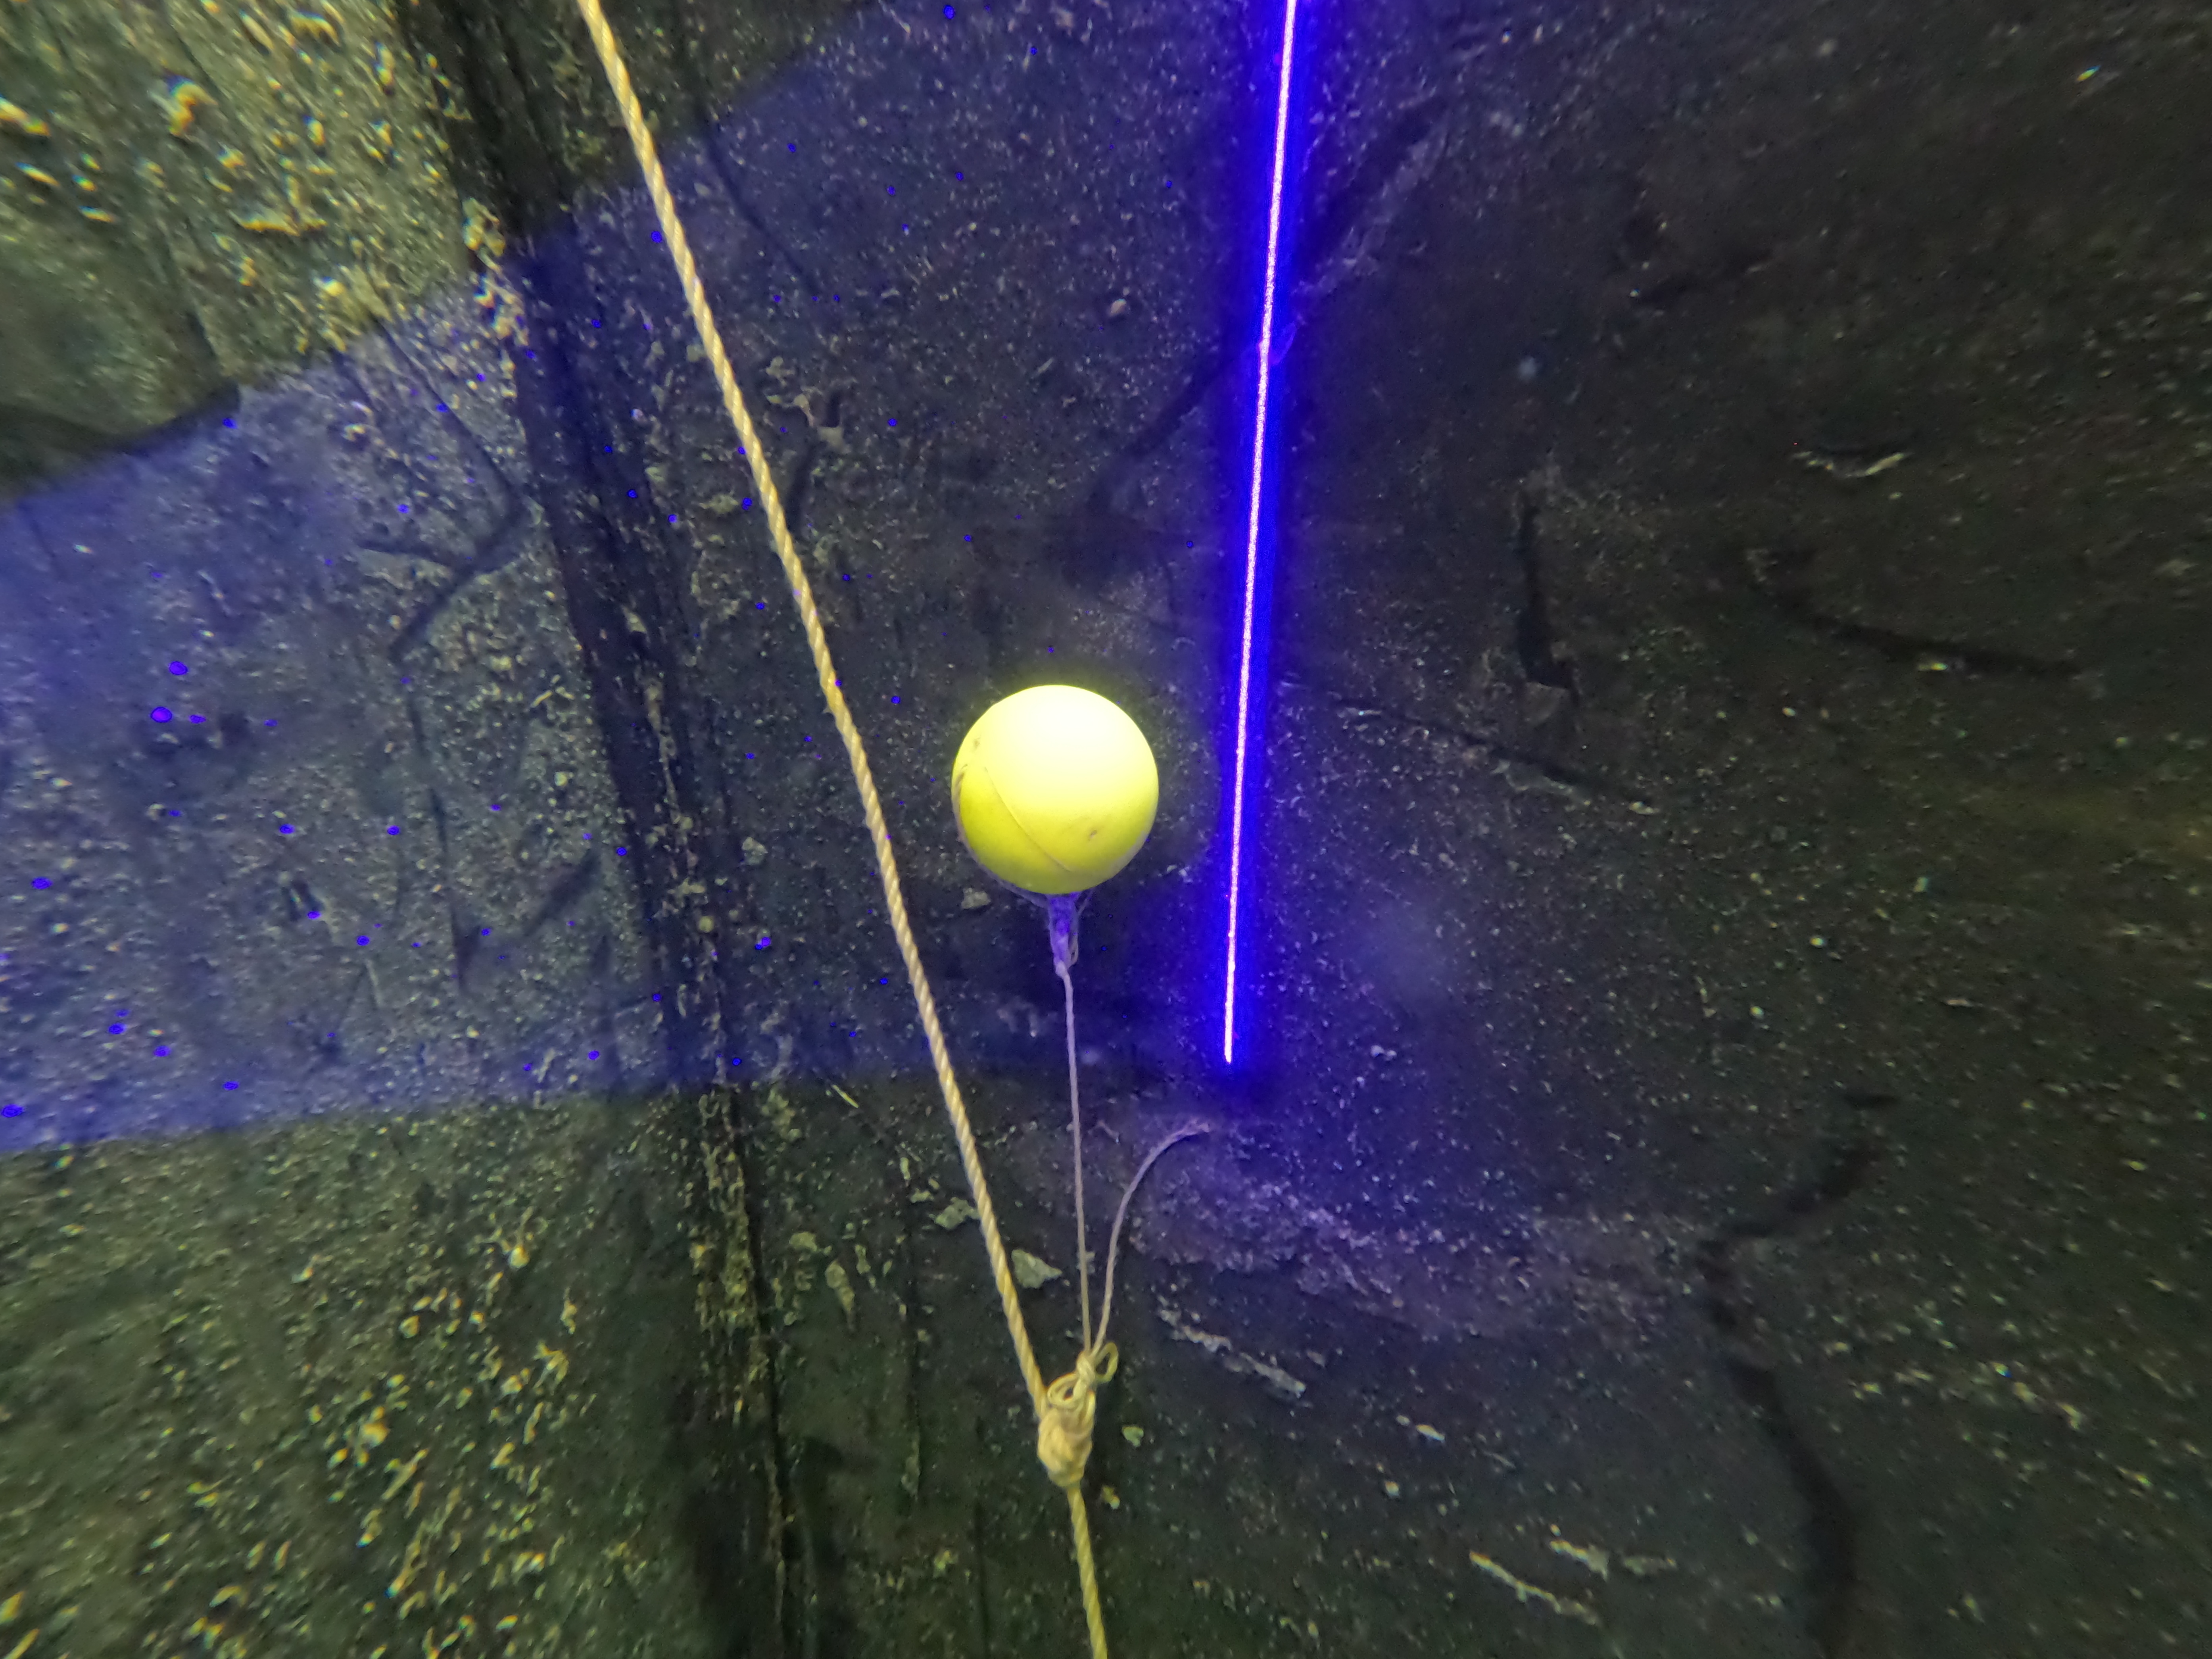

Supplement: Supplementary file 2862 [file G0030362.pdf › 2/G0030362.pdf]

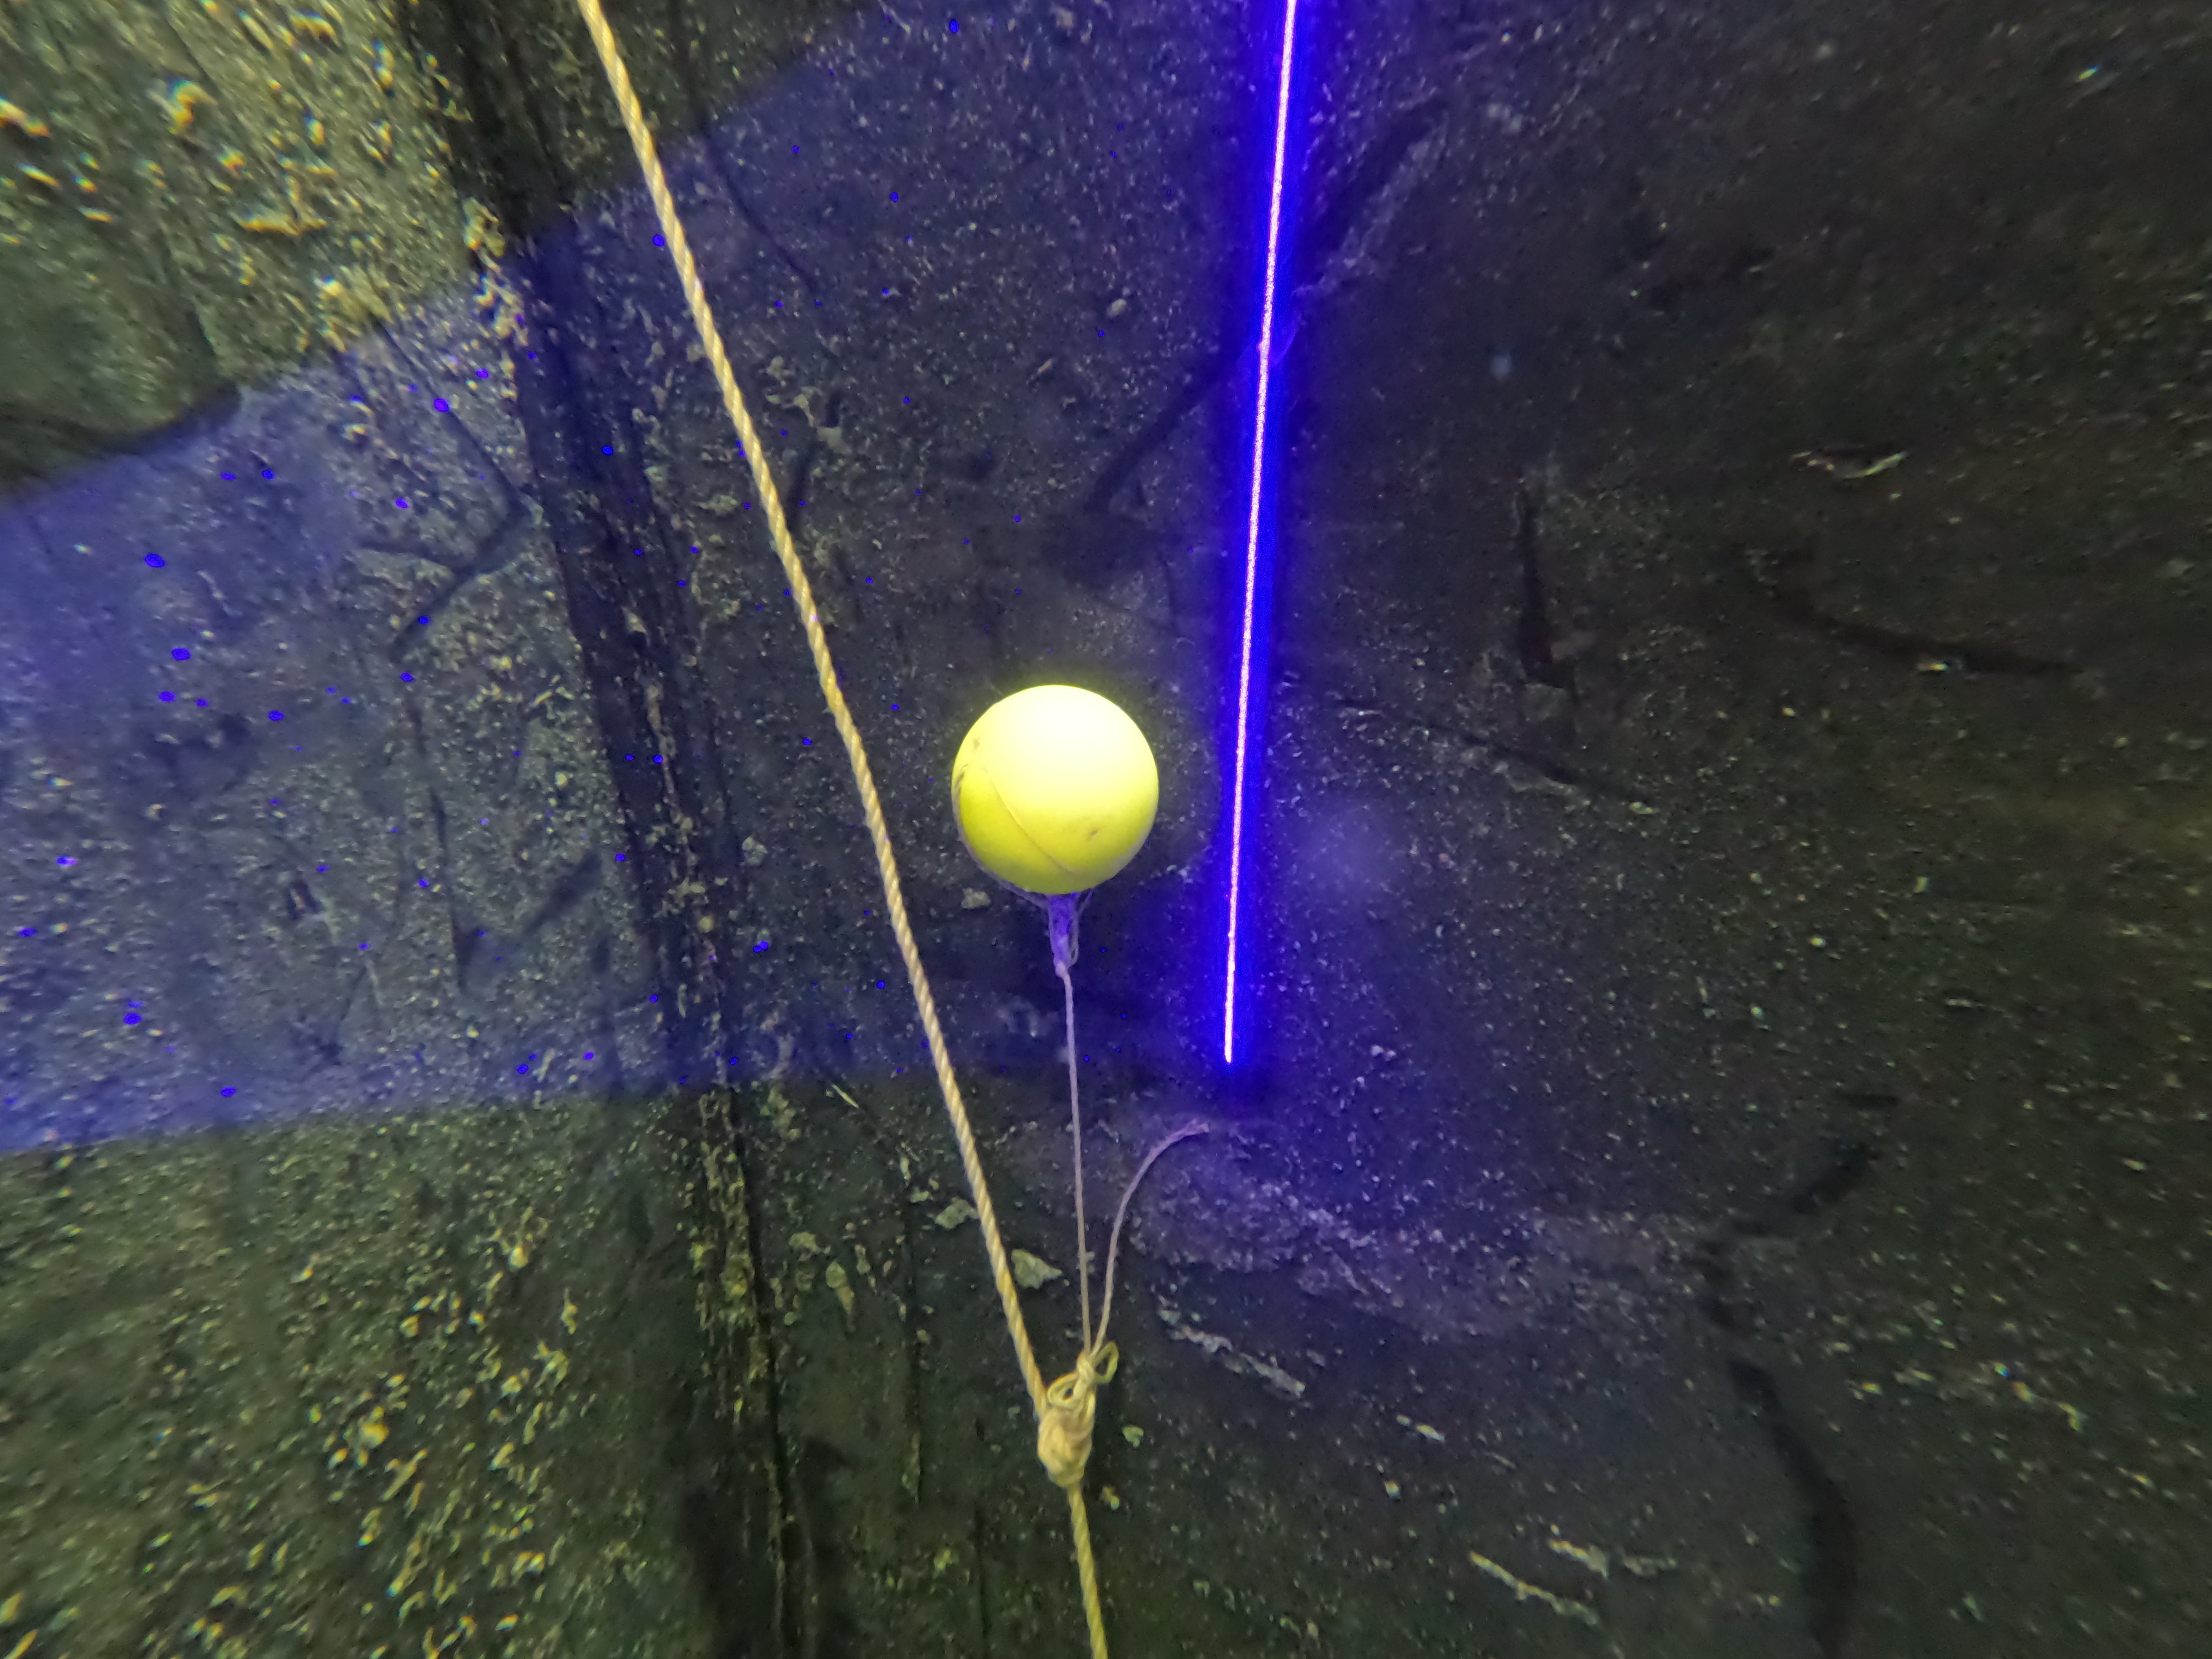

Supplement: Supplementary file 2863 [file G0030363.pdf › 2/G0030363.pdf]

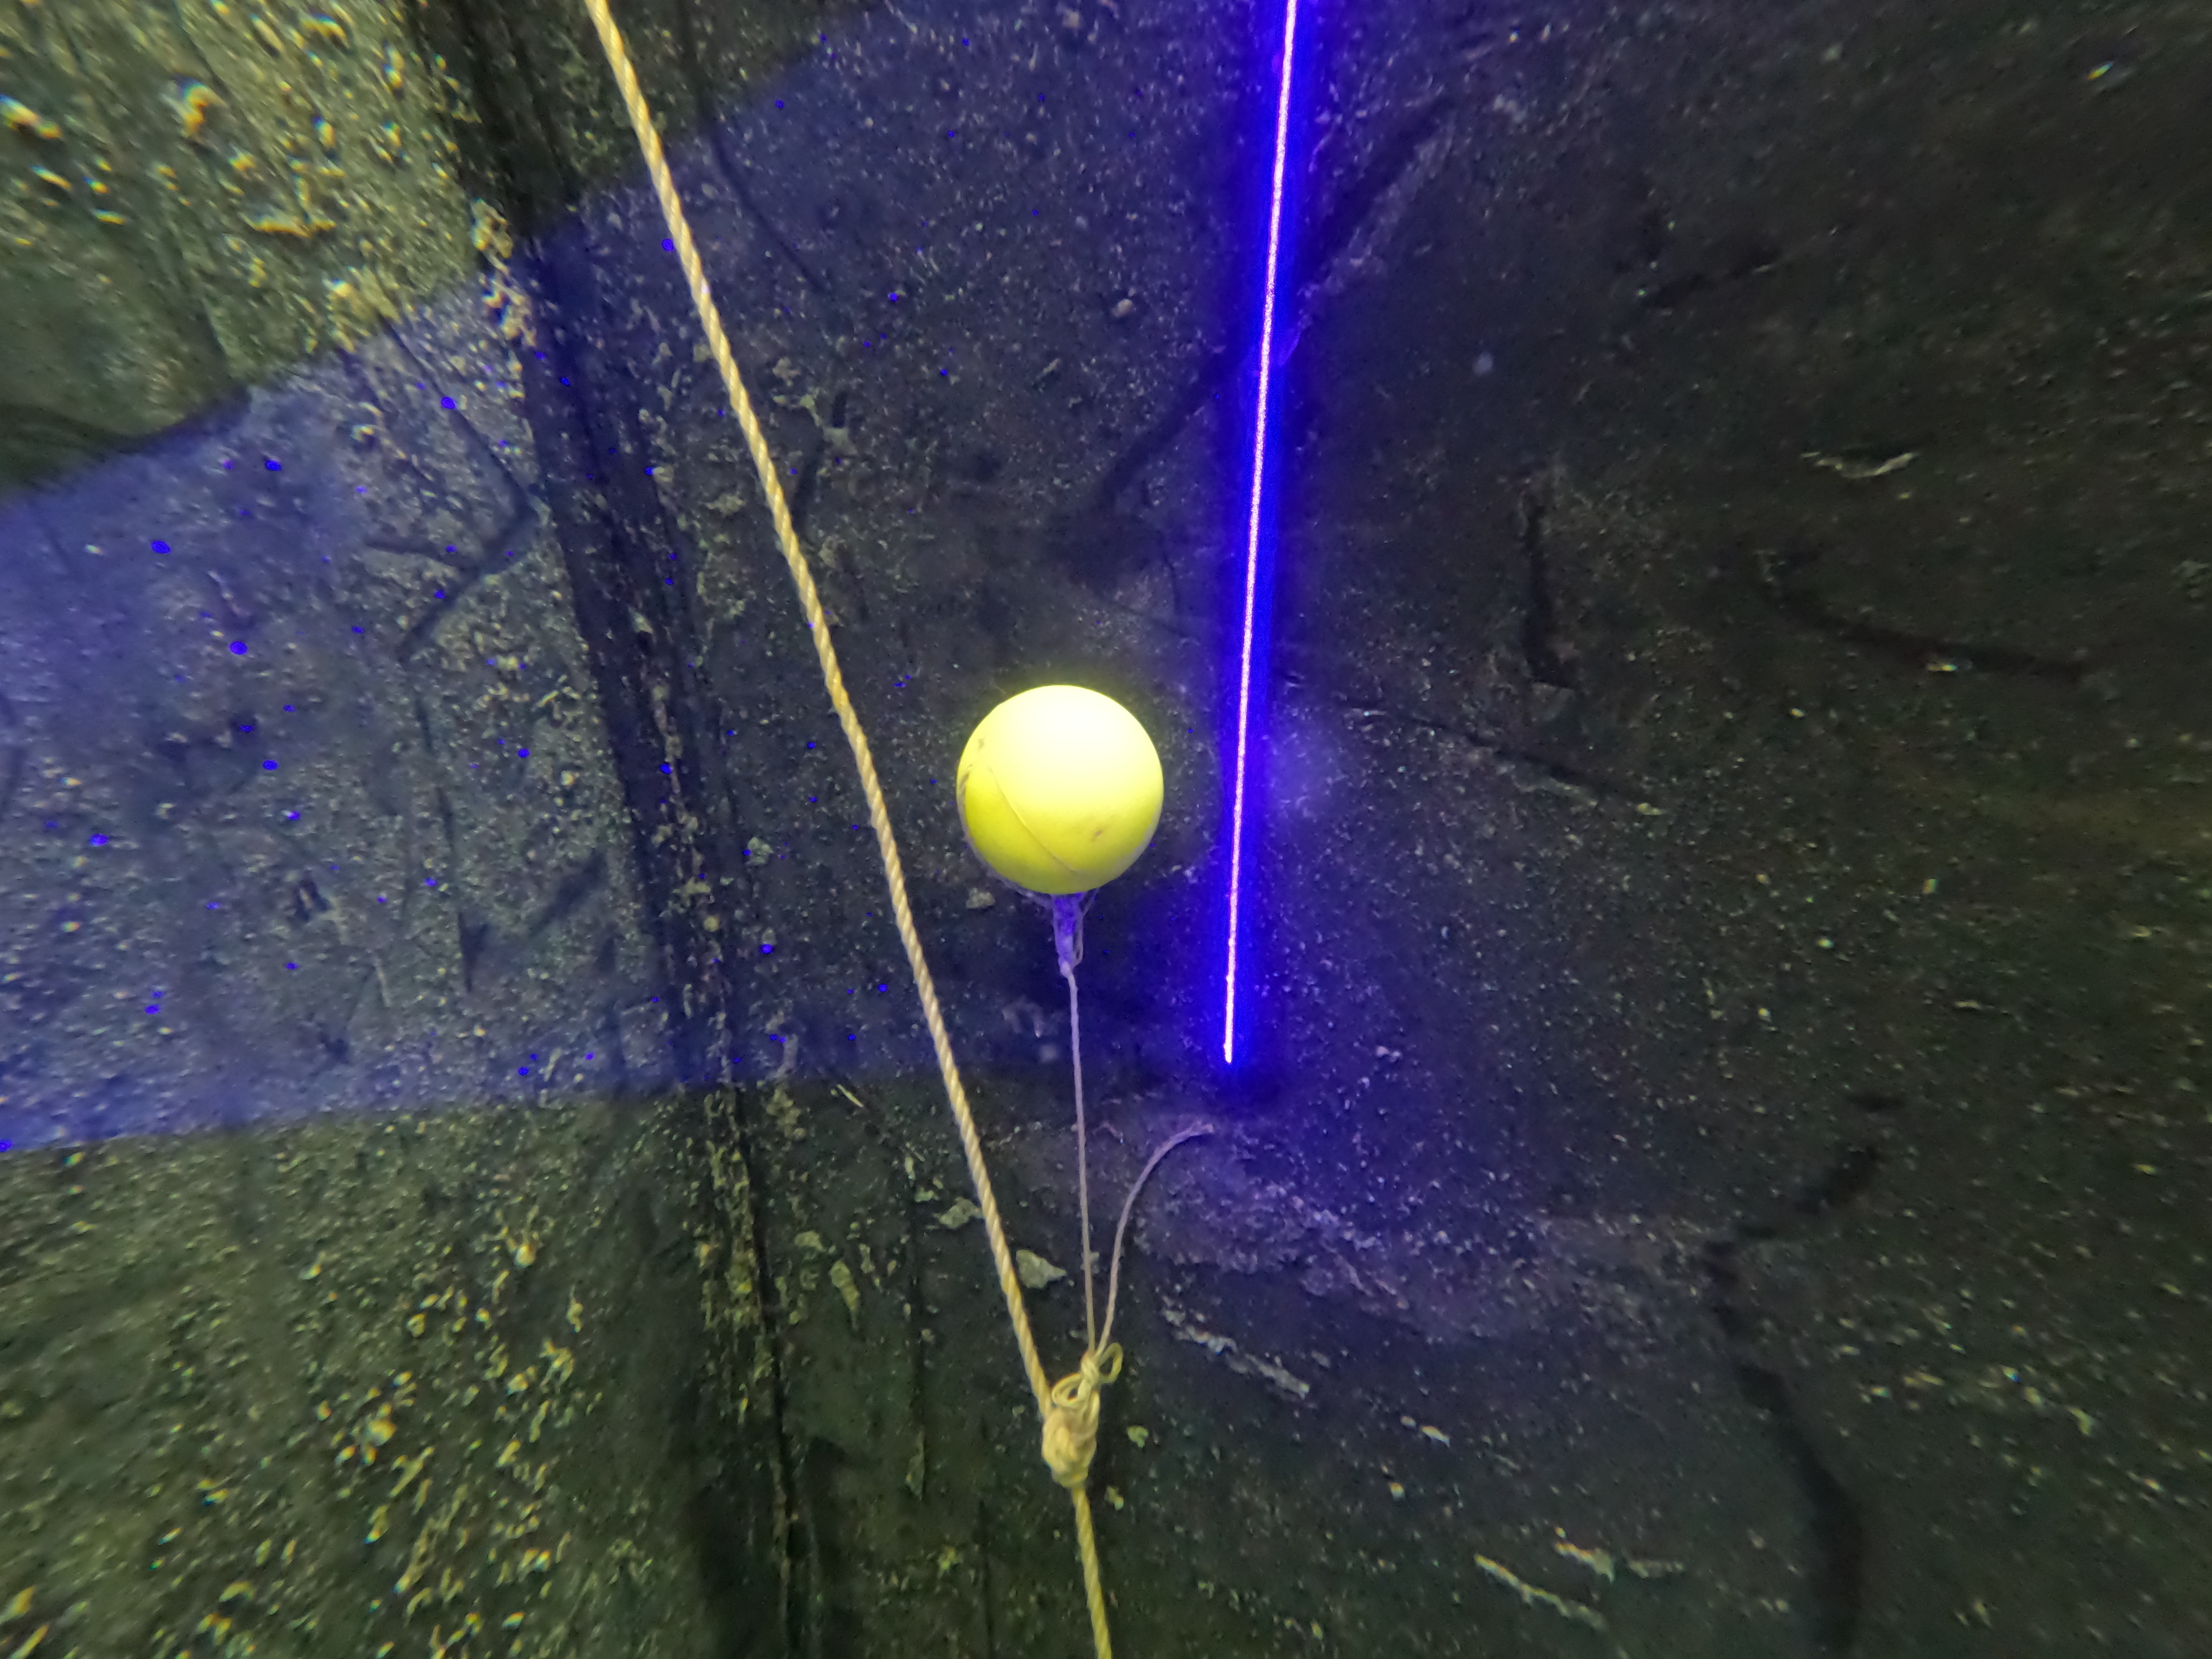

Supplement: Supplementary file 2864 [file G0030364.pdf › 2/G0030364.pdf]

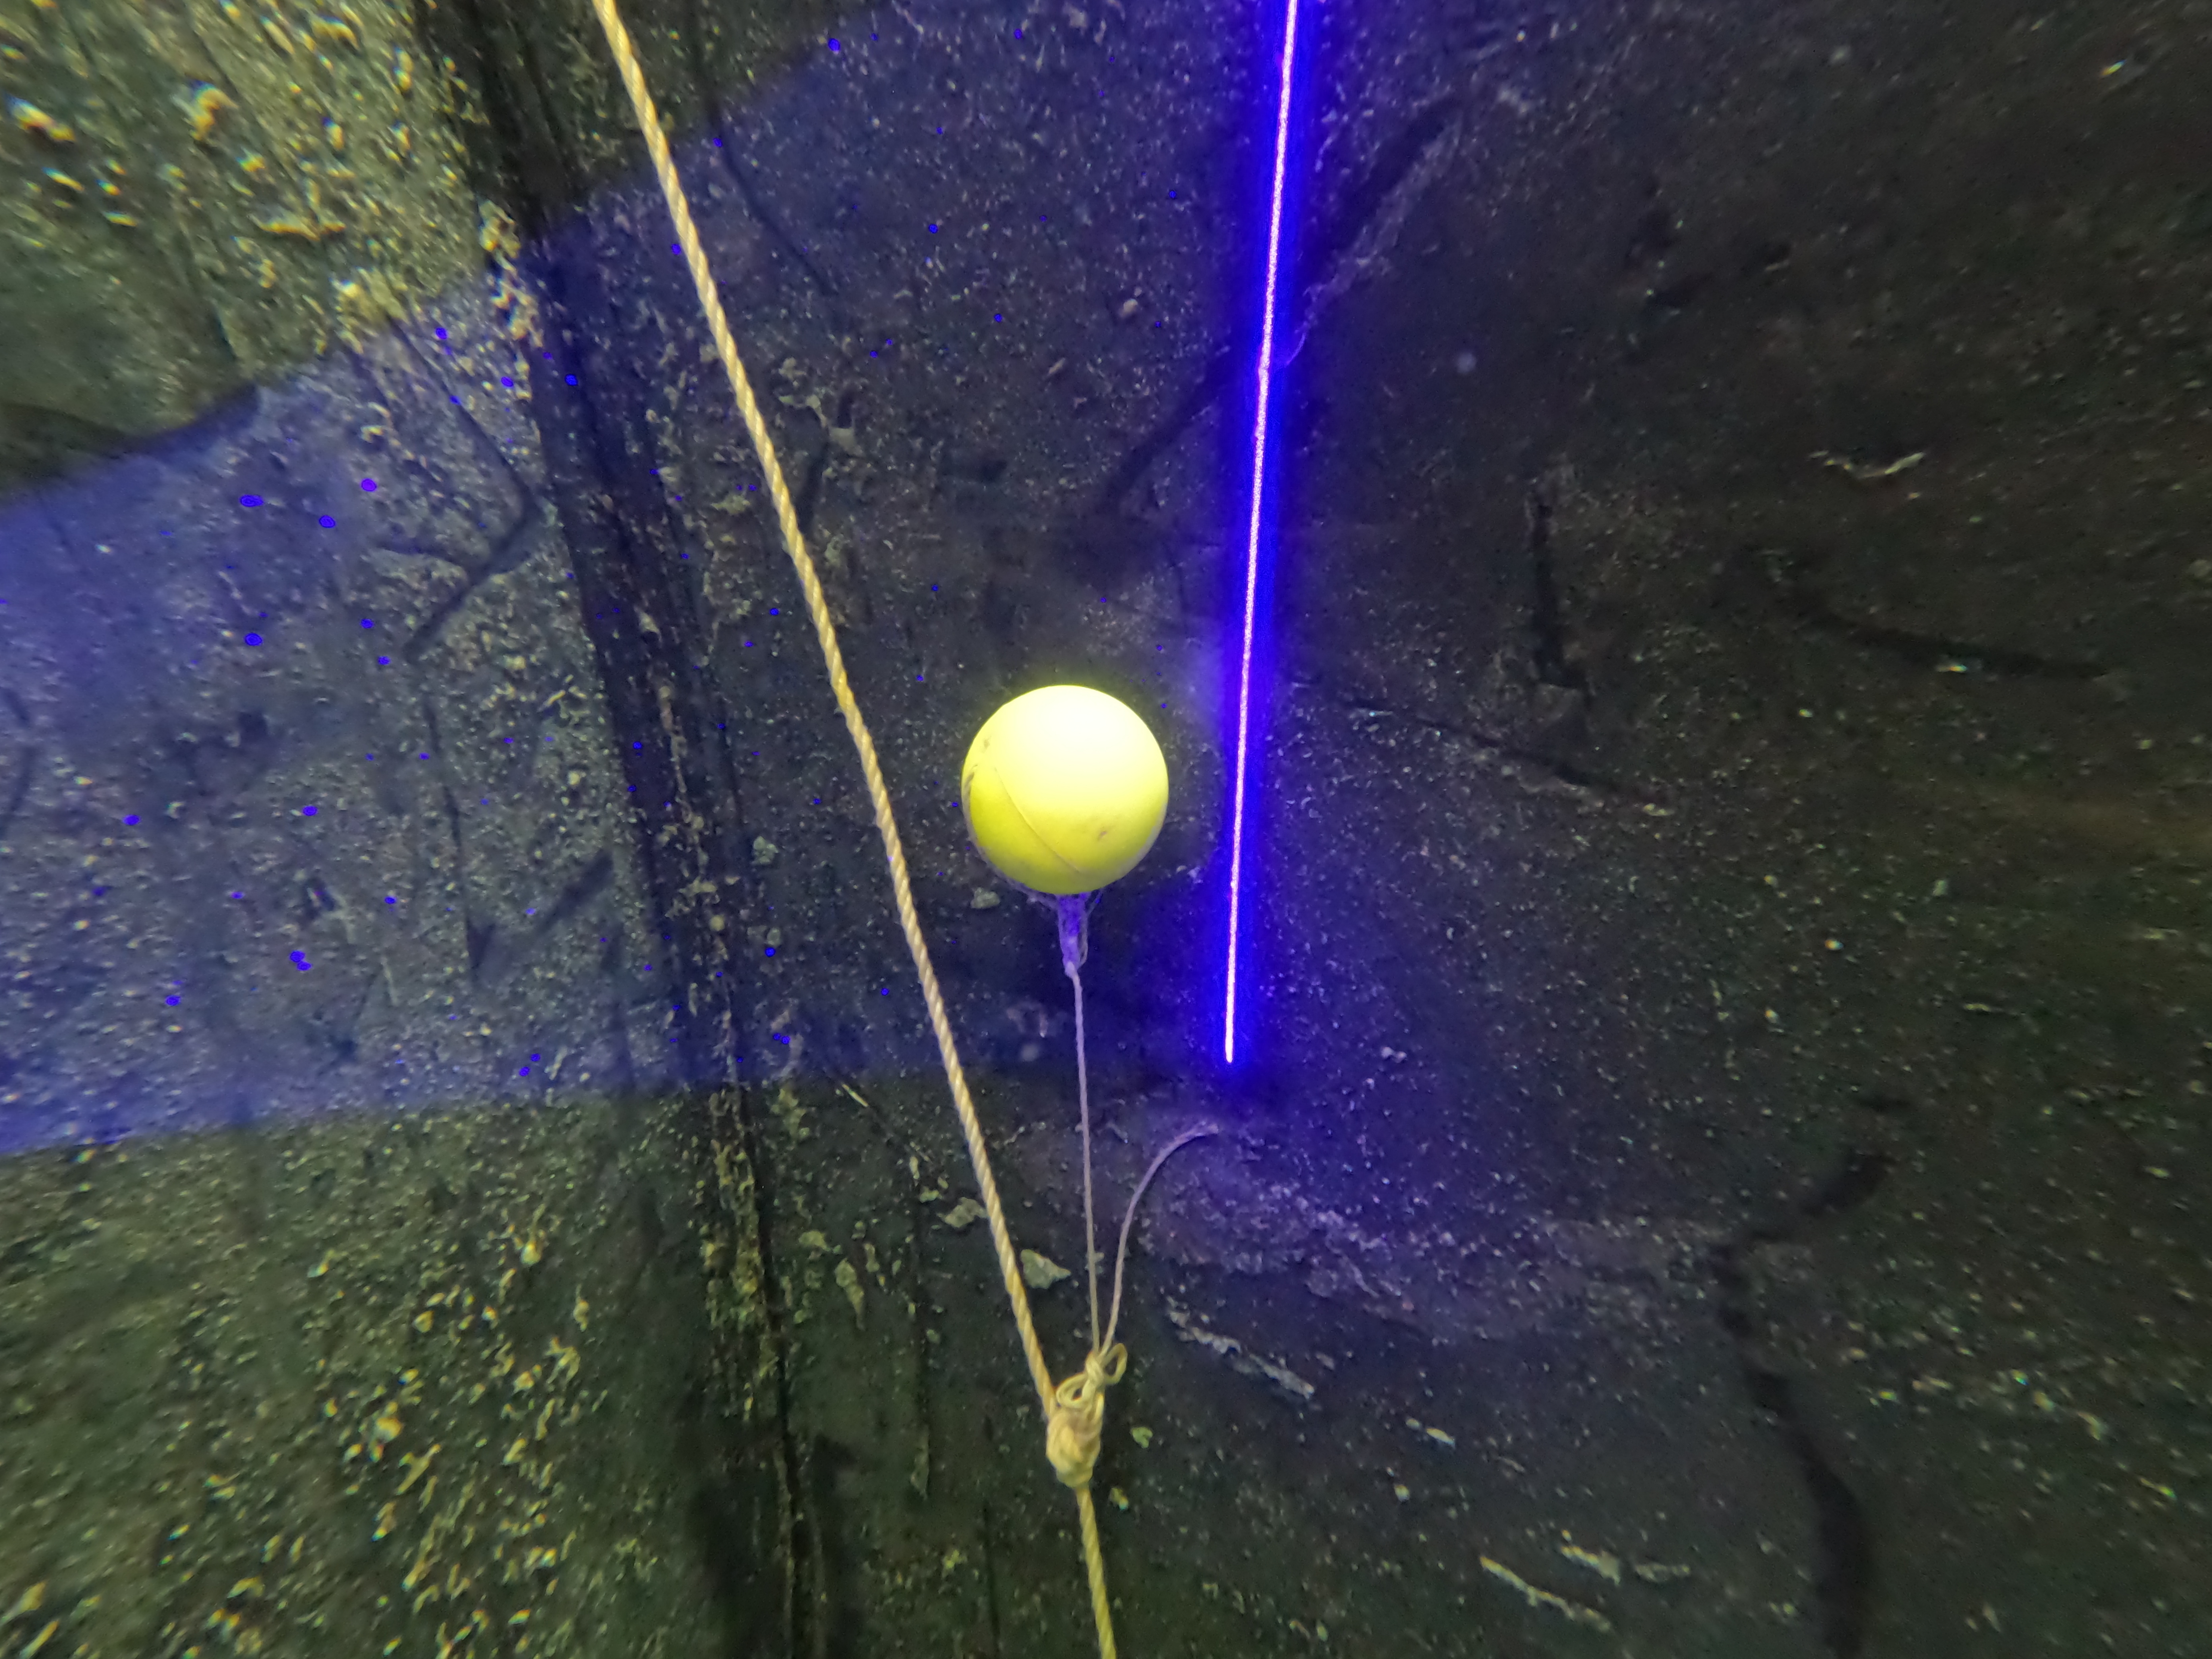

Supplement: Supplementary file 2865 [file G0030365.pdf › 2/G0030365.pdf]

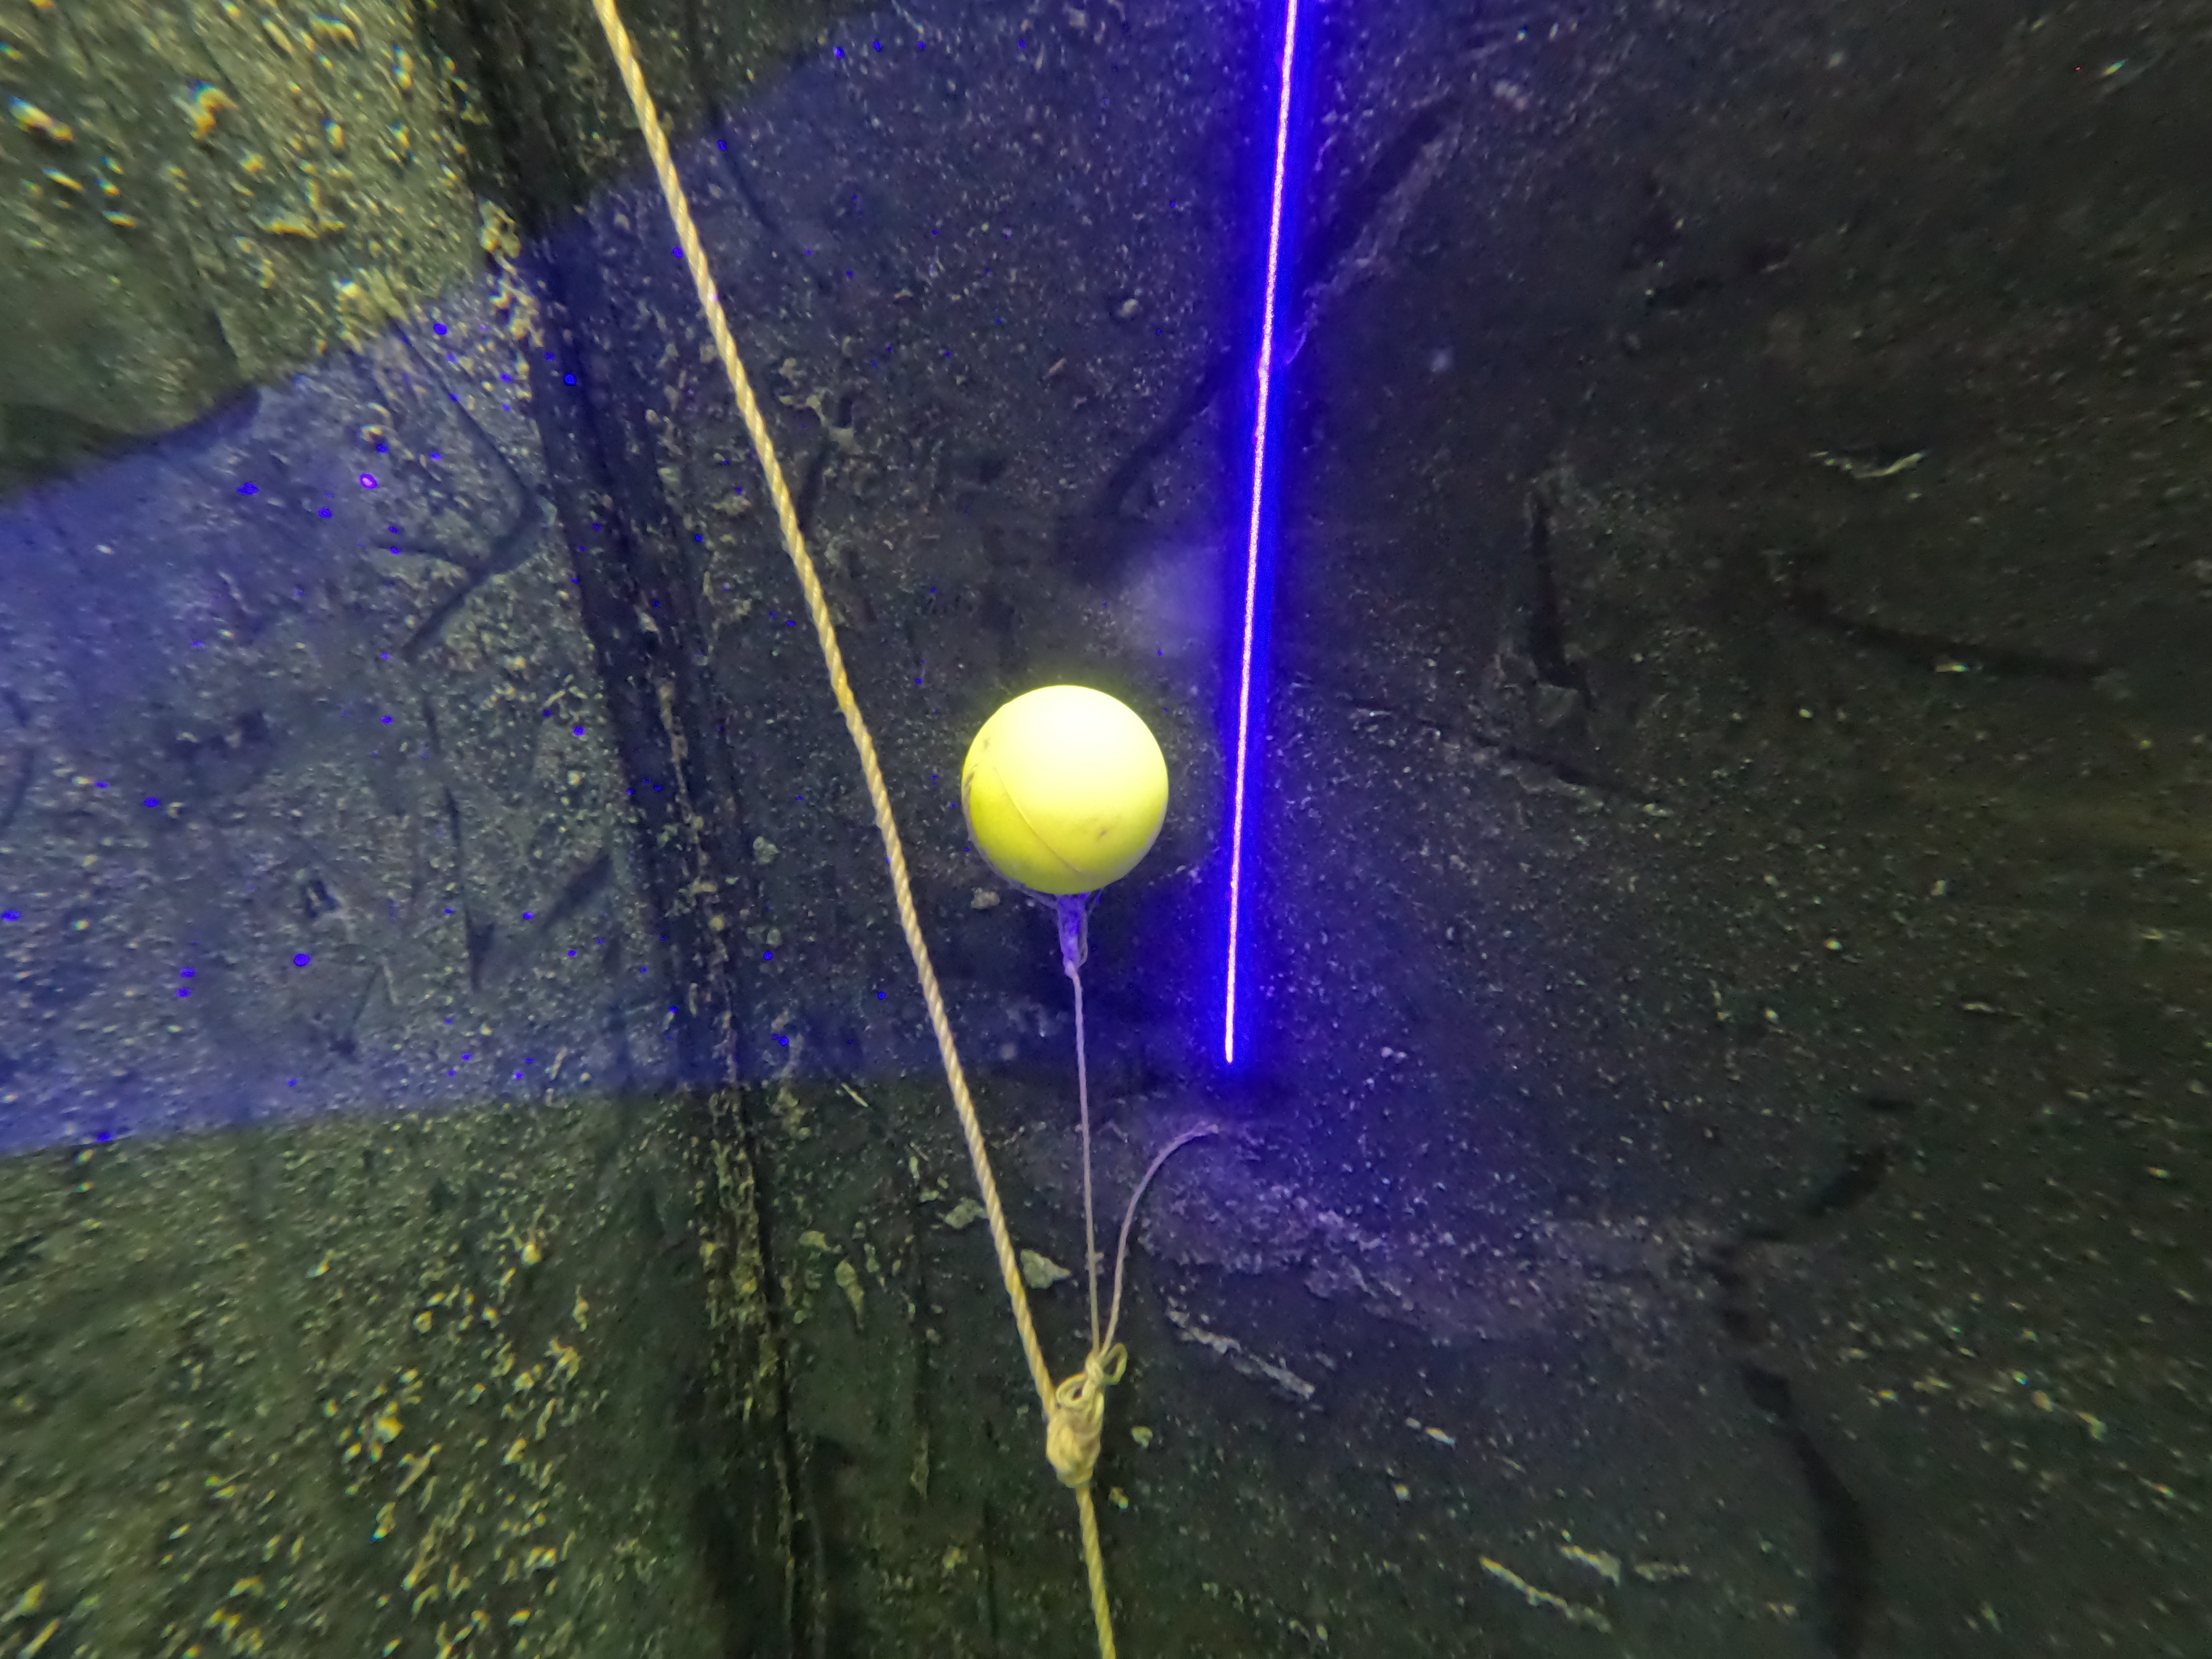

Supplement: Supplementary file 2866 [file G0030366.pdf › 2/G0030366.pdf]

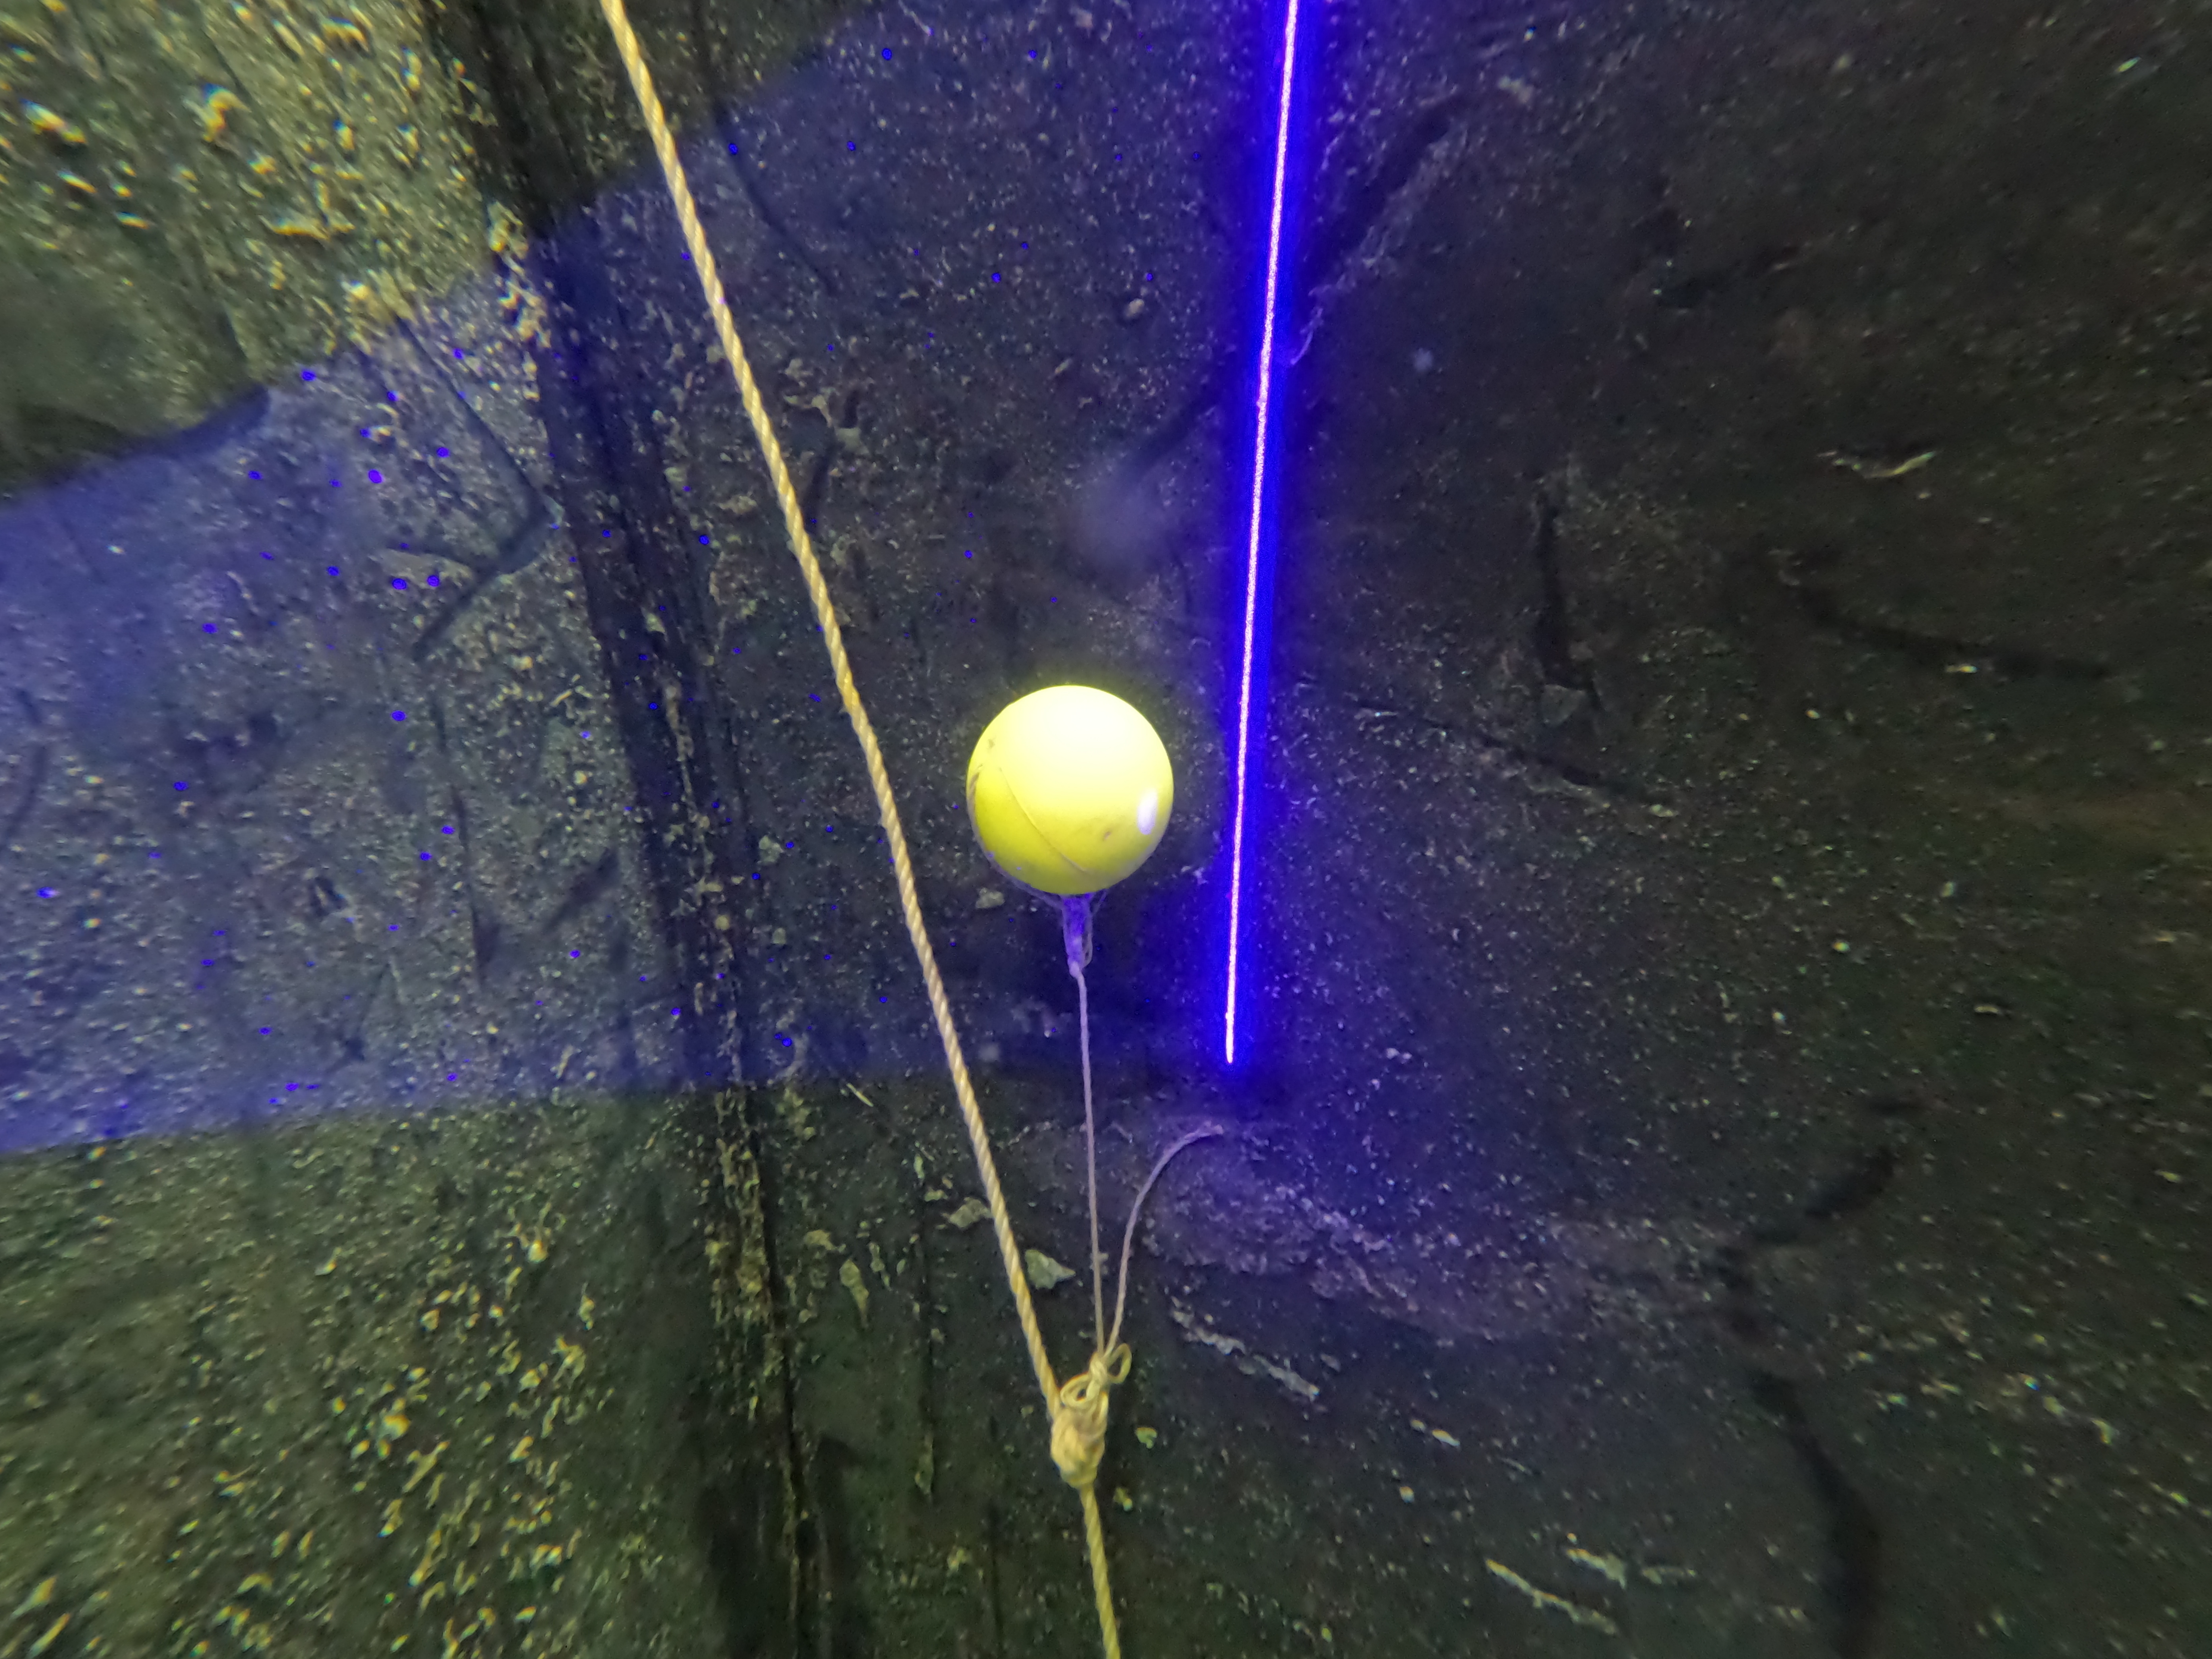

Supplement: Supplementary file 2867 [file G0030367.pdf › 2/G0030367.pdf]

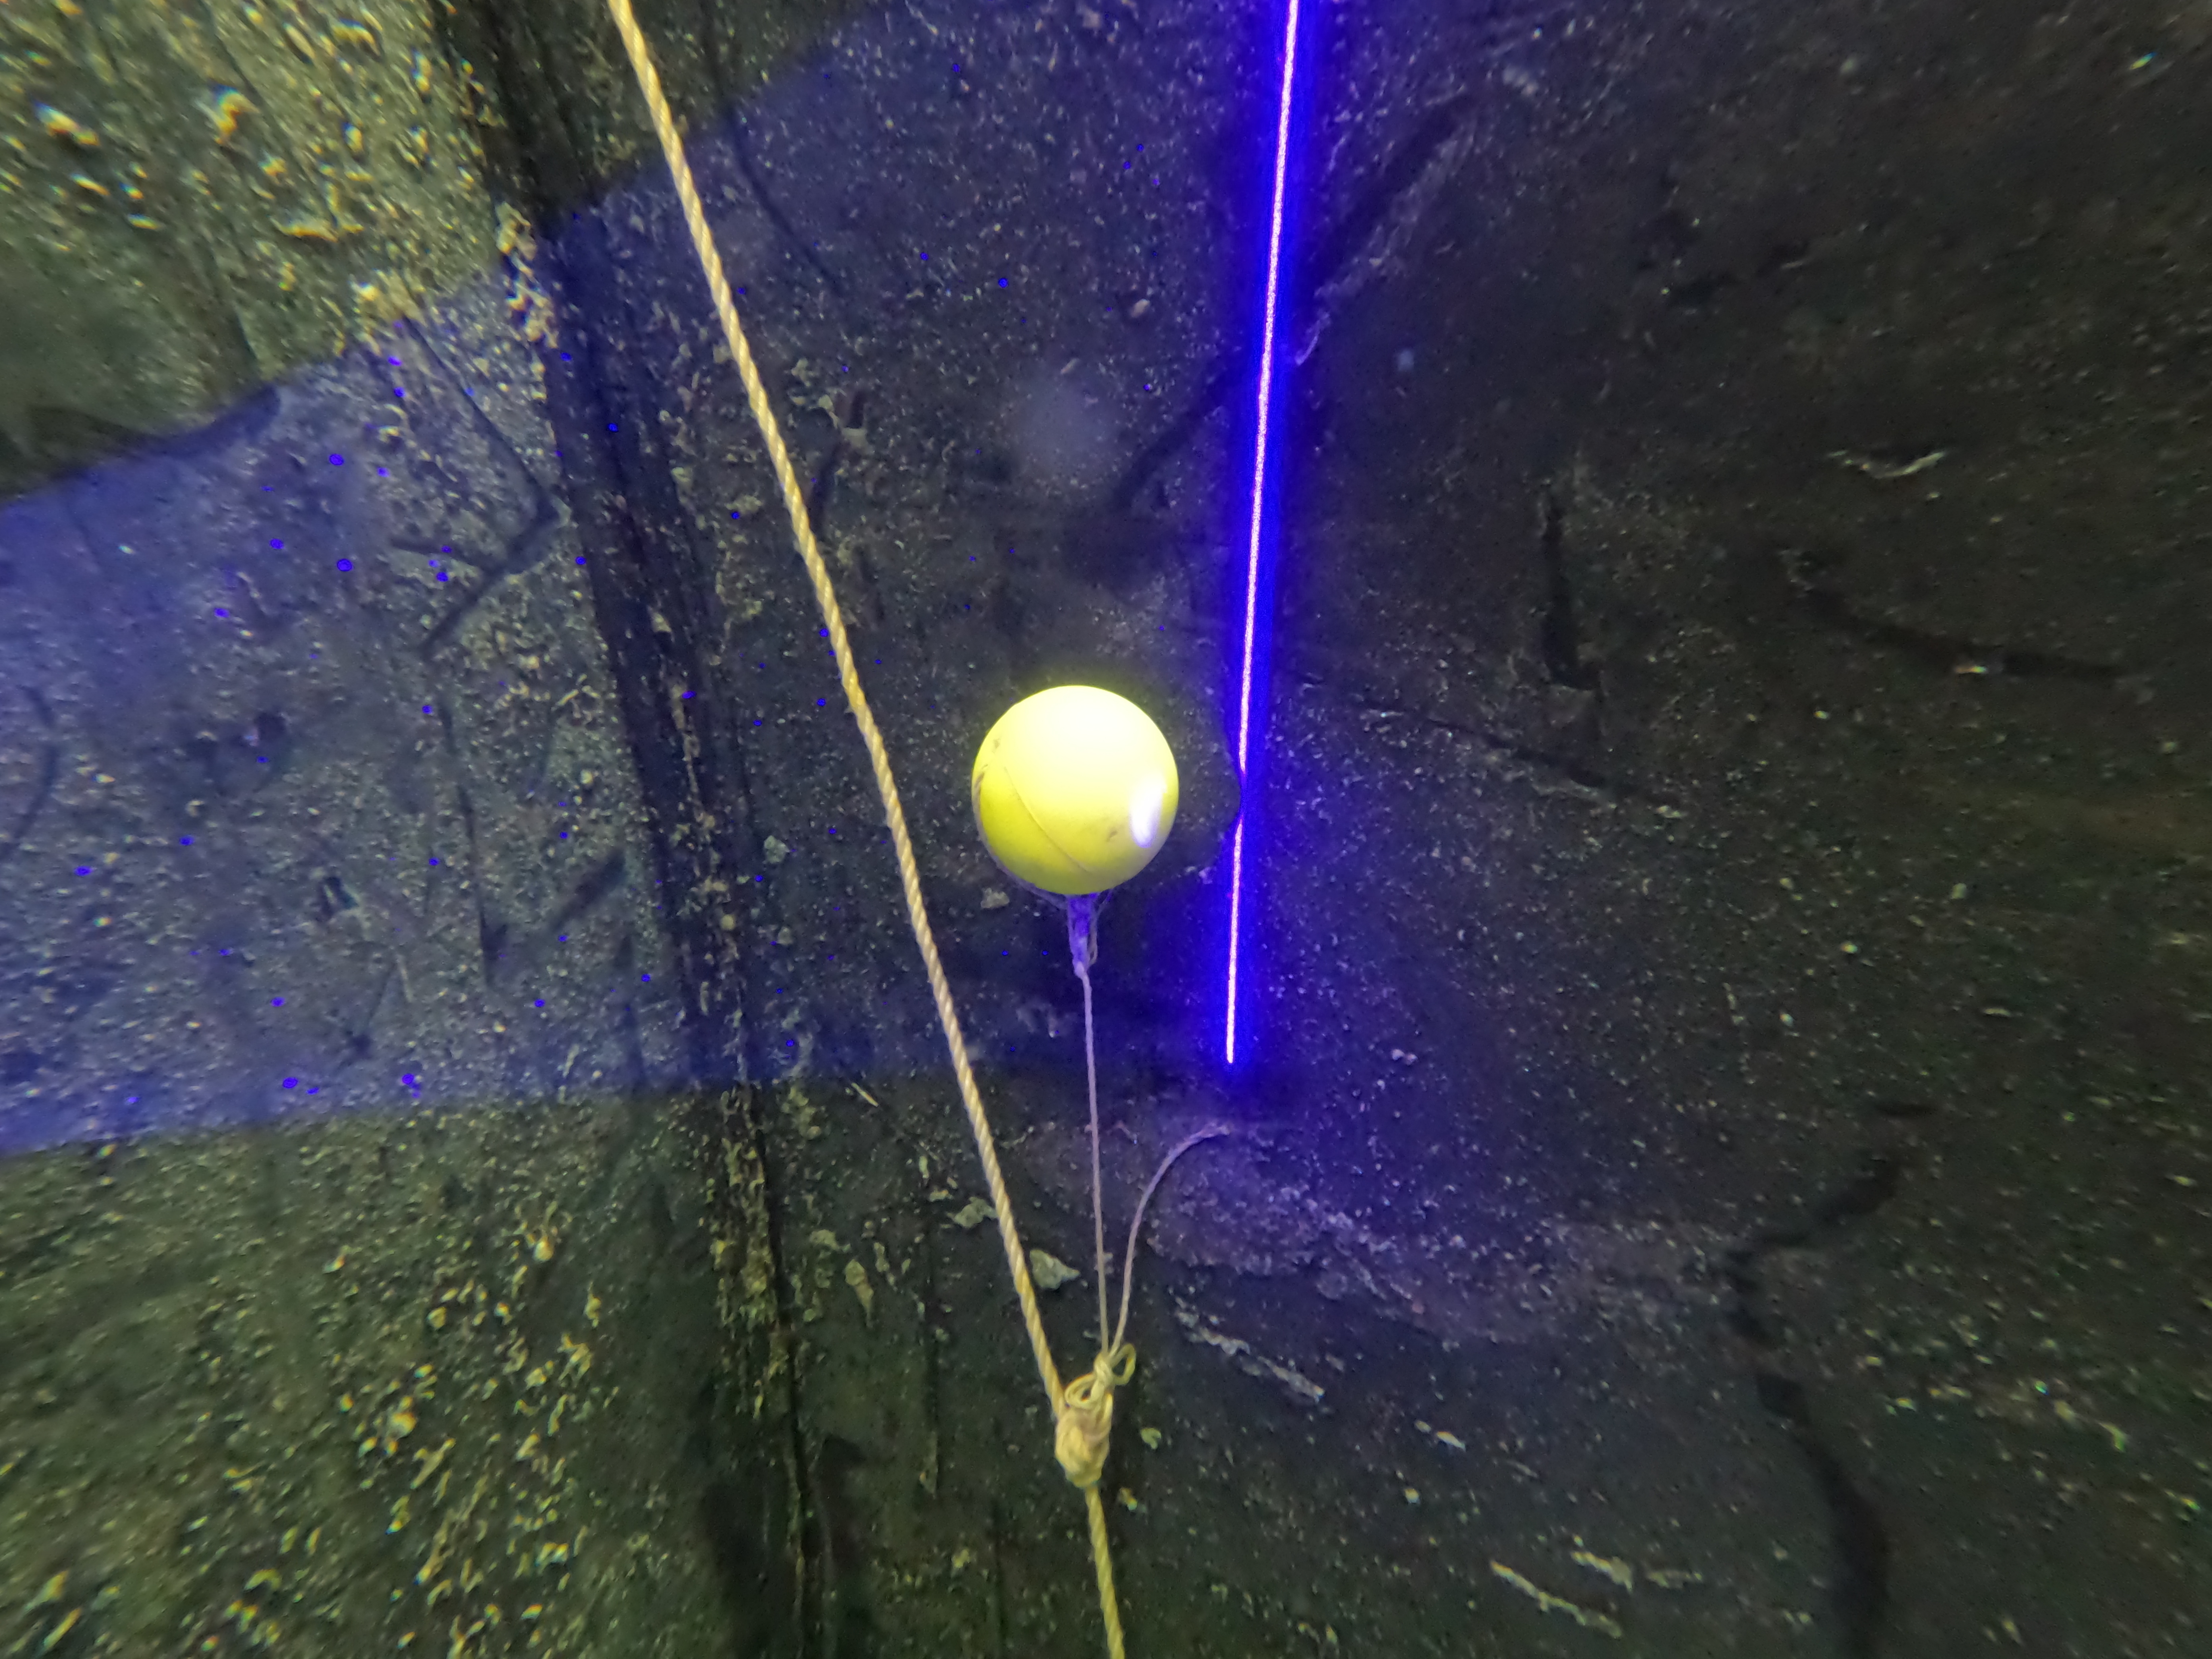

Supplement: Supplementary file 2868 [file G0030368.pdf › 2/G0030368.pdf]

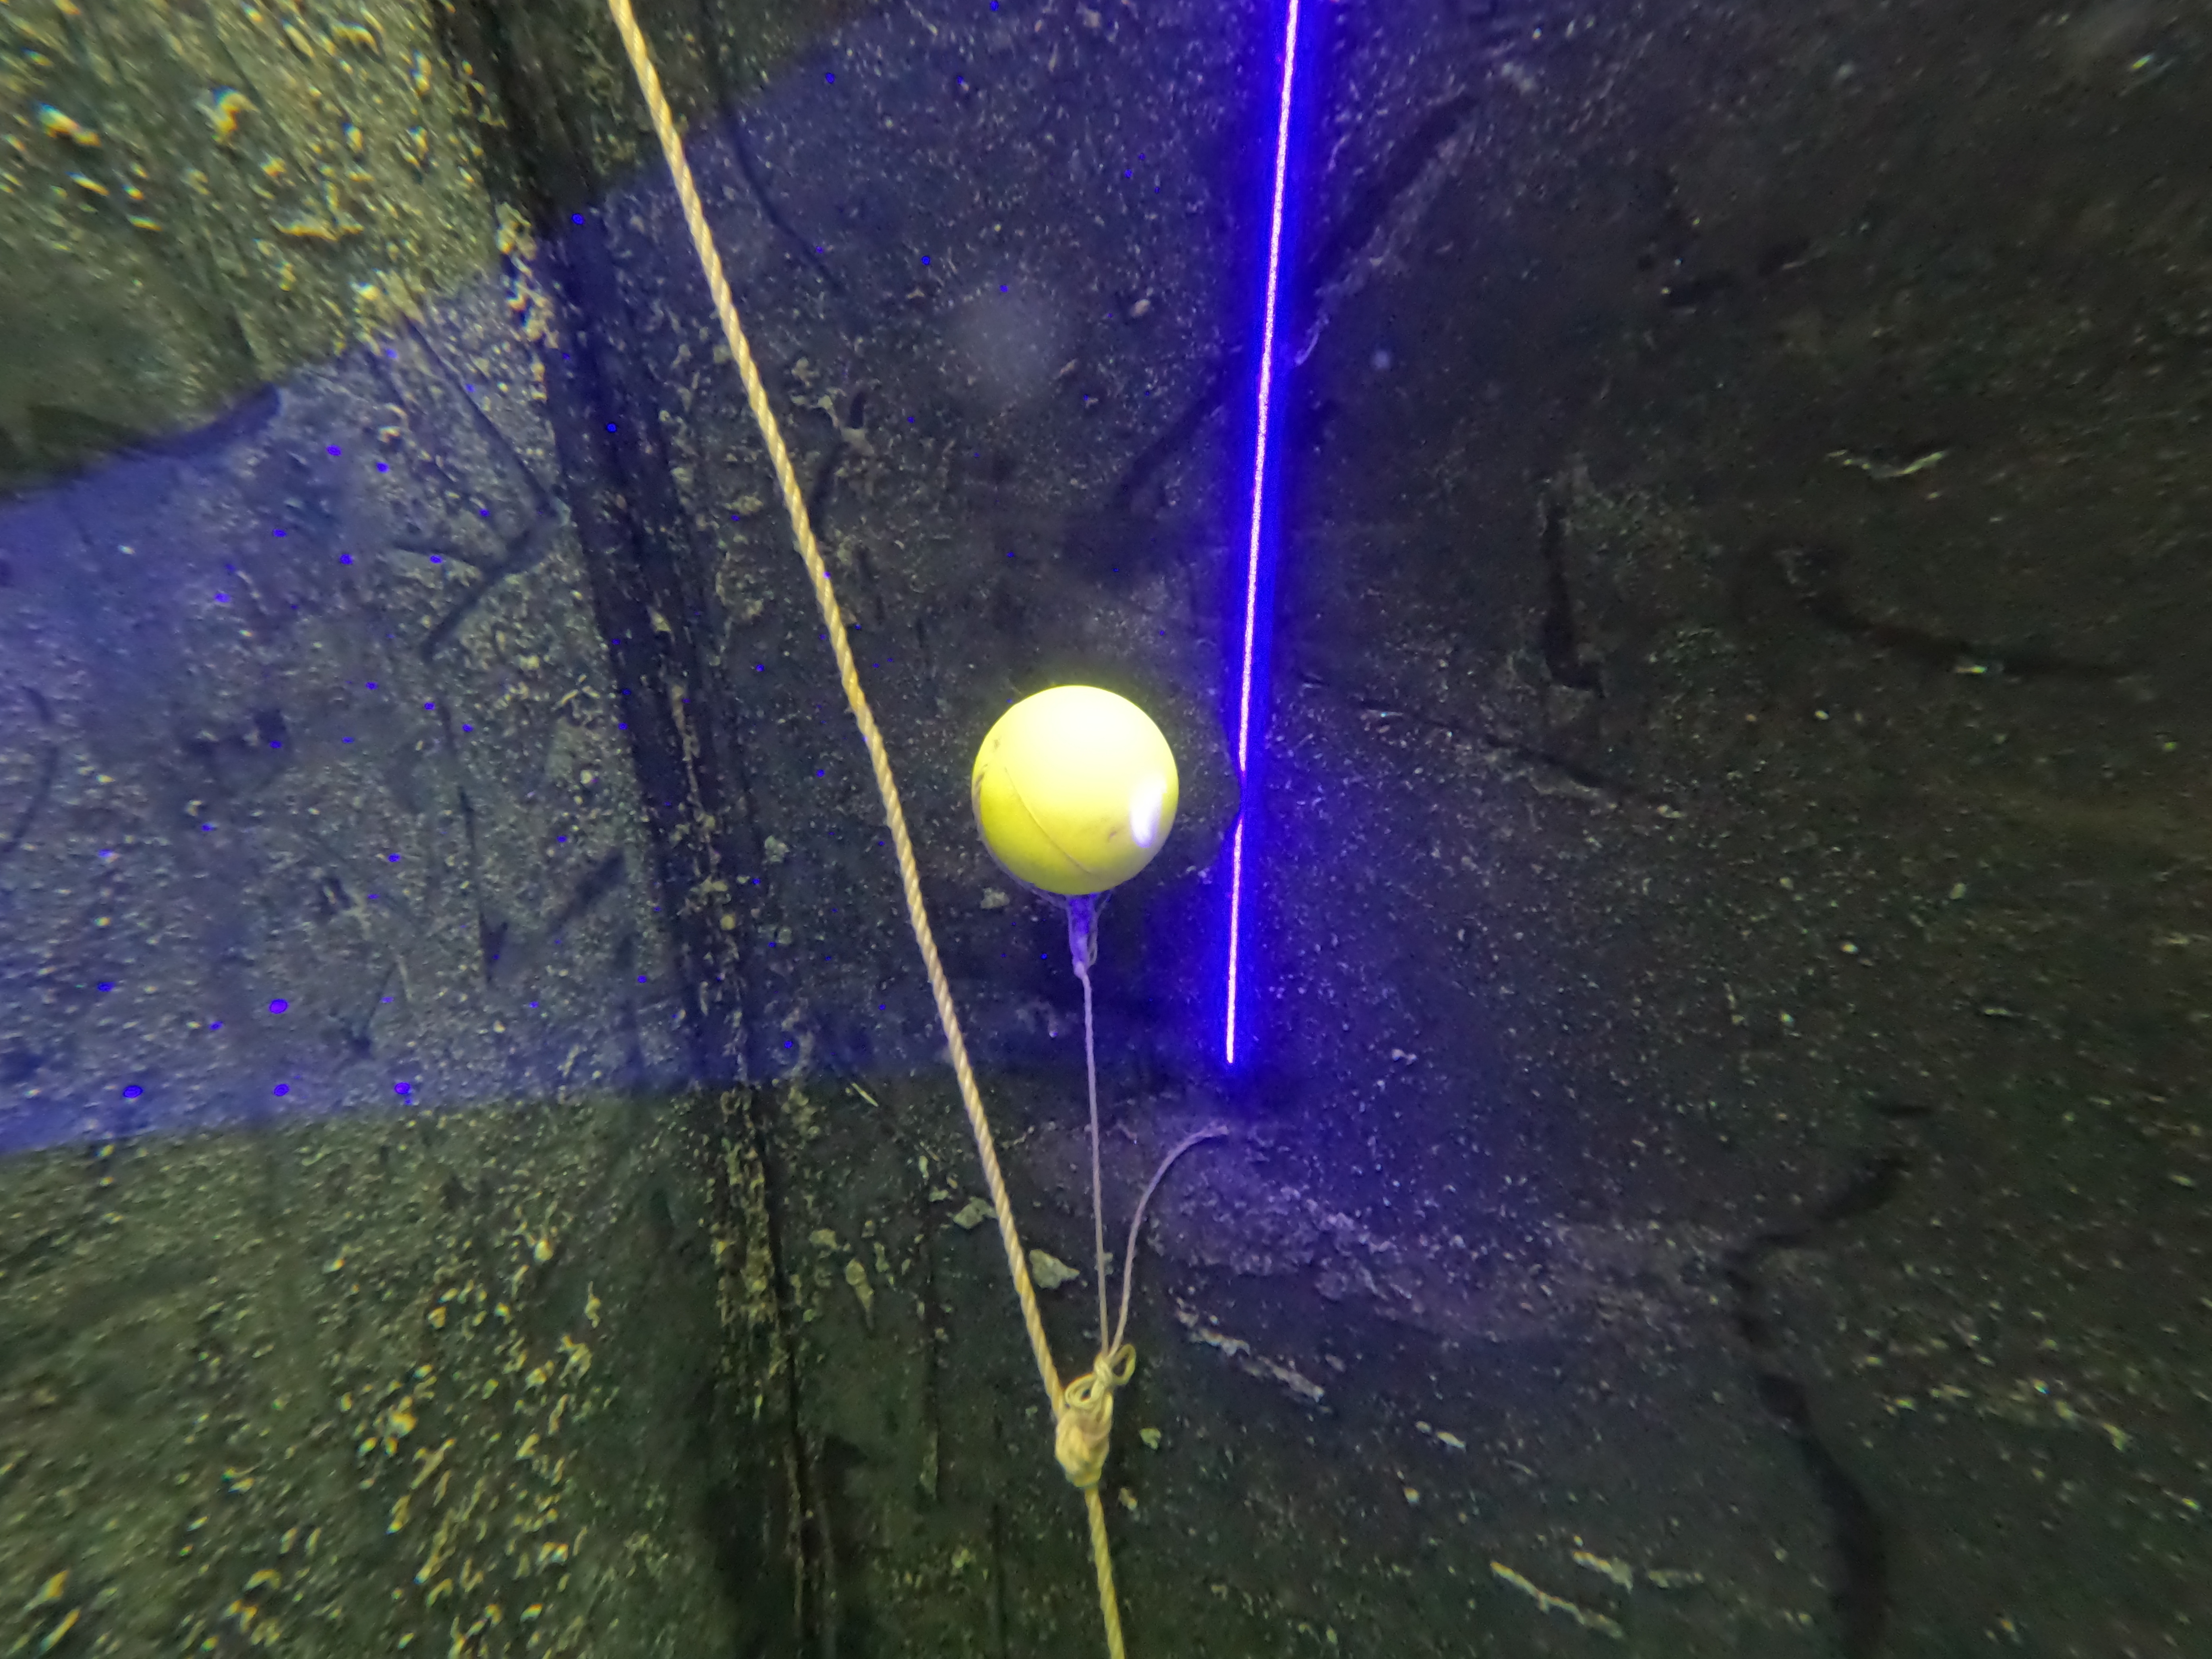

Supplement: Supplementary file 2869 [file G0030369.pdf › 2/G0030369.pdf]

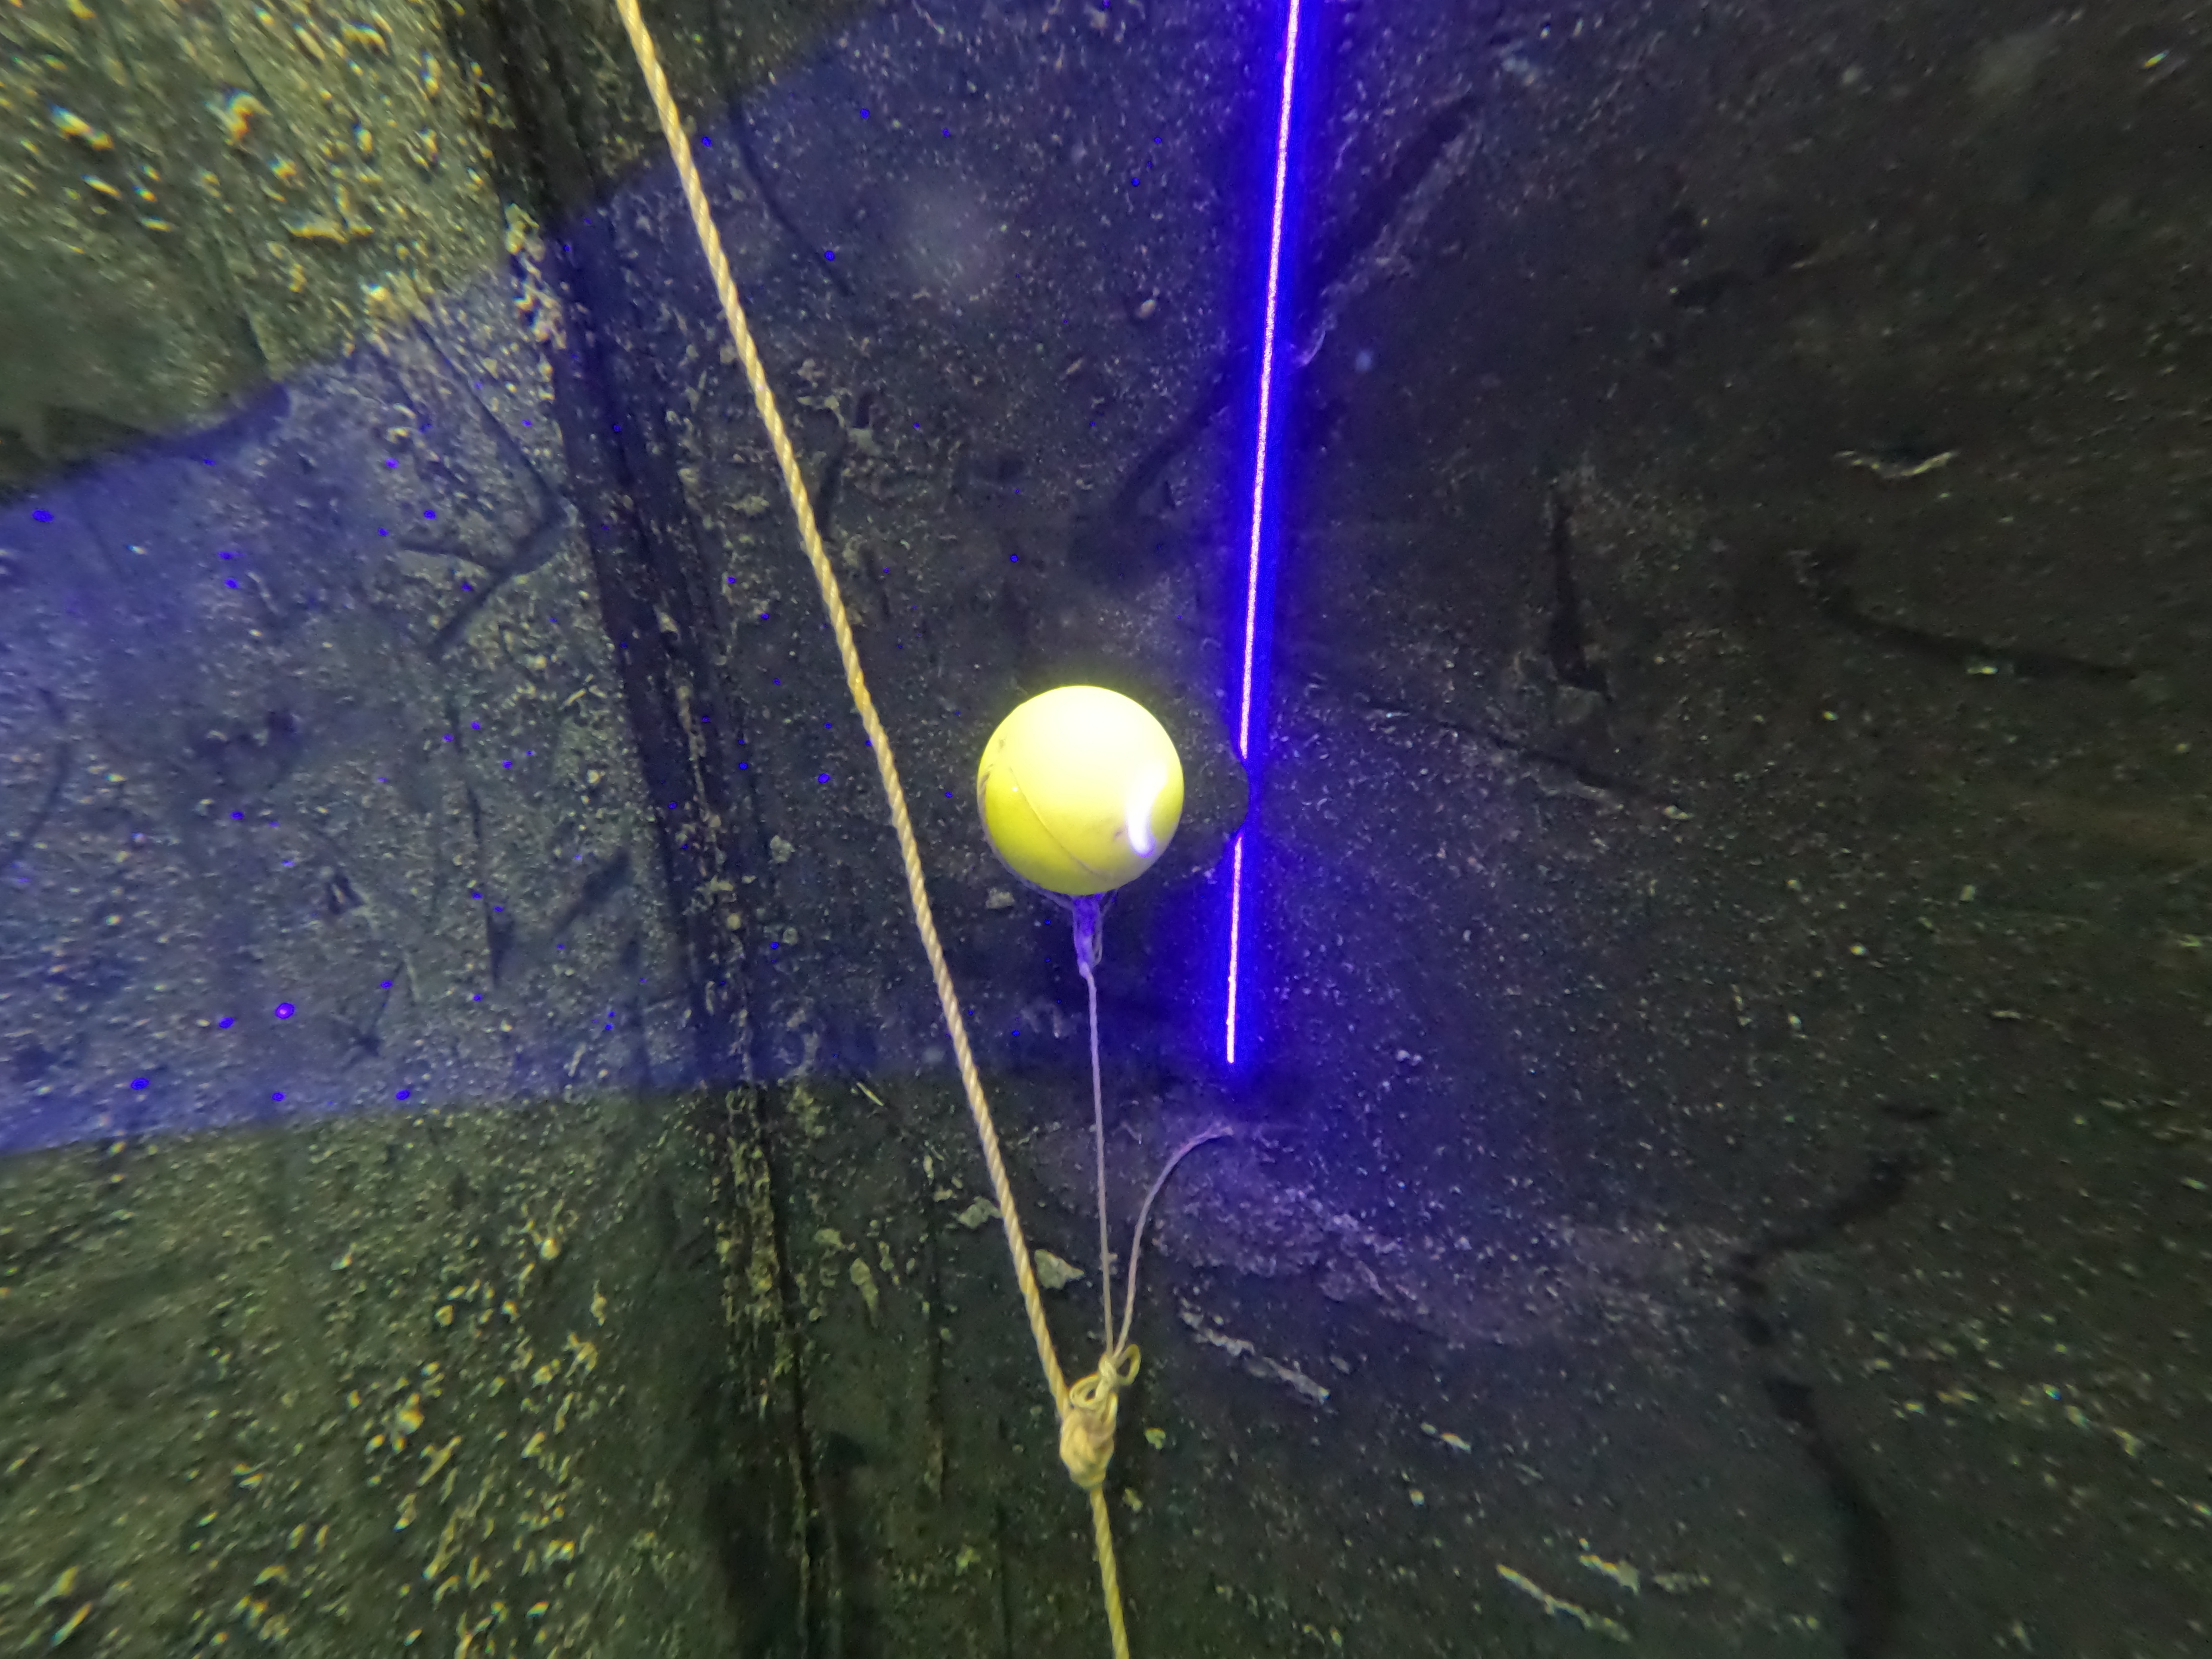

Supplement: Supplementary file 2870 [file G0030370.pdf › 2/G0030370.pdf]

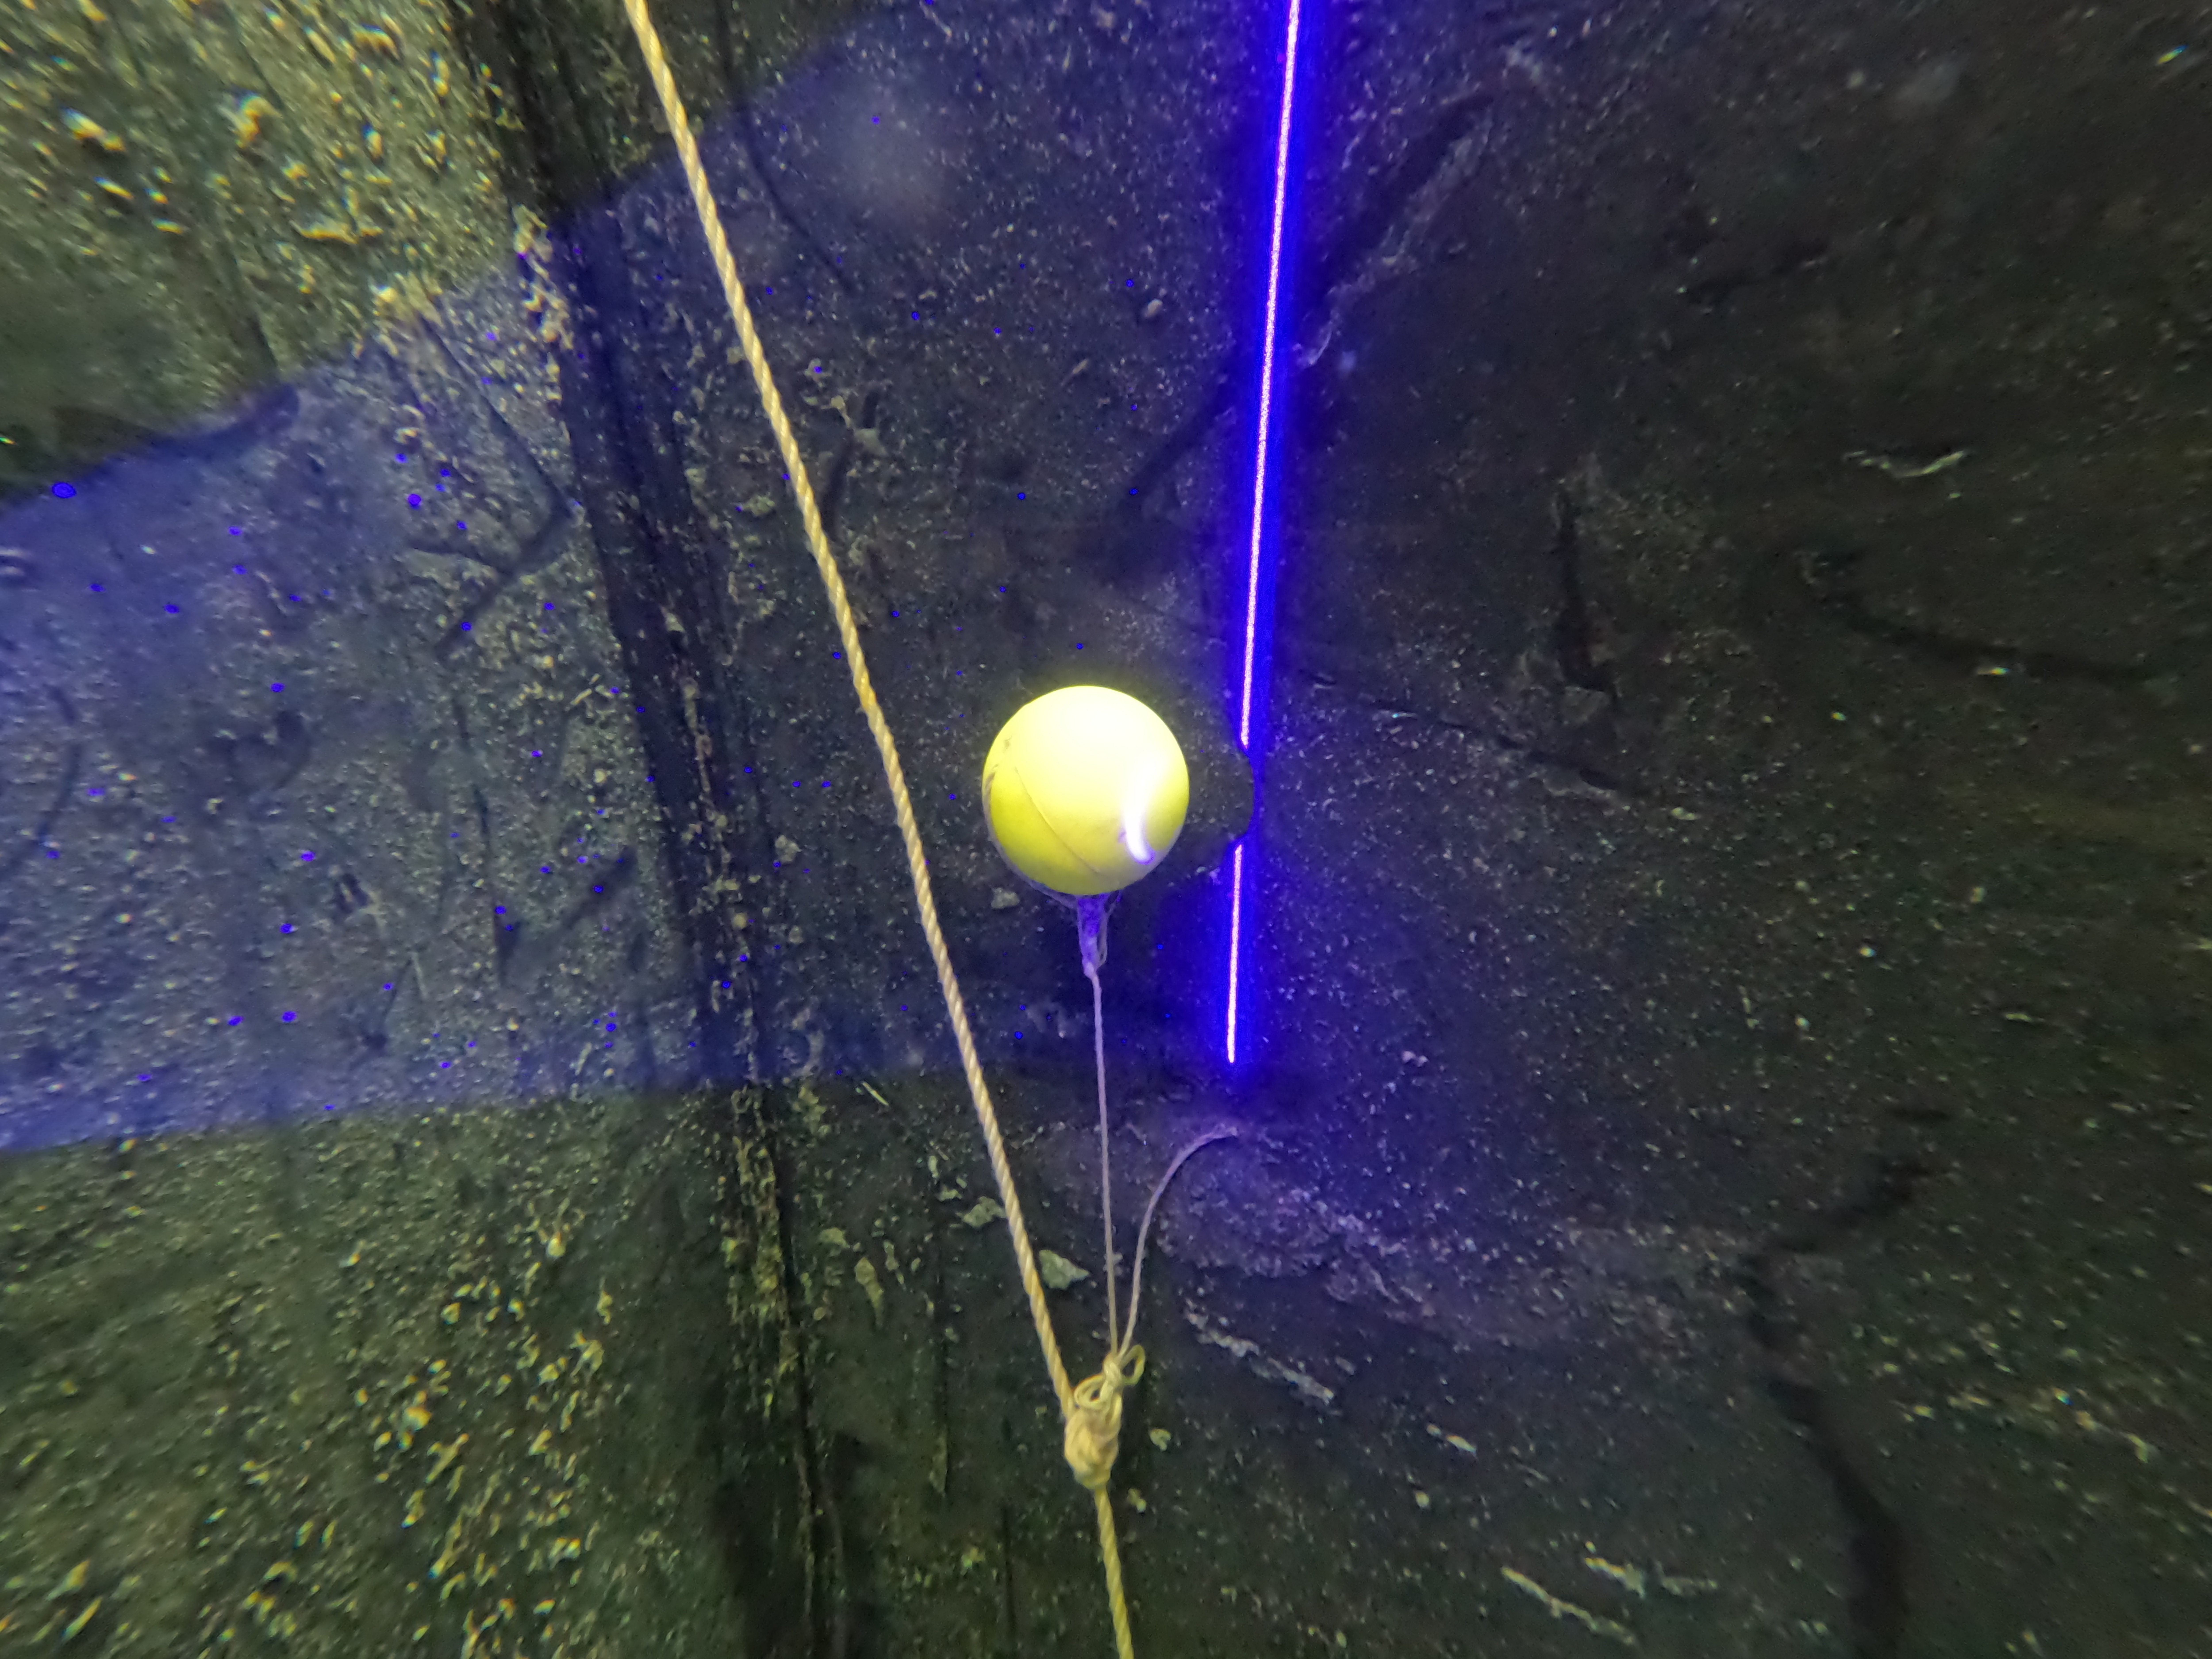

Supplement: Supplementary file 2871 [file G0030371.pdf › 2/G0030371.pdf]

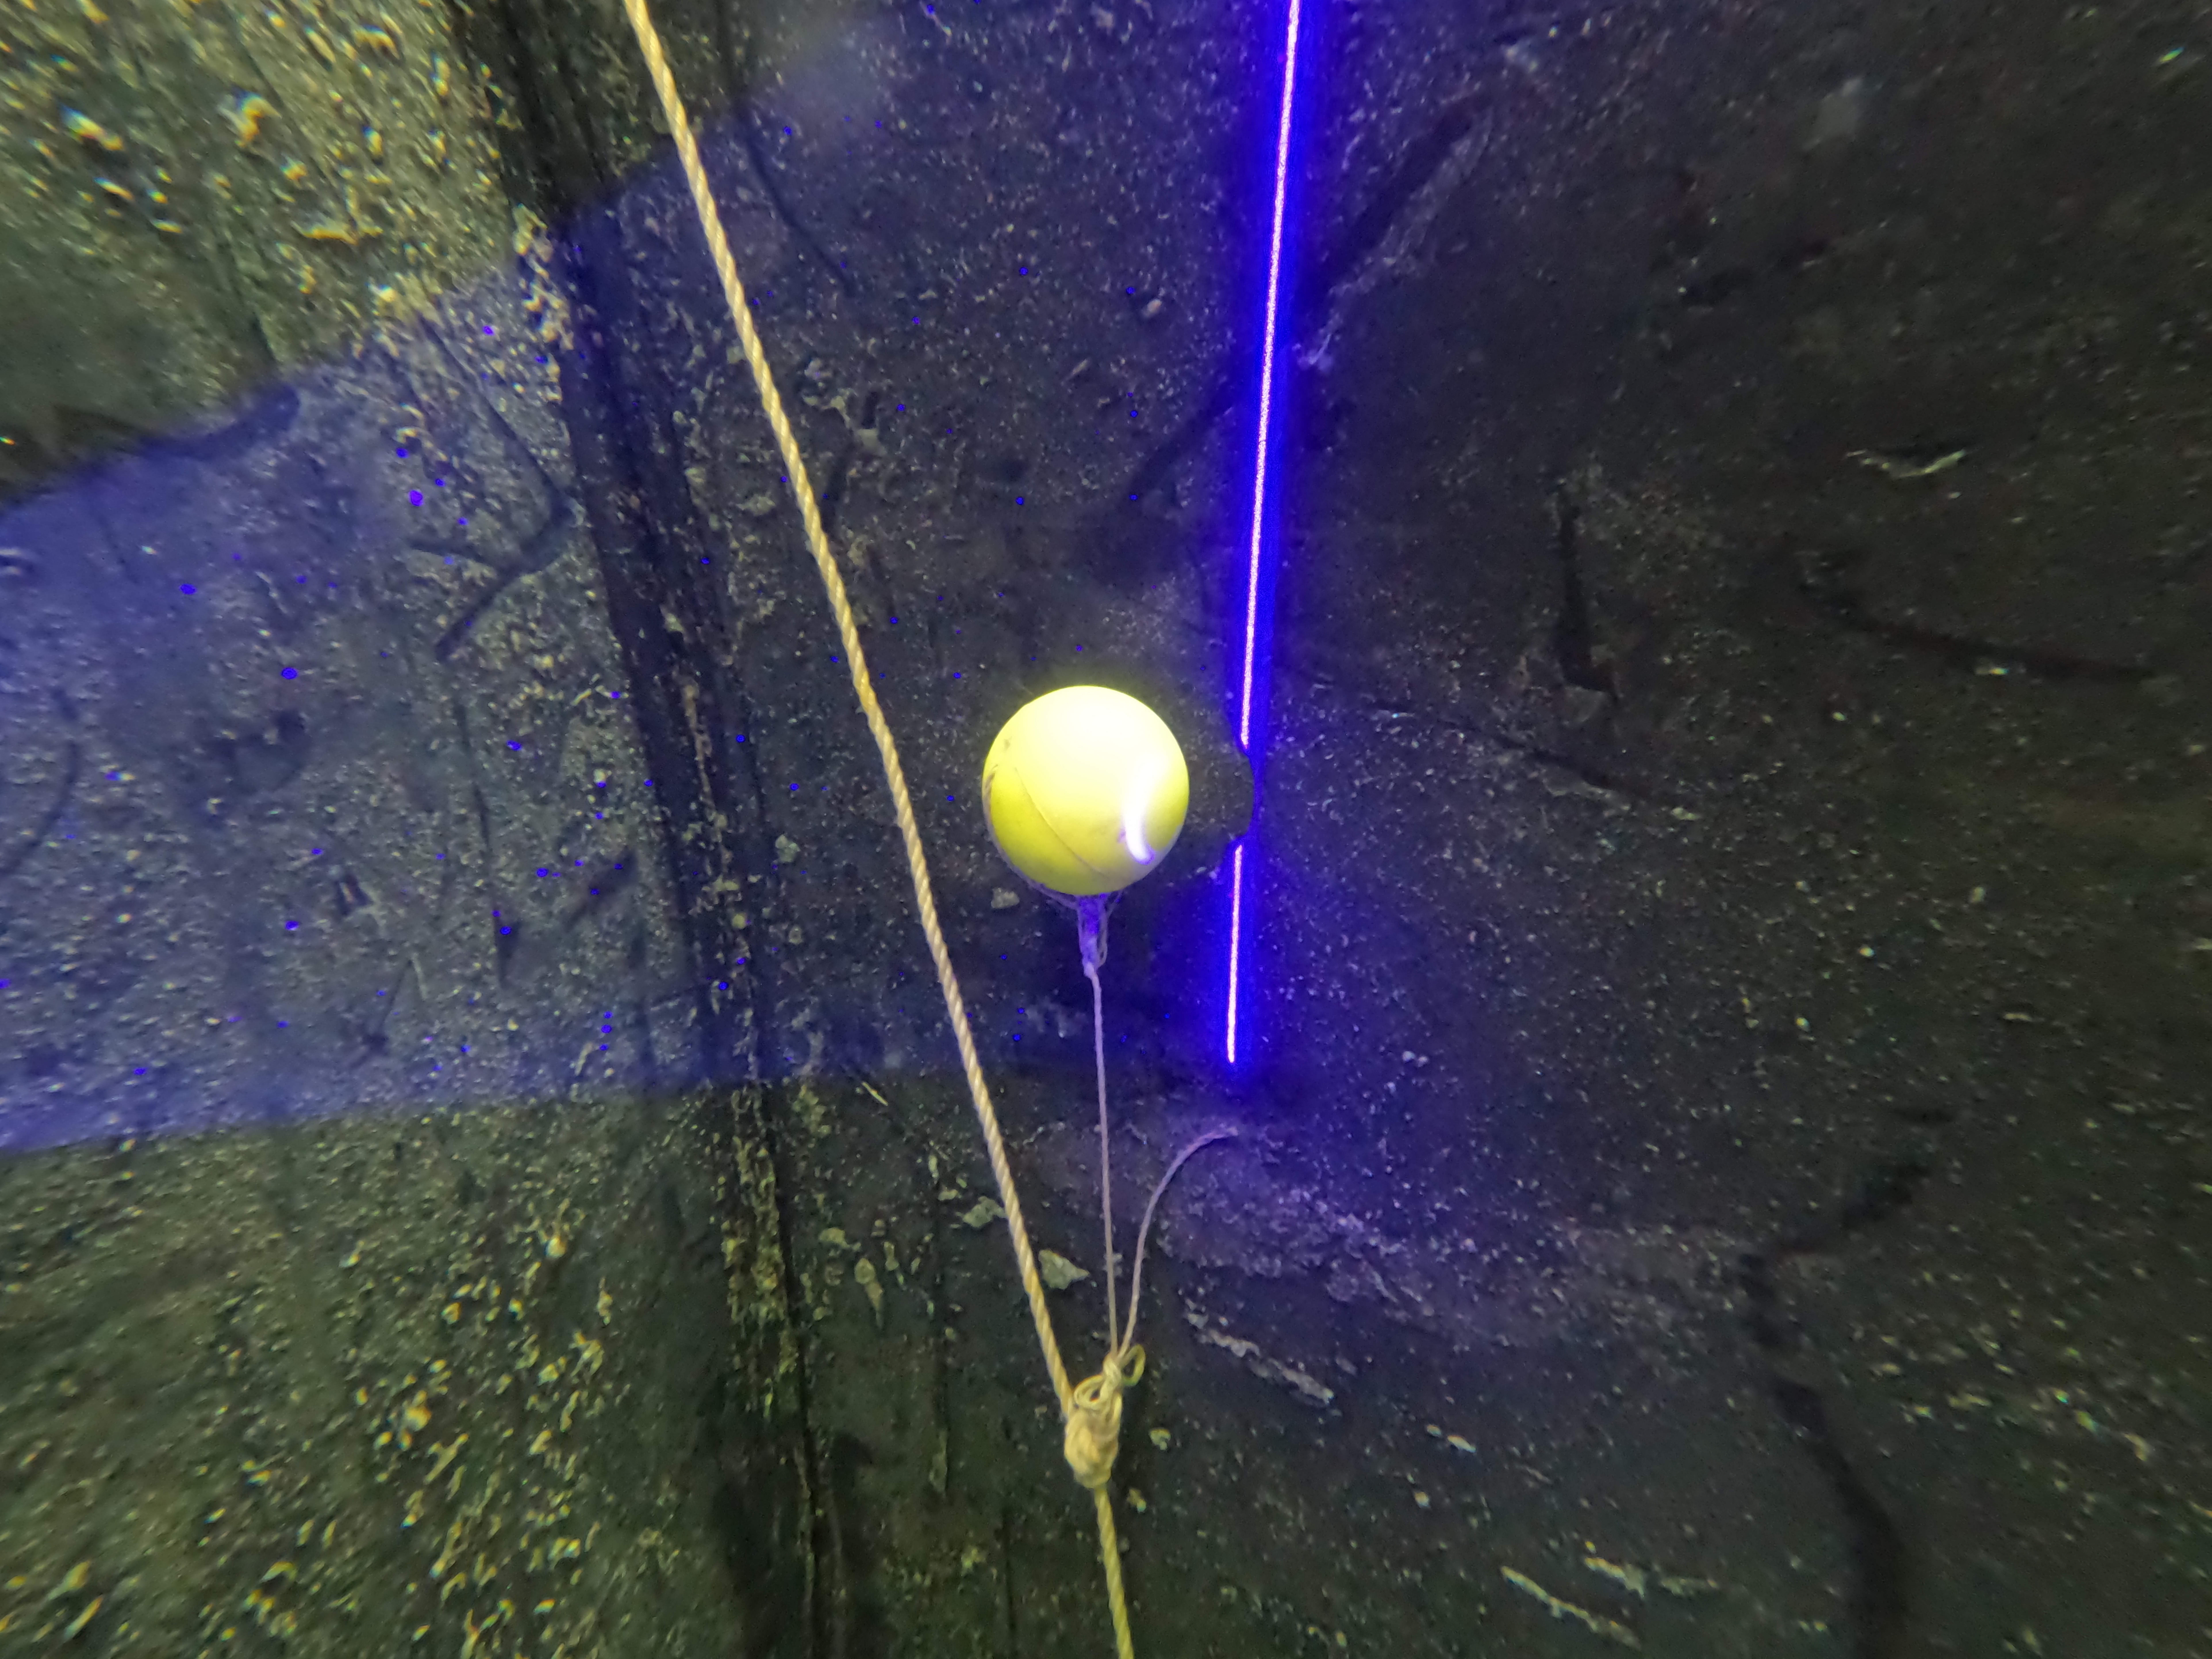

Supplement: Supplementary file 2872 [file G0030372.pdf › 2/G0030372.pdf]

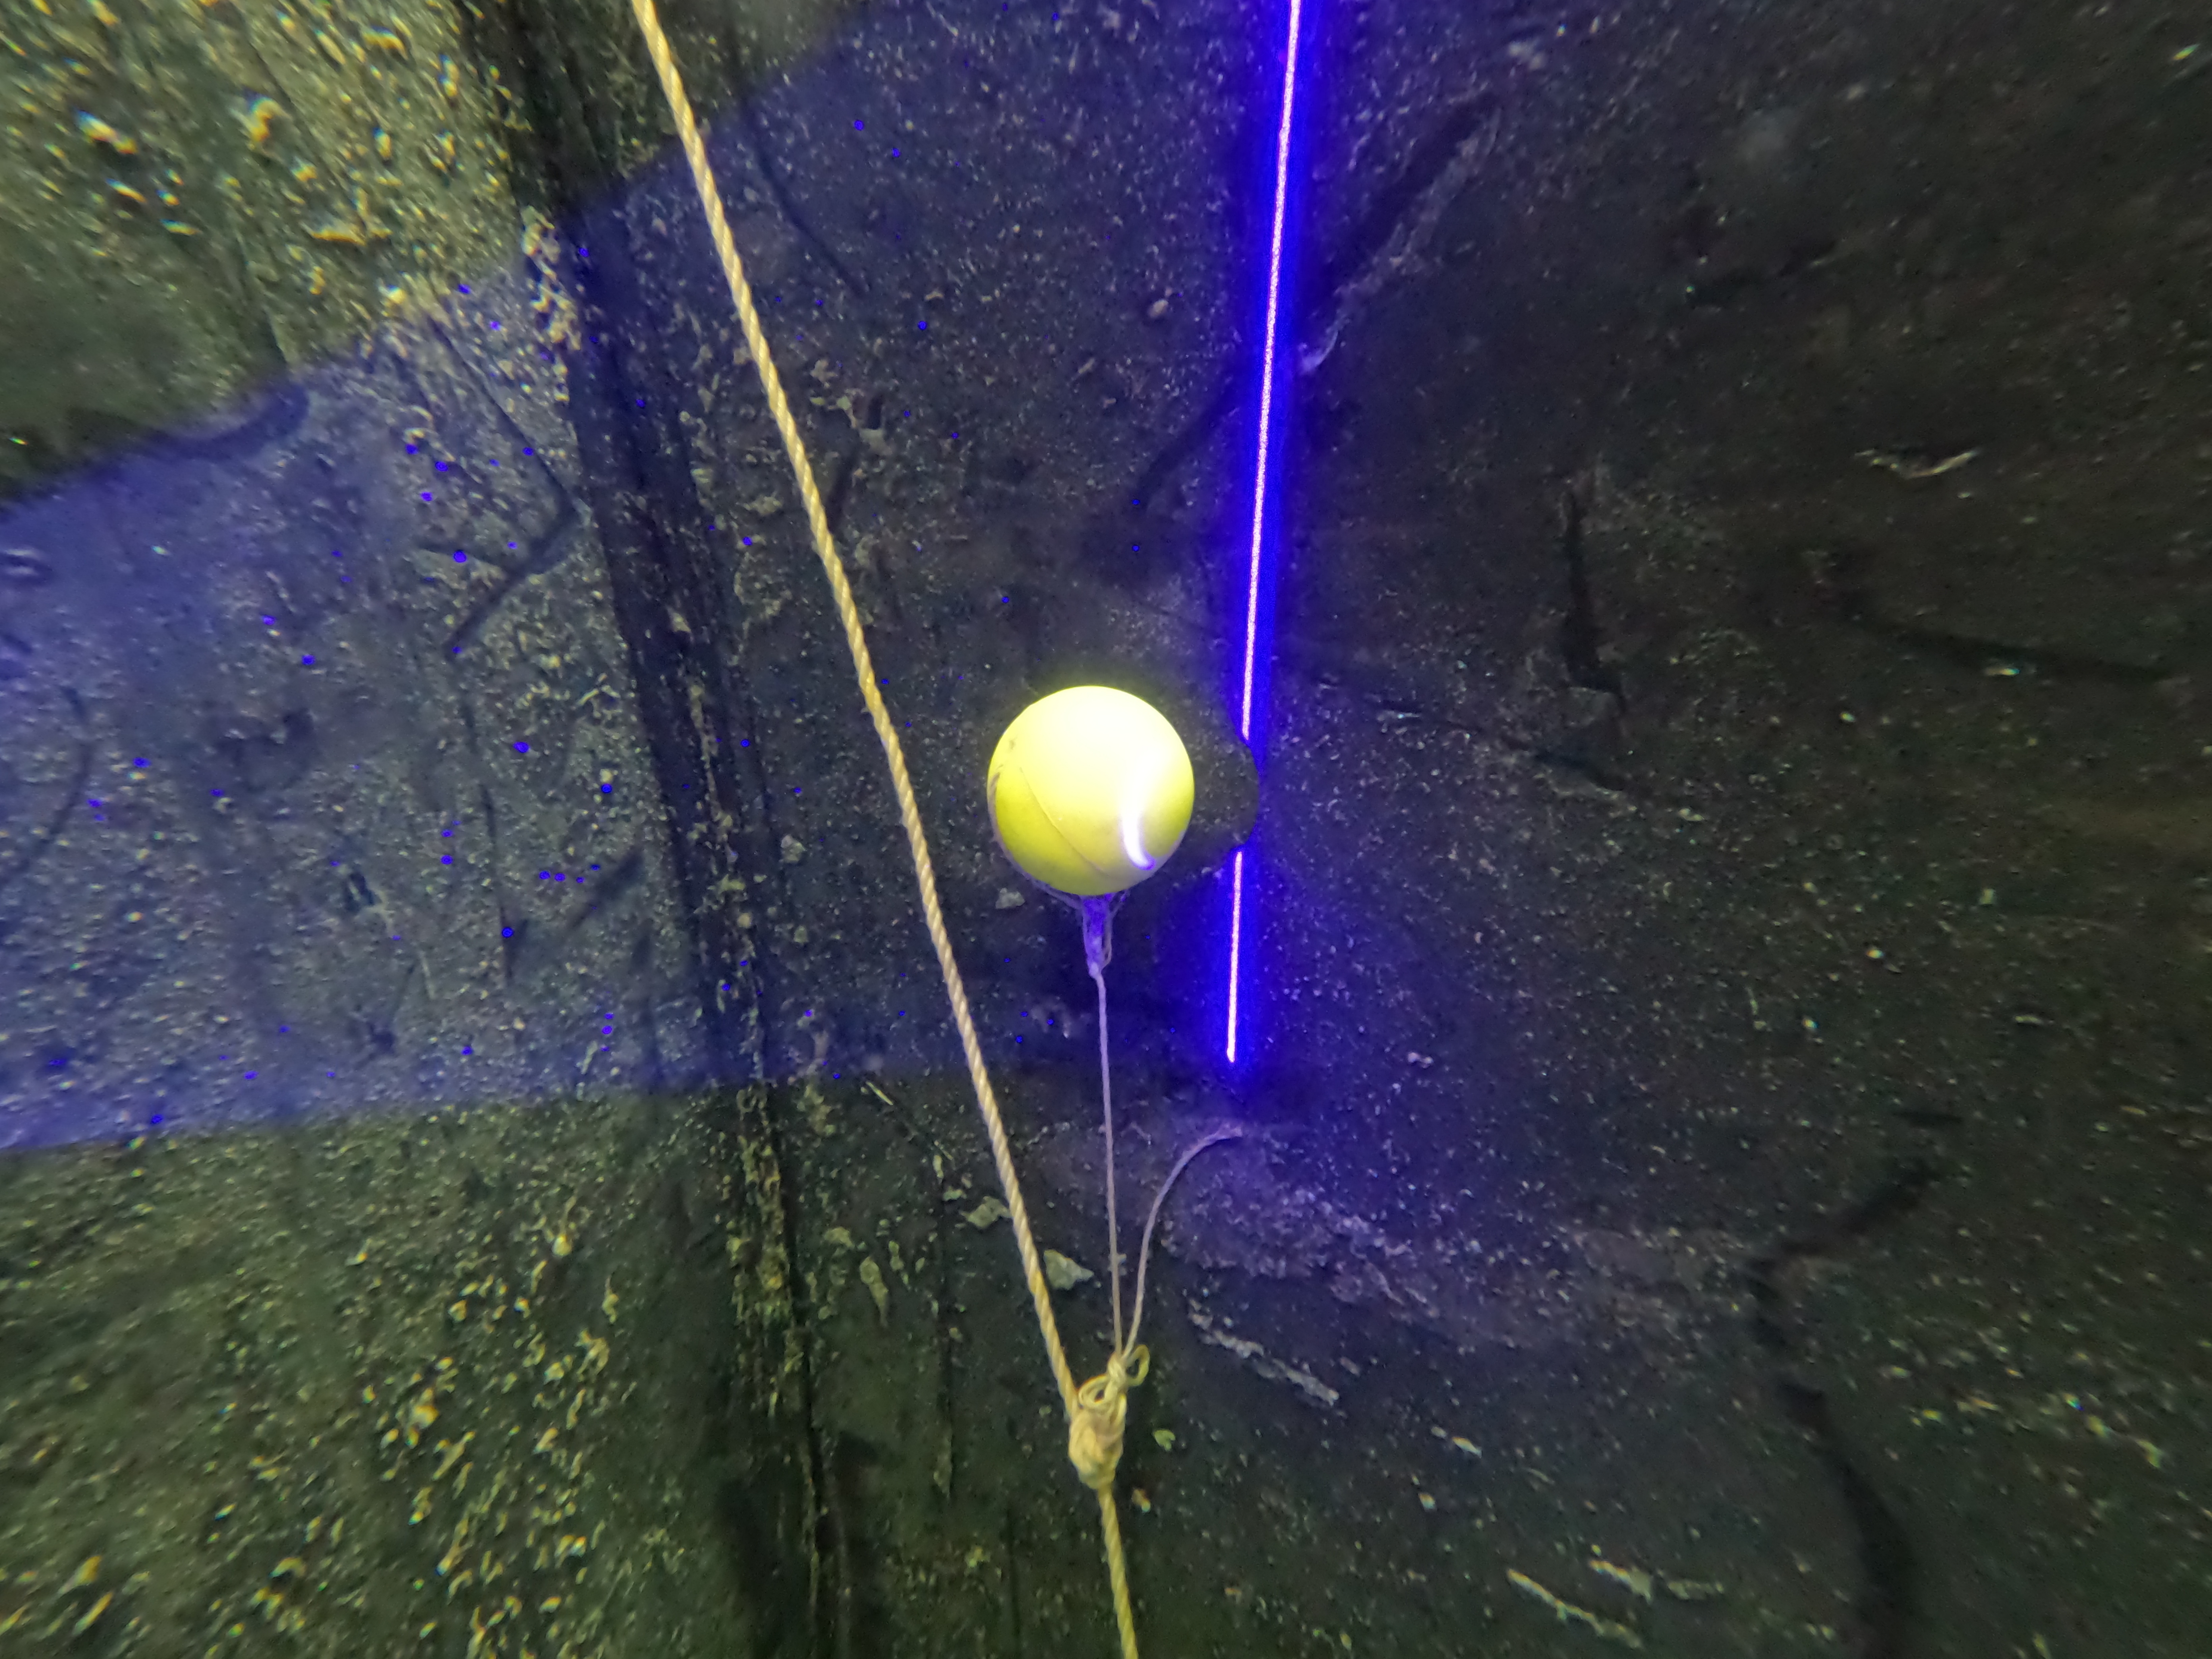

Supplement: Supplementary file 2873 [file G0030373.pdf › 2/G0030373.pdf]

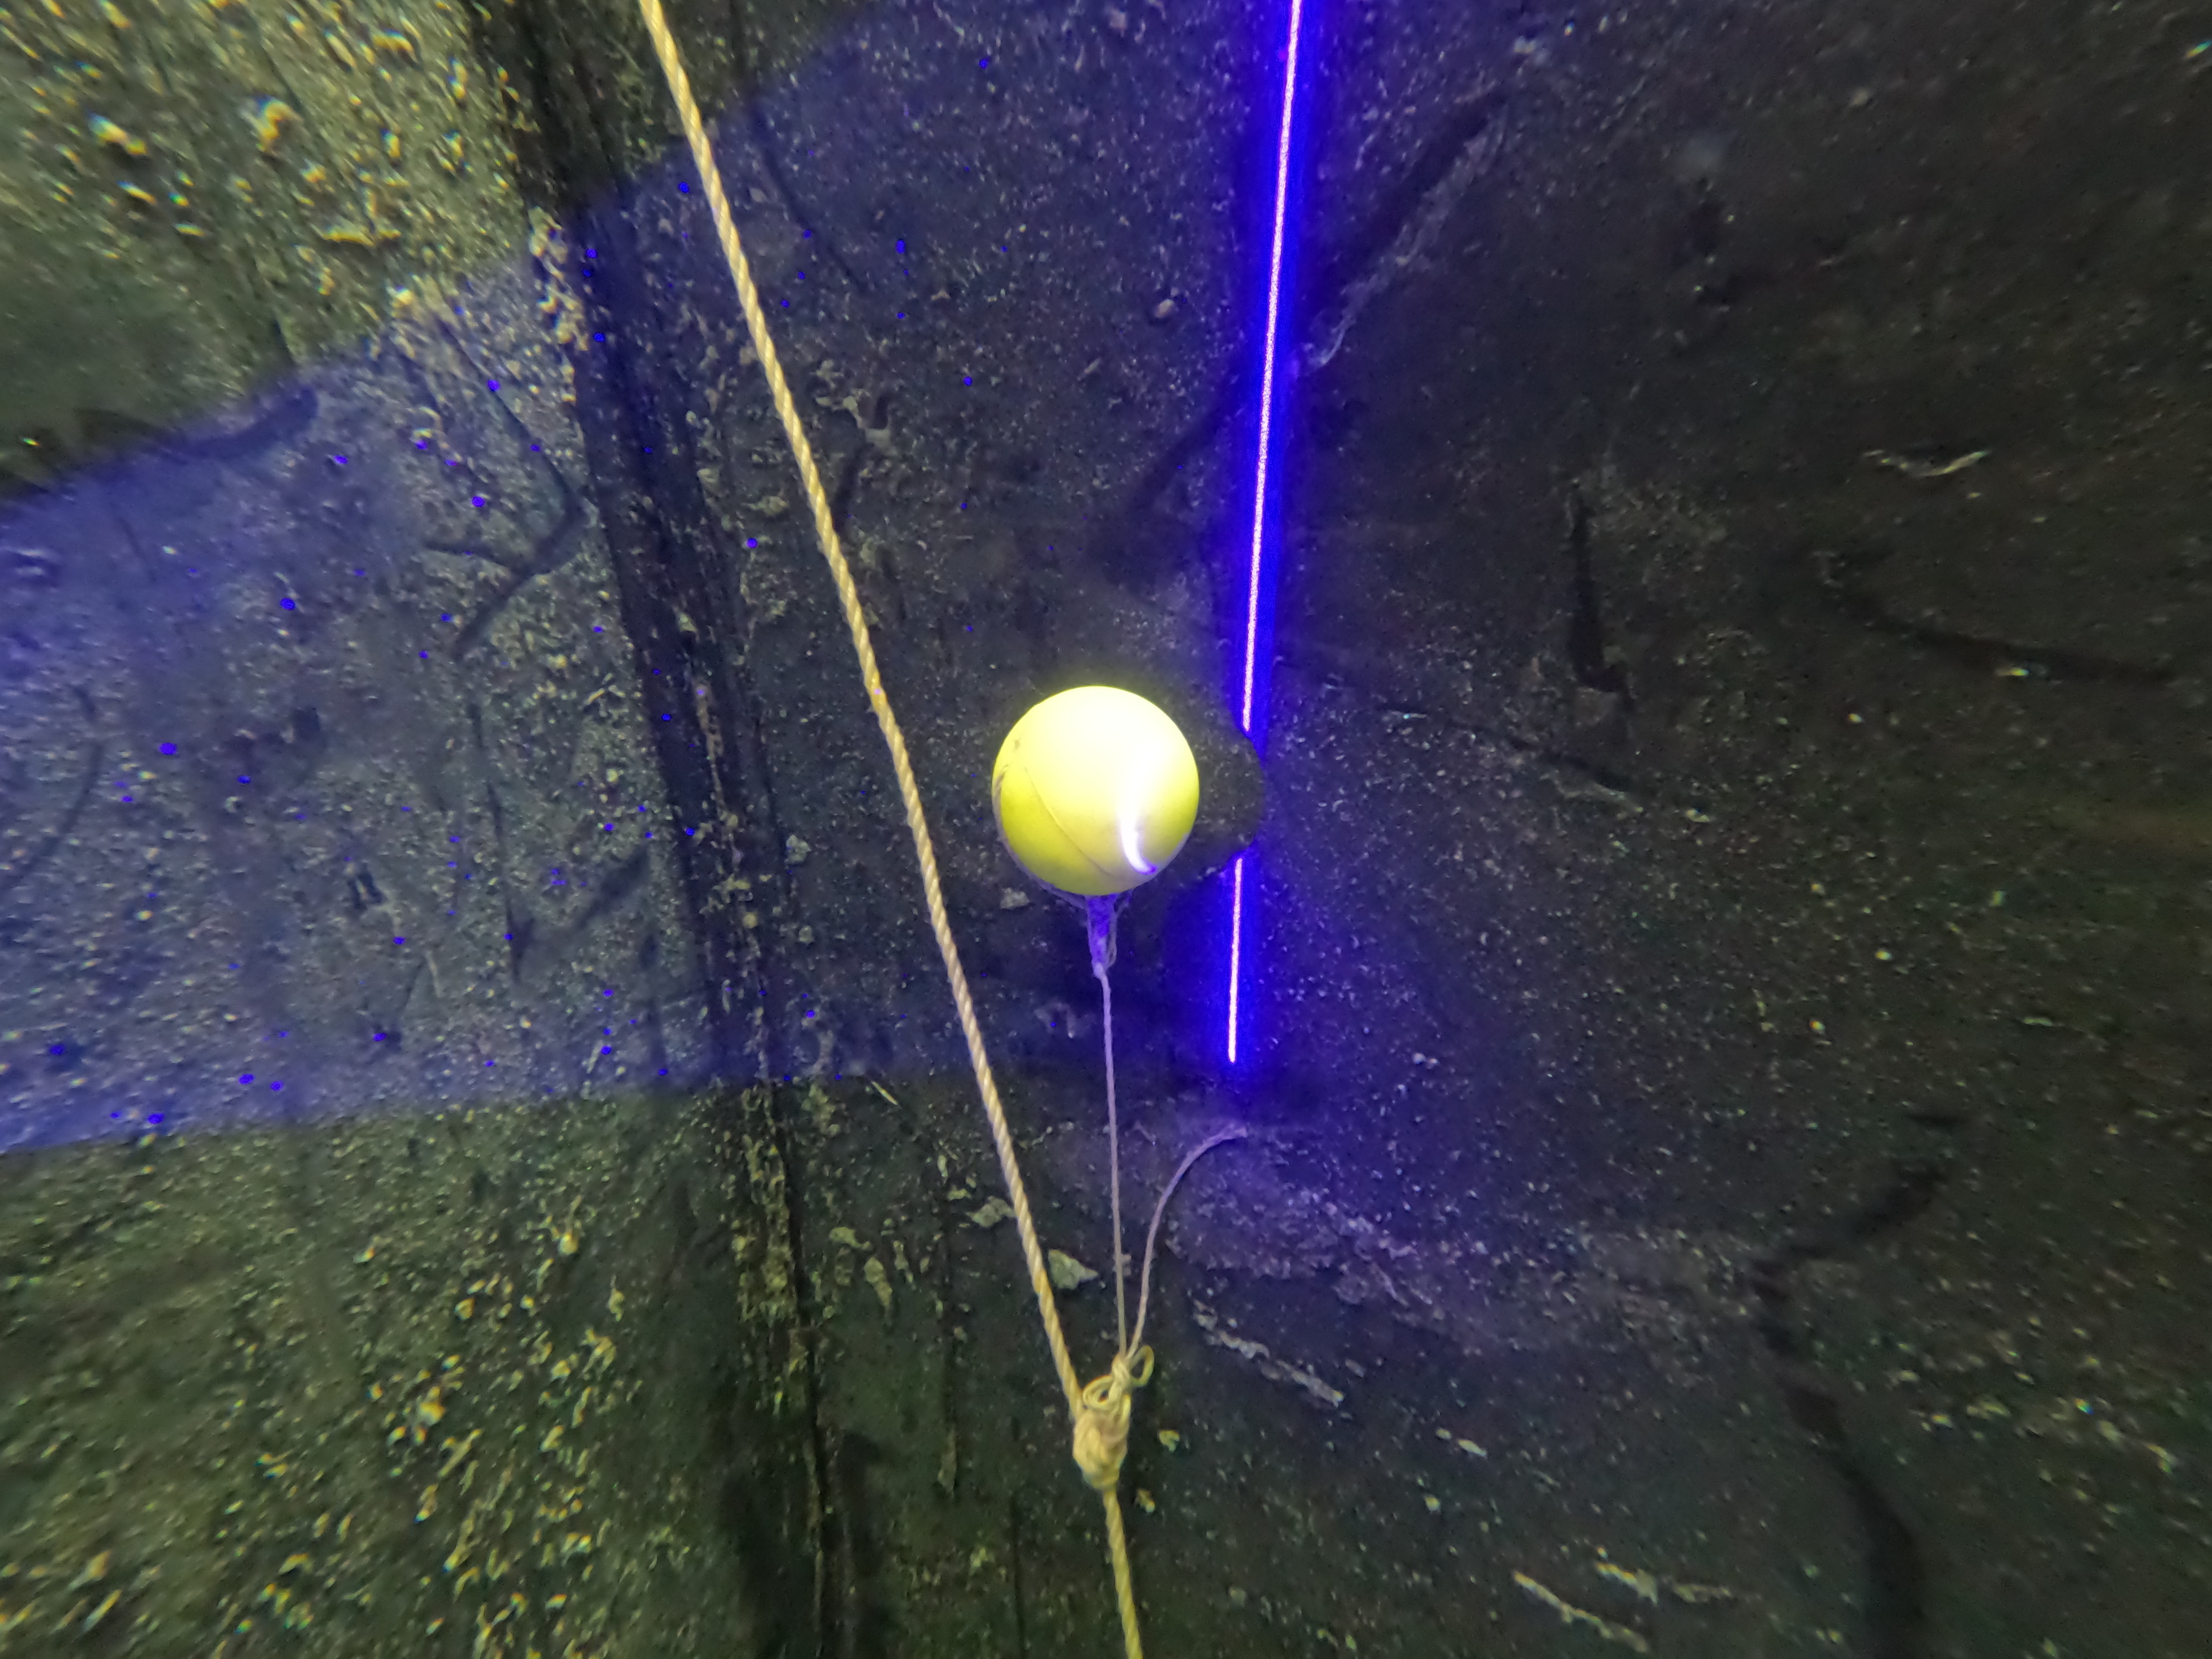

Supplement: Supplementary file 2874 [file G0030374.pdf › 2/G0030374.pdf]

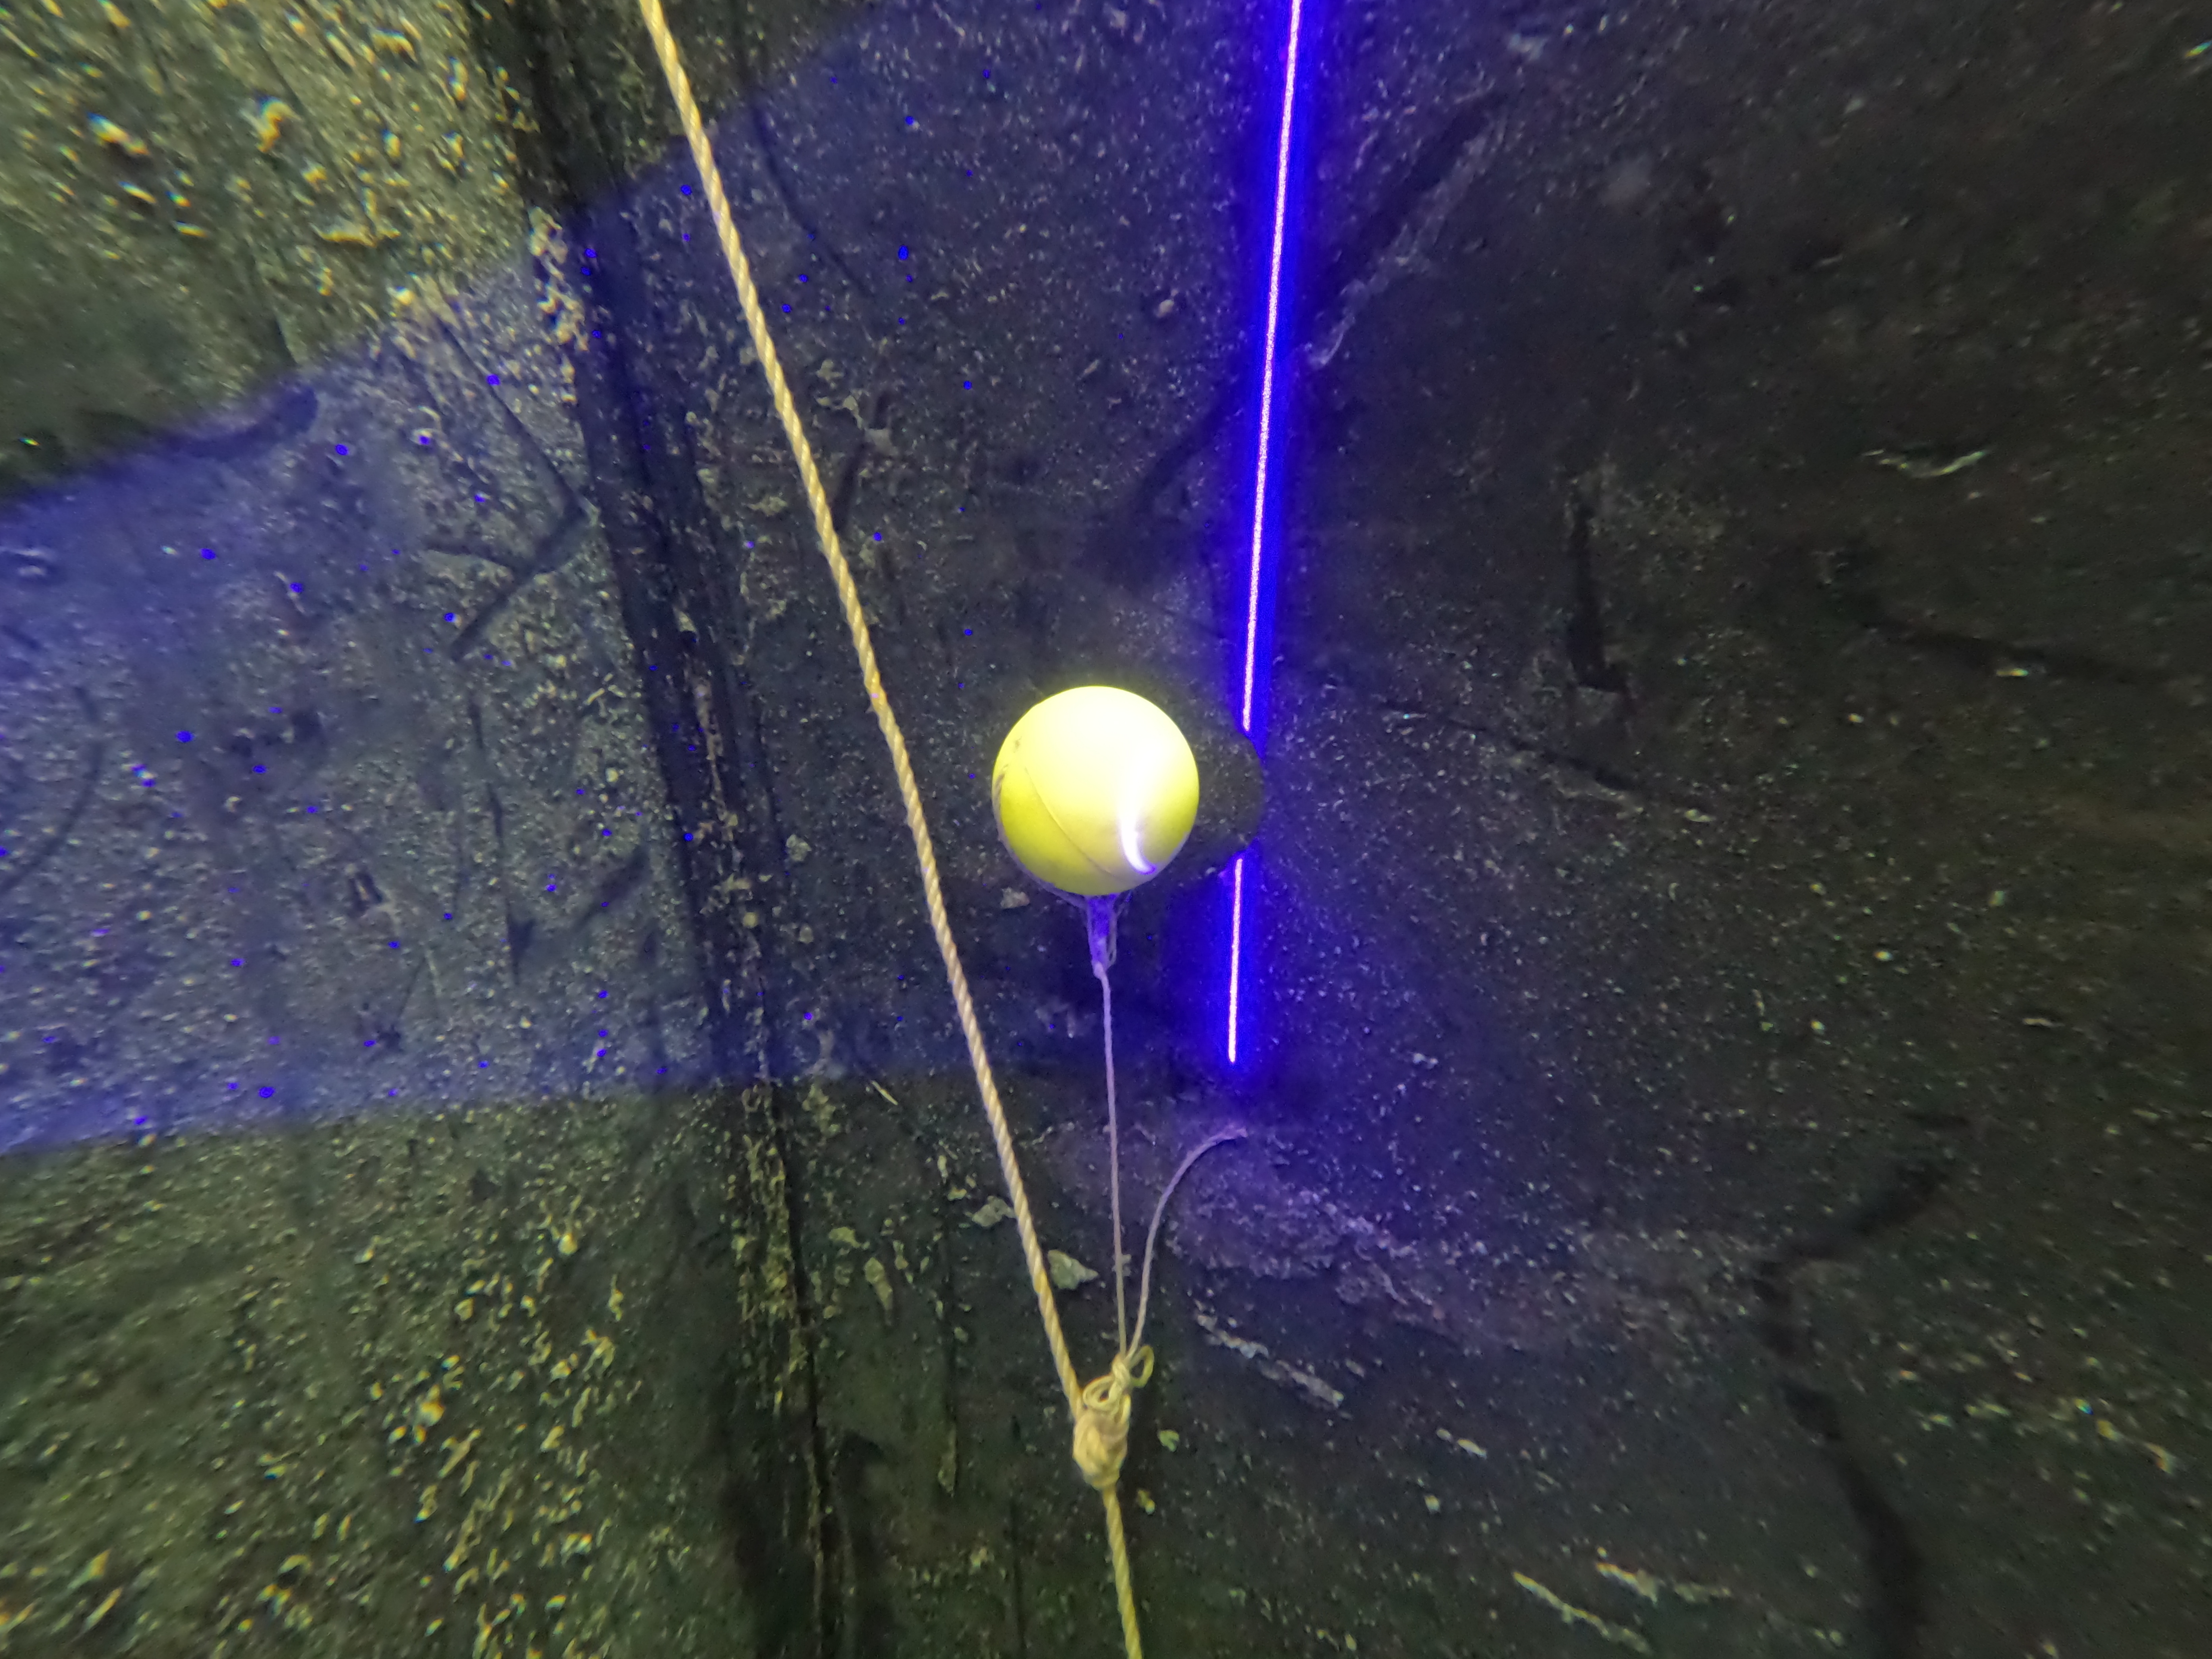

Supplement: Supplementary file 2875 [file G0030375.pdf › 2/G0030375.pdf]

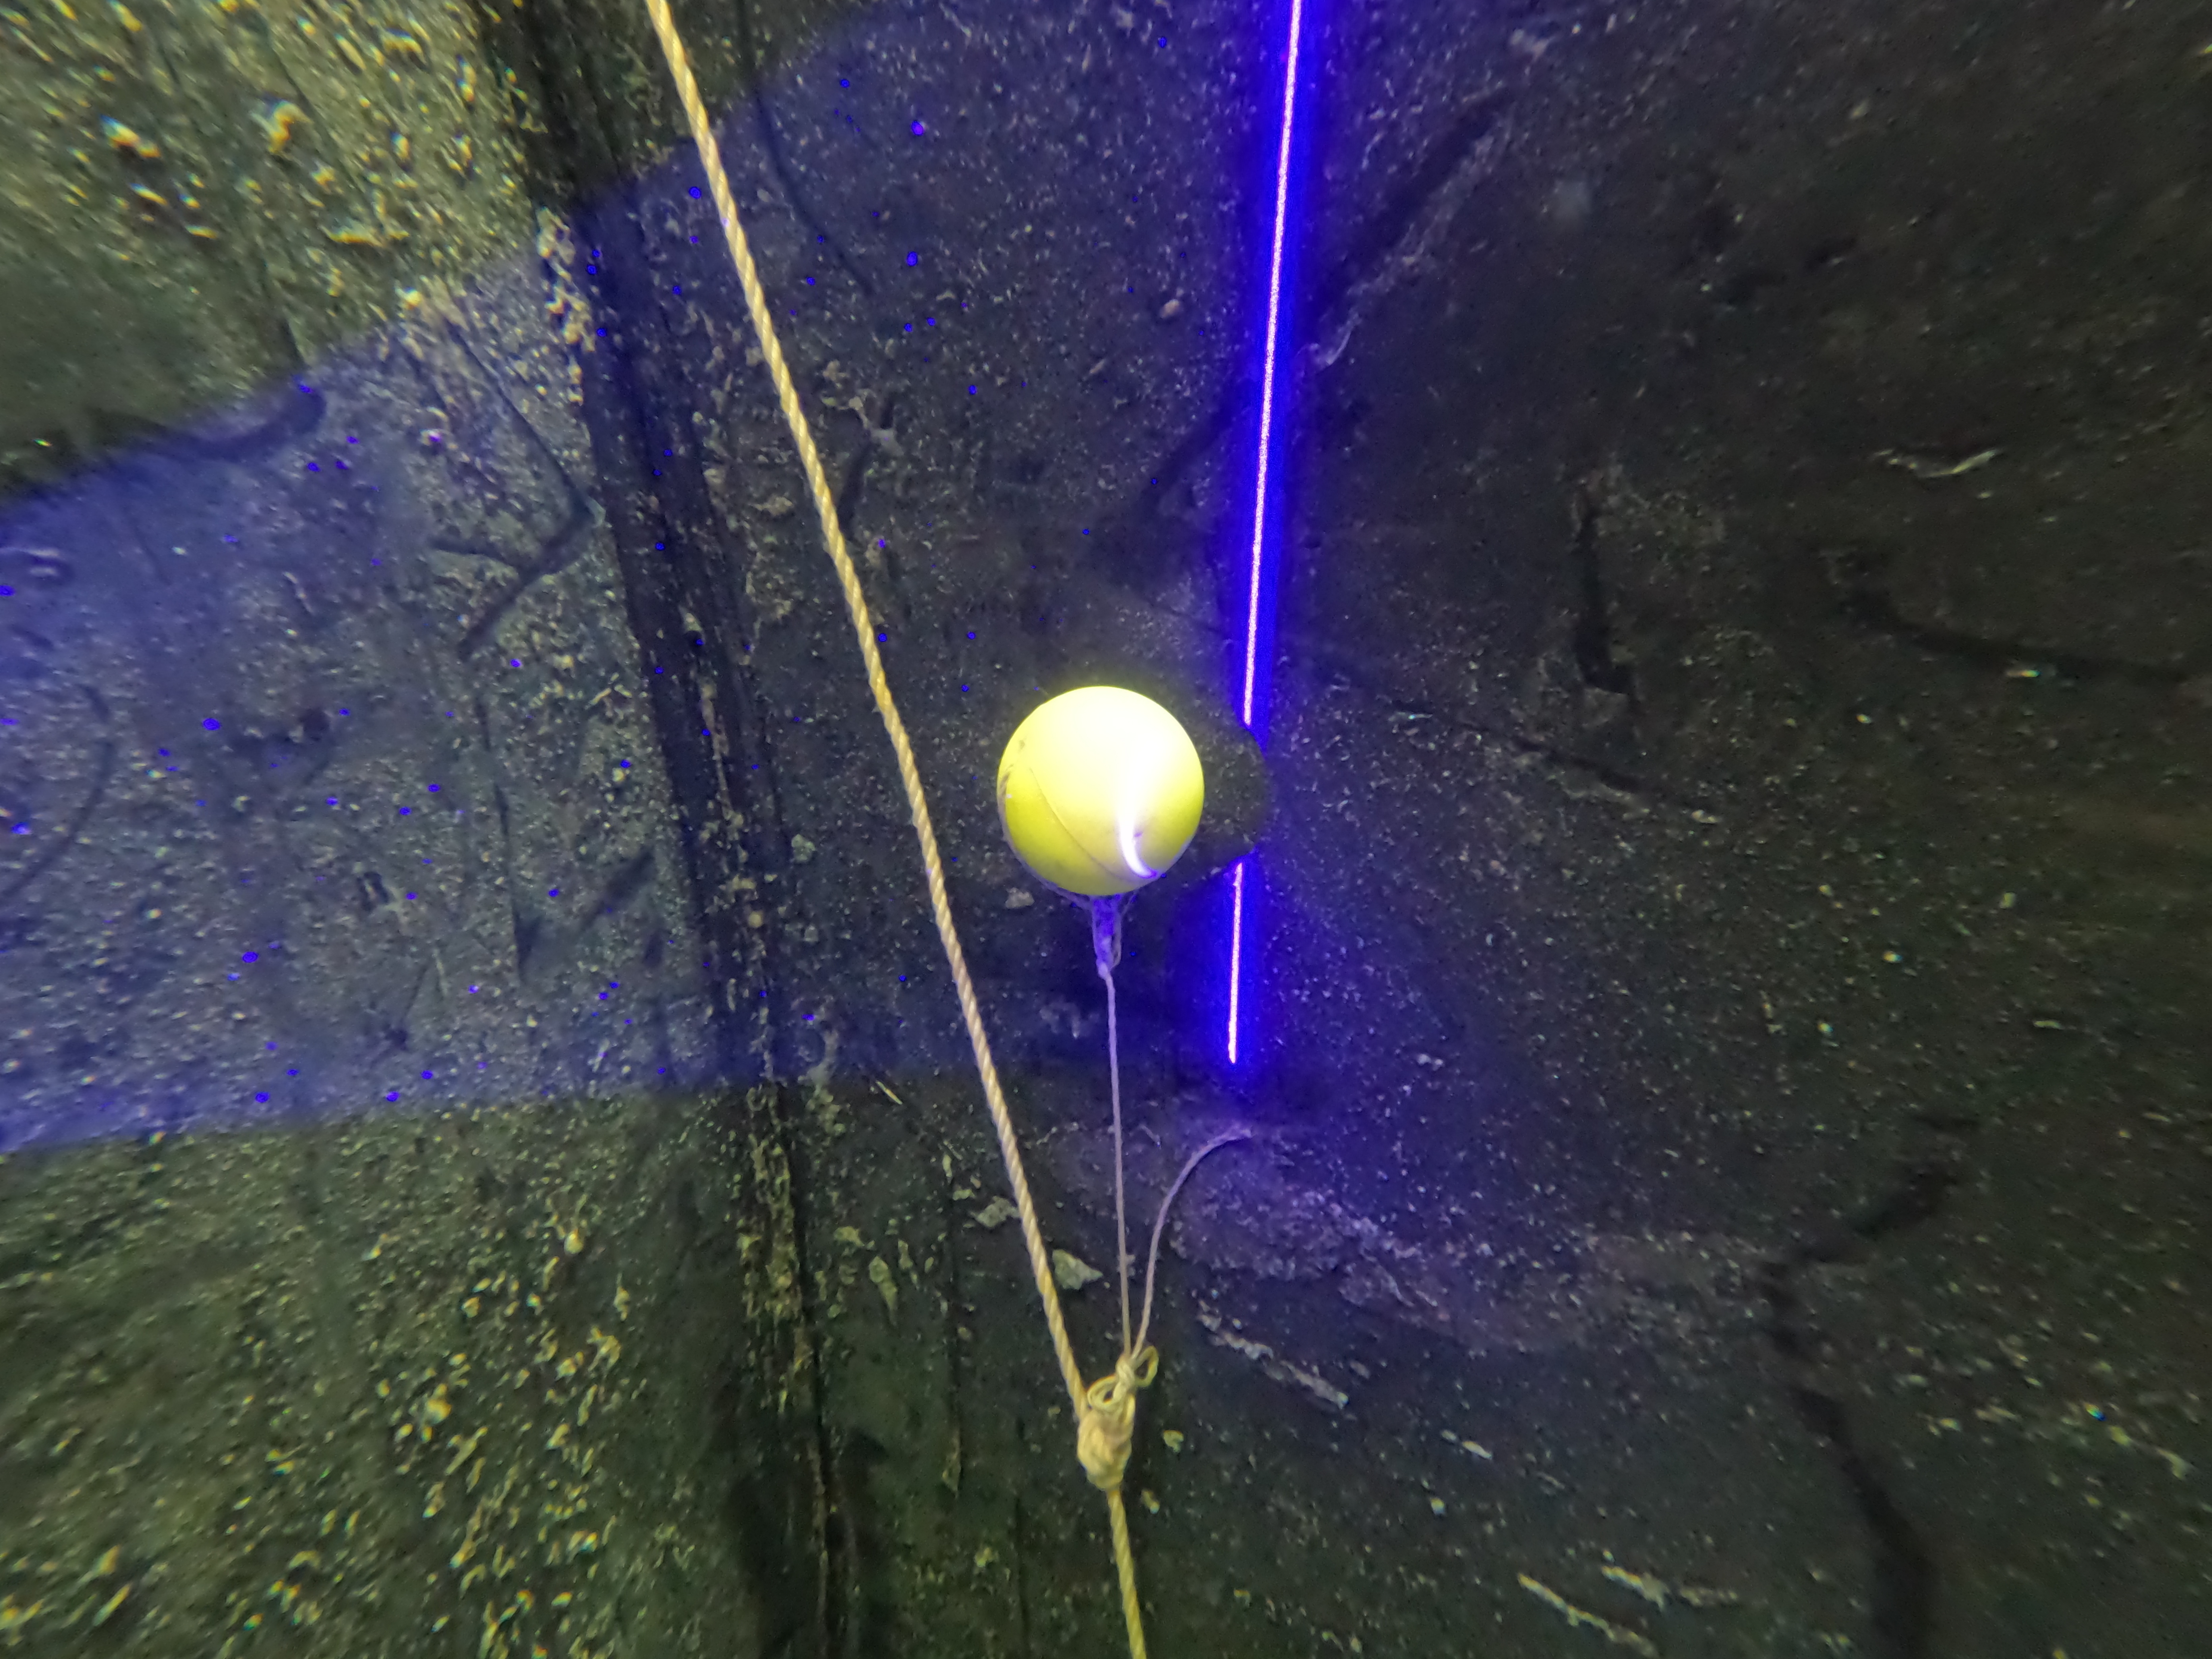

Supplement: Supplementary file 2876 [file G0030376.pdf › 2/G0030376.pdf]

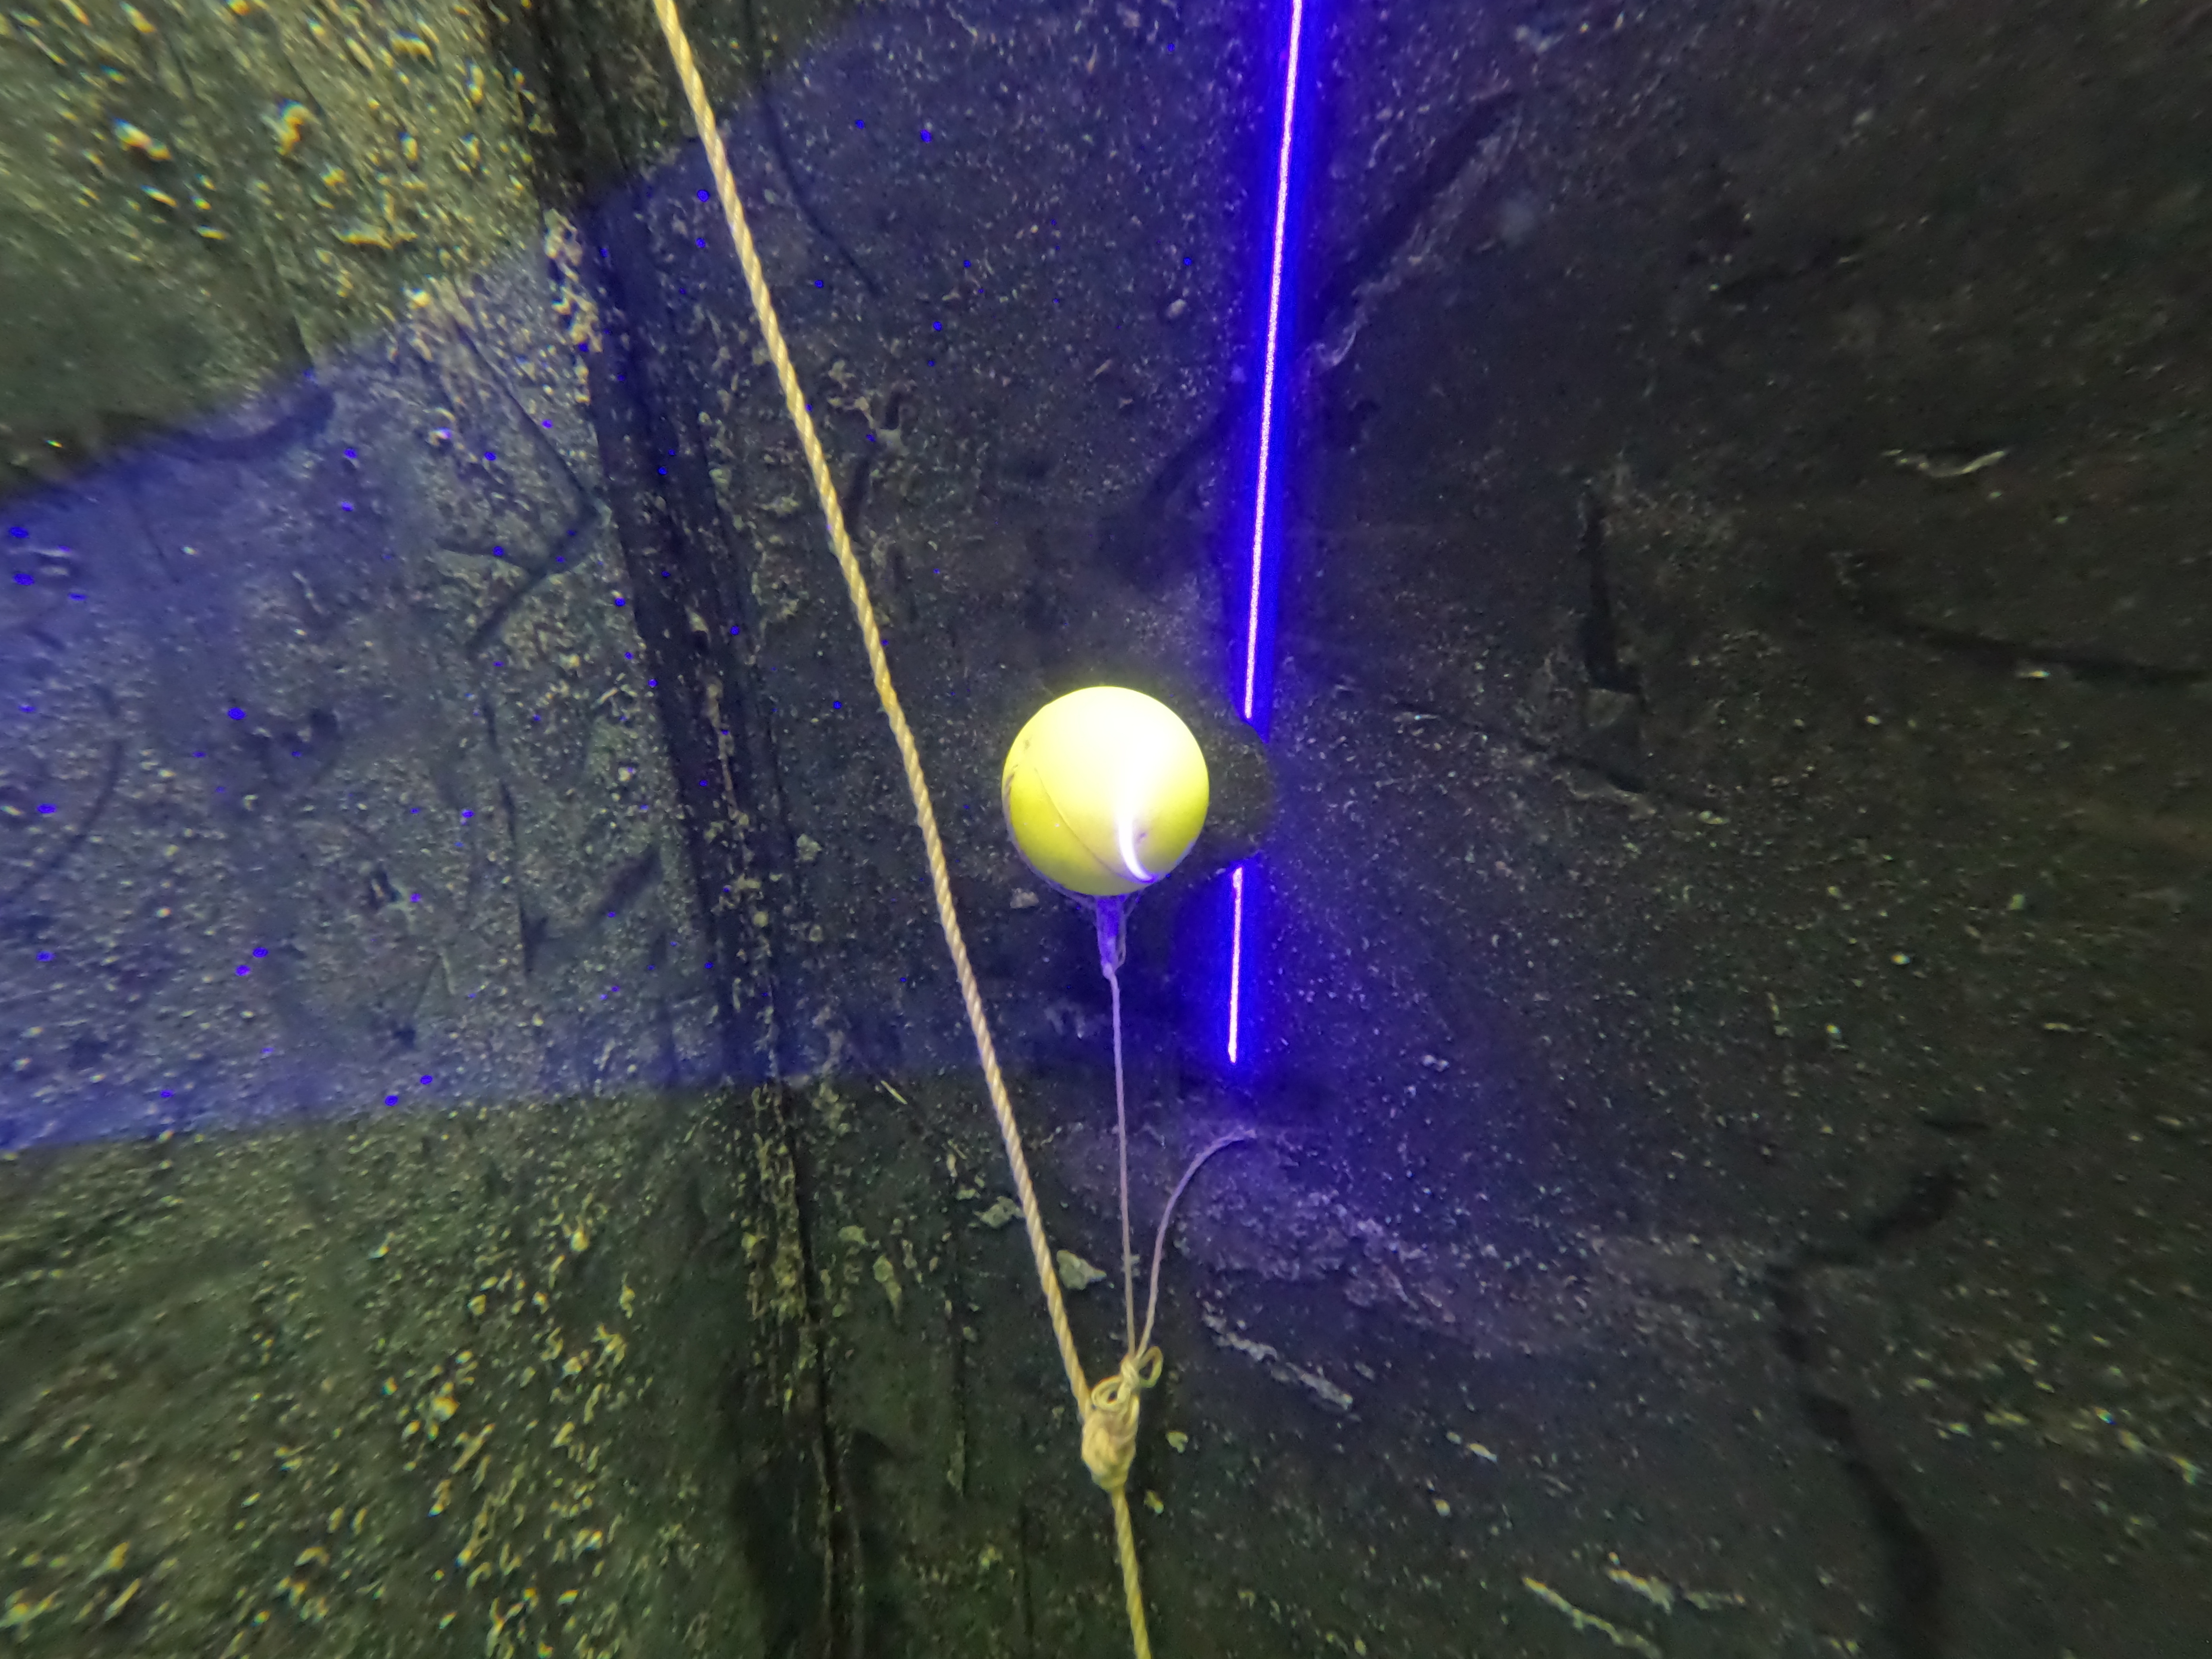

Supplement: Supplementary file 2877 [file G0030377.pdf › 2/G0030377.pdf]

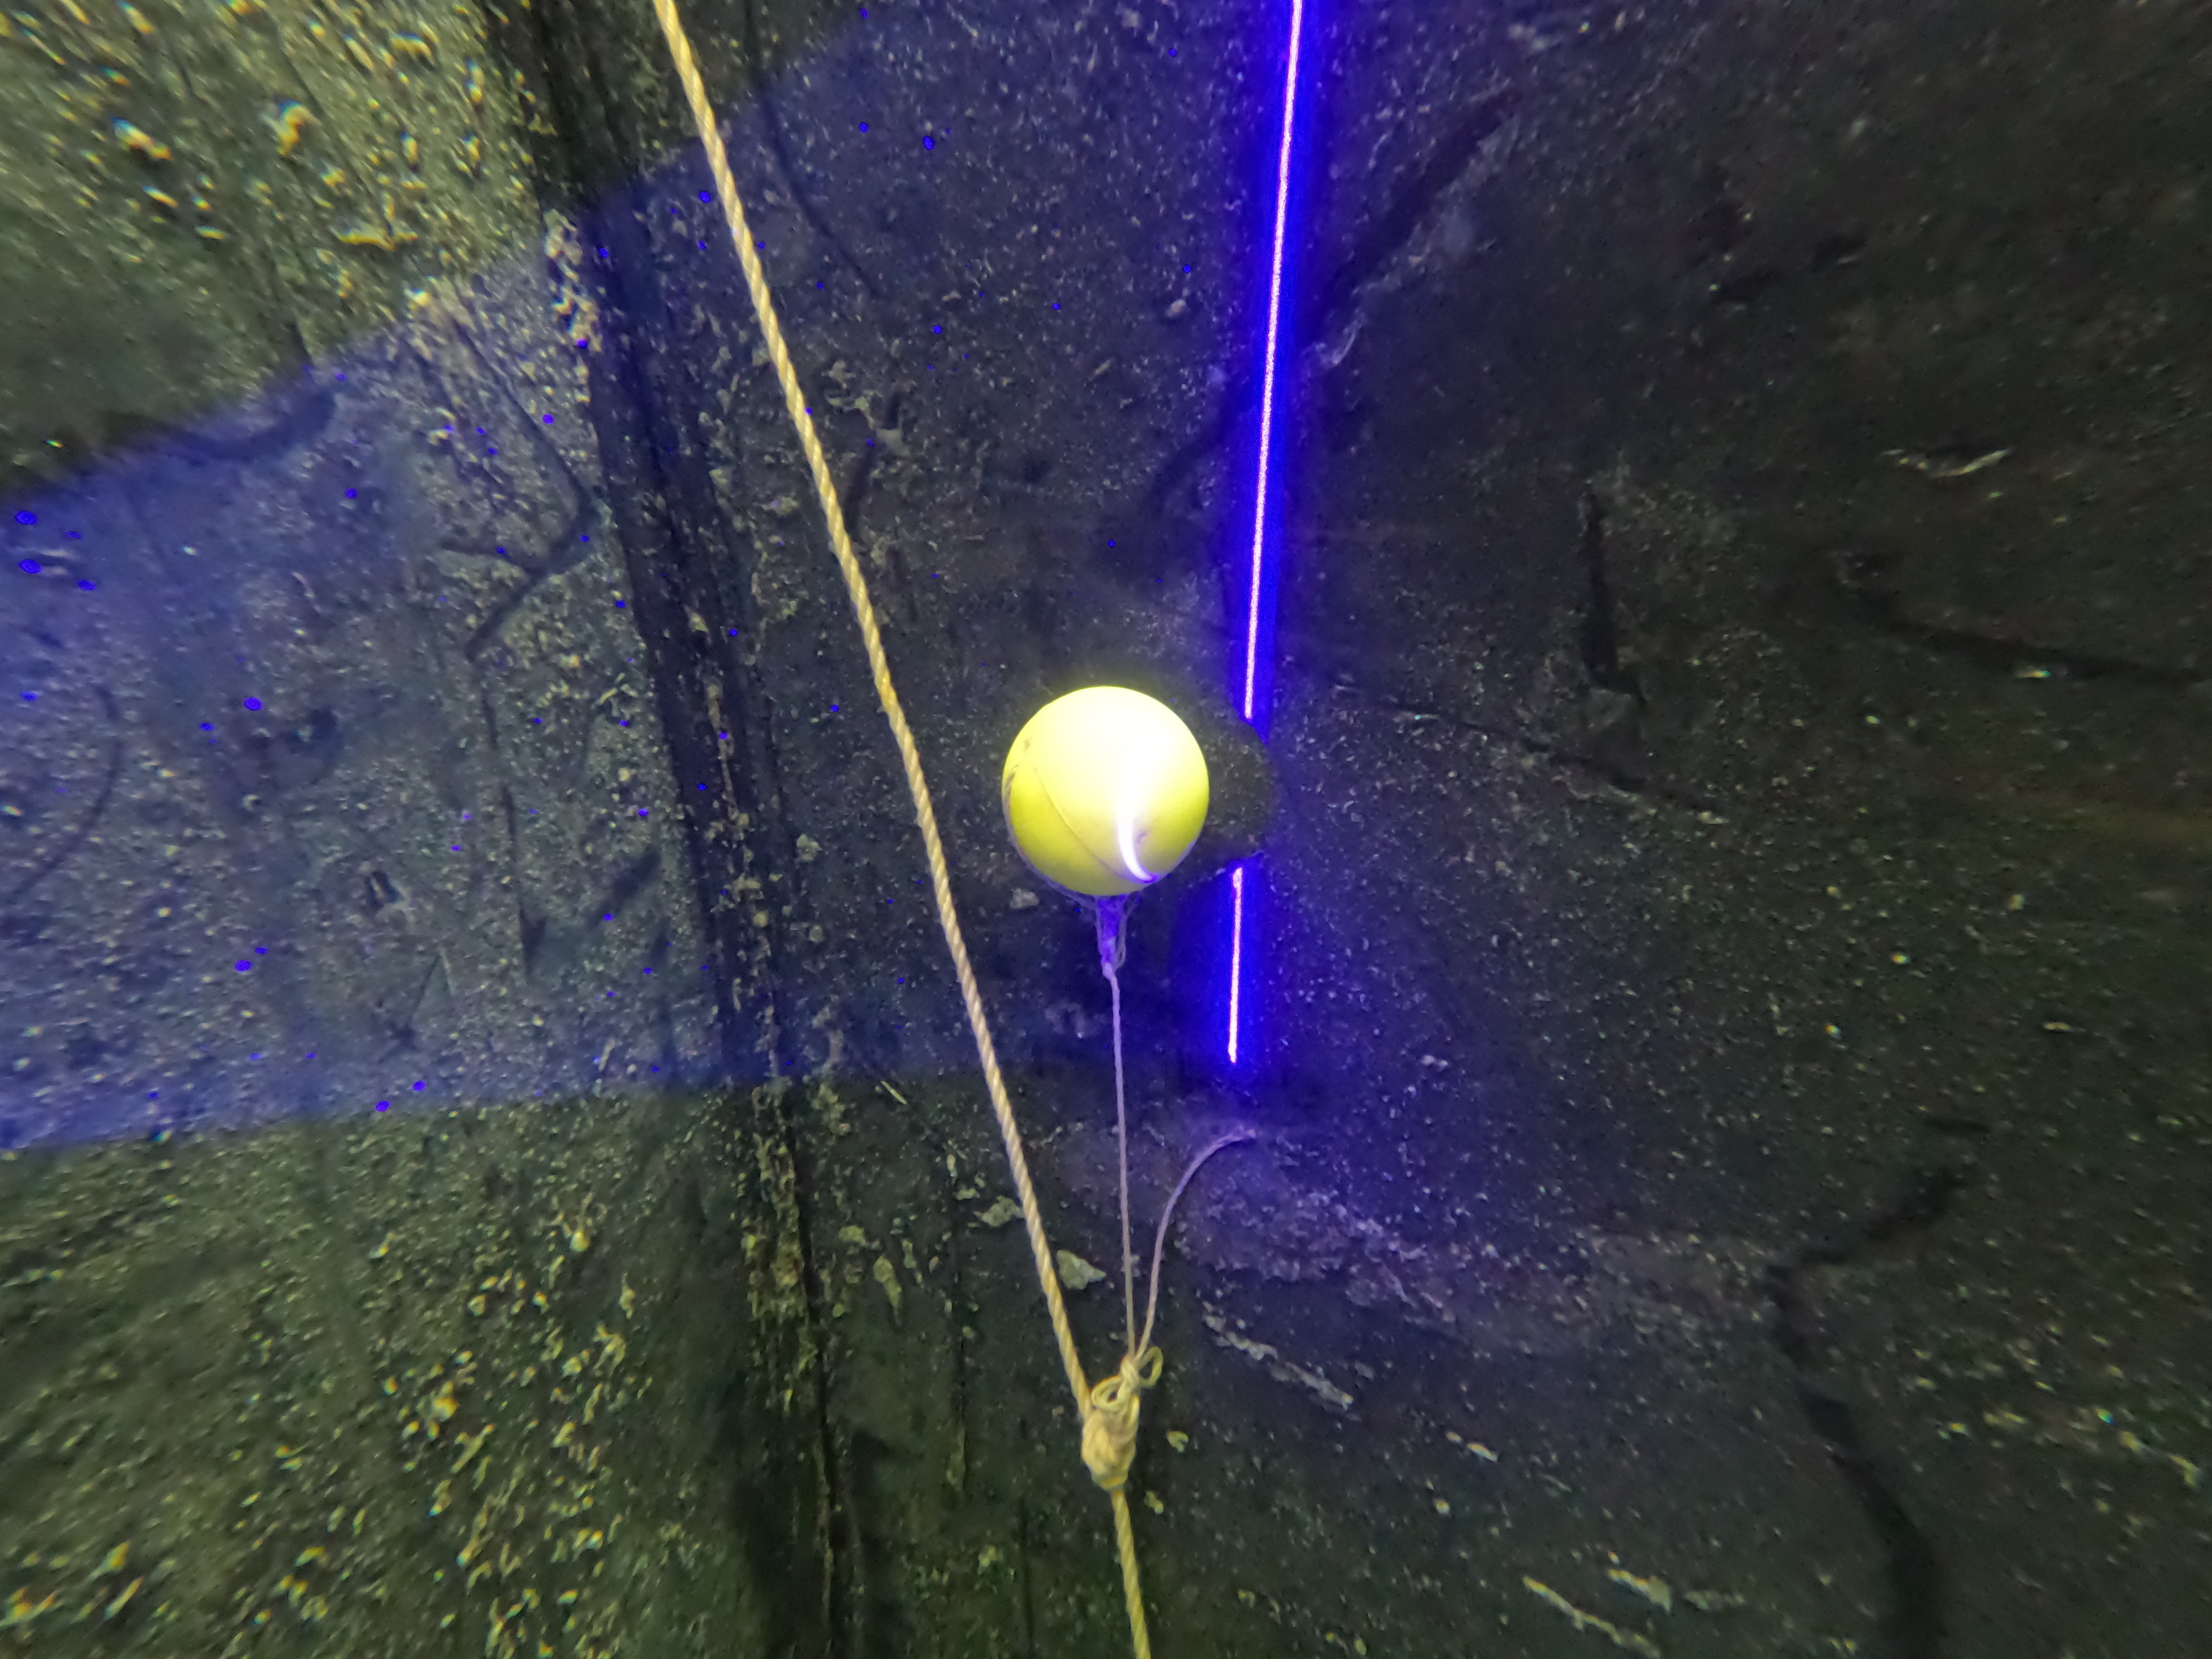

Supplement: Supplementary file 2878 [file G0030378.pdf › 2/G0030378.pdf]

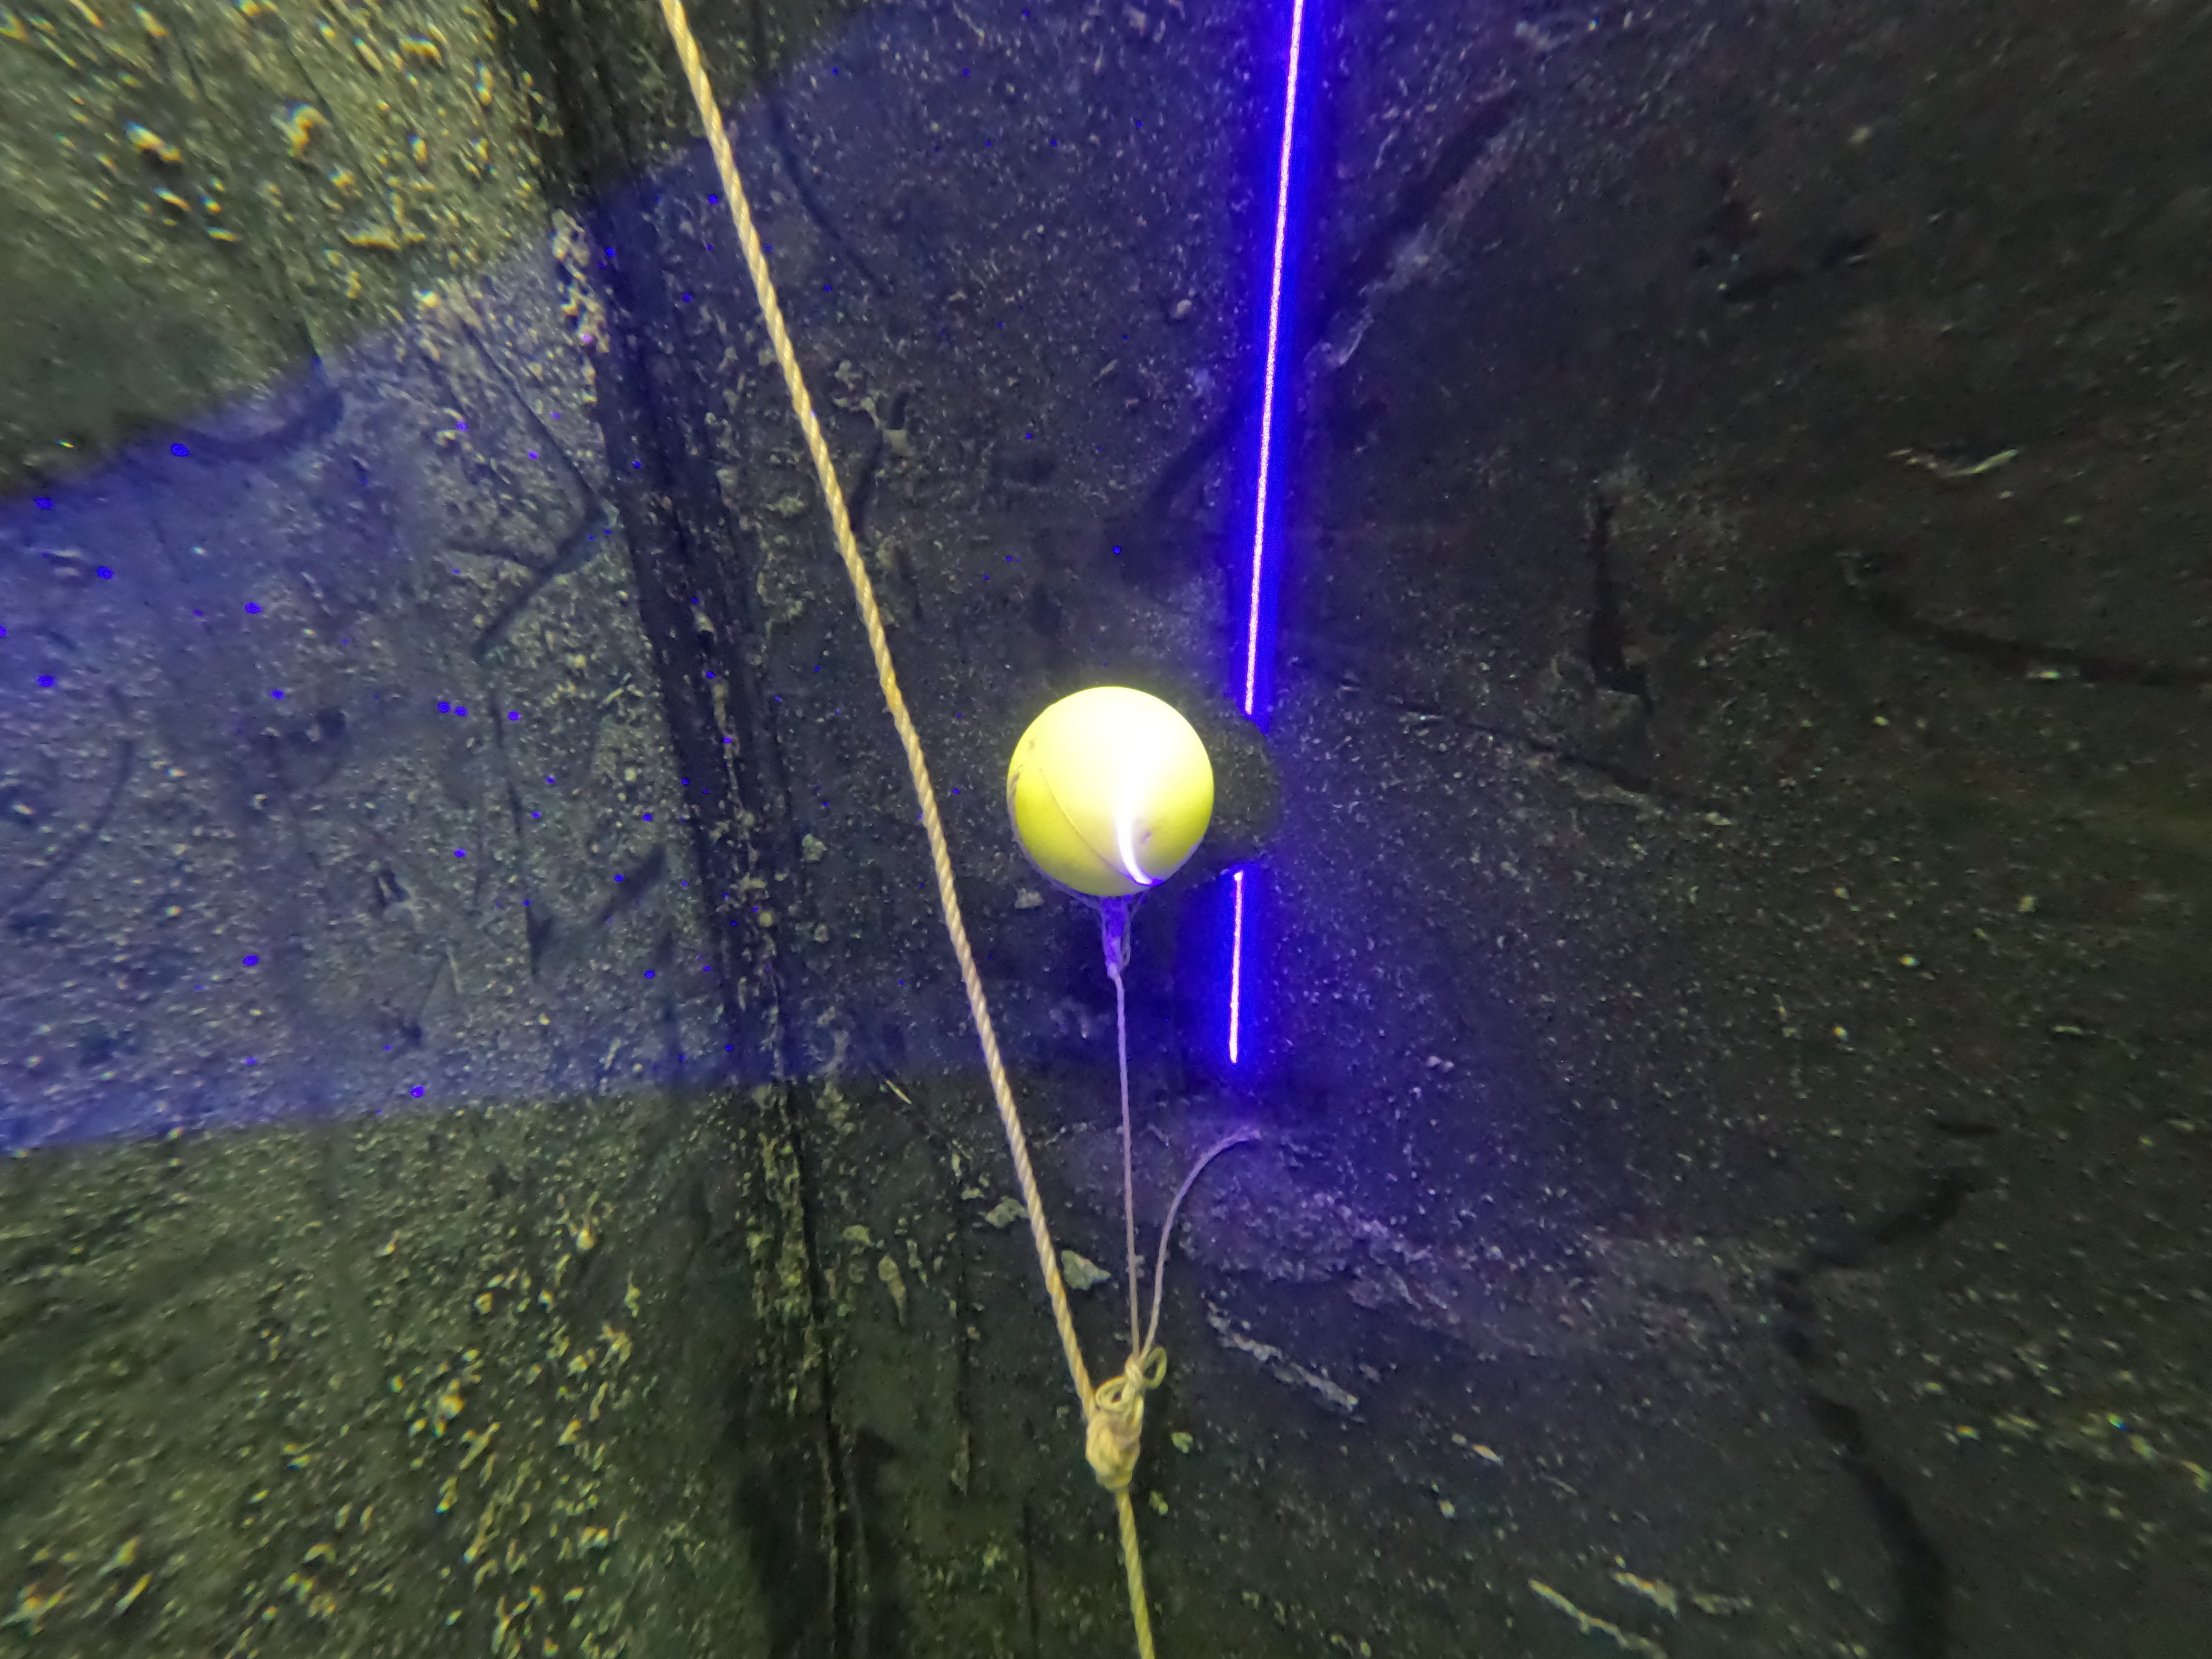

Supplement: Supplementary file 2879 [file G0030379.pdf › 2/G0030379.pdf]

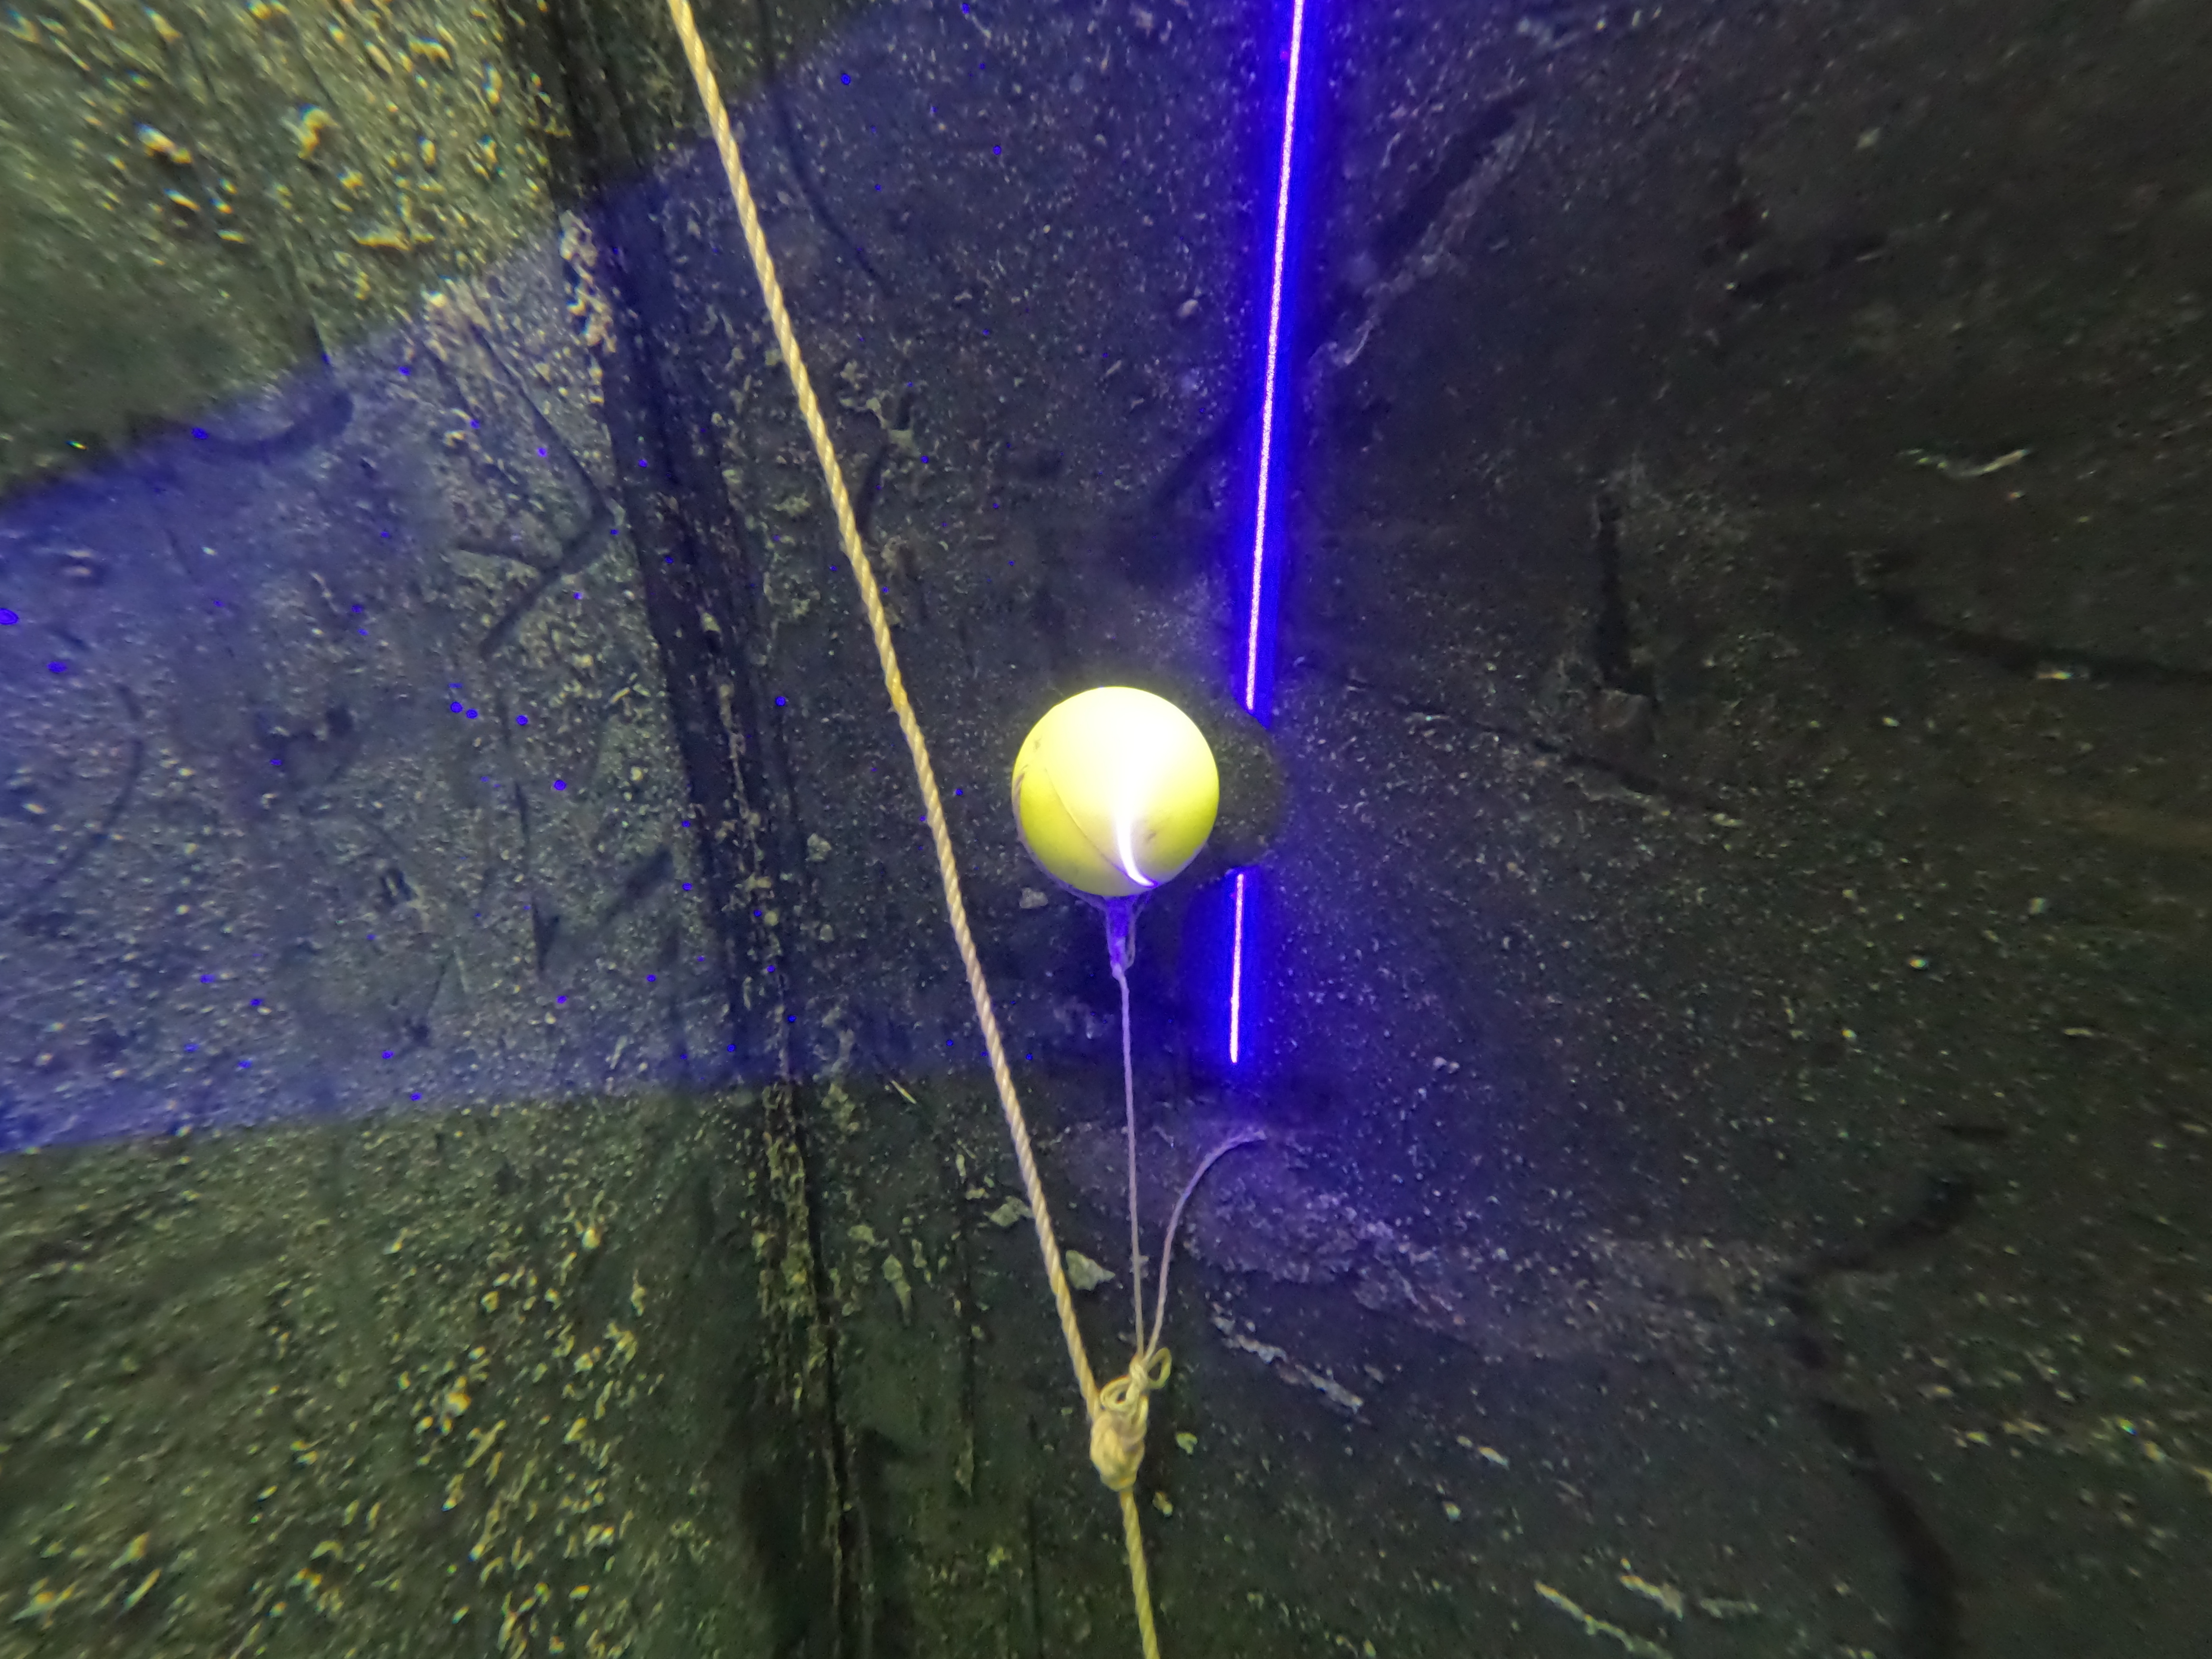

Supplement: Supplementary file 2880 [file G0030380.pdf › 2/G0030380.pdf]

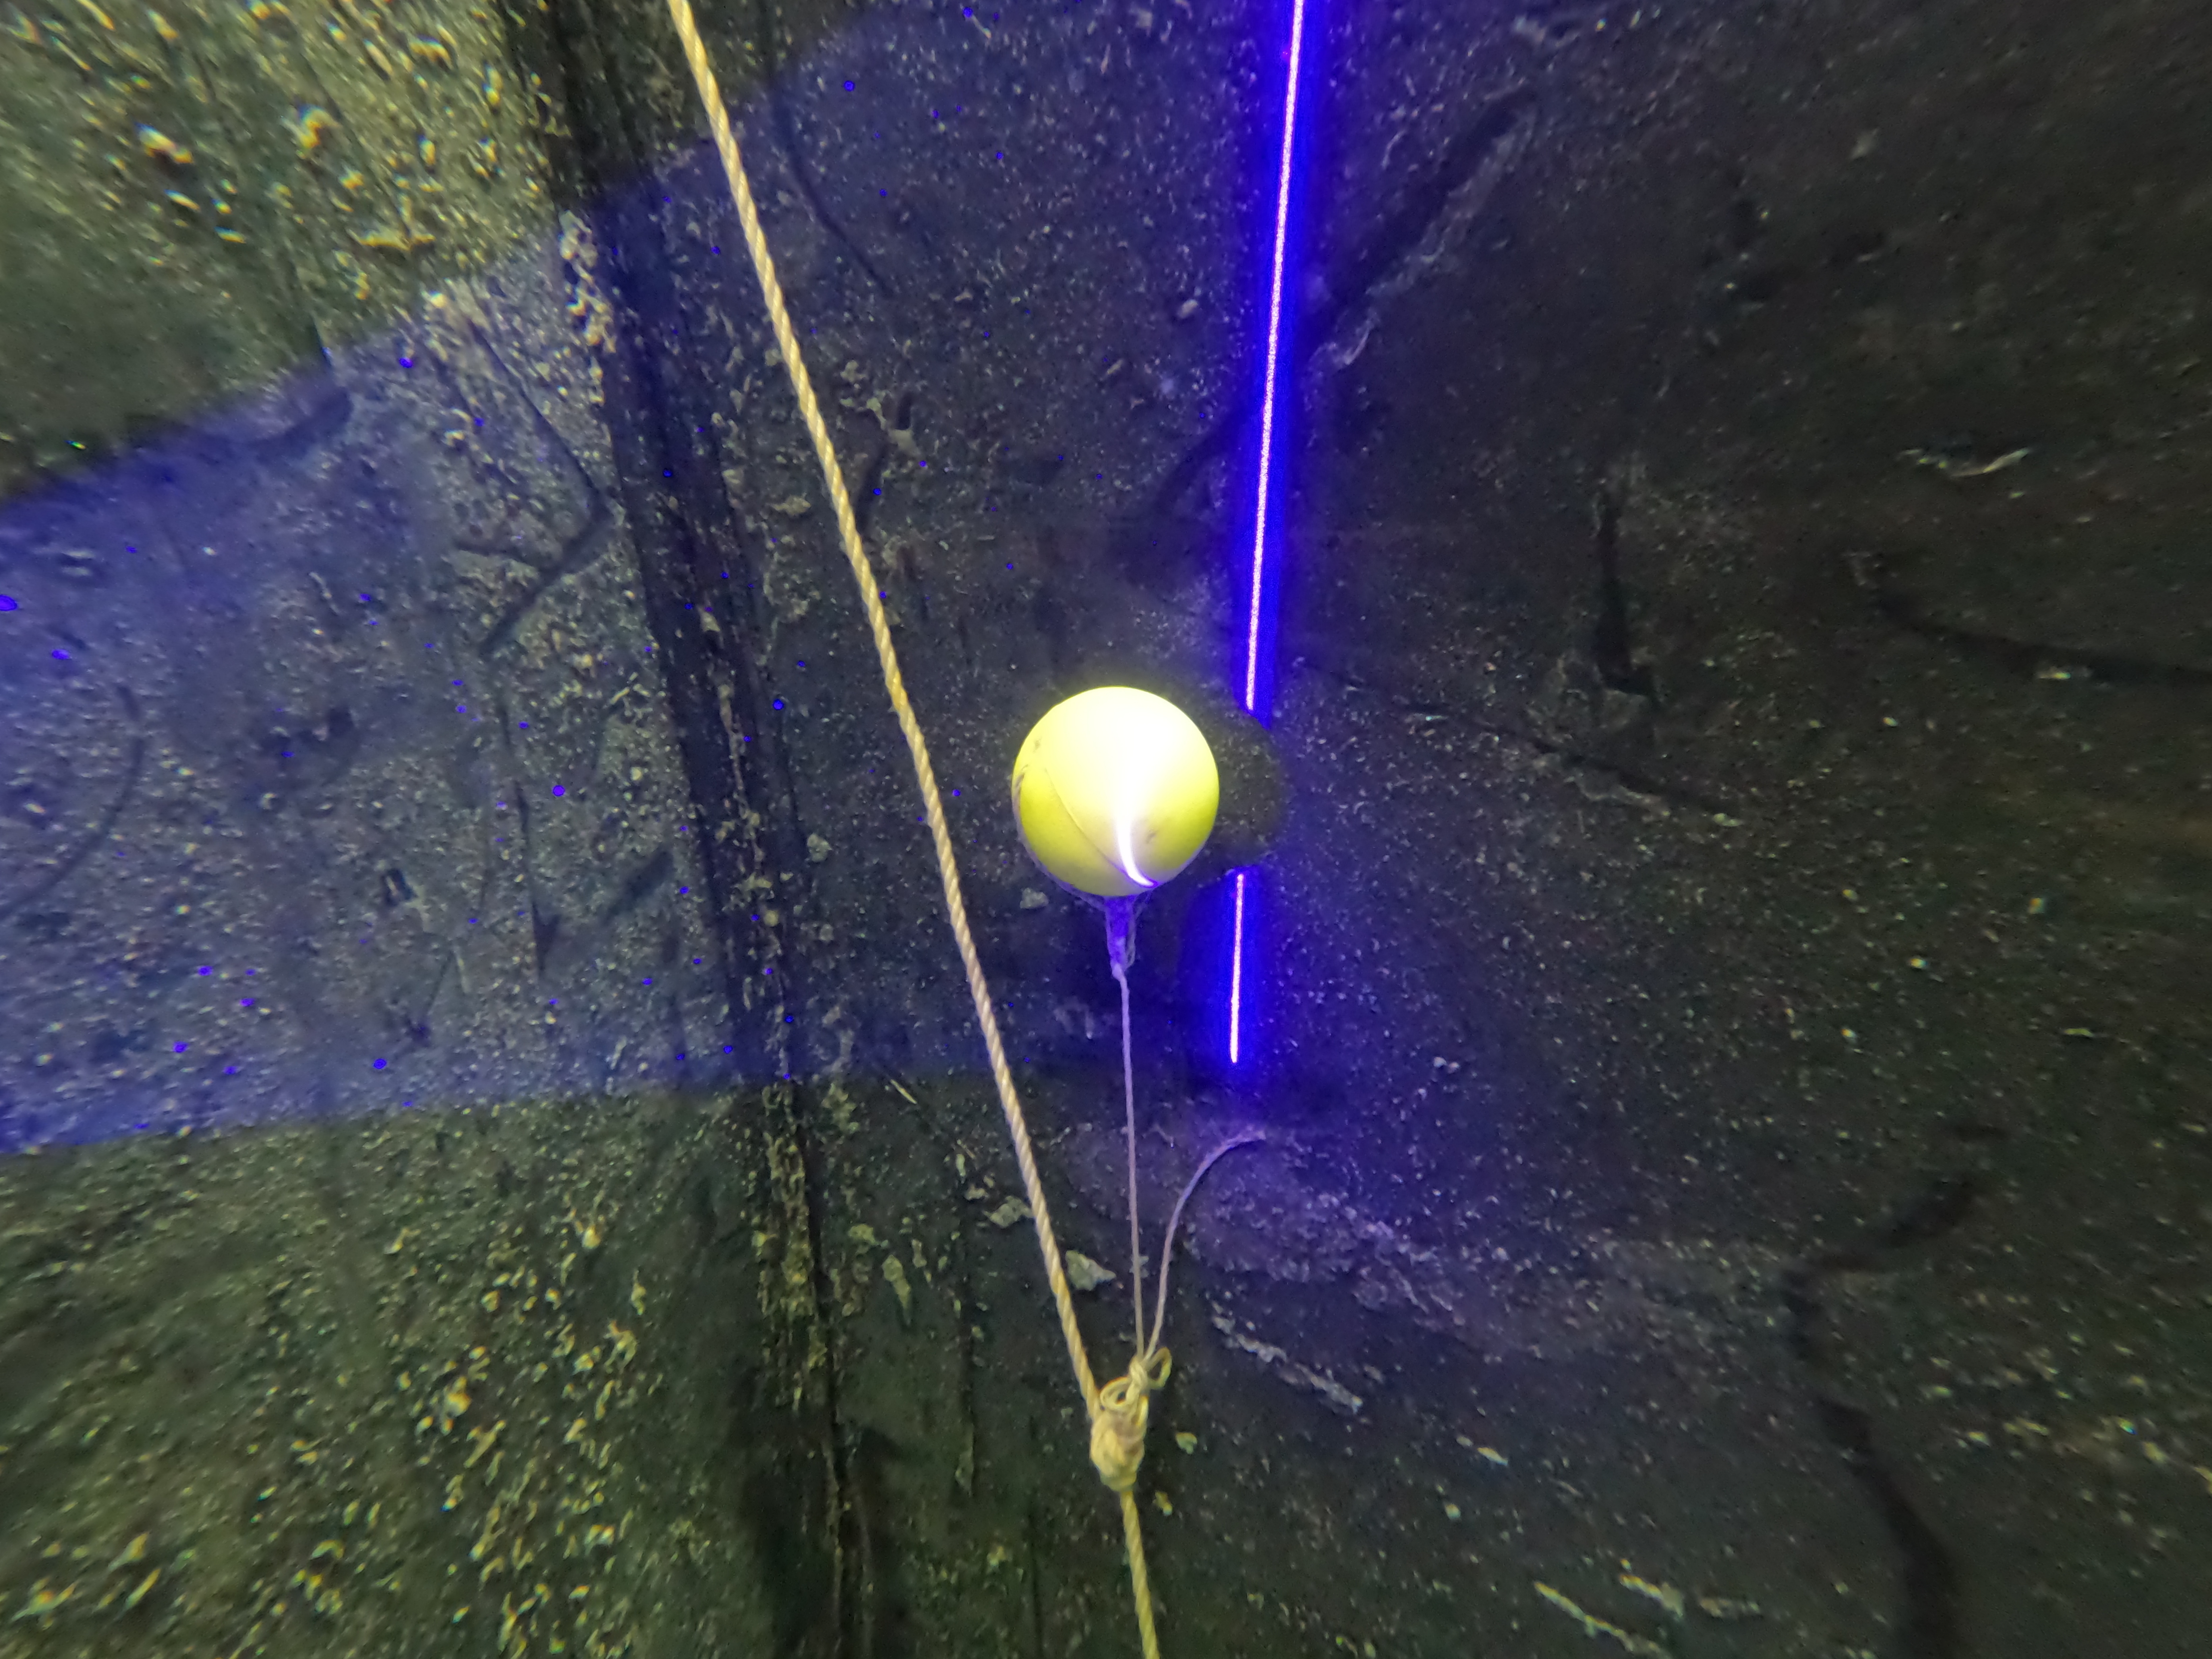

Supplement: Supplementary file 2881 [file G0030381.pdf › 2/G0030381.pdf]

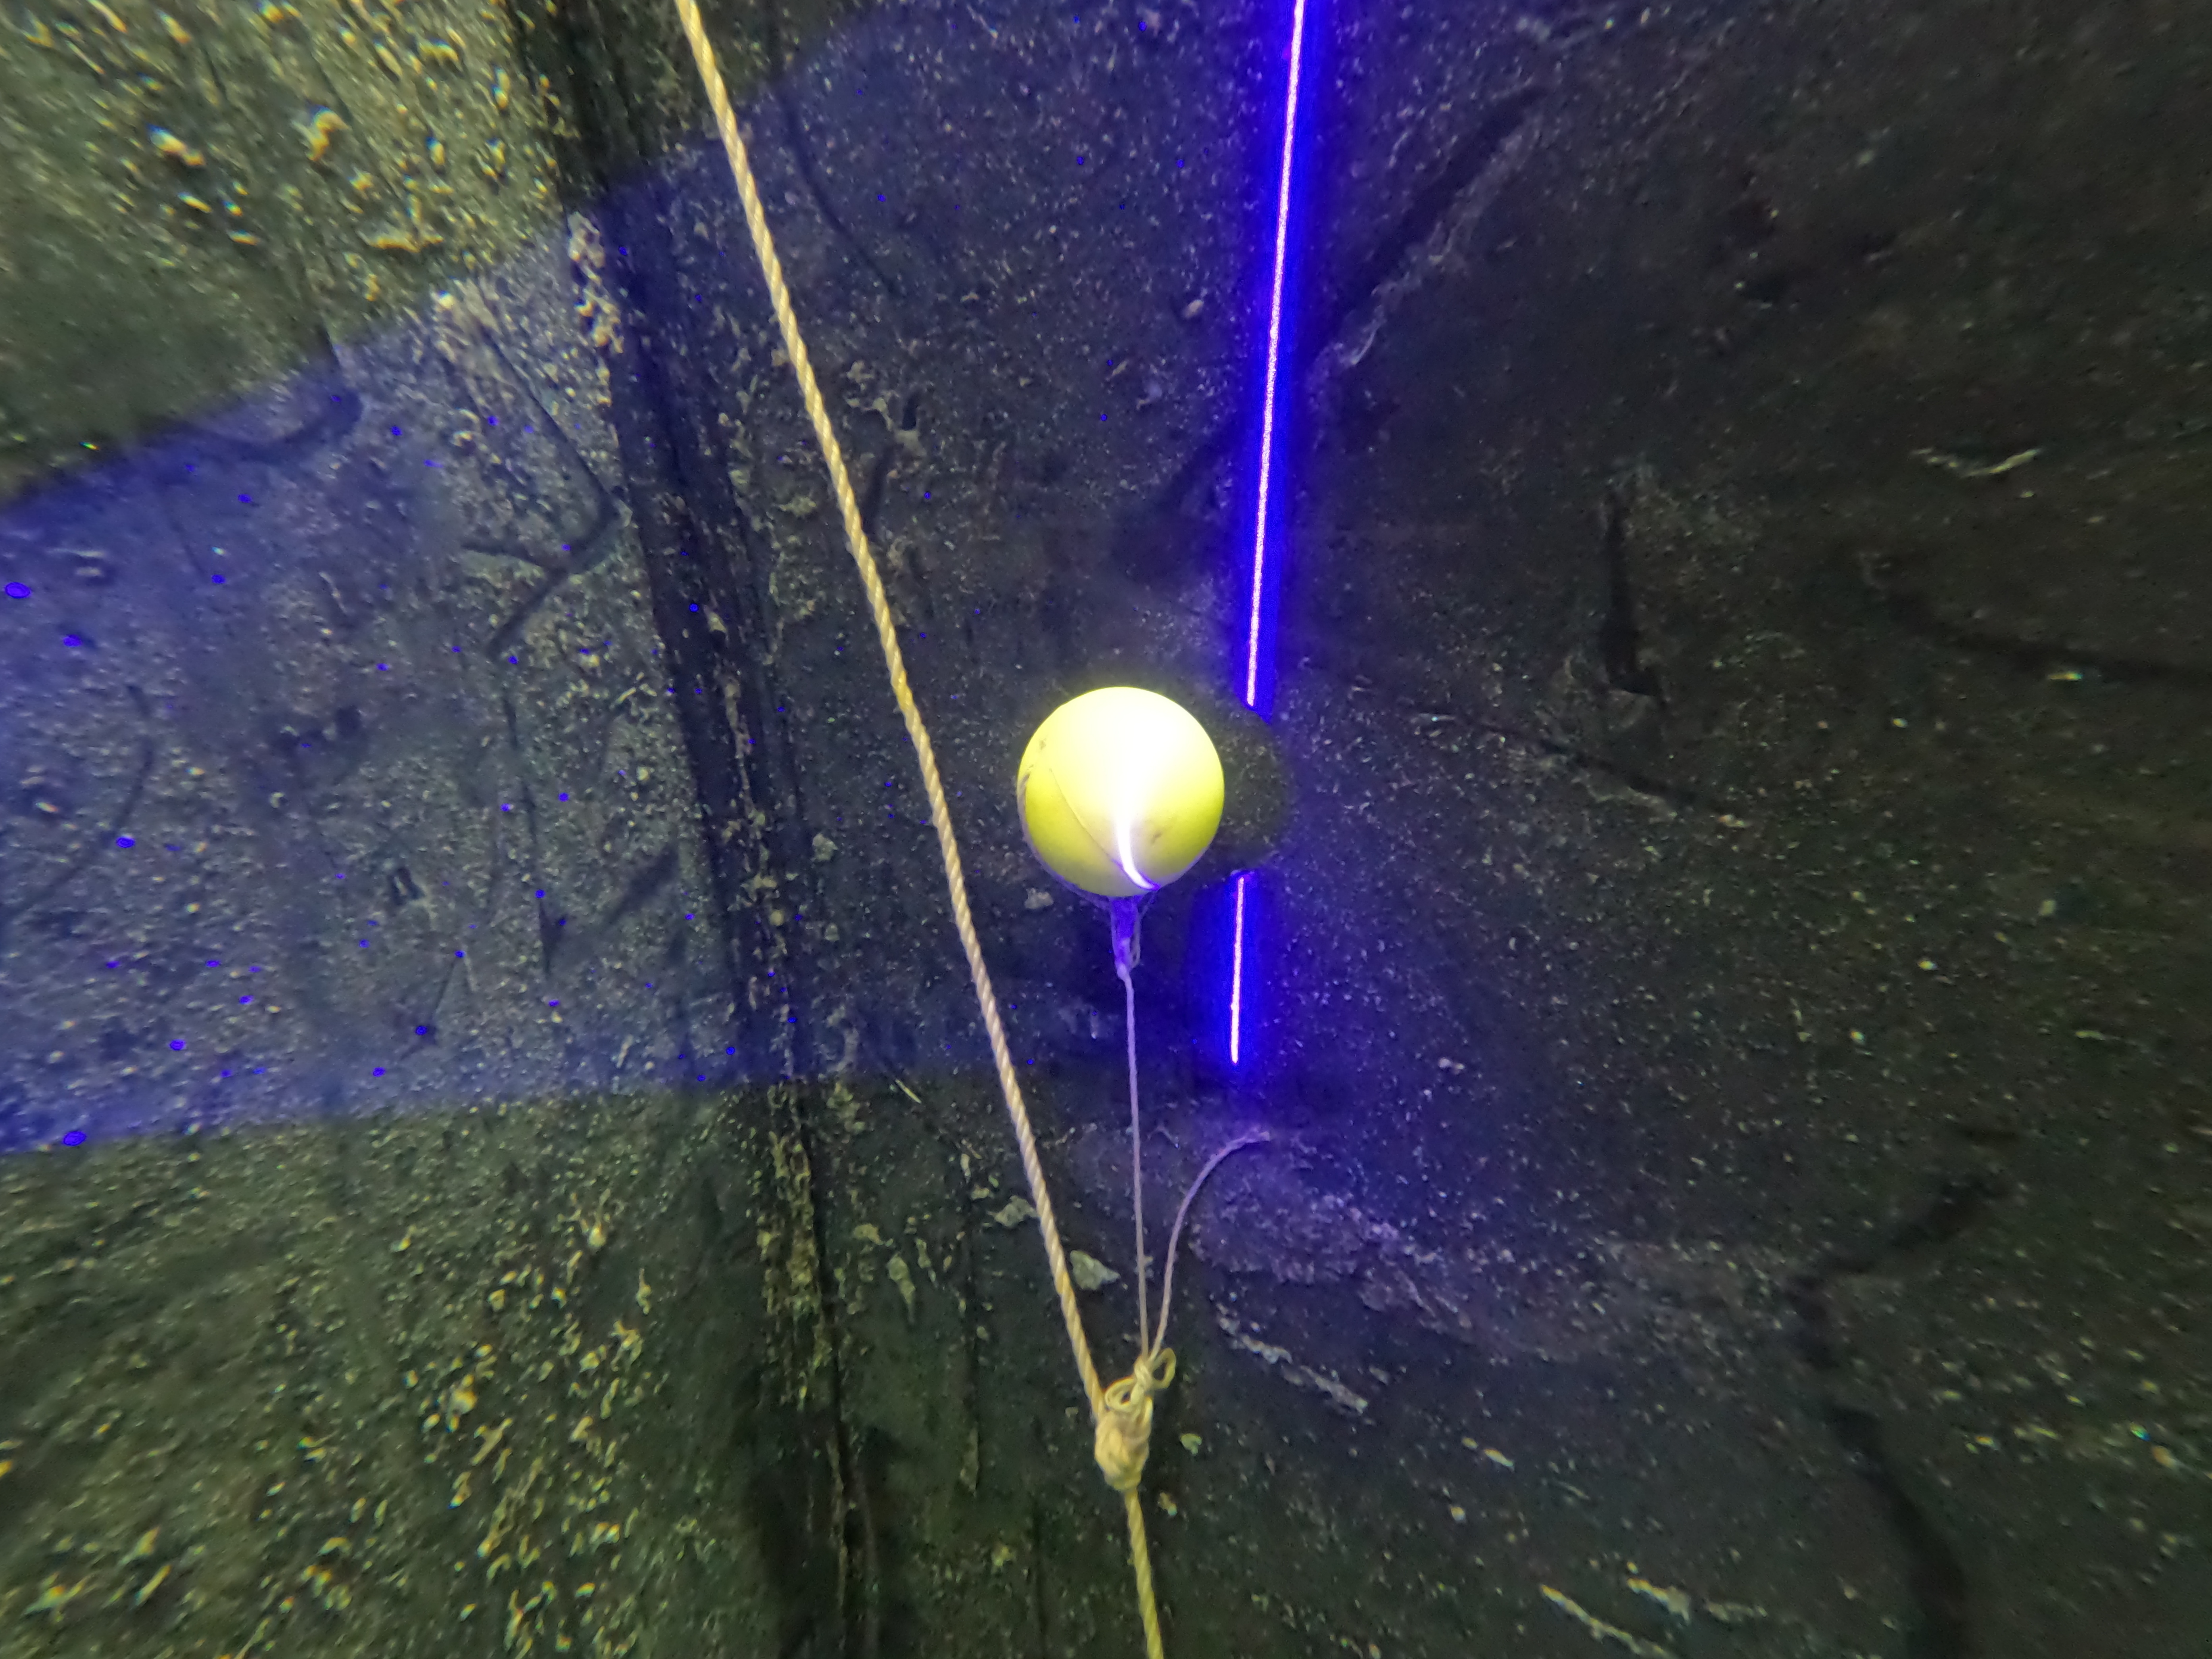

Supplement: Supplementary file 2882 [file G0030382.pdf › 2/G0030382.pdf]

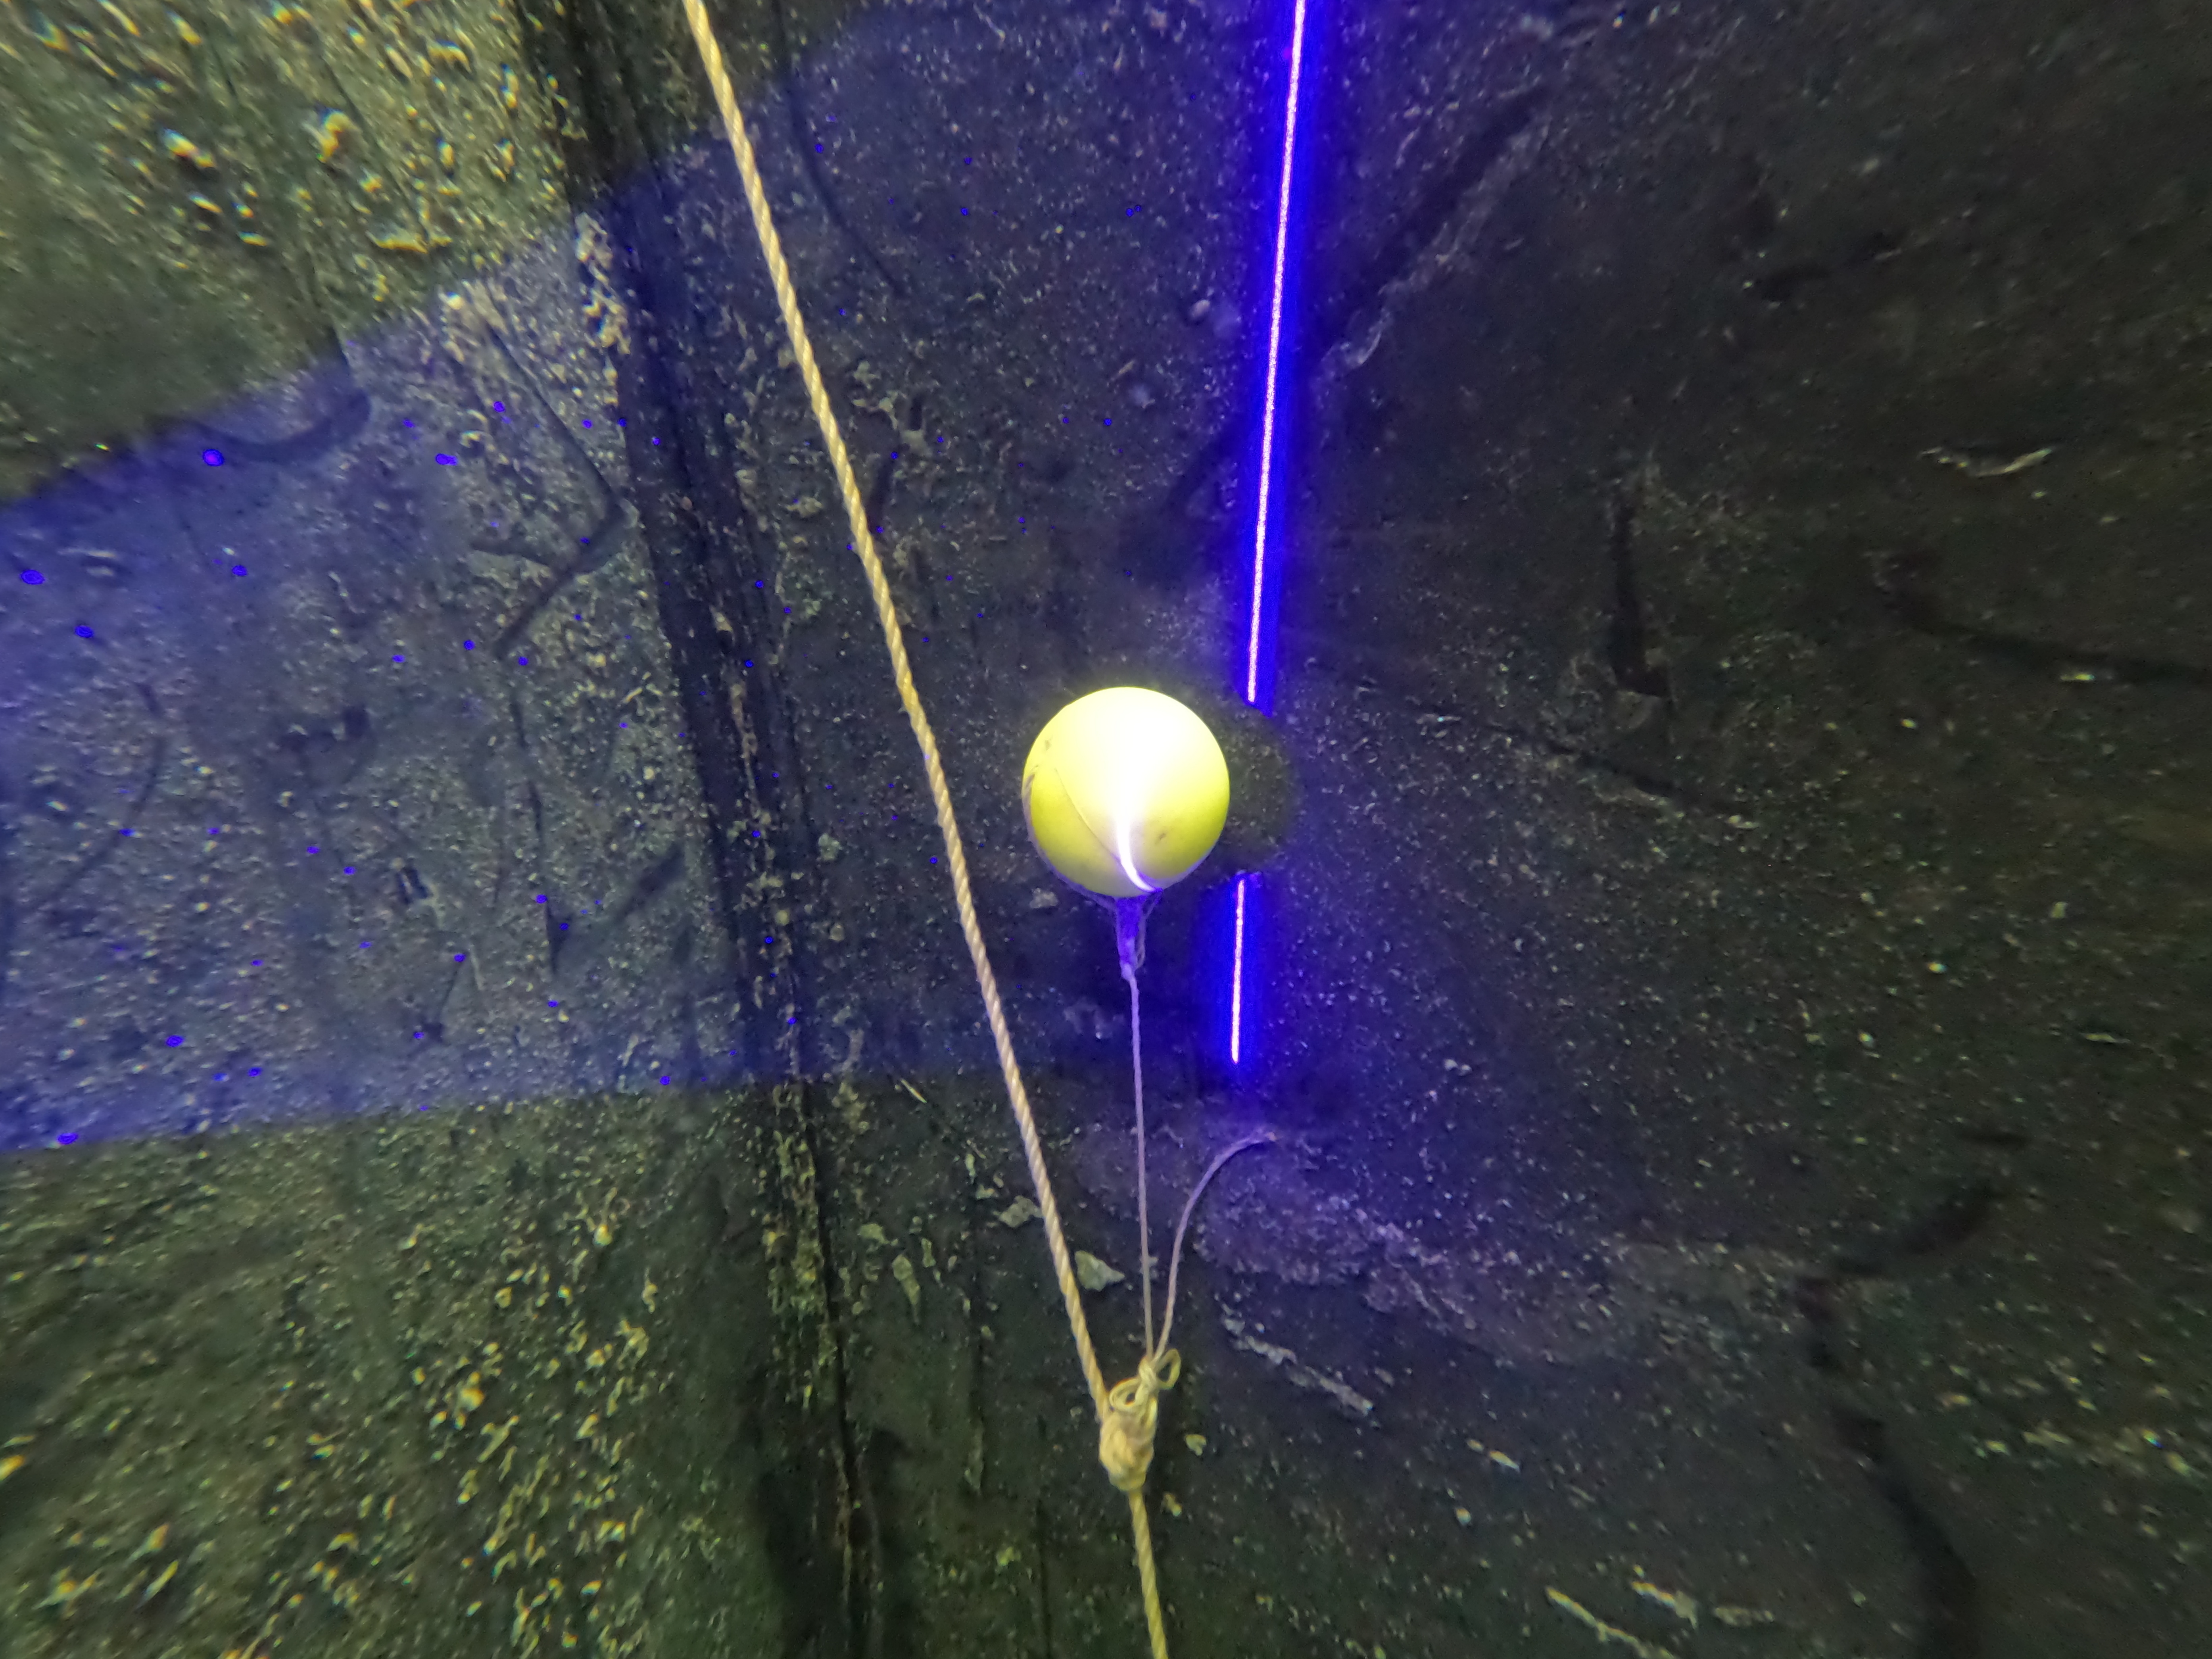

Supplement: Supplementary file 2883 [file G0030383.pdf › 2/G0030383.pdf]

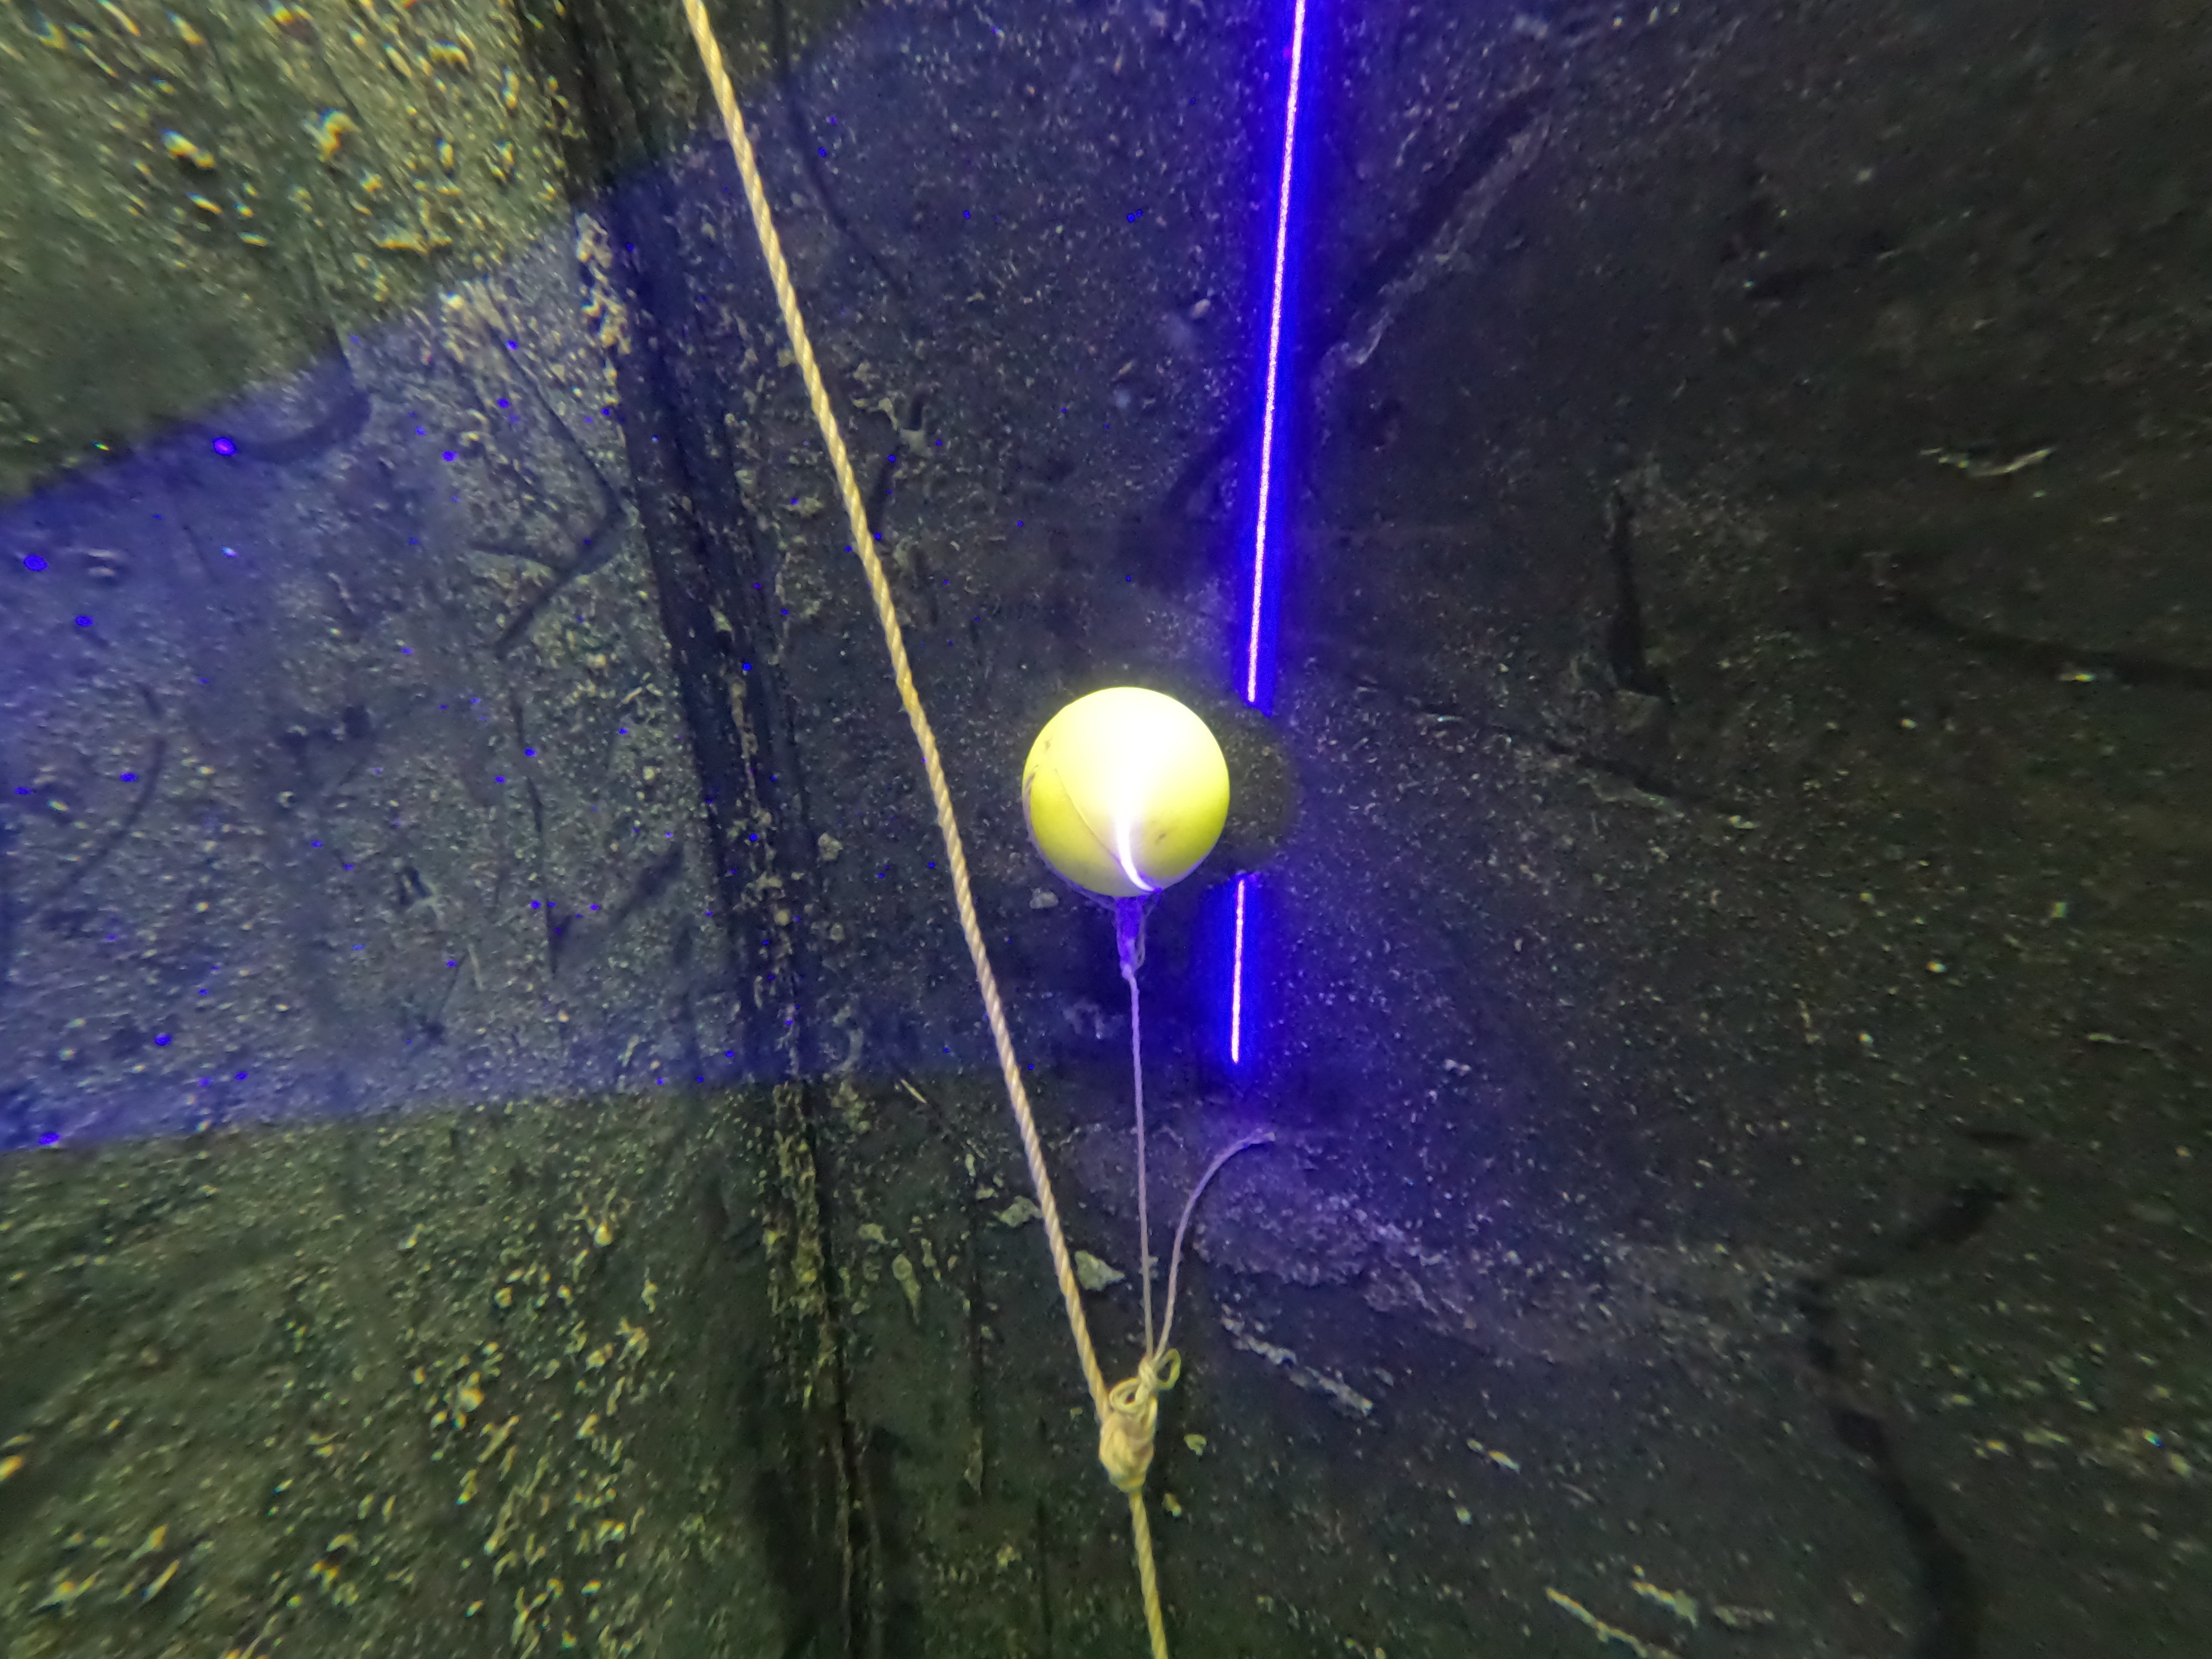

Supplement: Supplementary file 2884 [file G0030384.pdf › 2/G0030384.pdf]

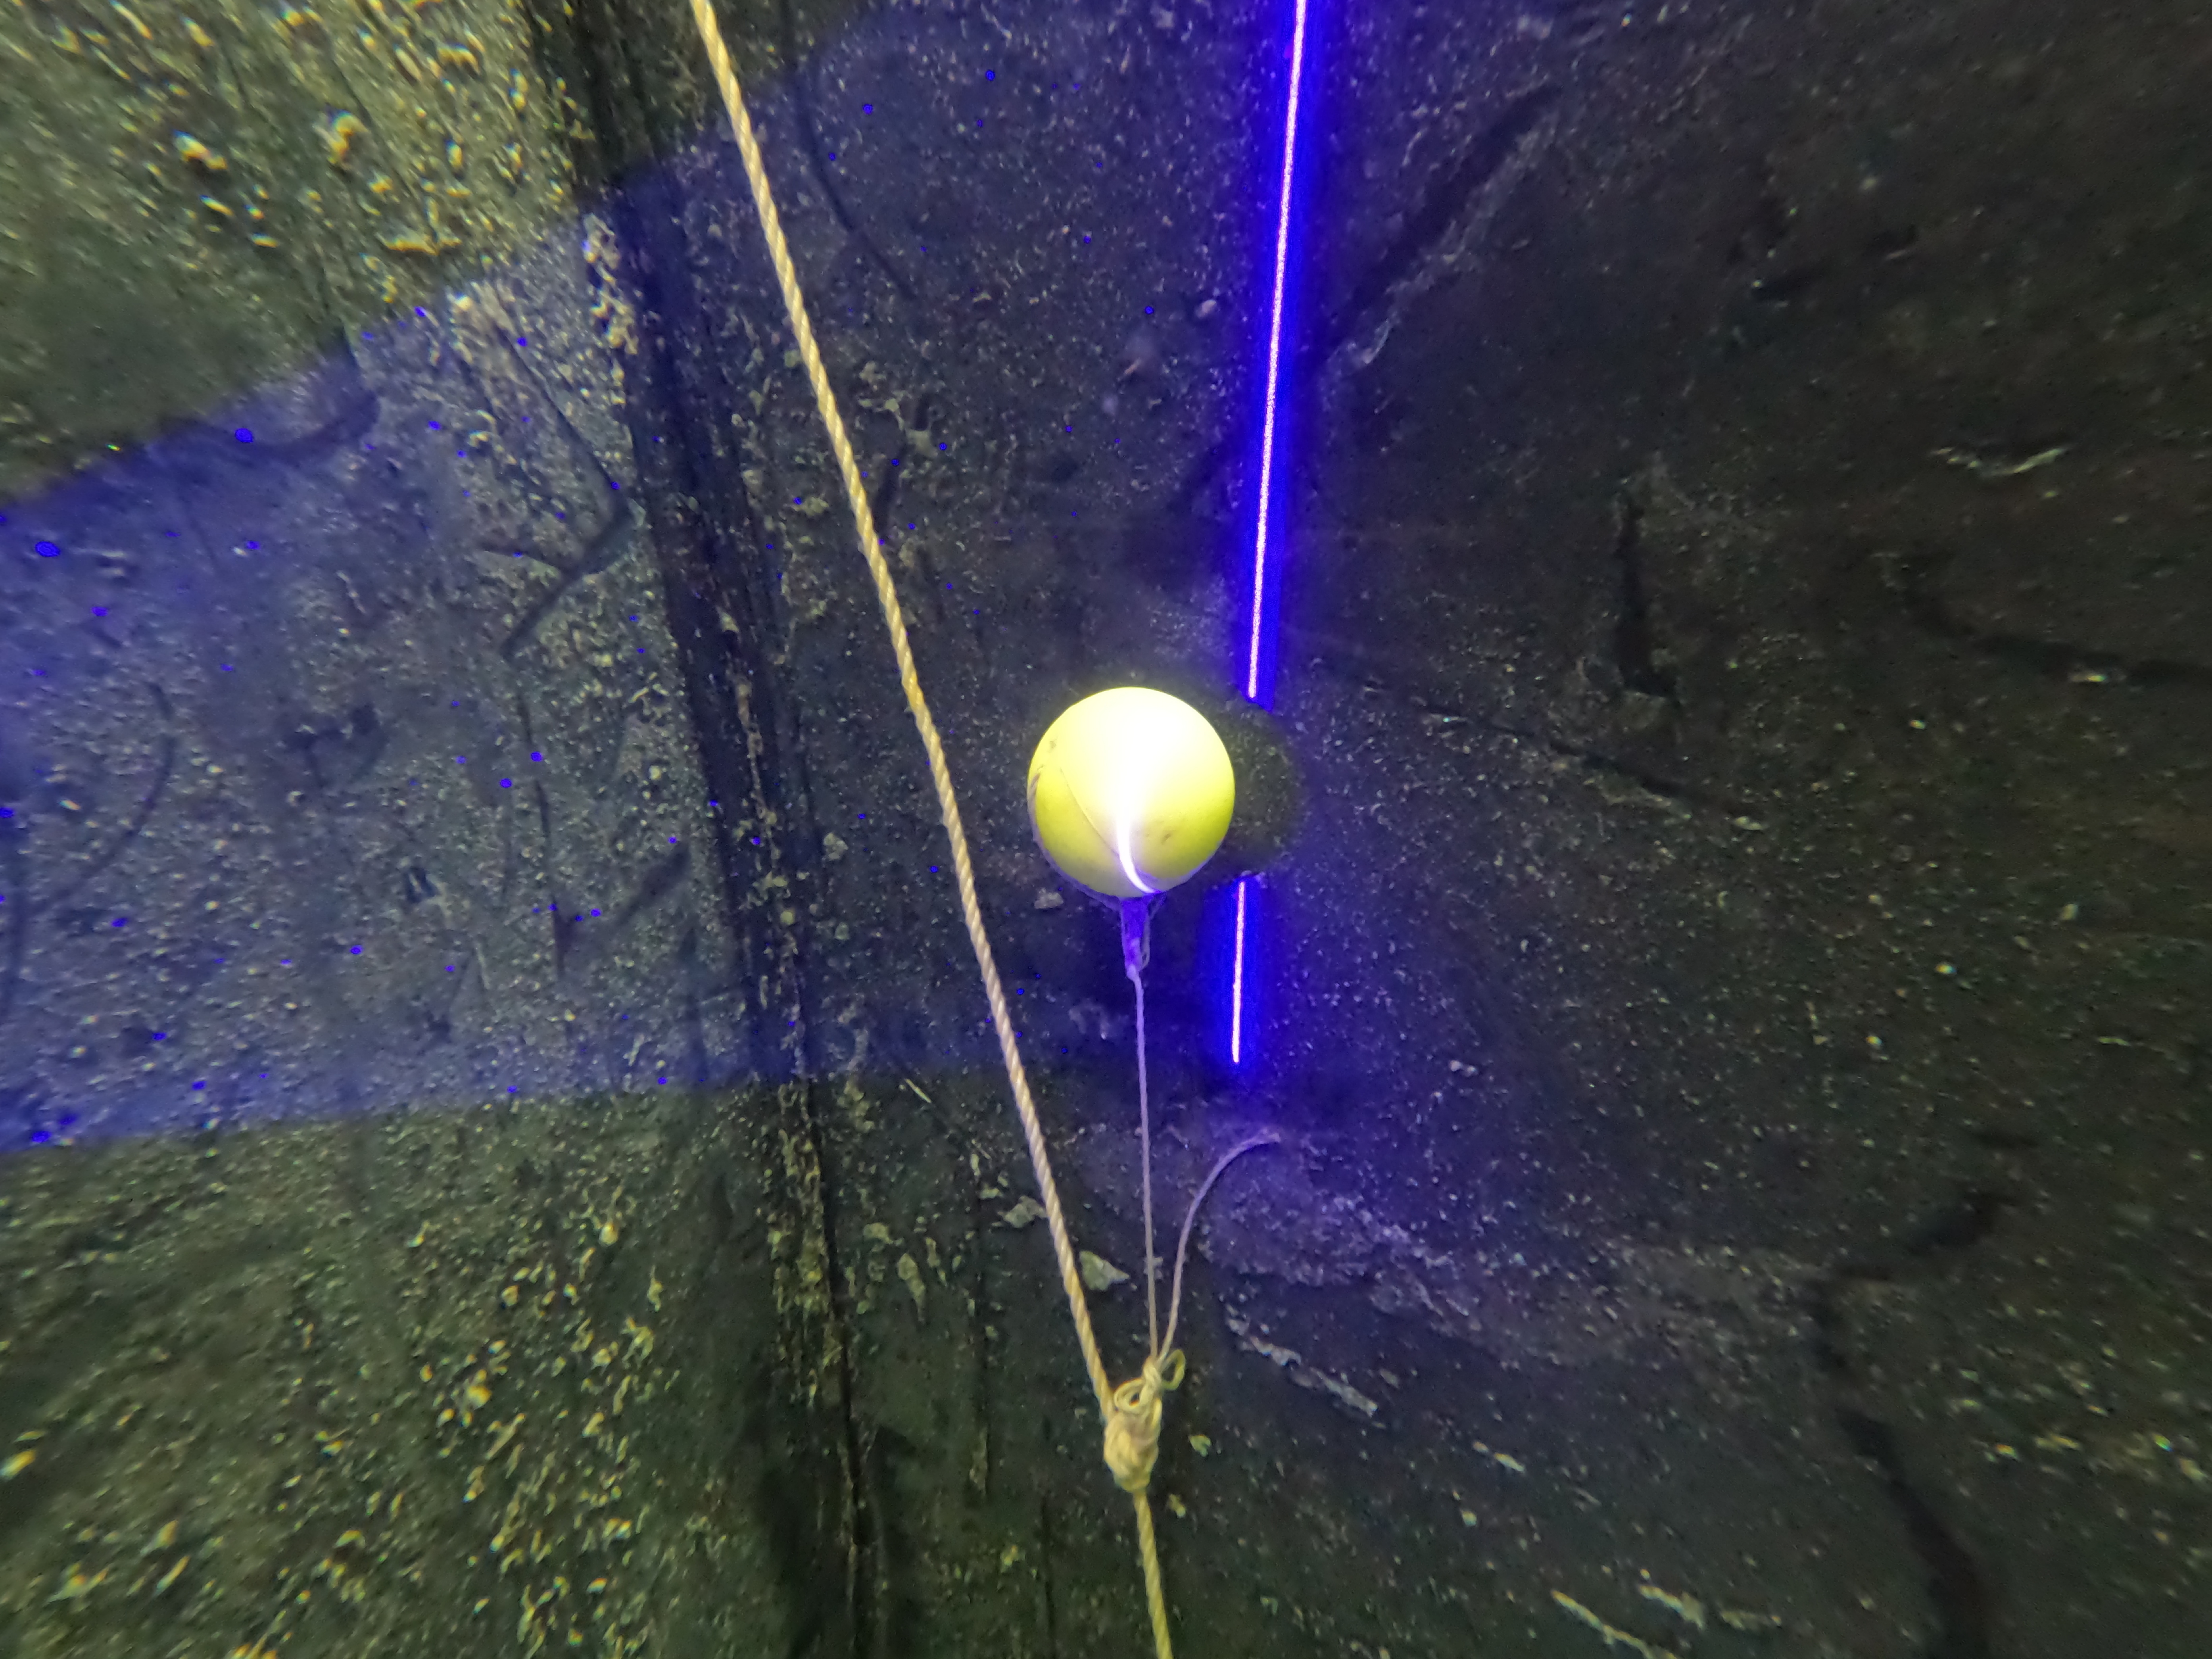

Supplement: Supplementary file 2885 [file G0030385.pdf › 2/G0030385.pdf]

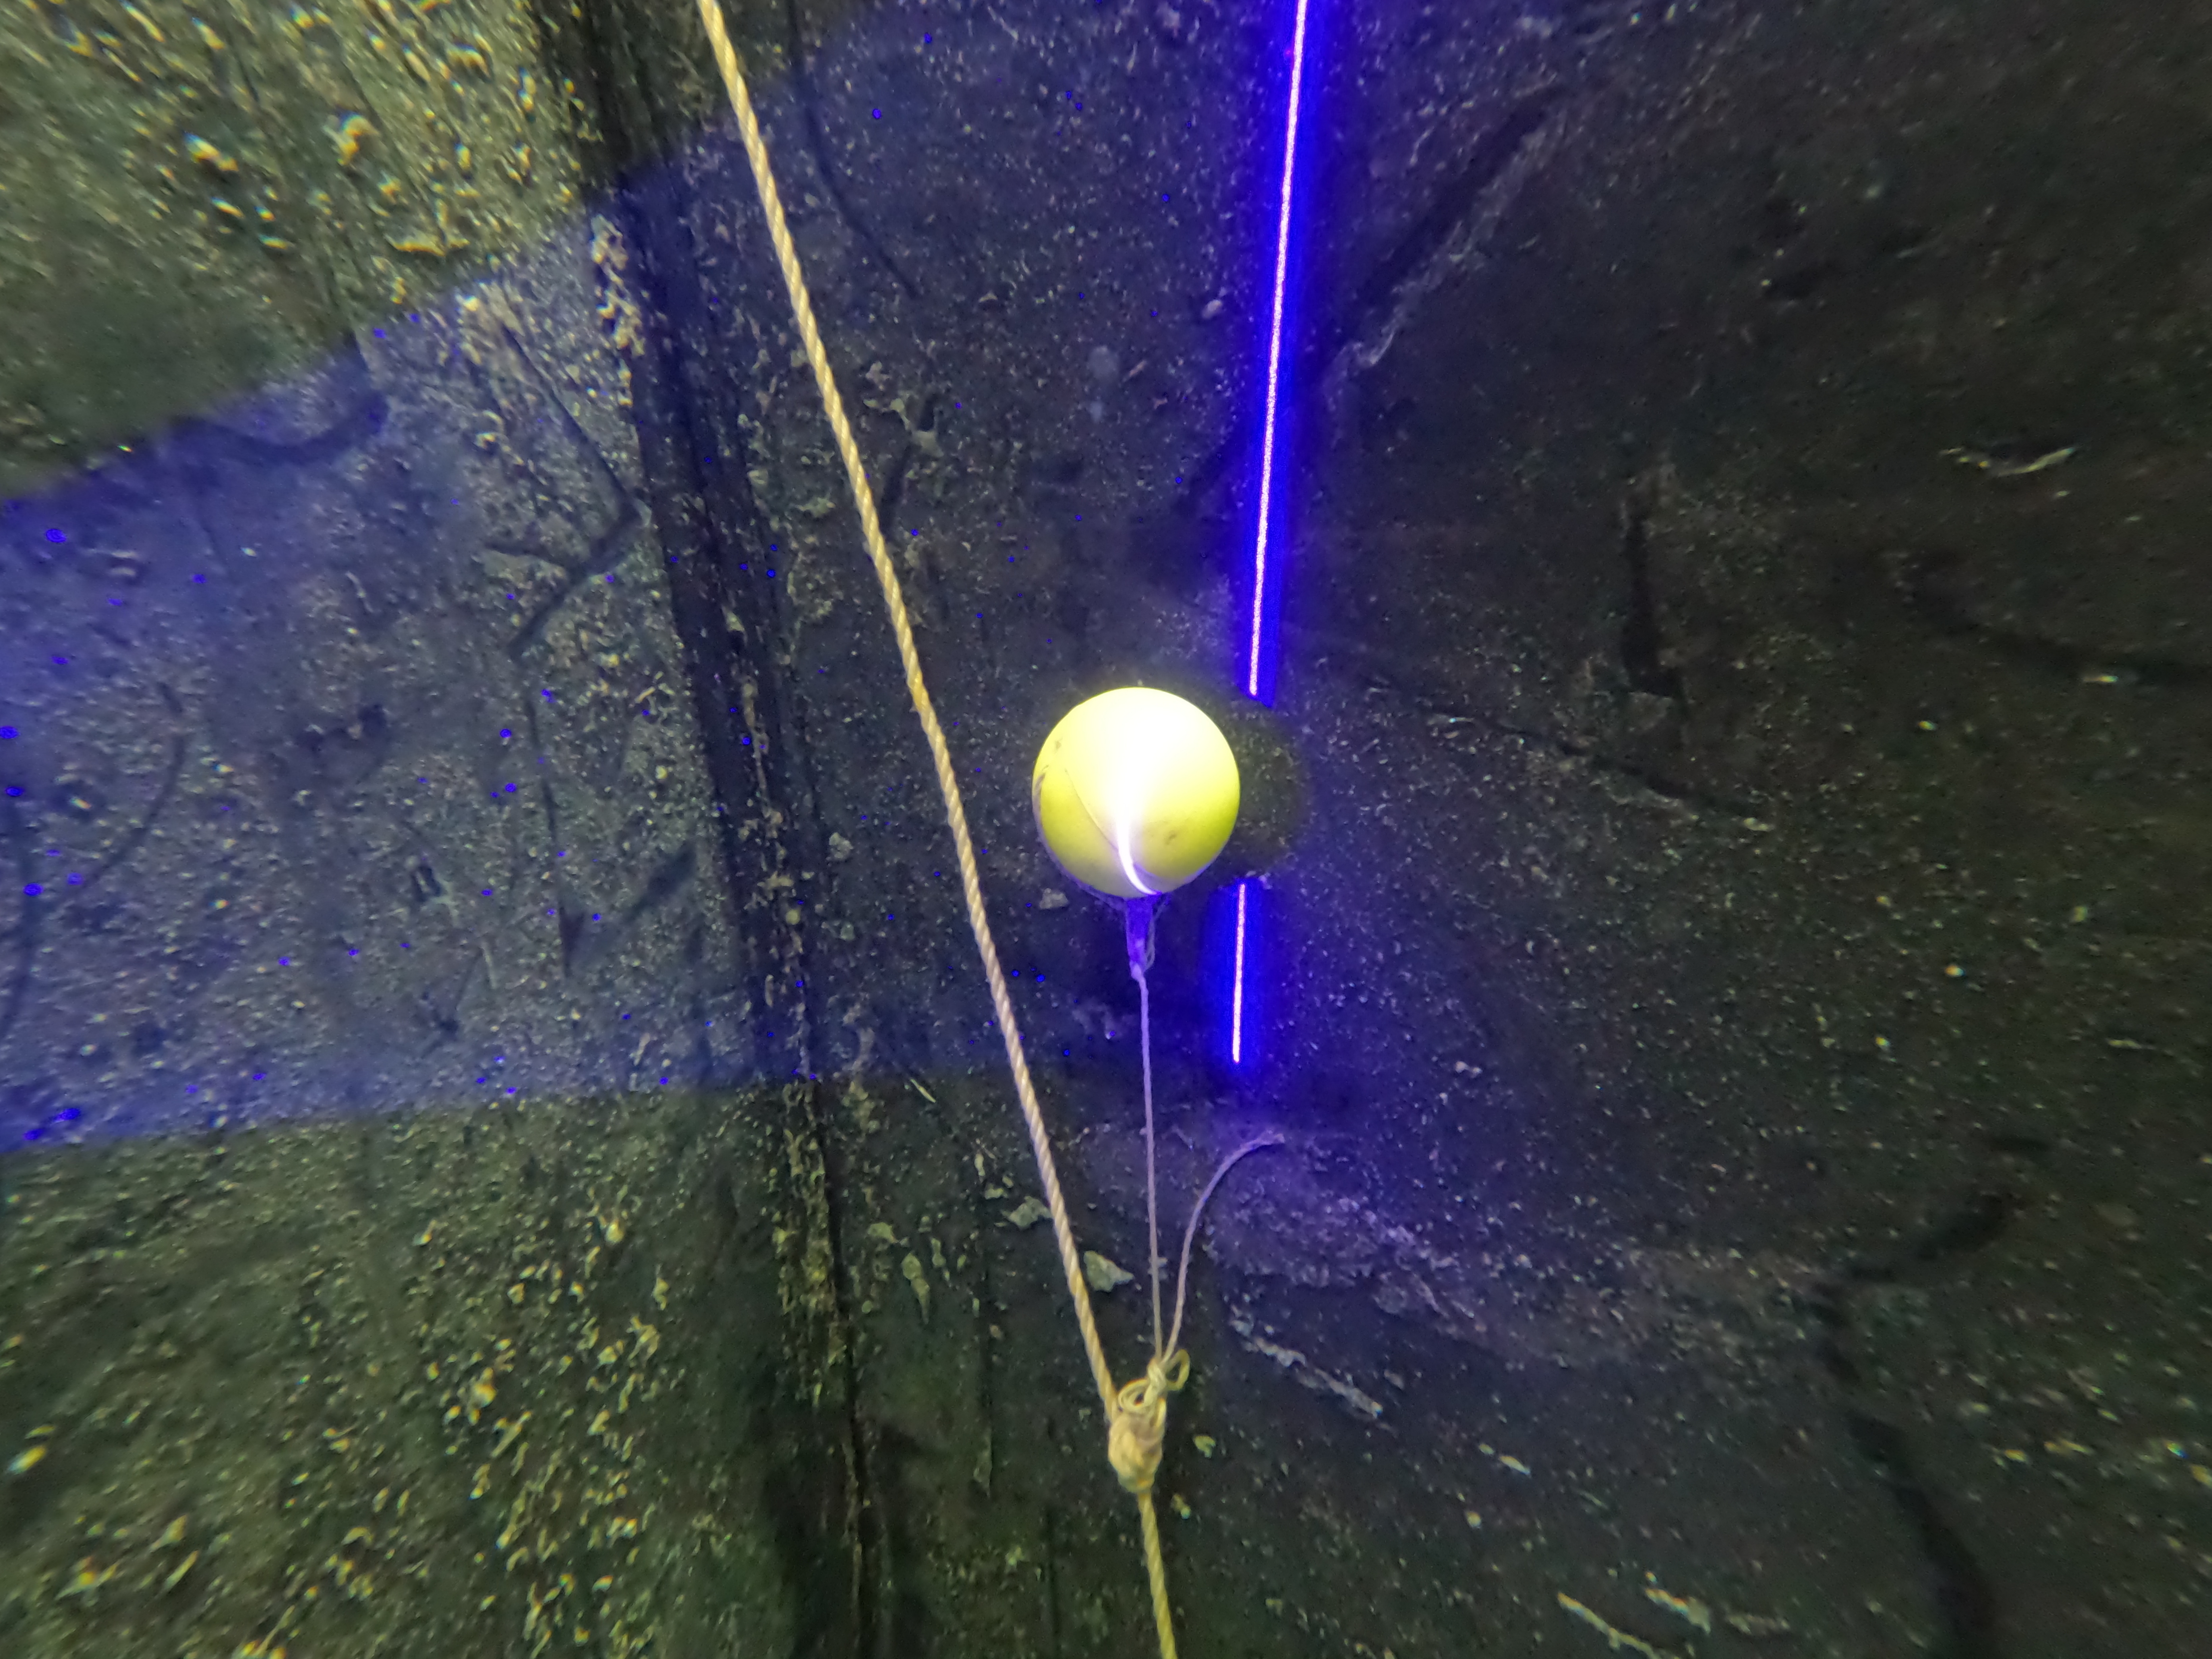

Supplement: Supplementary file 2886 [file G0030386.pdf › 2/G0030386.pdf]

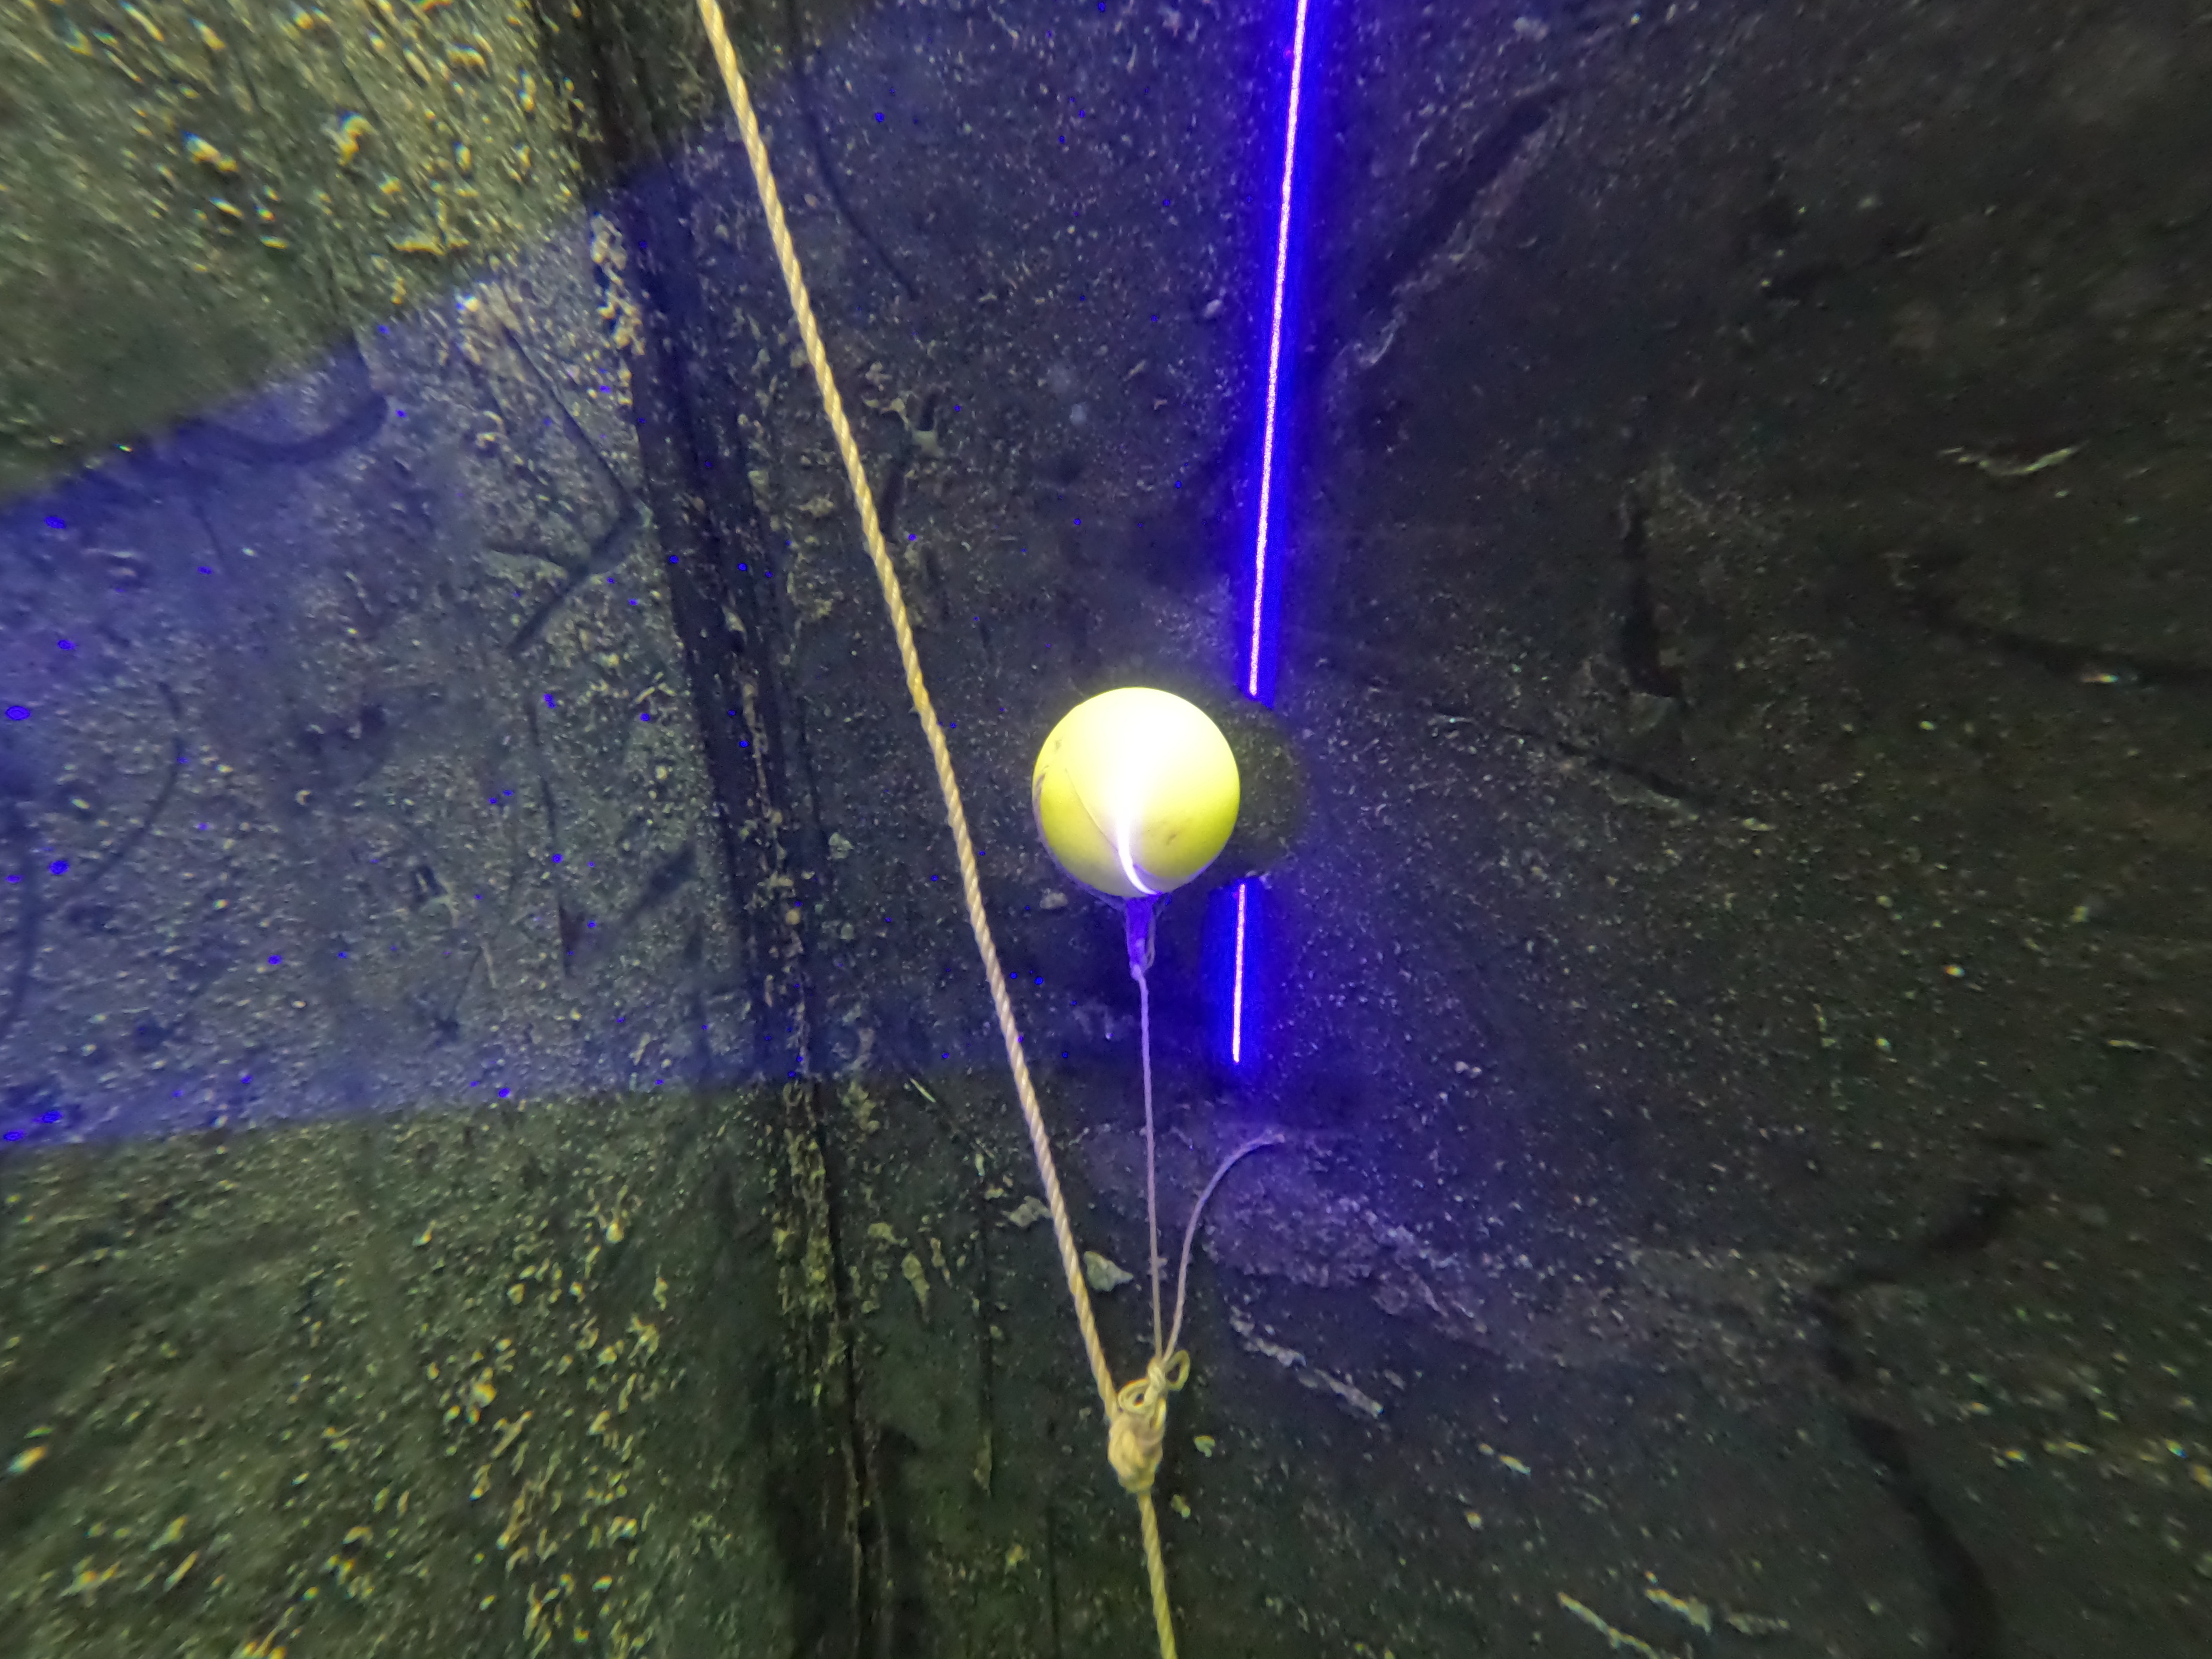

Supplement: Supplementary file 2887 [file G0030387.pdf › 2/G0030387.pdf]

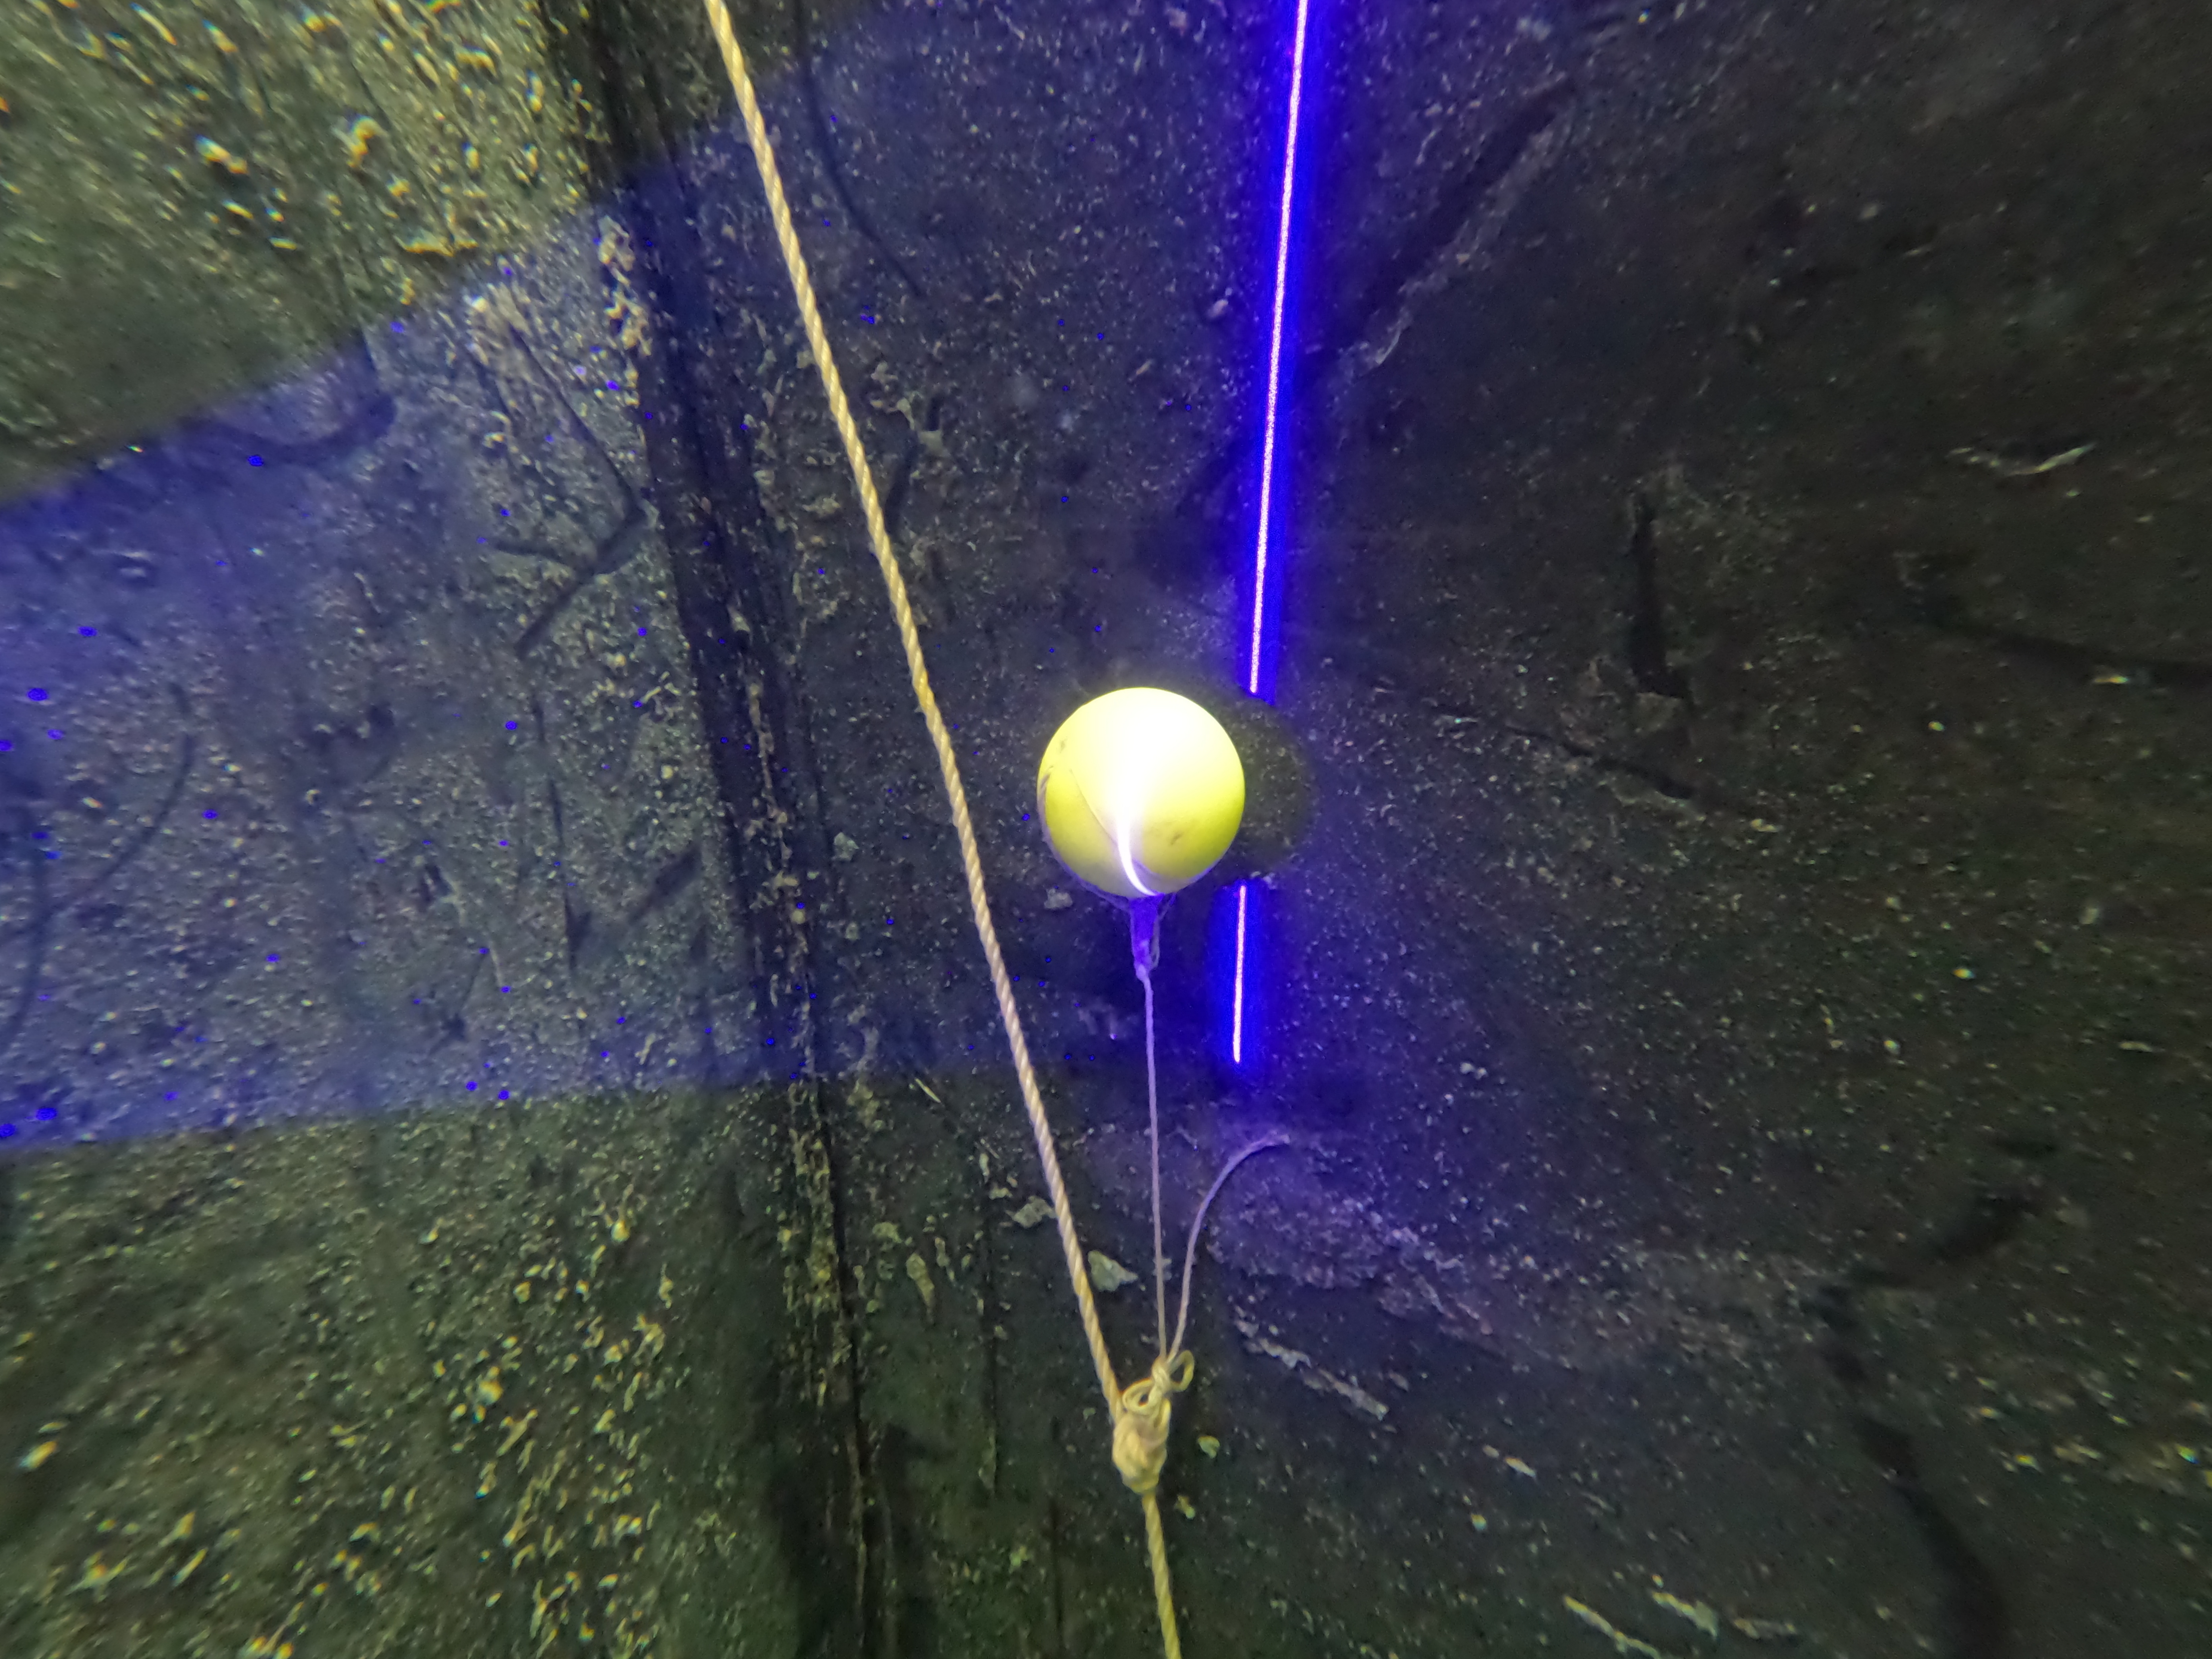

Supplement: Supplementary file 2888 [file G0030388.pdf › 2/G0030388.pdf]

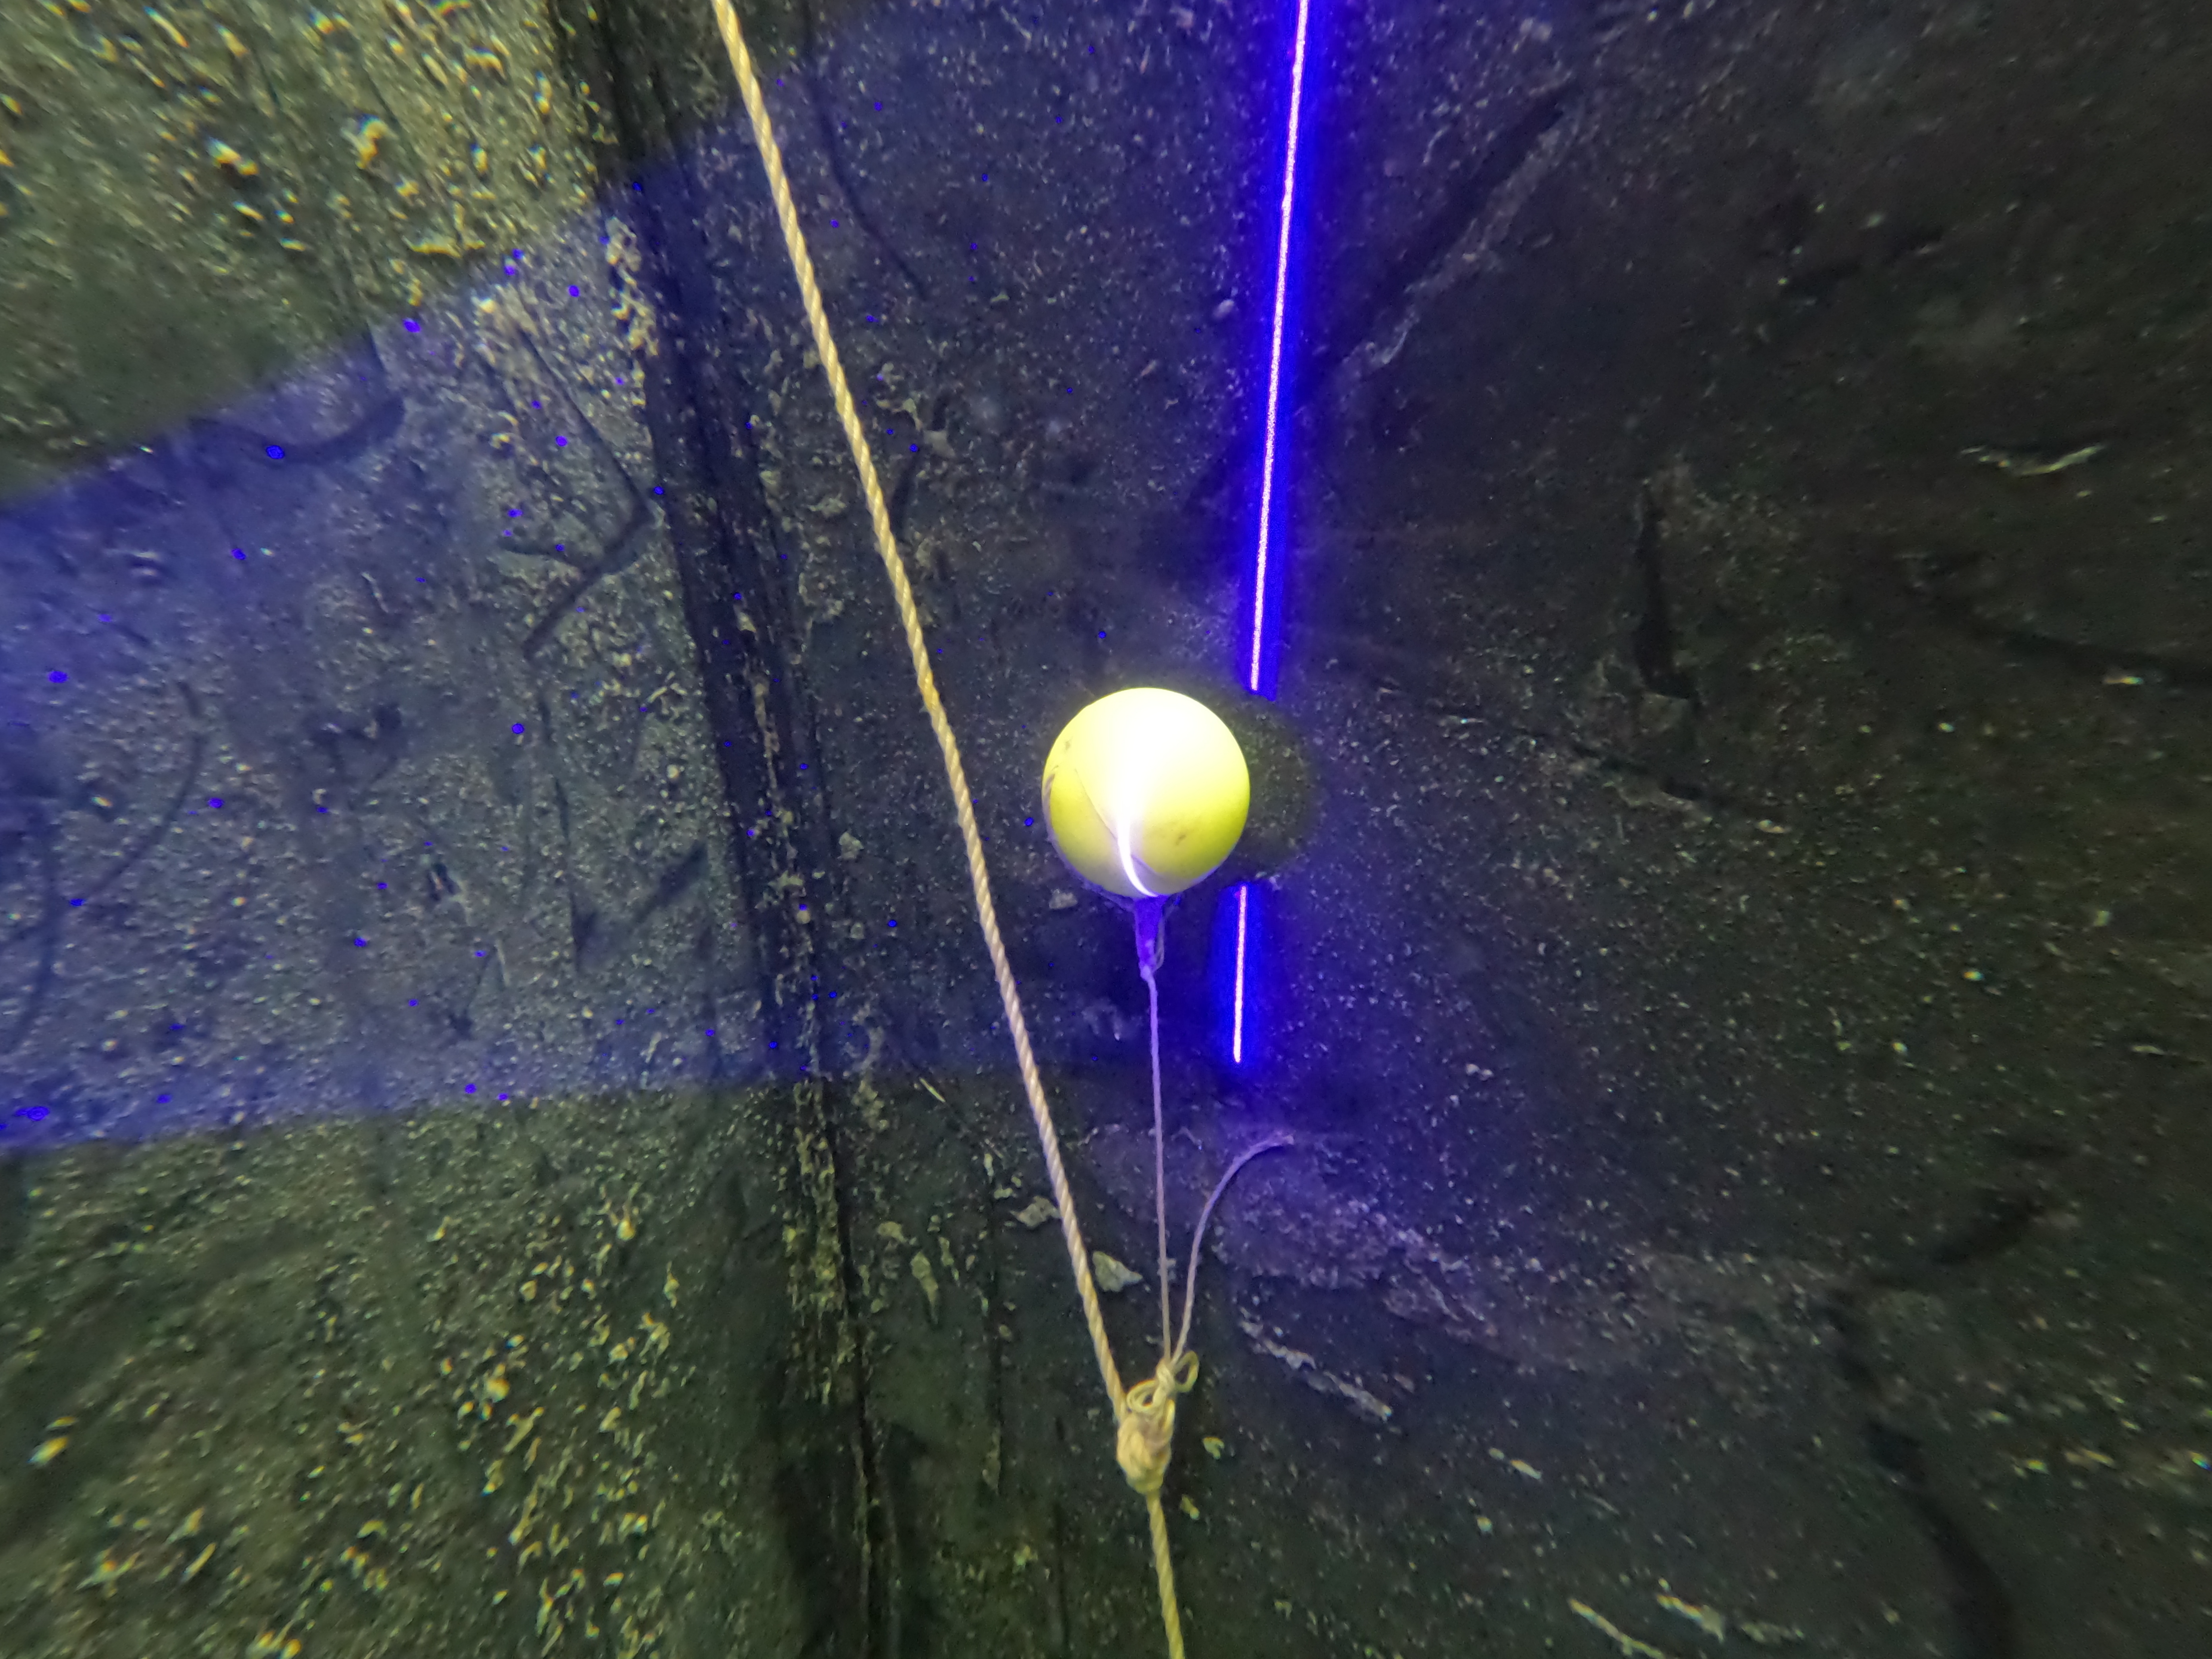

Supplement: Supplementary file 2889 [file G0030389.pdf › 2/G0030389.pdf]

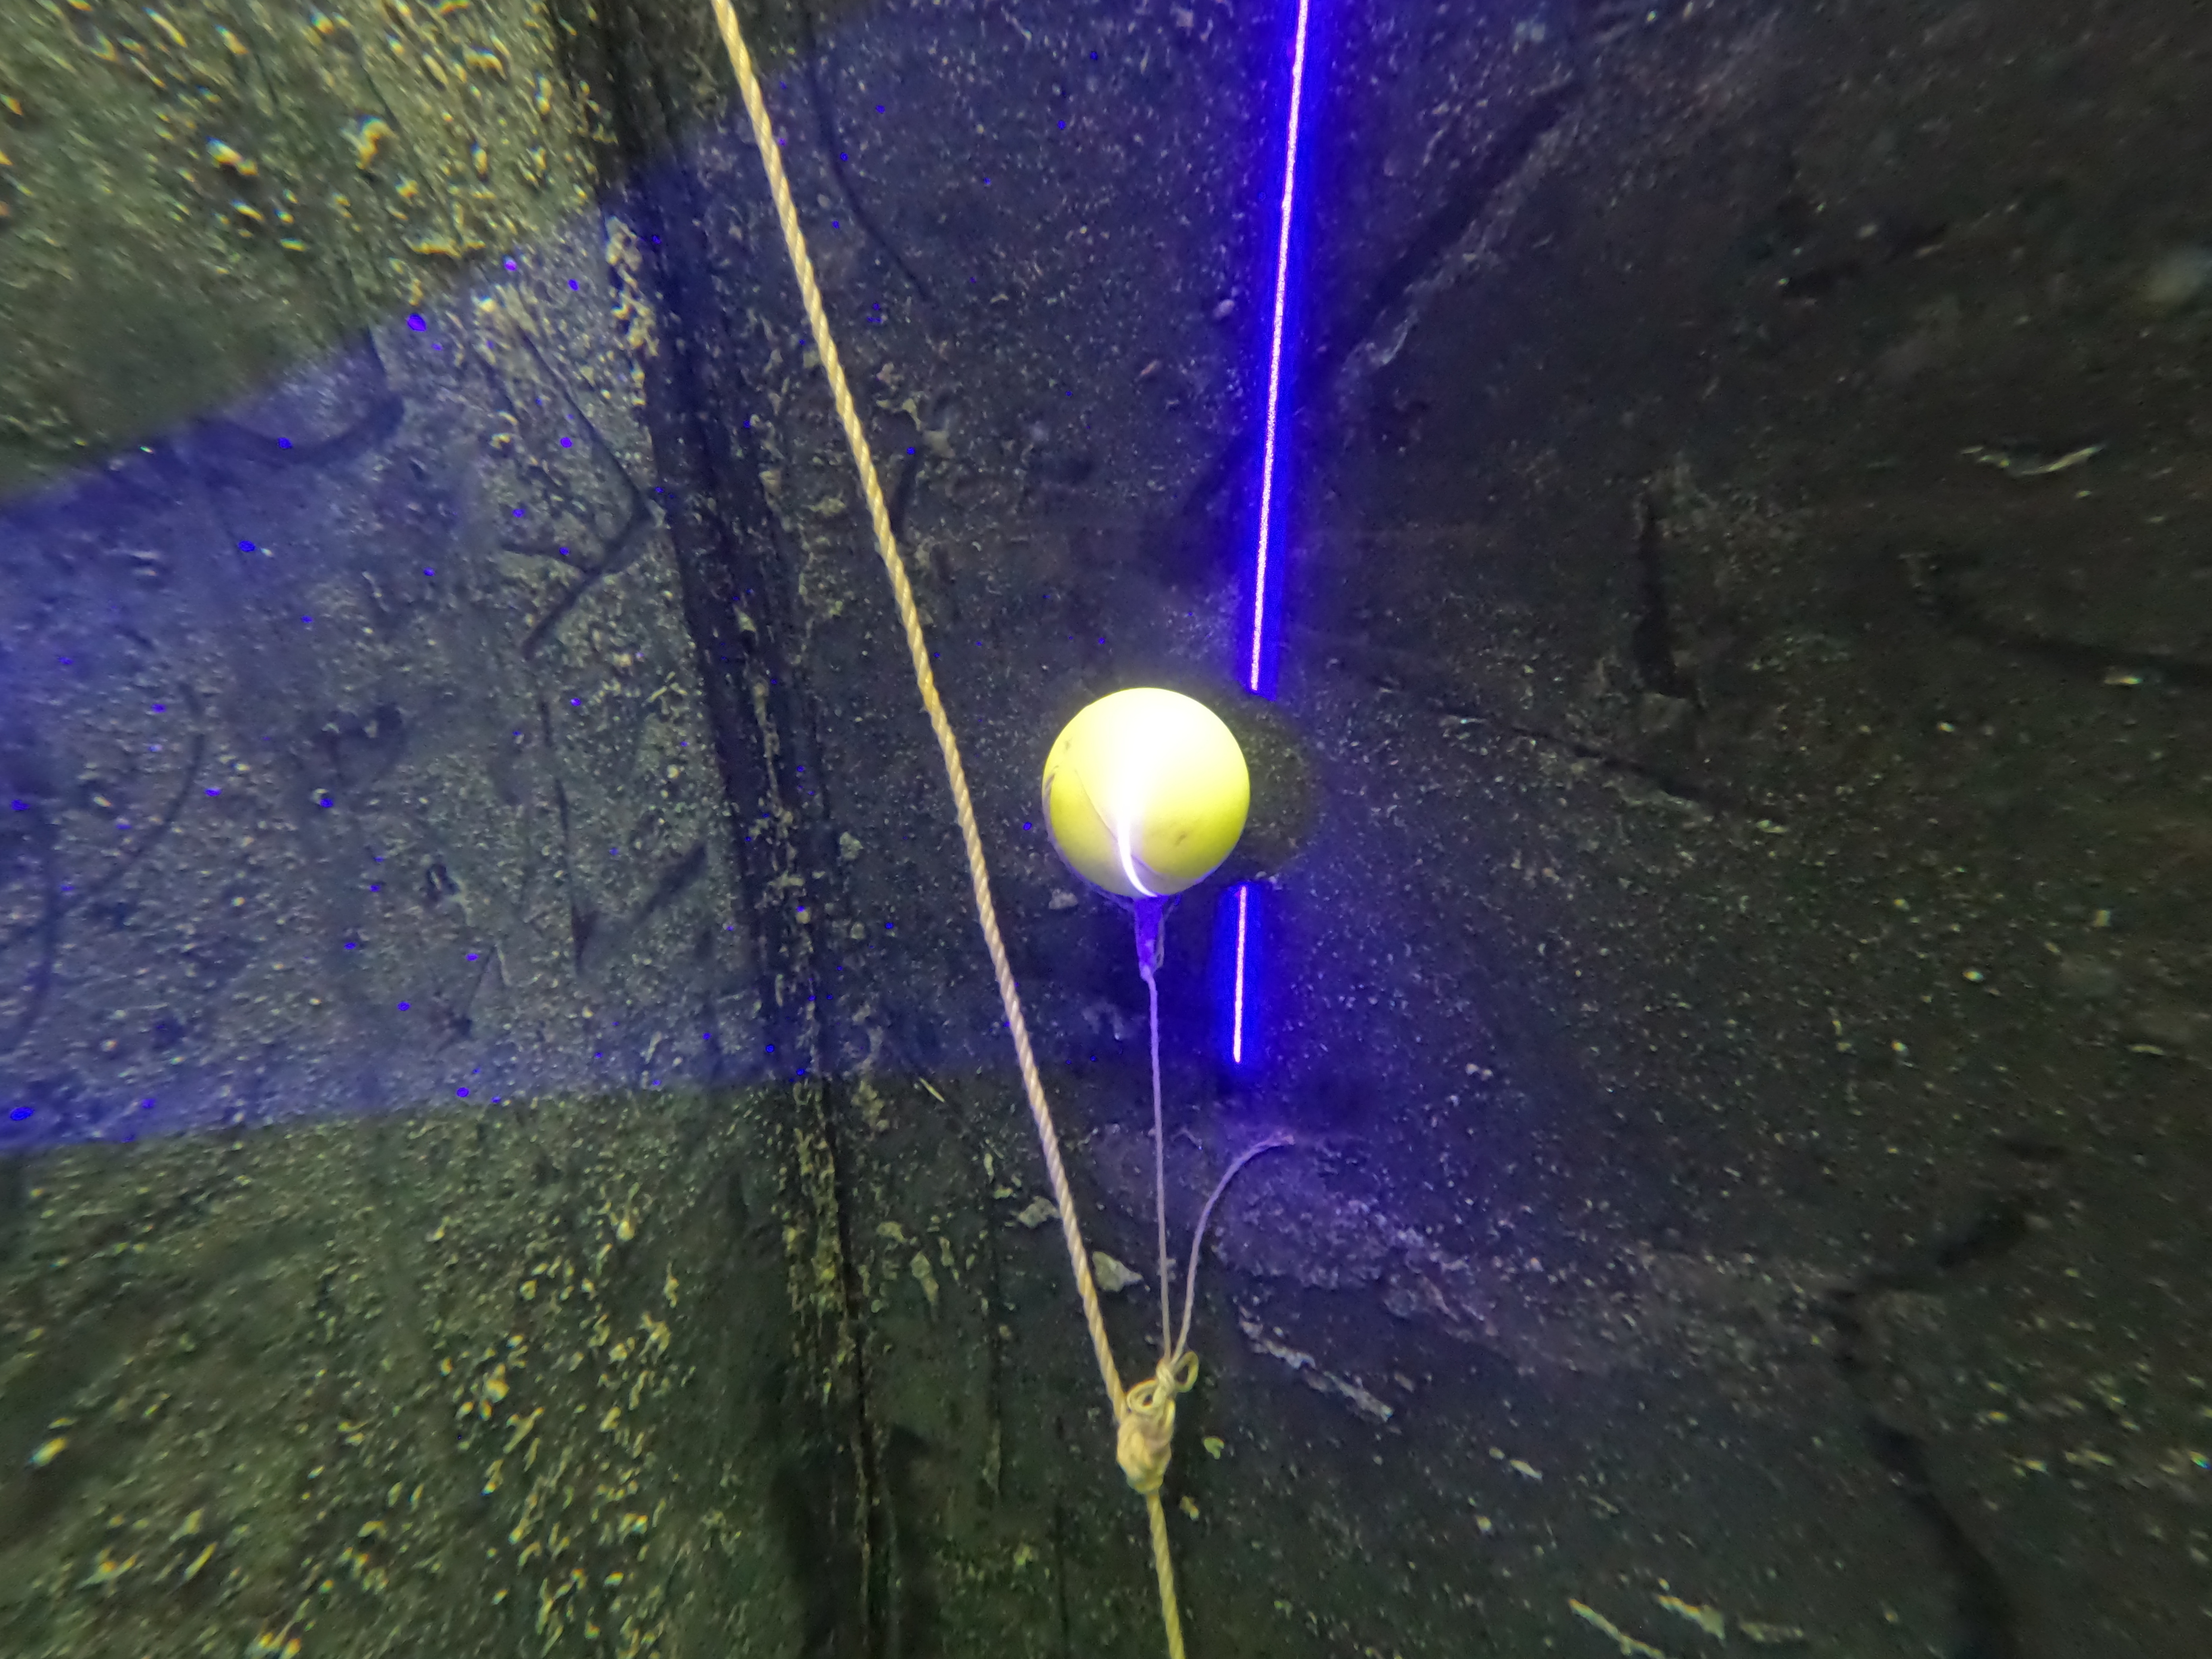

Supplement: Supplementary file 2890 [file G0030390.pdf › 2/G0030390.pdf]
