# Supplementary figures and images for: 3D reconstruction of shallow sea environment using direct system calibration and faint laser line extraction (part 29 of 35)
Source: Research Square preprint supplement (doi:10.21203/rs.3.rs-5262658/v1), 2024-12-02

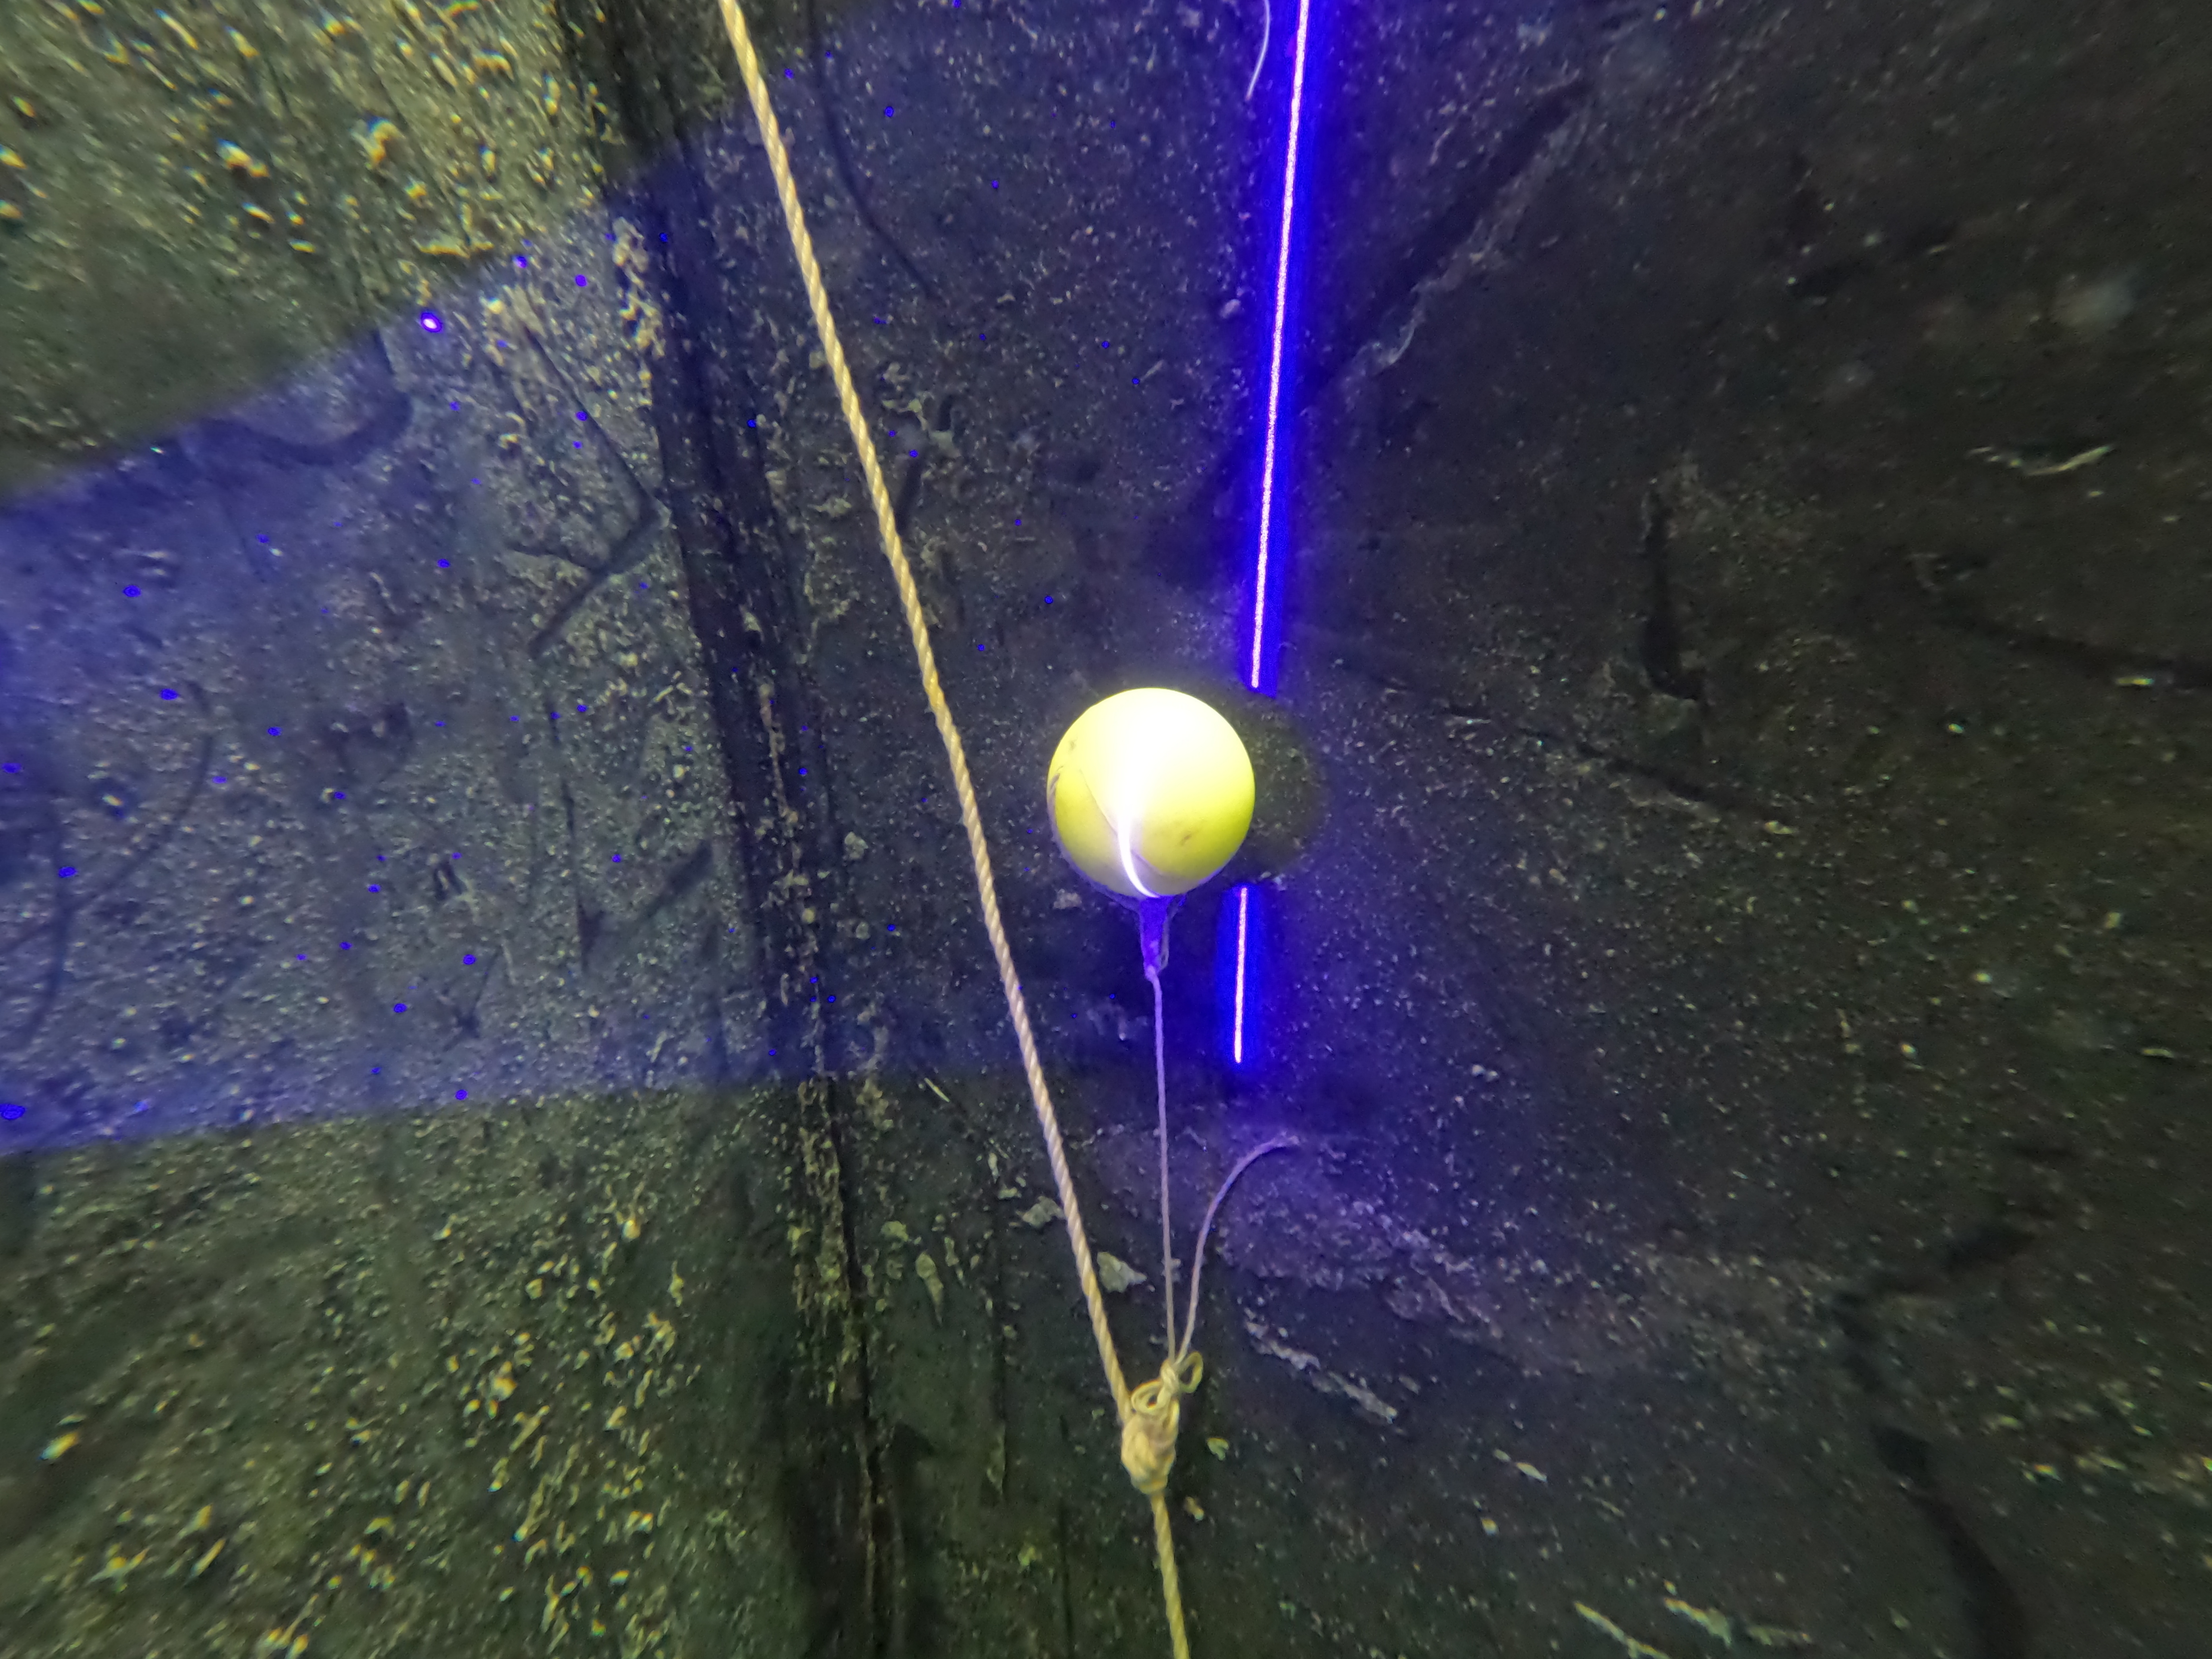

Supplement: Supplementary file 2891 [file G0030391.pdf › 2/G0030391.pdf]

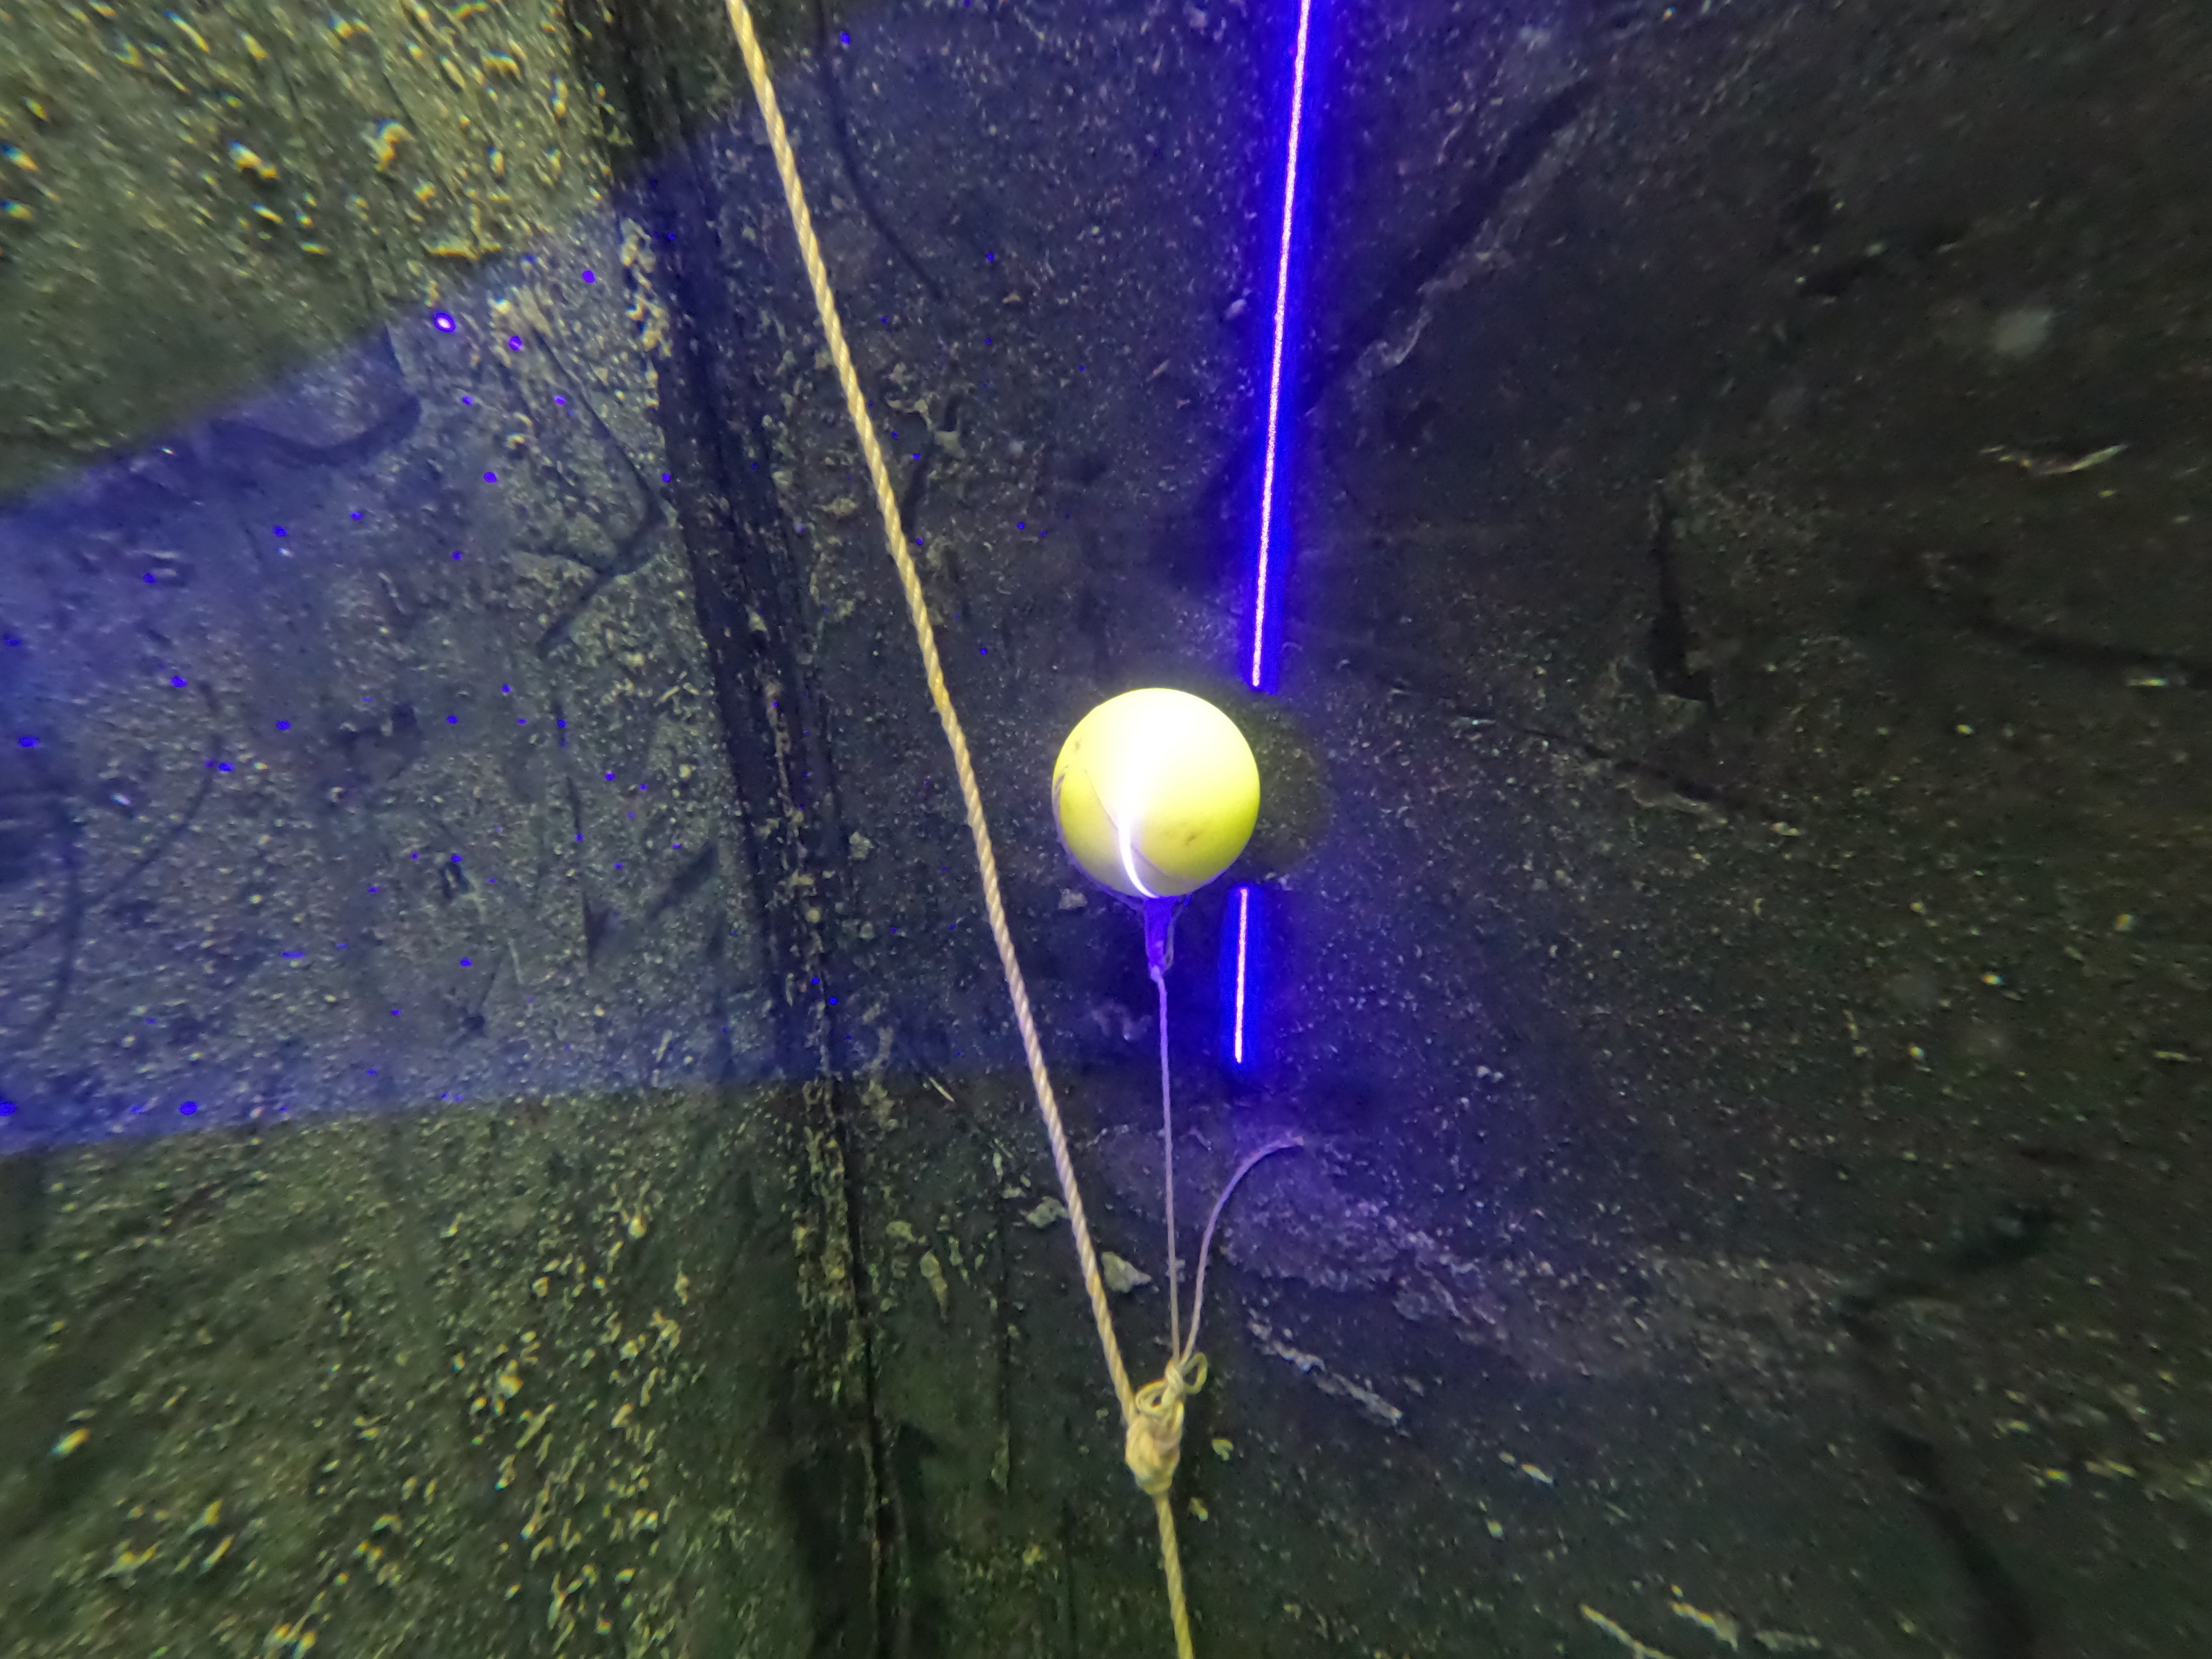

Supplement: Supplementary file 2892 [file G0030392.pdf › 2/G0030392.pdf]

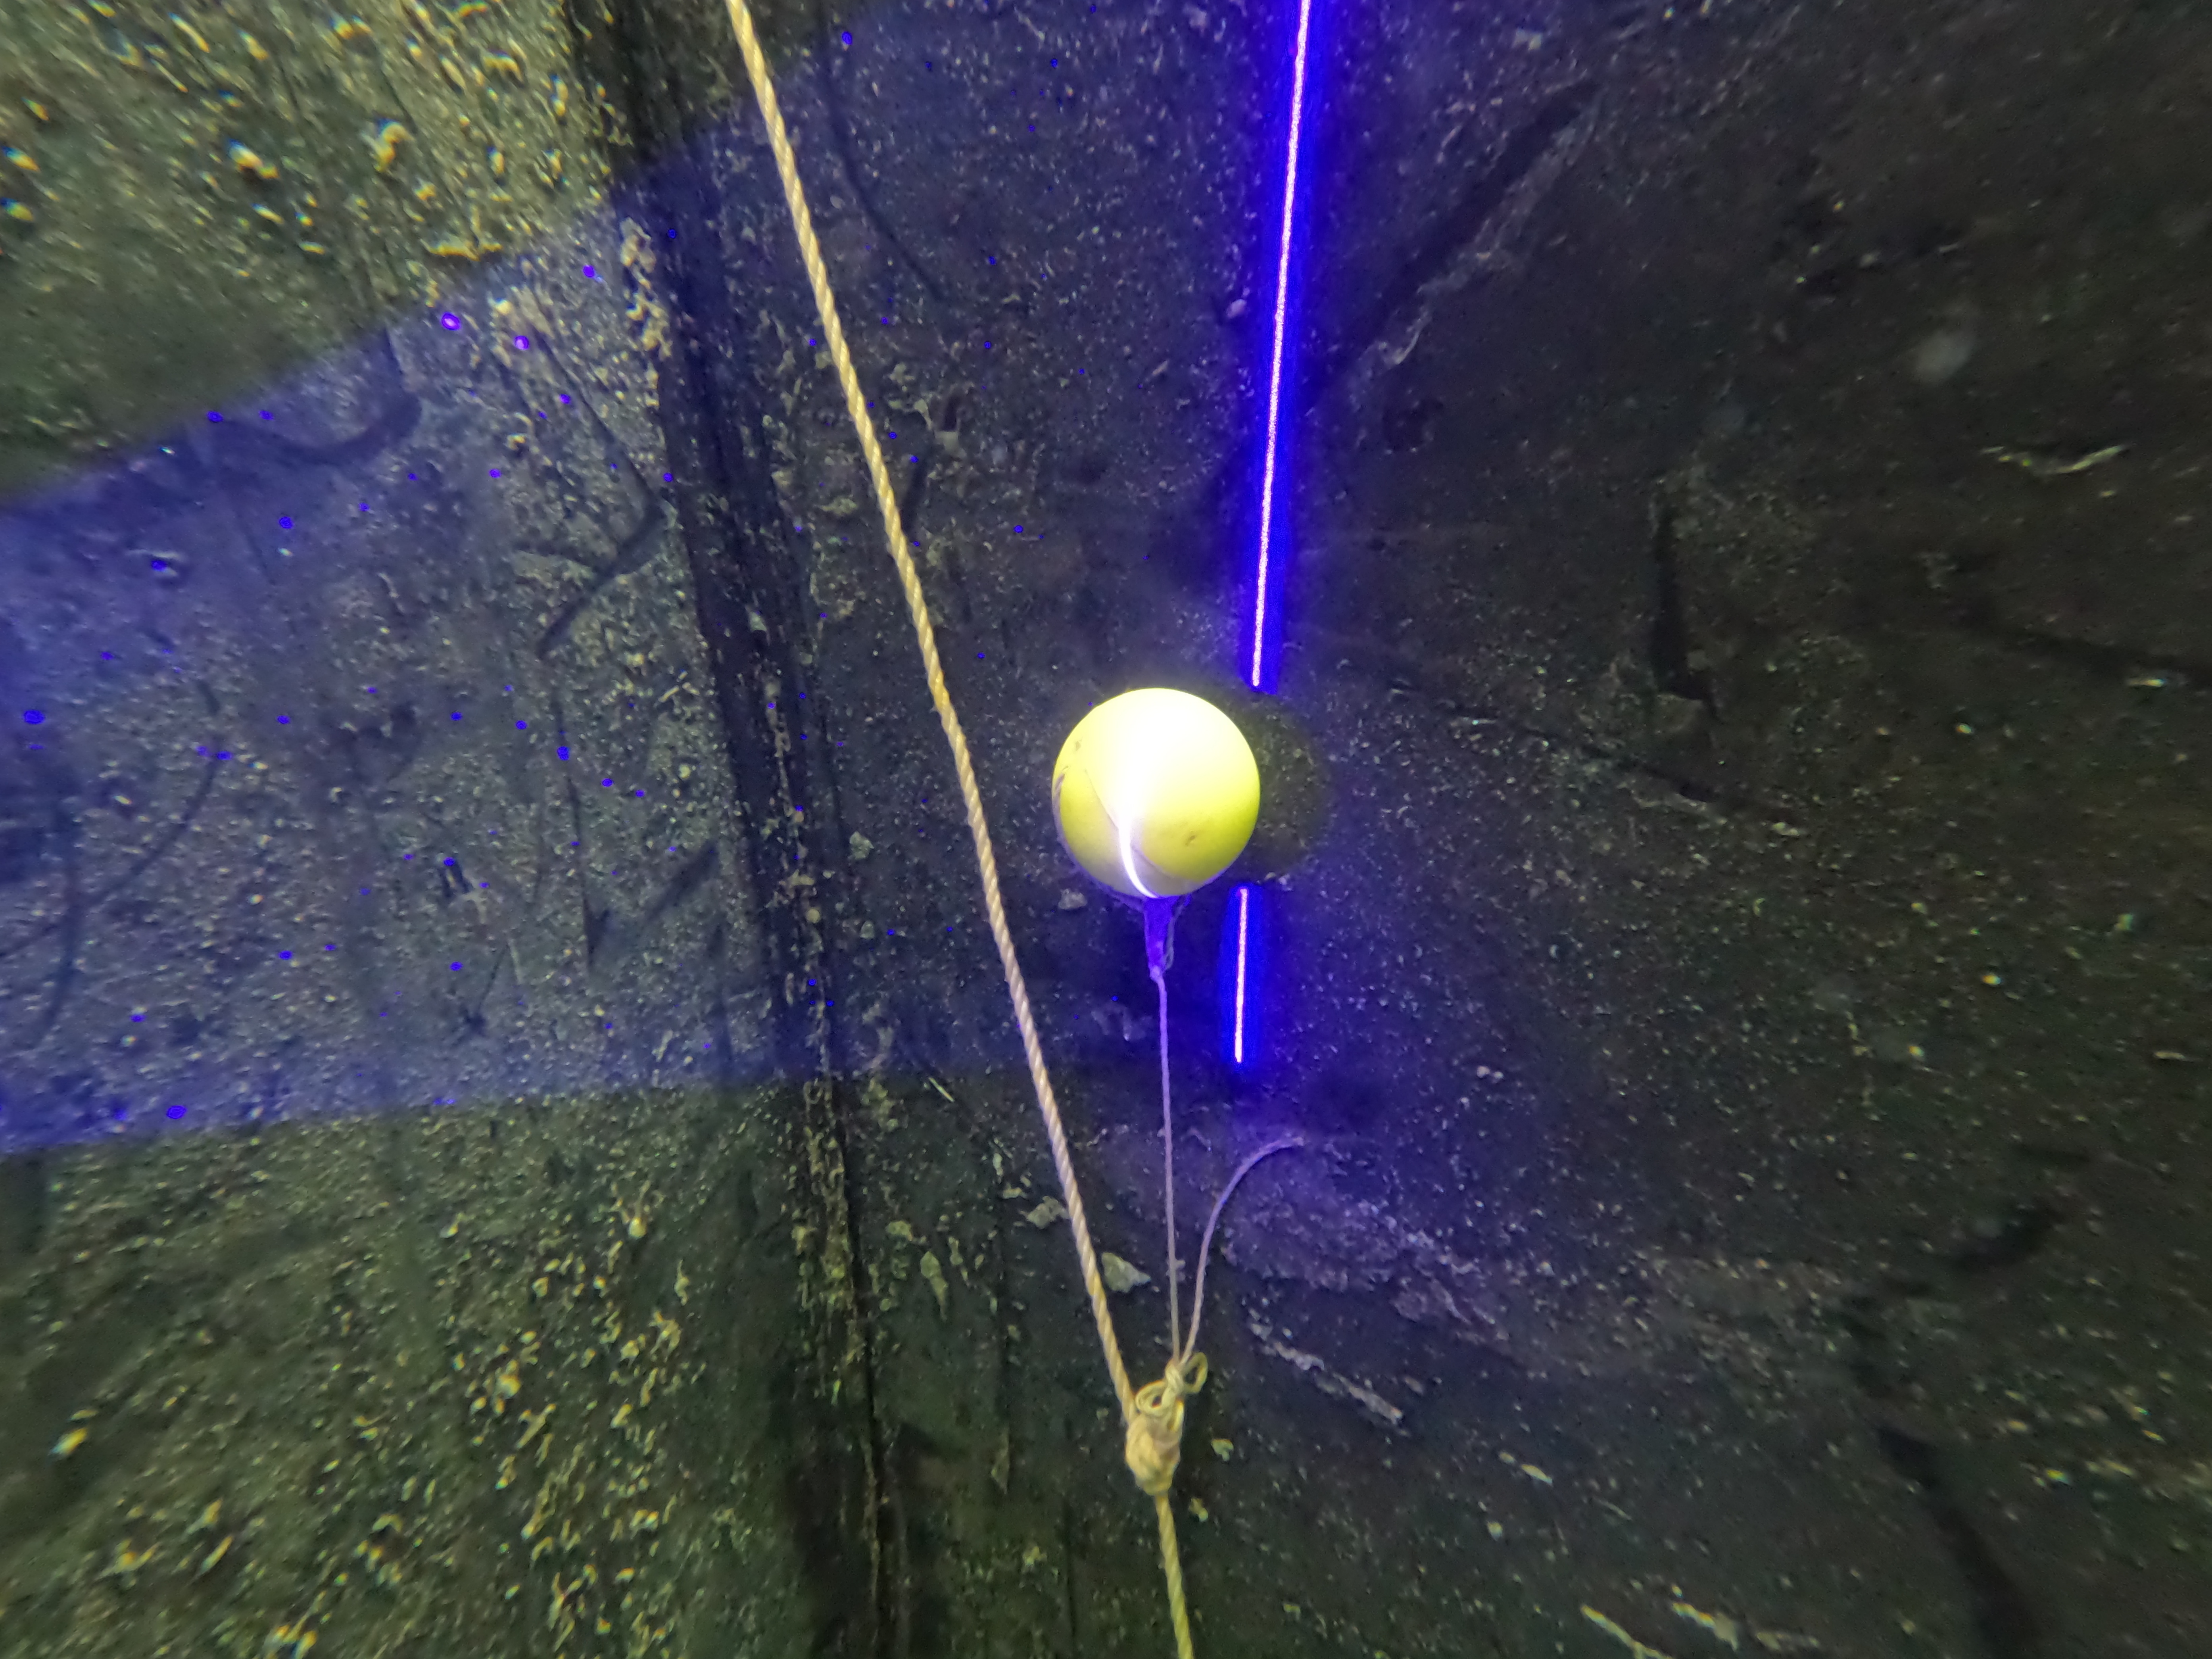

Supplement: Supplementary file 2893 [file G0030393.pdf › 2/G0030393.pdf]

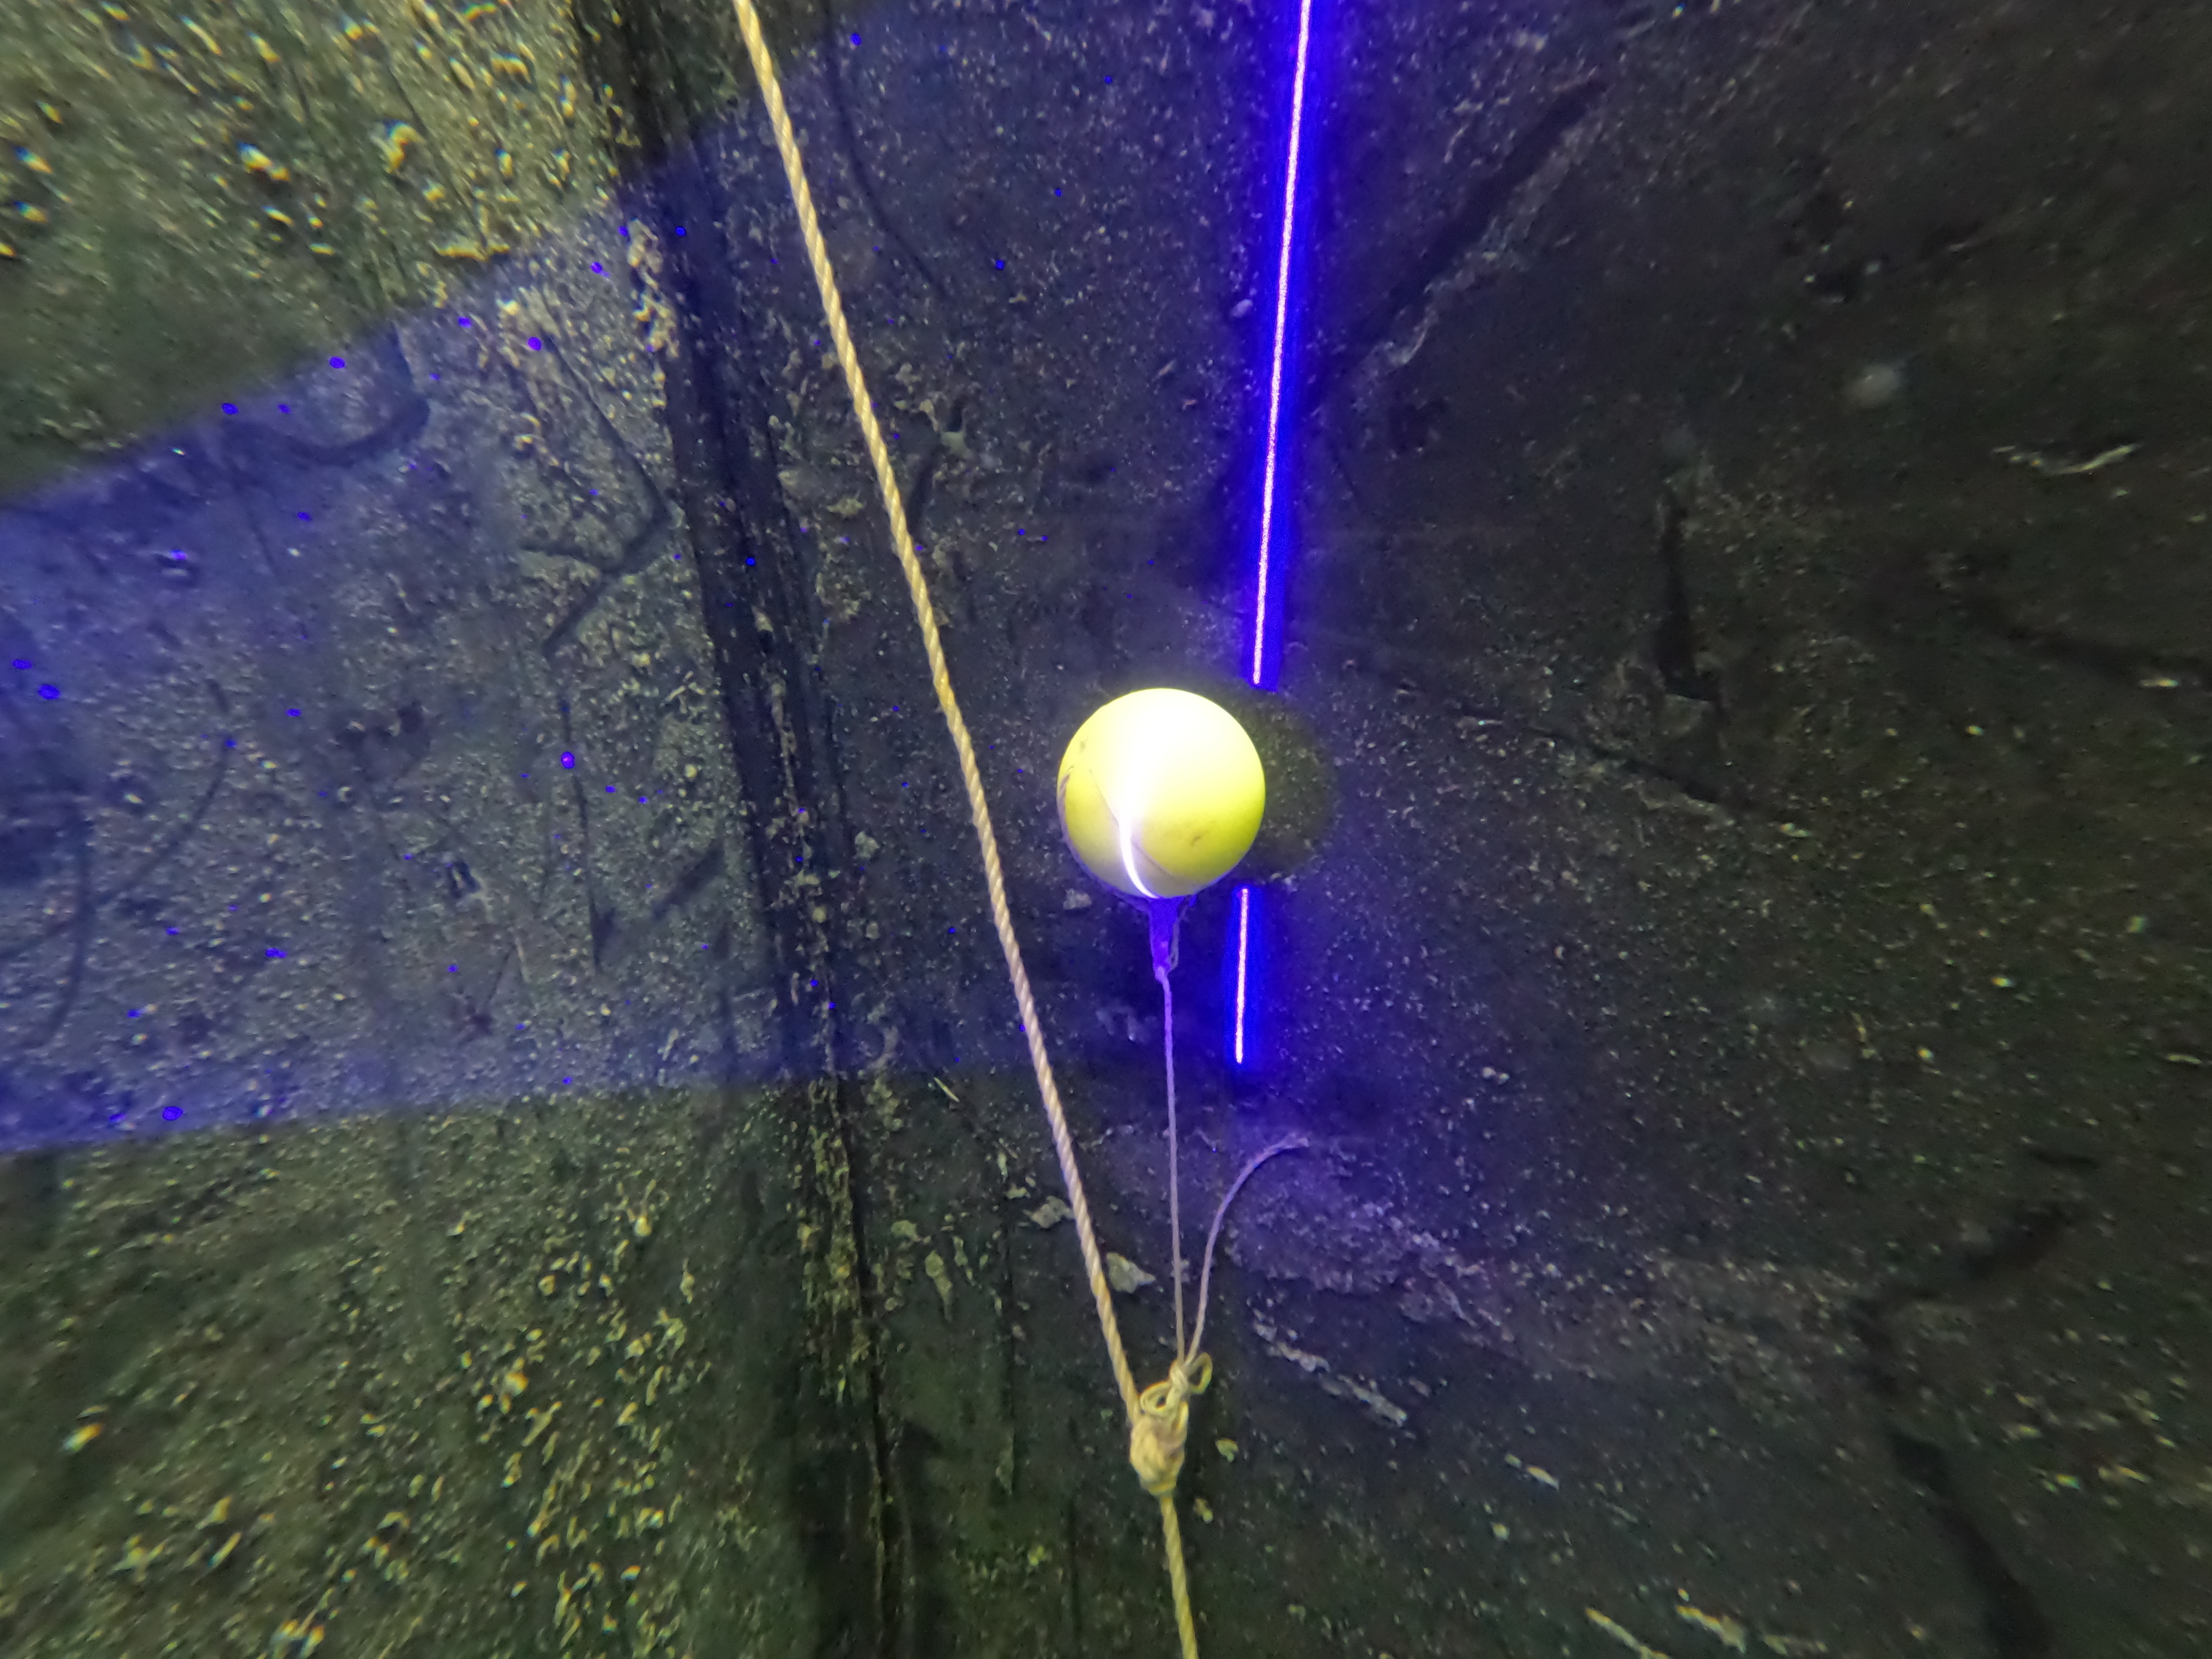

Supplement: Supplementary file 2894 [file G0030394.pdf › 2/G0030394.pdf]

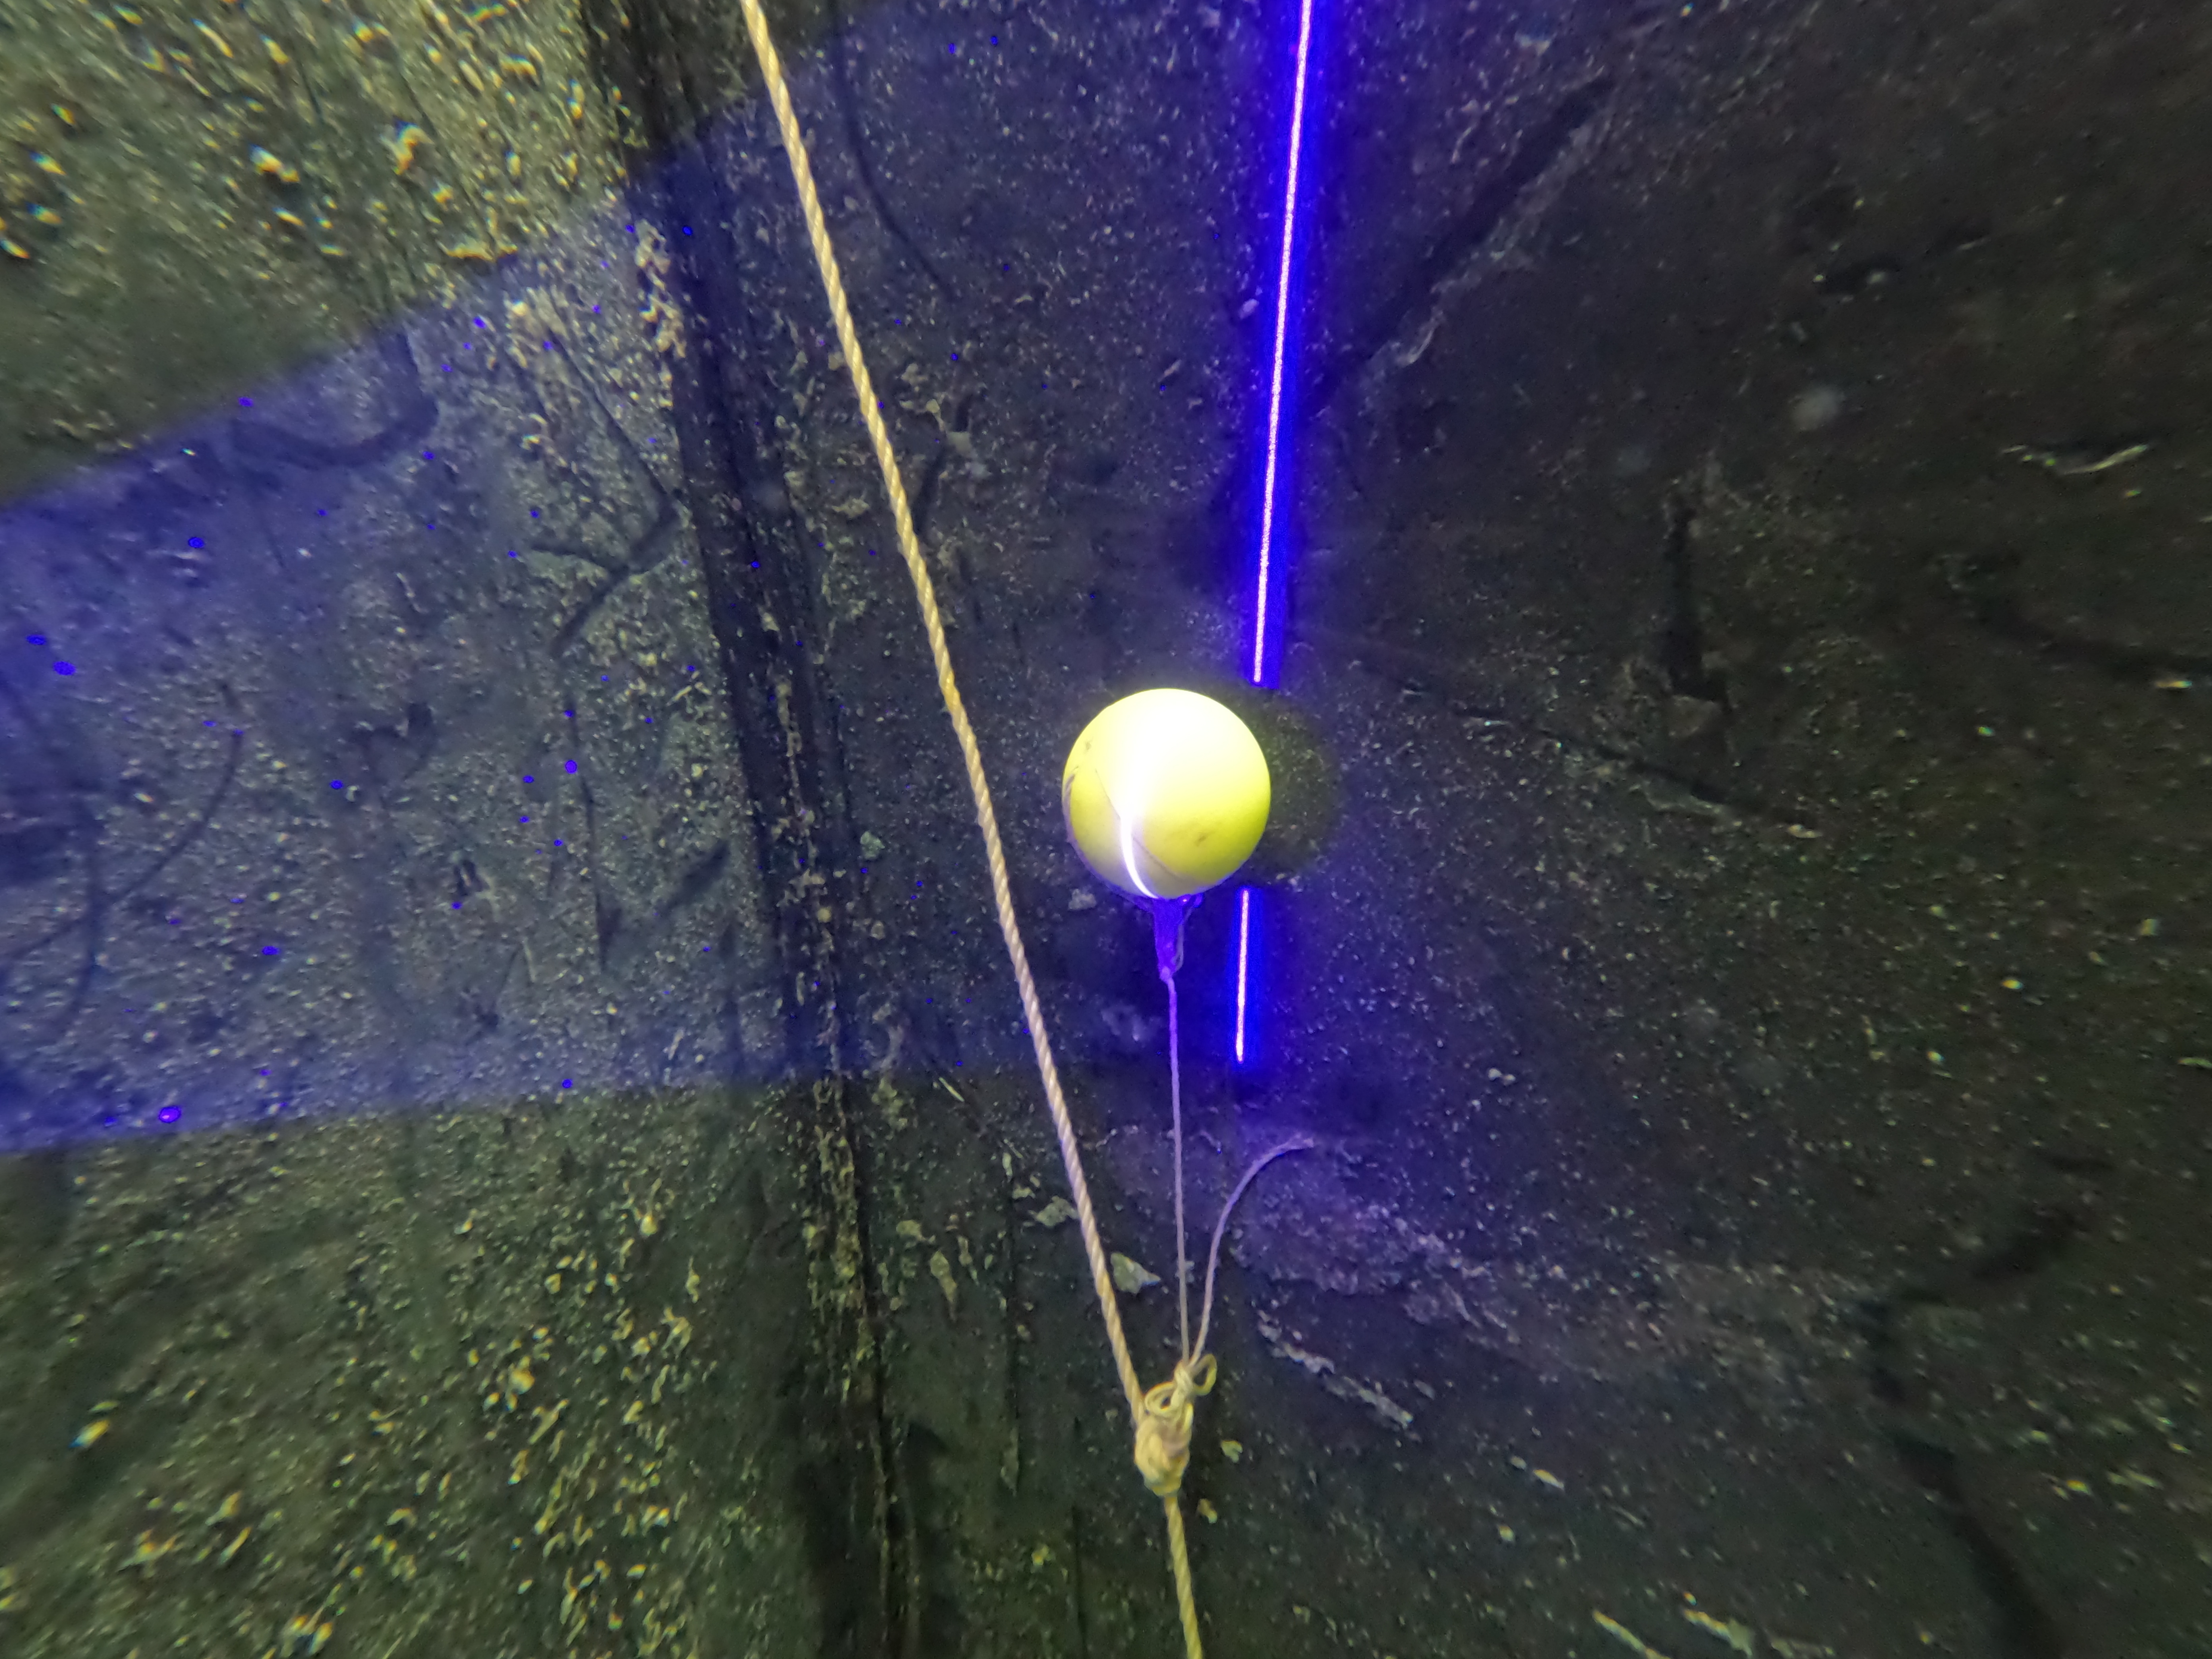

Supplement: Supplementary file 2895 [file G0030395.pdf › 2/G0030395.pdf]

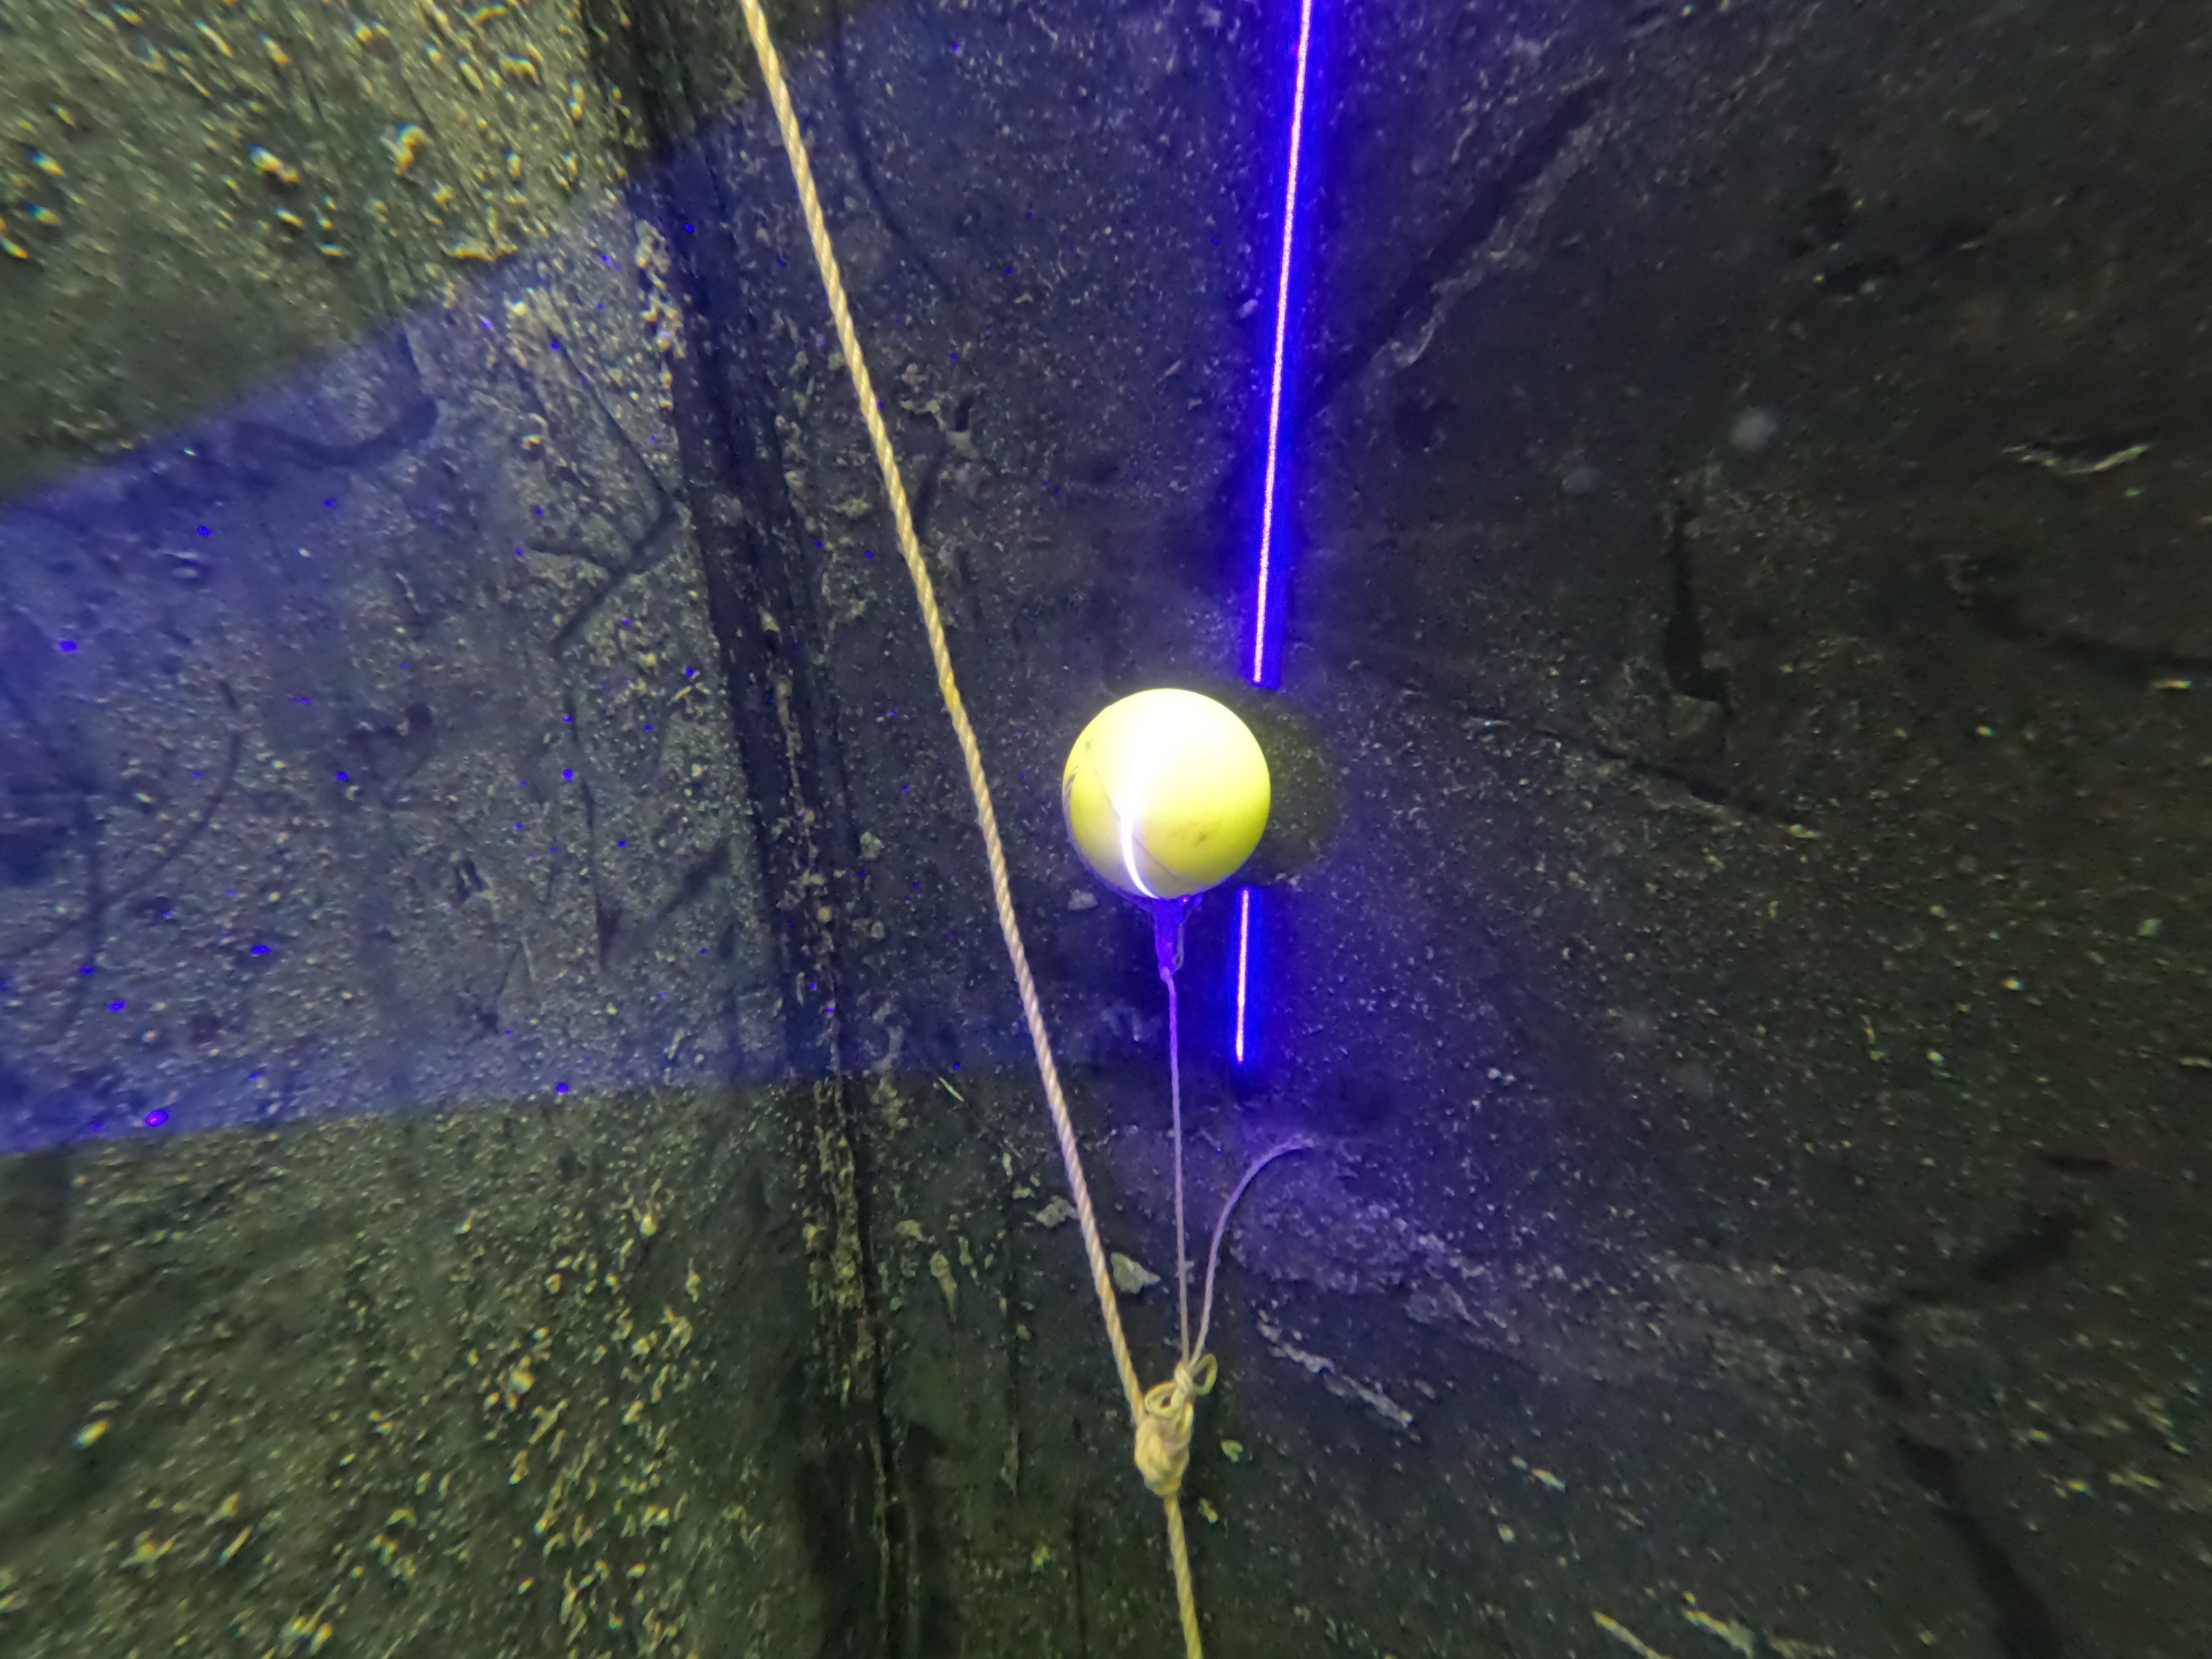

Supplement: Supplementary file 2896 [file G0030396.pdf › 2/G0030396.pdf]

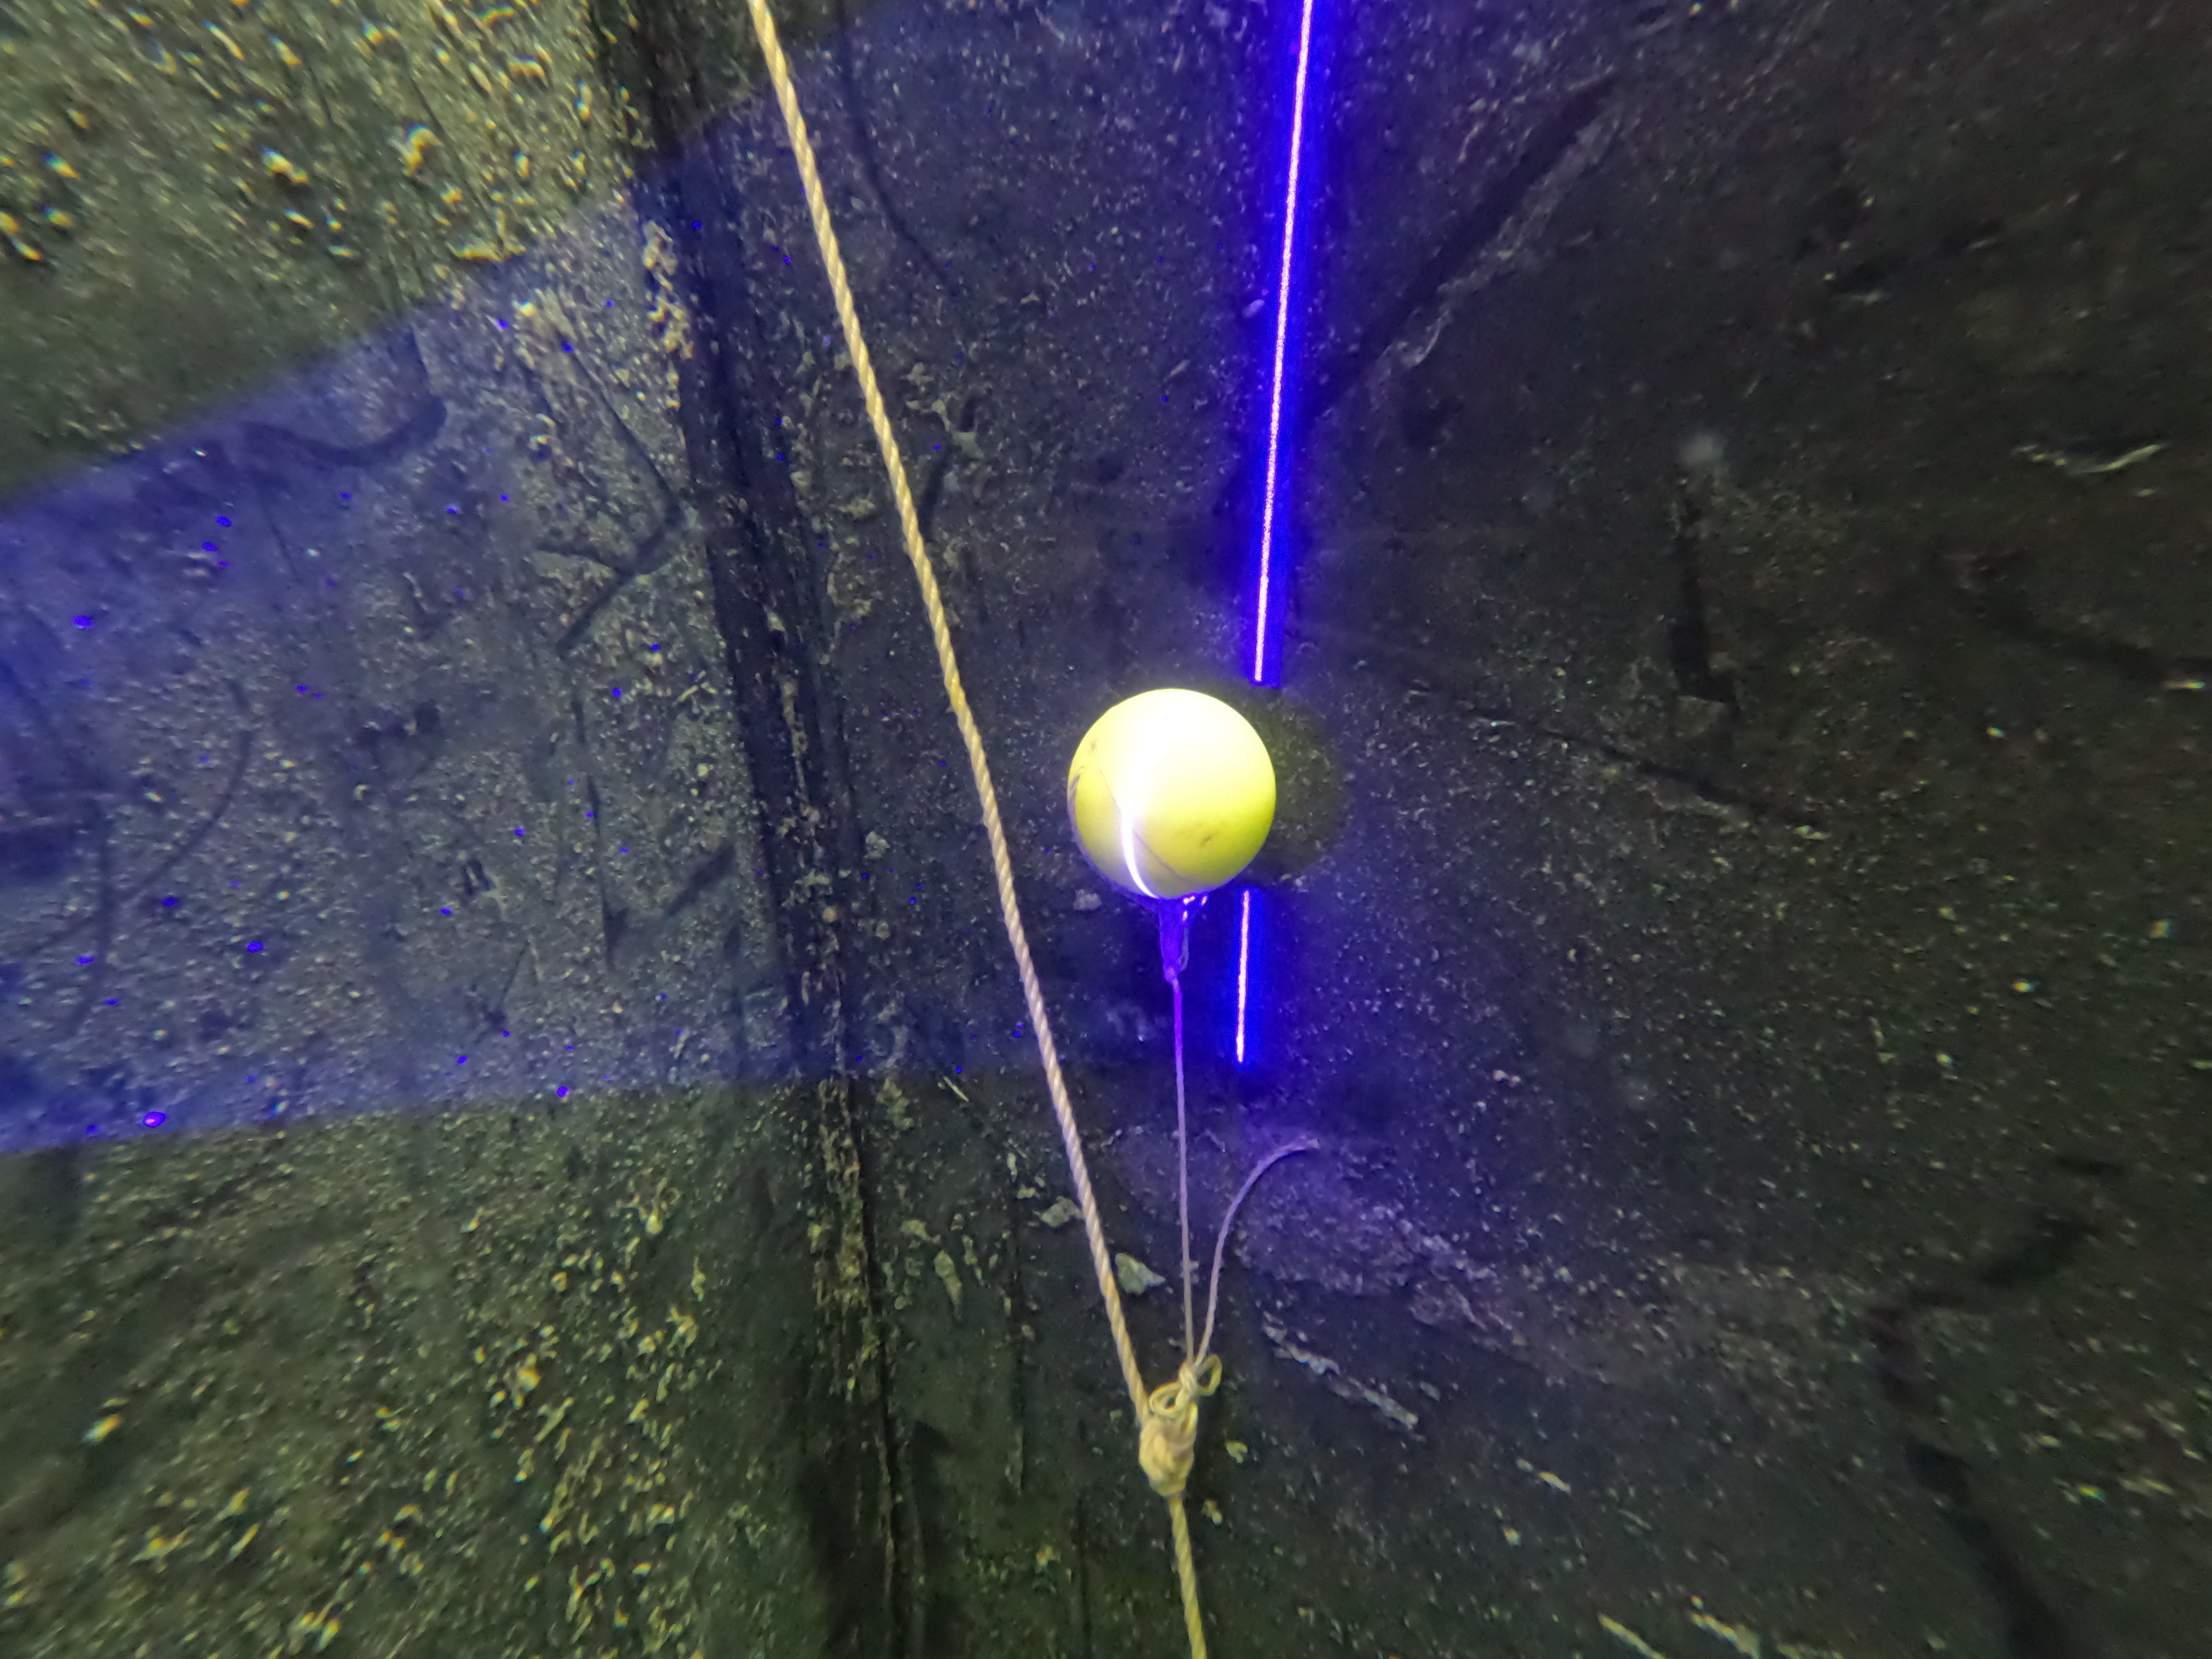

Supplement: Supplementary file 2897 [file G0030397.pdf › 2/G0030397.pdf]

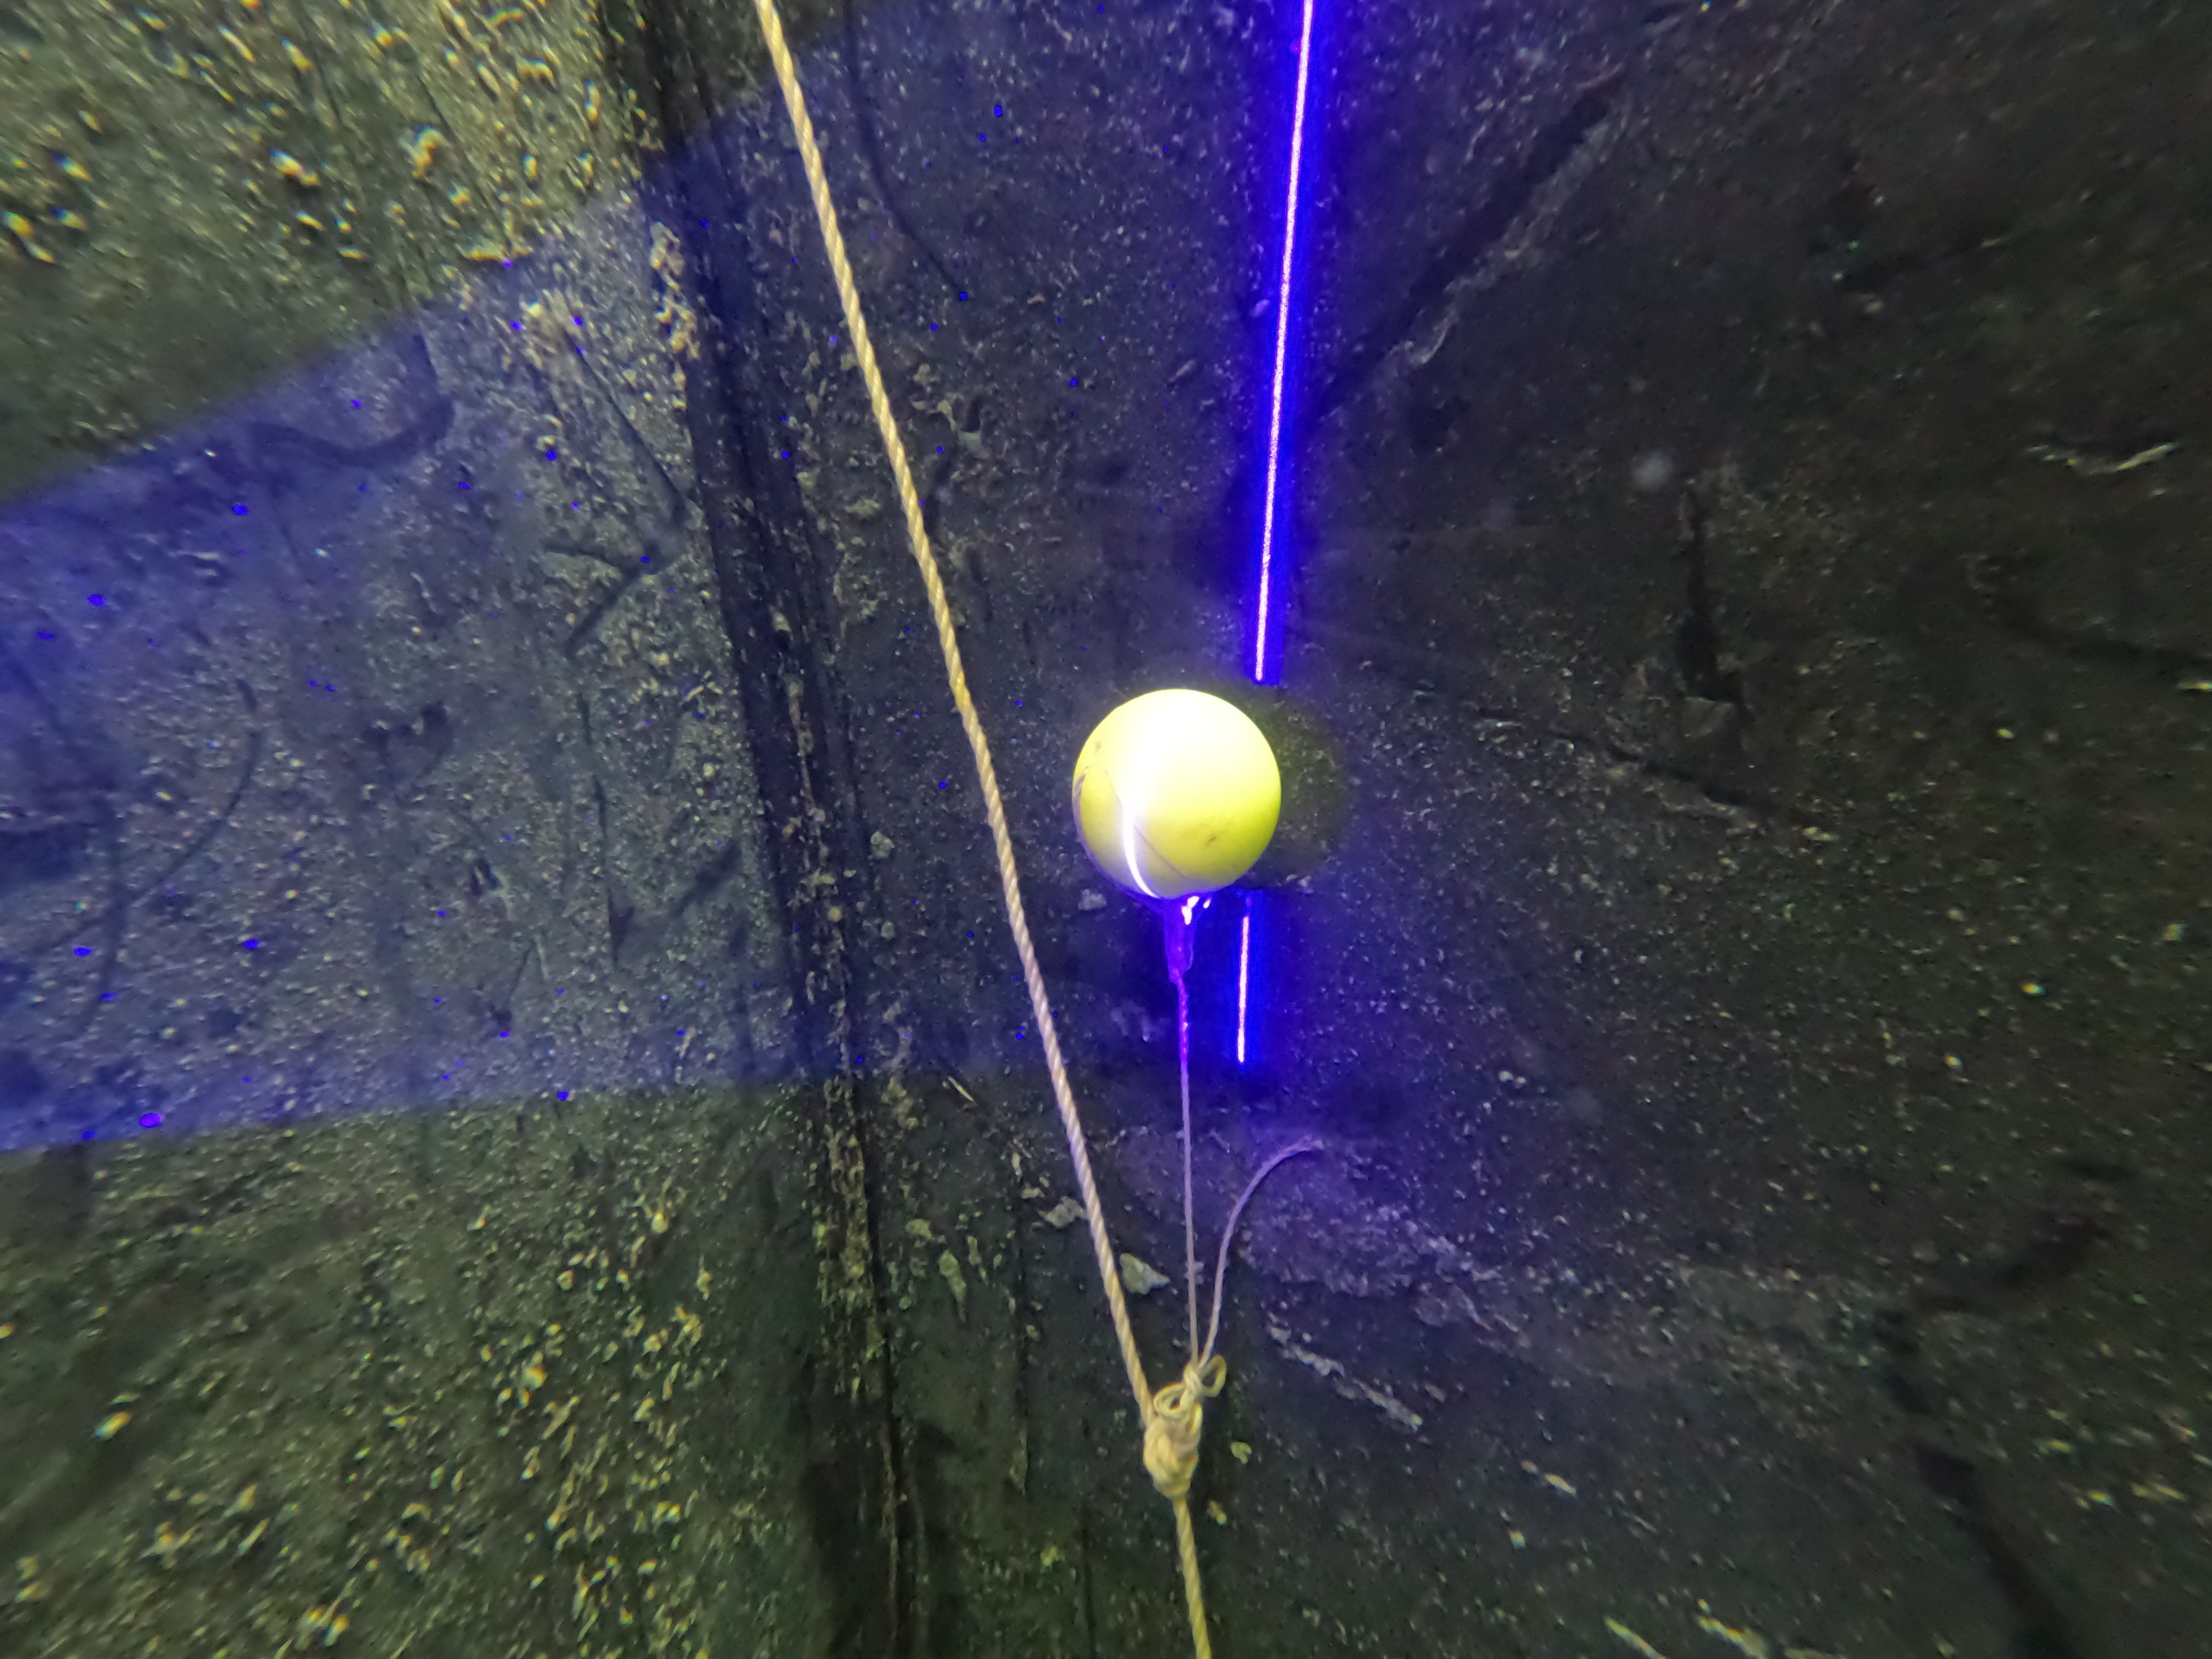

Supplement: Supplementary file 2898 [file G0030398.pdf › 2/G0030398.pdf]

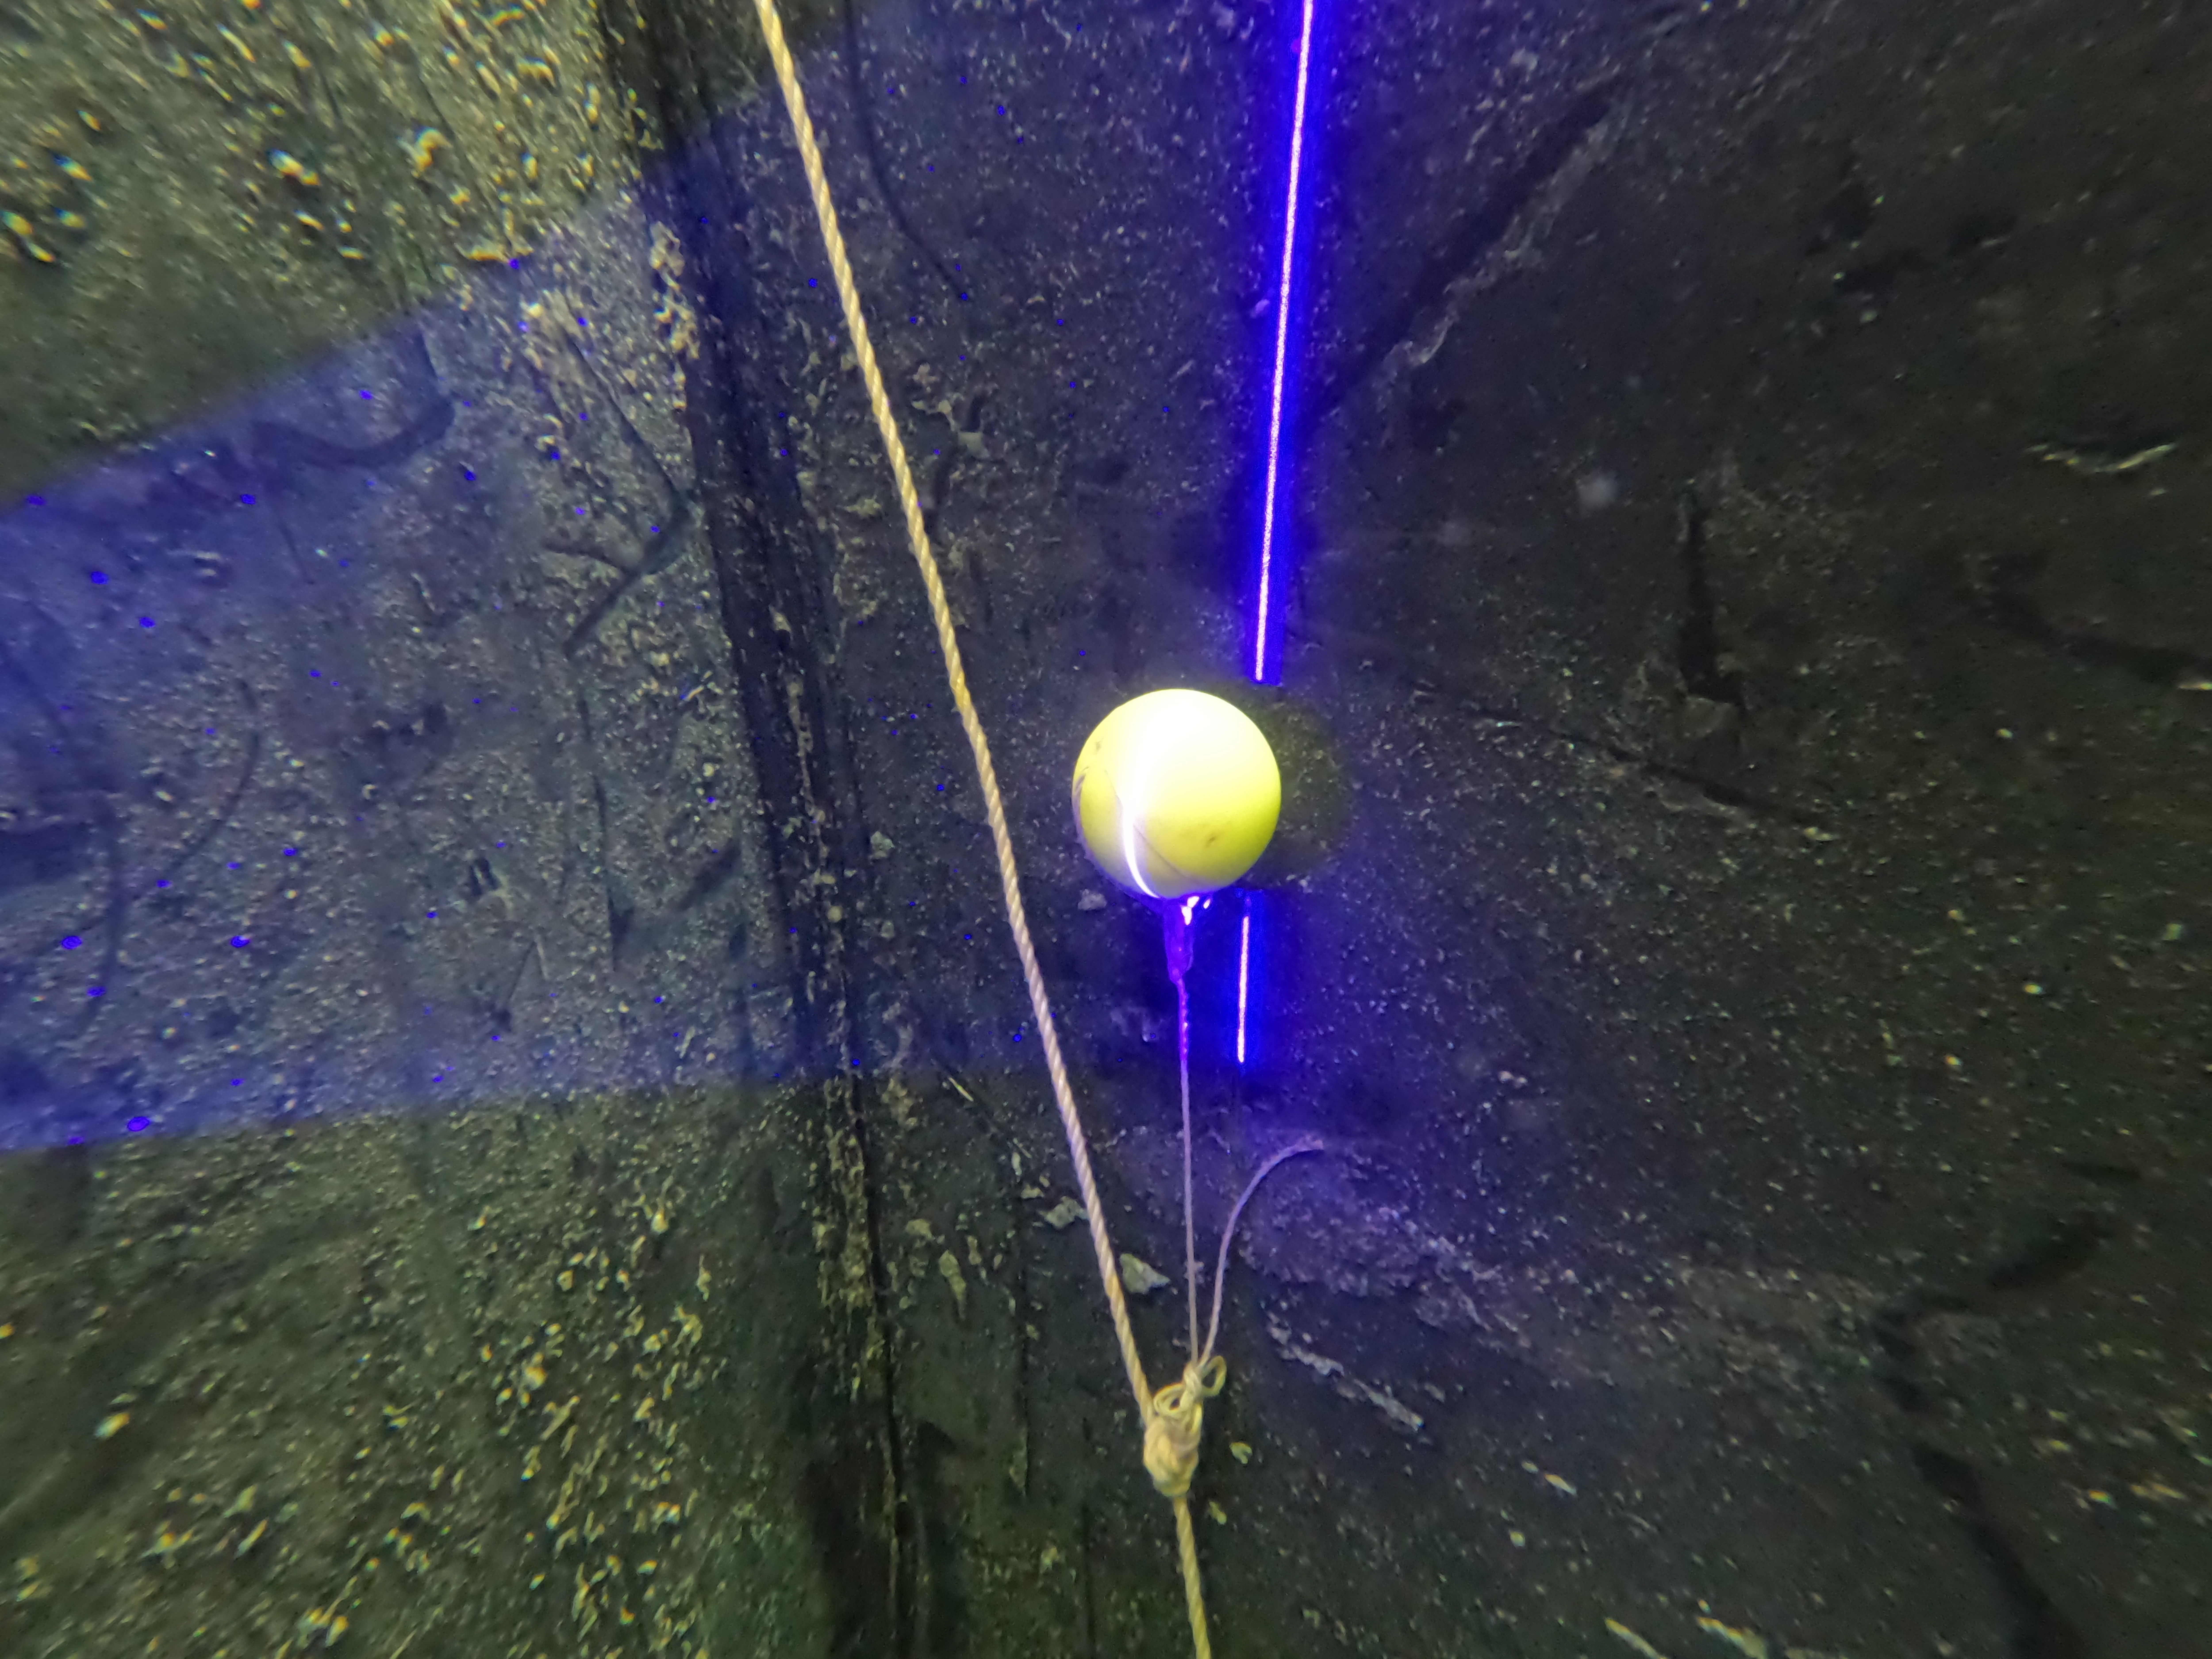

Supplement: Supplementary file 2899 [file G0030399.pdf › 2/G0030399.pdf]

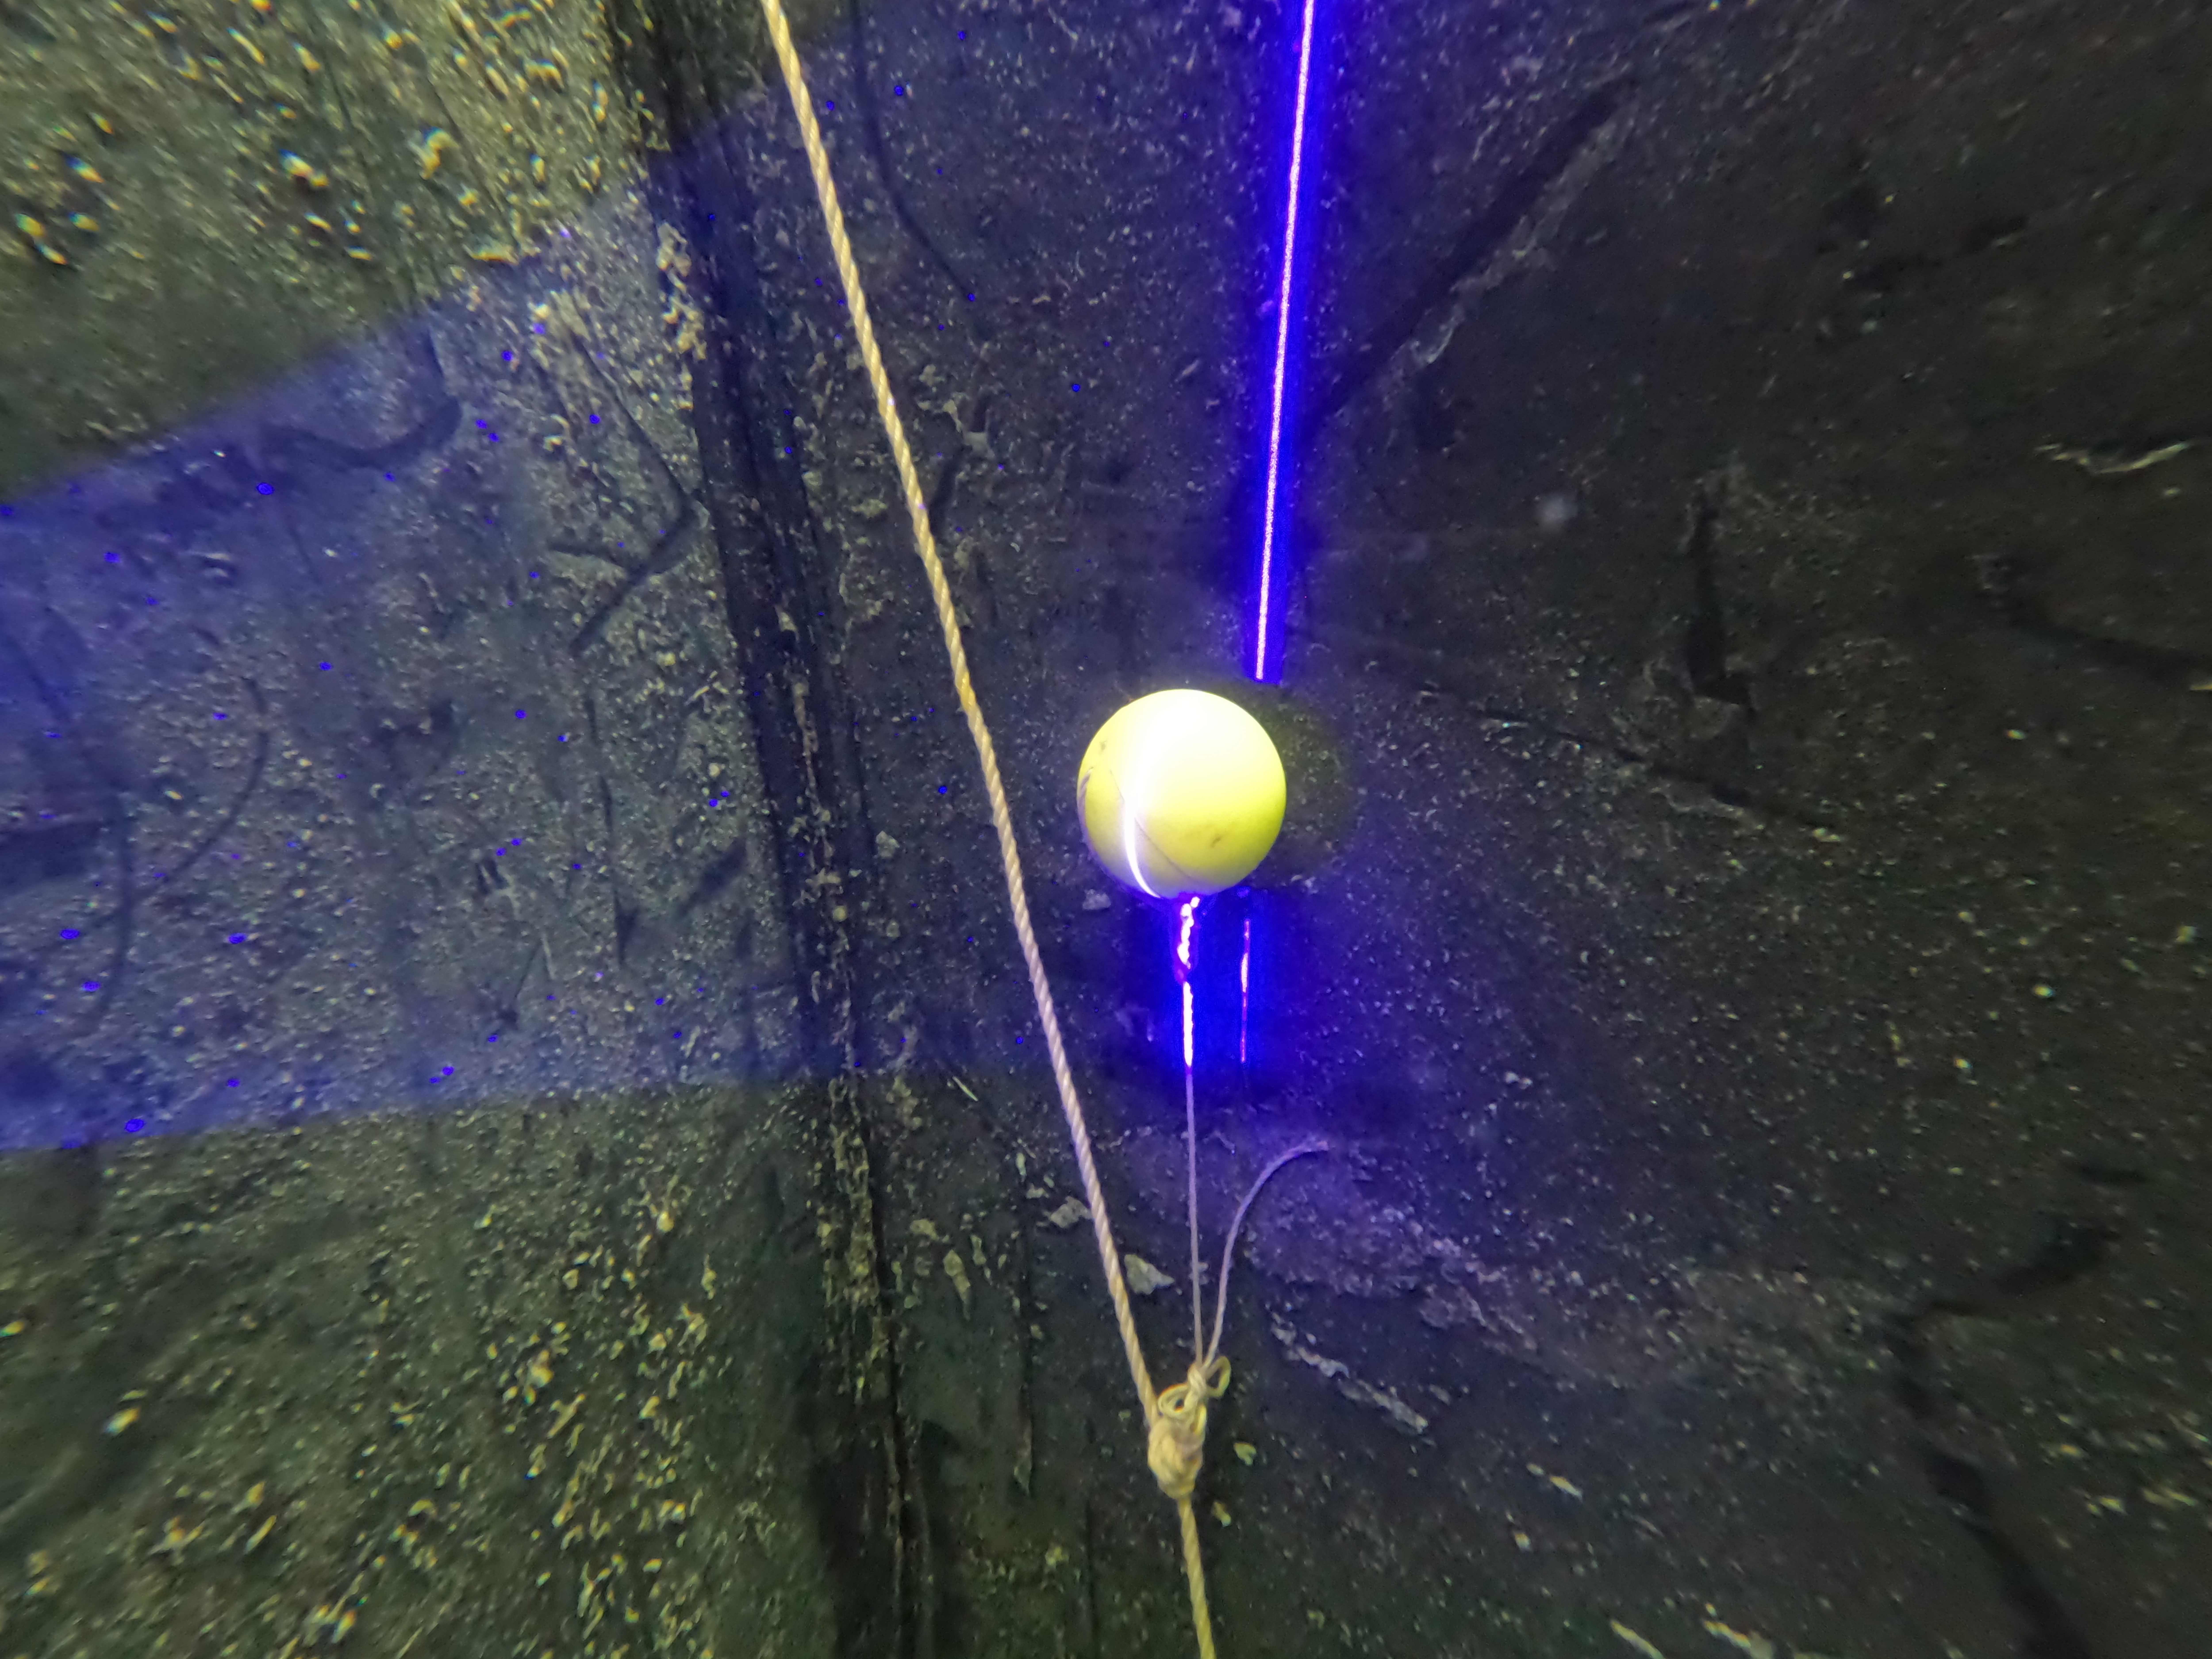

Supplement: Supplementary file 2900 [file G0030400.pdf › 2/G0030400.pdf]

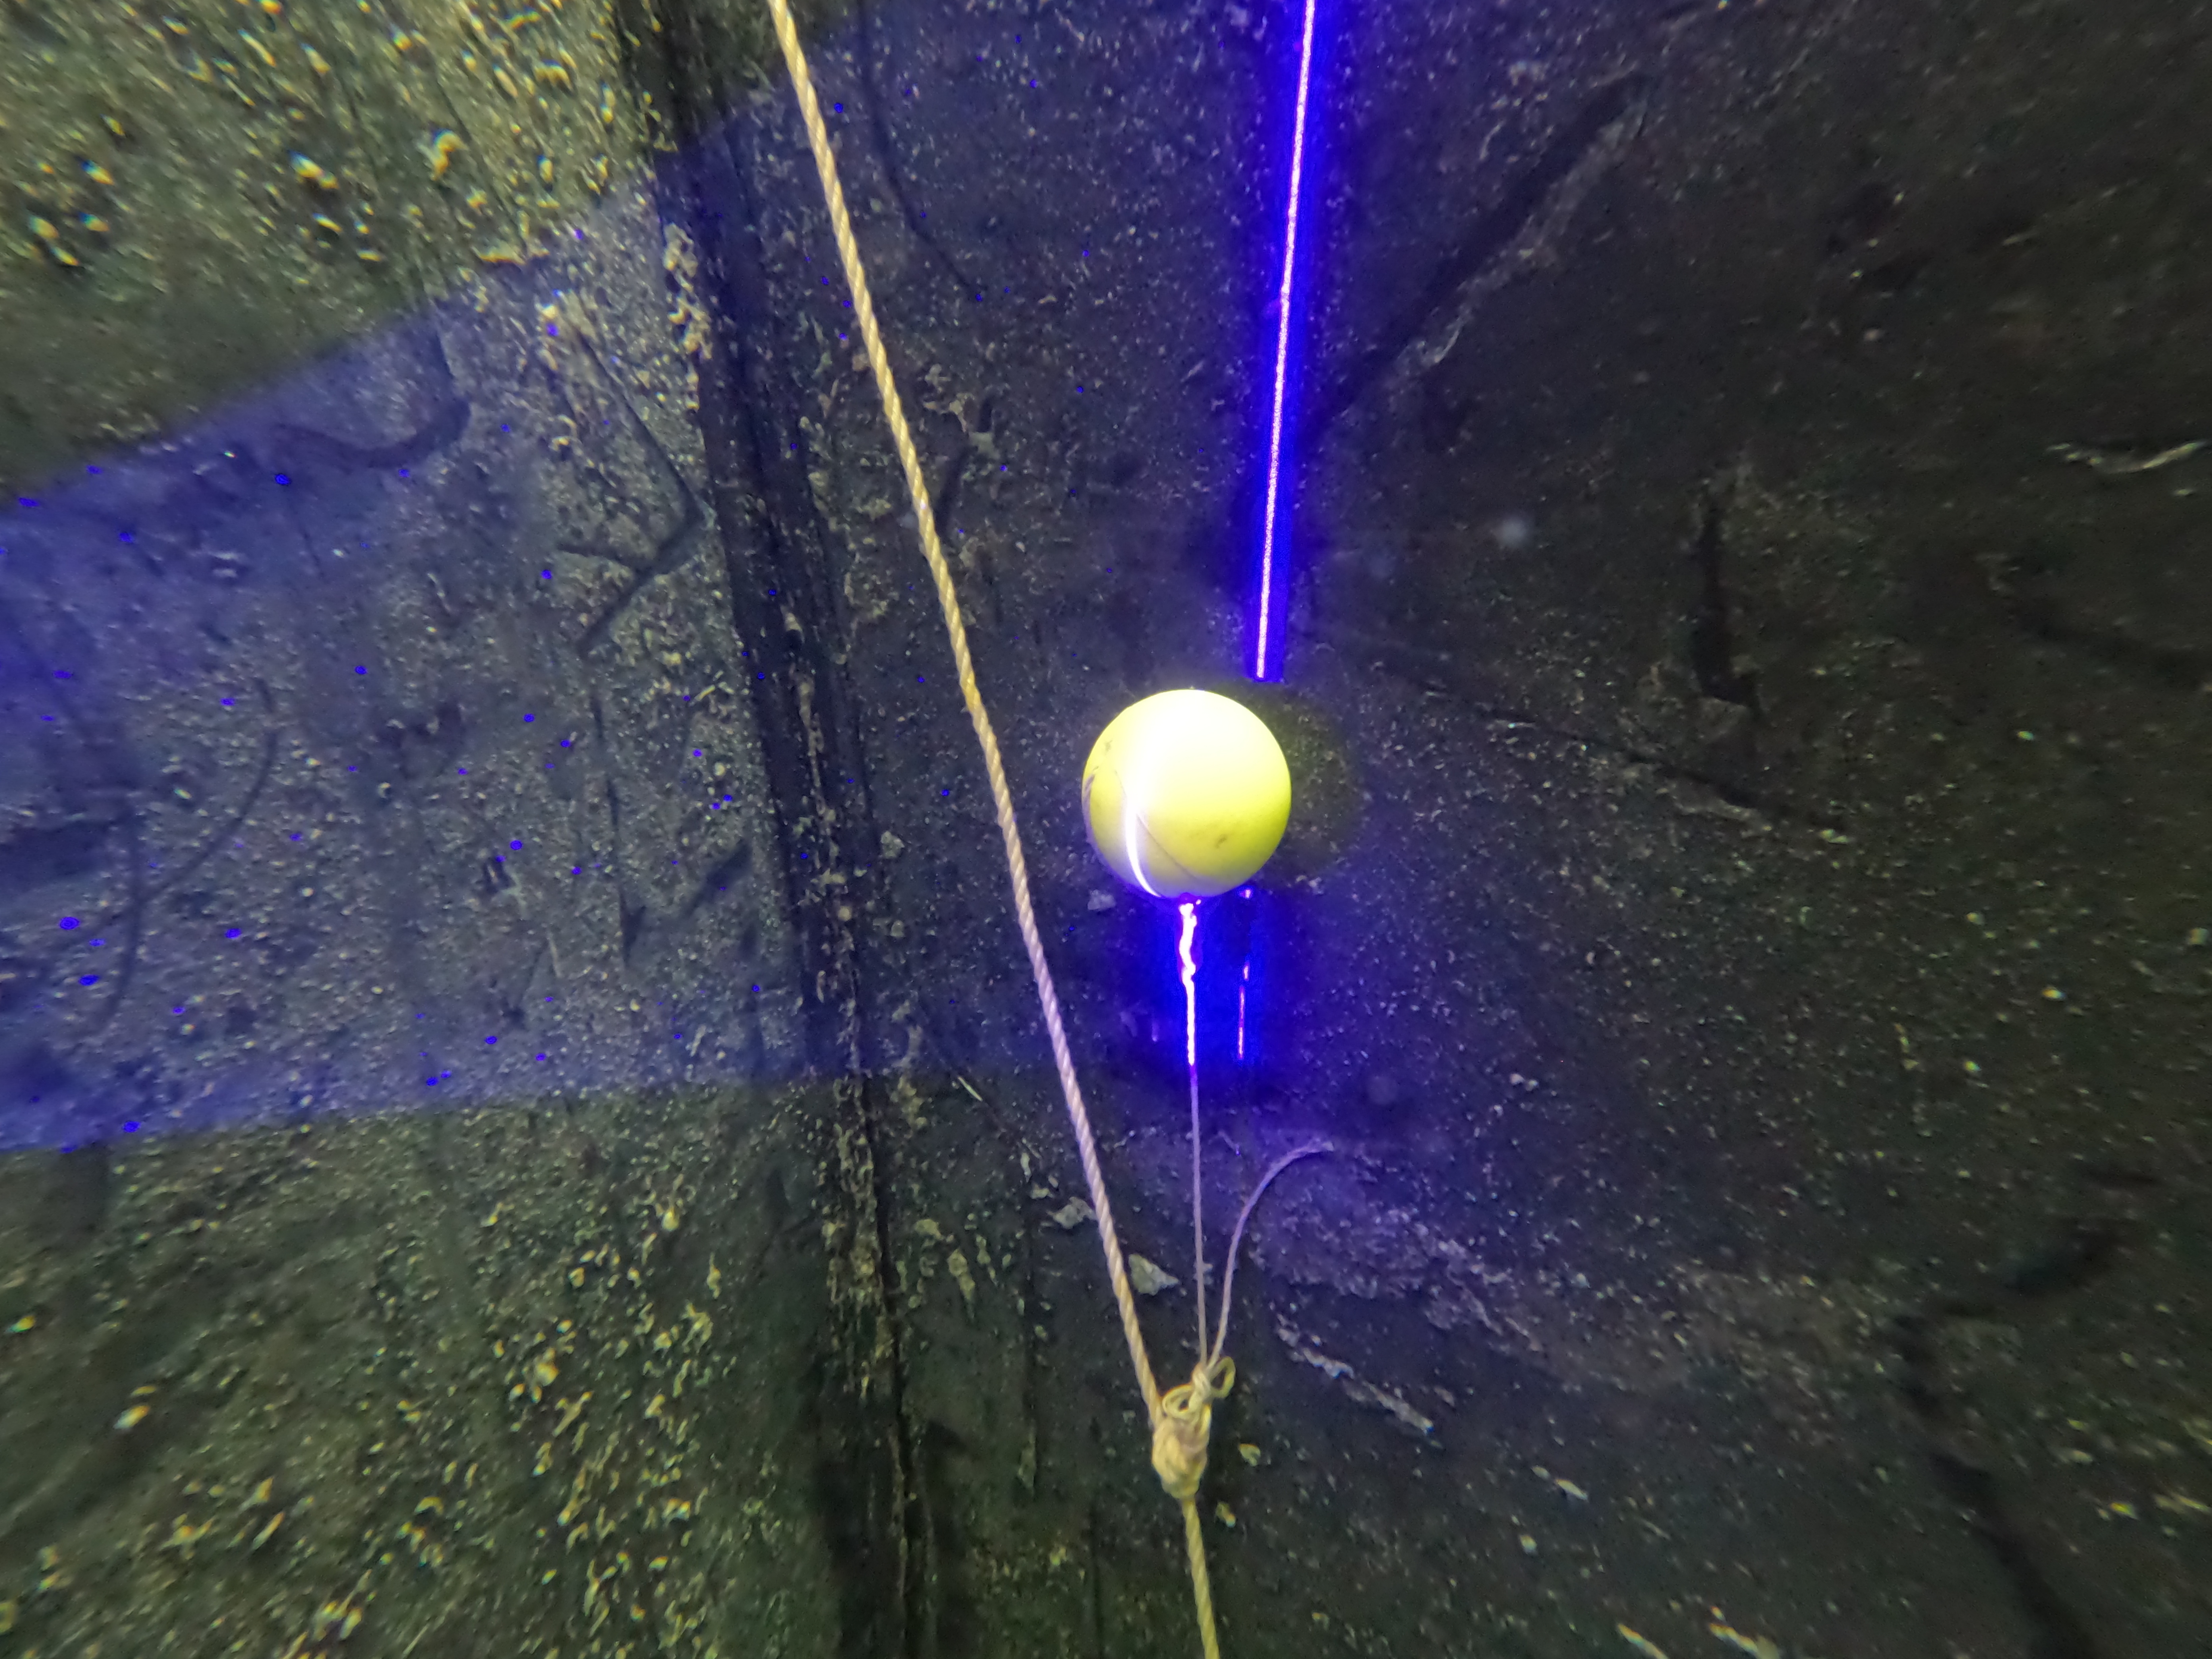

Supplement: Supplementary file 2901 [file G0030401.pdf › 2/G0030401.pdf]

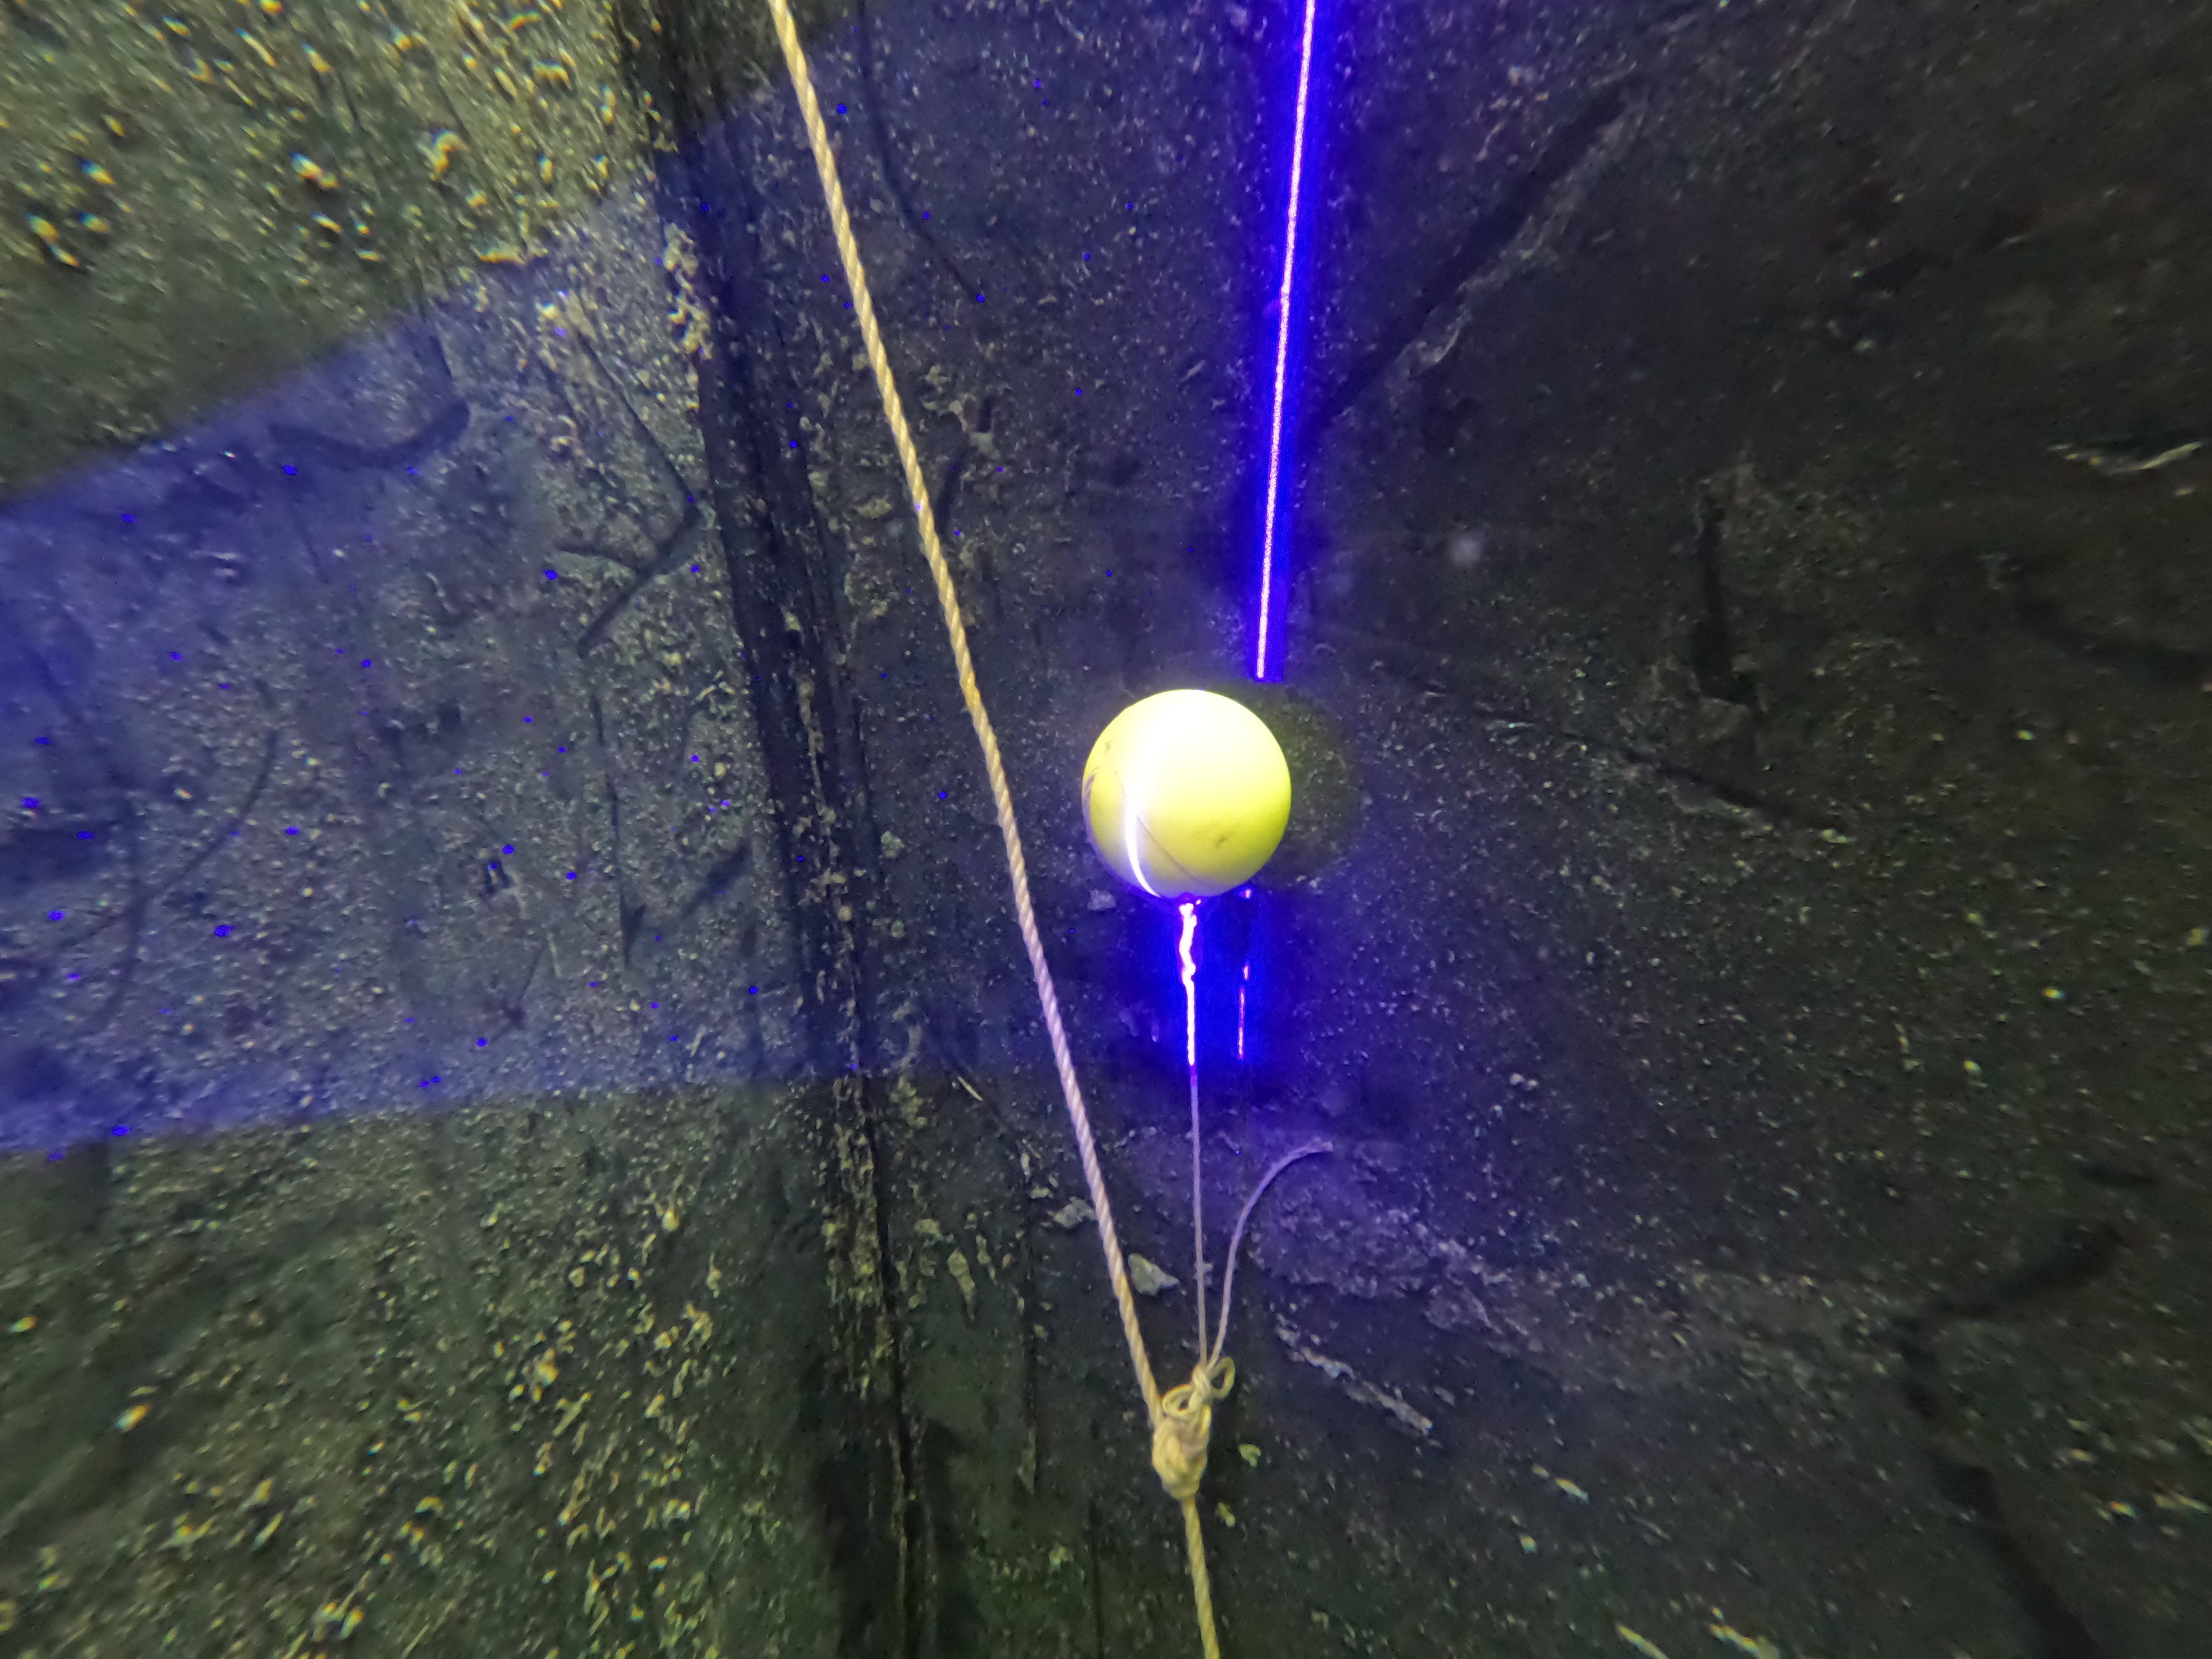

Supplement: Supplementary file 2902 [file G0030402.pdf › 2/G0030402.pdf]

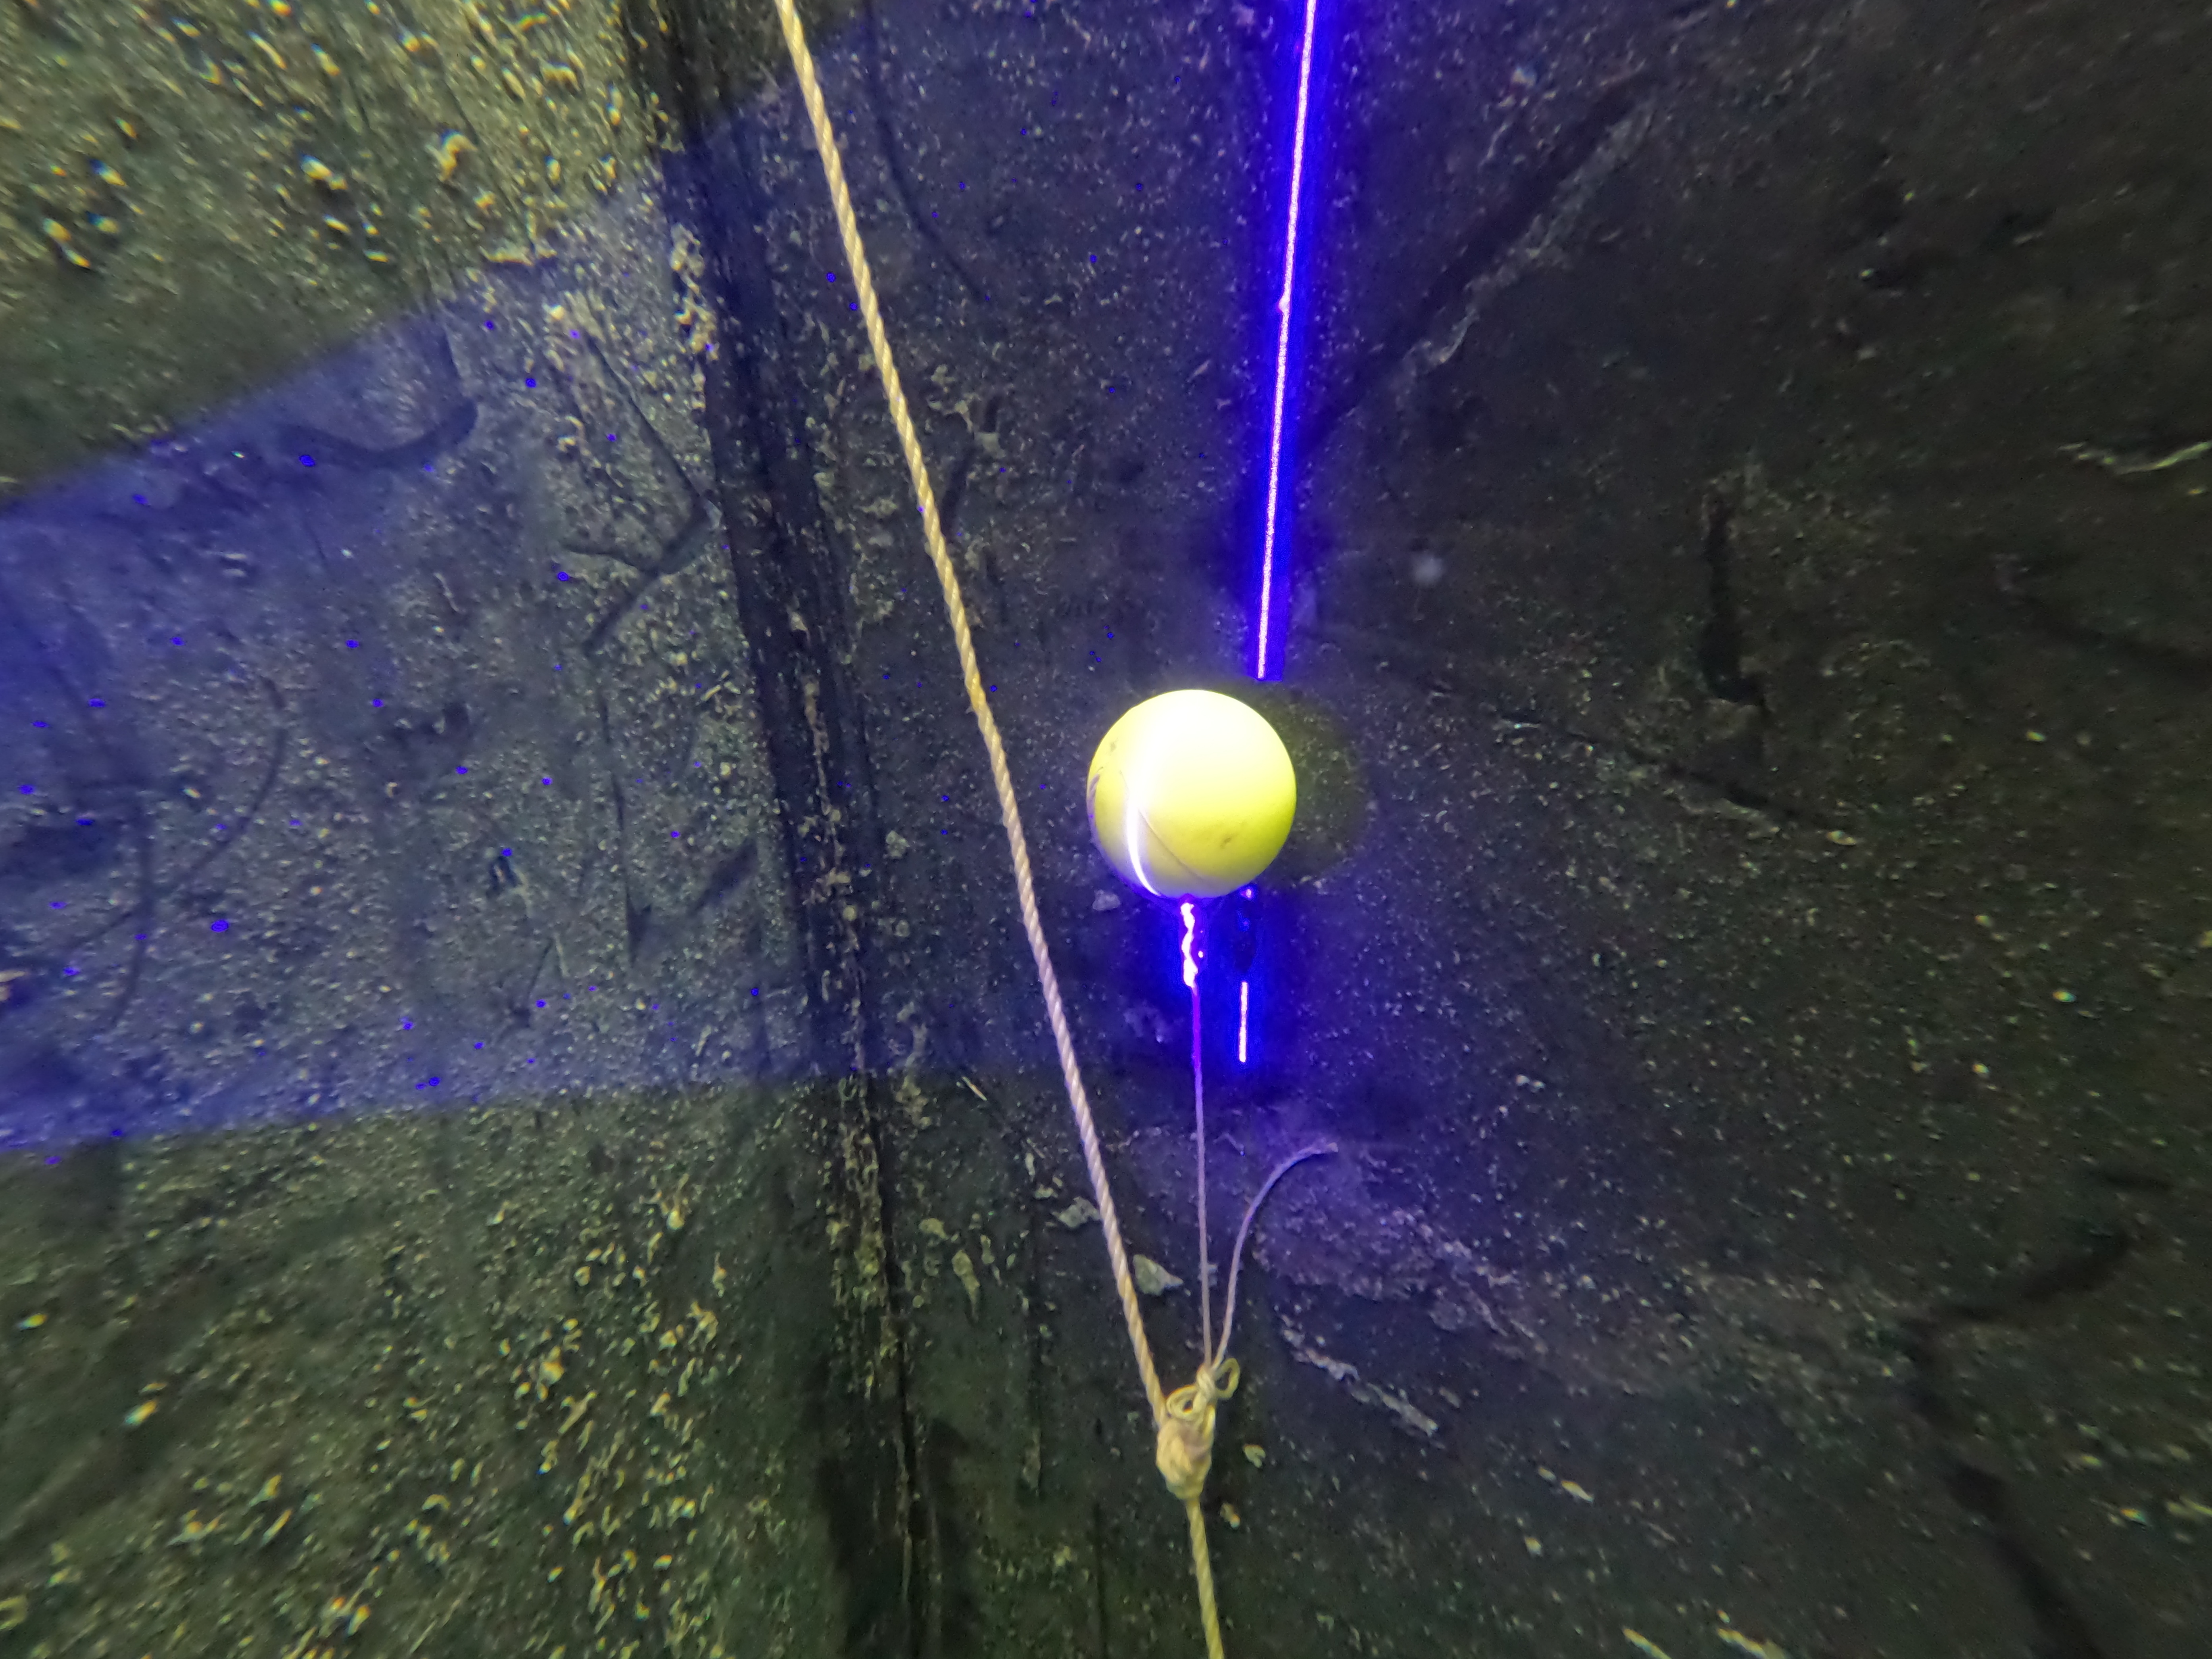

Supplement: Supplementary file 2903 [file G0030403.pdf › 2/G0030403.pdf]

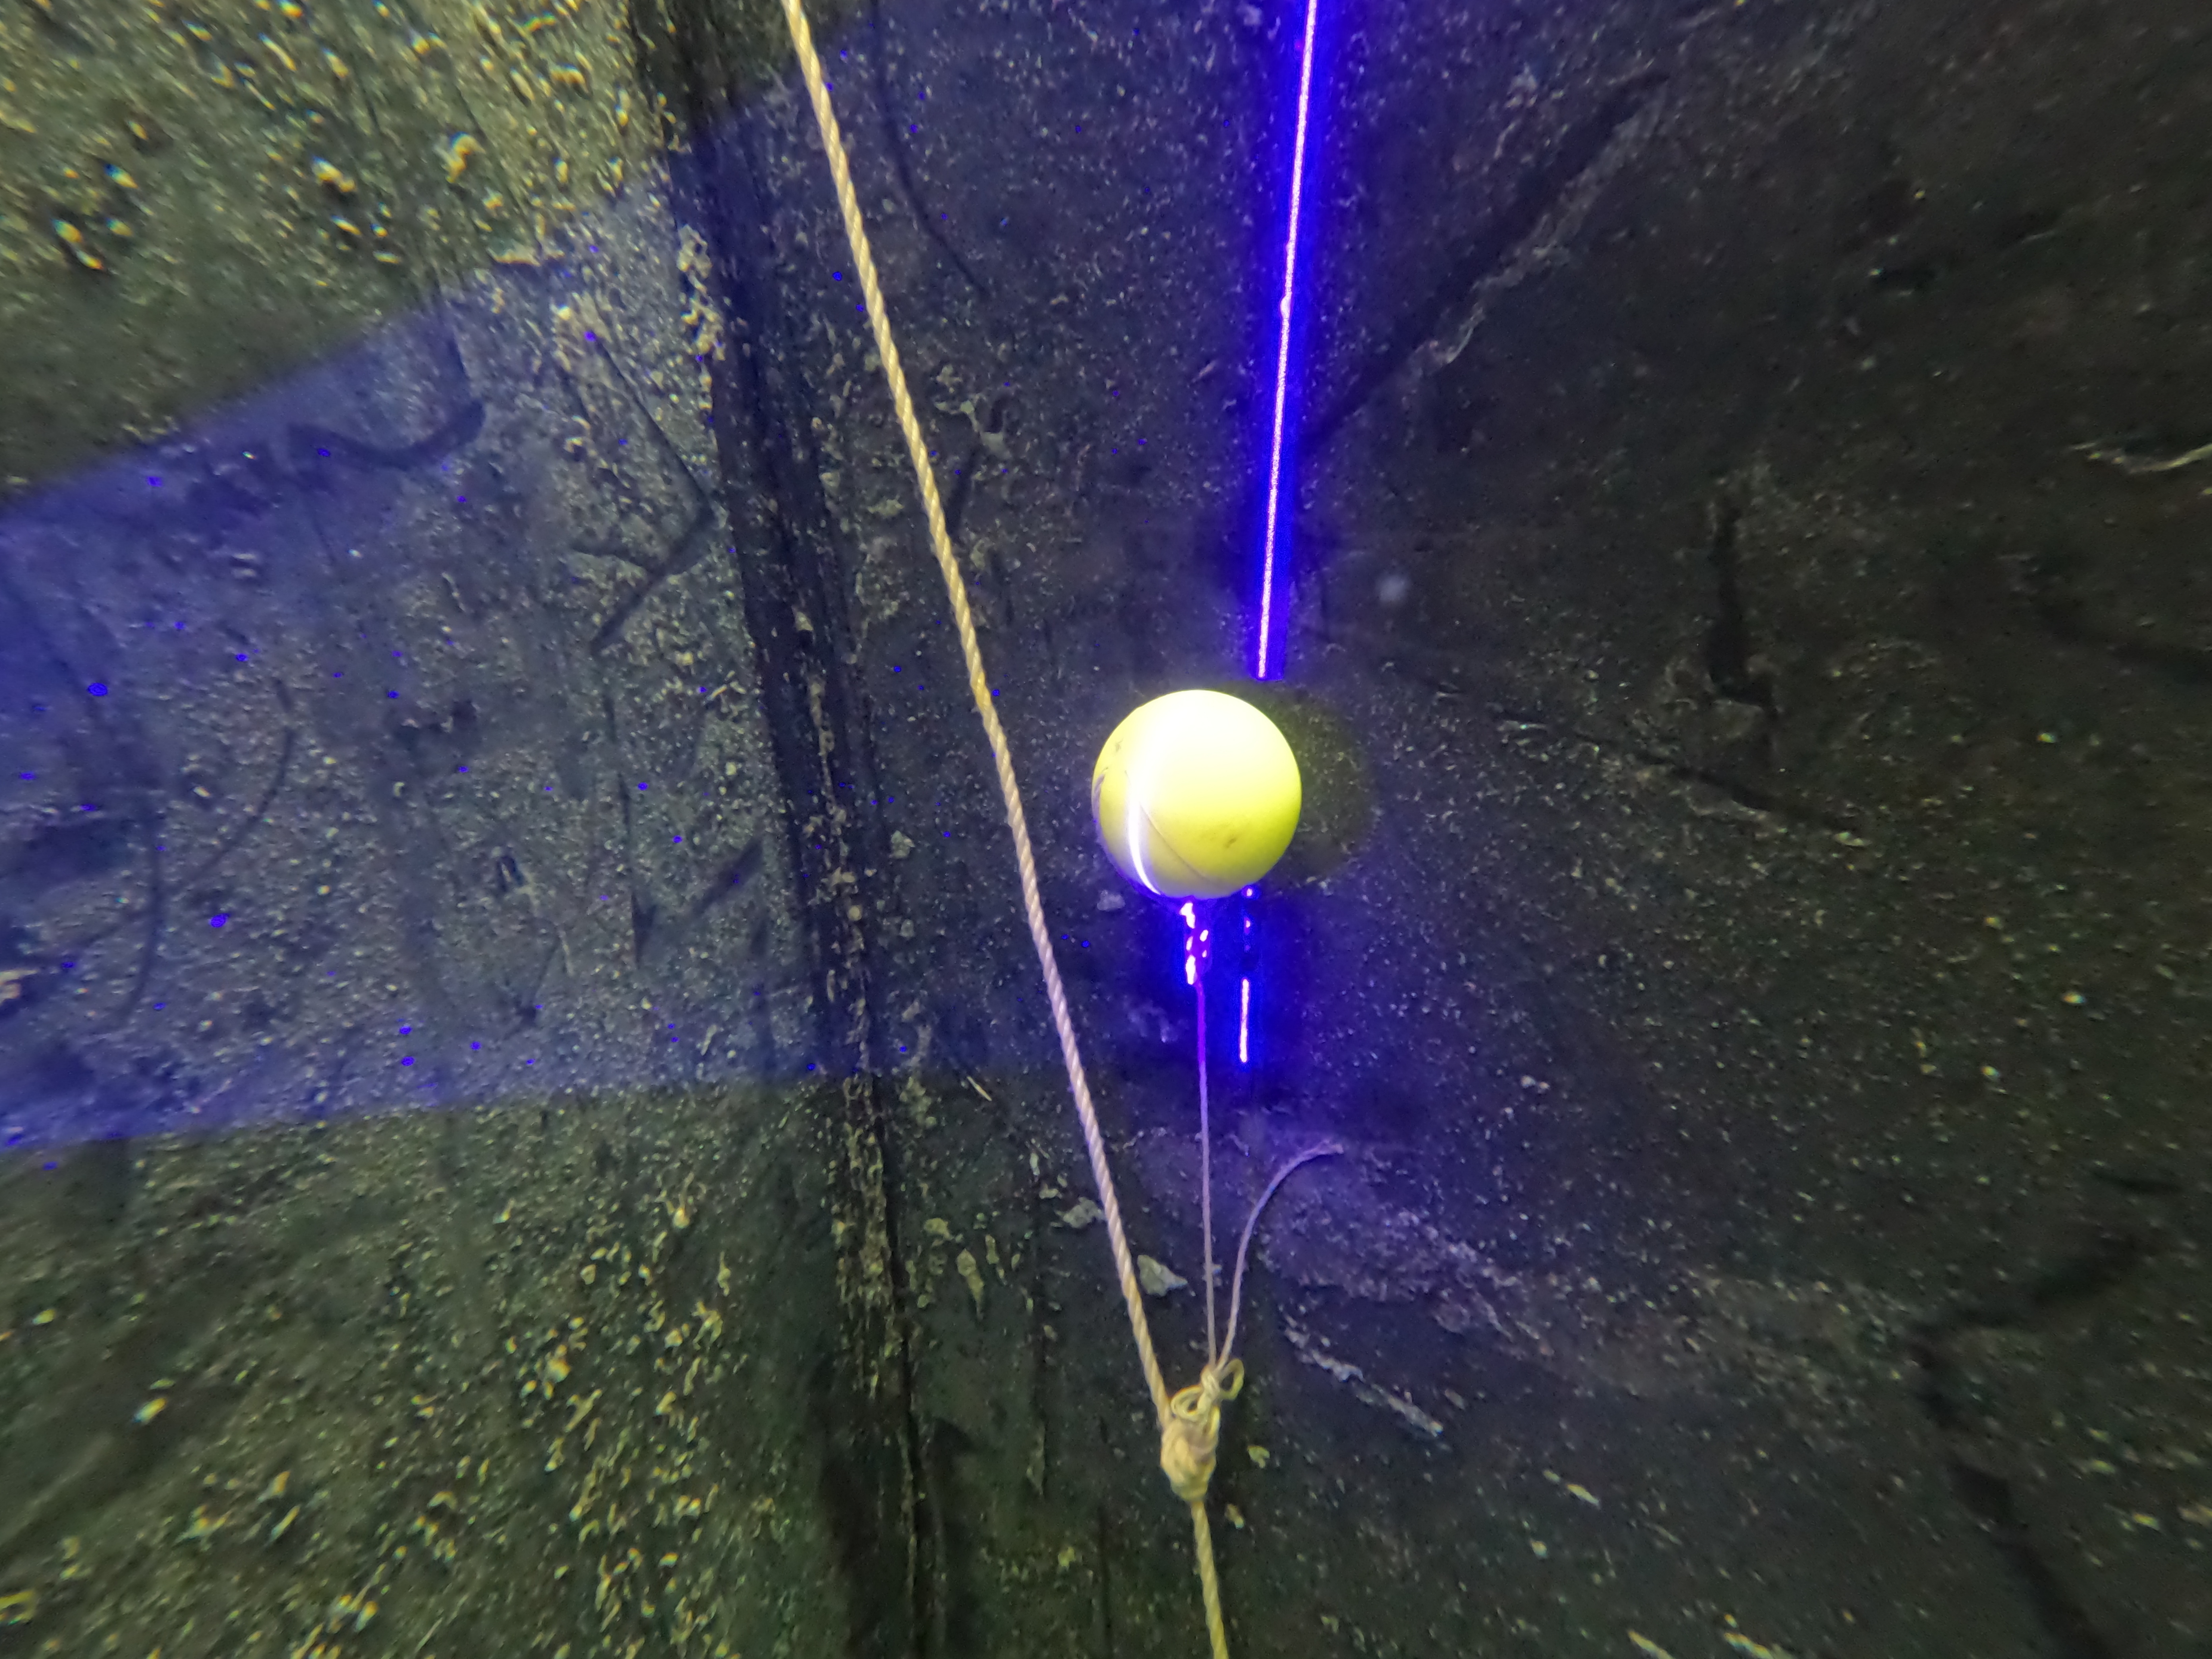

Supplement: Supplementary file 2904 [file G0030404.pdf › 2/G0030404.pdf]

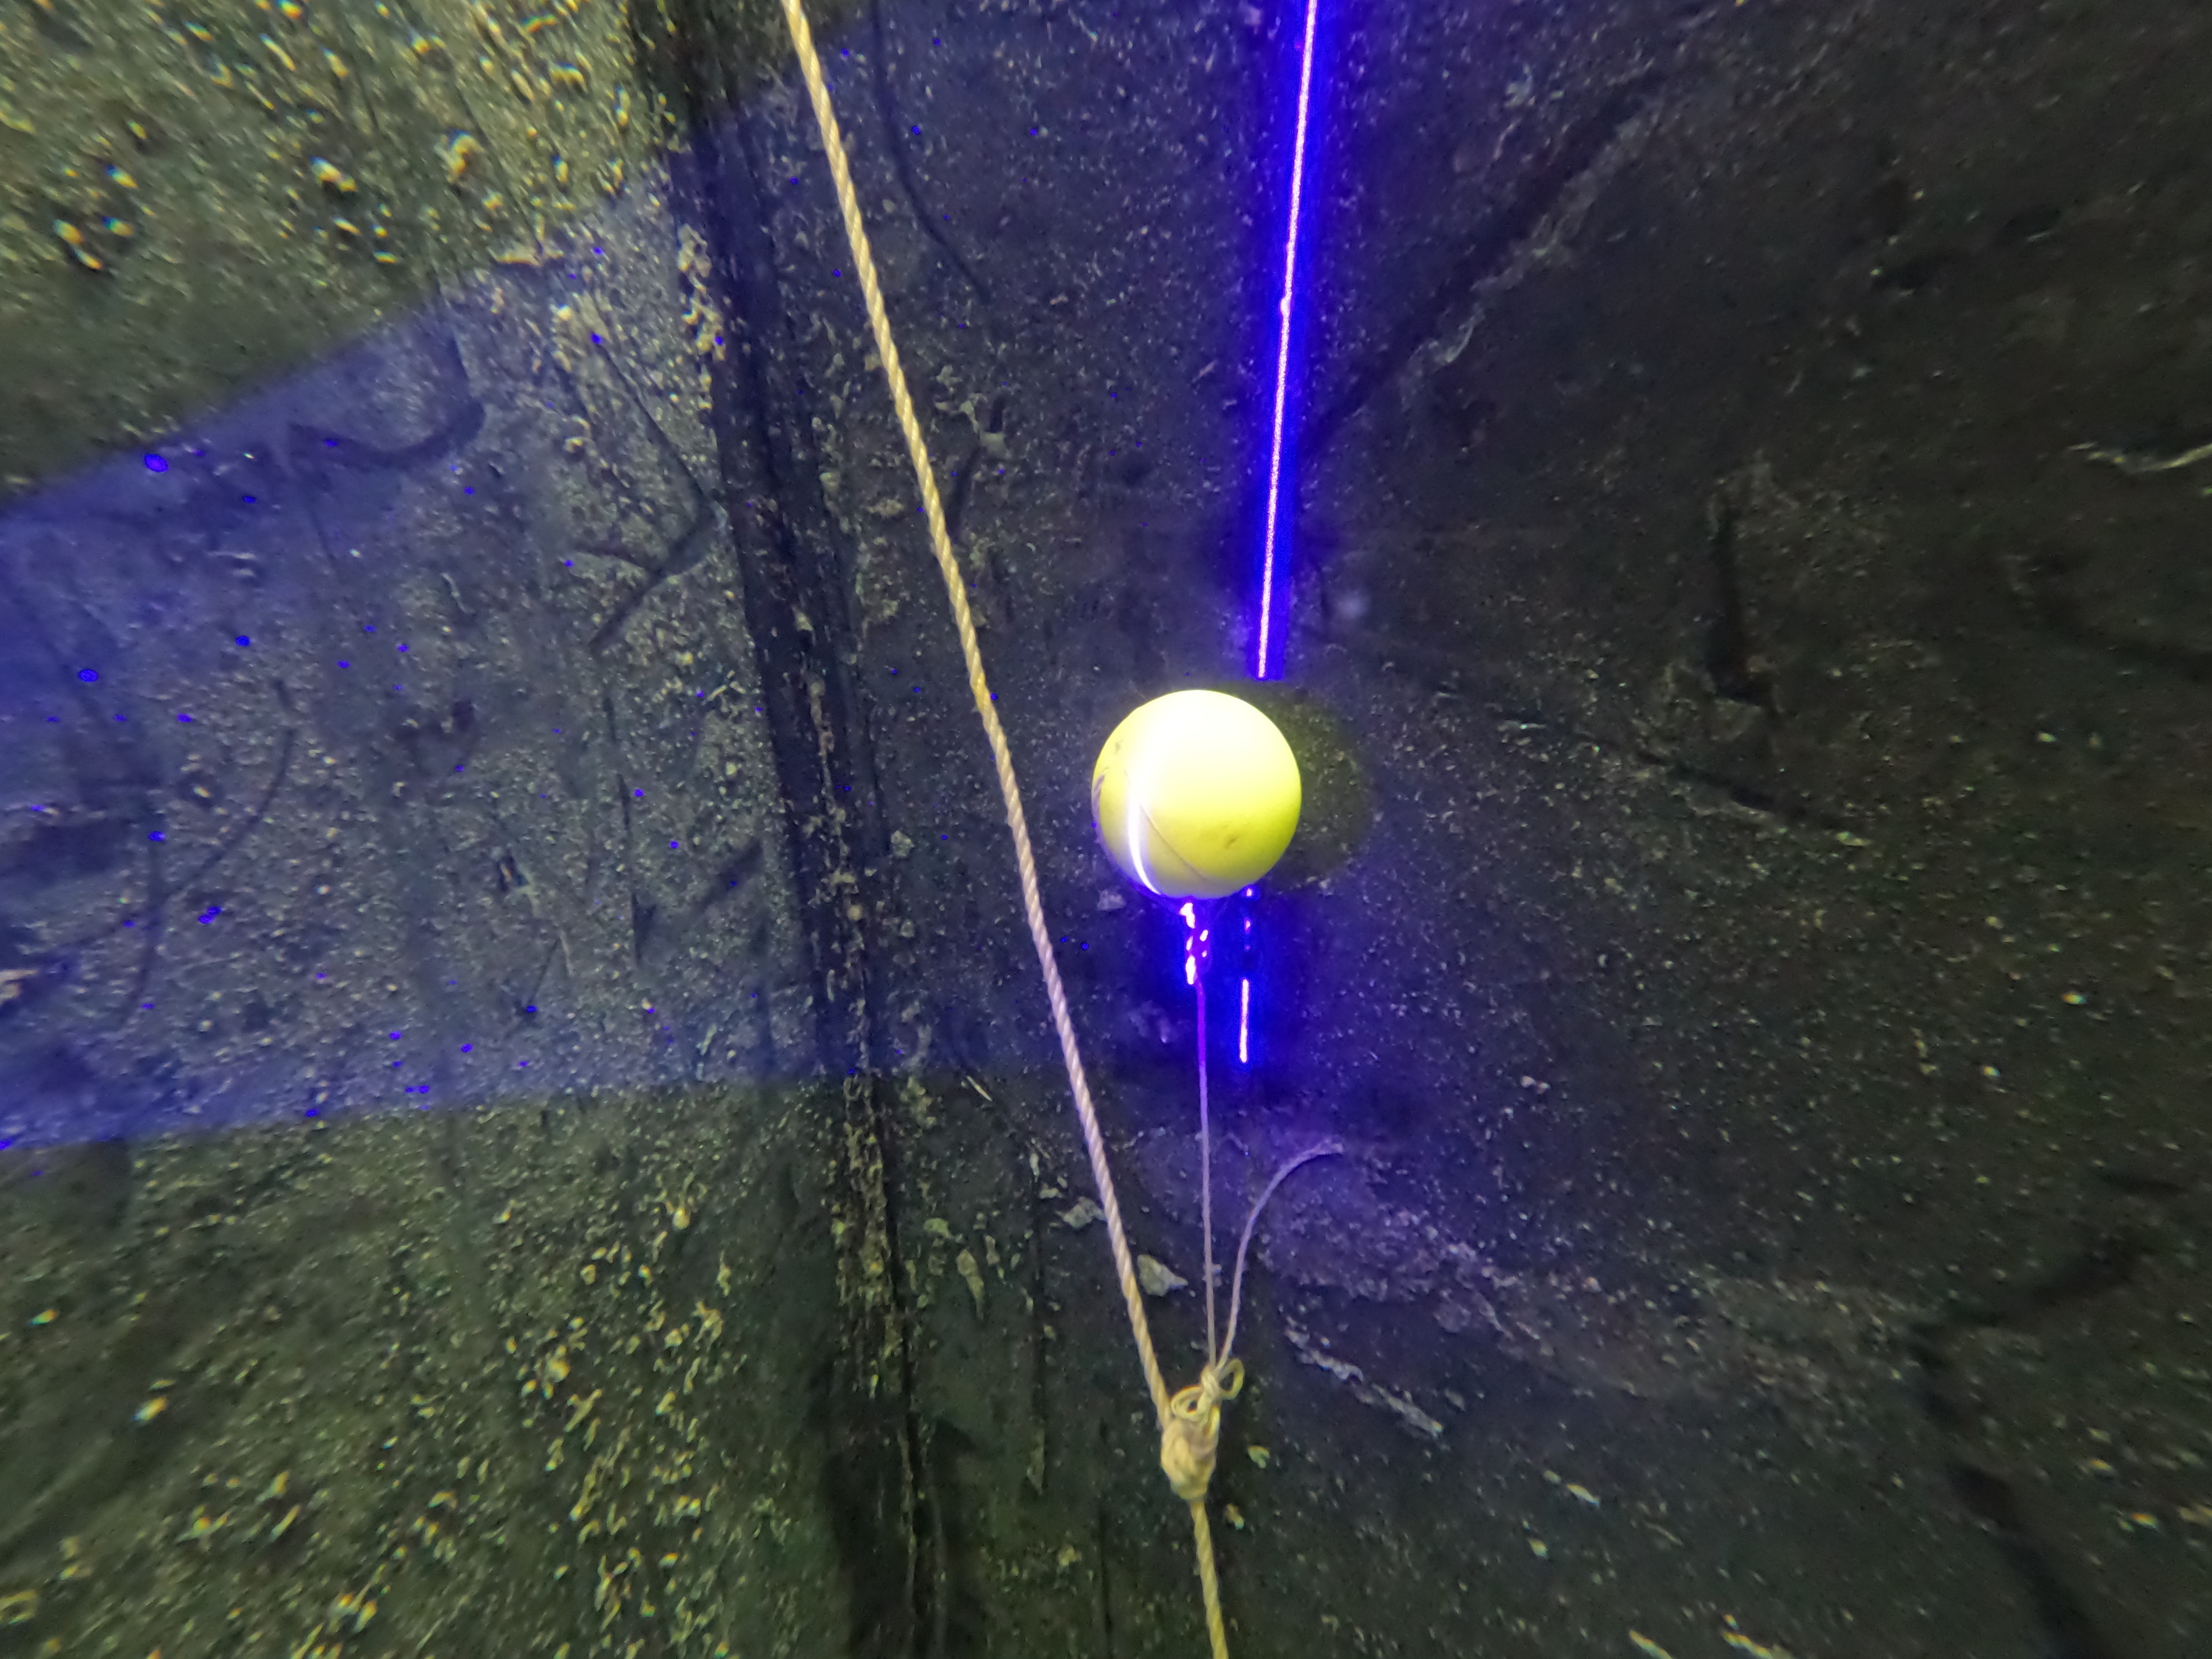

Supplement: Supplementary file 2905 [file G0030405.pdf › 2/G0030405.pdf]

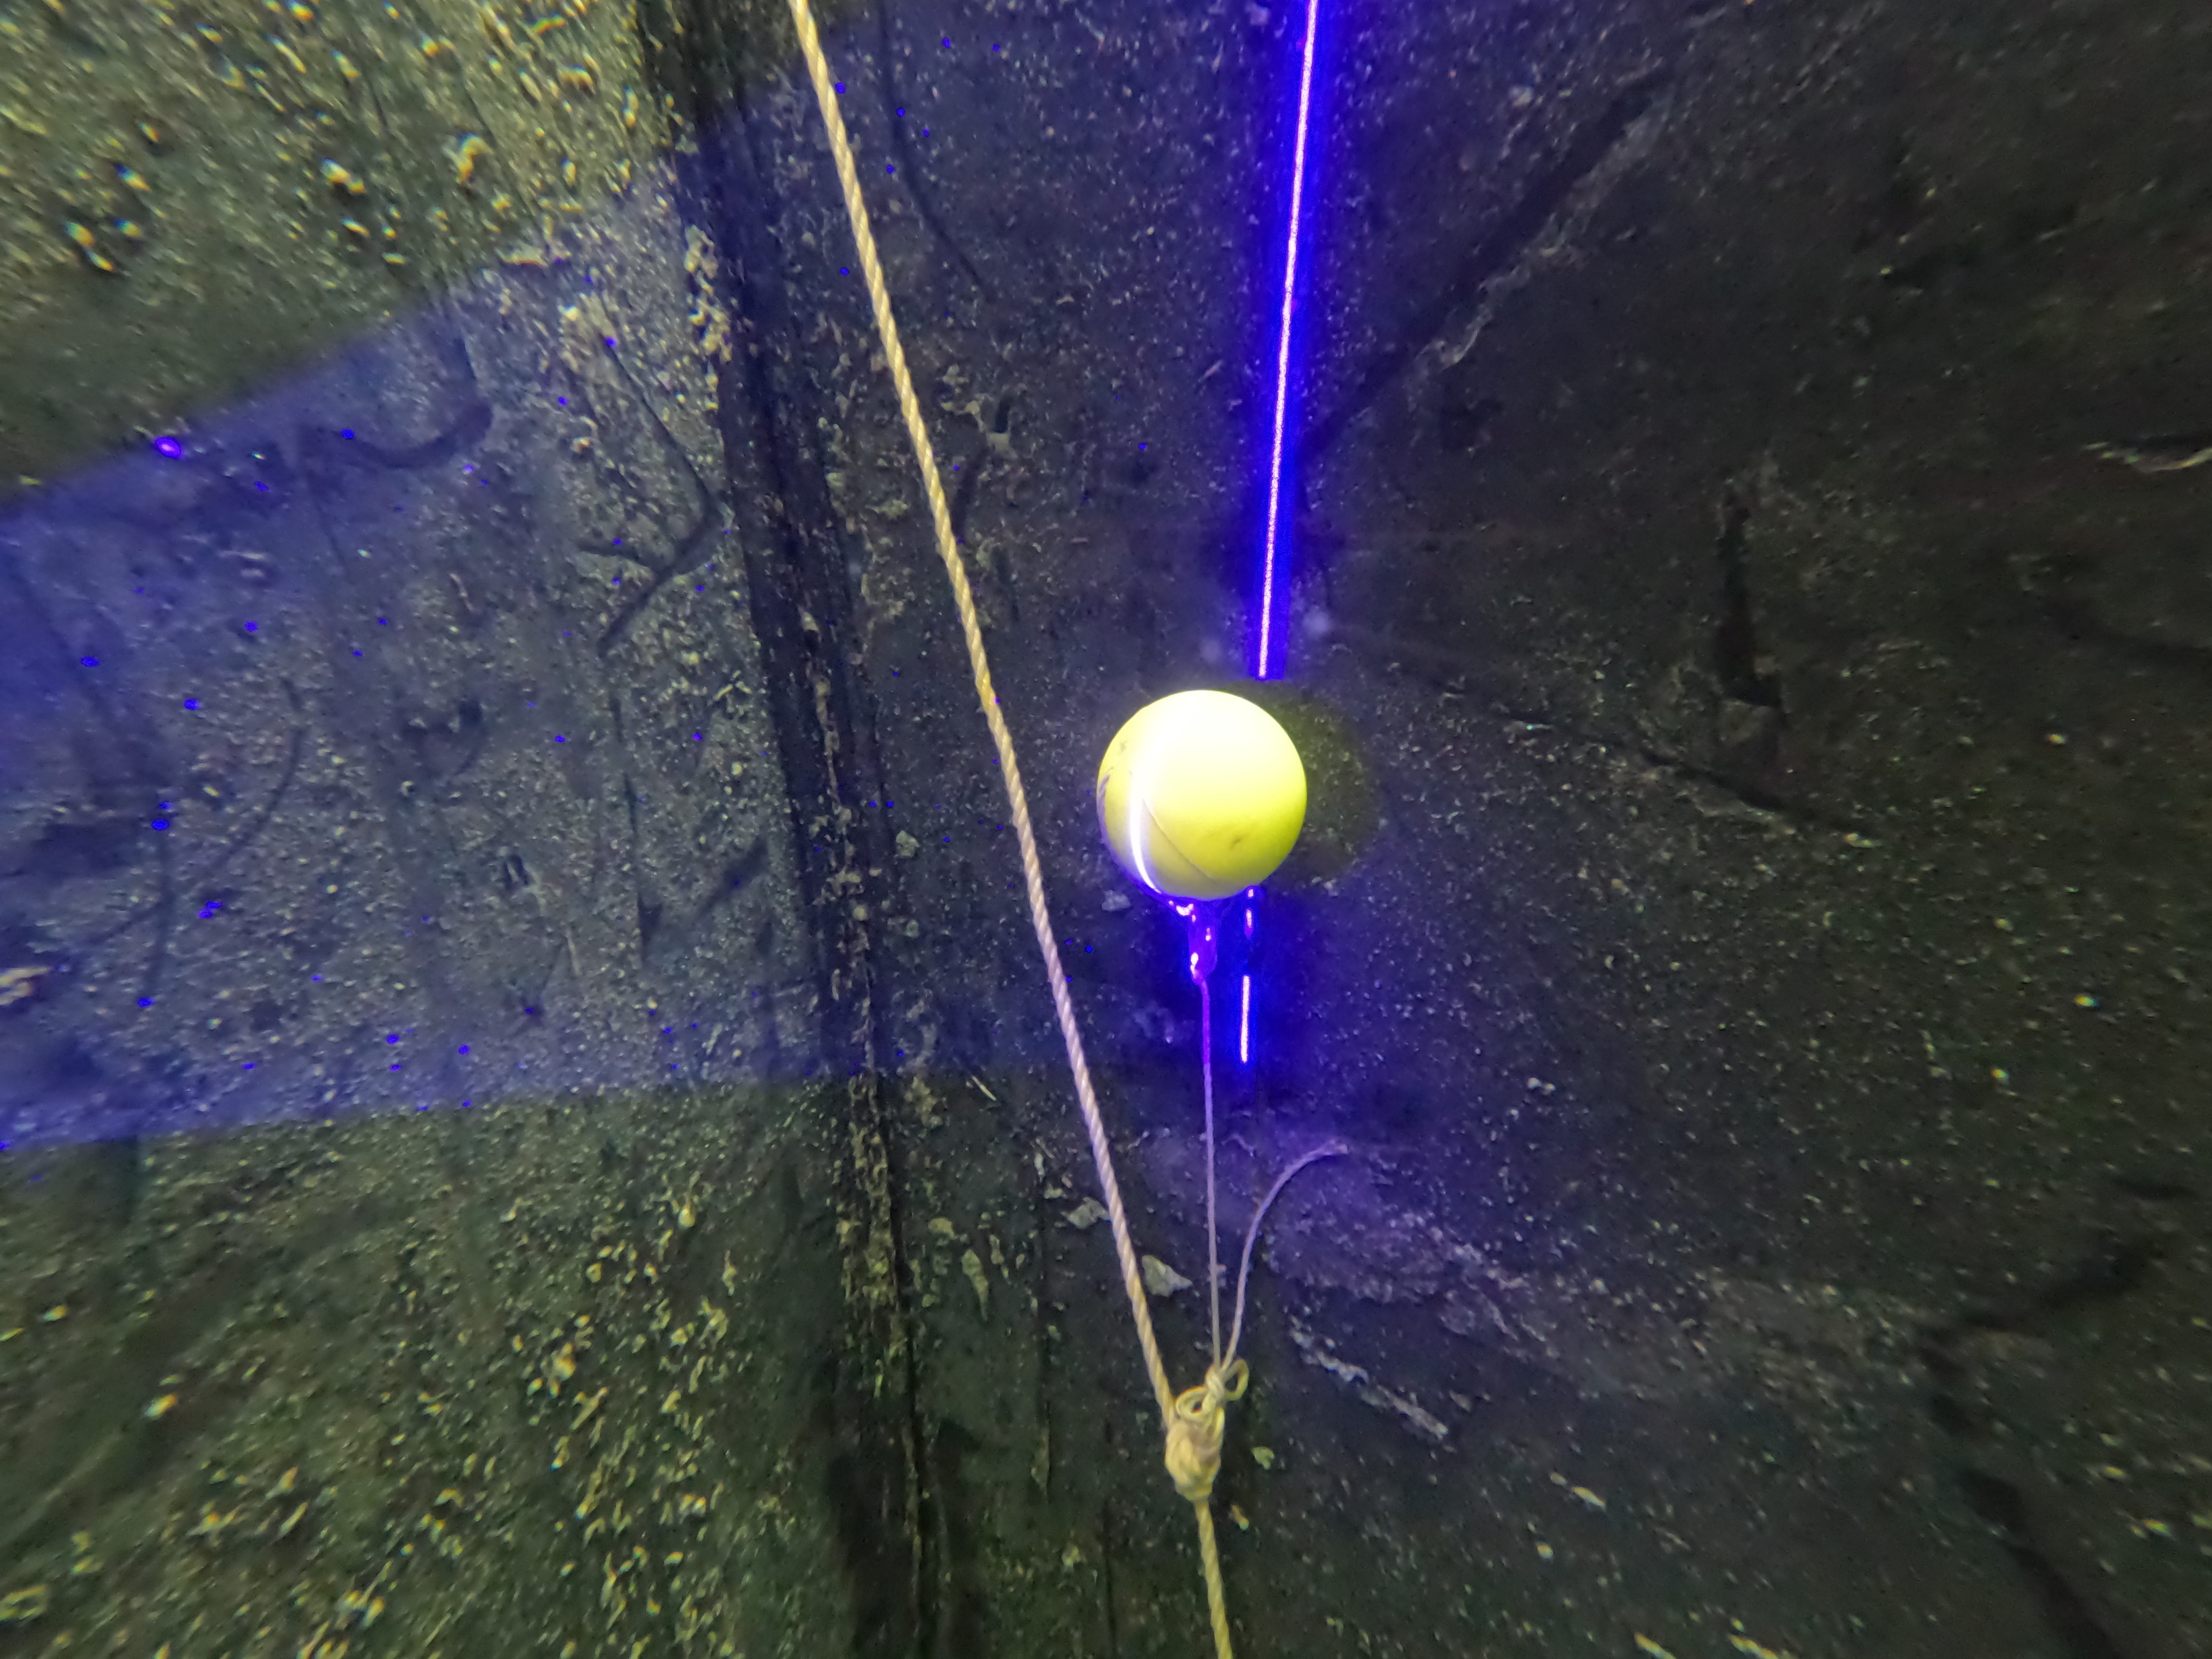

Supplement: Supplementary file 2906 [file G0030406.pdf › 2/G0030406.pdf]

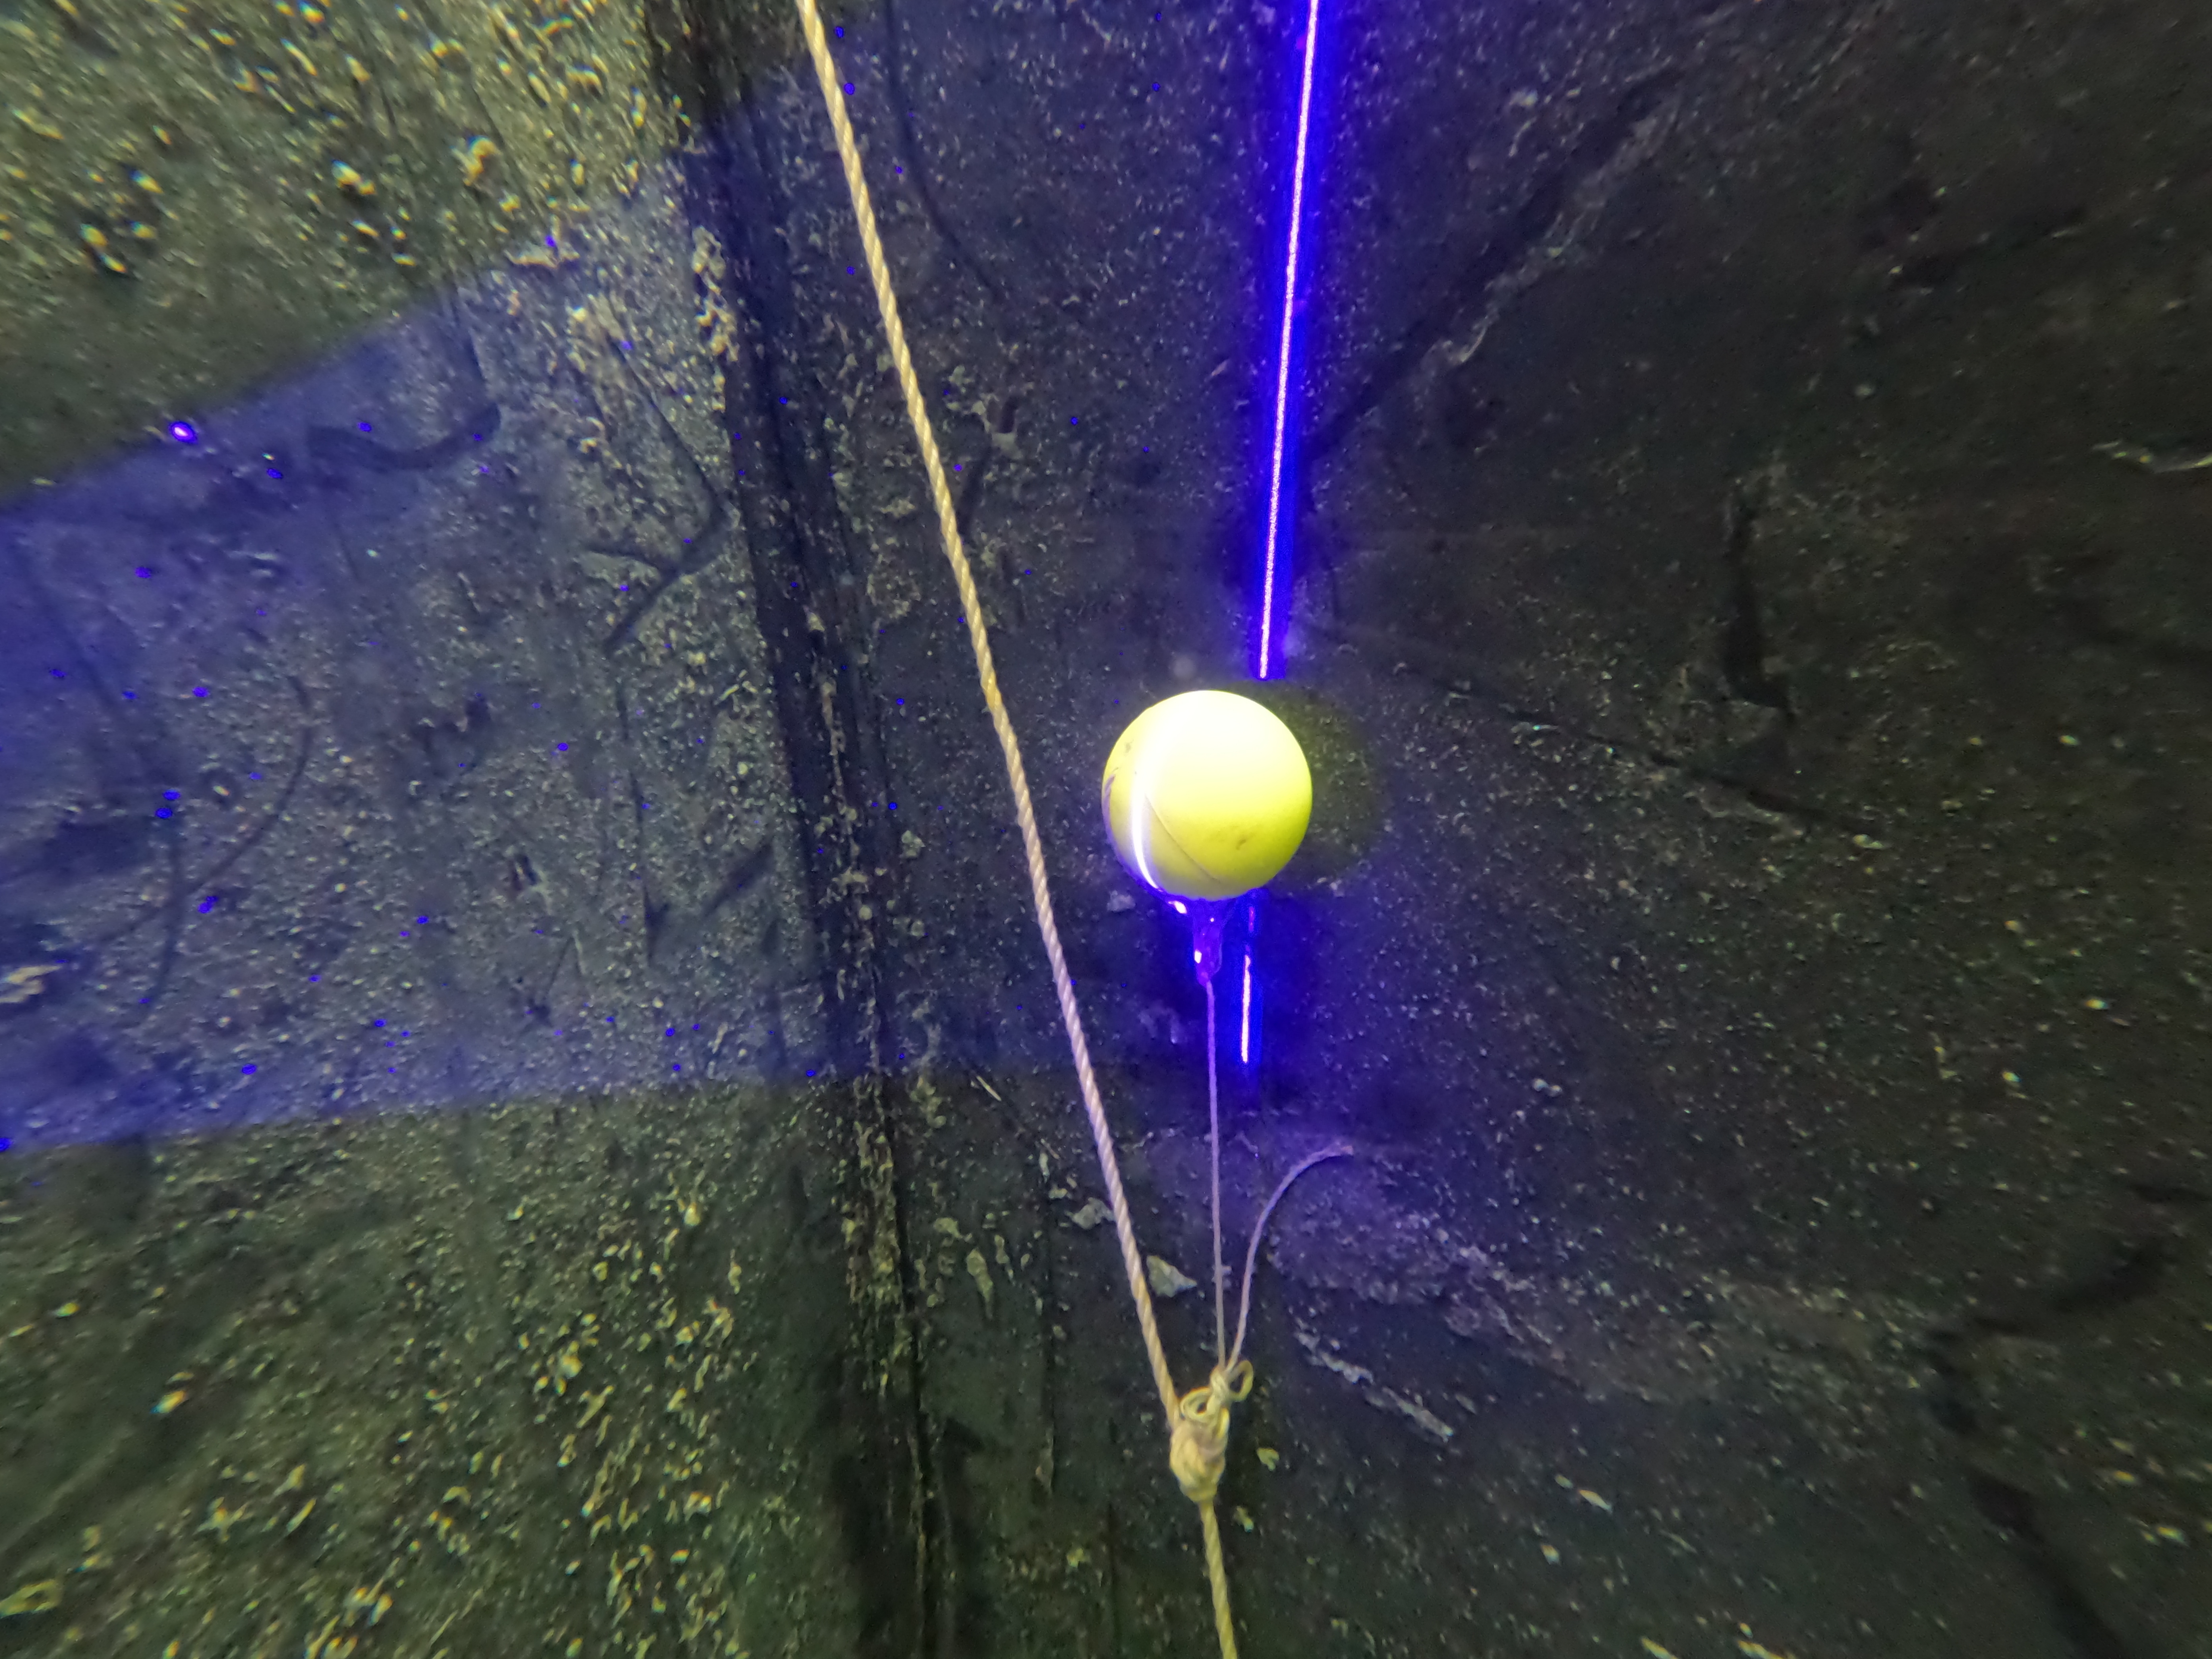

Supplement: Supplementary file 2907 [file G0030407.pdf › 2/G0030407.pdf]

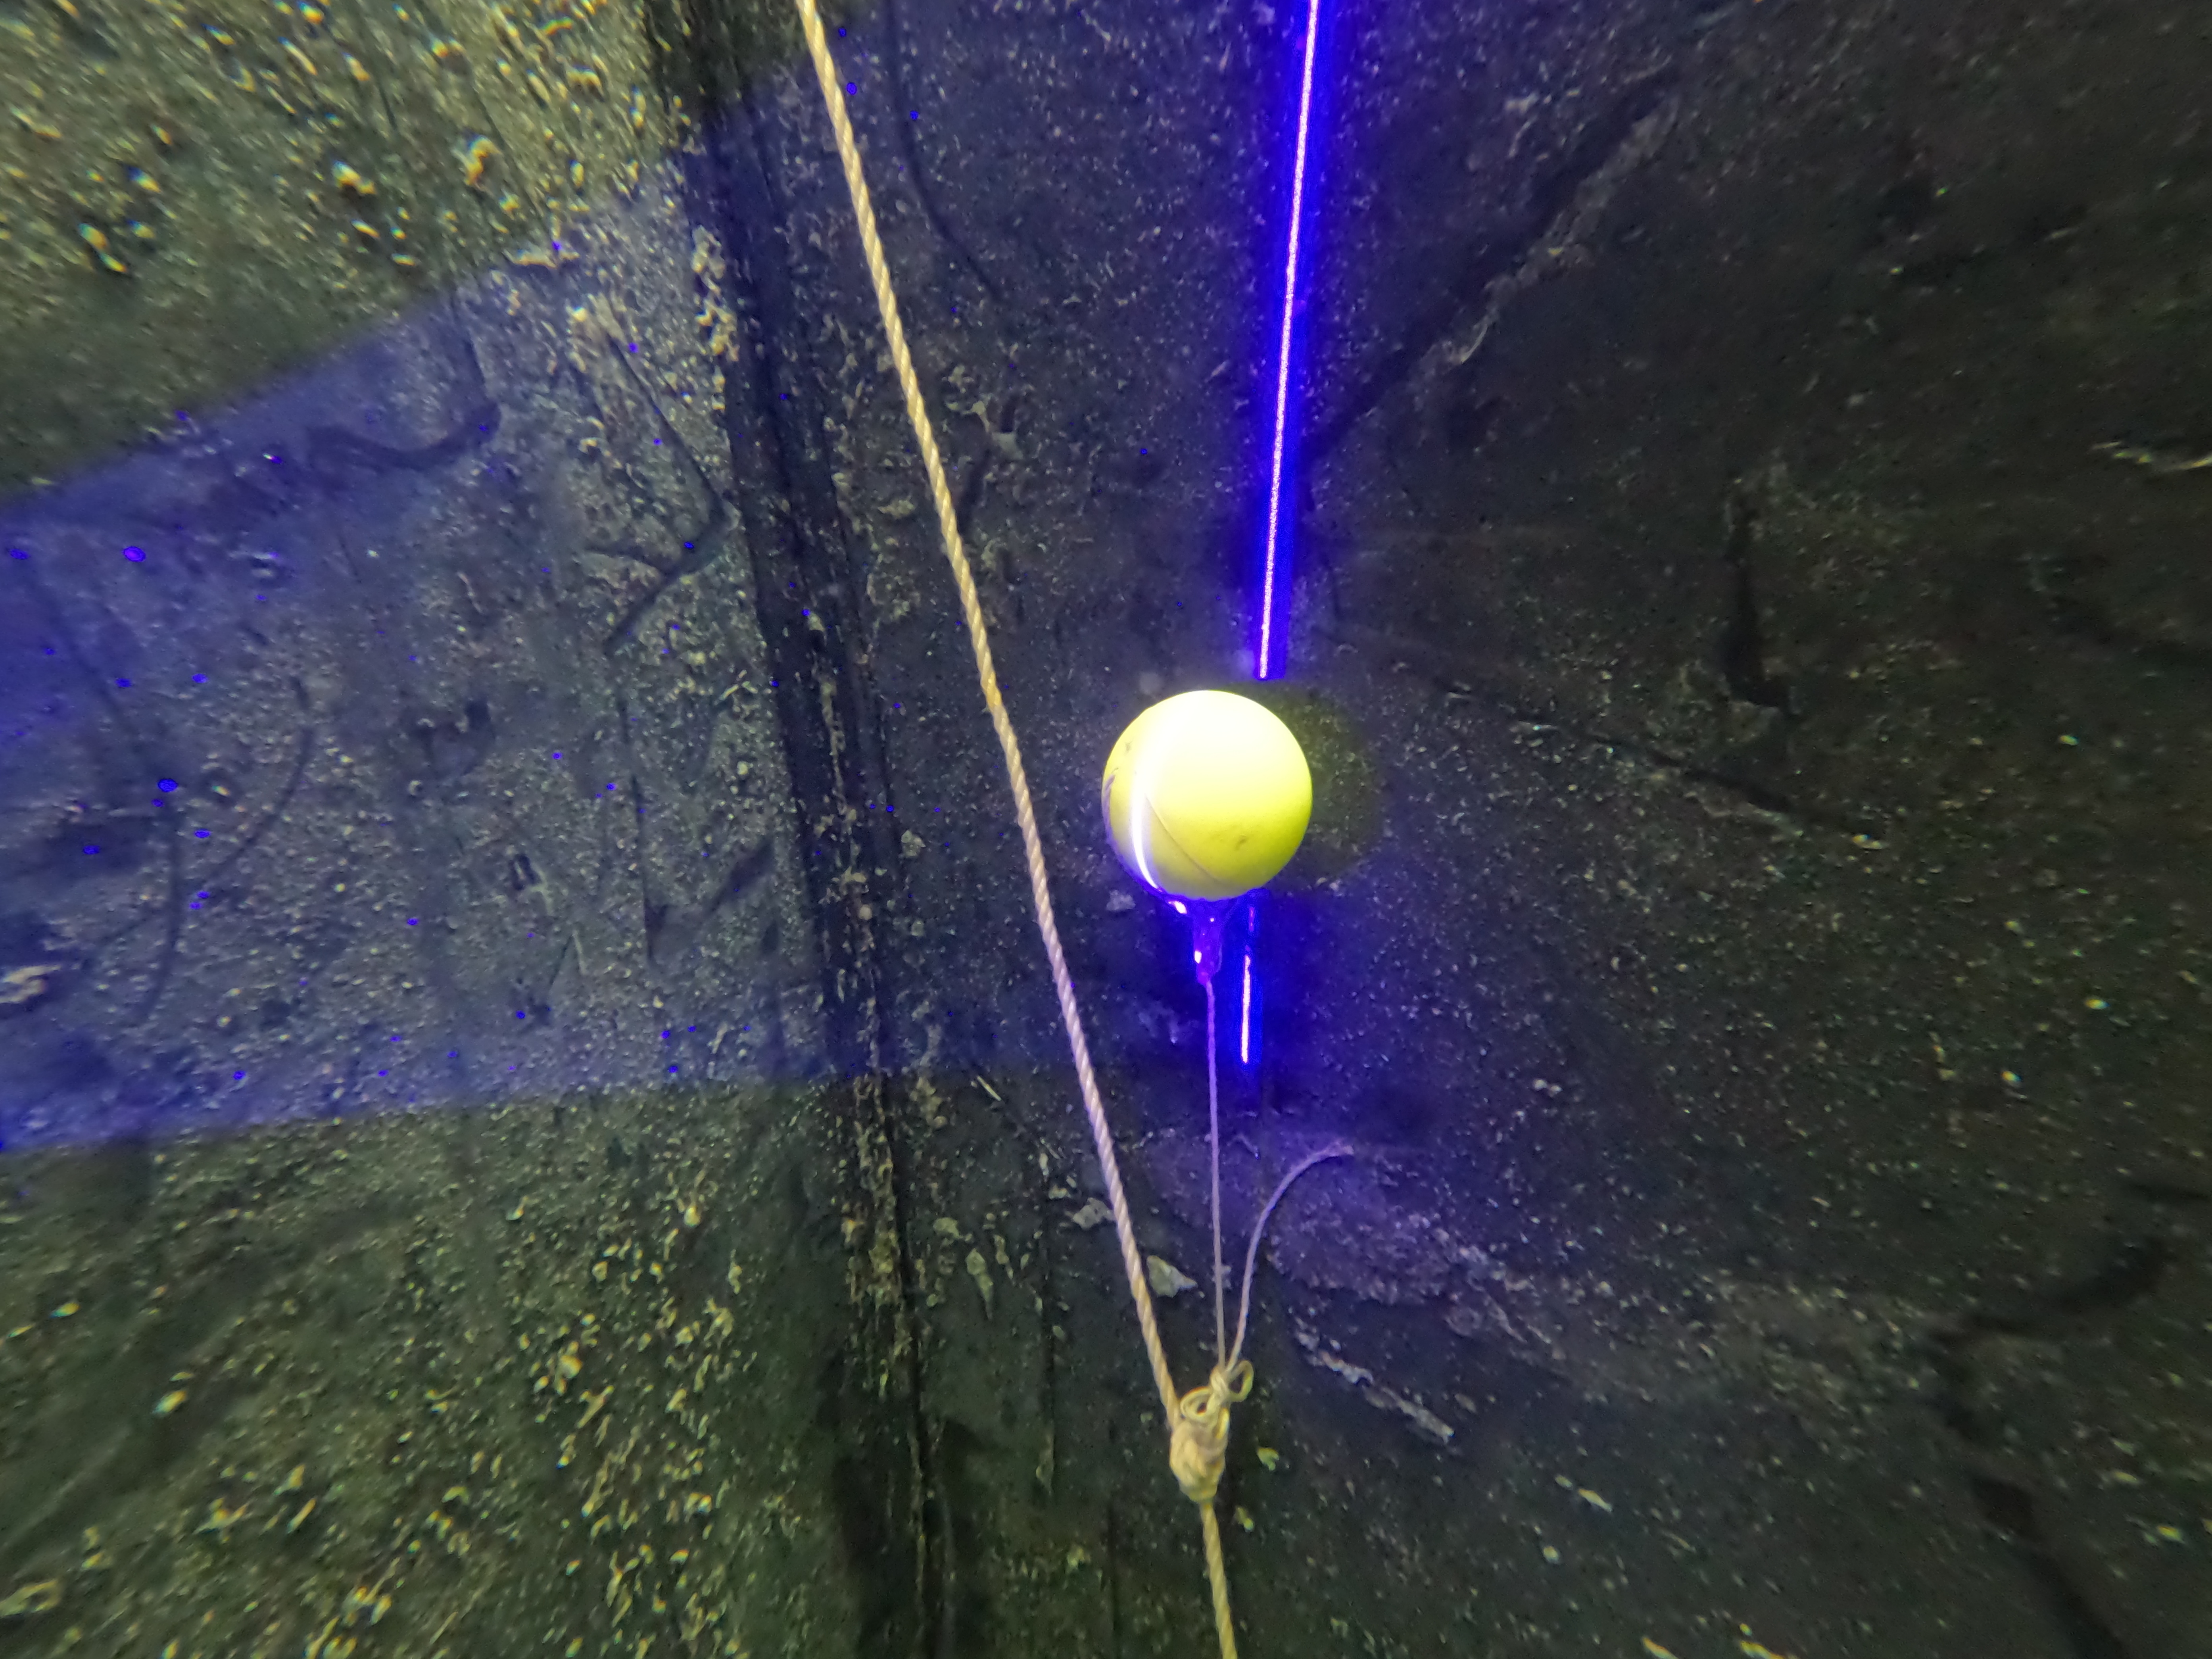

Supplement: Supplementary file 2908 [file G0030408.pdf › 2/G0030408.pdf]

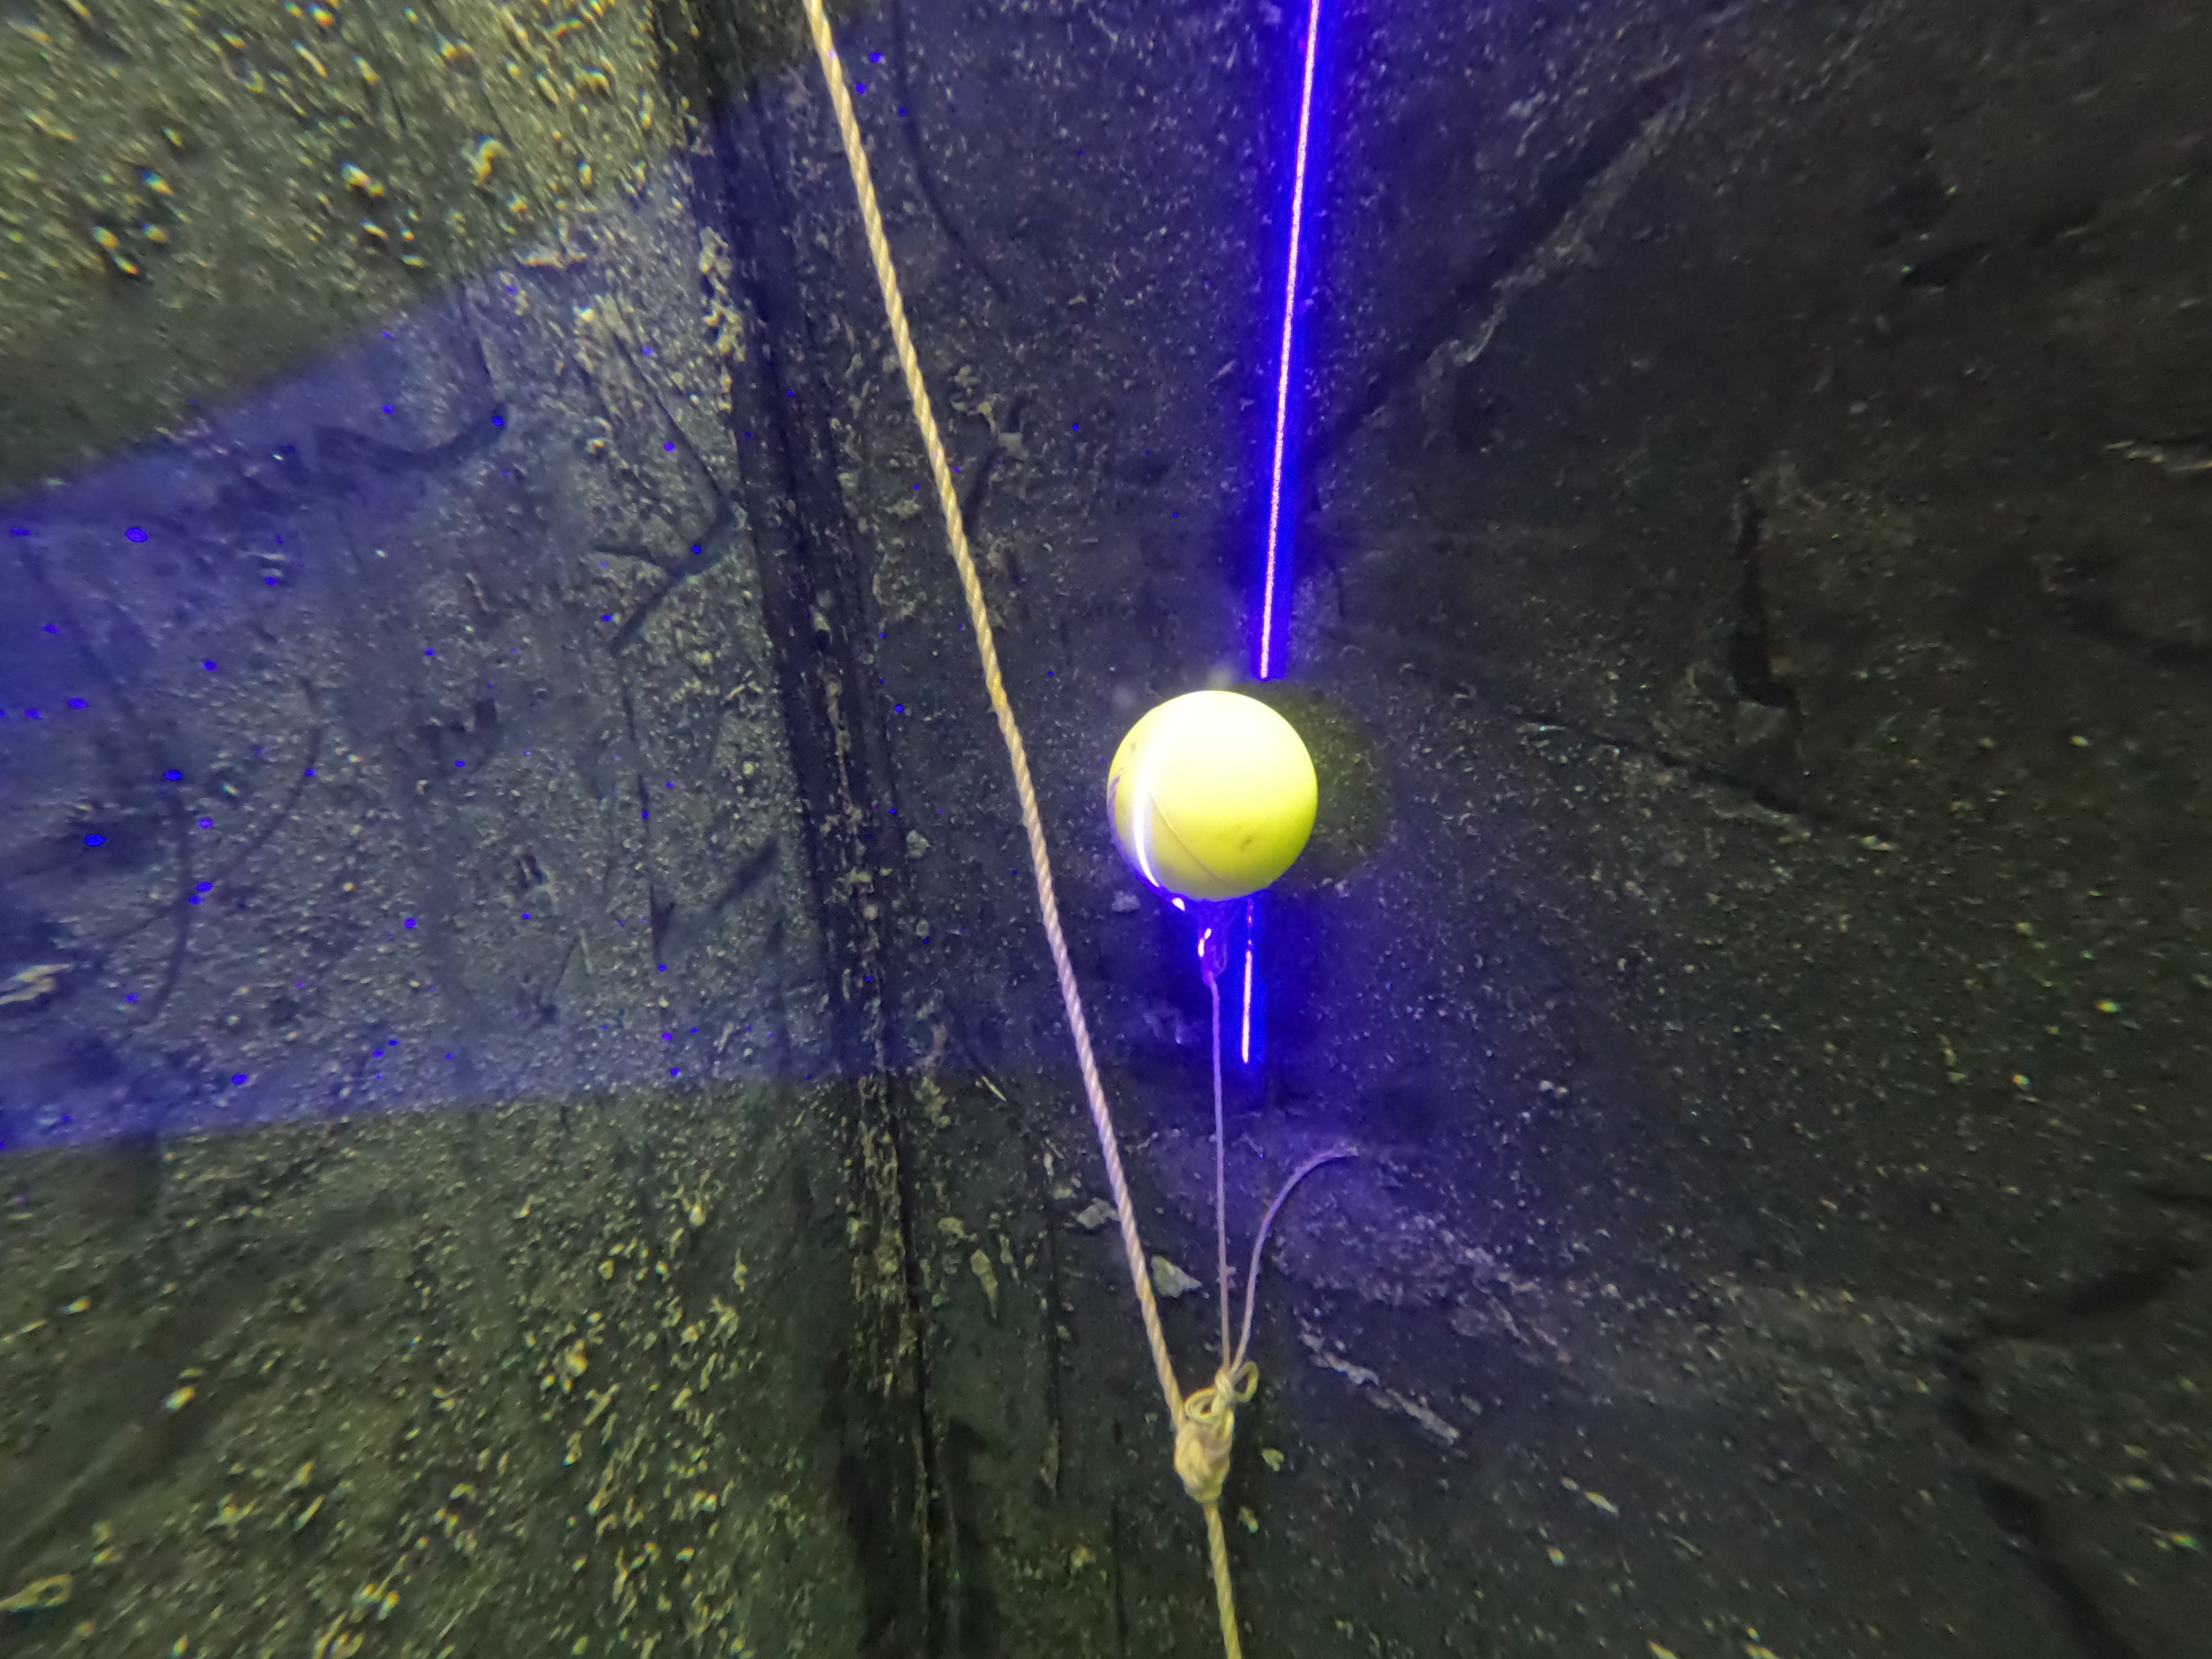

Supplement: Supplementary file 2909 [file G0030409.pdf › 2/G0030409.pdf]

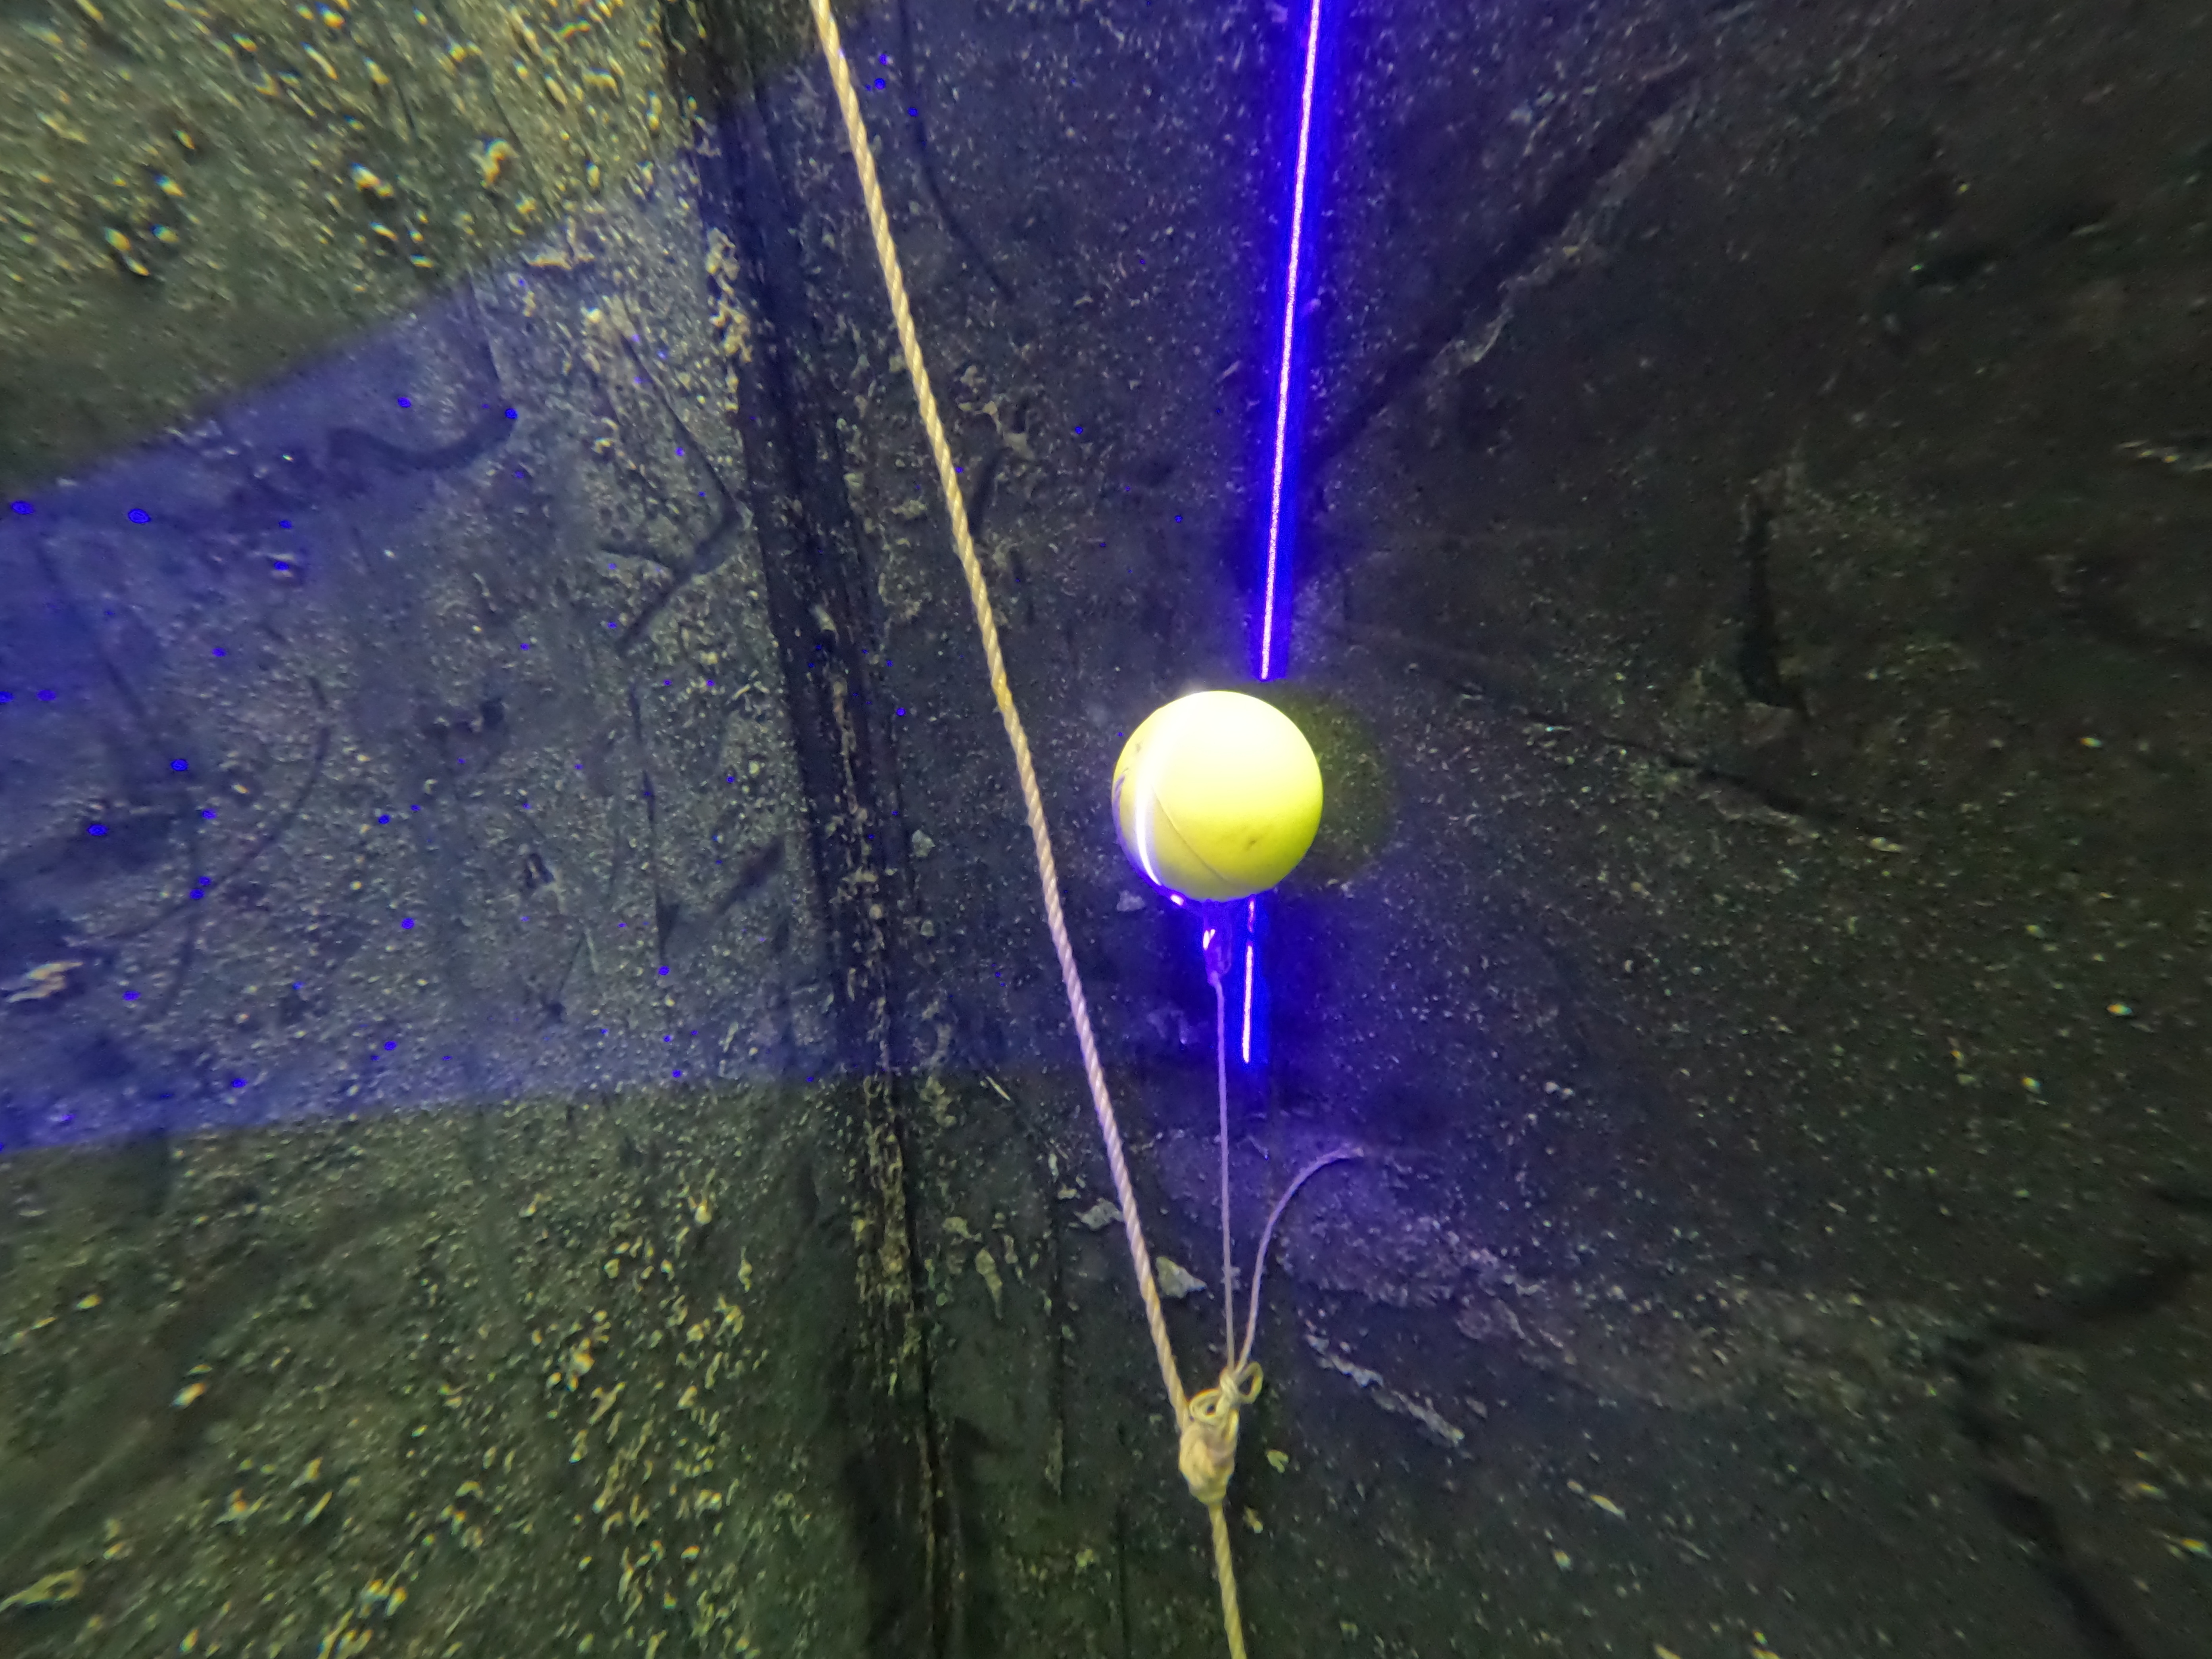

Supplement: Supplementary file 2910 [file G0030410.pdf › 2/G0030410.pdf]

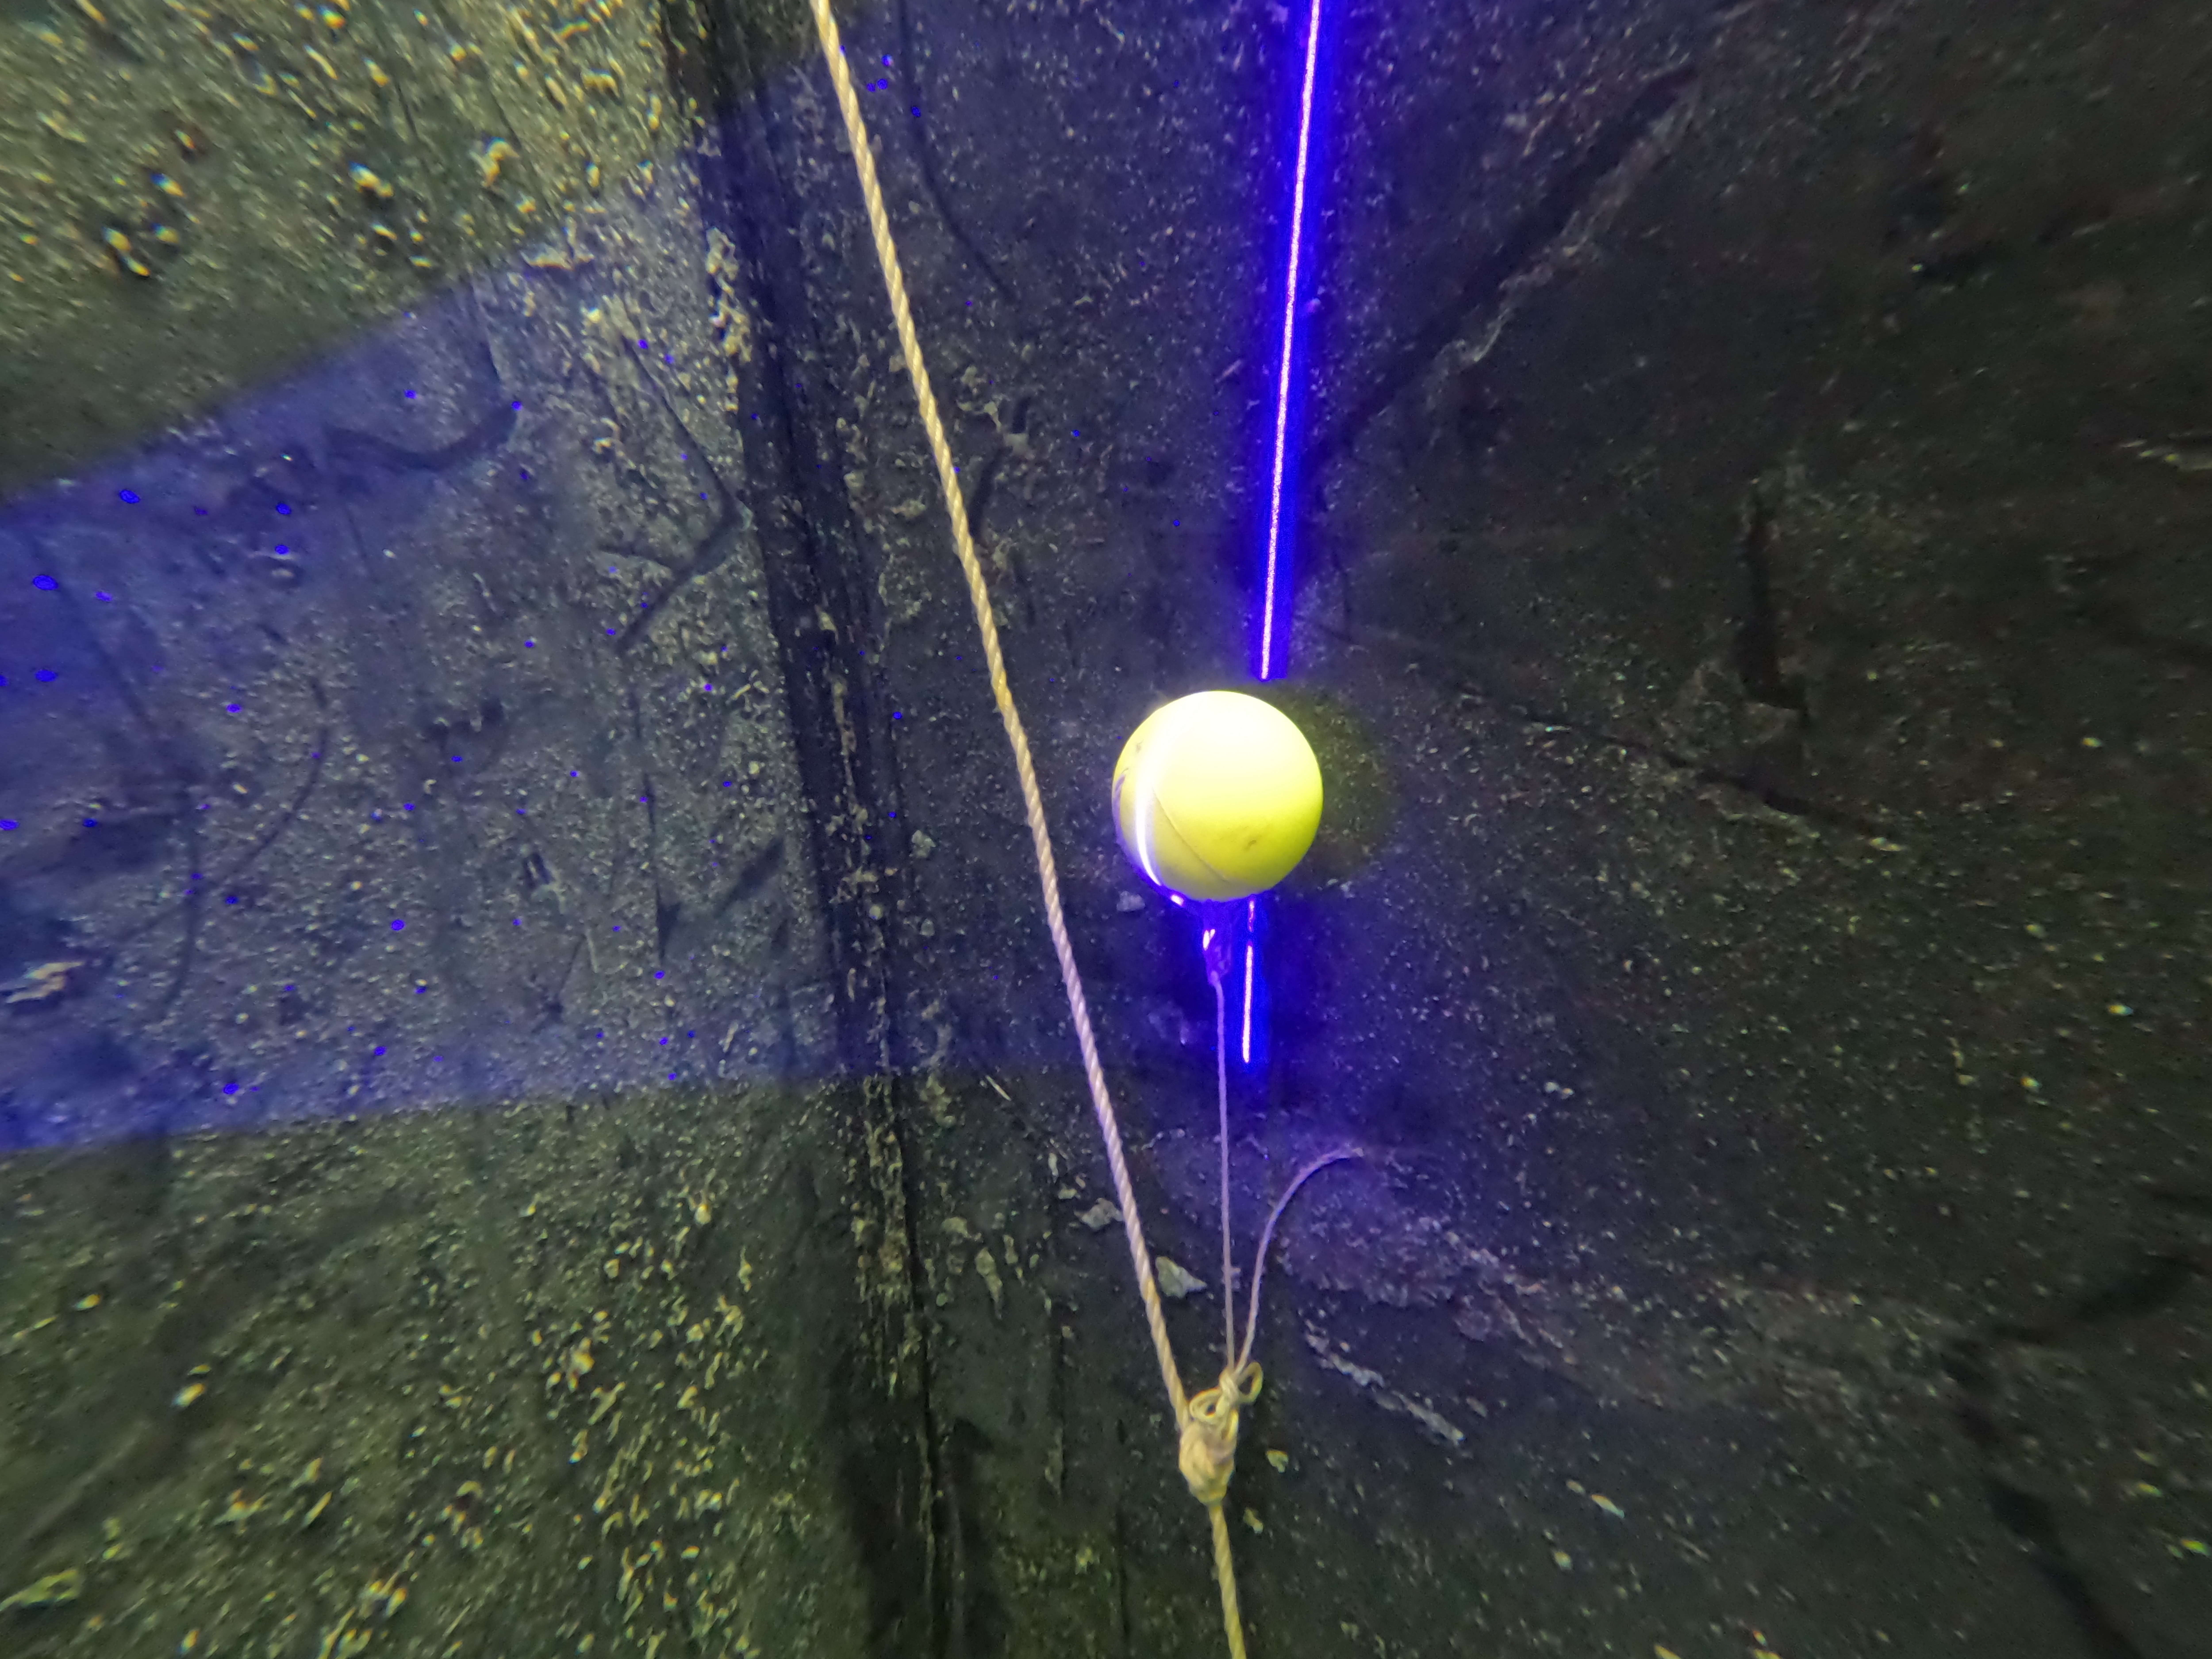

Supplement: Supplementary file 2911 [file G0030411.pdf › 2/G0030411.pdf]

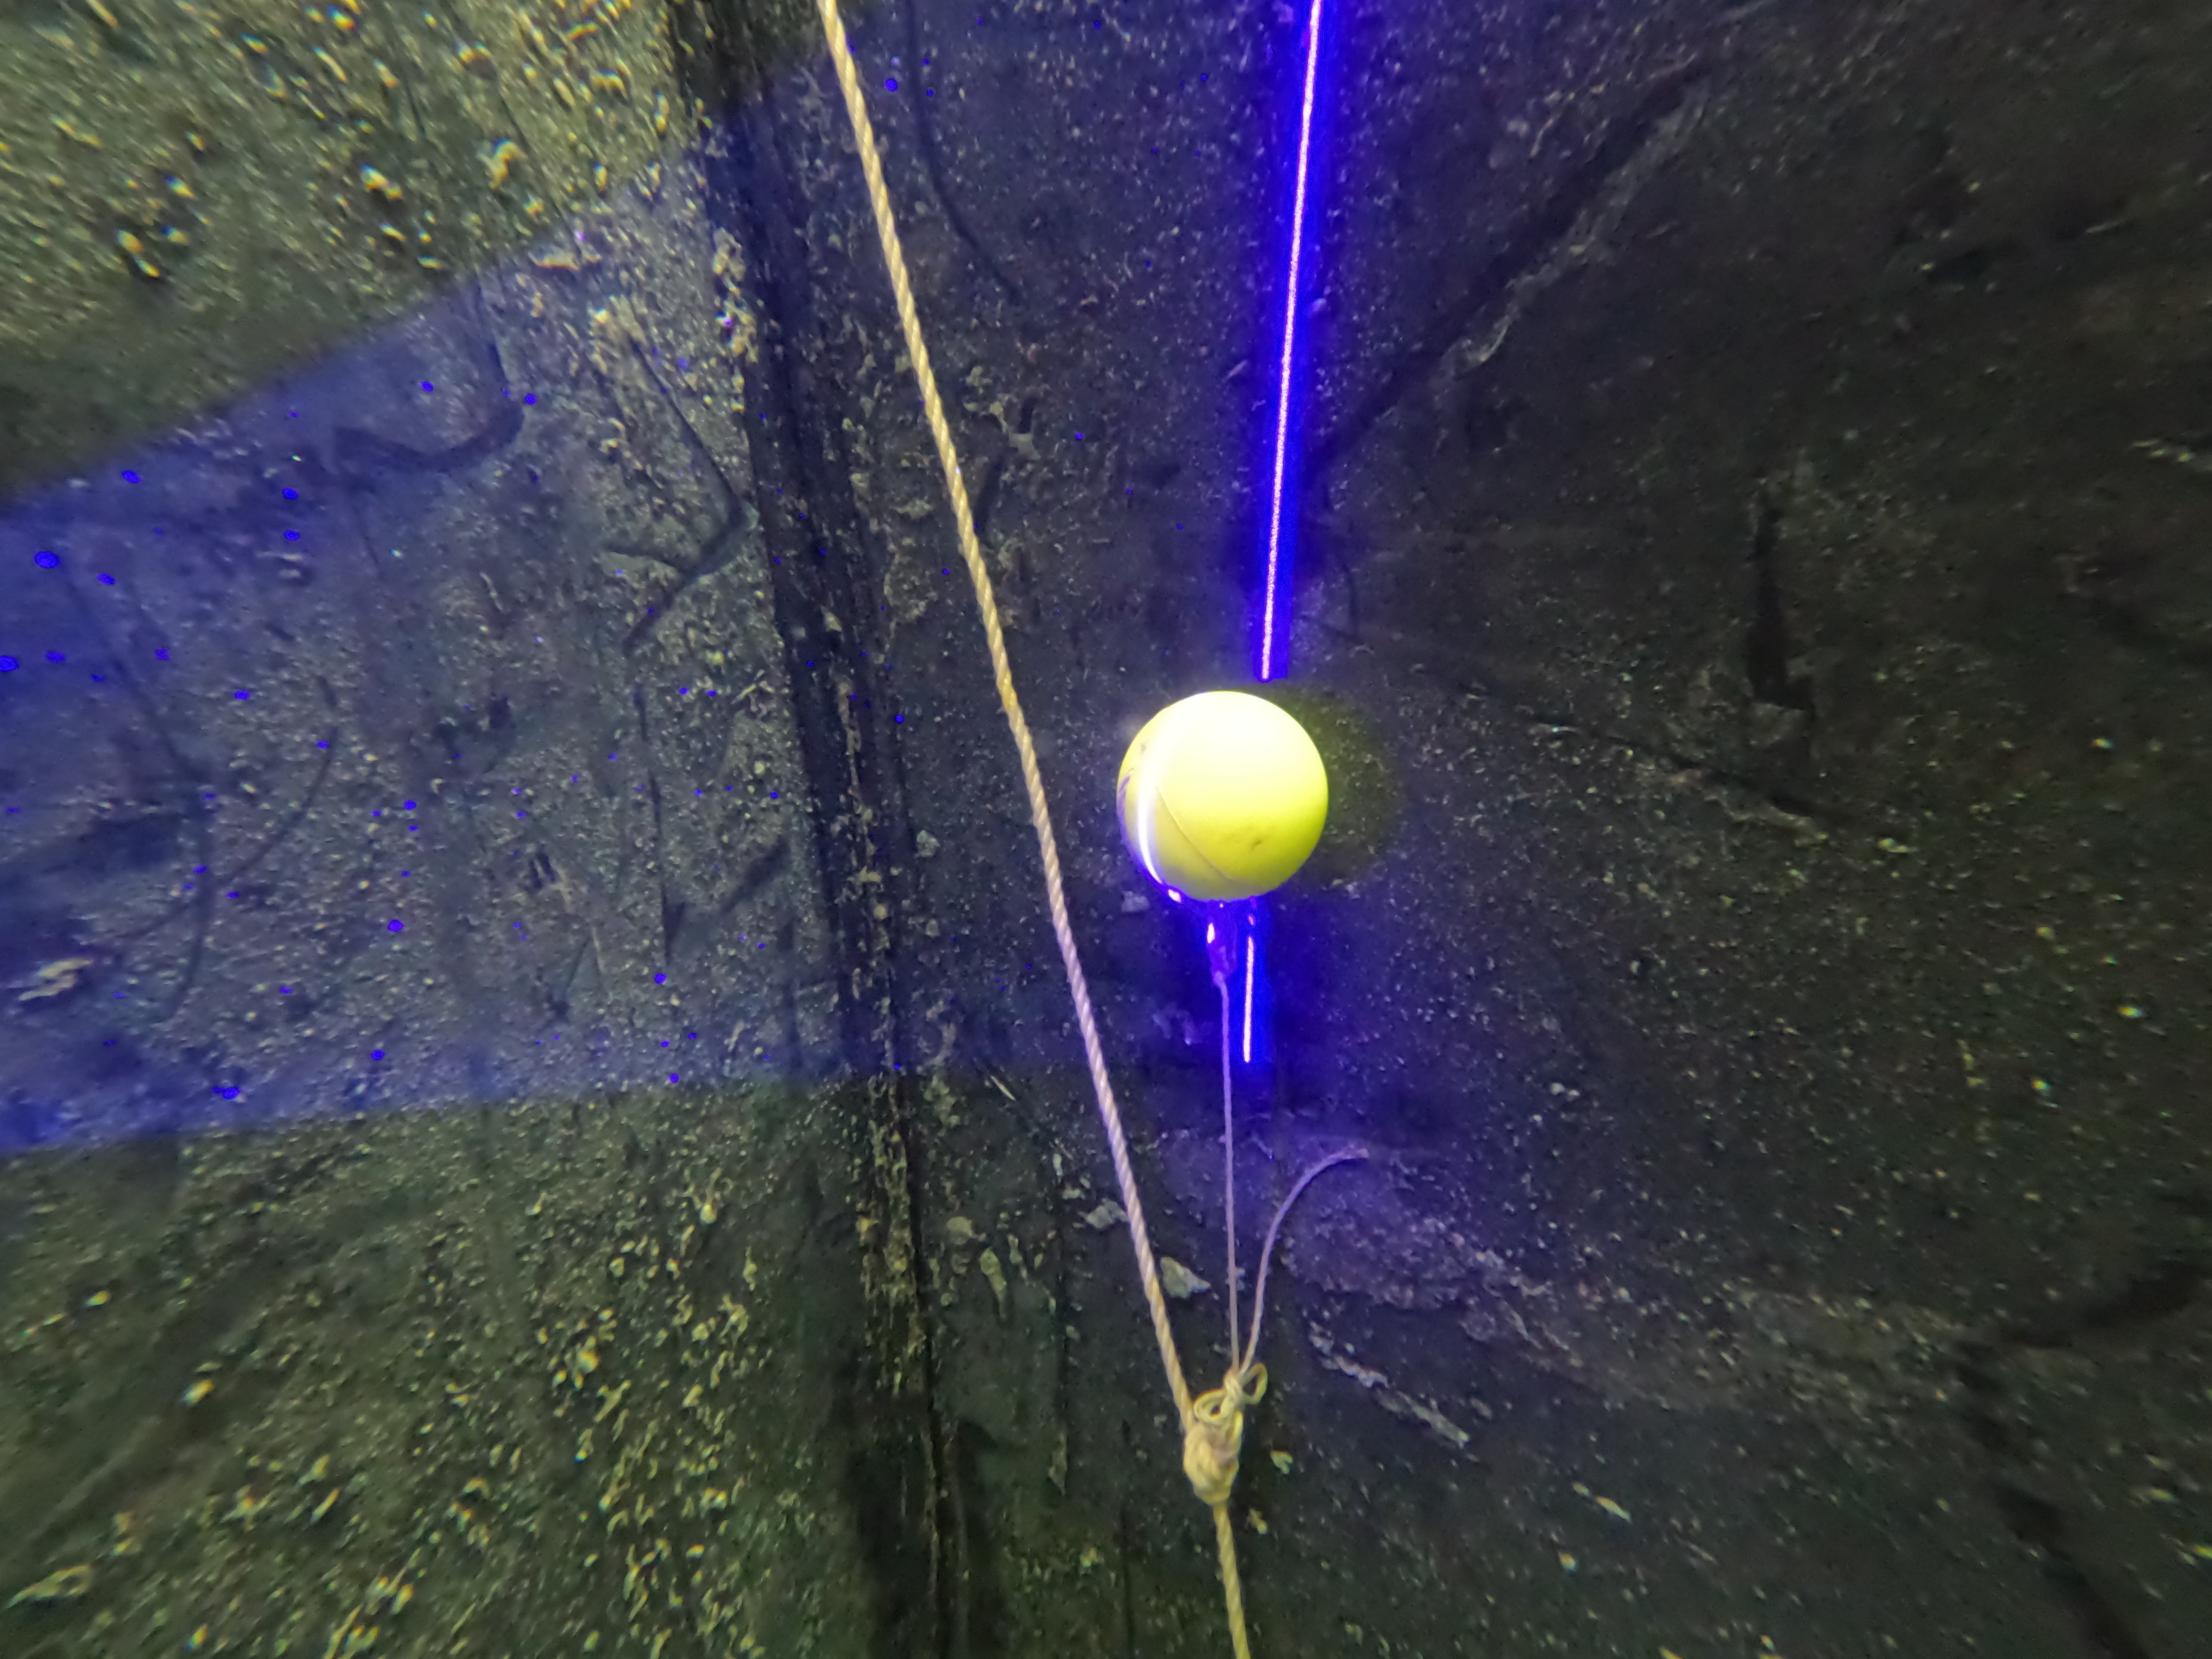

Supplement: Supplementary file 2912 [file G0030412.pdf › 2/G0030412.pdf]

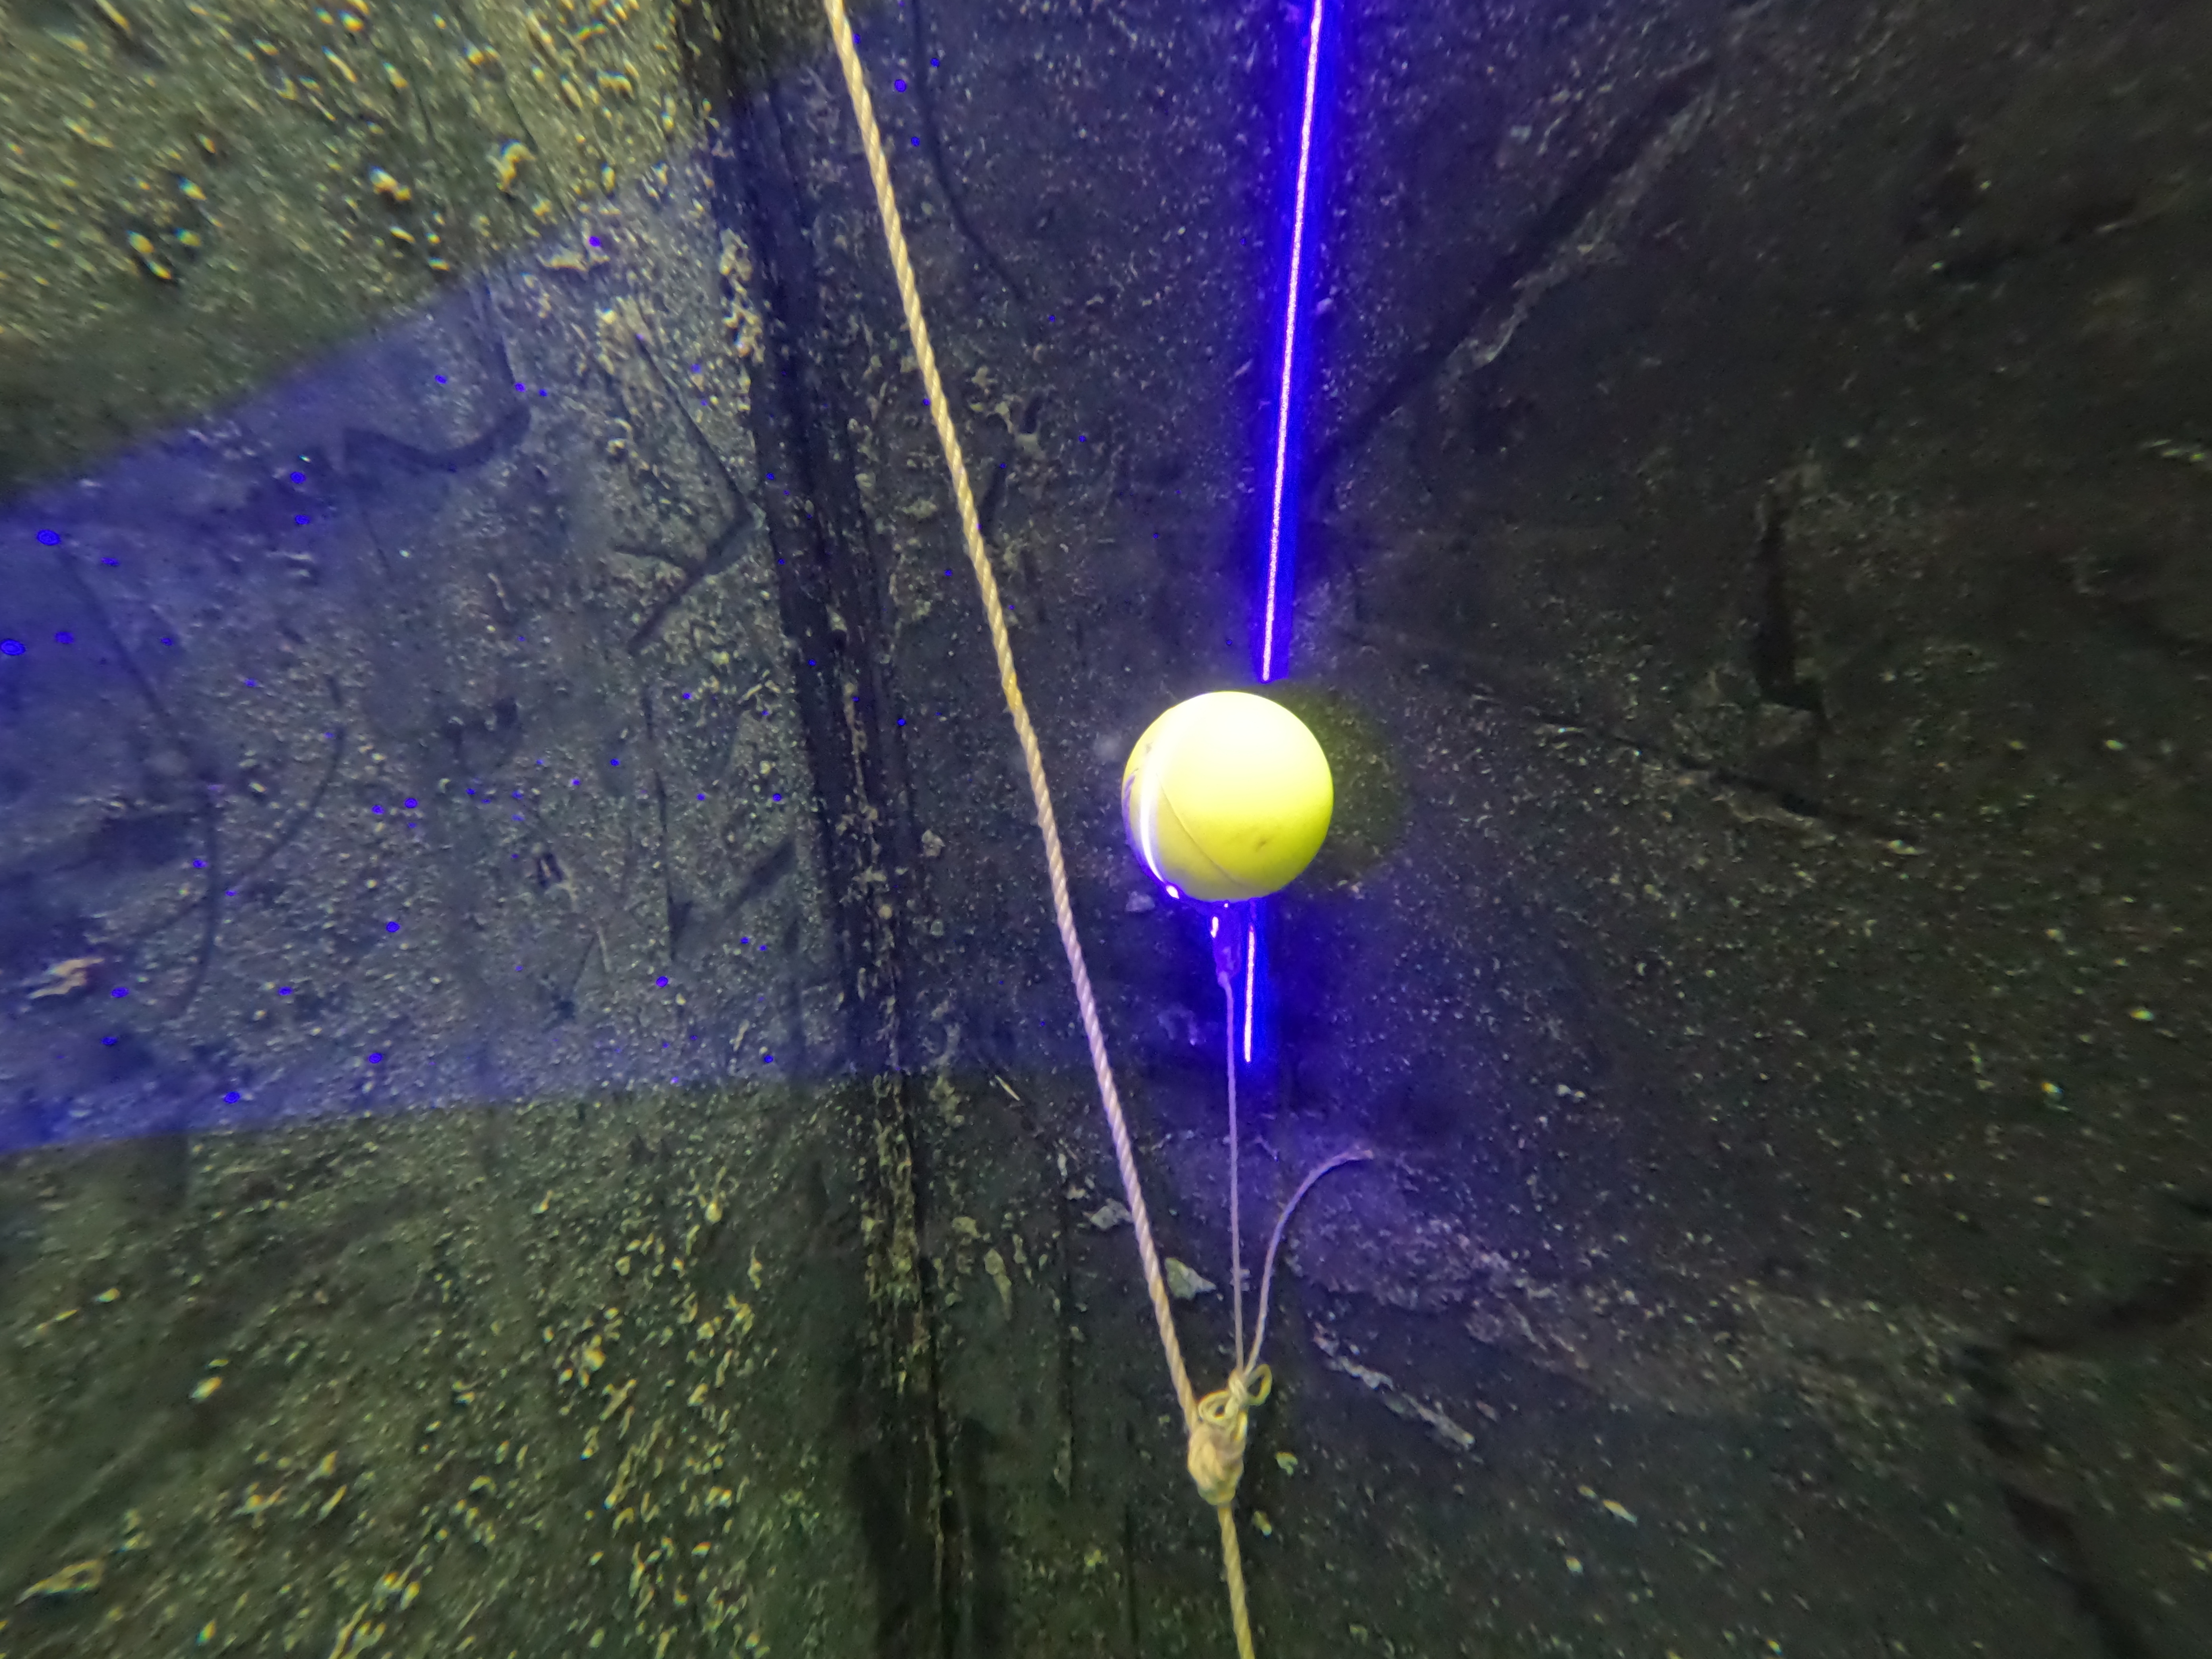

Supplement: Supplementary file 2913 [file G0030413.pdf › 2/G0030413.pdf]

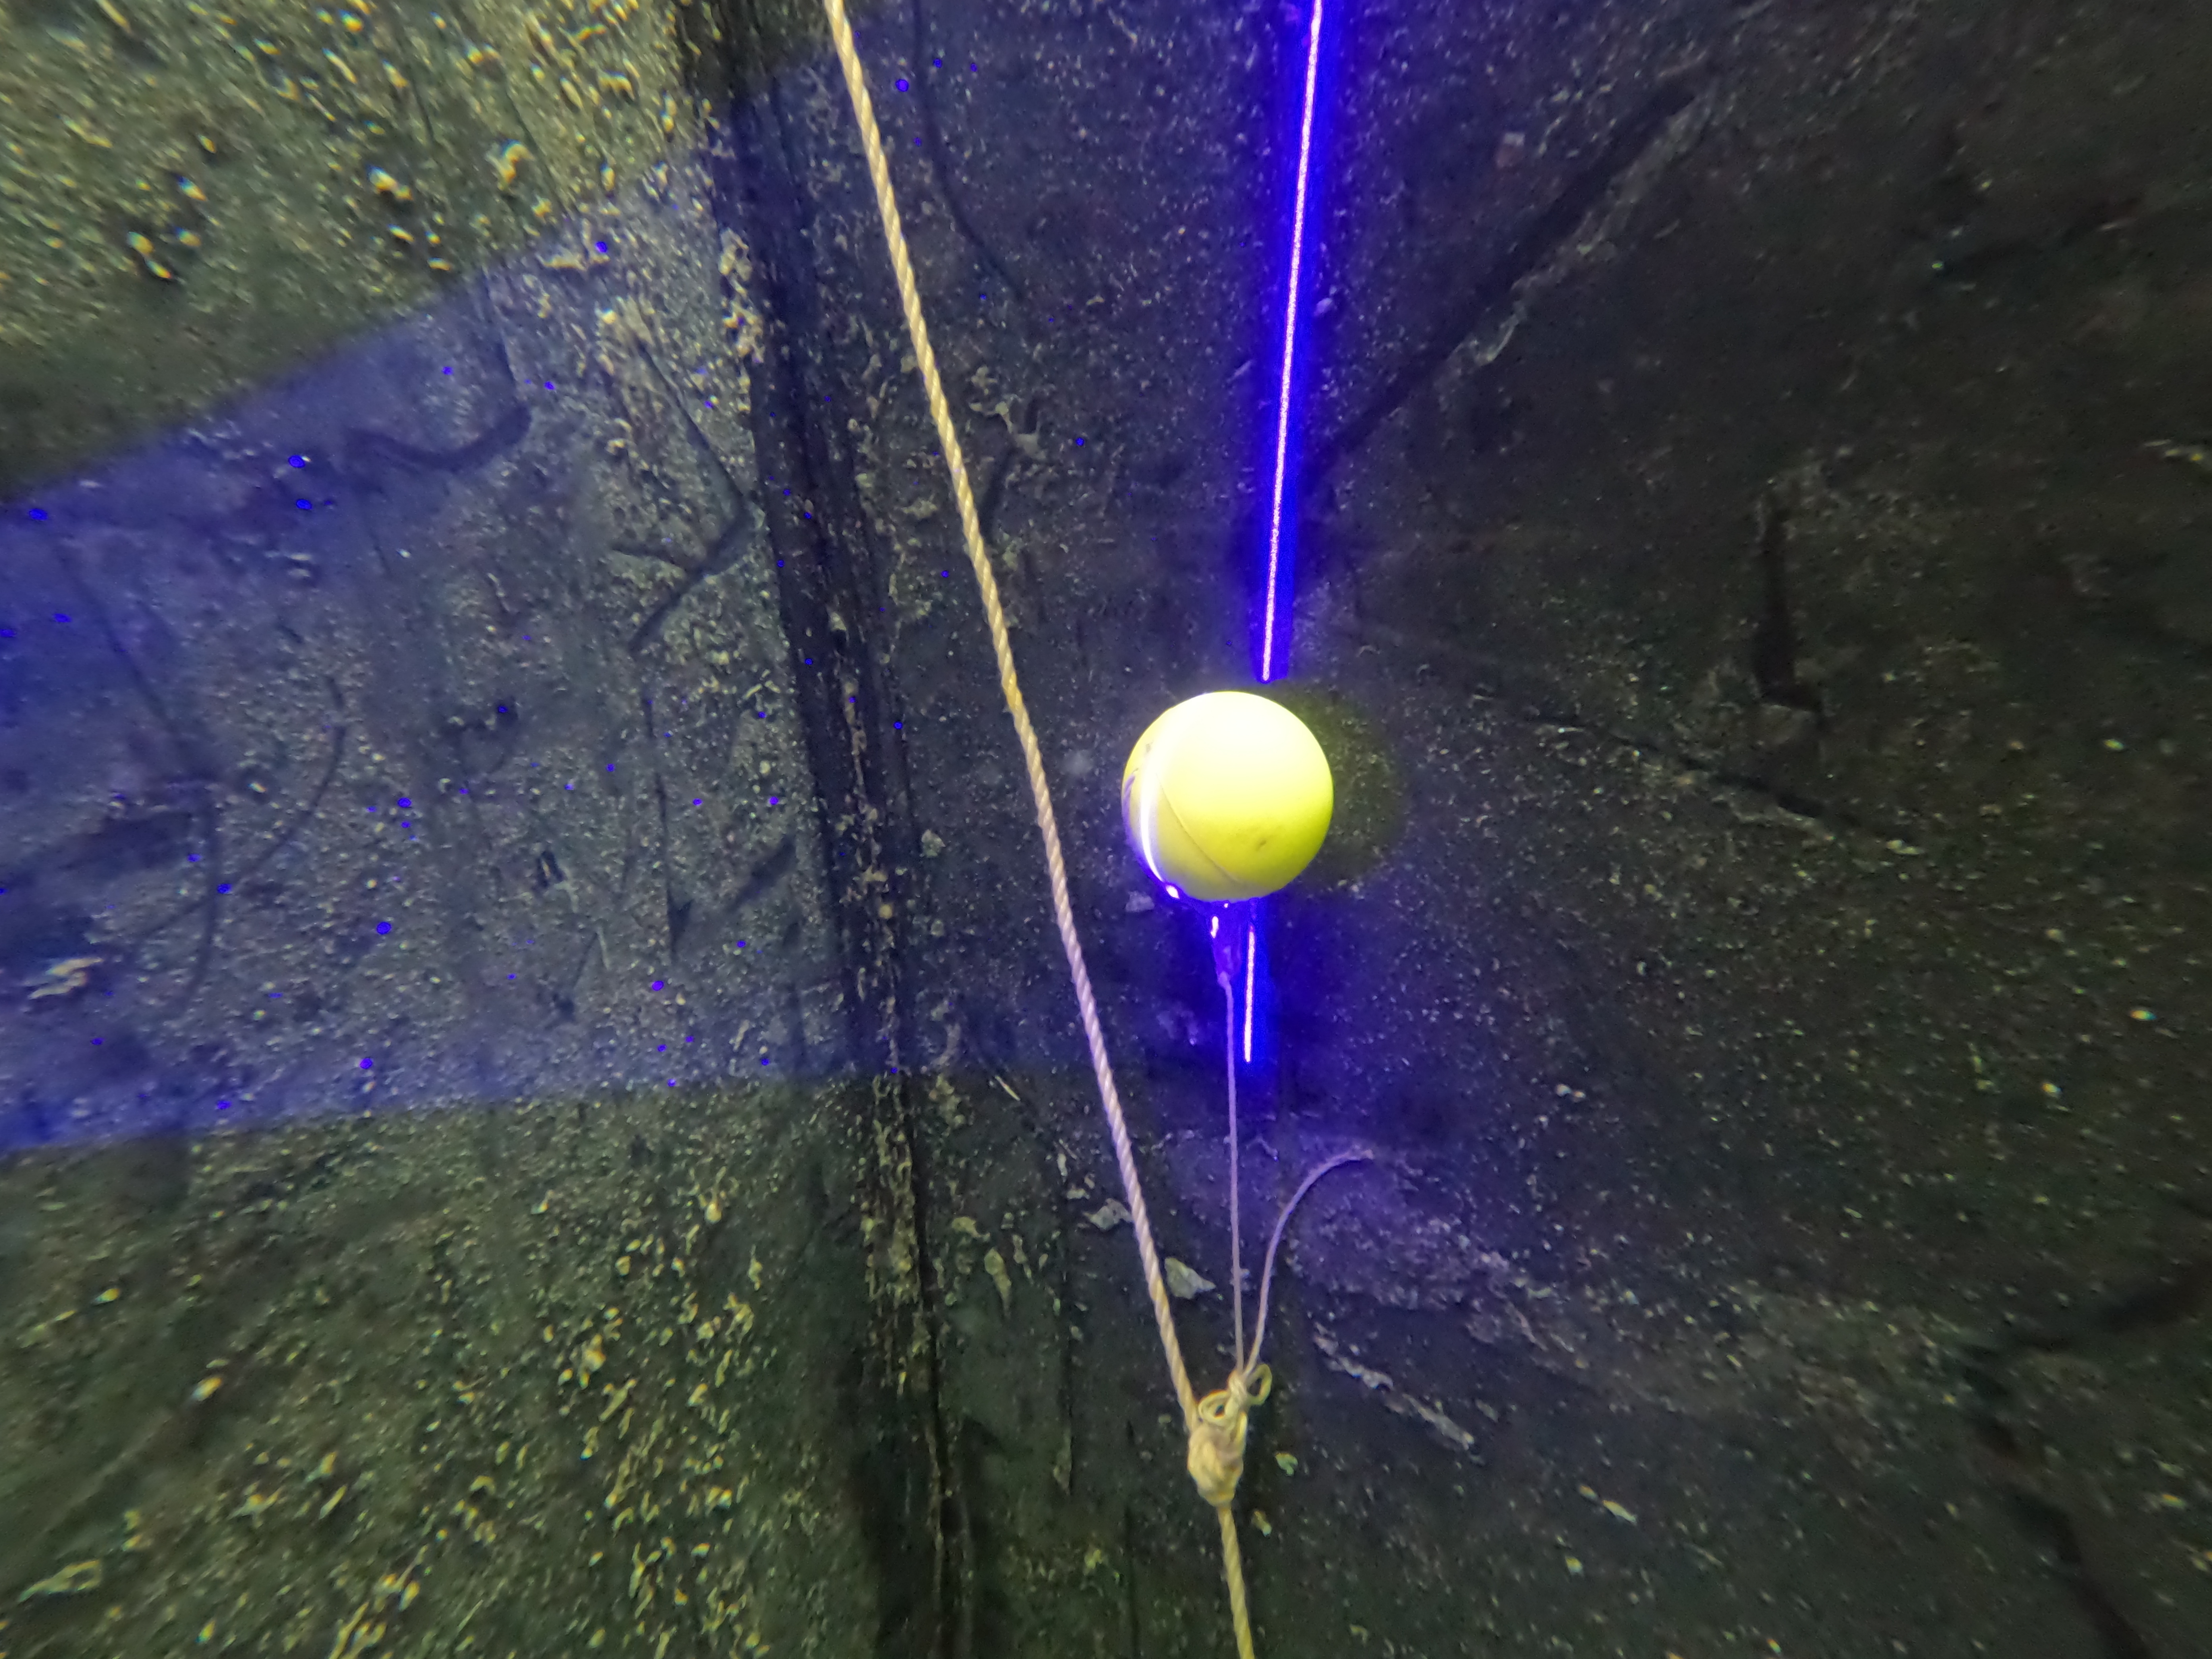

Supplement: Supplementary file 2914 [file G0030414.pdf › 2/G0030414.pdf]

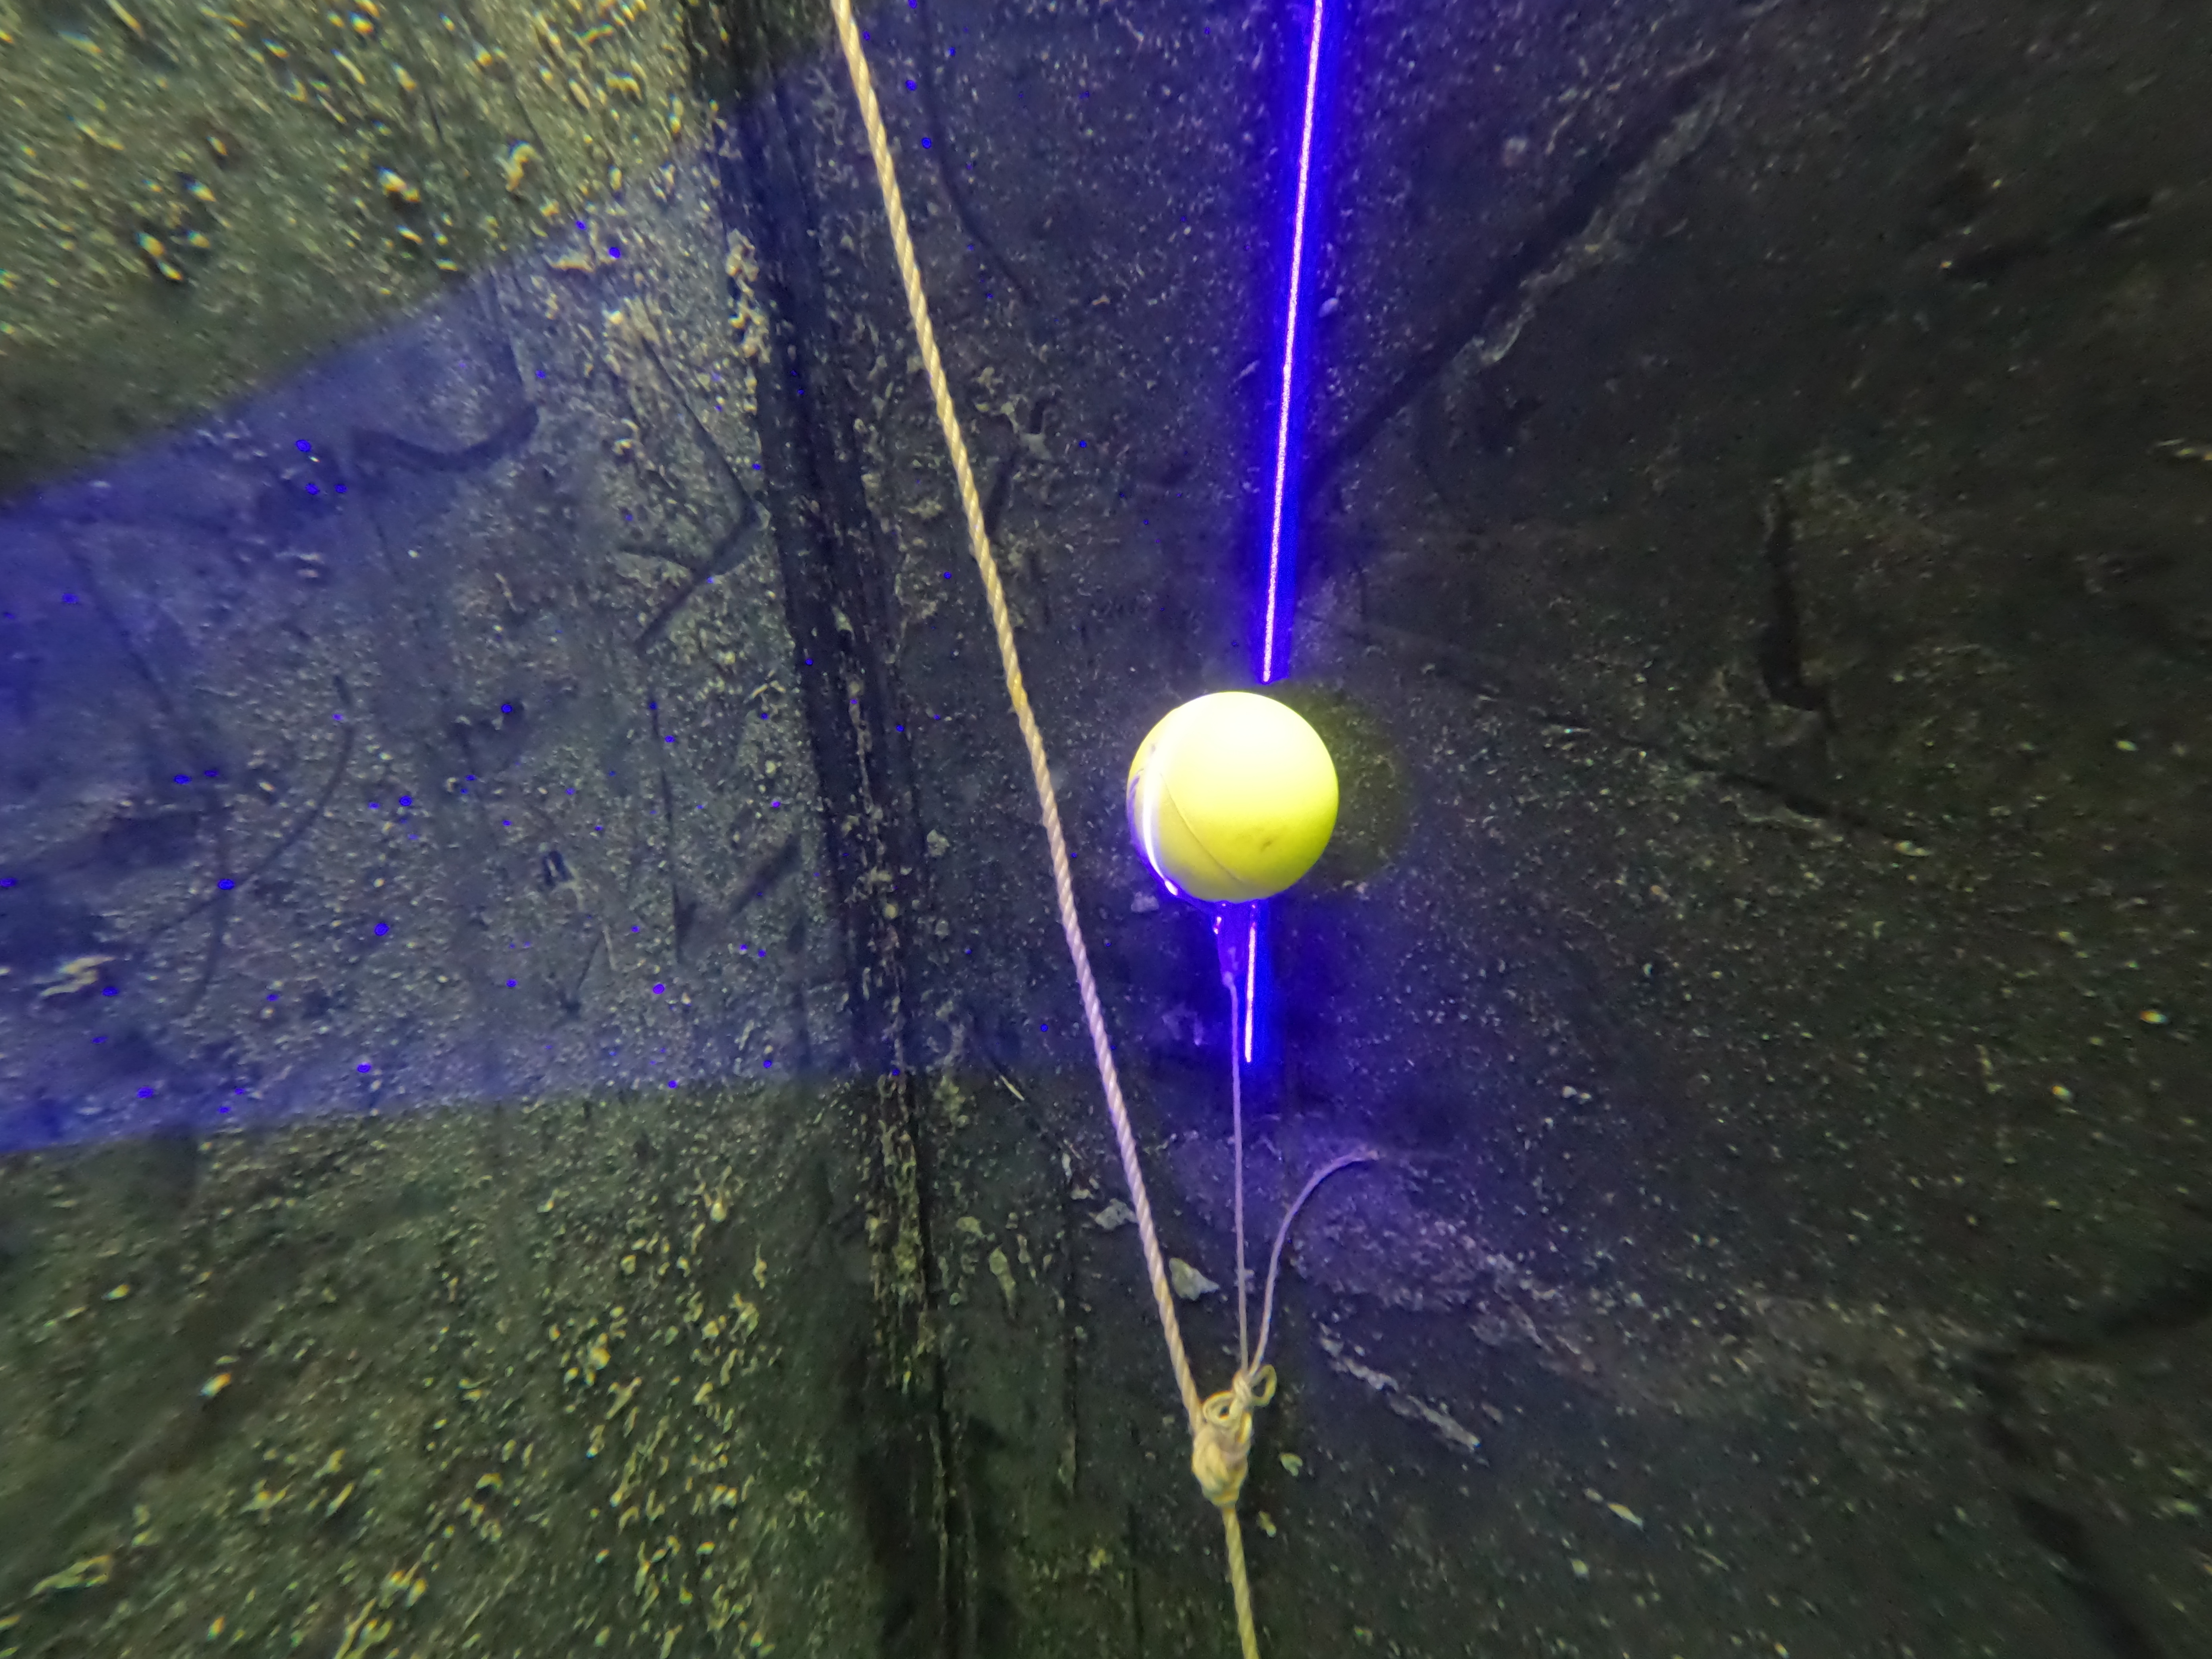

Supplement: Supplementary file 2915 [file G0030415.pdf › 2/G0030415.pdf]

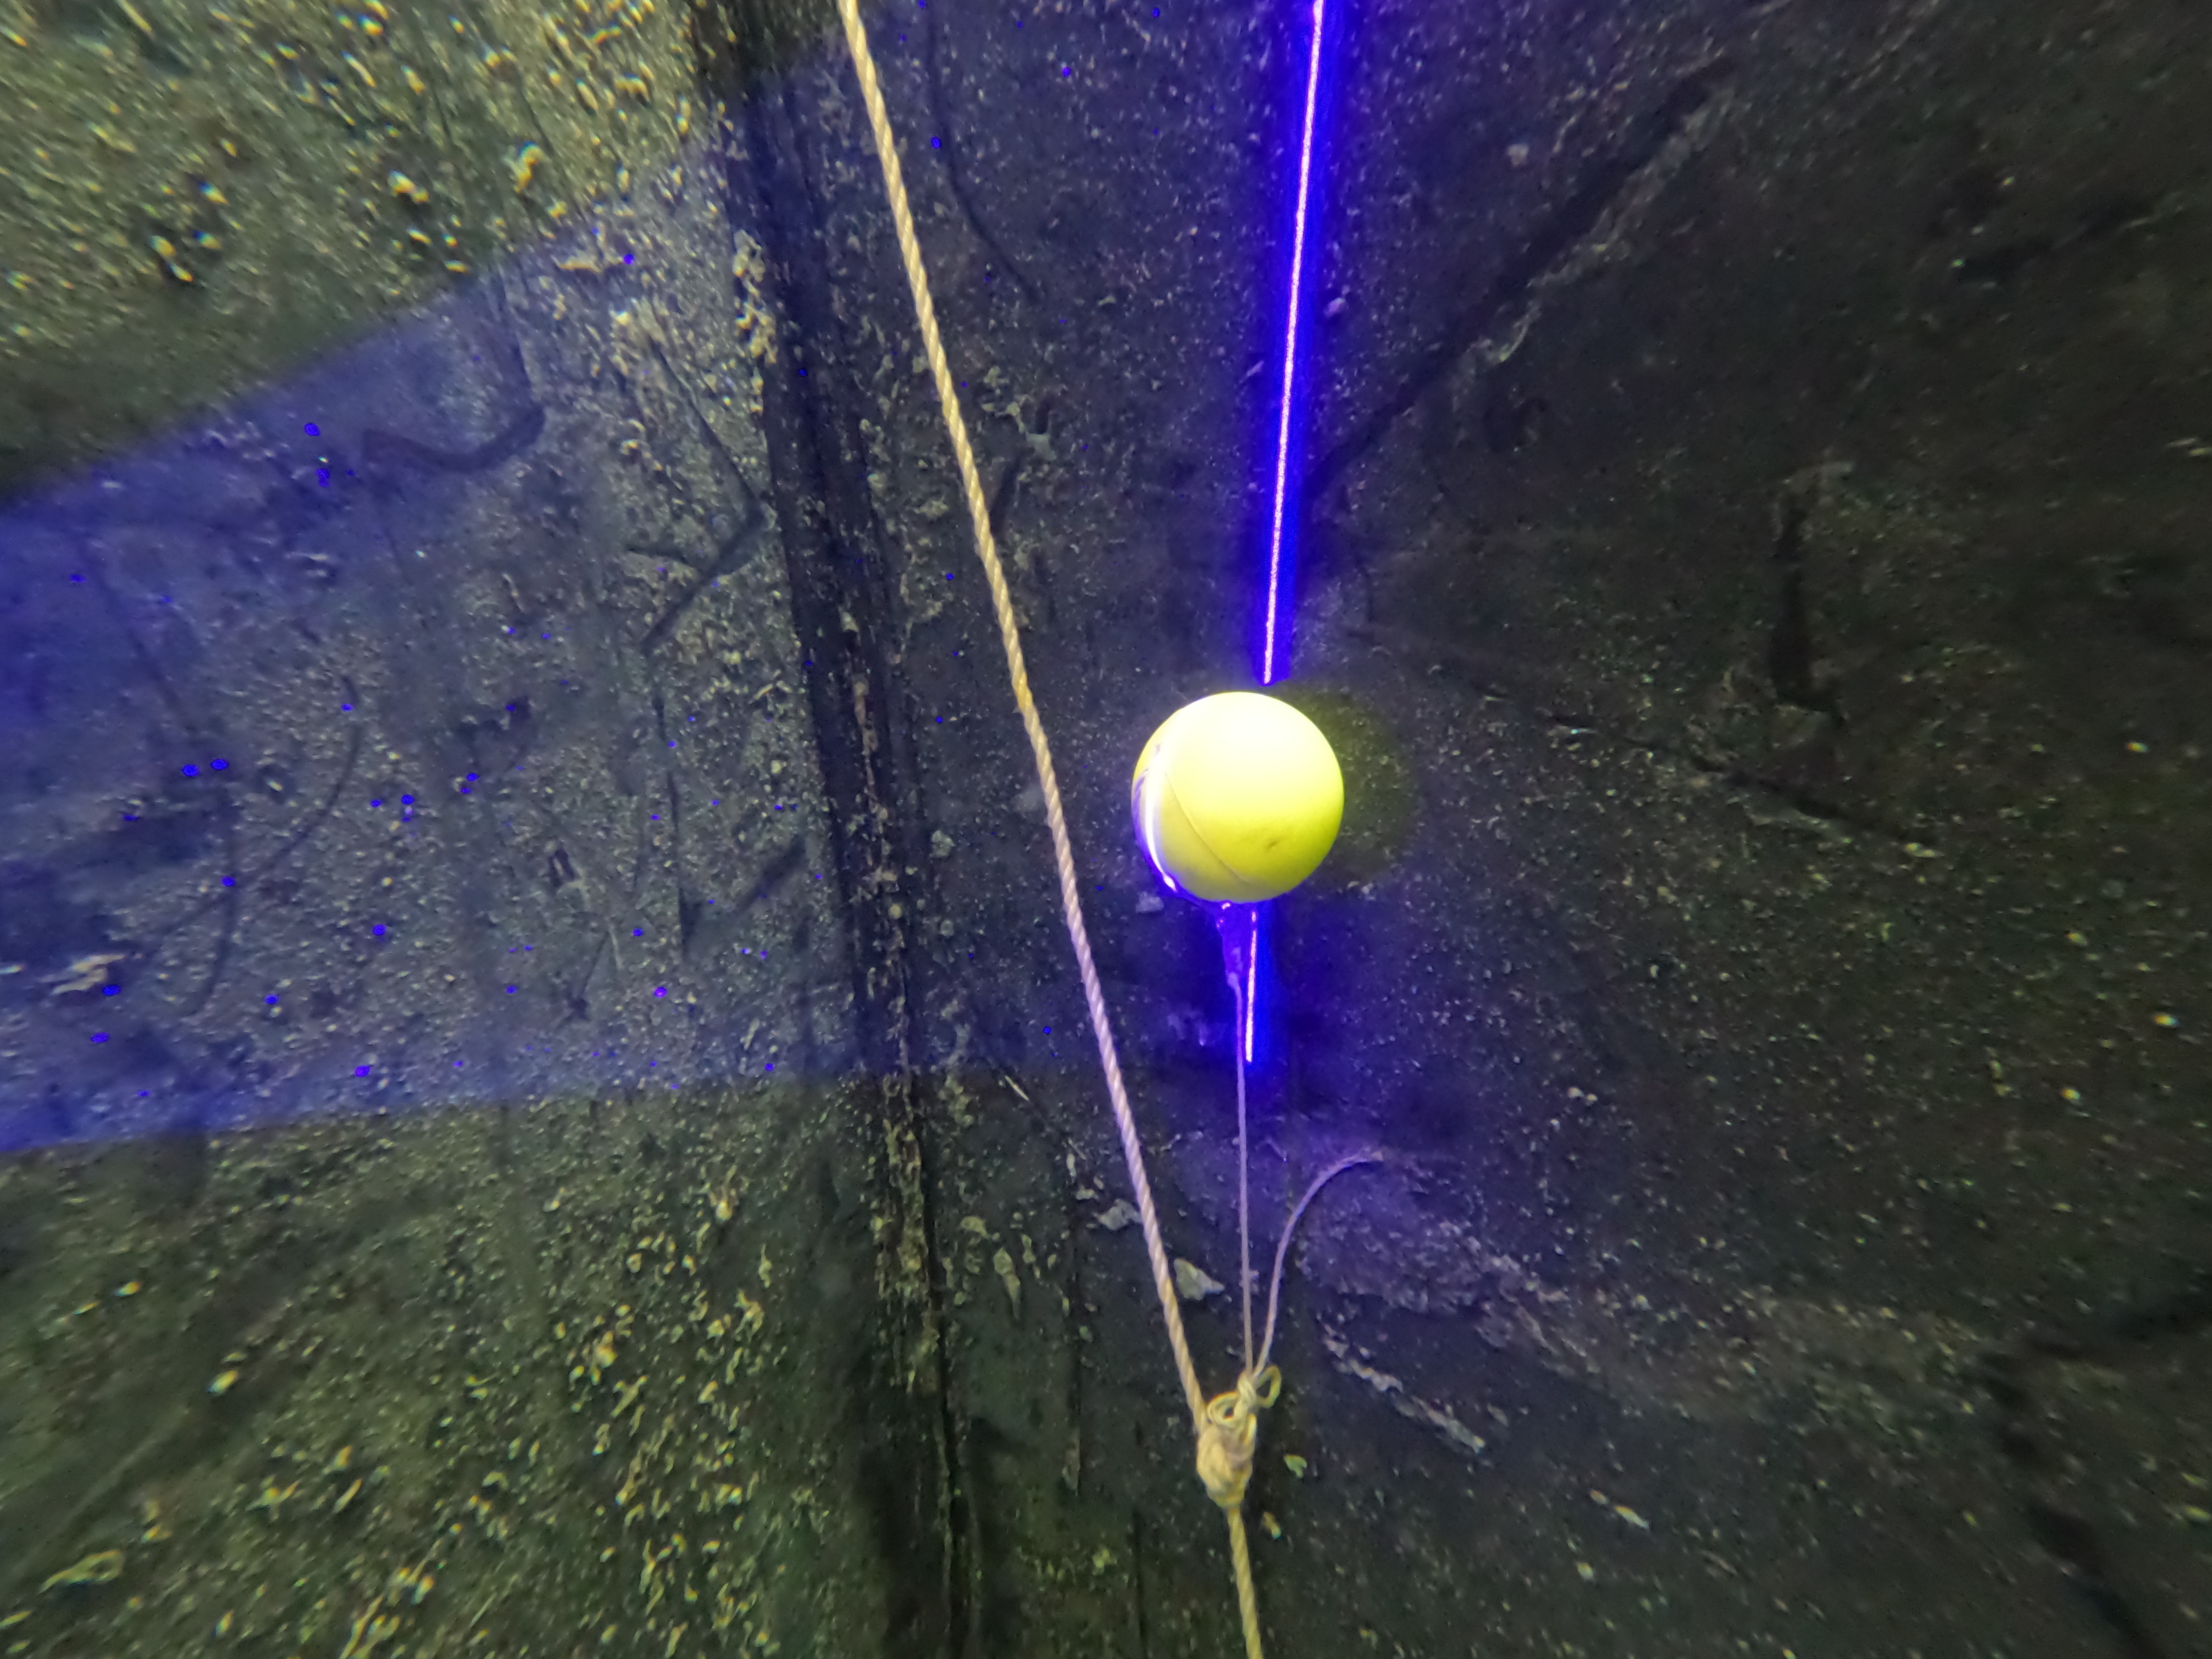

Supplement: Supplementary file 2916 [file G0030416.pdf › 2/G0030416.pdf]

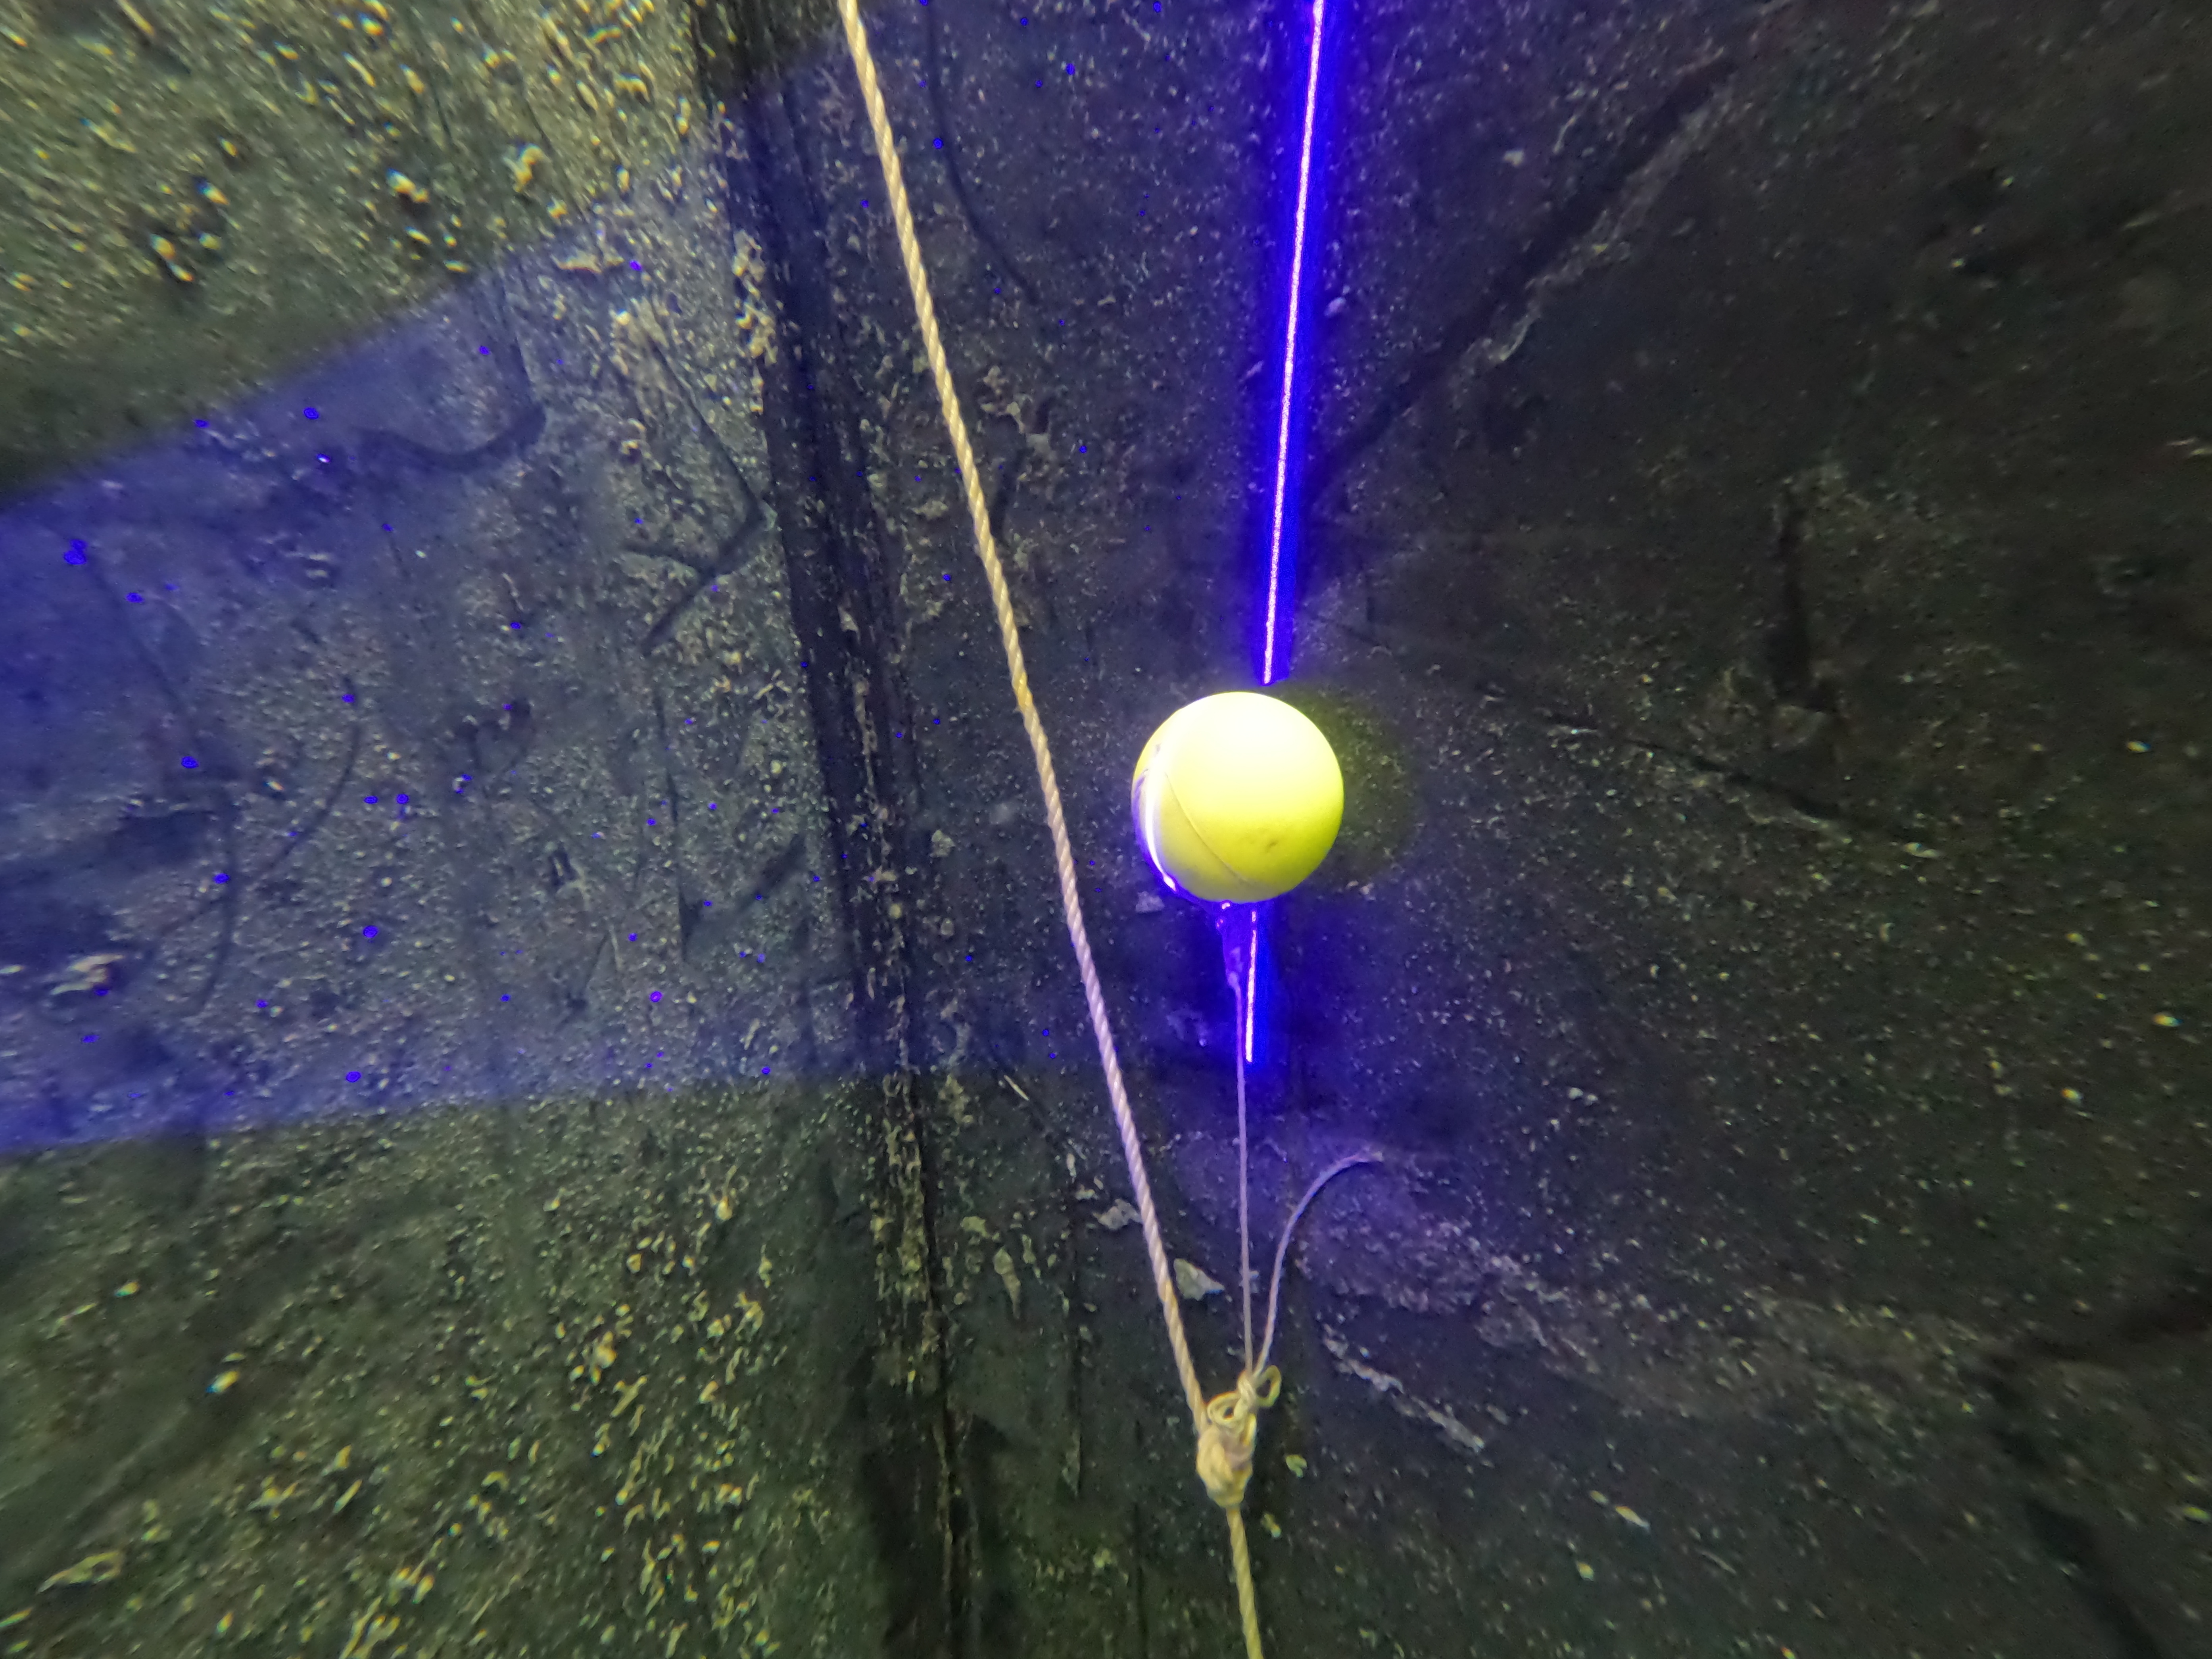

Supplement: Supplementary file 2917 [file G0030417.pdf › 2/G0030417.pdf]

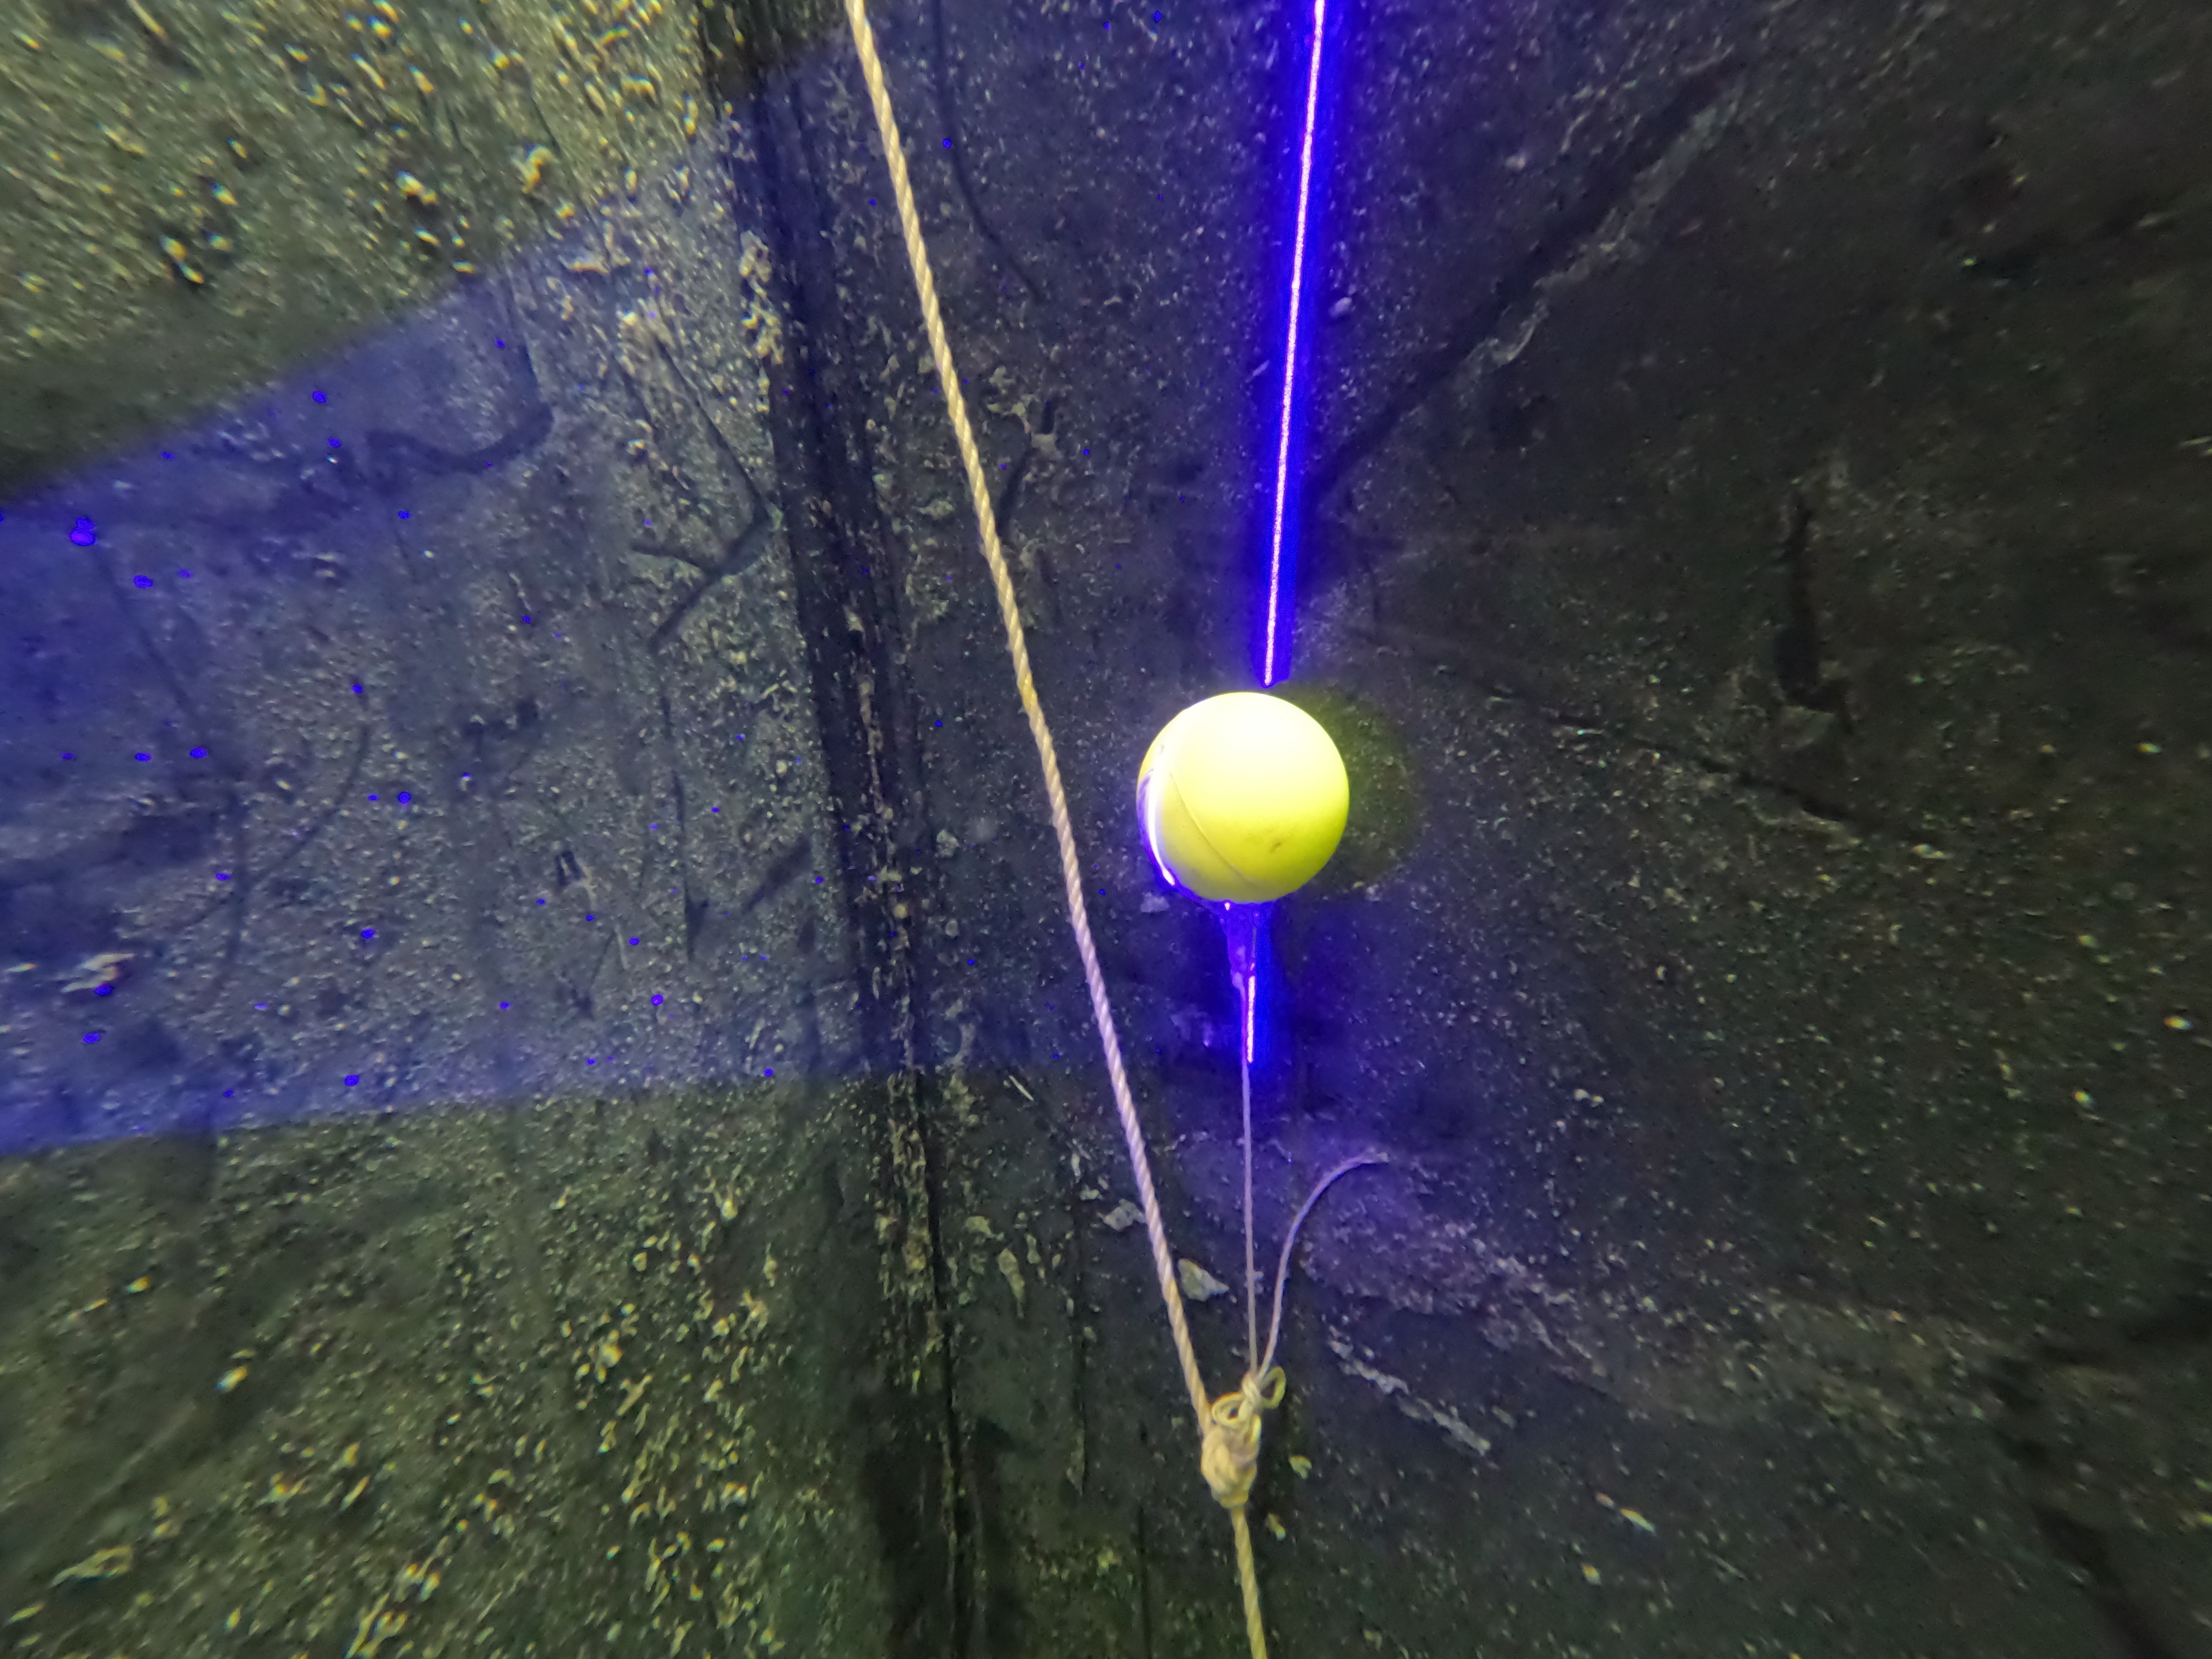

Supplement: Supplementary file 2918 [file G0030418.pdf › 2/G0030418.pdf]

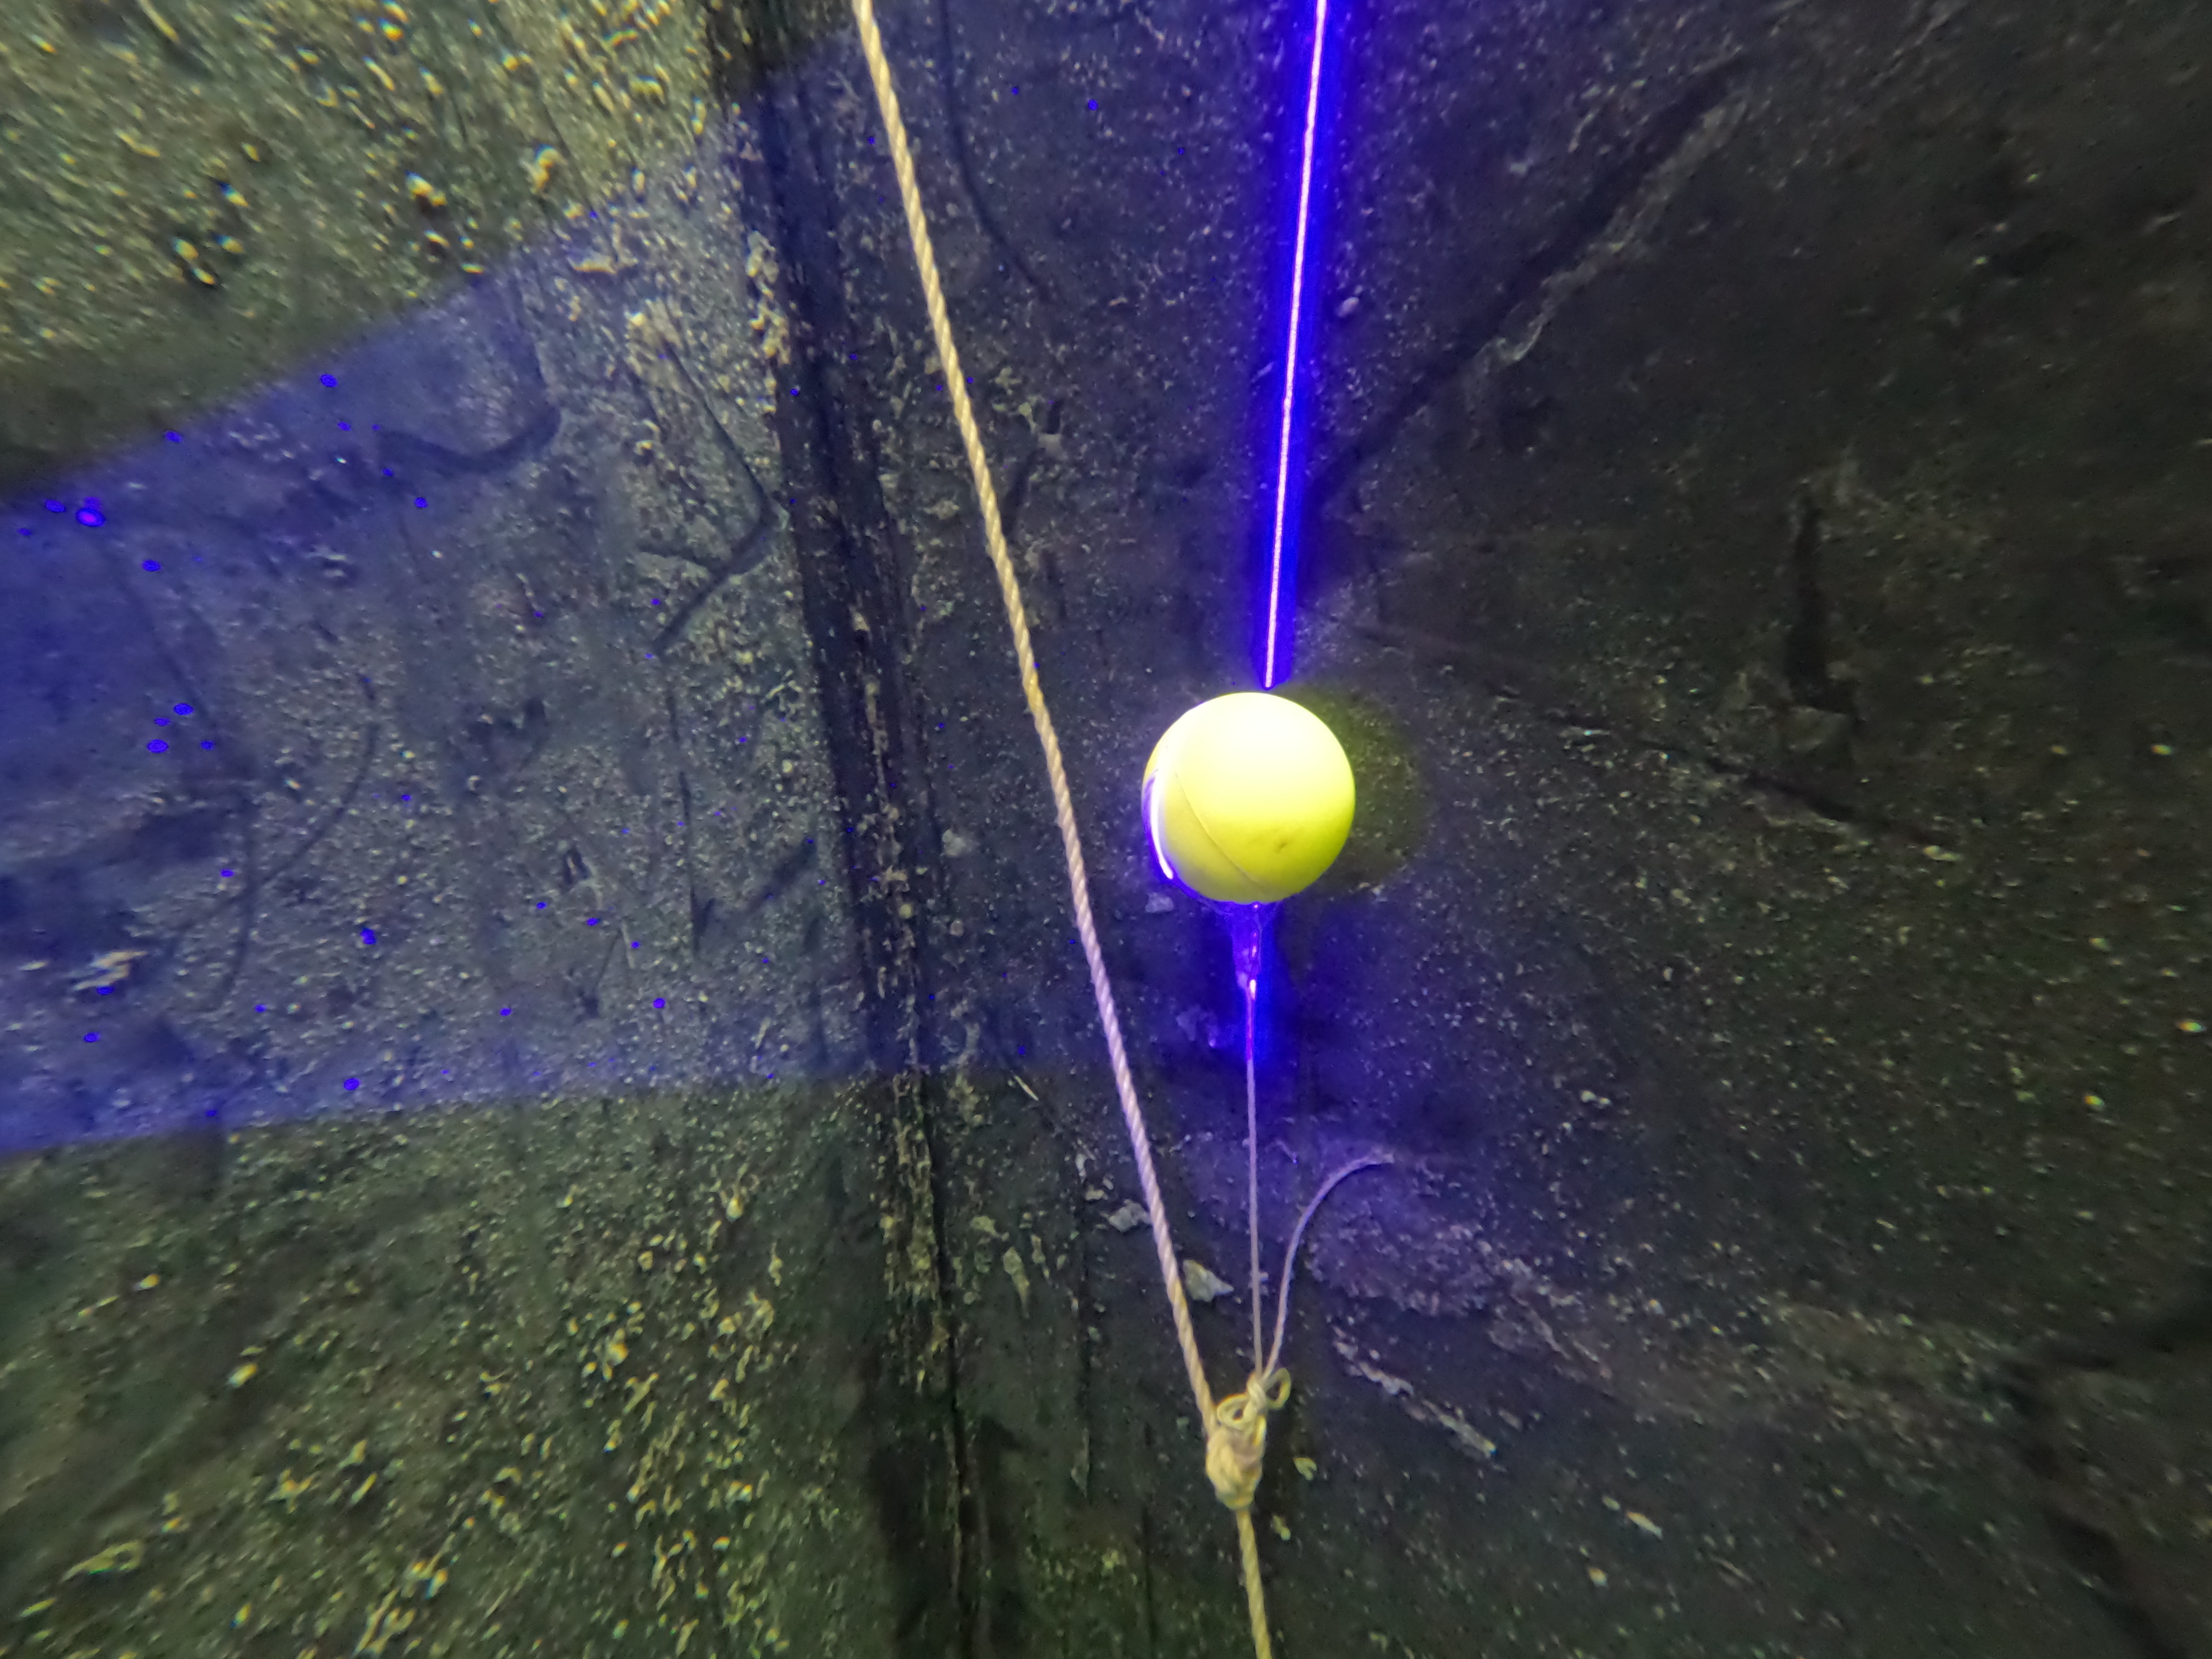

Supplement: Supplementary file 2919 [file G0030419.pdf › 2/G0030419.pdf]

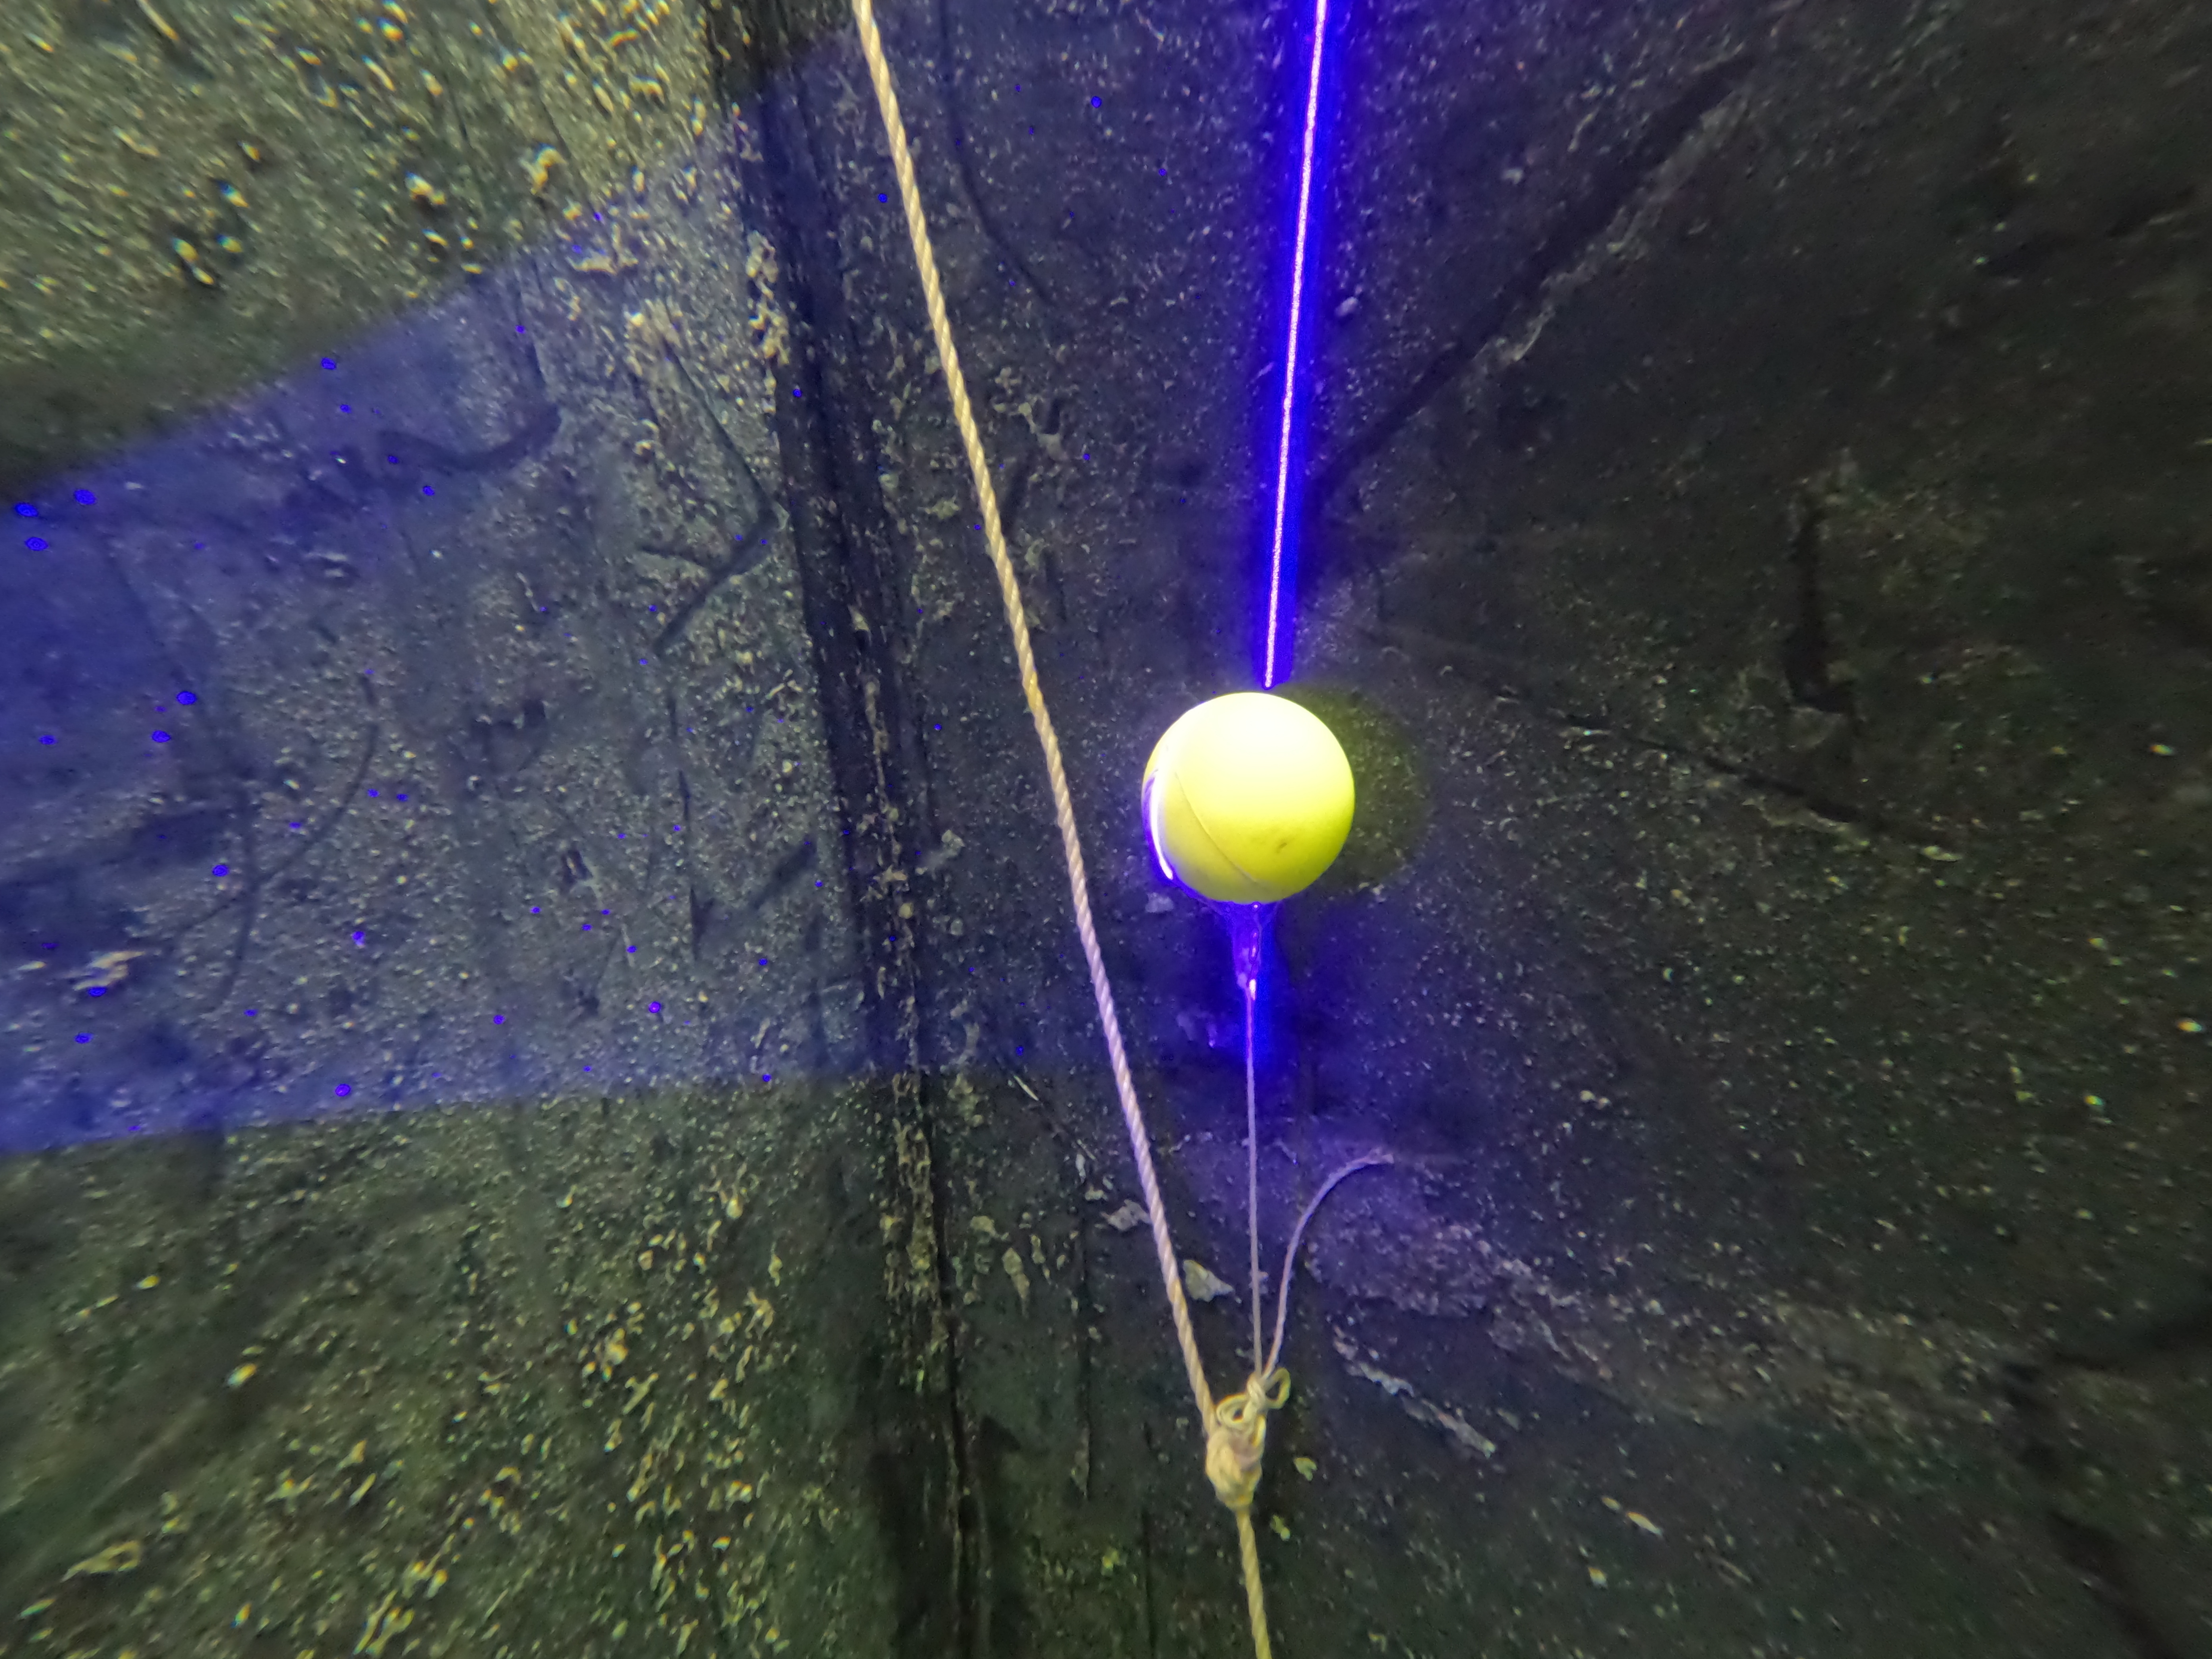

Supplement: Supplementary file 2920 [file G0030420.pdf › 2/G0030420.pdf]

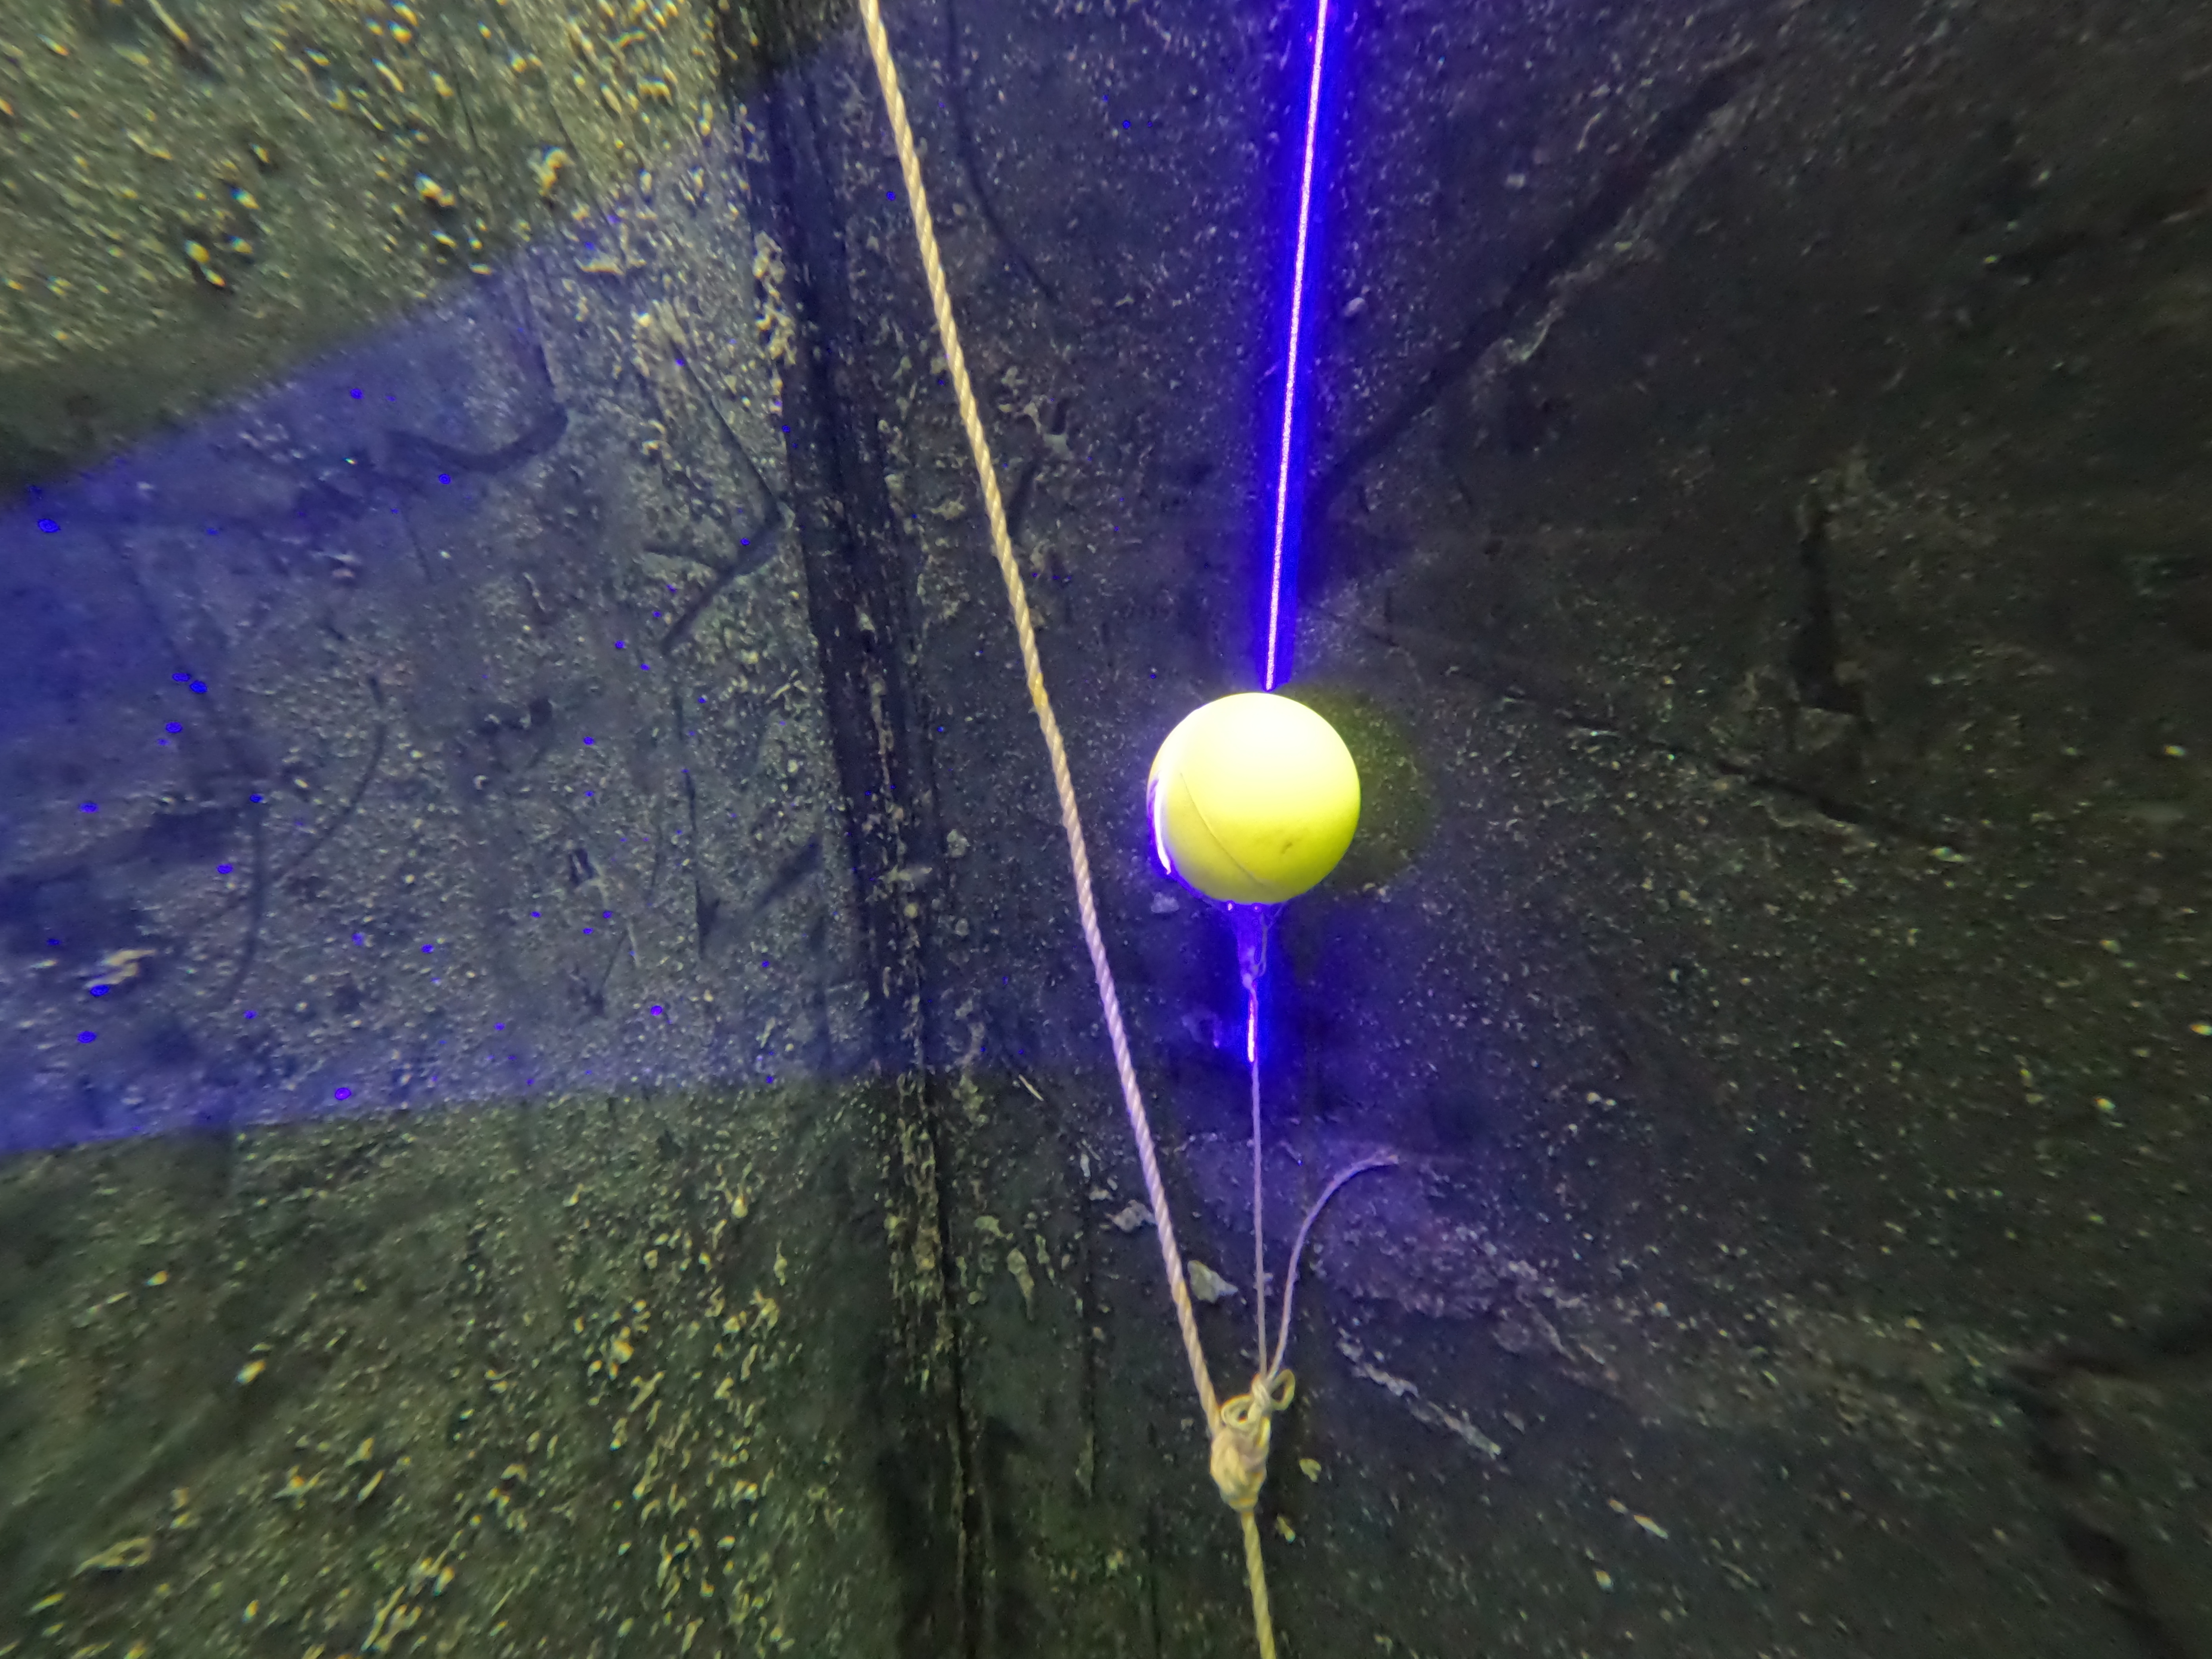

Supplement: Supplementary file 2921 [file G0030421.pdf › 2/G0030421.pdf]

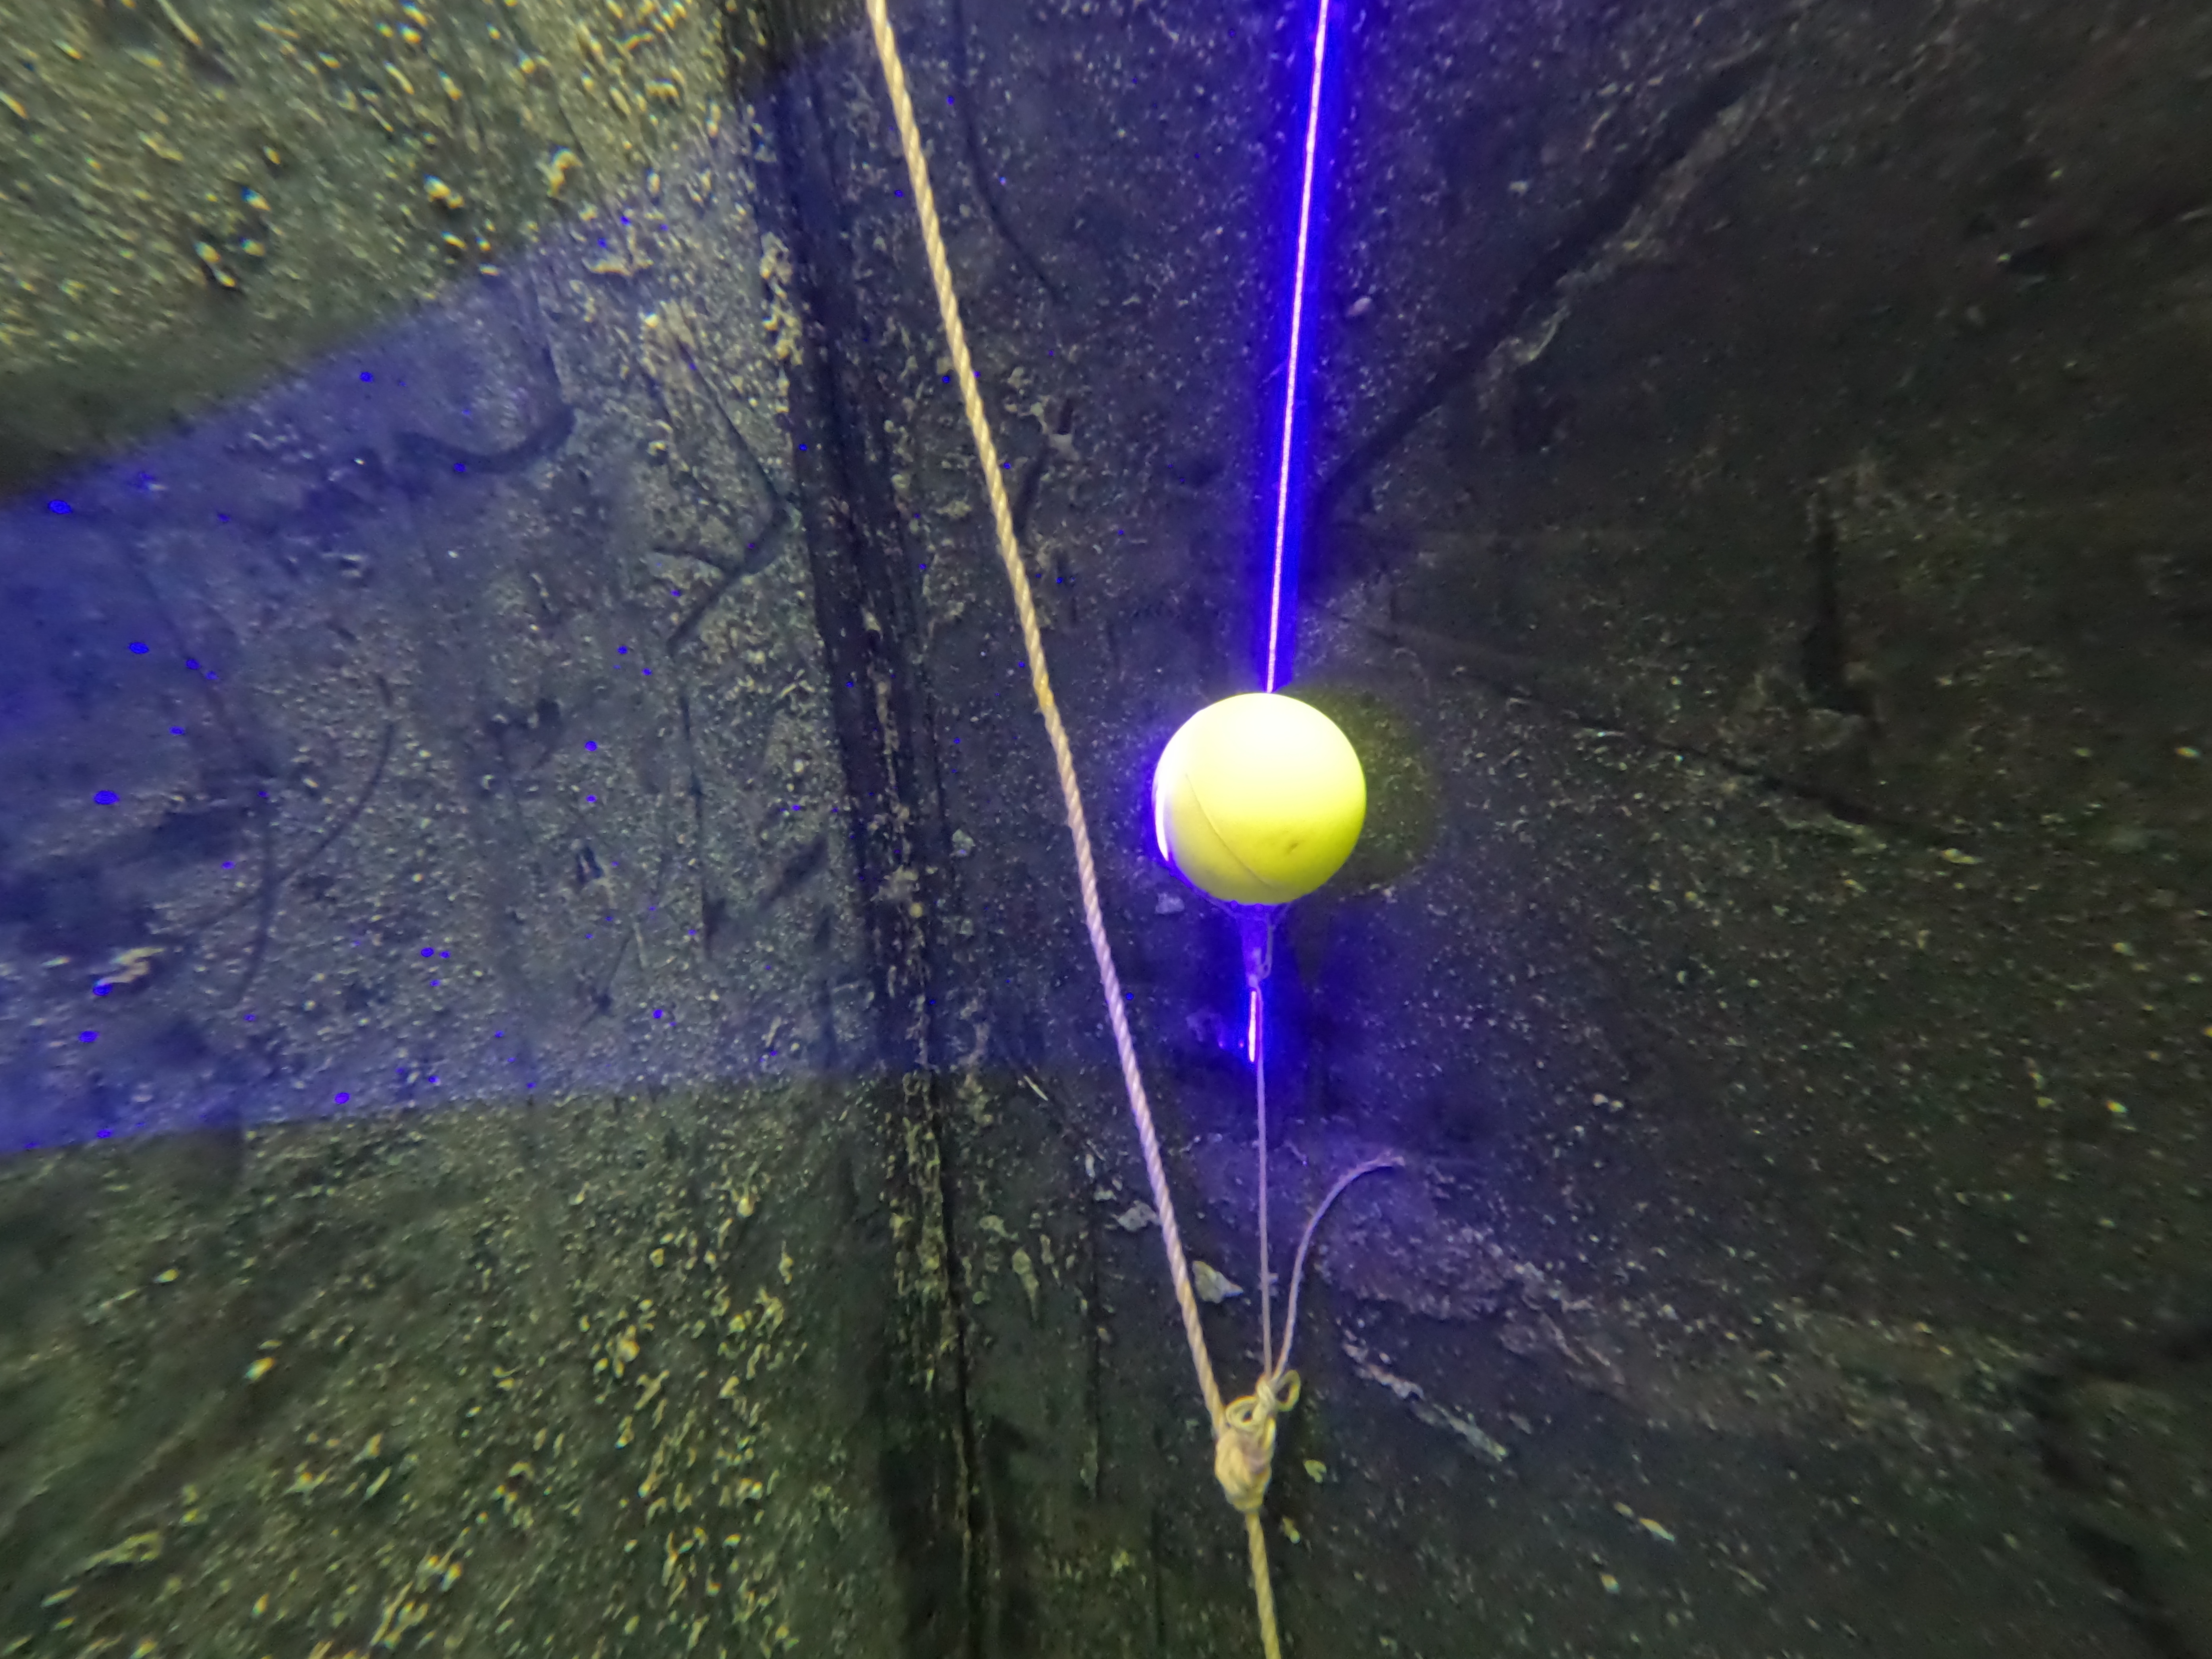

Supplement: Supplementary file 2922 [file G0030422.pdf › 2/G0030422.pdf]

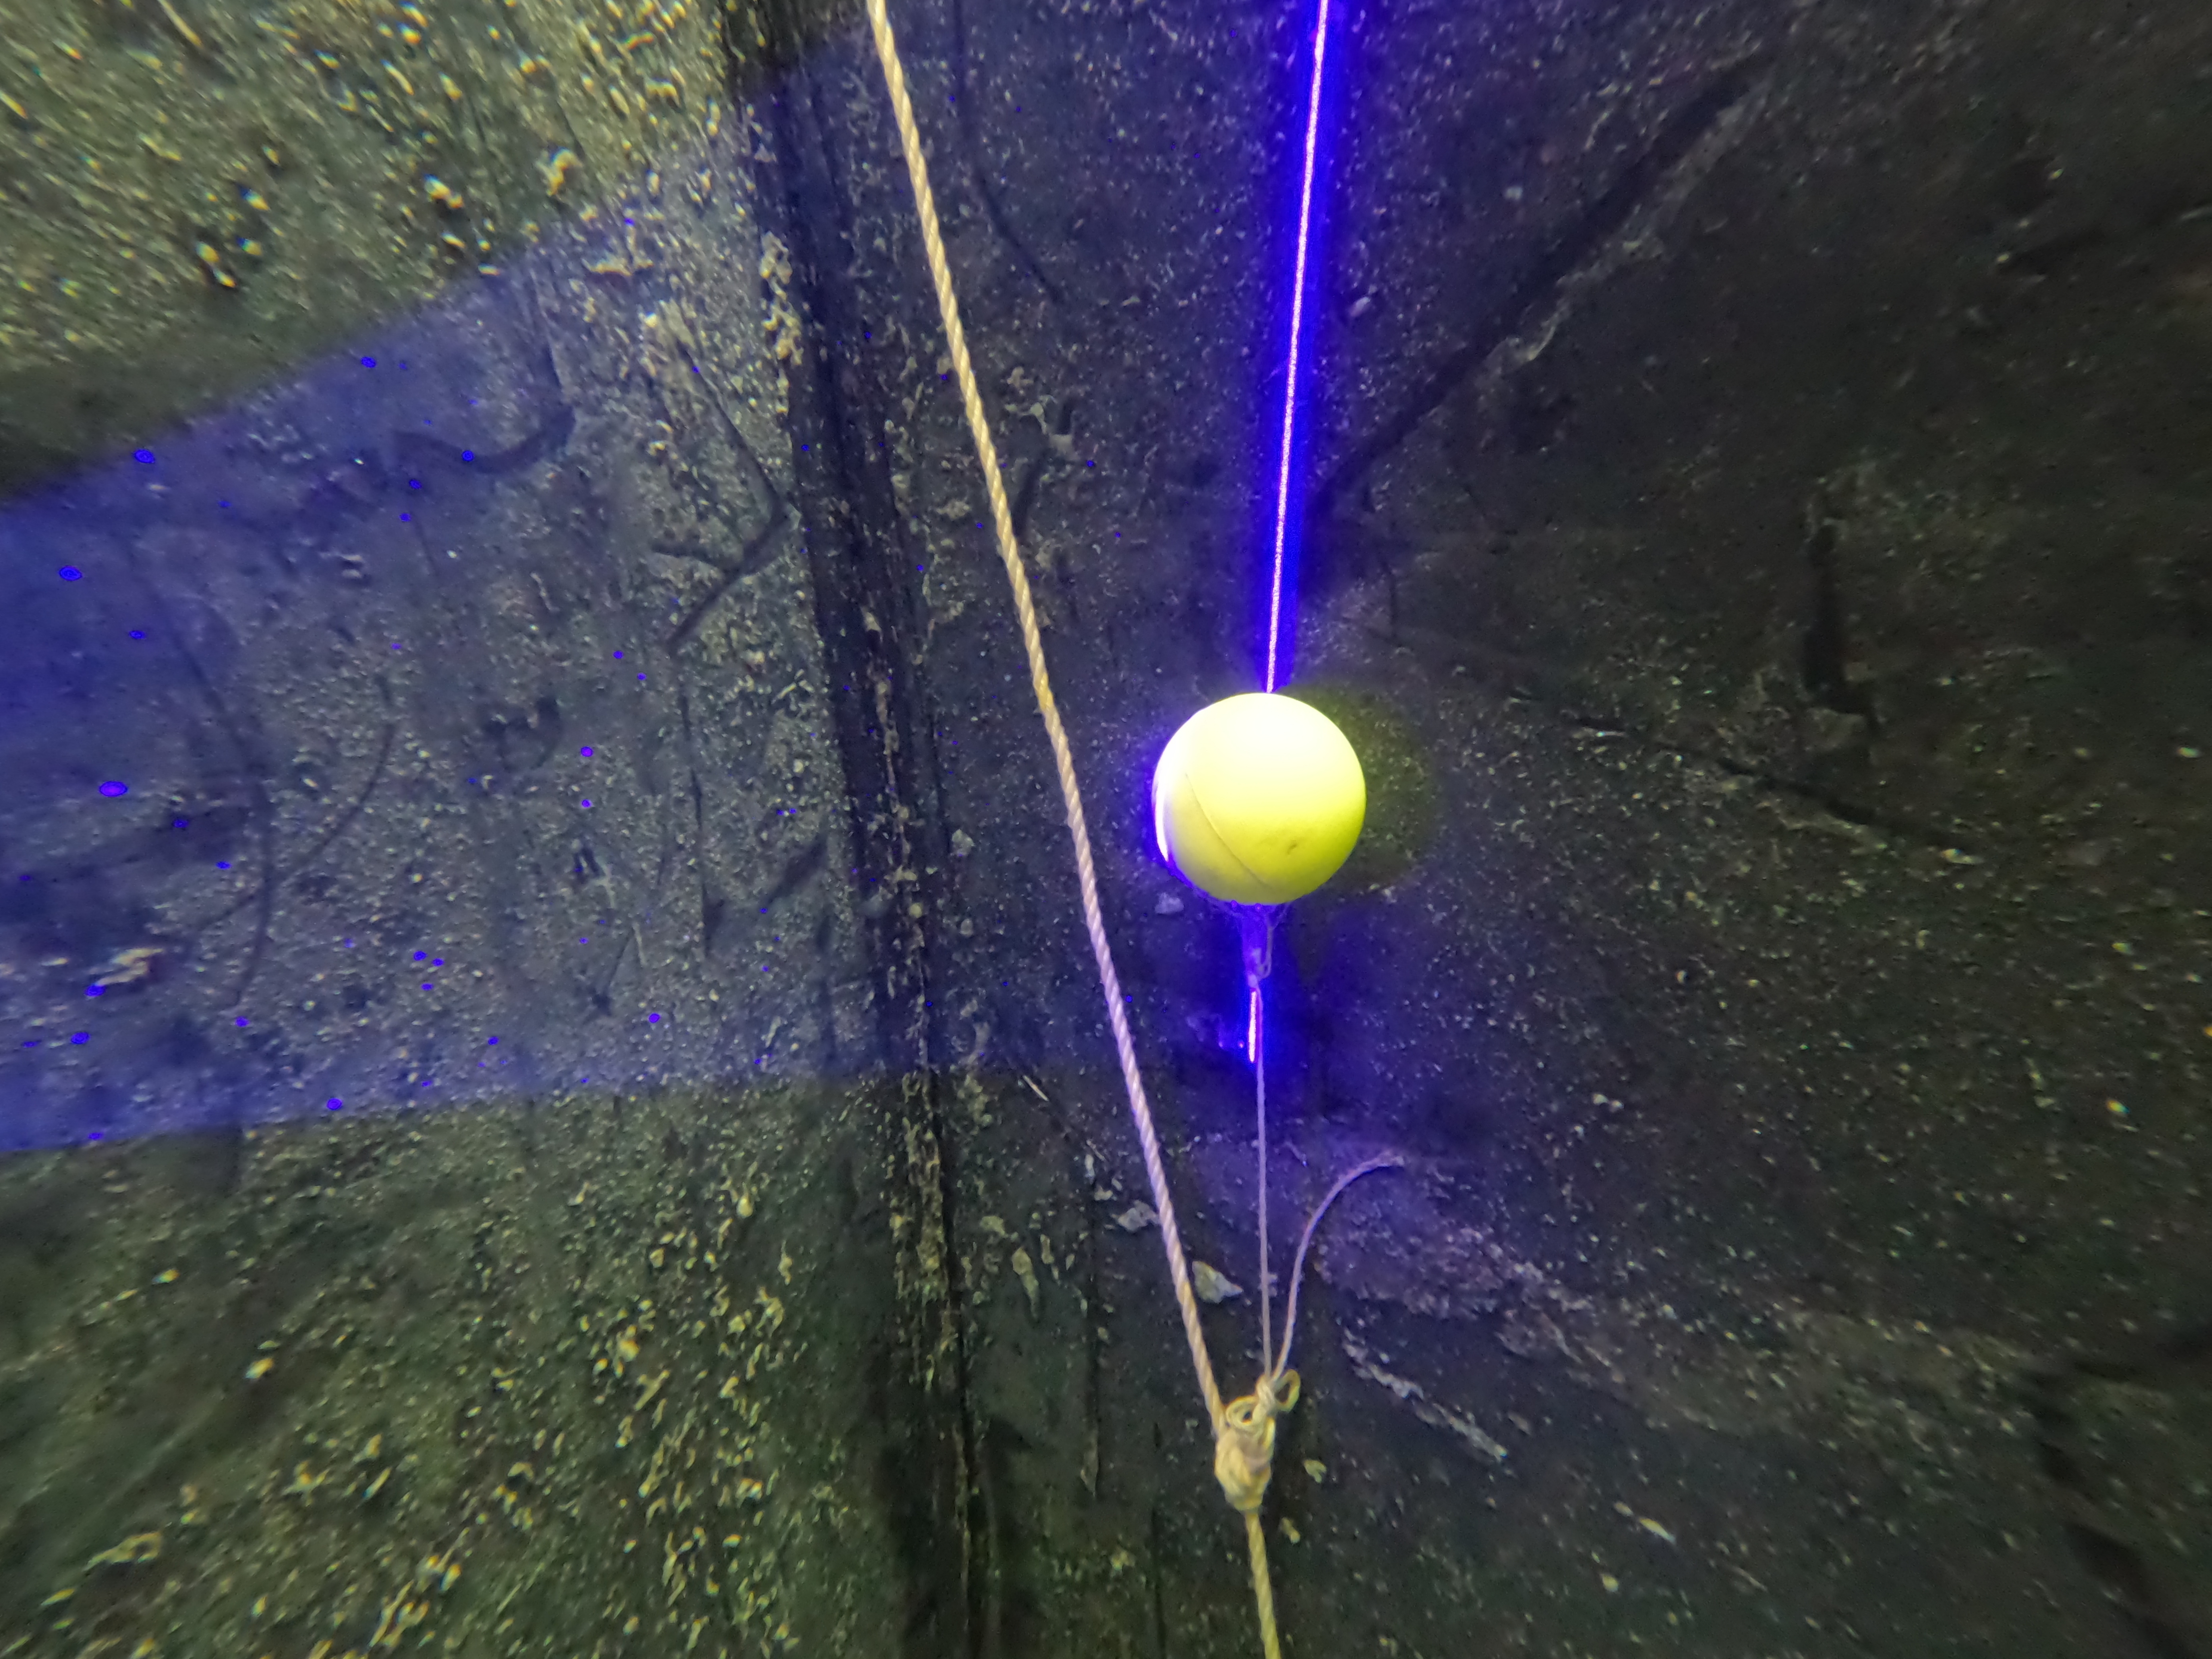

Supplement: Supplementary file 2923 [file G0030423.pdf › 2/G0030423.pdf]

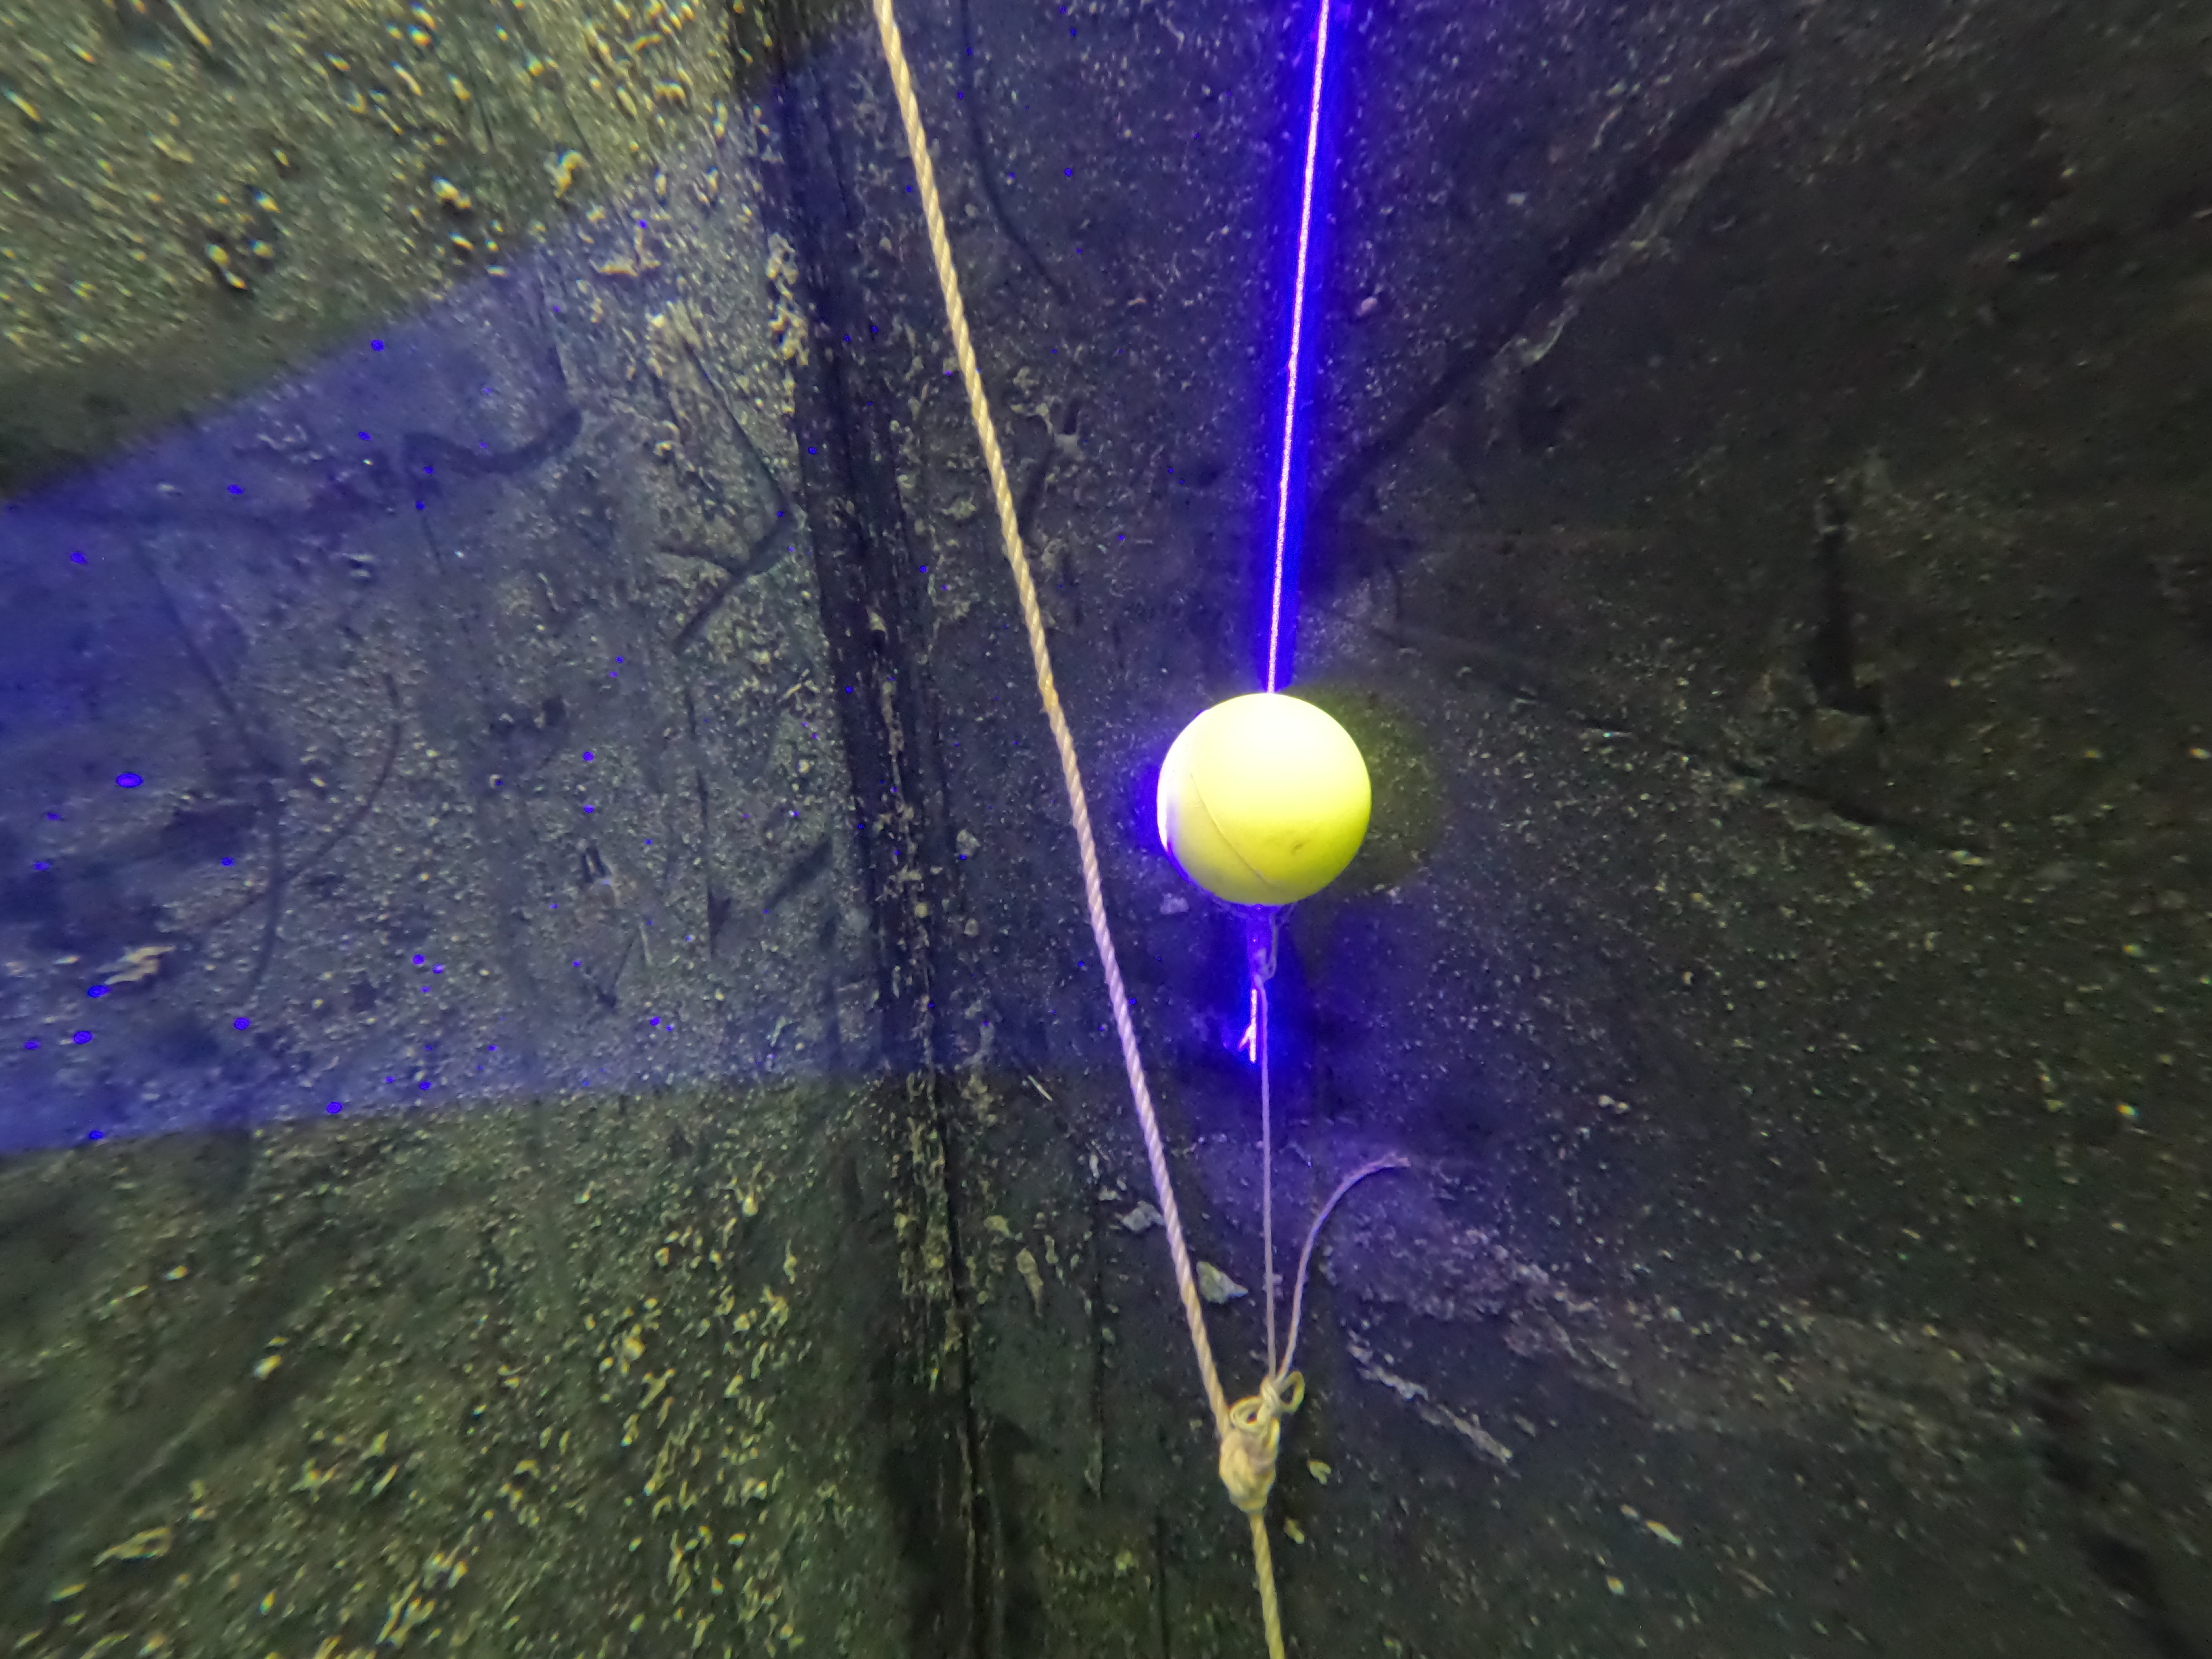

Supplement: Supplementary file 2924 [file G0030424.pdf › 2/G0030424.pdf]

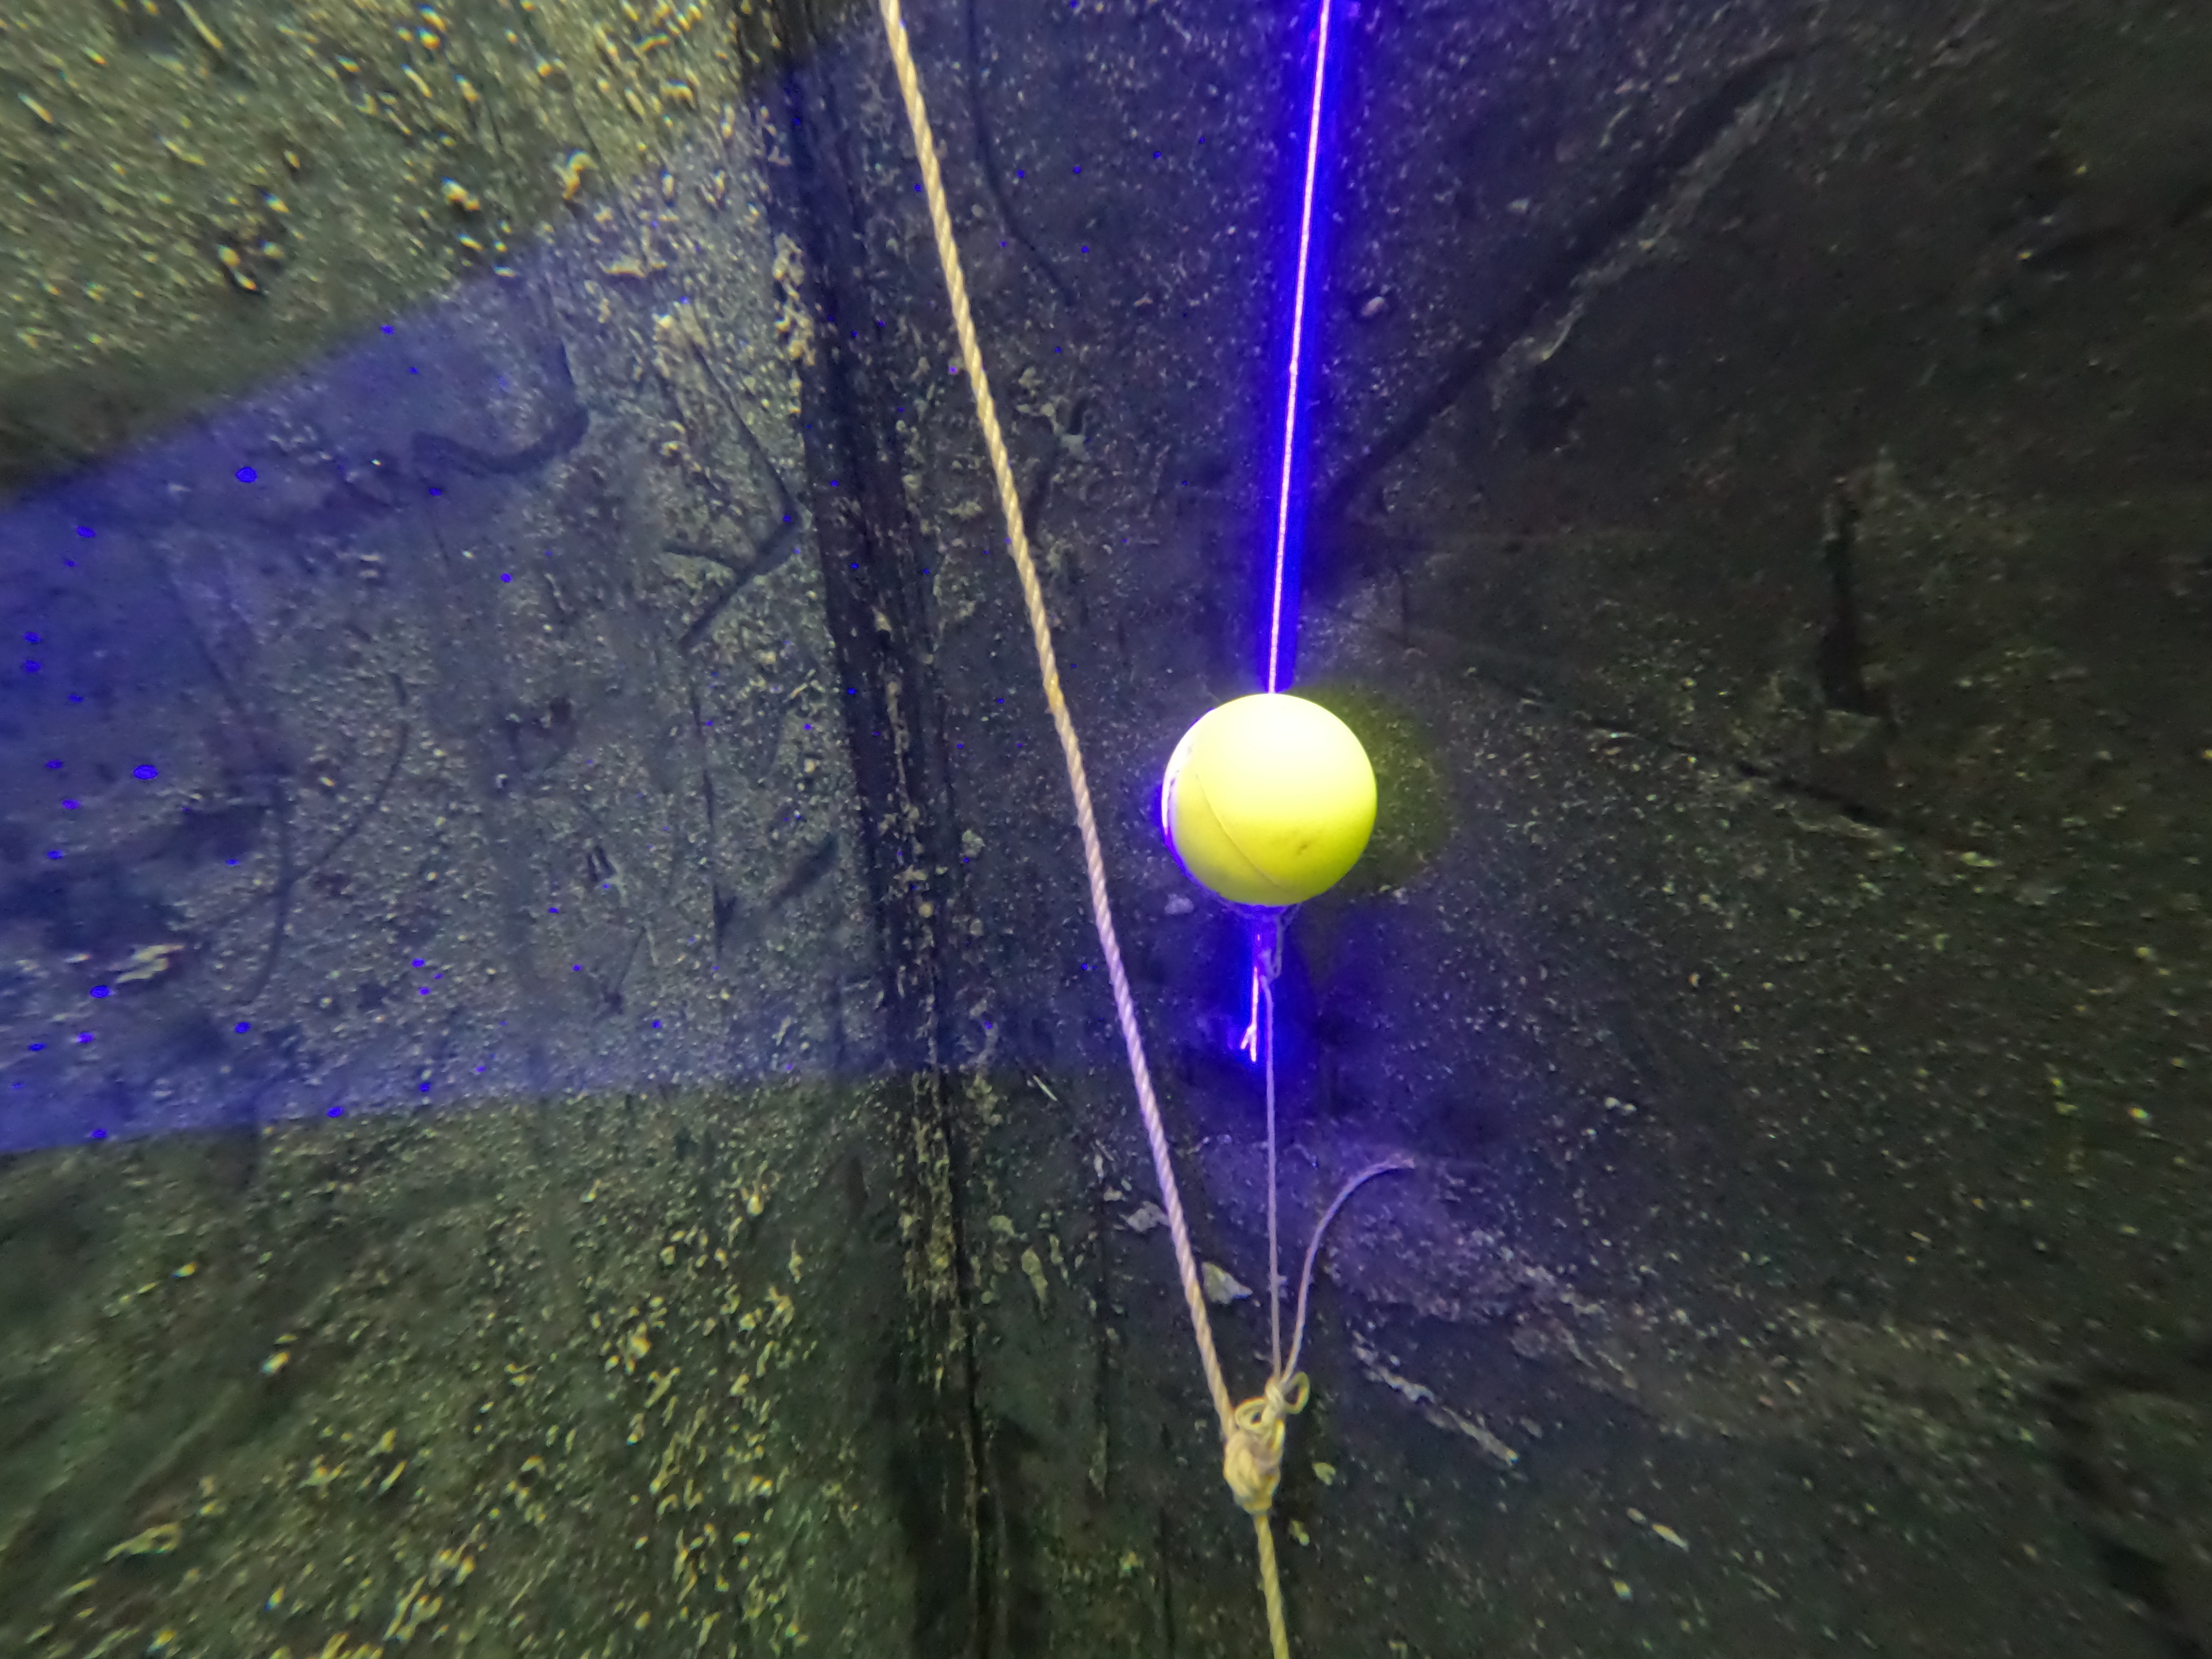

Supplement: Supplementary file 2925 [file G0030425.pdf › 2/G0030425.pdf]

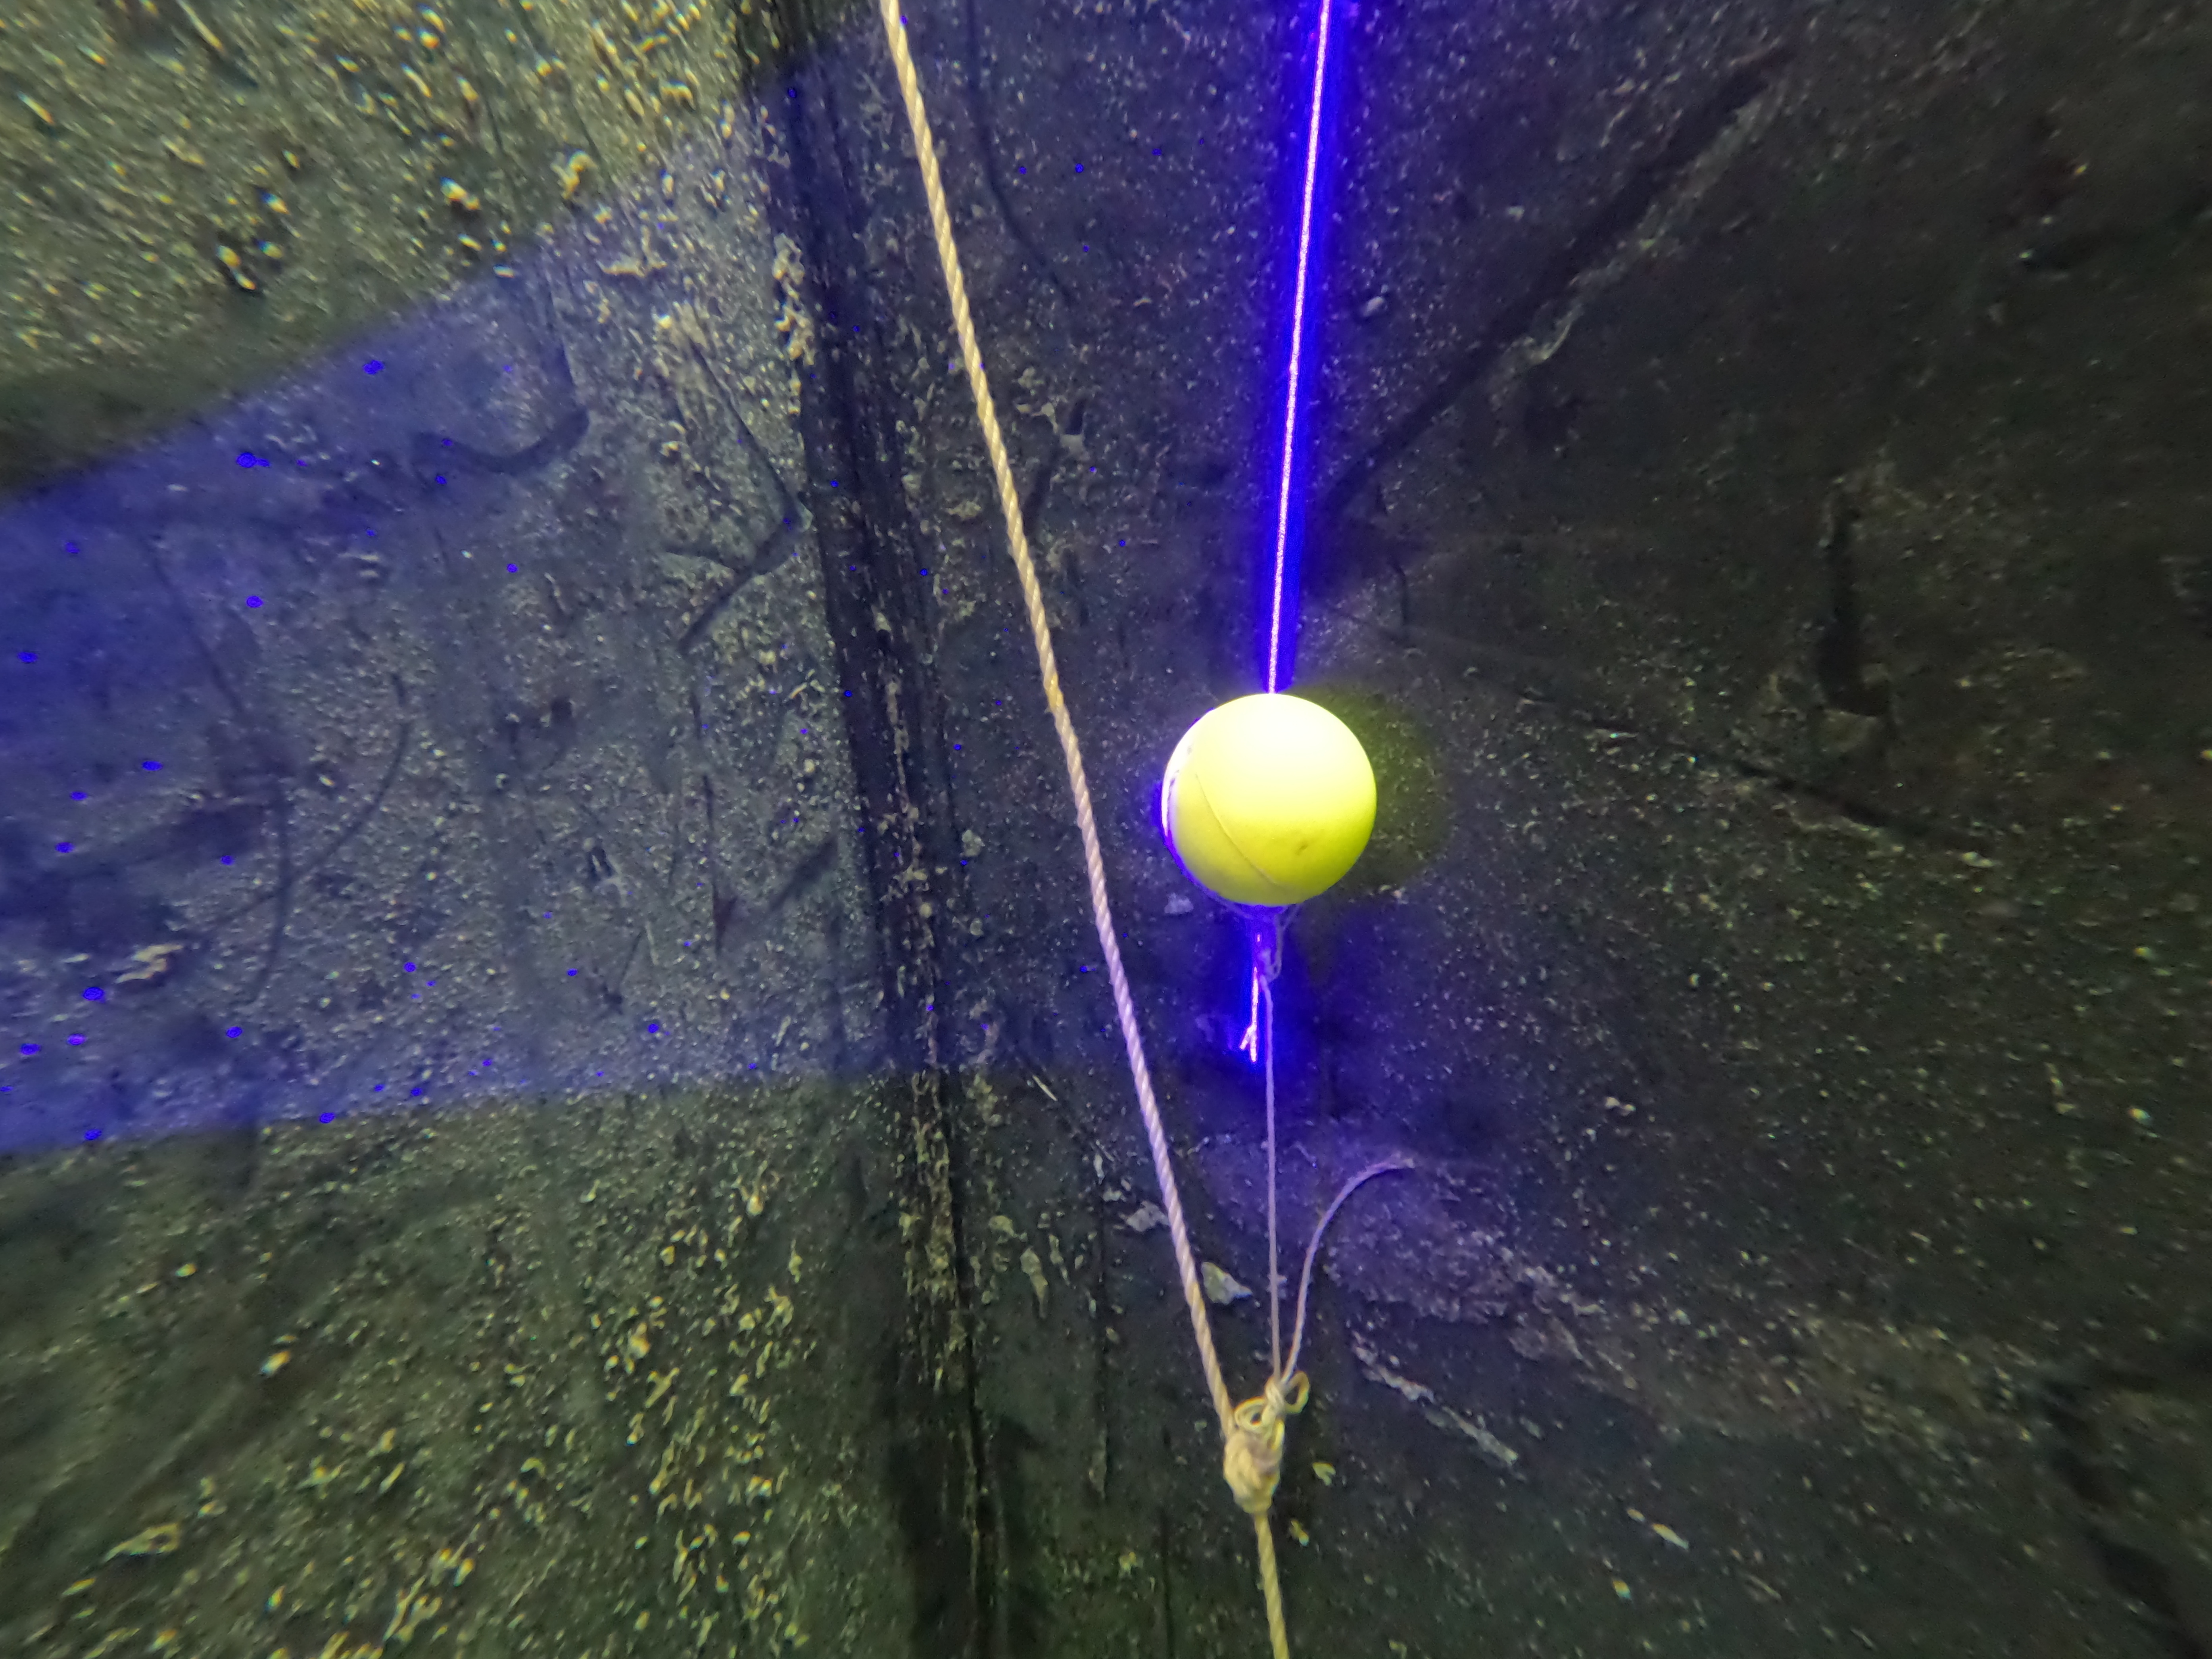

Supplement: Supplementary file 2926 [file G0030426.pdf › 2/G0030426.pdf]

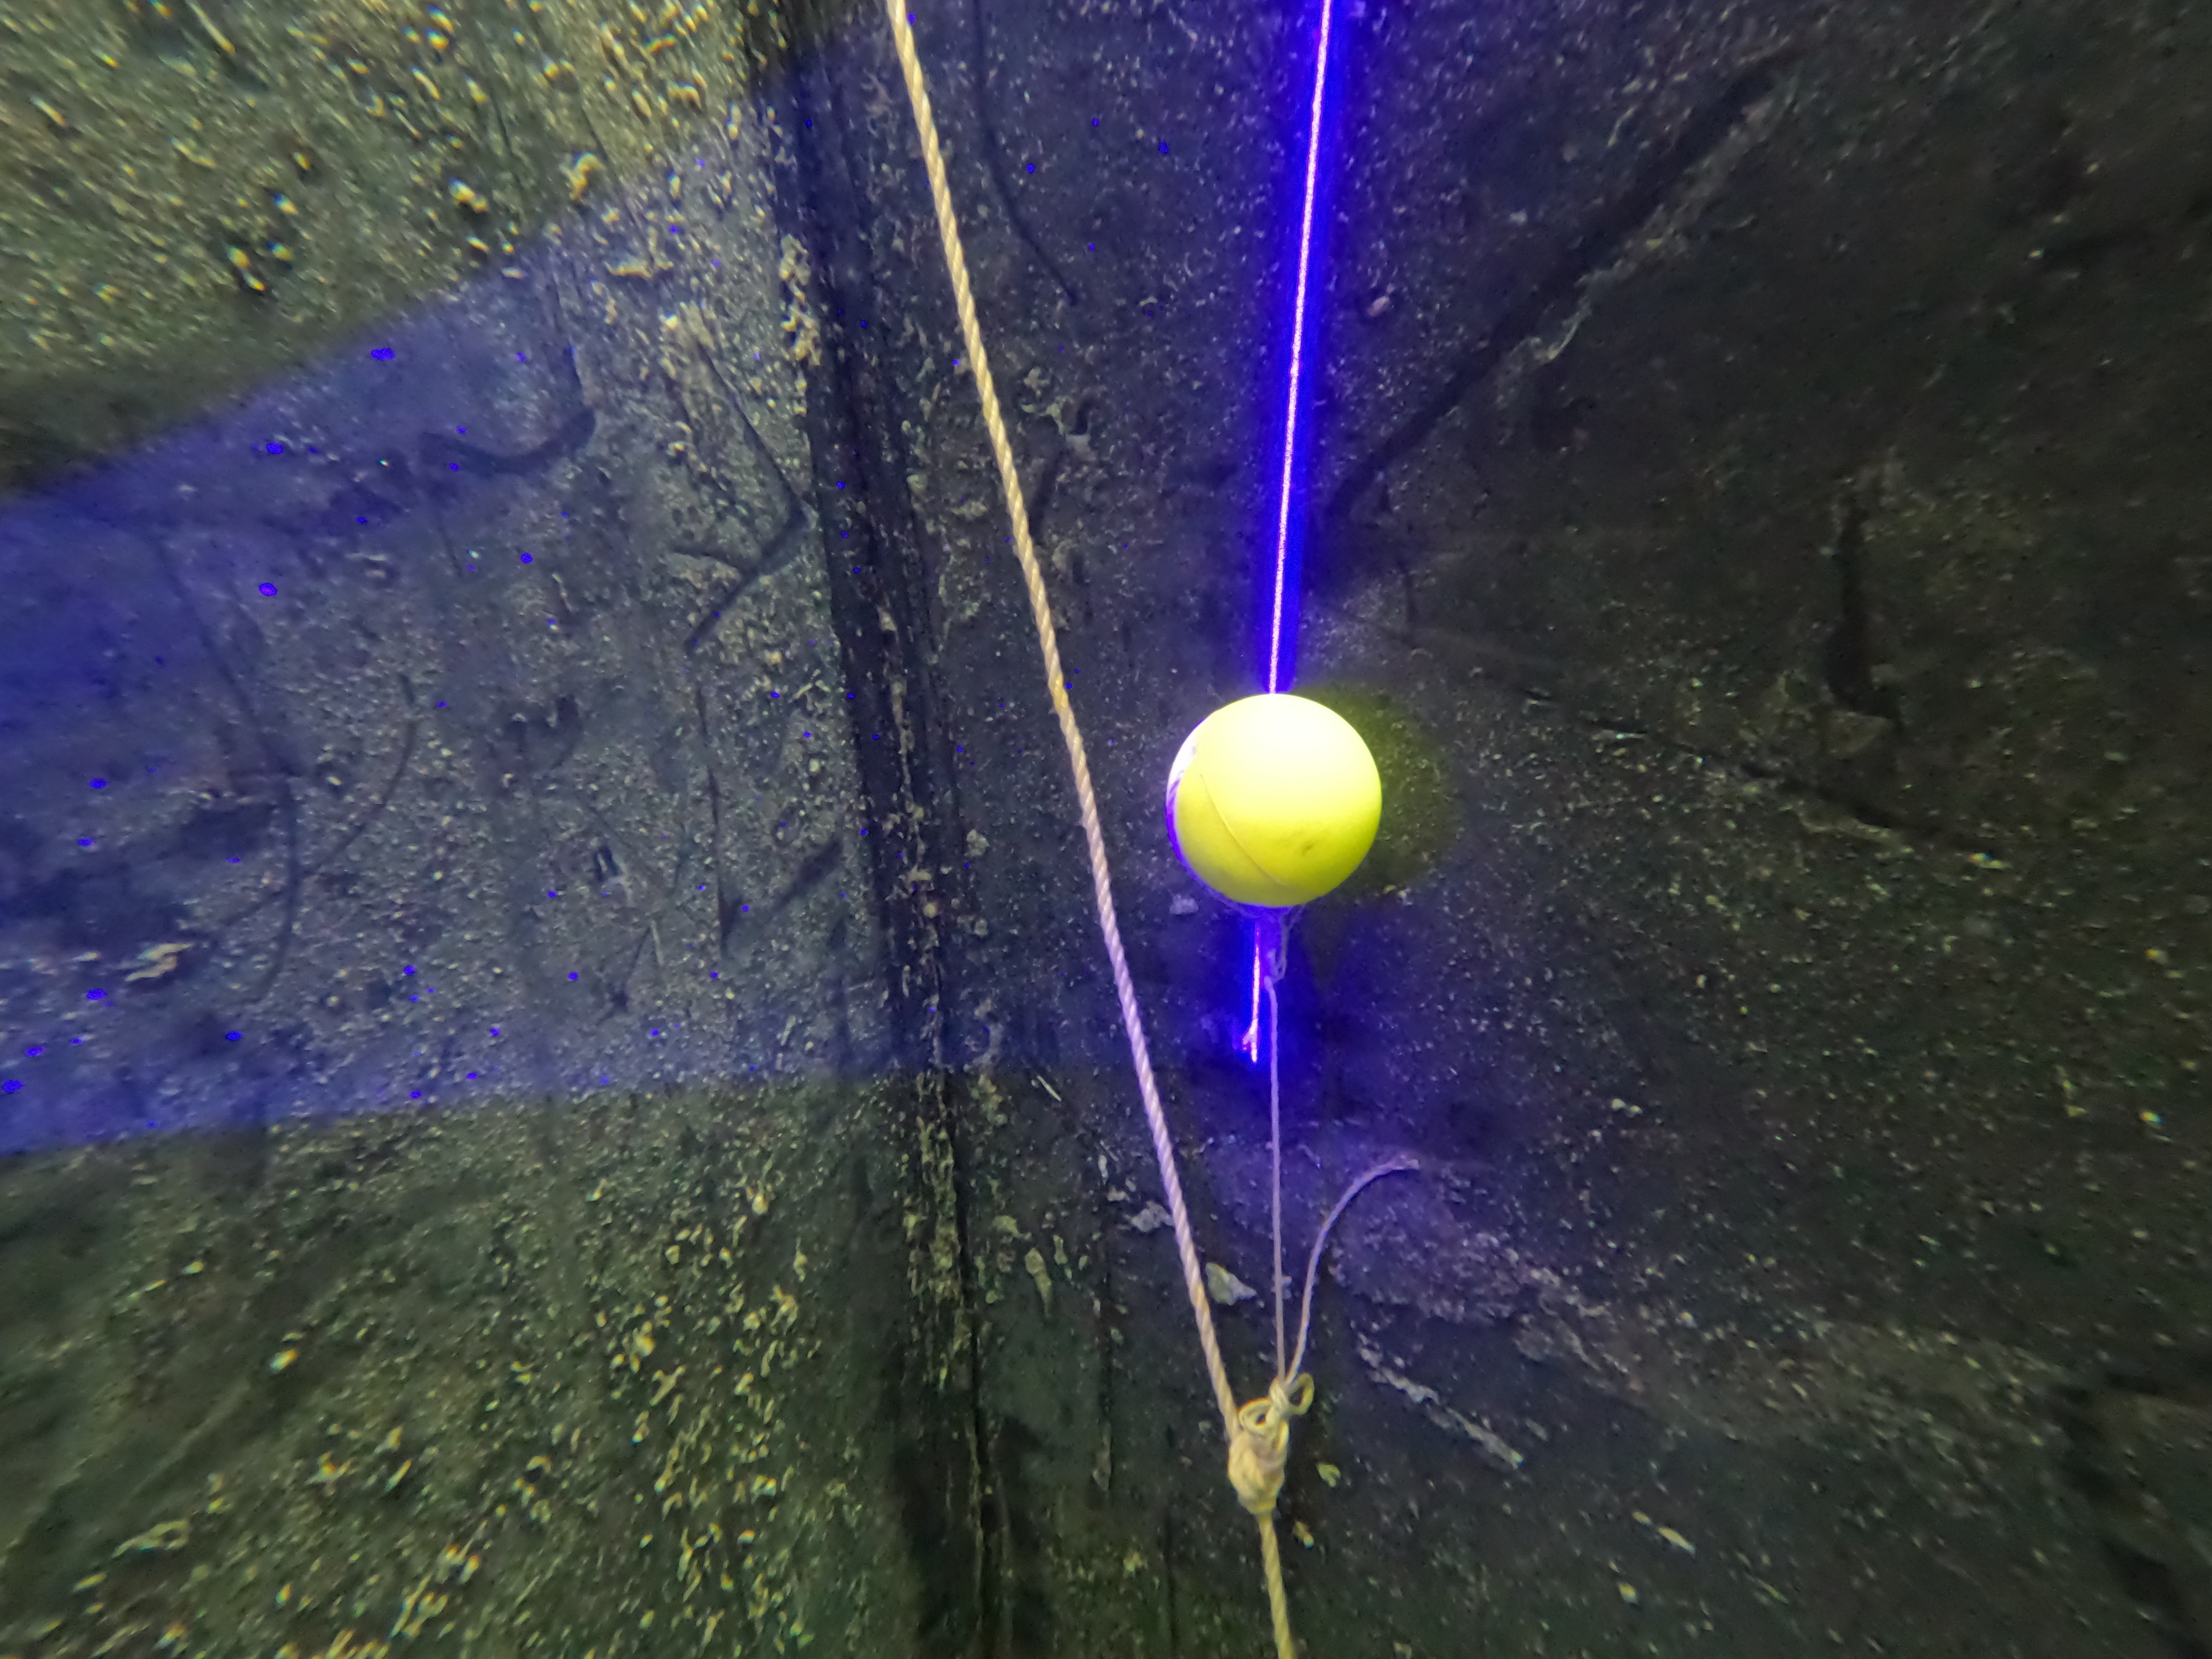

Supplement: Supplementary file 2927 [file G0030427.pdf › 2/G0030427.pdf]

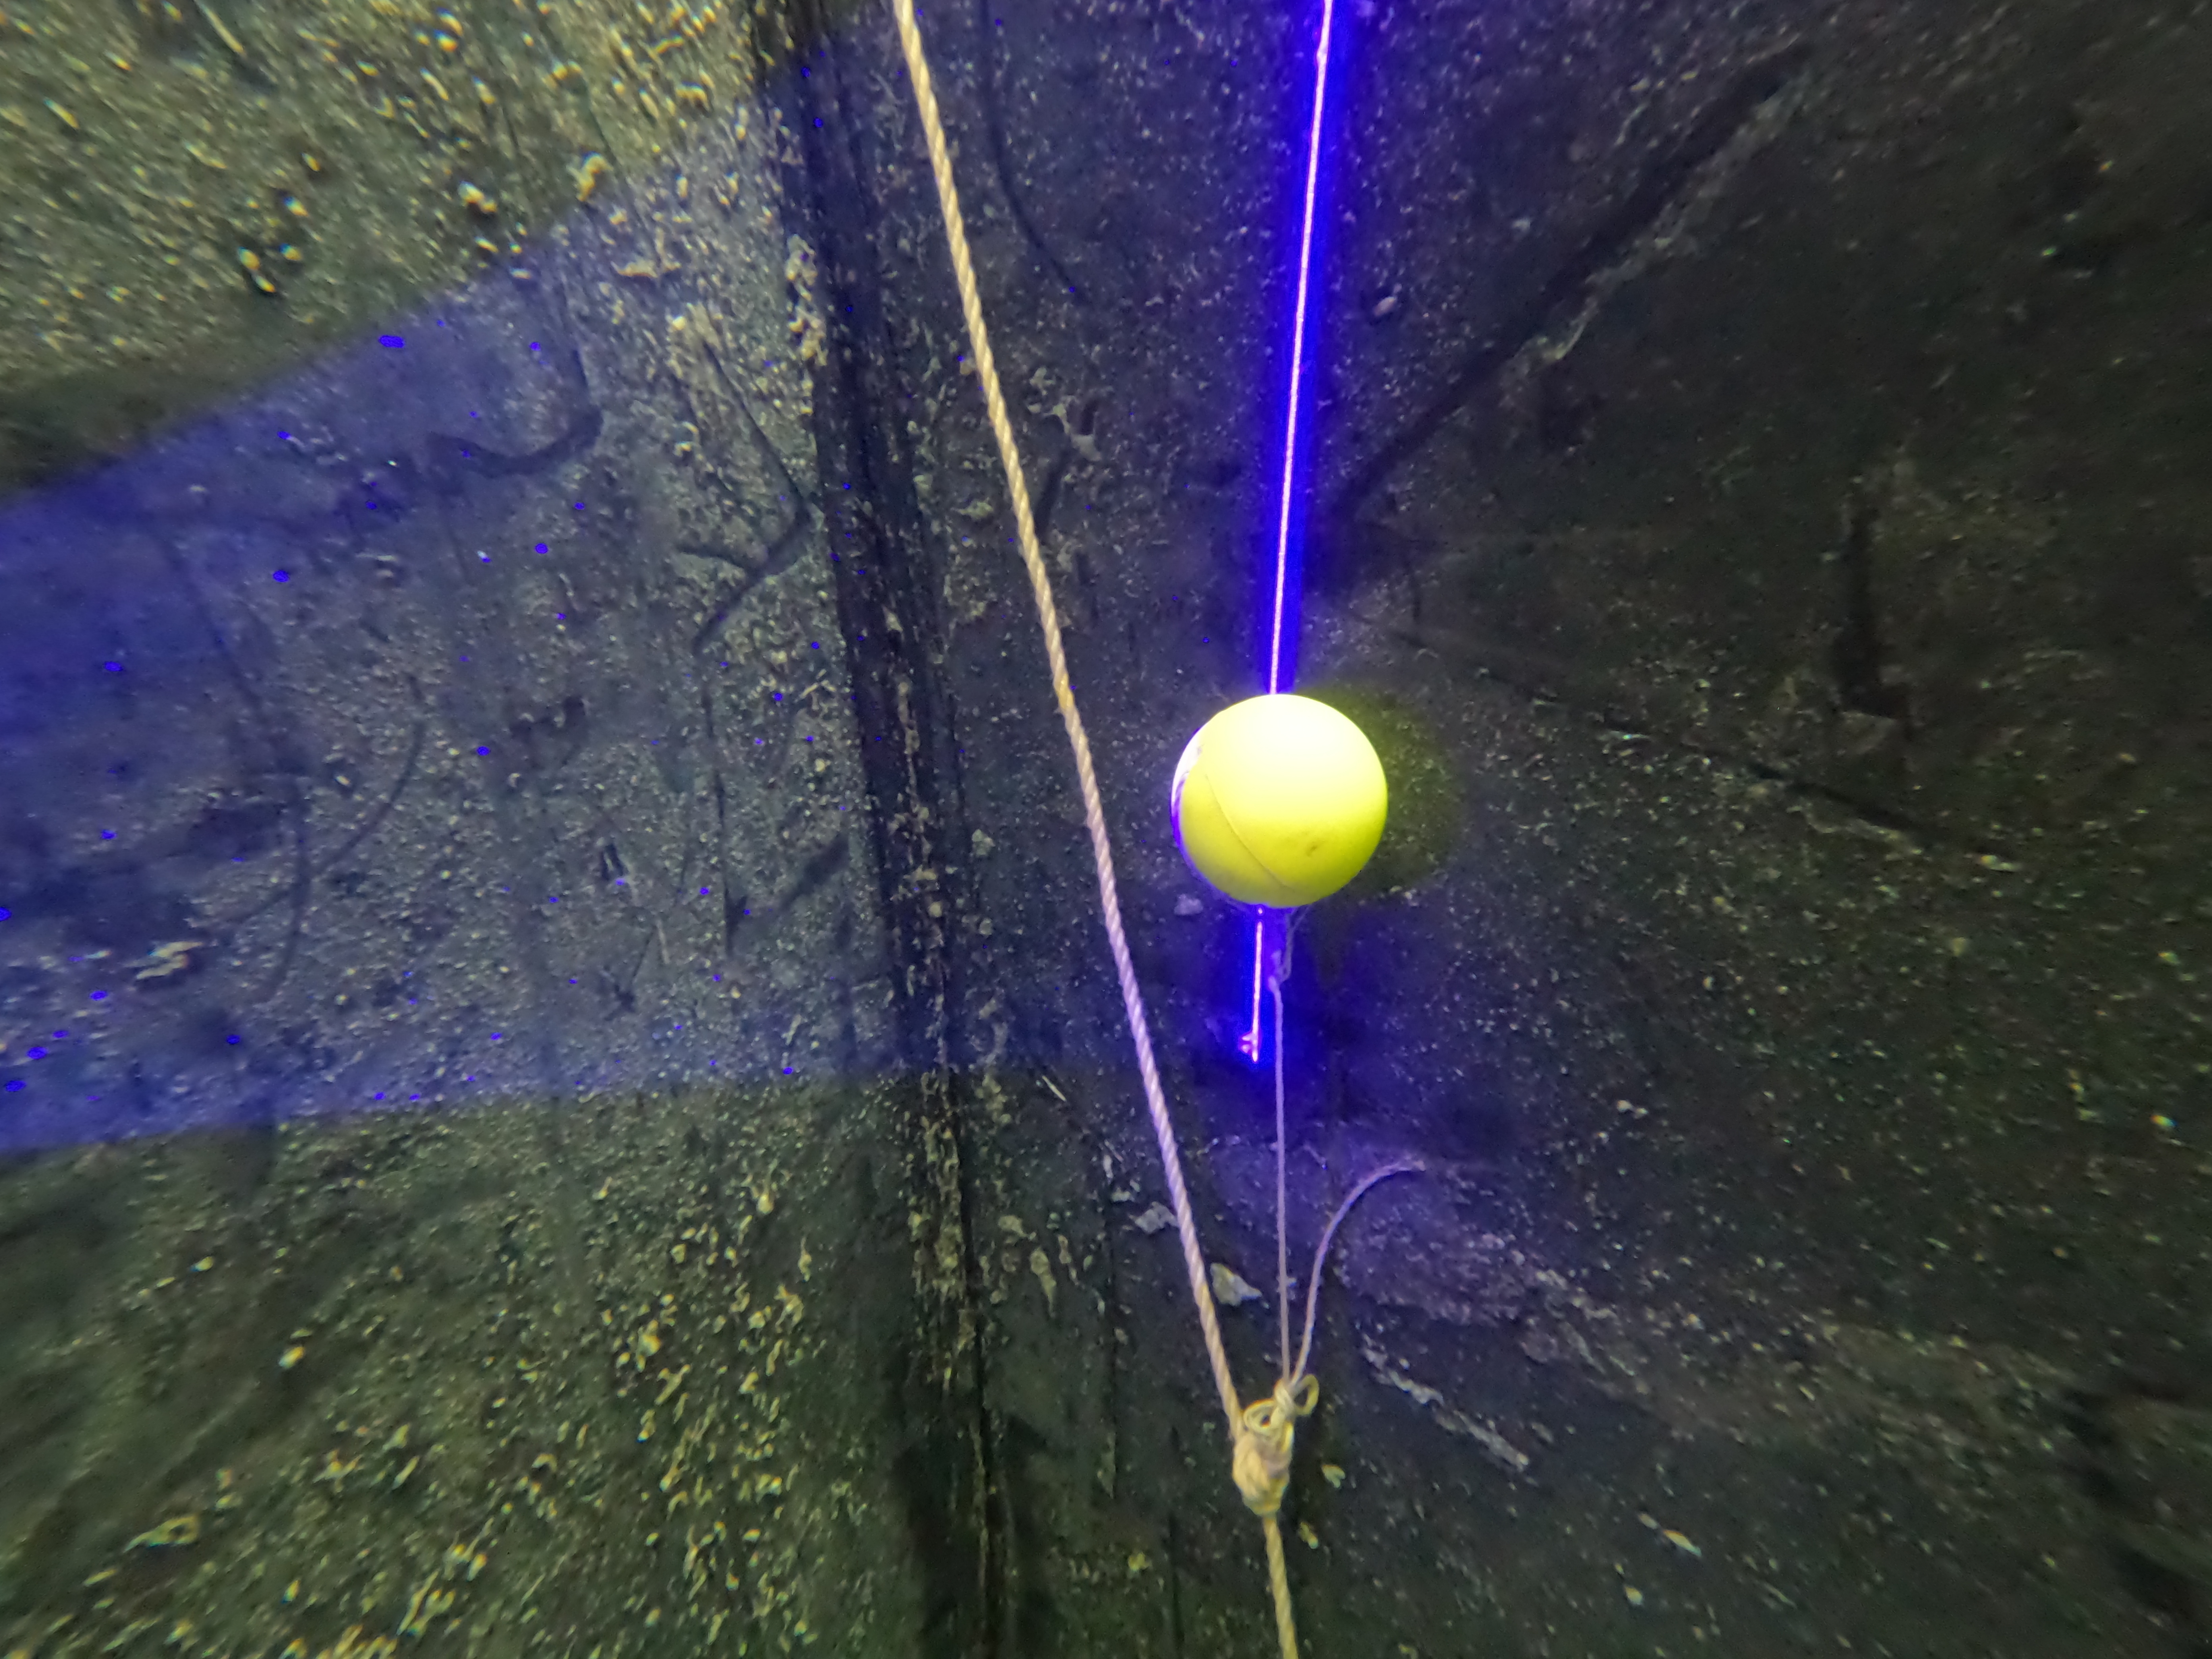

Supplement: Supplementary file 2928 [file G0030428.pdf › 2/G0030428.pdf]

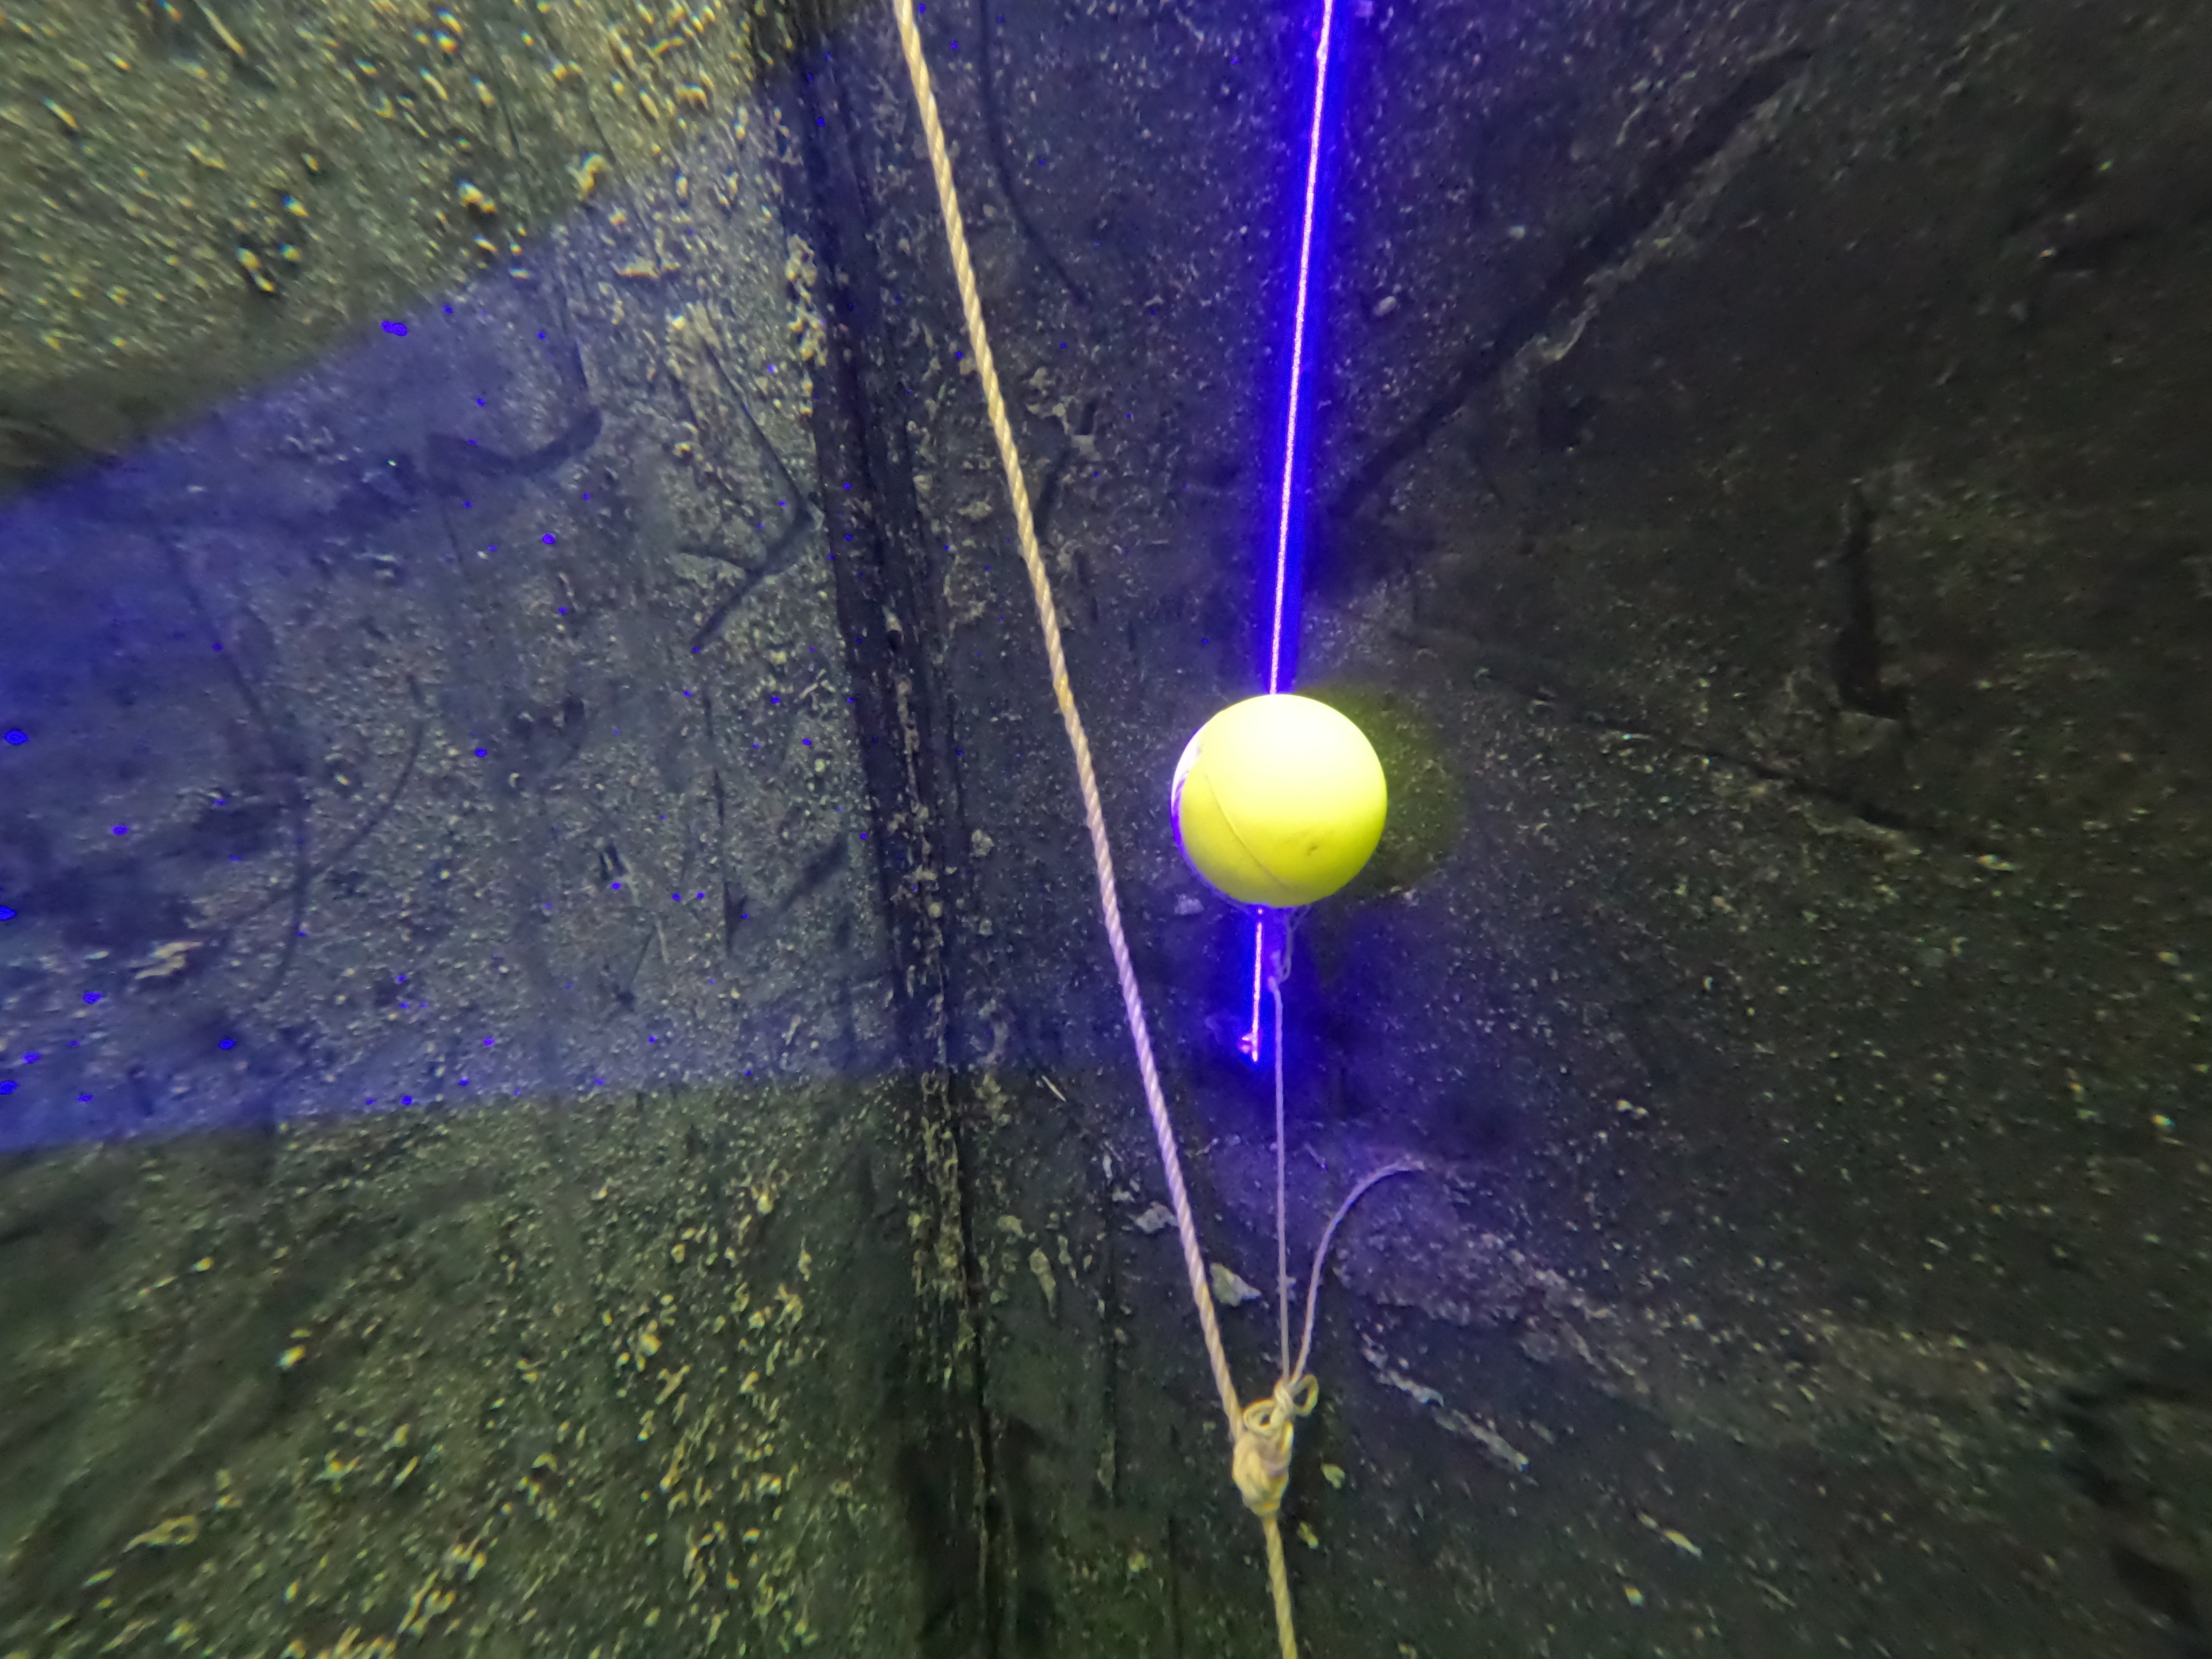

Supplement: Supplementary file 2929 [file G0030429.pdf › 2/G0030429.pdf]

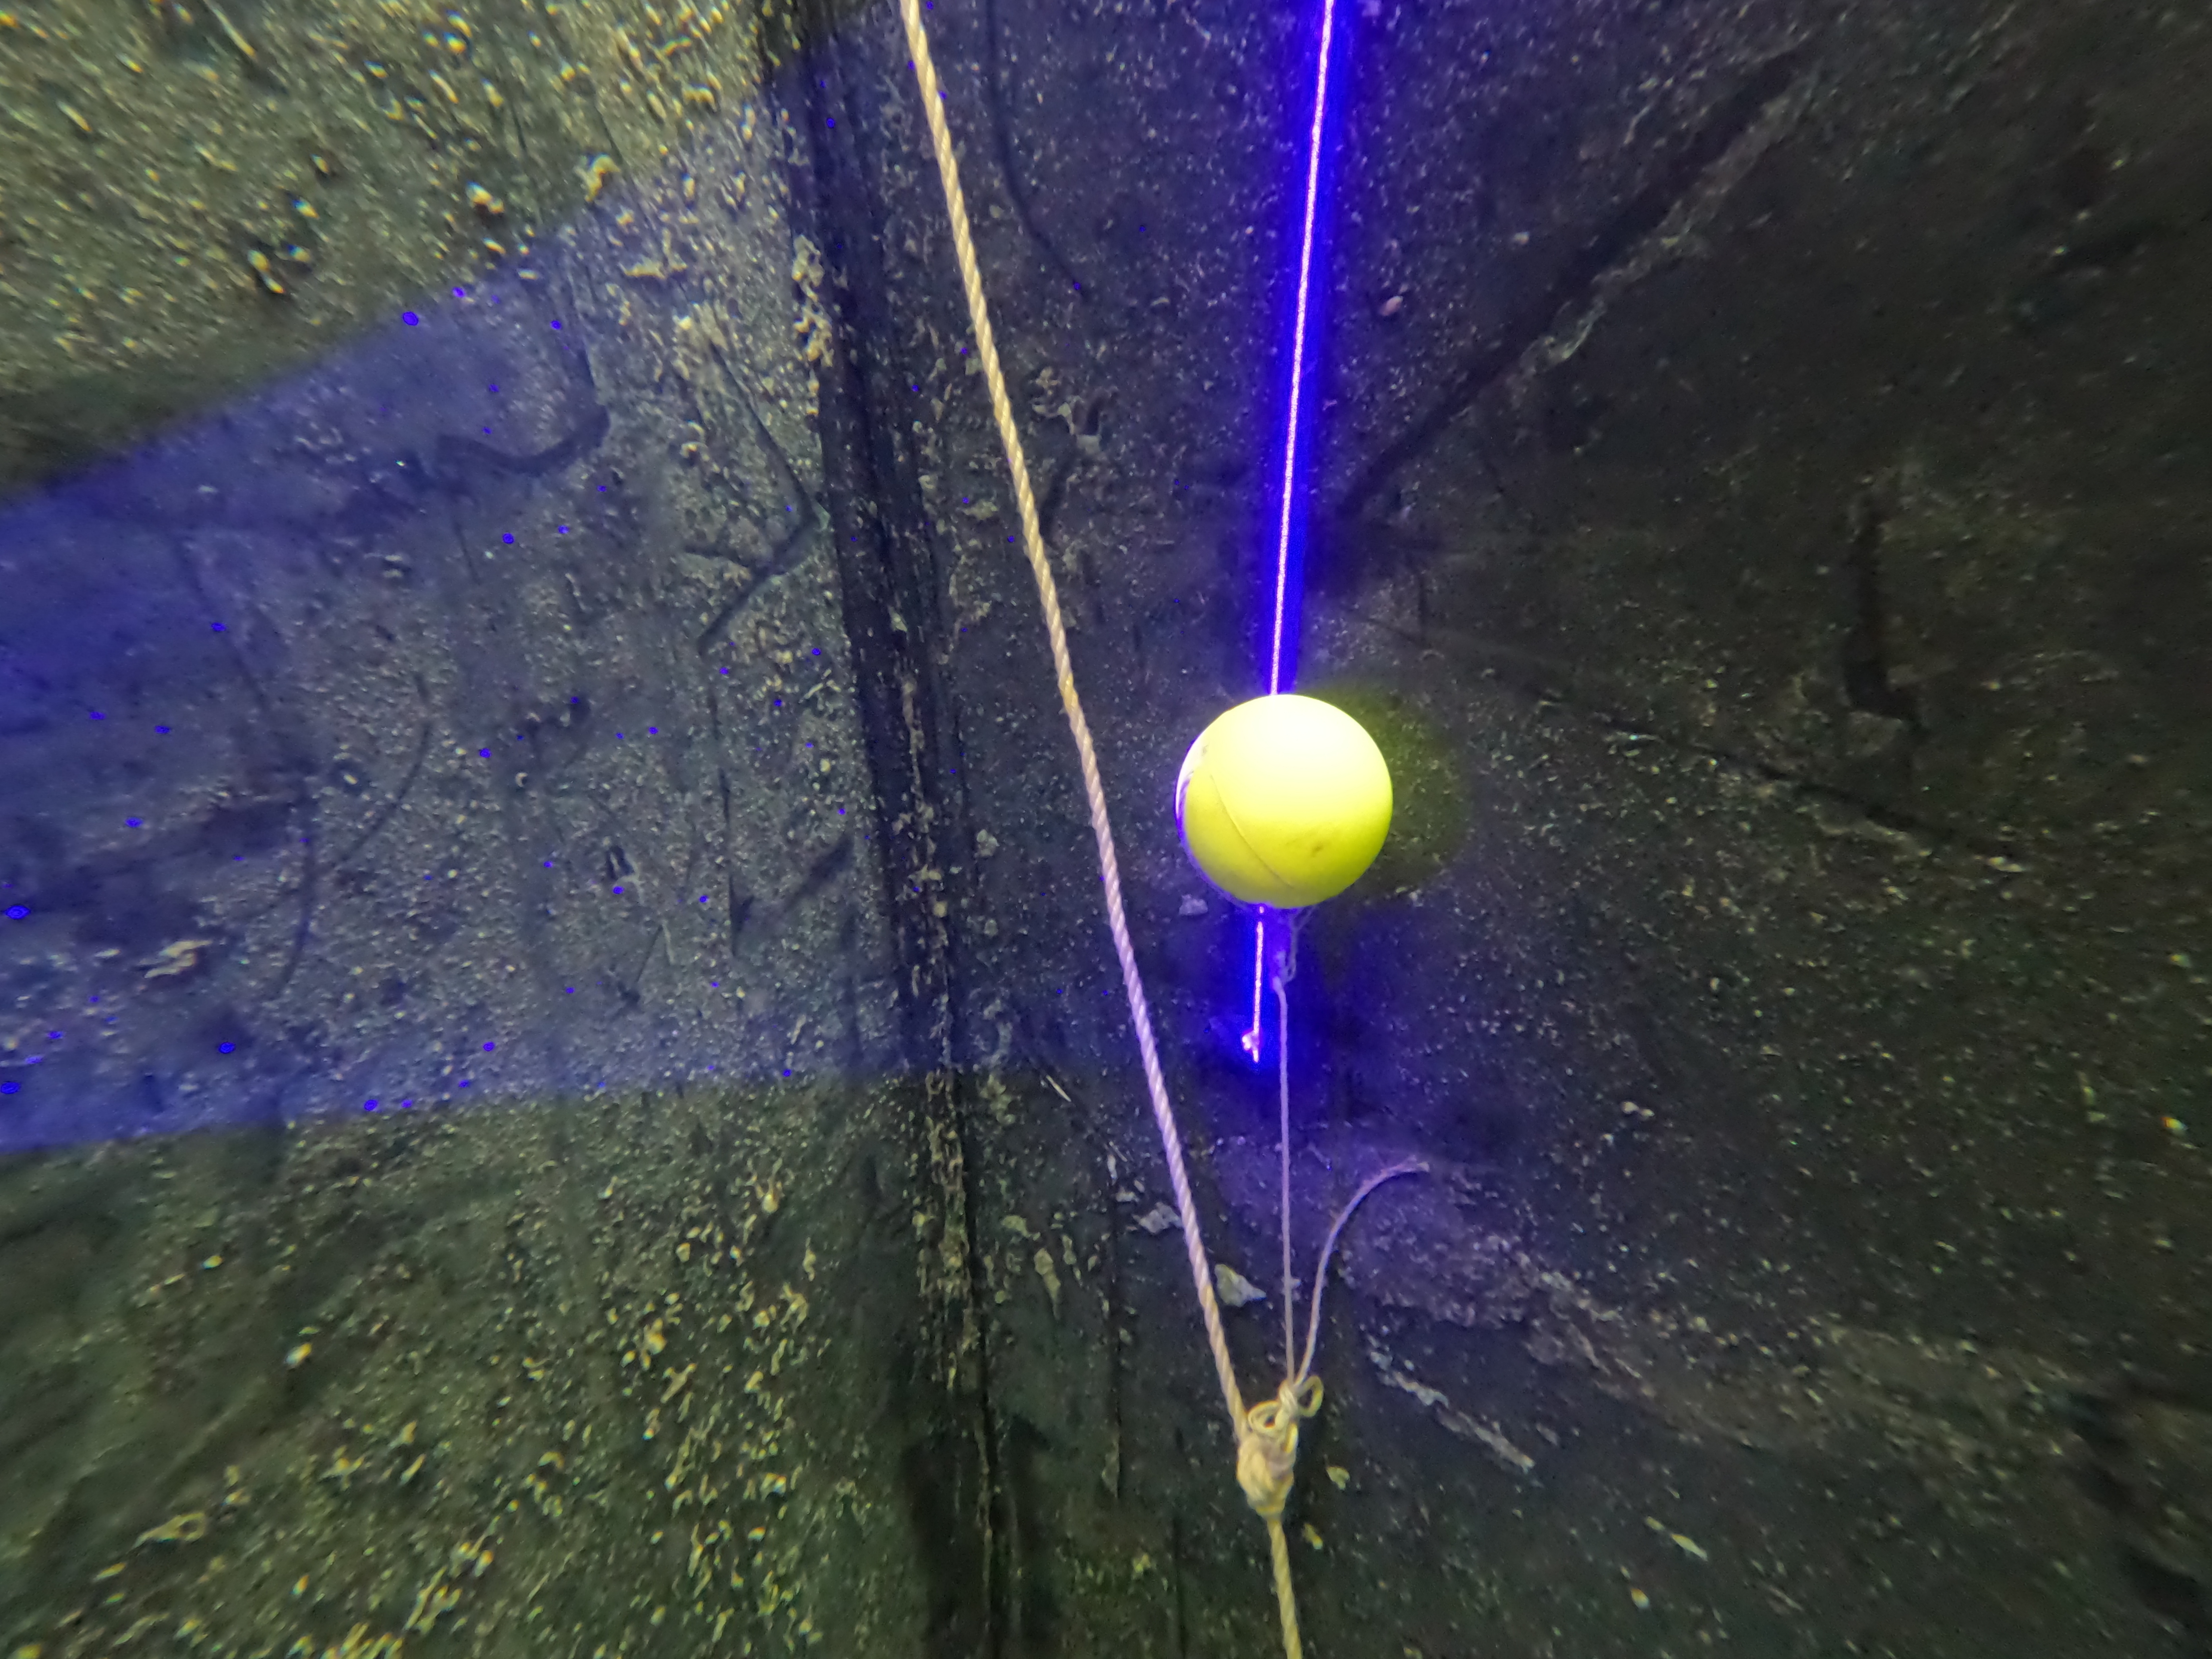

Supplement: Supplementary file 2930 [file G0030430.pdf › 2/G0030430.pdf]

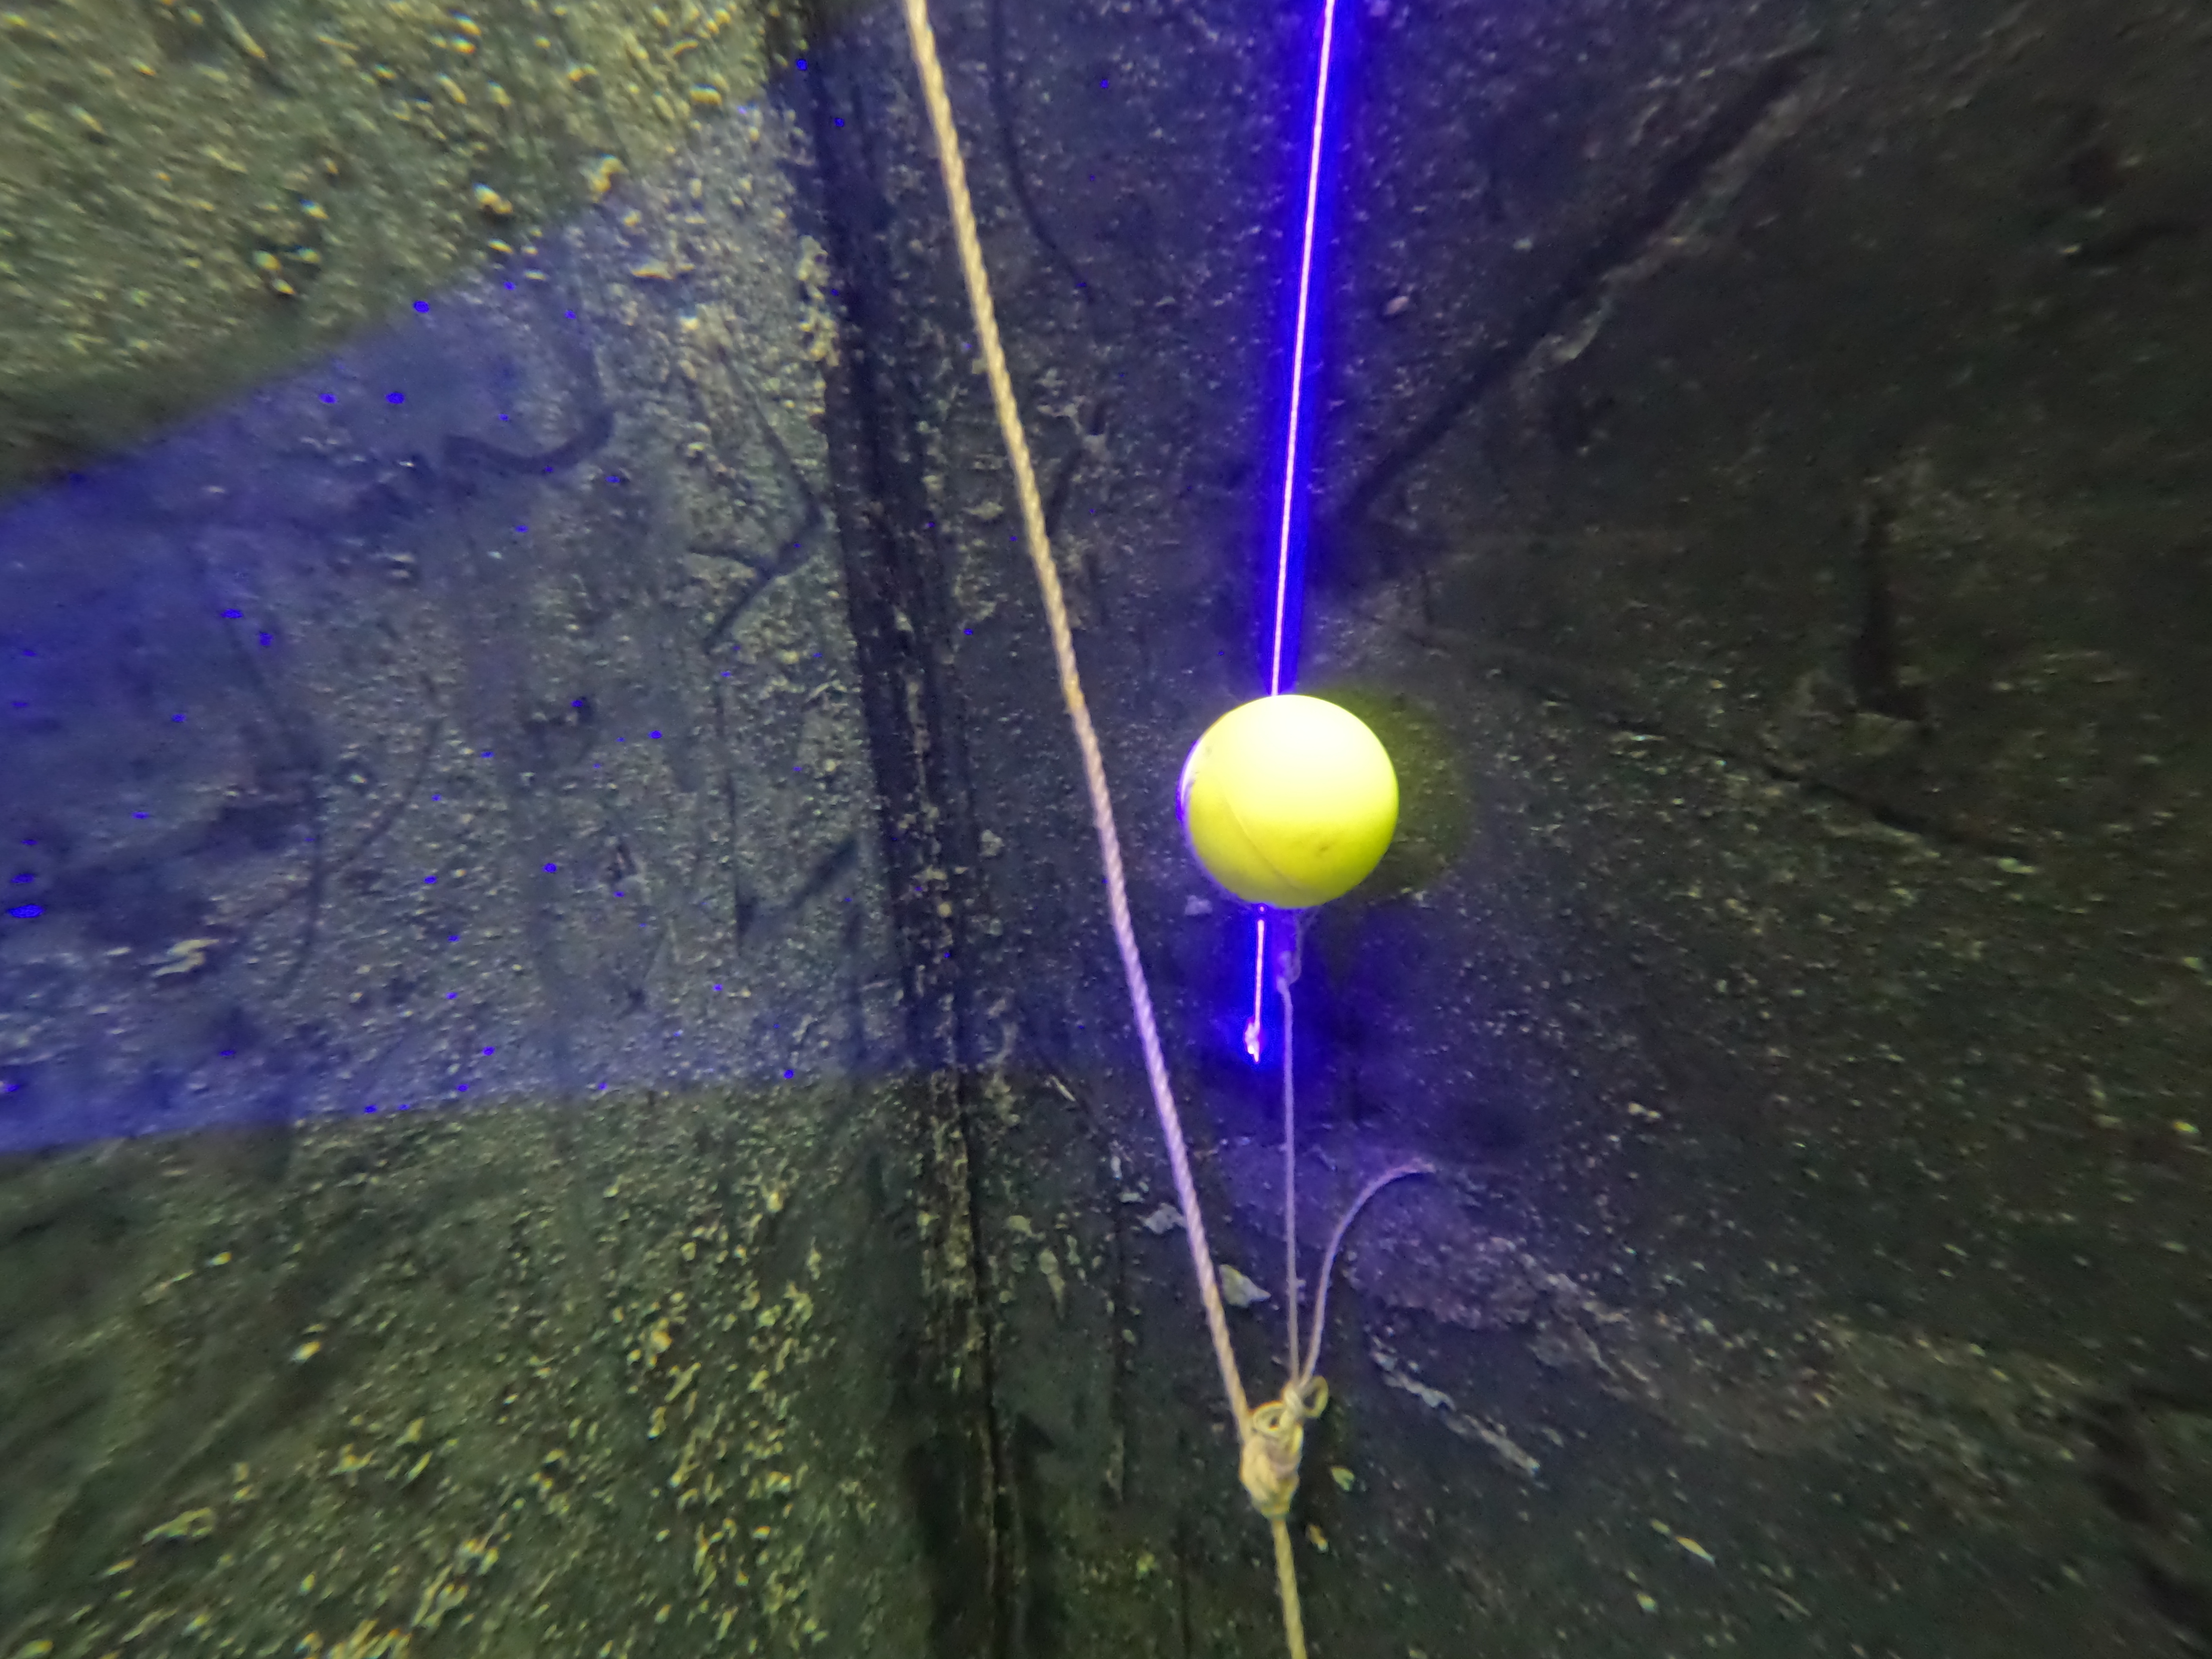

Supplement: Supplementary file 2931 [file G0030431.pdf › 2/G0030431.pdf]

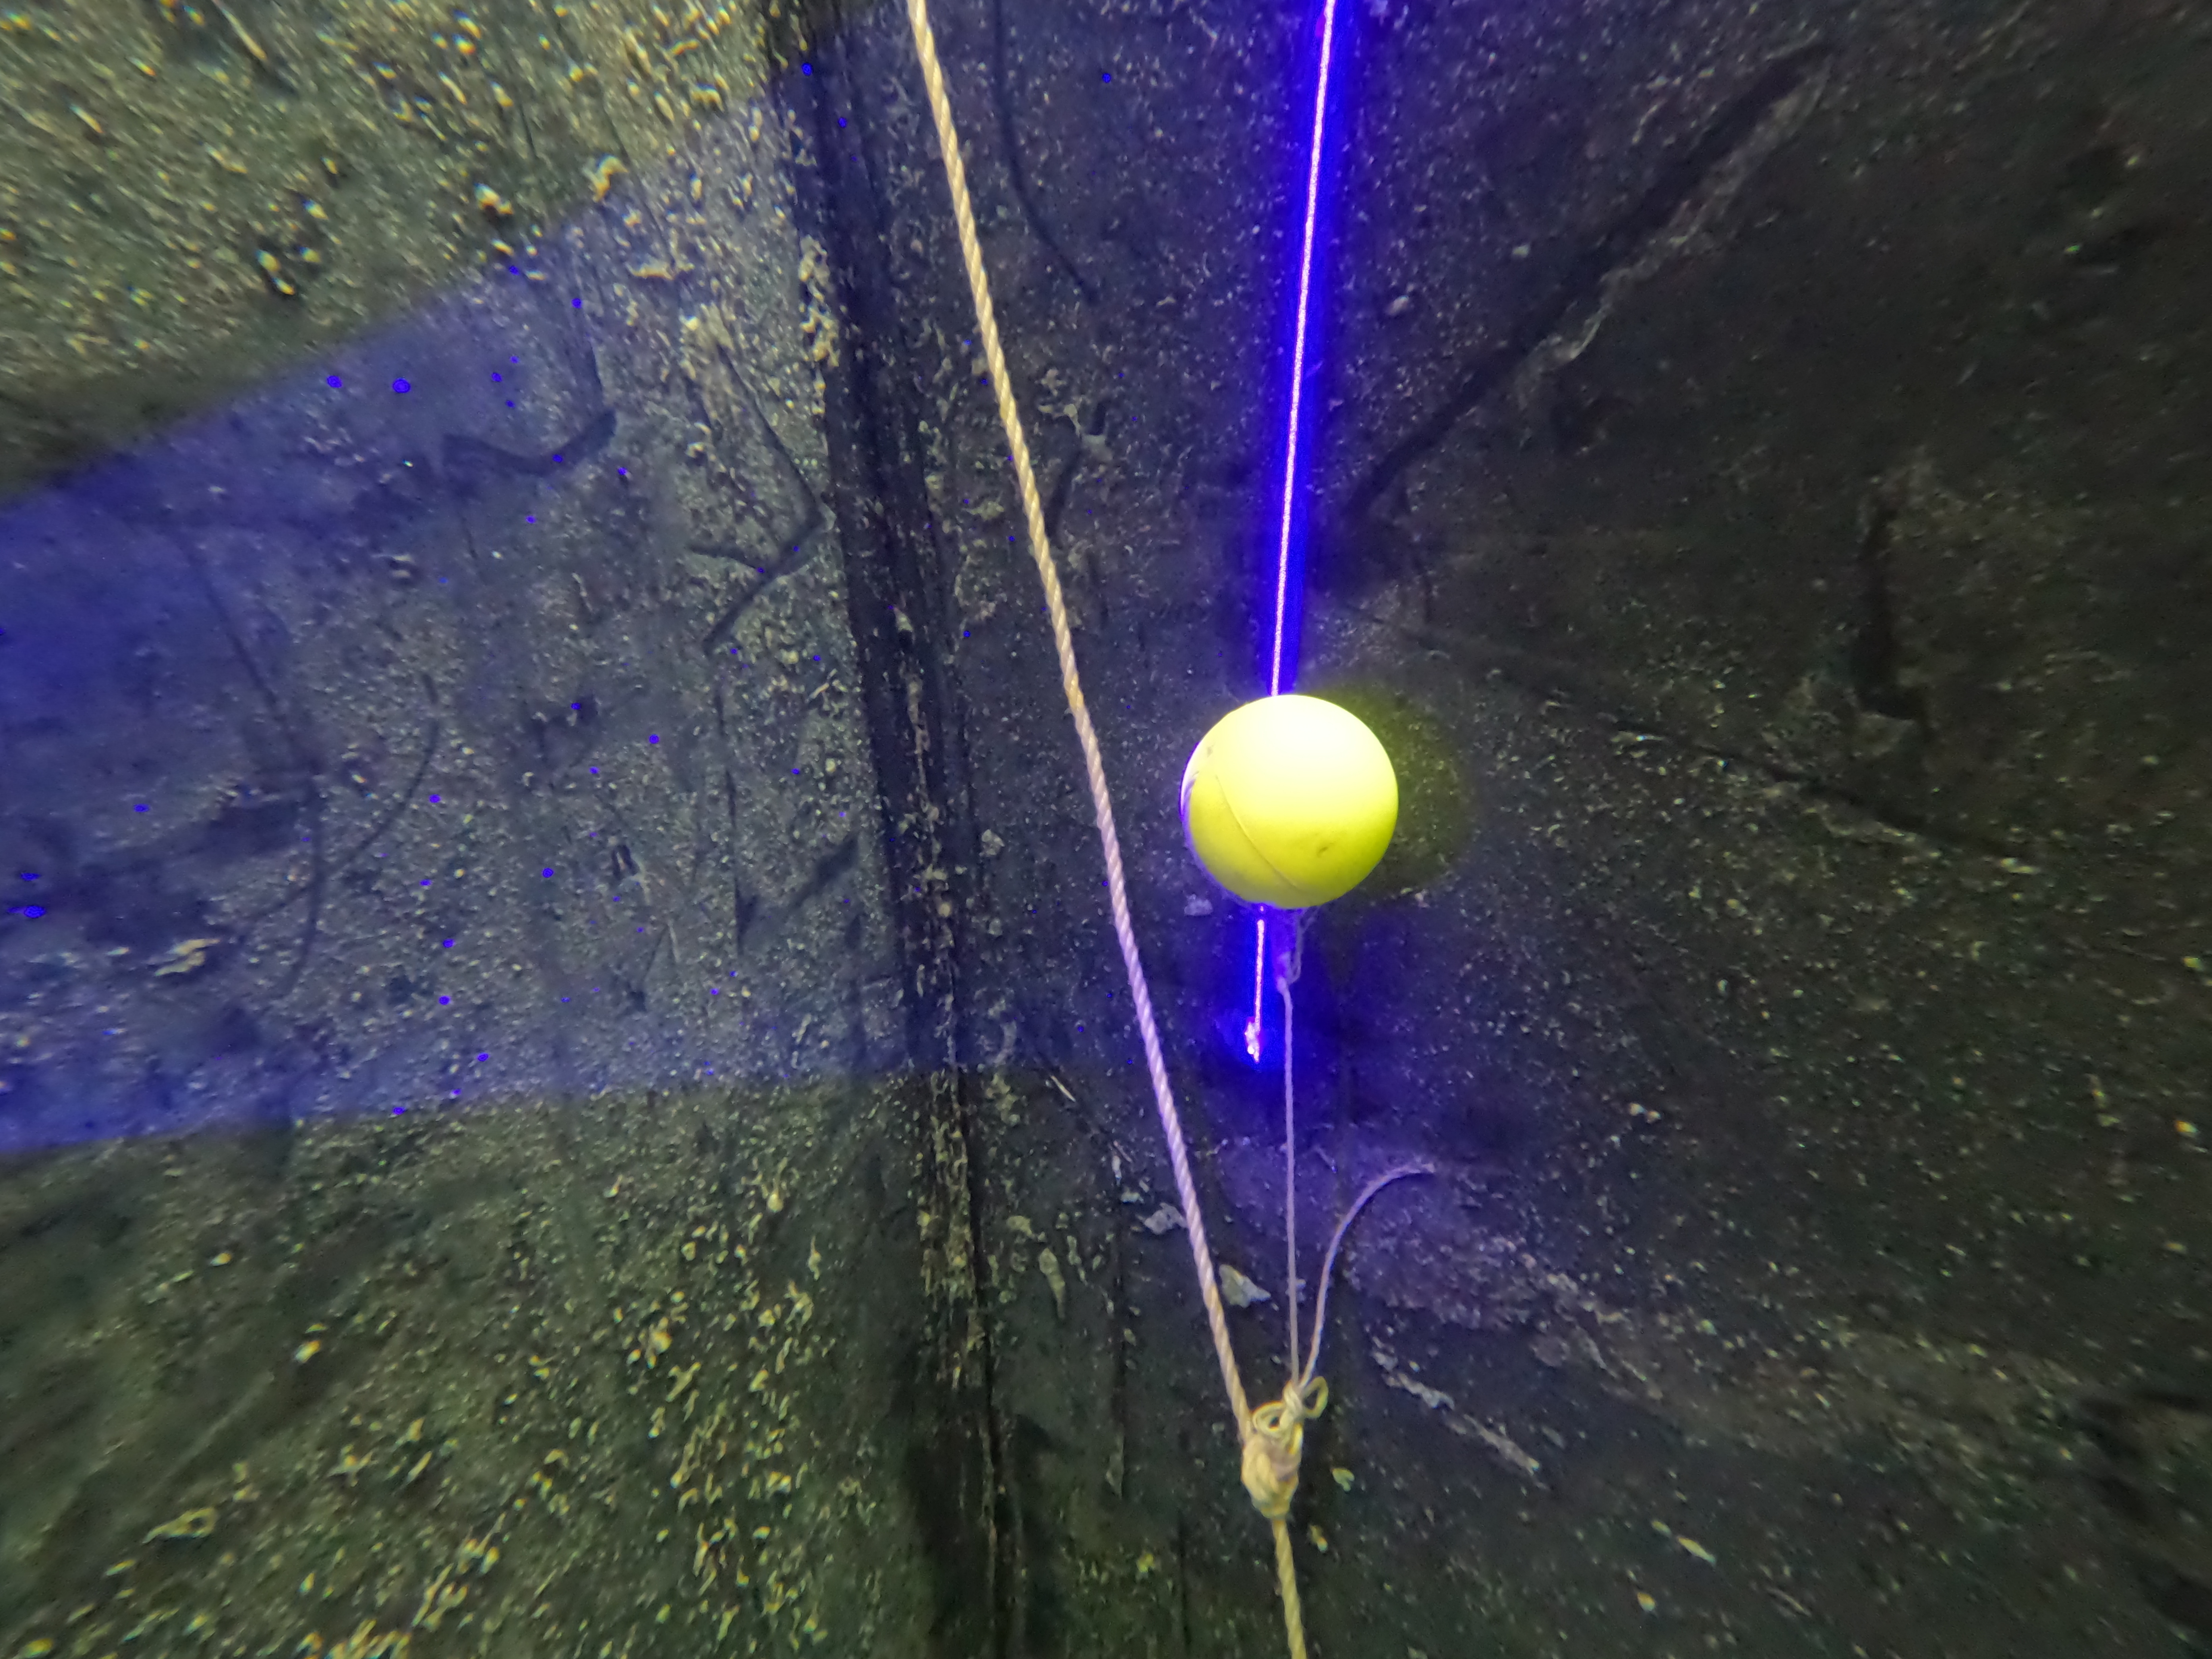

Supplement: Supplementary file 2932 [file G0030432.pdf › 2/G0030432.pdf]

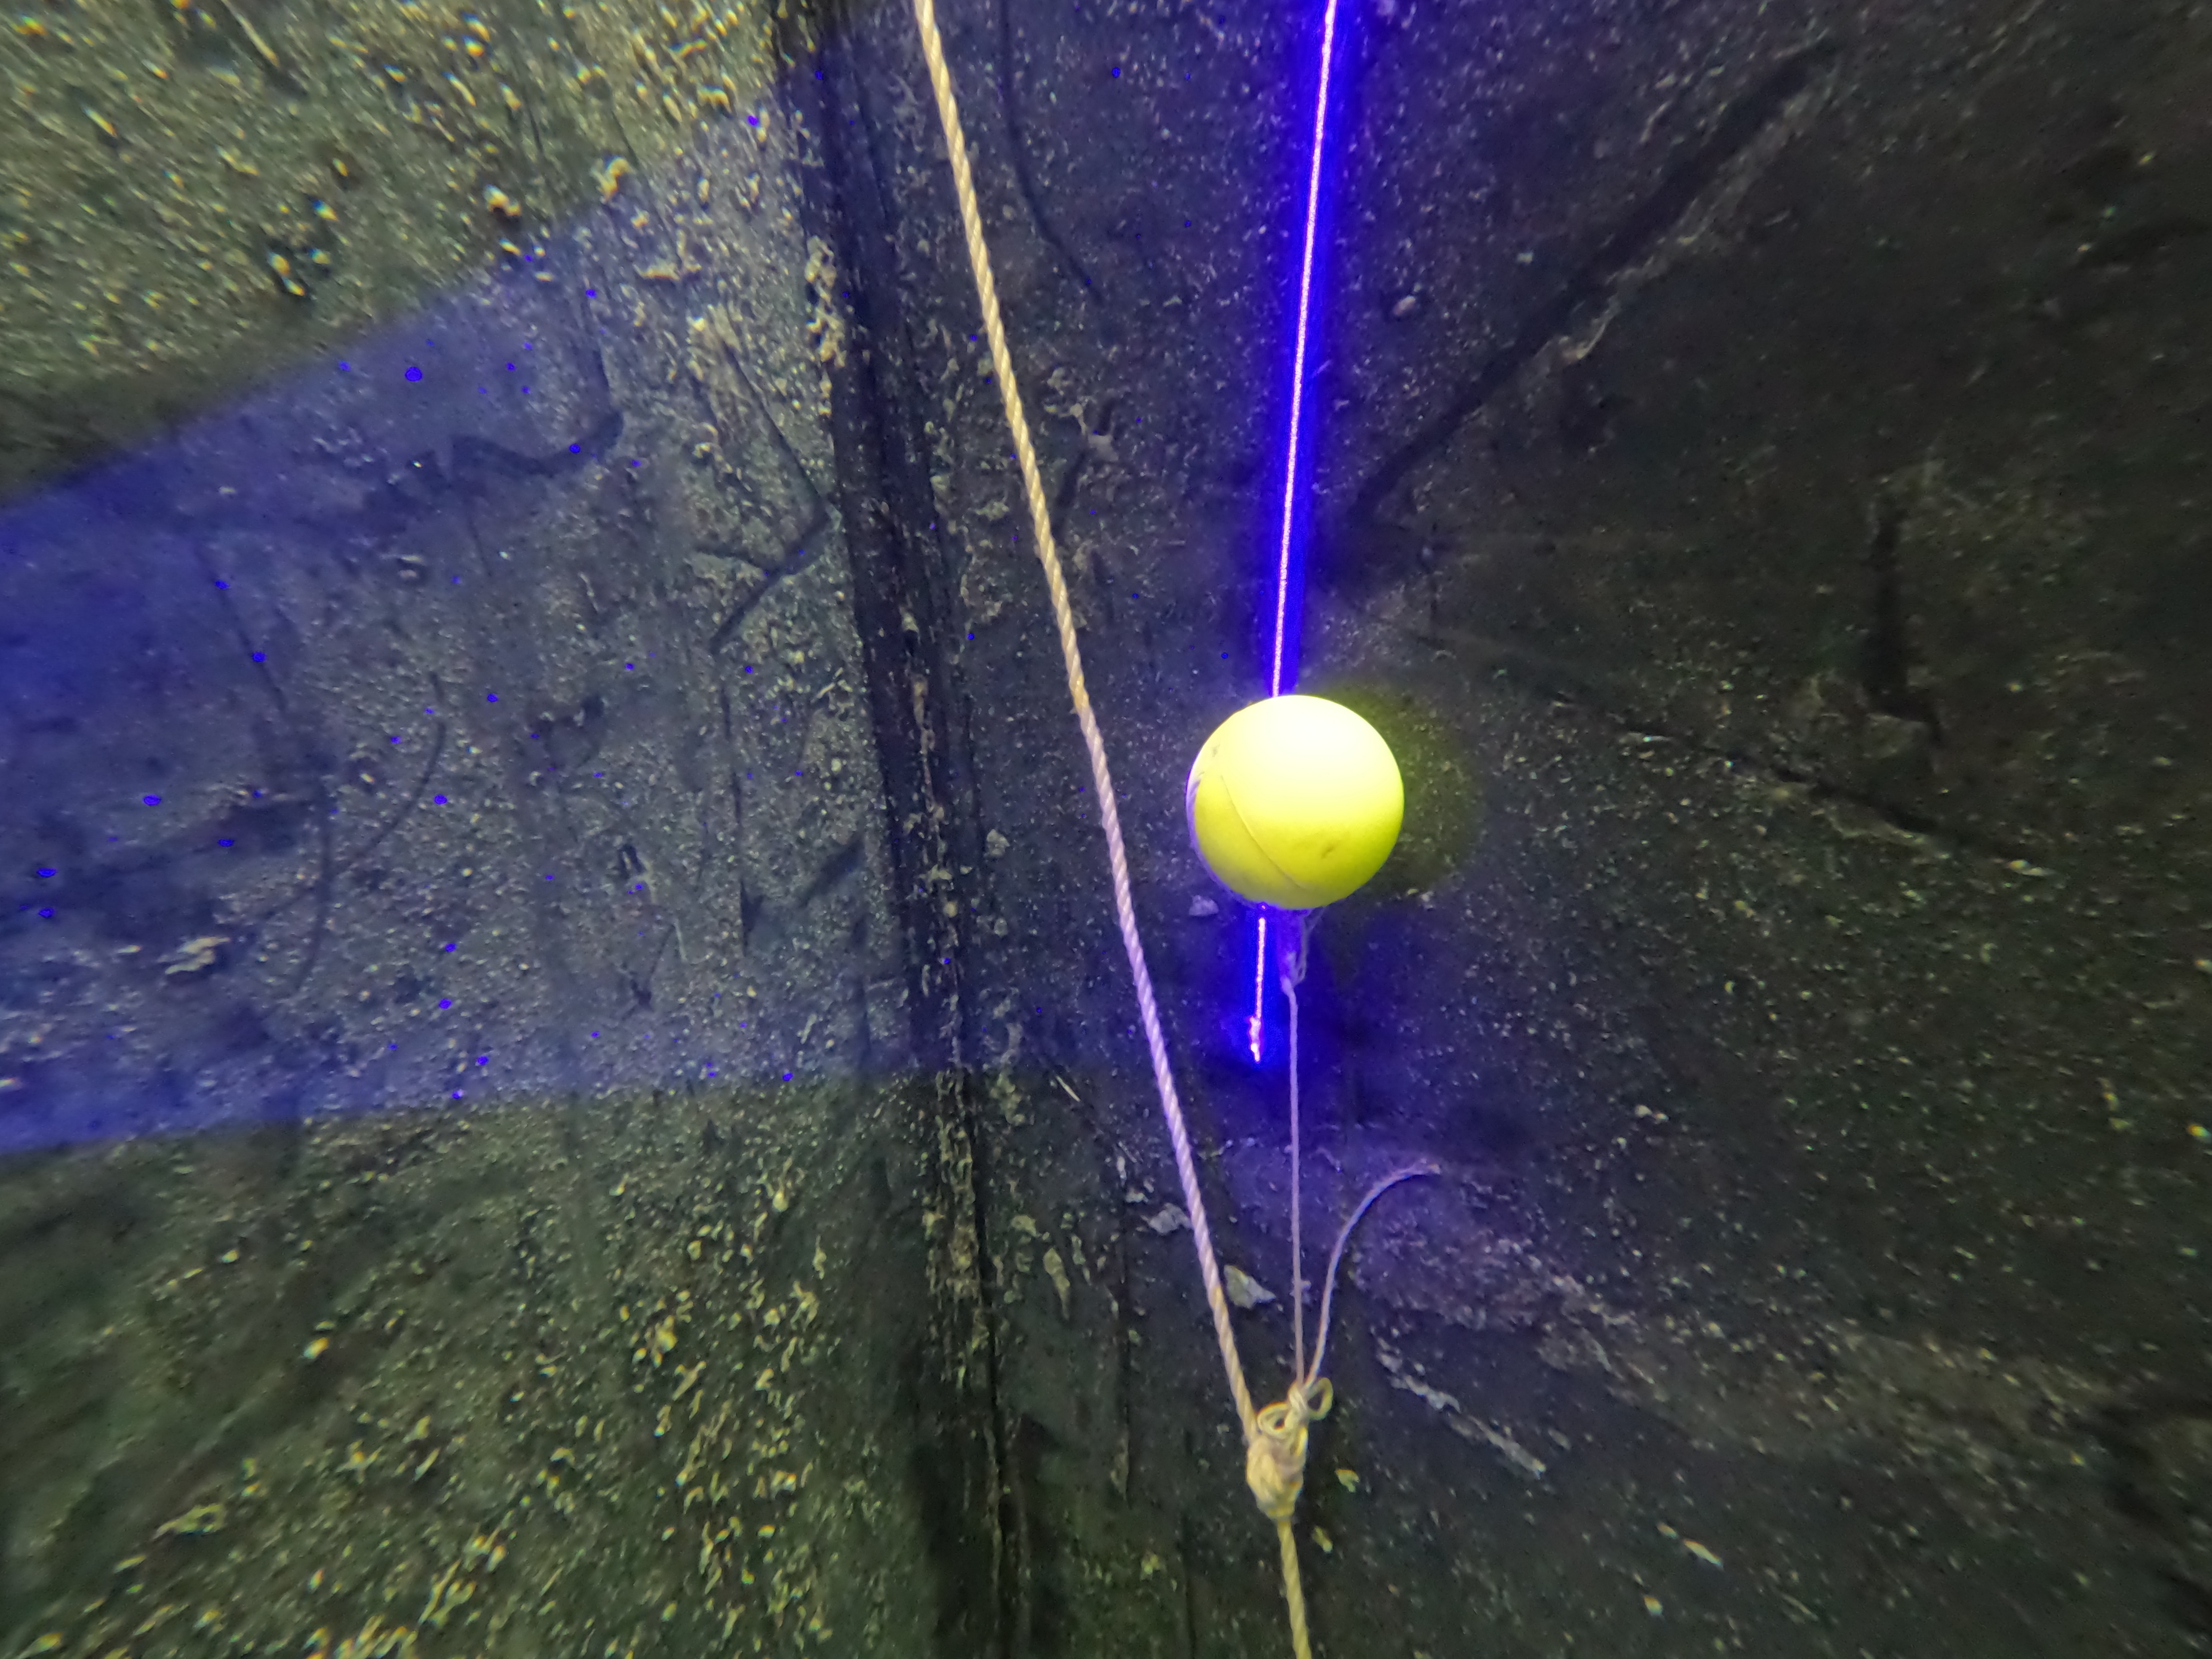

Supplement: Supplementary file 2933 [file G0030433.pdf › 2/G0030433.pdf]

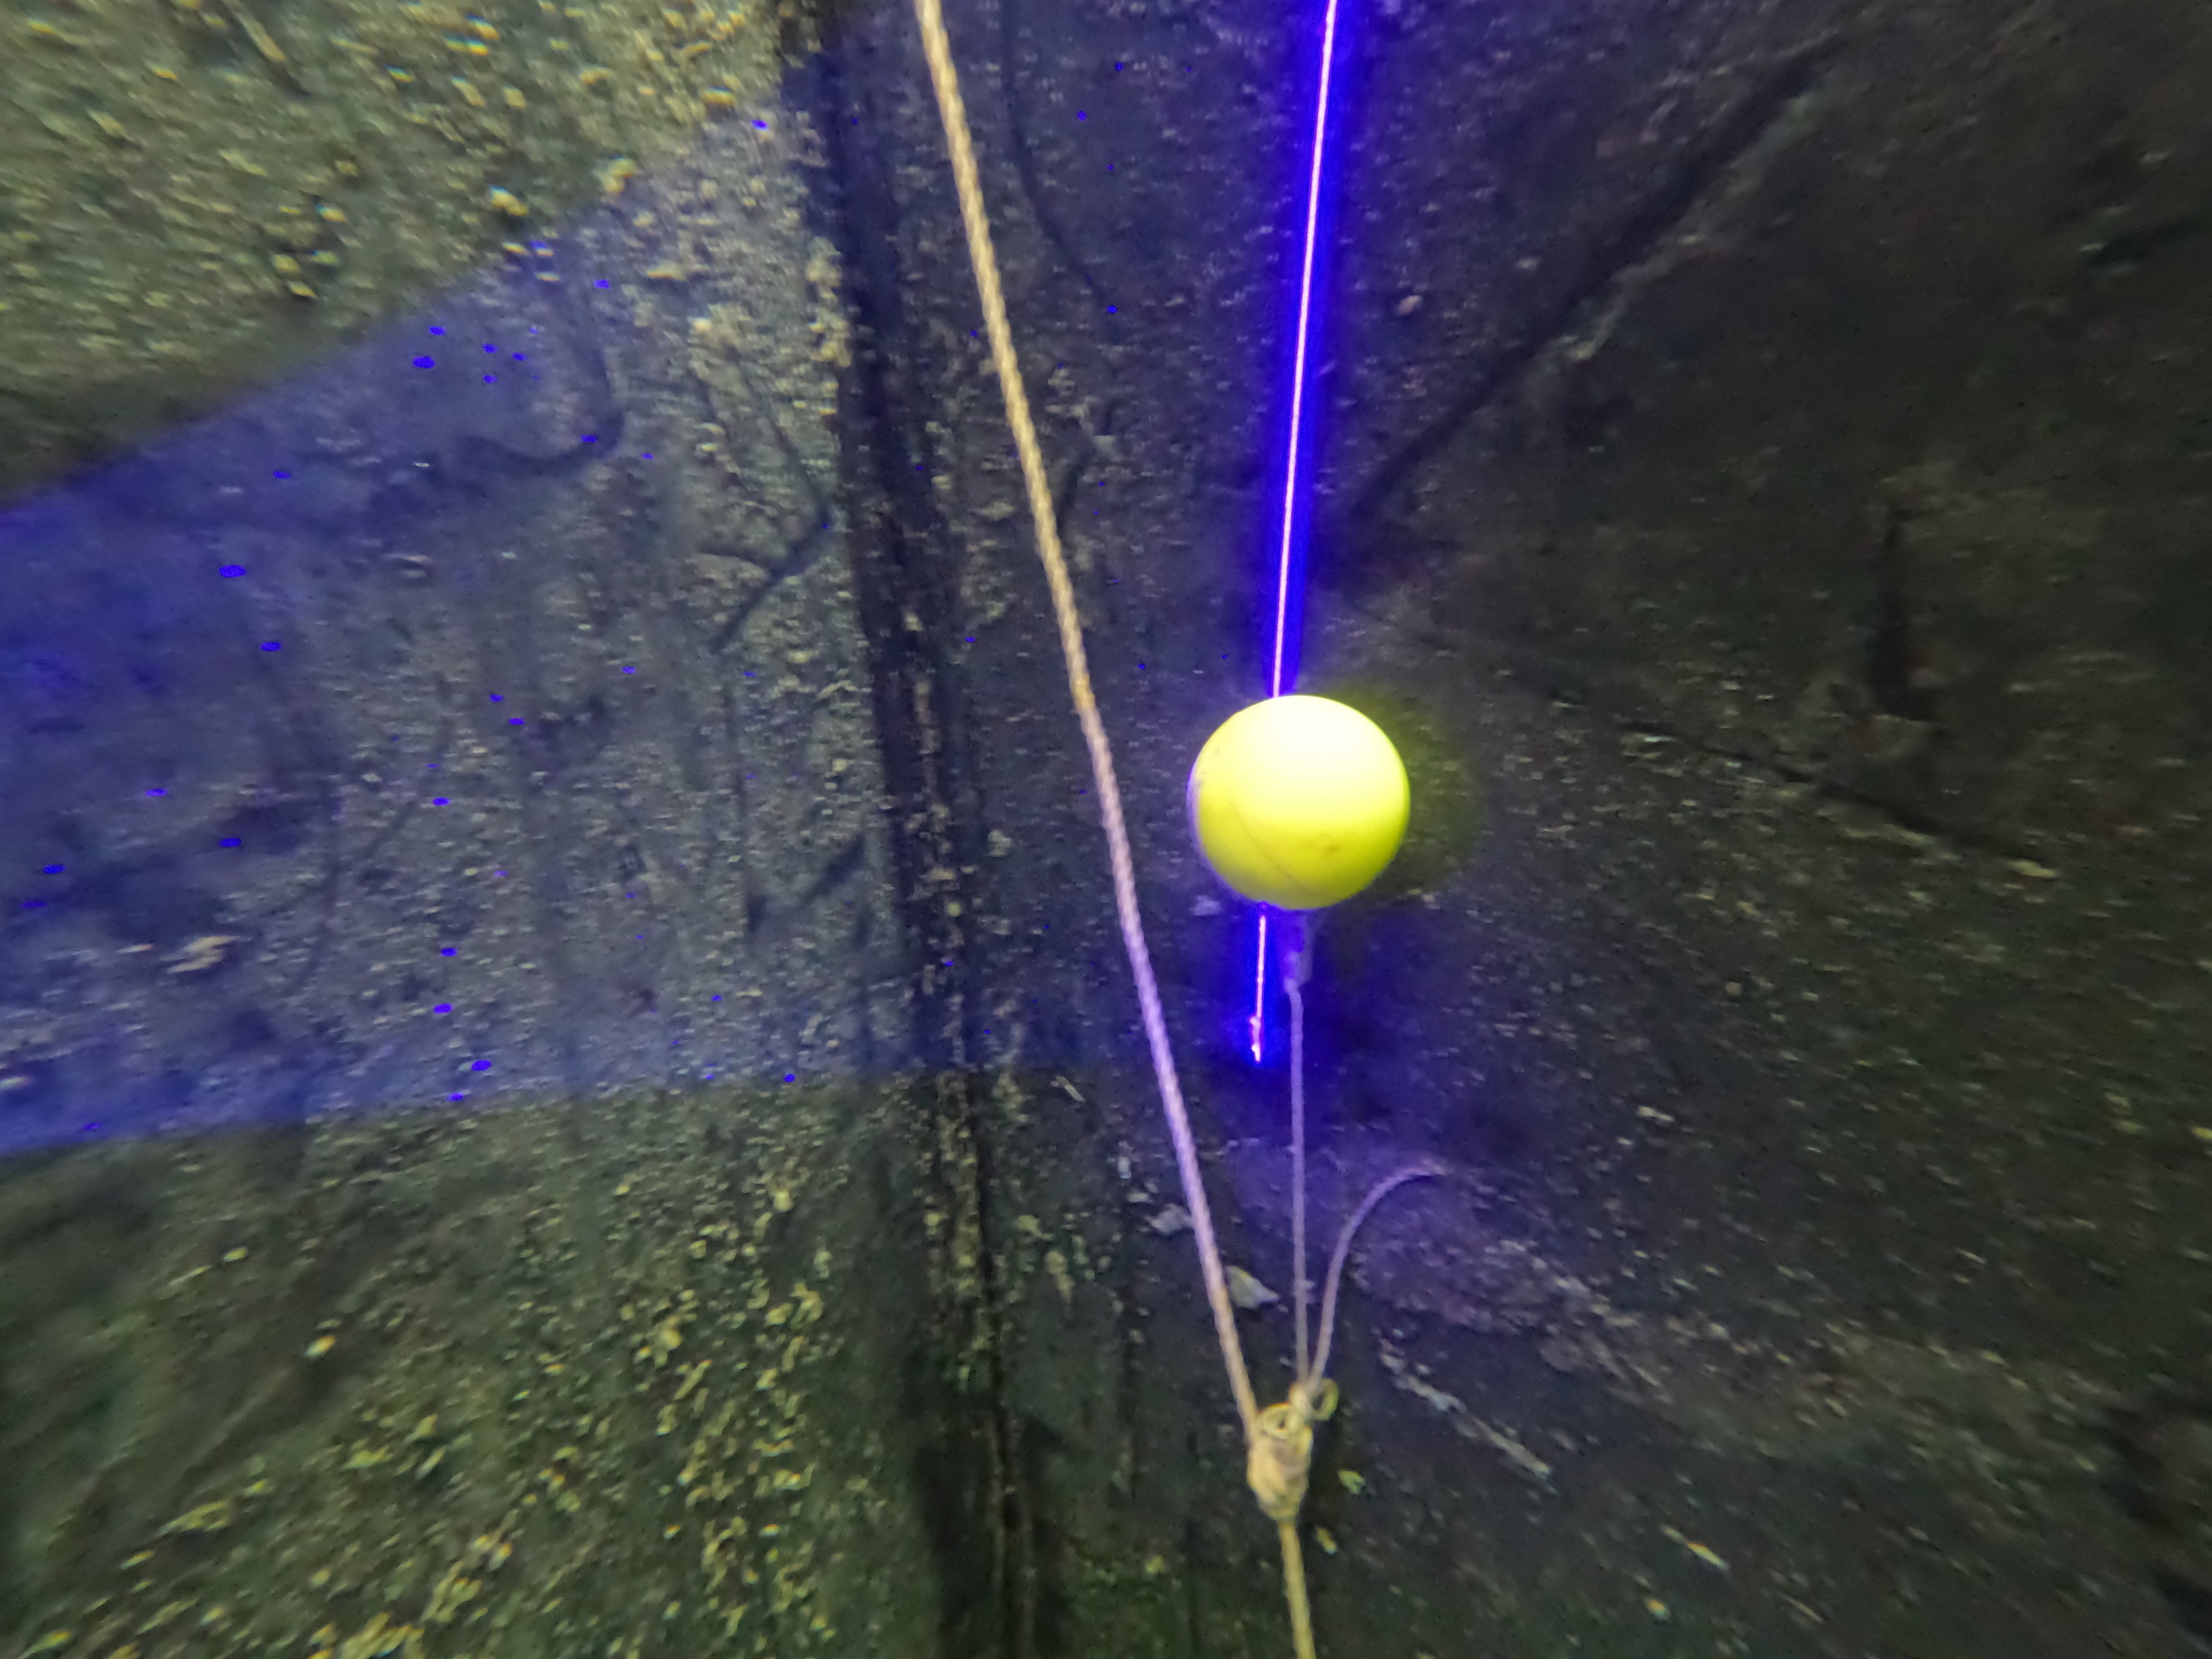

Supplement: Supplementary file 2934 [file G0030434.pdf › 2/G0030434.pdf]

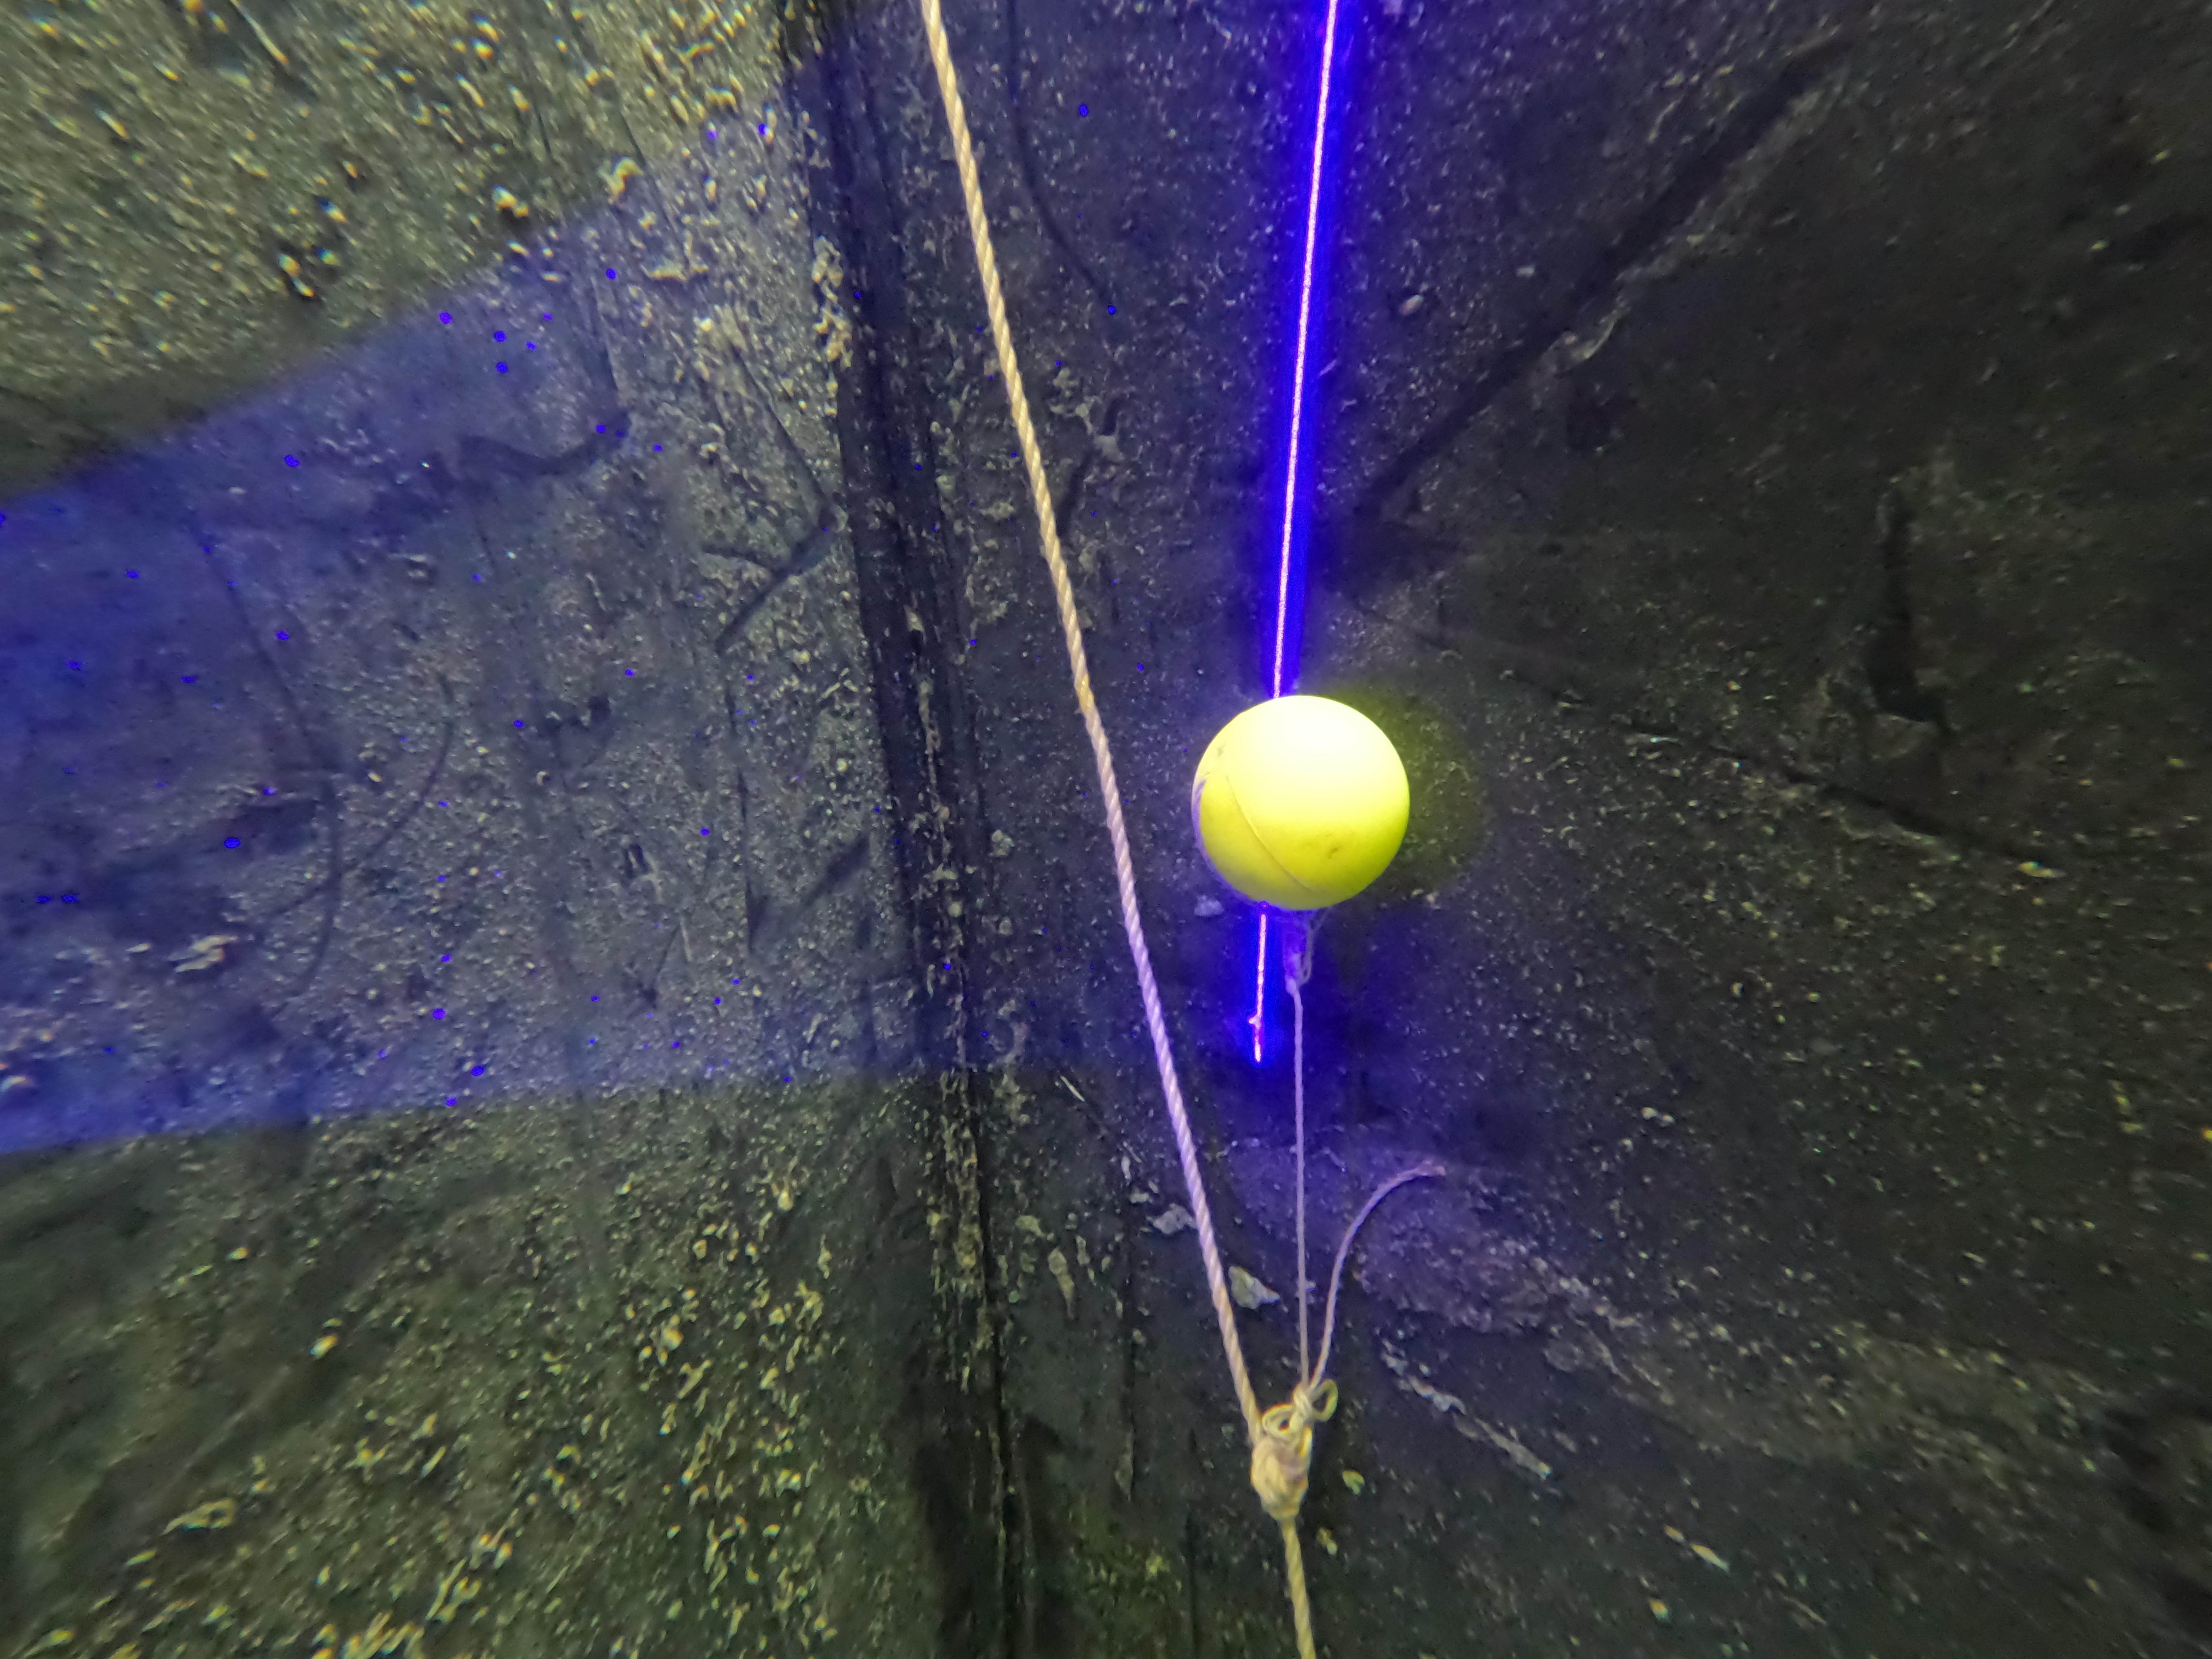

Supplement: Supplementary file 2935 [file G0030435.pdf › 2/G0030435.pdf]

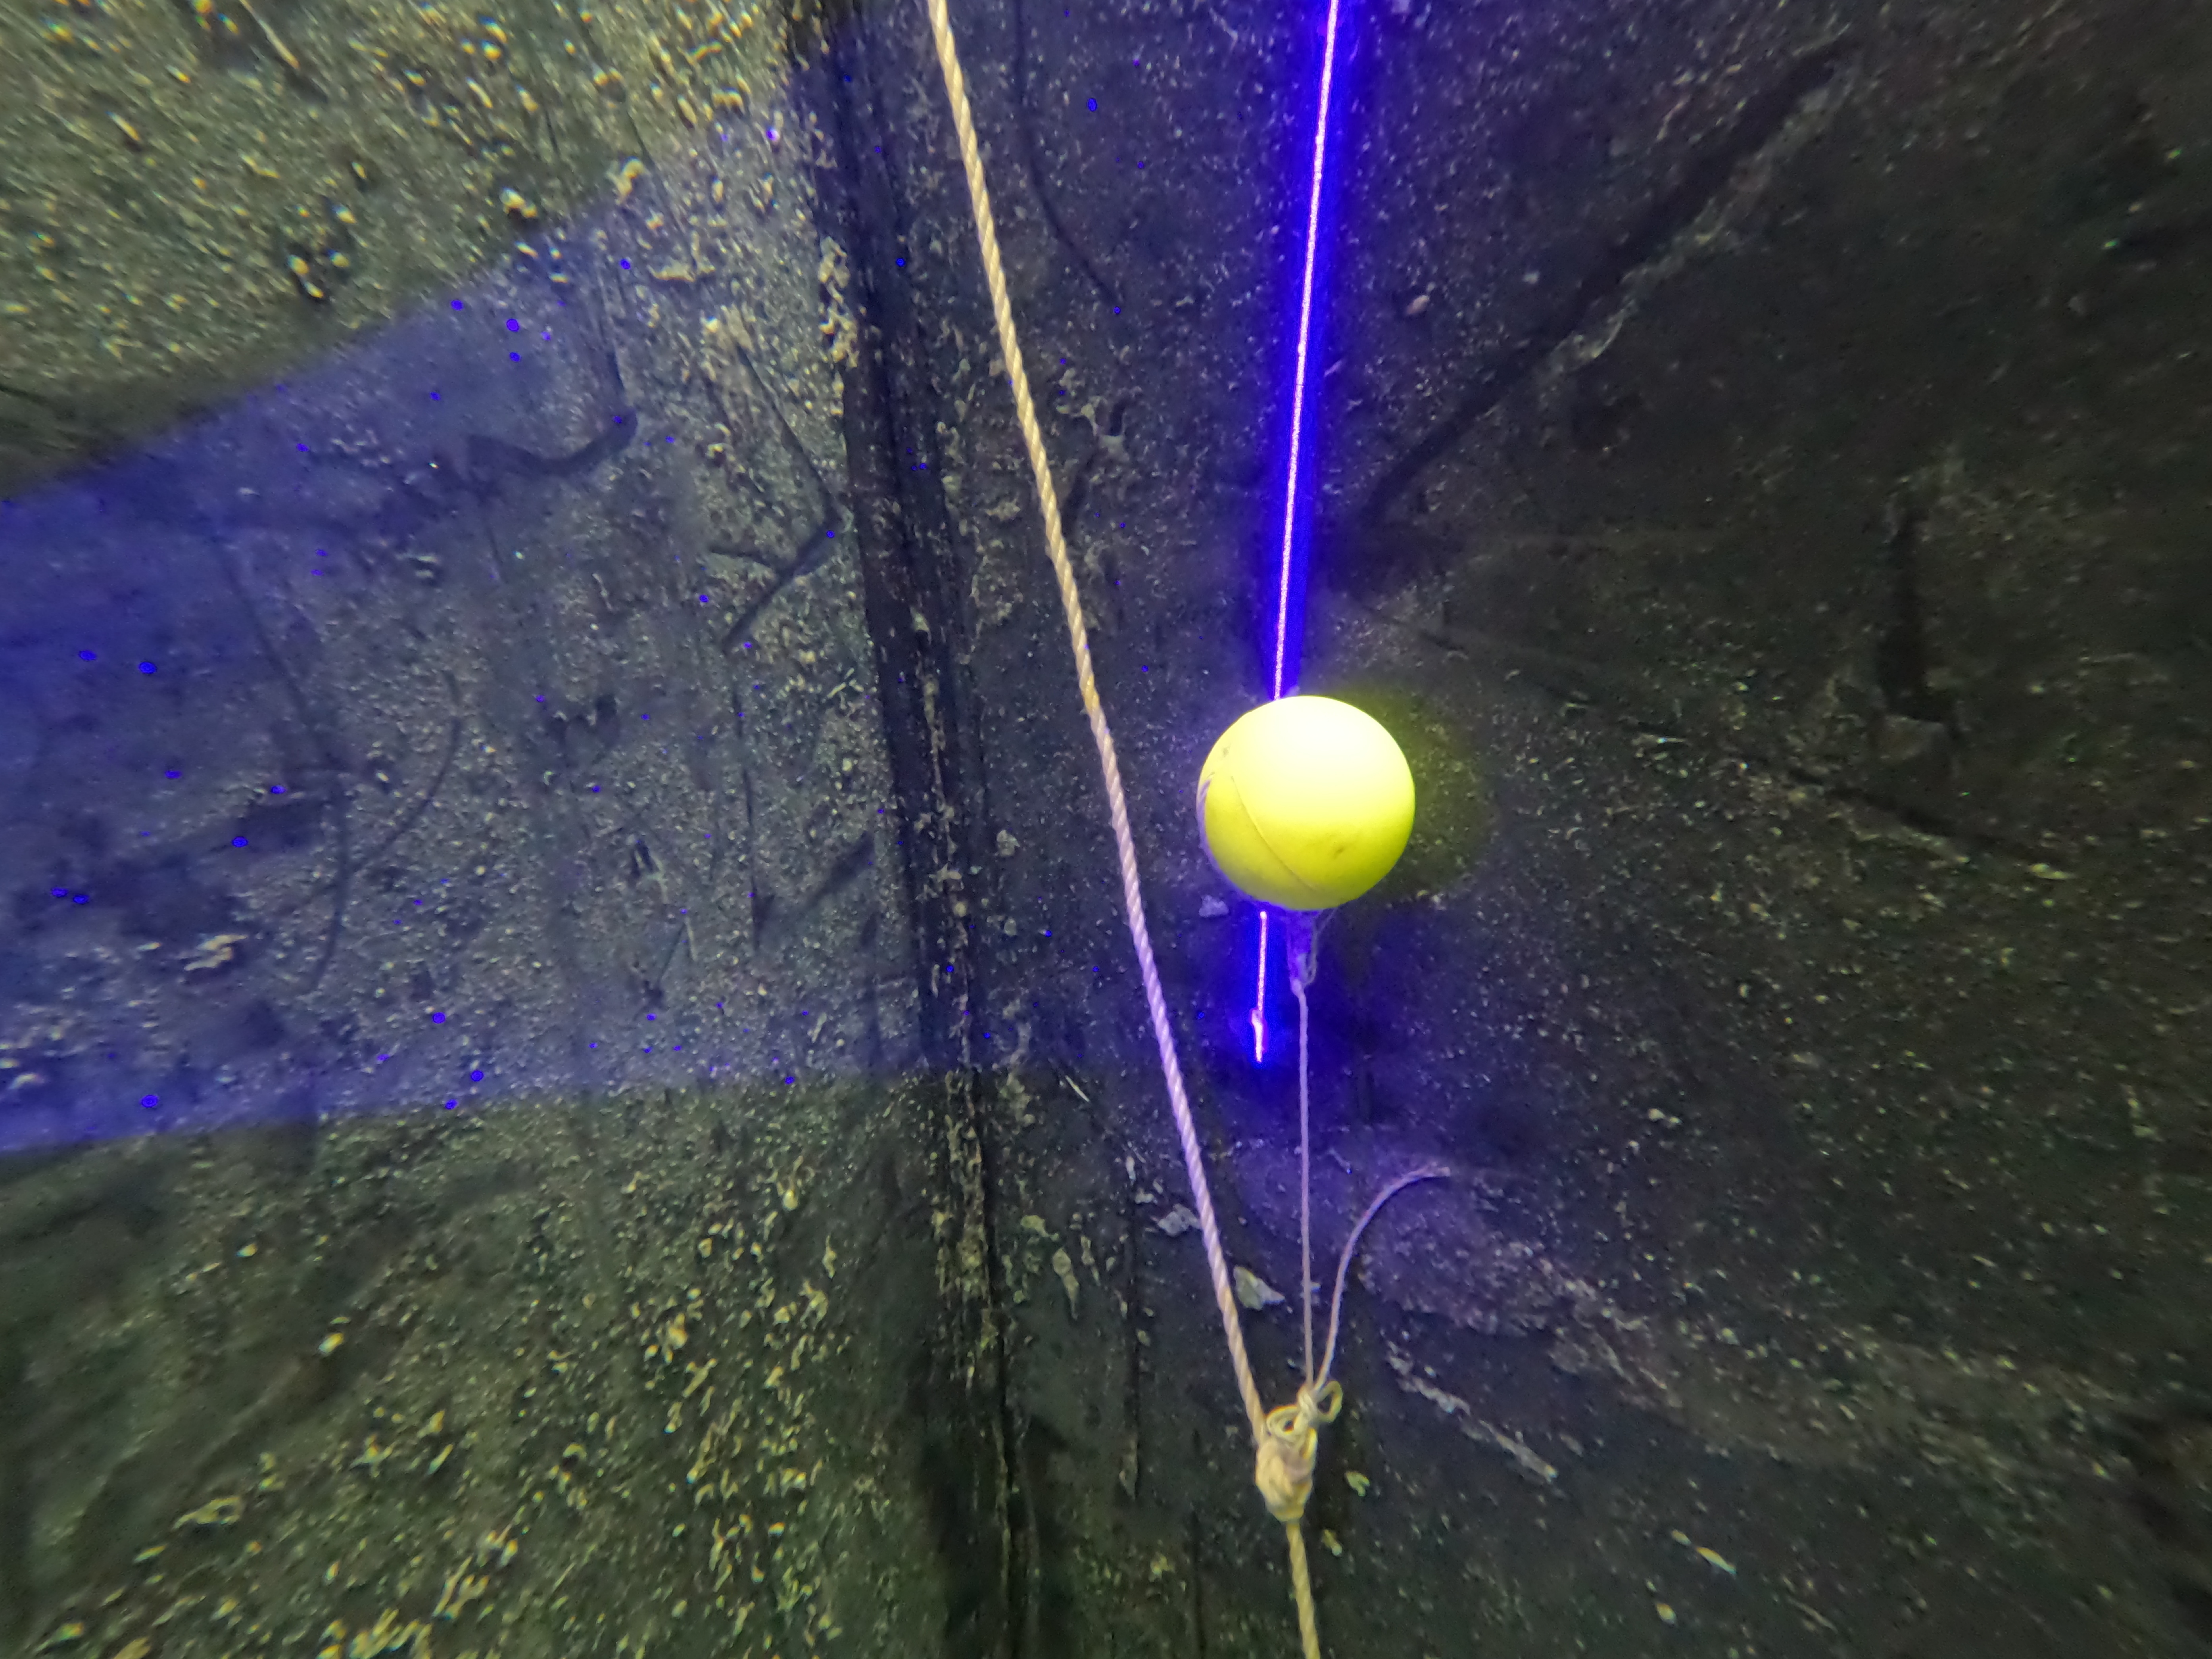

Supplement: Supplementary file 2936 [file G0030436.pdf › 2/G0030436.pdf]

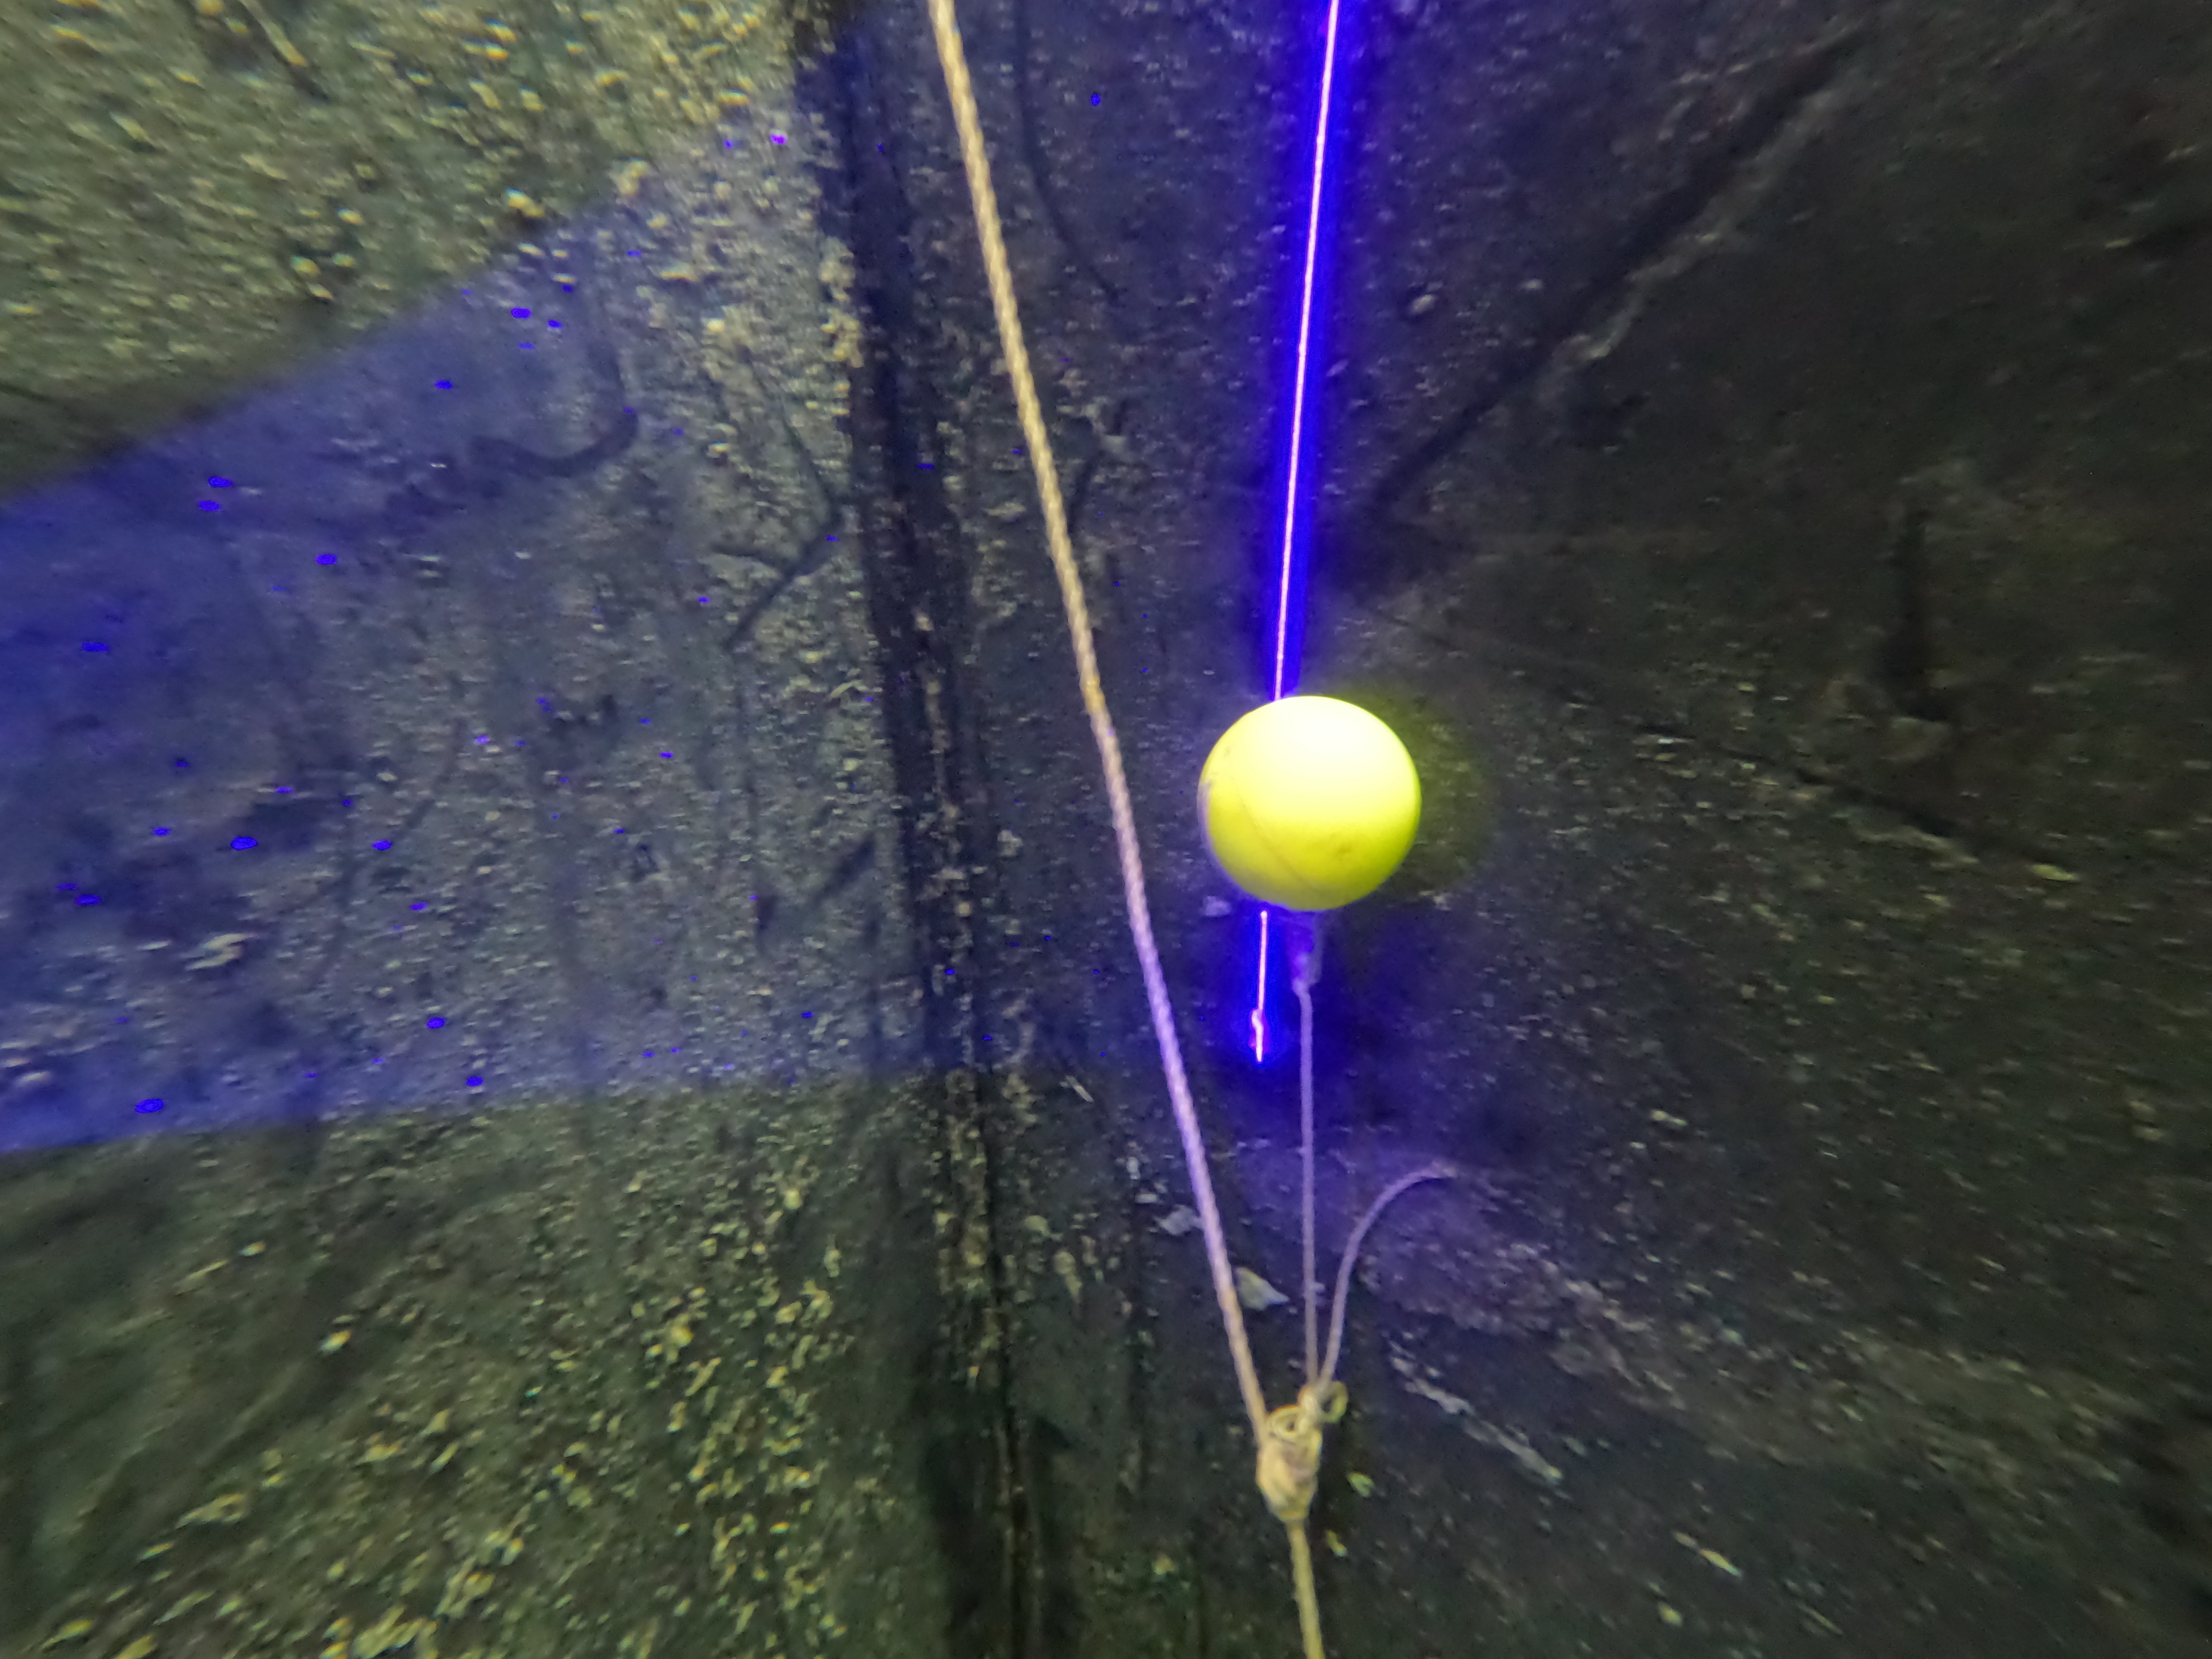

Supplement: Supplementary file 2937 [file G0030437.pdf › 2/G0030437.pdf]

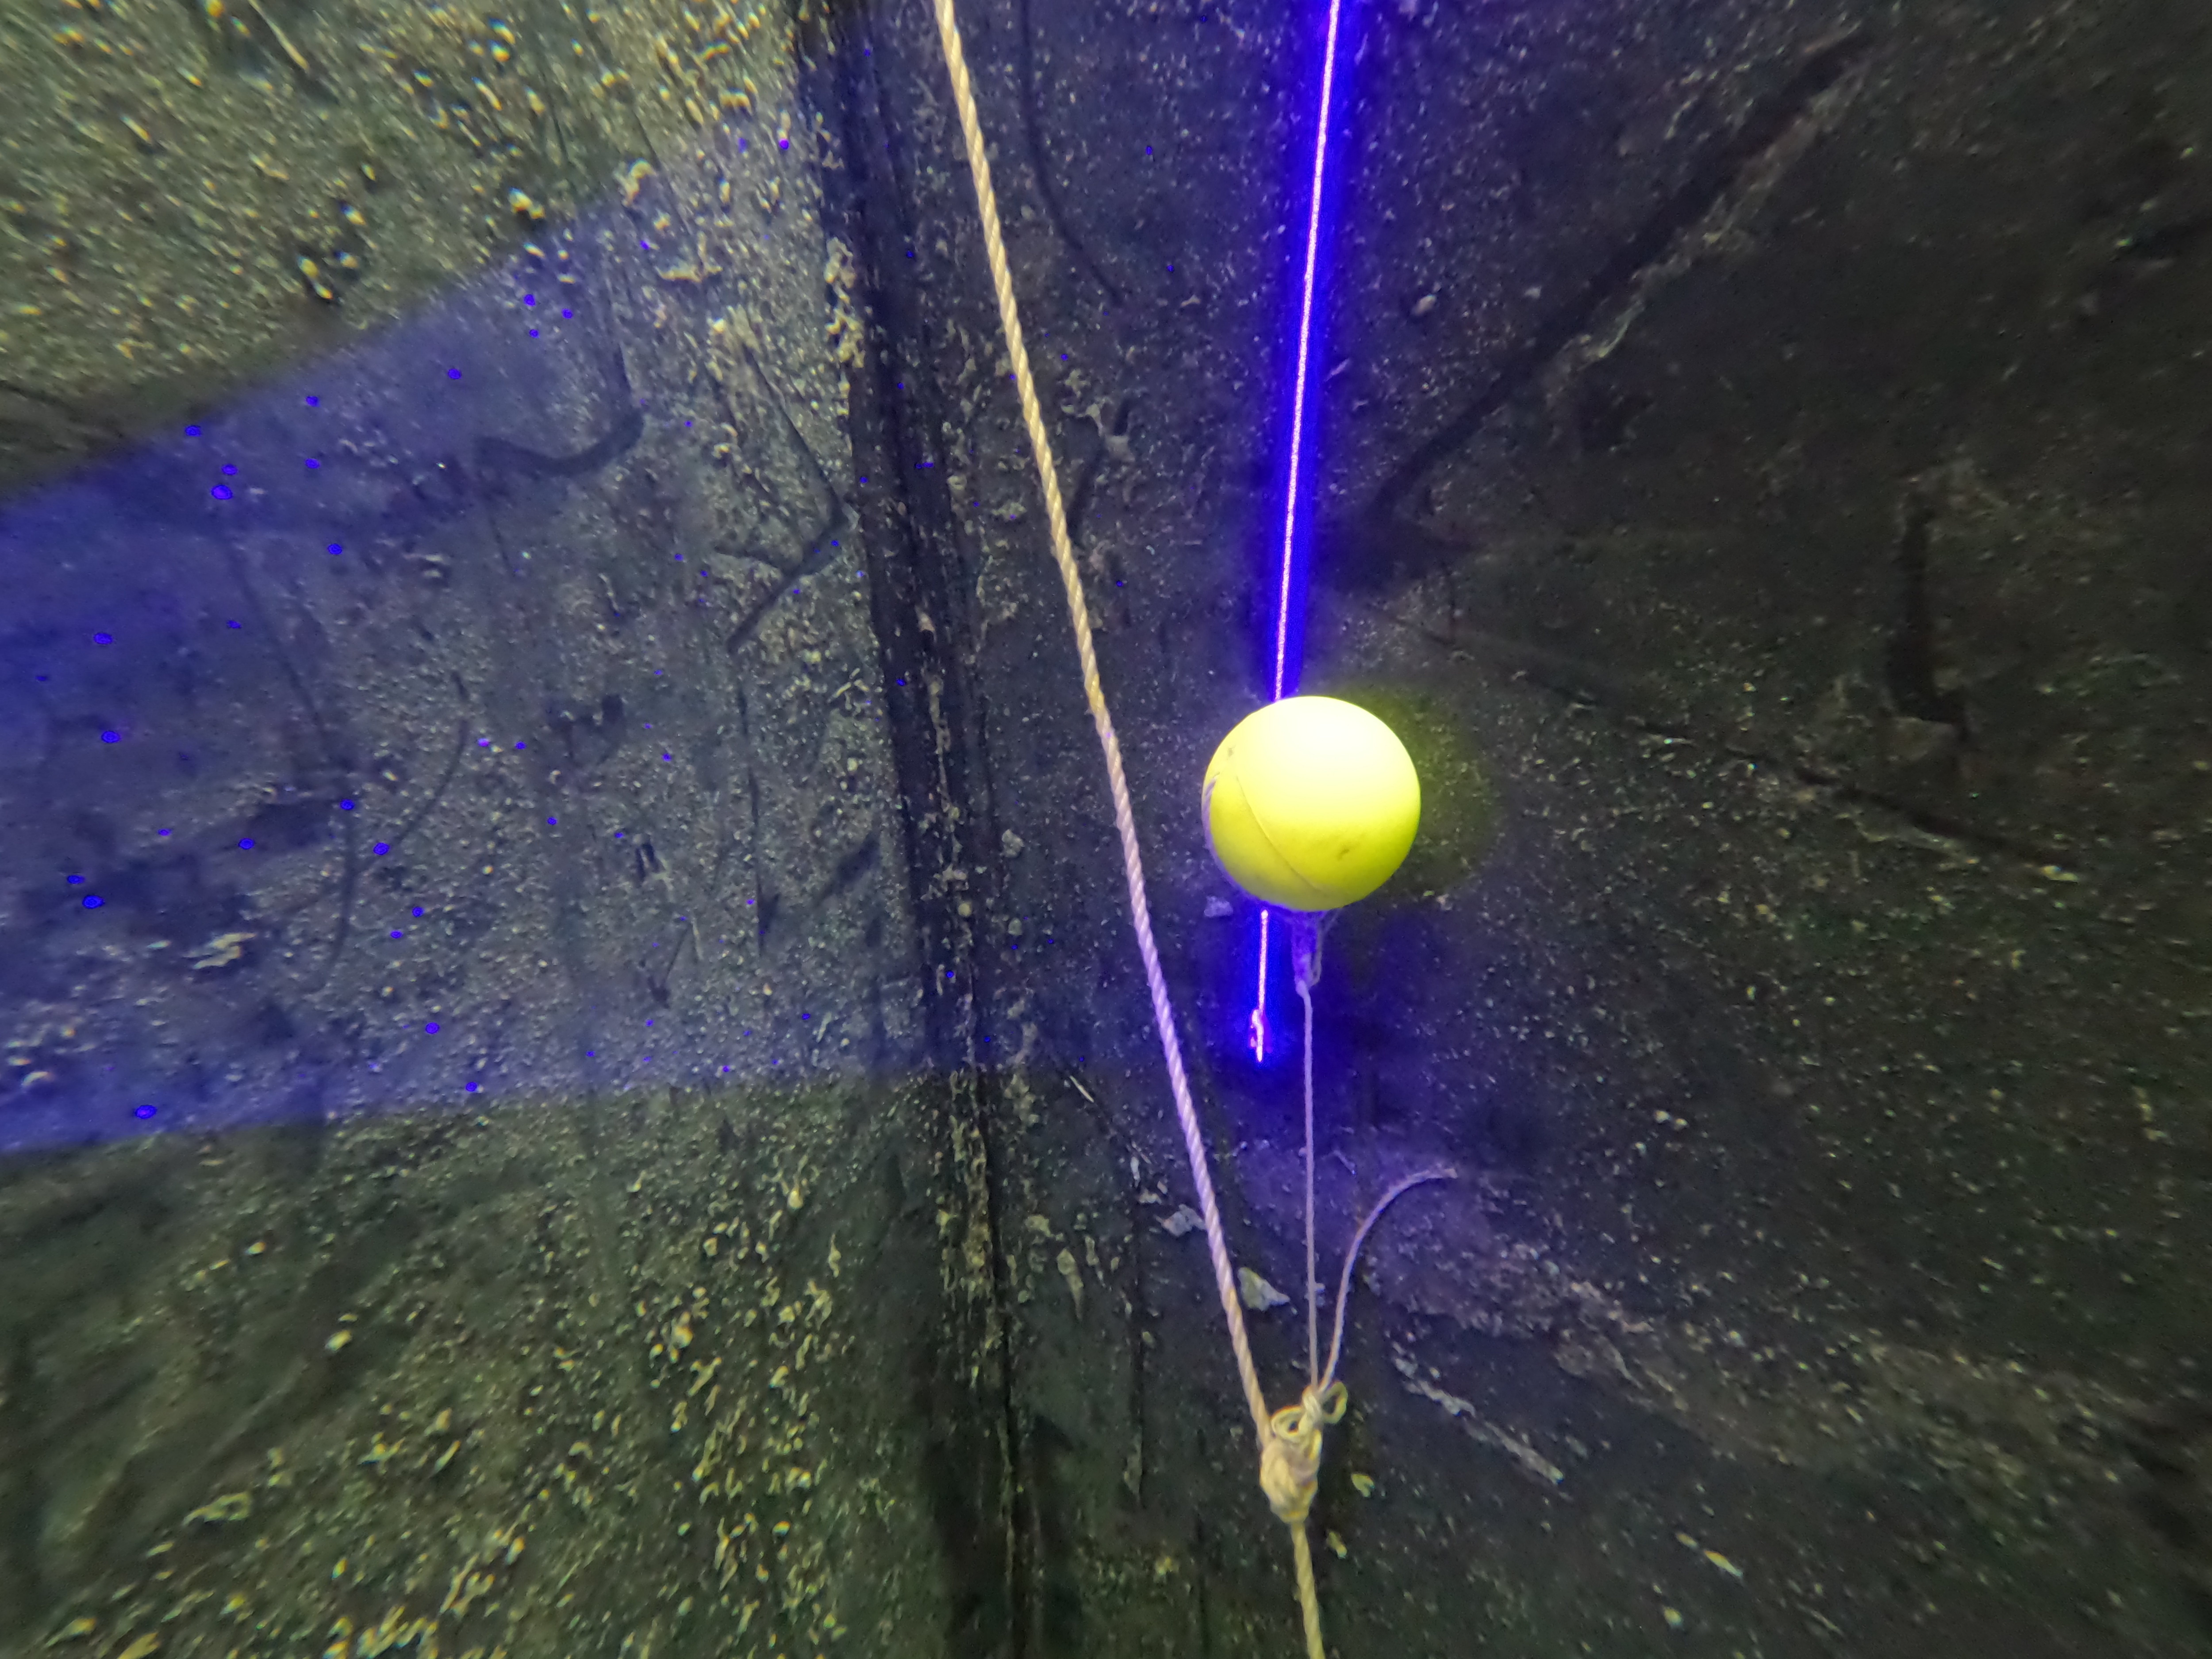

Supplement: Supplementary file 2938 [file G0030438.pdf › 2/G0030438.pdf]

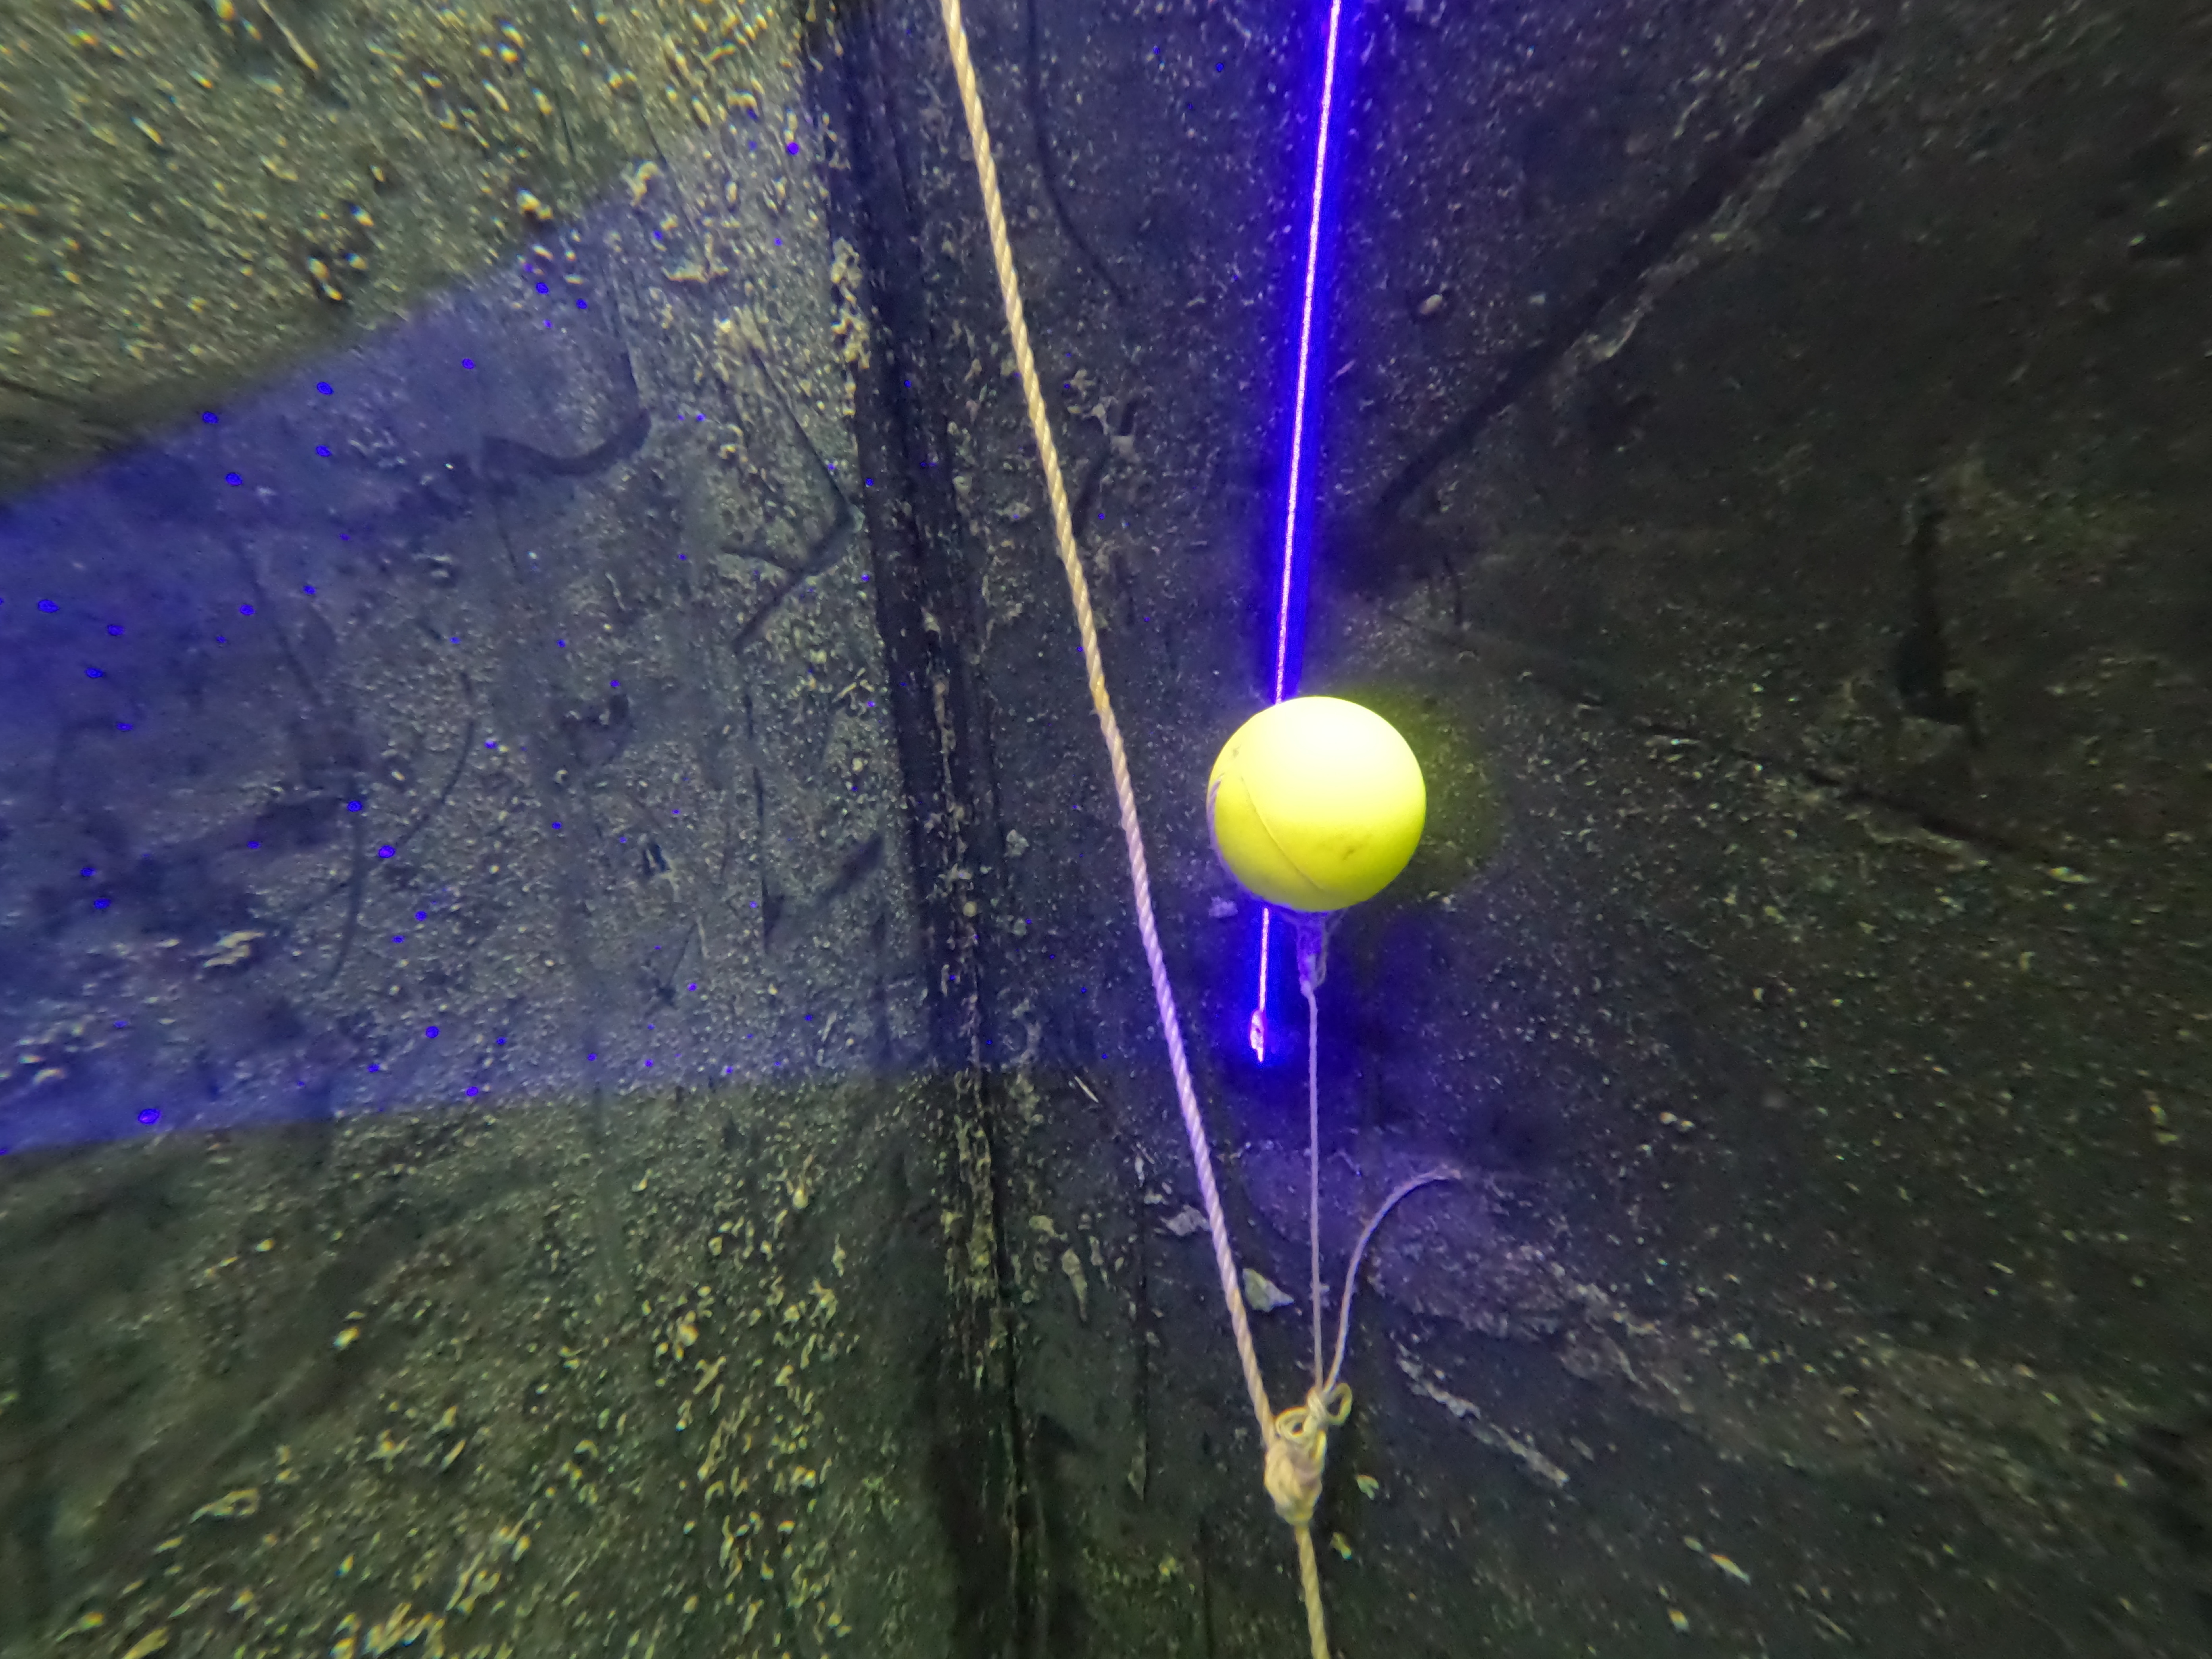

Supplement: Supplementary file 2939 [file G0030439.pdf › 2/G0030439.pdf]

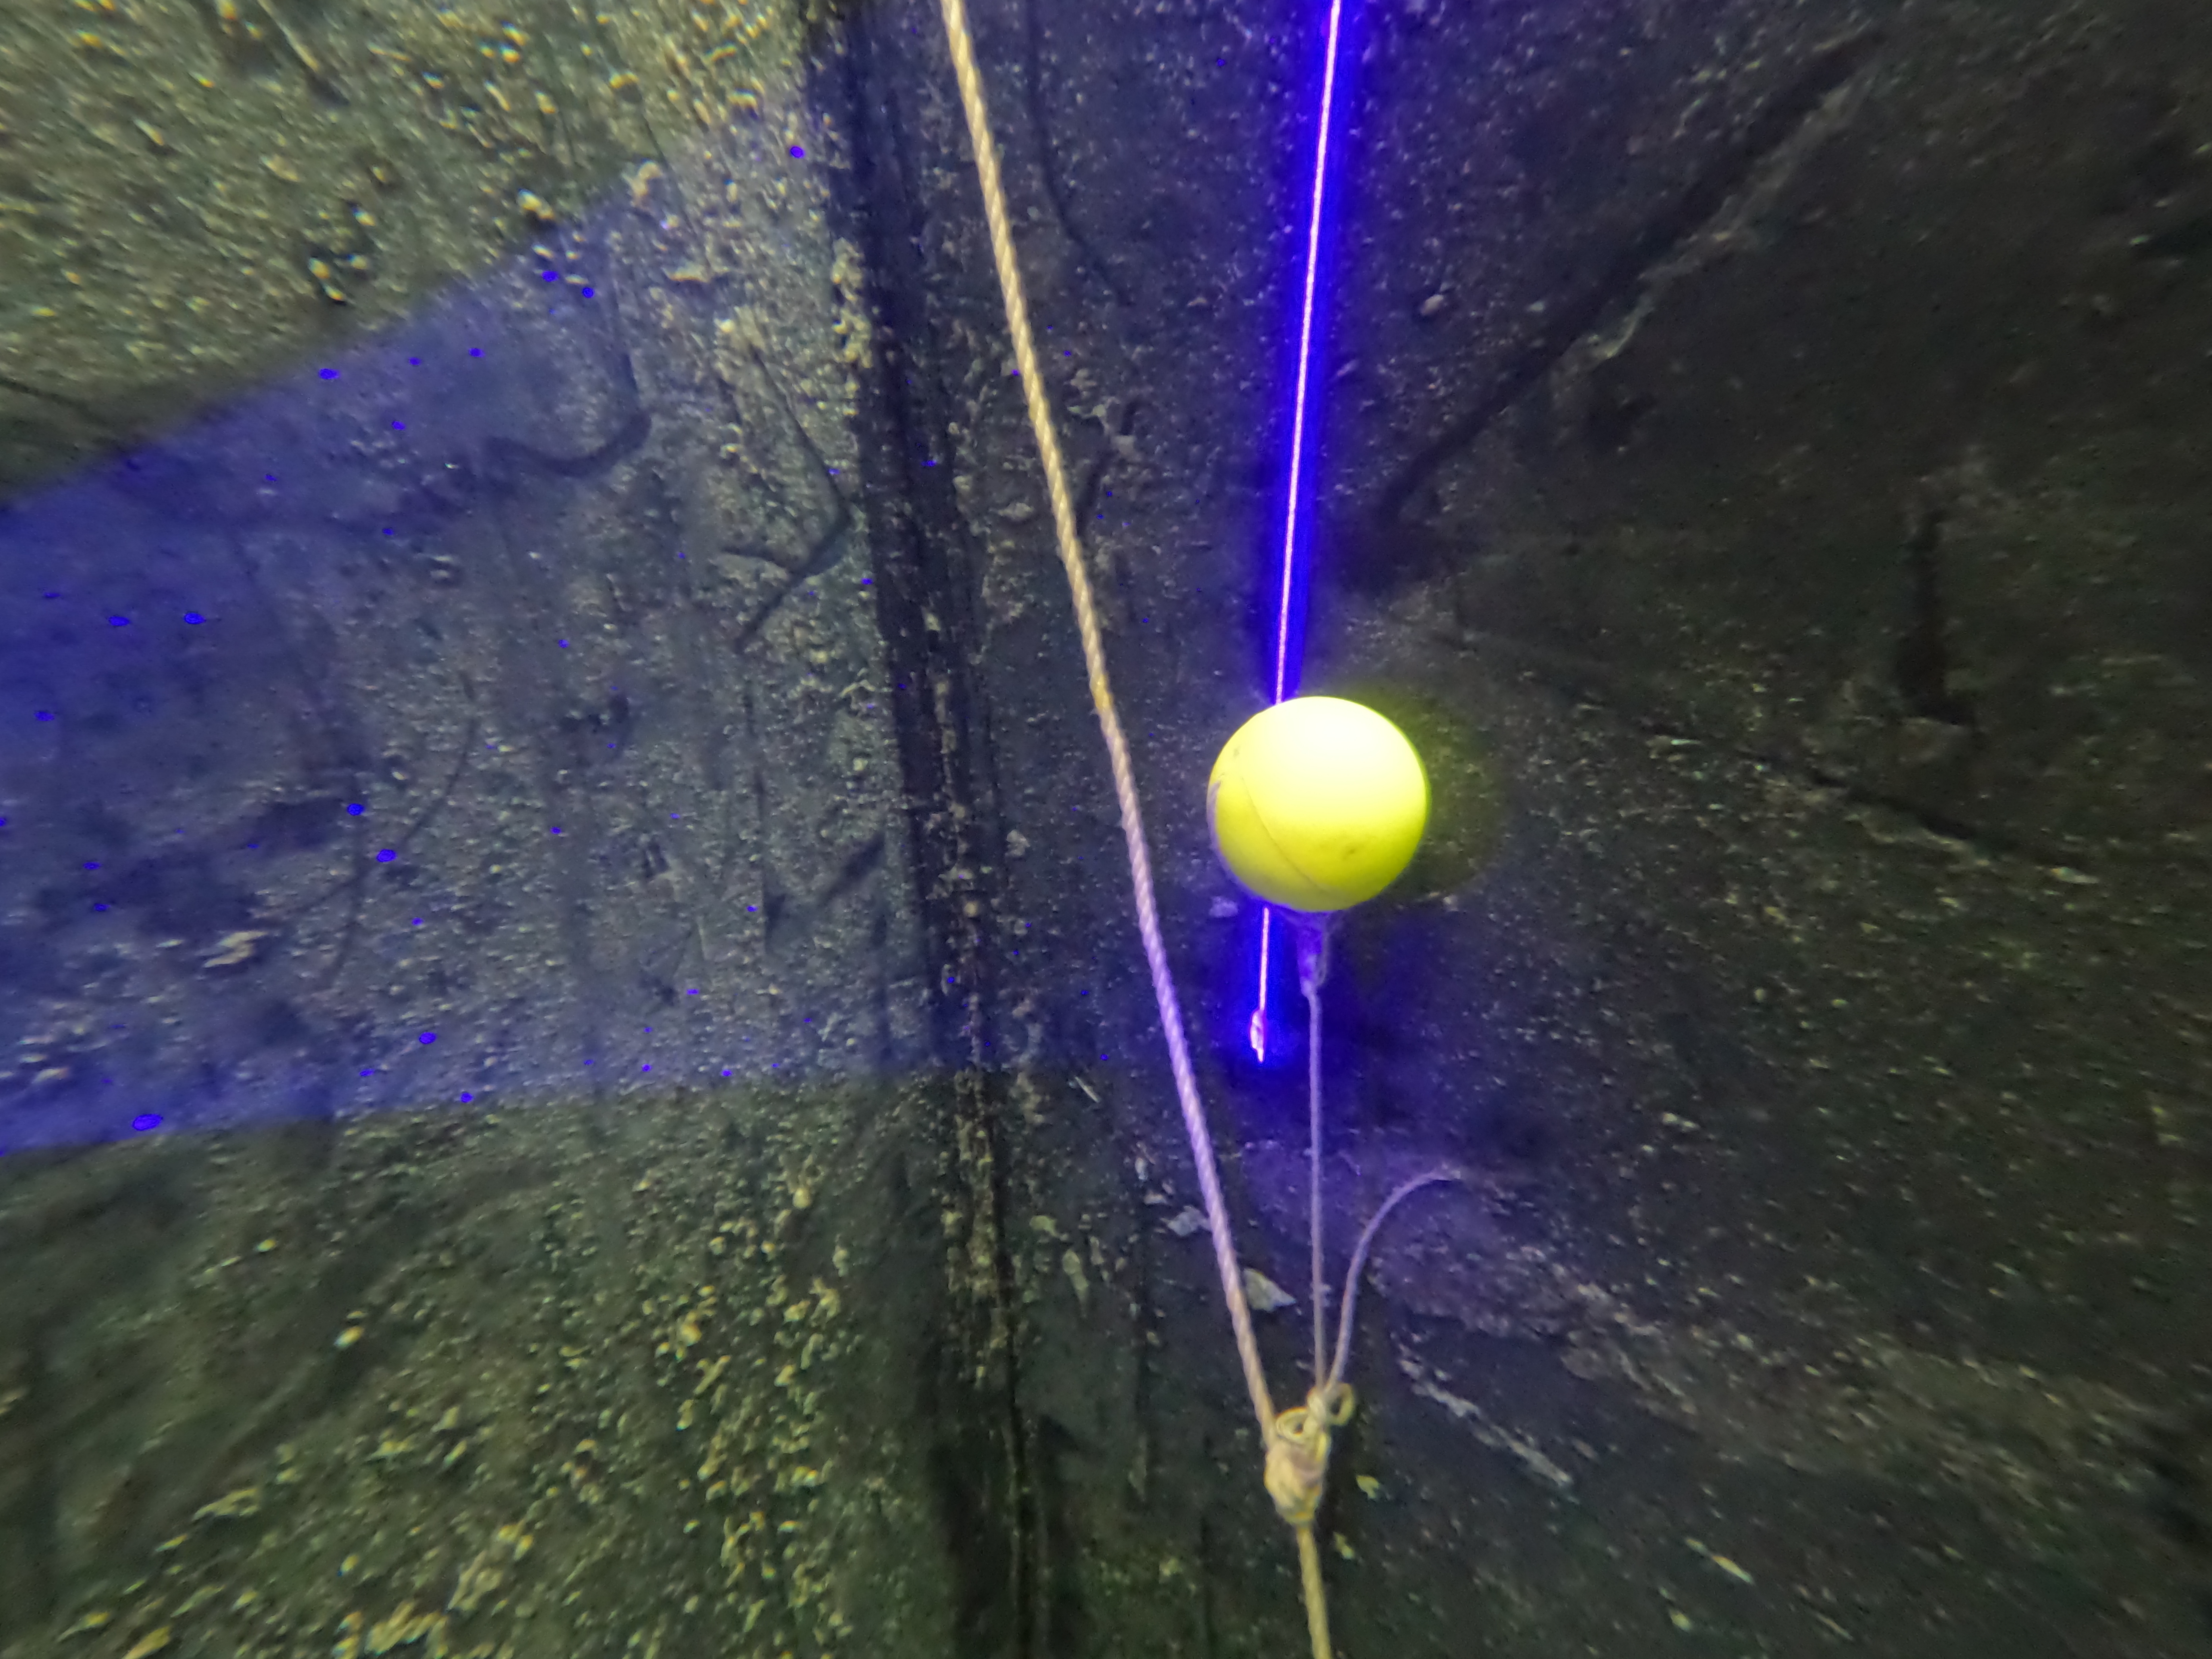

Supplement: Supplementary file 2940 [file G0030440.pdf › 2/G0030440.pdf]

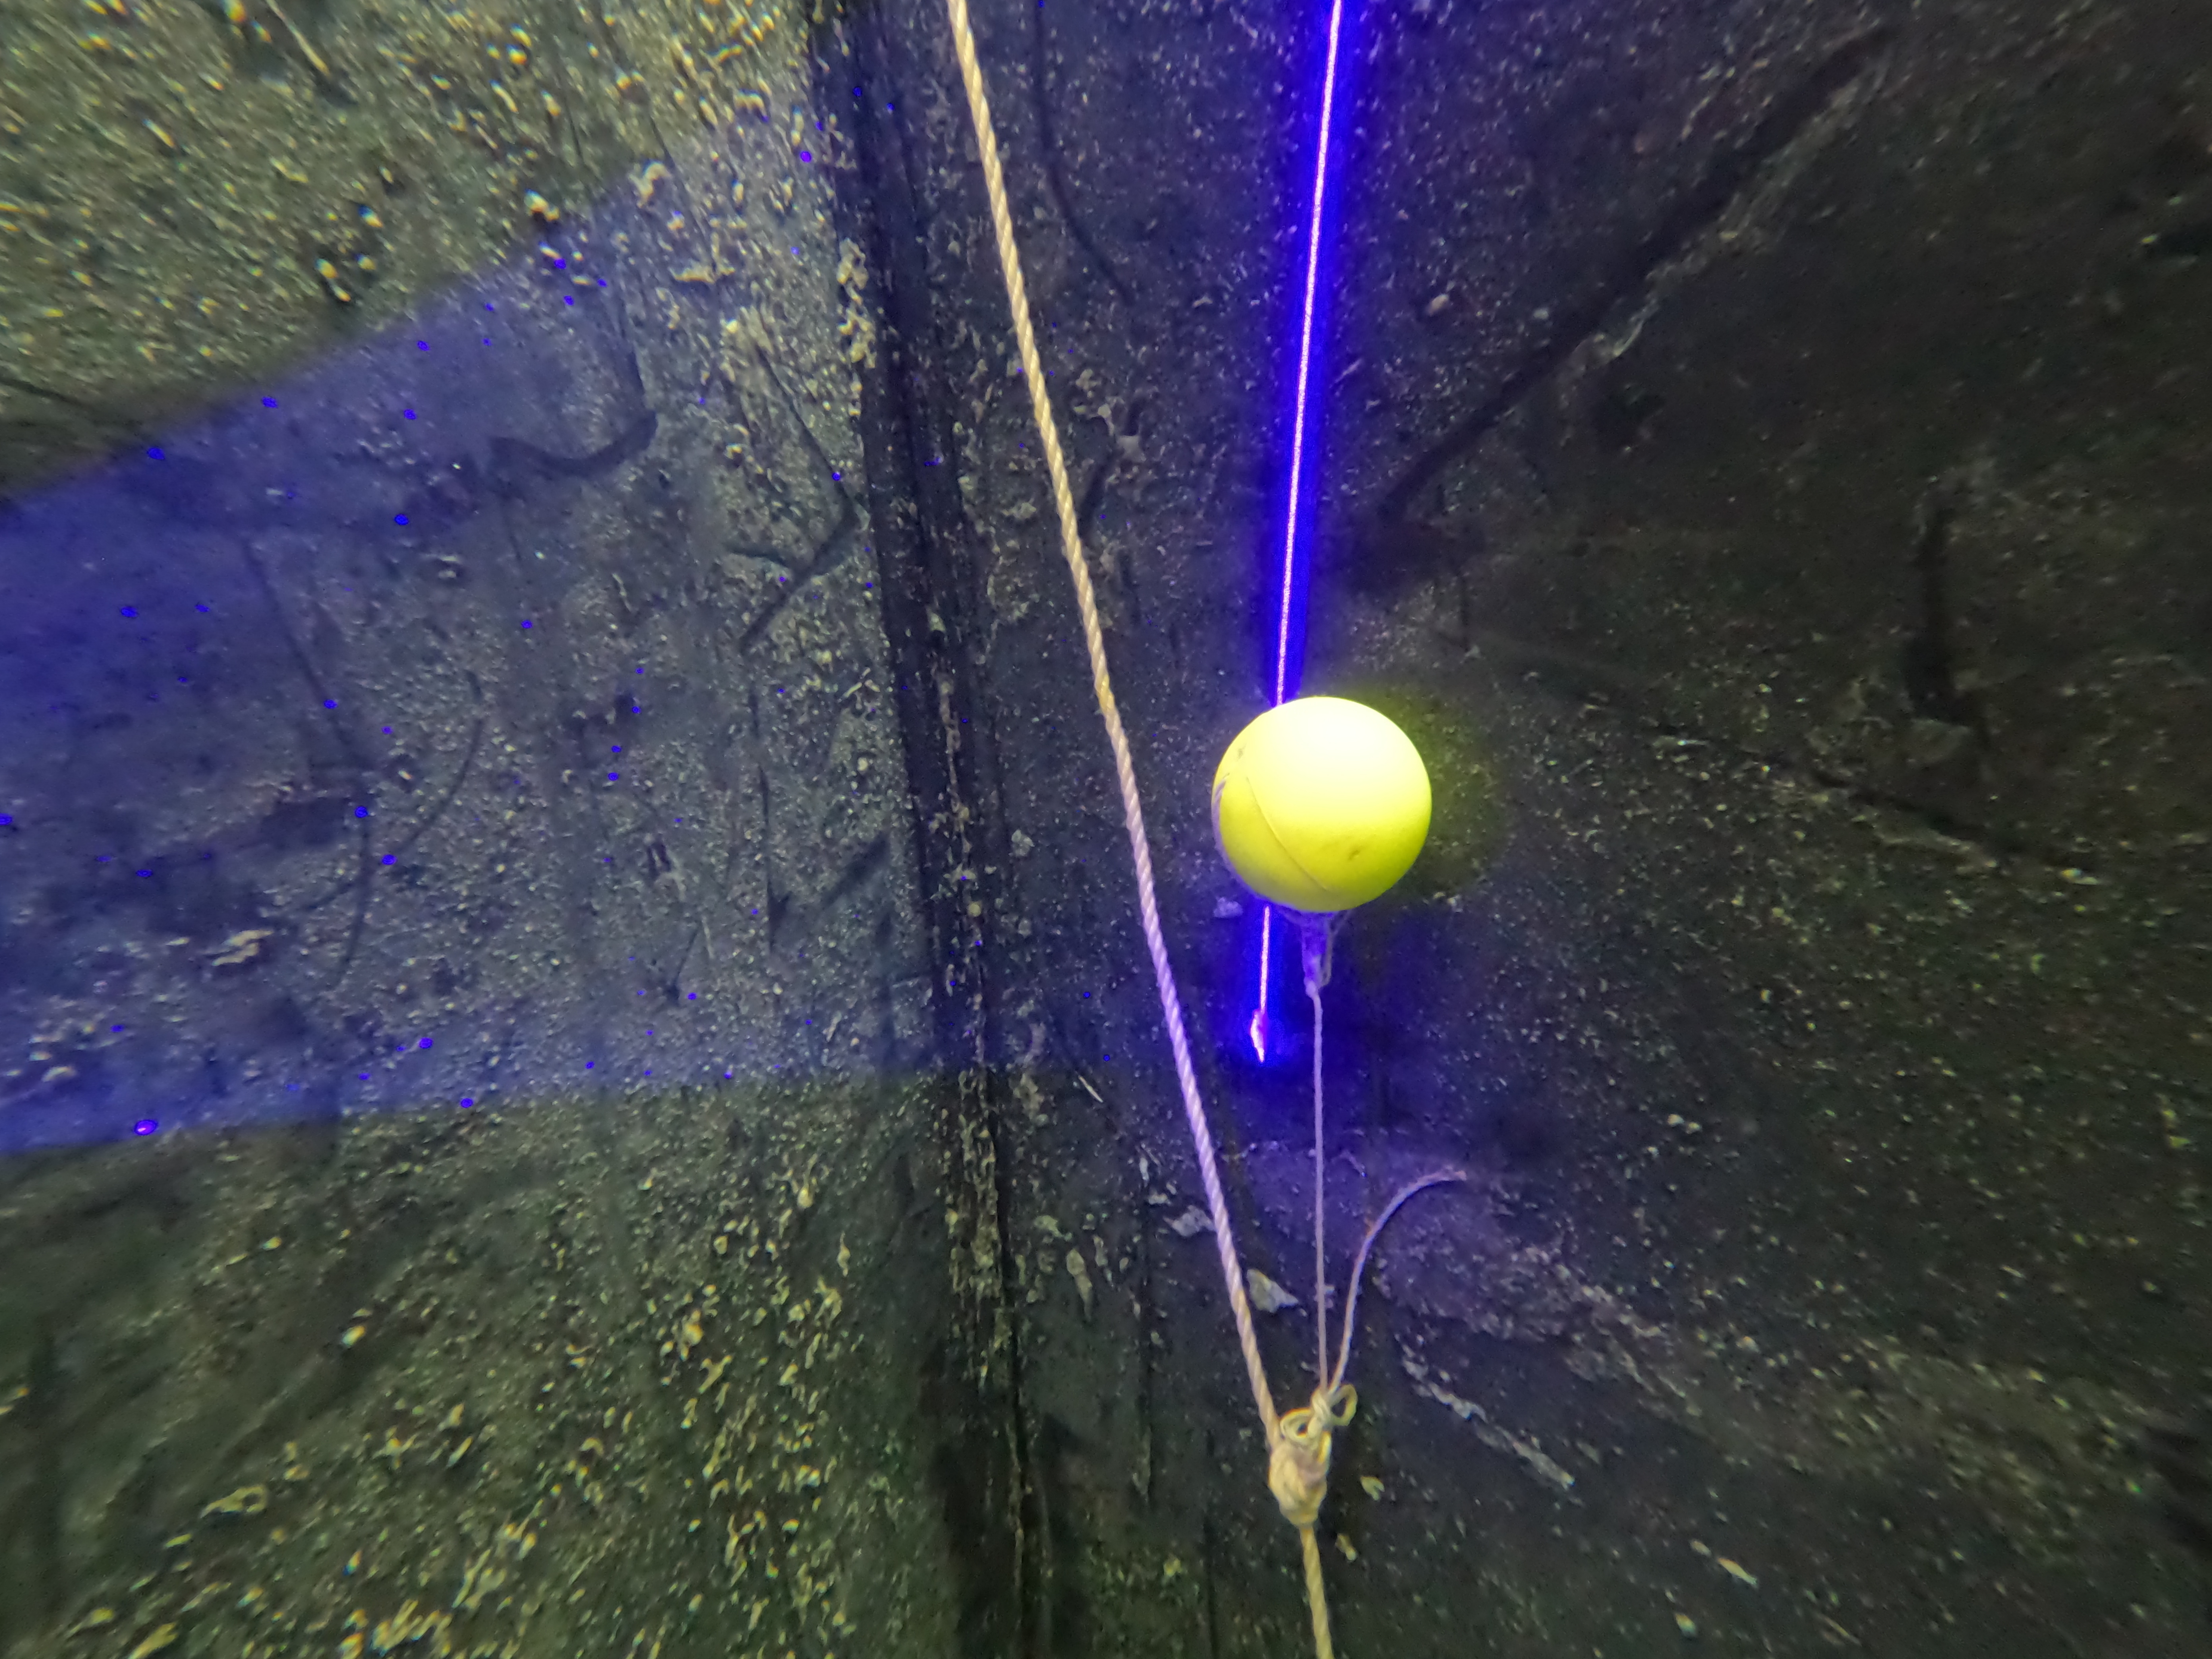

Supplement: Supplementary file 2941 [file G0030441.pdf › 2/G0030441.pdf]

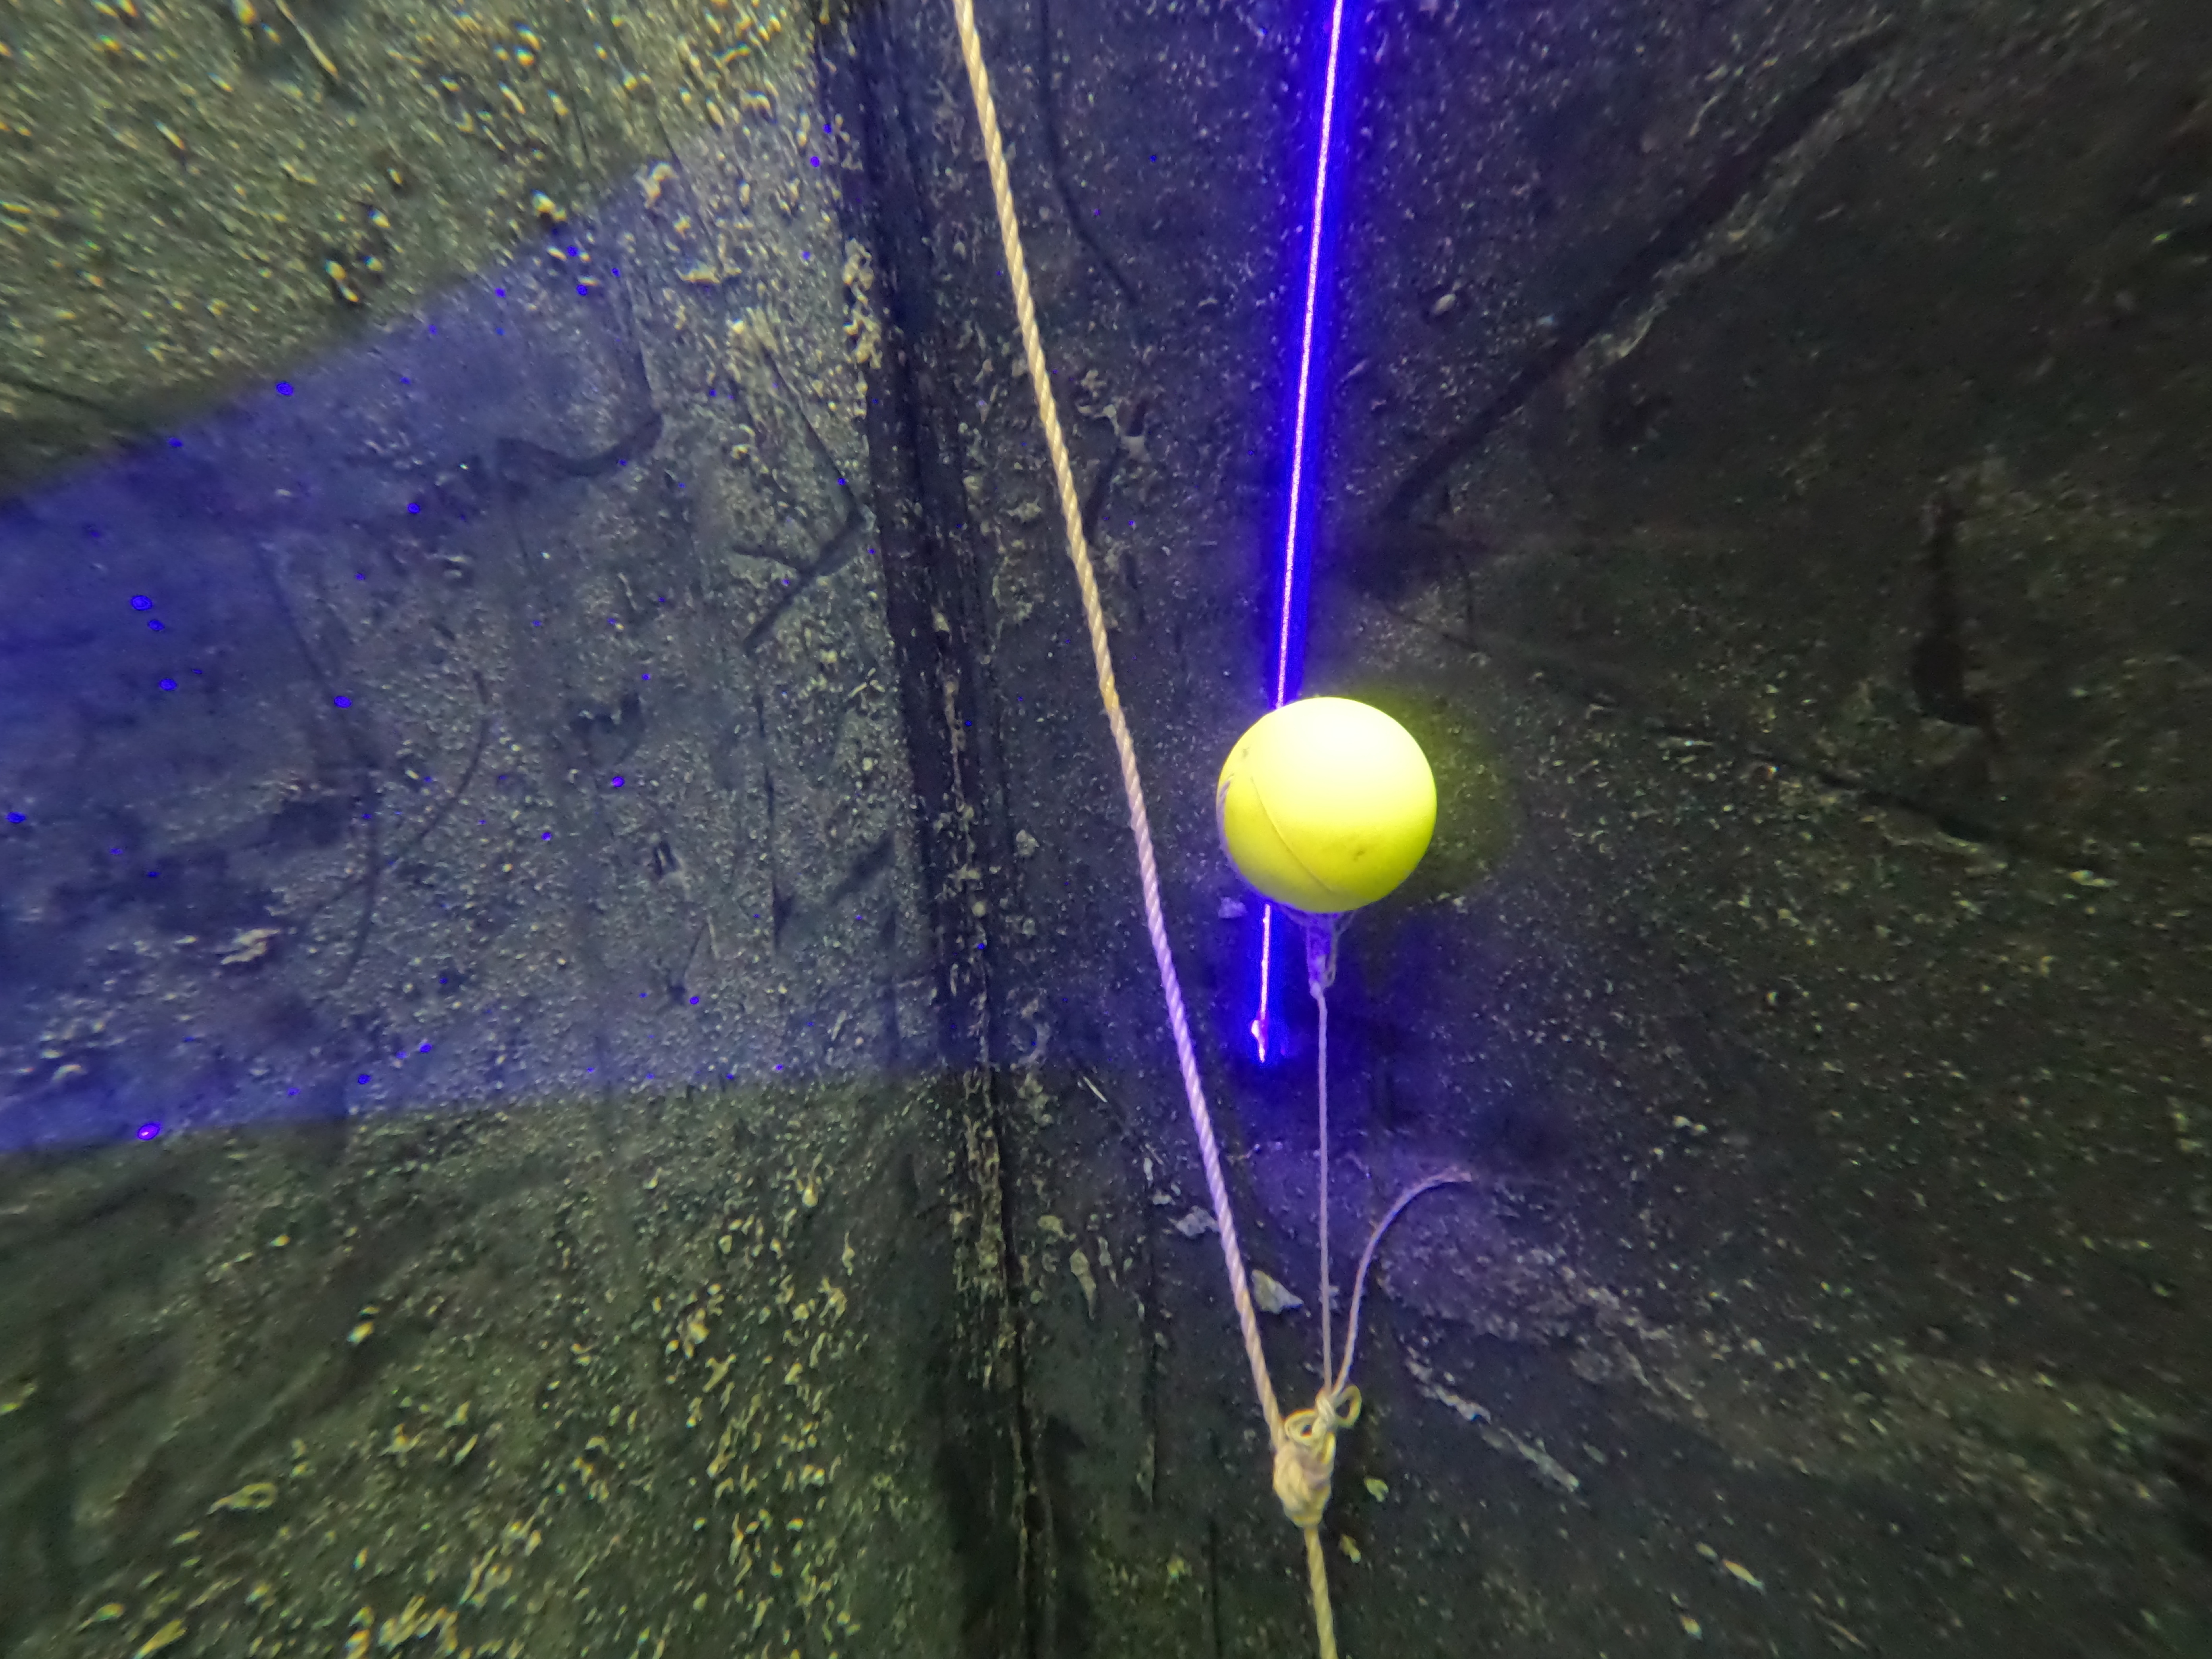

Supplement: Supplementary file 2942 [file G0030442.pdf › 2/G0030442.pdf]

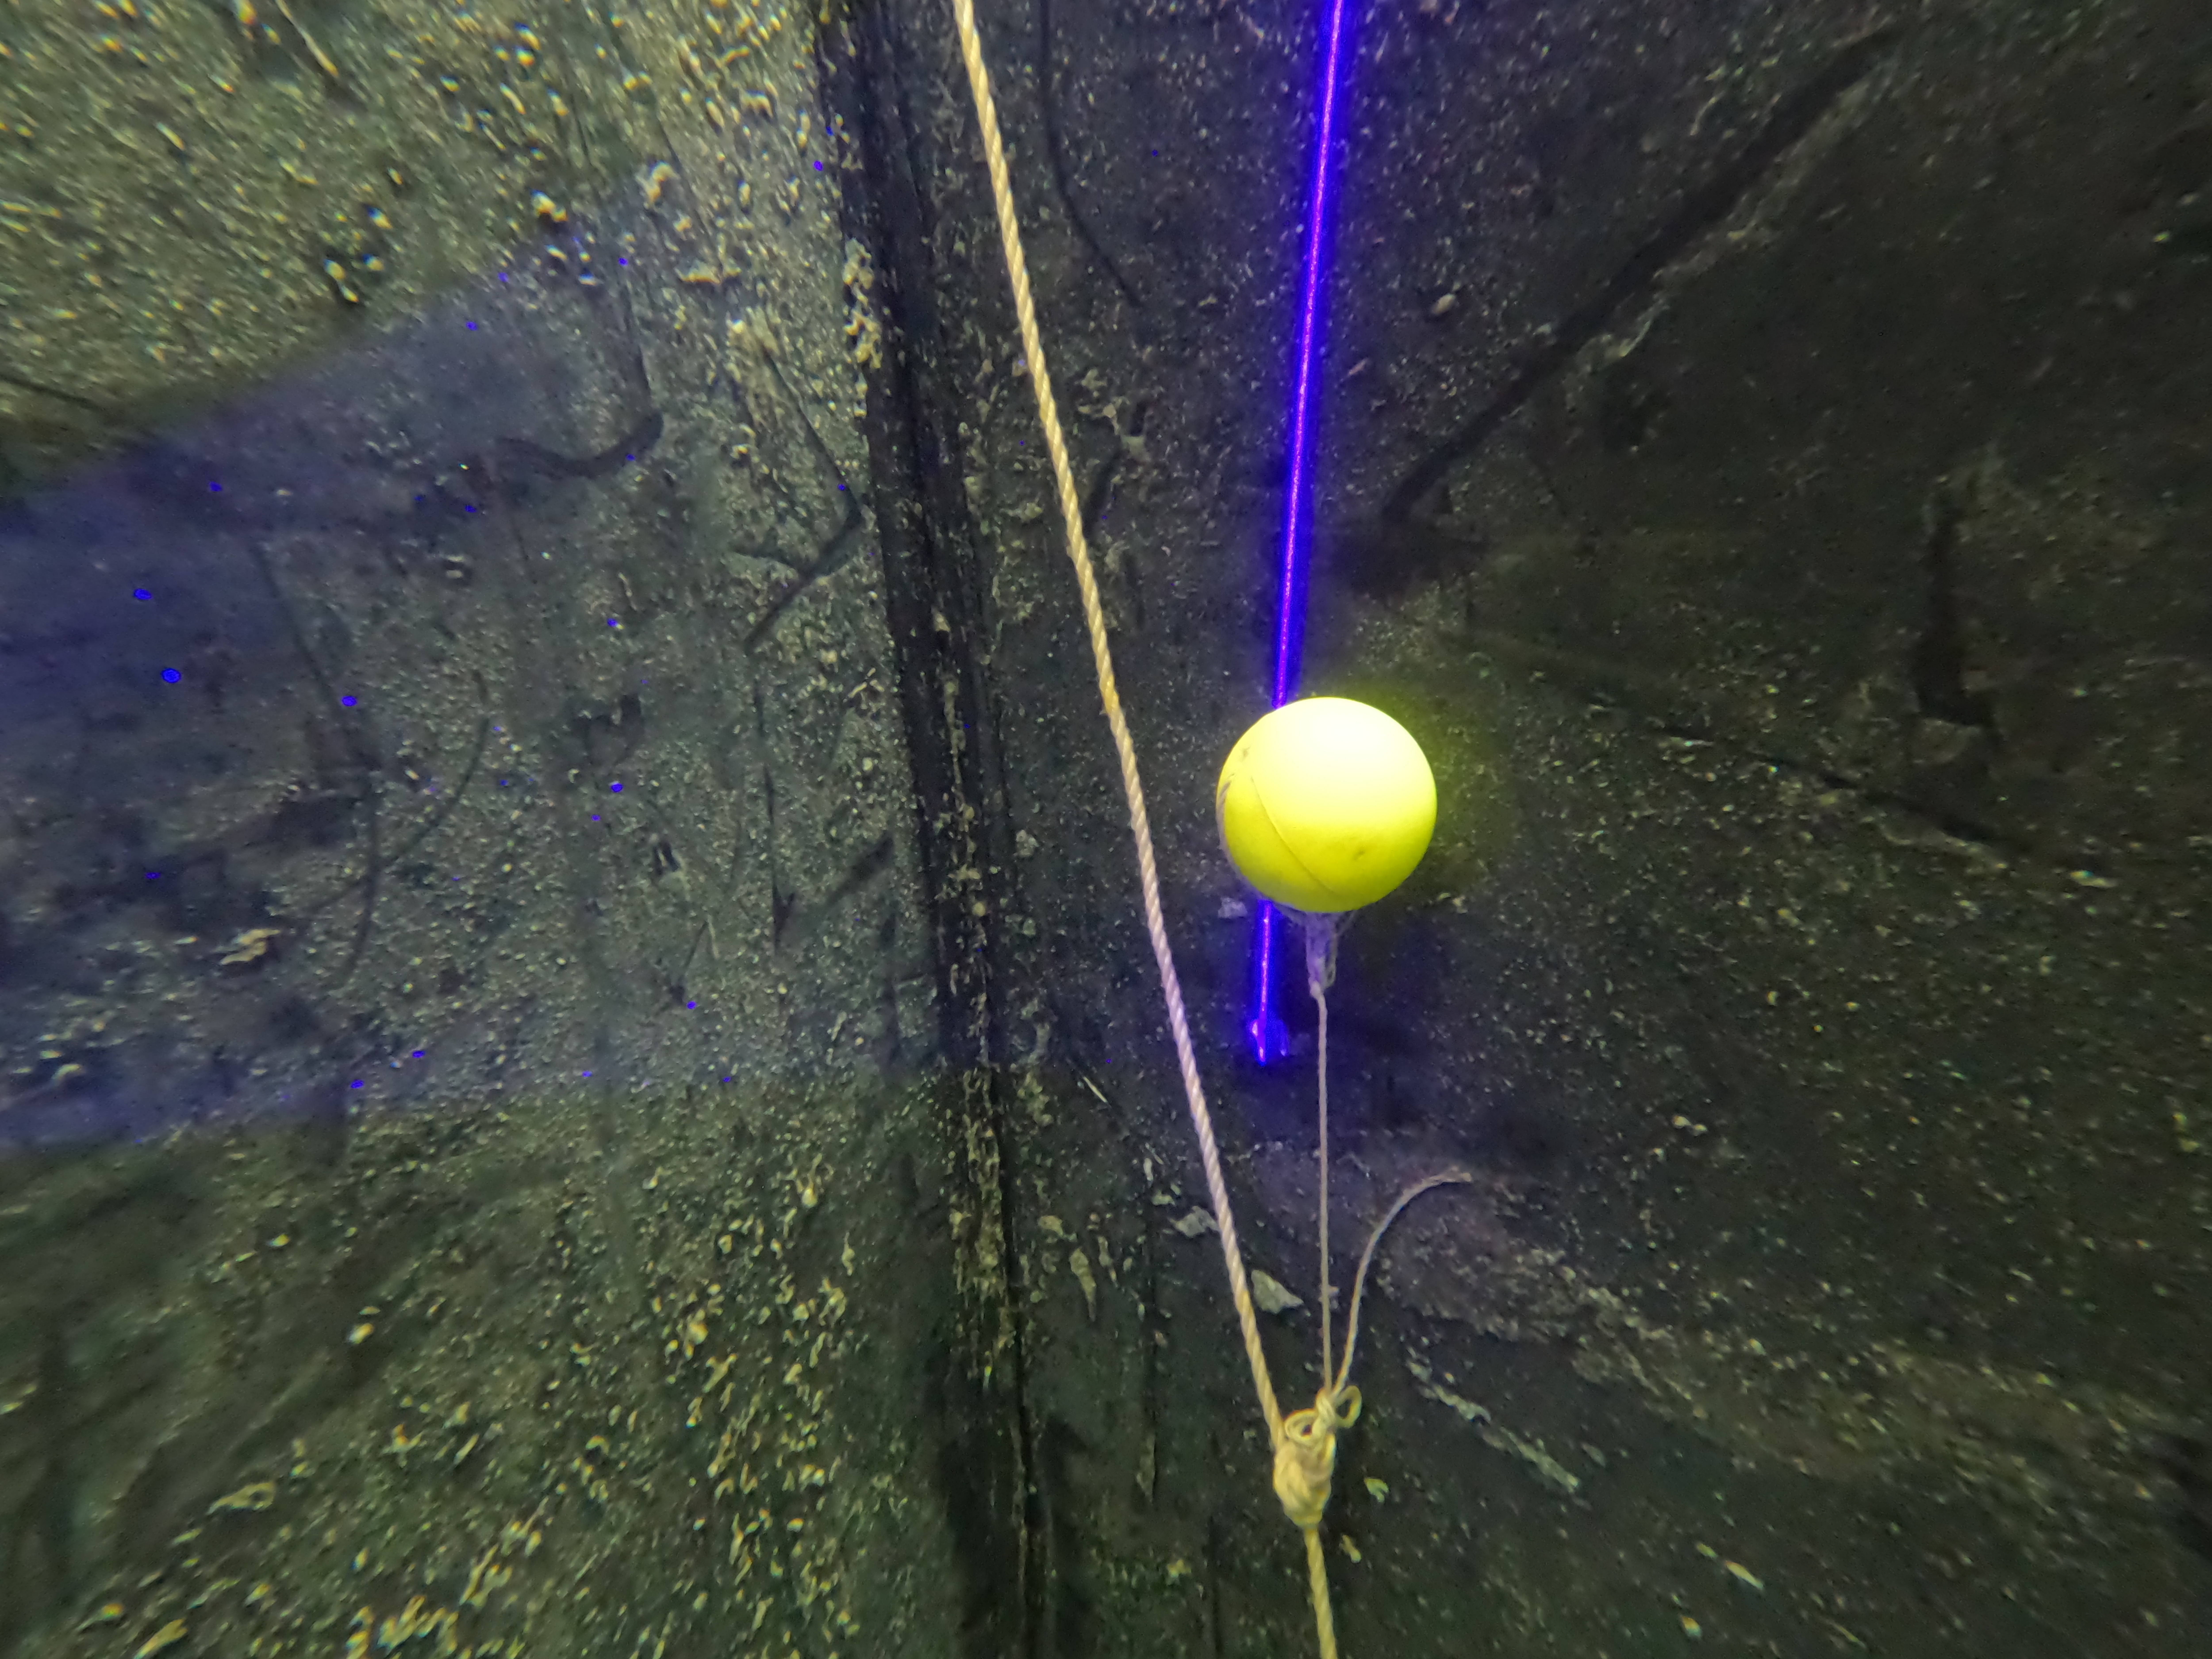

Supplement: Supplementary file 2943 [file G0030443.pdf › 2/G0030443.pdf]

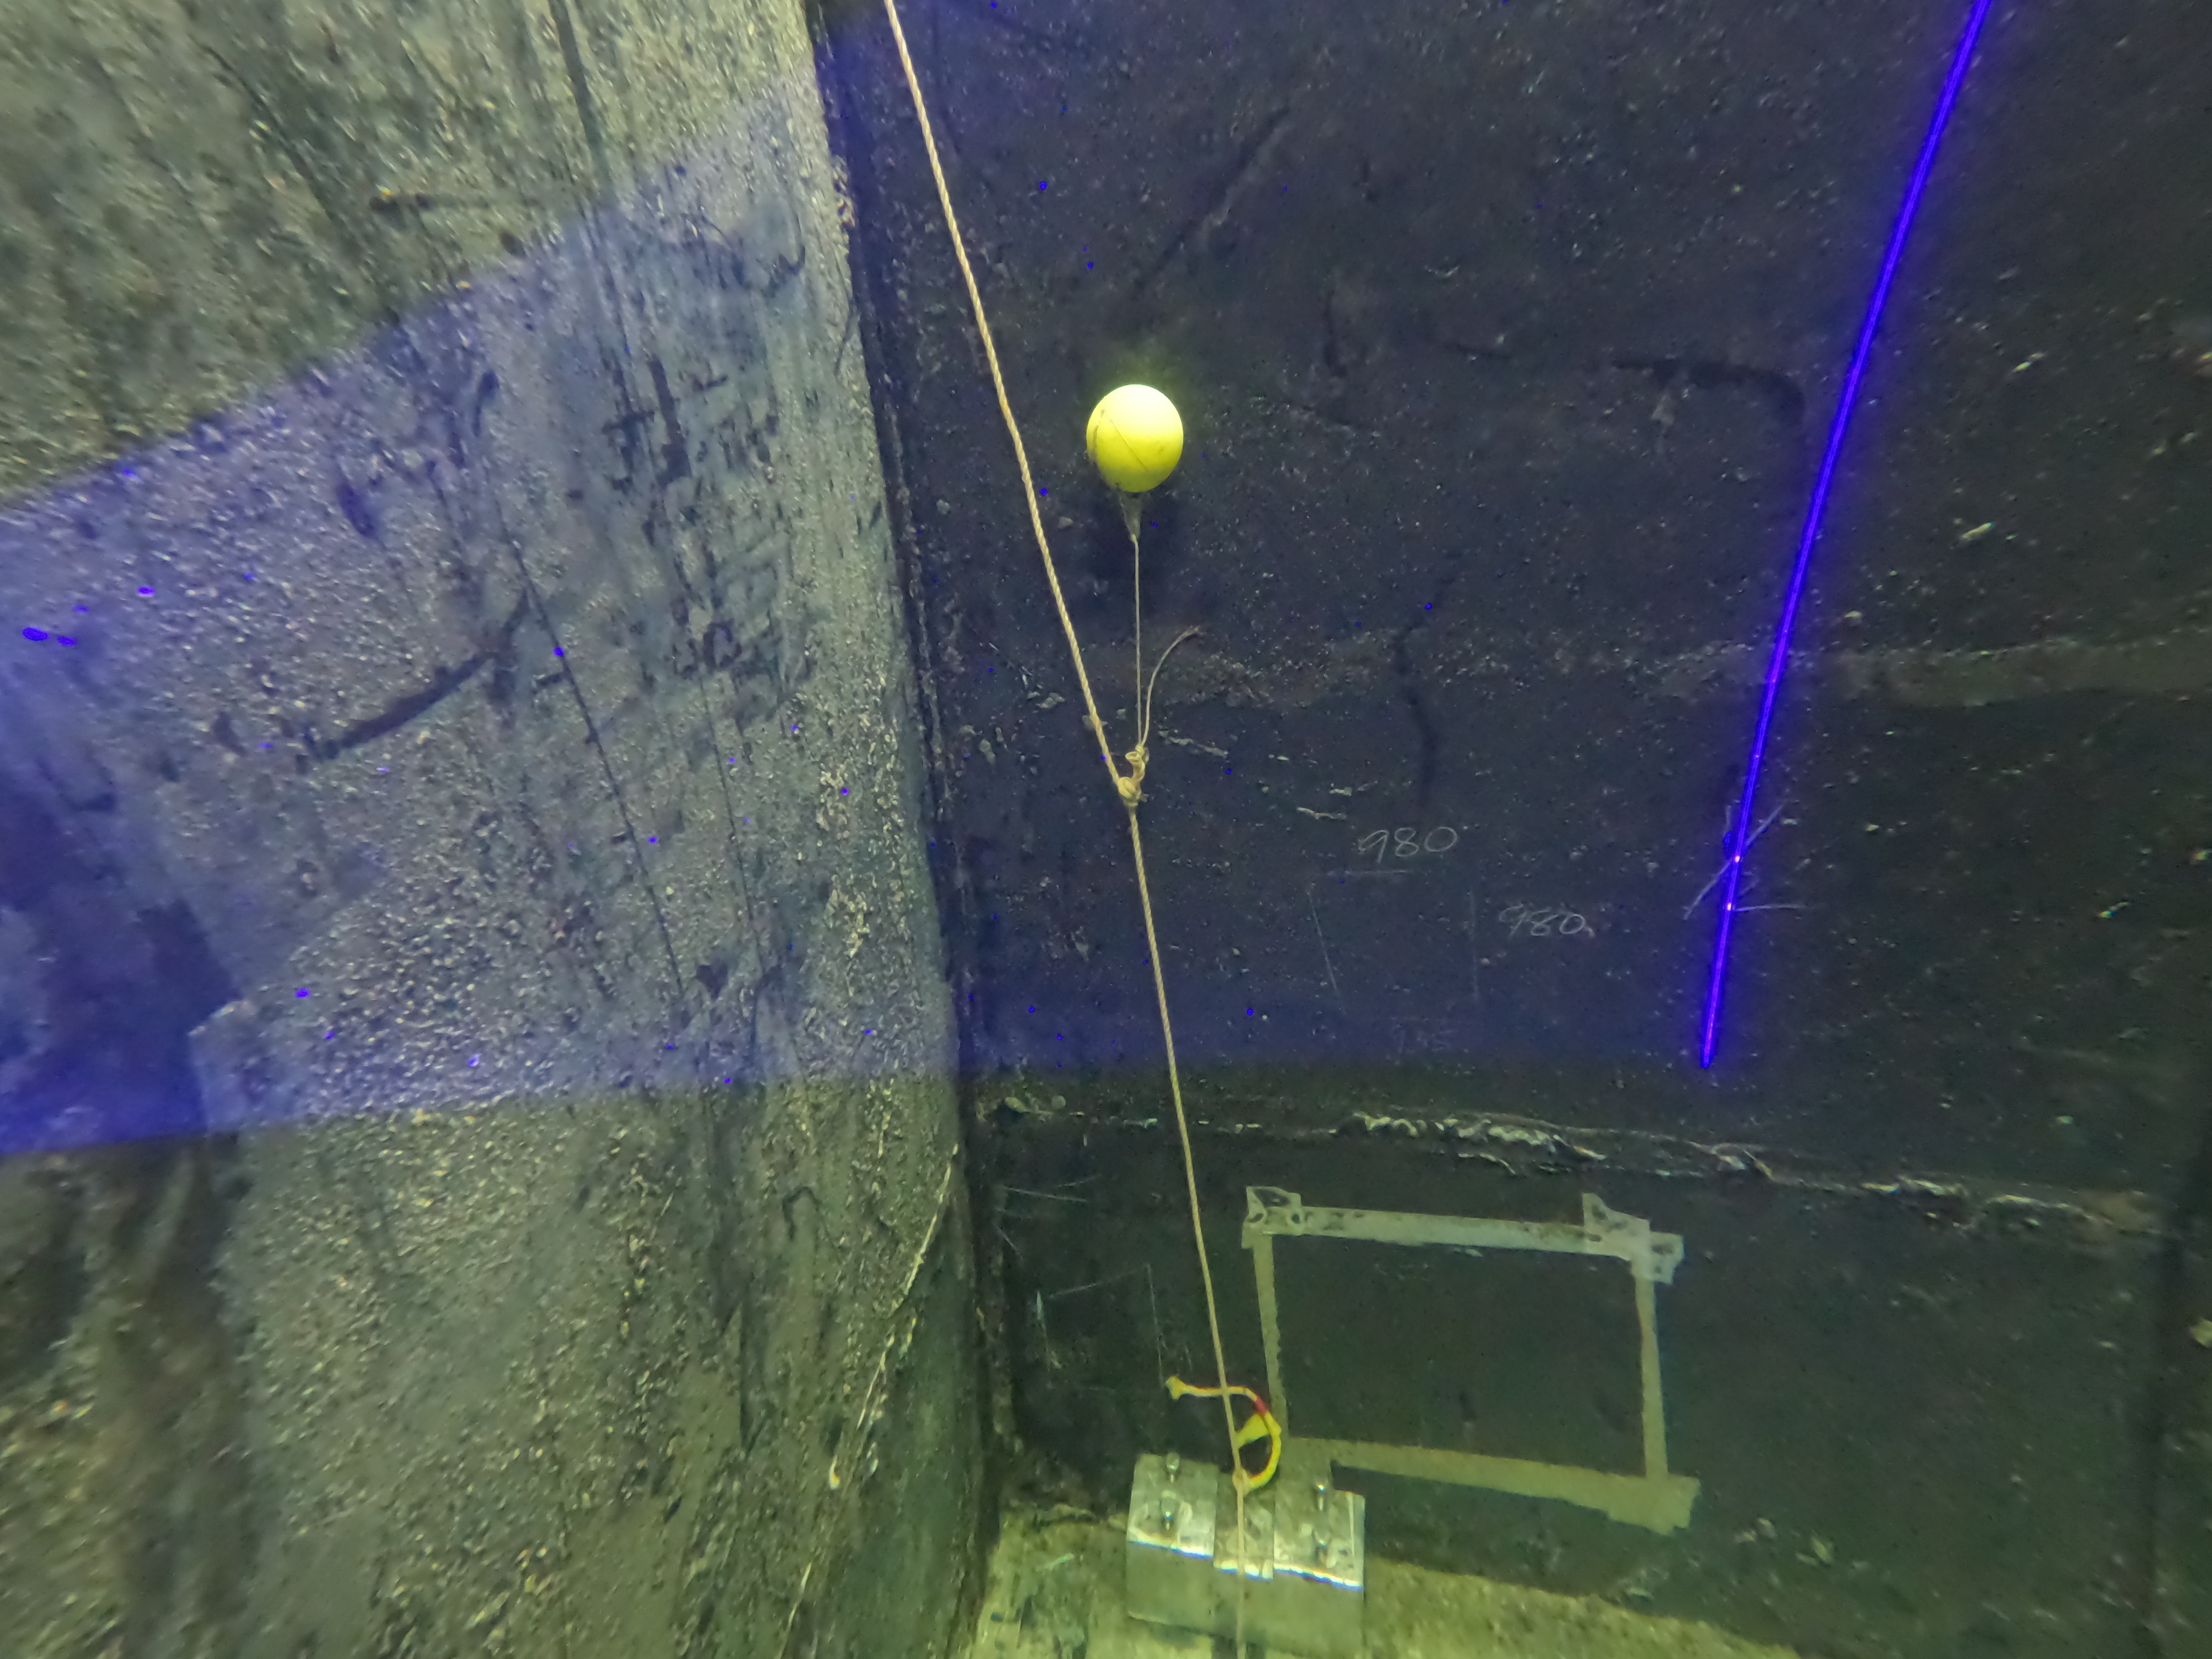

Supplement: Supplementary file 2944 [file G0031744.pdf › 12/G0031744.pdf]

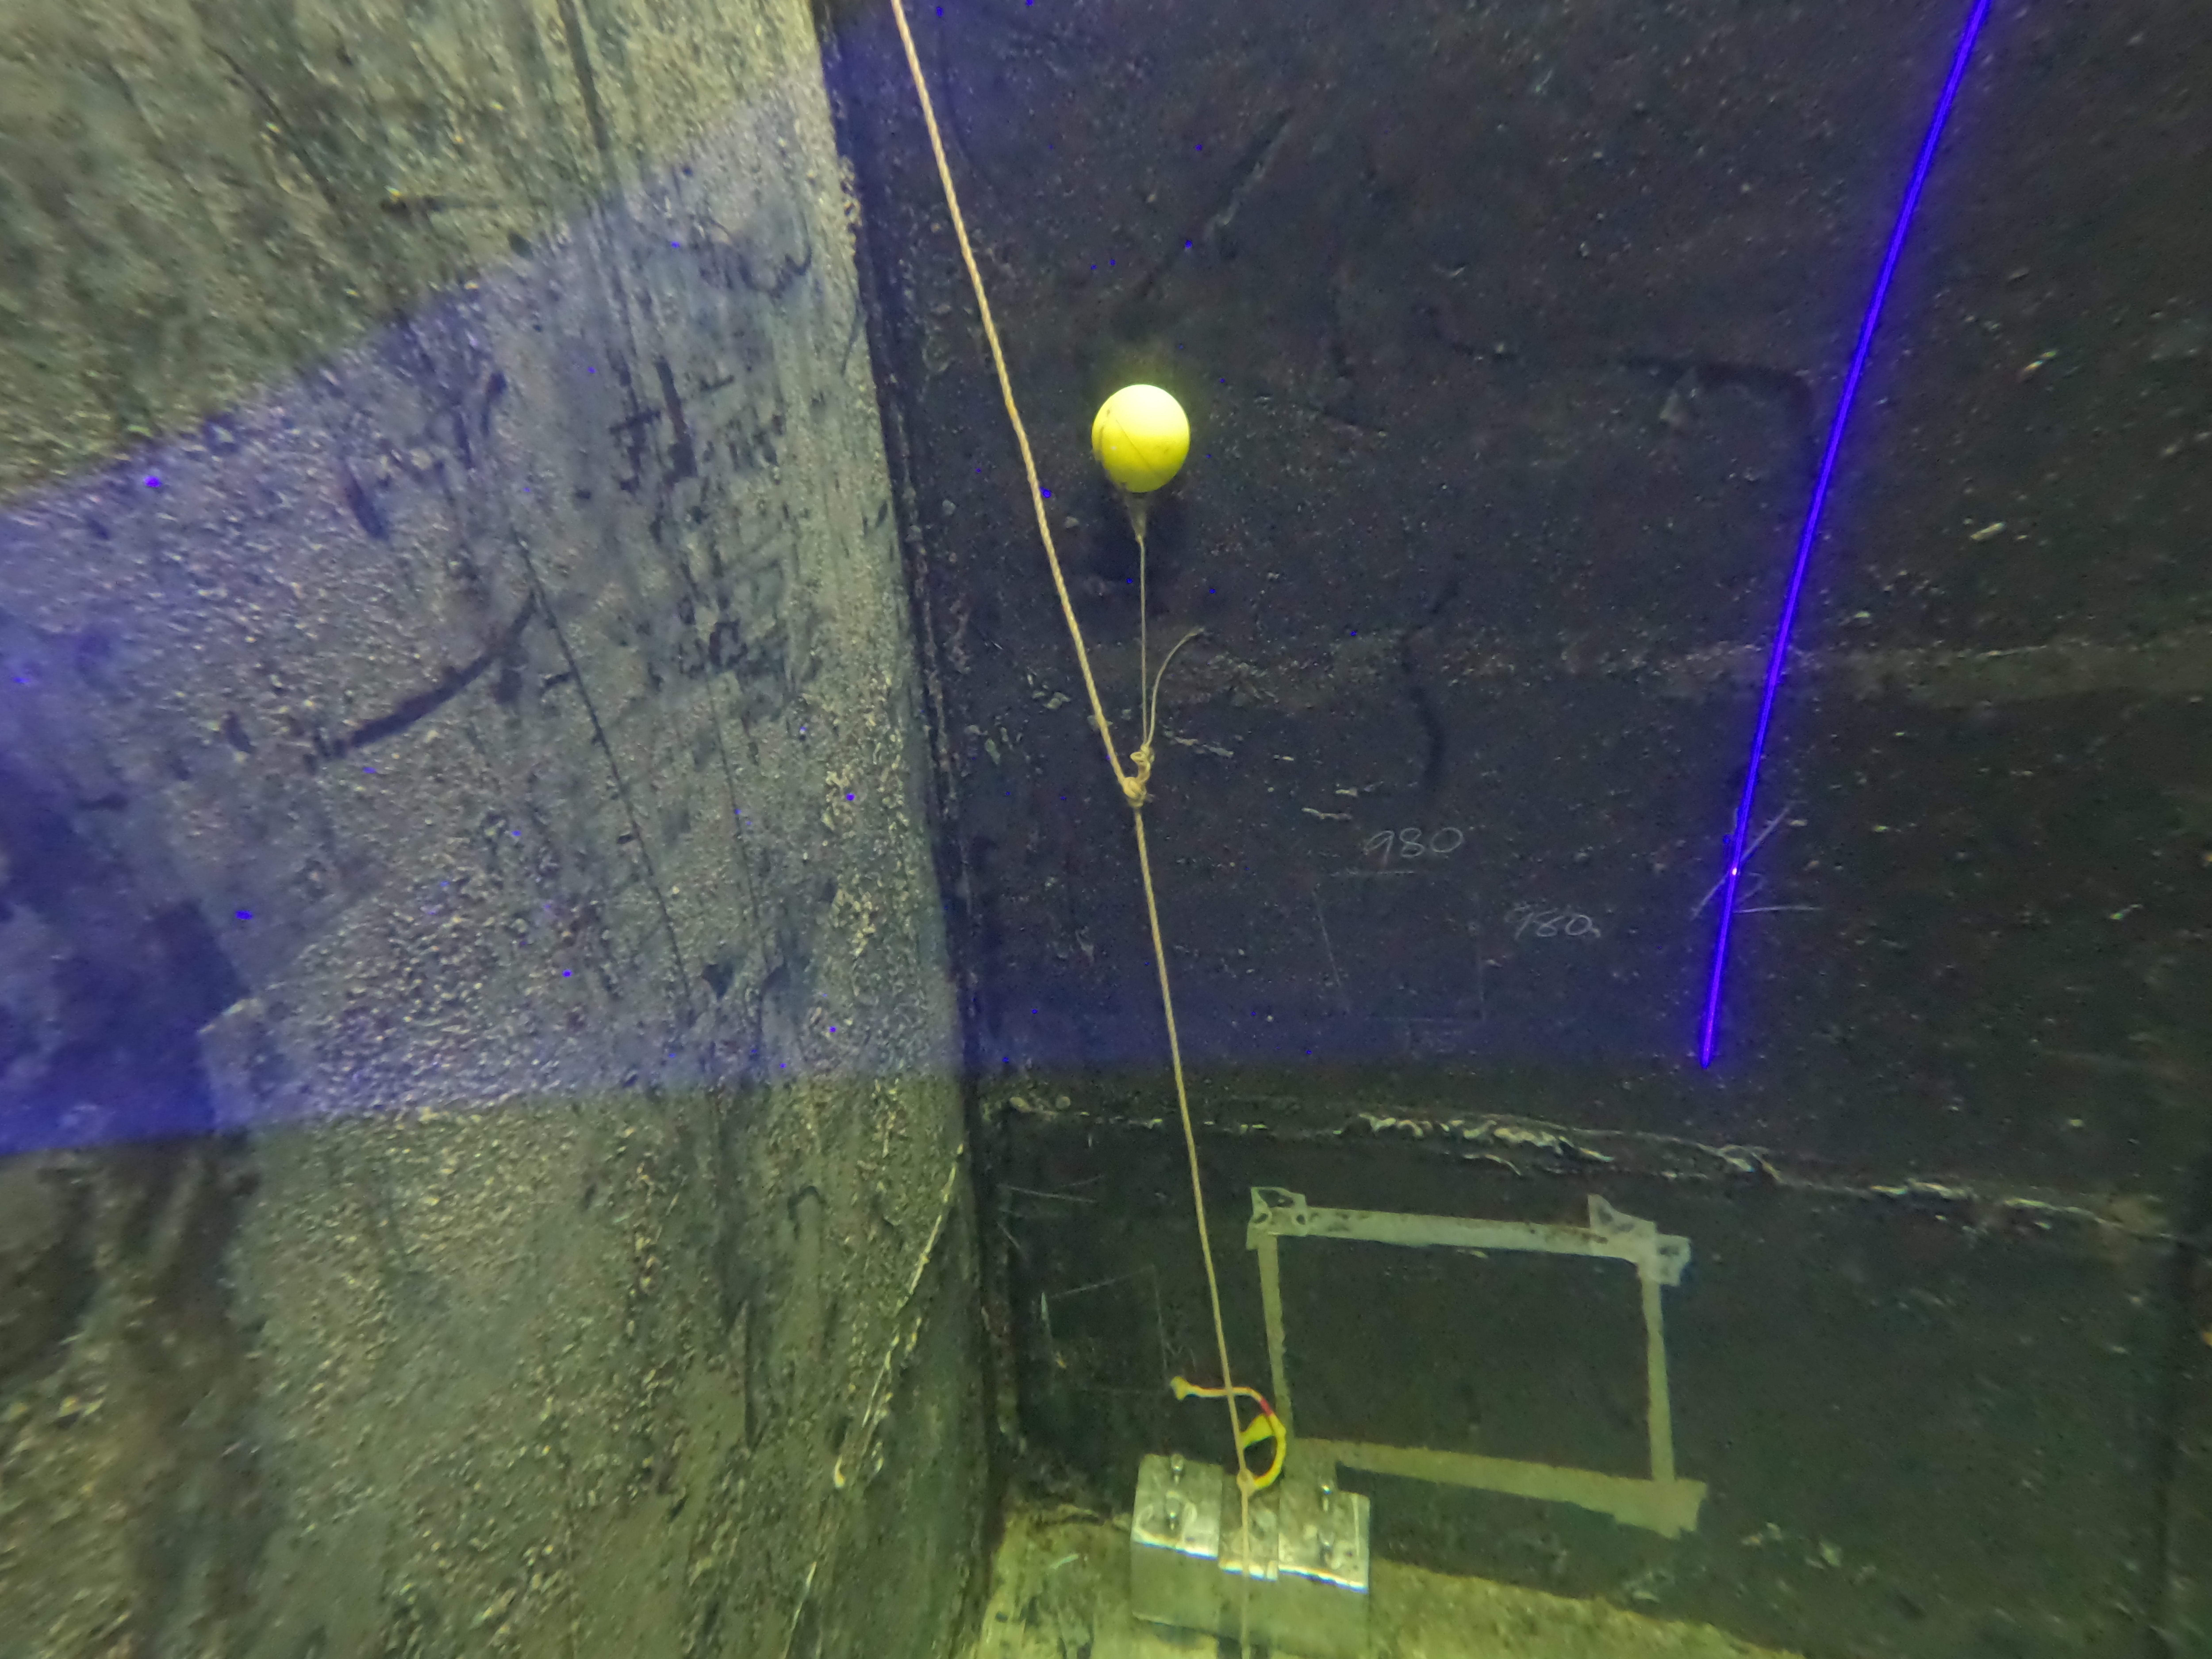

980

980

2

Supplement: Supplementary file 2945 [file G0031745.pdf › 12/G0031745.pdf]

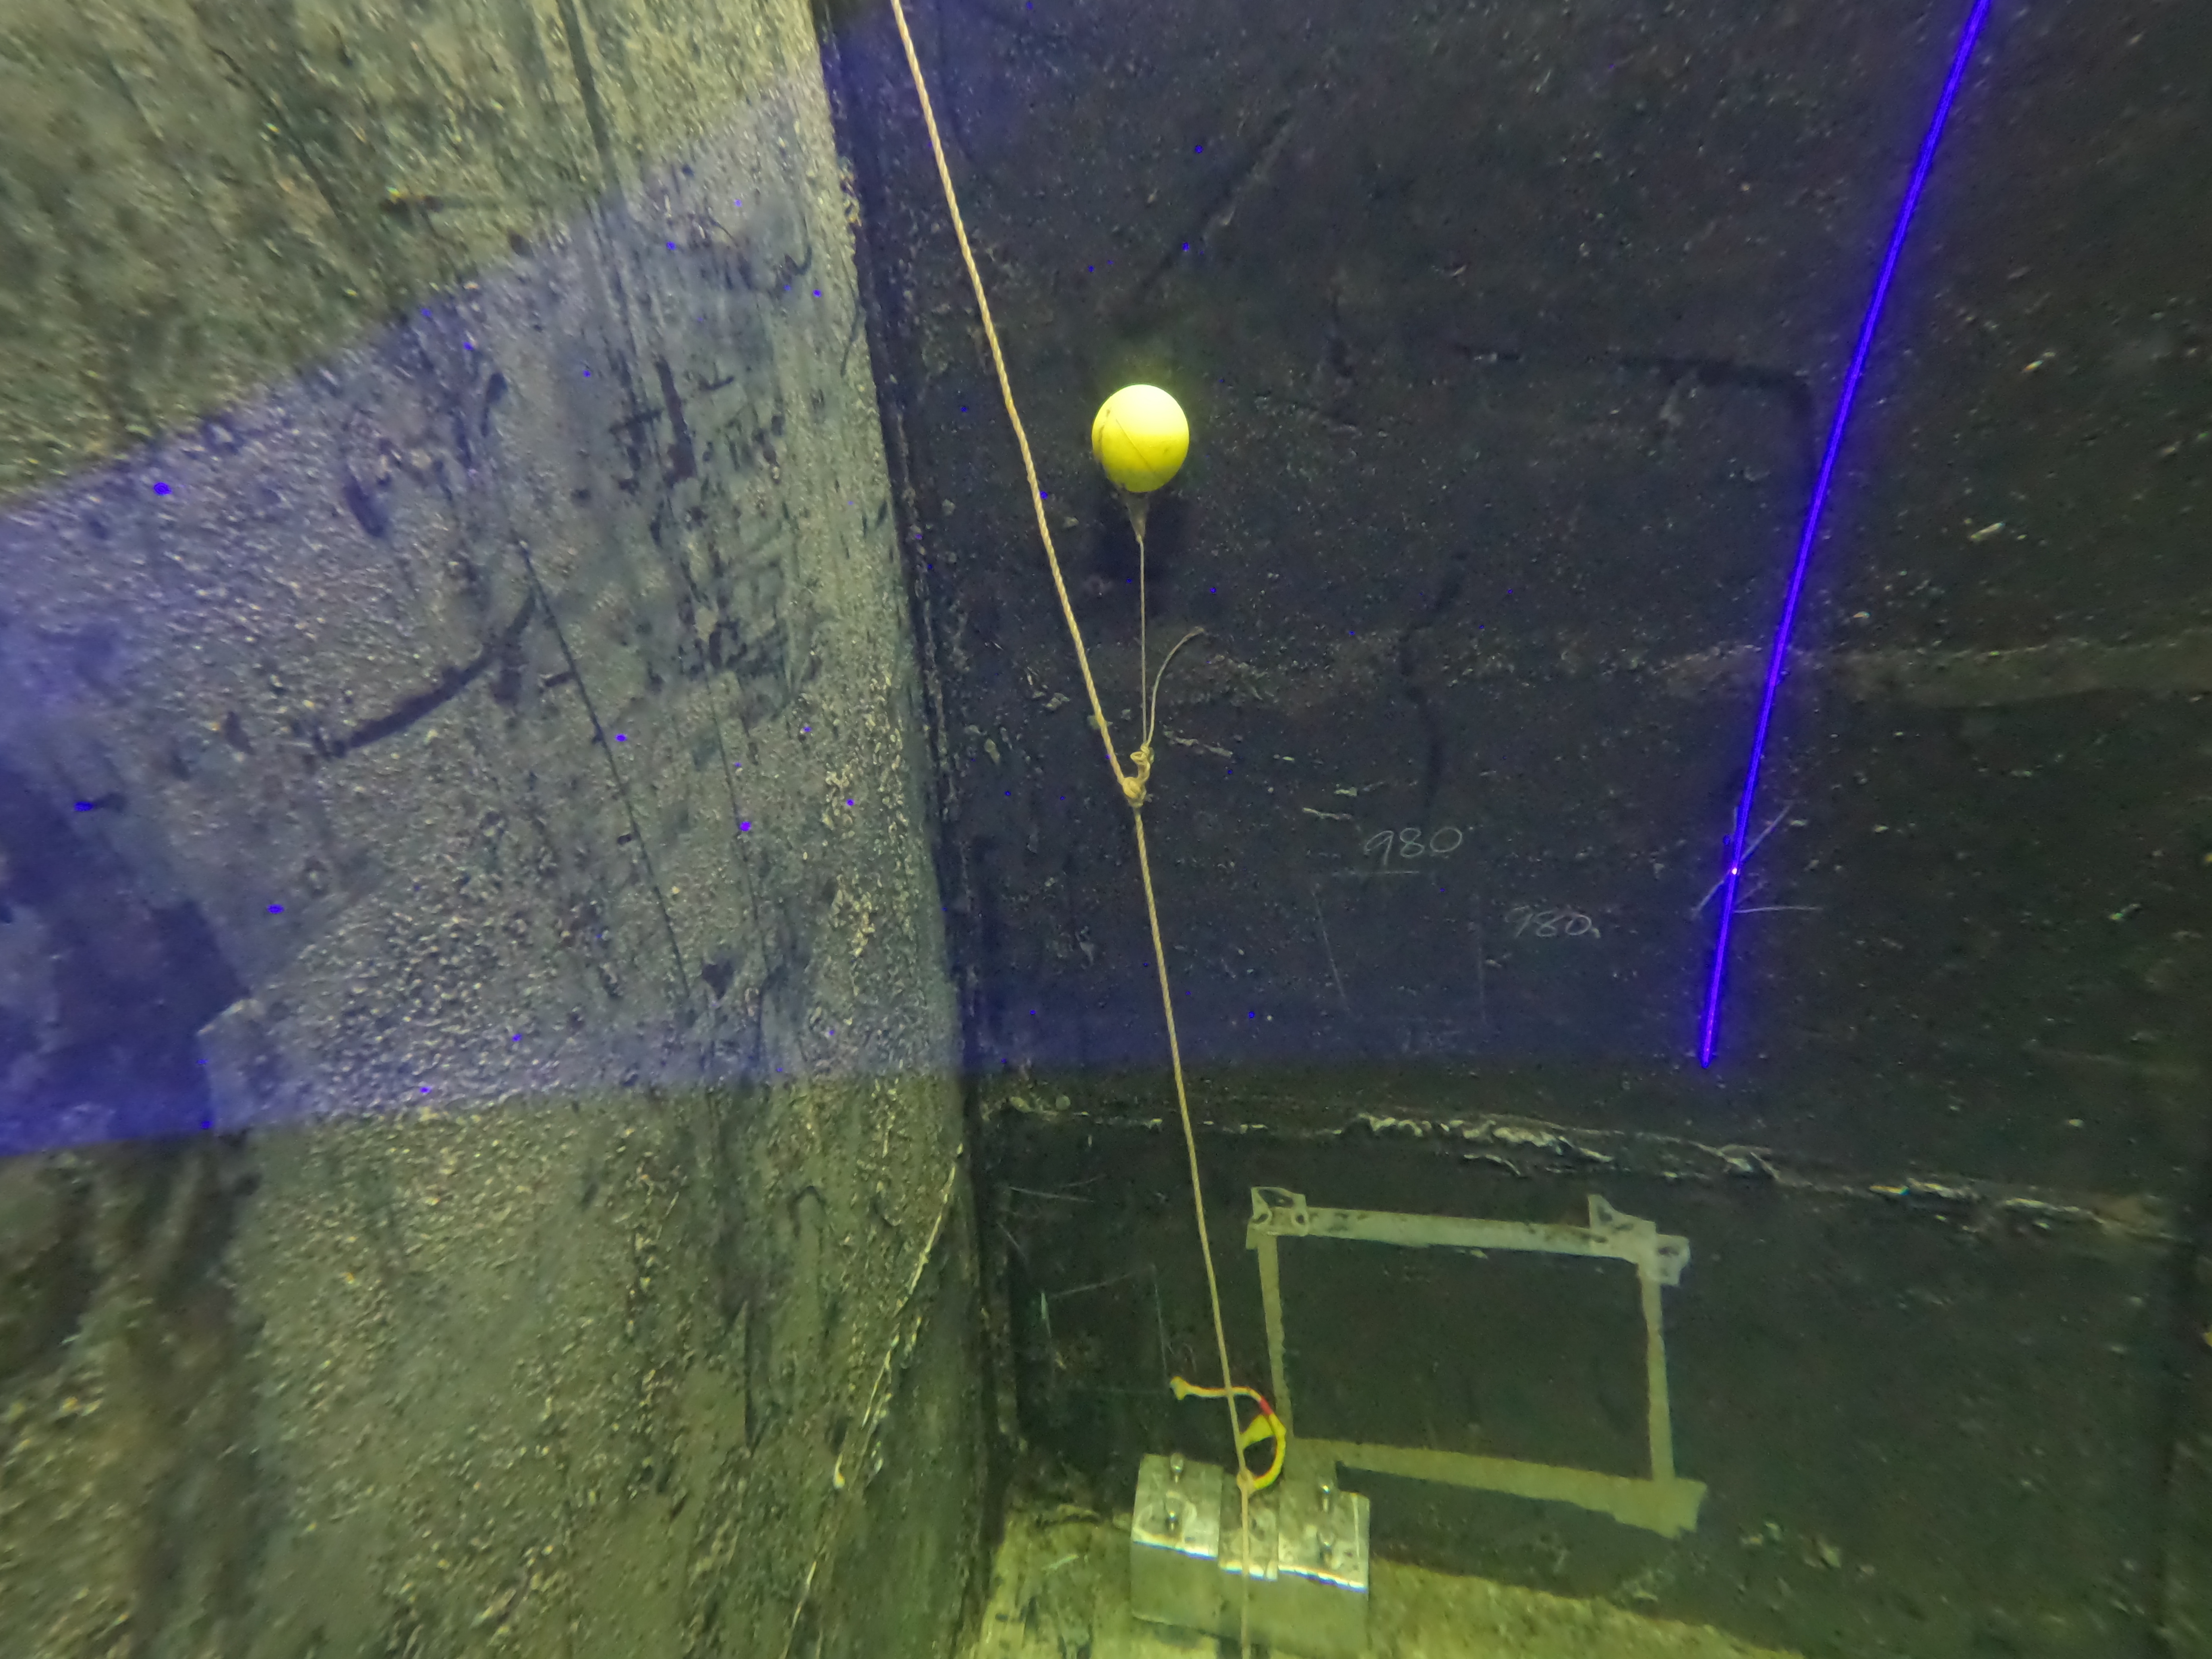

980

980

Supplement: Supplementary file 2946 [file G0031746.pdf › 12/G0031746.pdf]

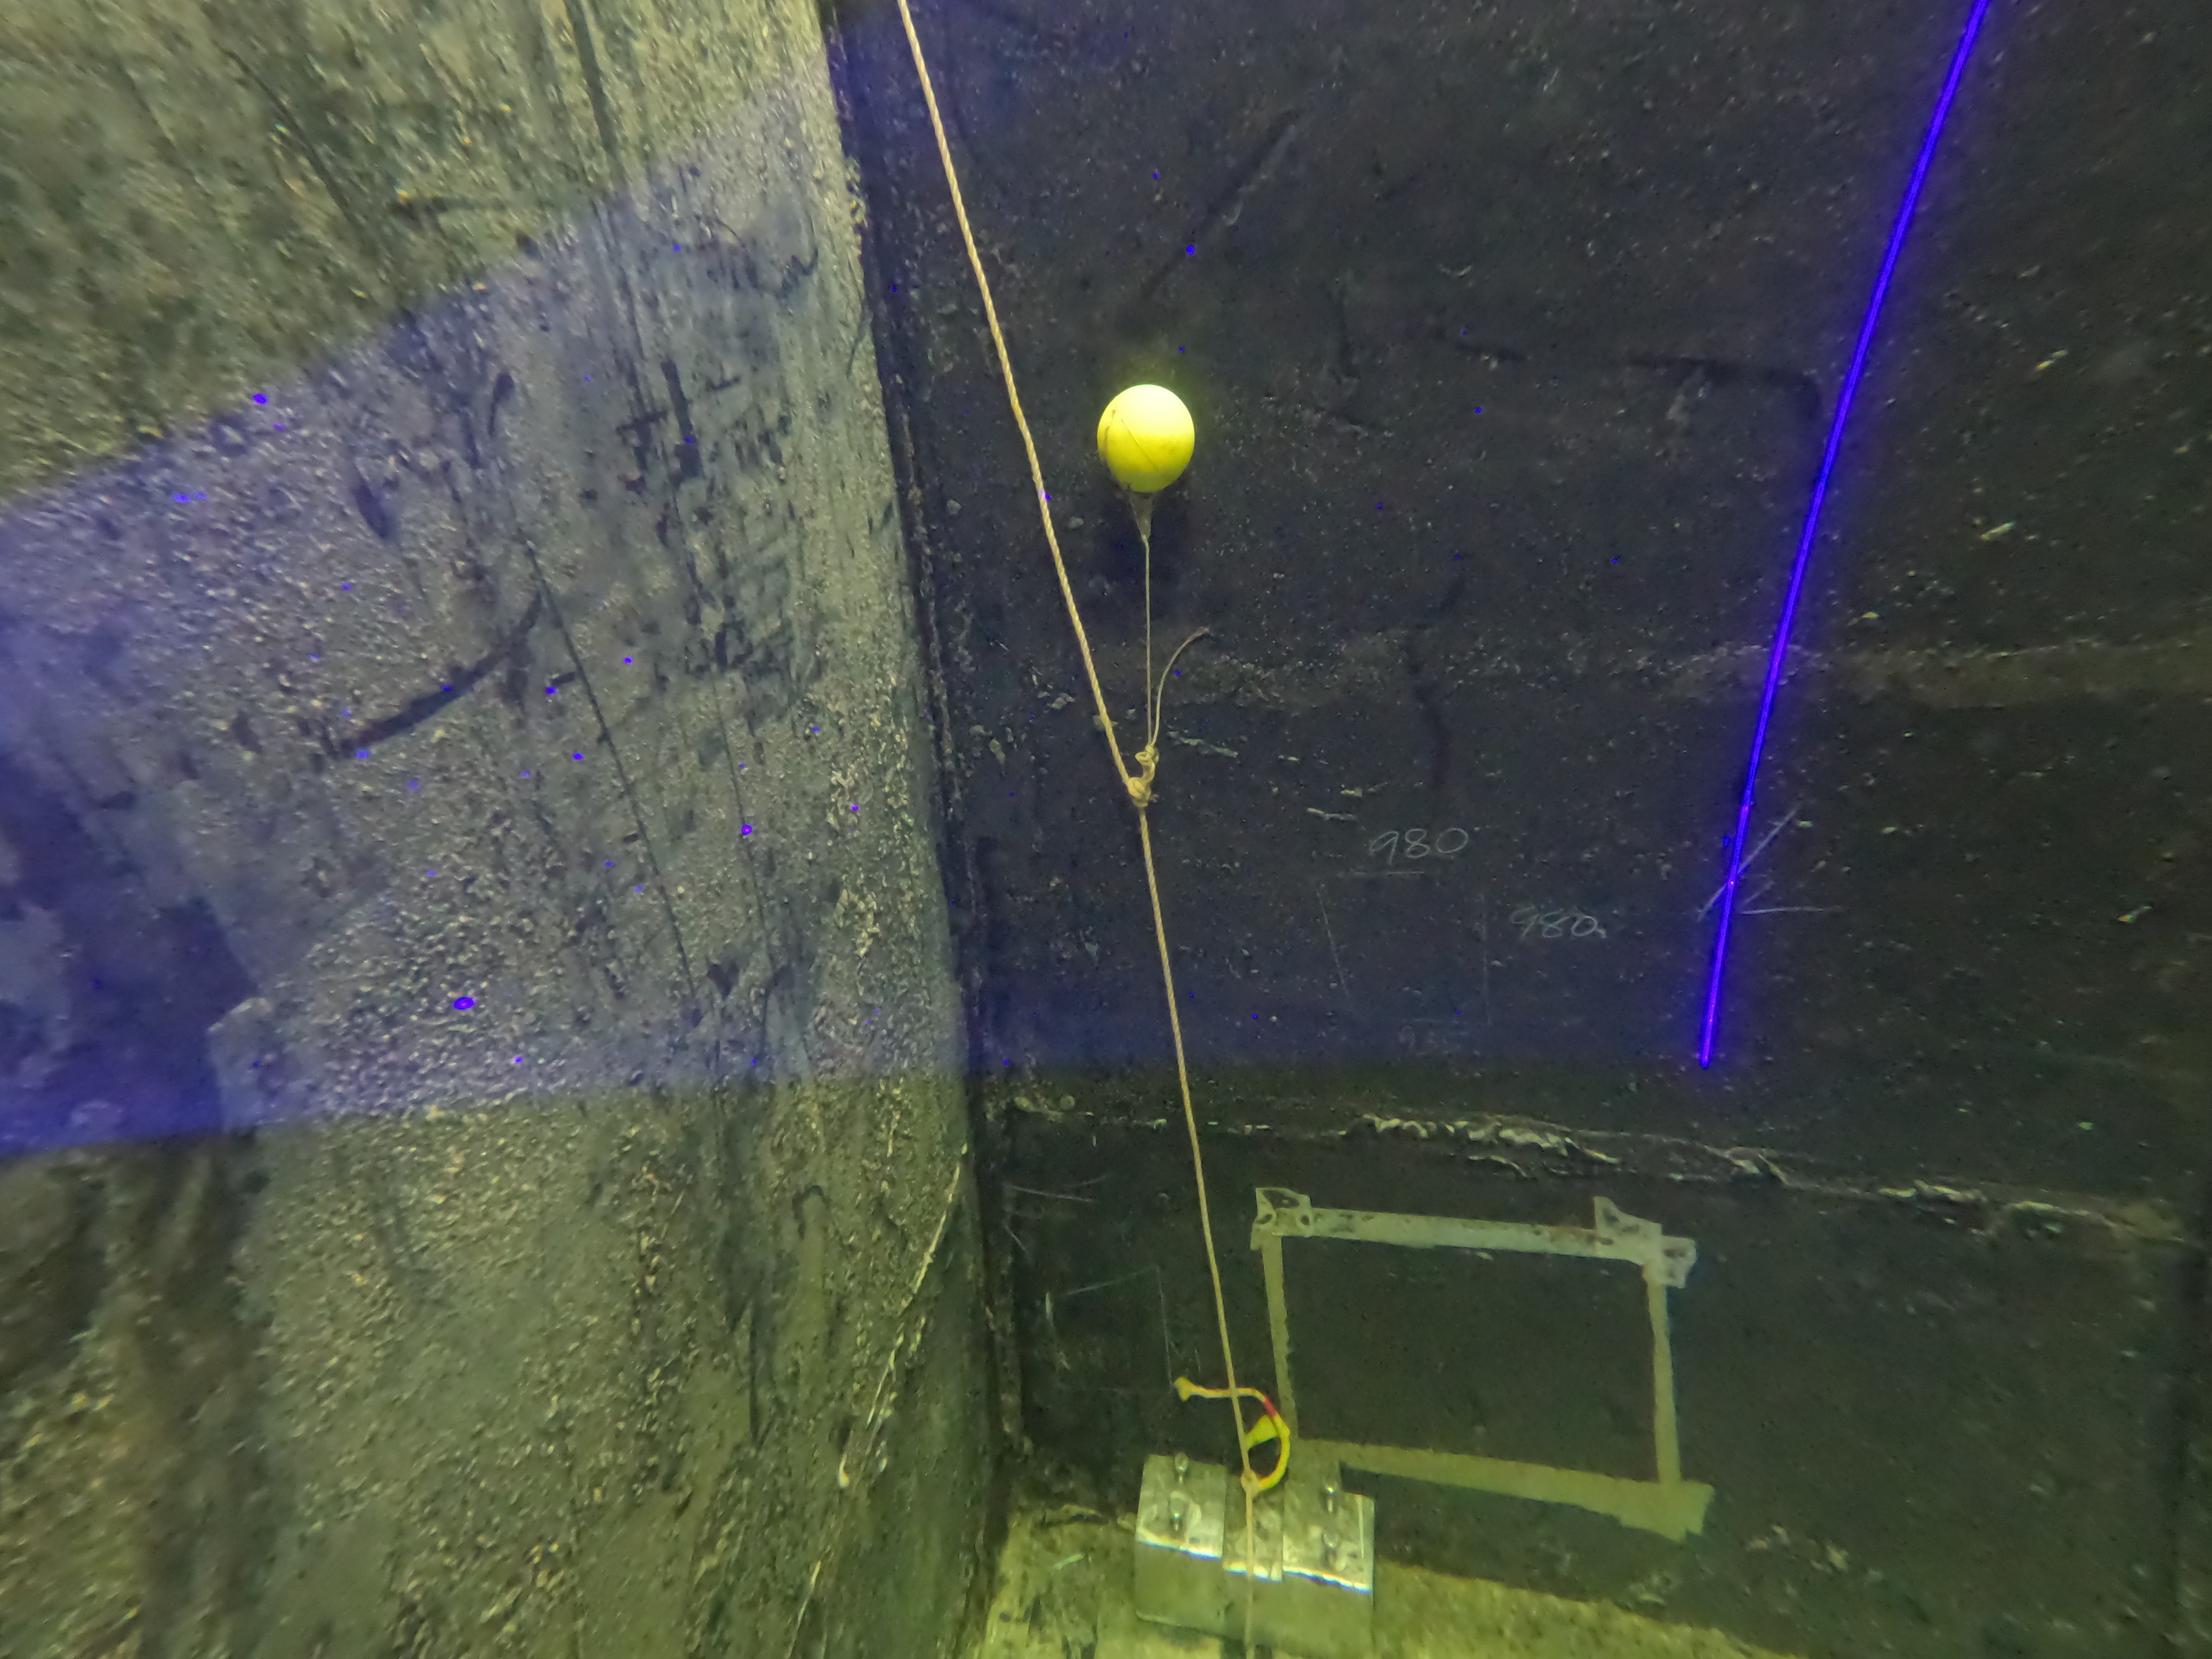

Supplement: Supplementary file 2947 [file G0031747.pdf › 12/G0031747.pdf]

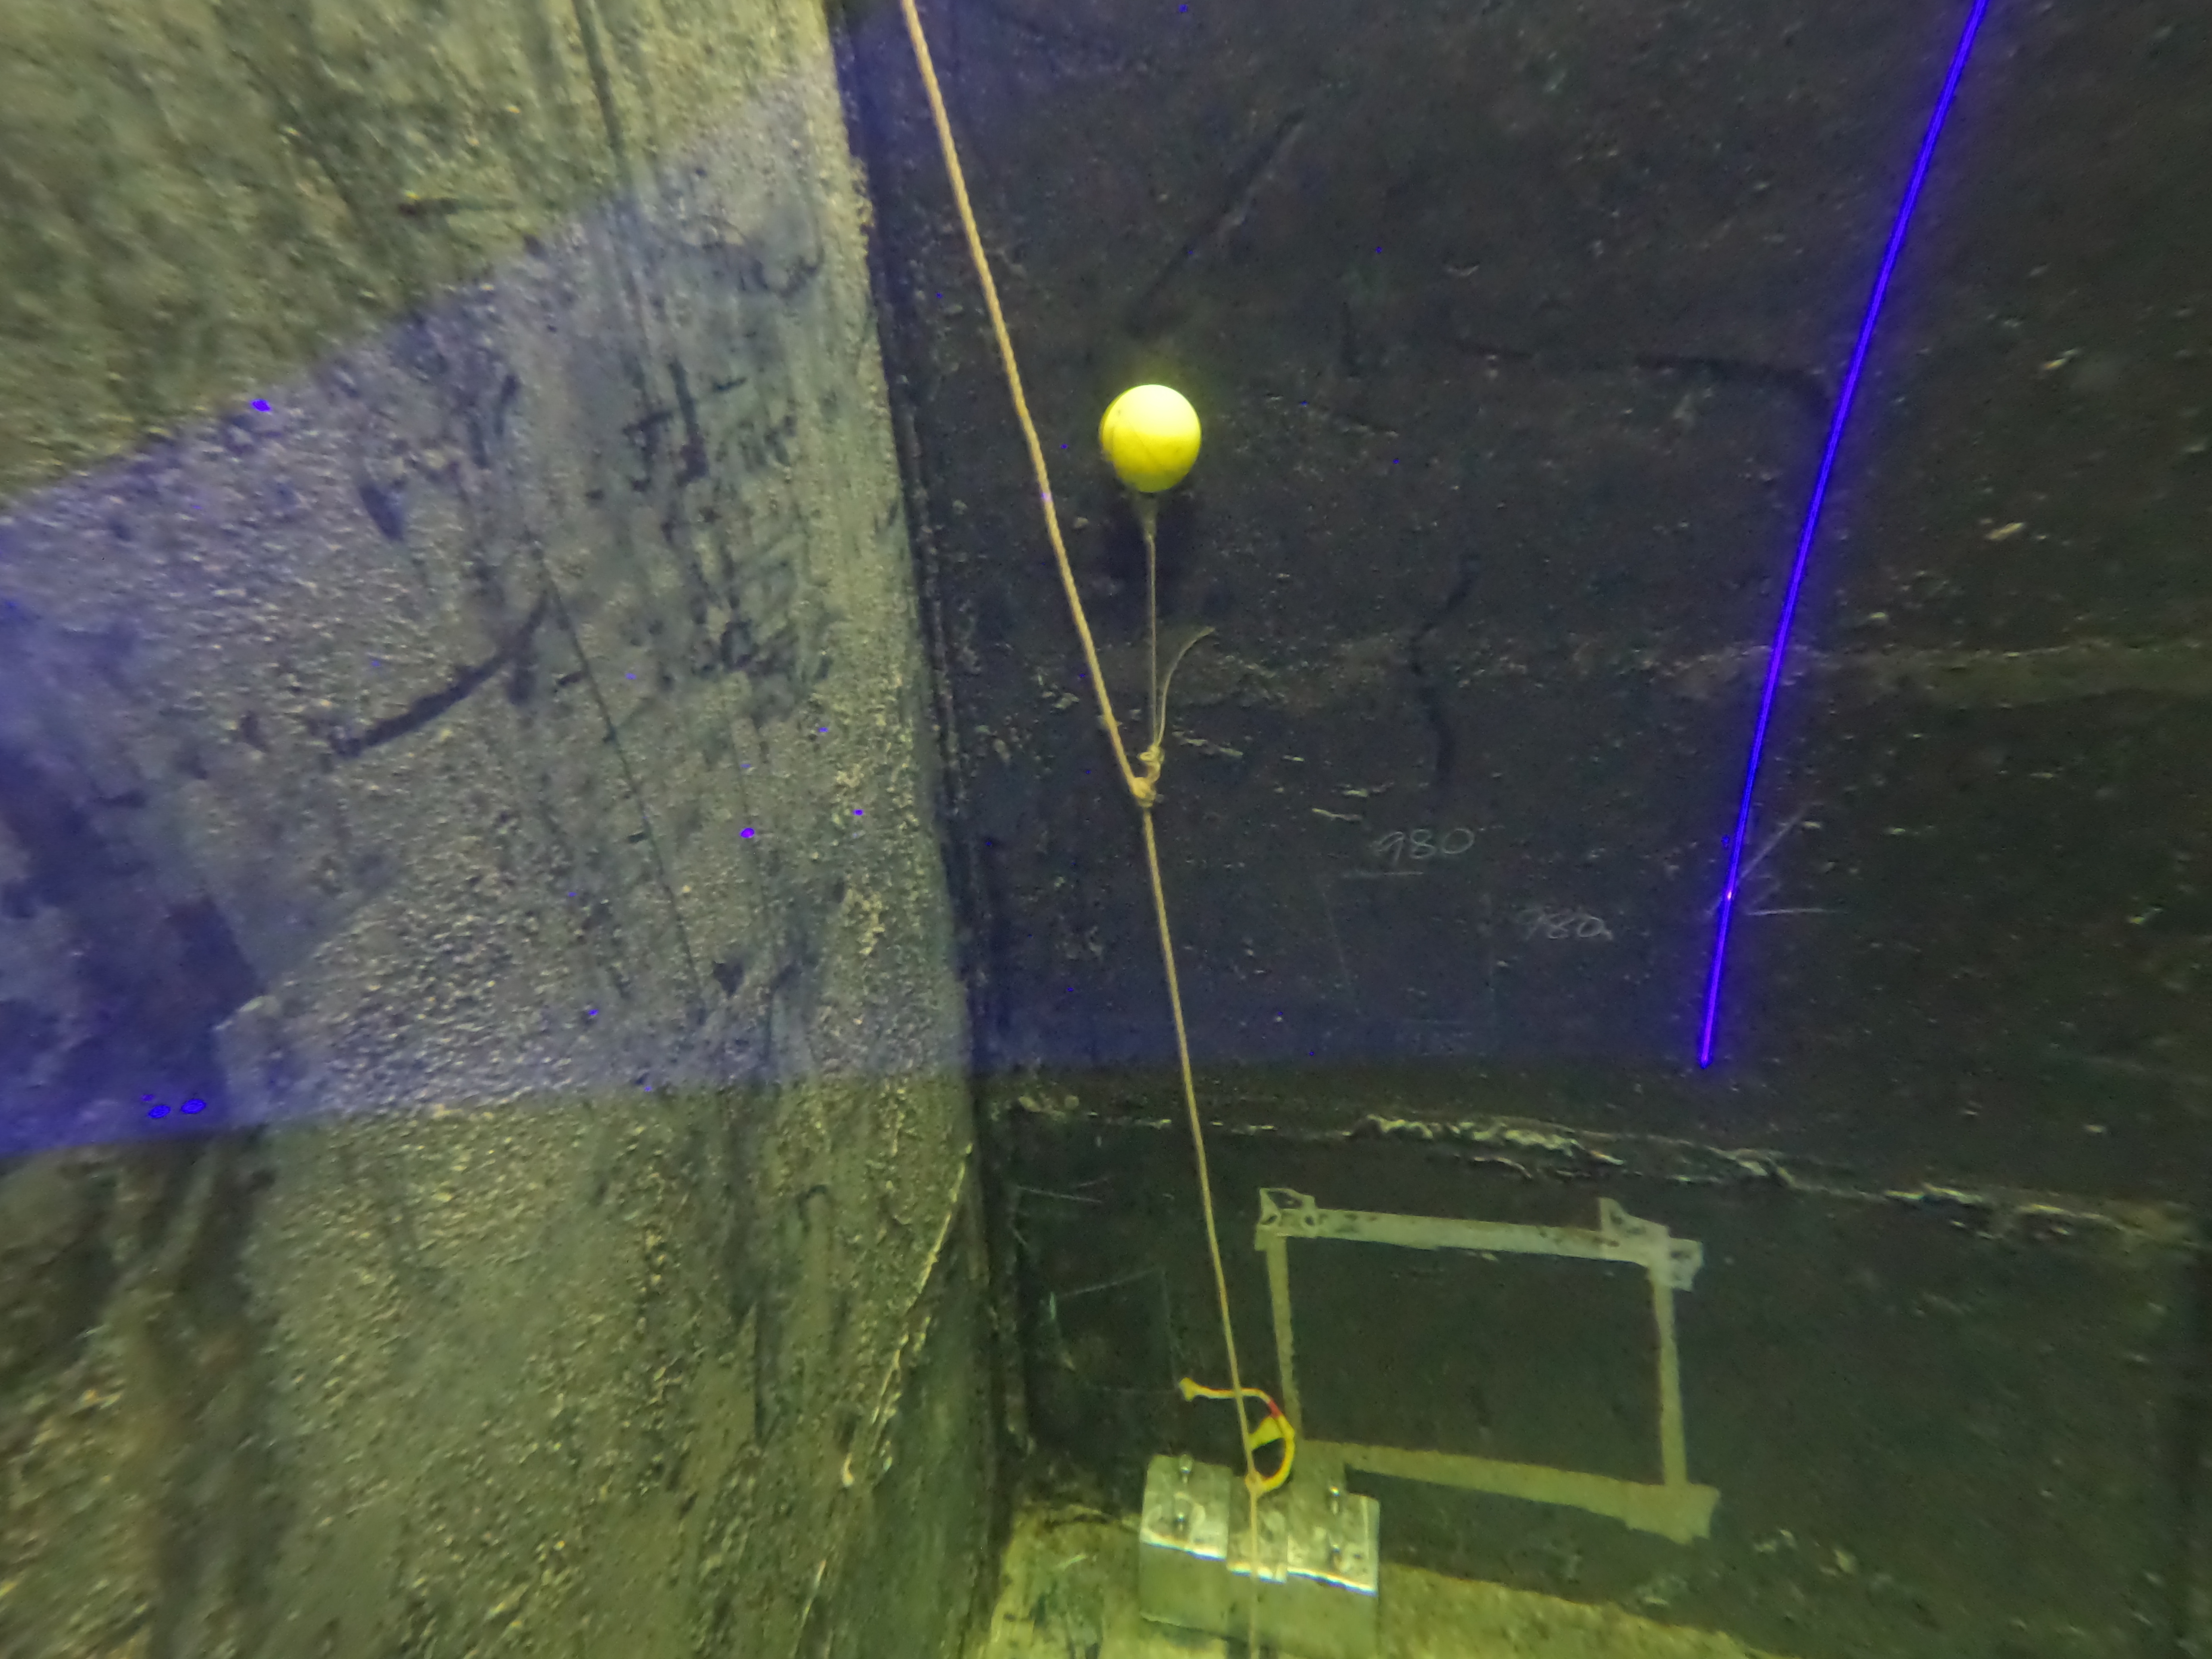

Supplement: Supplementary file 2948 [file G0031748.pdf › 12/G0031748.pdf]

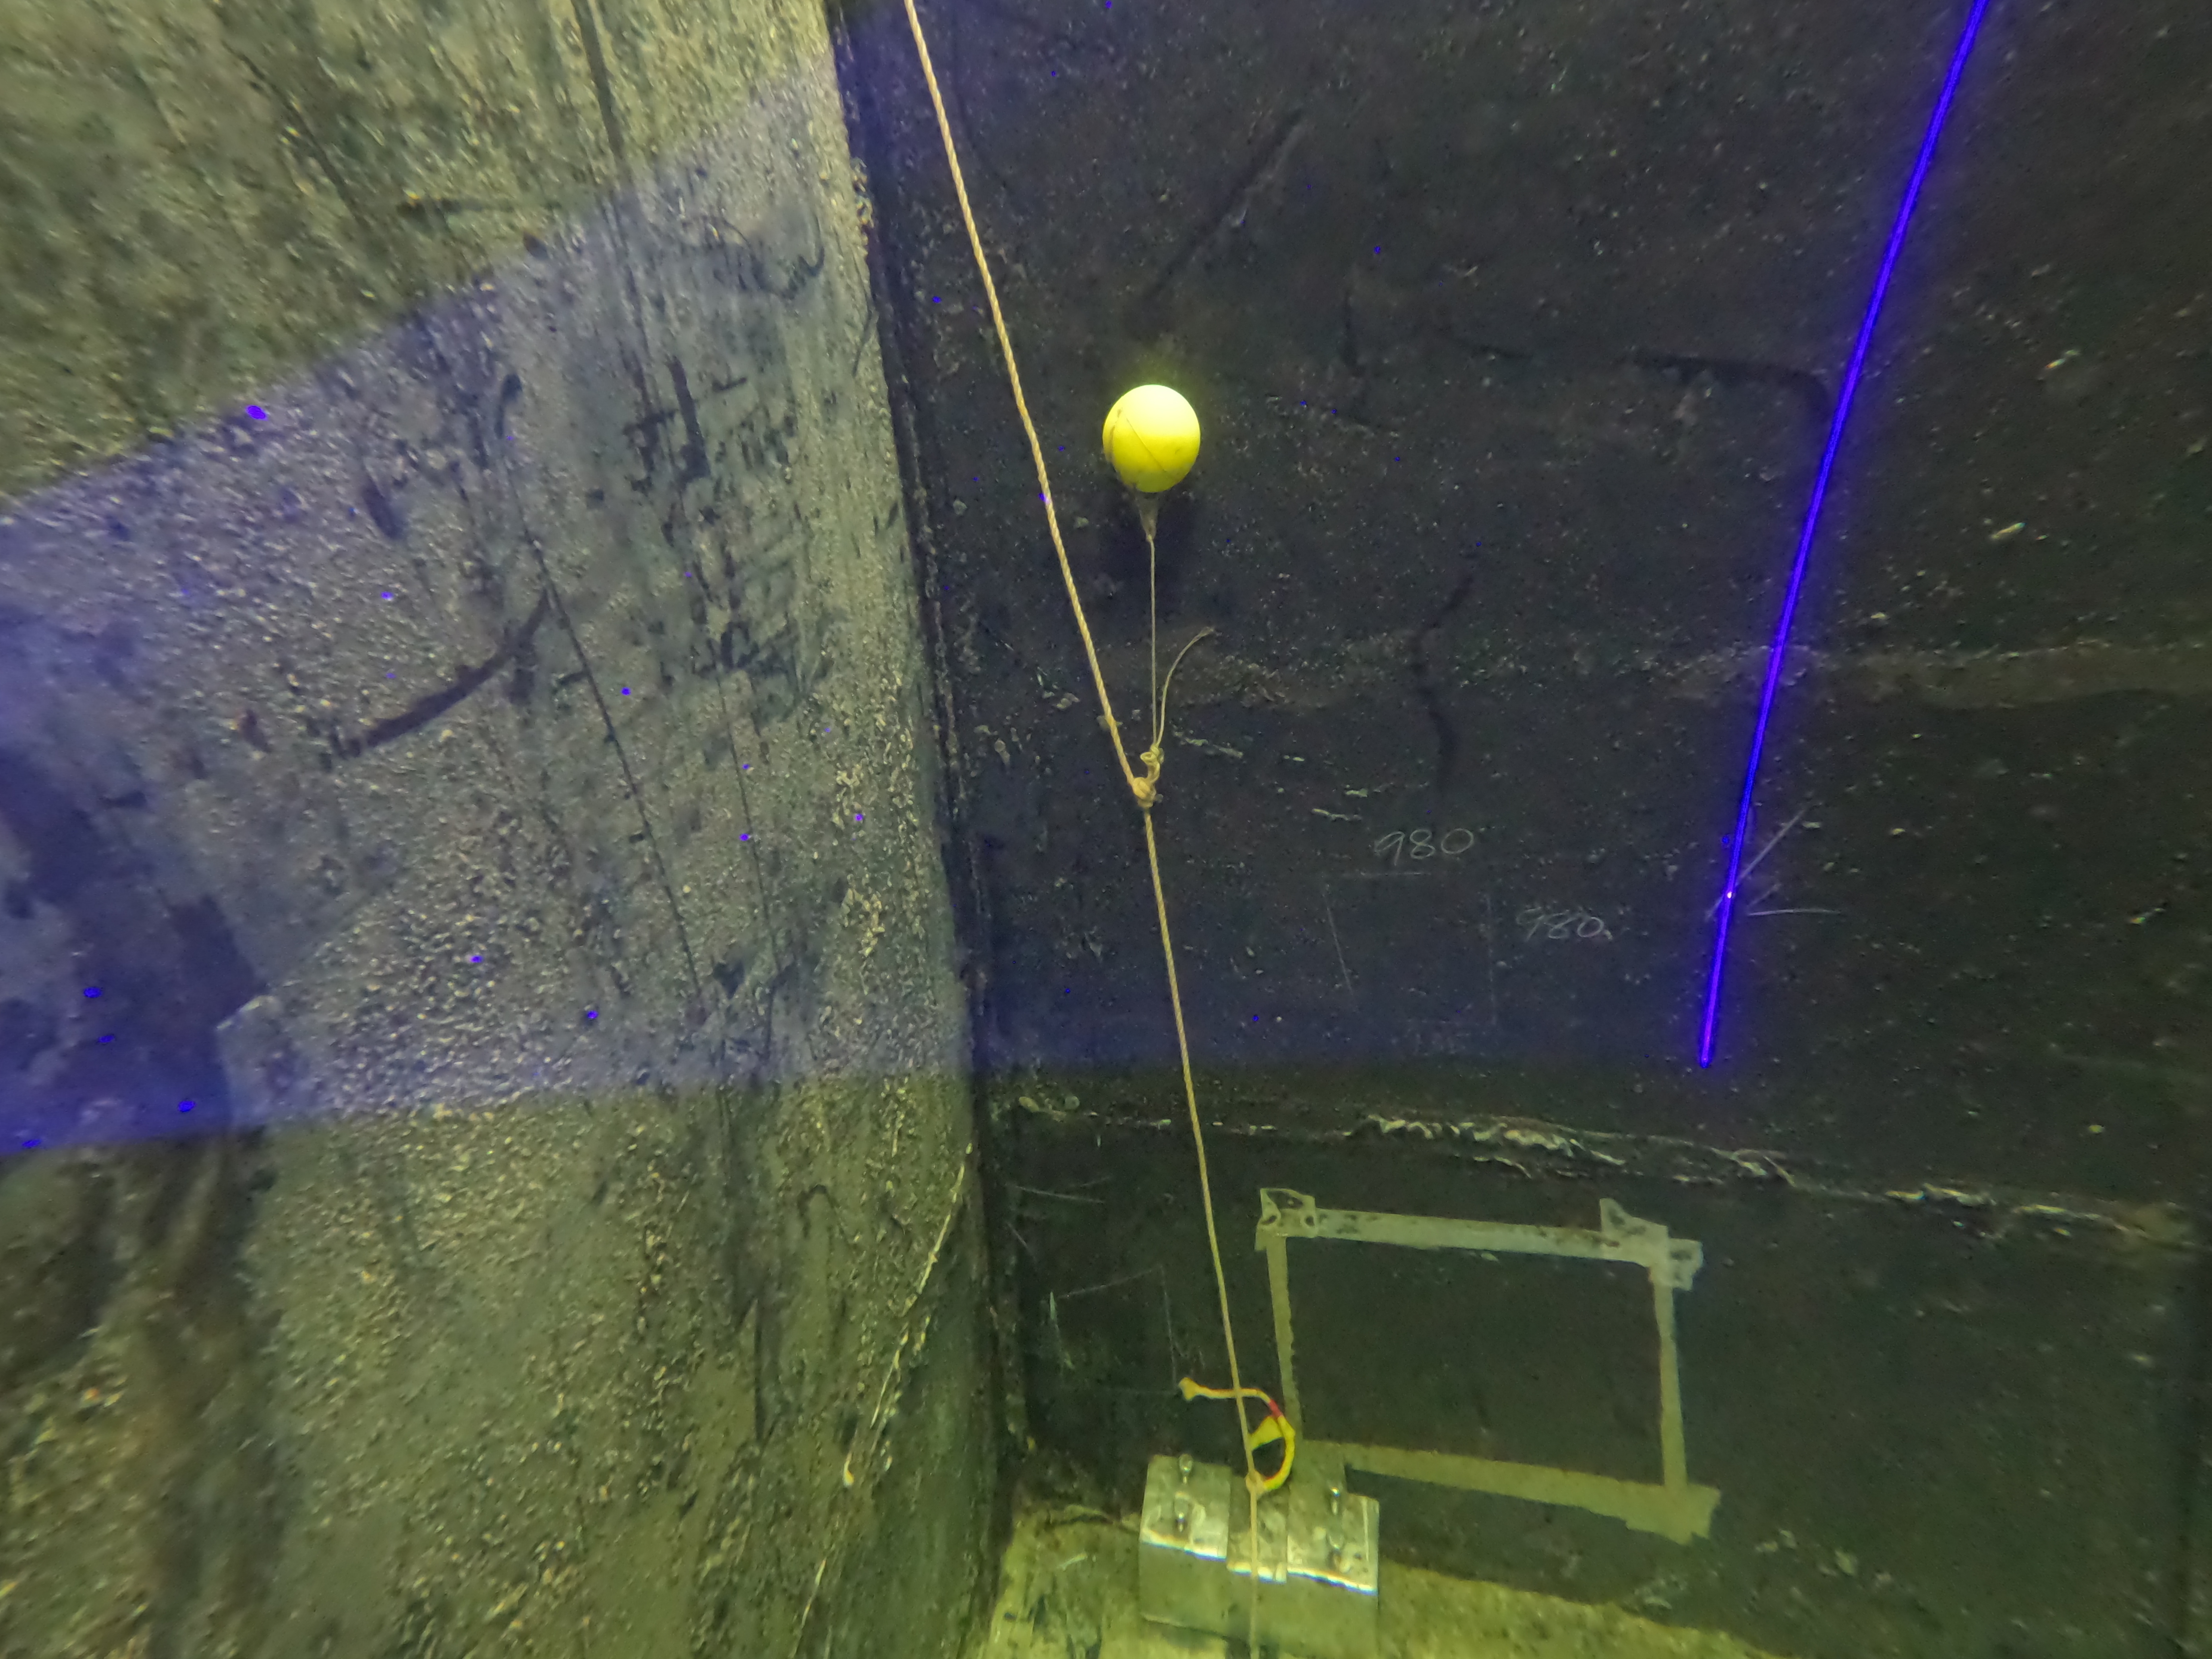

980

980

Supplement: Supplementary file 2949 [file G0031749.pdf › 12/G0031749.pdf]

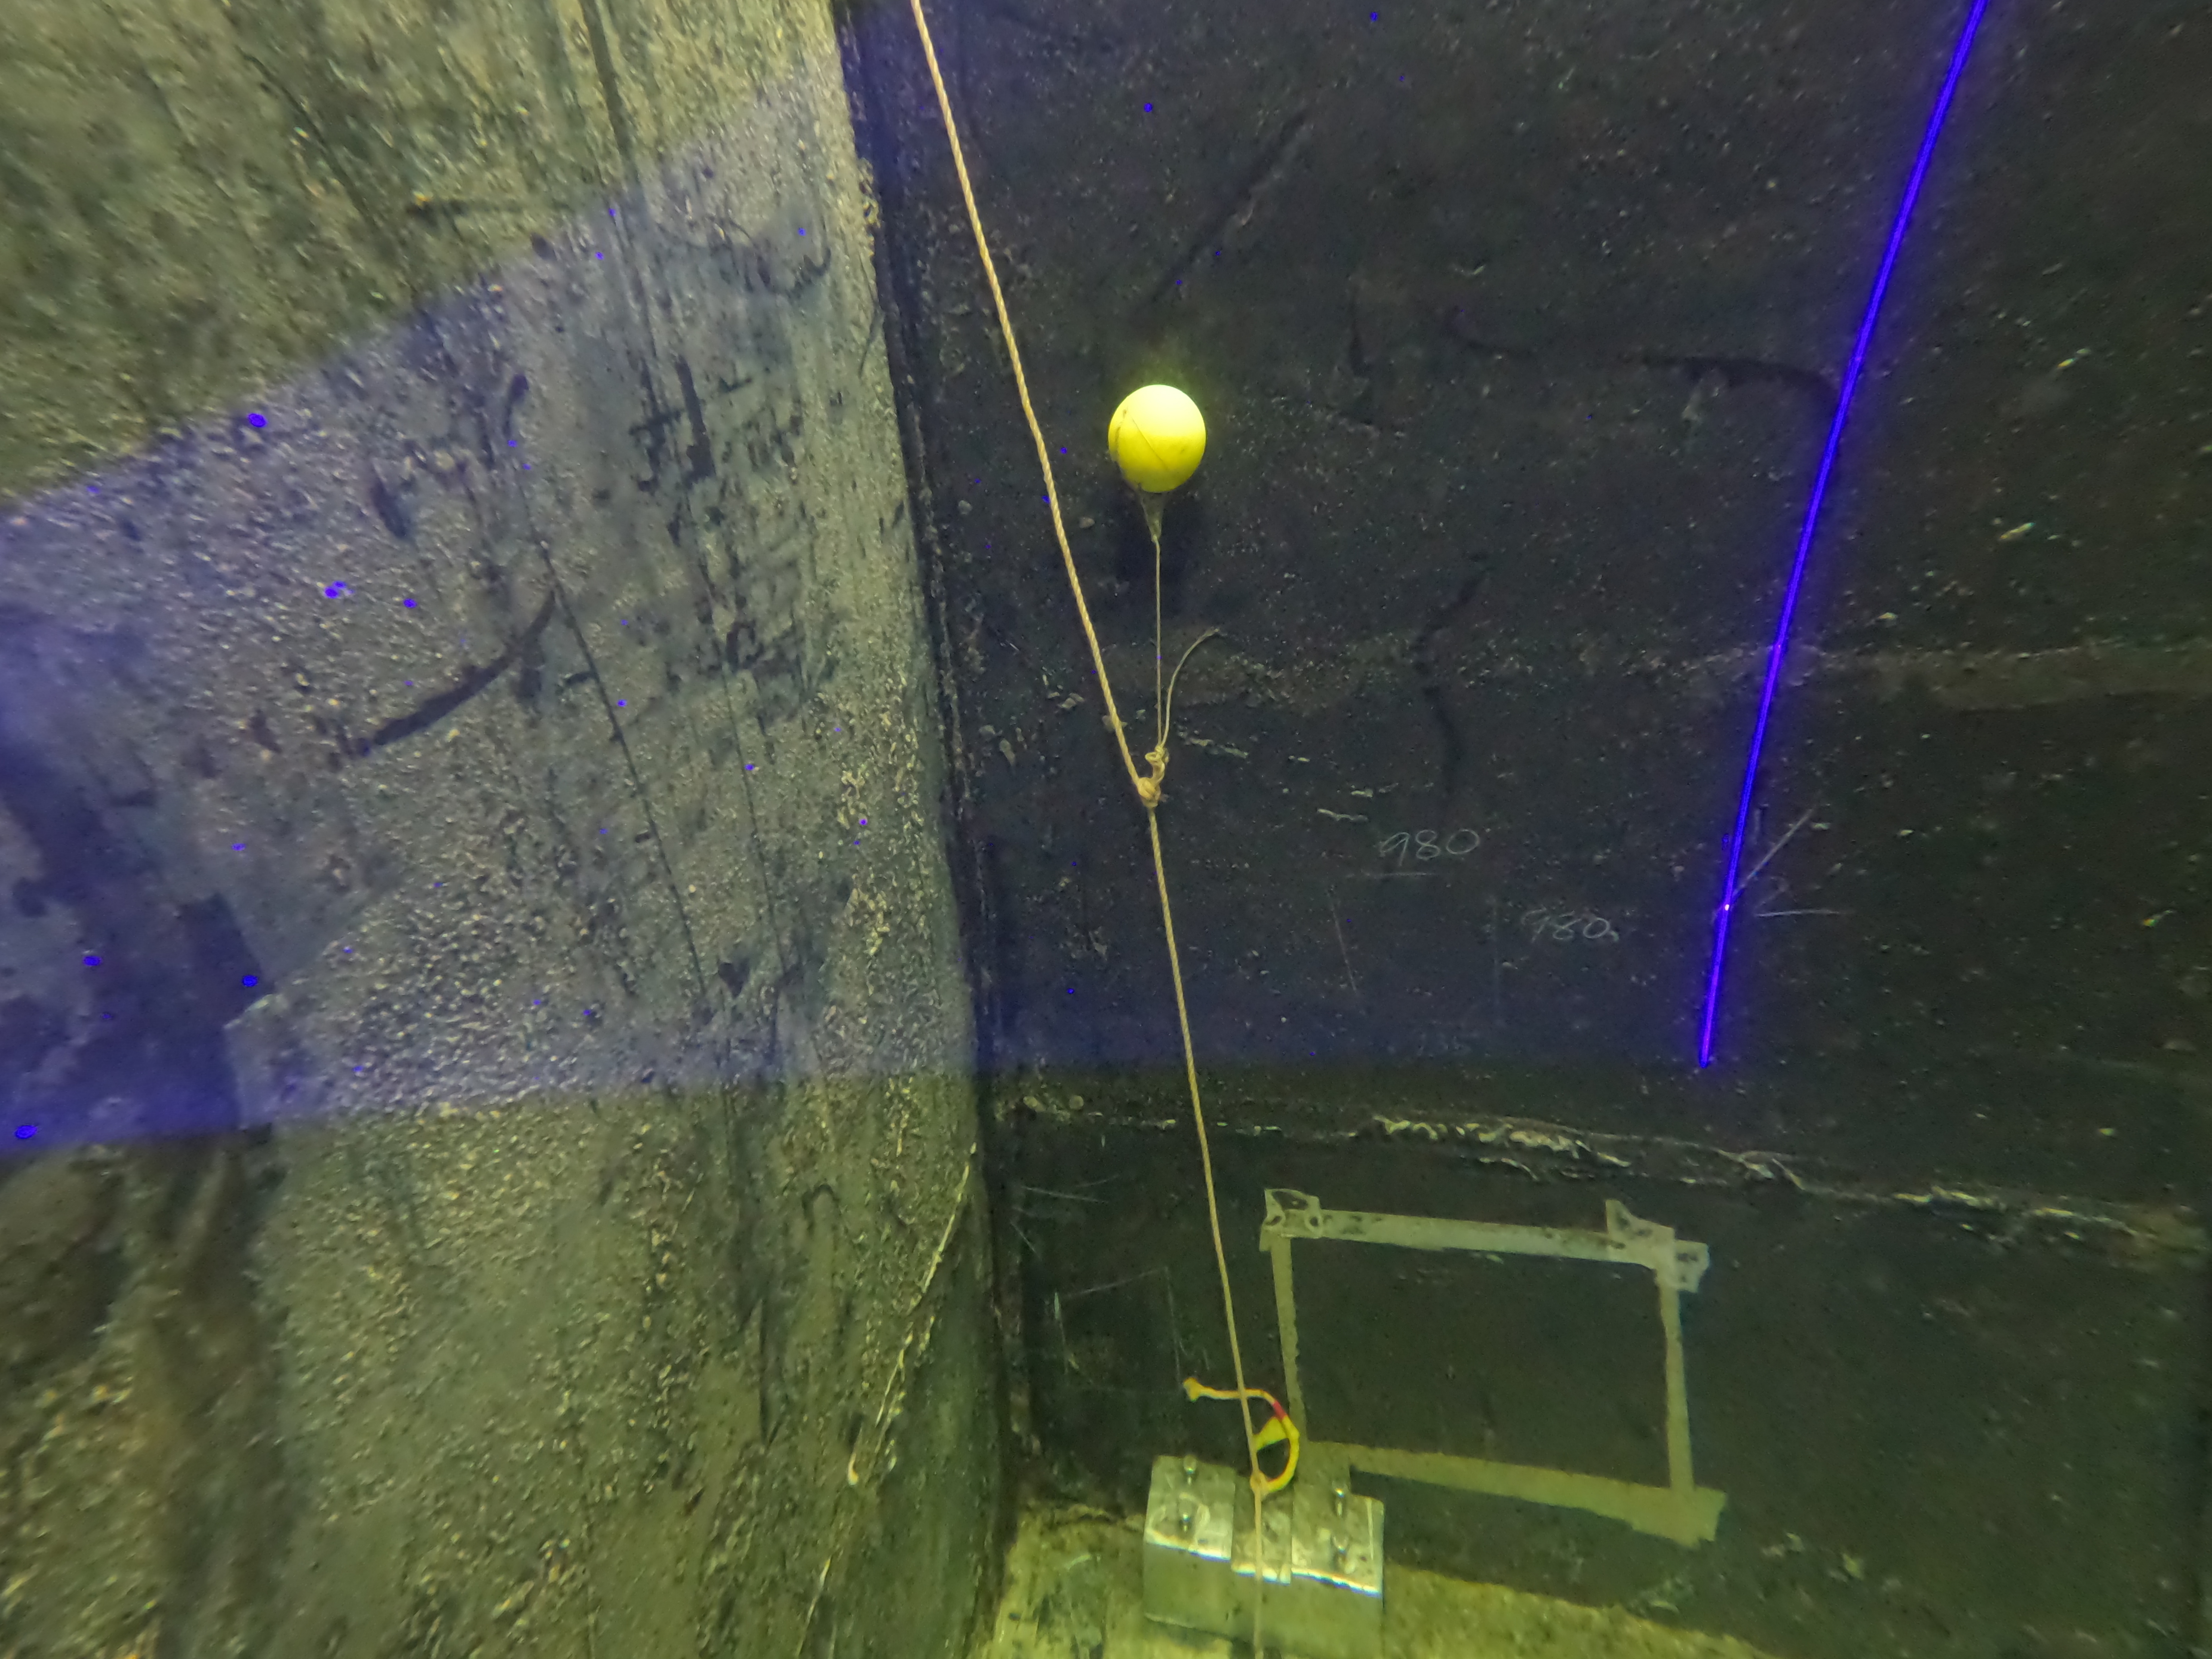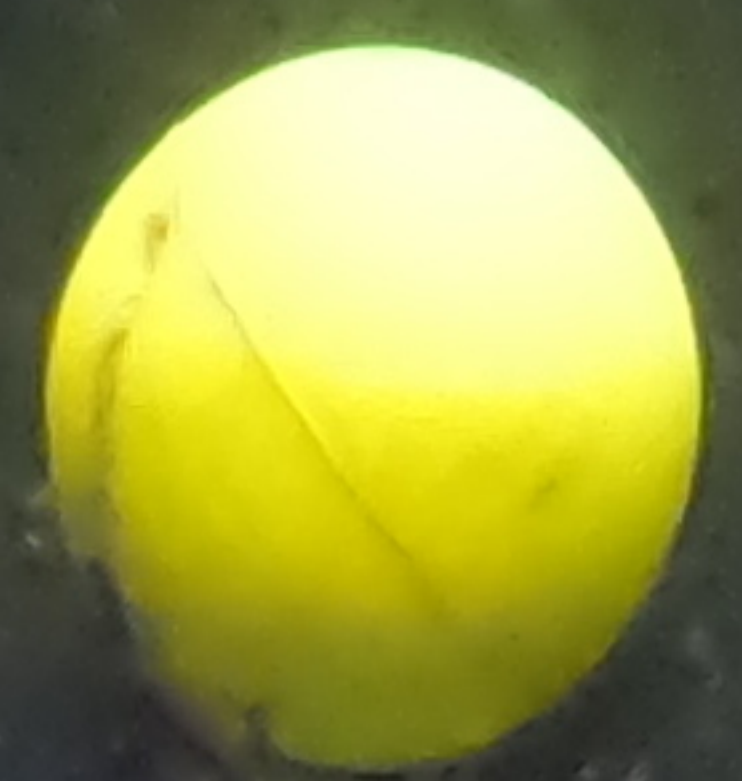

980

980

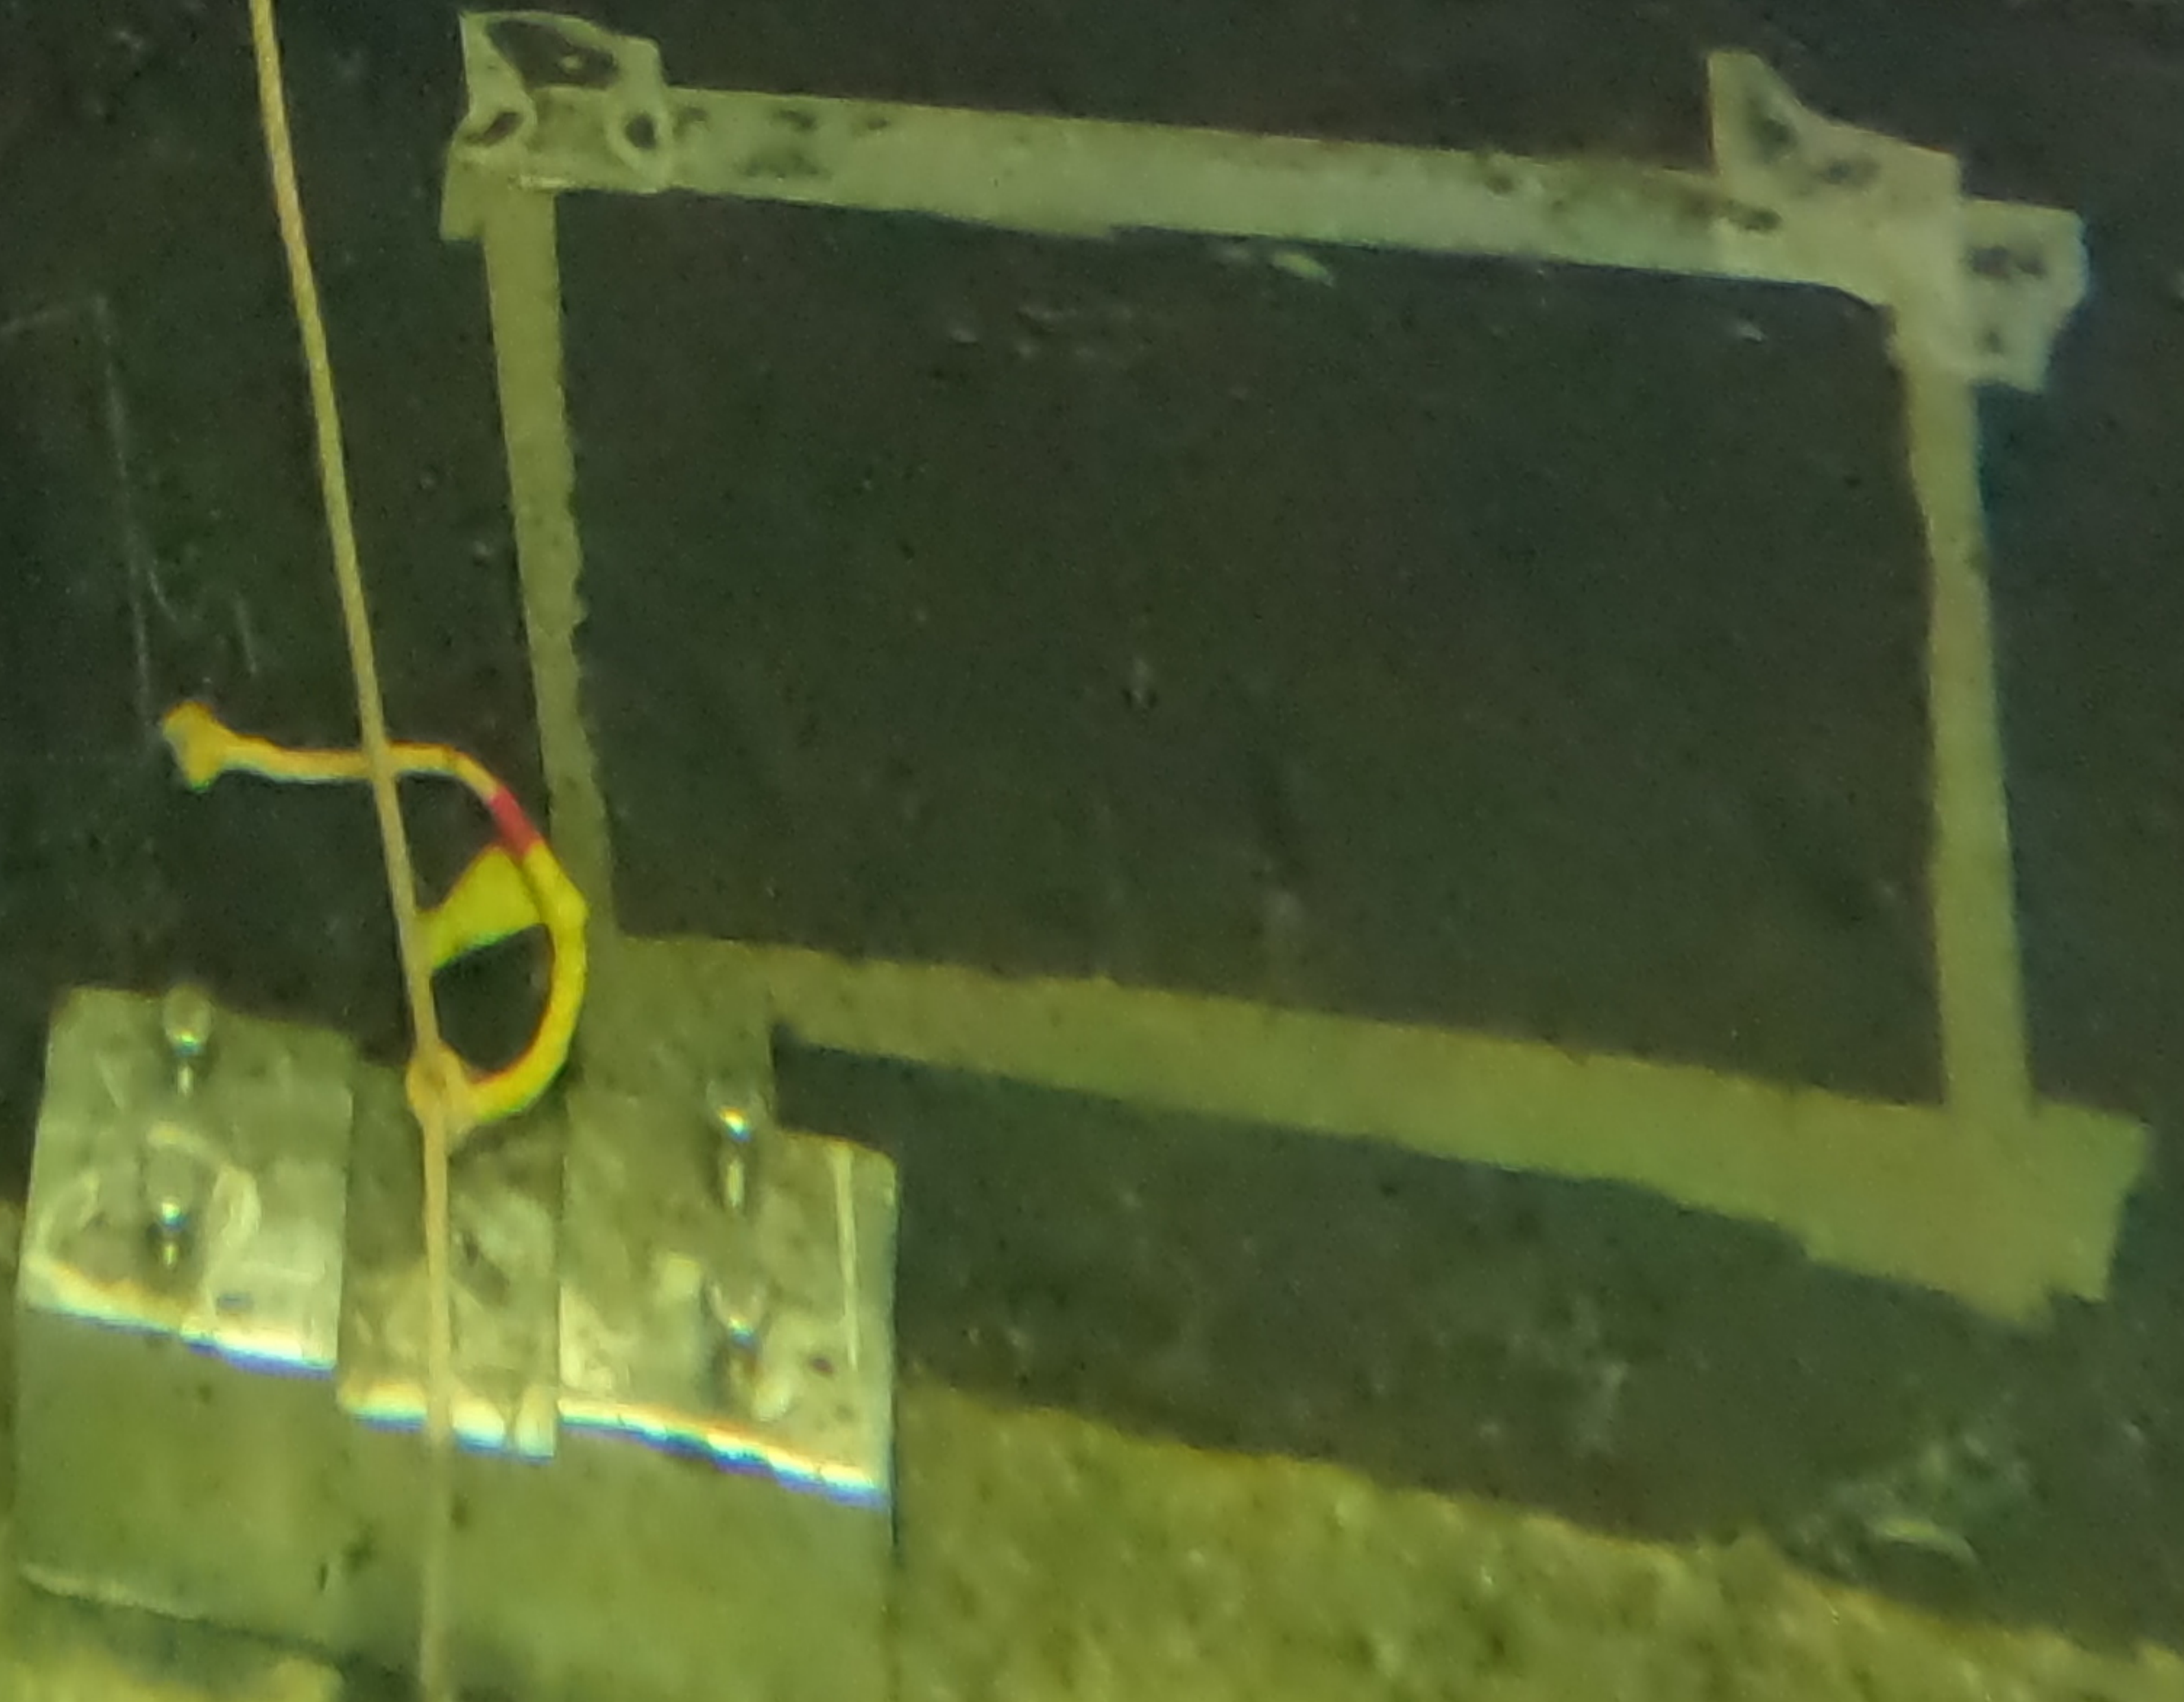

Supplement: Supplementary file 2950 [file G0031750.pdf › 12/G0031750.pdf]

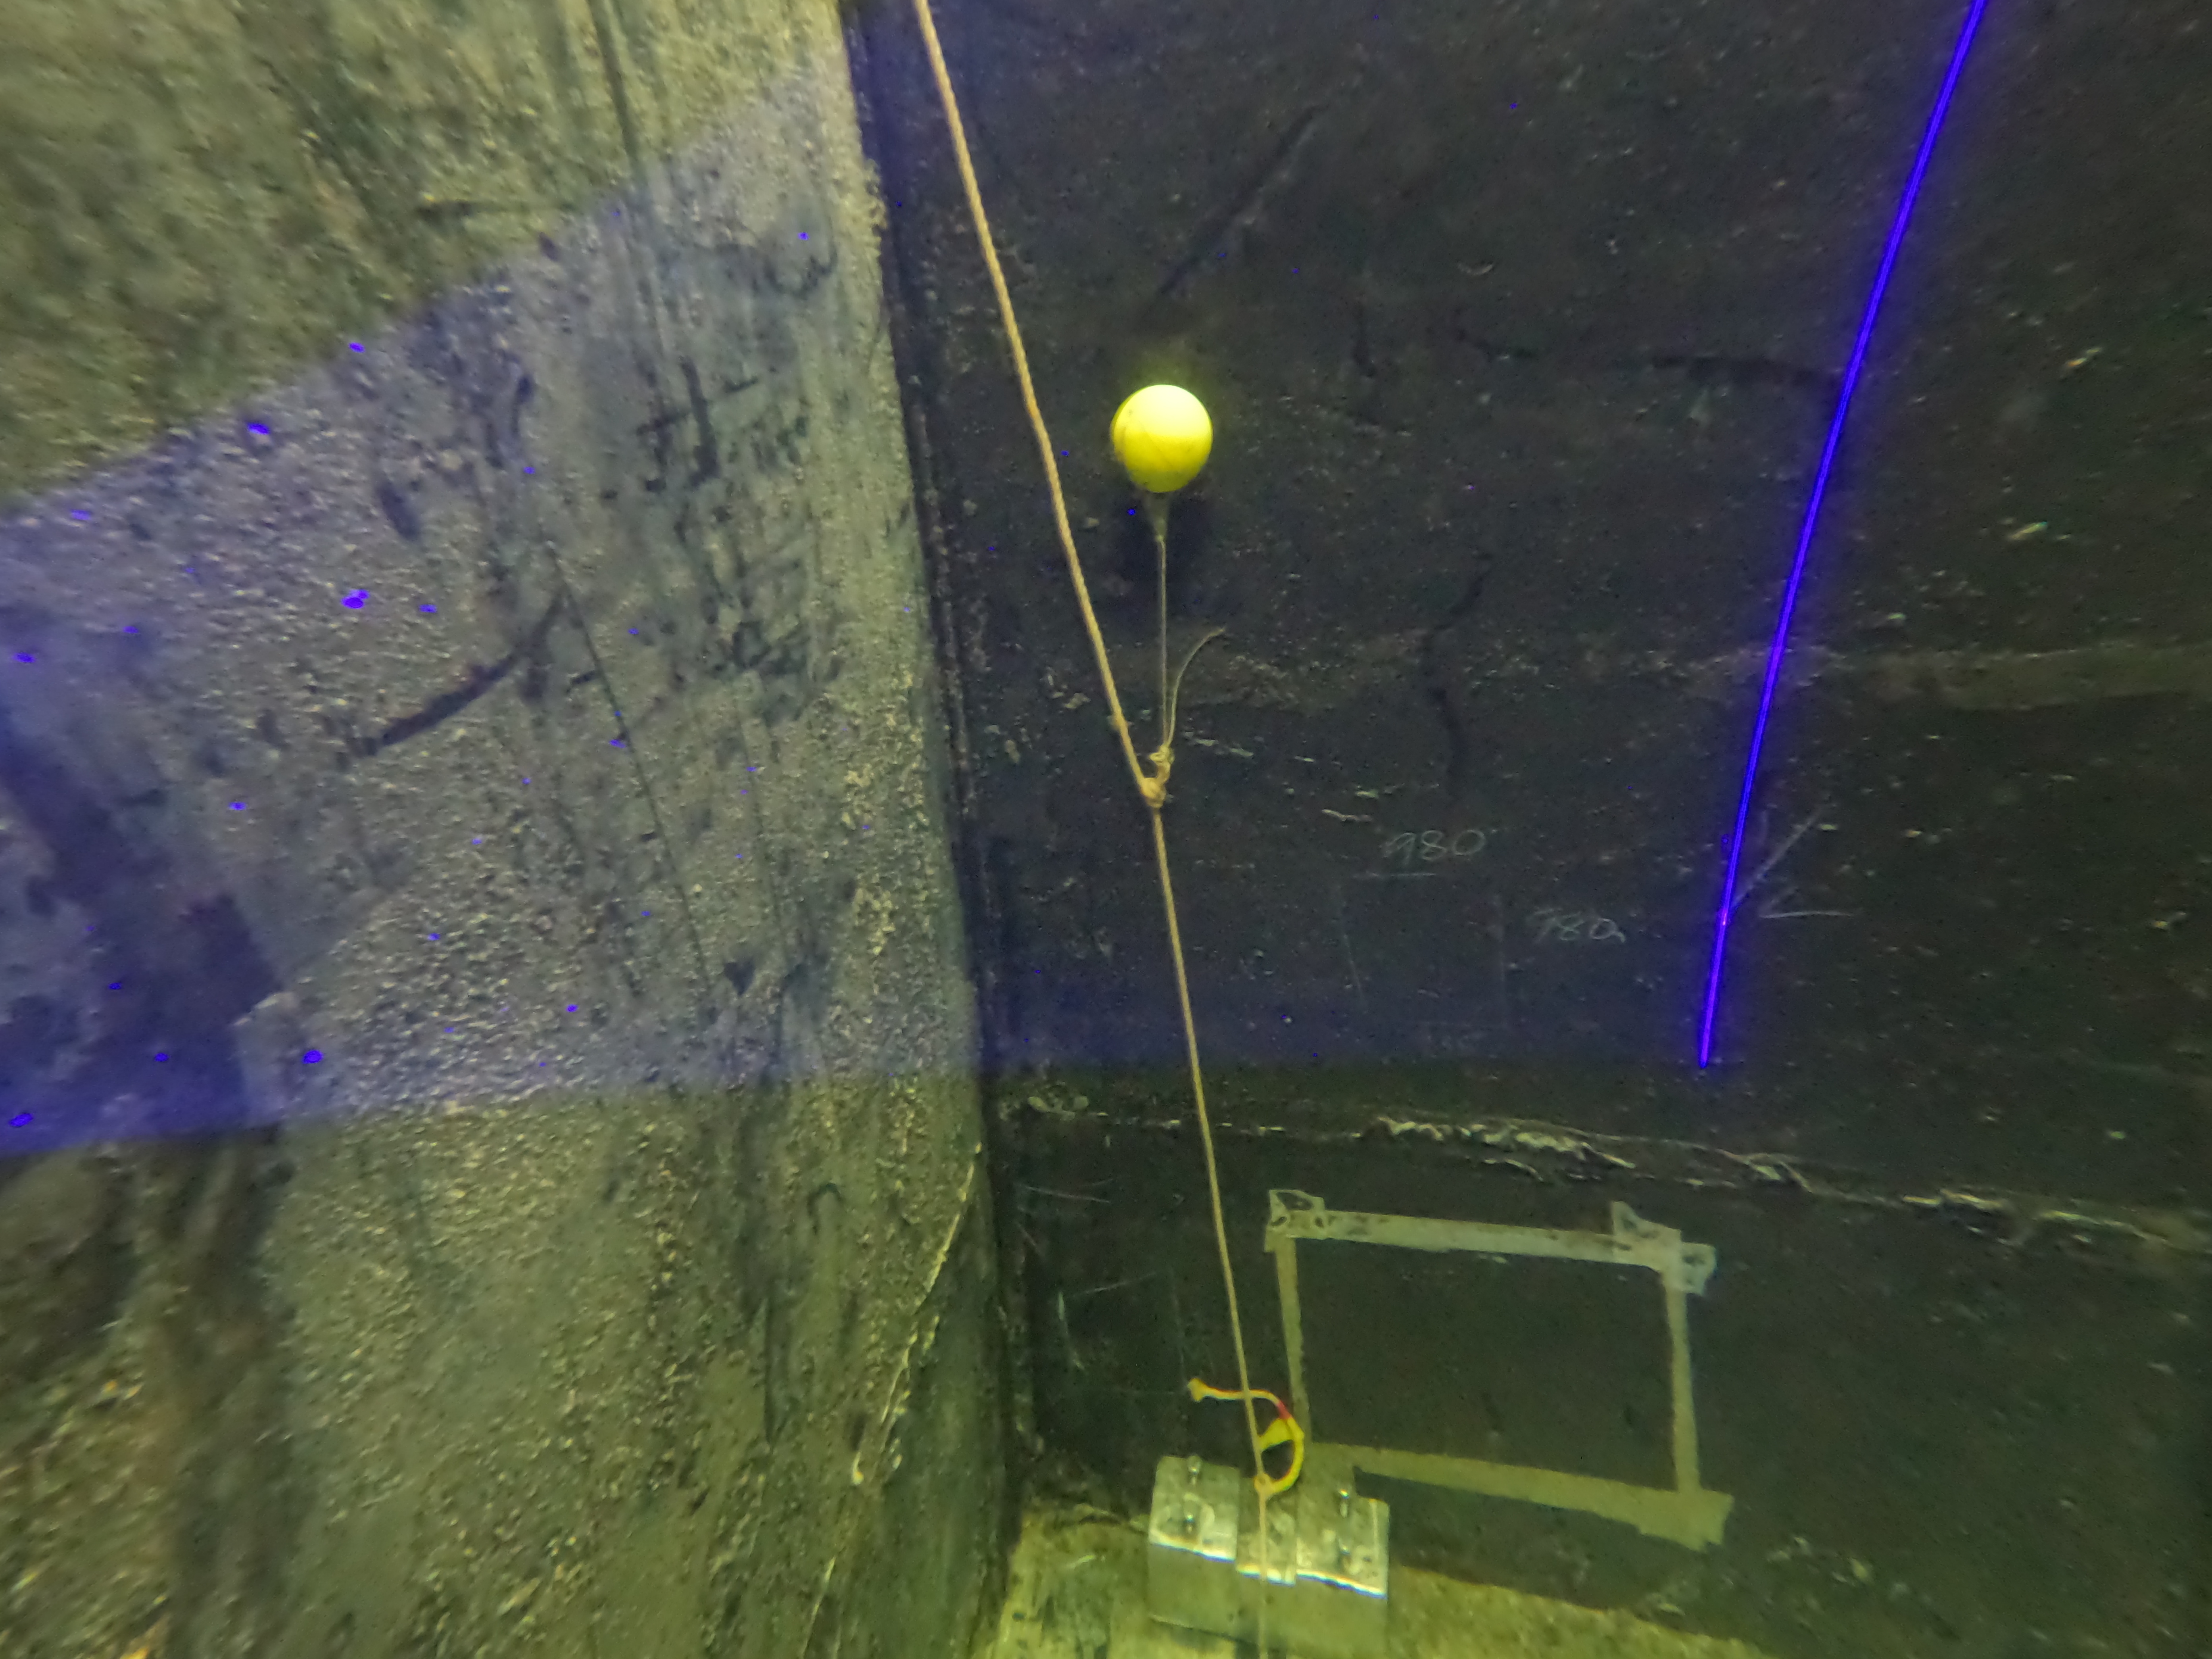

Supplement: Supplementary file 2951 [file G0031751.pdf › 12/G0031751.pdf]

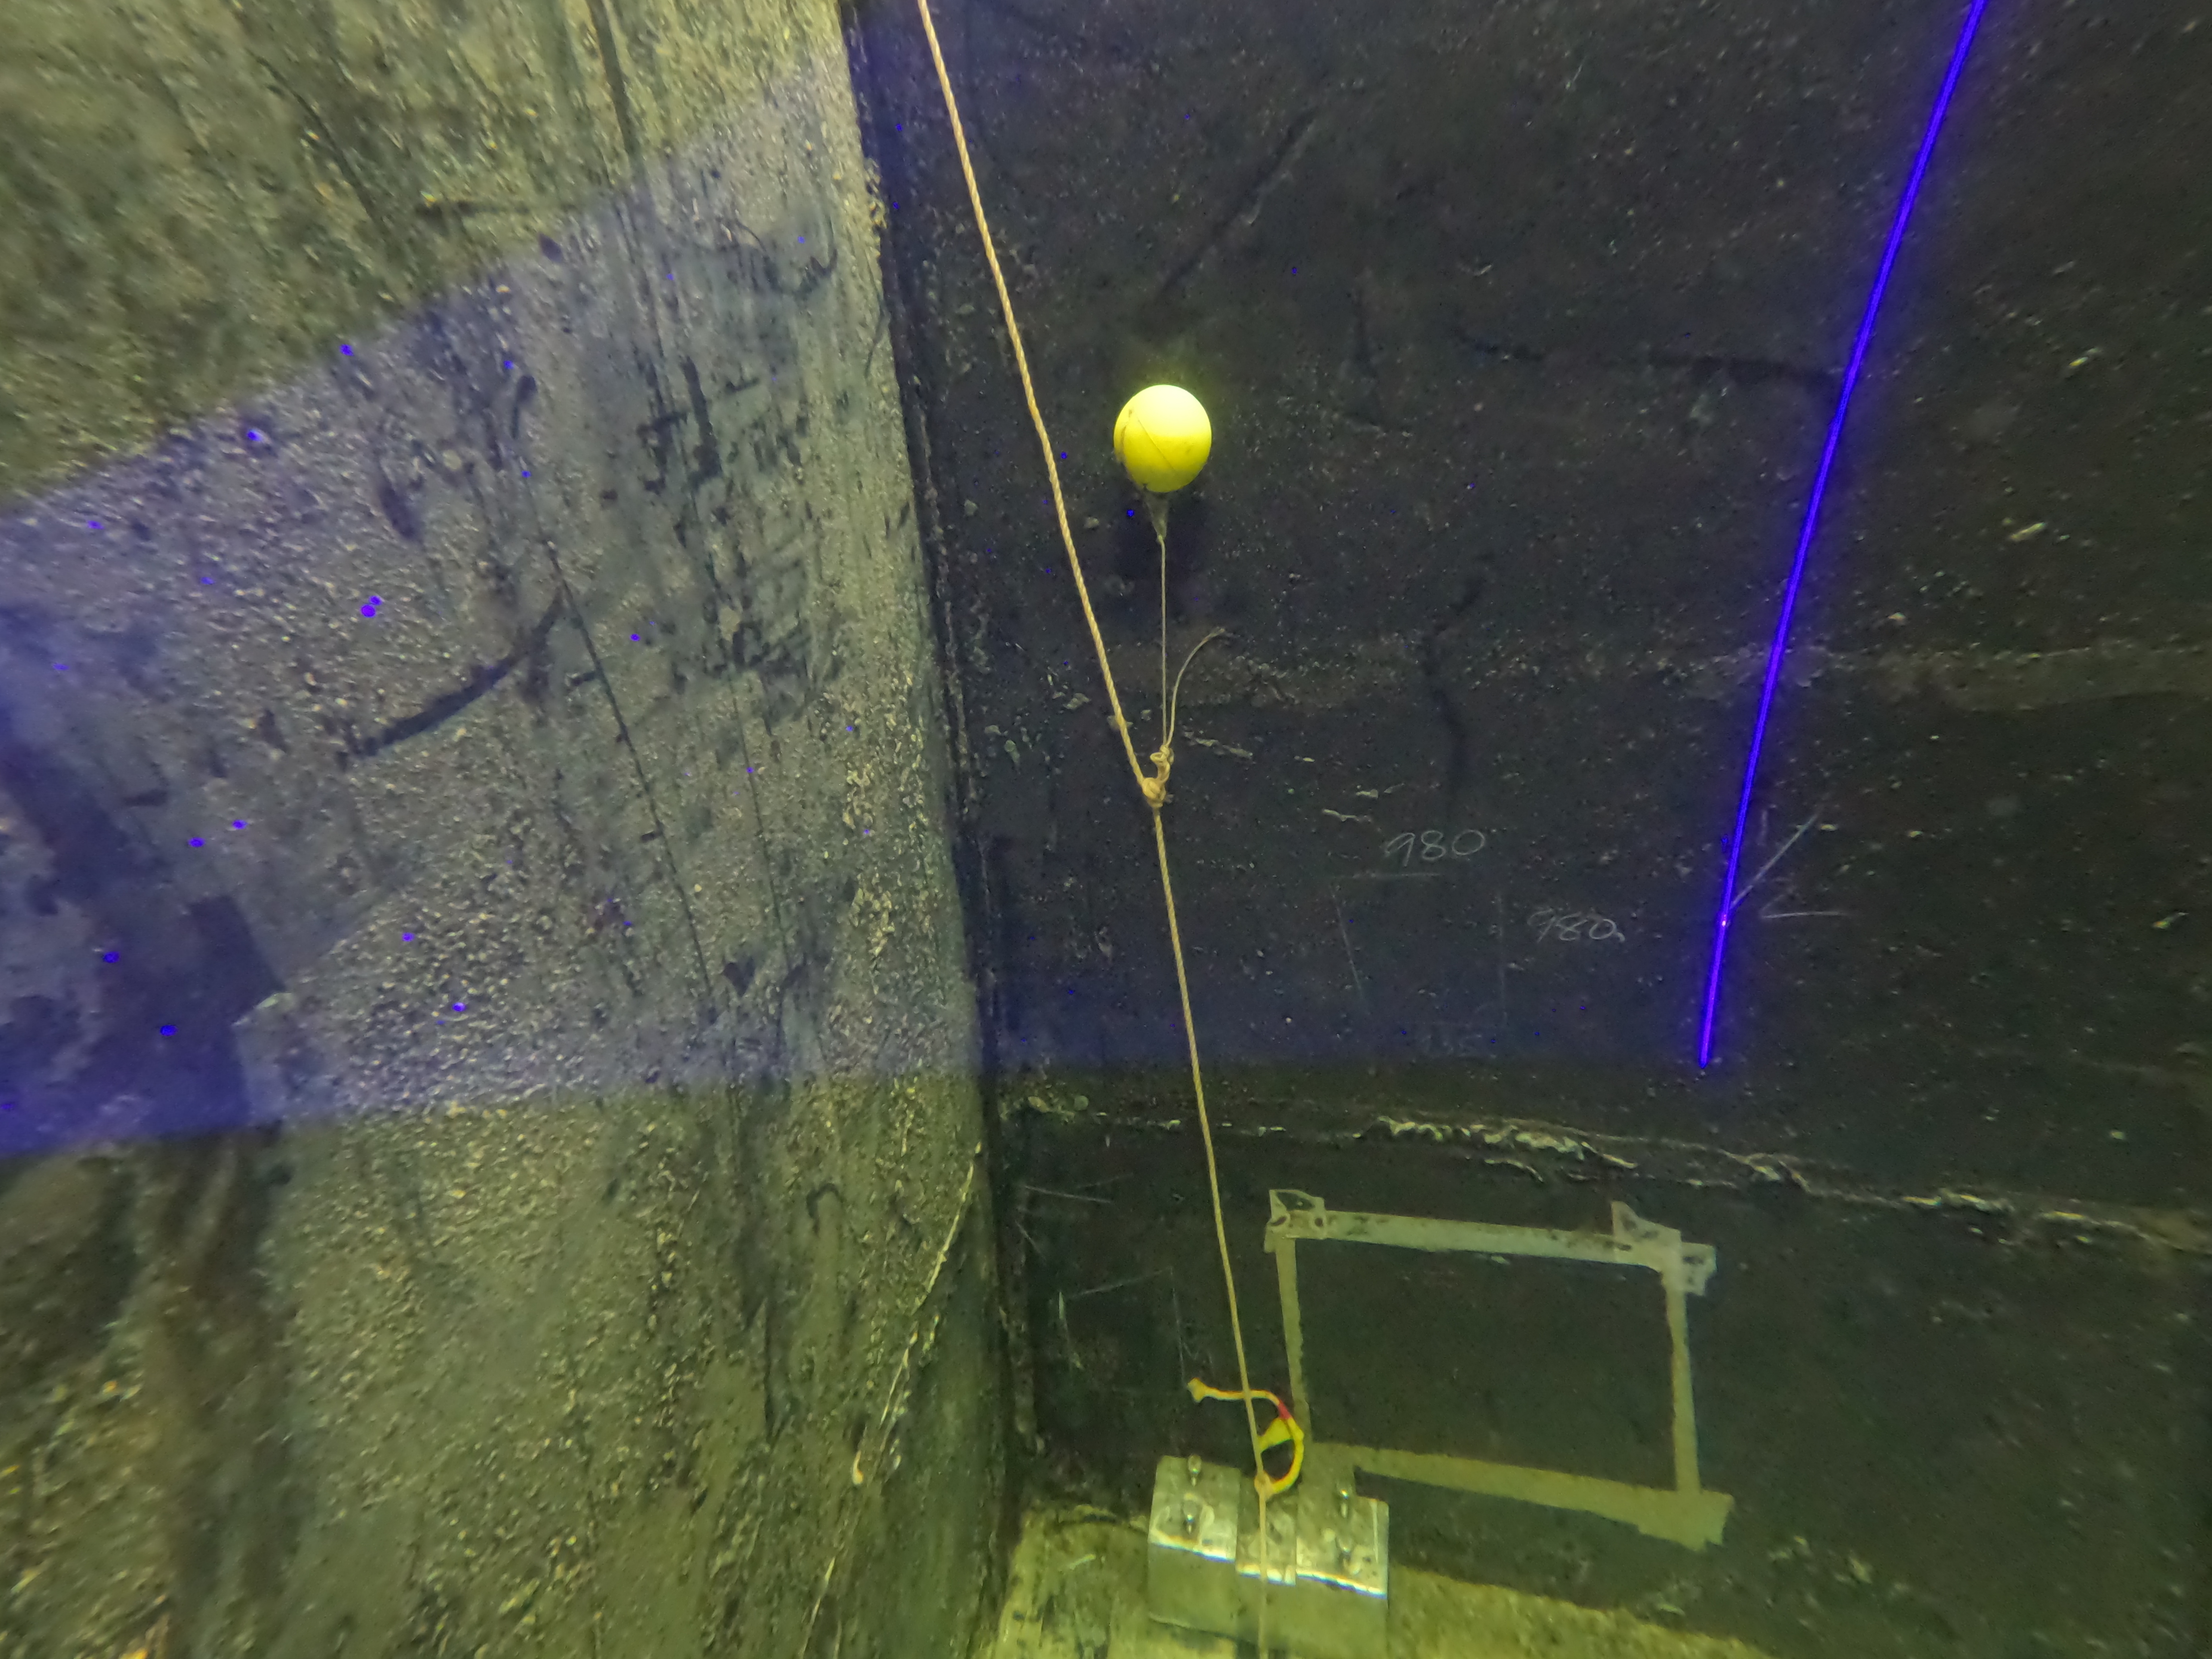

Supplement: Supplementary file 2952 [file G0031752.pdf › 12/G0031752.pdf]

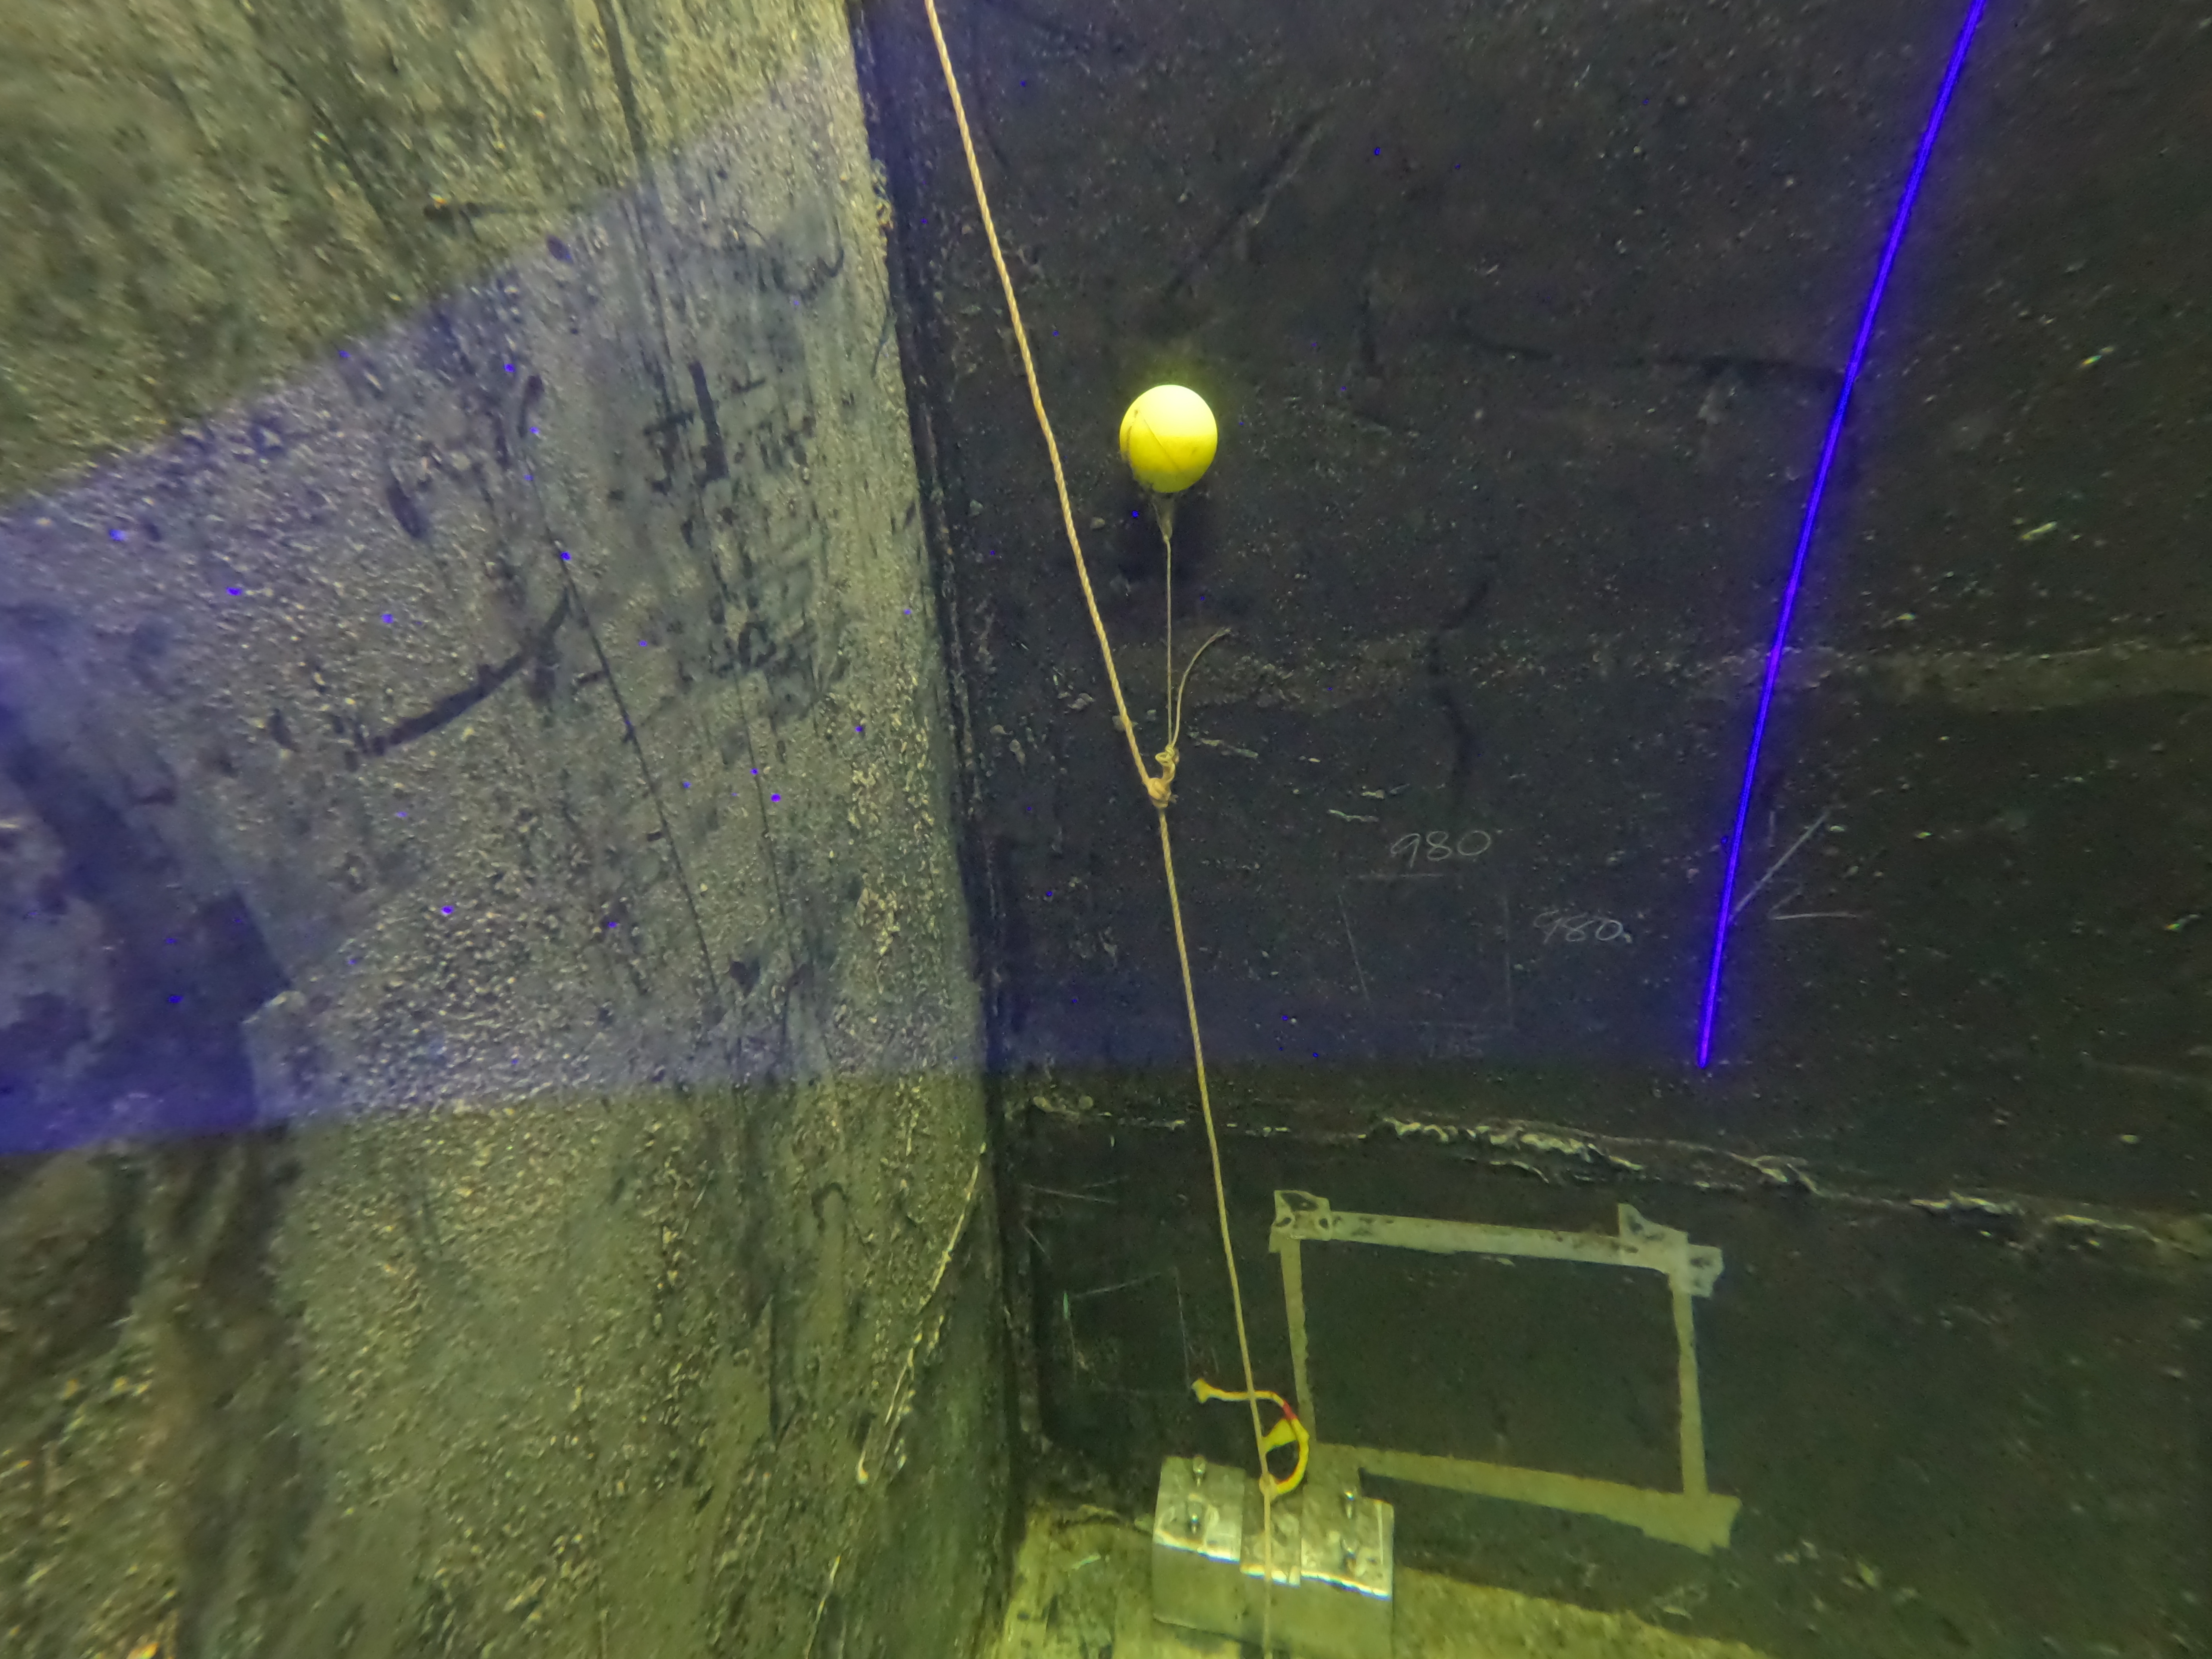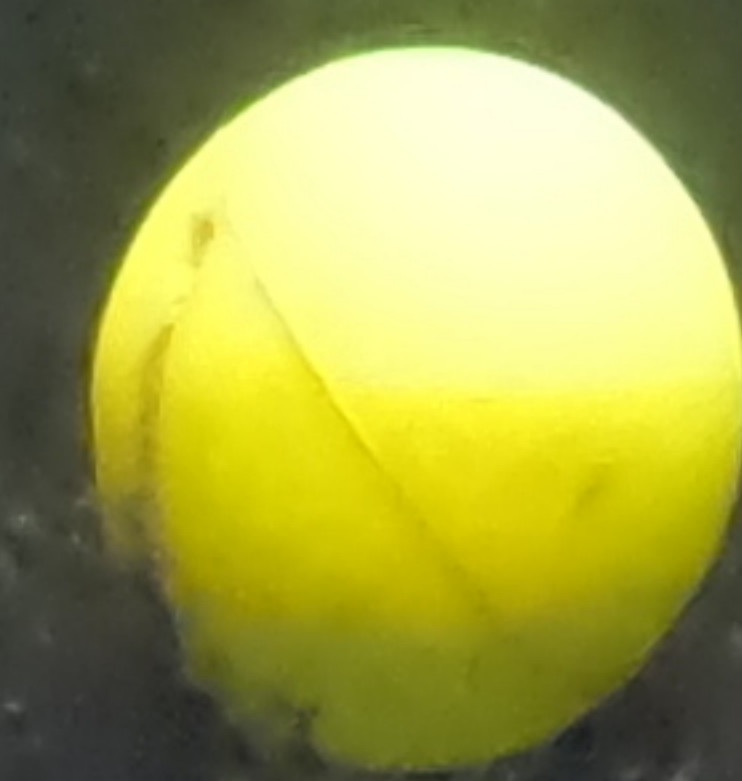

980

980

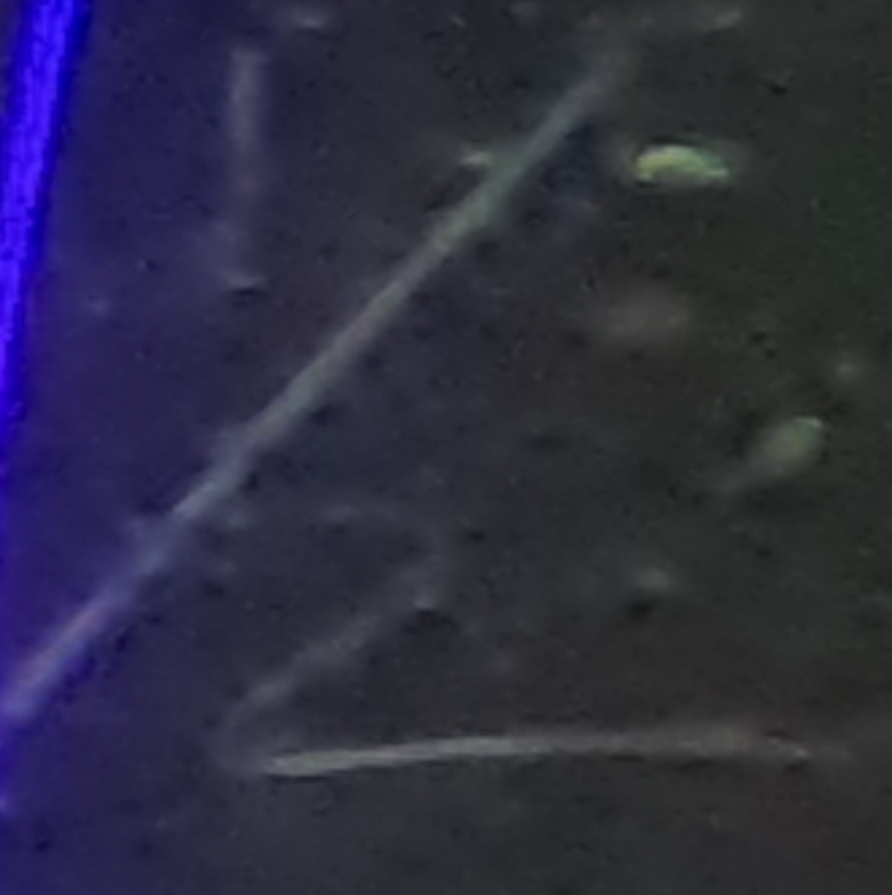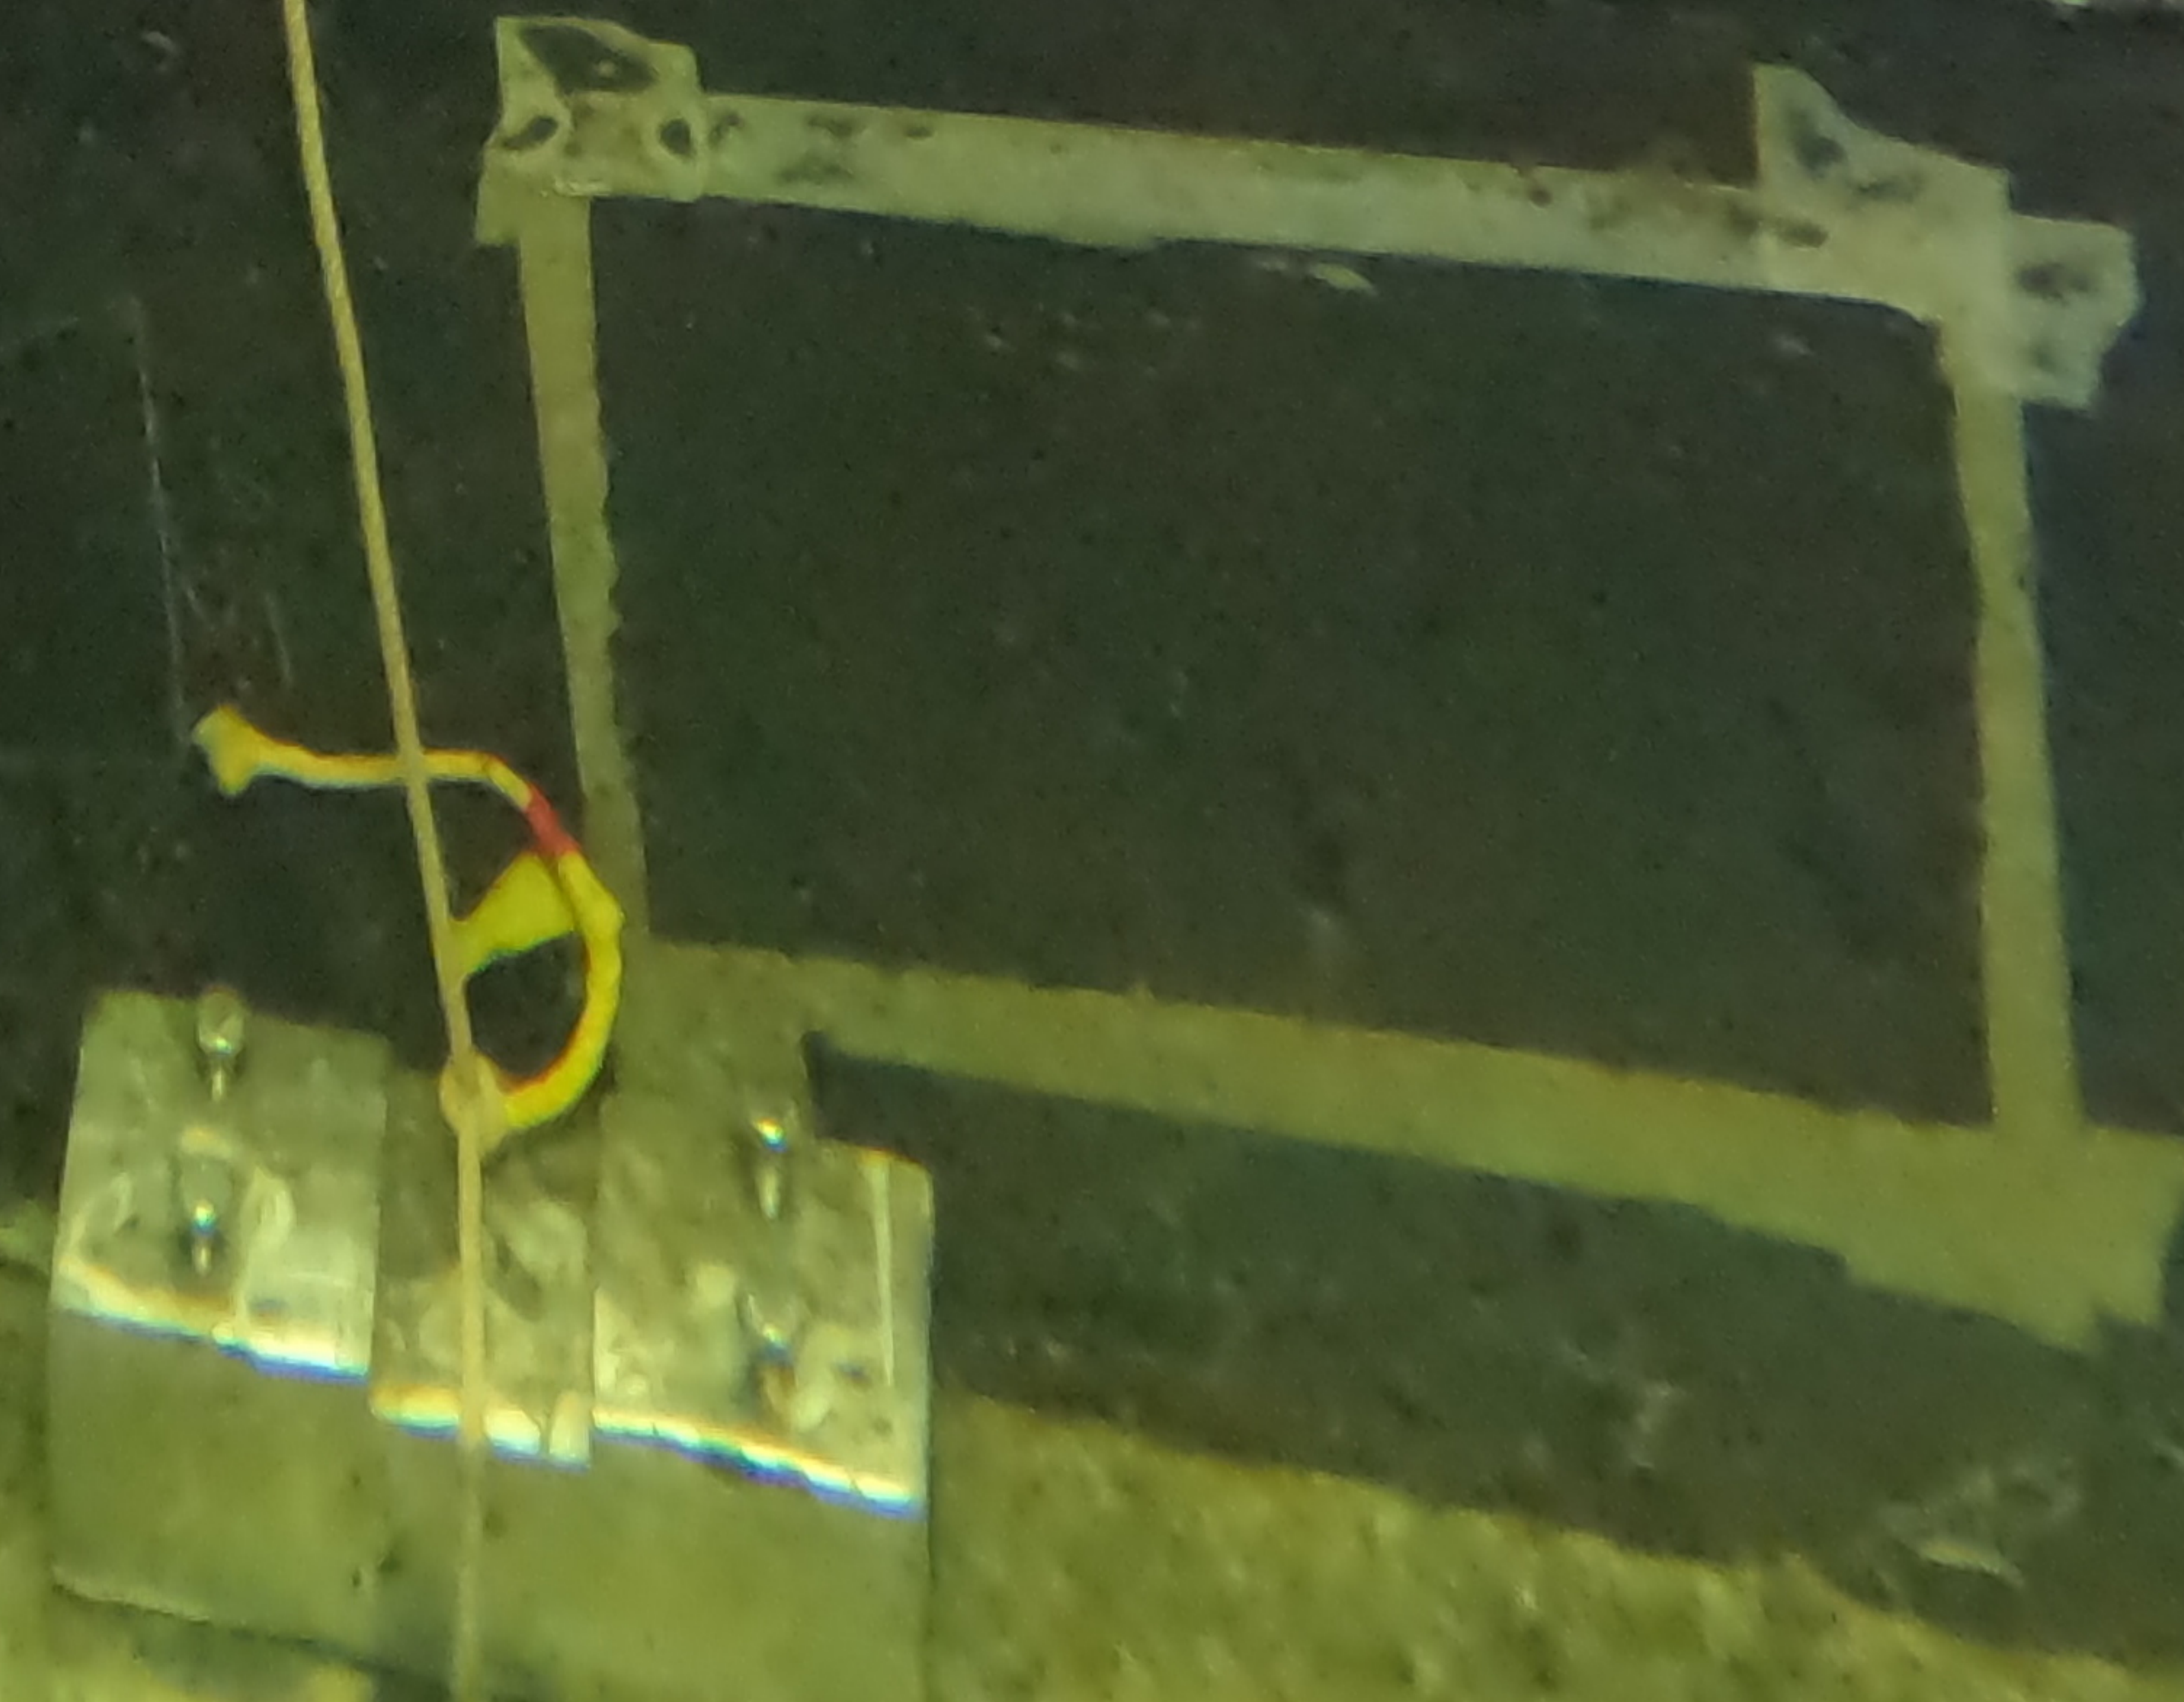

Supplement: Supplementary file 2953 [file G0031753.pdf › 12/G0031753.pdf]

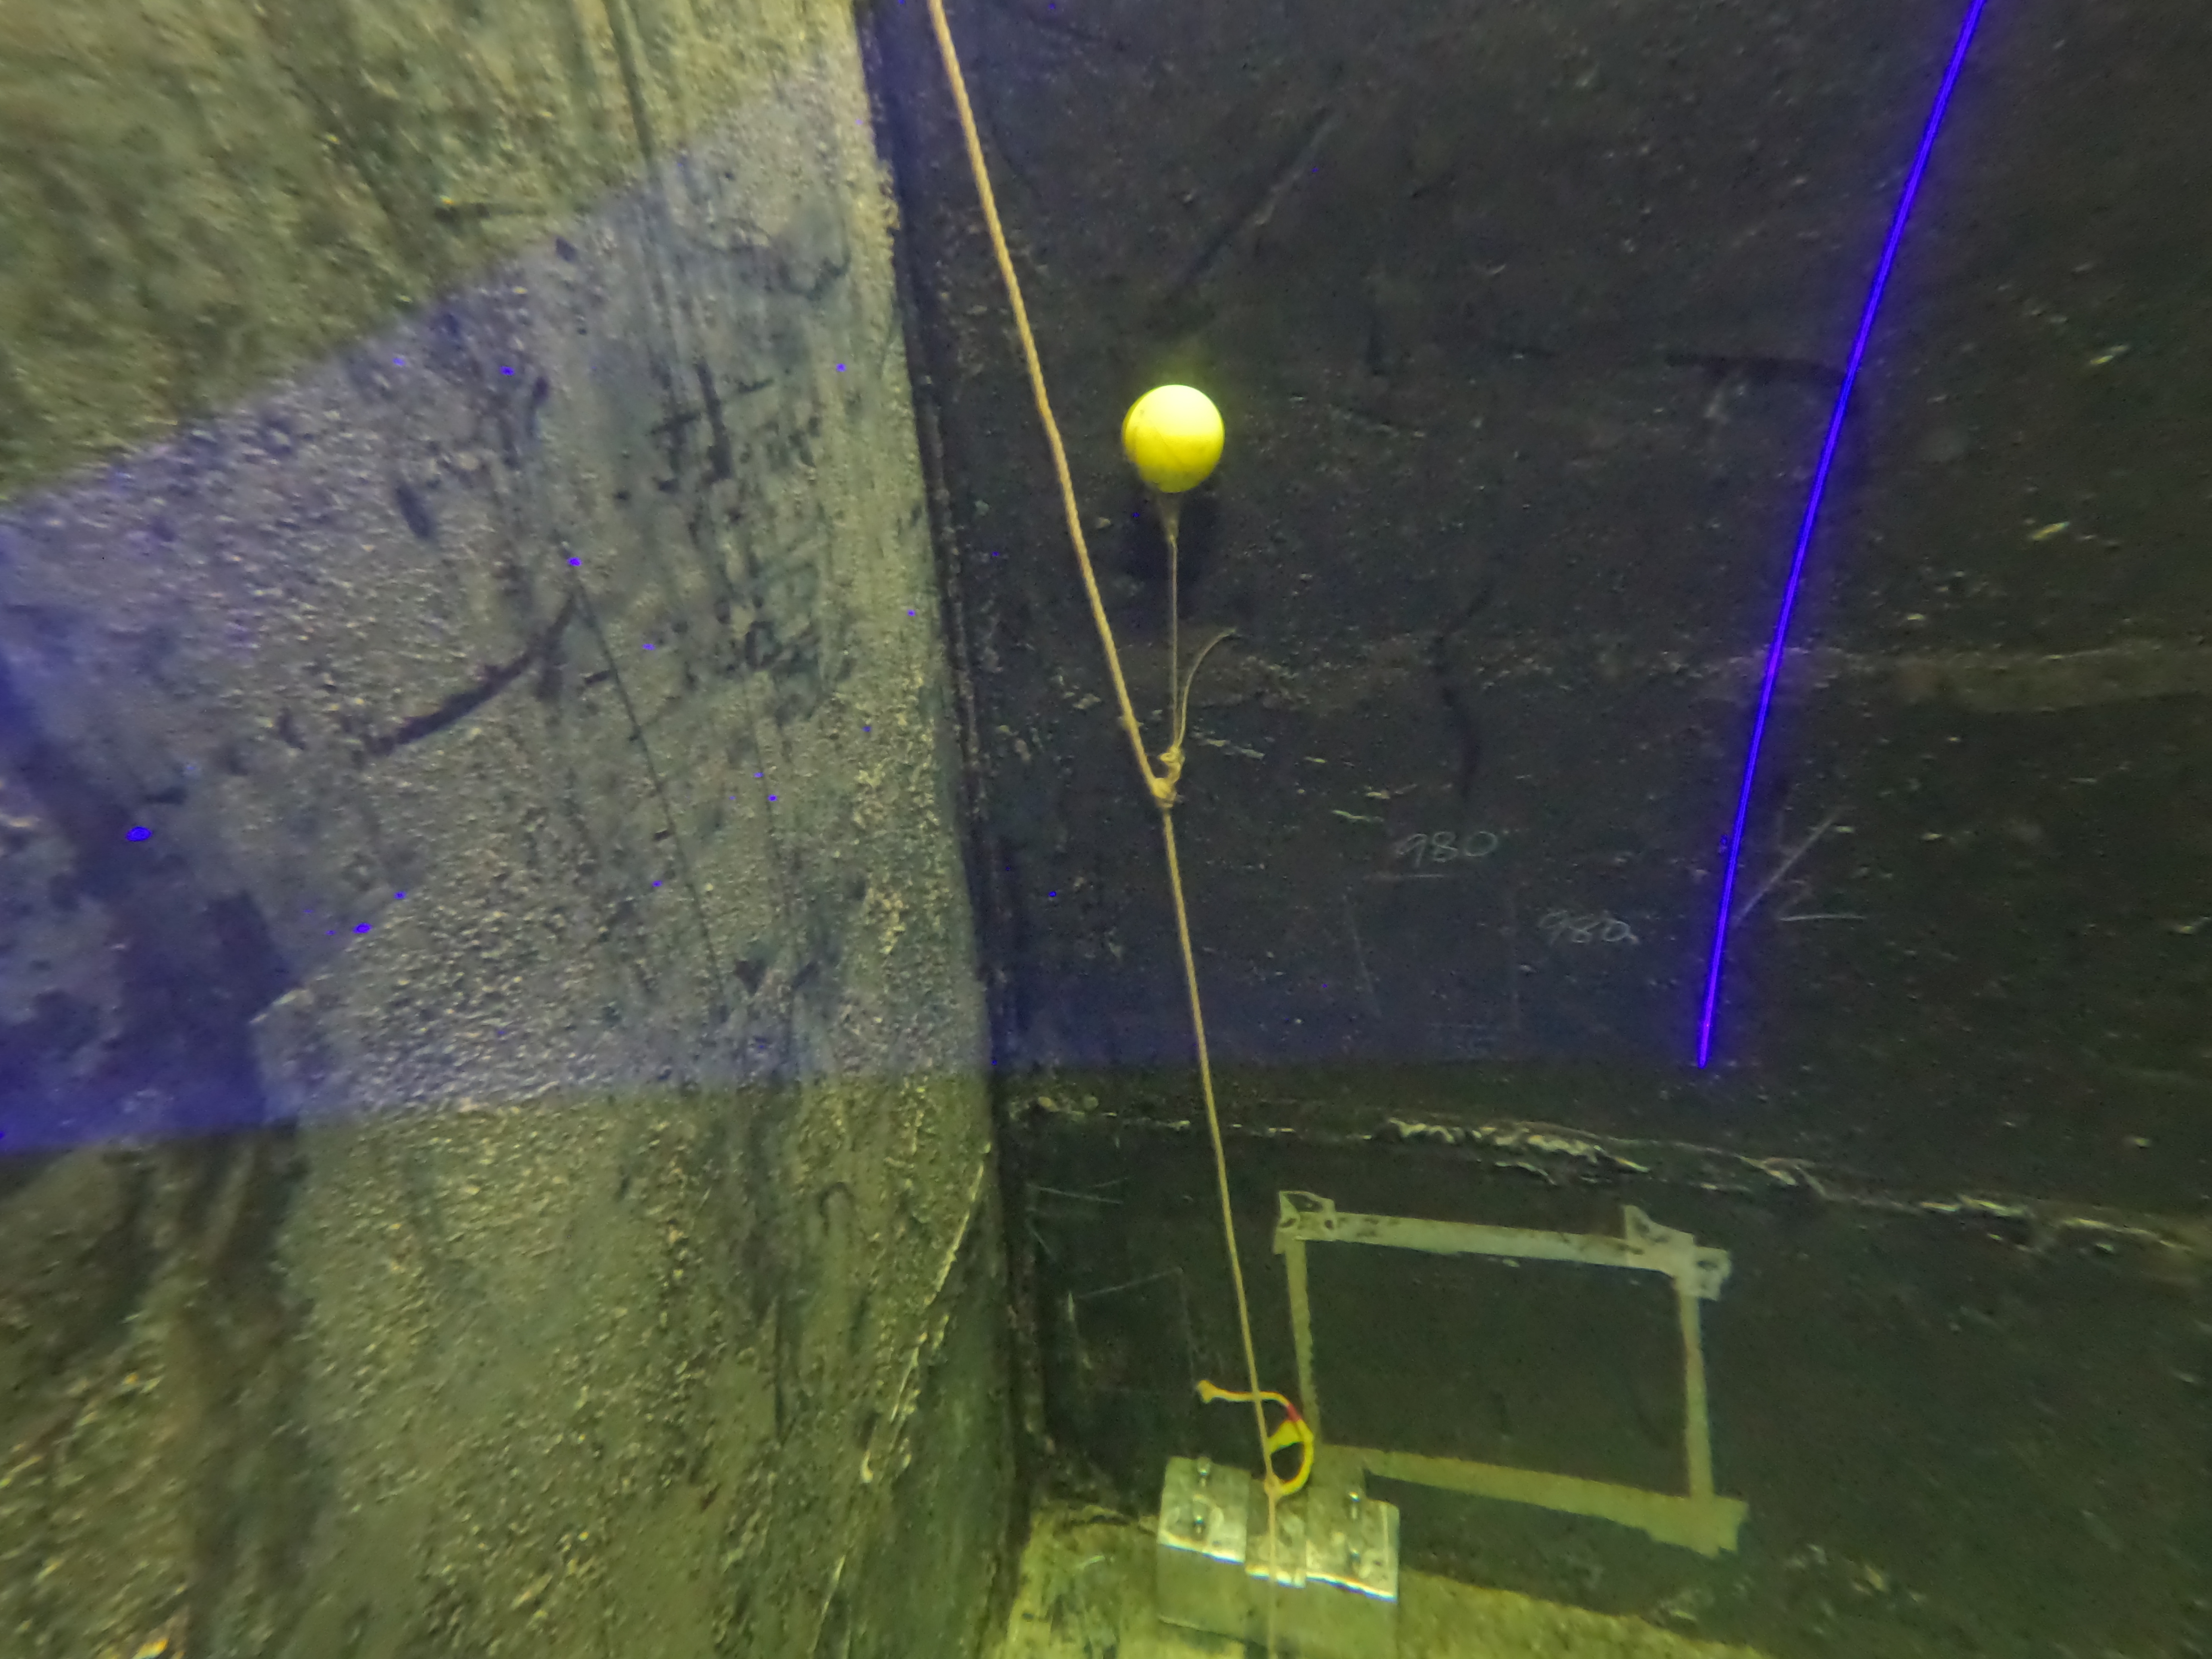

Supplement: Supplementary file 2954 [file G0031754.pdf › 12/G0031754.pdf]

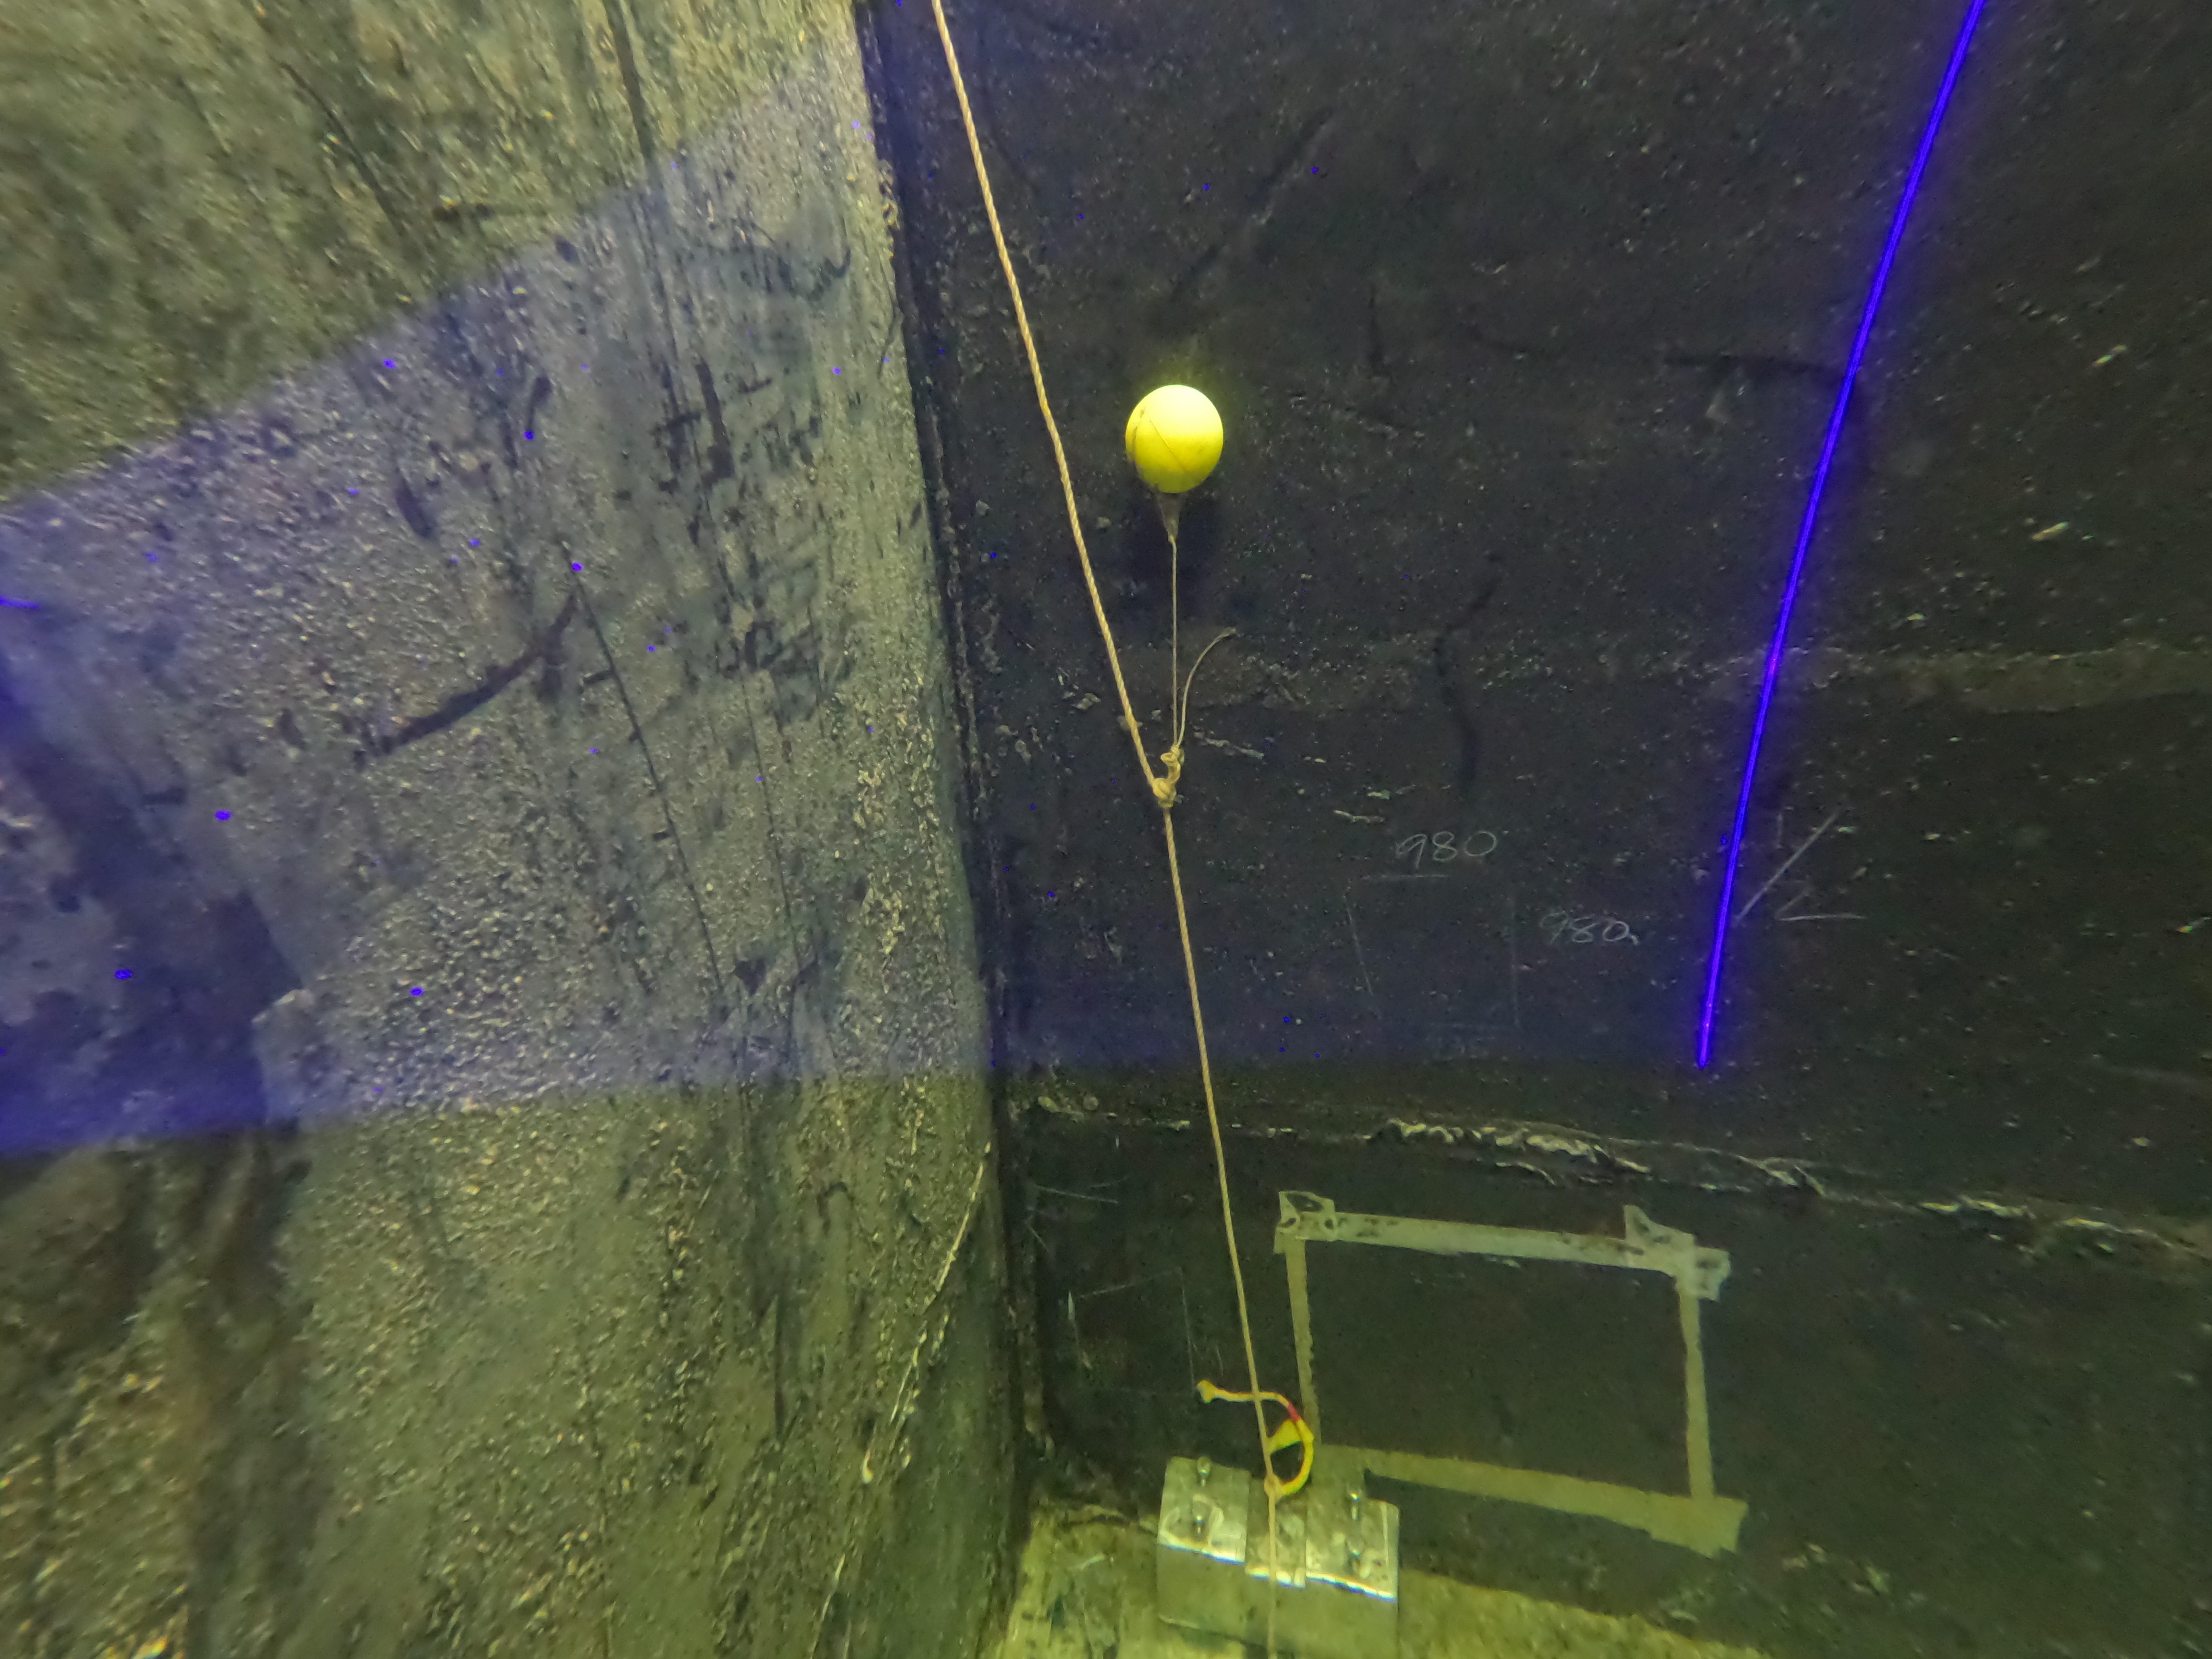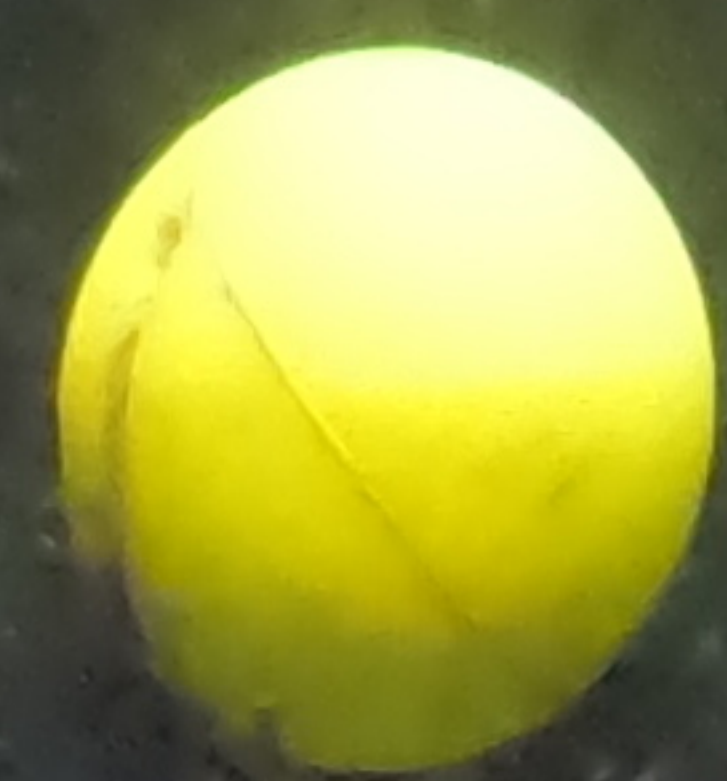

980

980

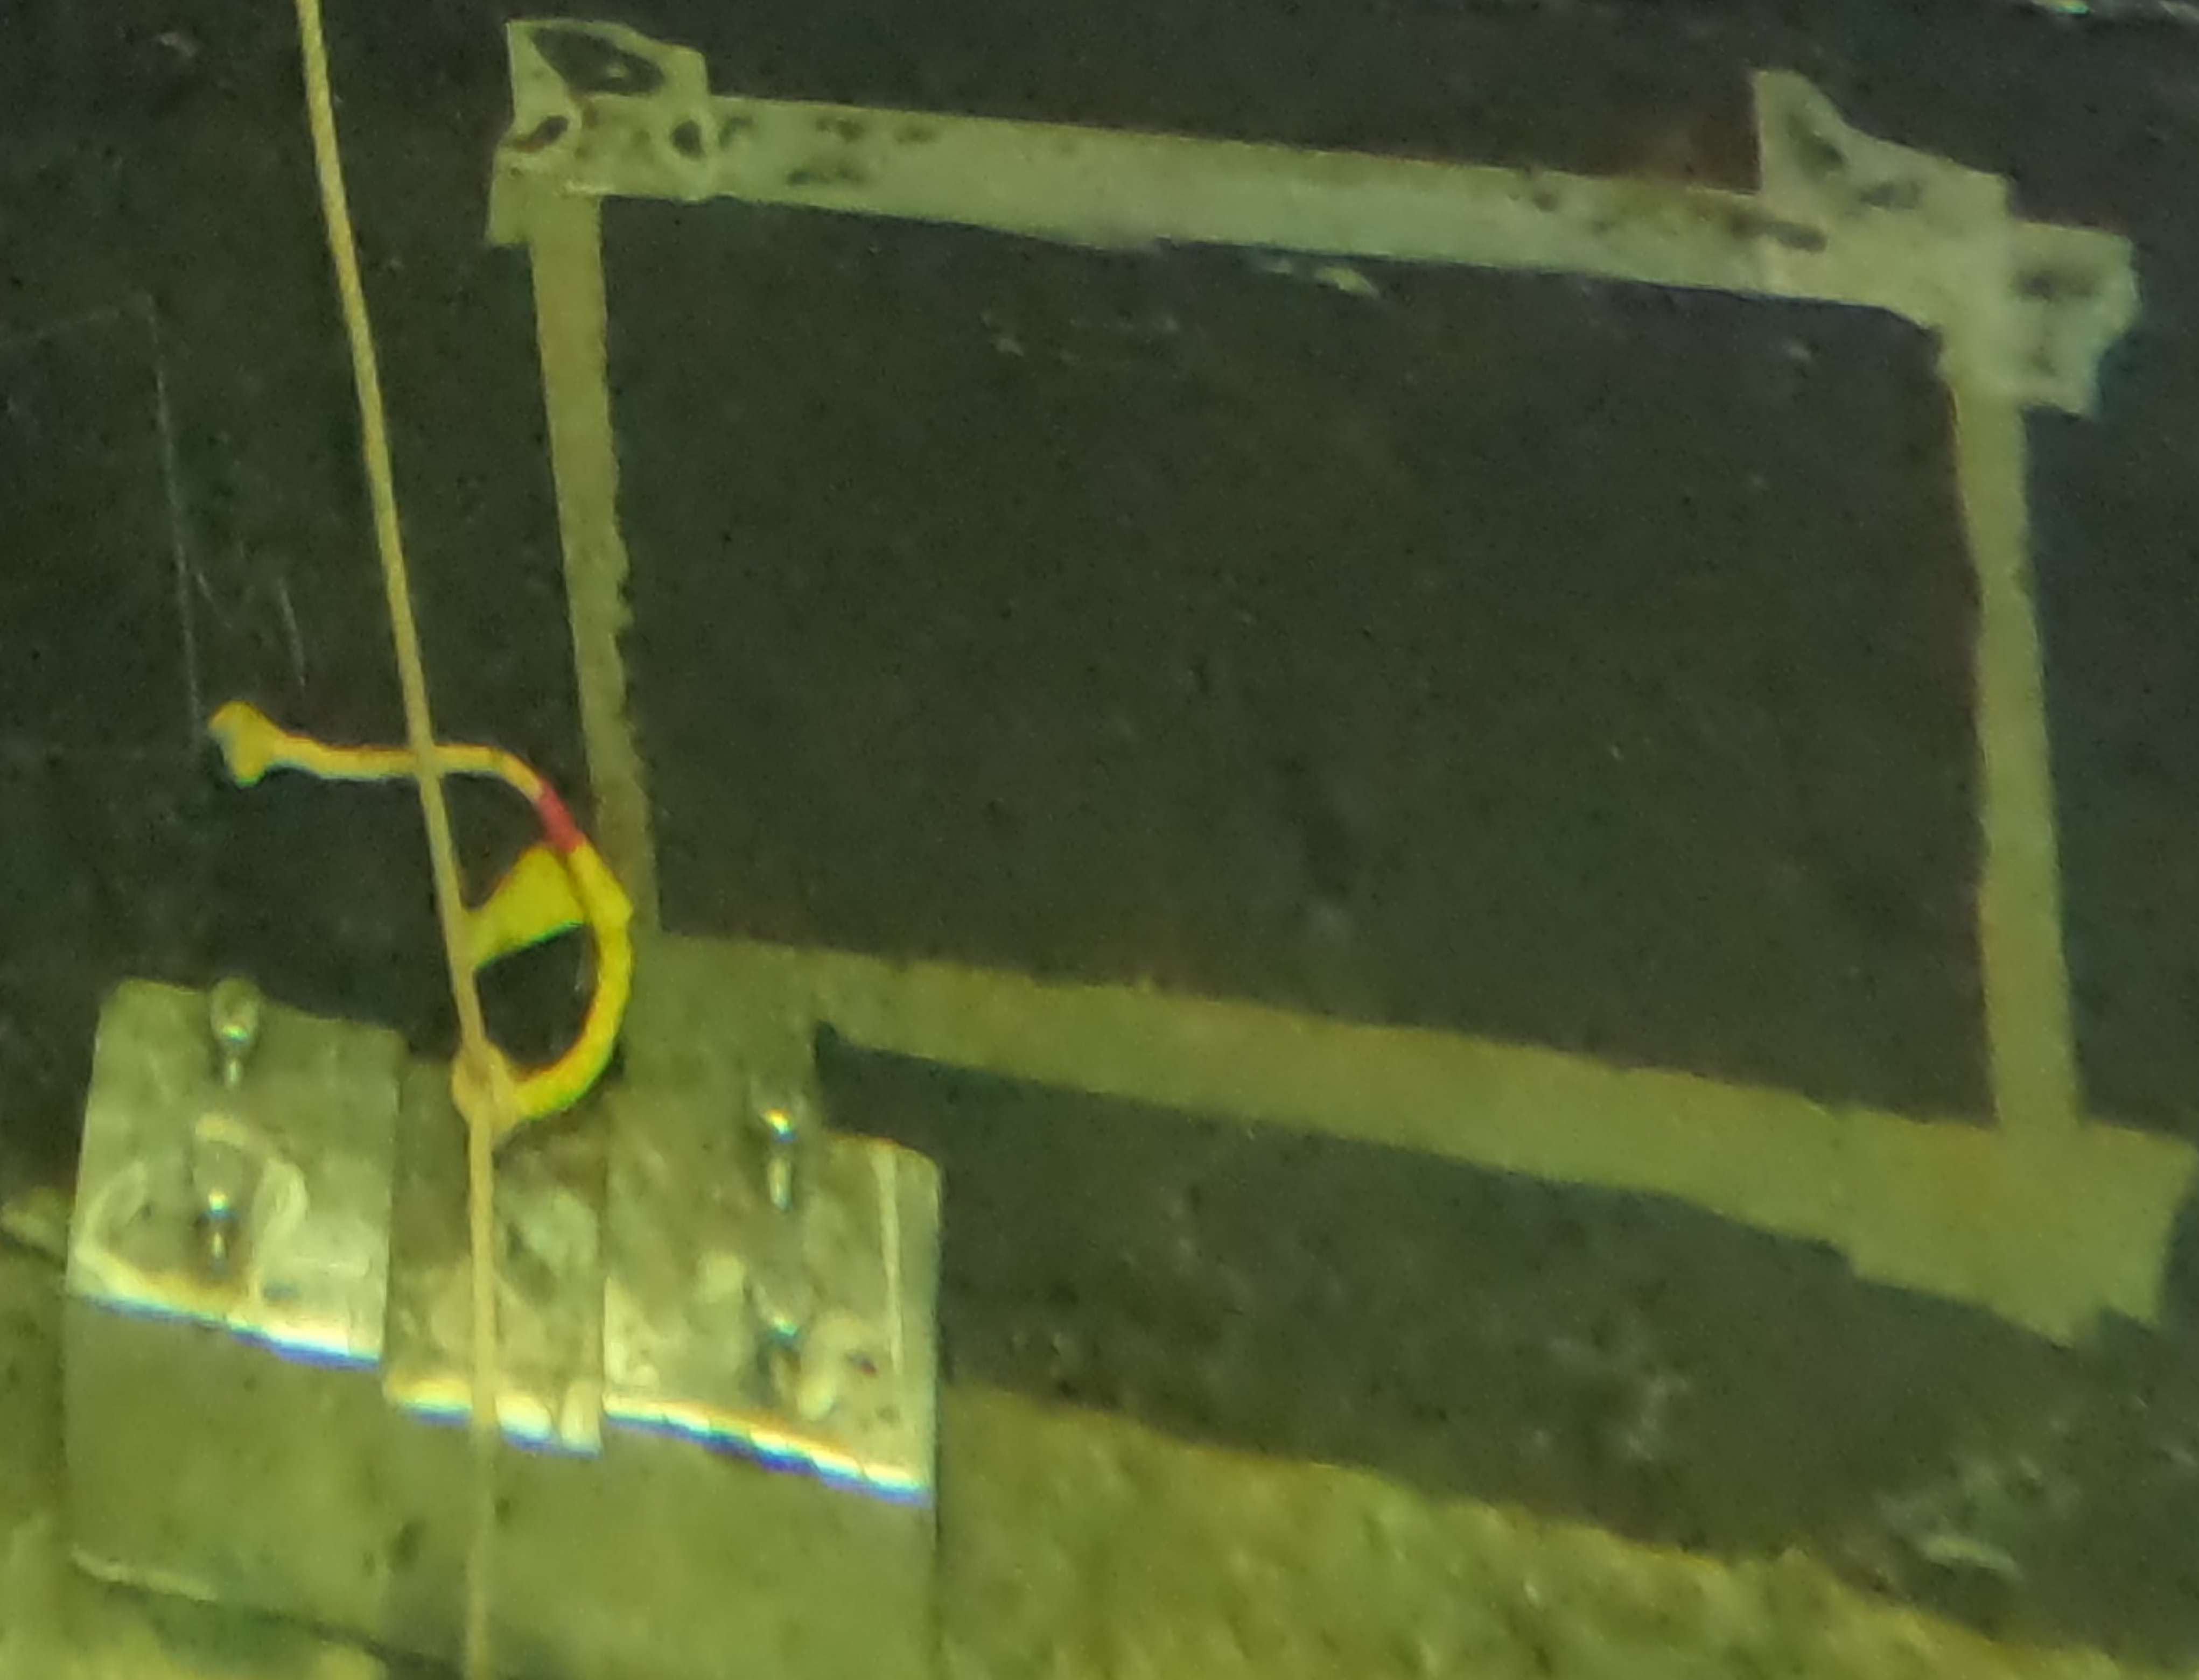

Supplement: Supplementary file 2955 [file G0031755.pdf › 12/G0031755.pdf]

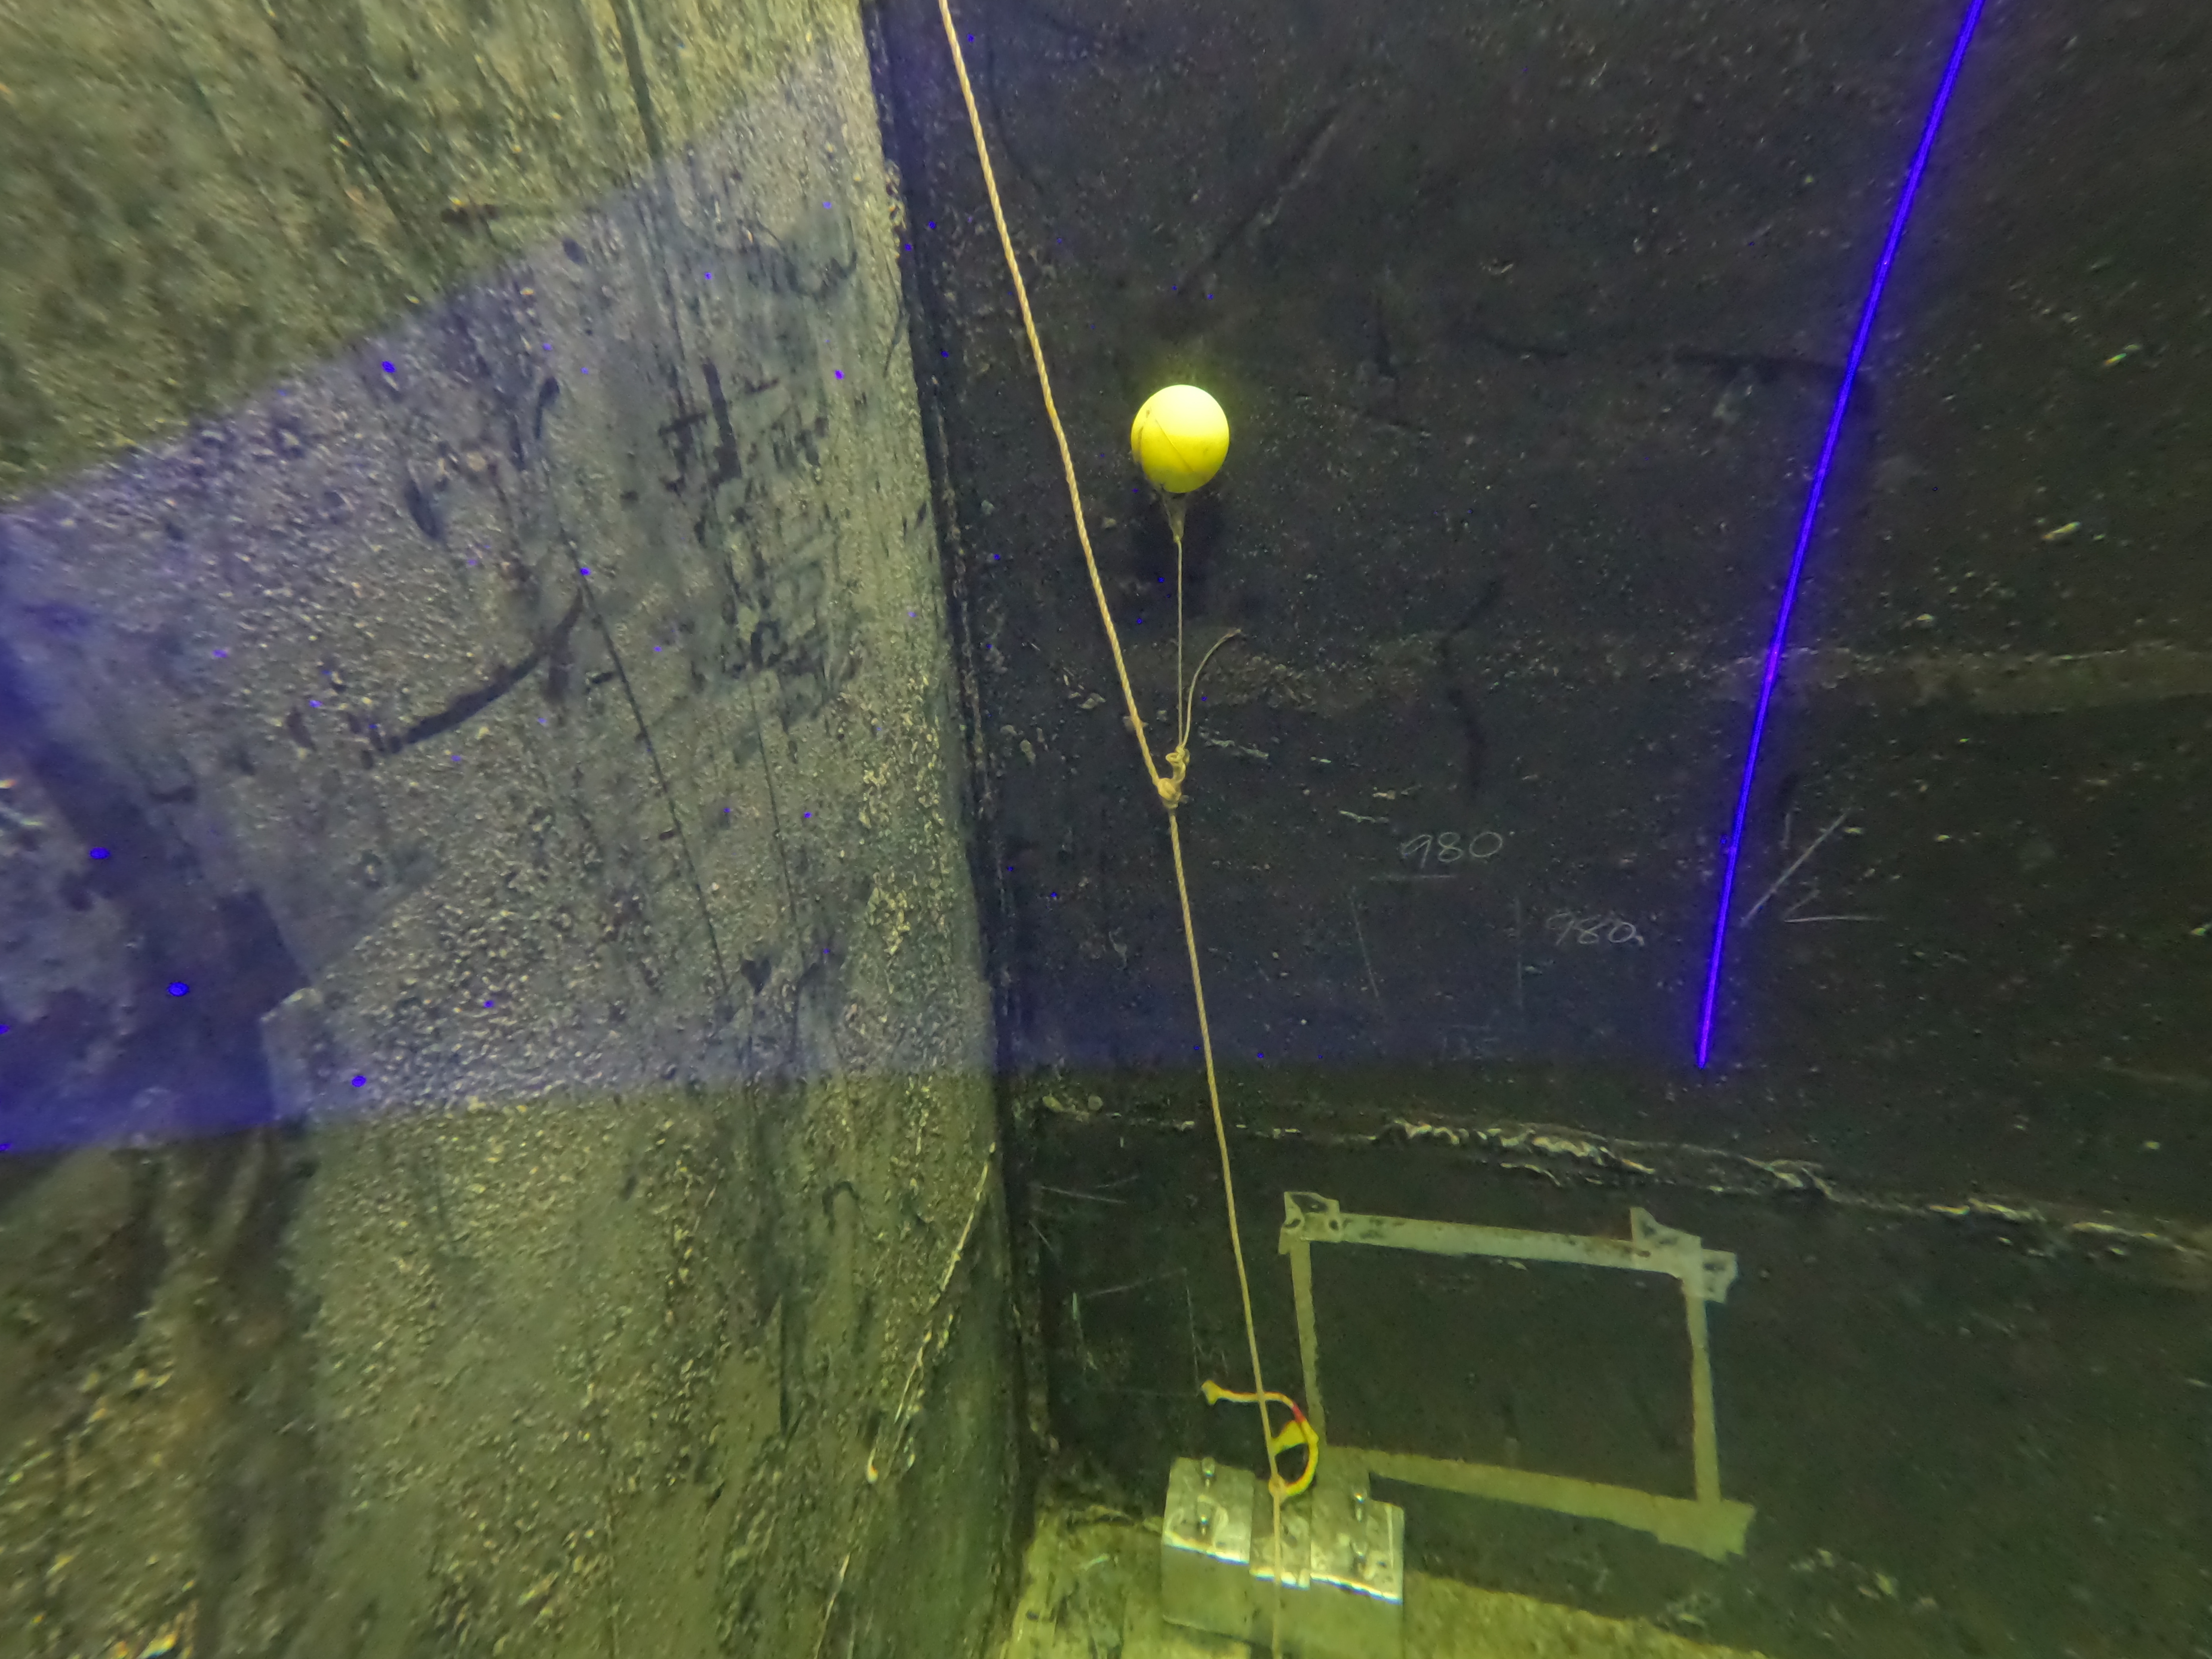

980

980

Supplement: Supplementary file 2956 [file G0031756.pdf › 12/G0031756.pdf]

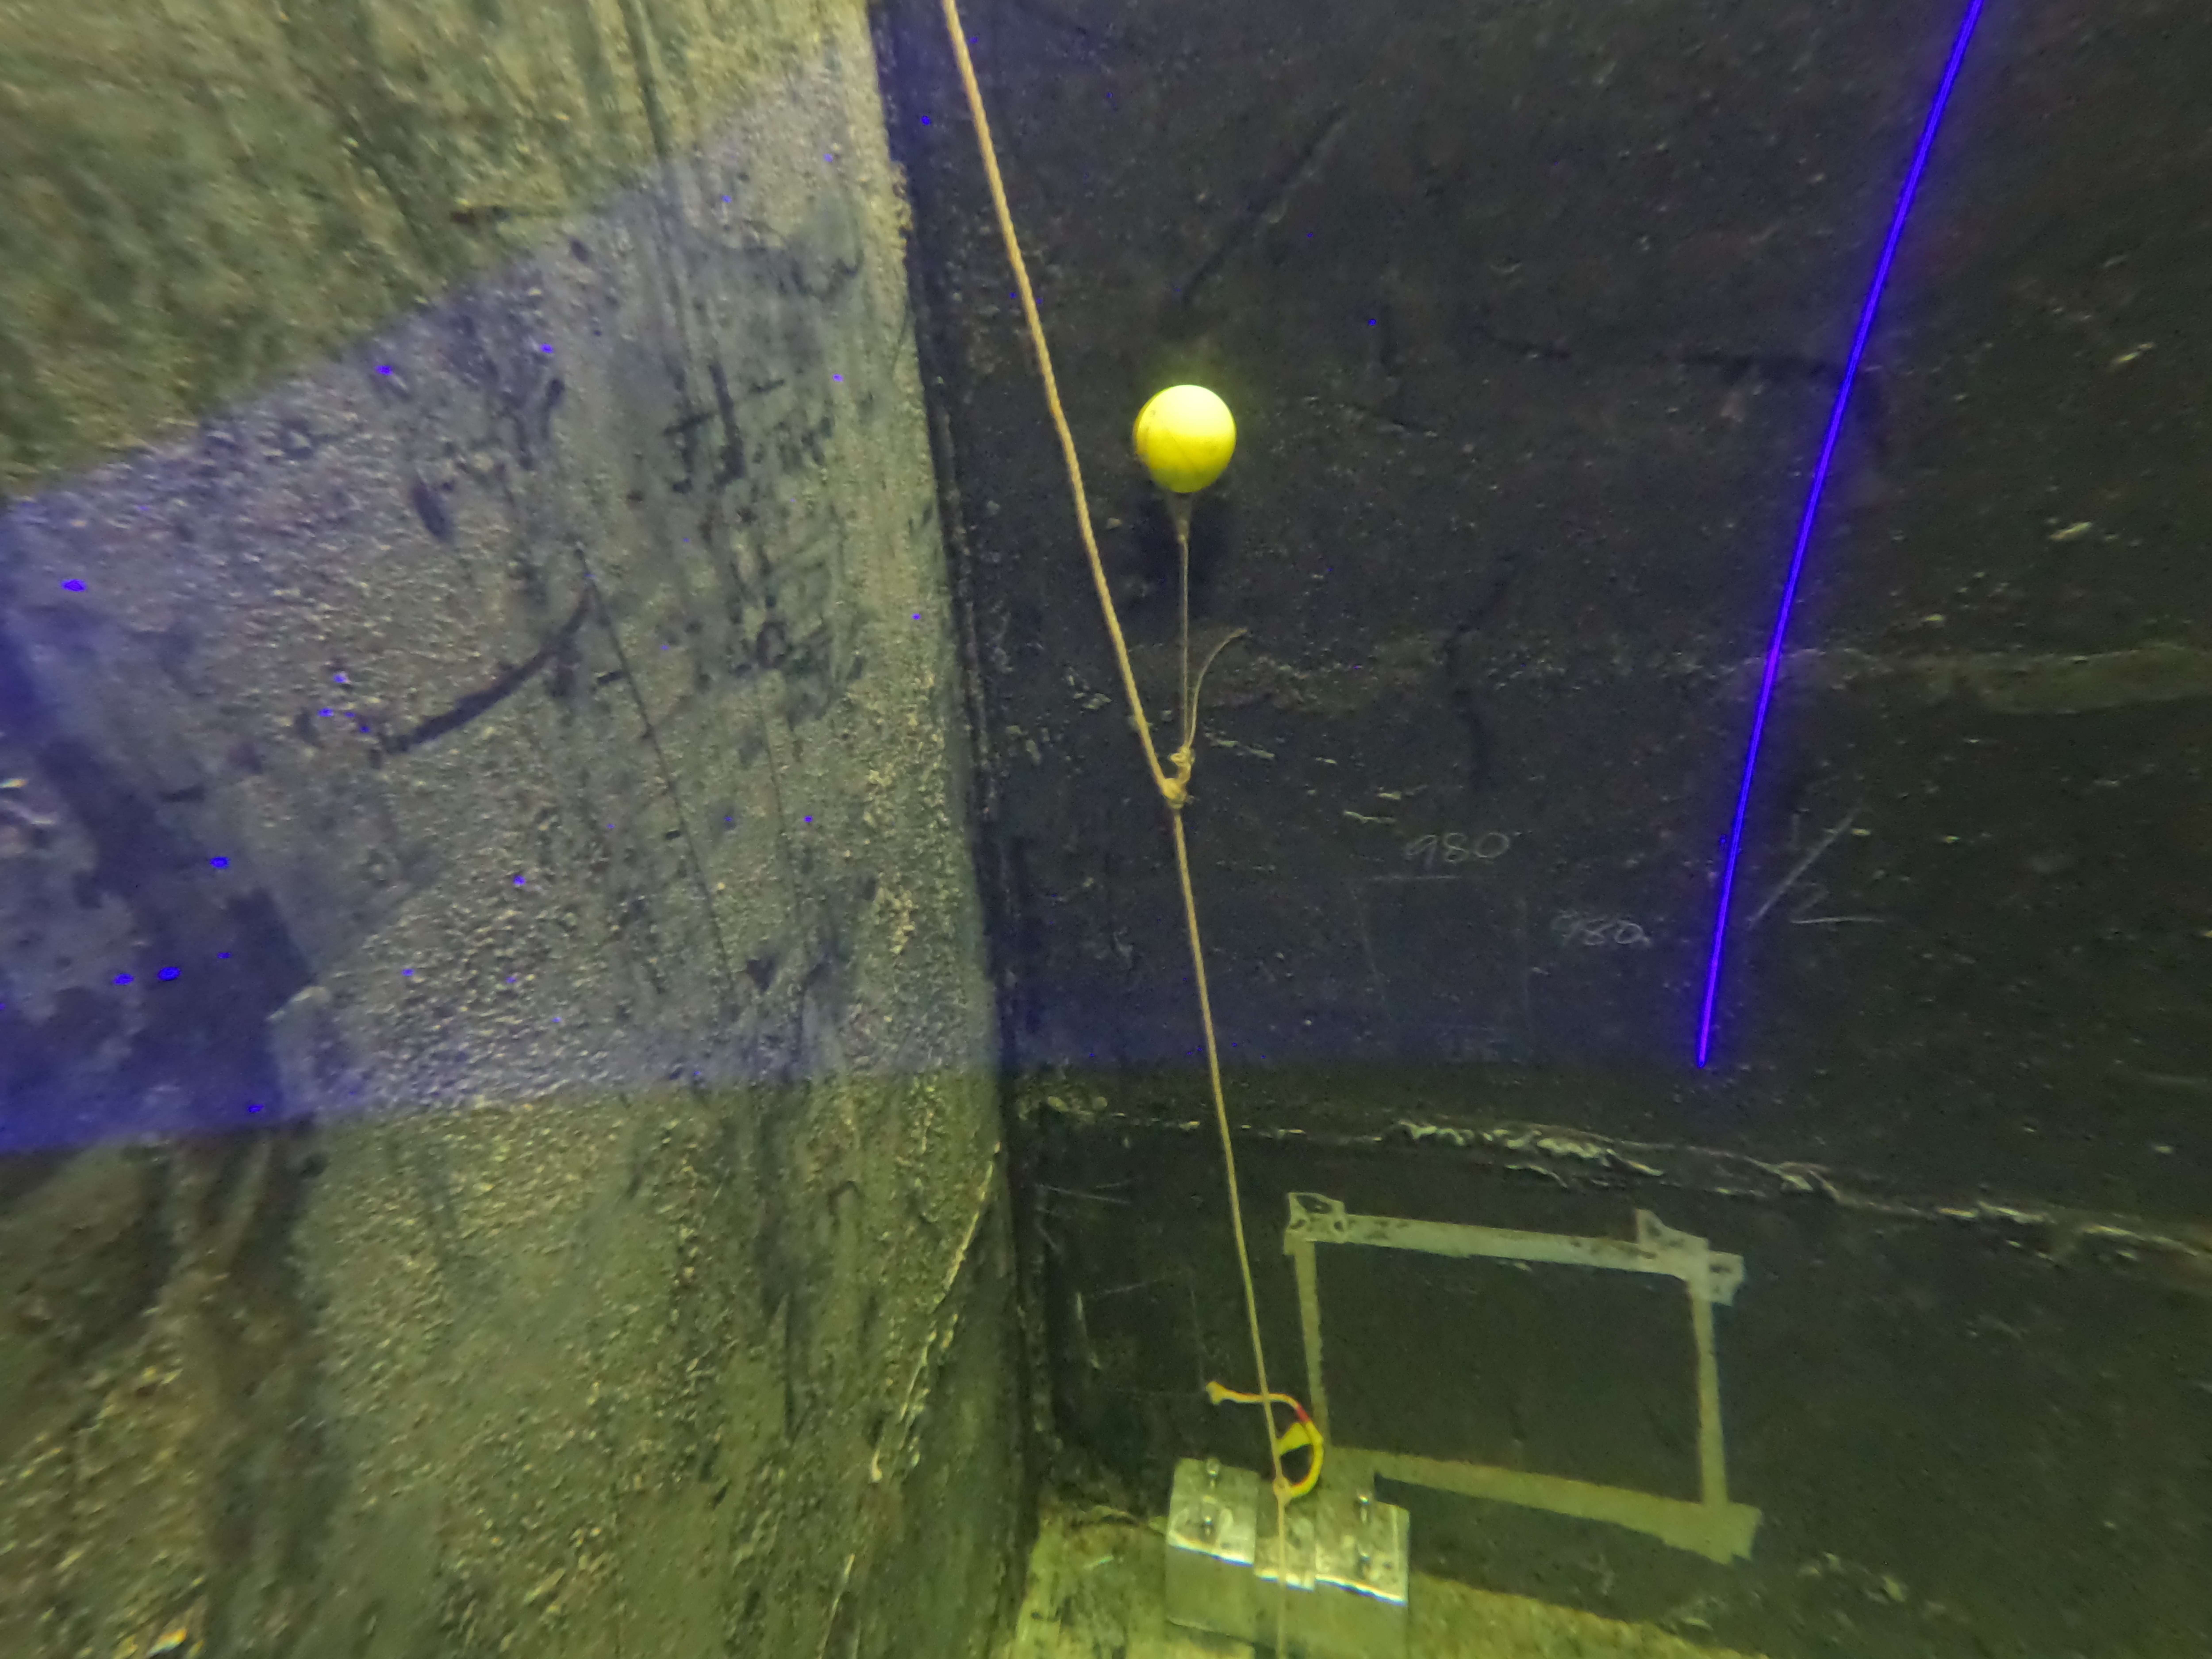

Supplement: Supplementary file 2957 [file G0031757.pdf › 12/G0031757.pdf]

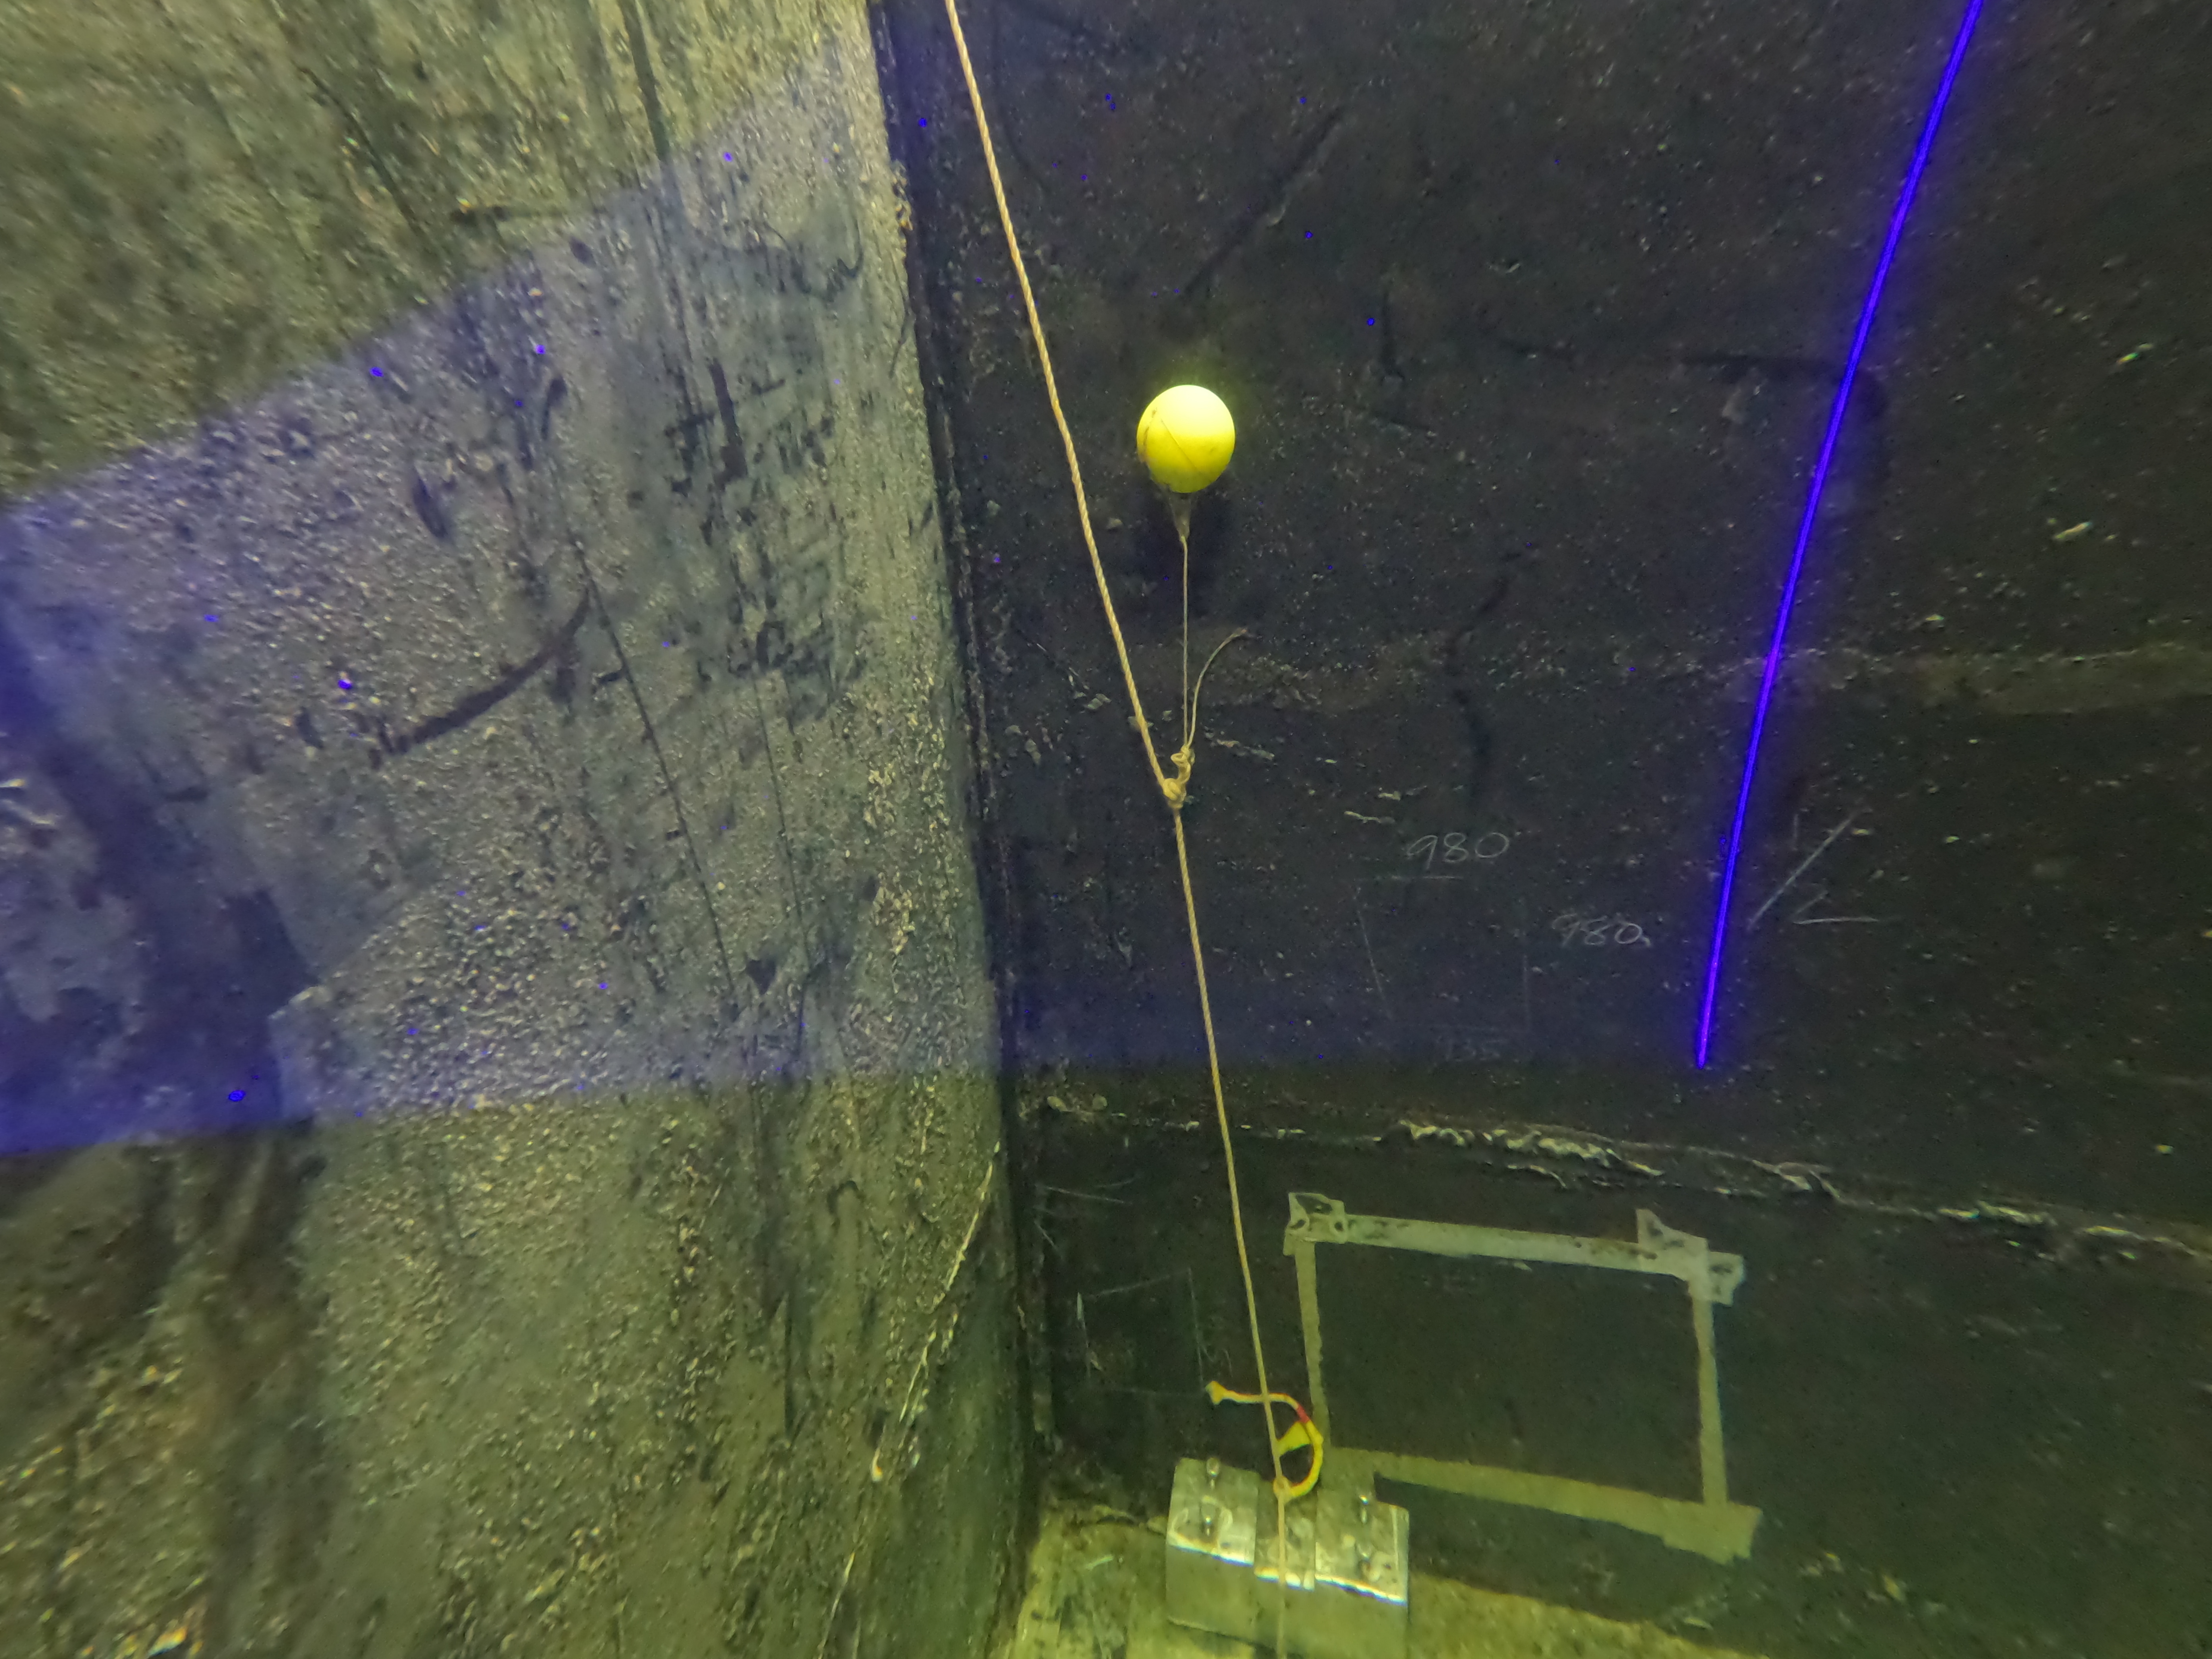

Supplement: Supplementary file 2958 [file G0031758.pdf › 12/G0031758.pdf]

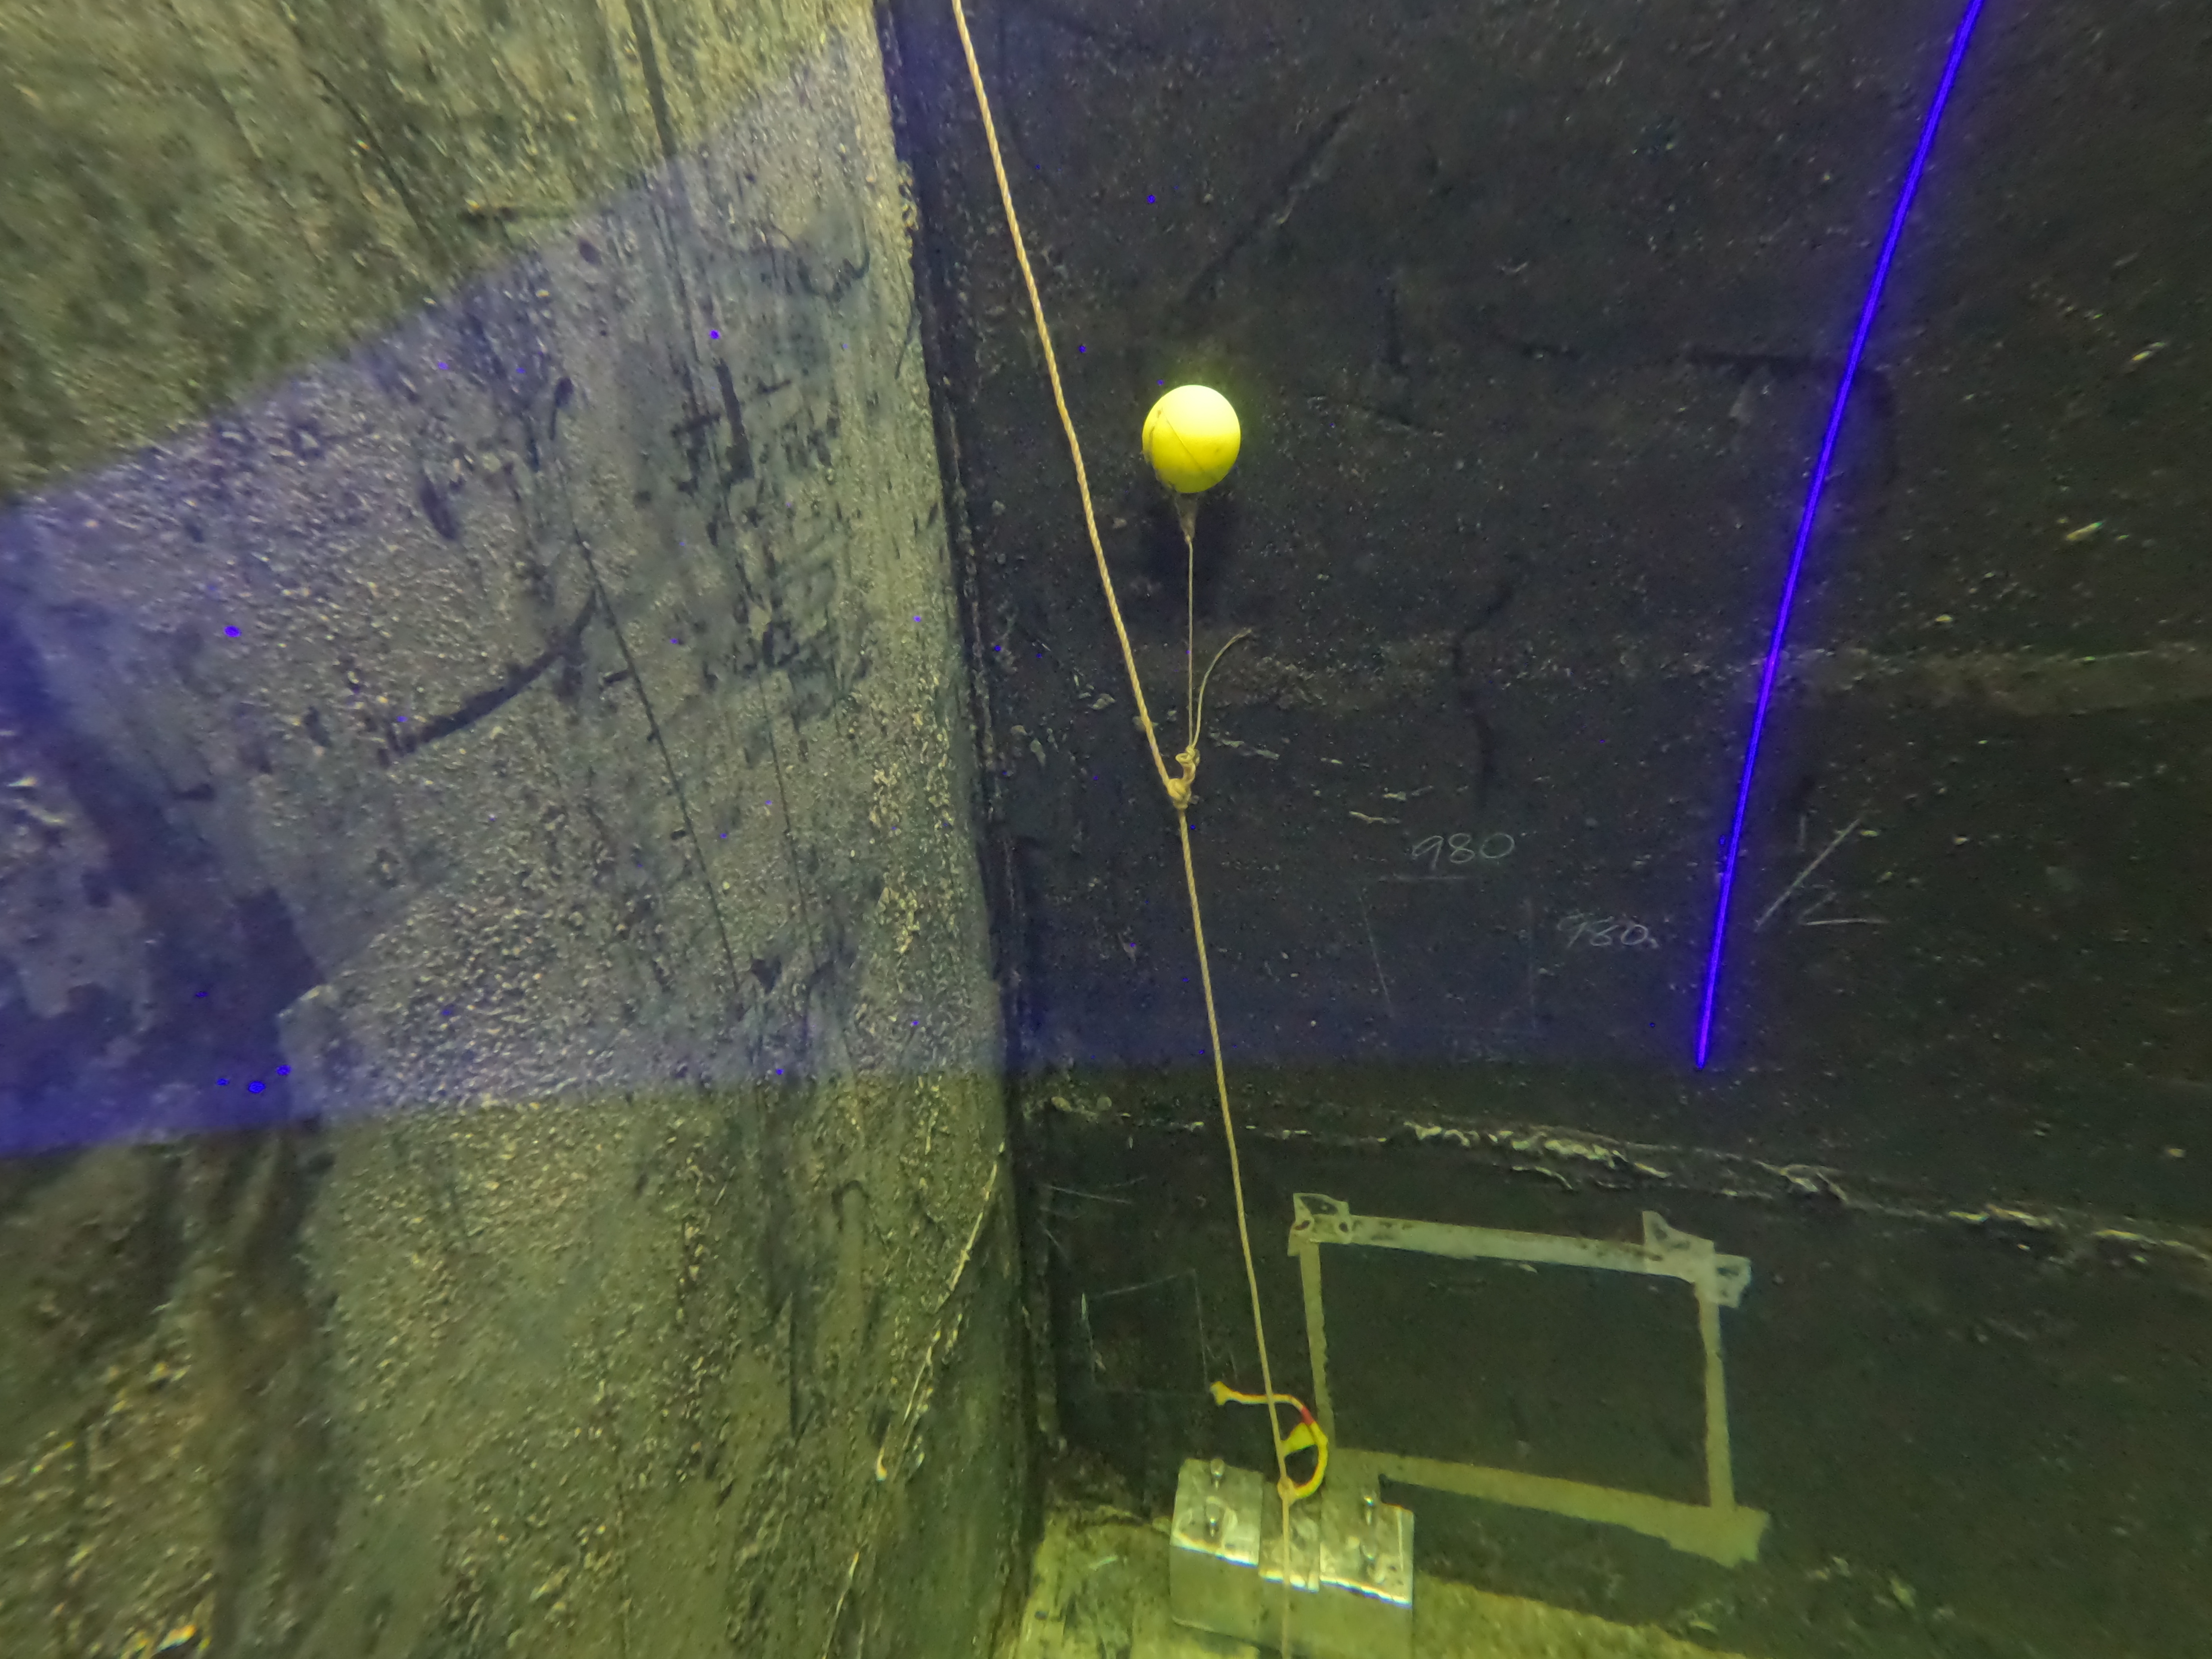

Supplement: Supplementary file 2959 [file G0031759.pdf › 12/G0031759.pdf]

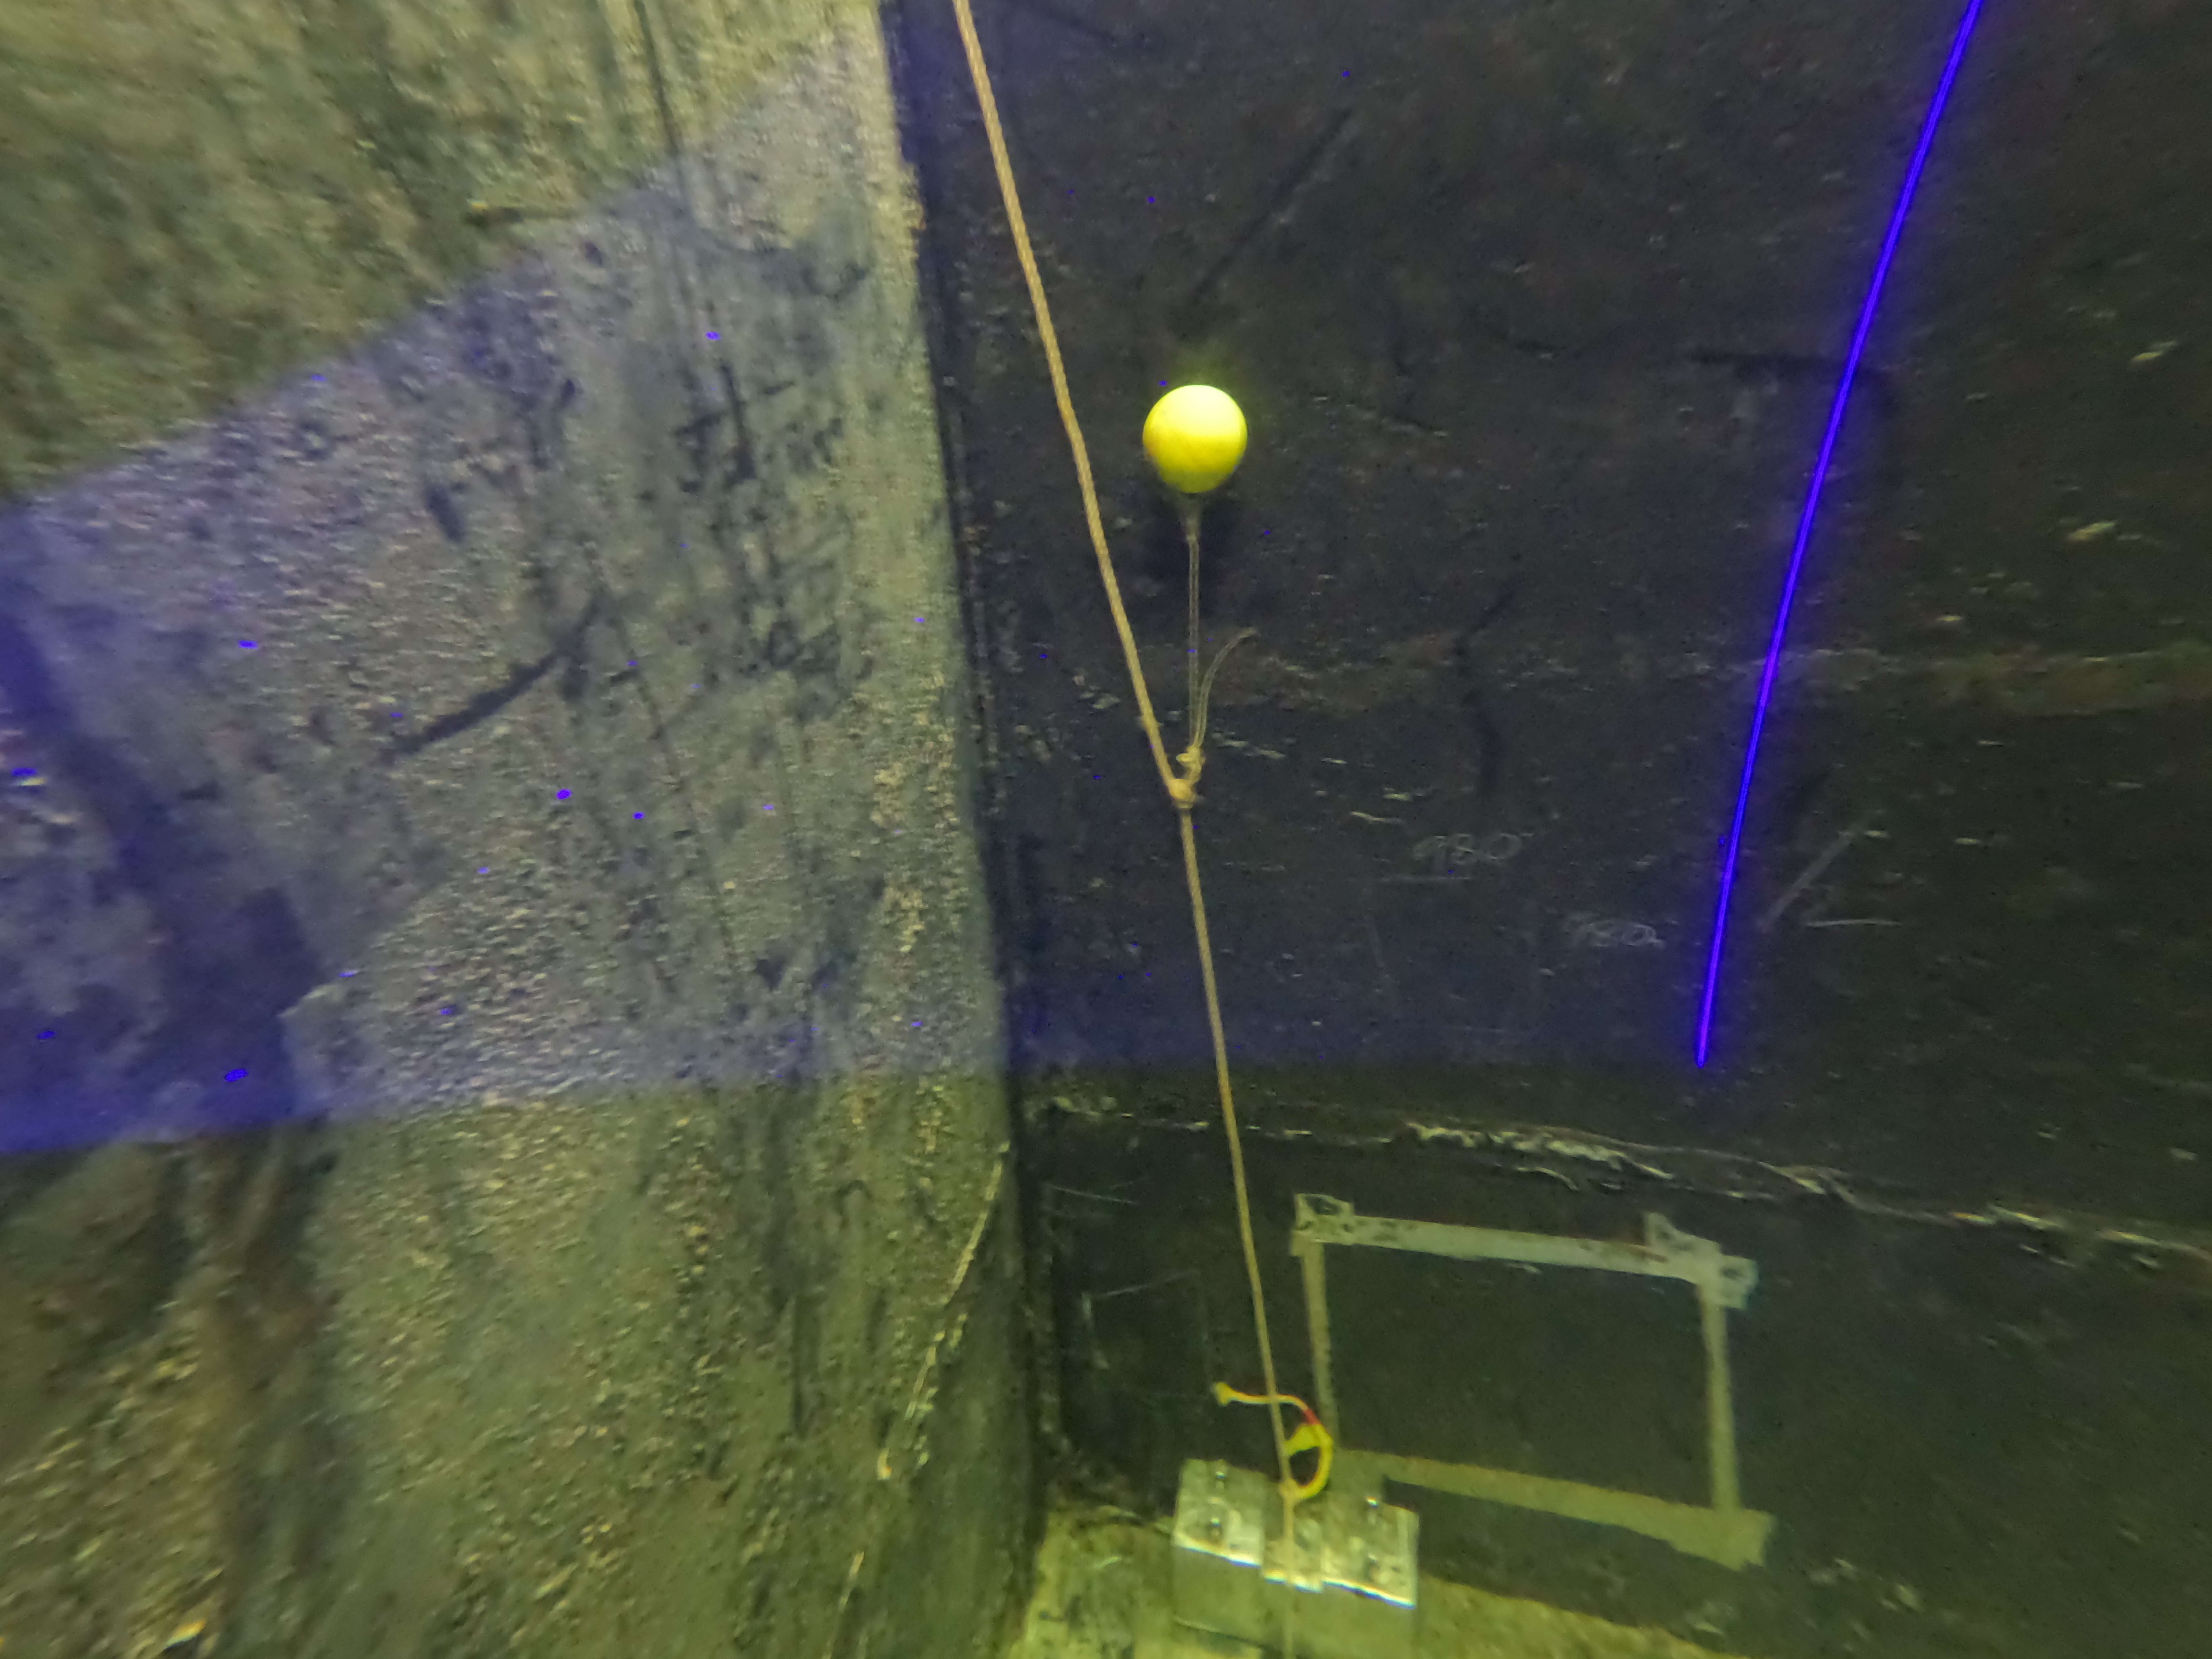

Supplement: Supplementary file 2960 [file G0031760.pdf › 12/G0031760.pdf]

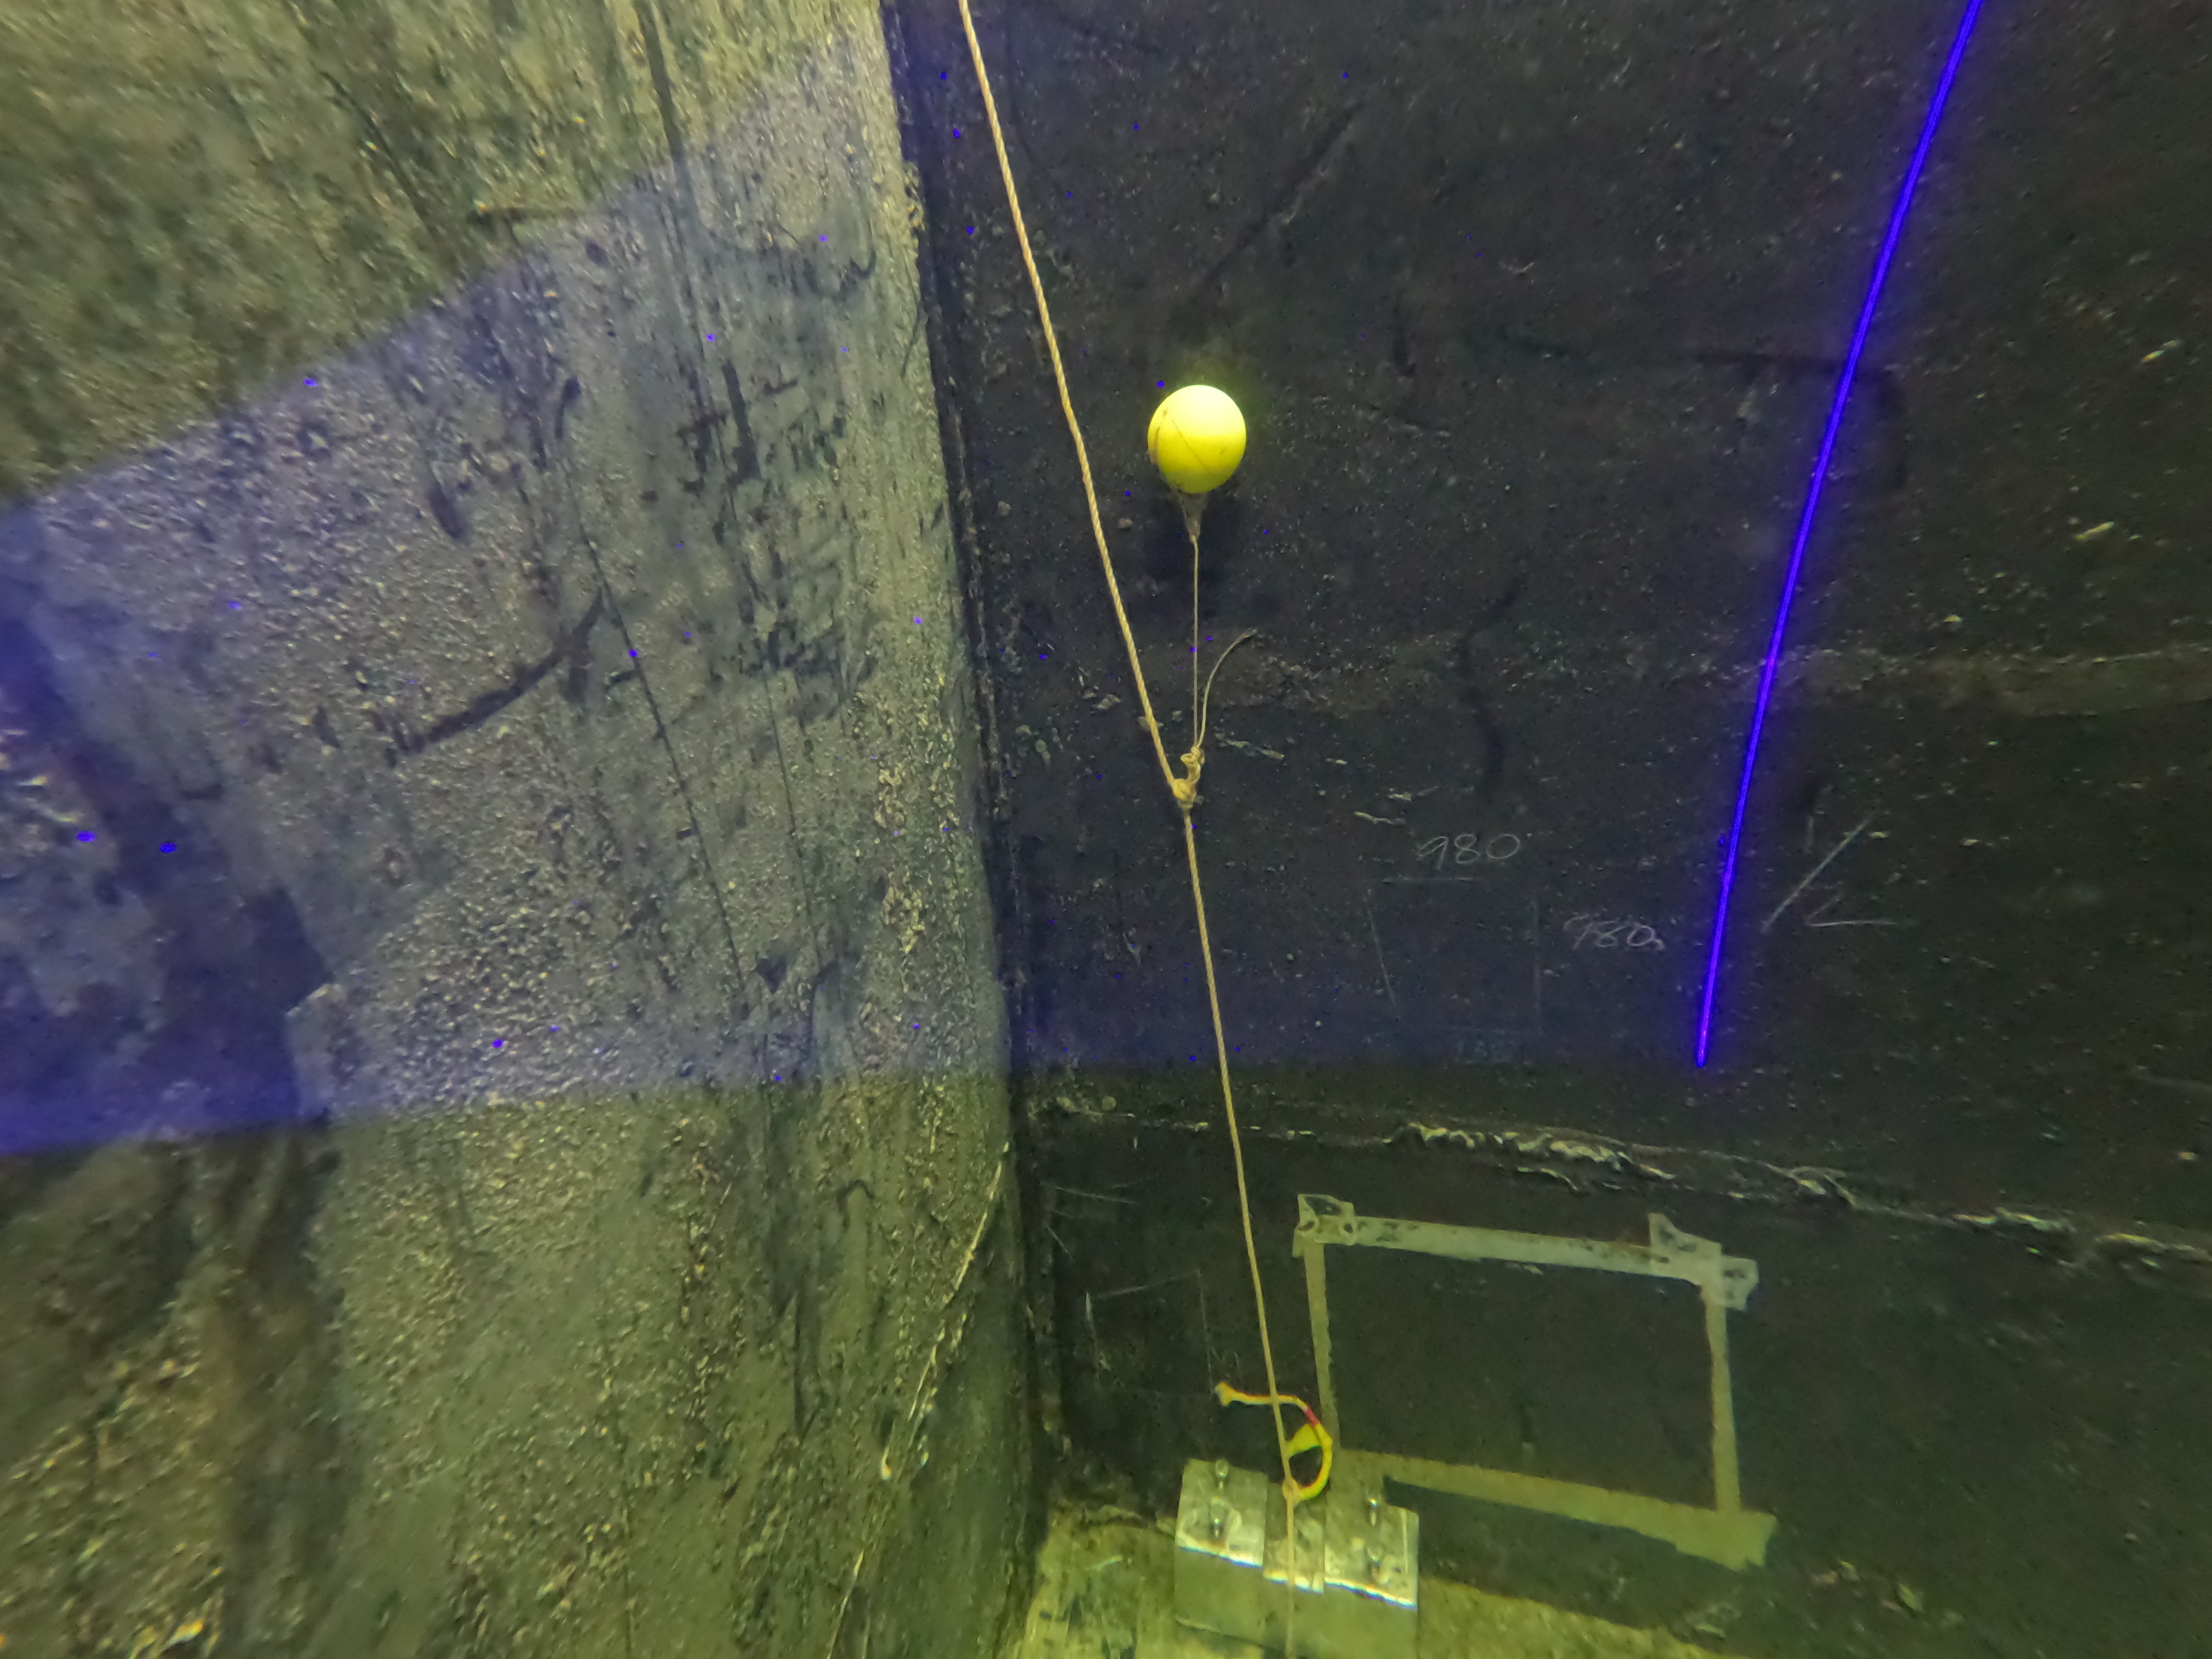

Supplement: Supplementary file 2961 [file G0031761.pdf › 12/G0031761.pdf]

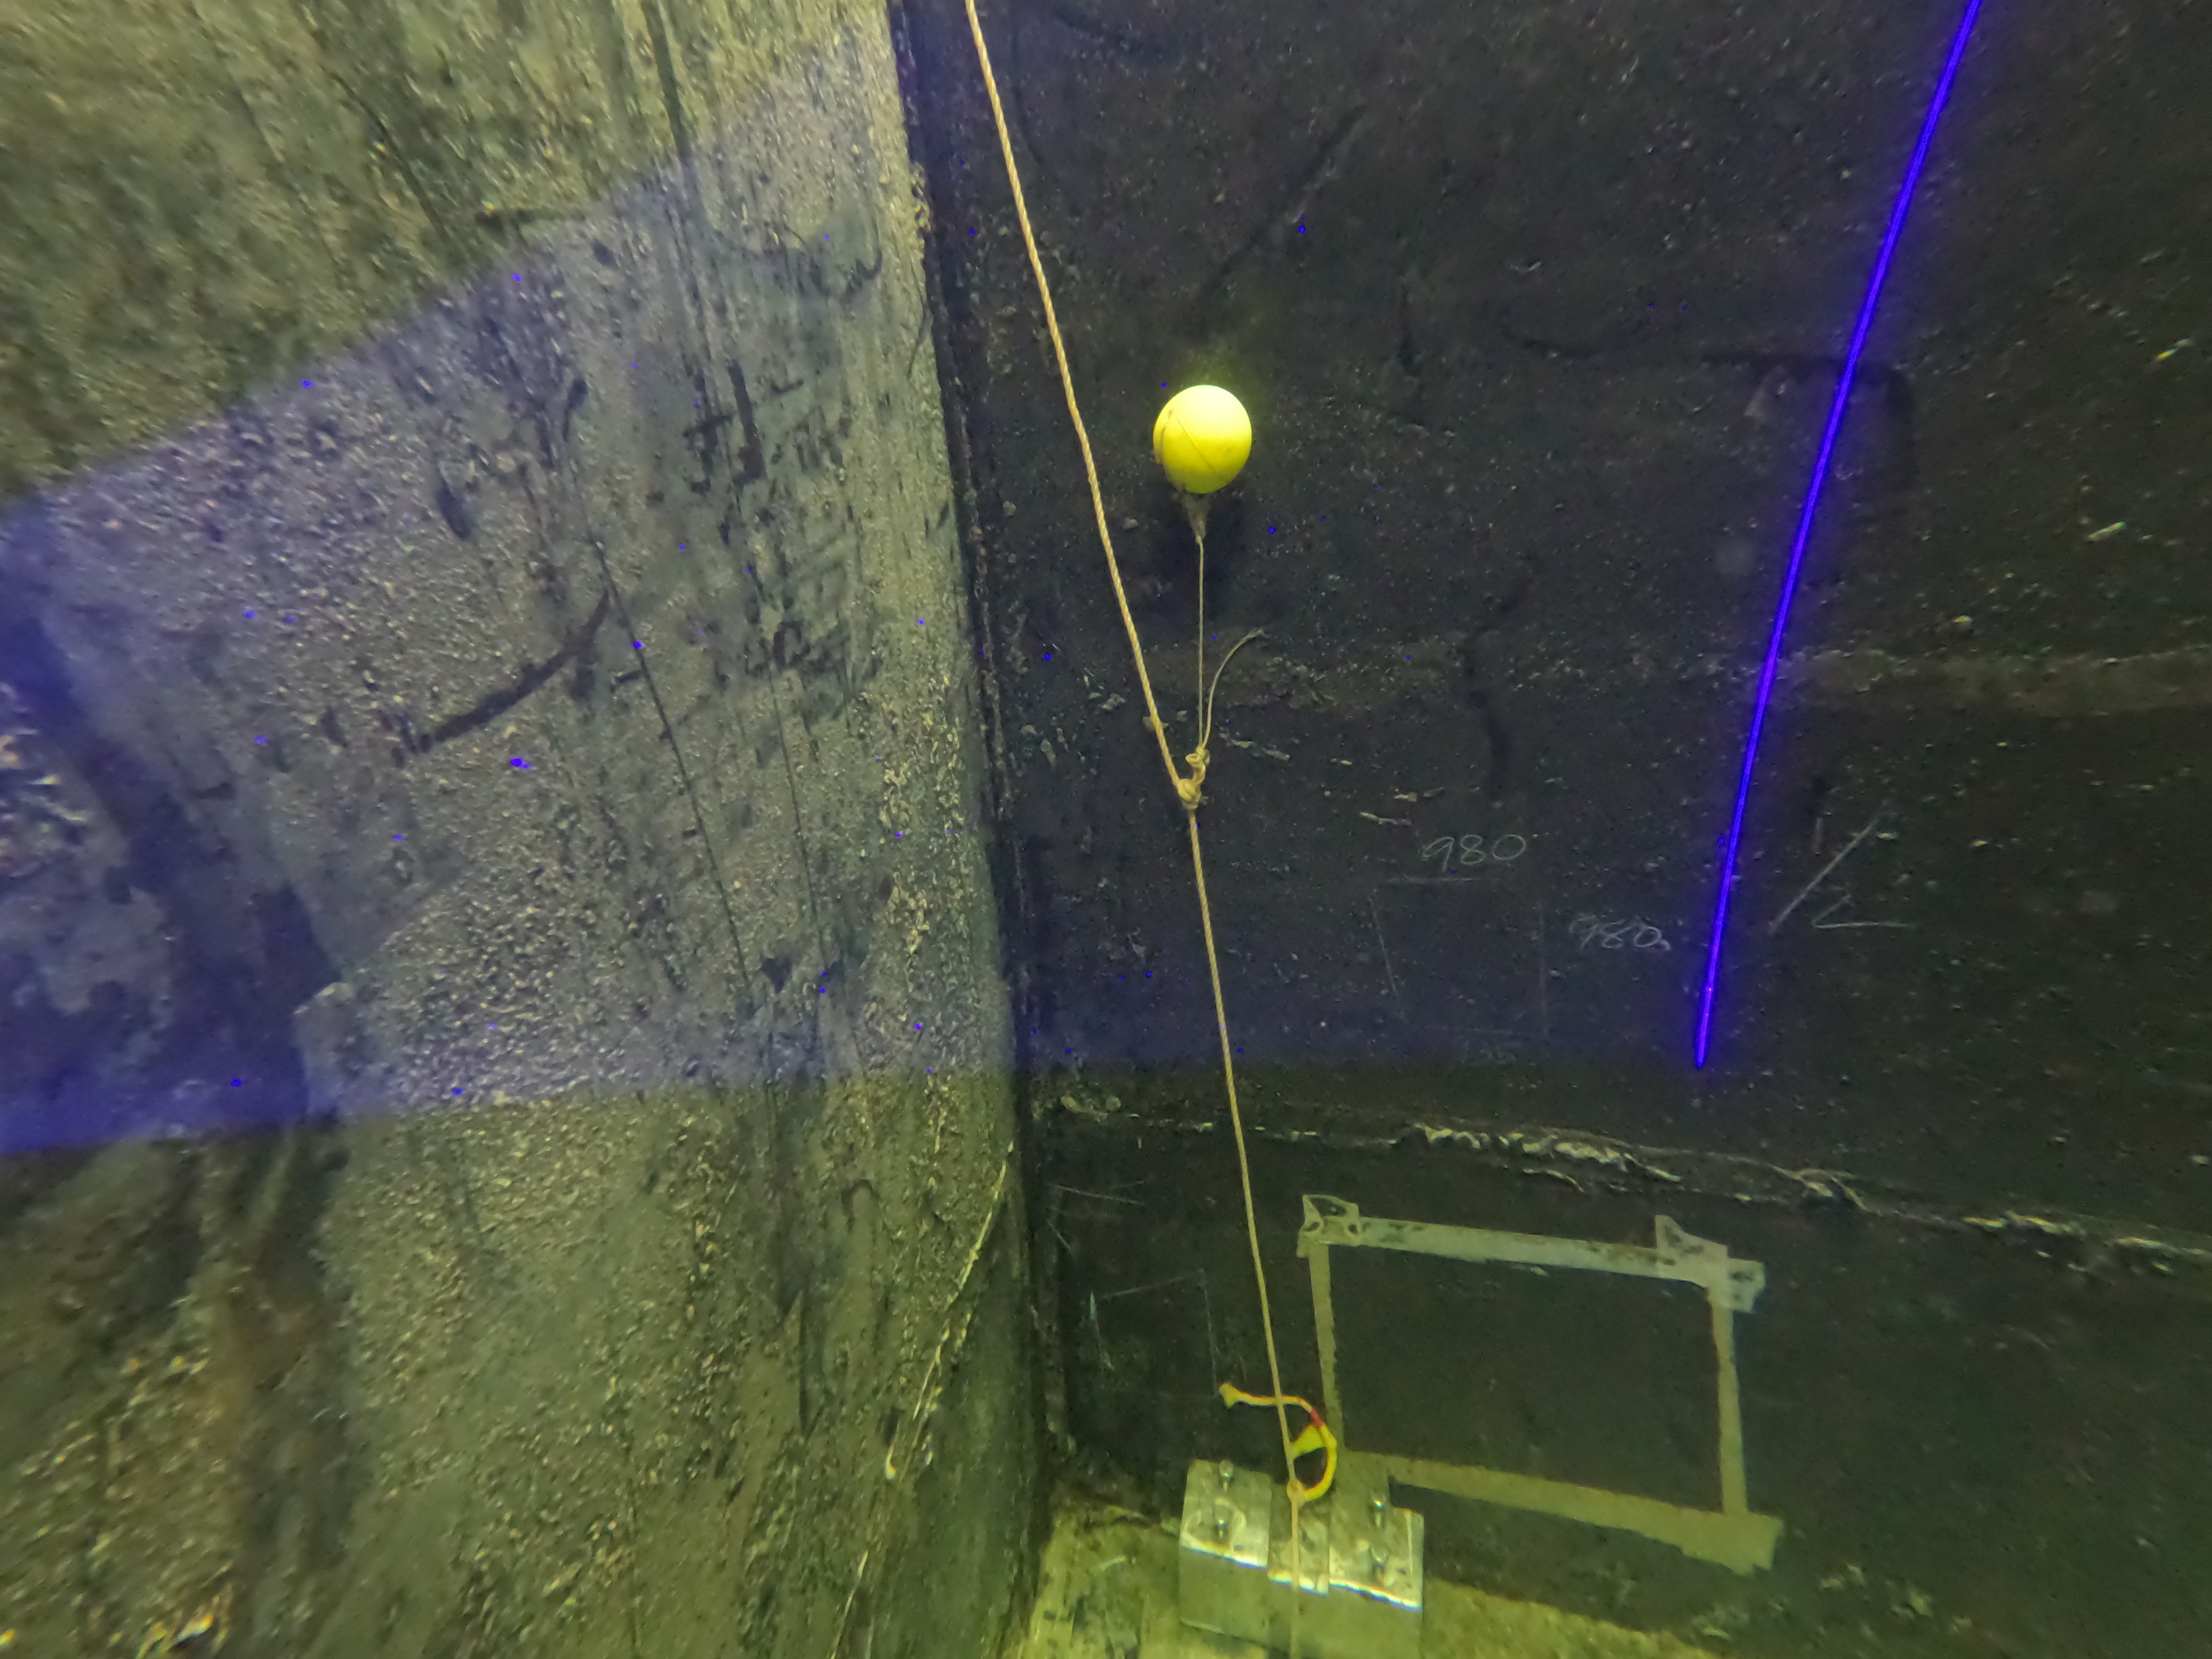

980

980

1/2

Supplement: Supplementary file 2962 [file G0031762.pdf › 12/G0031762.pdf]

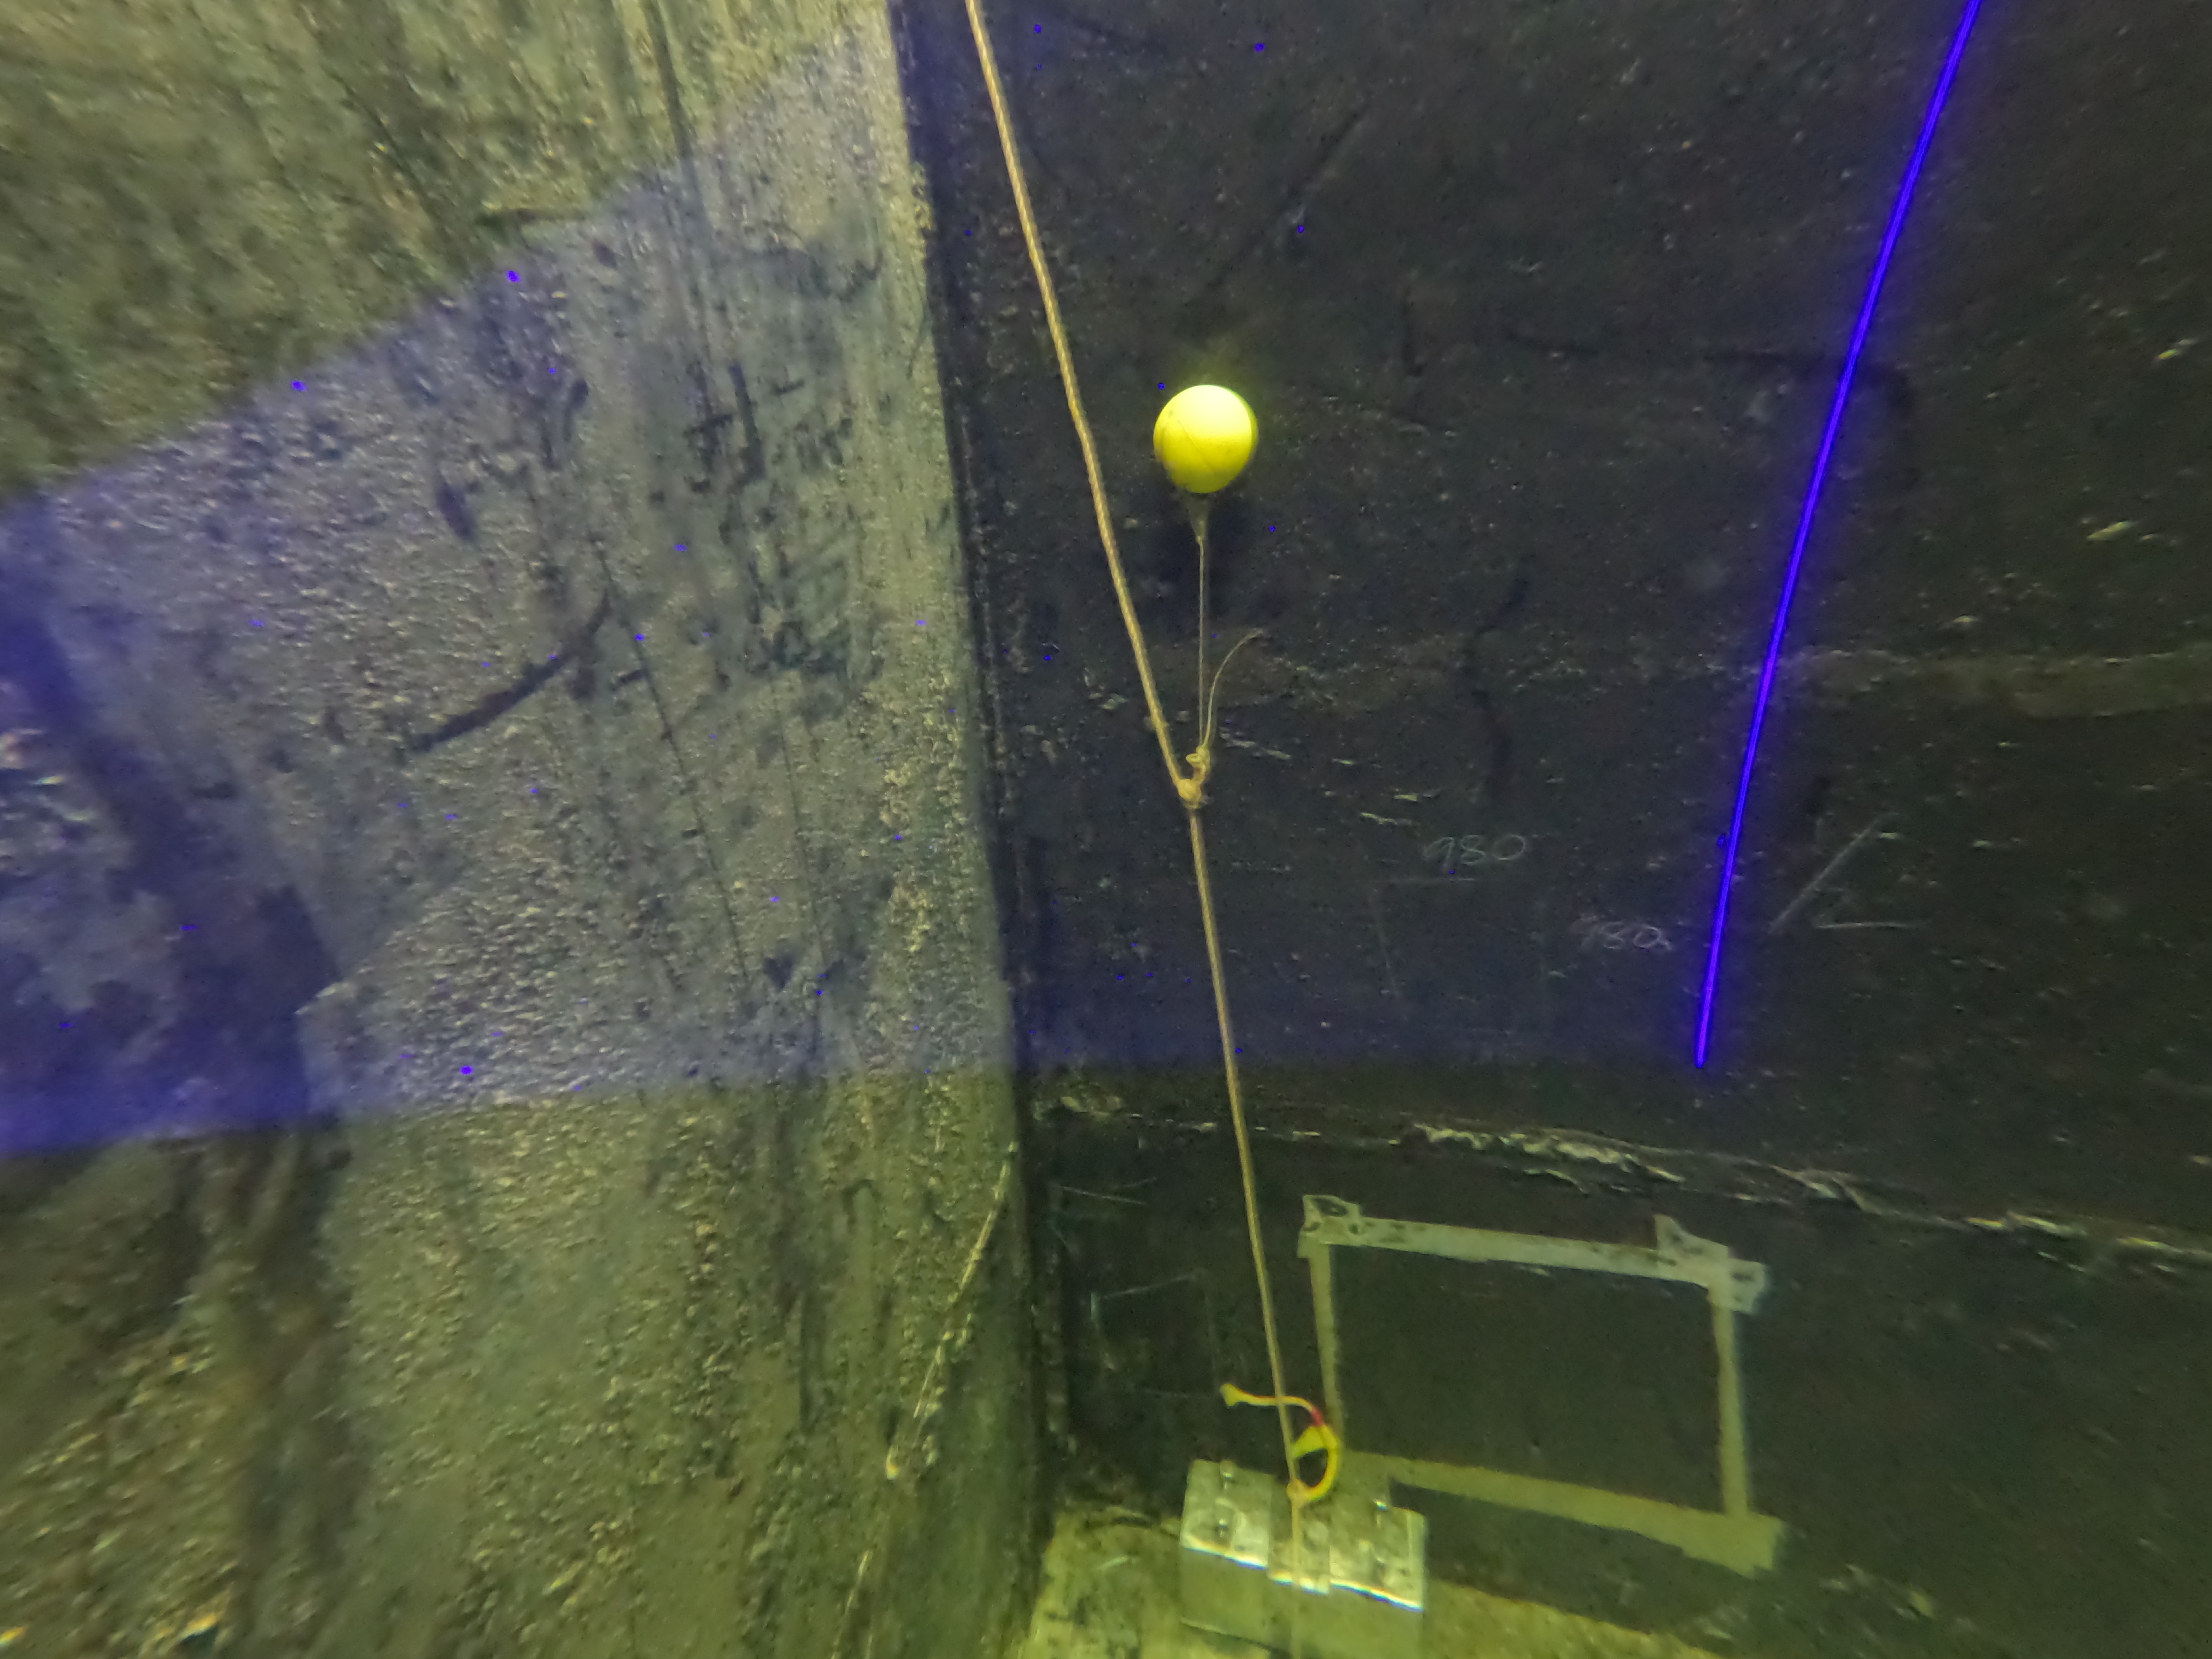

Supplement: Supplementary file 2963 [file G0031763.pdf › 12/G0031763.pdf]

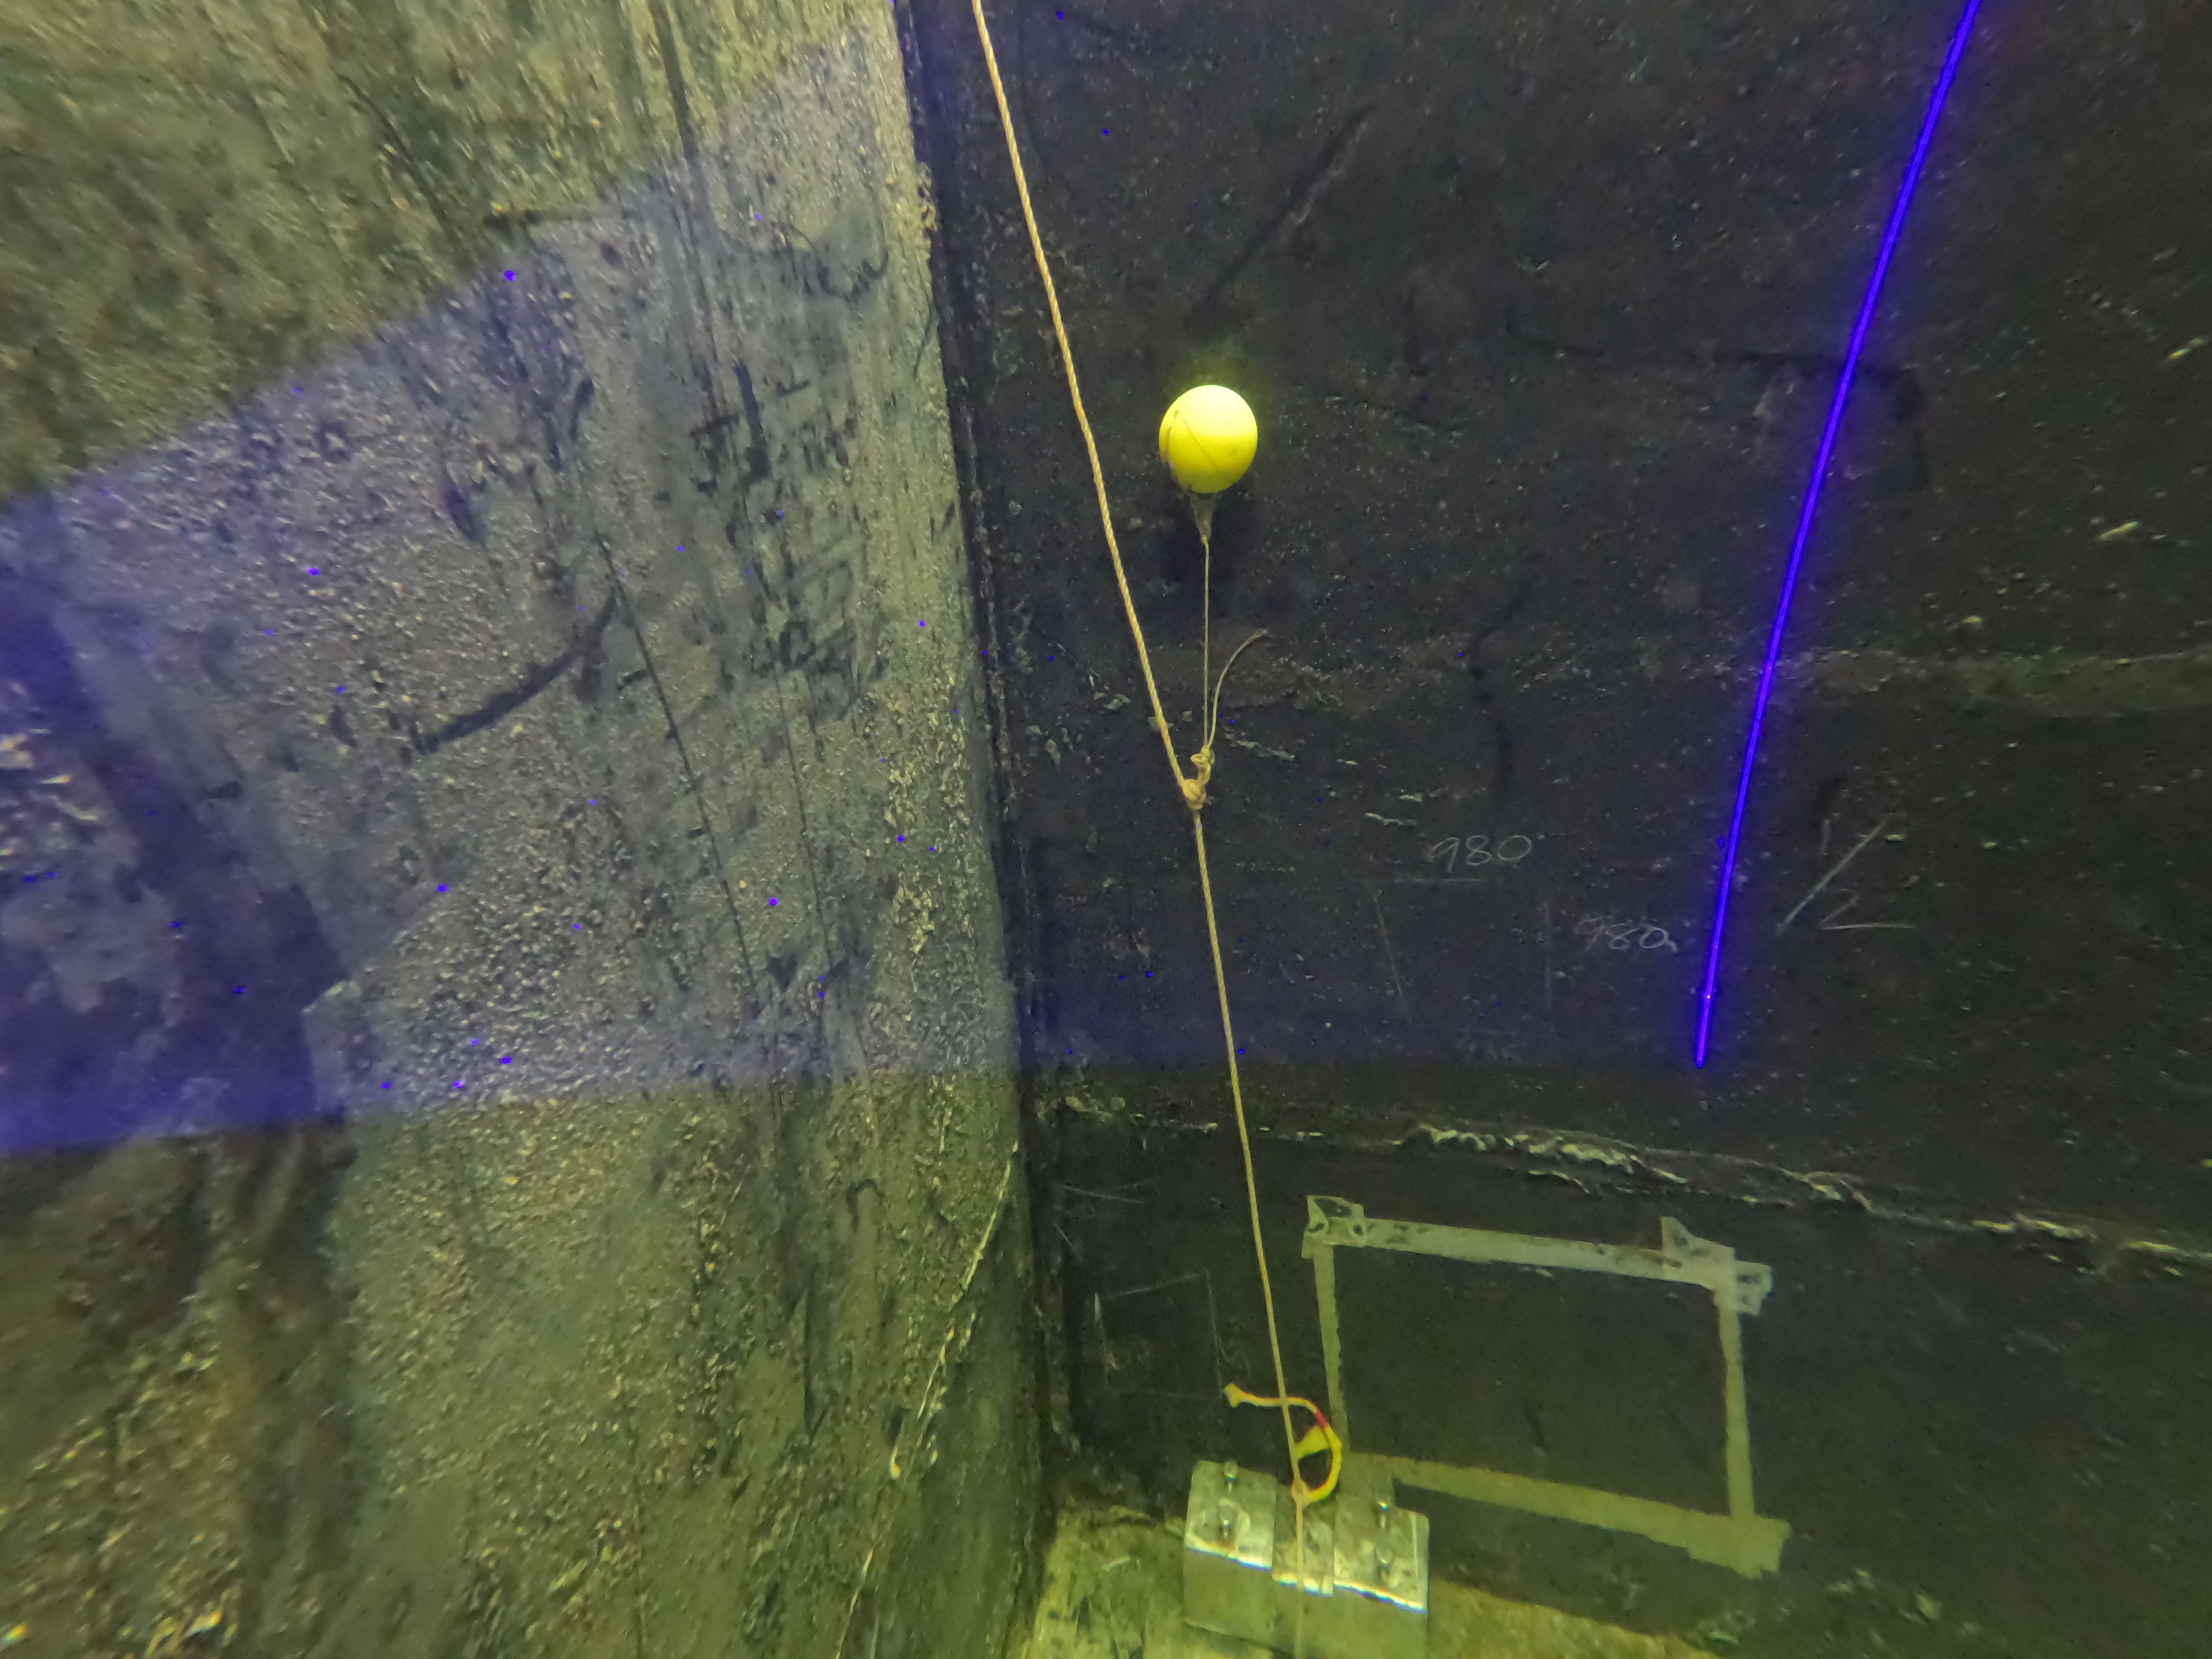

100m

100m

100m

100m

980

980

1/2

Supplement: Supplementary file 2964 [file G0031764.pdf › 12/G0031764.pdf]

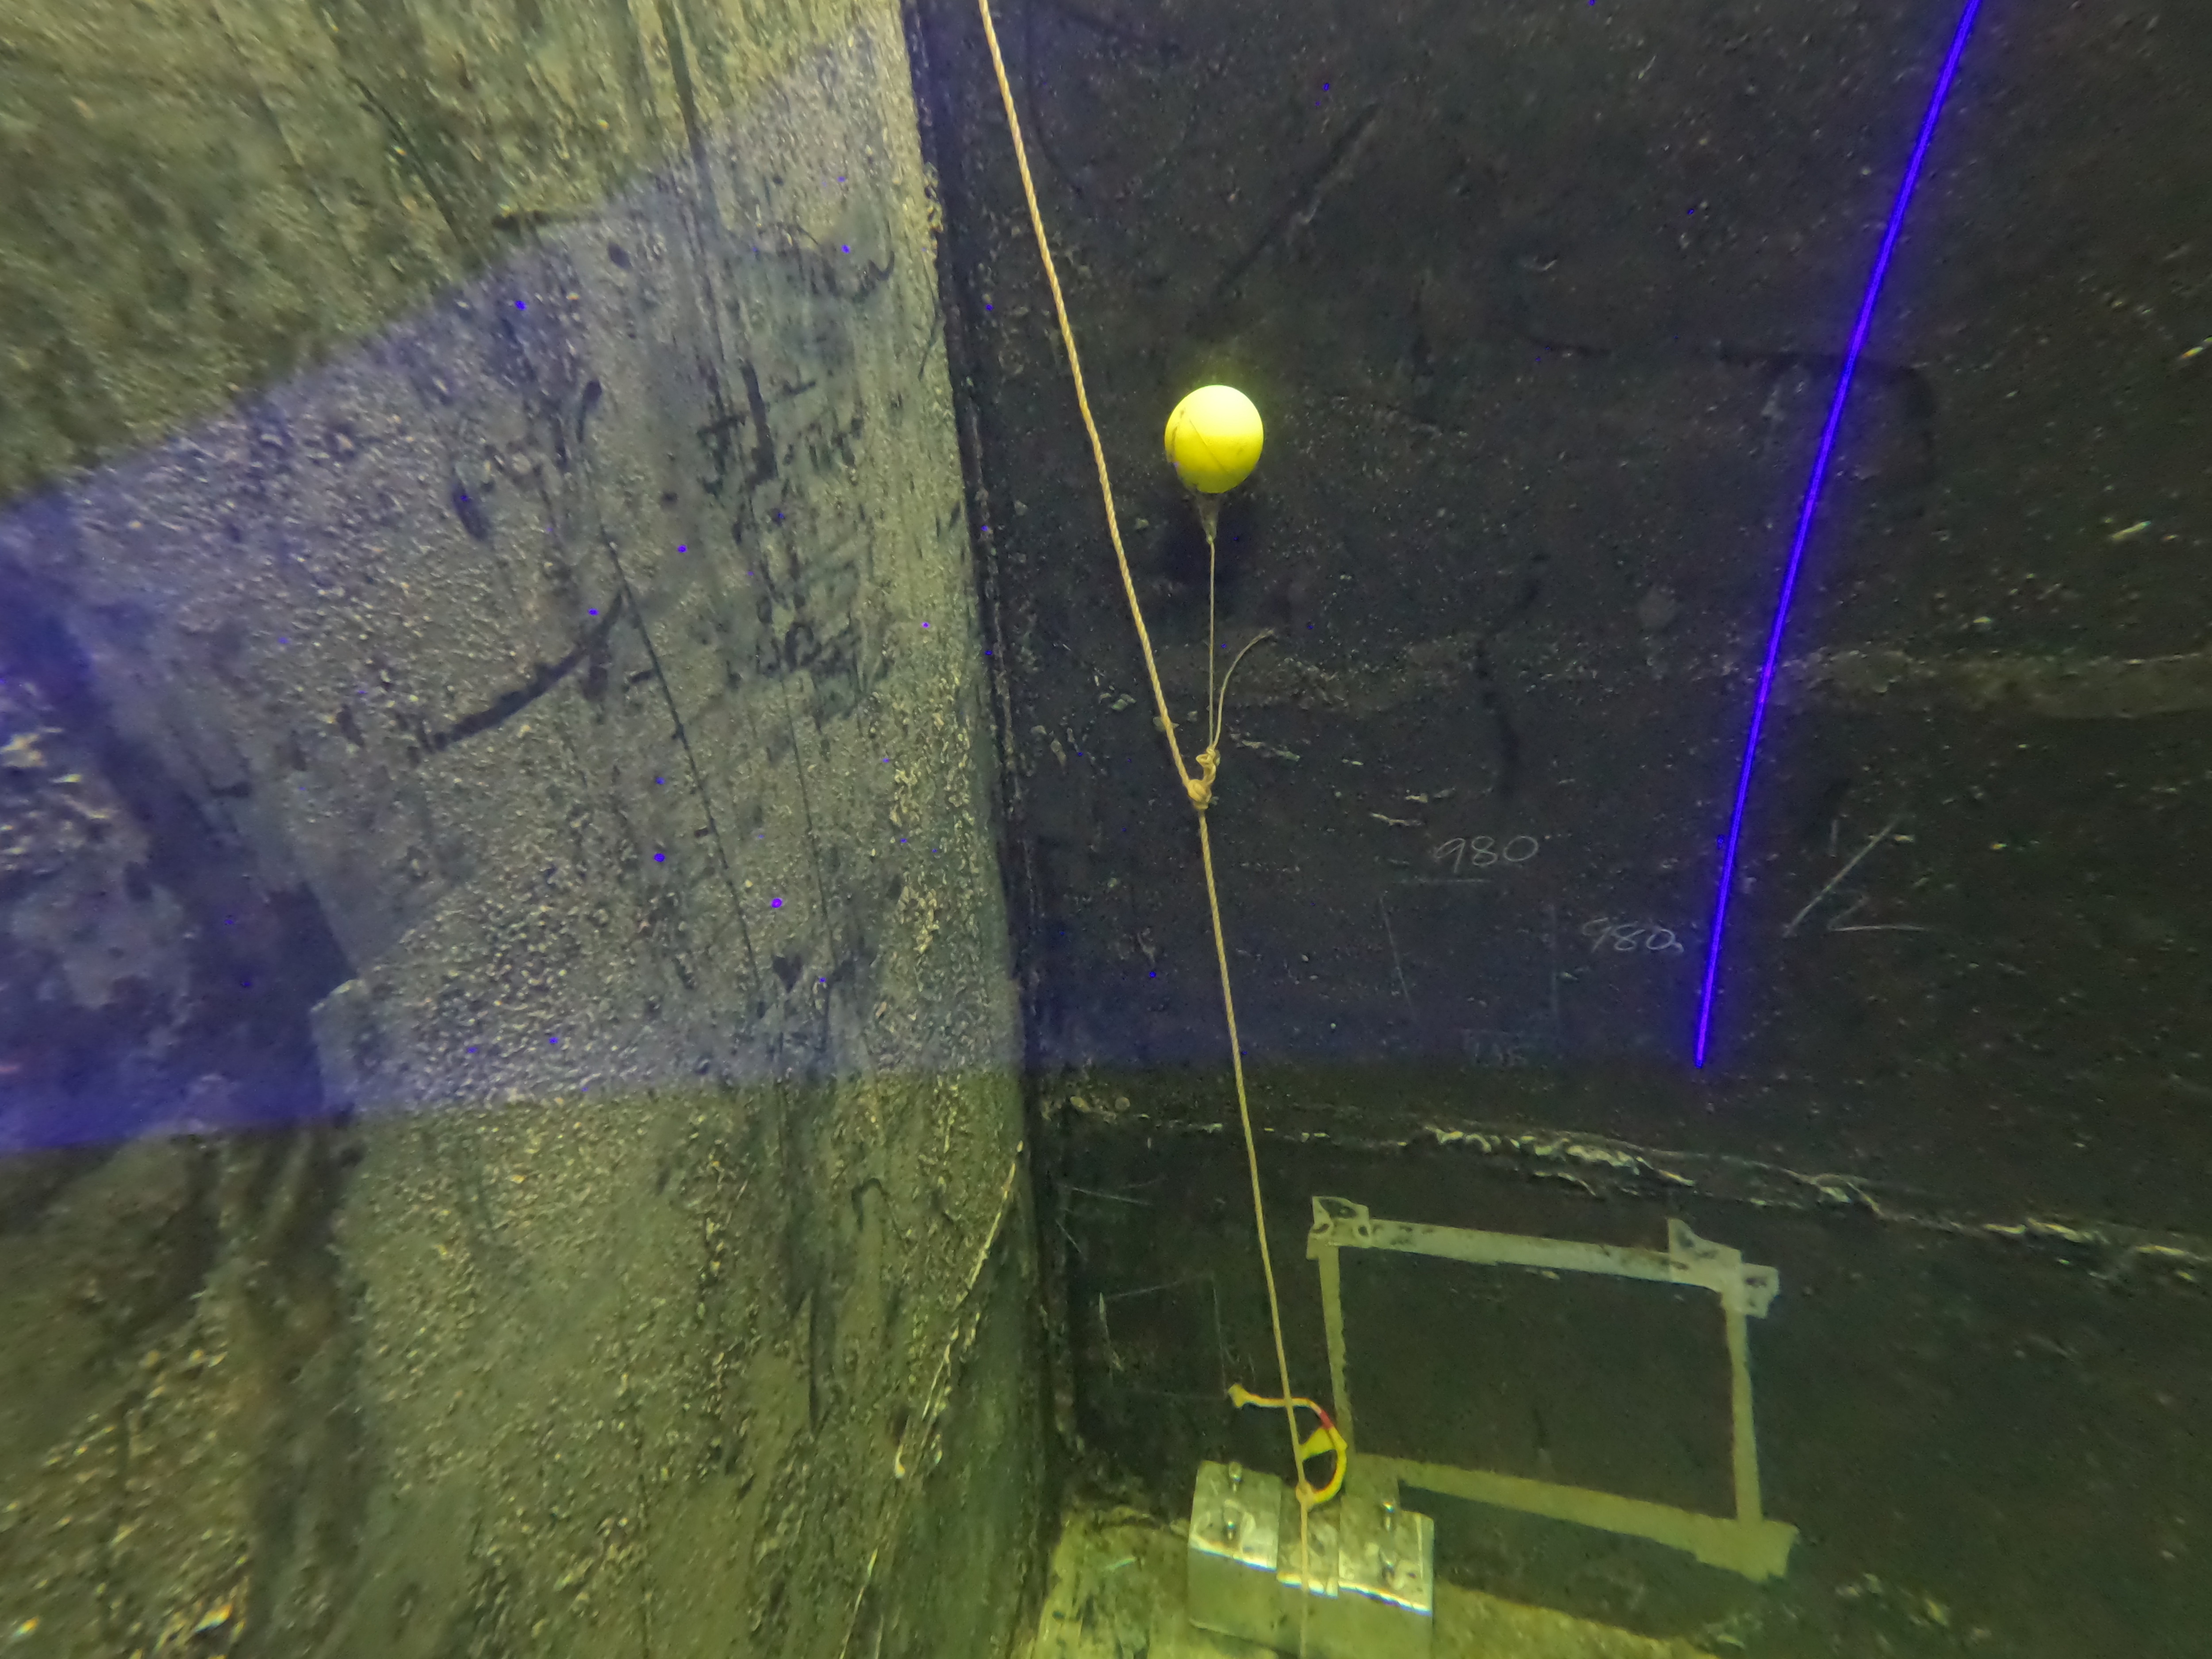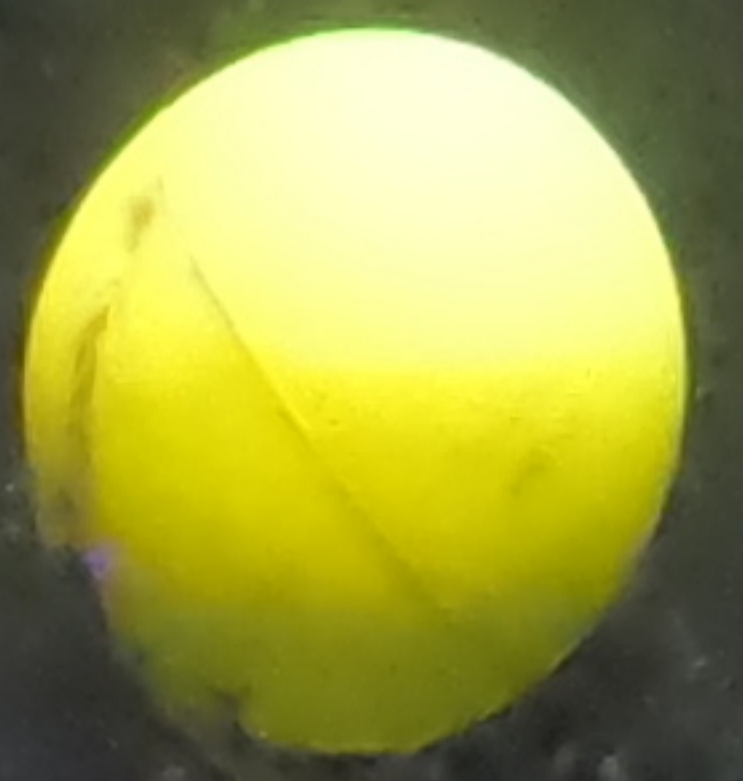

980

980

12

Supplement: Supplementary file 2965 [file G0031765.pdf › 12/G0031765.pdf]

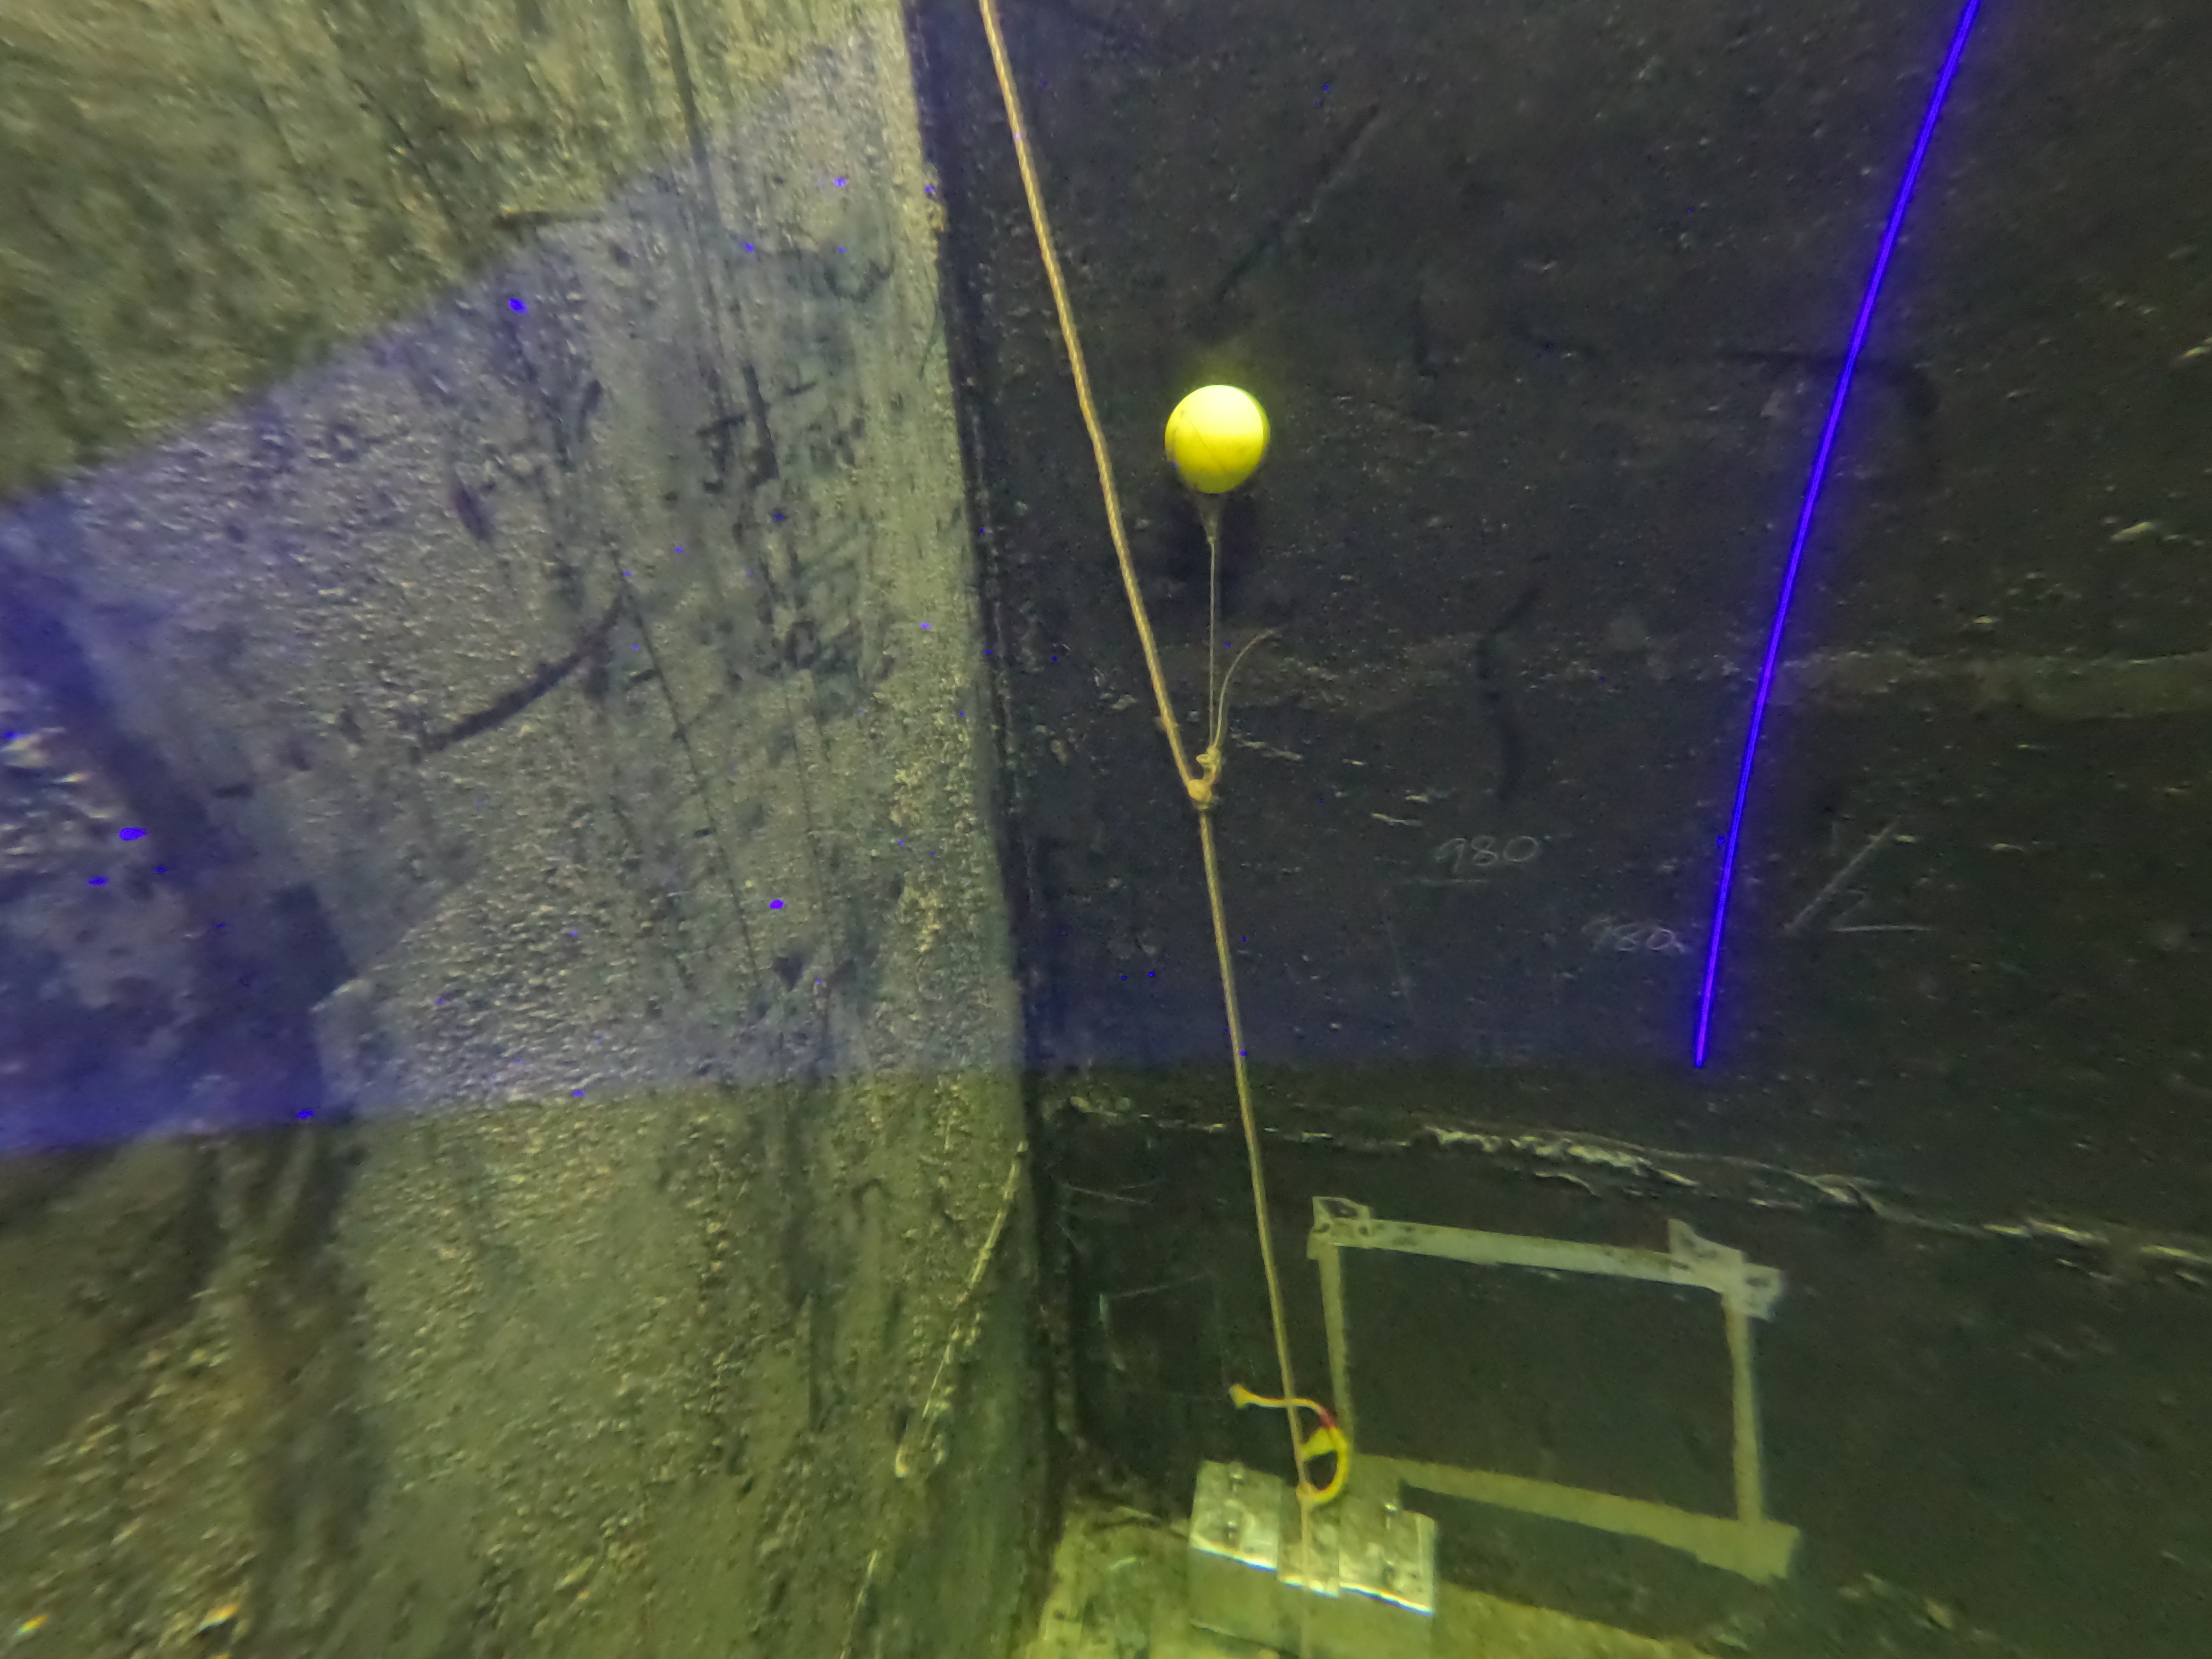

Supplement: Supplementary file 2966 [file G0031766.pdf › 12/G0031766.pdf]

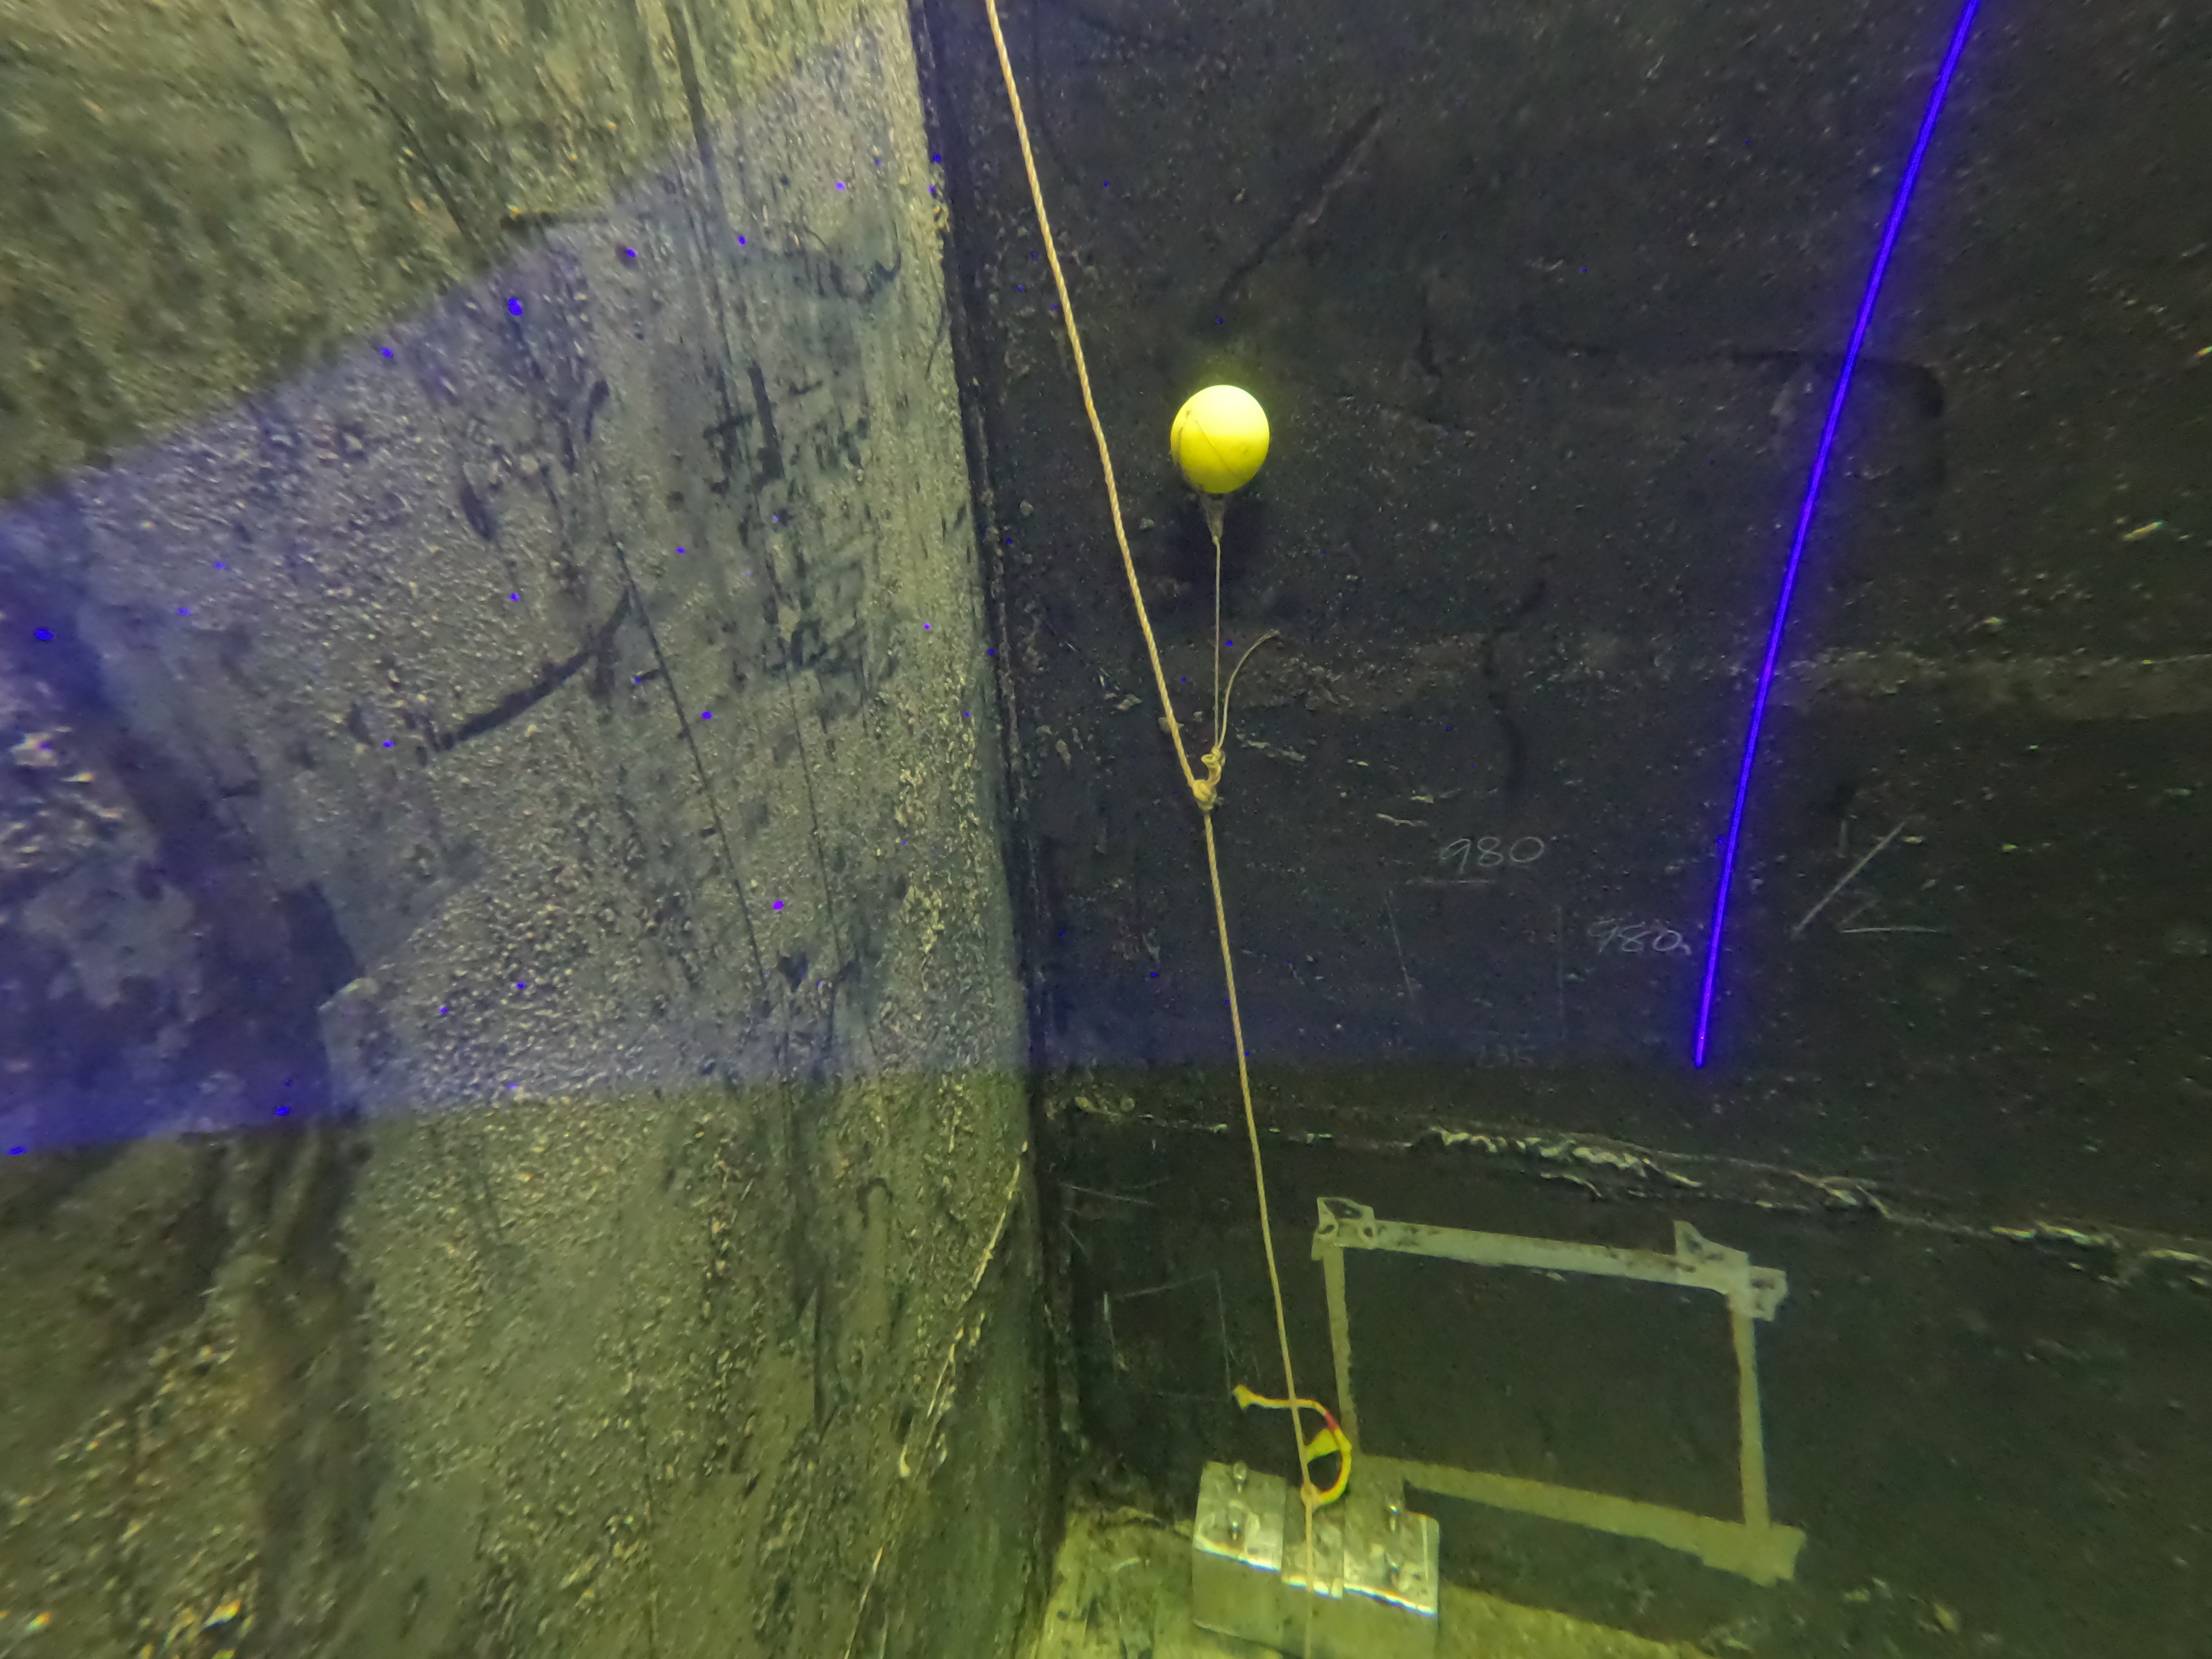

Supplement: Supplementary file 2967 [file G0031767.pdf › 12/G0031767.pdf]

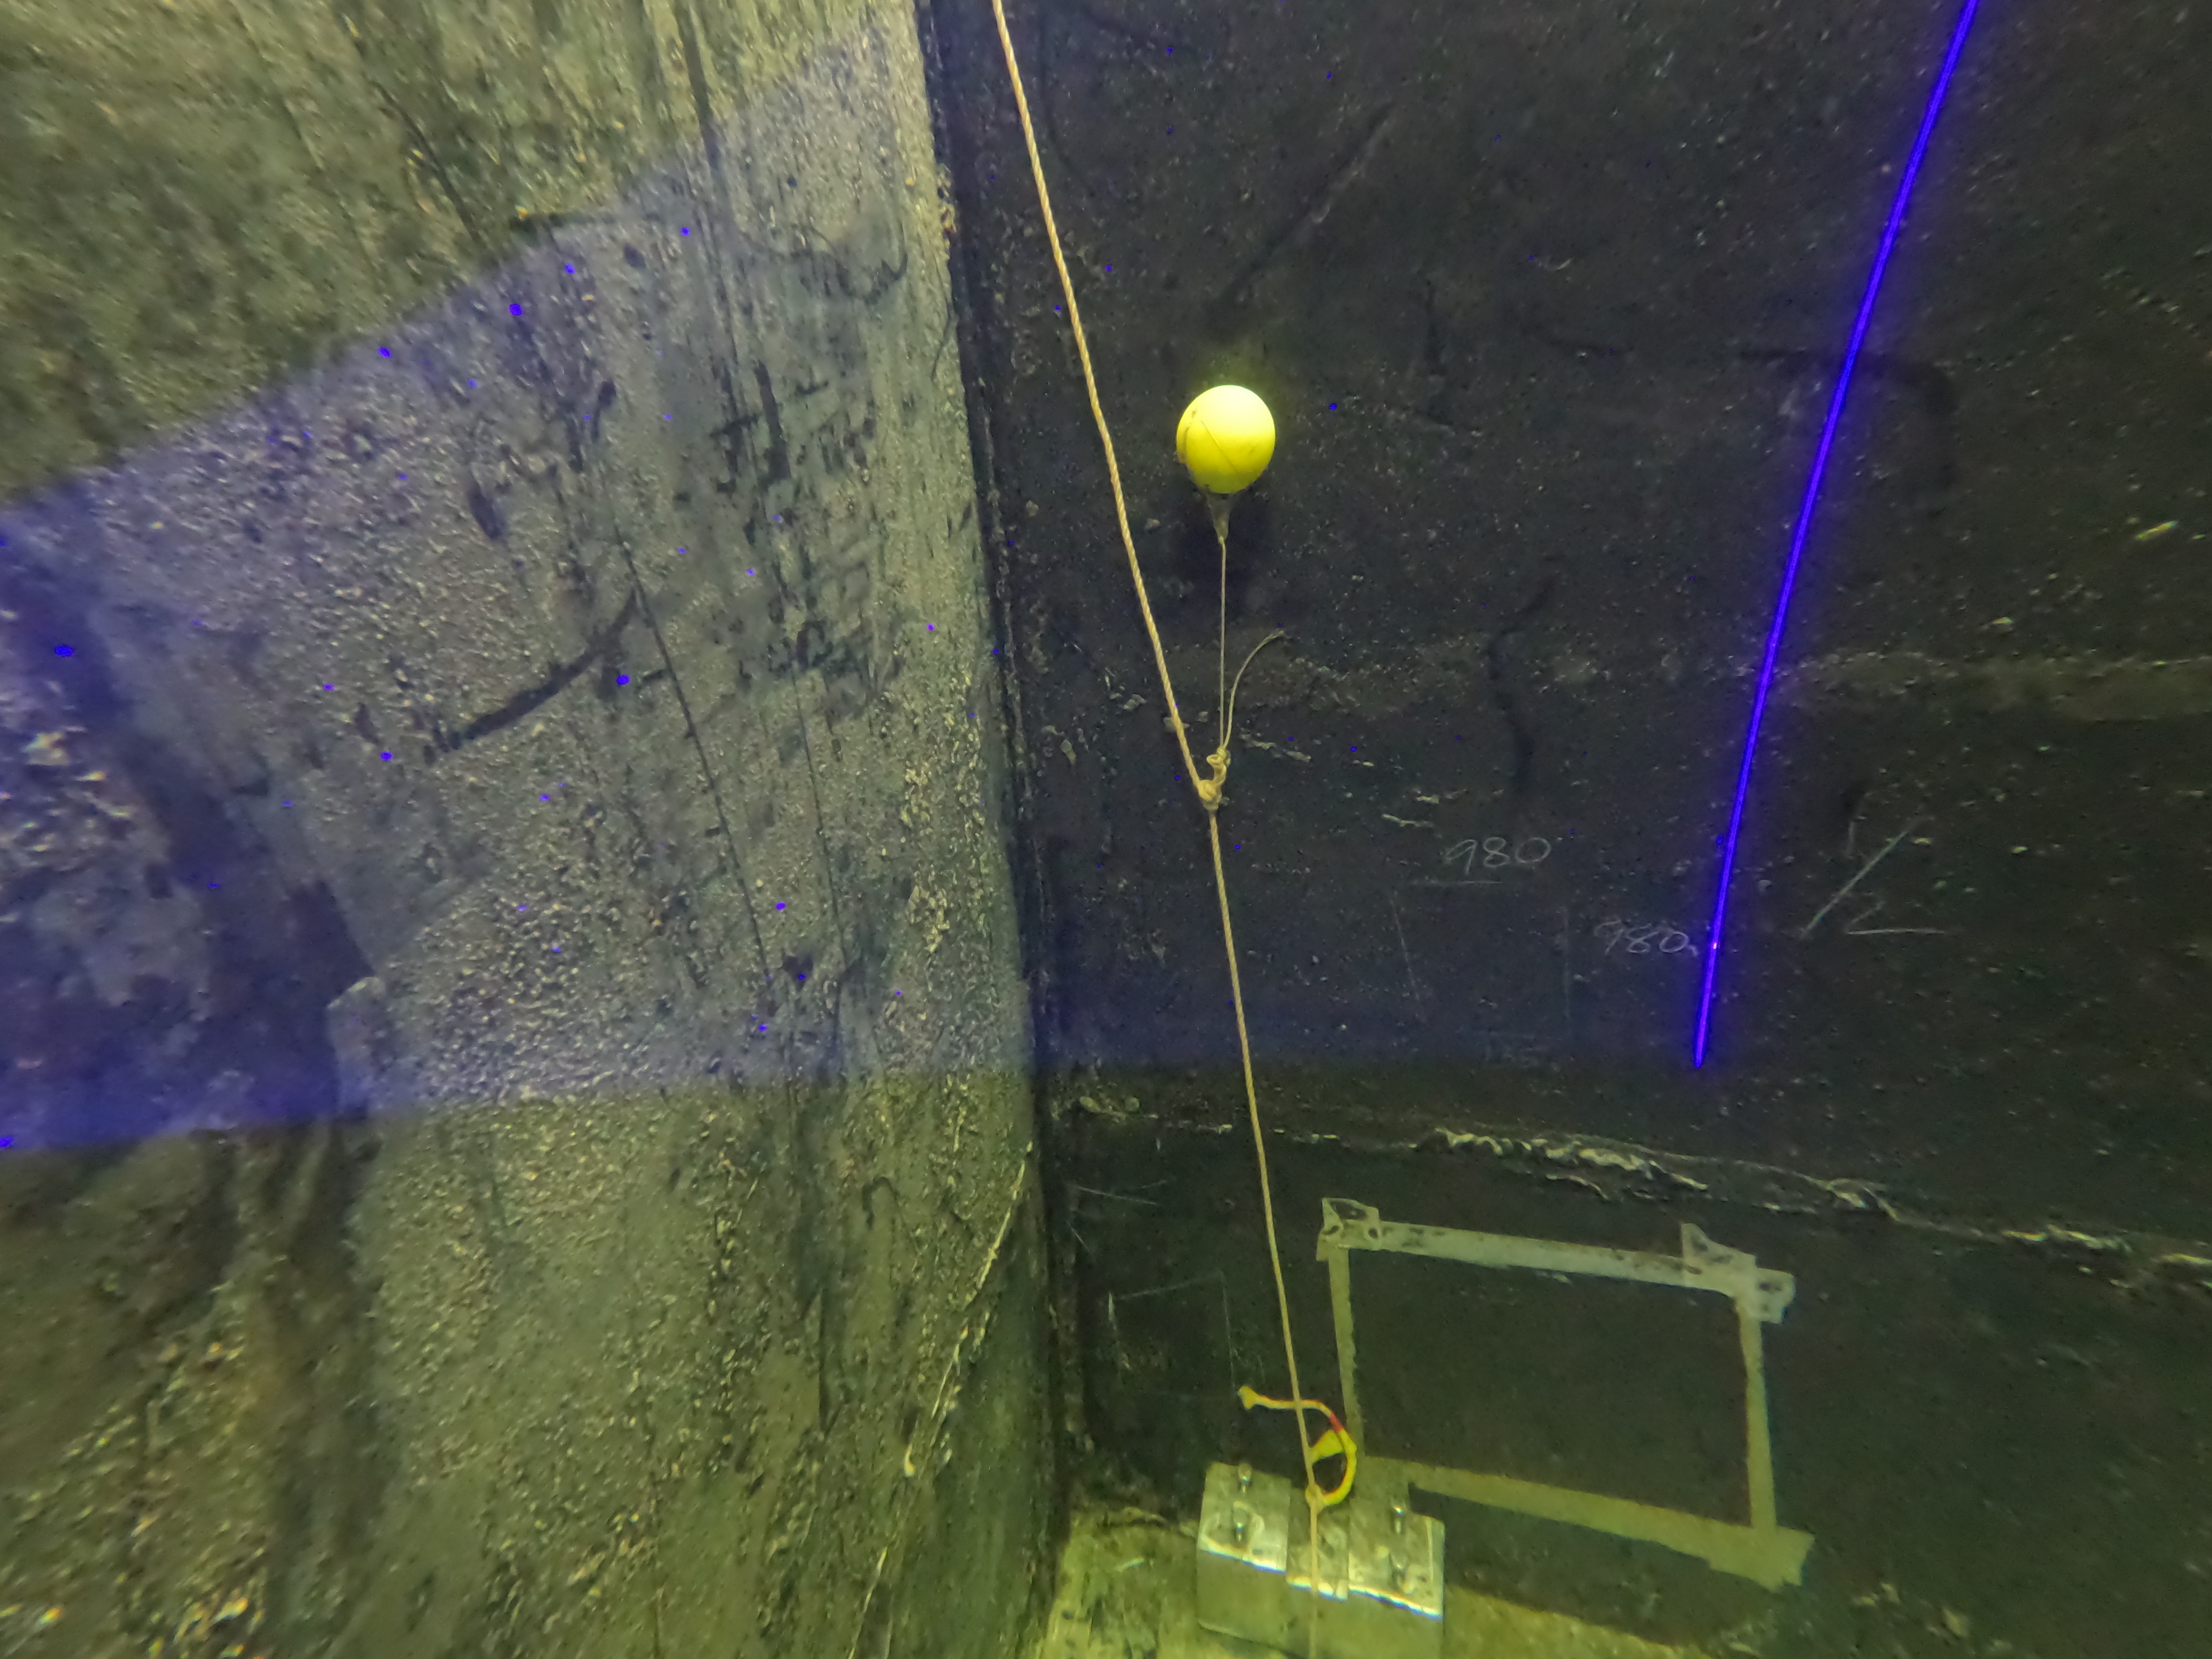

980

980

✓

Supplement: Supplementary file 2968 [file G0031768.pdf › 12/G0031768.pdf]

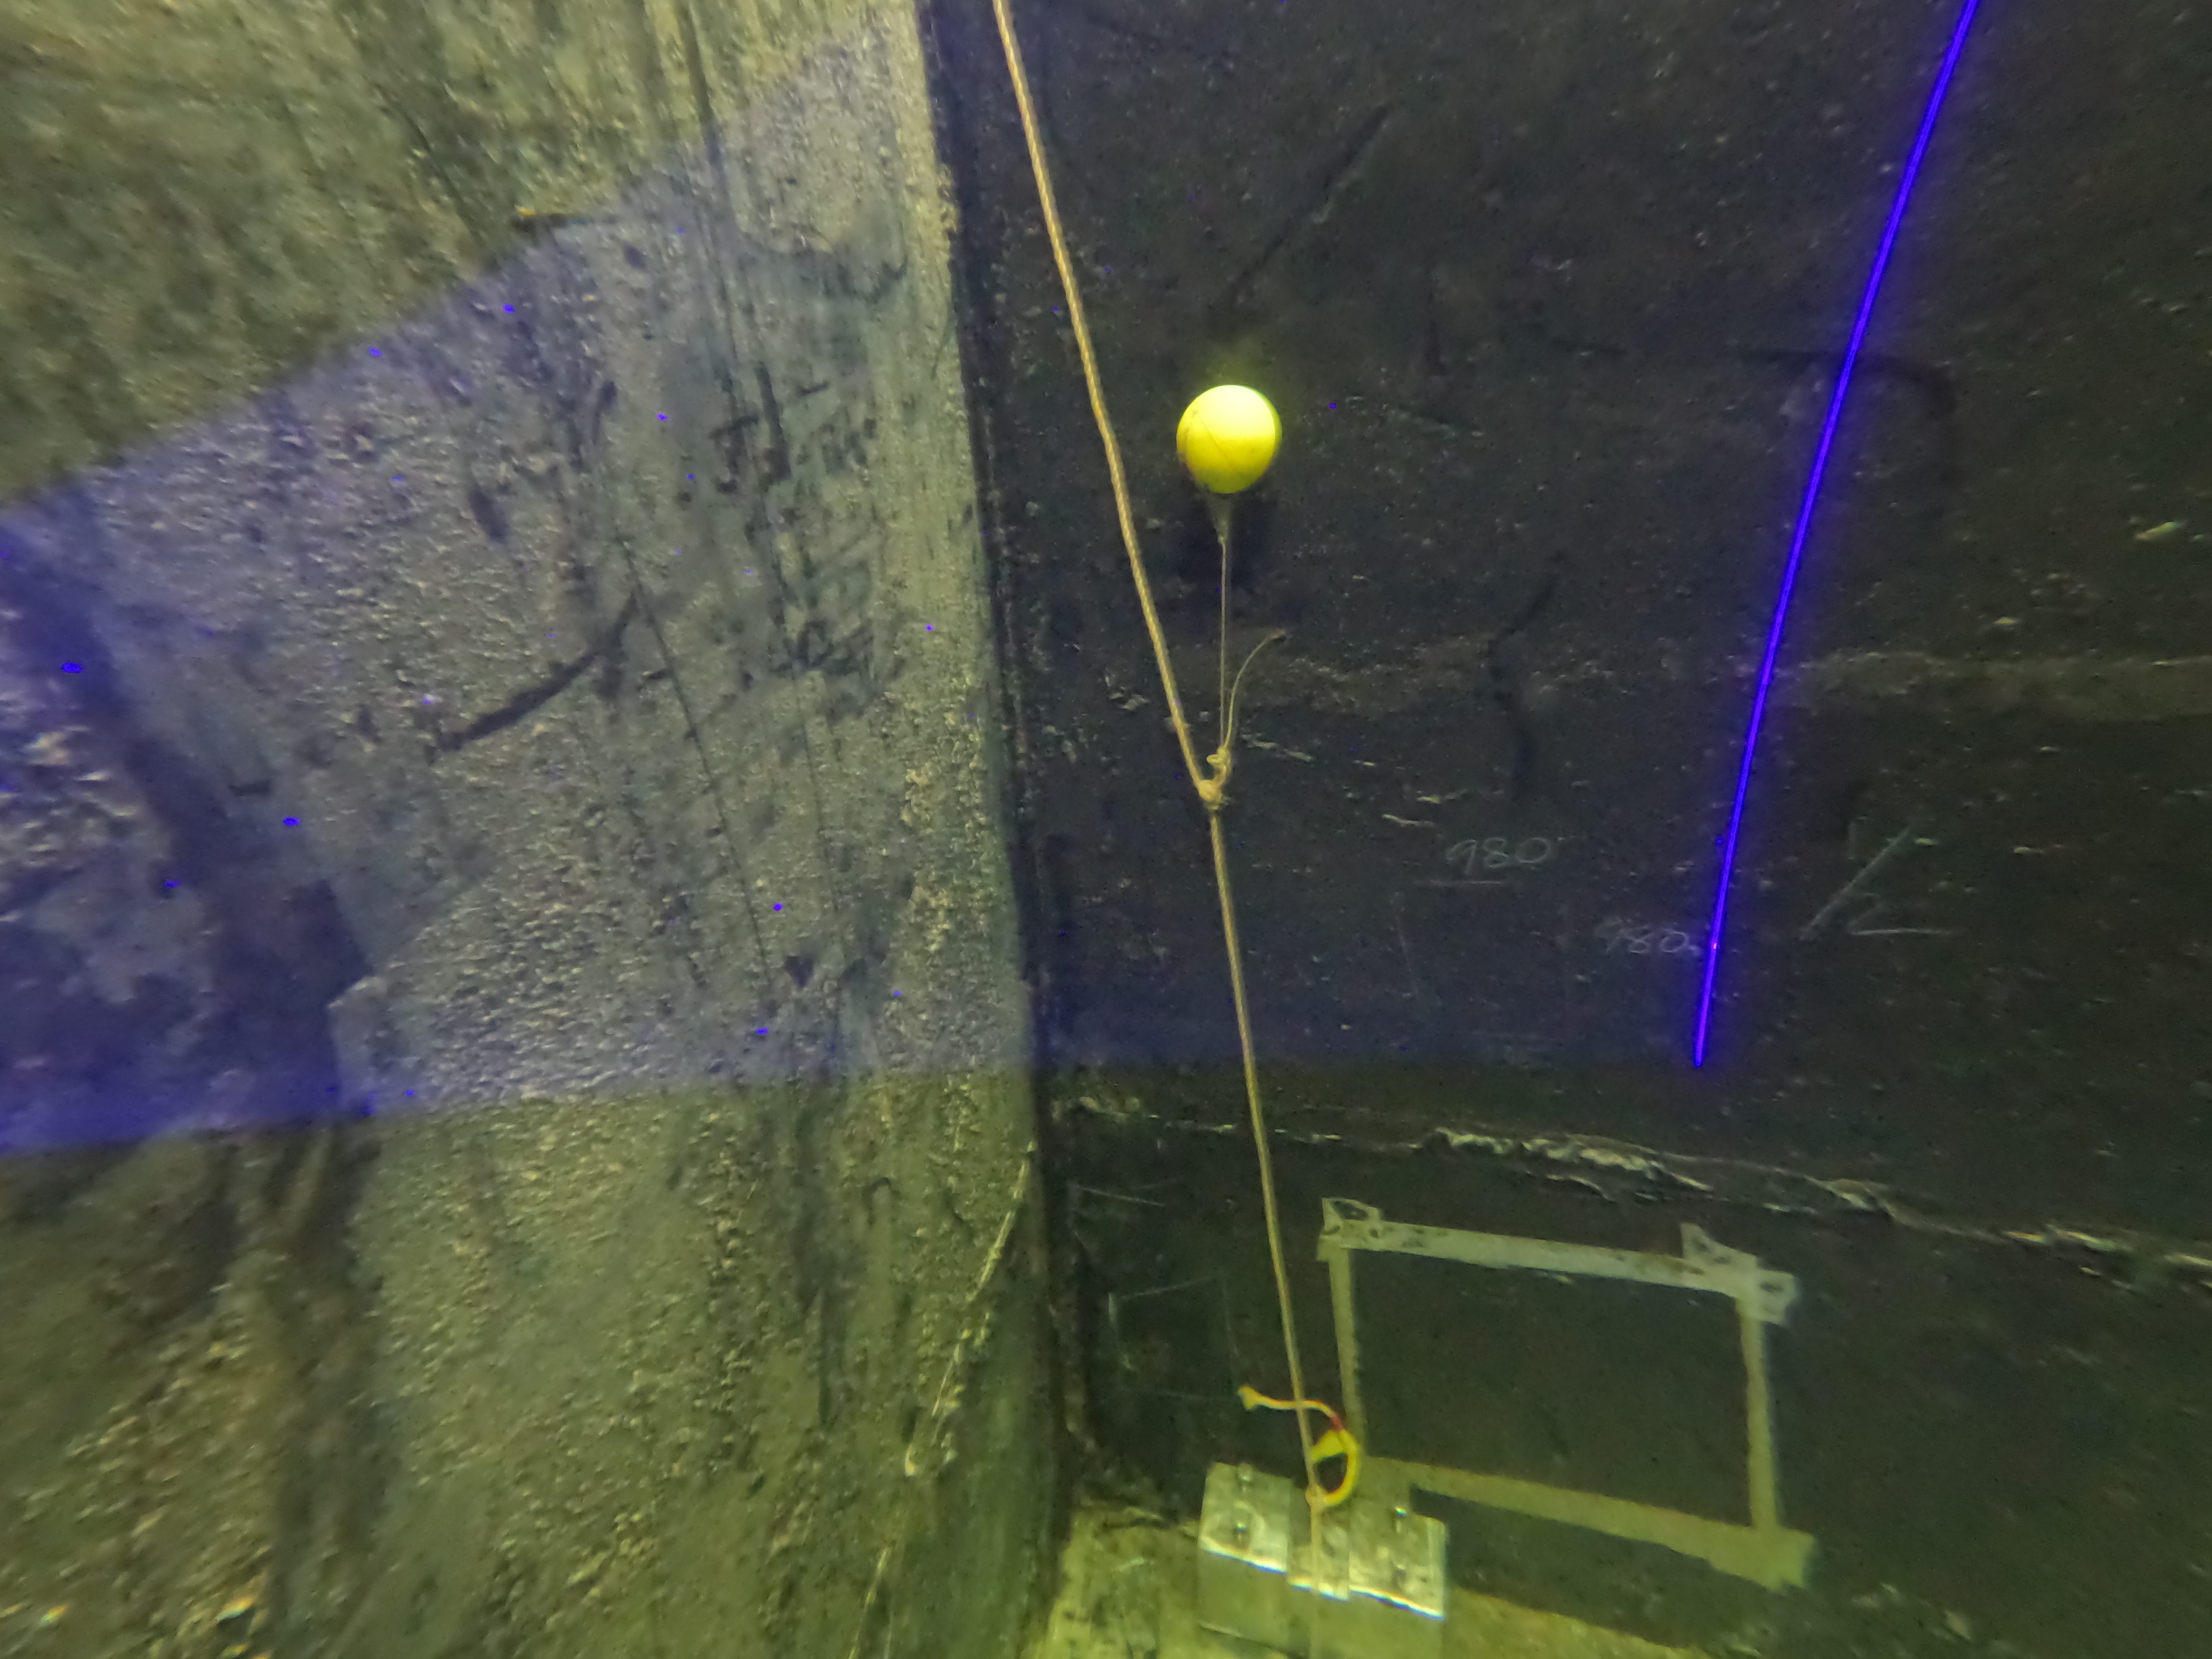

Supplement: Supplementary file 2969 [file G0031769.pdf › 12/G0031769.pdf]

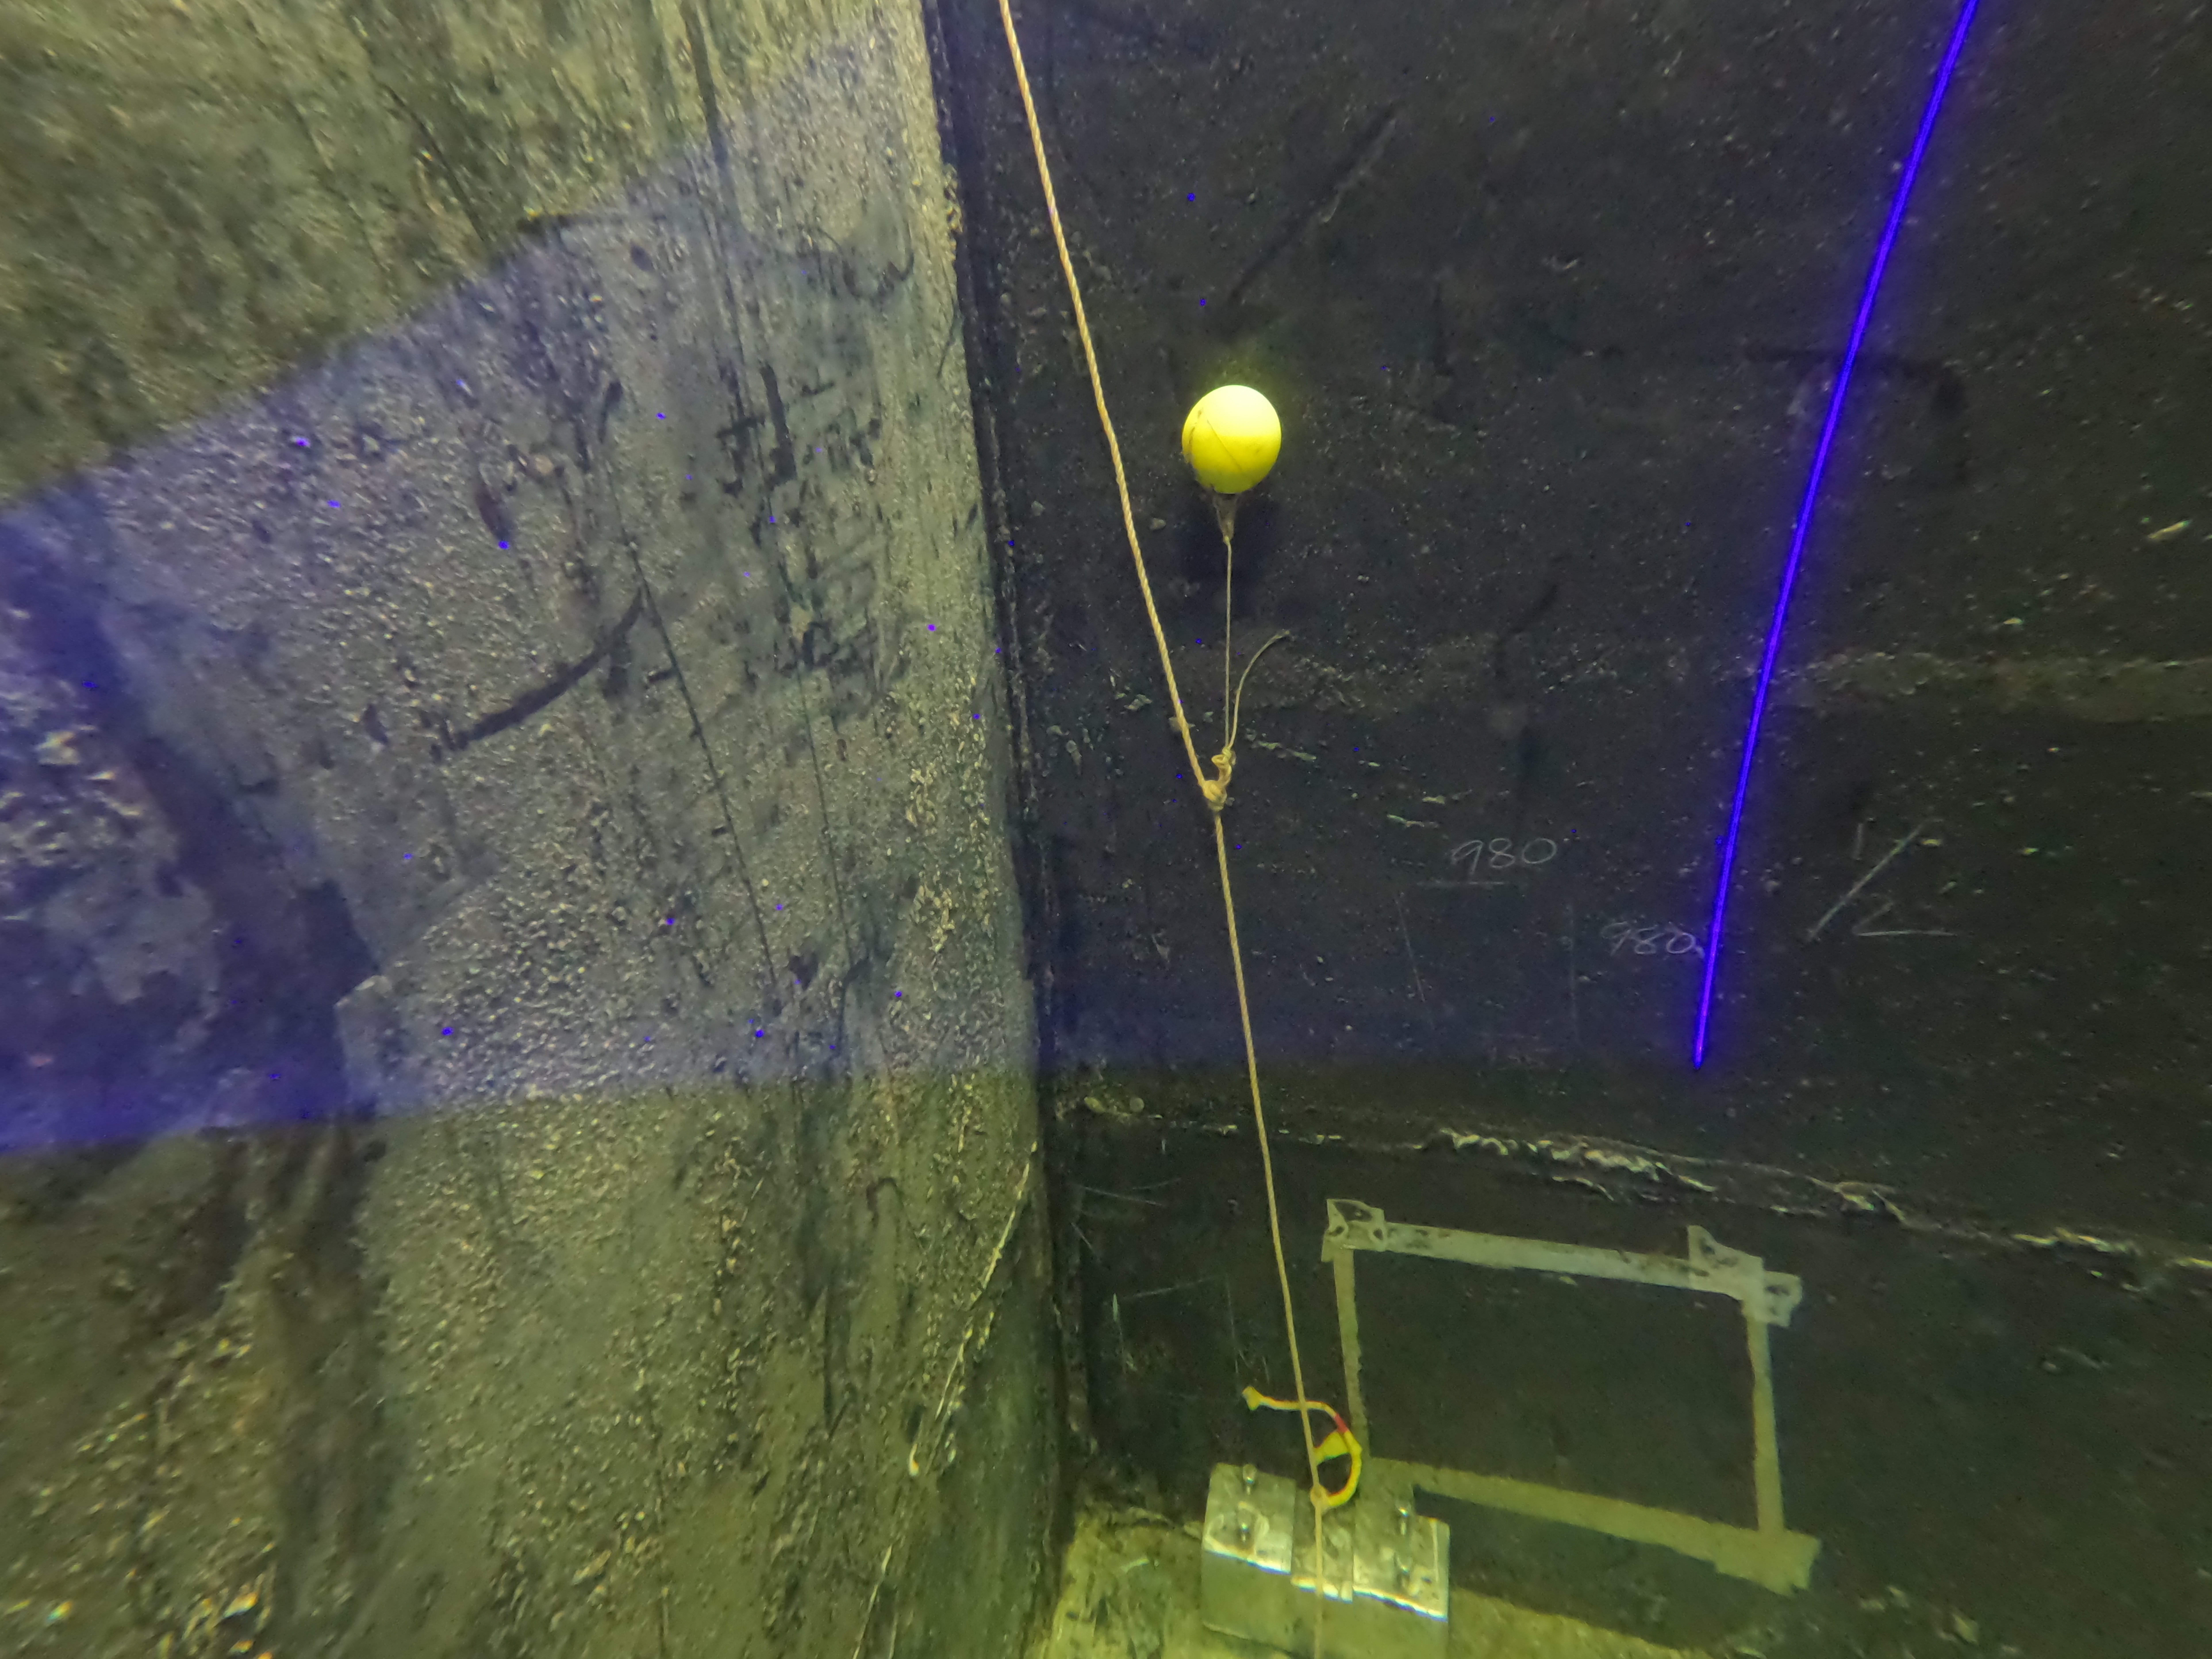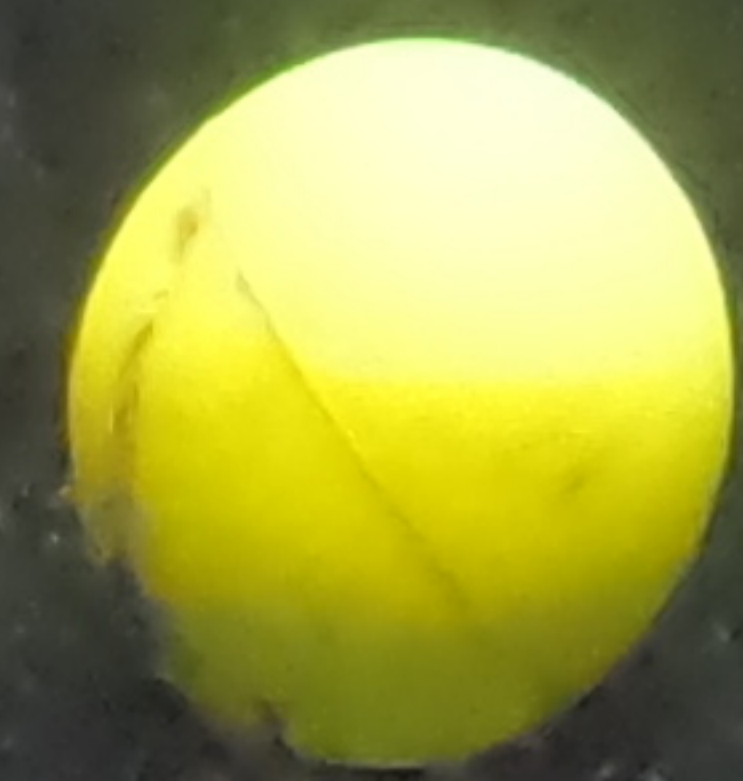

980

980

1/2

Supplement: Supplementary file 2970 [file G0031770.pdf › 12/G0031770.pdf]

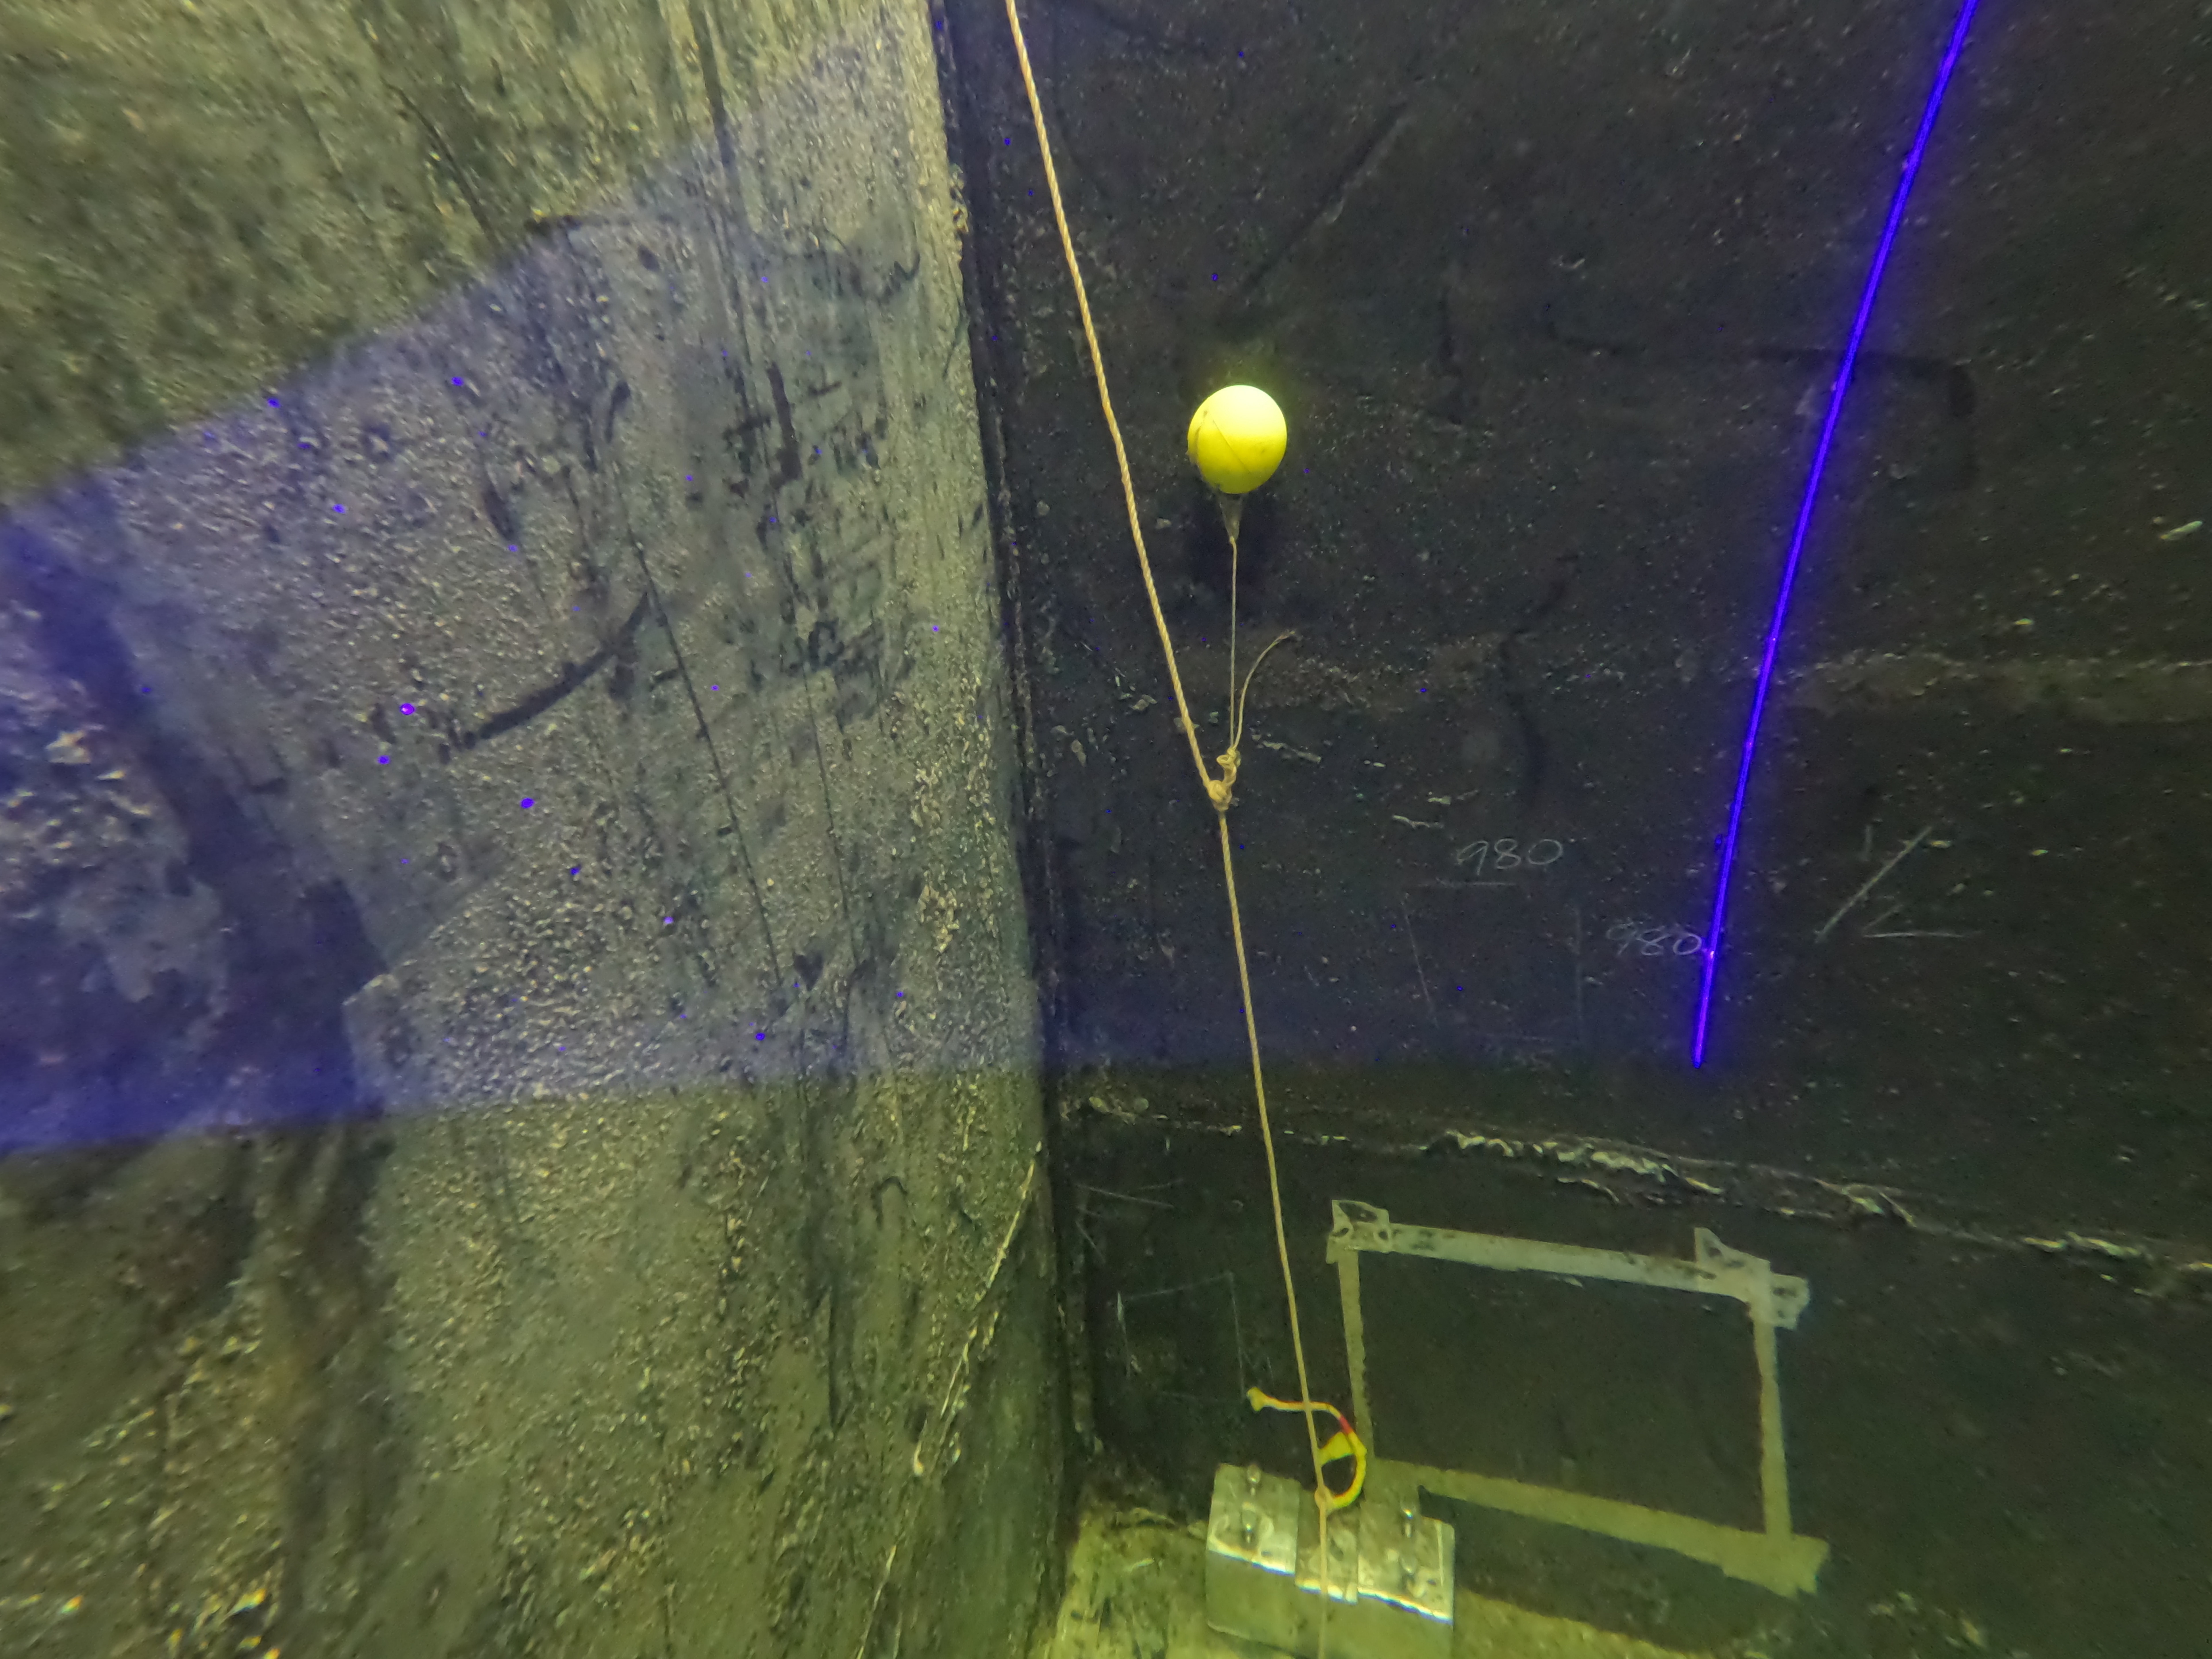

Supplement: Supplementary file 2971 [file G0031771.pdf › 12/G0031771.pdf]

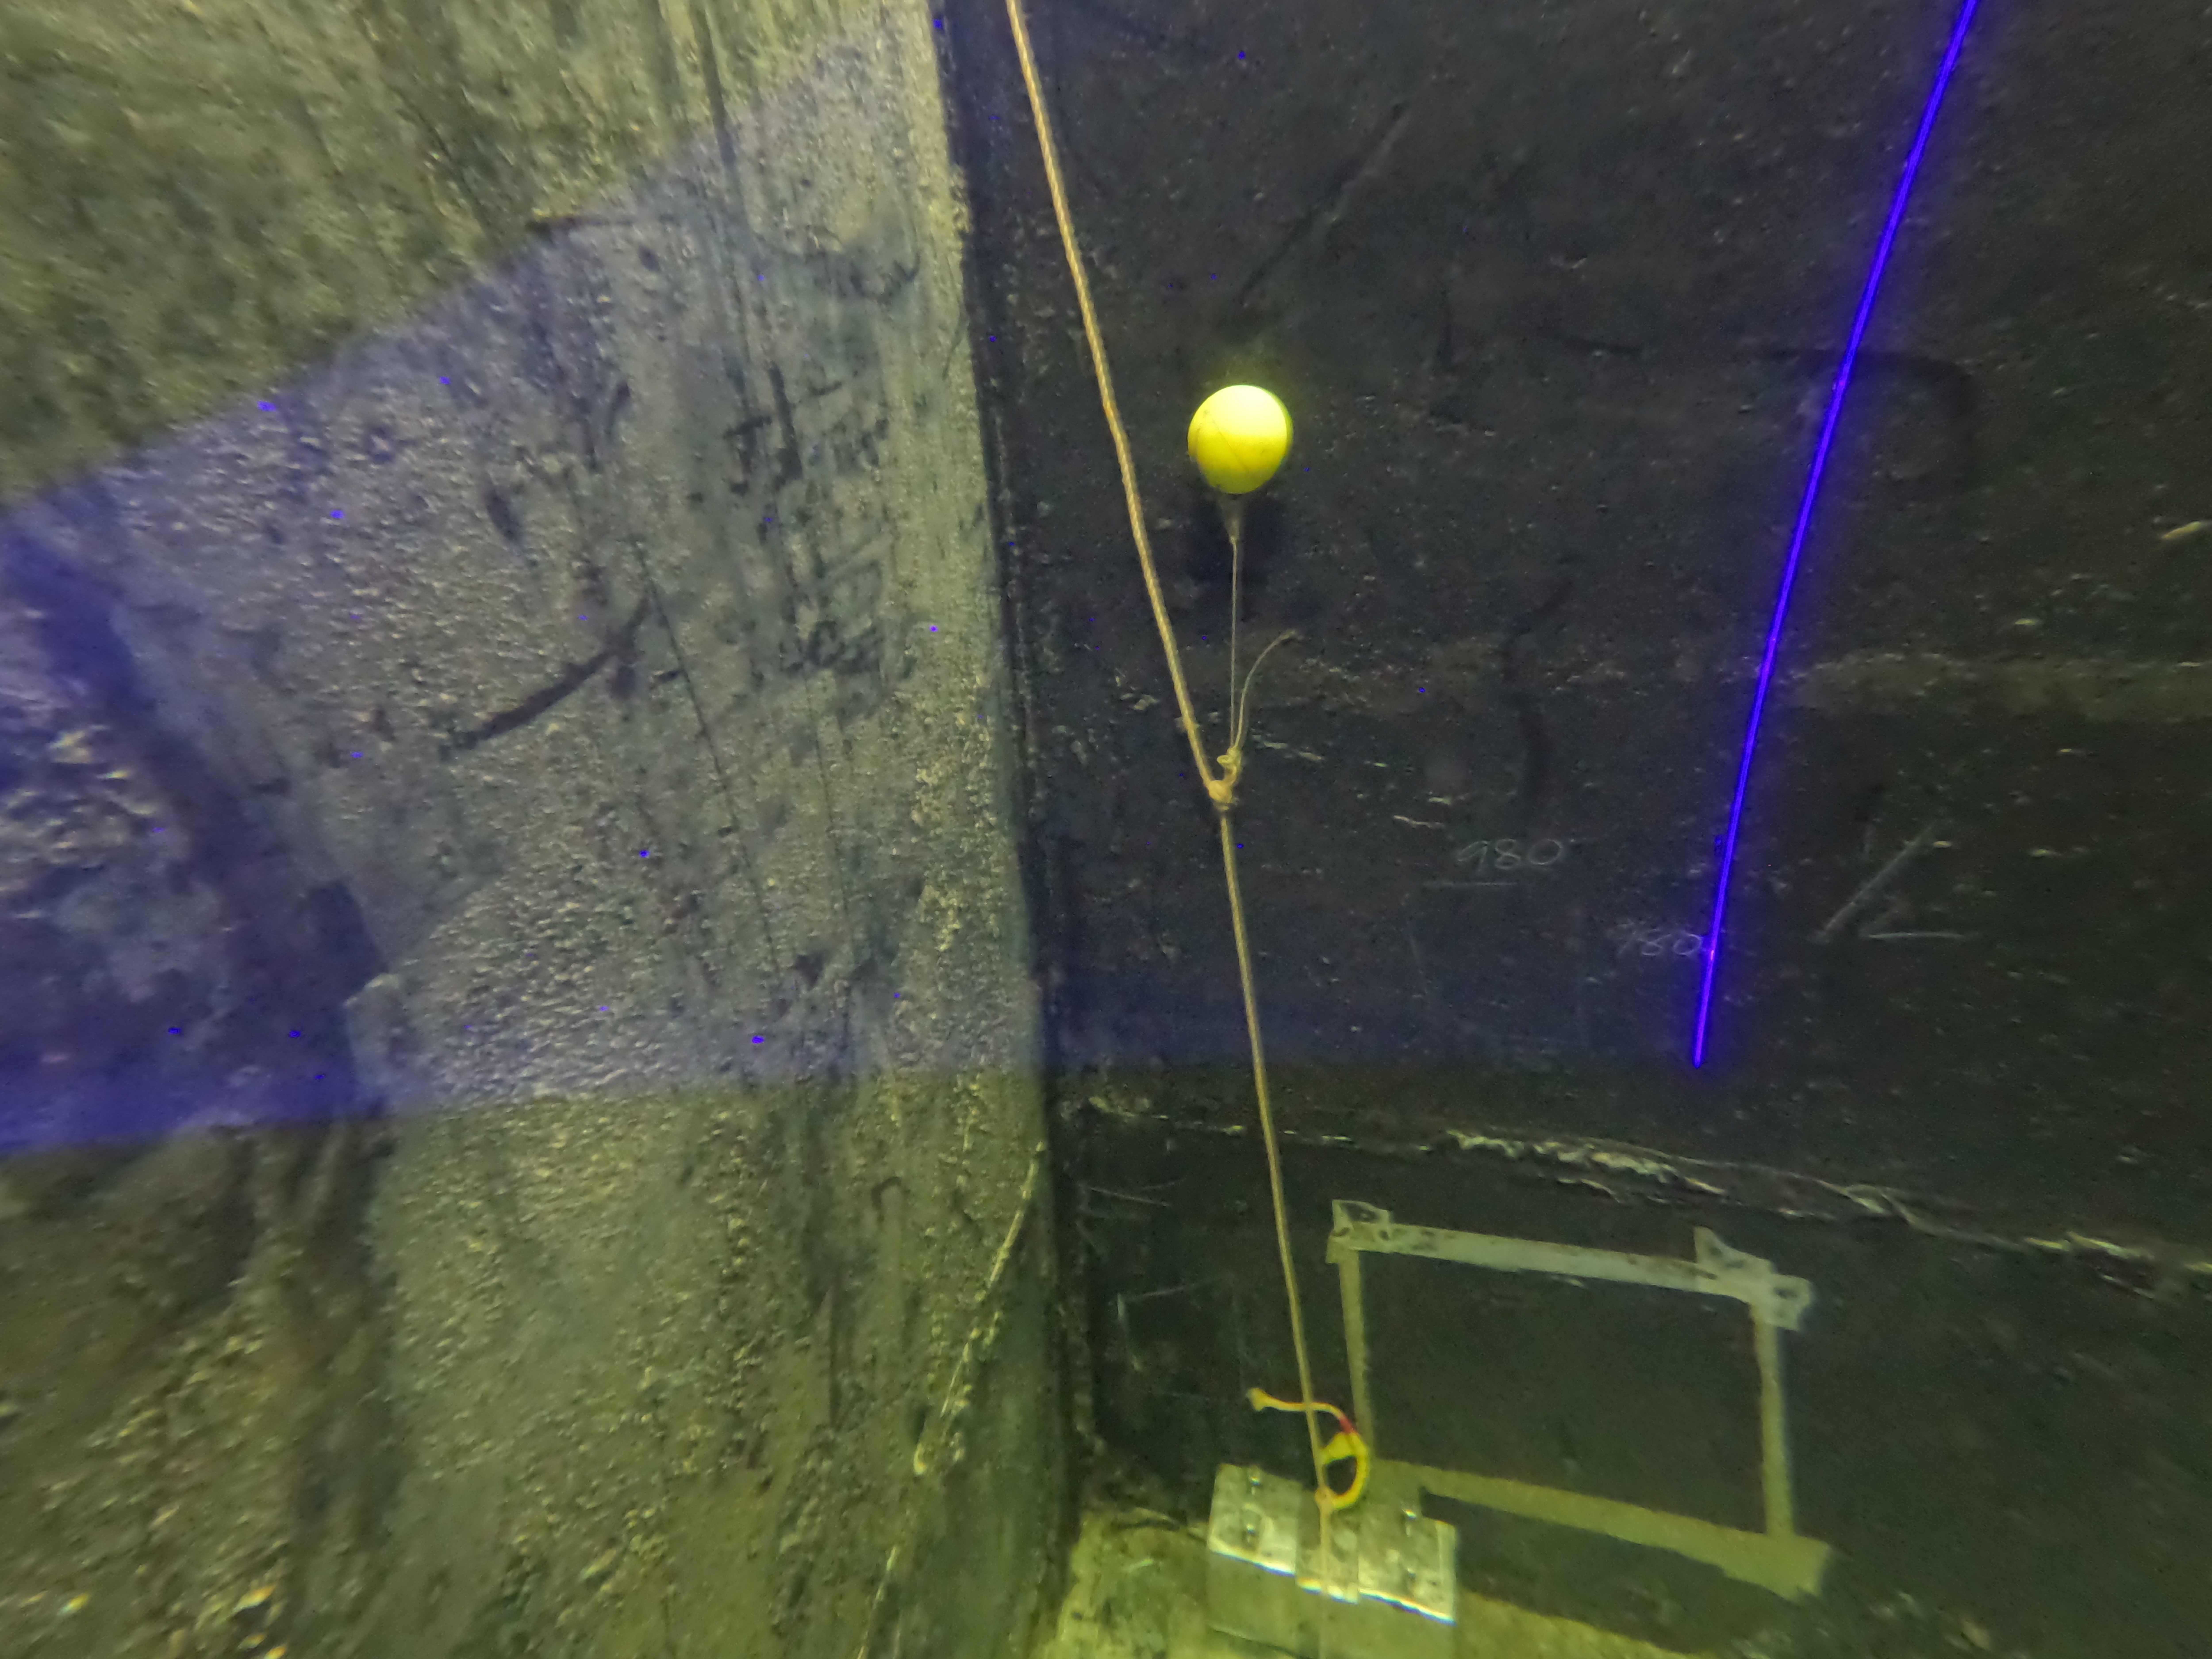

Supplement: Supplementary file 2972 [file G0031772.pdf › 12/G0031772.pdf]

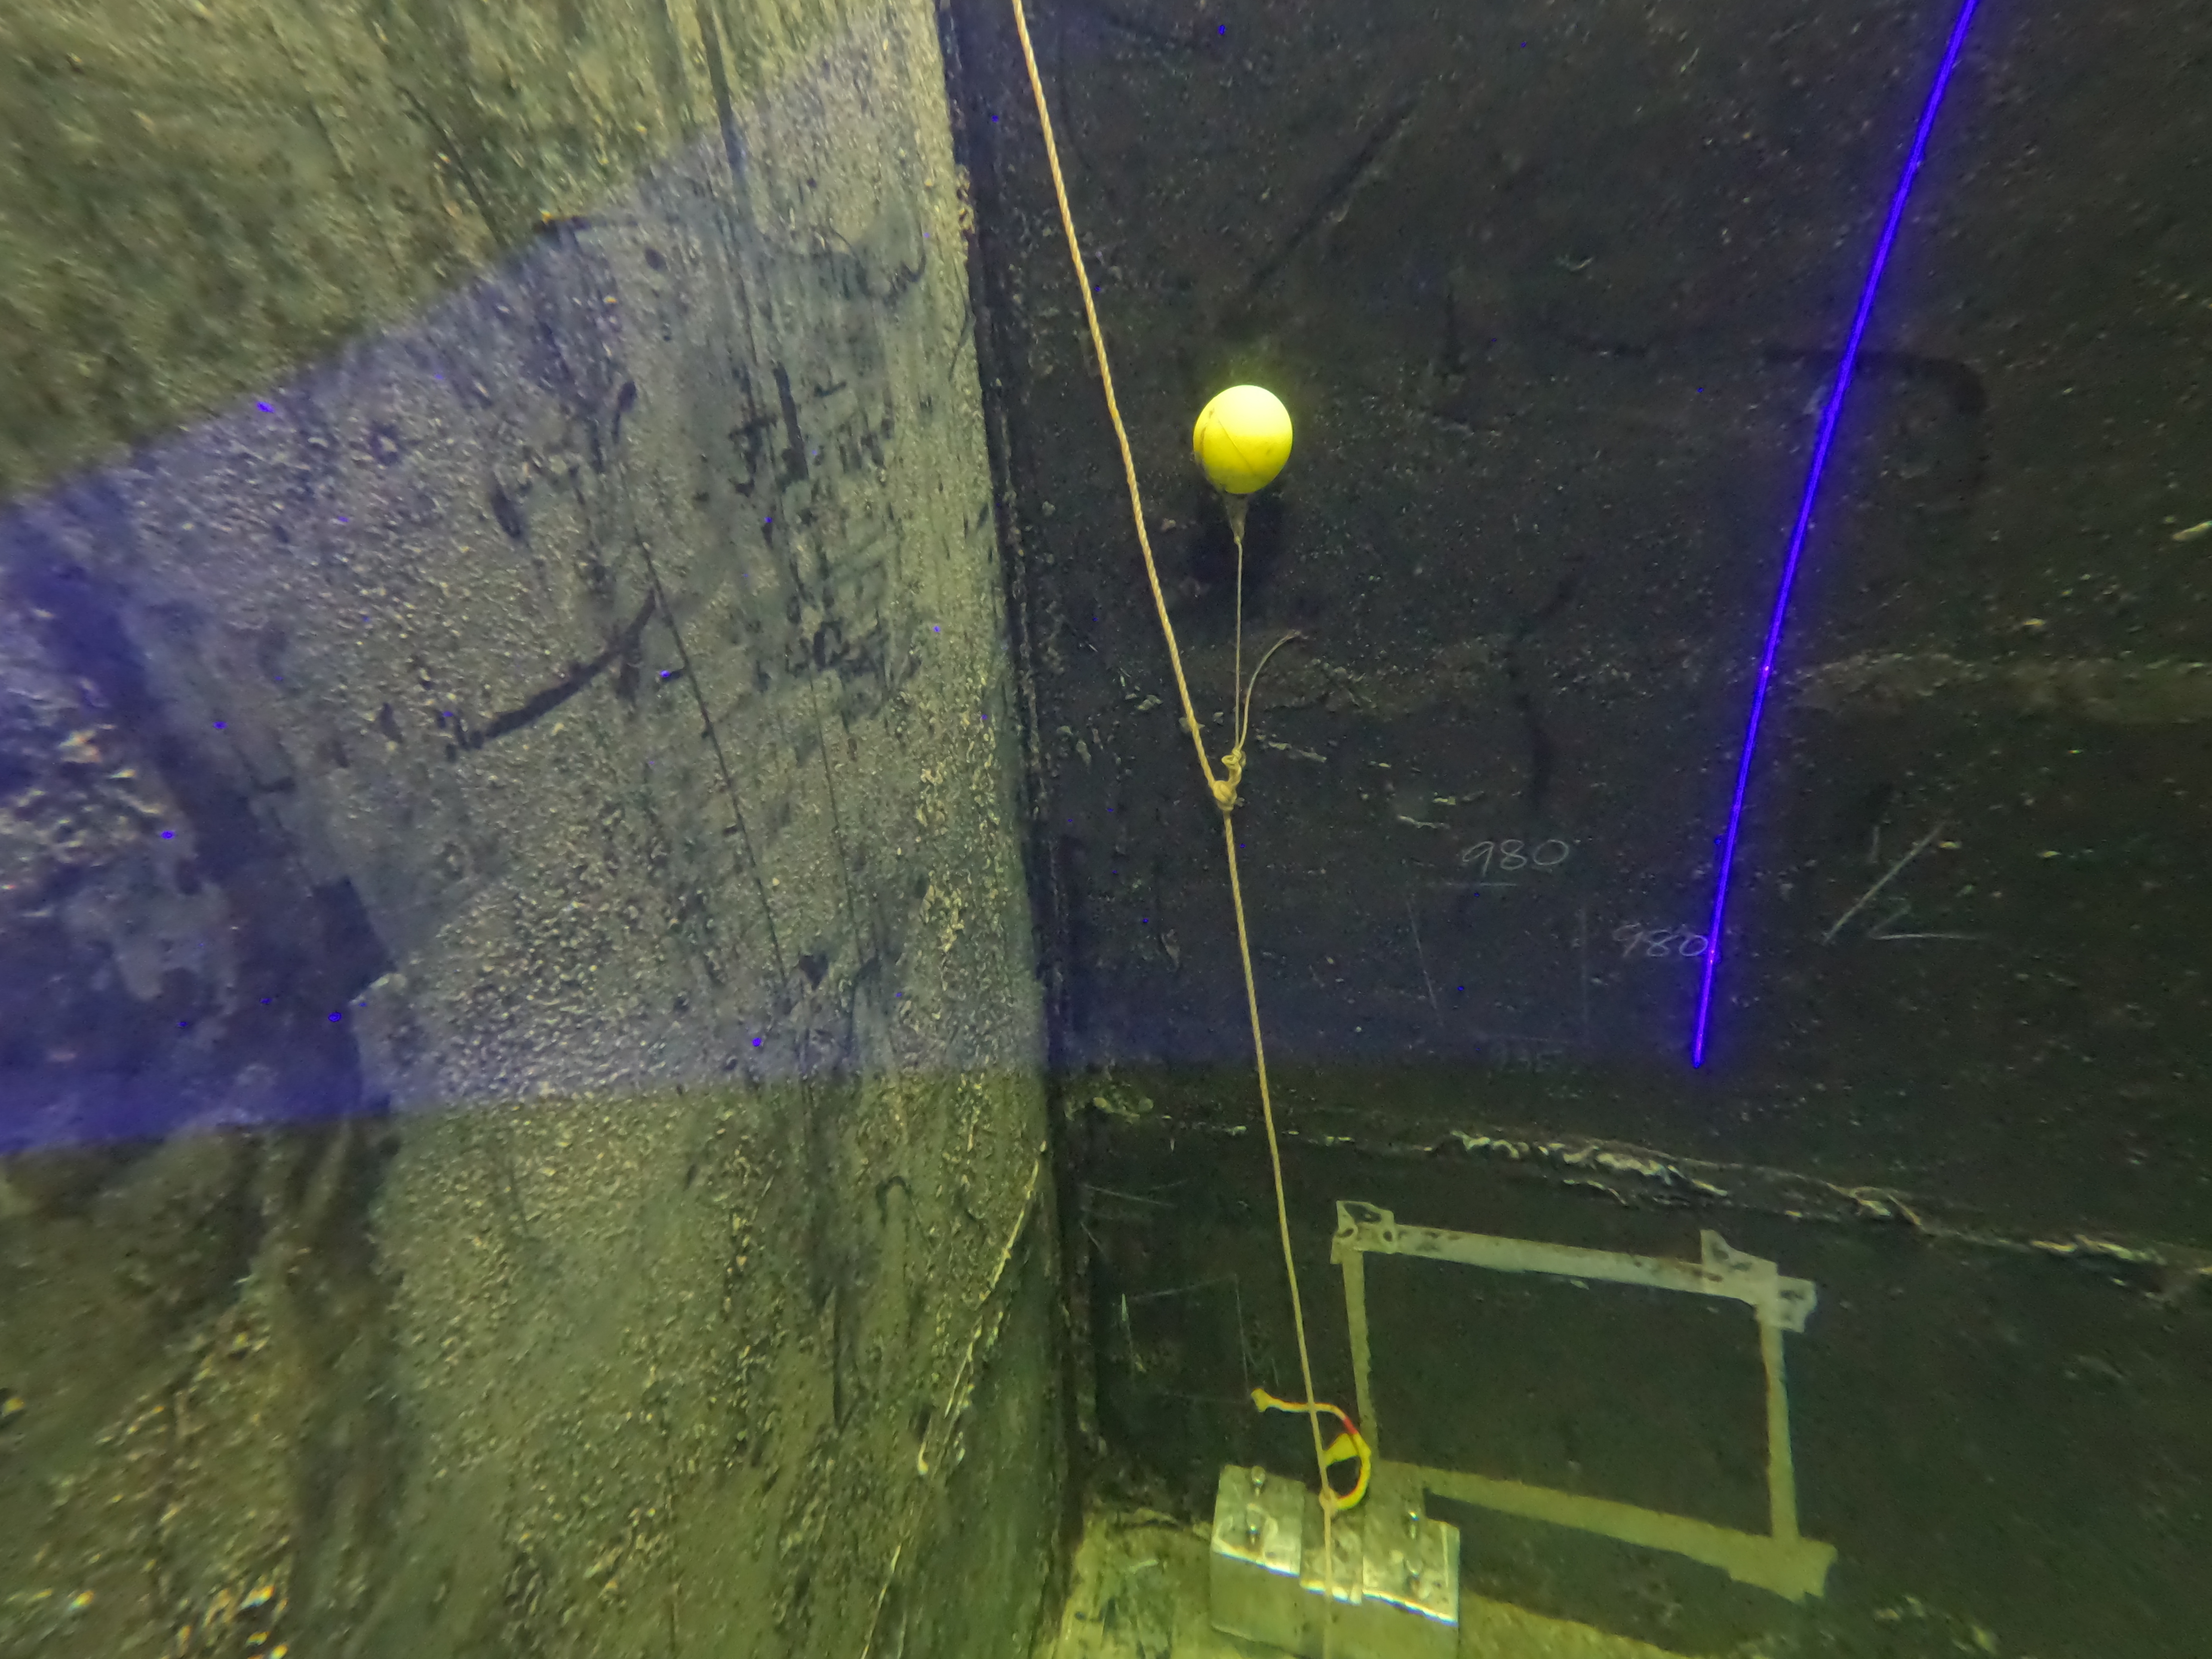

980

980

1/2

Supplement: Supplementary file 2973 [file G0031773.pdf › 12/G0031773.pdf]

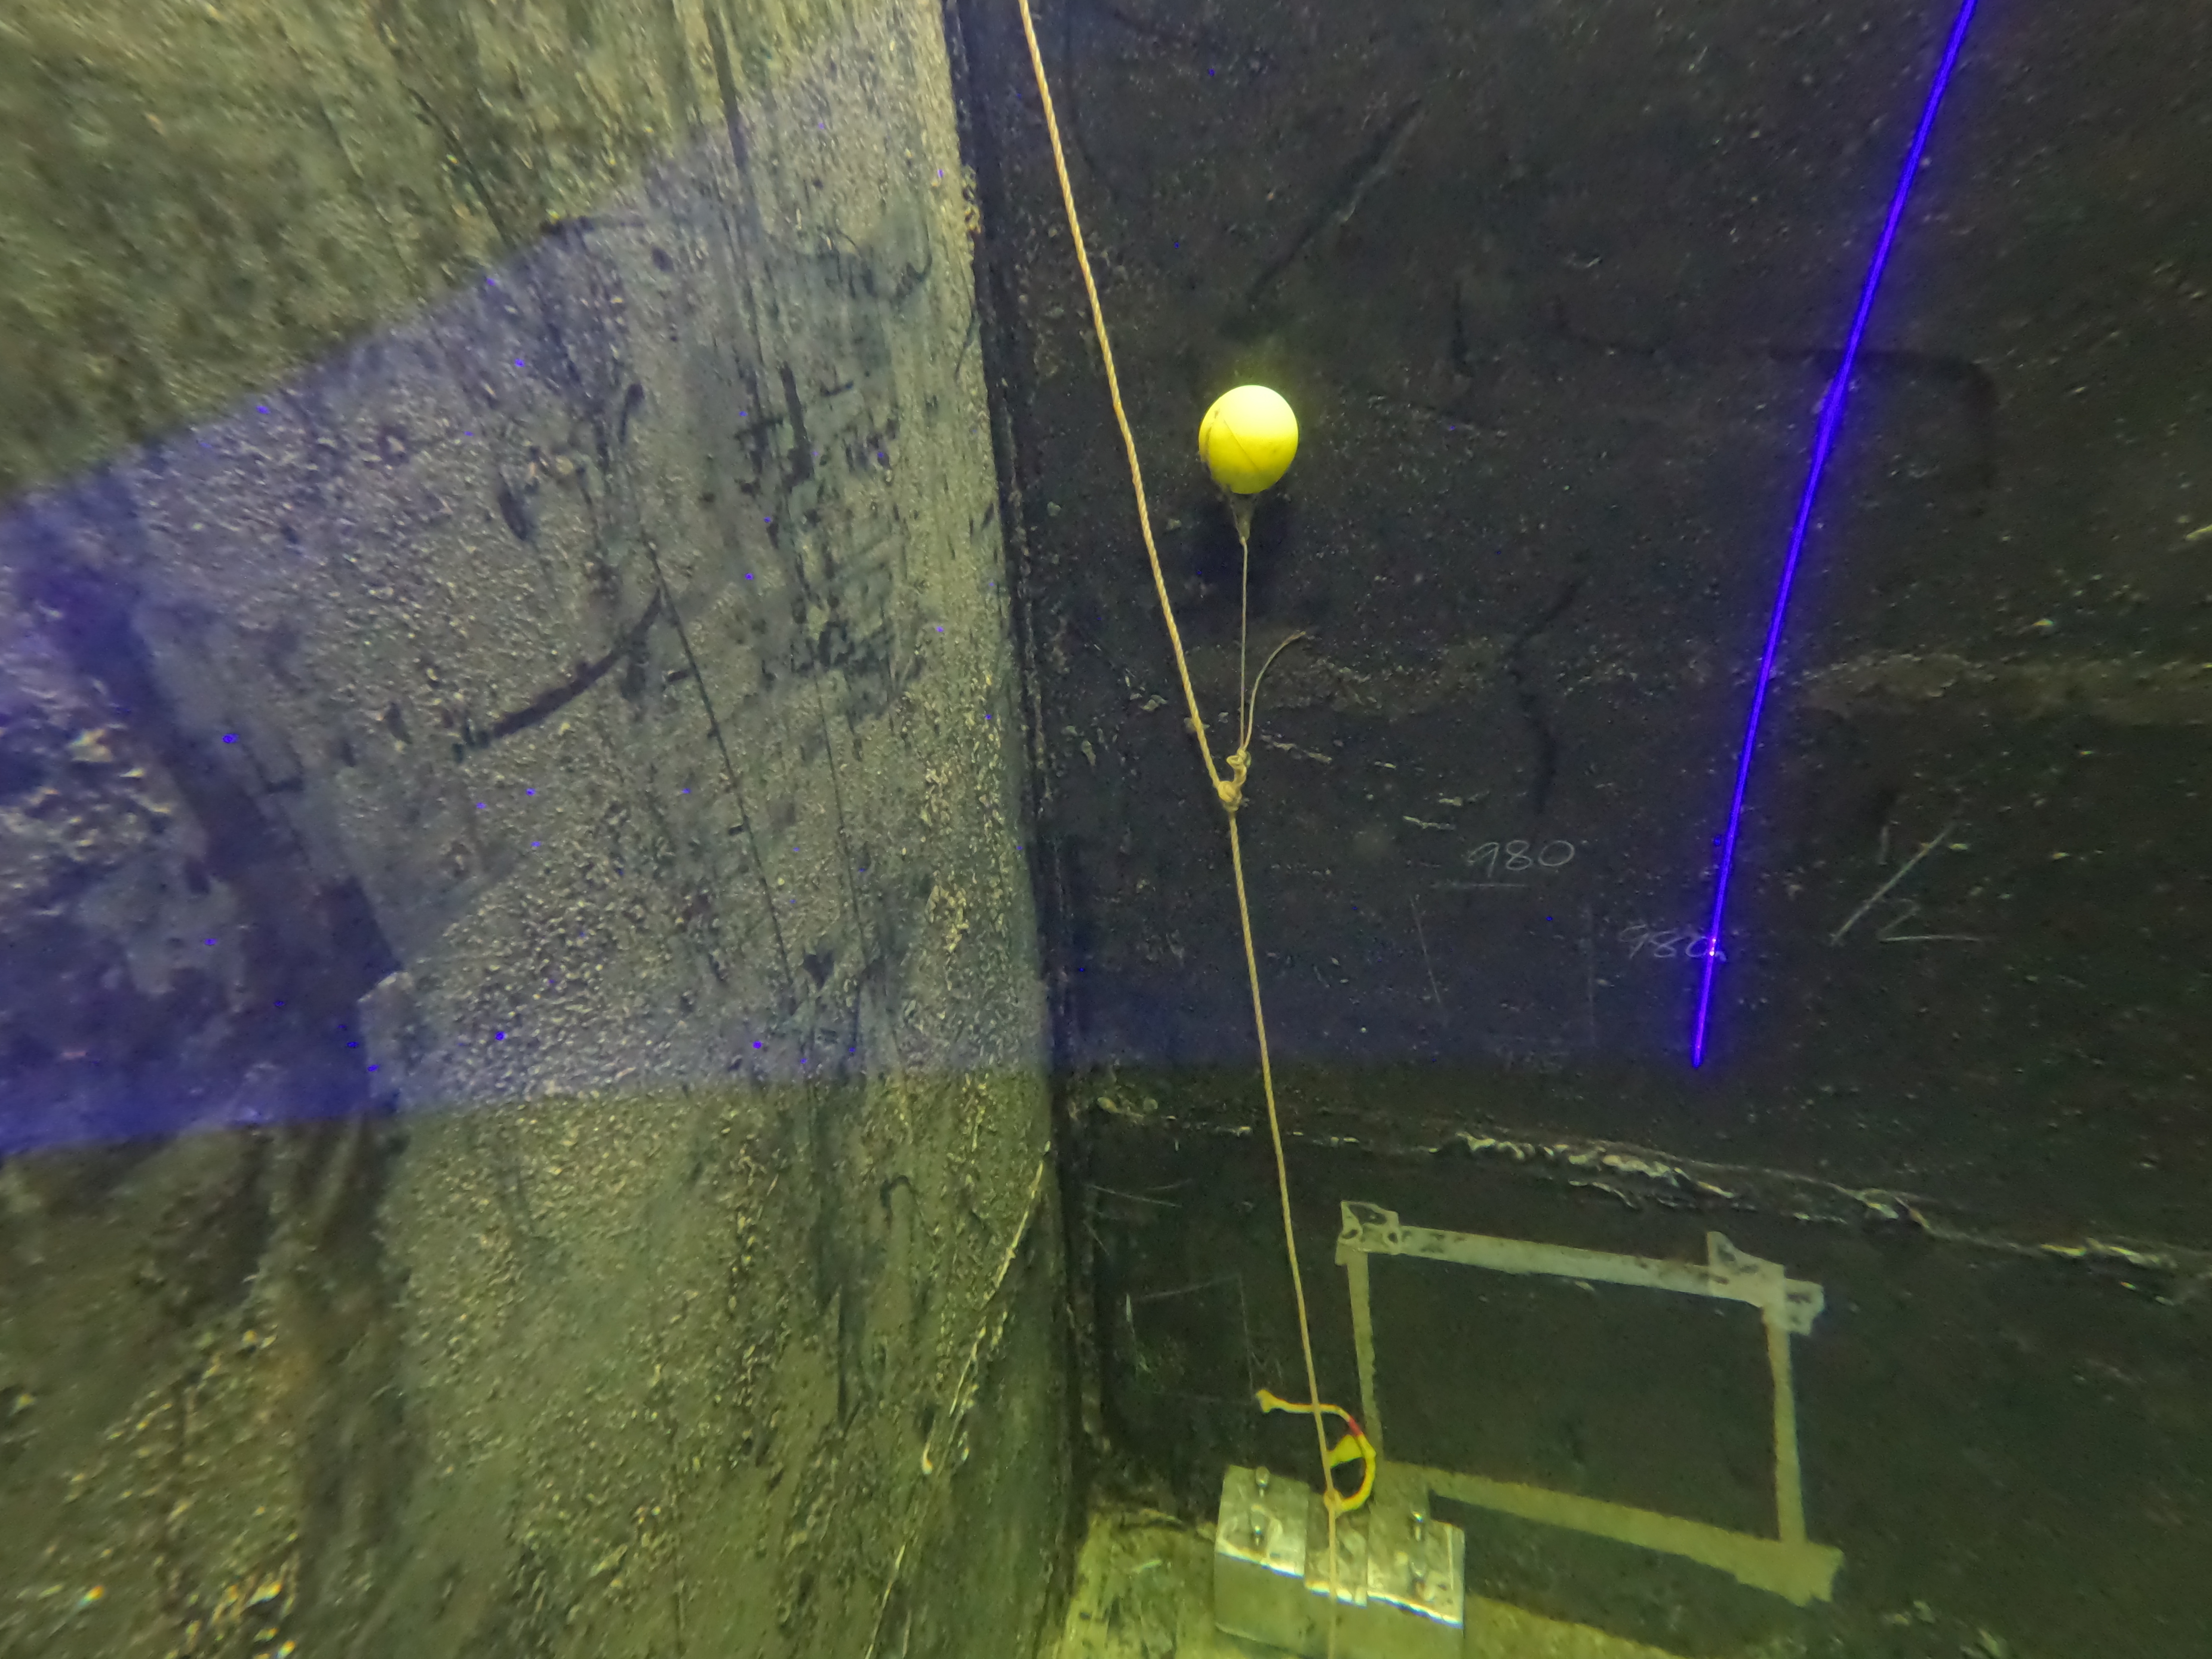

980

980

1 1/2

Supplement: Supplementary file 2974 [file G0031774.pdf › 12/G0031774.pdf]

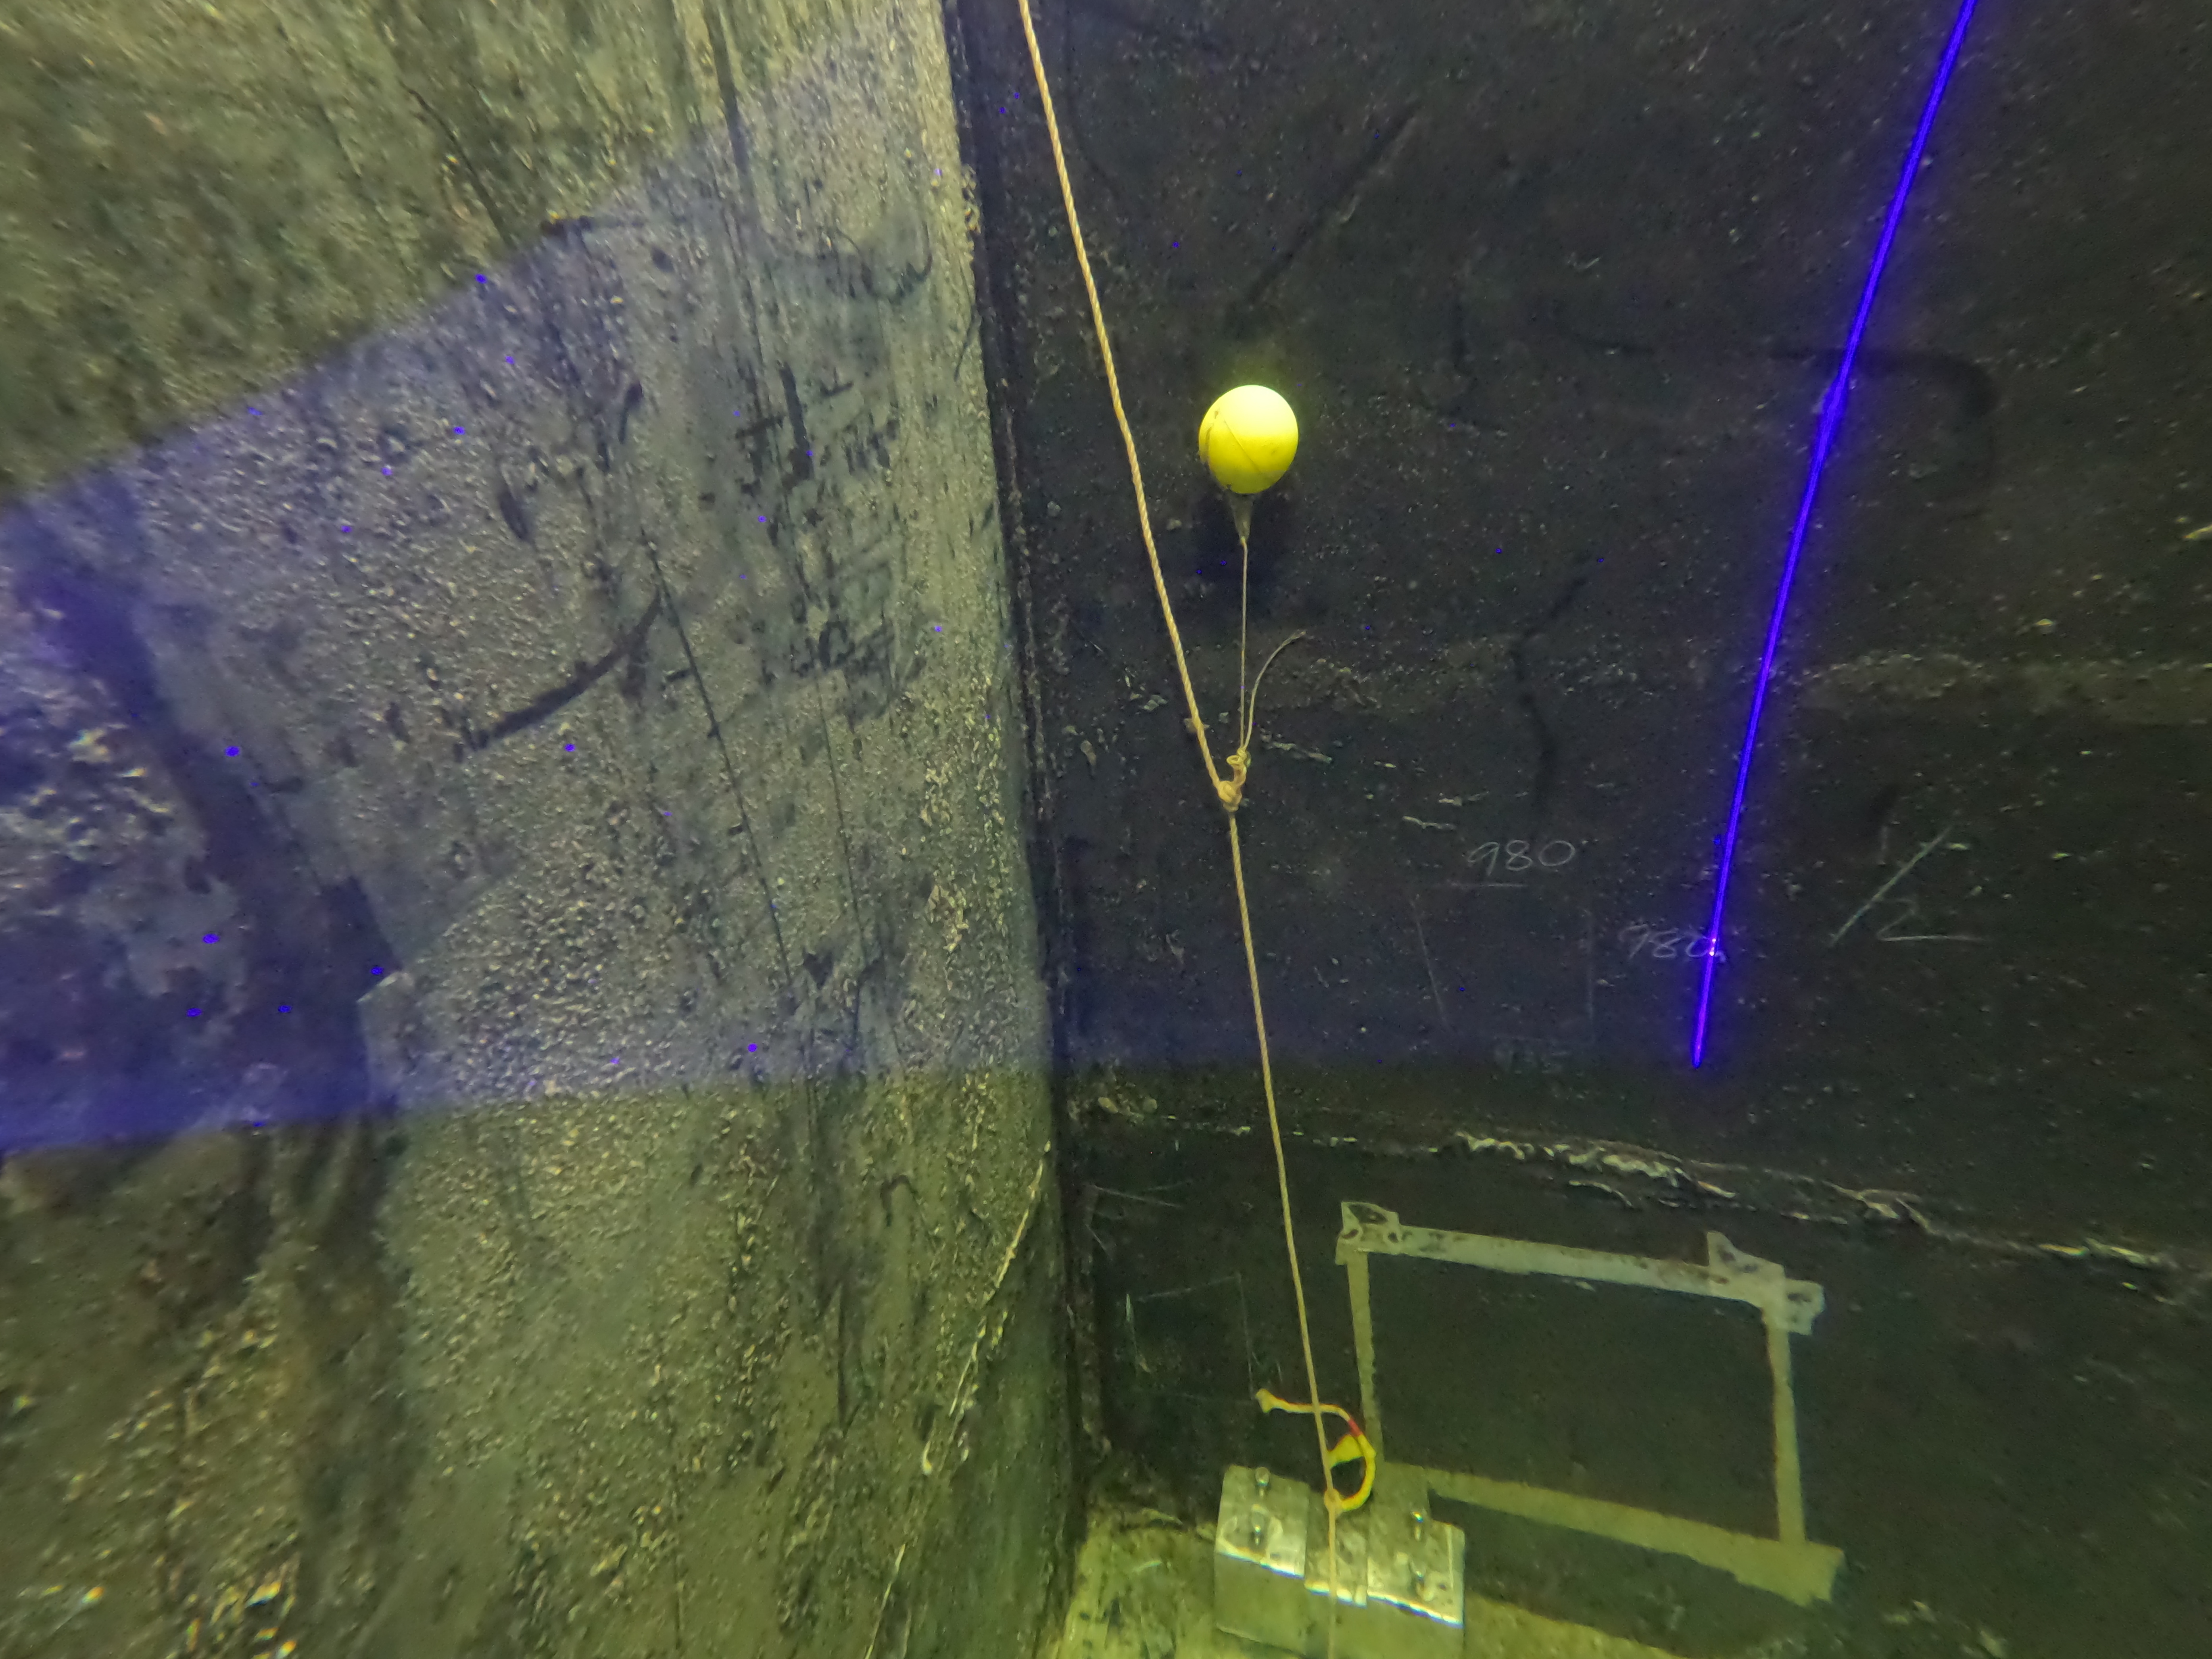

Supplement: Supplementary file 2975 [file G0031775.pdf › 12/G0031775.pdf]

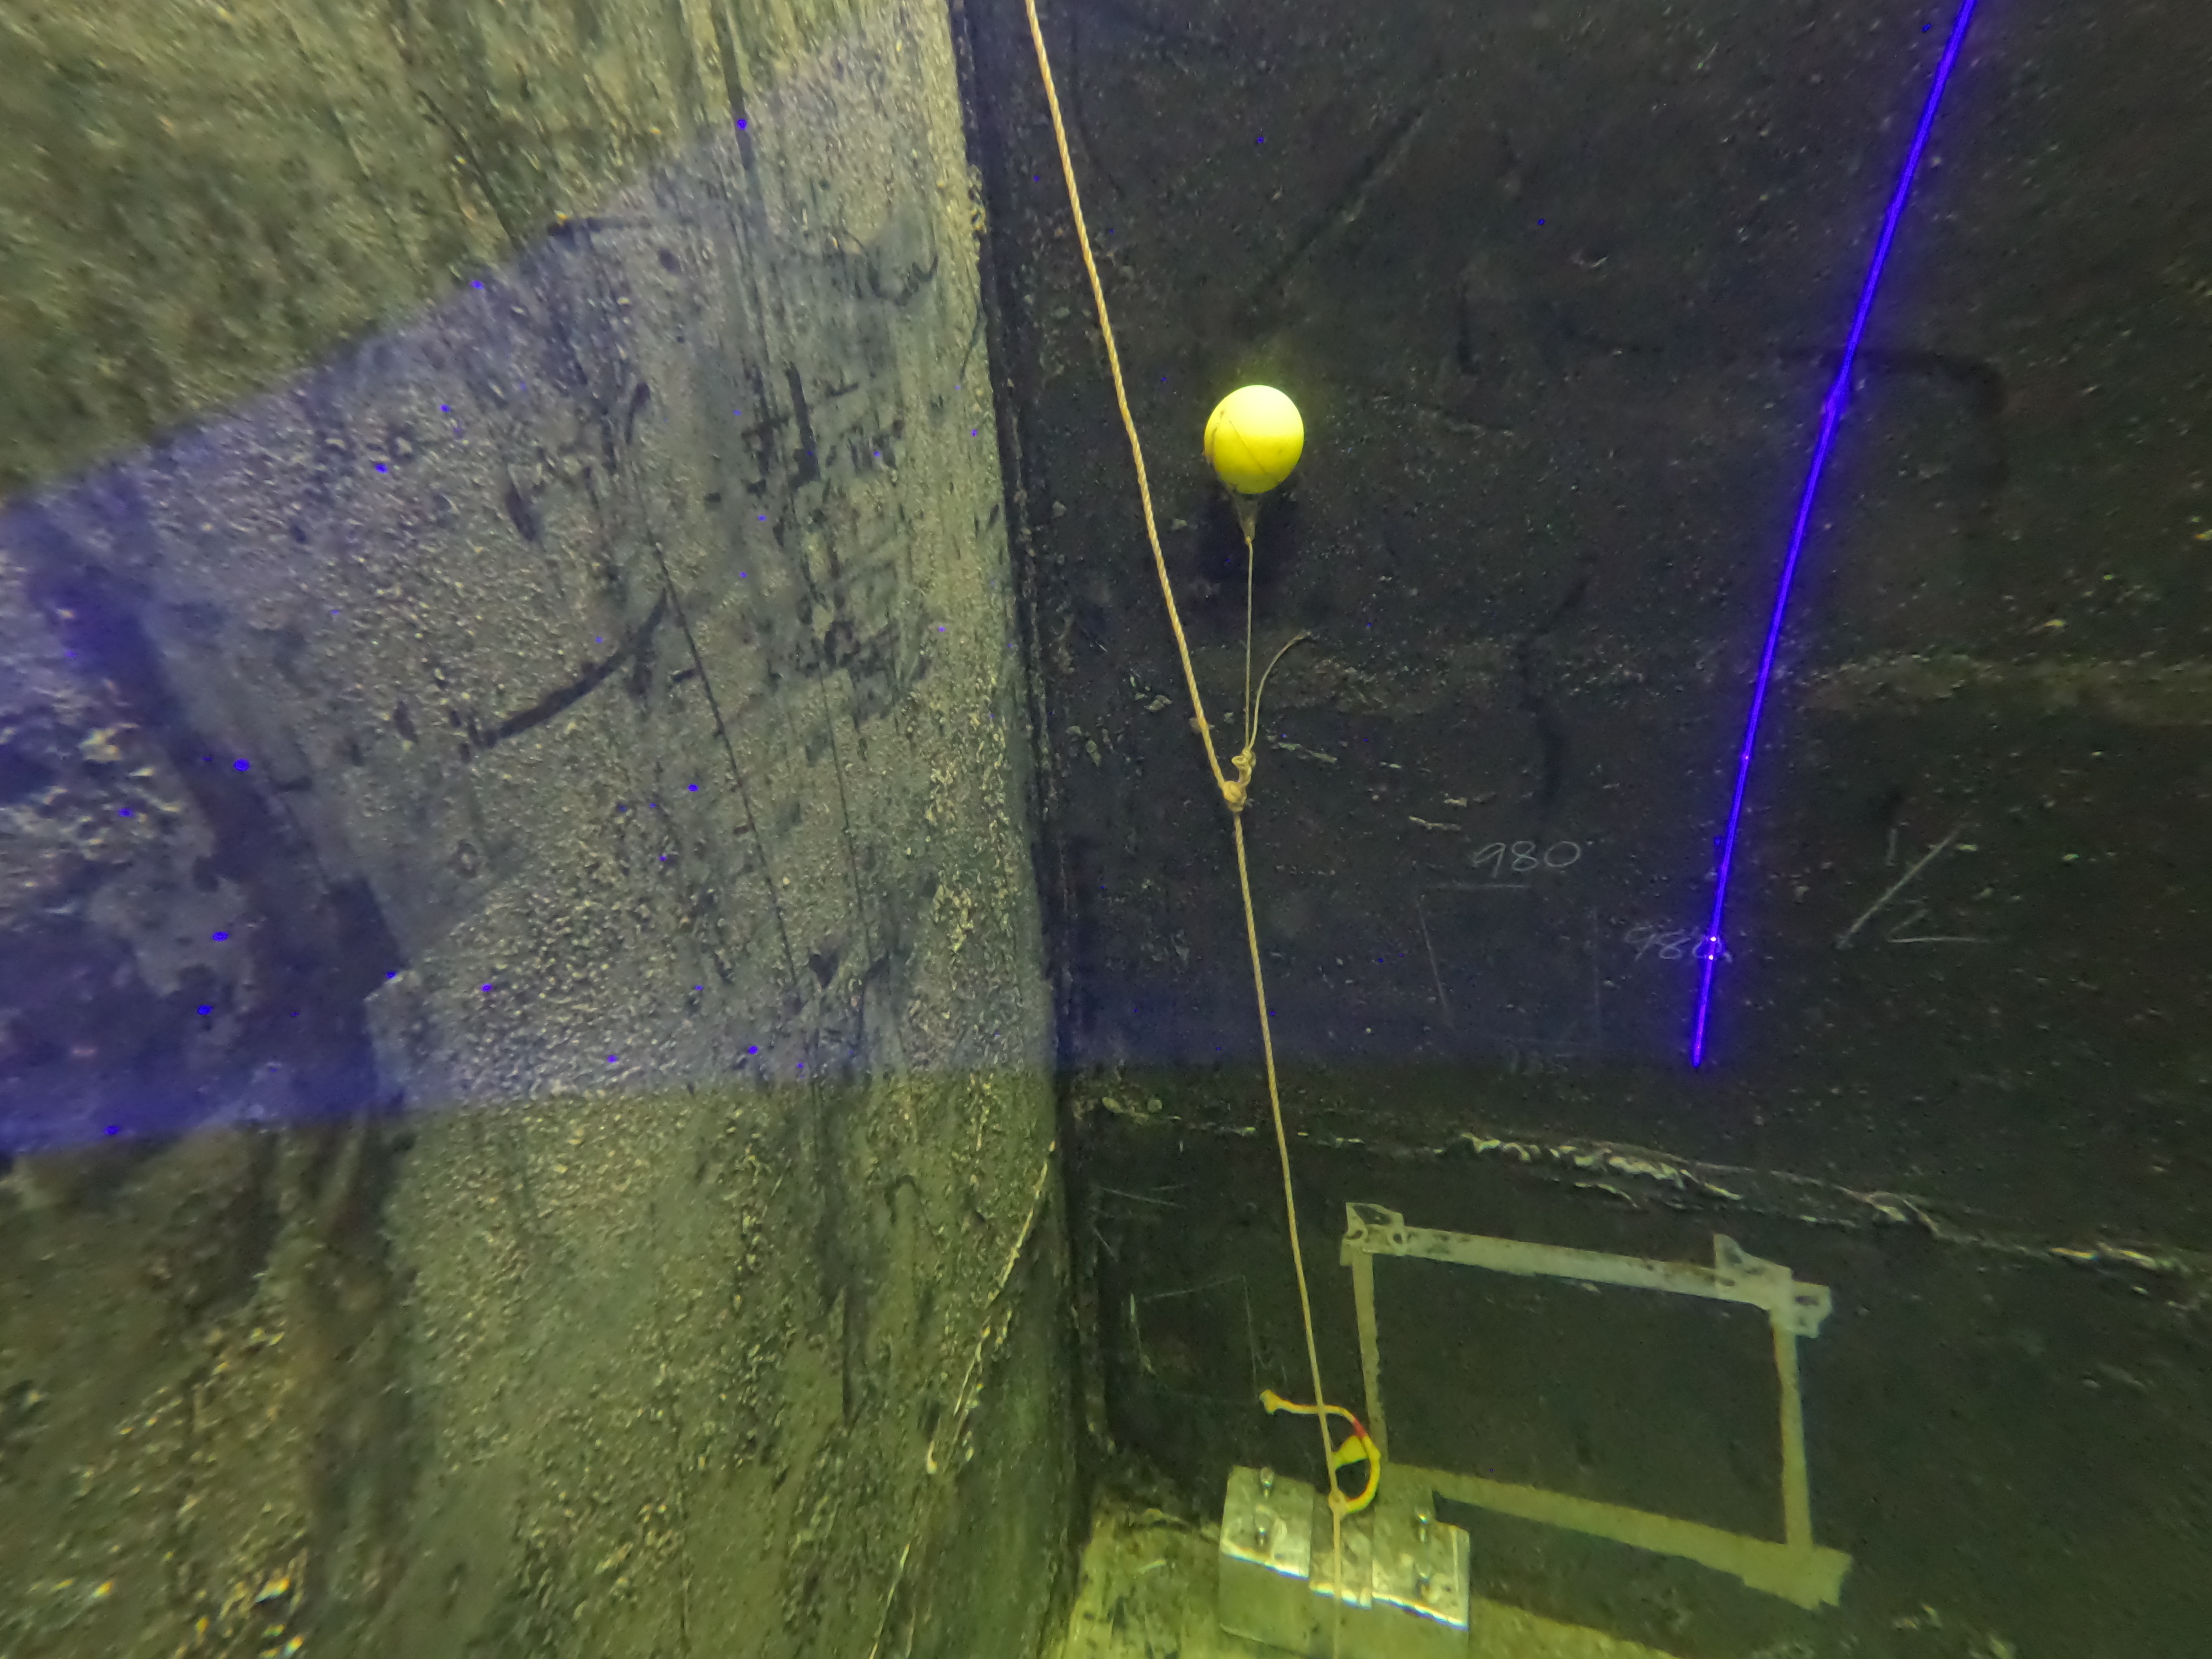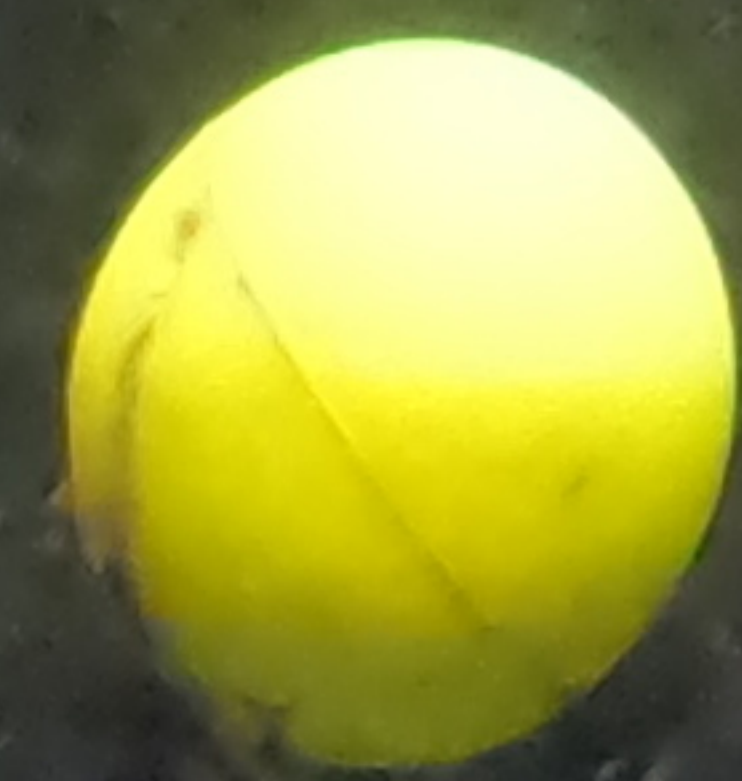

980

980

1/2

Supplement: Supplementary file 2976 [file G0031776.pdf › 12/G0031776.pdf]

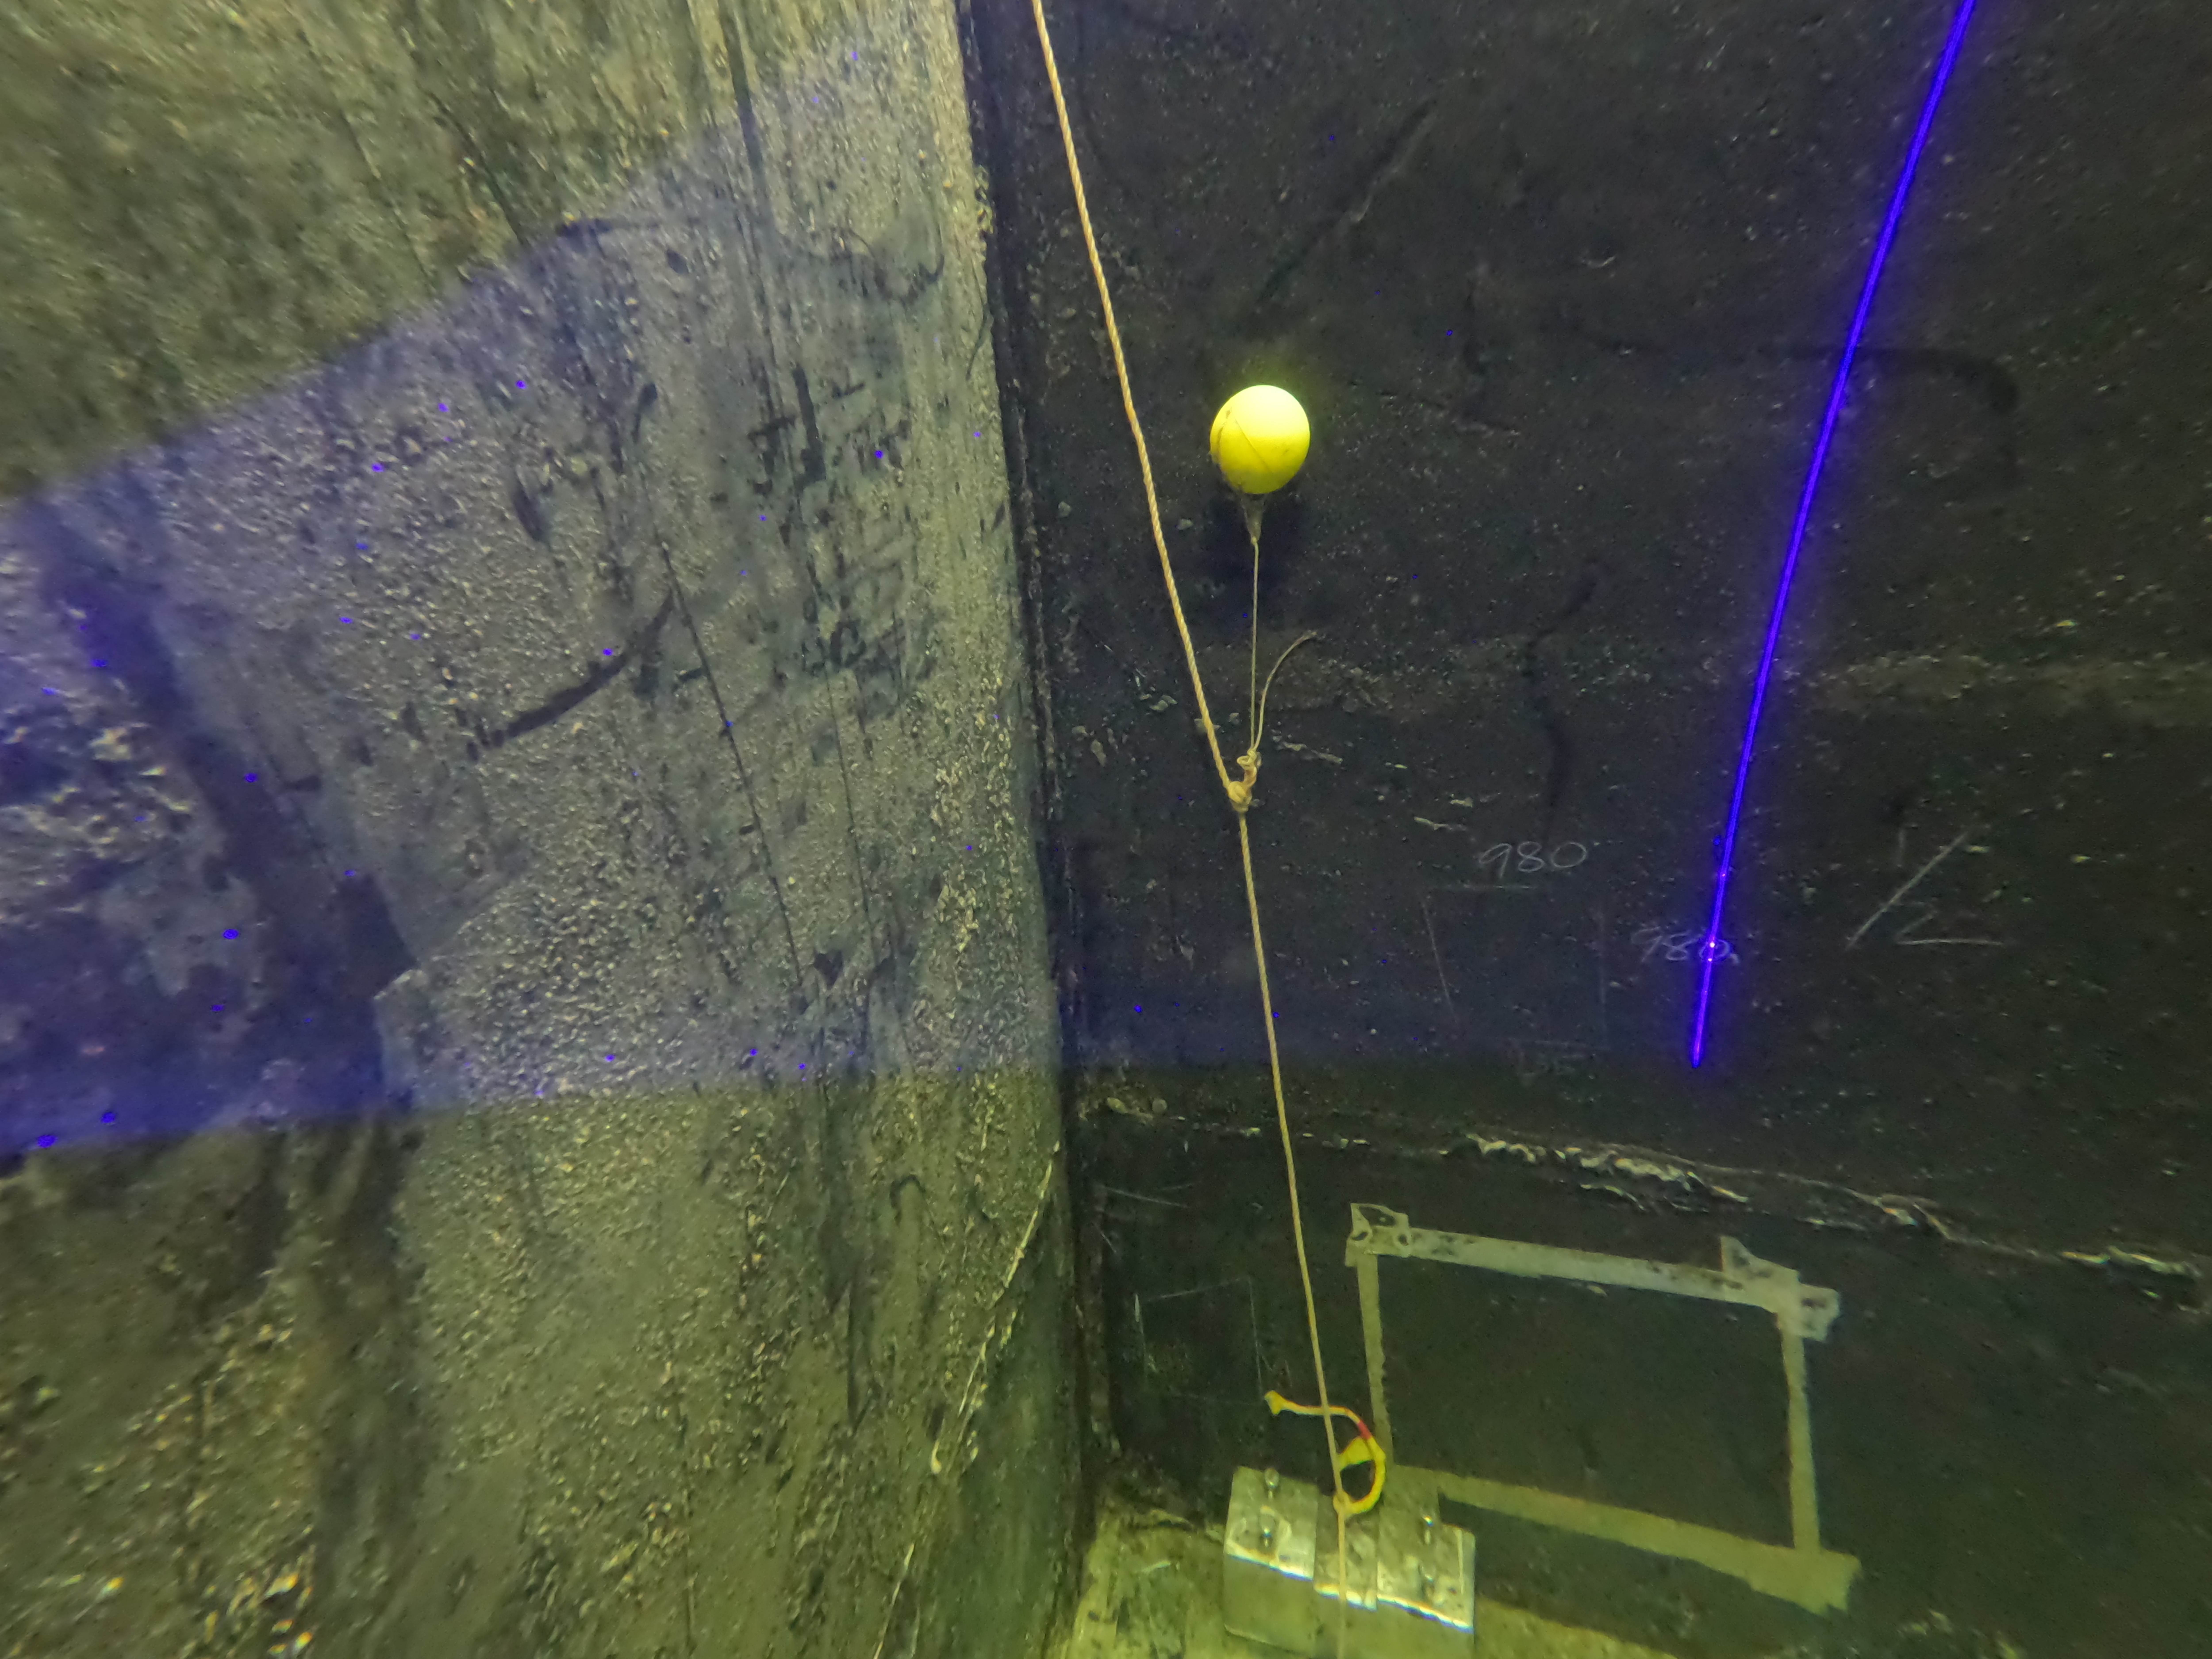

Supplement: Supplementary file 2977 [file G0031777.pdf › 12/G0031777.pdf]

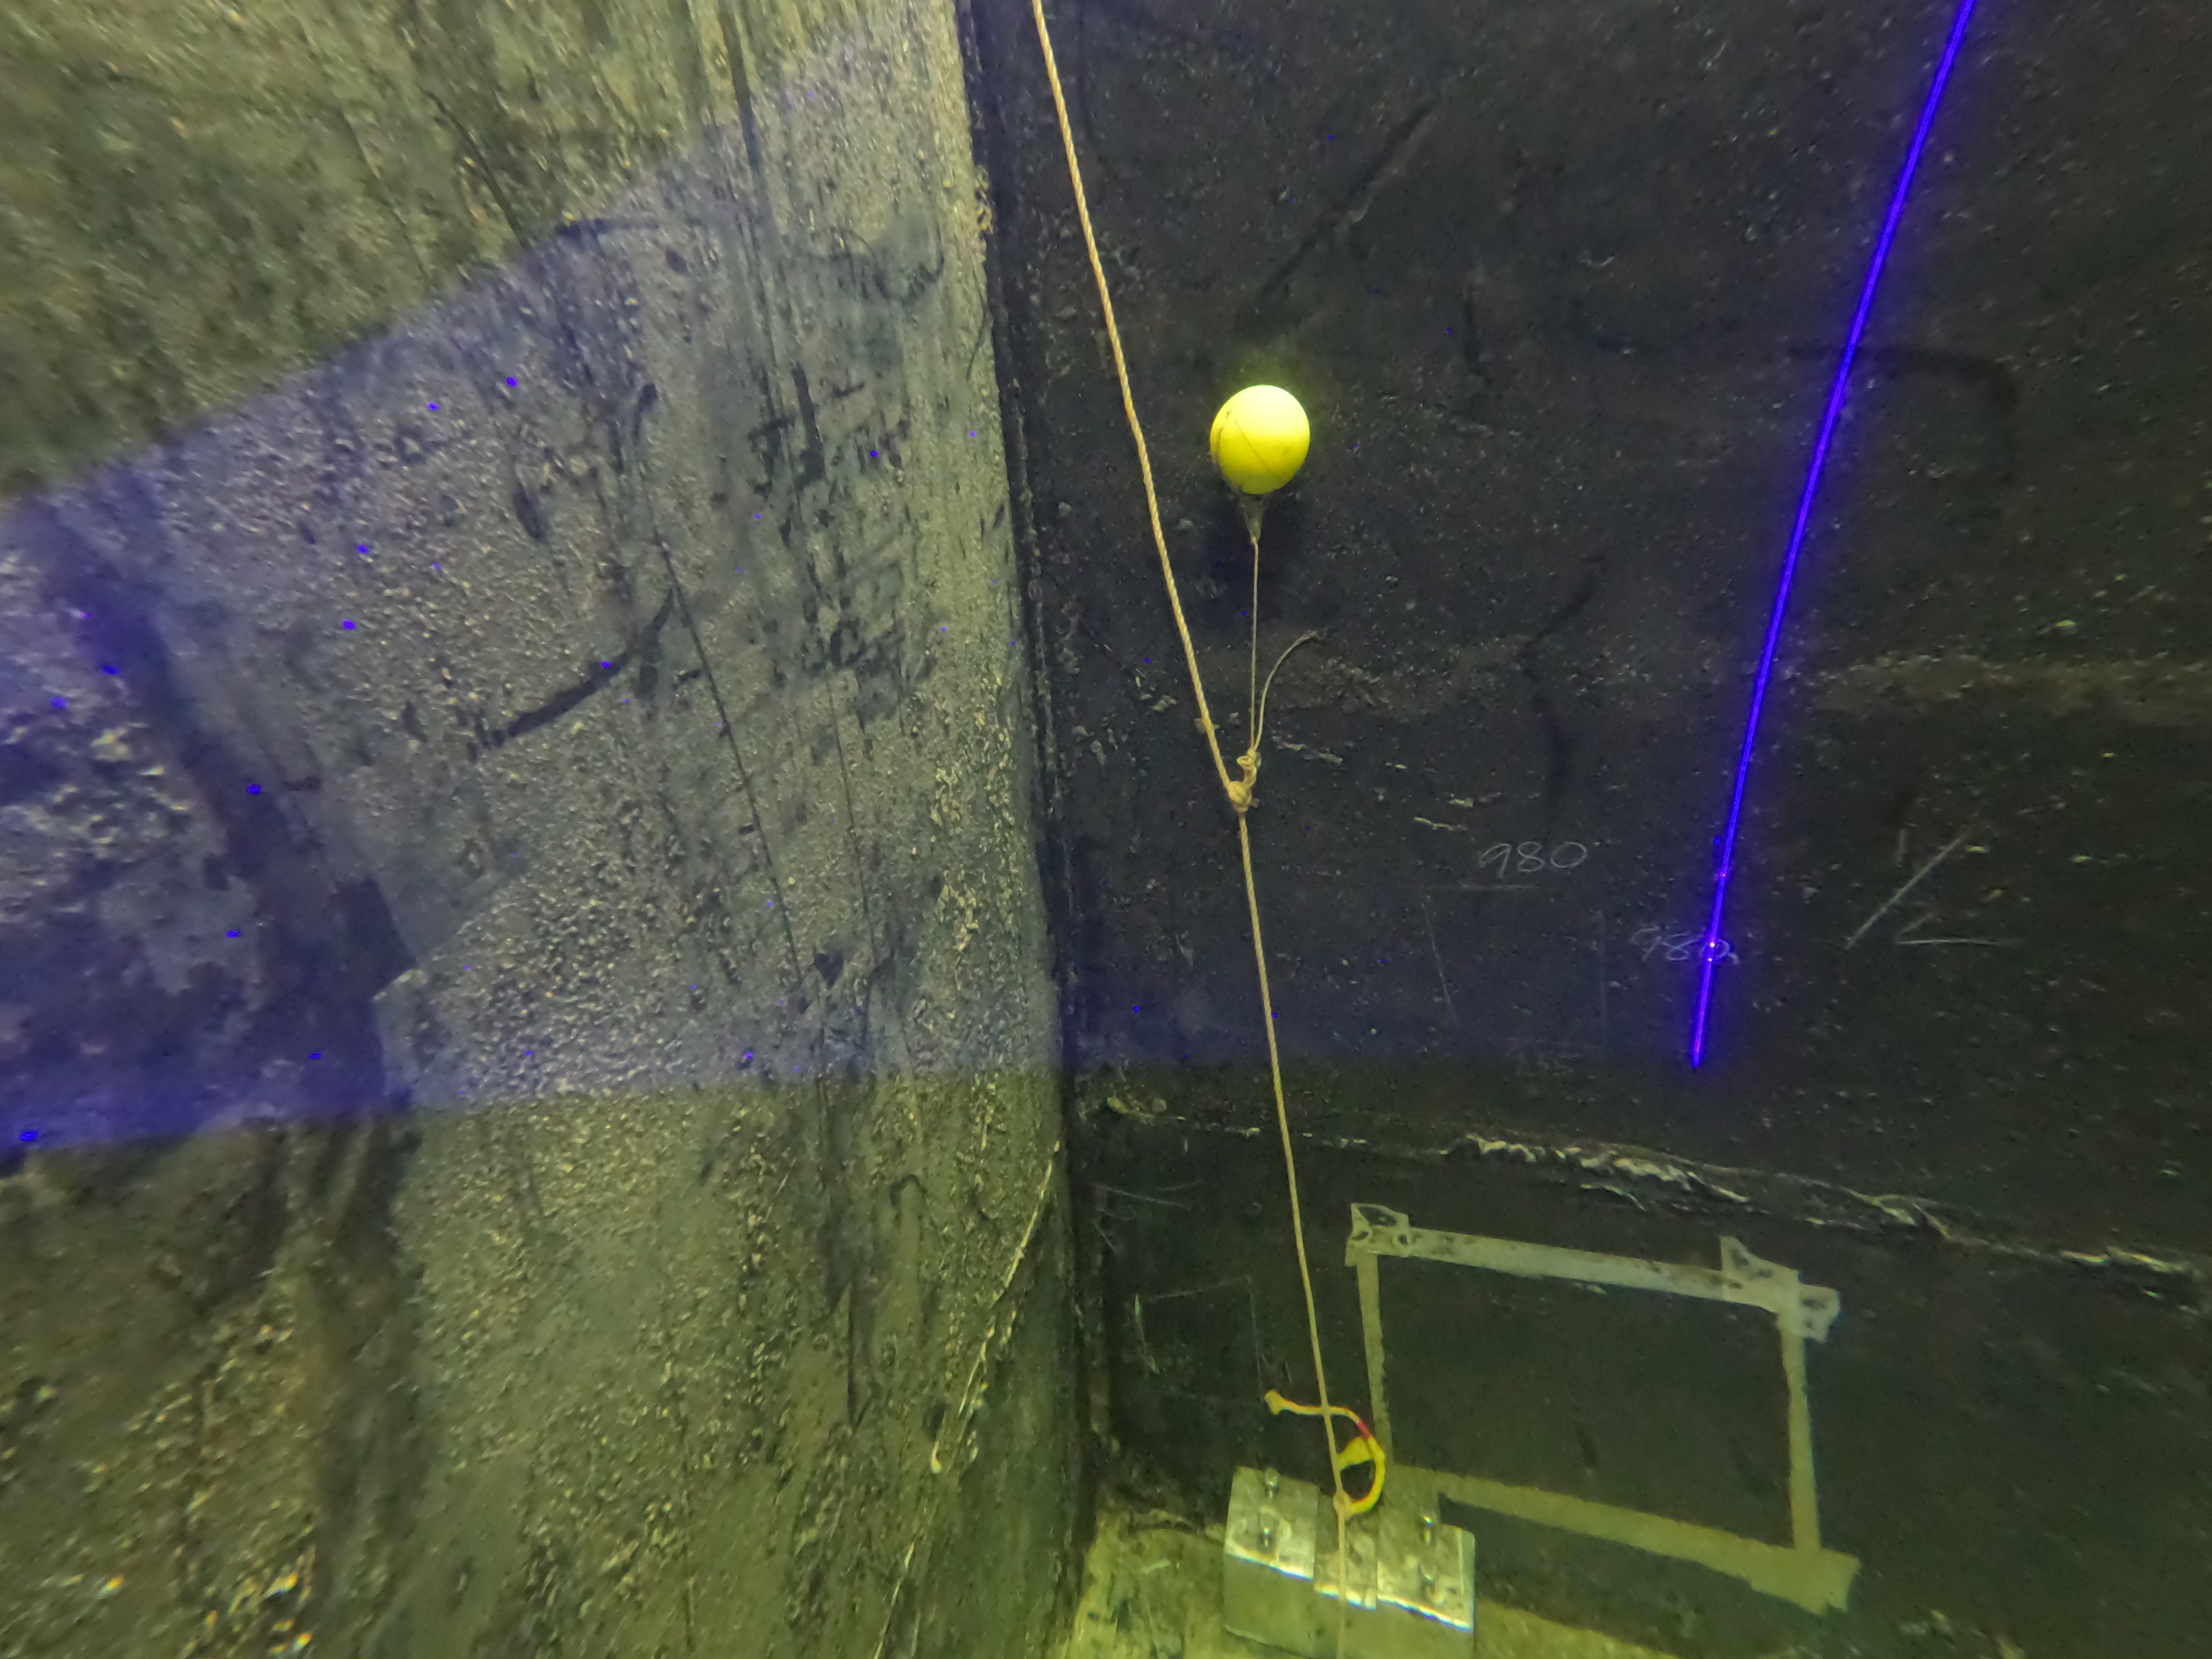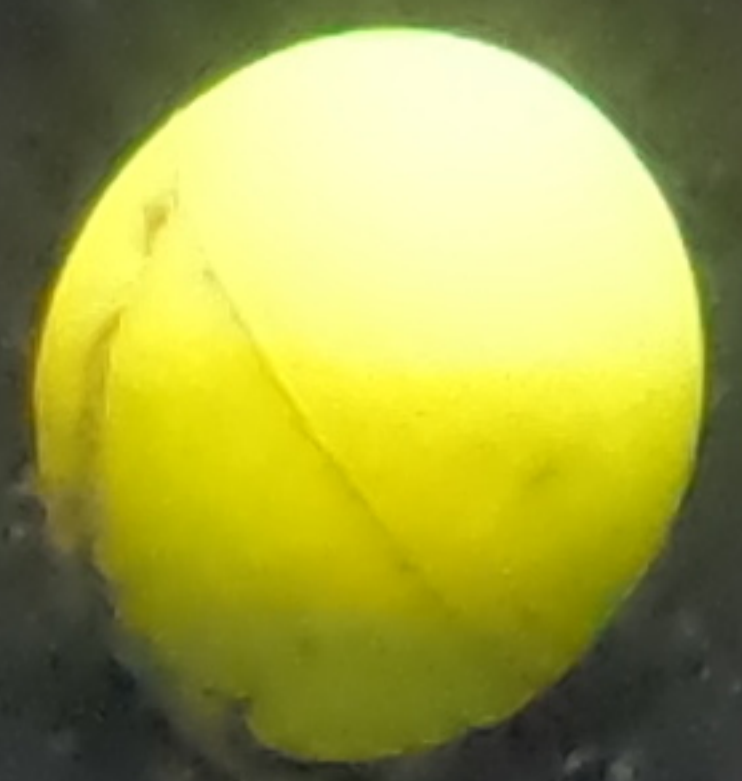

980

980

1/2

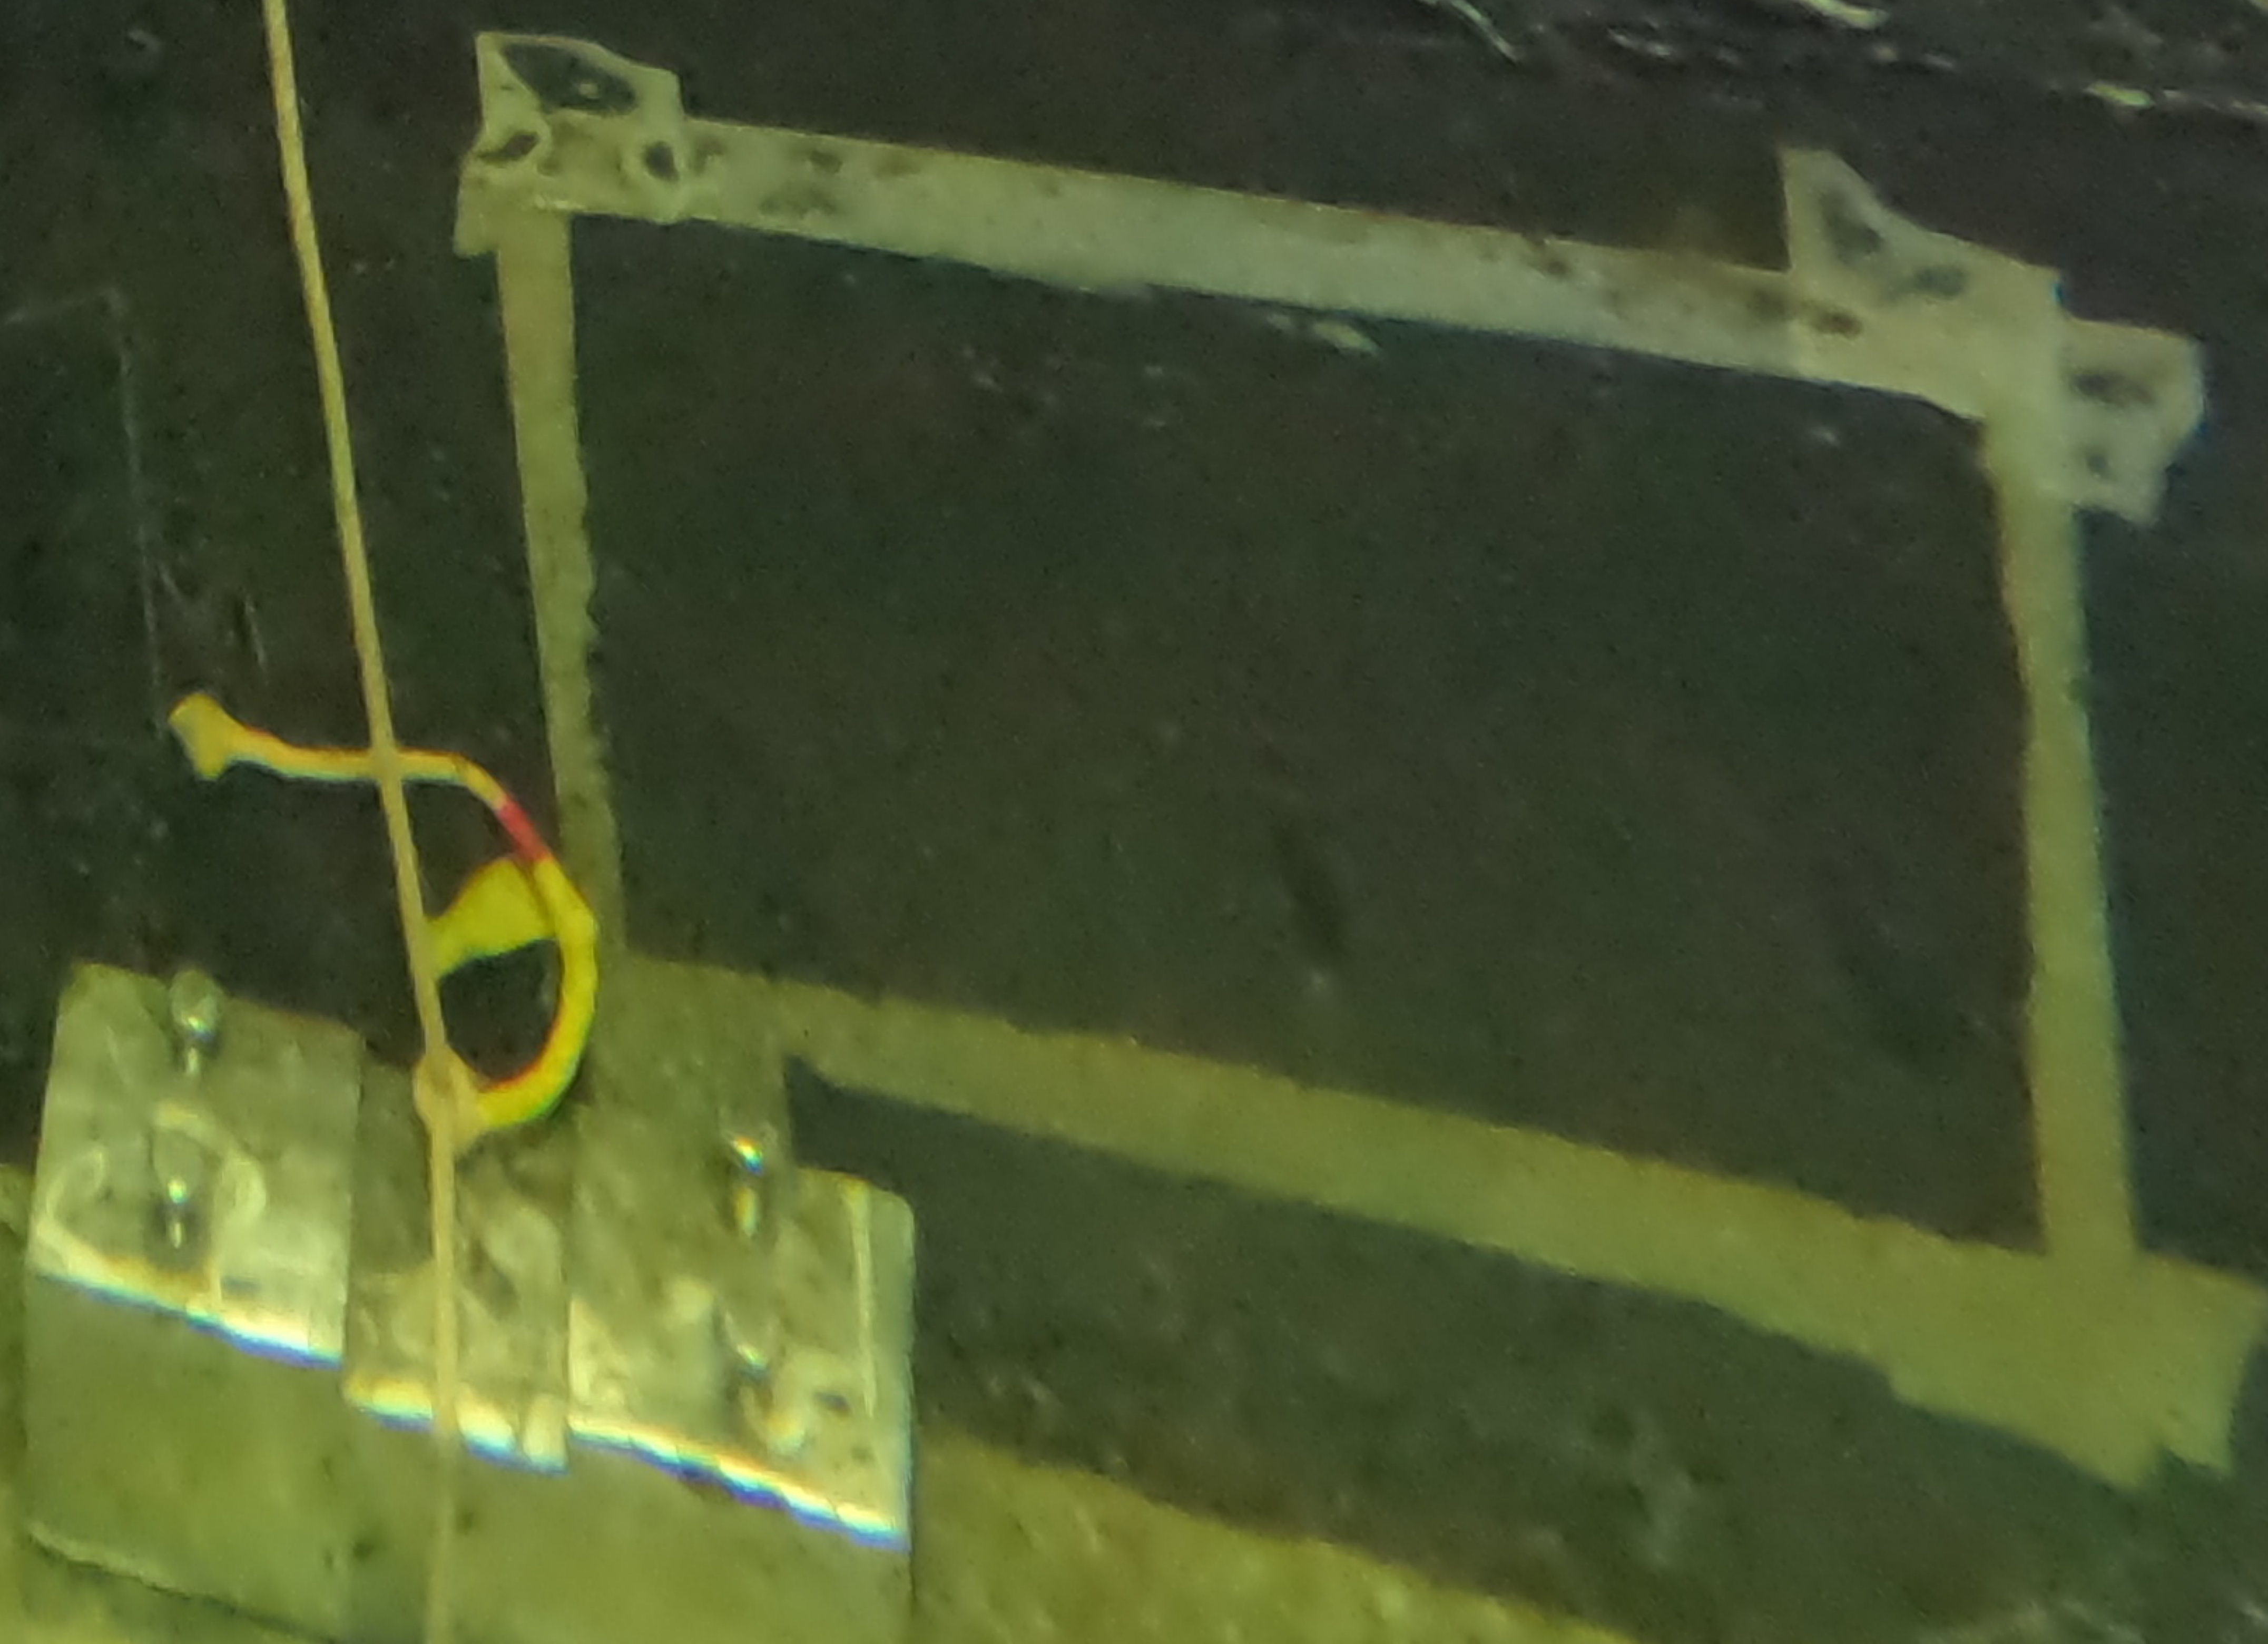

Supplement: Supplementary file 2978 [file G0031778.pdf › 12/G0031778.pdf]

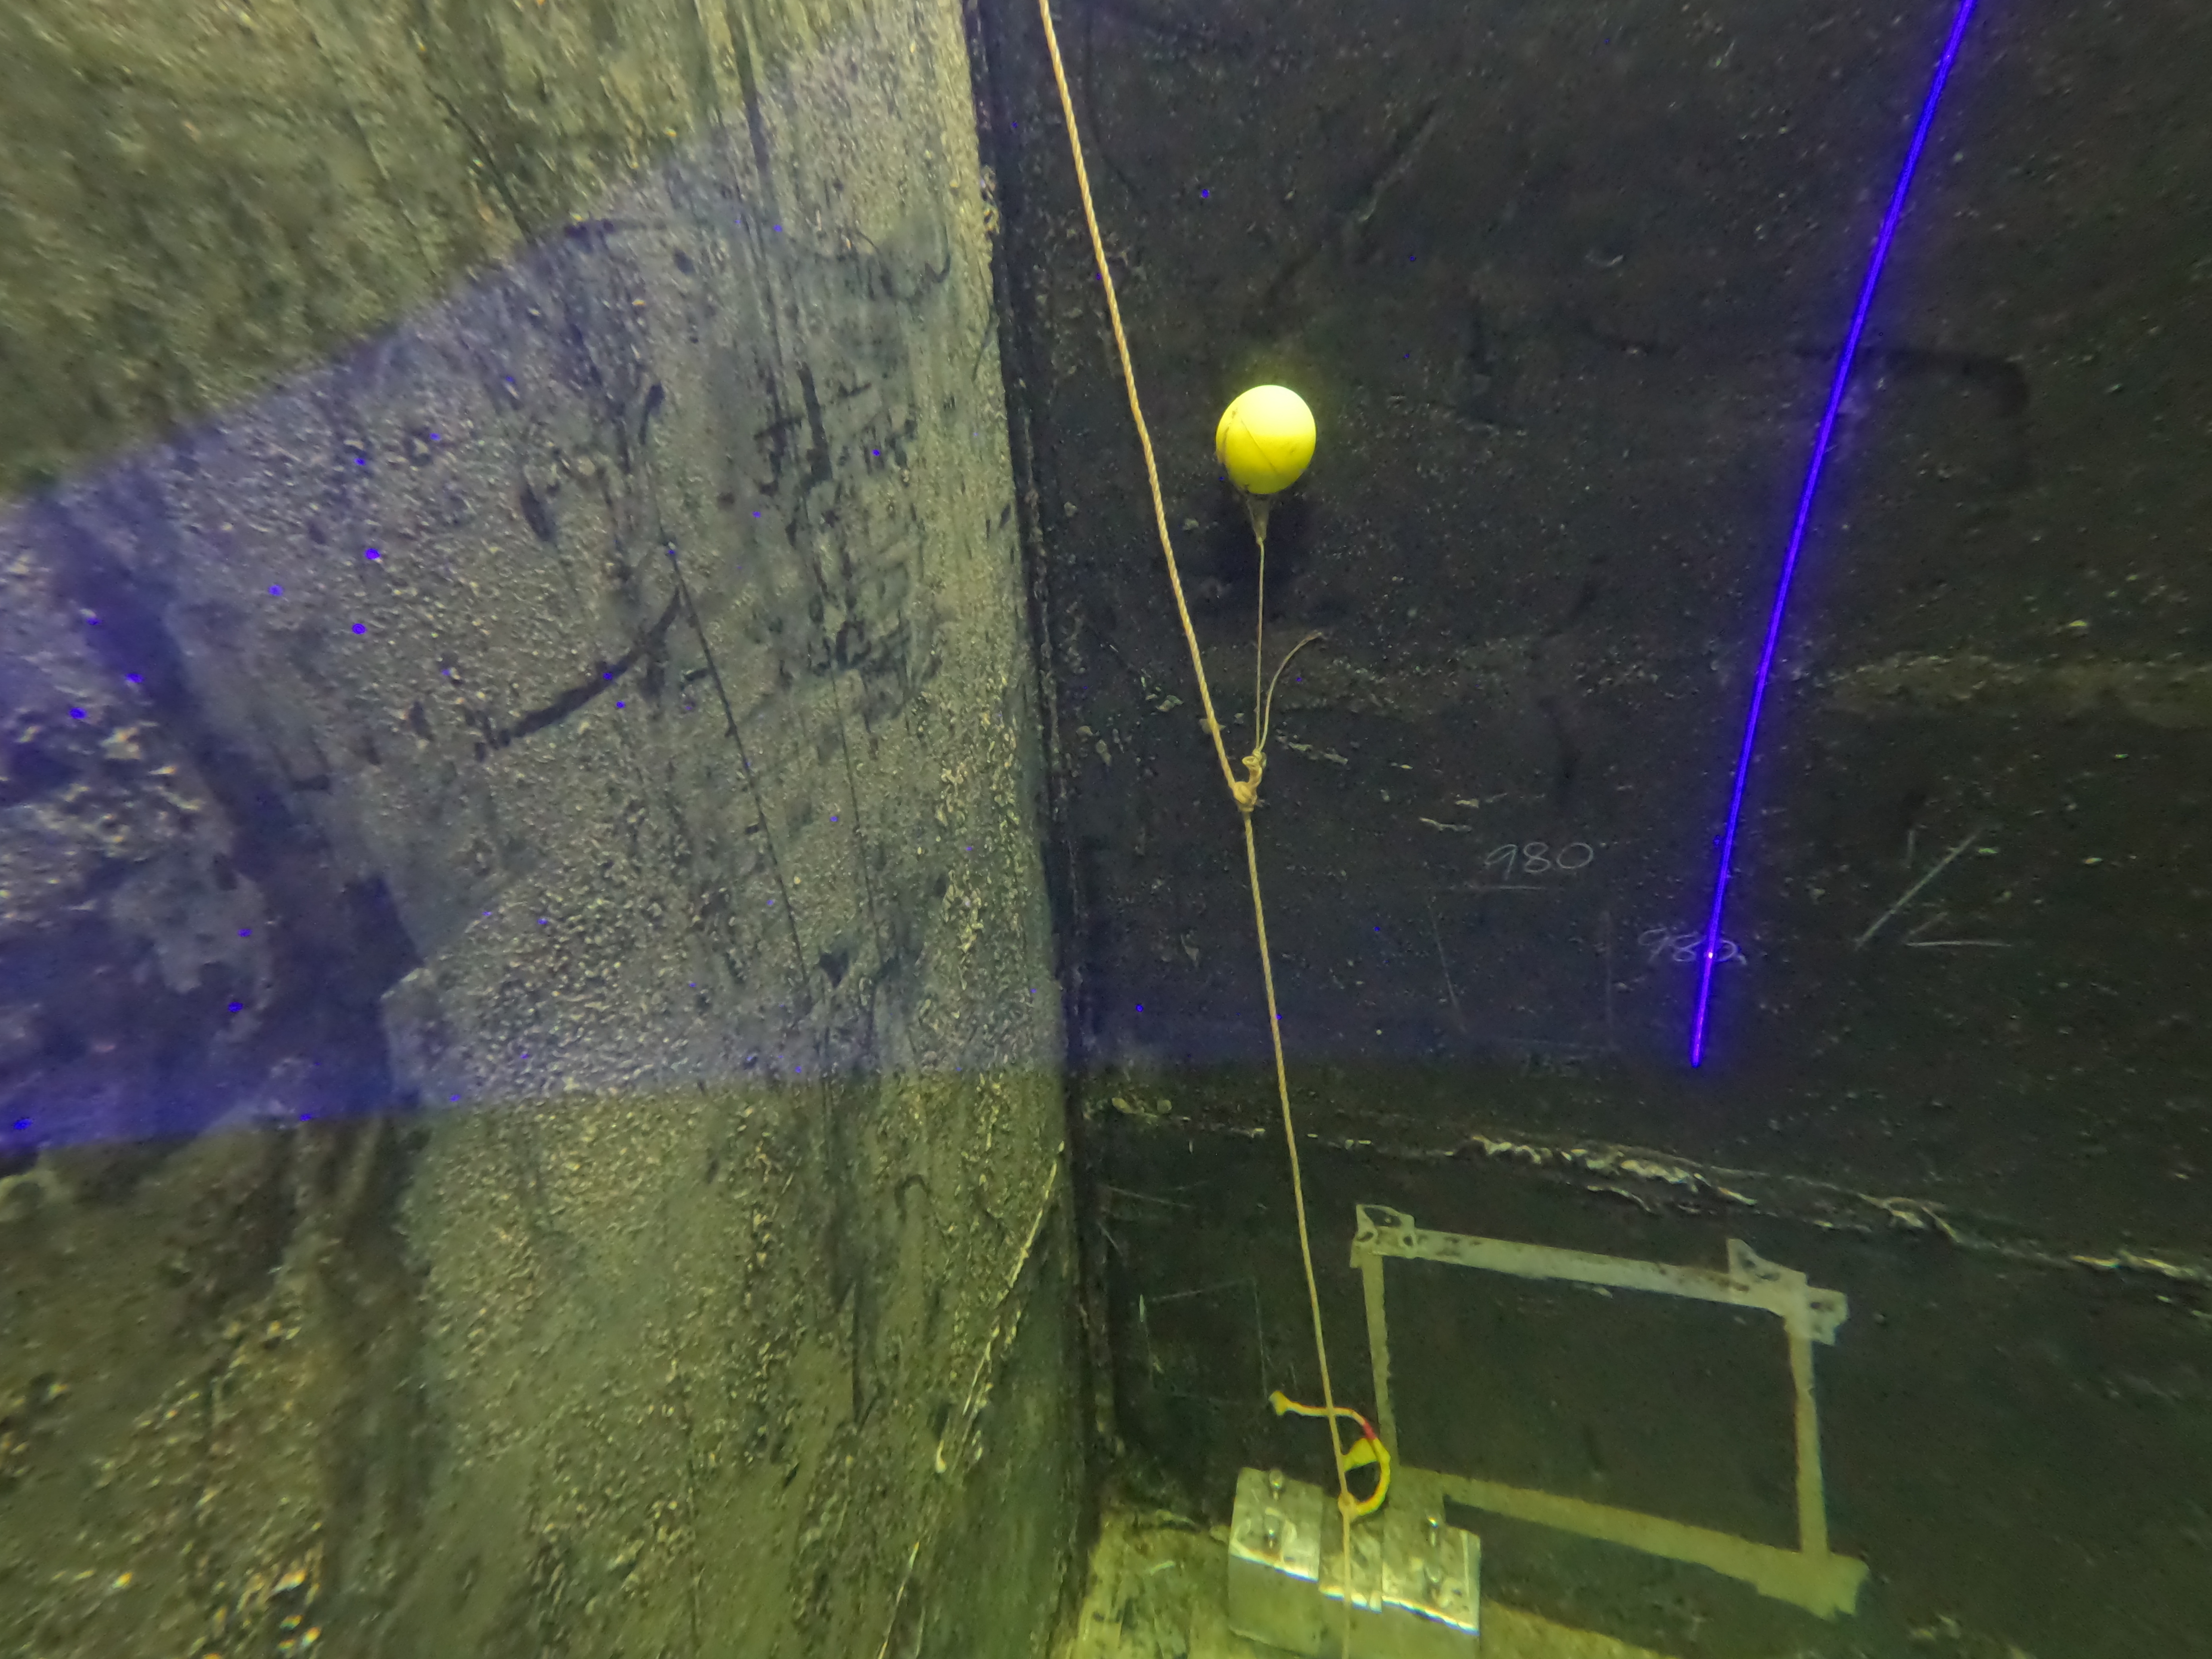

Supplement: Supplementary file 2979 [file G0031779.pdf › 12/G0031779.pdf]

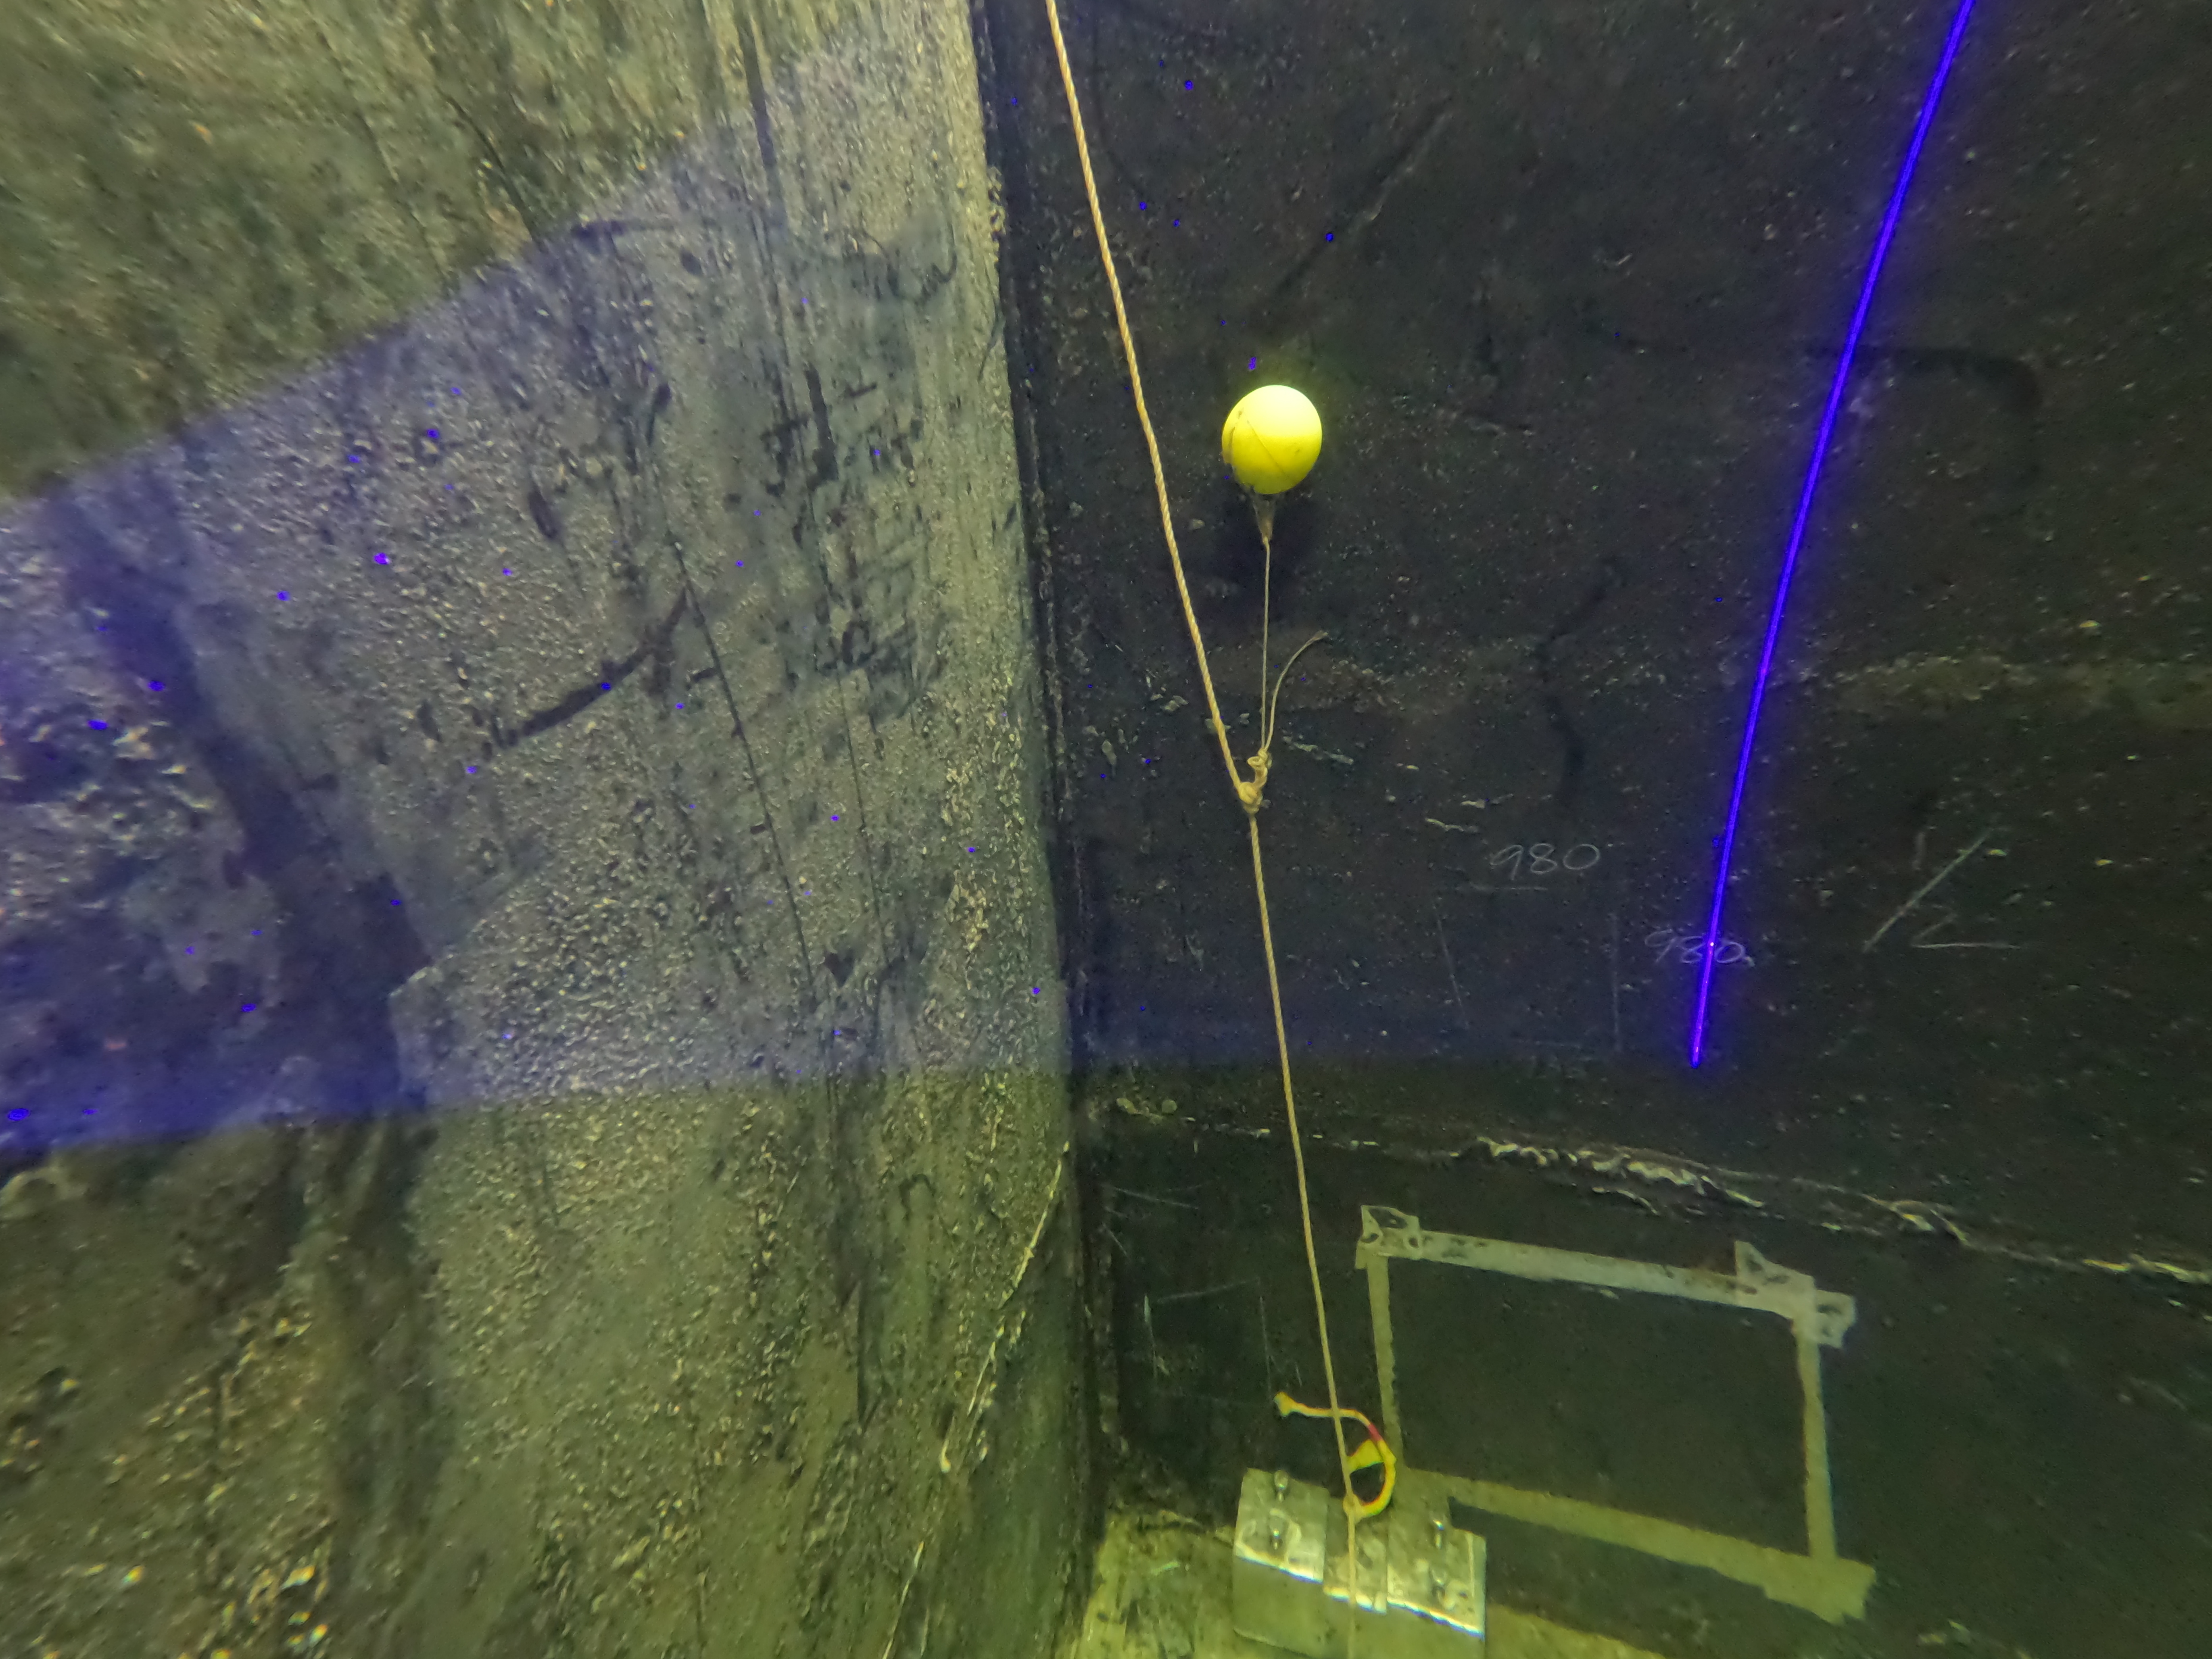

Supplement: Supplementary file 2980 [file G0031780.pdf › 12/G0031780.pdf]

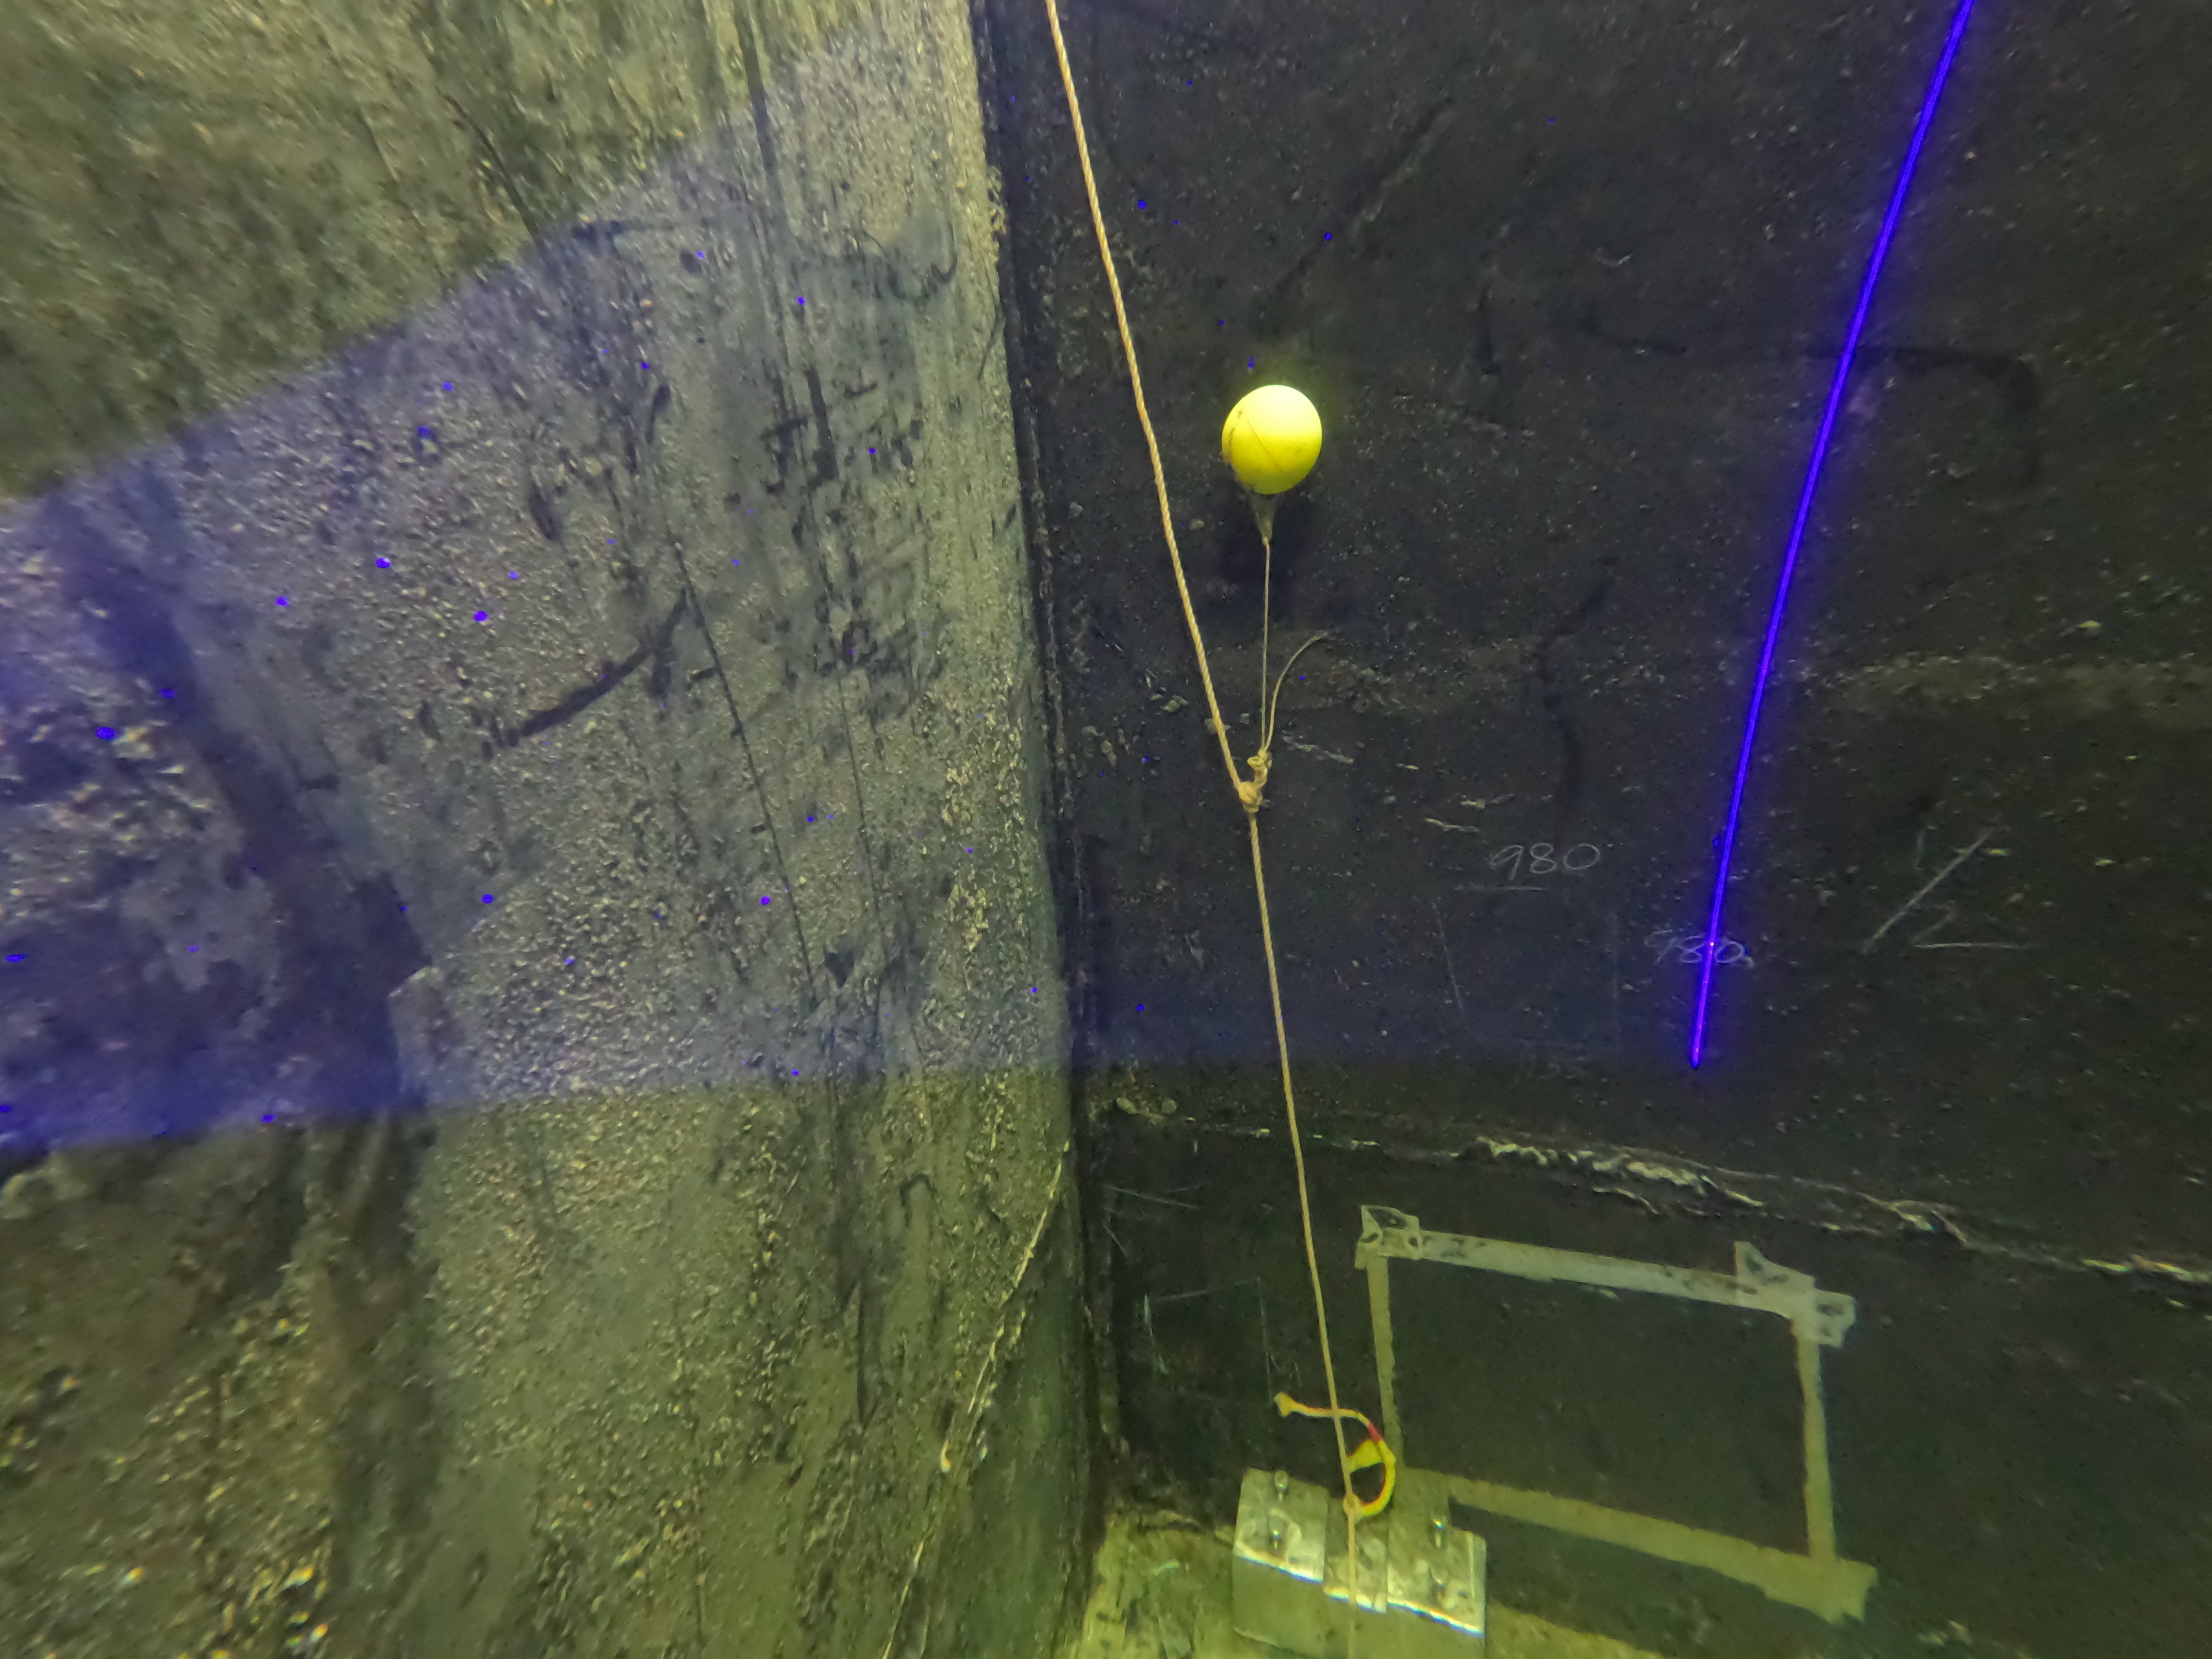

Supplement: Supplementary file 2981 [file G0031781.pdf › 12/G0031781.pdf]

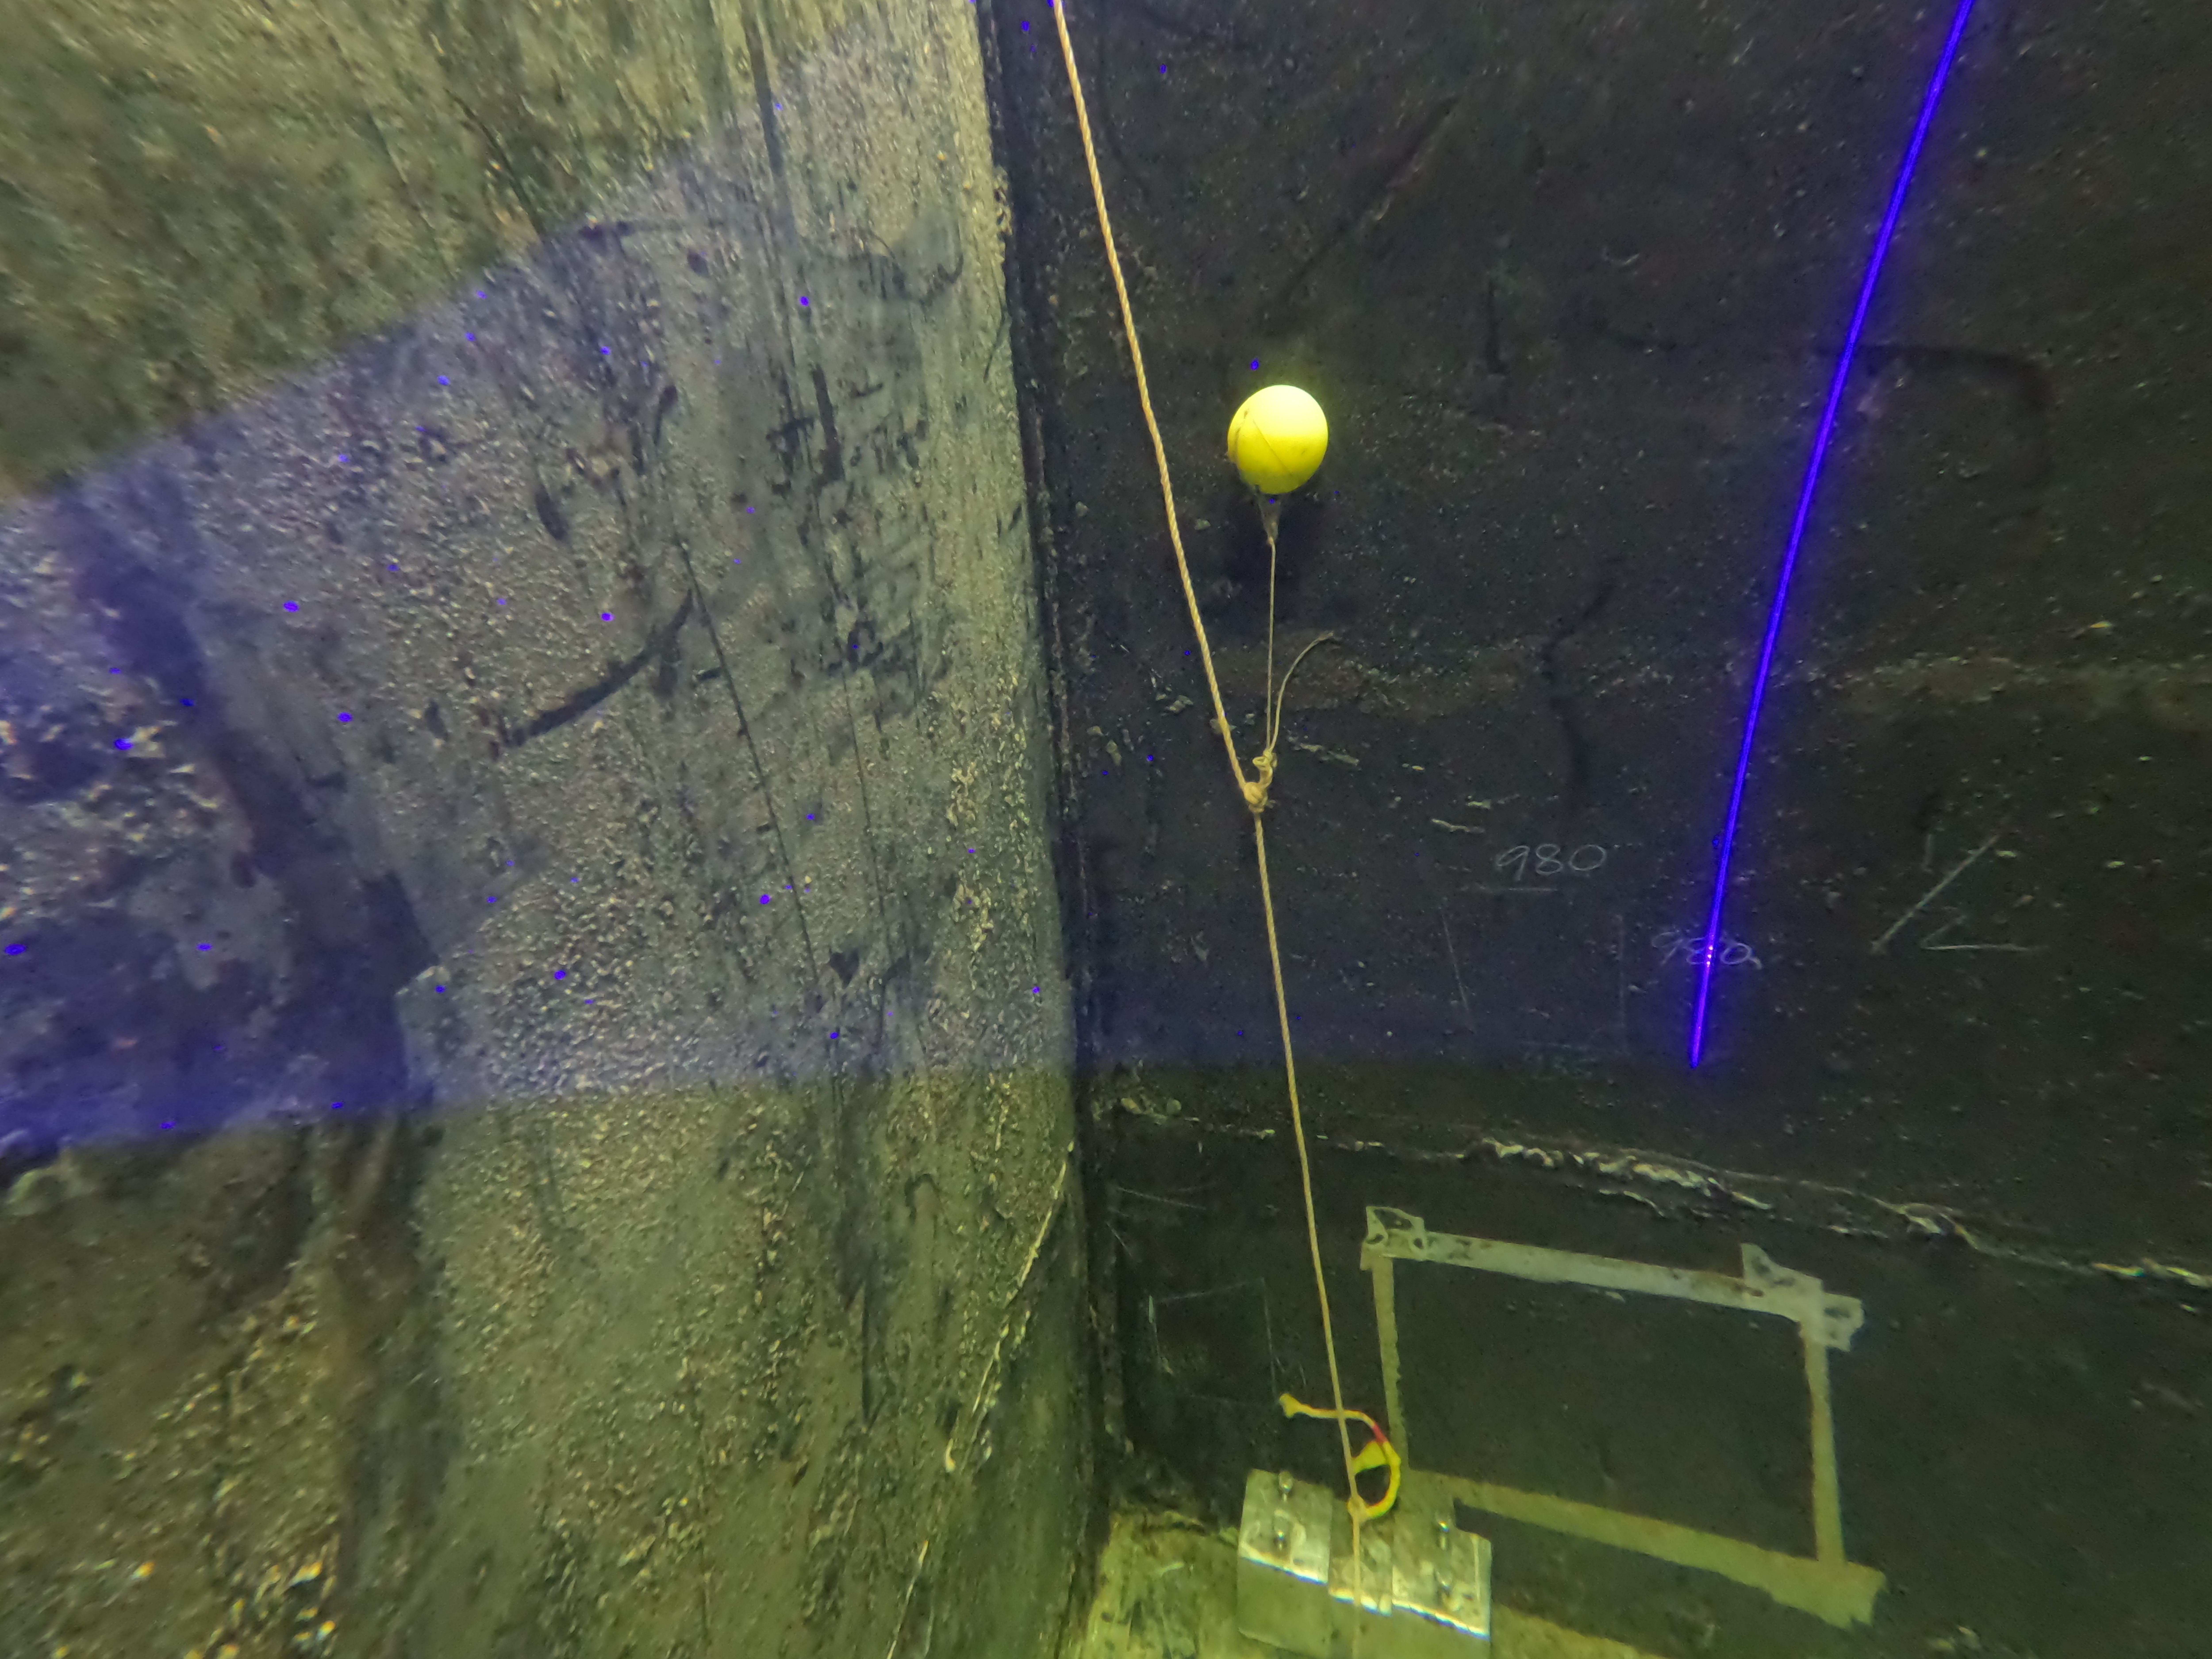

980

980

Supplement: Supplementary file 2982 [file G0031782.pdf › 12/G0031782.pdf]

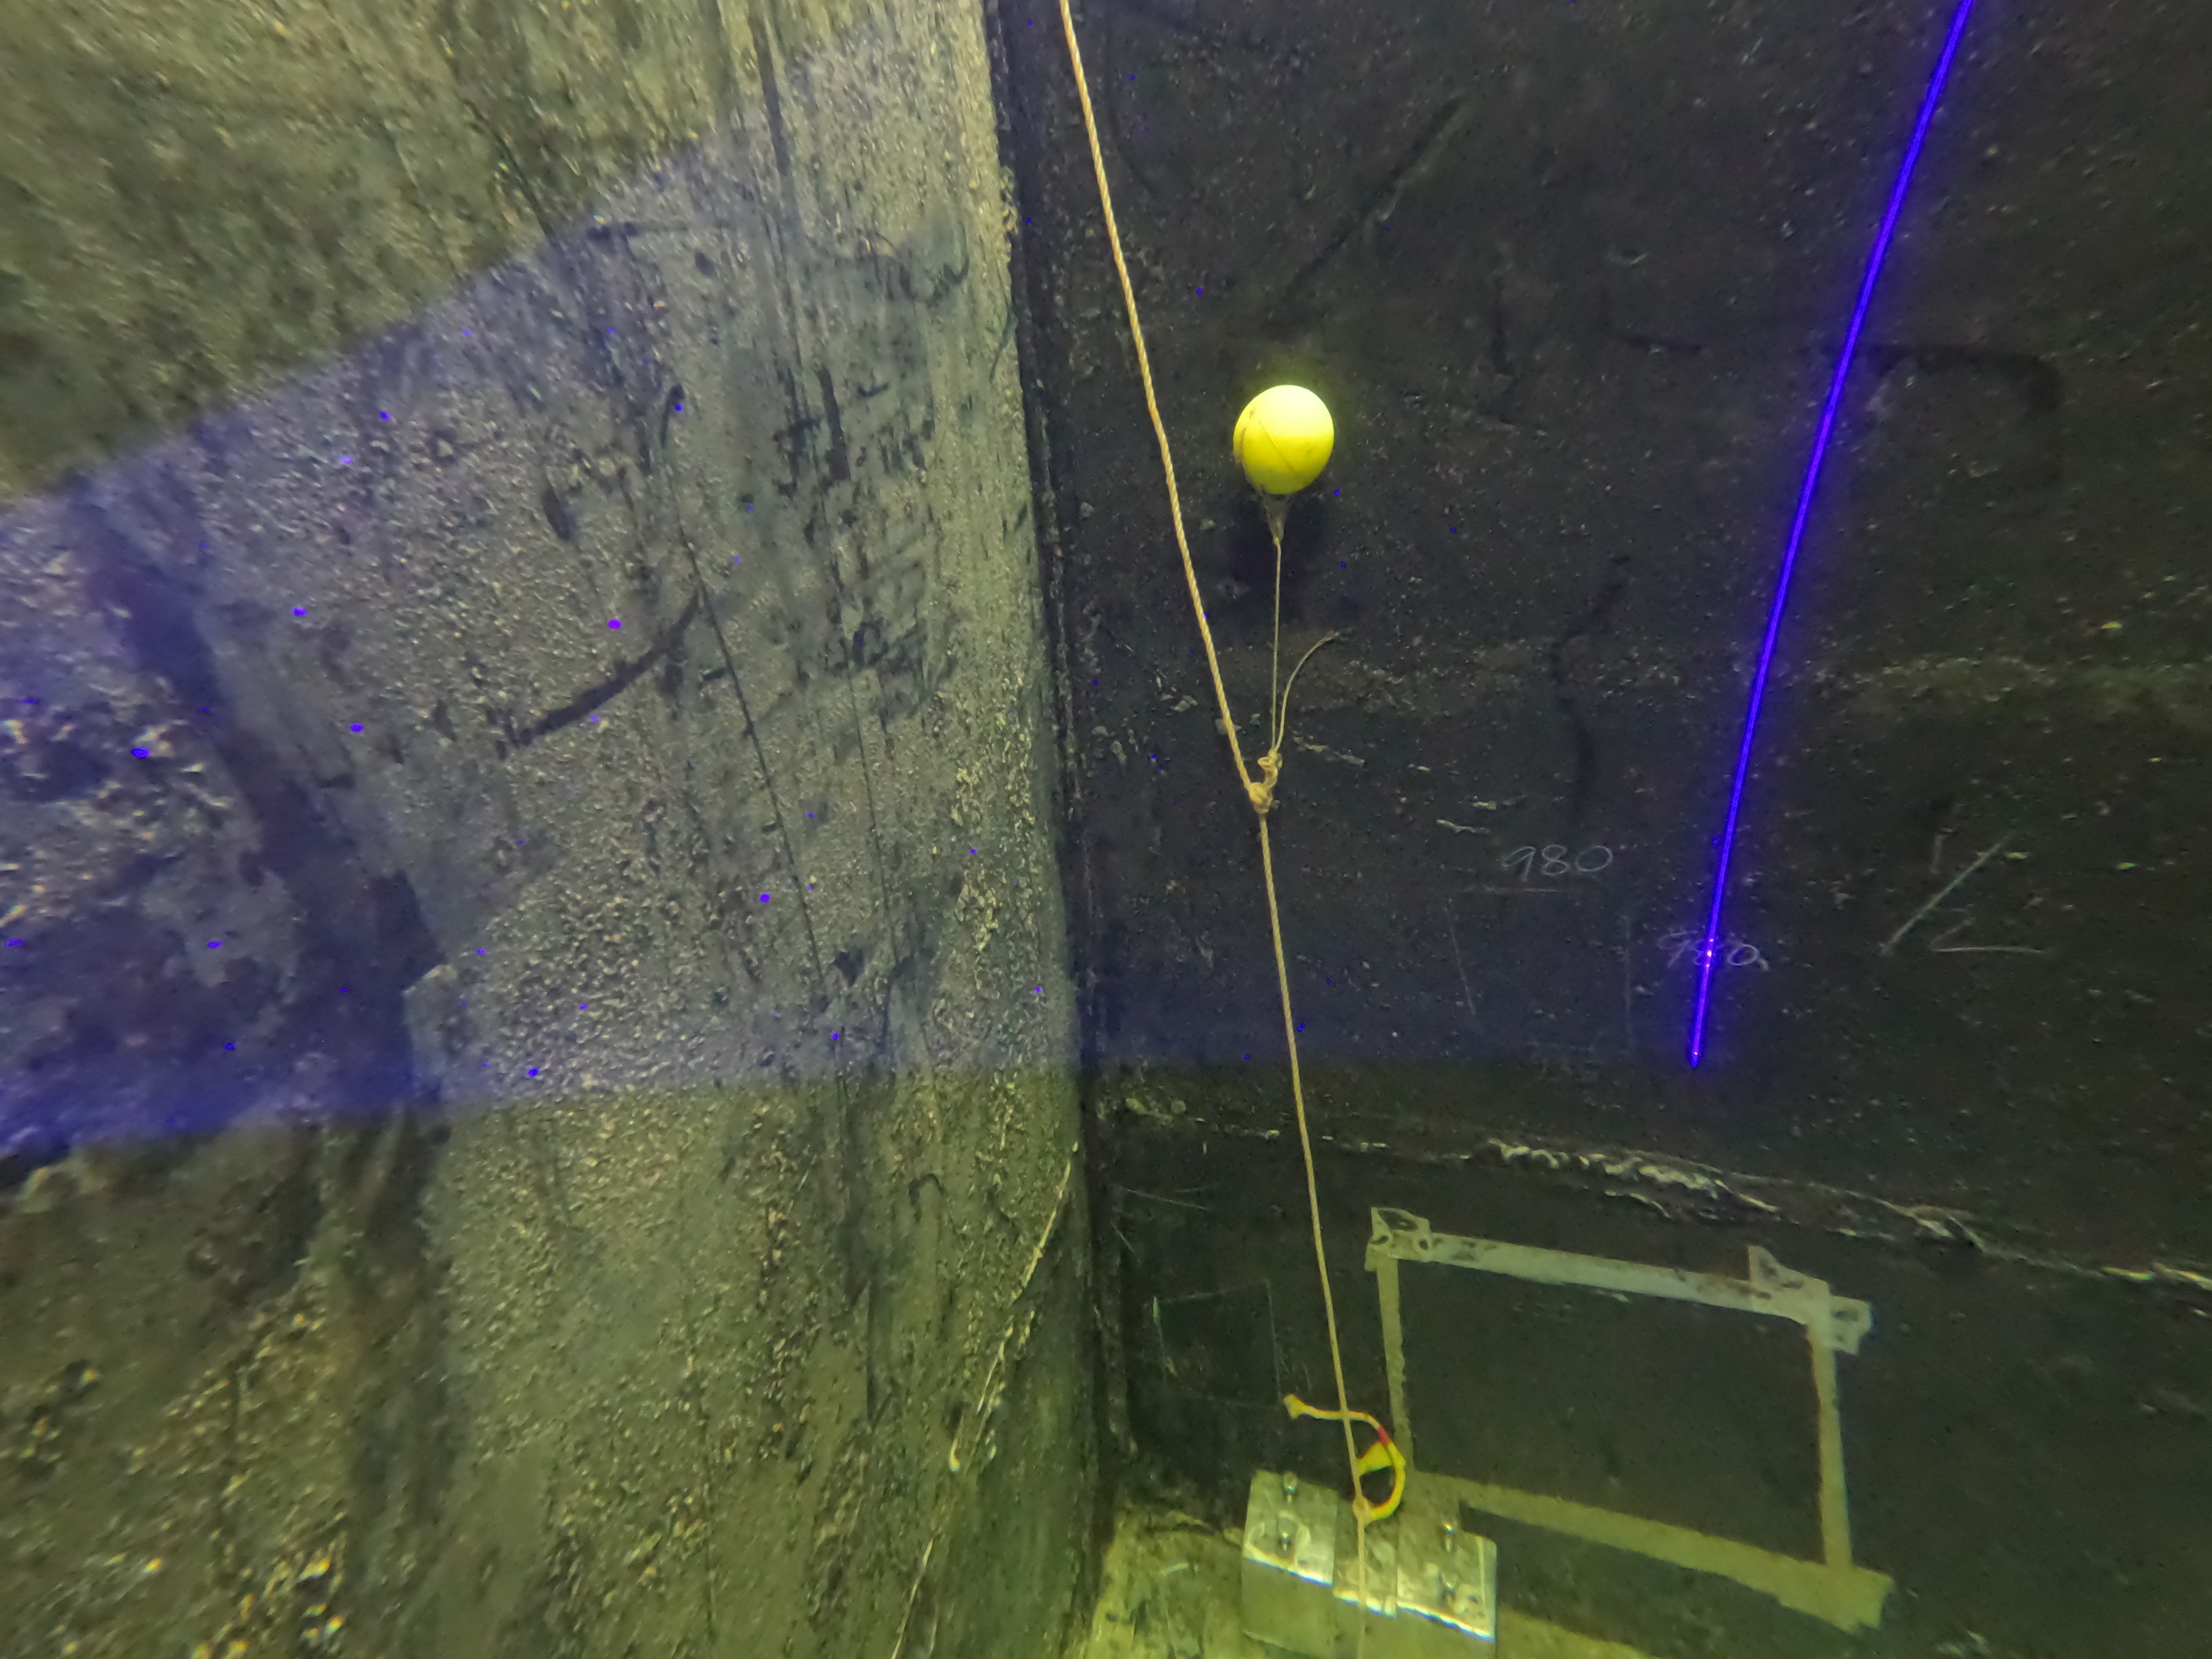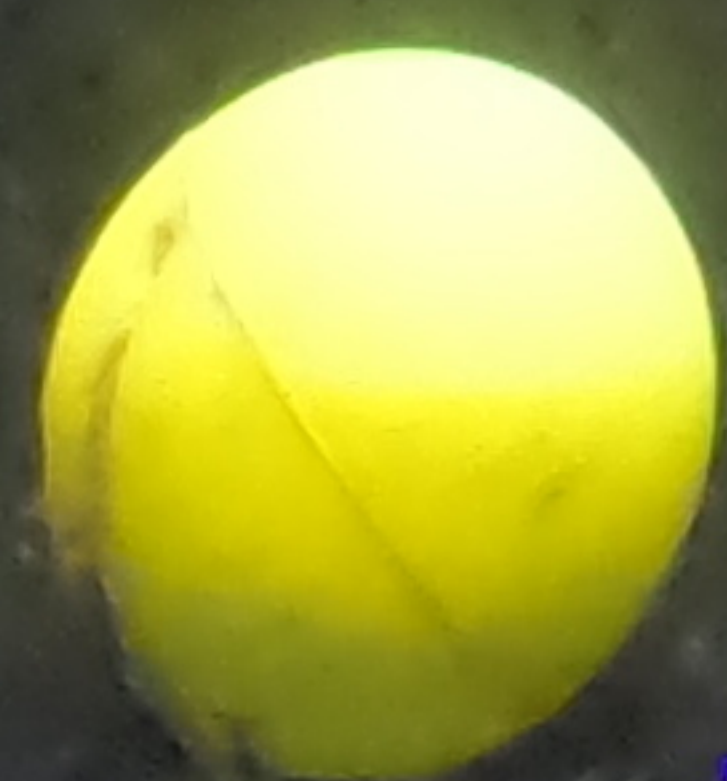

980

980

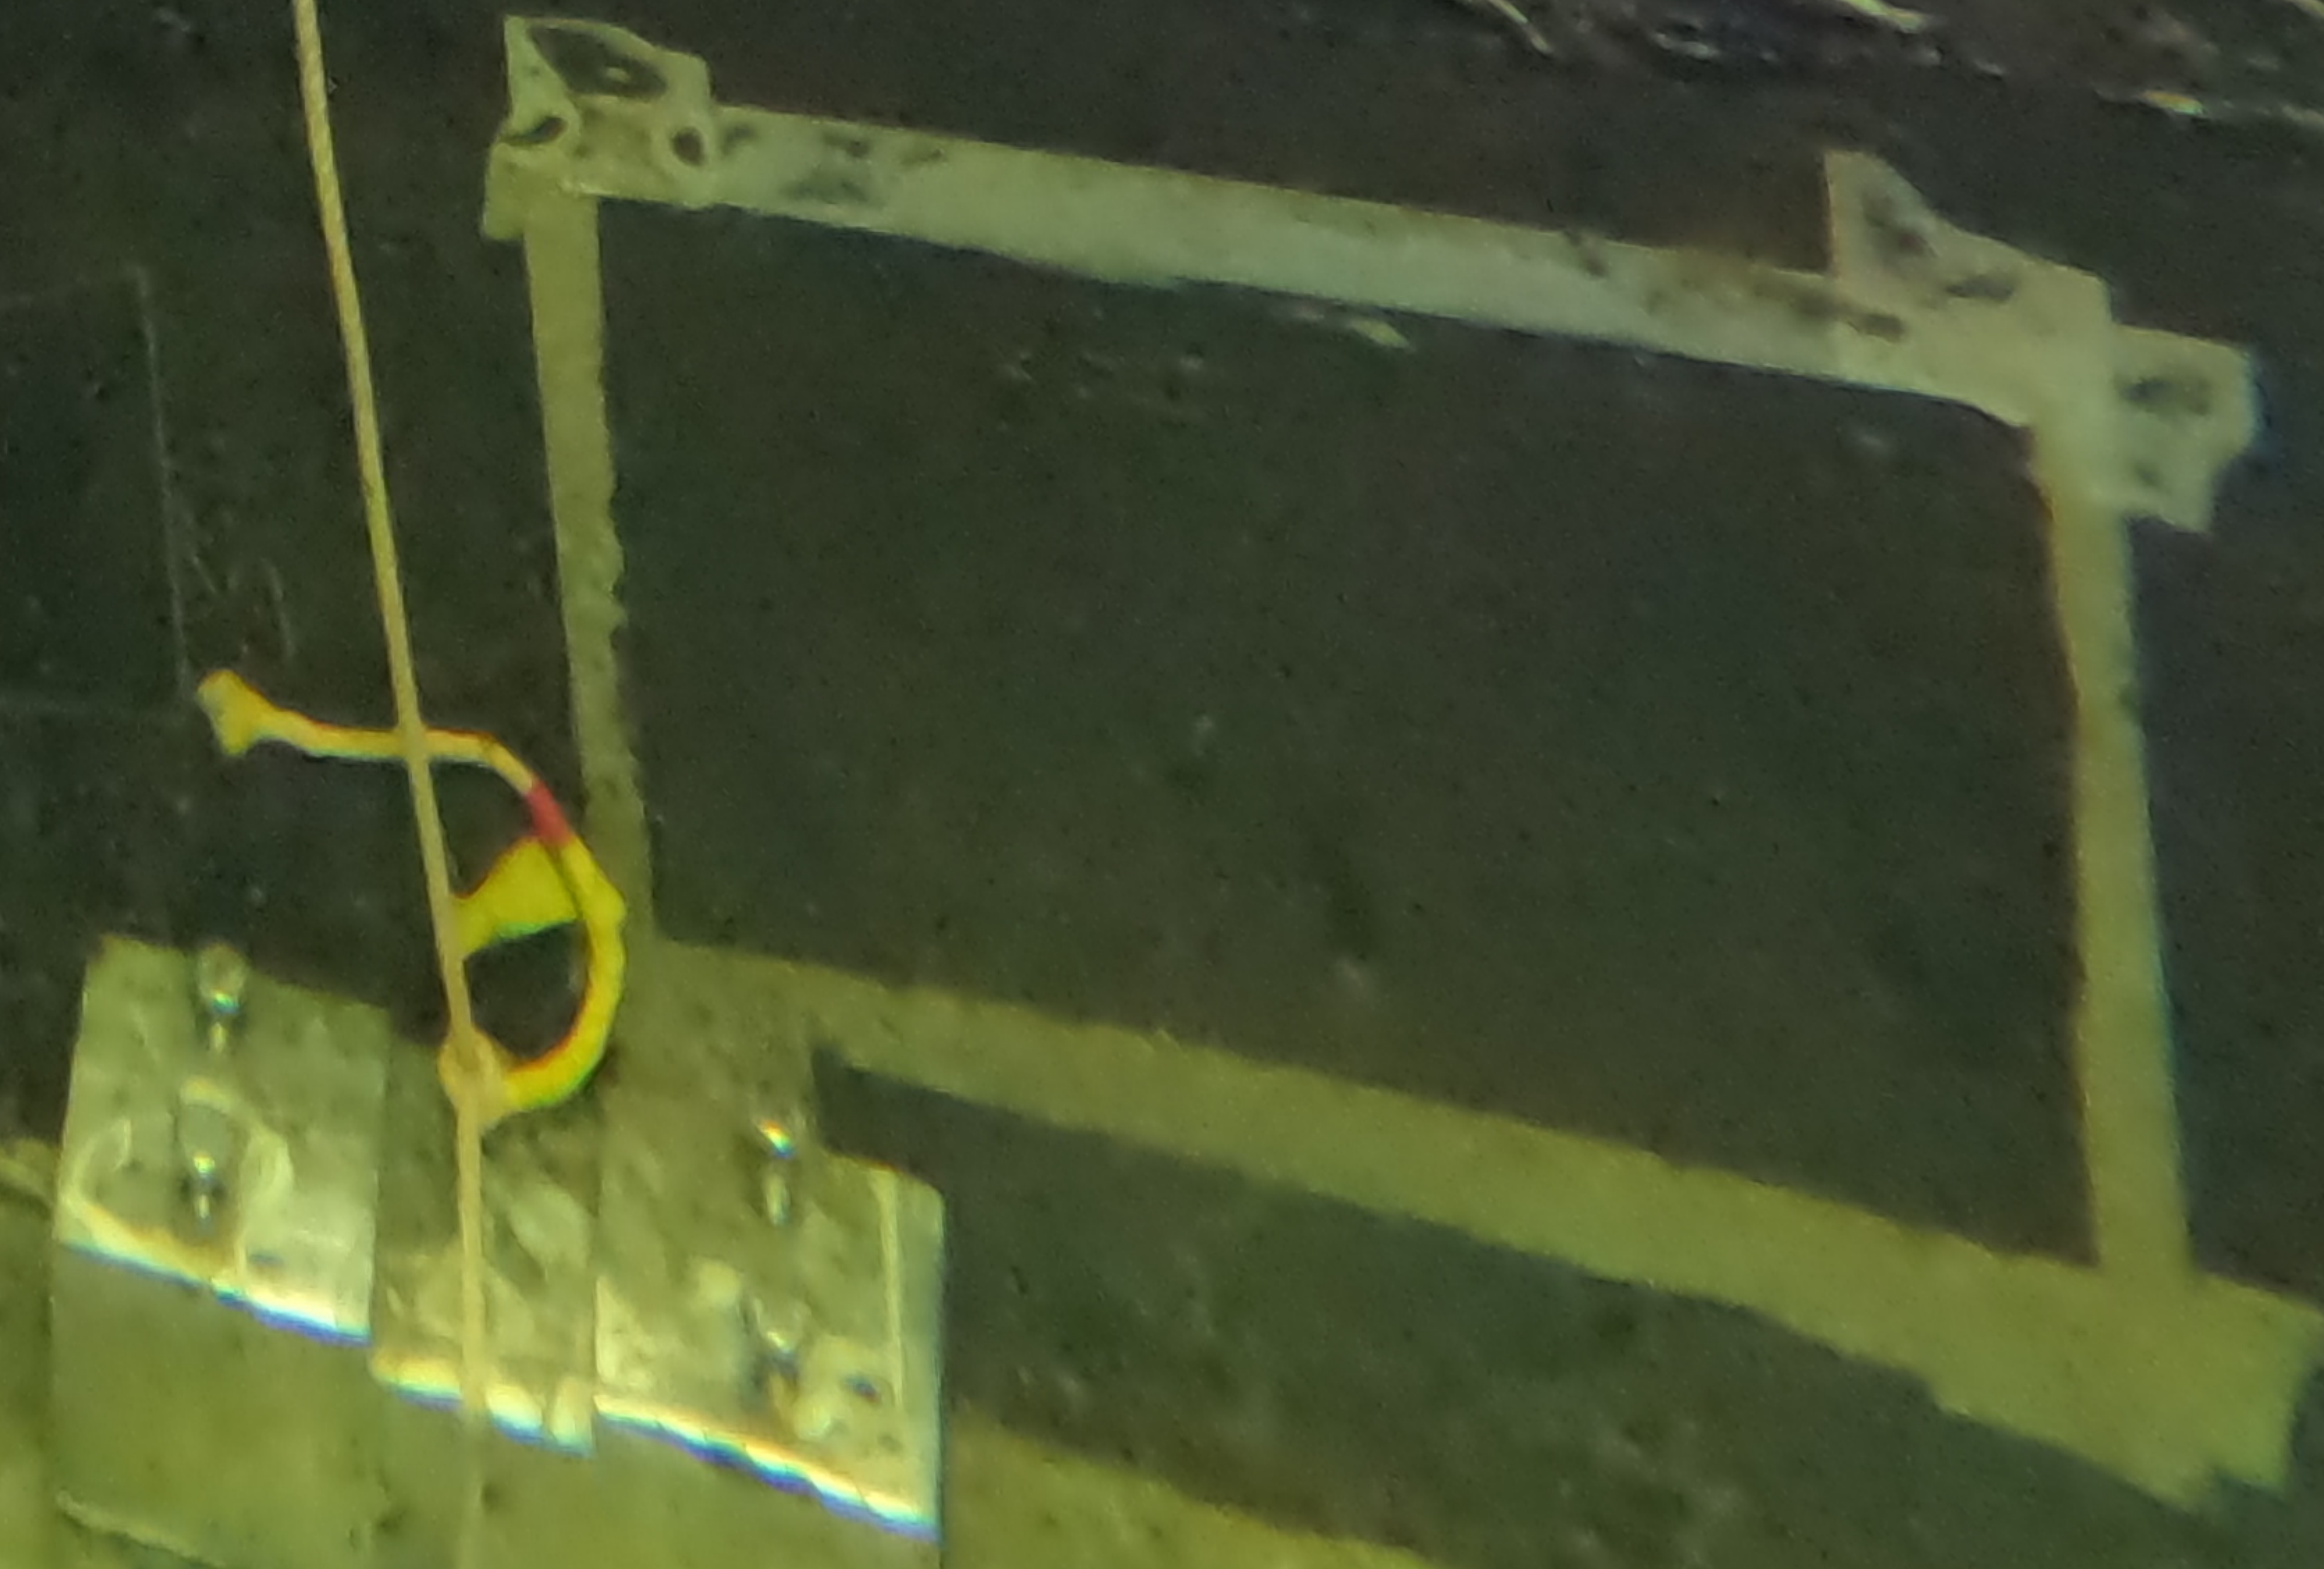

Supplement: Supplementary file 2983 [file G0031783.pdf › 12/G0031783.pdf]

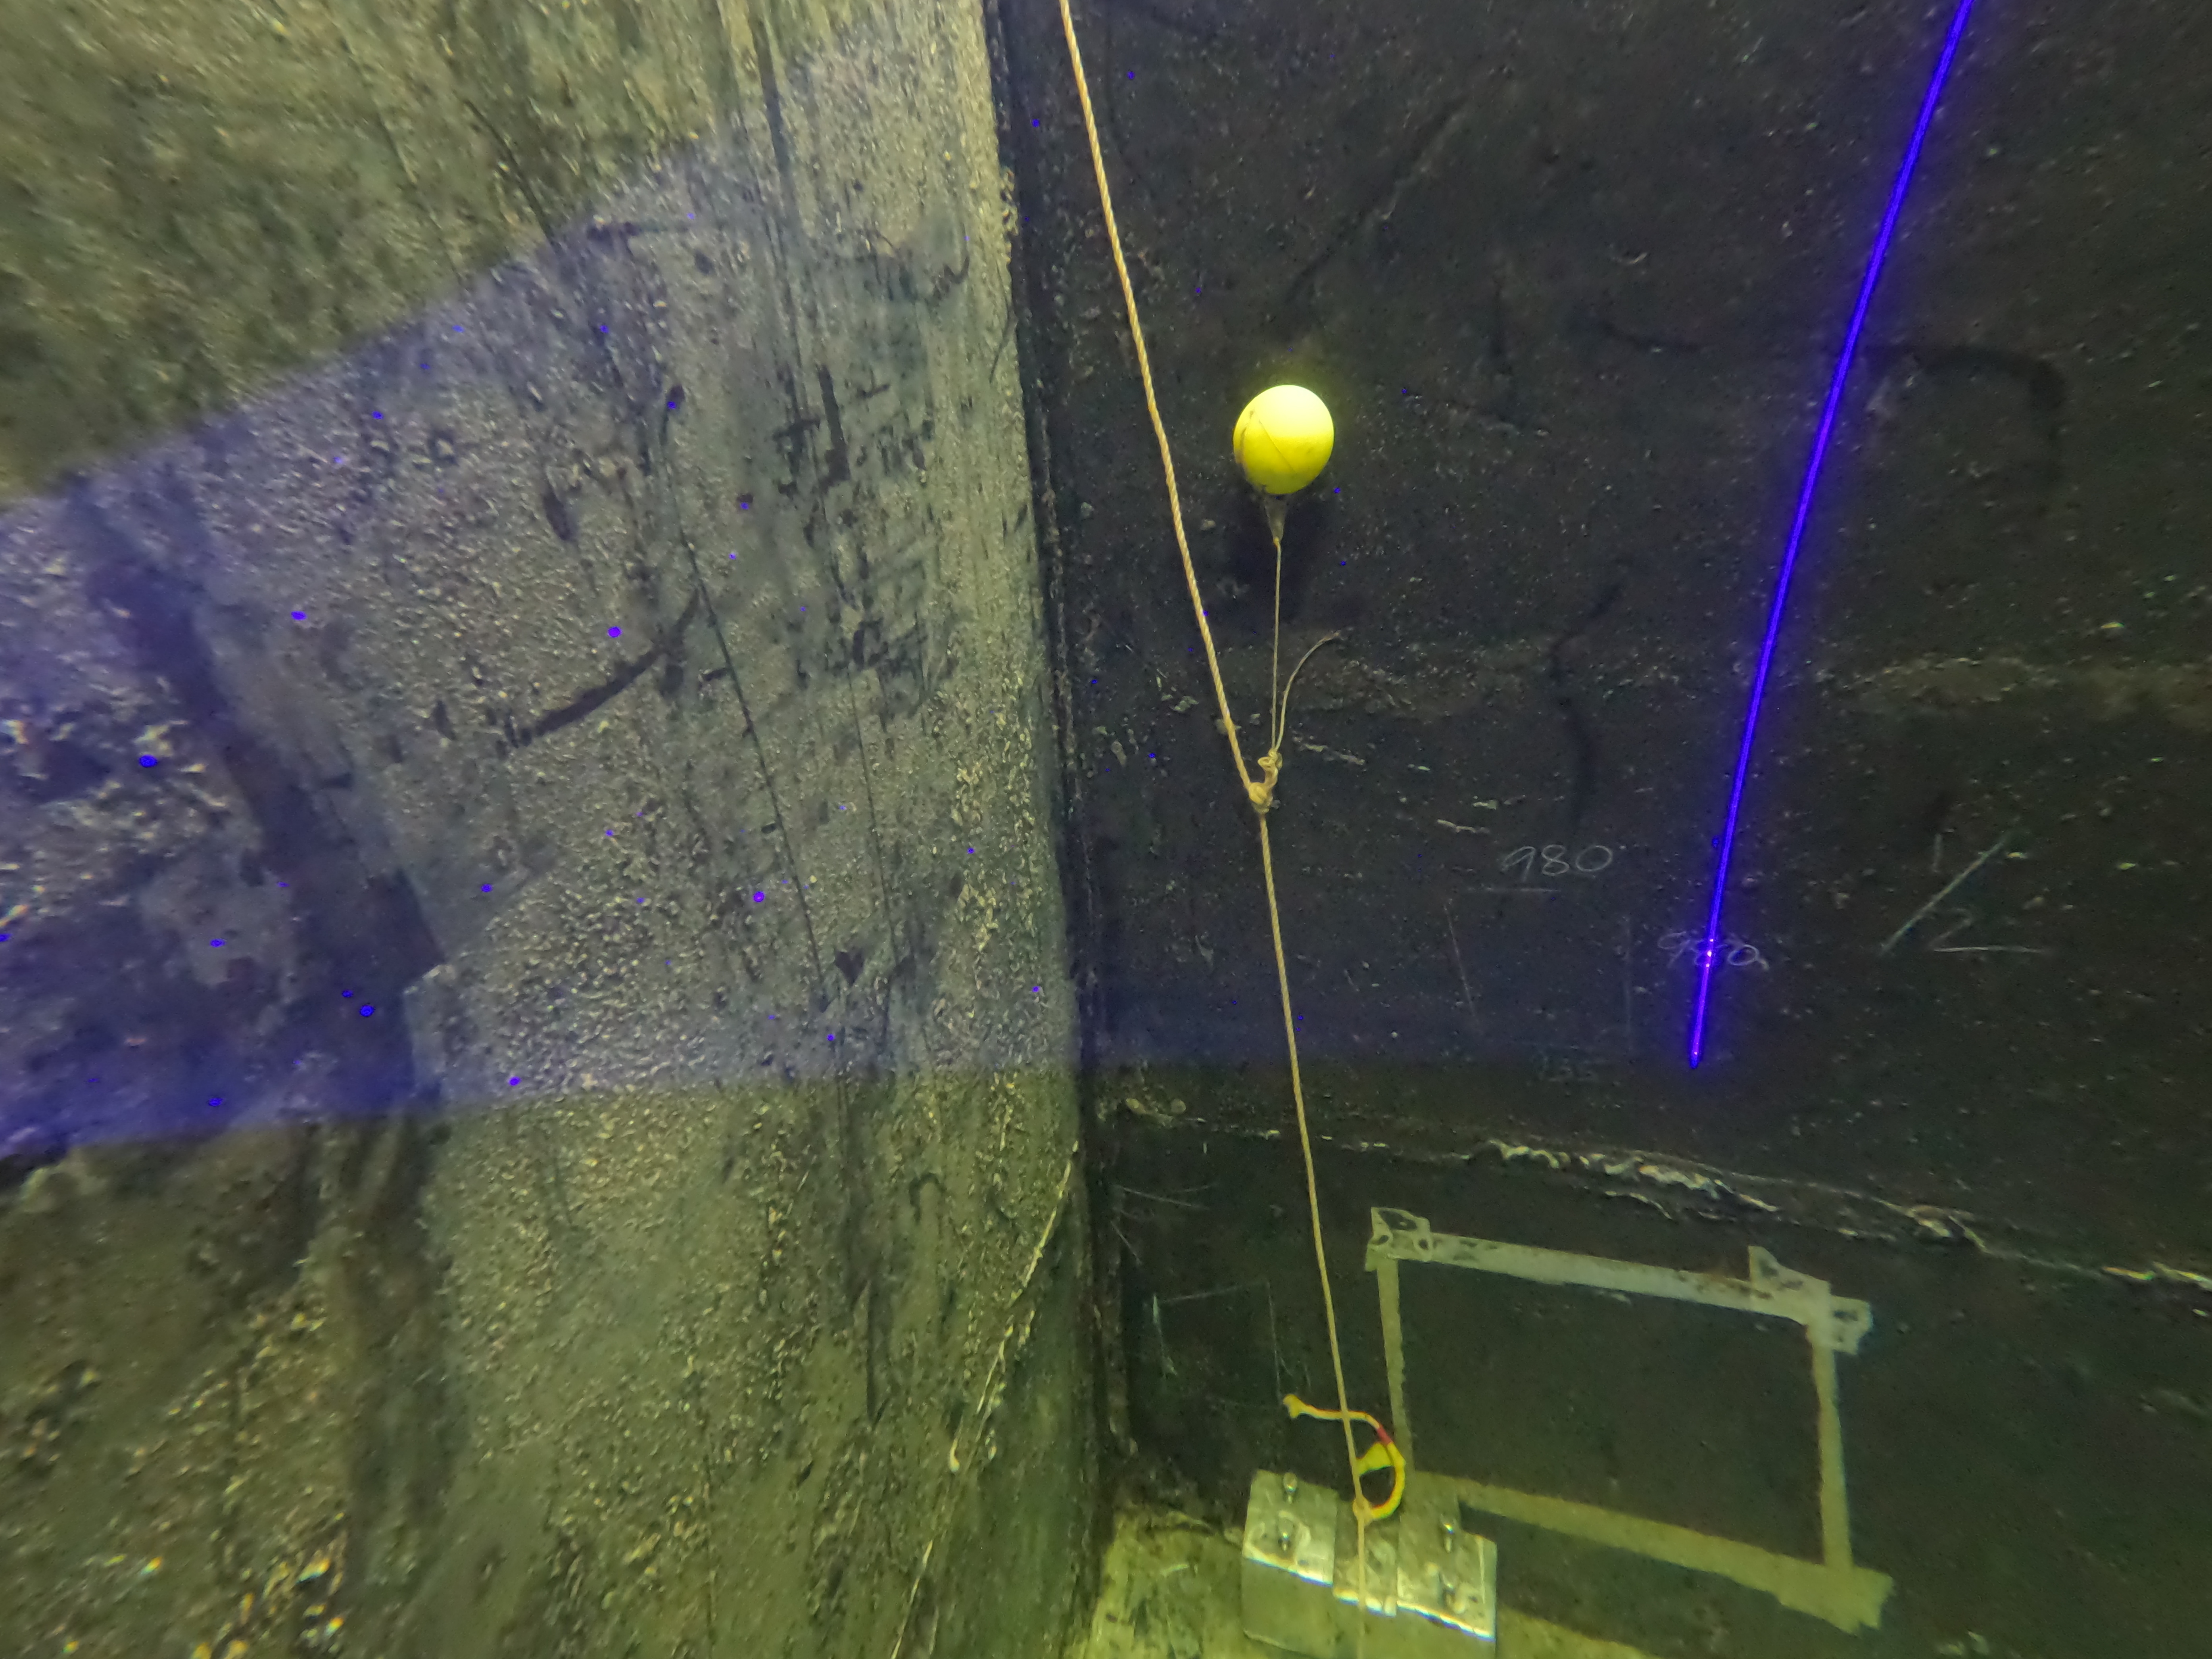

980

980

1/2

Supplement: Supplementary file 2984 [file G0031784.pdf › 12/G0031784.pdf]

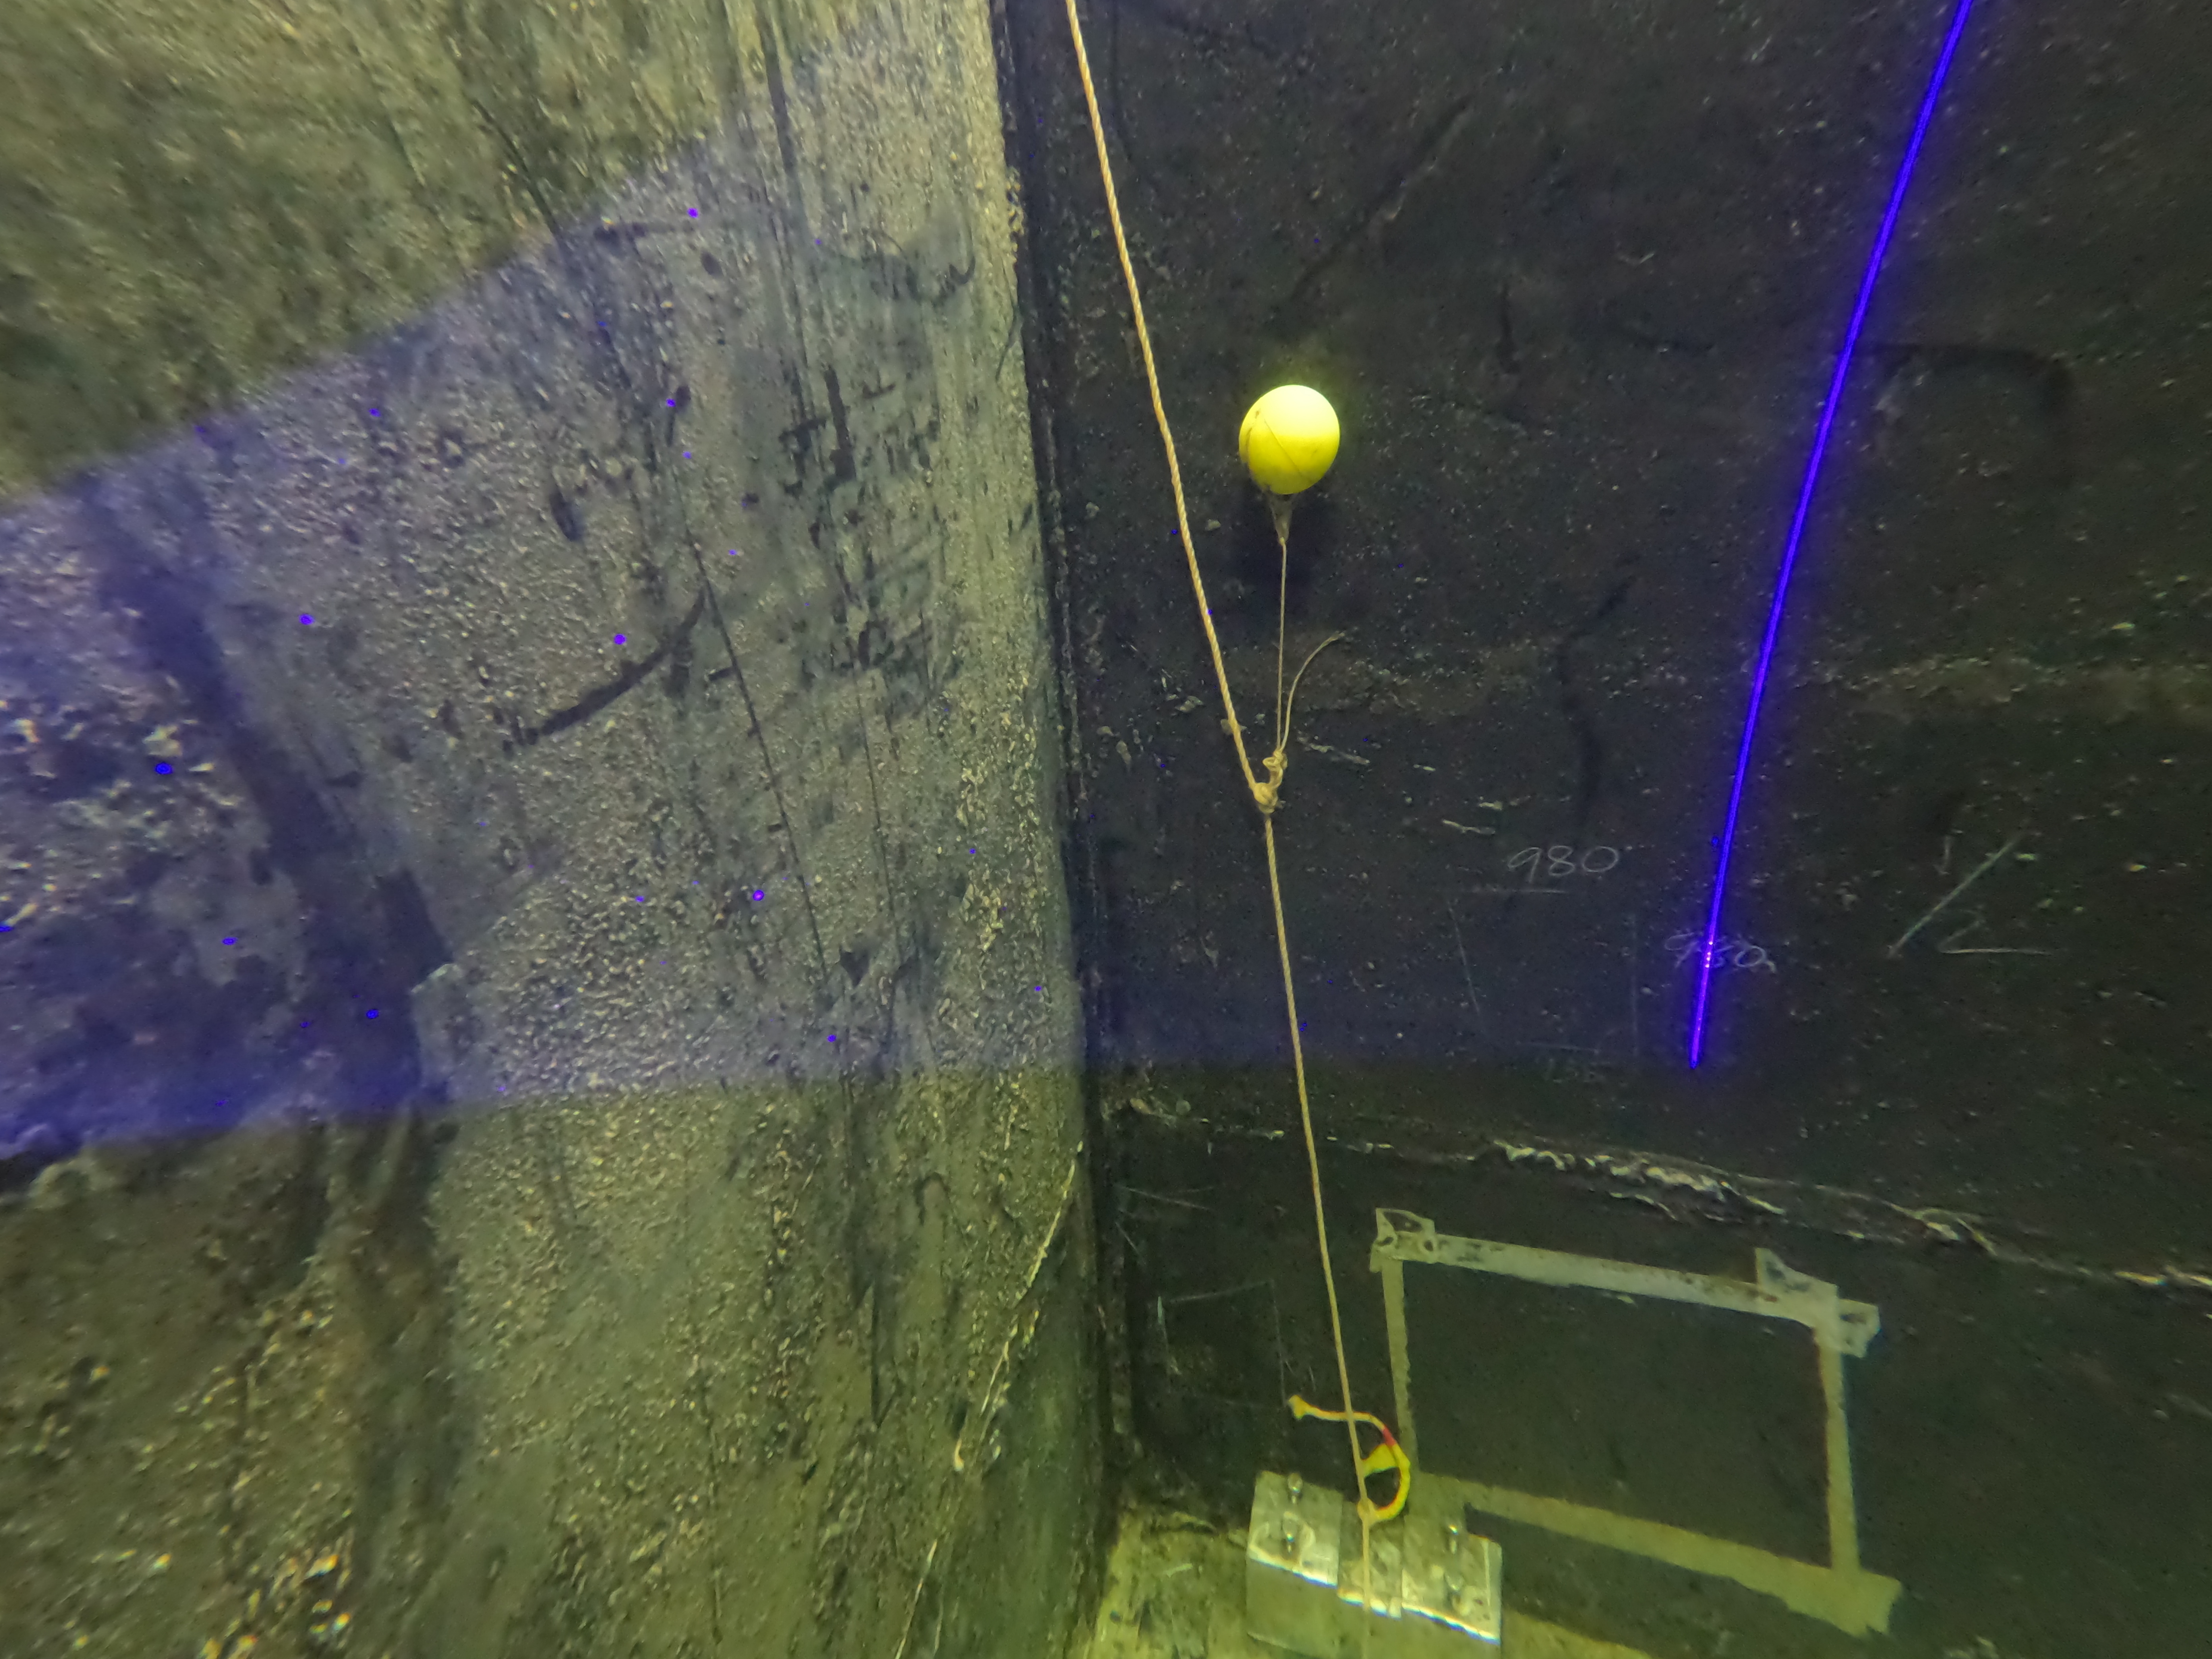

980

980

Supplement: Supplementary file 2985 [file G0031785.pdf › 12/G0031785.pdf]

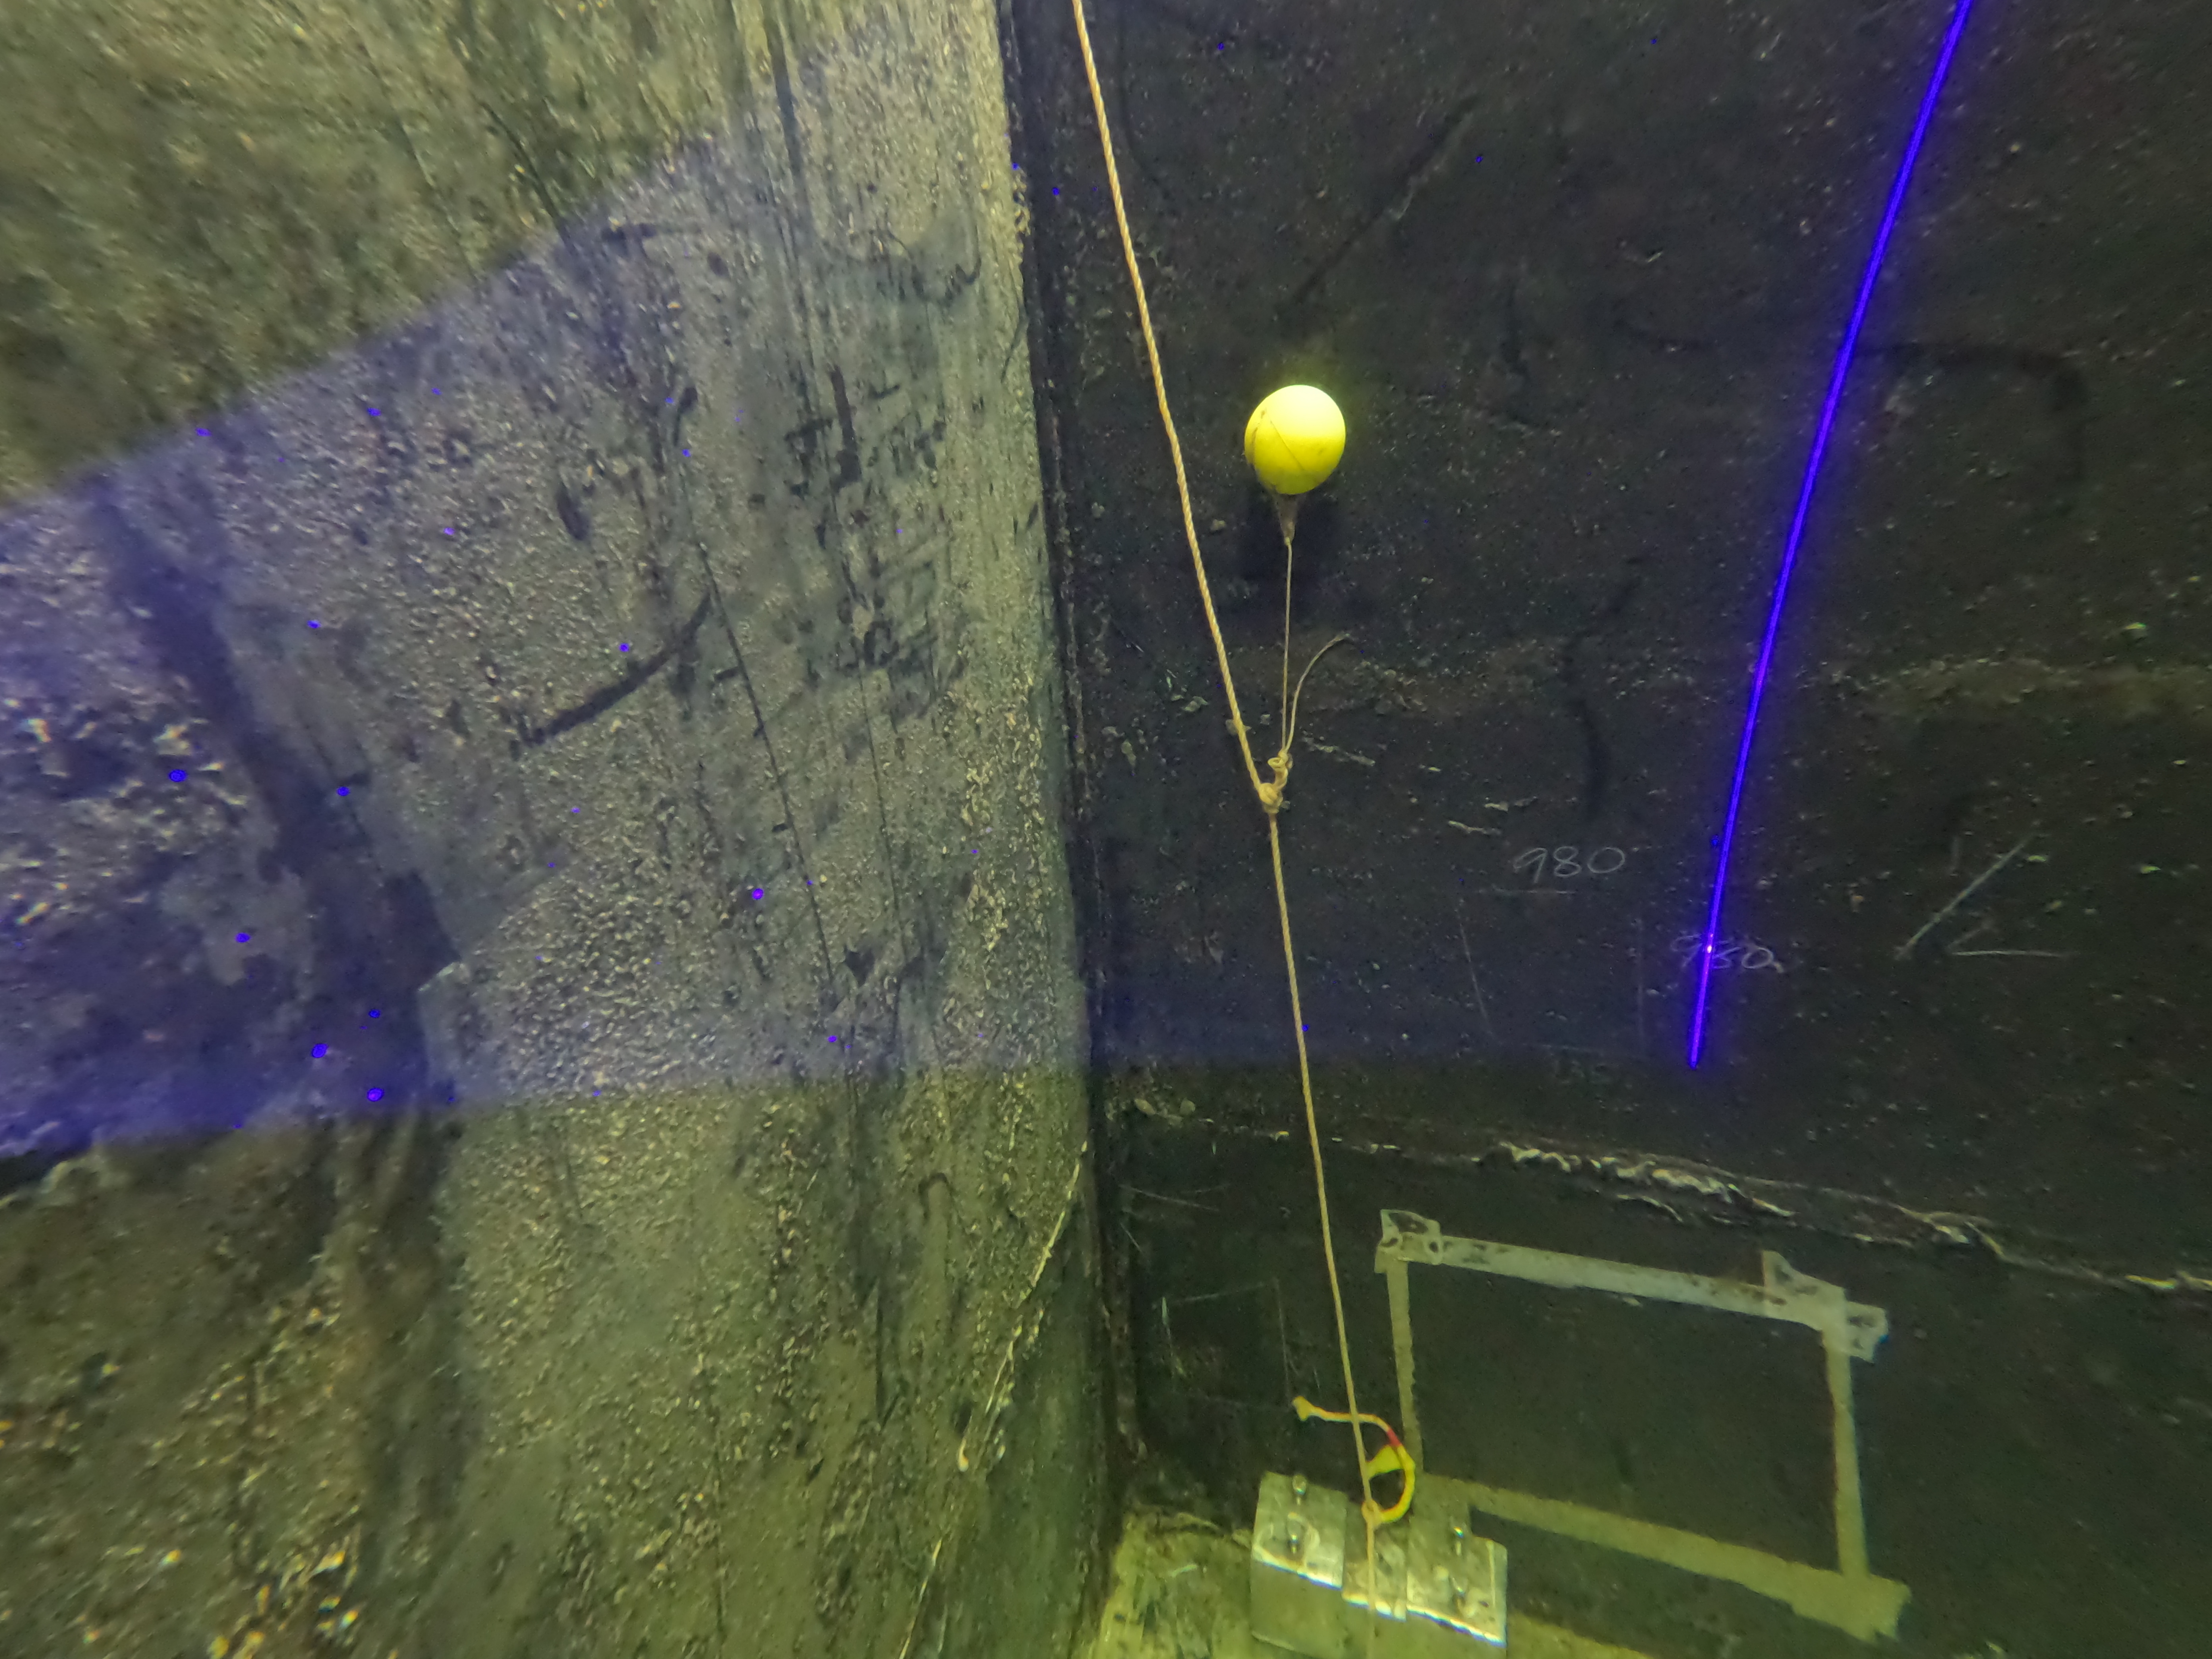

980

980

Supplement: Supplementary file 2986 [file G0031786.pdf › 12/G0031786.pdf]

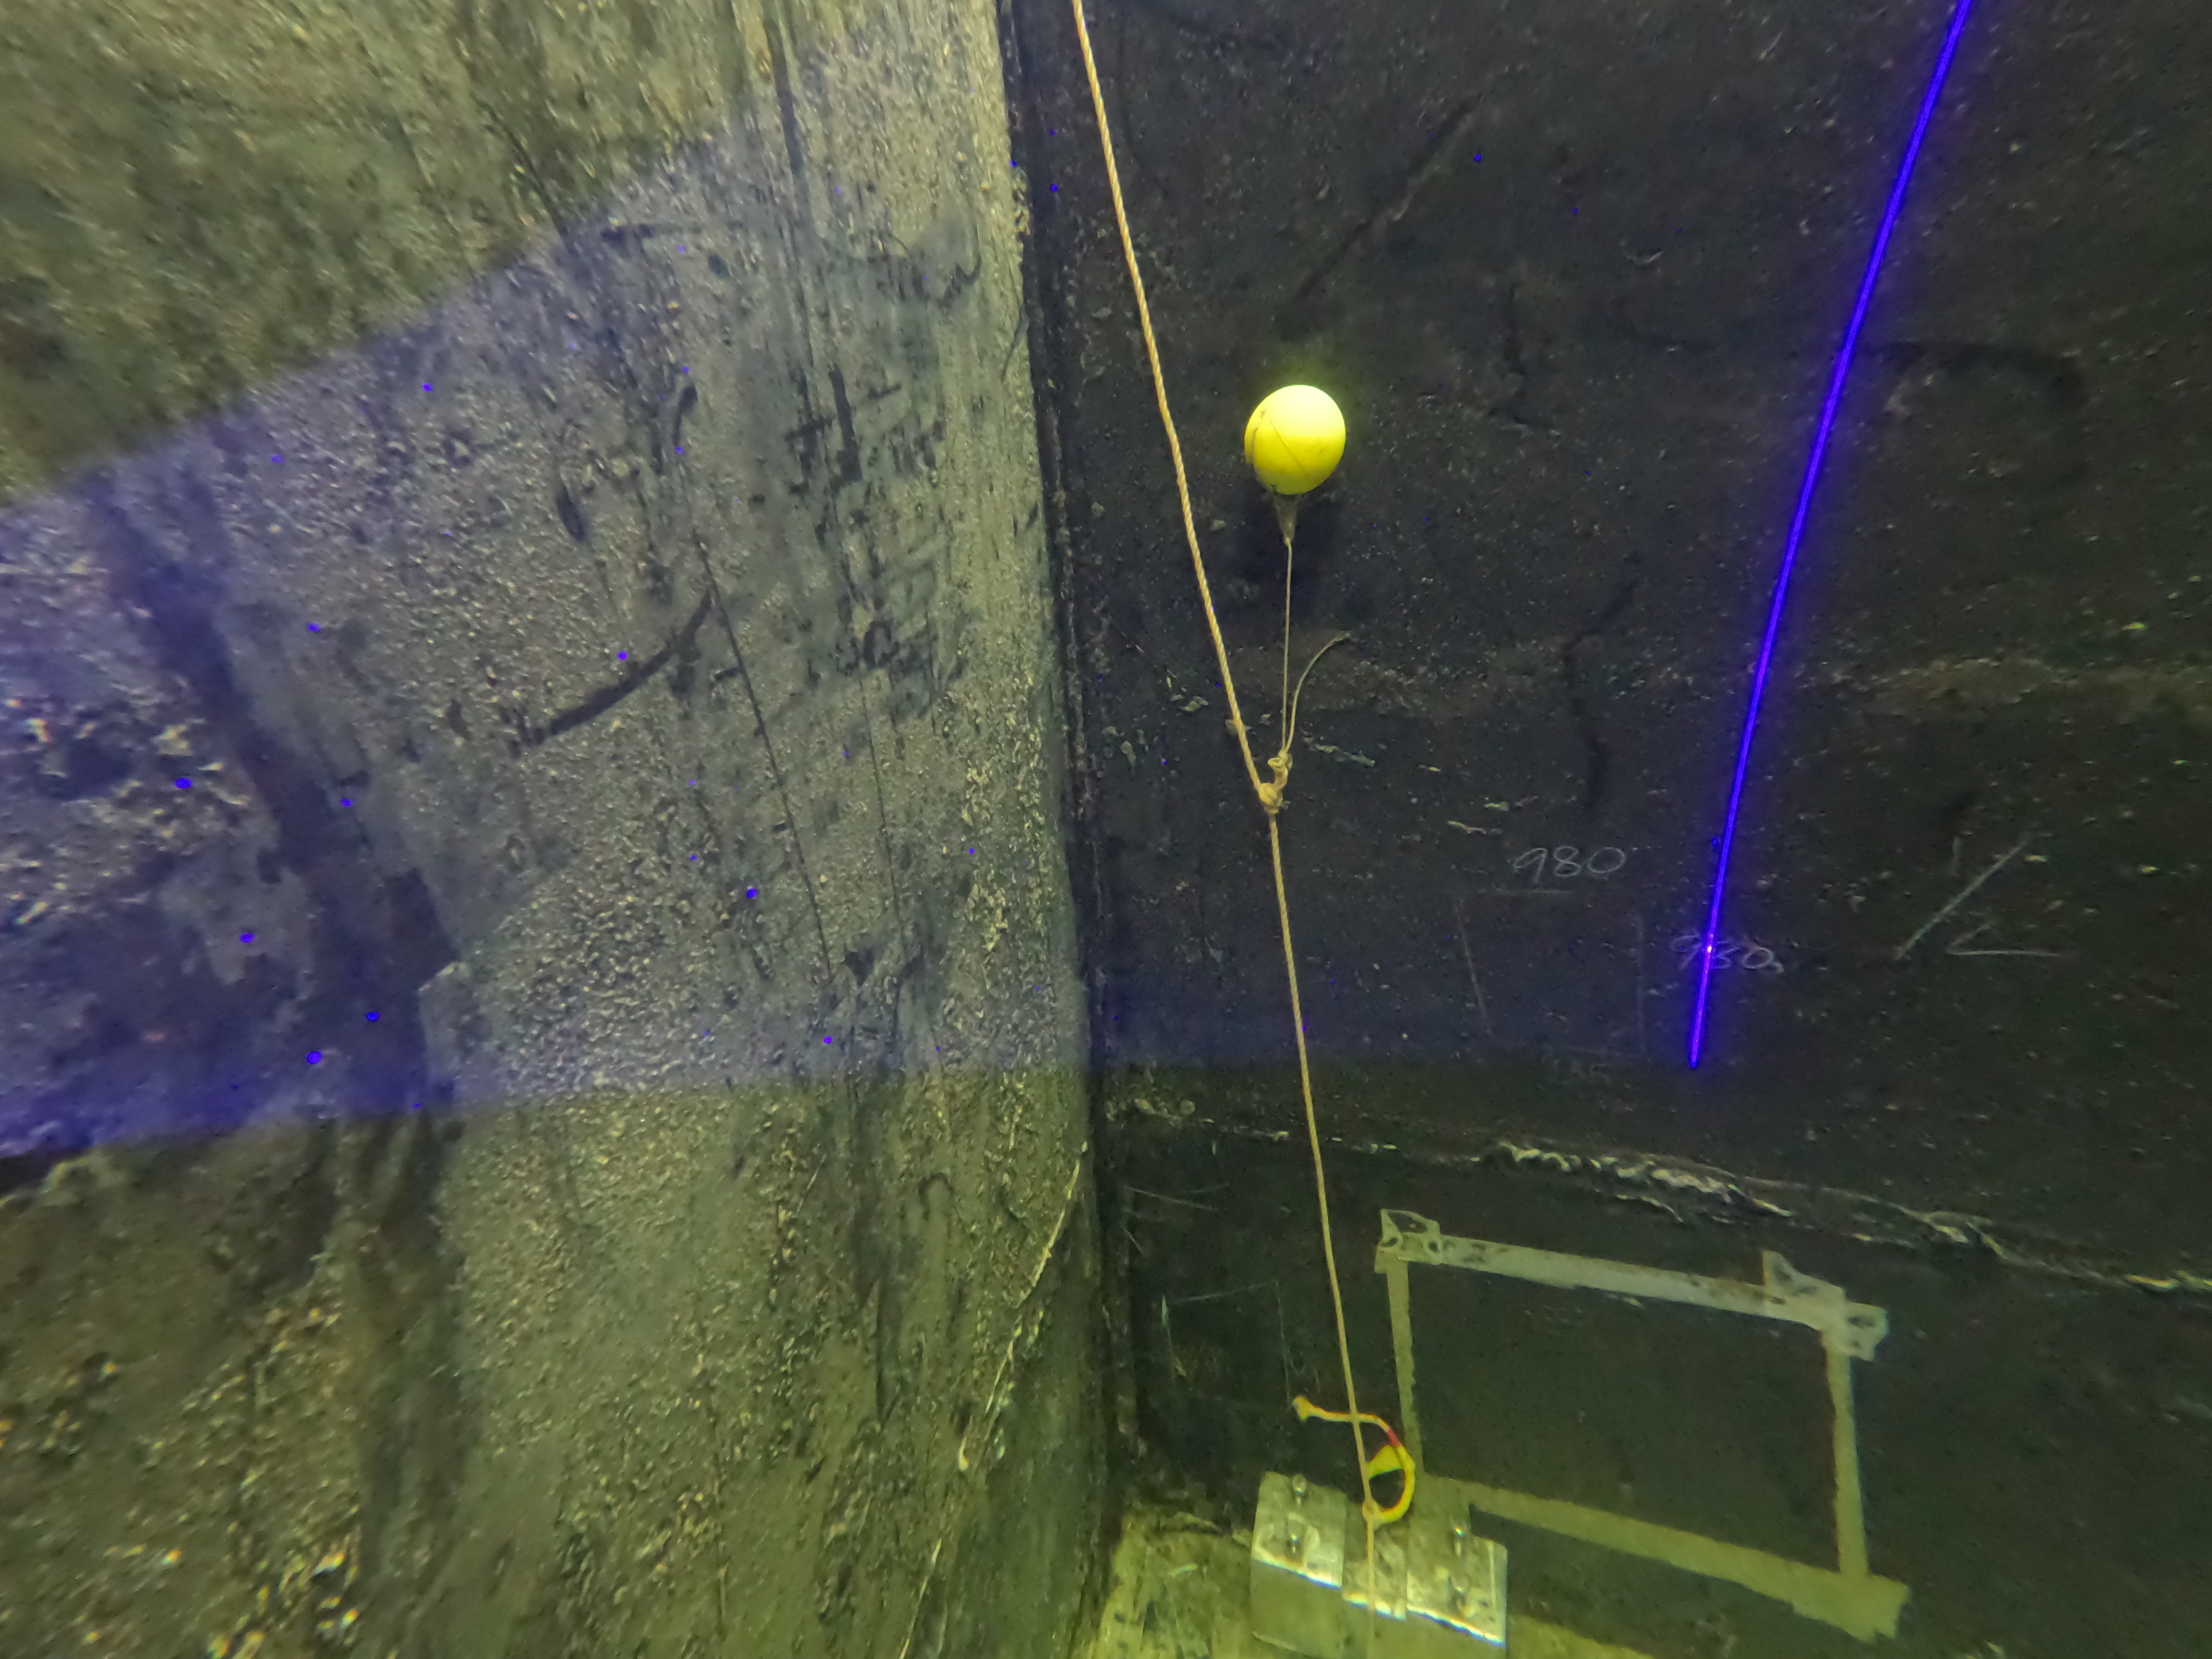

980

930

Supplement: Supplementary file 2987 [file G0031787.pdf › 12/G0031787.pdf]

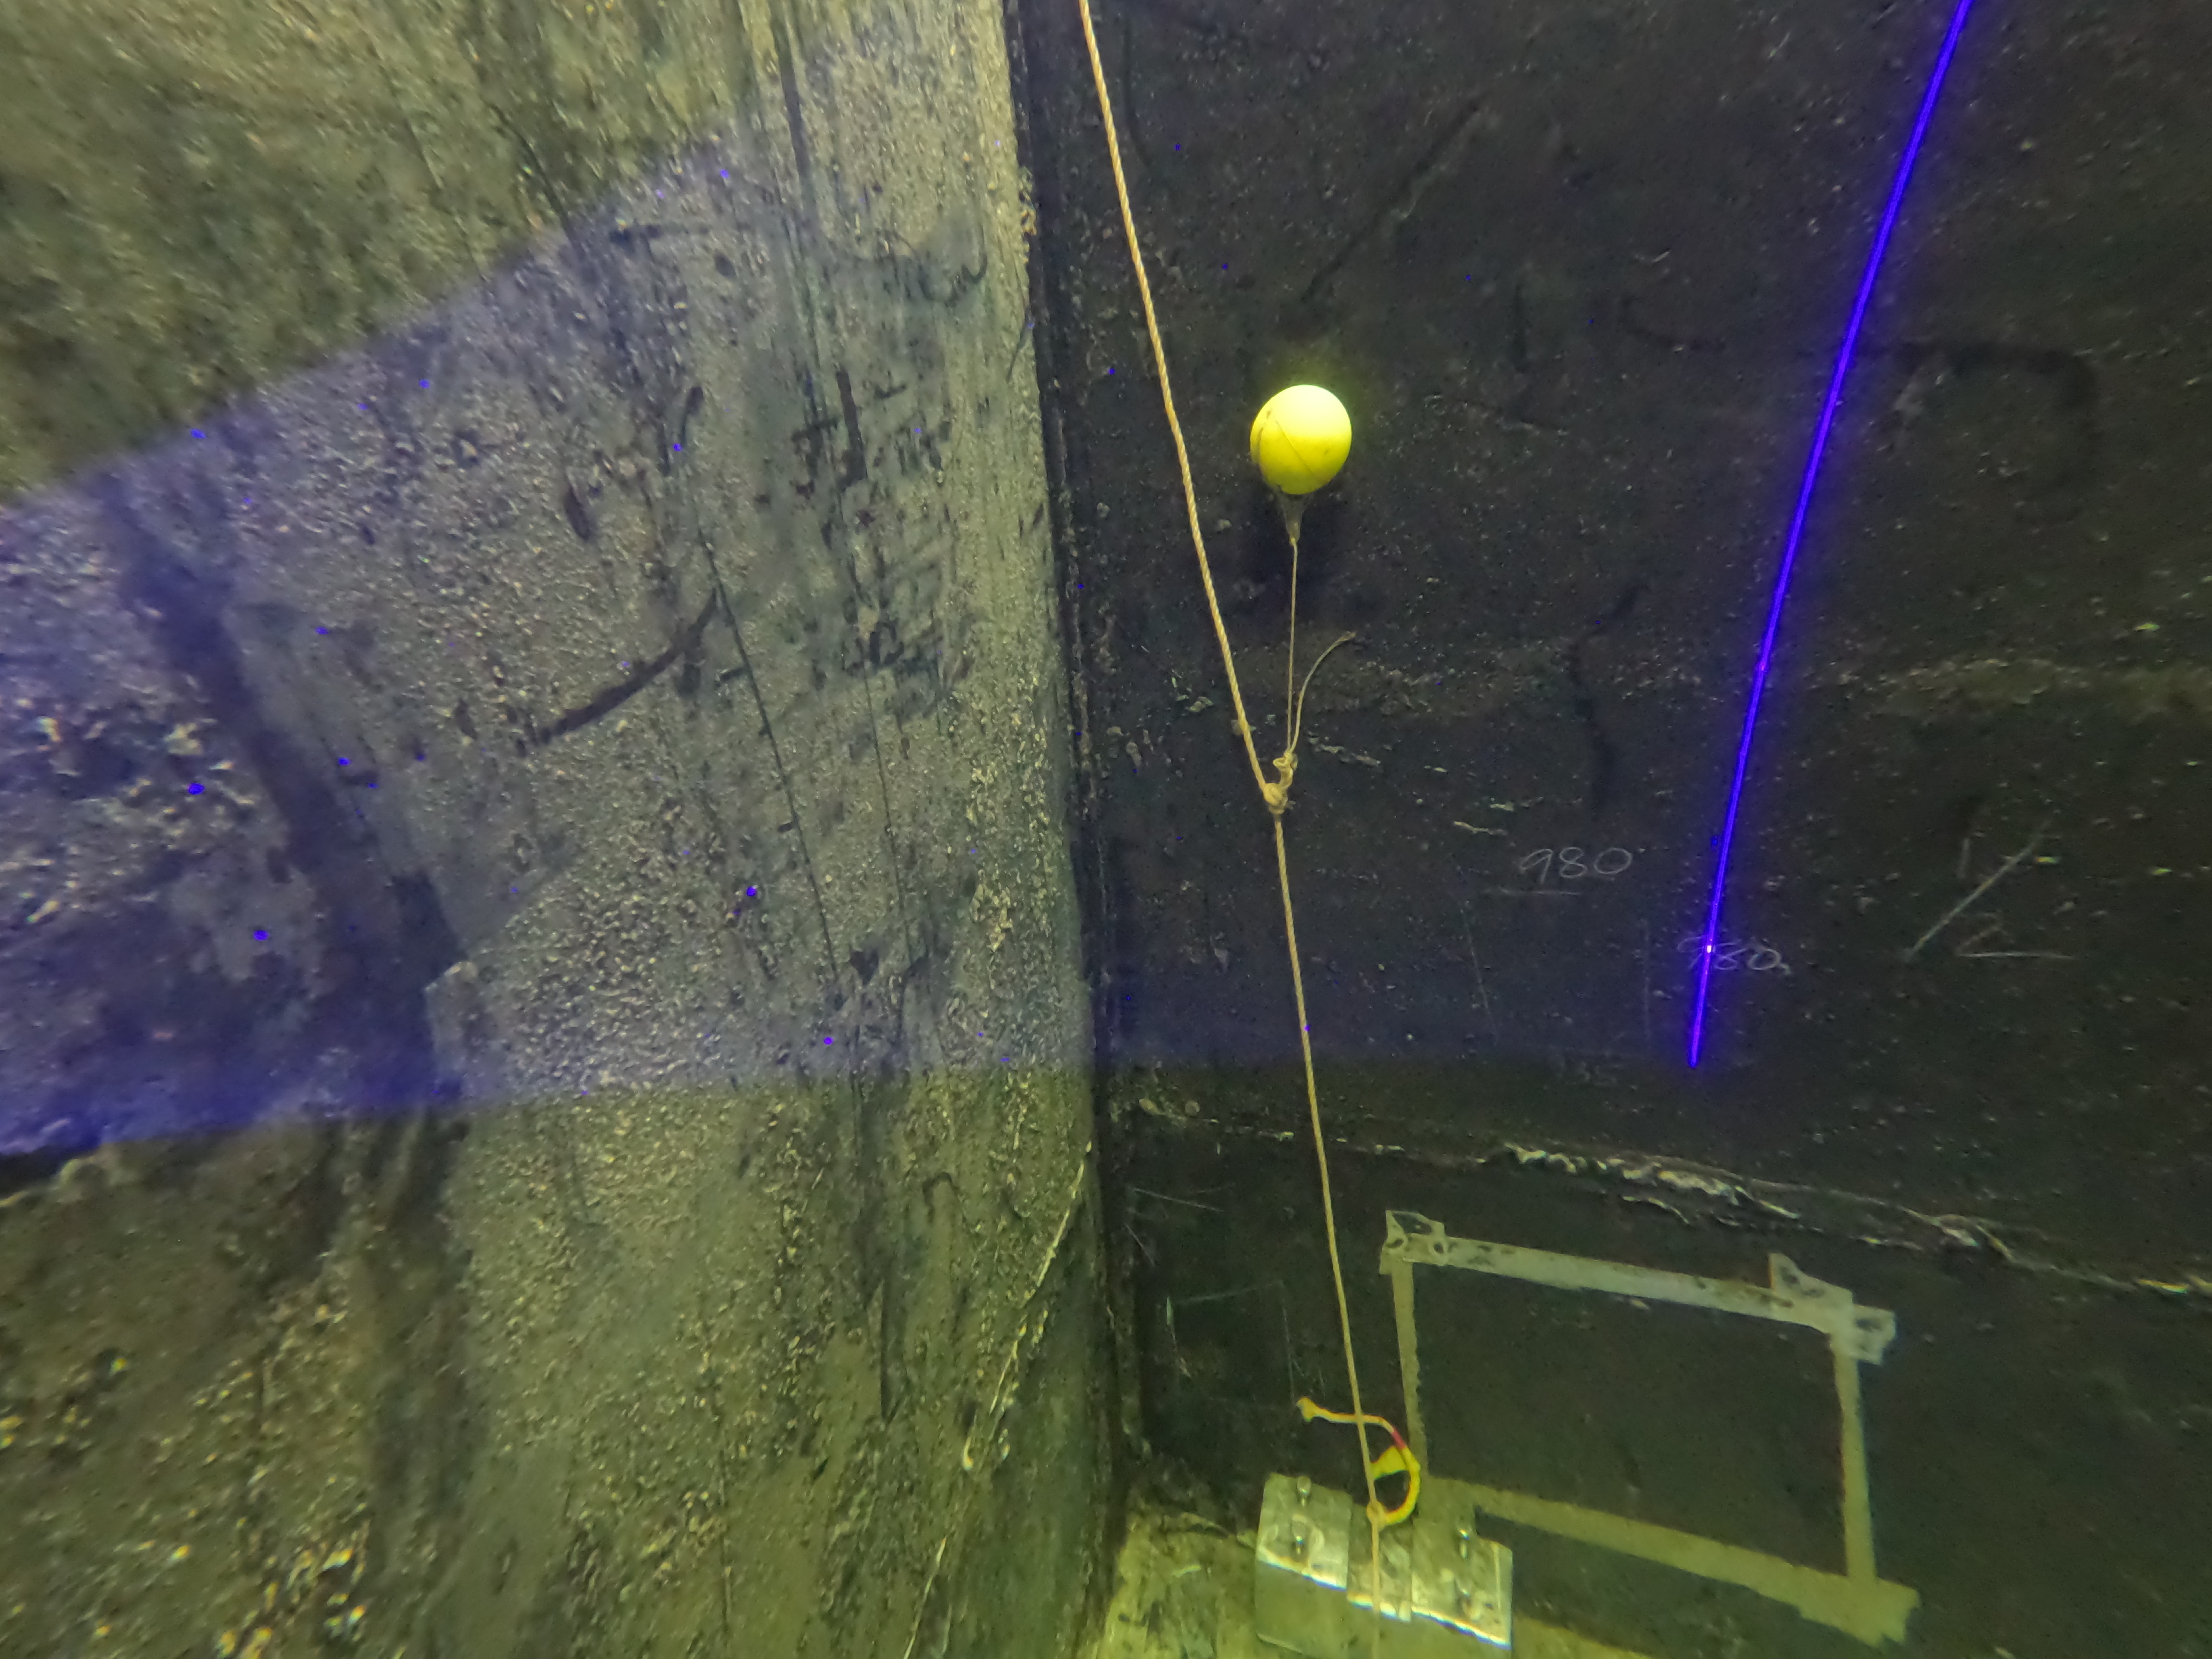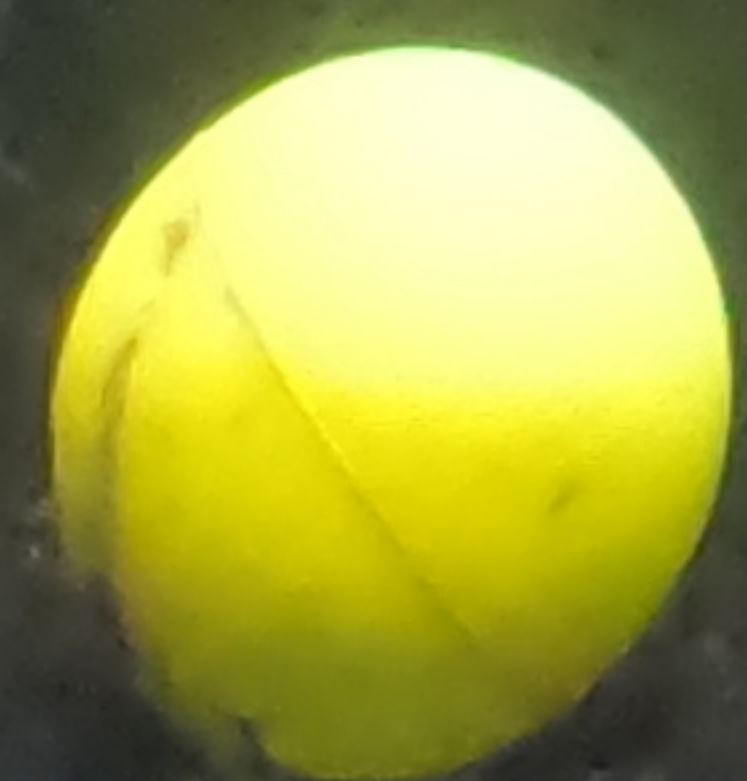

980

980

Supplement: Supplementary file 2988 [file G0031788.pdf › 12/G0031788.pdf]

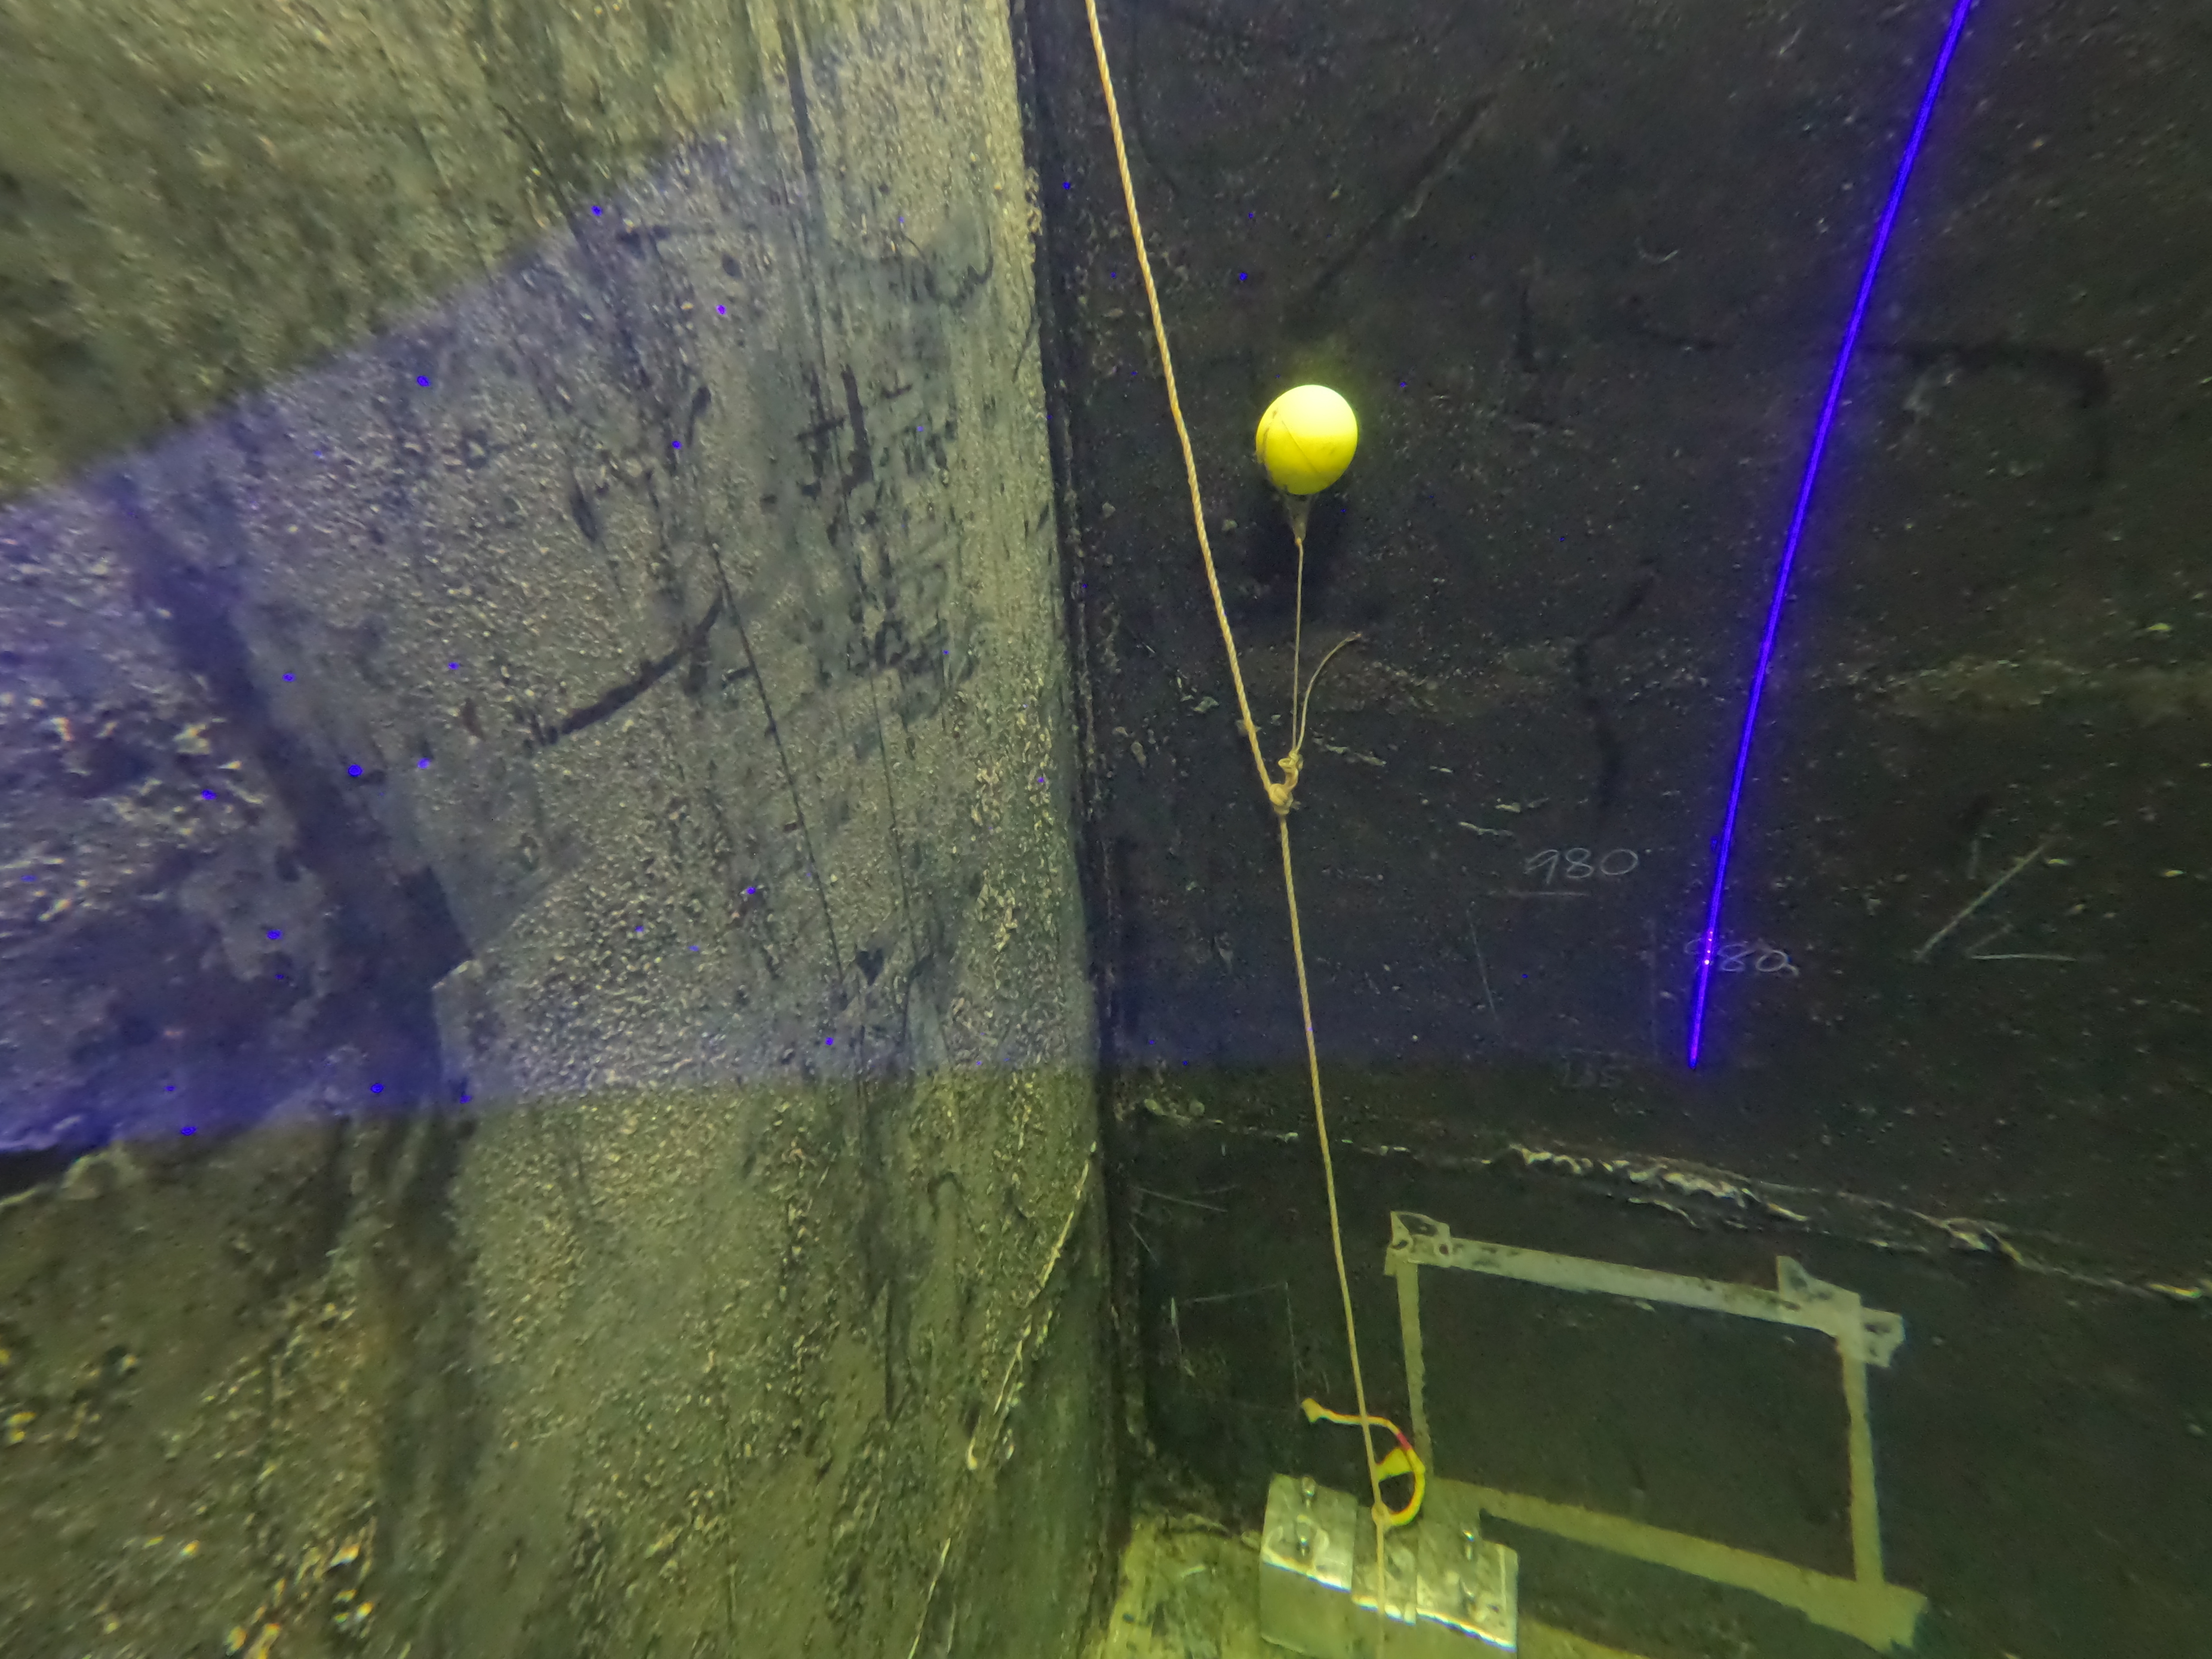

980

980

Supplement: Supplementary file 2989 [file G0031789.pdf › 12/G0031789.pdf]

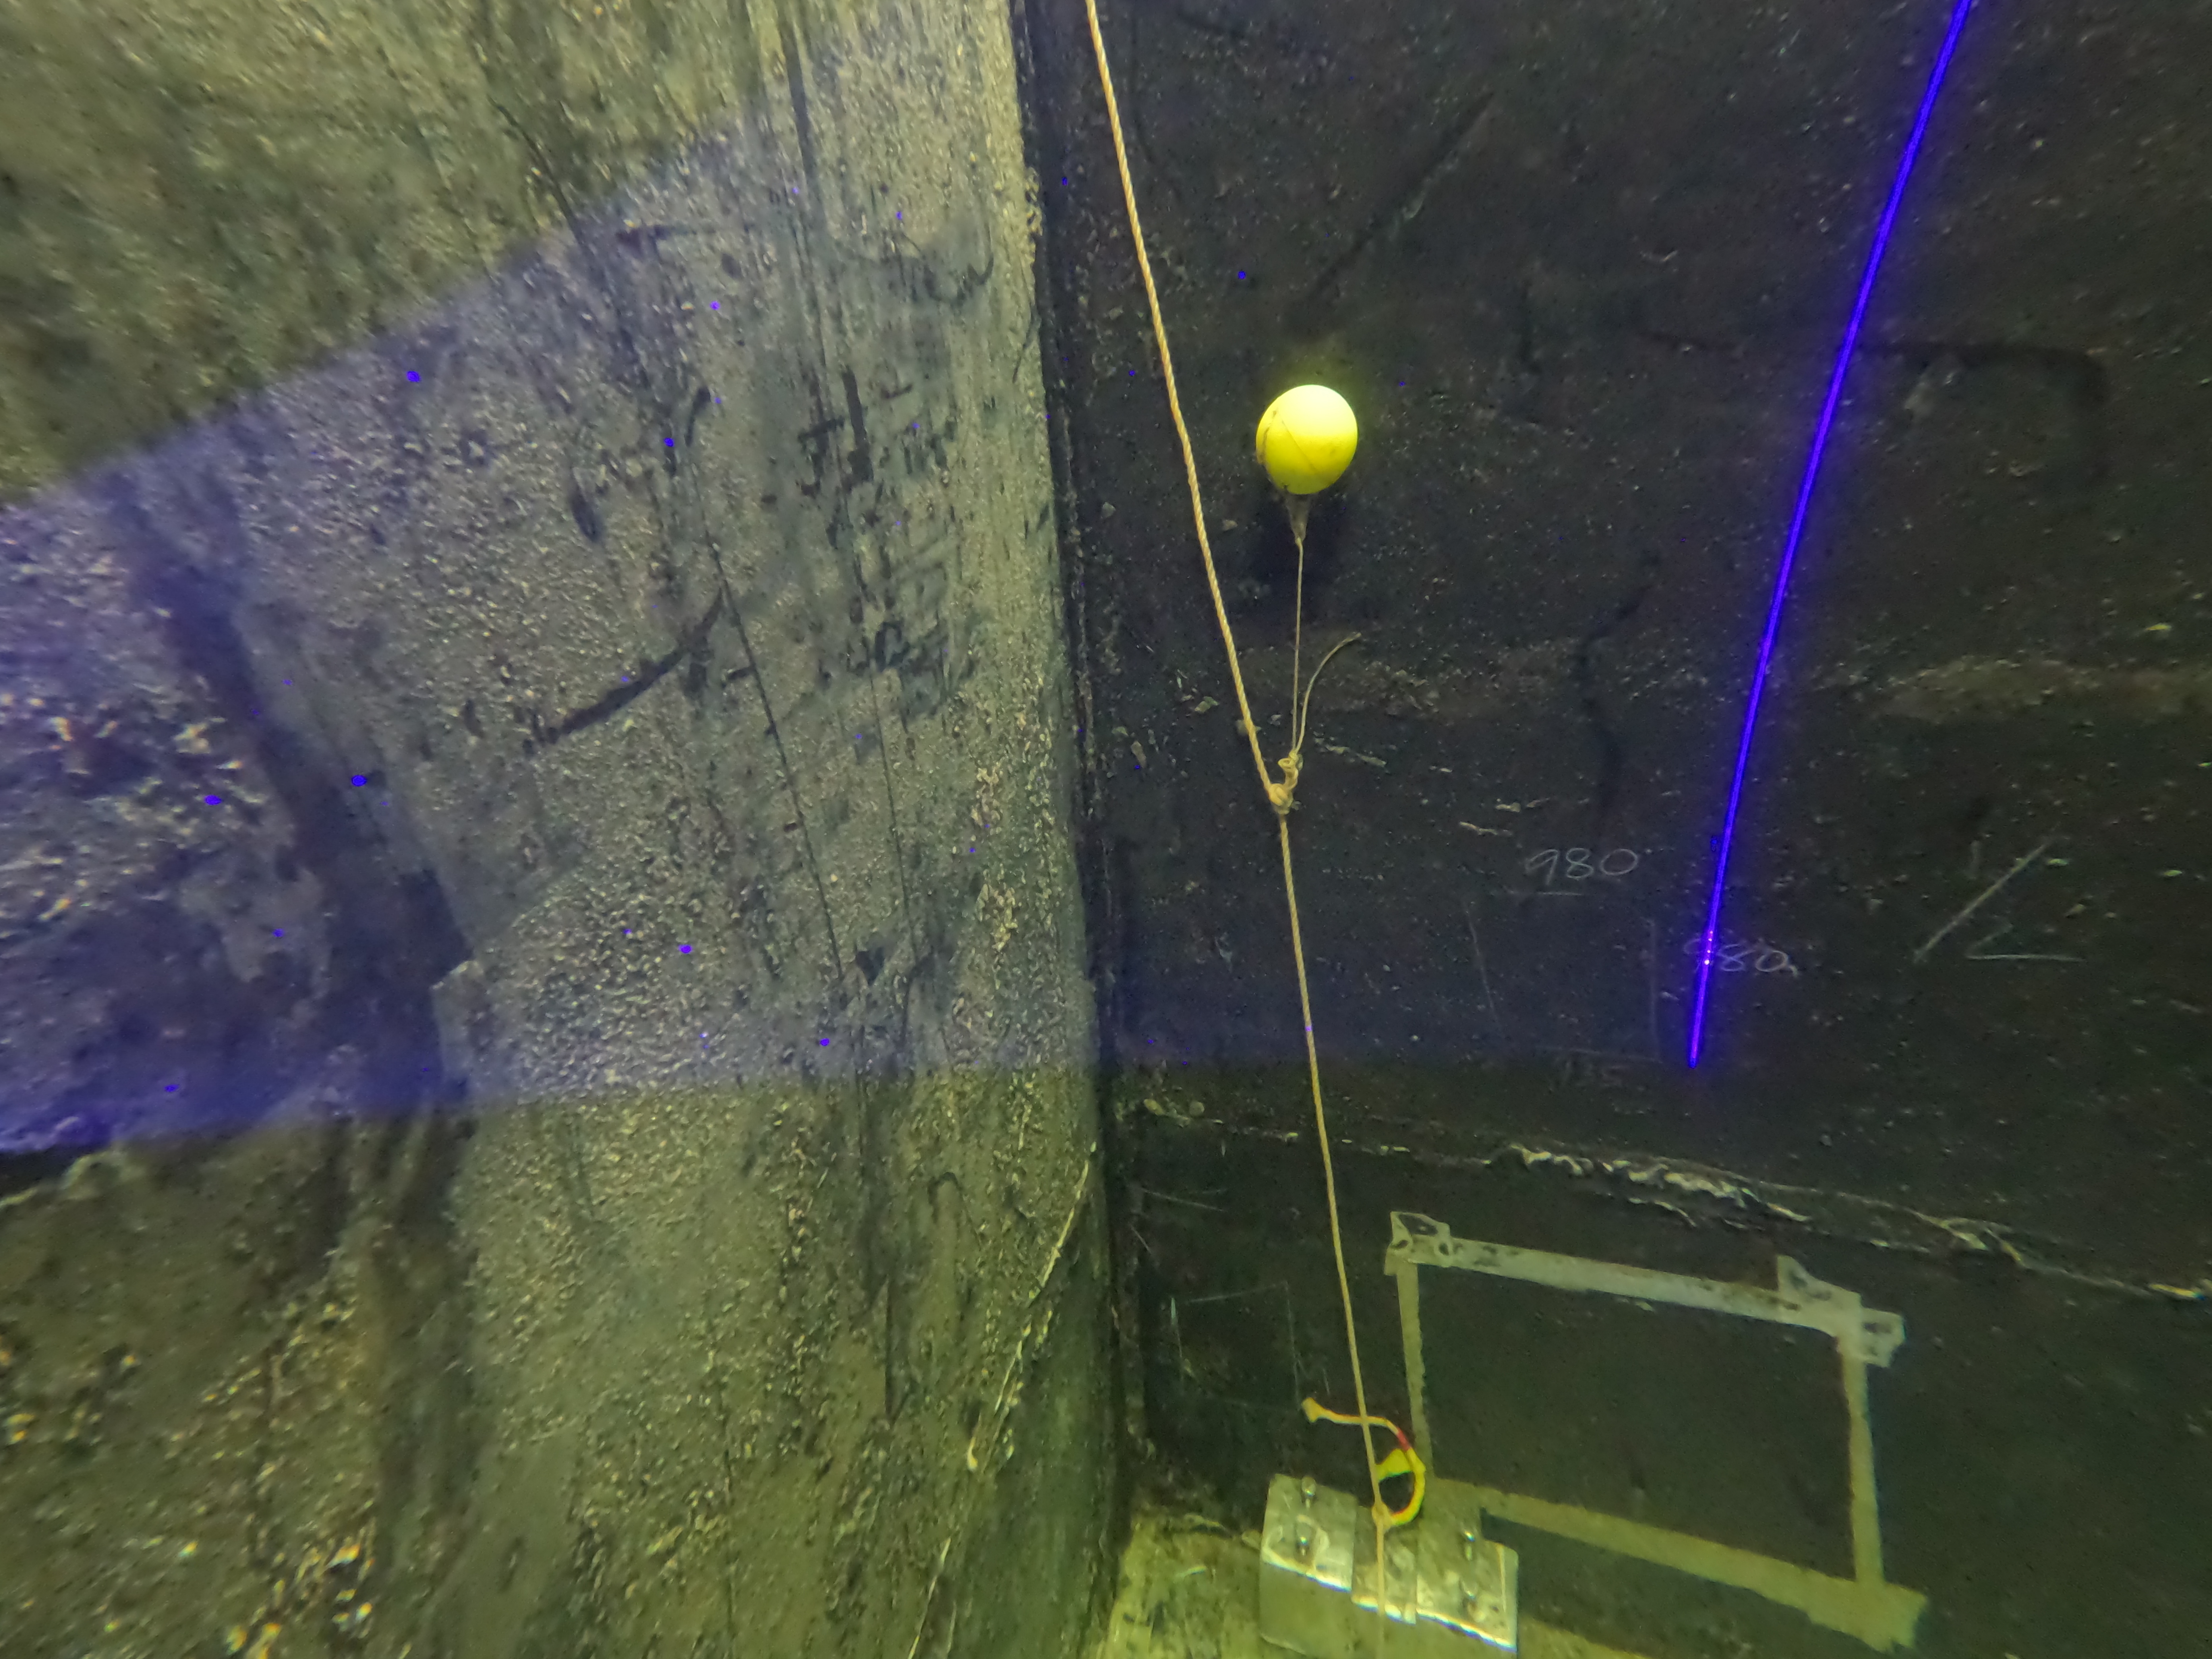

980

980

Supplement: Supplementary file 2990 [file G0031790.pdf › 12/G0031790.pdf]
