# Supplementary figures and images for: 3D reconstruction of shallow sea environment using direct system calibration and faint laser line extraction (part 30 of 35)
Source: Research Square preprint supplement (doi:10.21203/rs.3.rs-5262658/v1), 2024-12-02

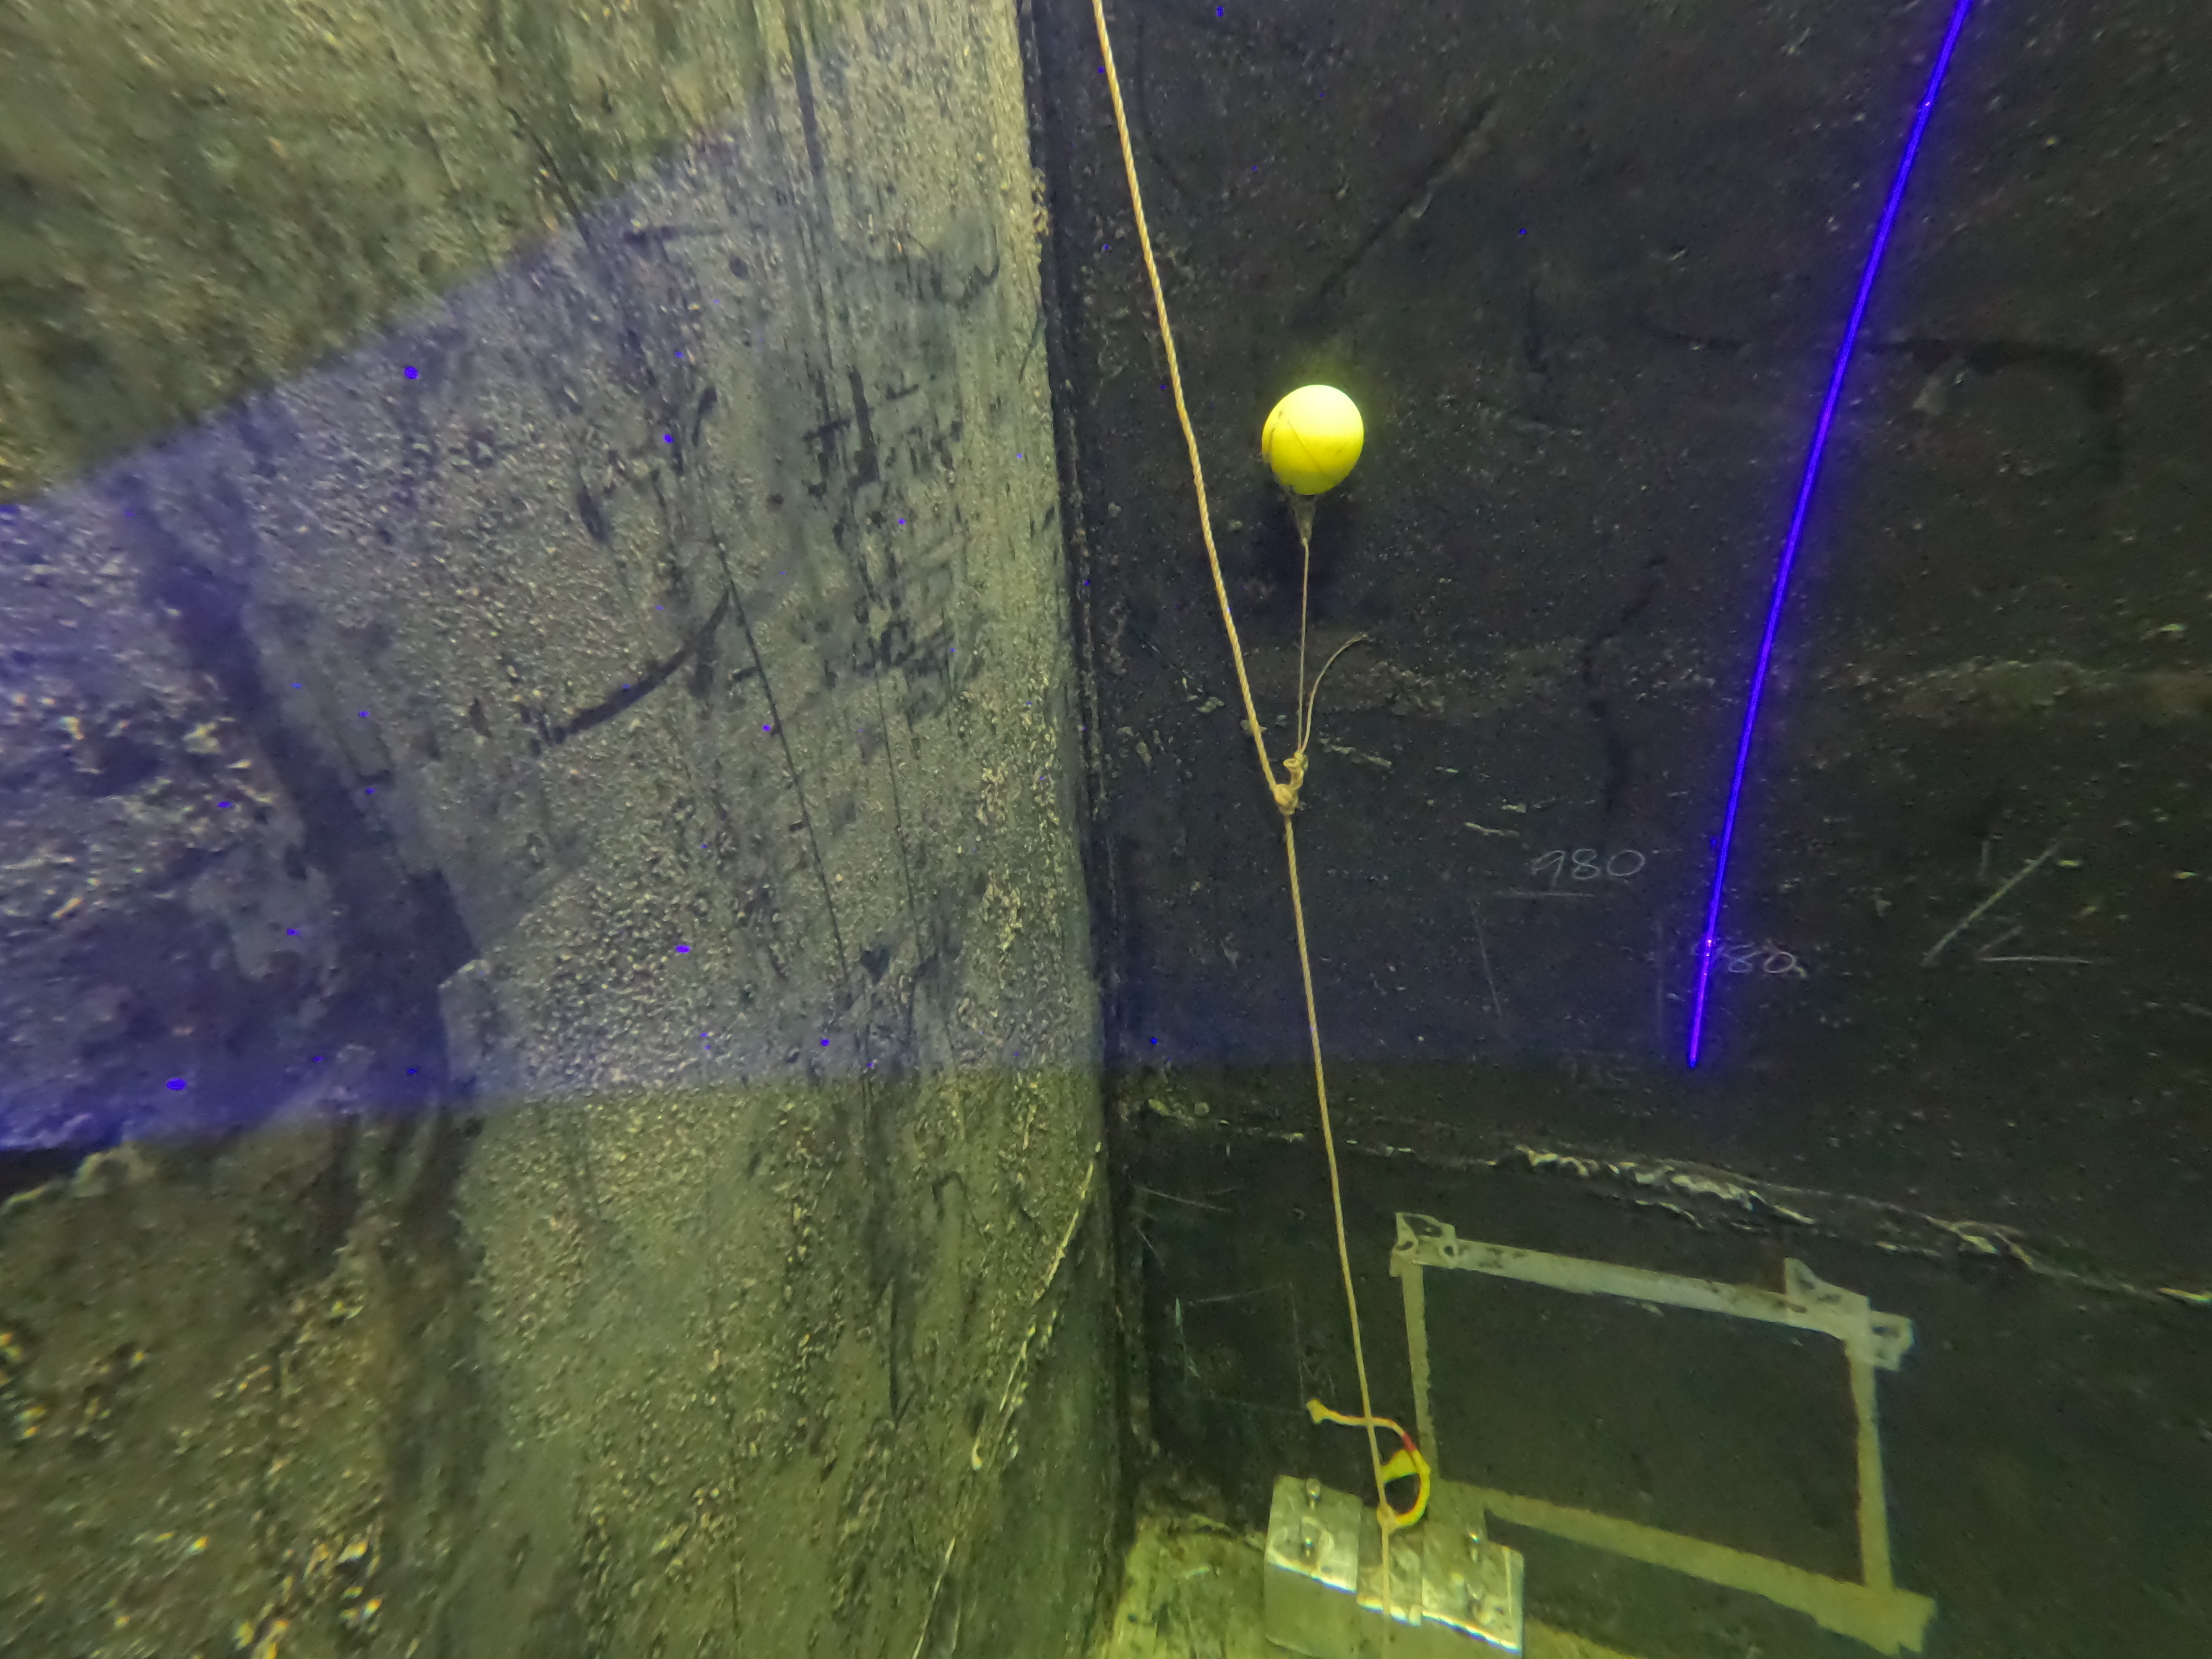

Supplement: Supplementary file 2991 [file G0031791.pdf › 12/G0031791.pdf]

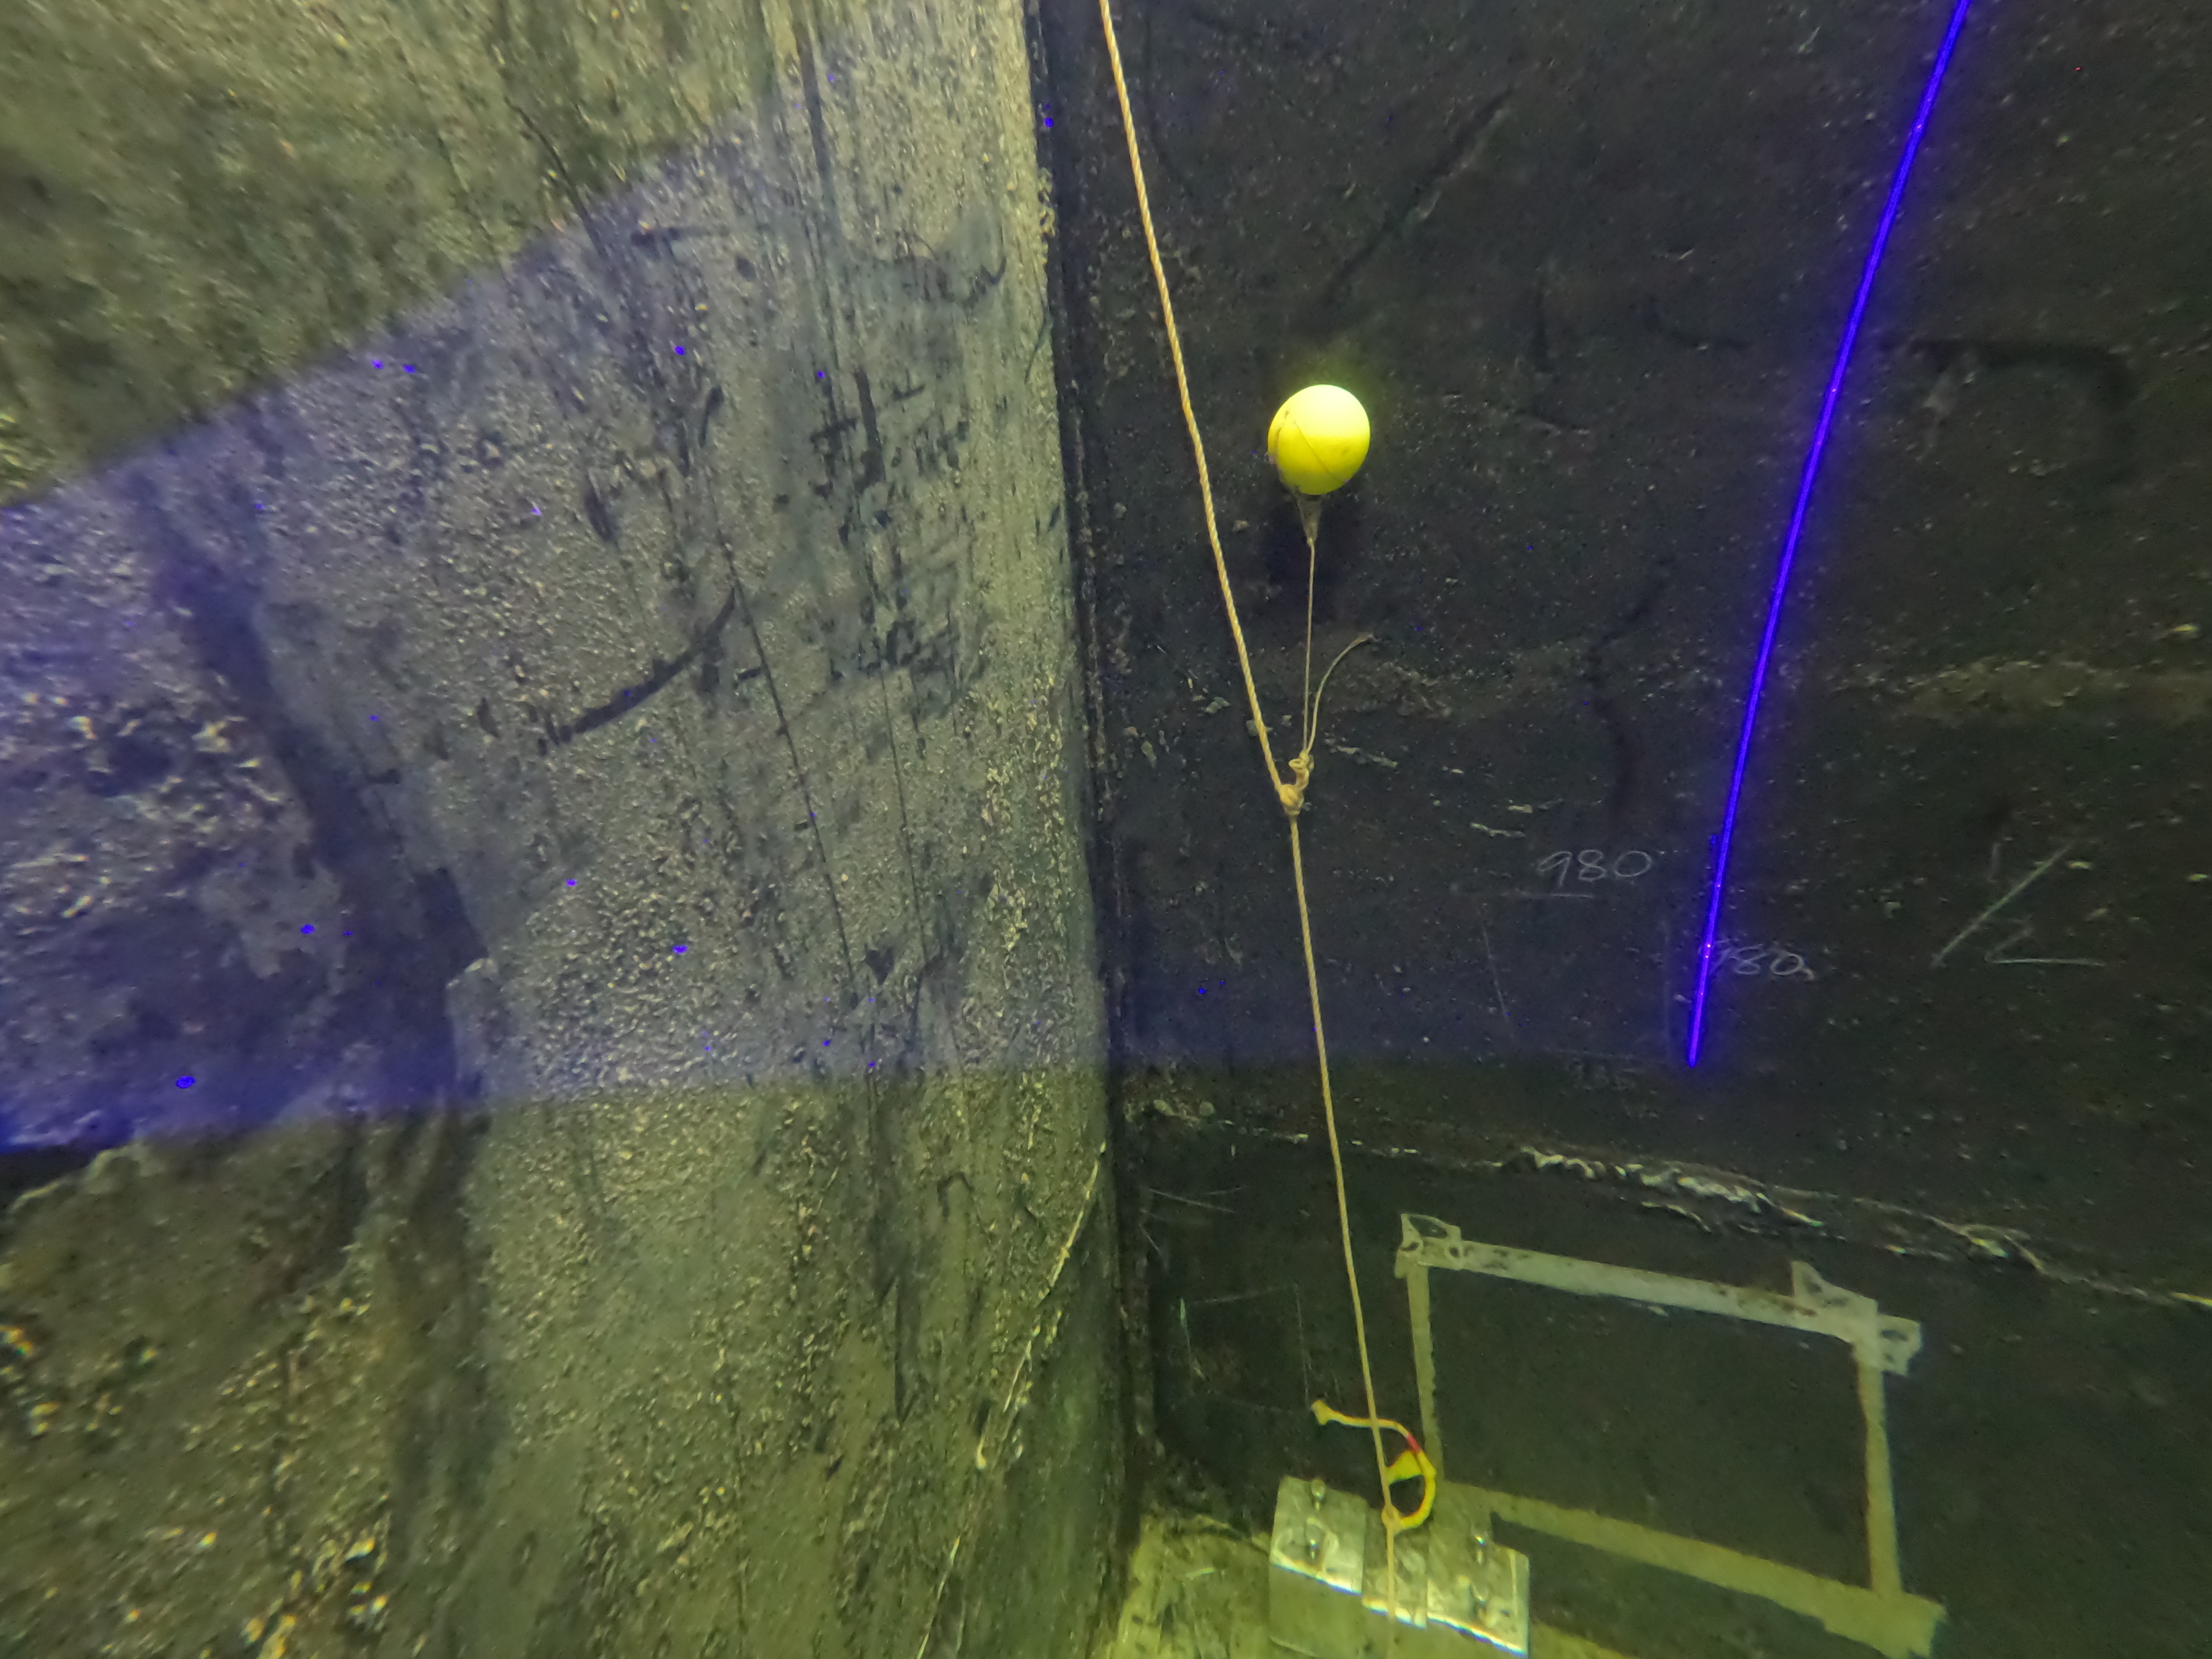

Supplement: Supplementary file 2992 [file G0031792.pdf › 12/G0031792.pdf]

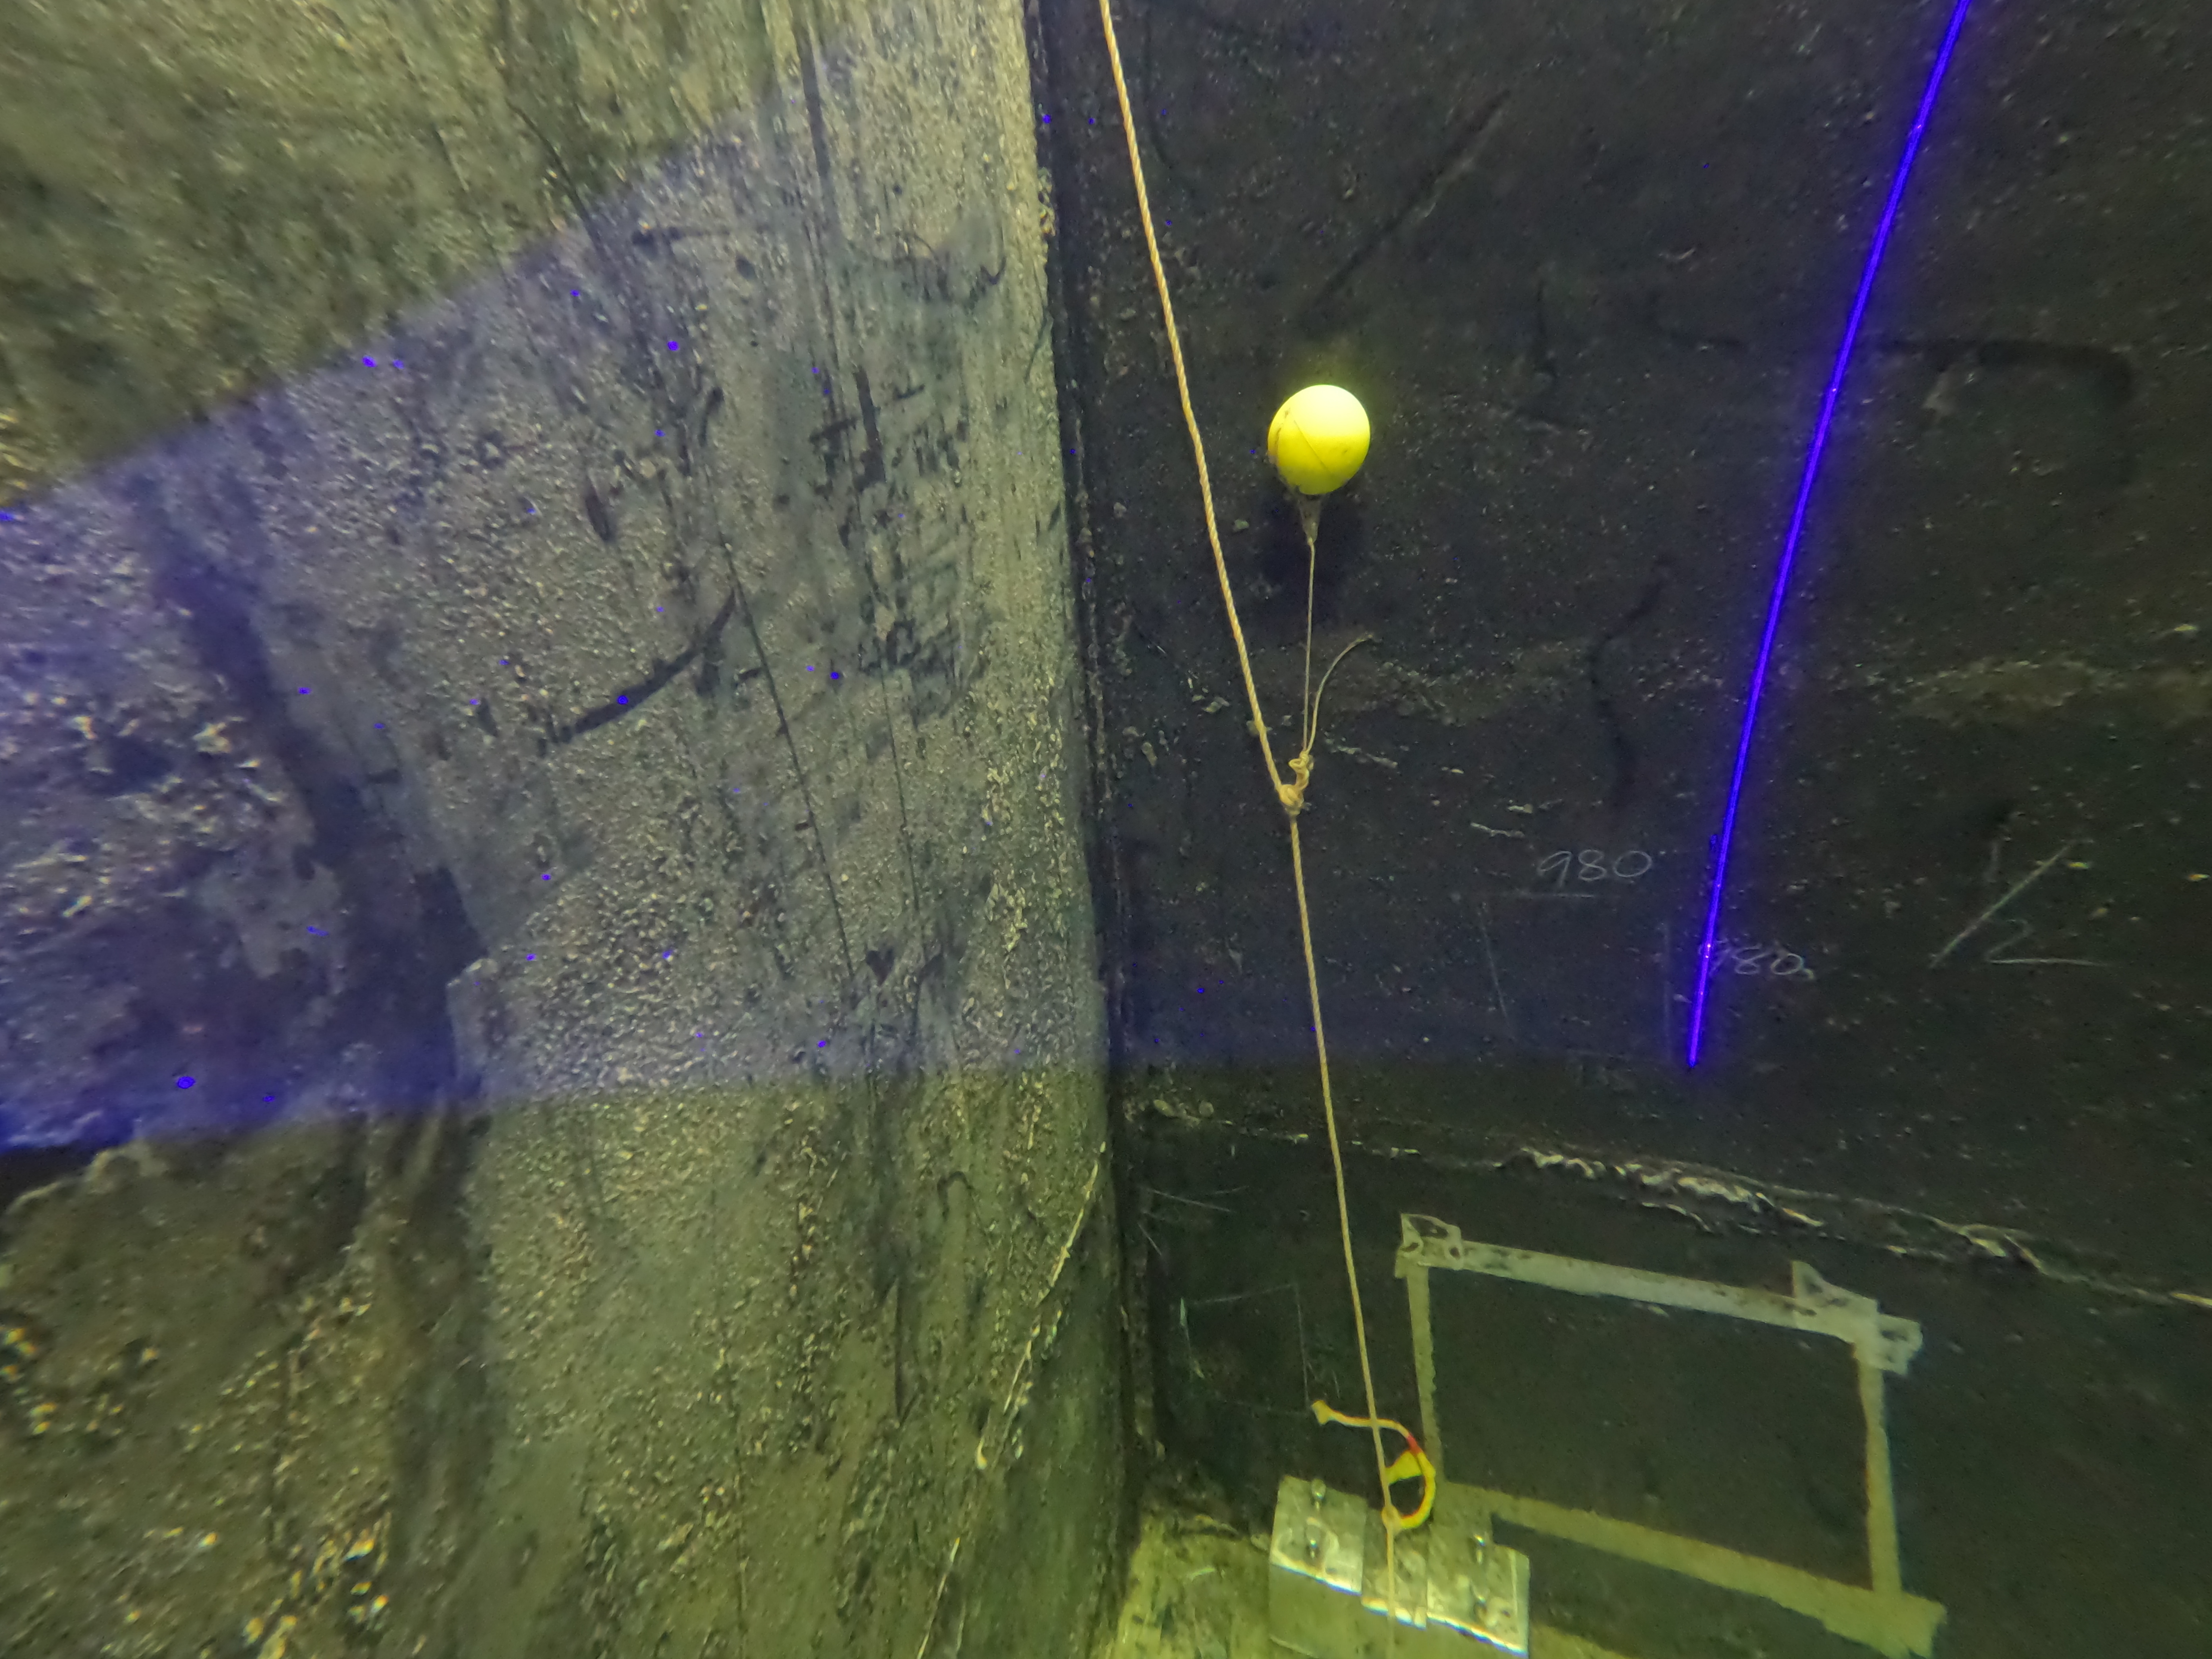

980

980

1/2

Supplement: Supplementary file 2993 [file G0031793.pdf › 12/G0031793.pdf]

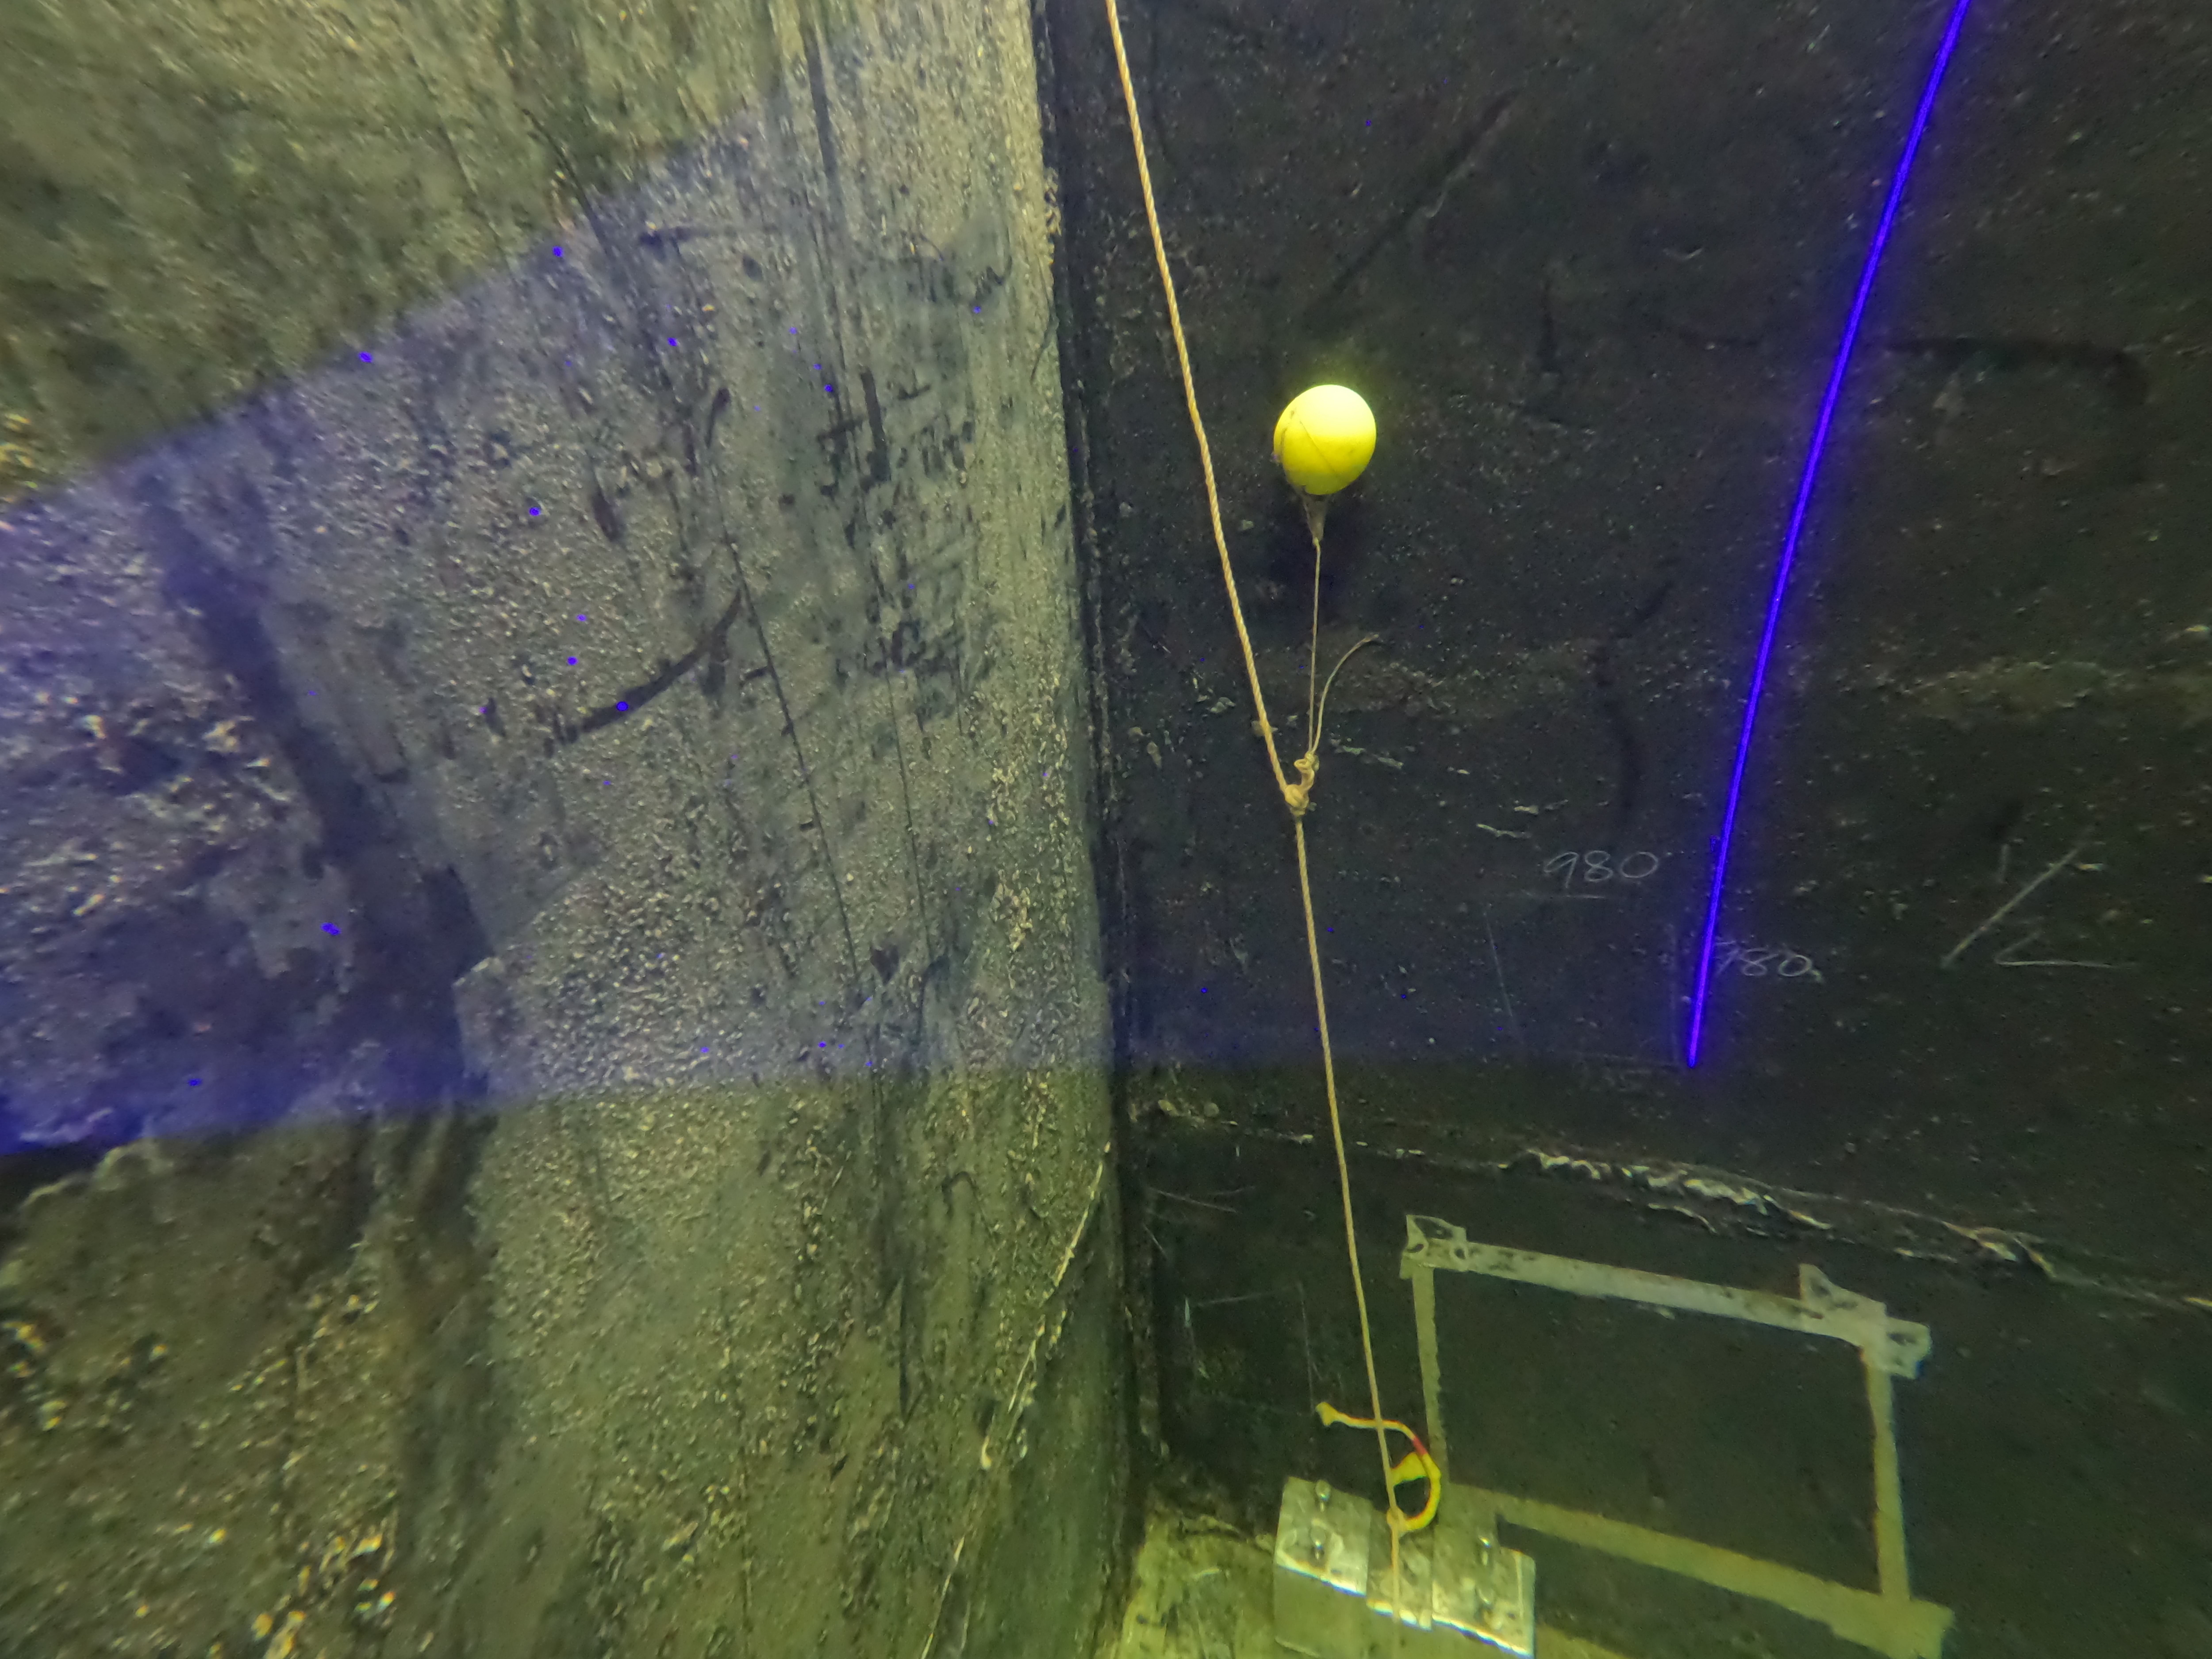

980

980

Supplement: Supplementary file 2994 [file G0031794.pdf › 12/G0031794.pdf]

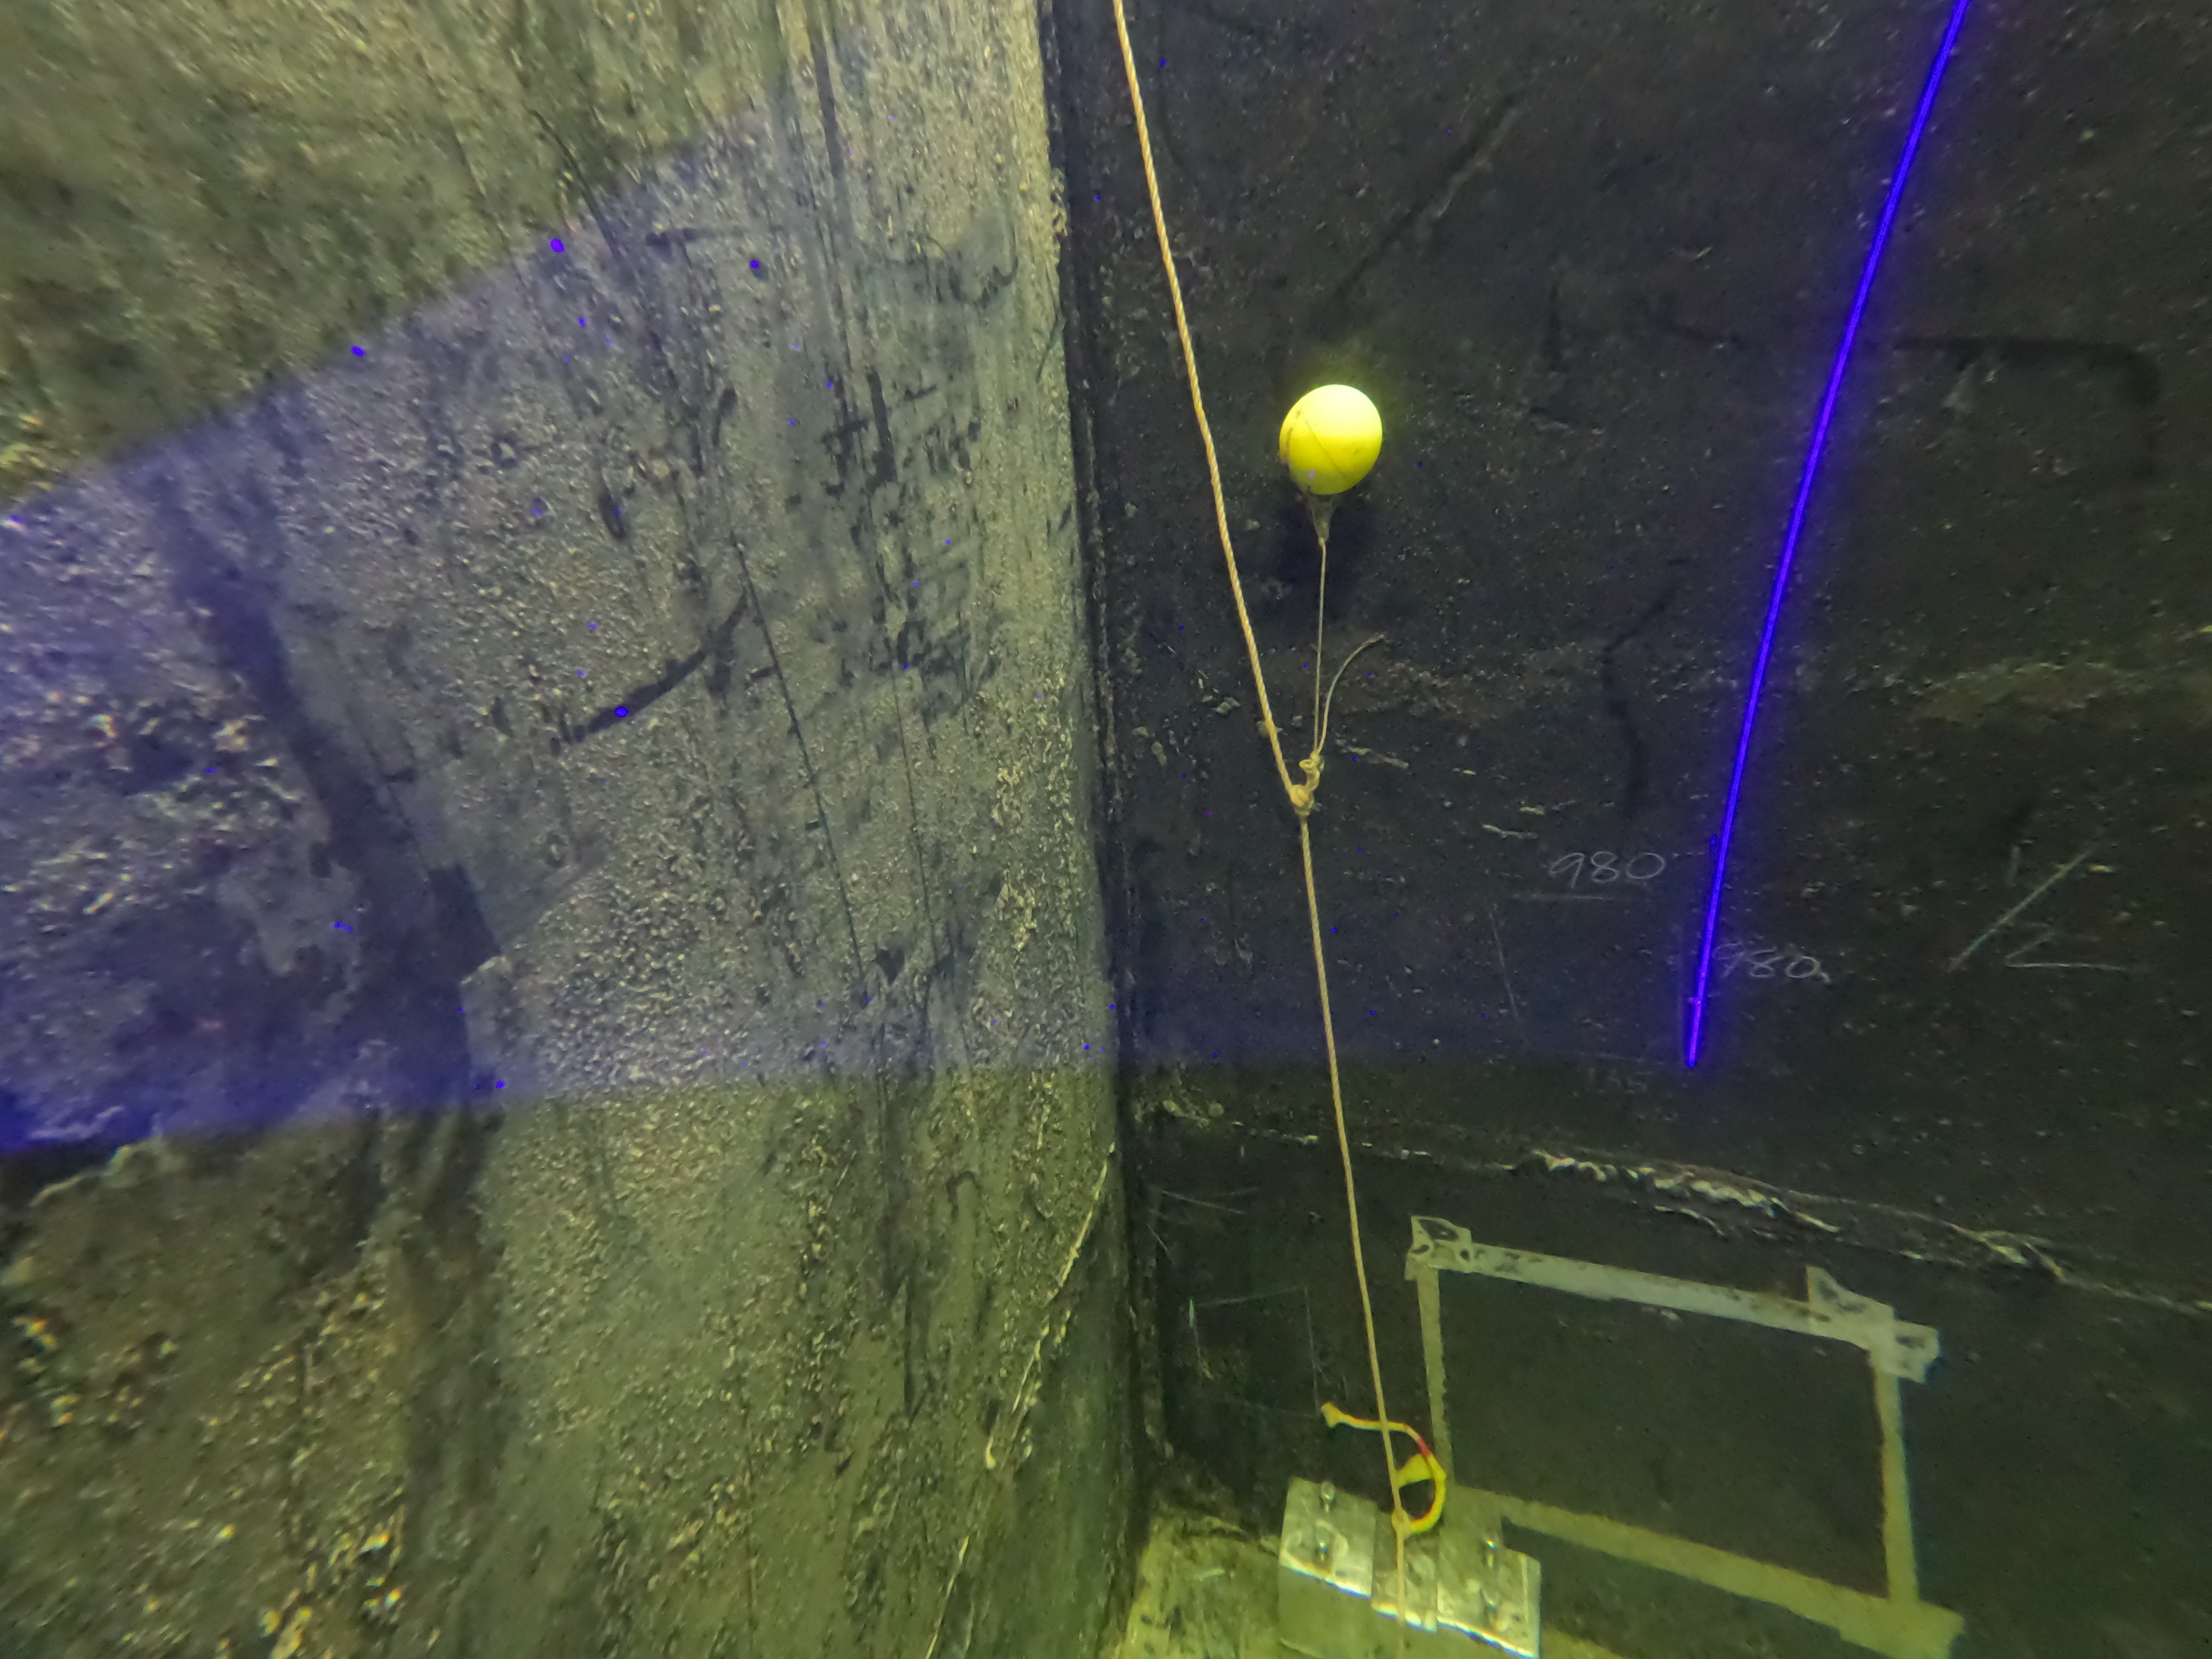

Supplement: Supplementary file 2995 [file G0031795.pdf › 12/G0031795.pdf]

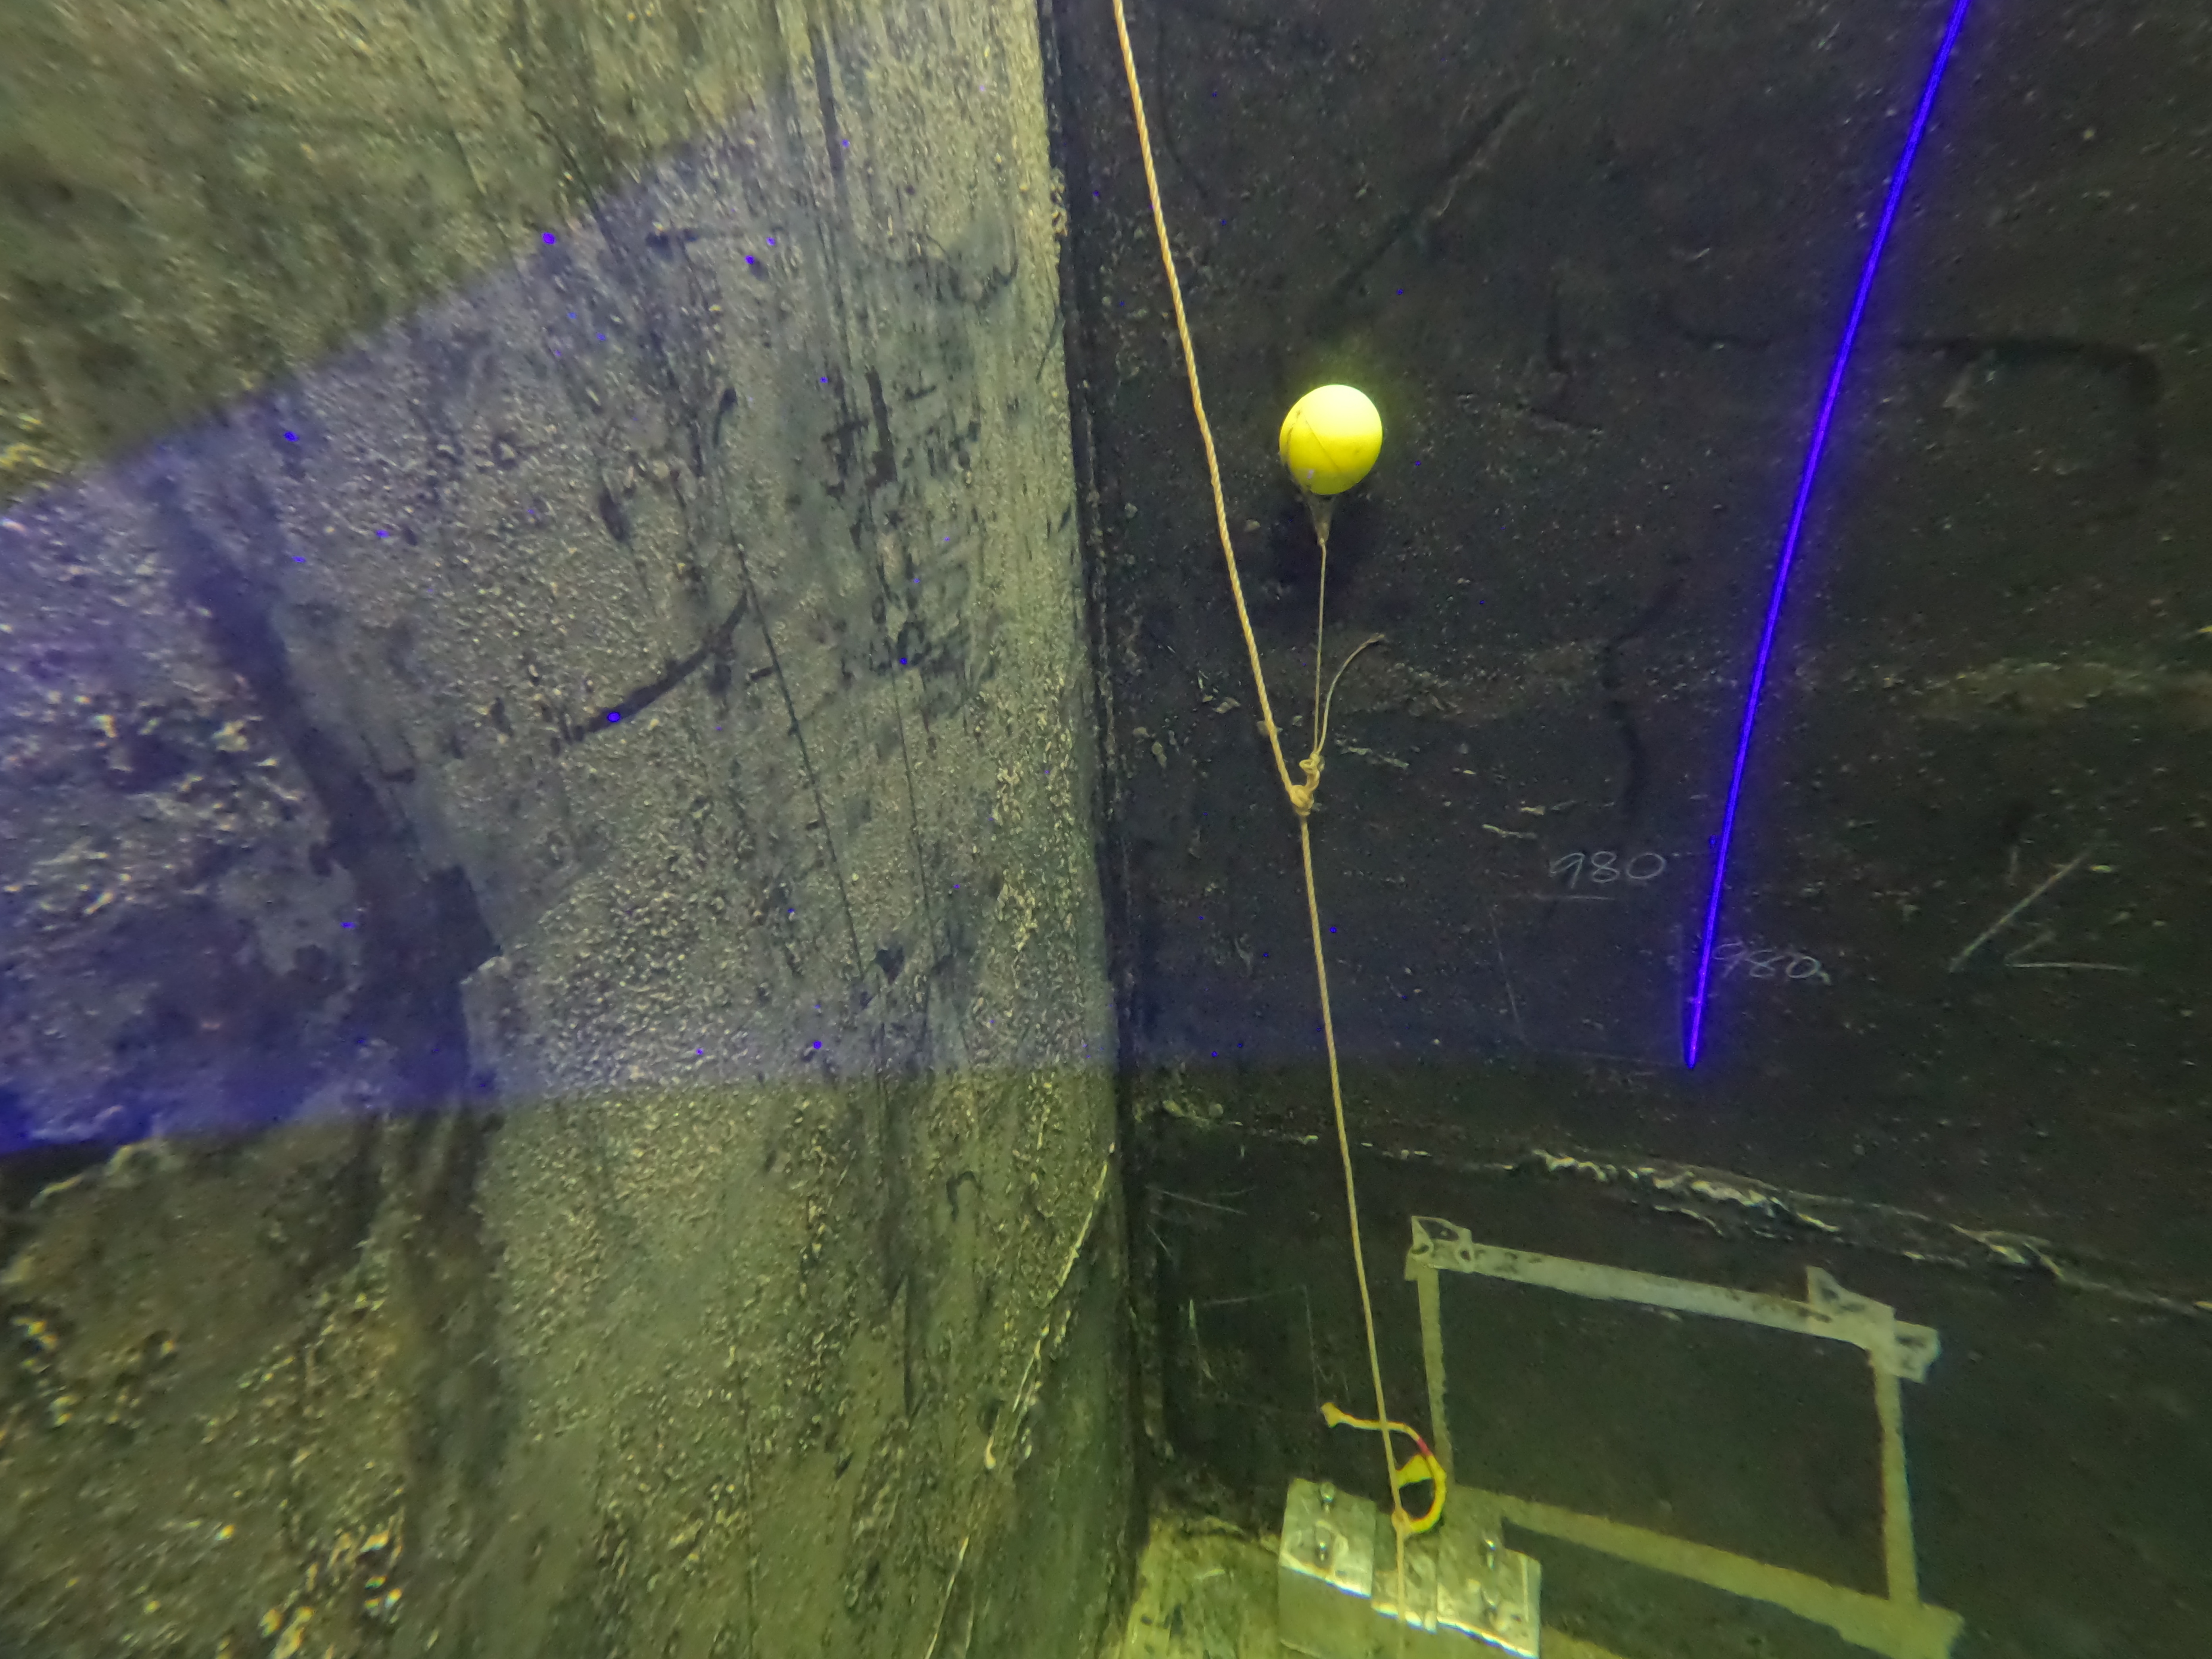

Supplement: Supplementary file 2996 [file G0031796.pdf › 12/G0031796.pdf]

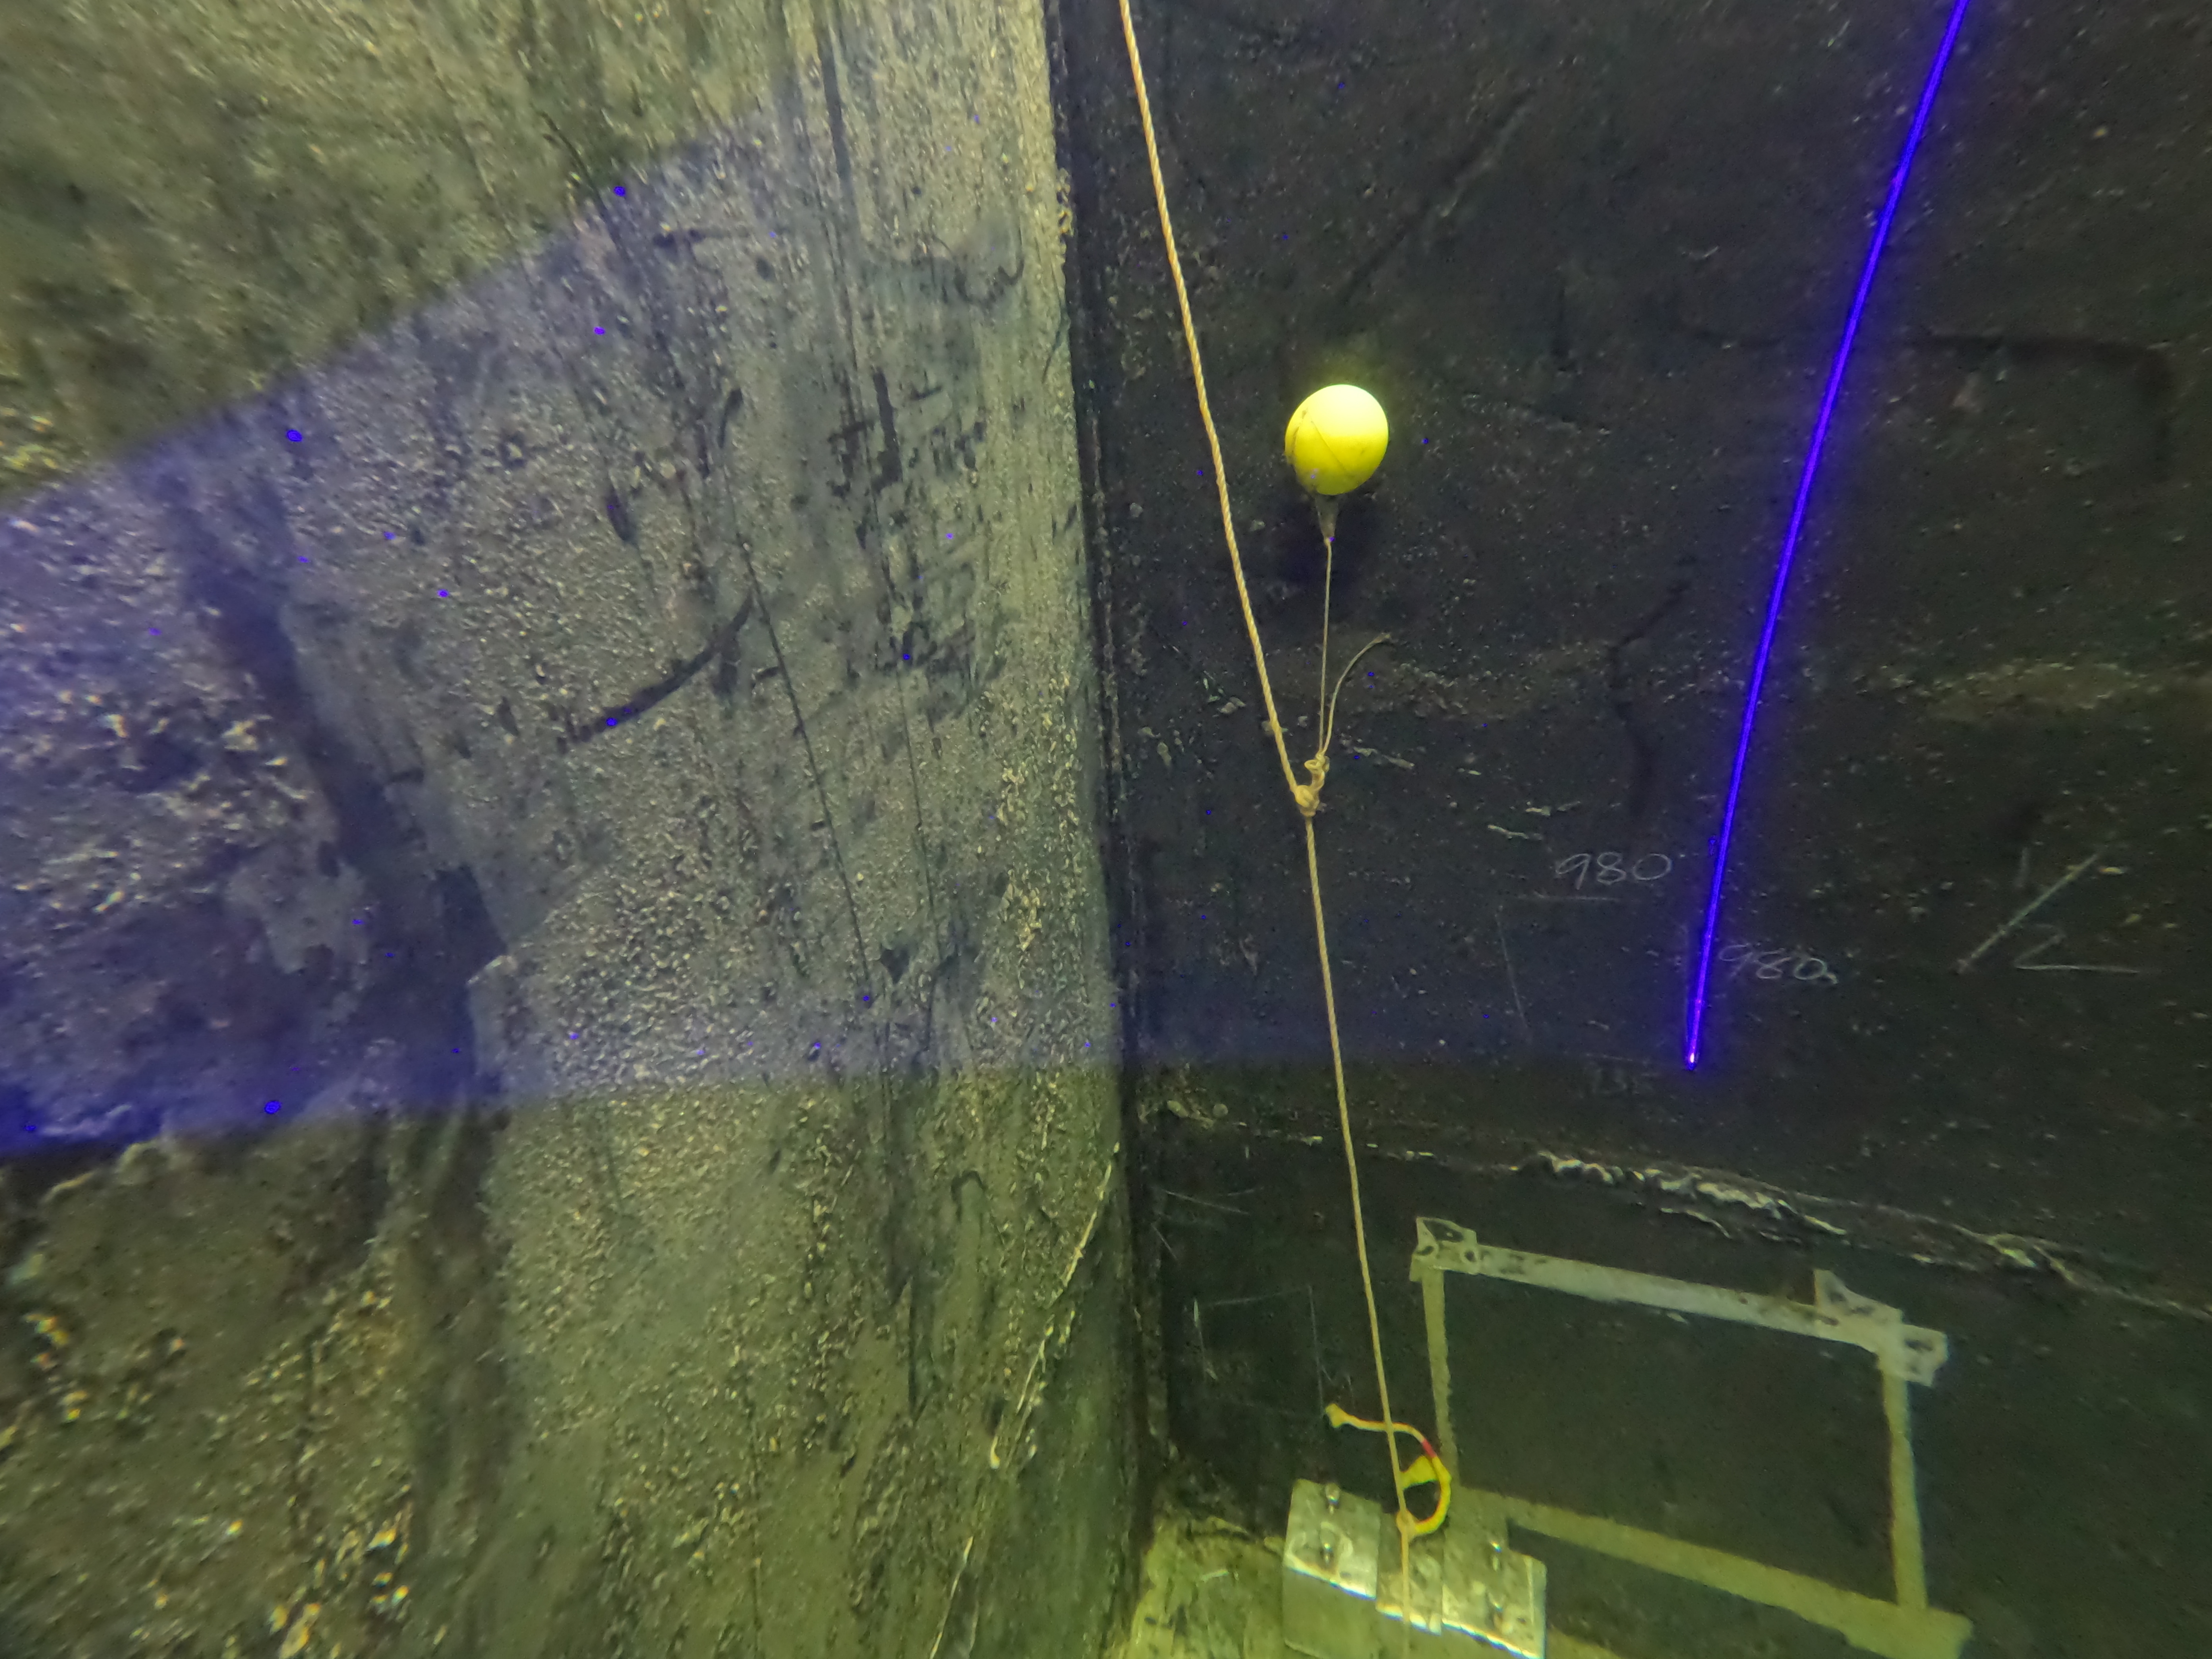

Supplement: Supplementary file 2997 [file G0031797.pdf › 12/G0031797.pdf]

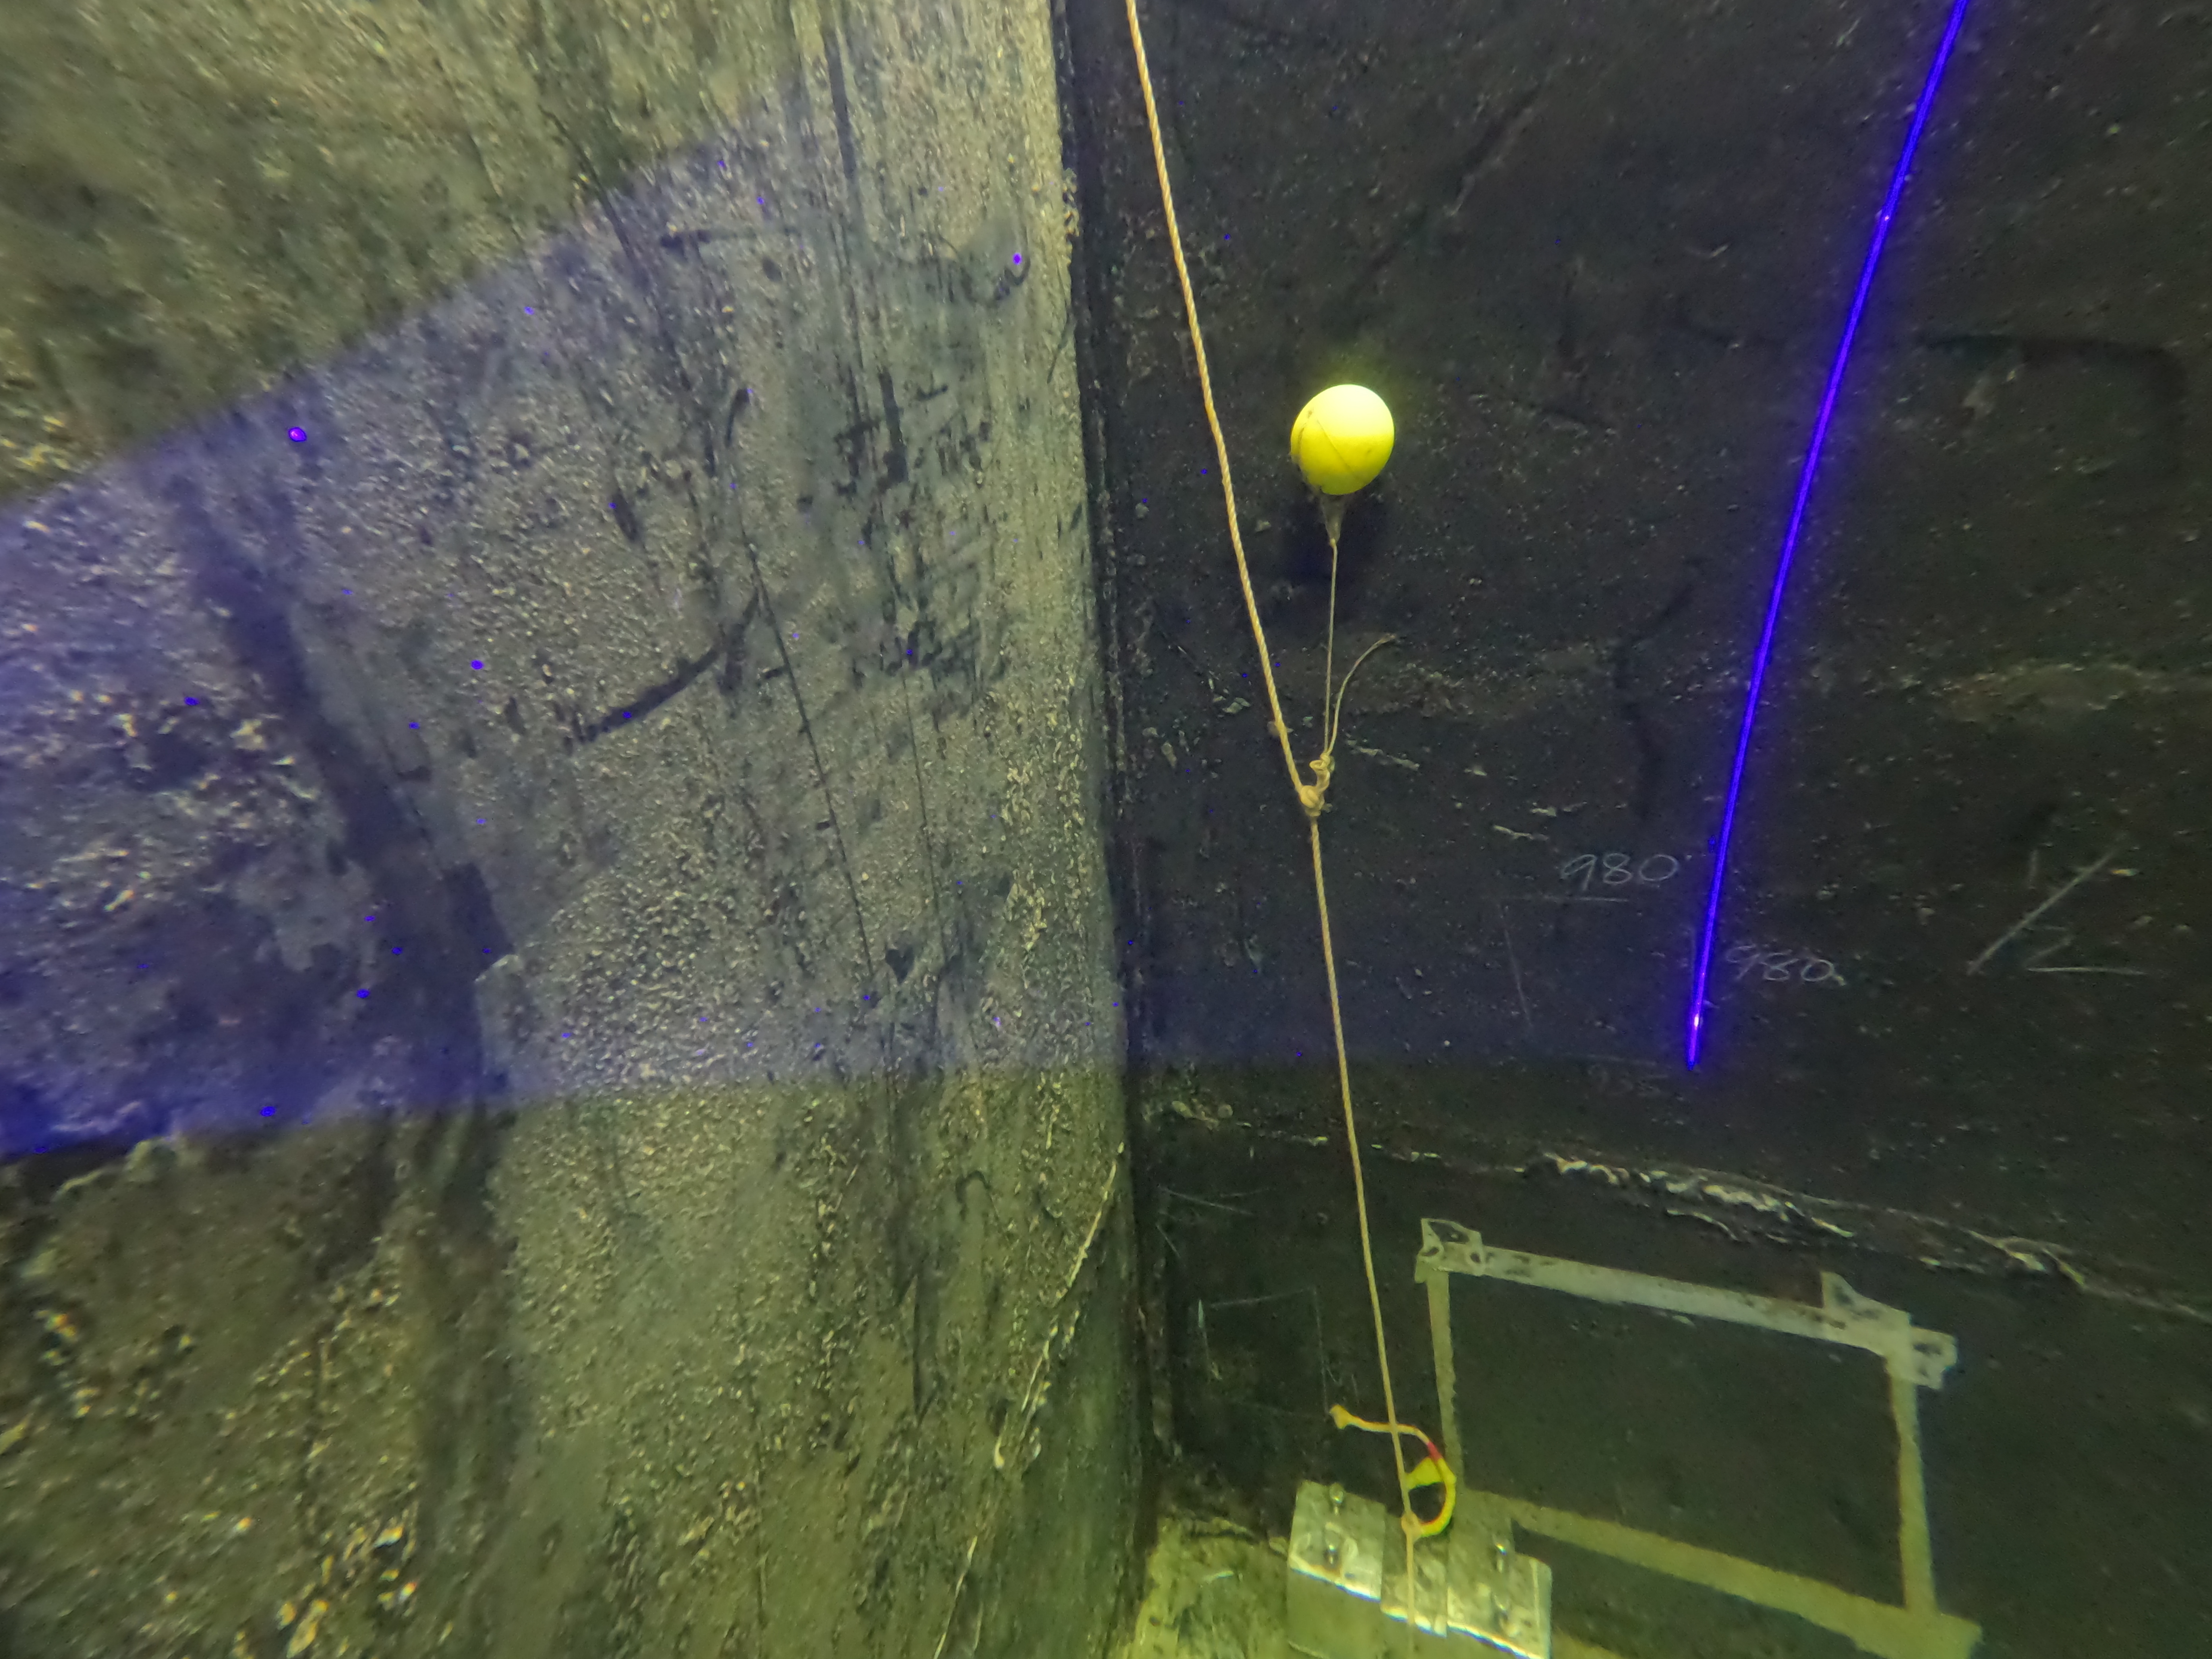

980

980

Supplement: Supplementary file 2998 [file G0031798.pdf › 12/G0031798.pdf]

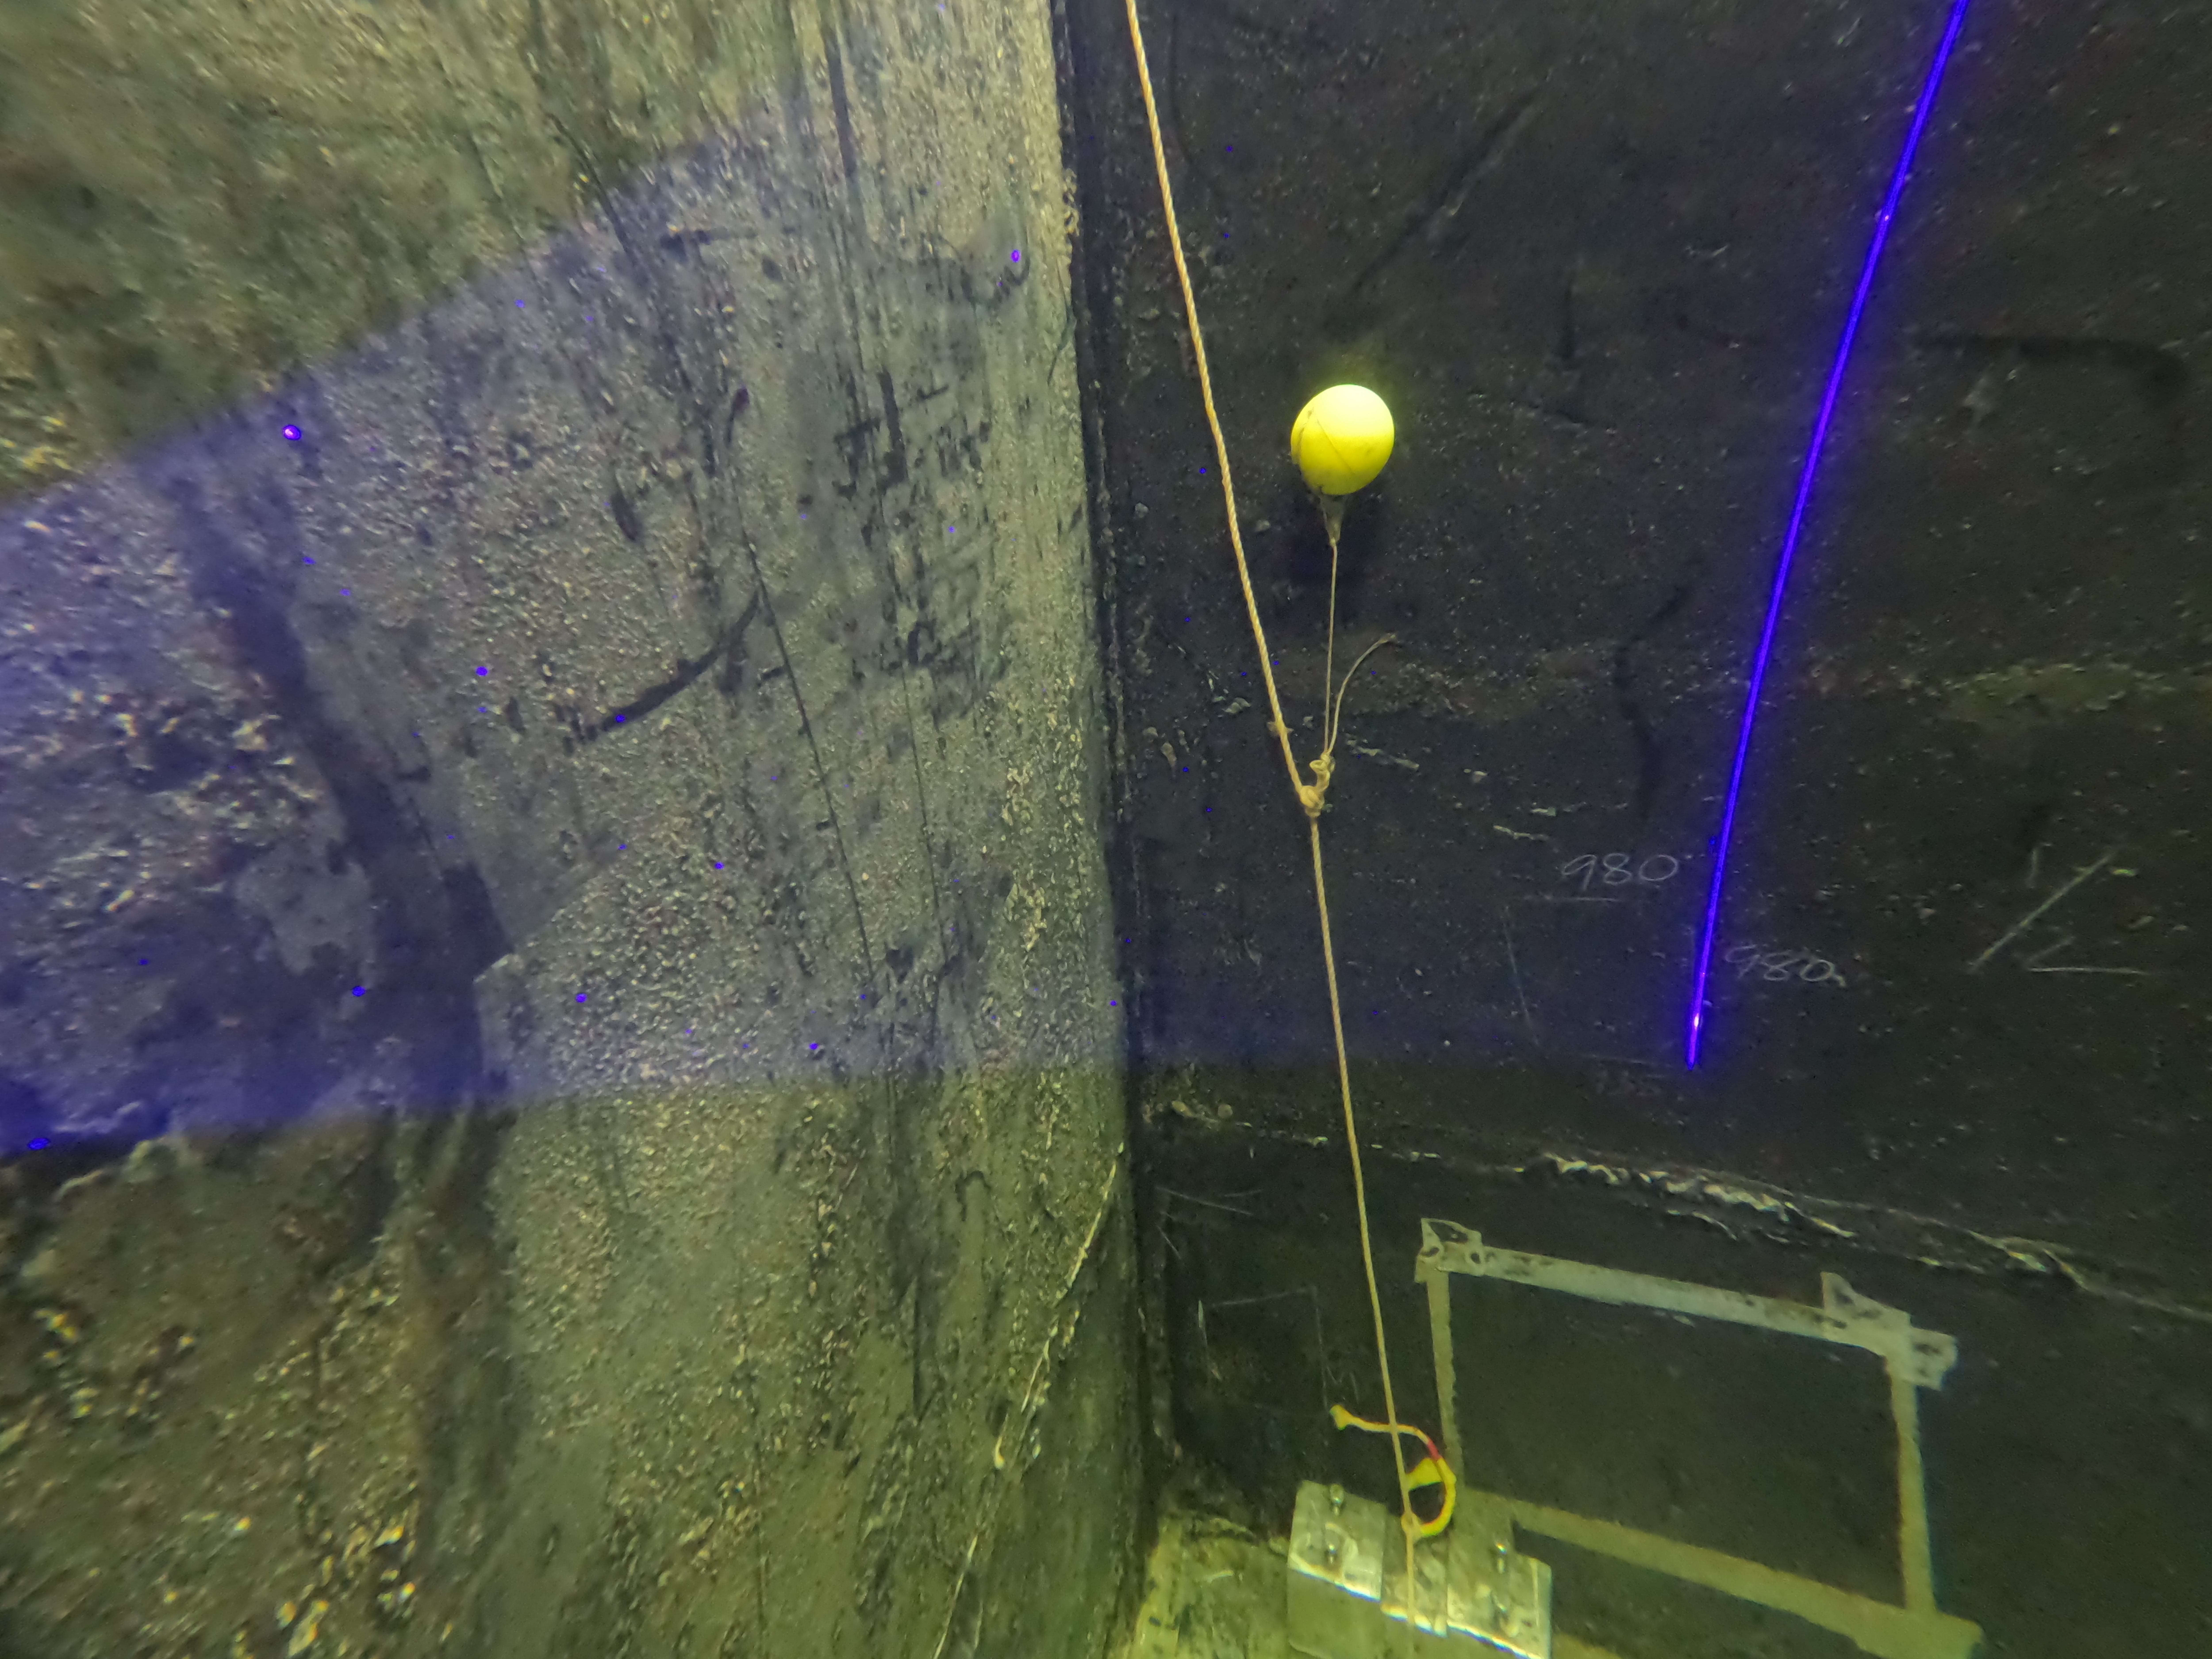

980

980

Supplement: Supplementary file 2999 [file G0031799.pdf › 12/G0031799.pdf]

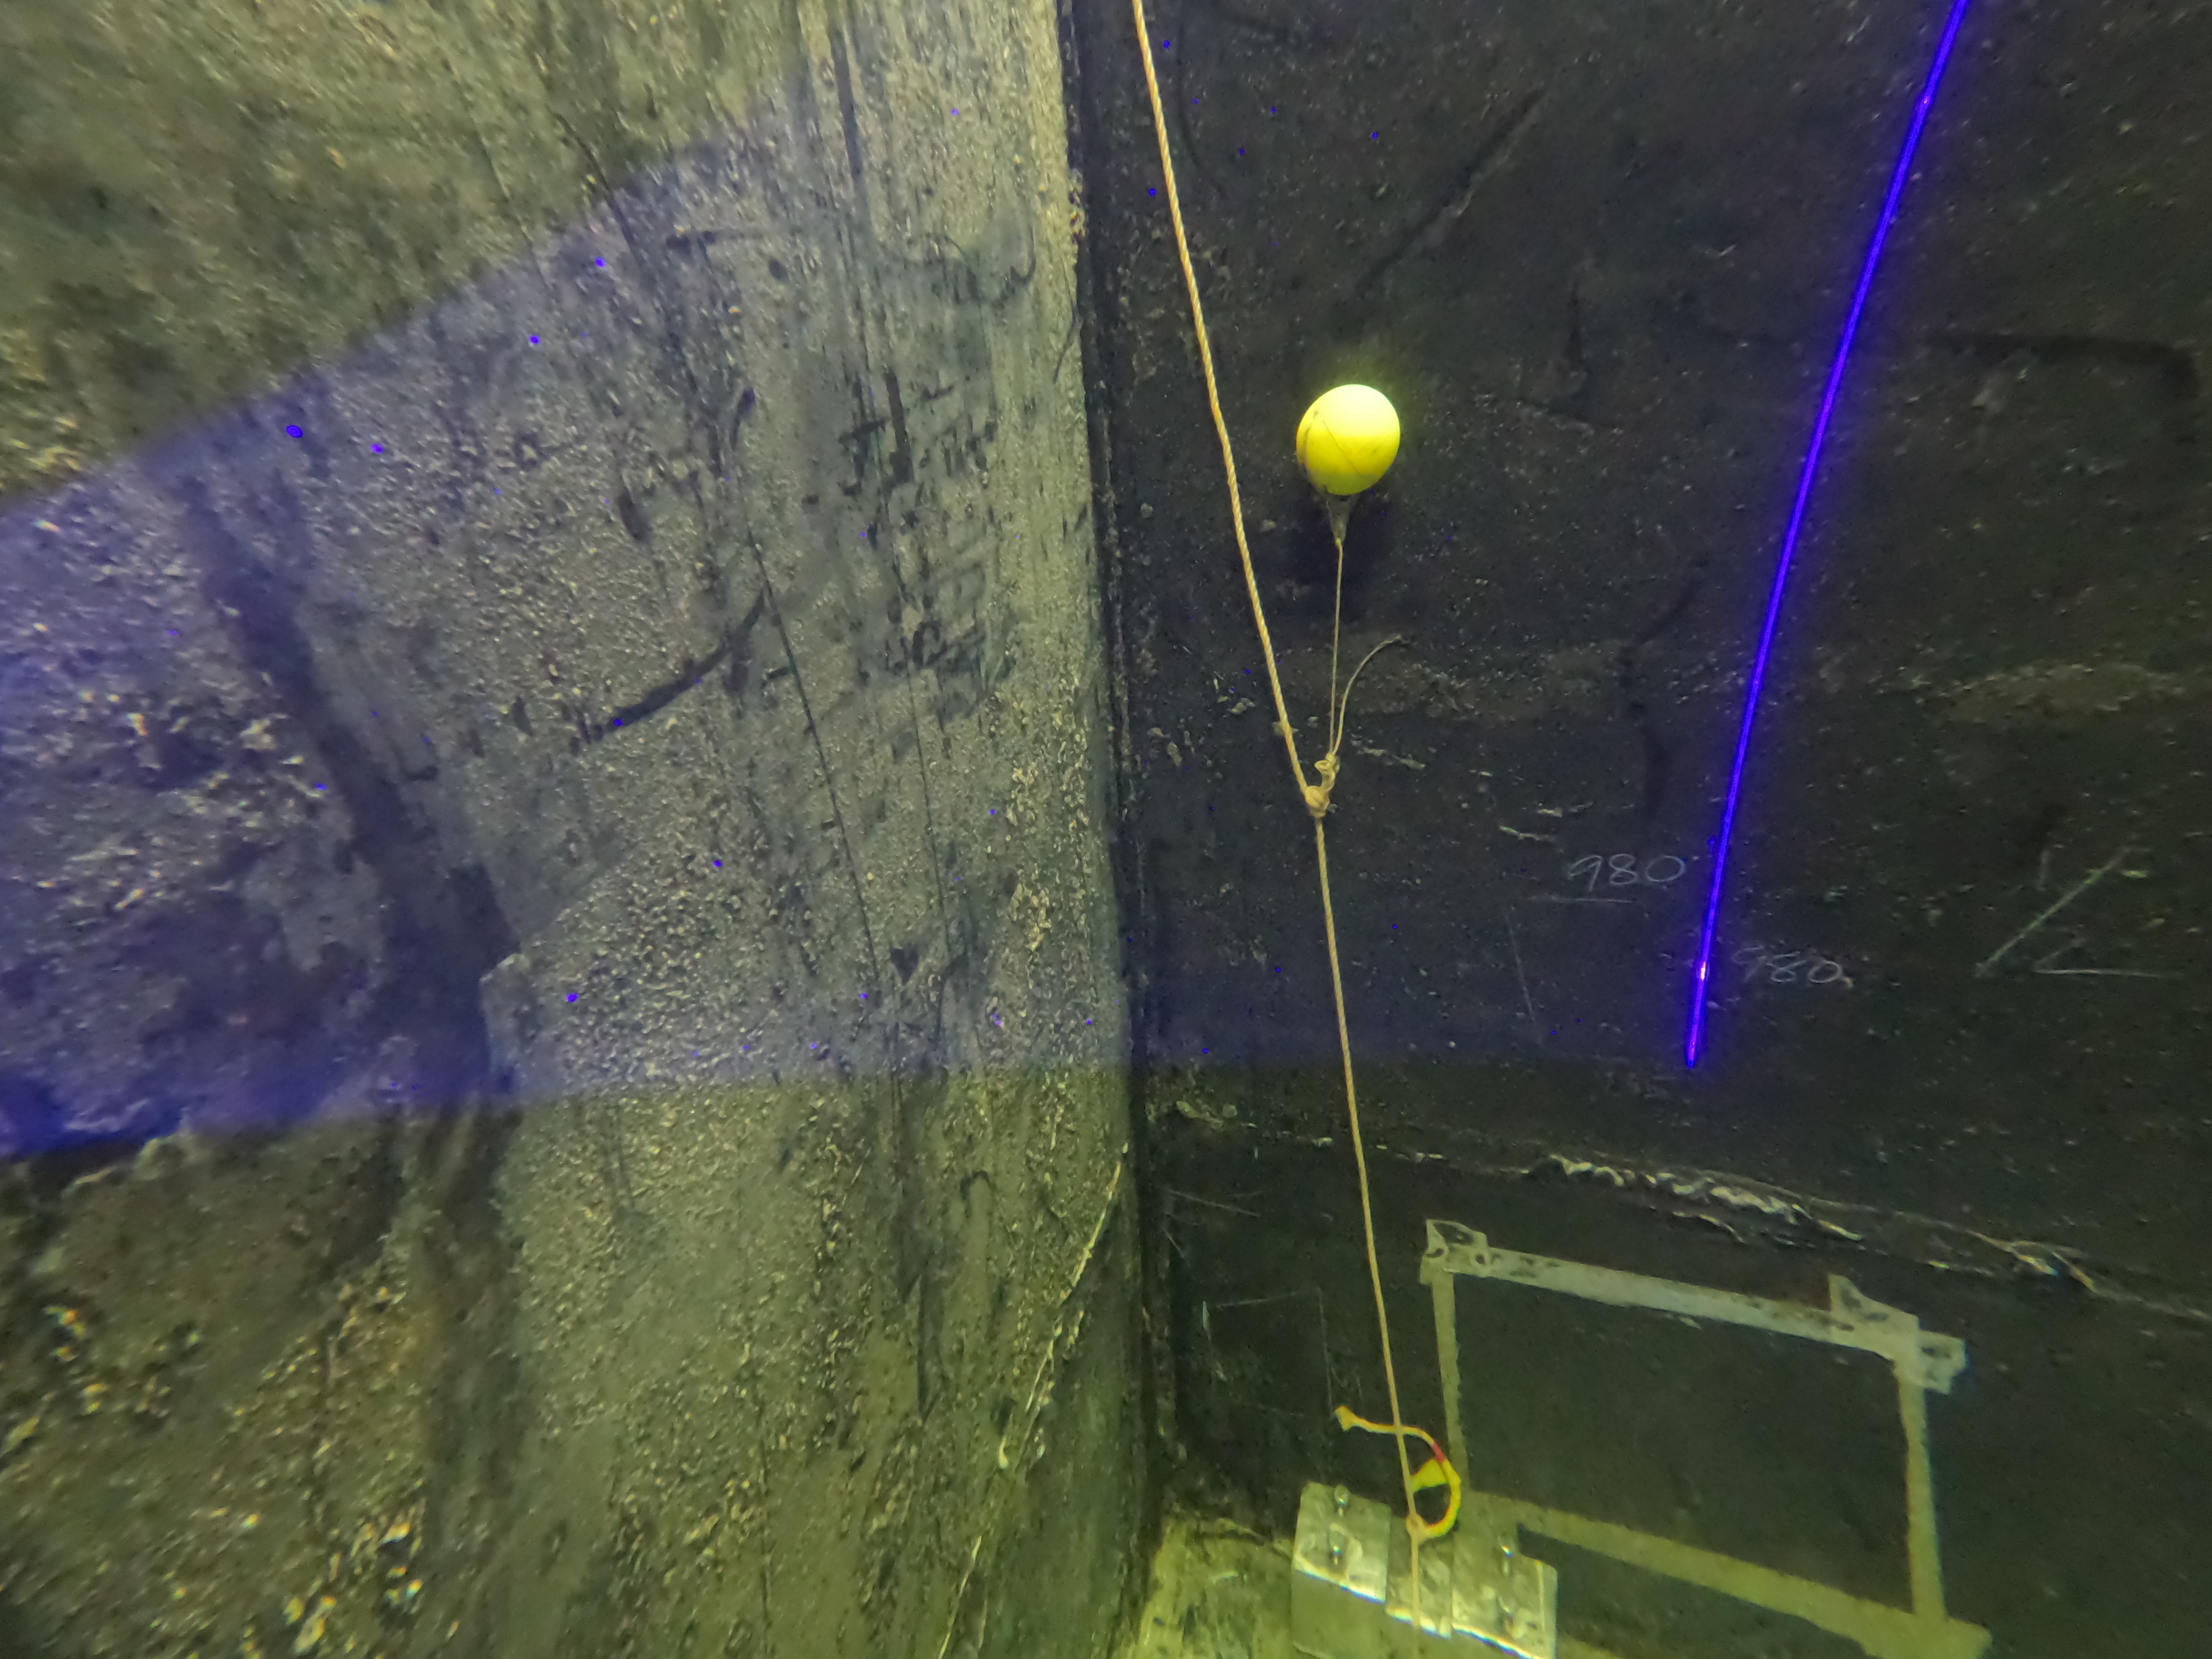

Supplement: Supplementary file 3000 [file G0031800.pdf › 12/G0031800.pdf]

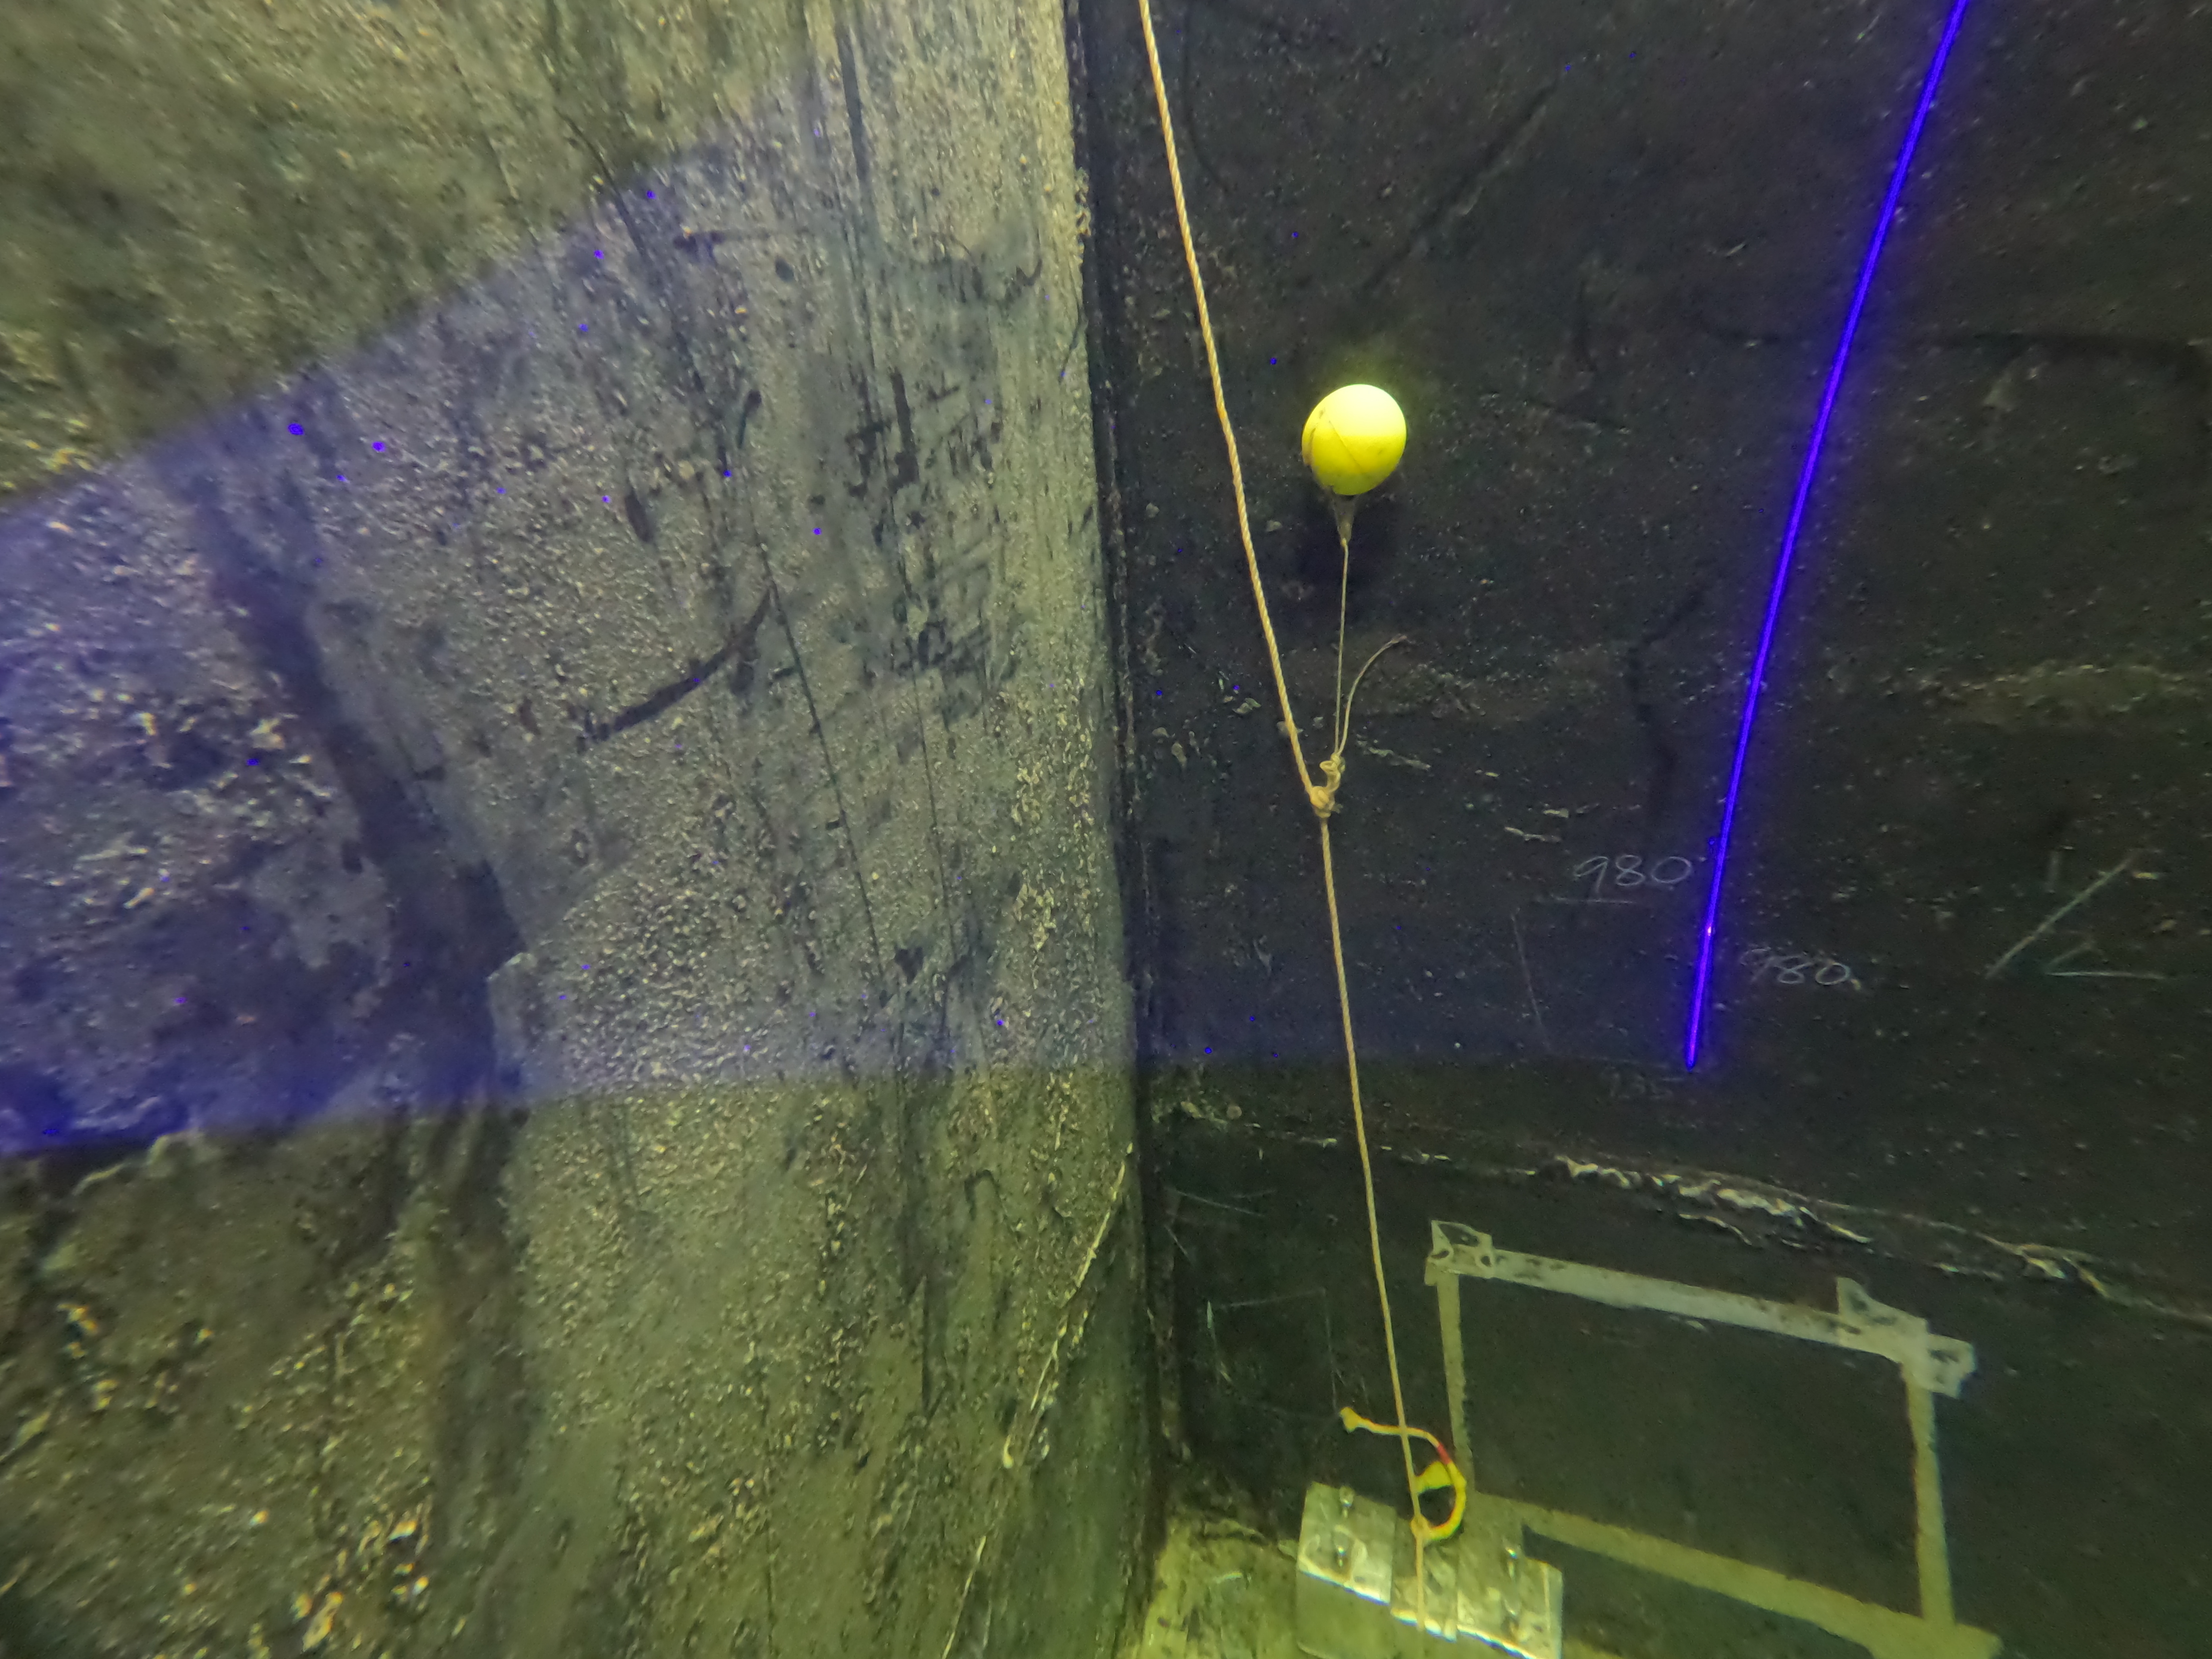

980

980

Supplement: Supplementary file 3001 [file G0031801.pdf › 12/G0031801.pdf]

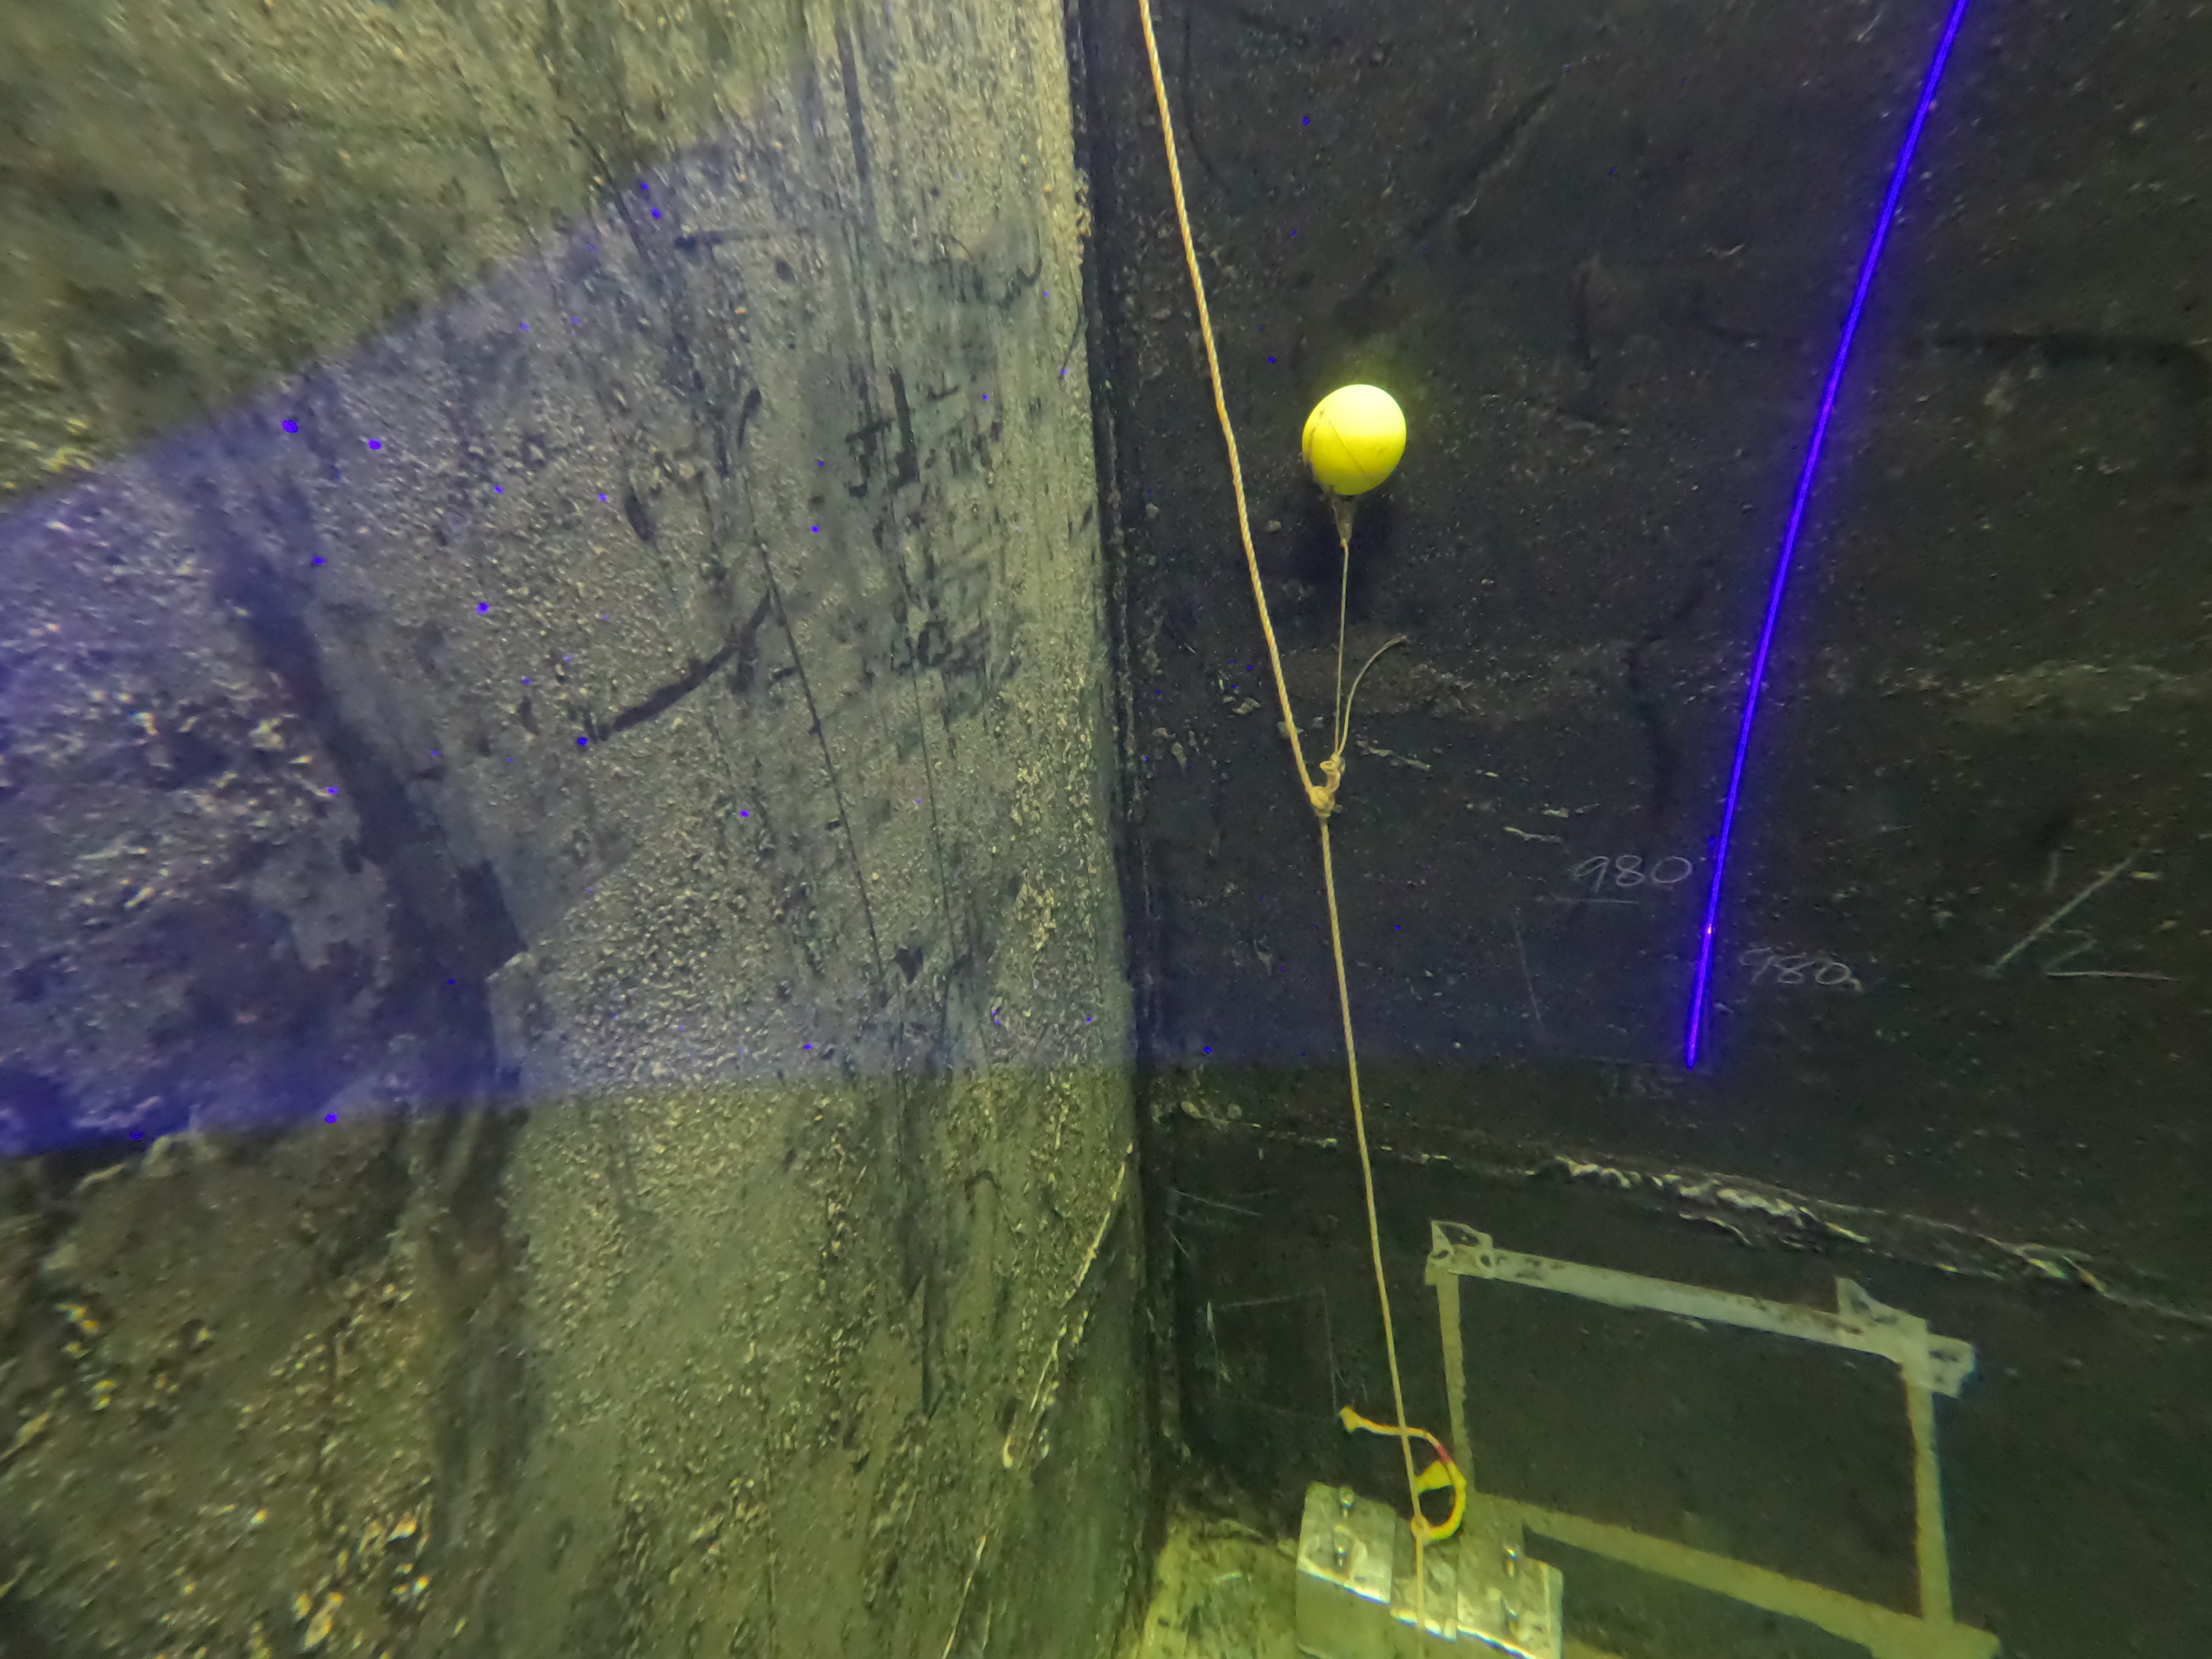

Handwritten markings on the concrete structure, possibly including '1/2' and '980'.

980

980

1/2

Supplement: Supplementary file 3002 [file G0031802.pdf › 12/G0031802.pdf]

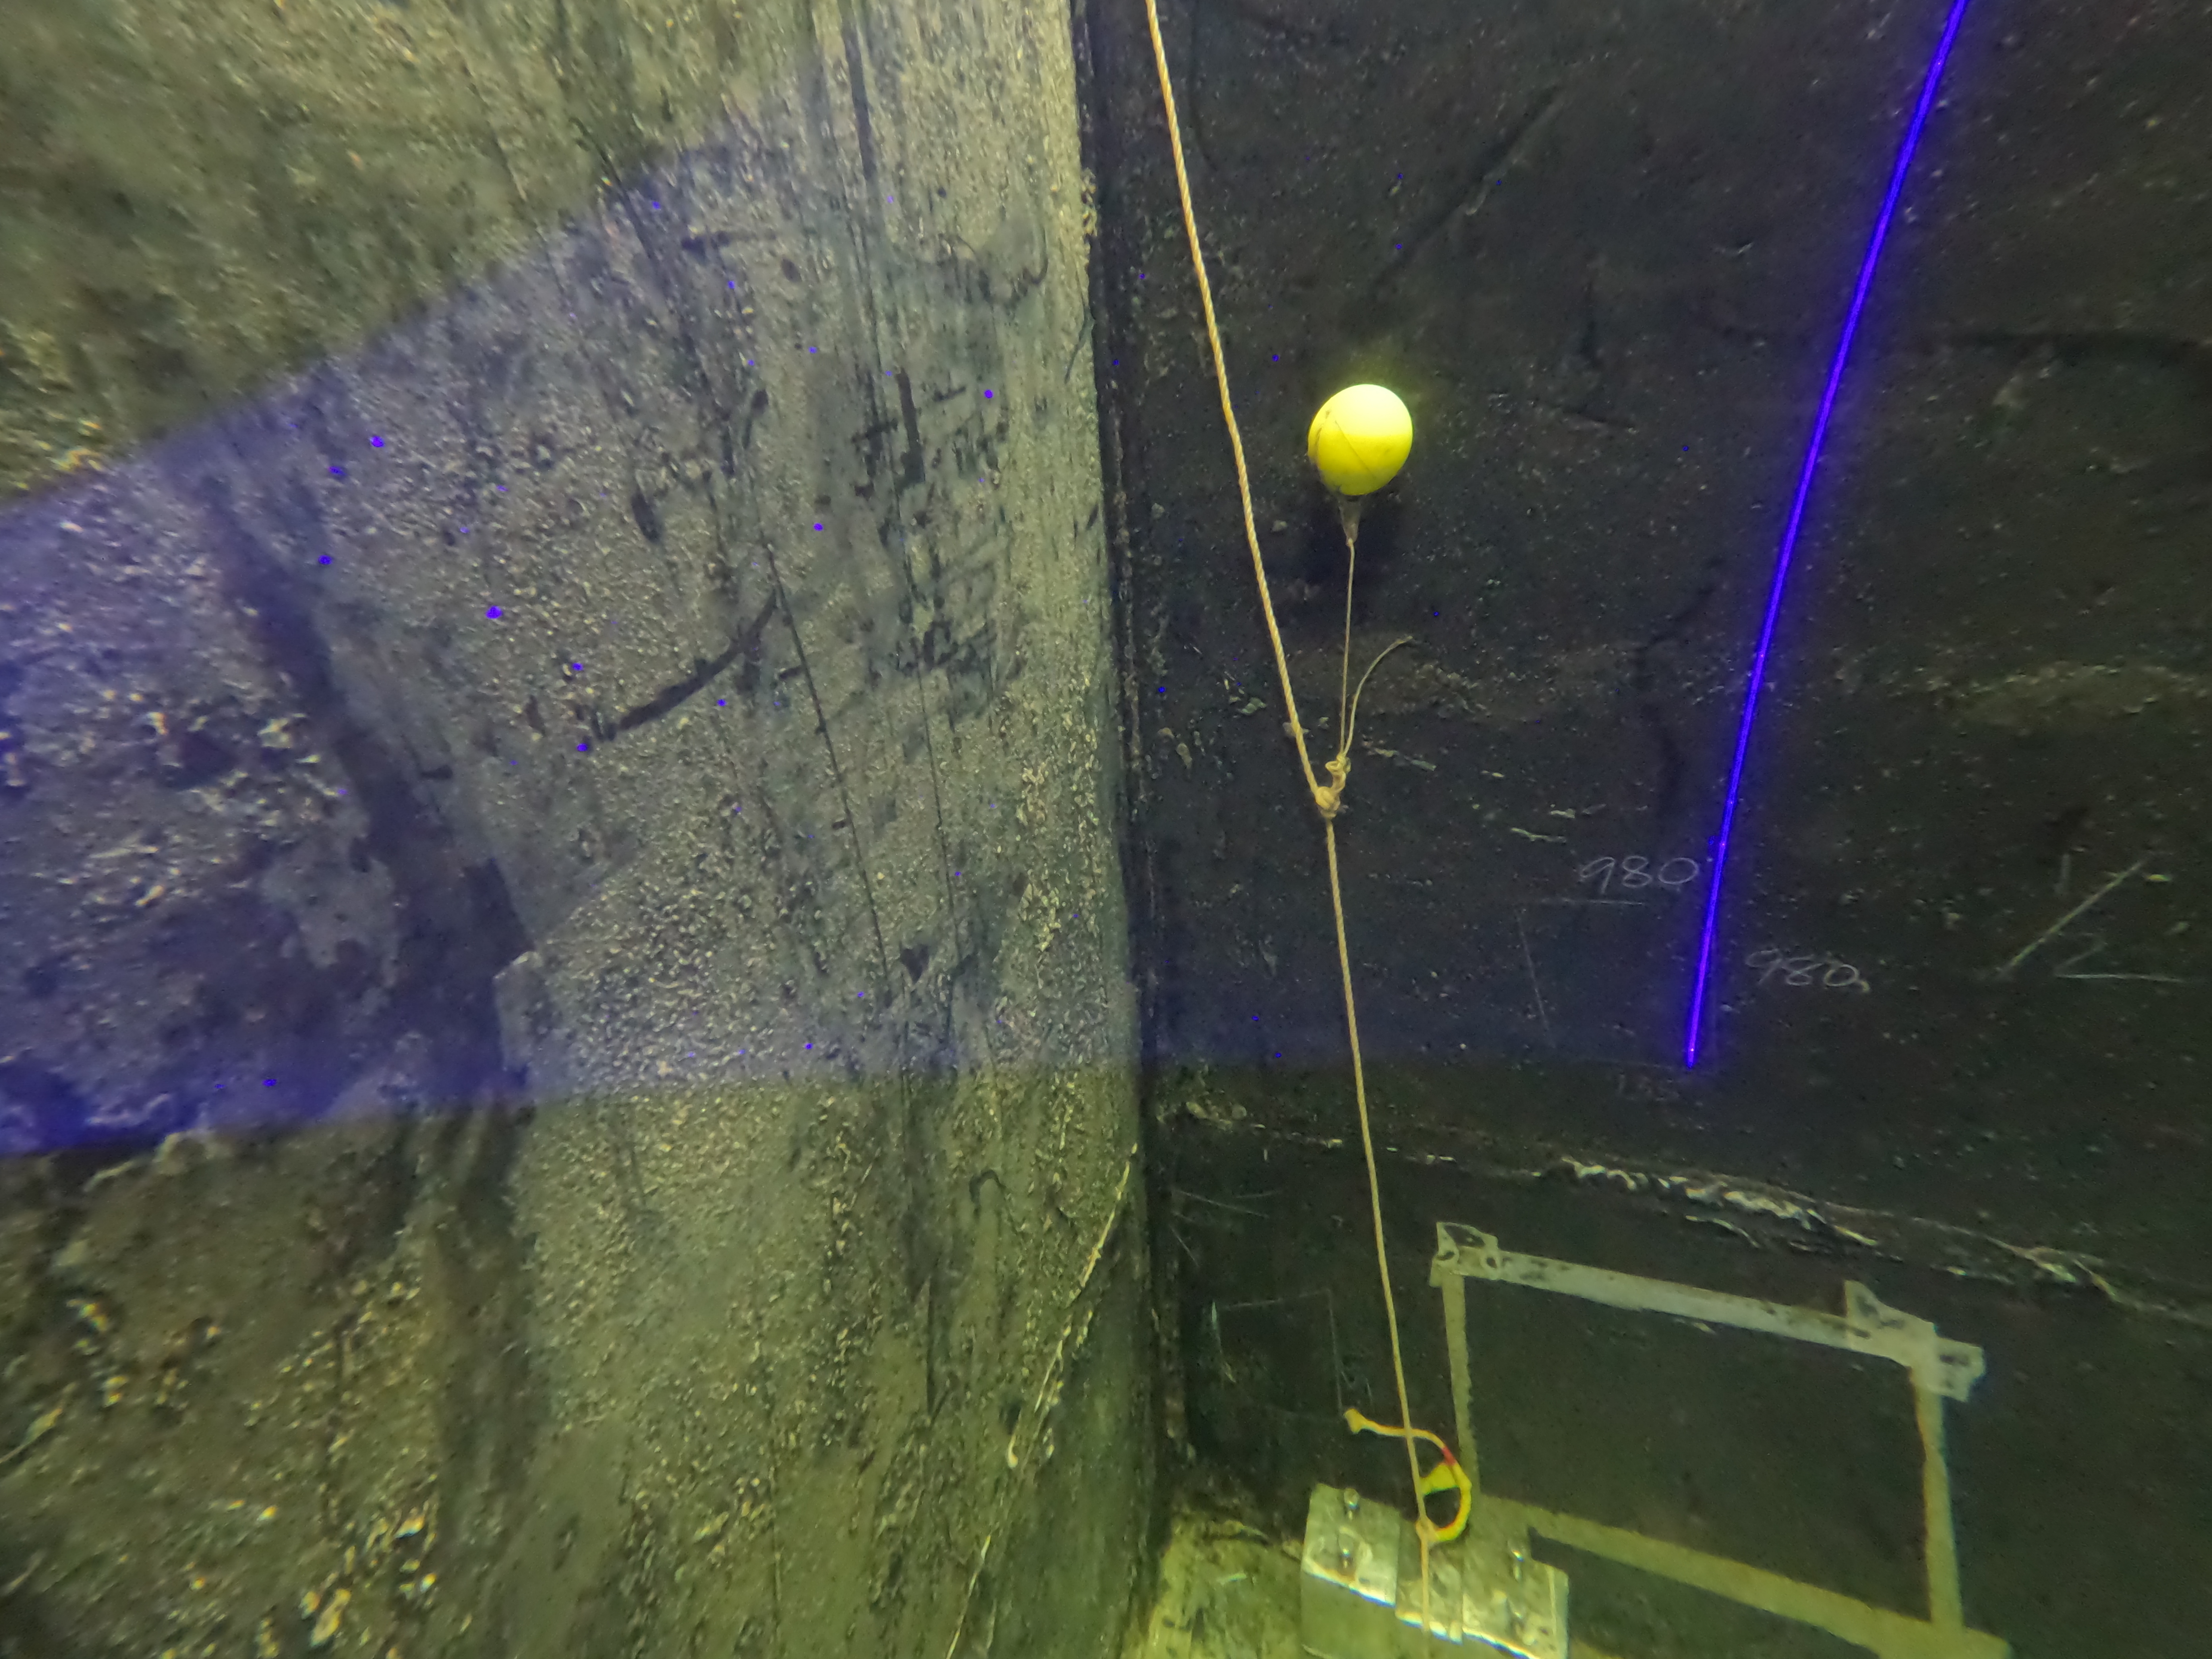

Supplement: Supplementary file 3003 [file G0031803.pdf › 12/G0031803.pdf]

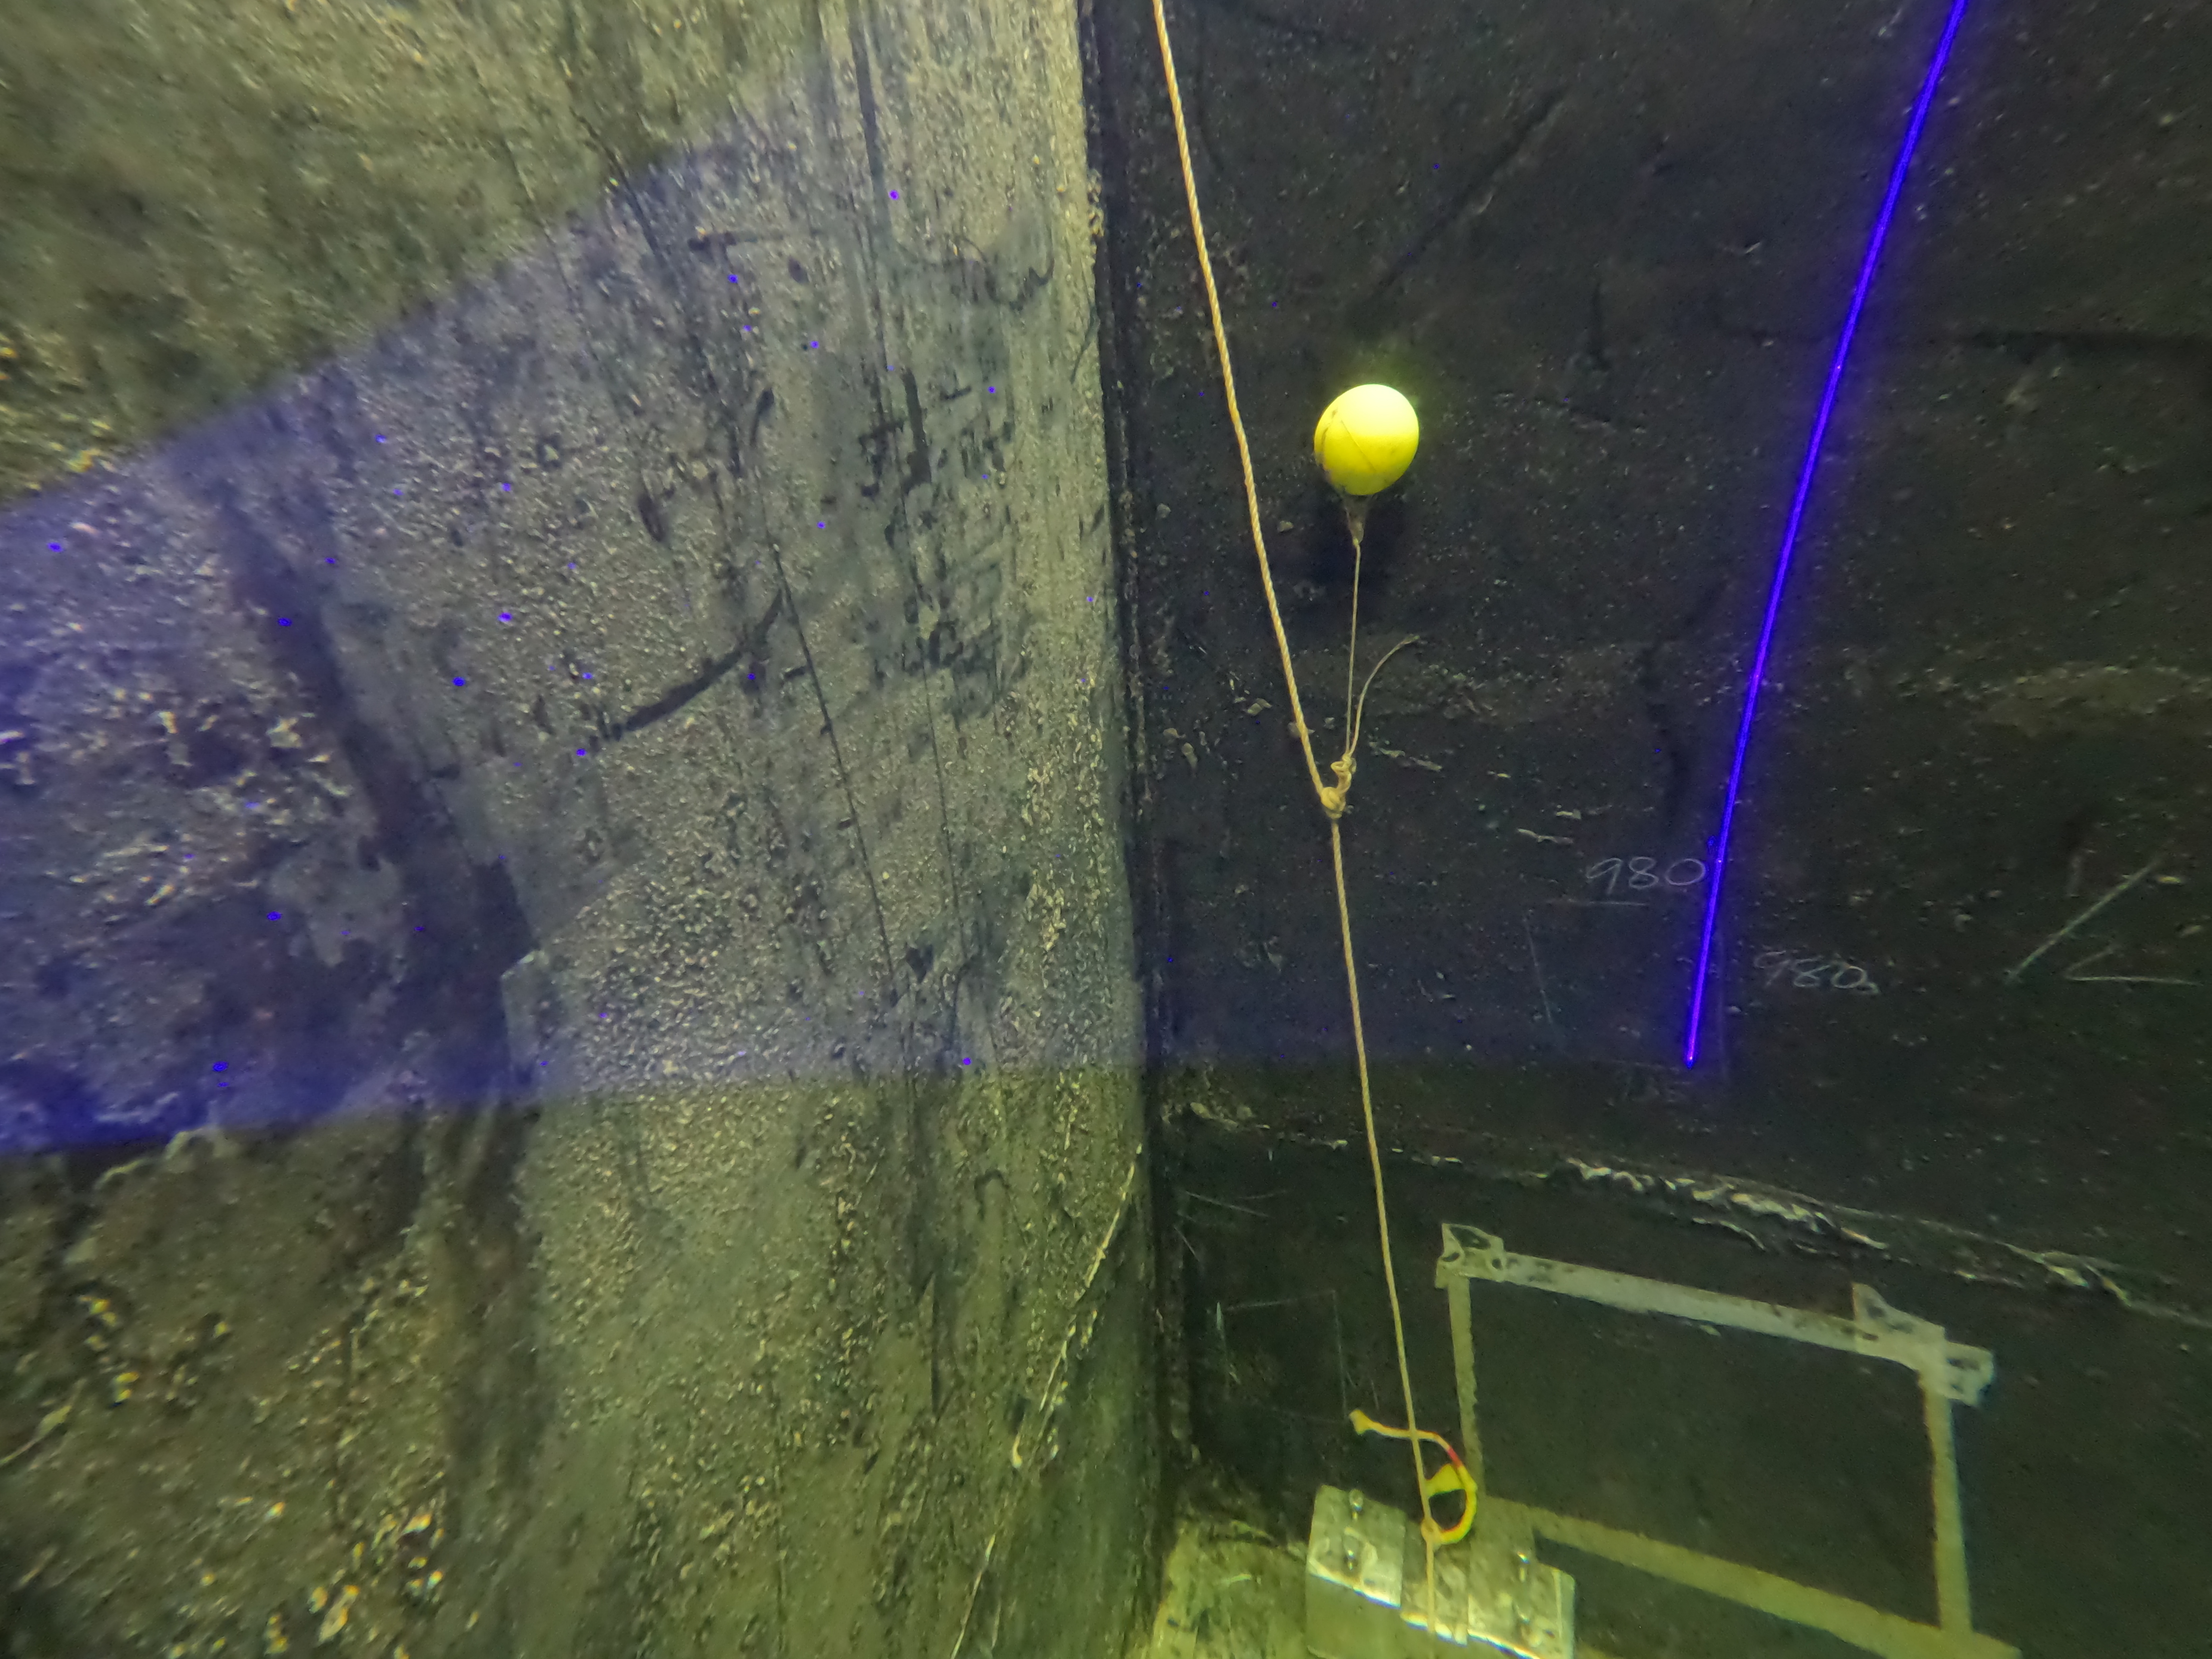

980

980

Supplement: Supplementary file 3004 [file G0031804.pdf › 12/G0031804.pdf]

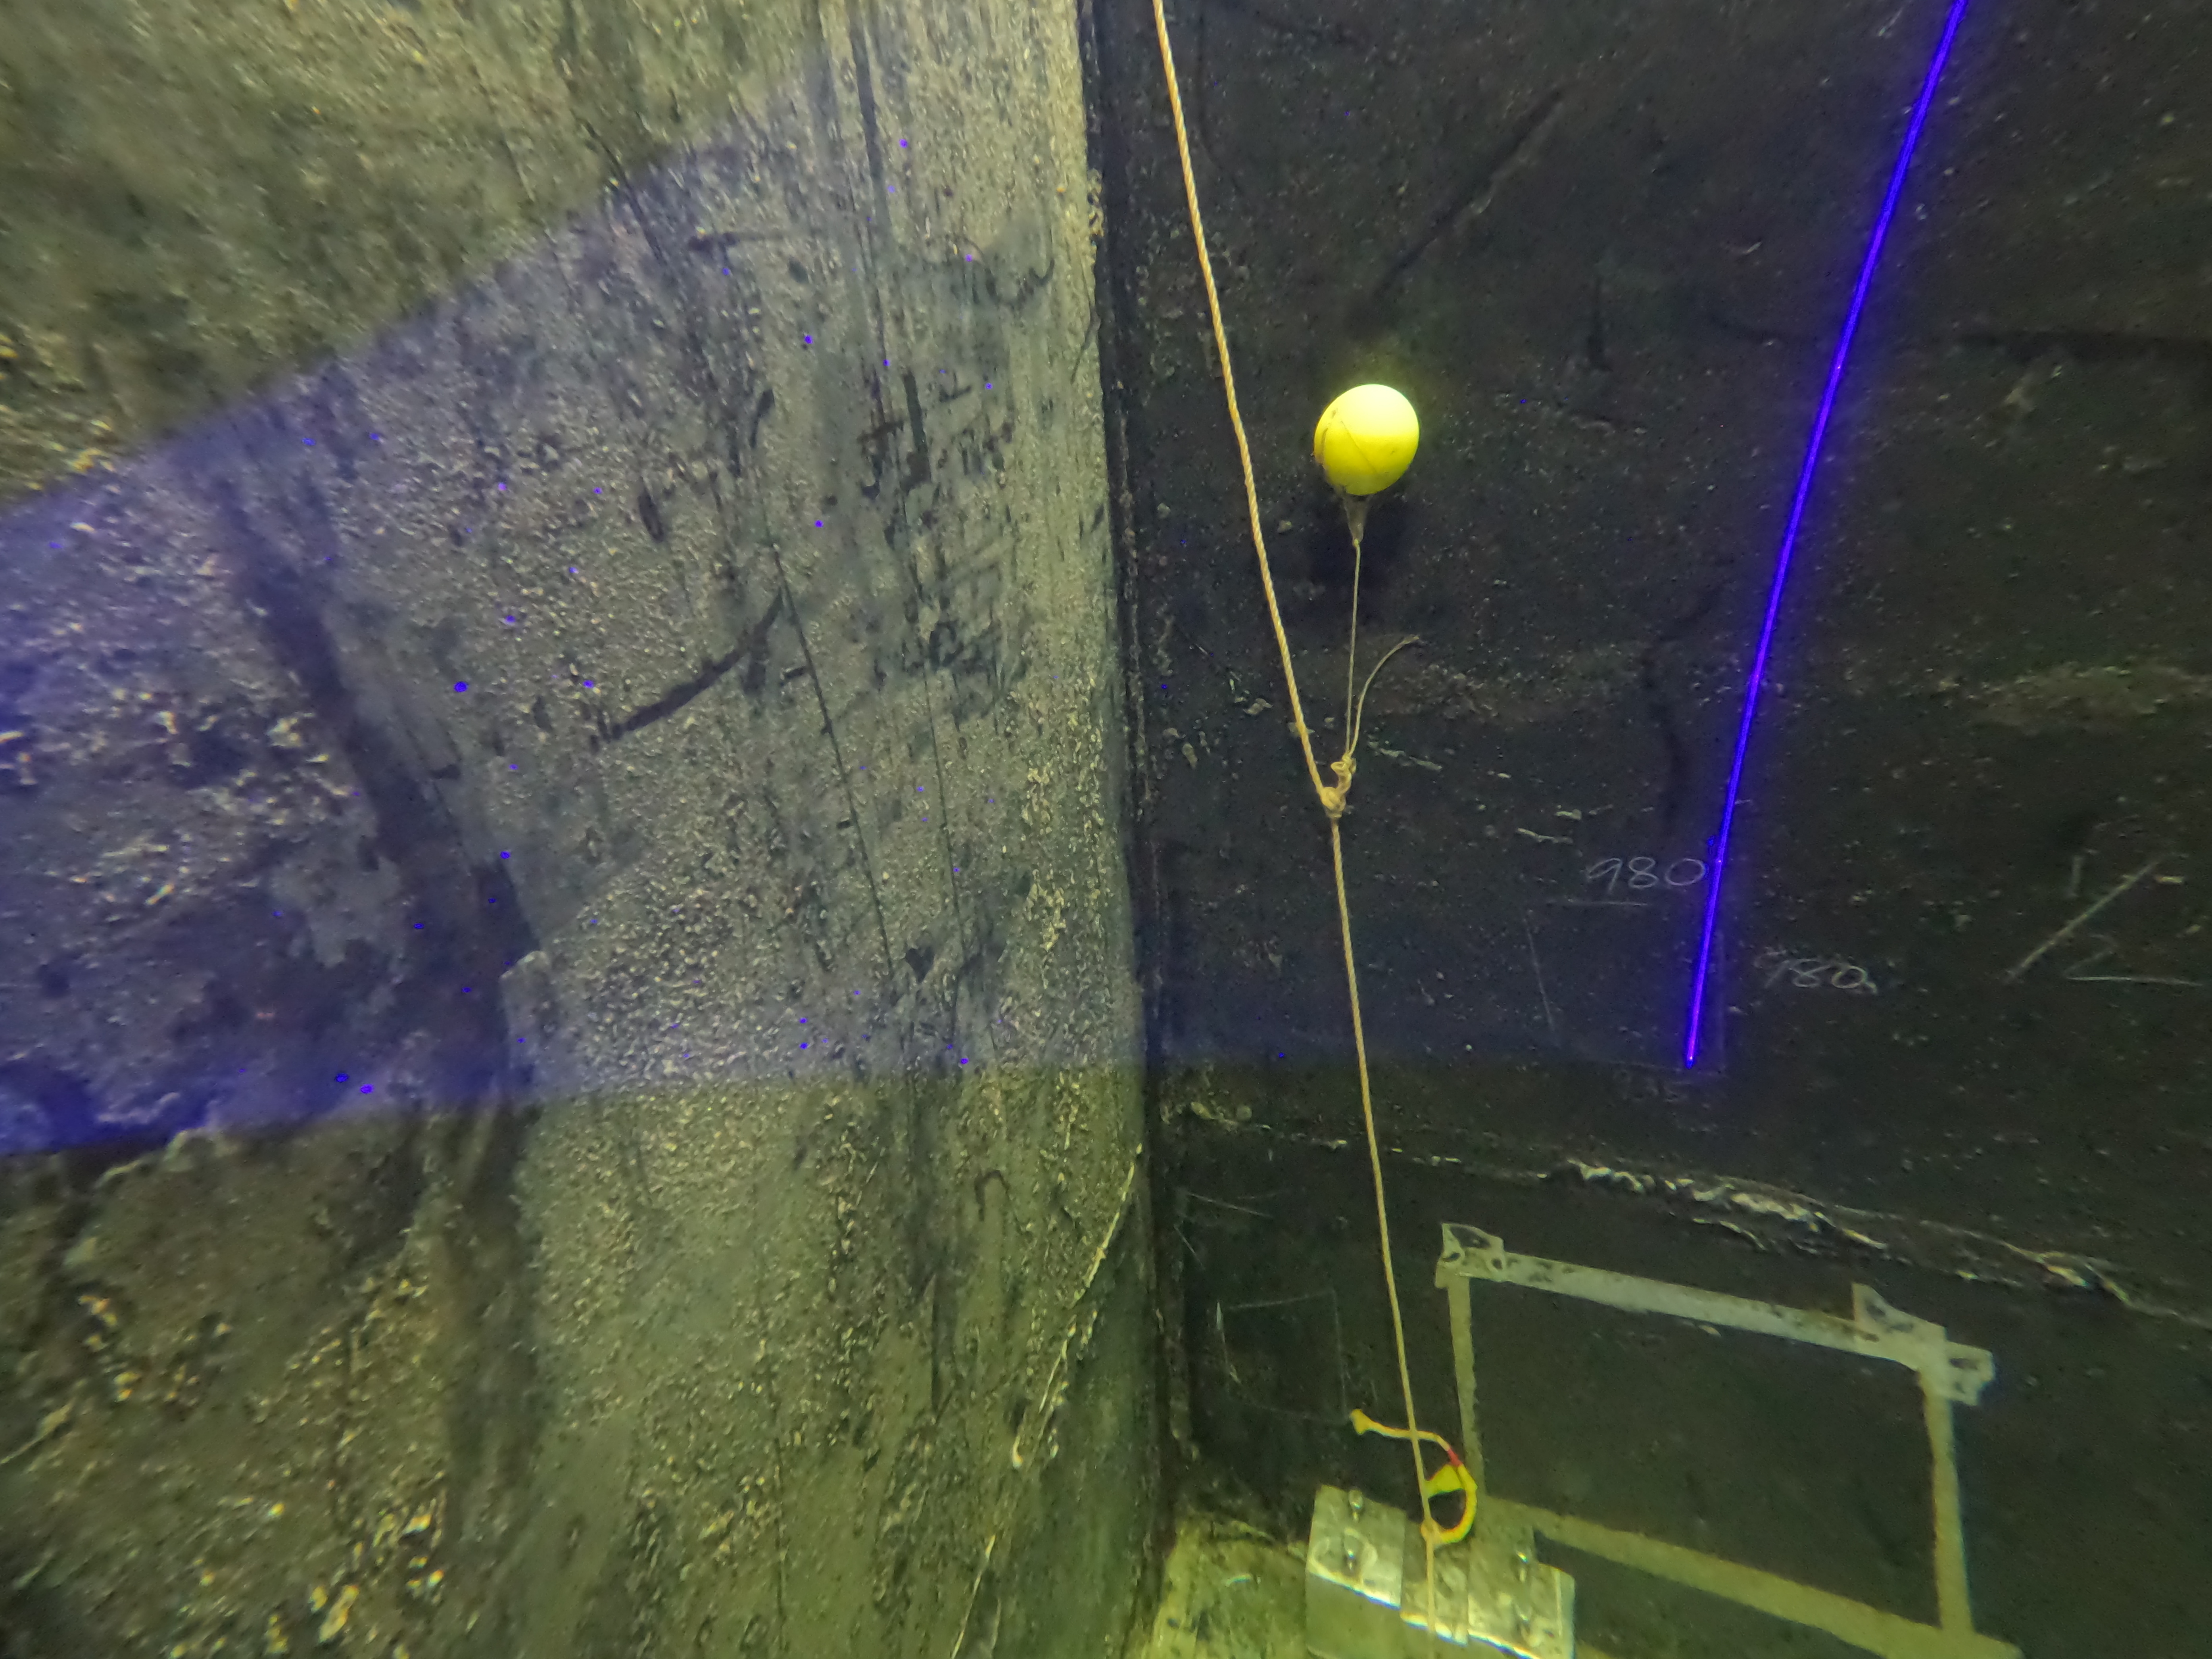

Supplement: Supplementary file 3005 [file G0031805.pdf › 12/G0031805.pdf]

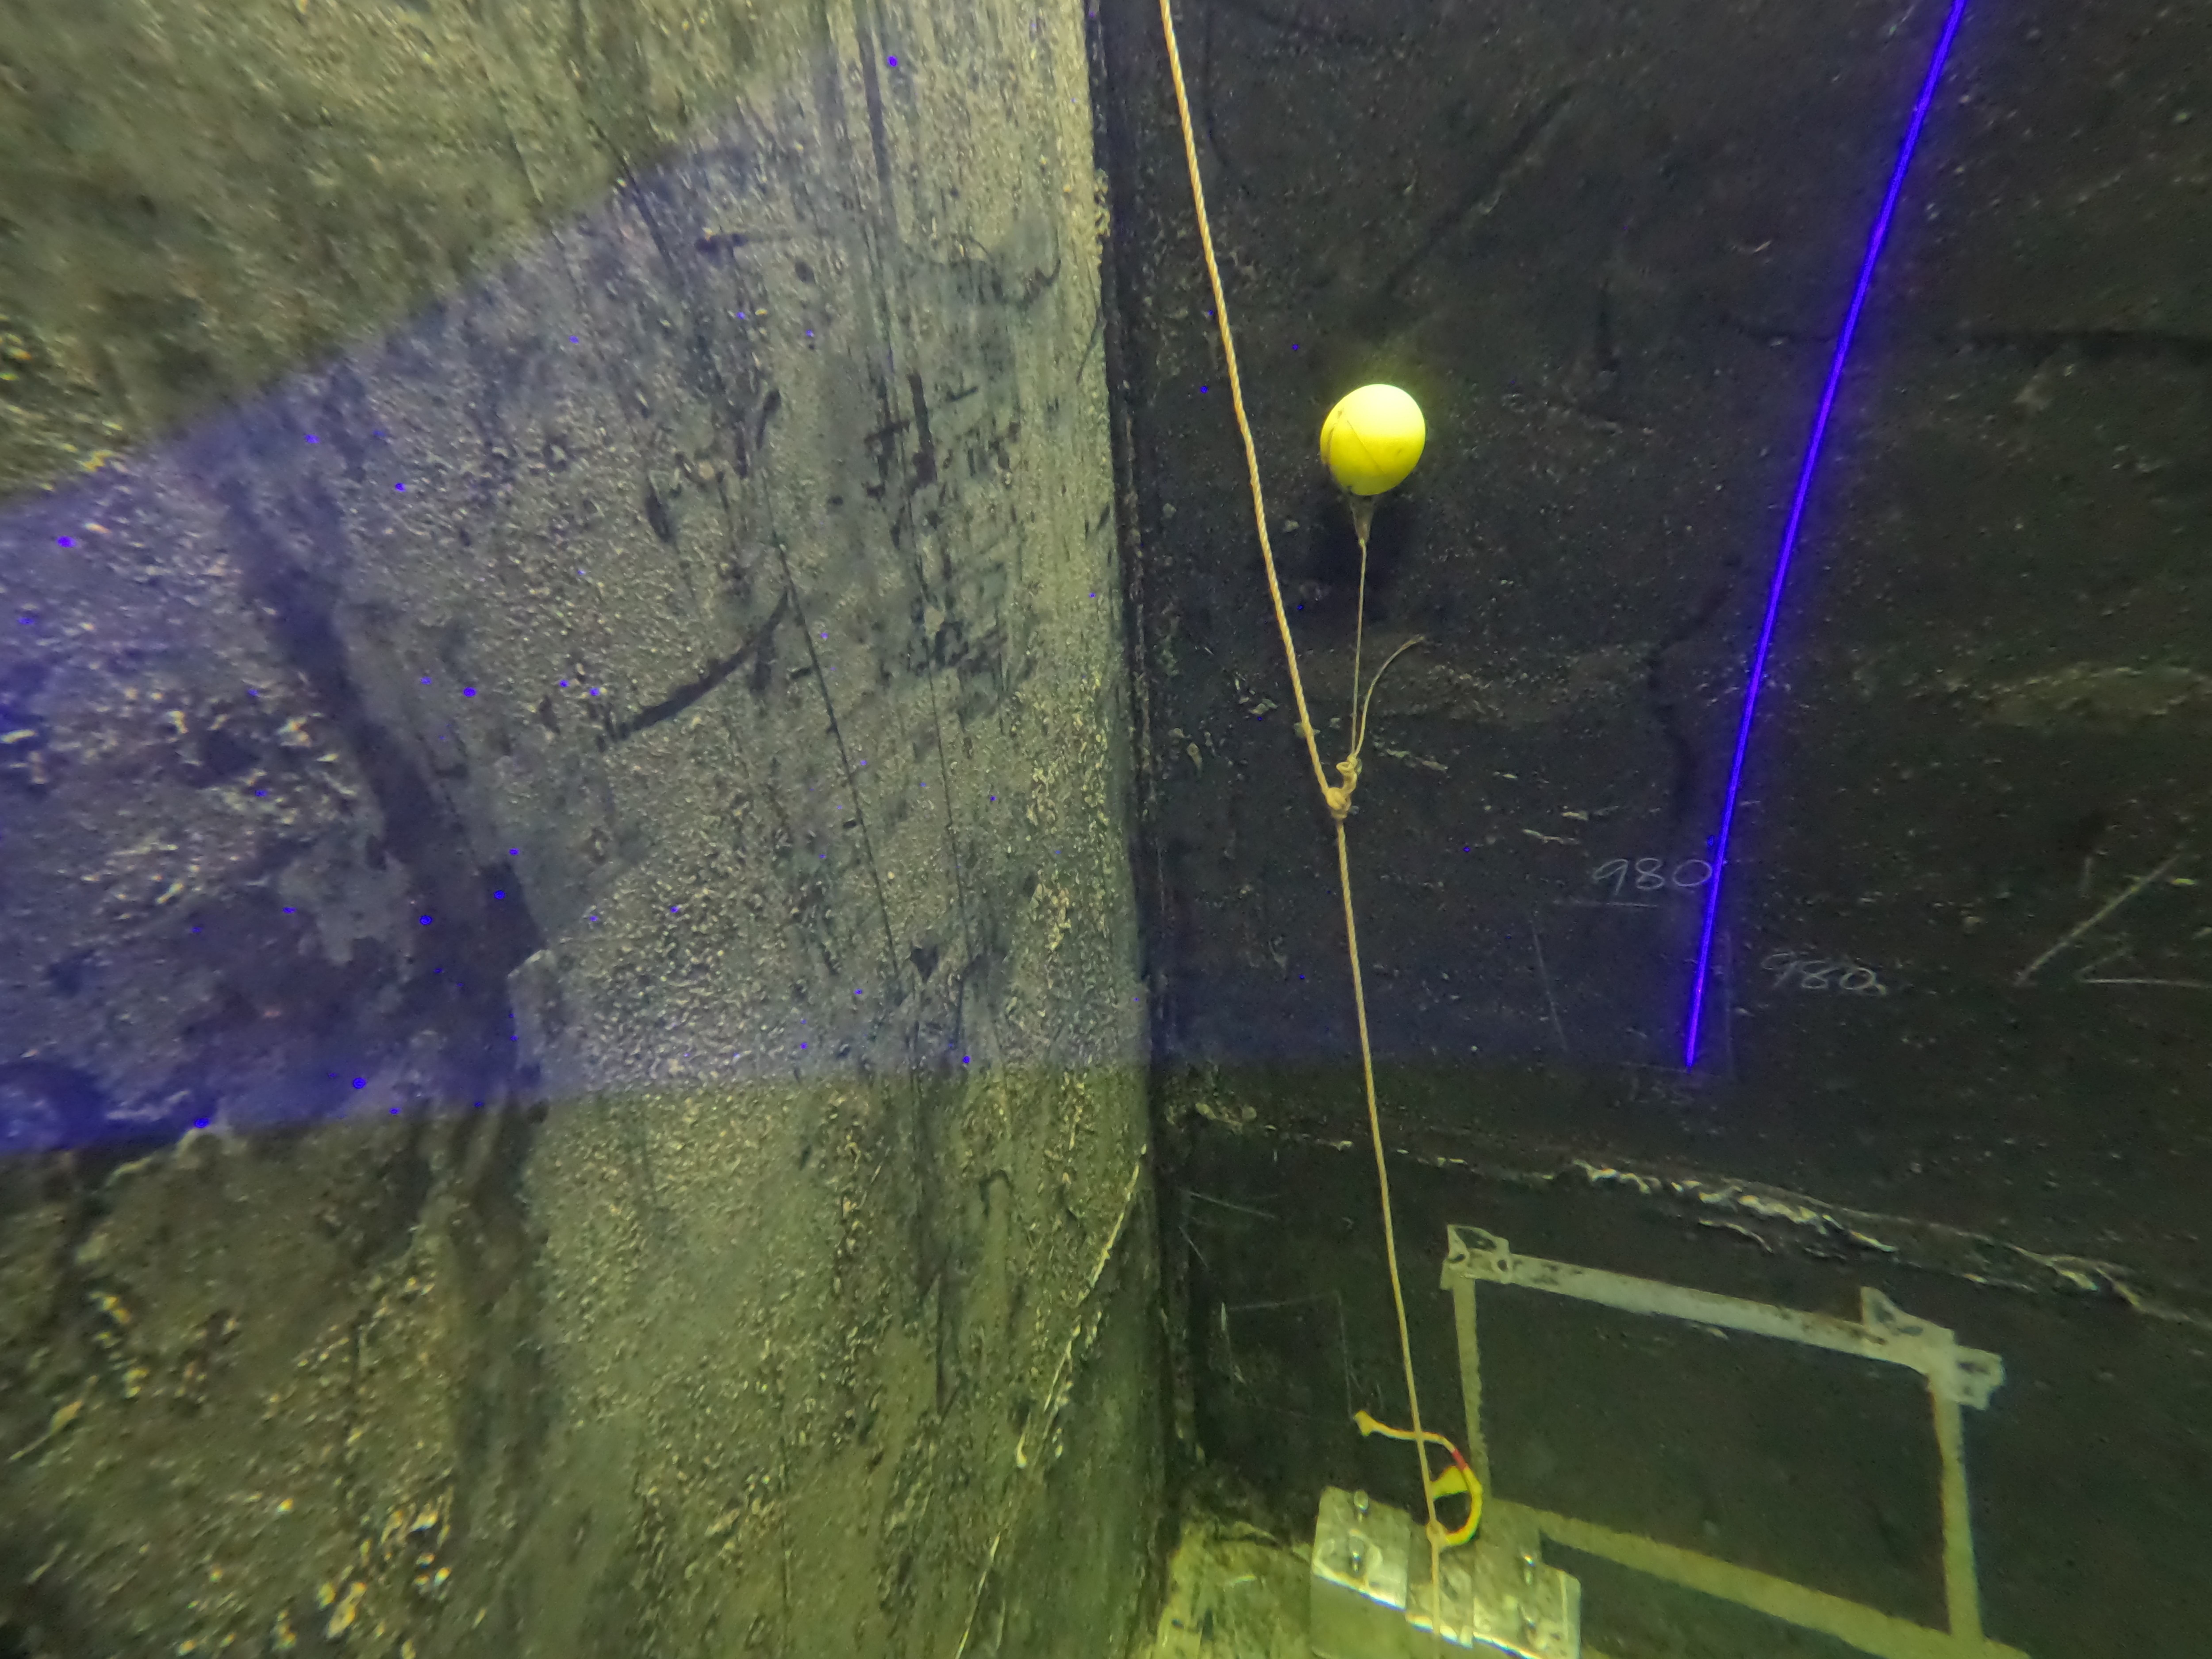

980

980

Supplement: Supplementary file 3006 [file G0031806.pdf › 12/G0031806.pdf]

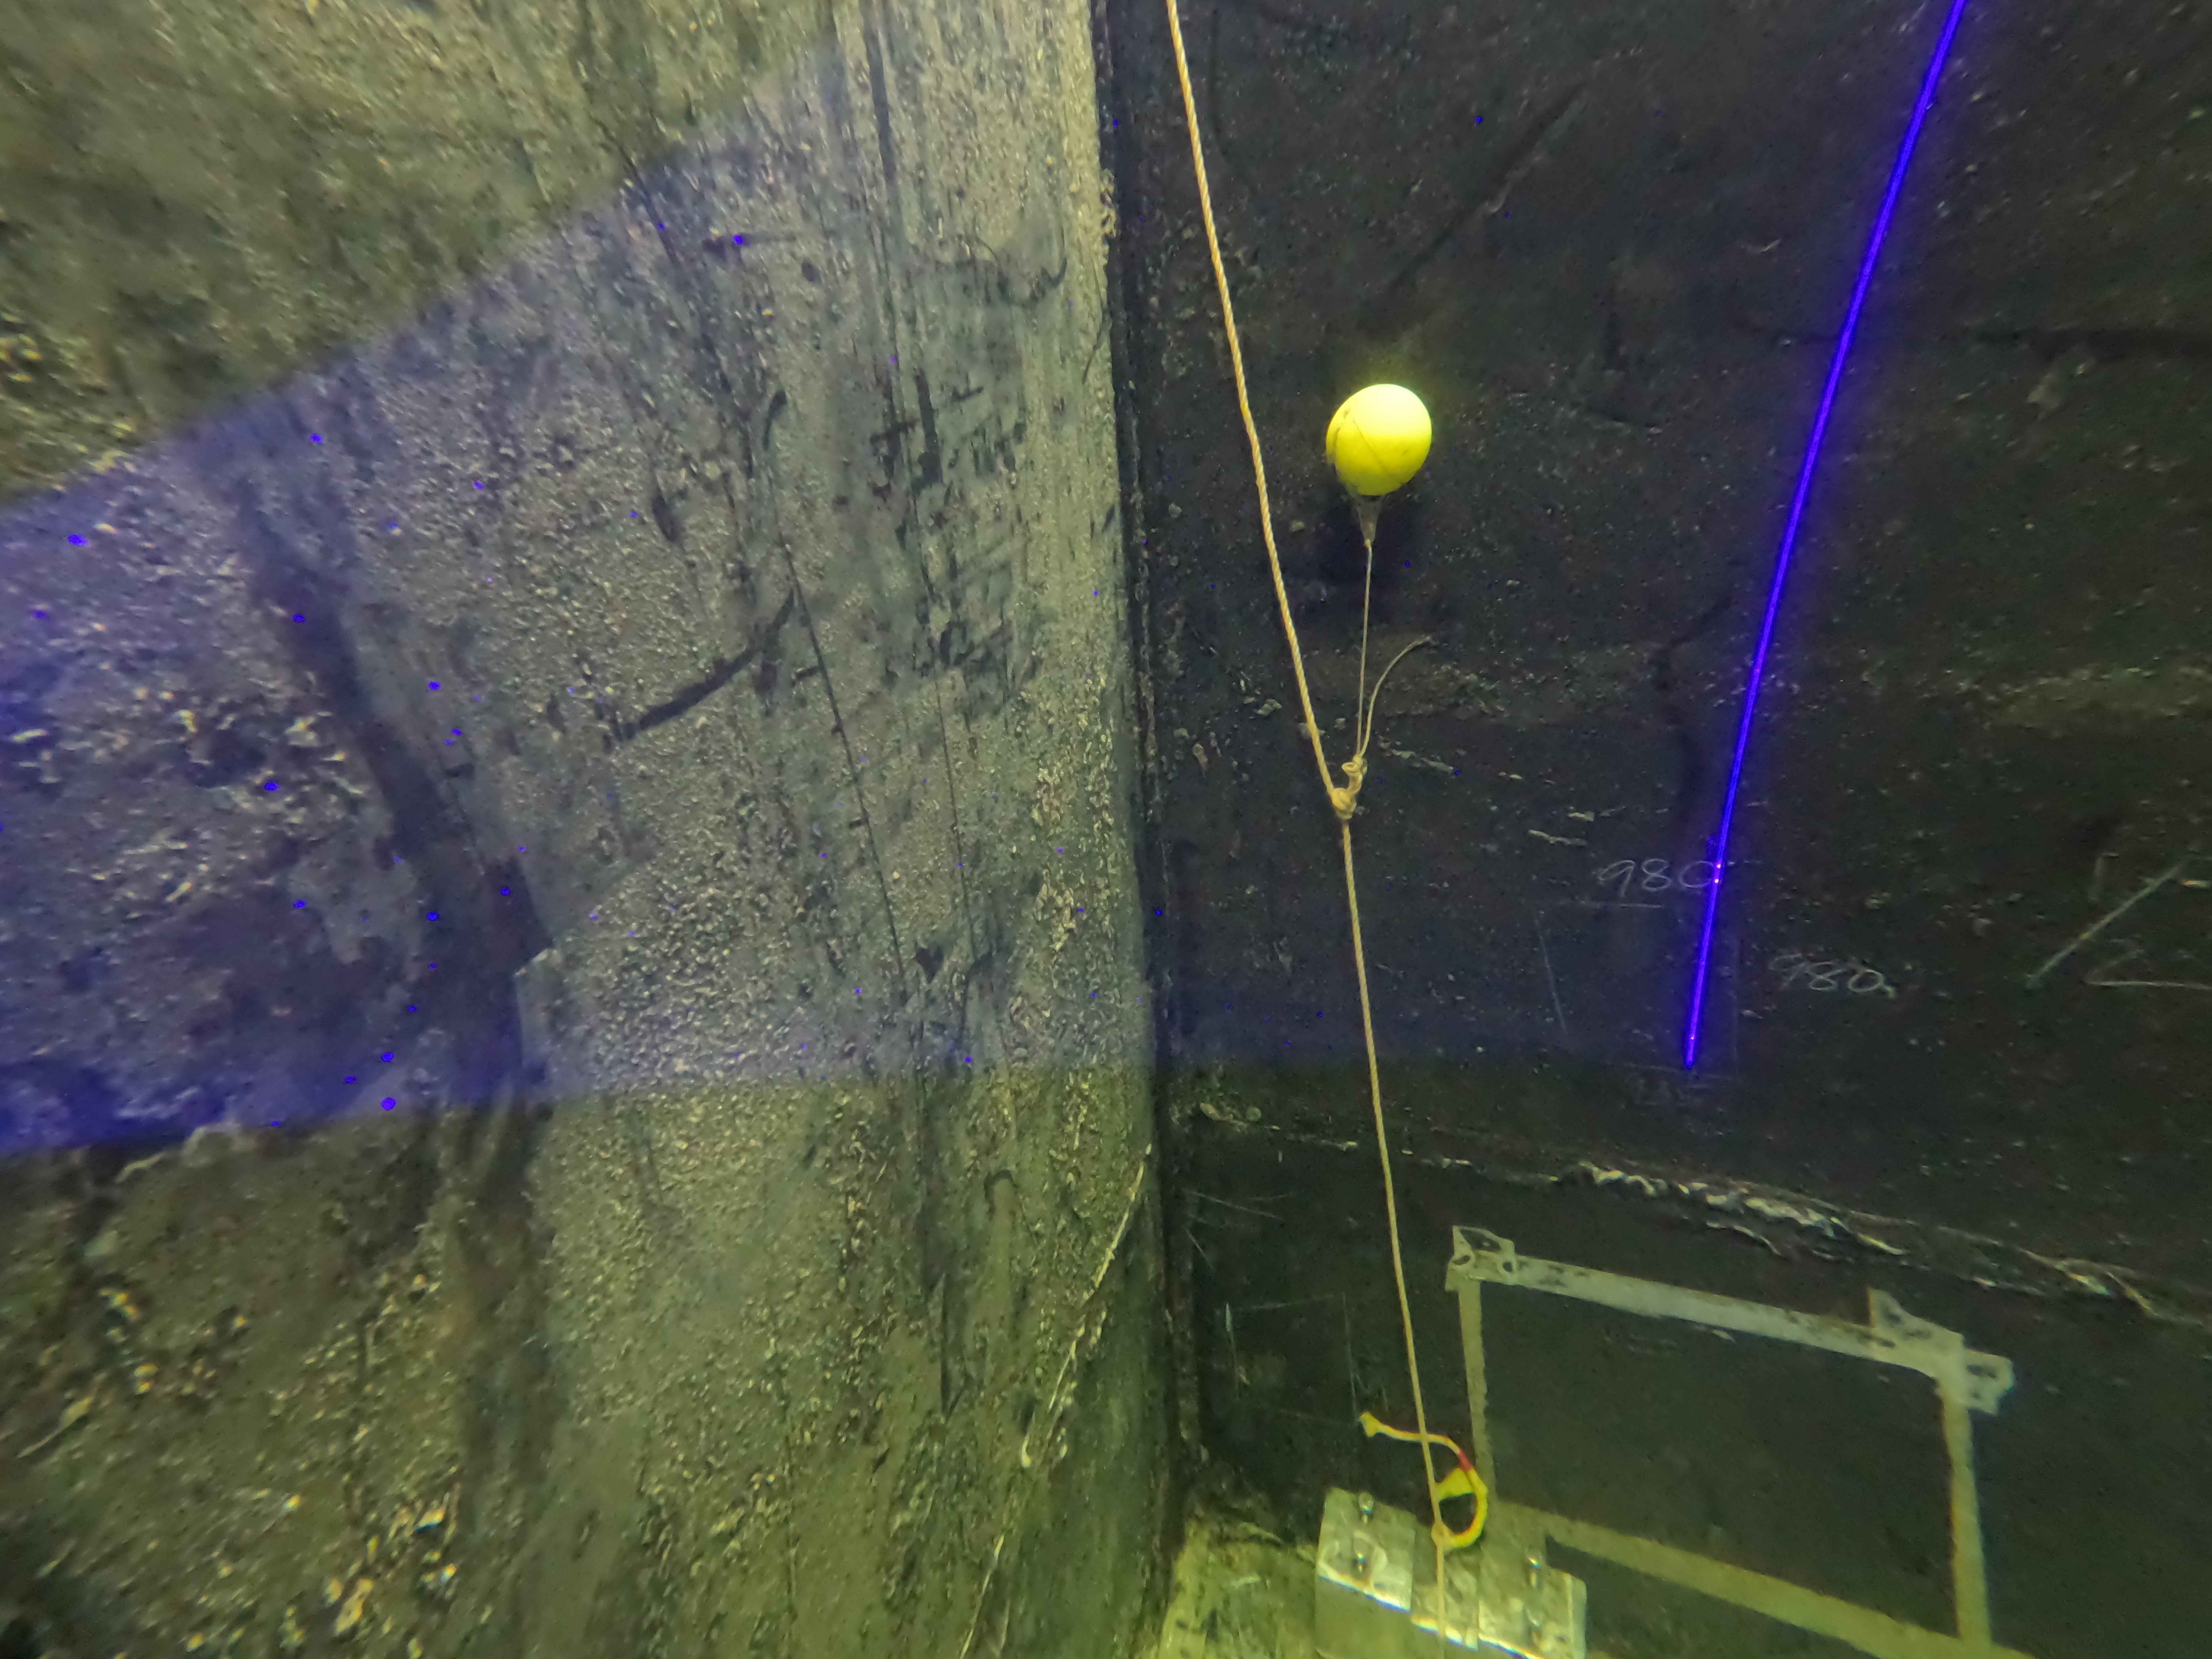

Supplement: Supplementary file 3007 [file G0031807.pdf › 12/G0031807.pdf]

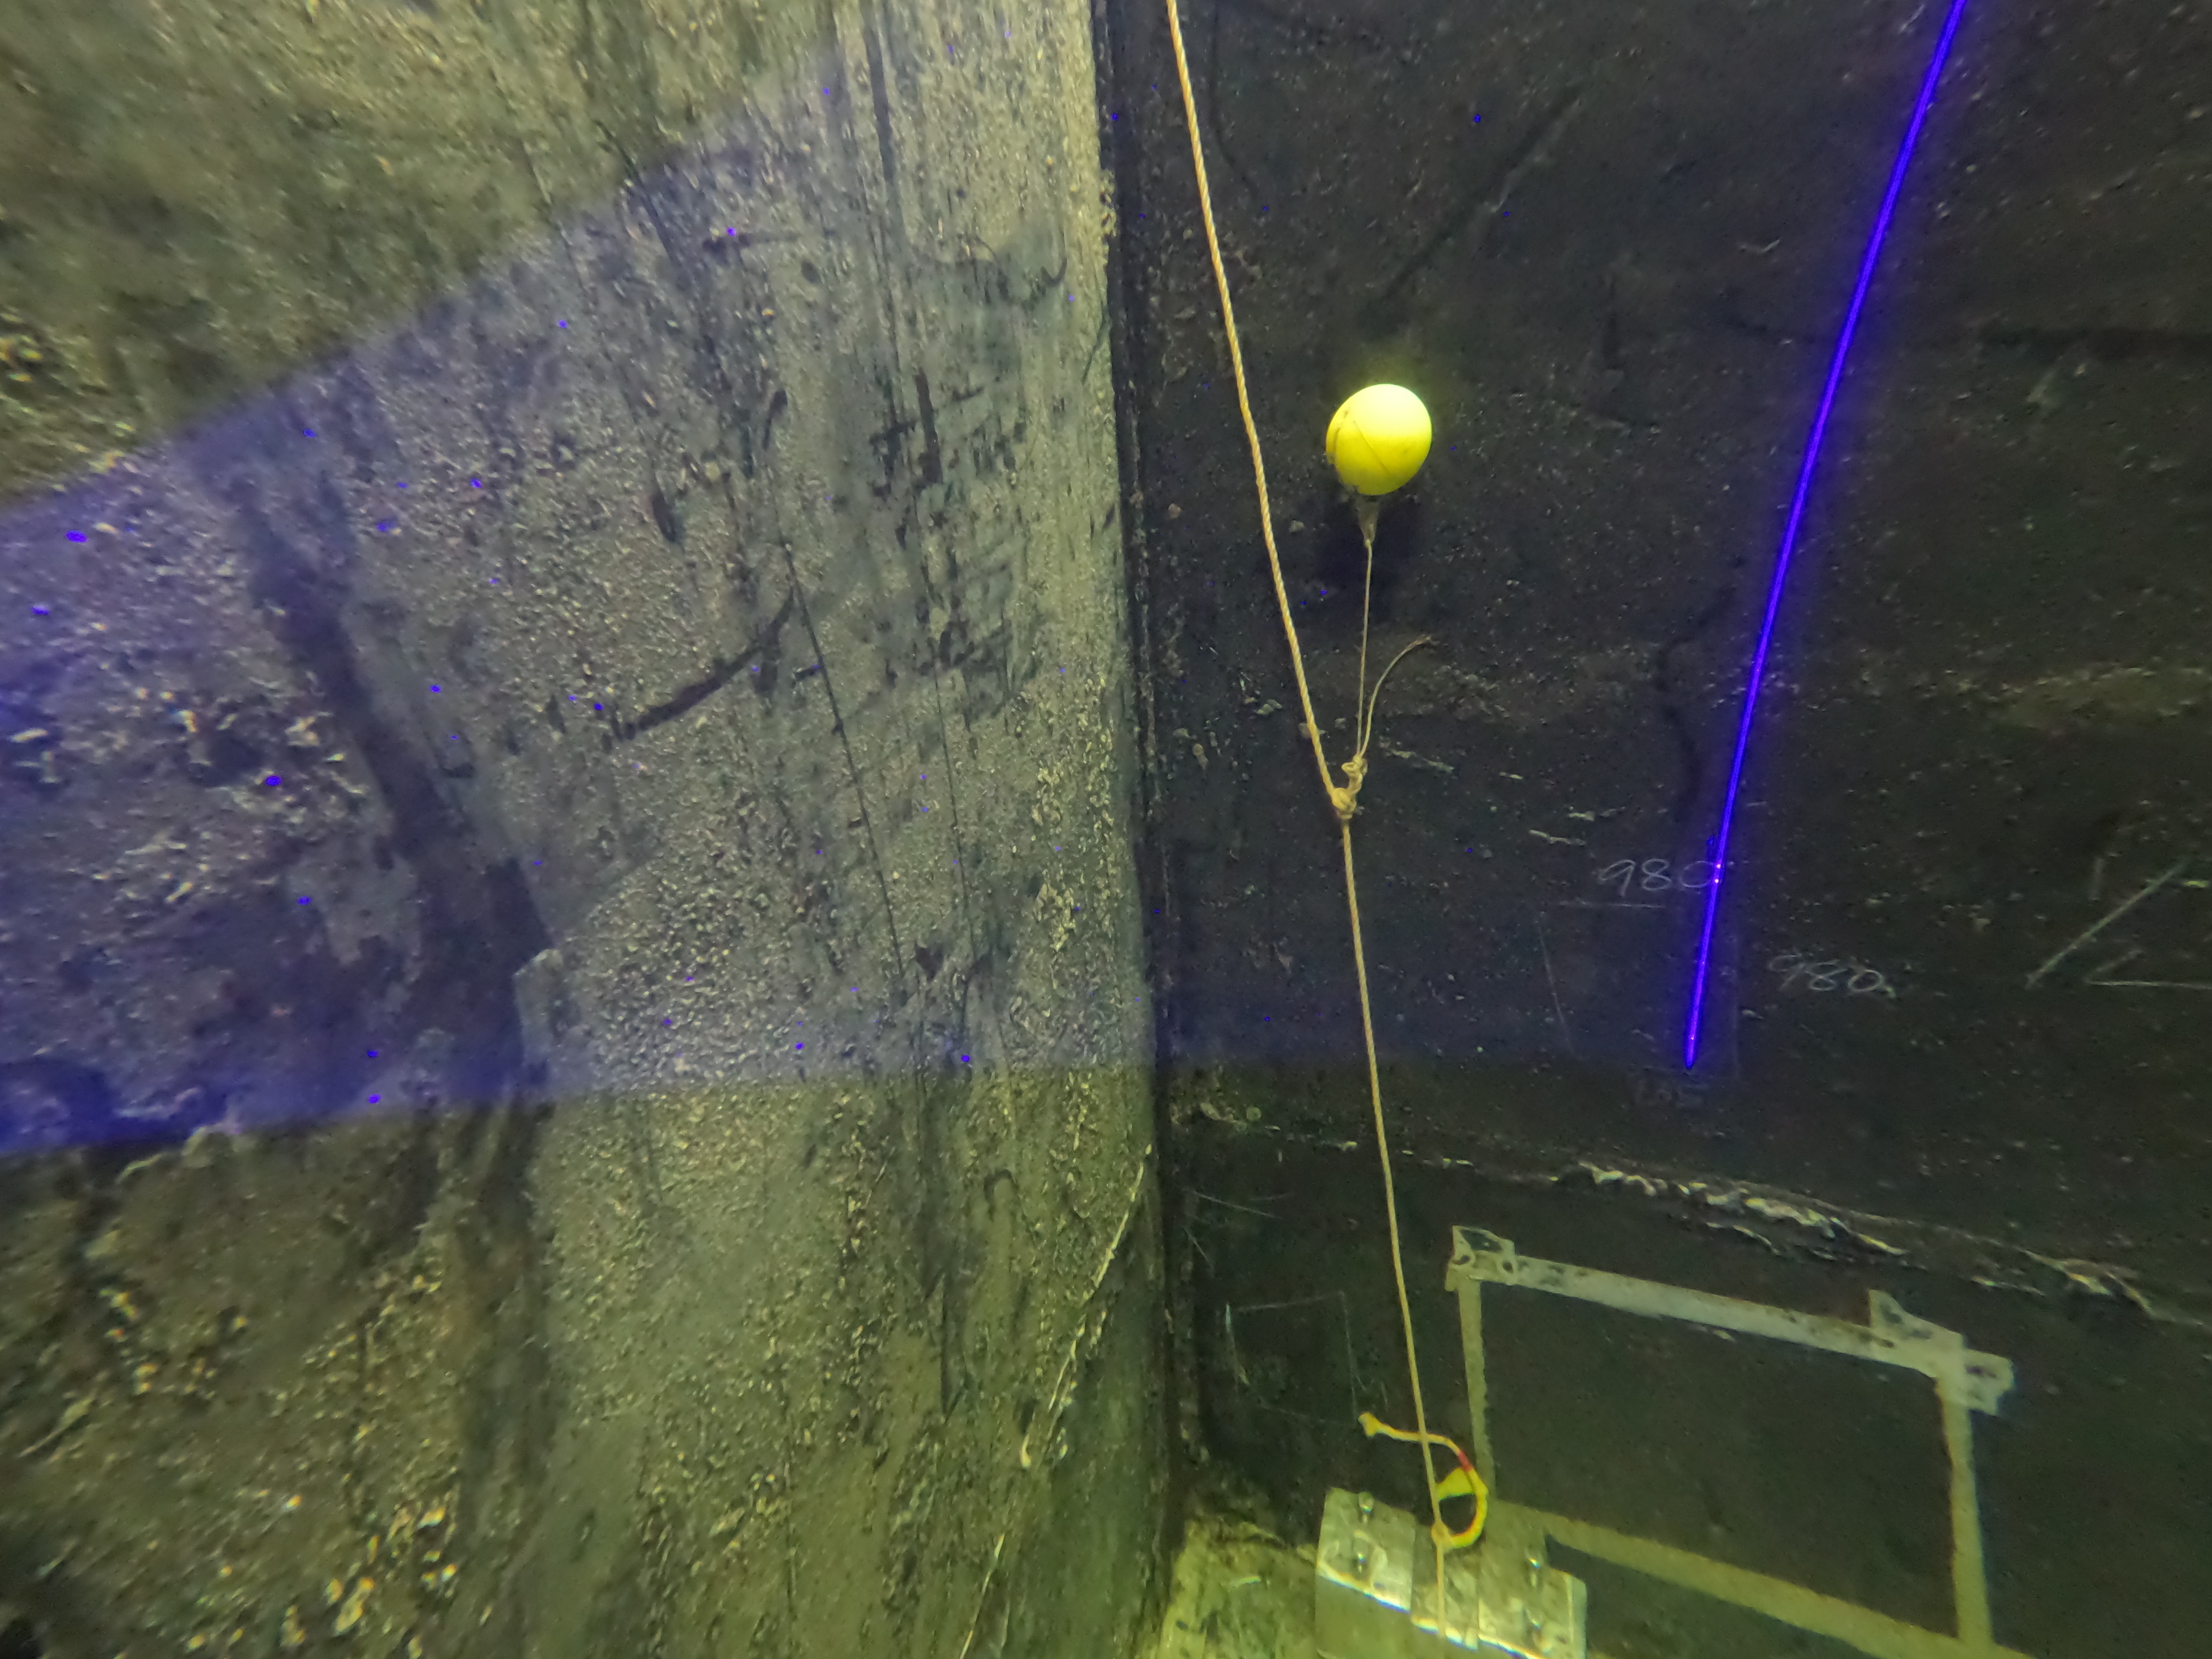

980

980

Supplement: Supplementary file 3008 [file G0031808.pdf › 12/G0031808.pdf]

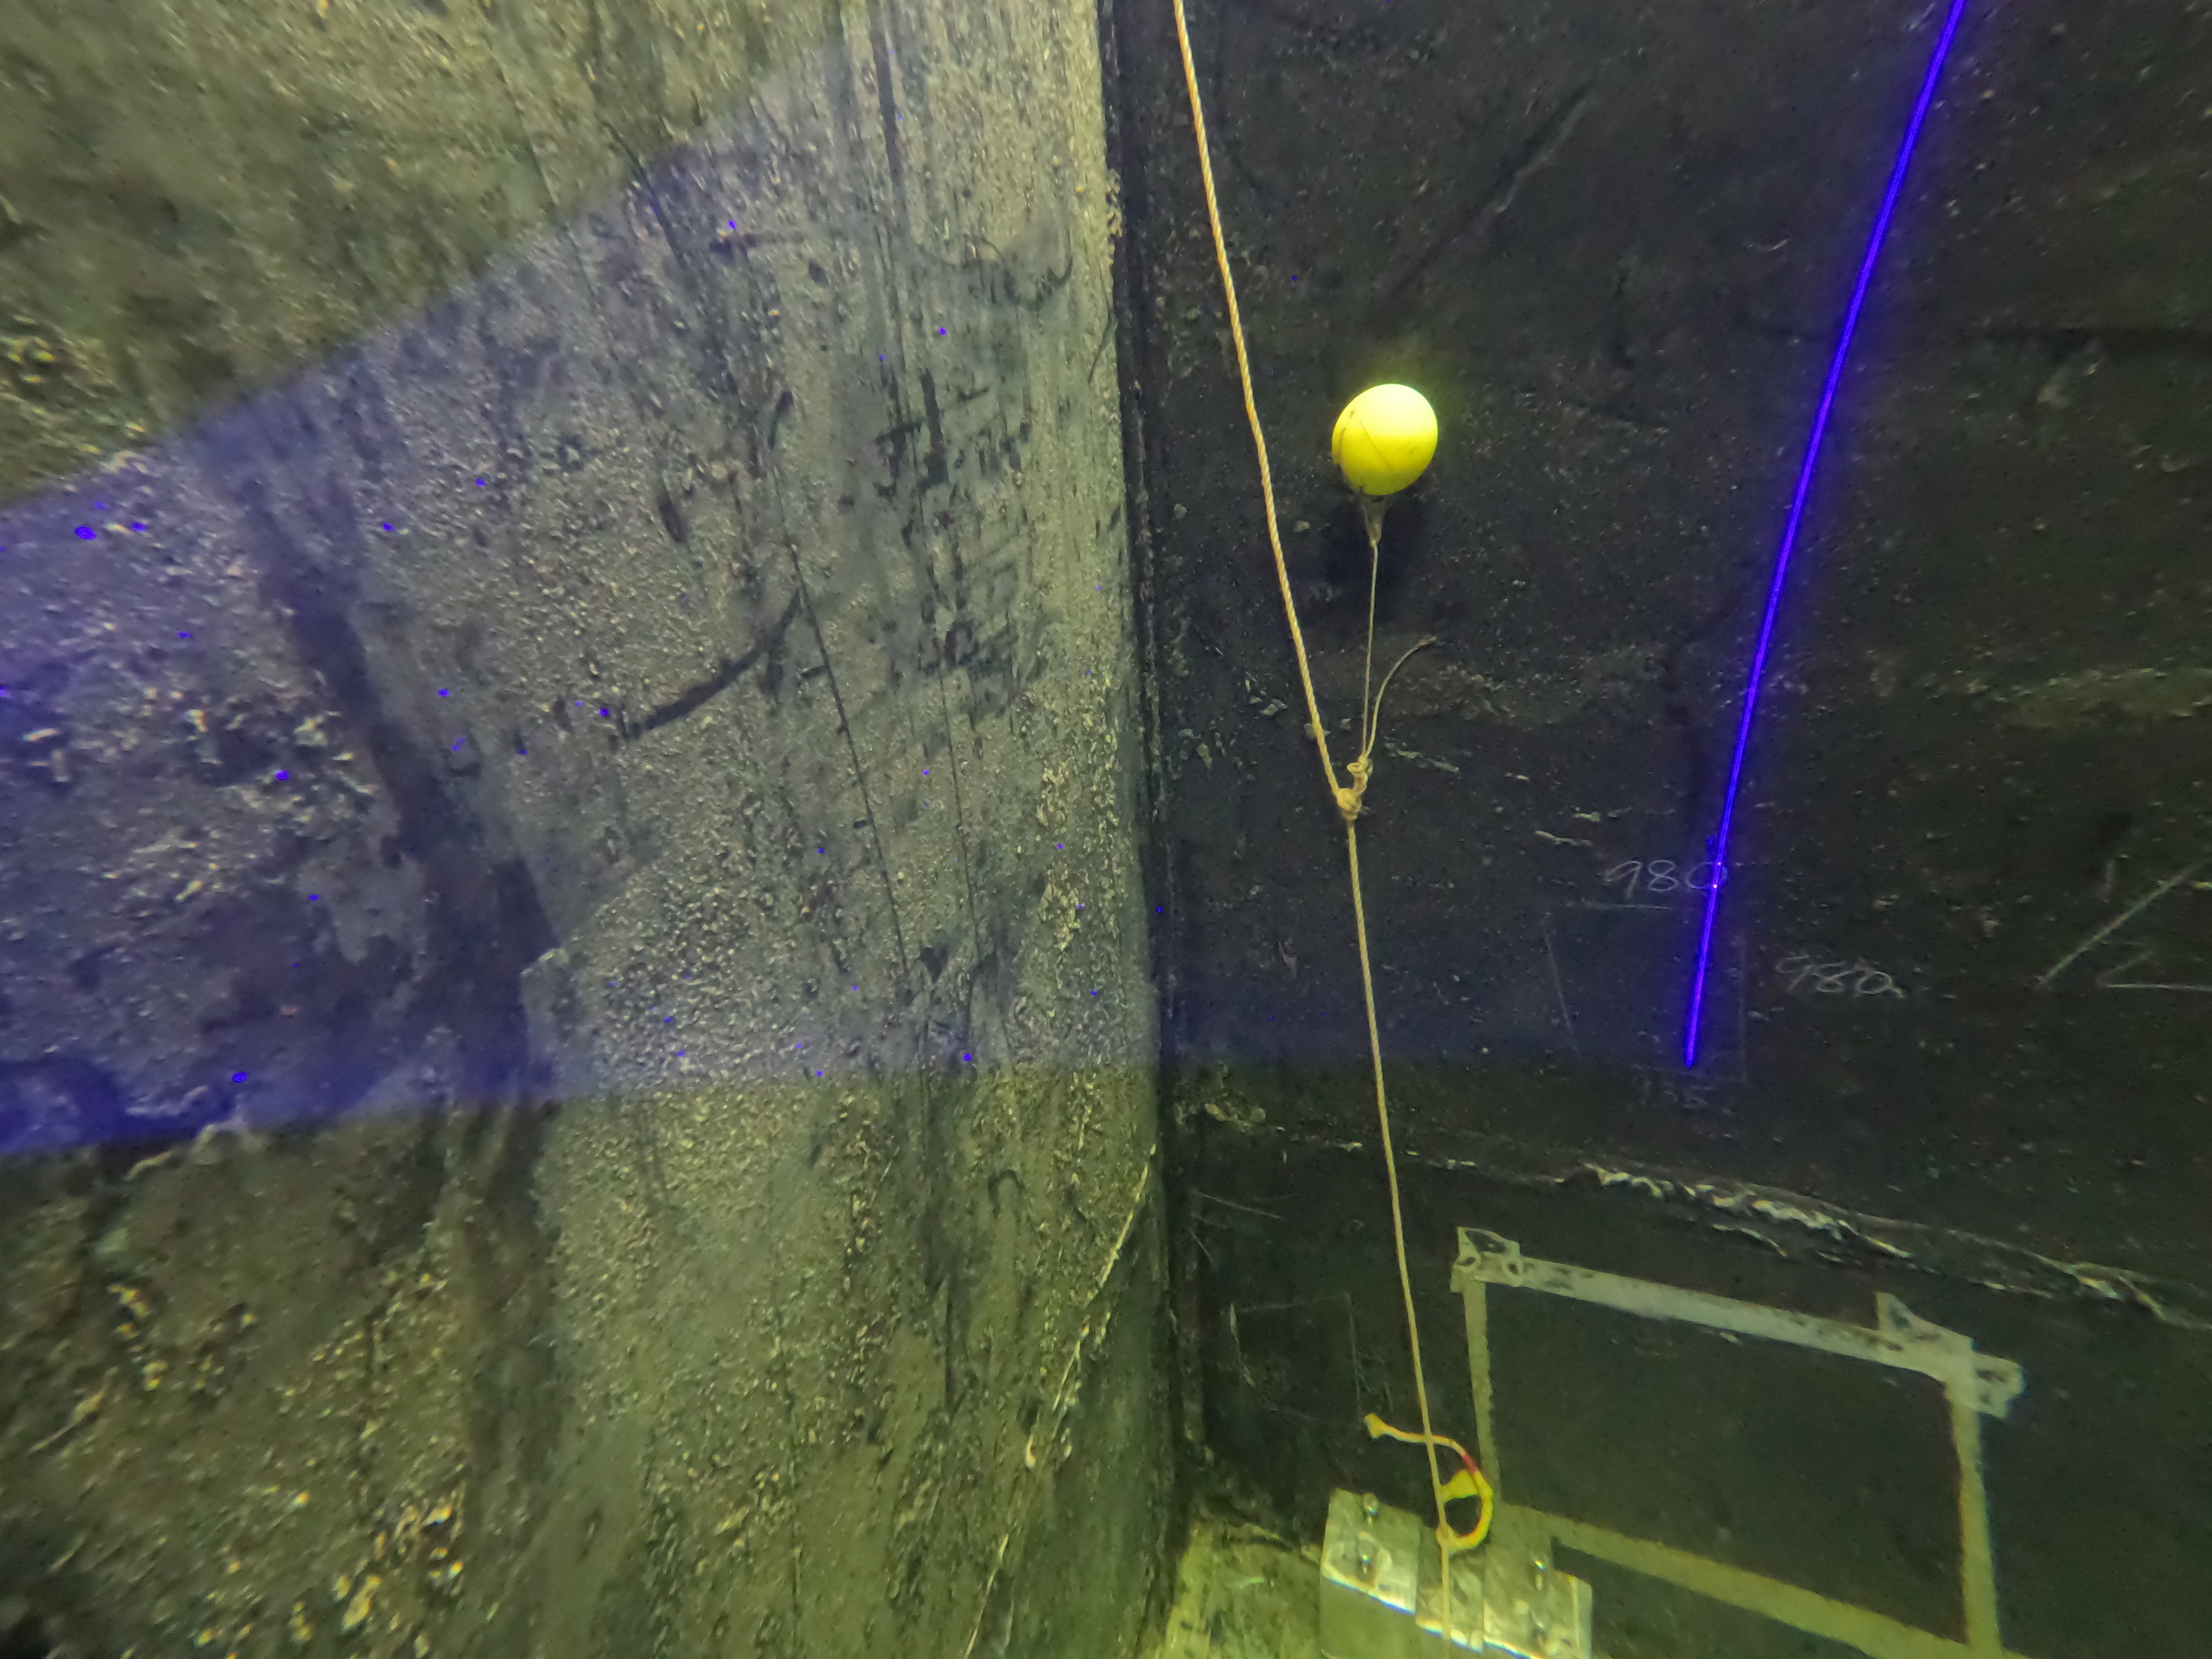

980

980

Supplement: Supplementary file 3009 [file G0031809.pdf › 12/G0031809.pdf]

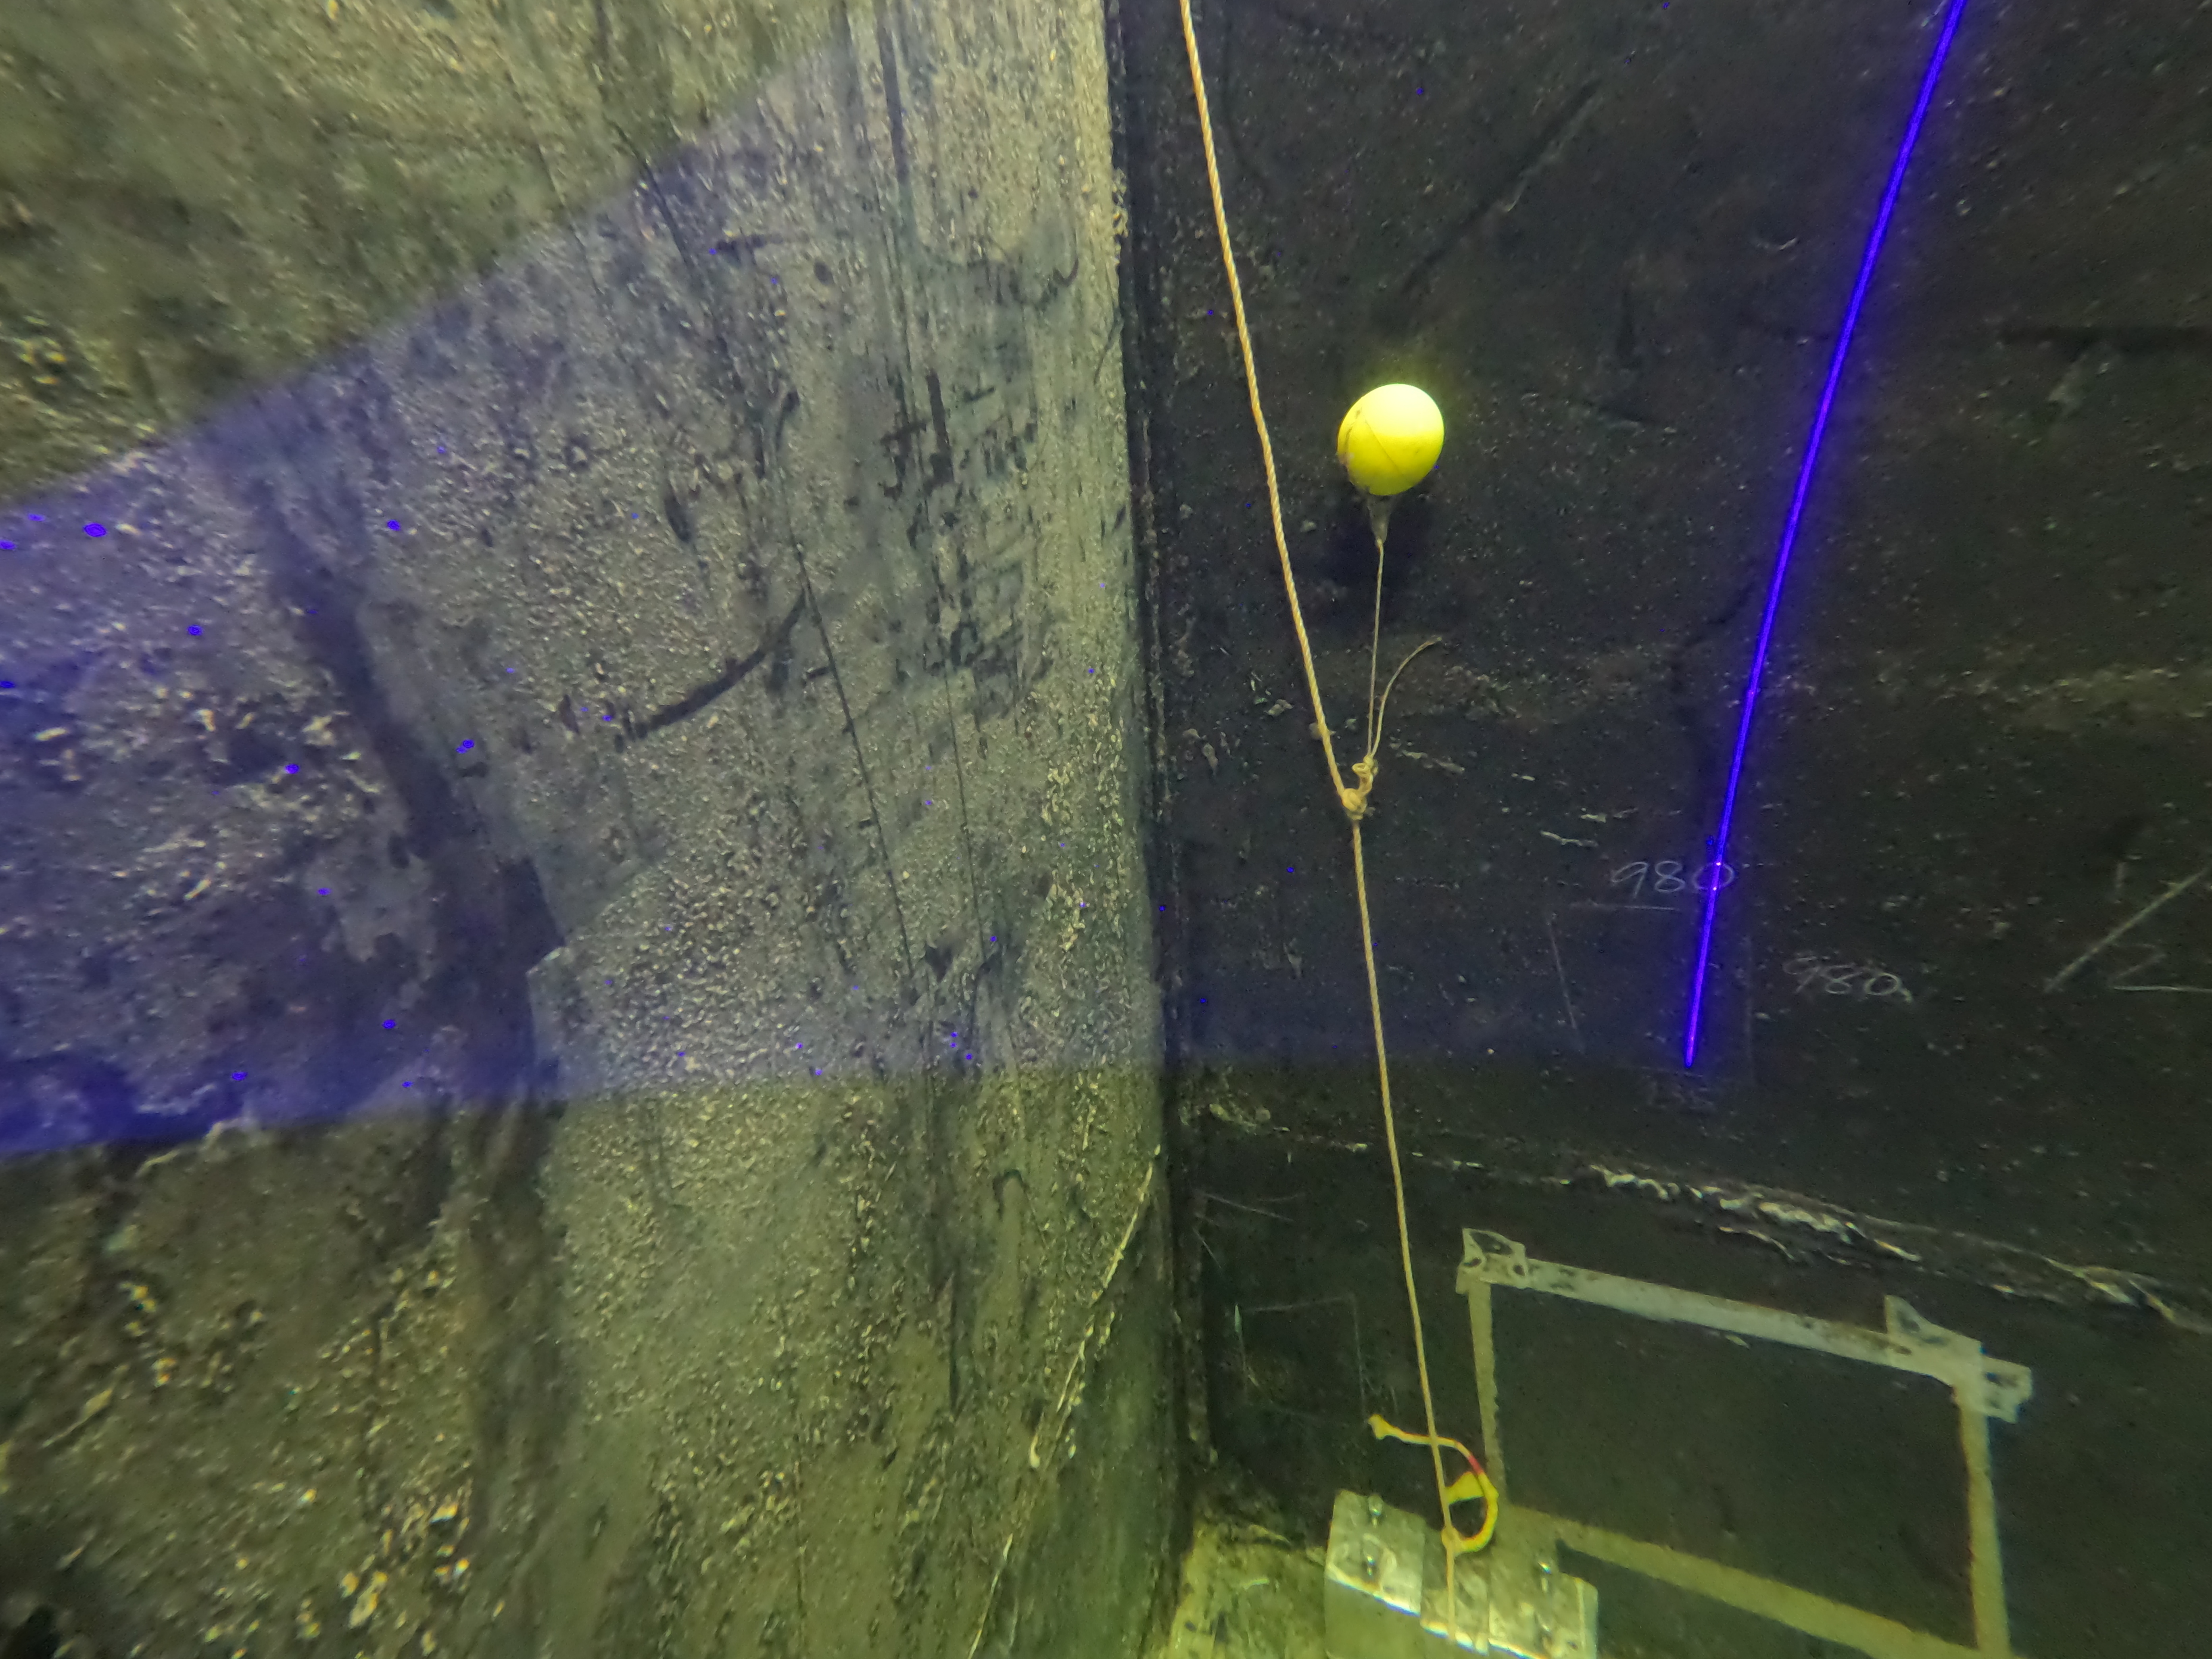

980

980

Supplement: Supplementary file 3010 [file G0031810.pdf › 12/G0031810.pdf]

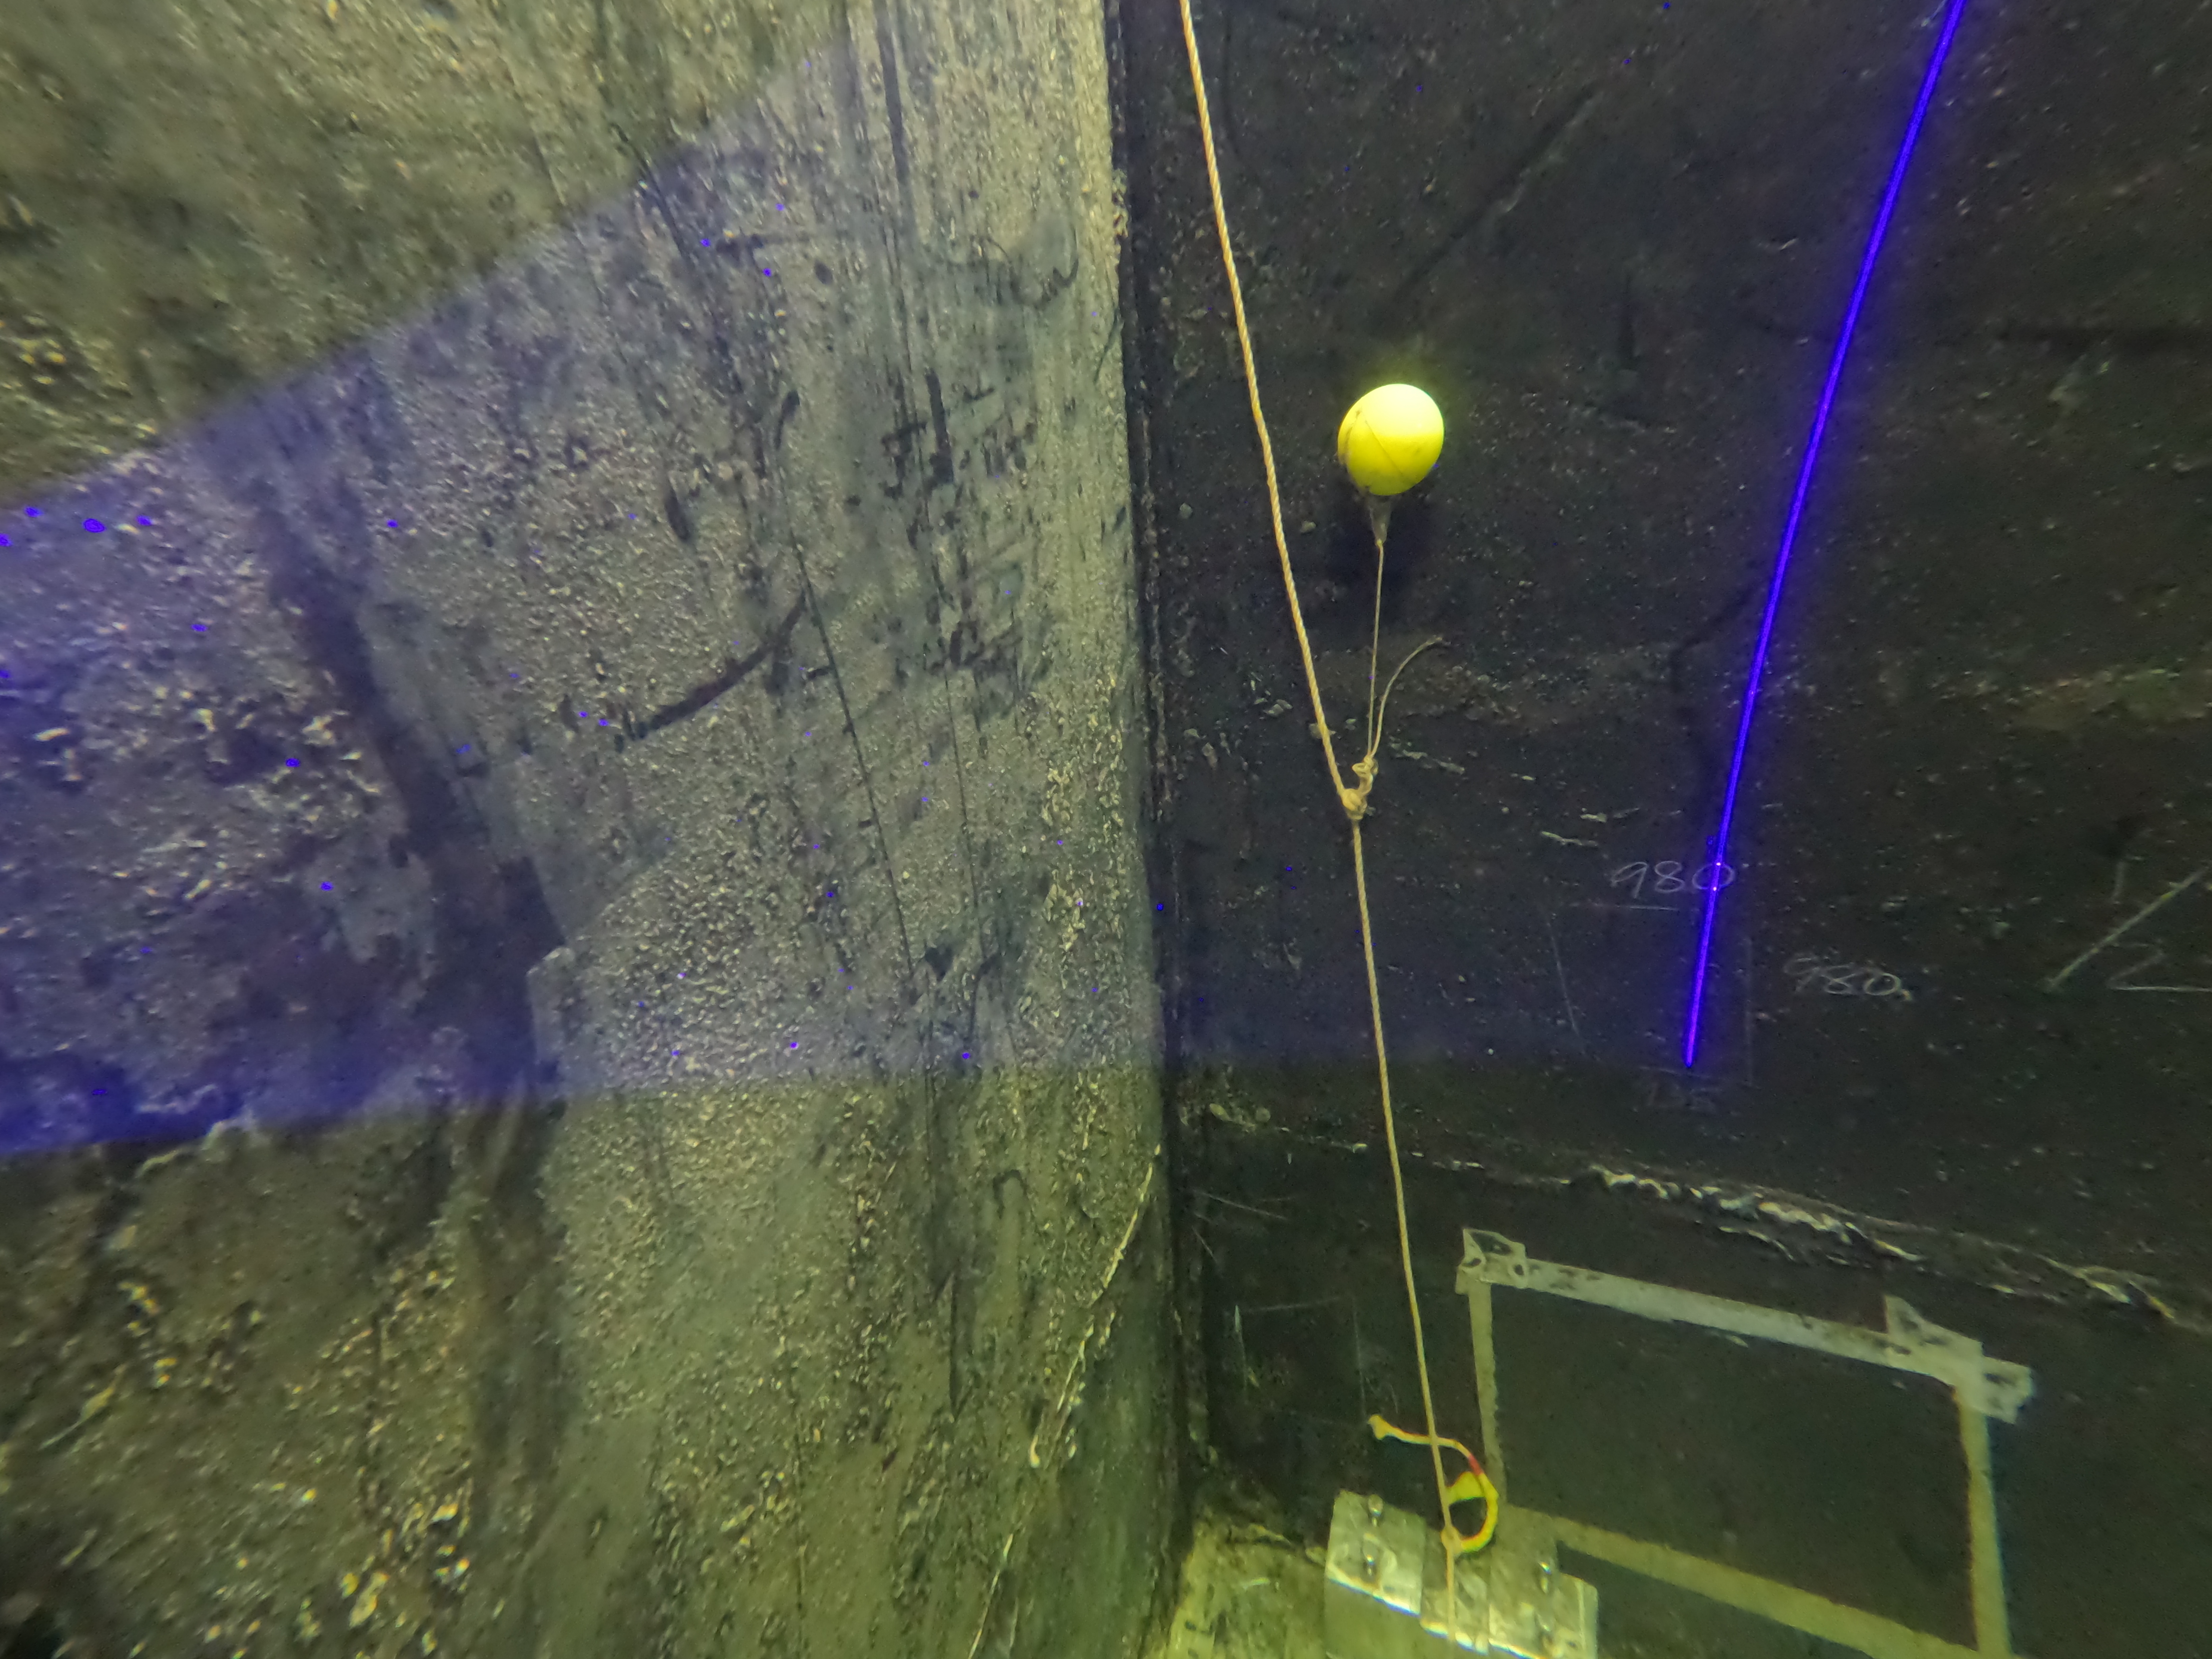

980

980

1/2

Supplement: Supplementary file 3011 [file G0031811.pdf › 12/G0031811.pdf]

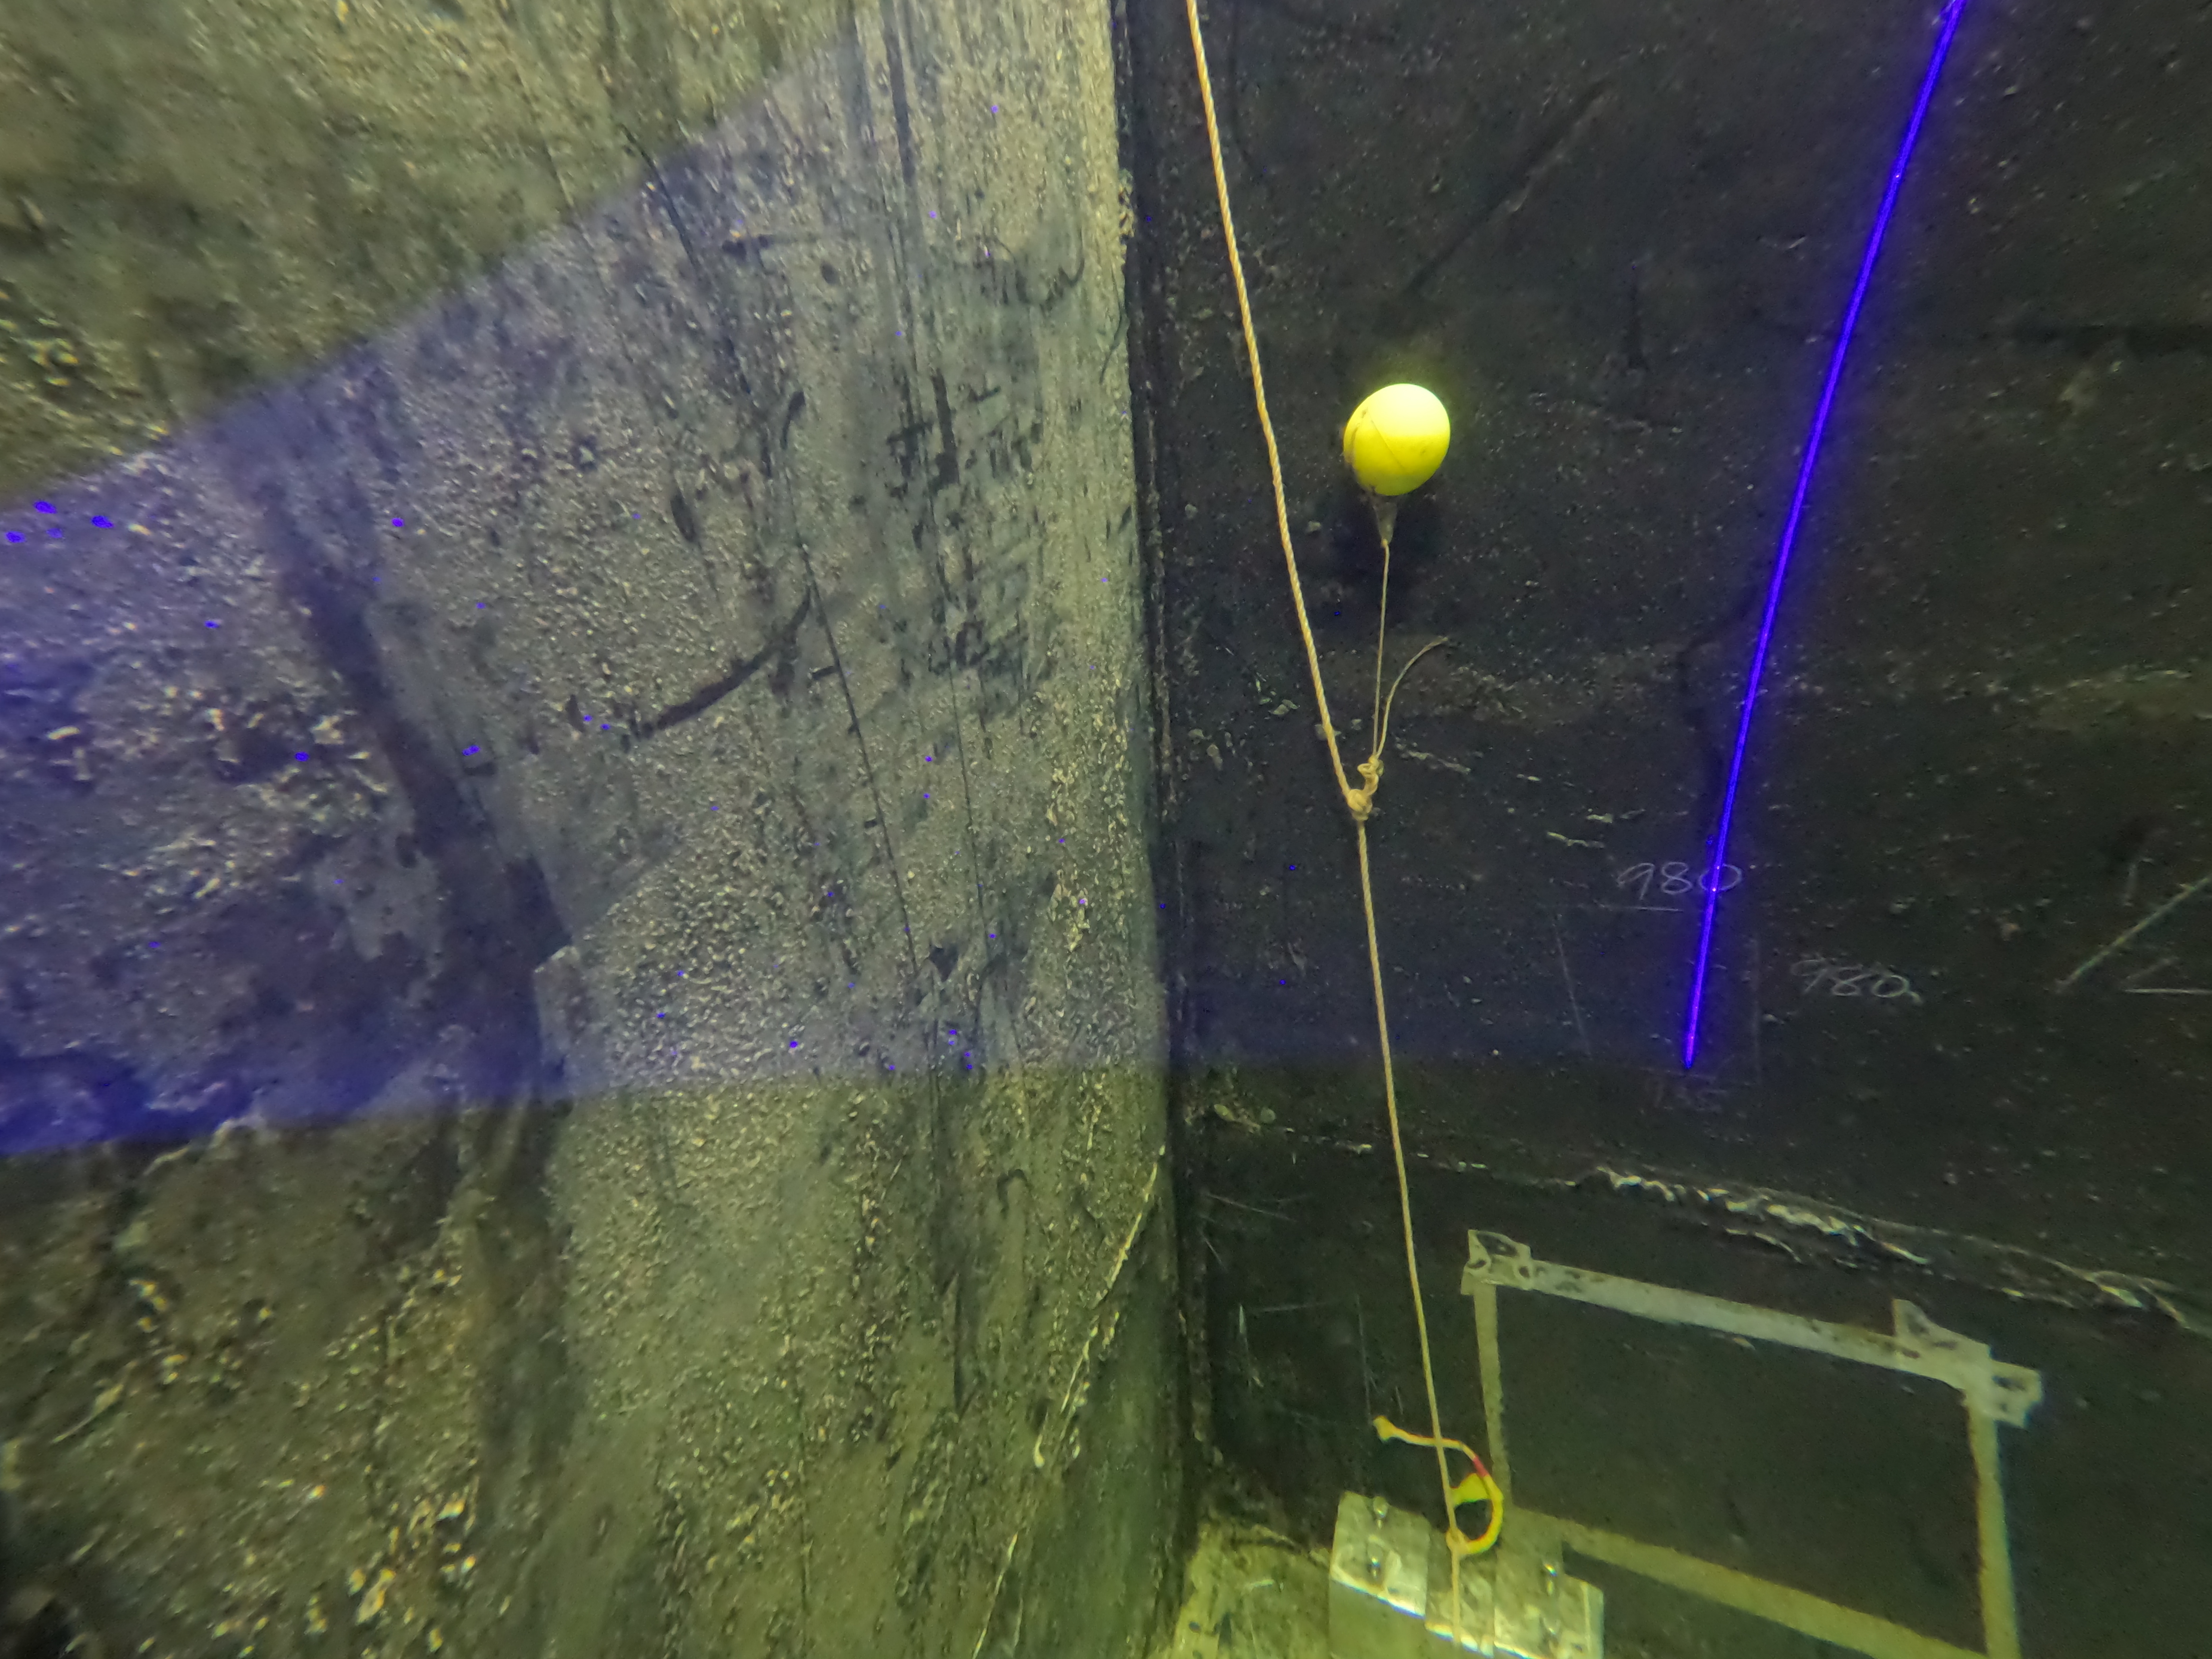

Supplement: Supplementary file 3012 [file G0031812.pdf › 12/G0031812.pdf]

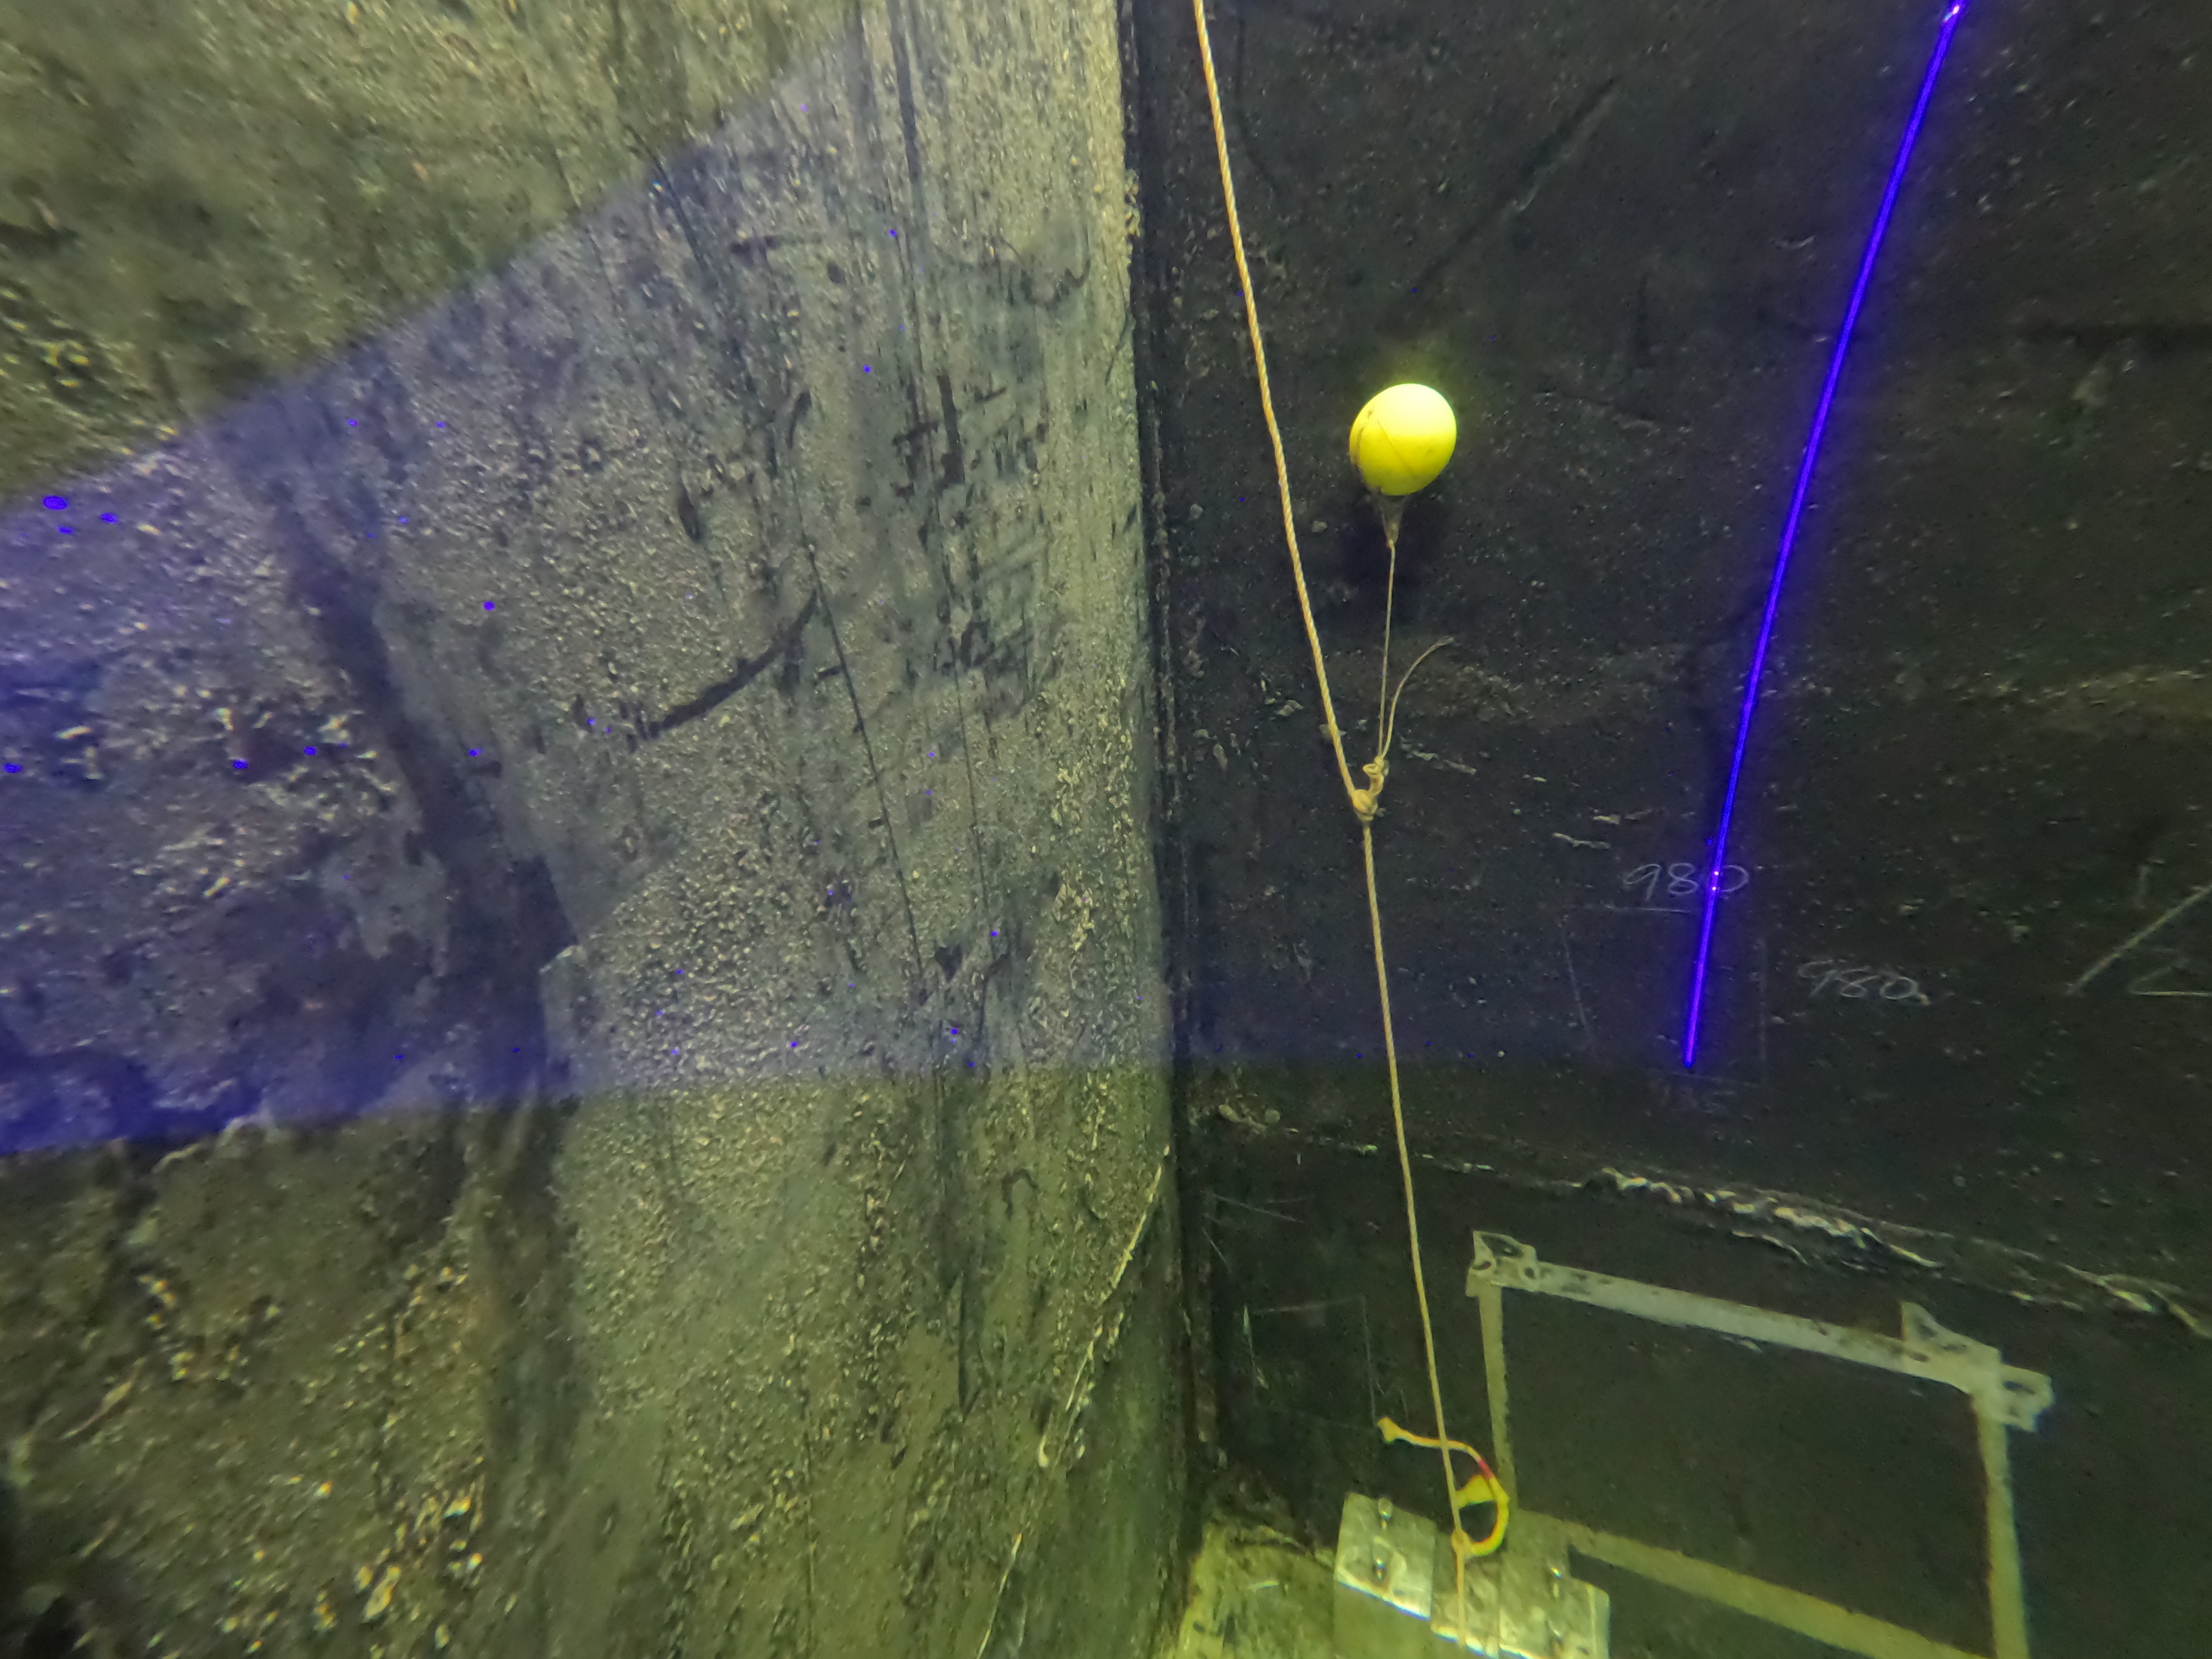

980

980

Supplement: Supplementary file 3013 [file G0031813.pdf › 12/G0031813.pdf]

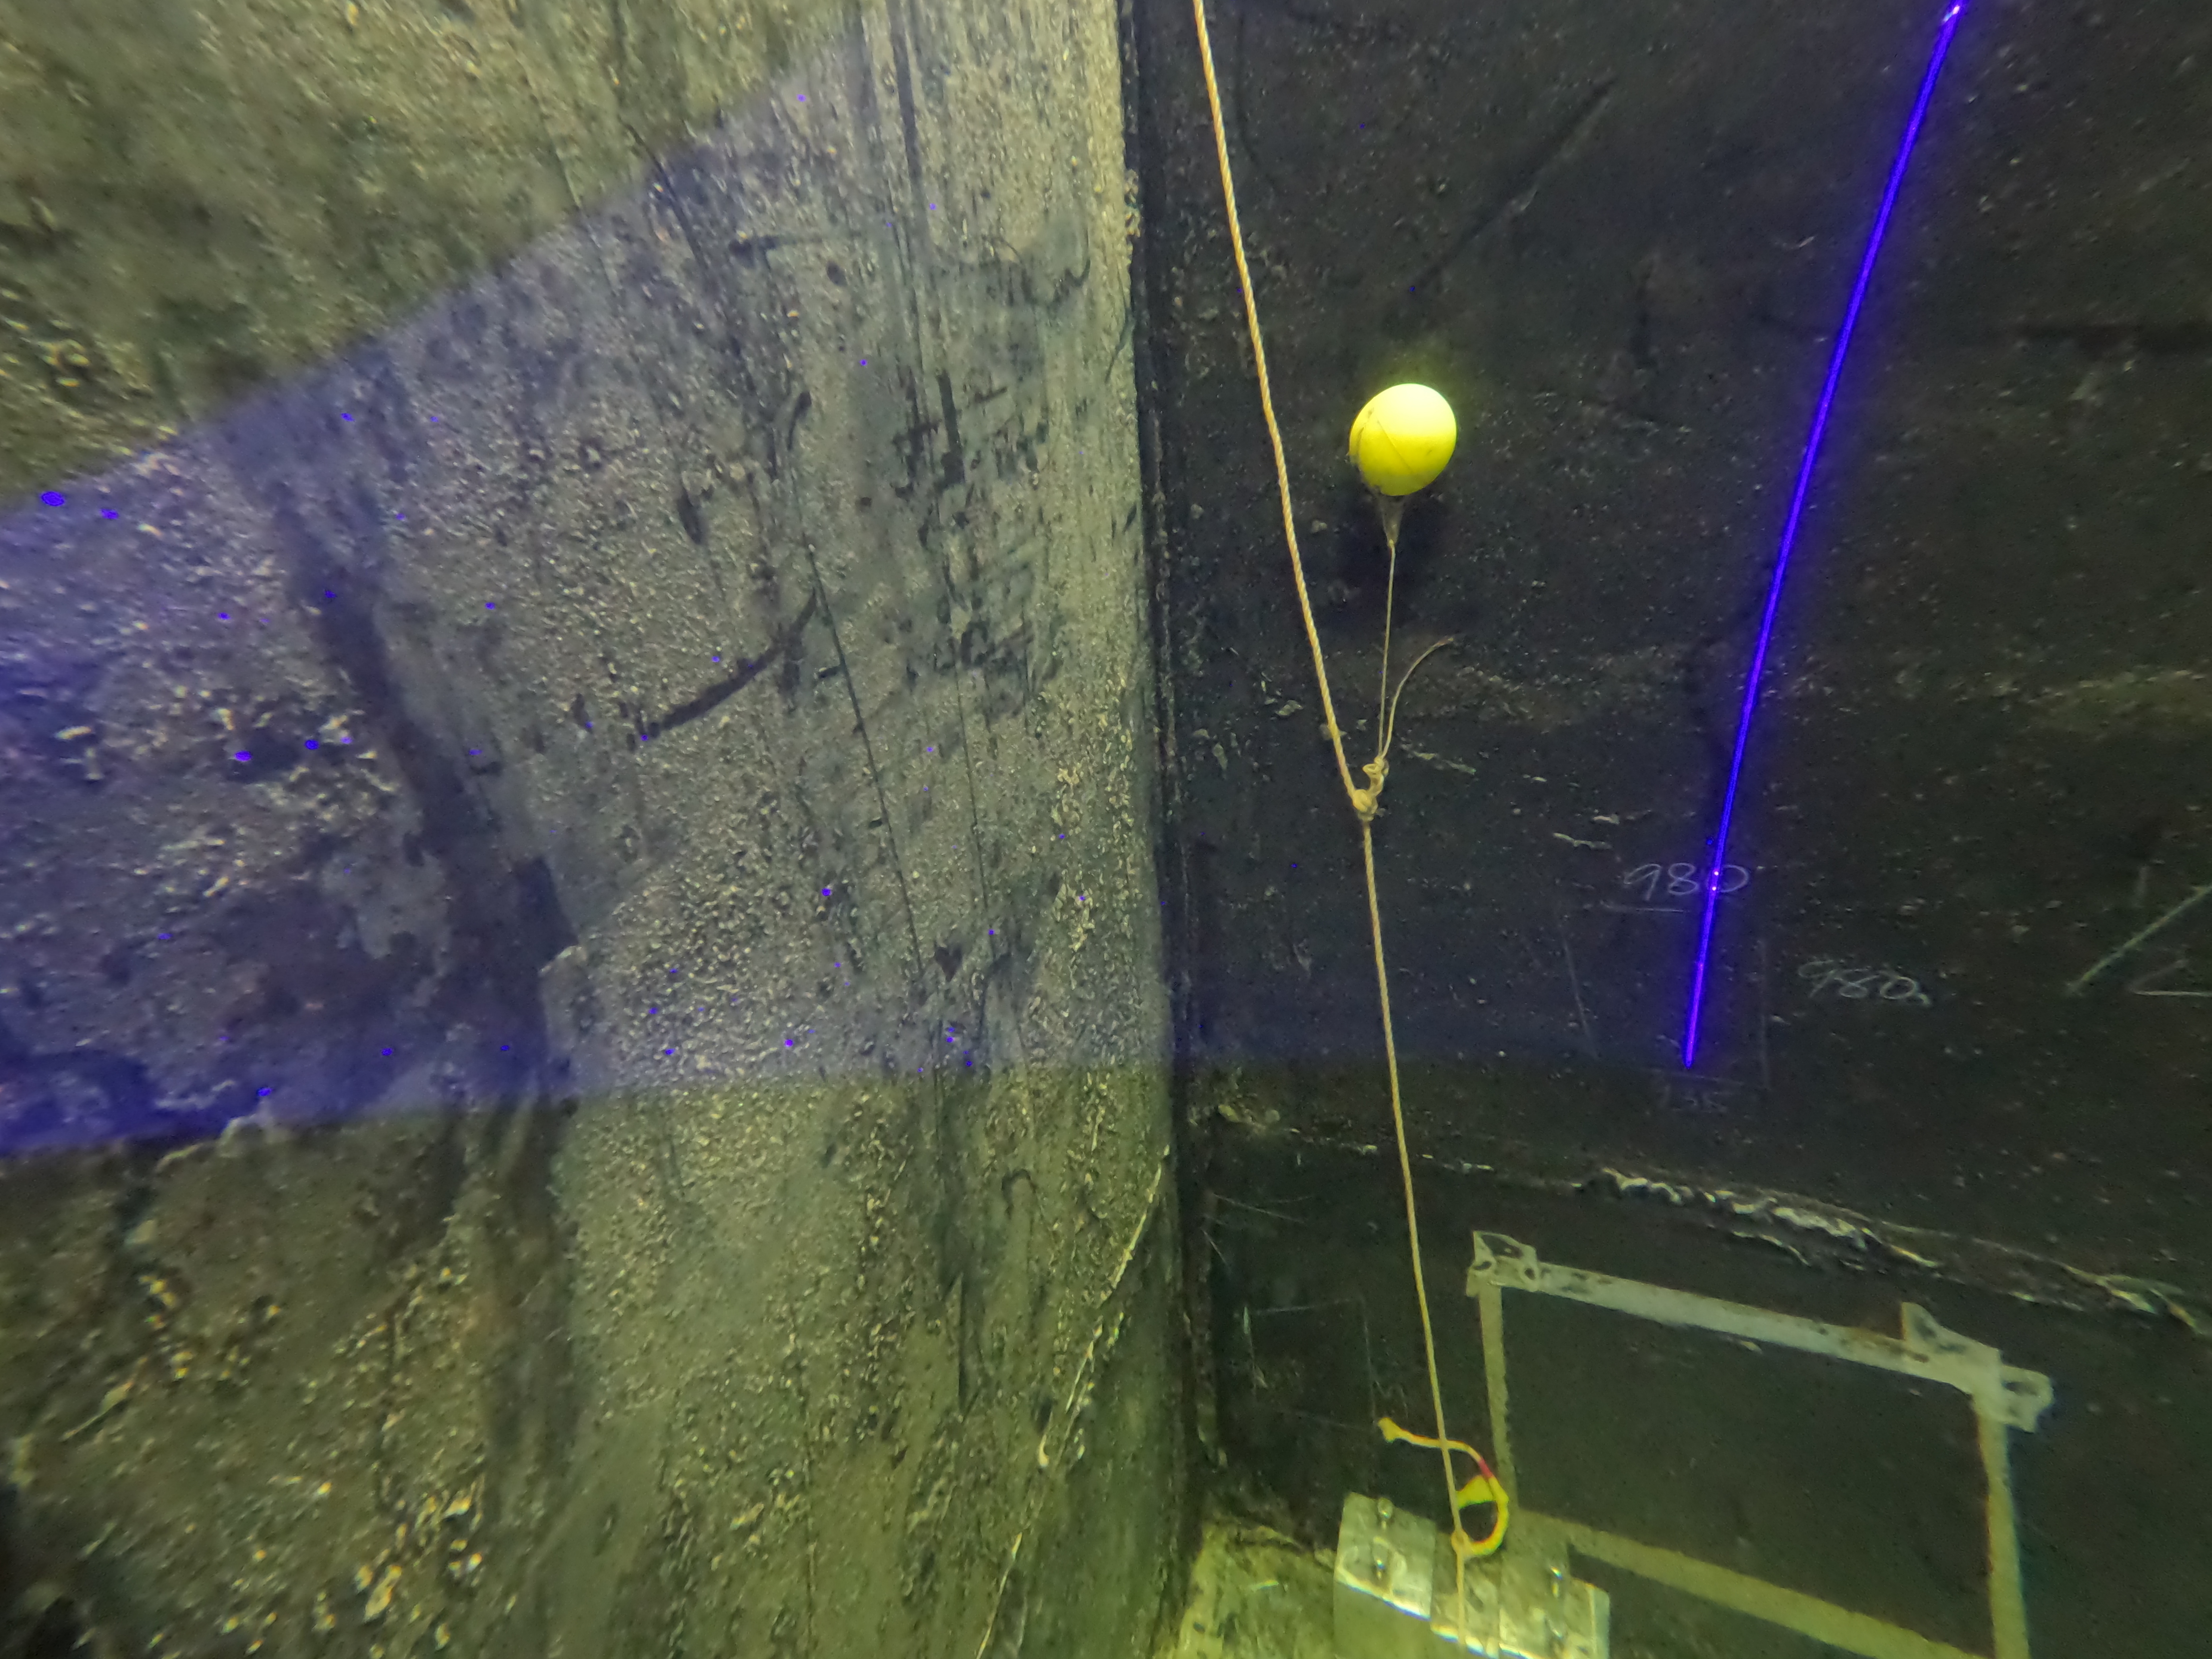

Supplement: Supplementary file 3014 [file G0031814.pdf › 12/G0031814.pdf]

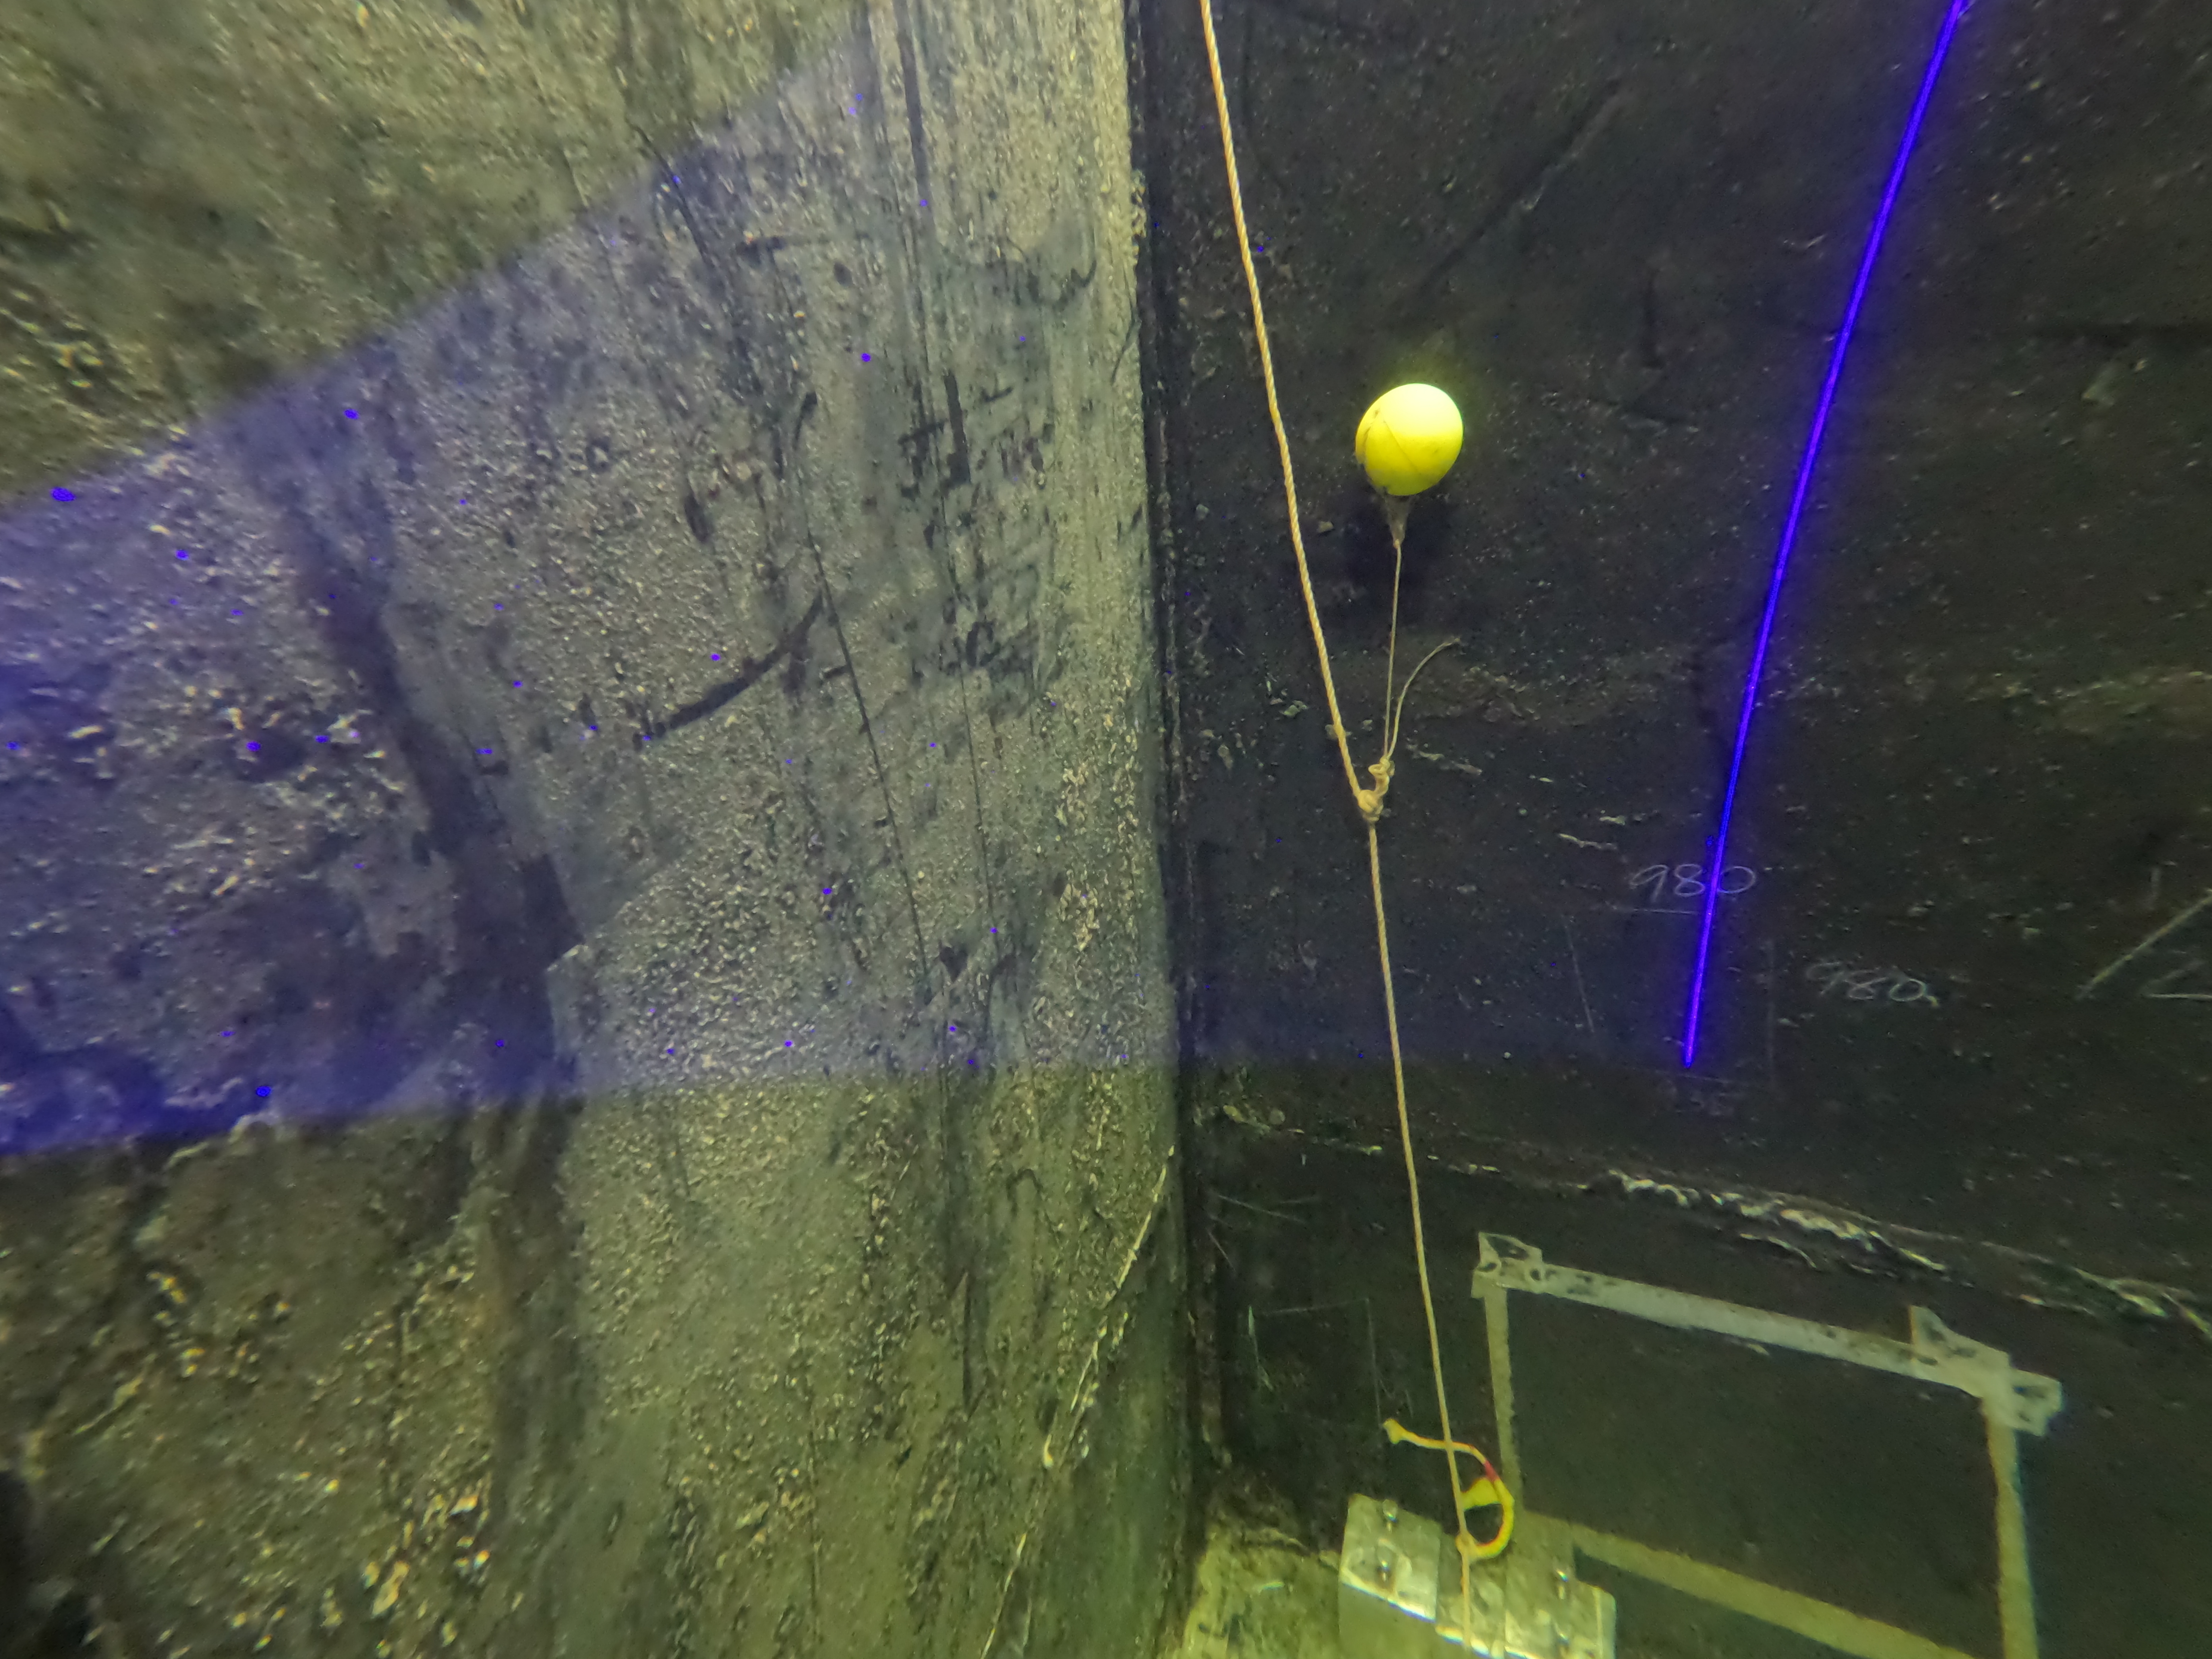

Supplement: Supplementary file 3015 [file G0031815.pdf › 12/G0031815.pdf]

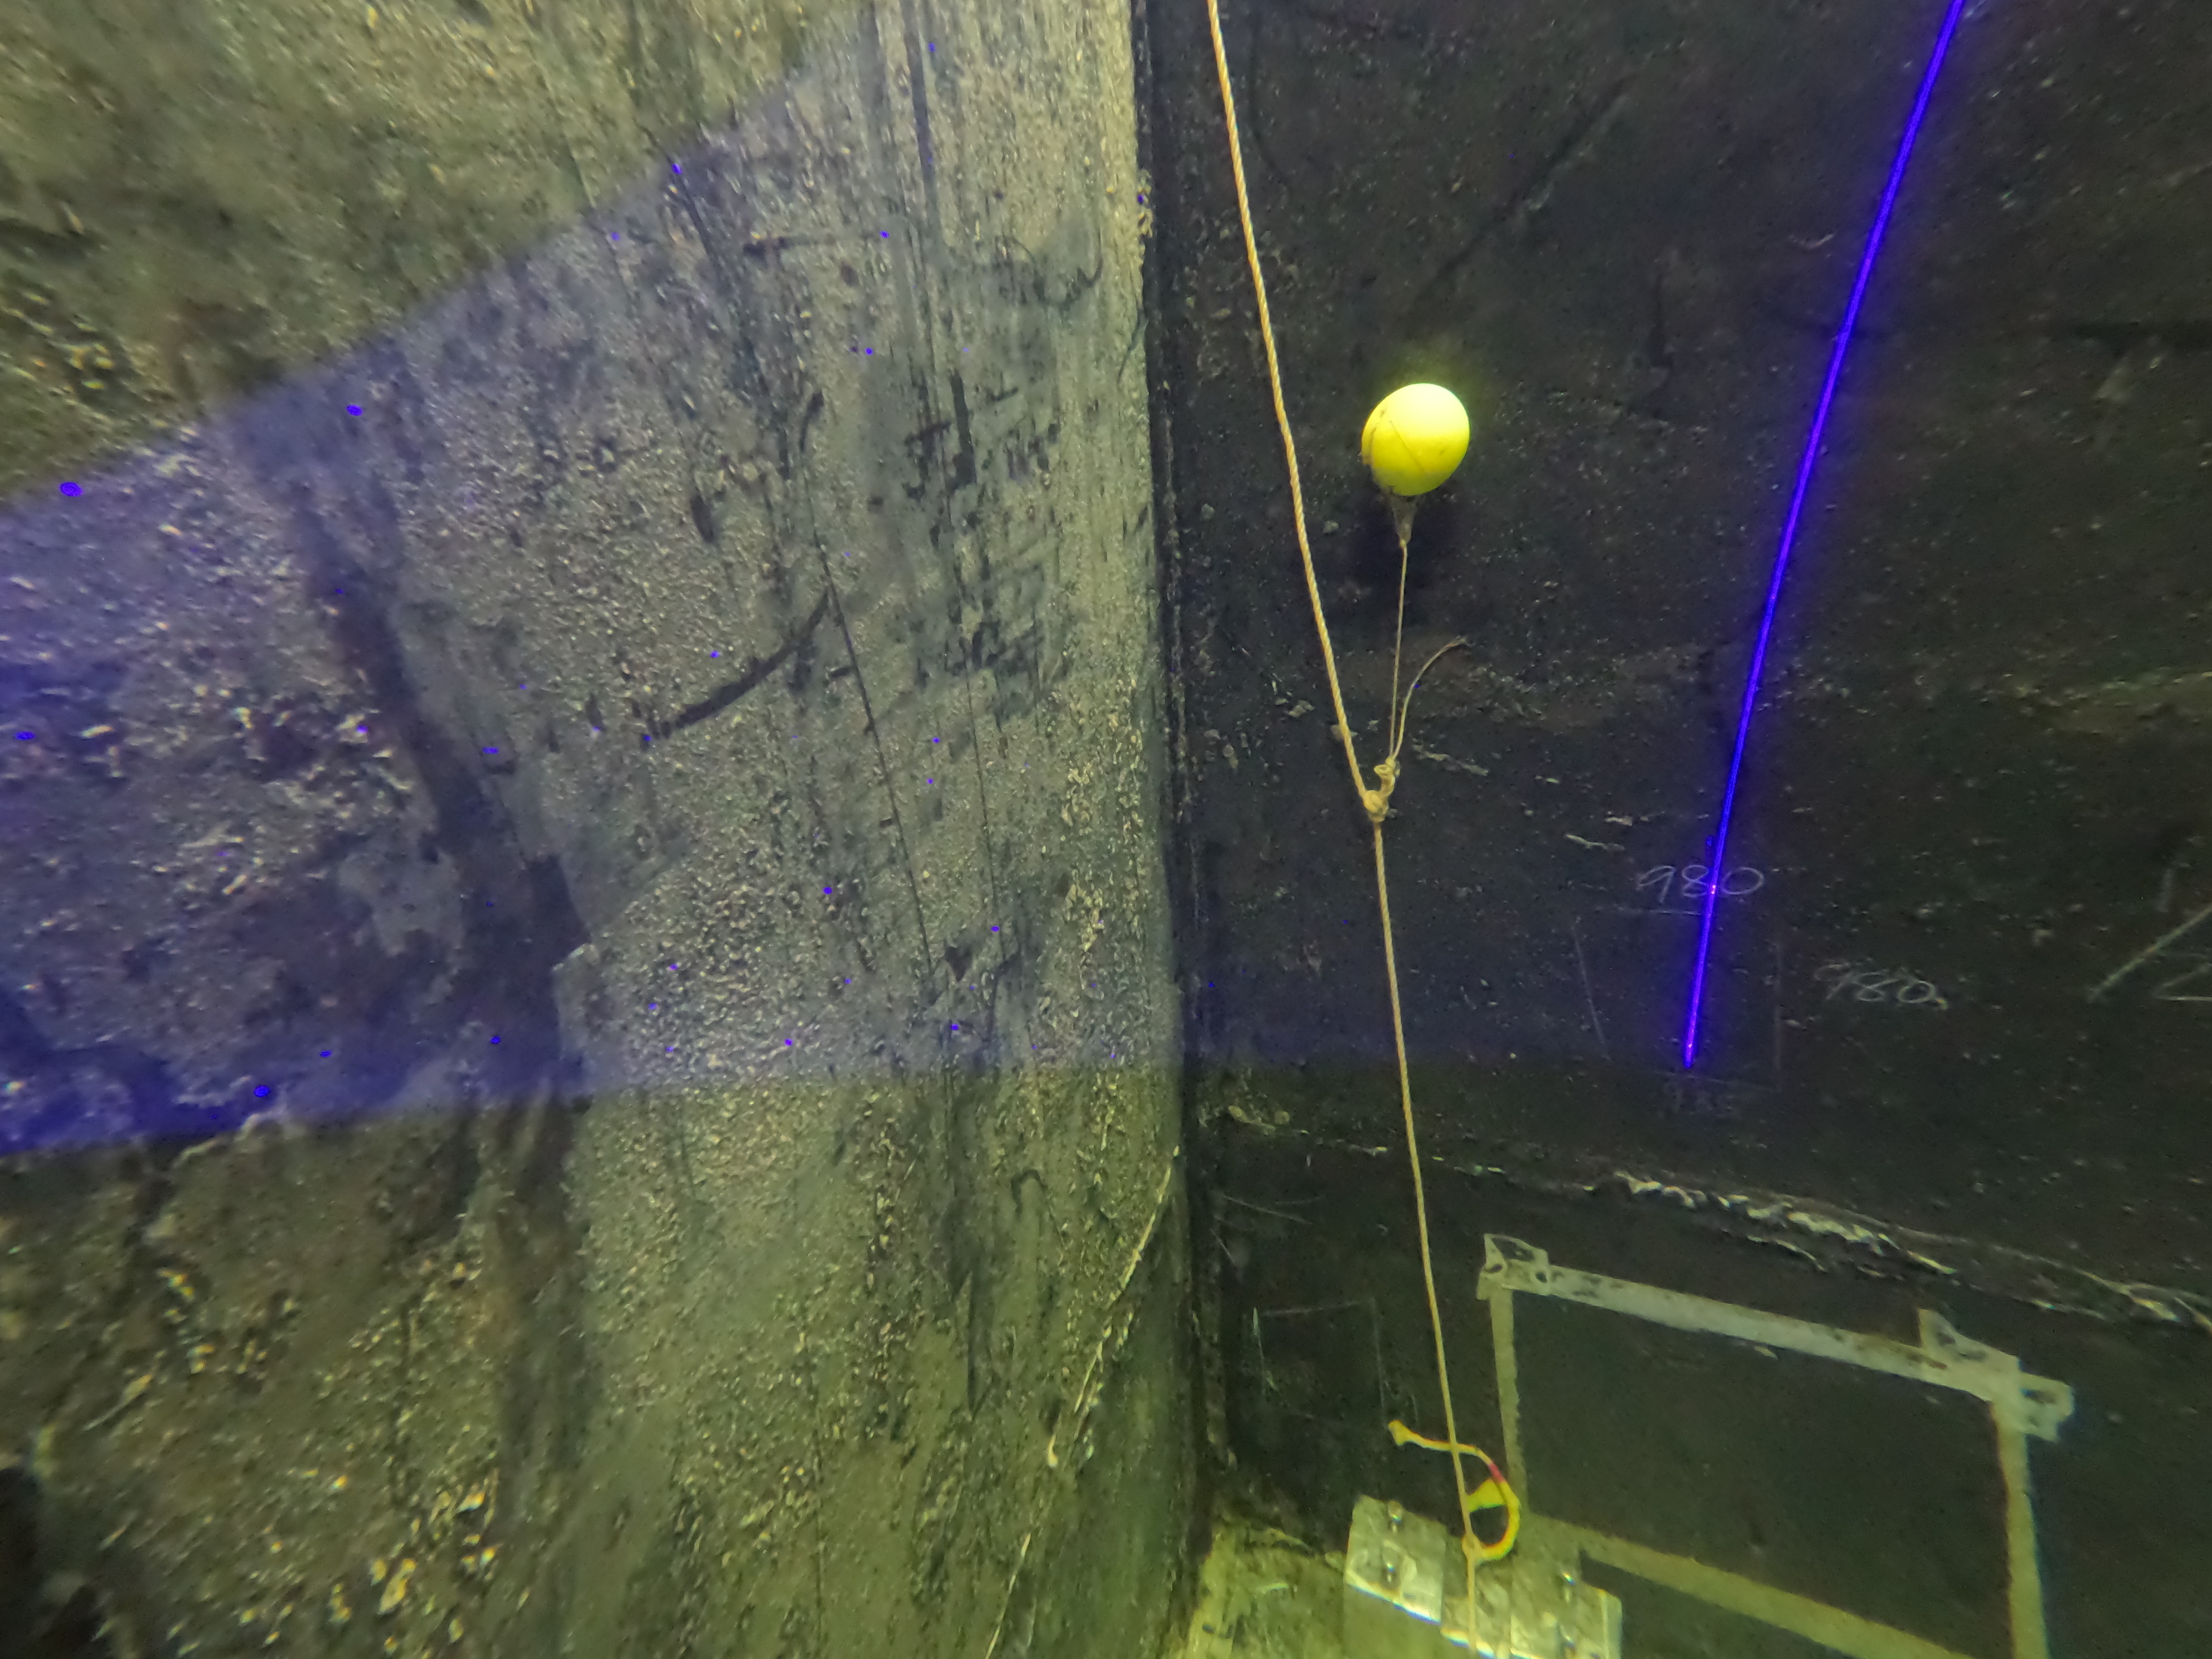

Supplement: Supplementary file 3016 [file G0031816.pdf › 12/G0031816.pdf]

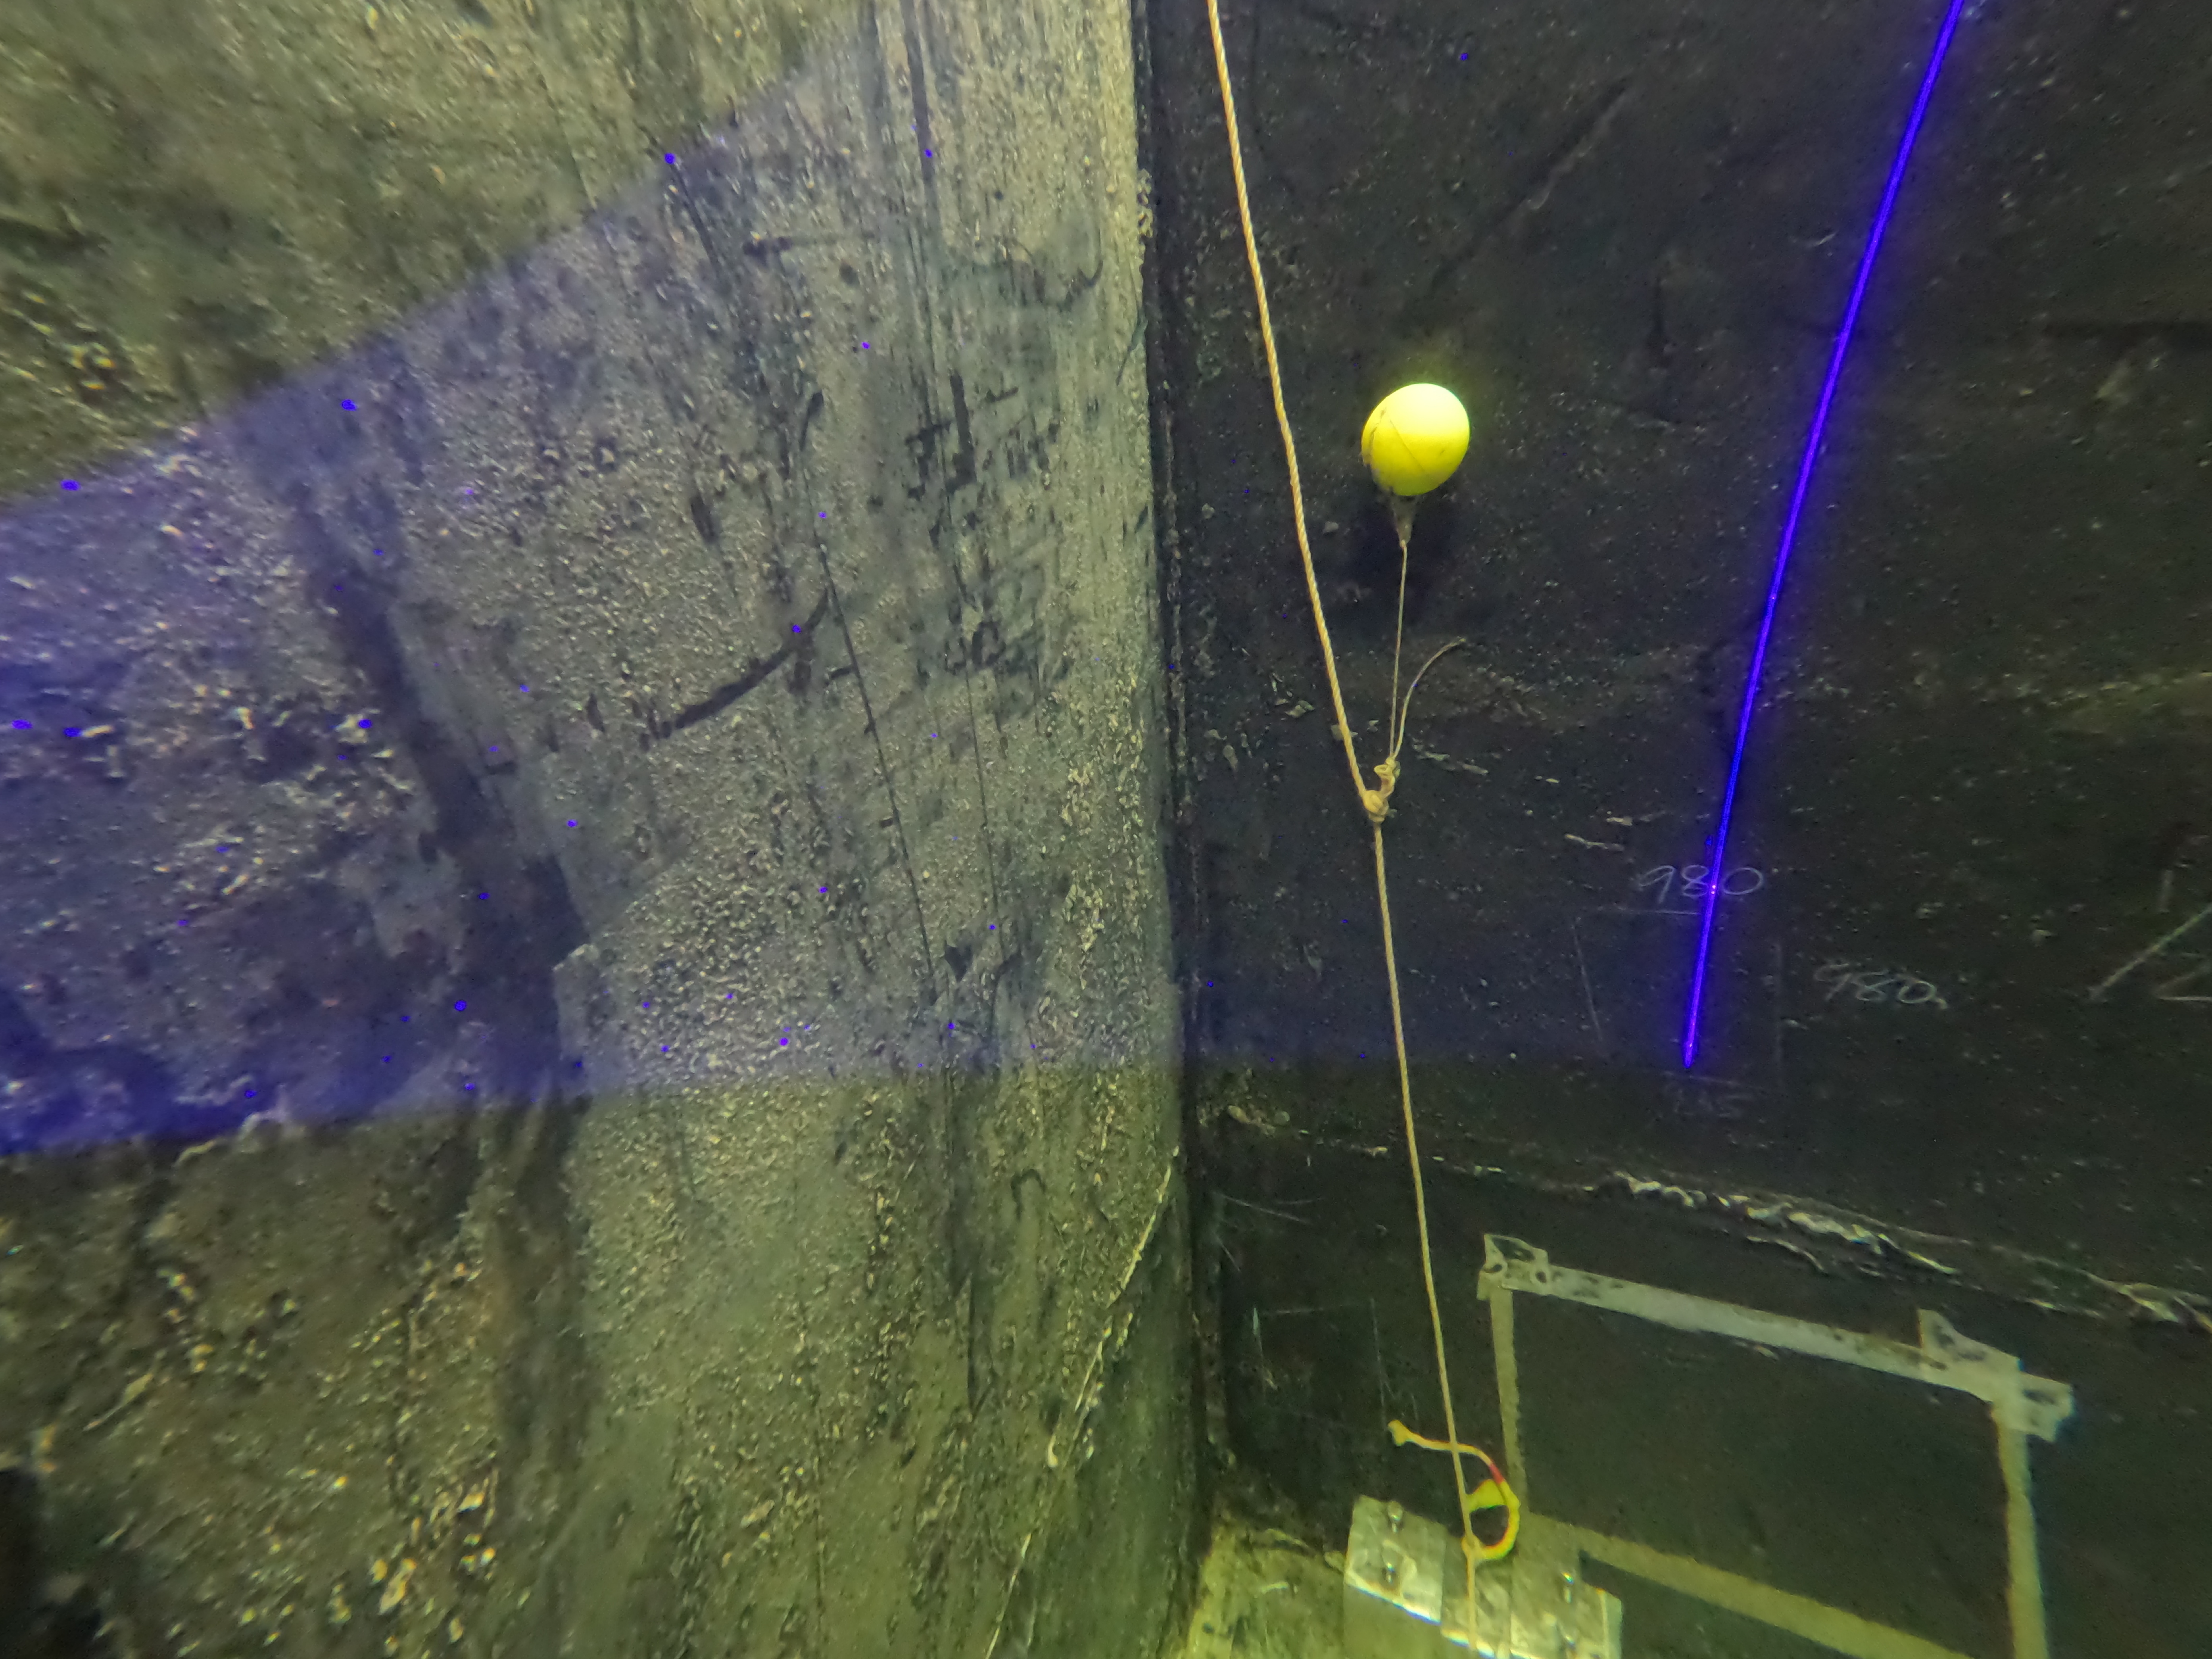

Supplement: Supplementary file 3017 [file G0031817.pdf › 12/G0031817.pdf]

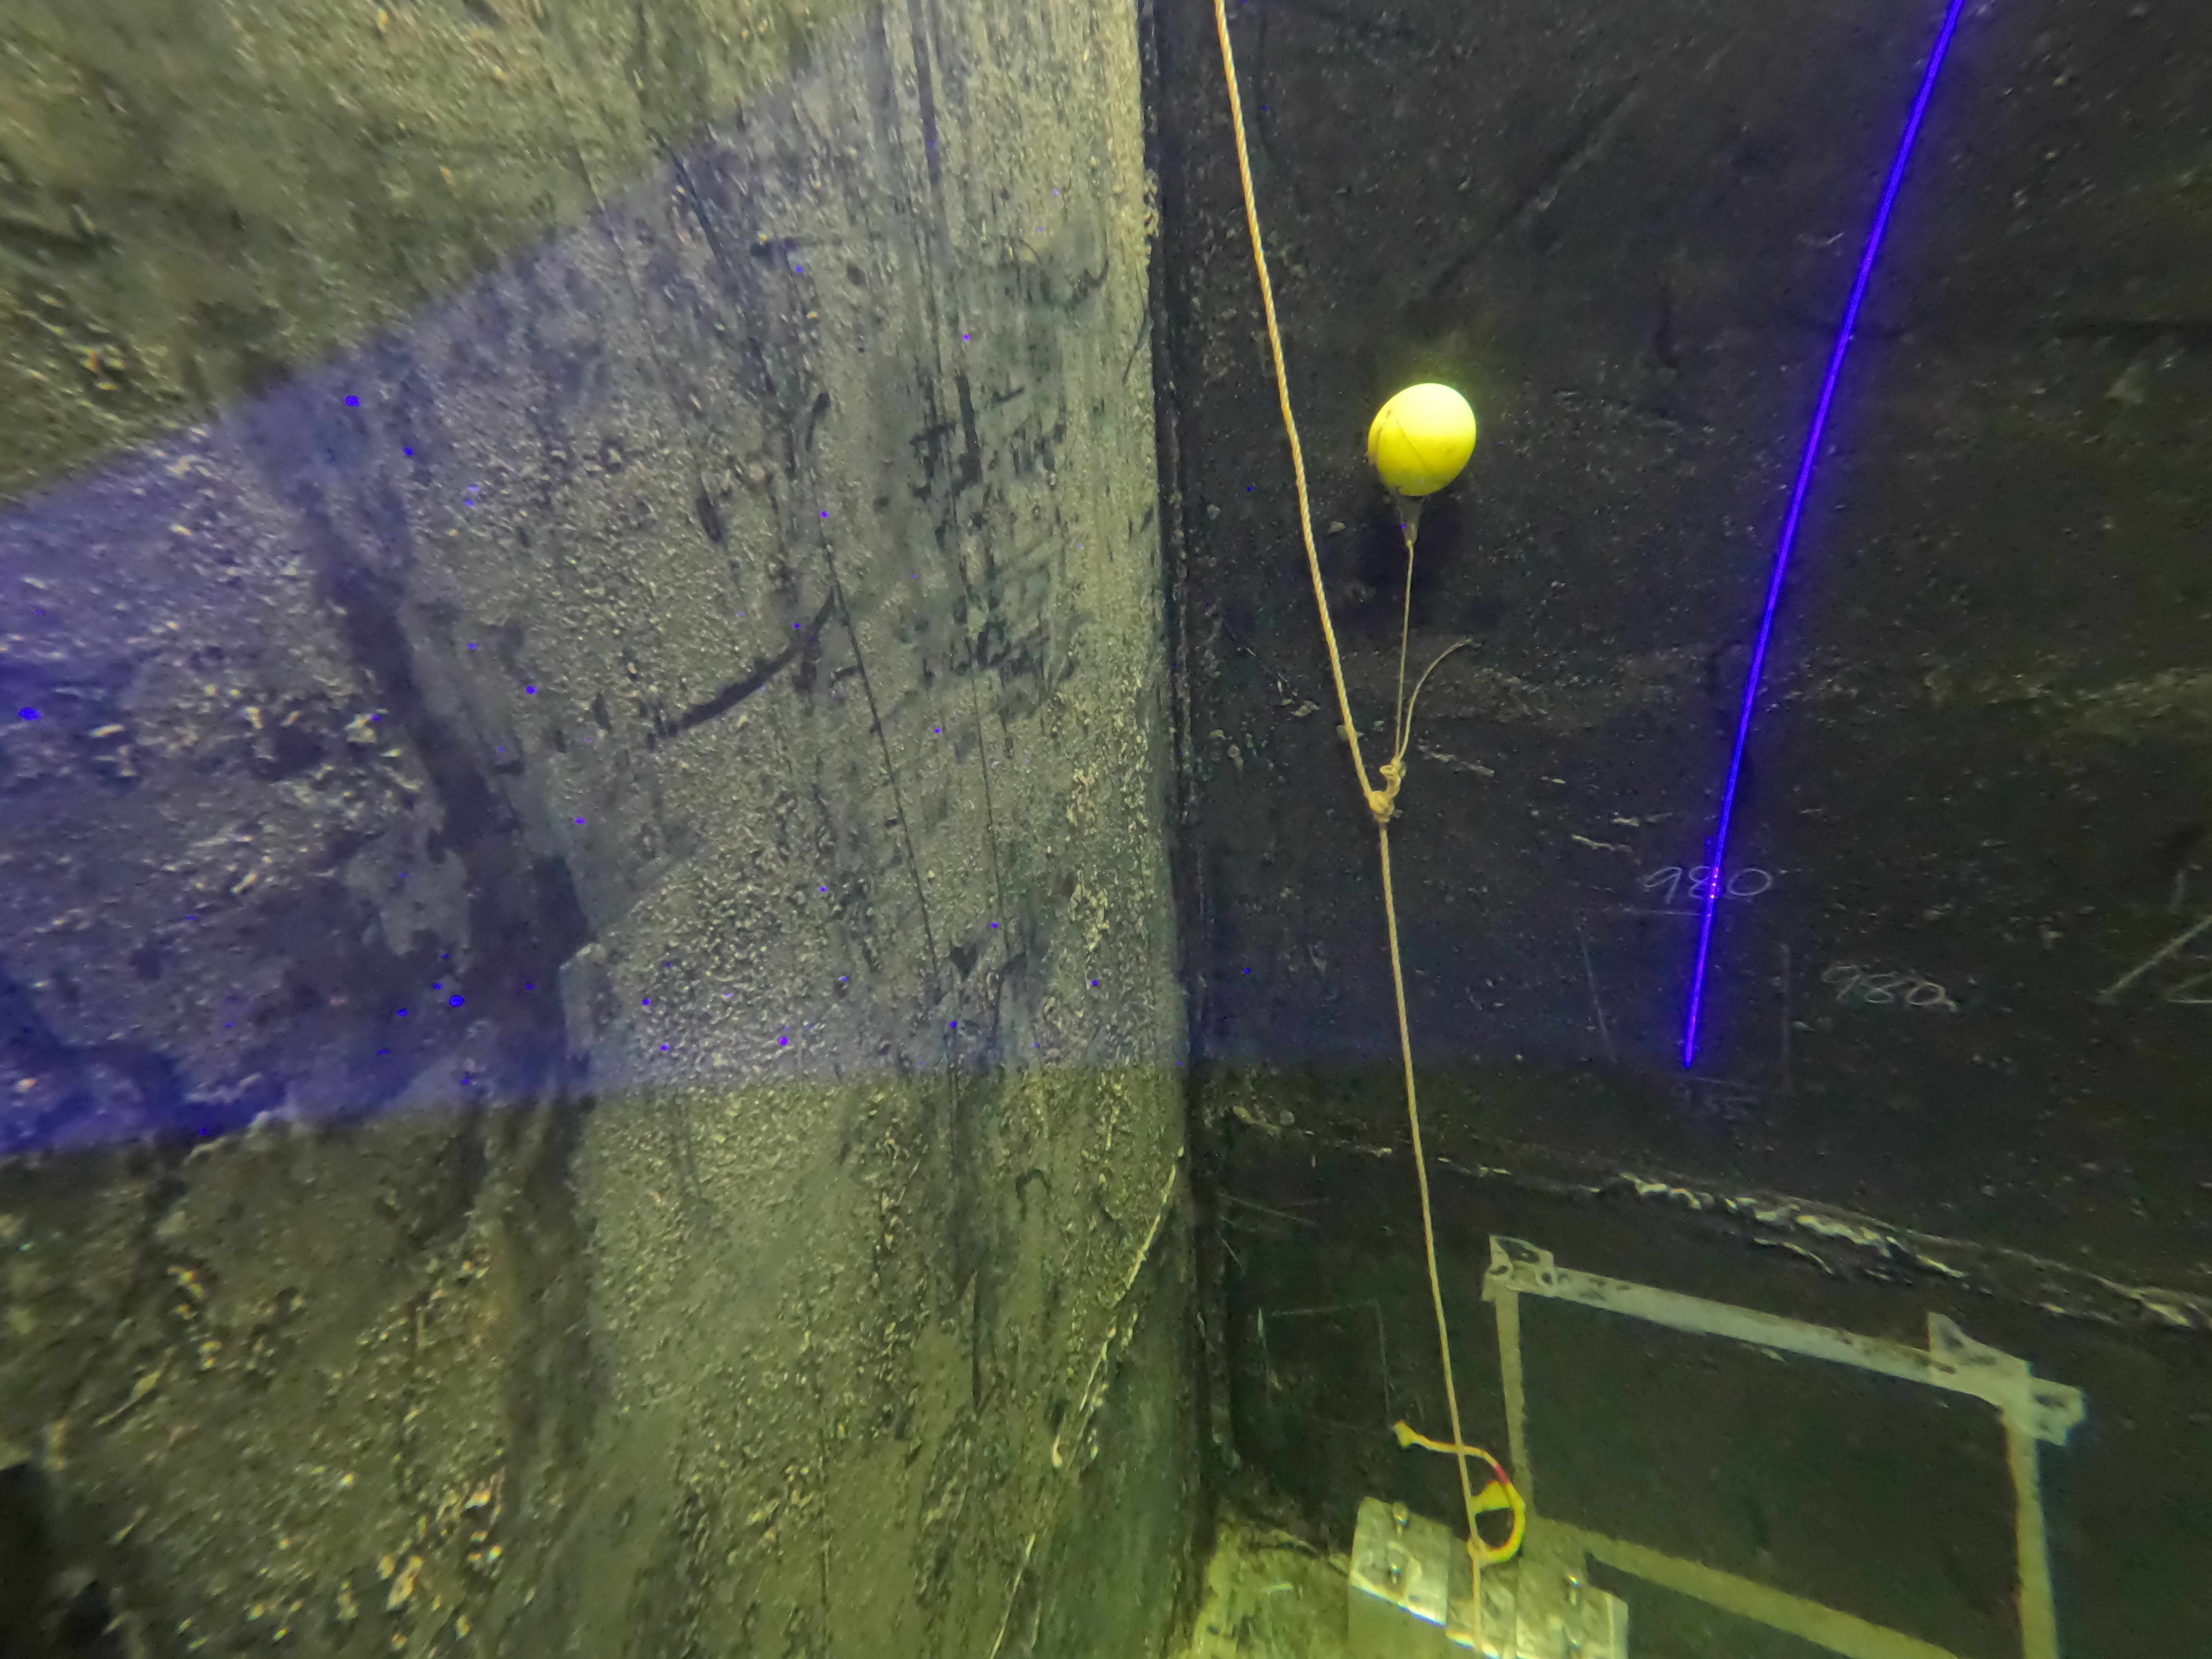

980

980

Supplement: Supplementary file 3018 [file G0031818.pdf › 12/G0031818.pdf]

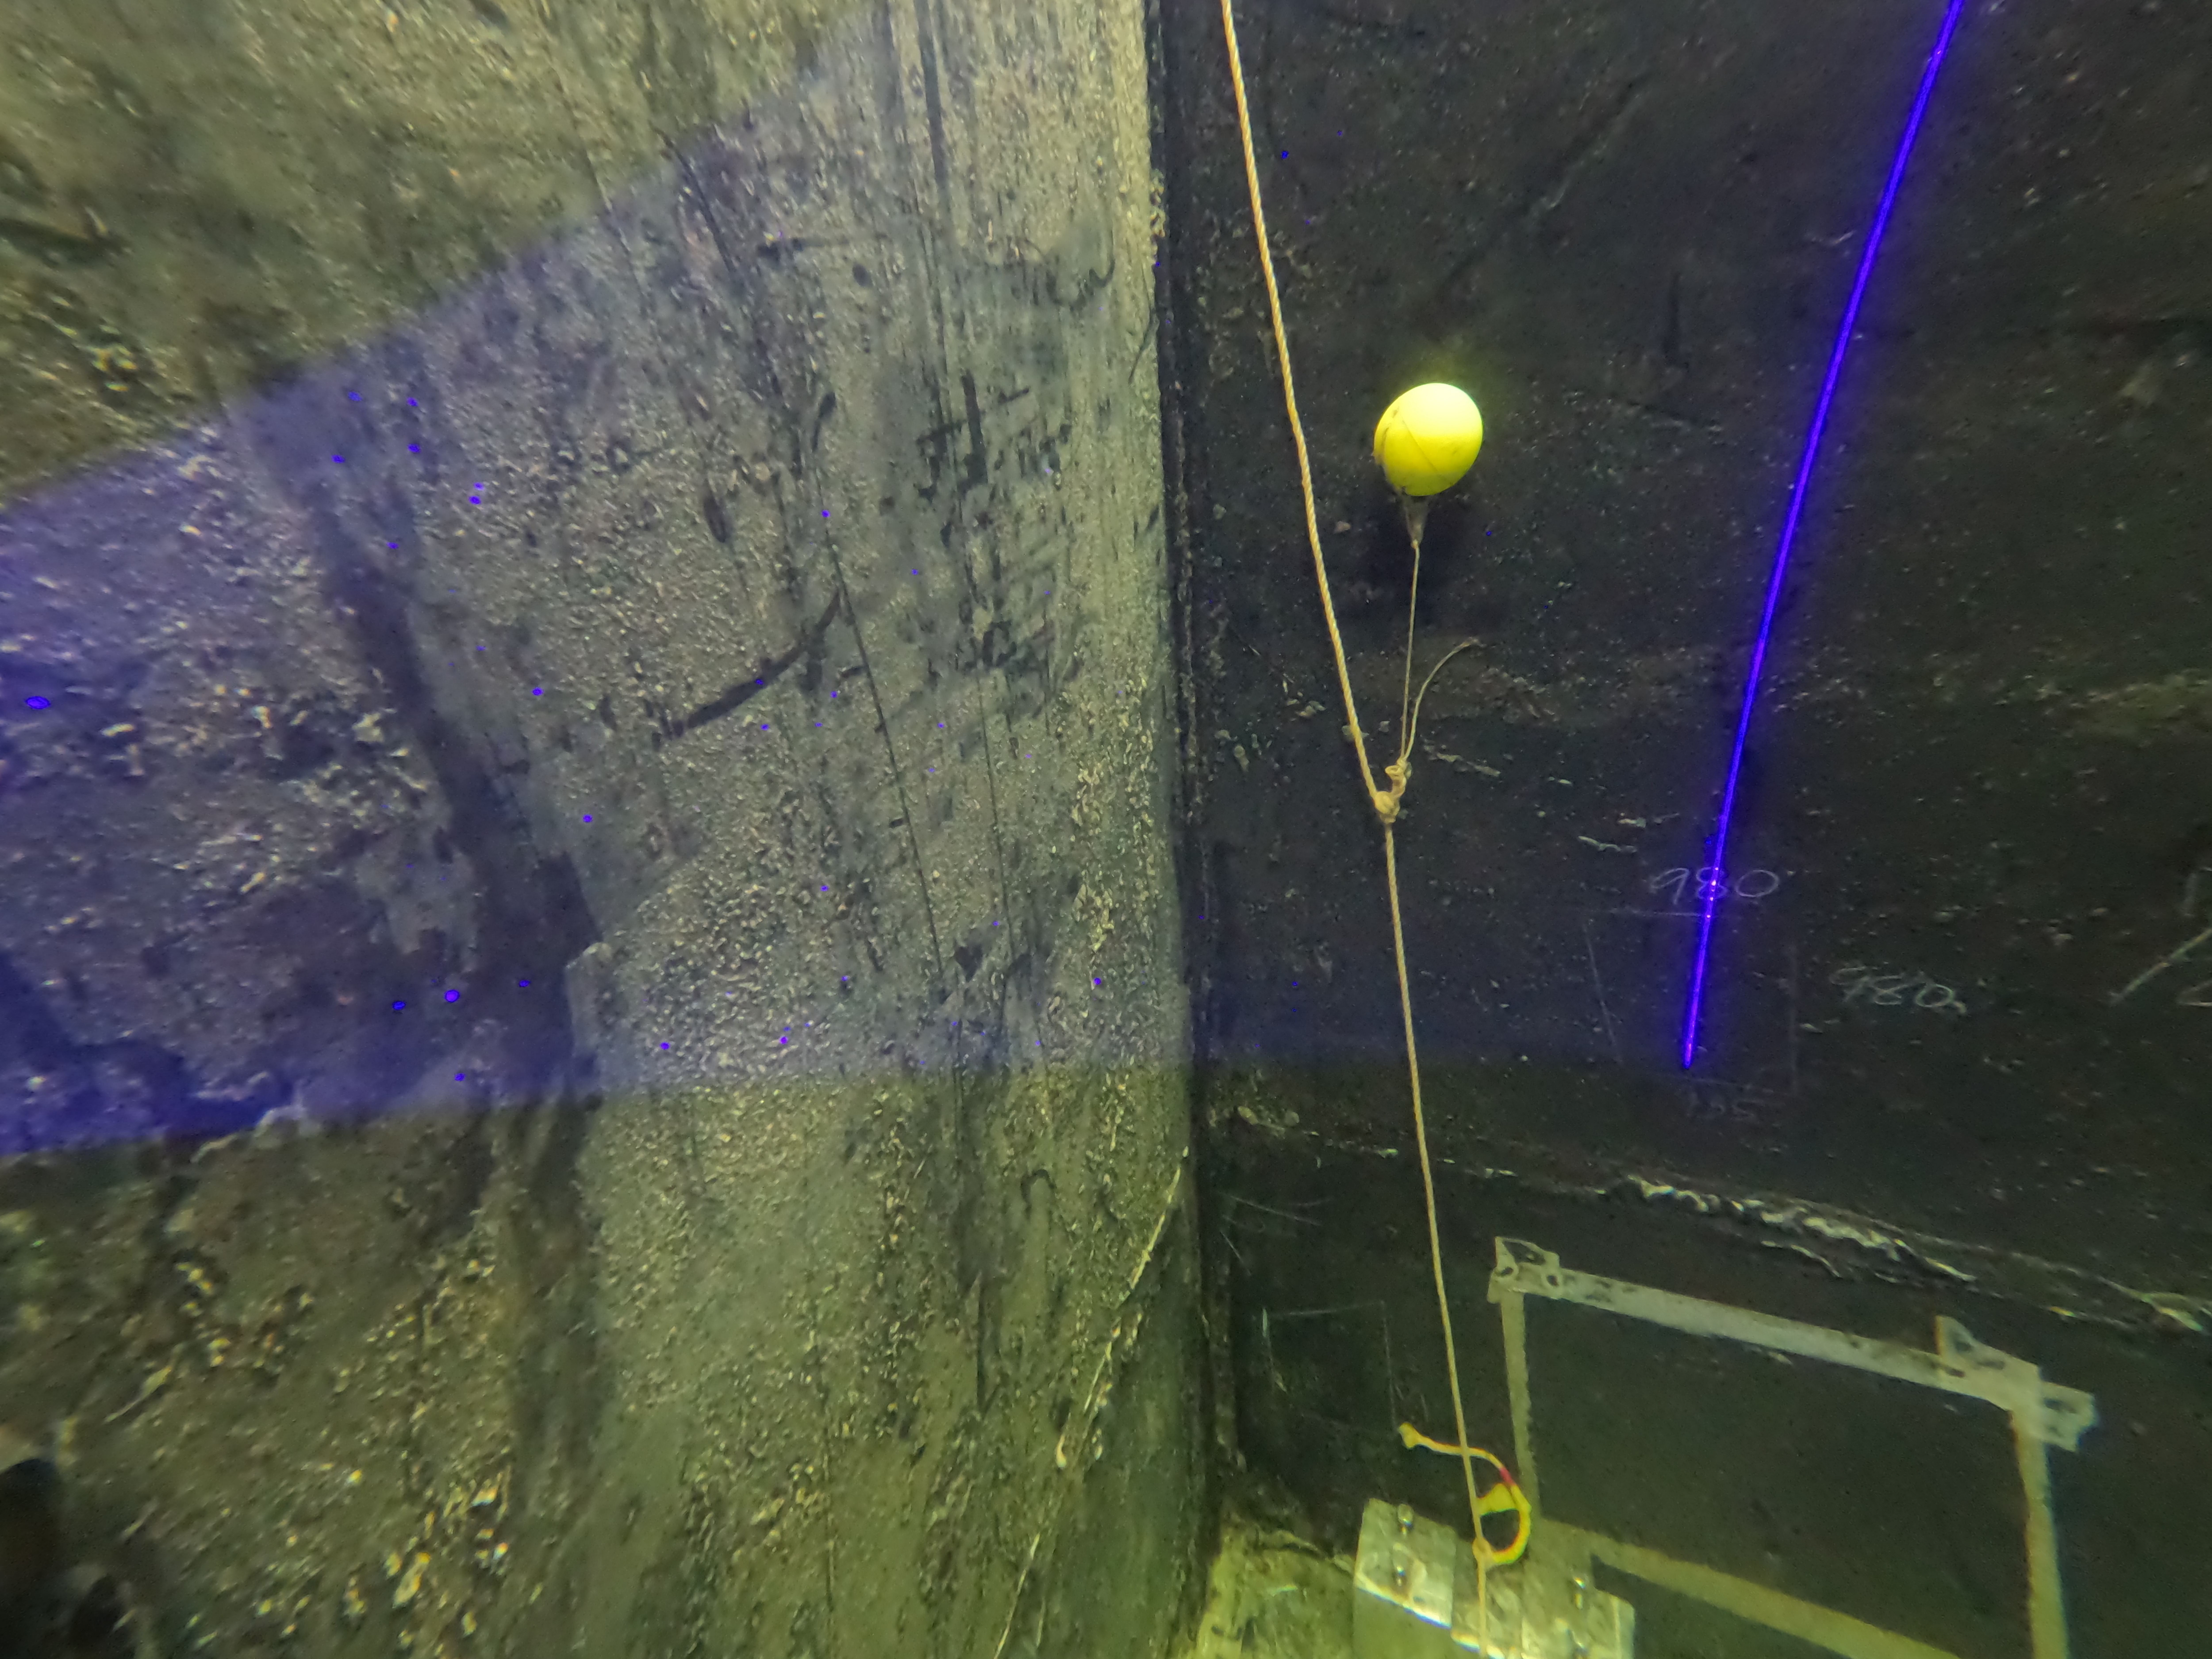

Supplement: Supplementary file 3019 [file G0031819.pdf › 12/G0031819.pdf]

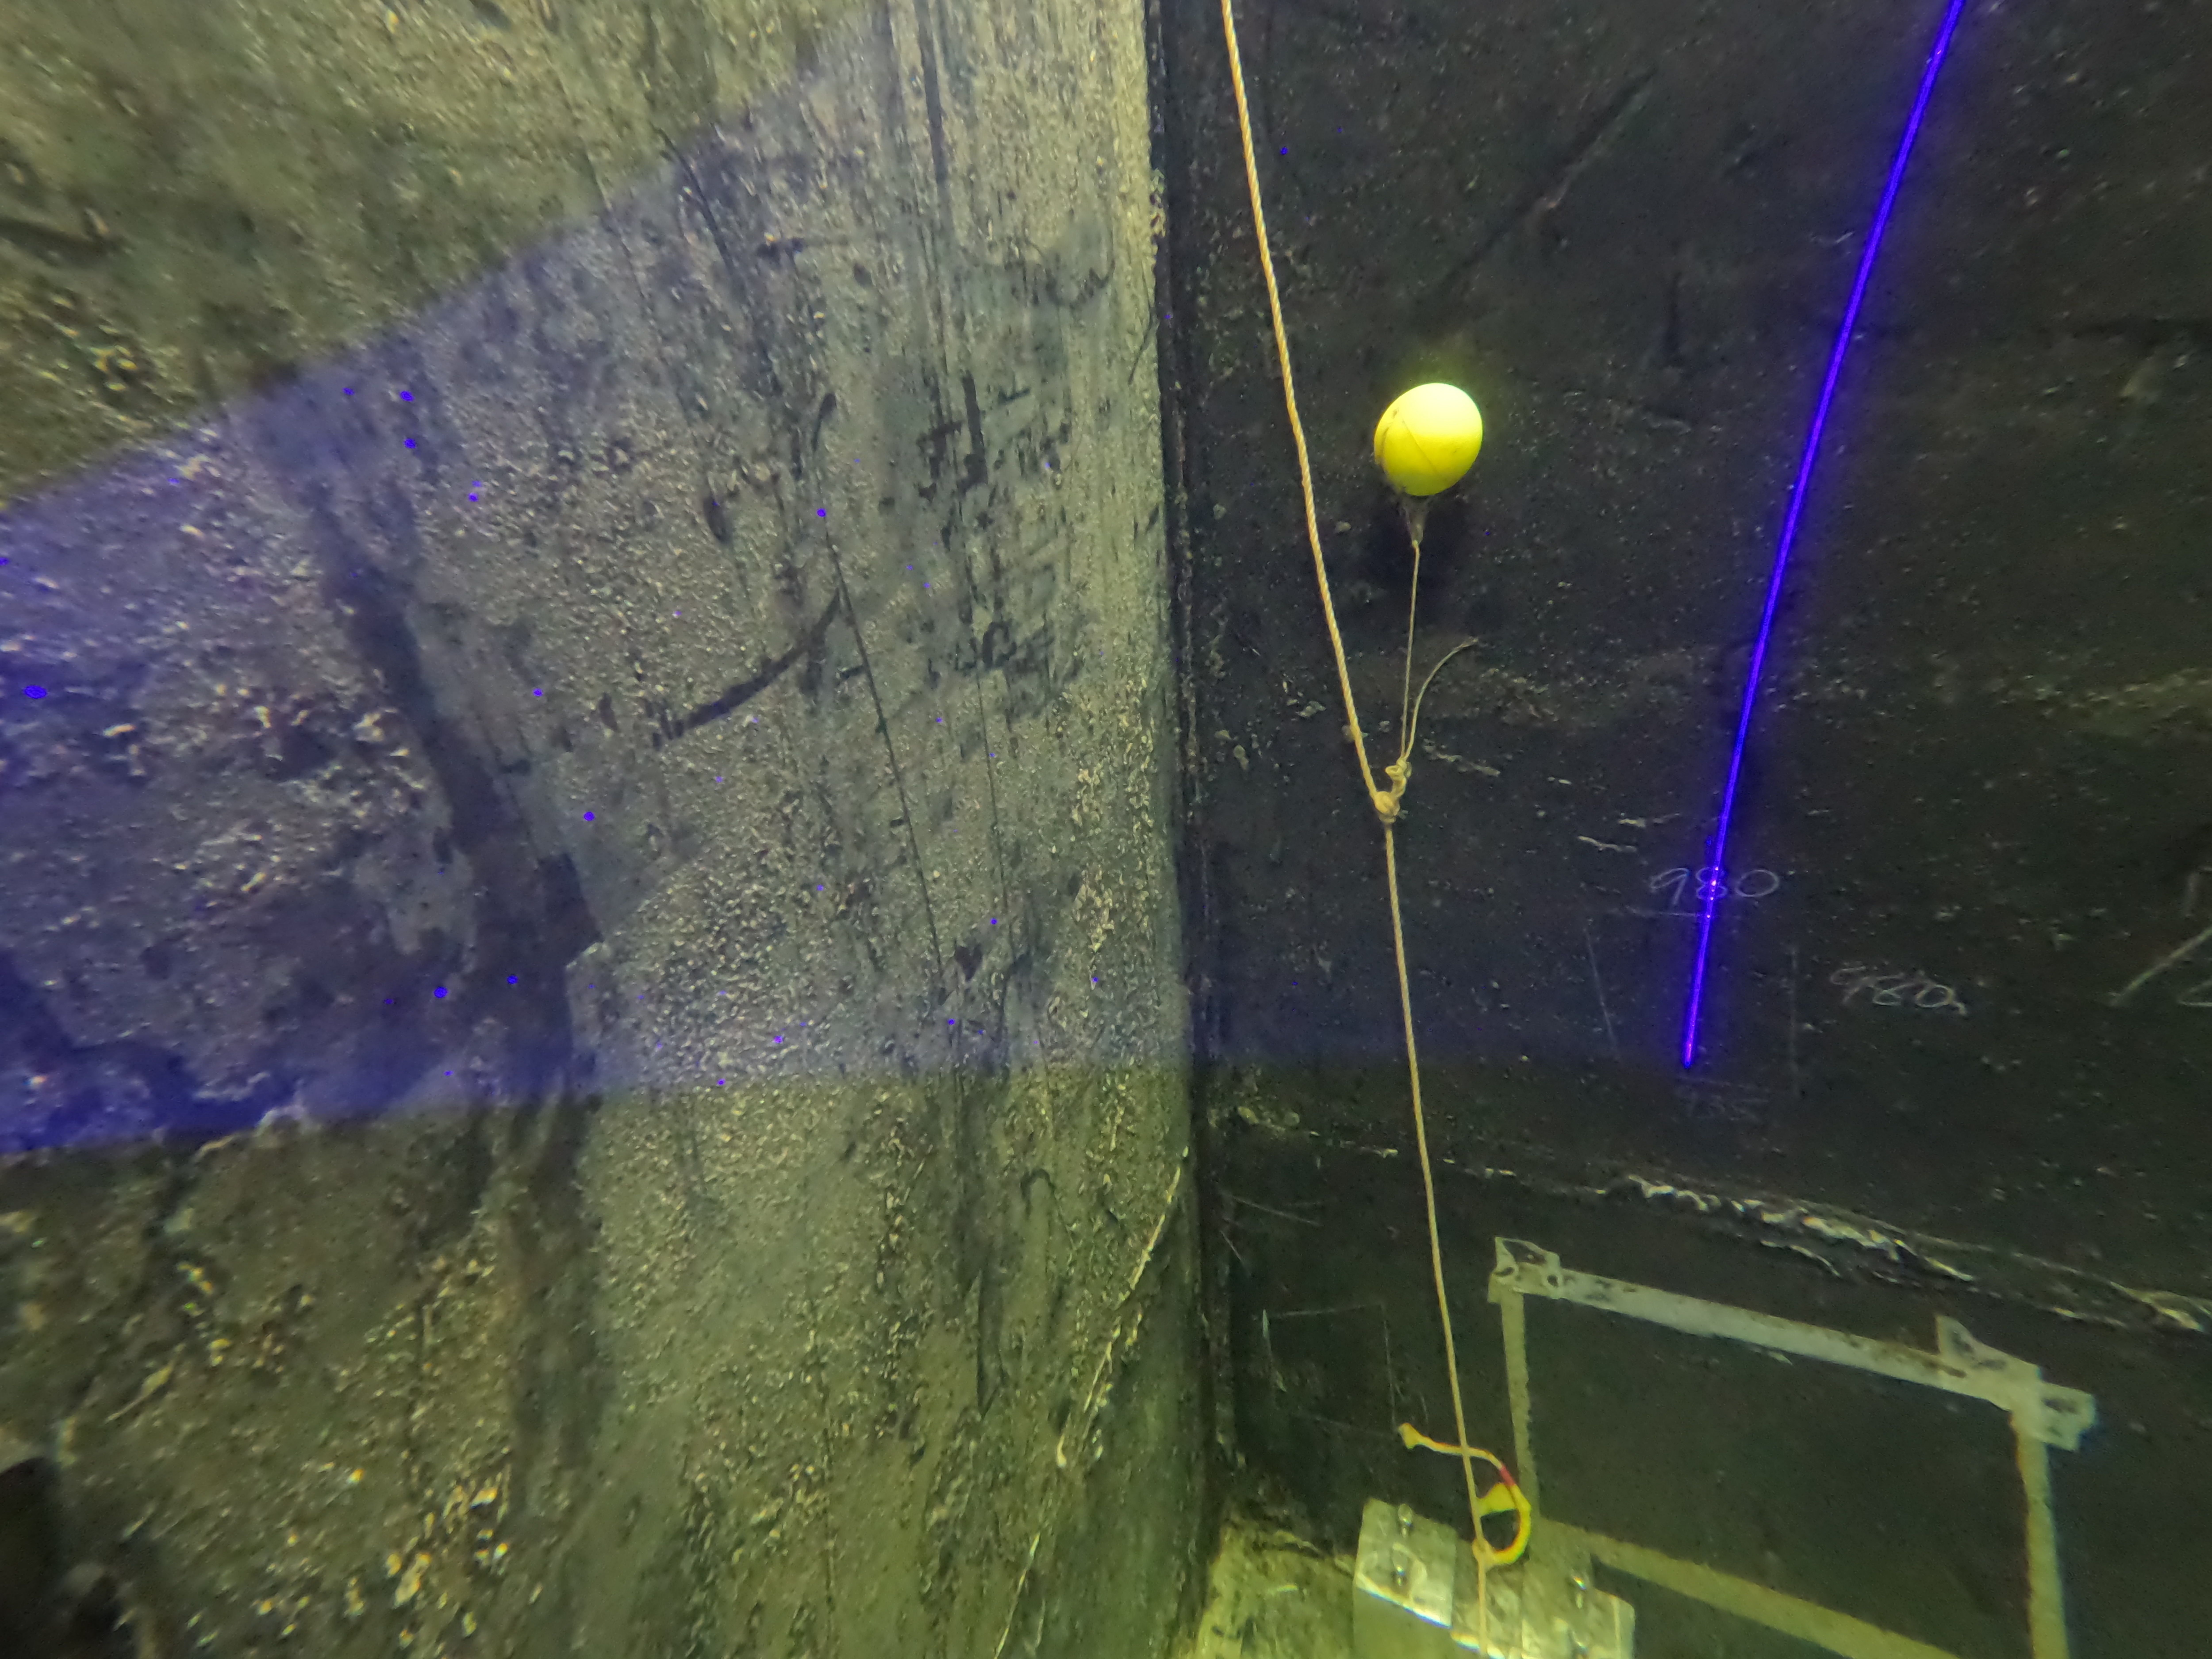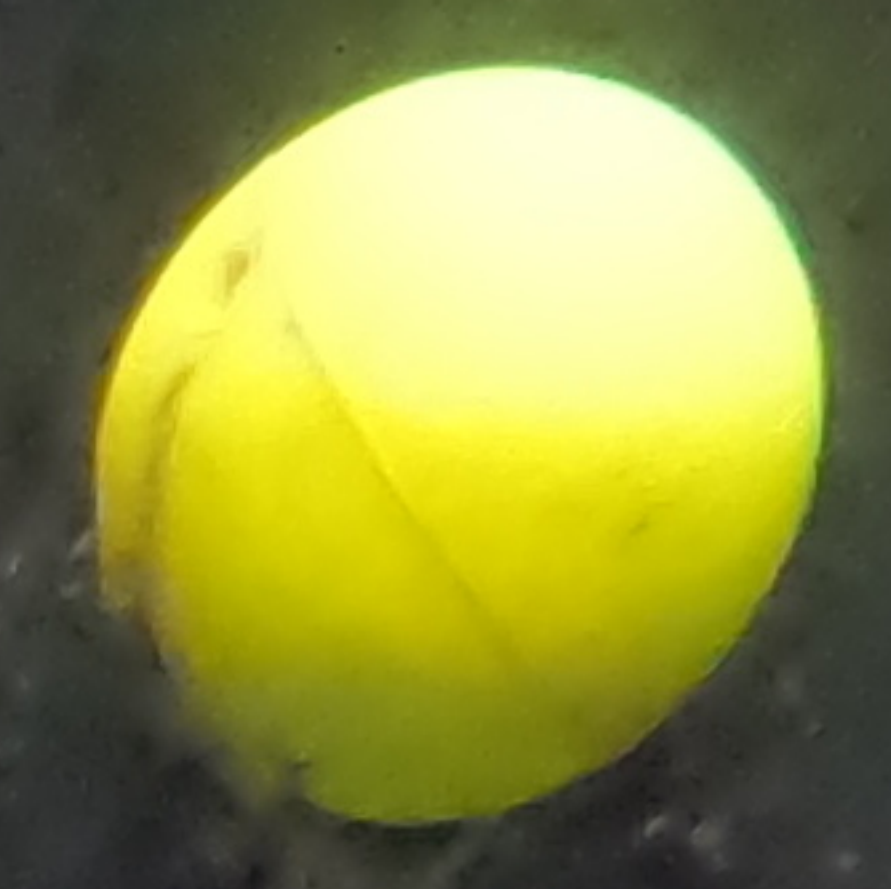

980

980

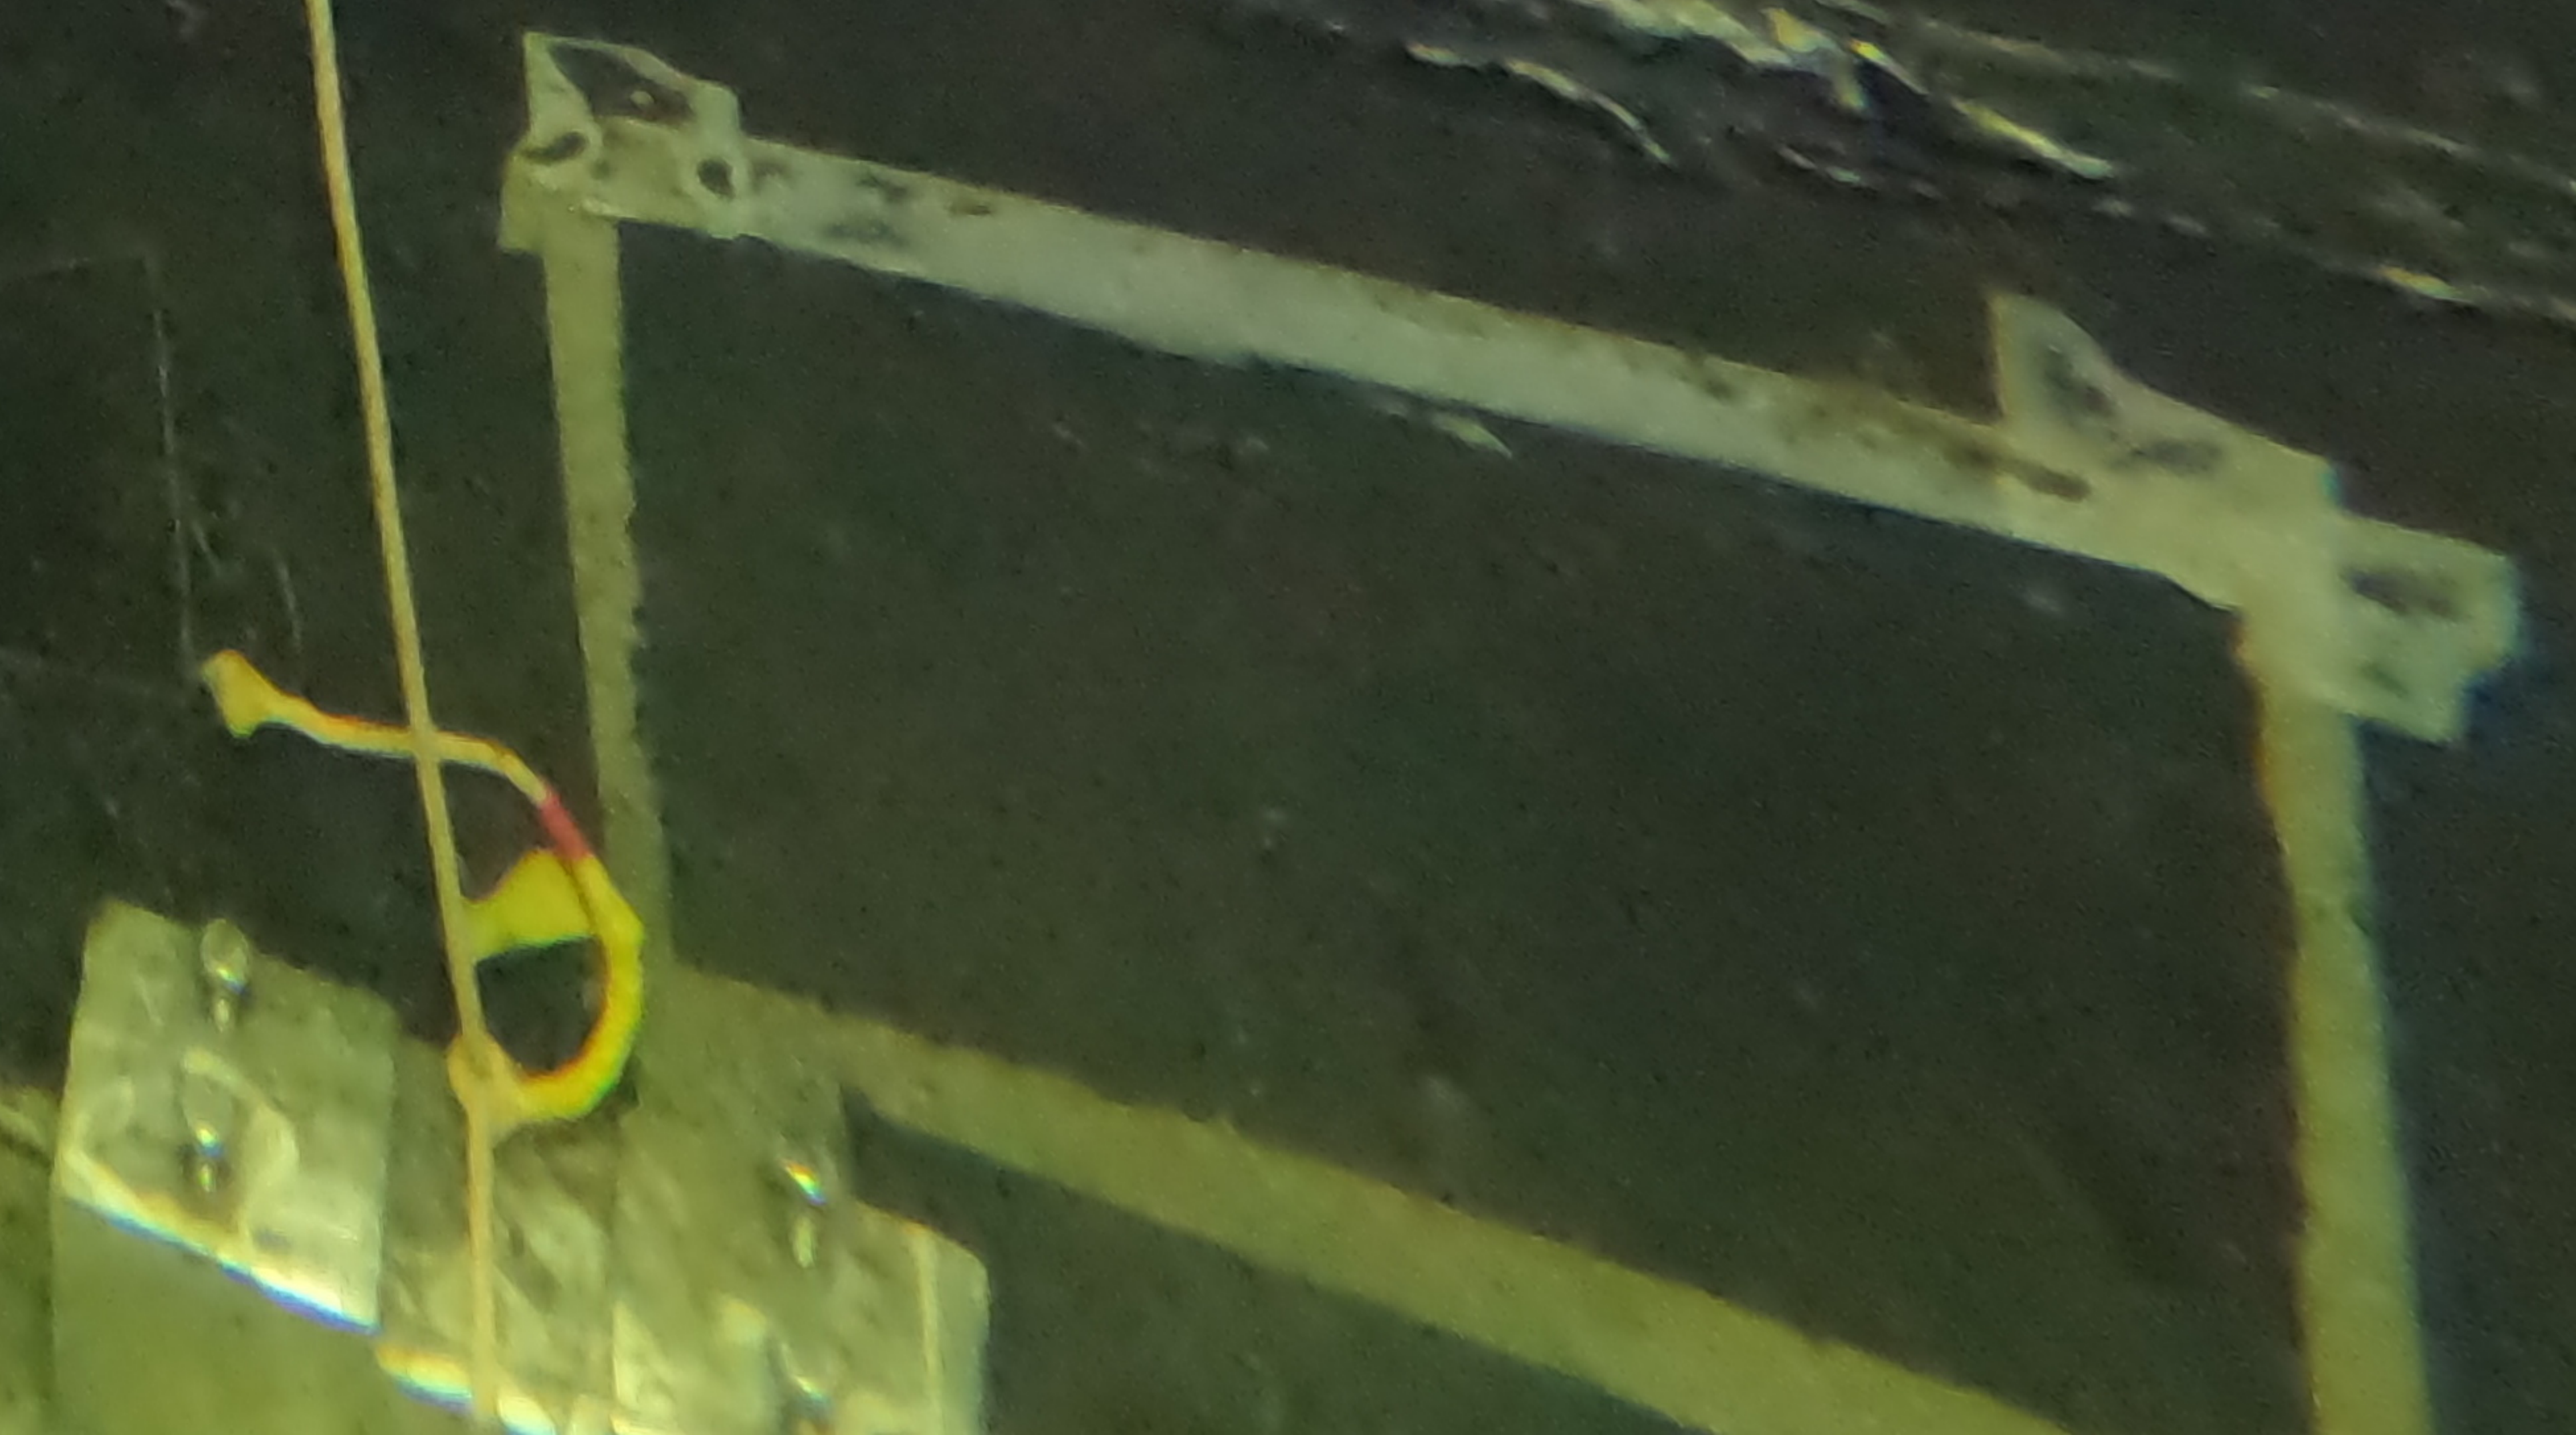

Supplement: Supplementary file 3020 [file G0031820.pdf › 12/G0031820.pdf]

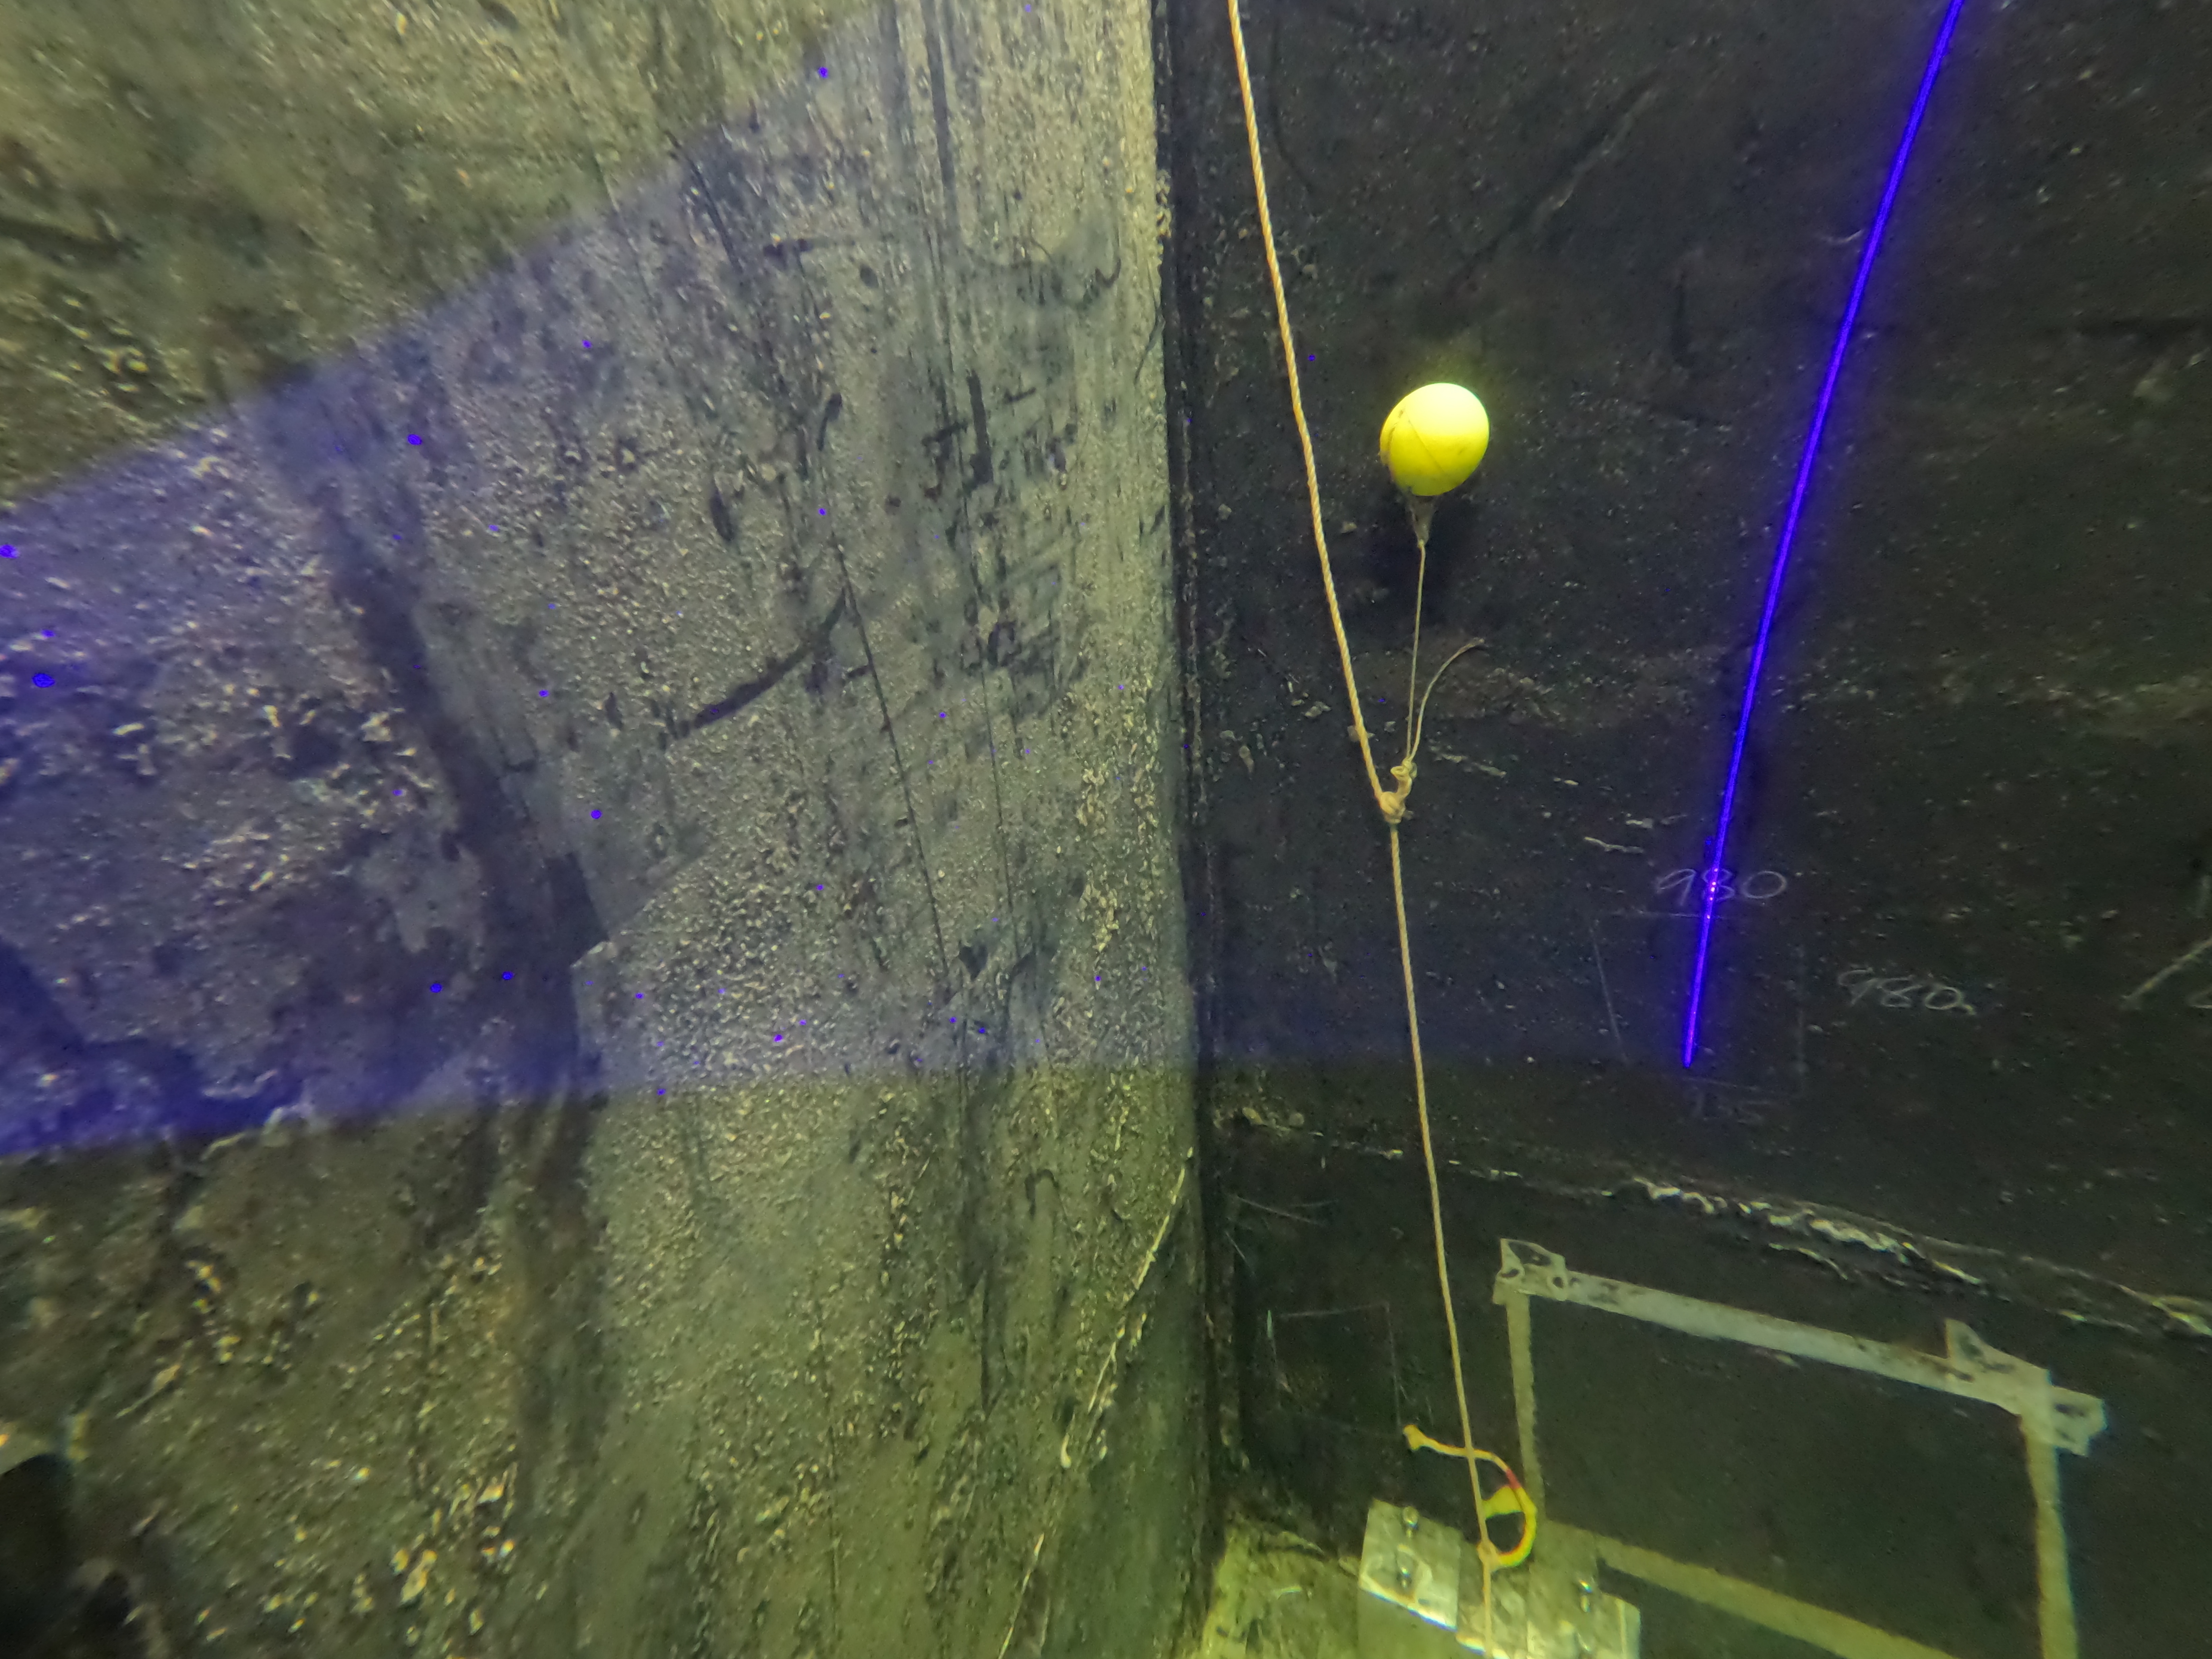

980

980

Supplement: Supplementary file 3021 [file G0031821.pdf › 12/G0031821.pdf]

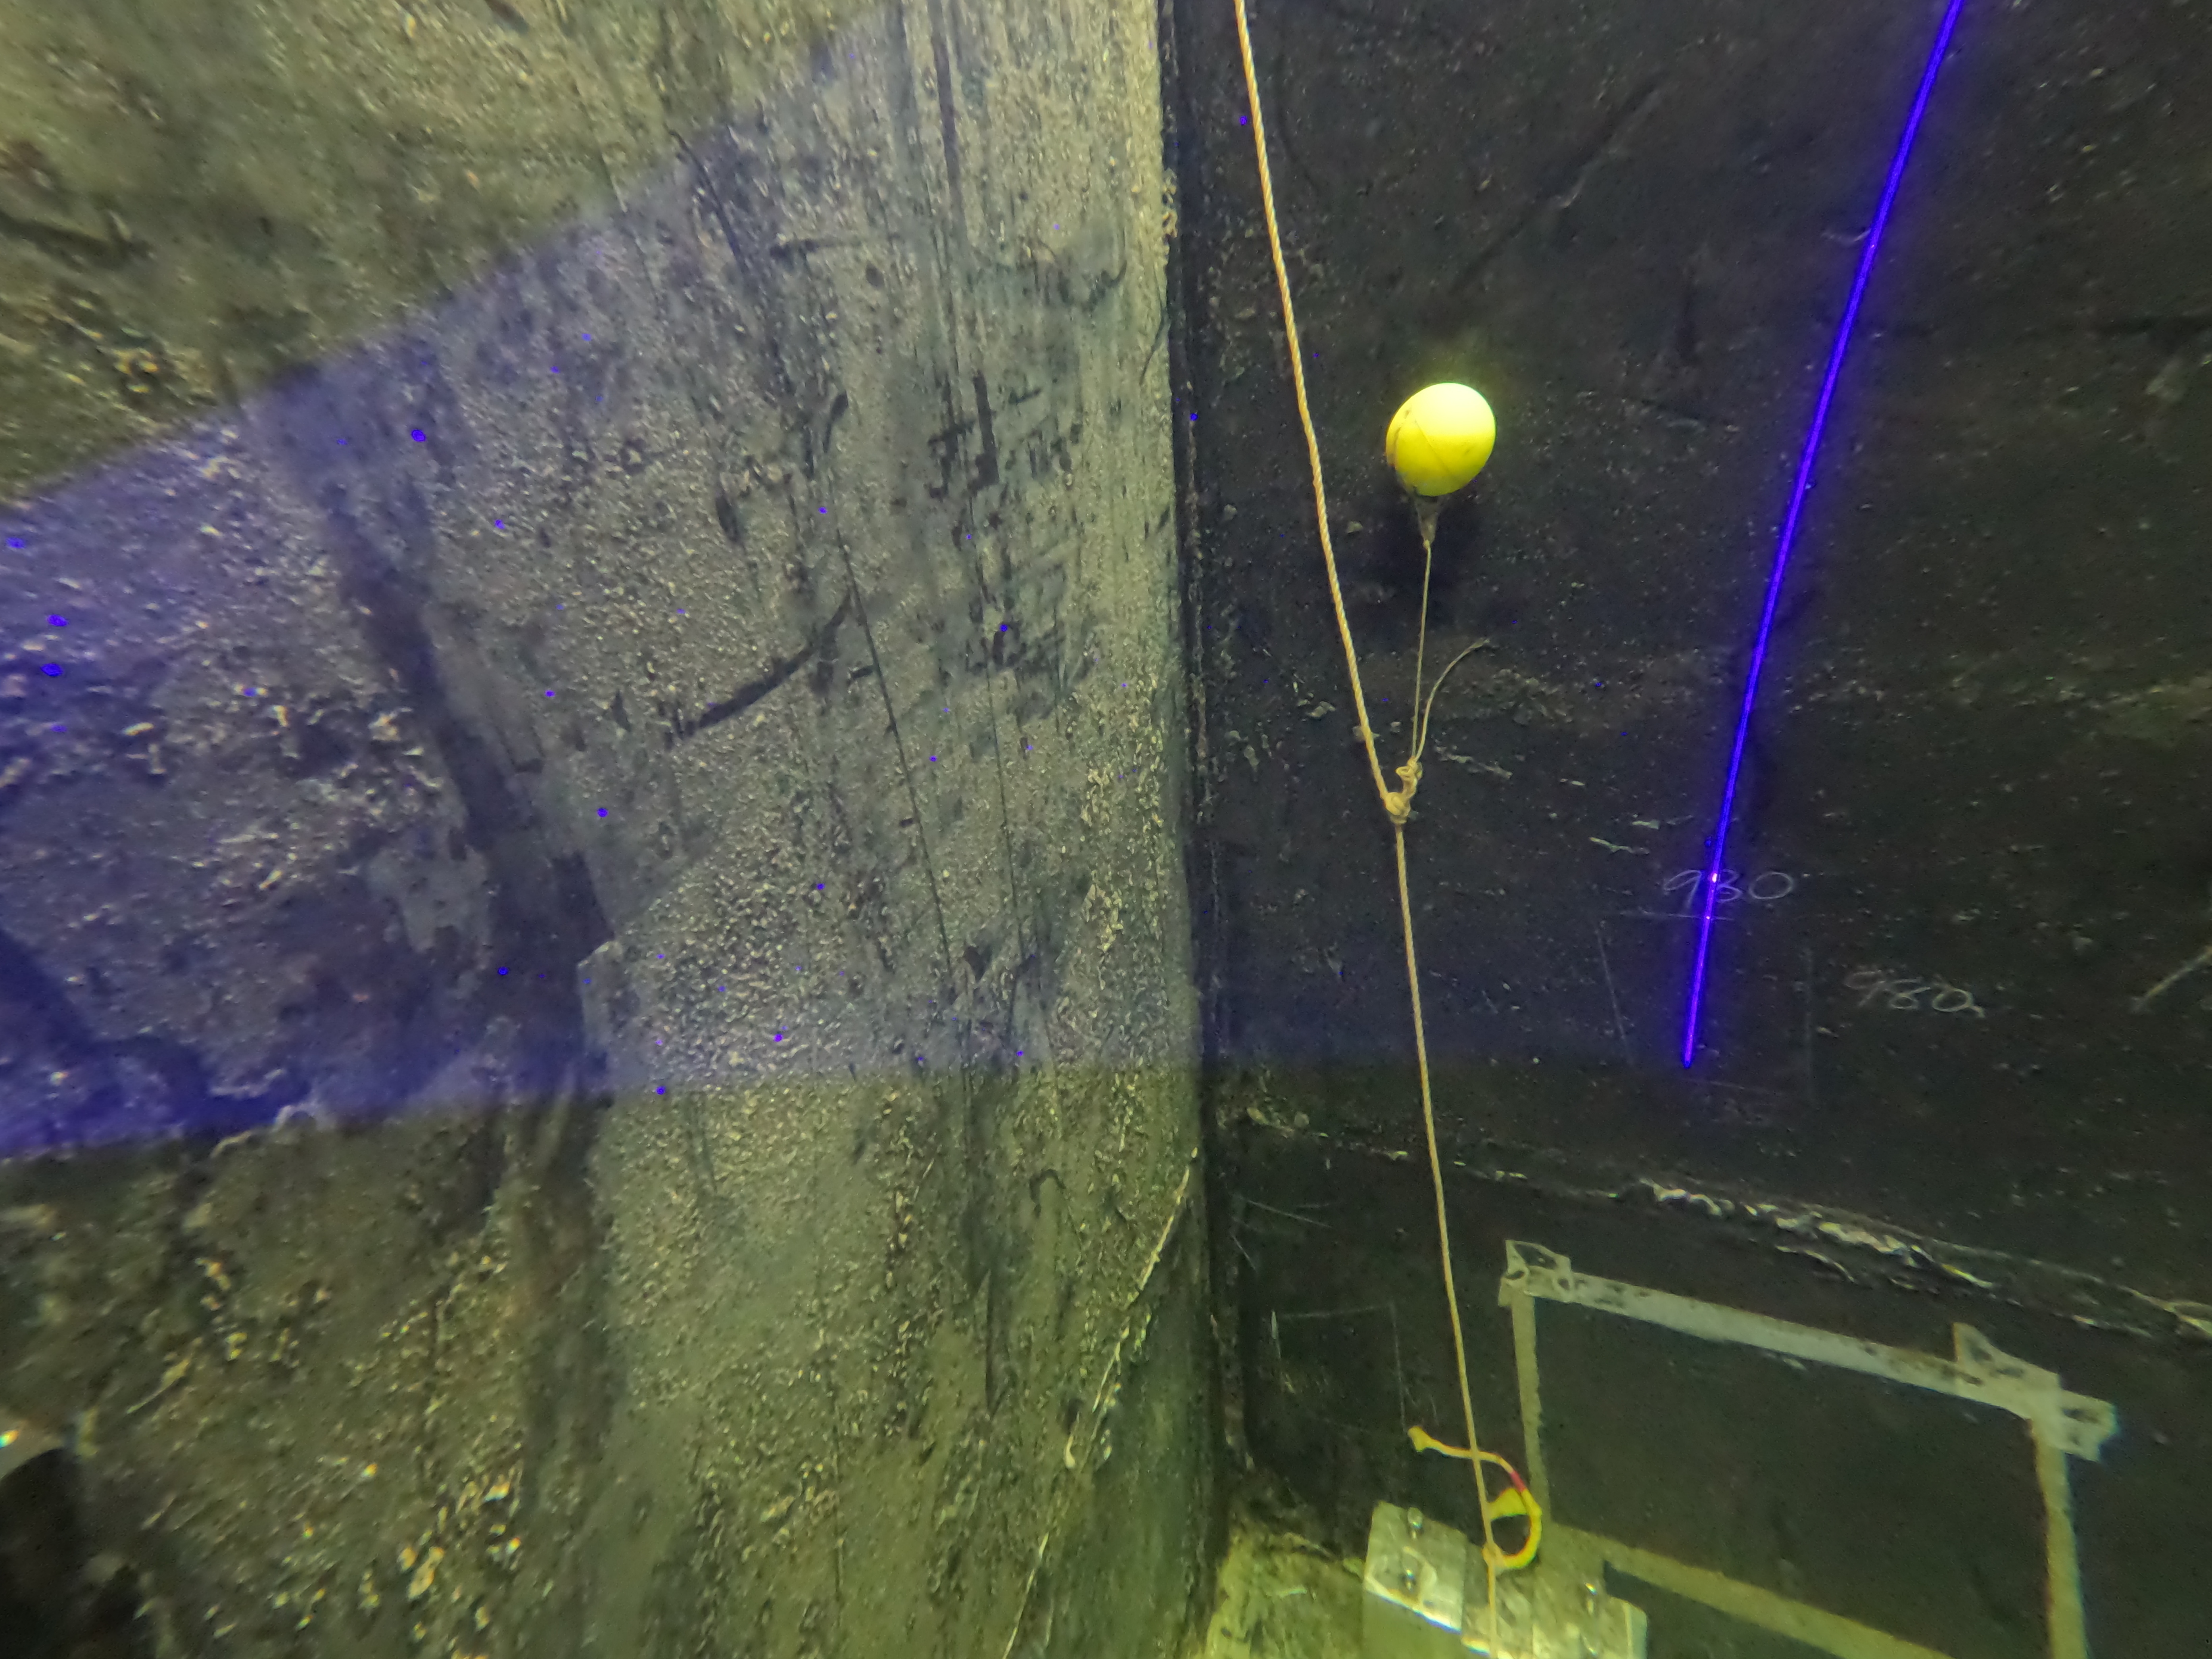

Supplement: Supplementary file 3022 [file G0031822.pdf › 12/G0031822.pdf]

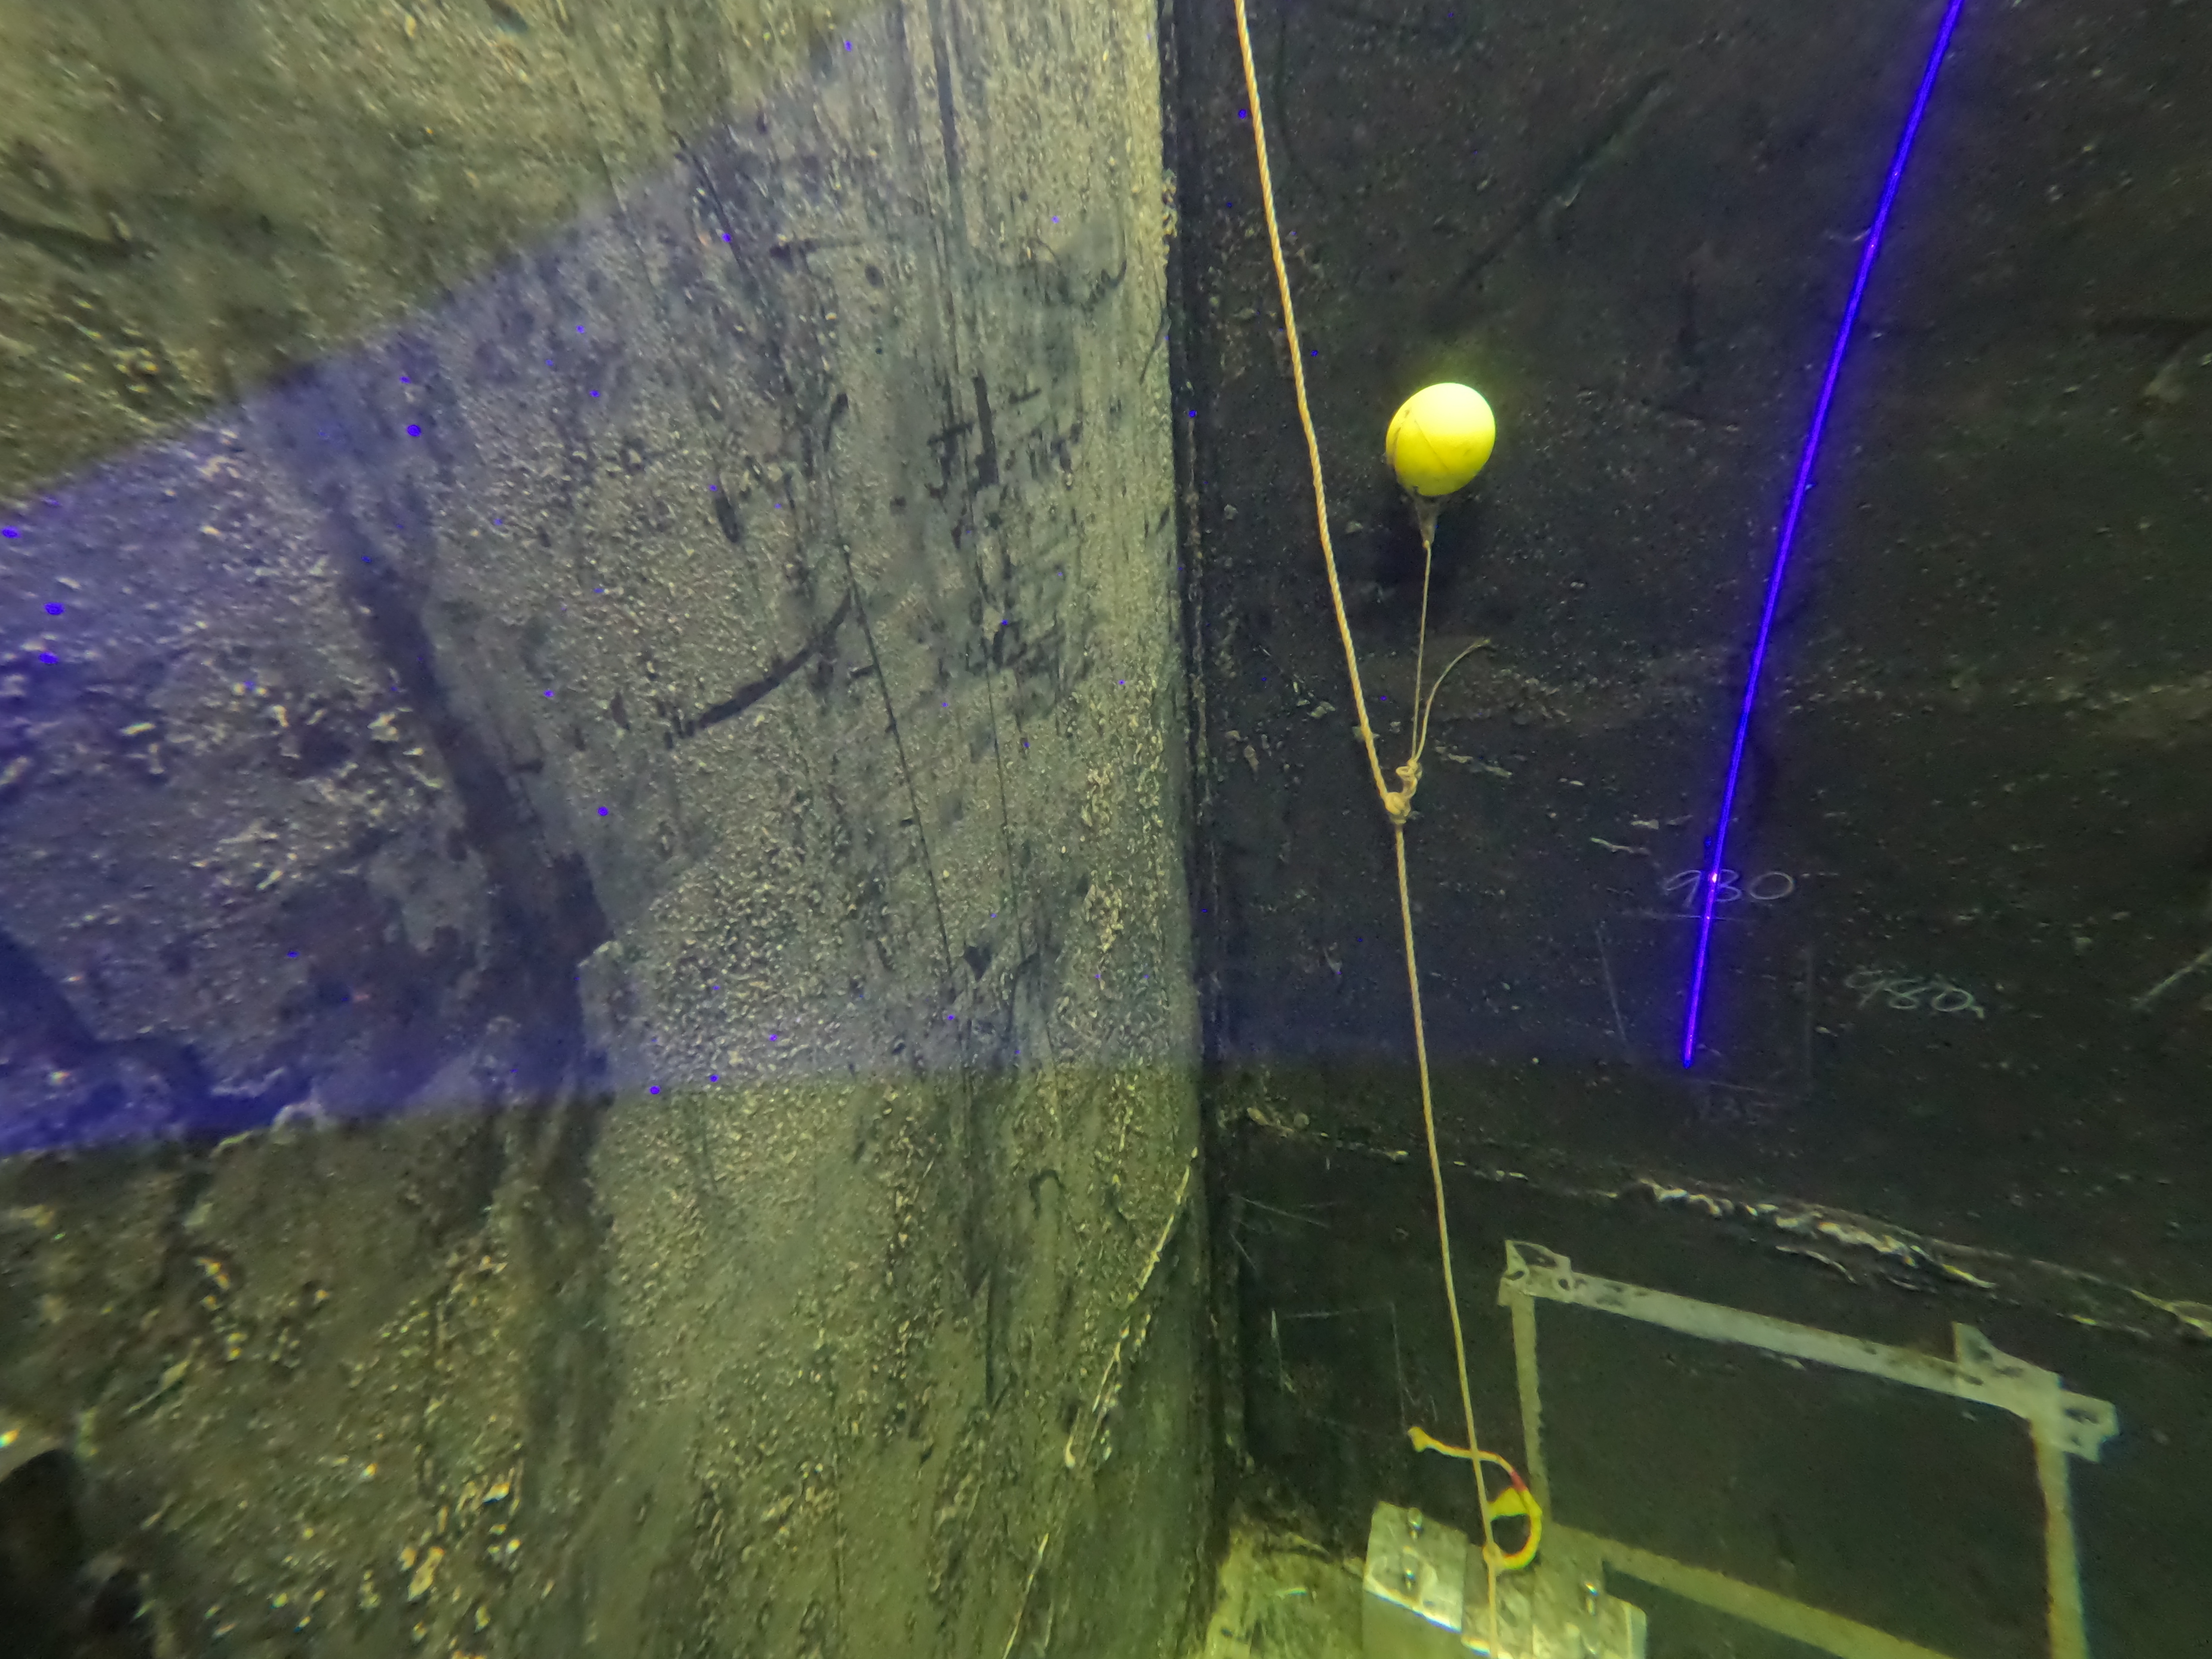

Supplement: Supplementary file 3023 [file G0031823.pdf › 12/G0031823.pdf]

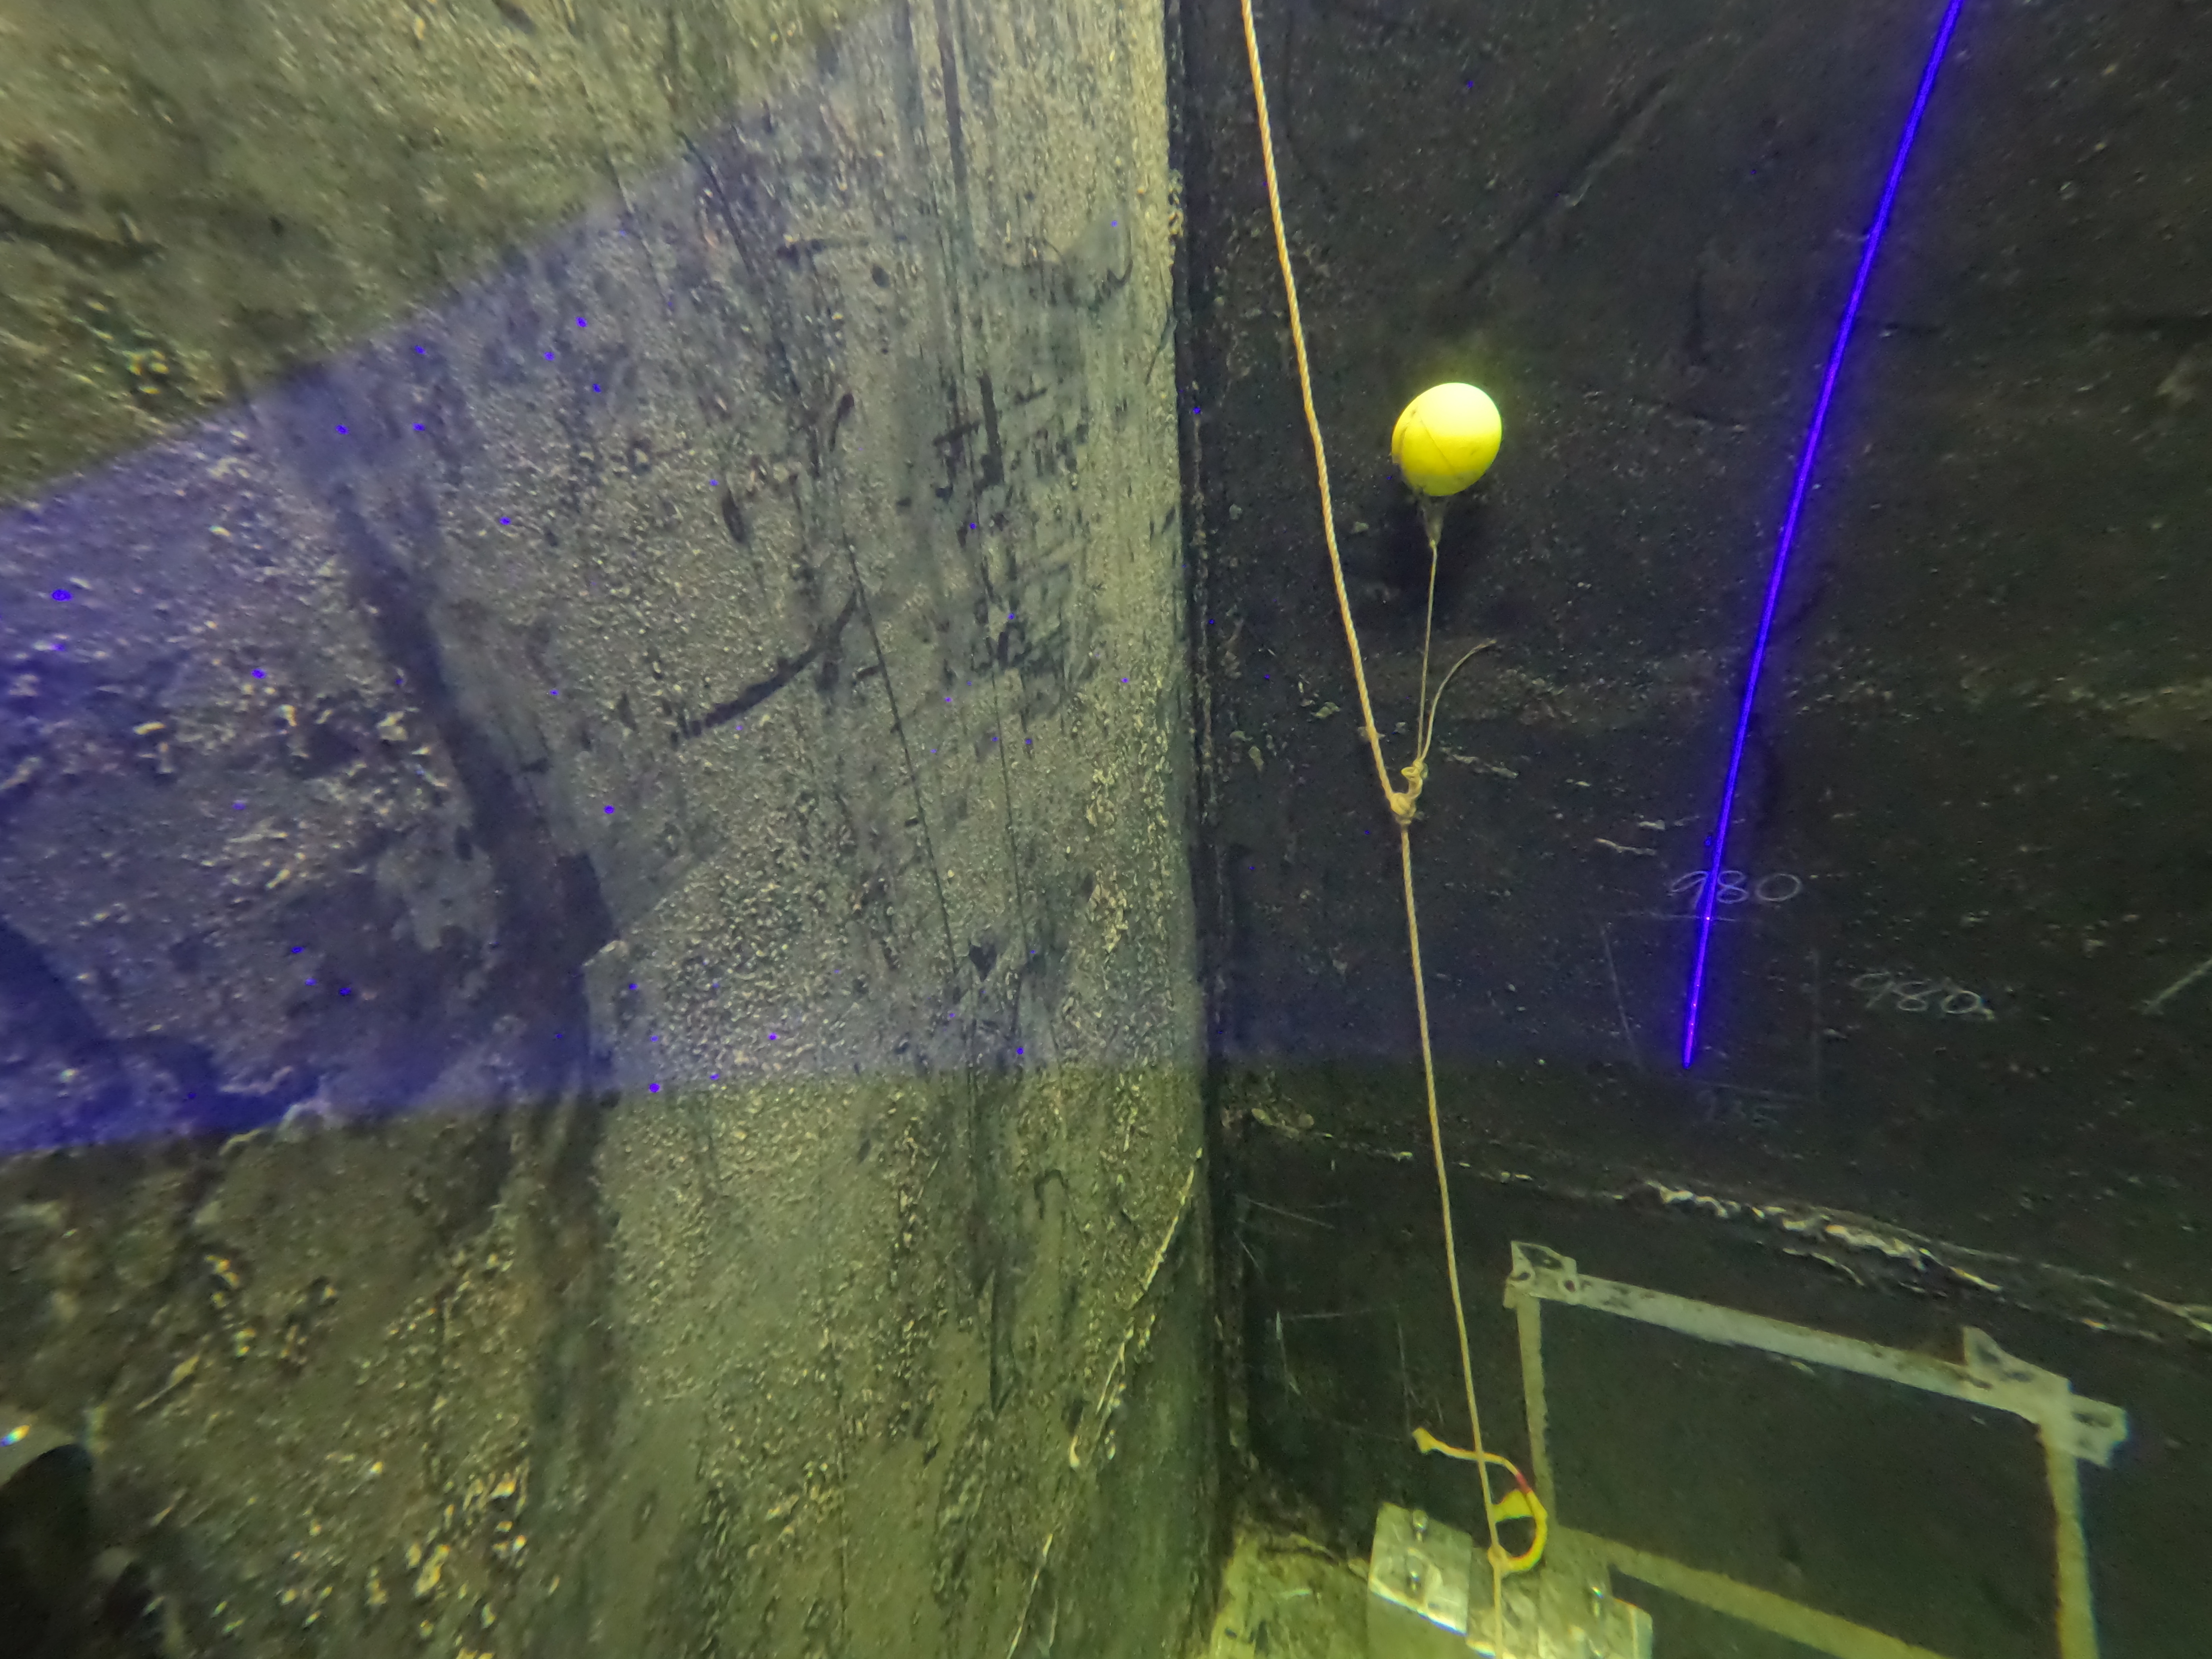

Supplement: Supplementary file 3024 [file G0031824.pdf › 12/G0031824.pdf]

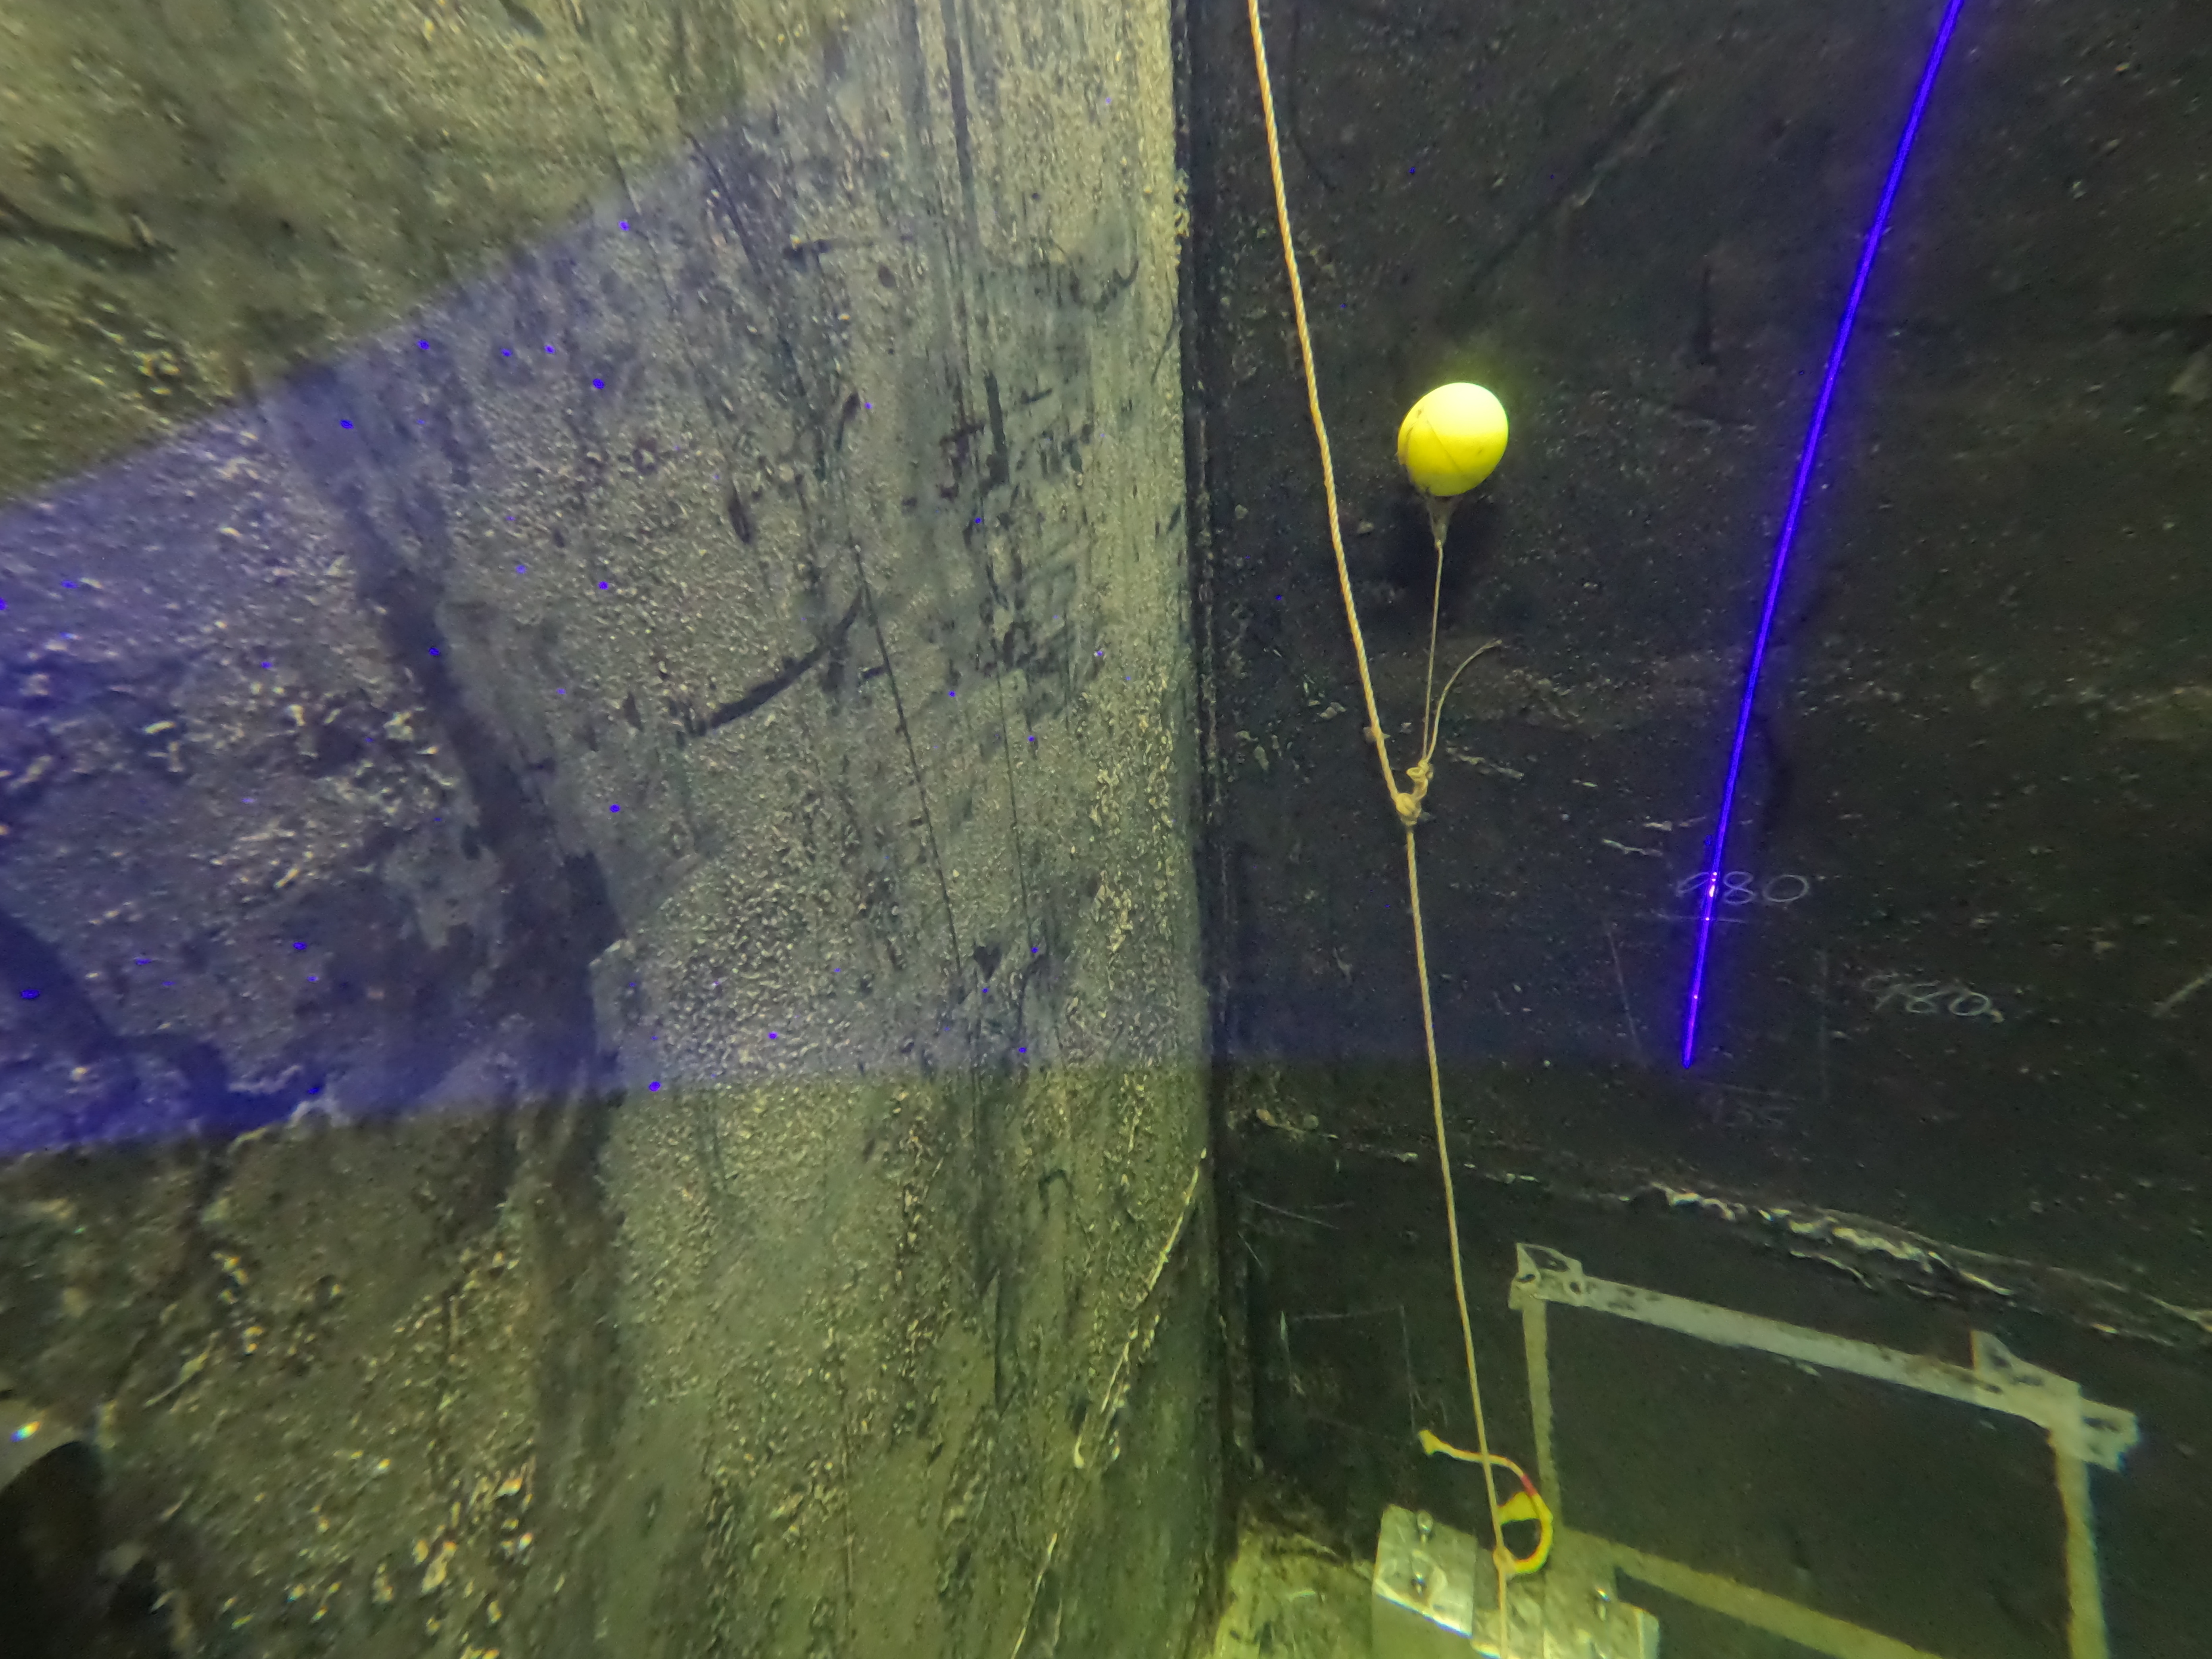

Supplement: Supplementary file 3025 [file G0031825.pdf › 12/G0031825.pdf]

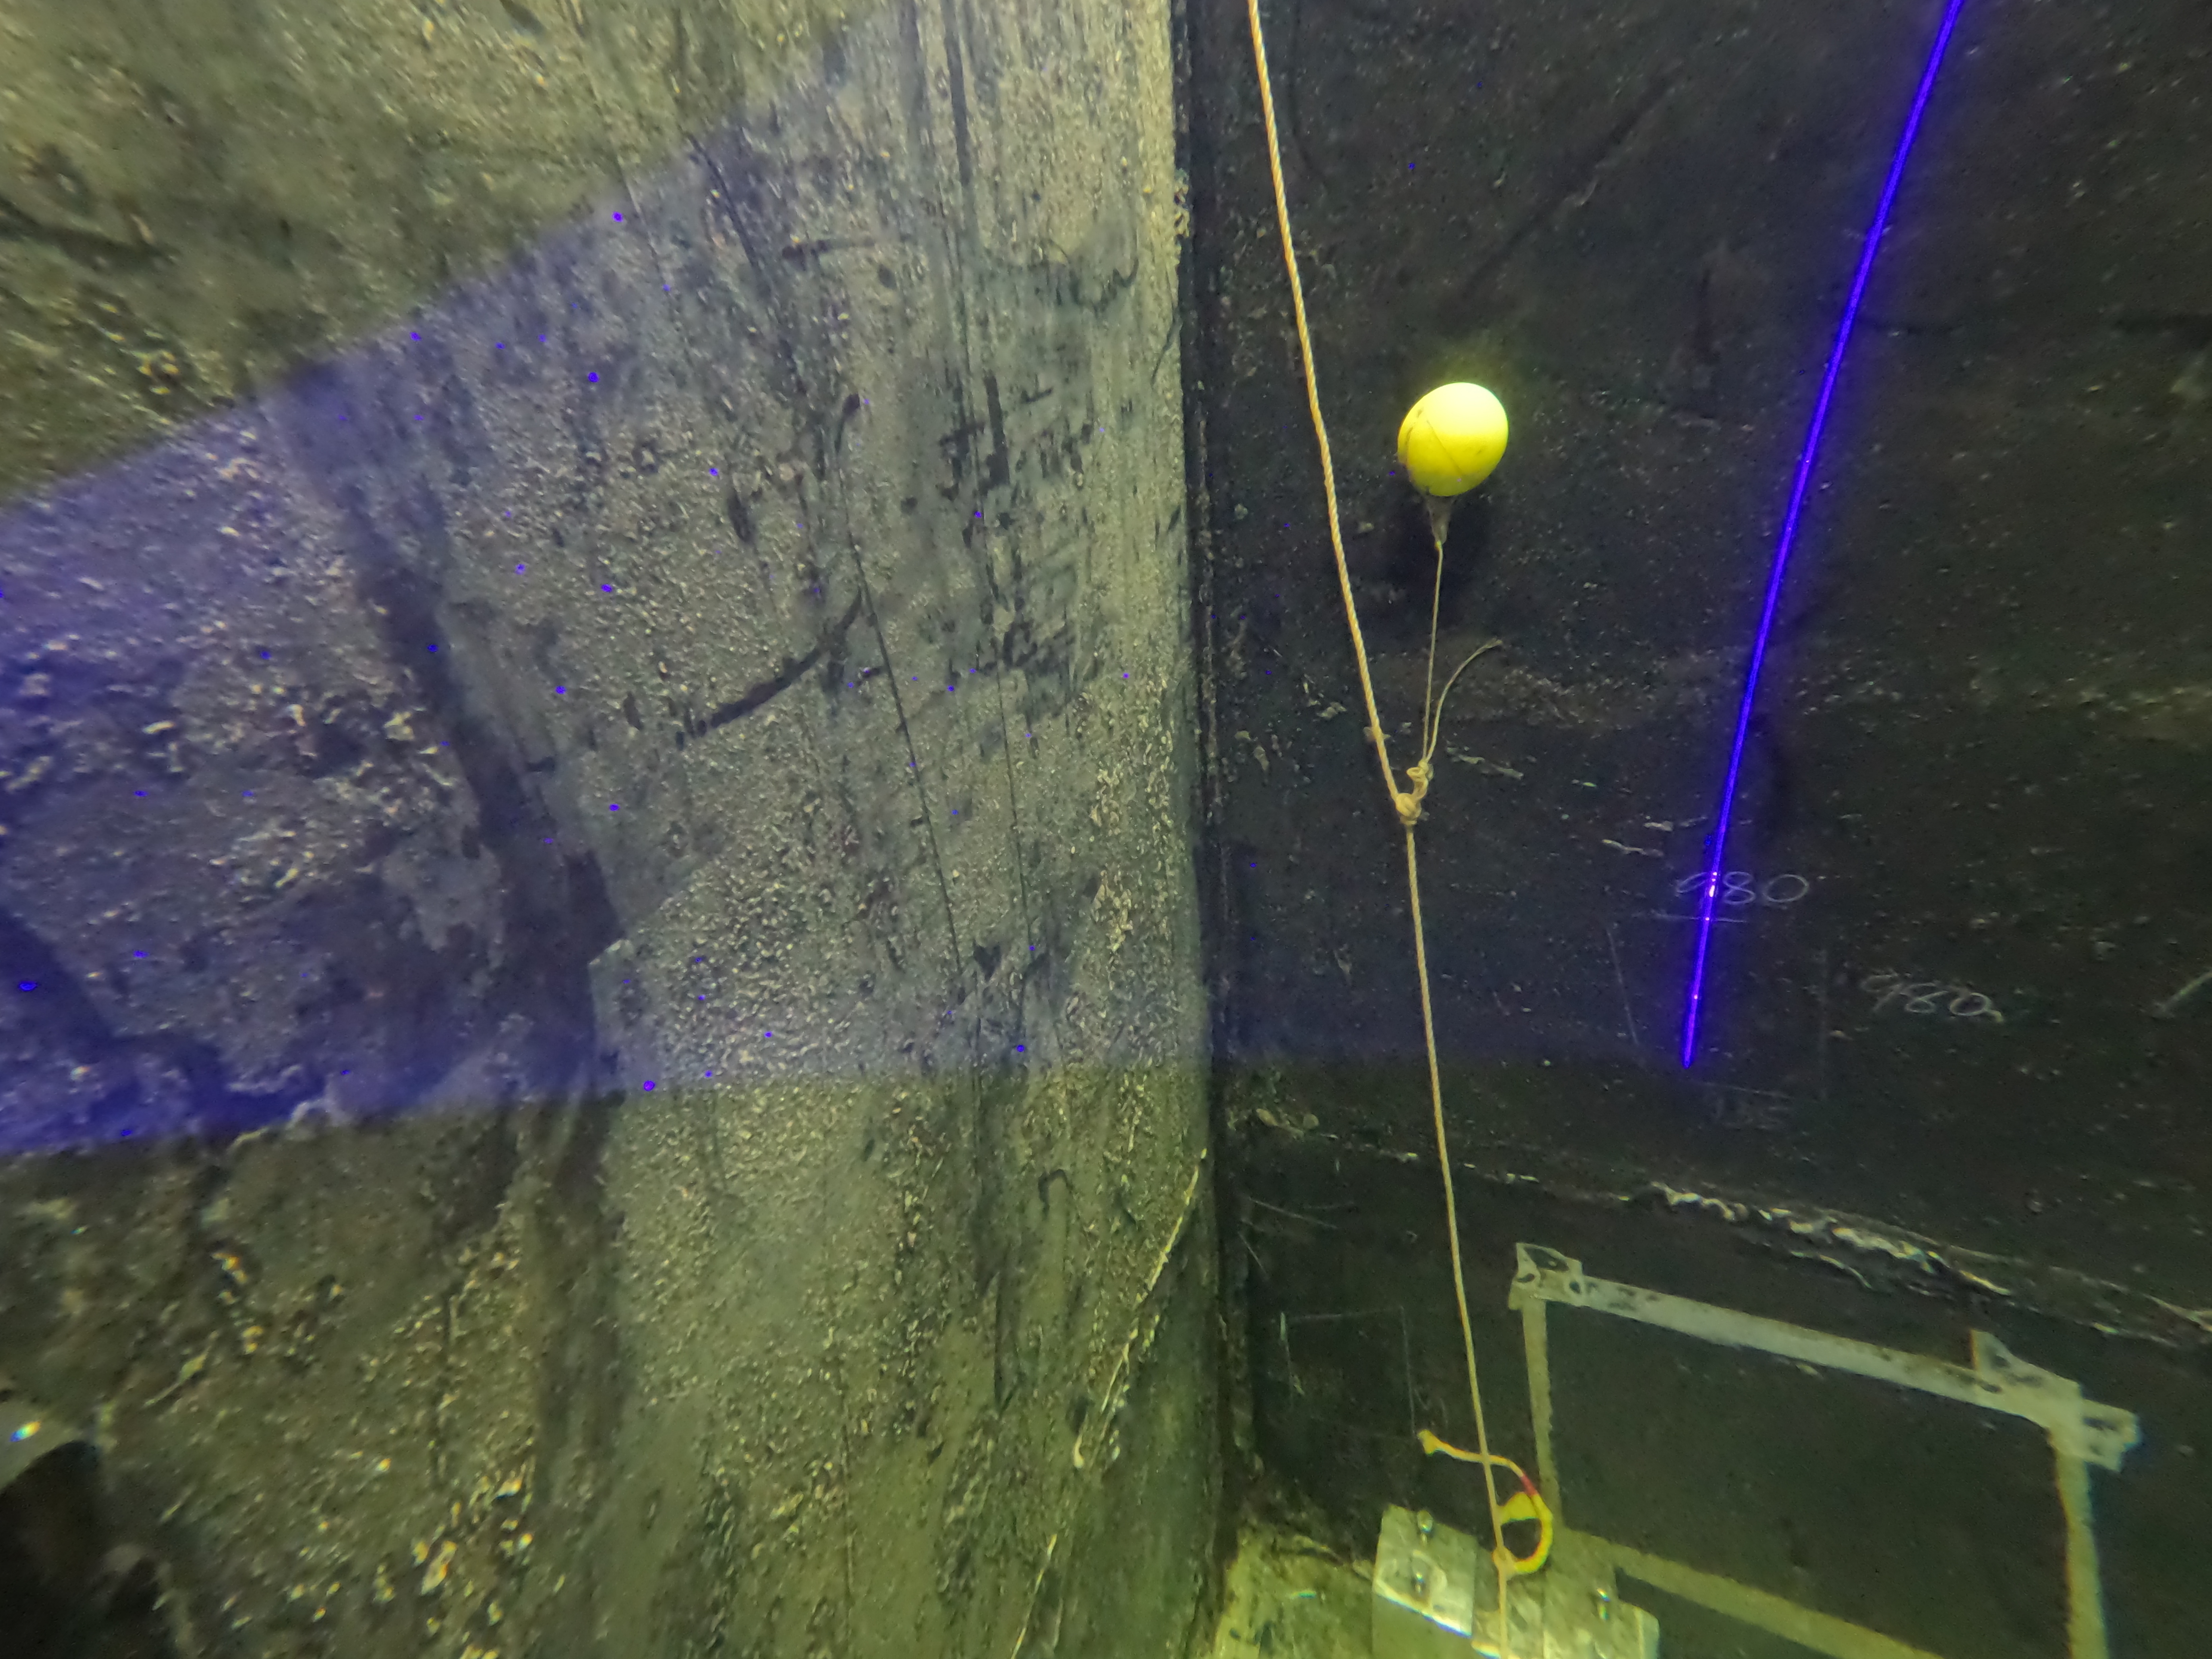

Supplement: Supplementary file 3026 [file G0031826.pdf › 12/G0031826.pdf]

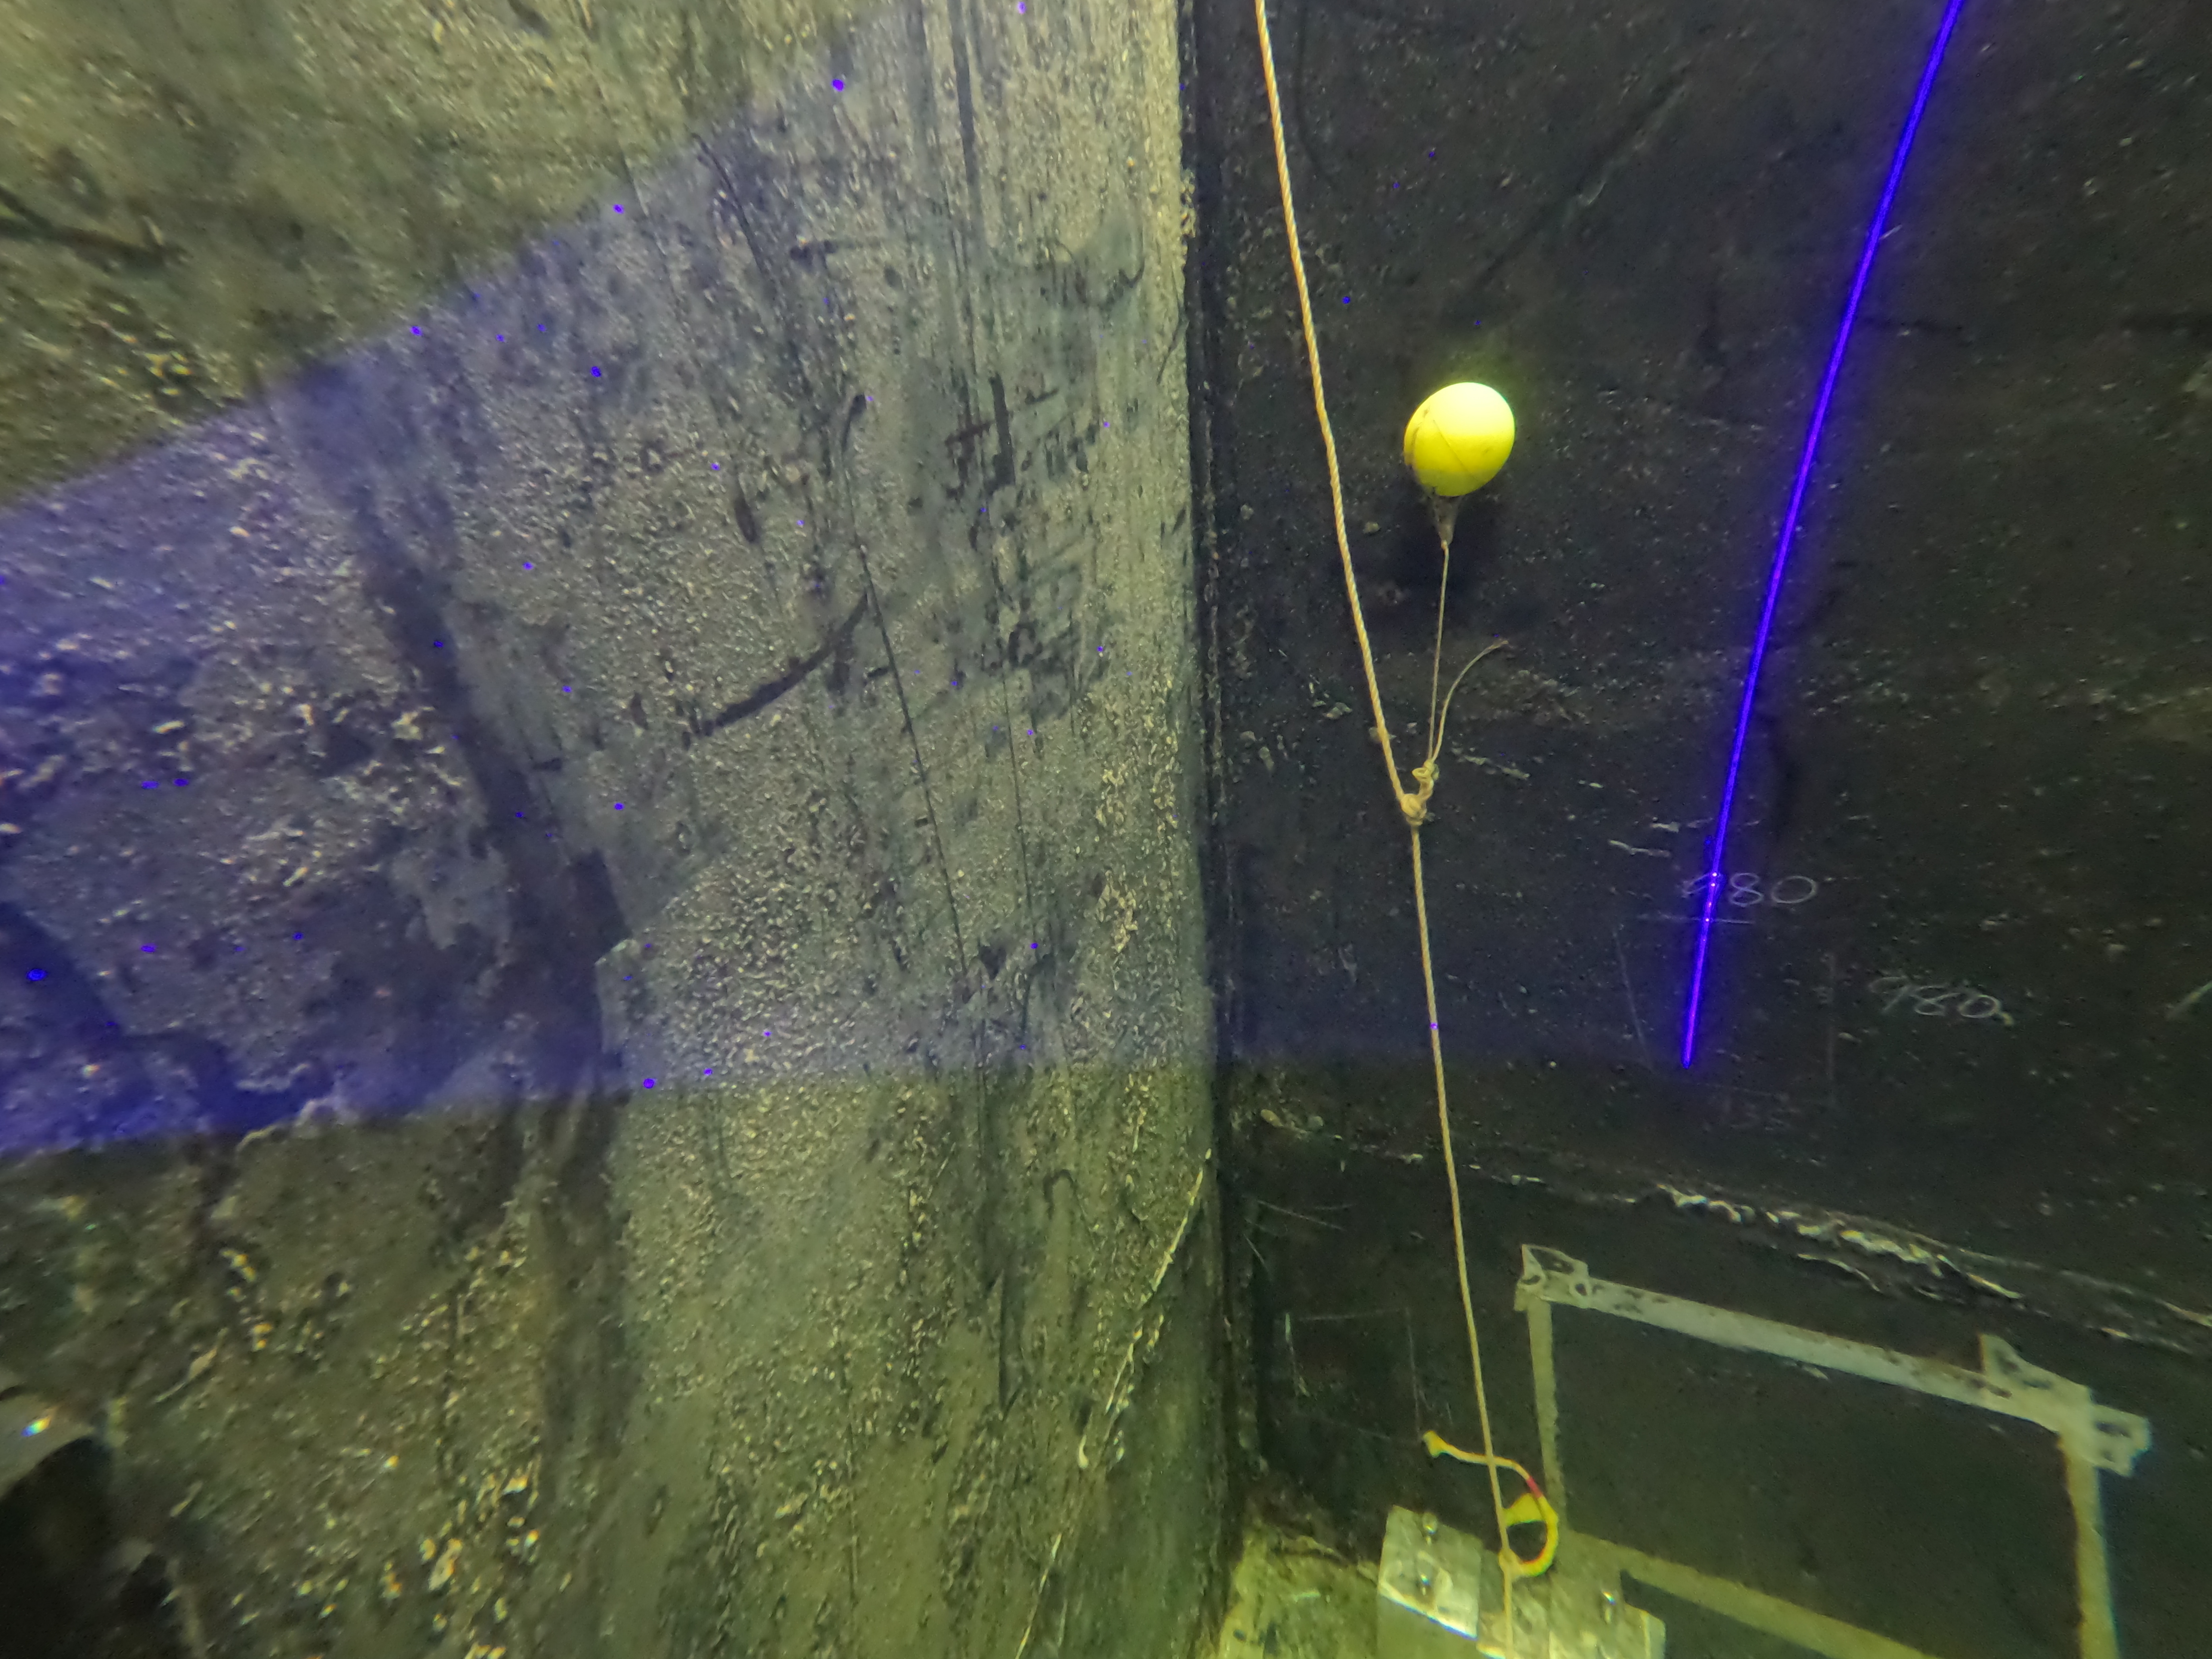

Supplement: Supplementary file 3027 [file G0031827.pdf › 12/G0031827.pdf]

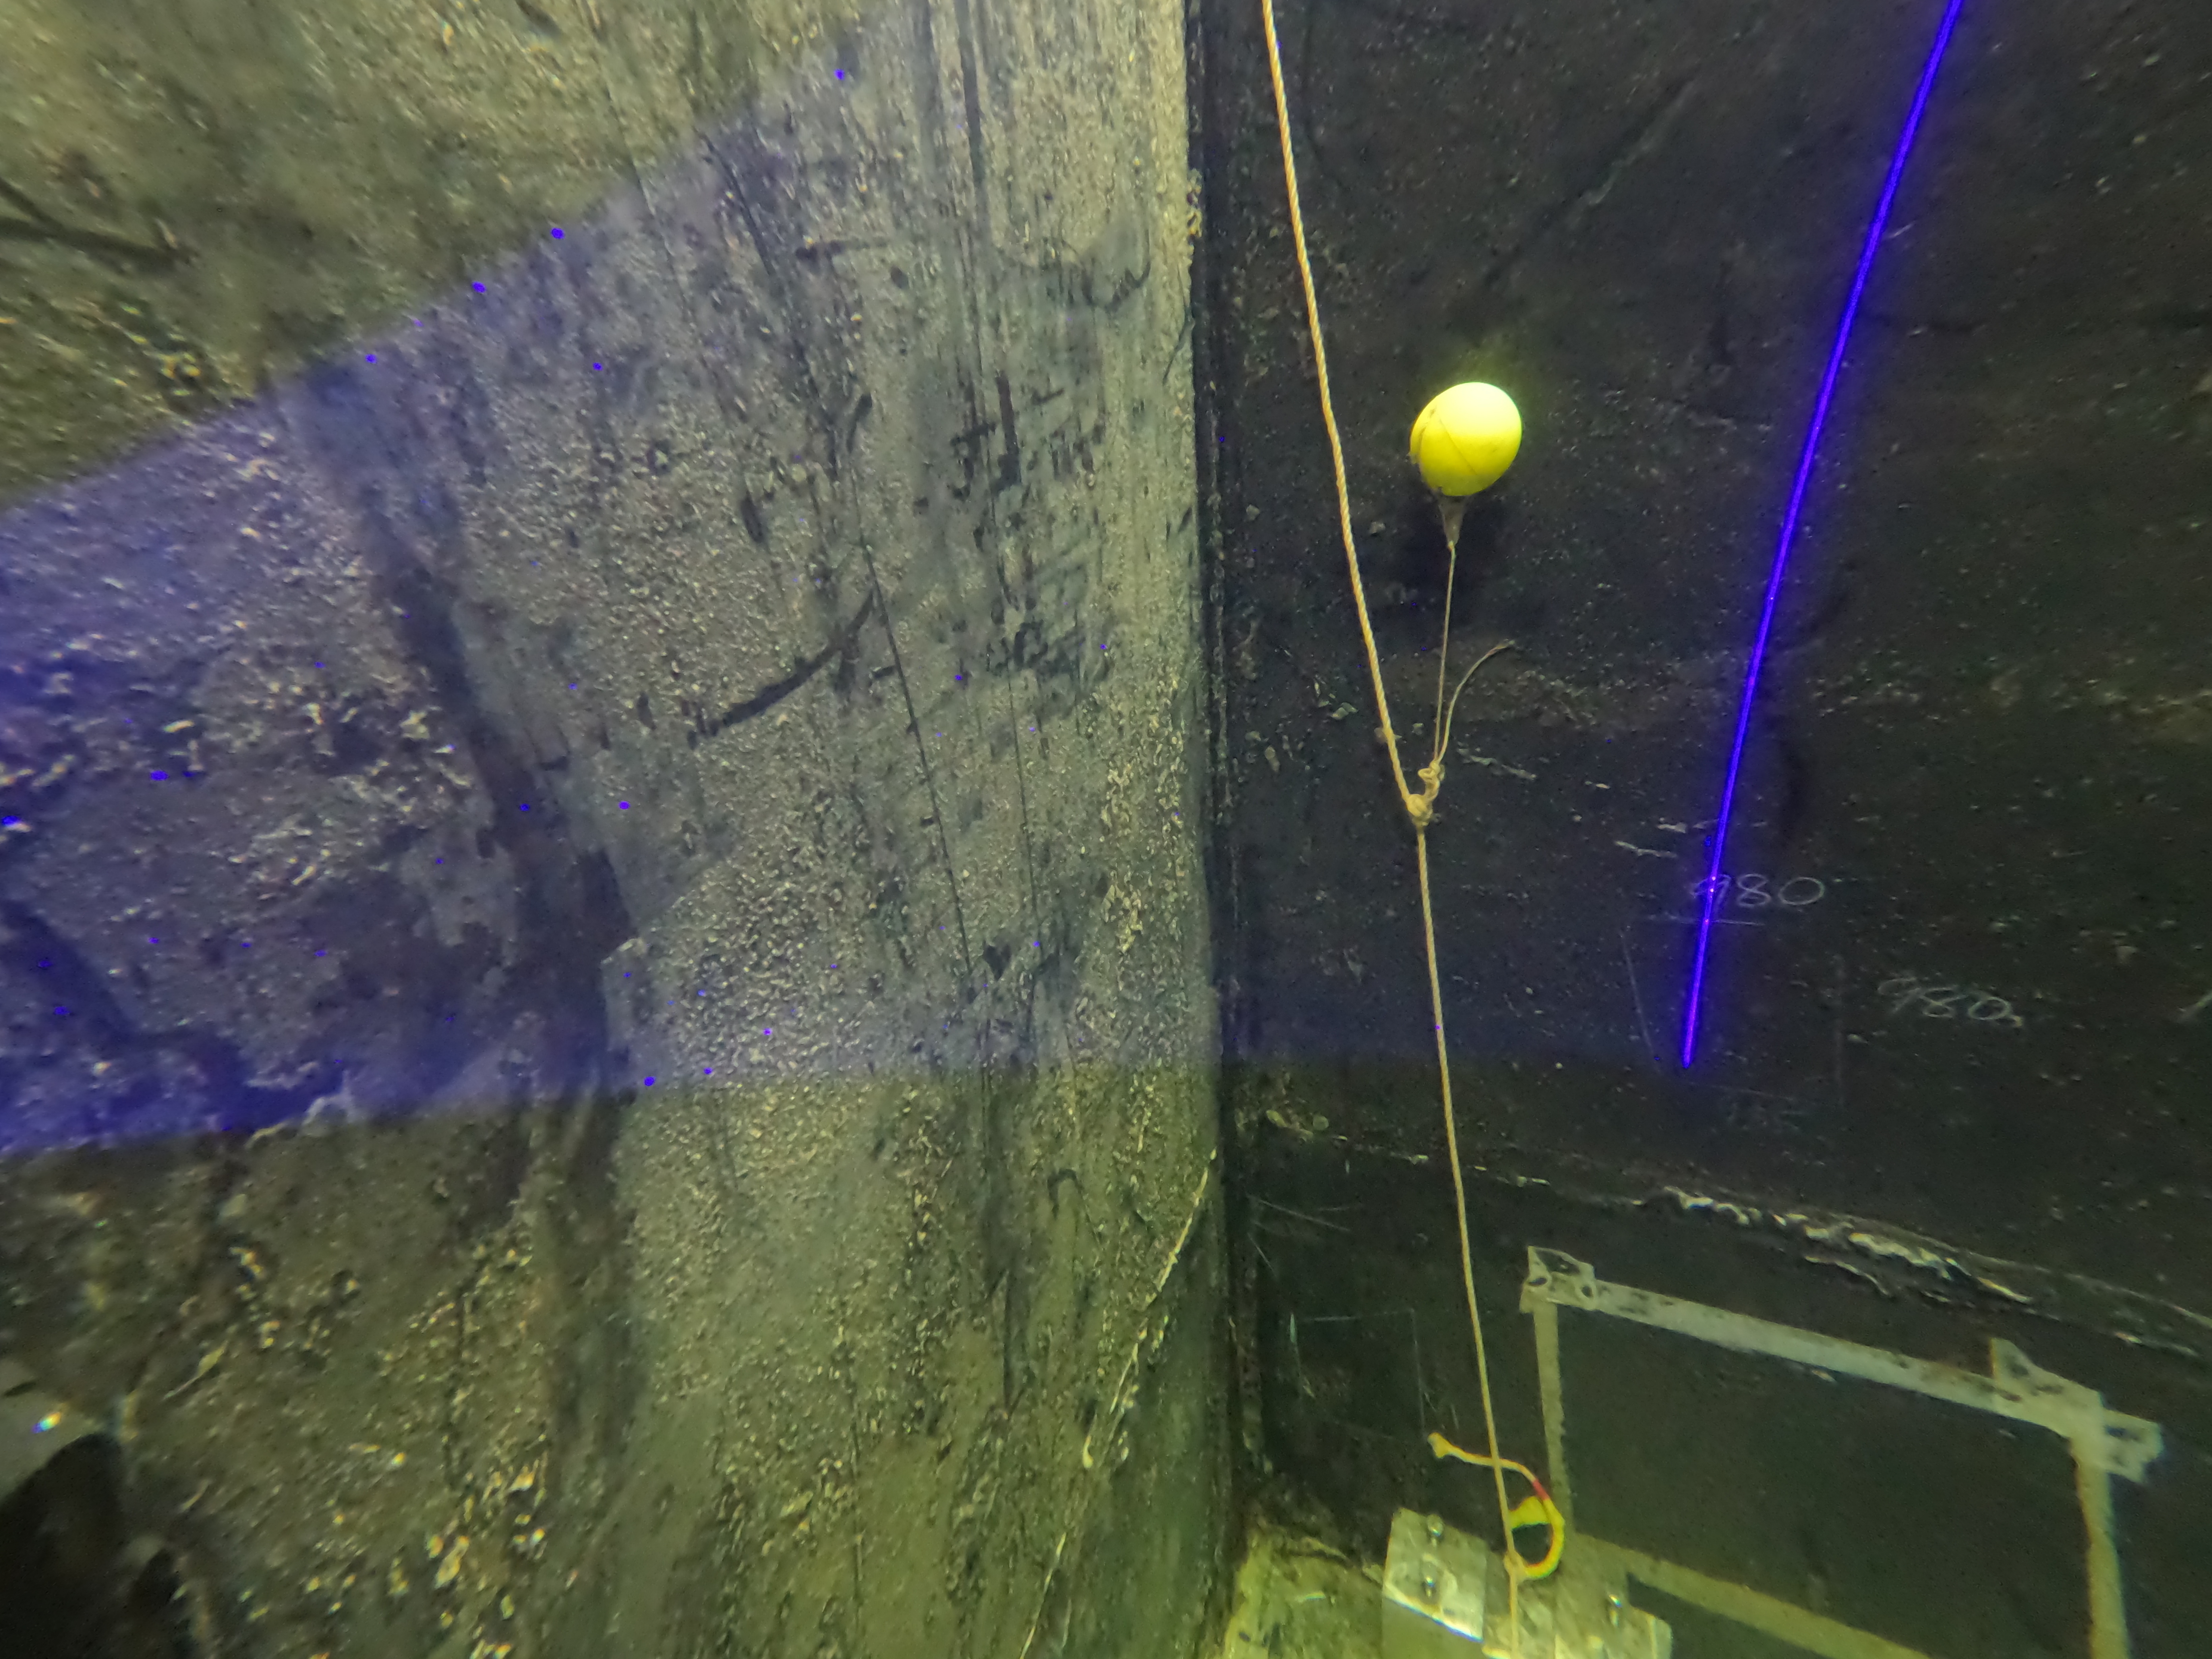

Supplement: Supplementary file 3028 [file G0031828.pdf › 12/G0031828.pdf]

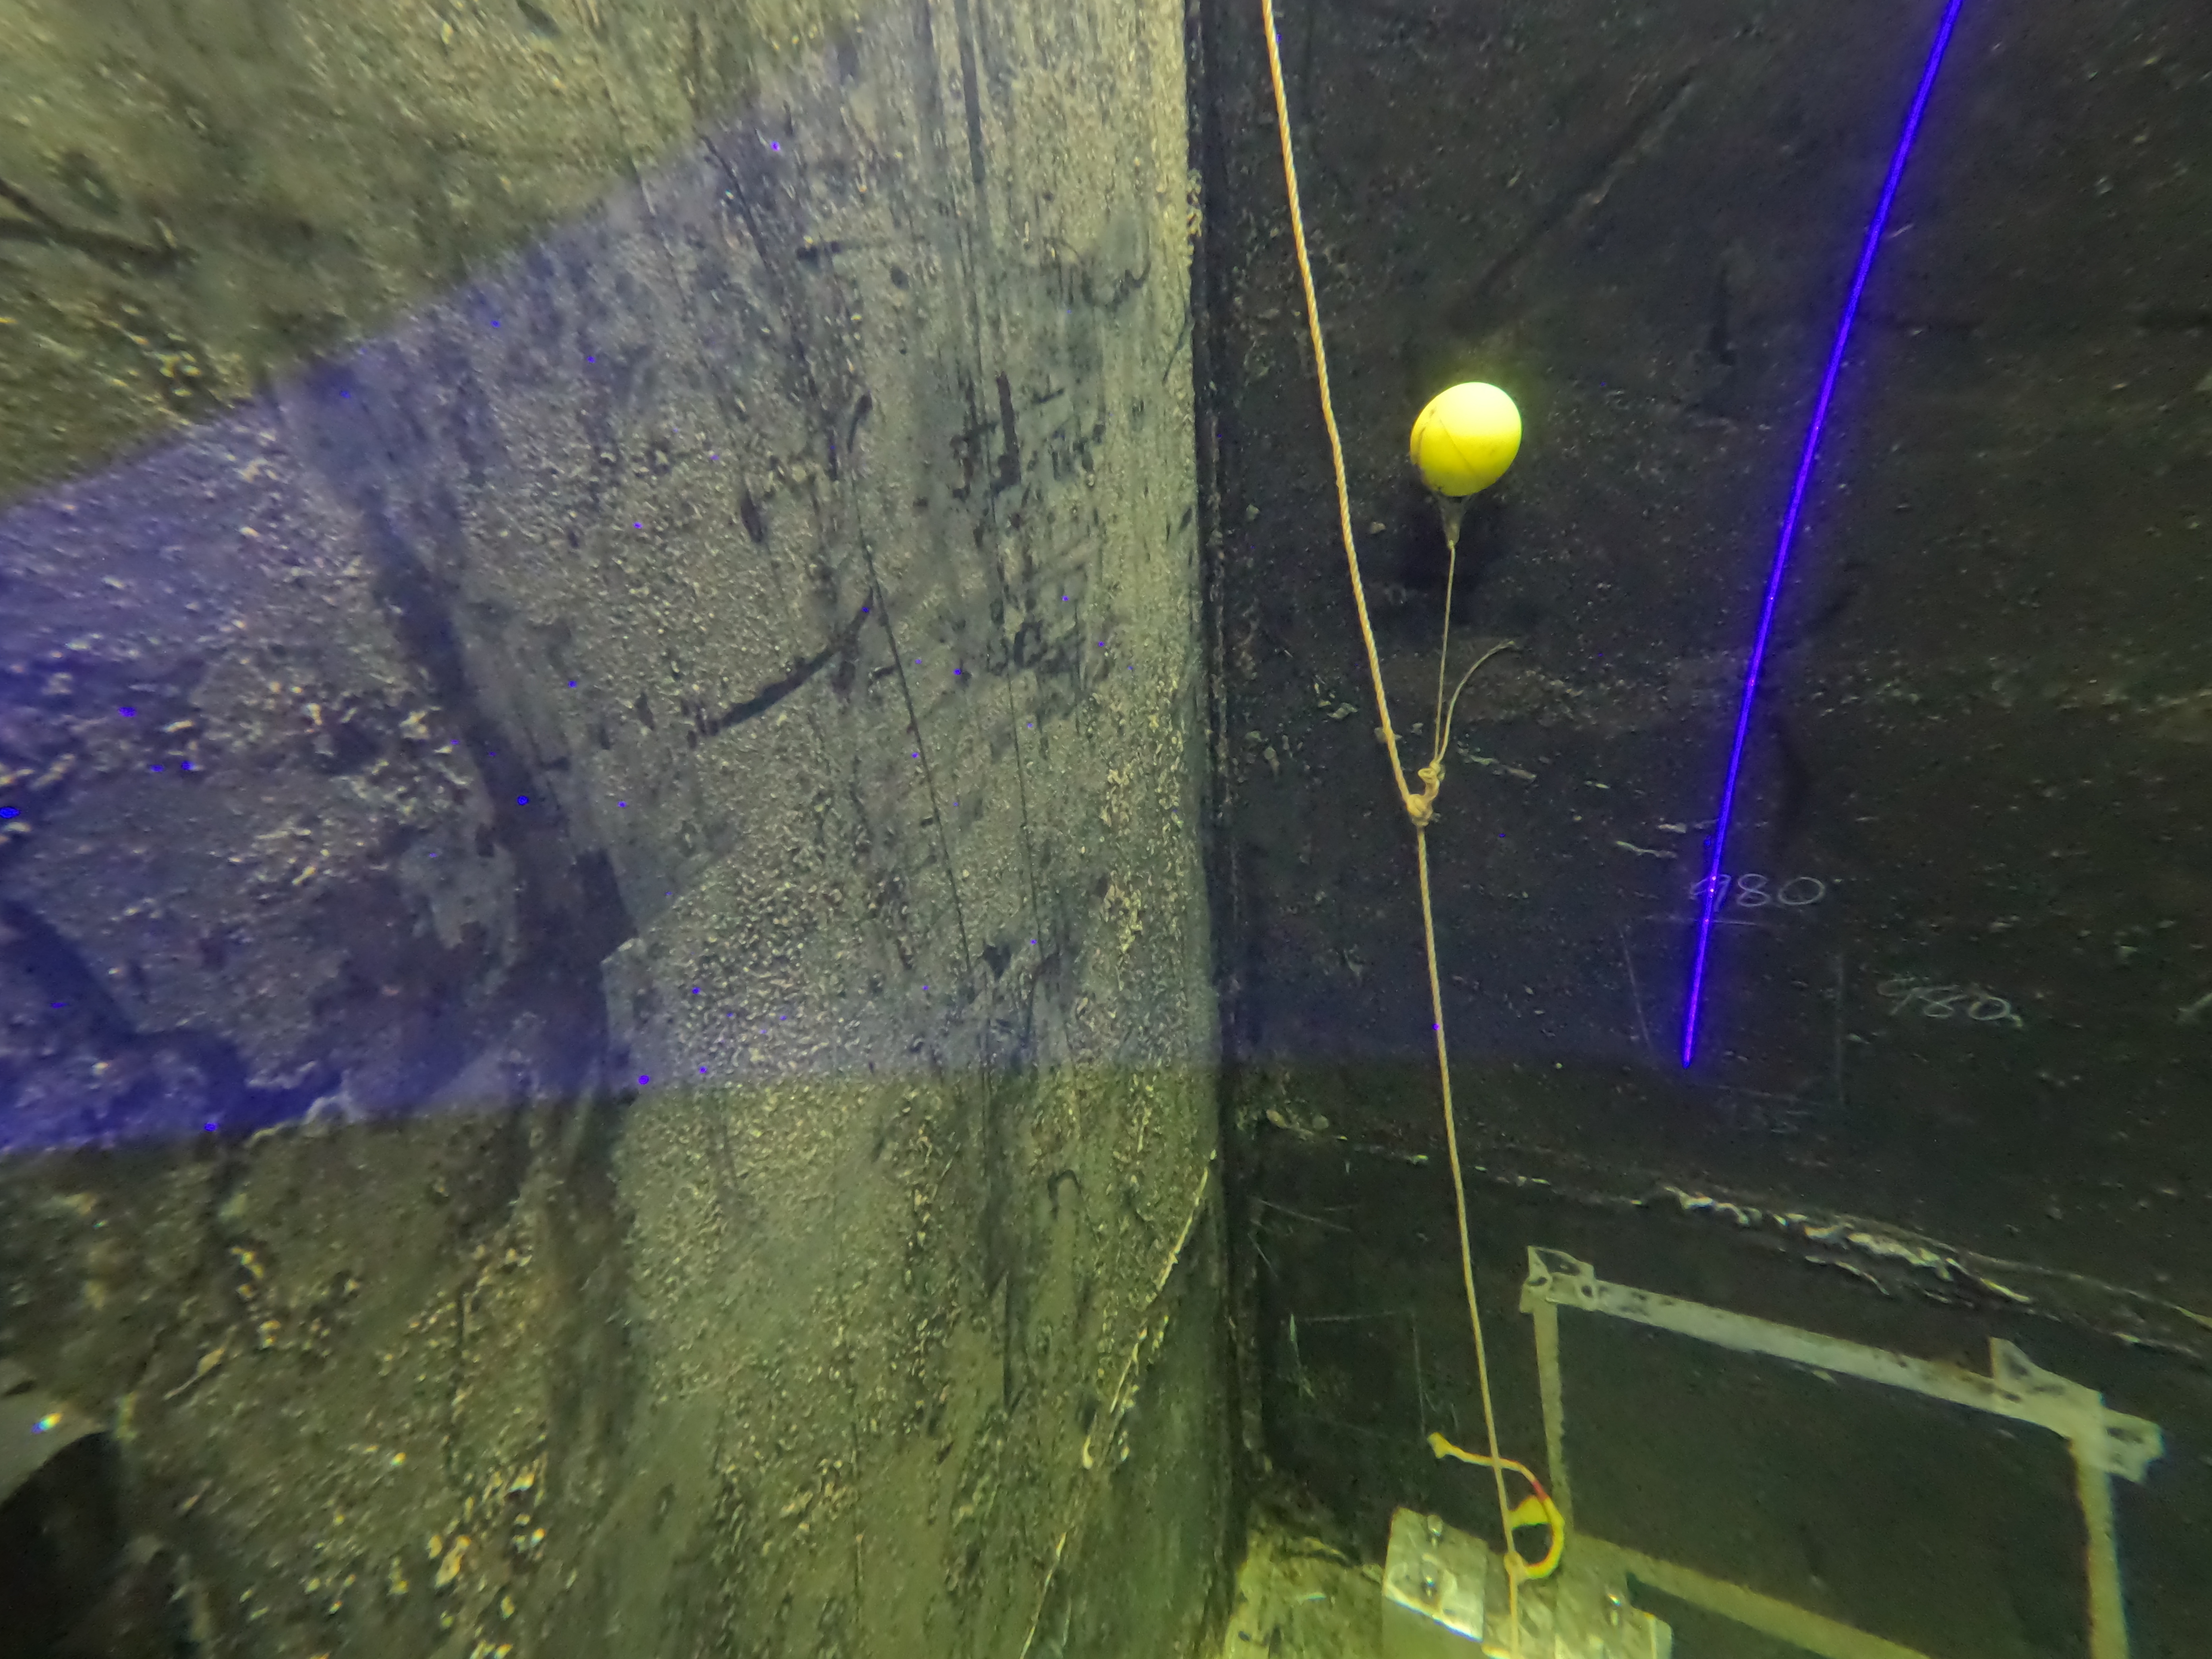

Supplement: Supplementary file 3029 [file G0031829.pdf › 12/G0031829.pdf]

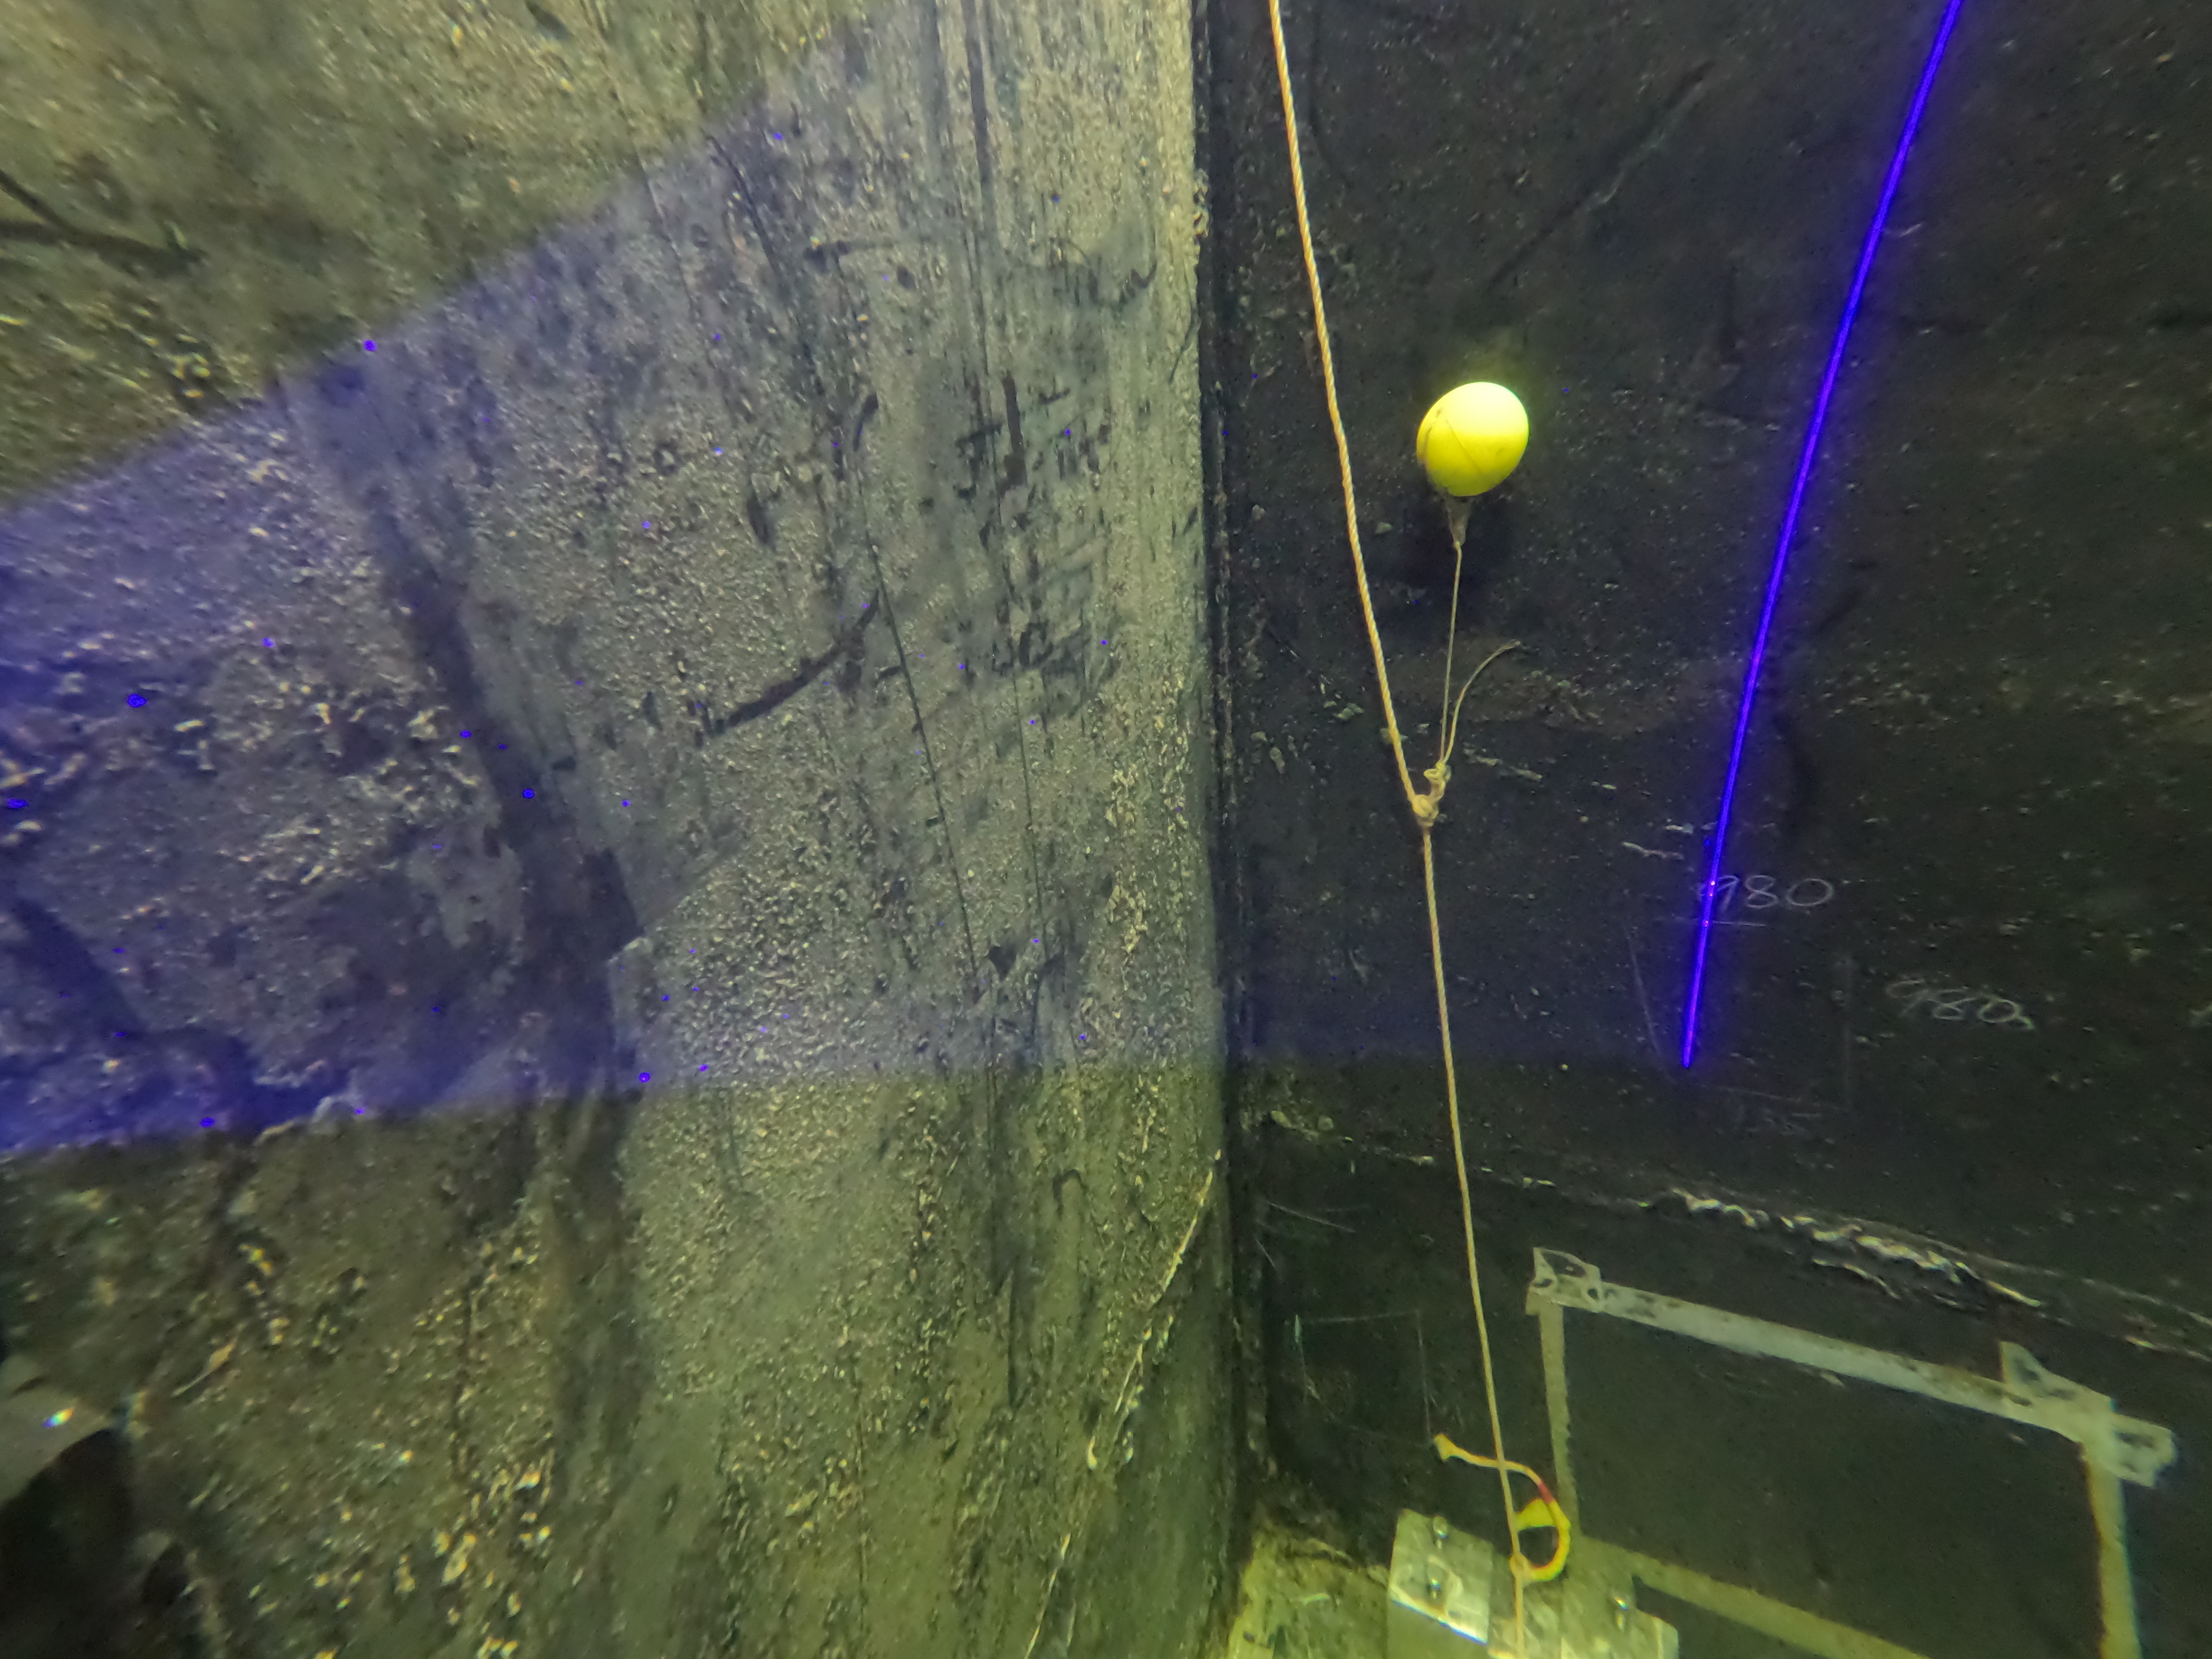

Supplement: Supplementary file 3030 [file G0031830.pdf › 12/G0031830.pdf]

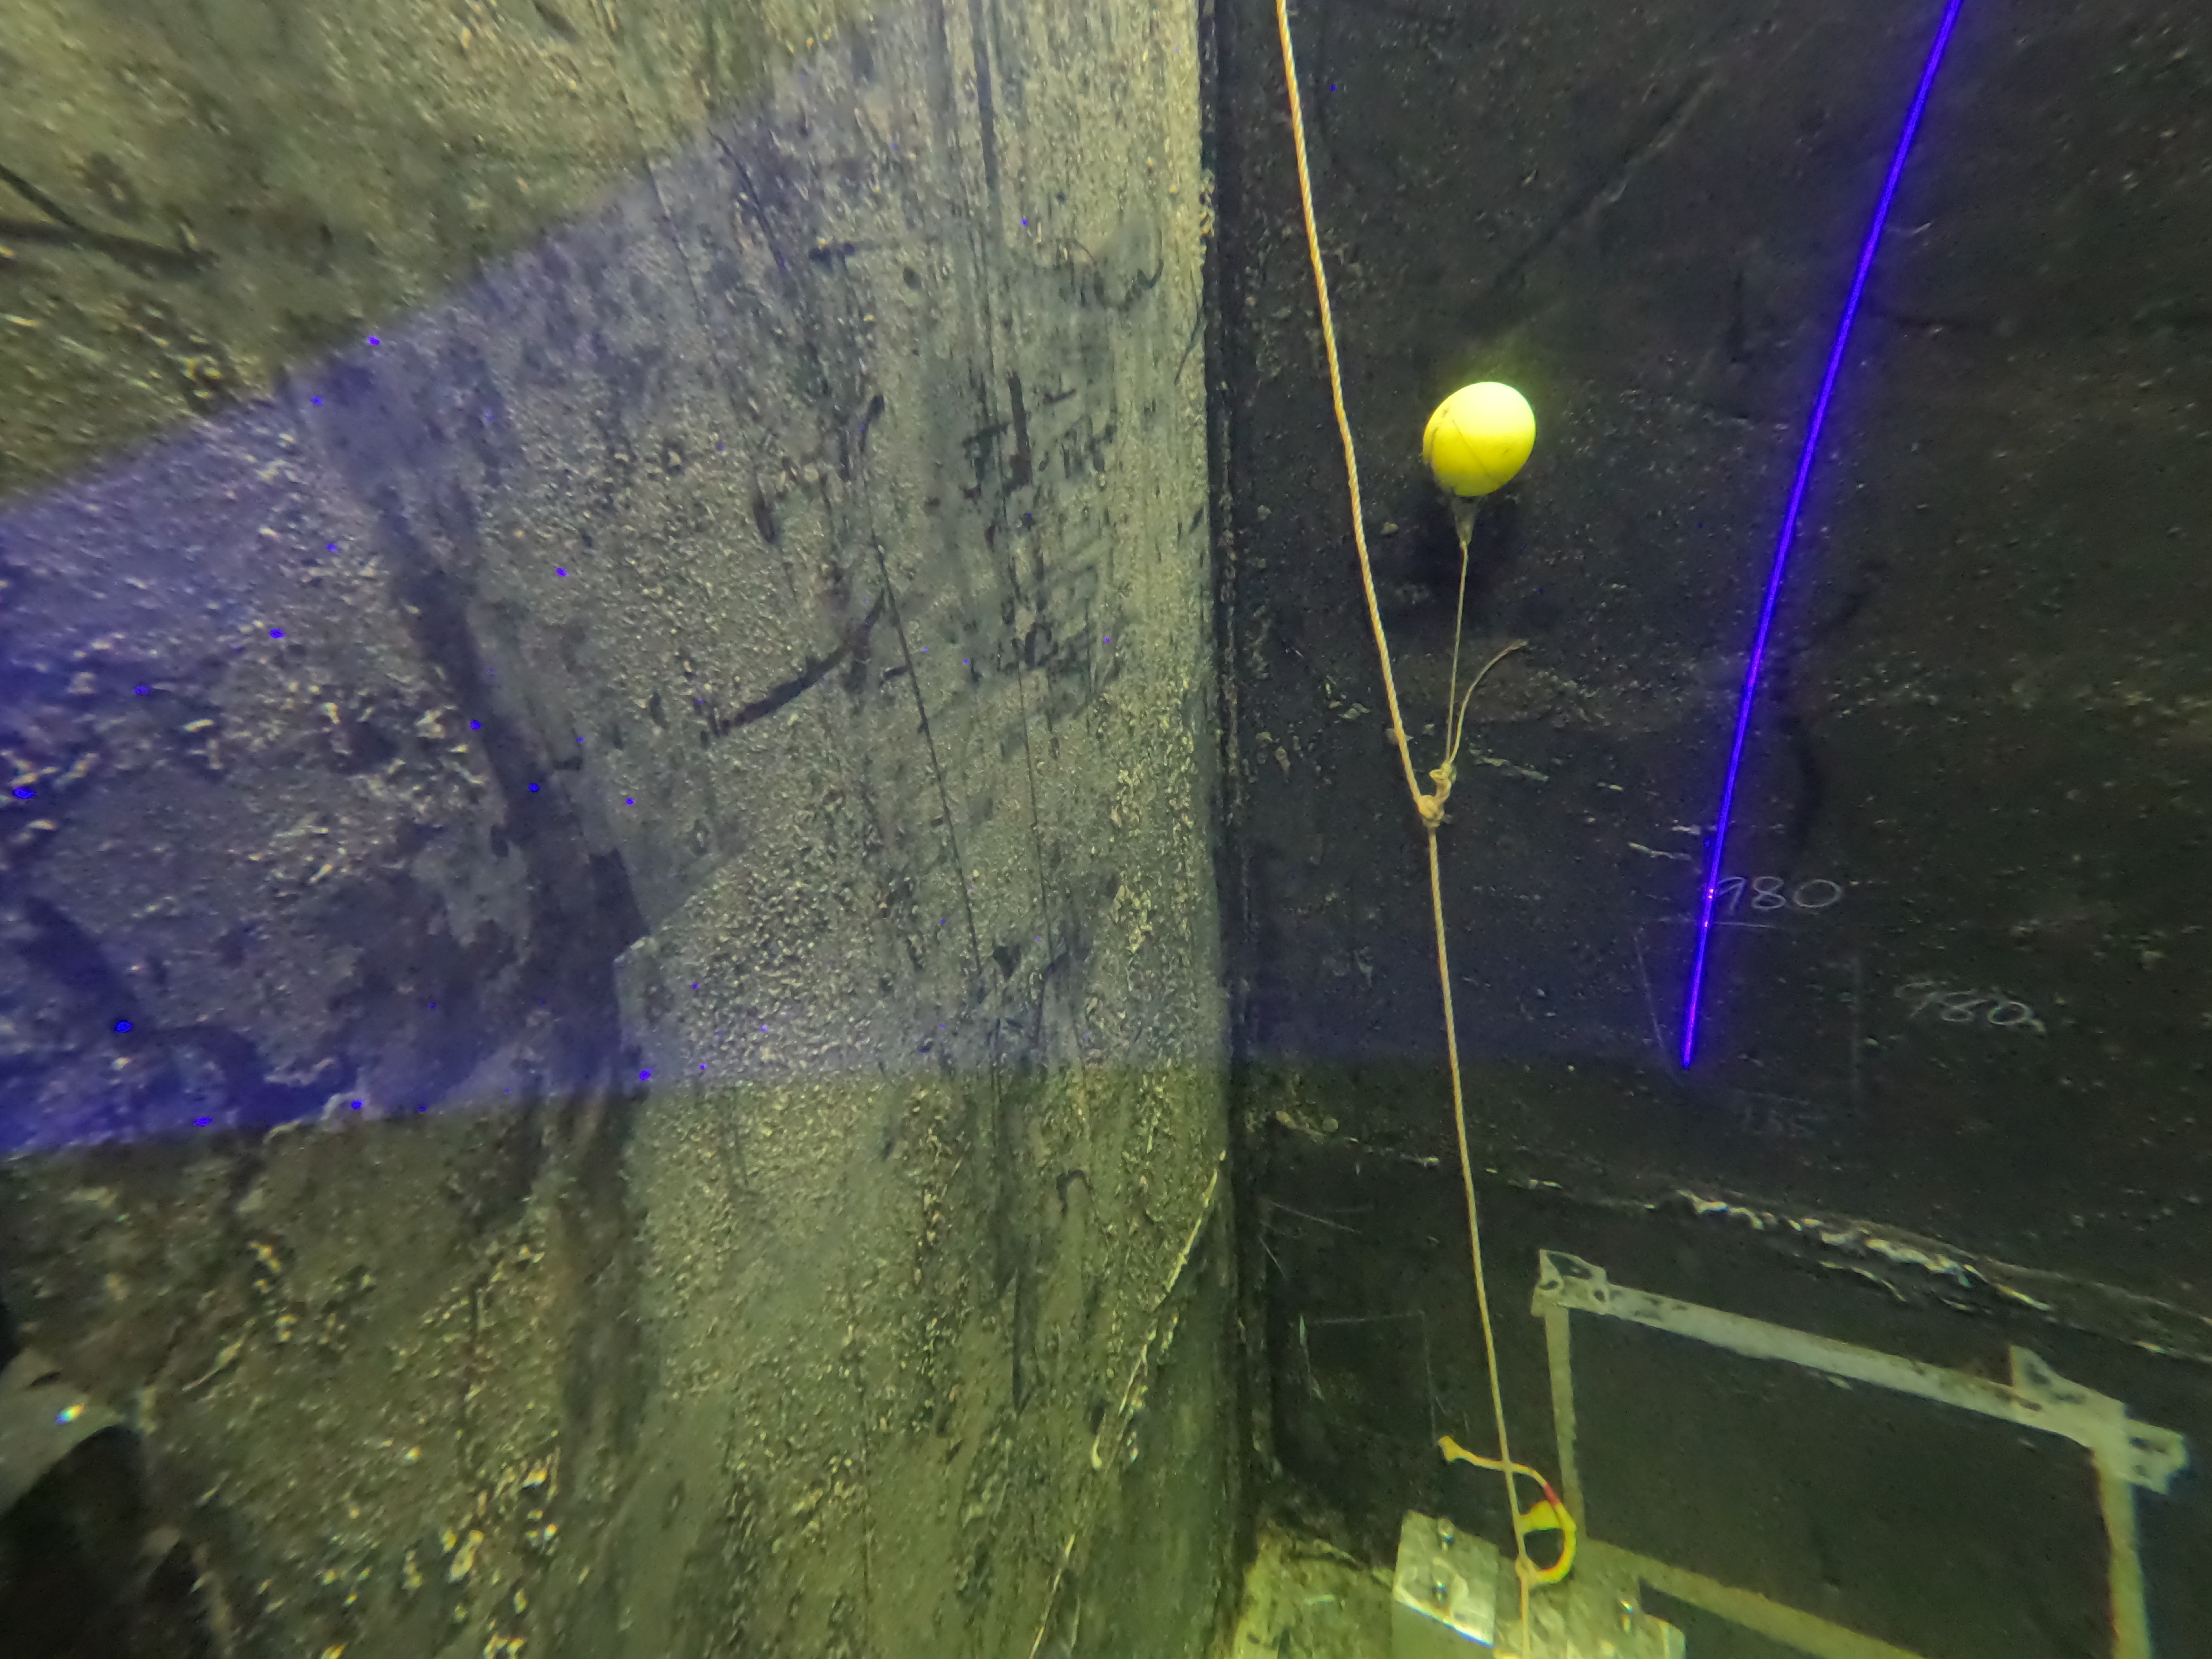

Supplement: Supplementary file 3031 [file G0031831.pdf › 12/G0031831.pdf]

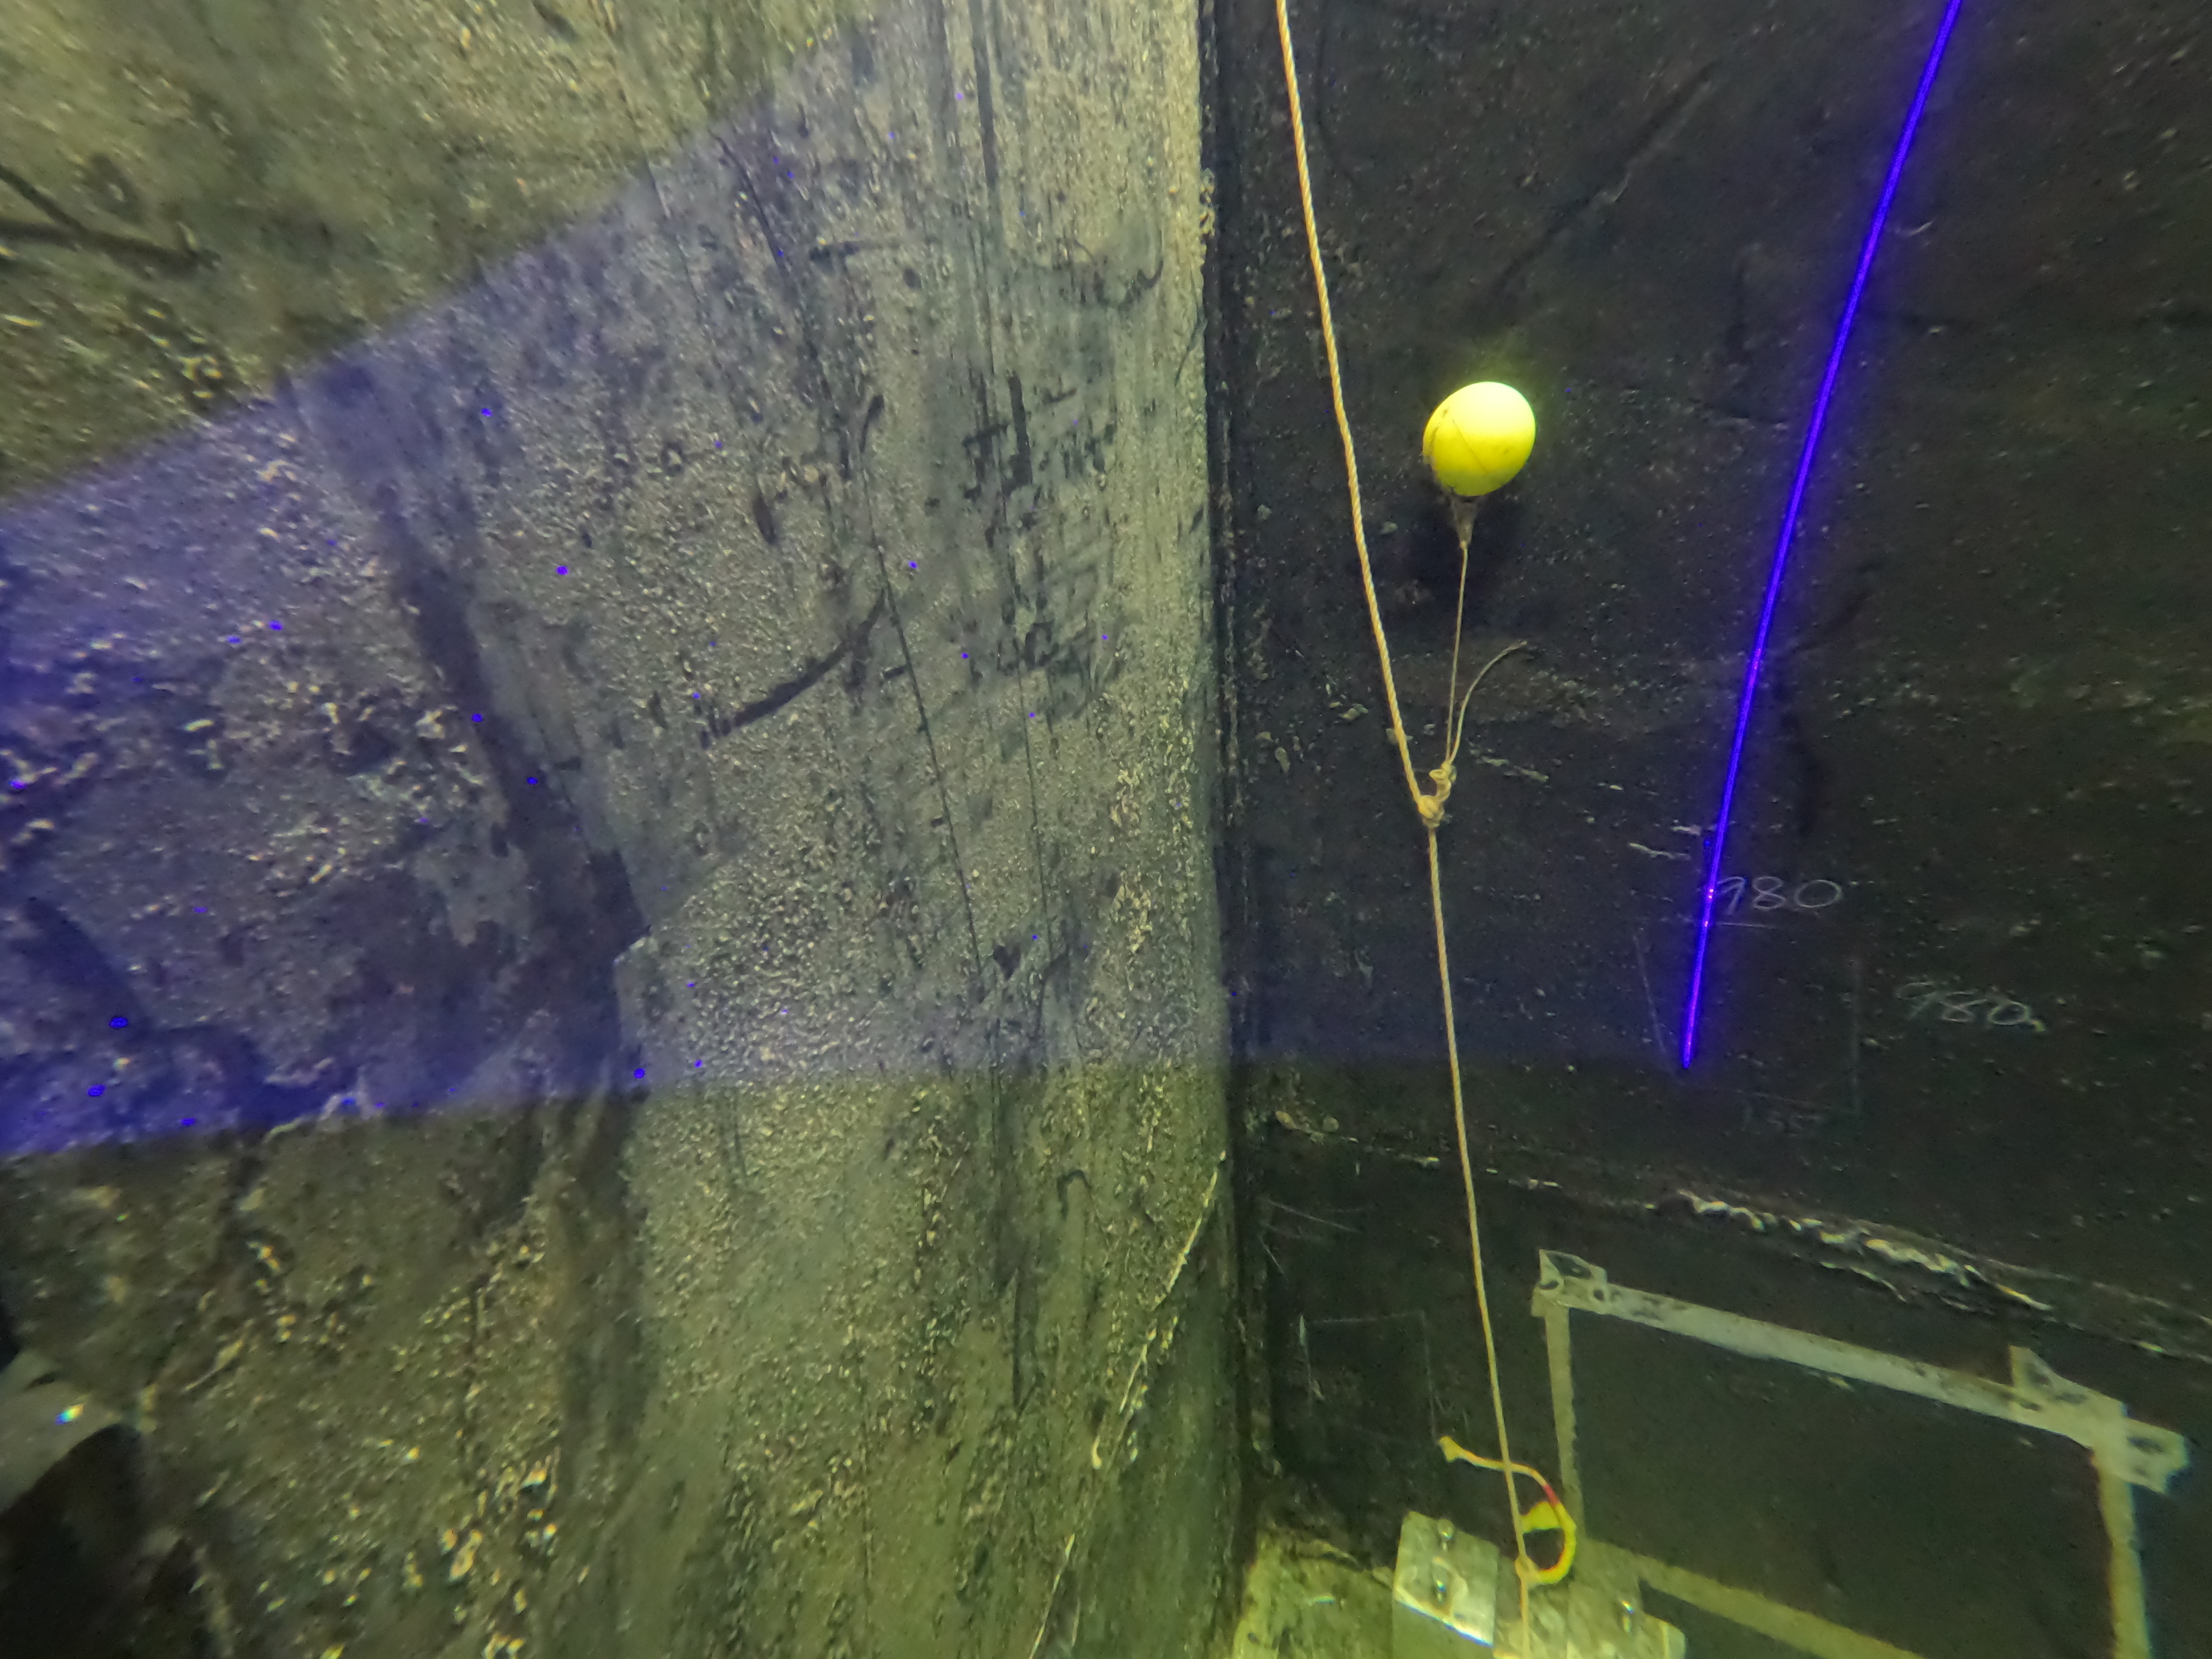

Supplement: Supplementary file 3032 [file G0031832.pdf › 12/G0031832.pdf]

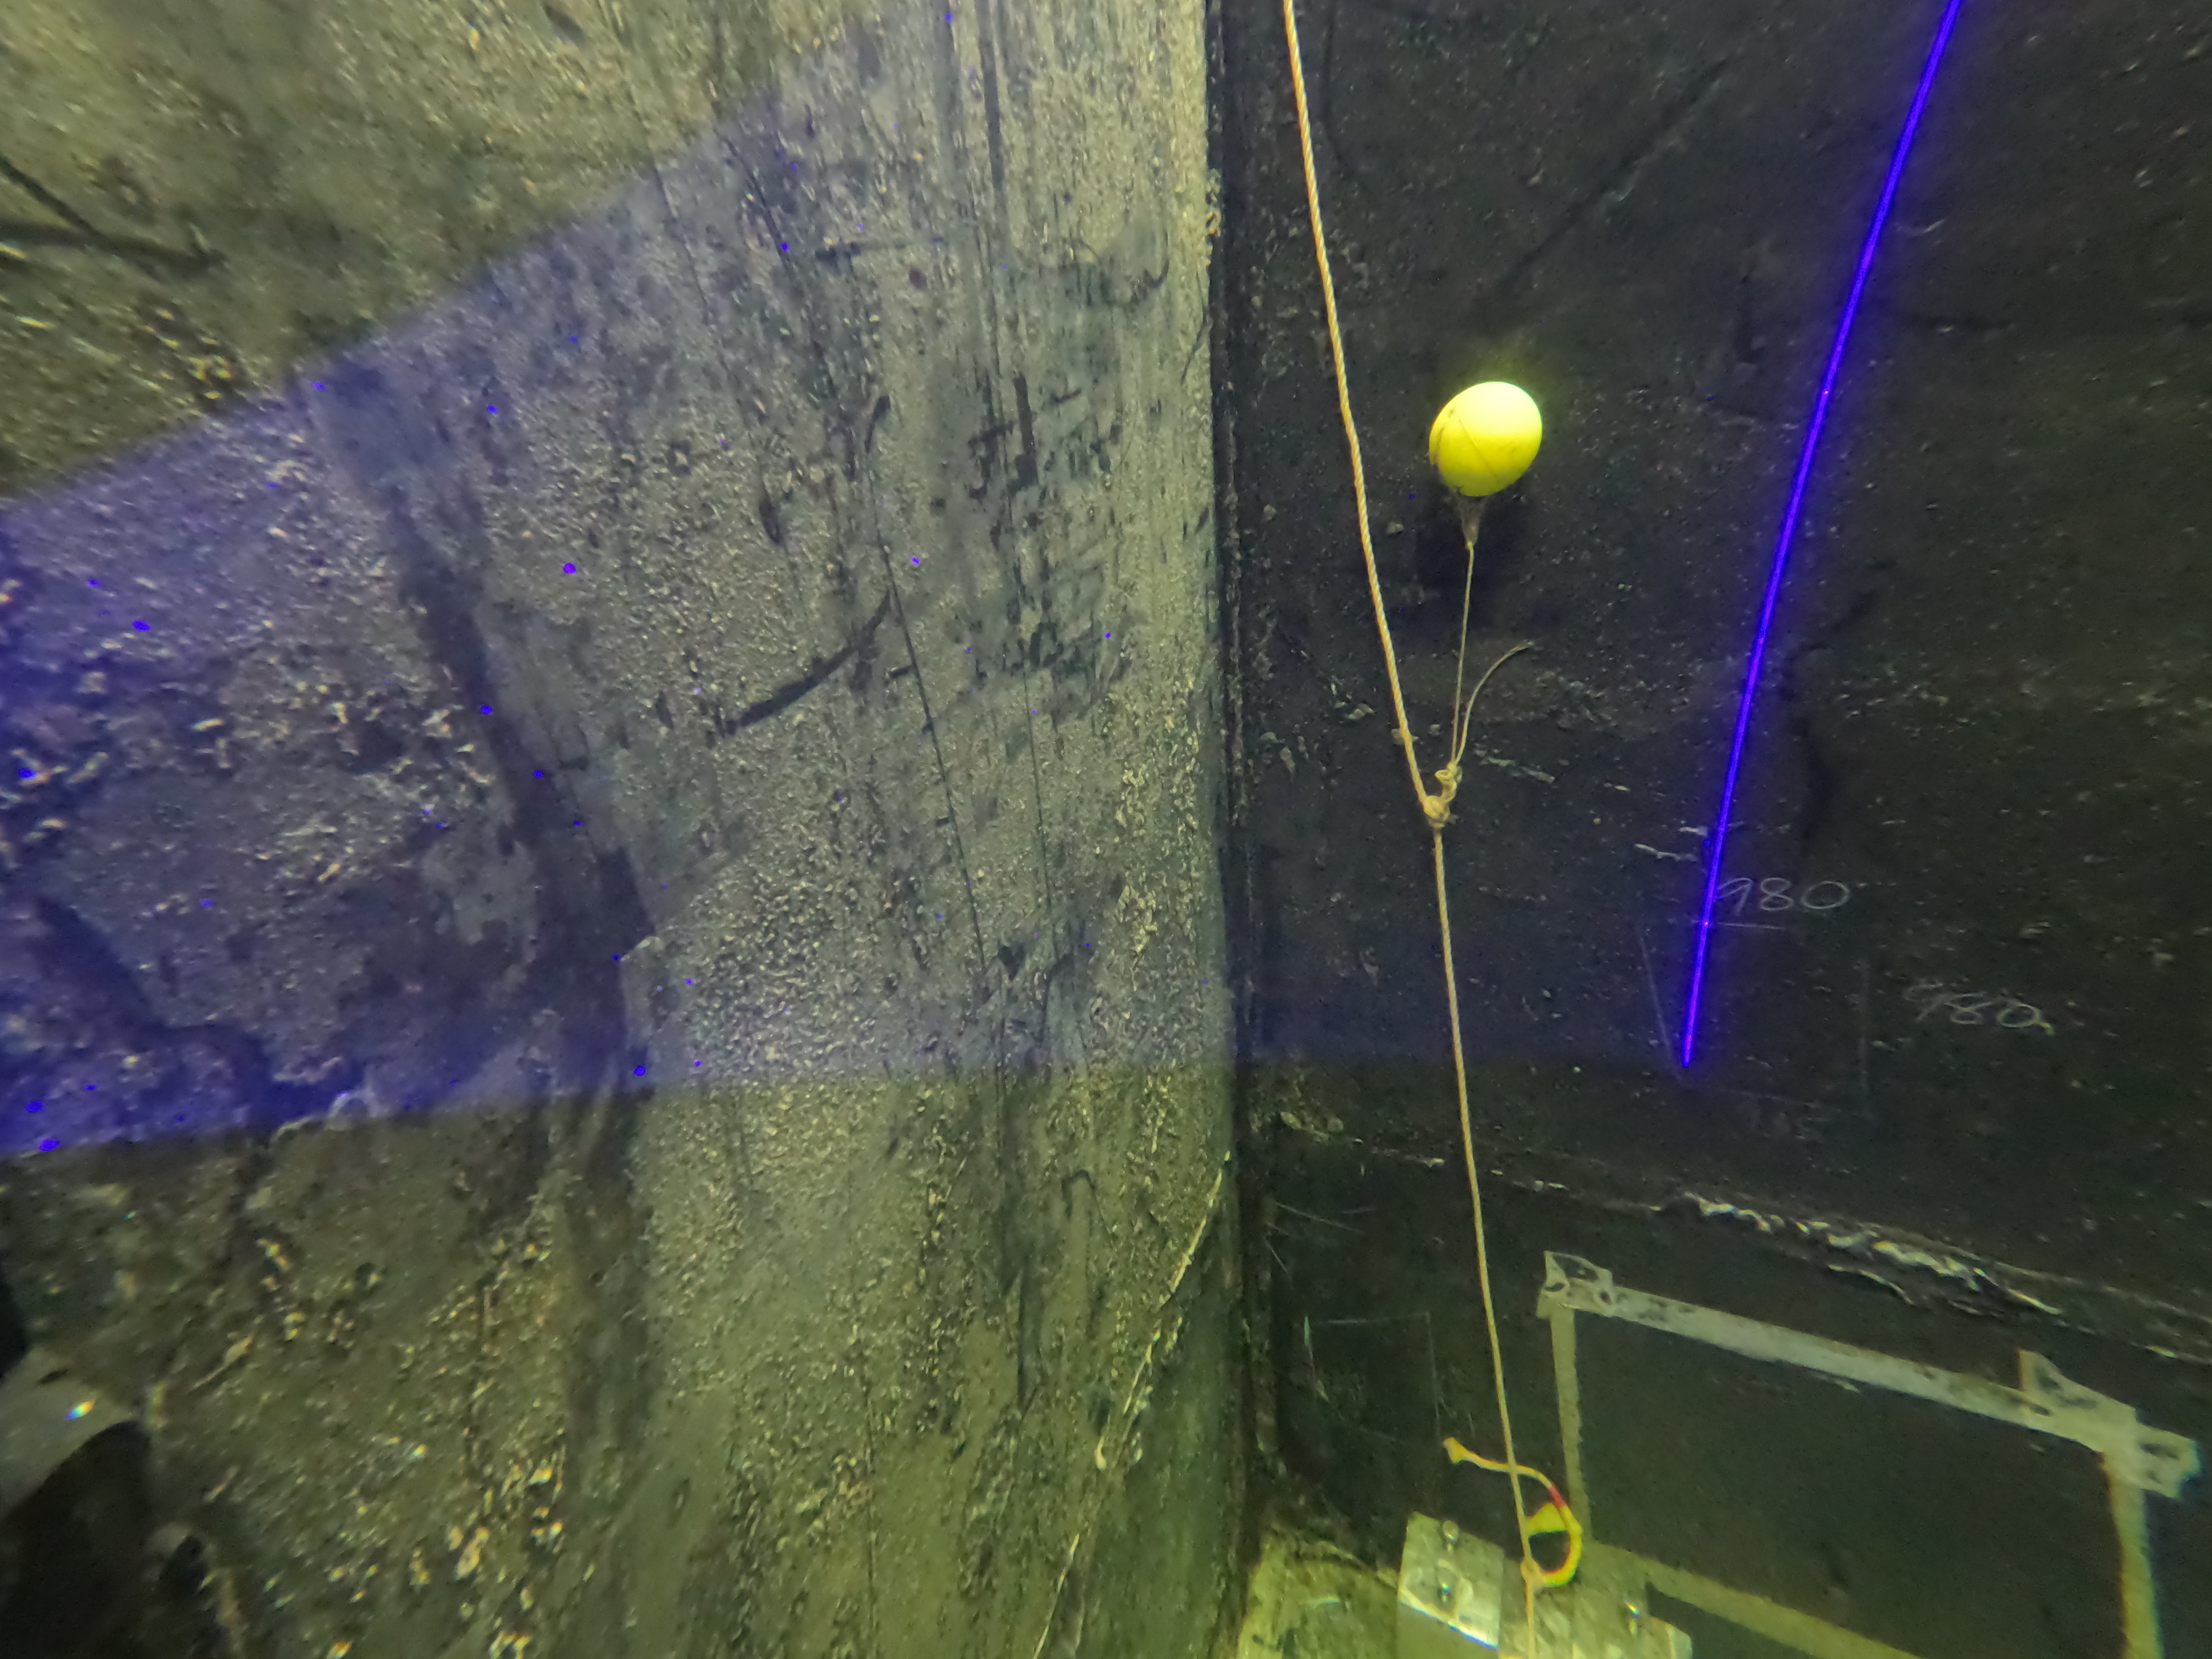

Supplement: Supplementary file 3033 [file G0031833.pdf › 12/G0031833.pdf]

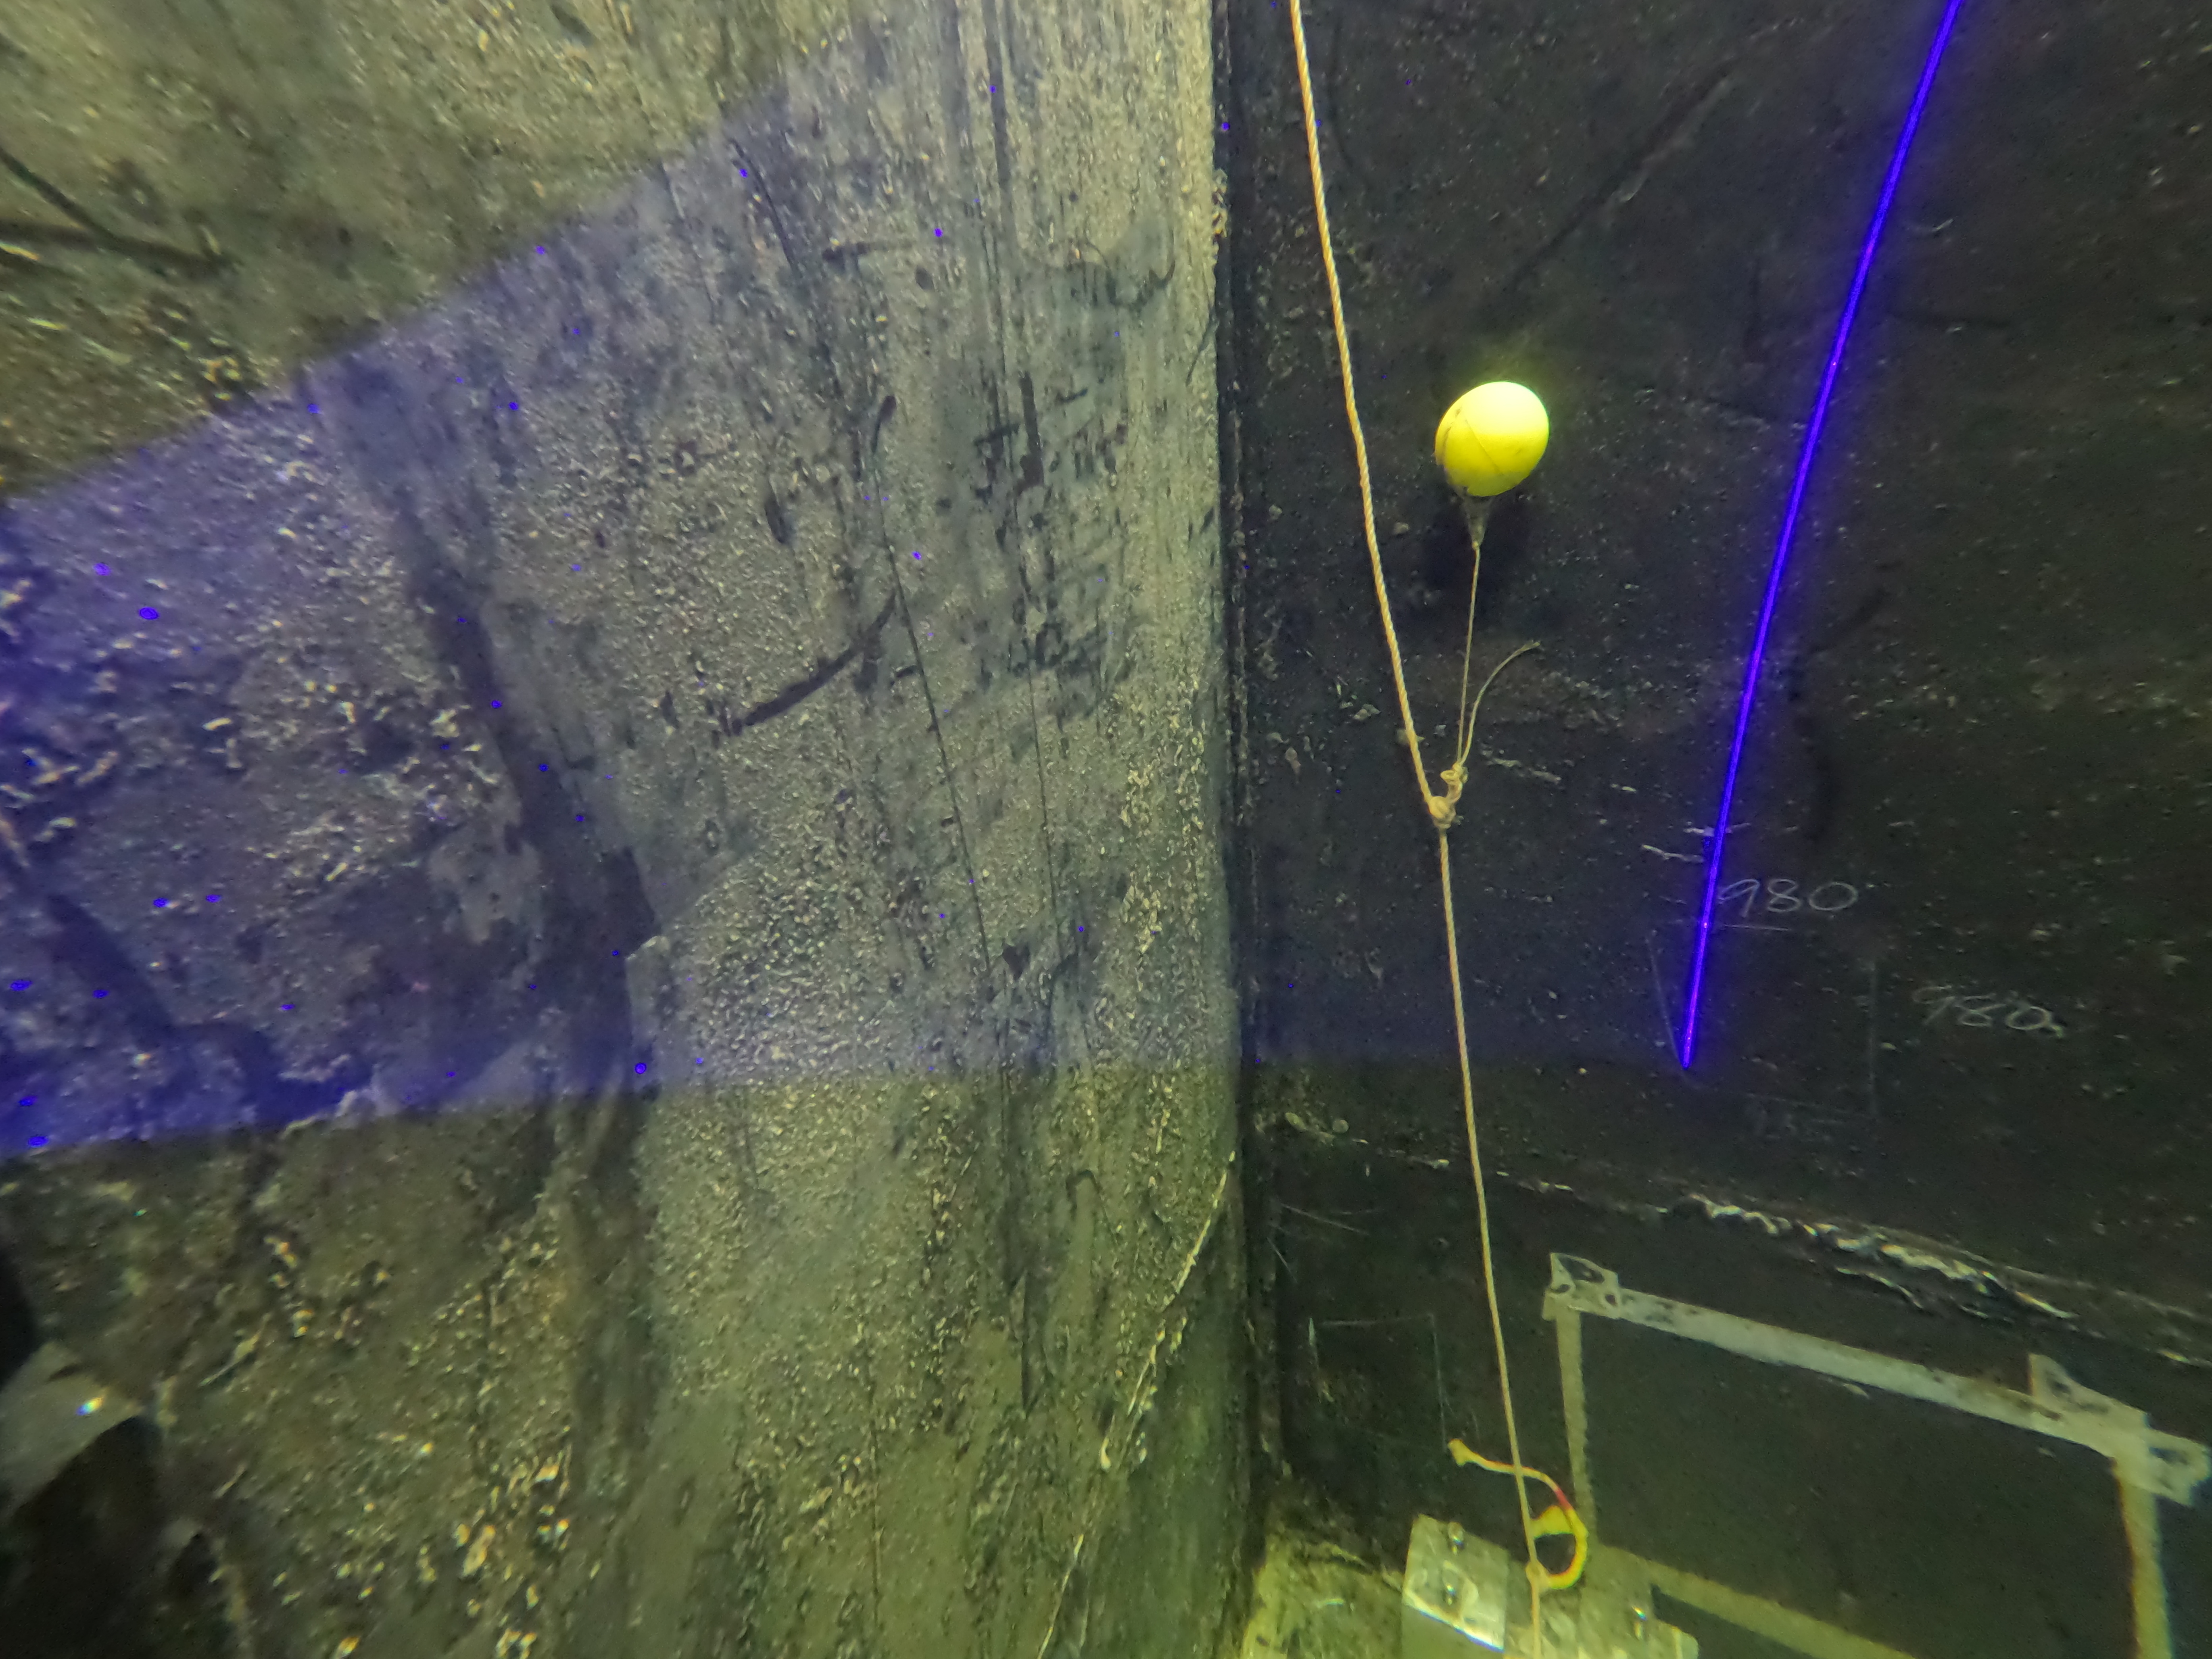

Supplement: Supplementary file 3034 [file G0031834.pdf › 12/G0031834.pdf]

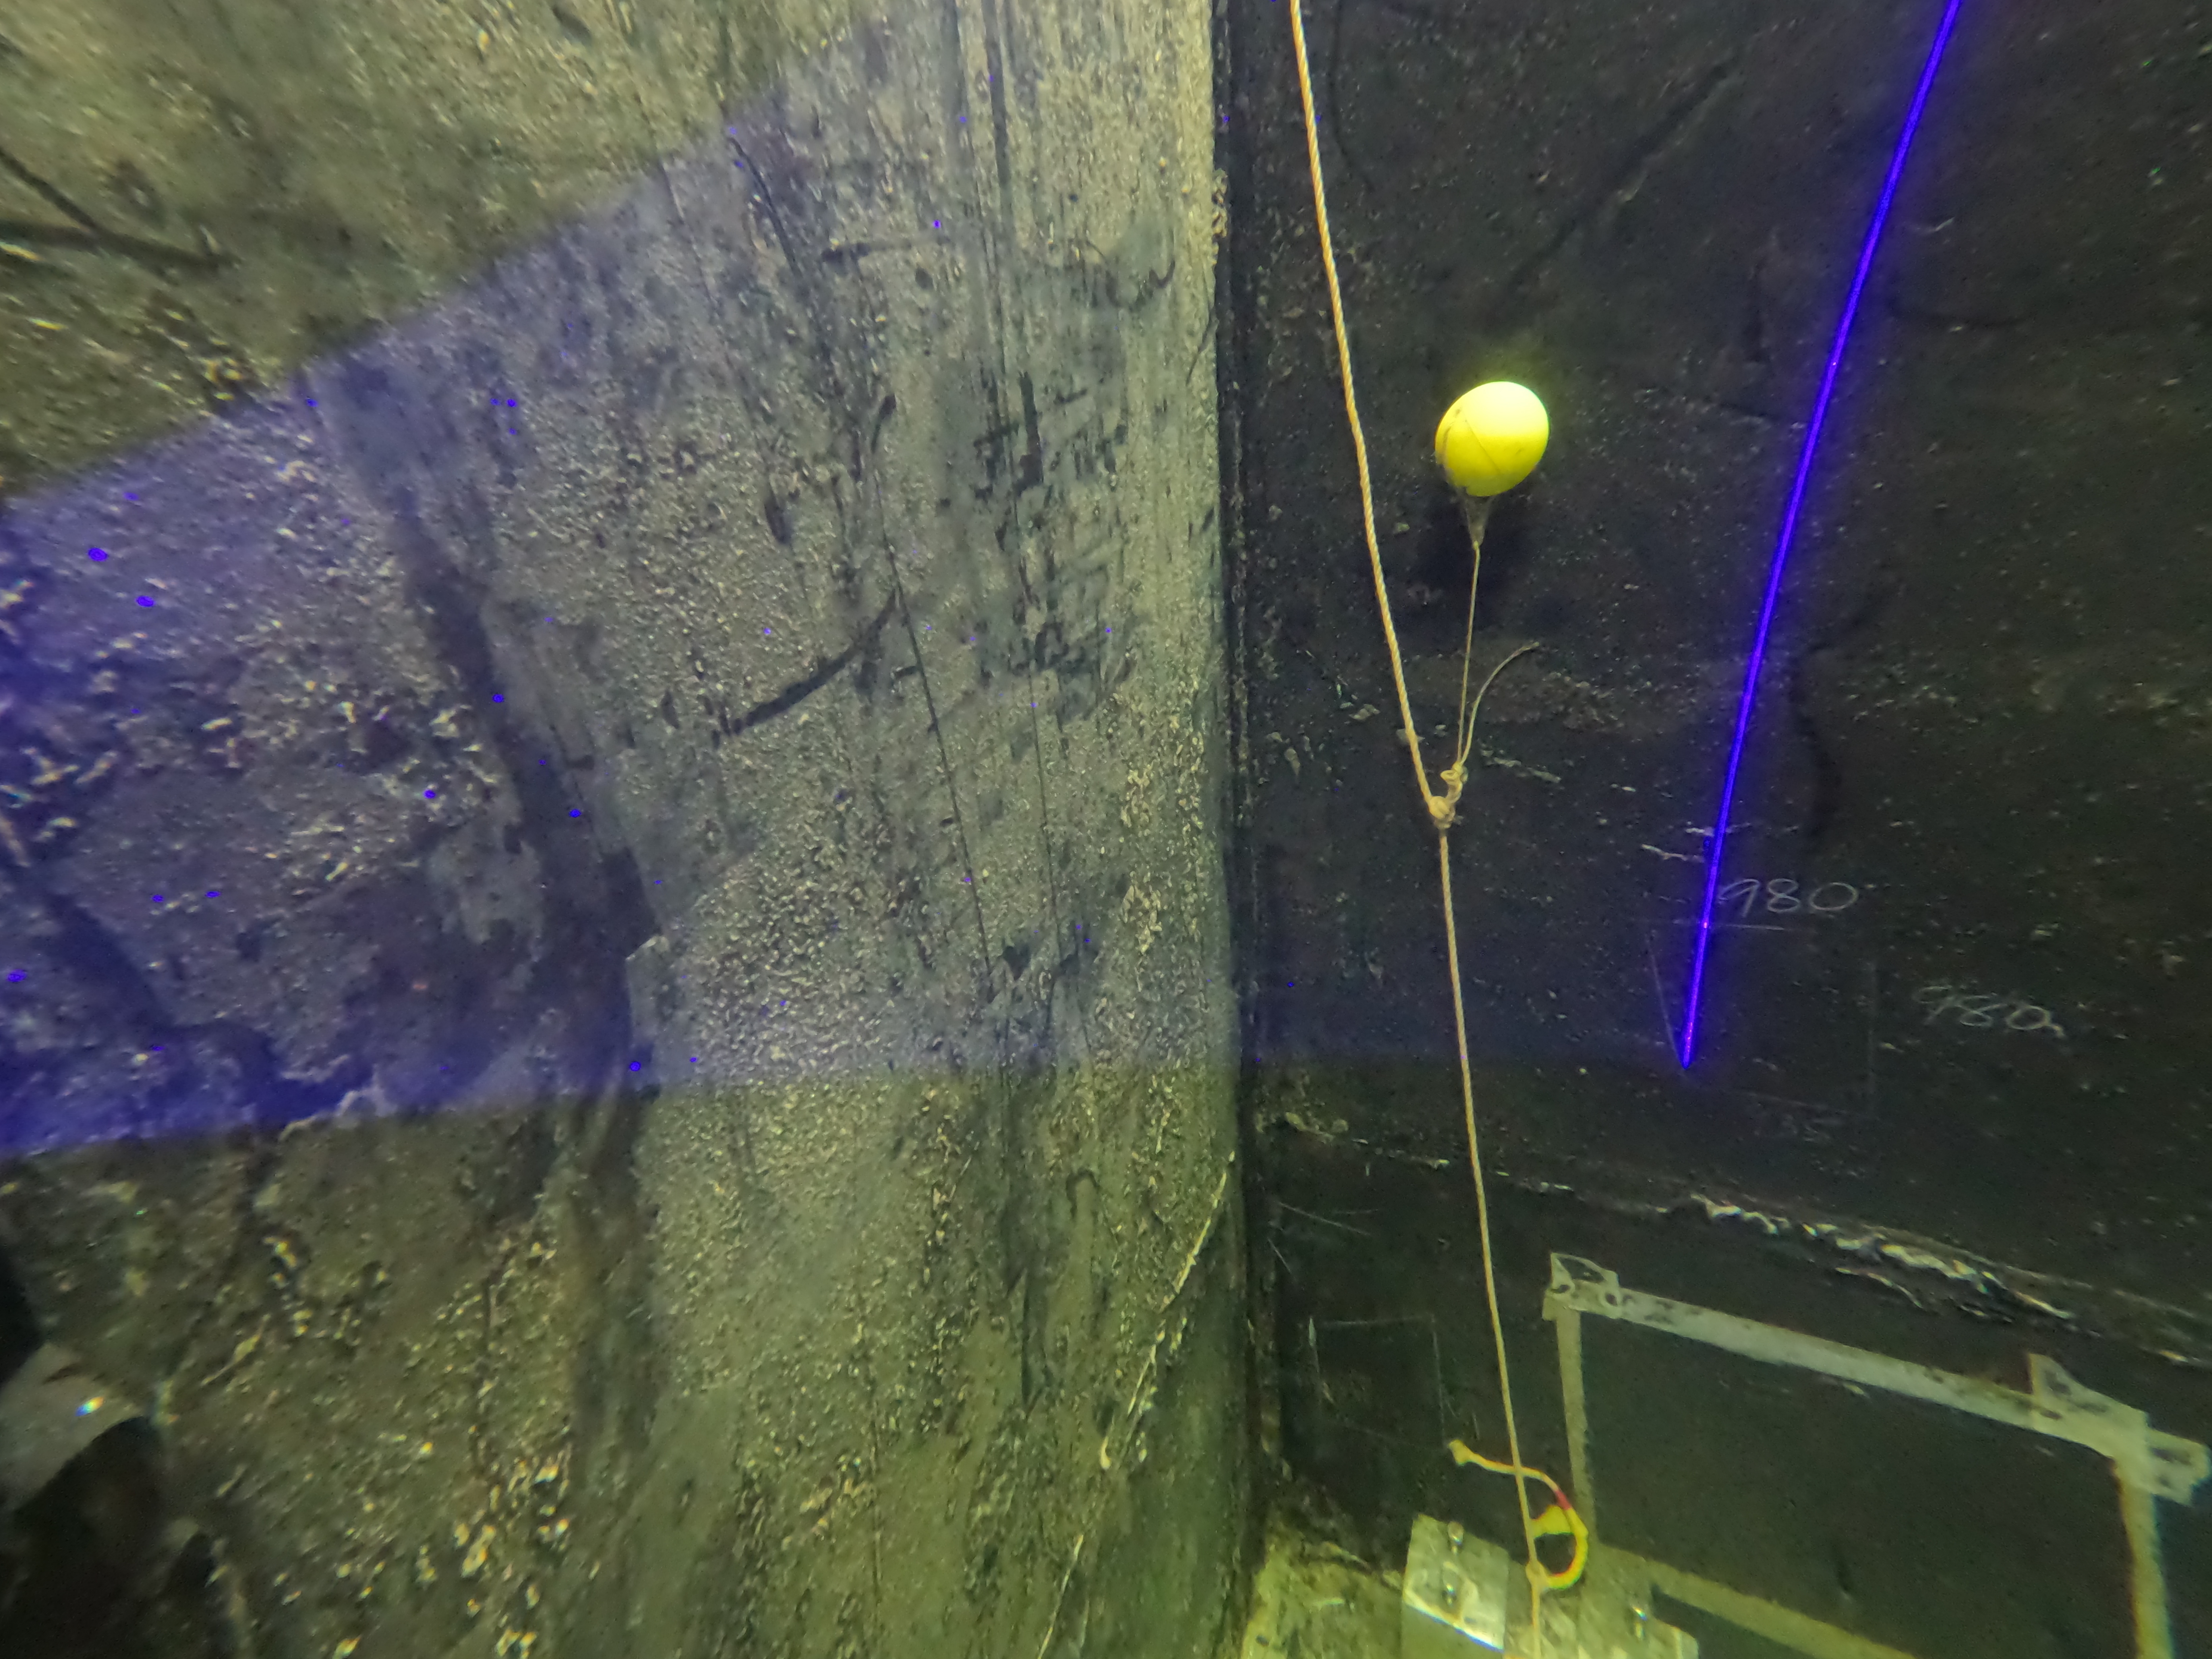

Supplement: Supplementary file 3035 [file G0031835.pdf › 12/G0031835.pdf]

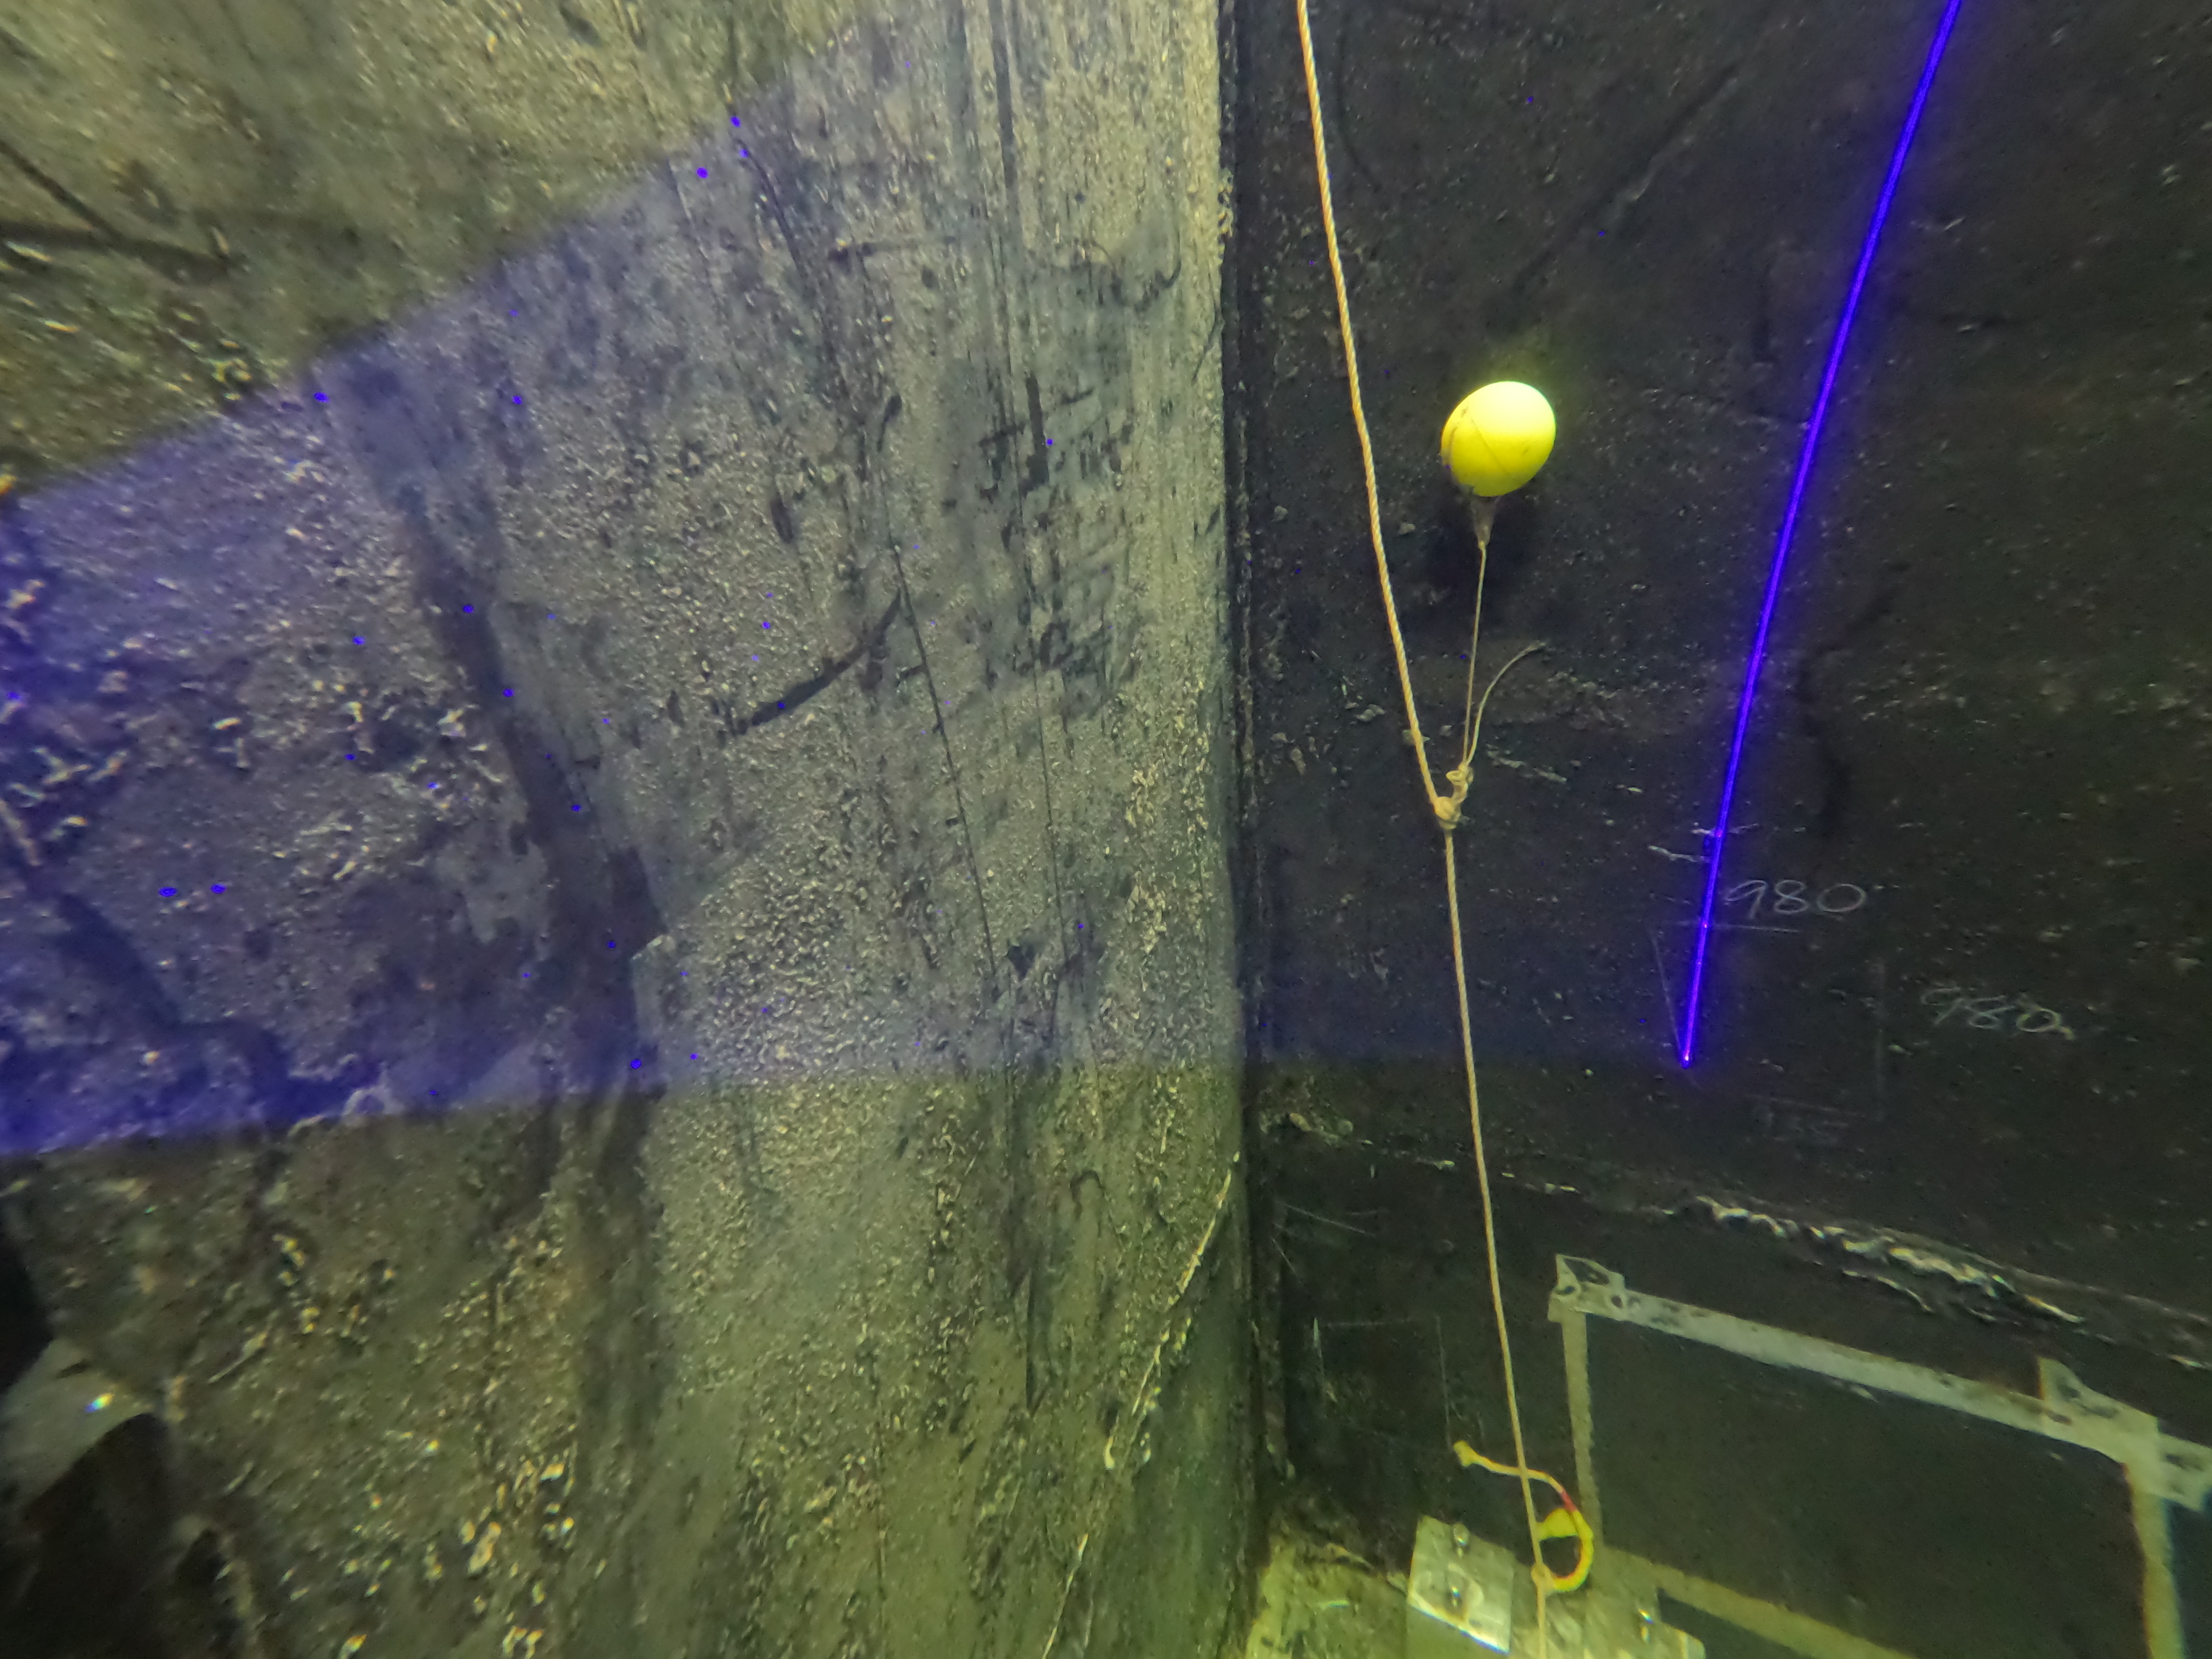

Supplement: Supplementary file 3036 [file G0031836.pdf › 12/G0031836.pdf]

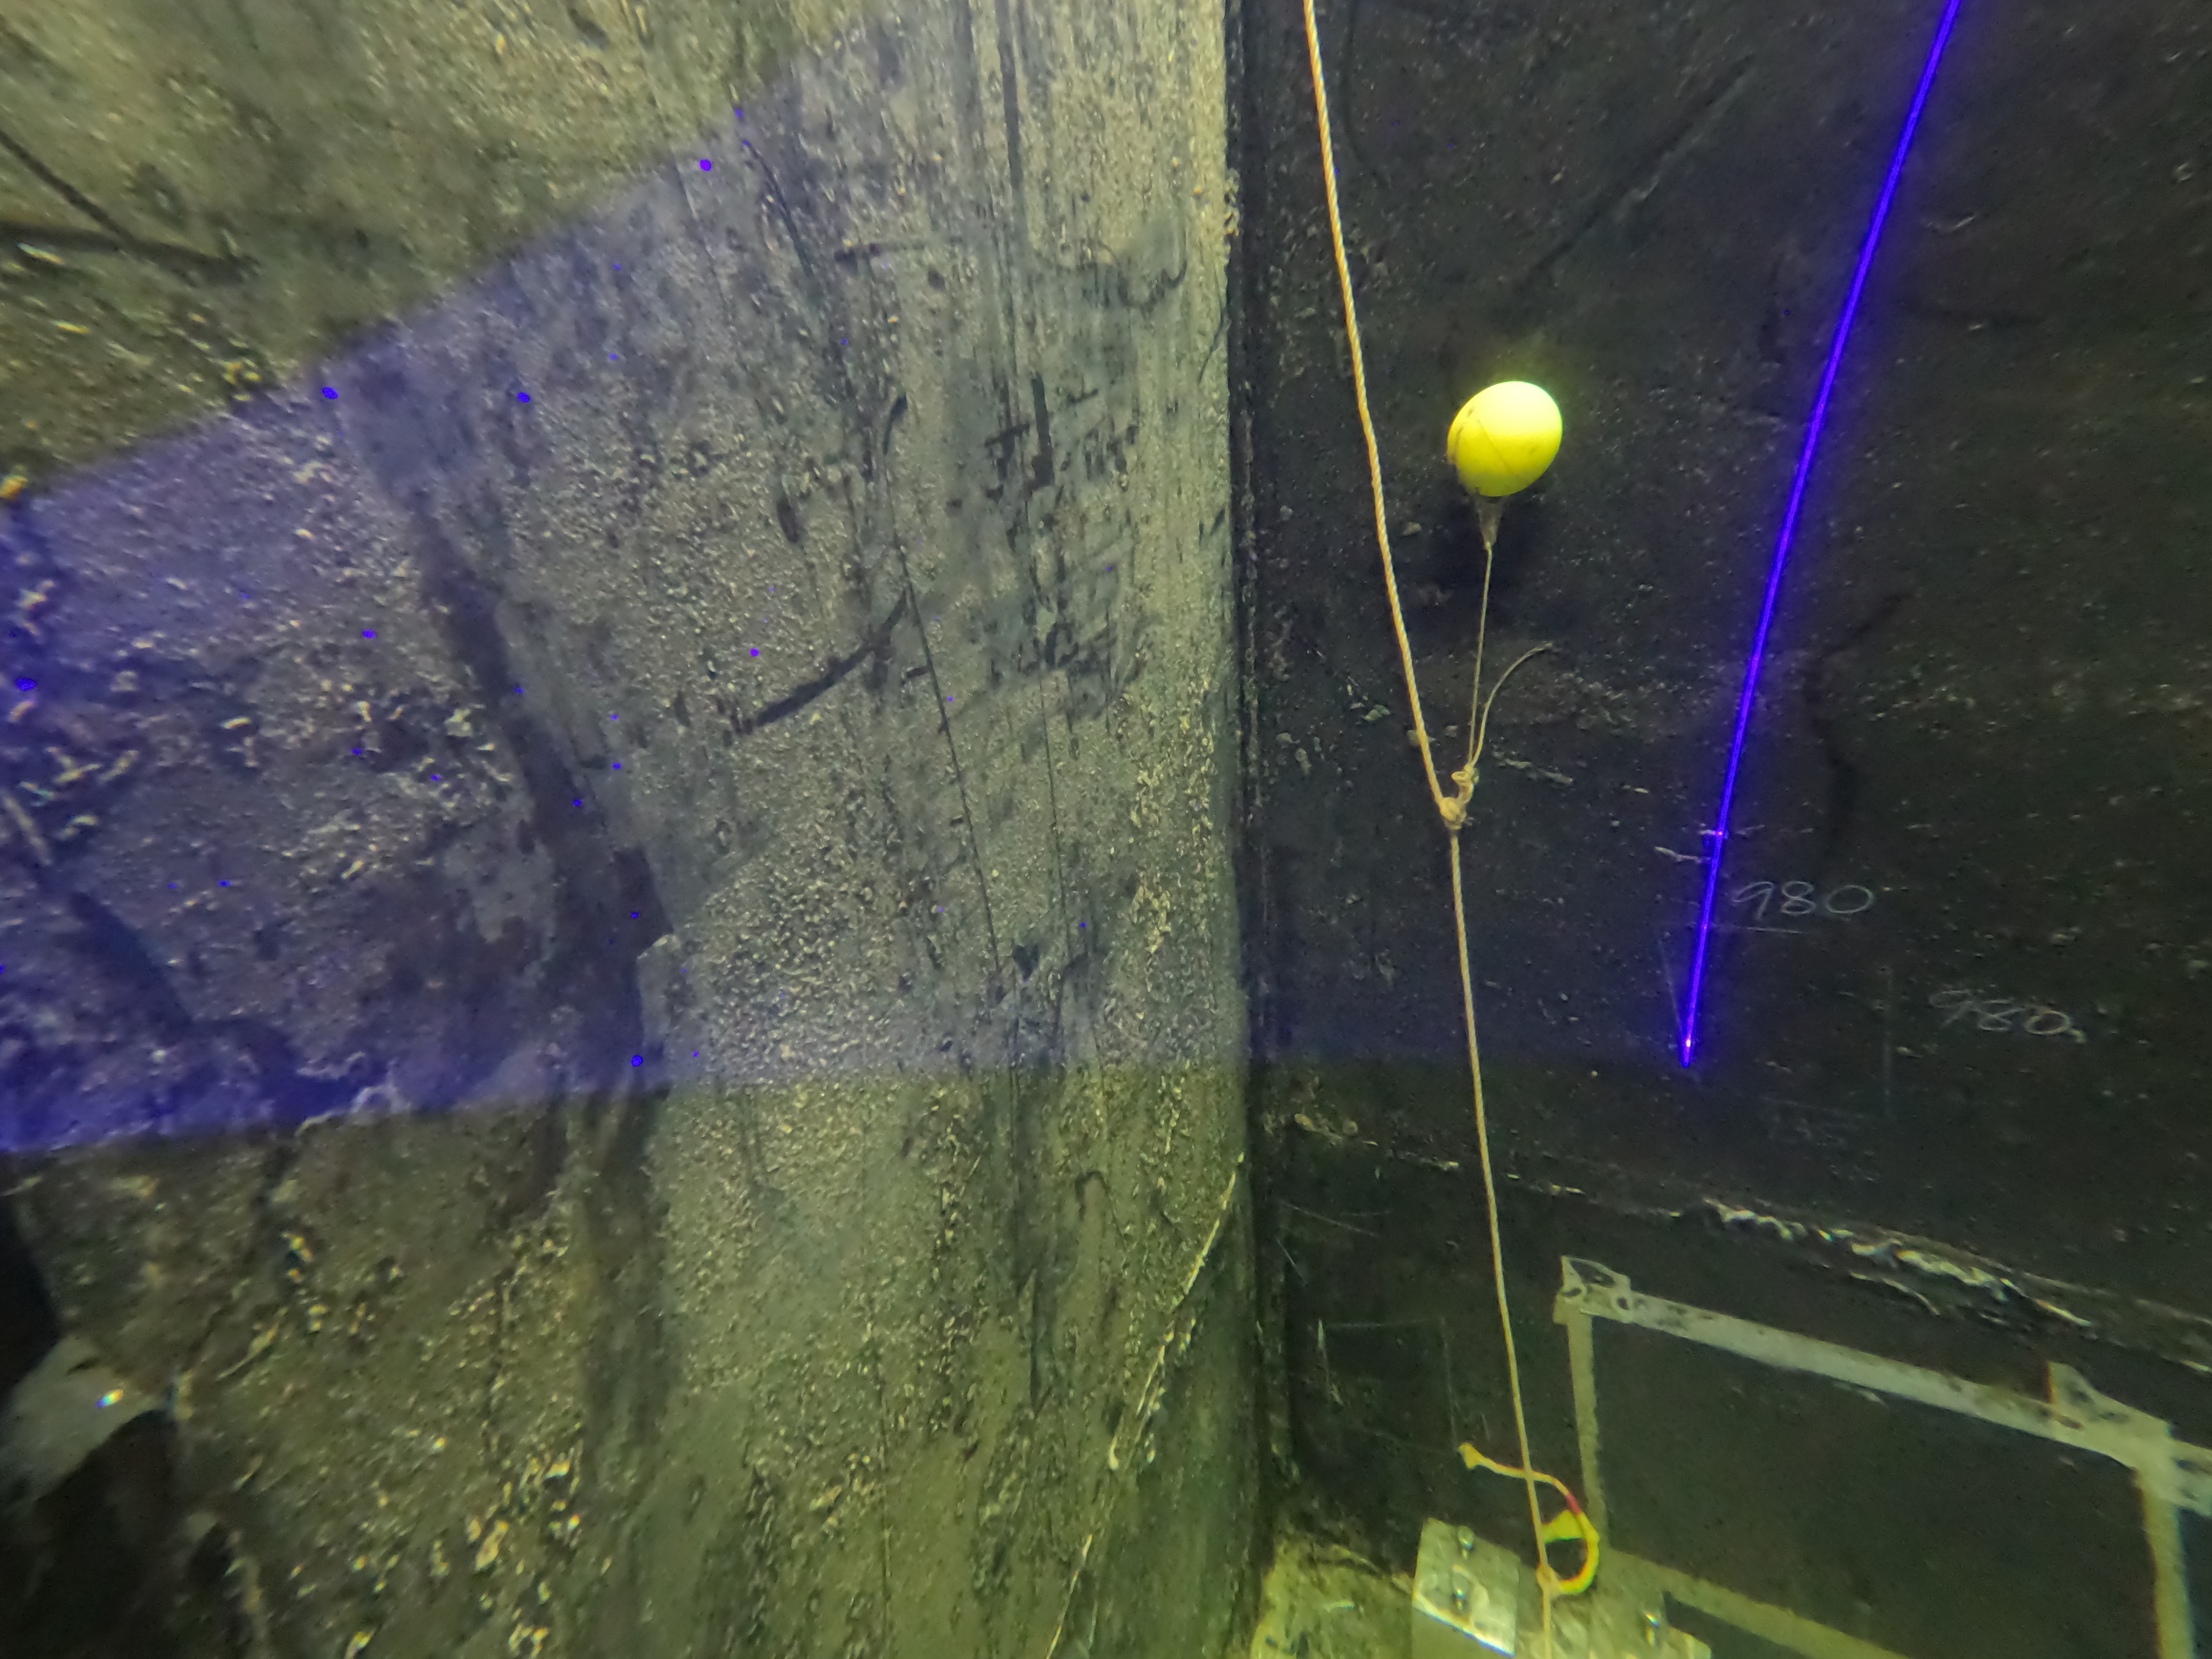

Supplement: Supplementary file 3037 [file G0031837.pdf › 12/G0031837.pdf]

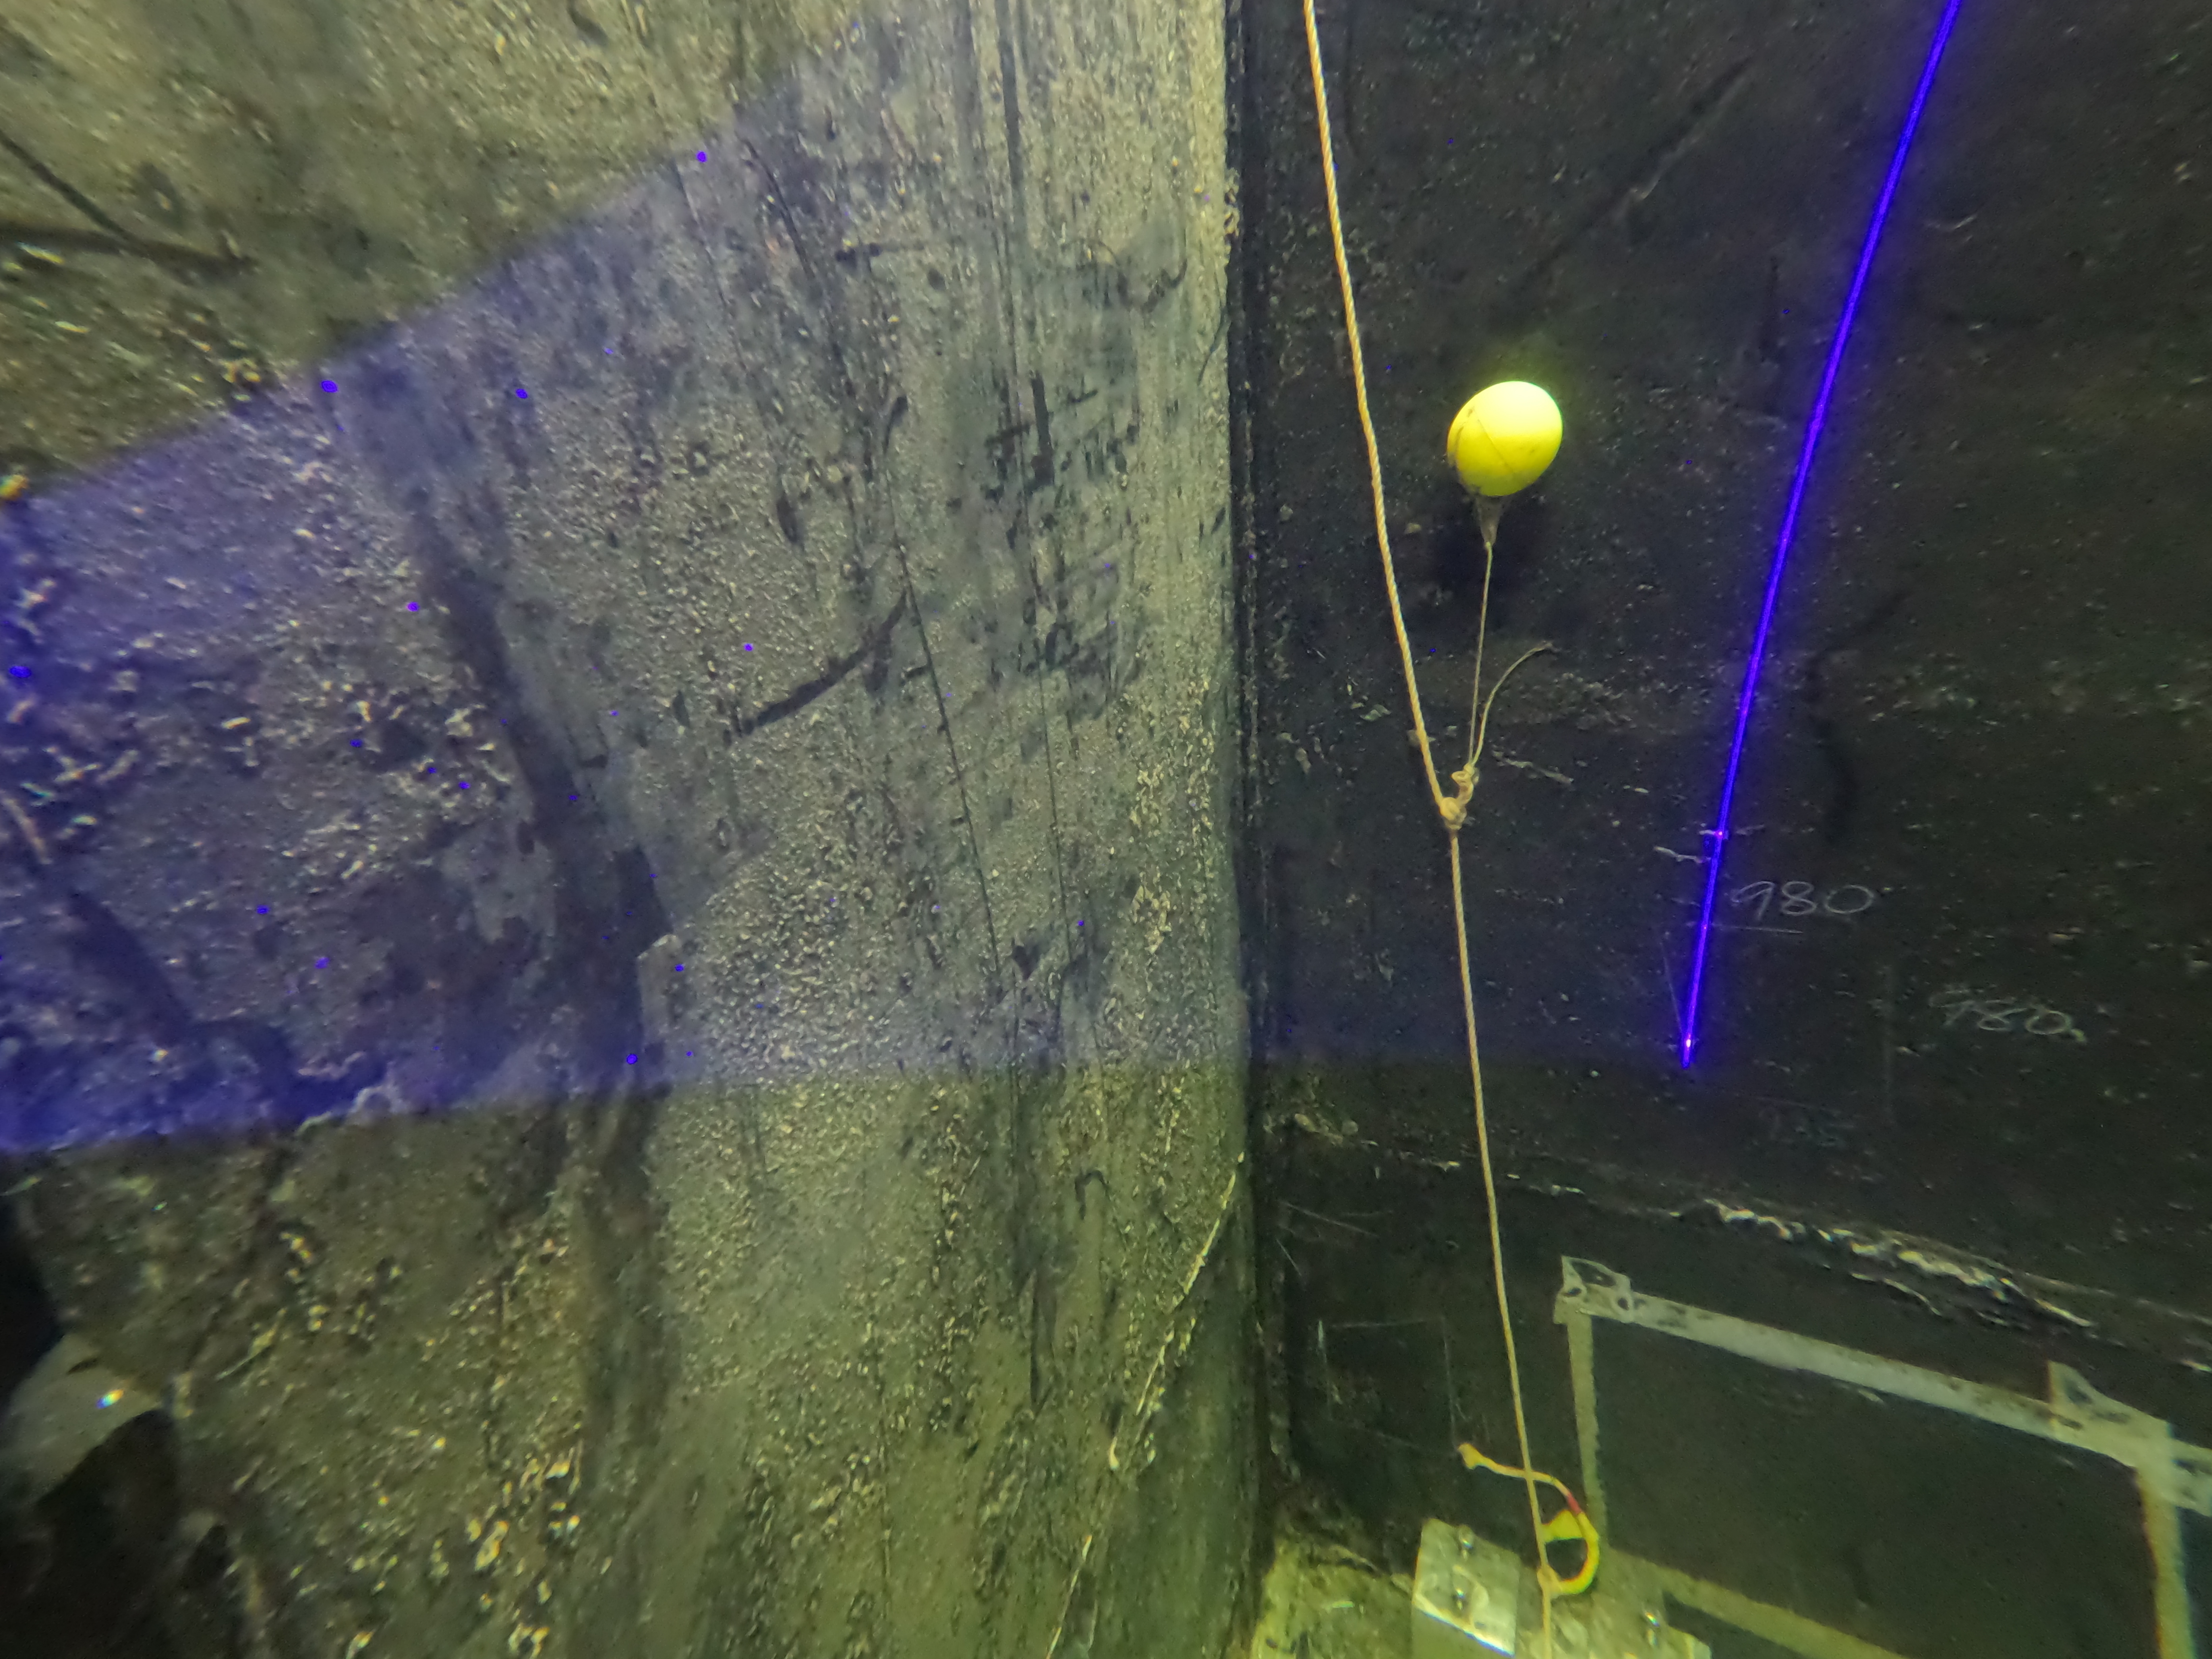

Supplement: Supplementary file 3038 [file G0031838.pdf › 12/G0031838.pdf]

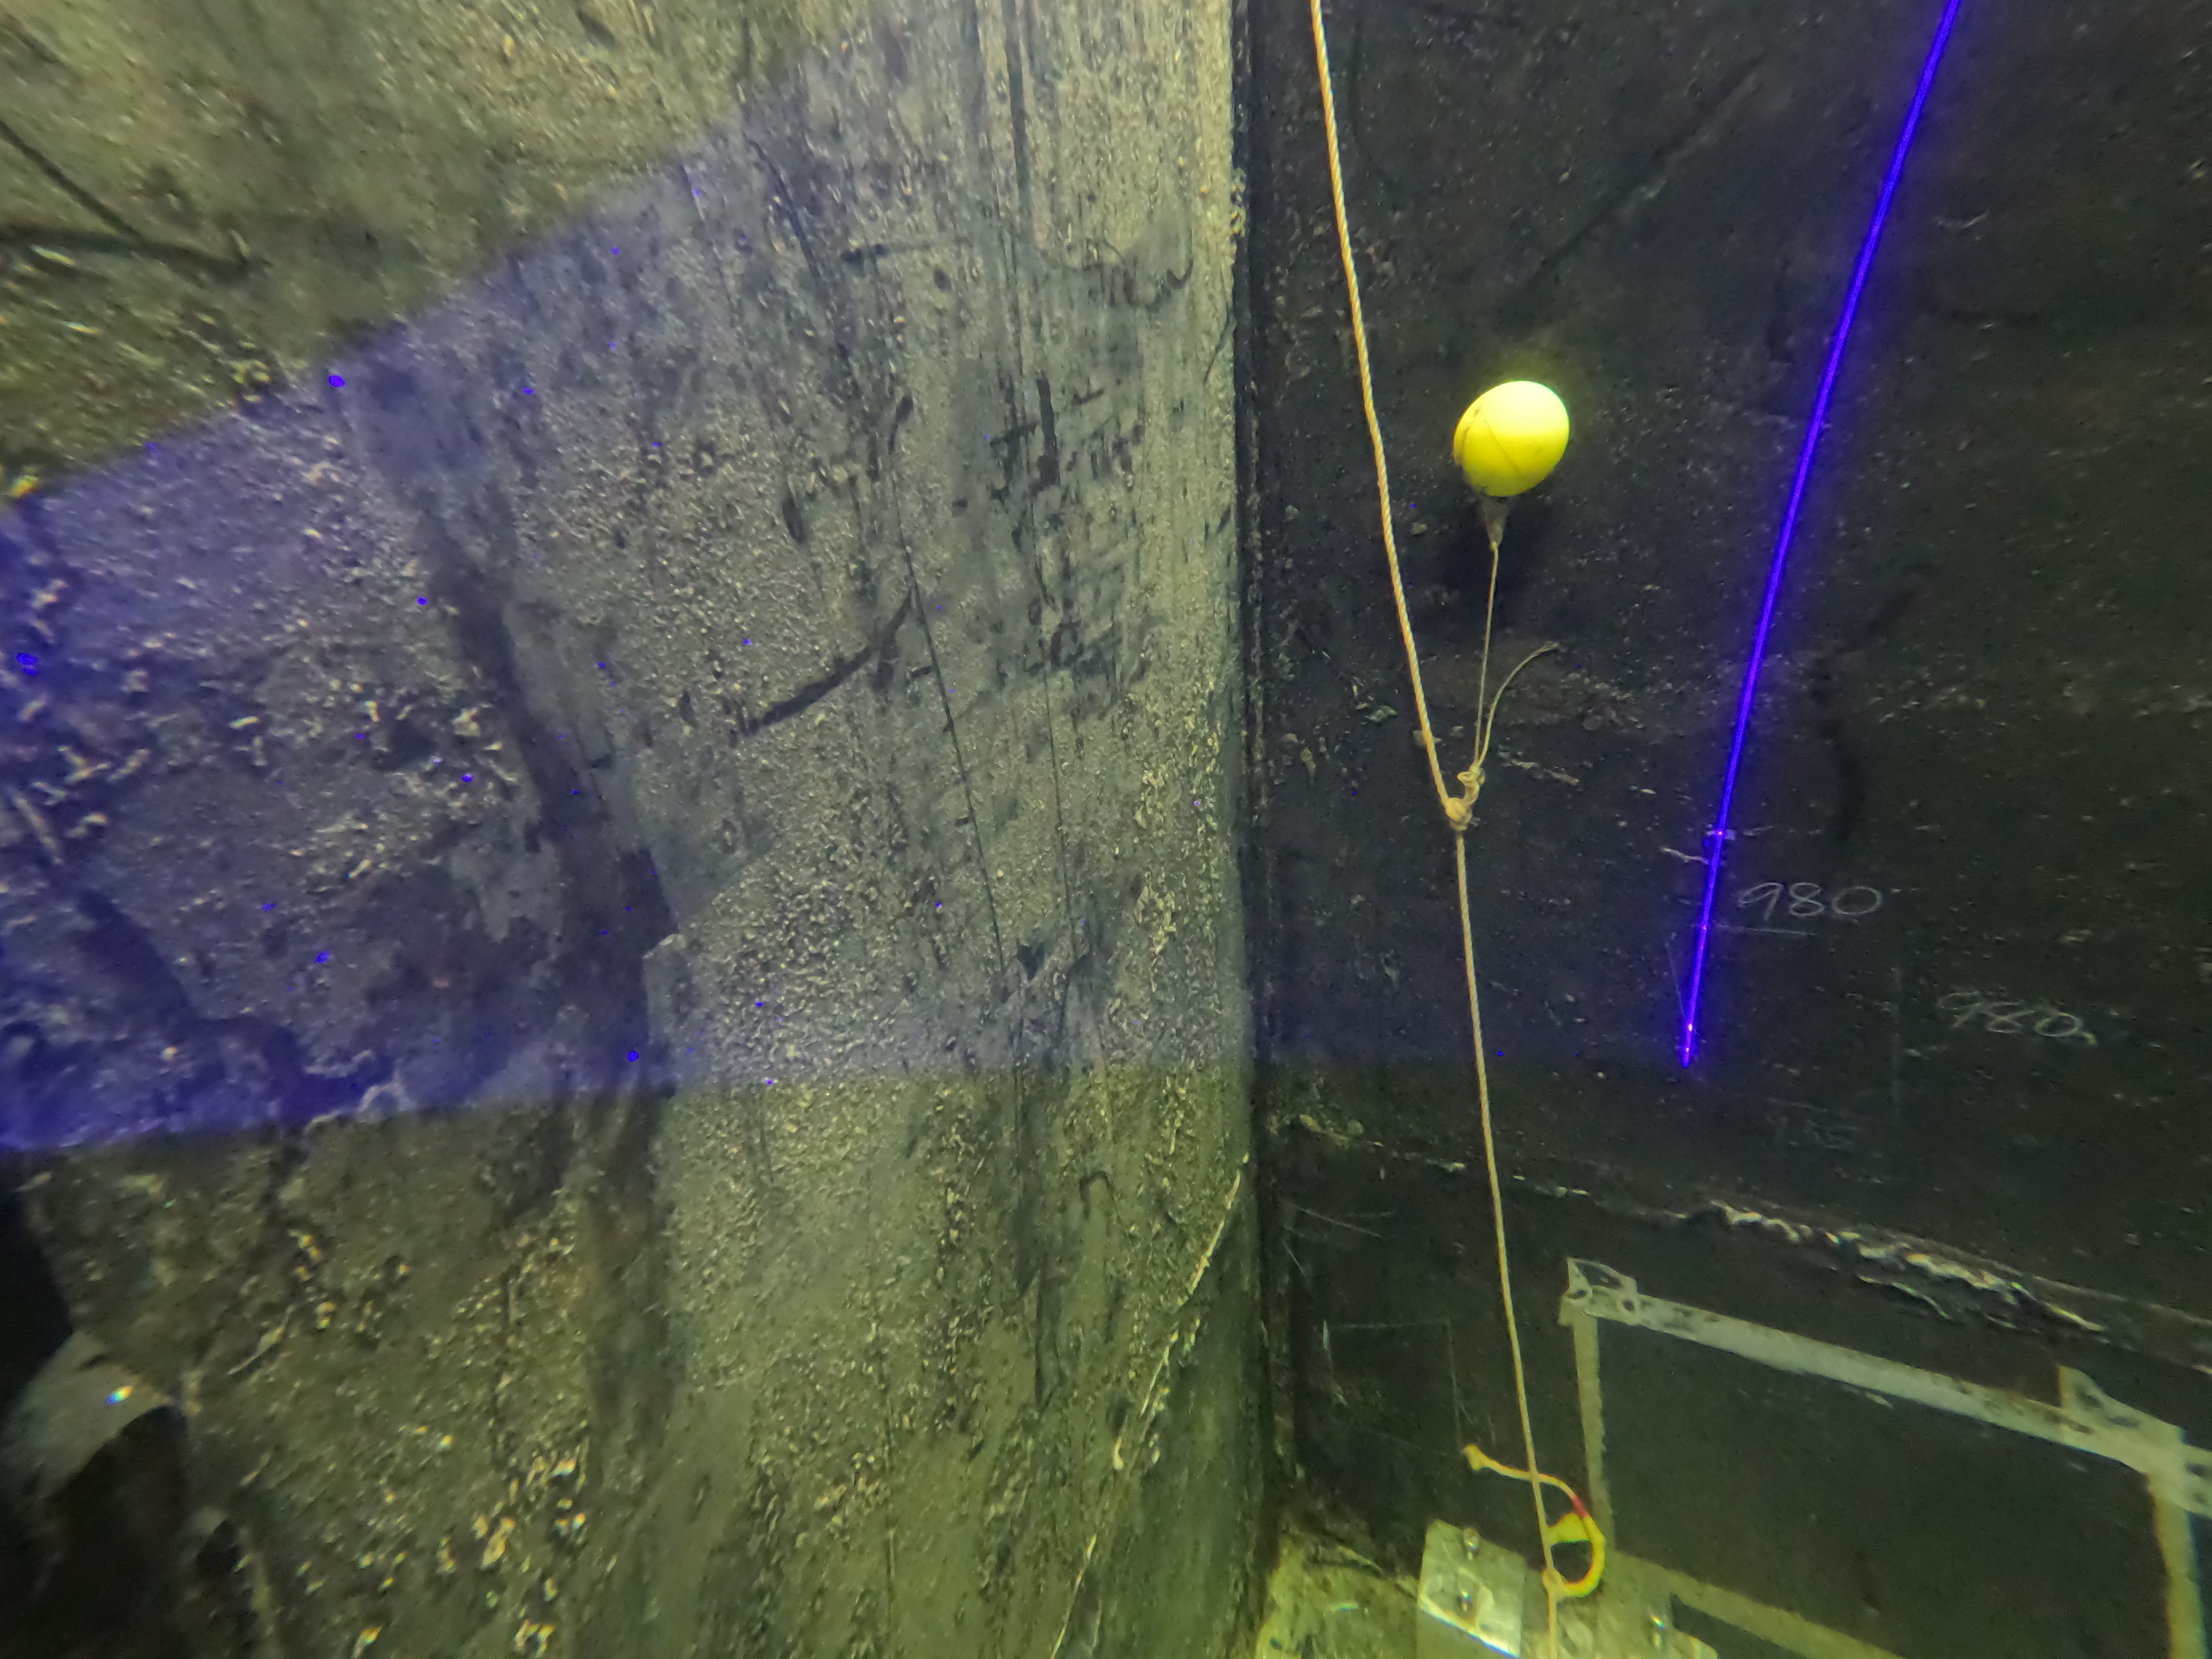

Supplement: Supplementary file 3039 [file G0031839.pdf › 12/G0031839.pdf]

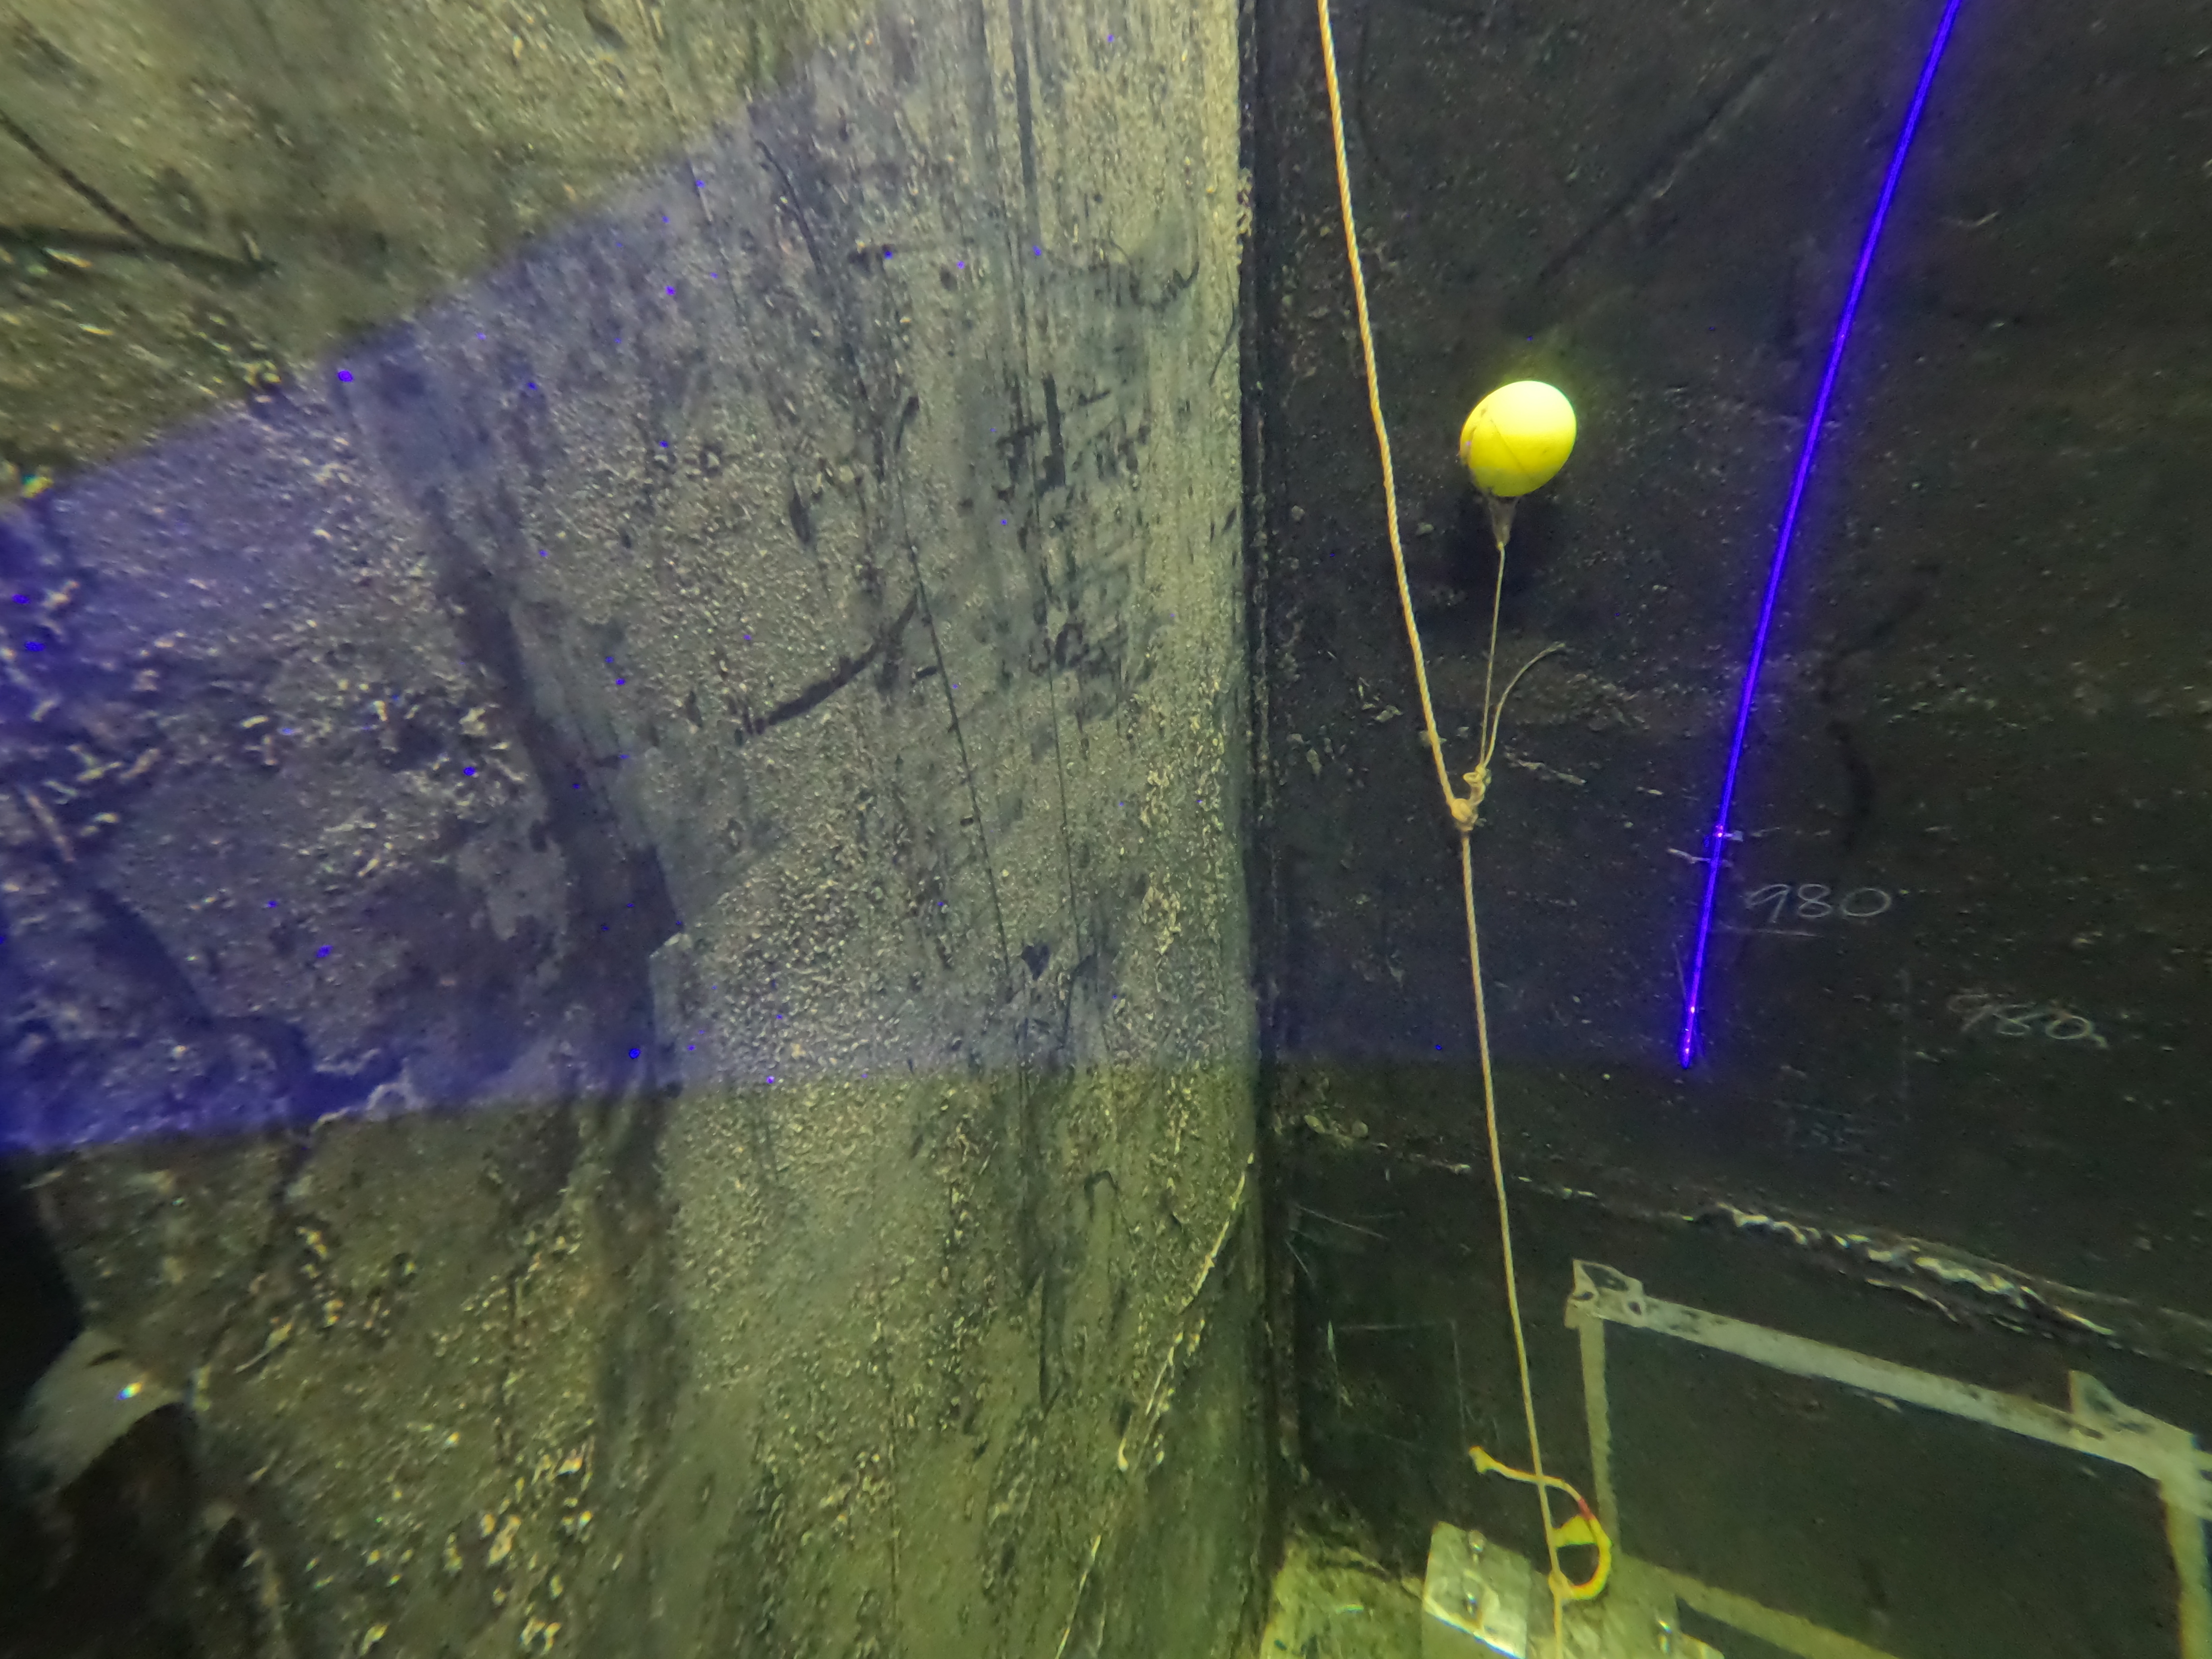

Supplement: Supplementary file 3040 [file G0031840.pdf › 12/G0031840.pdf]

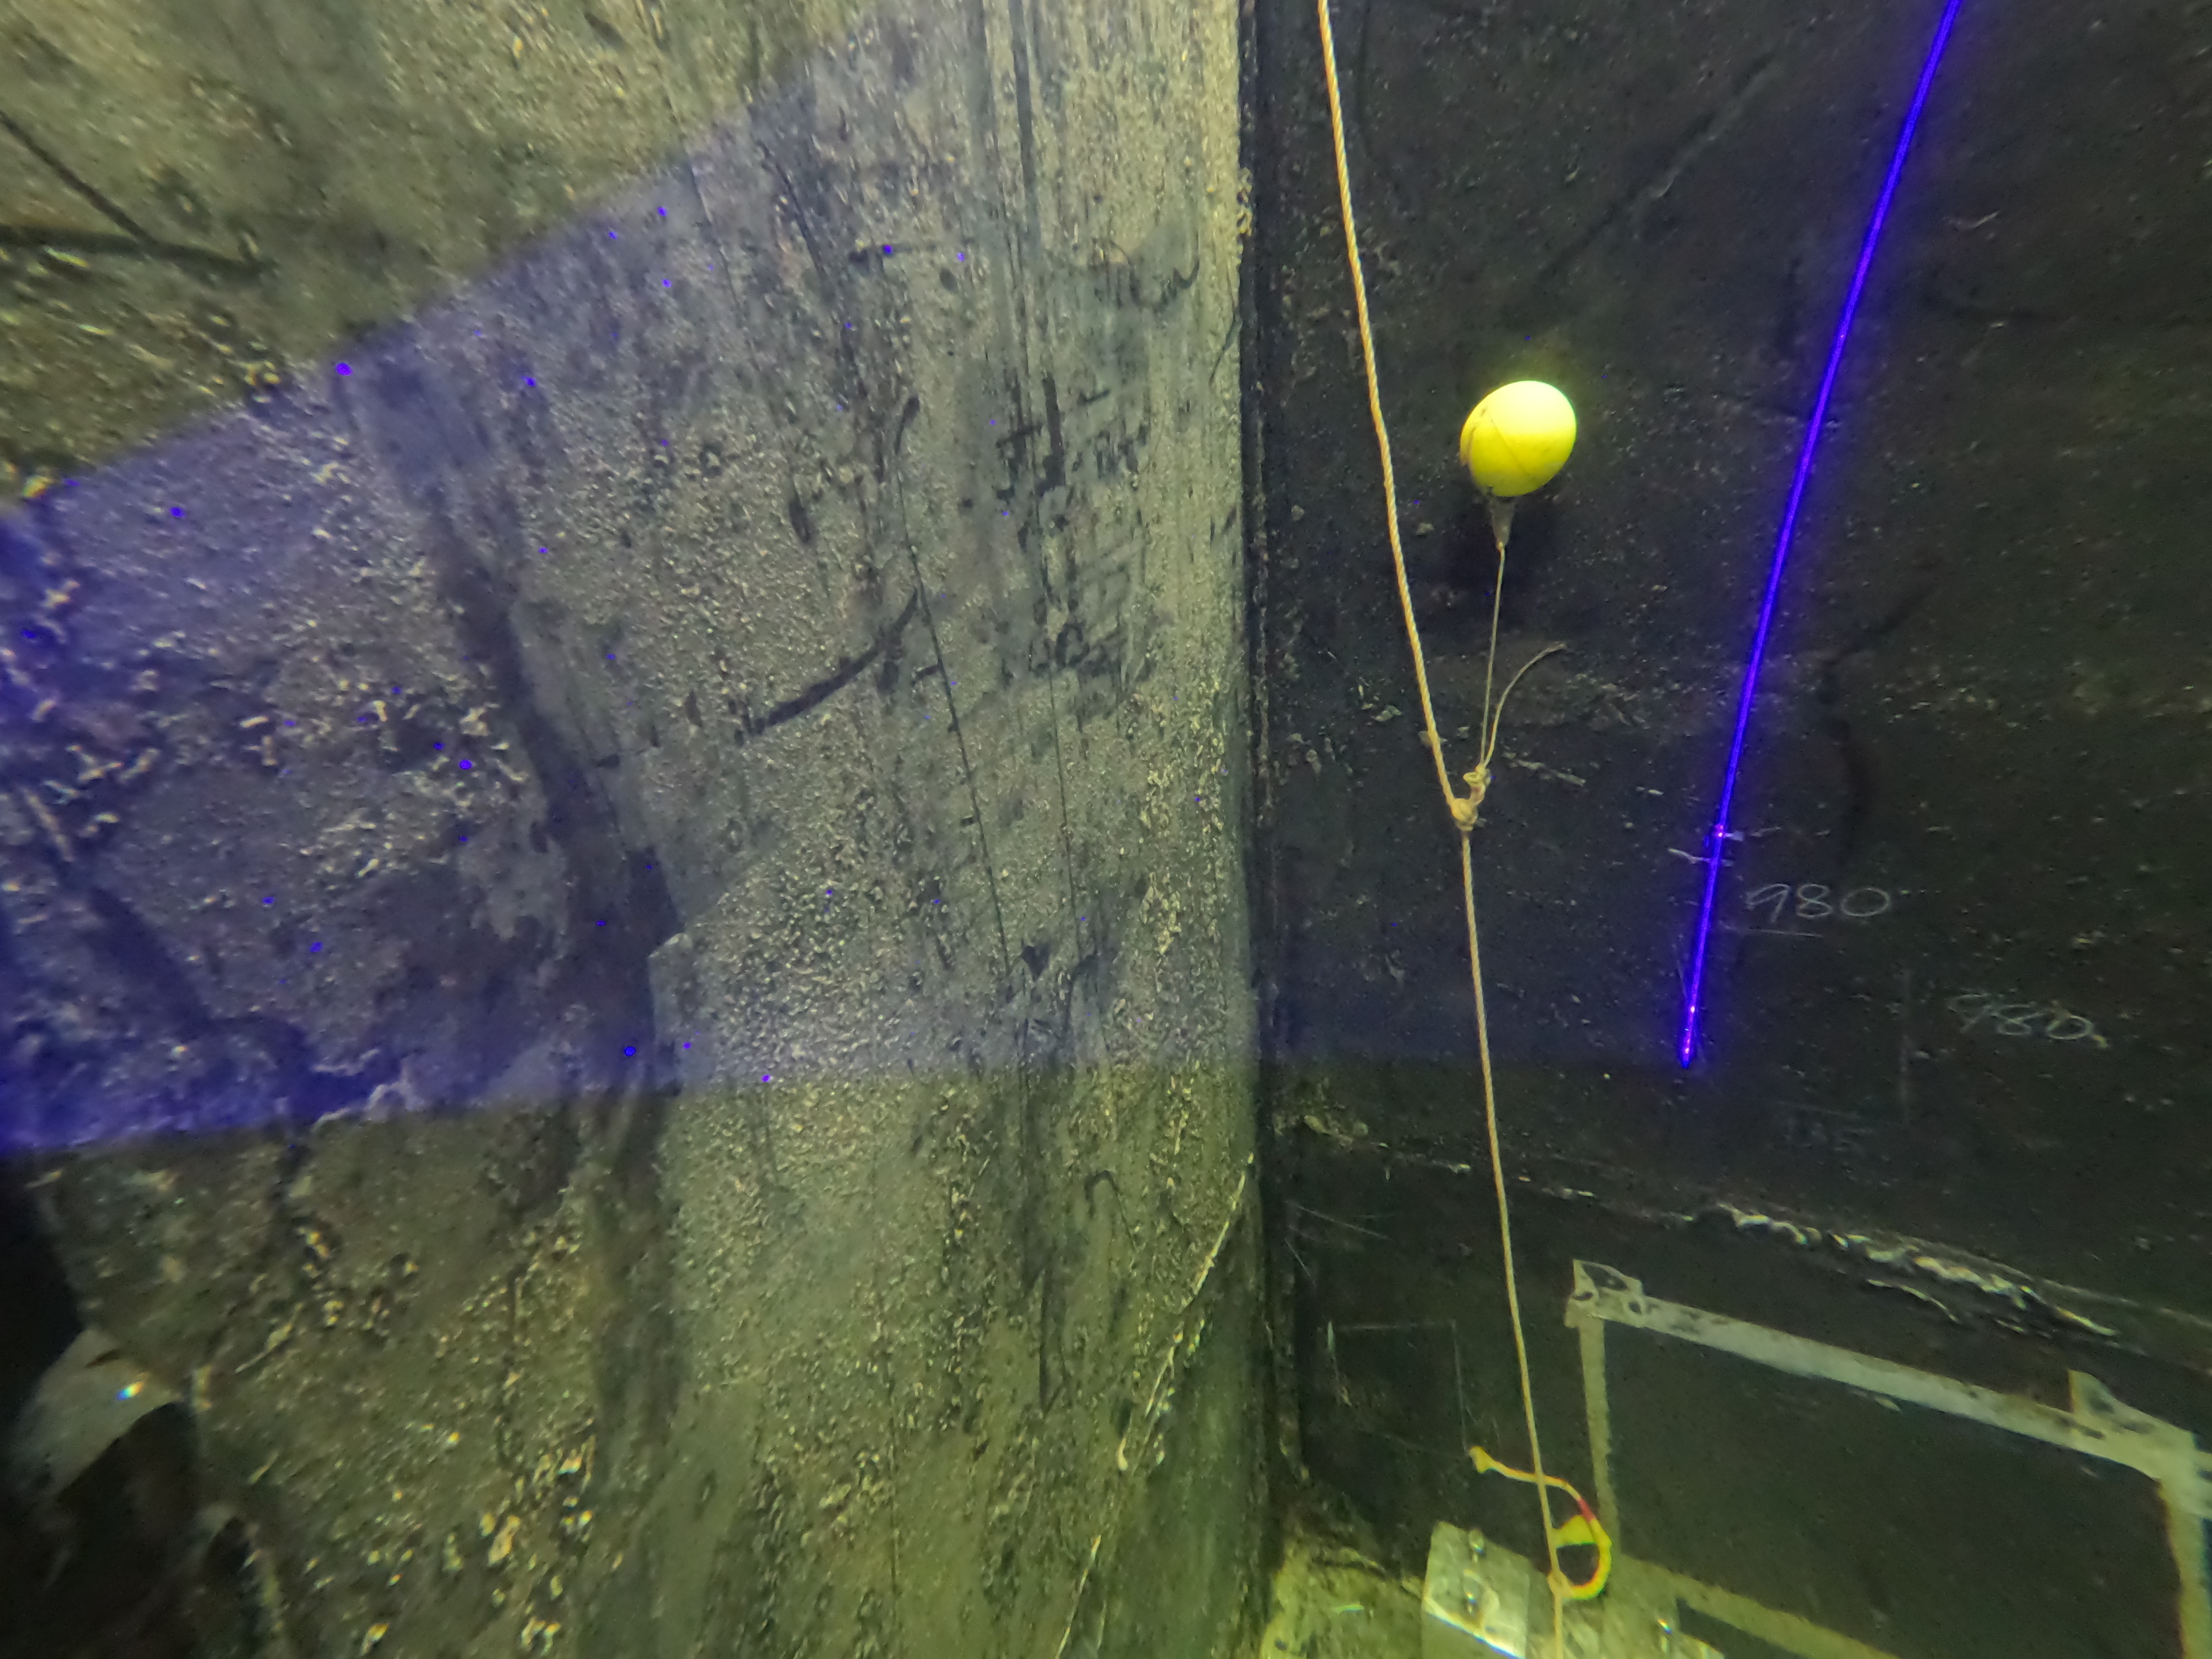

Supplement: Supplementary file 3041 [file G0031841.pdf › 12/G0031841.pdf]

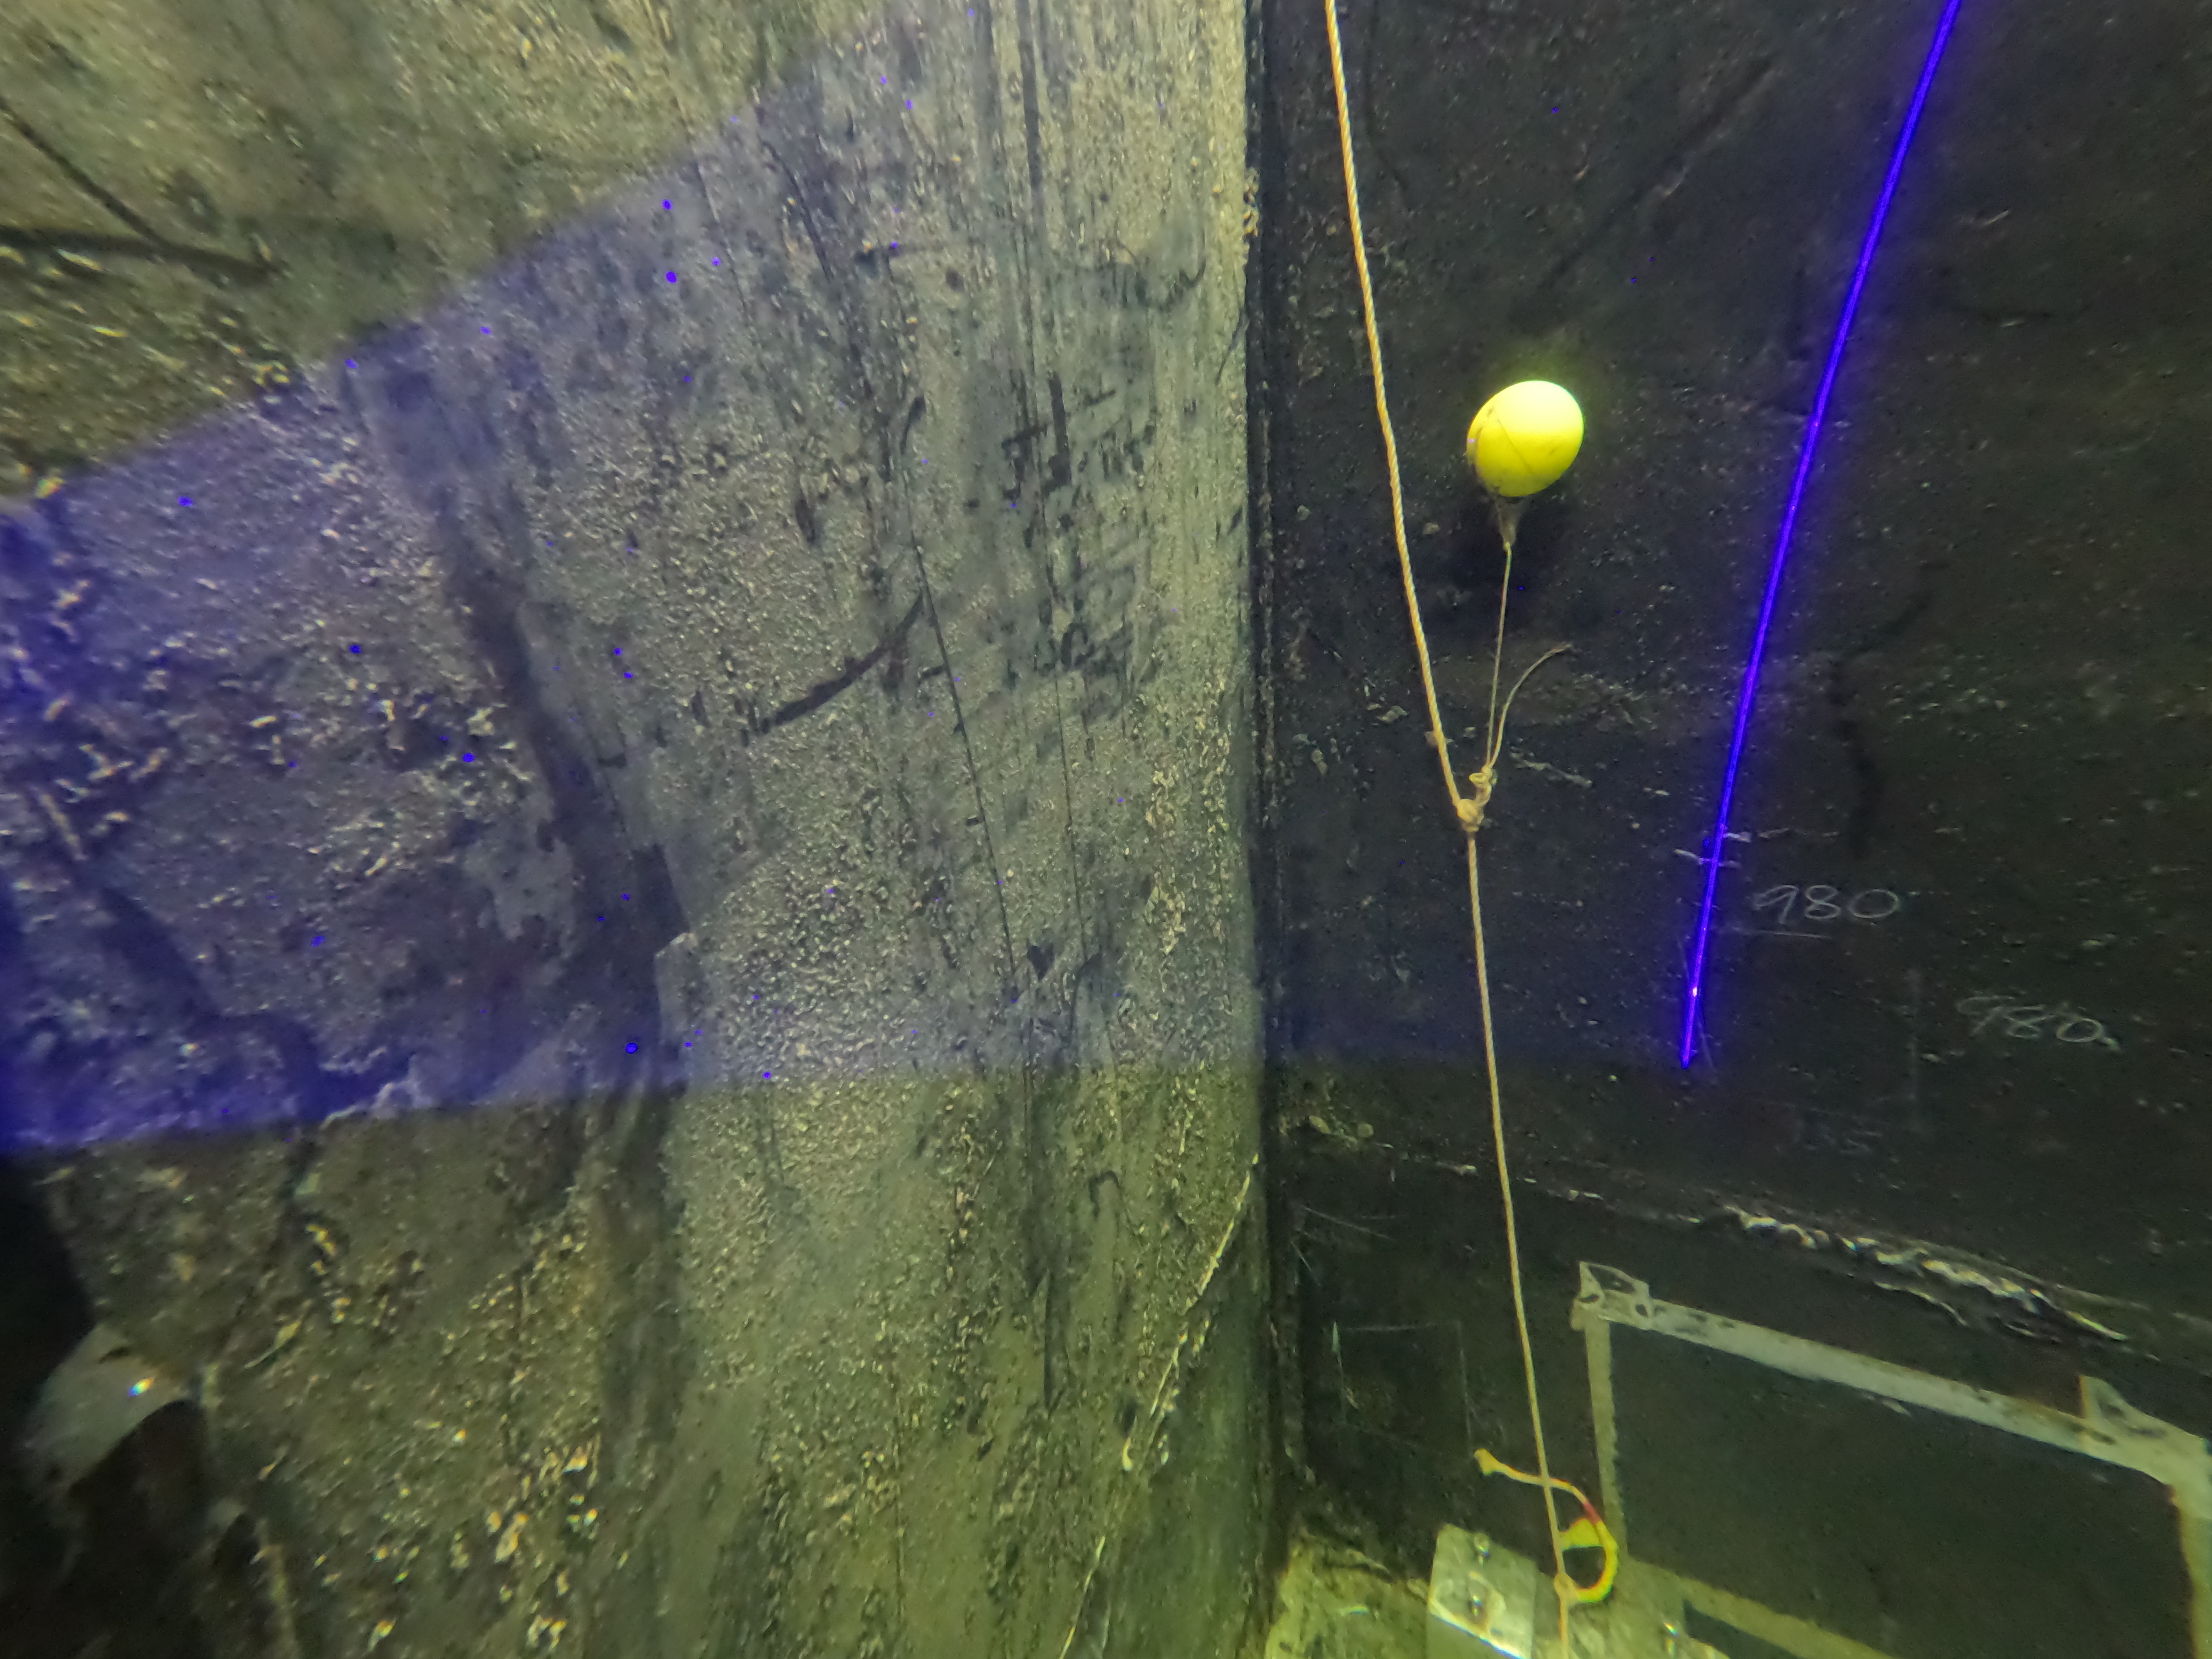

980

980

Supplement: Supplementary file 3042 [file G0031842.pdf › 12/G0031842.pdf]

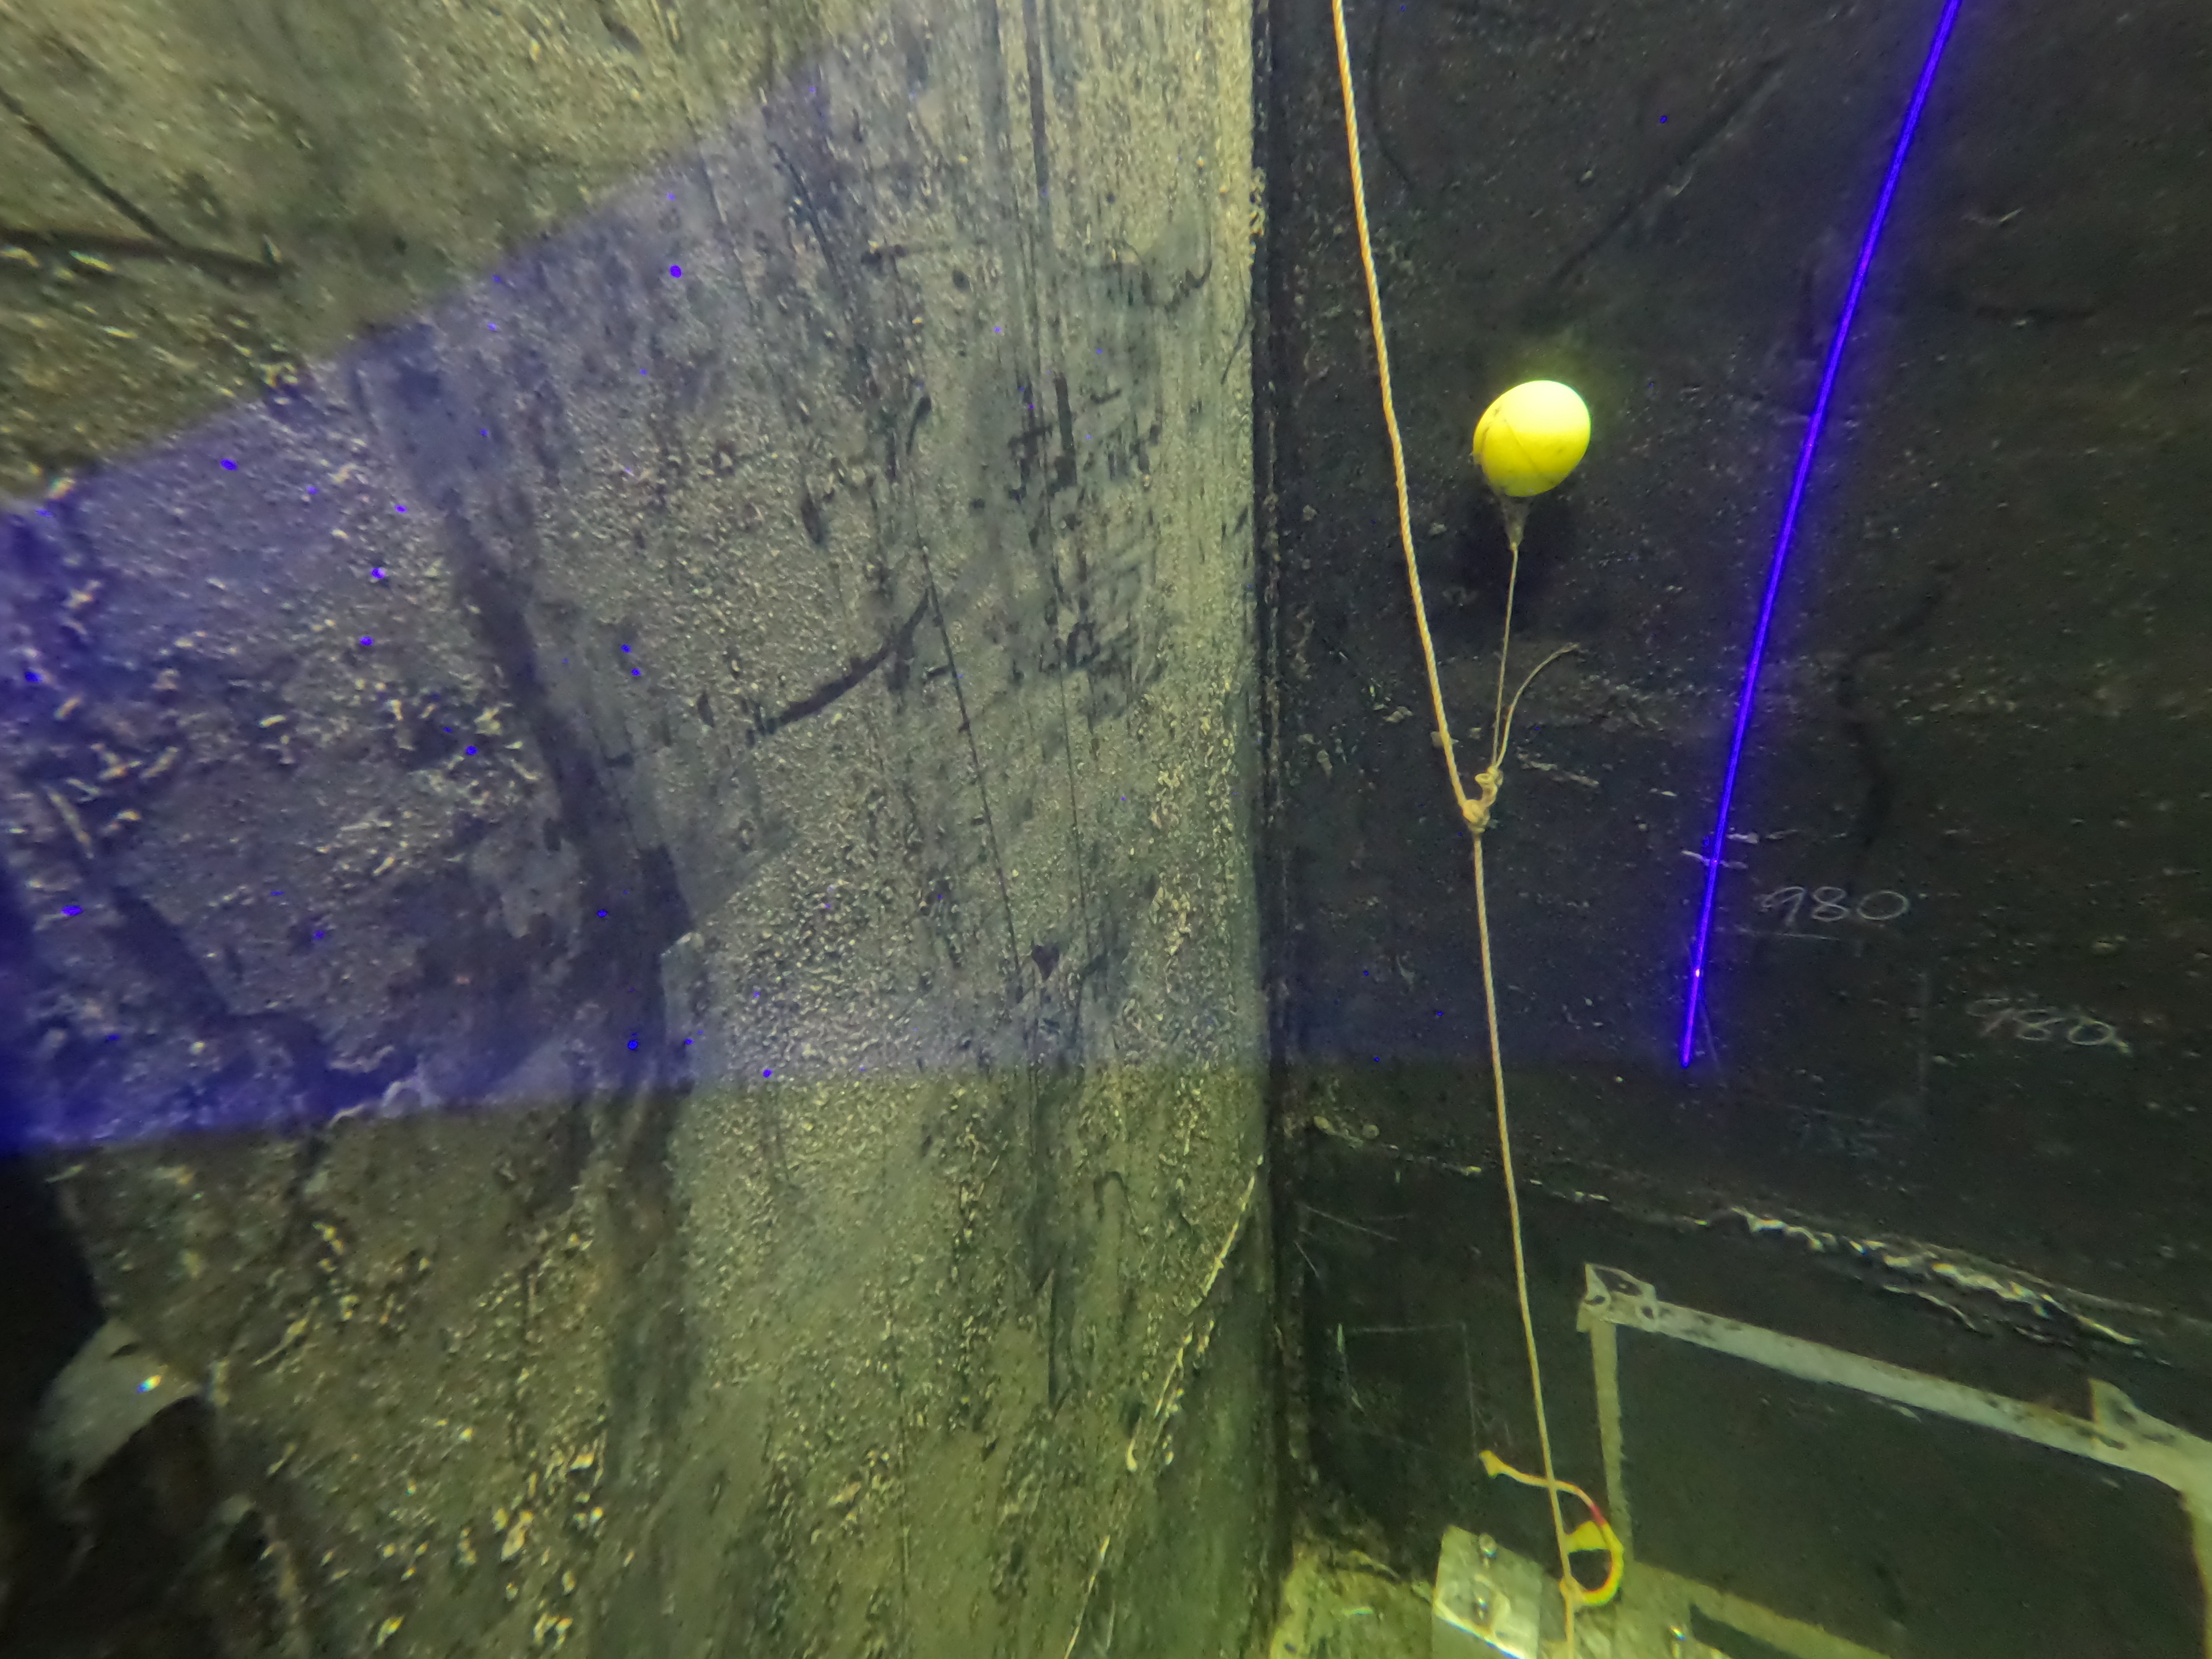

980

980

Supplement: Supplementary file 3043 [file G0031843.pdf › 12/G0031843.pdf]

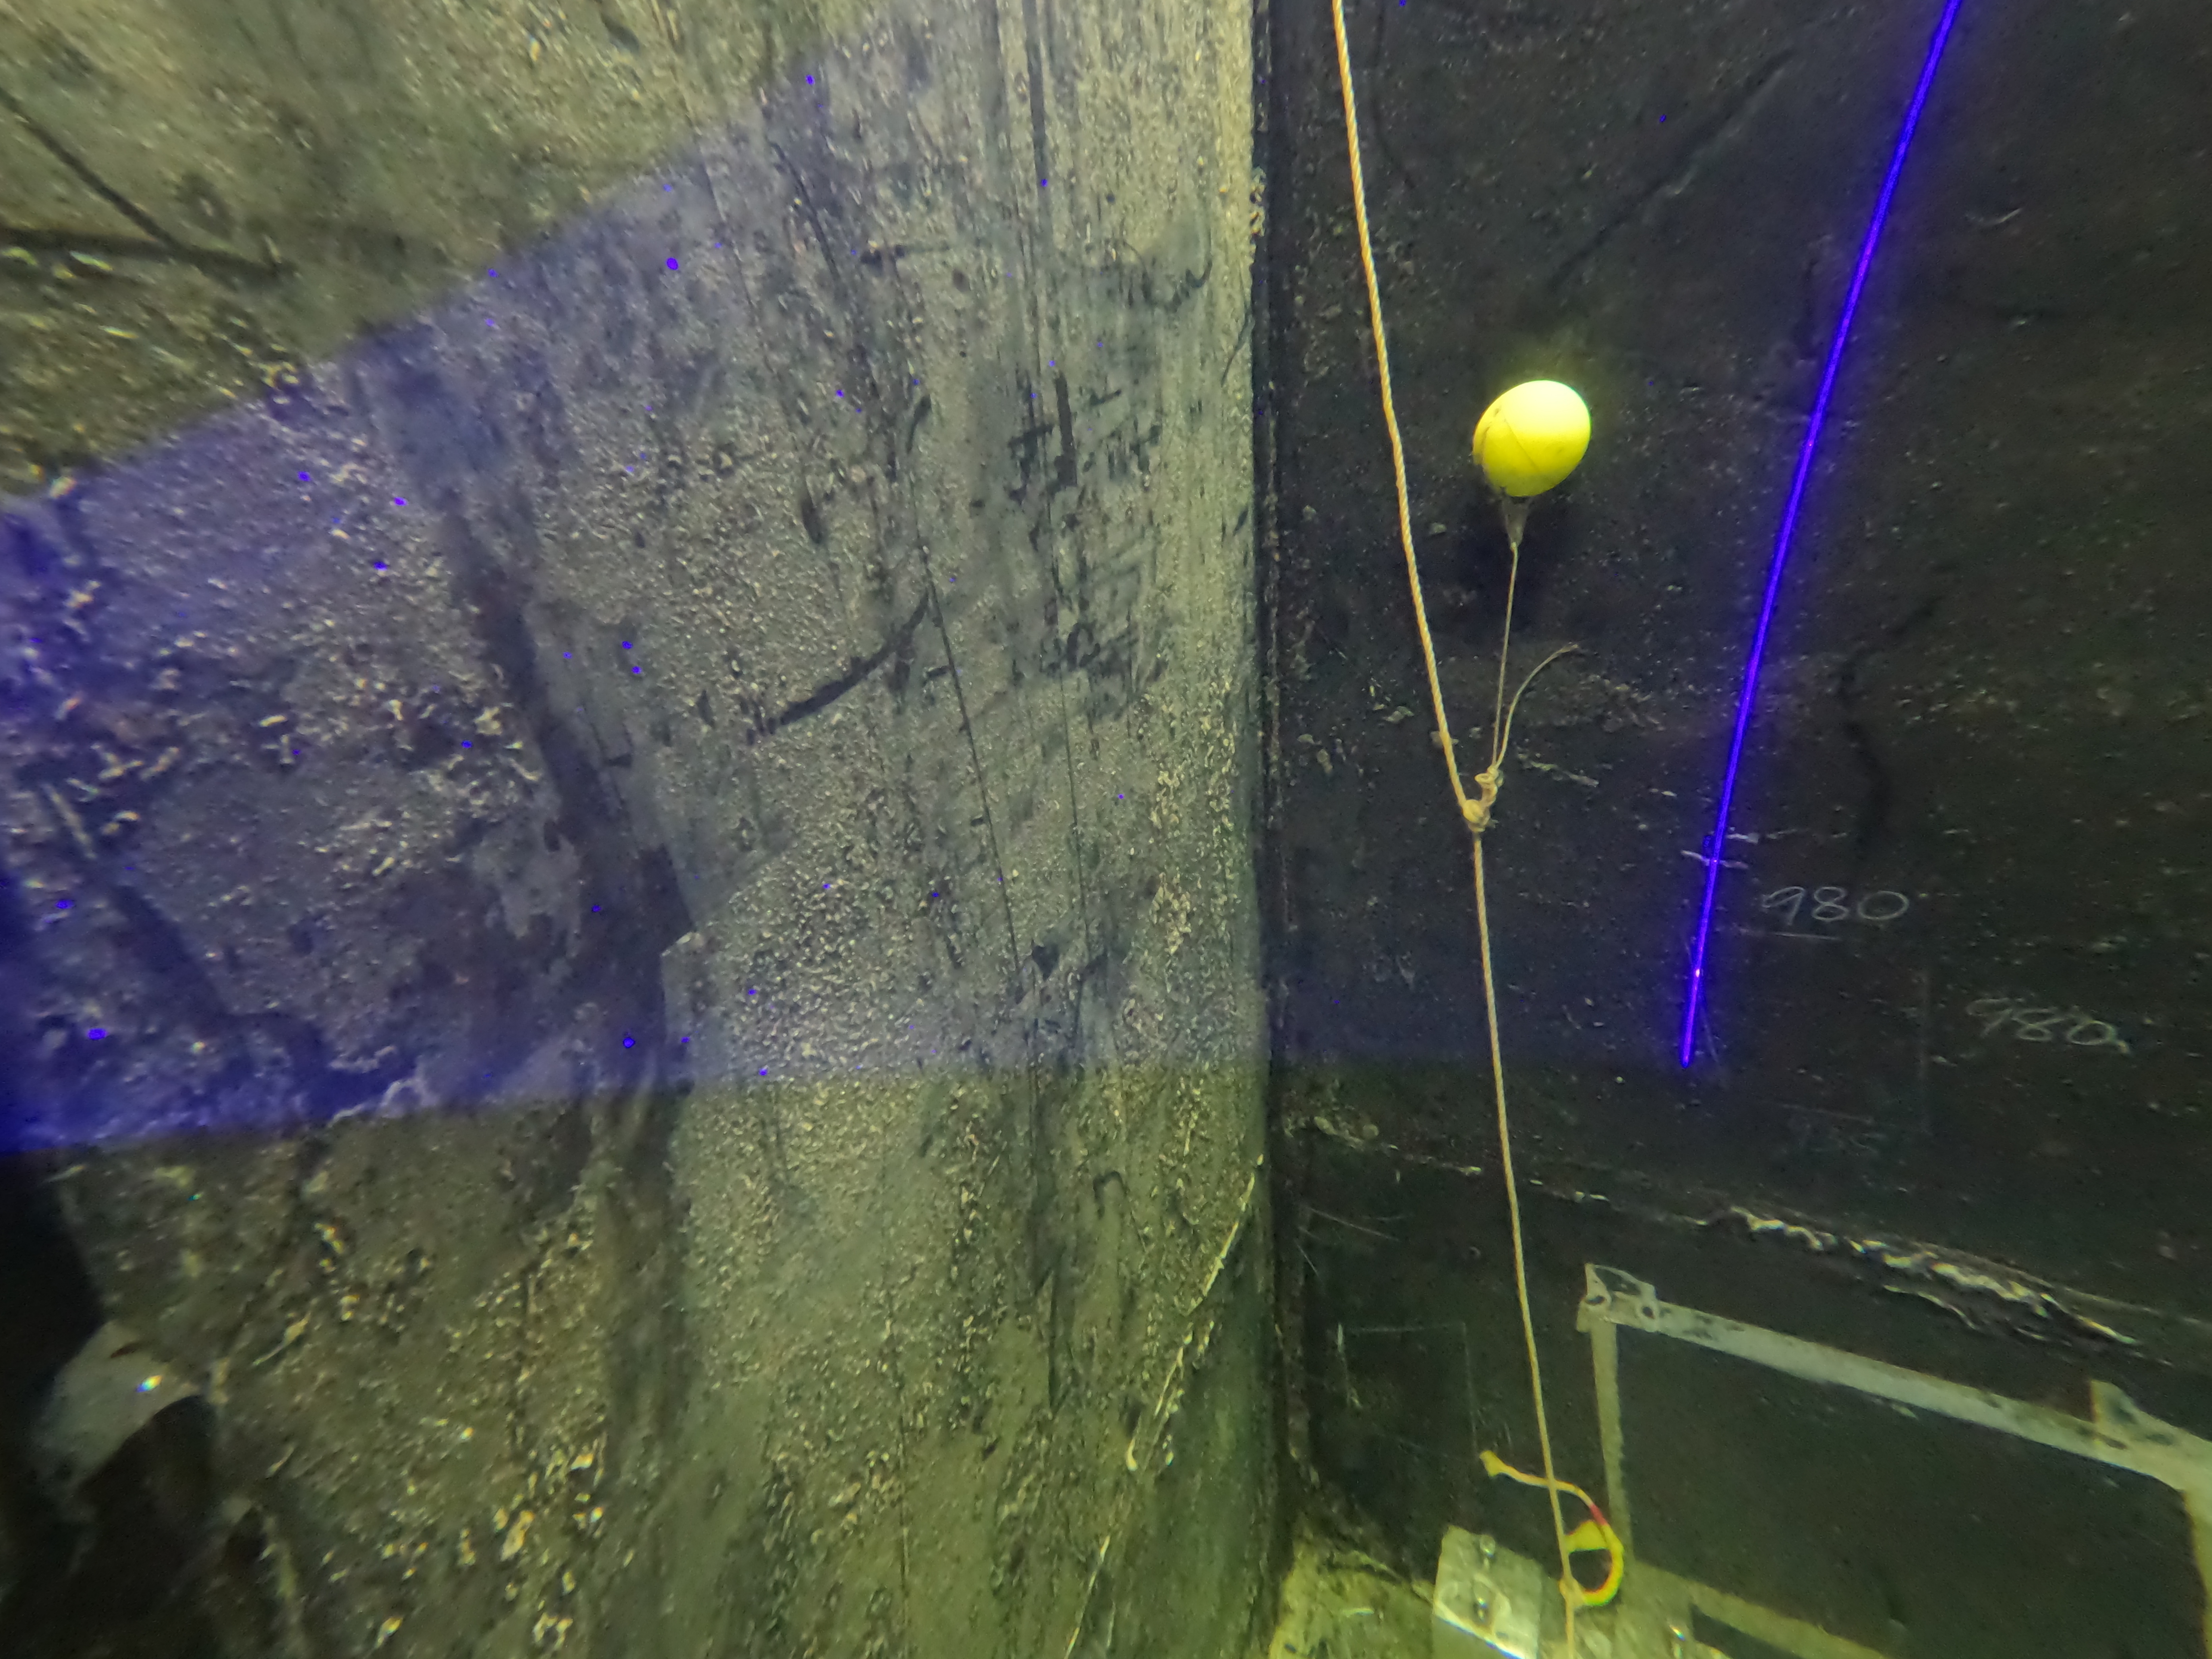

Supplement: Supplementary file 3044 [file G0031844.pdf › 12/G0031844.pdf]

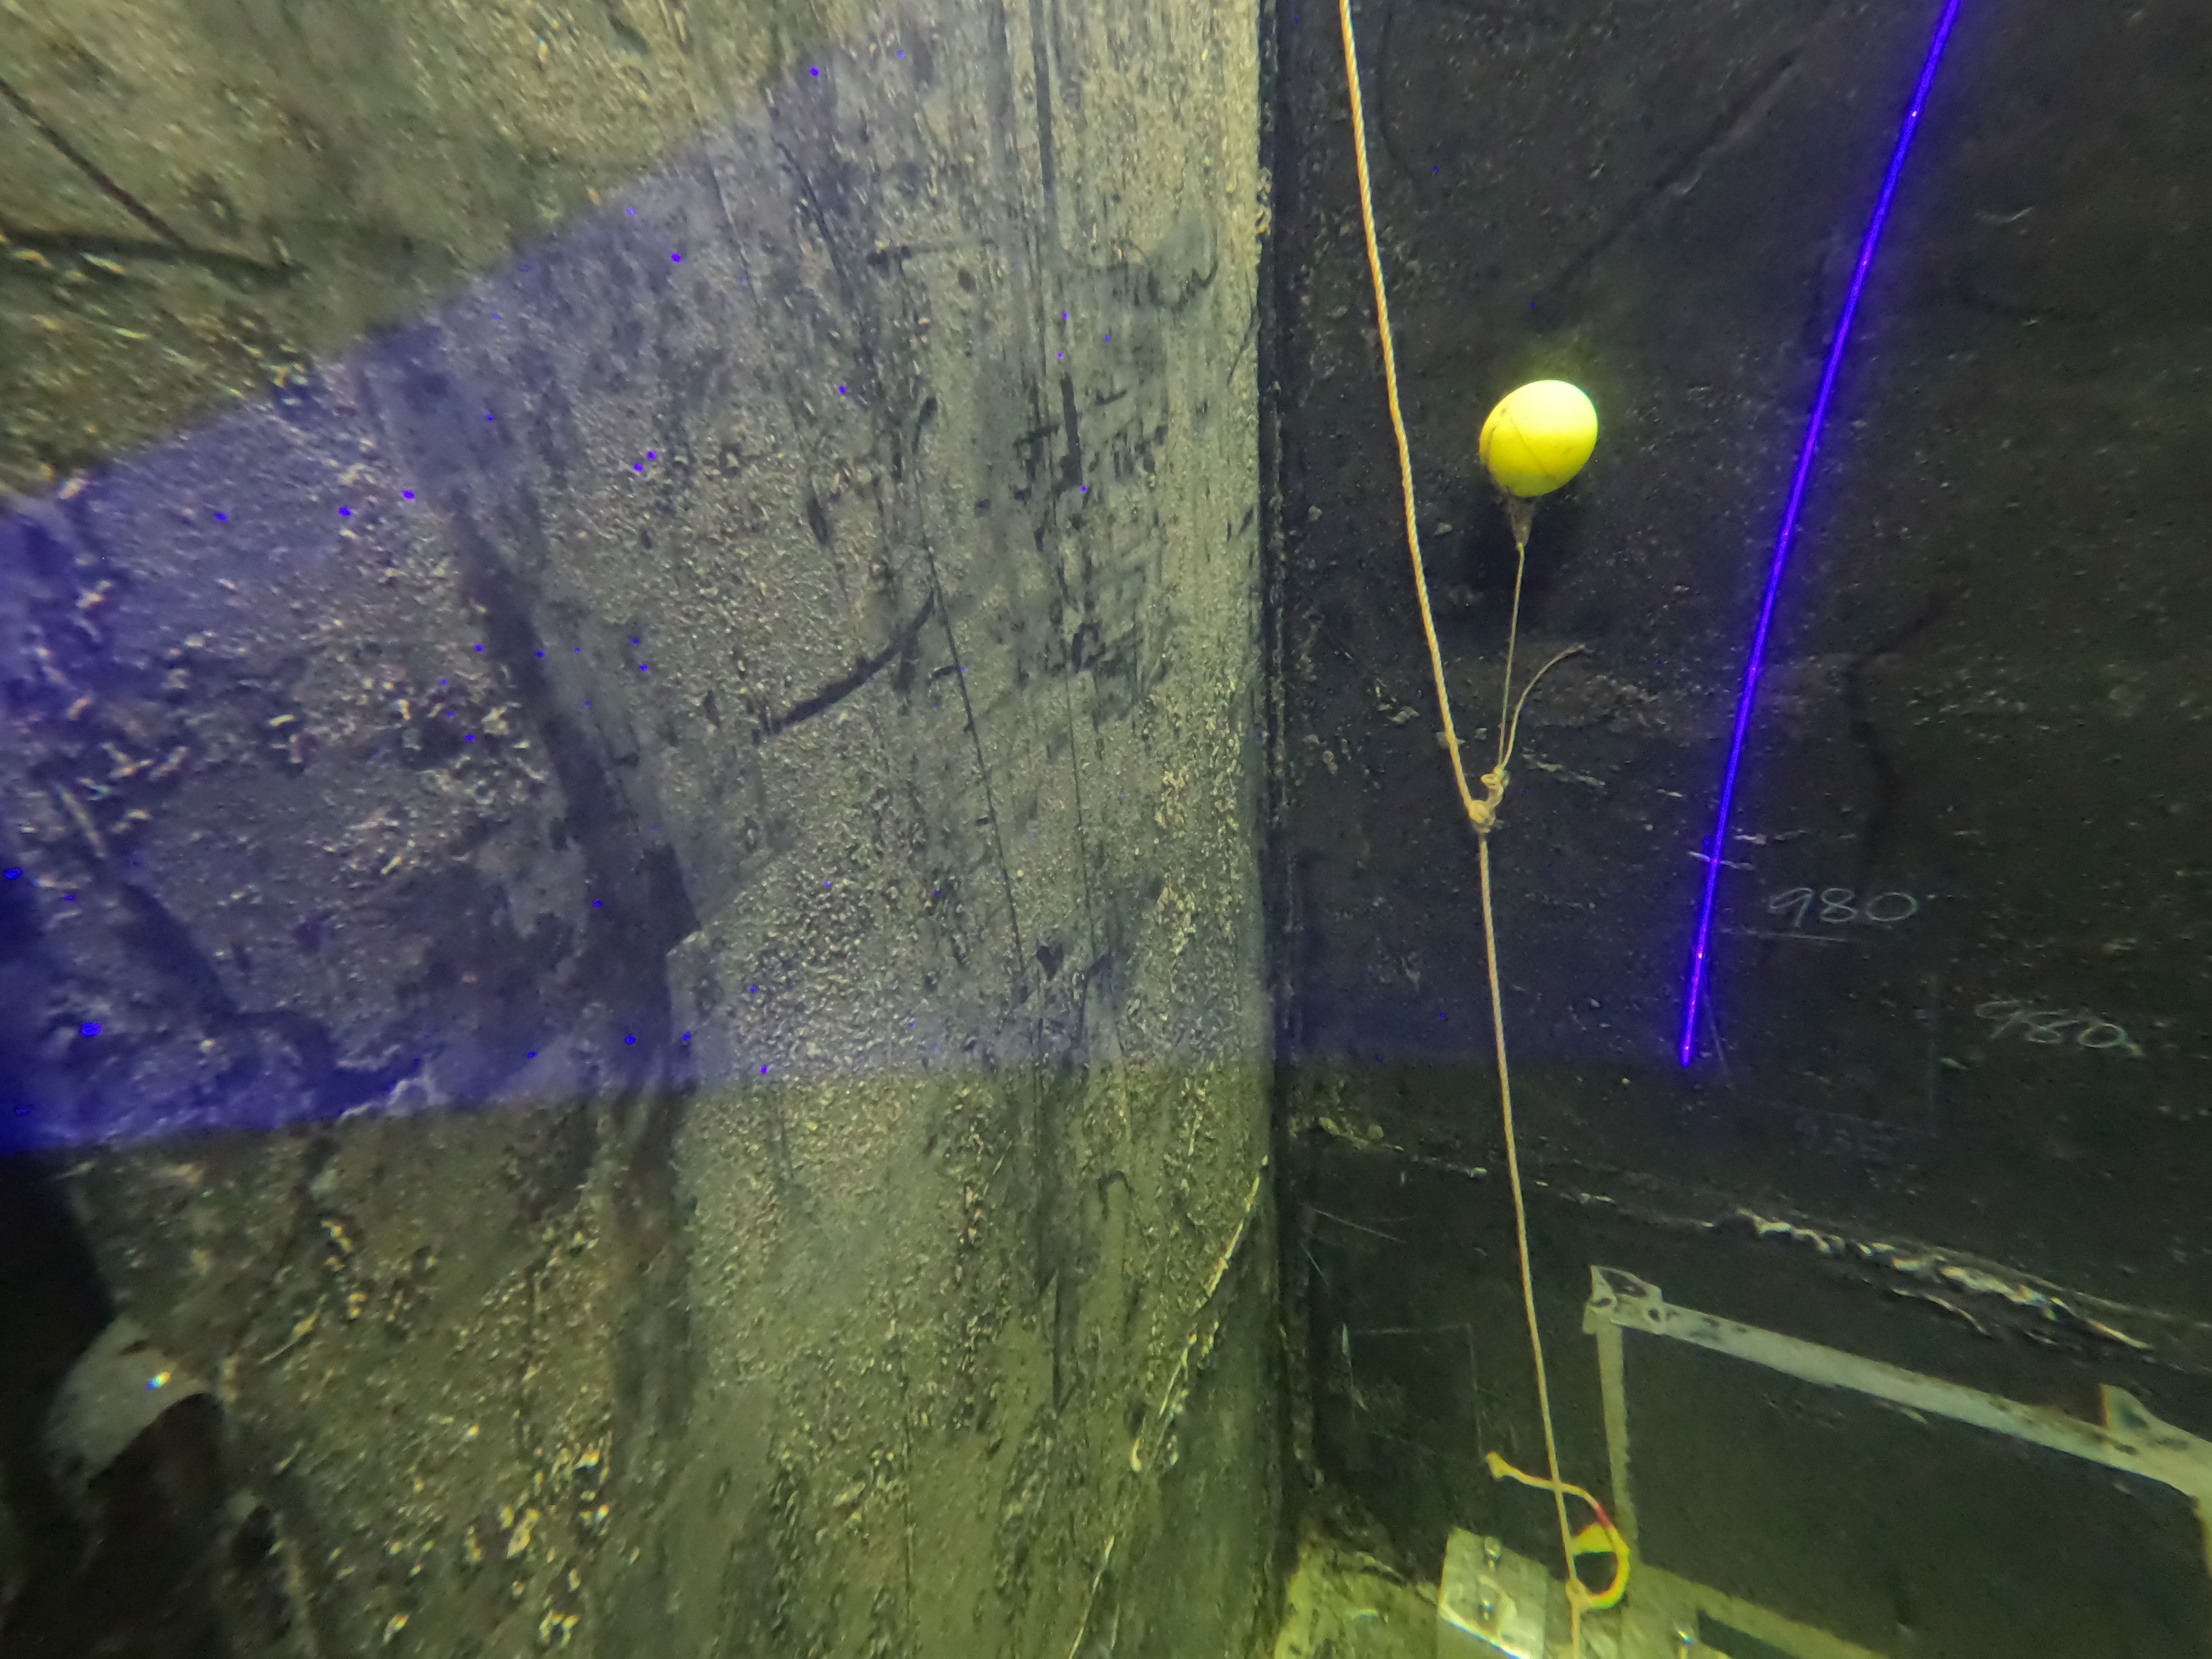

Supplement: Supplementary file 3045 [file G0031845.pdf › 12/G0031845.pdf]

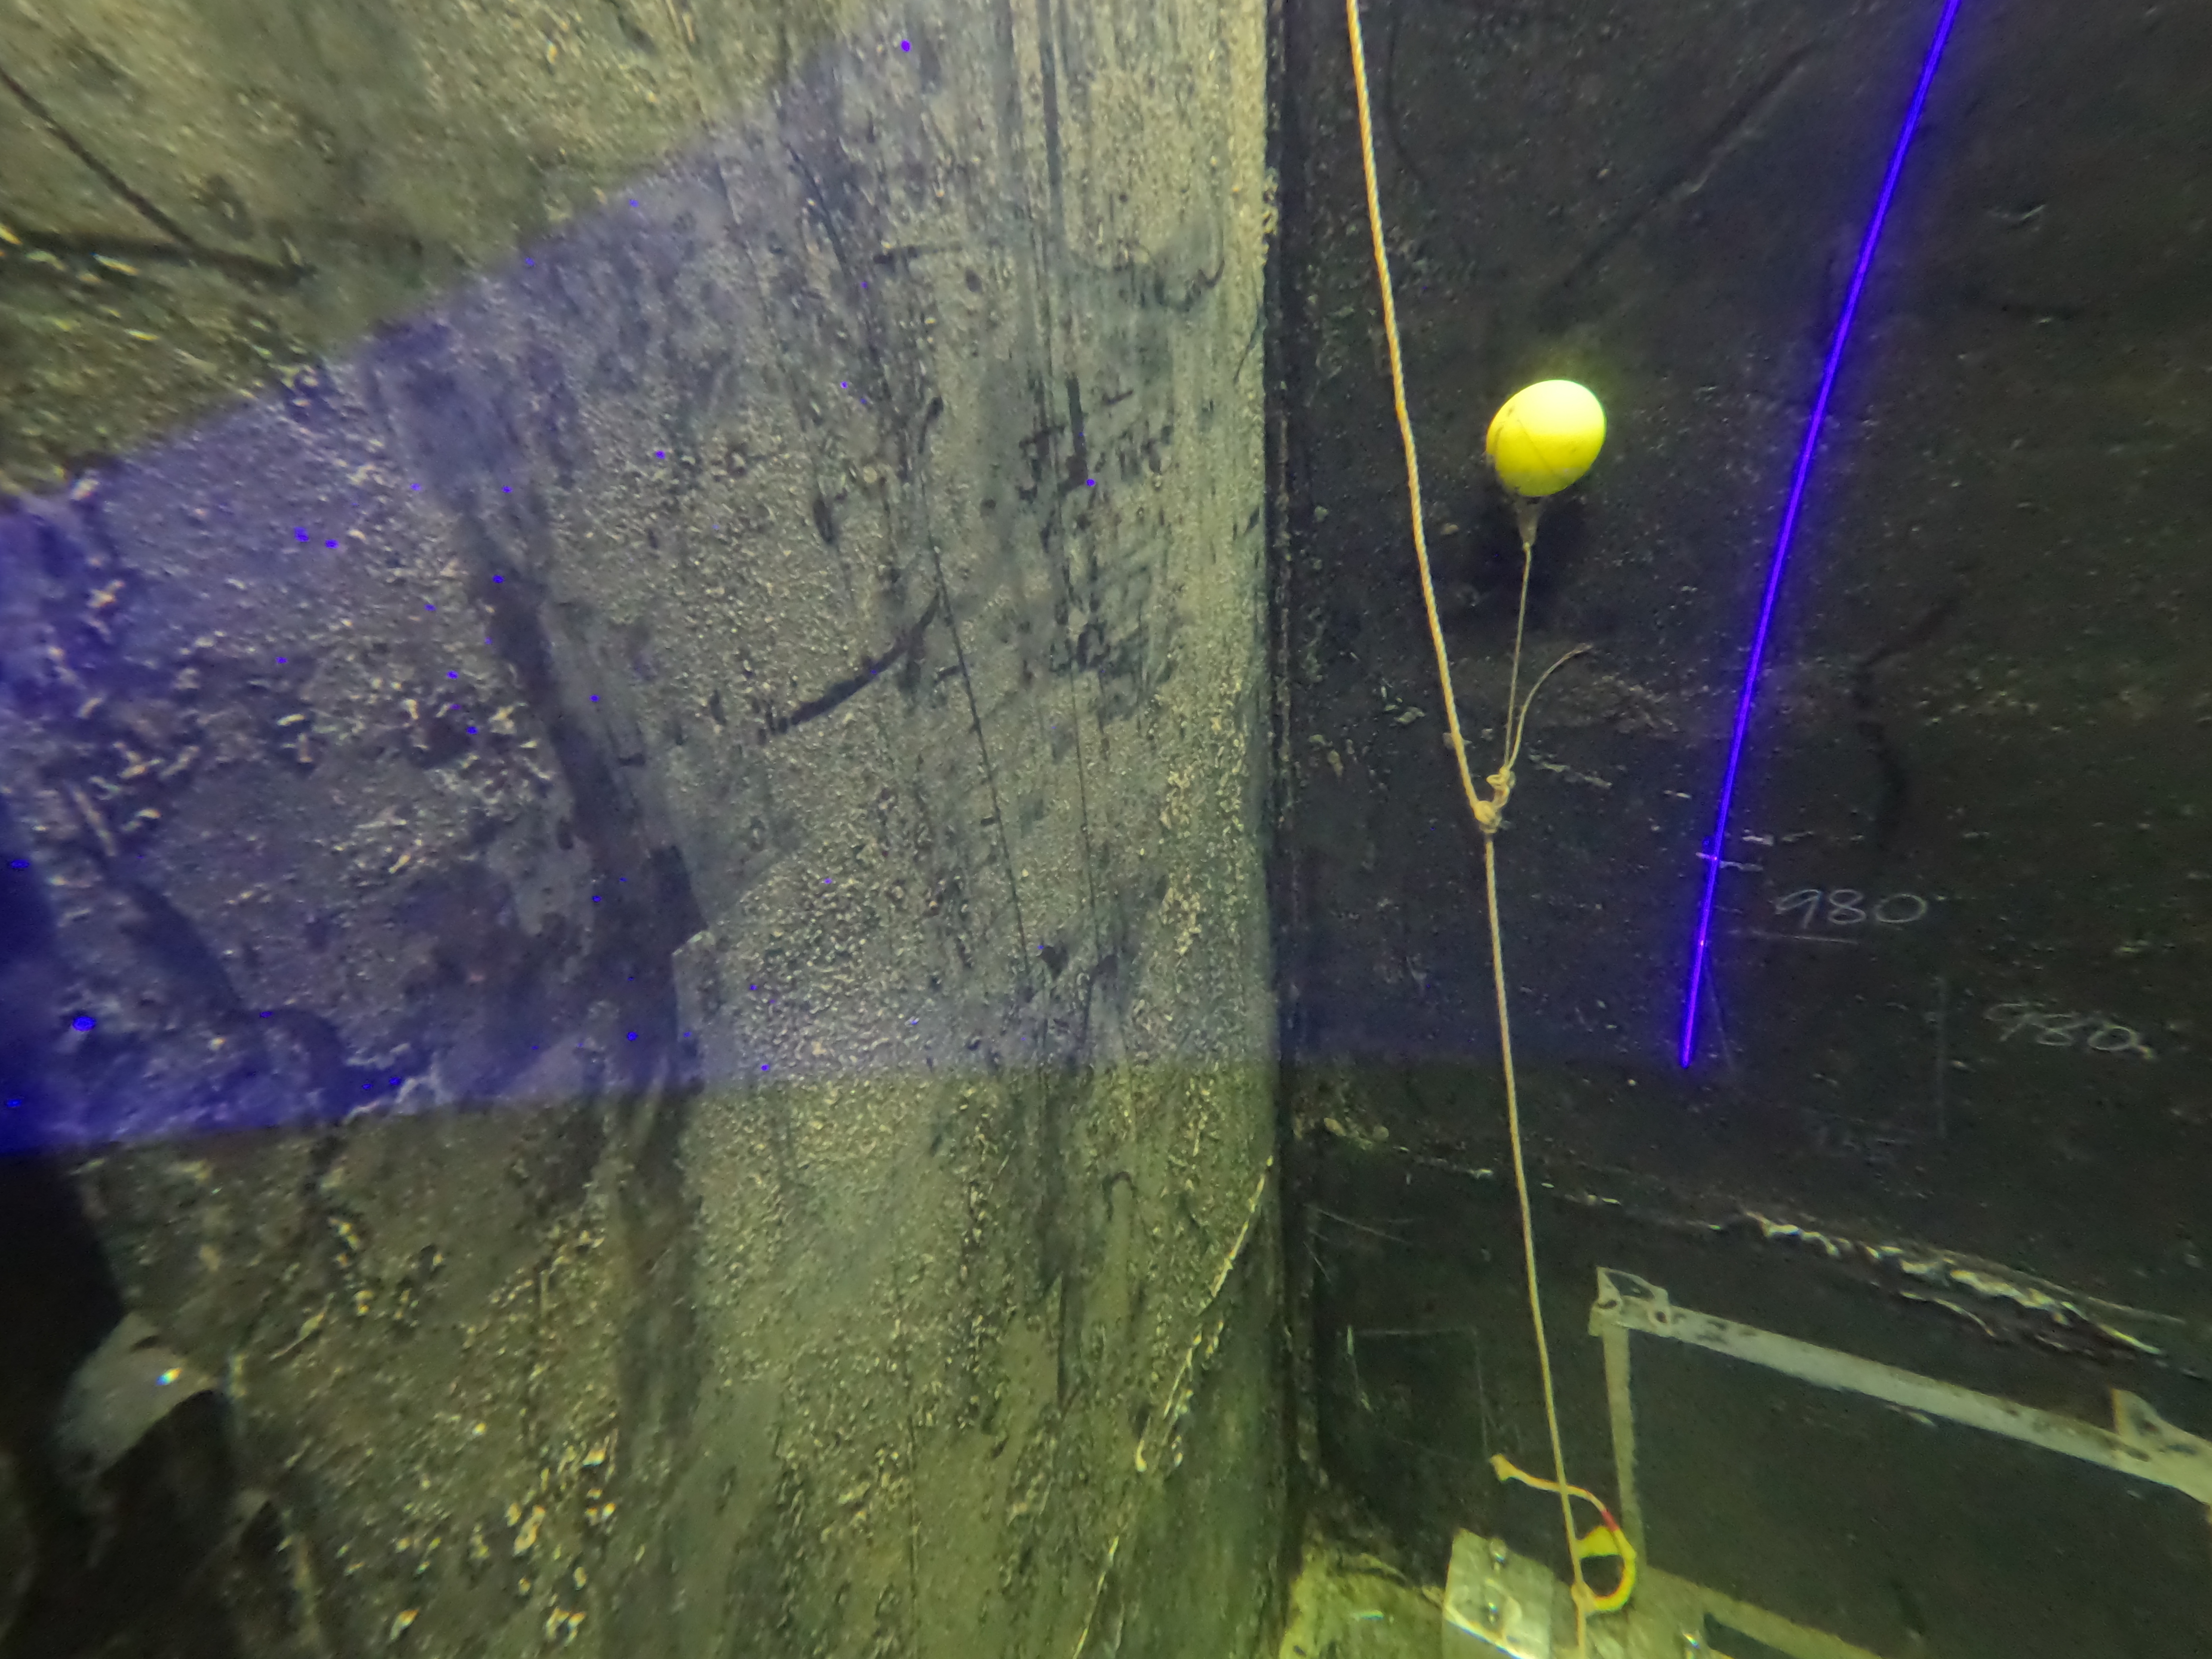

Supplement: Supplementary file 3046 [file G0031846.pdf › 12/G0031846.pdf]

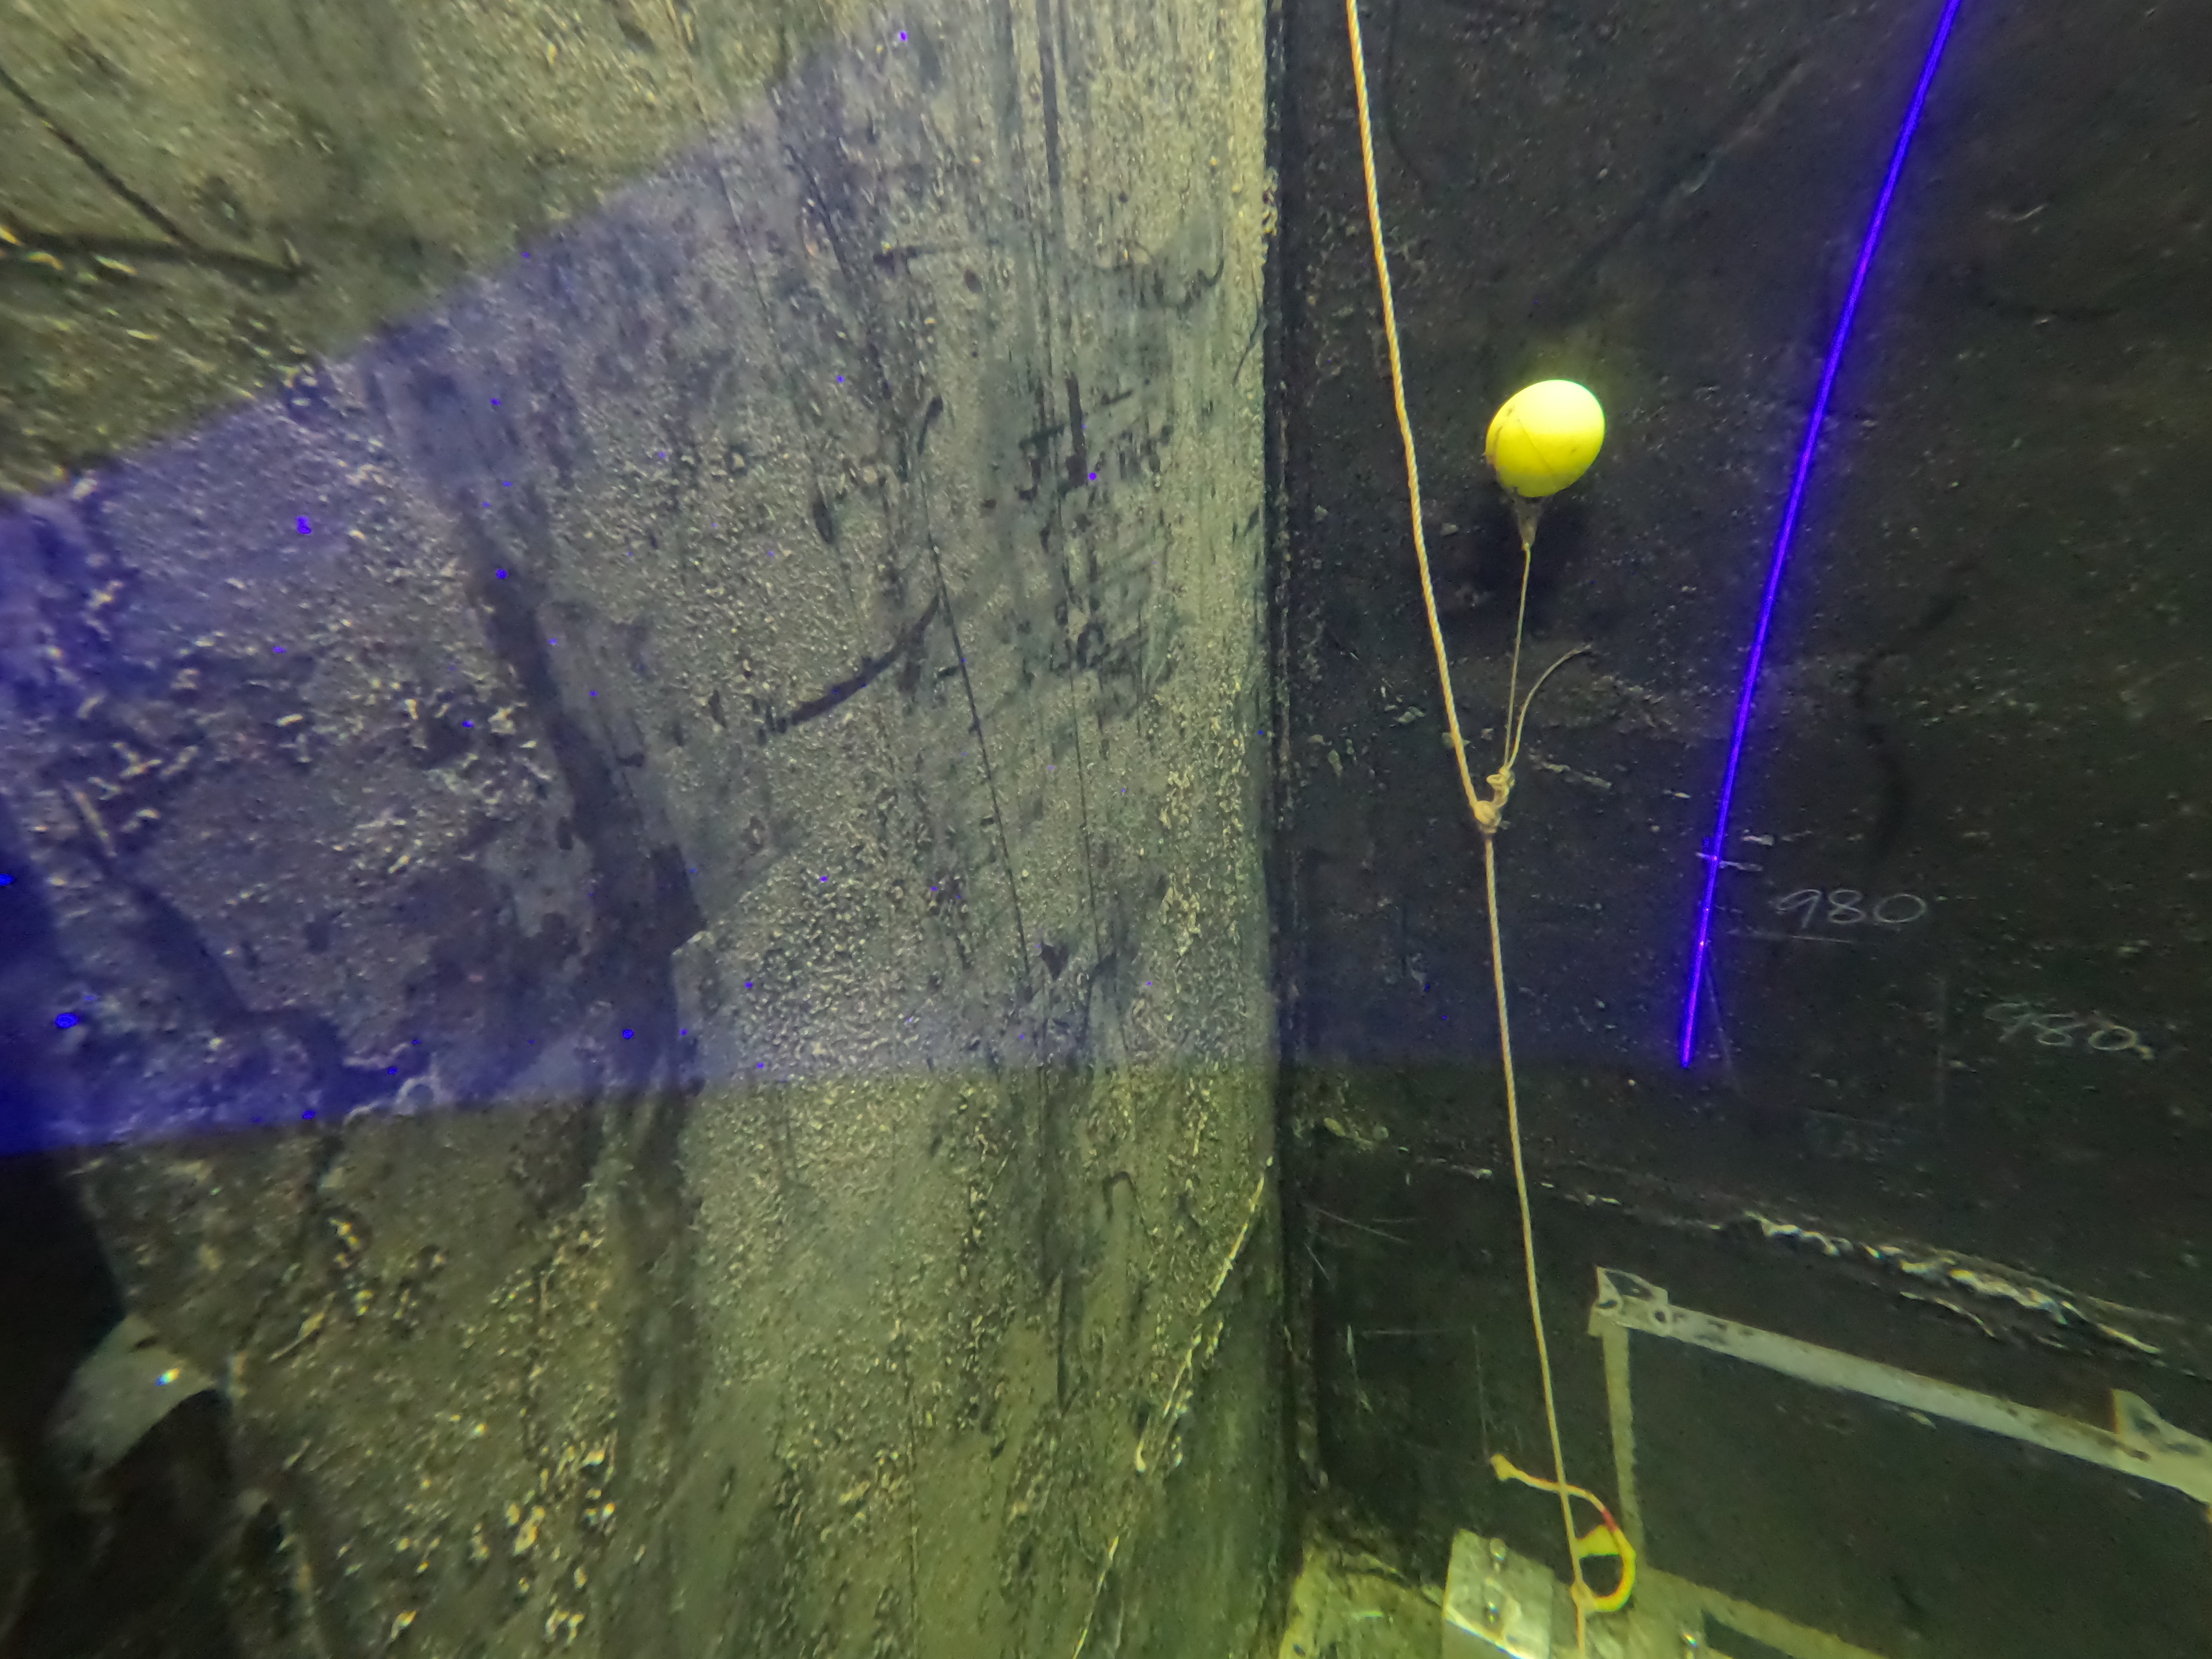

Supplement: Supplementary file 3047 [file G0031847.pdf › 12/G0031847.pdf]

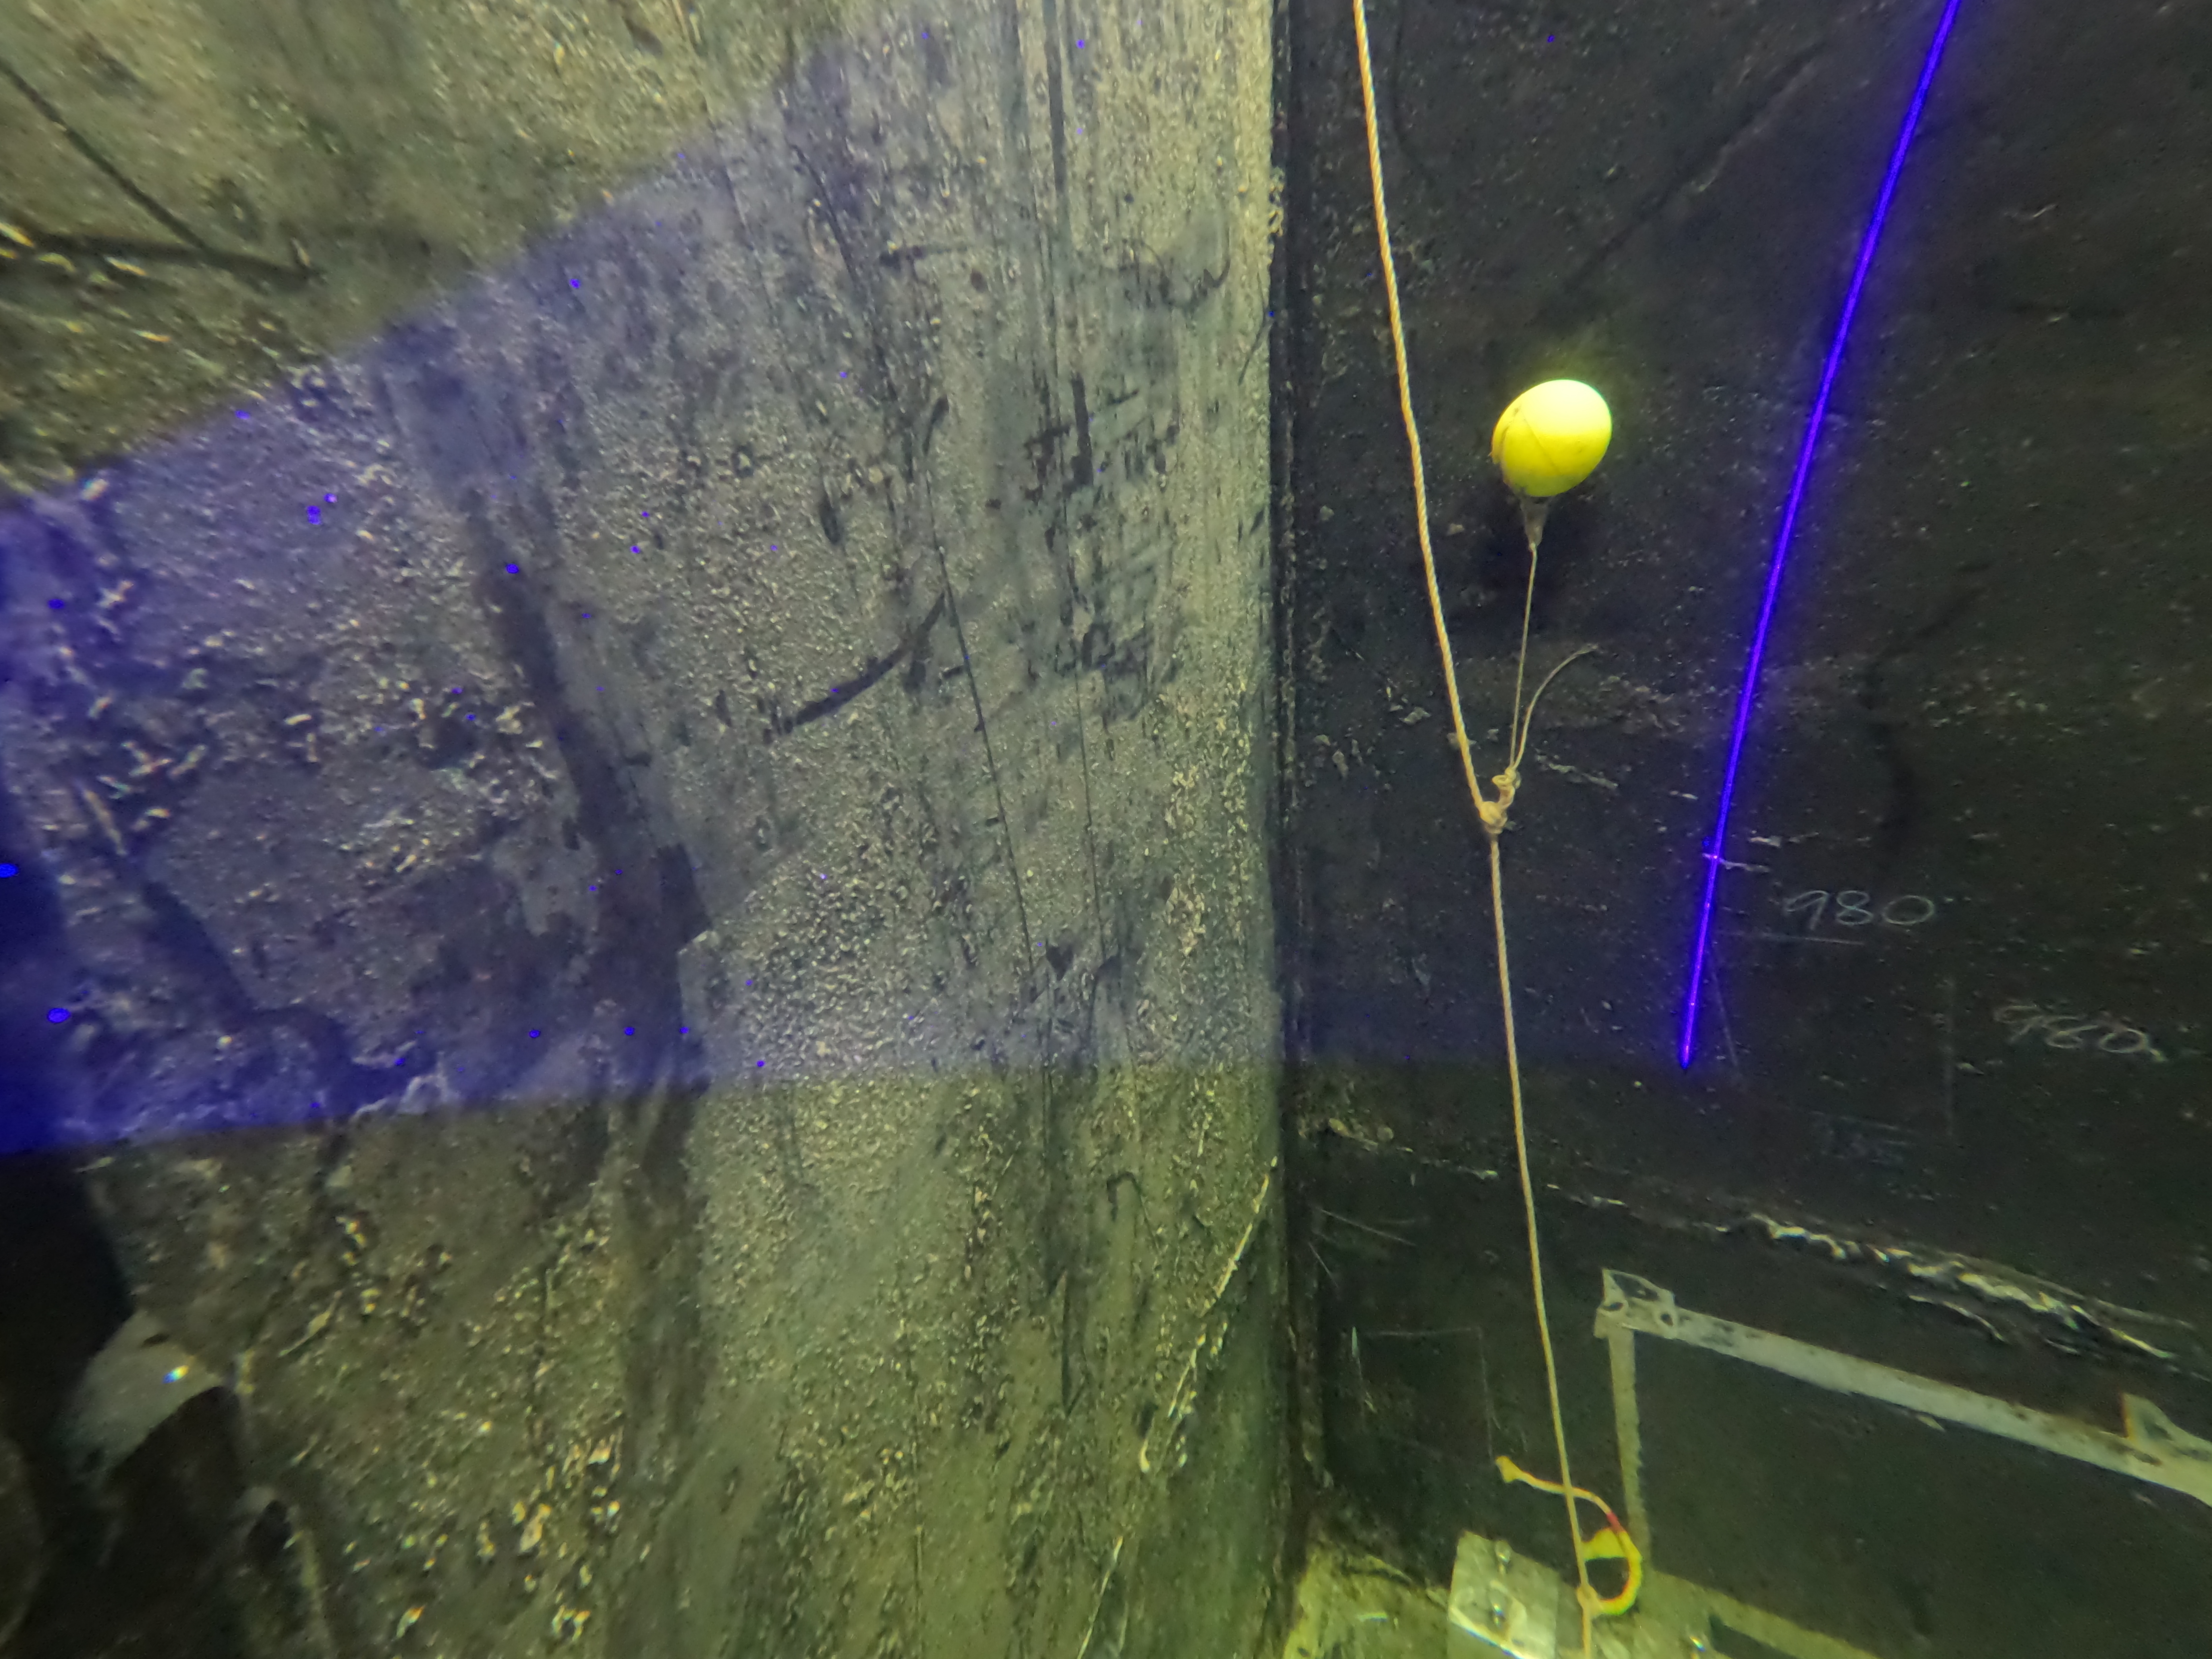

Supplement: Supplementary file 3048 [file G0031848.pdf › 12/G0031848.pdf]

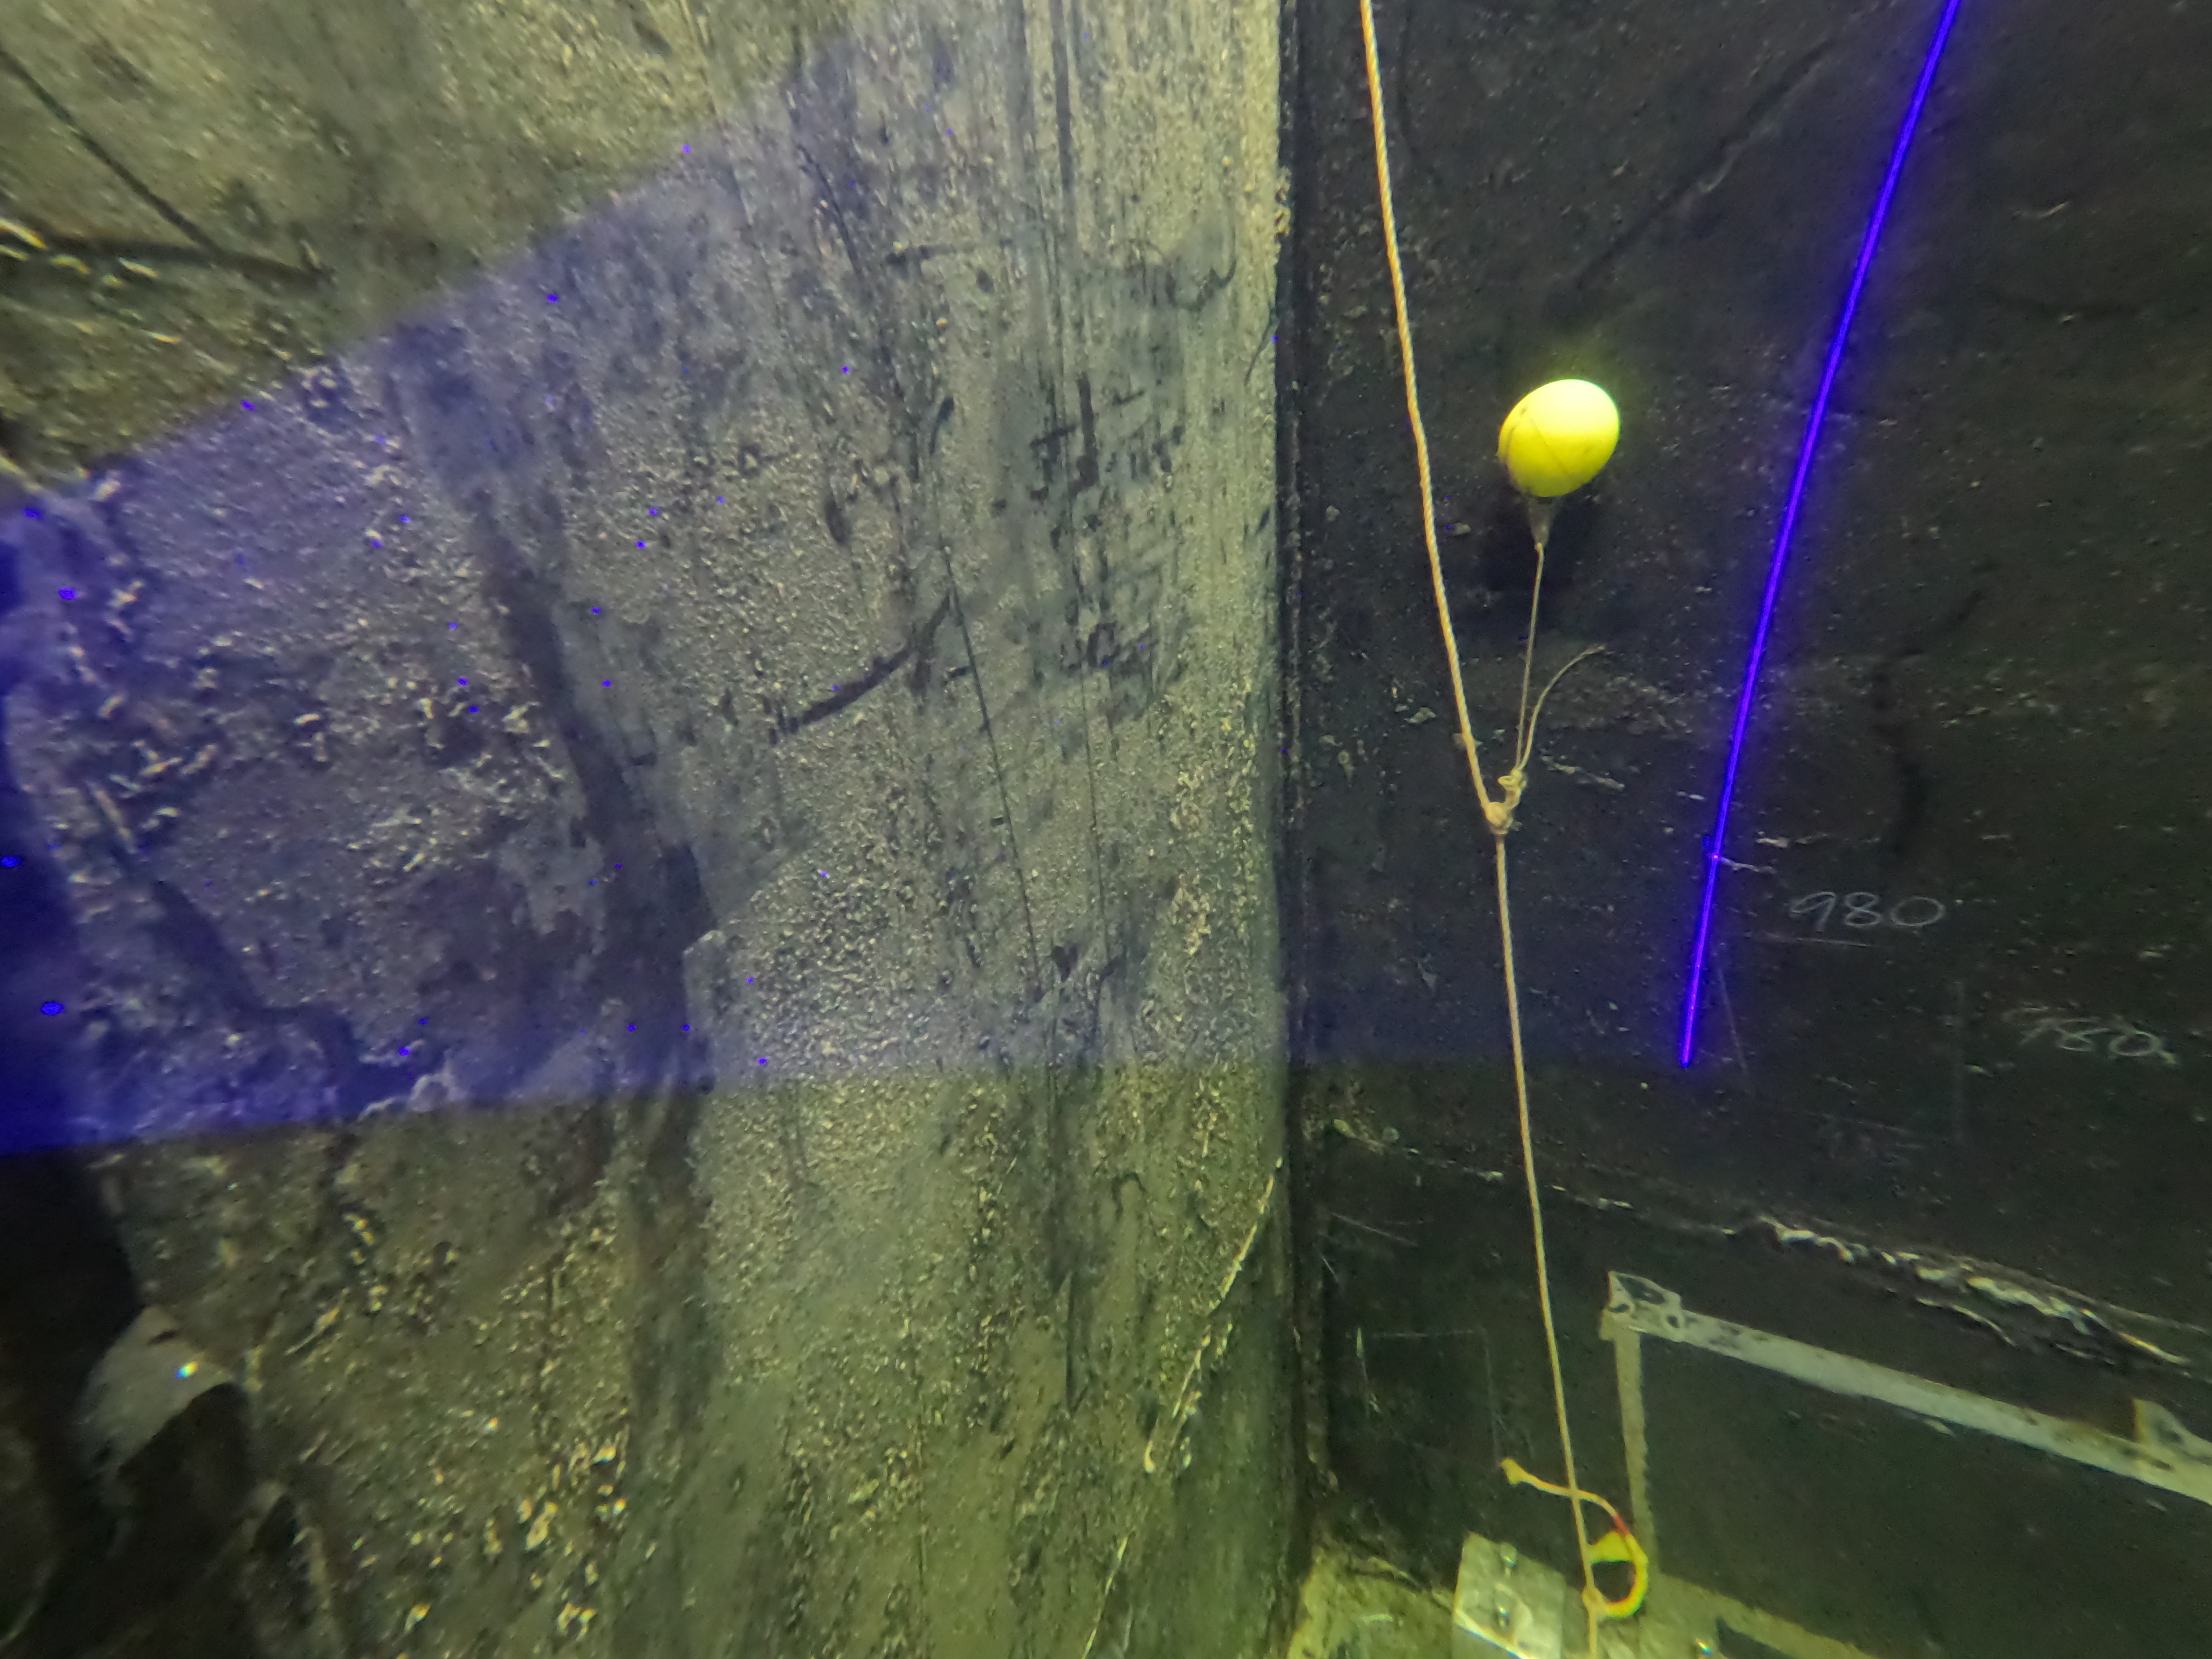

980

780

Supplement: Supplementary file 3049 [file G0031849.pdf › 12/G0031849.pdf]

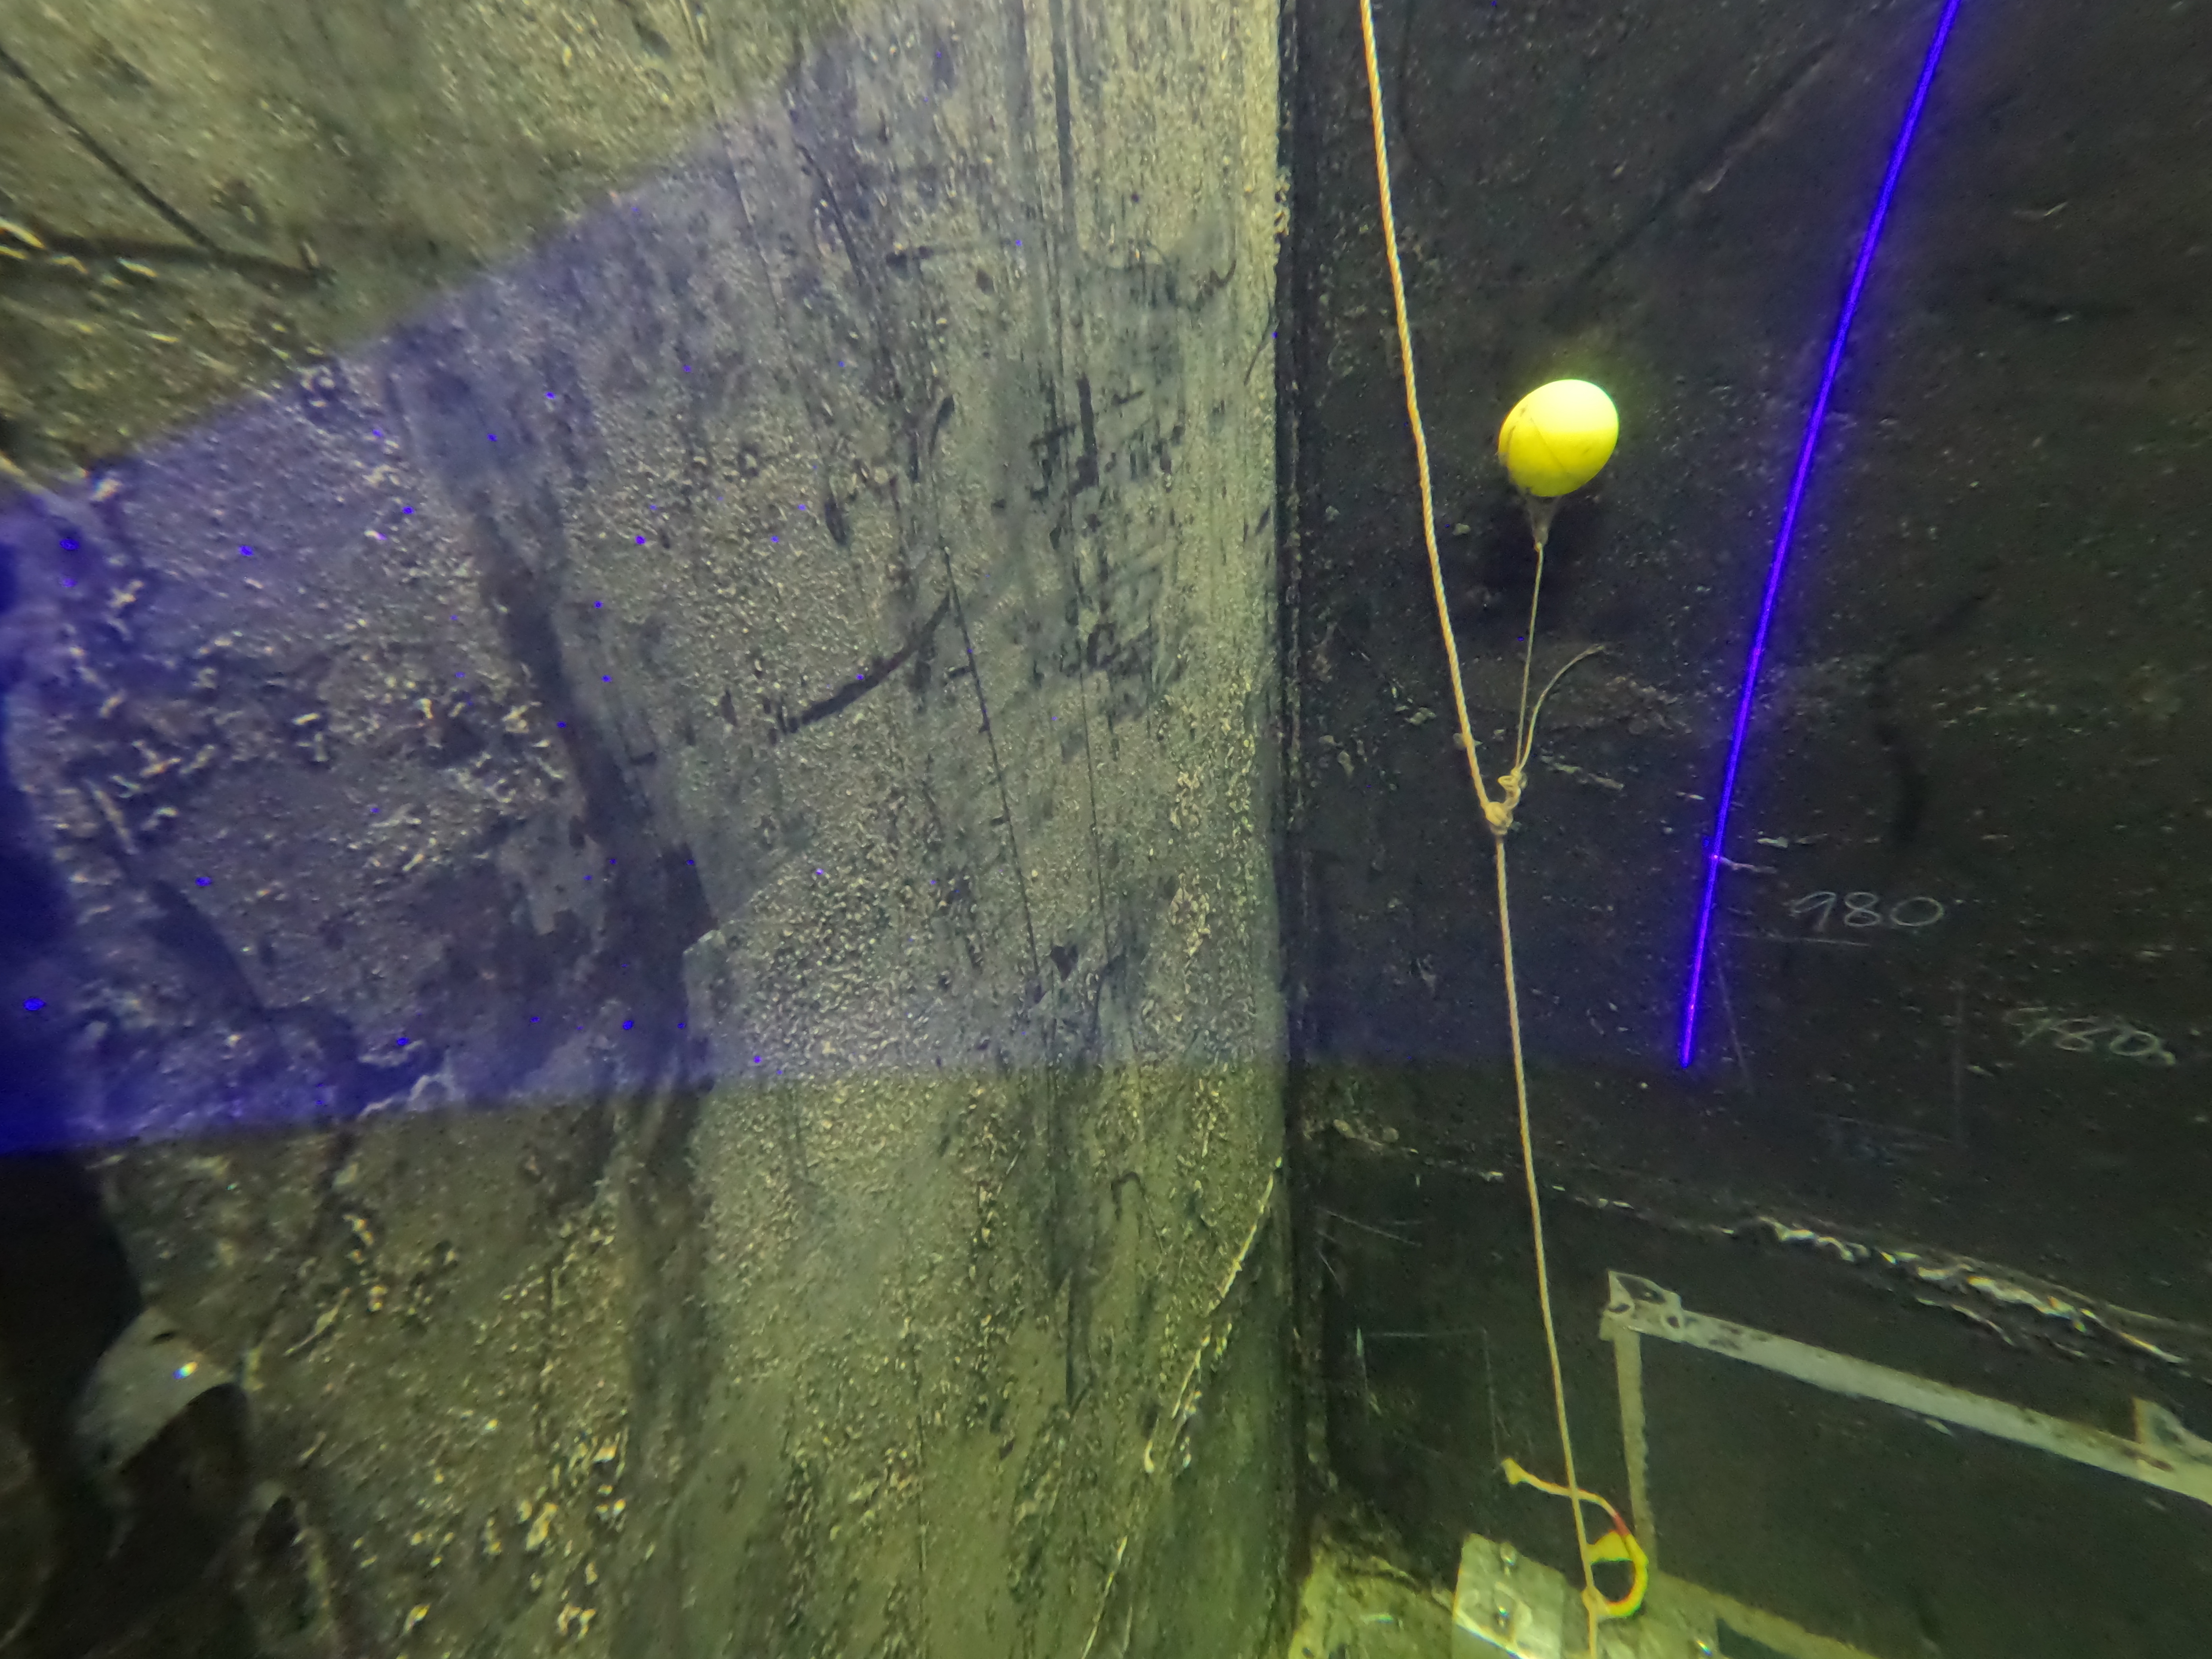

Supplement: Supplementary file 3050 [file G0031850.pdf › 12/G0031850.pdf]

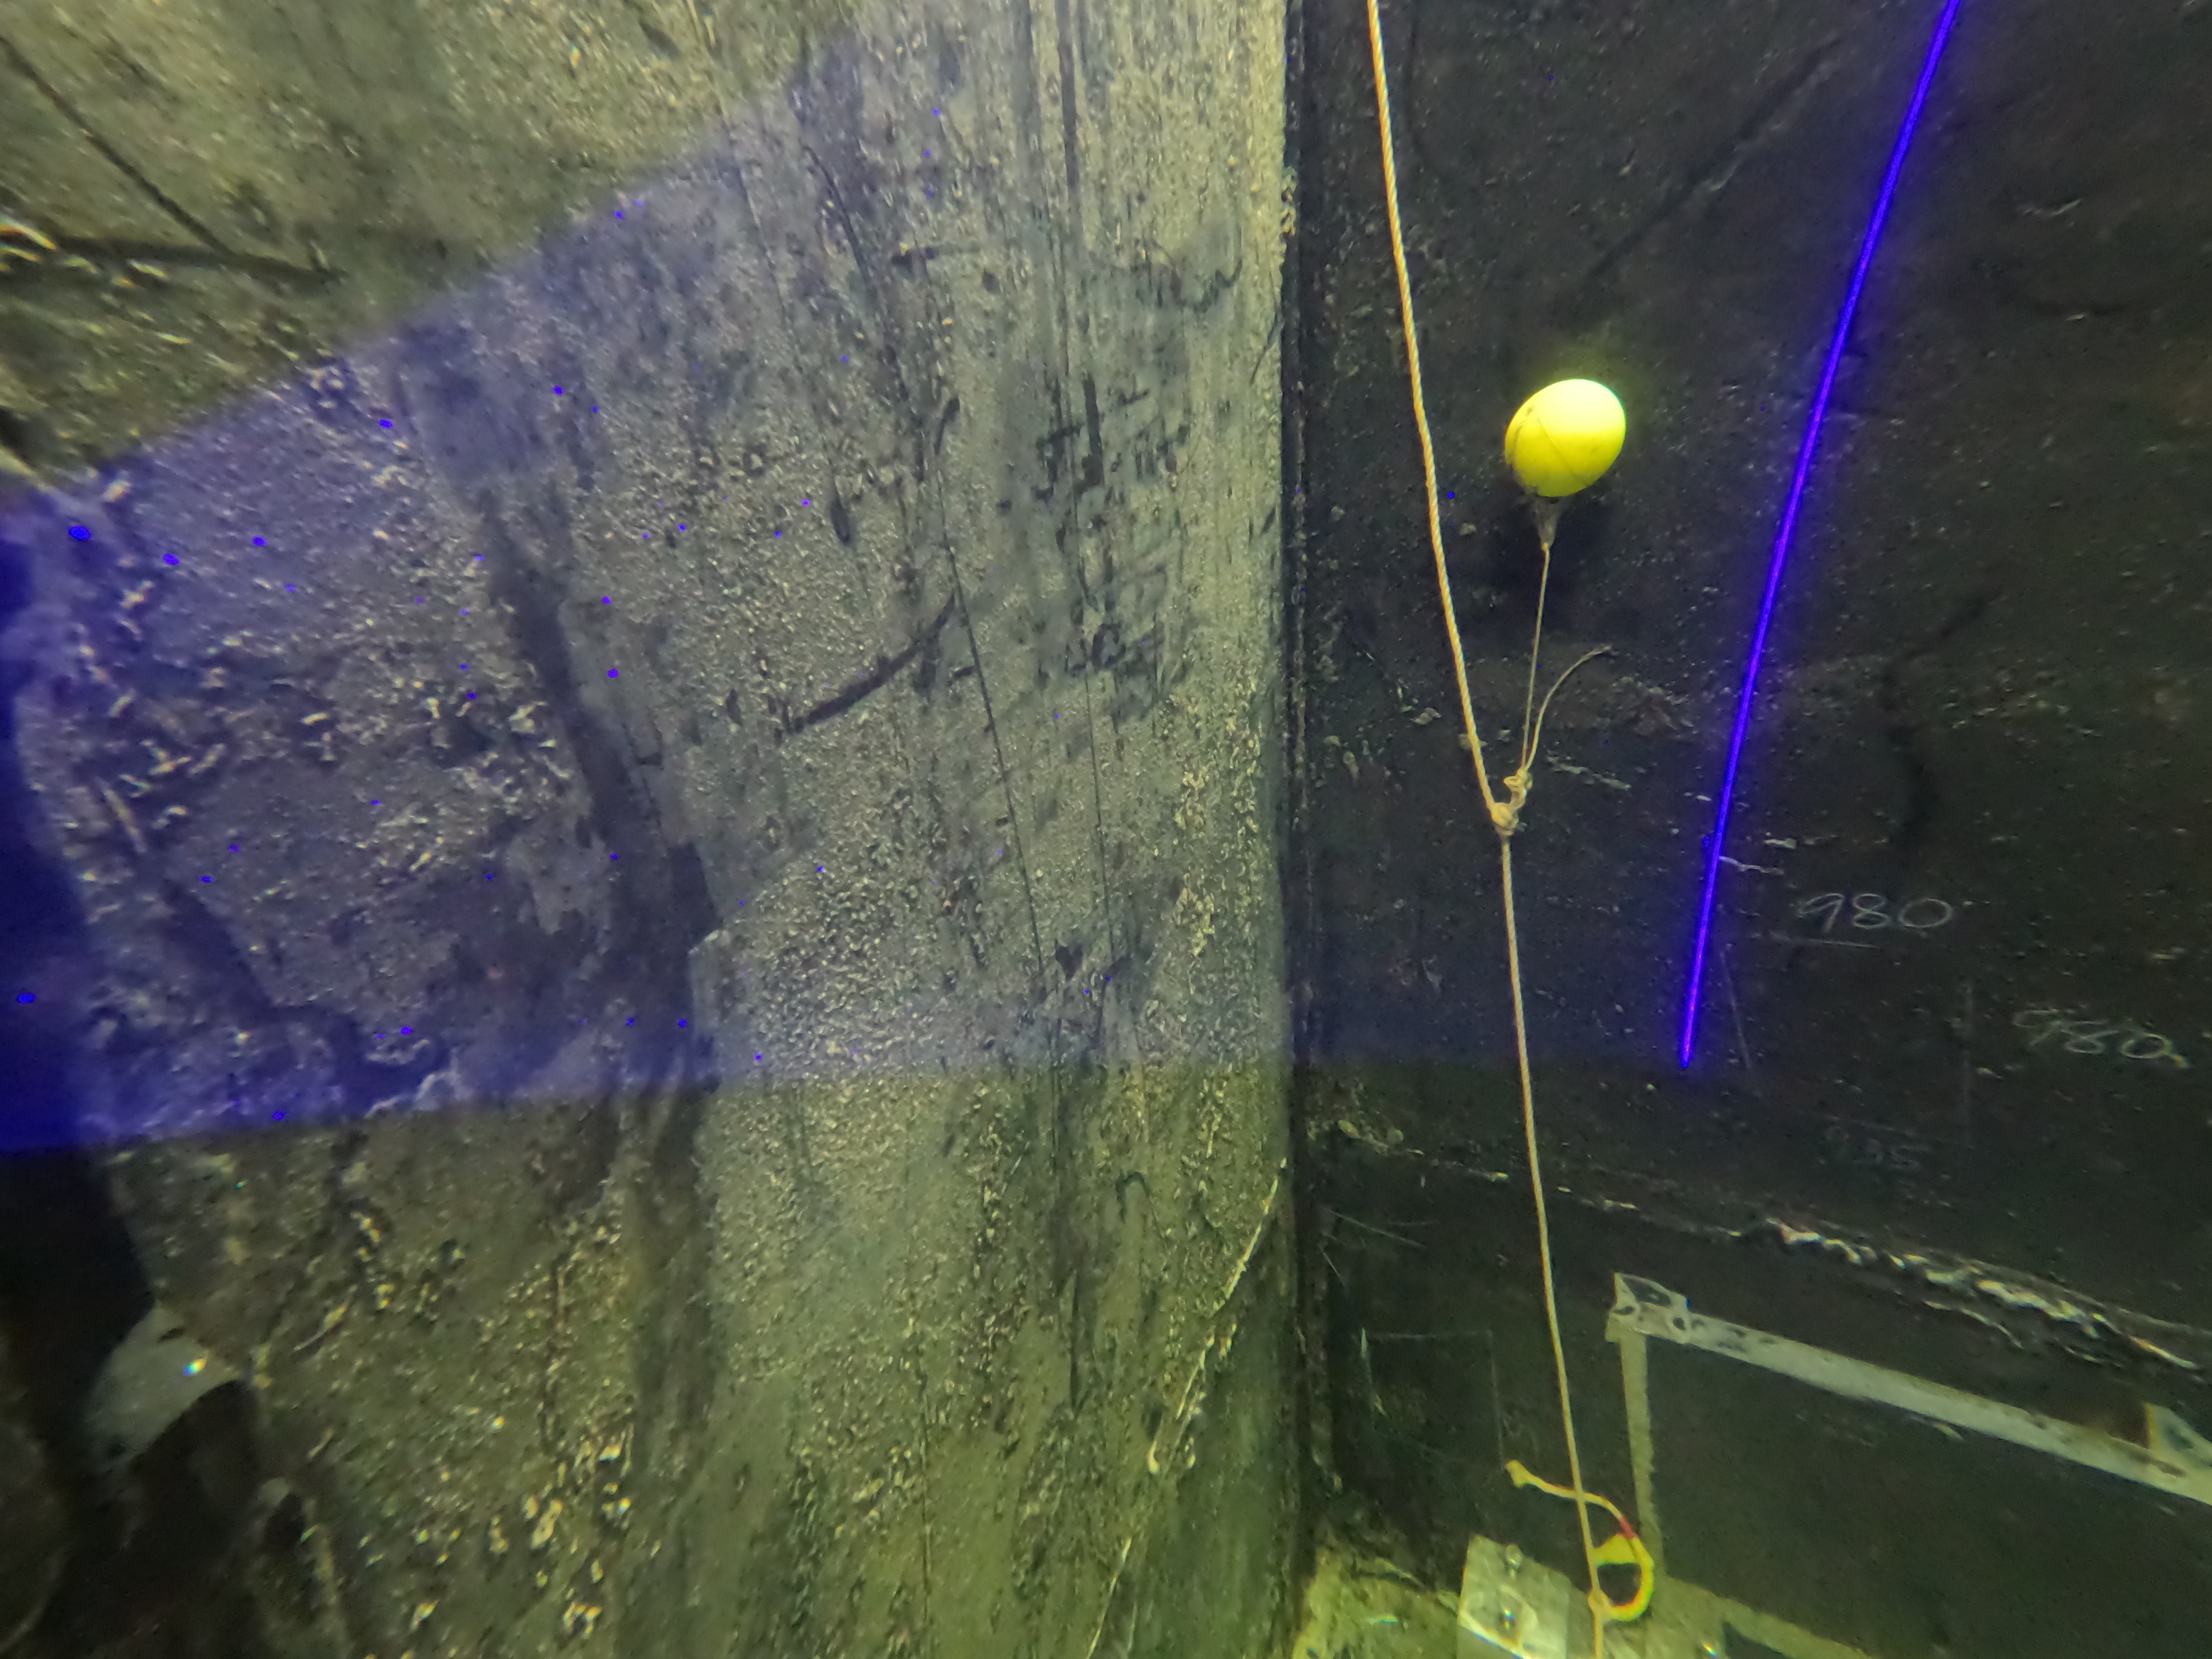

Supplement: Supplementary file 3051 [file G0031851.pdf › 12/G0031851.pdf]

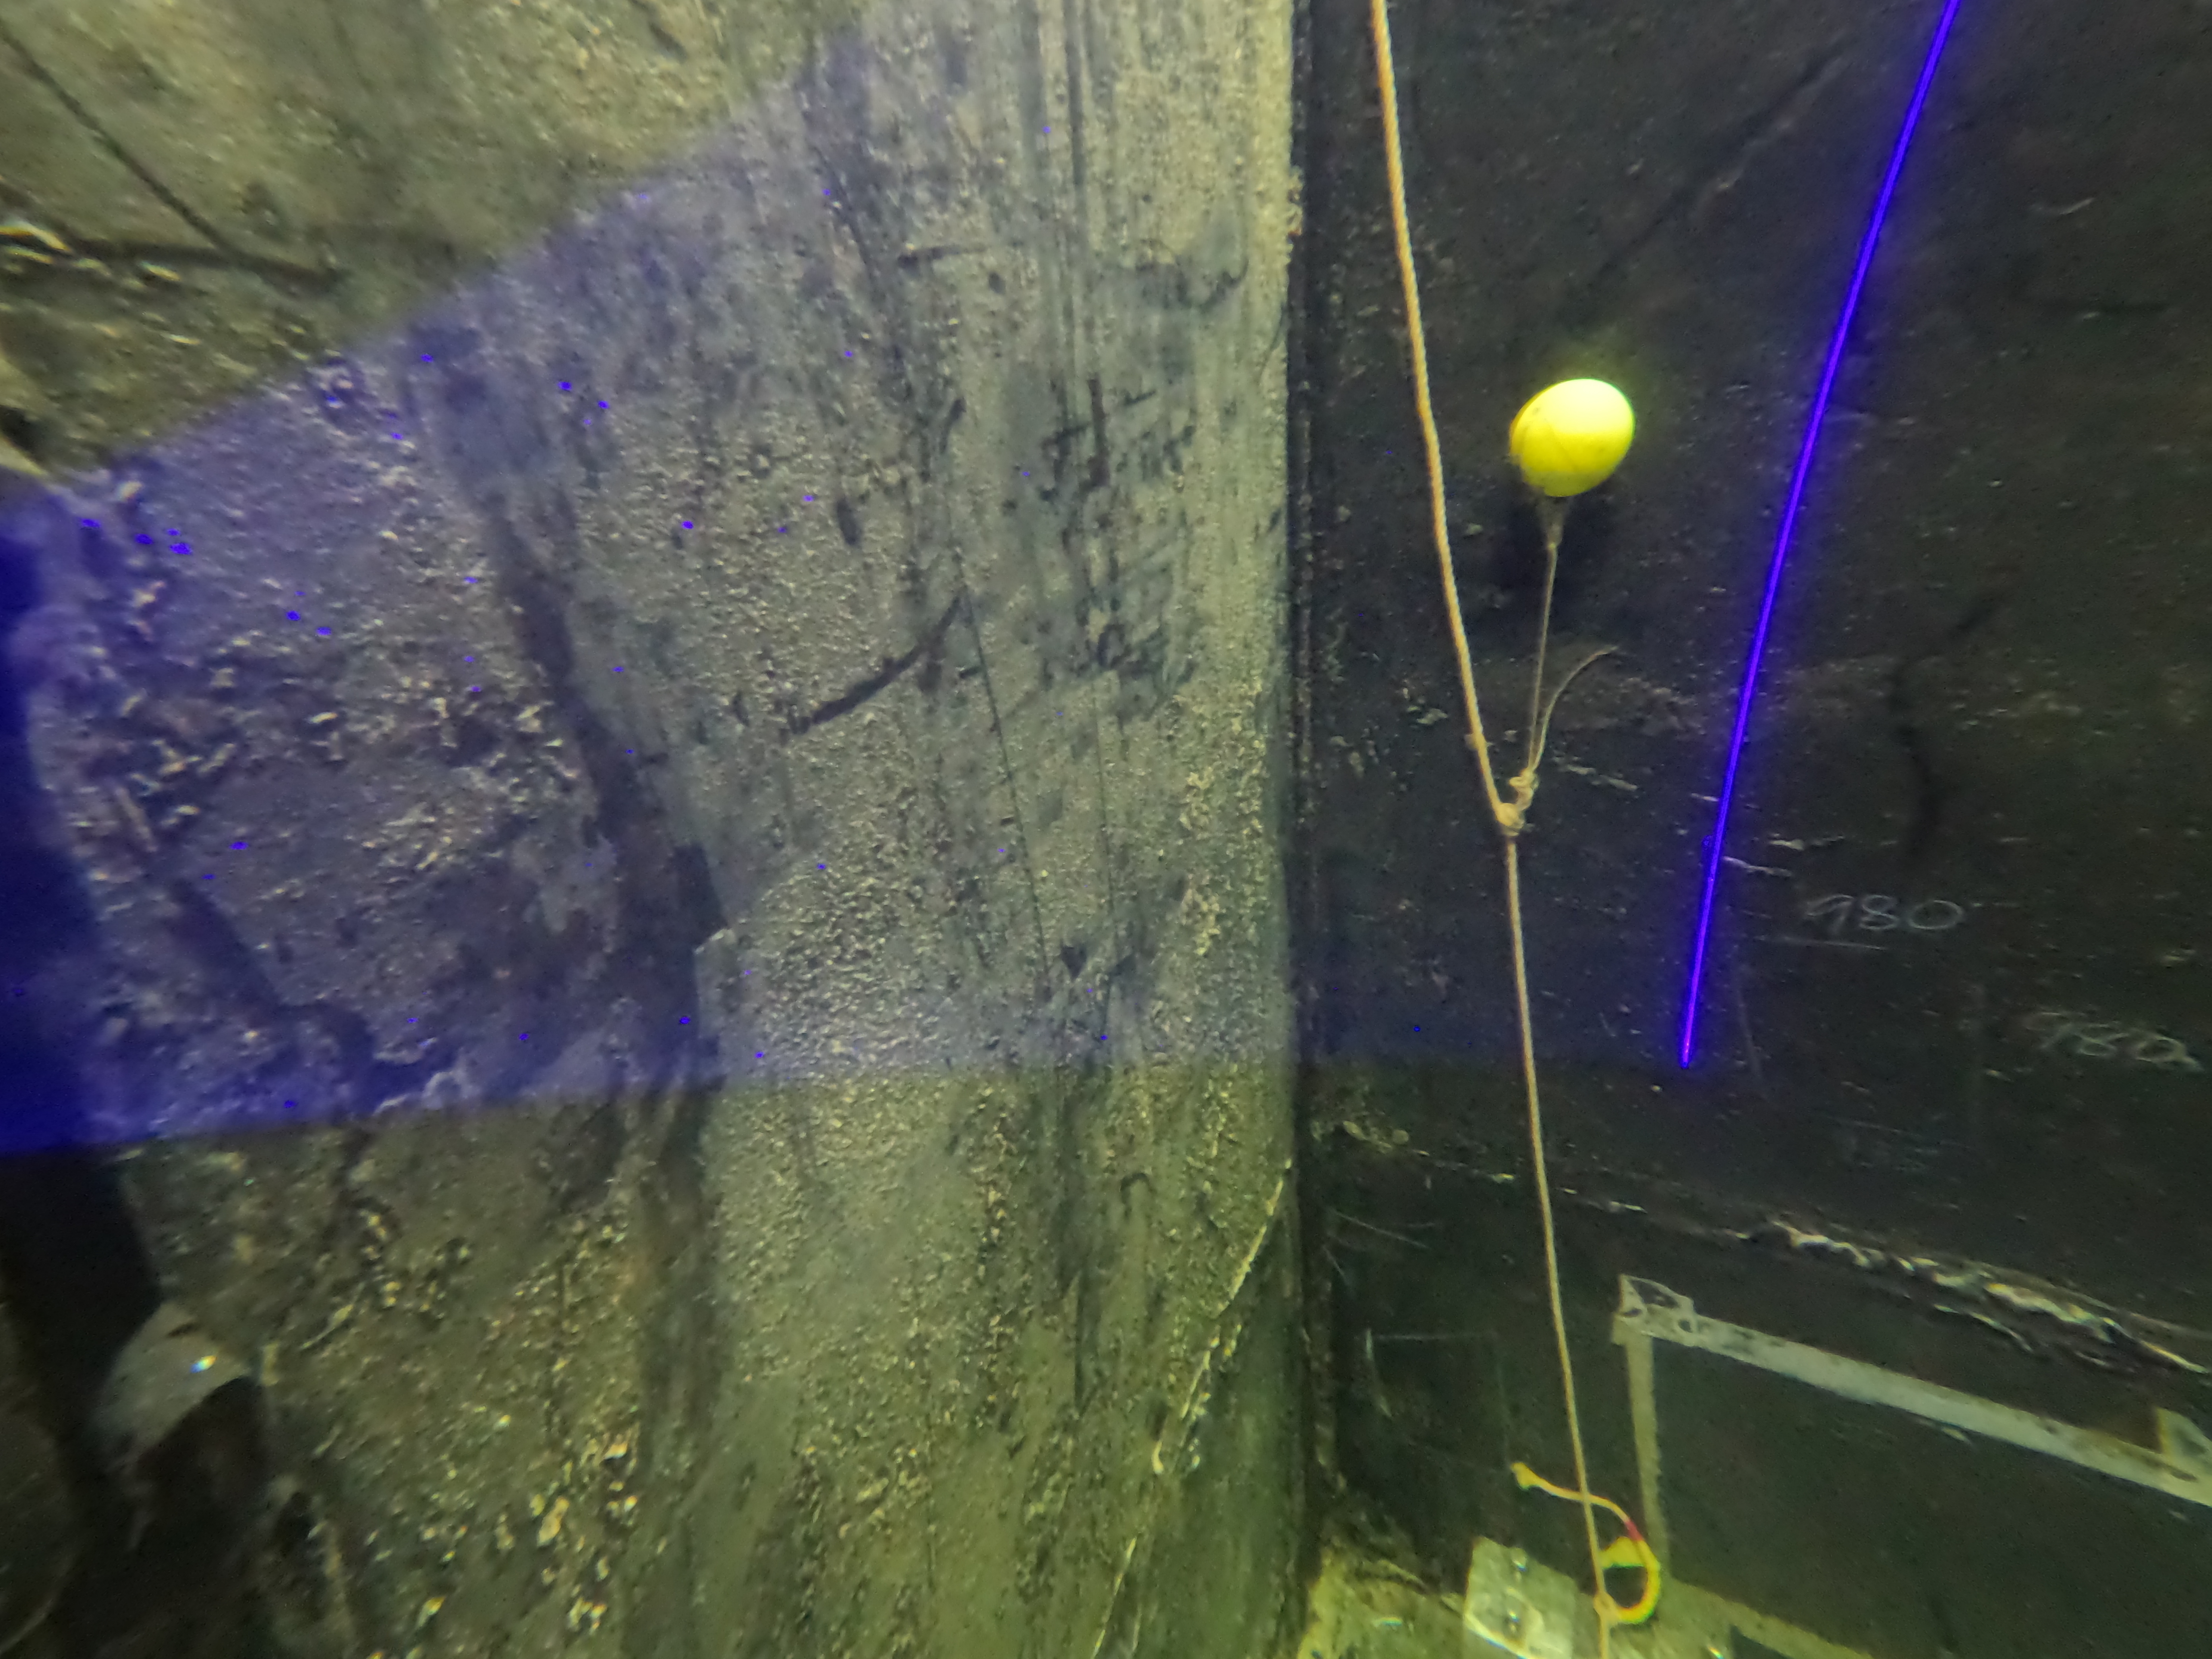

Supplement: Supplementary file 3052 [file G0031852.pdf › 12/G0031852.pdf]

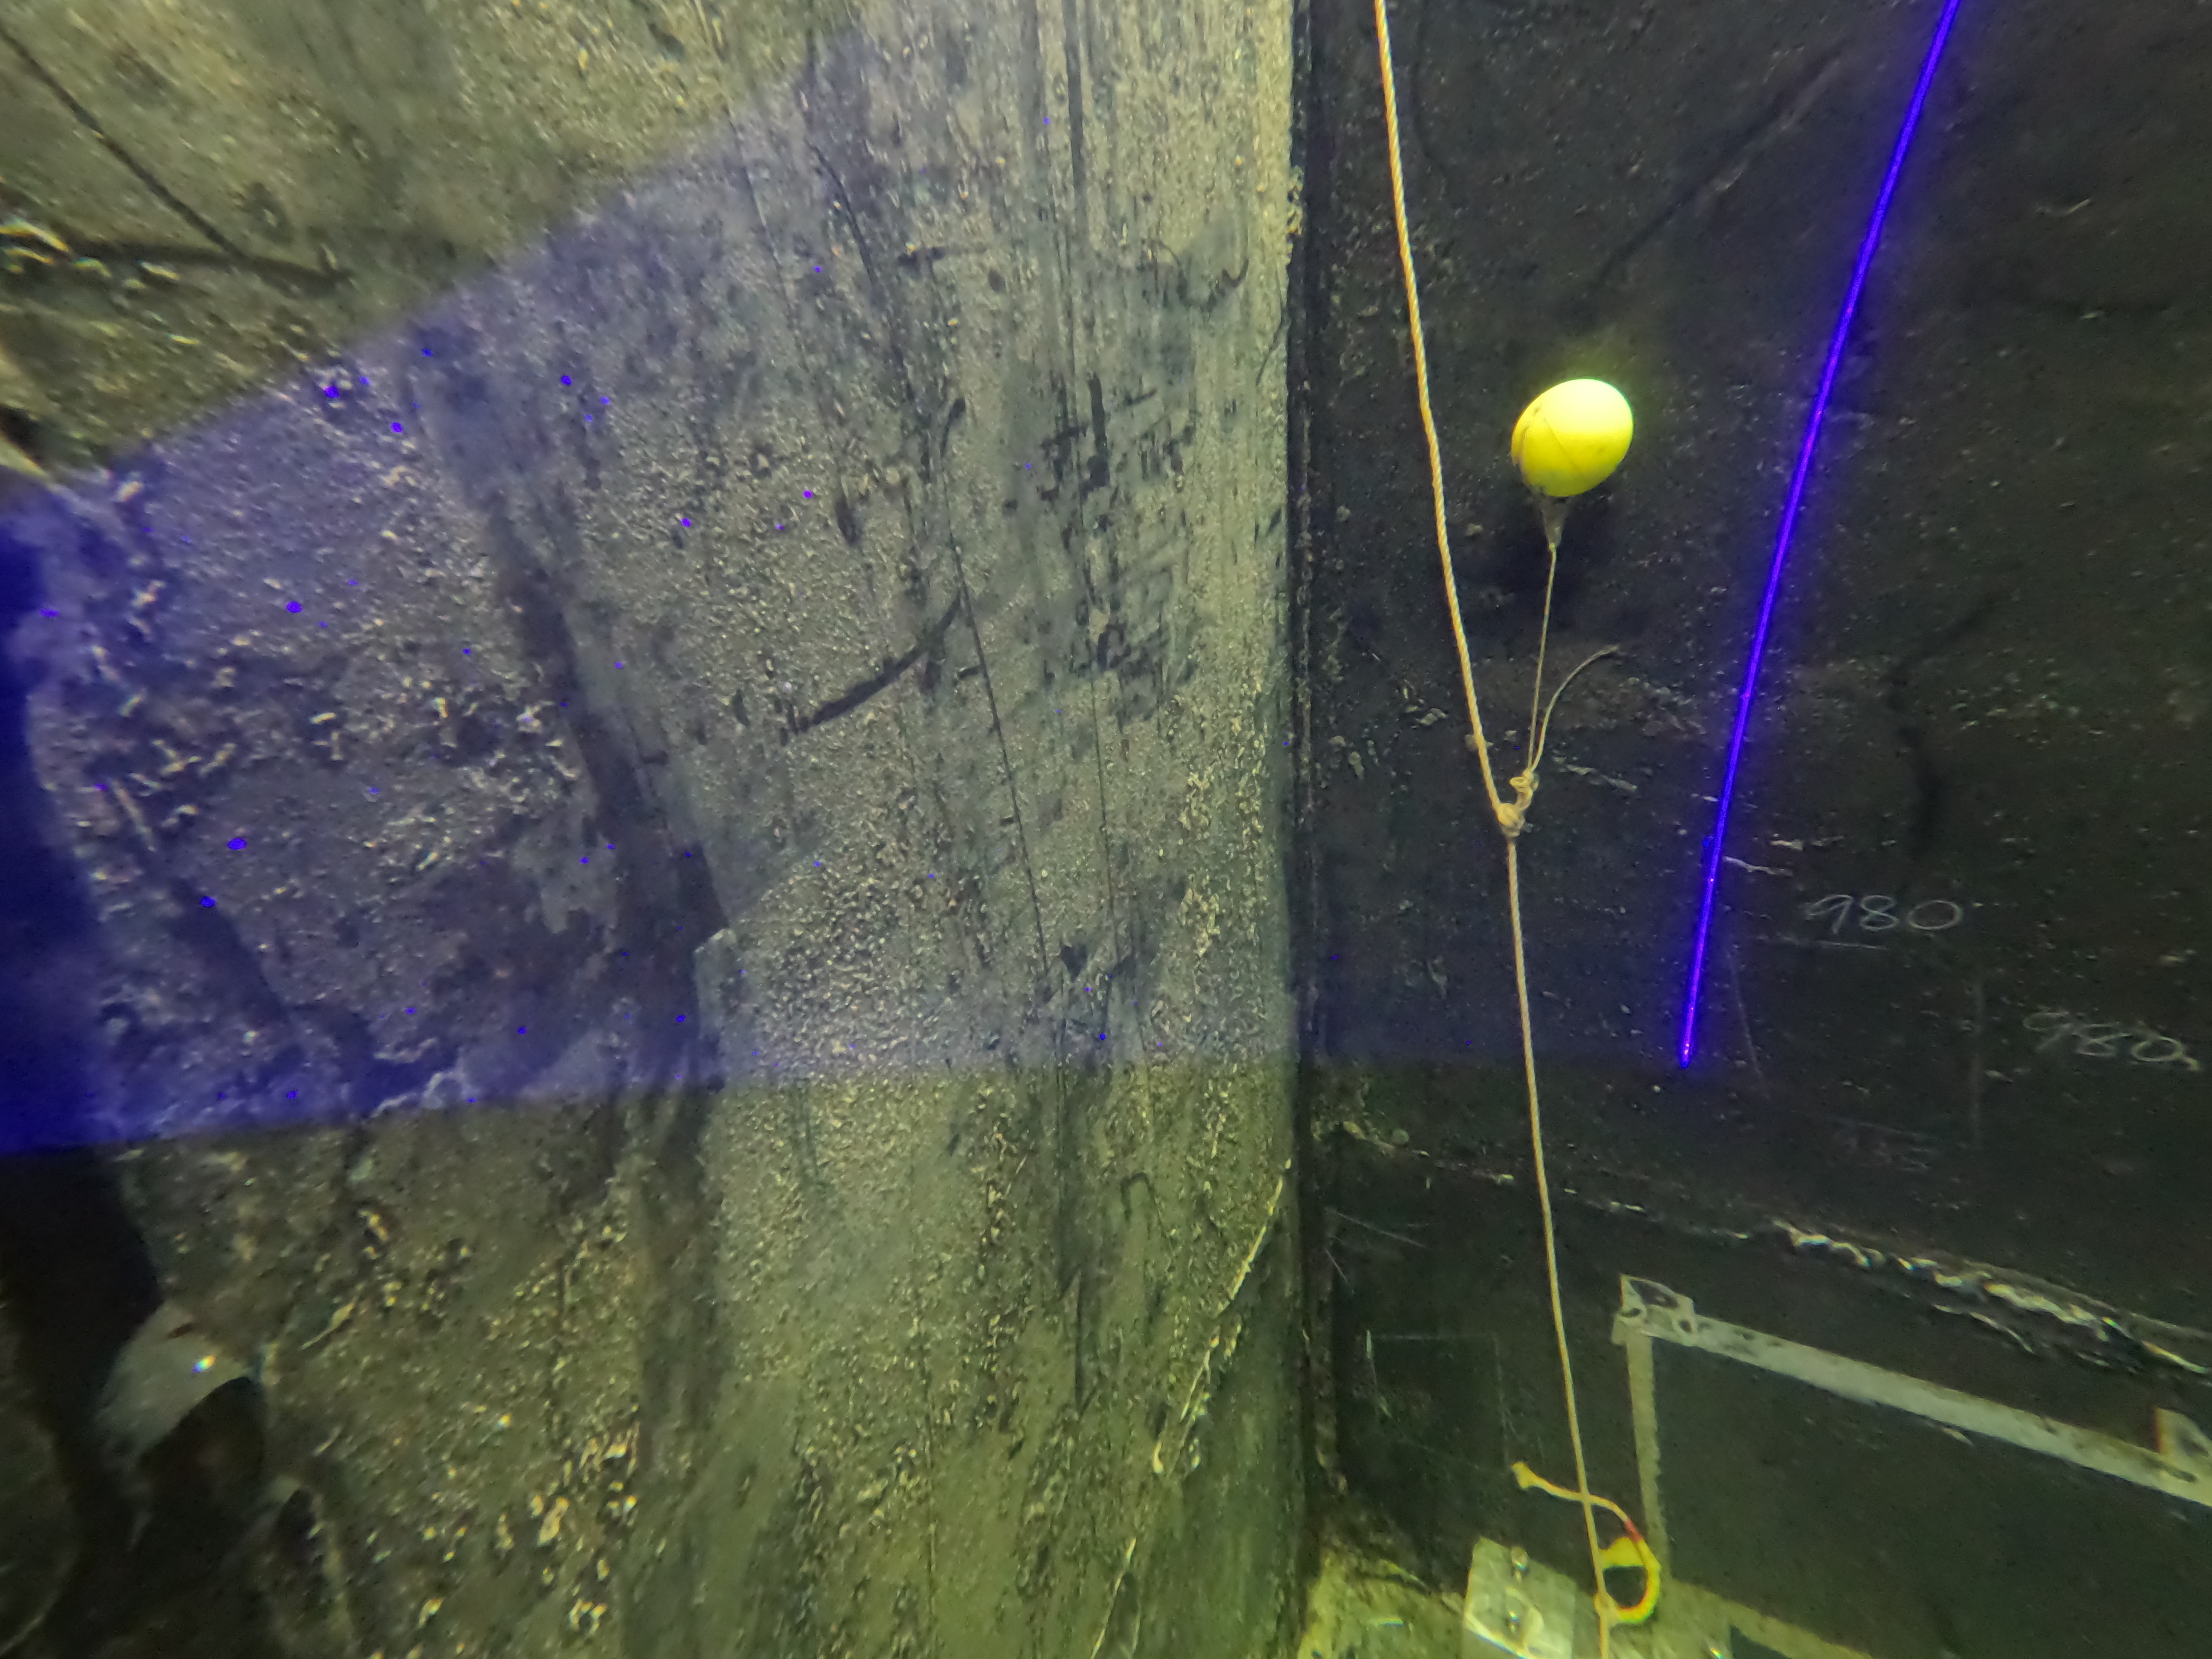

Supplement: Supplementary file 3053 [file G0031853.pdf › 12/G0031853.pdf]

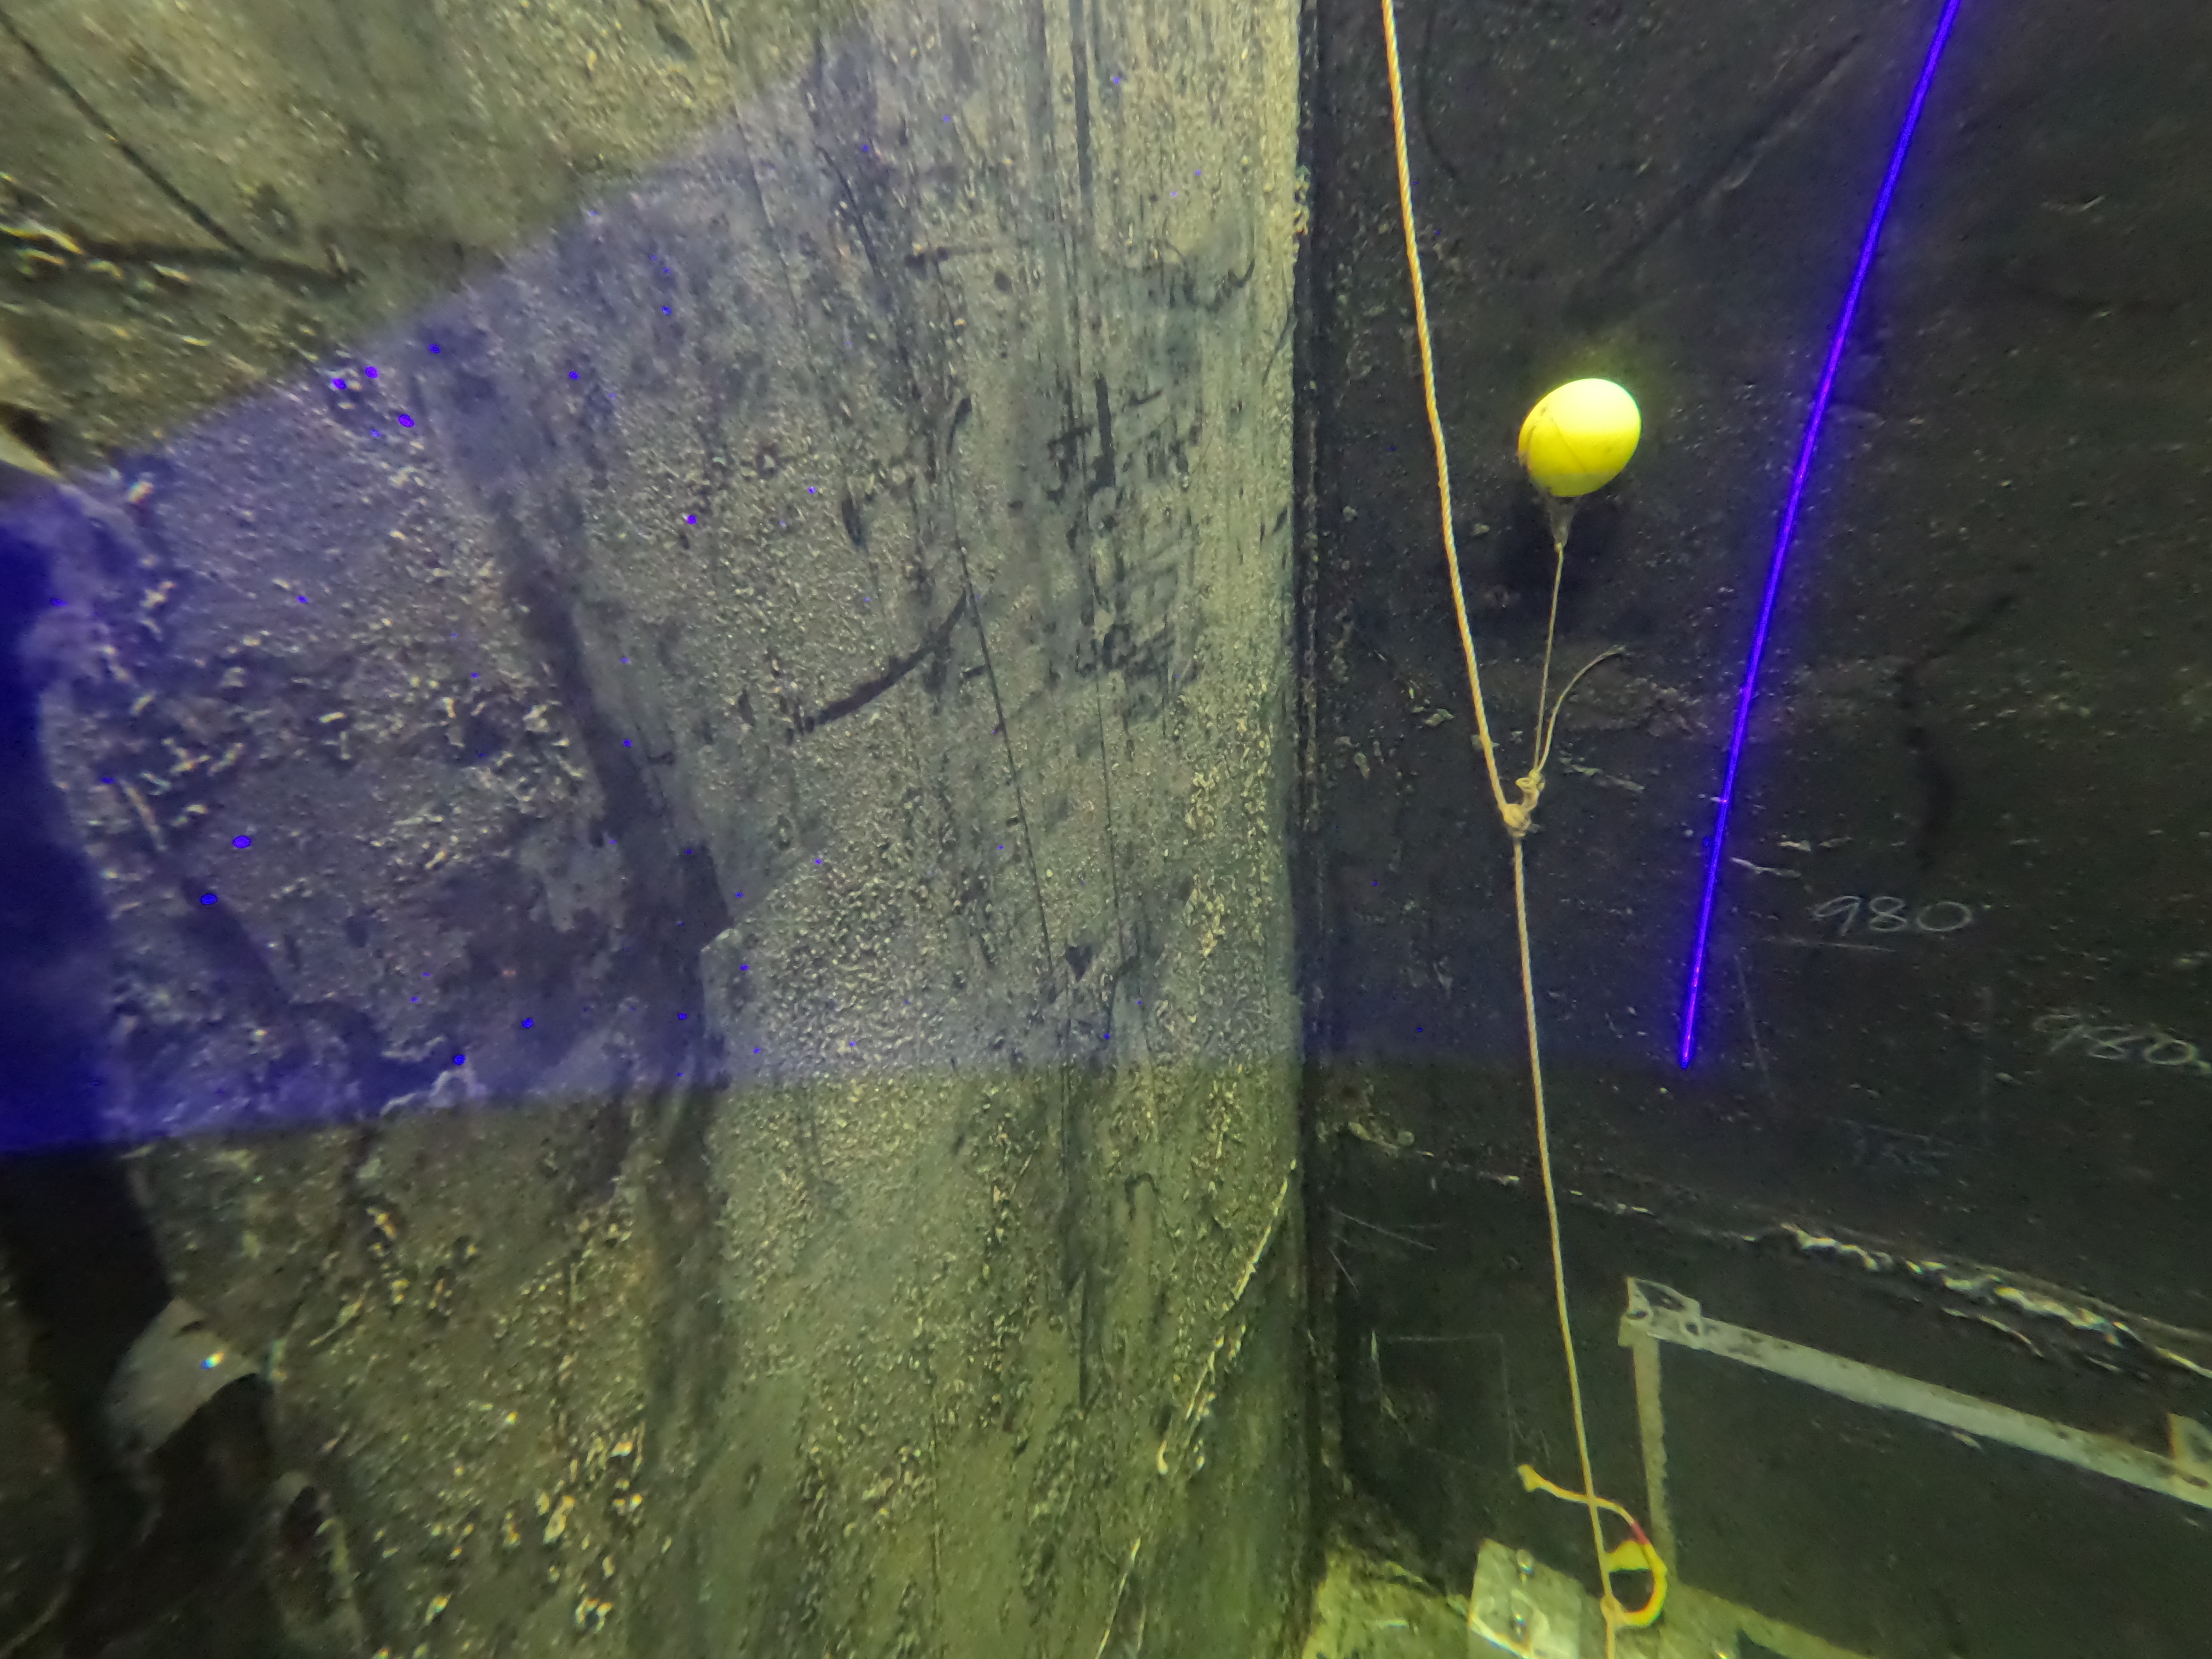

980

980

Supplement: Supplementary file 3054 [file G0031854.pdf › 12/G0031854.pdf]

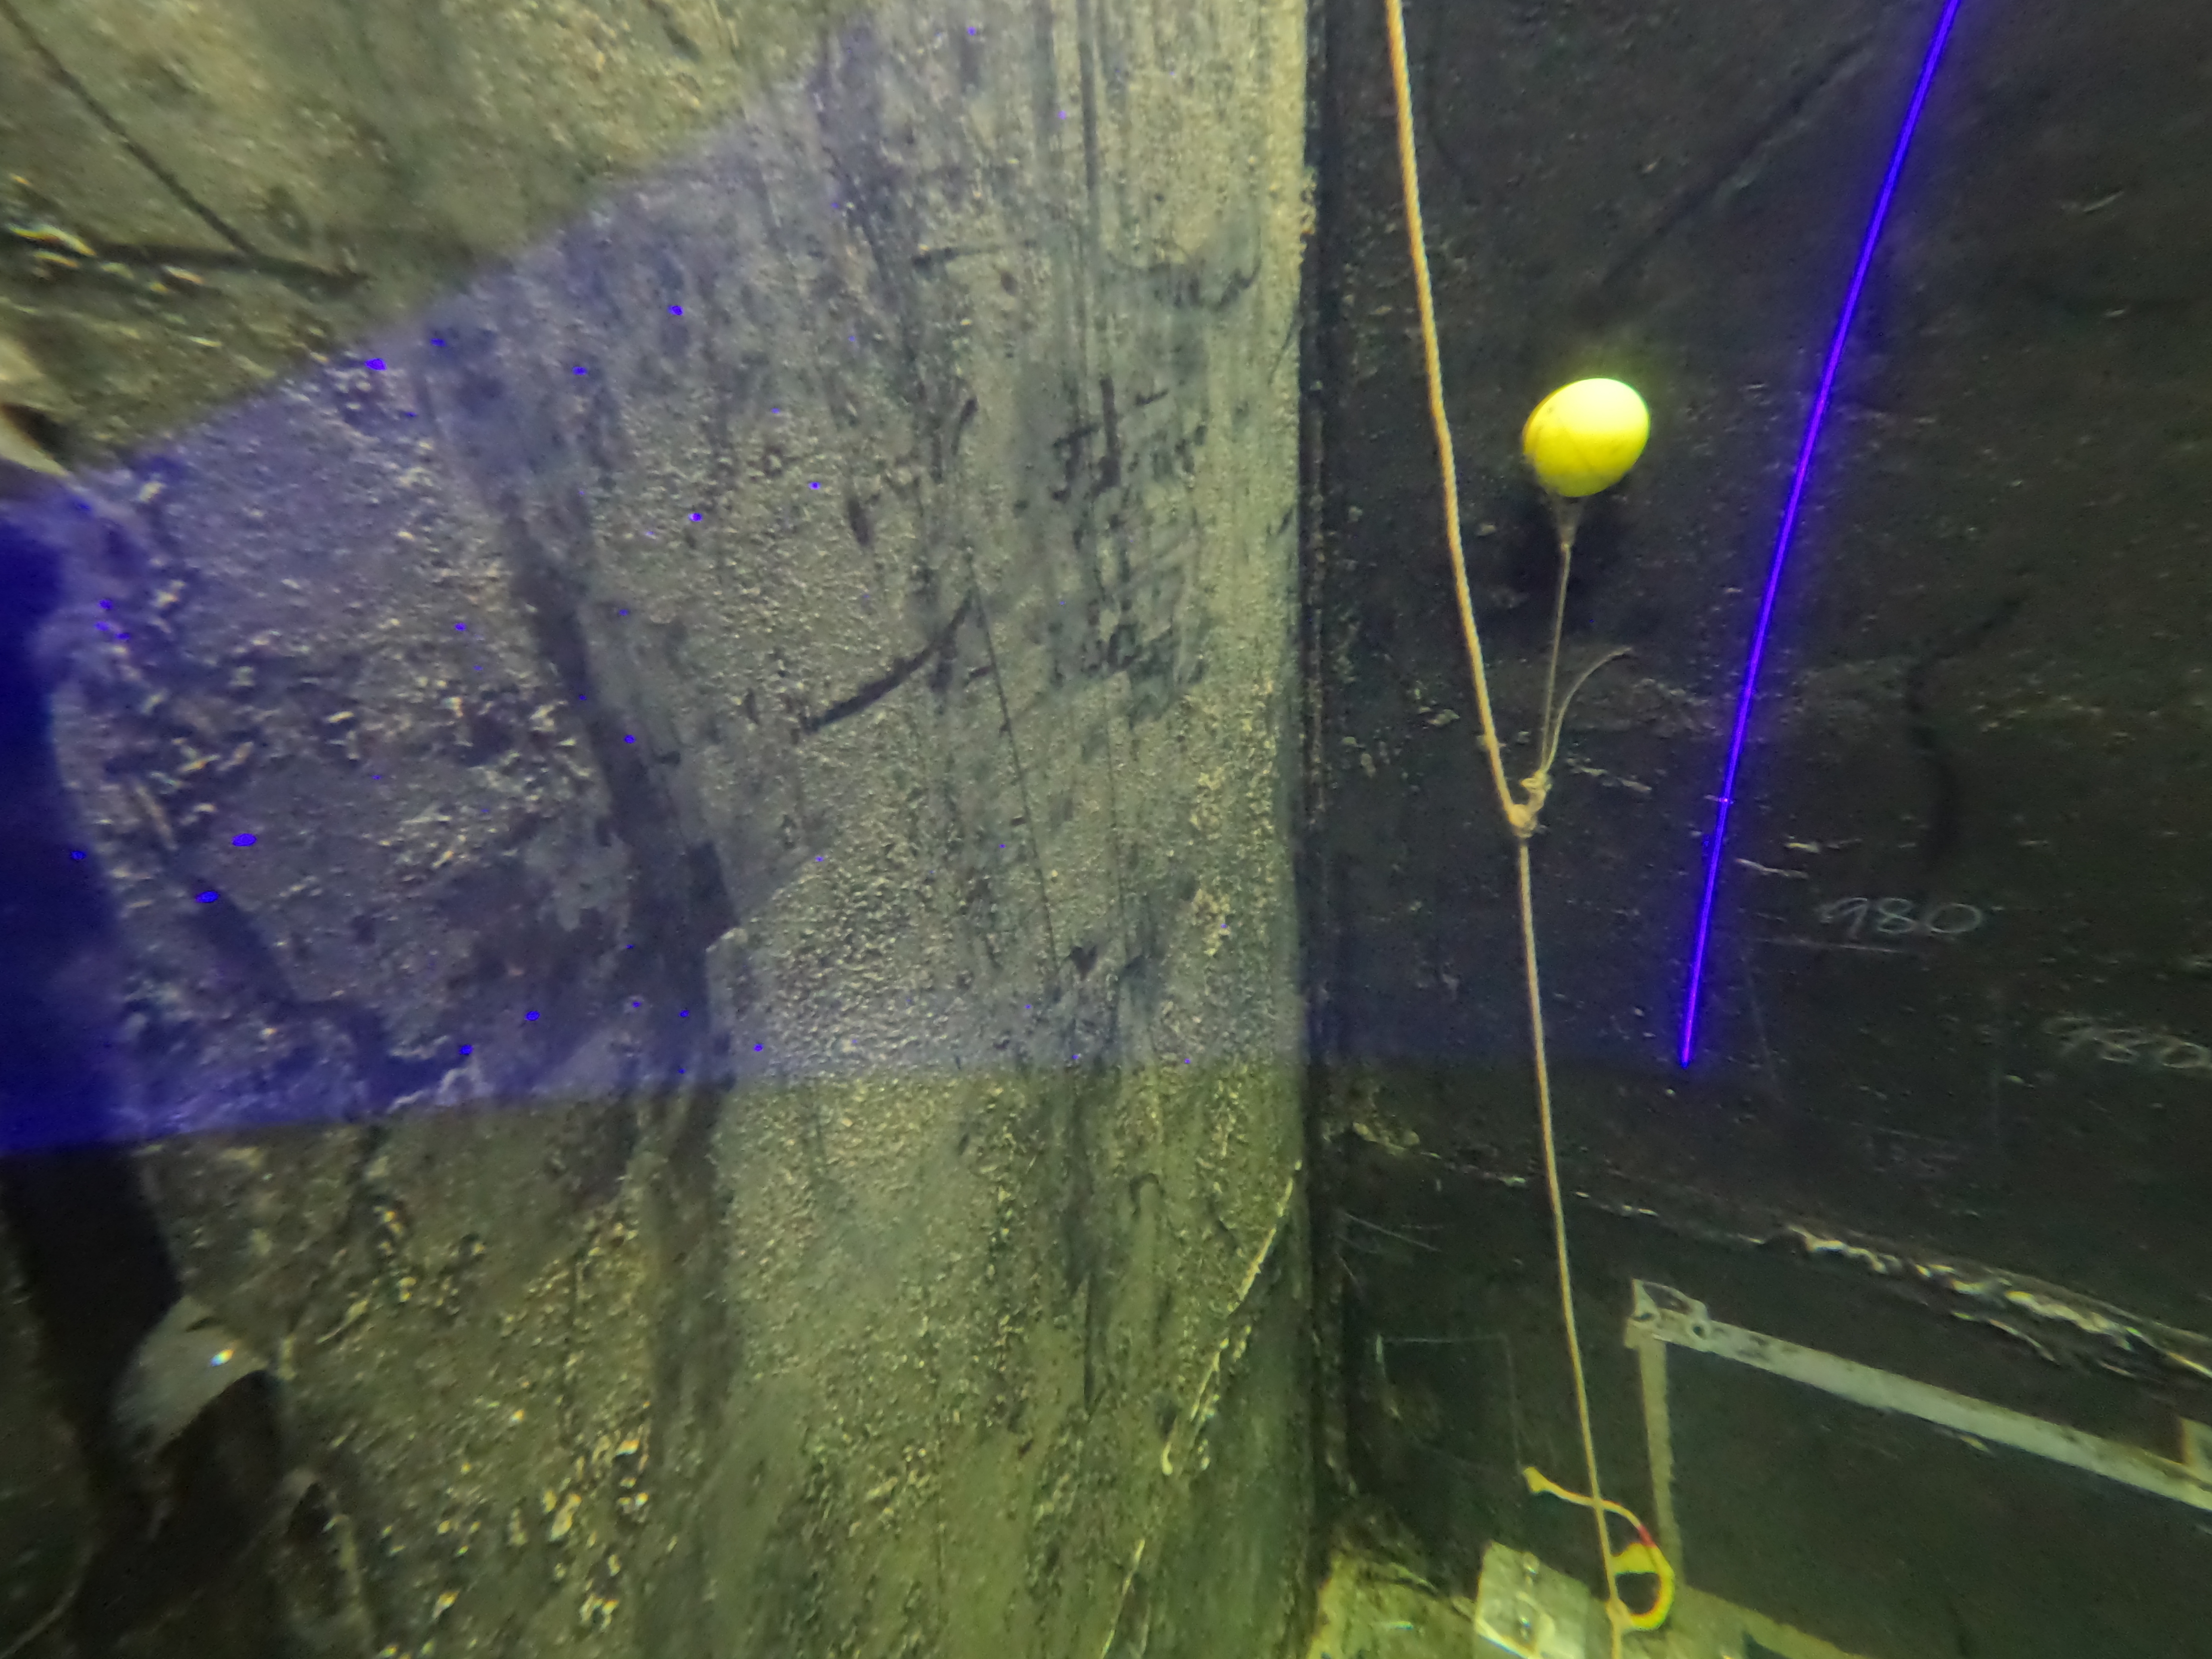

Supplement: Supplementary file 3055 [file G0031855.pdf › 12/G0031855.pdf]

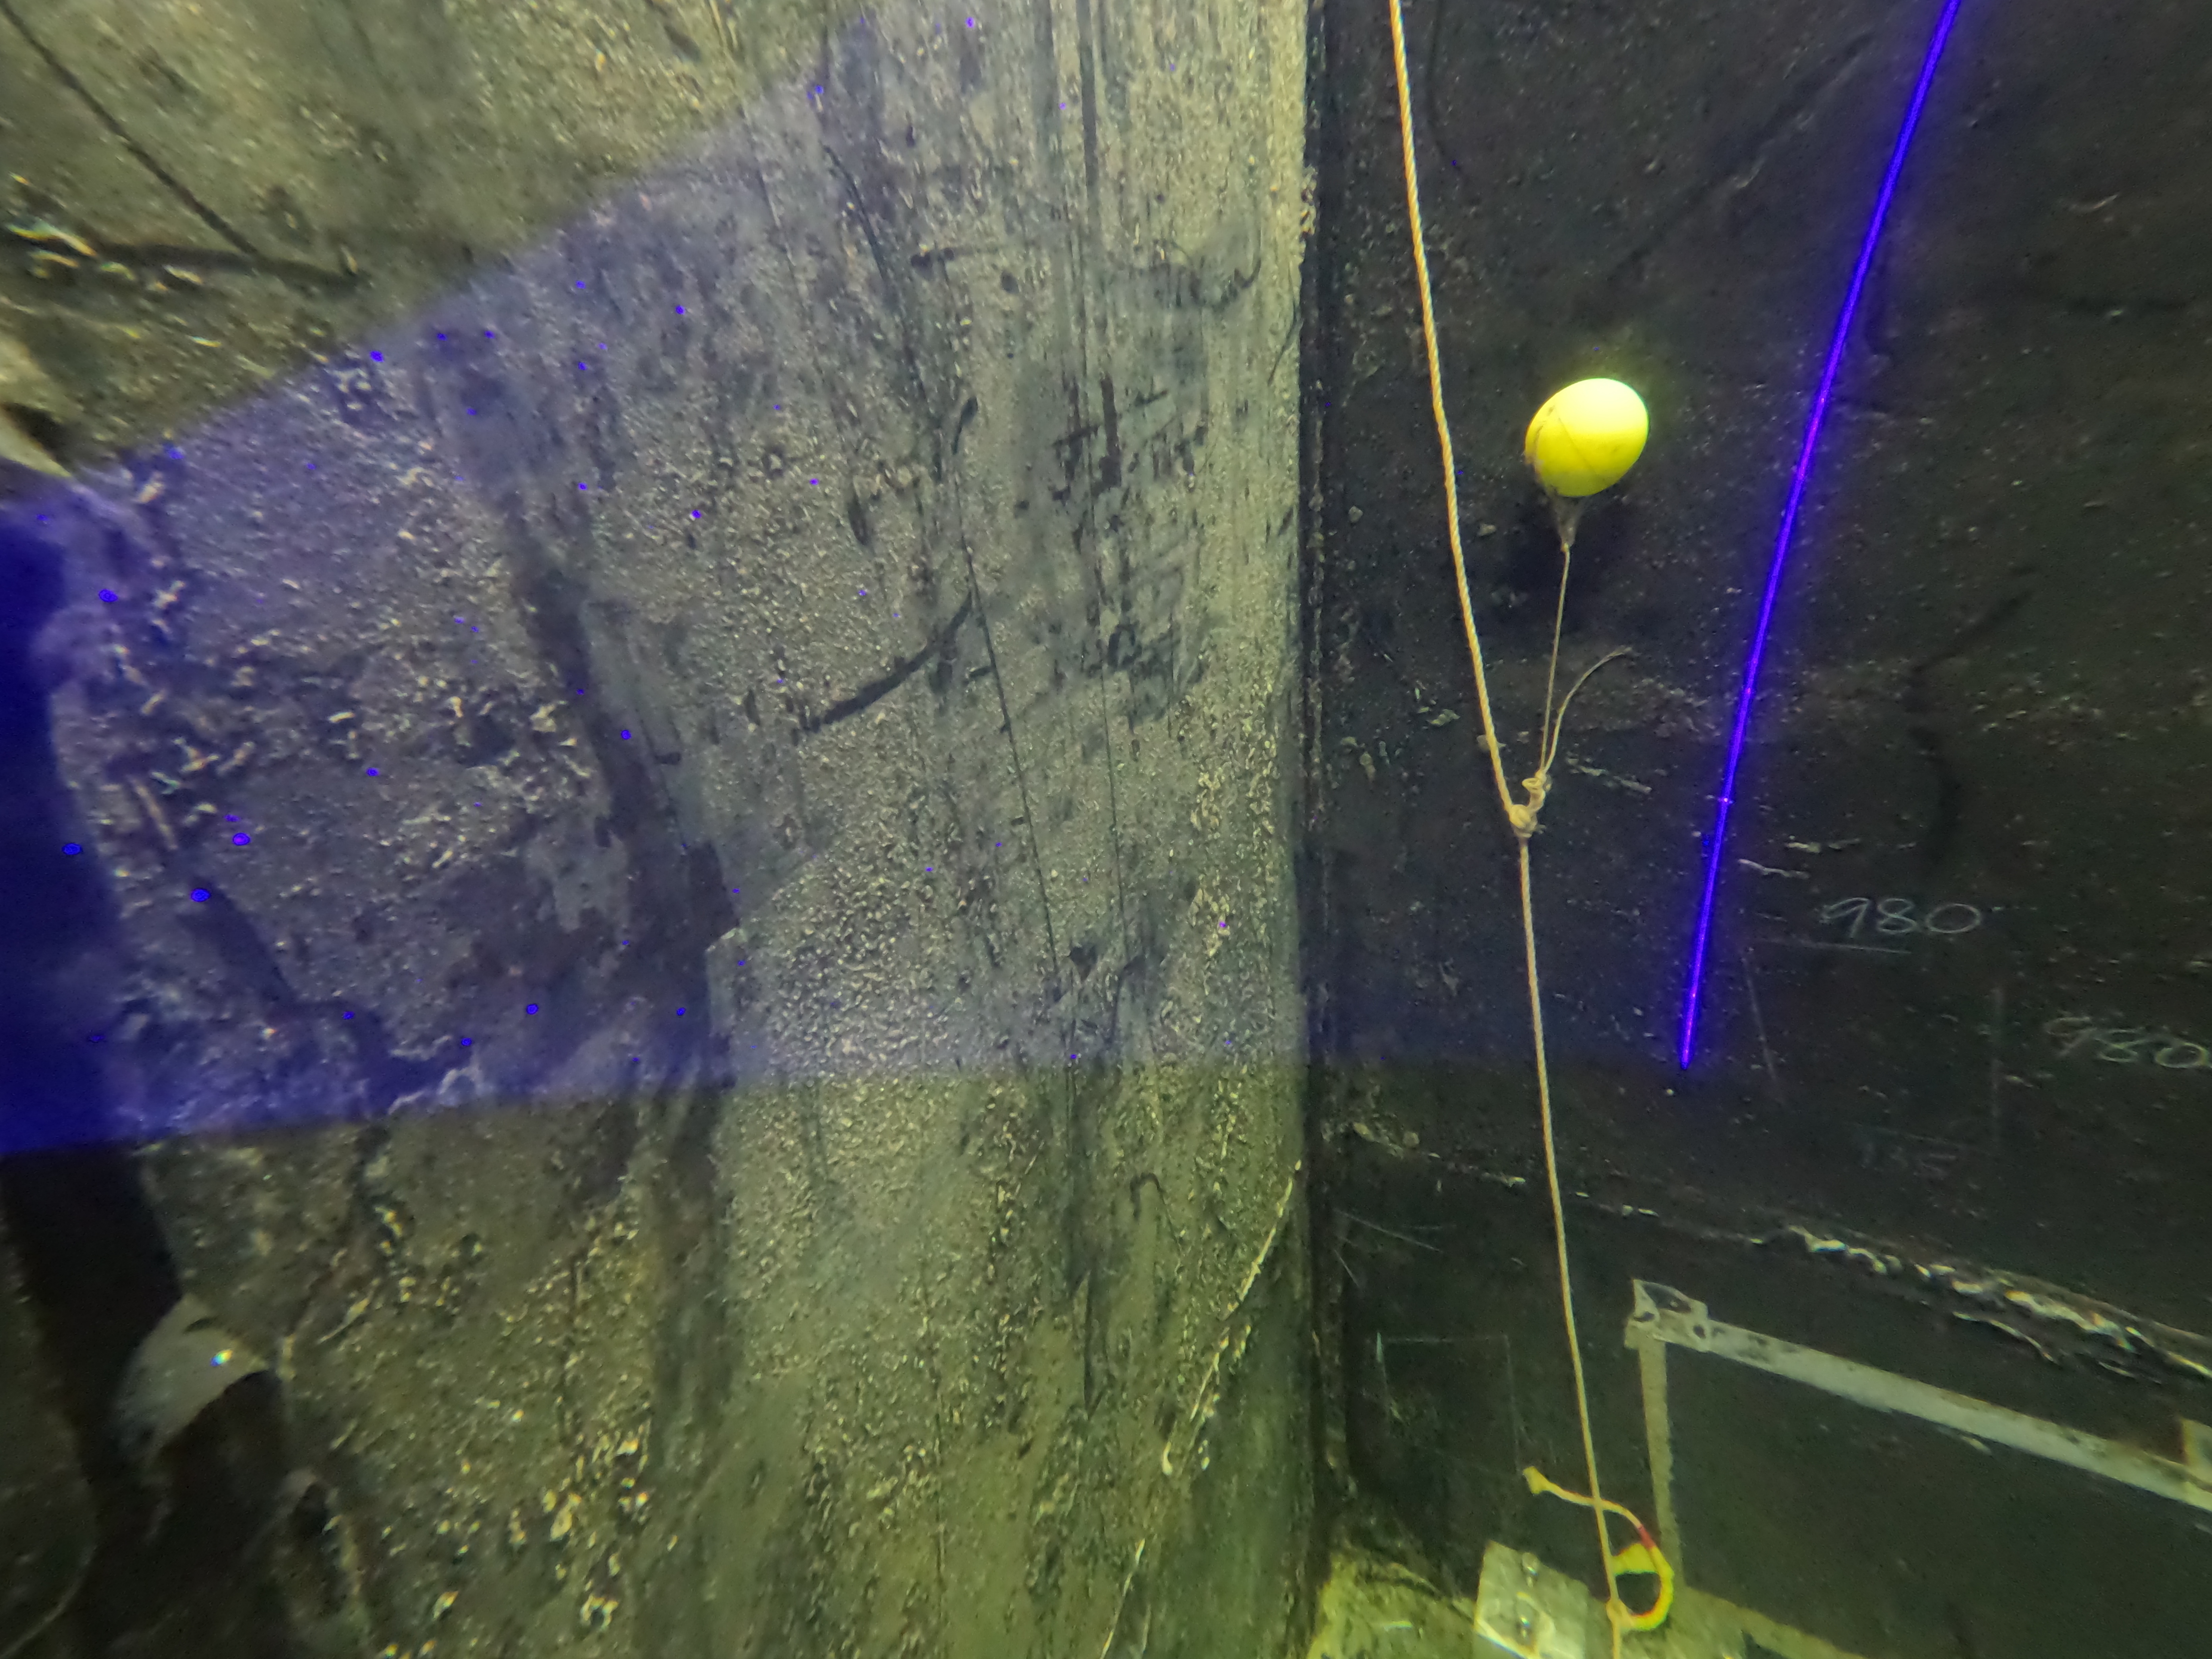

Supplement: Supplementary file 3056 [file G0031856.pdf › 12/G0031856.pdf]

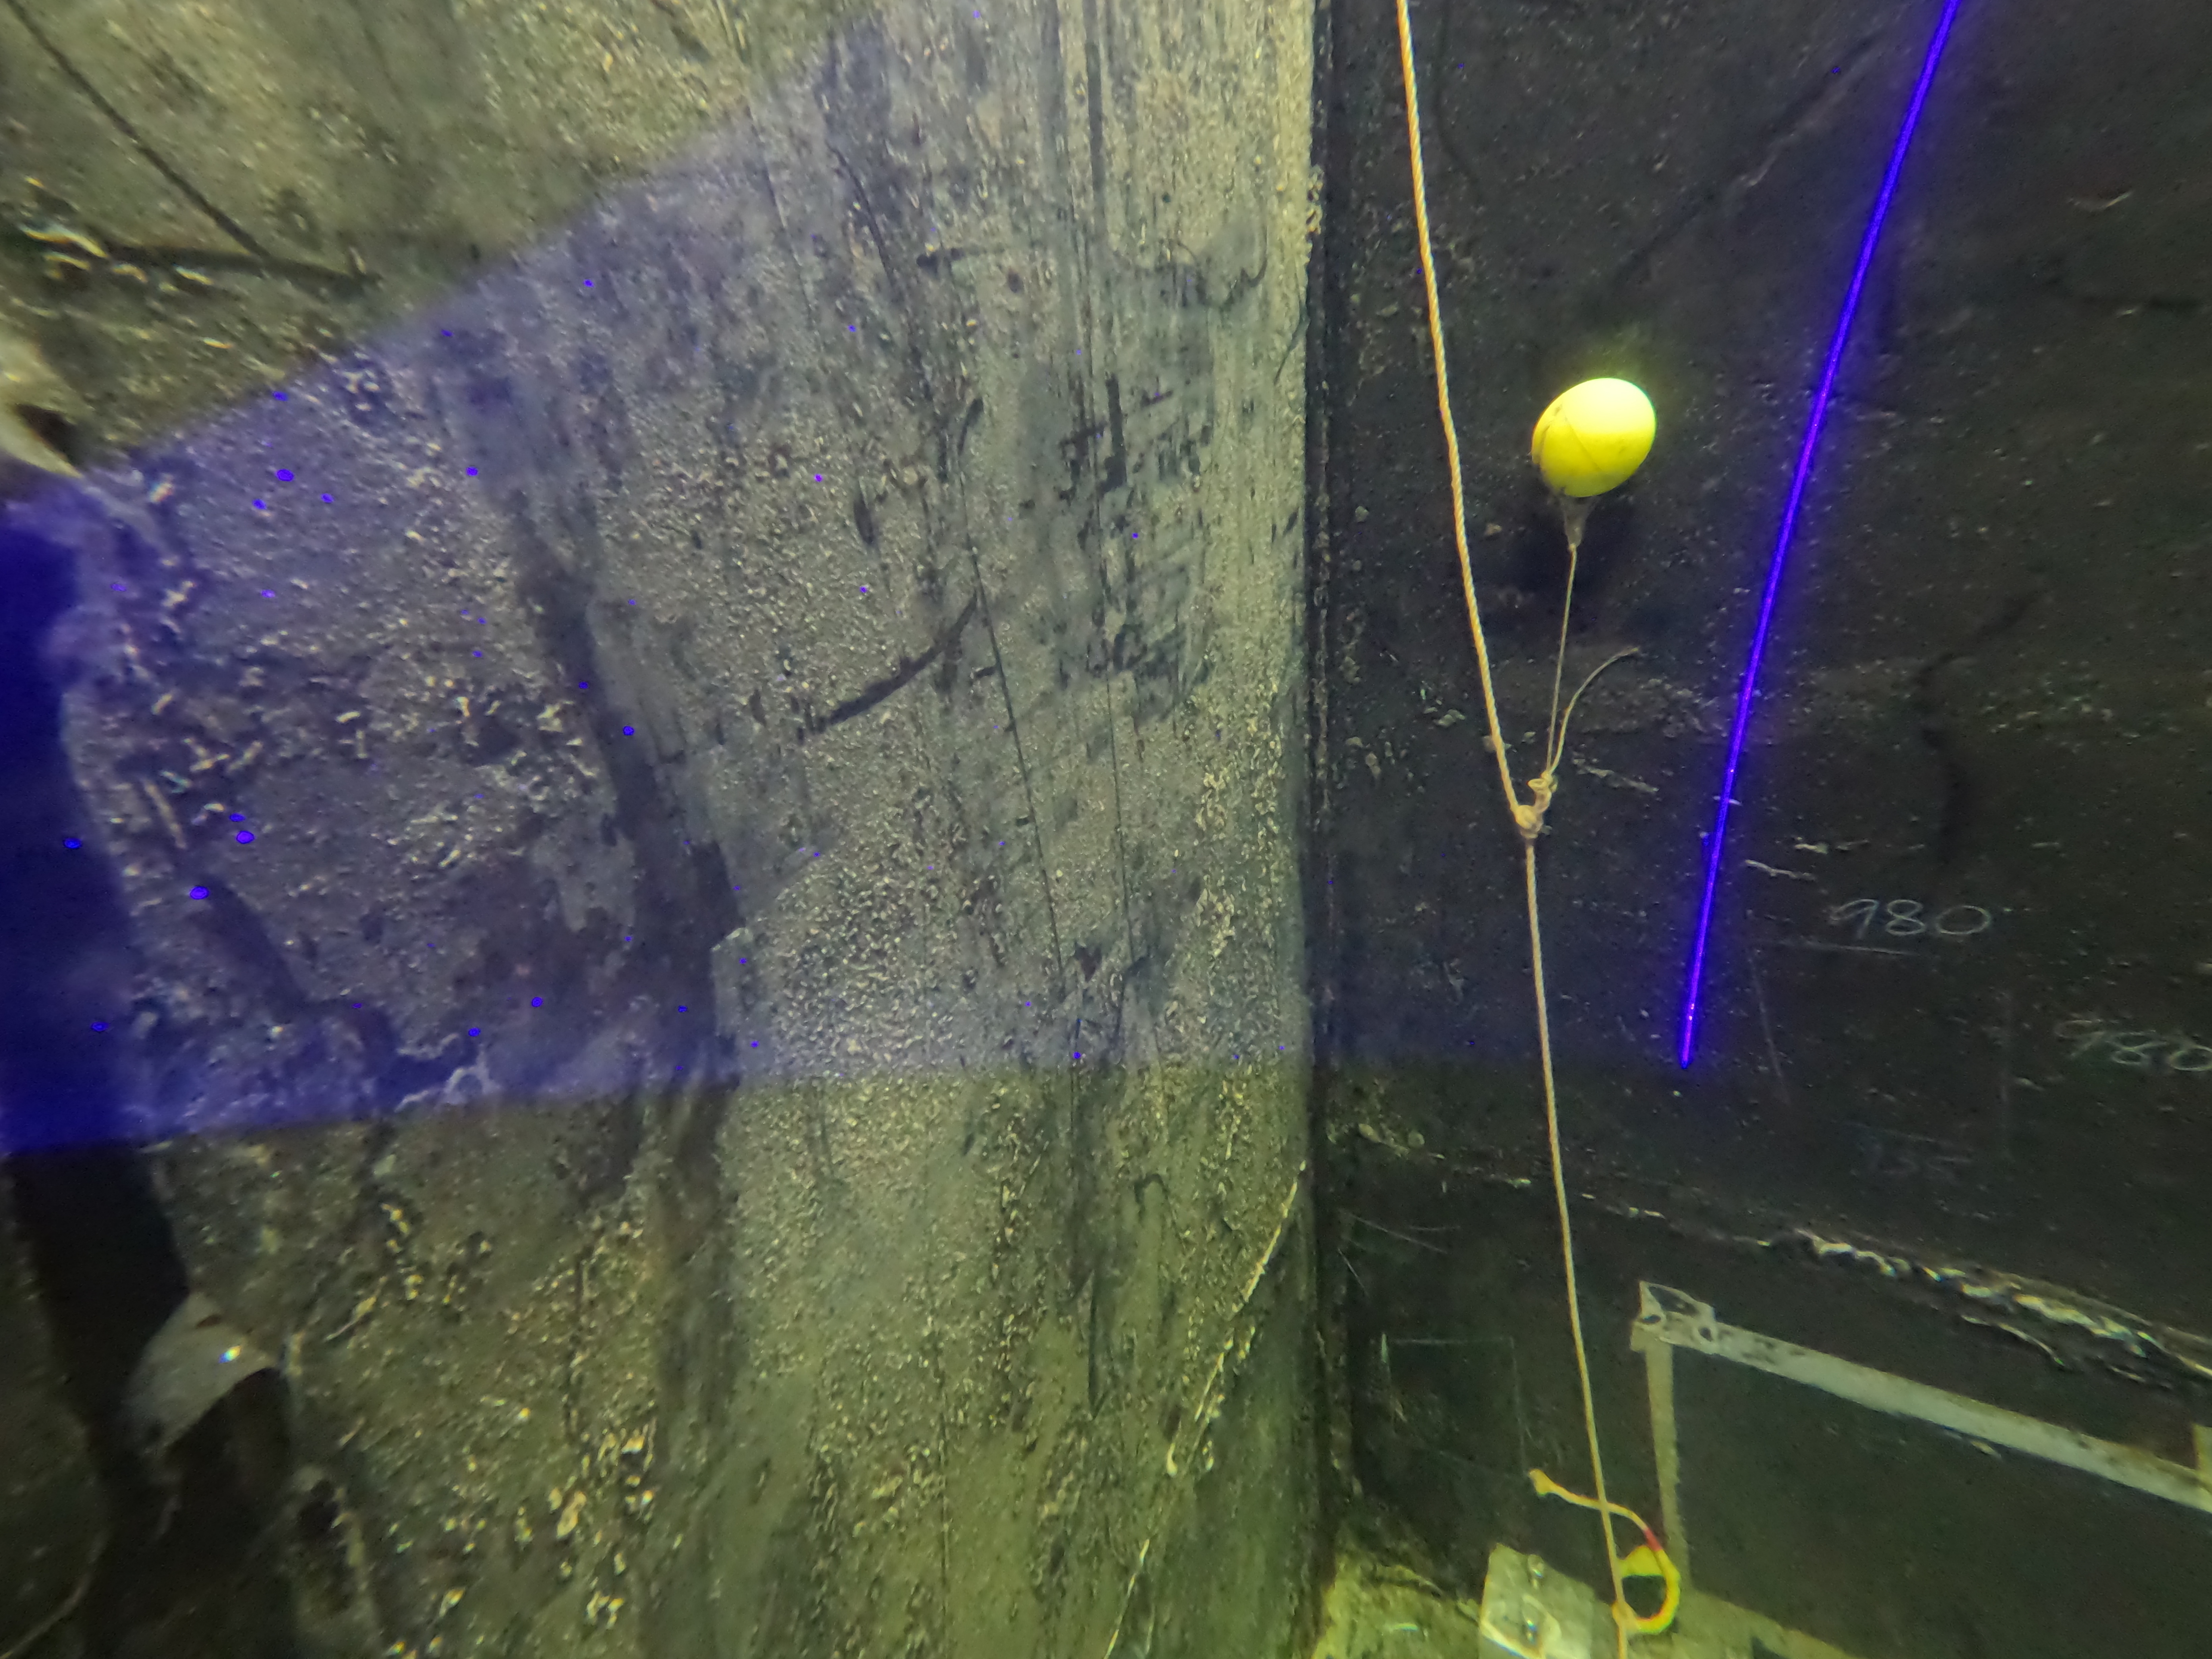

Supplement: Supplementary file 3057 [file G0031857.pdf › 12/G0031857.pdf]

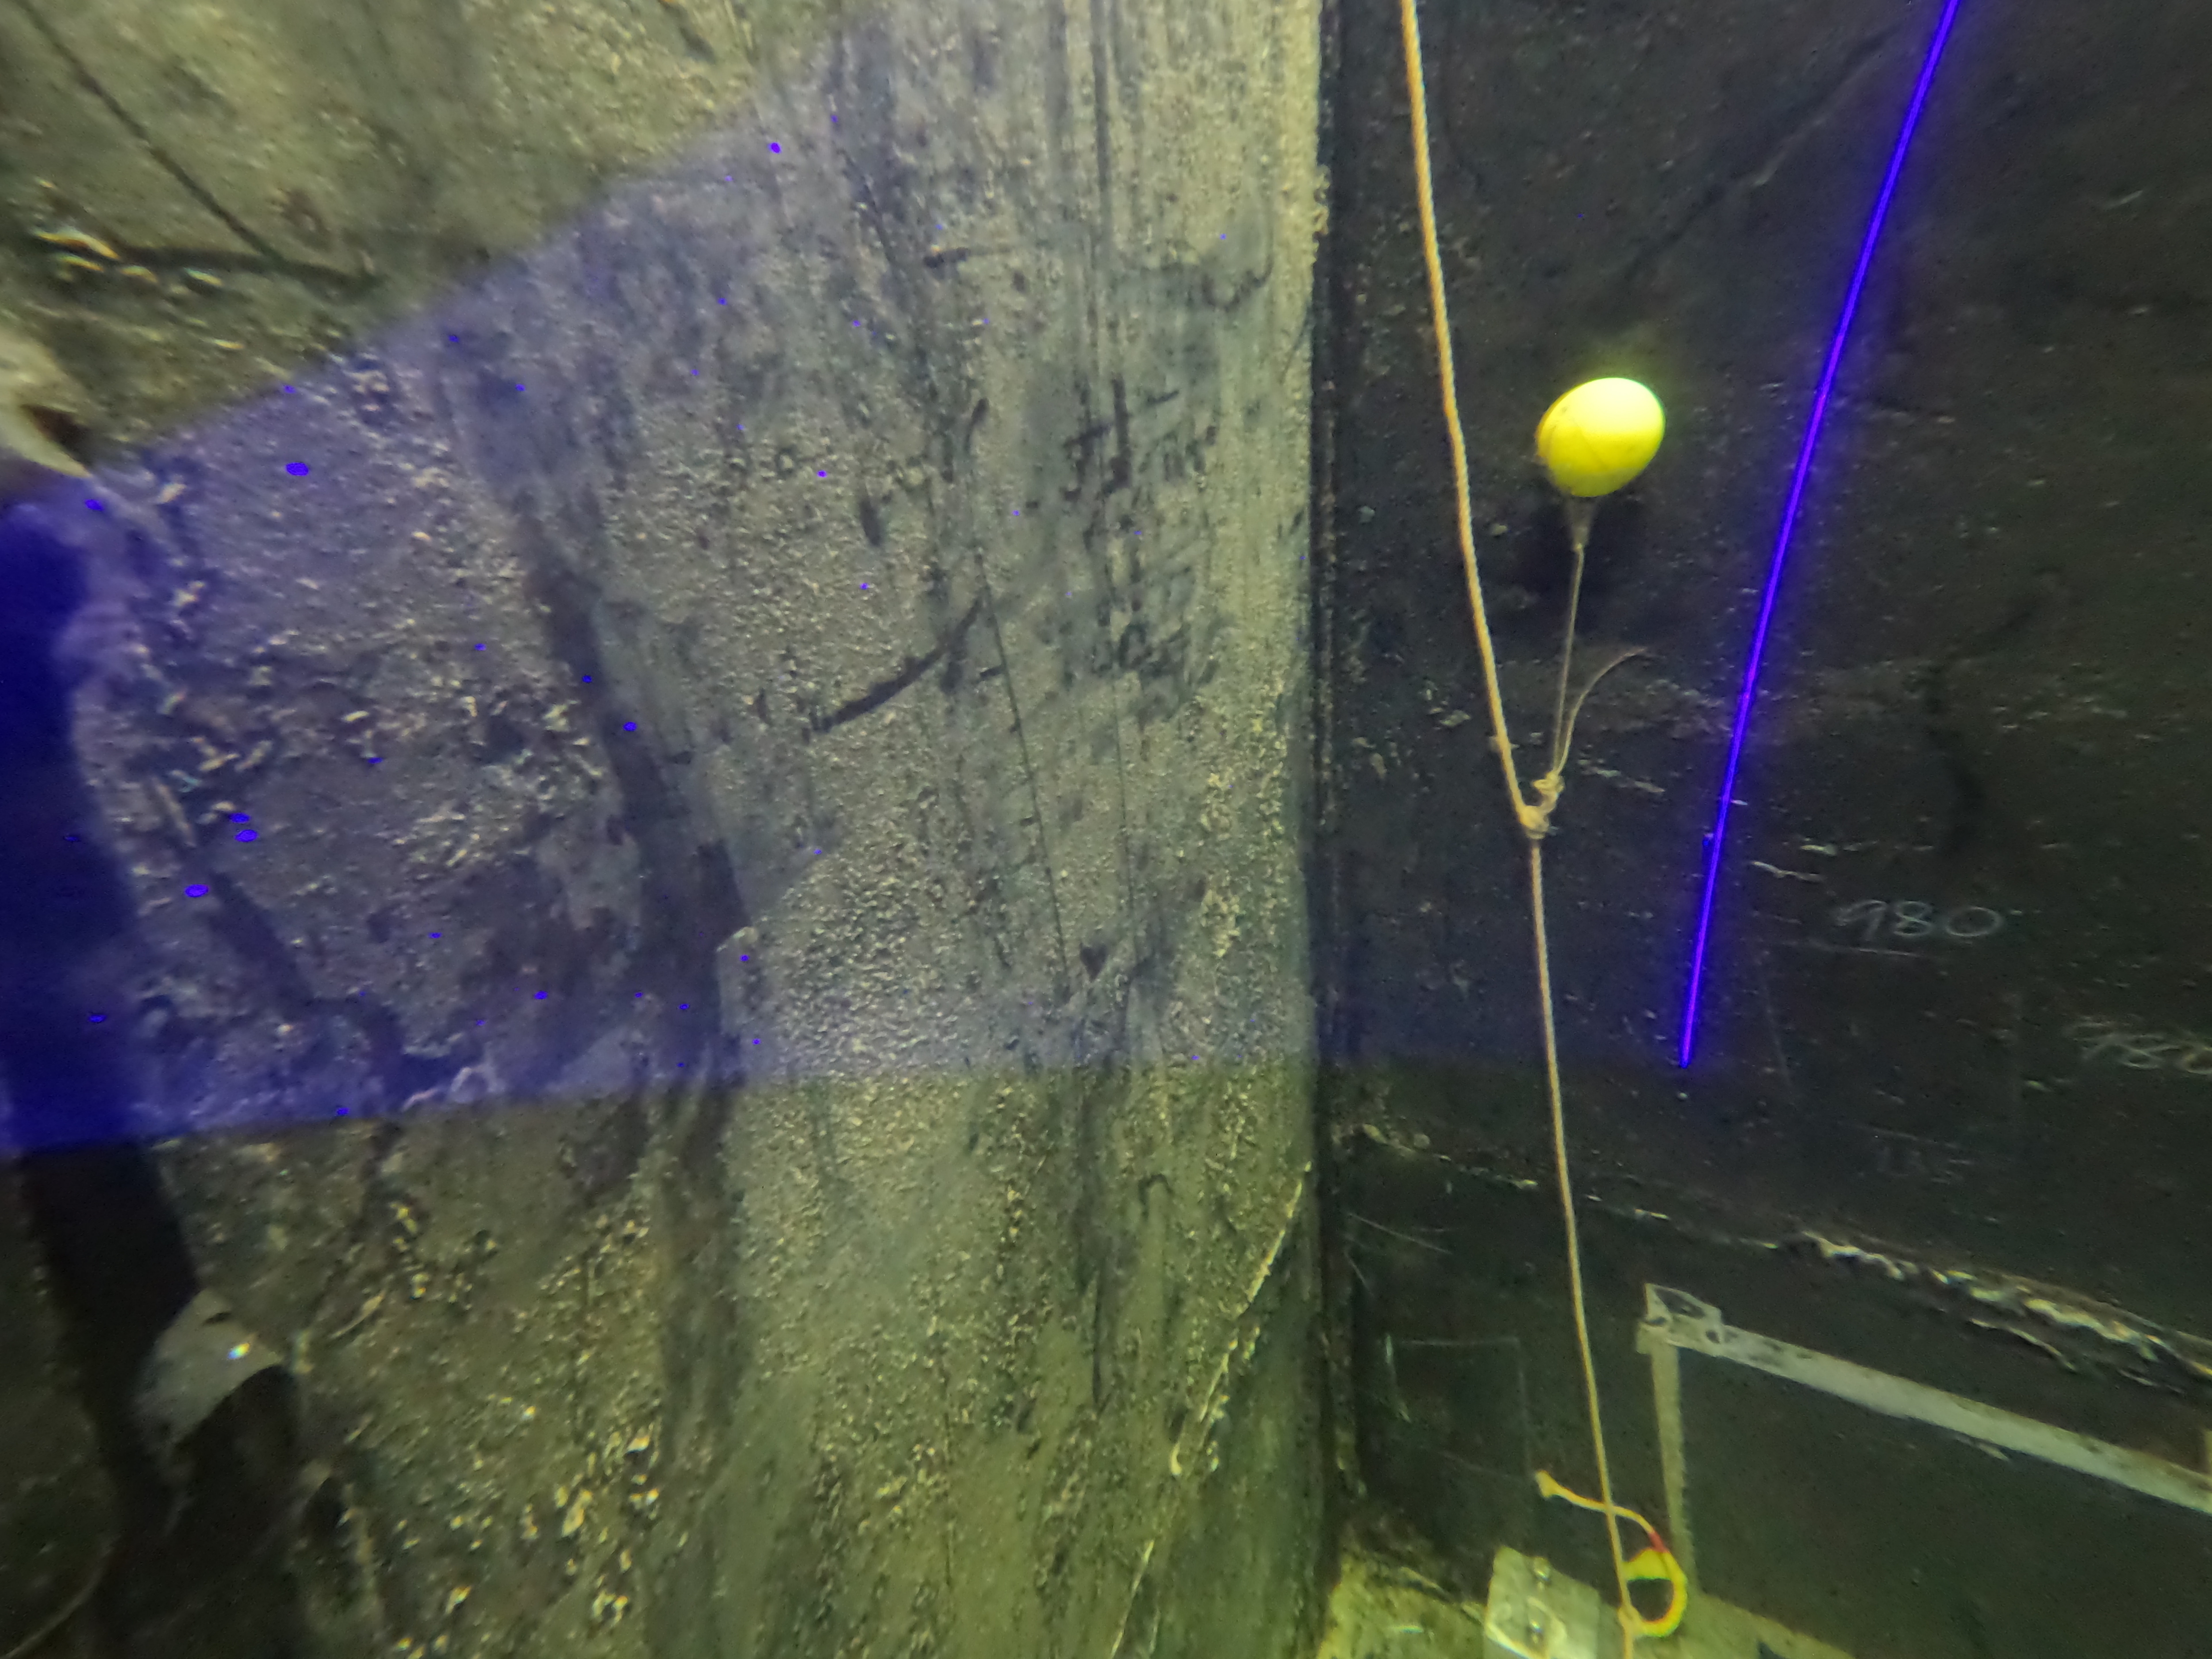

Supplement: Supplementary file 3058 [file G0031858.pdf › 12/G0031858.pdf]

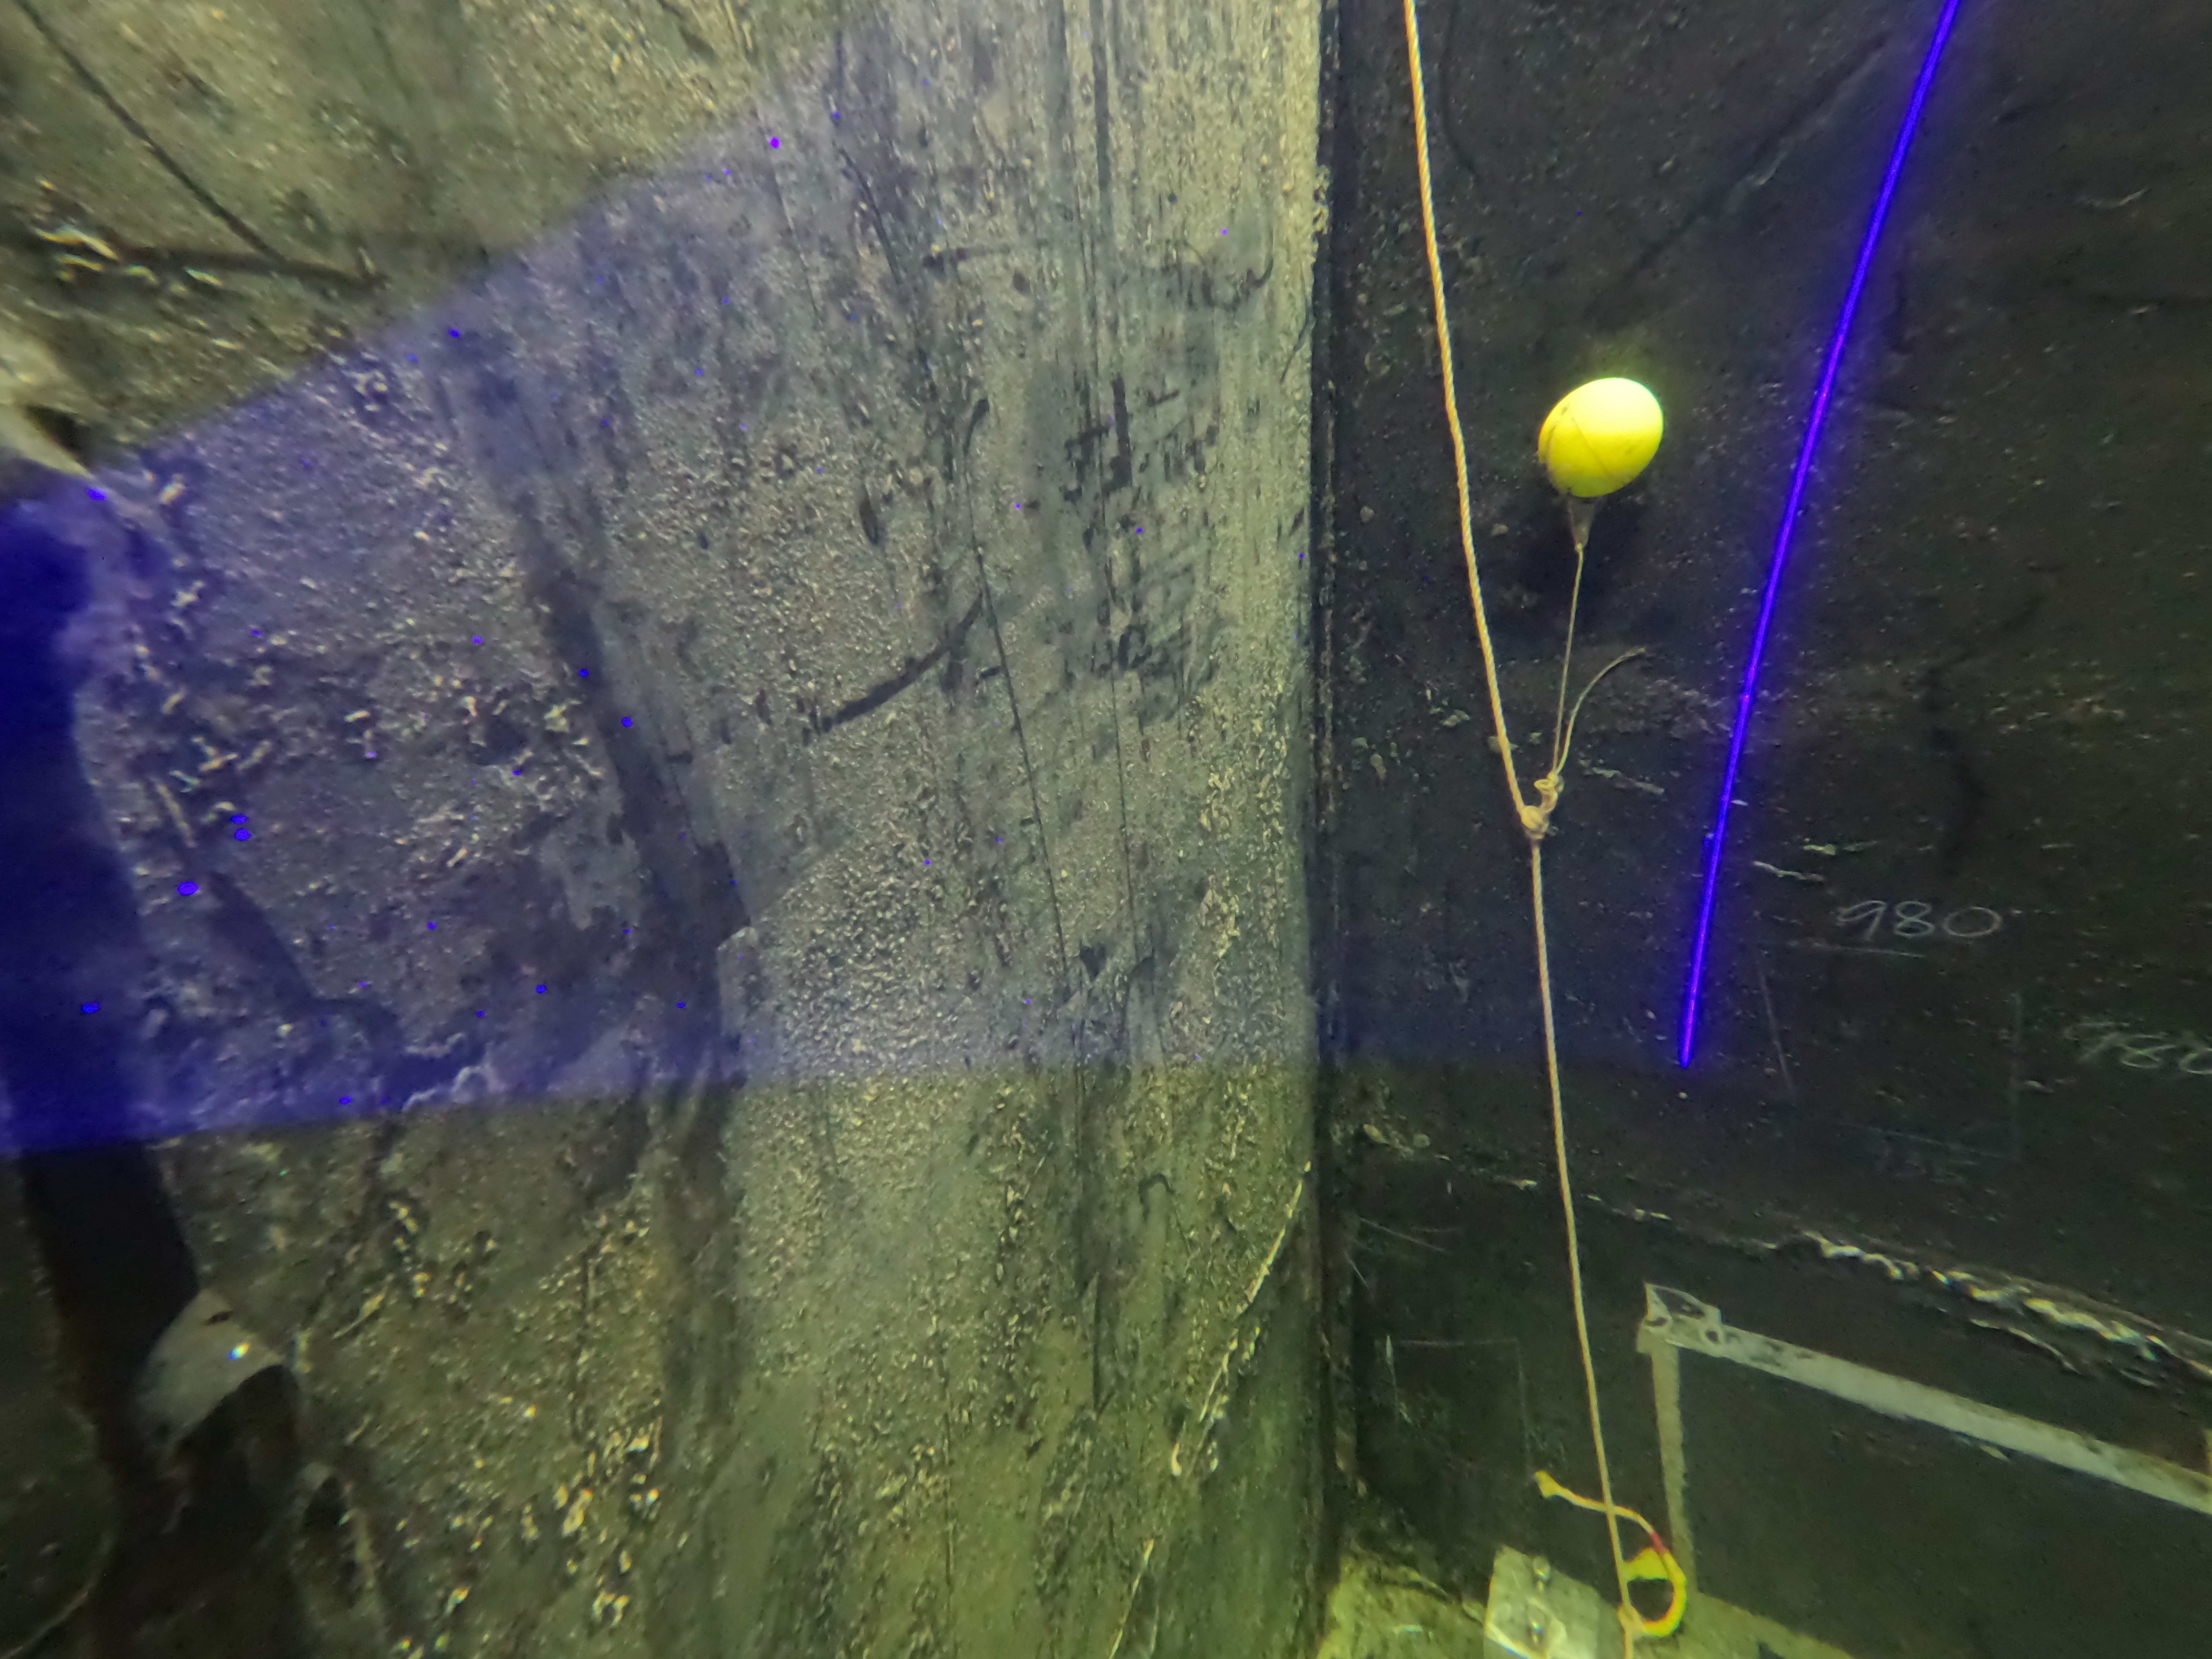

Supplement: Supplementary file 3059 [file G0031859.pdf › 12/G0031859.pdf]

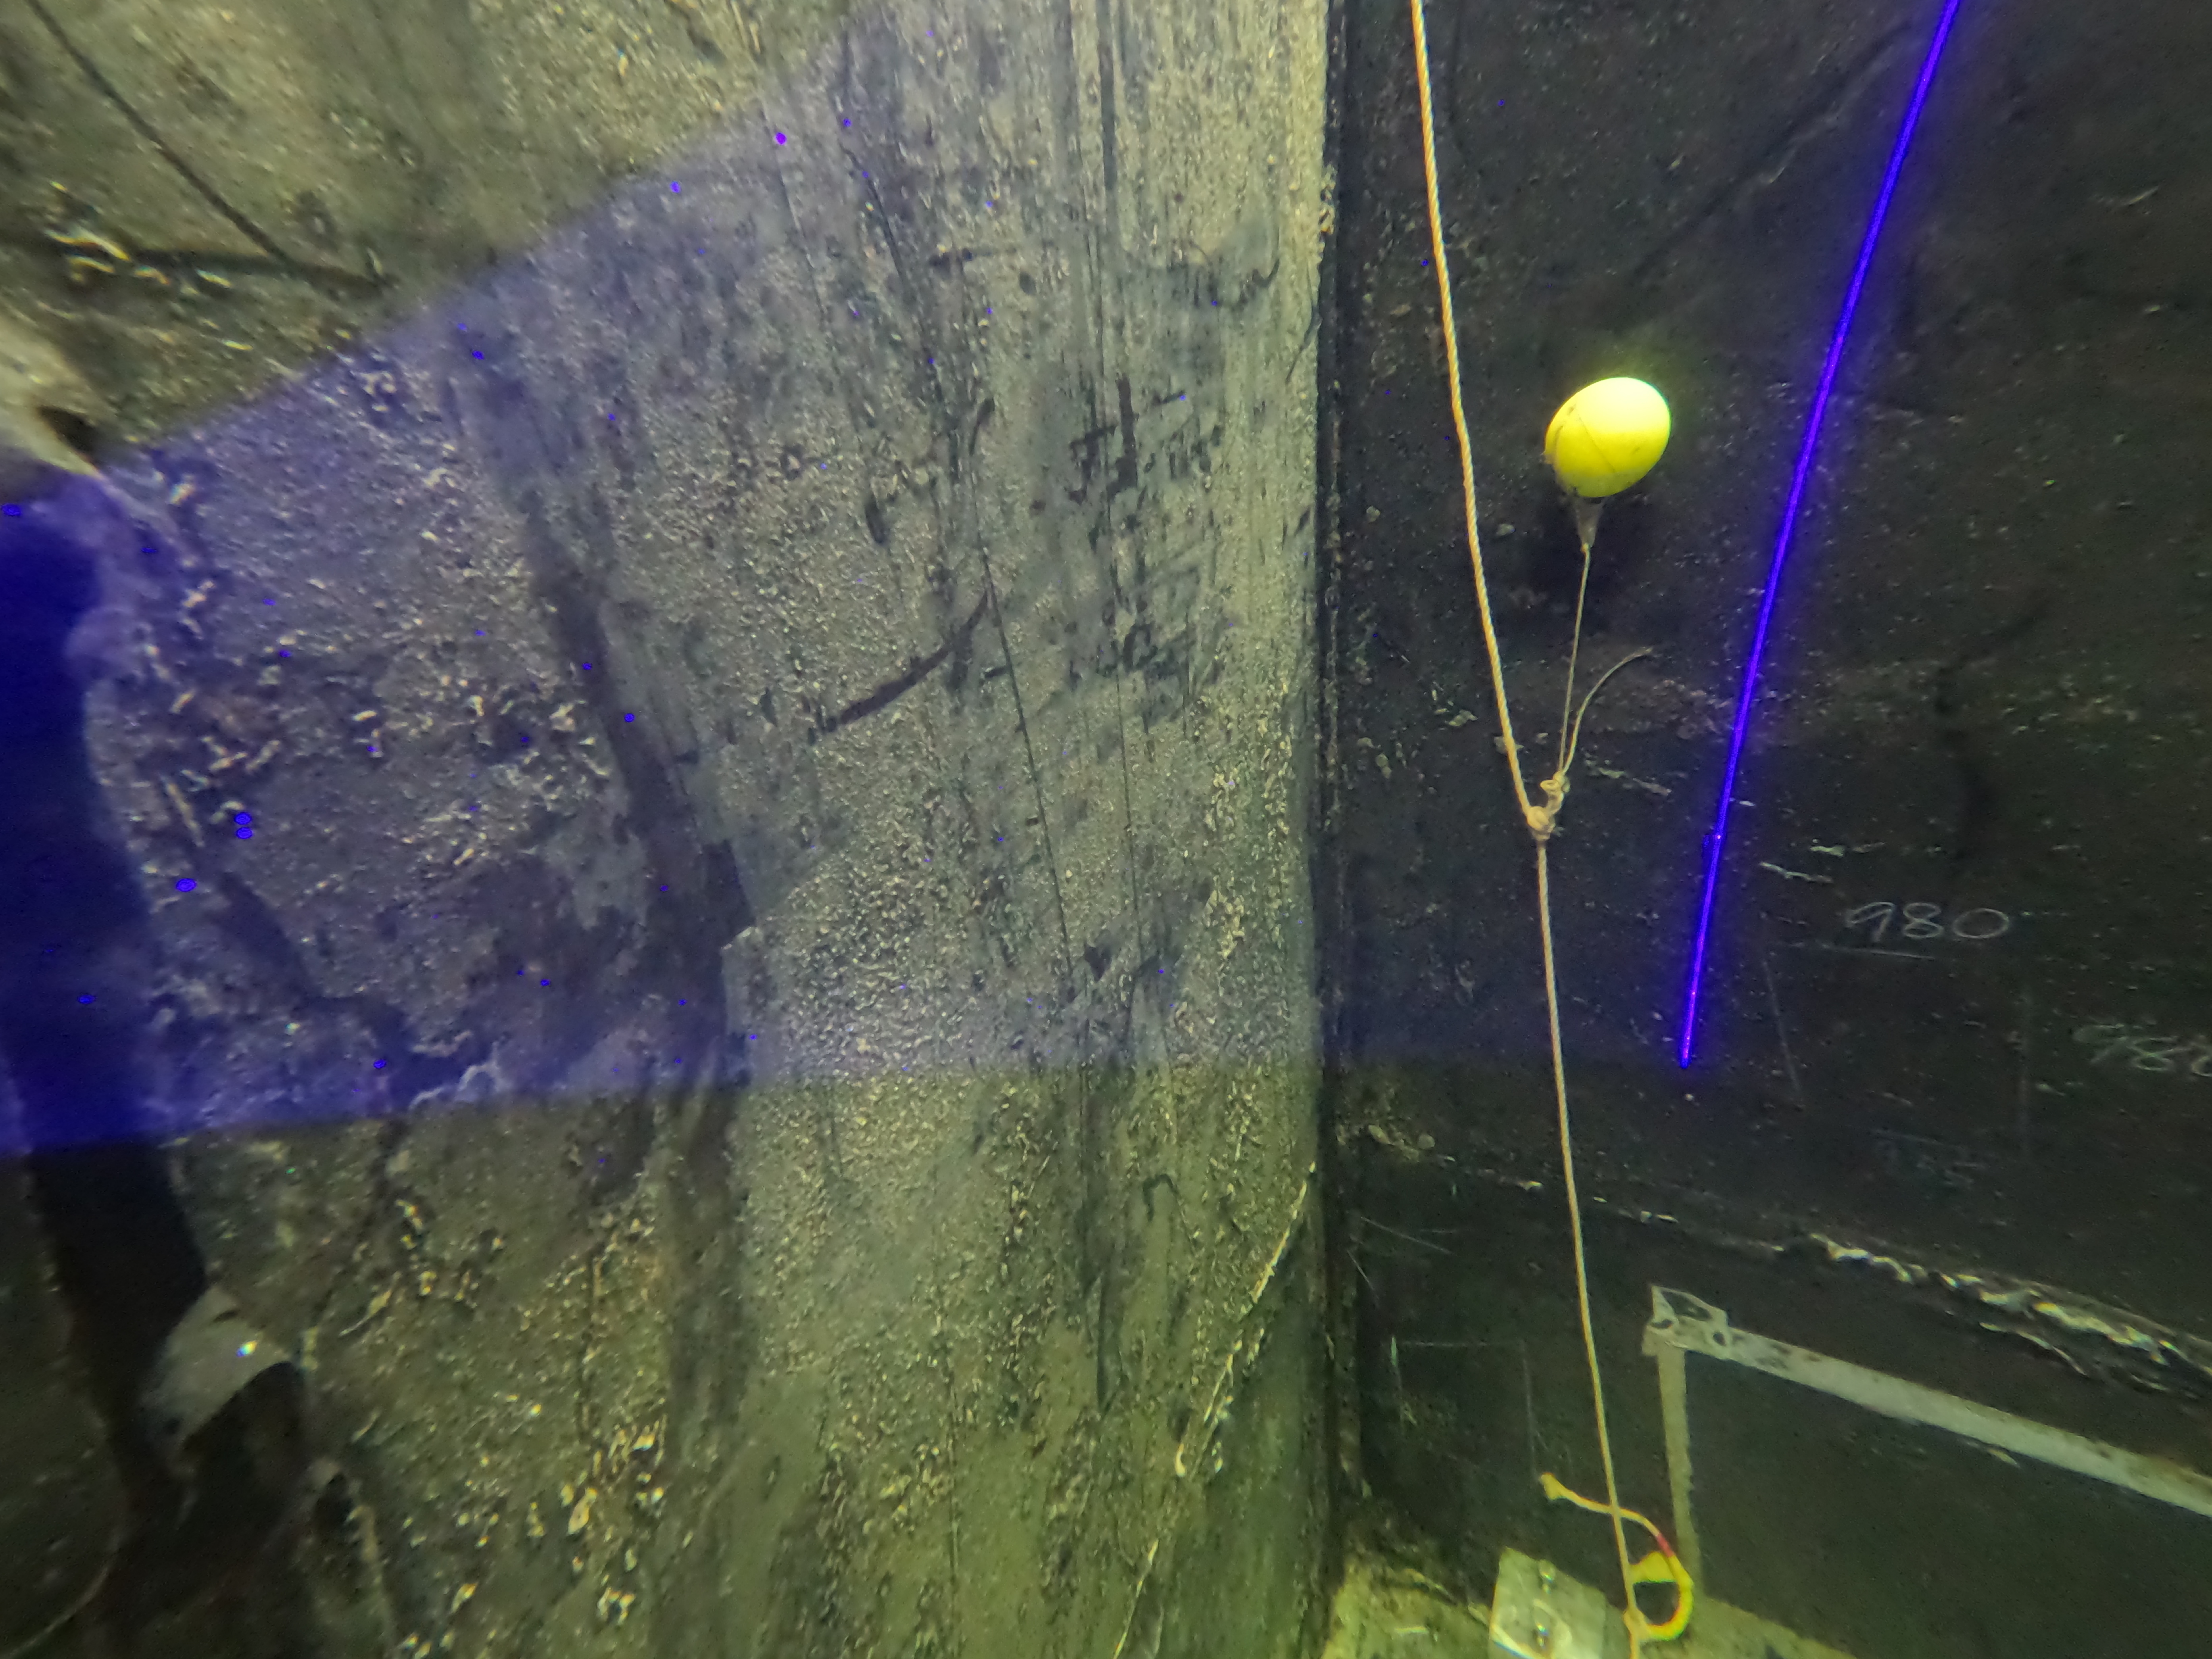

980

980

Supplement: Supplementary file 3060 [file G0031860.pdf › 12/G0031860.pdf]

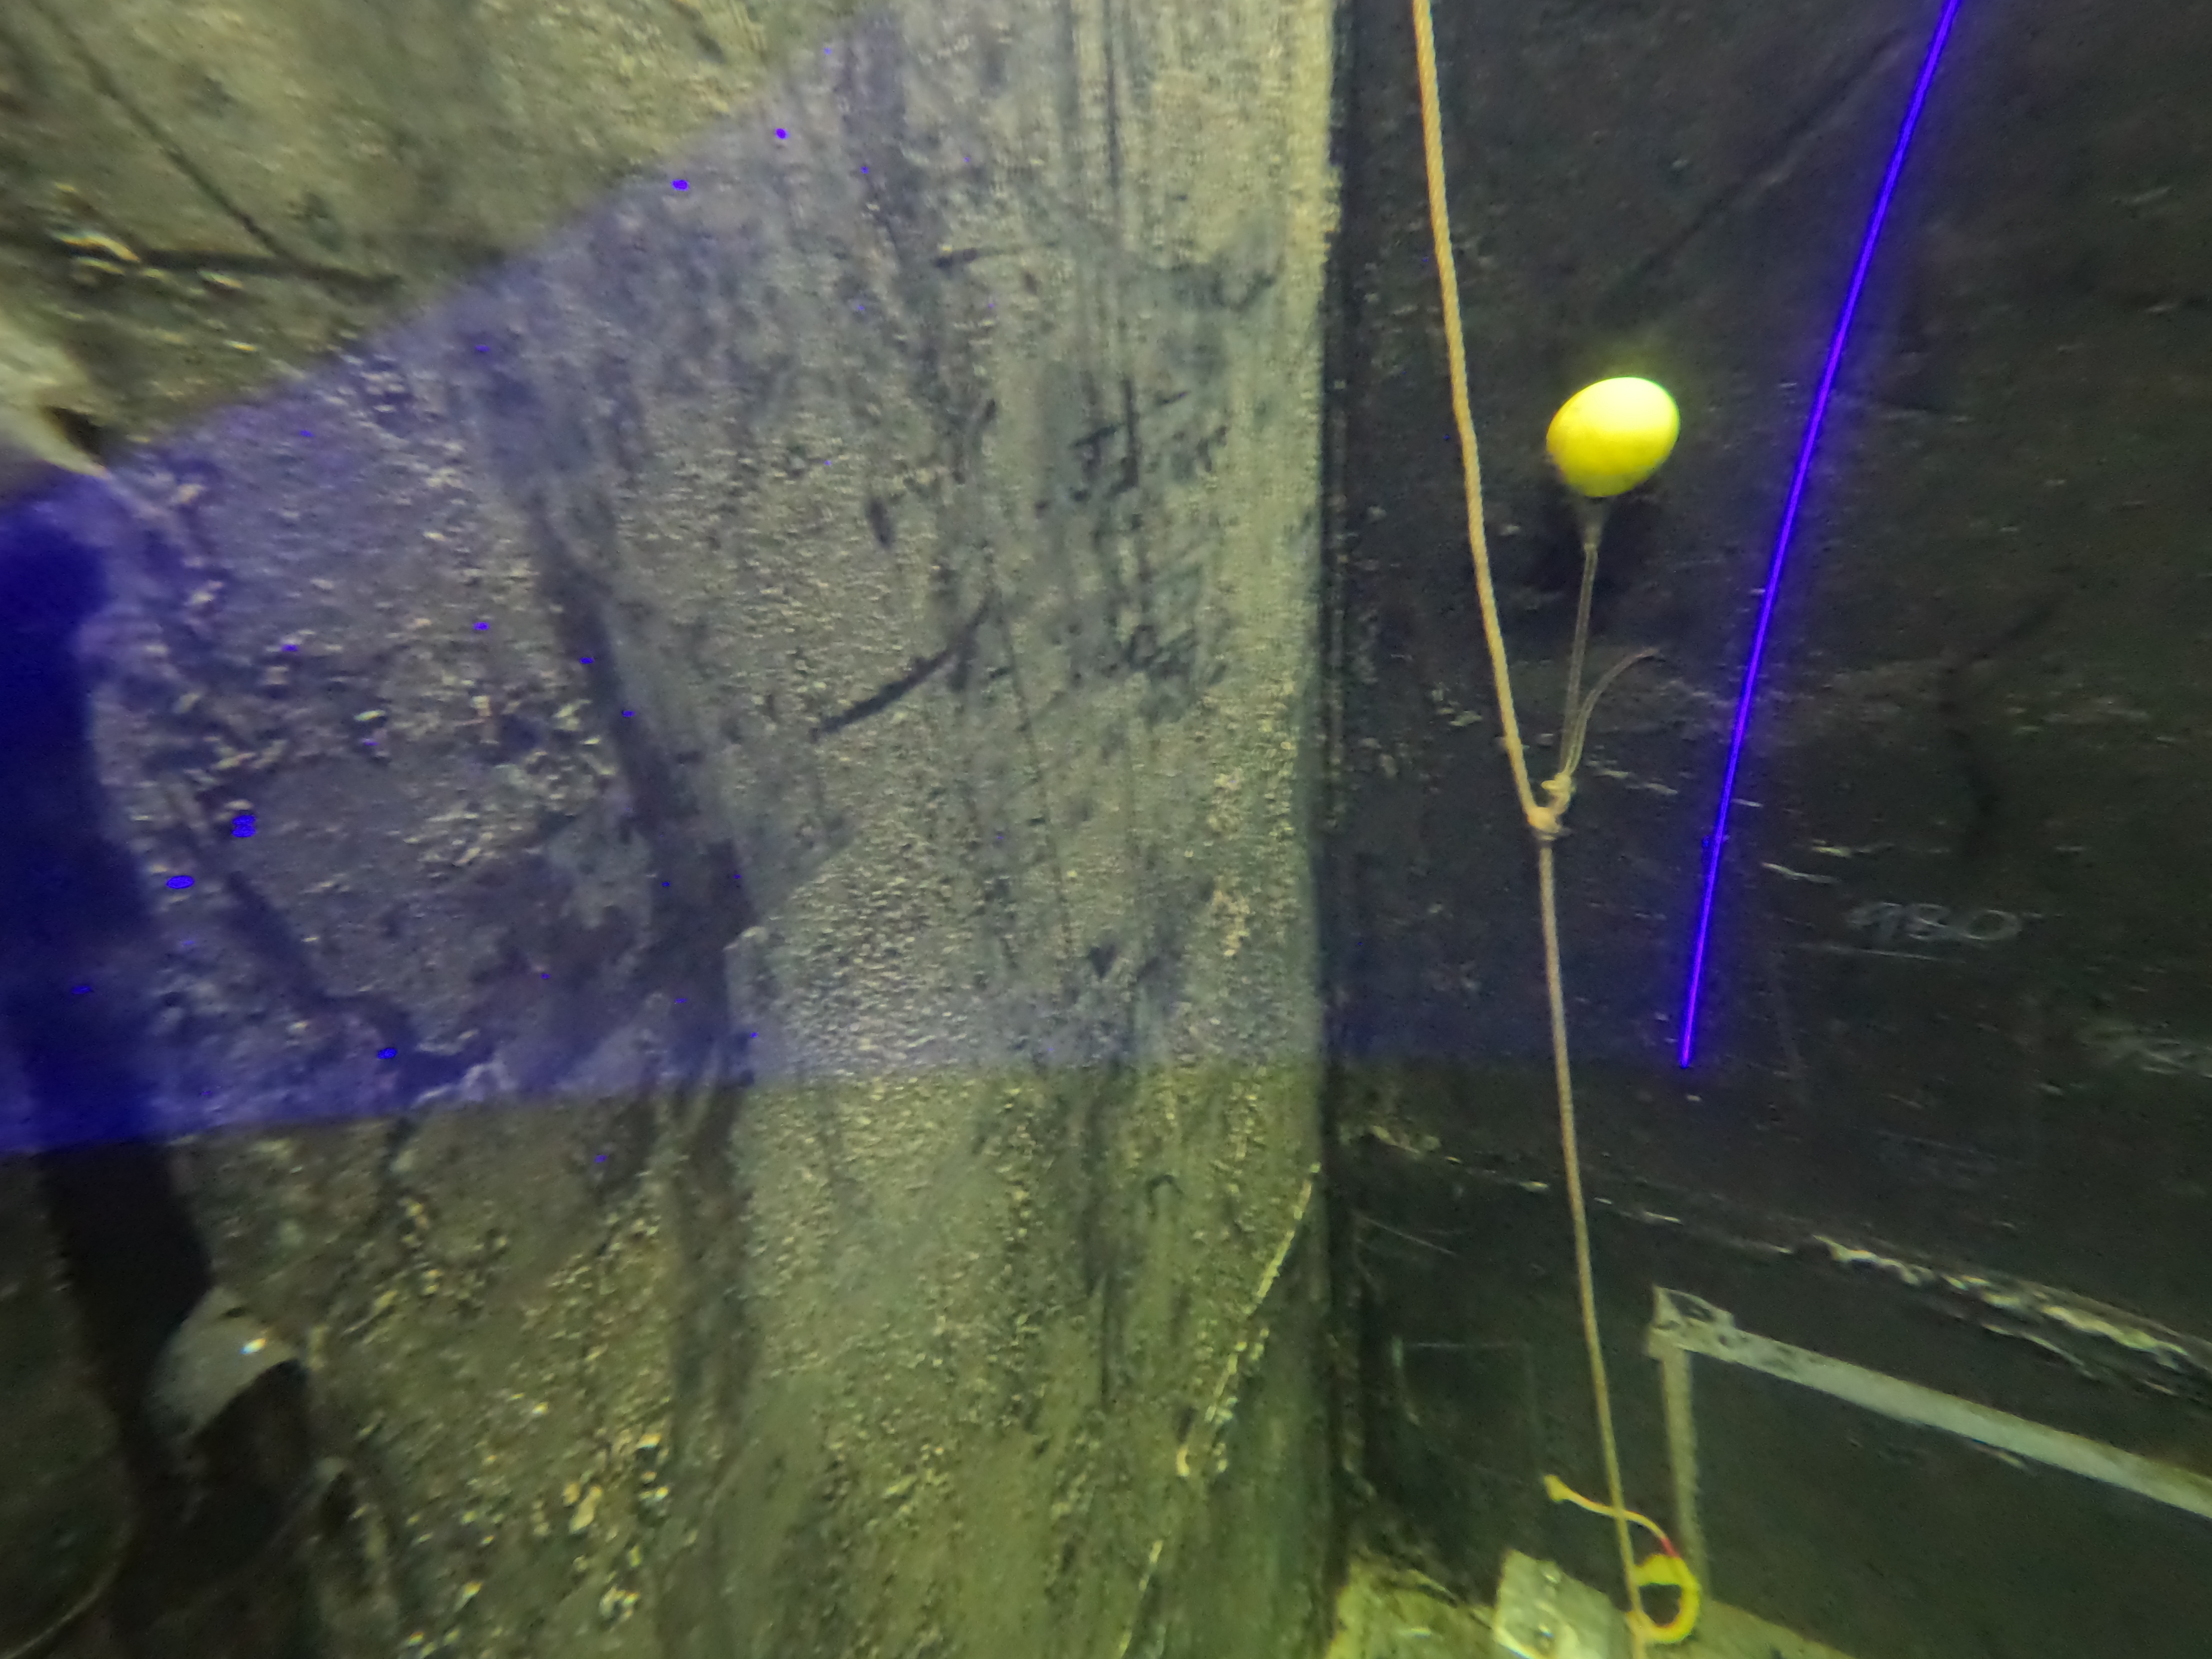

Supplement: Supplementary file 3061 [file G0031861.pdf › 12/G0031861.pdf]

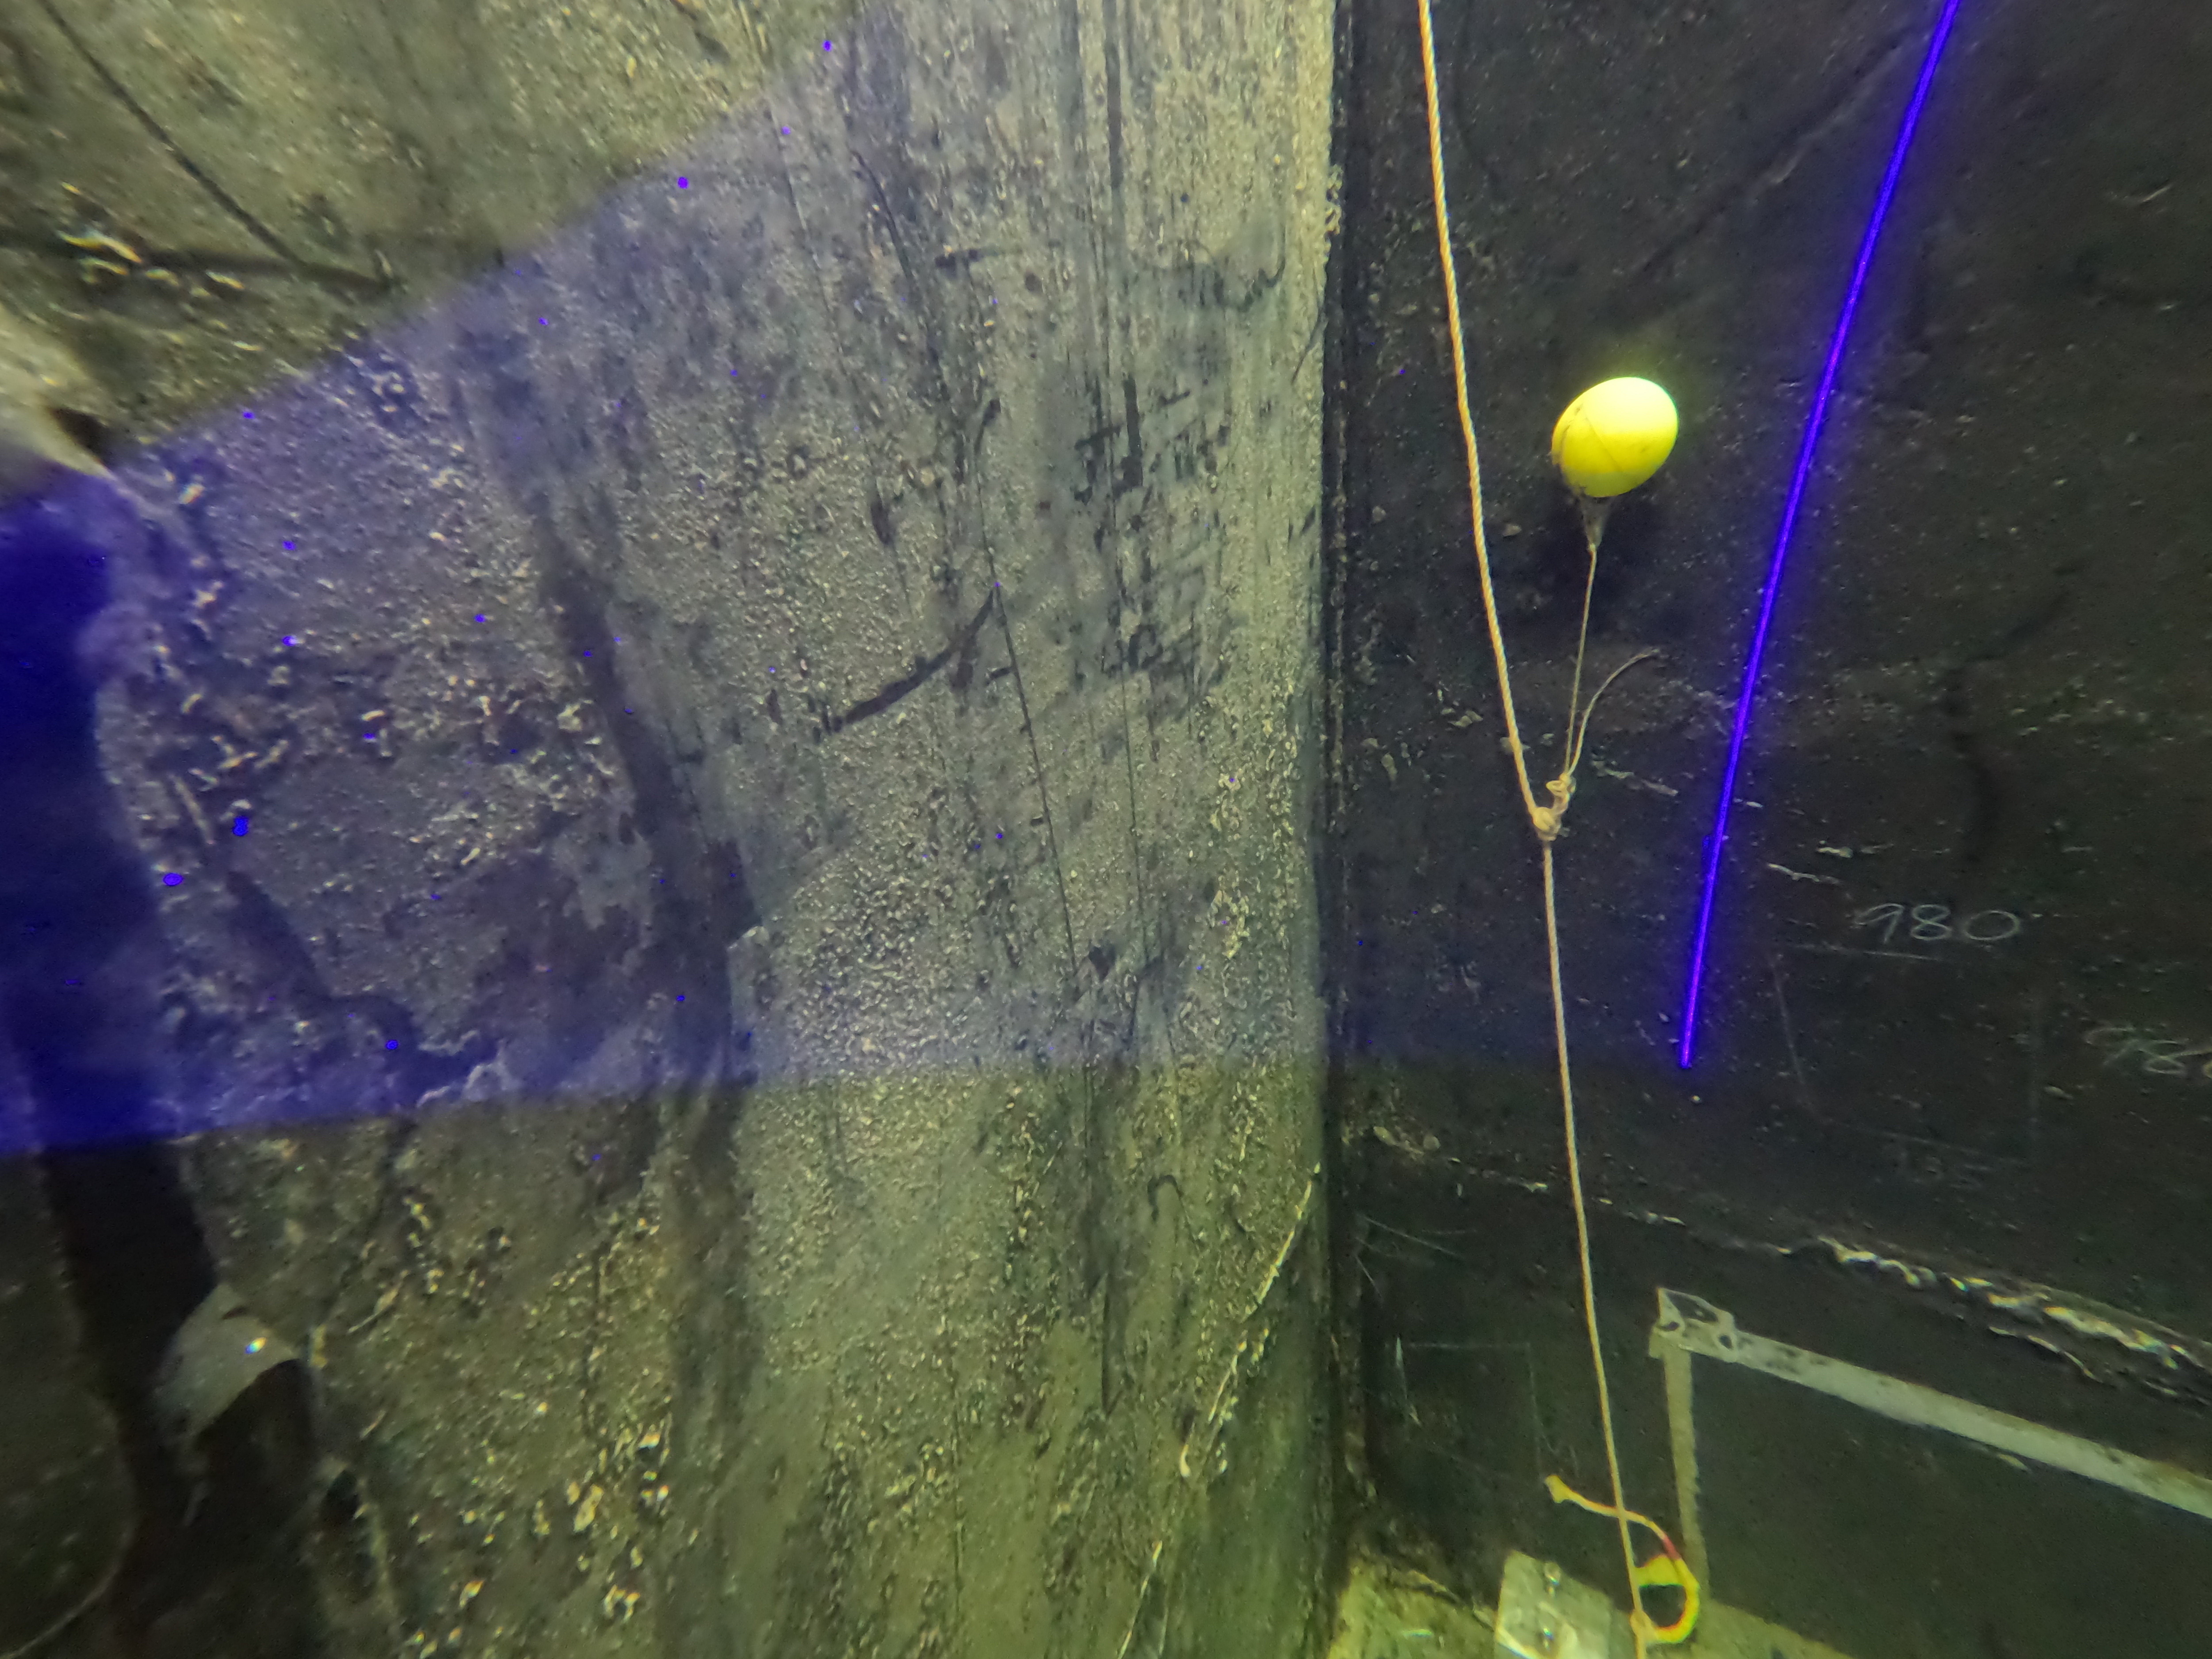

Supplement: Supplementary file 3062 [file G0031862.pdf › 12/G0031862.pdf]

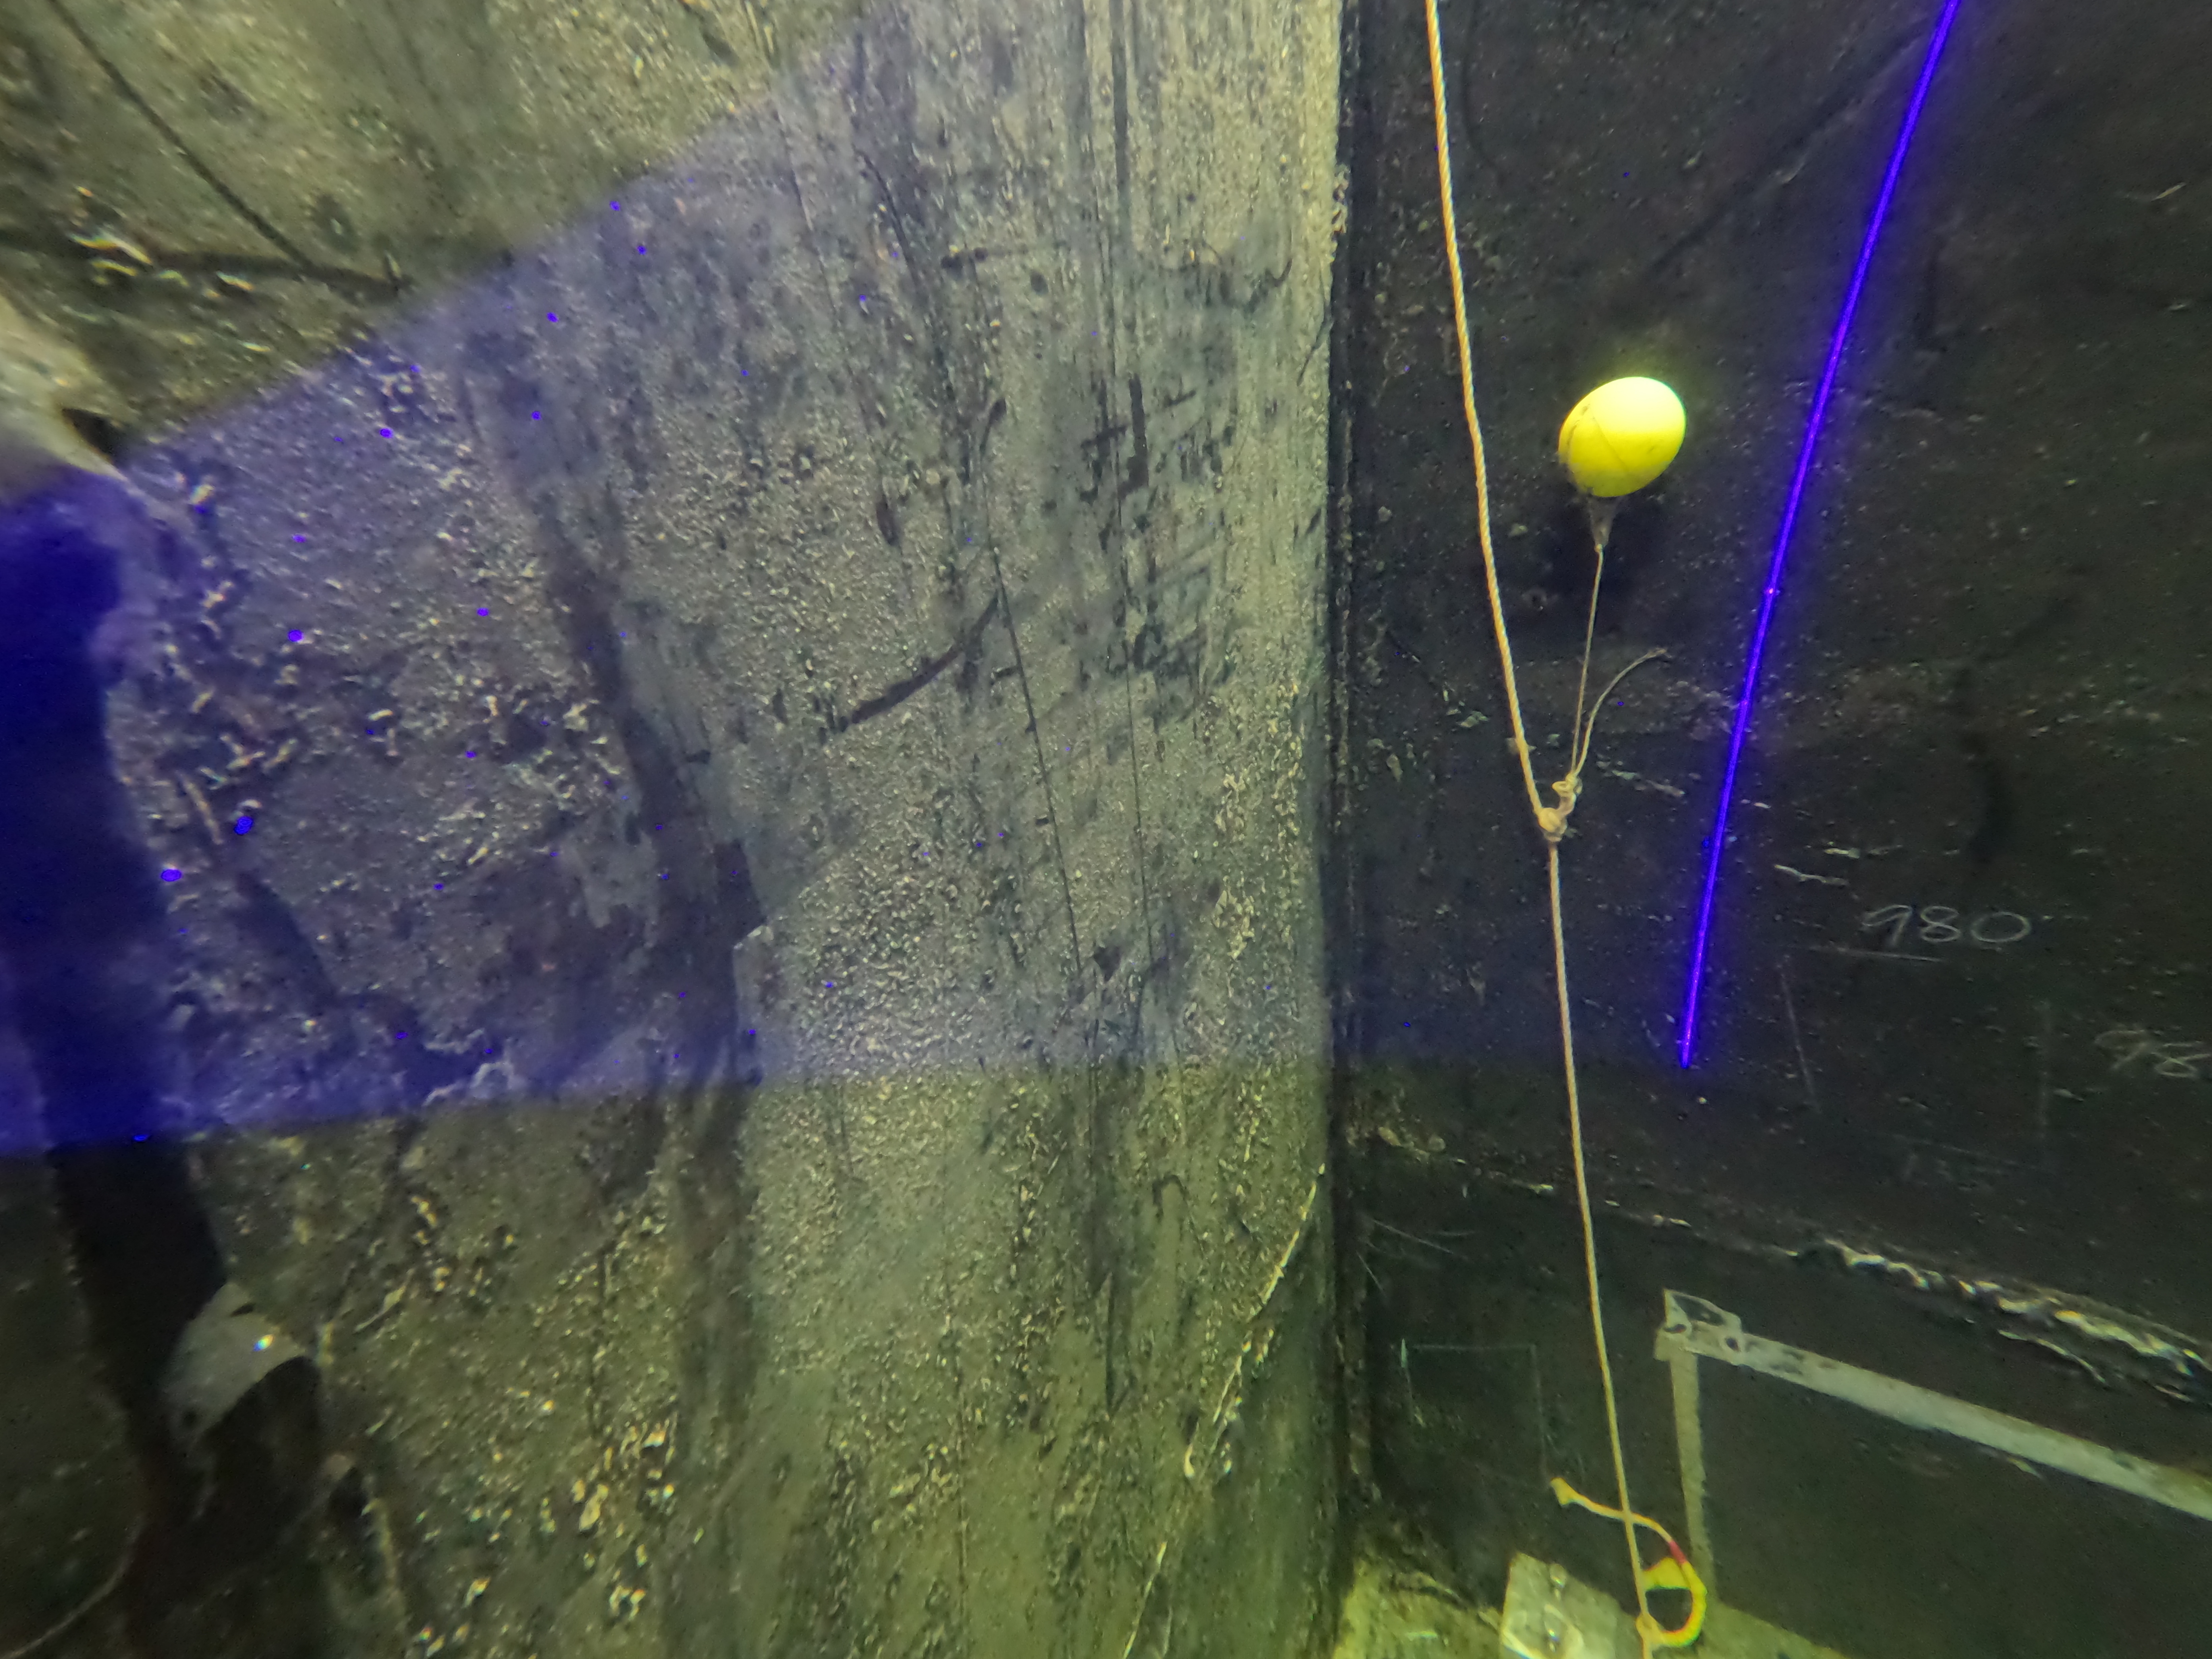

Supplement: Supplementary file 3063 [file G0031863.pdf › 12/G0031863.pdf]

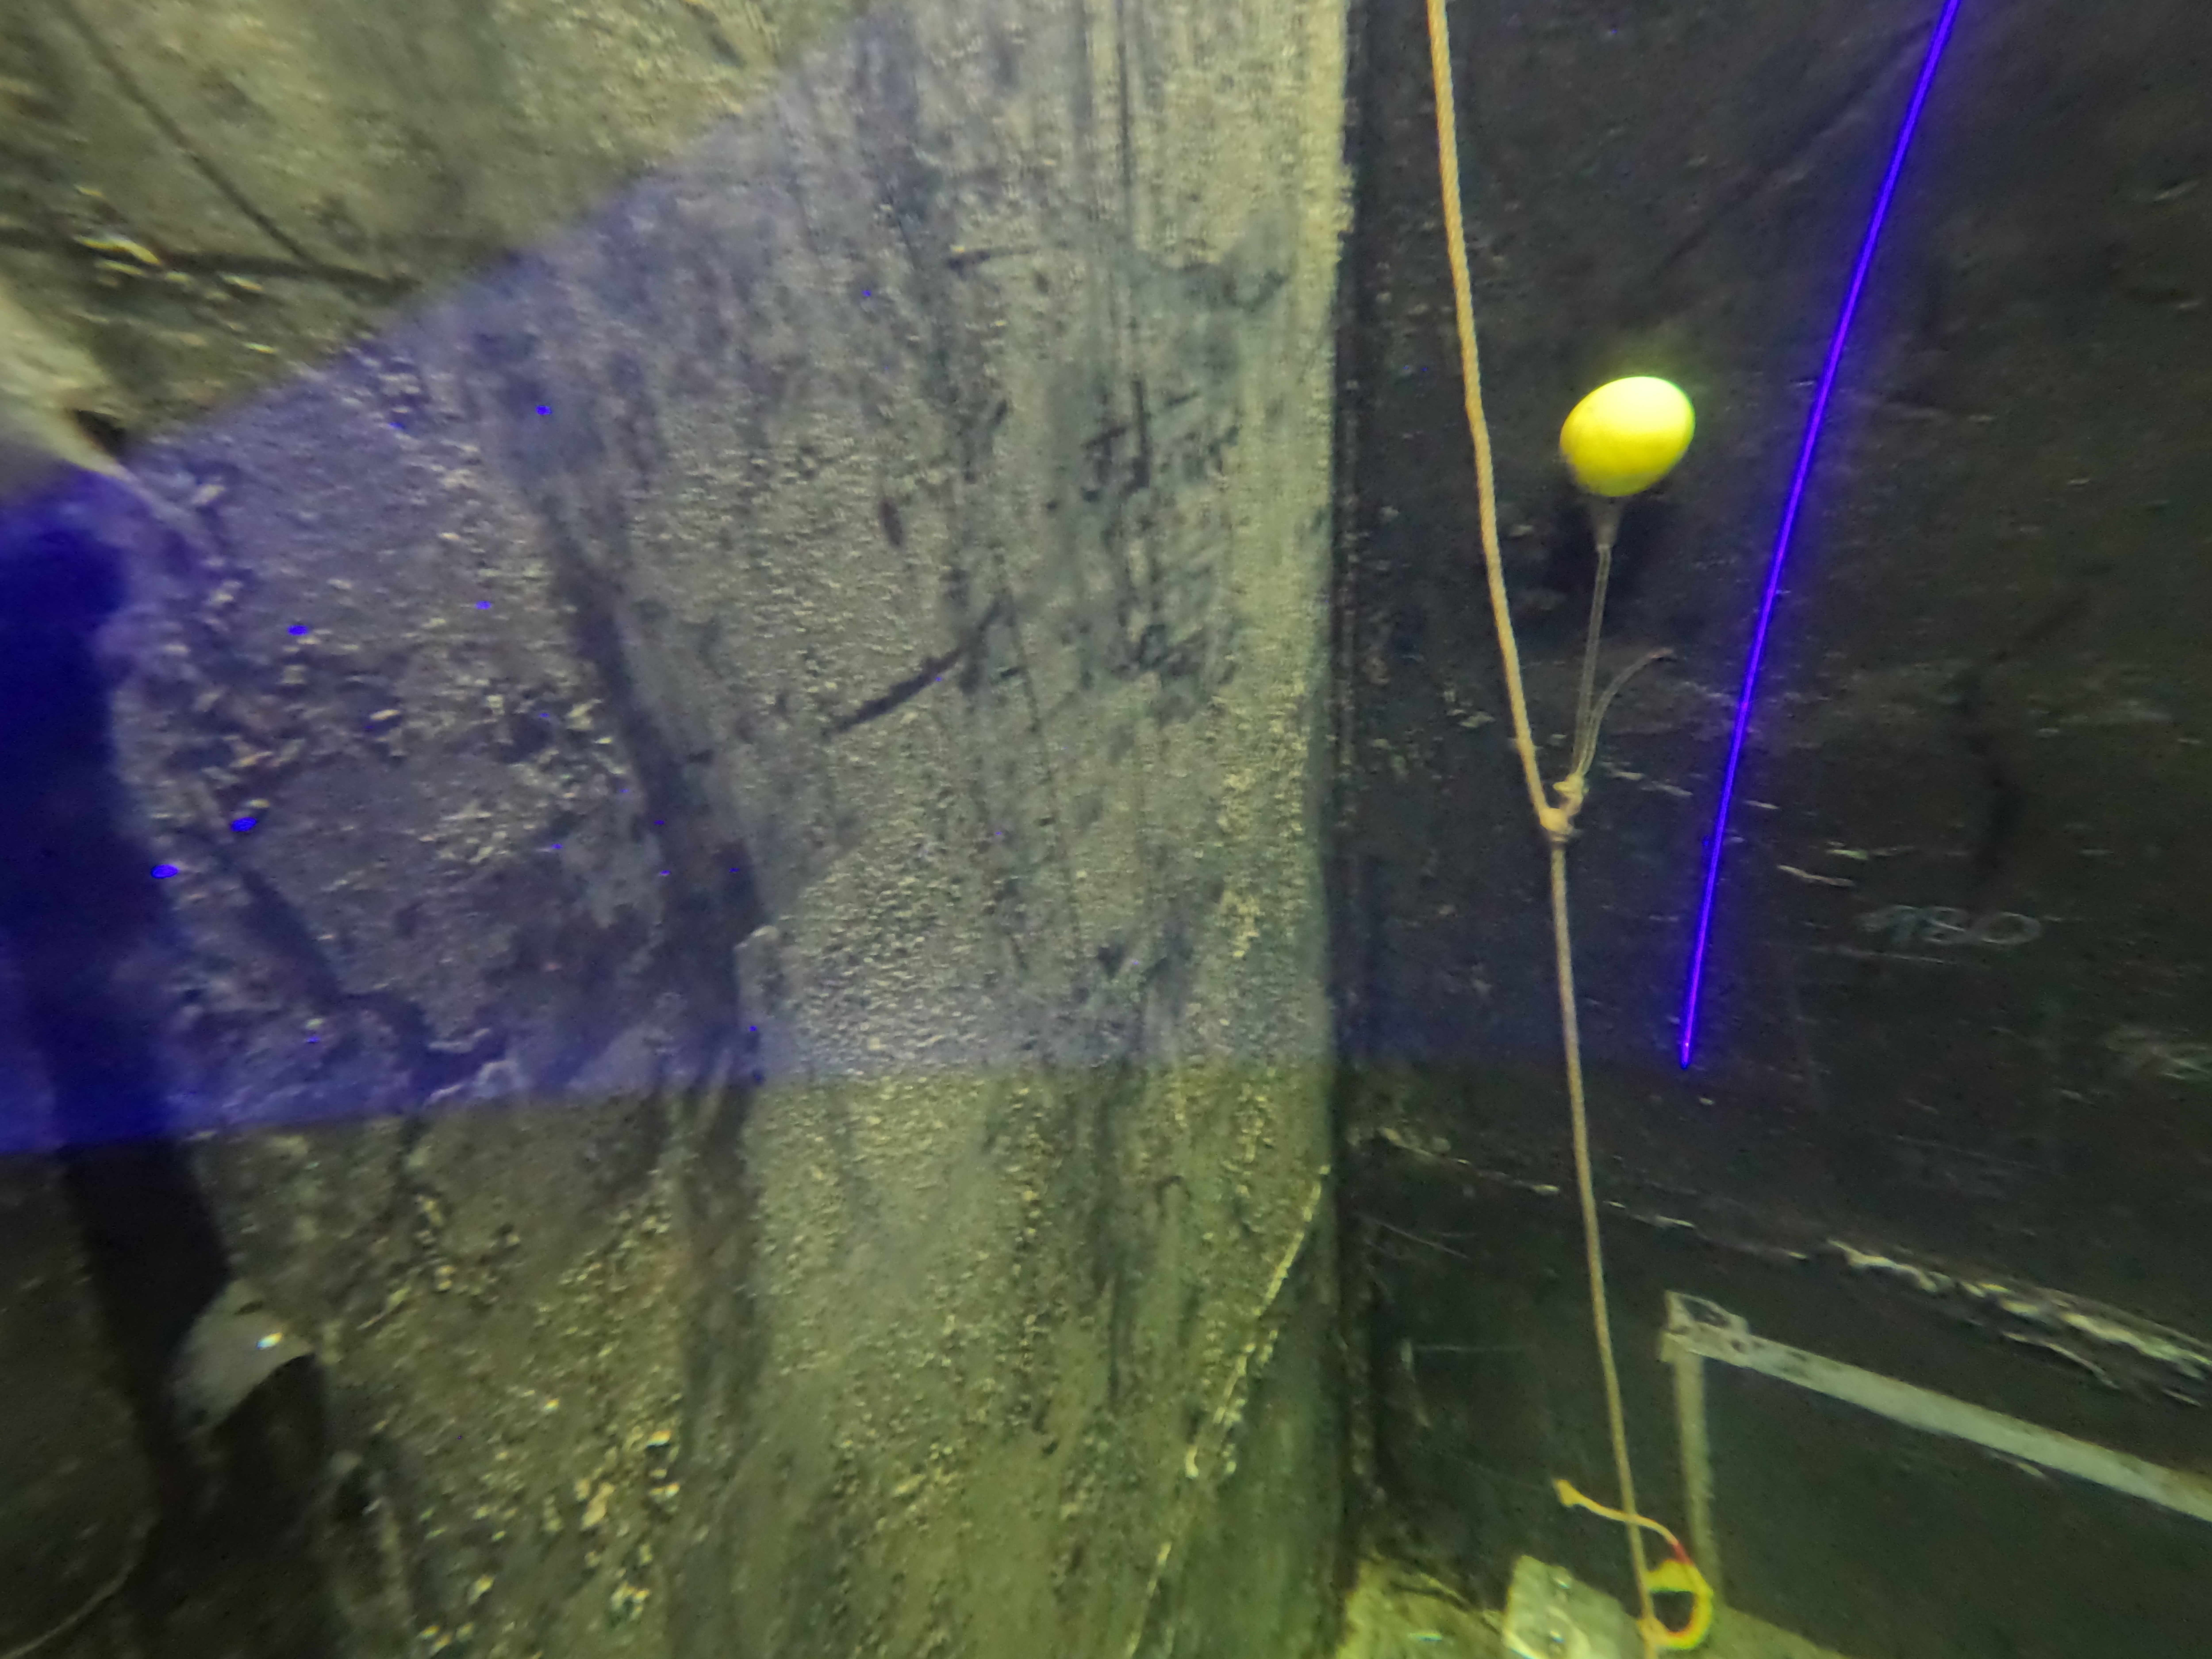

Supplement: Supplementary file 3064 [file G0031864.pdf › 12/G0031864.pdf]

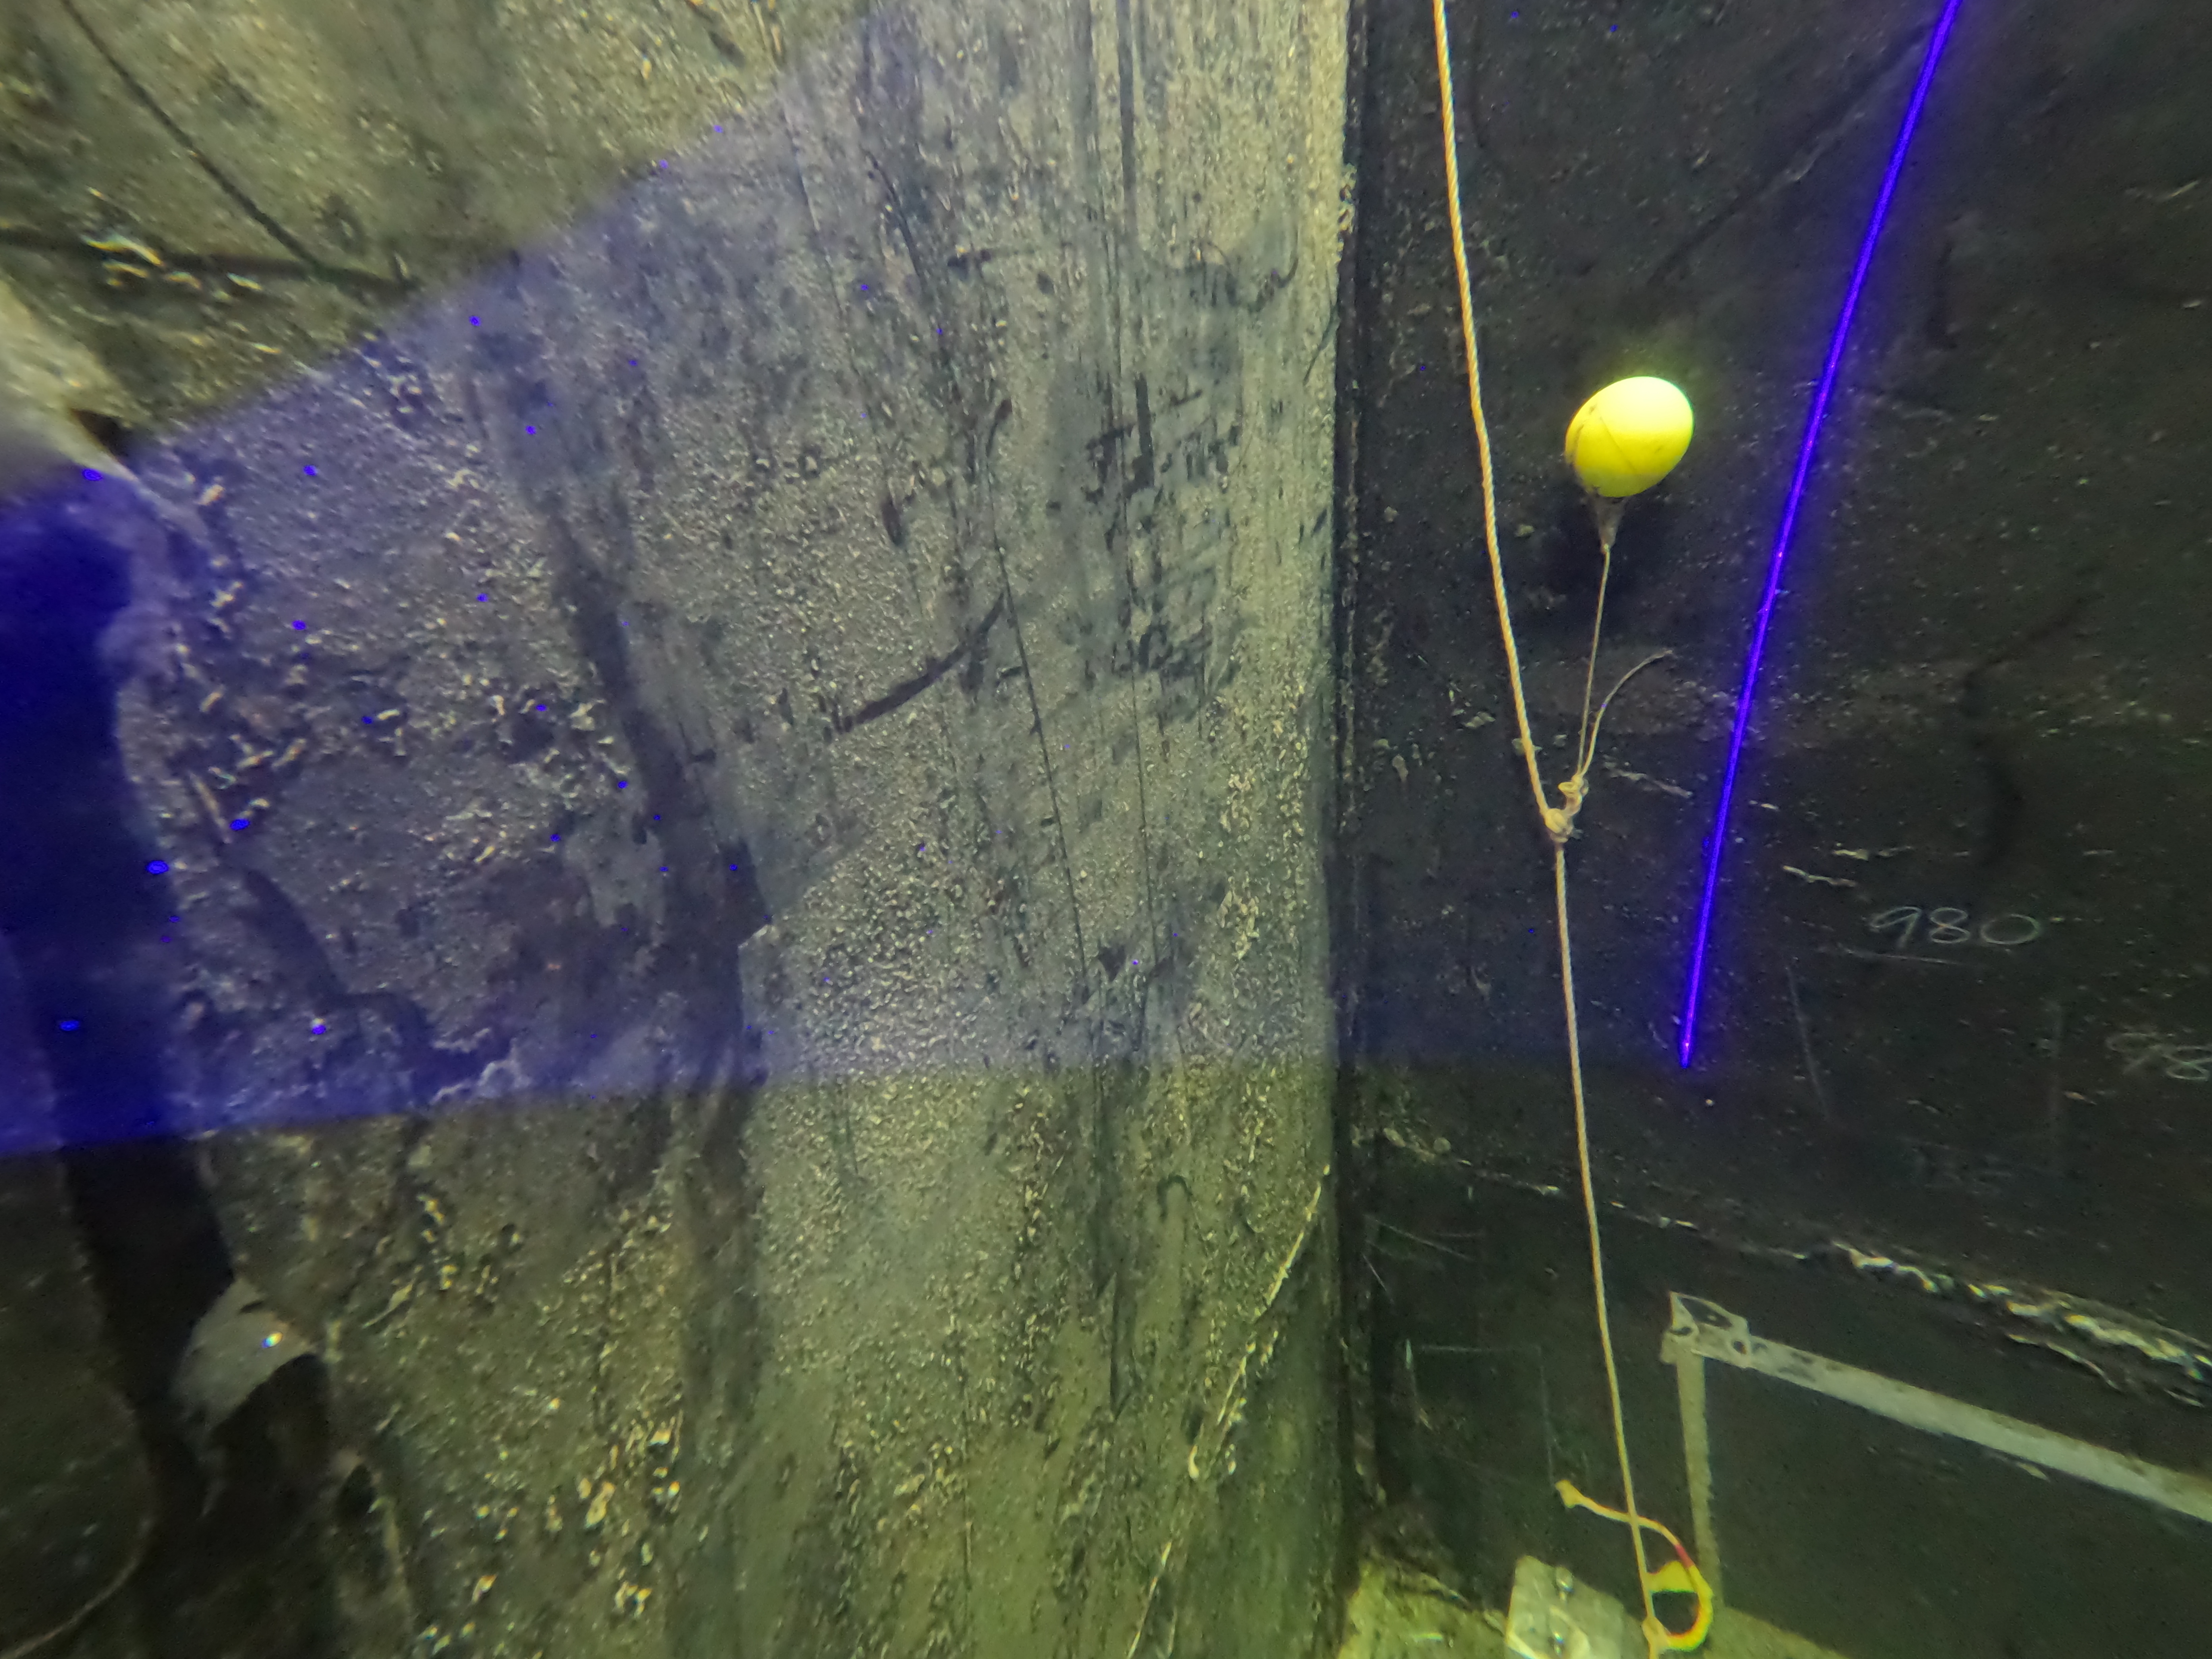

980

Supplement: Supplementary file 3065 [file G0031865.pdf › 12/G0031865.pdf]

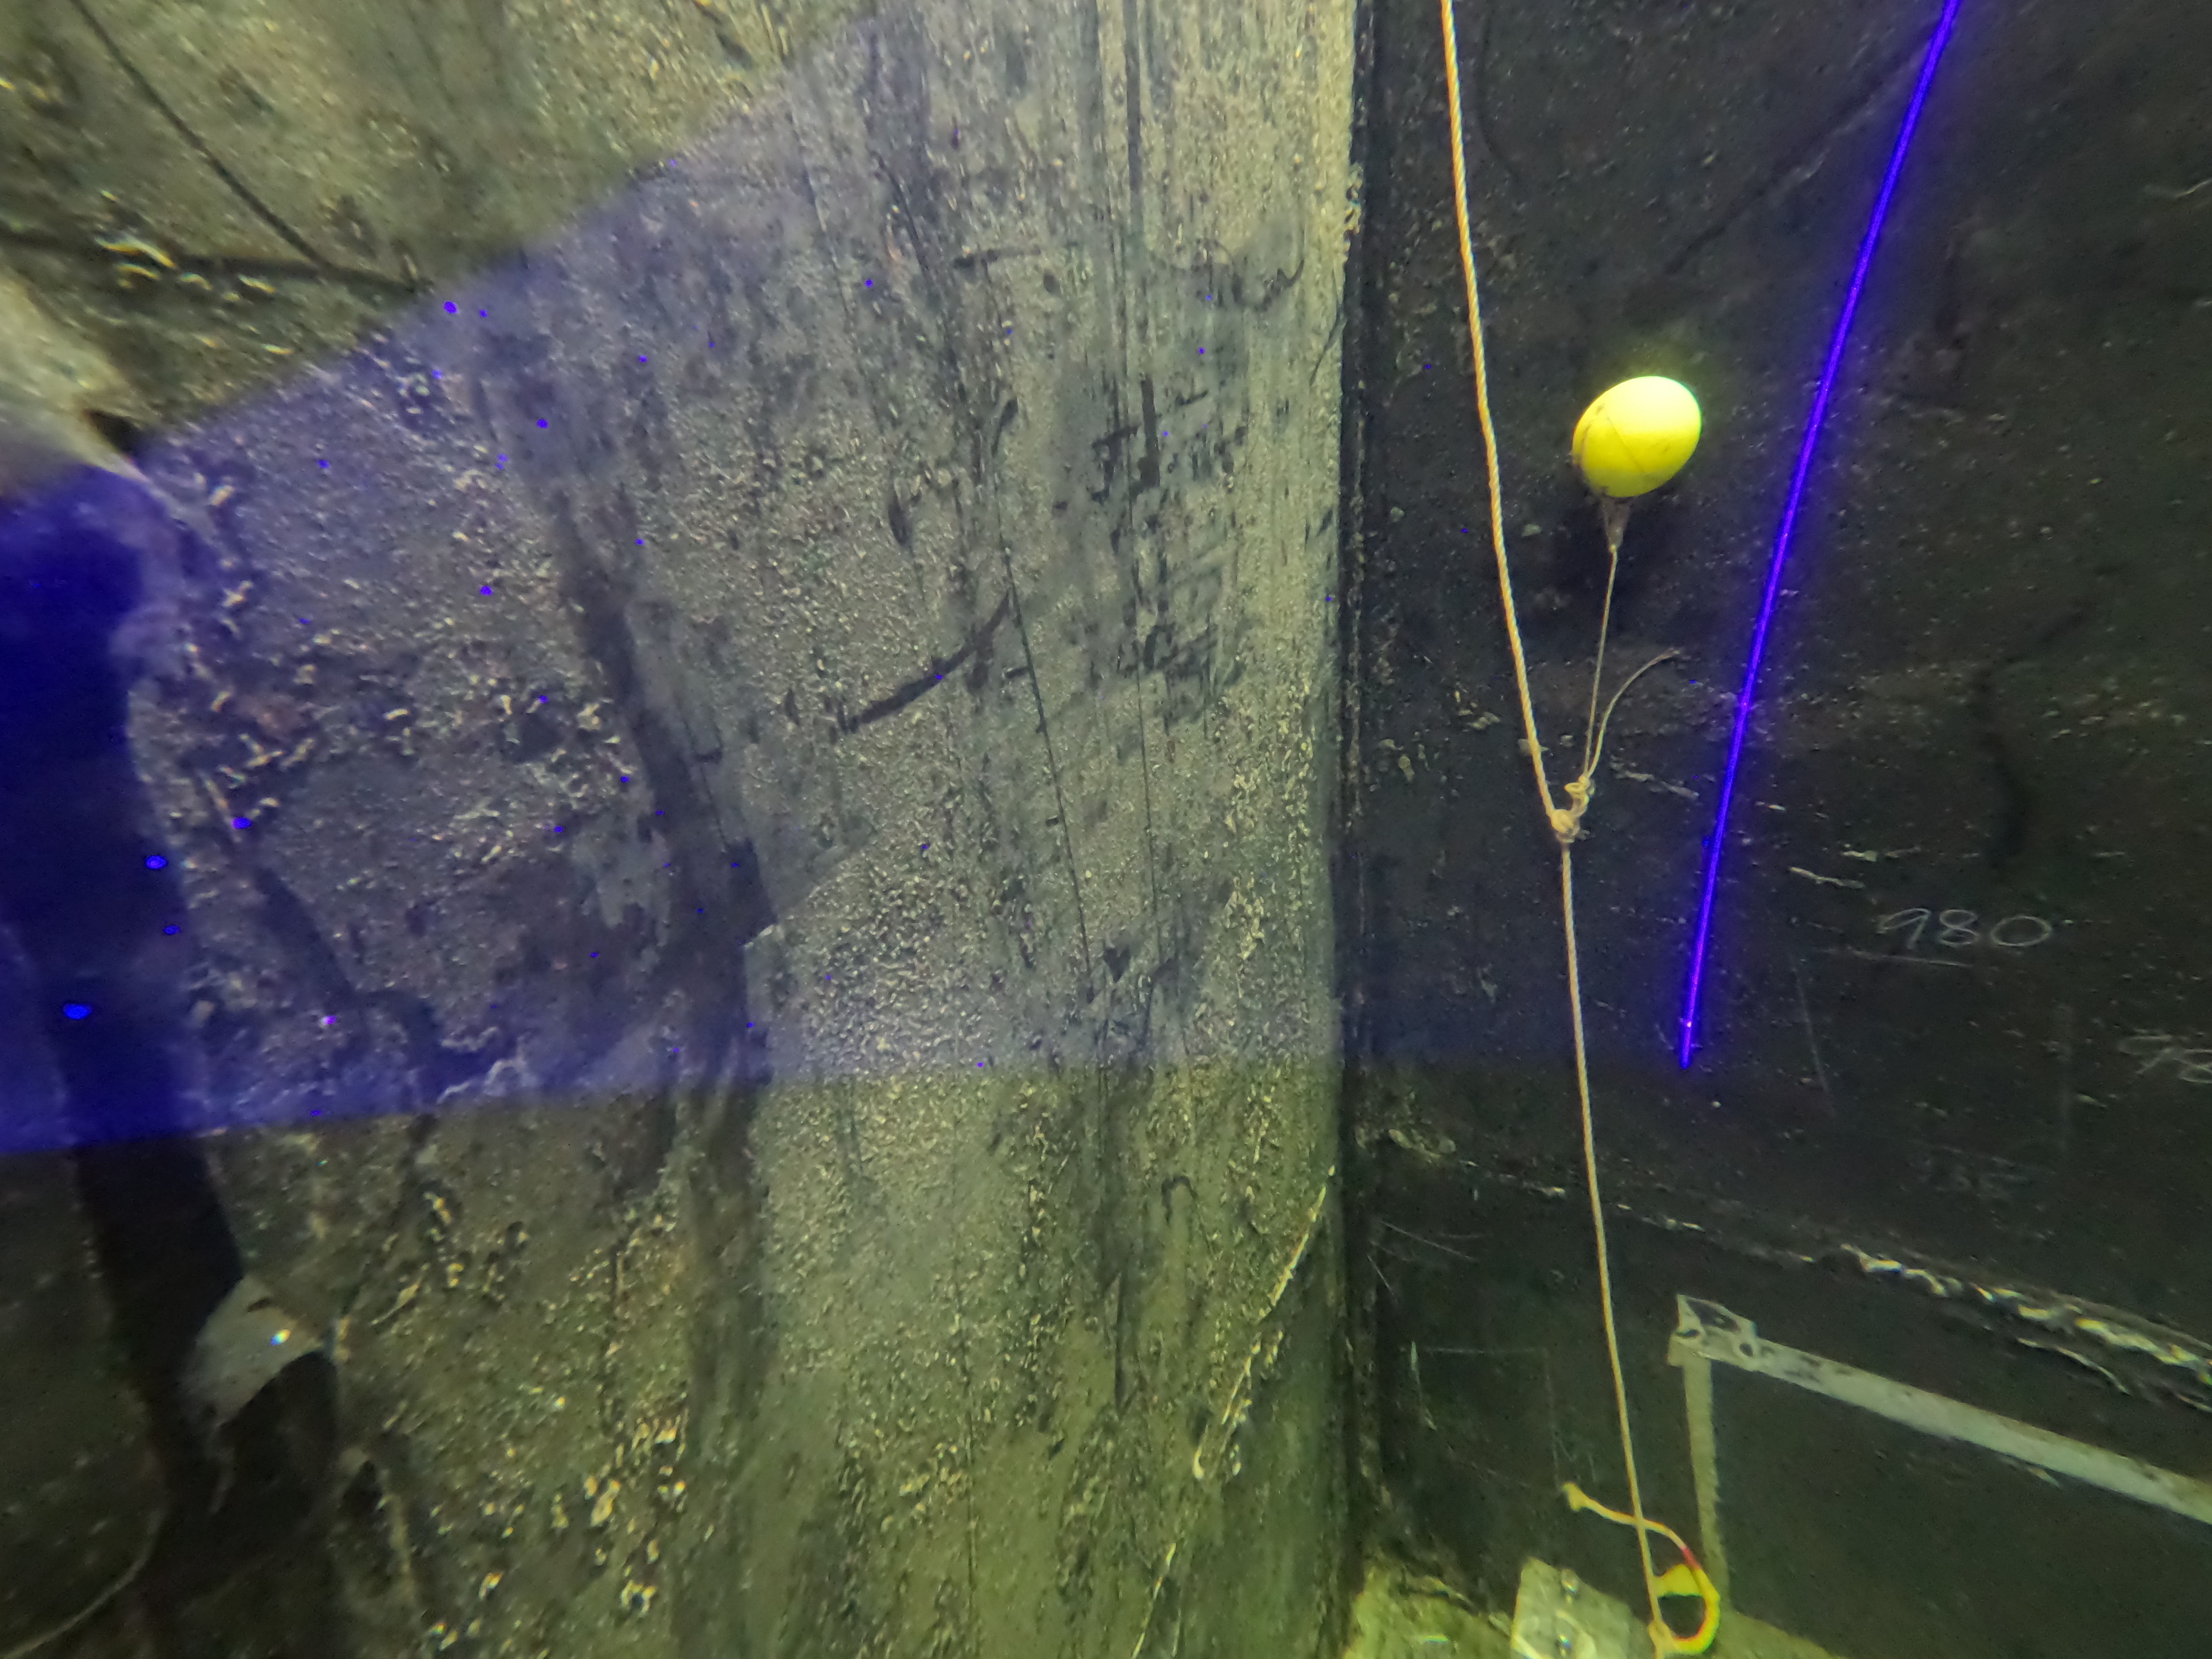

Supplement: Supplementary file 3066 [file G0031866.pdf › 12/G0031866.pdf]

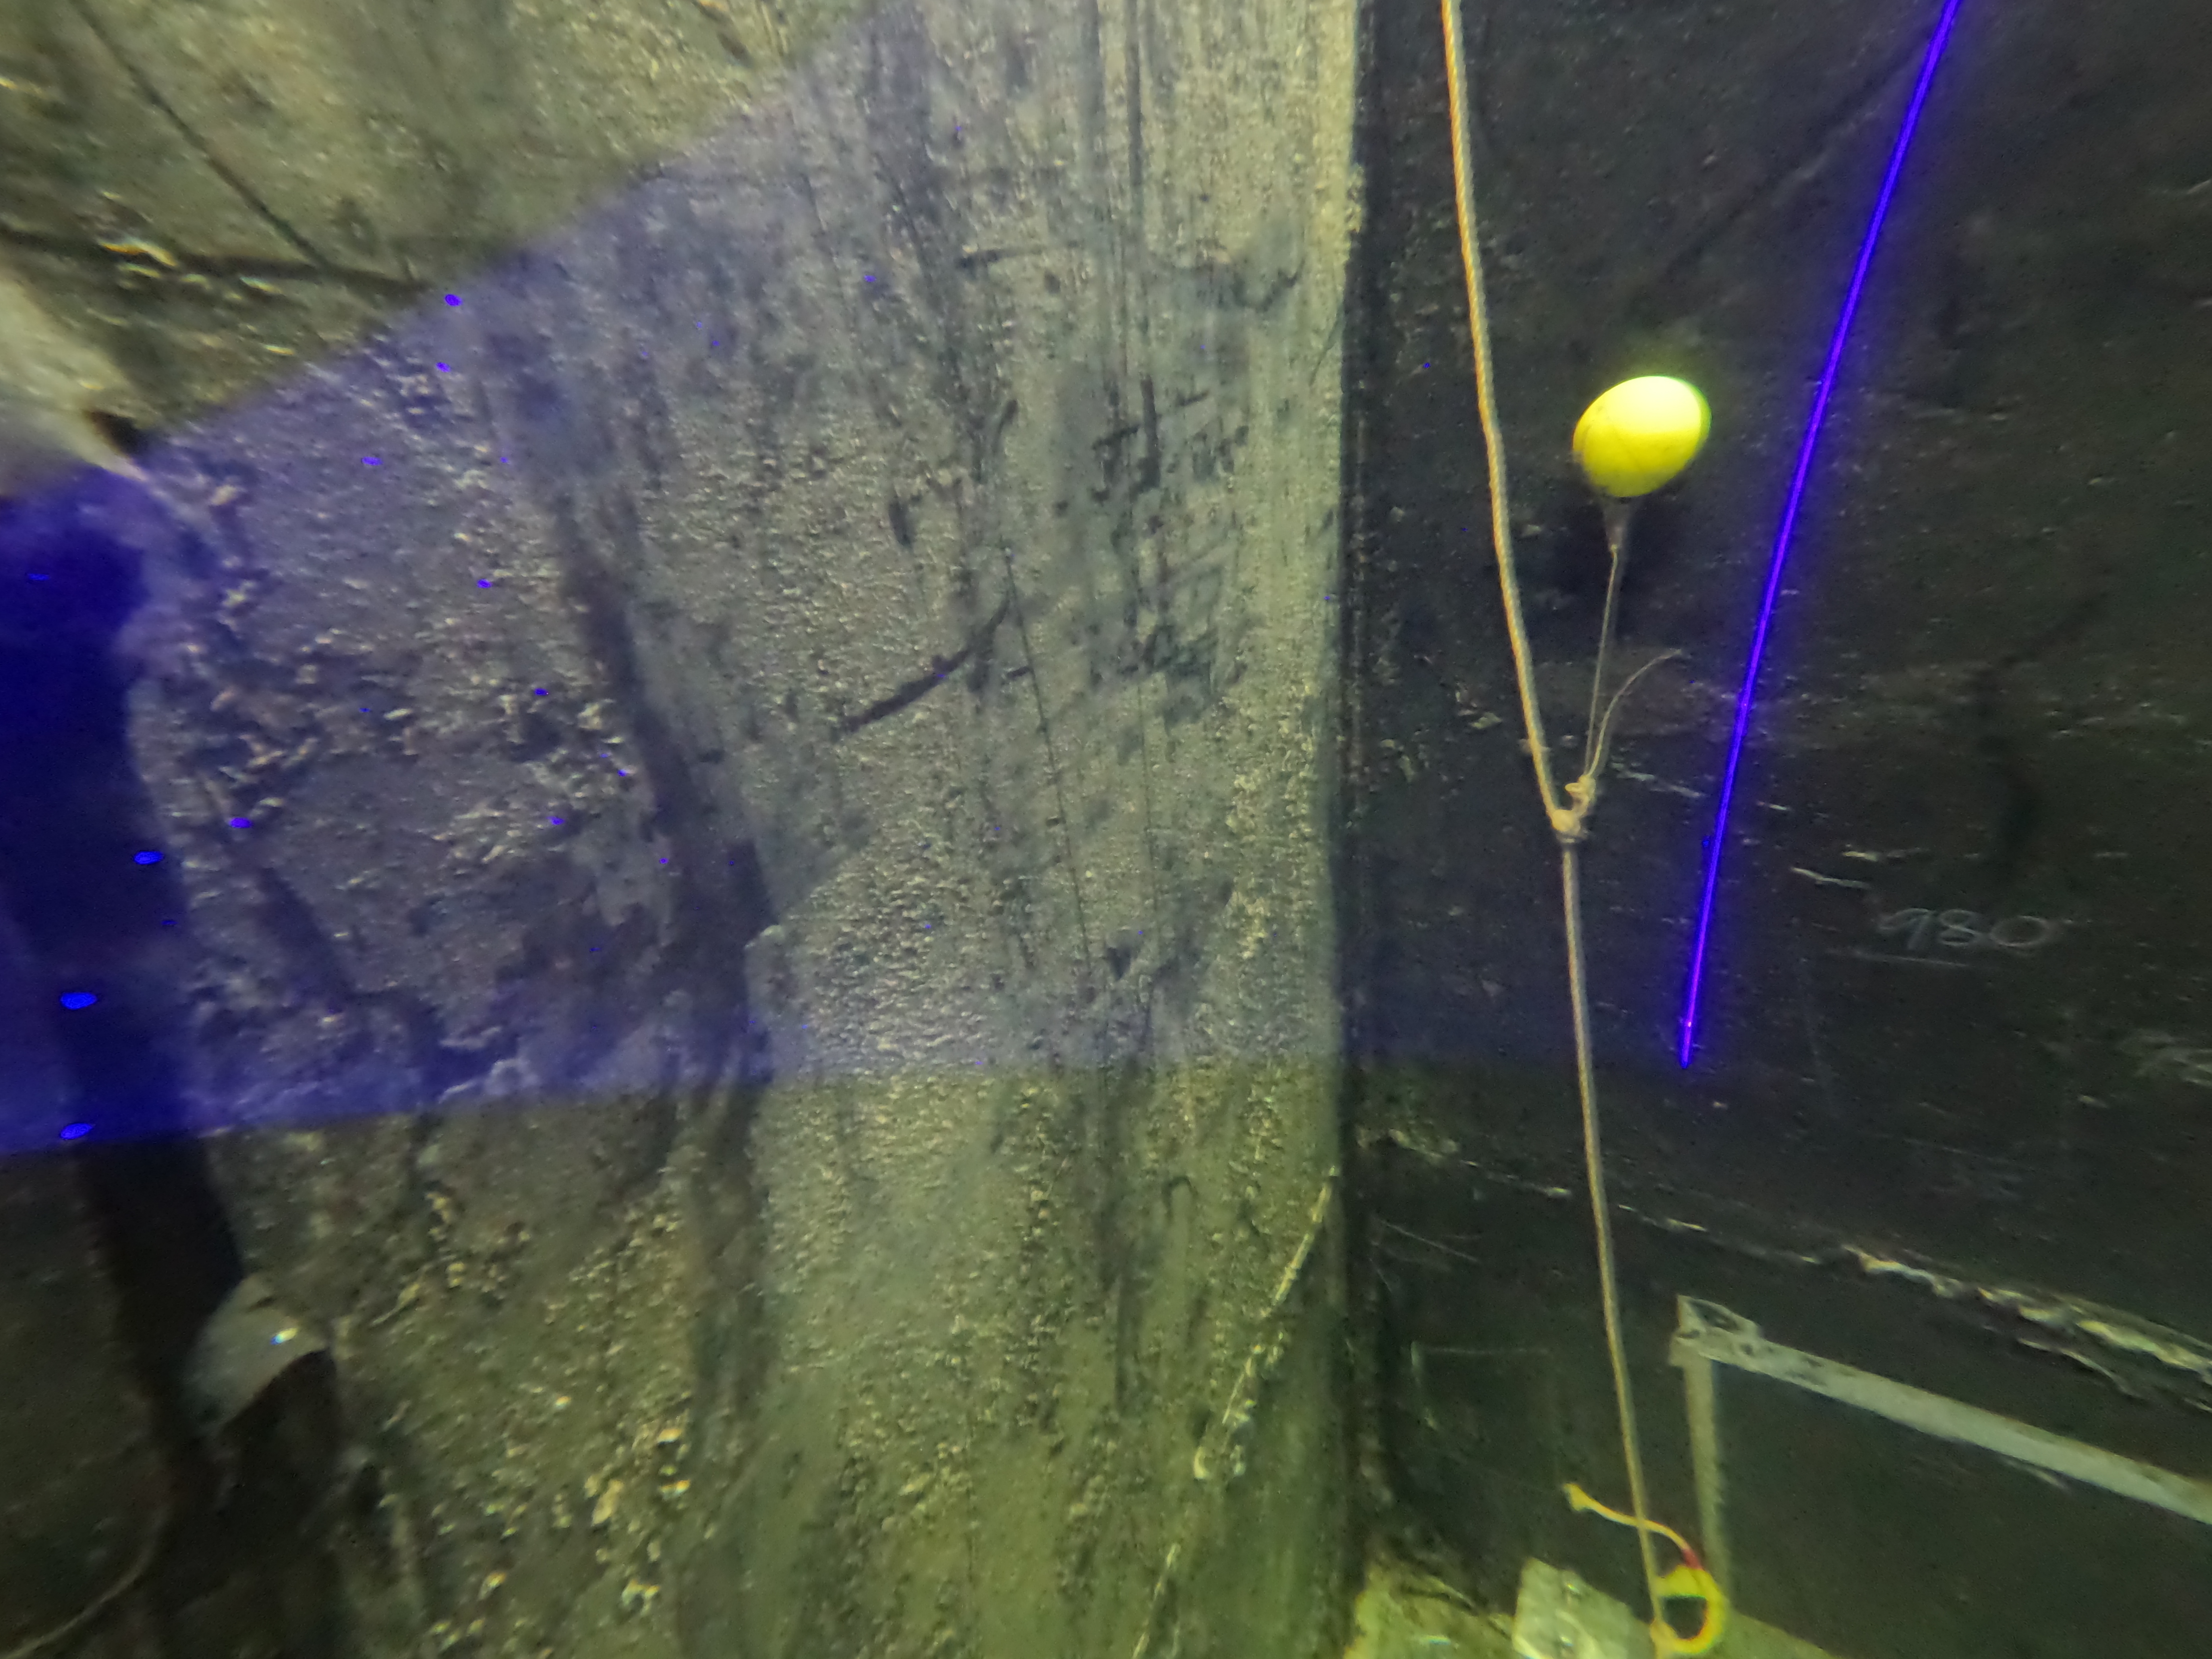

Supplement: Supplementary file 3067 [file G0031867.pdf › 12/G0031867.pdf]

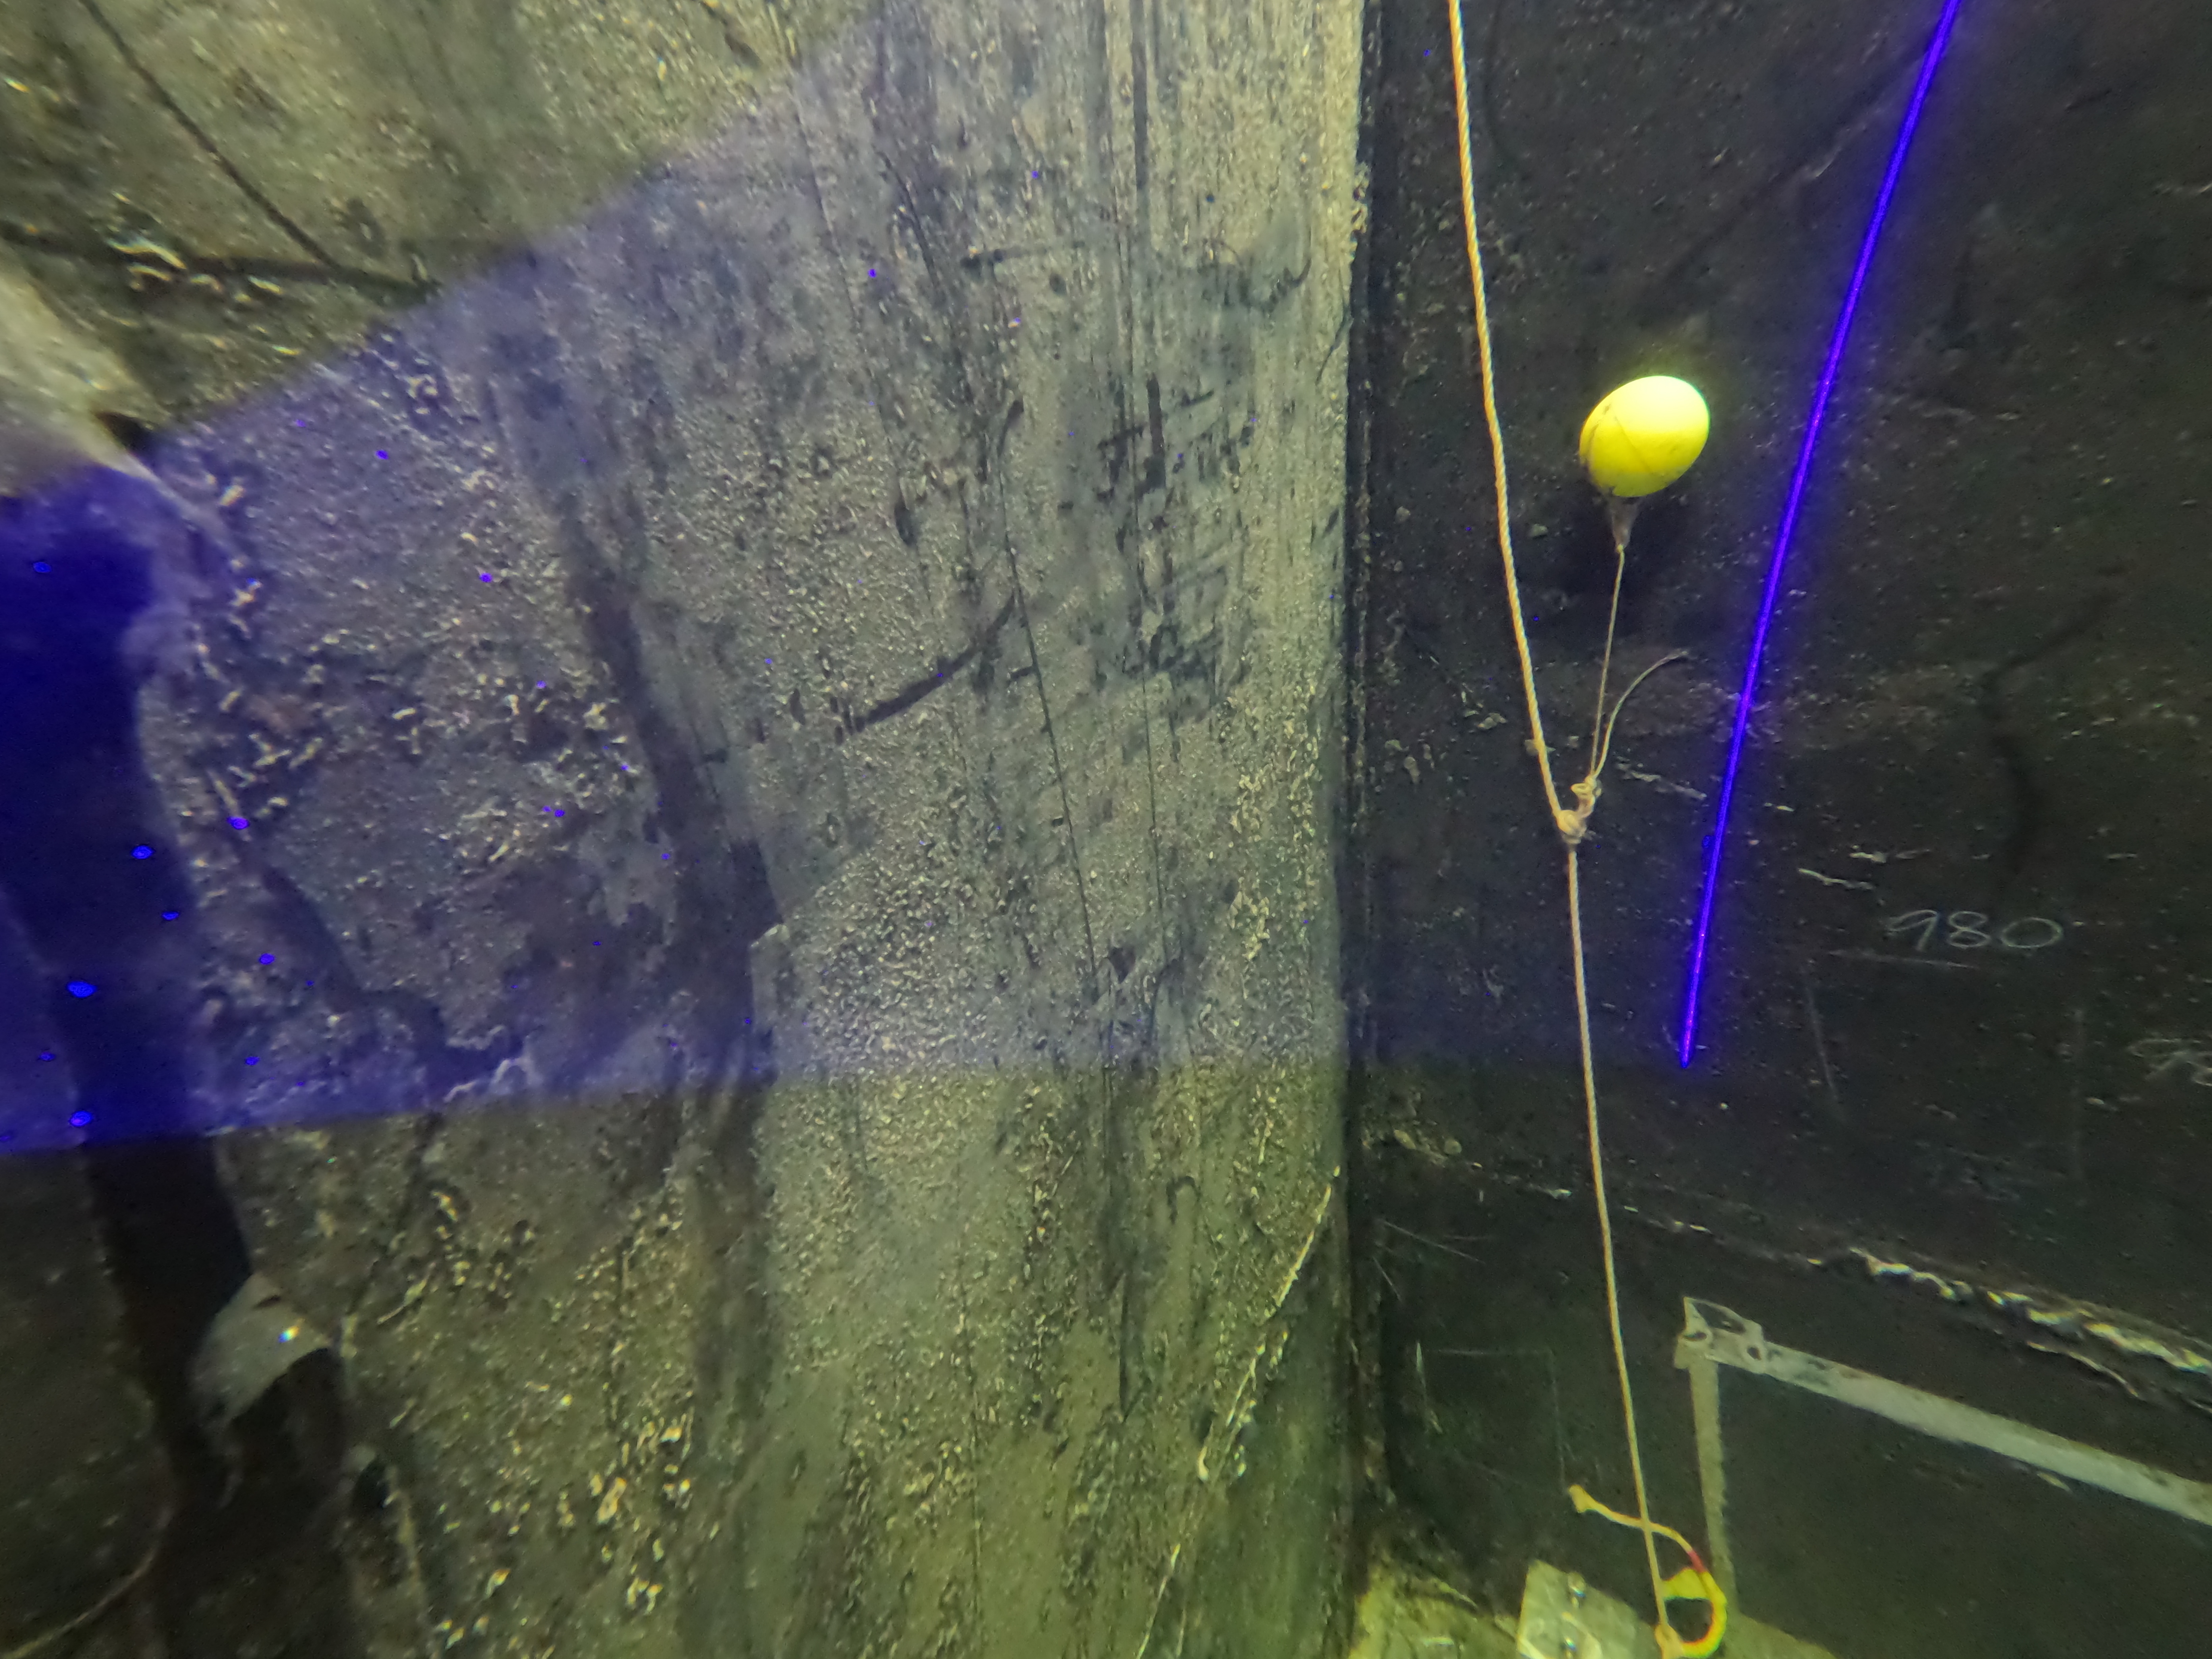

Supplement: Supplementary file 3068 [file G0031868.pdf › 12/G0031868.pdf]

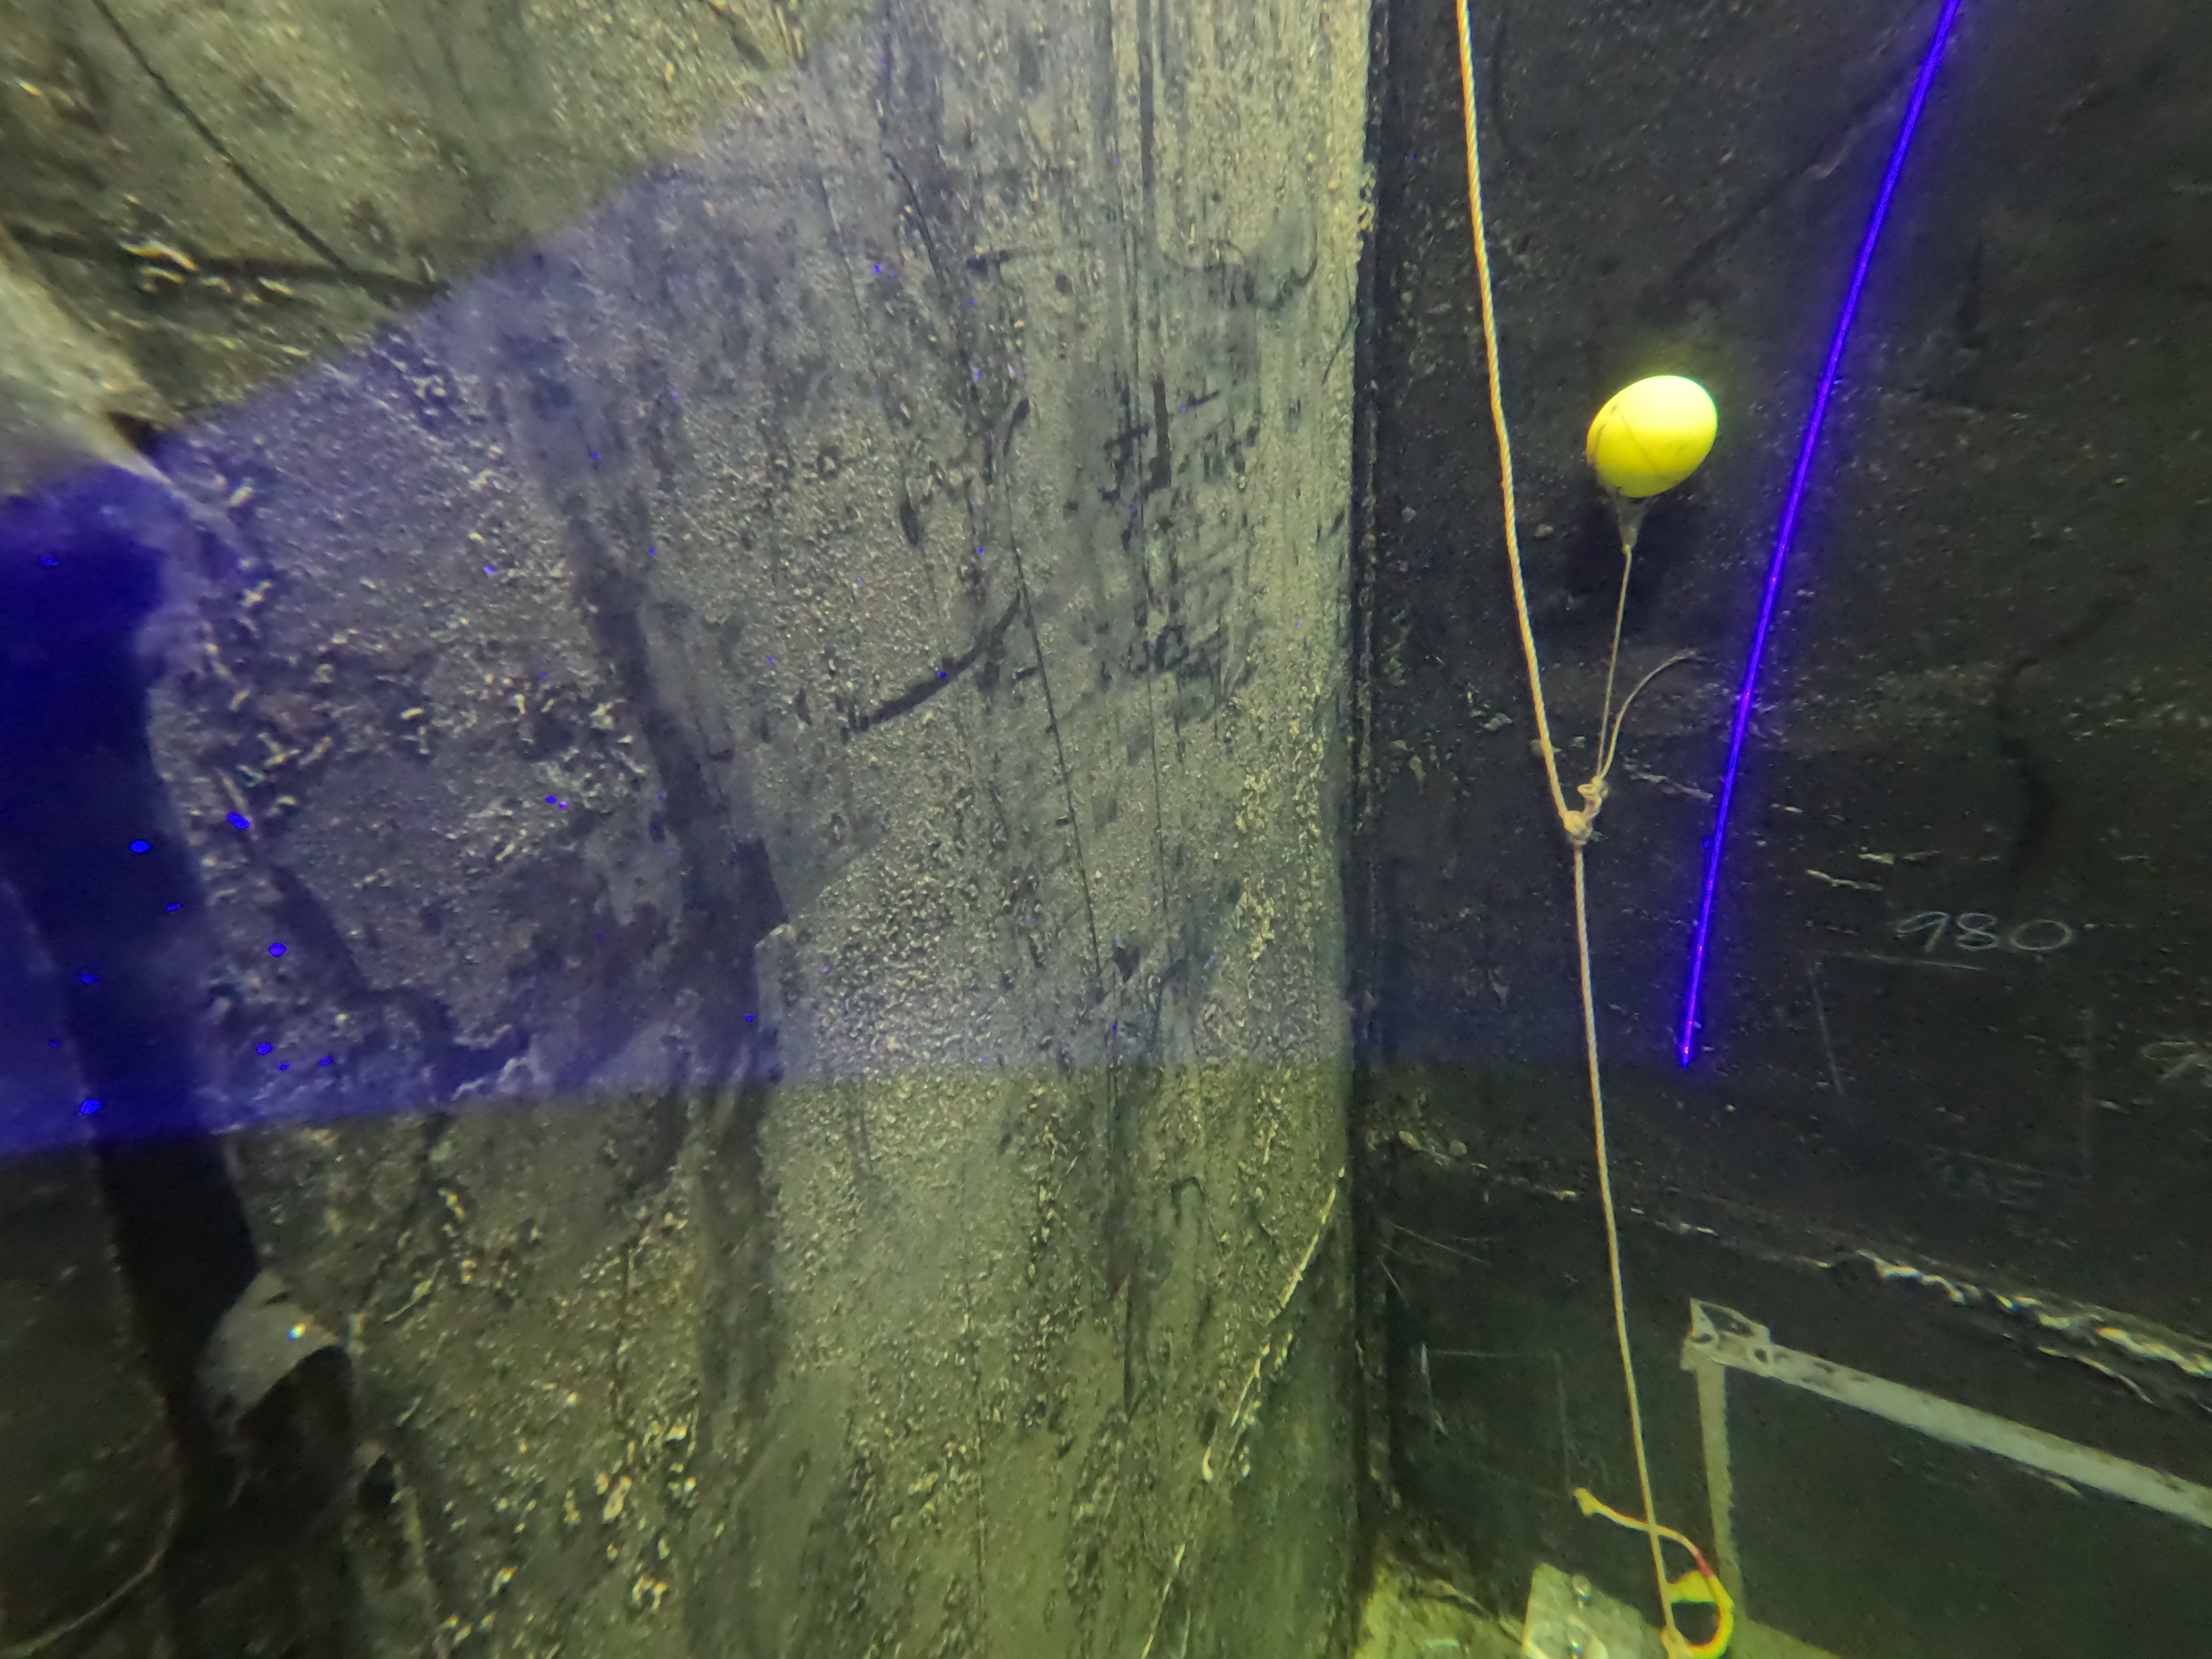

Supplement: Supplementary file 3069 [file G0031869.pdf › 12/G0031869.pdf]

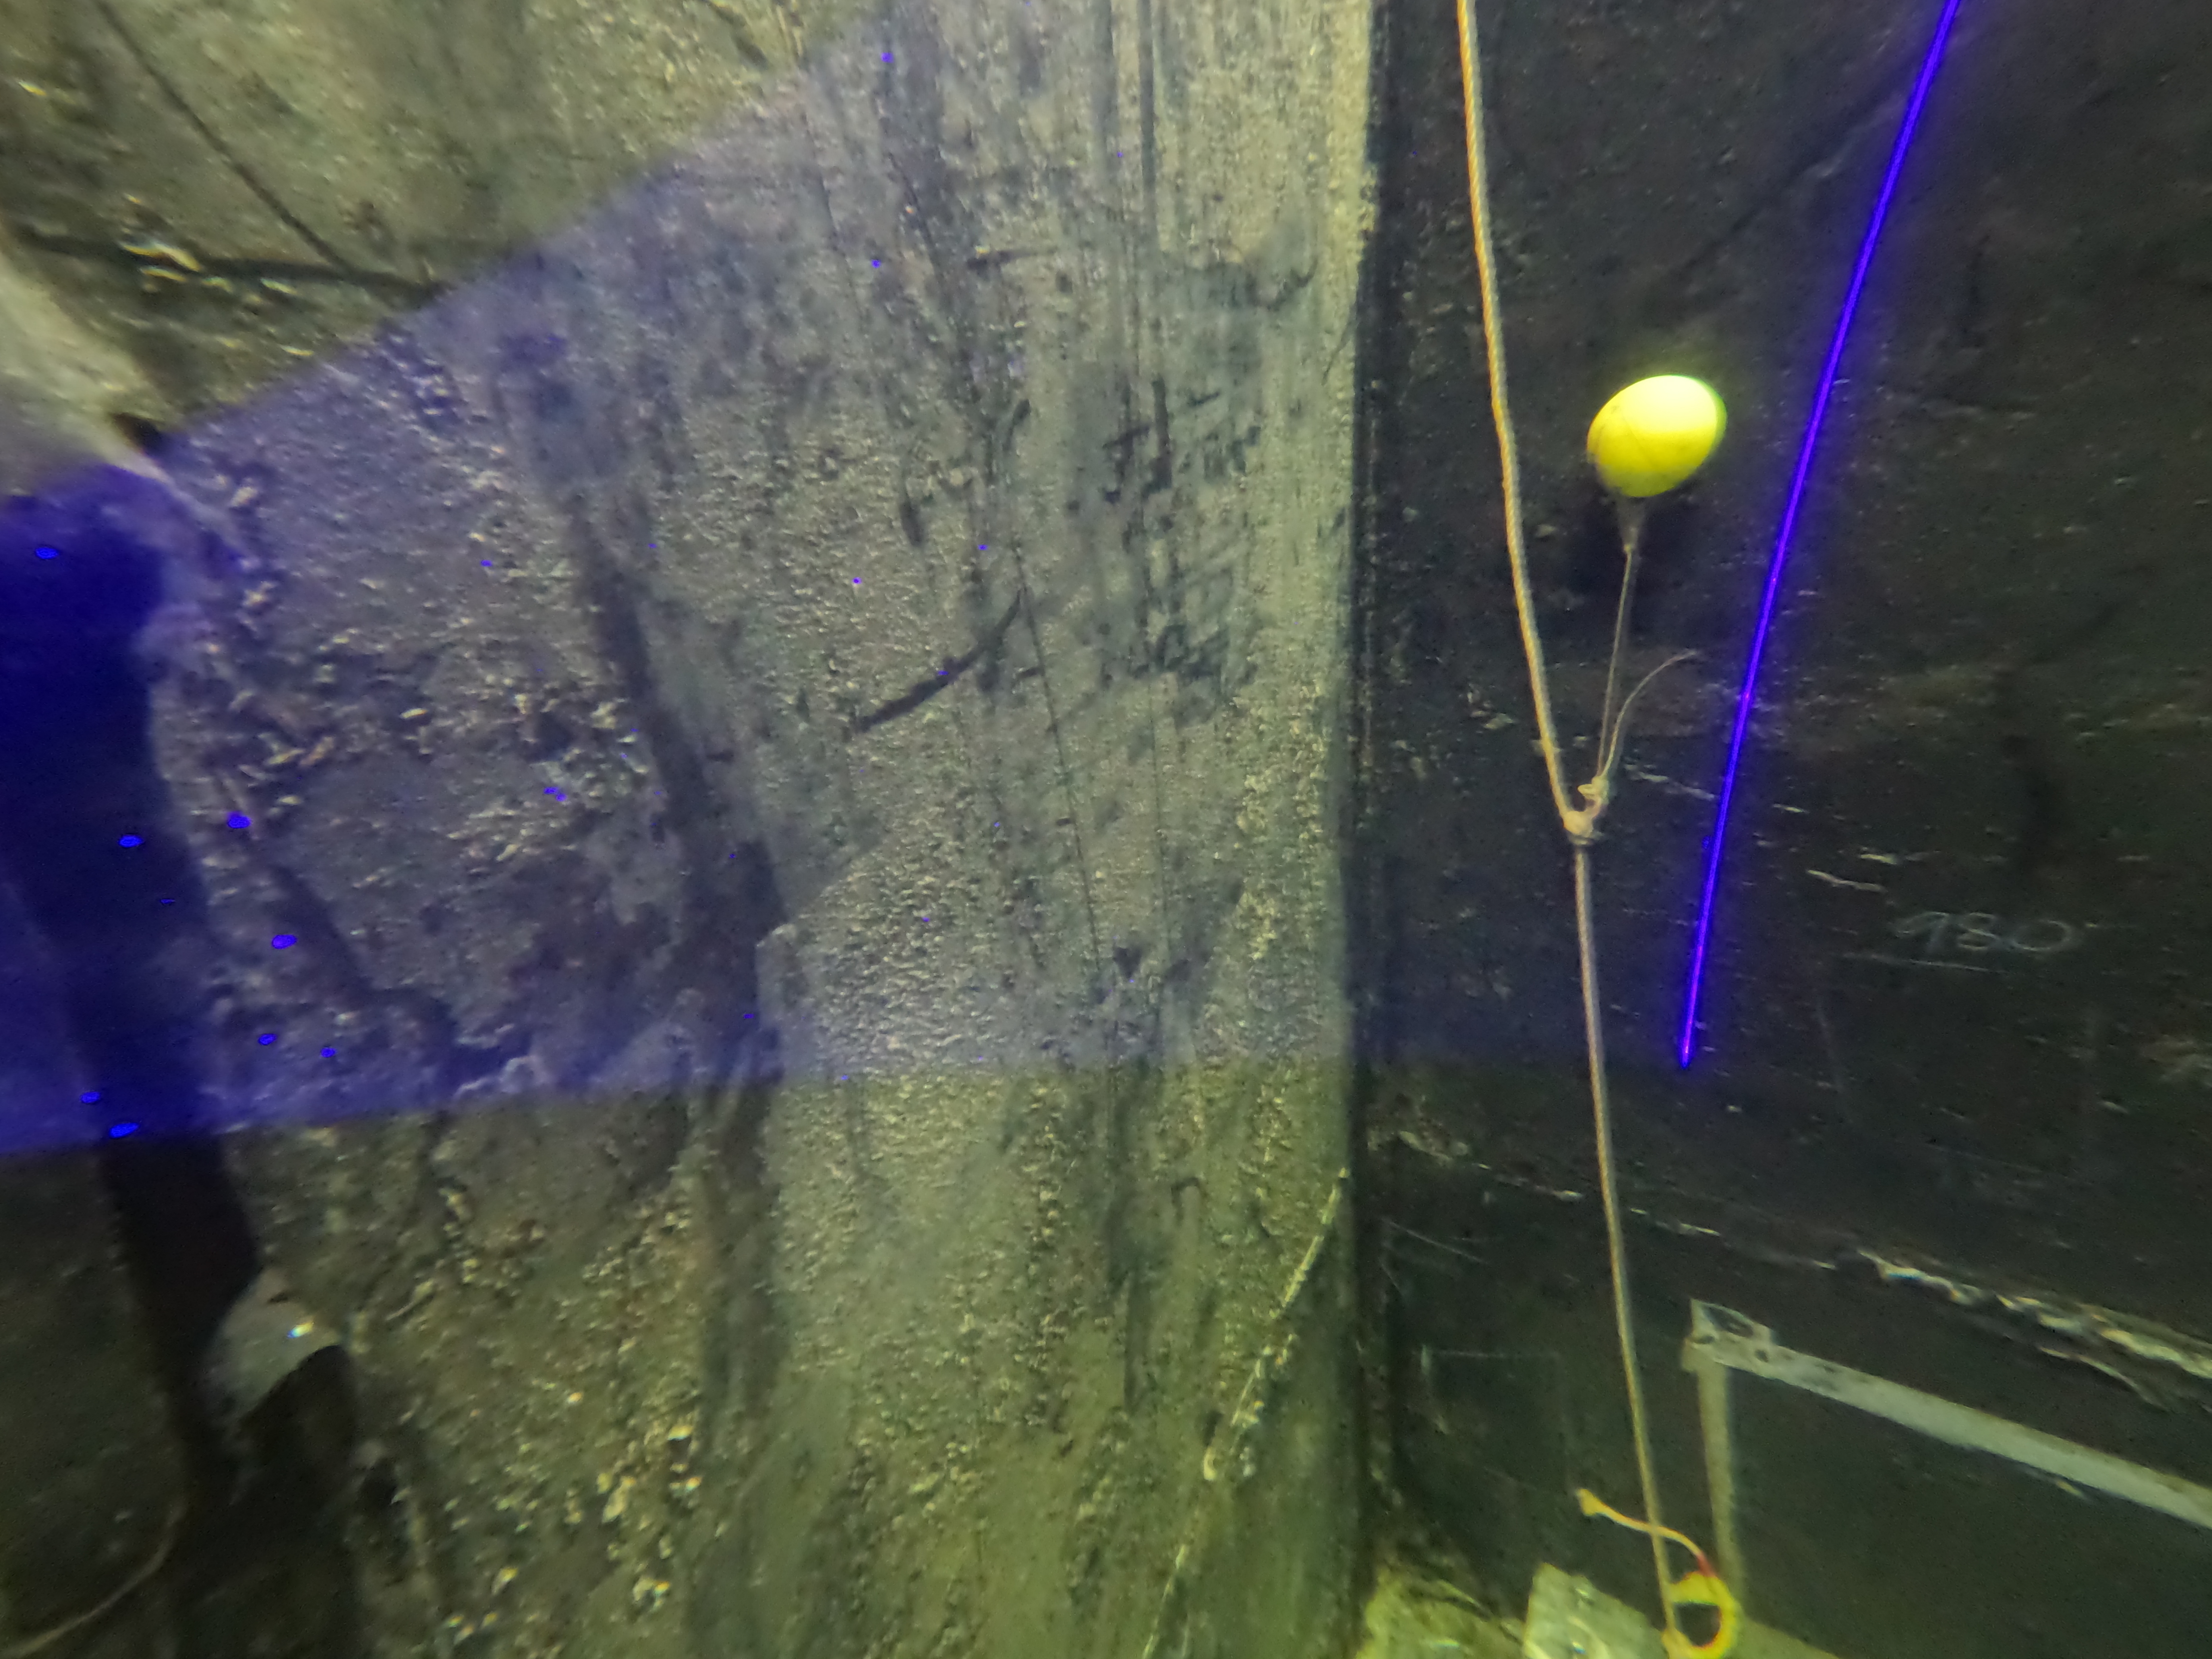

Supplement: Supplementary file 3070 [file G0031870.pdf › 12/G0031870.pdf]

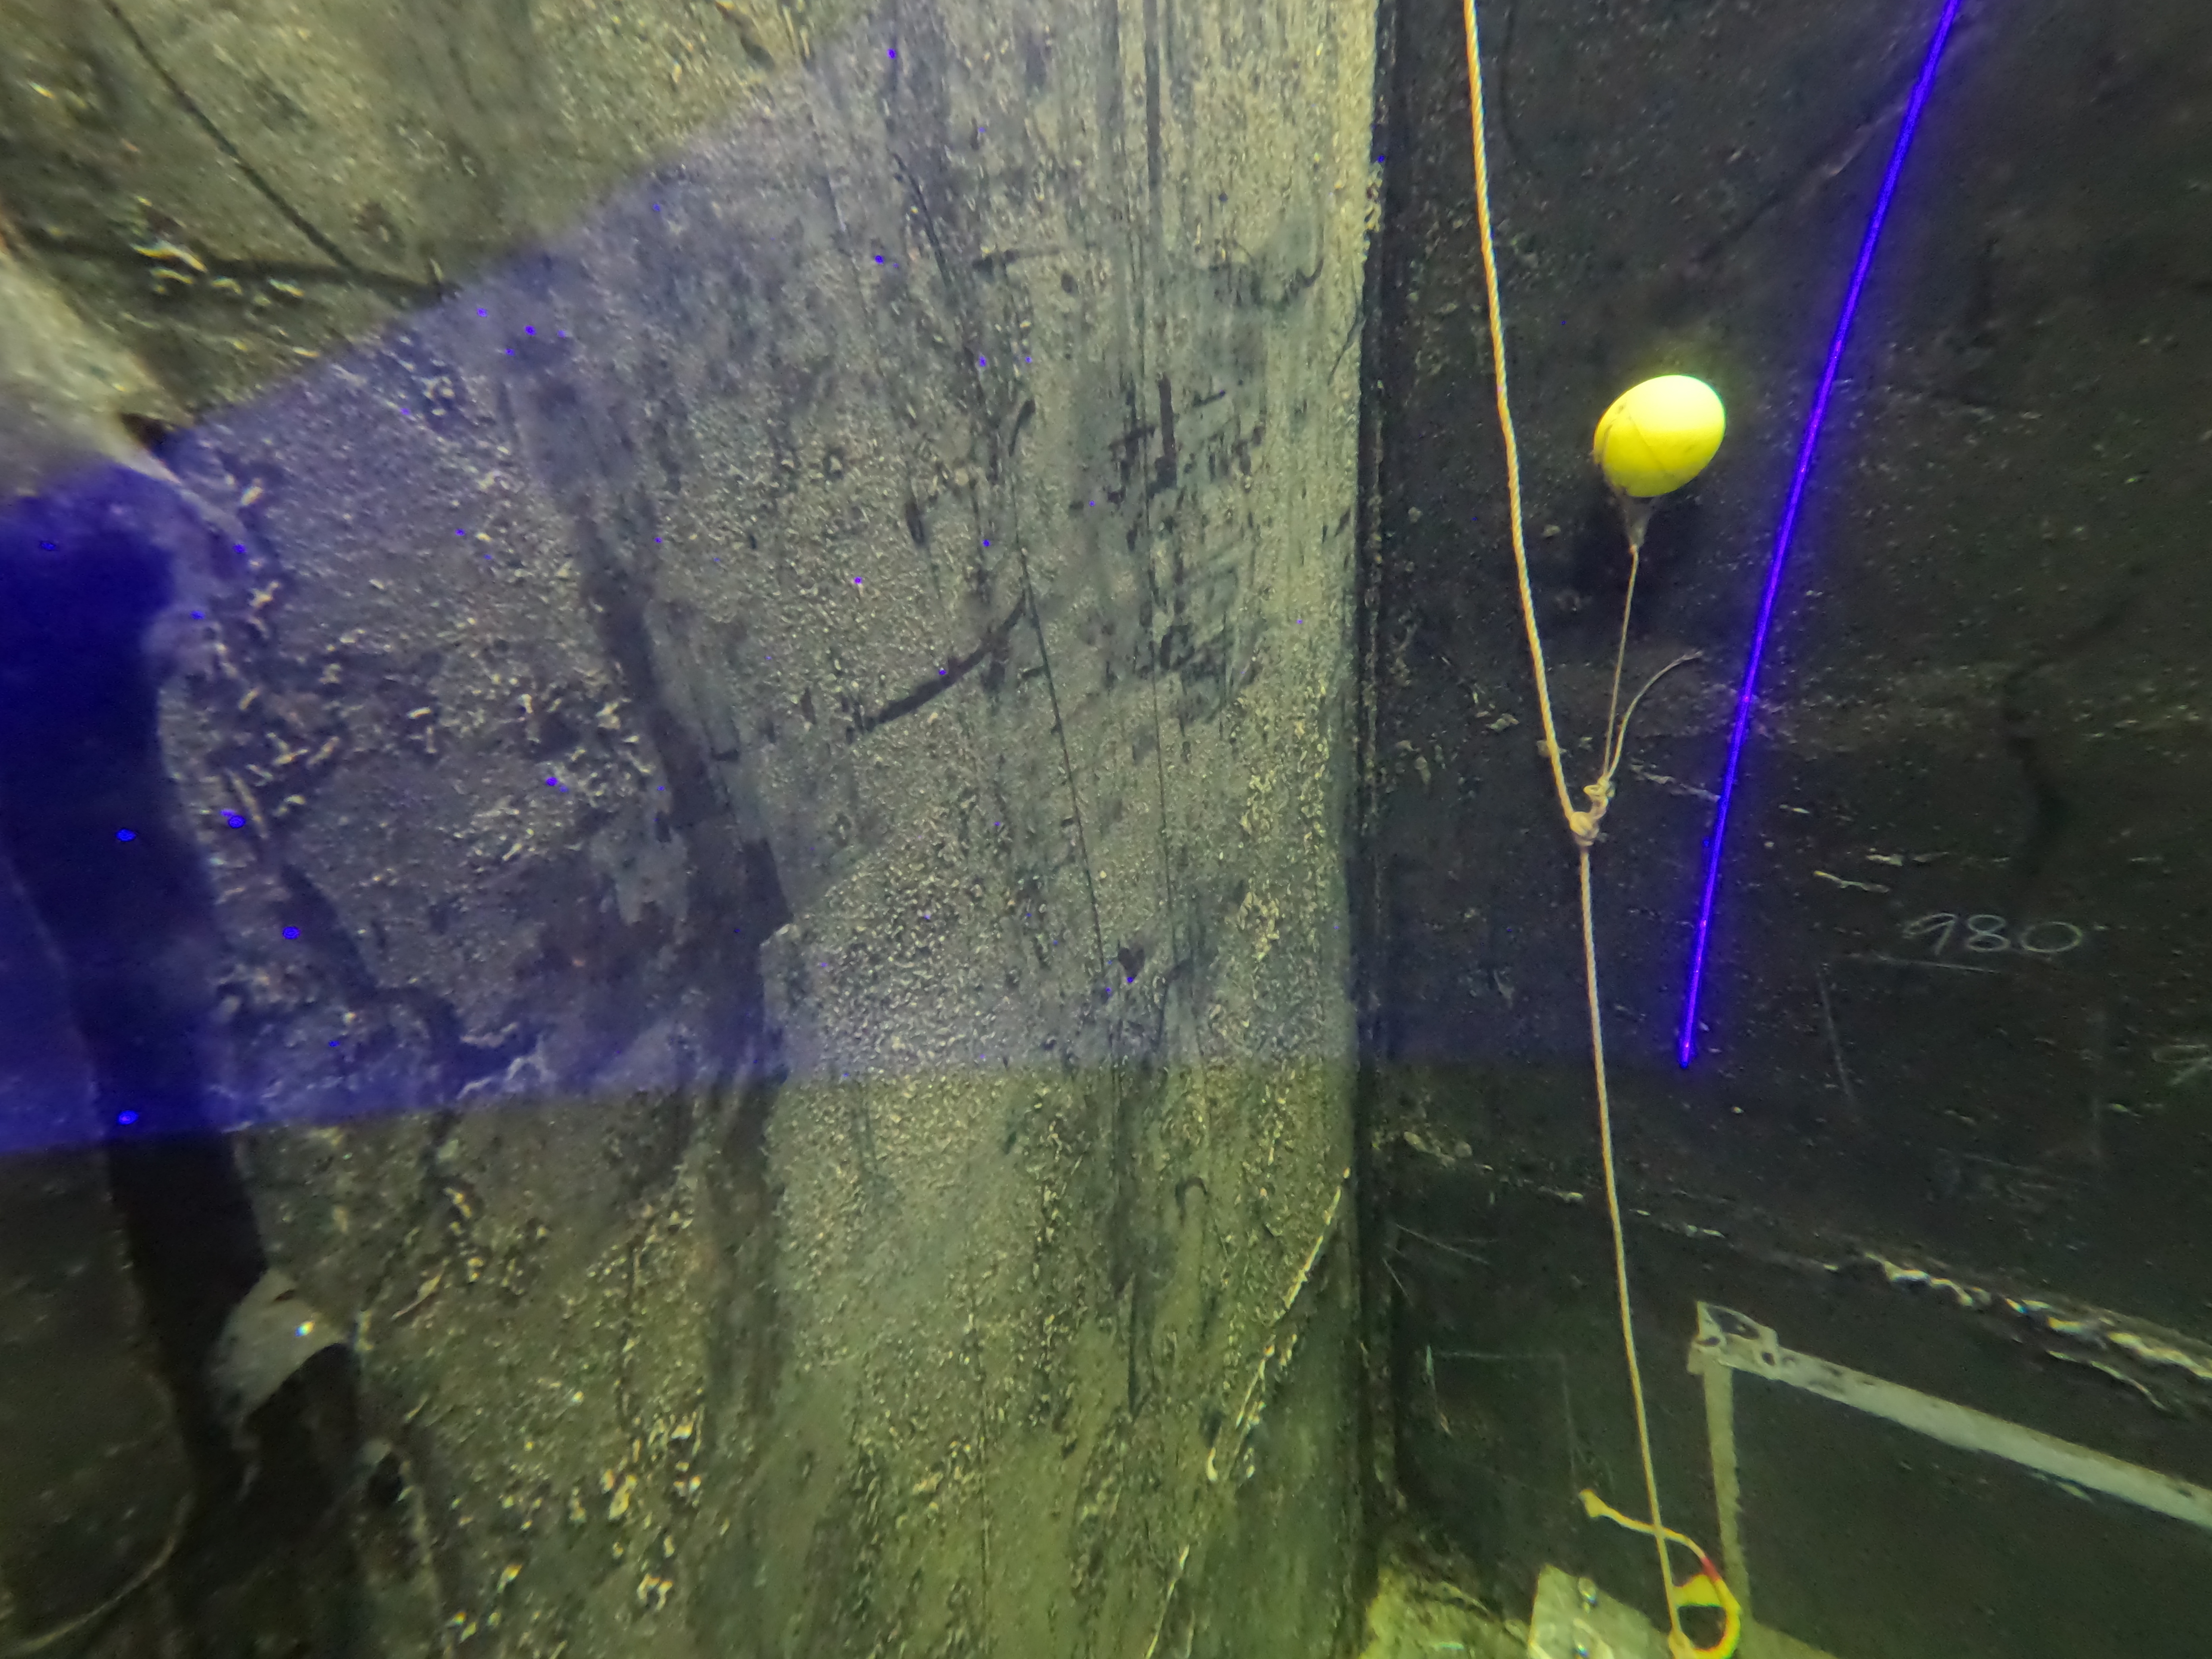

980

Supplement: Supplementary file 3071 [file G0031871.pdf › 12/G0031871.pdf]

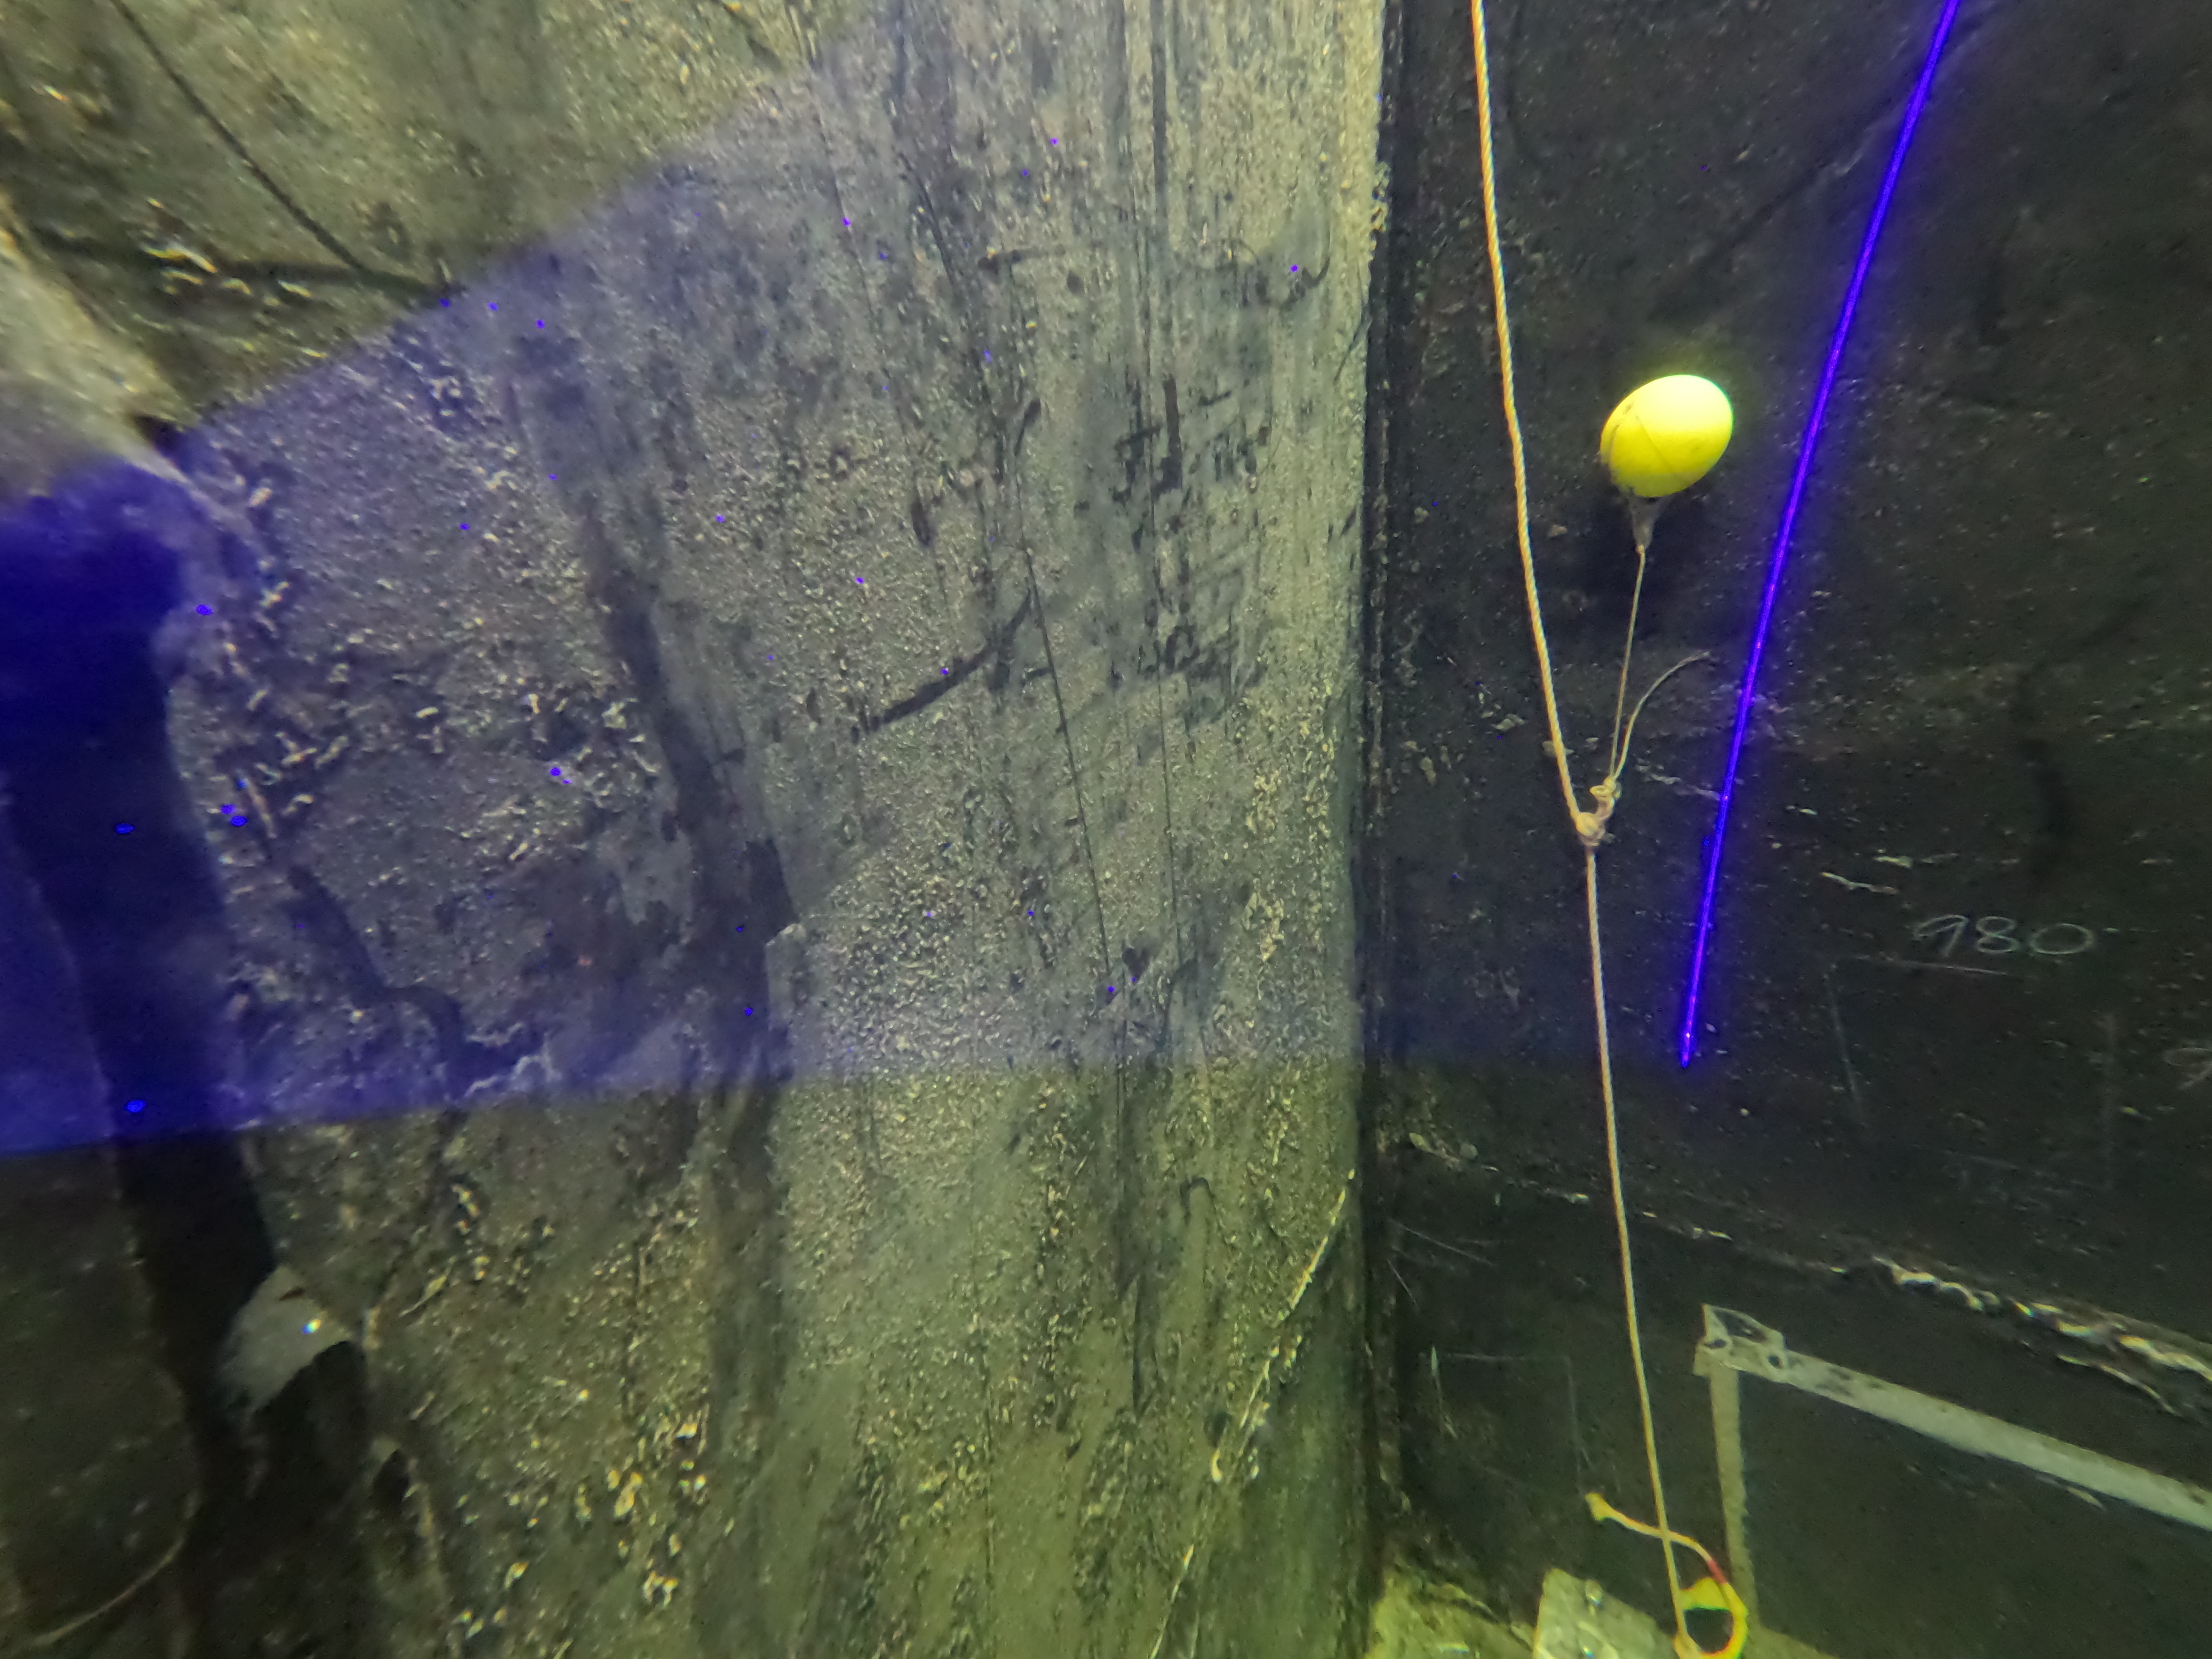

980

Supplement: Supplementary file 3072 [file G0031872.pdf › 12/G0031872.pdf]

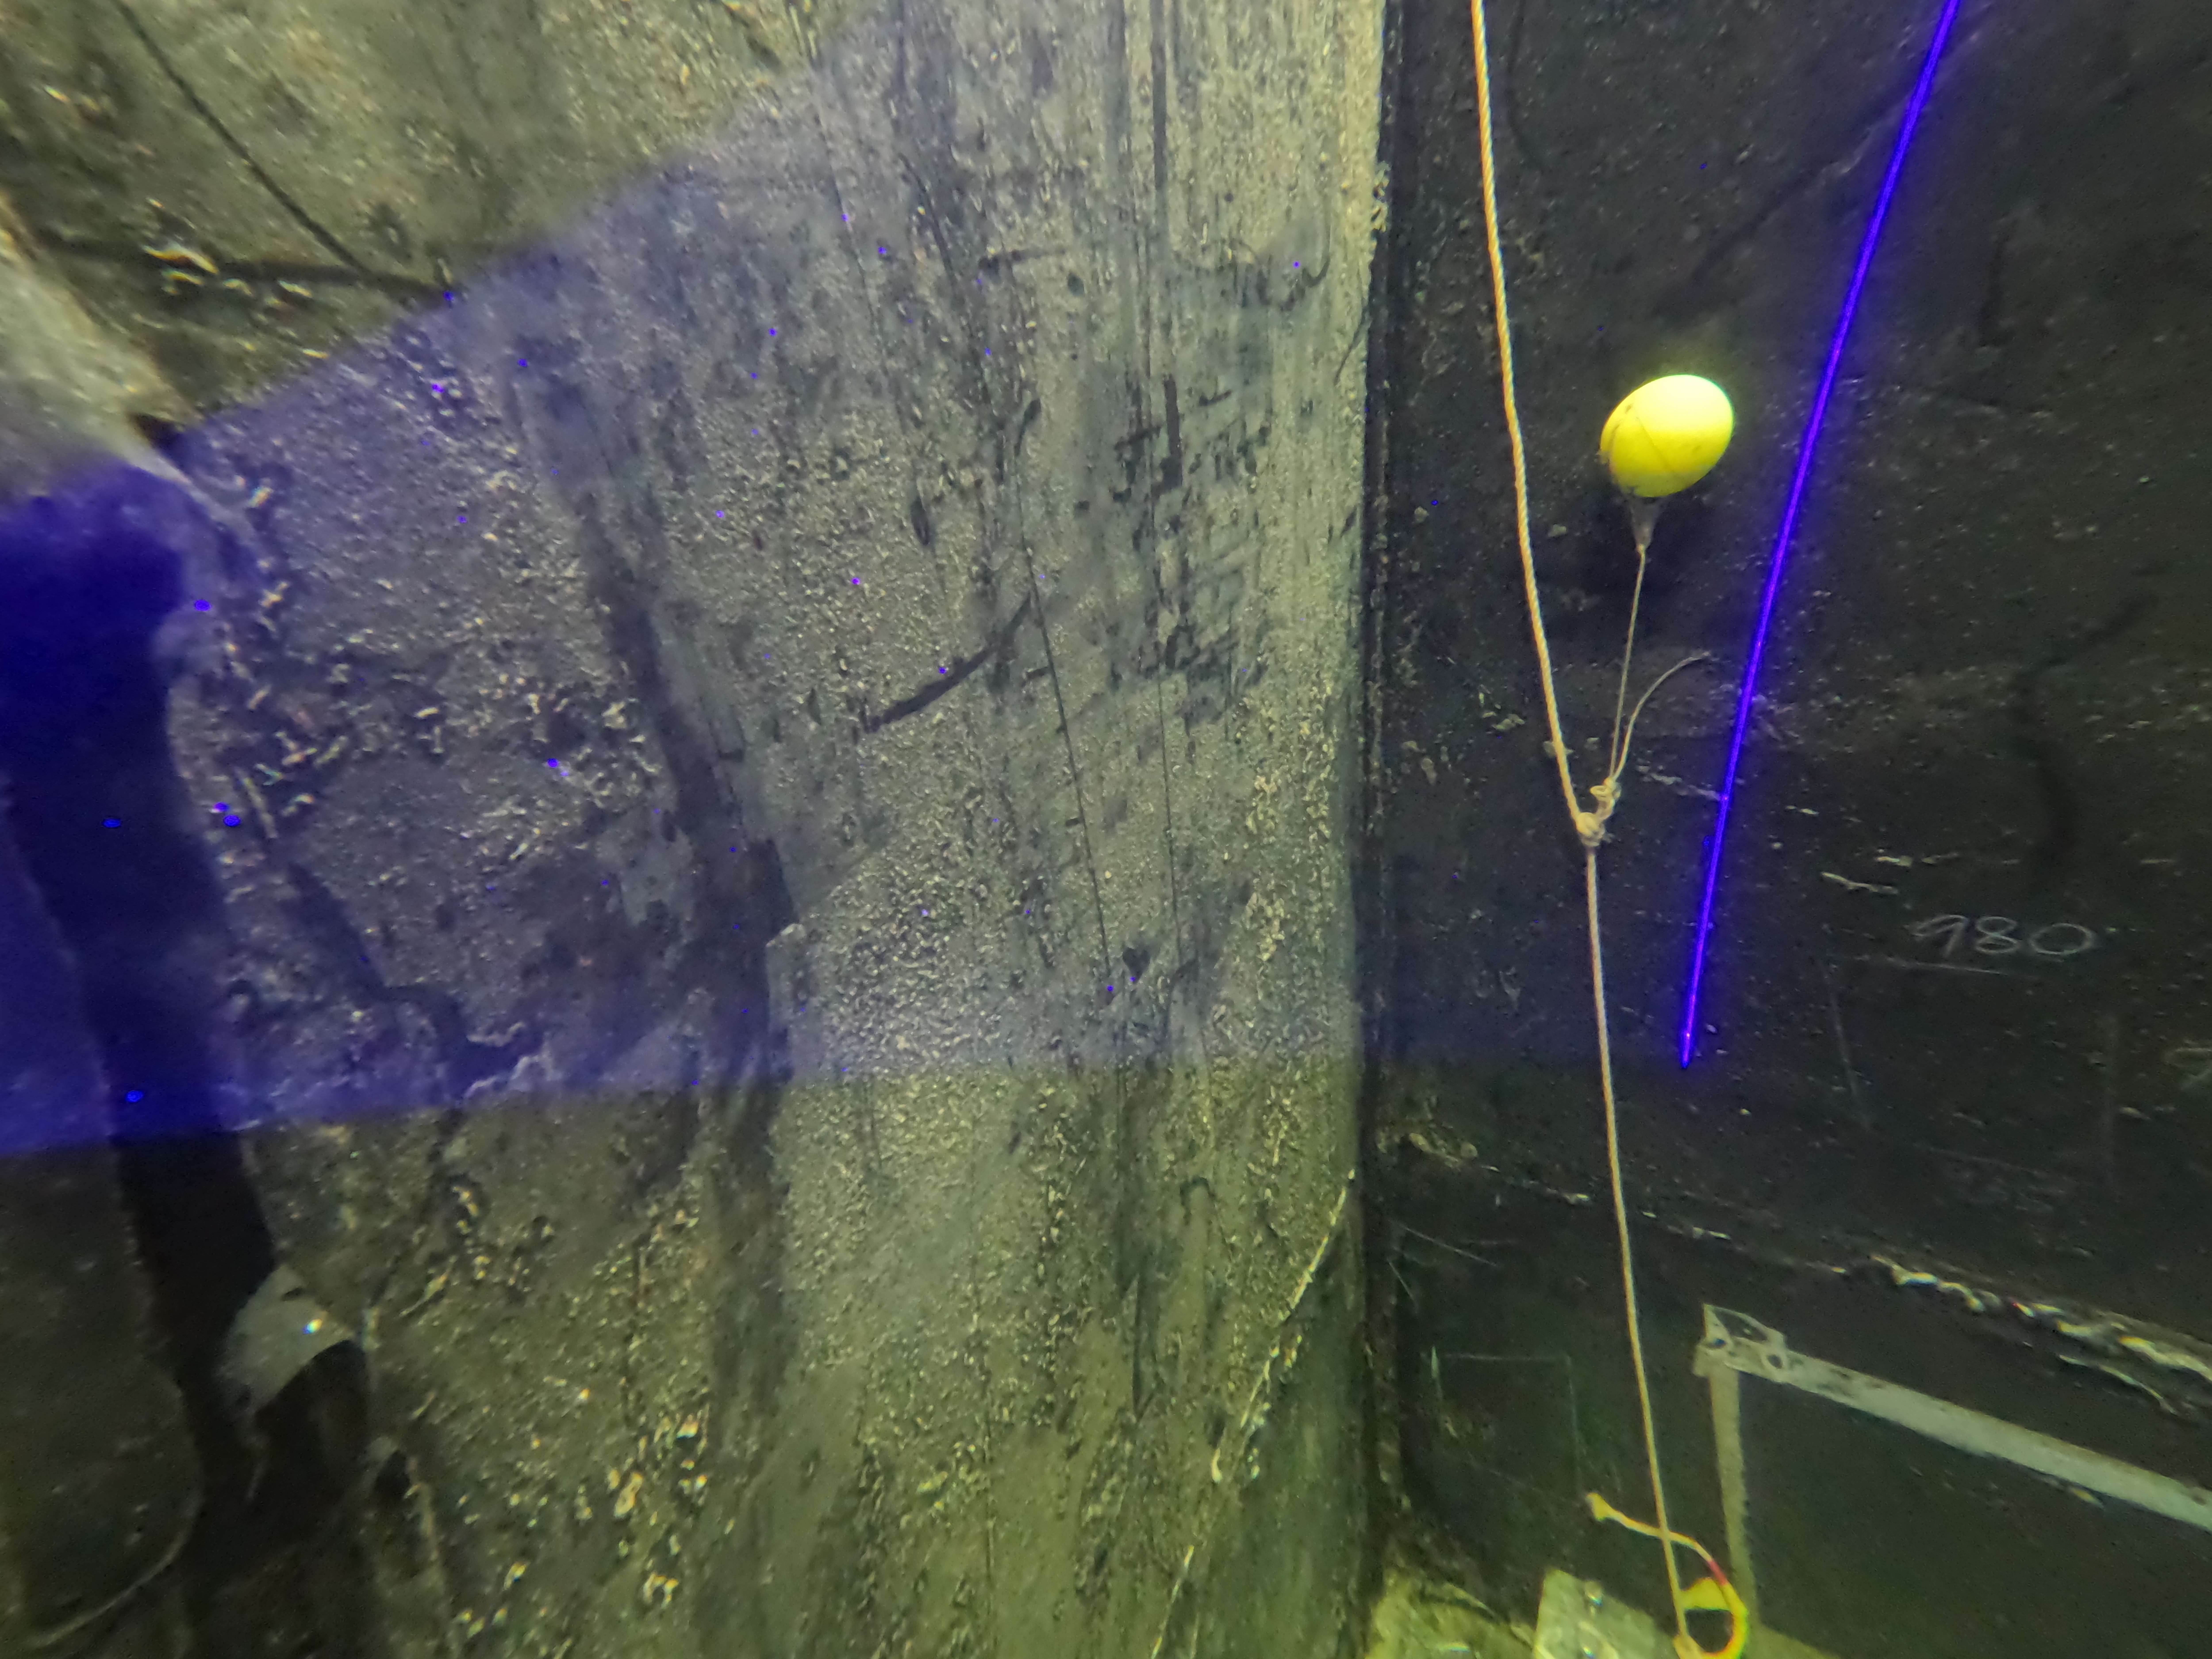

Supplement: Supplementary file 3073 [file G0031873.pdf › 12/G0031873.pdf]

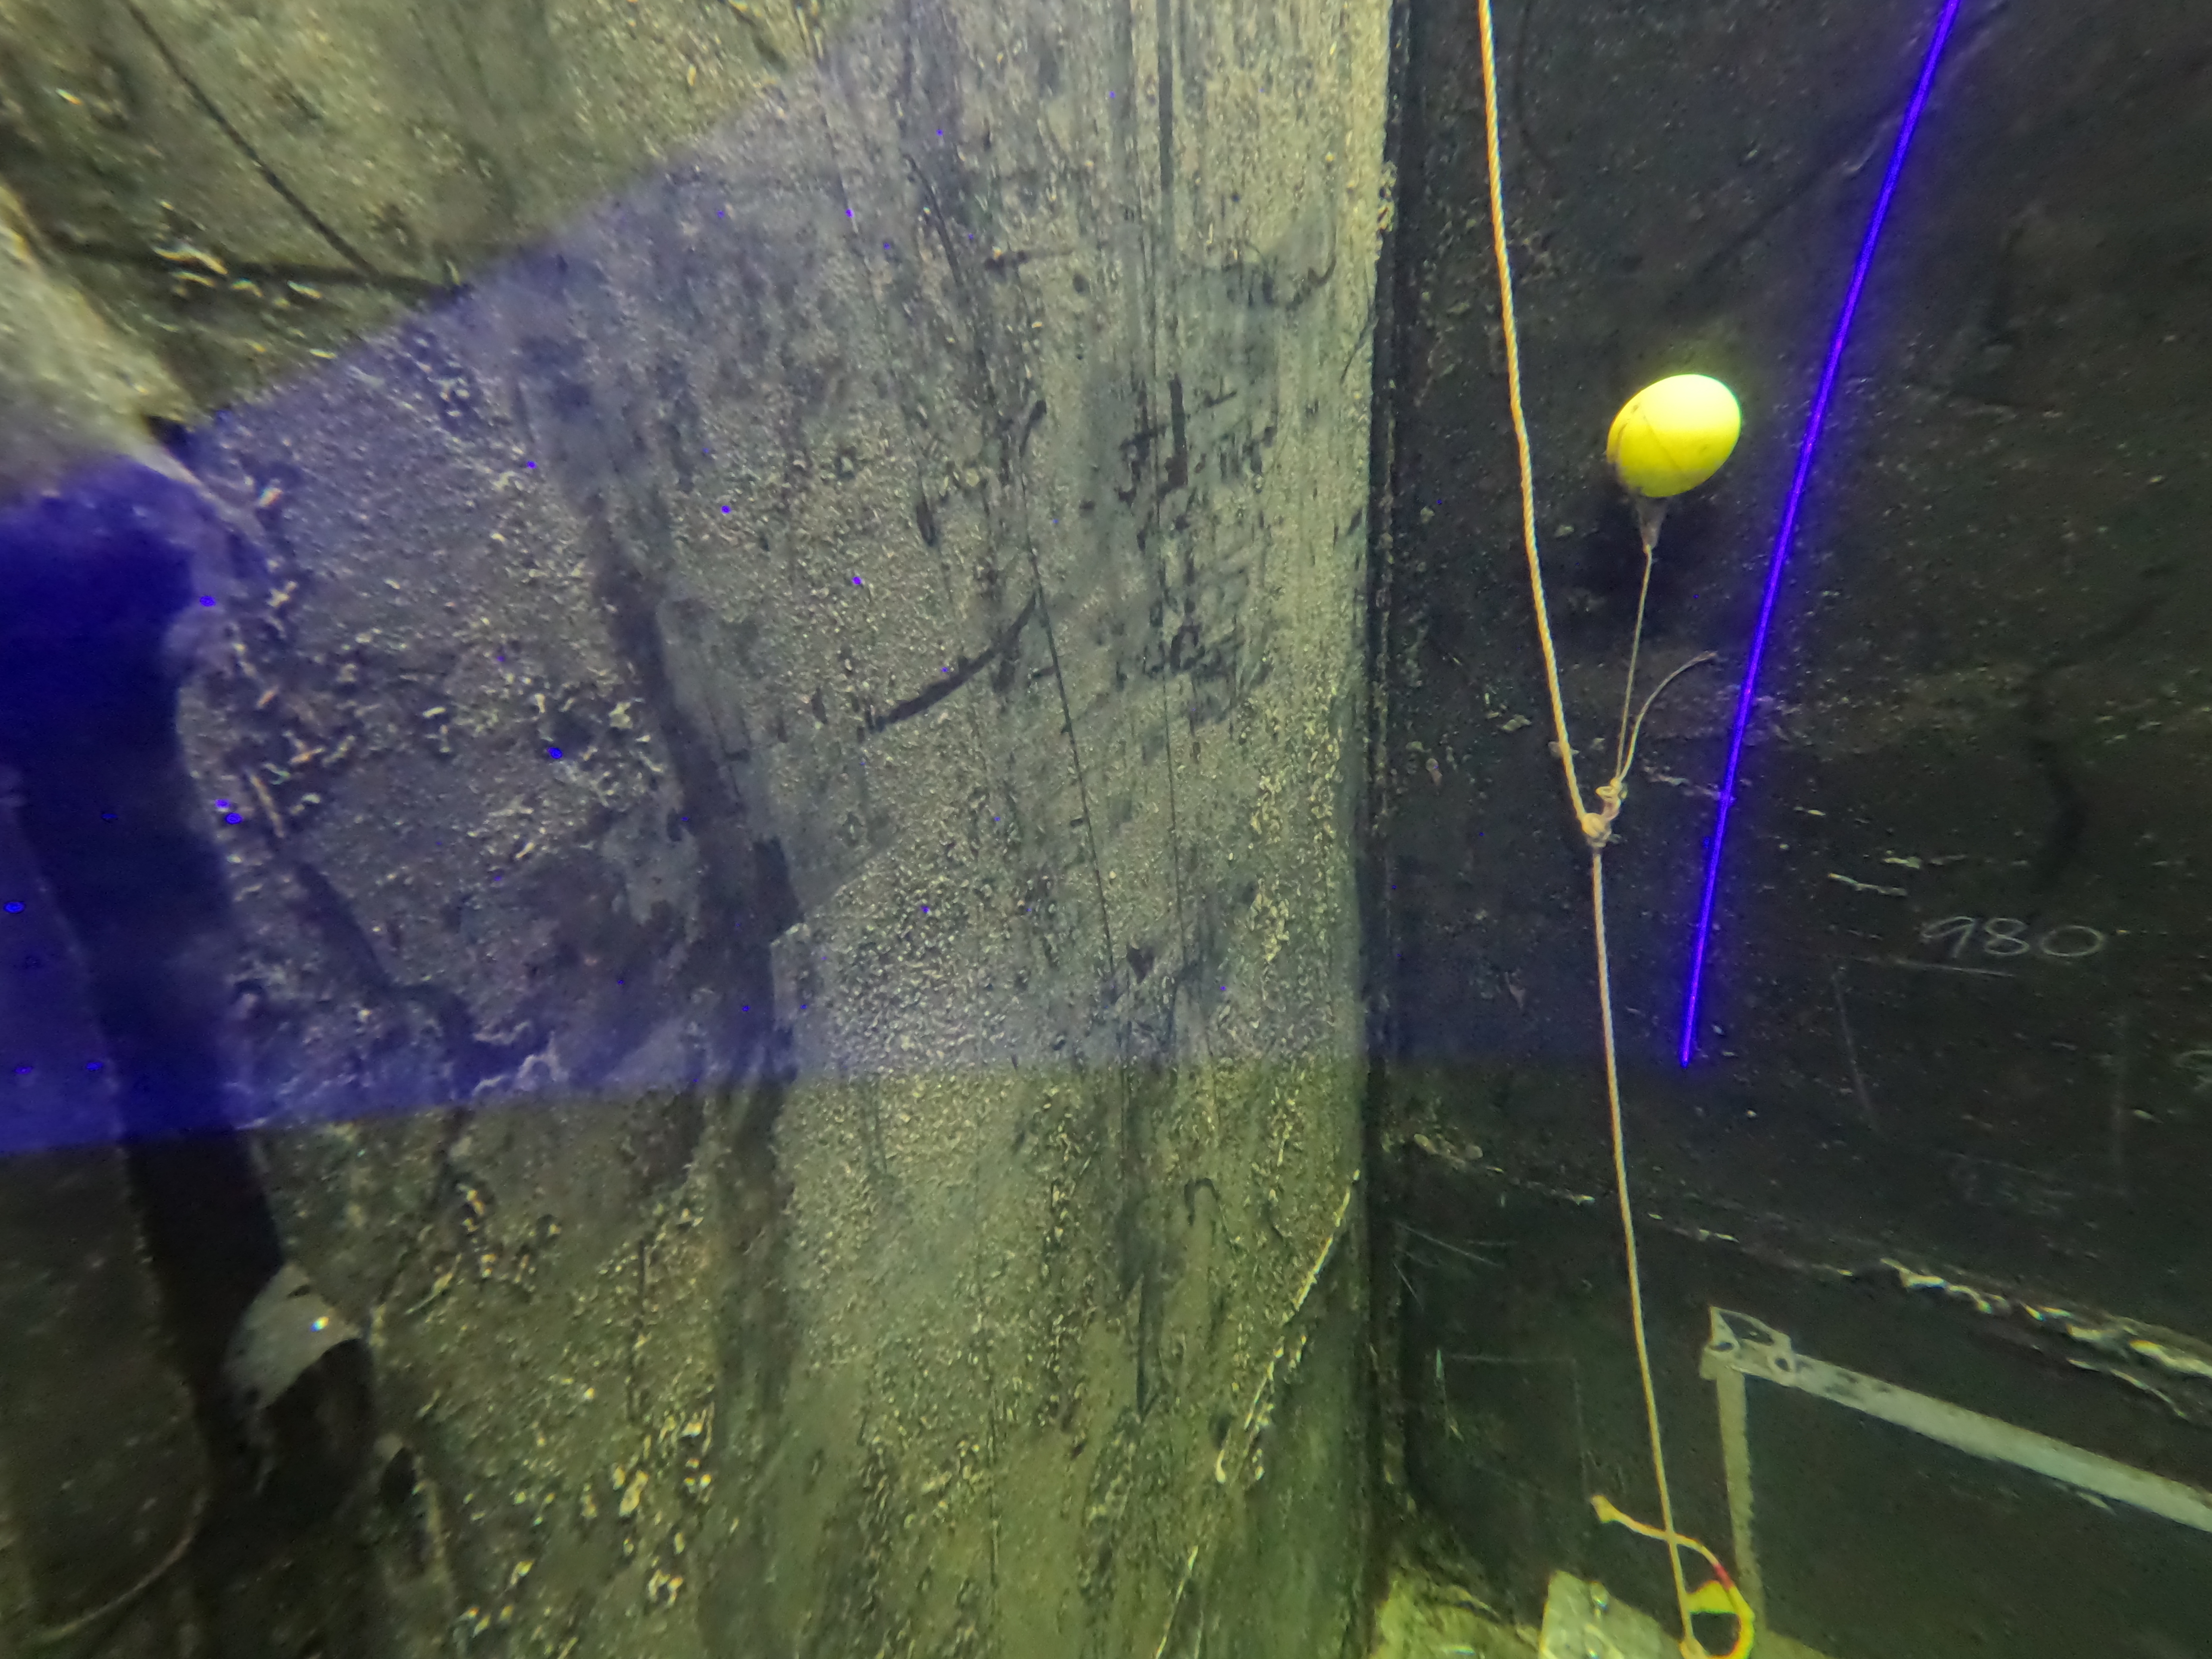

980

Supplement: Supplementary file 3074 [file G0031874.pdf › 12/G0031874.pdf]

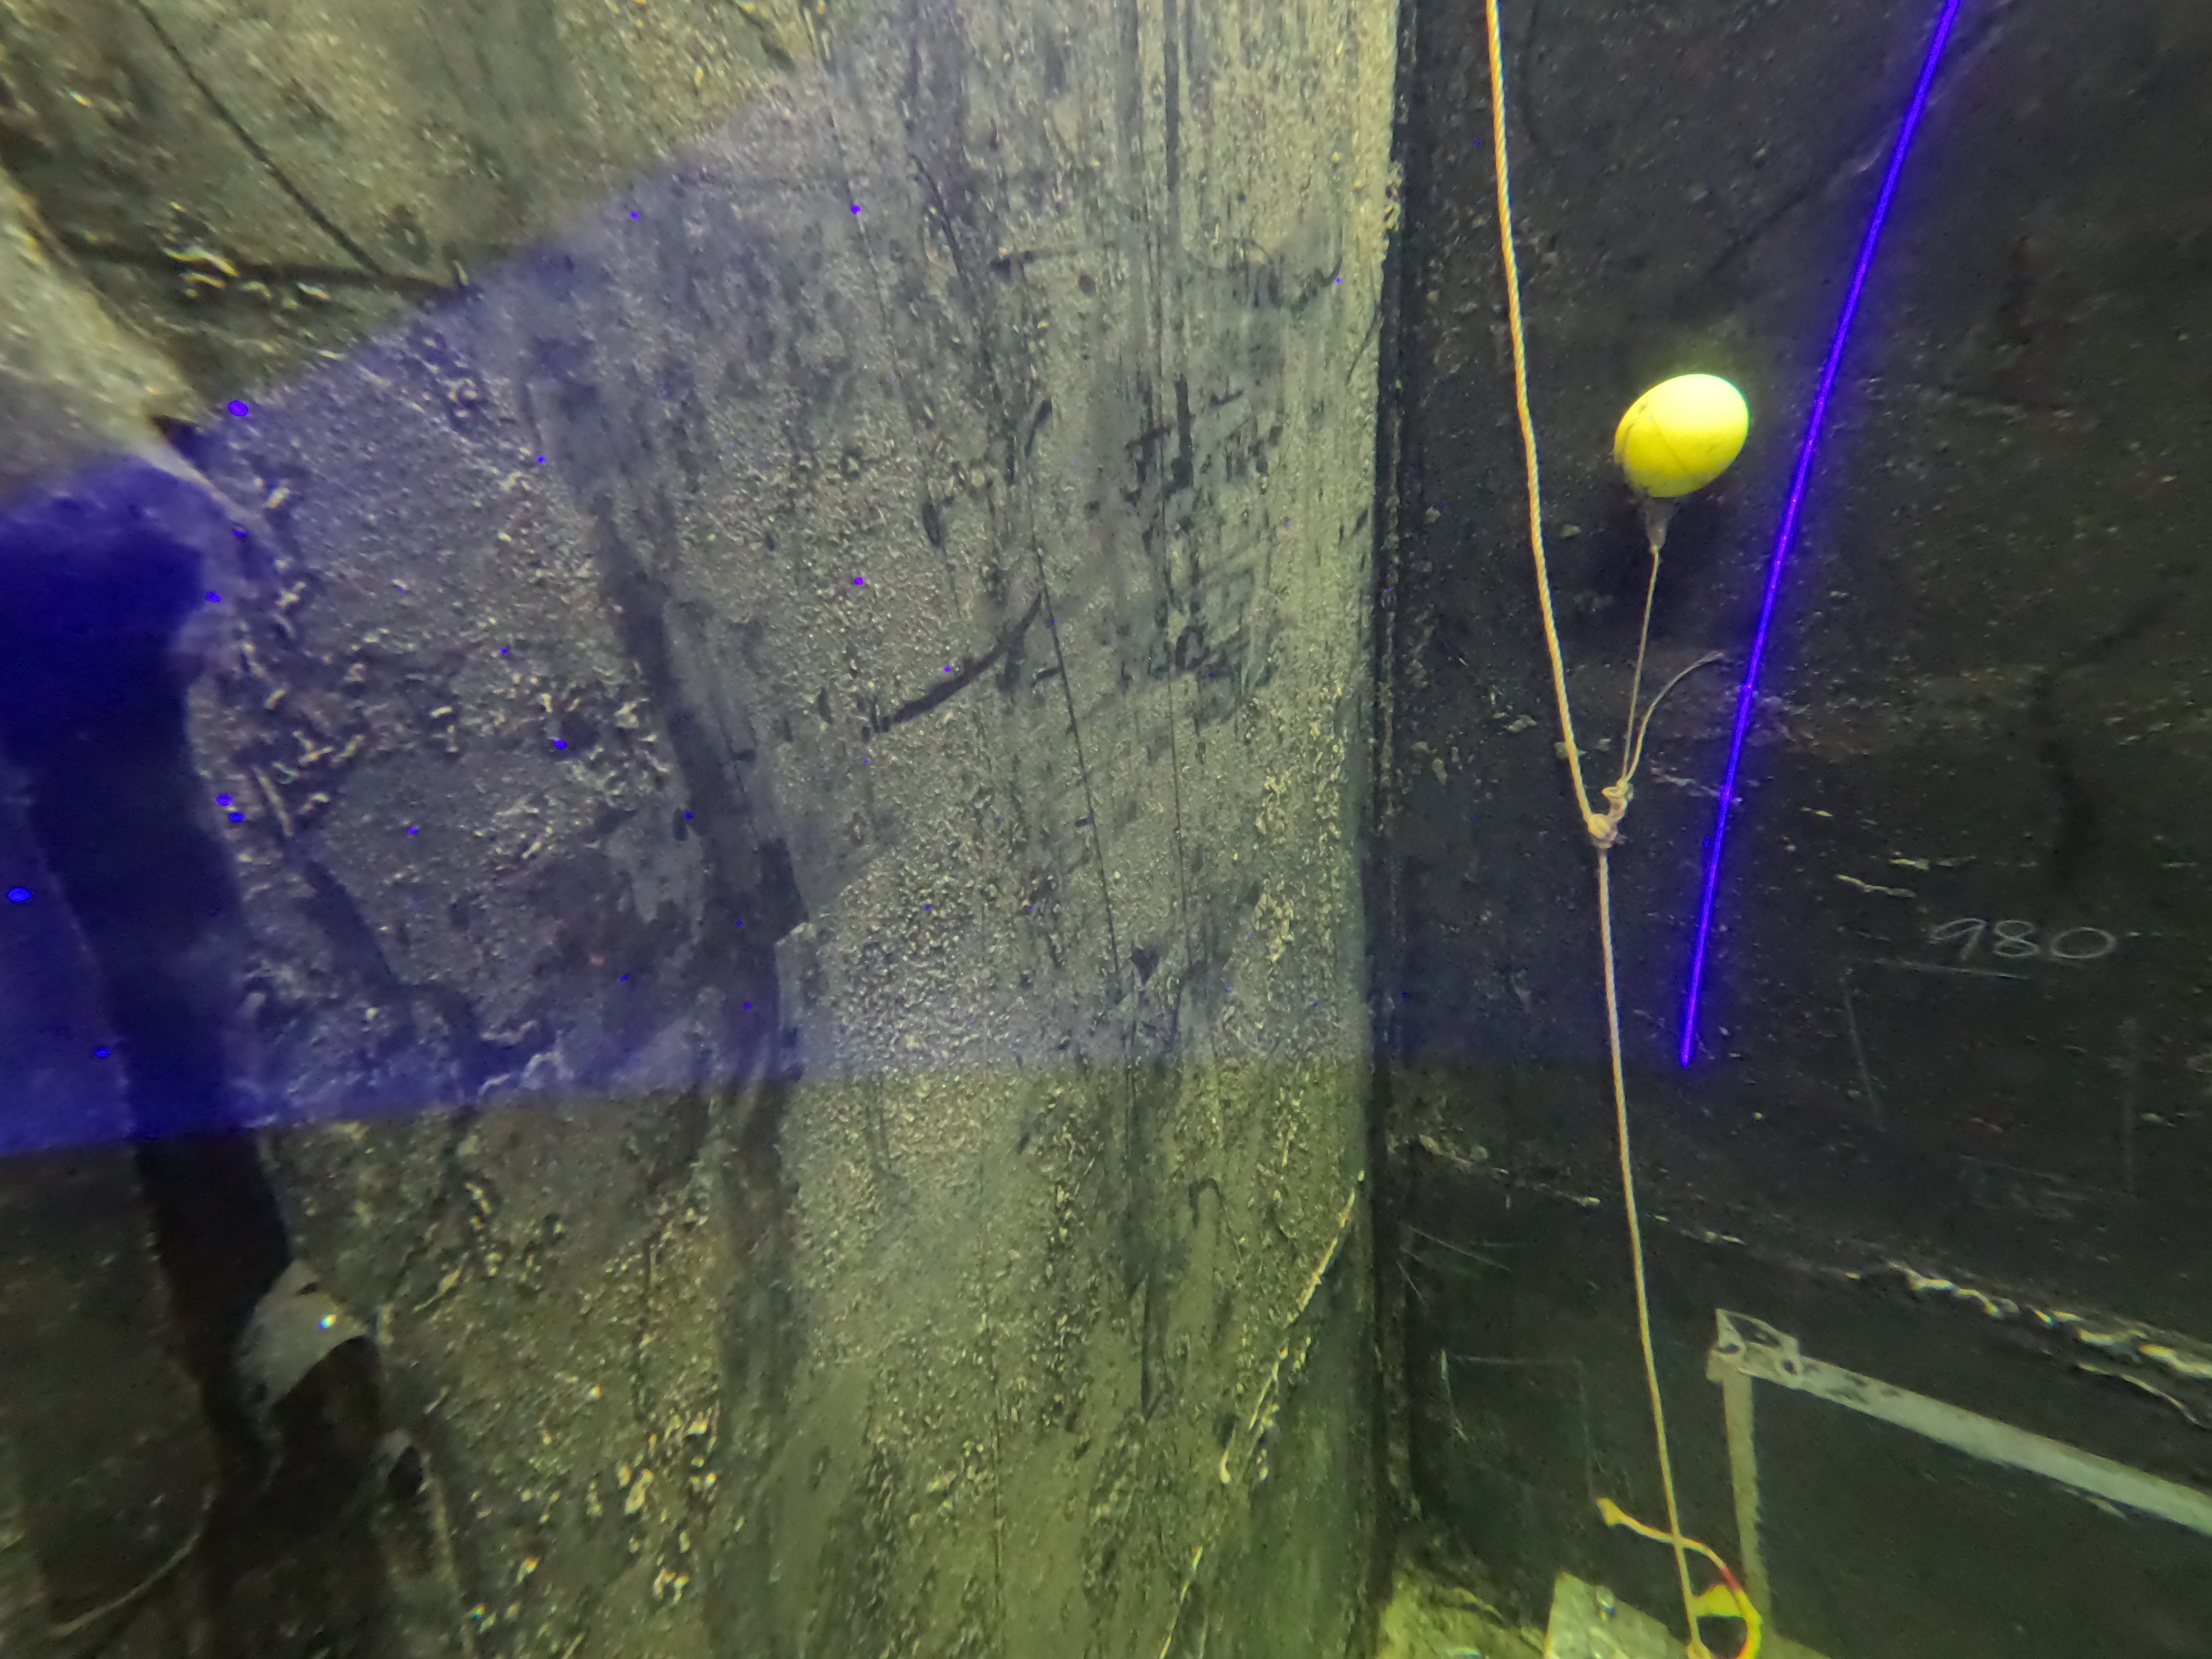

Supplement: Supplementary file 3075 [file G0031875.pdf › 12/G0031875.pdf]

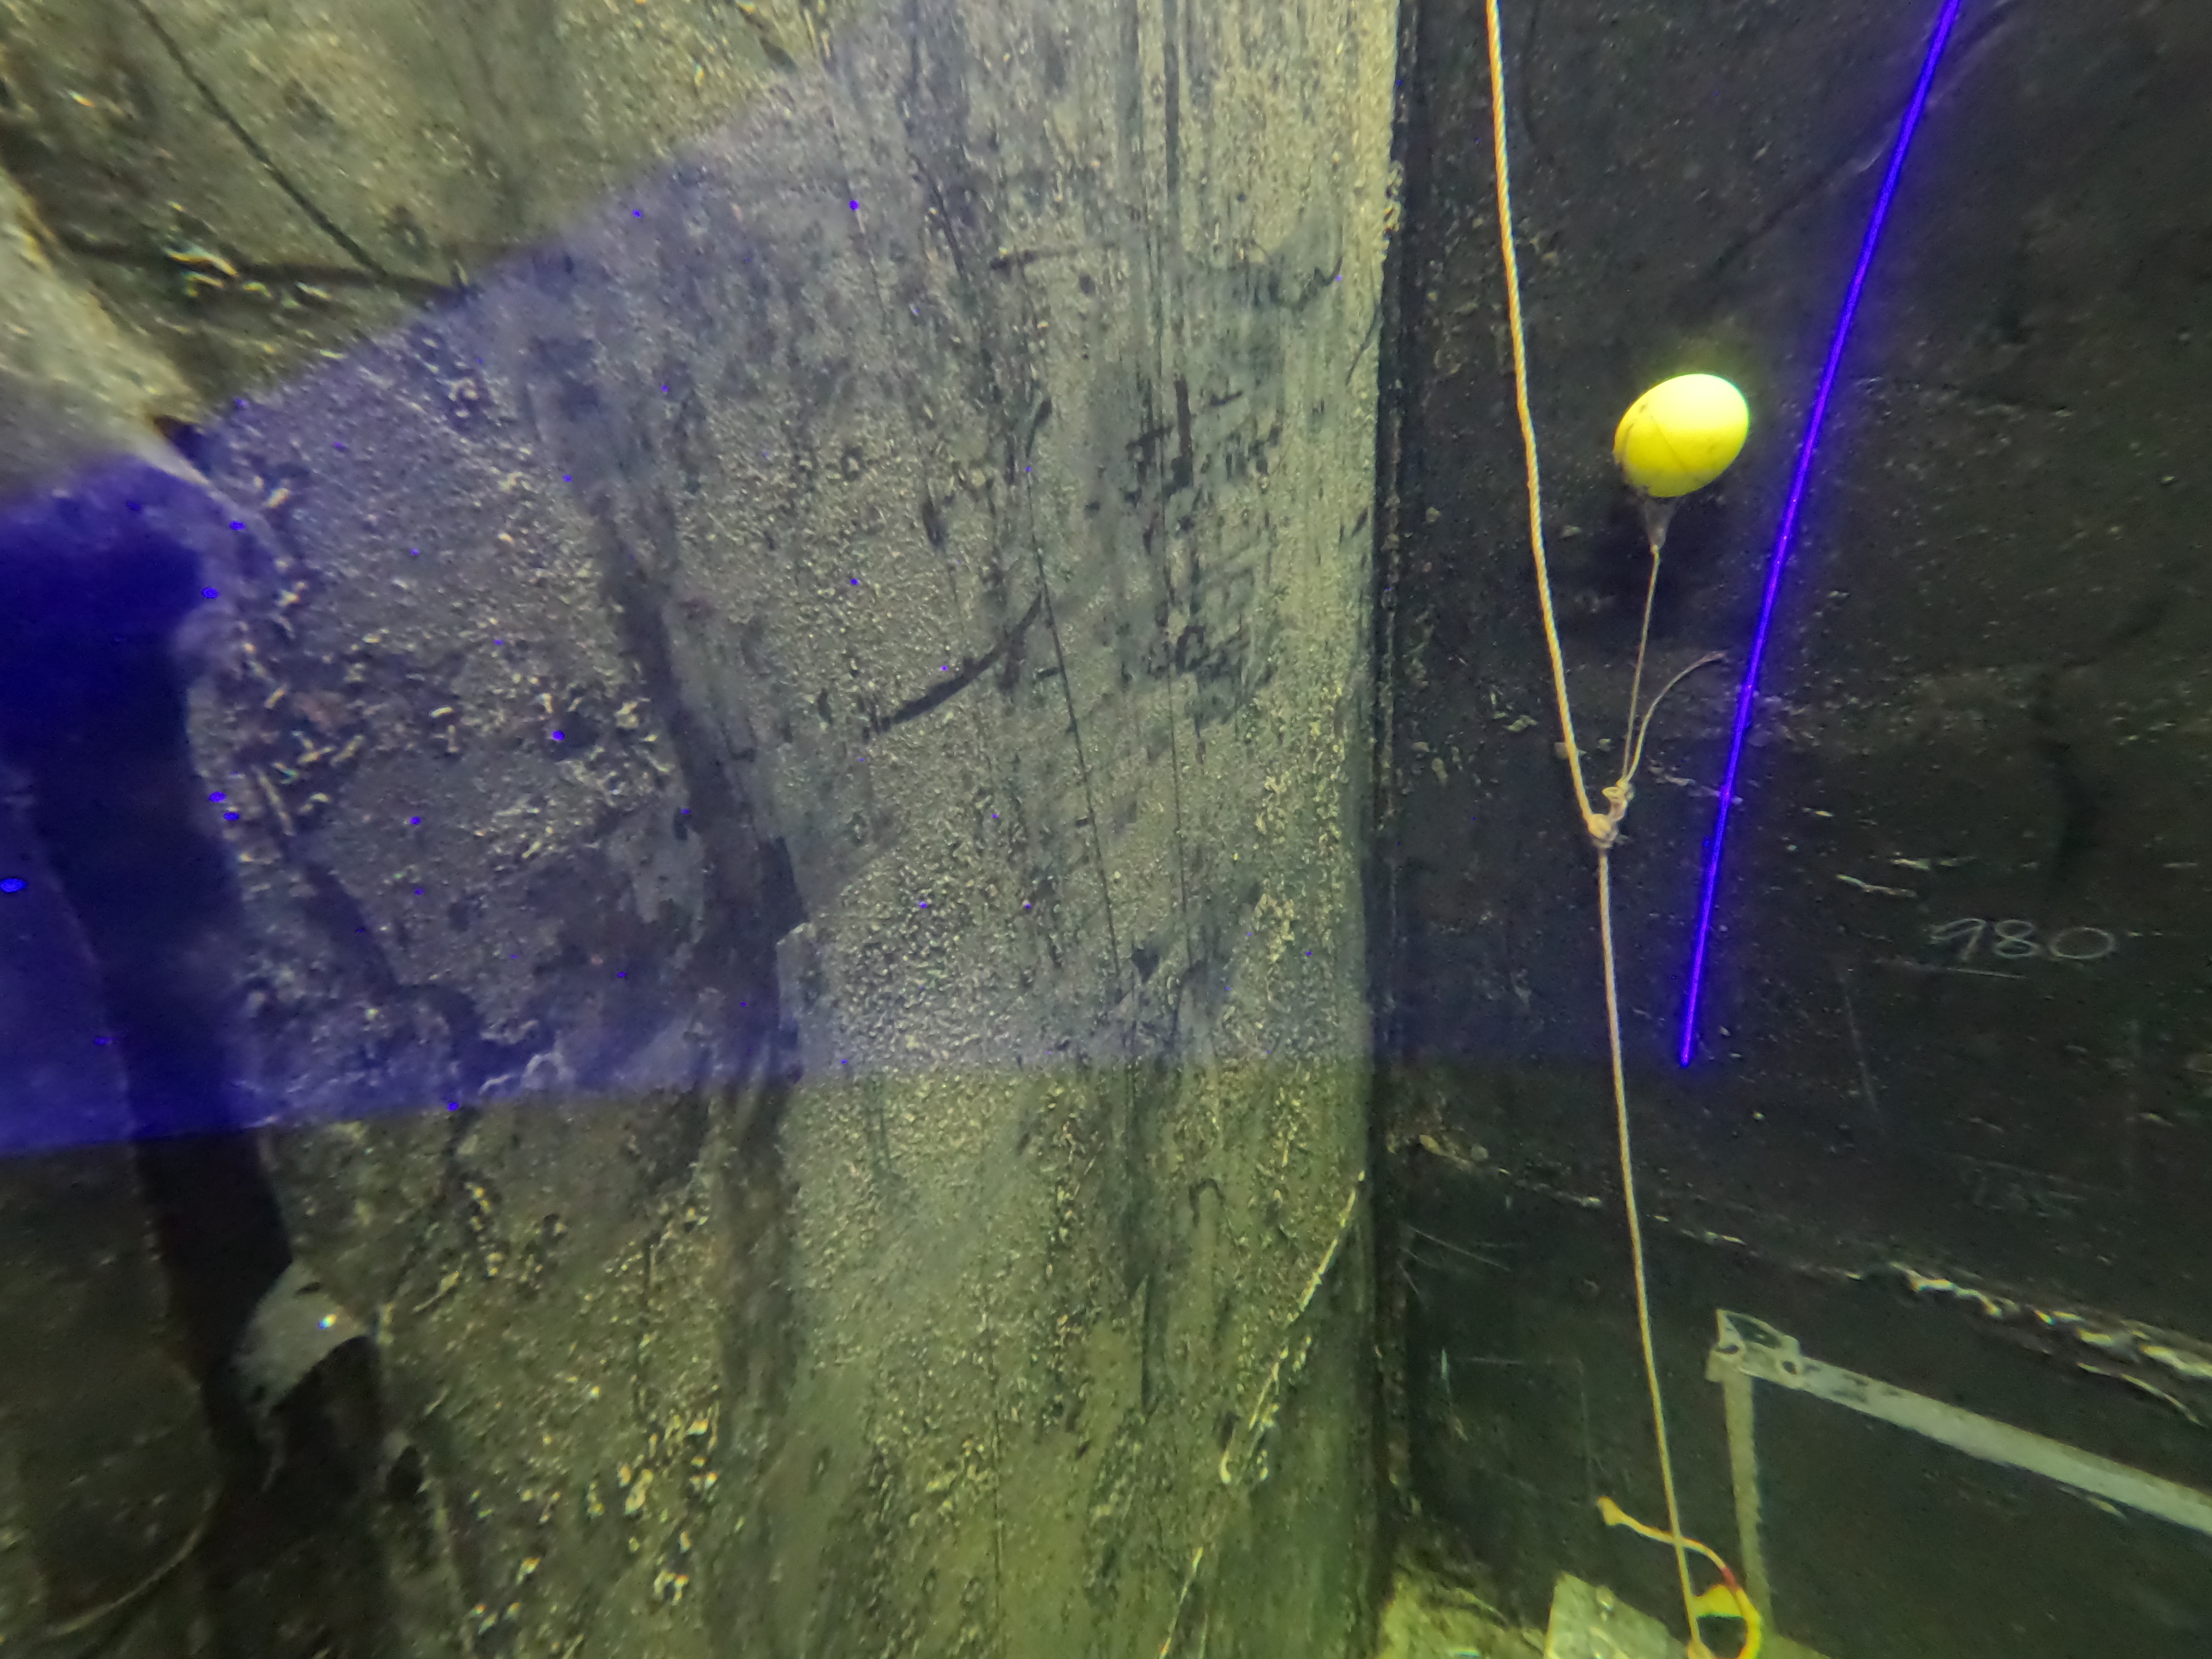

Supplement: Supplementary file 3076 [file G0031876.pdf › 12/G0031876.pdf]

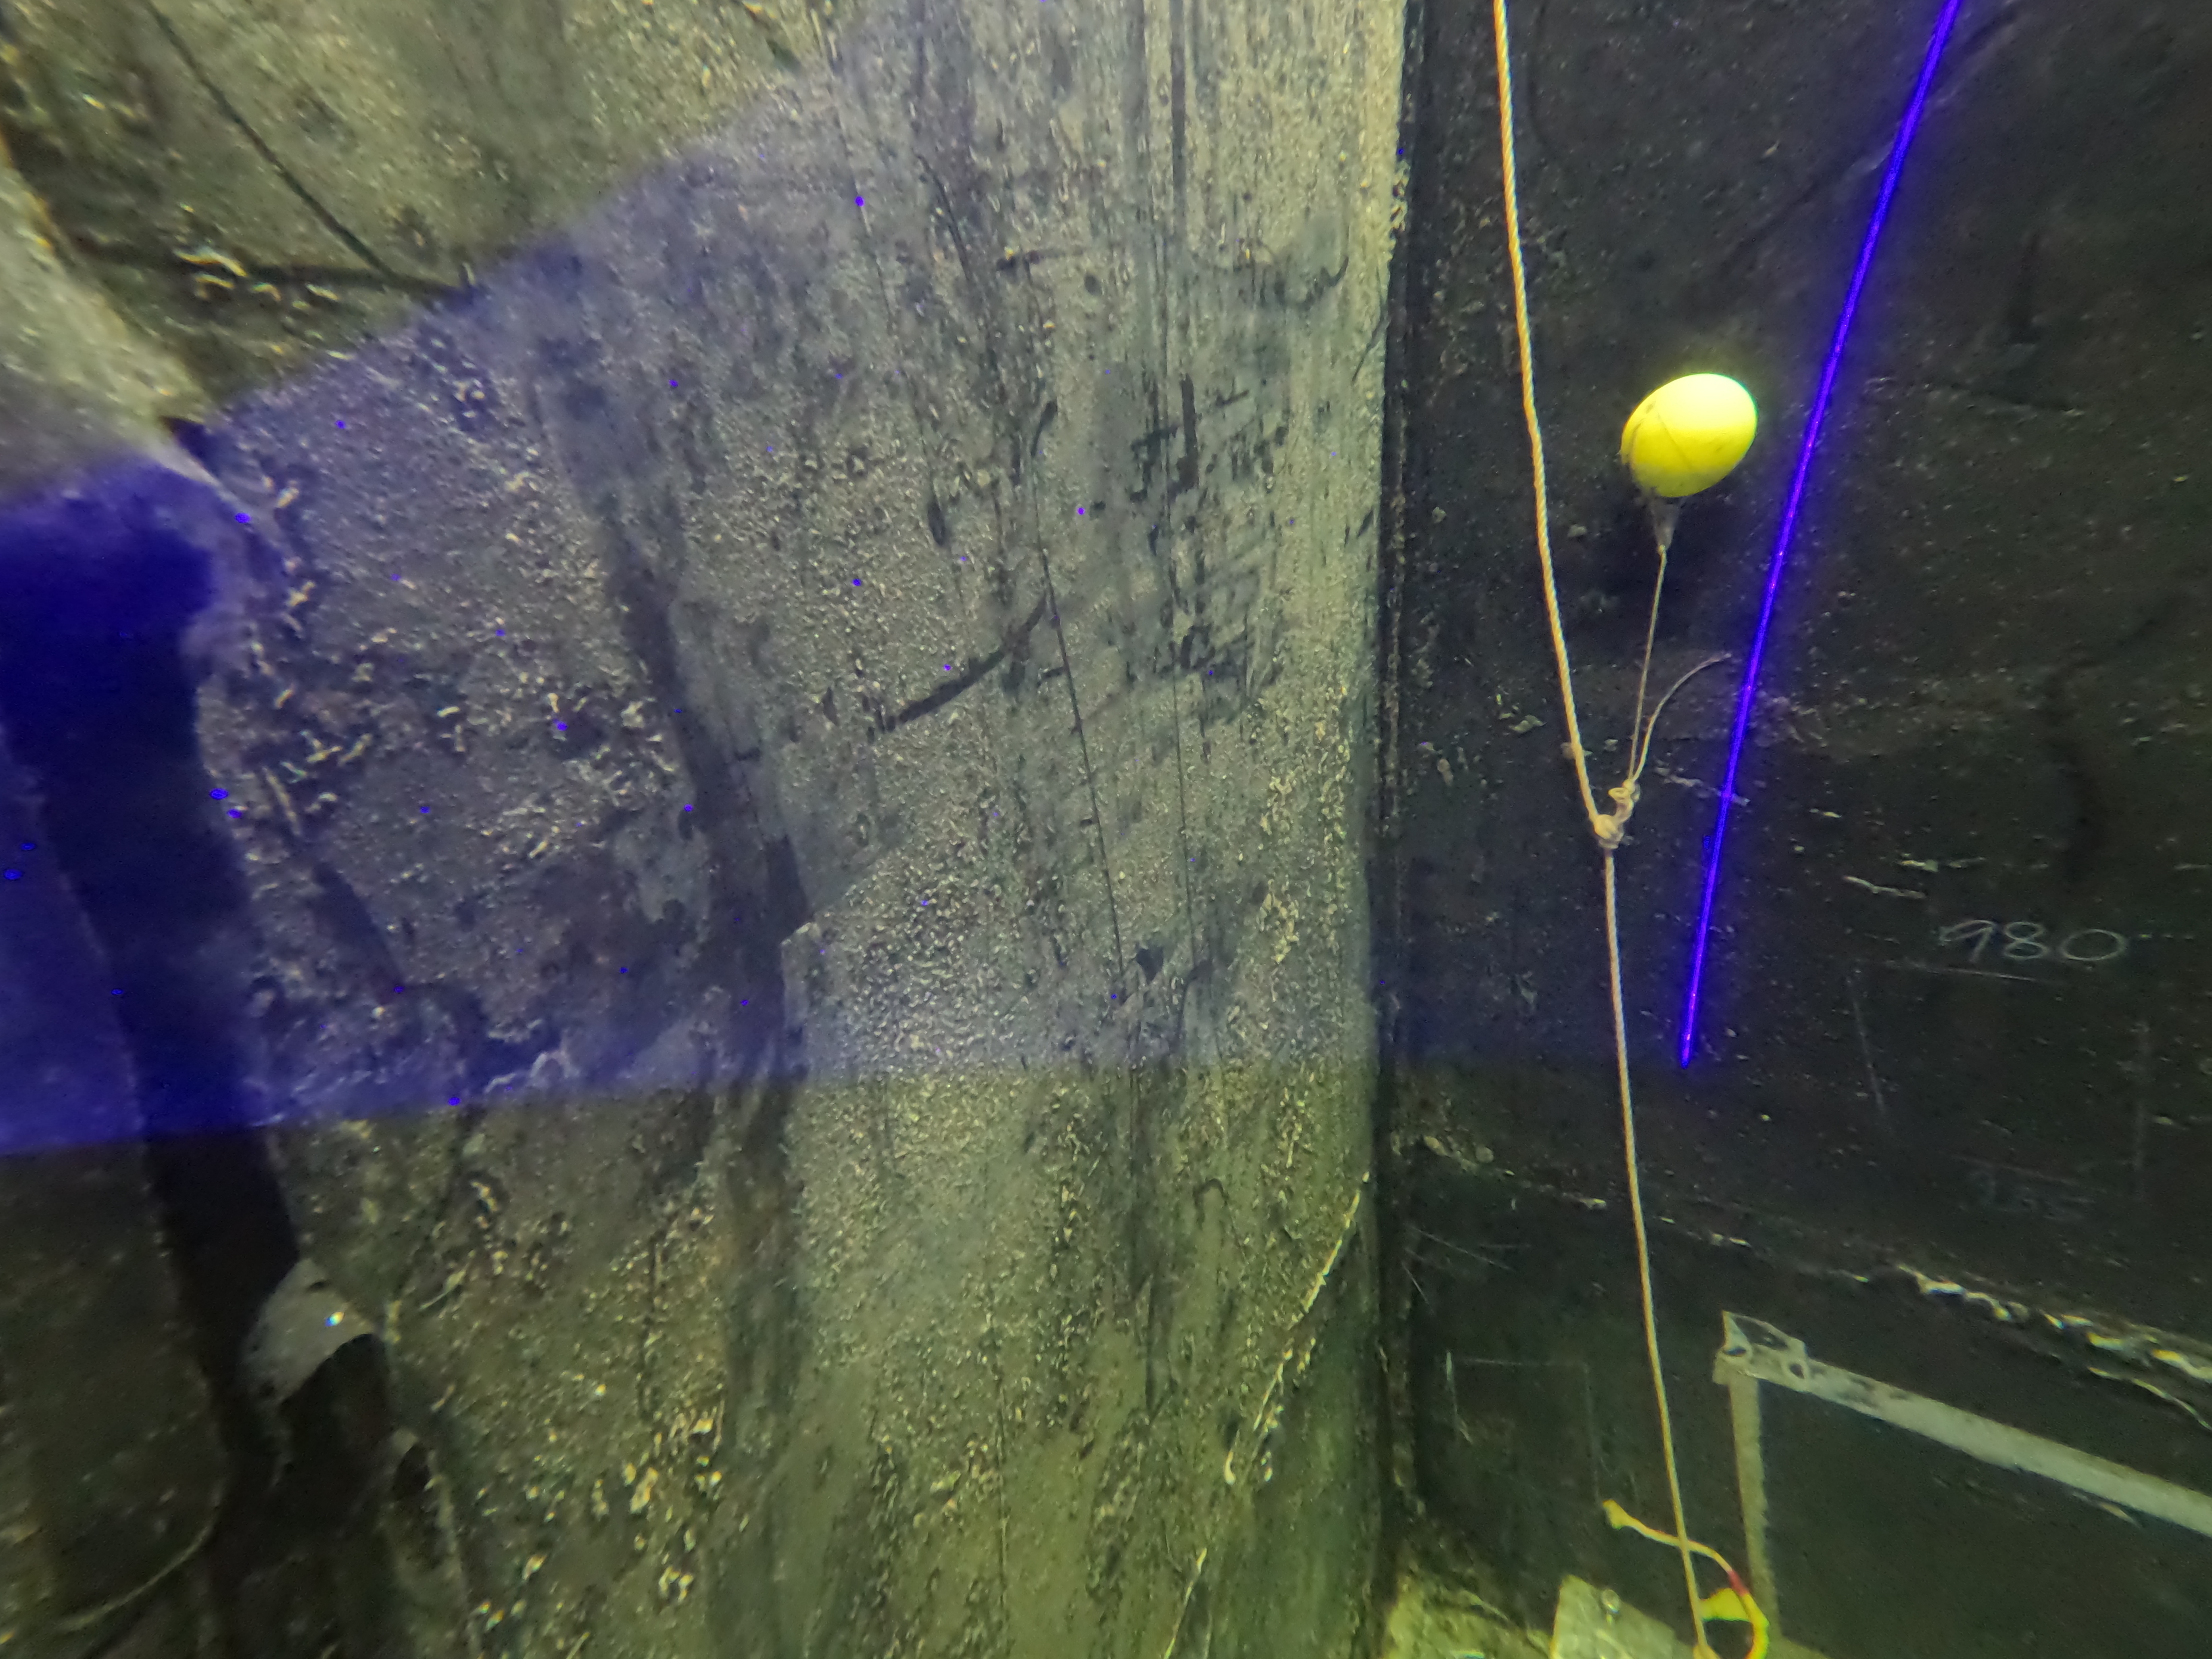

980

Supplement: Supplementary file 3077 [file G0031877.pdf › 12/G0031877.pdf]

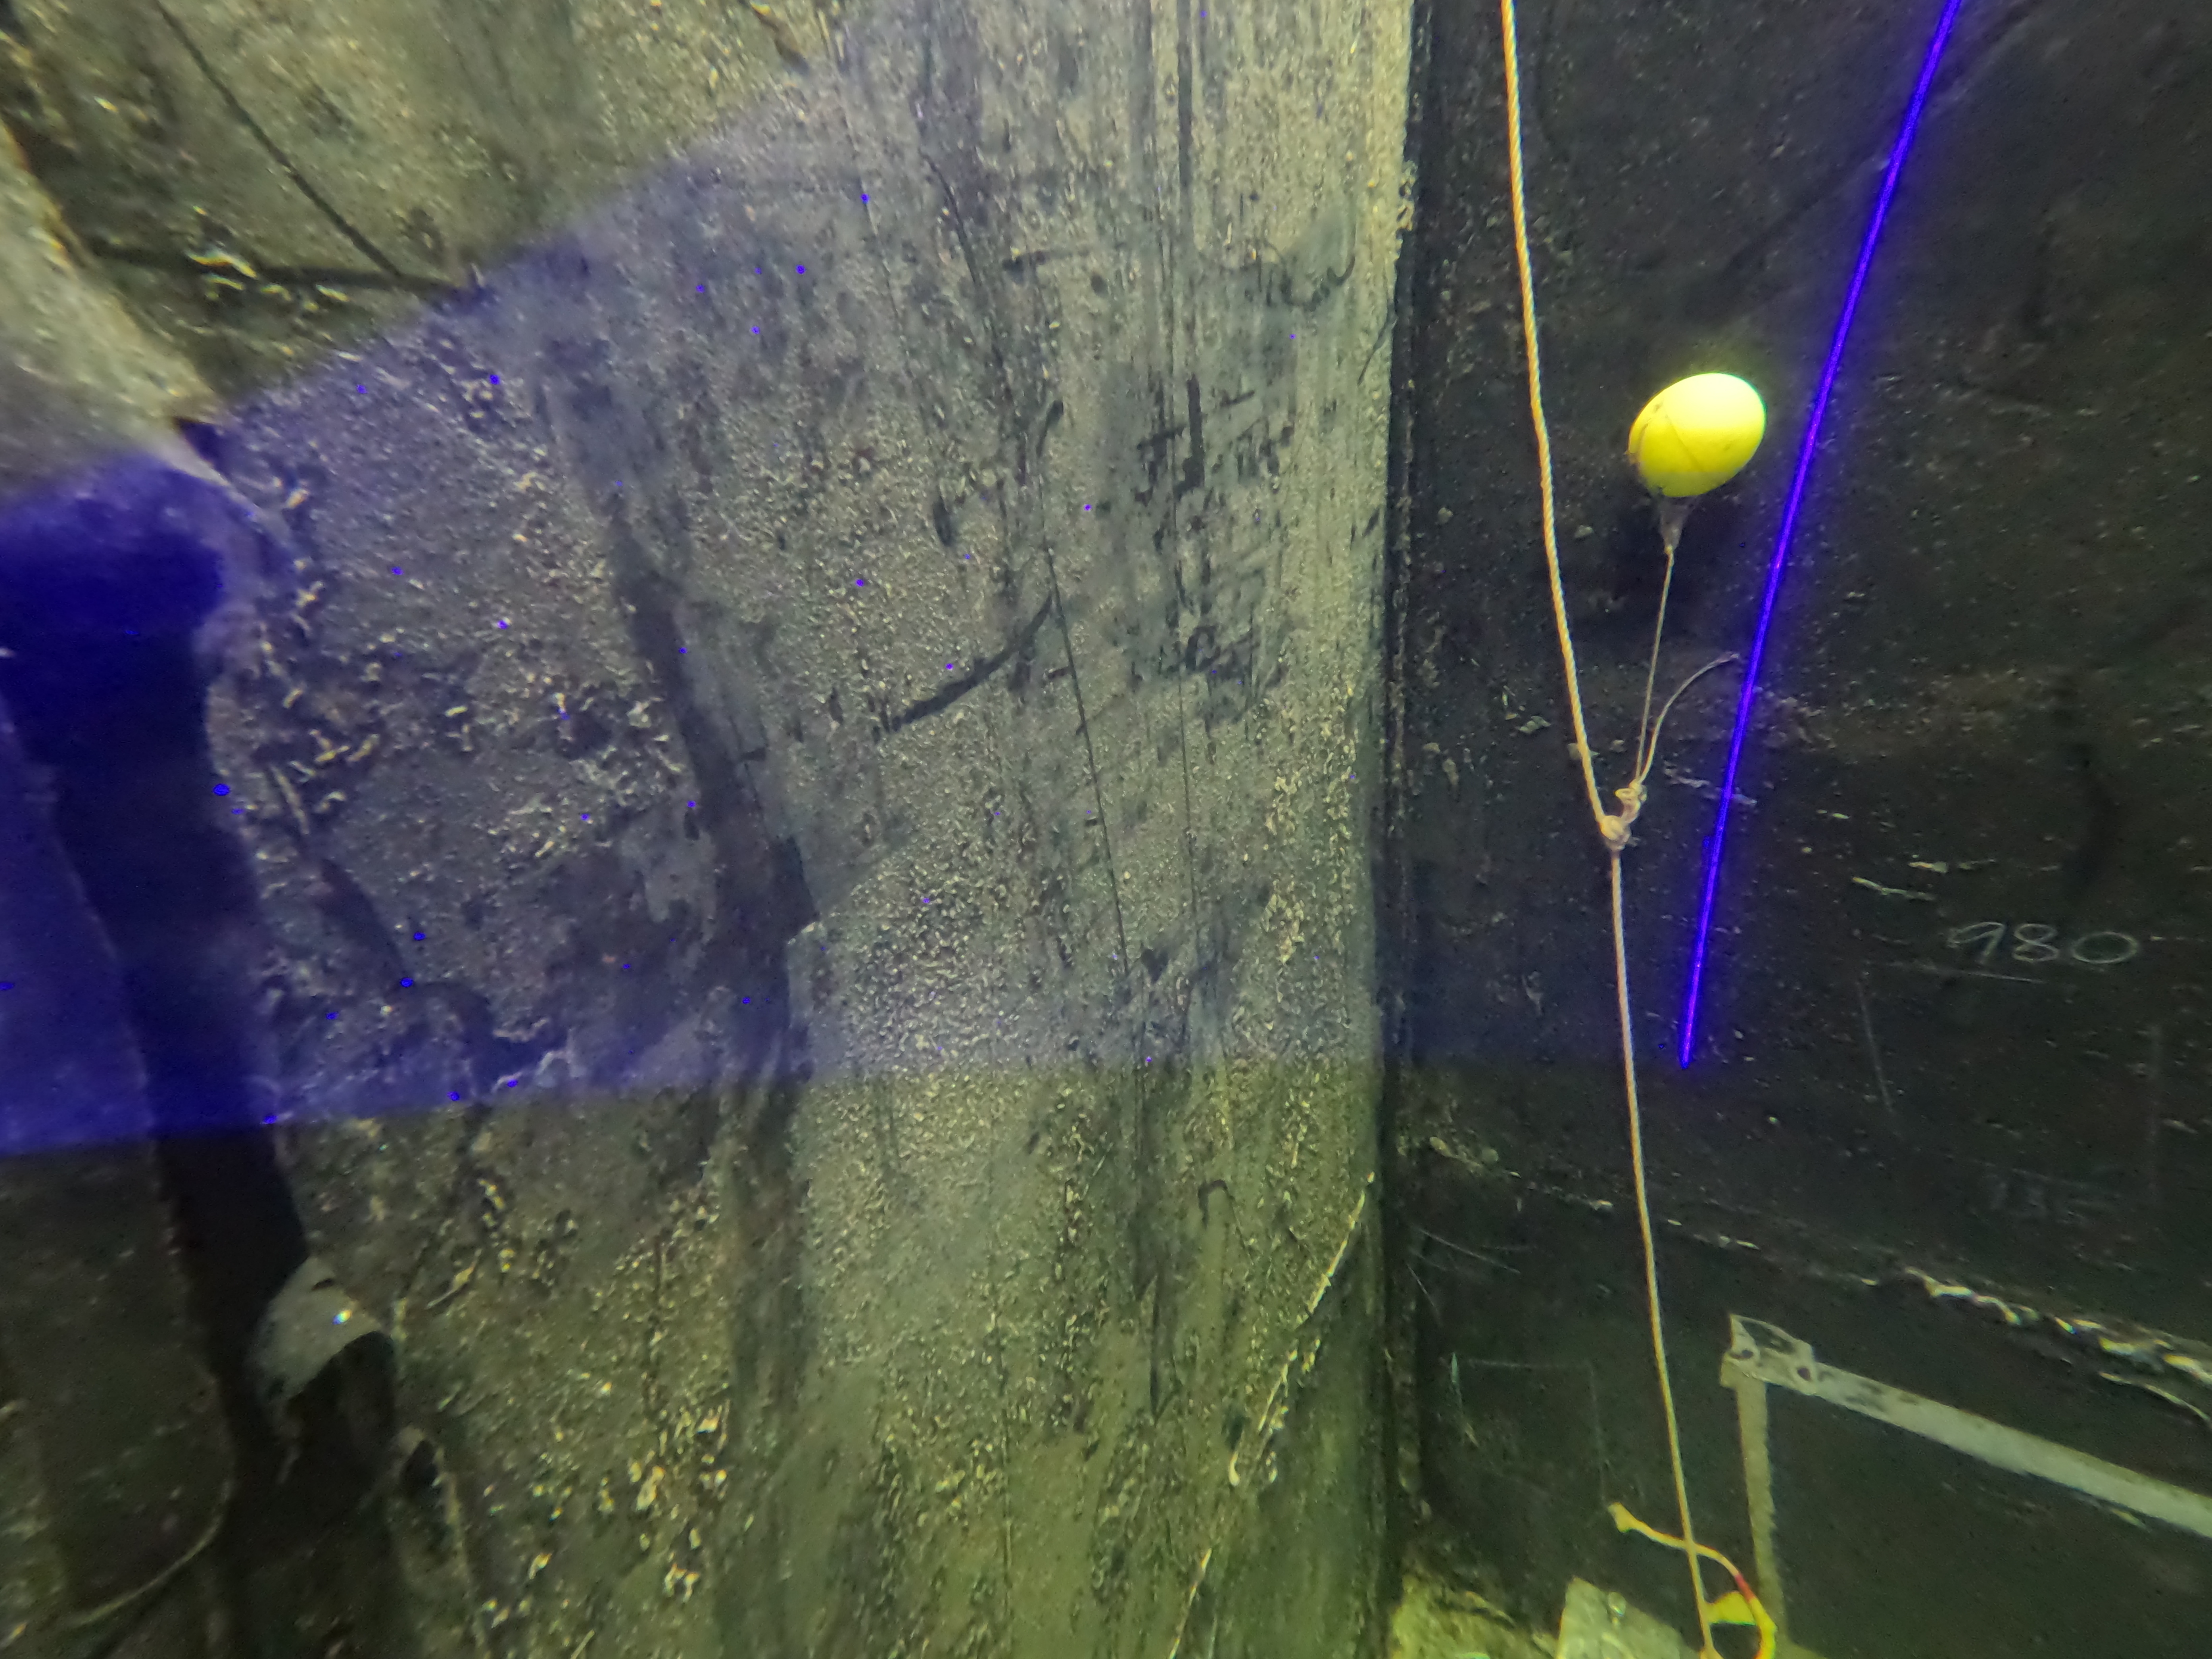

Supplement: Supplementary file 3078 [file G0031878.pdf › 12/G0031878.pdf]

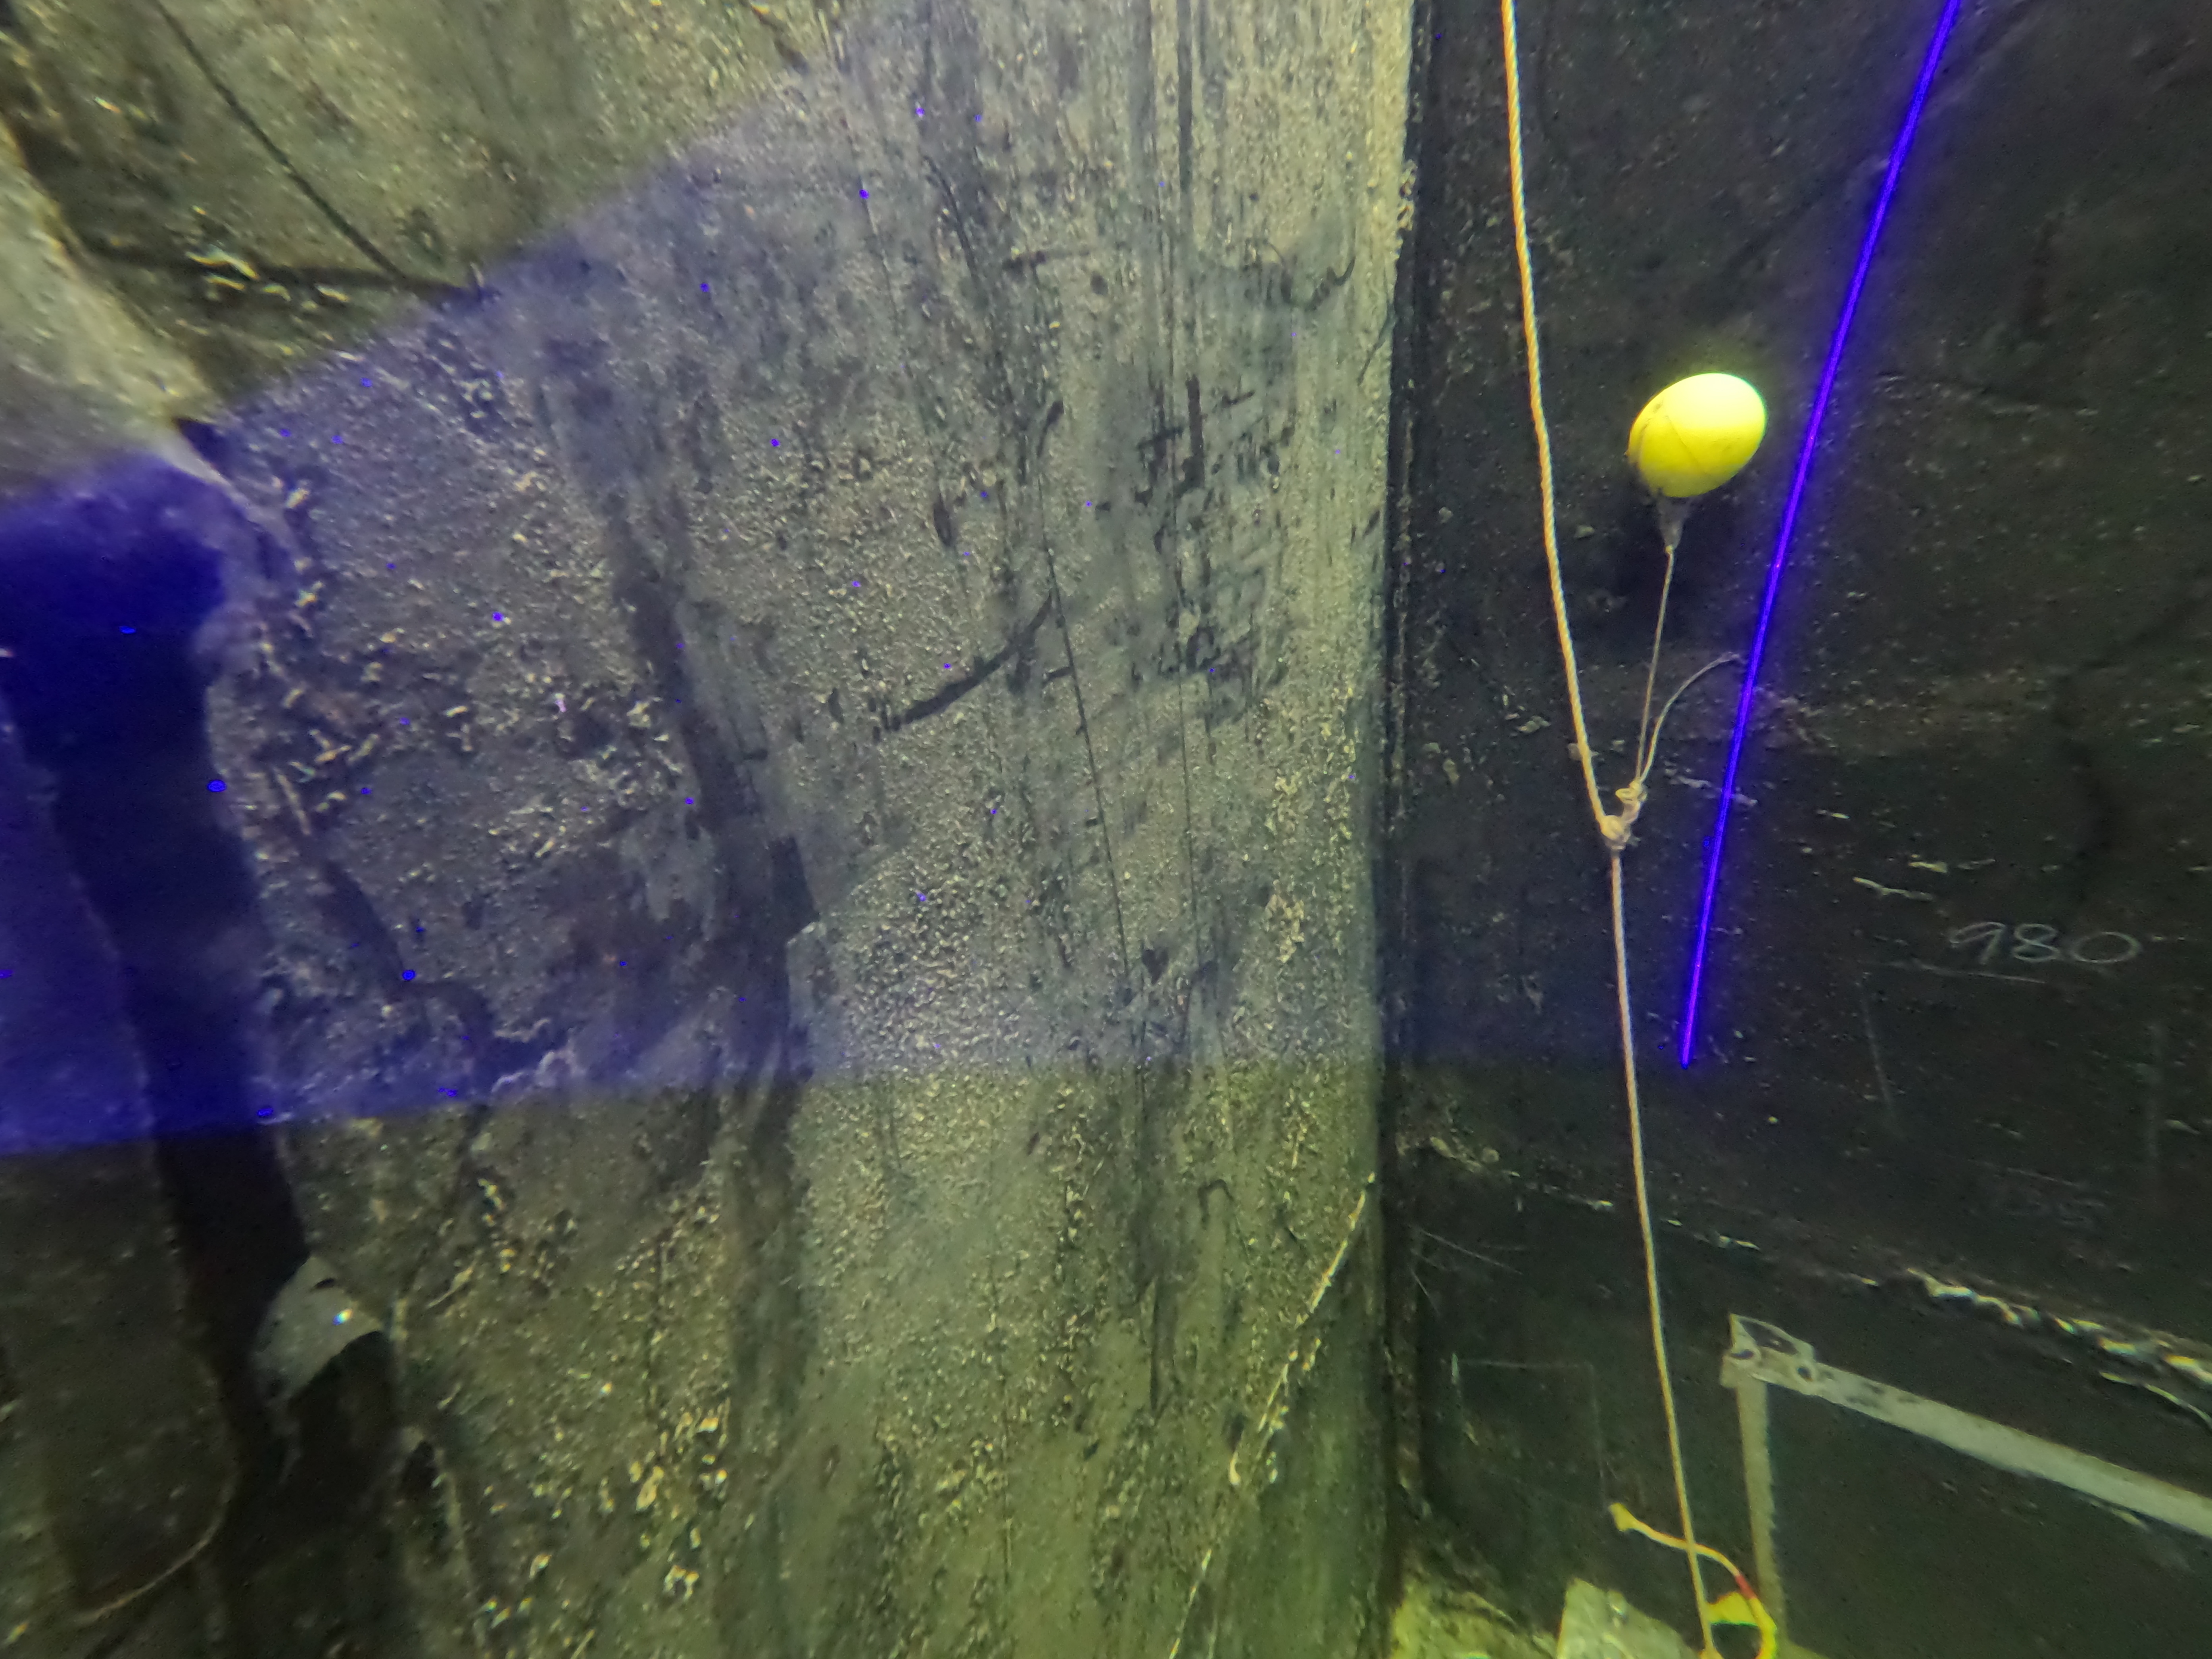

980

Supplement: Supplementary file 3079 [file G0031879.pdf › 12/G0031879.pdf]

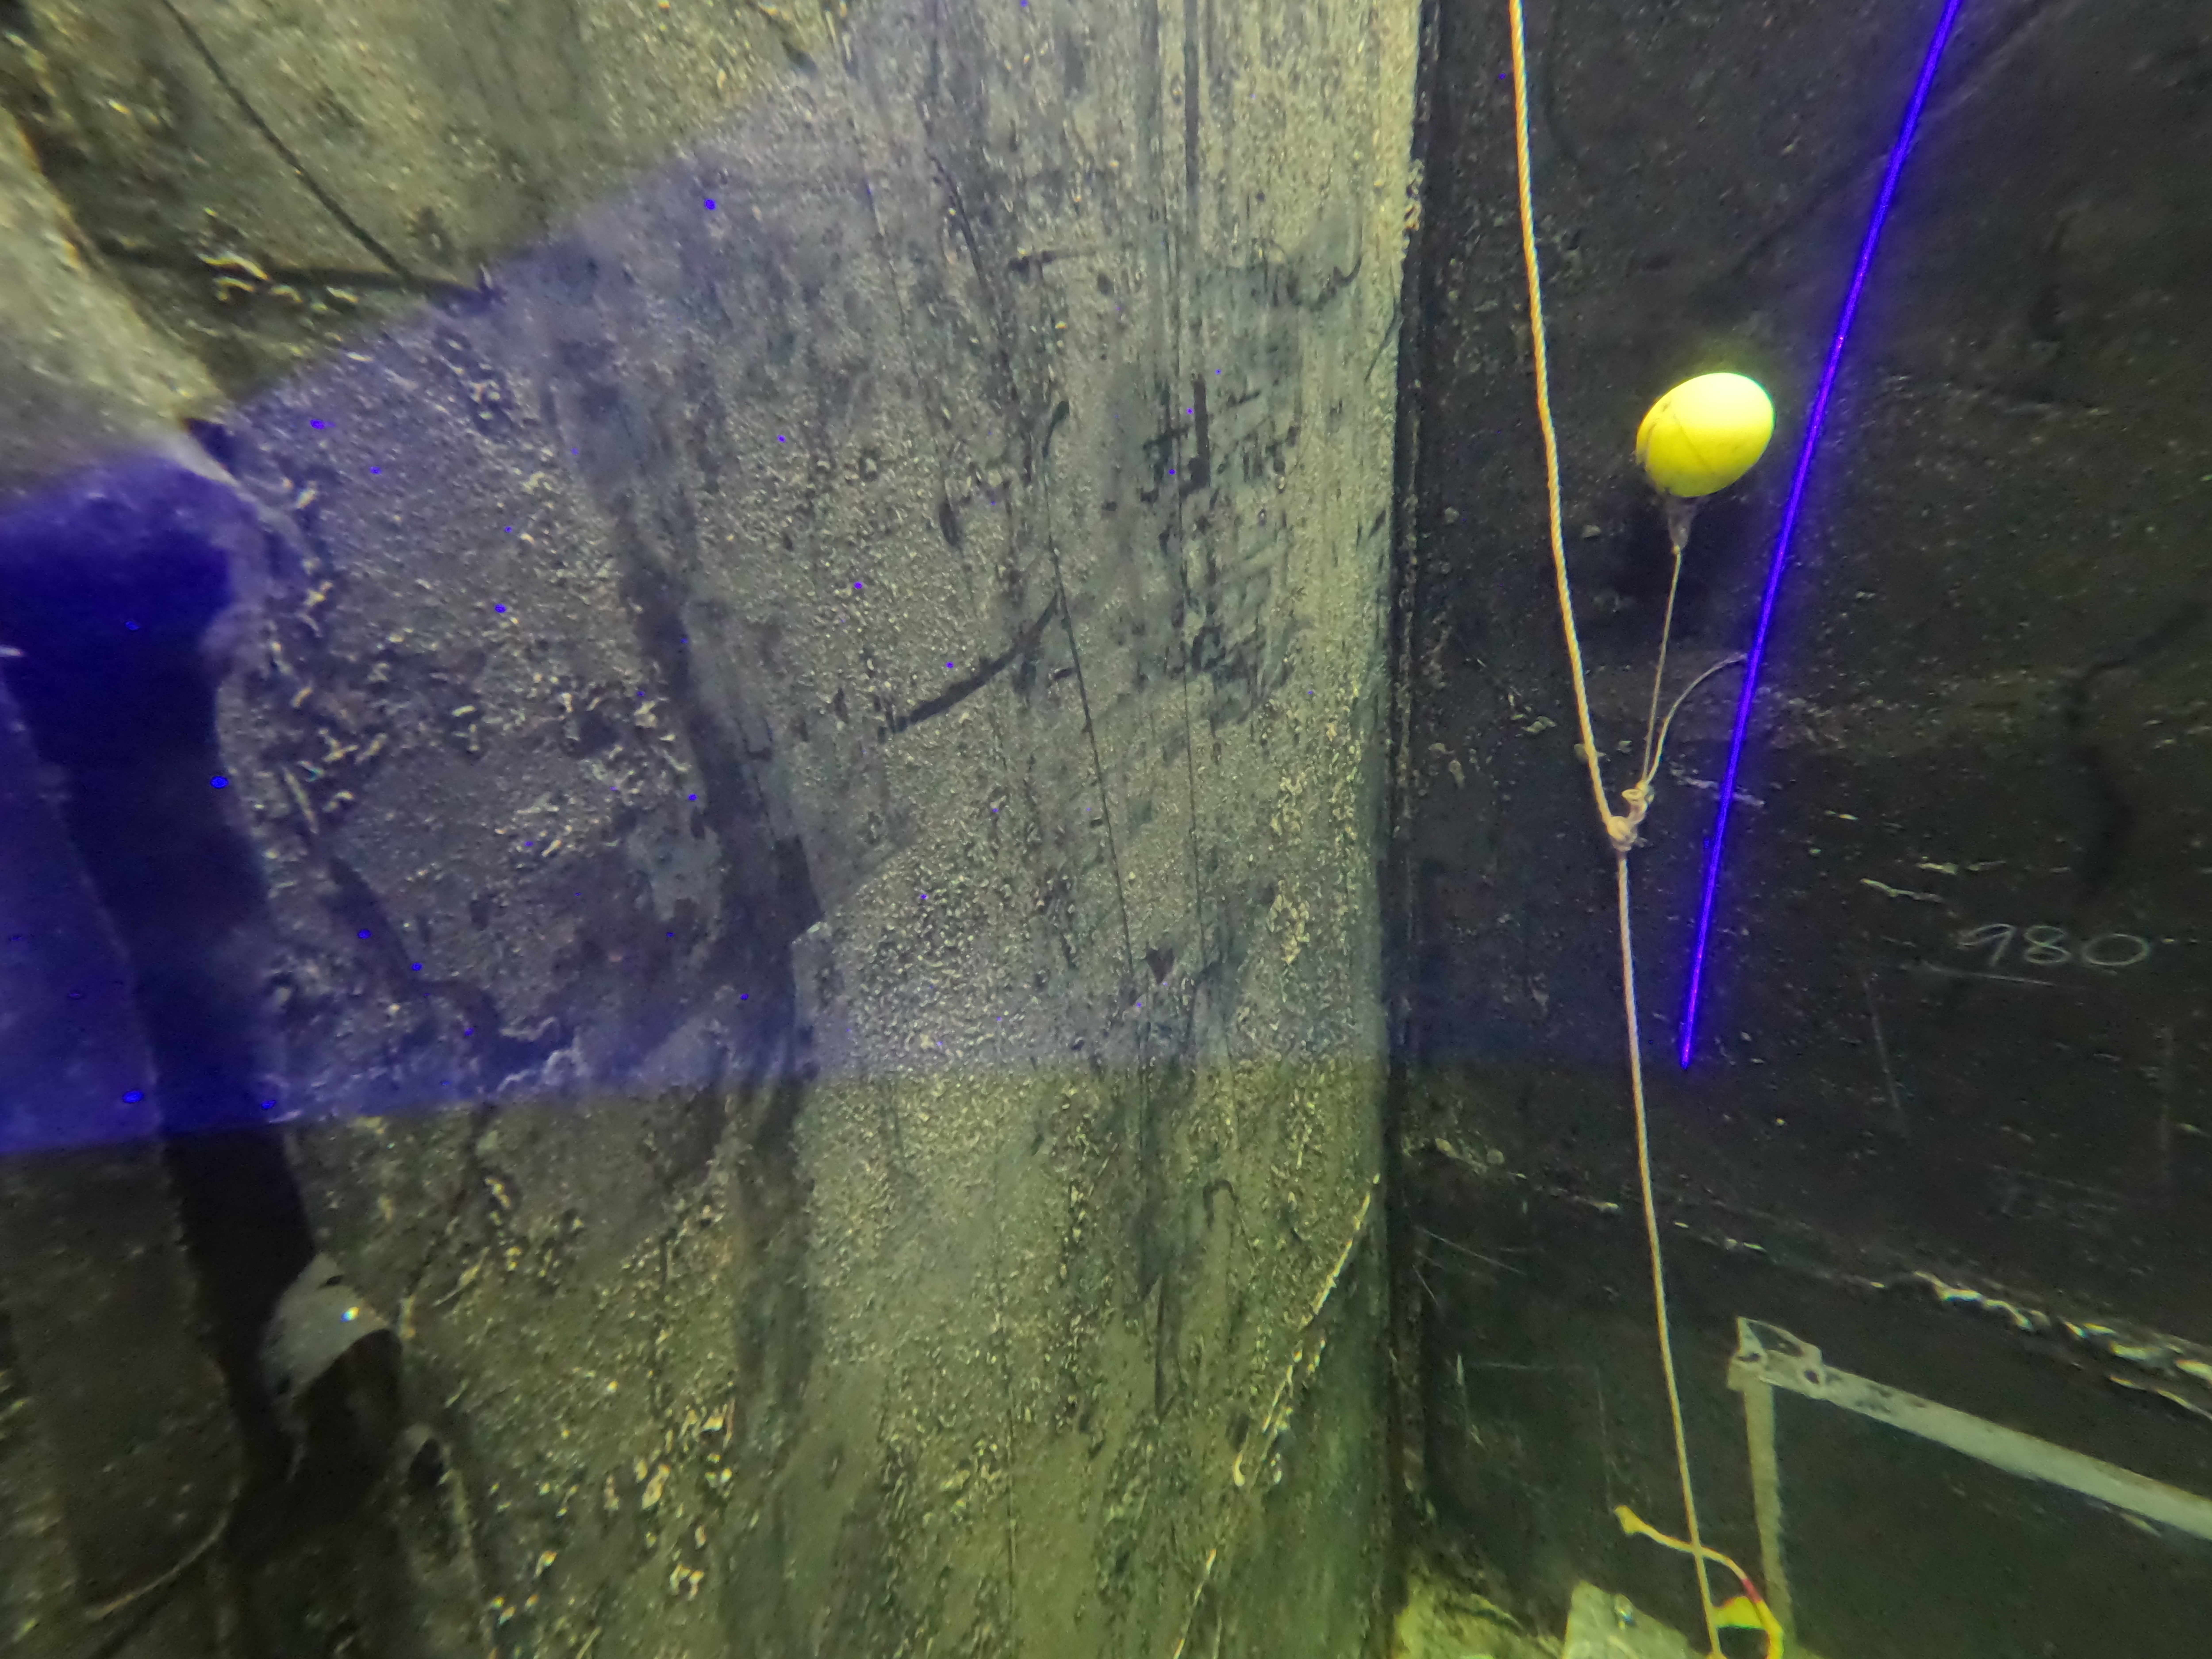

Supplement: Supplementary file 3080 [file G0031880.pdf › 12/G0031880.pdf]

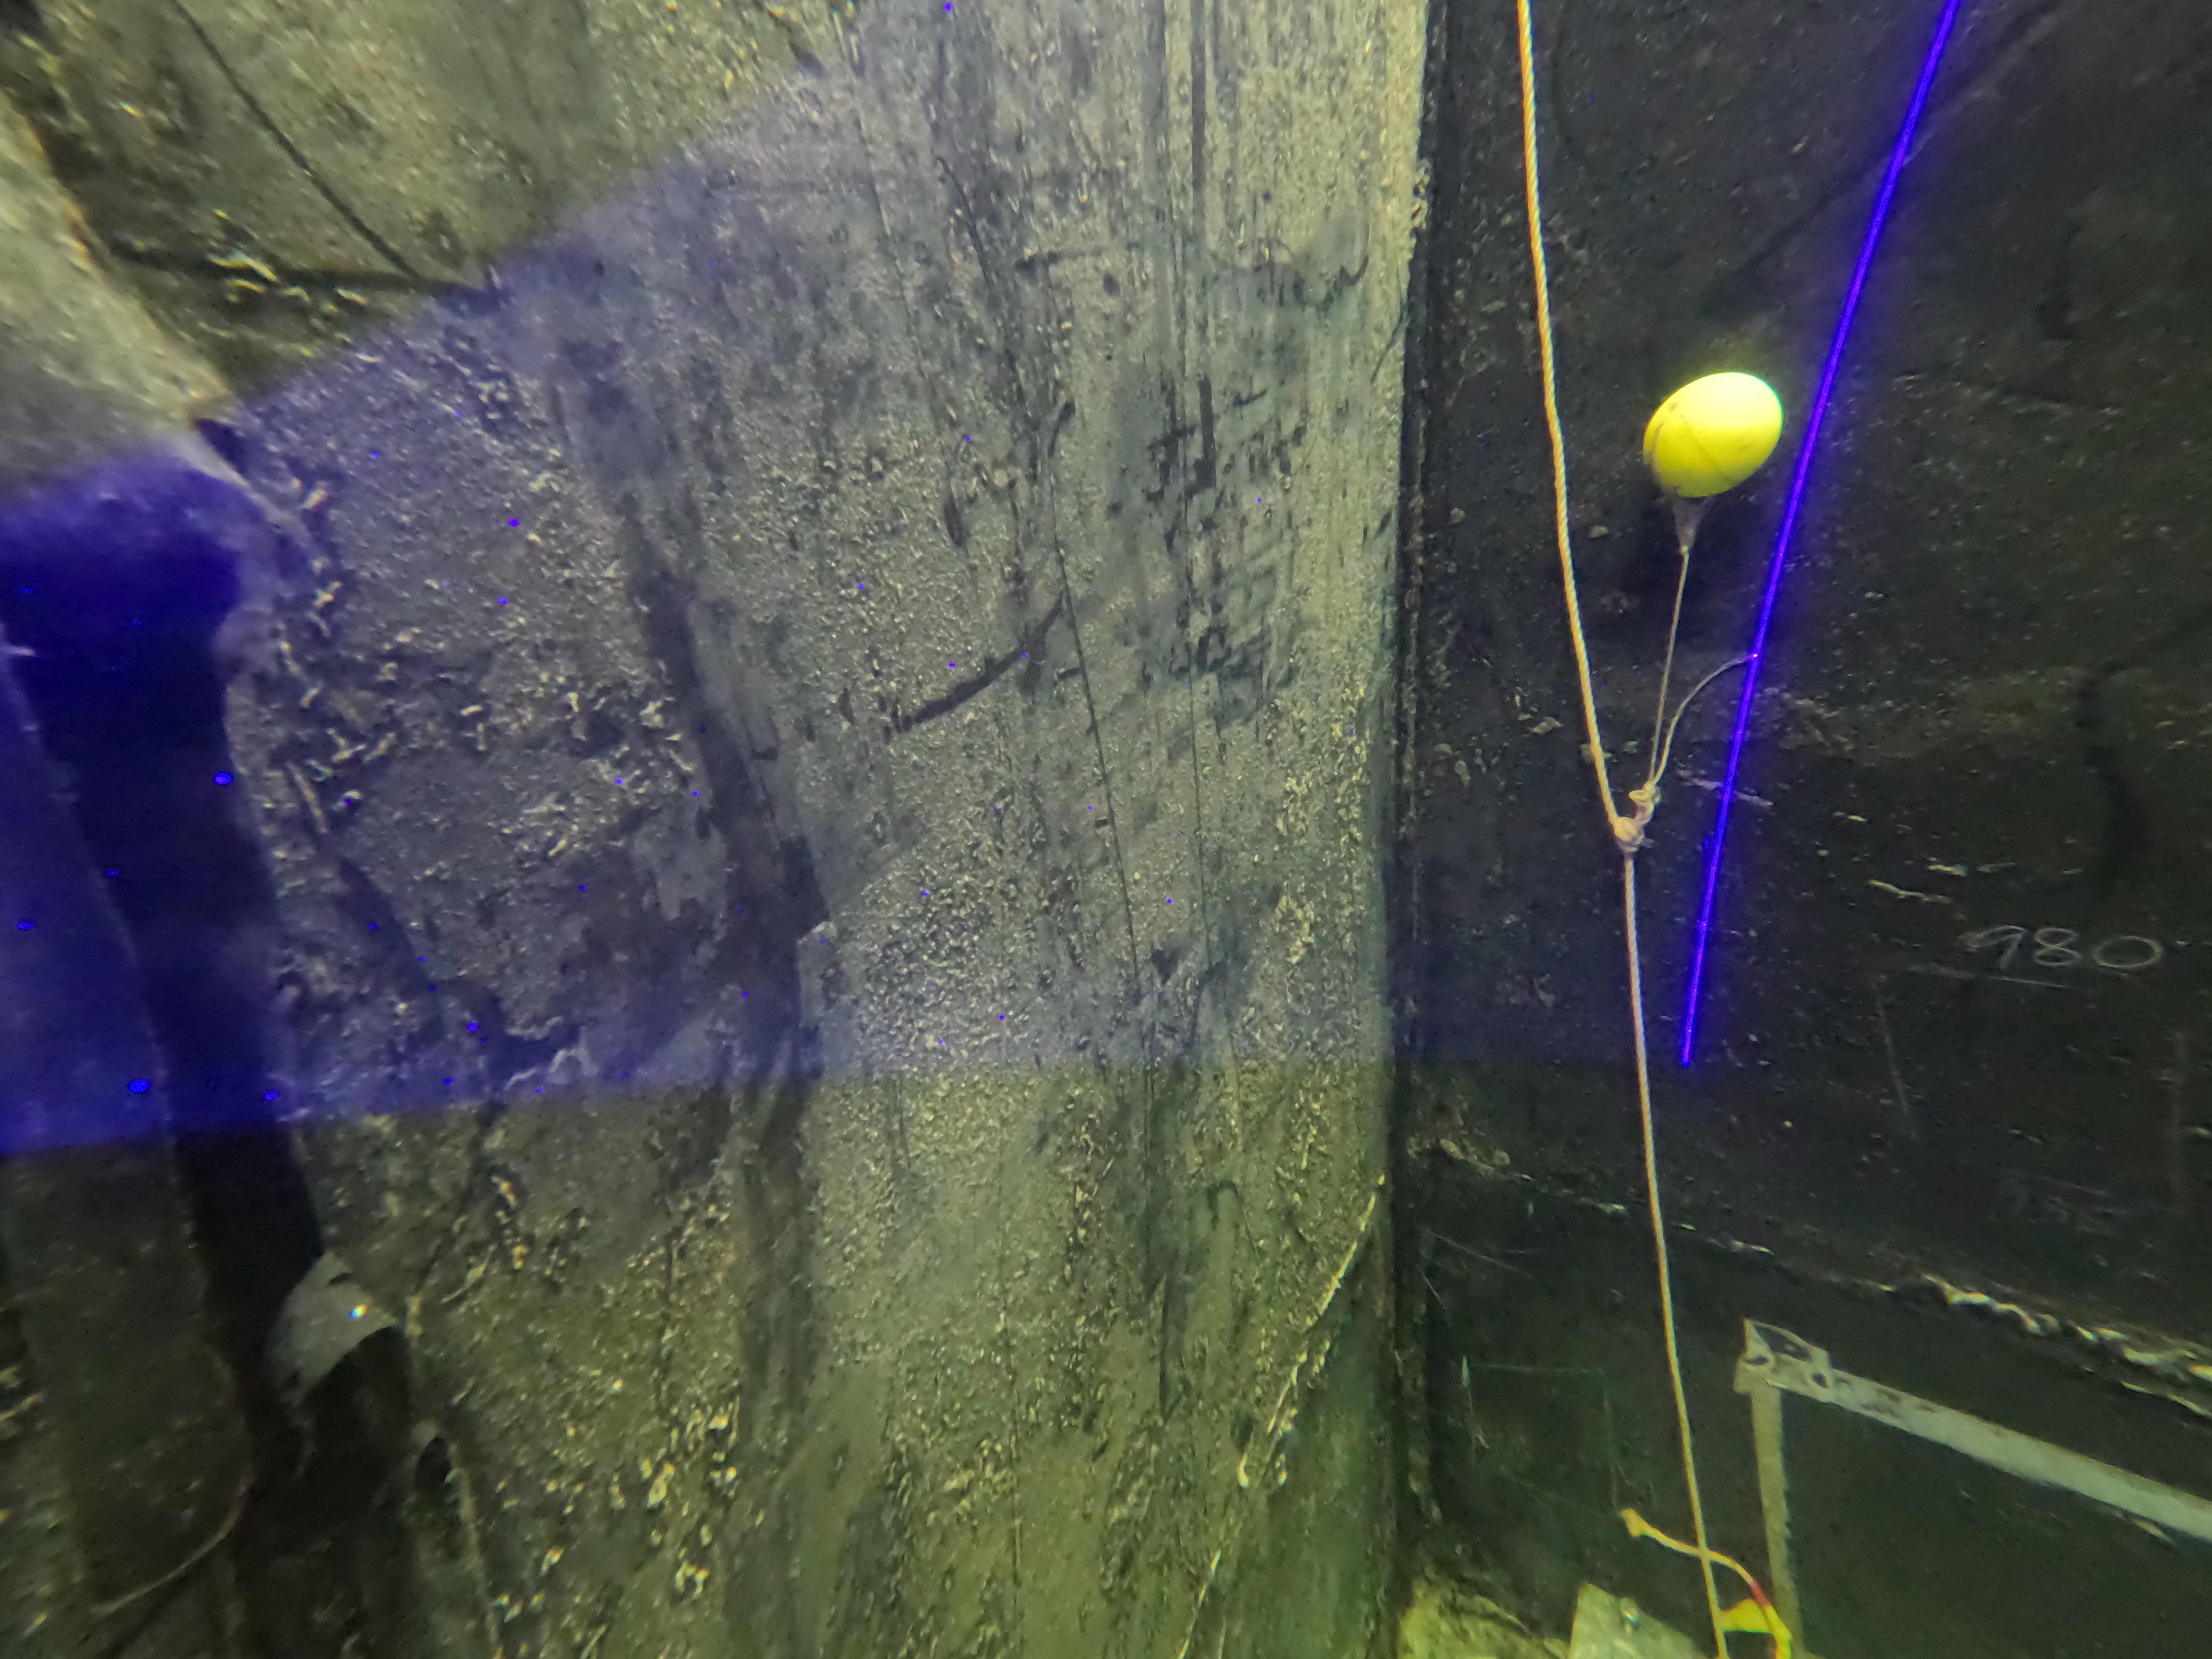

Supplement: Supplementary file 3081 [file G0031881.pdf › 12/G0031881.pdf]

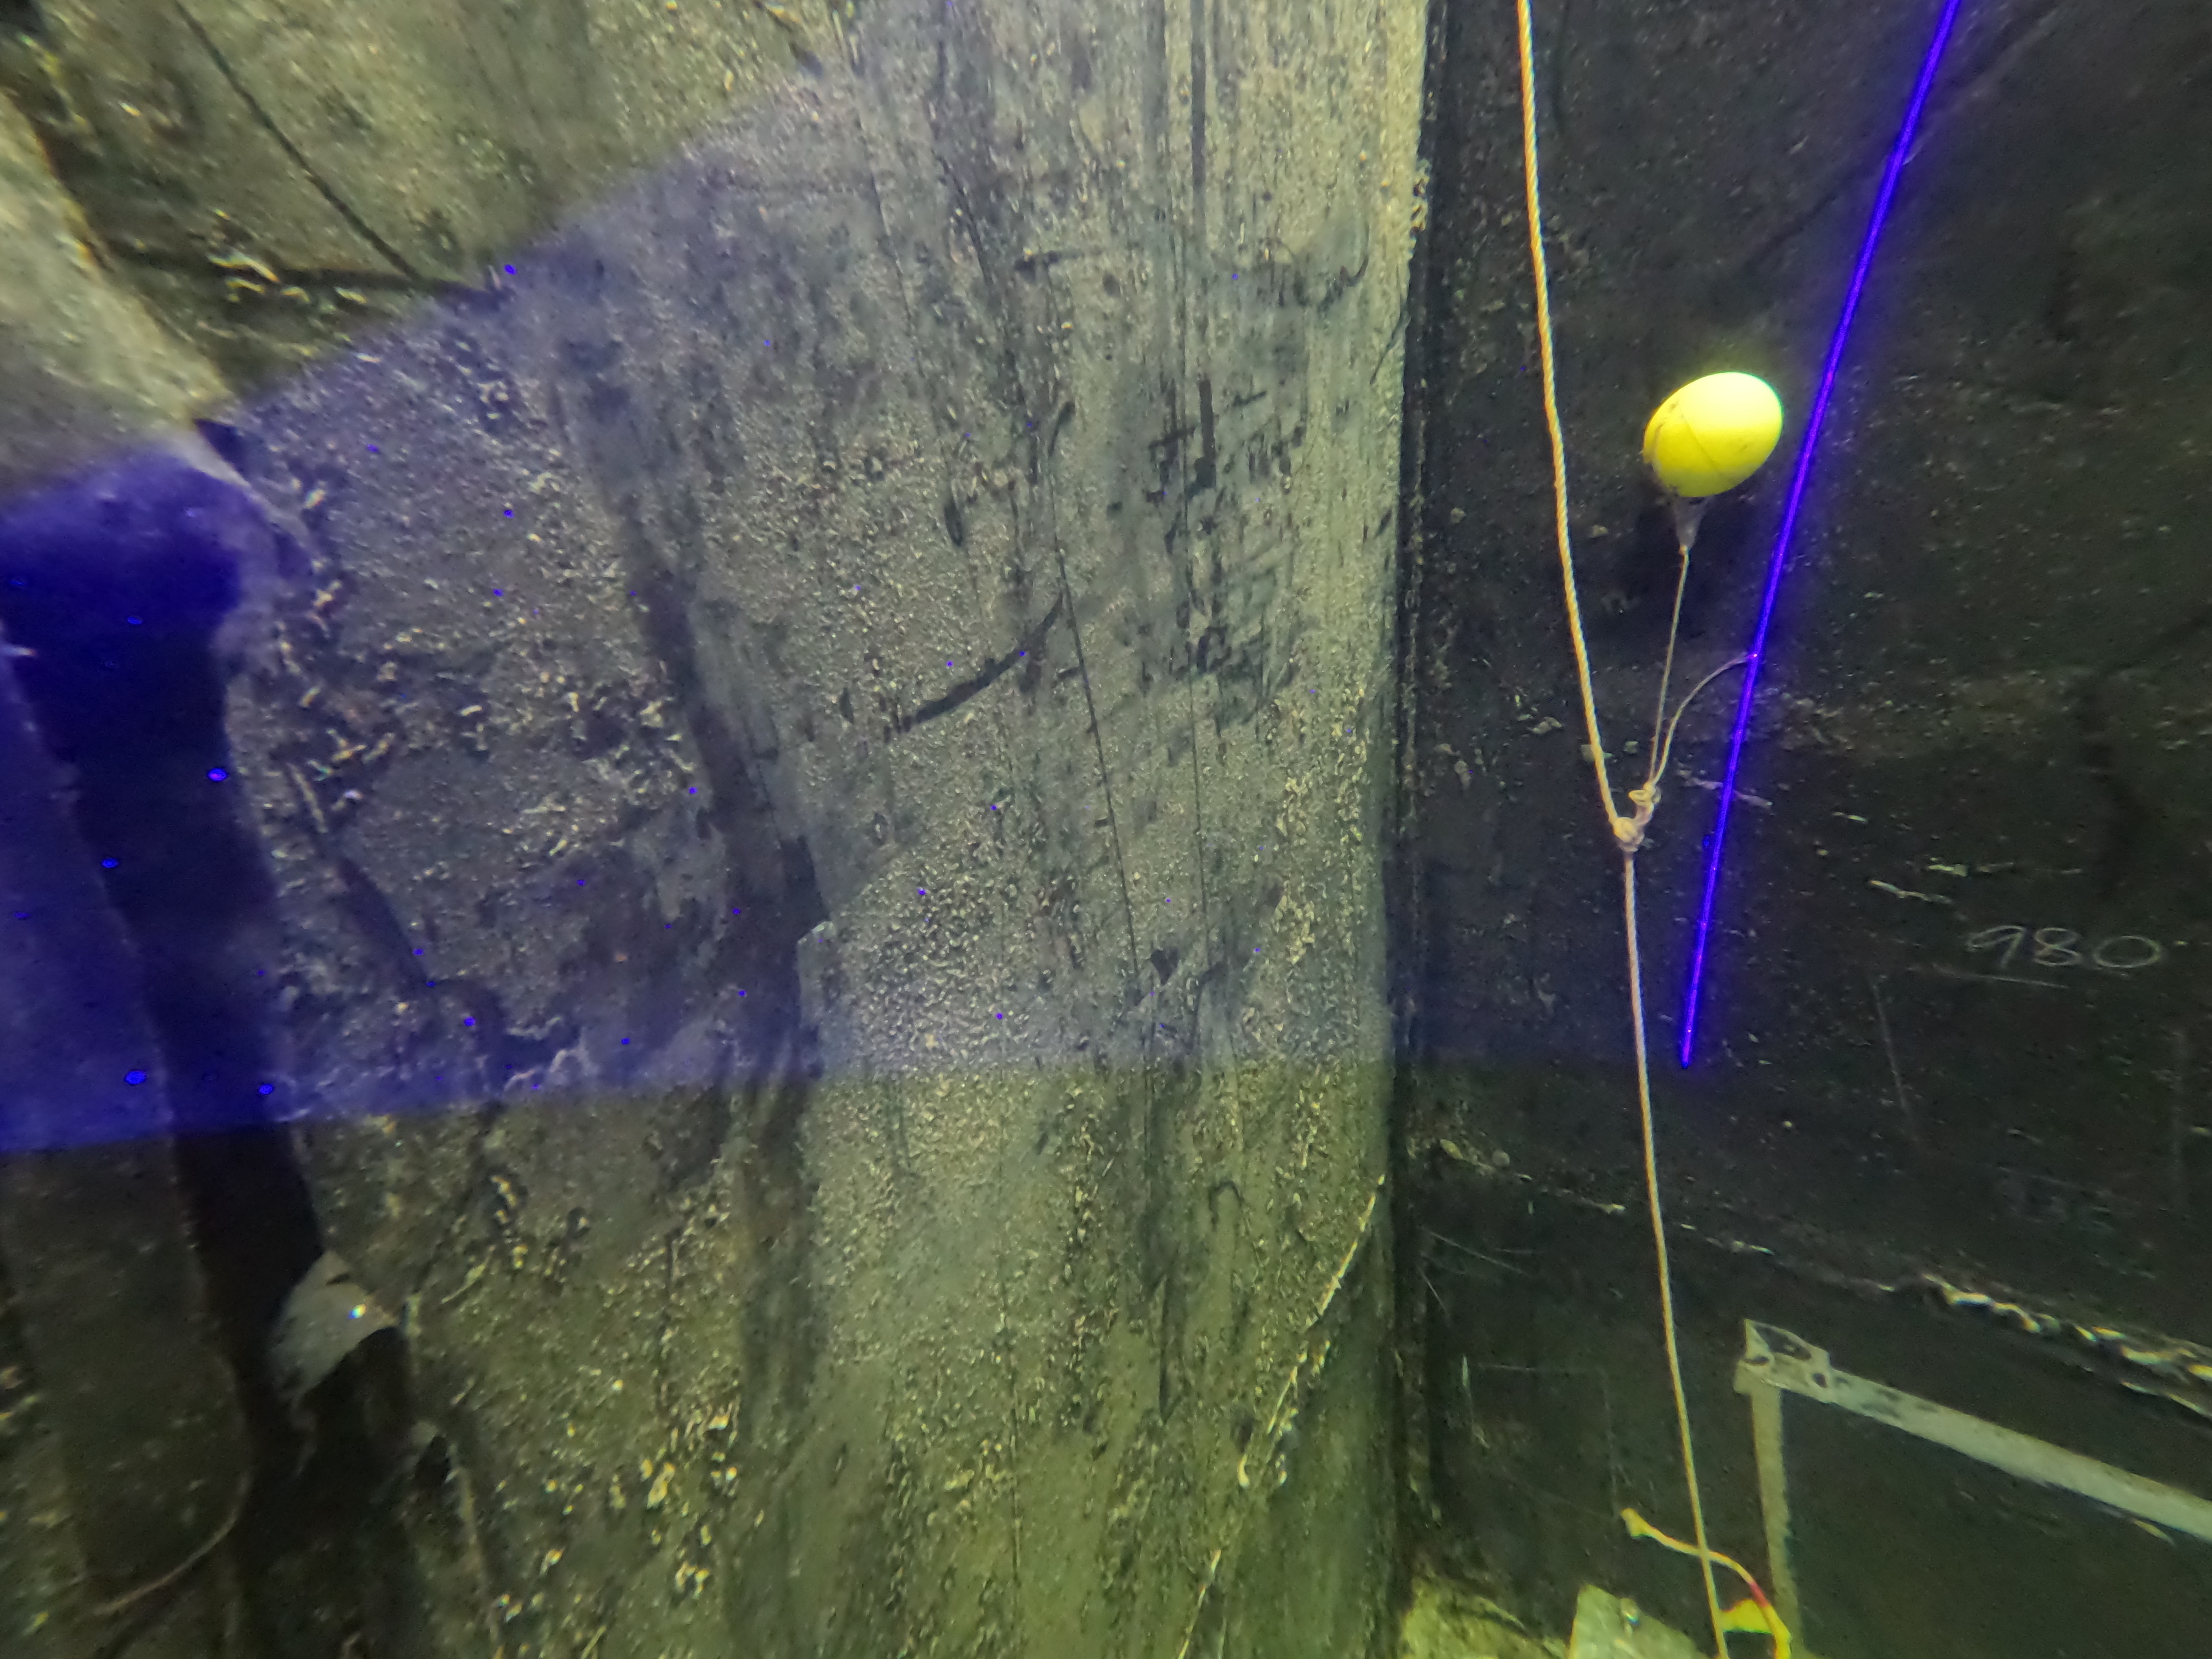

Supplement: Supplementary file 3082 [file G0031882.pdf › 12/G0031882.pdf]

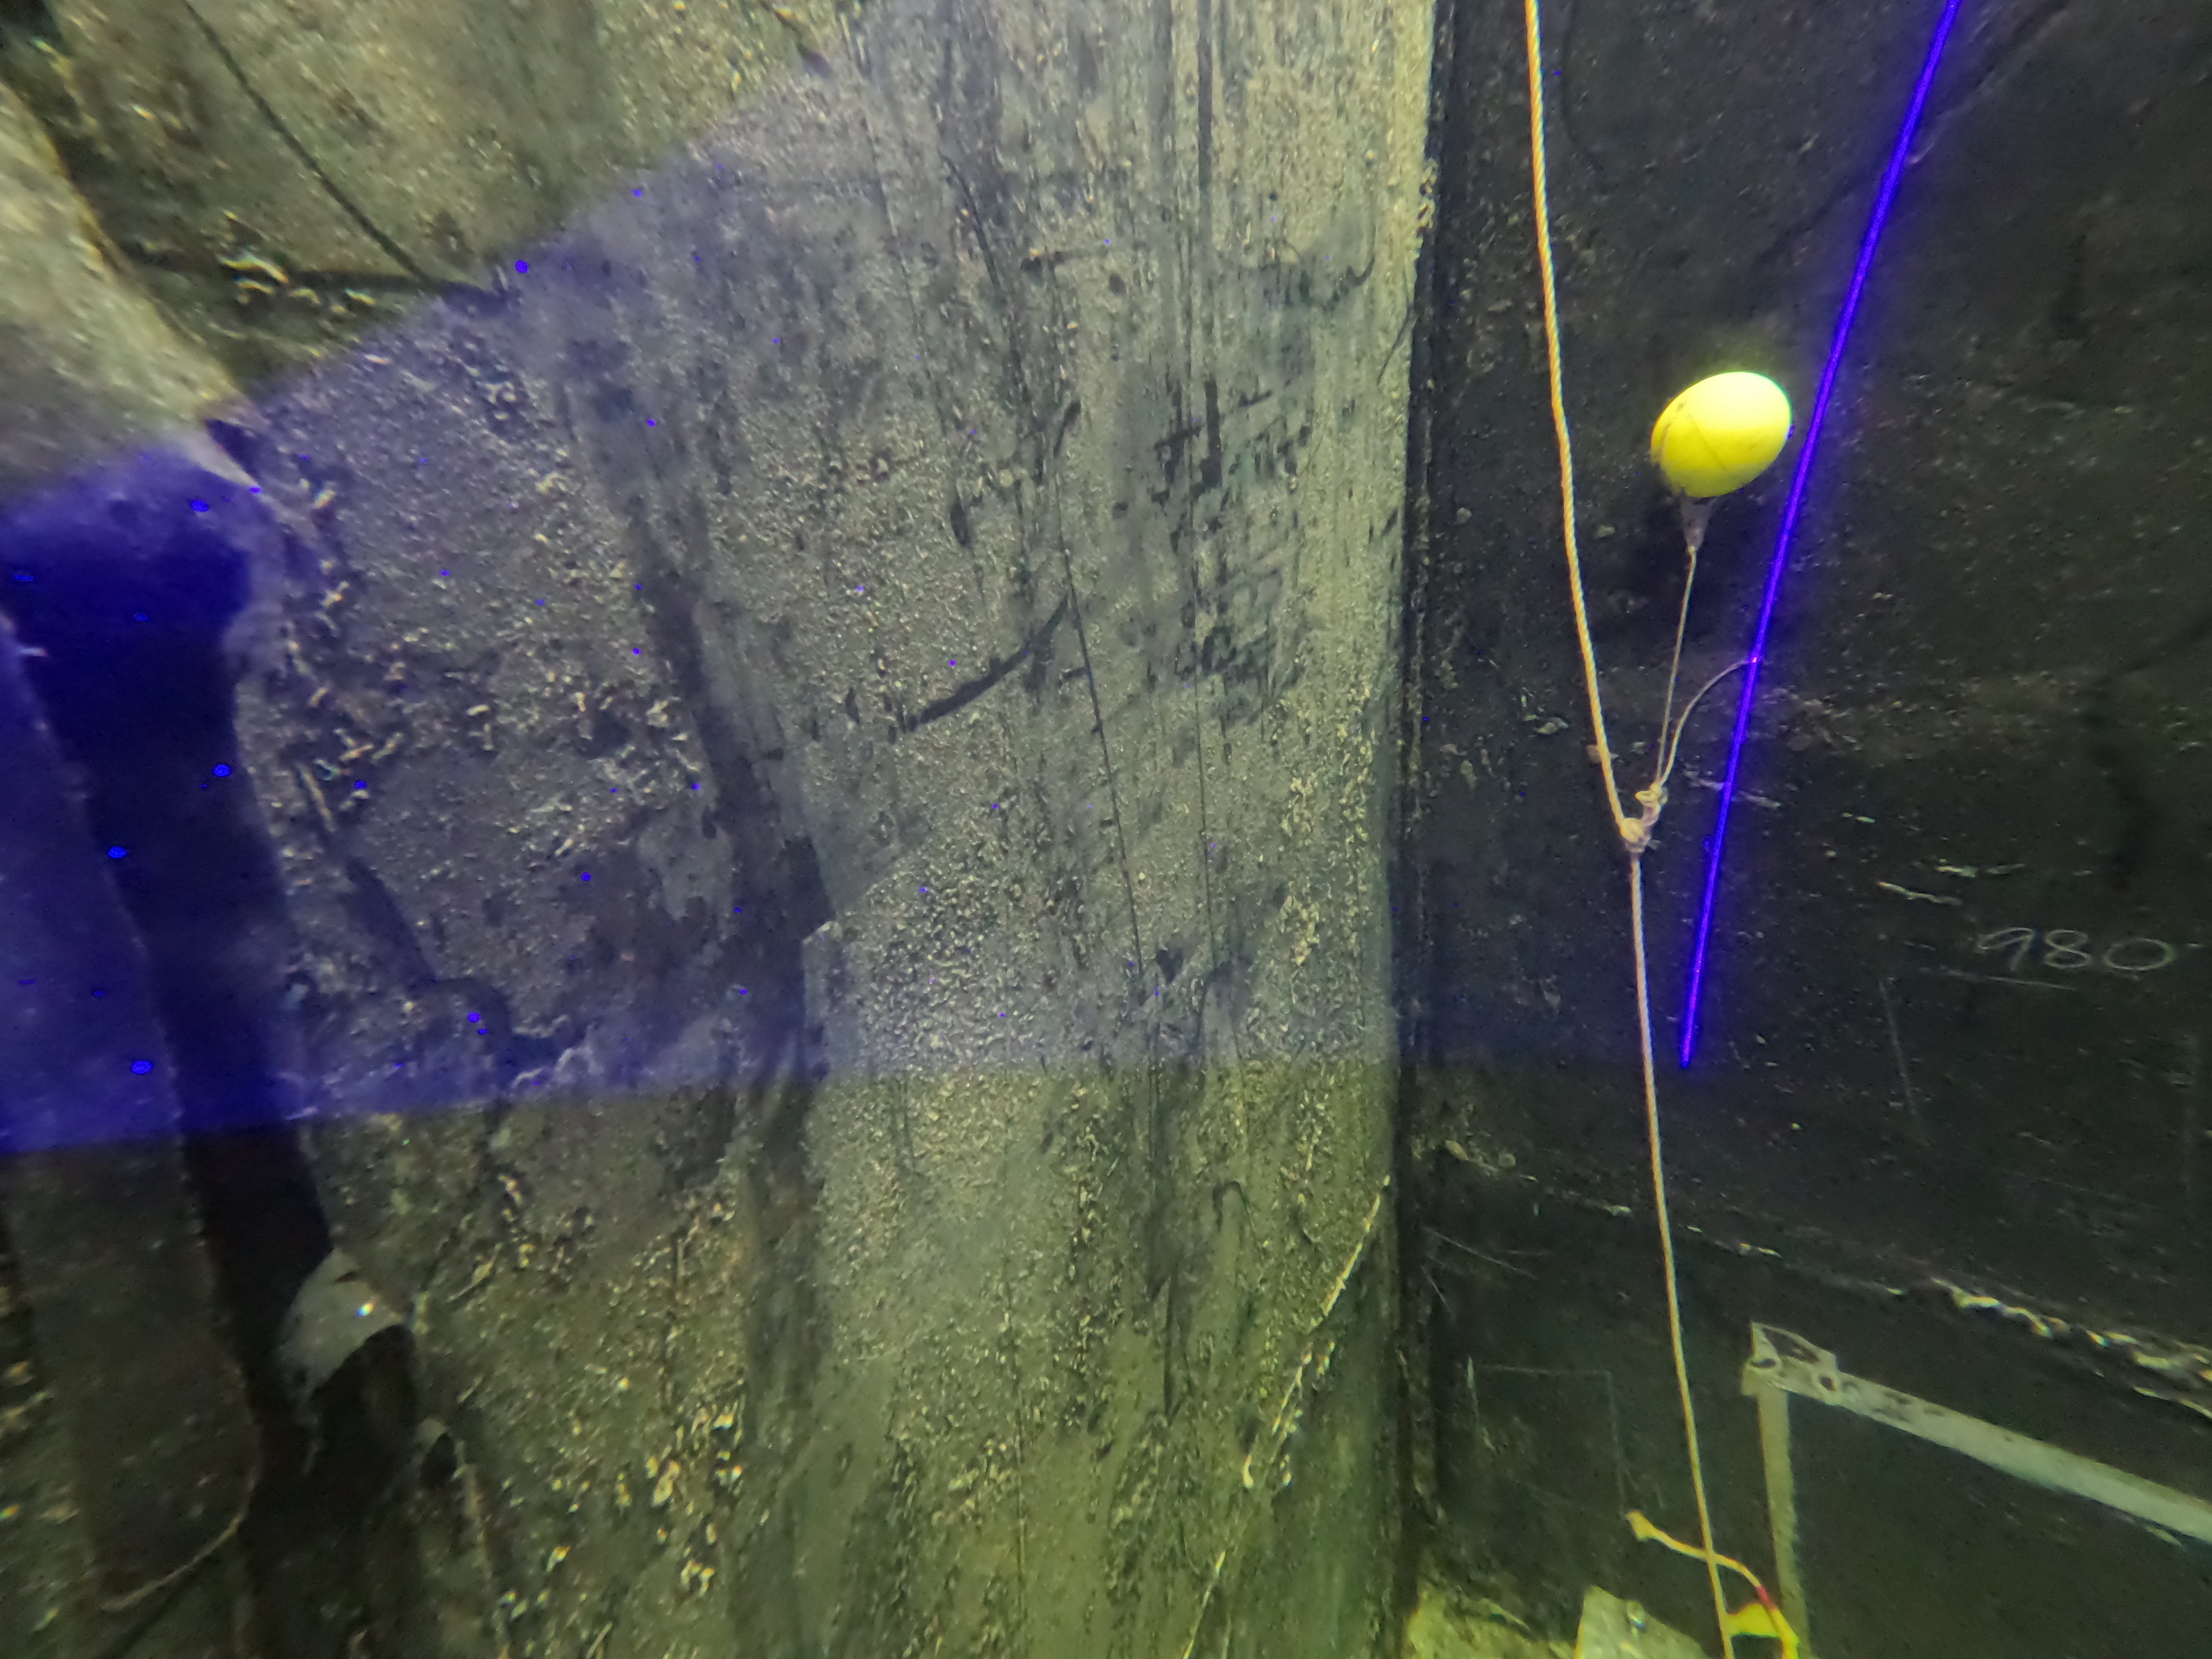

Supplement: Supplementary file 3083 [file G0031883.pdf › 12/G0031883.pdf]

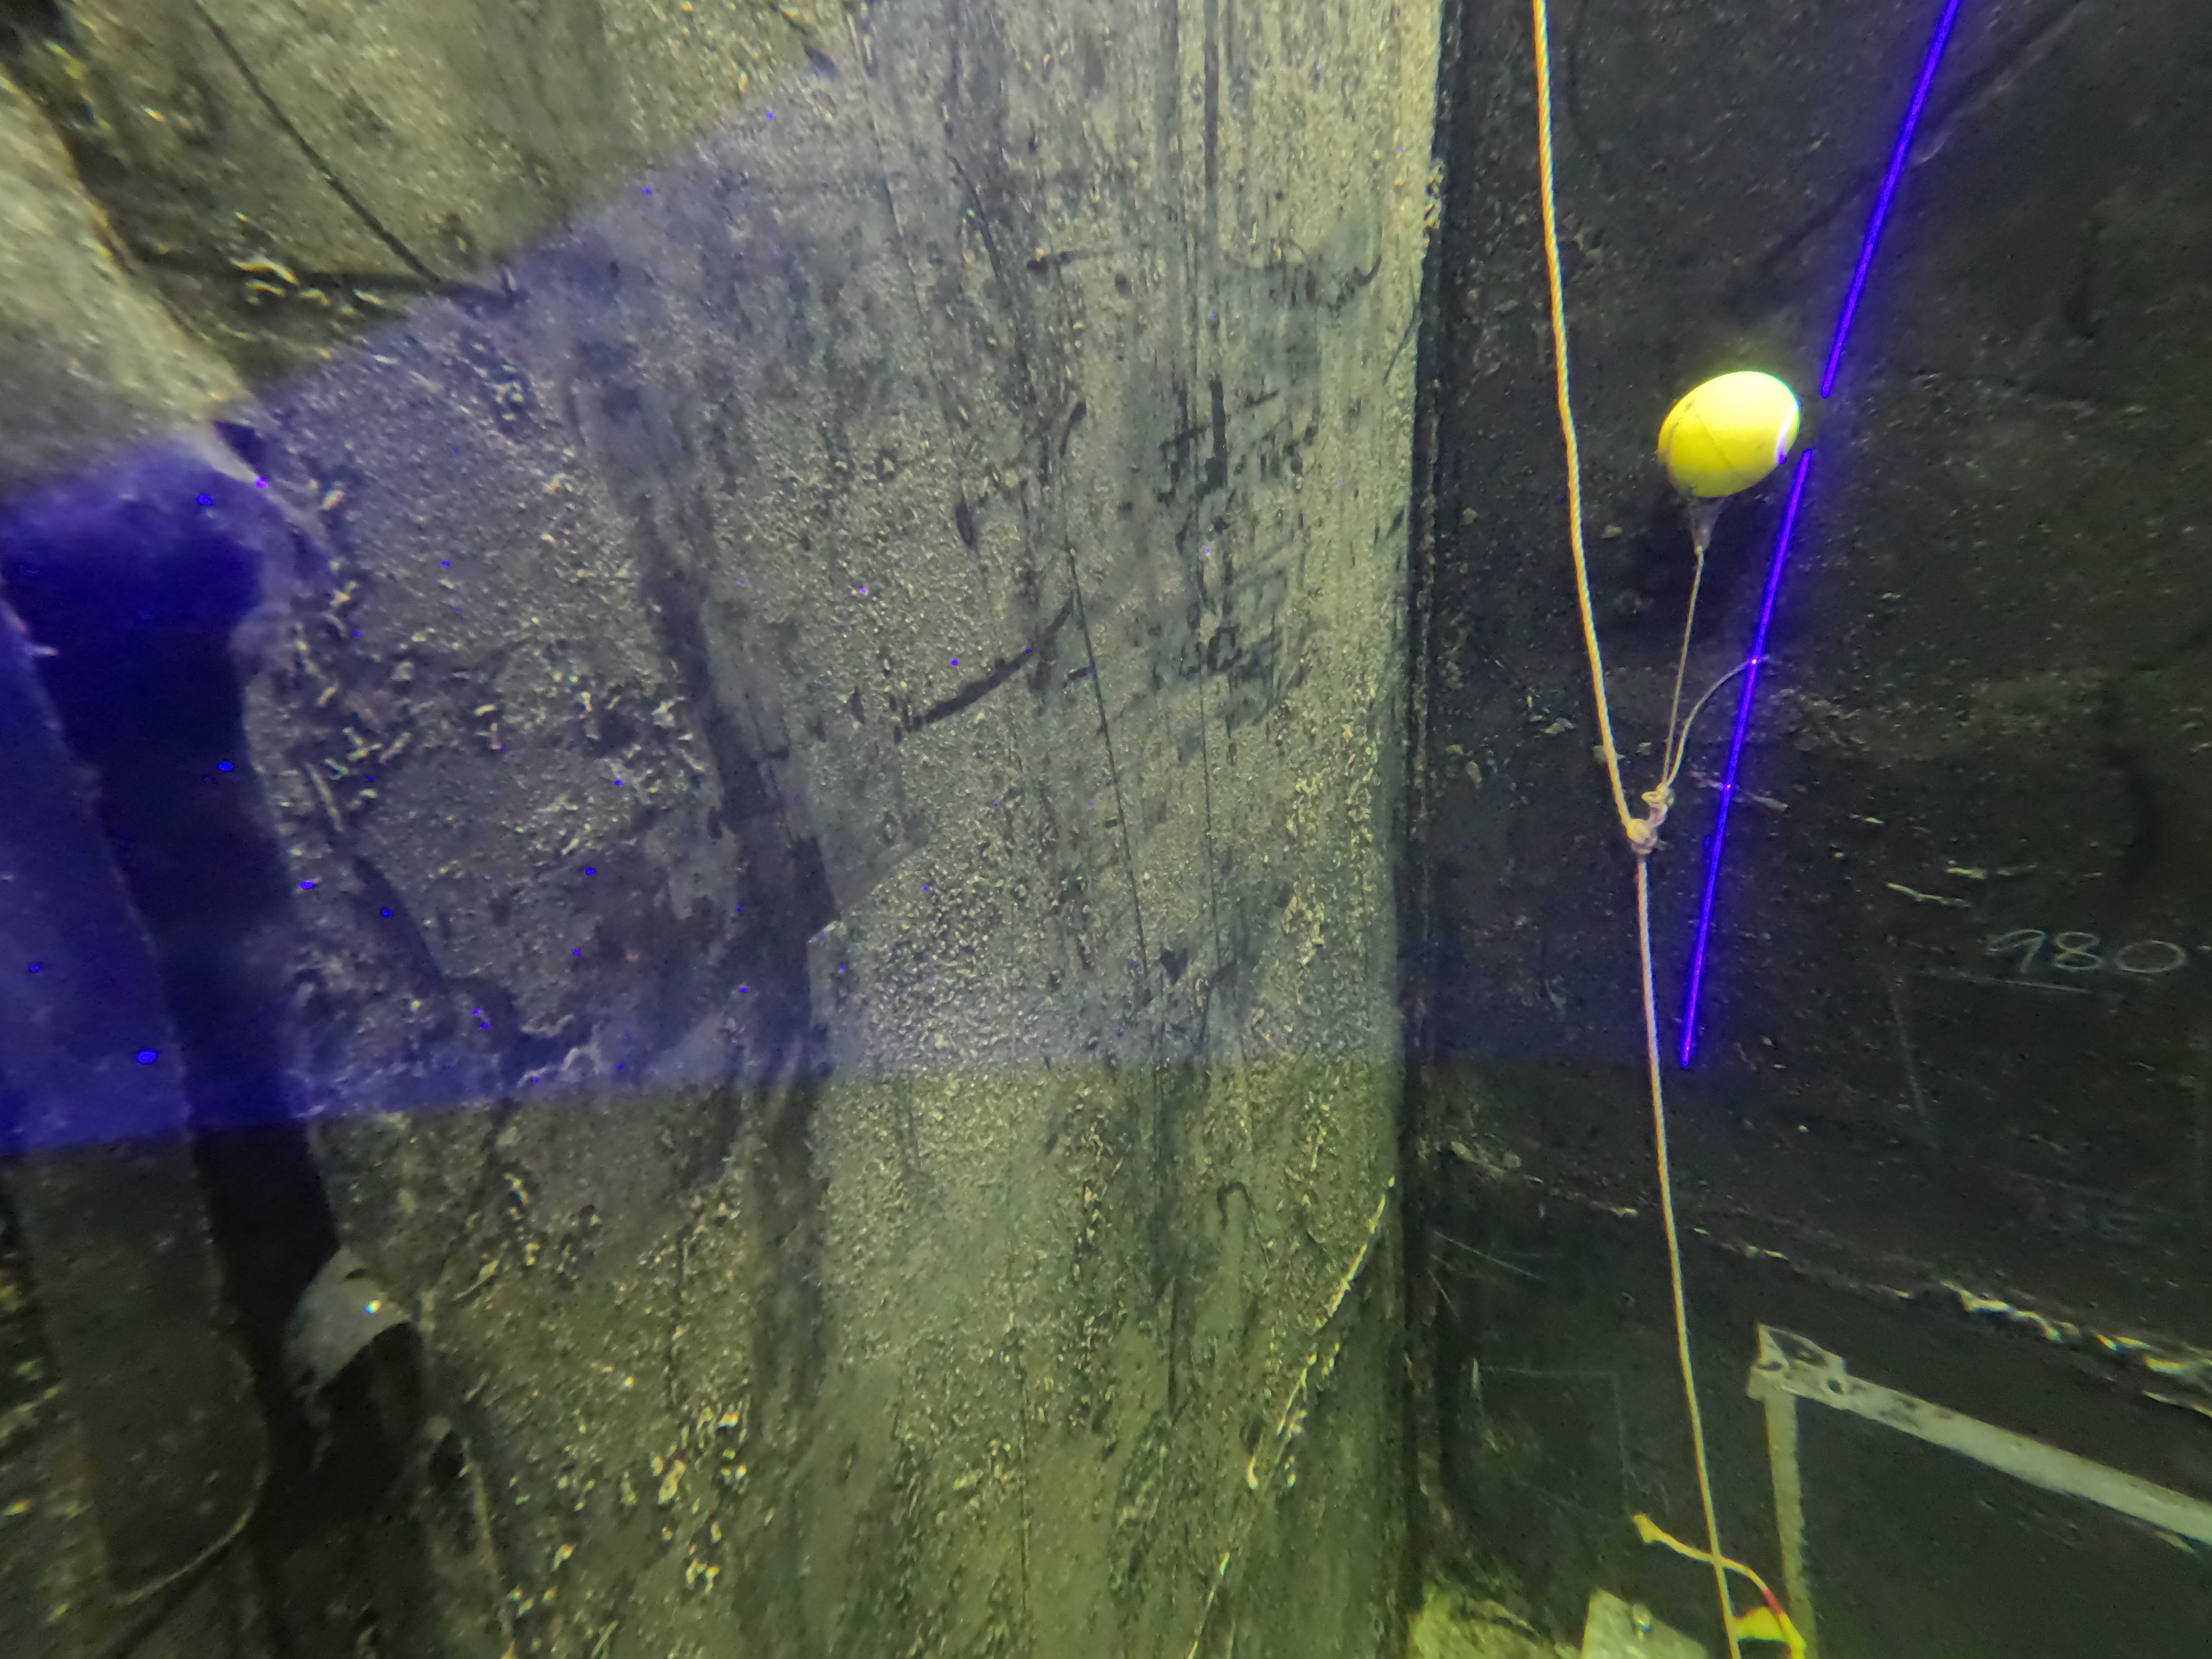

Supplement: Supplementary file 3084 [file G0031884.pdf › 12/G0031884.pdf]

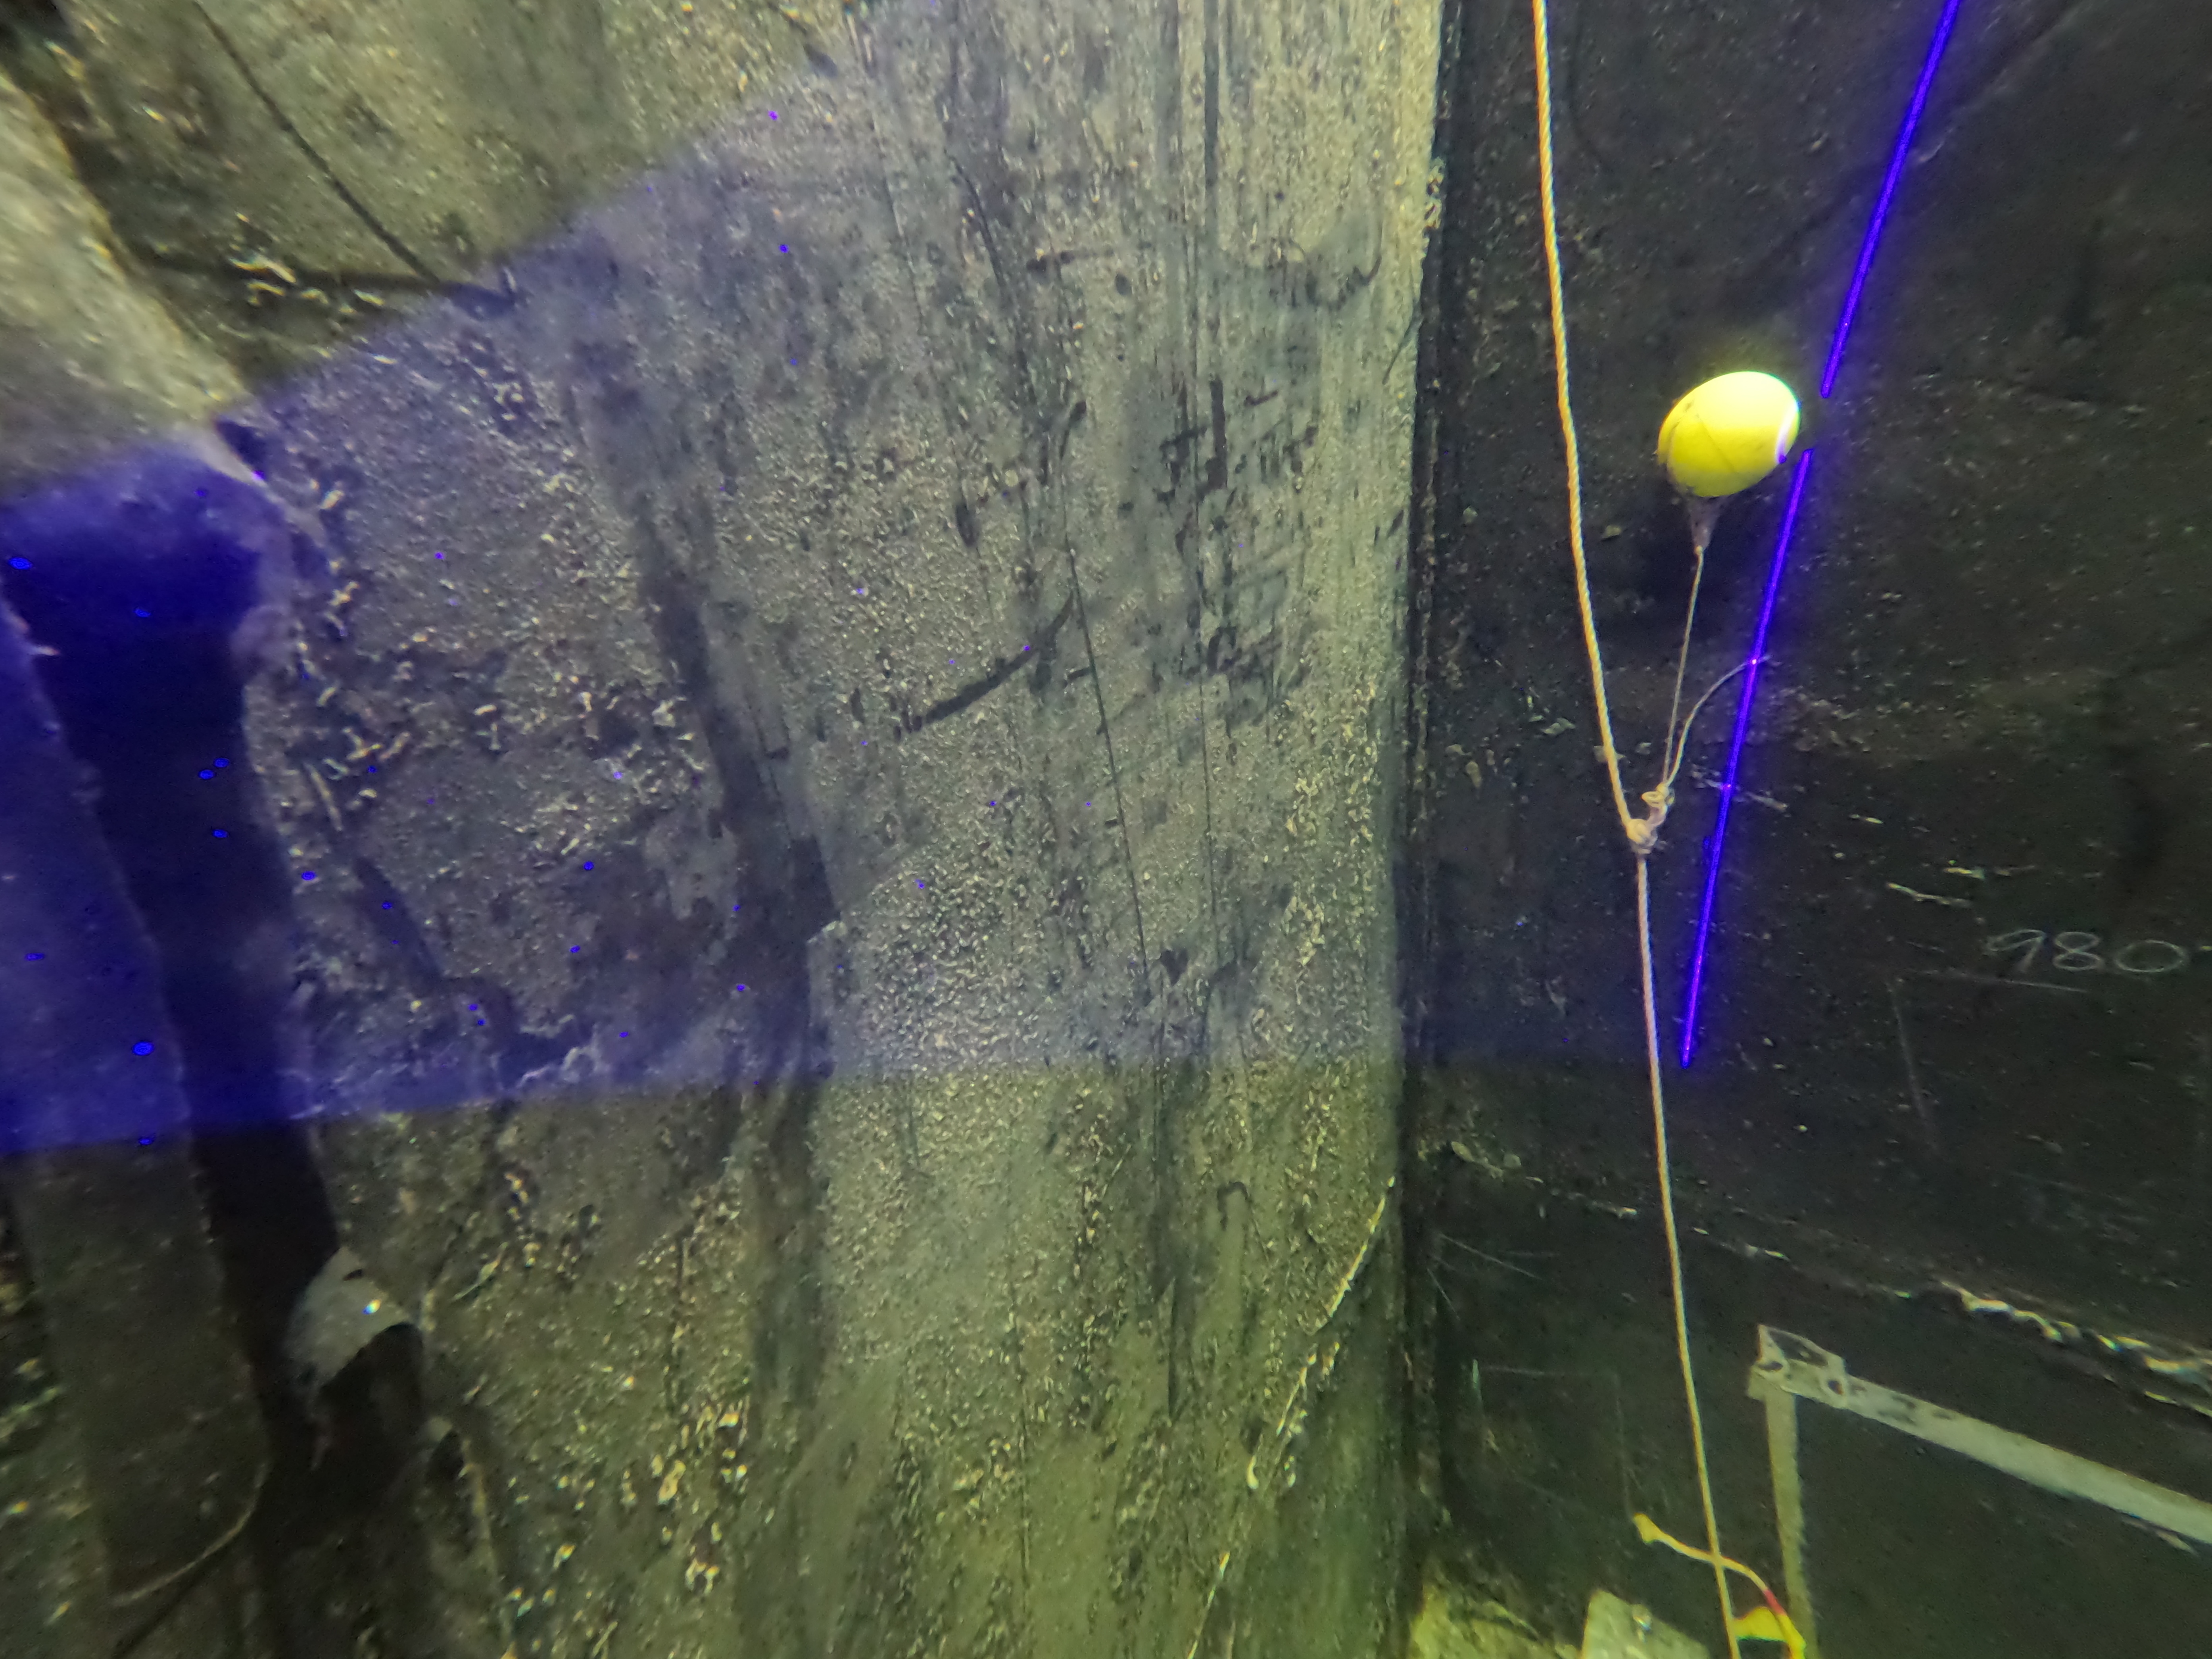

Supplement: Supplementary file 3085 [file G0031885.pdf › 12/G0031885.pdf]

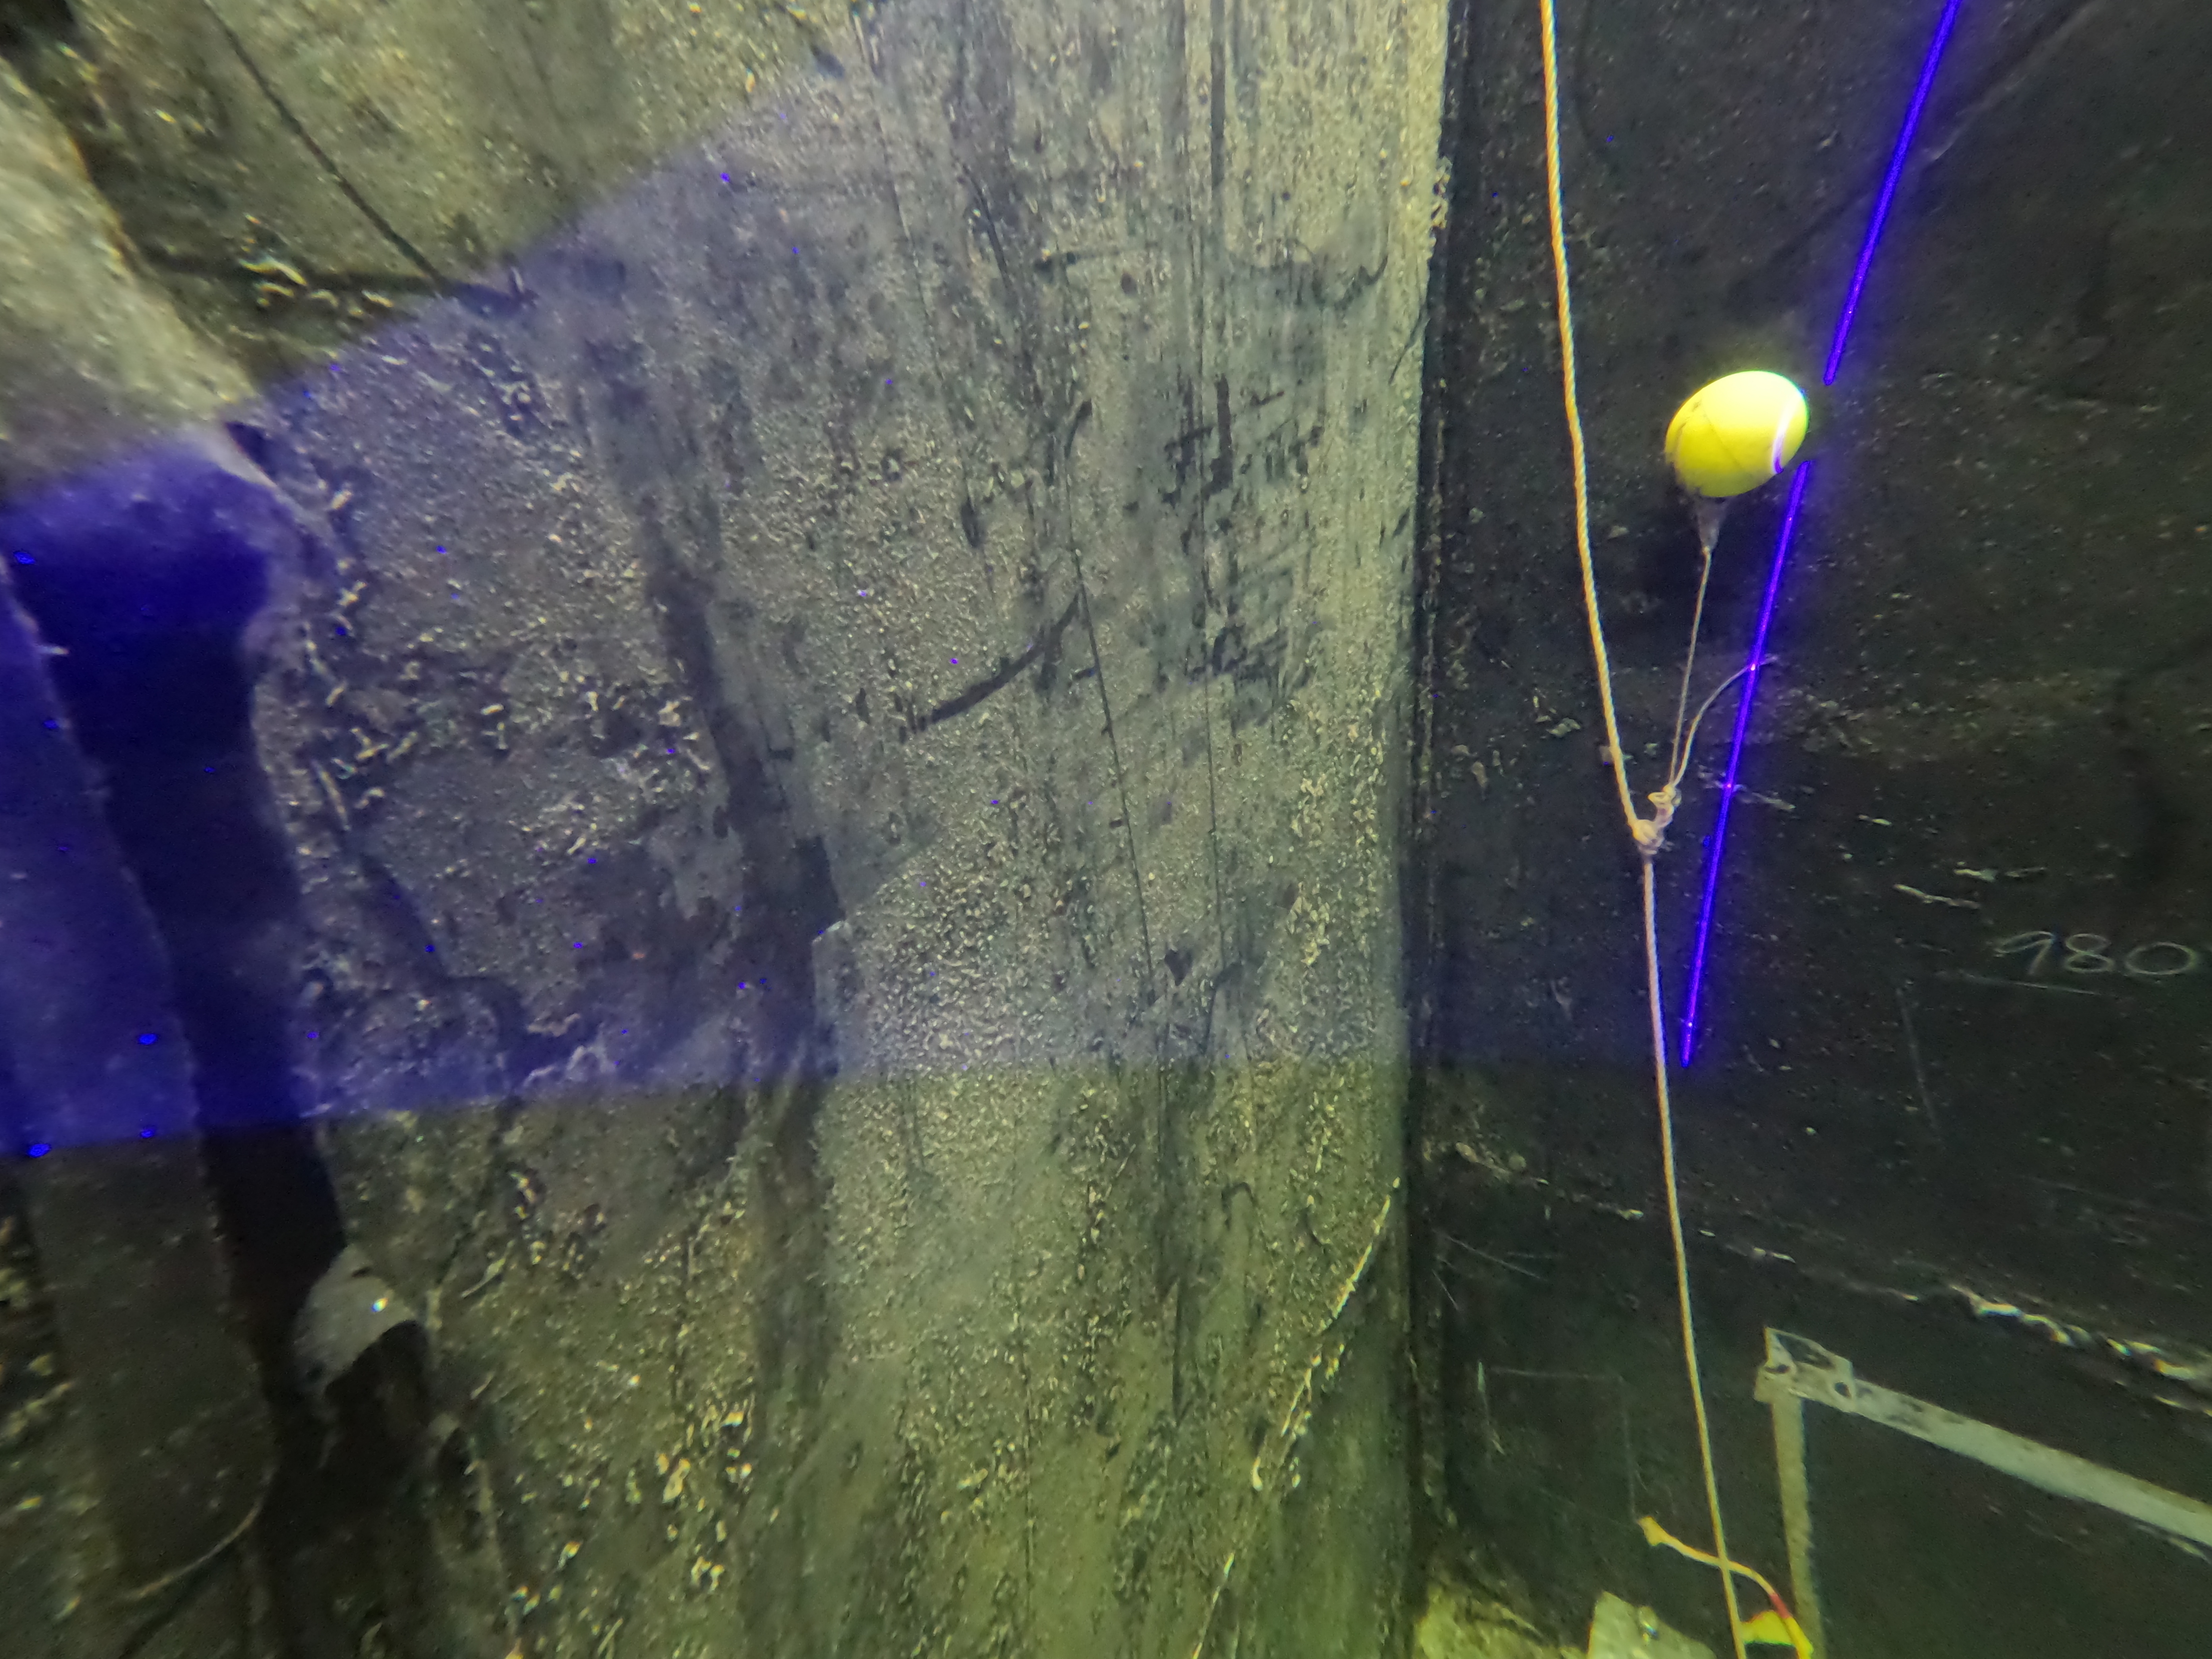

Supplement: Supplementary file 3086 [file G0031886.pdf › 12/G0031886.pdf]

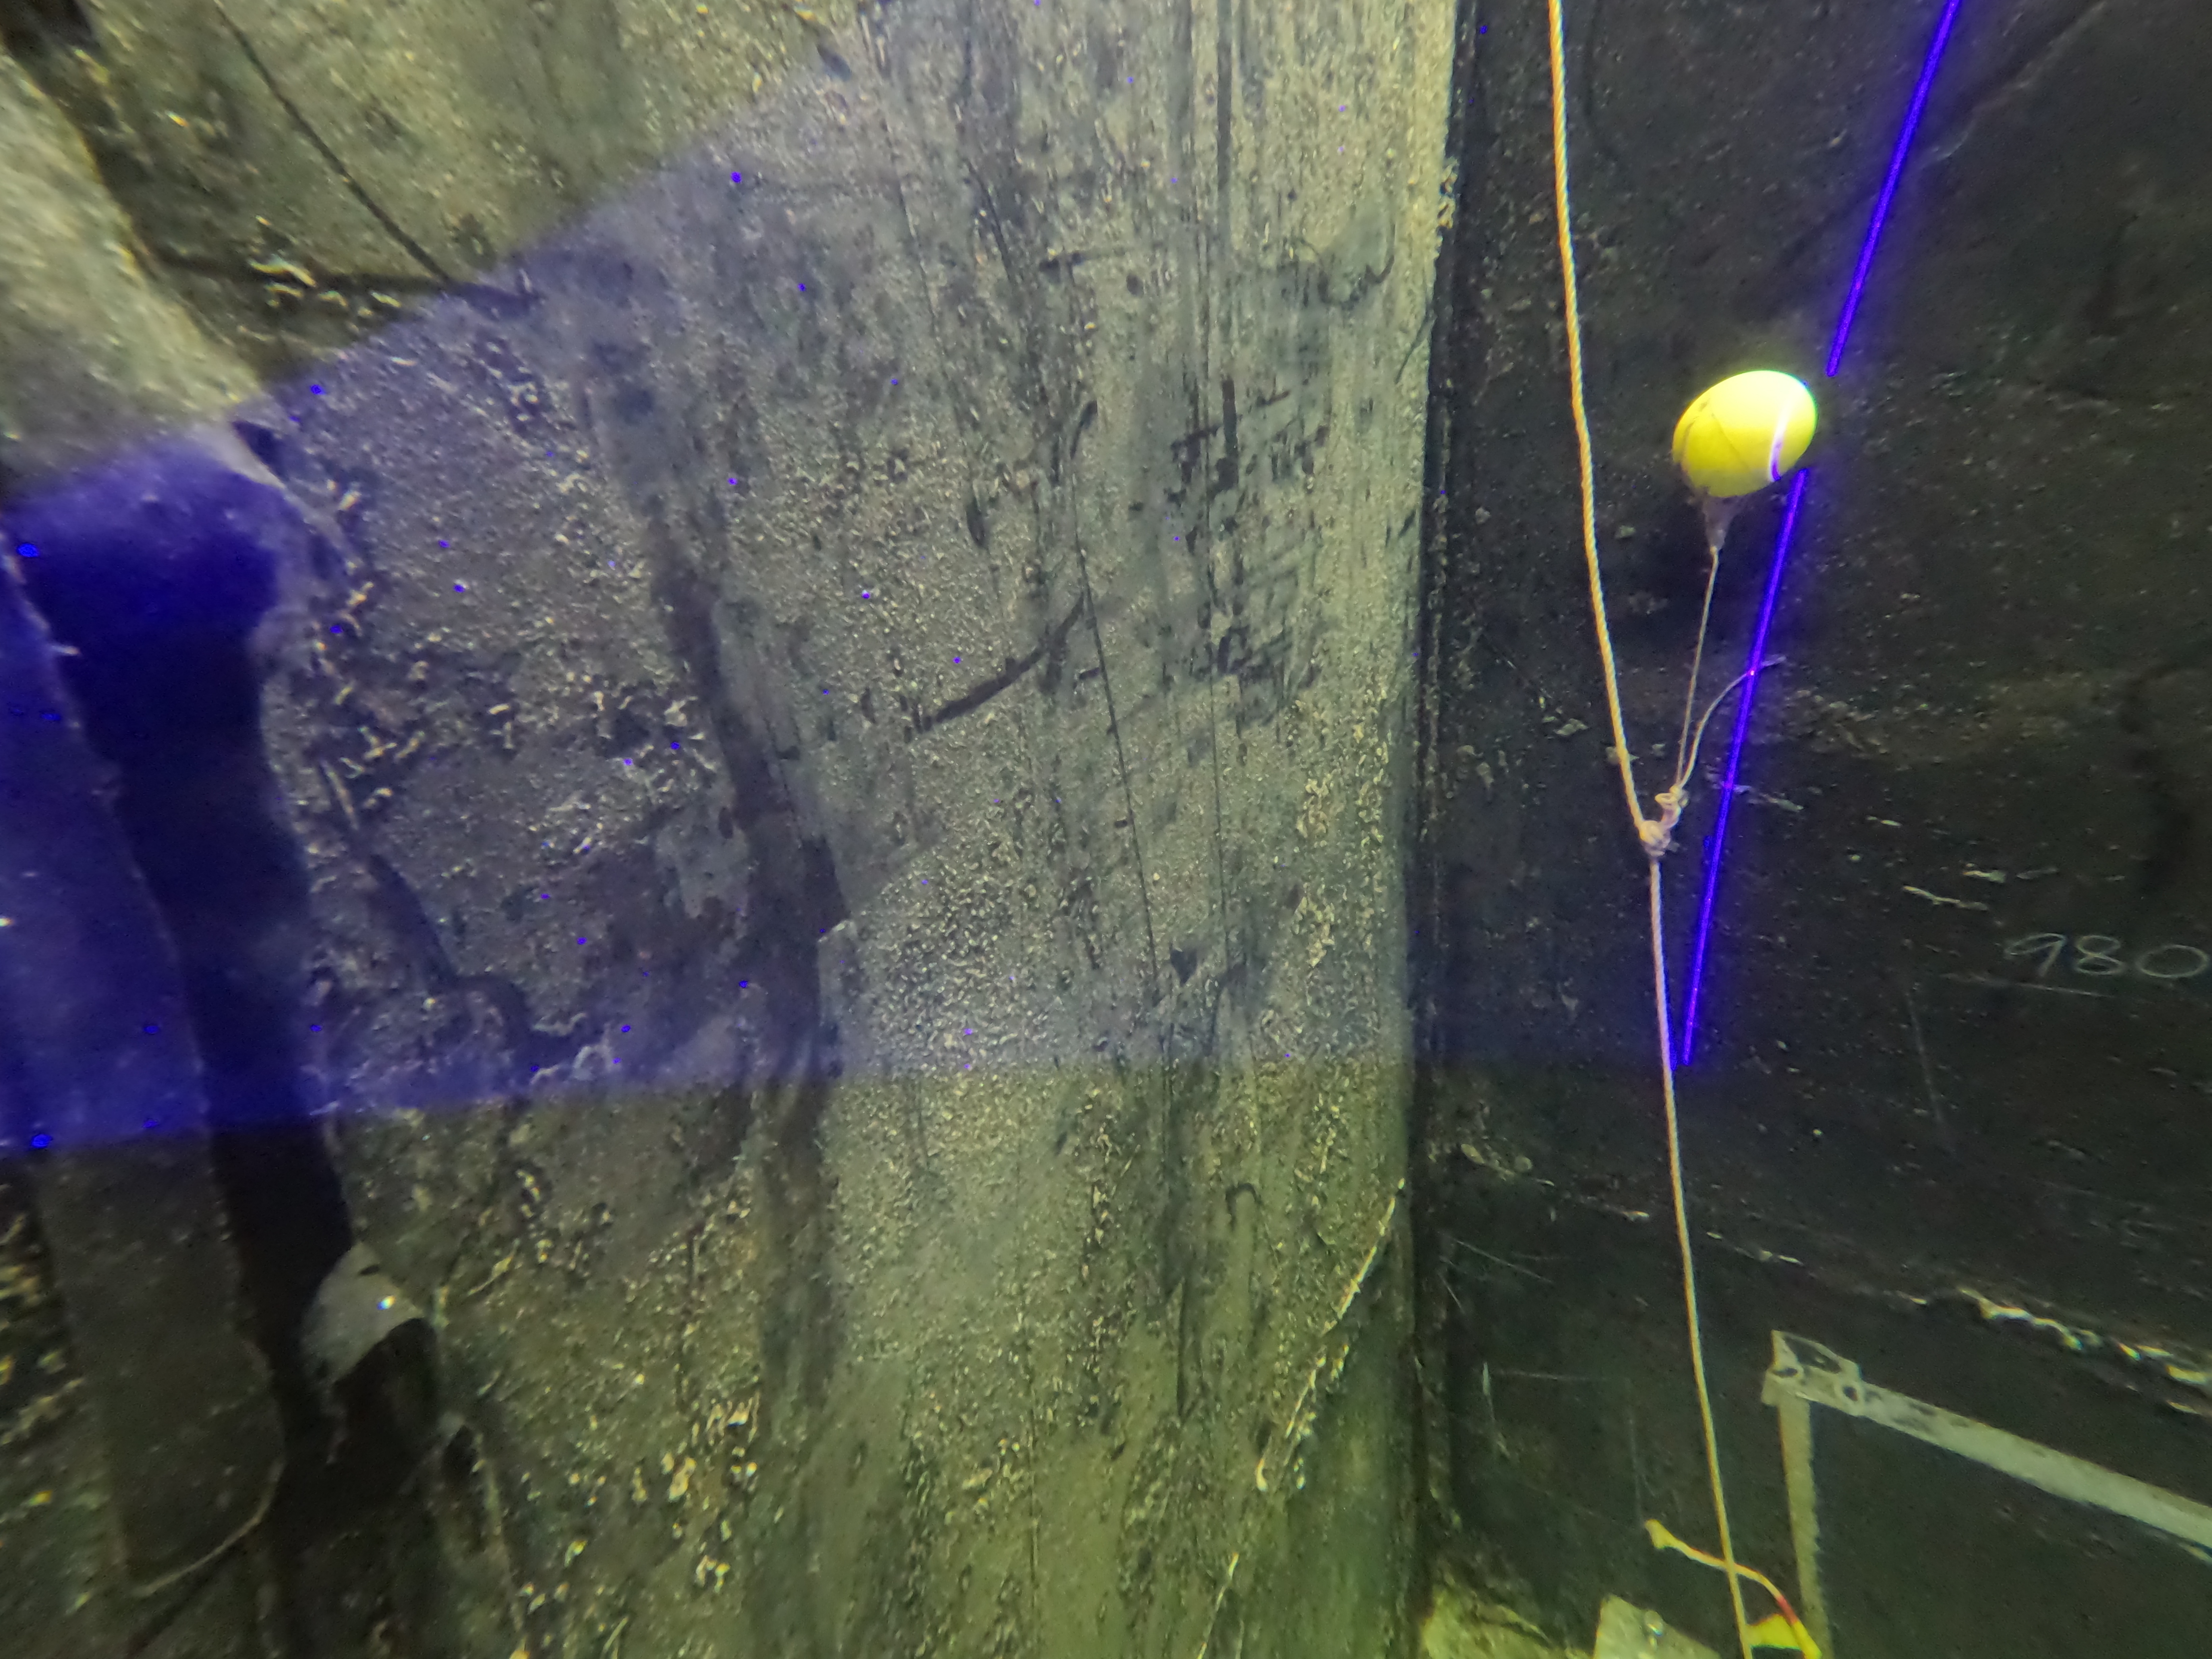

980

Supplement: Supplementary file 3087 [file G0031887.pdf › 12/G0031887.pdf]

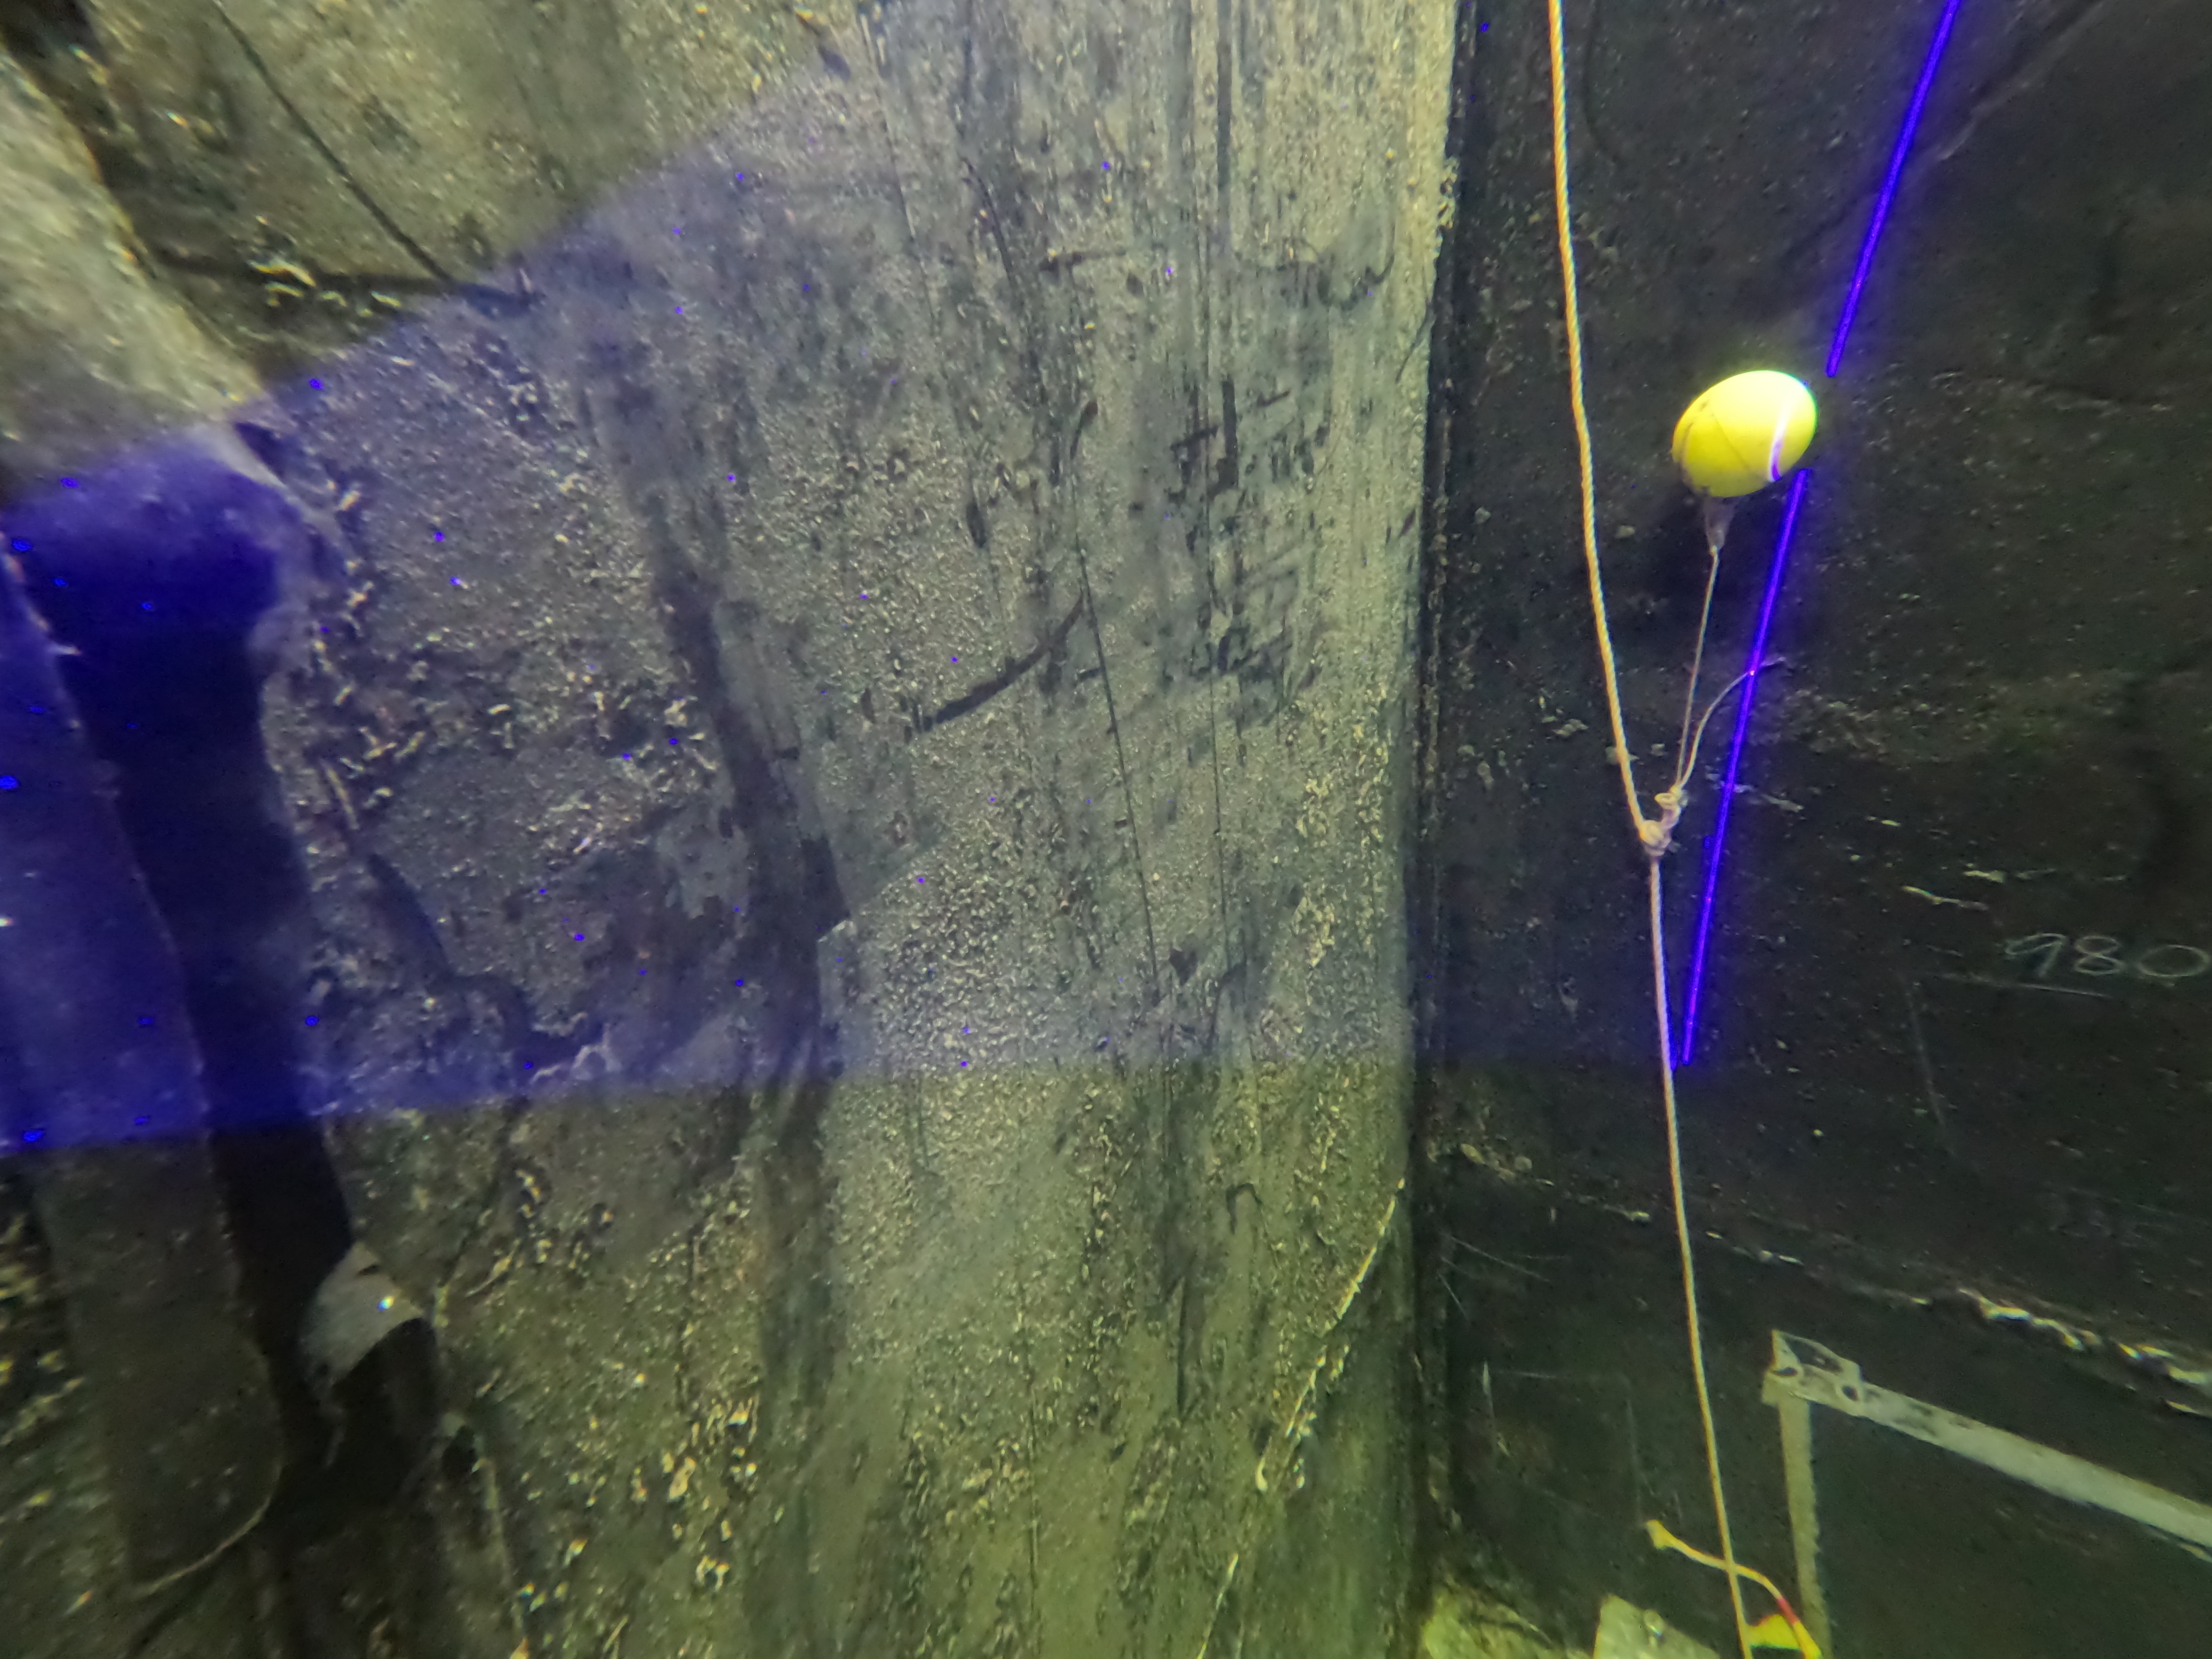

980

Supplement: Supplementary file 3088 [file G0031888.pdf › 12/G0031888.pdf]

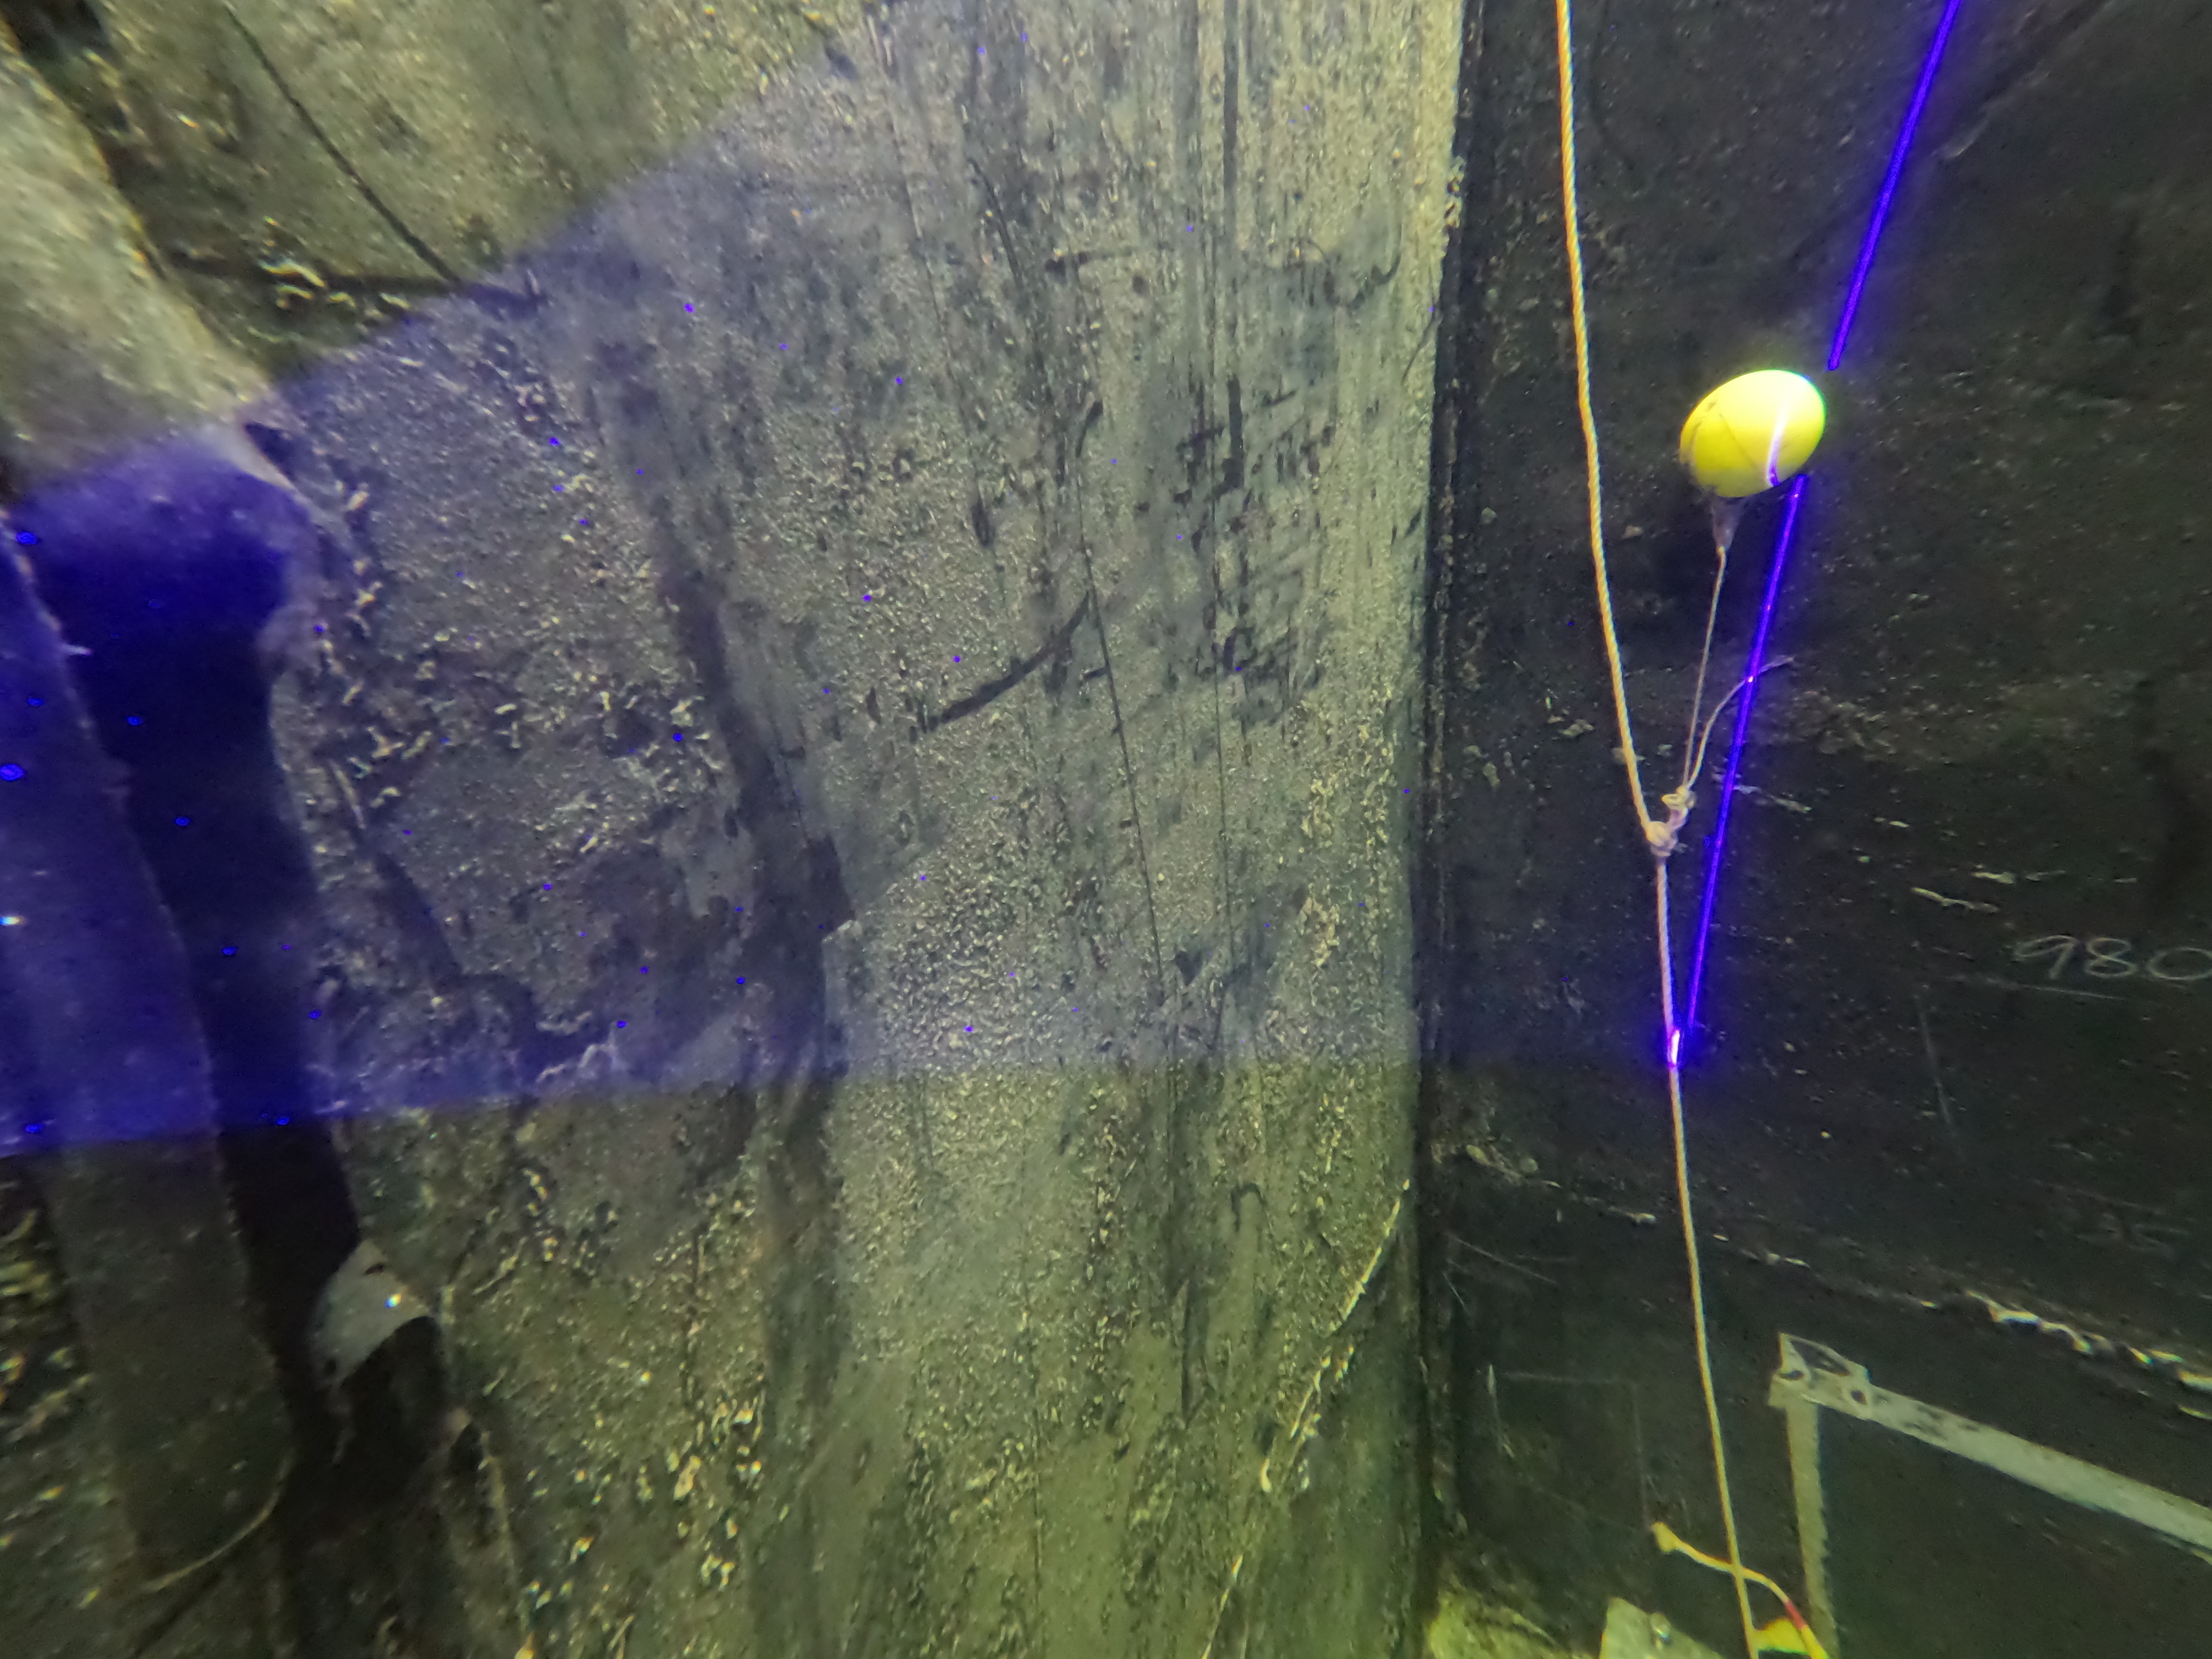

Supplement: Supplementary file 3089 [file G0031889.pdf › 12/G0031889.pdf]

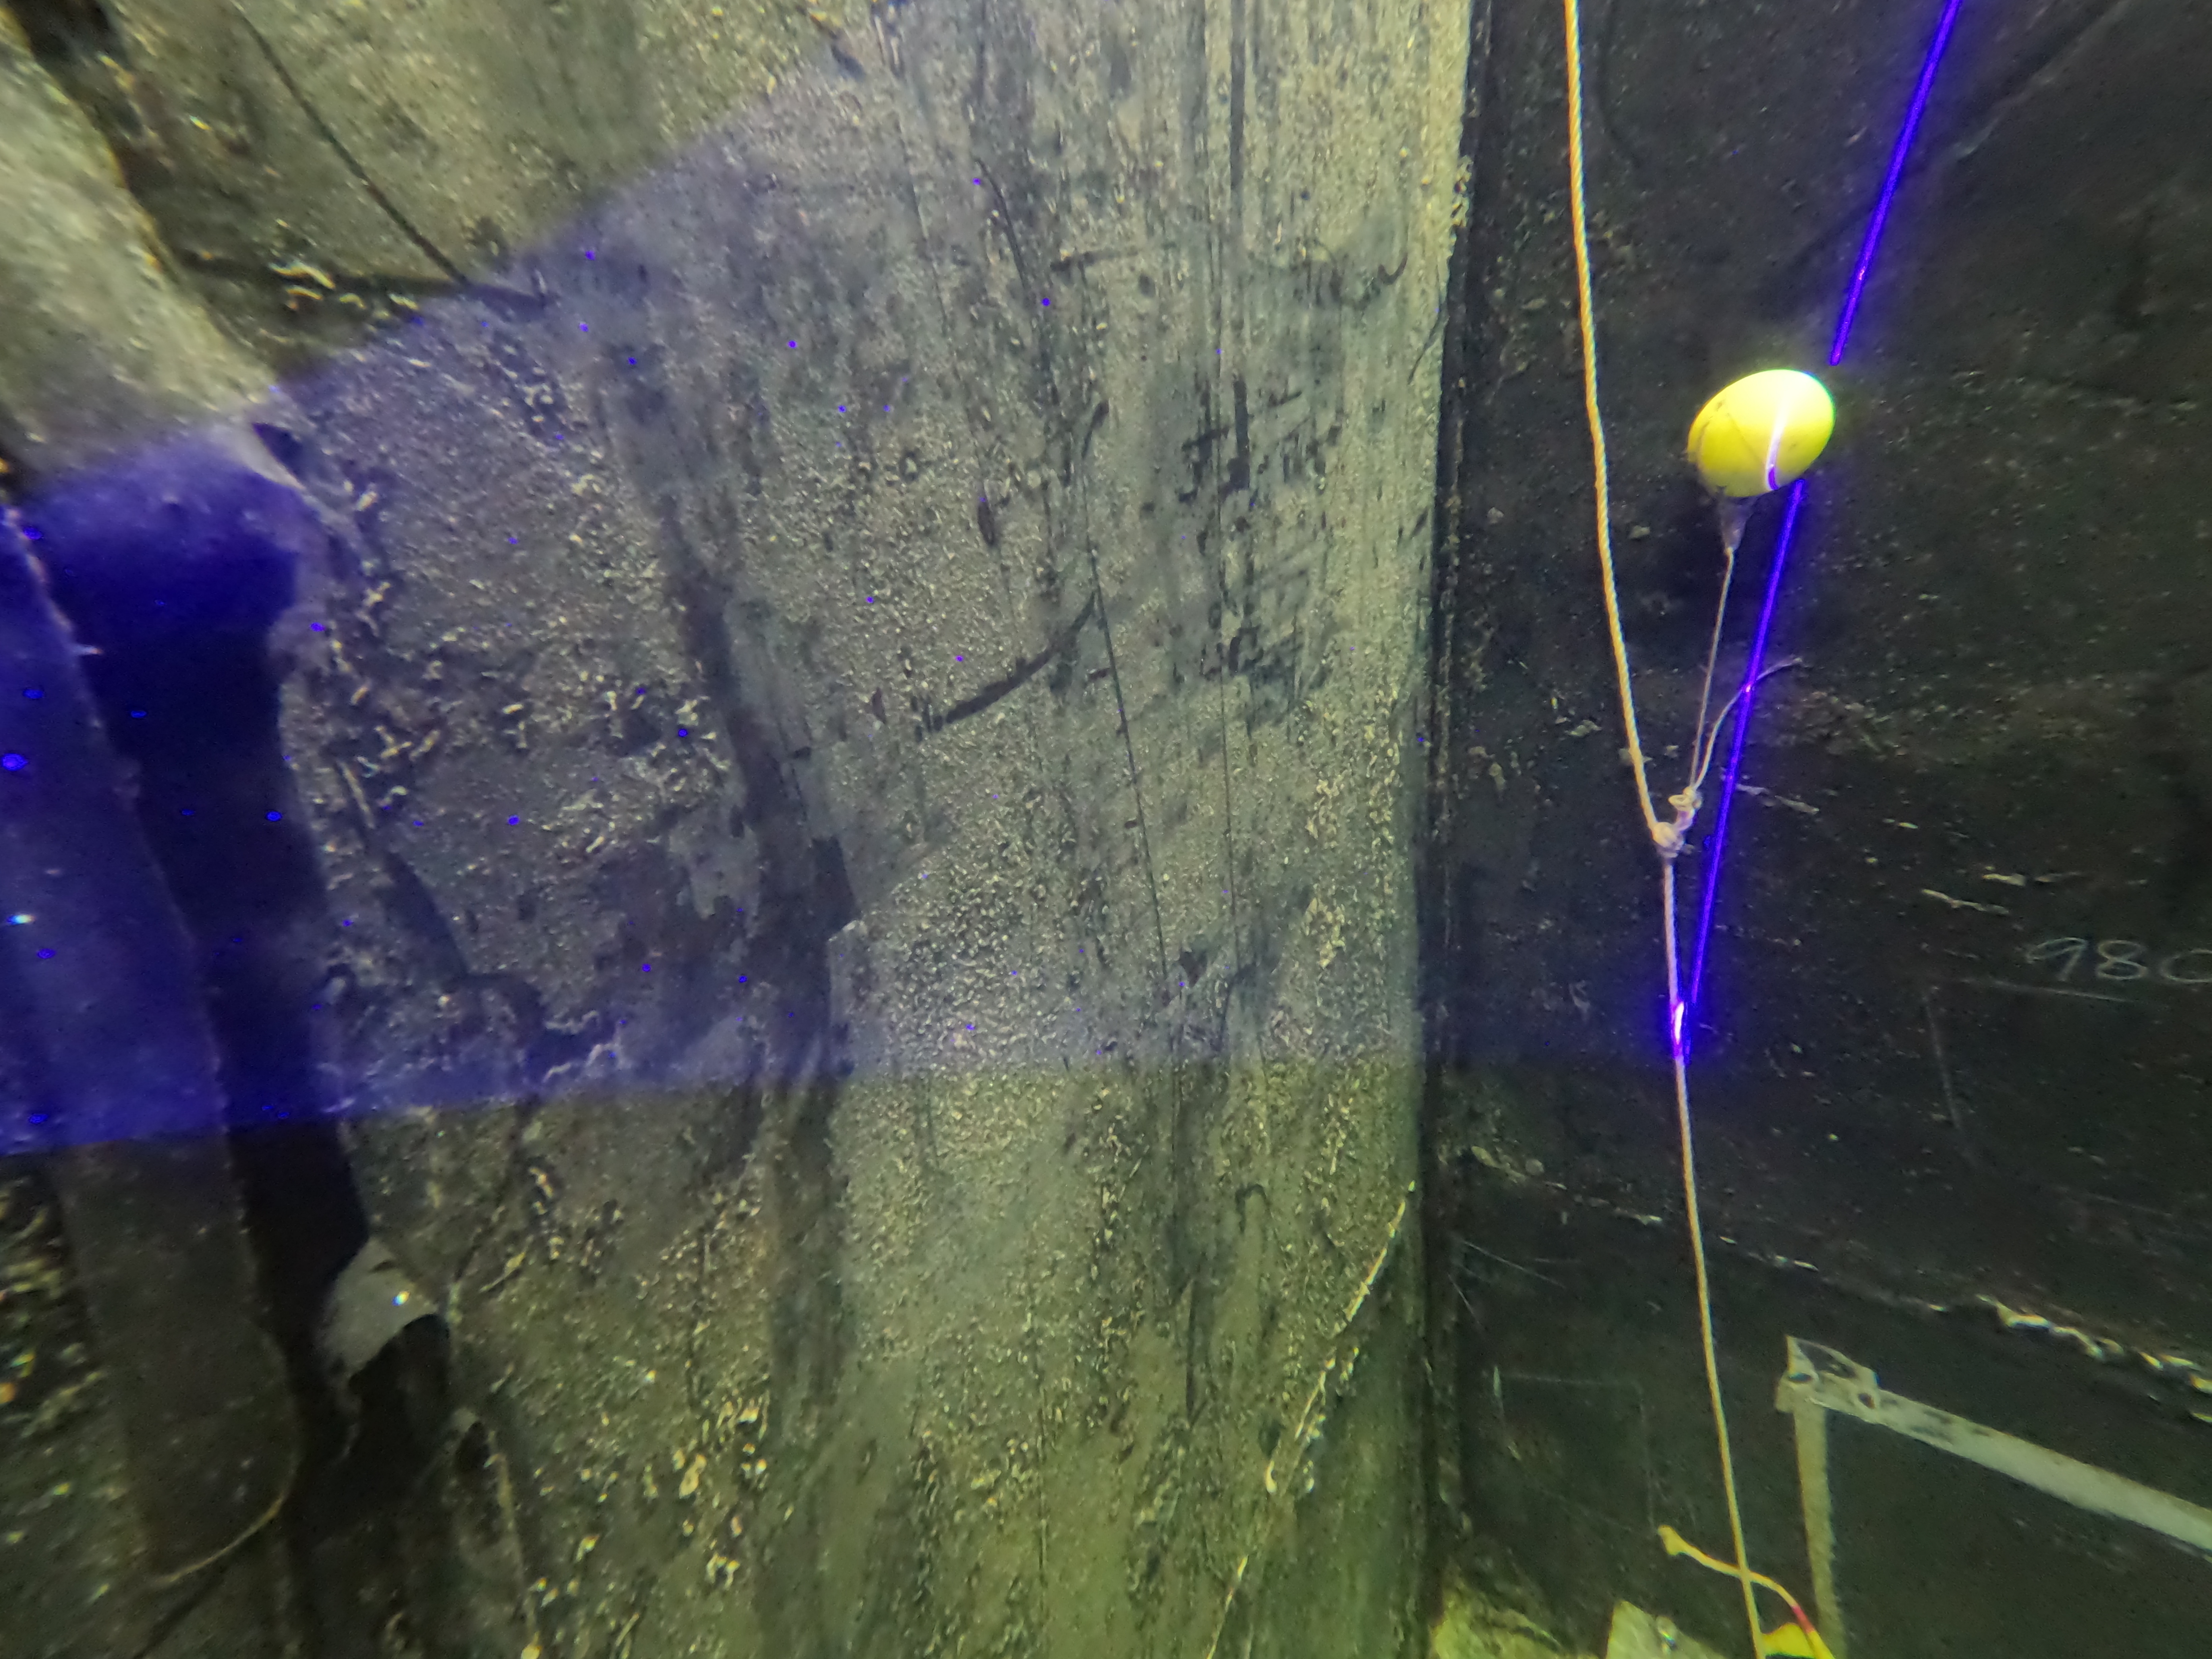

Supplement: Supplementary file 3090 [file G0031890.pdf › 12/G0031890.pdf]
