# Supplementary figures and images for: 3D reconstruction of shallow sea environment using direct system calibration and faint laser line extraction (part 31 of 35)
Source: Research Square preprint supplement (doi:10.21203/rs.3.rs-5262658/v1), 2024-12-02

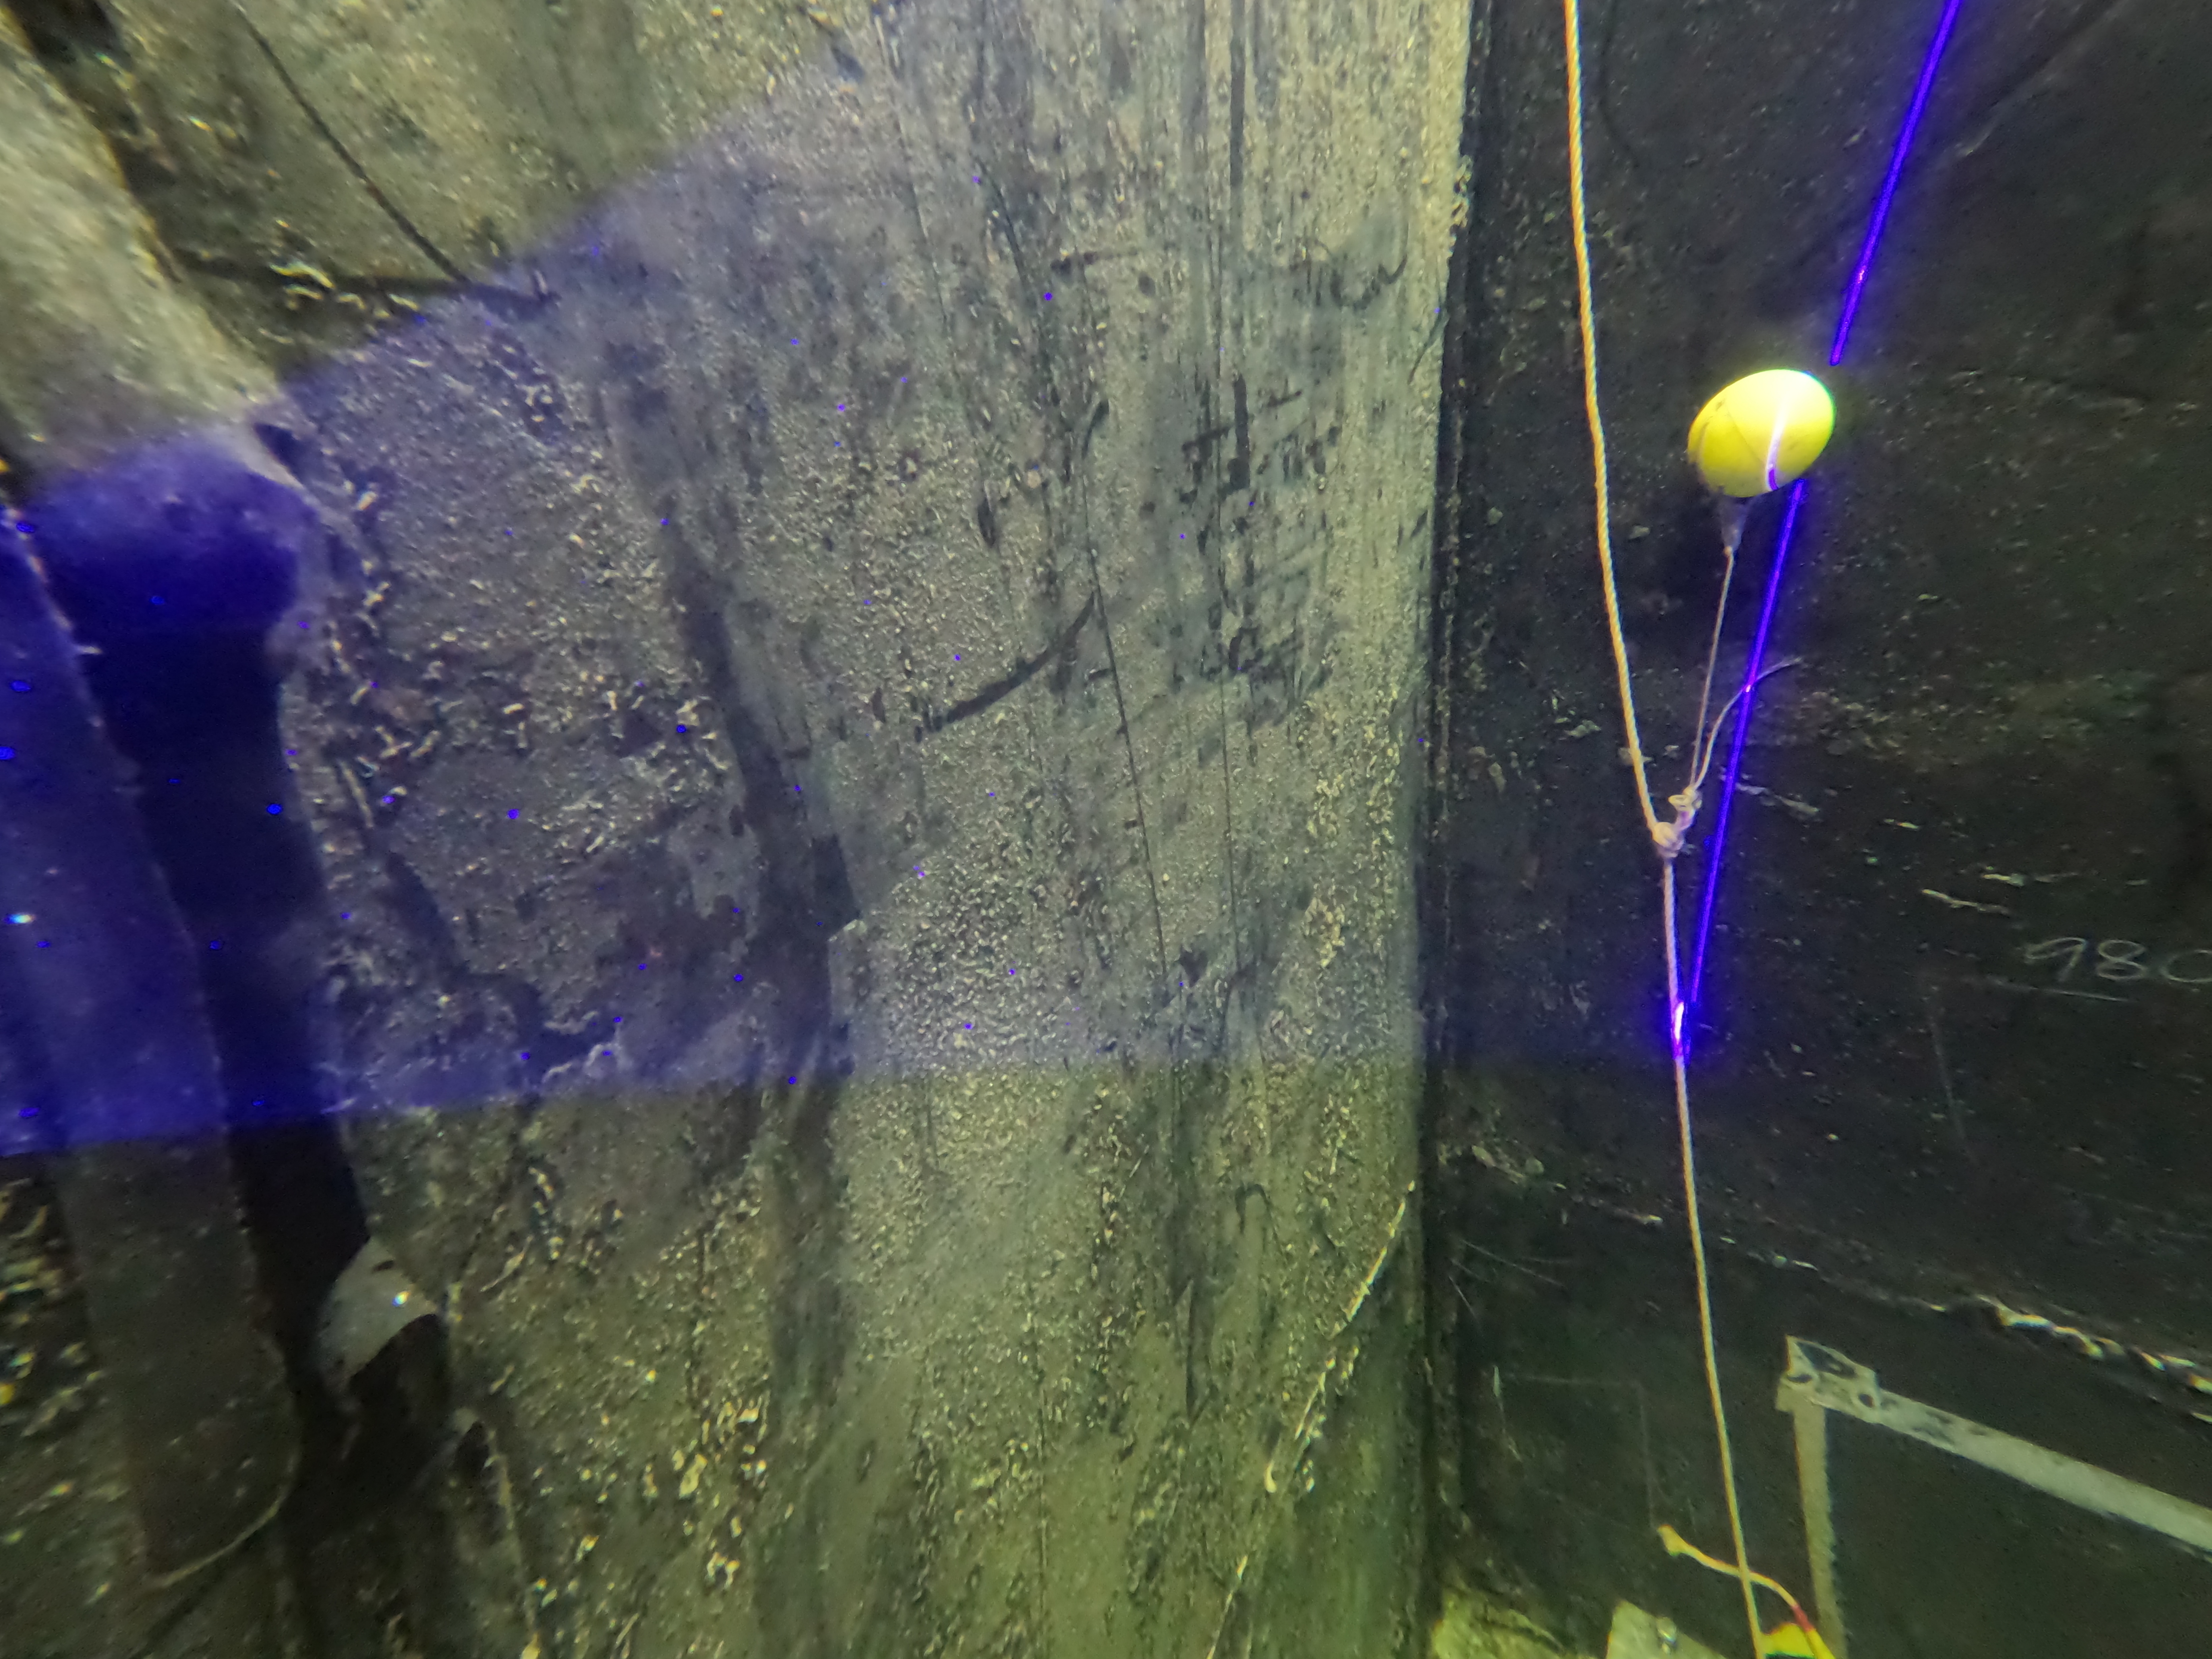

Supplement: Supplementary file 3091 [file G0031891.pdf › 12/G0031891.pdf]

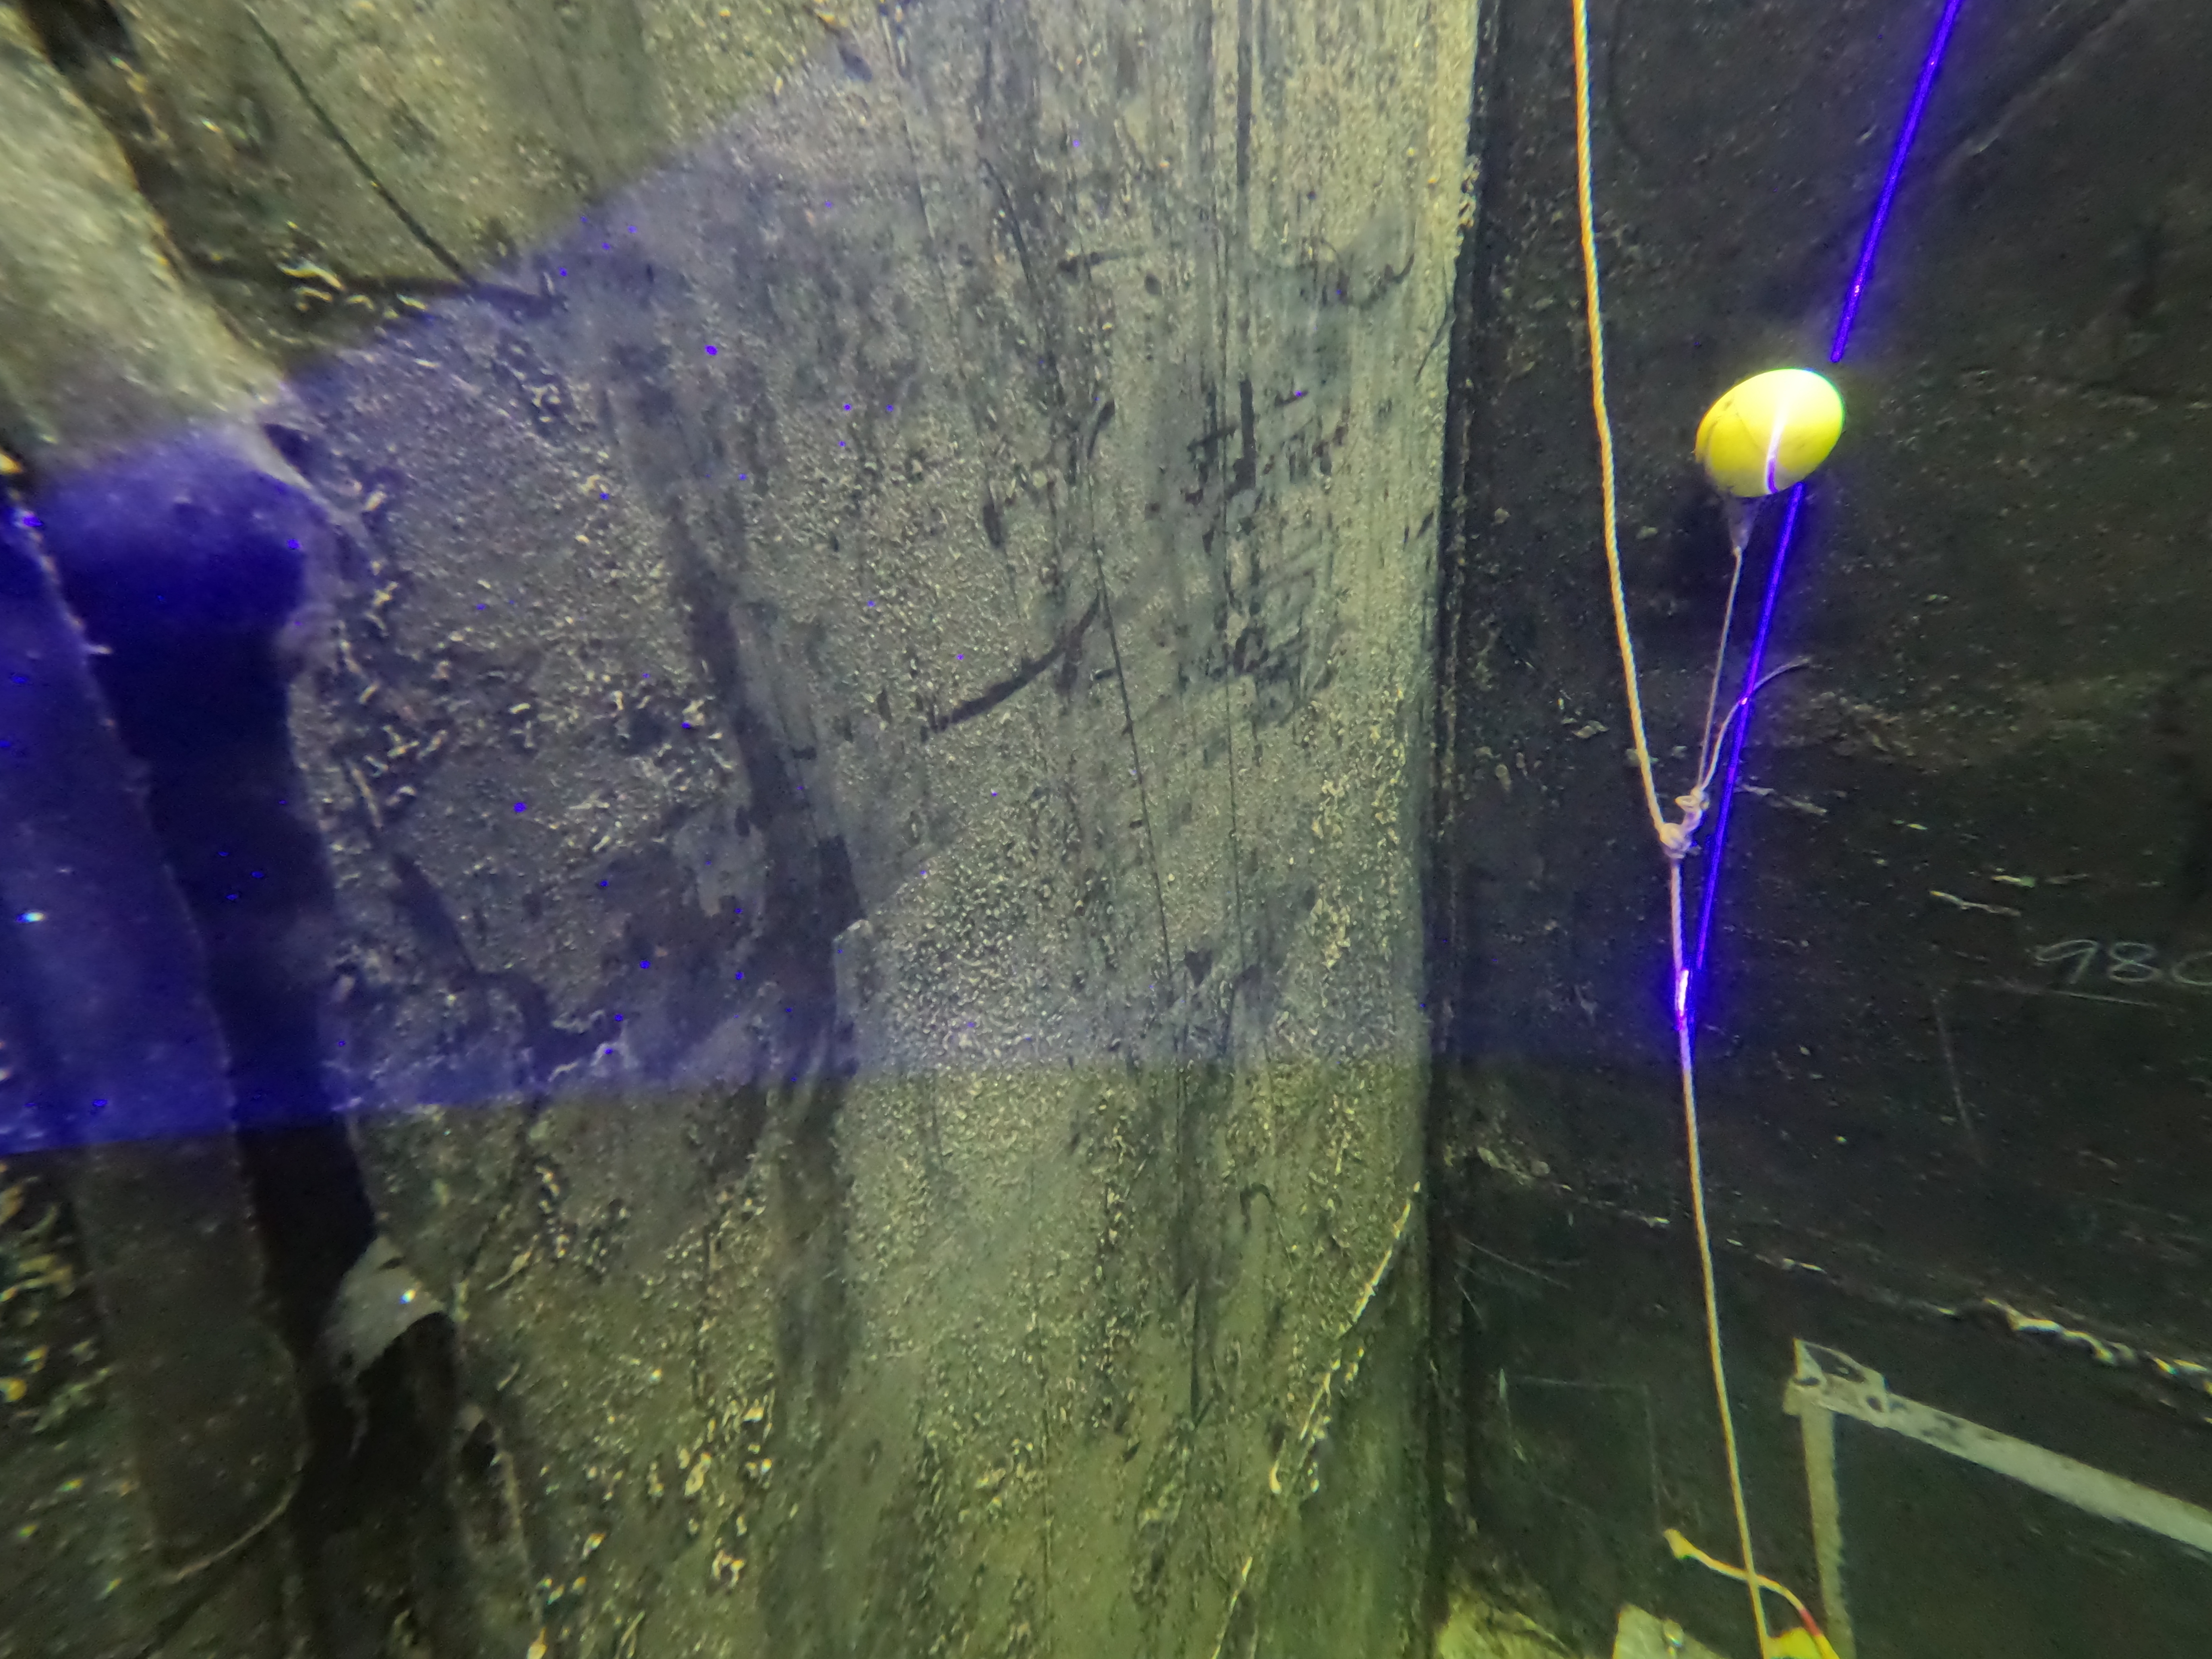

980

Supplement: Supplementary file 3092 [file G0031892.pdf › 12/G0031892.pdf]

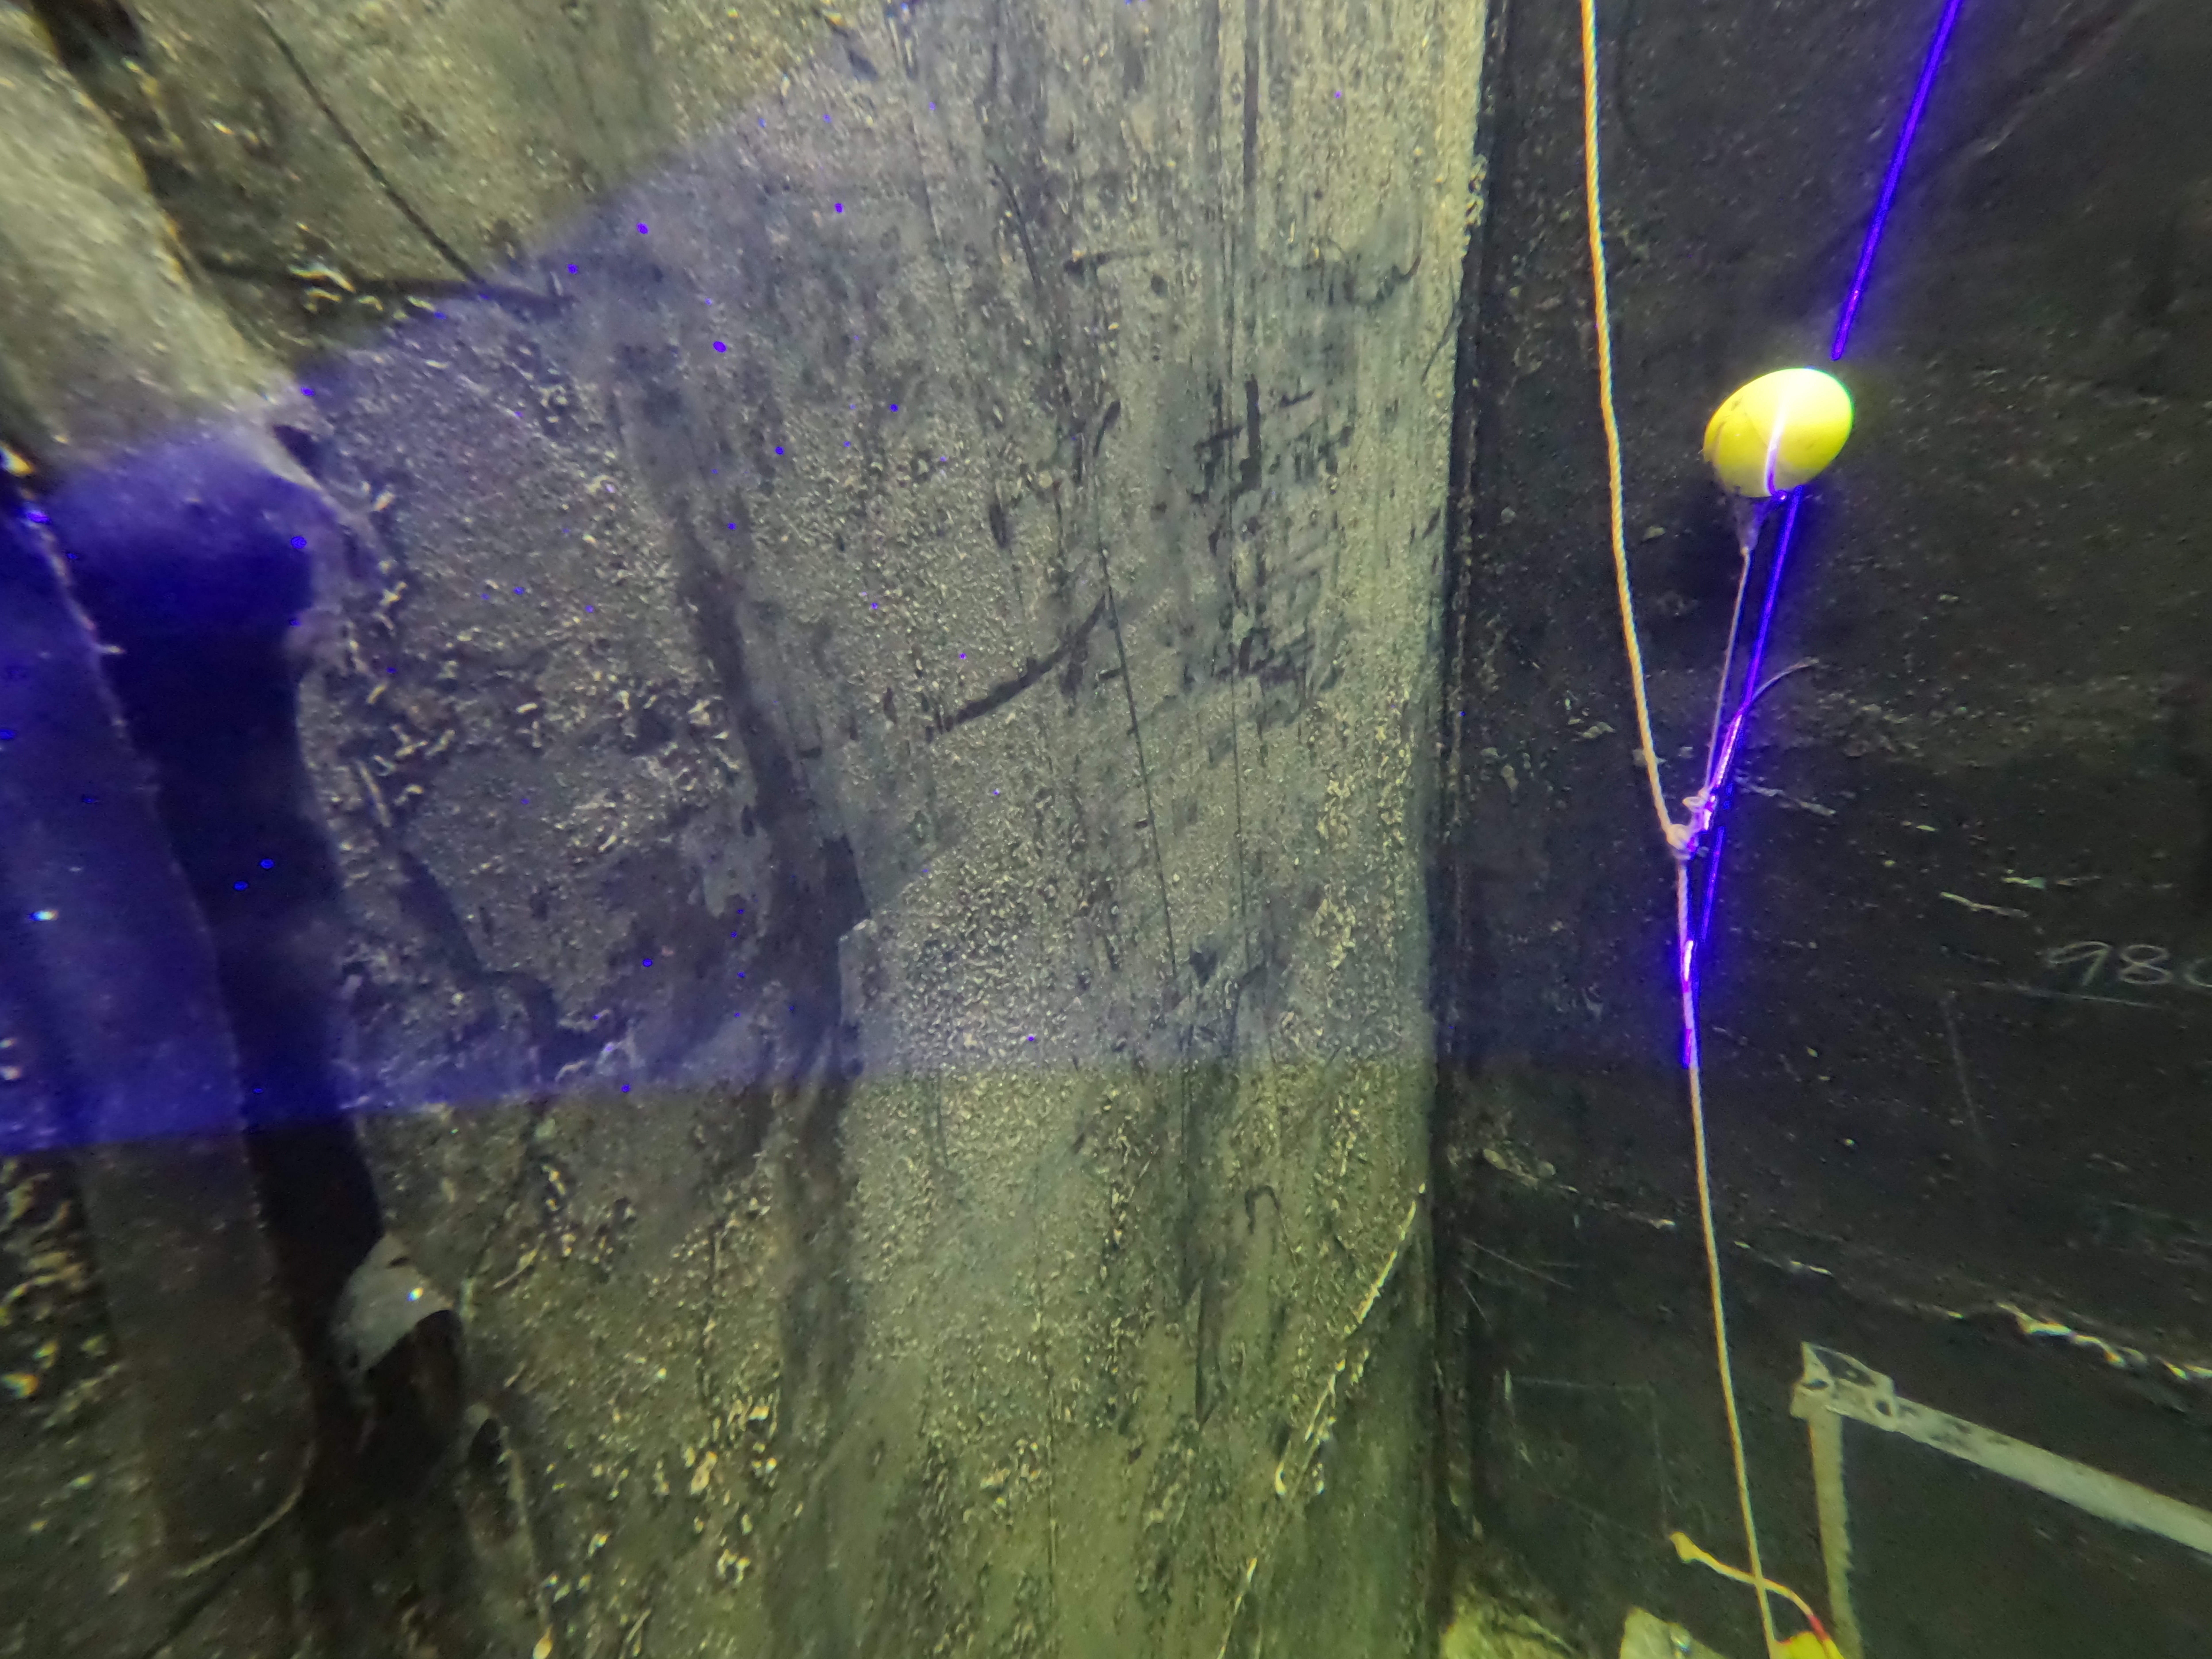

Supplement: Supplementary file 3093 [file G0031893.pdf › 12/G0031893.pdf]

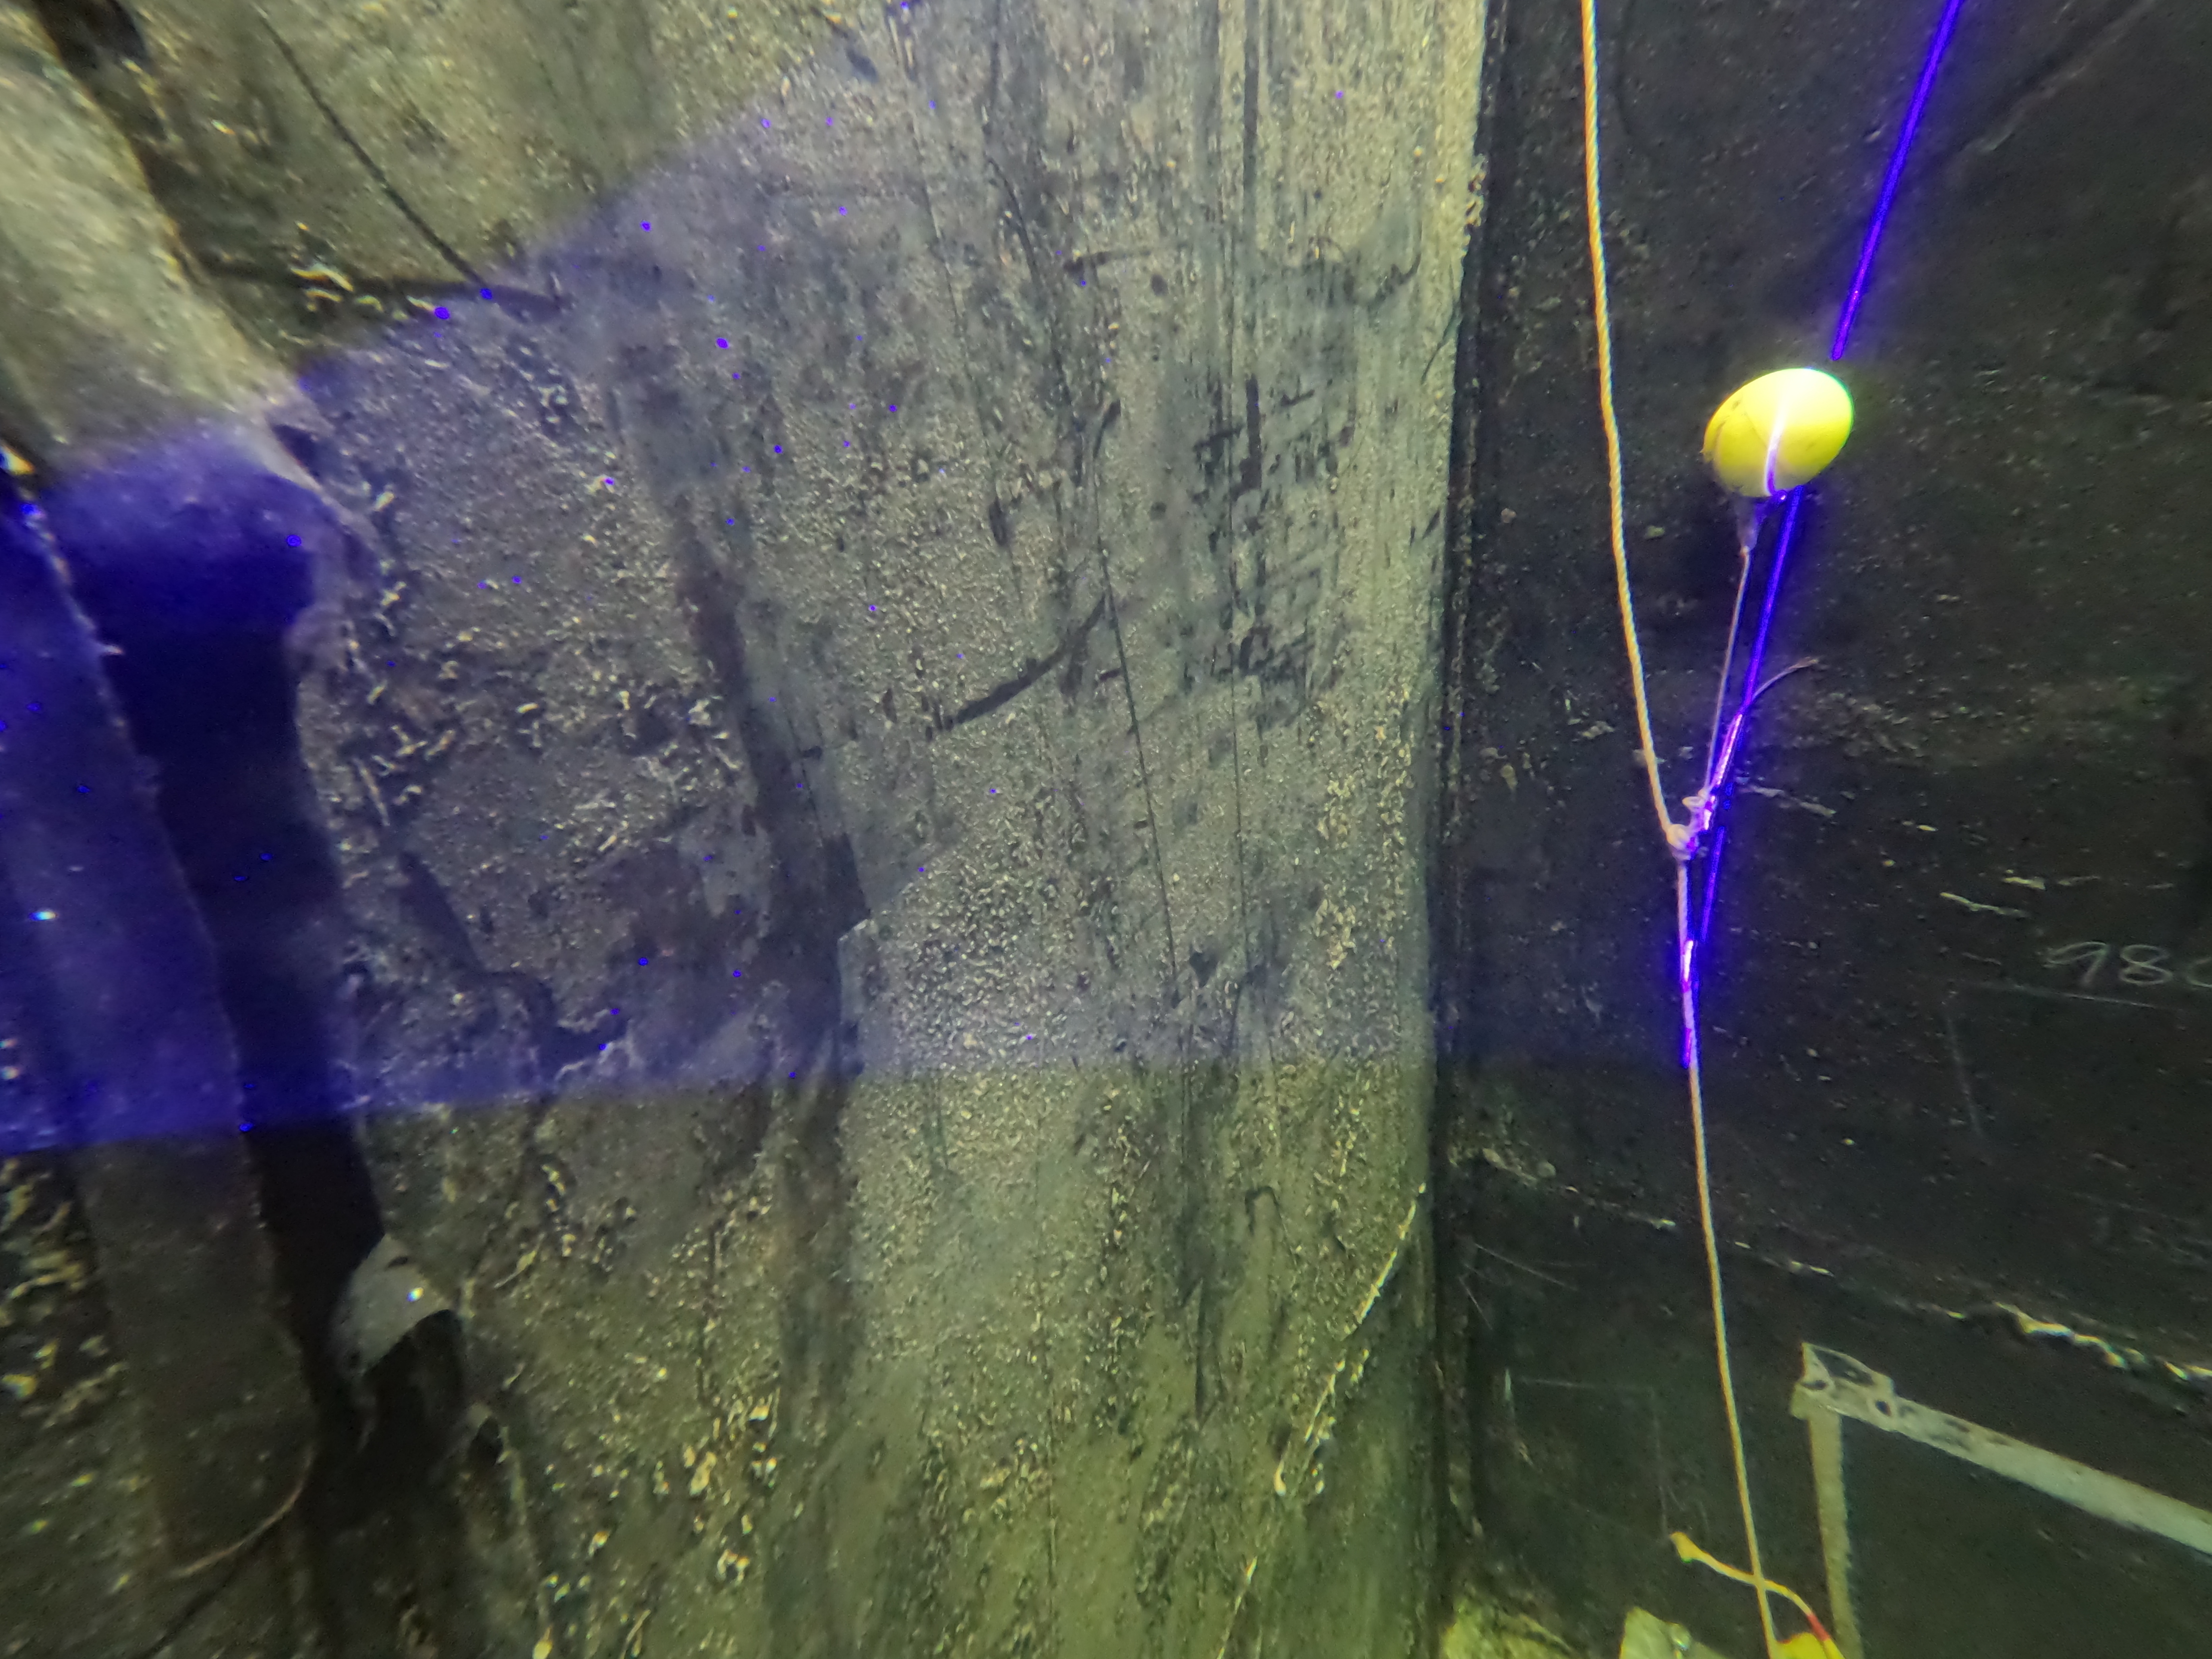

Supplement: Supplementary file 3094 [file G0031894.pdf › 12/G0031894.pdf]

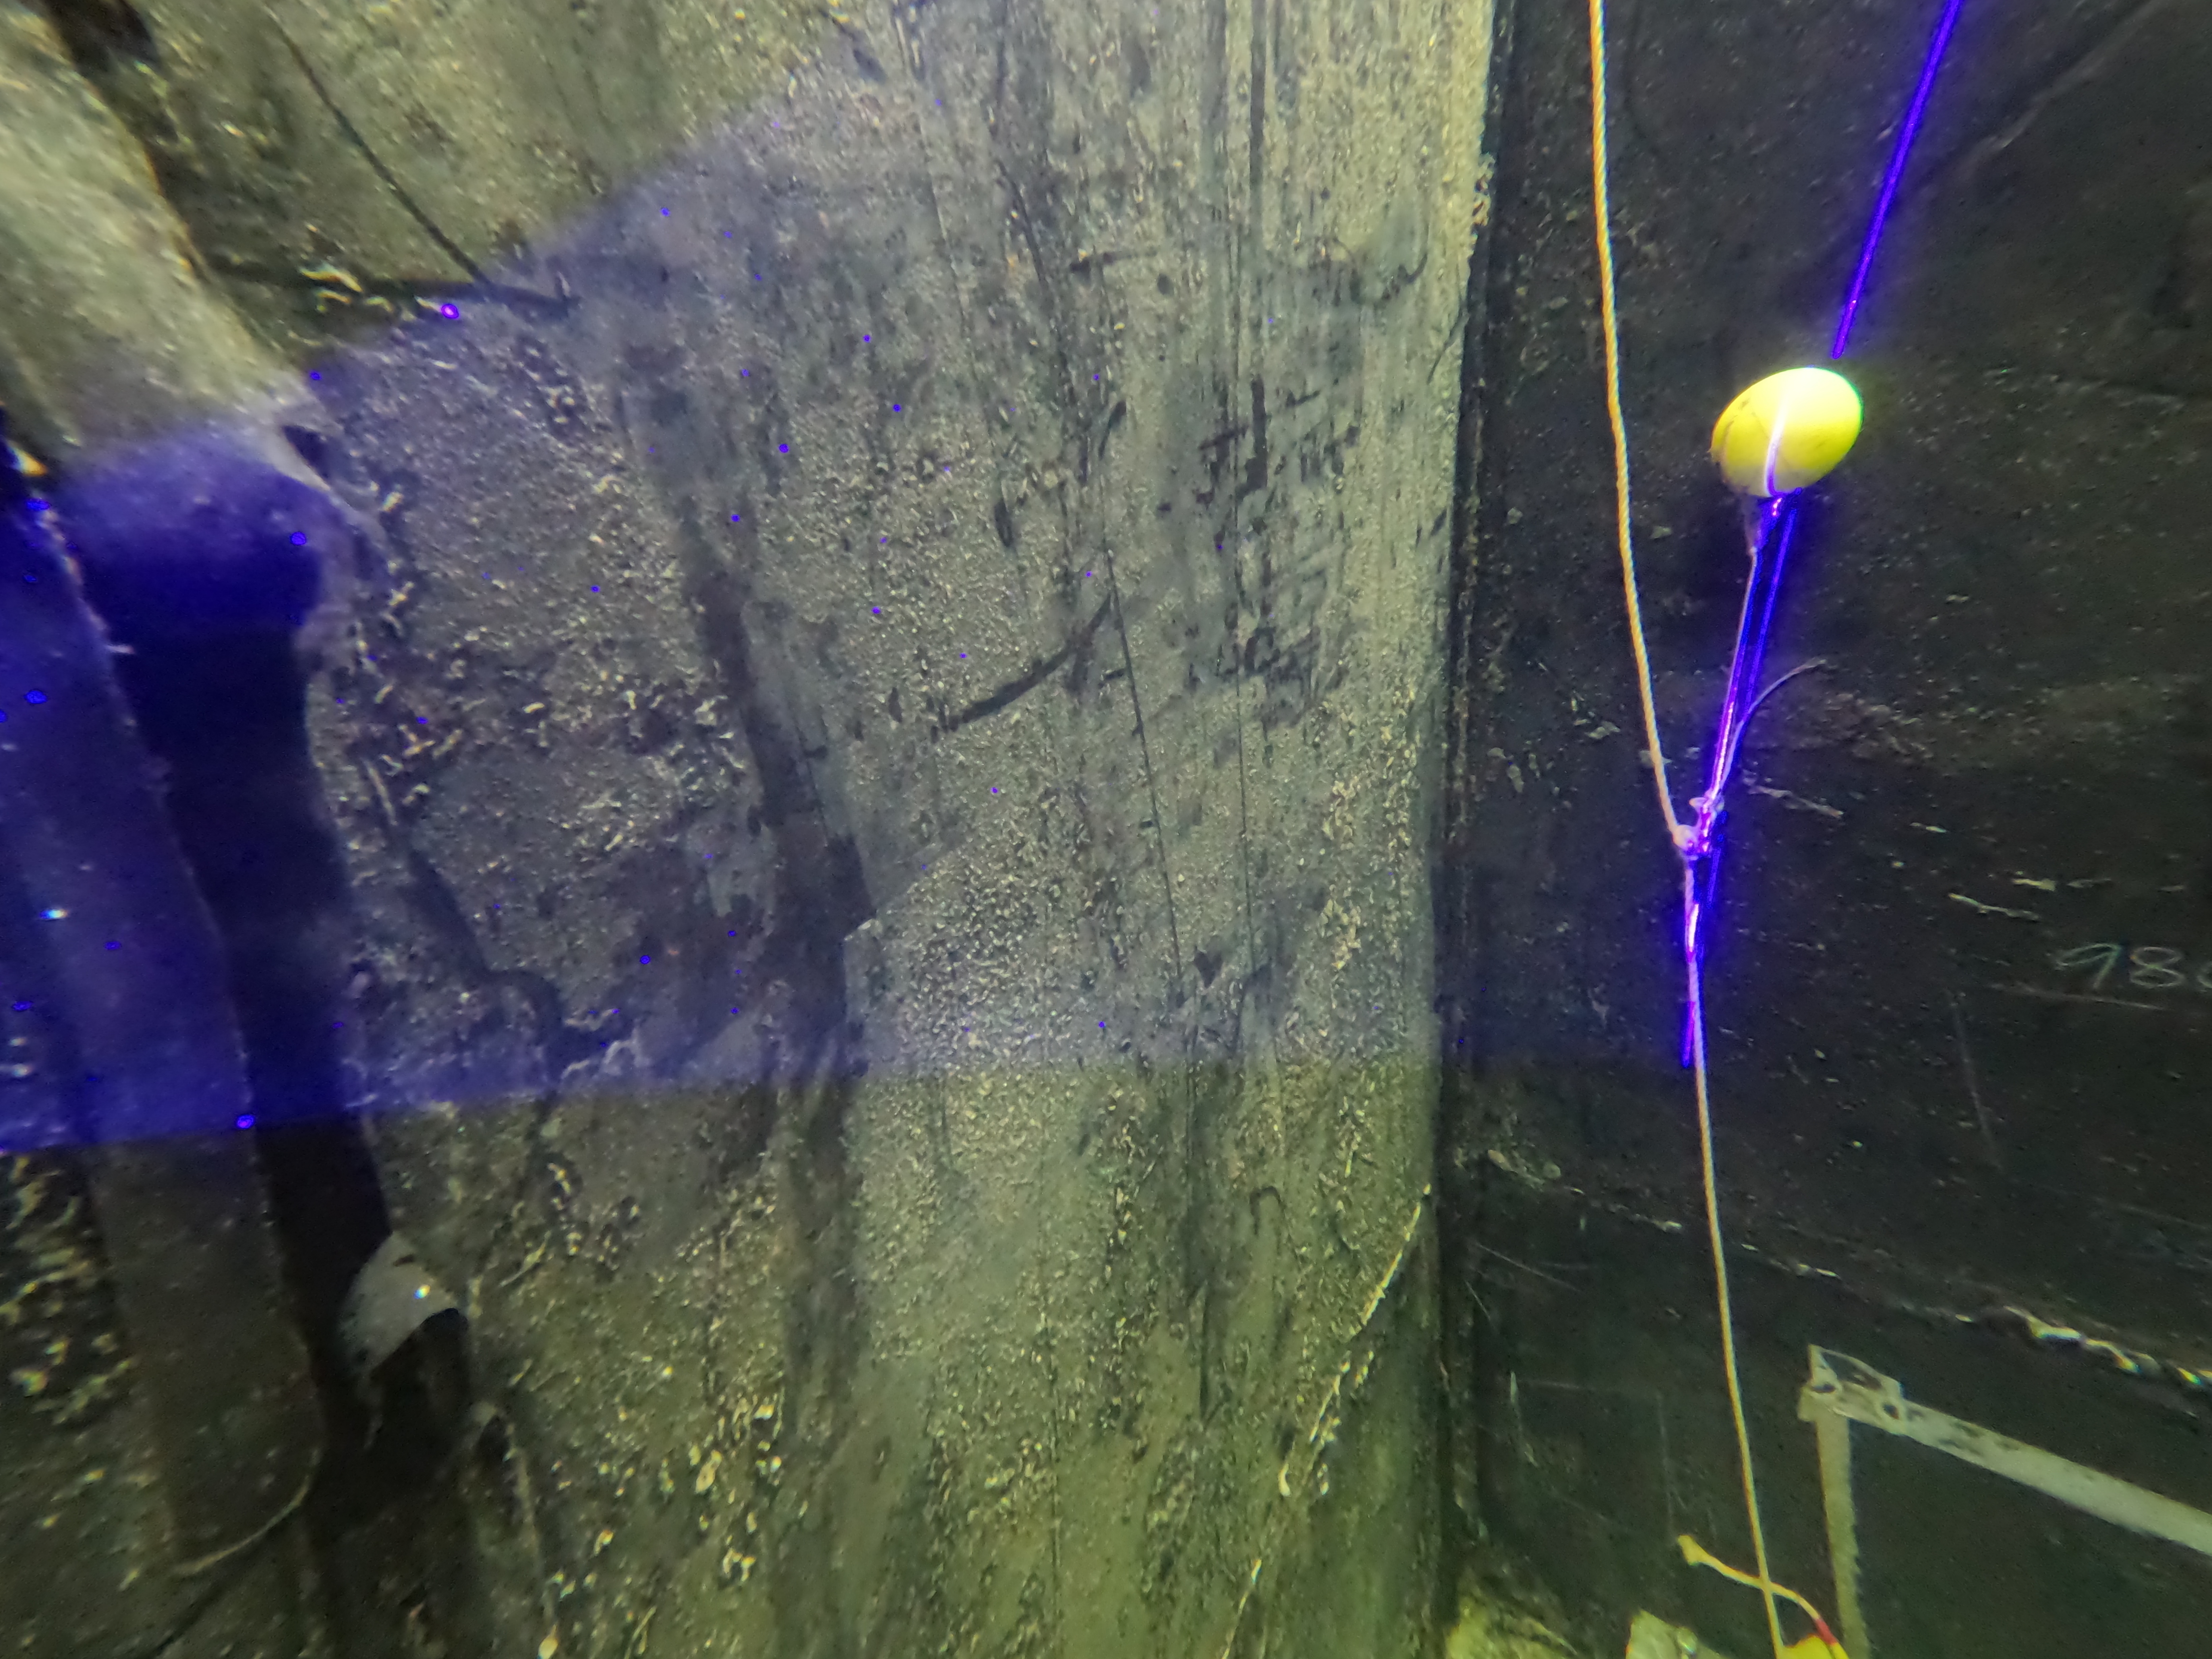

Supplement: Supplementary file 3095 [file G0031895.pdf › 12/G0031895.pdf]

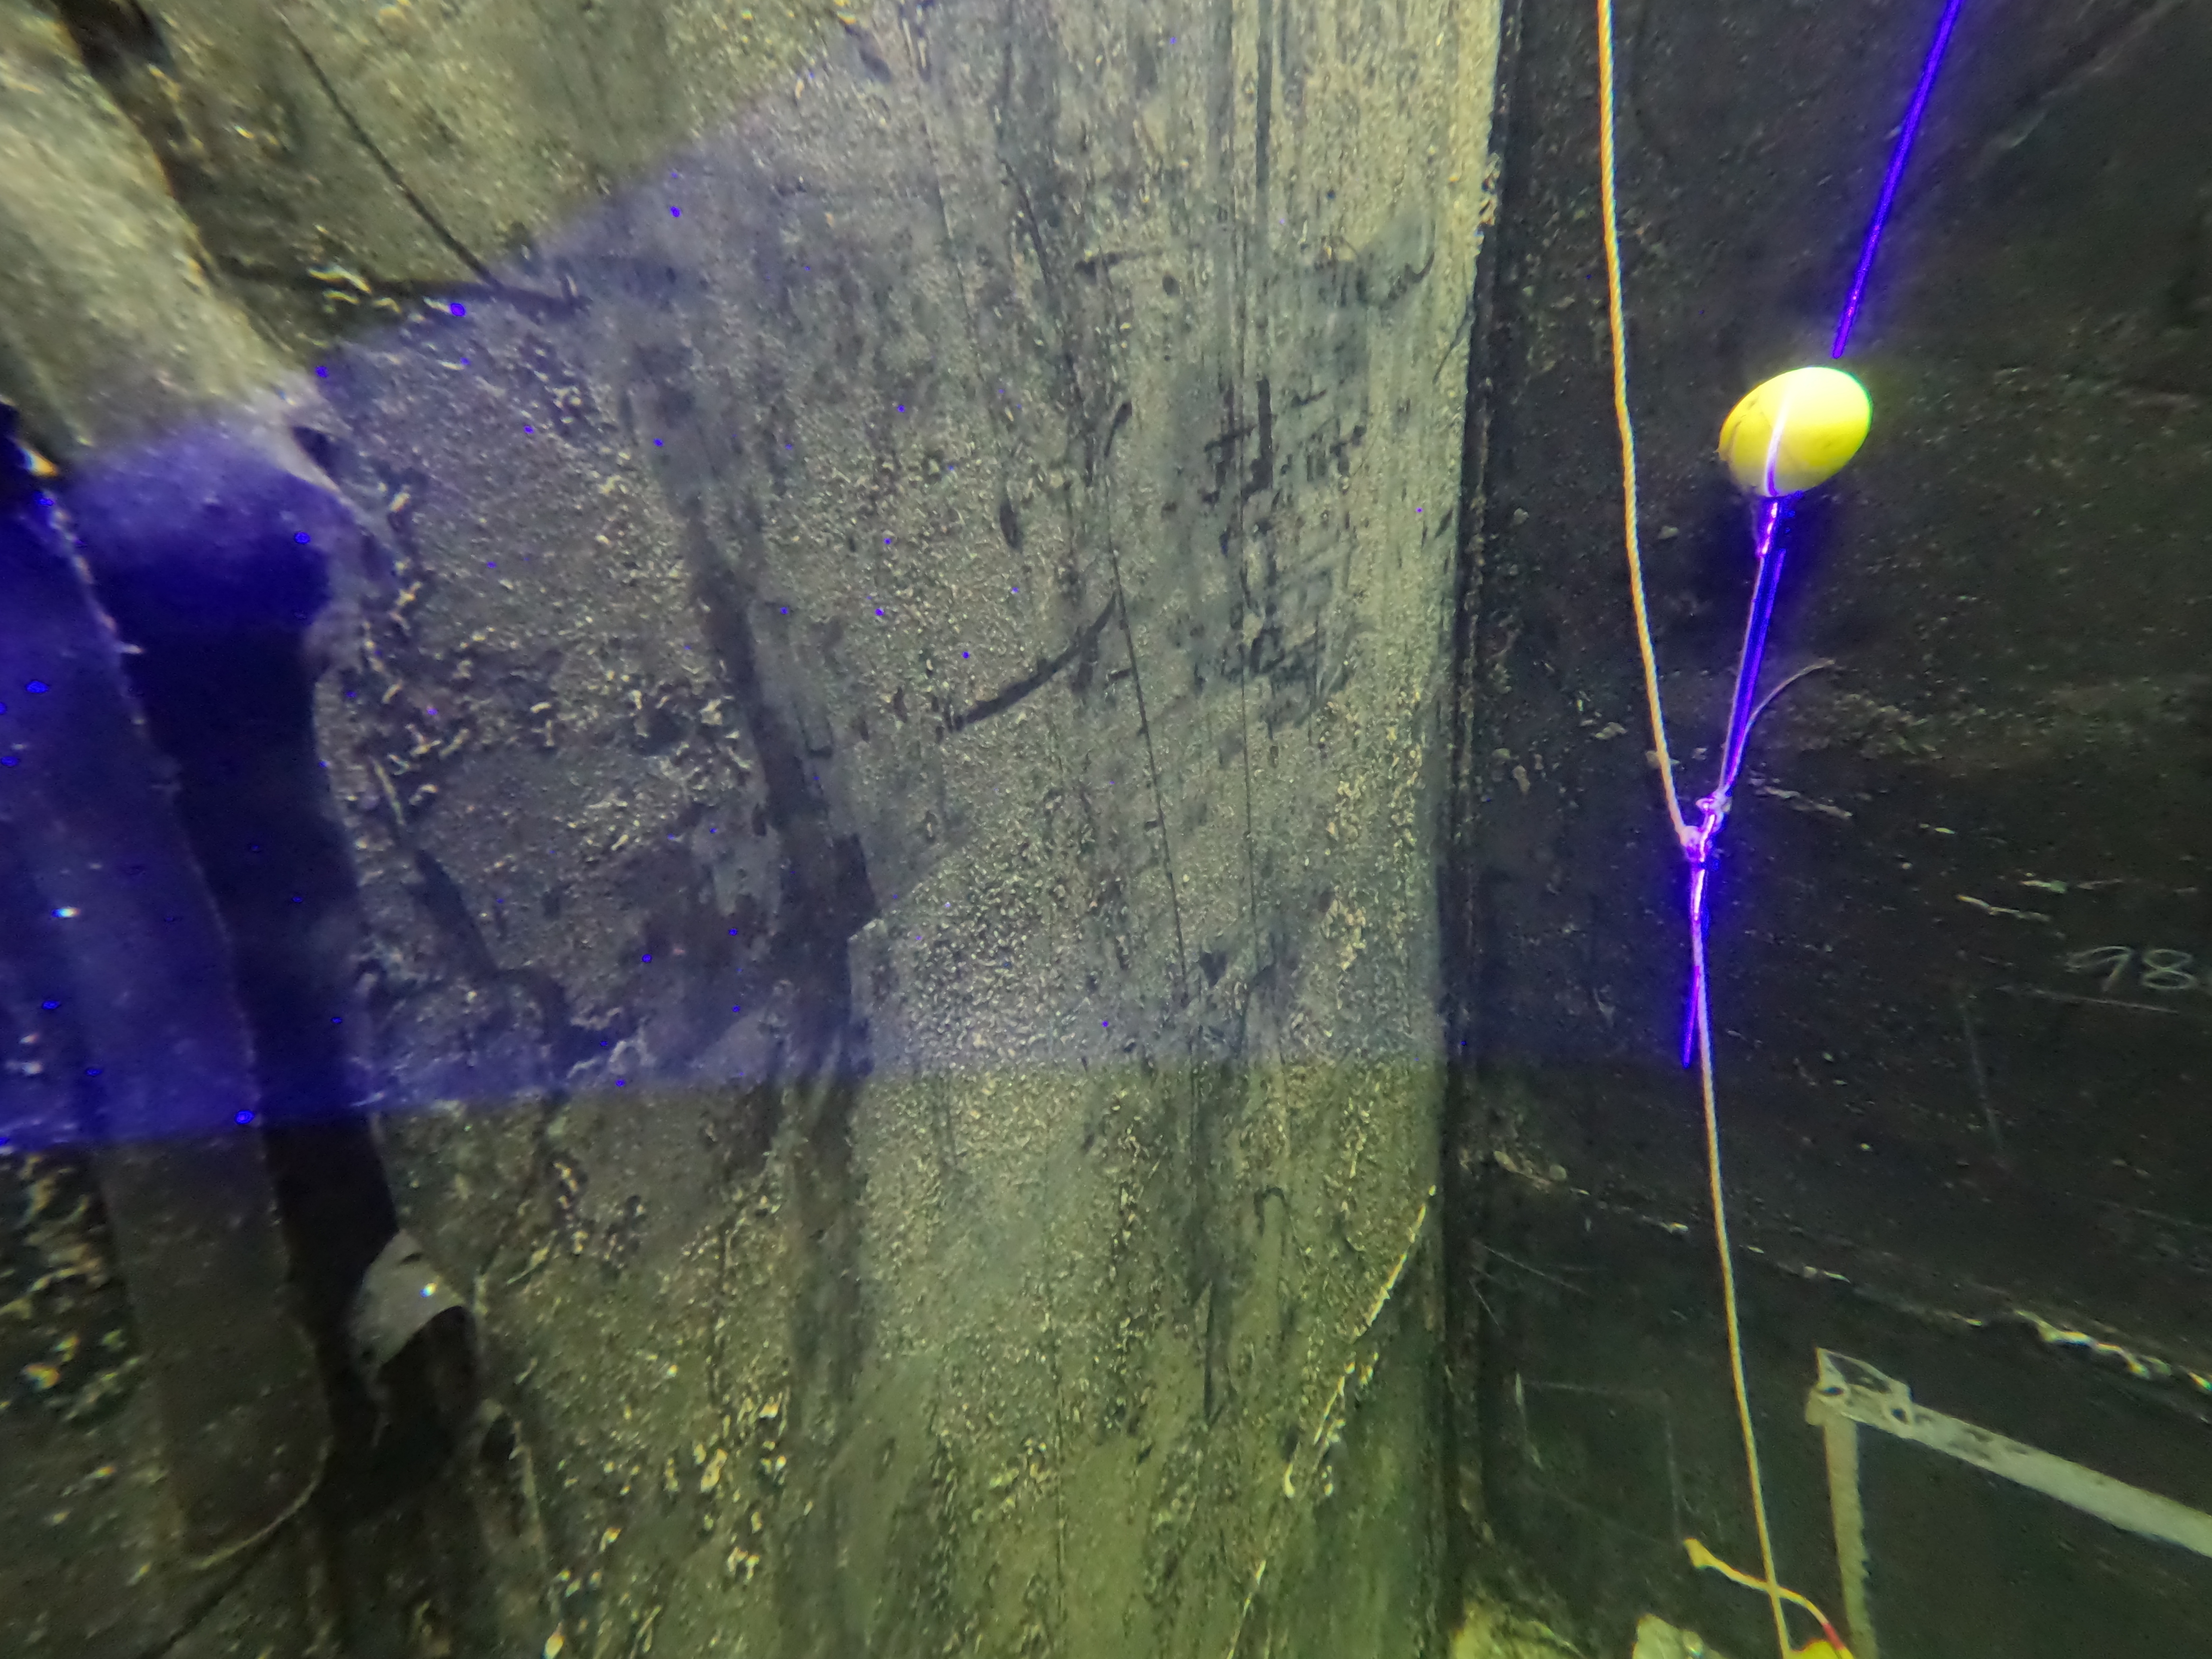

Supplement: Supplementary file 3096 [file G0031896.pdf › 12/G0031896.pdf]

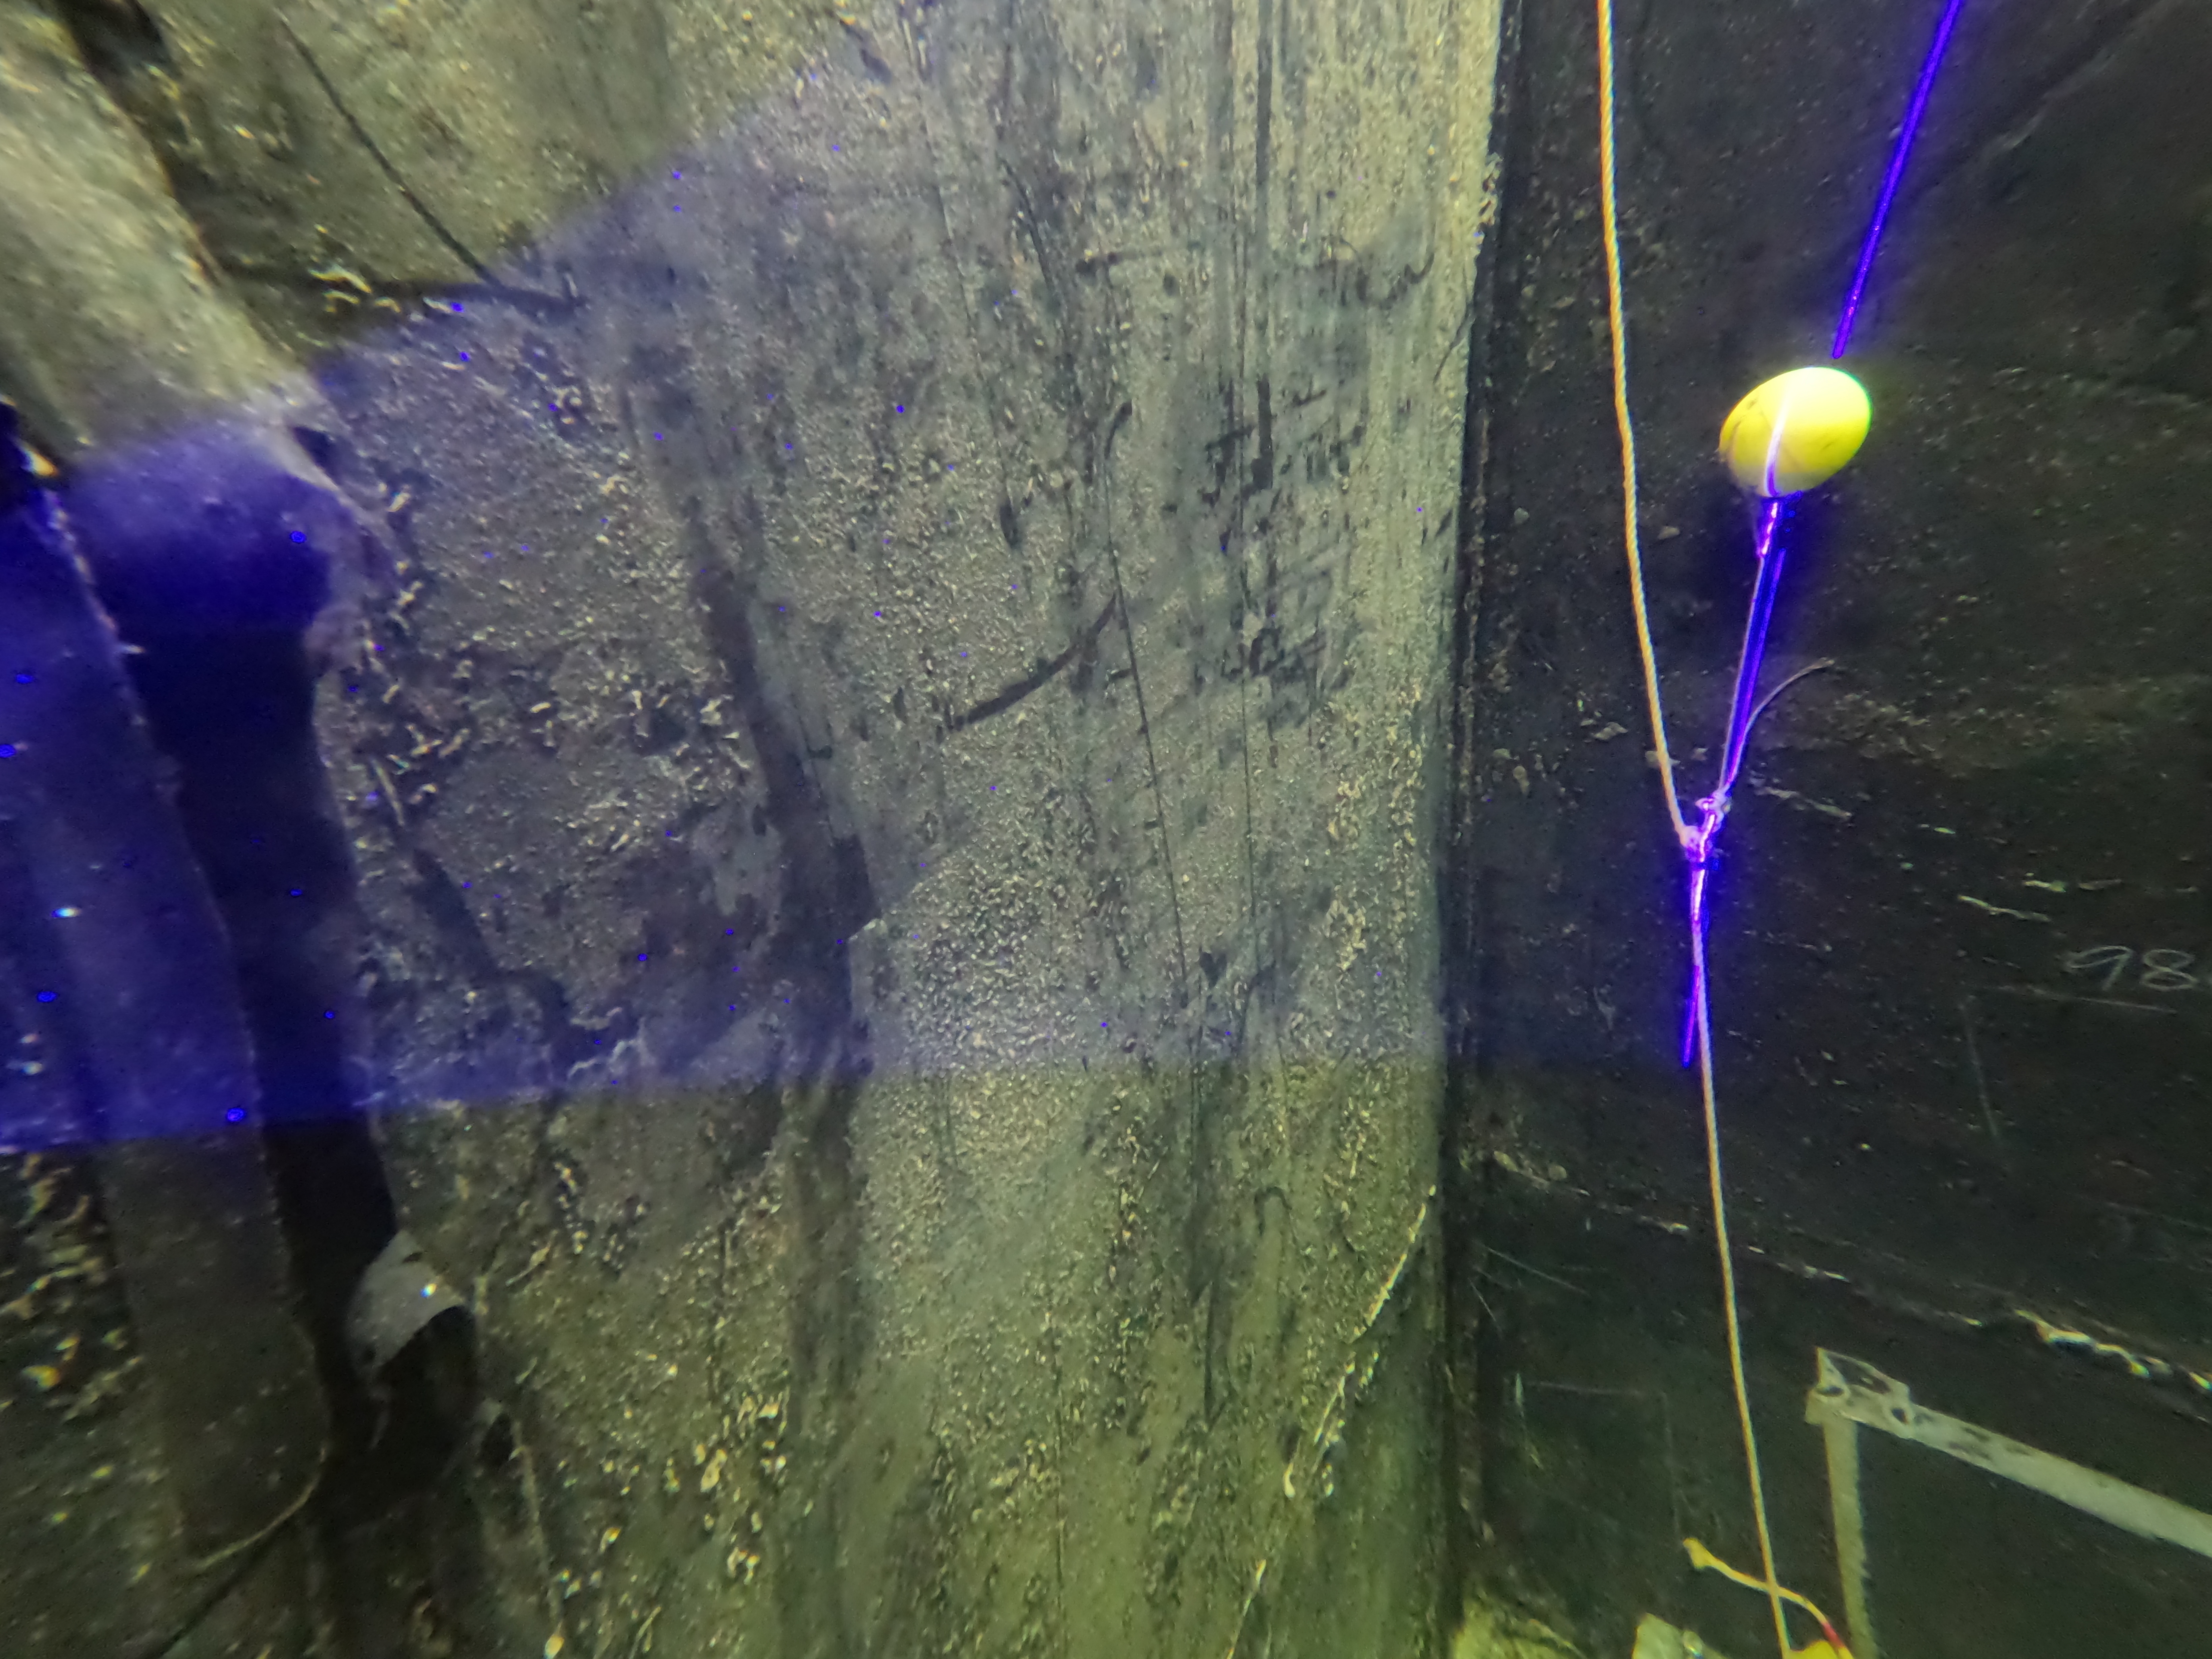

98

Supplement: Supplementary file 3097 [file G0031897.pdf › 12/G0031897.pdf]

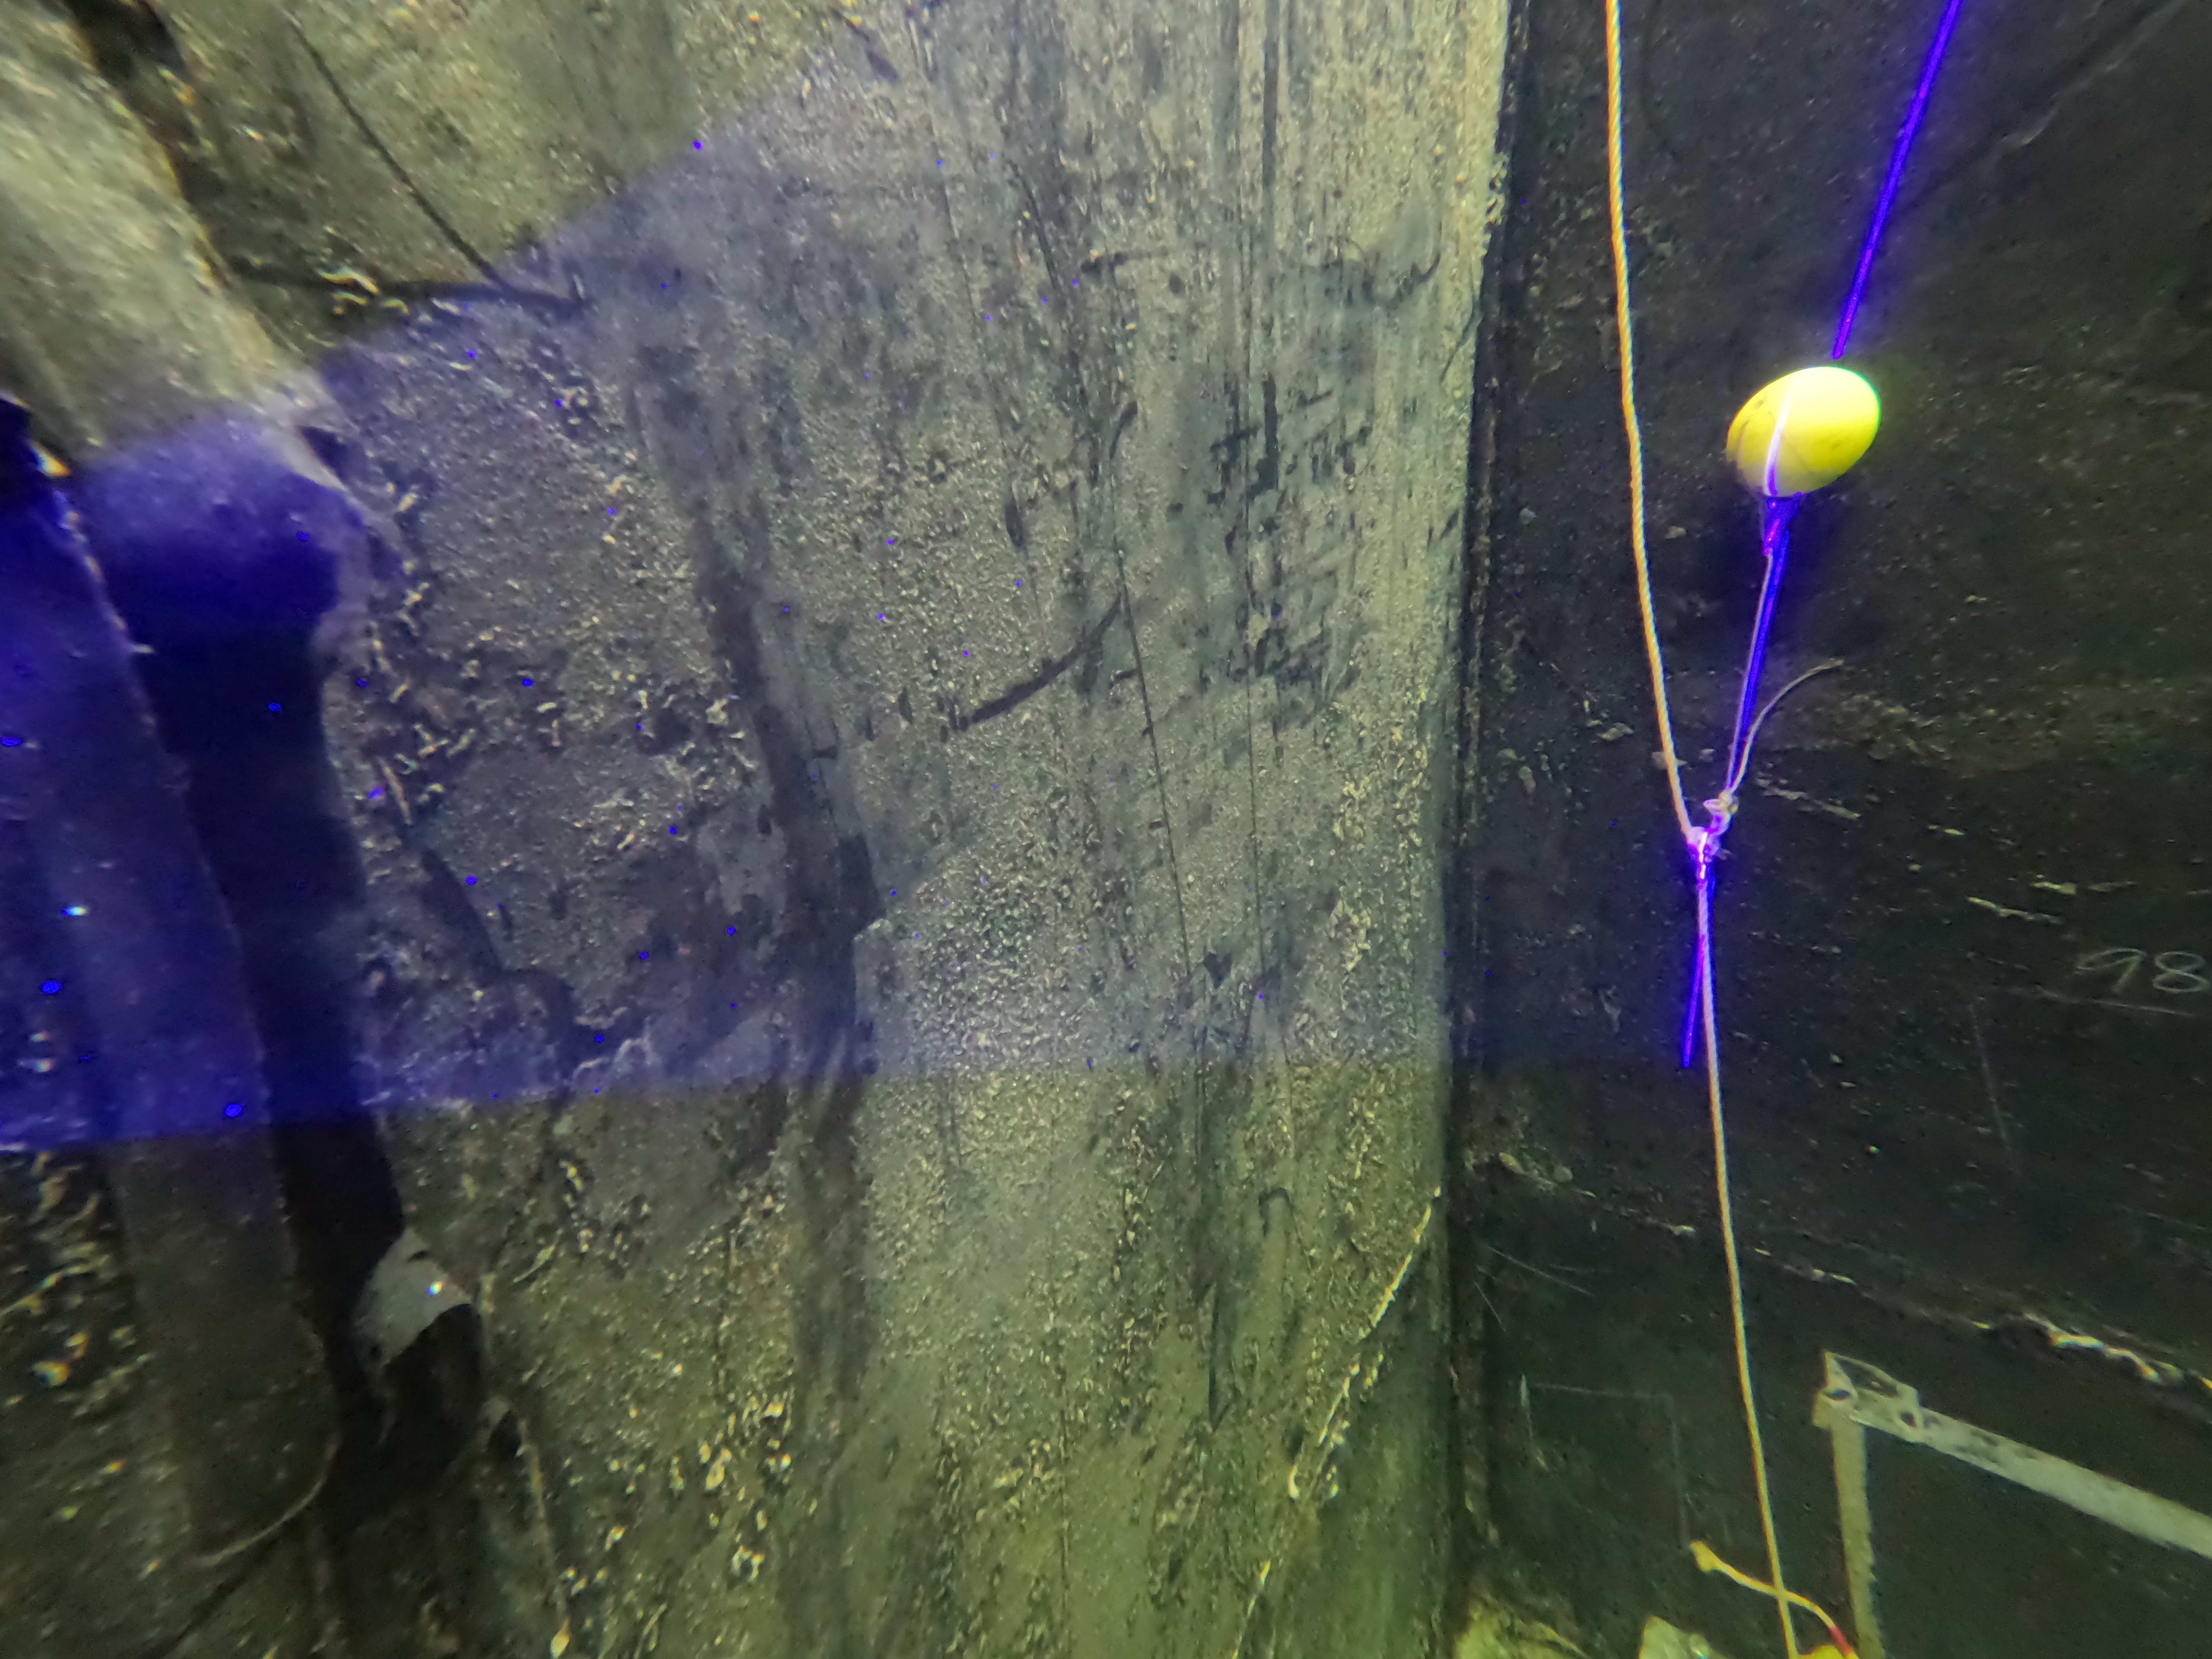

Supplement: Supplementary file 3098 [file G0031898.pdf › 12/G0031898.pdf]

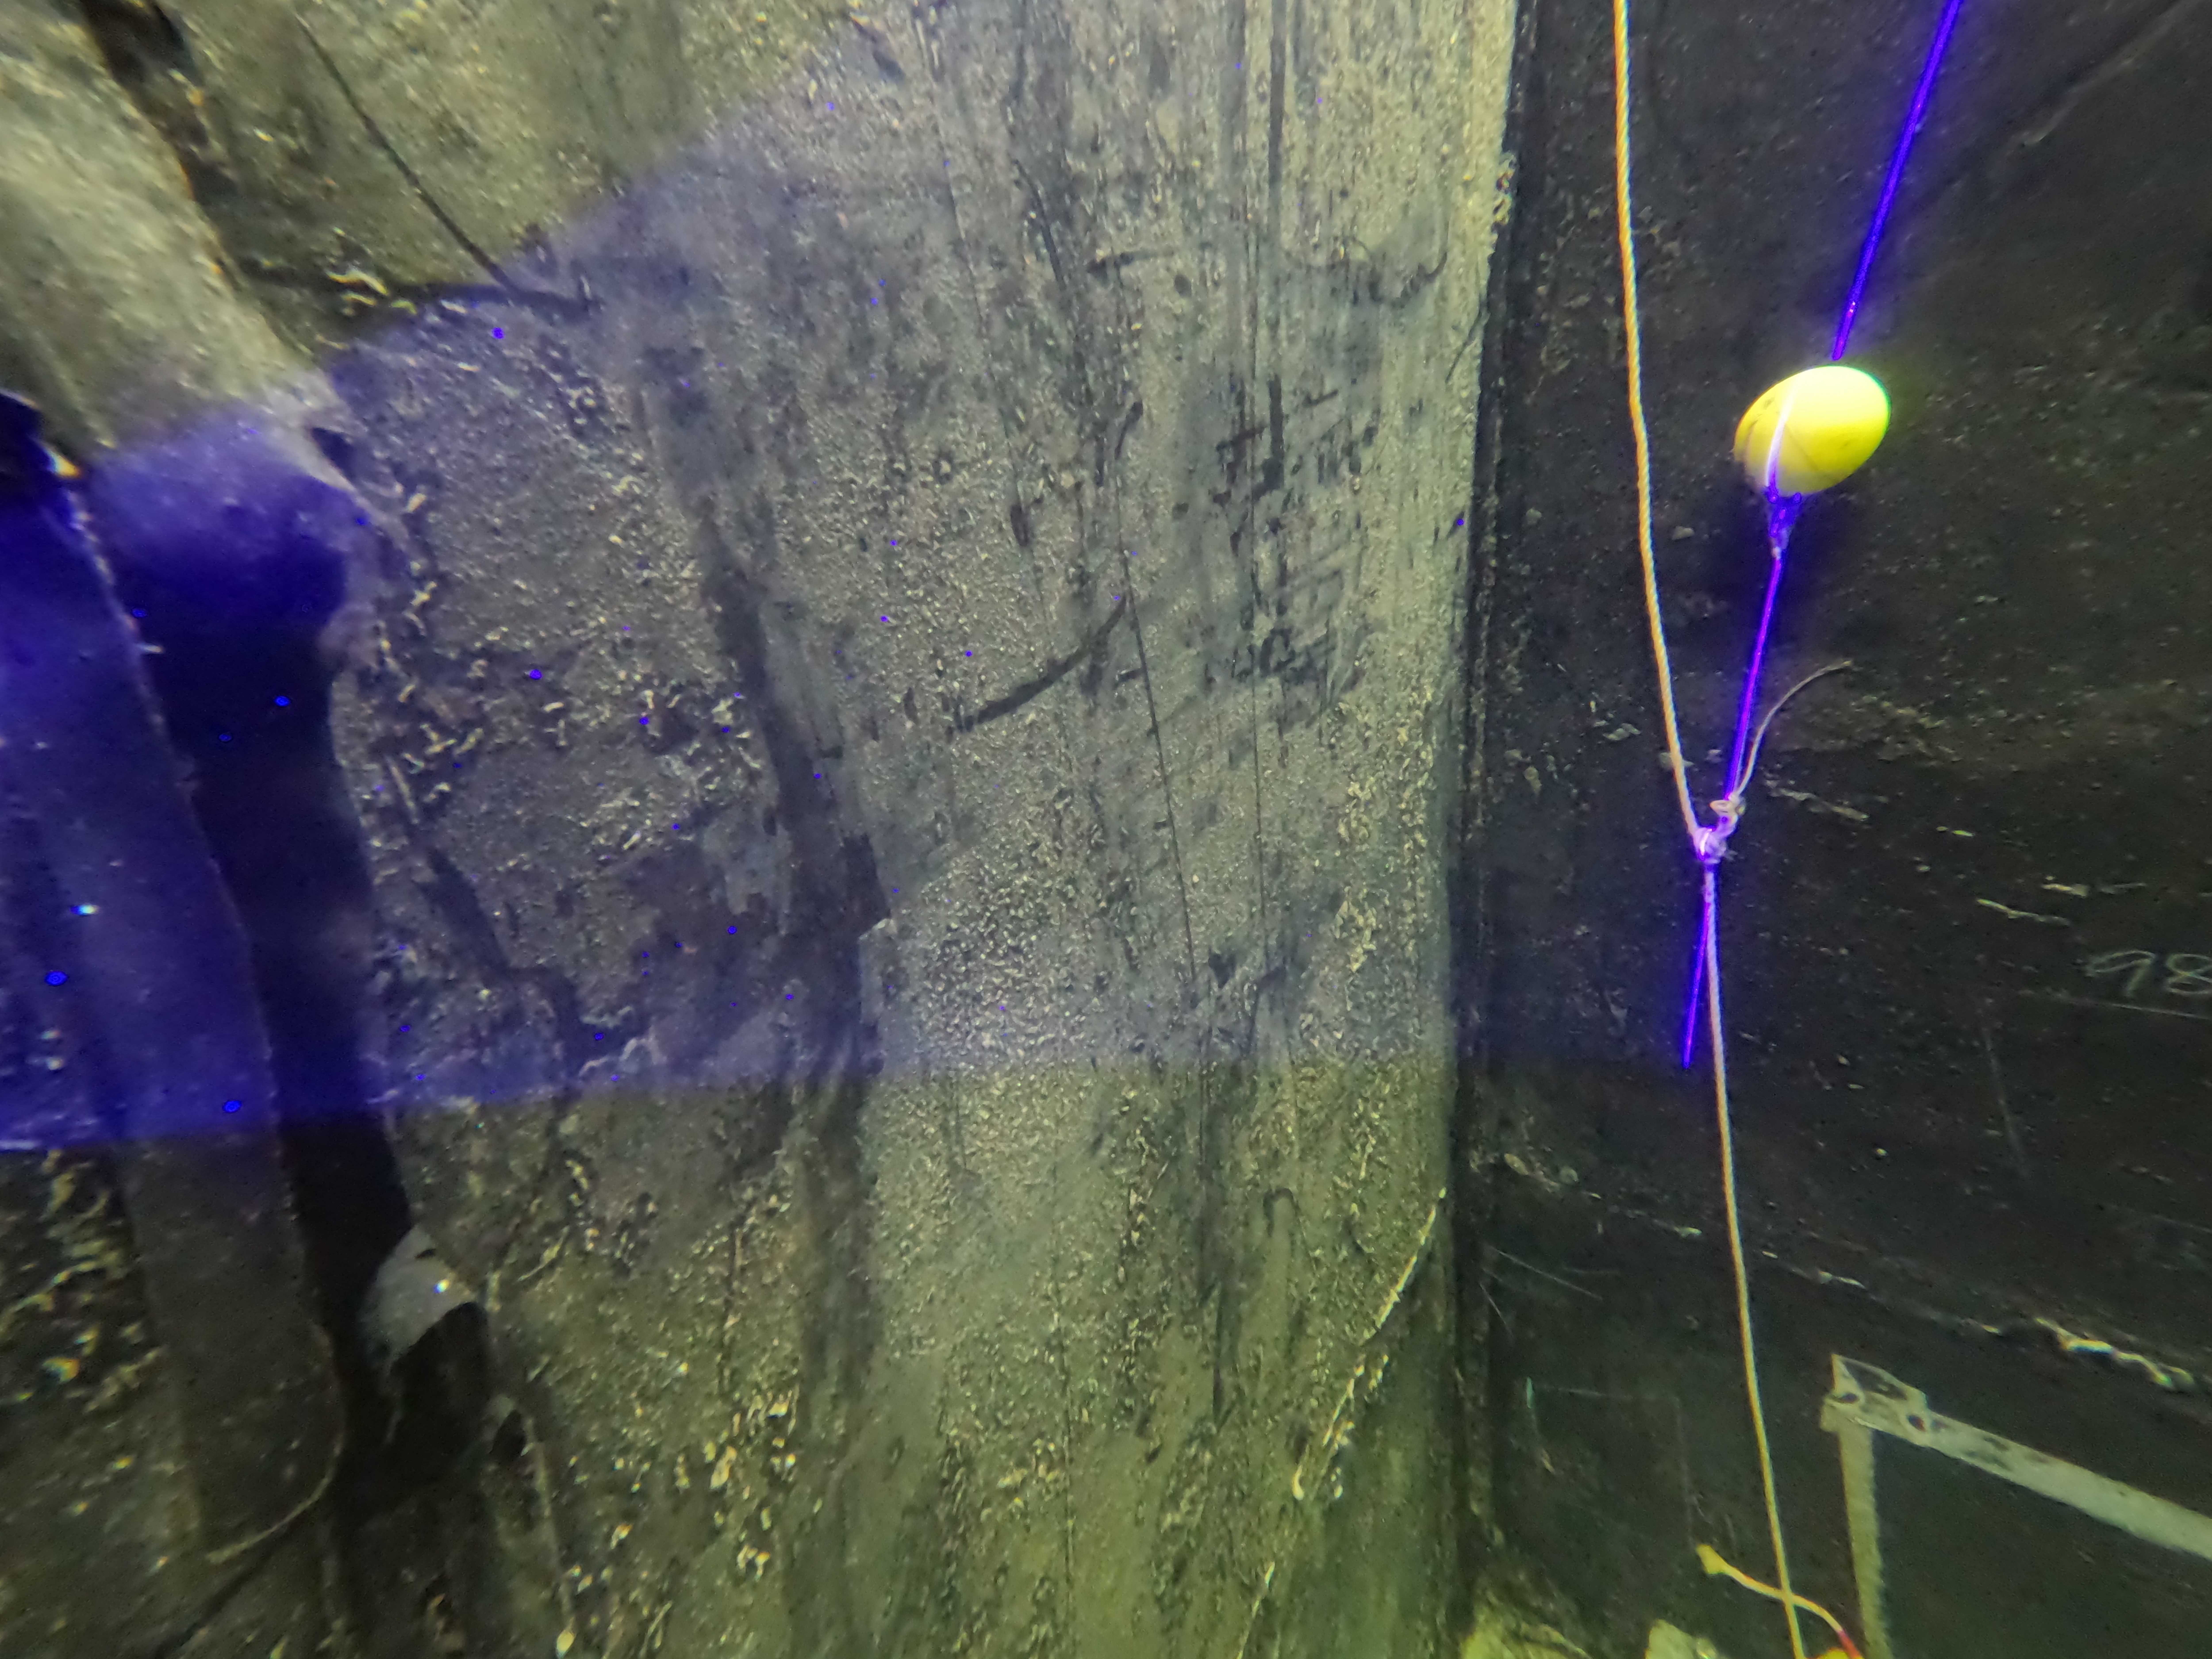

Supplement: Supplementary file 3099 [file G0031899.pdf › 12/G0031899.pdf]

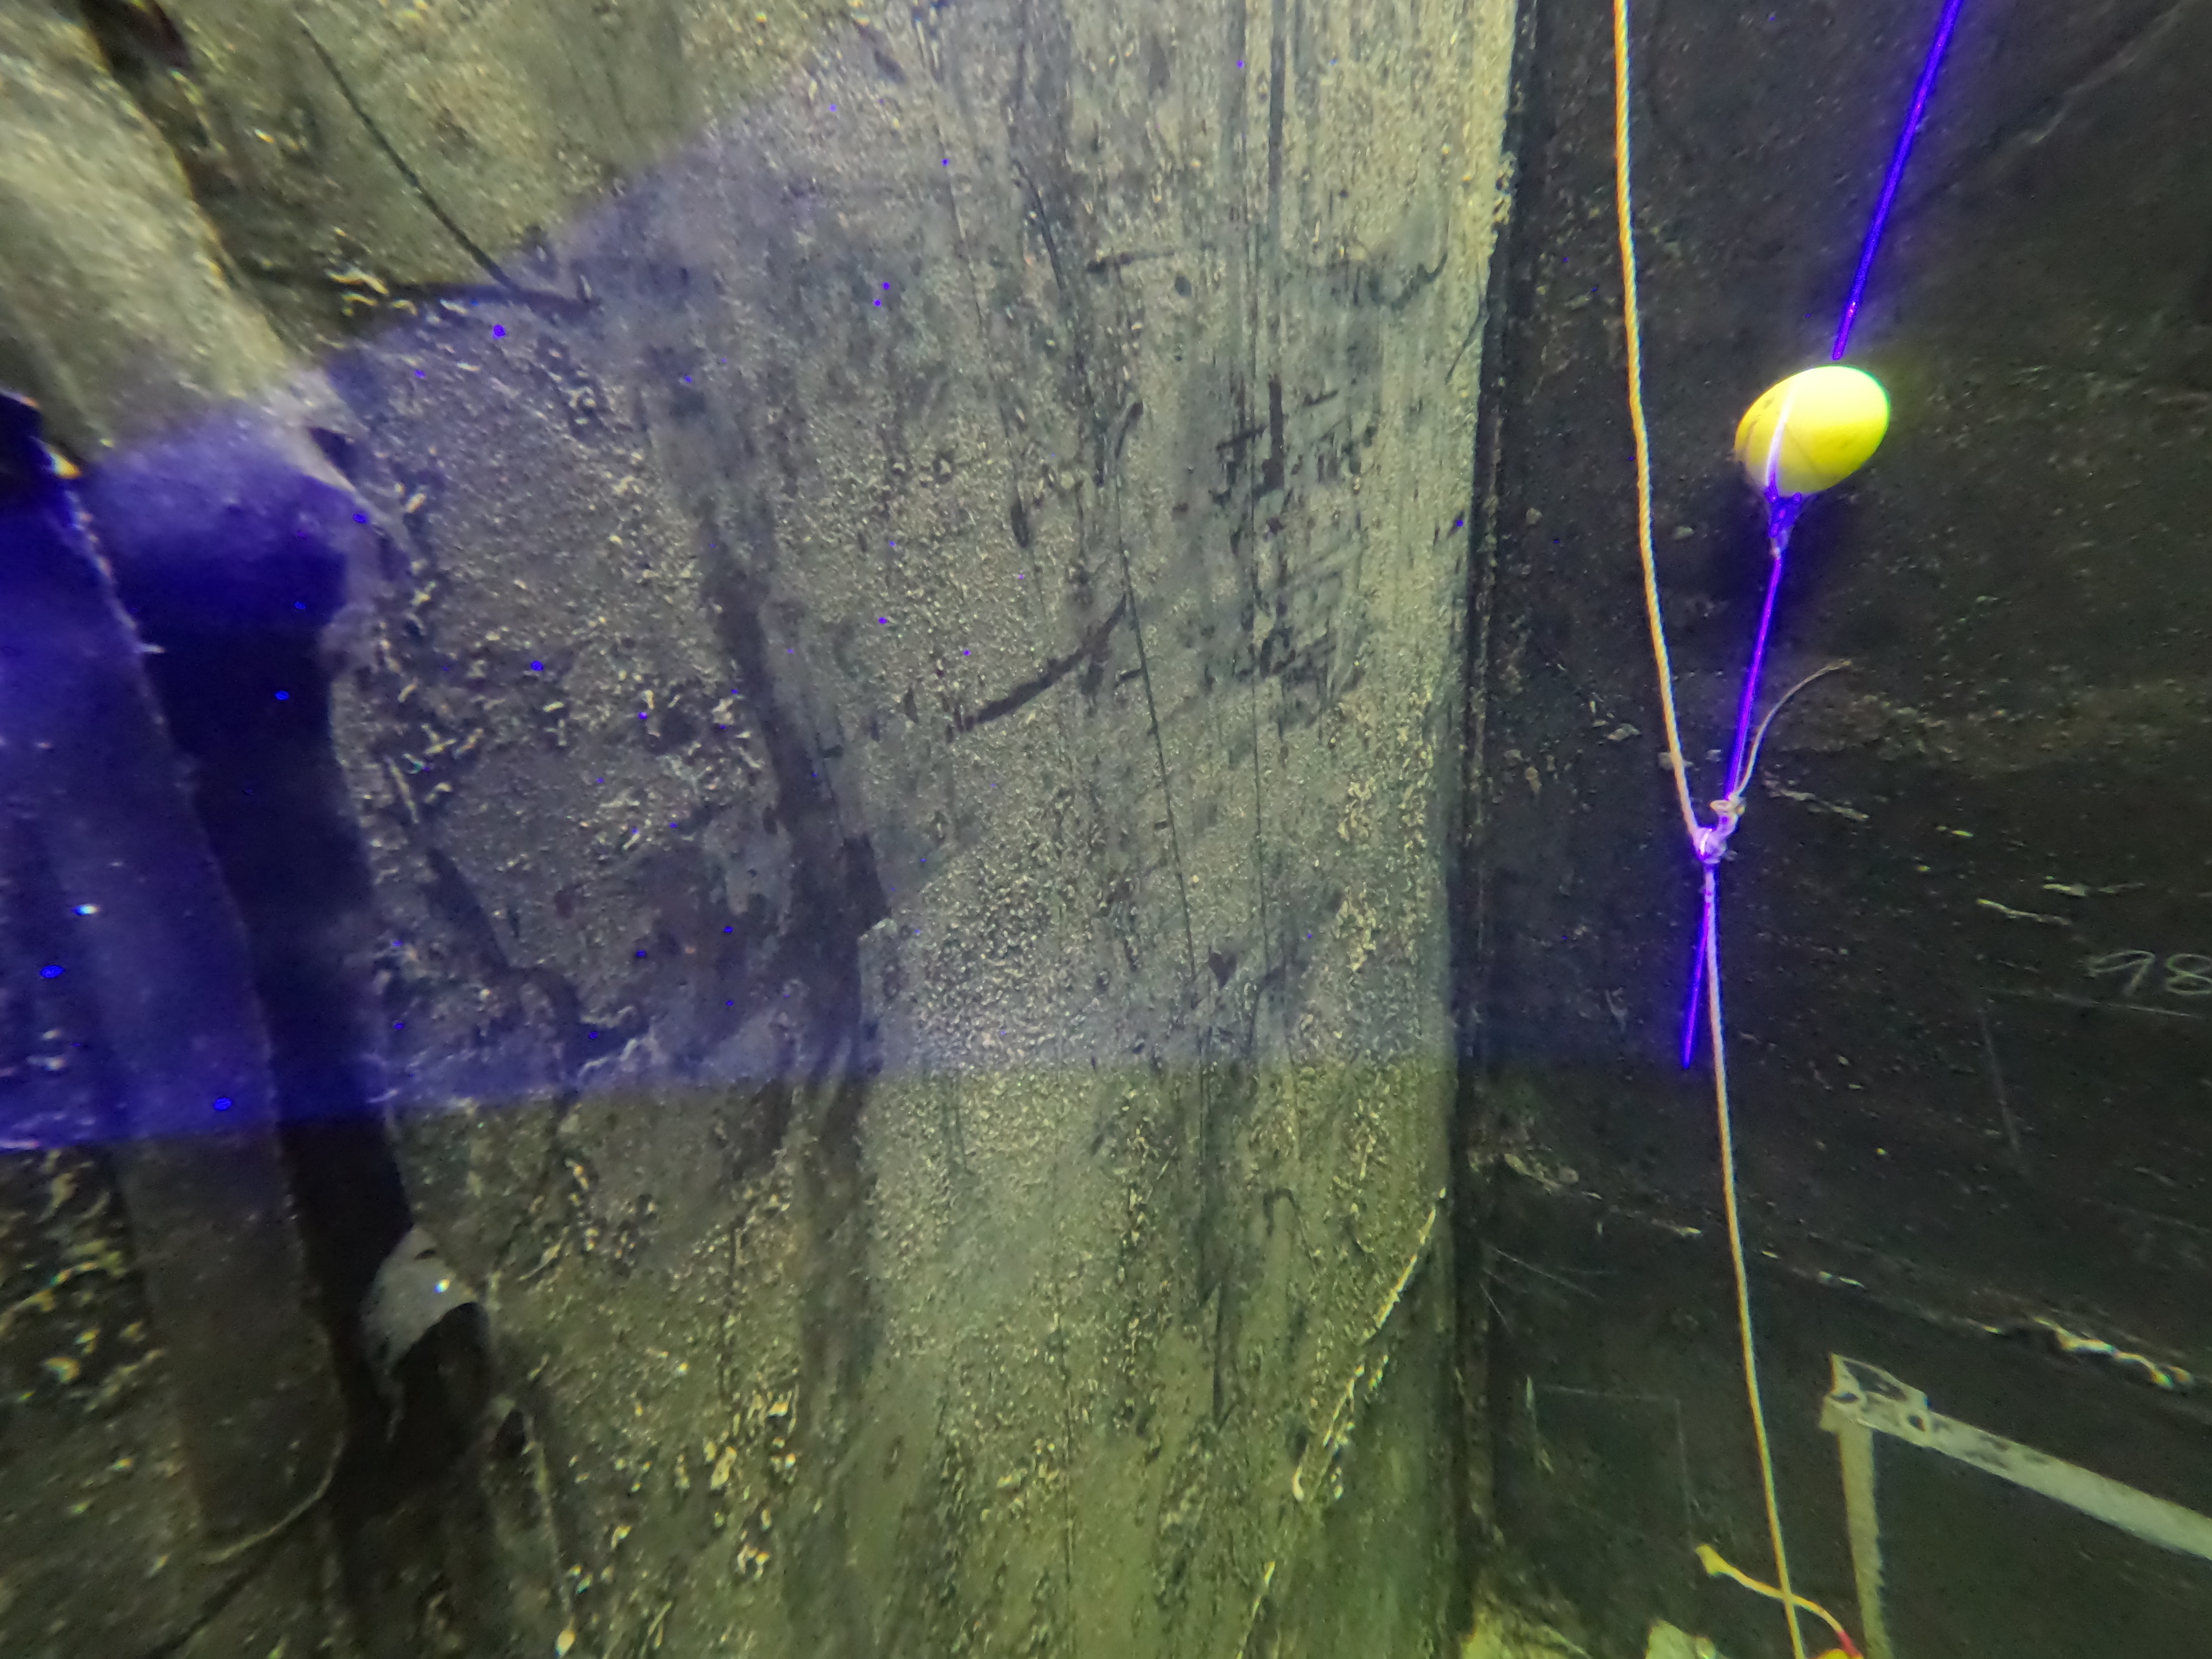

Supplement: Supplementary file 3100 [file G0031900.pdf › 12/G0031900.pdf]

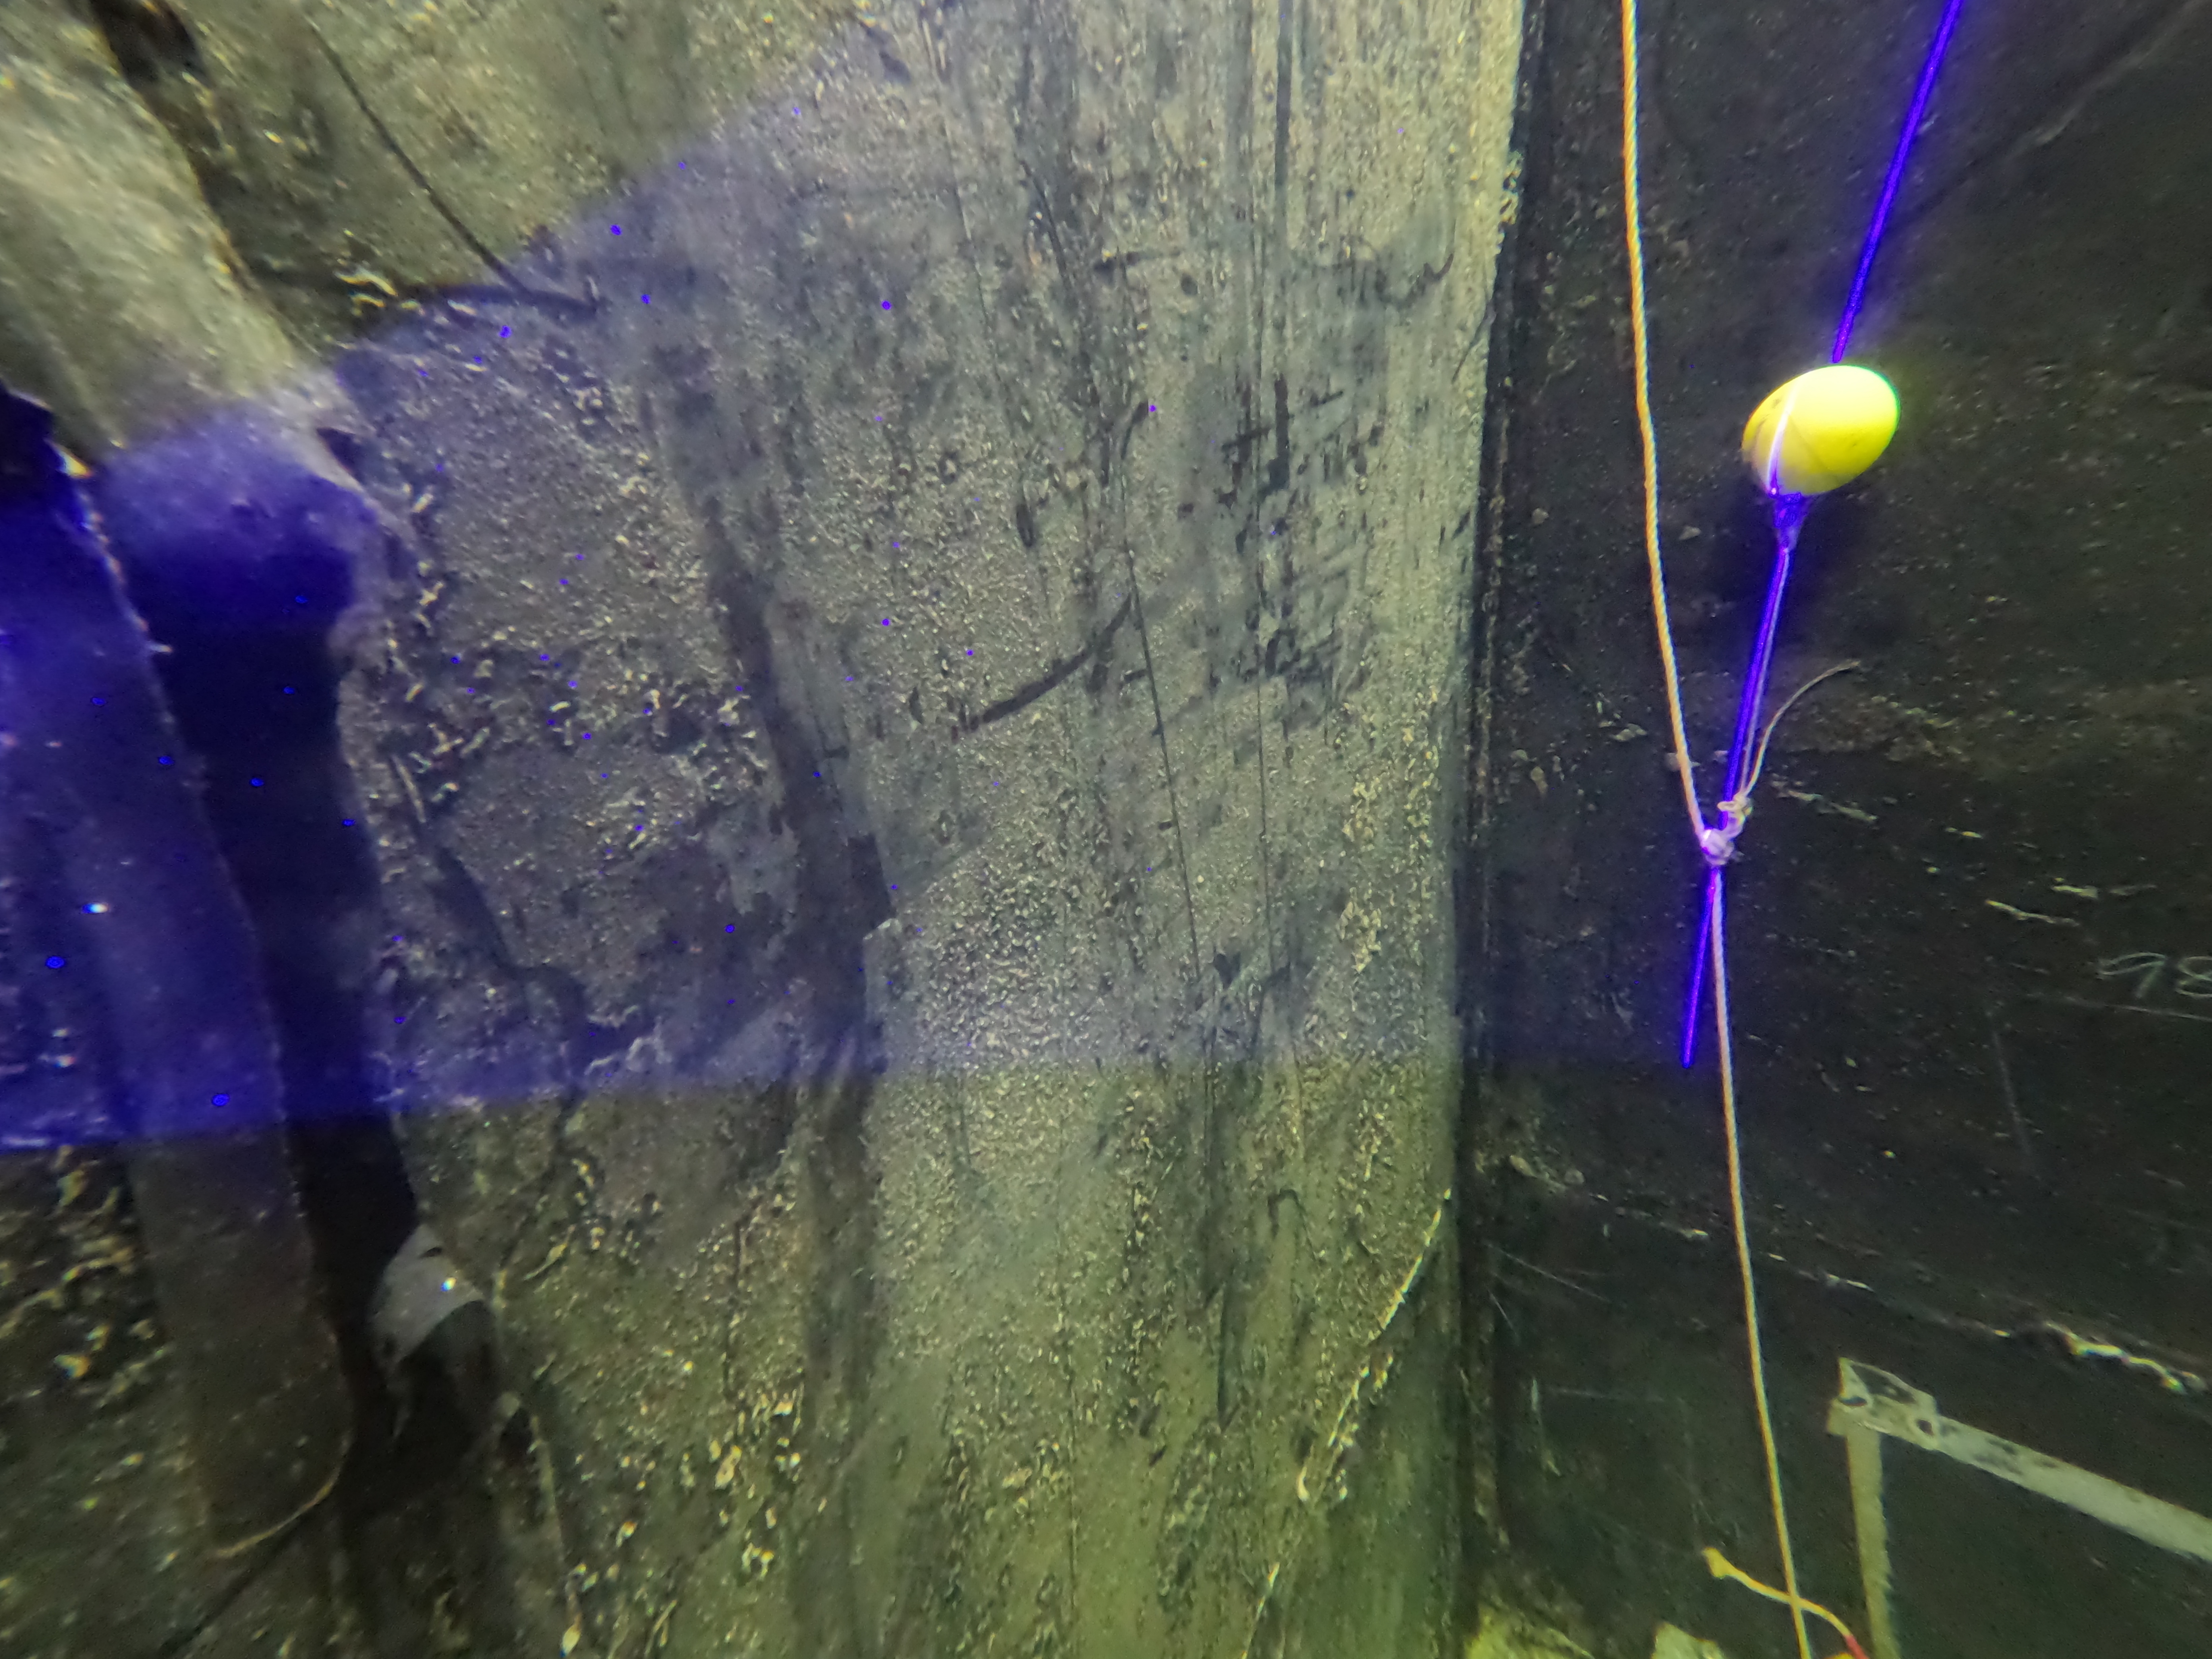

Supplement: Supplementary file 3101 [file G0031901.pdf › 12/G0031901.pdf]

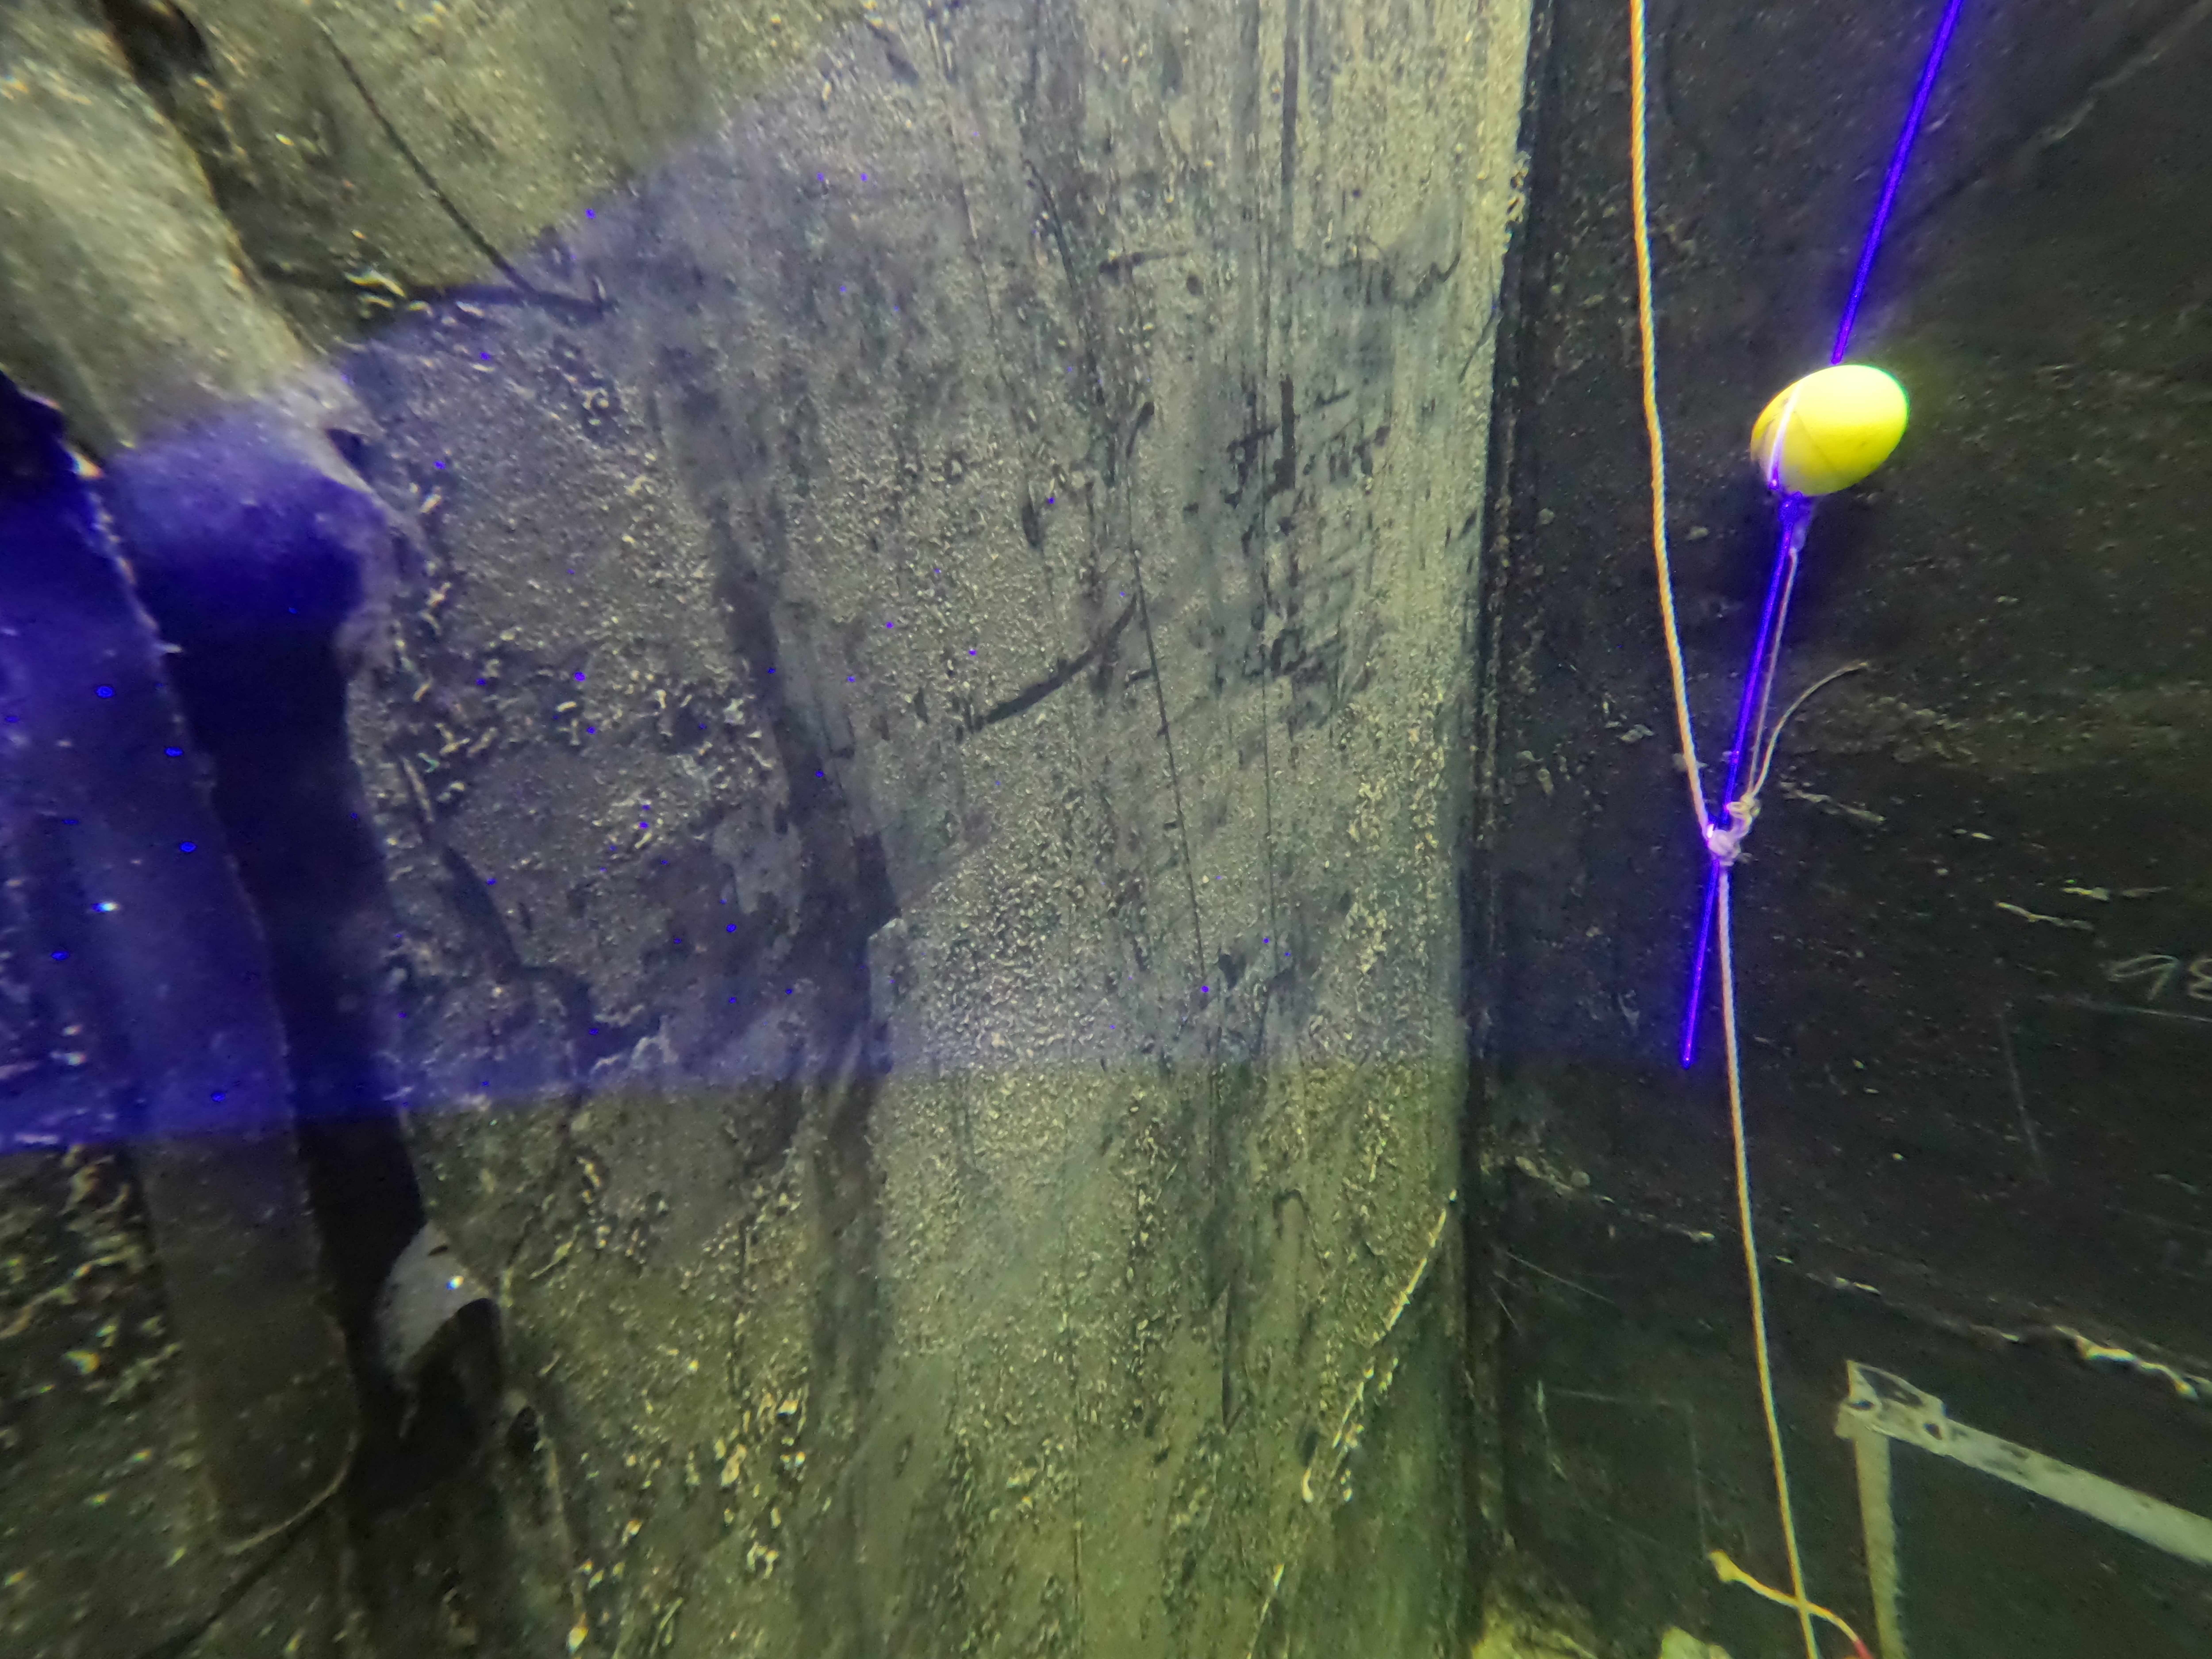

Supplement: Supplementary file 3102 [file G0031902.pdf › 12/G0031902.pdf]

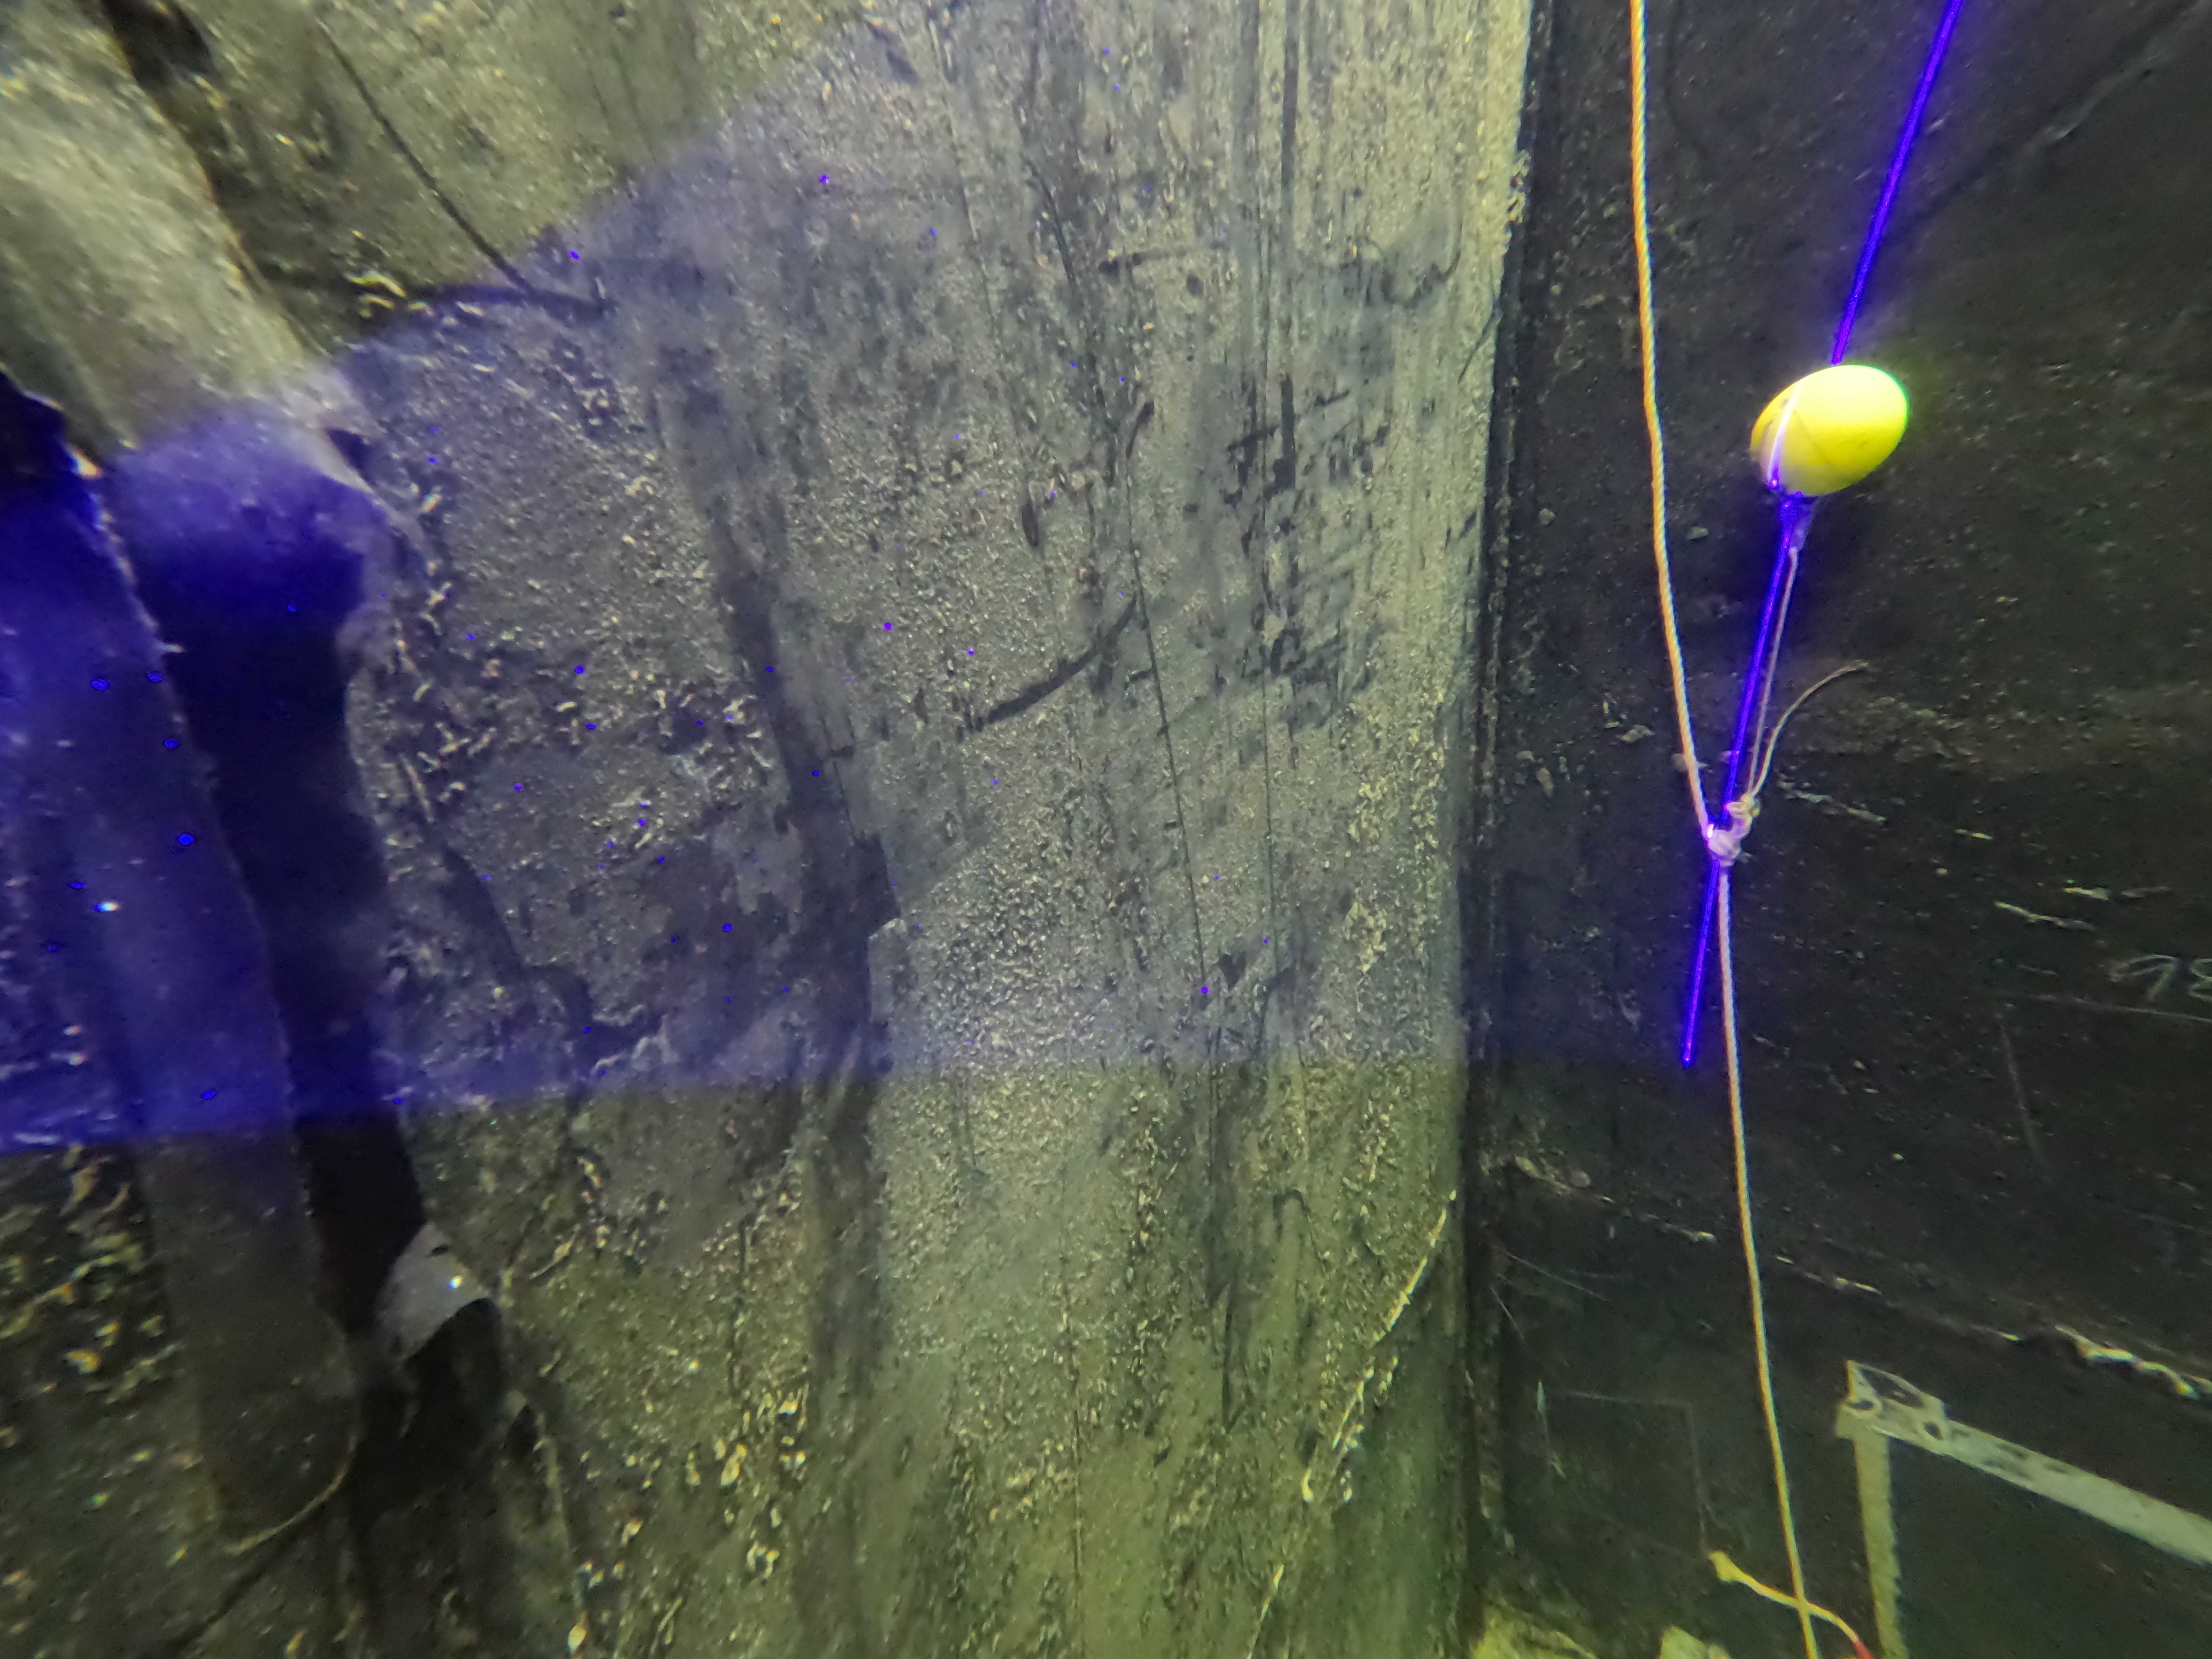

Supplement: Supplementary file 3103 [file G0031903.pdf › 12/G0031903.pdf]

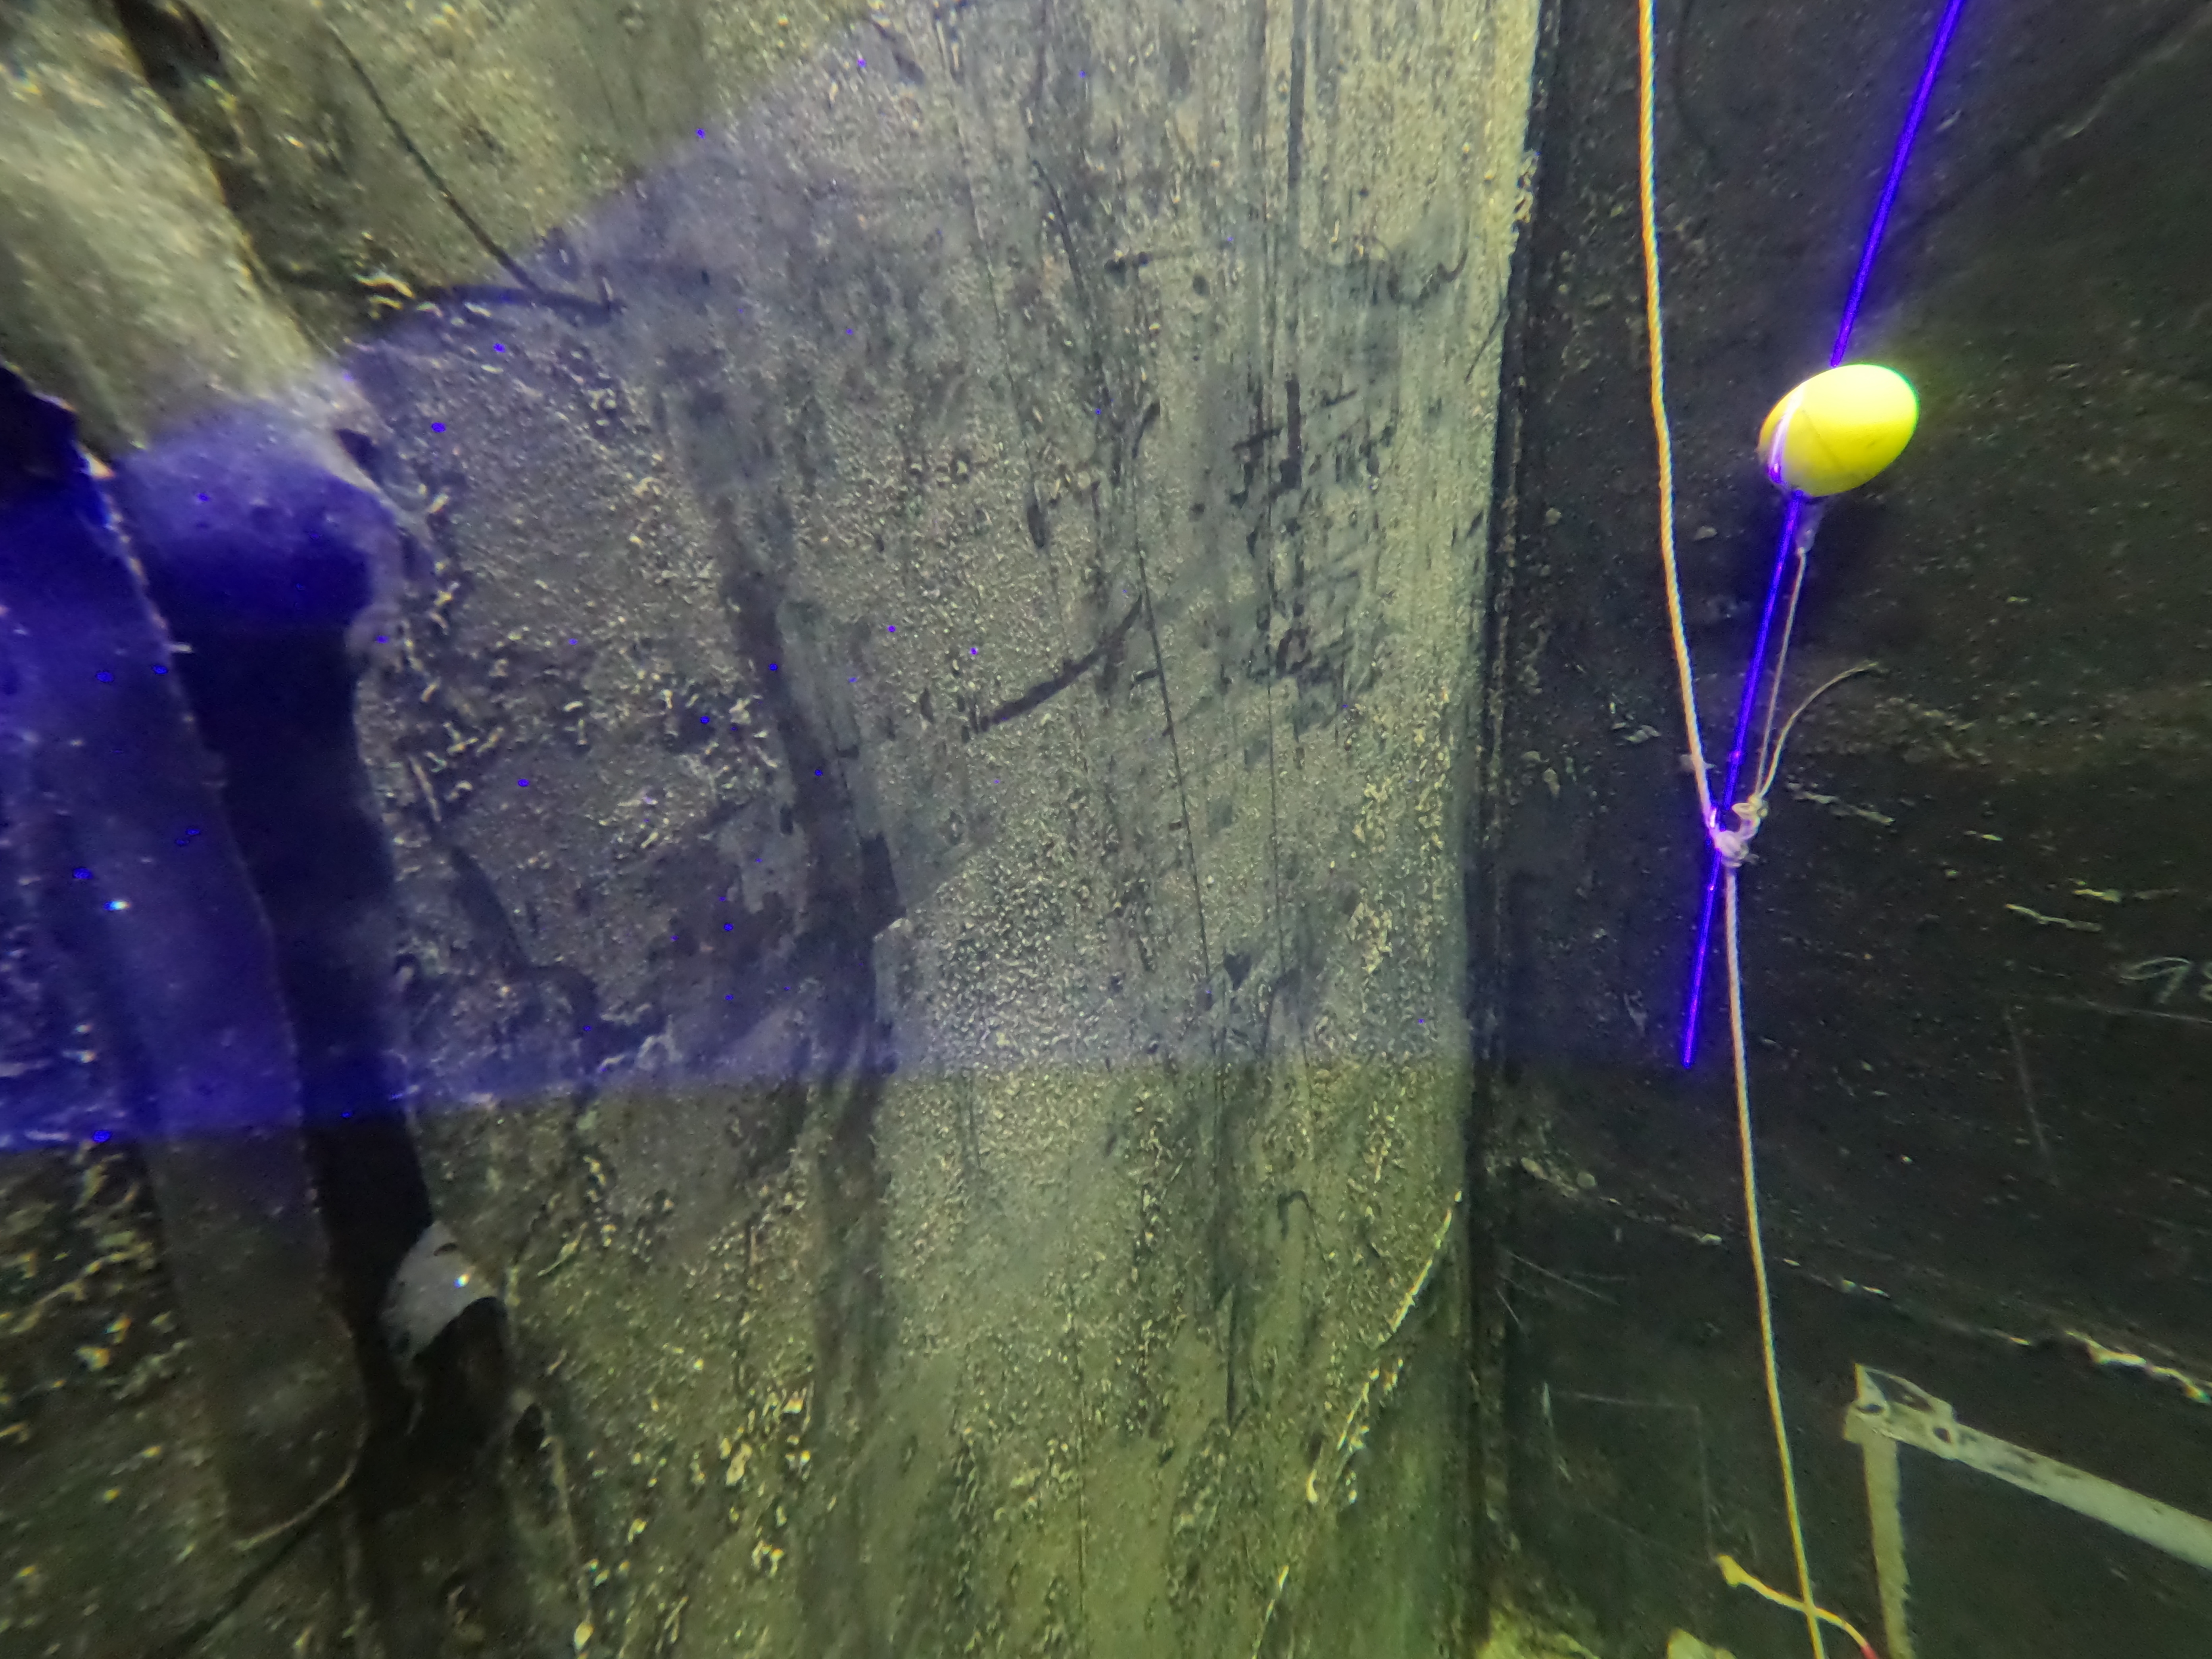

Supplement: Supplementary file 3104 [file G0031904.pdf › 12/G0031904.pdf]

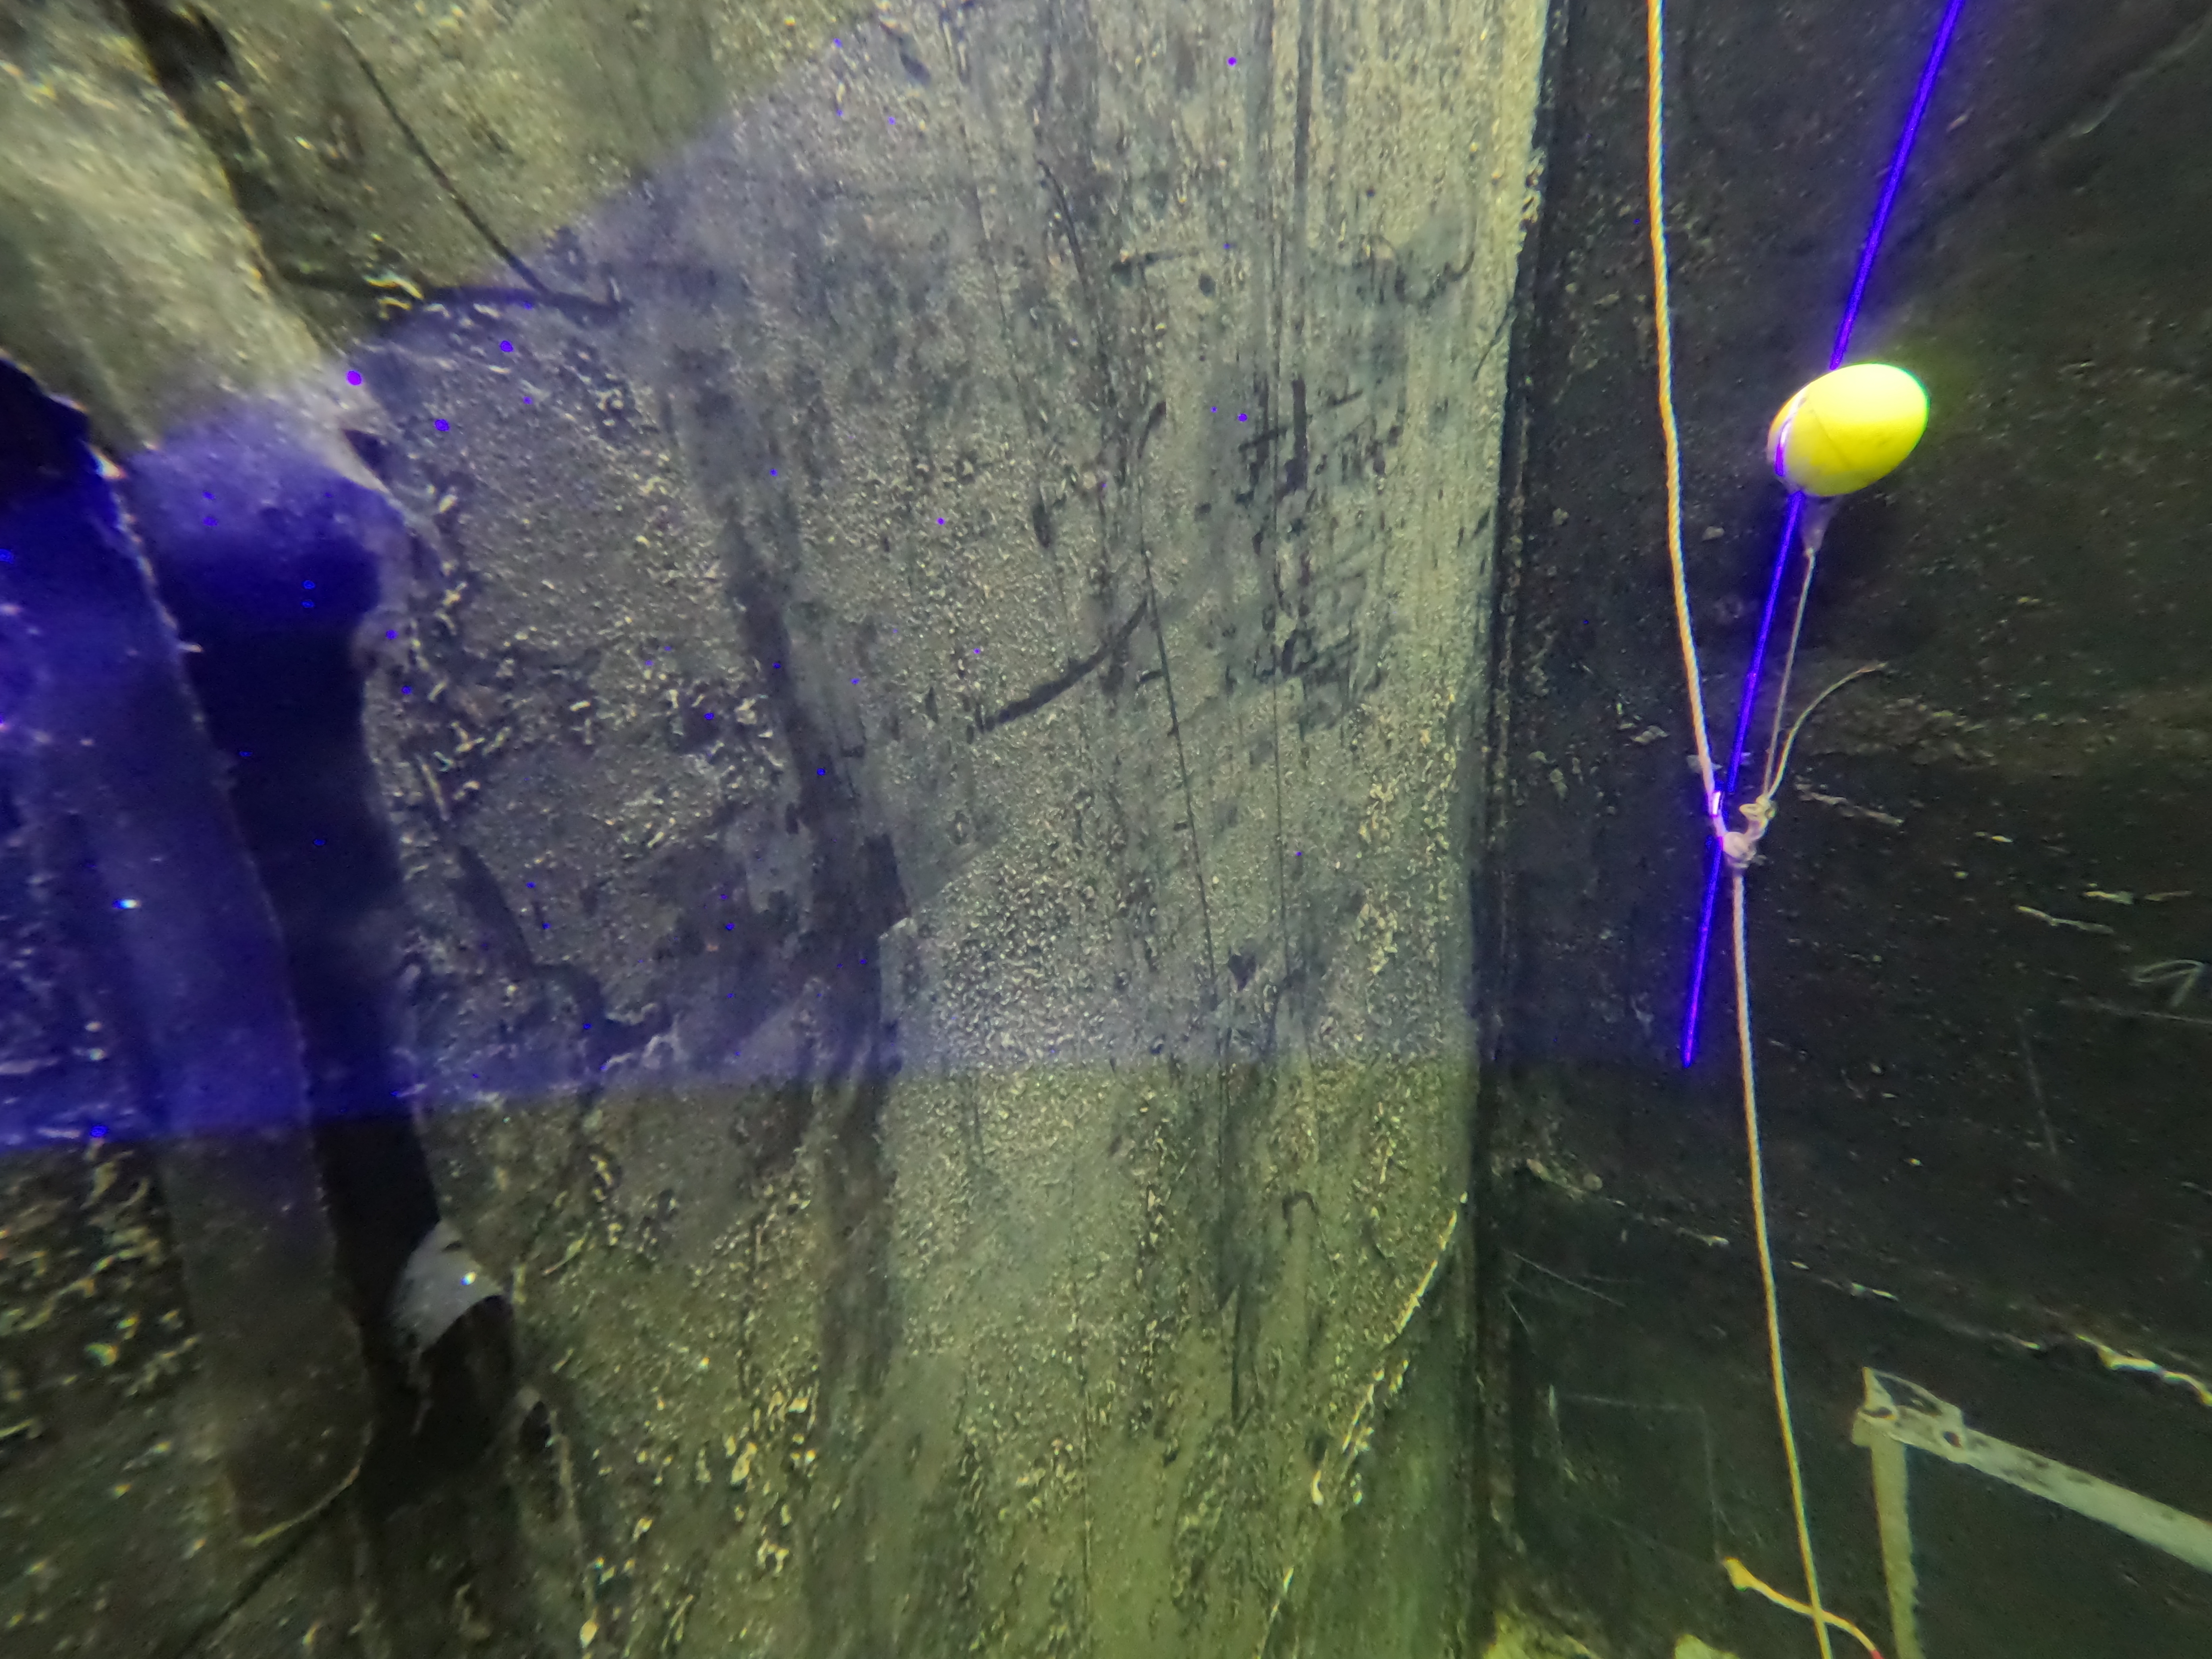

Supplement: Supplementary file 3105 [file G0031905.pdf › 12/G0031905.pdf]

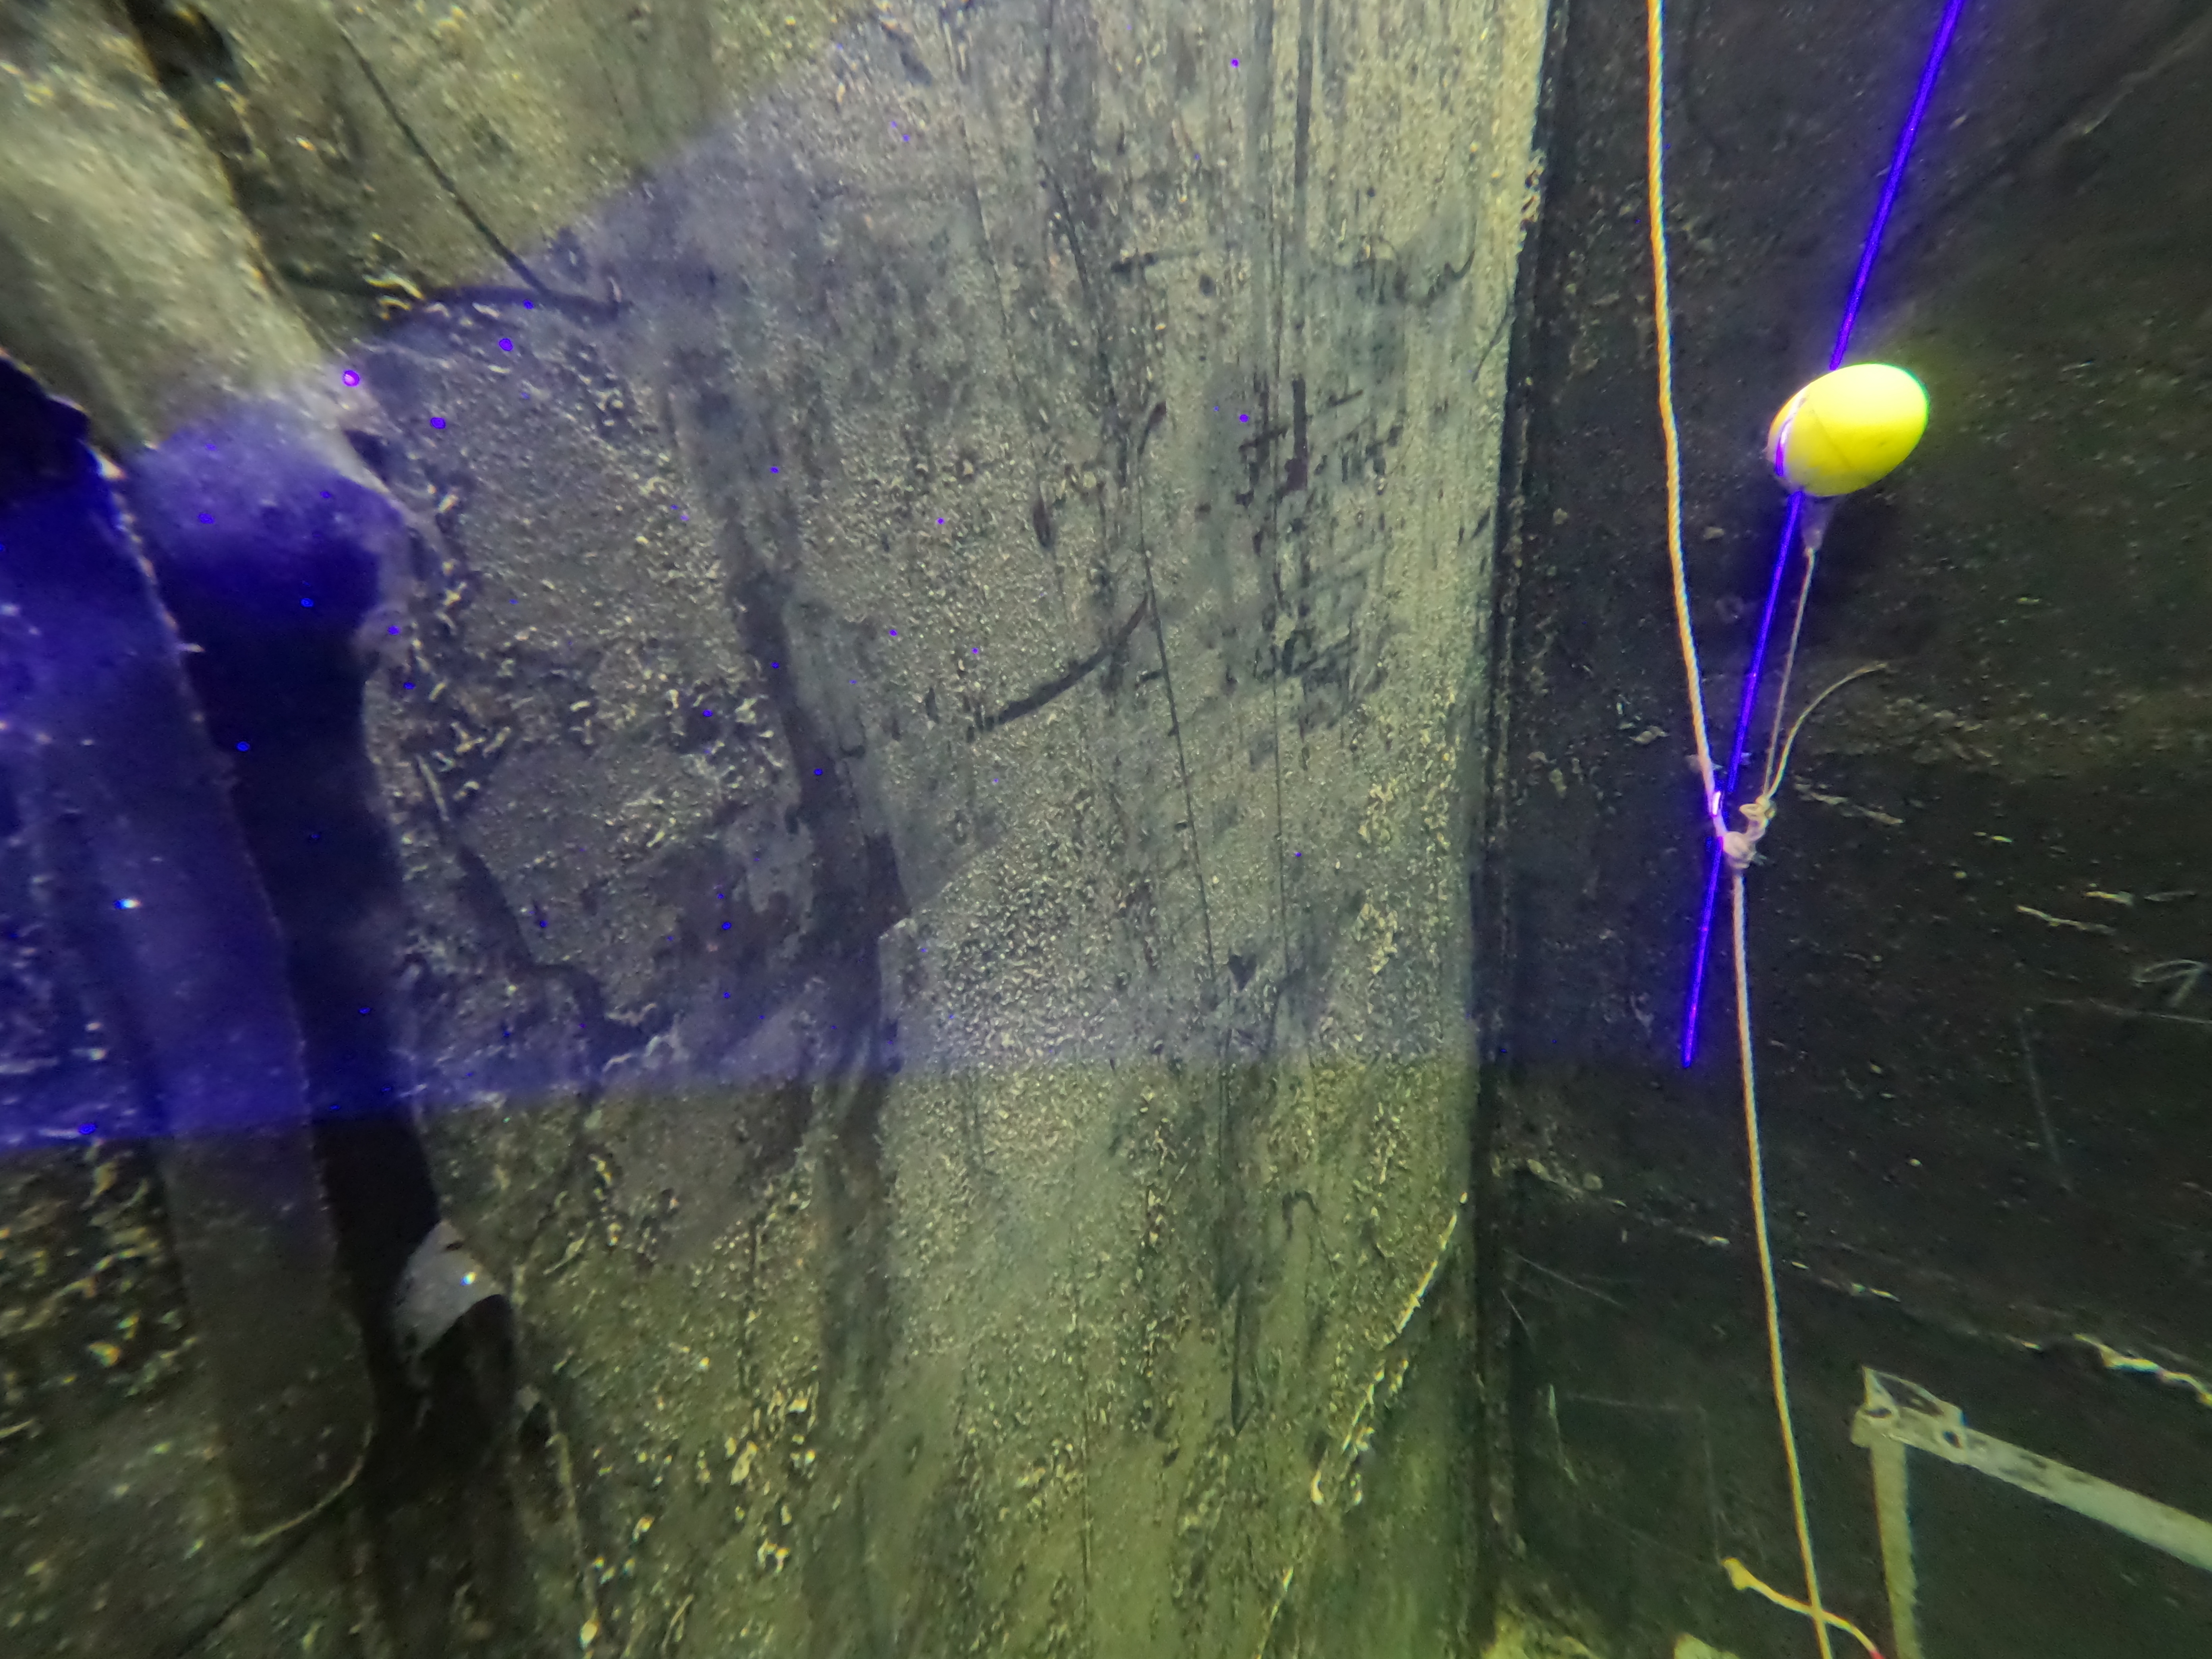

Supplement: Supplementary file 3106 [file G0031906.pdf › 12/G0031906.pdf]

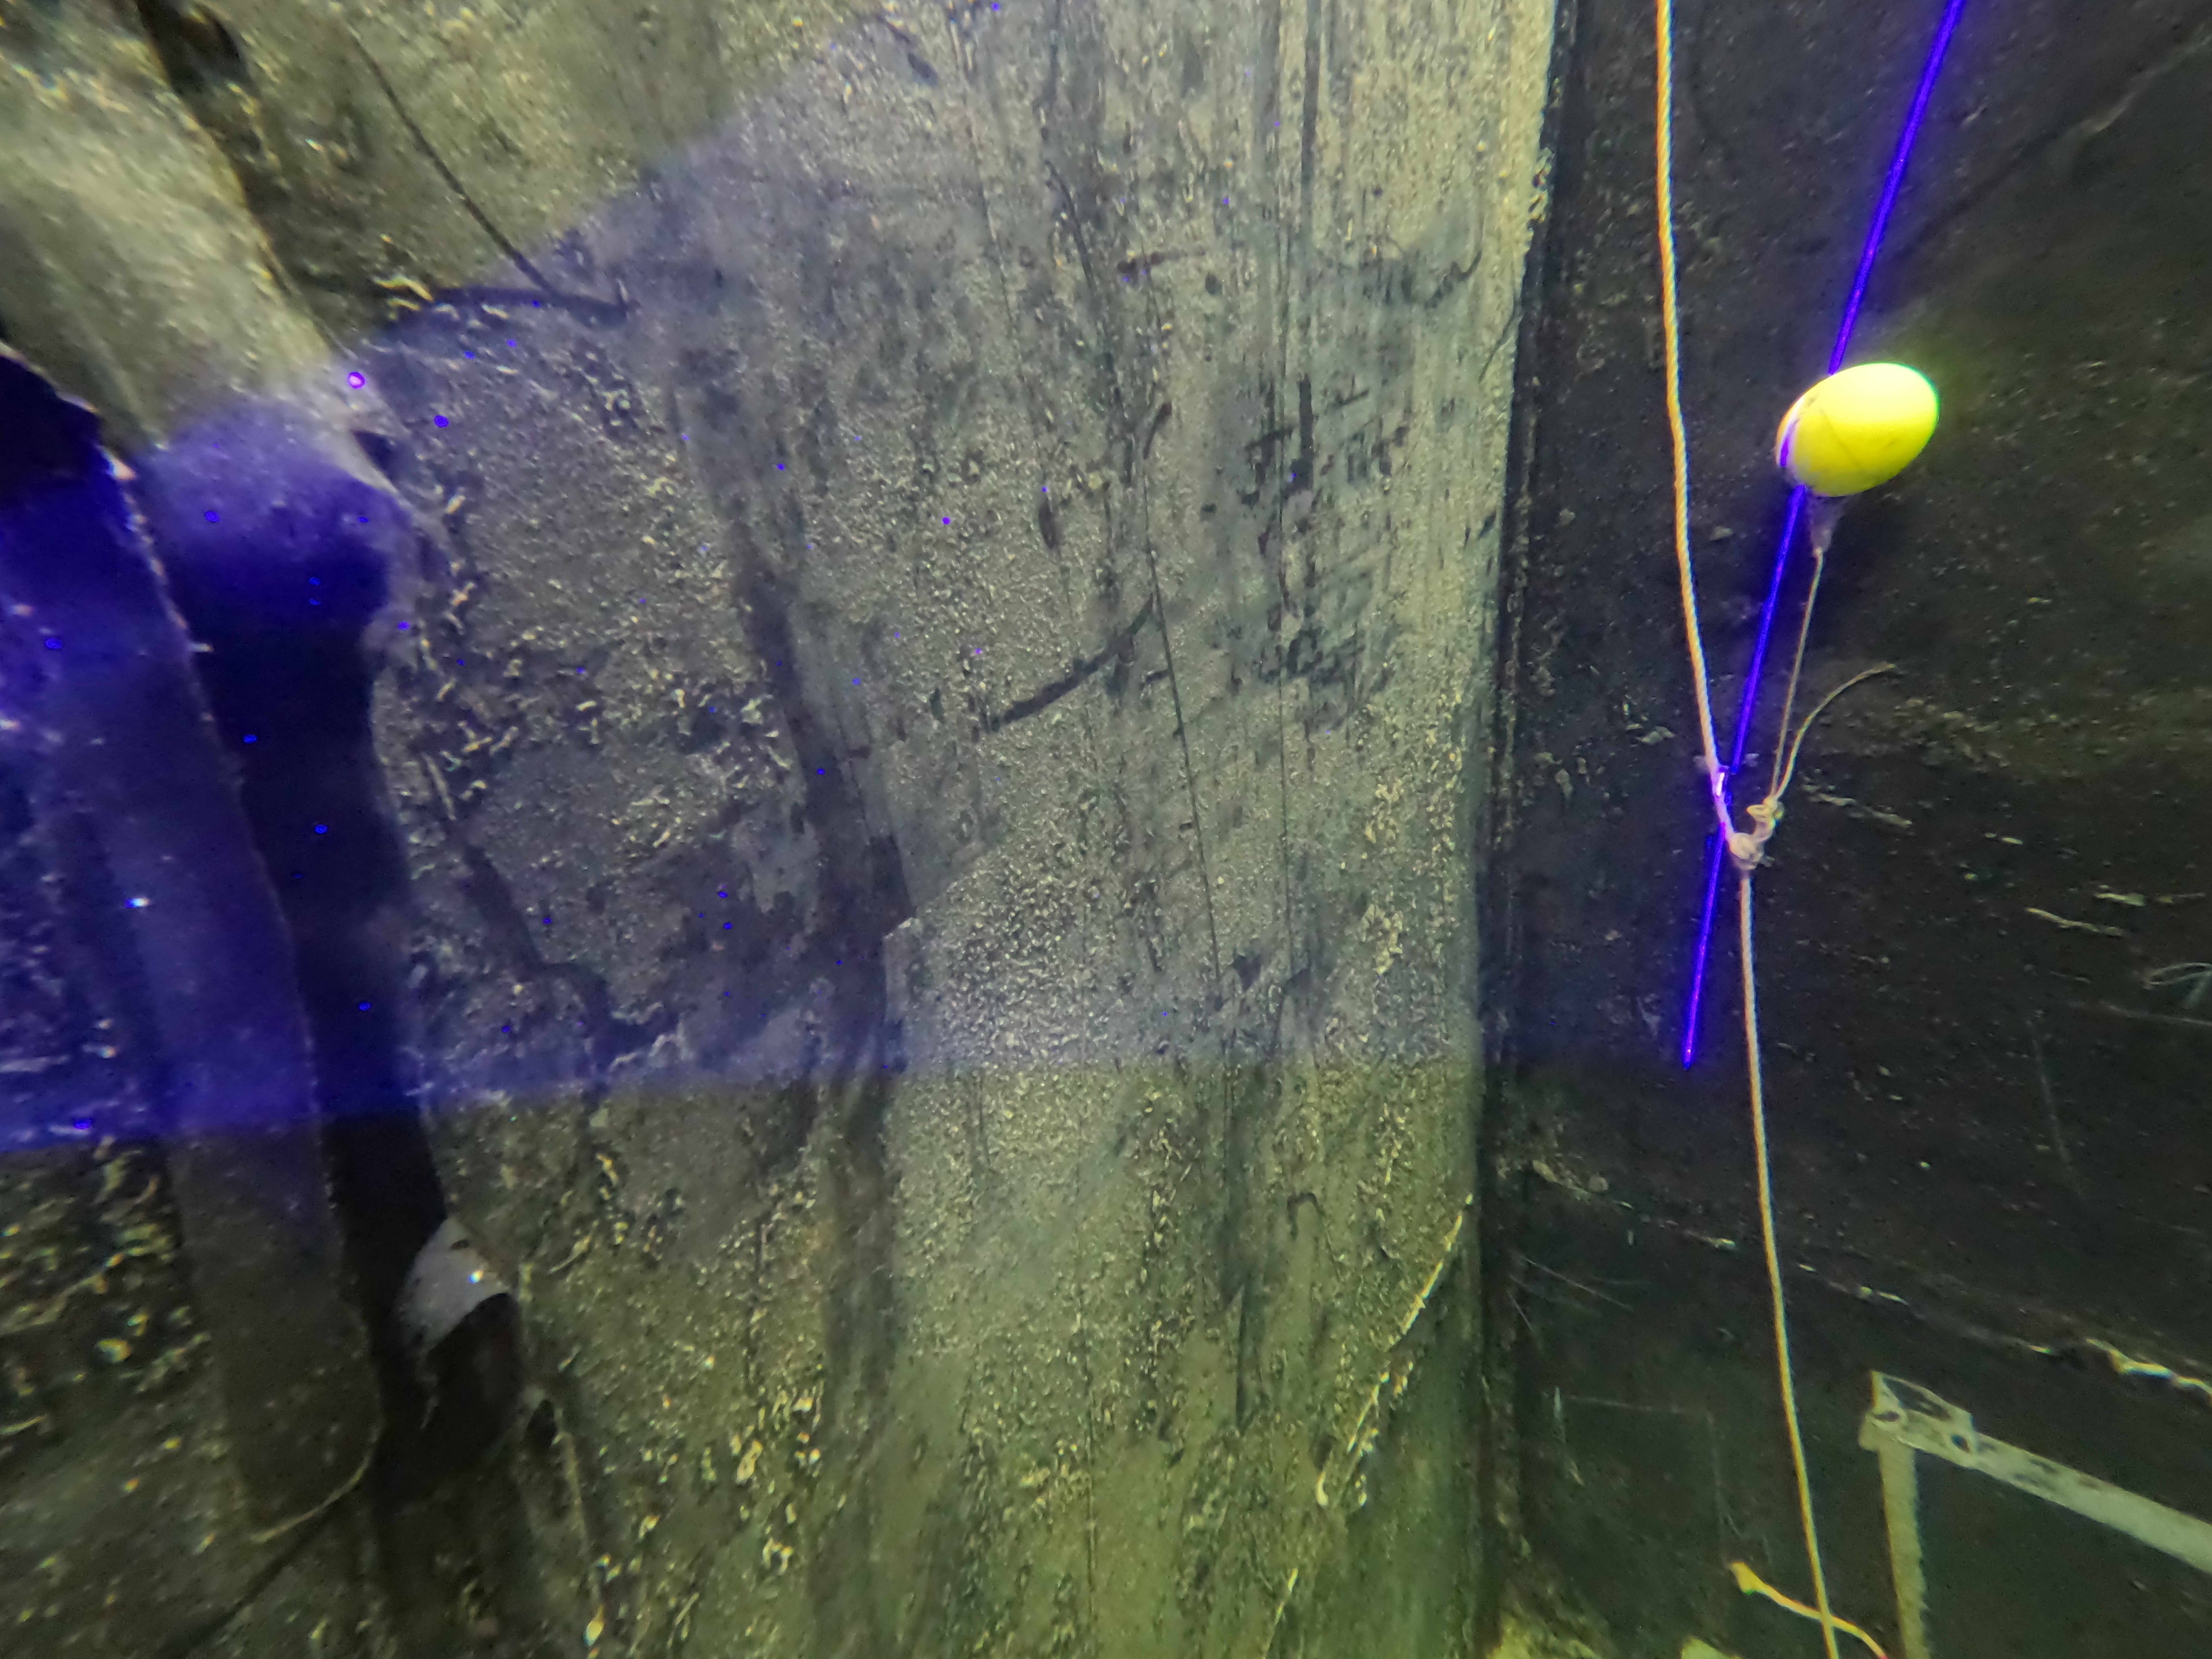

Supplement: Supplementary file 3107 [file G0031907.pdf › 12/G0031907.pdf]

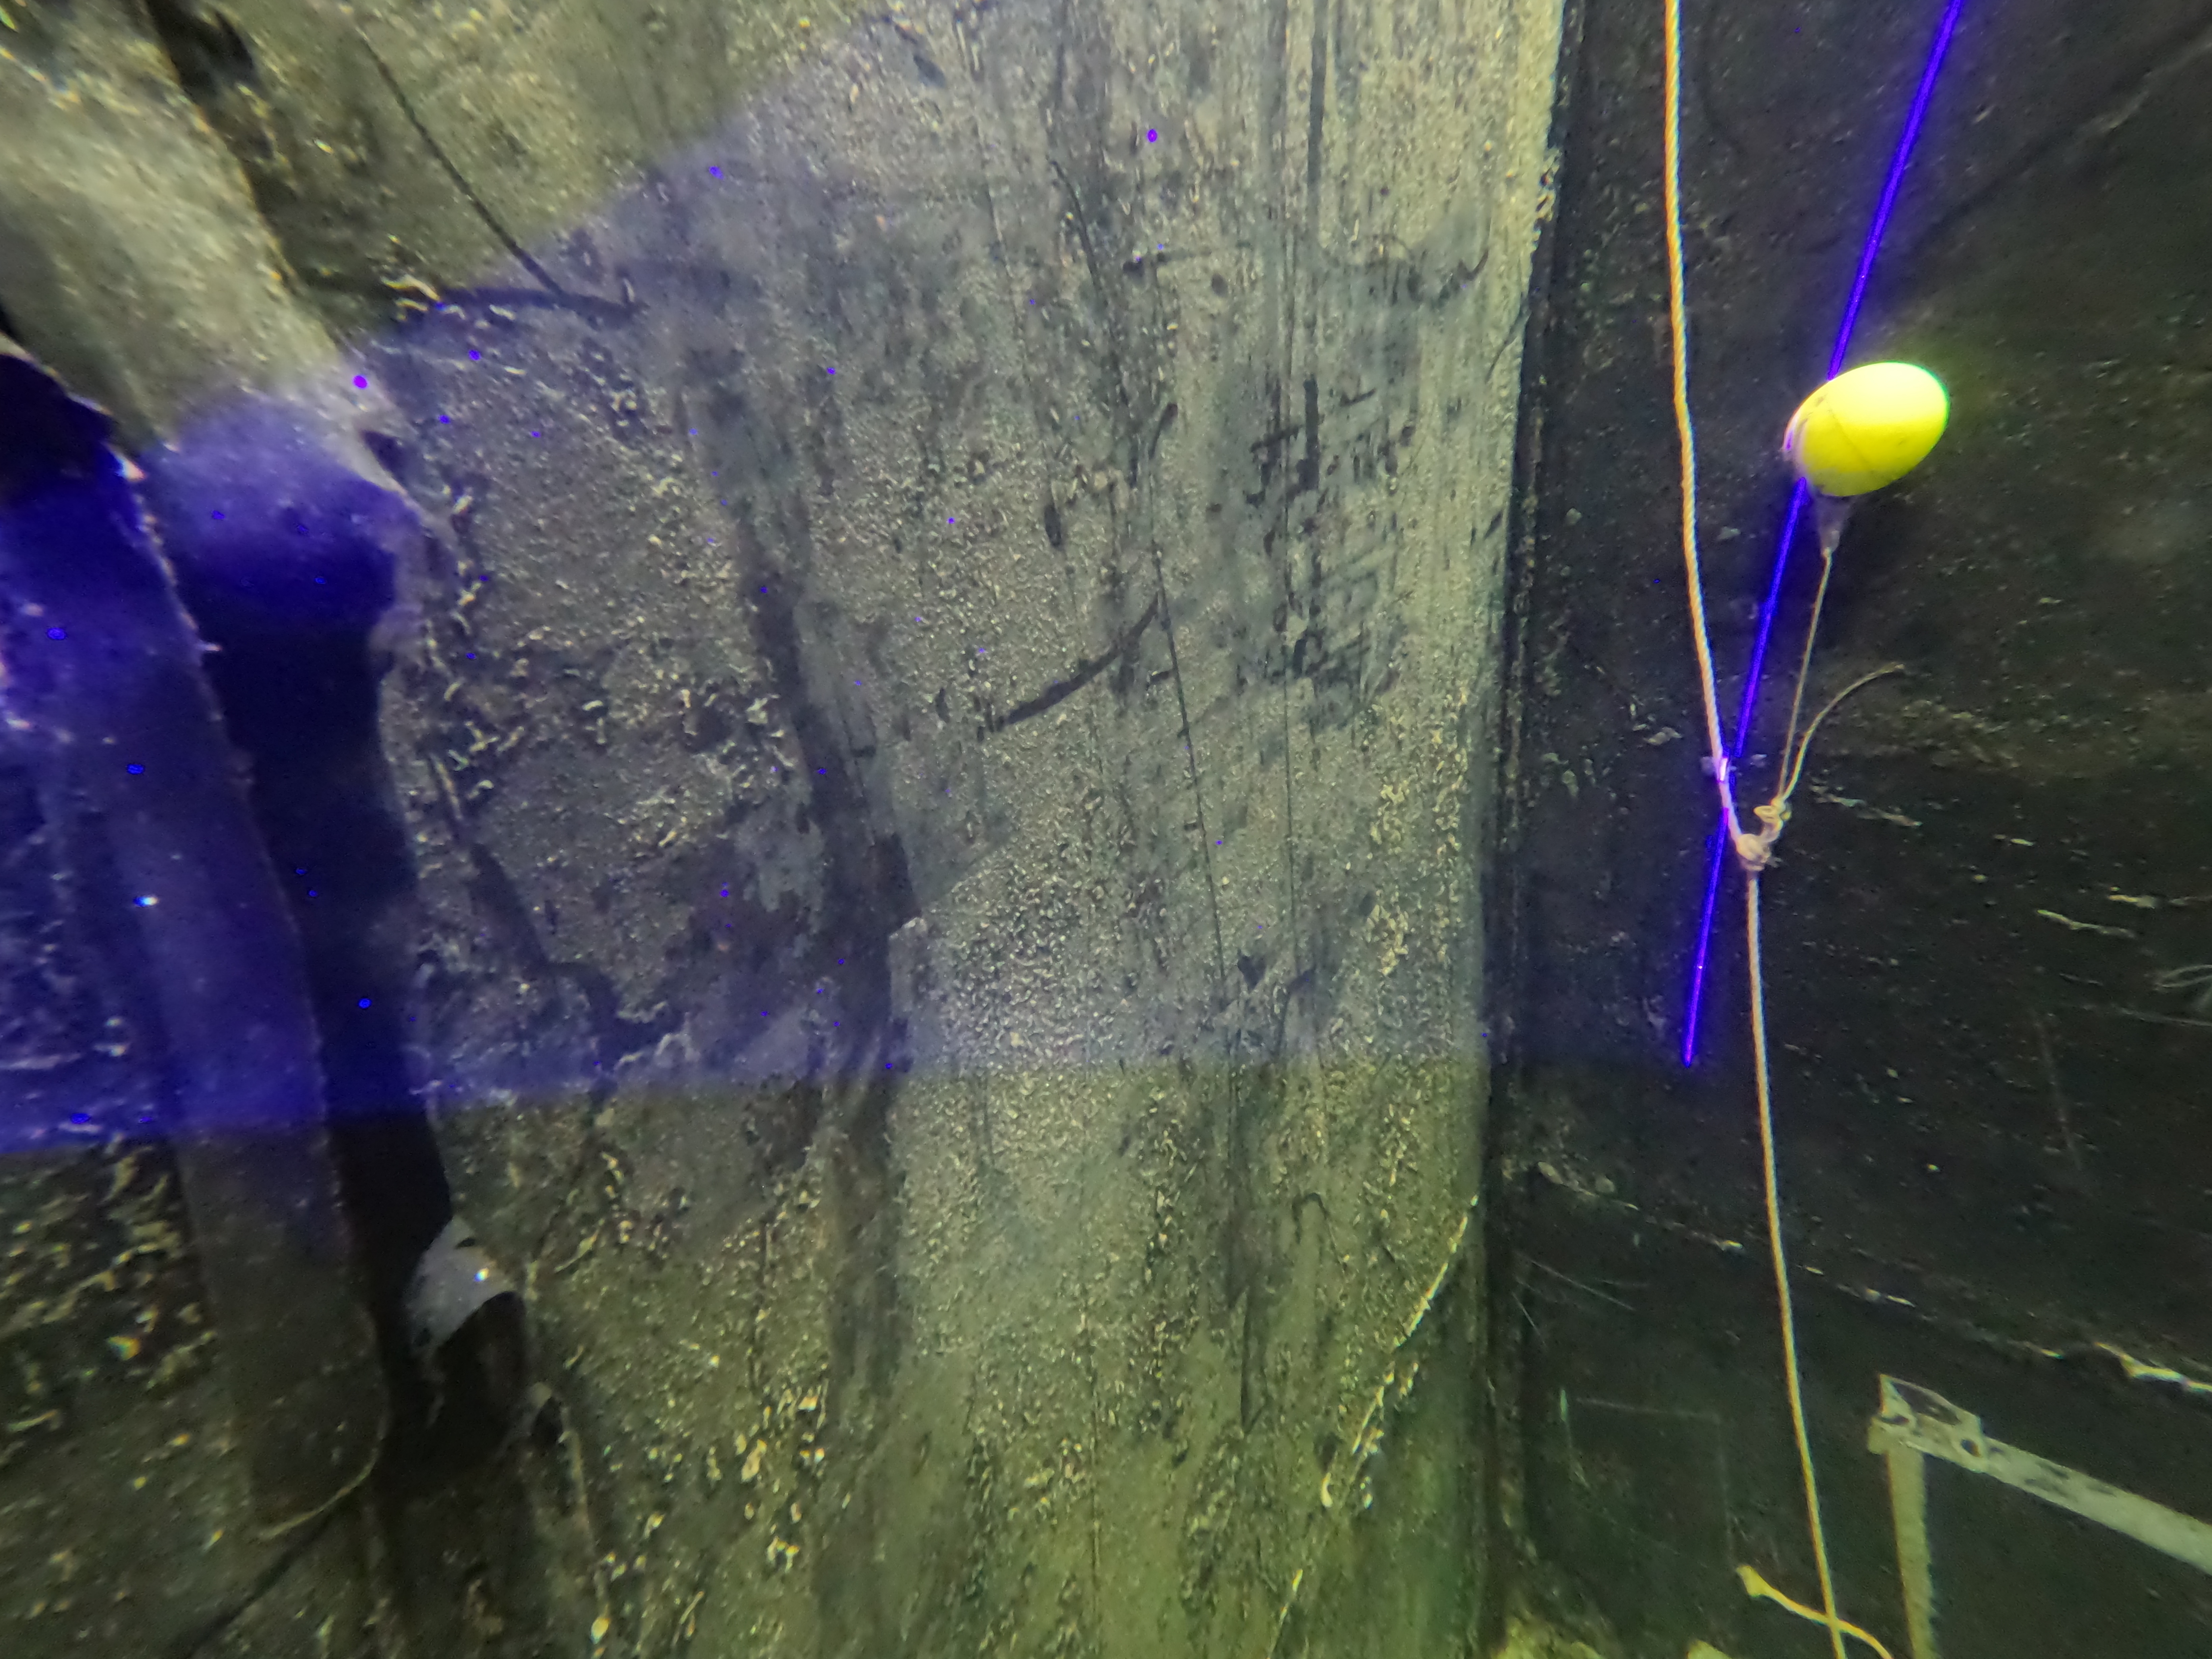

Supplement: Supplementary file 3108 [file G0031908.pdf › 12/G0031908.pdf]

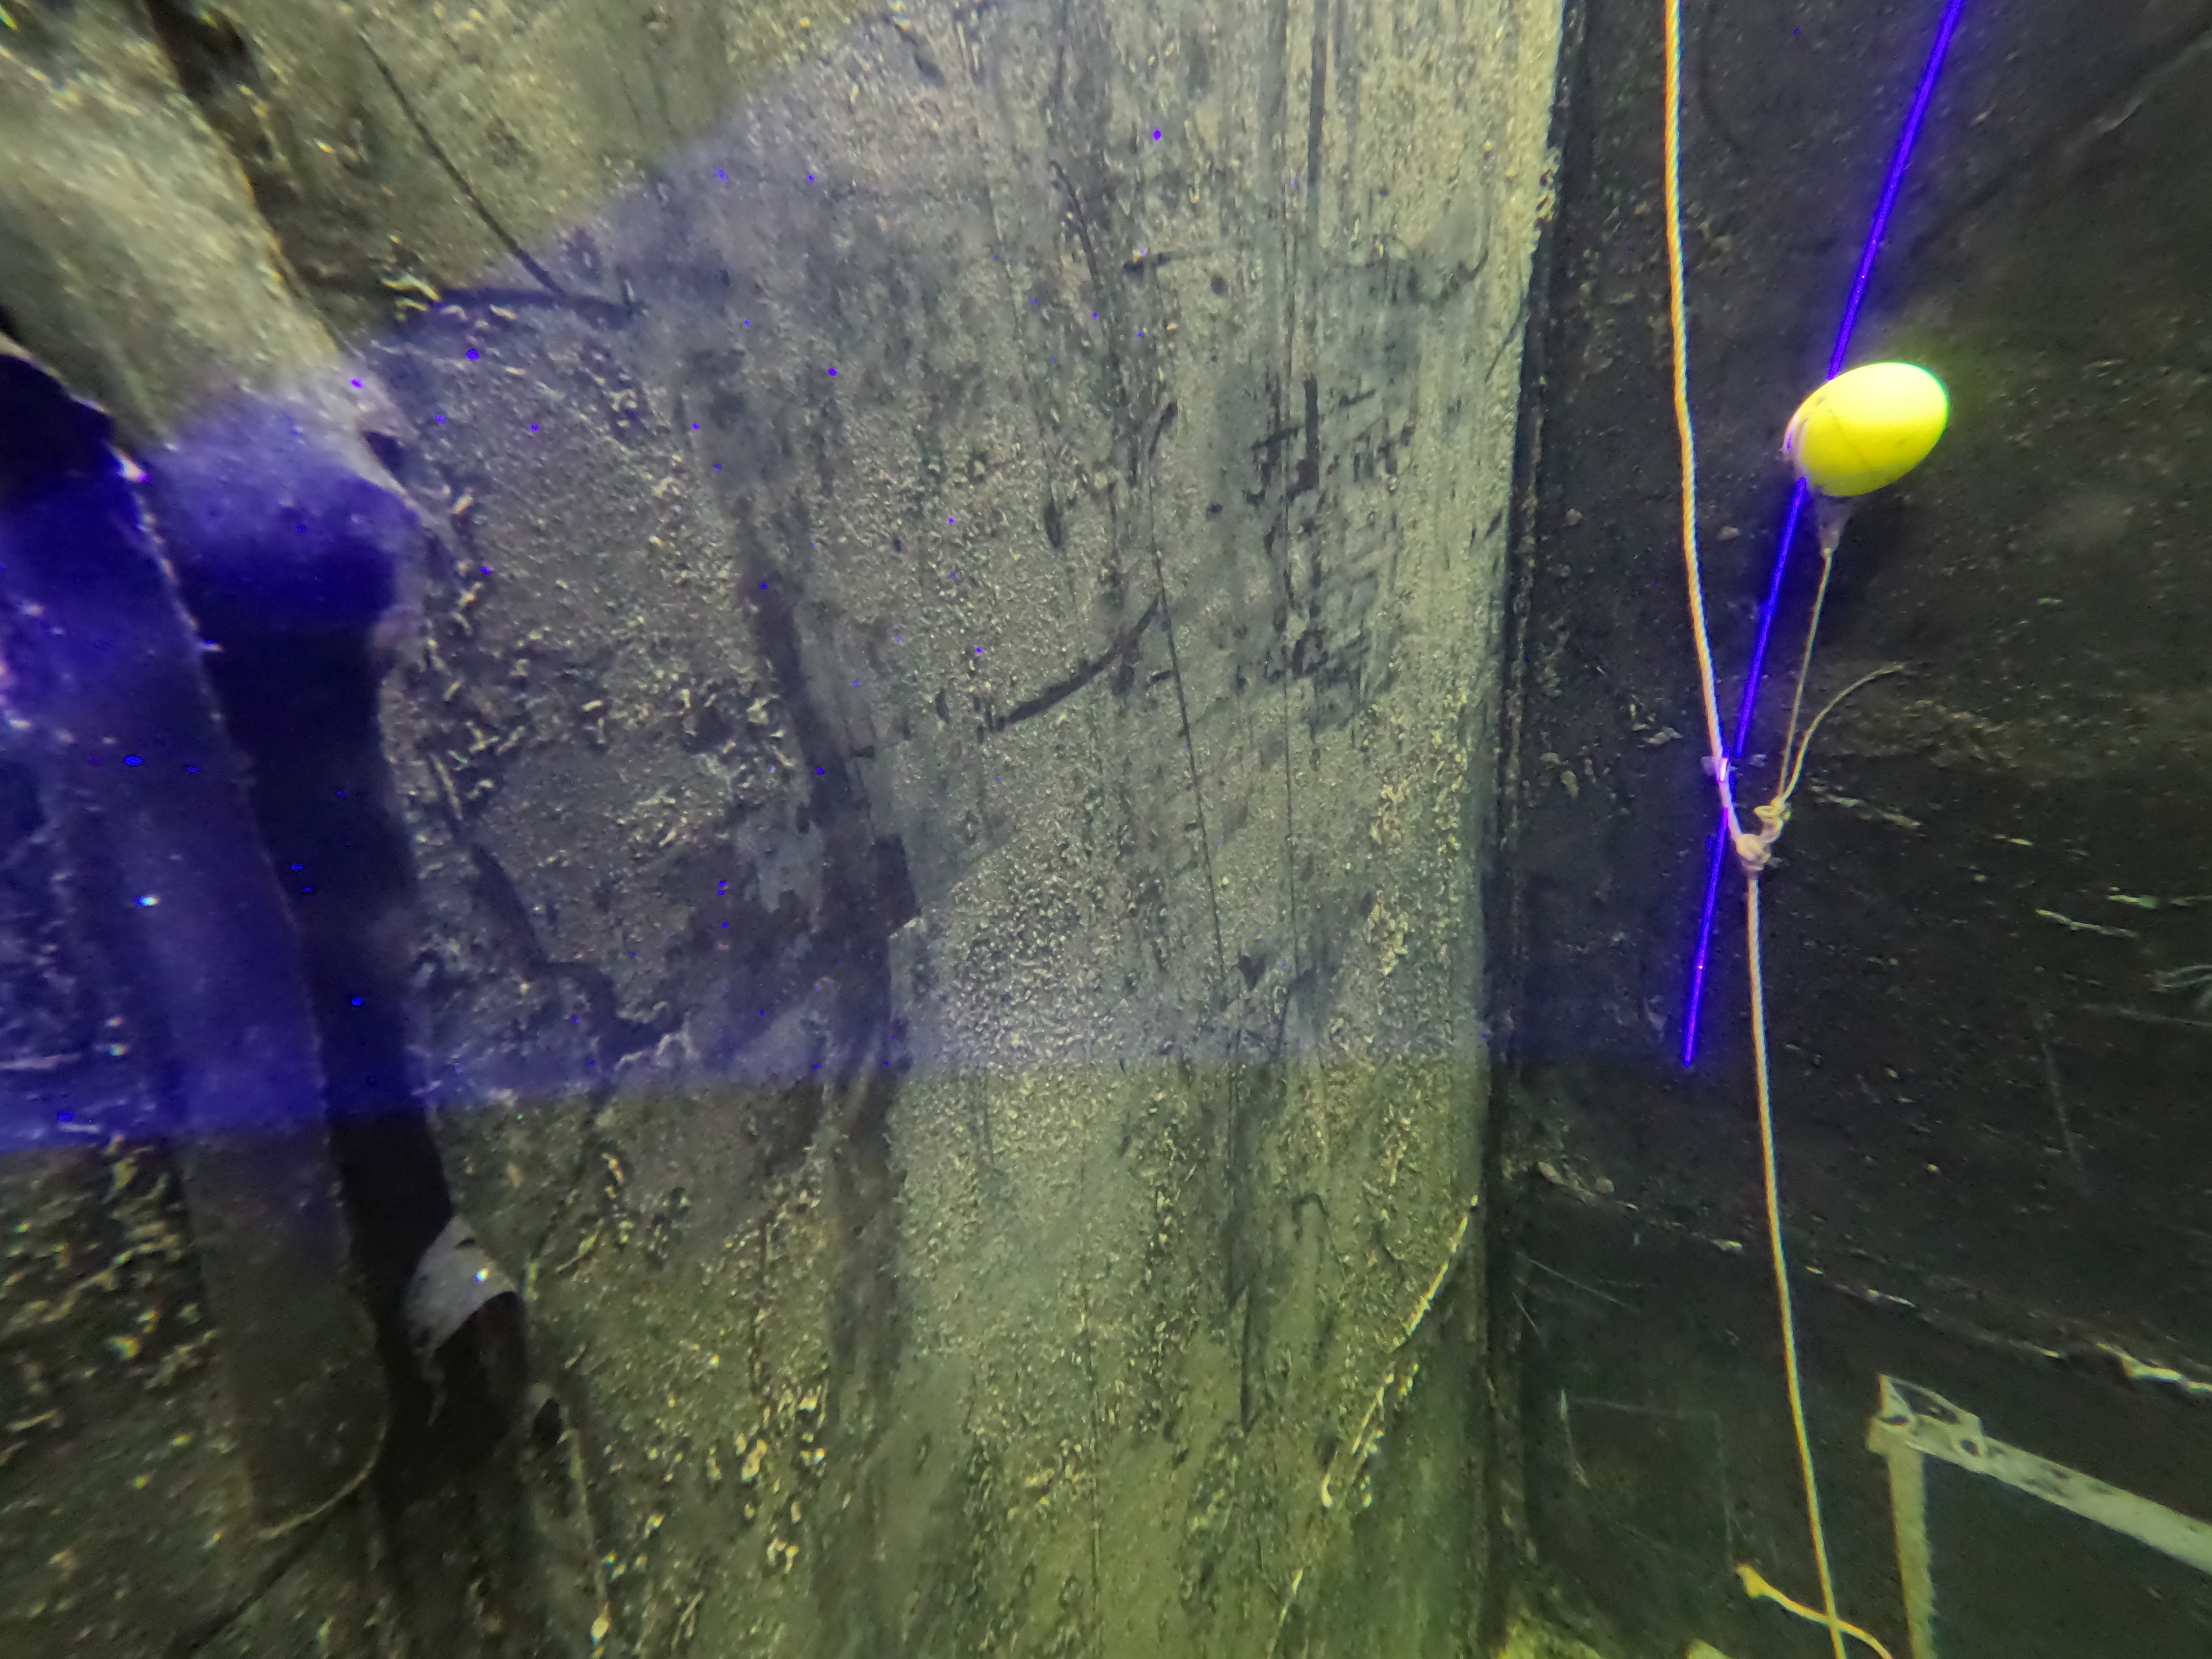

Supplement: Supplementary file 3109 [file G0031909.pdf › 12/G0031909.pdf]

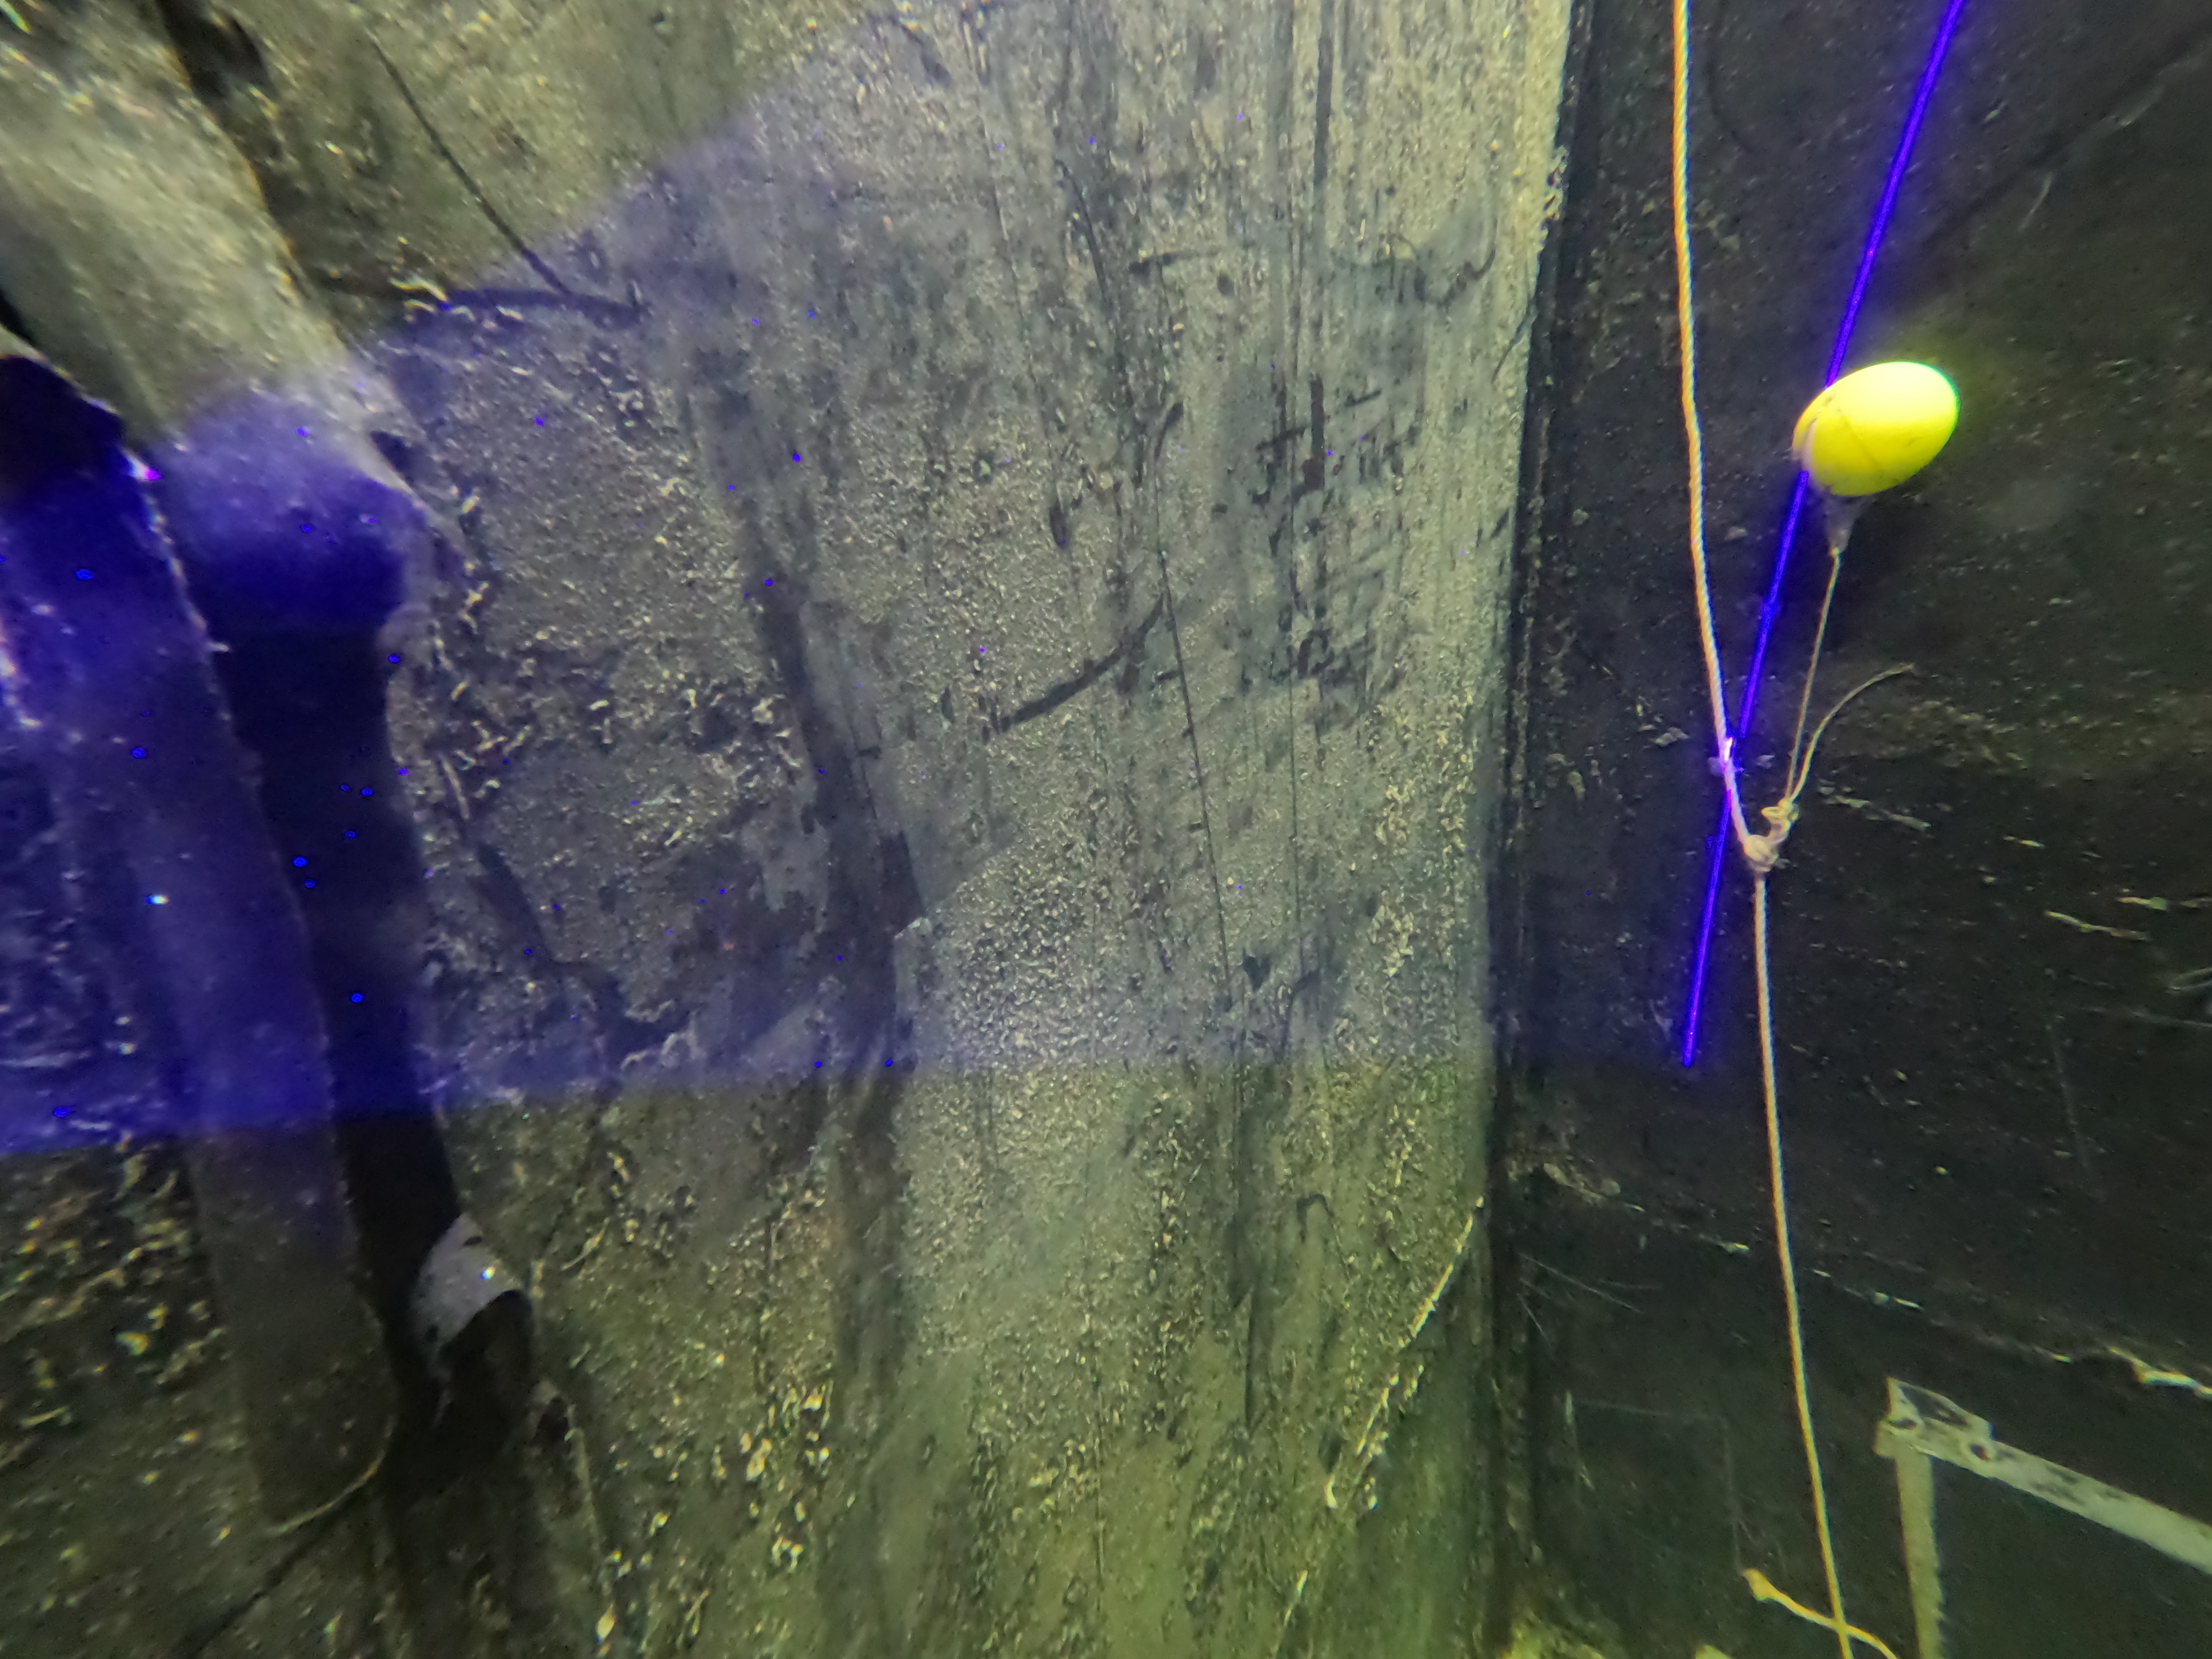

Supplement: Supplementary file 3110 [file G0031910.pdf › 12/G0031910.pdf]

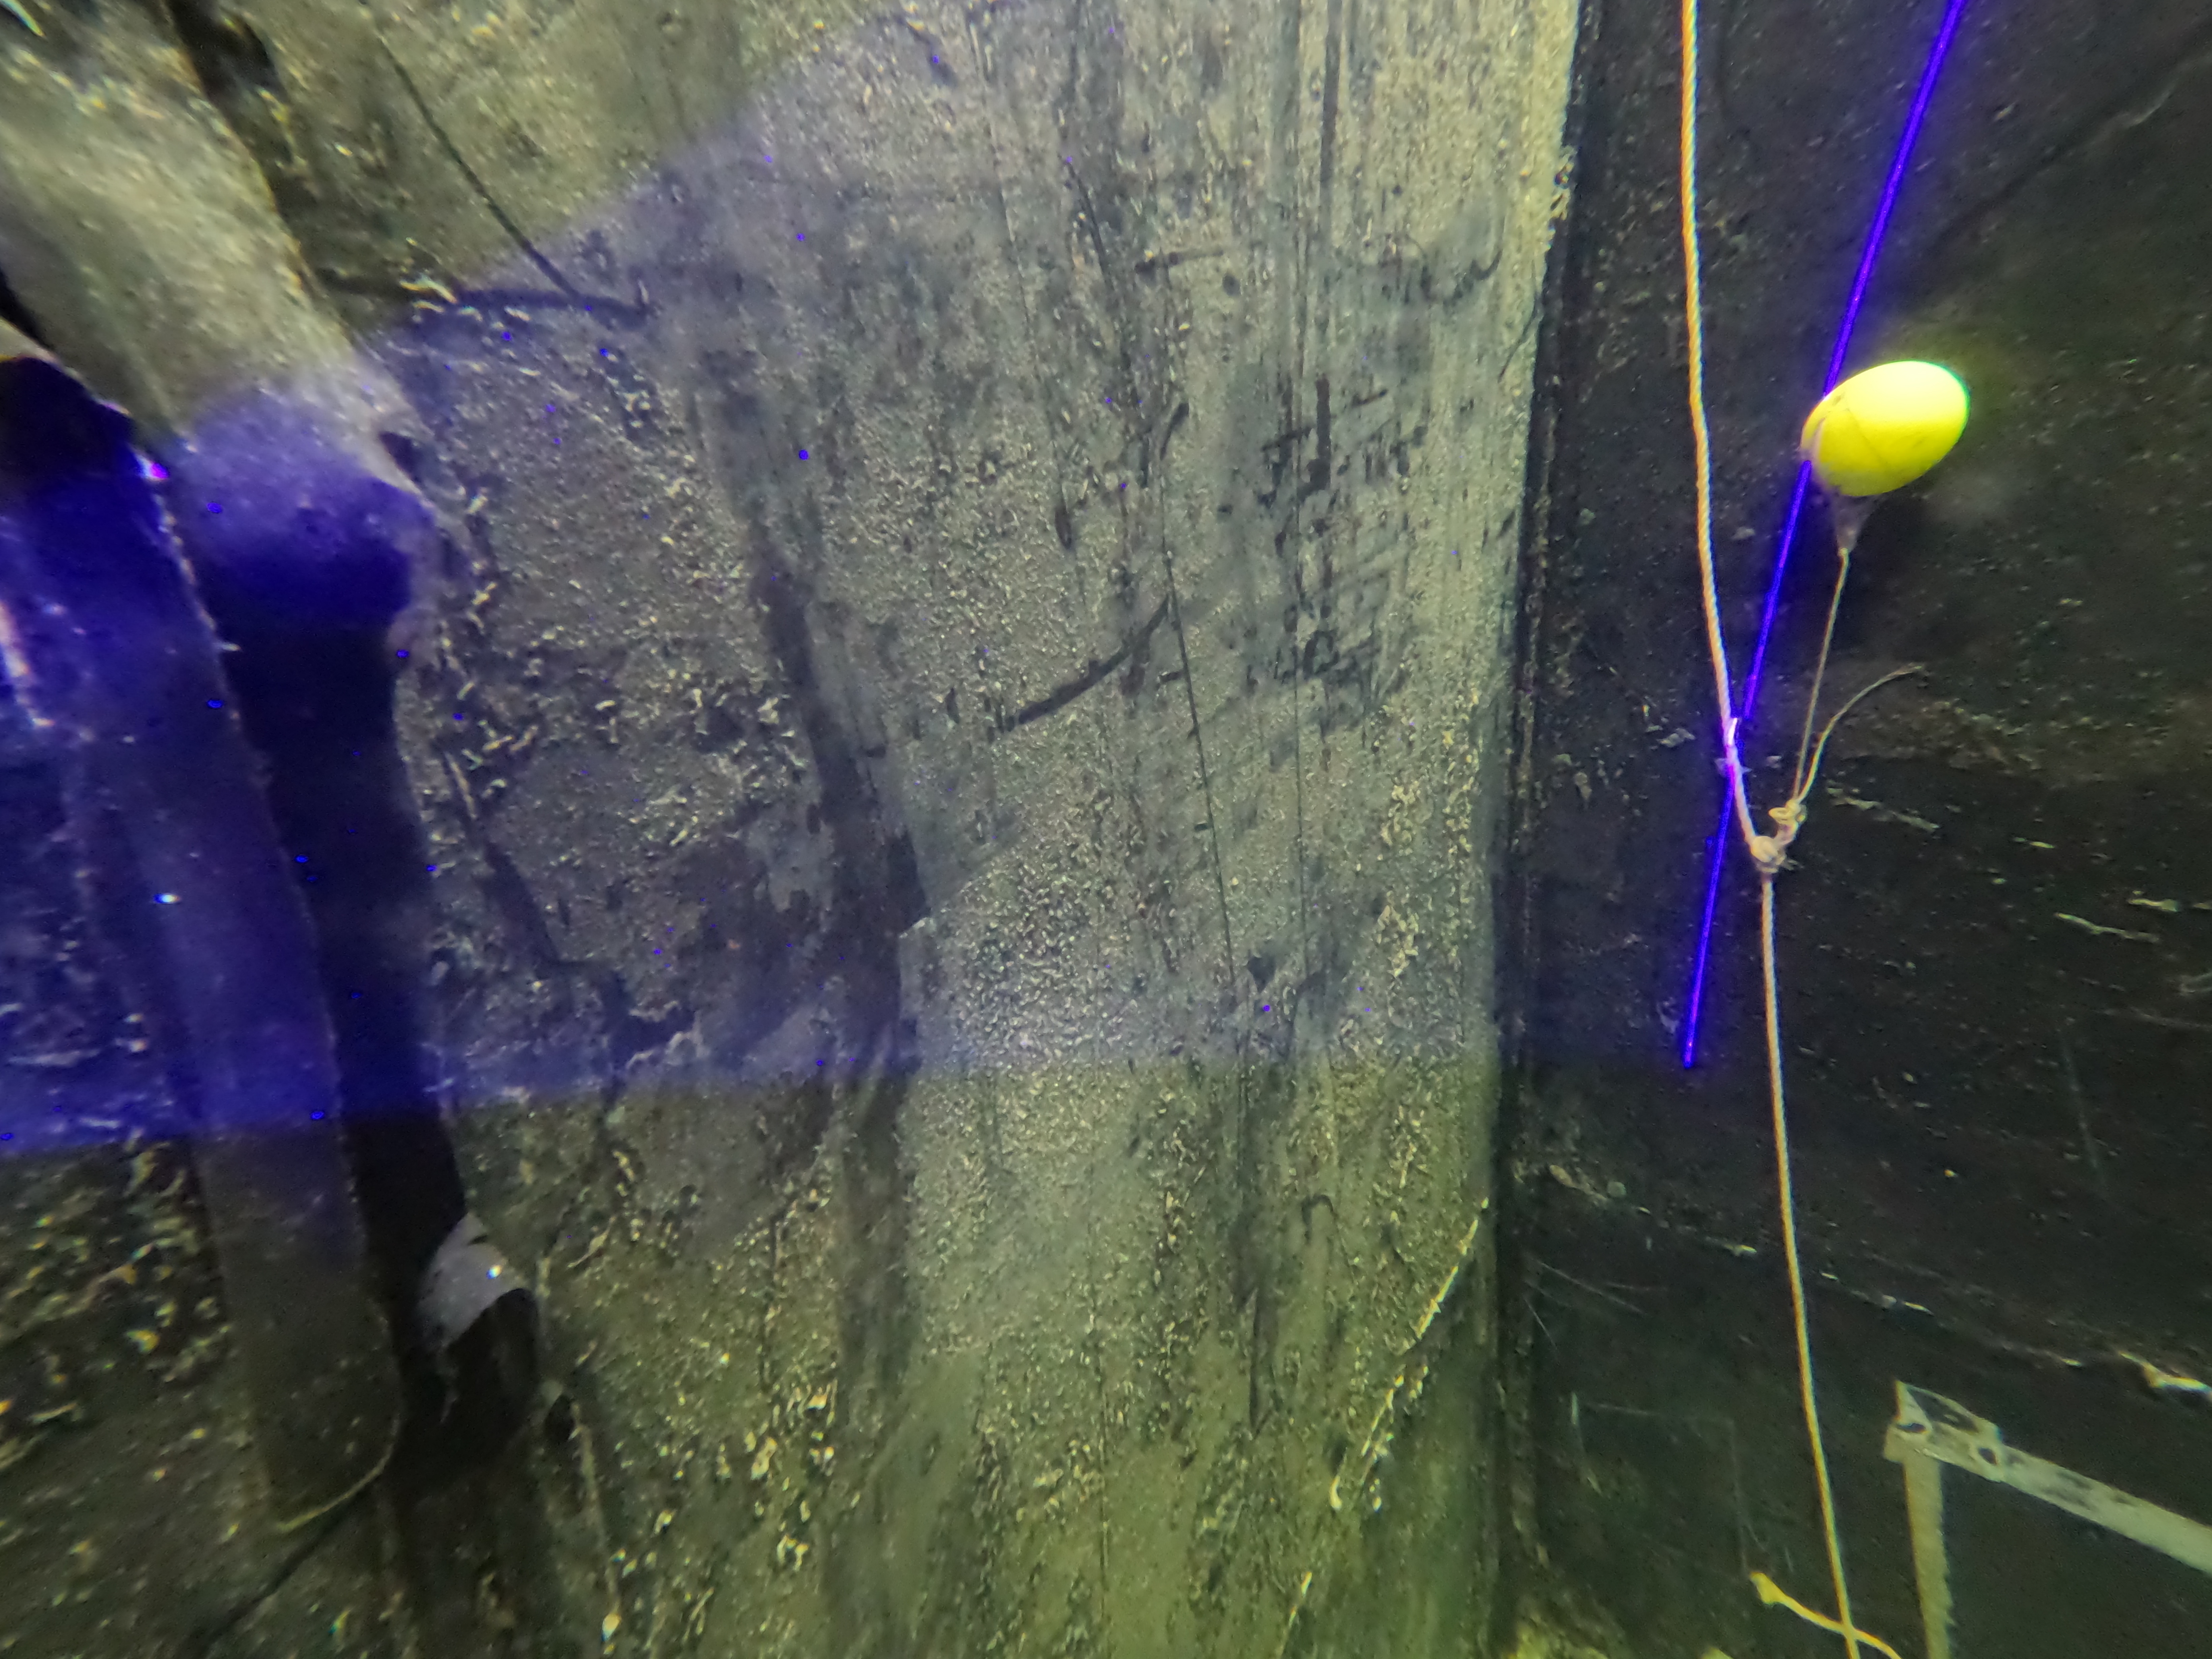

Supplement: Supplementary file 3111 [file G0031911.pdf › 12/G0031911.pdf]

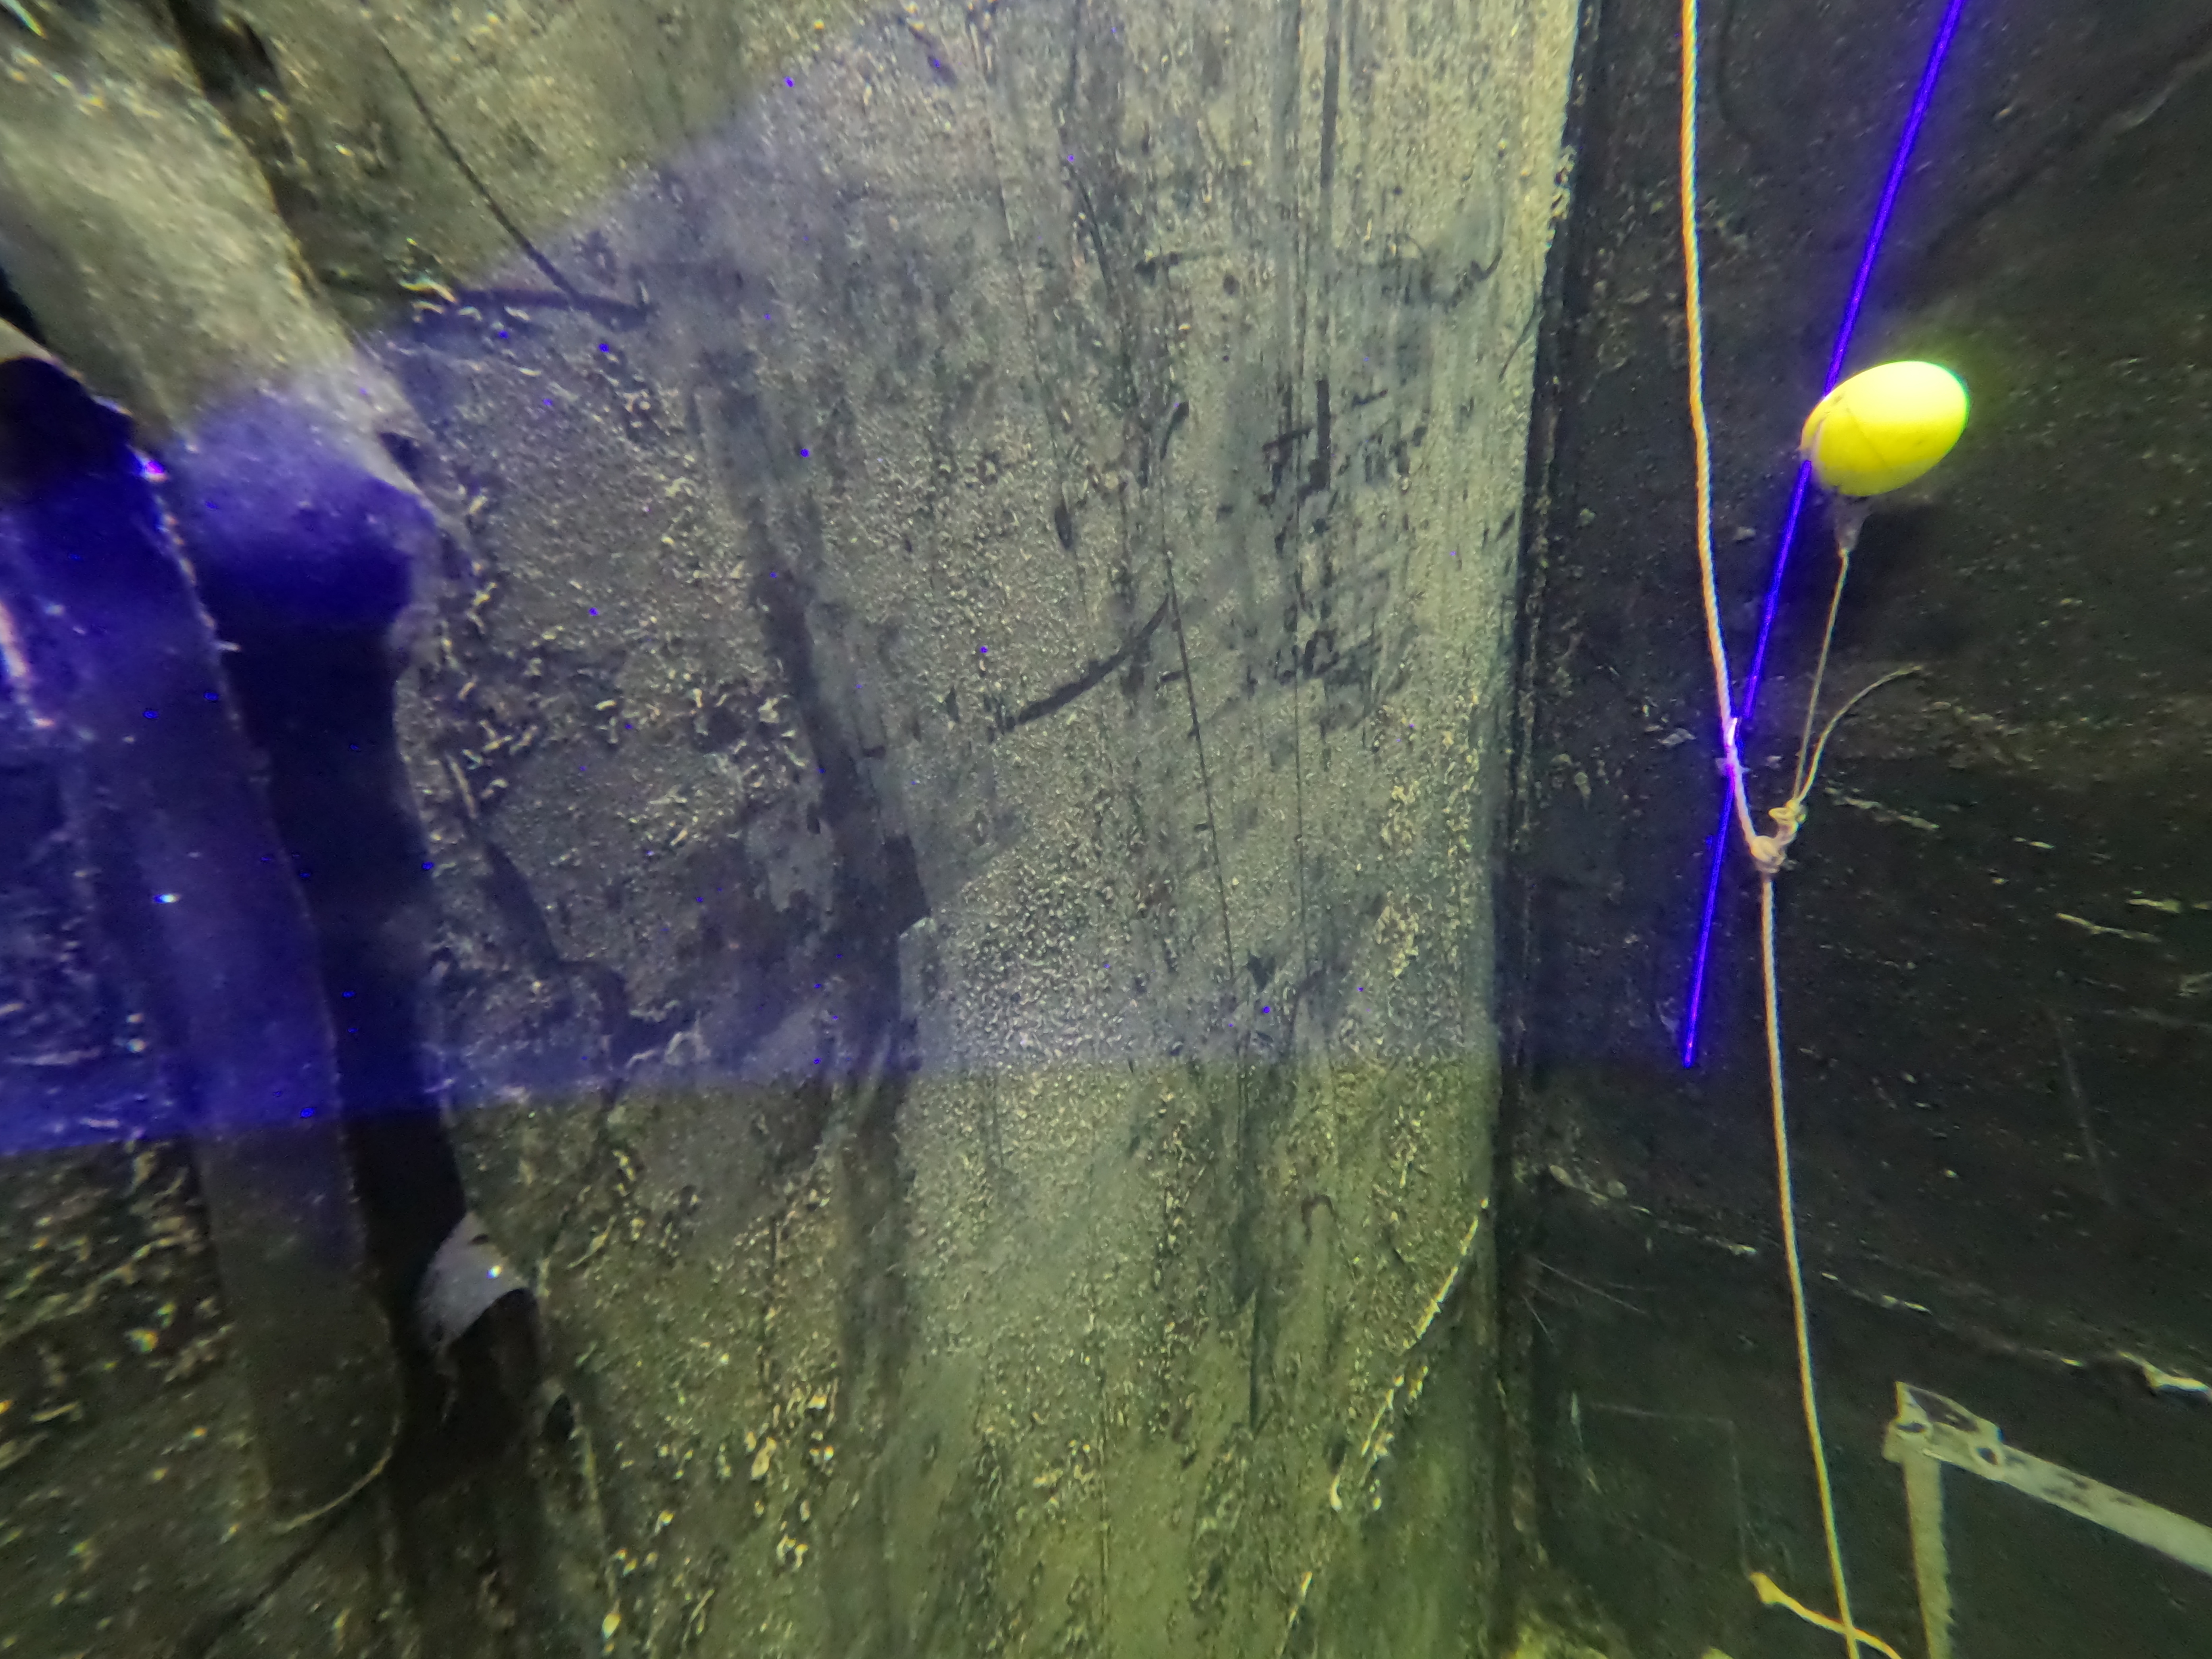

Supplement: Supplementary file 3112 [file G0031912.pdf › 12/G0031912.pdf]

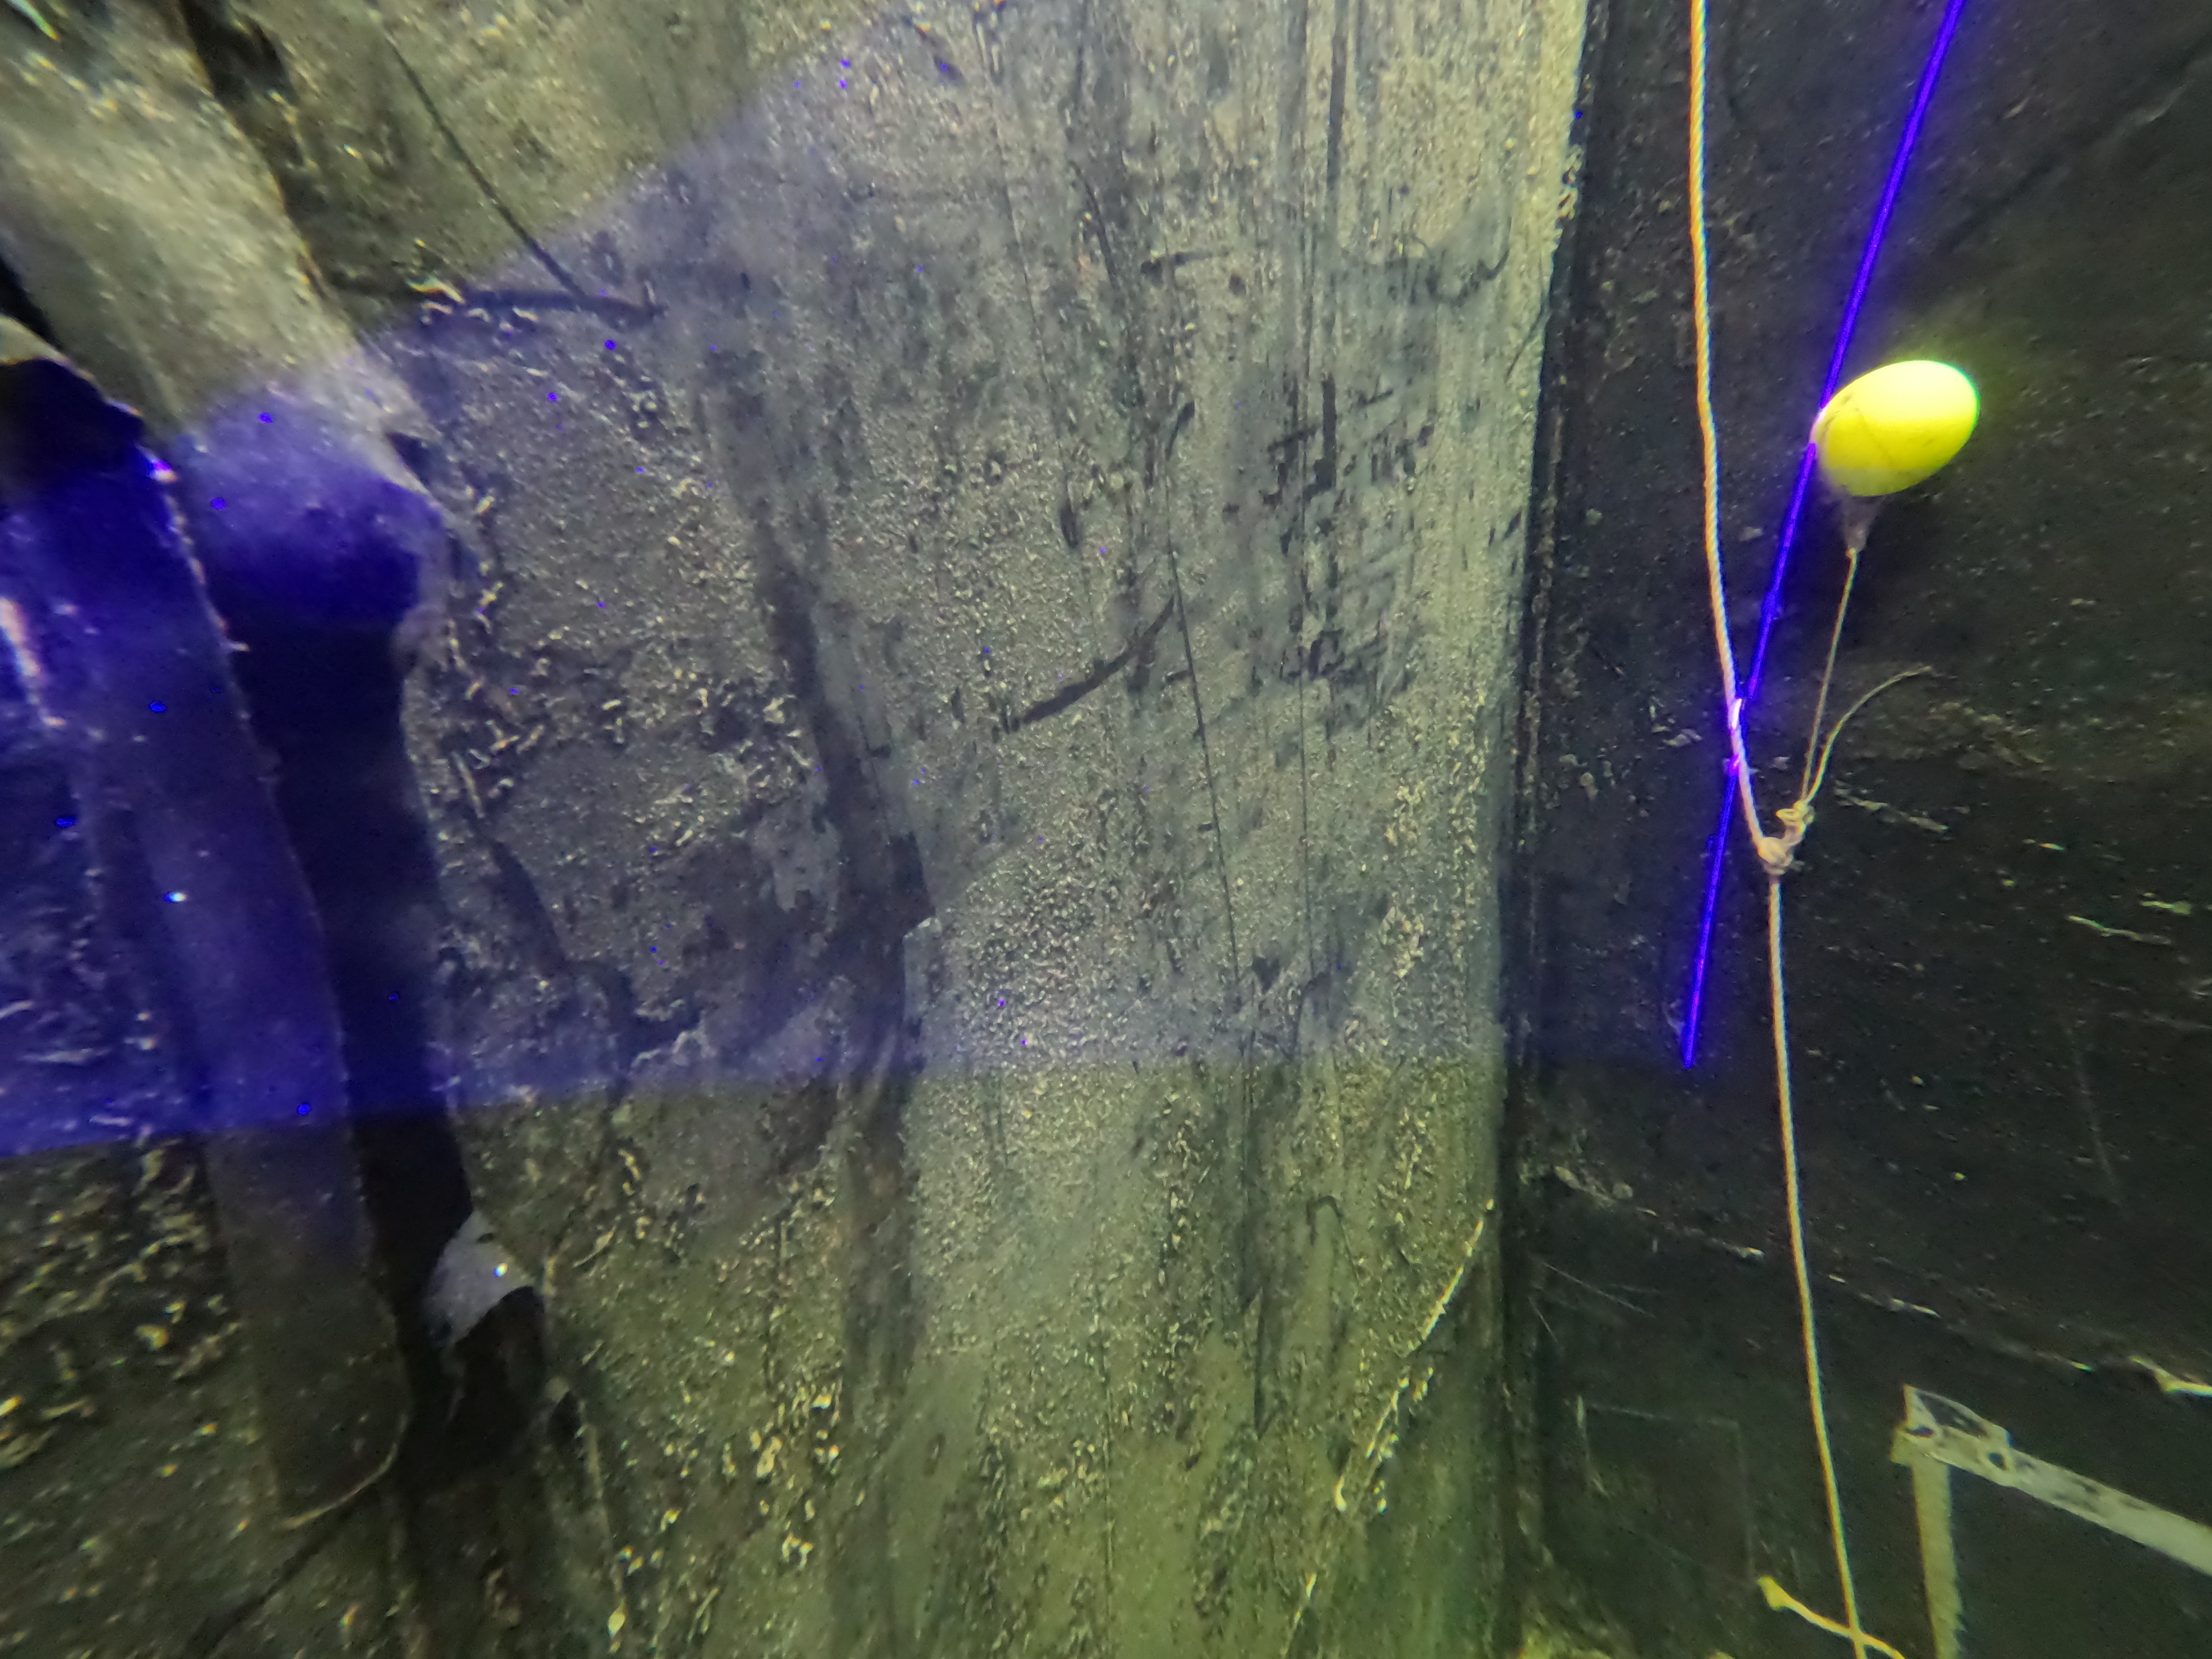

Supplement: Supplementary file 3113 [file G0031913.pdf › 12/G0031913.pdf]

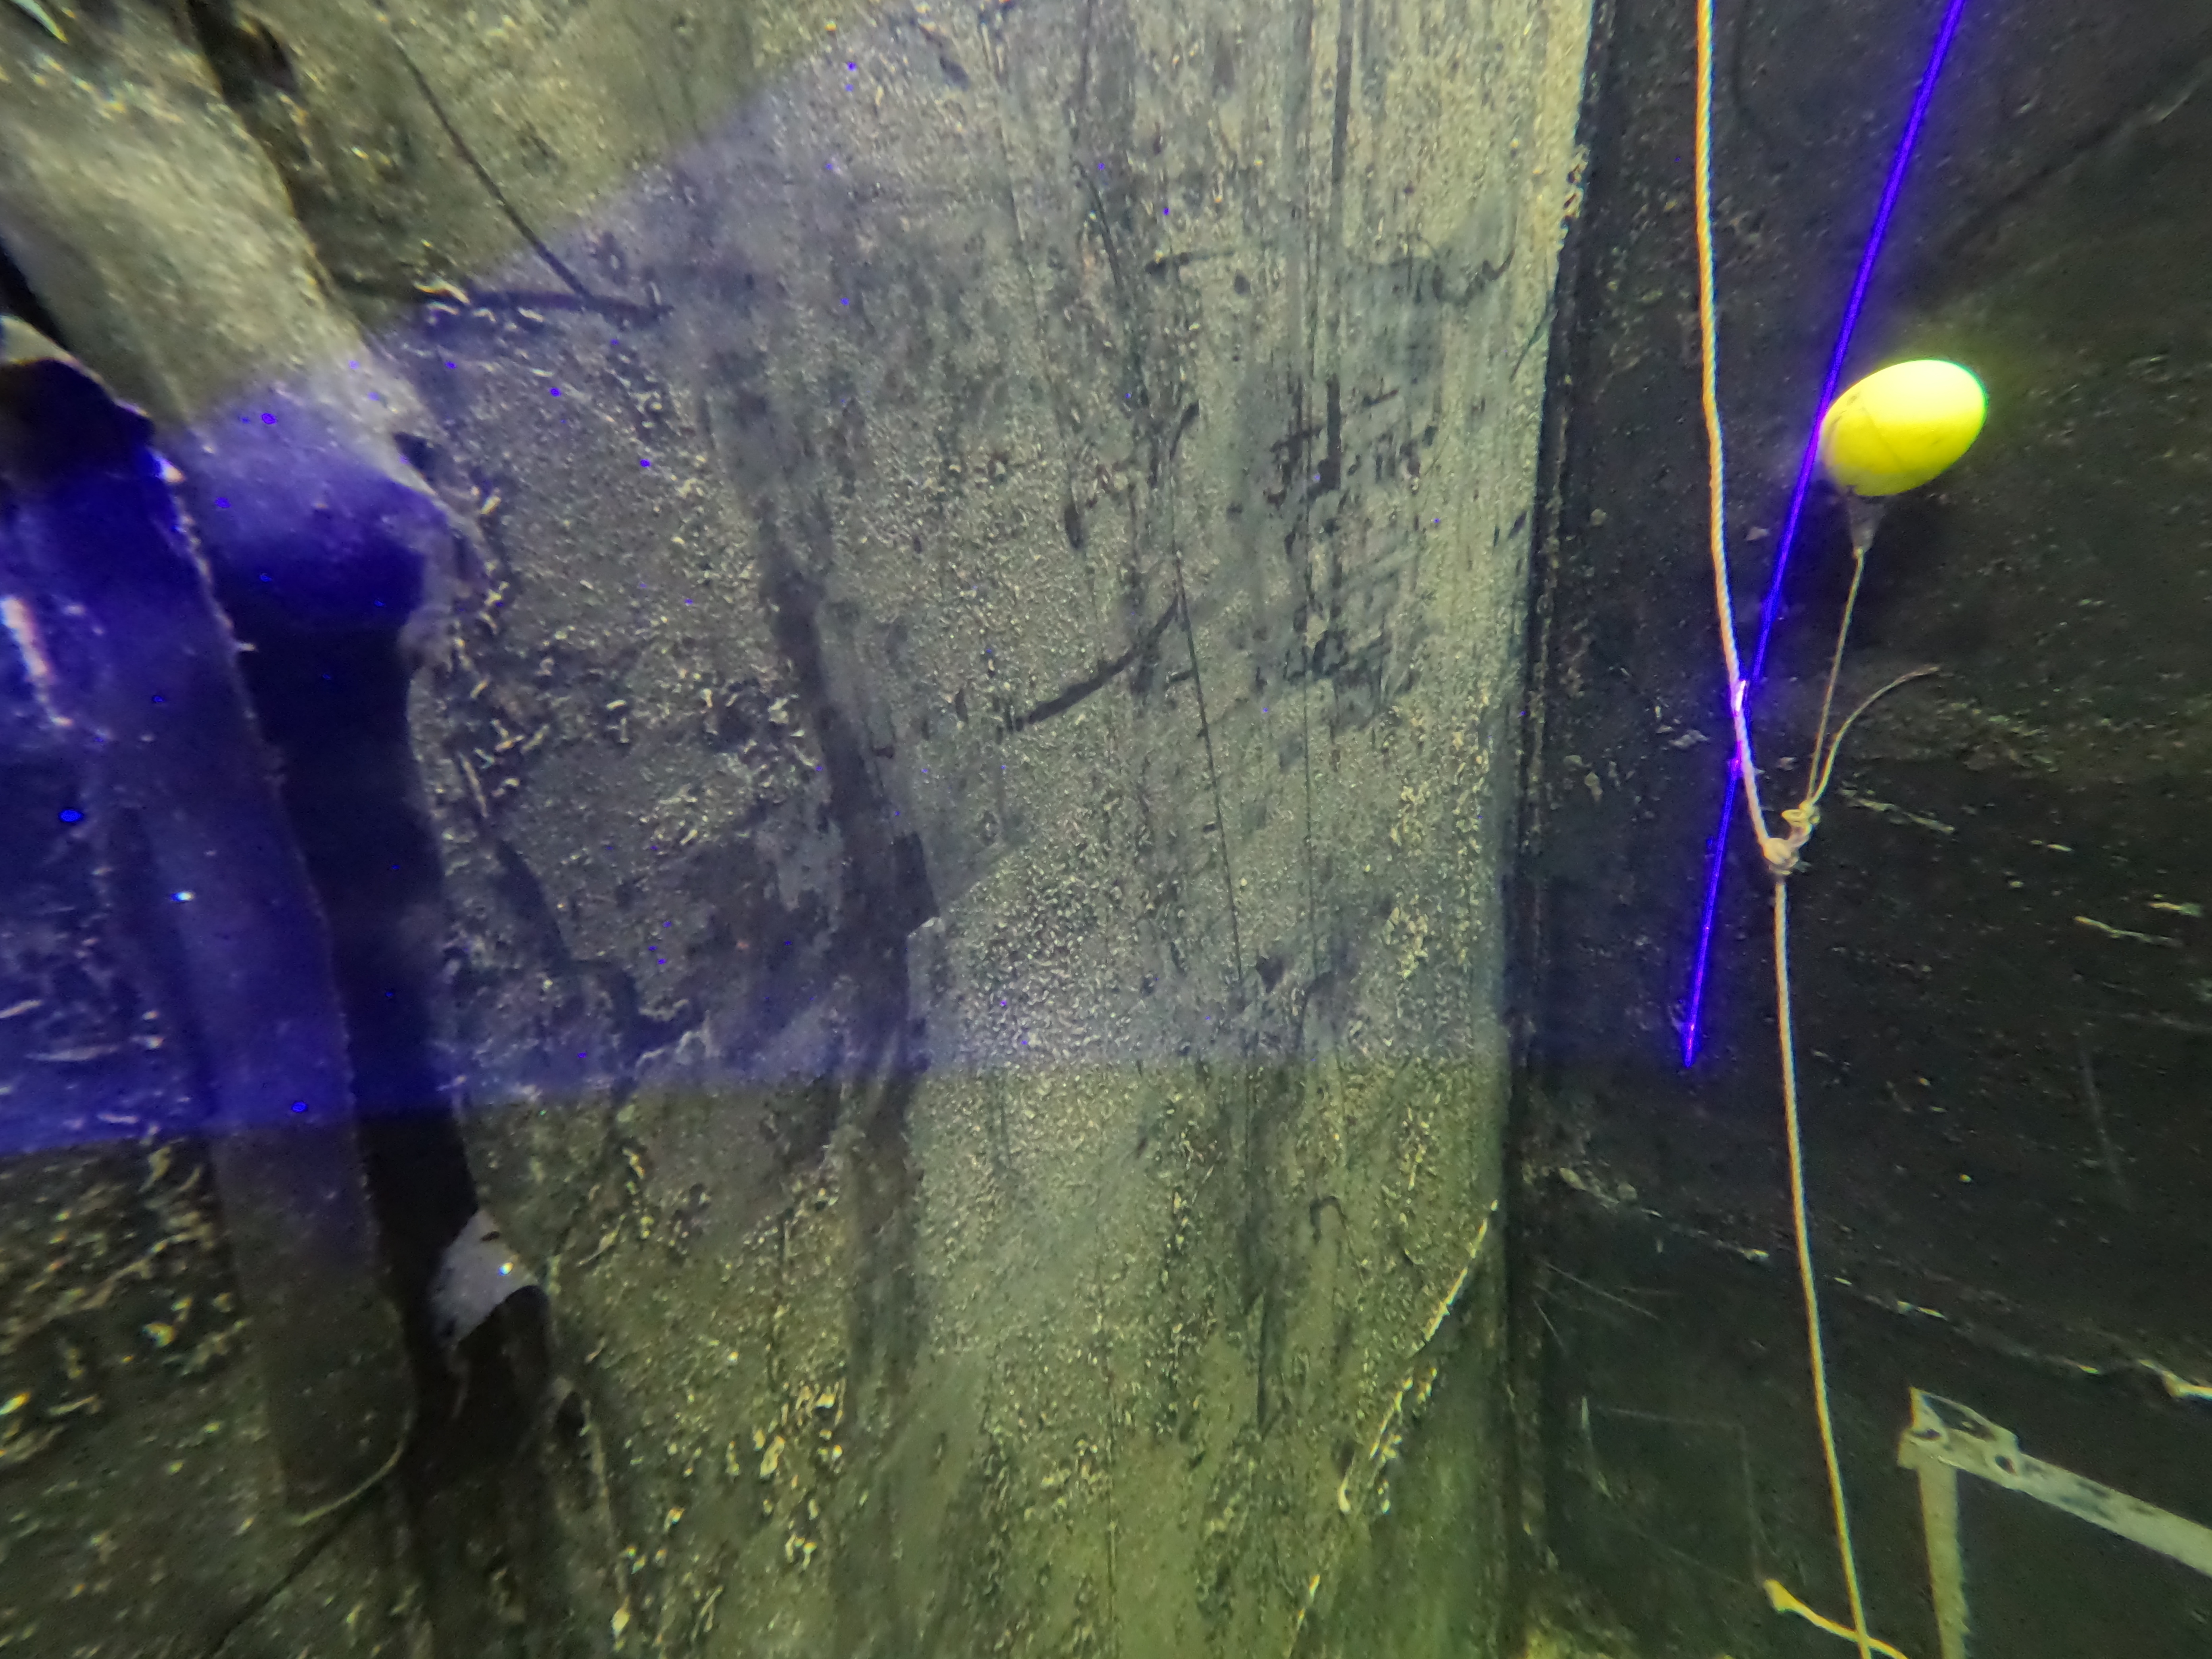

Supplement: Supplementary file 3114 [file G0031914.pdf › 12/G0031914.pdf]

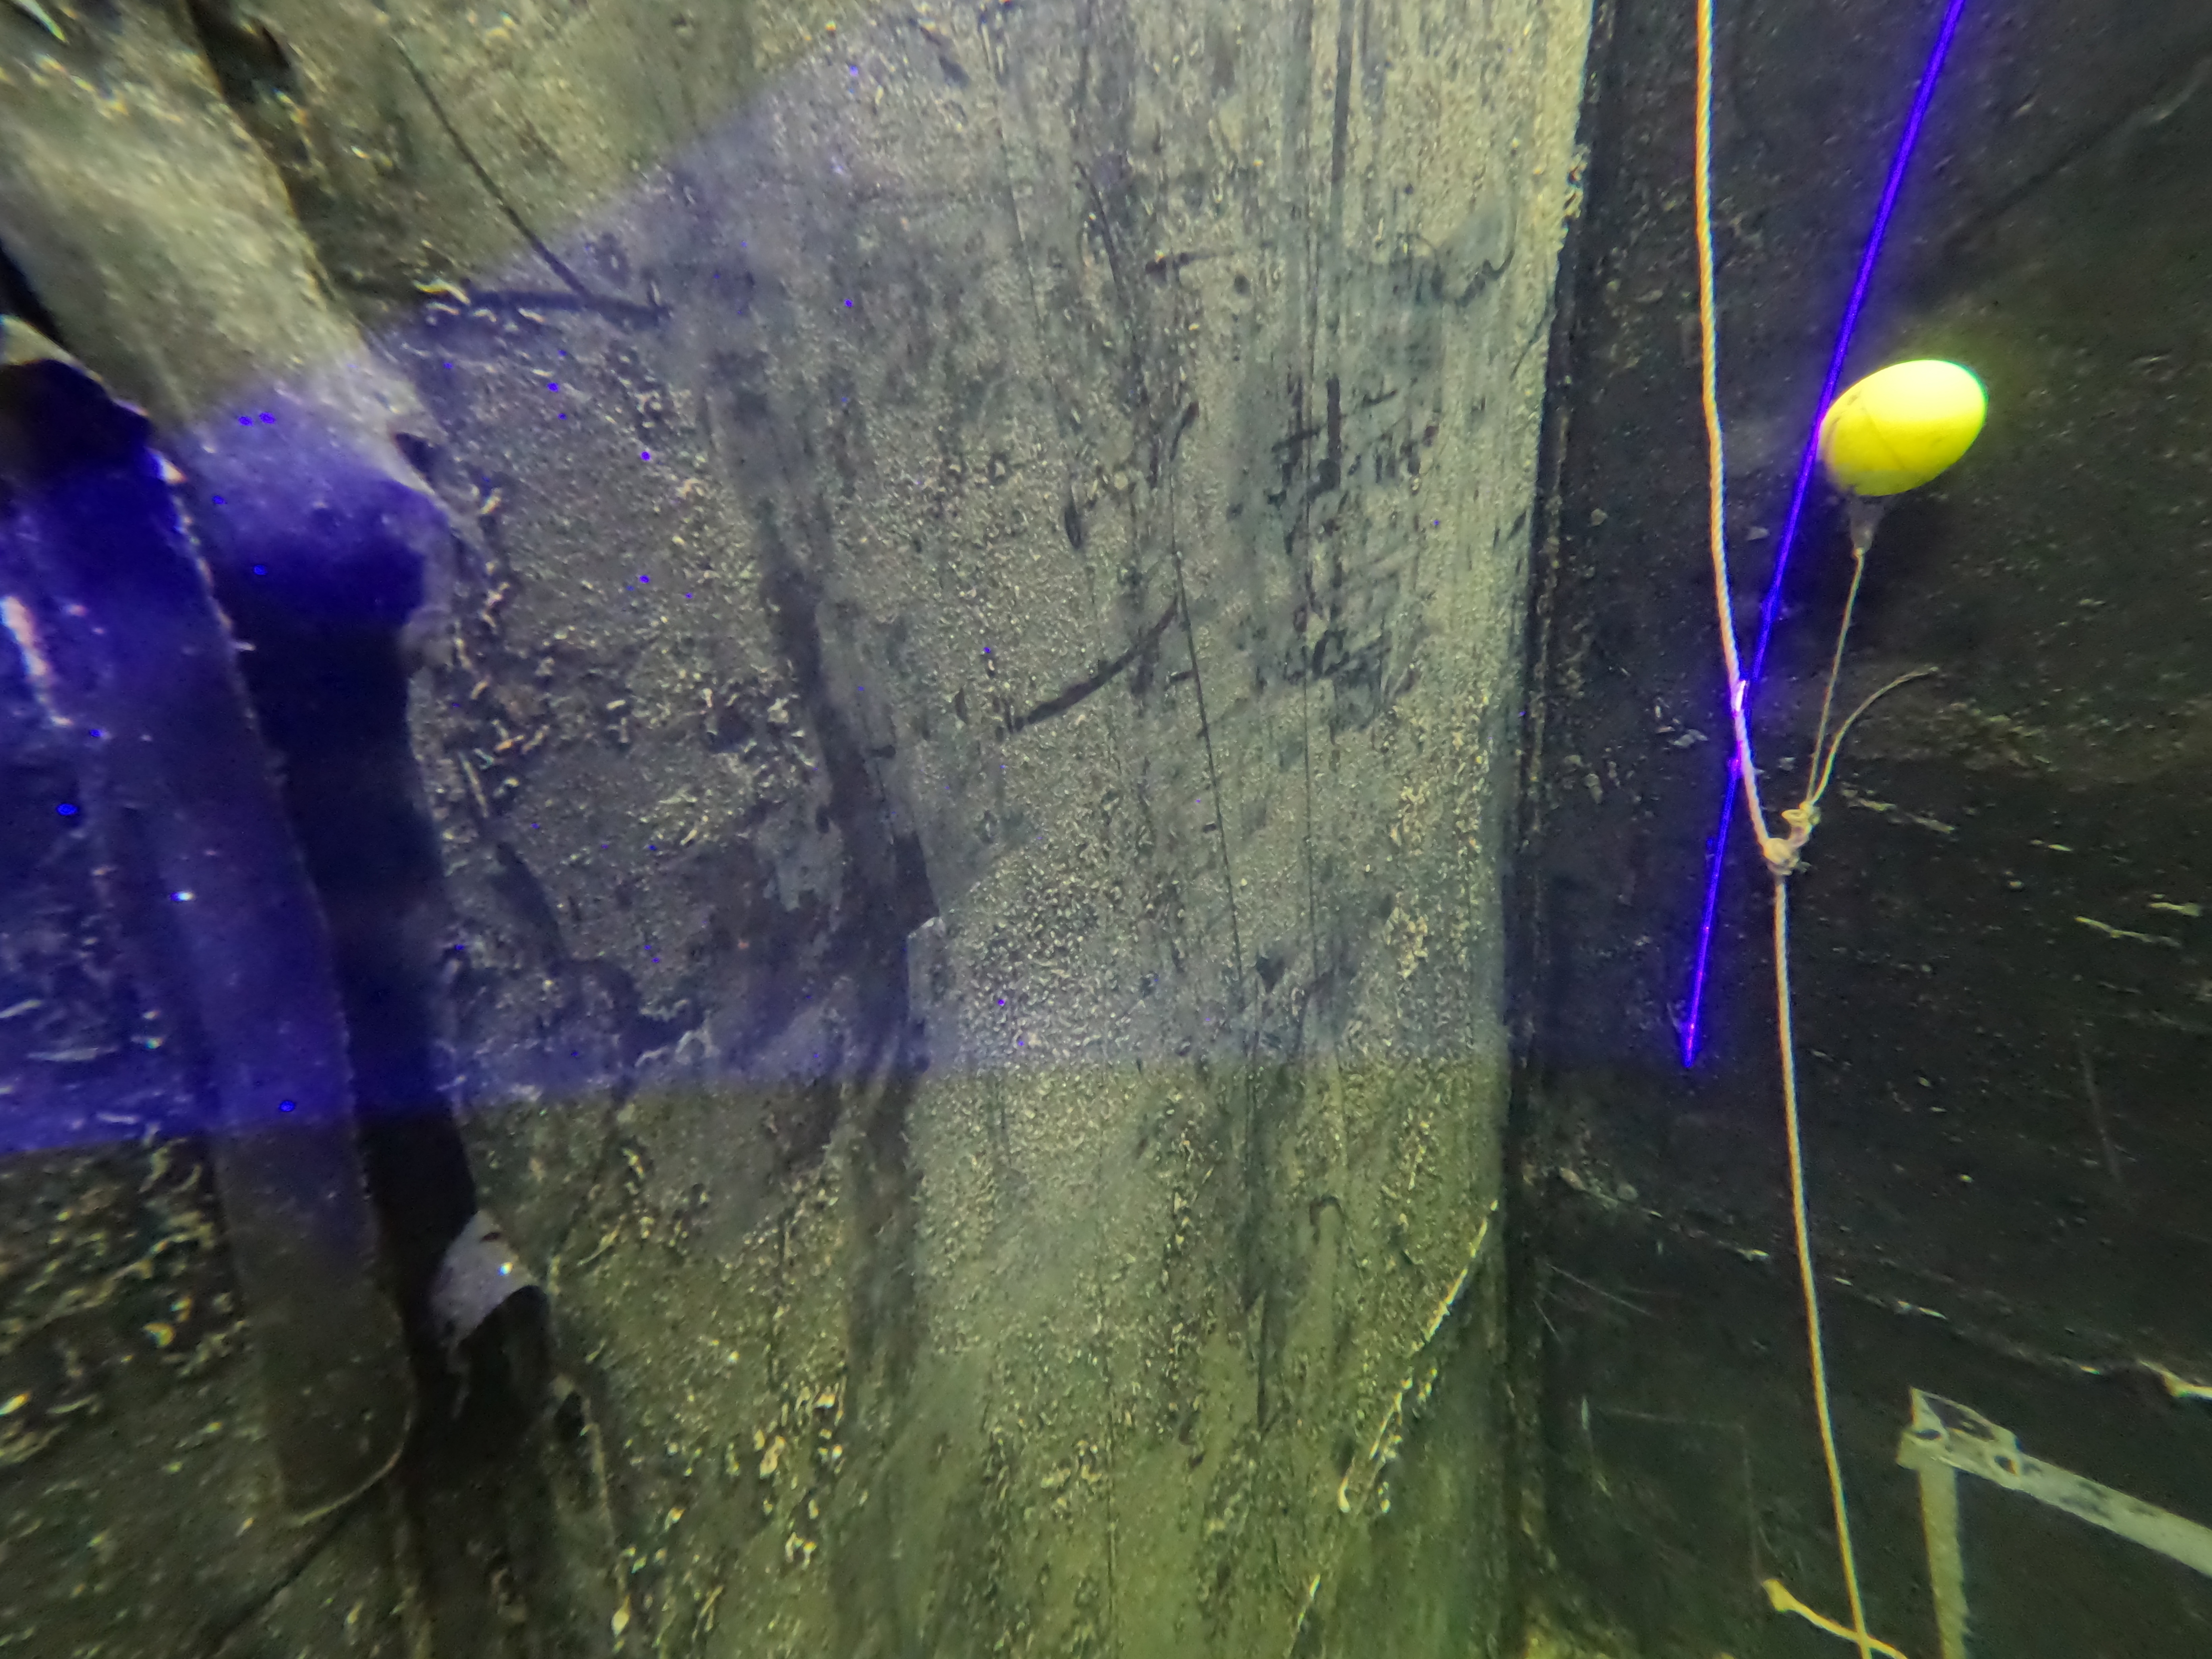

Supplement: Supplementary file 3115 [file G0031915.pdf › 12/G0031915.pdf]

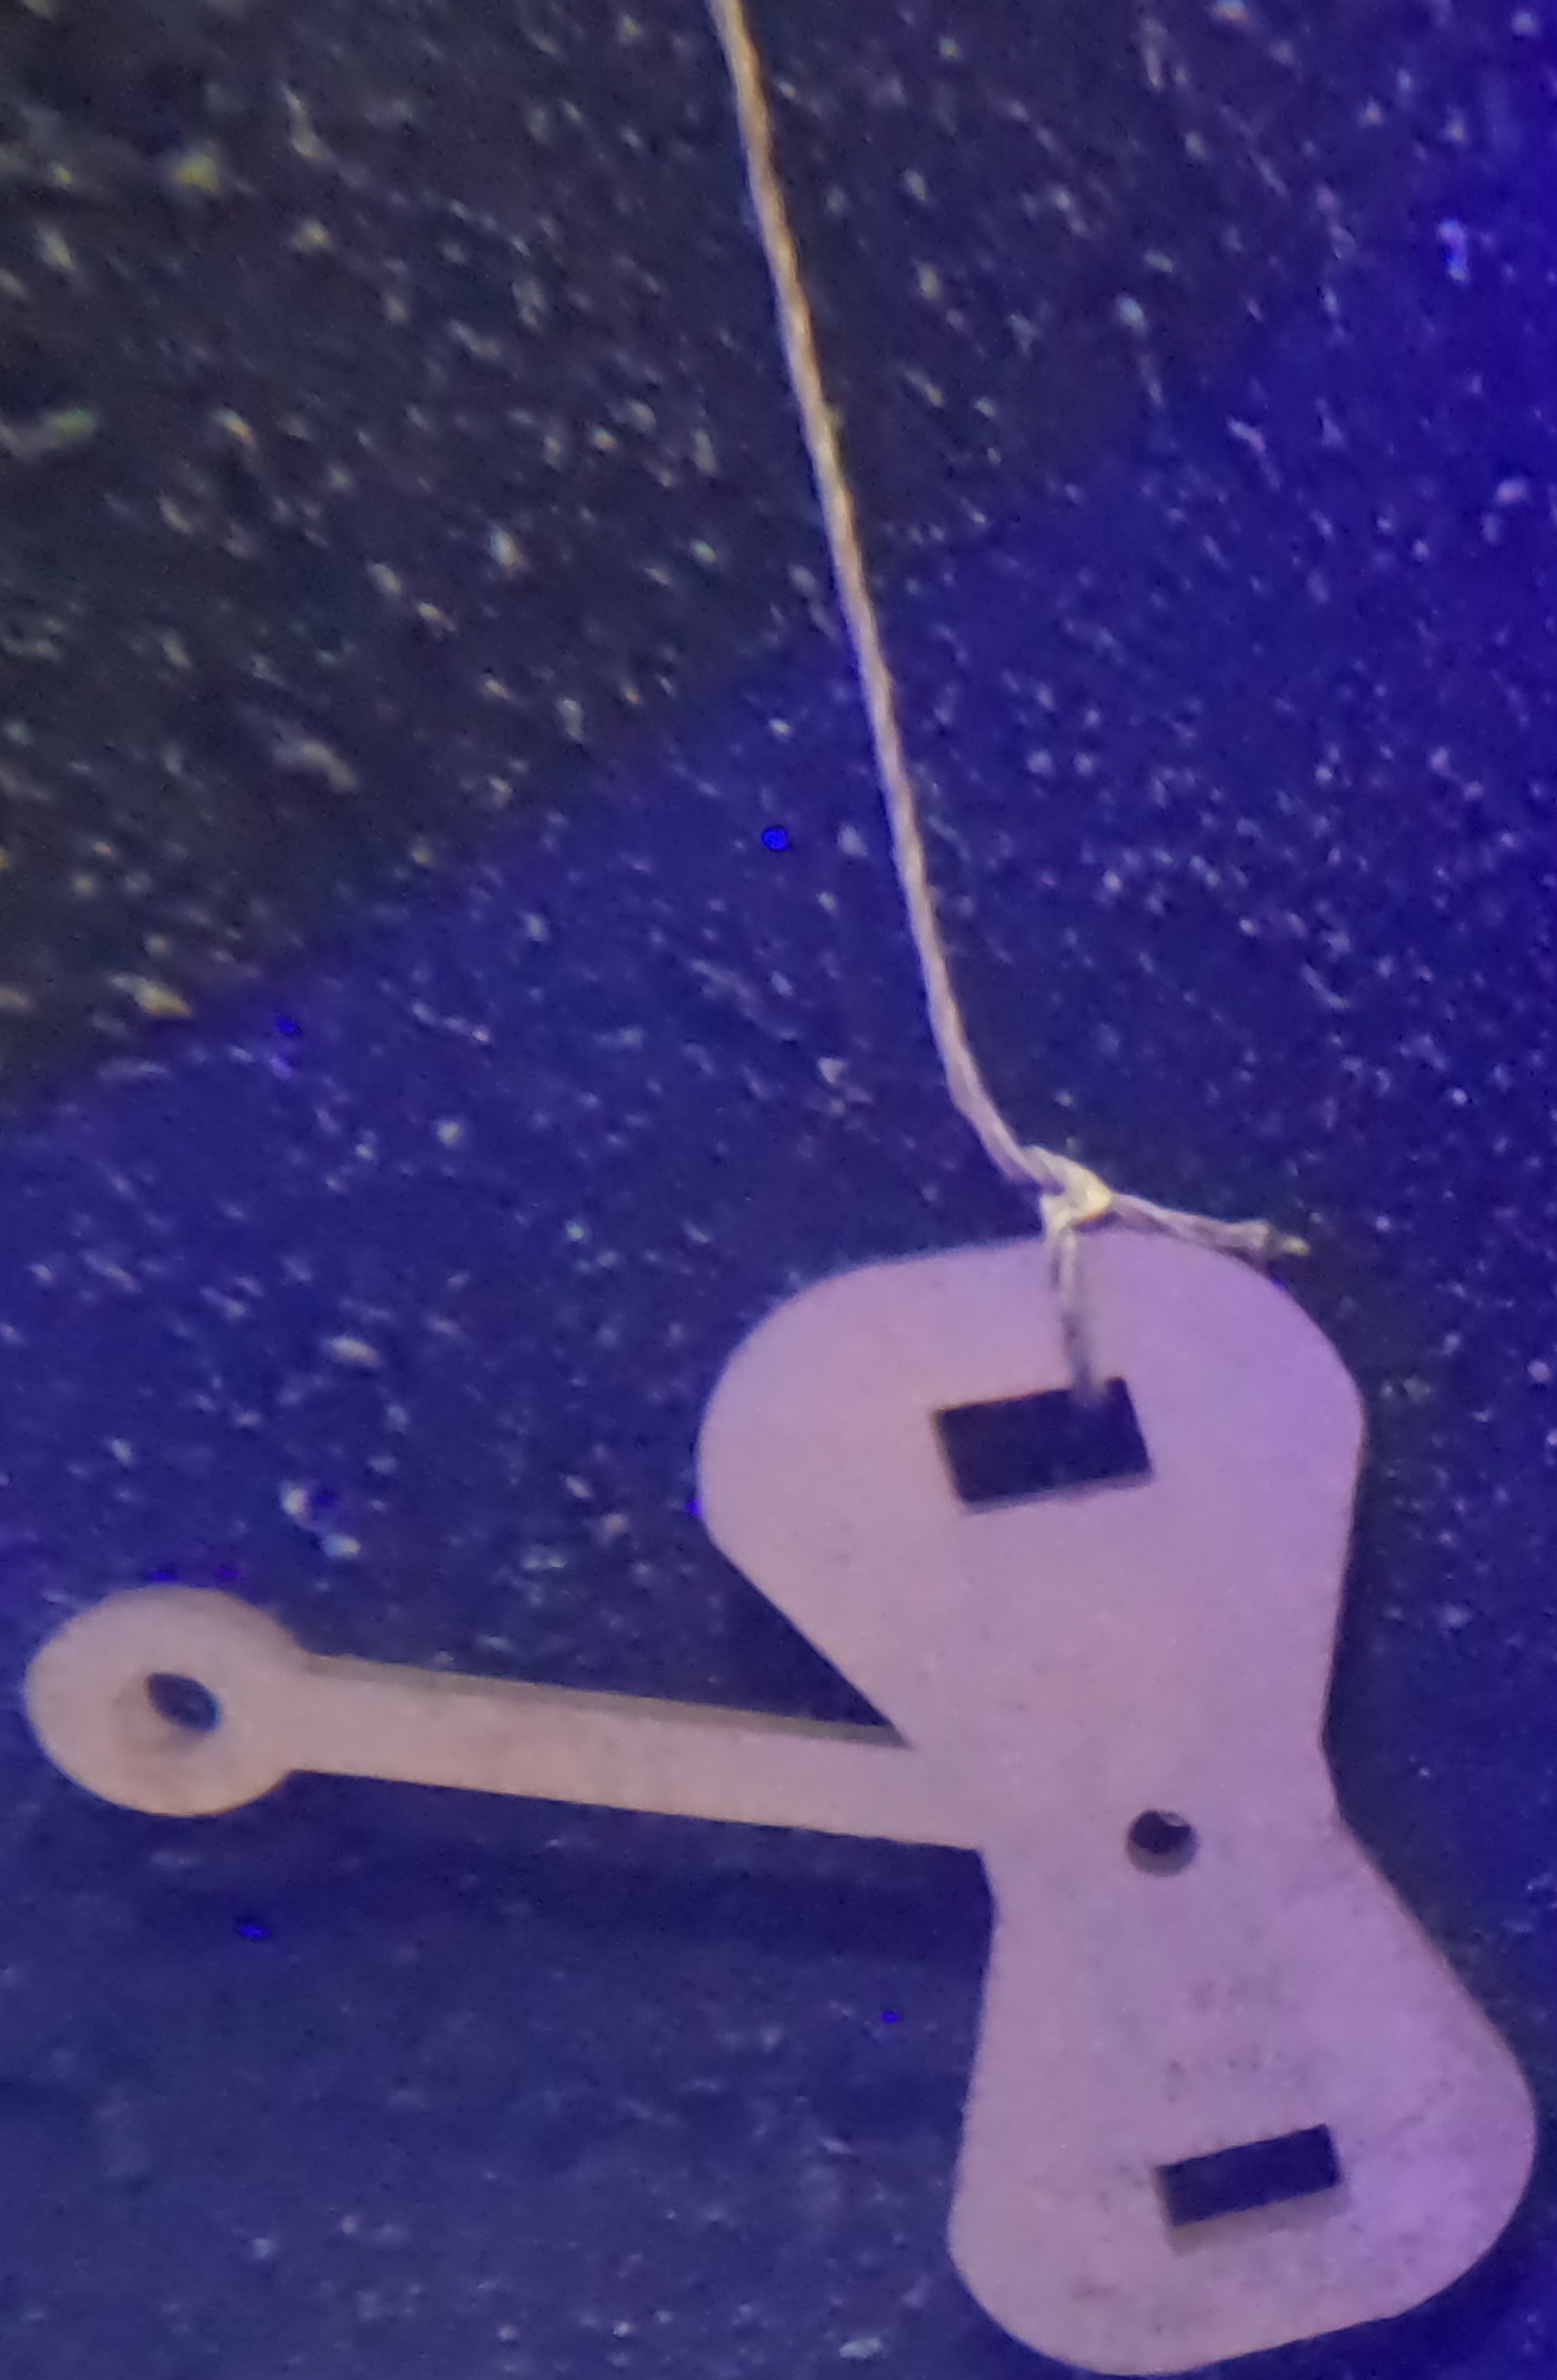

Supplement: Supplementary file 3116 [file G0015557.pdf › Level_2_1/G0015557.pdf]

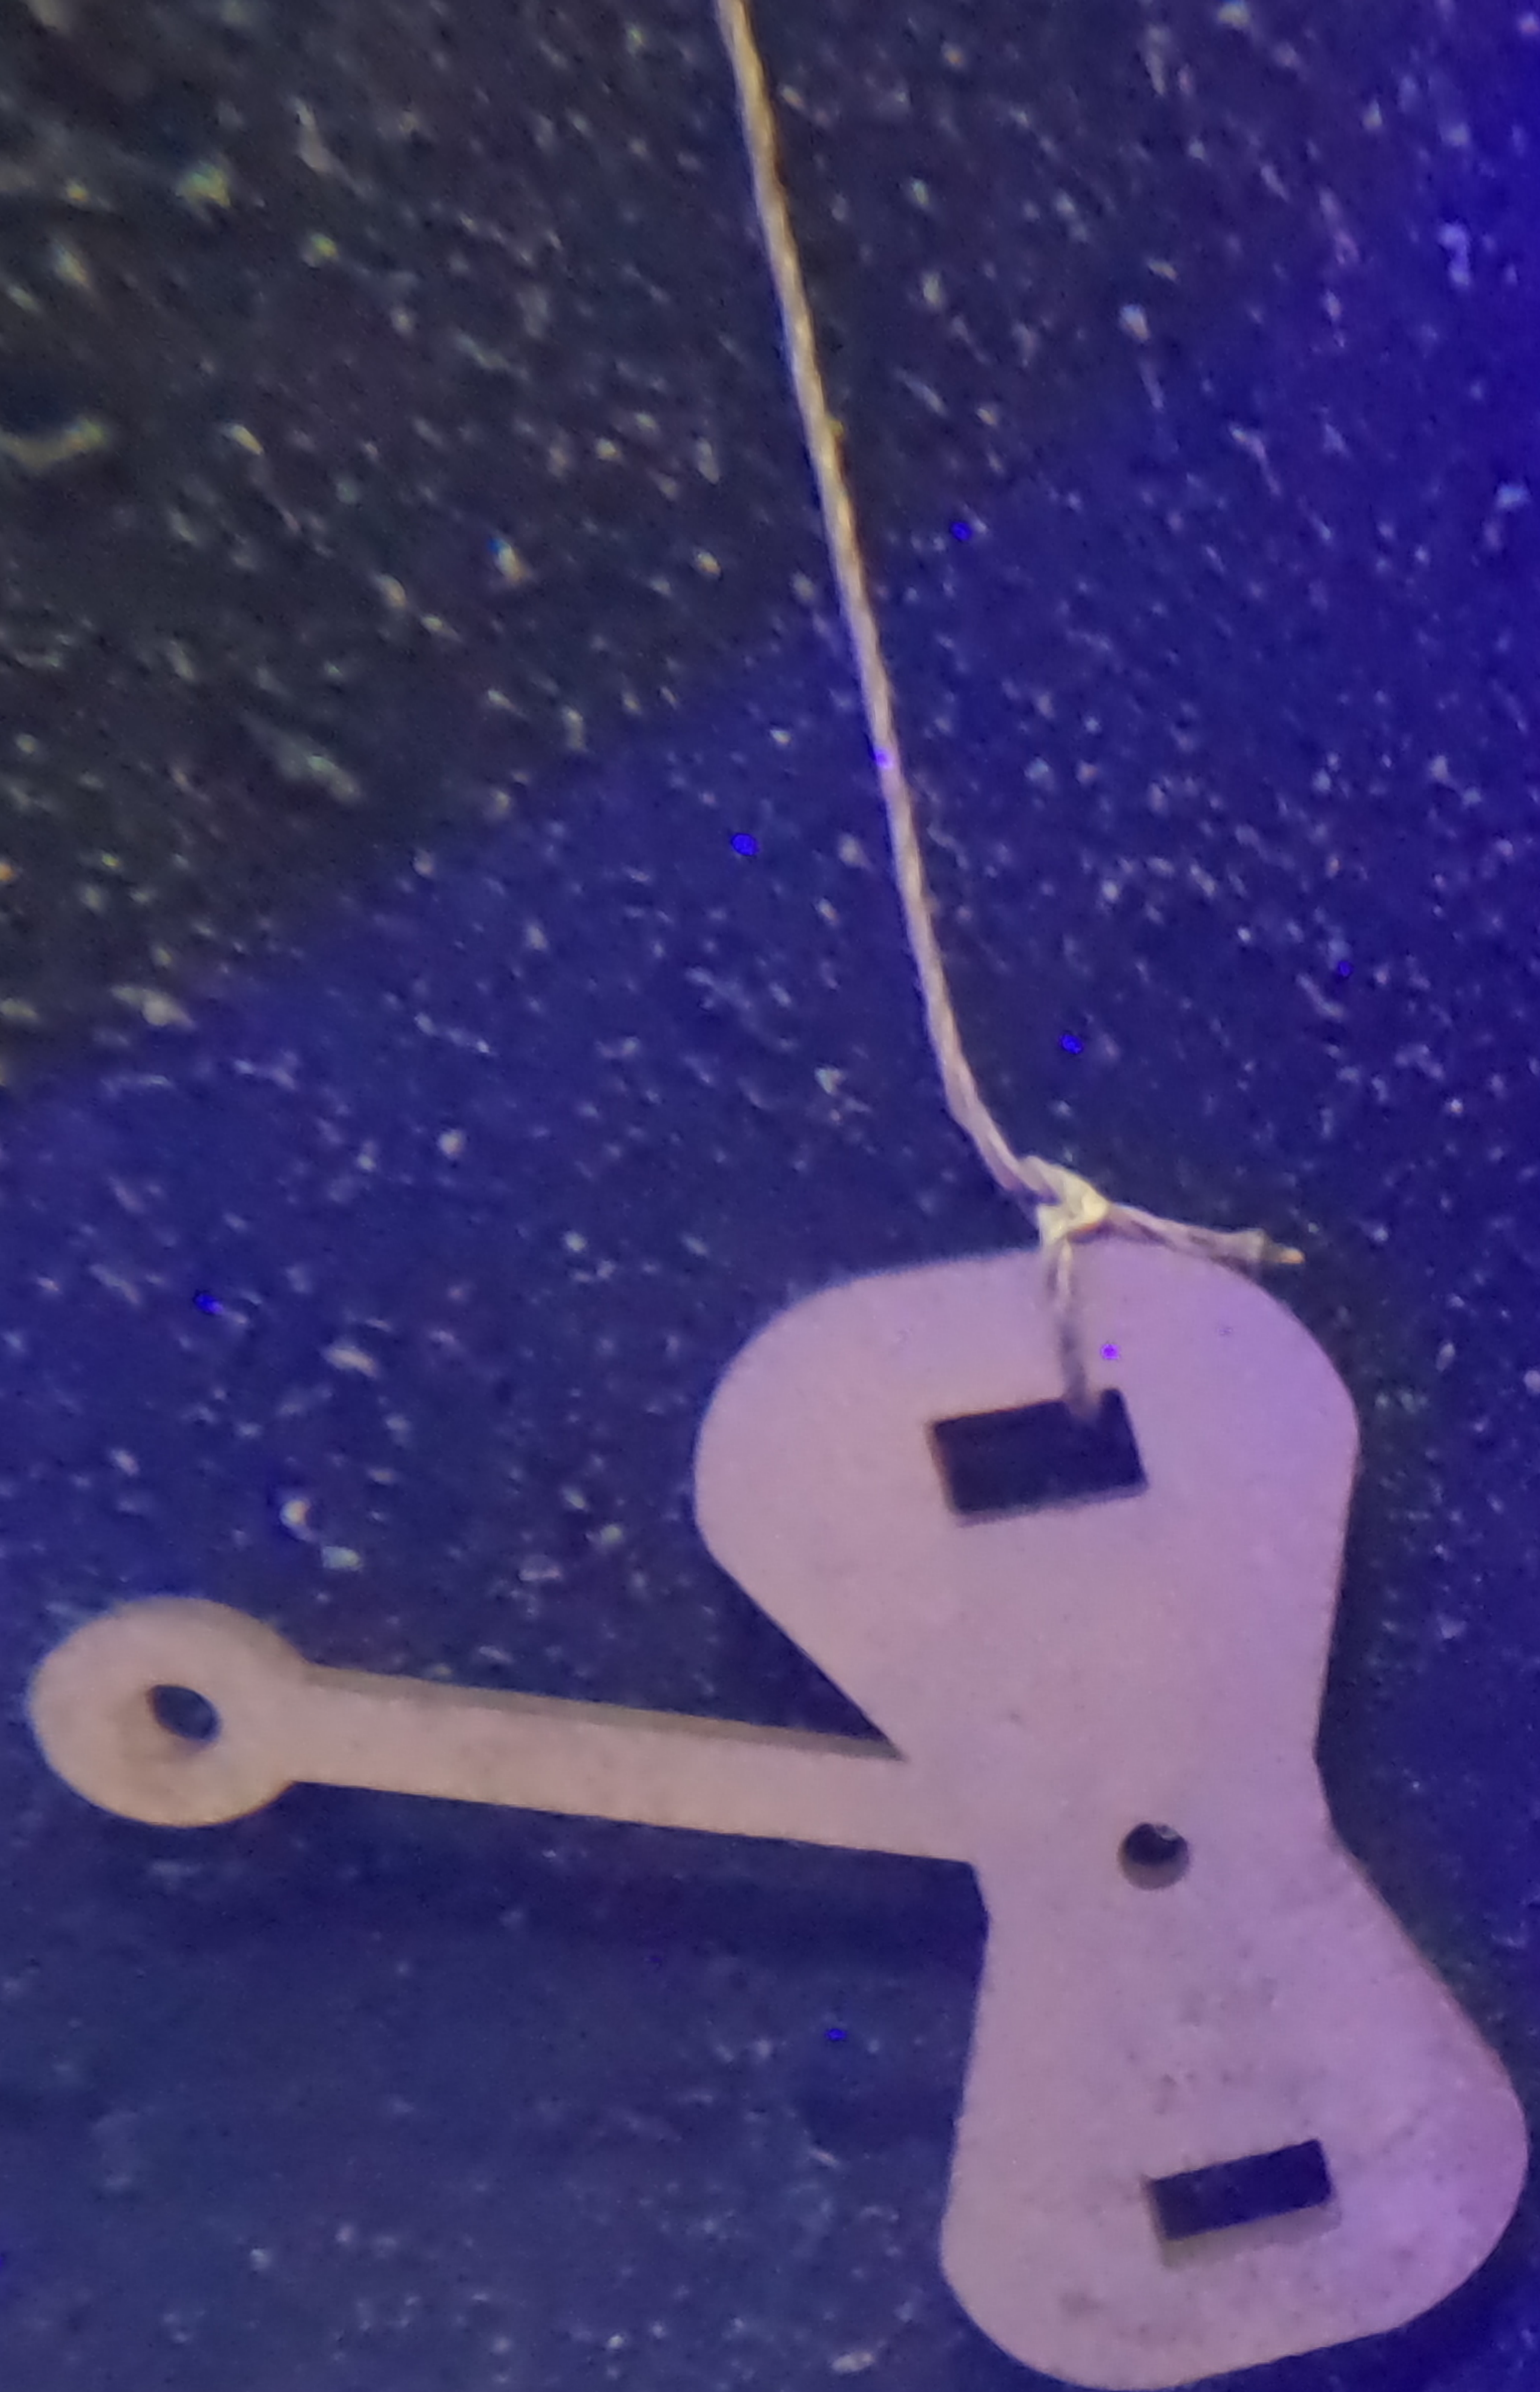

Supplement: Supplementary file 3117 [file G0015558.pdf › Level_2_1/G0015558.pdf]

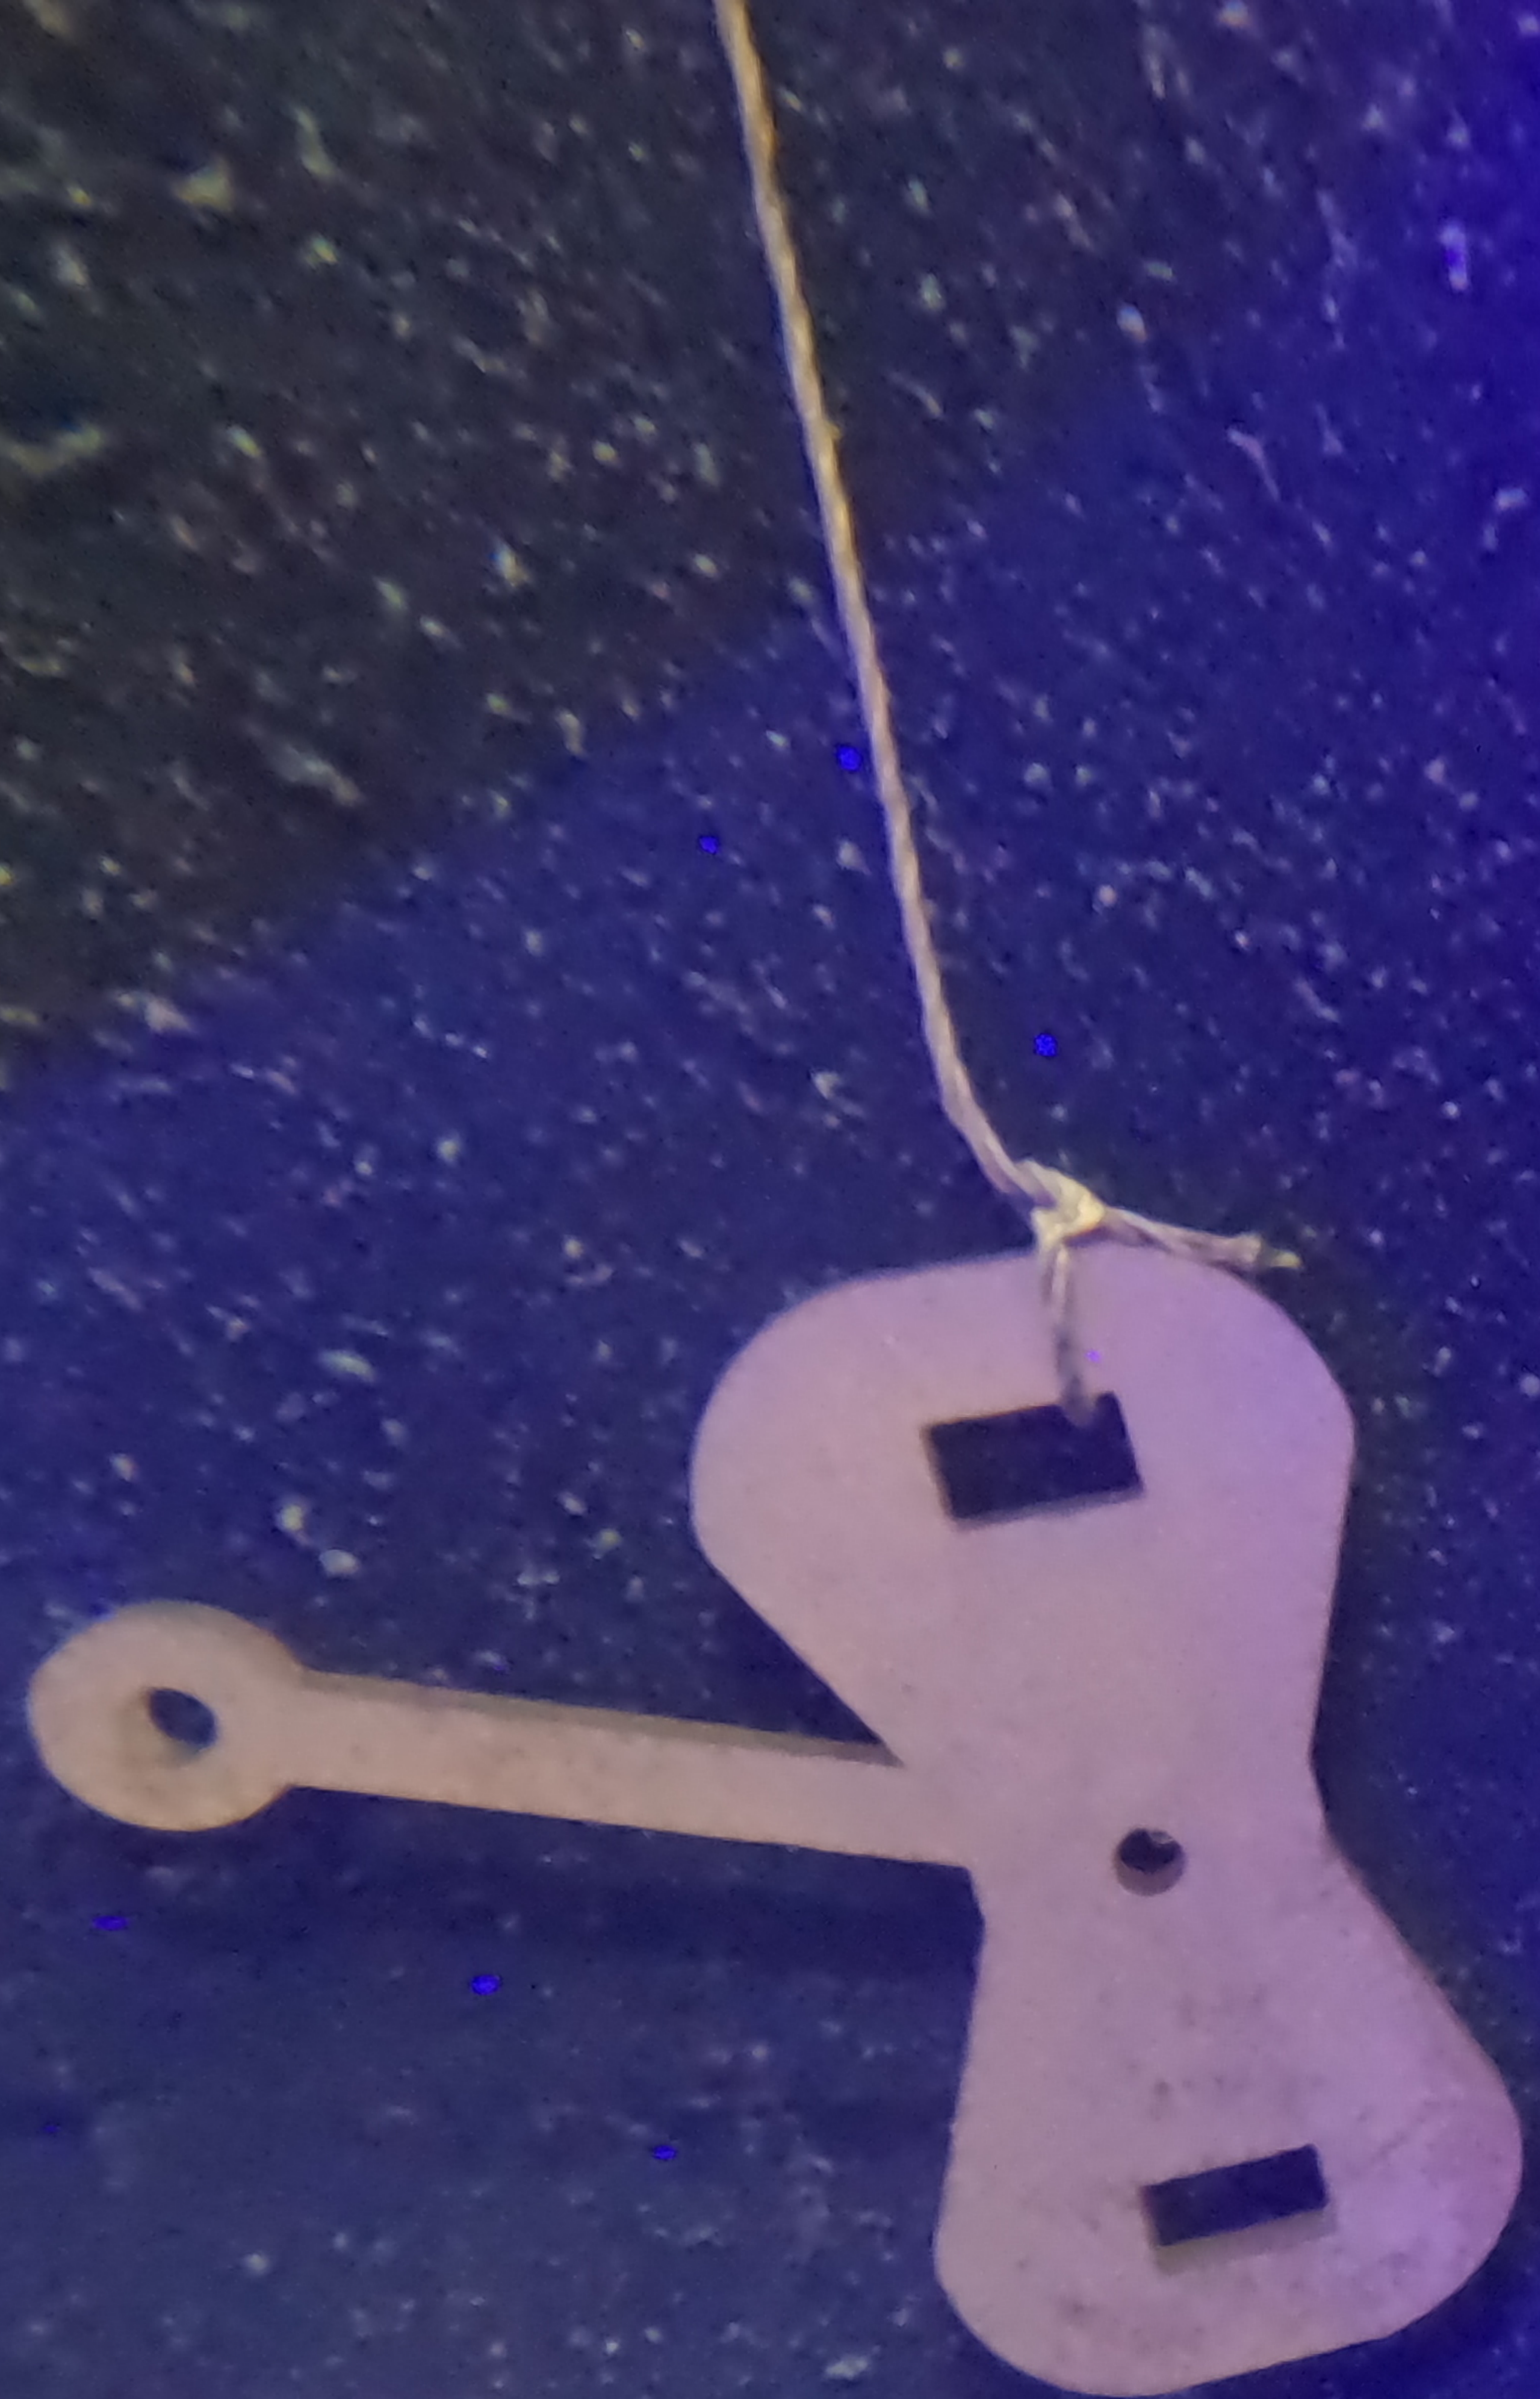

Supplement: Supplementary file 3118 [file G0015559.pdf › Level_2_1/G0015559.pdf]

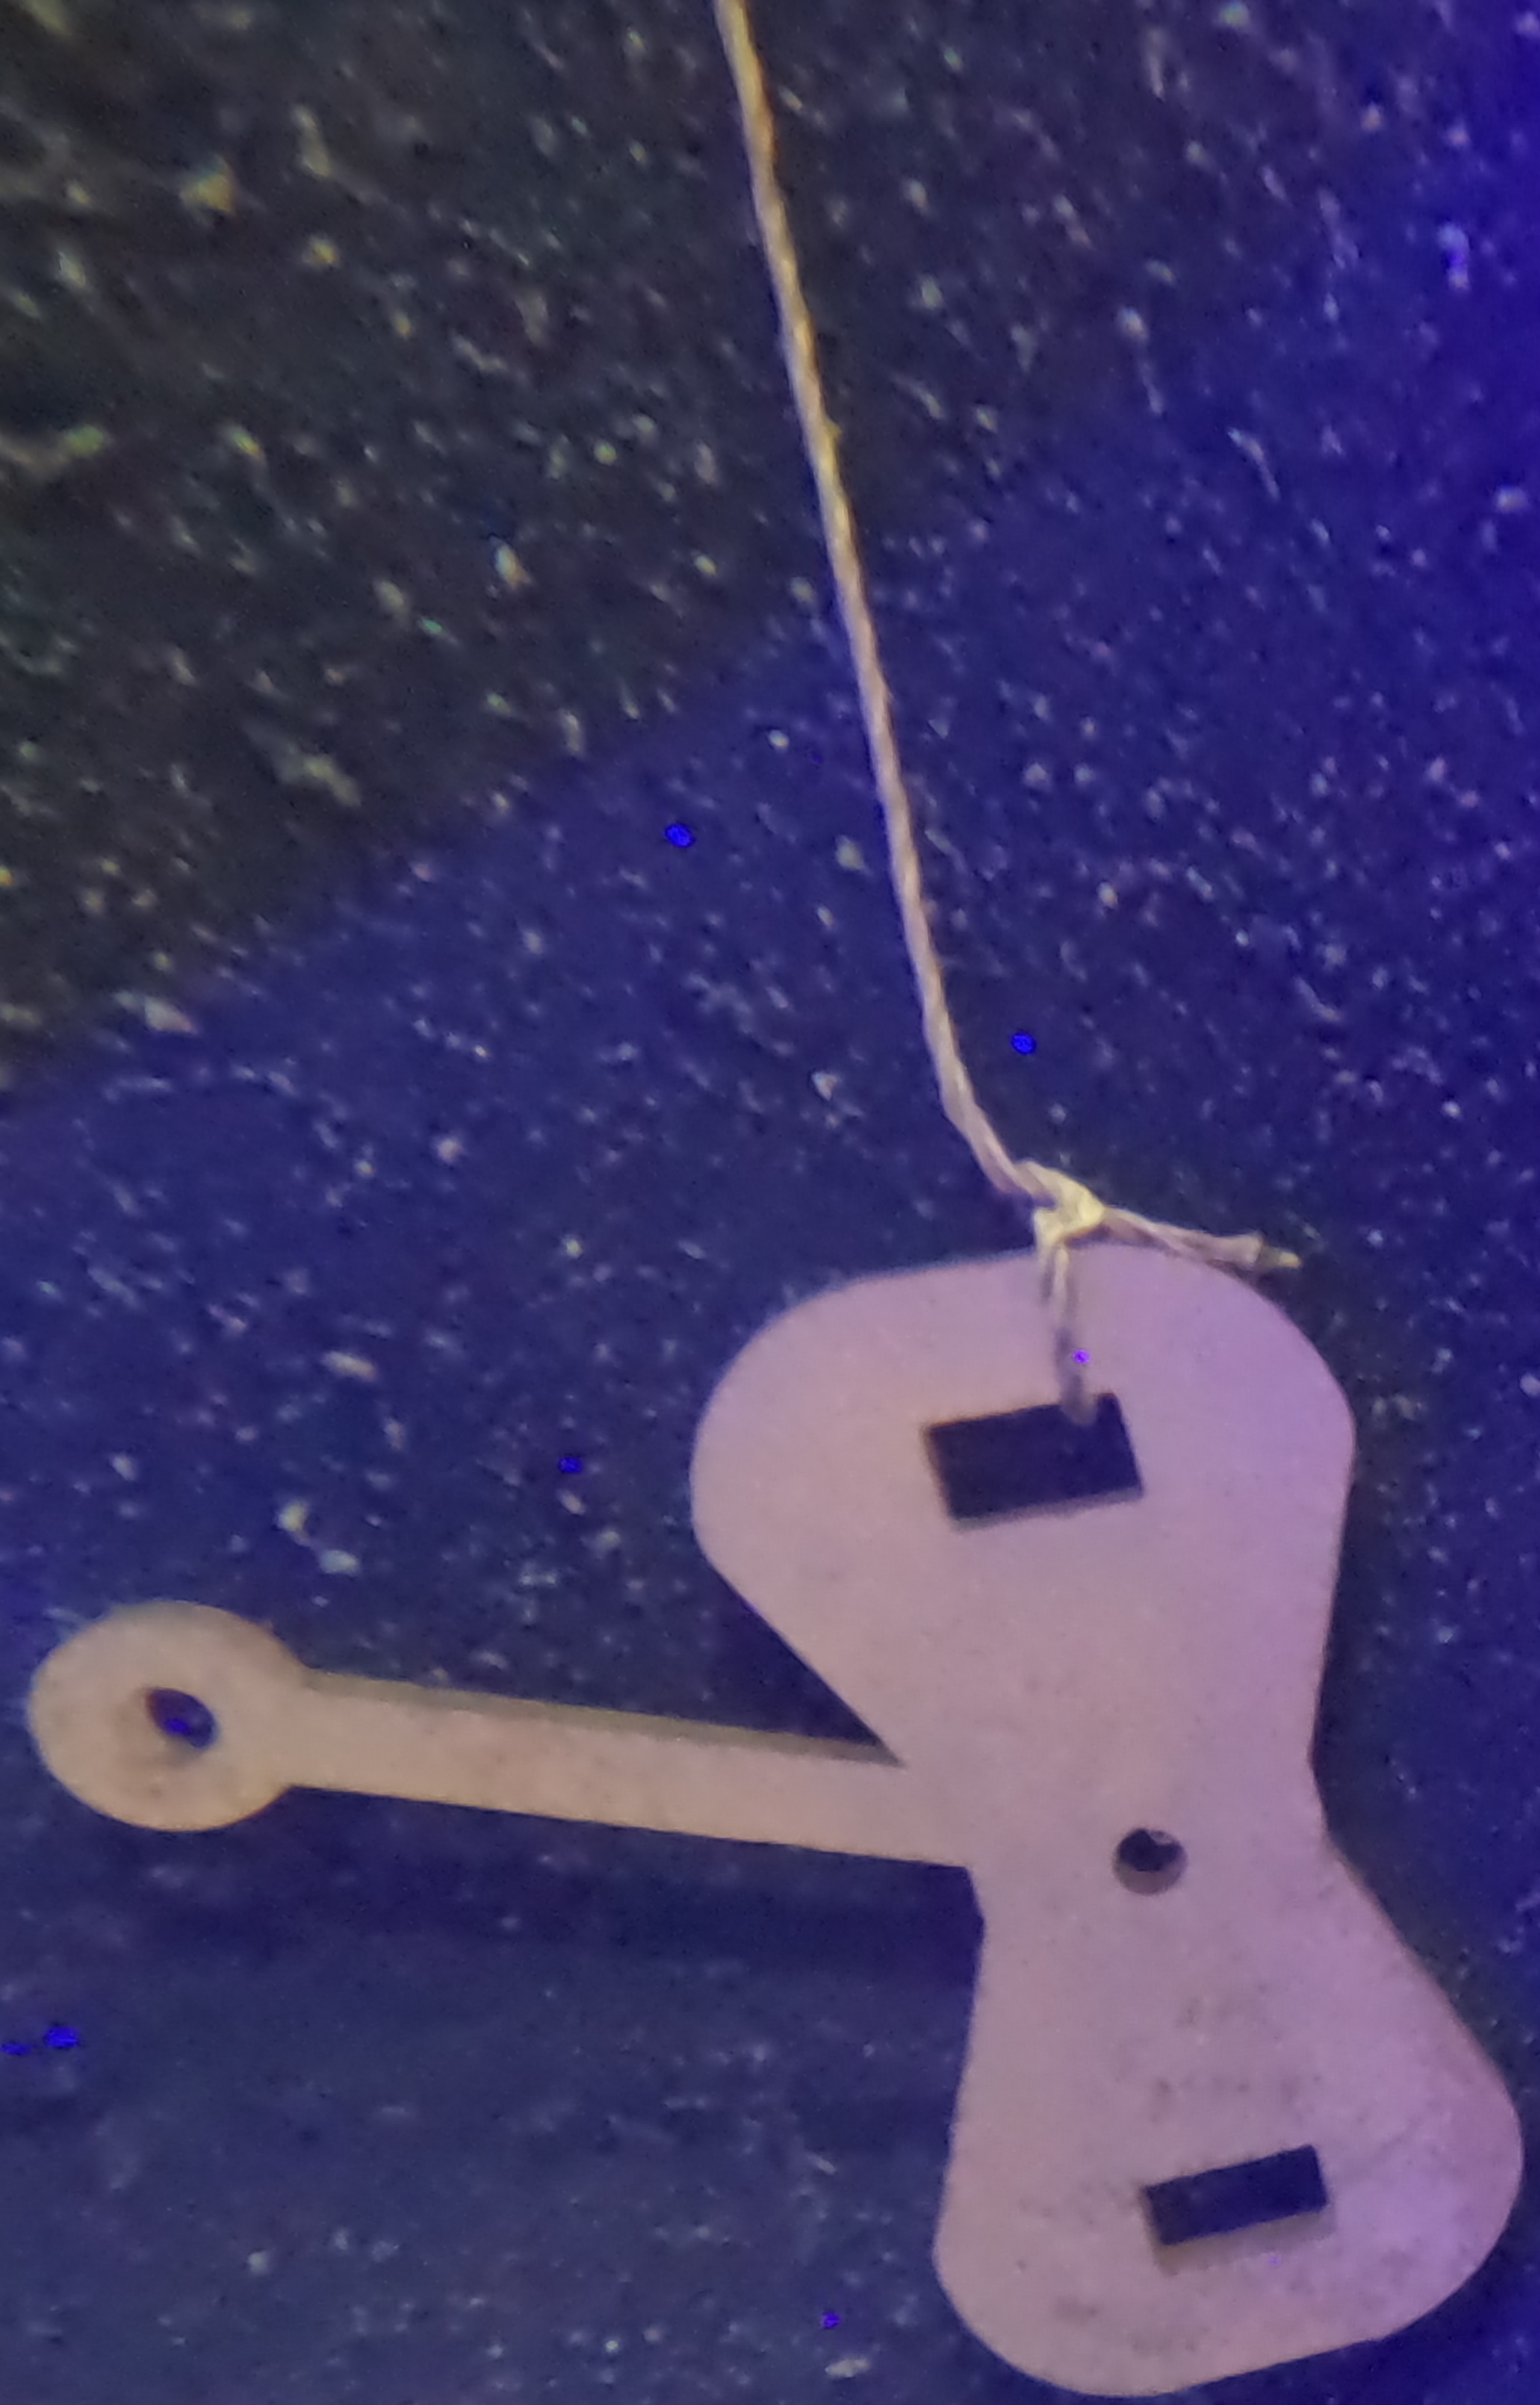

Supplement: Supplementary file 3119 [file G0015560.pdf › Level_2_1/G0015560.pdf]

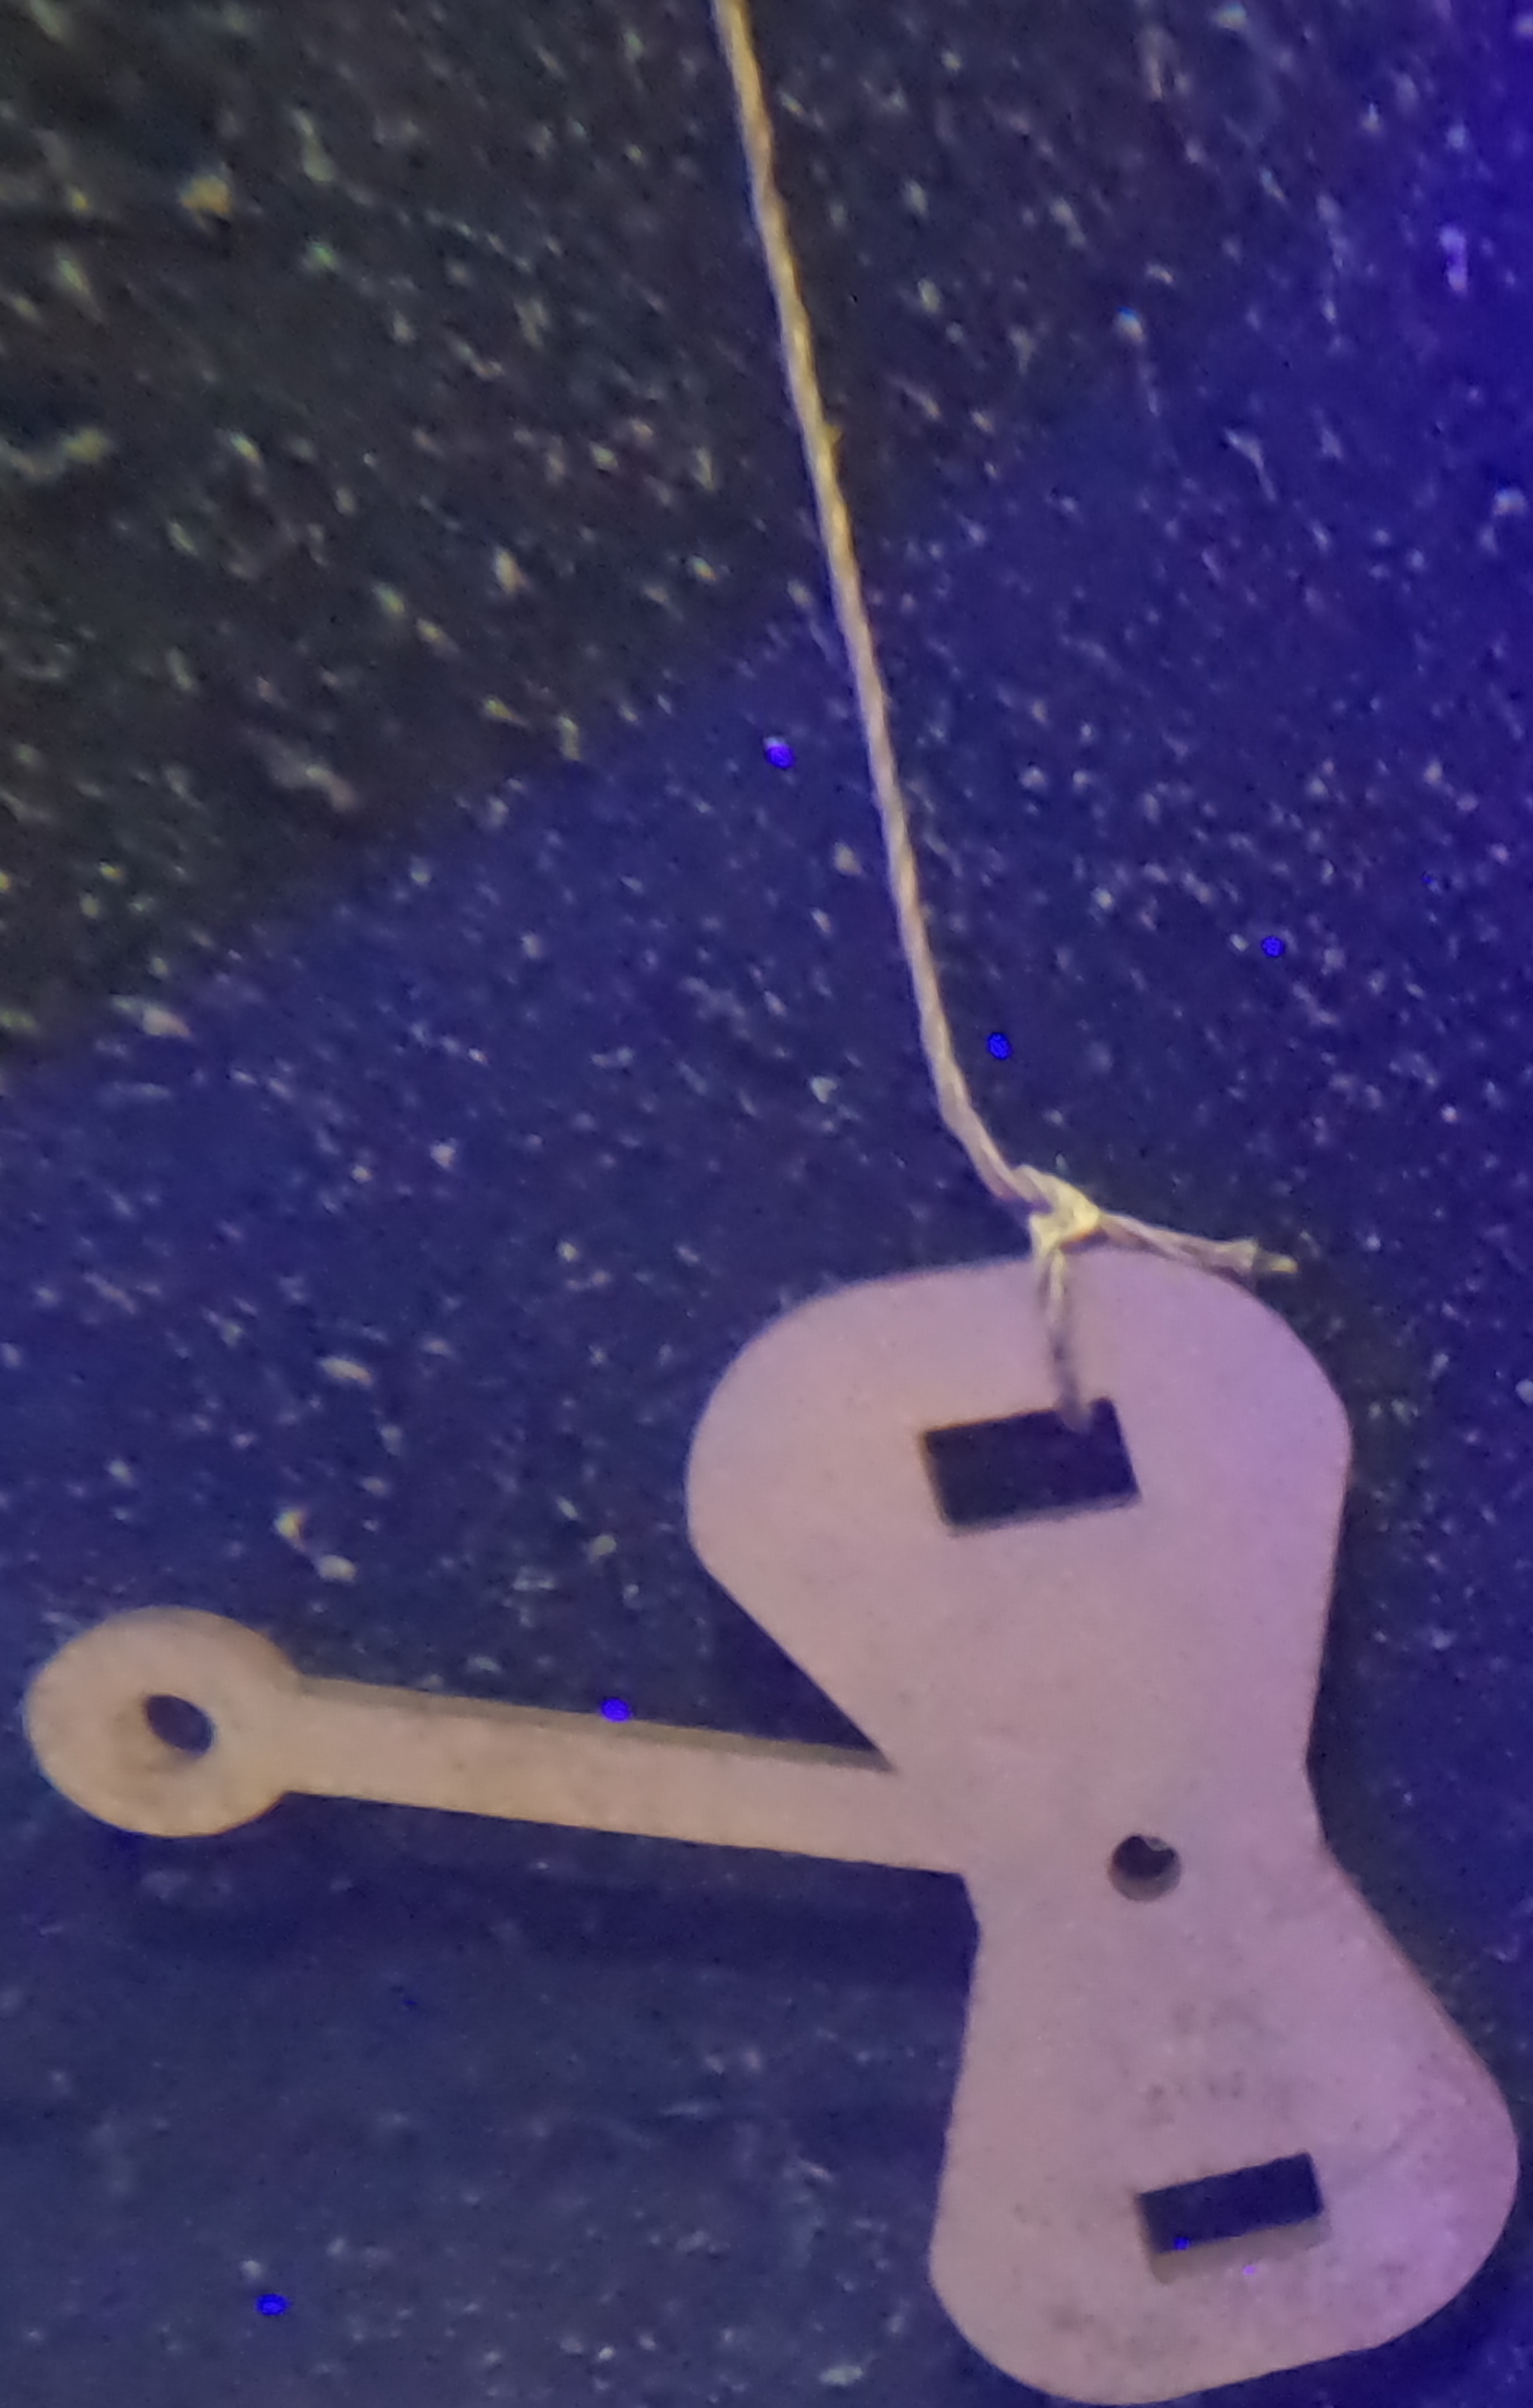

Supplement: Supplementary file 3120 [file G0015561.pdf › Level_2_1/G0015561.pdf]

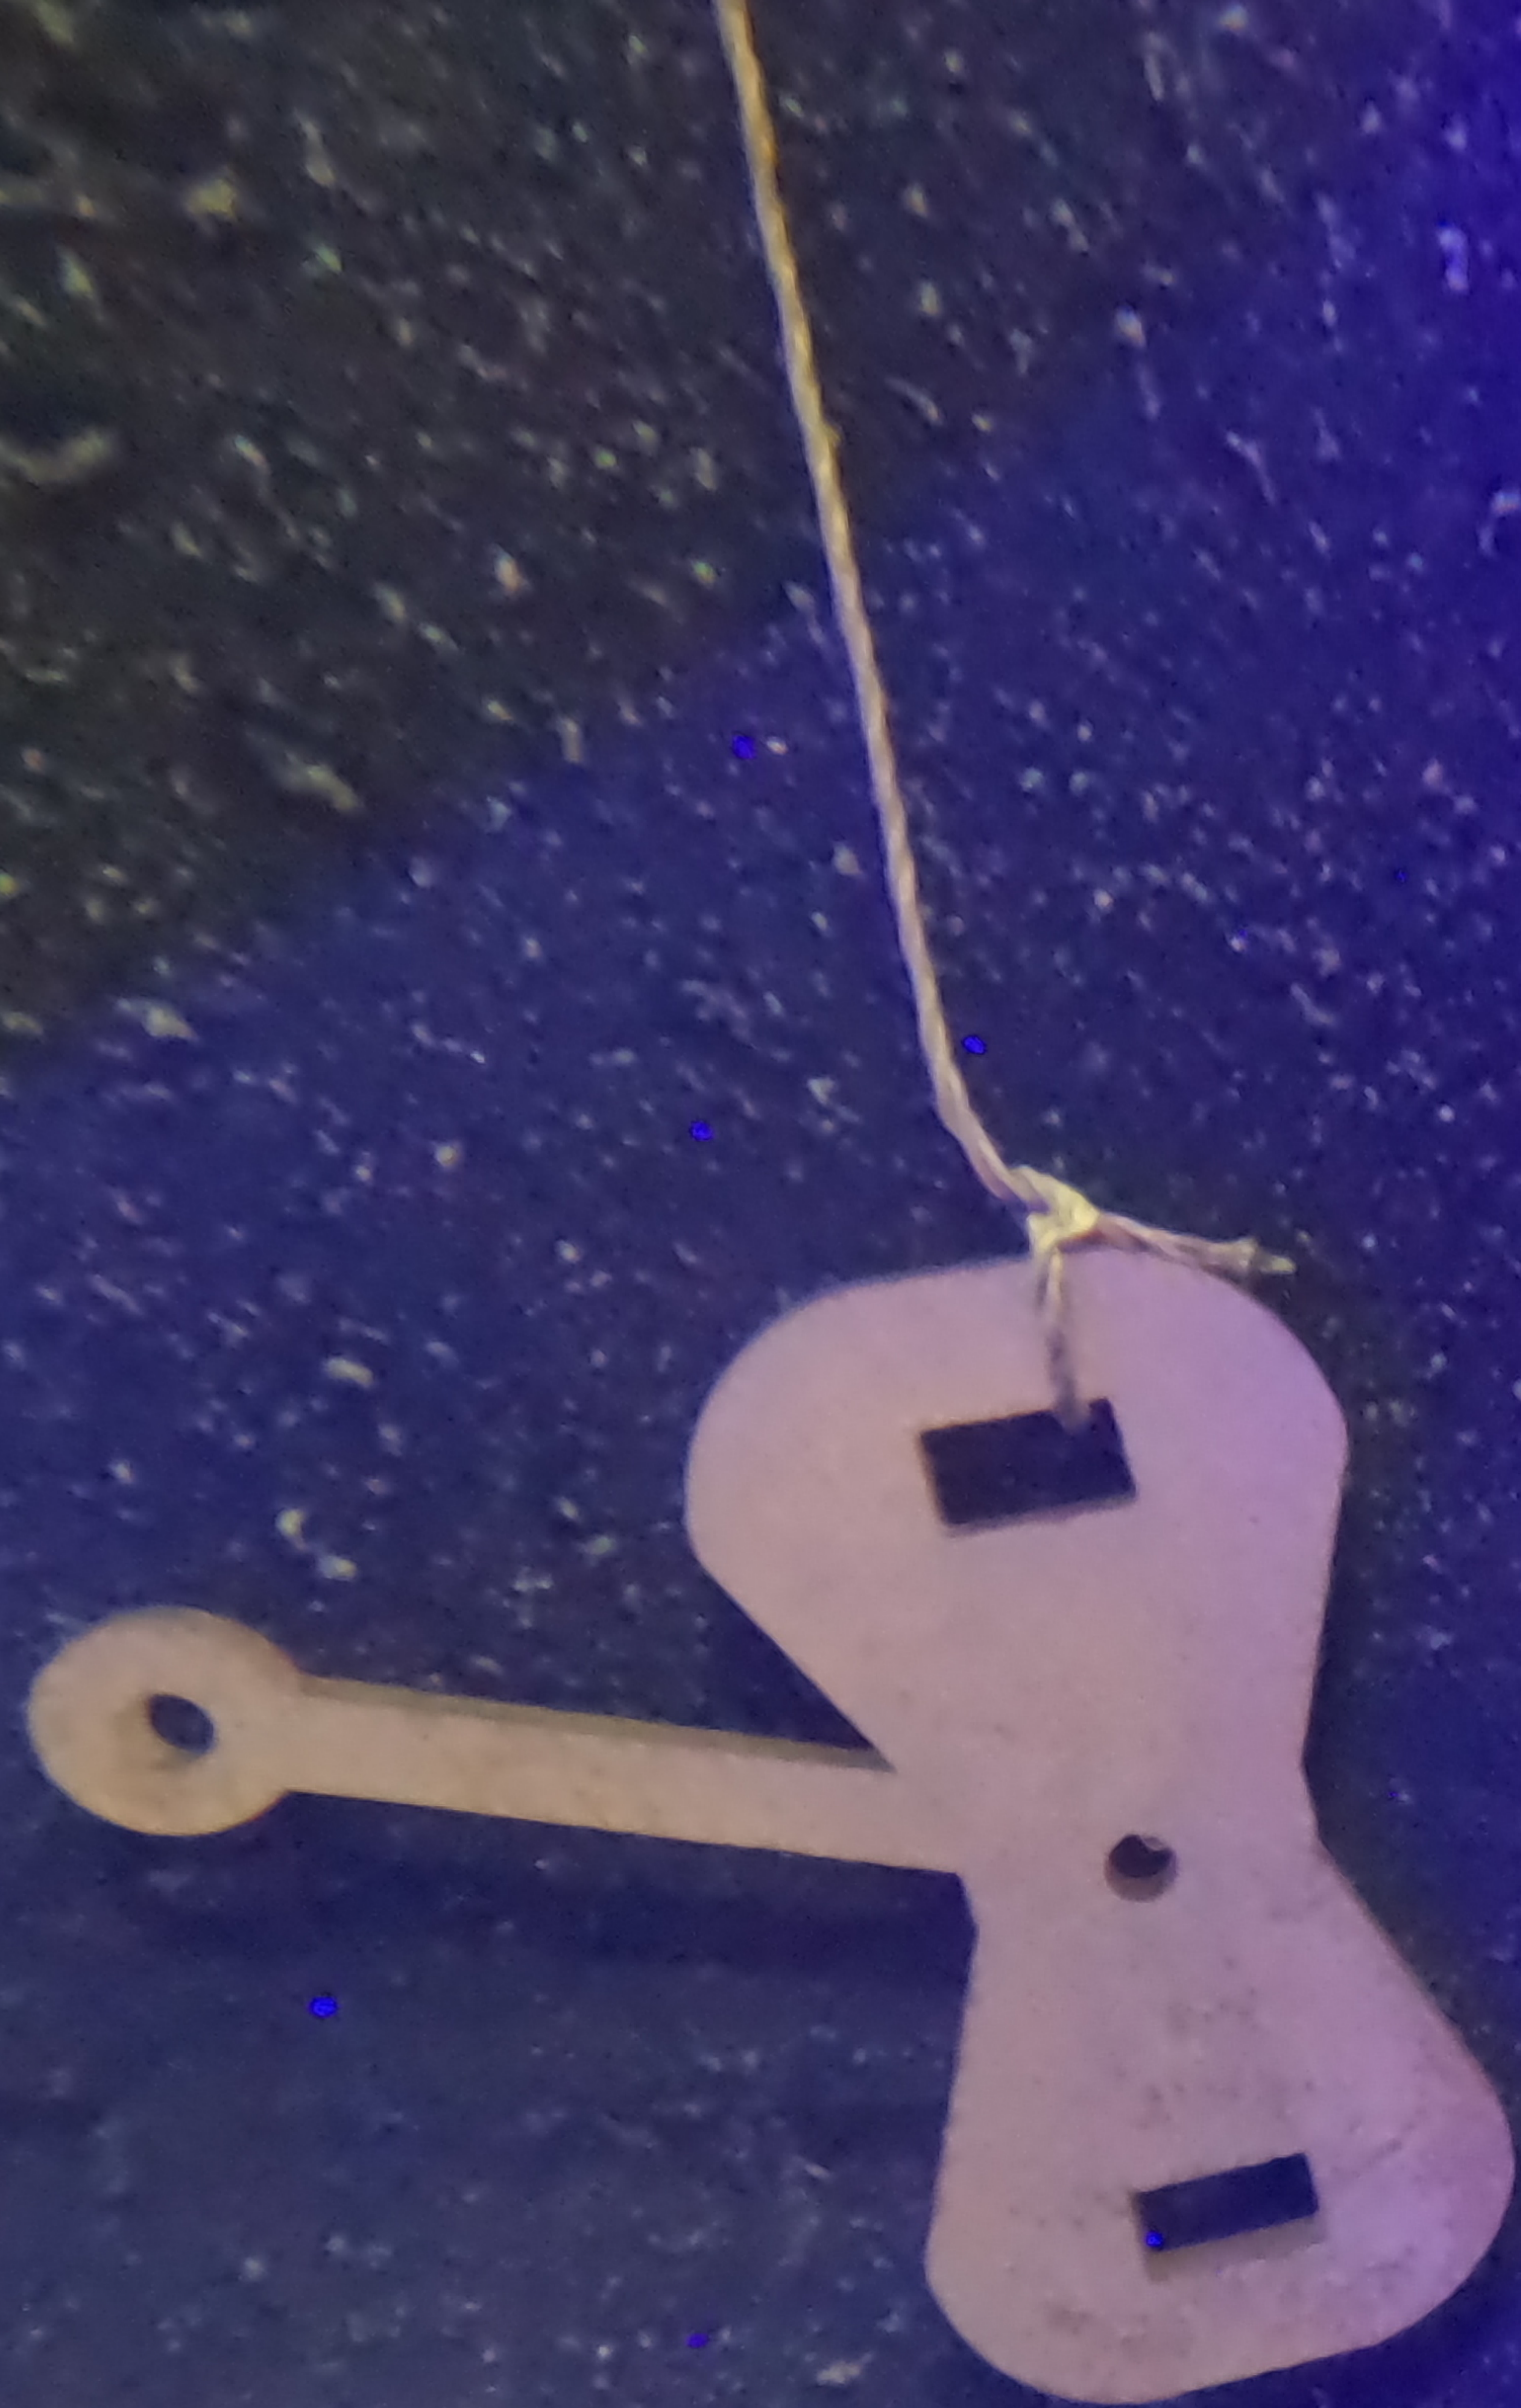

Supplement: Supplementary file 3121 [file G0015562.pdf › Level_2_1/G0015562.pdf]

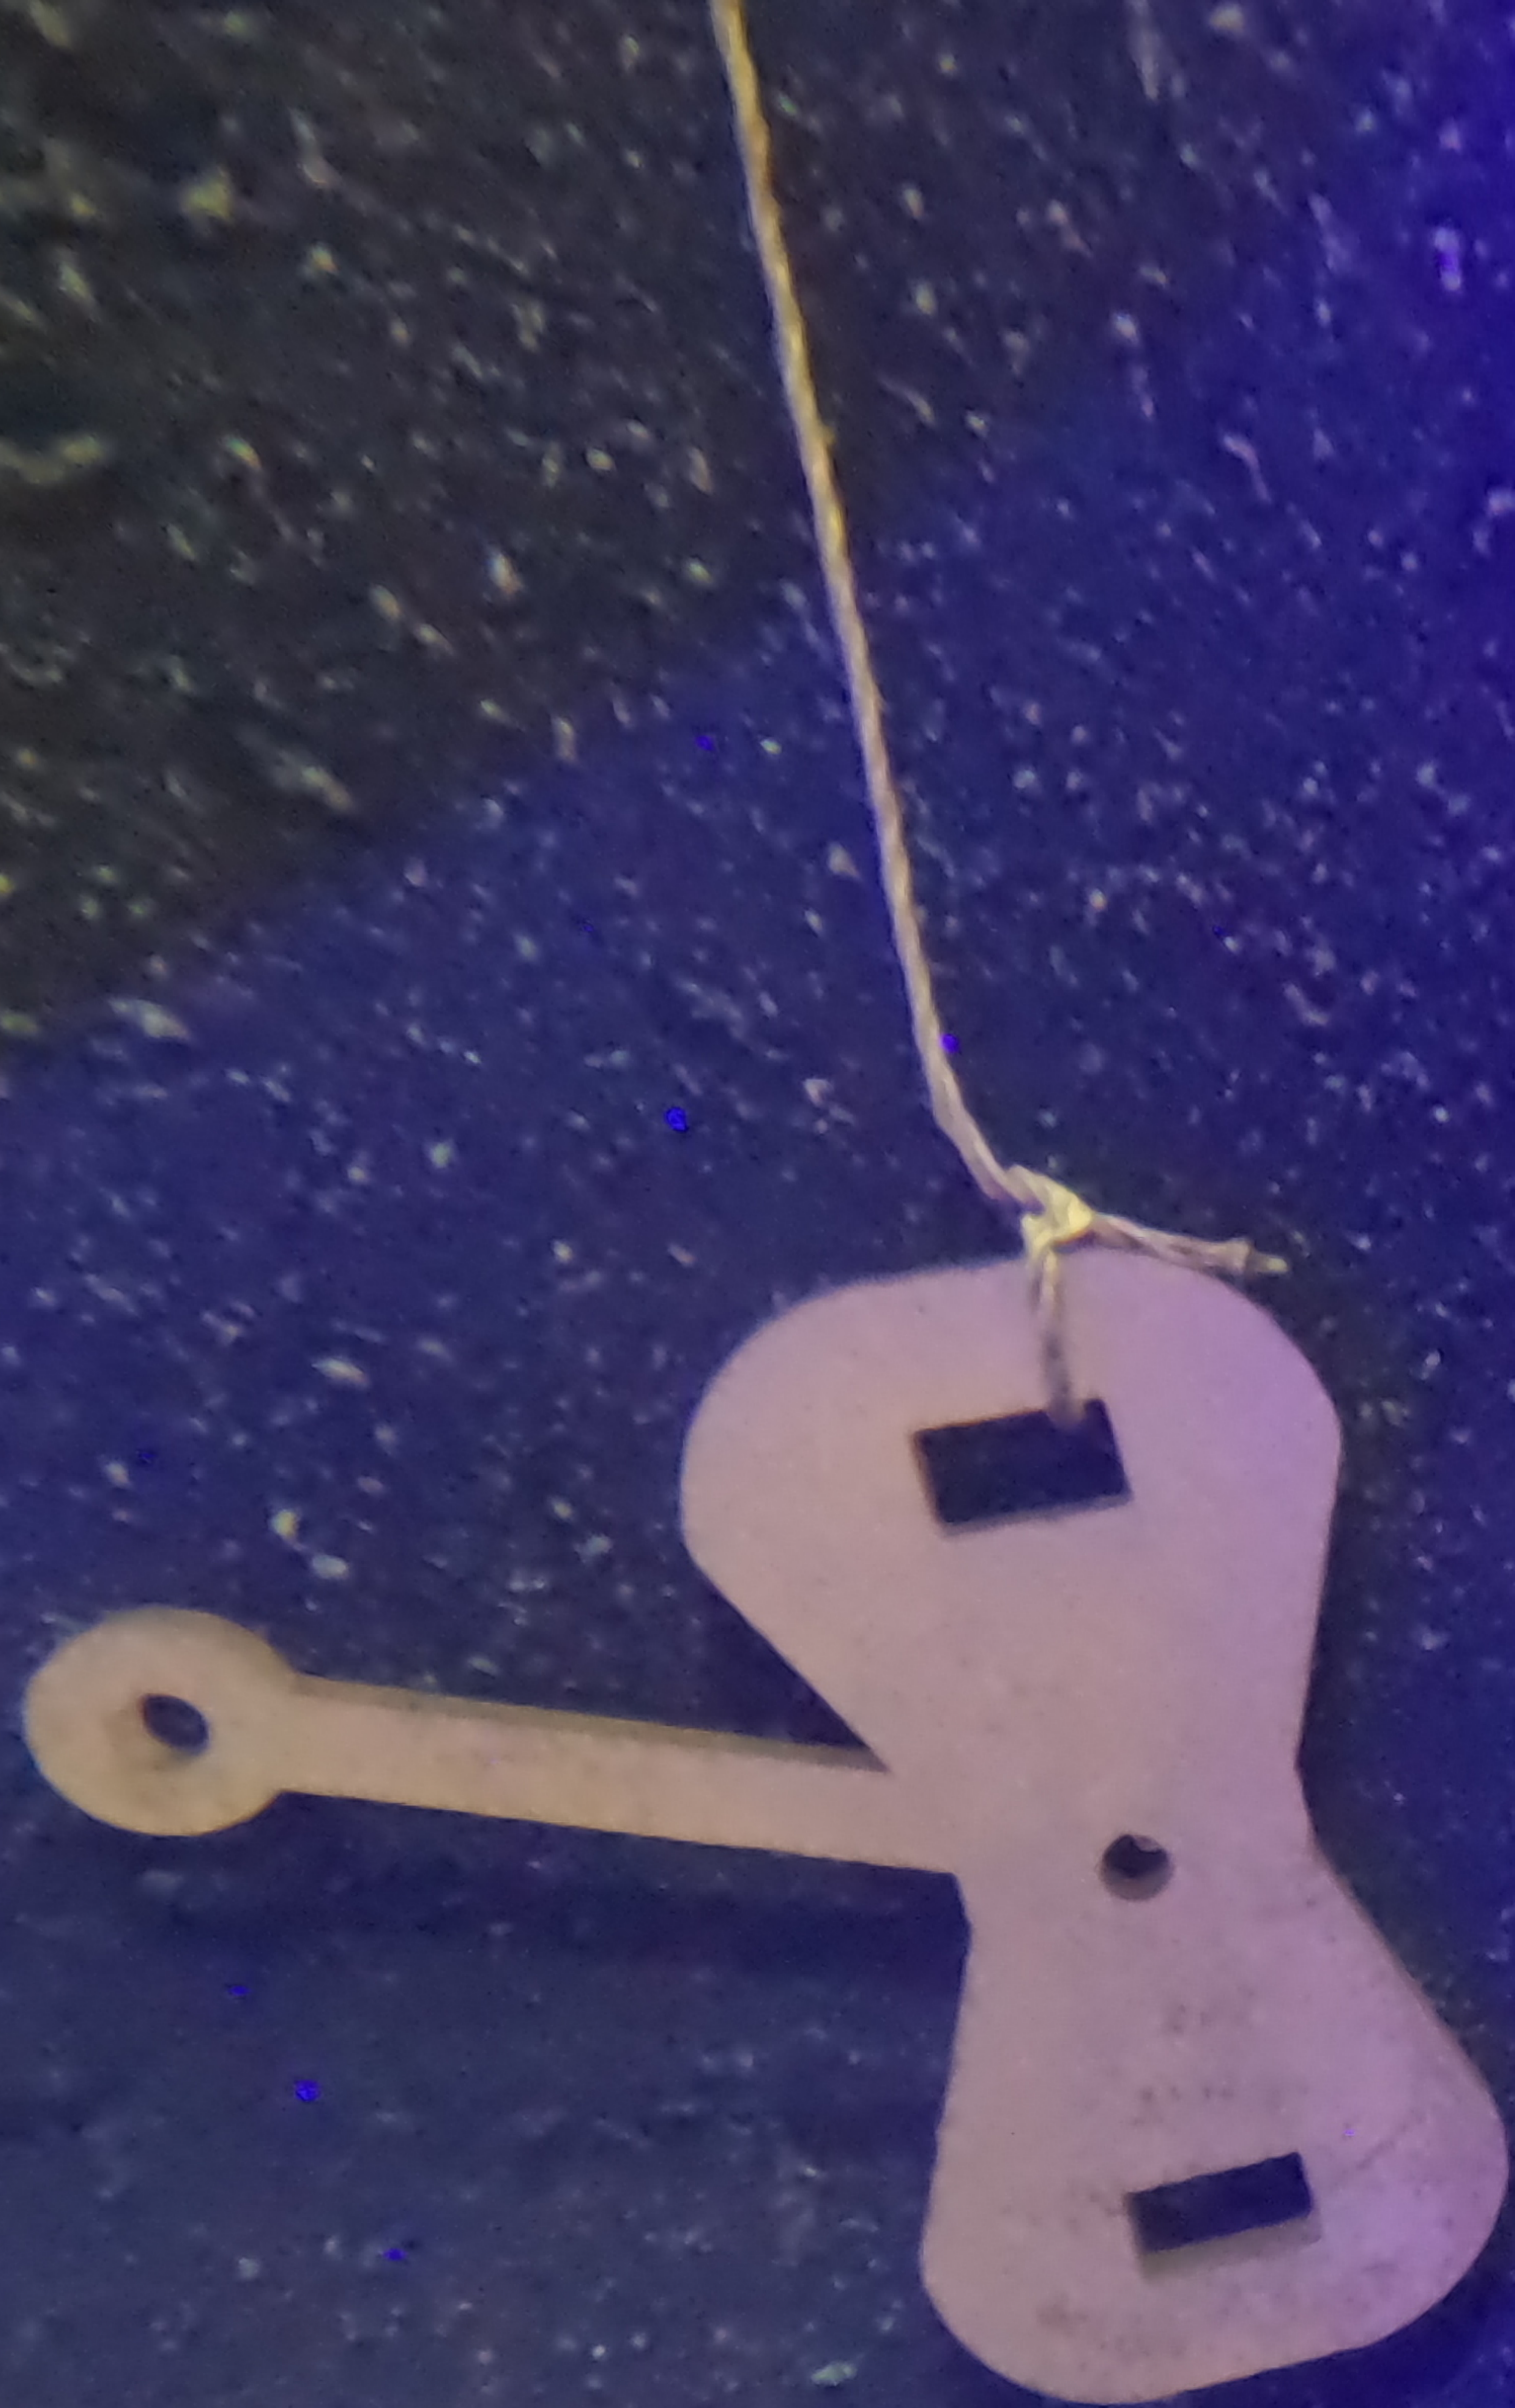

Supplement: Supplementary file 3122 [file G0015563.pdf › Level_2_1/G0015563.pdf]

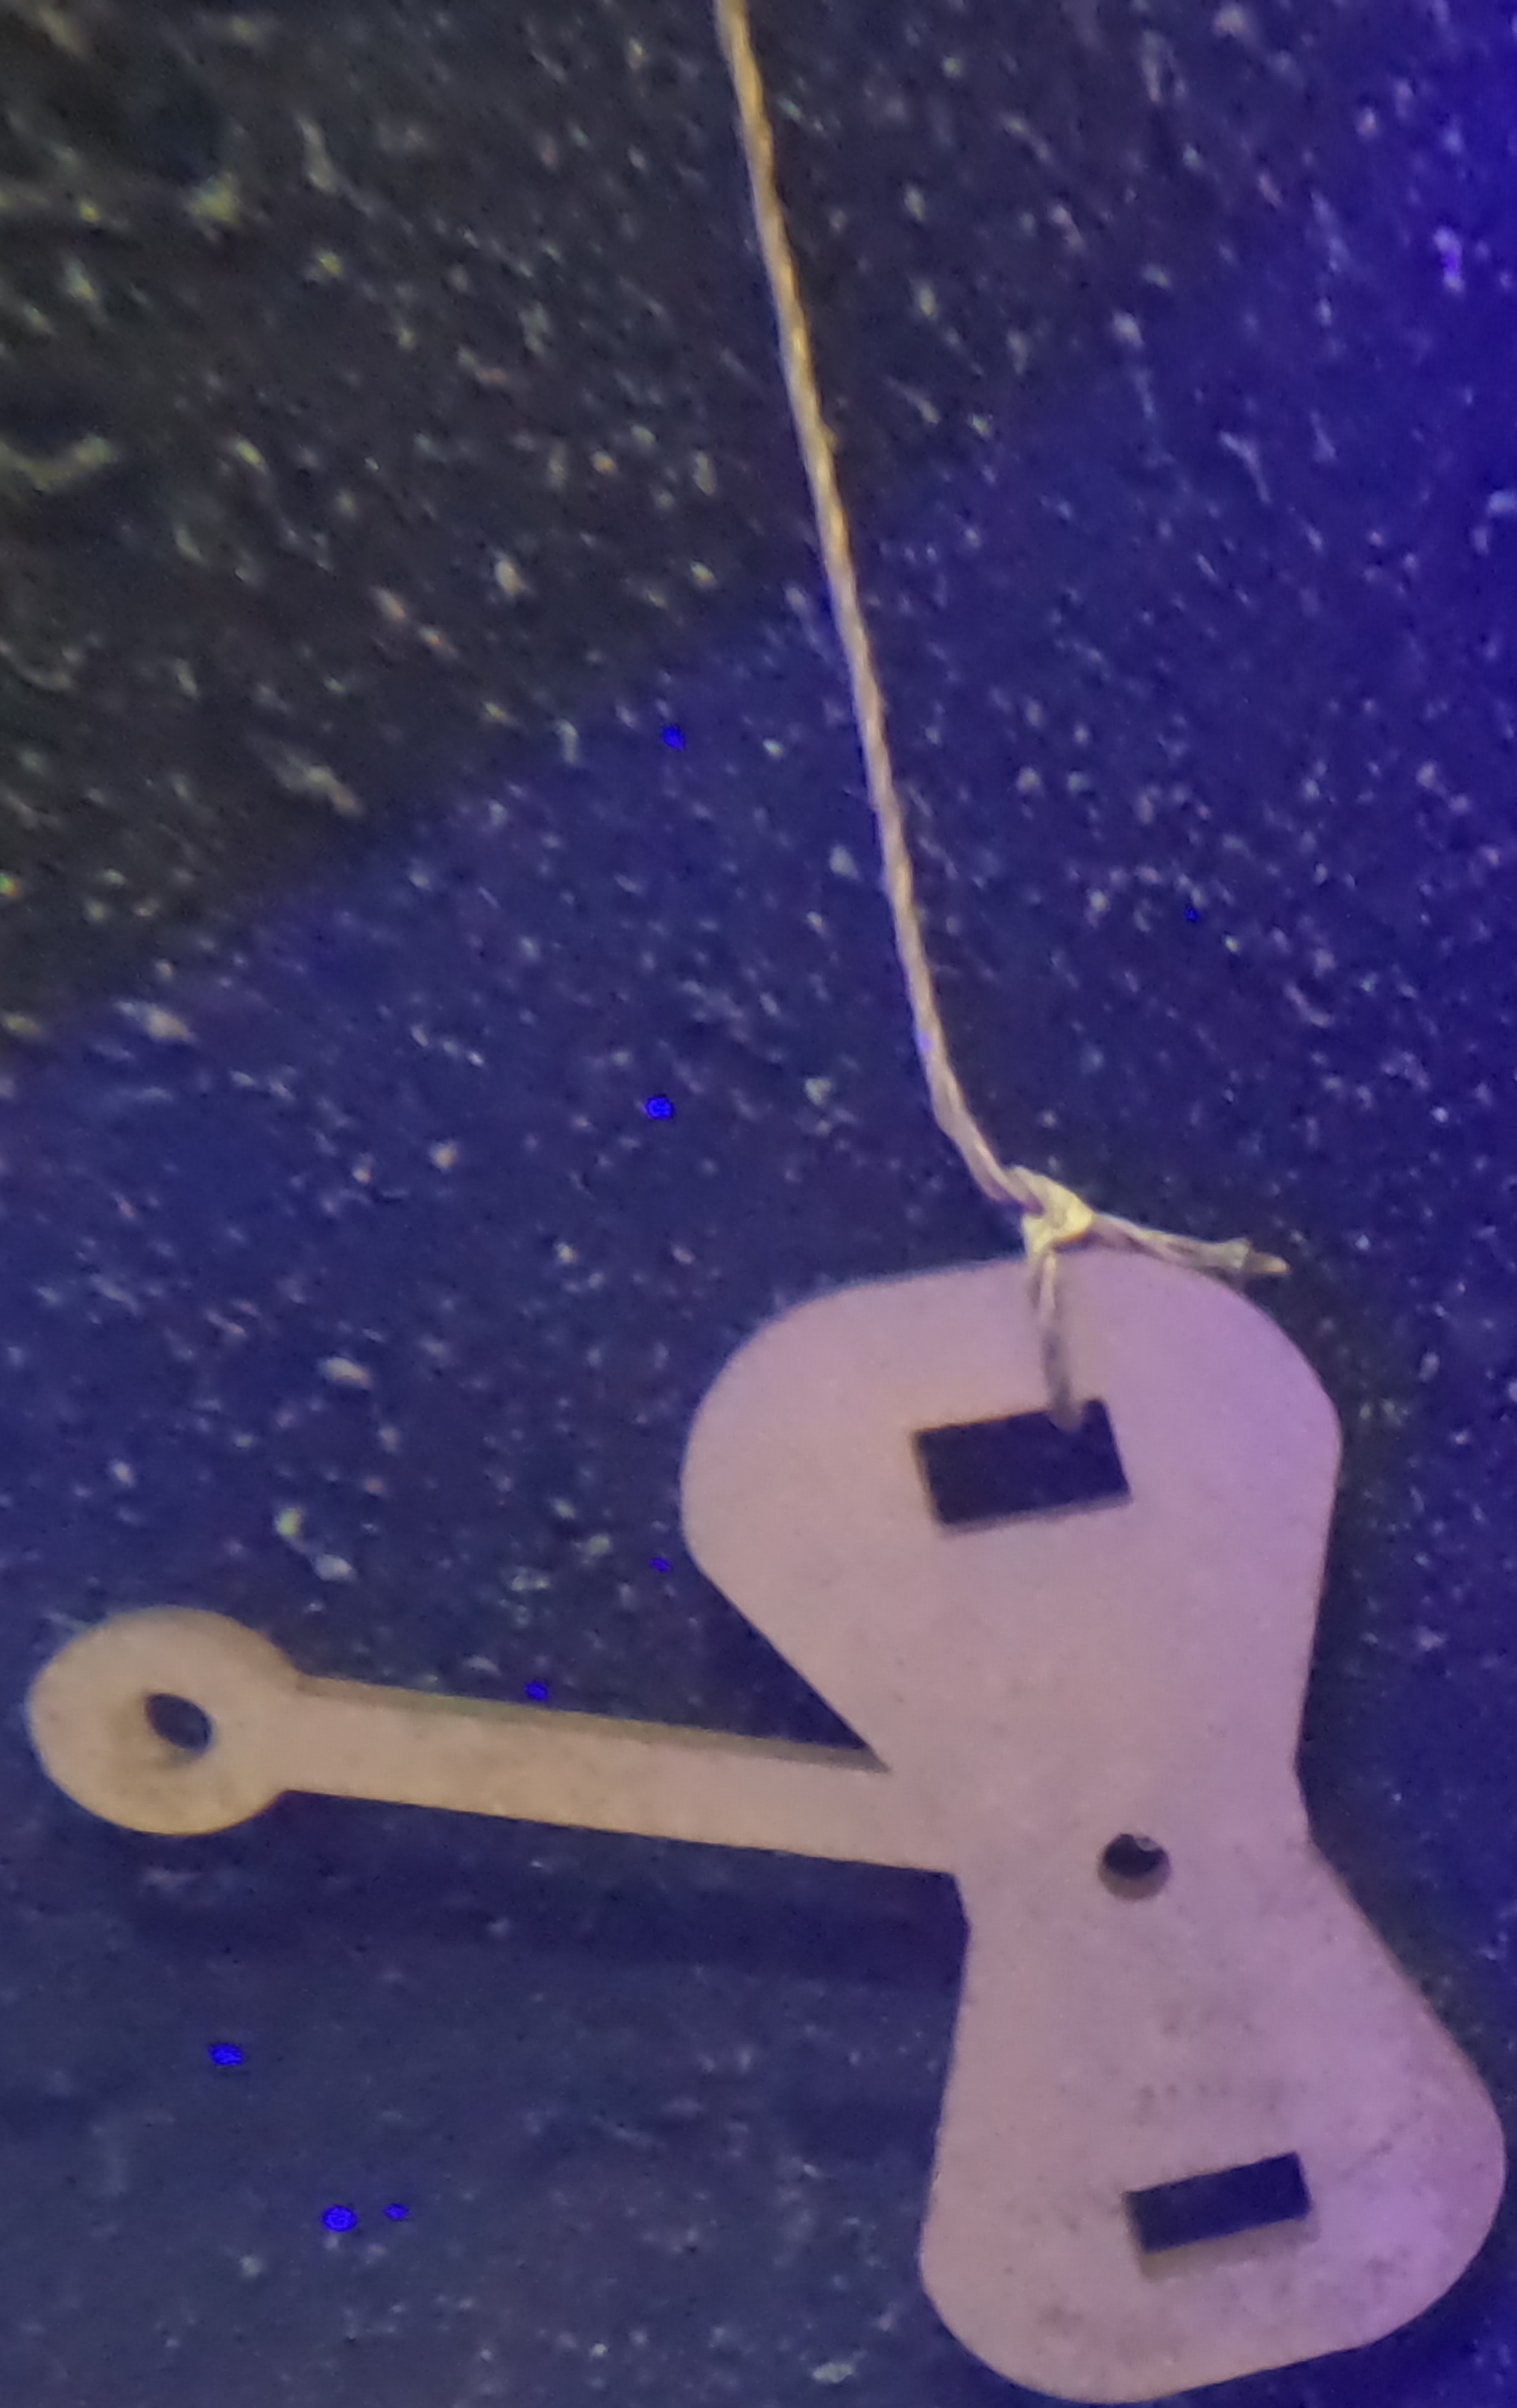

Supplement: Supplementary file 3123 [file G0015564.pdf › Level_2_1/G0015564.pdf]

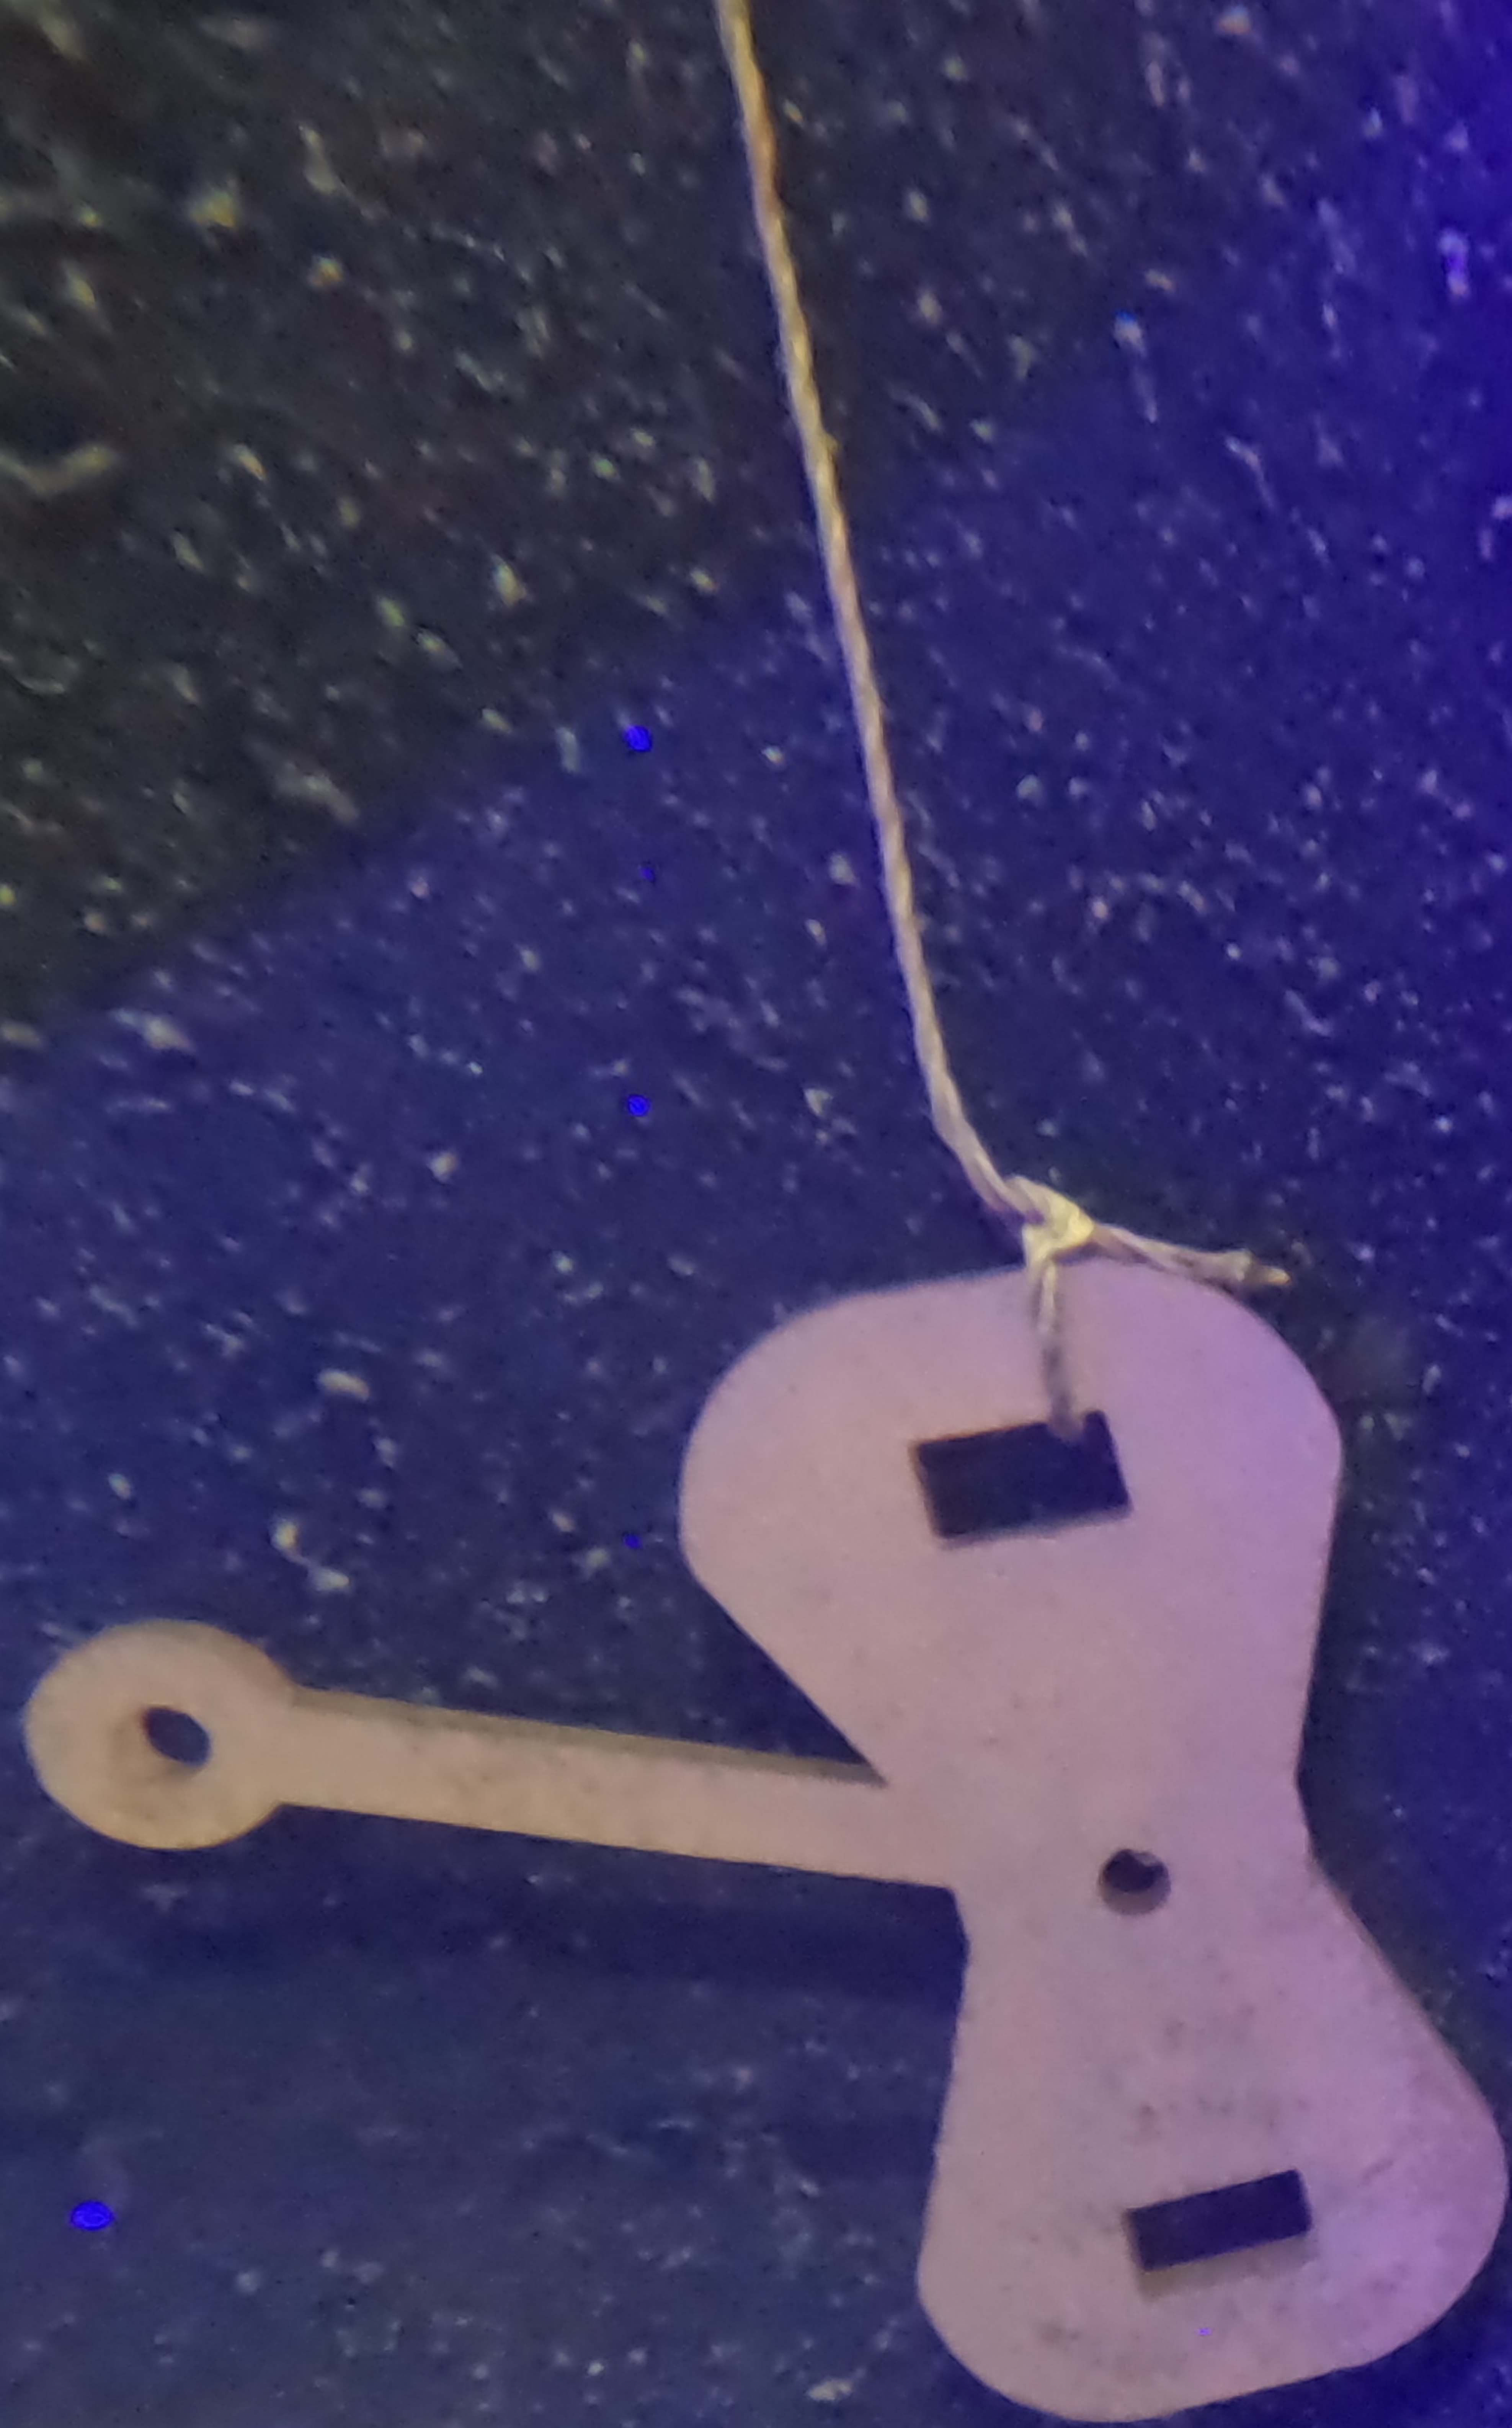

Supplement: Supplementary file 3124 [file G0015565.pdf › Level_2_1/G0015565.pdf]

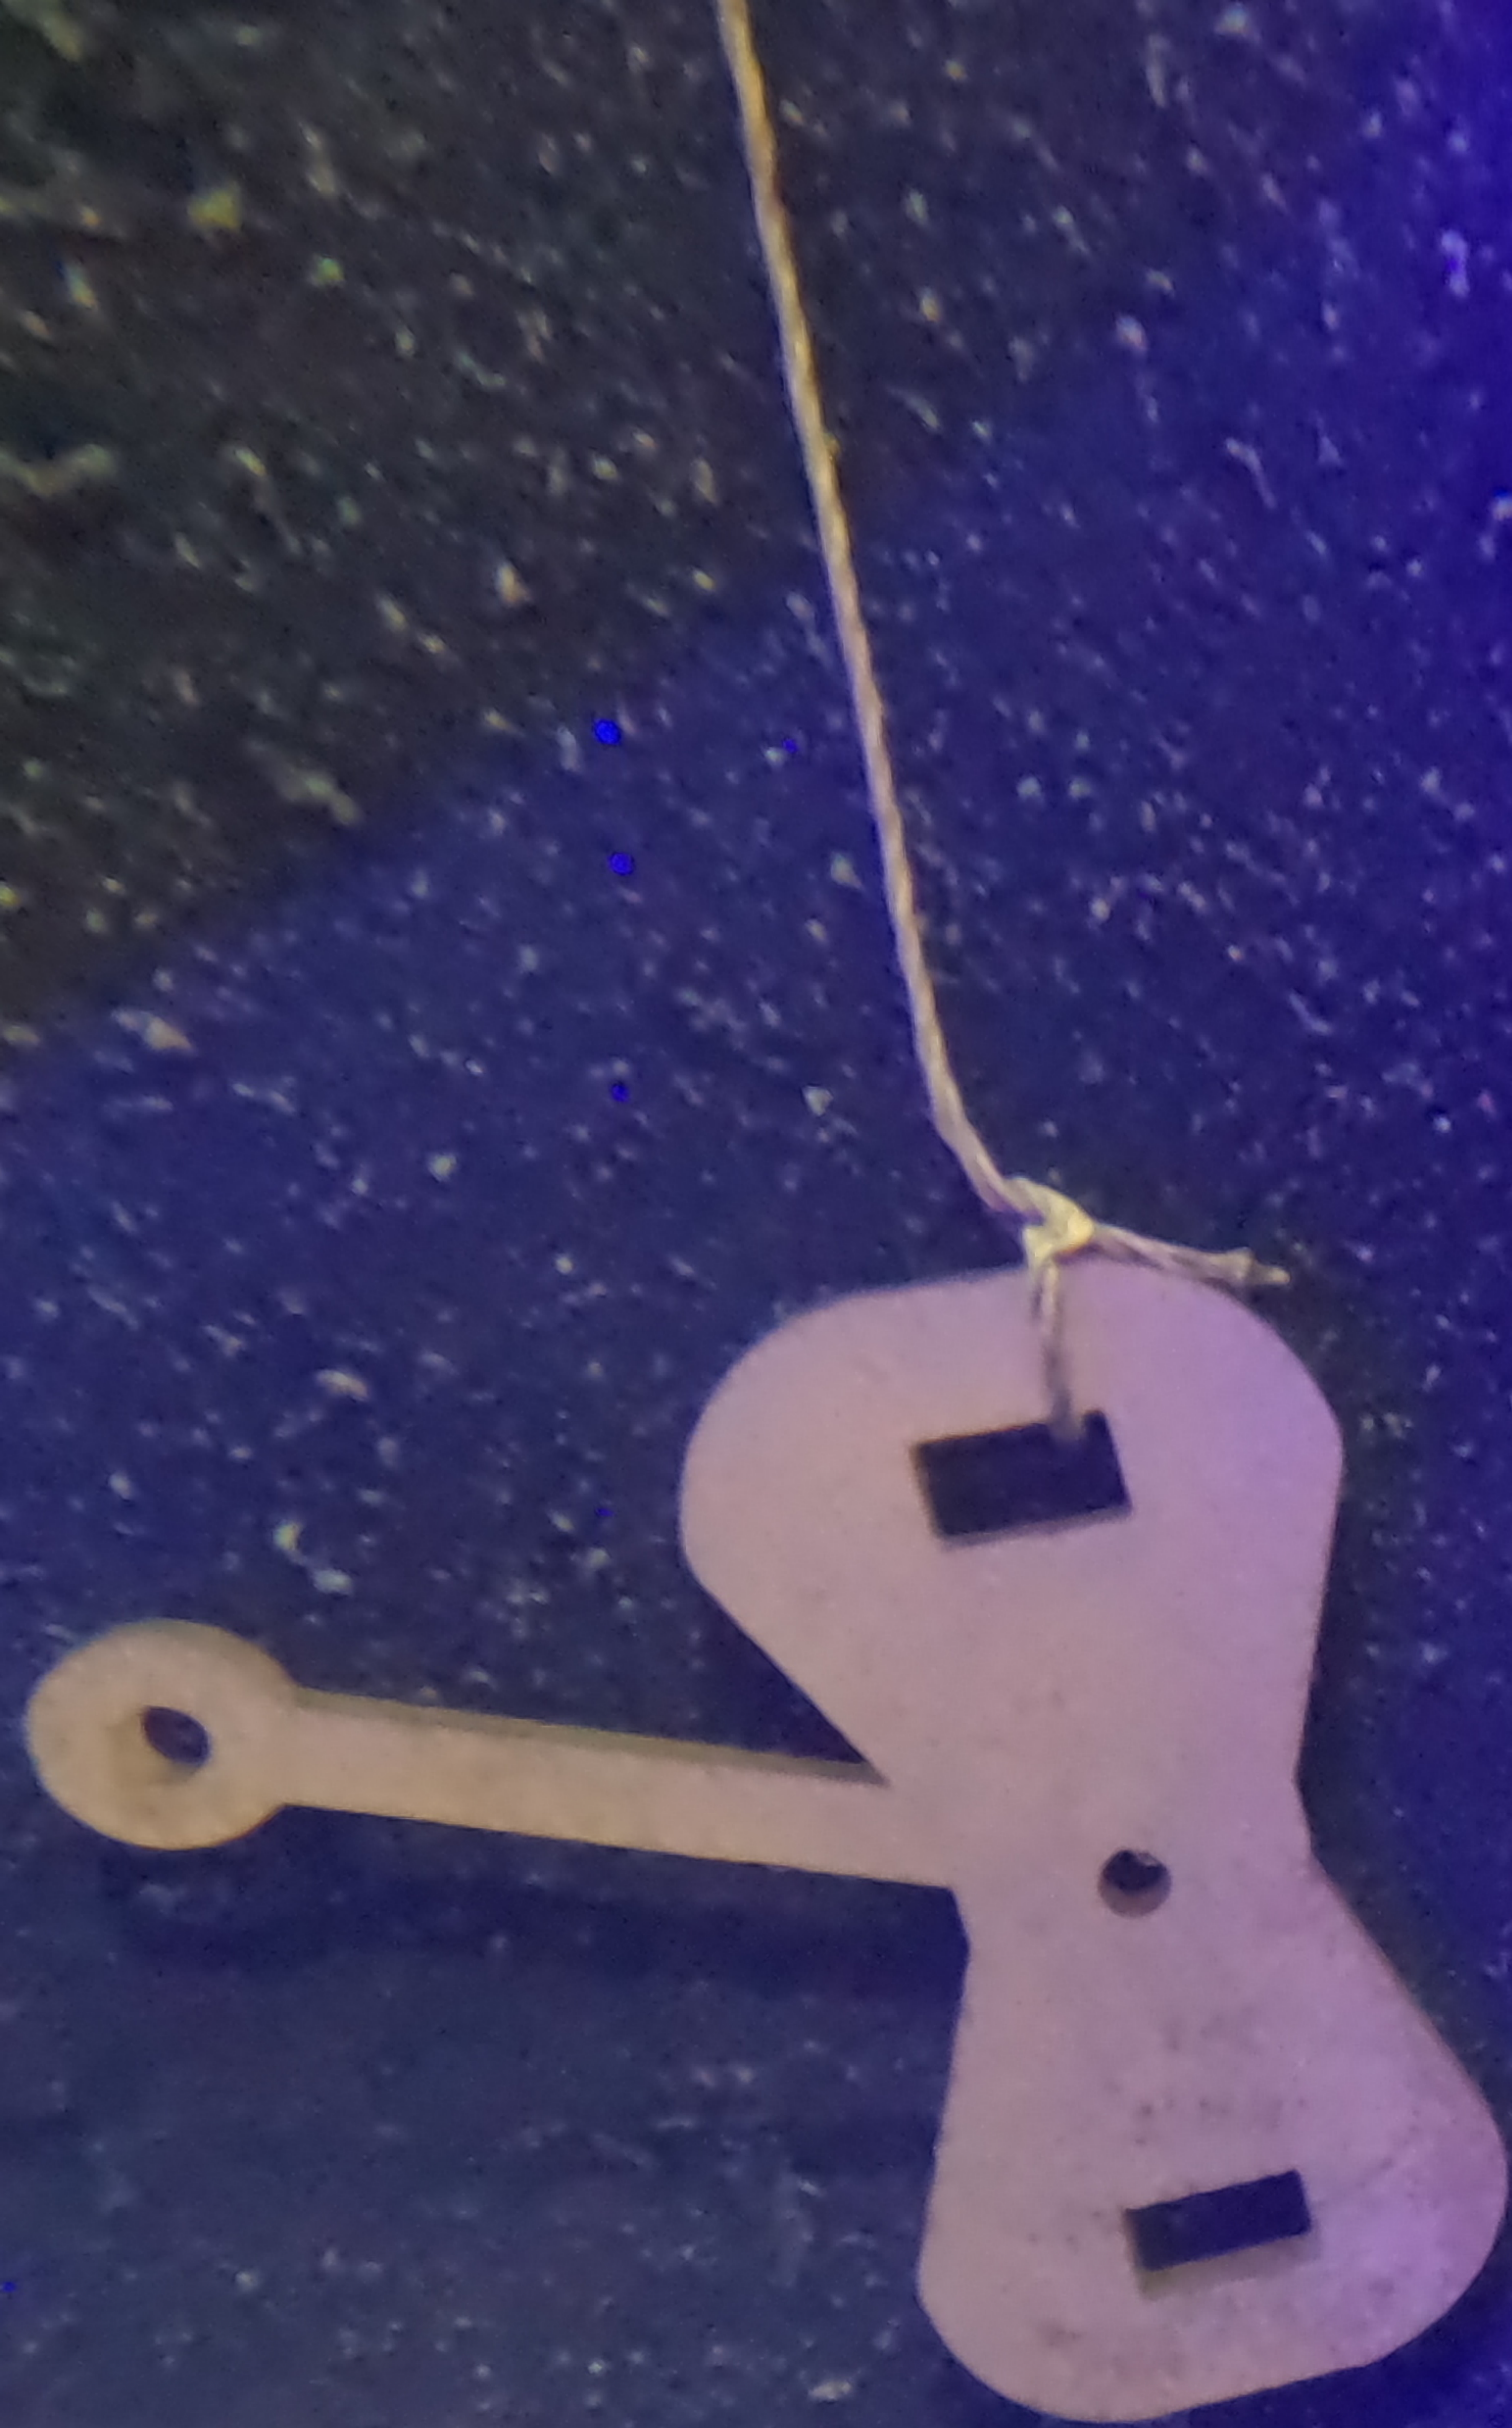

Supplement: Supplementary file 3125 [file G0015566.pdf › Level_2_1/G0015566.pdf]

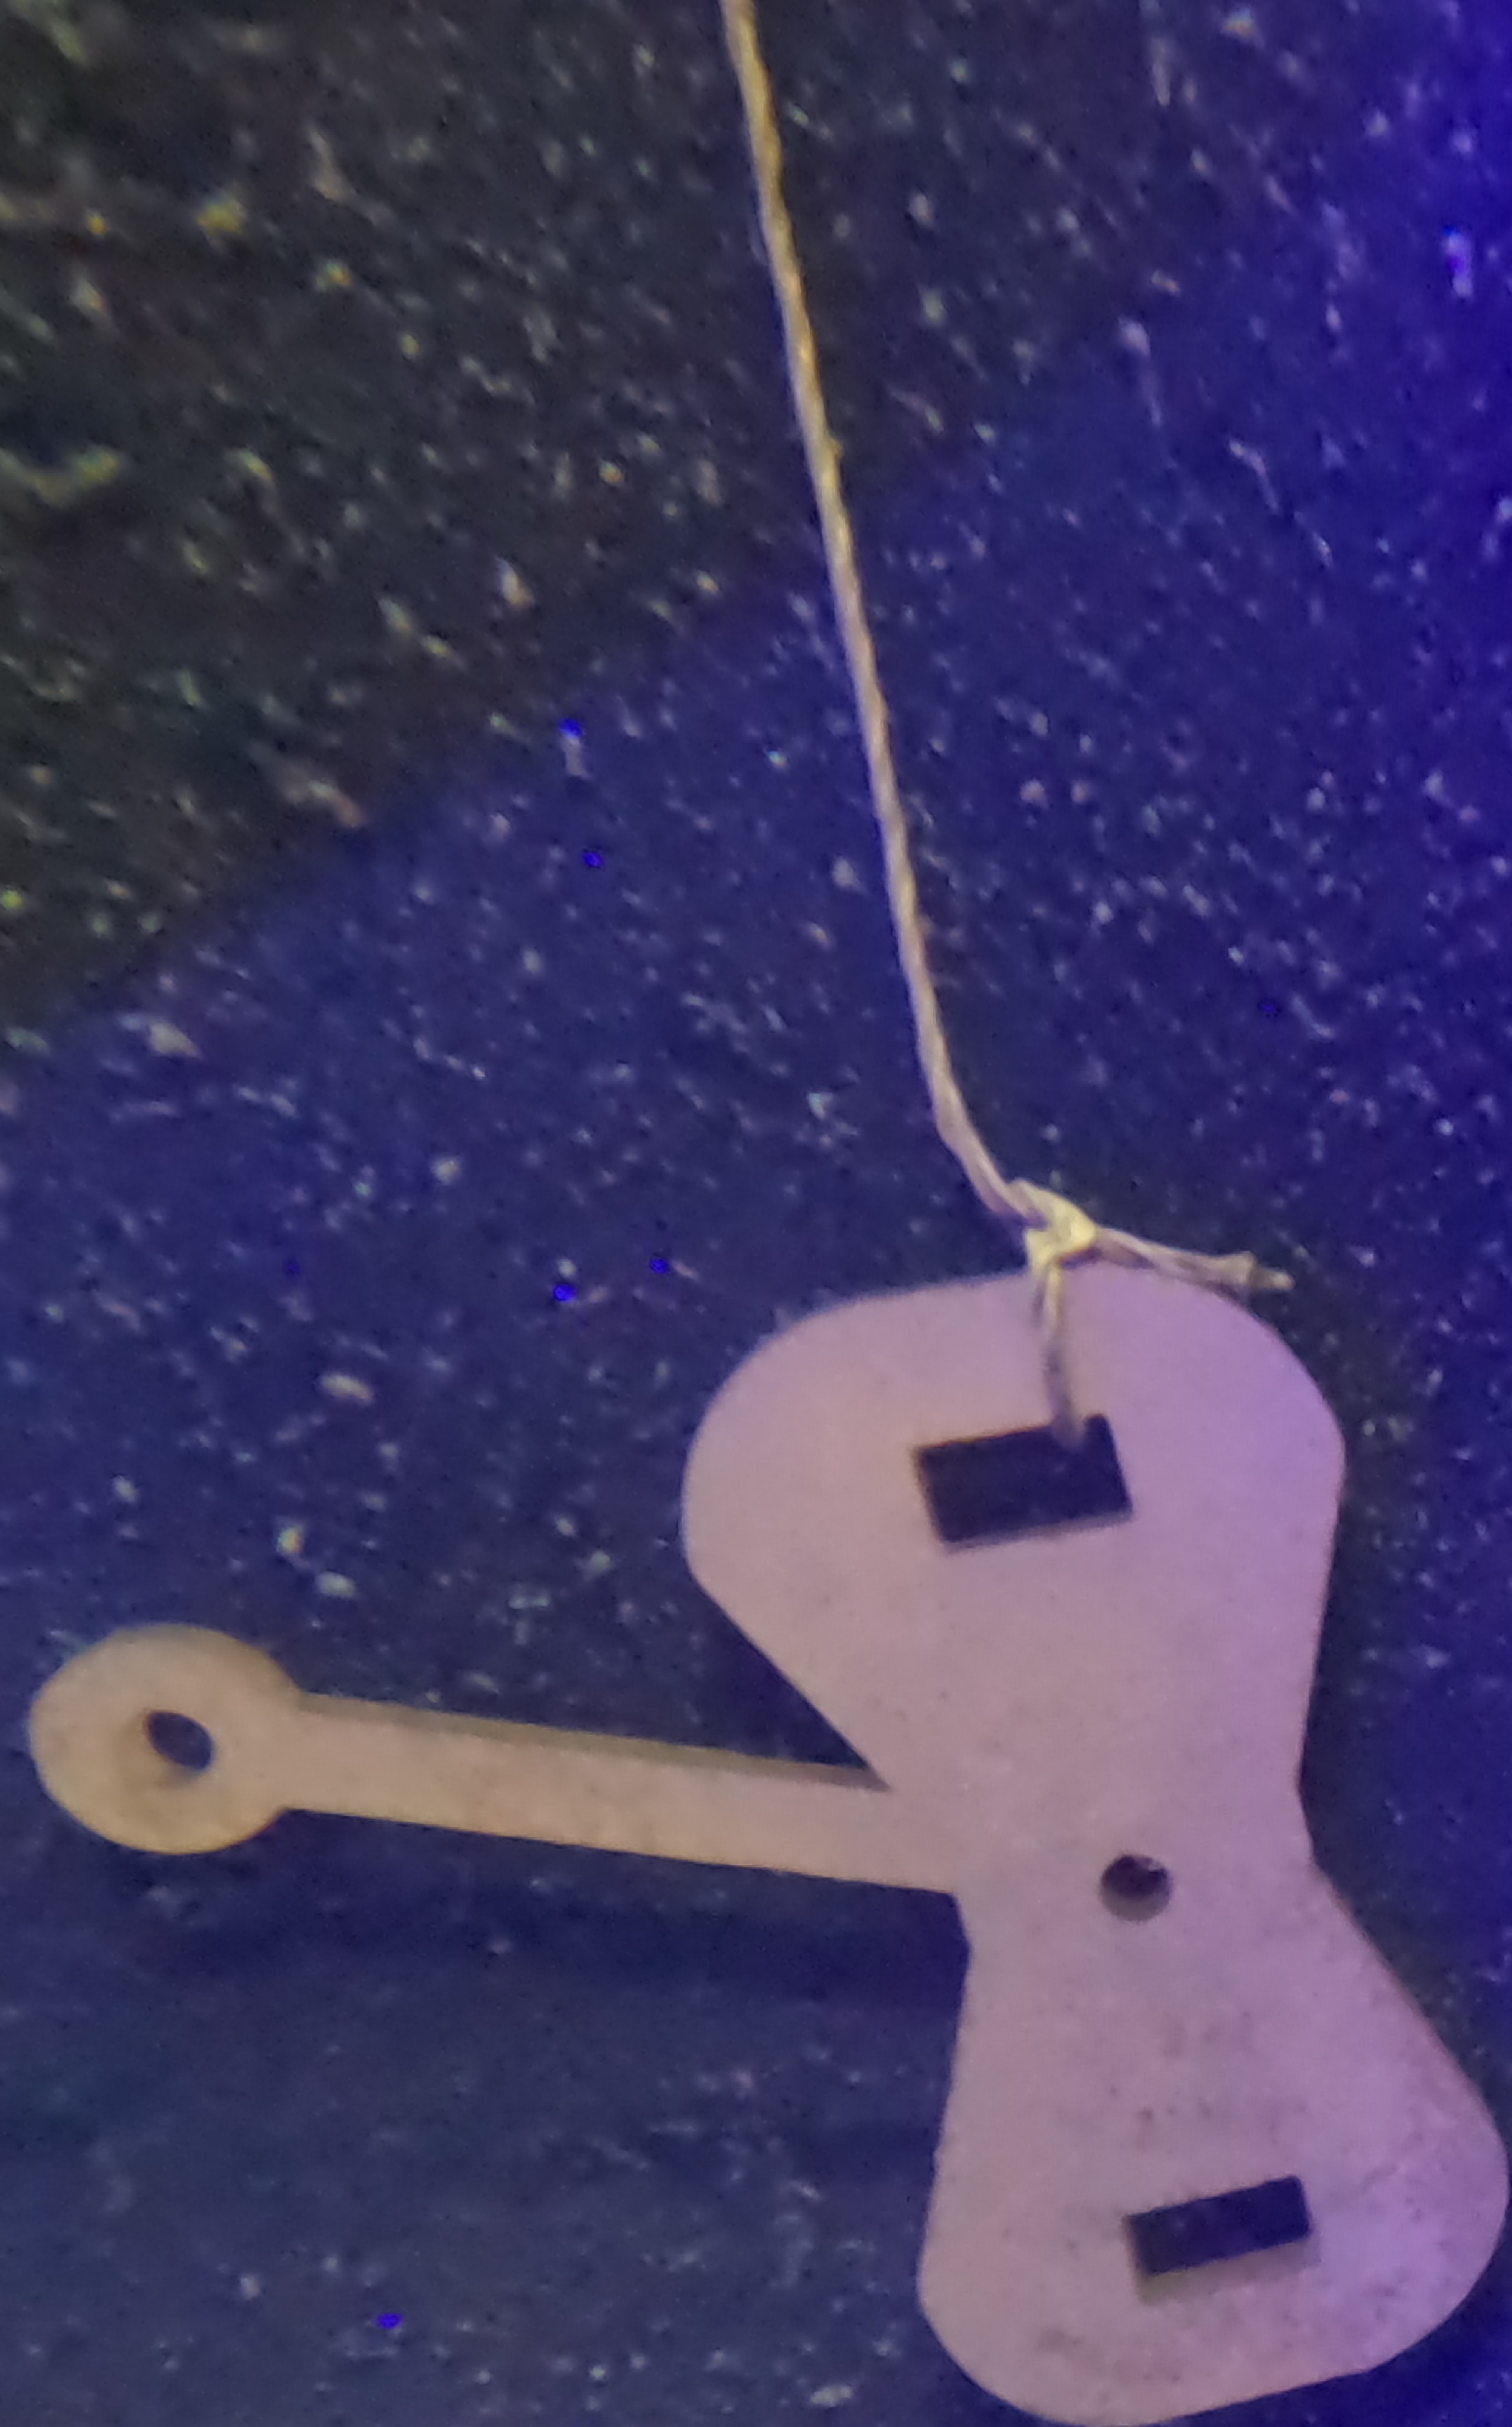

Supplement: Supplementary file 3126 [file G0015567.pdf › Level_2_1/G0015567.pdf]

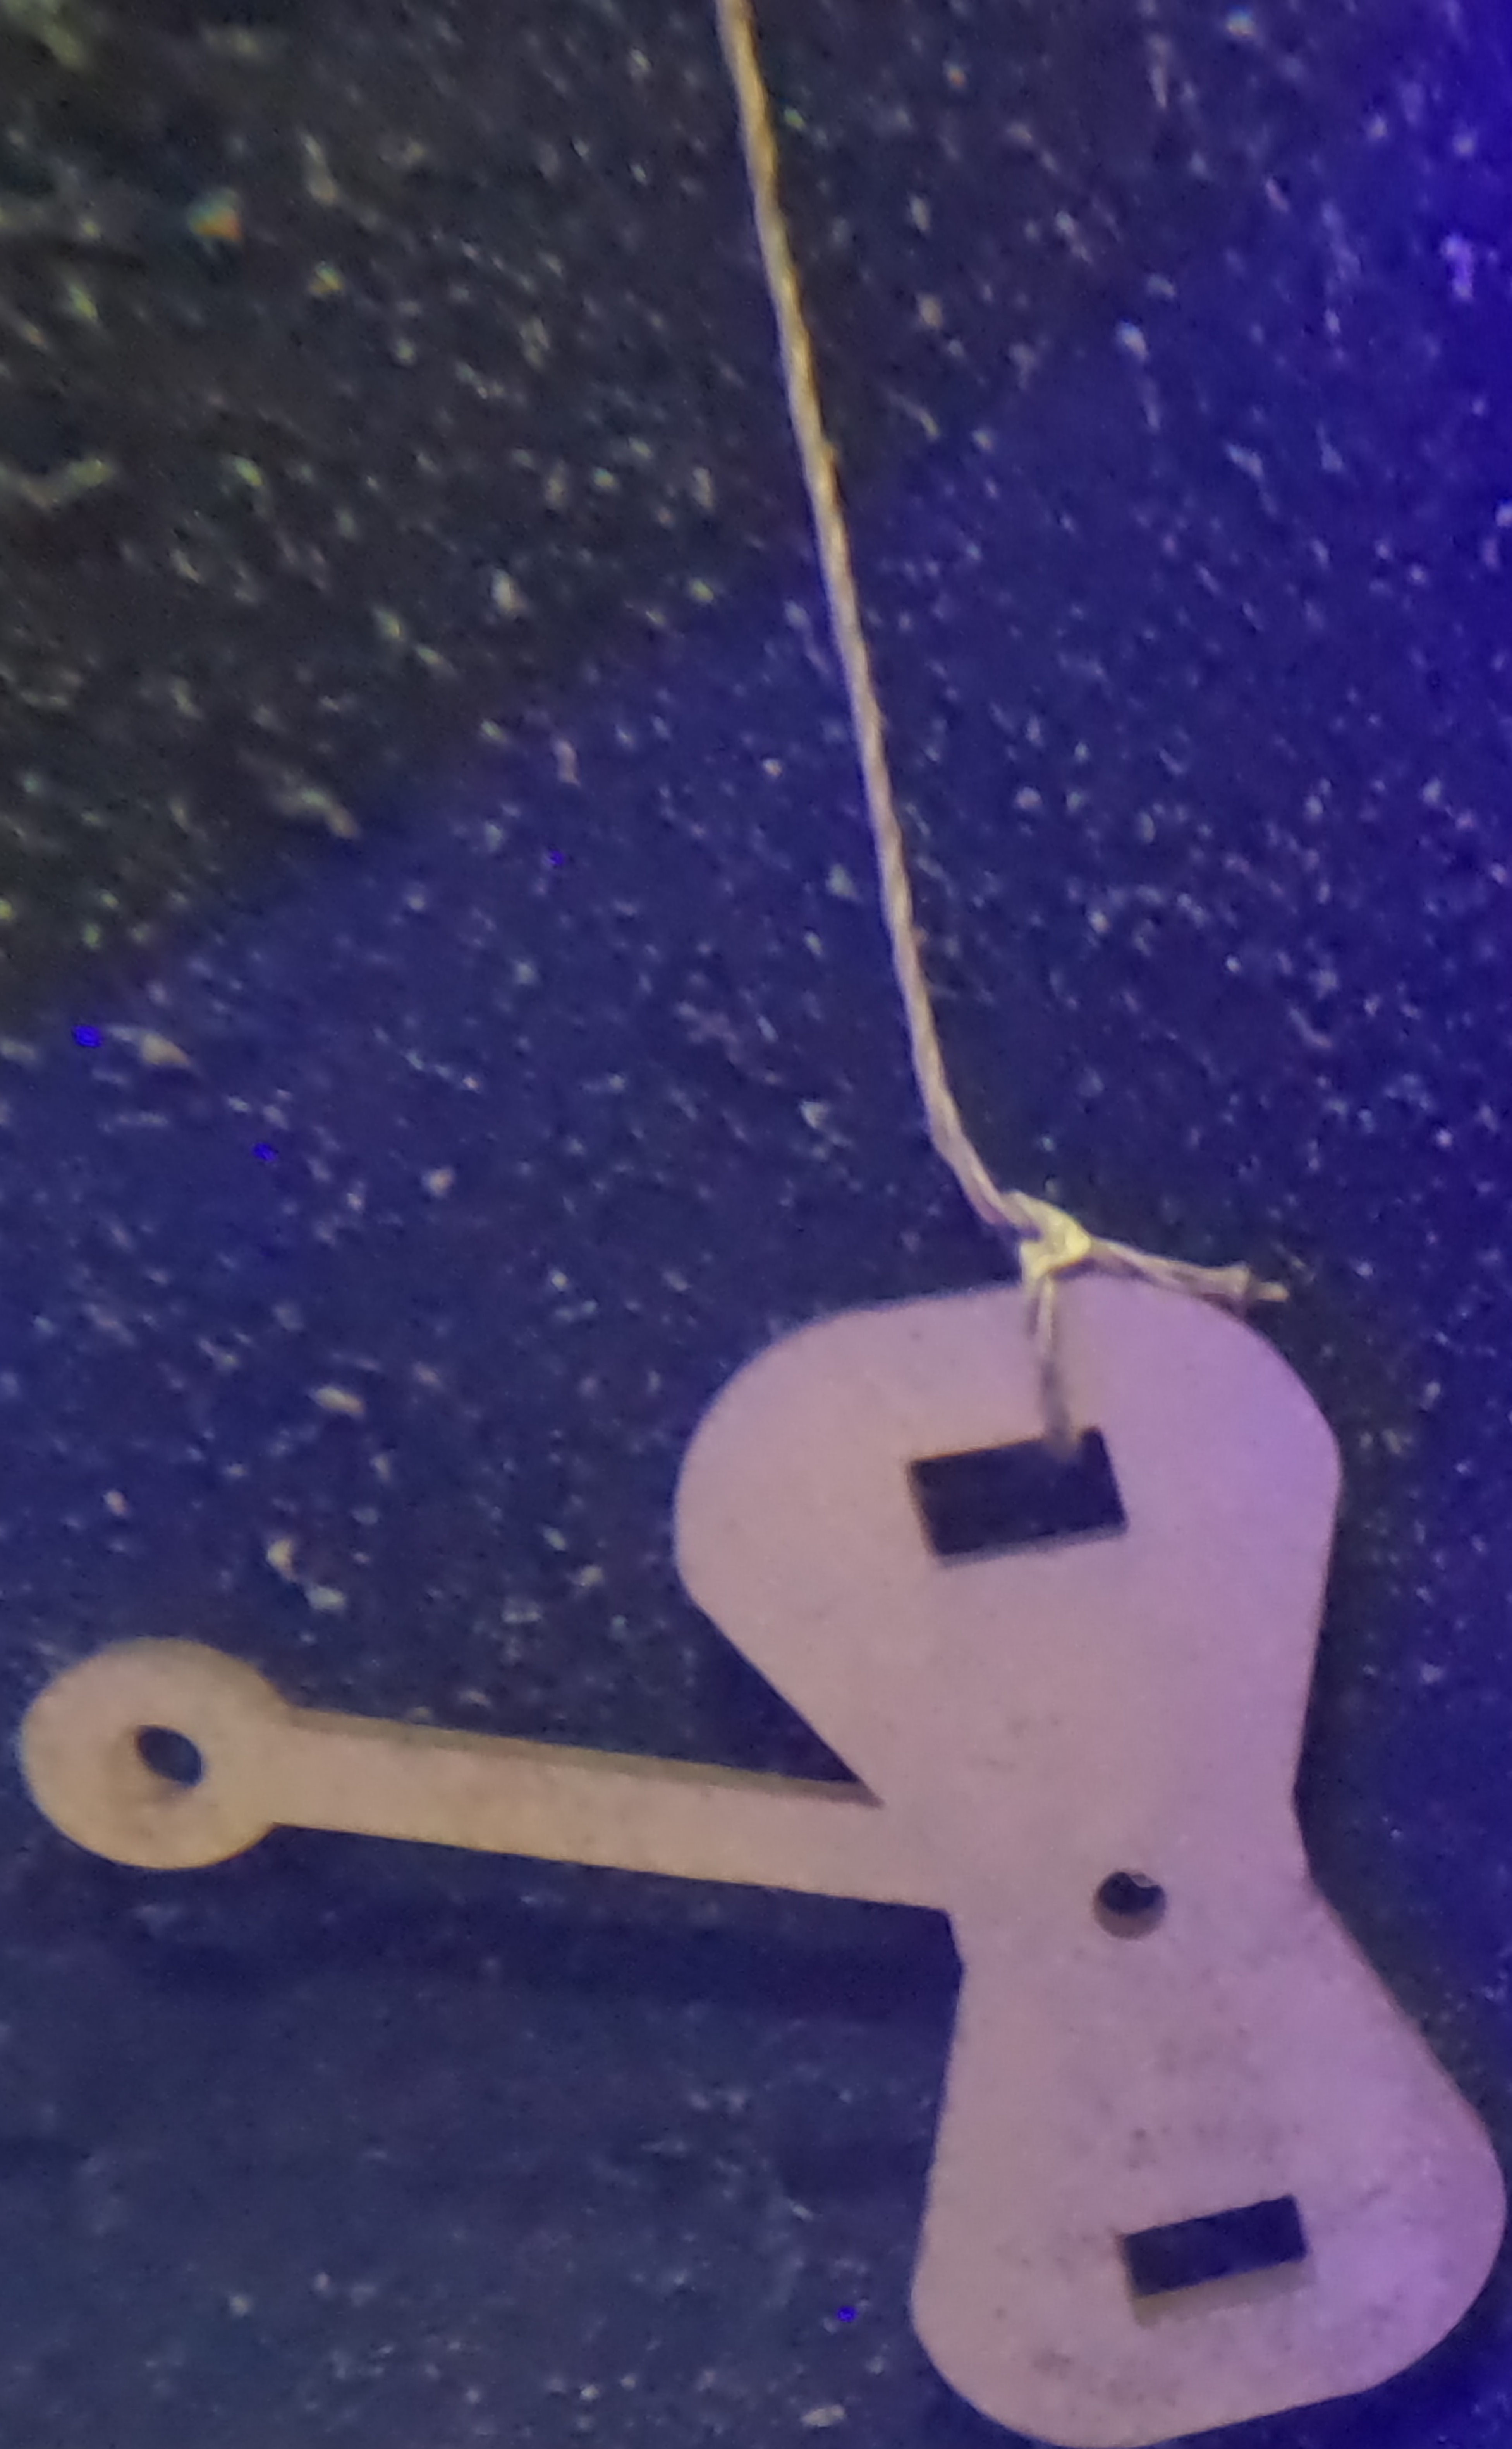

Supplement: Supplementary file 3127 [file G0015568.pdf › Level_2_1/G0015568.pdf]

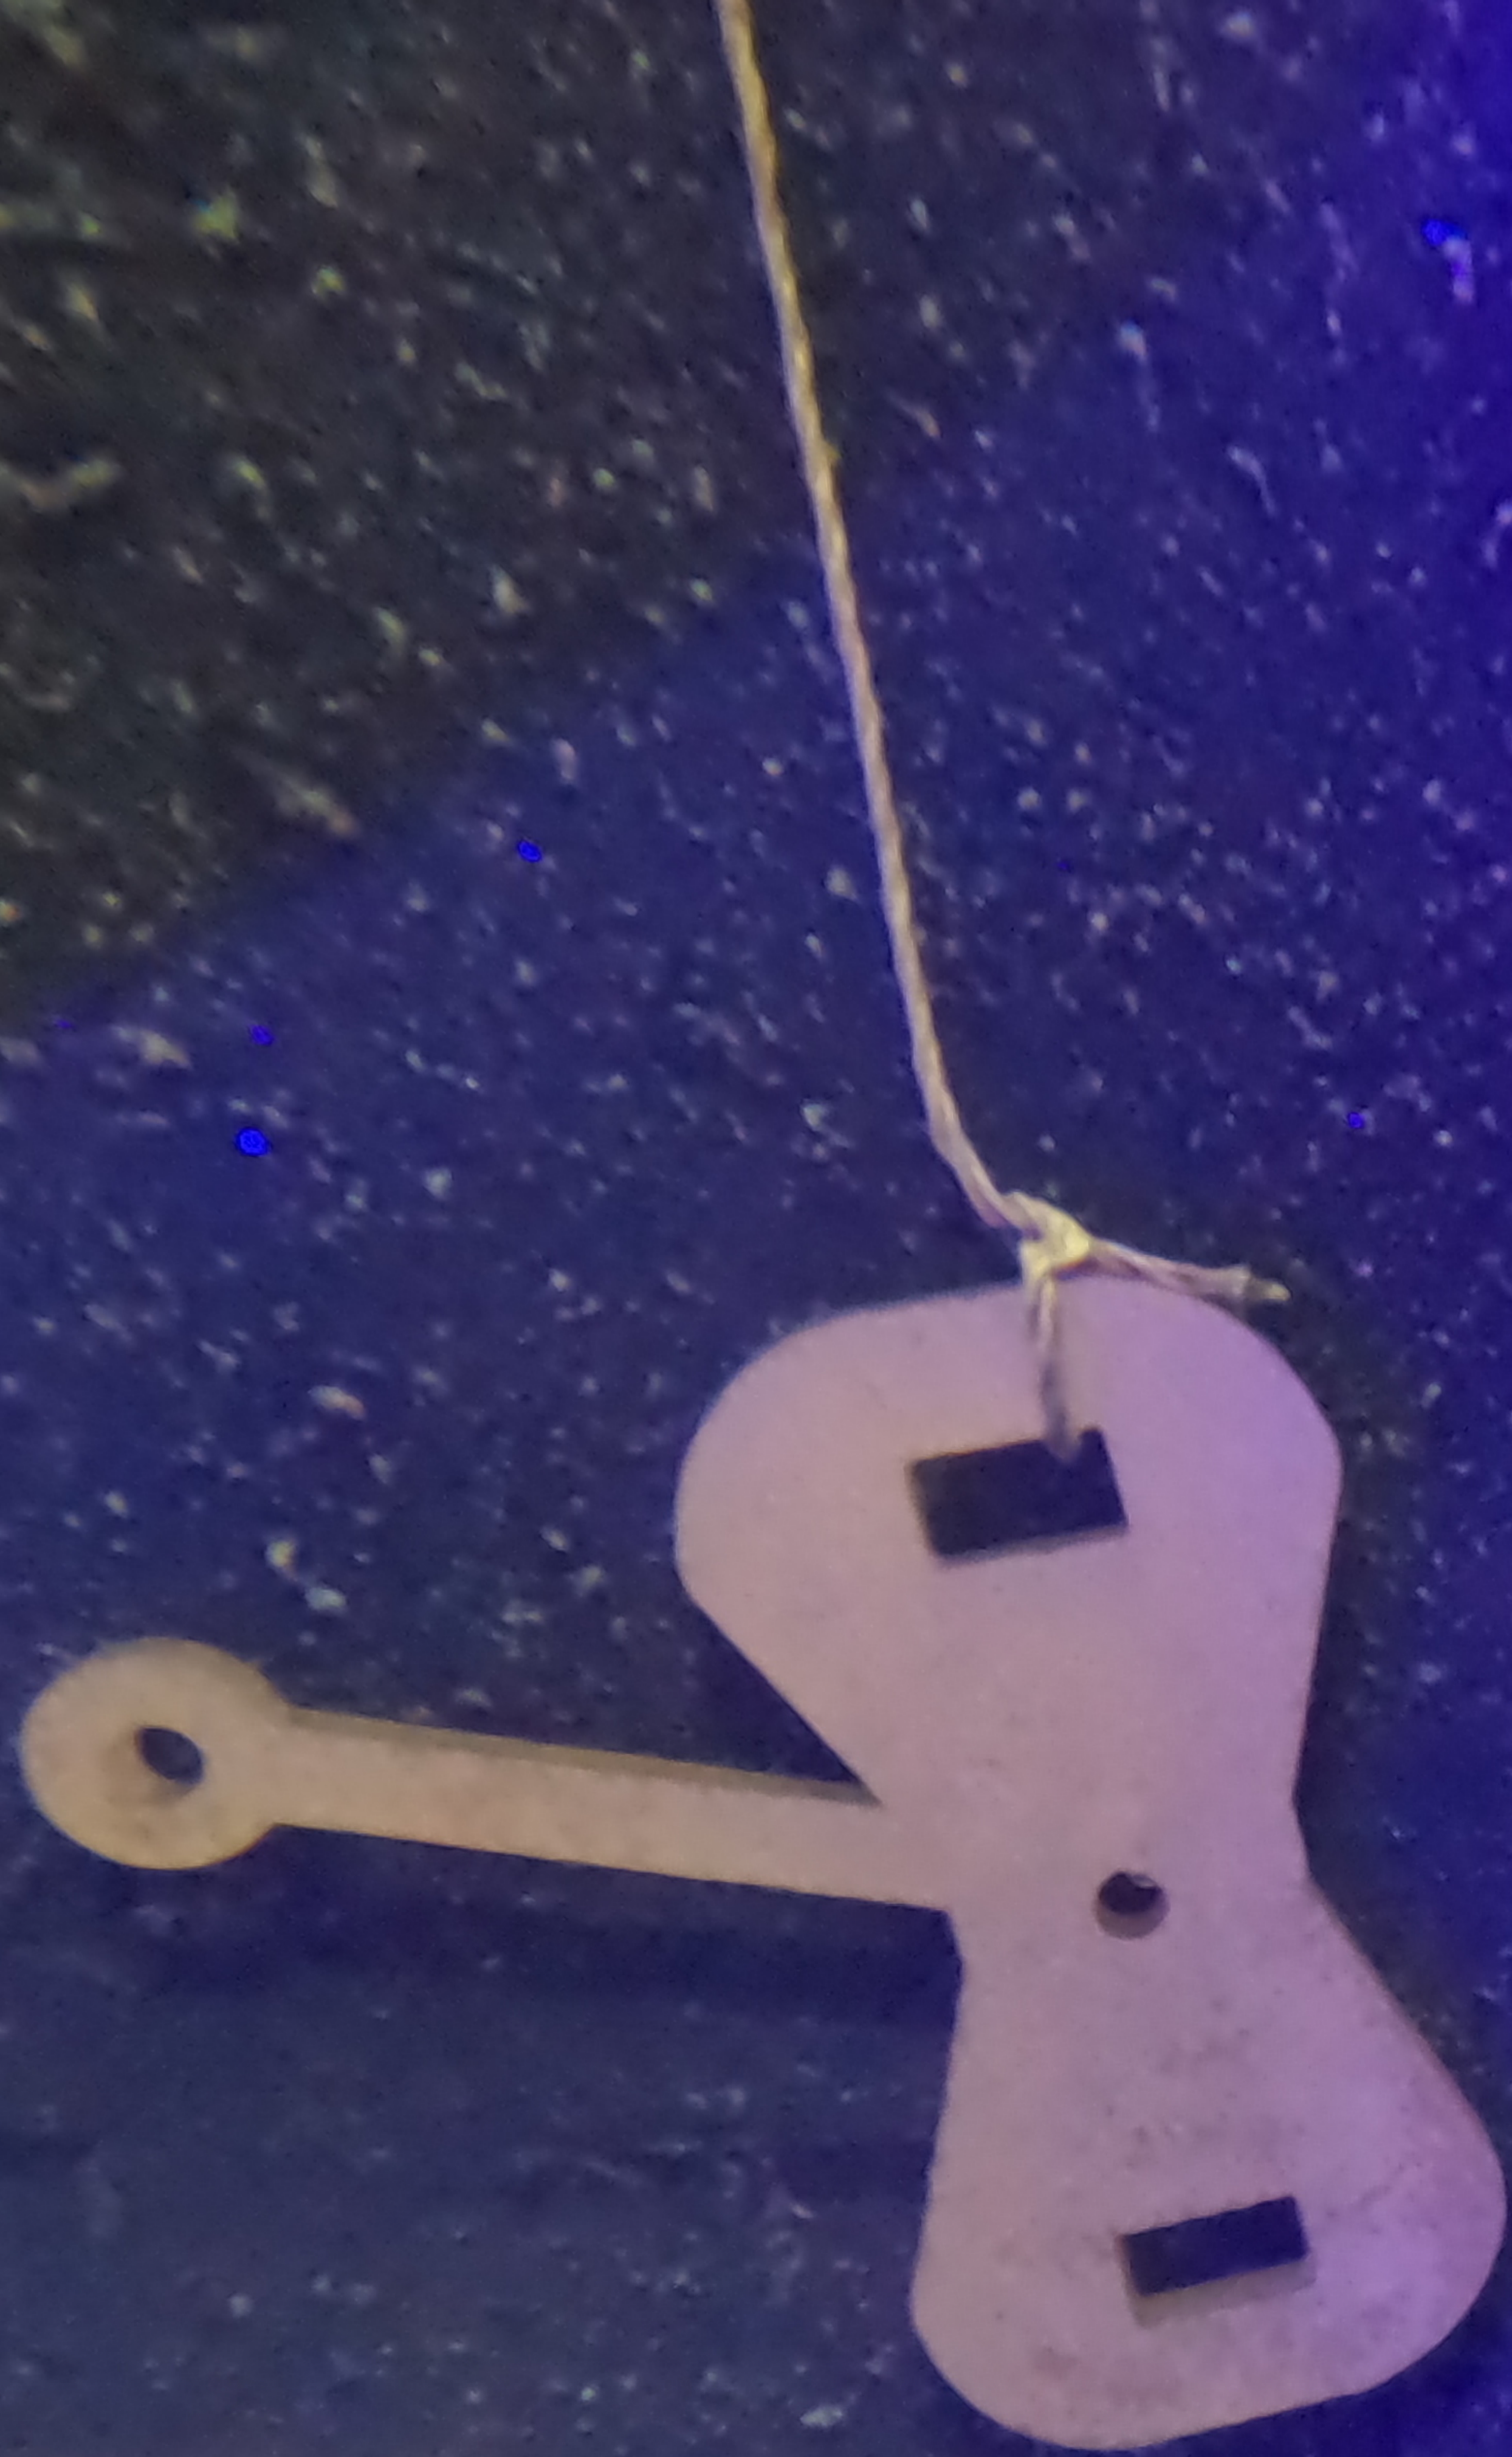

Supplement: Supplementary file 3128 [file G0015569.pdf › Level_2_1/G0015569.pdf]

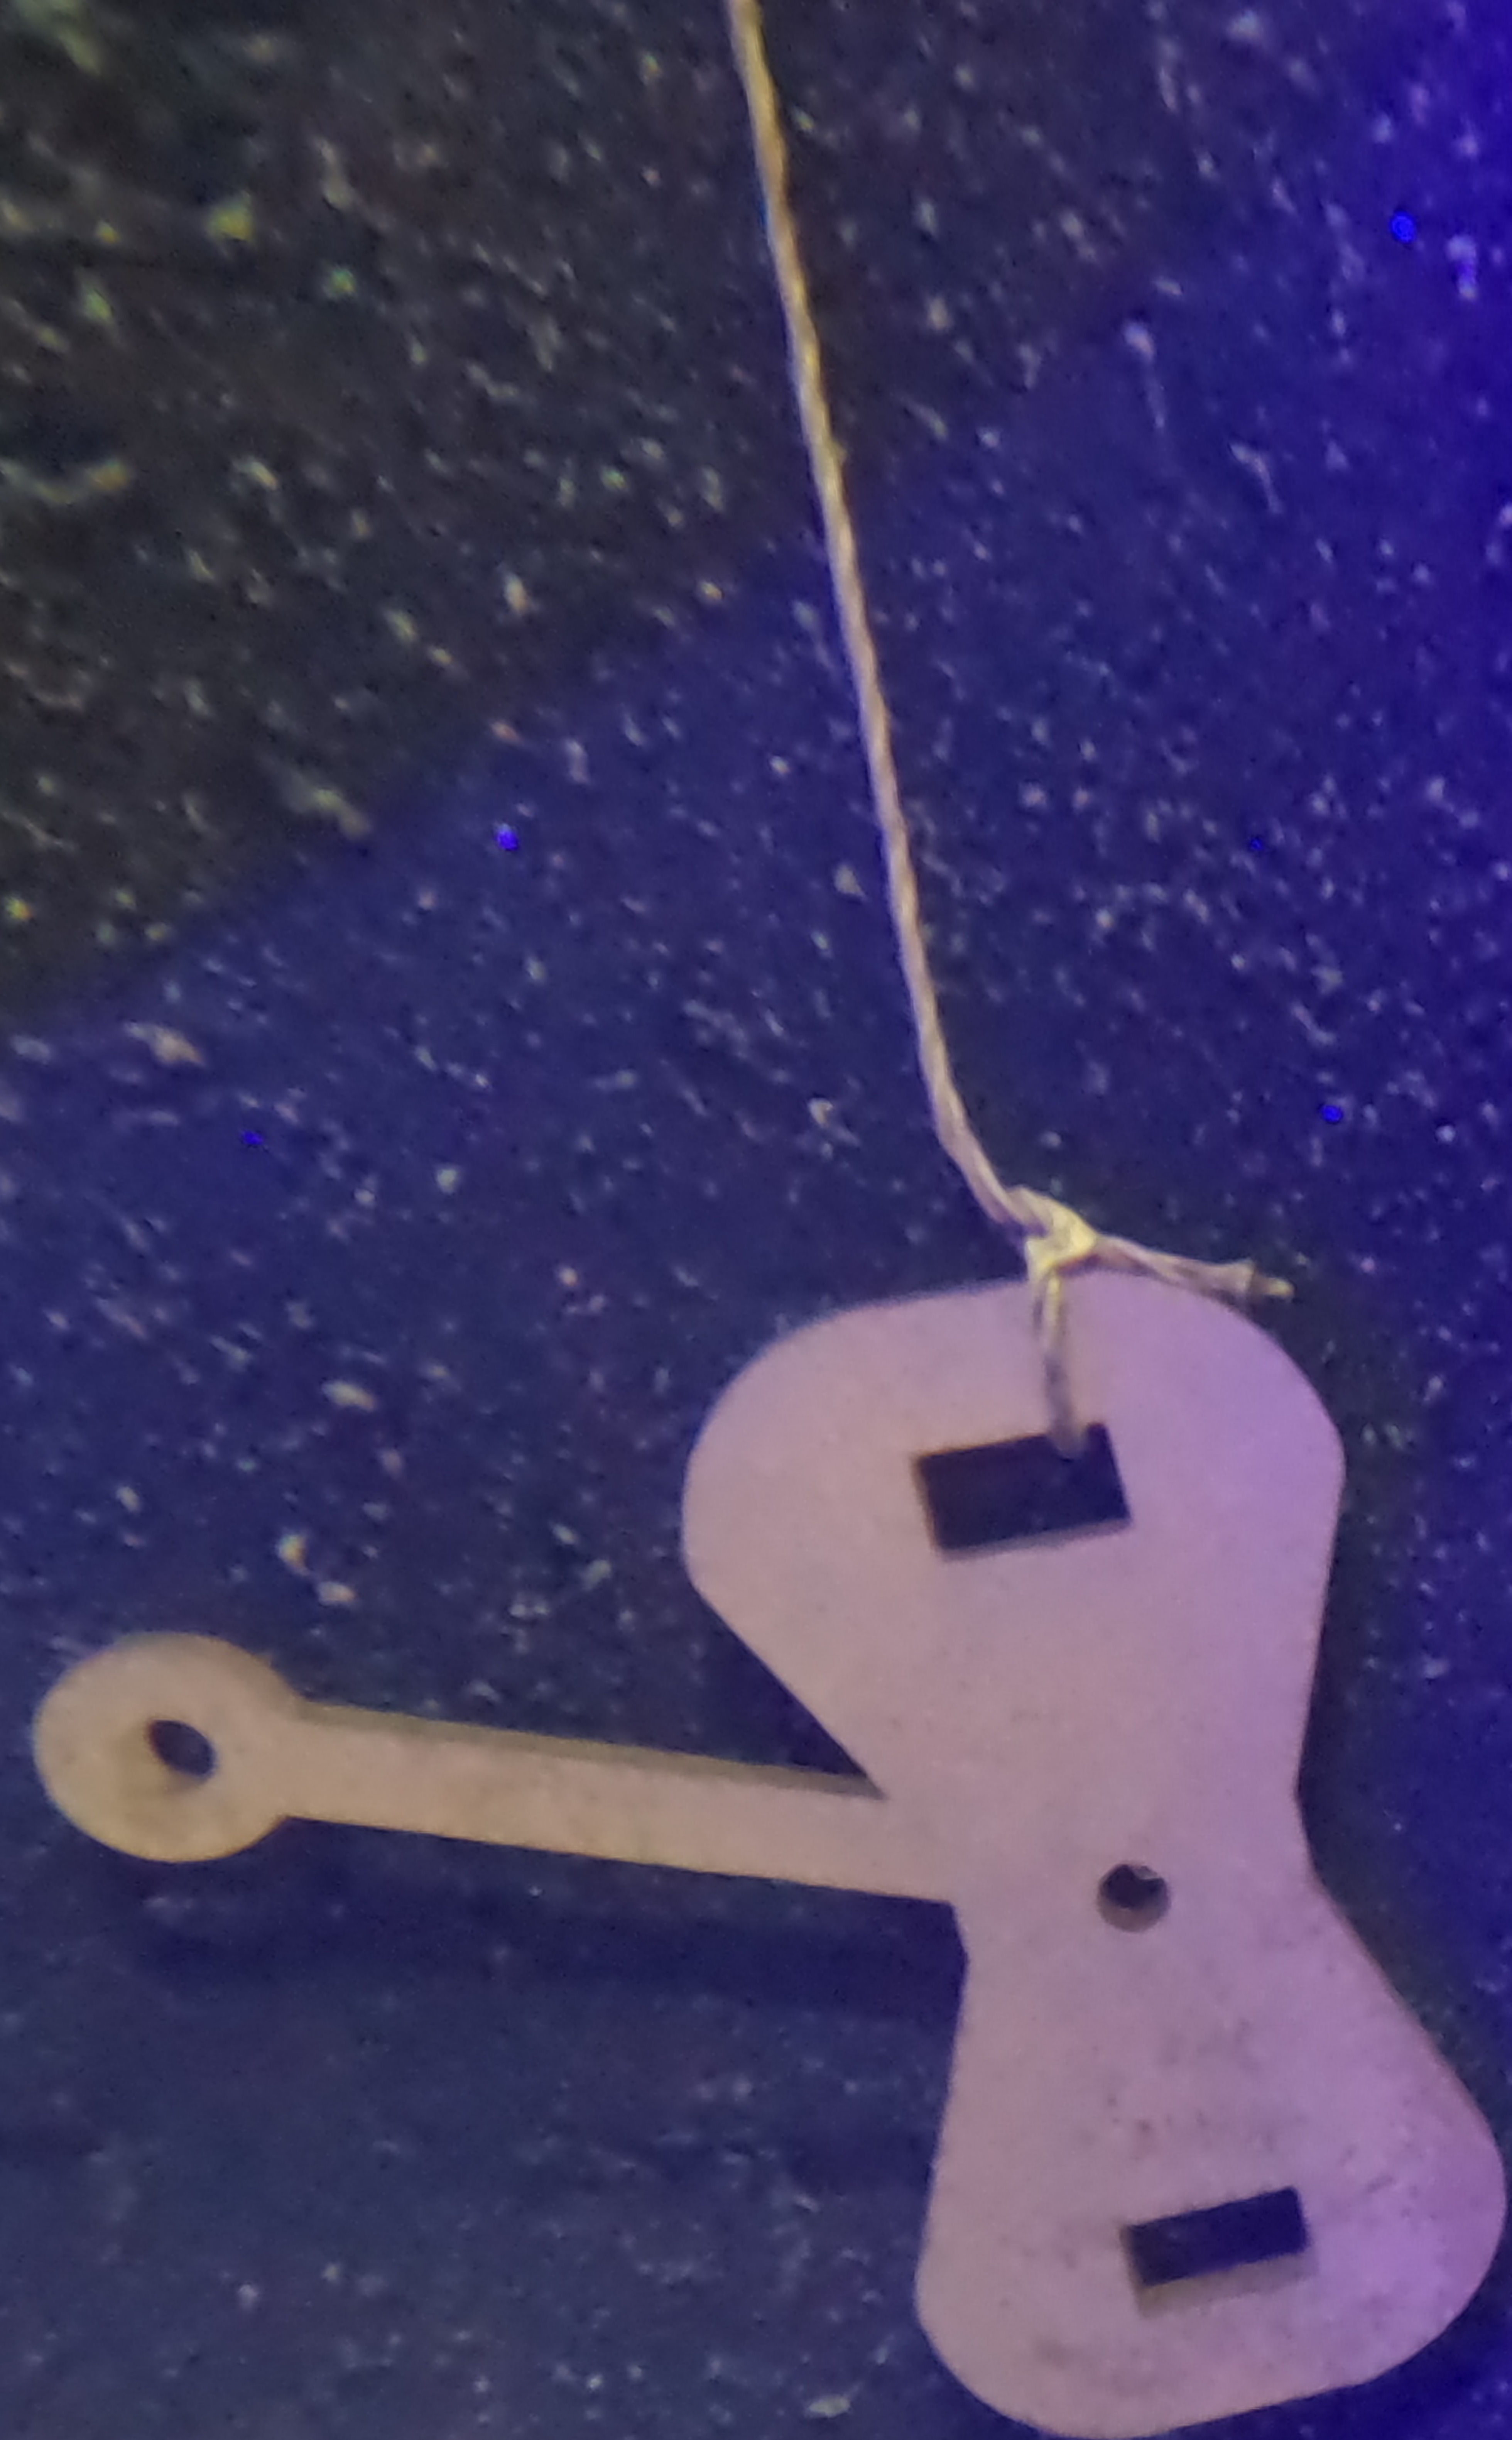

Supplement: Supplementary file 3129 [file G0015570.pdf › Level_2_1/G0015570.pdf]

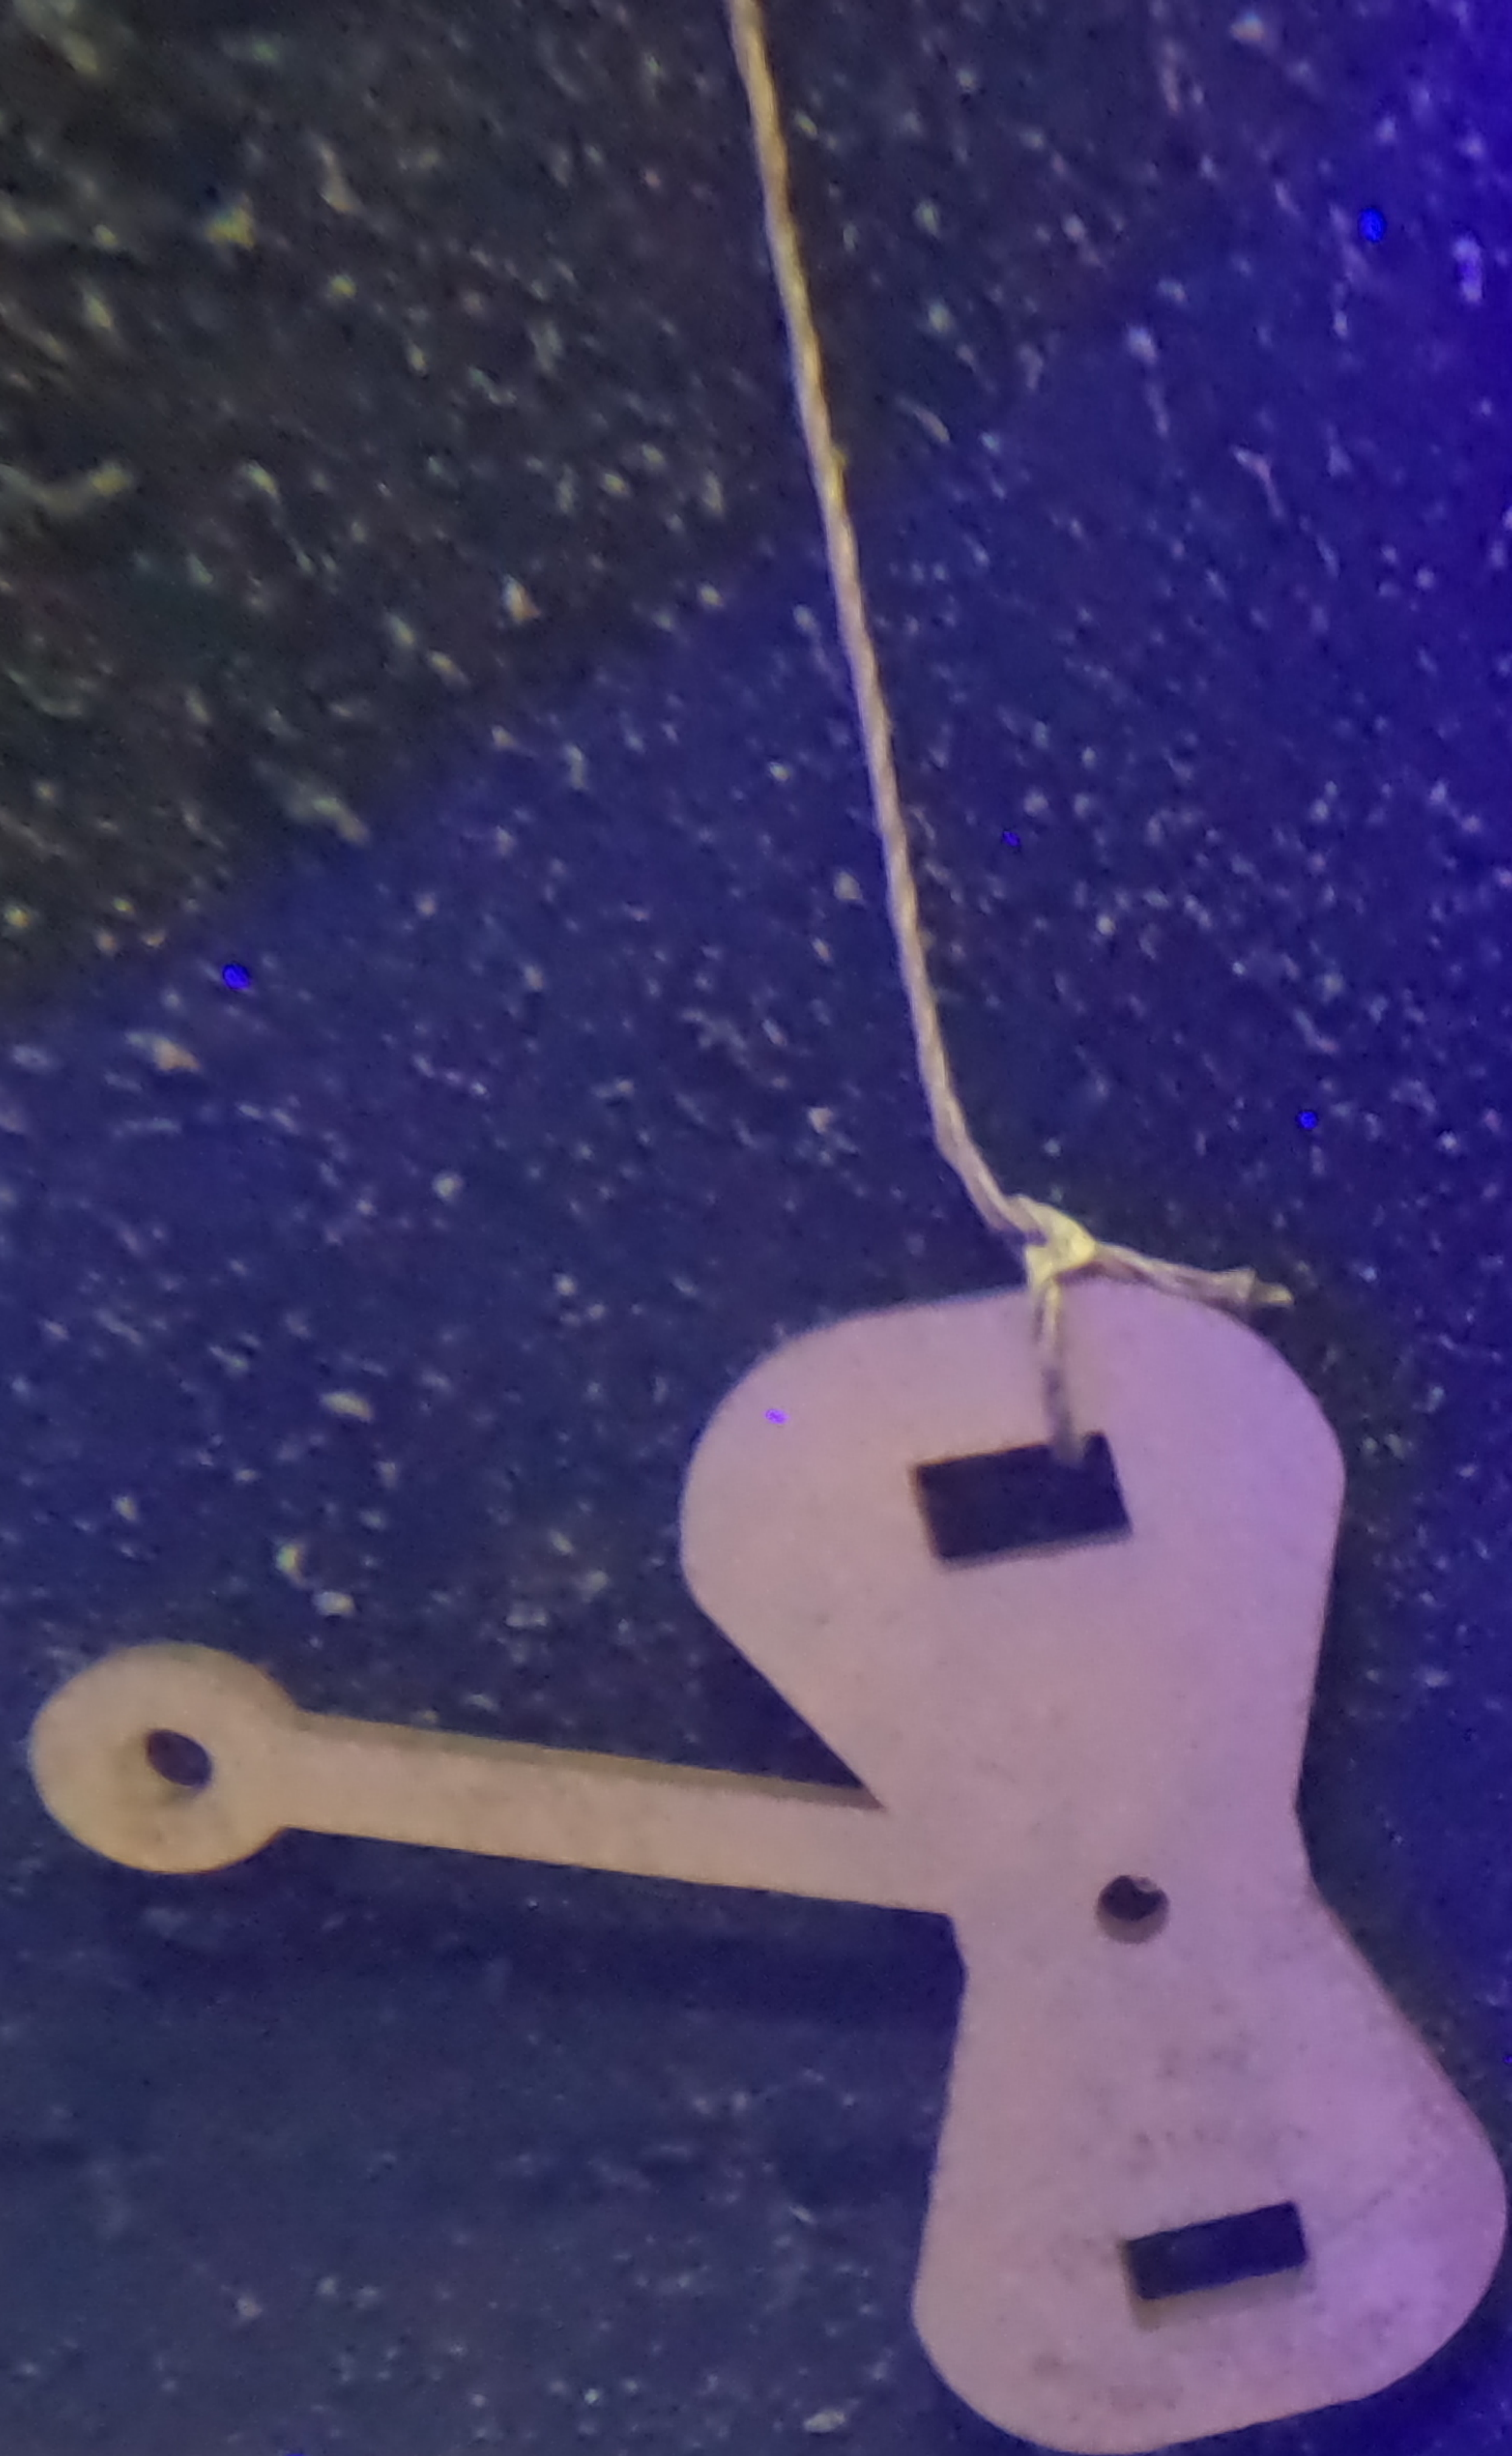

Supplement: Supplementary file 3130 [file G0015571.pdf › Level_2_1/G0015571.pdf]

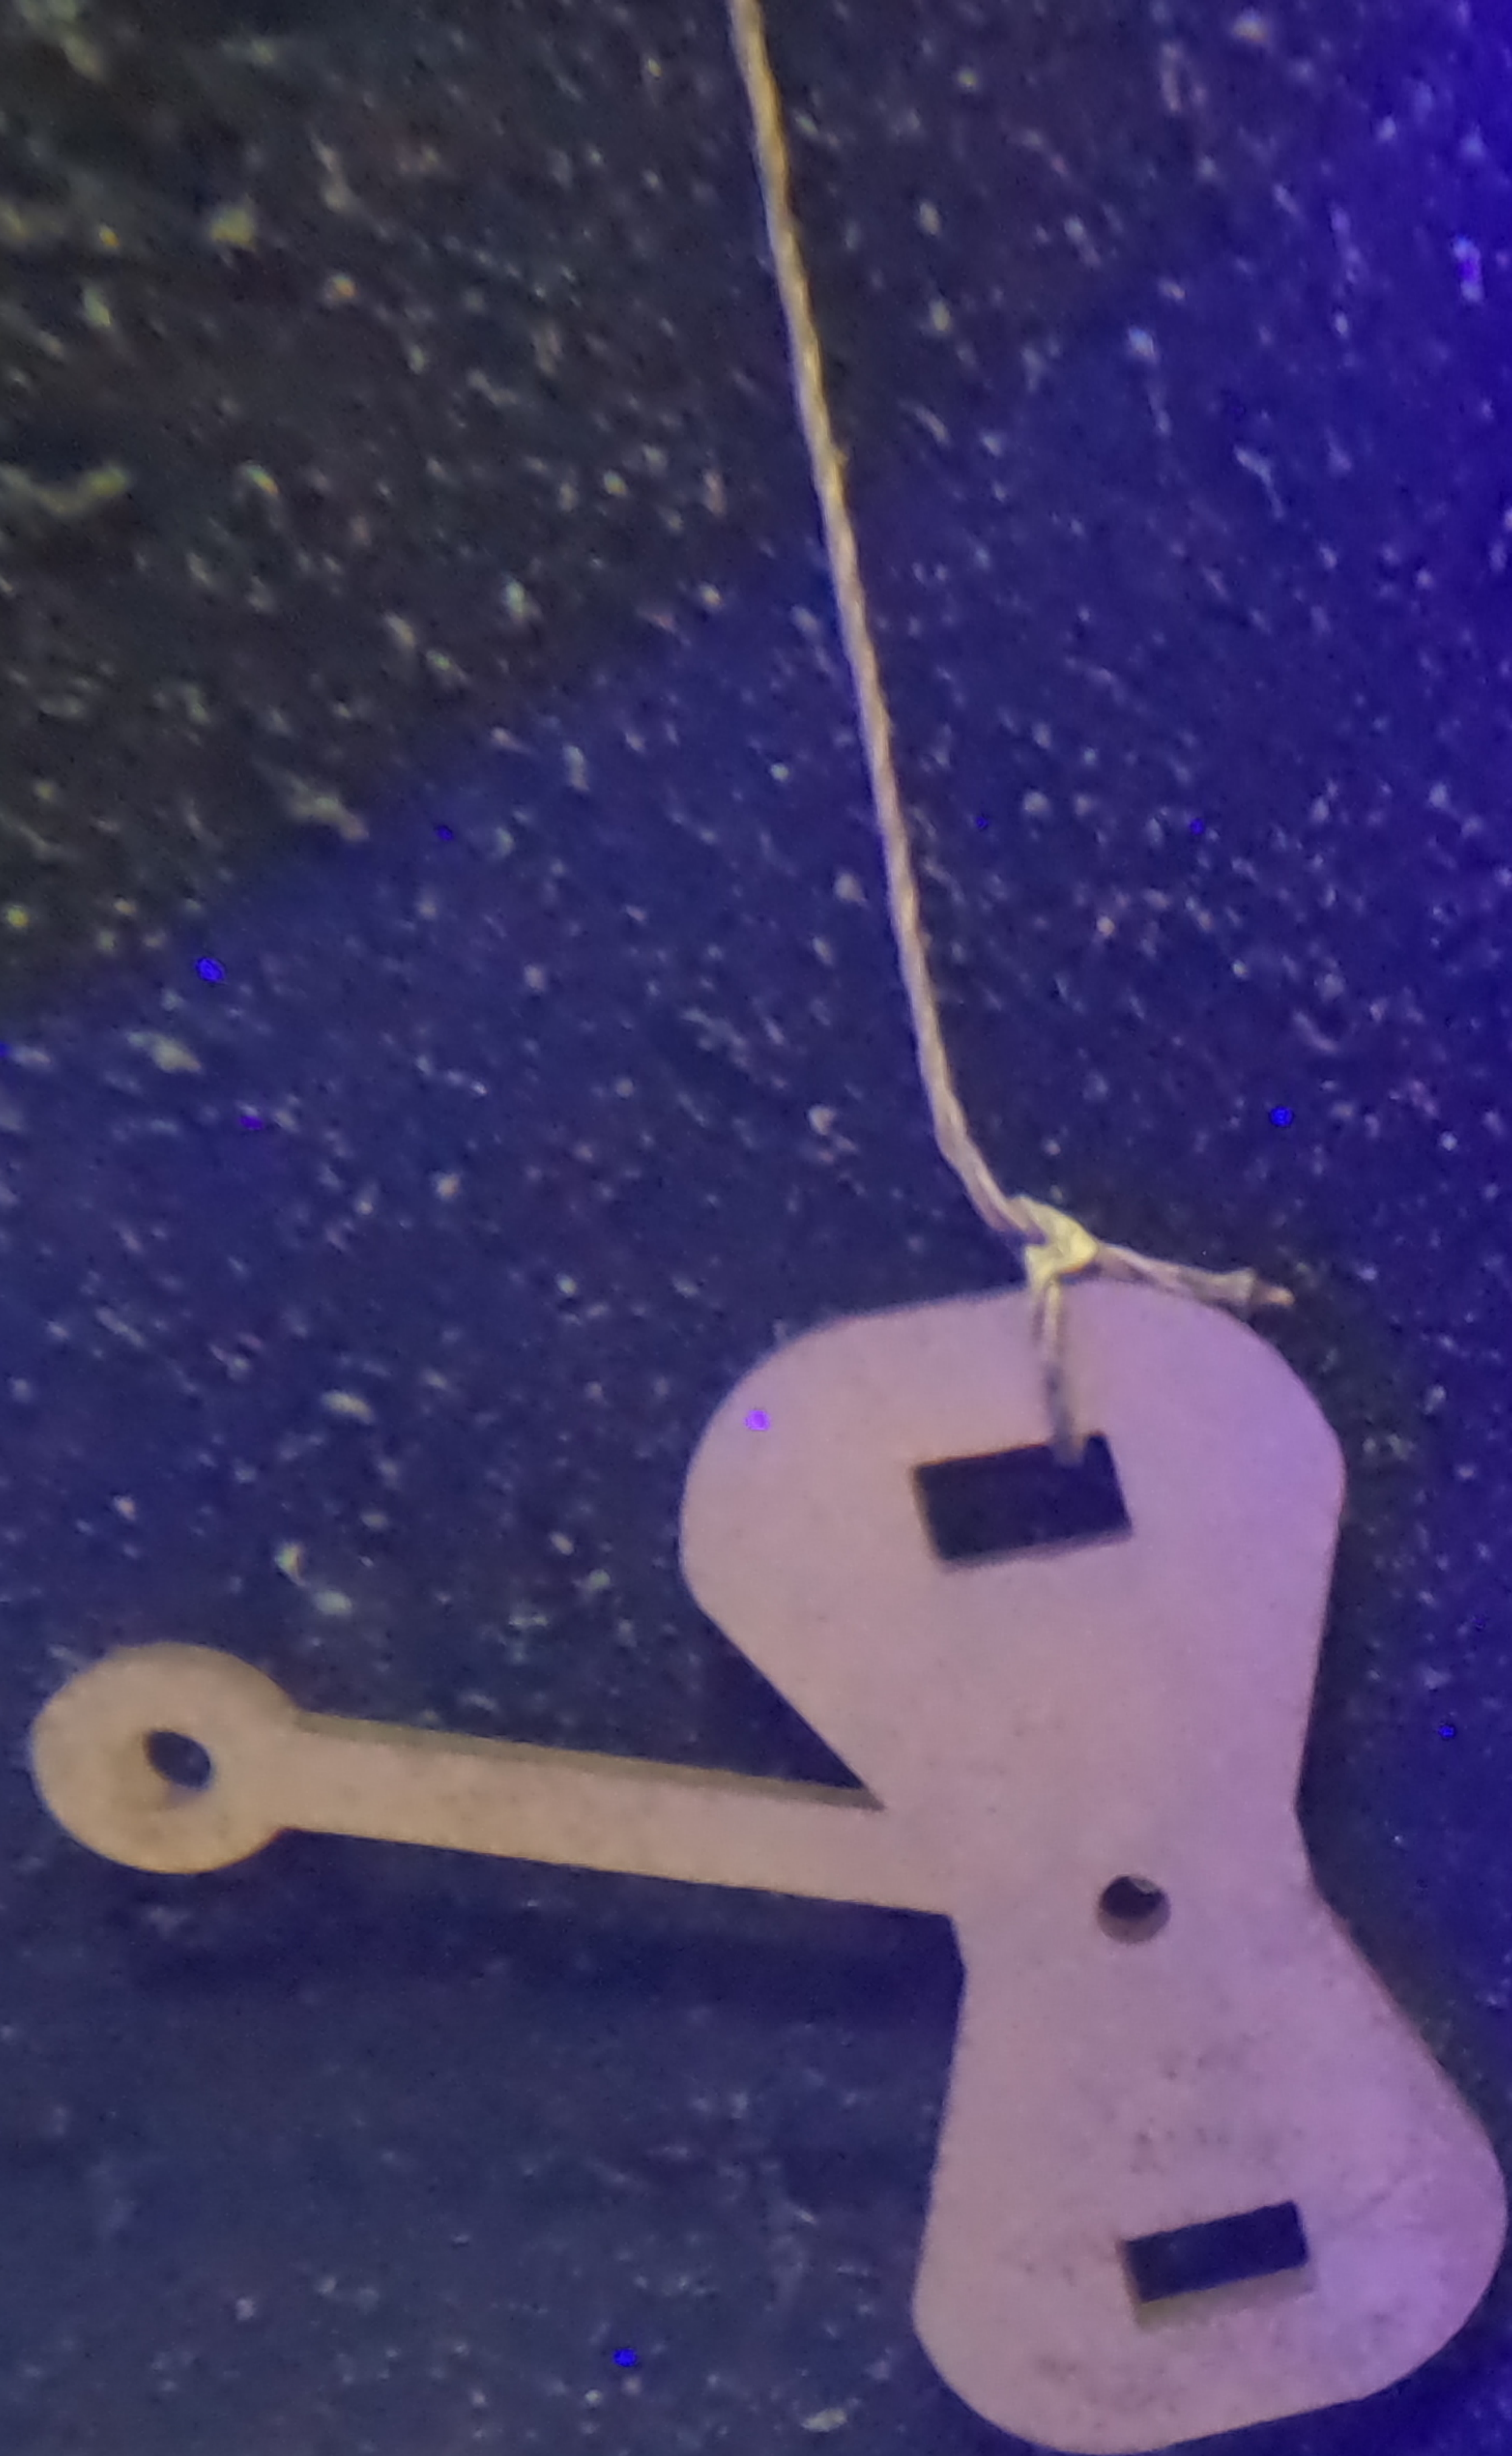

Supplement: Supplementary file 3131 [file G0015572.pdf › Level_2_1/G0015572.pdf]

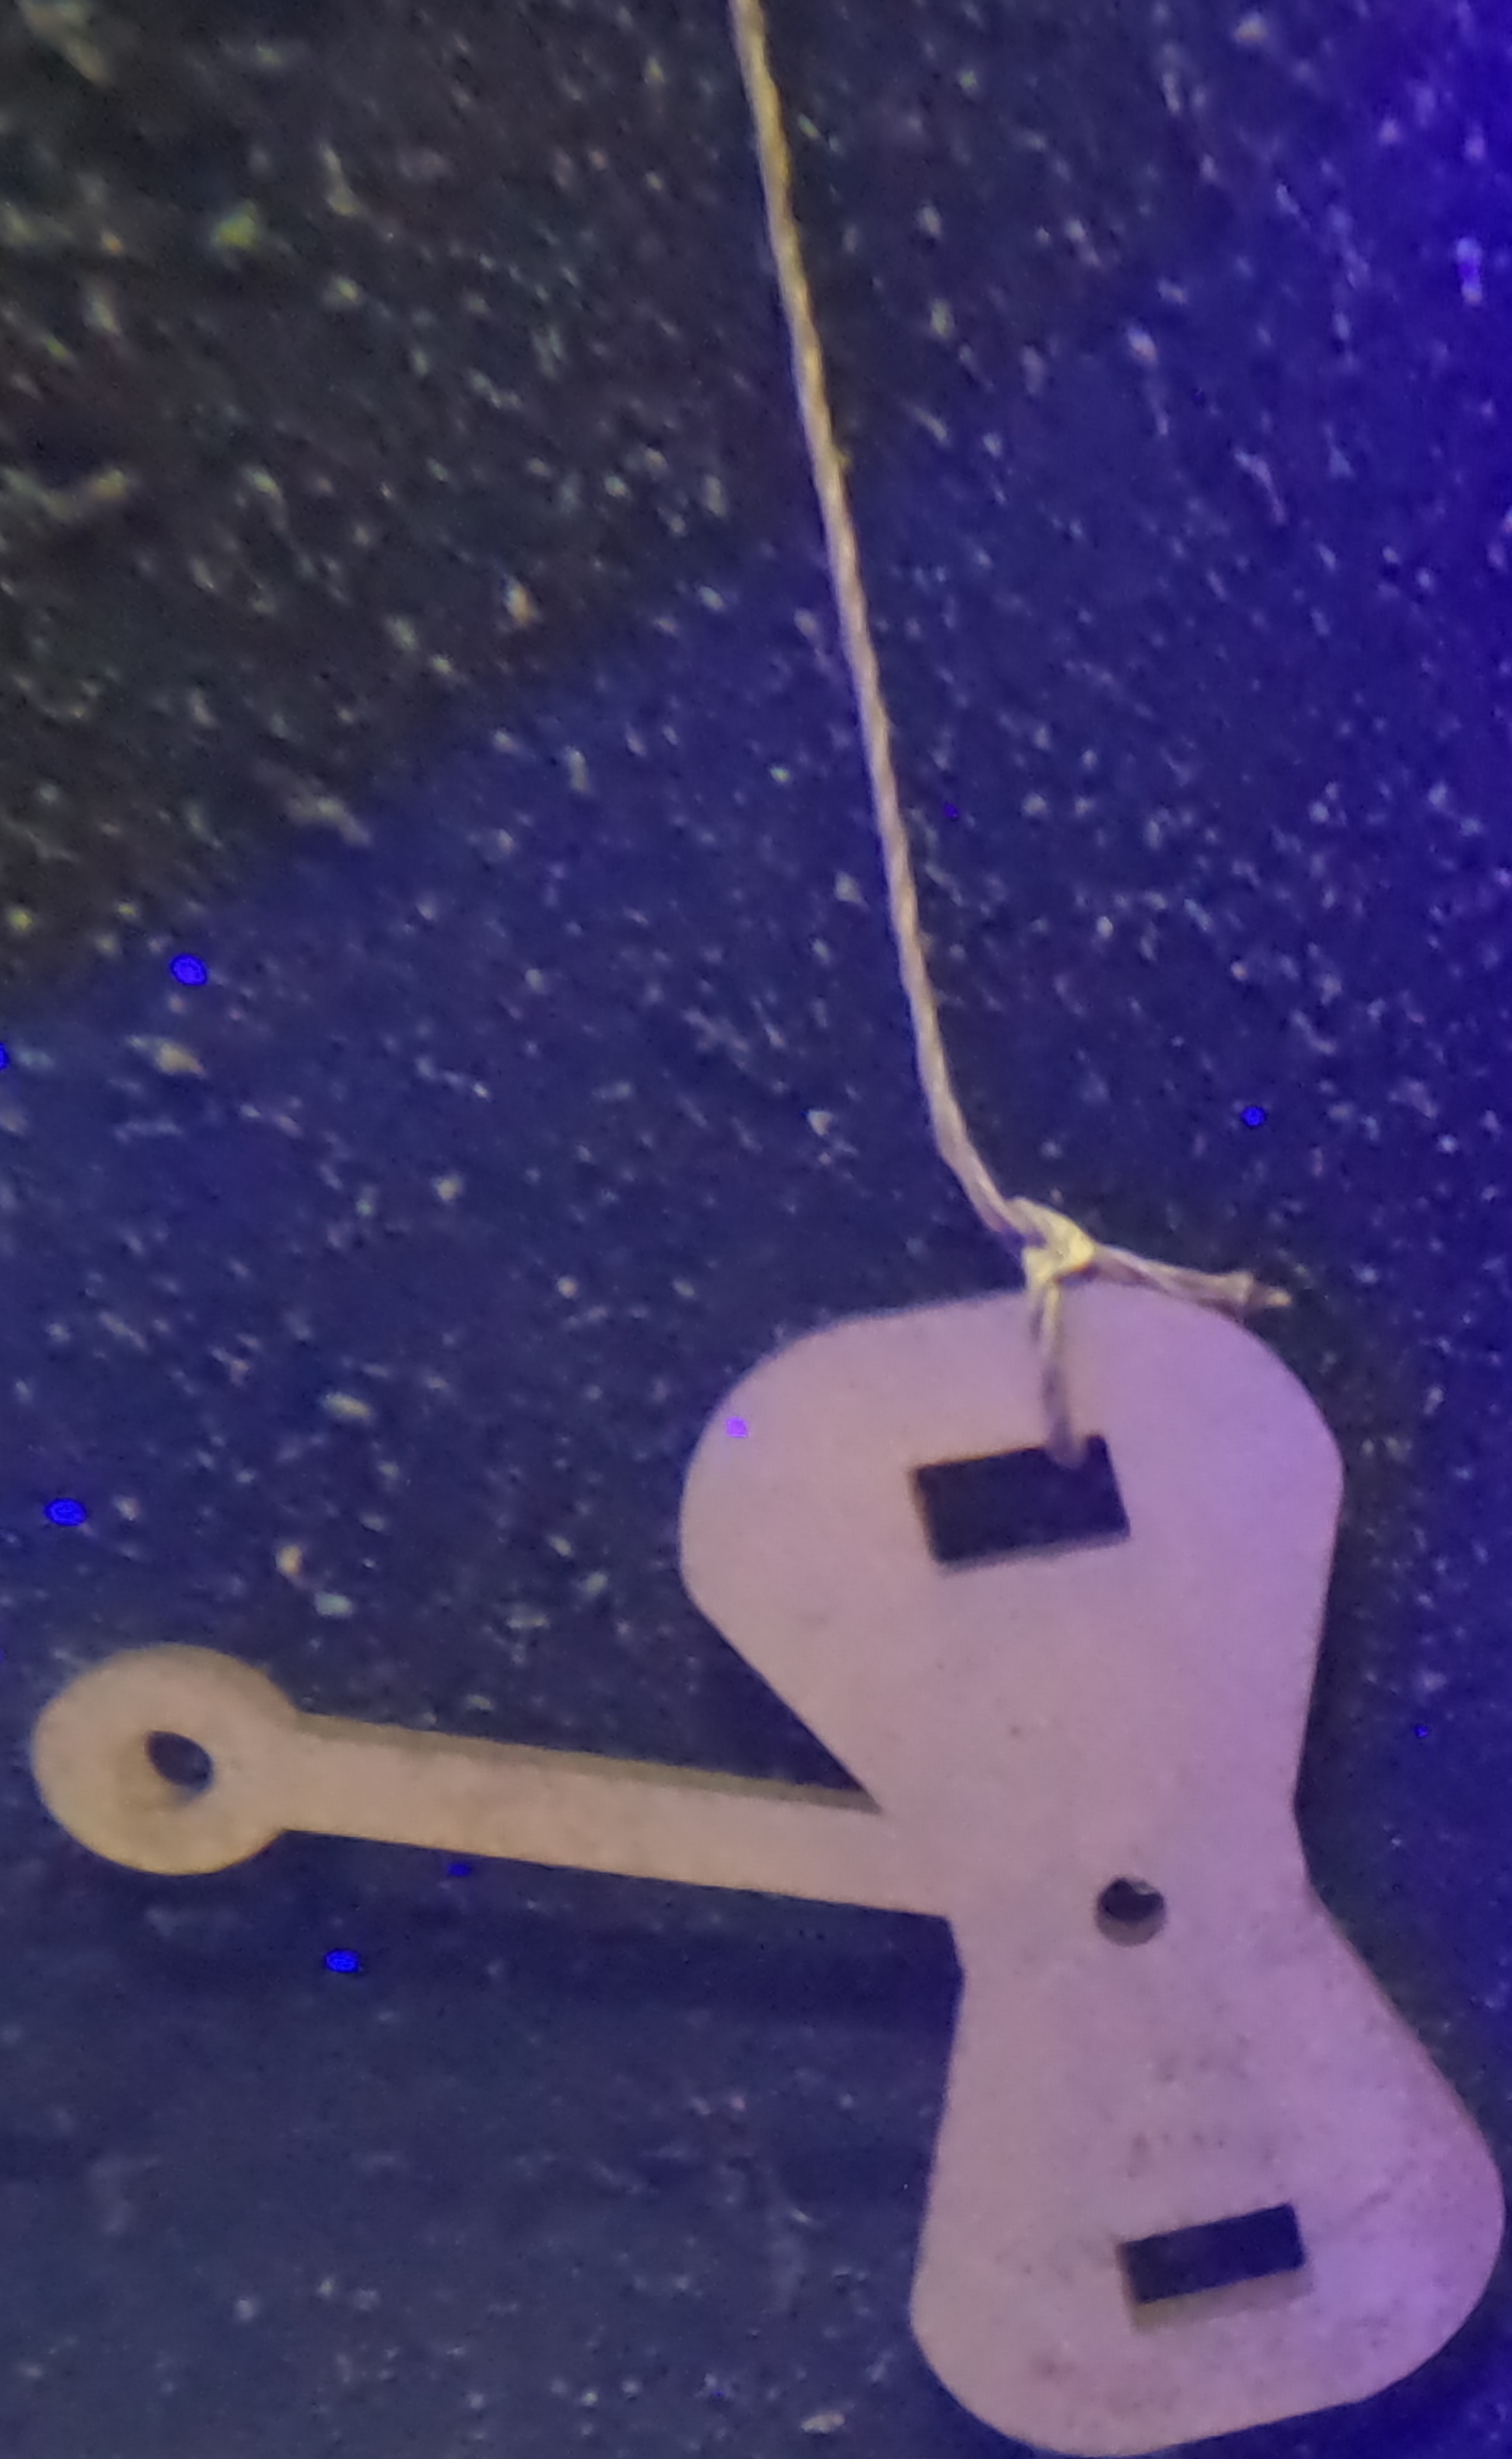

Supplement: Supplementary file 3132 [file G0015573.pdf › Level_2_1/G0015573.pdf]

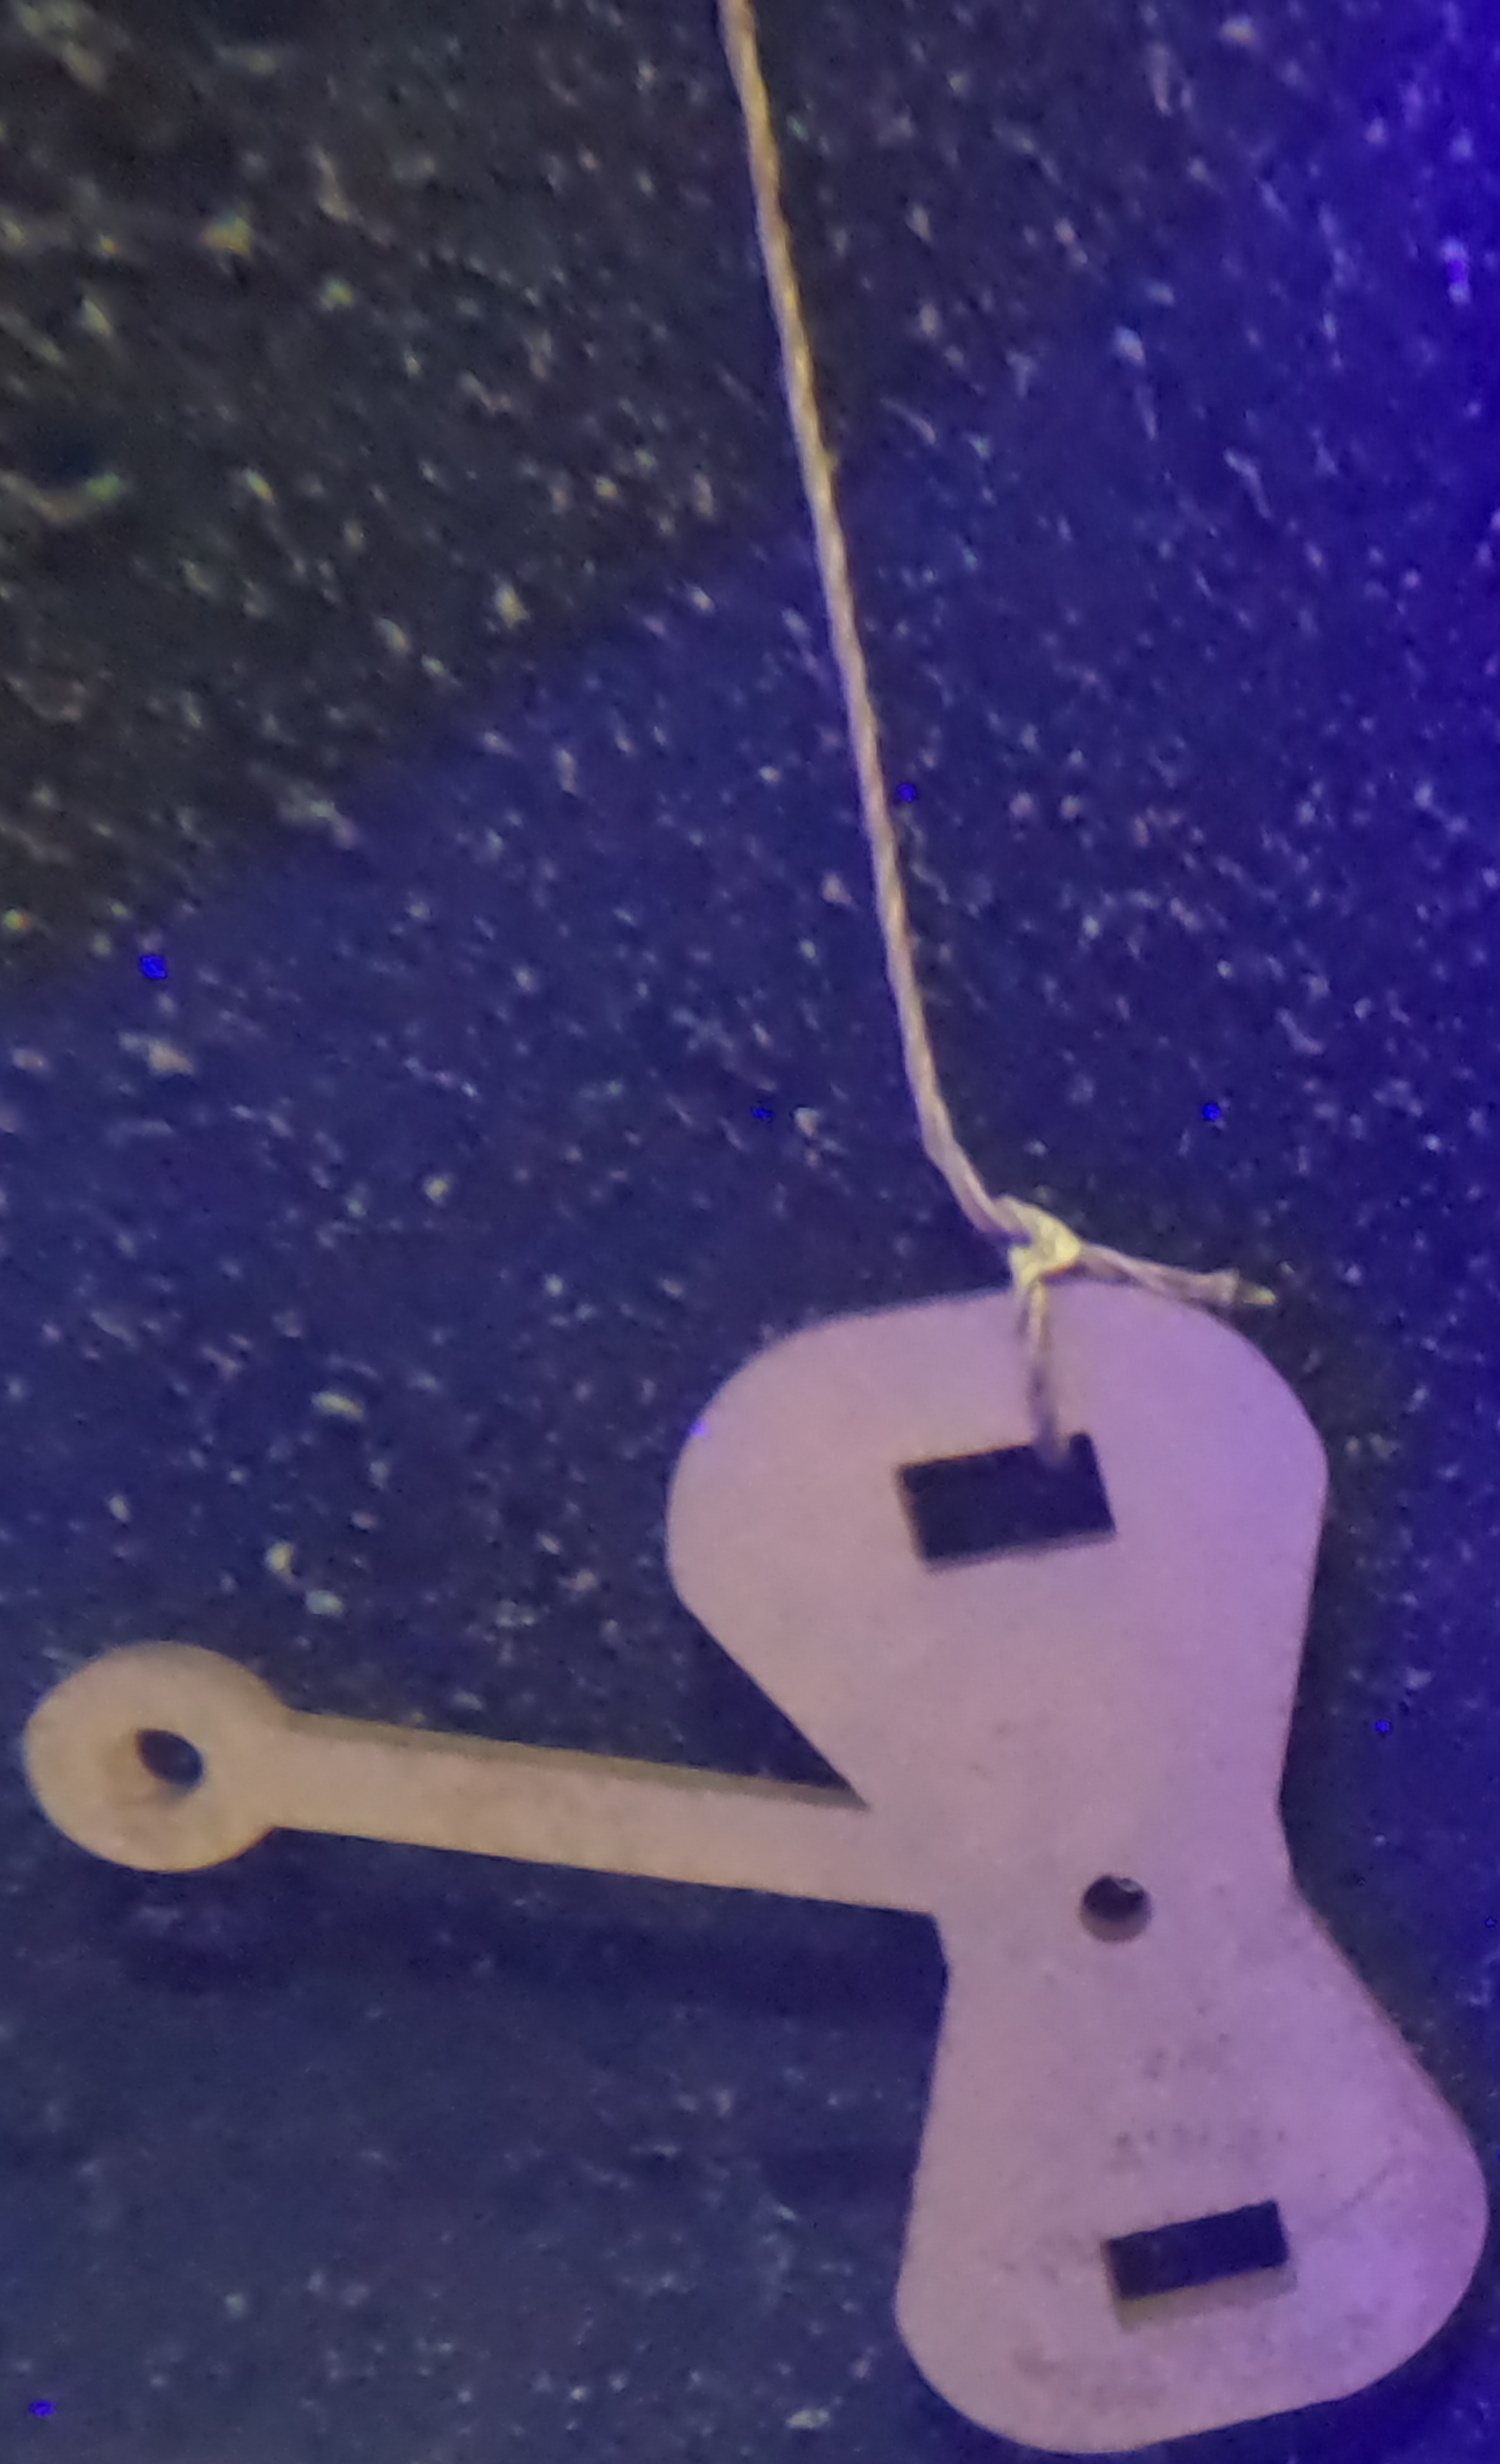

Supplement: Supplementary file 3133 [file G0015574.pdf › Level_2_1/G0015574.pdf]

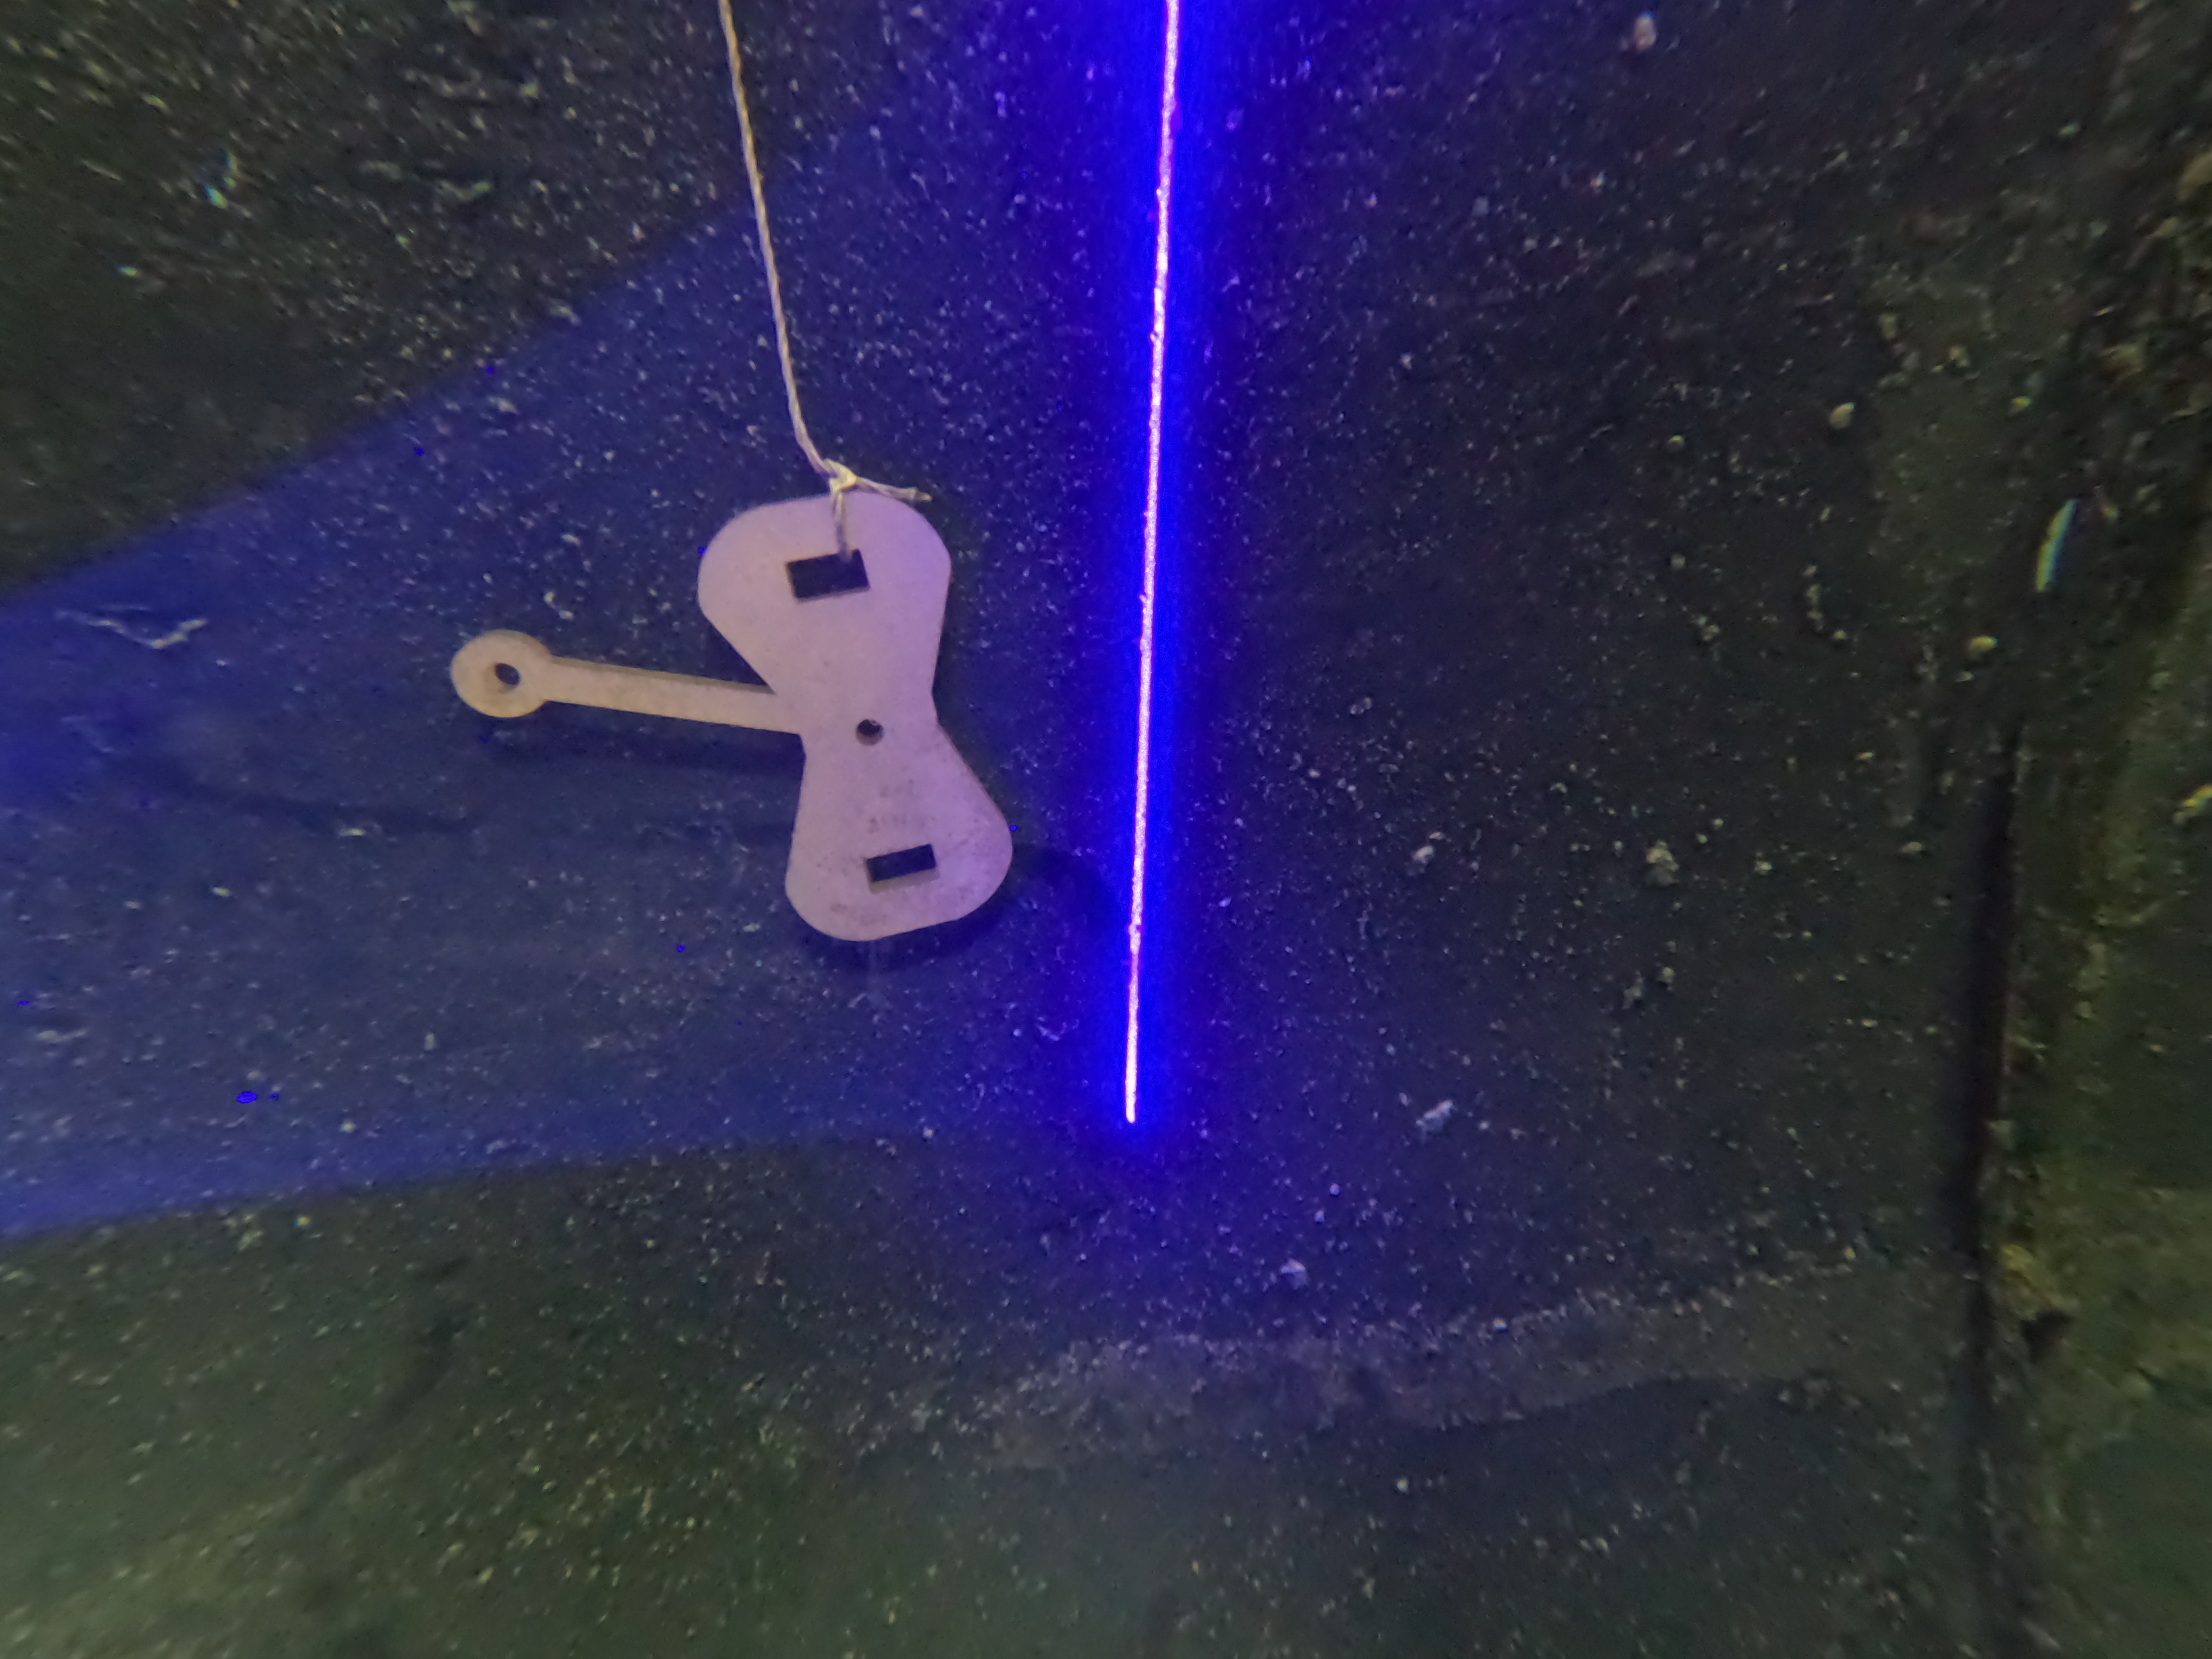

Supplement: Supplementary file 3134 [file G0015575.pdf › Level_2_1/G0015575.pdf]

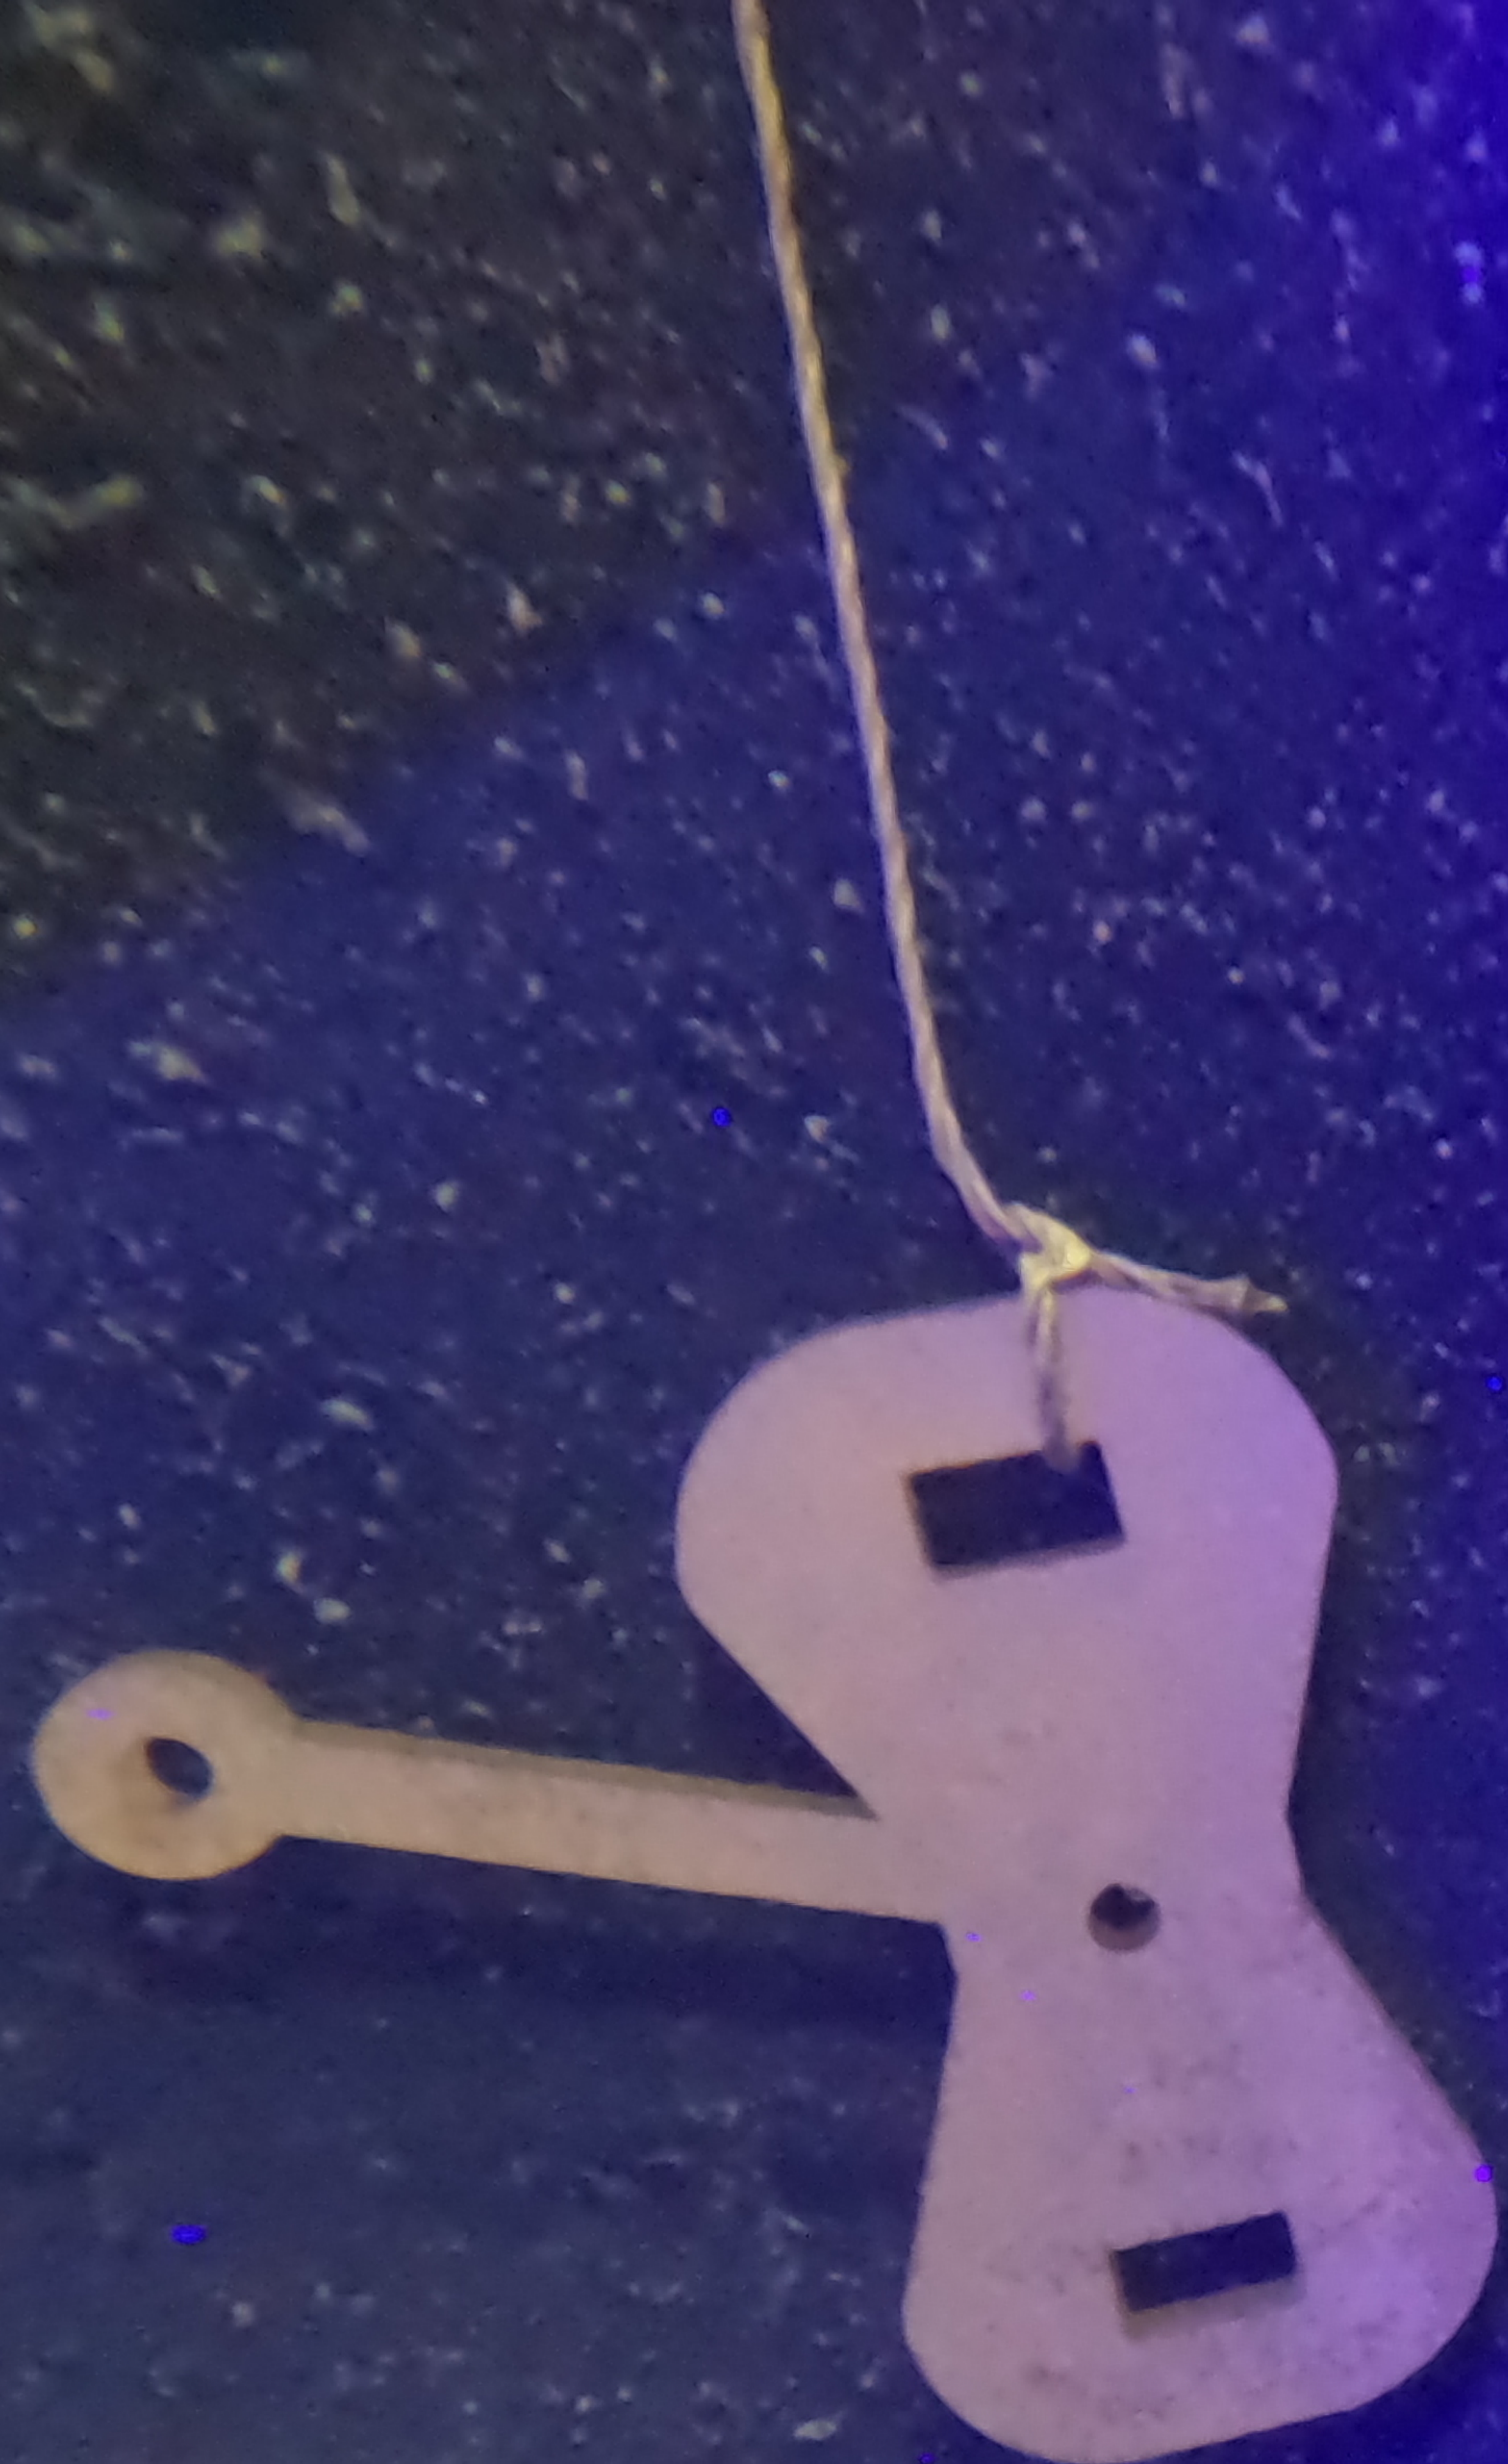

Supplement: Supplementary file 3135 [file G0015576.pdf › Level_2_1/G0015576.pdf]

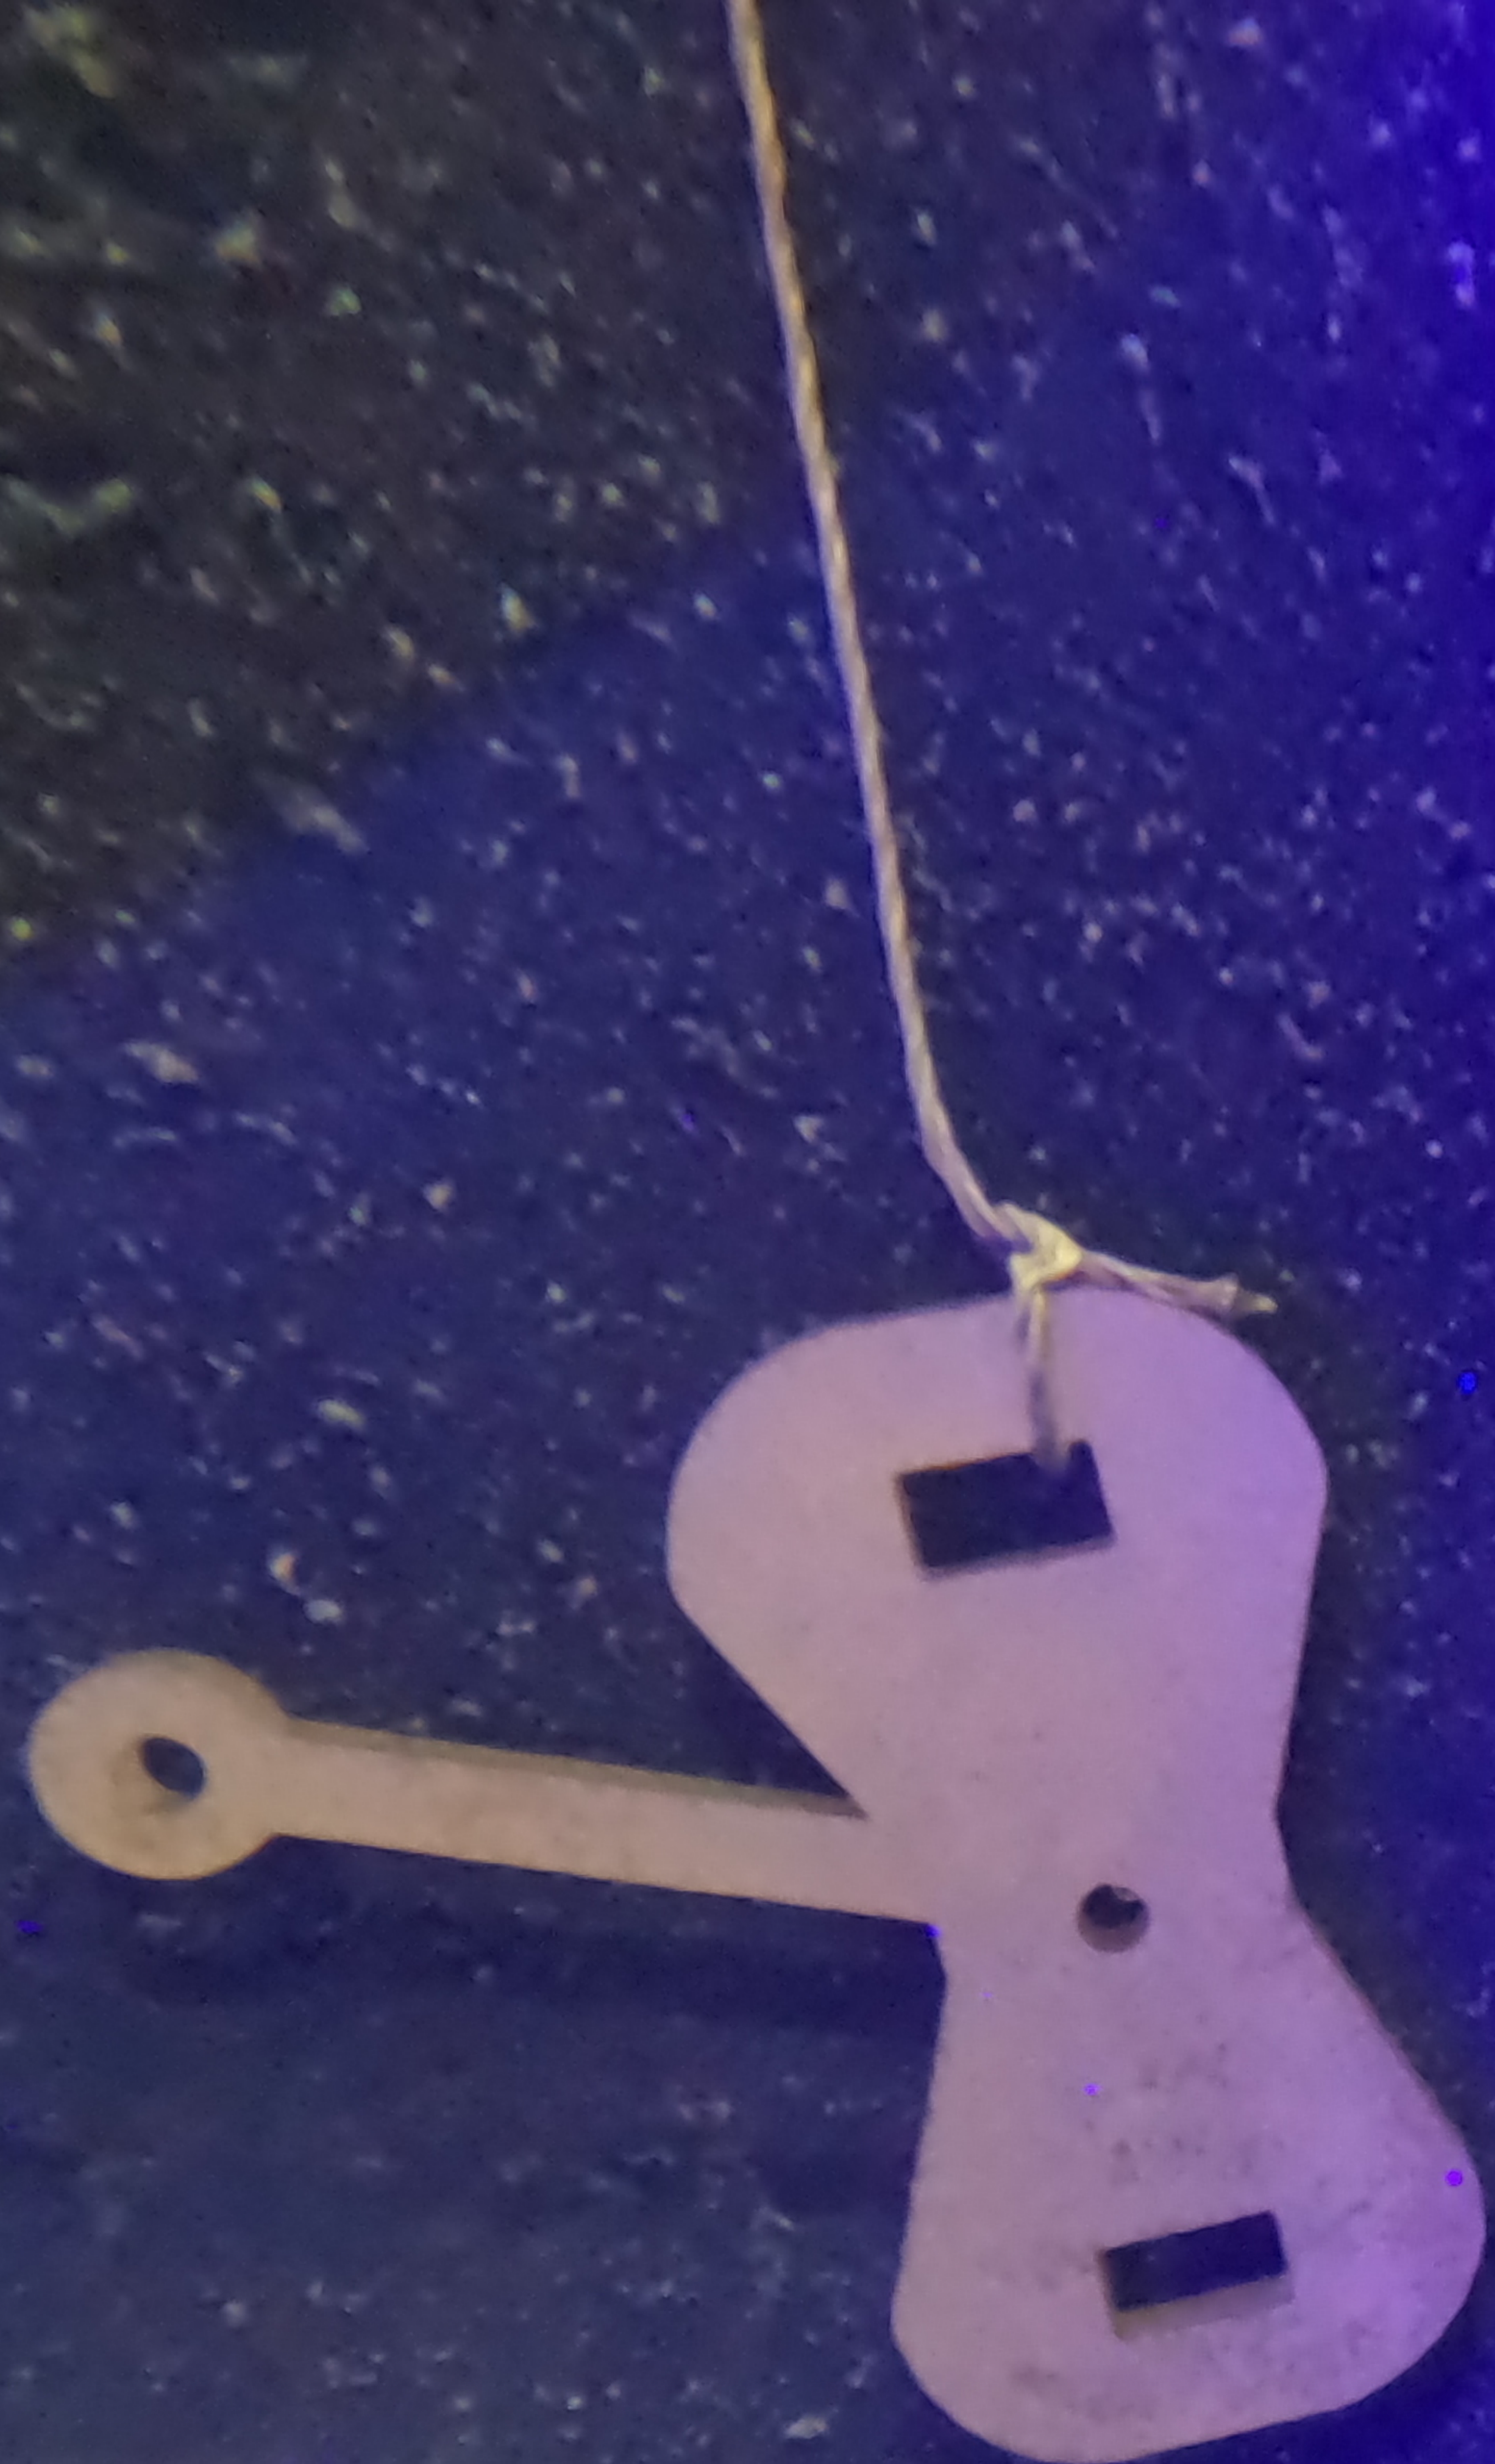

Supplement: Supplementary file 3136 [file G0015577.pdf › Level_2_1/G0015577.pdf]

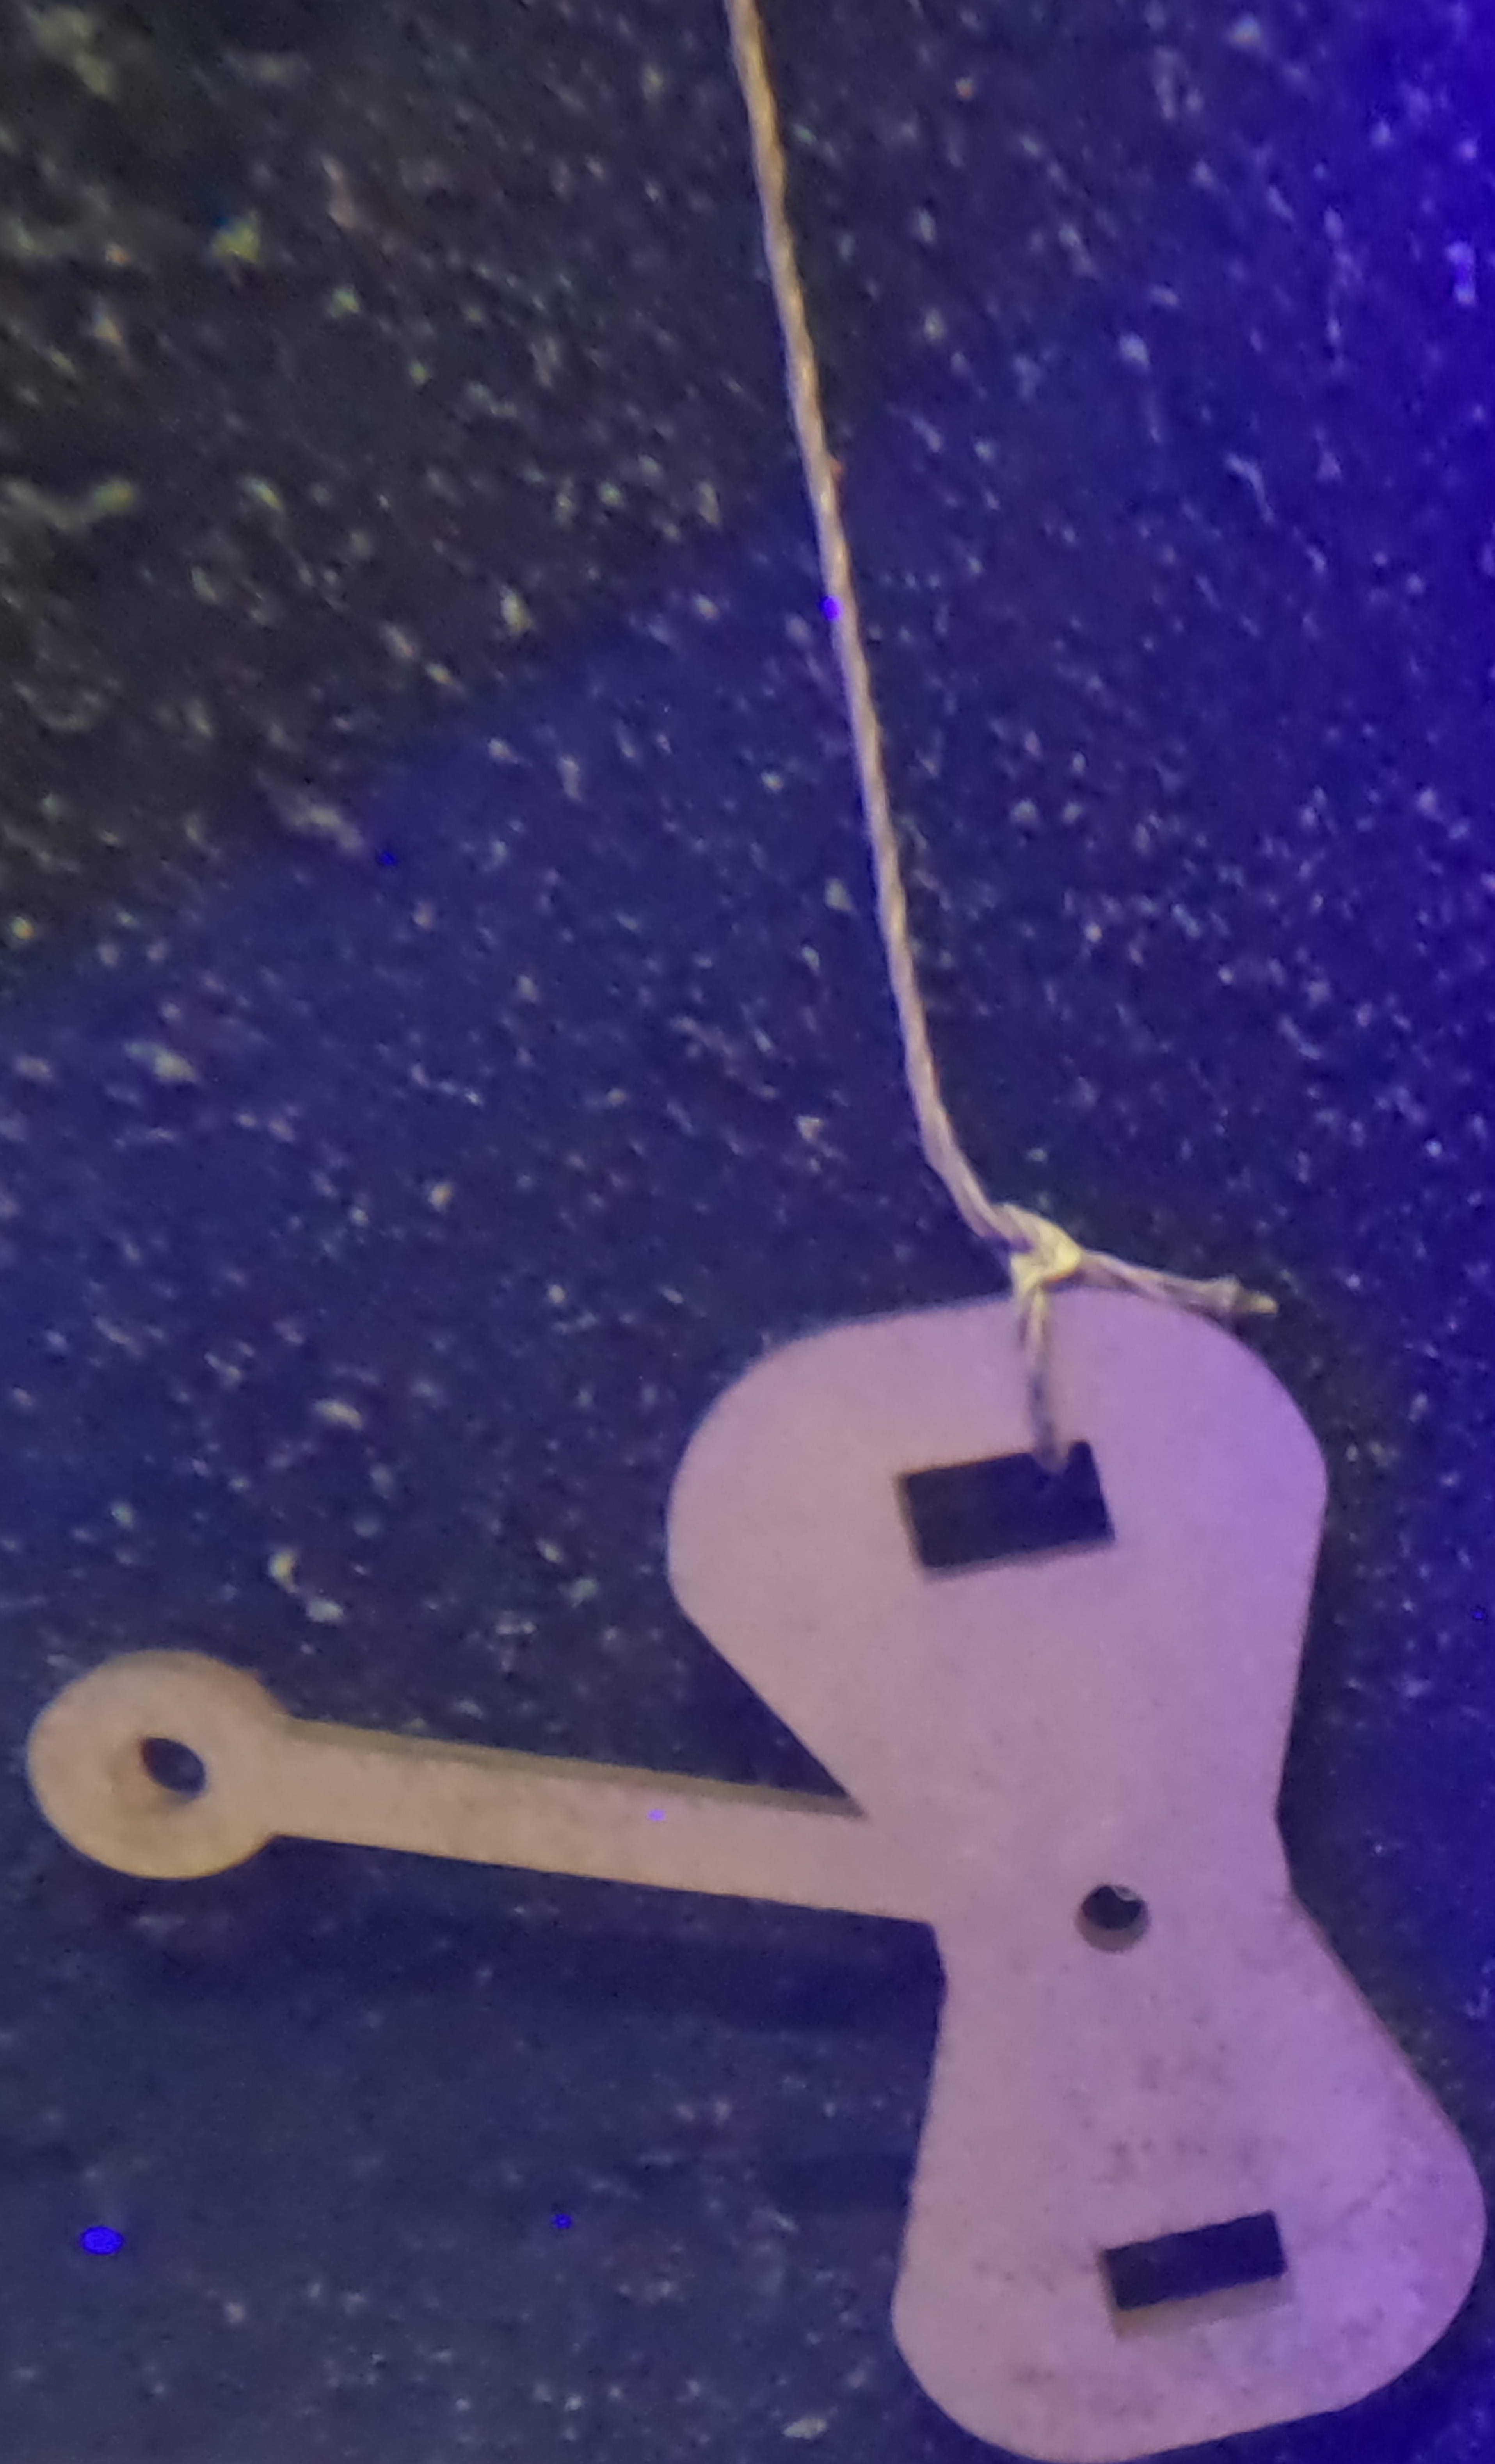

Supplement: Supplementary file 3137 [file G0015578.pdf › Level_2_1/G0015578.pdf]

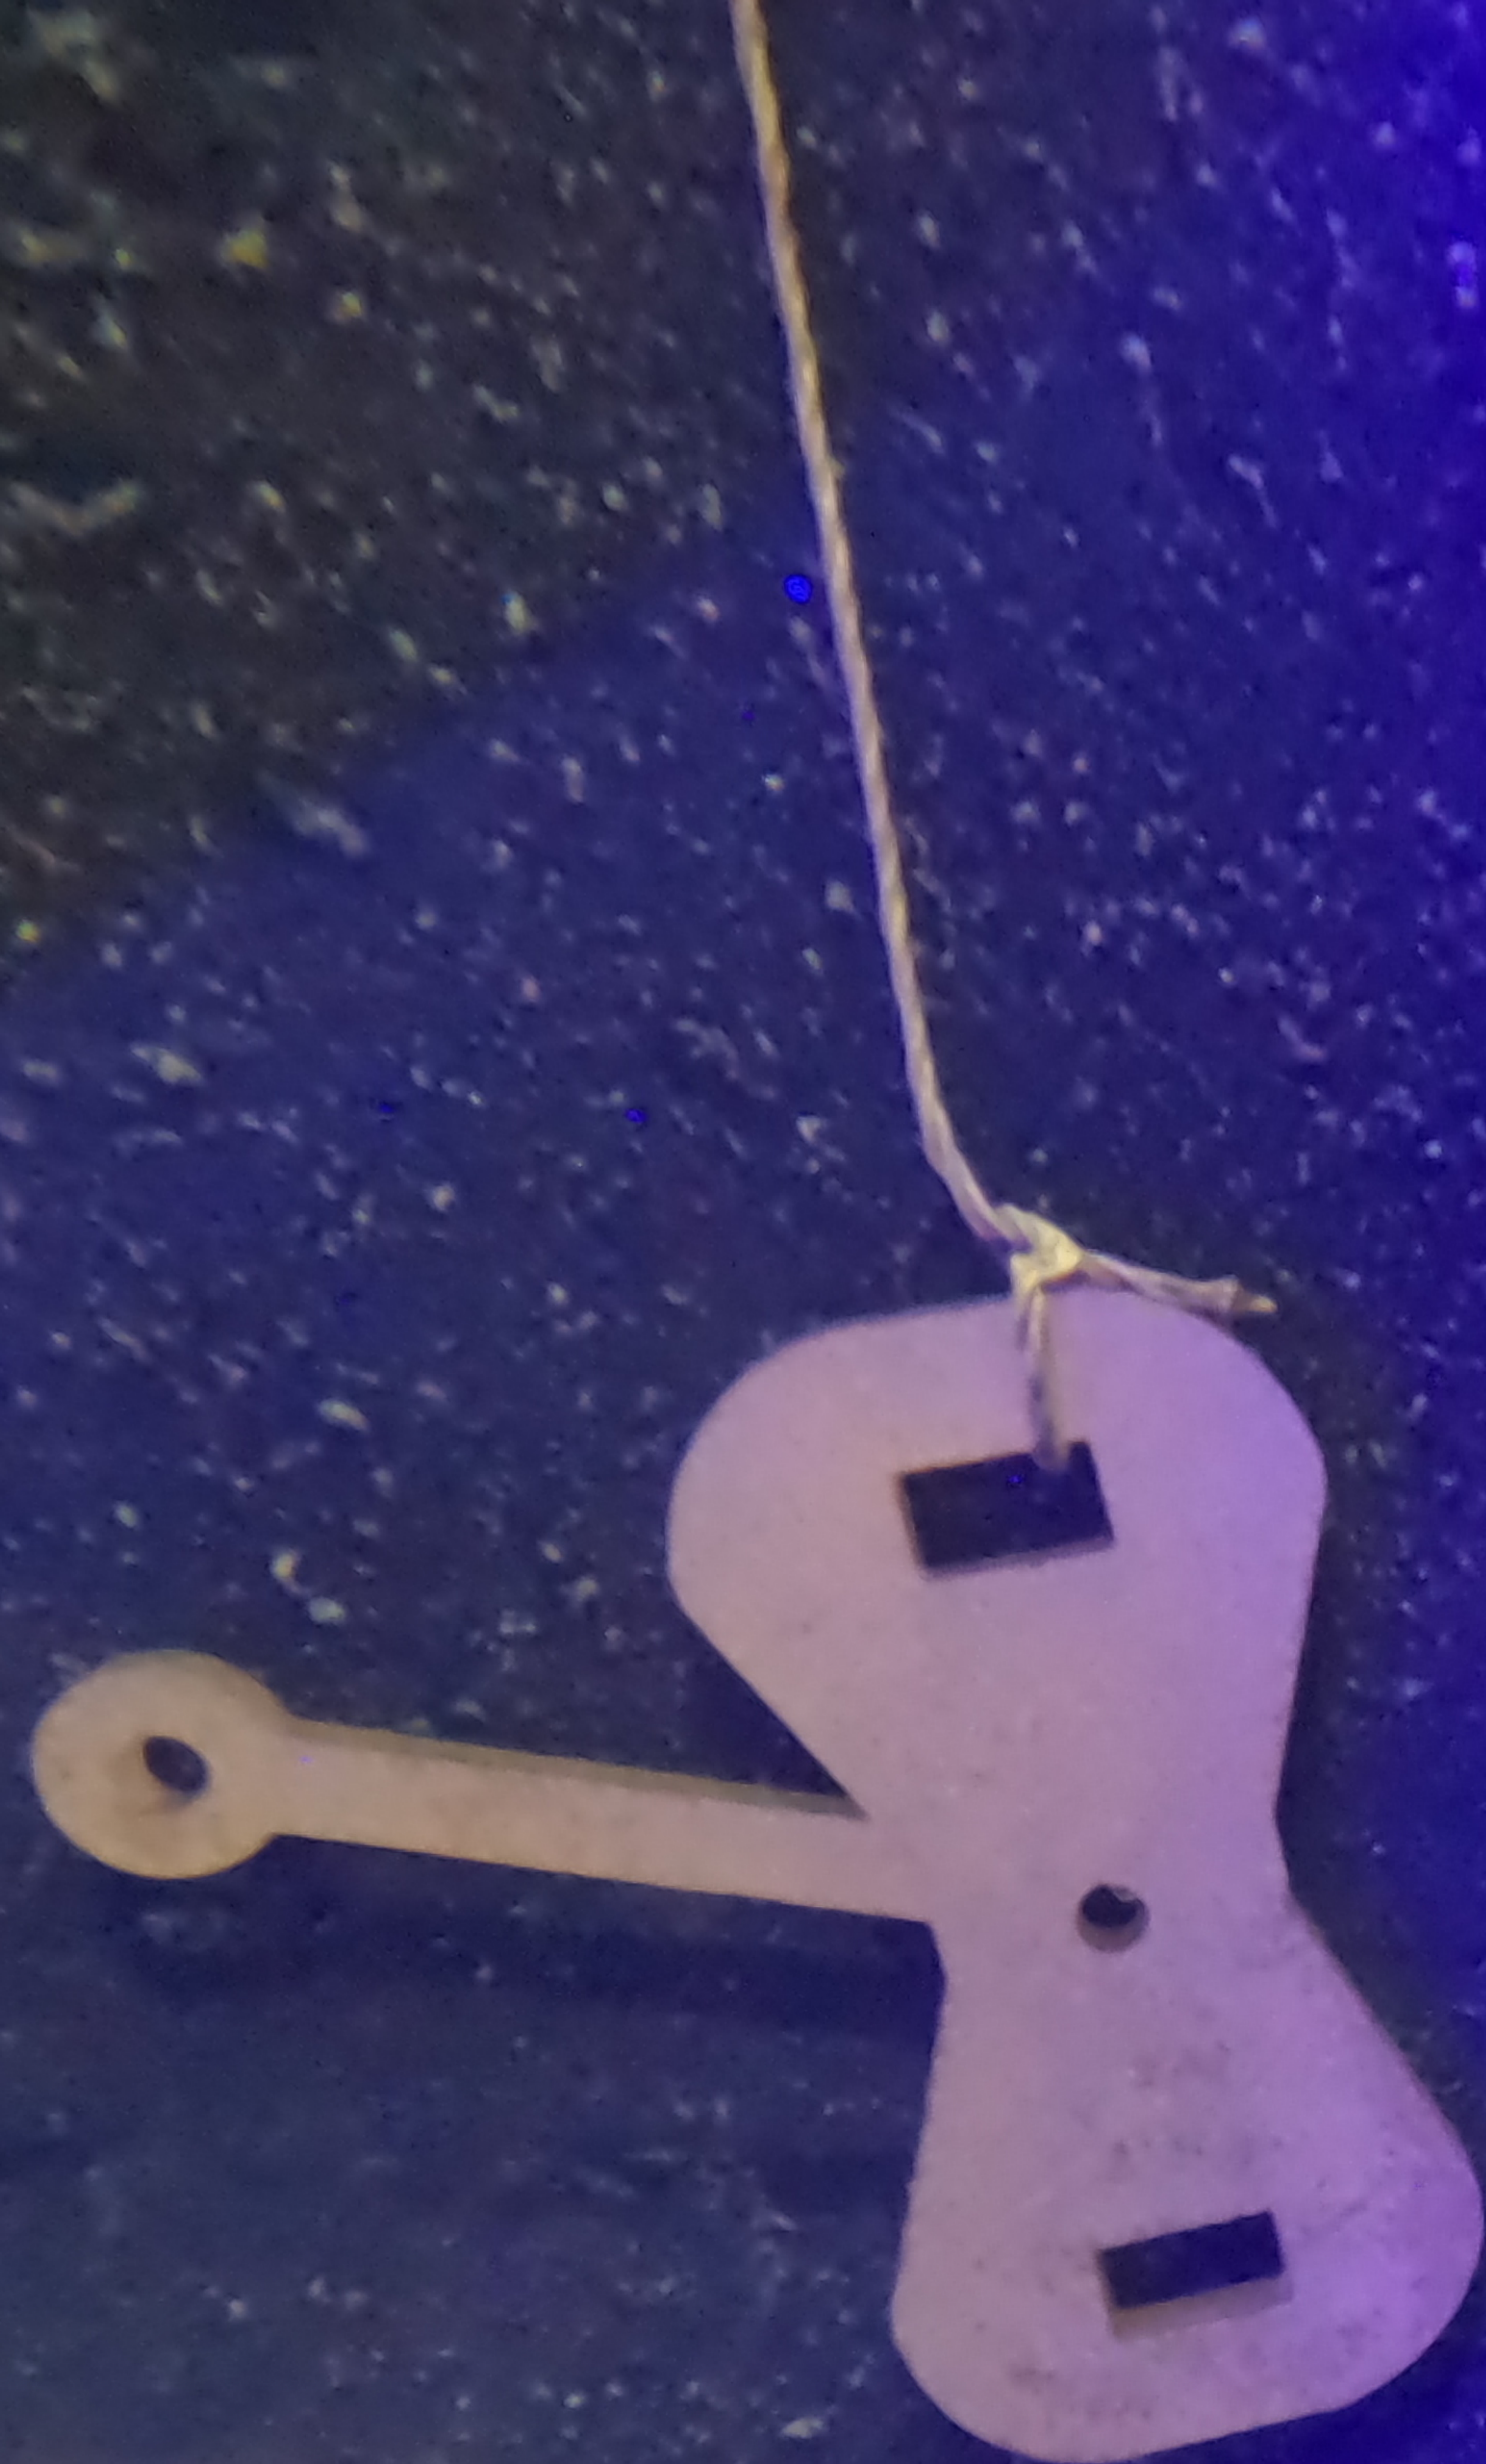

Supplement: Supplementary file 3138 [file G0015579.pdf › Level_2_1/G0015579.pdf]

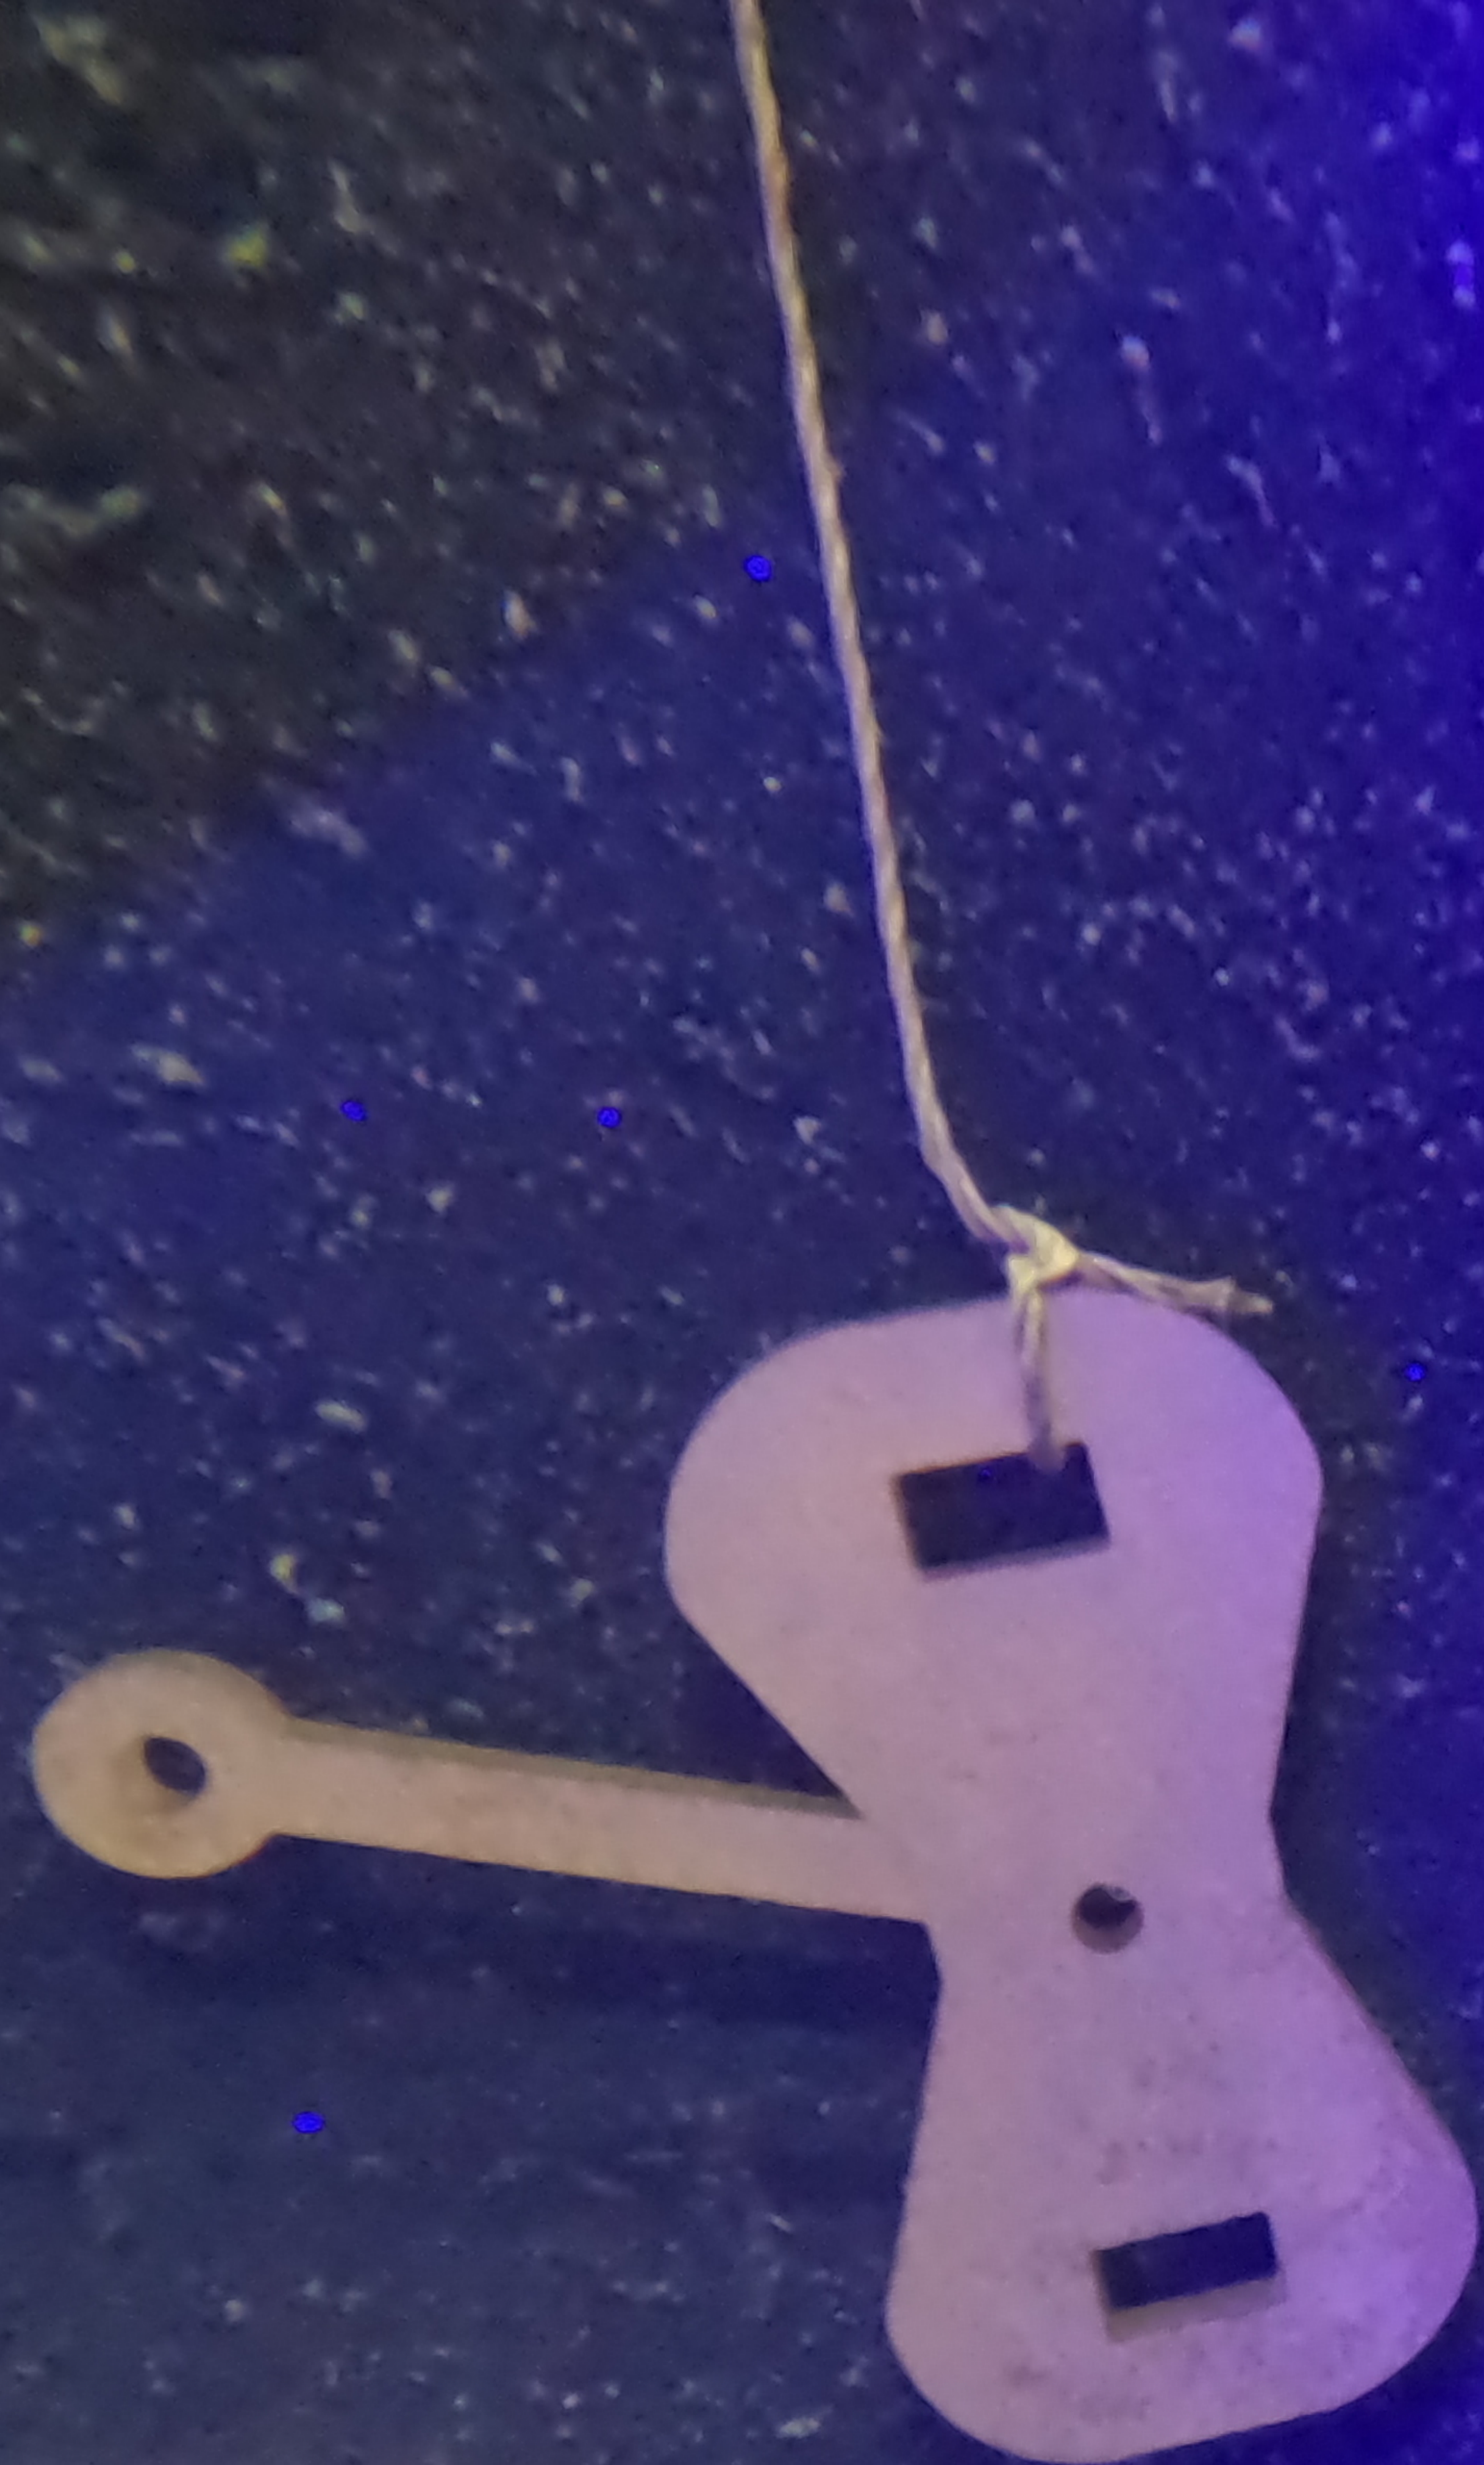

Supplement: Supplementary file 3139 [file G0015580.pdf › Level_2_1/G0015580.pdf]

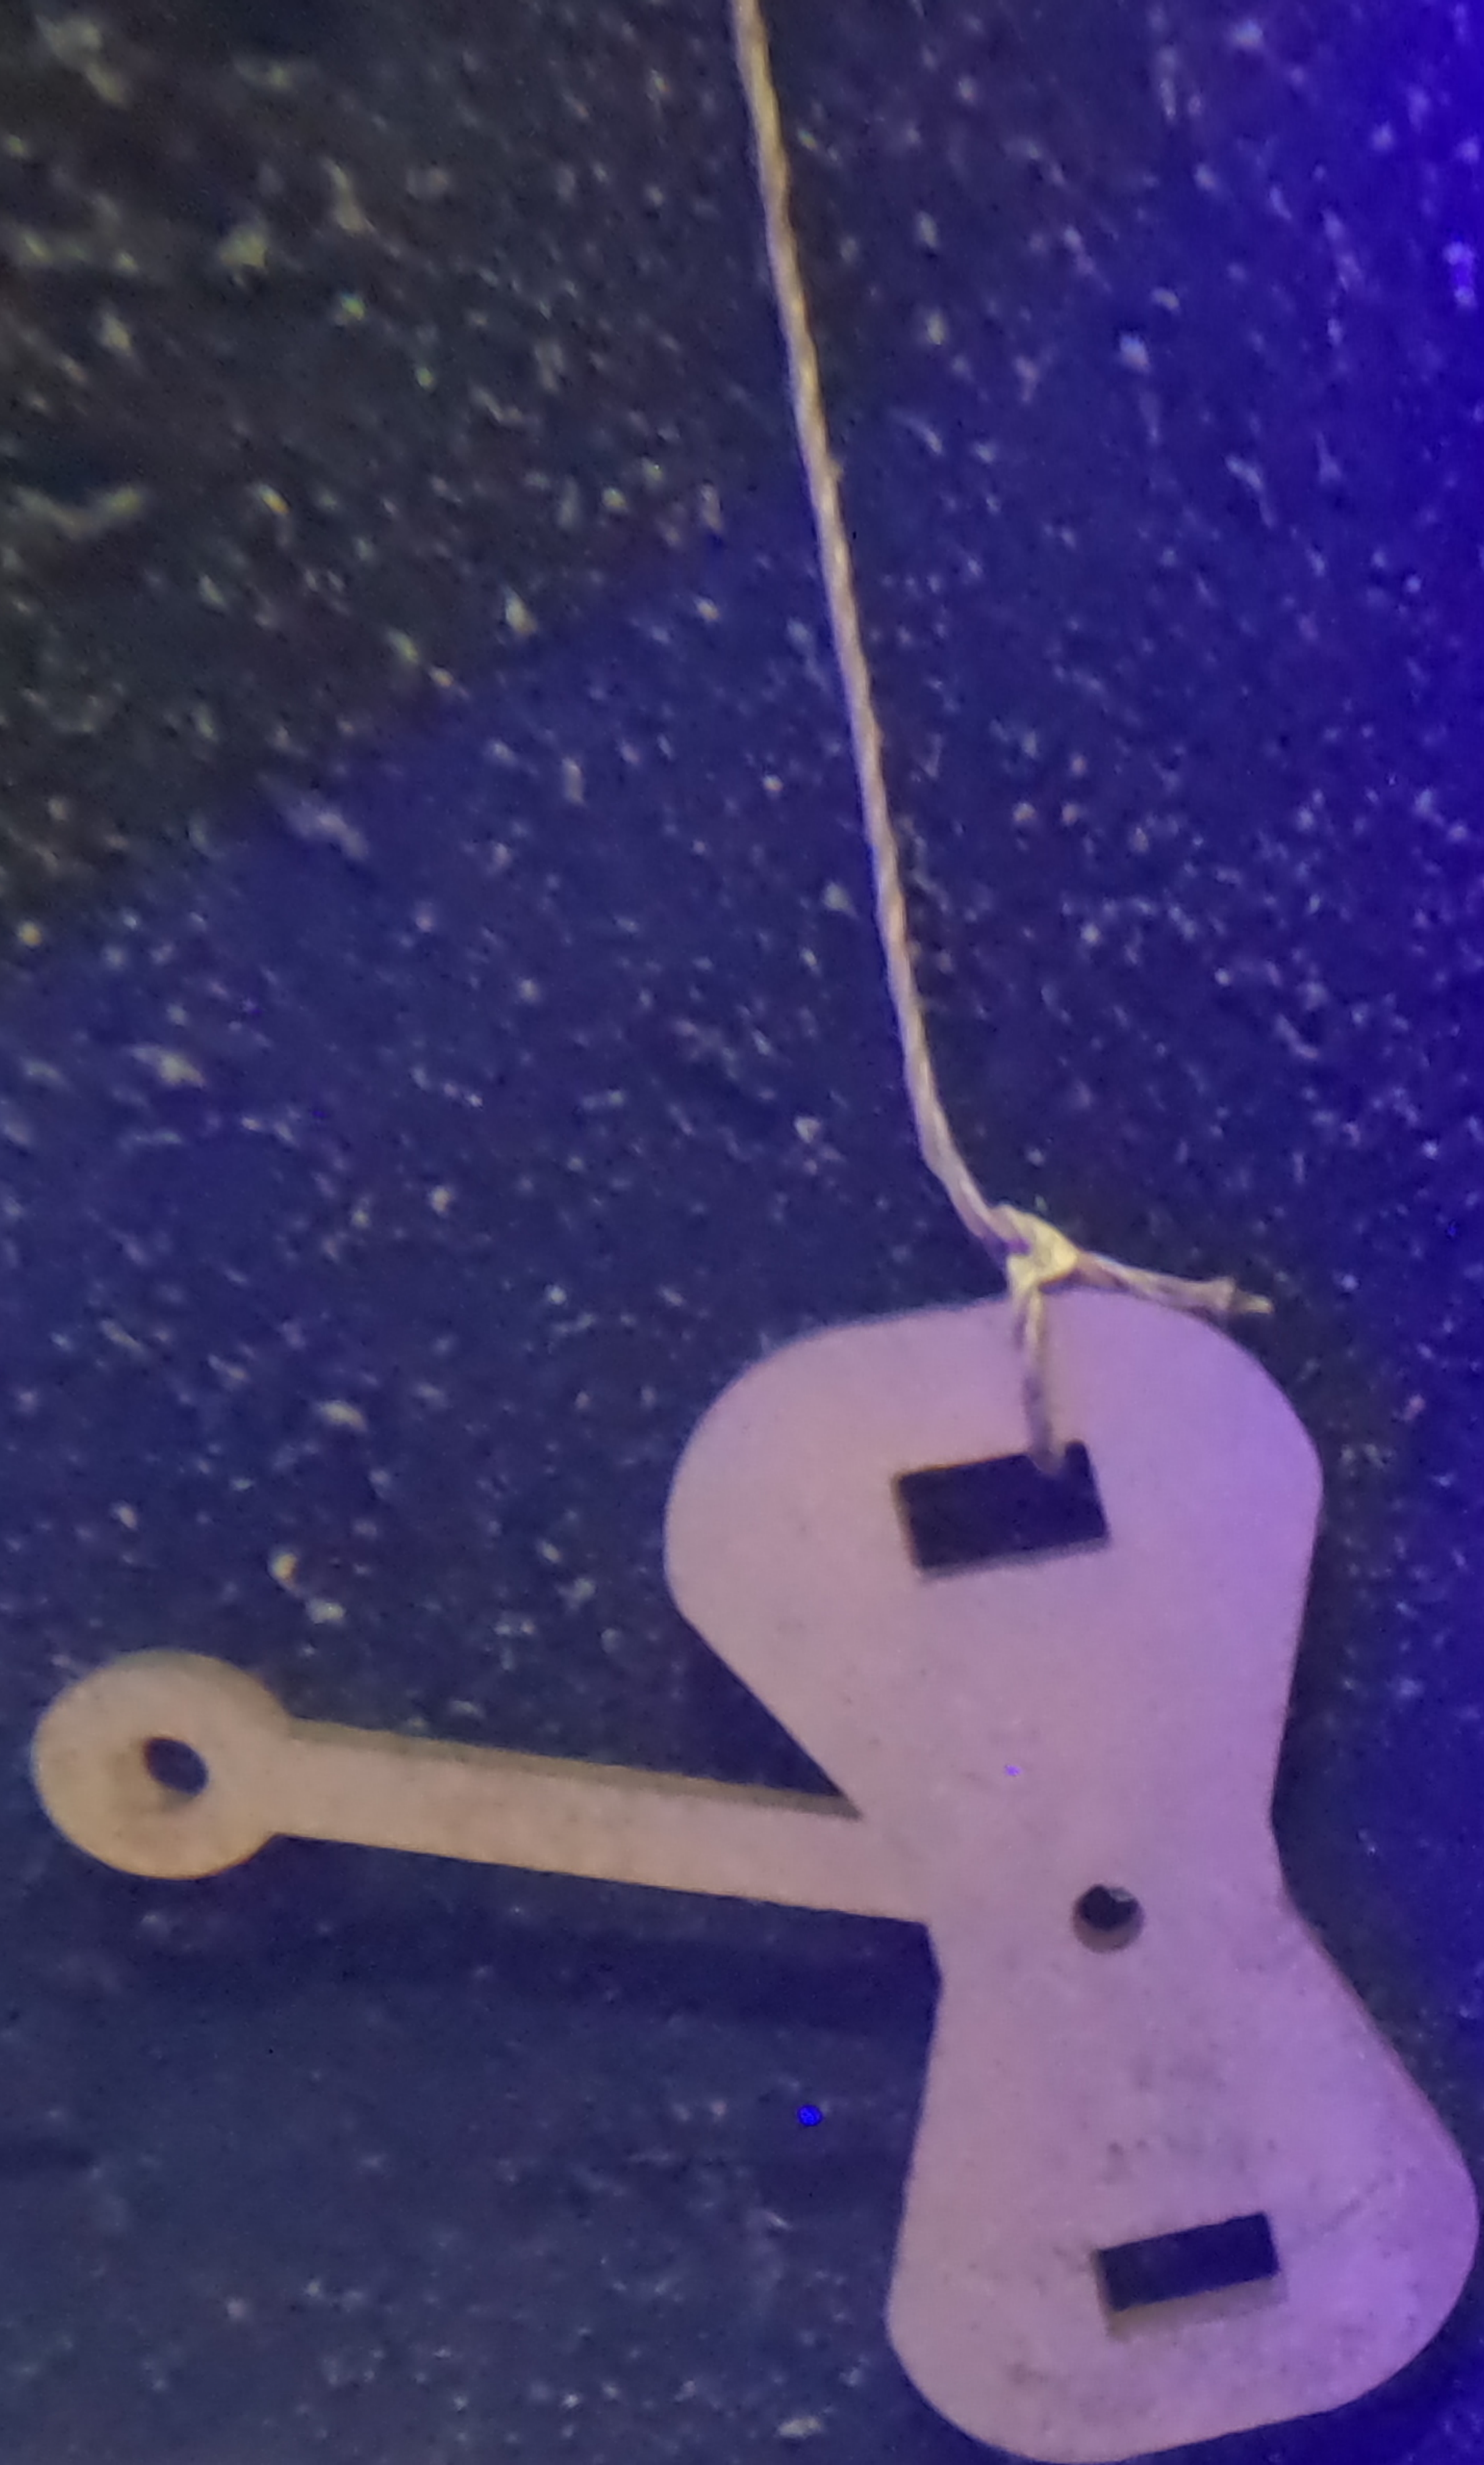

Supplement: Supplementary file 3140 [file G0015581.pdf › Level_2_1/G0015581.pdf]

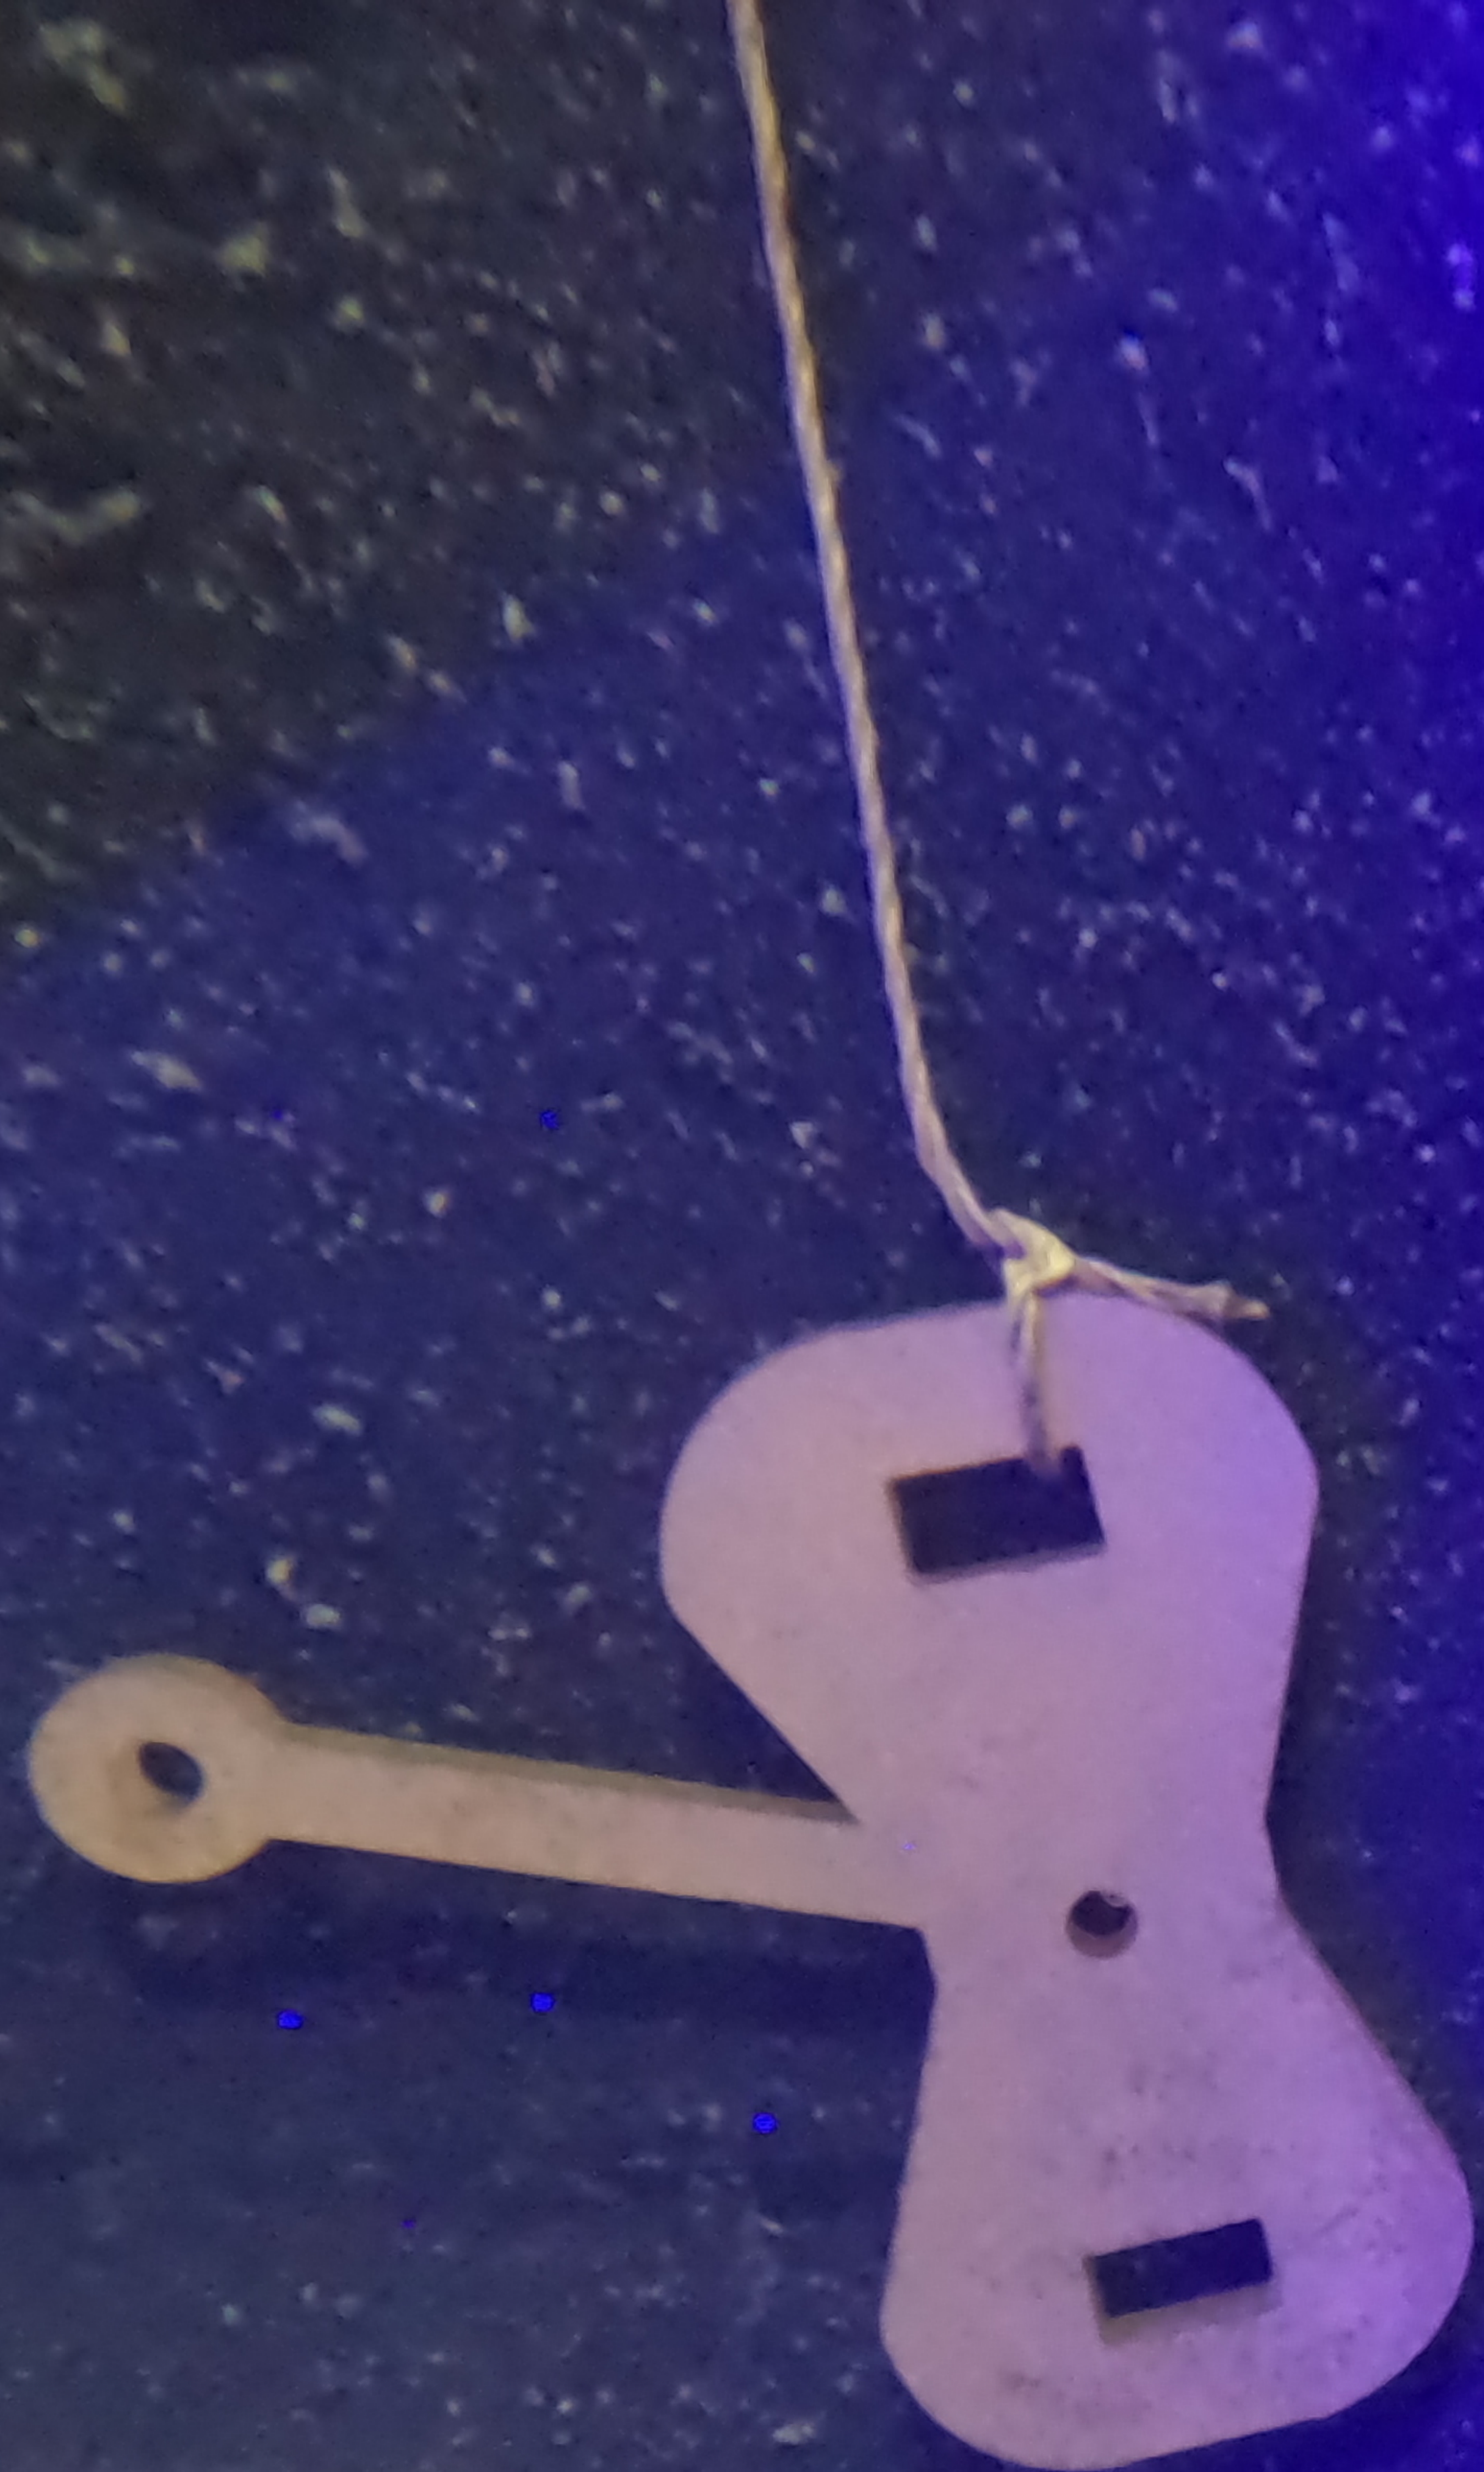

Supplement: Supplementary file 3141 [file G0015582.pdf › Level_2_1/G0015582.pdf]

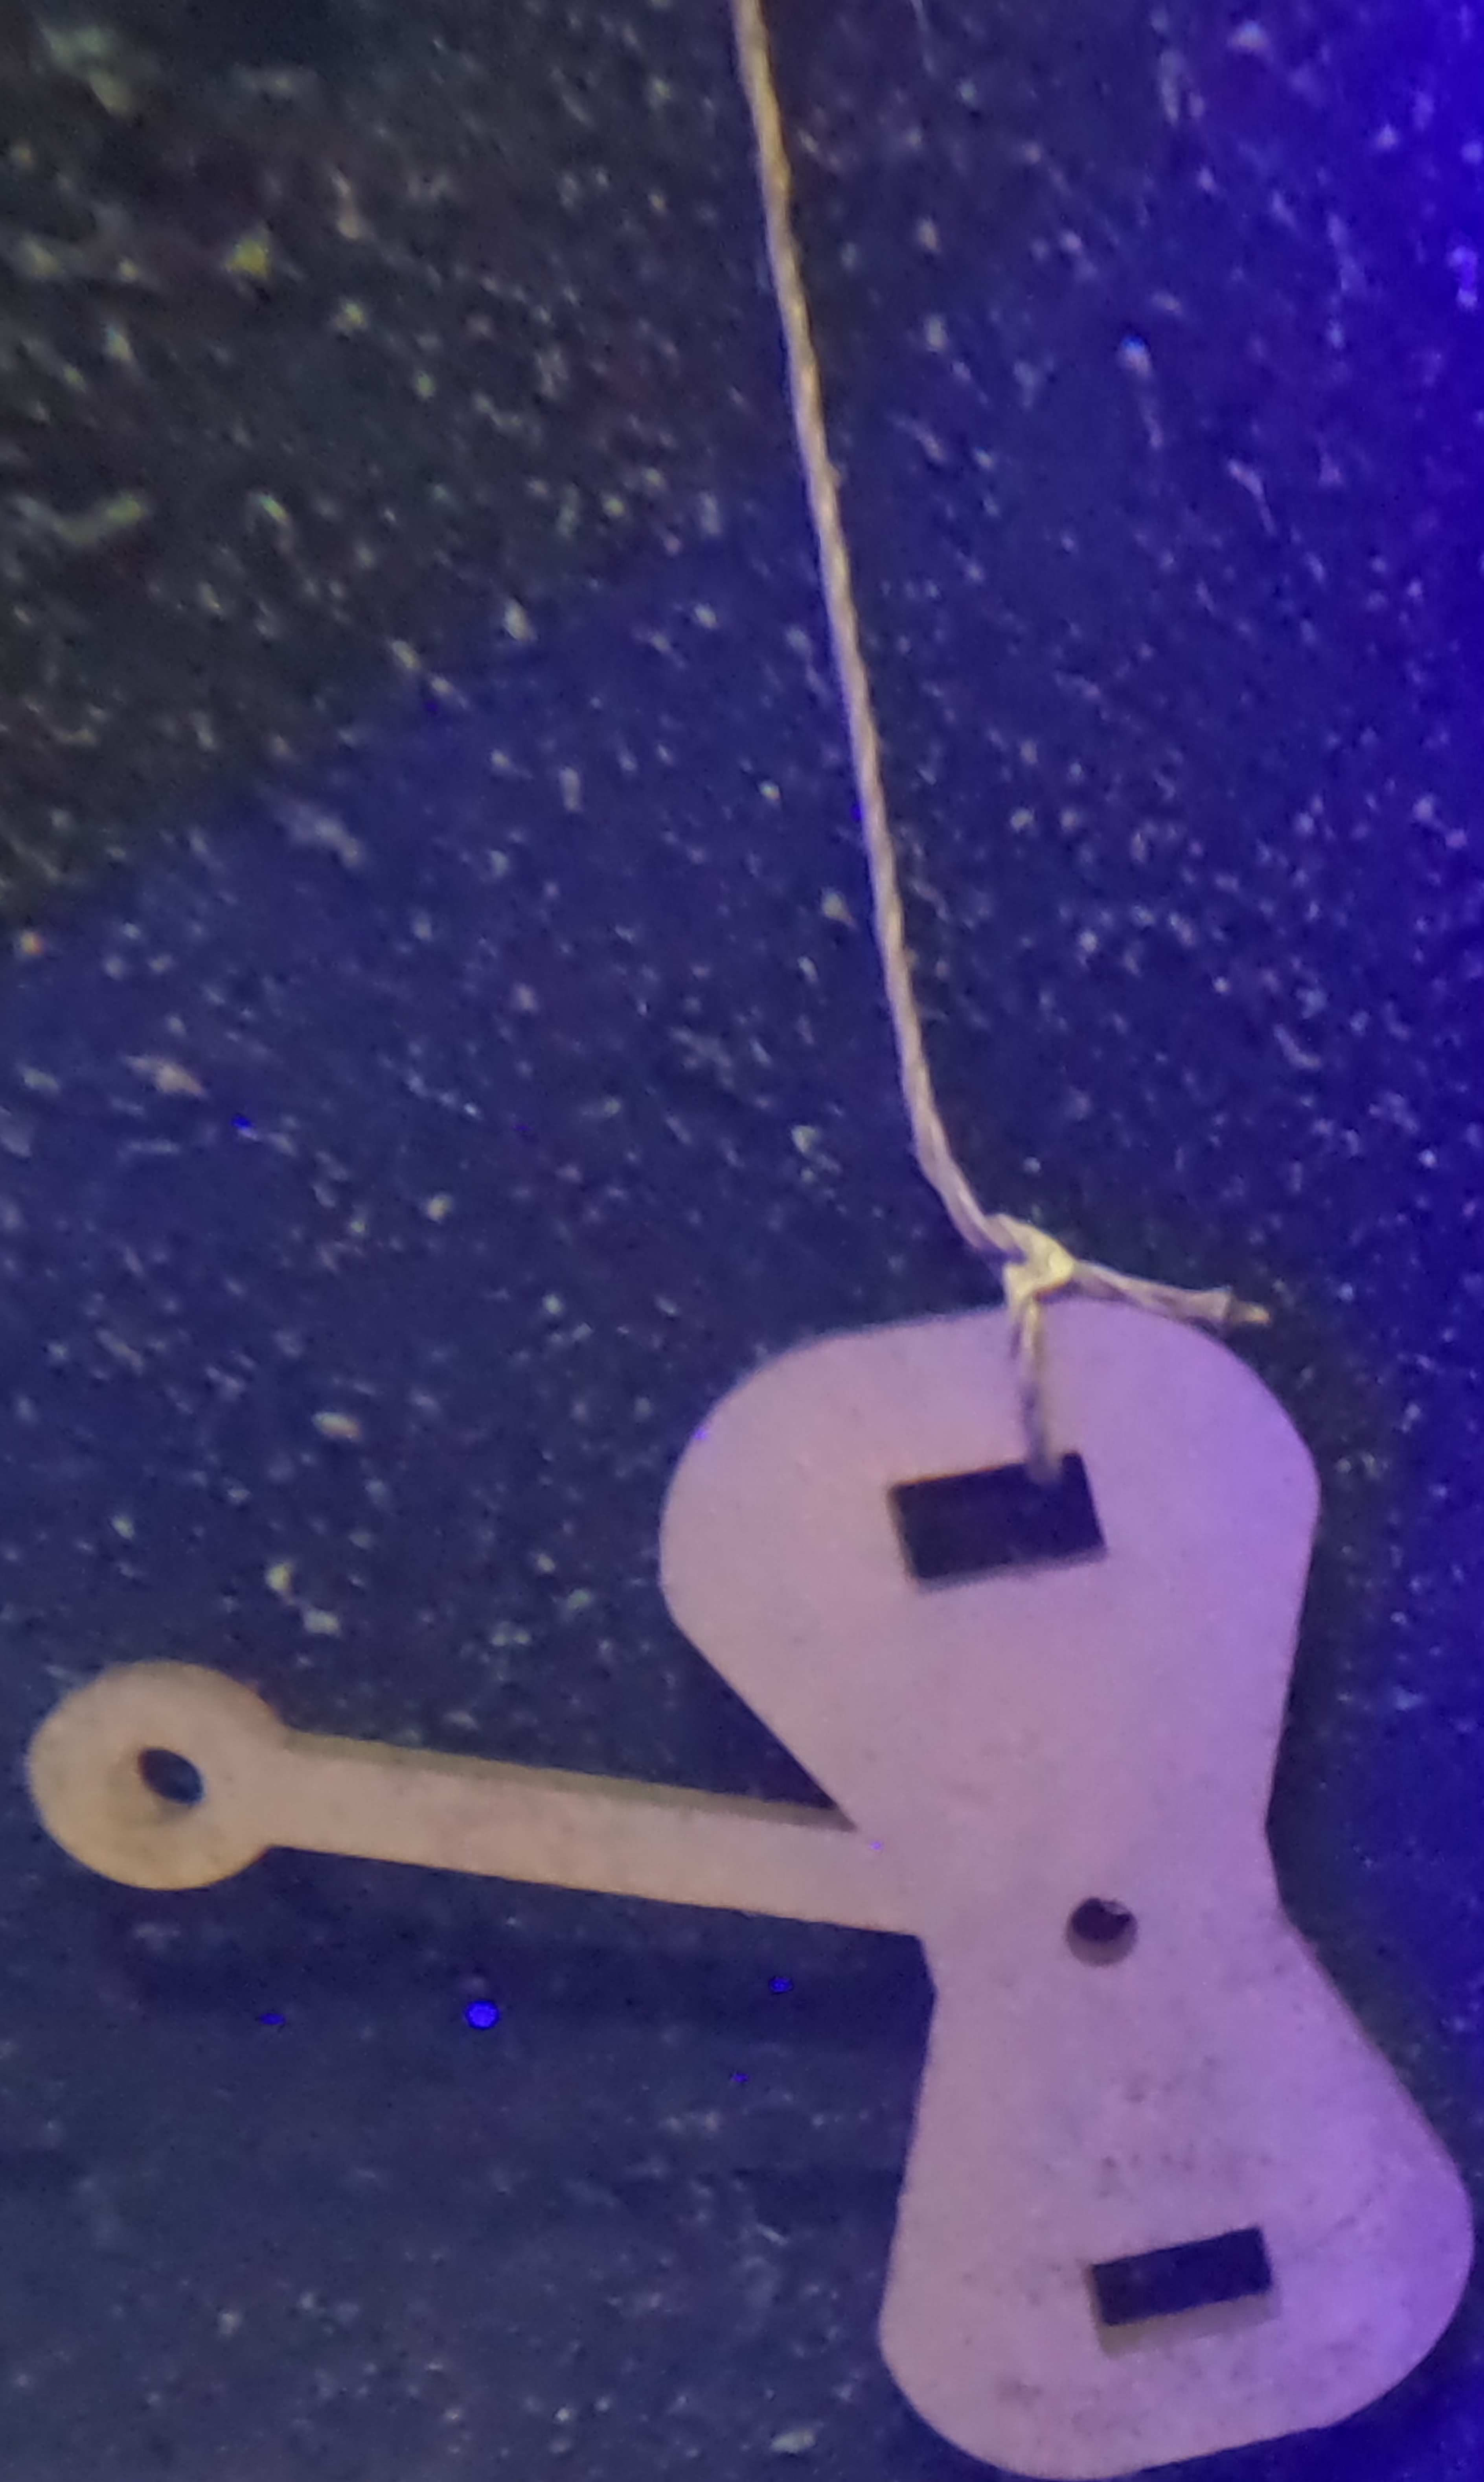

Supplement: Supplementary file 3142 [file G0015583.pdf › Level_2_1/G0015583.pdf]

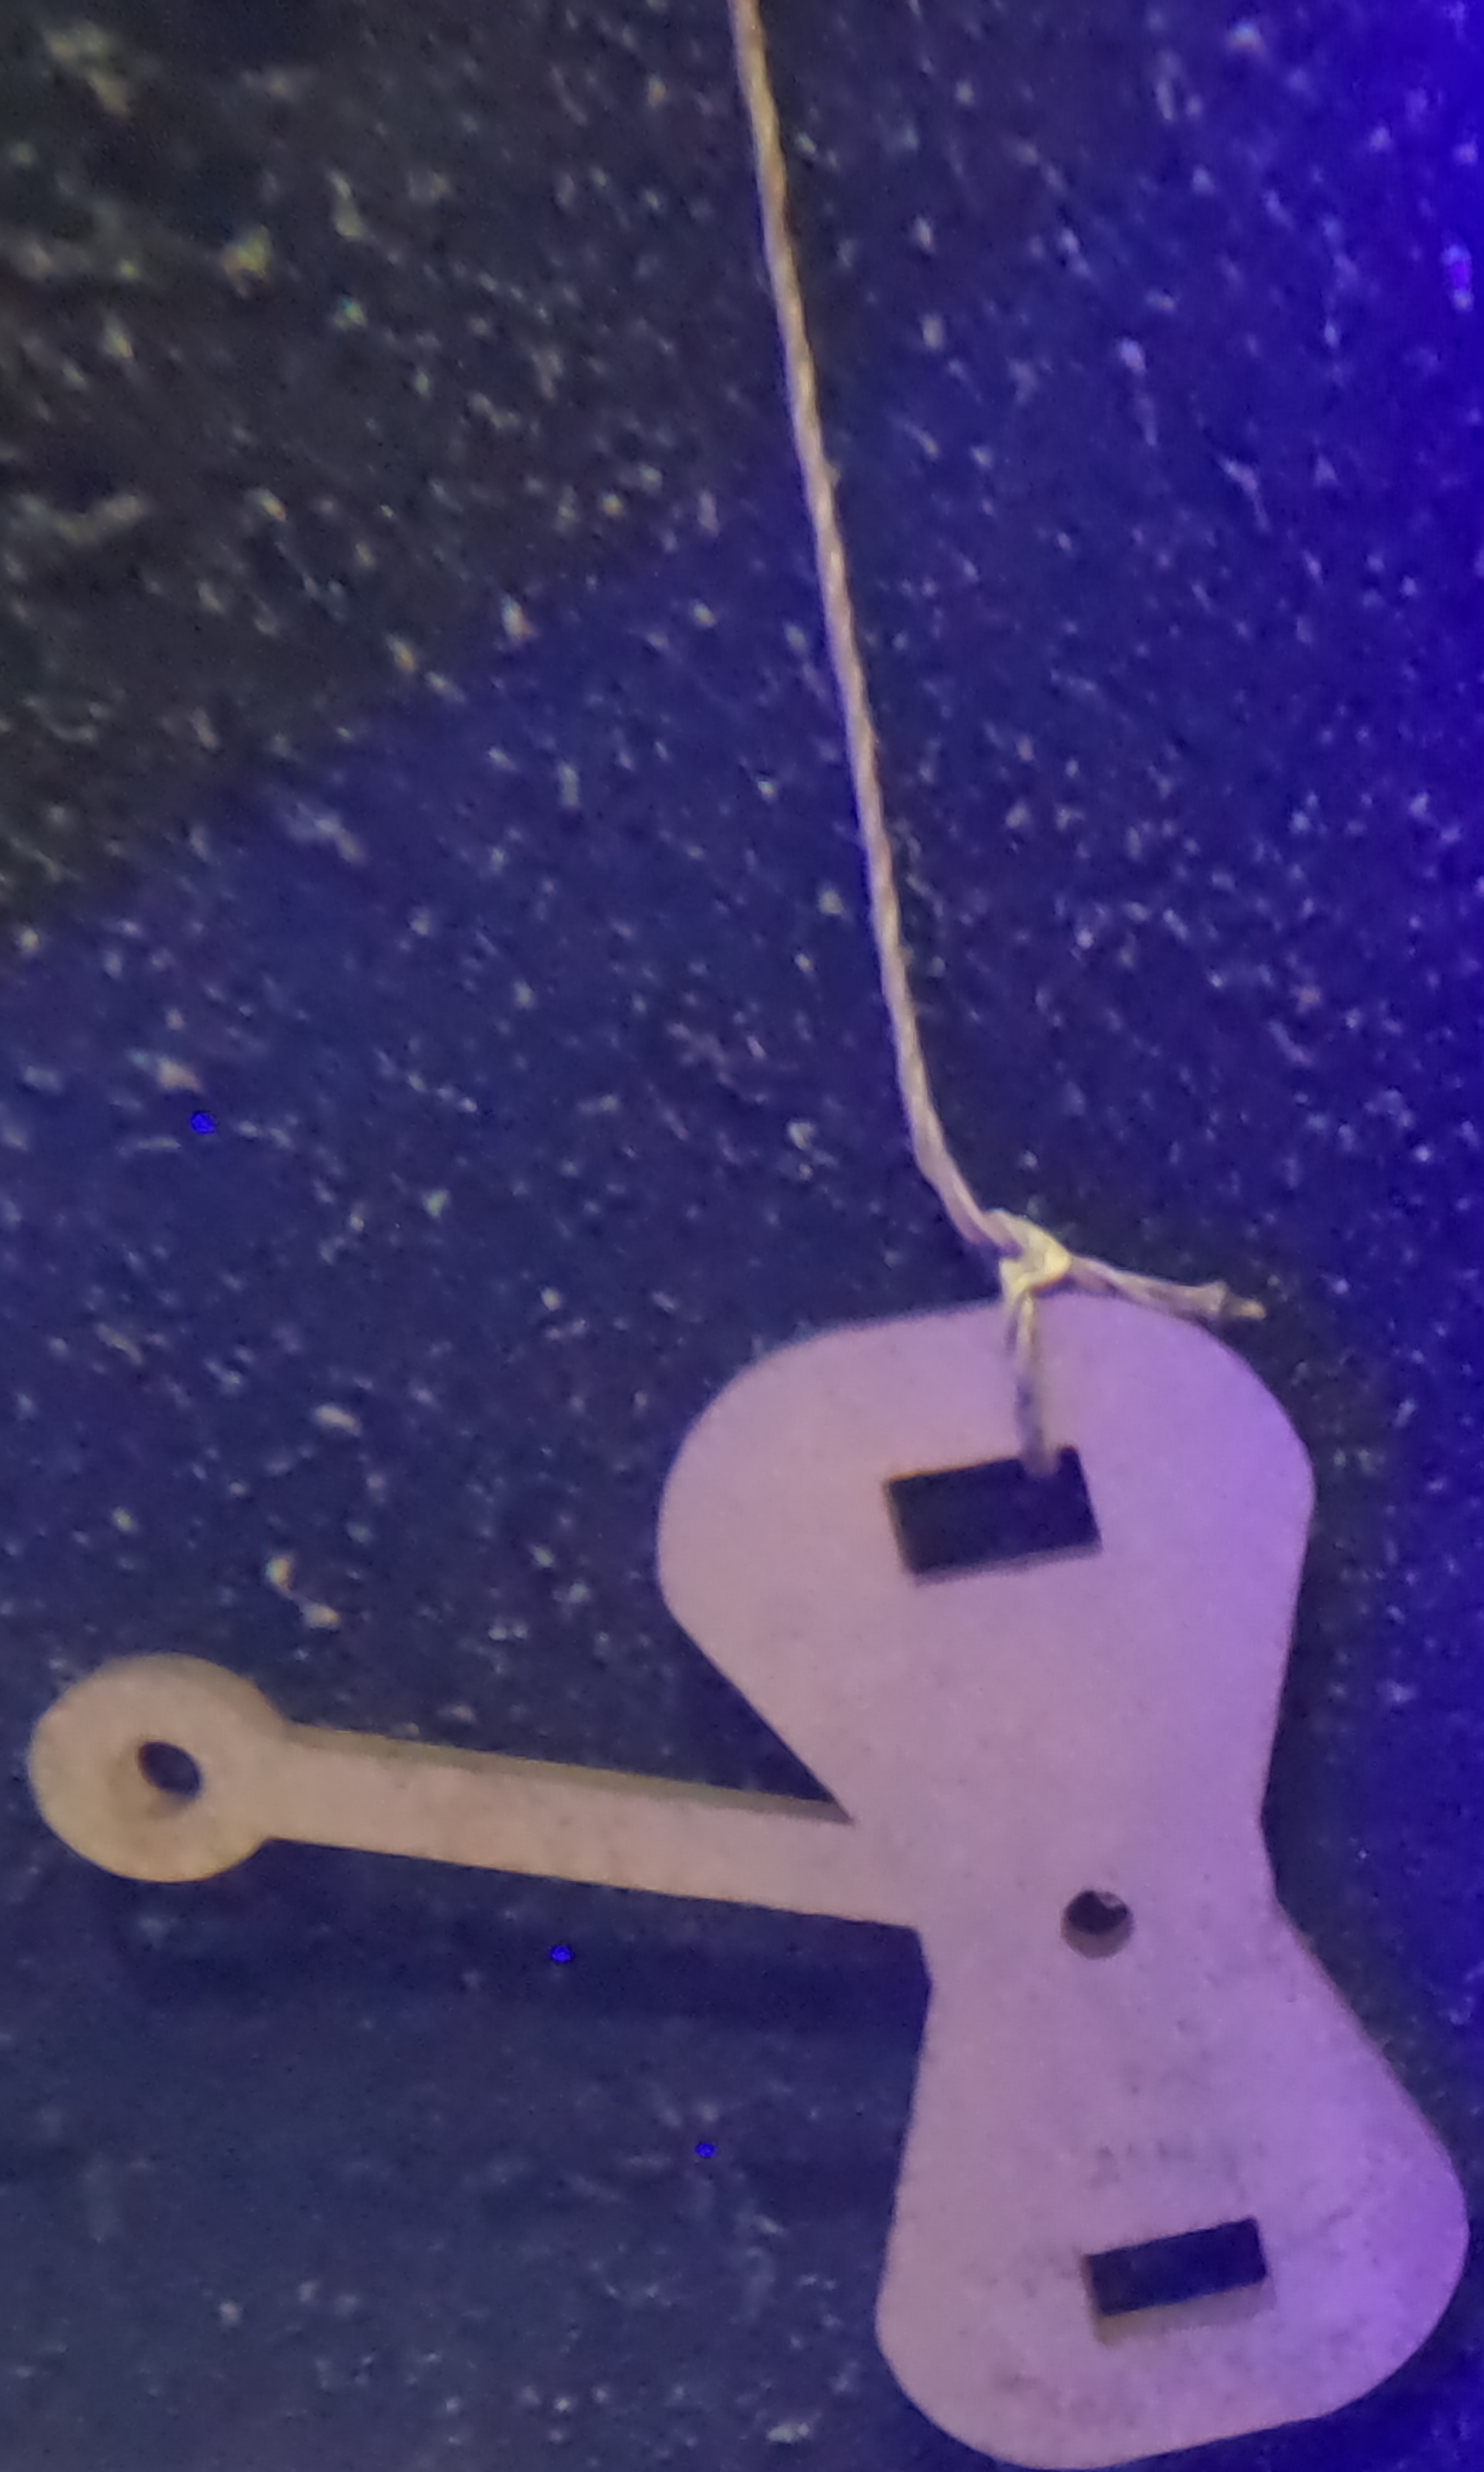

Supplement: Supplementary file 3143 [file G0015584.pdf › Level_2_1/G0015584.pdf]

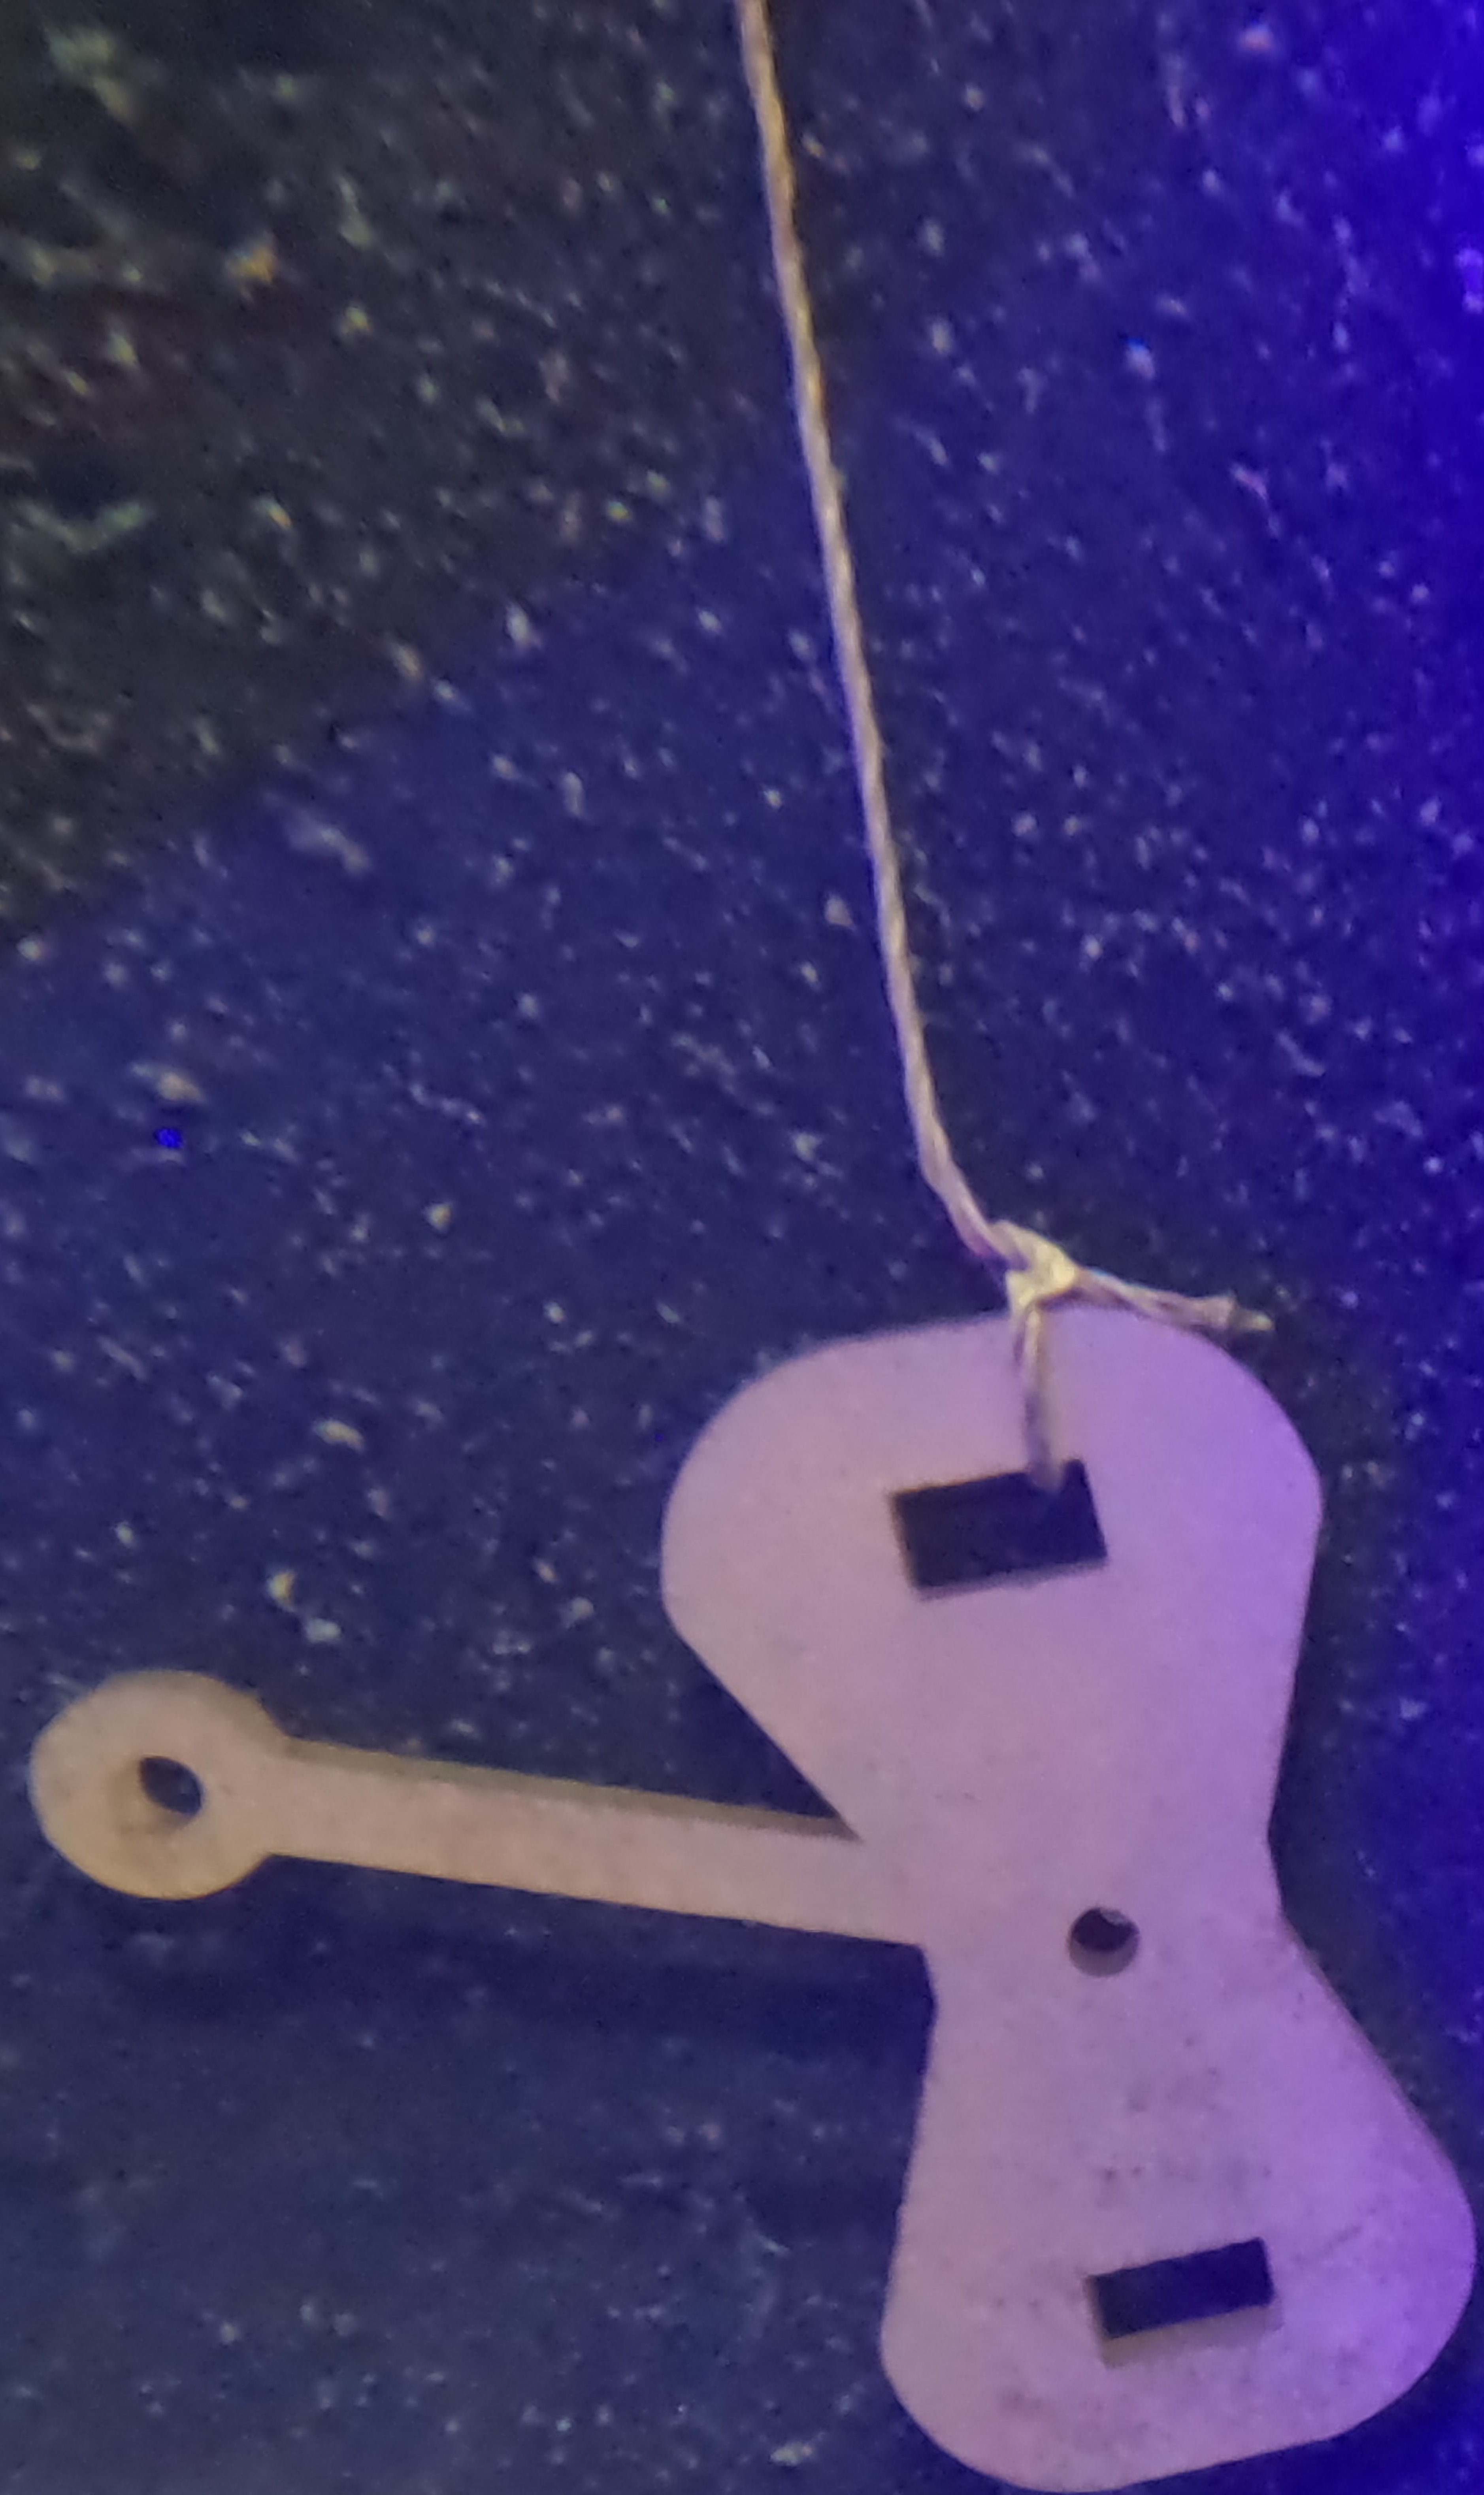

Supplement: Supplementary file 3144 [file G0015585.pdf › Level_2_1/G0015585.pdf]

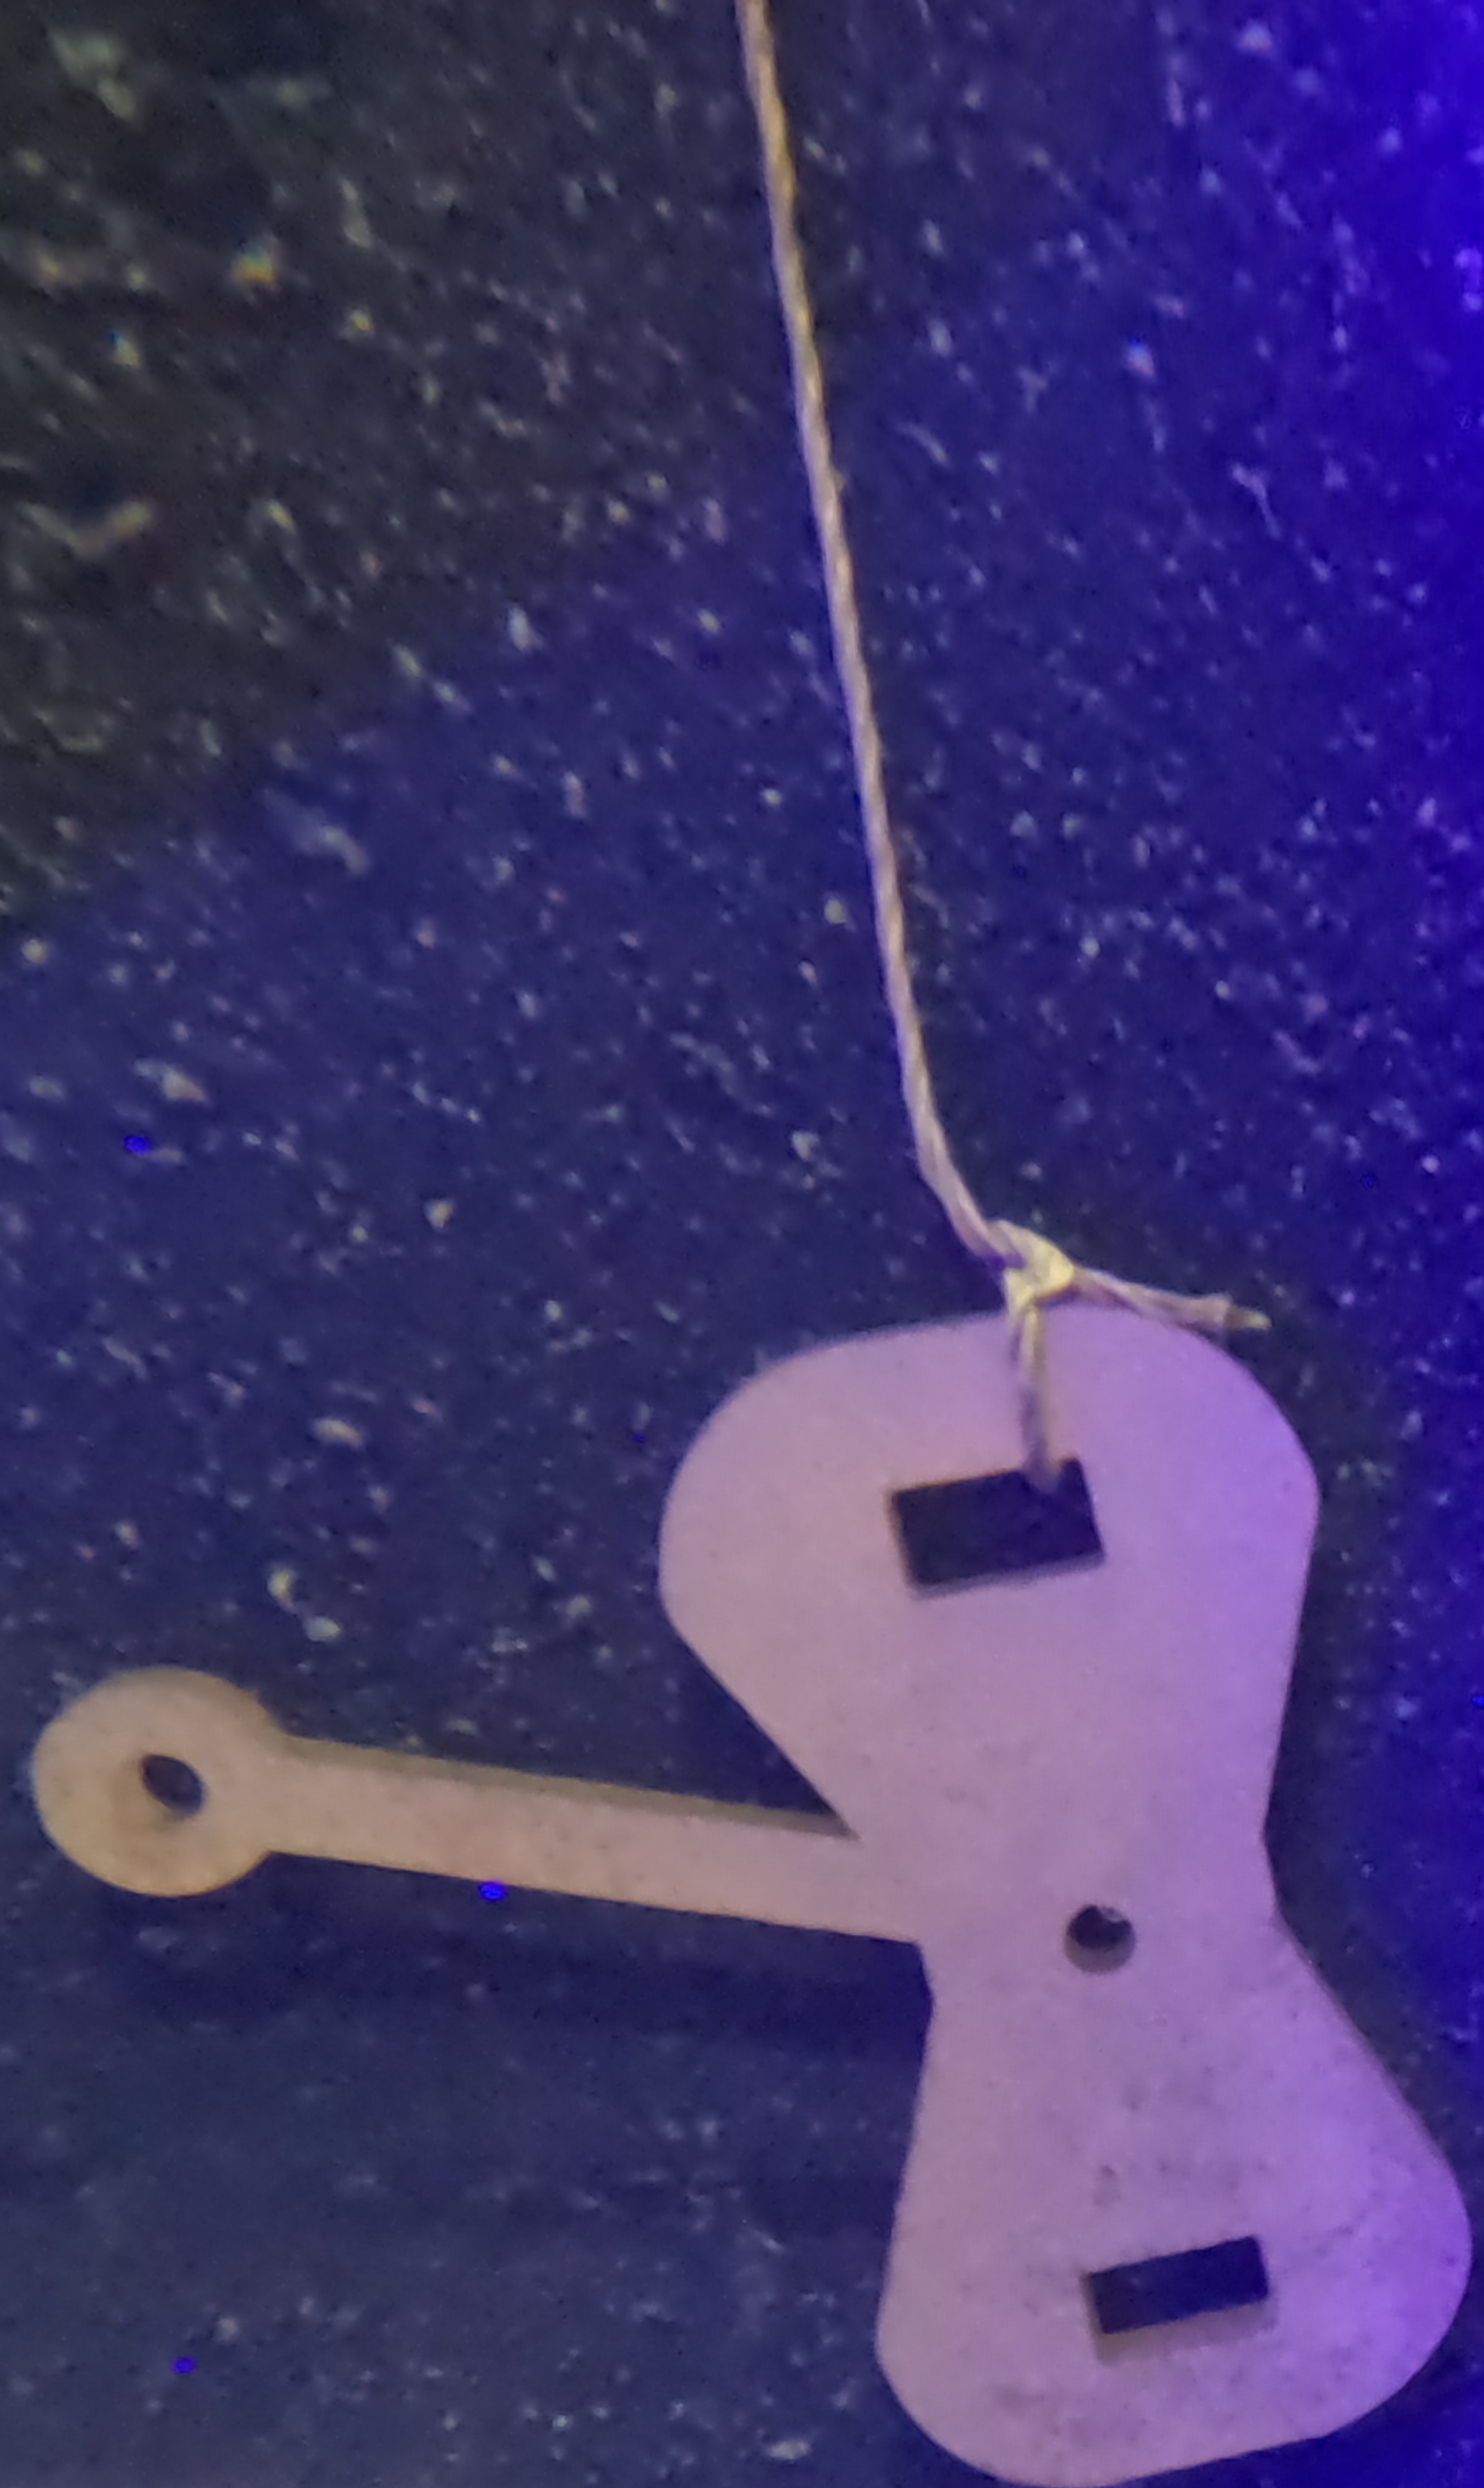

Supplement: Supplementary file 3145 [file G0015586.pdf › Level_2_1/G0015586.pdf]

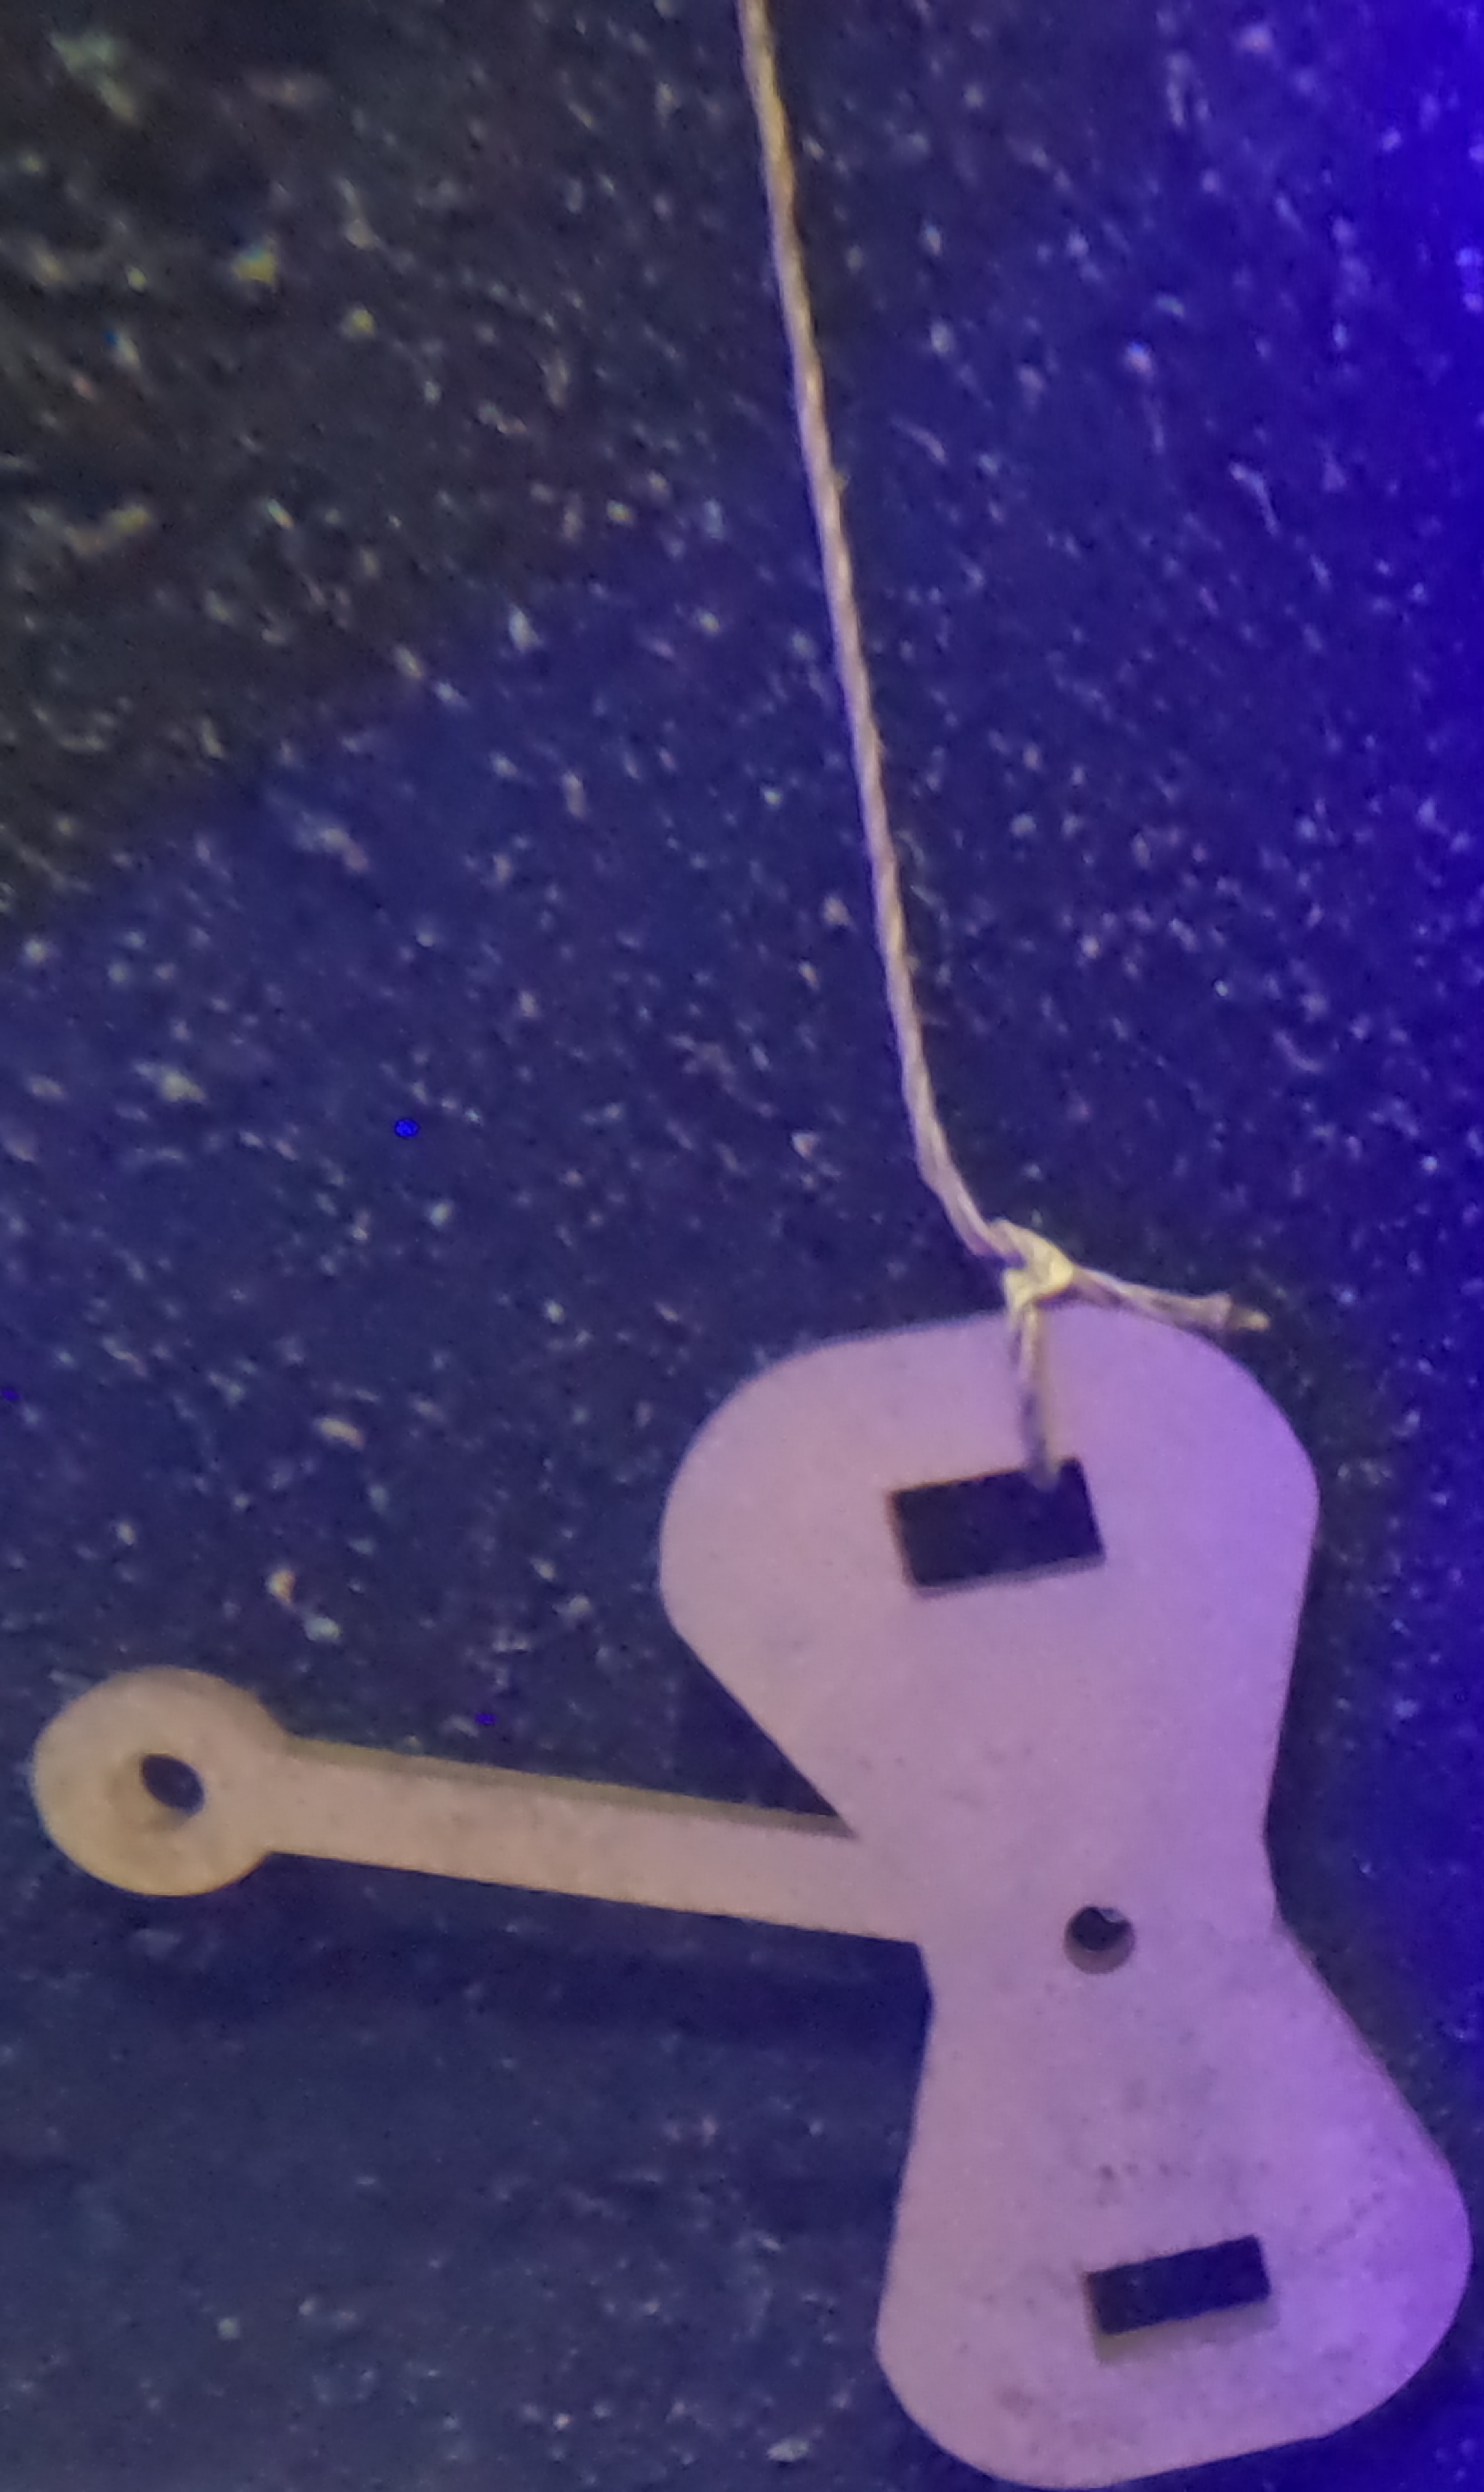

Supplement: Supplementary file 3146 [file G0015587.pdf › Level_2_1/G0015587.pdf]

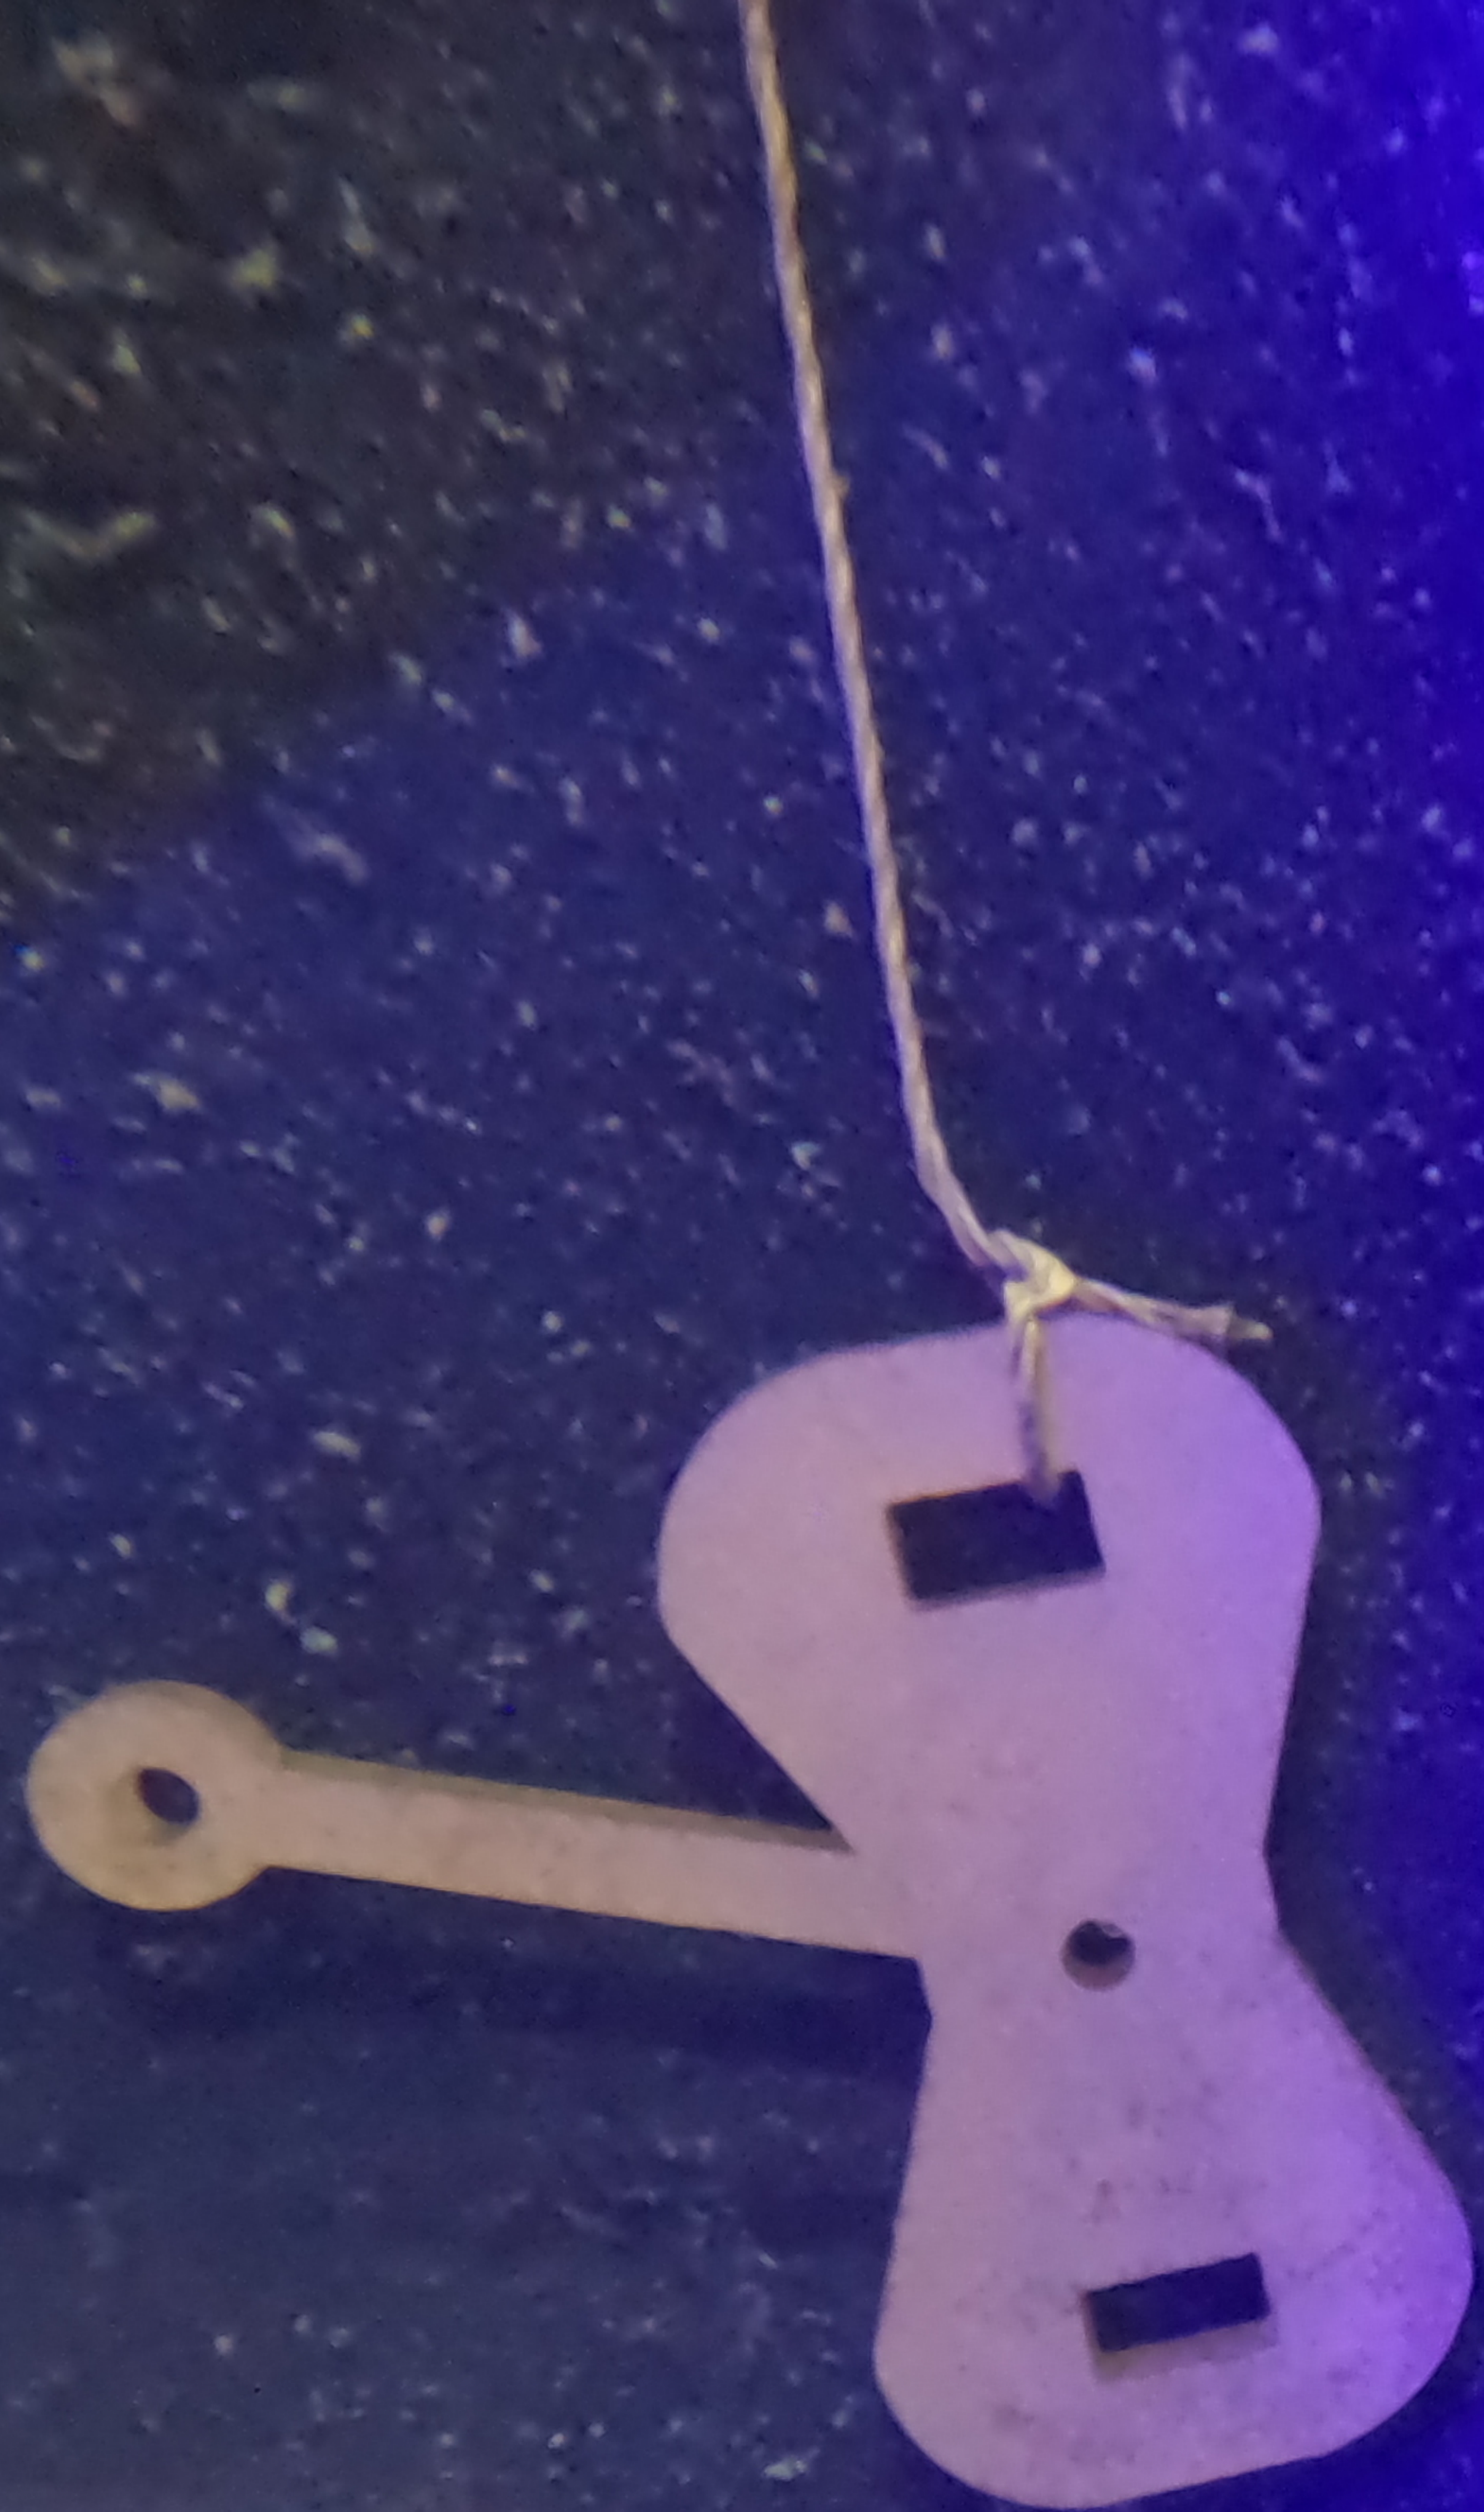

Supplement: Supplementary file 3147 [file G0015588.pdf › Level_2_1/G0015588.pdf]

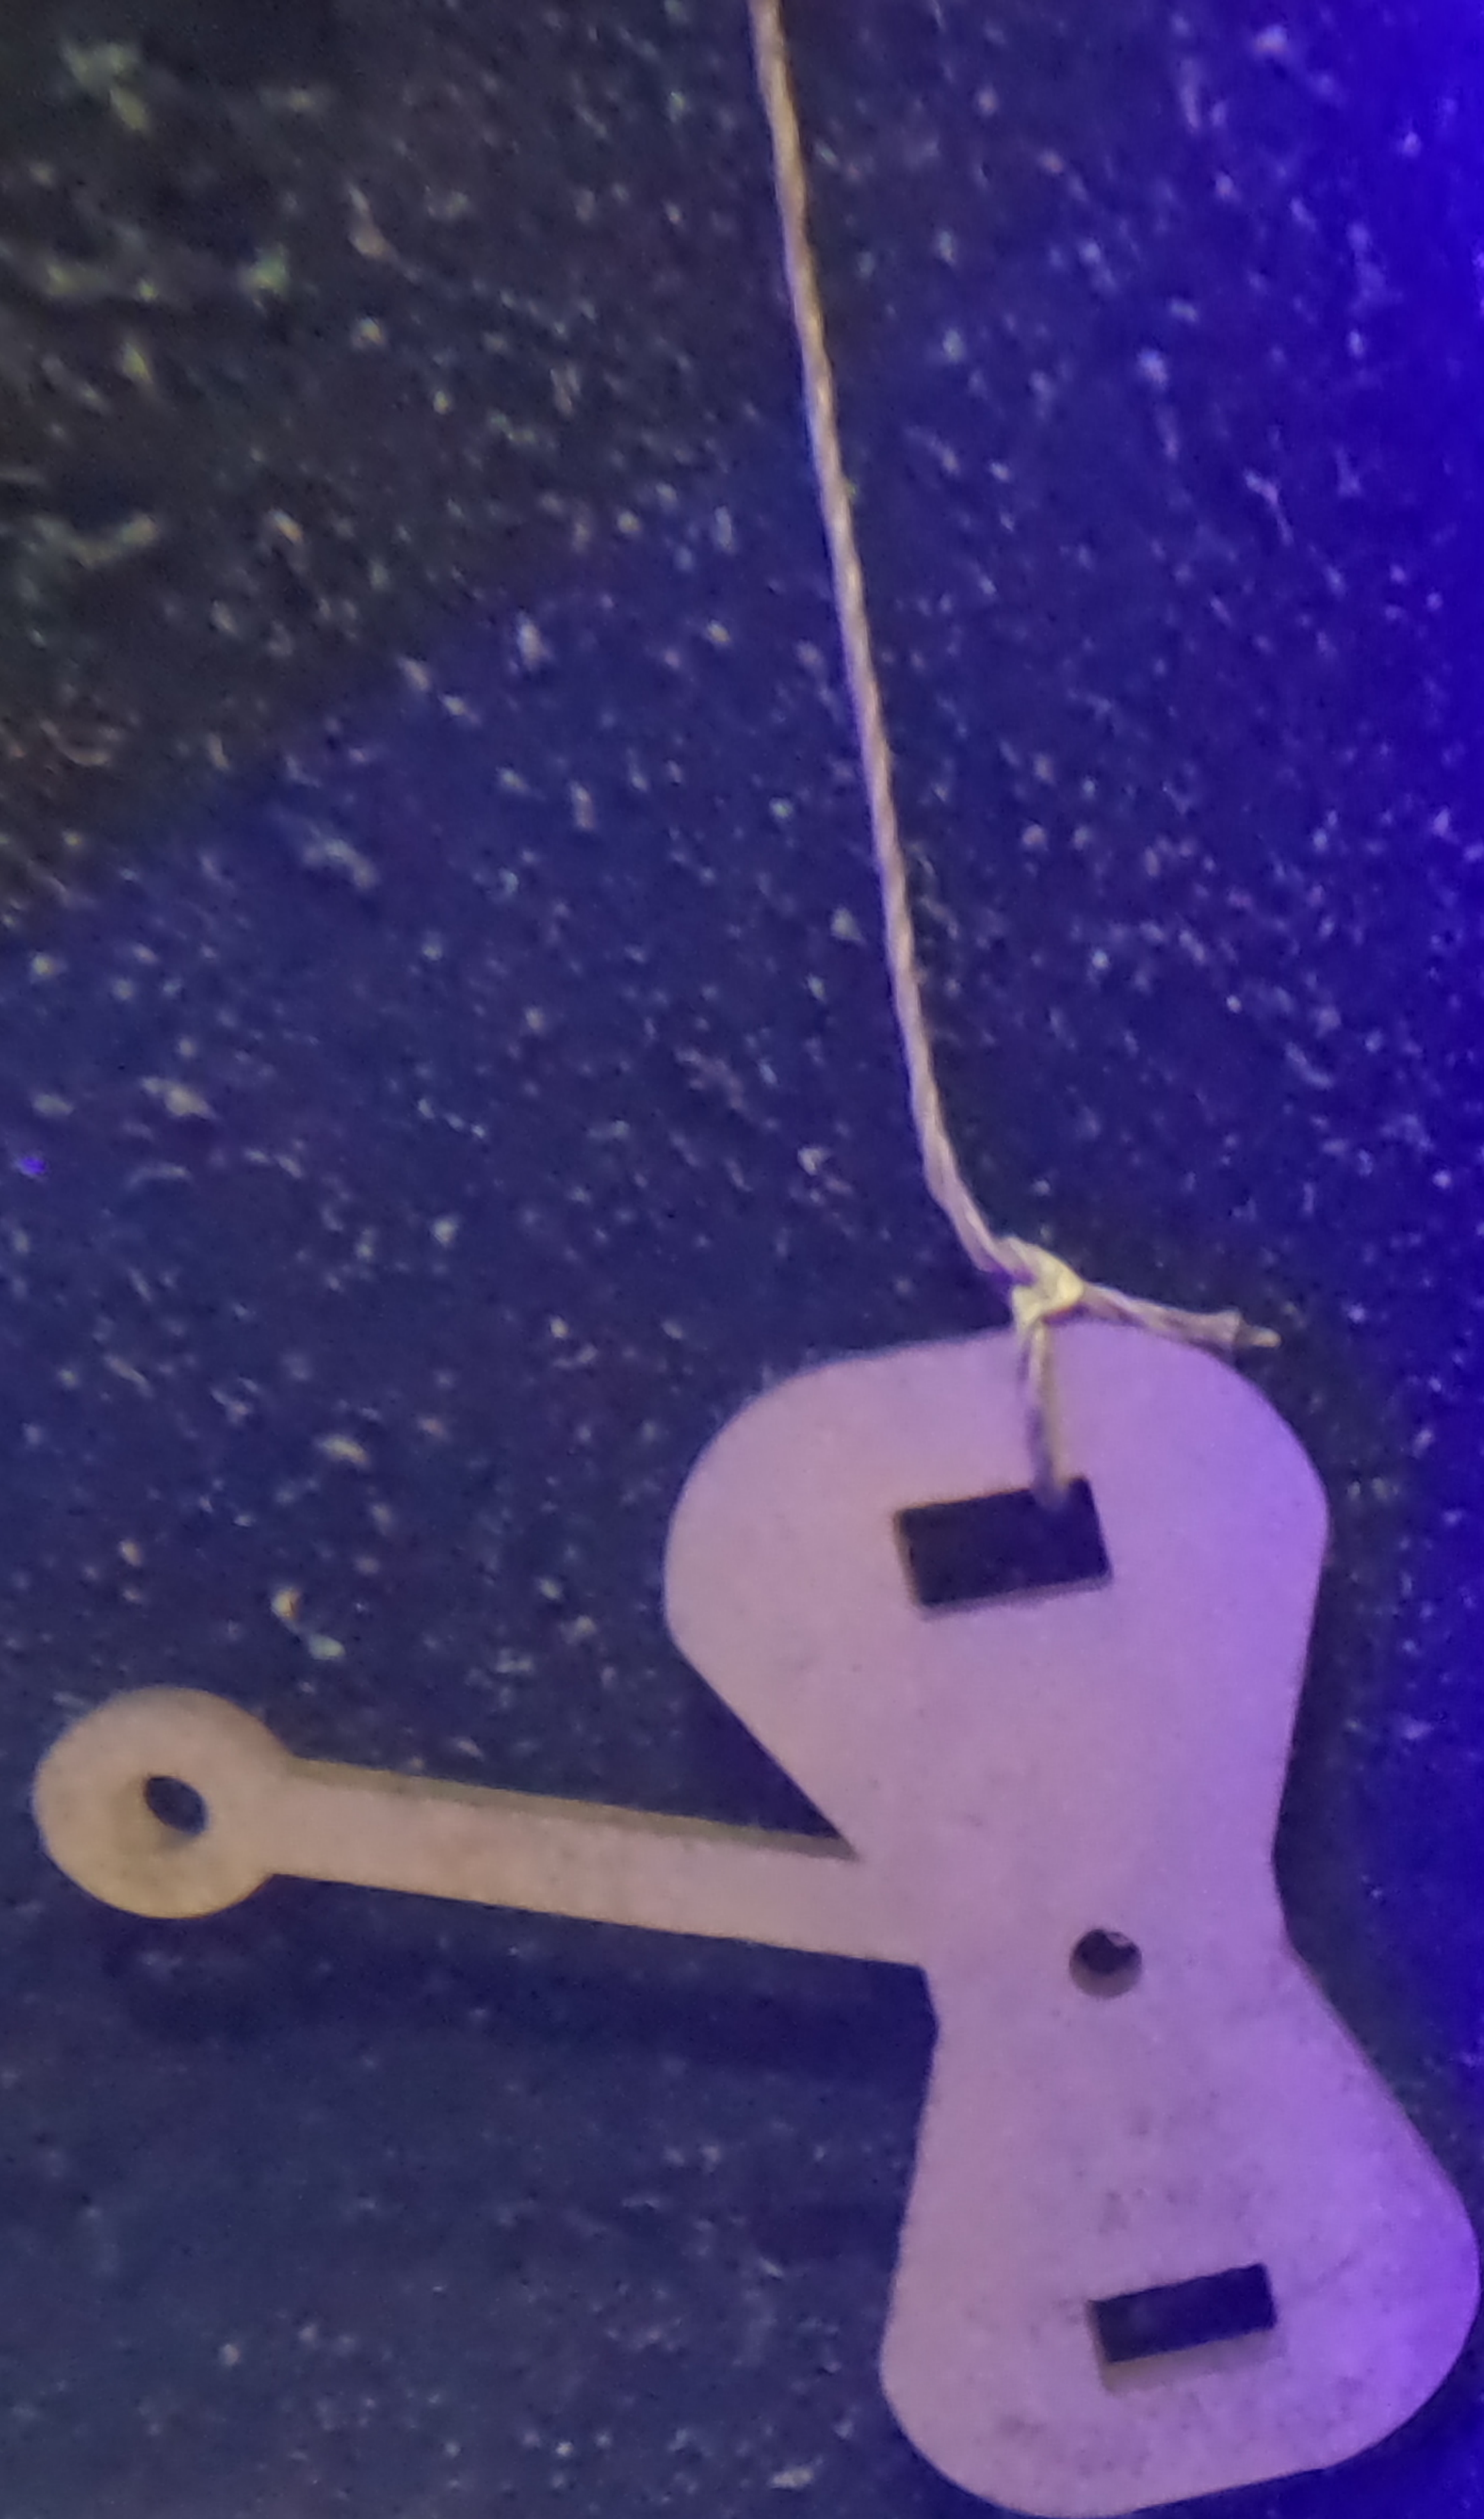

Supplement: Supplementary file 3148 [file G0015589.pdf › Level_2_1/G0015589.pdf]

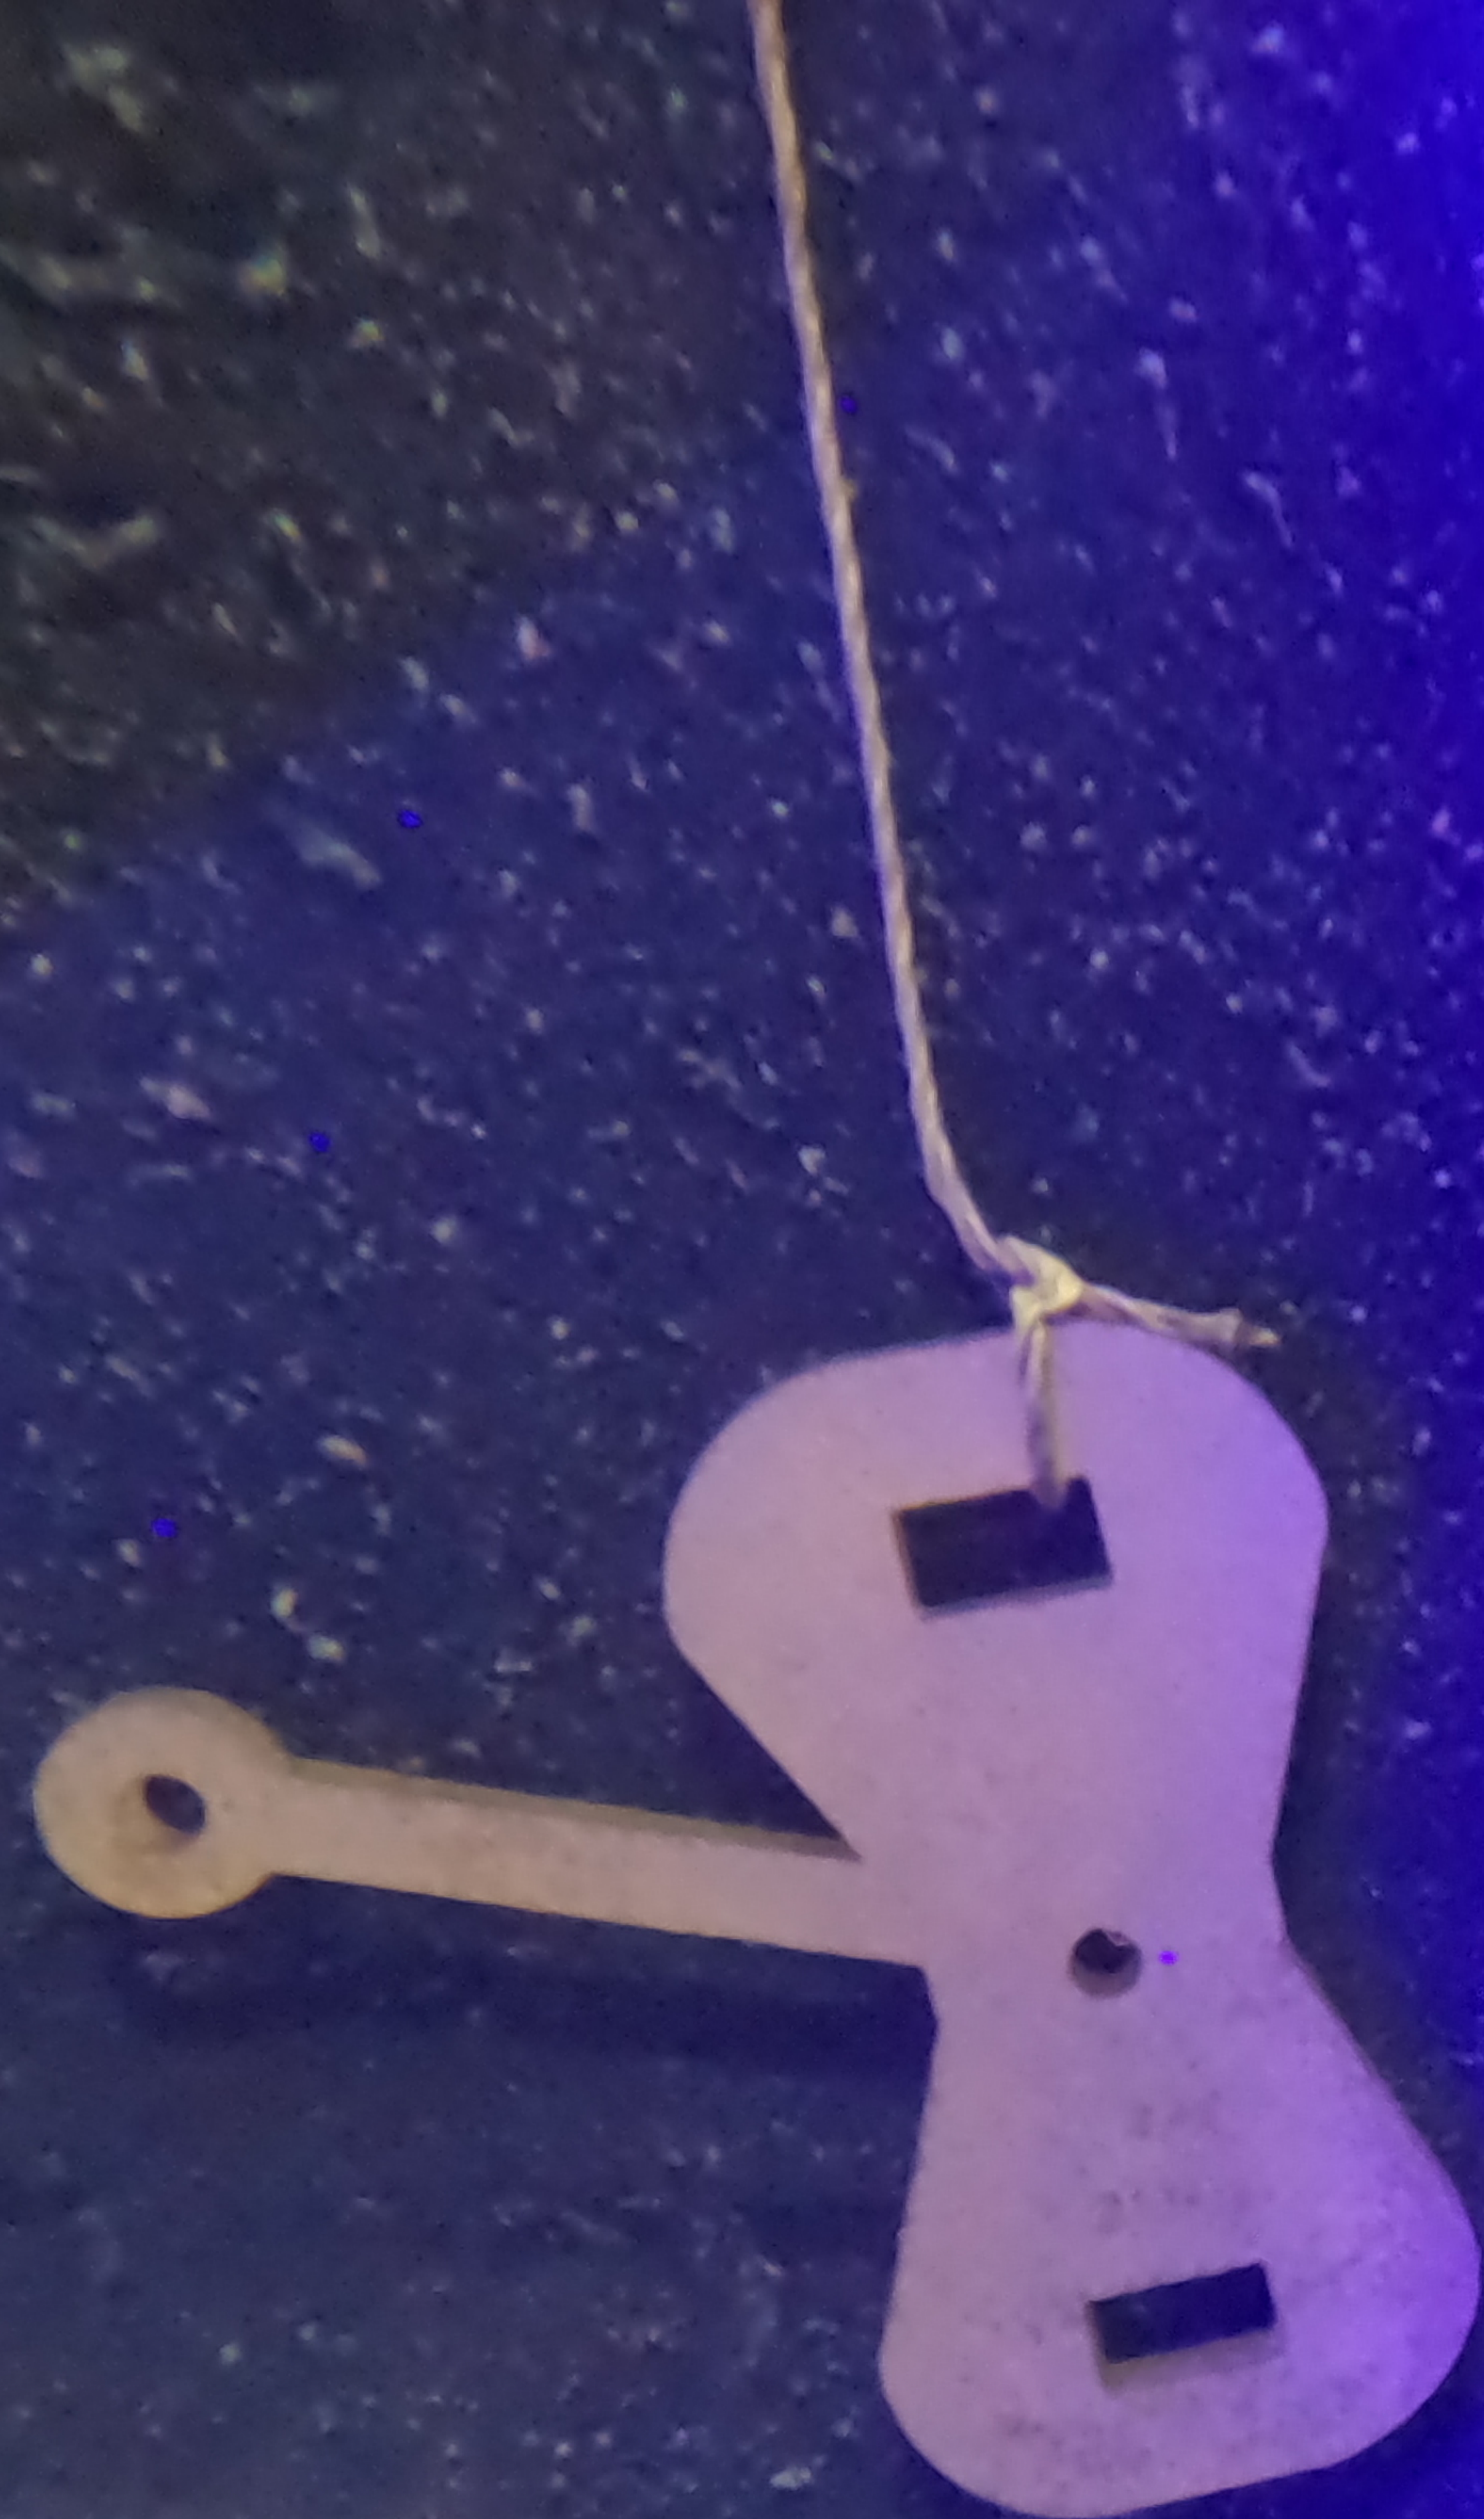

Supplement: Supplementary file 3149 [file G0015590.pdf › Level_2_1/G0015590.pdf]

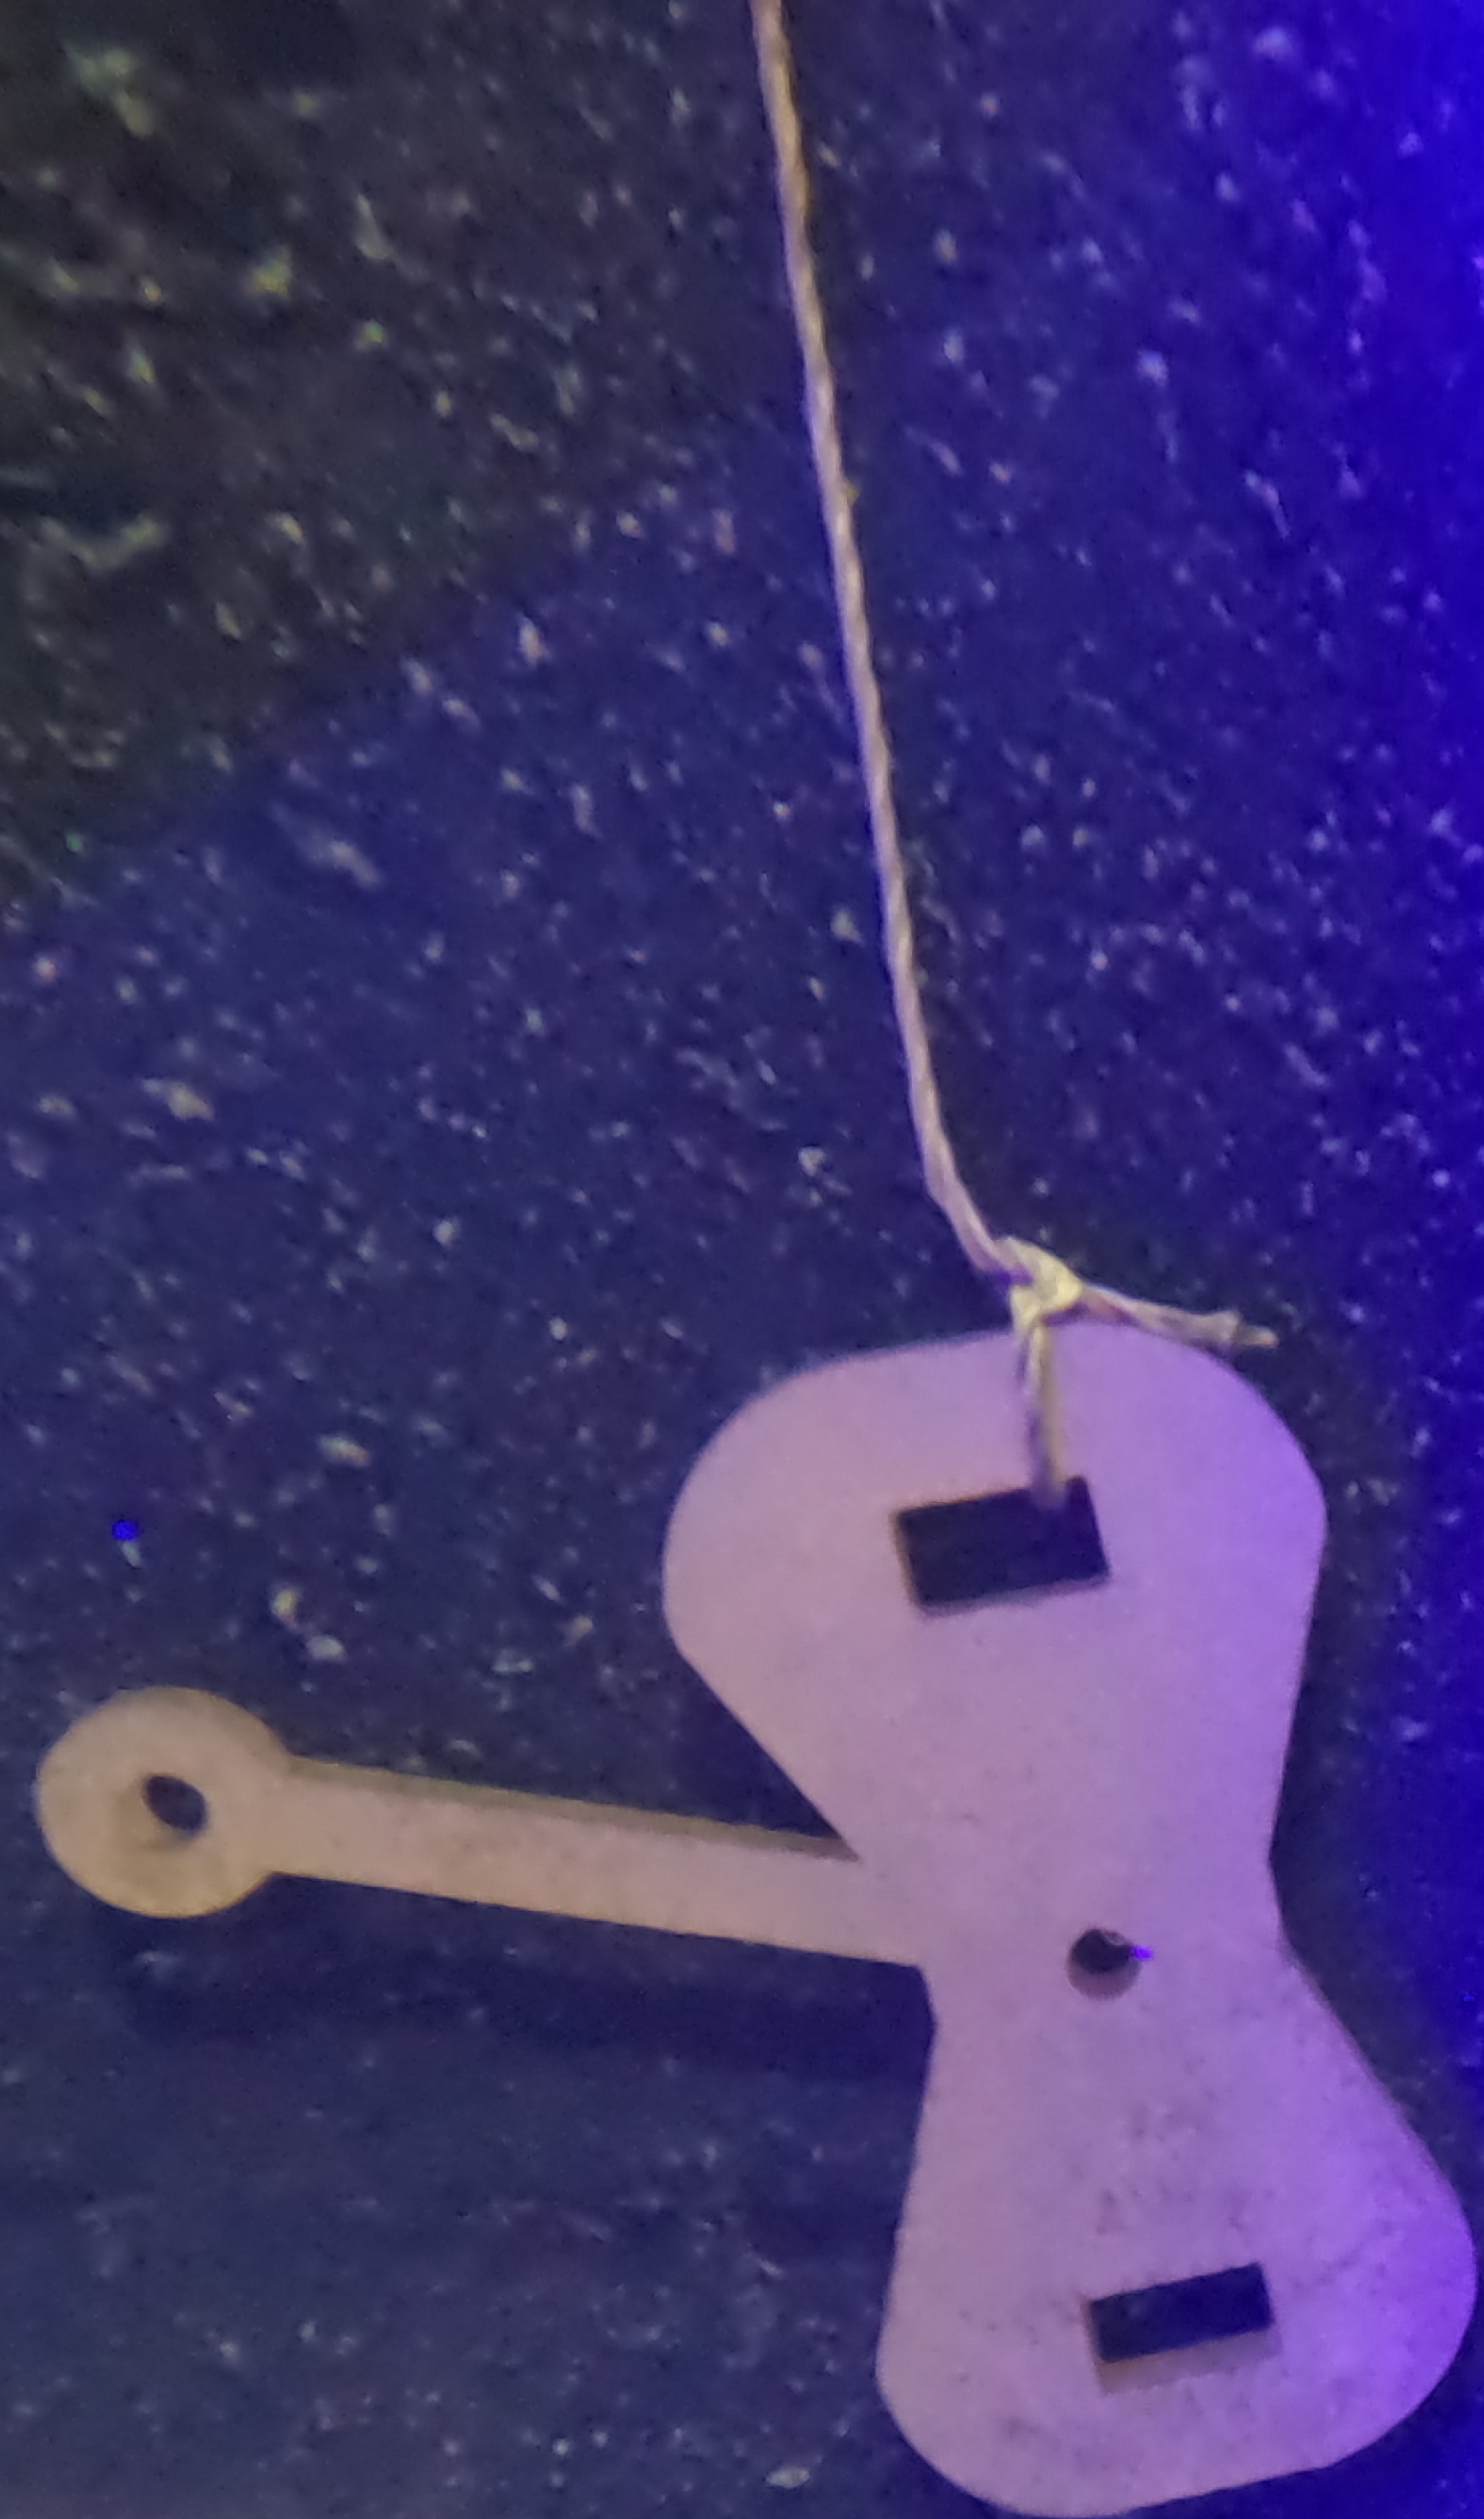

Supplement: Supplementary file 3150 [file G0015591.pdf › Level_2_1/G0015591.pdf]

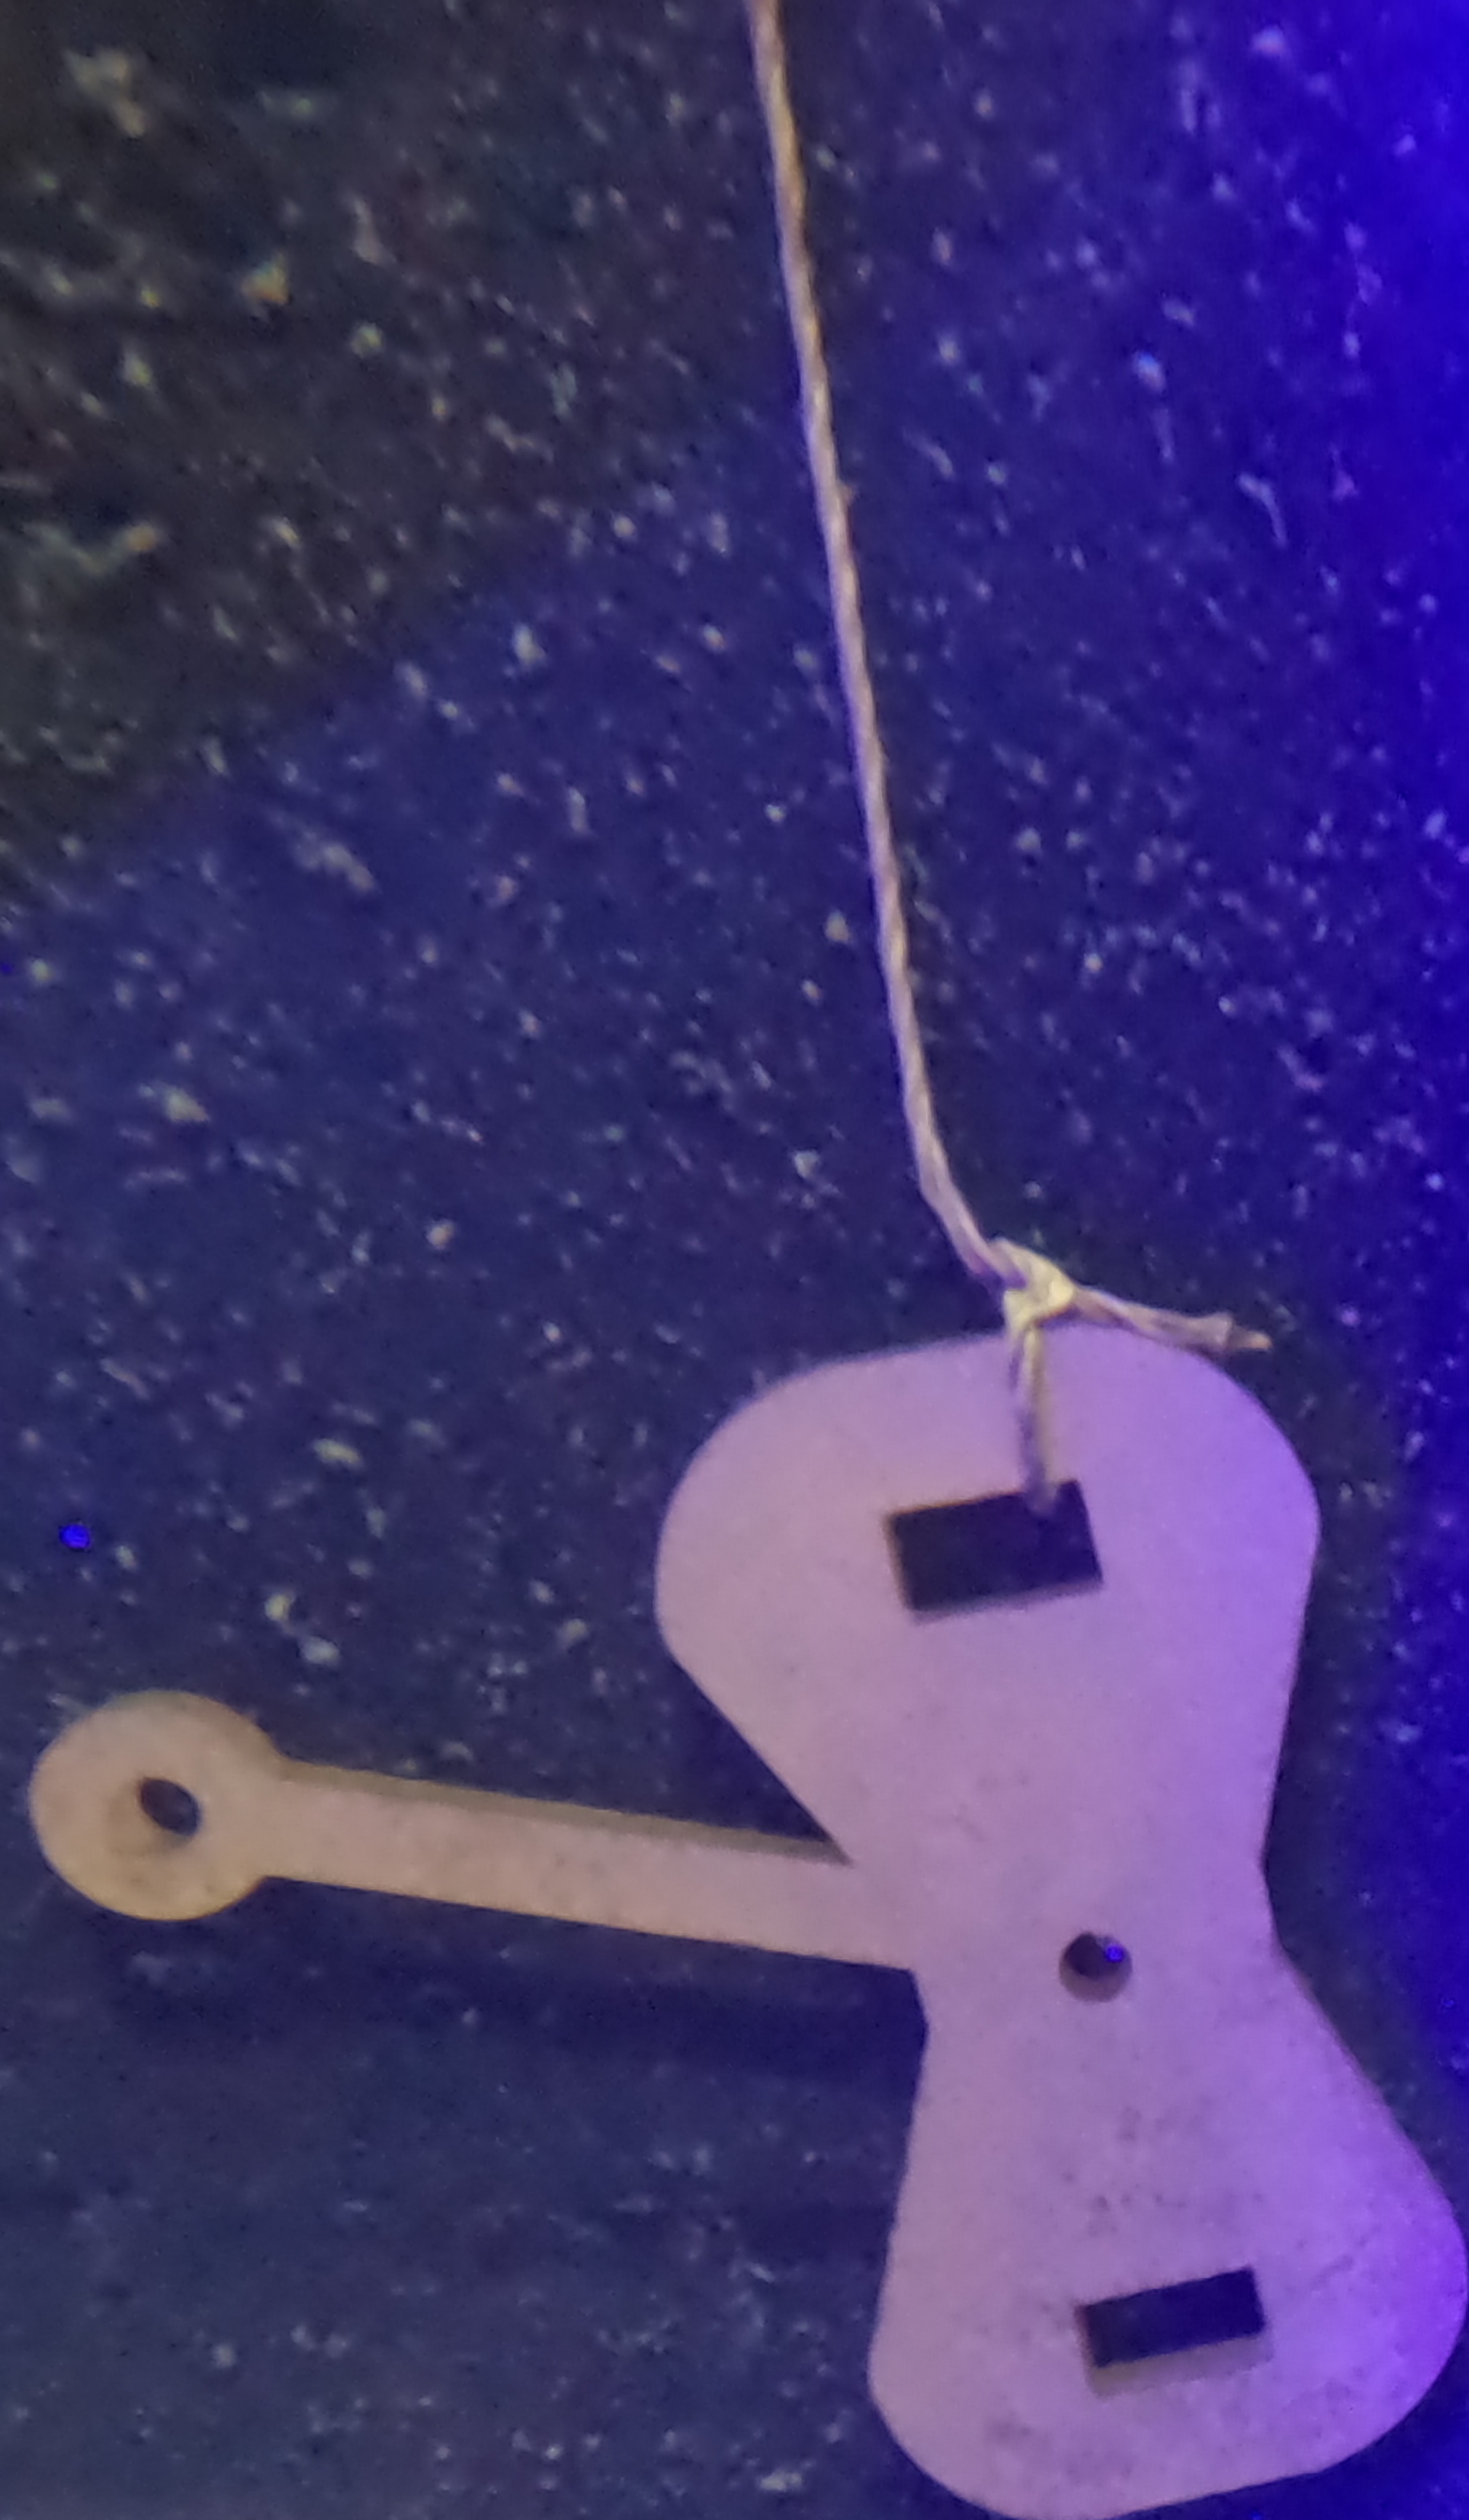

Supplement: Supplementary file 3151 [file G0015592.pdf › Level_2_1/G0015592.pdf]

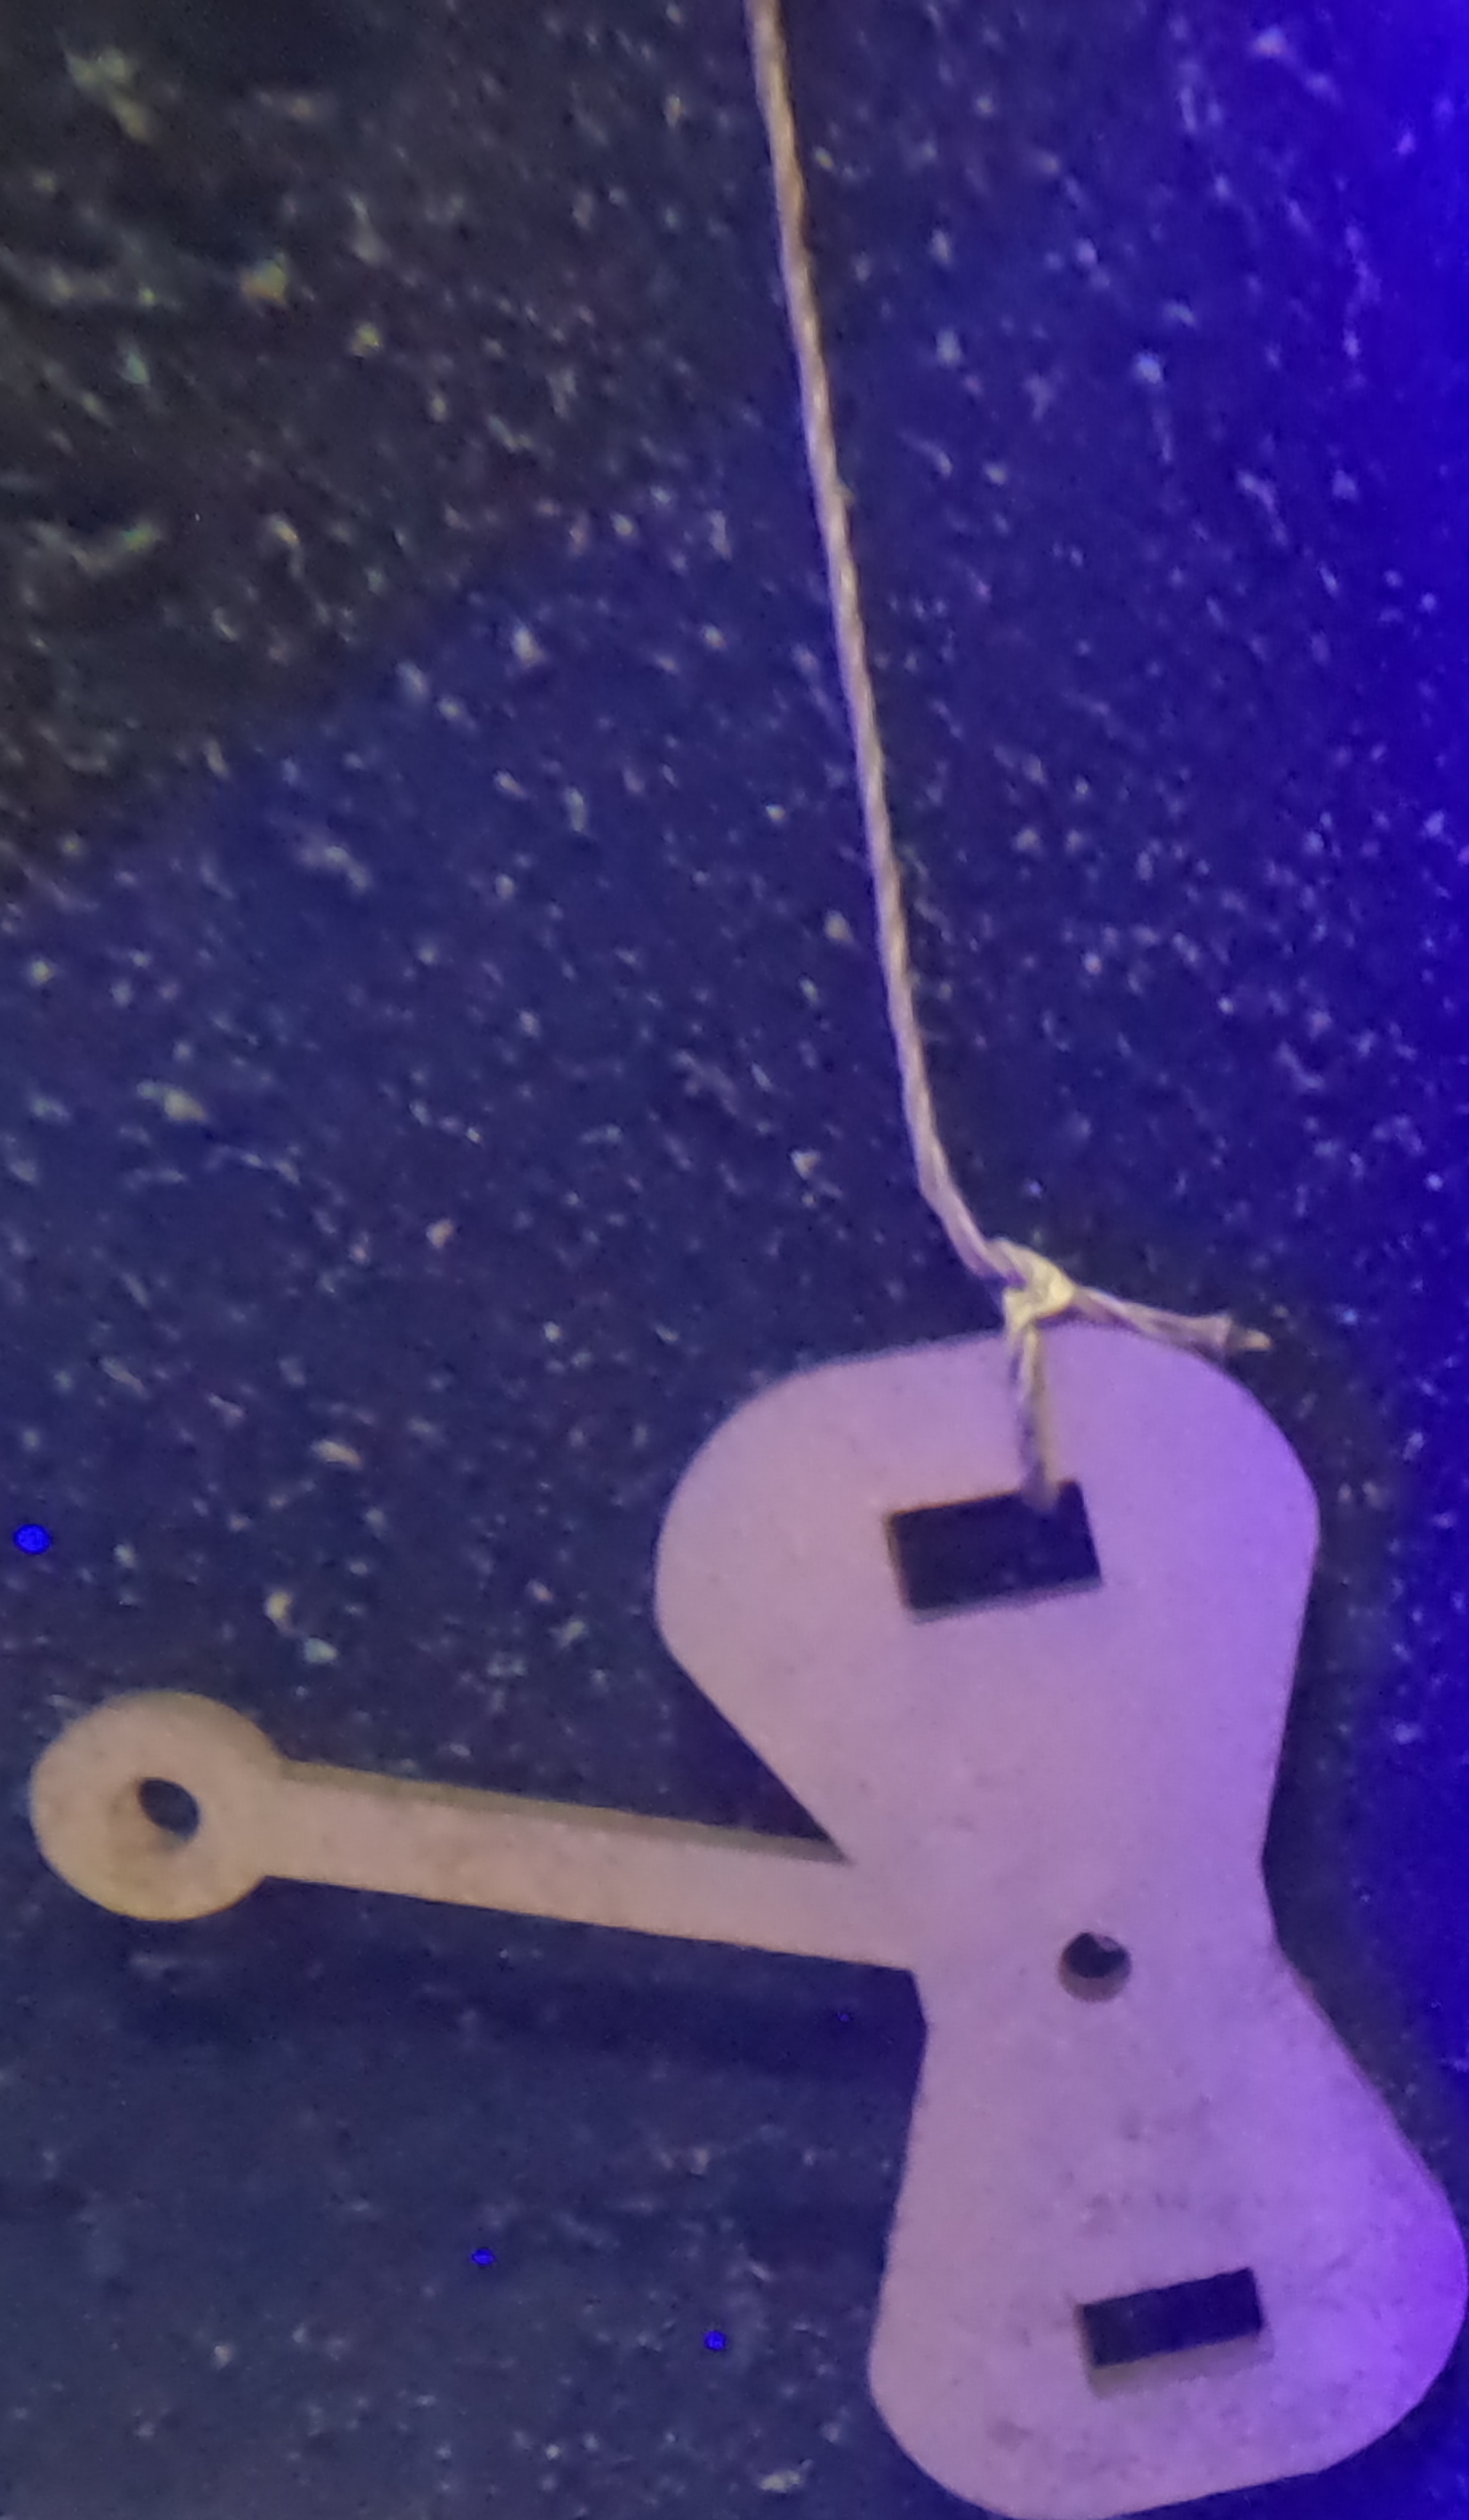

Supplement: Supplementary file 3152 [file G0015593.pdf › Level_2_1/G0015593.pdf]

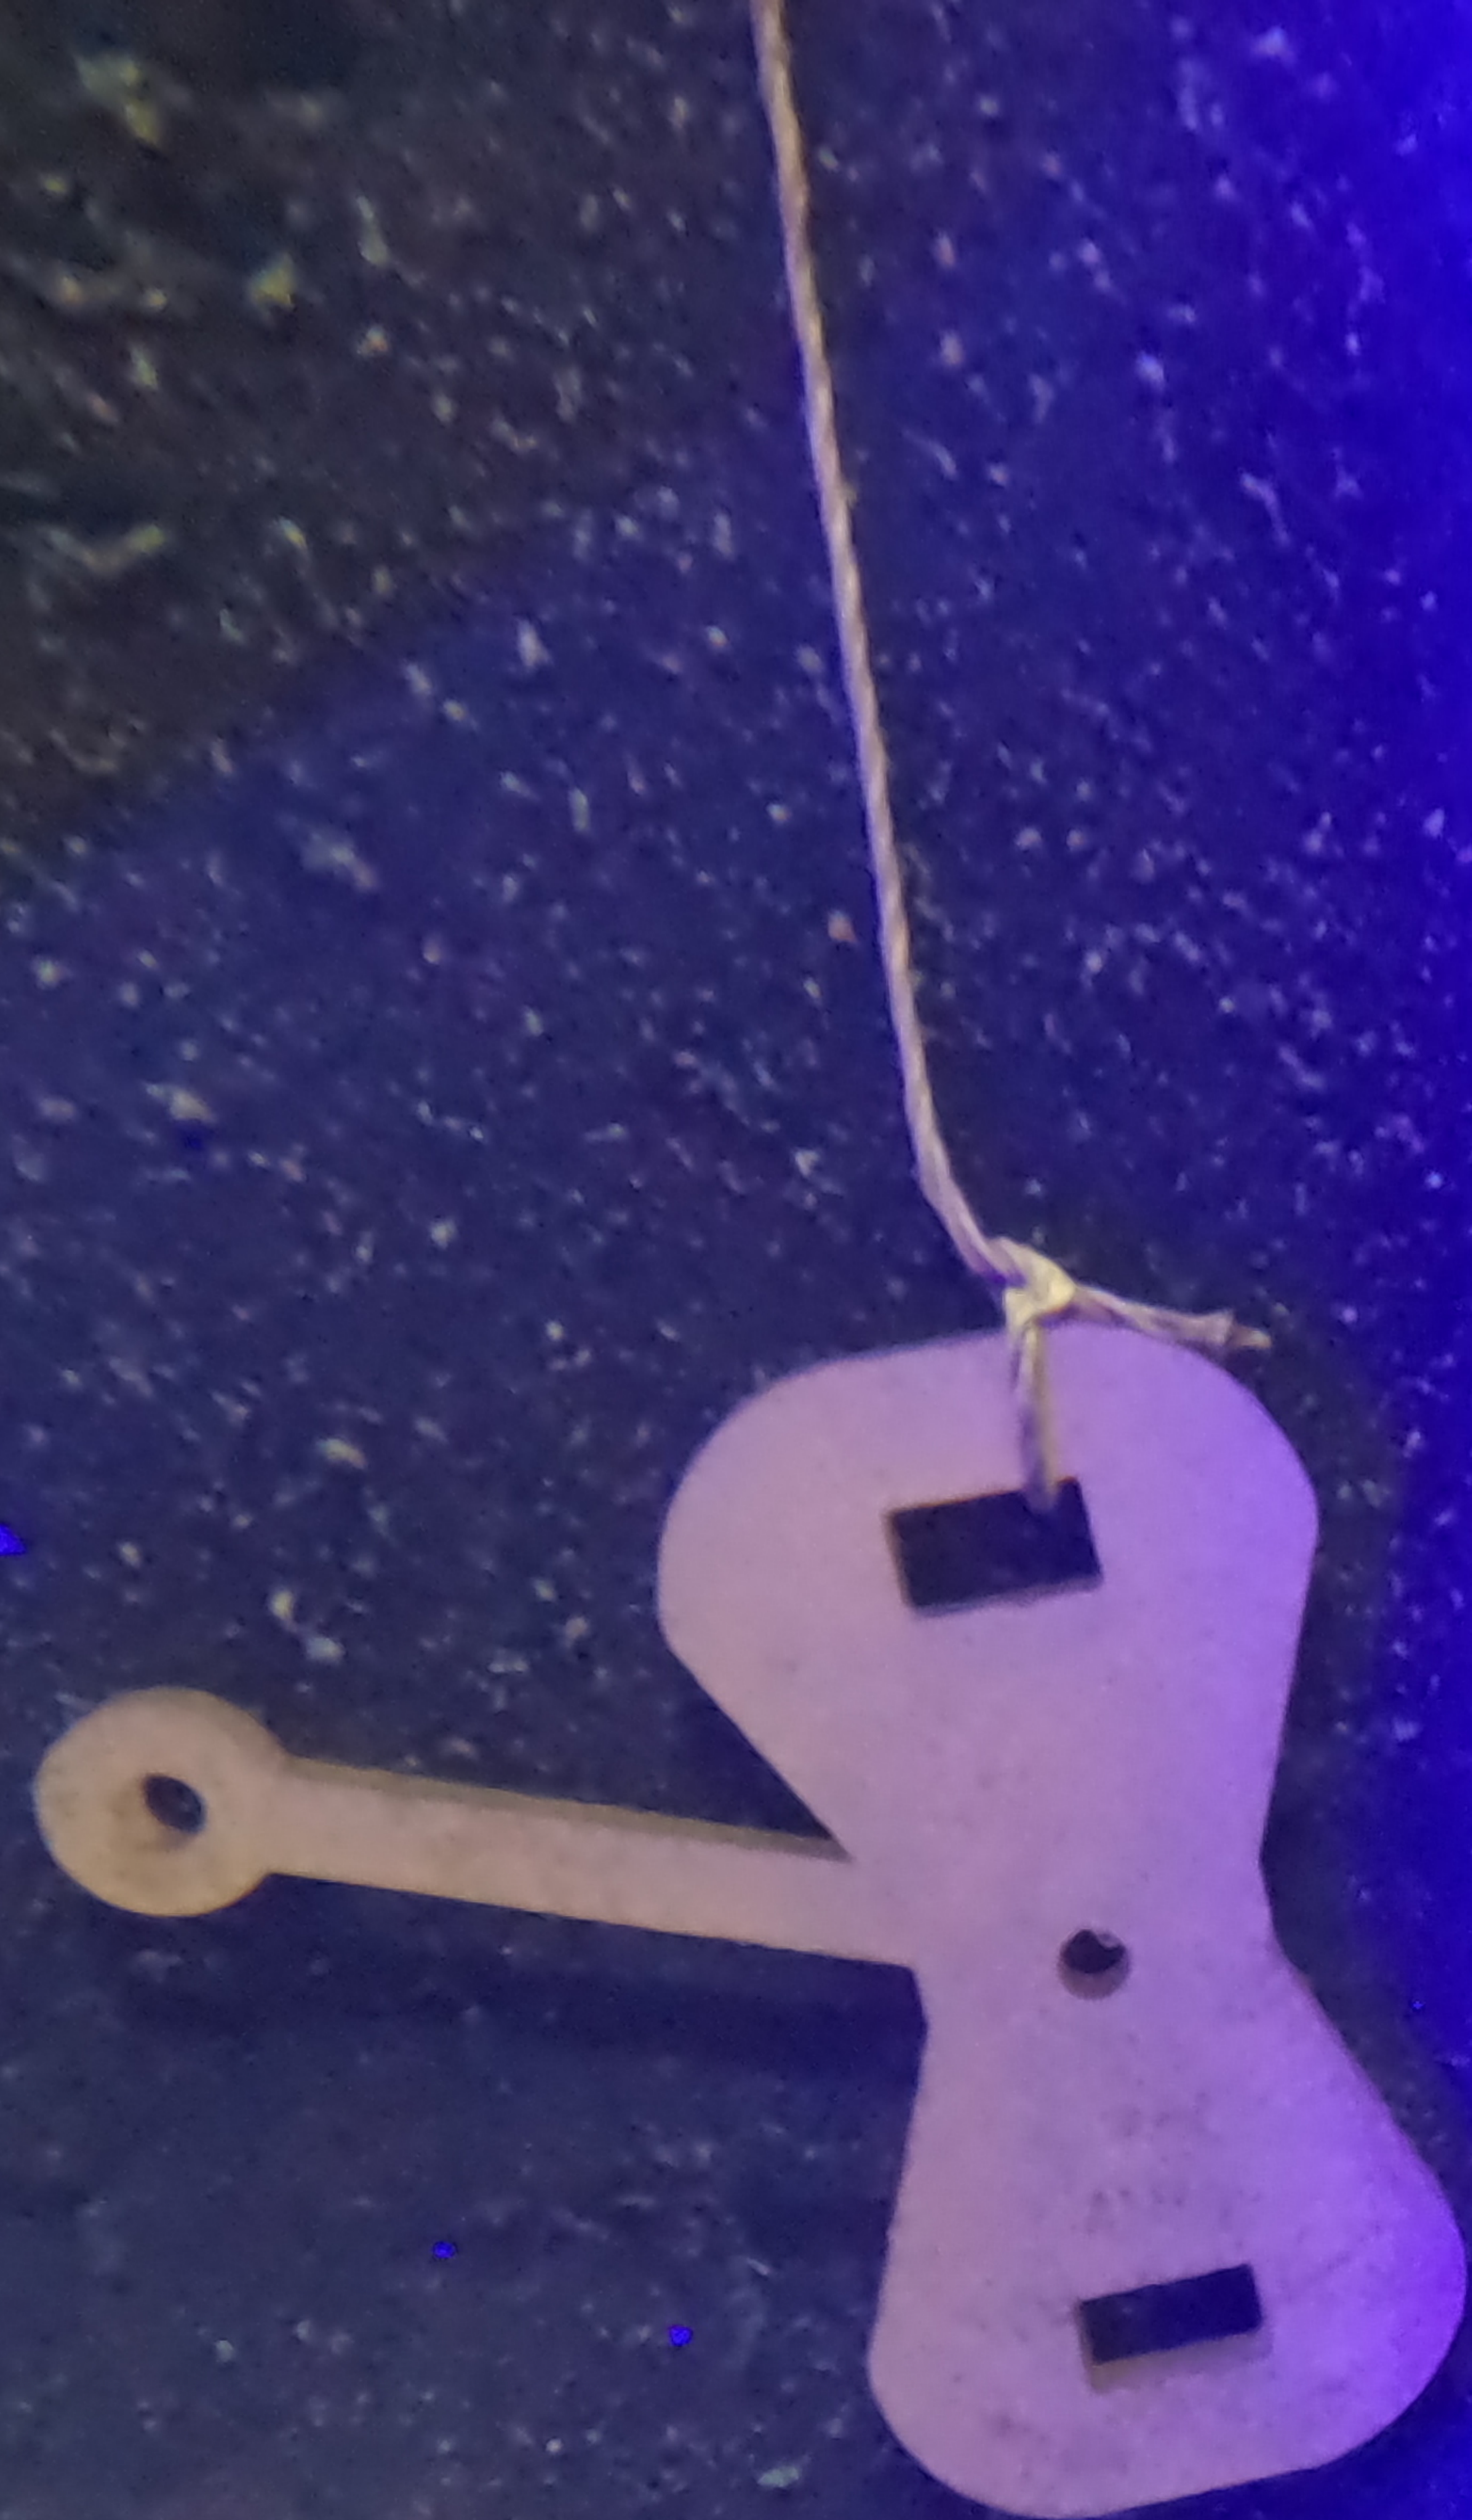

Supplement: Supplementary file 3153 [file G0015594.pdf › Level_2_1/G0015594.pdf]

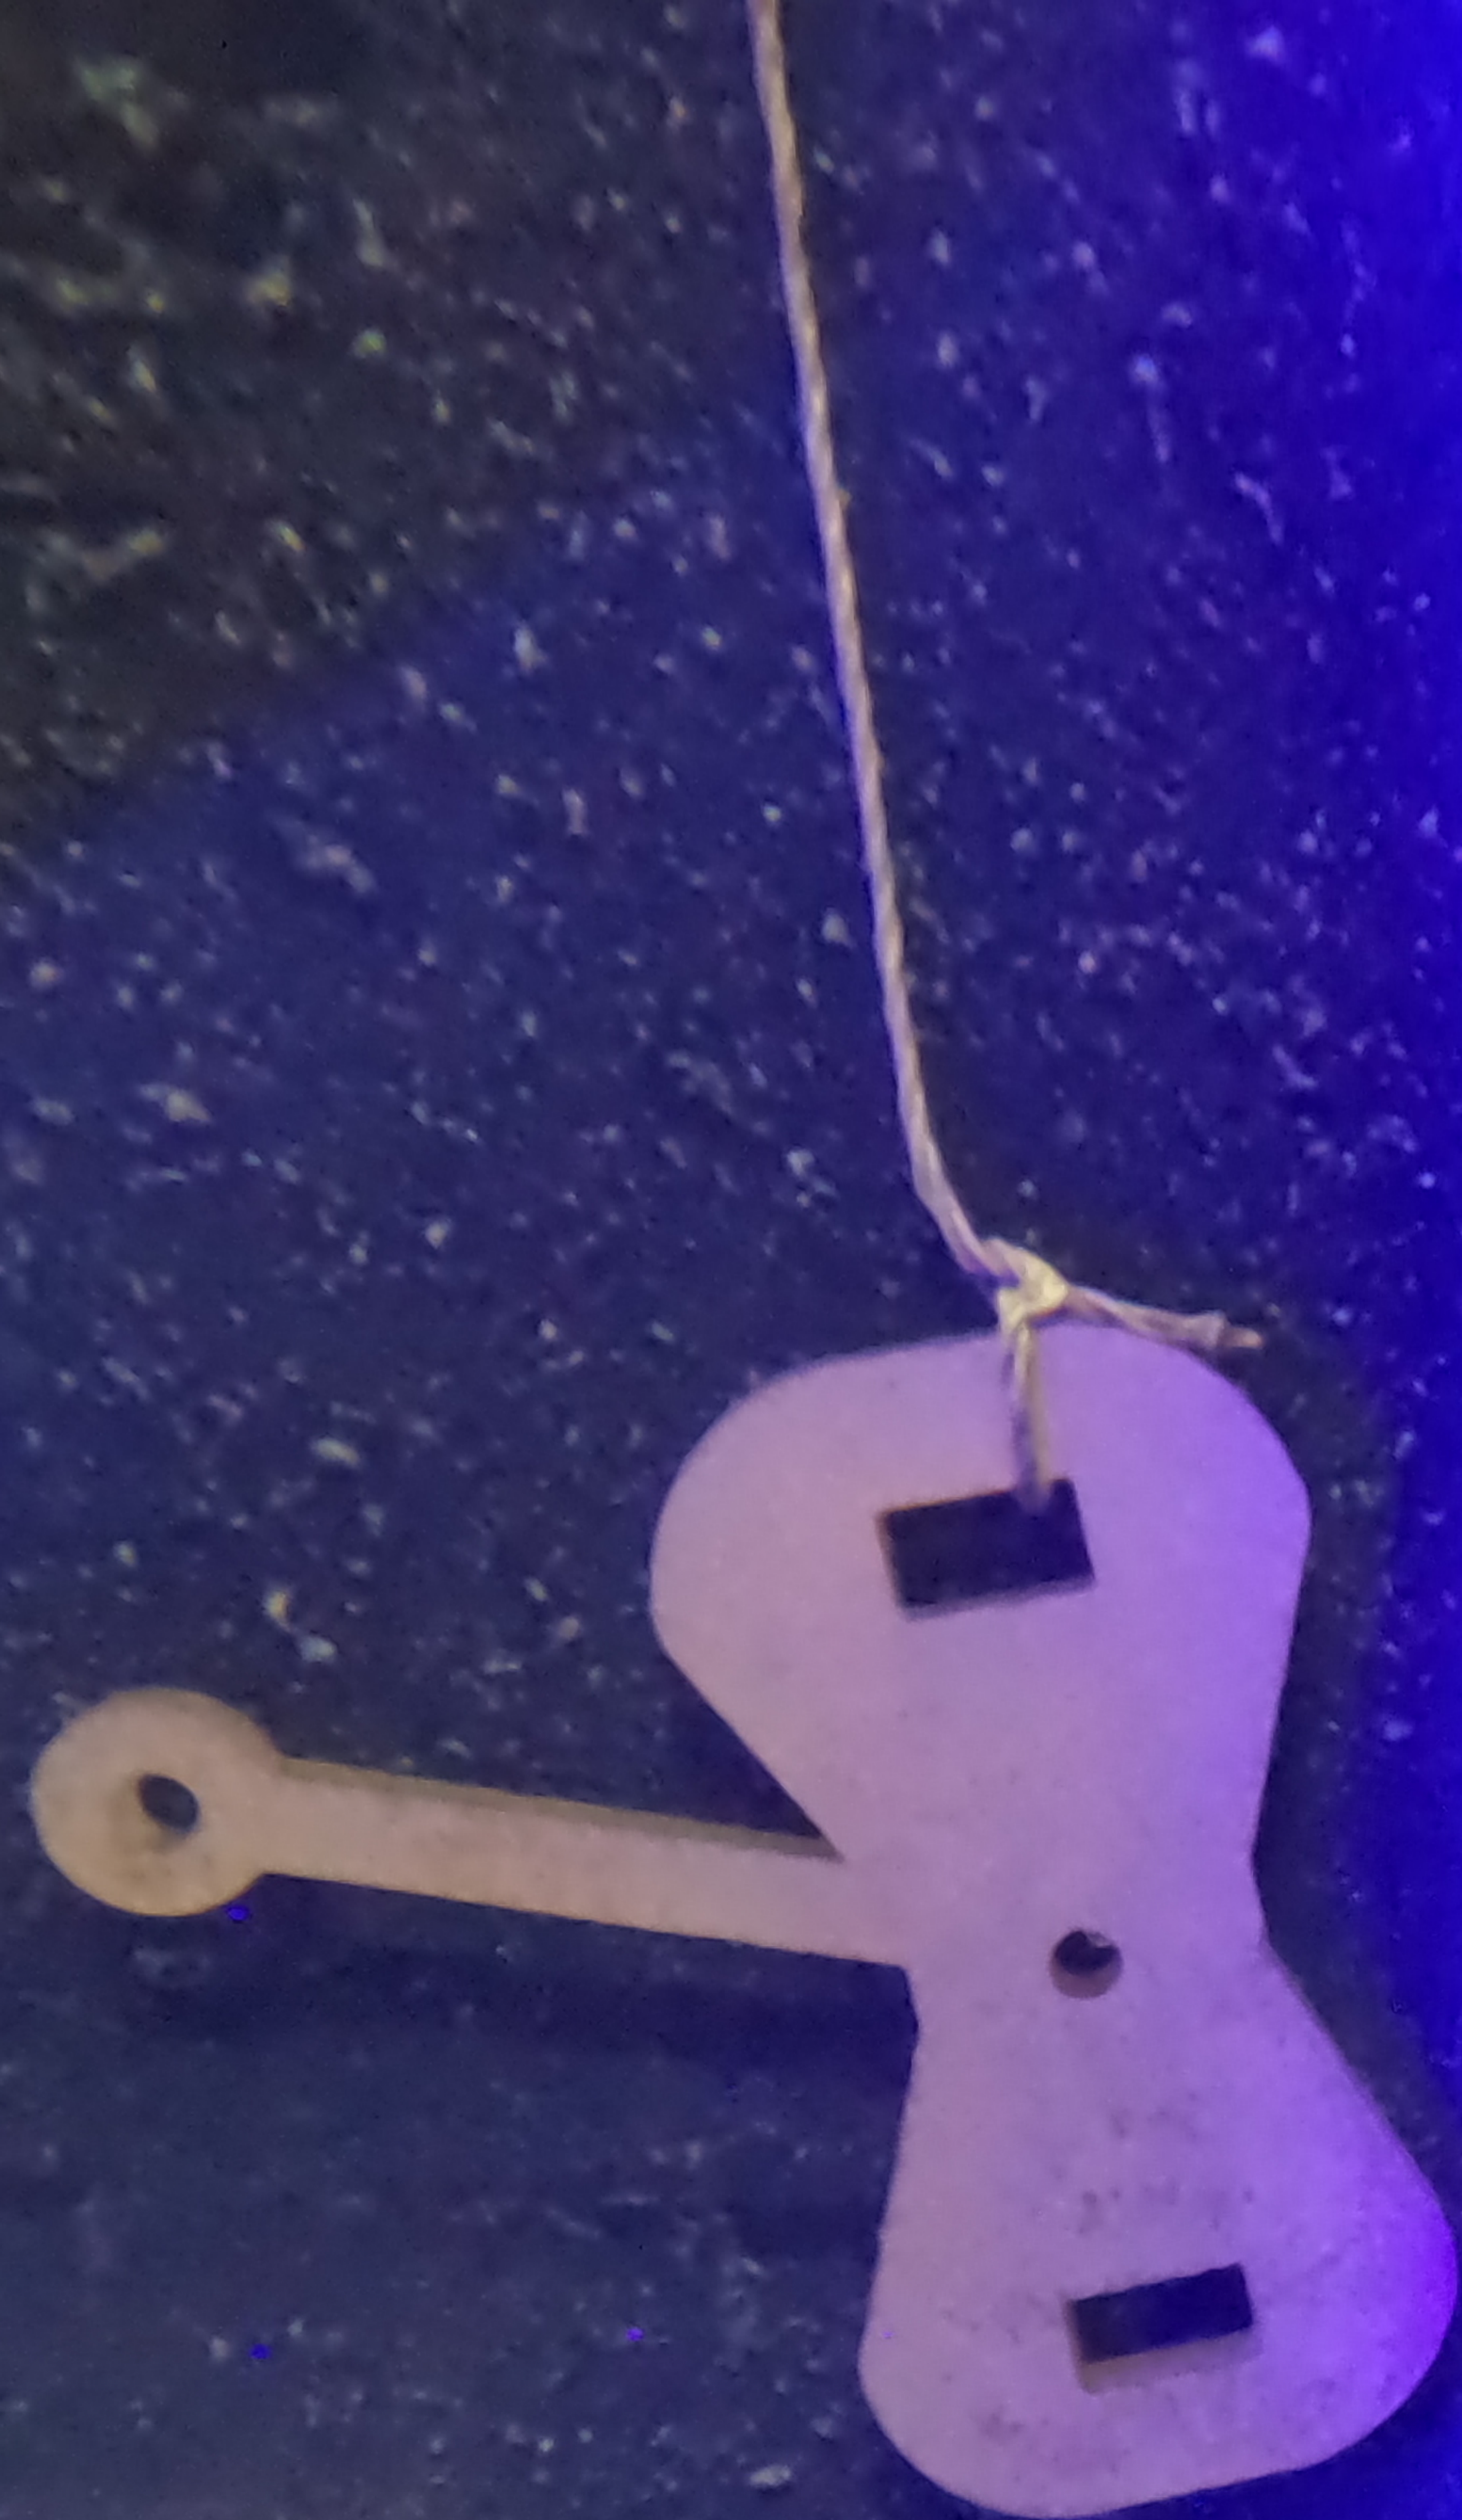

Supplement: Supplementary file 3154 [file G0015595.pdf › Level_2_1/G0015595.pdf]

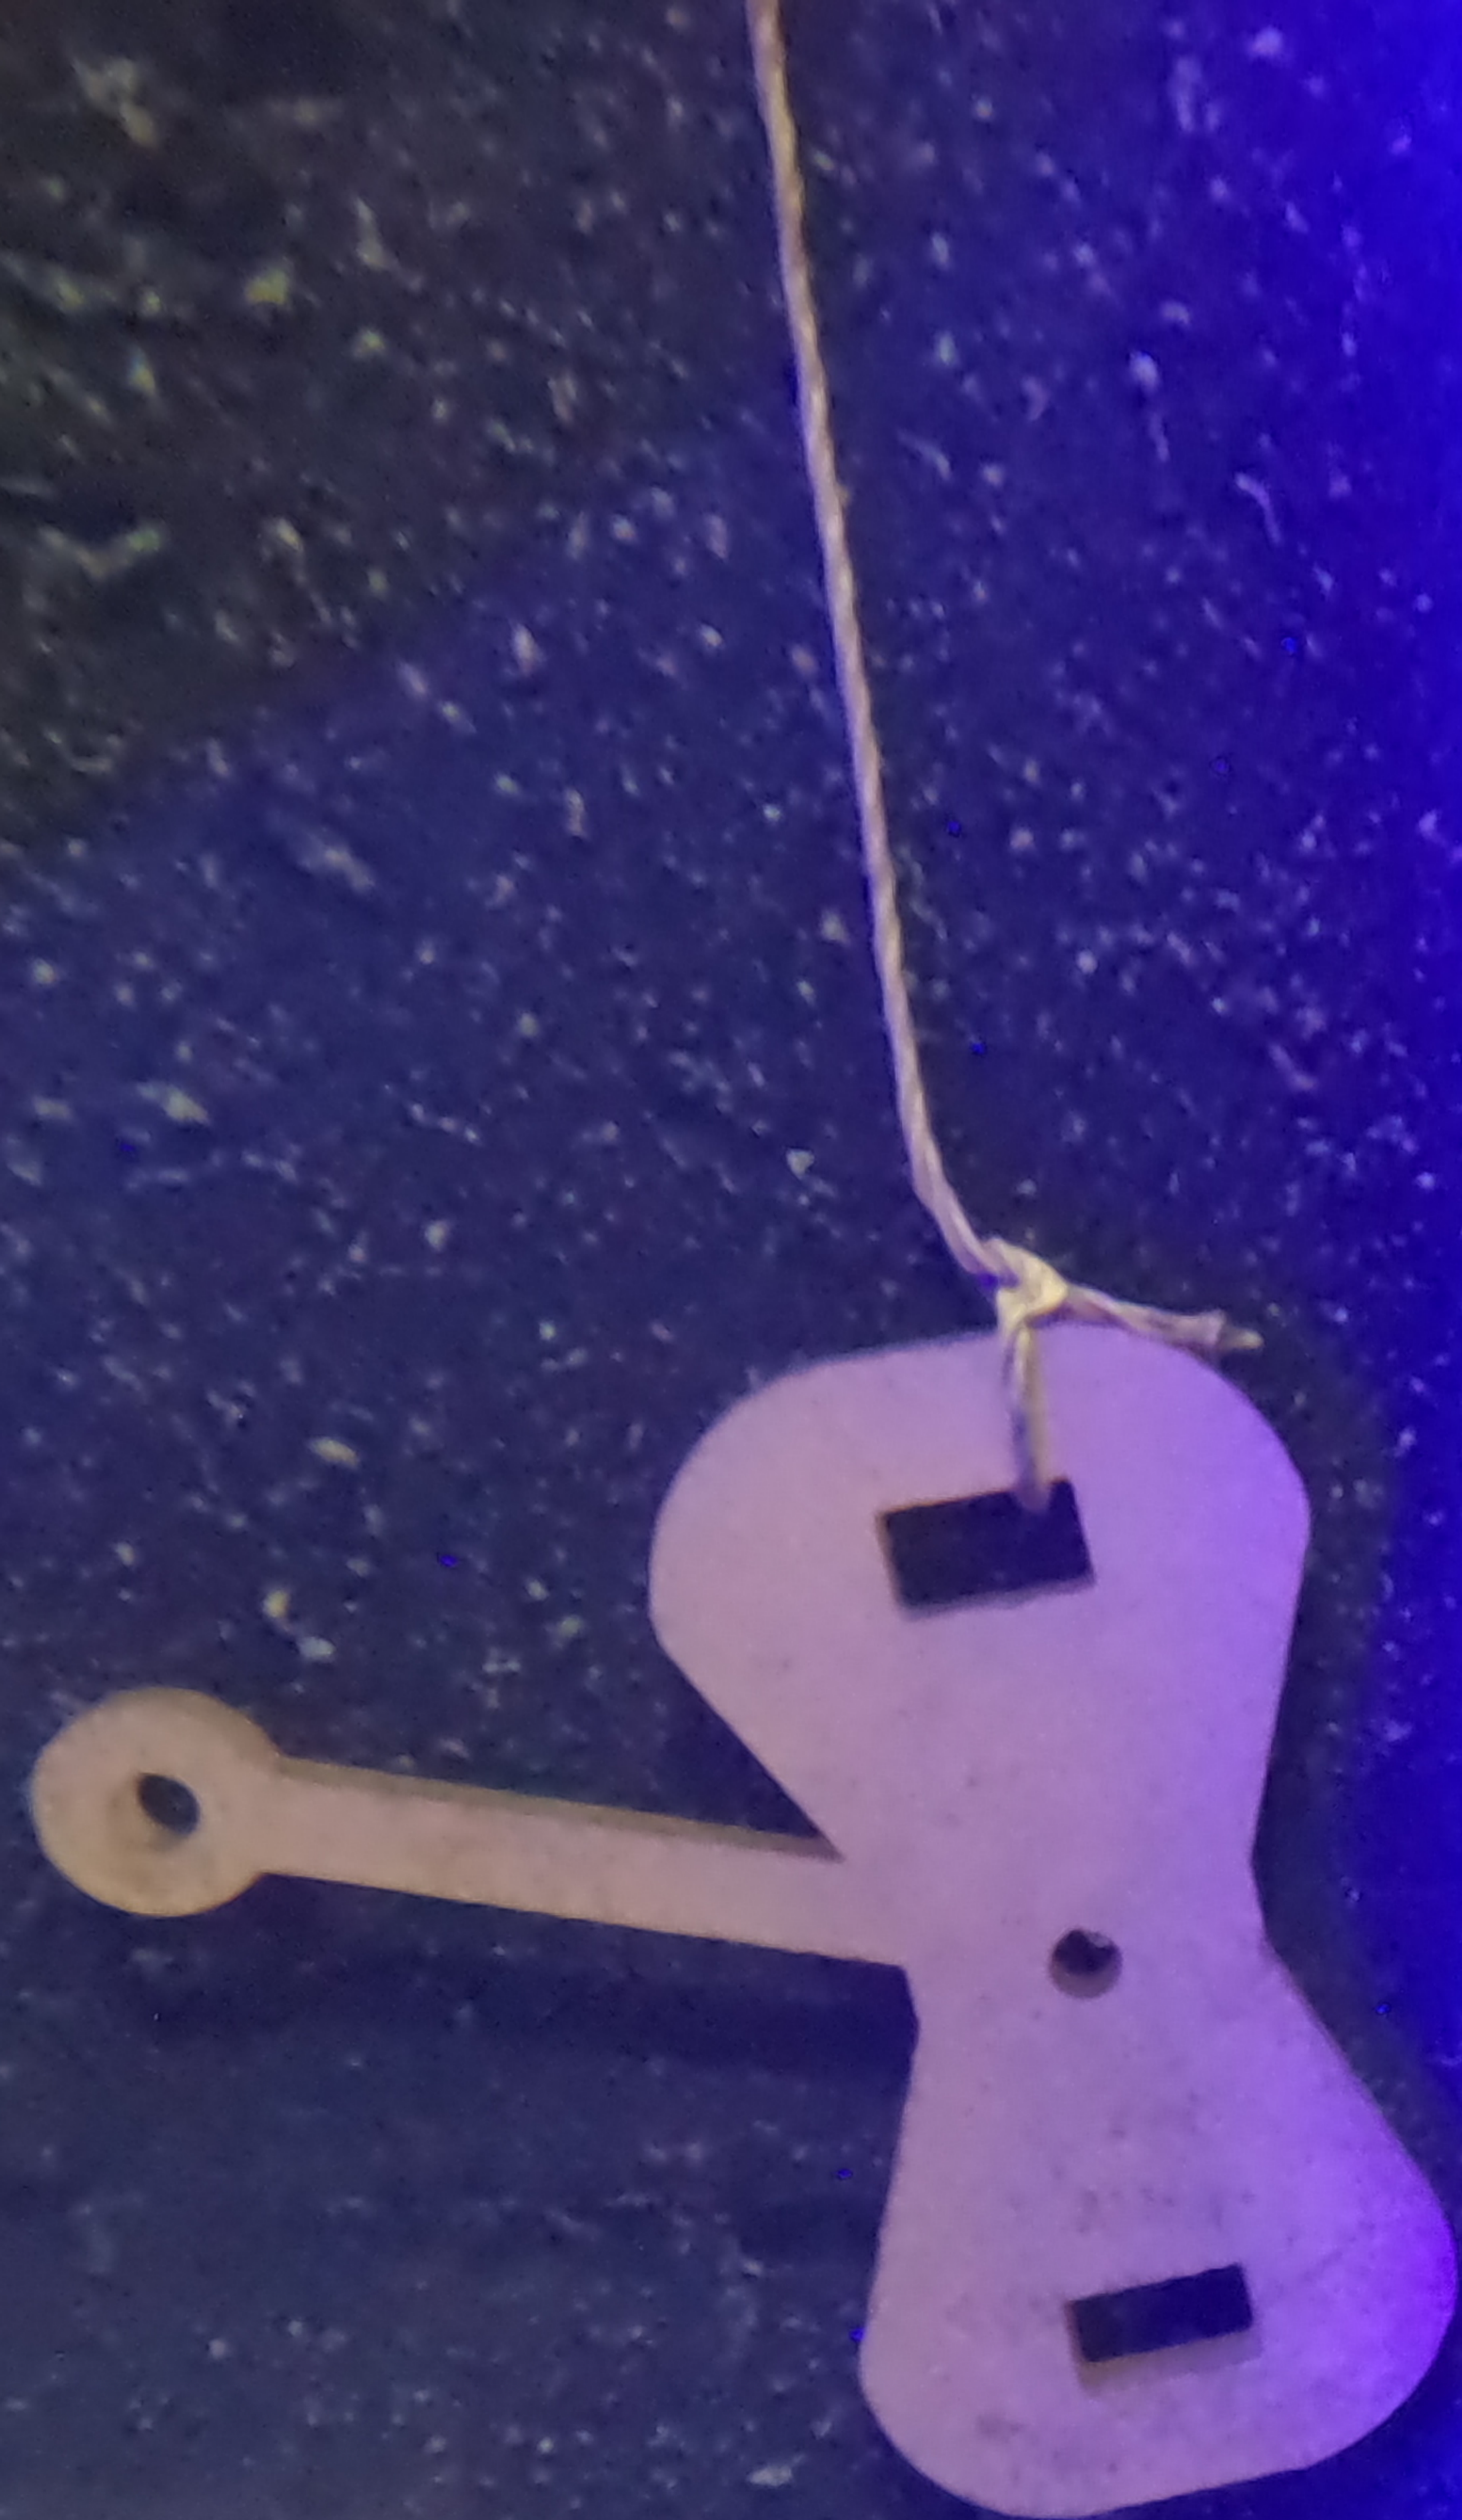

Supplement: Supplementary file 3155 [file G0015596.pdf › Level_2_1/G0015596.pdf]

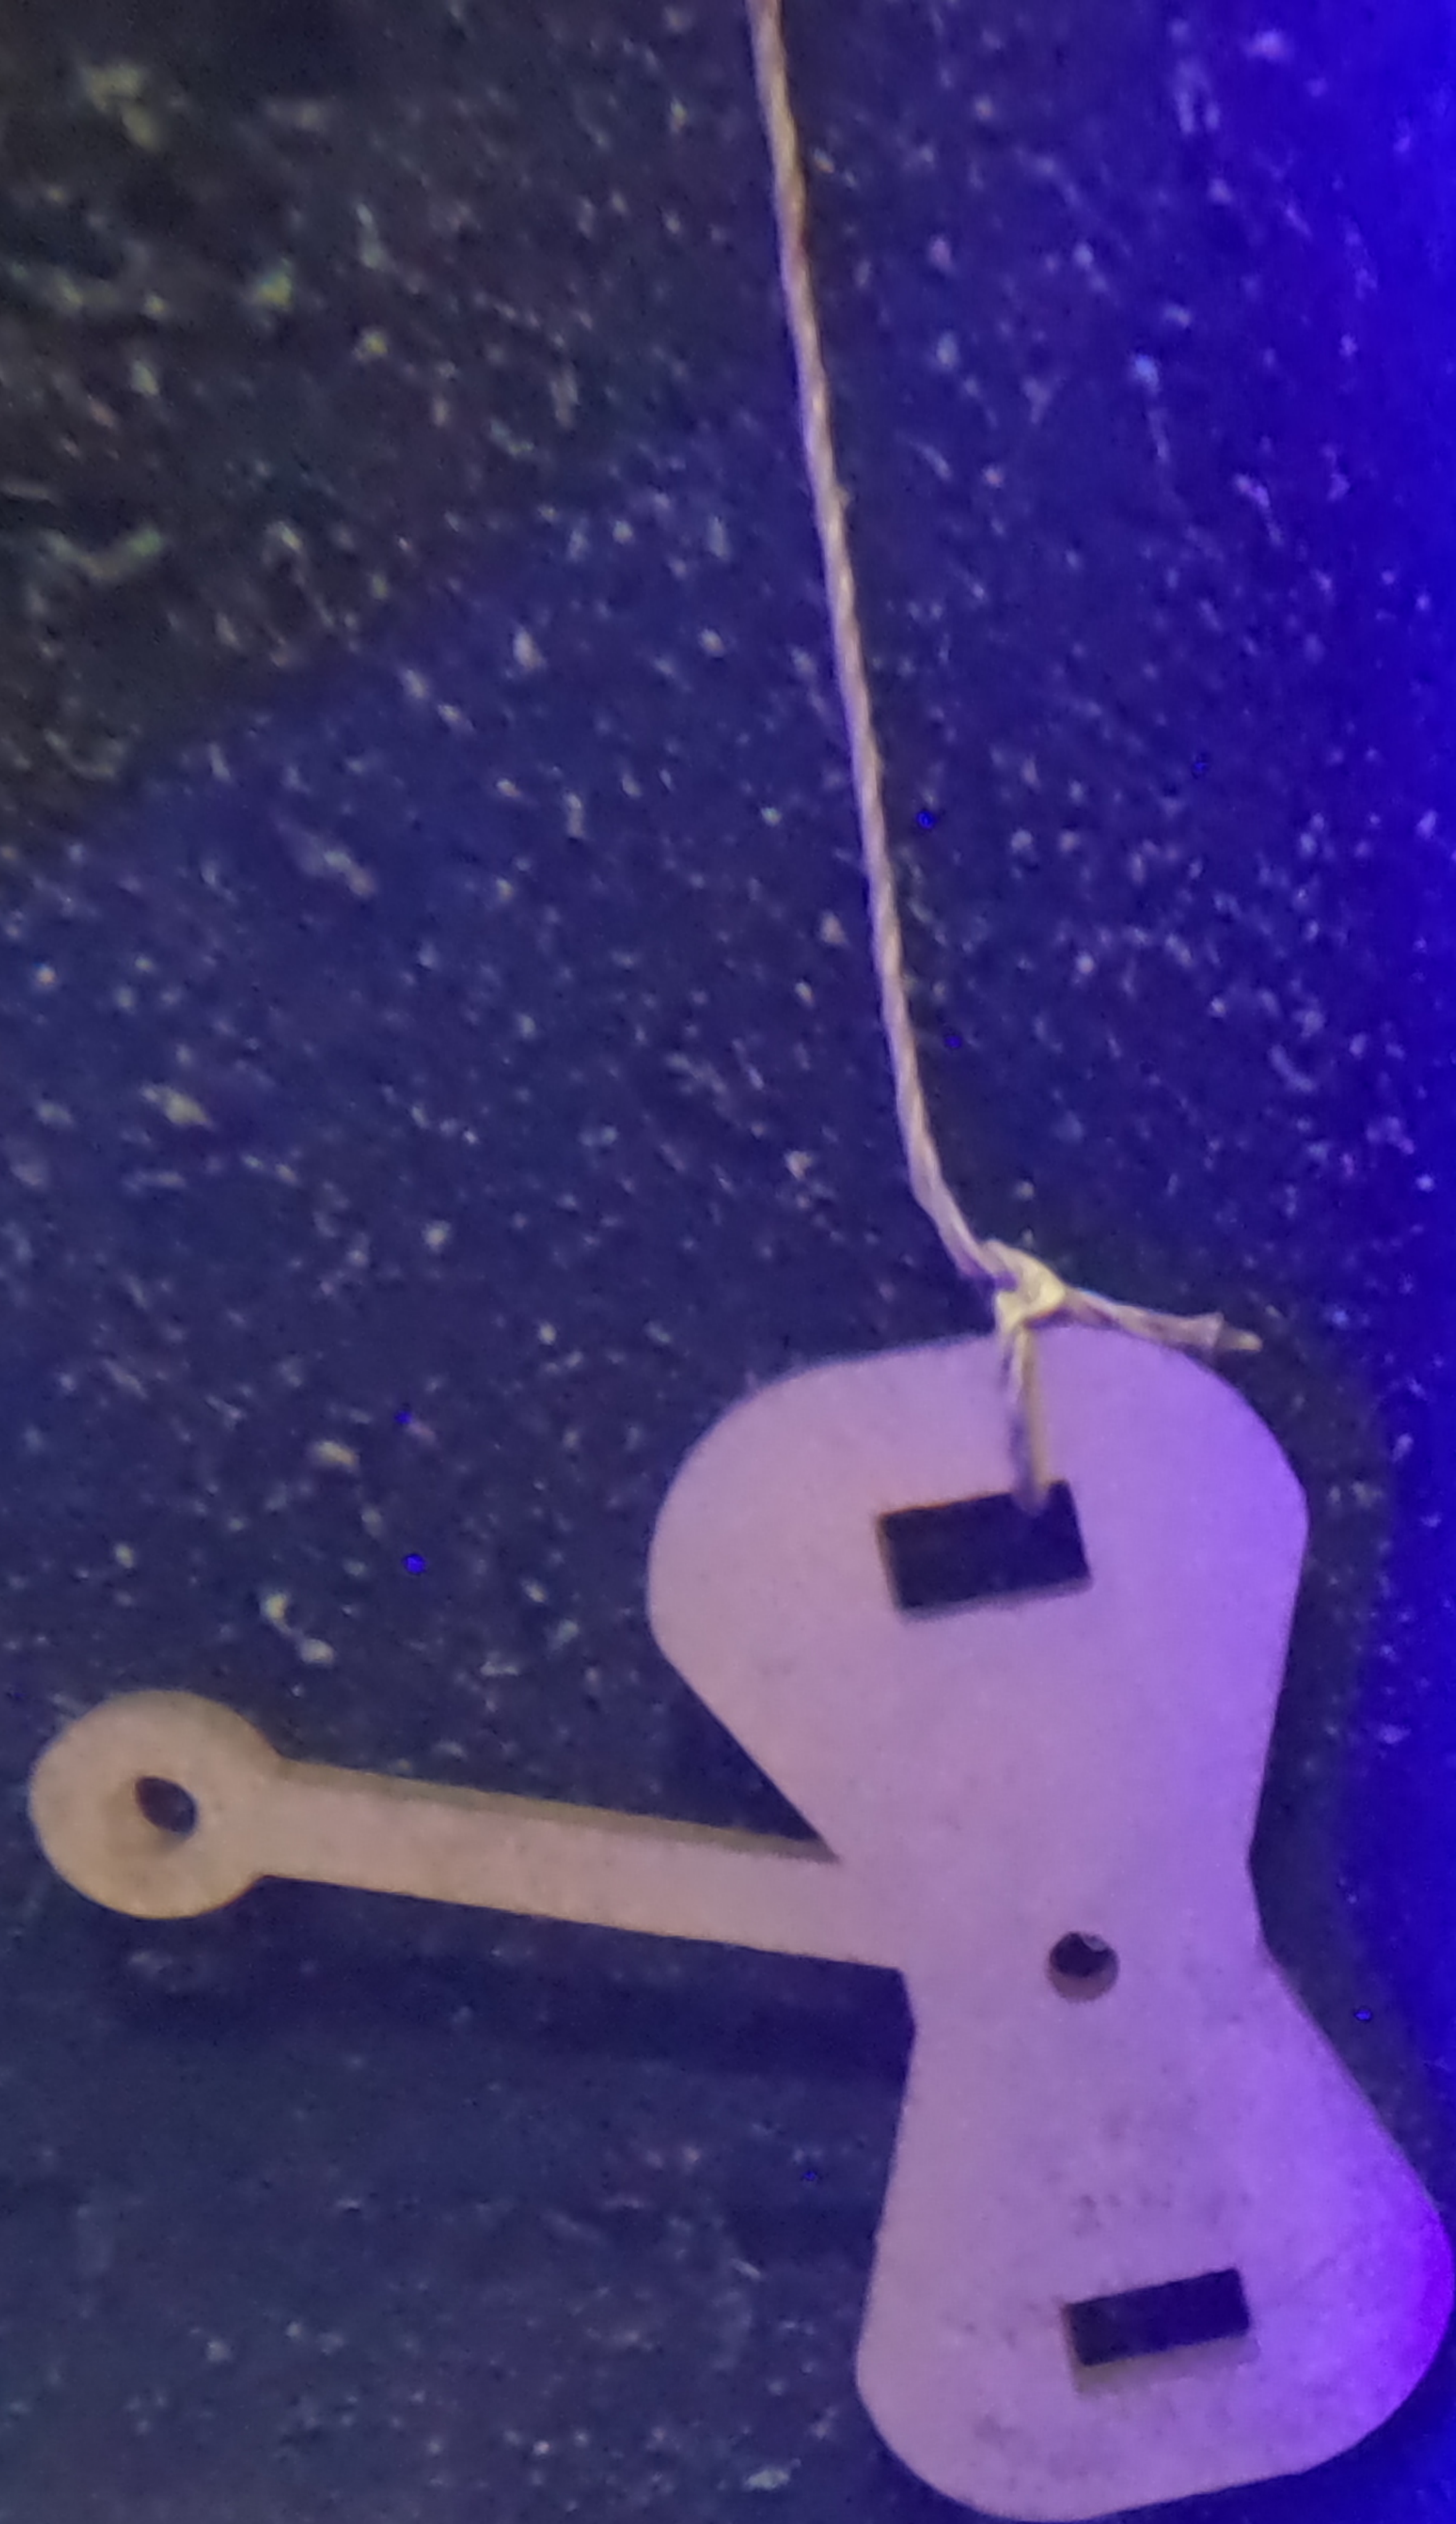

Supplement: Supplementary file 3156 [file G0015597.pdf › Level_2_1/G0015597.pdf]

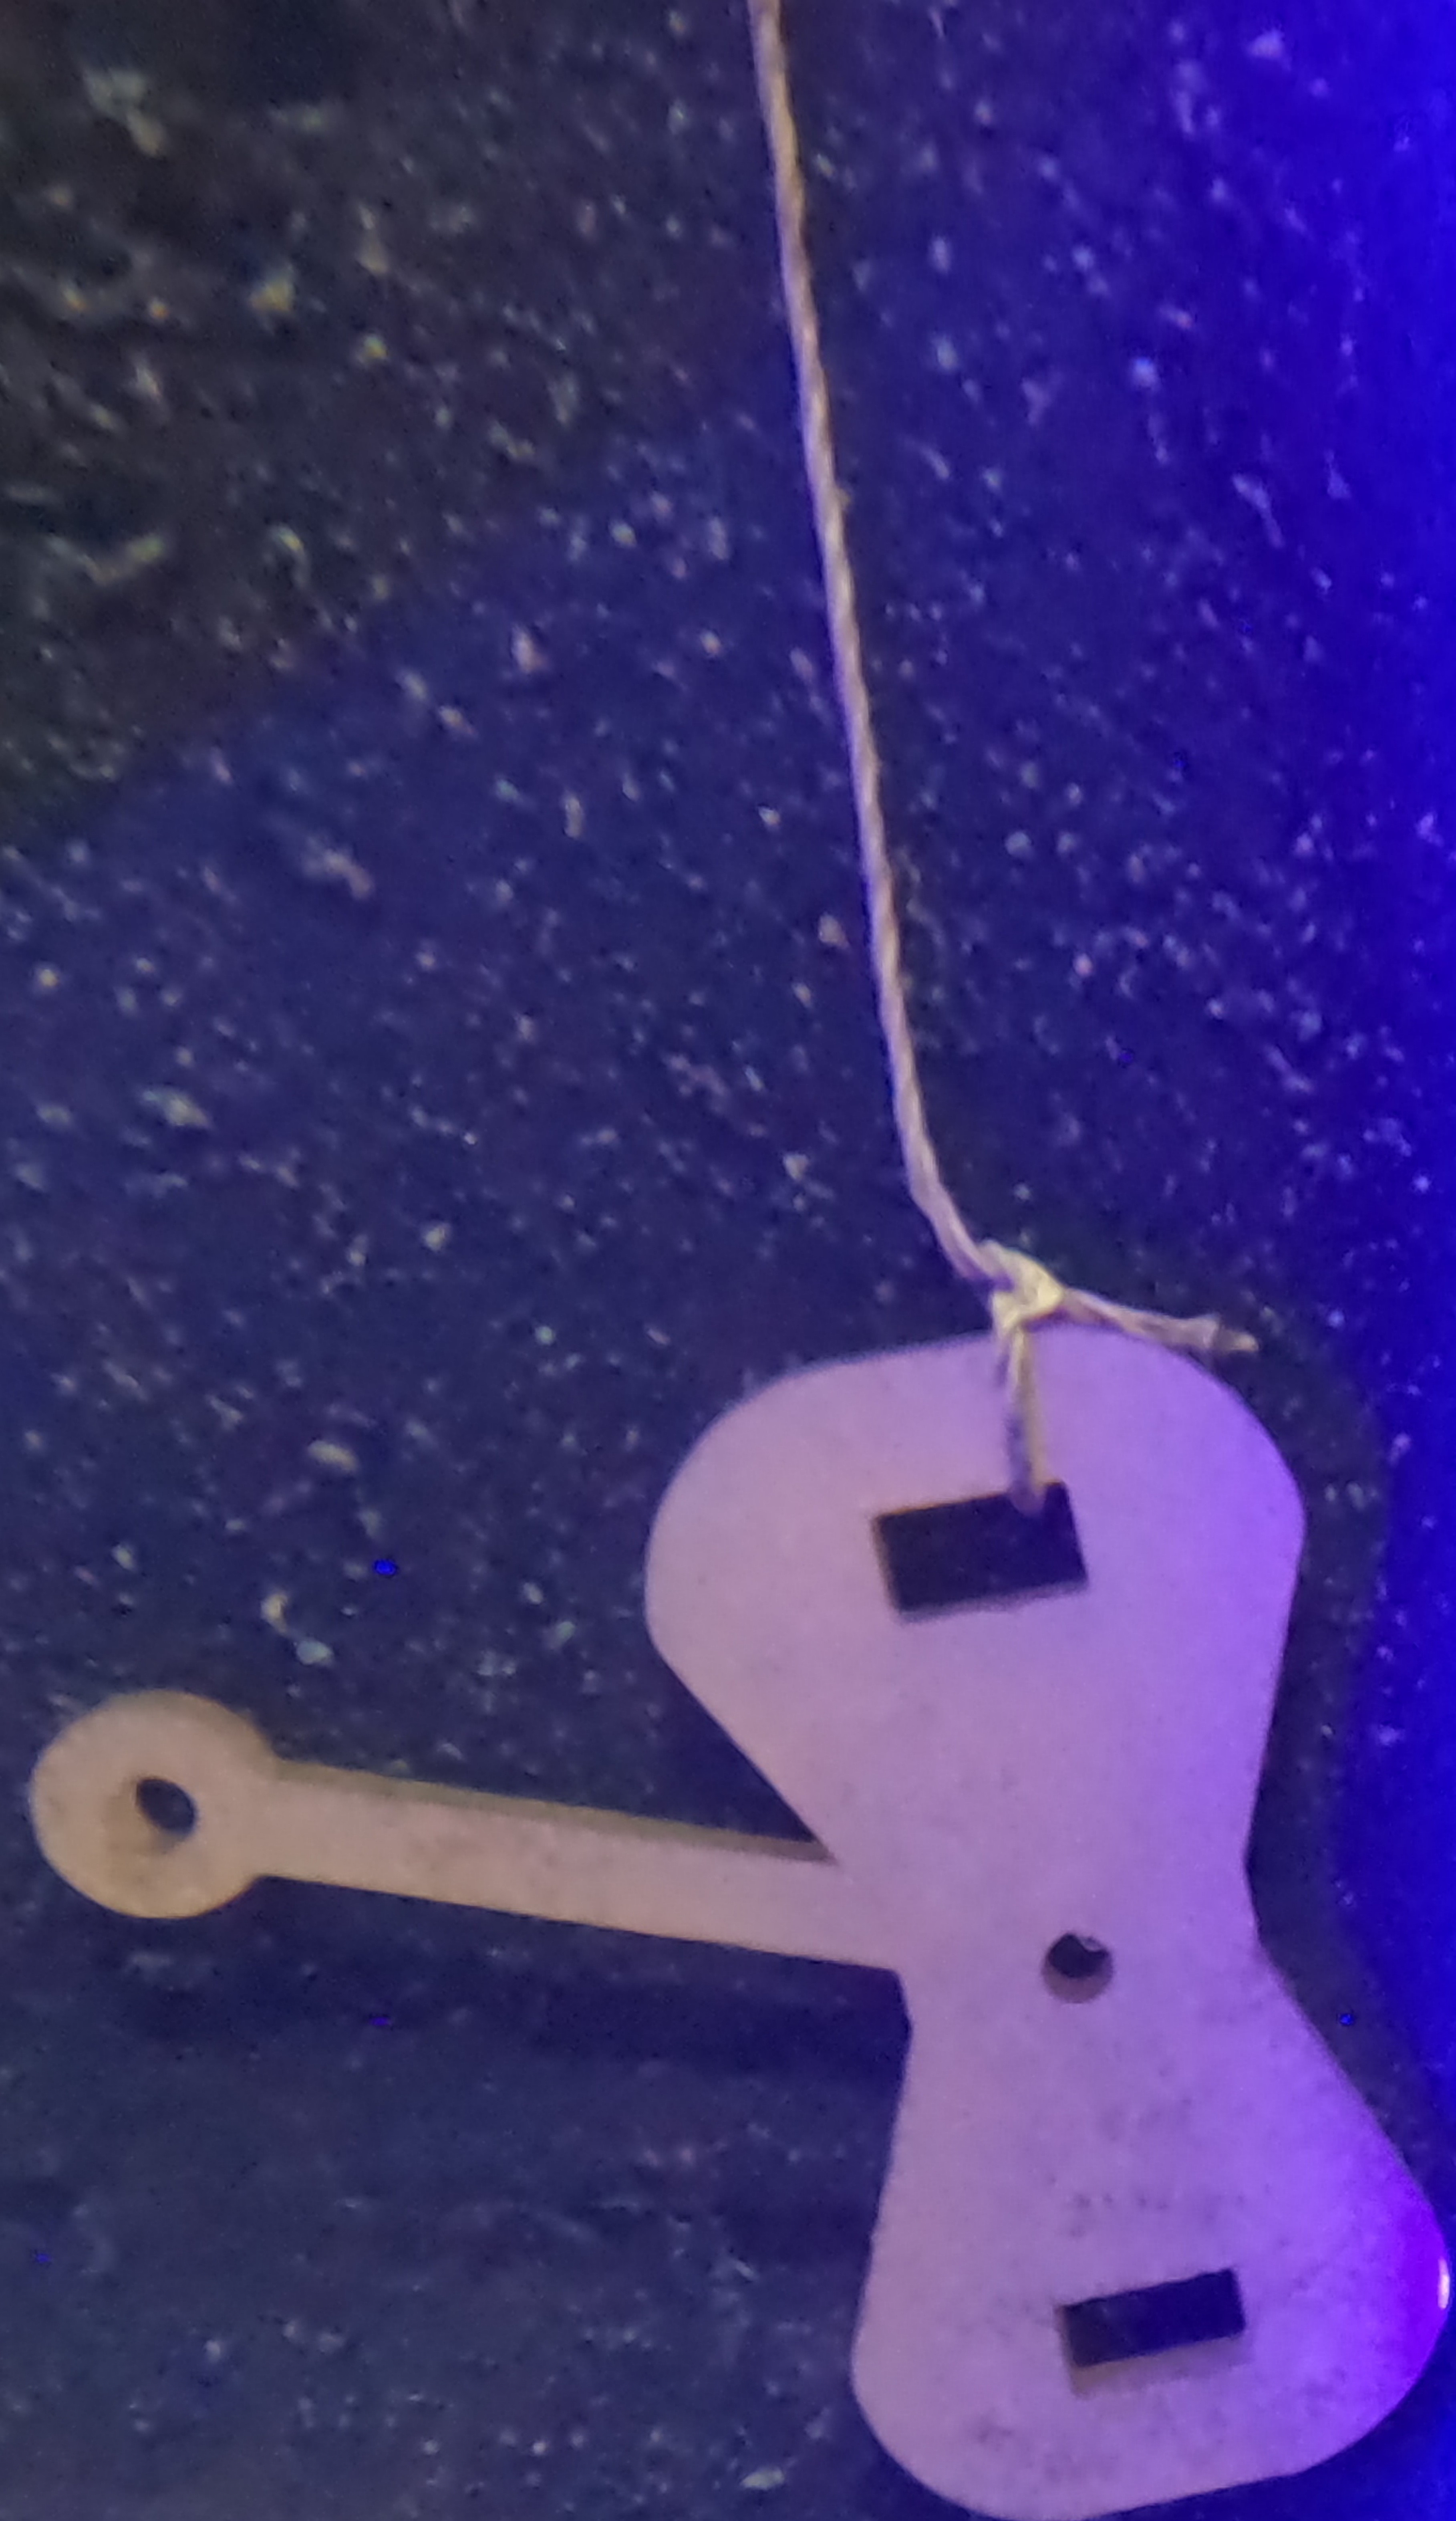

Supplement: Supplementary file 3157 [file G0015598.pdf › Level_2_1/G0015598.pdf]

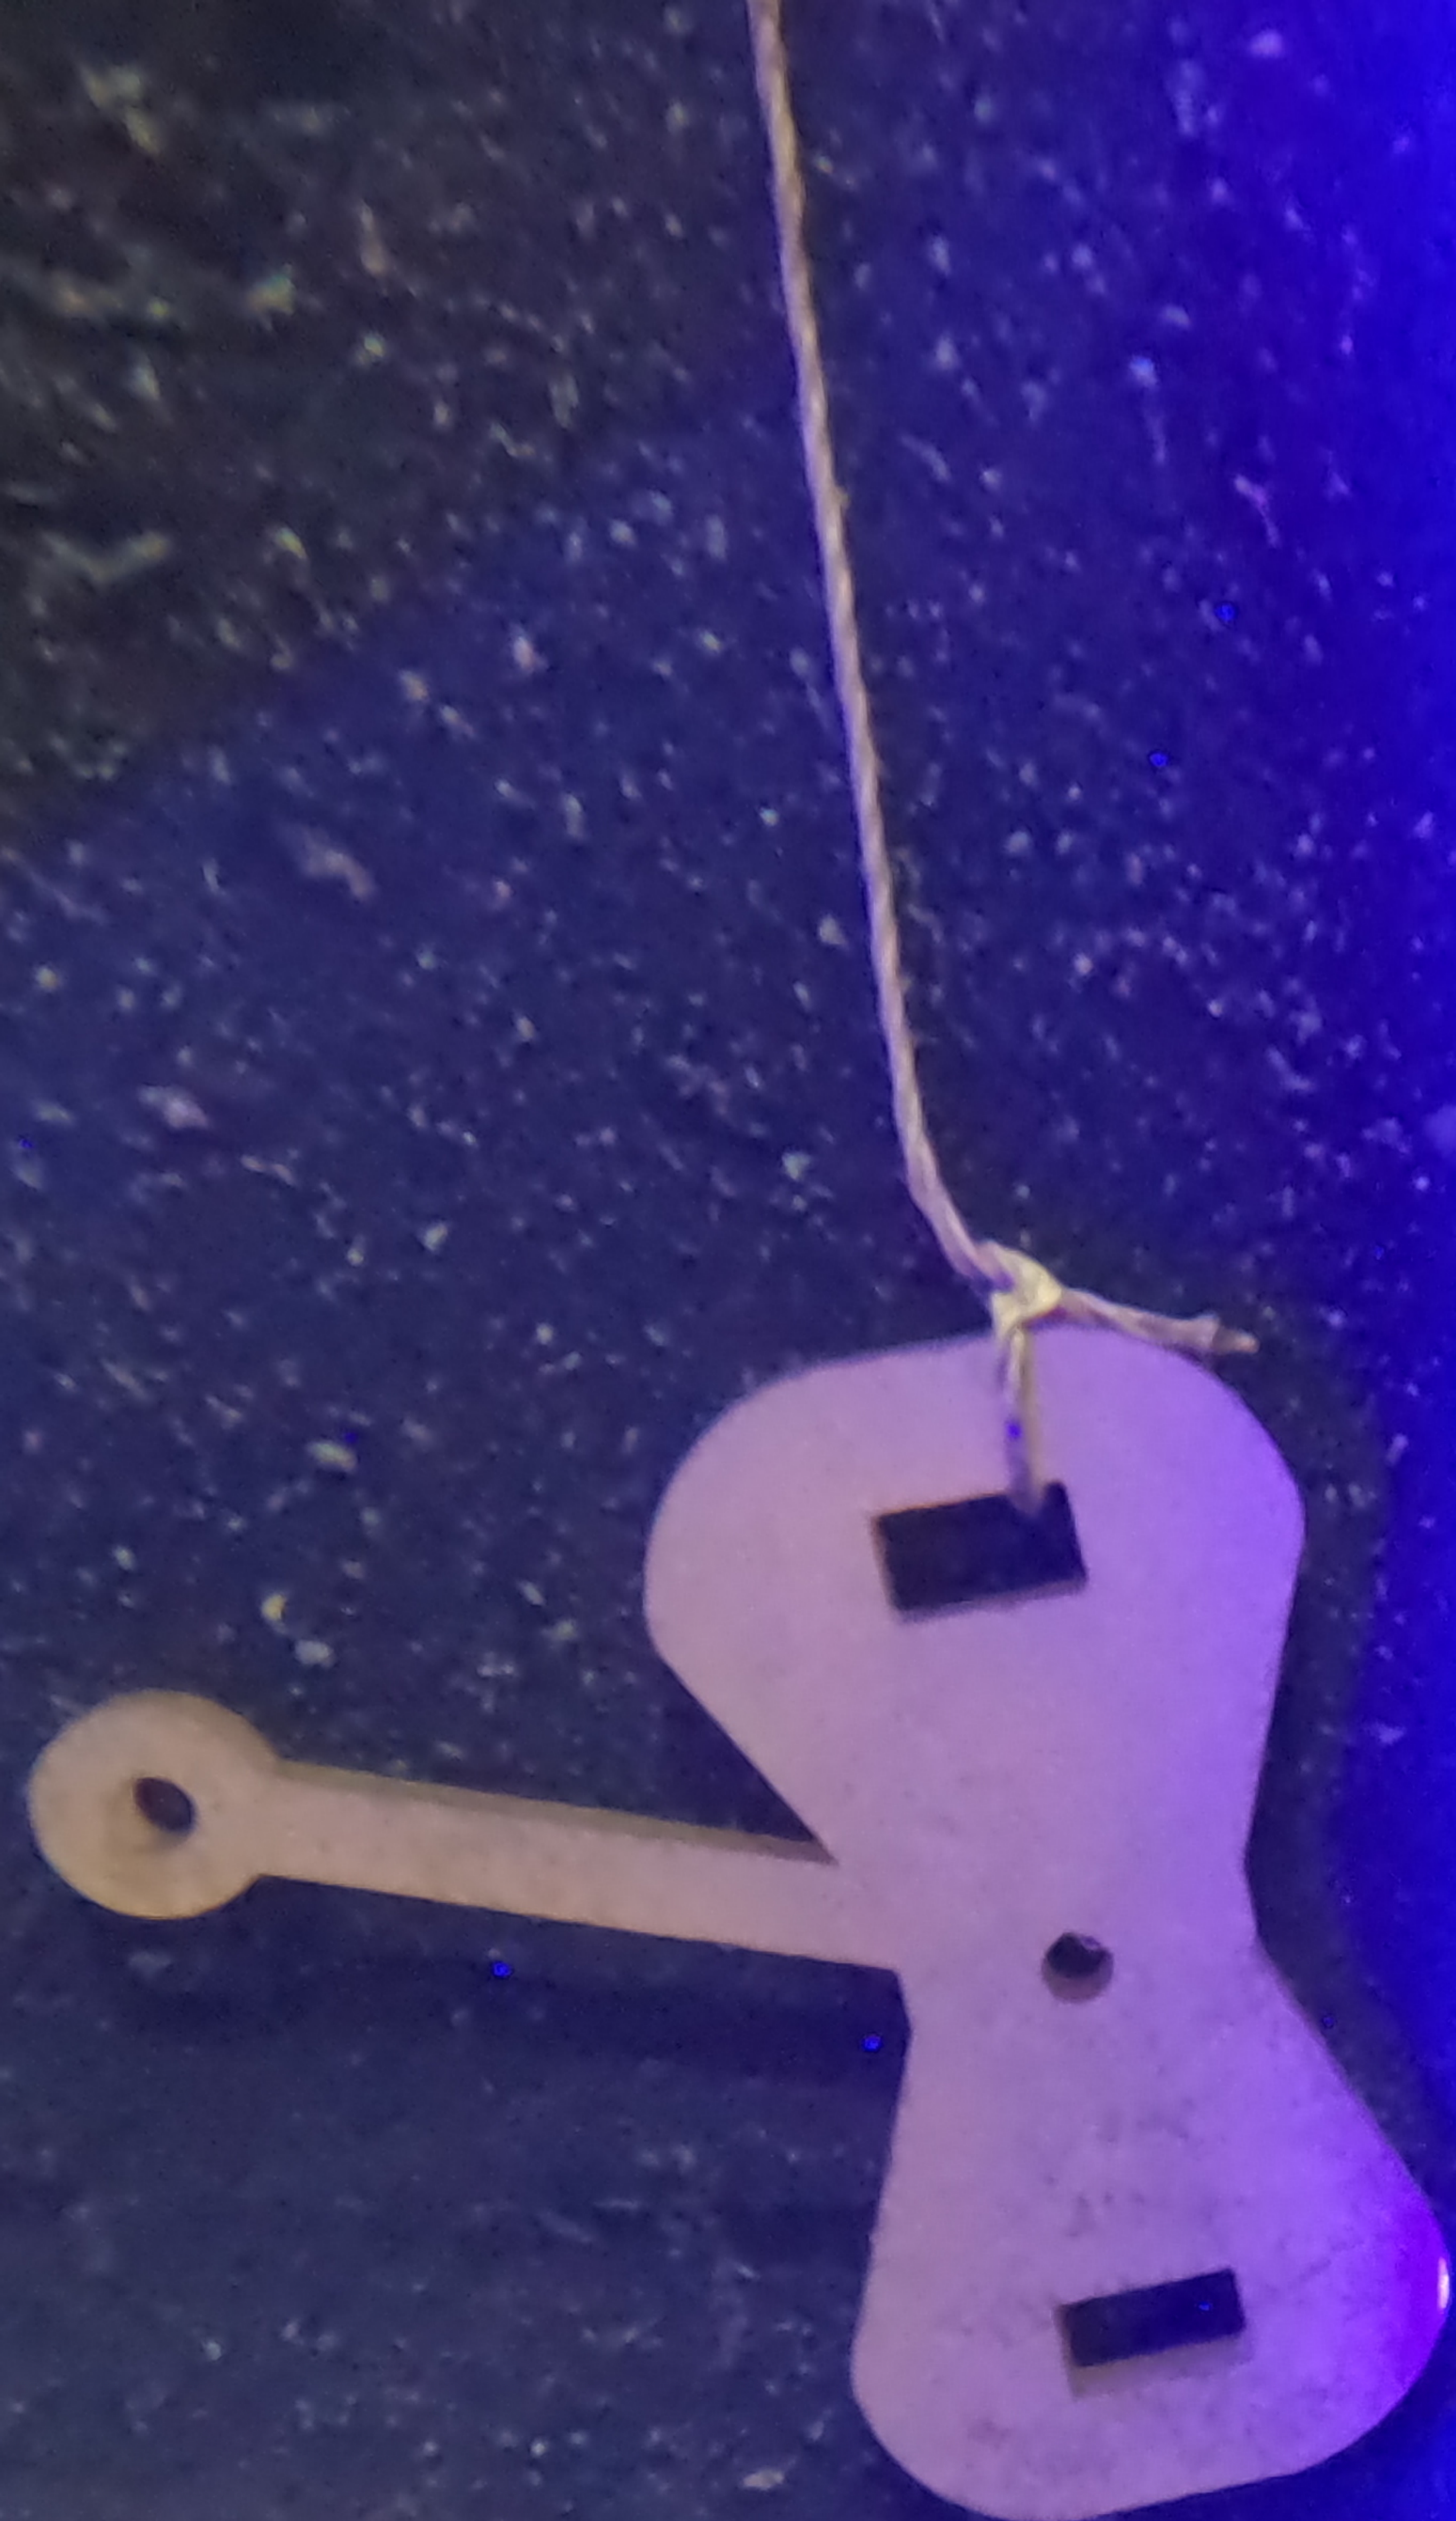

Supplement: Supplementary file 3158 [file G0015599.pdf › Level_2_1/G0015599.pdf]

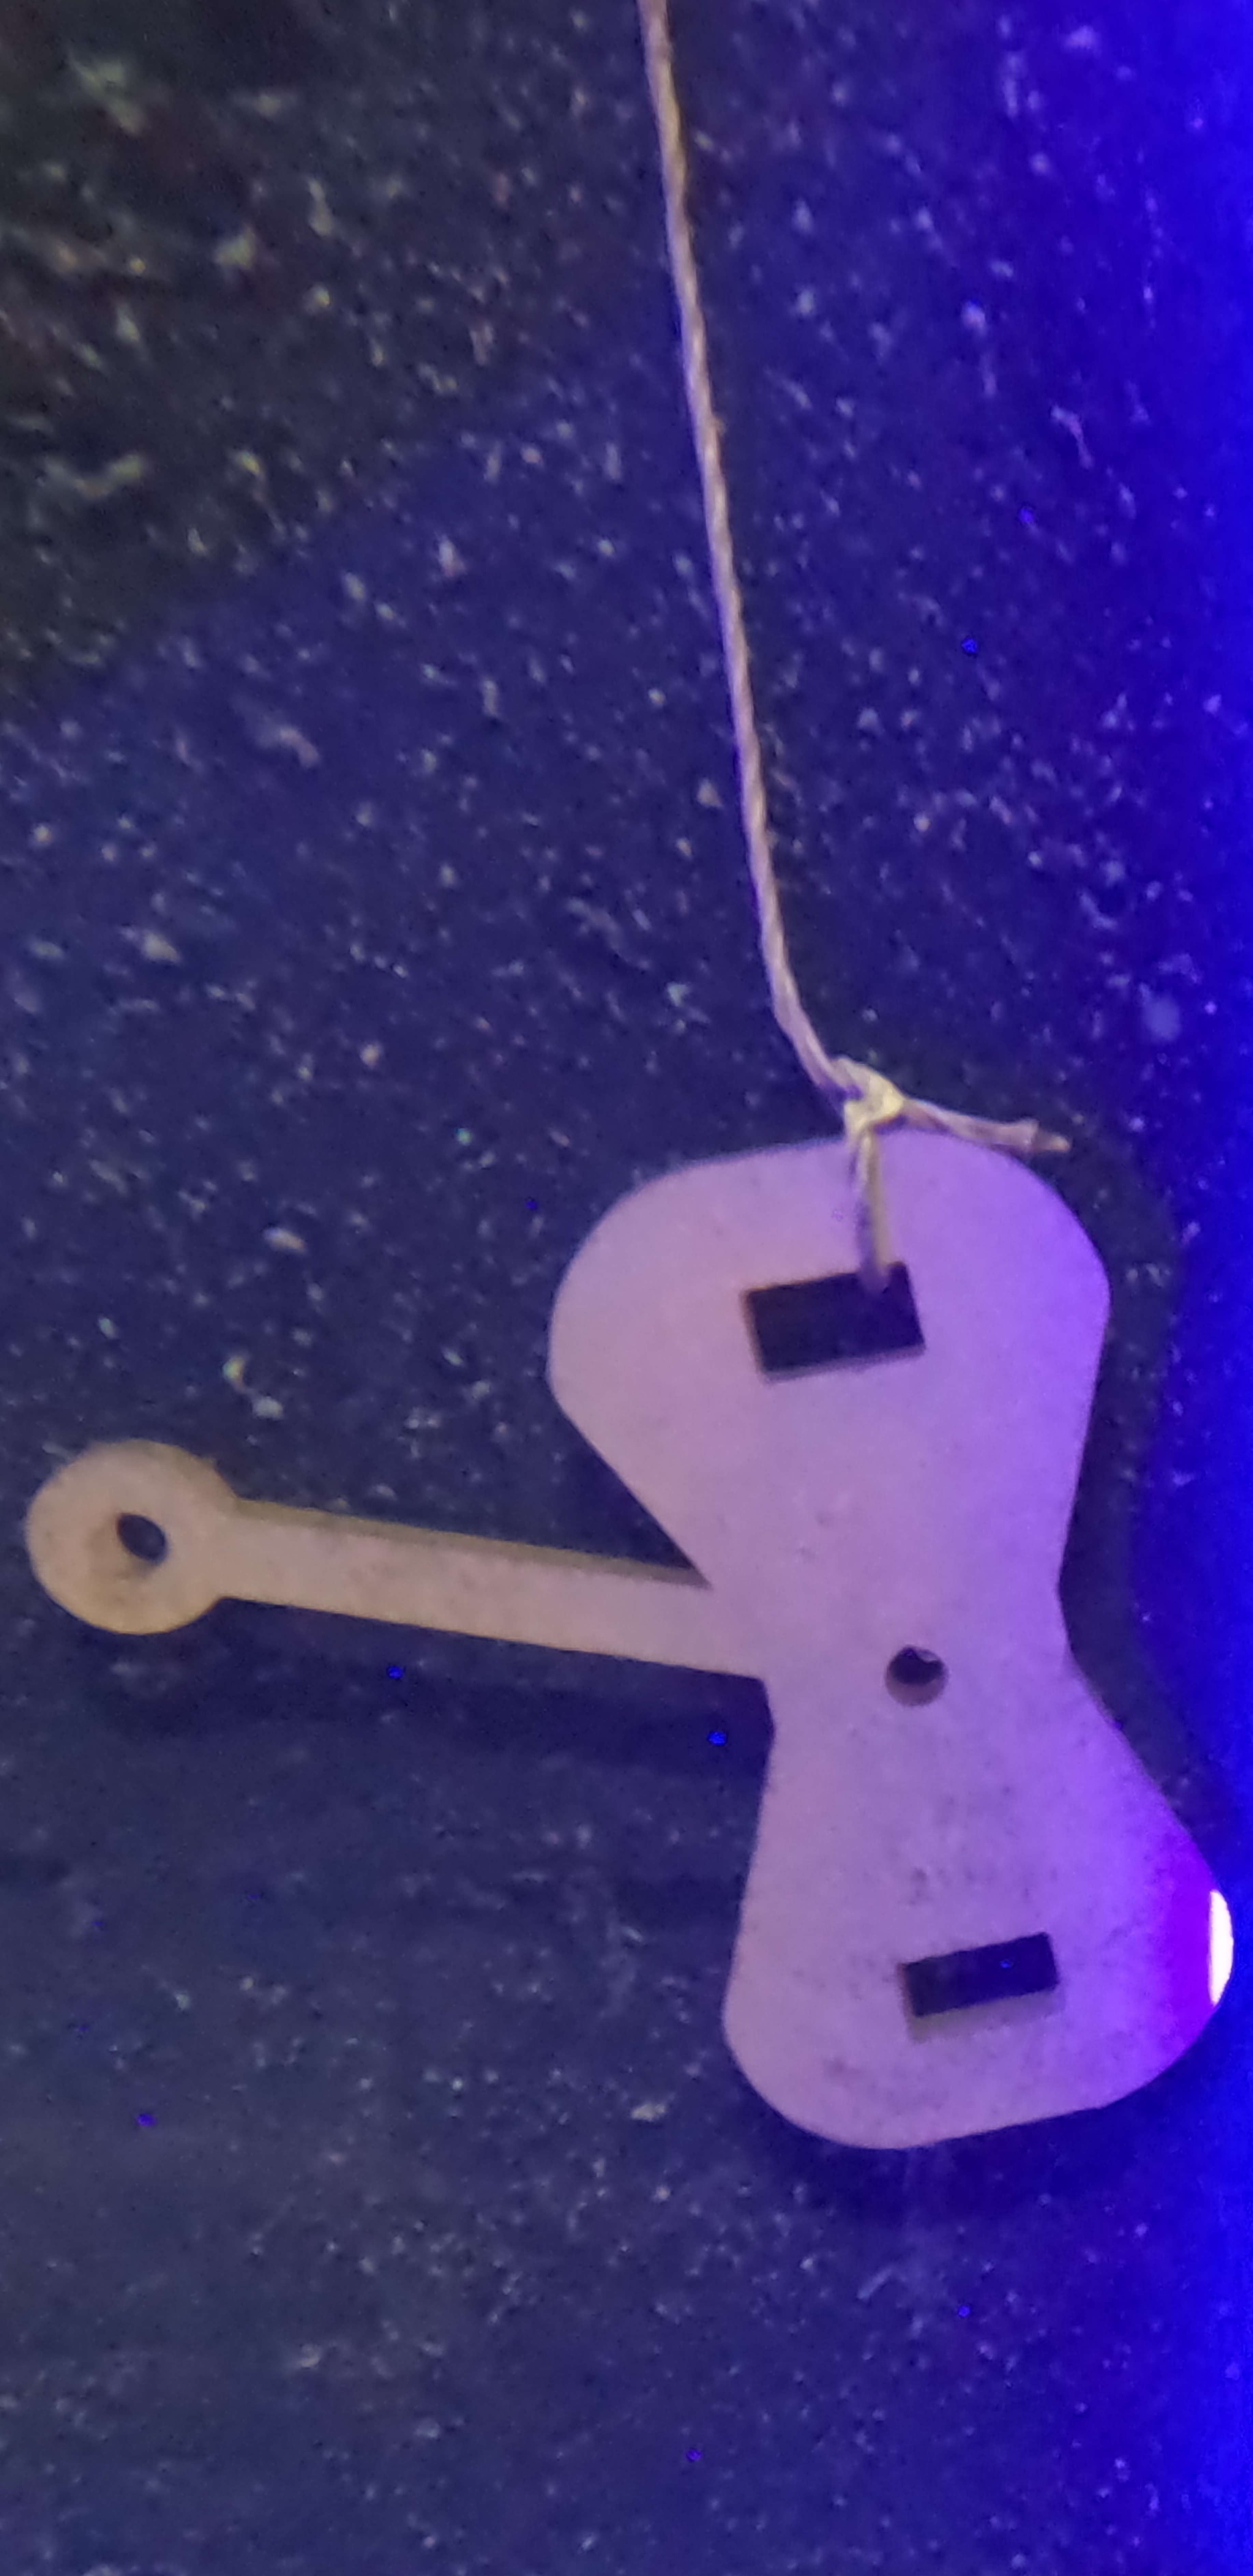

Supplement: Supplementary file 3159 [file G0015600.pdf › Level_2_1/G0015600.pdf]

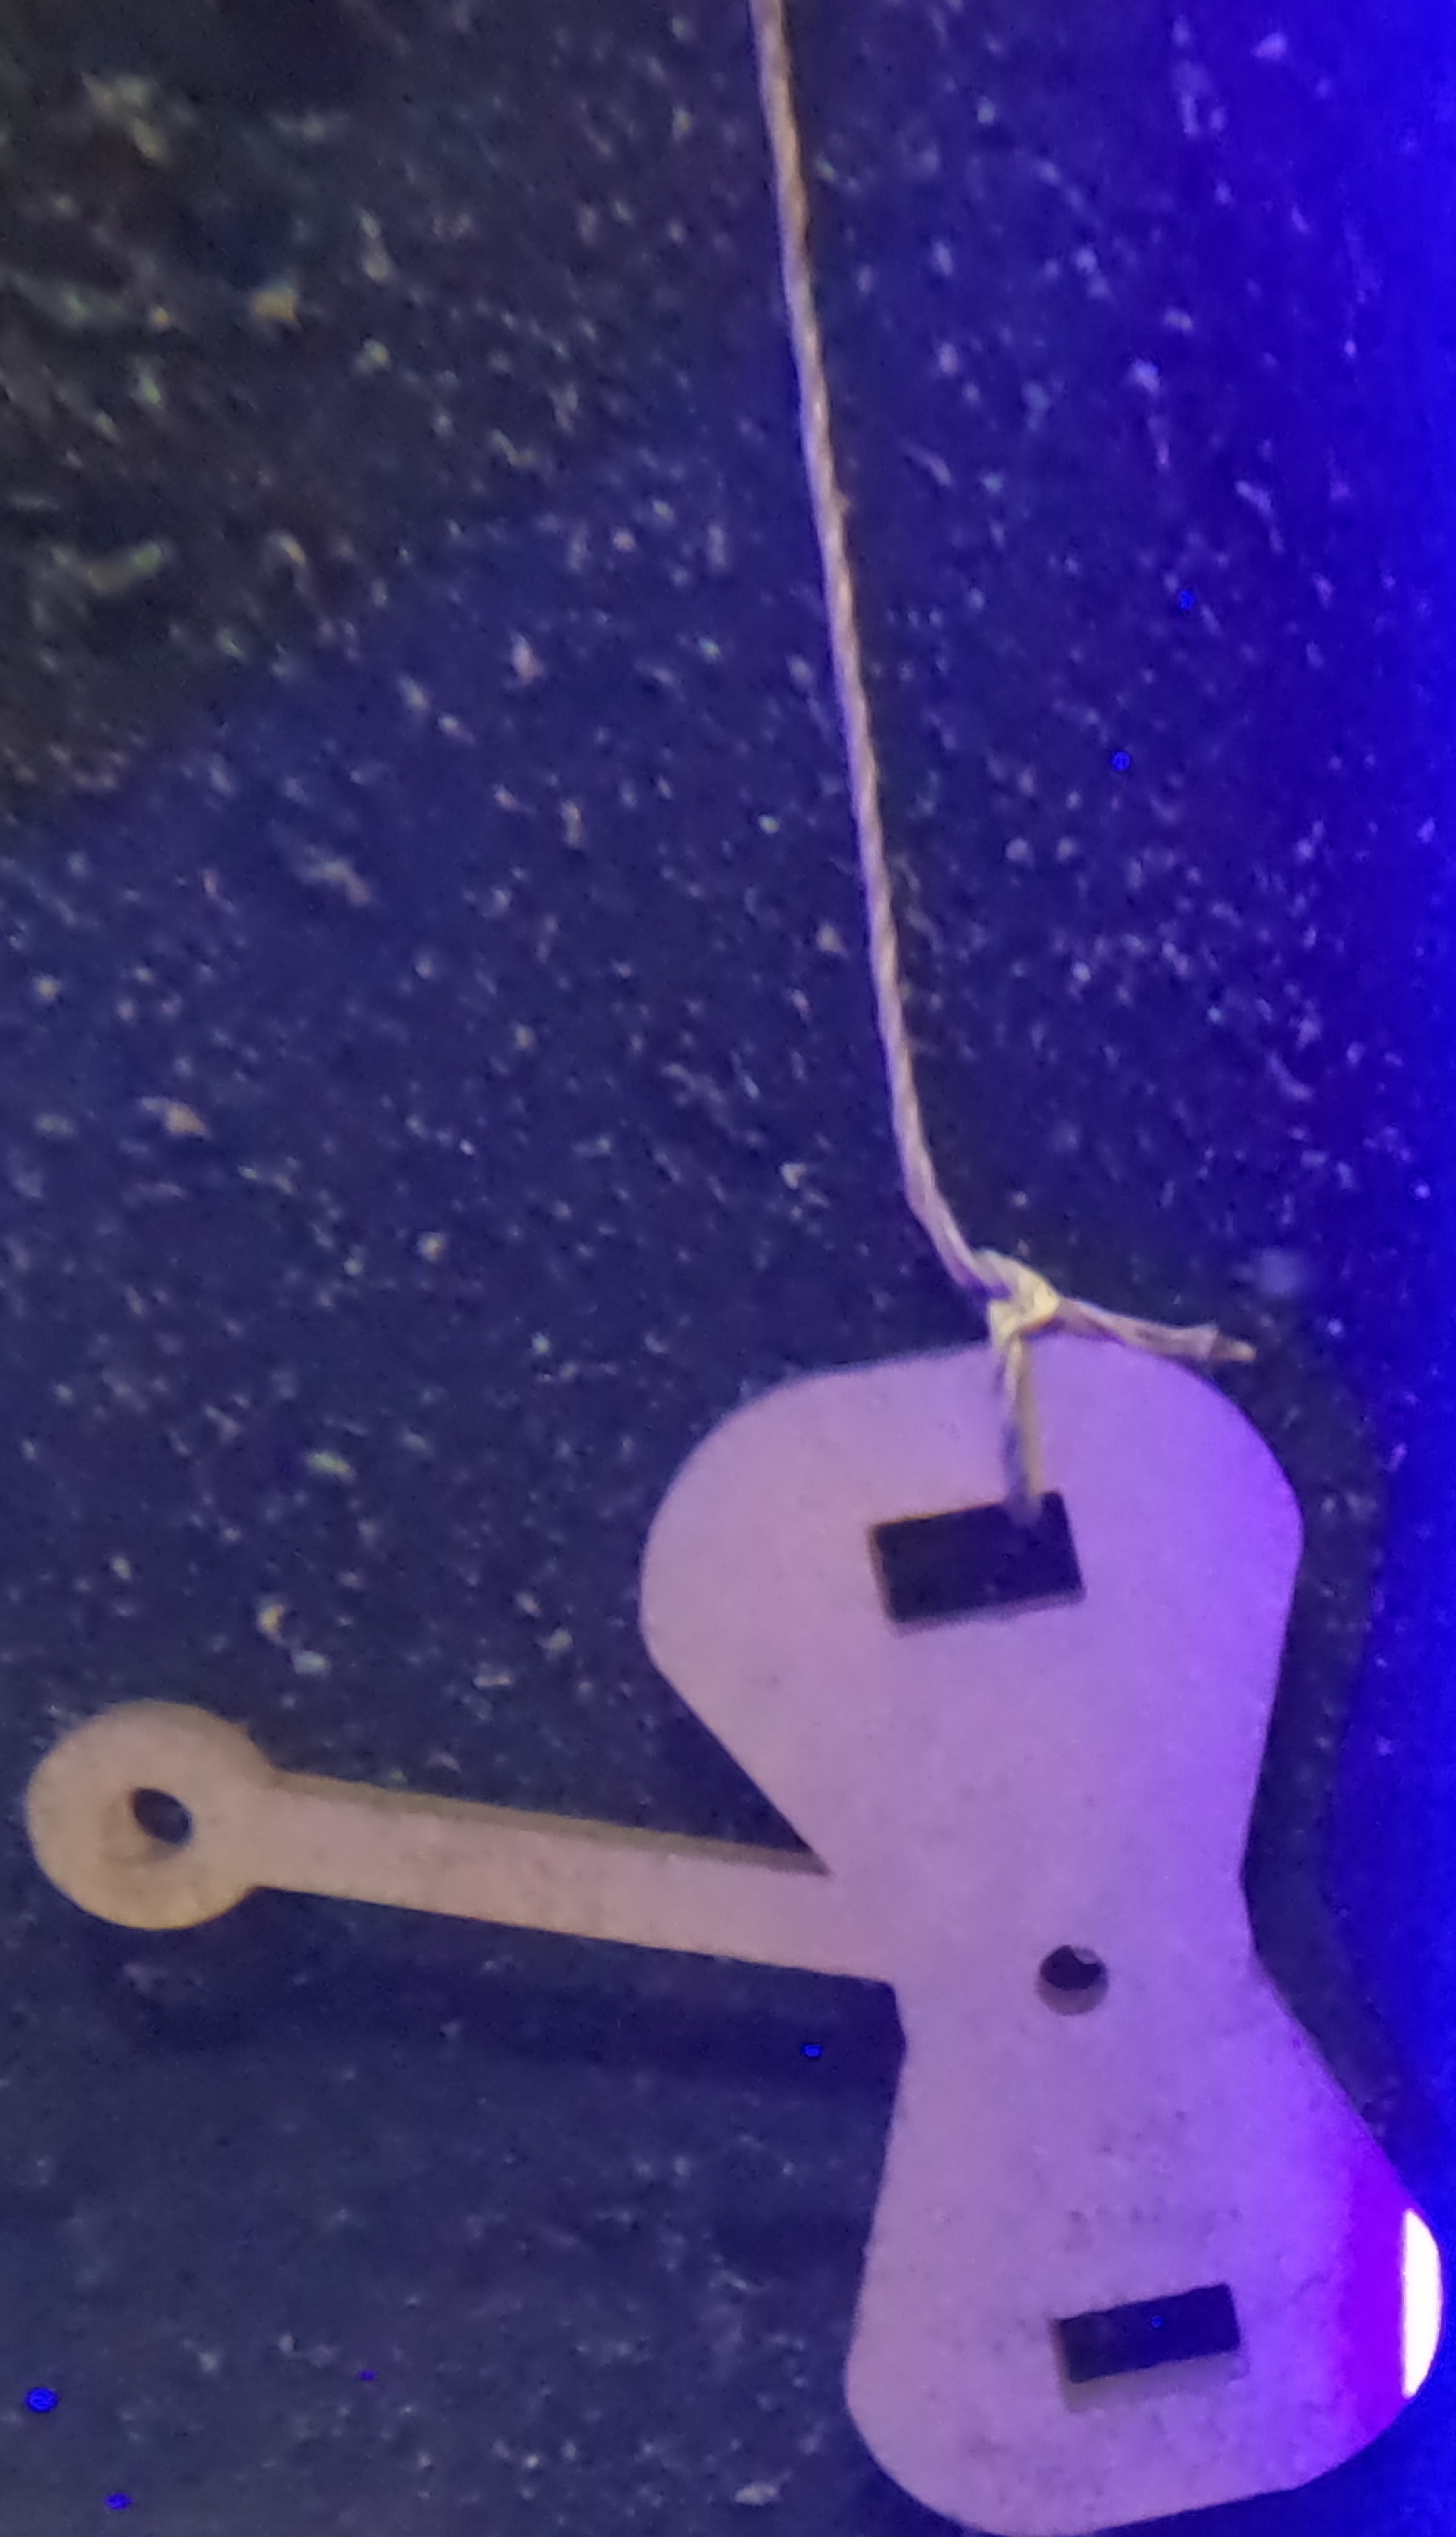

Supplement: Supplementary file 3160 [file G0015601.pdf › Level_2_1/G0015601.pdf]

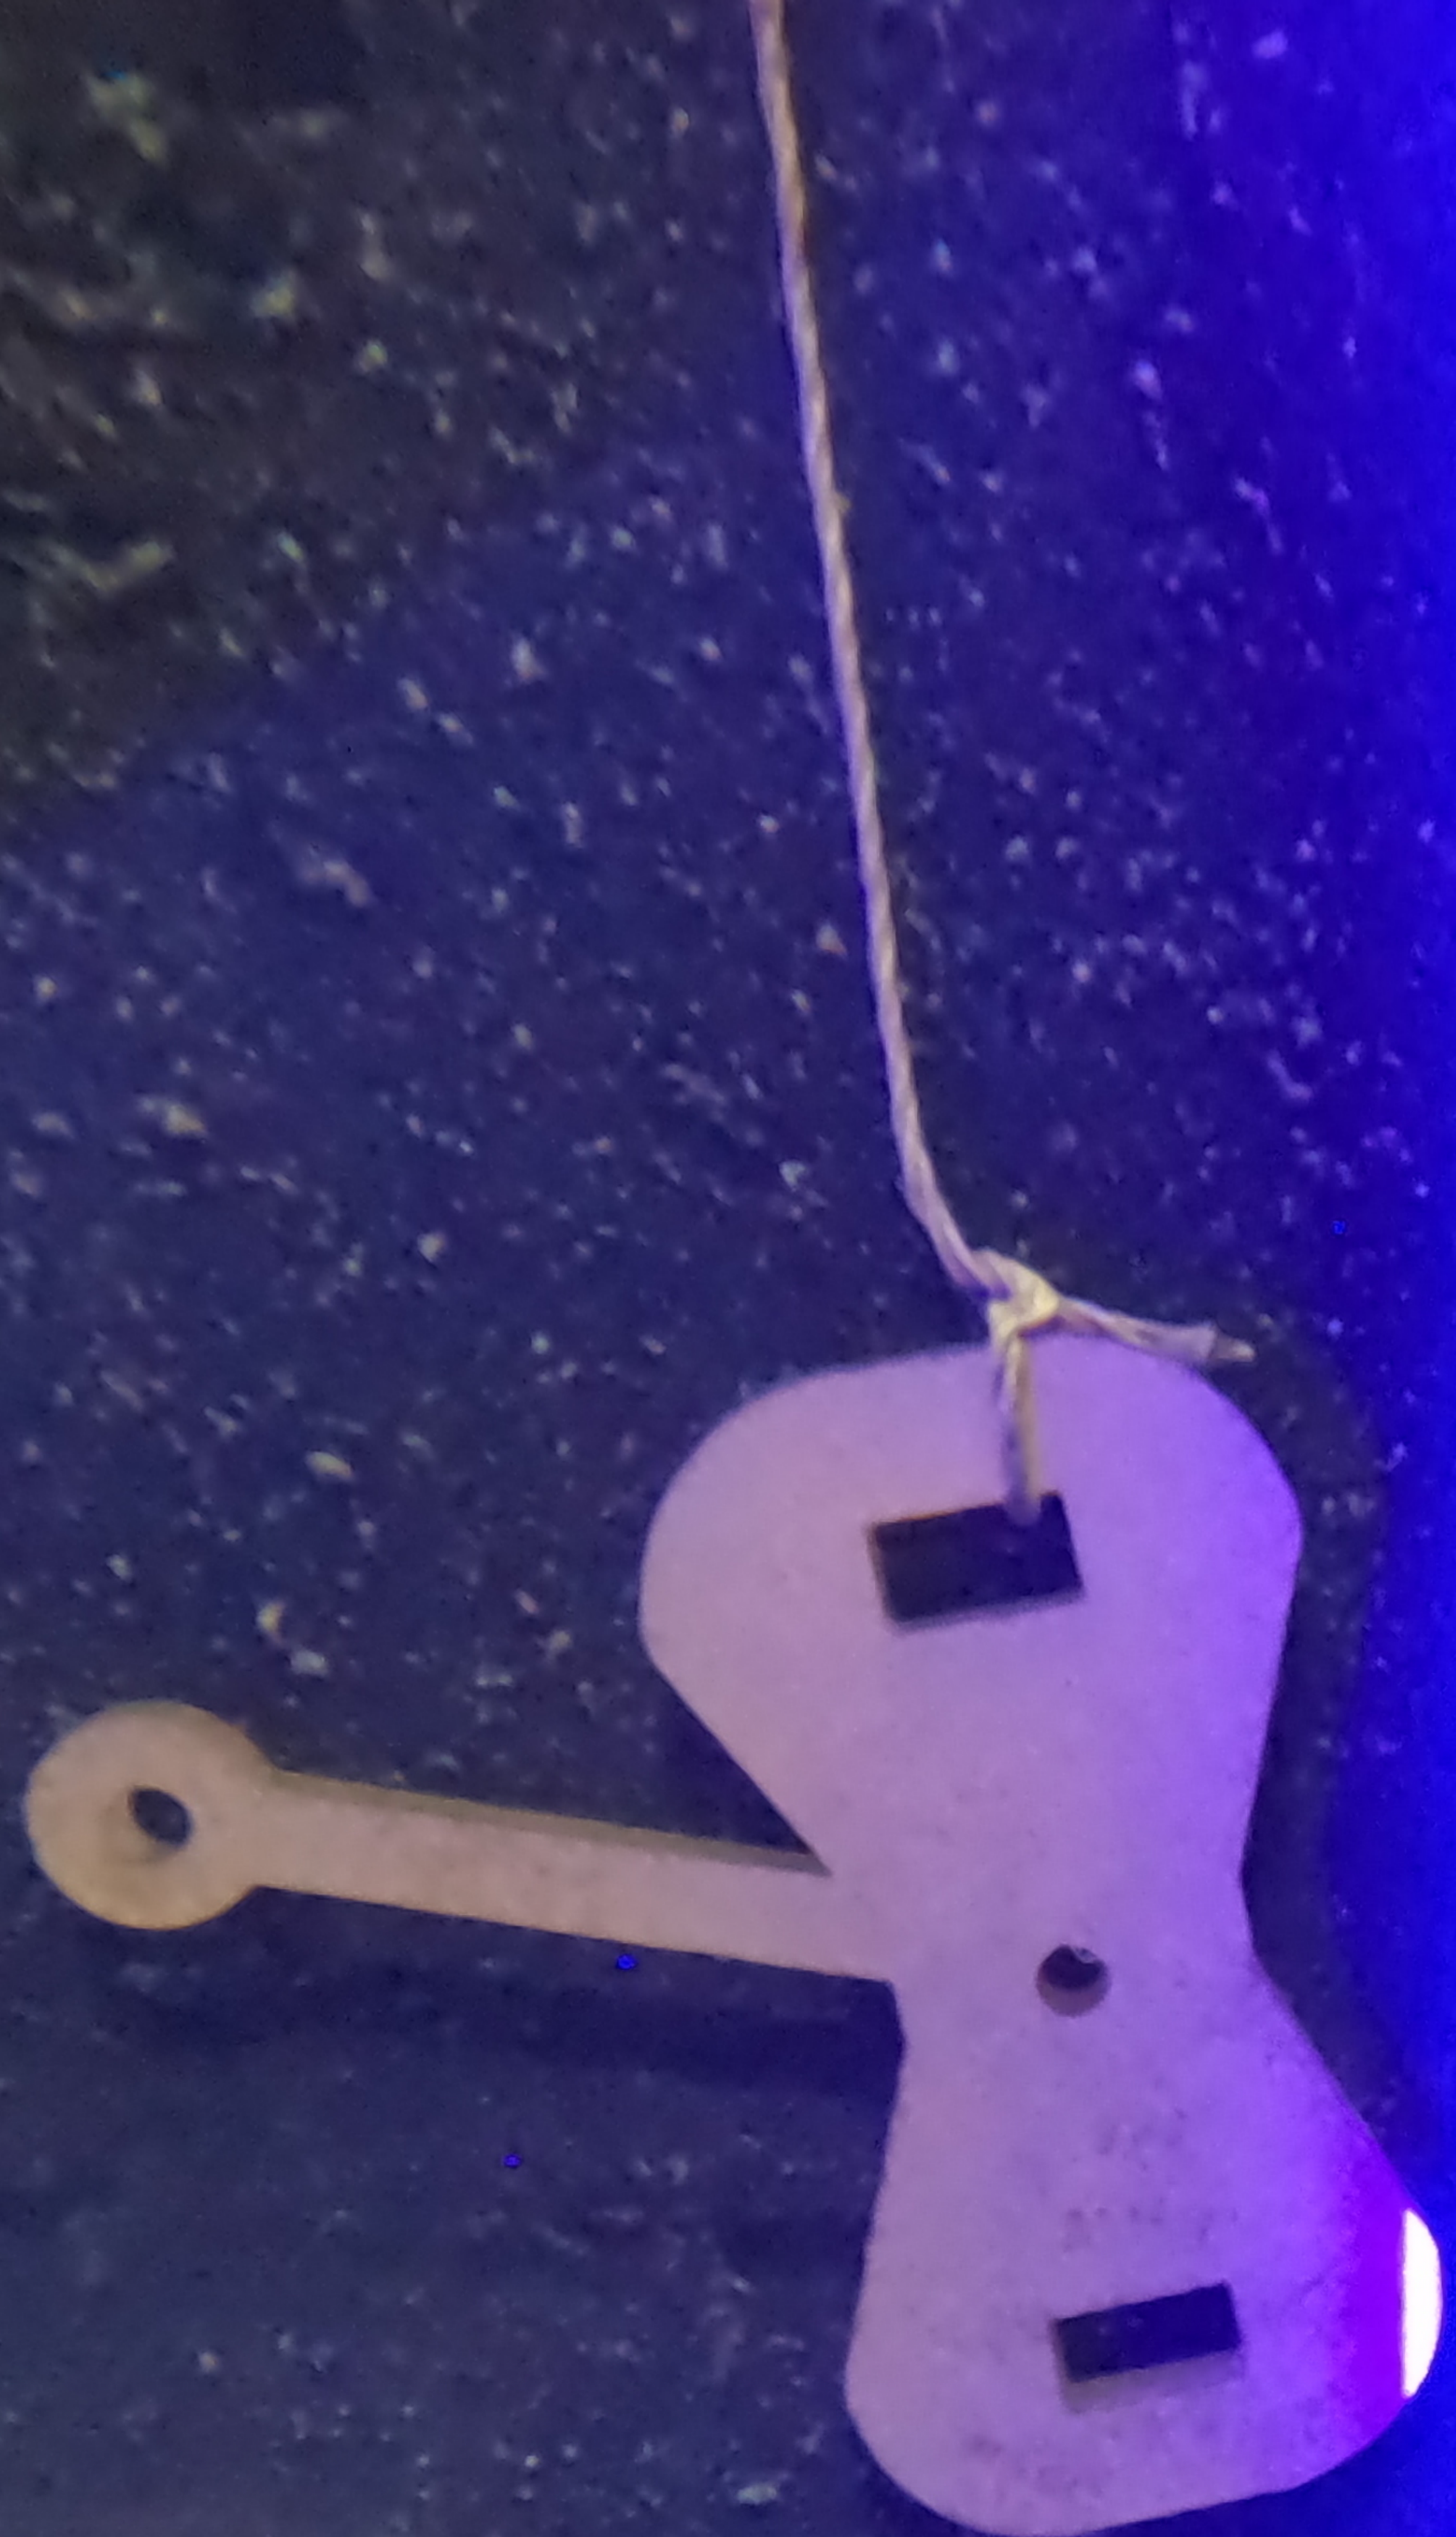

Supplement: Supplementary file 3161 [file G0015602.pdf › Level_2_1/G0015602.pdf]

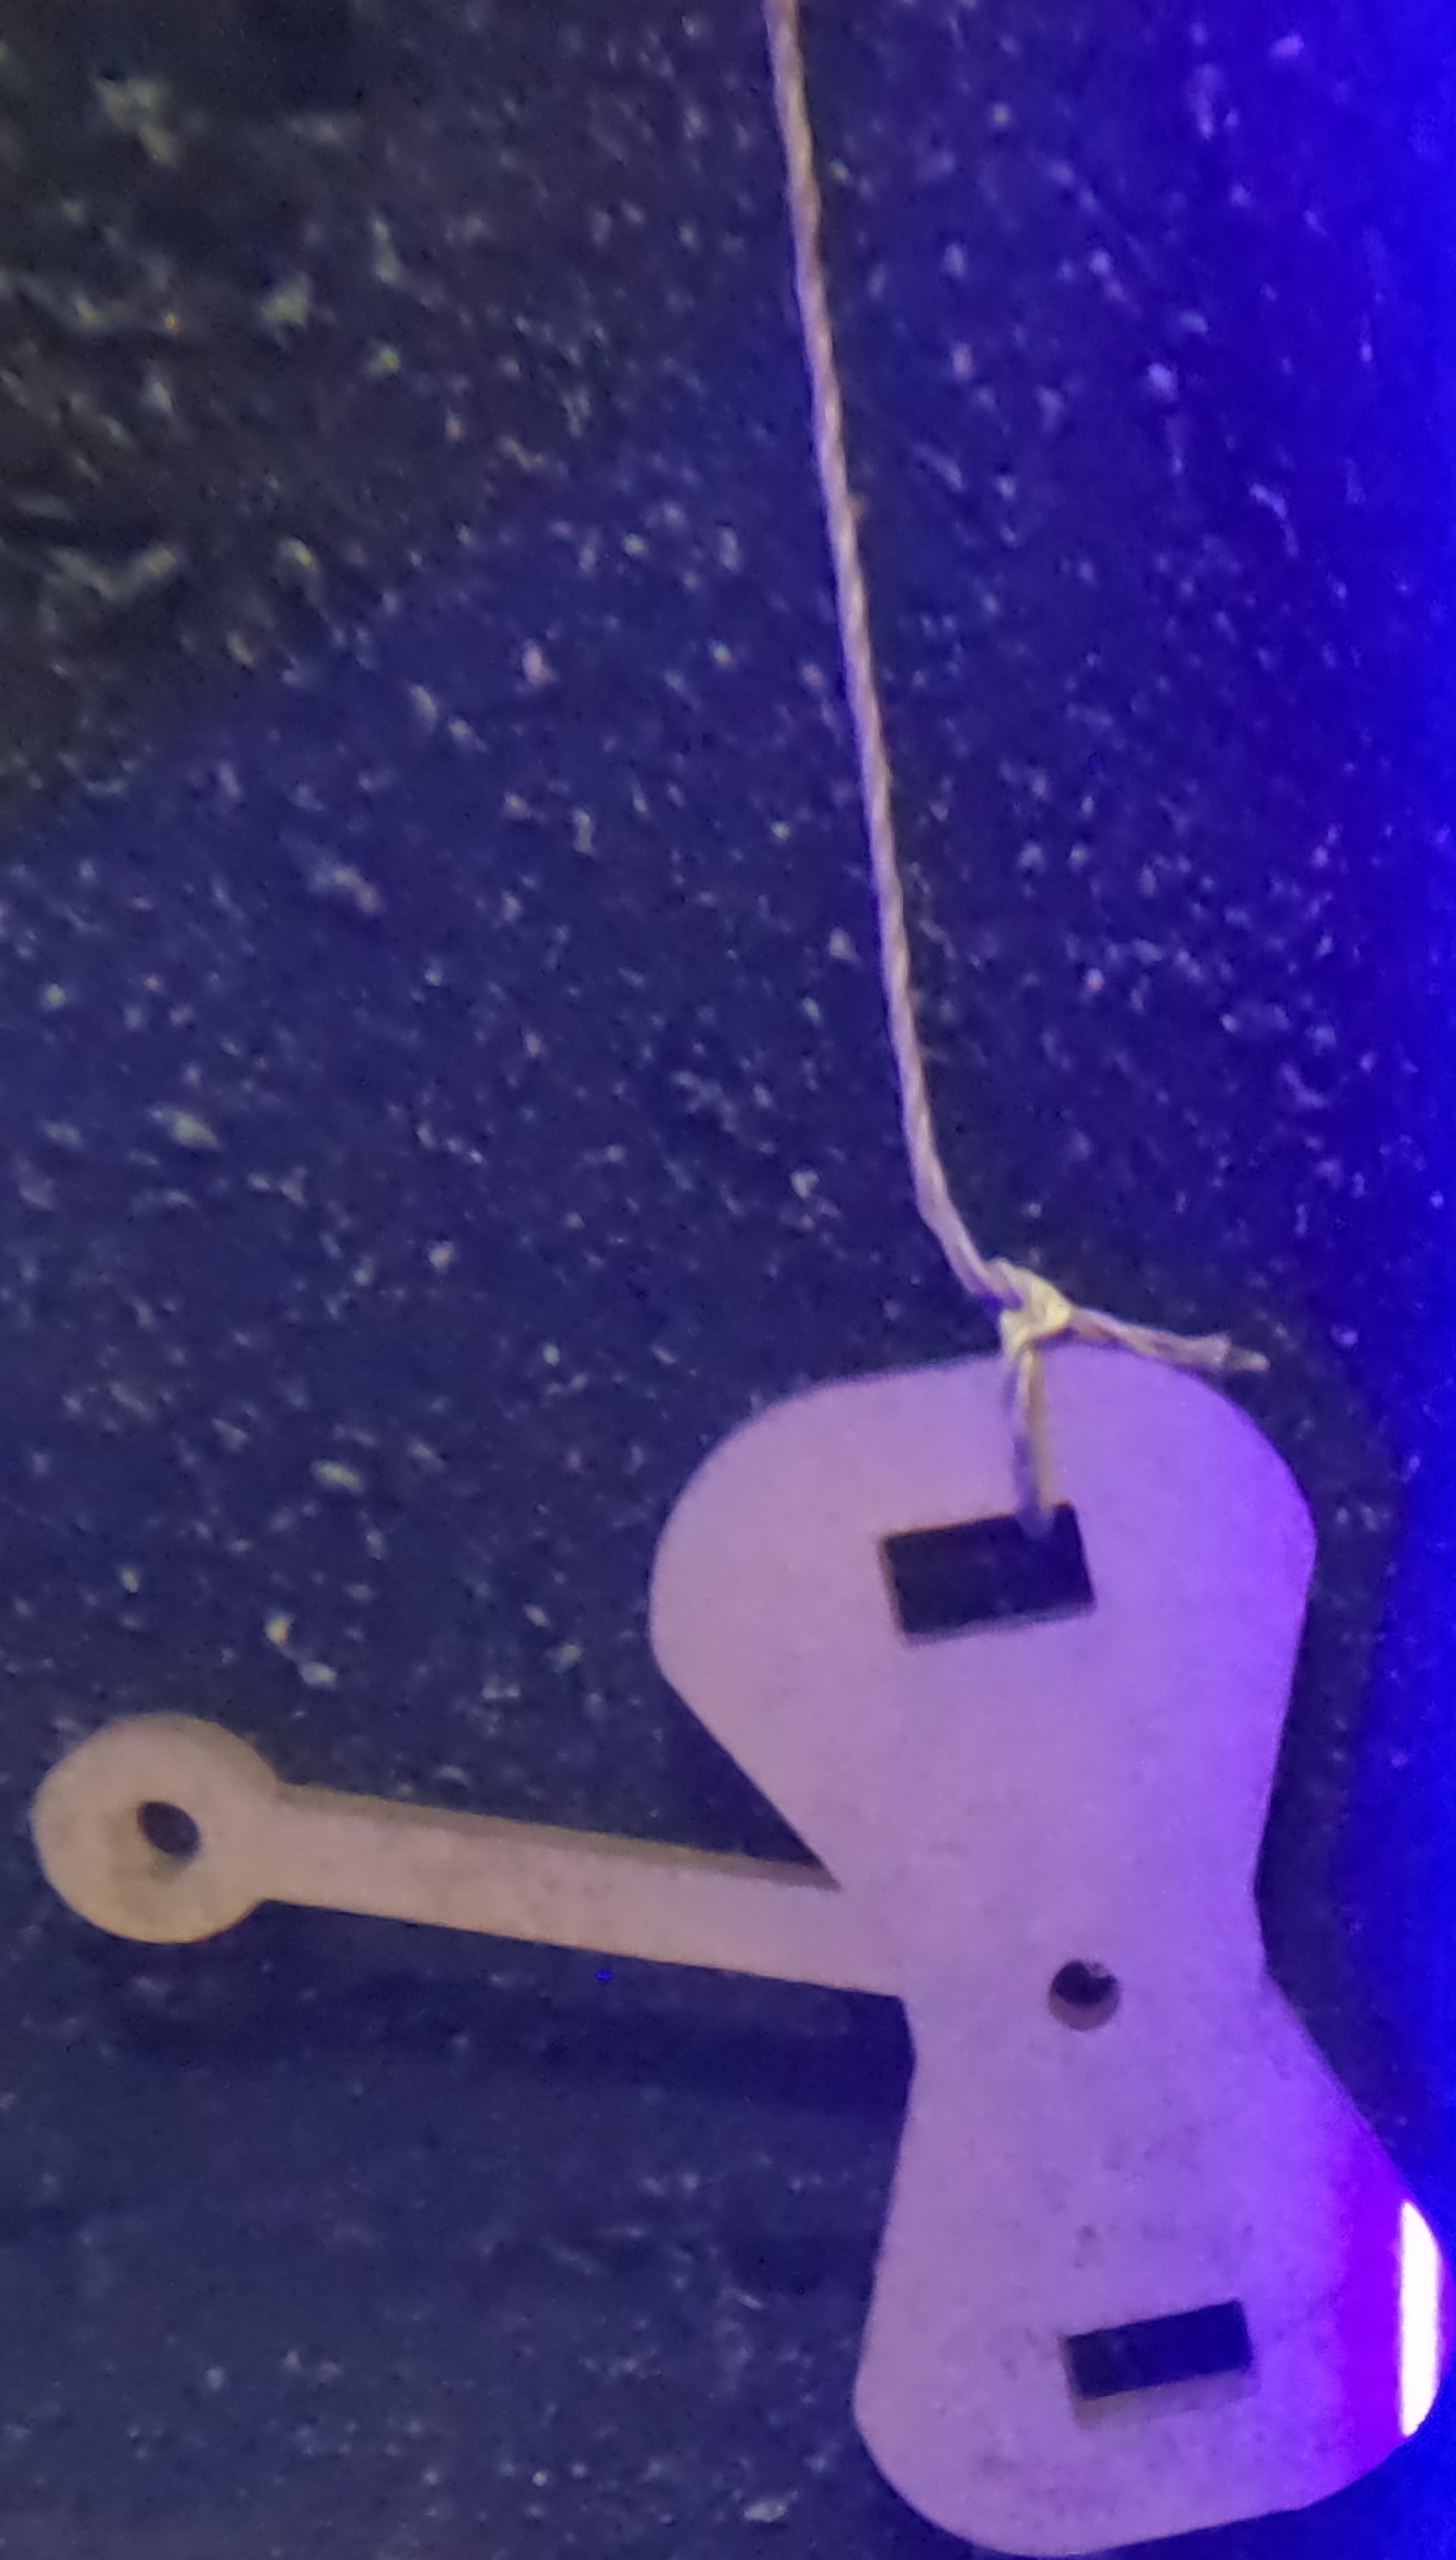

Supplement: Supplementary file 3162 [file G0015603.pdf › Level_2_1/G0015603.pdf]

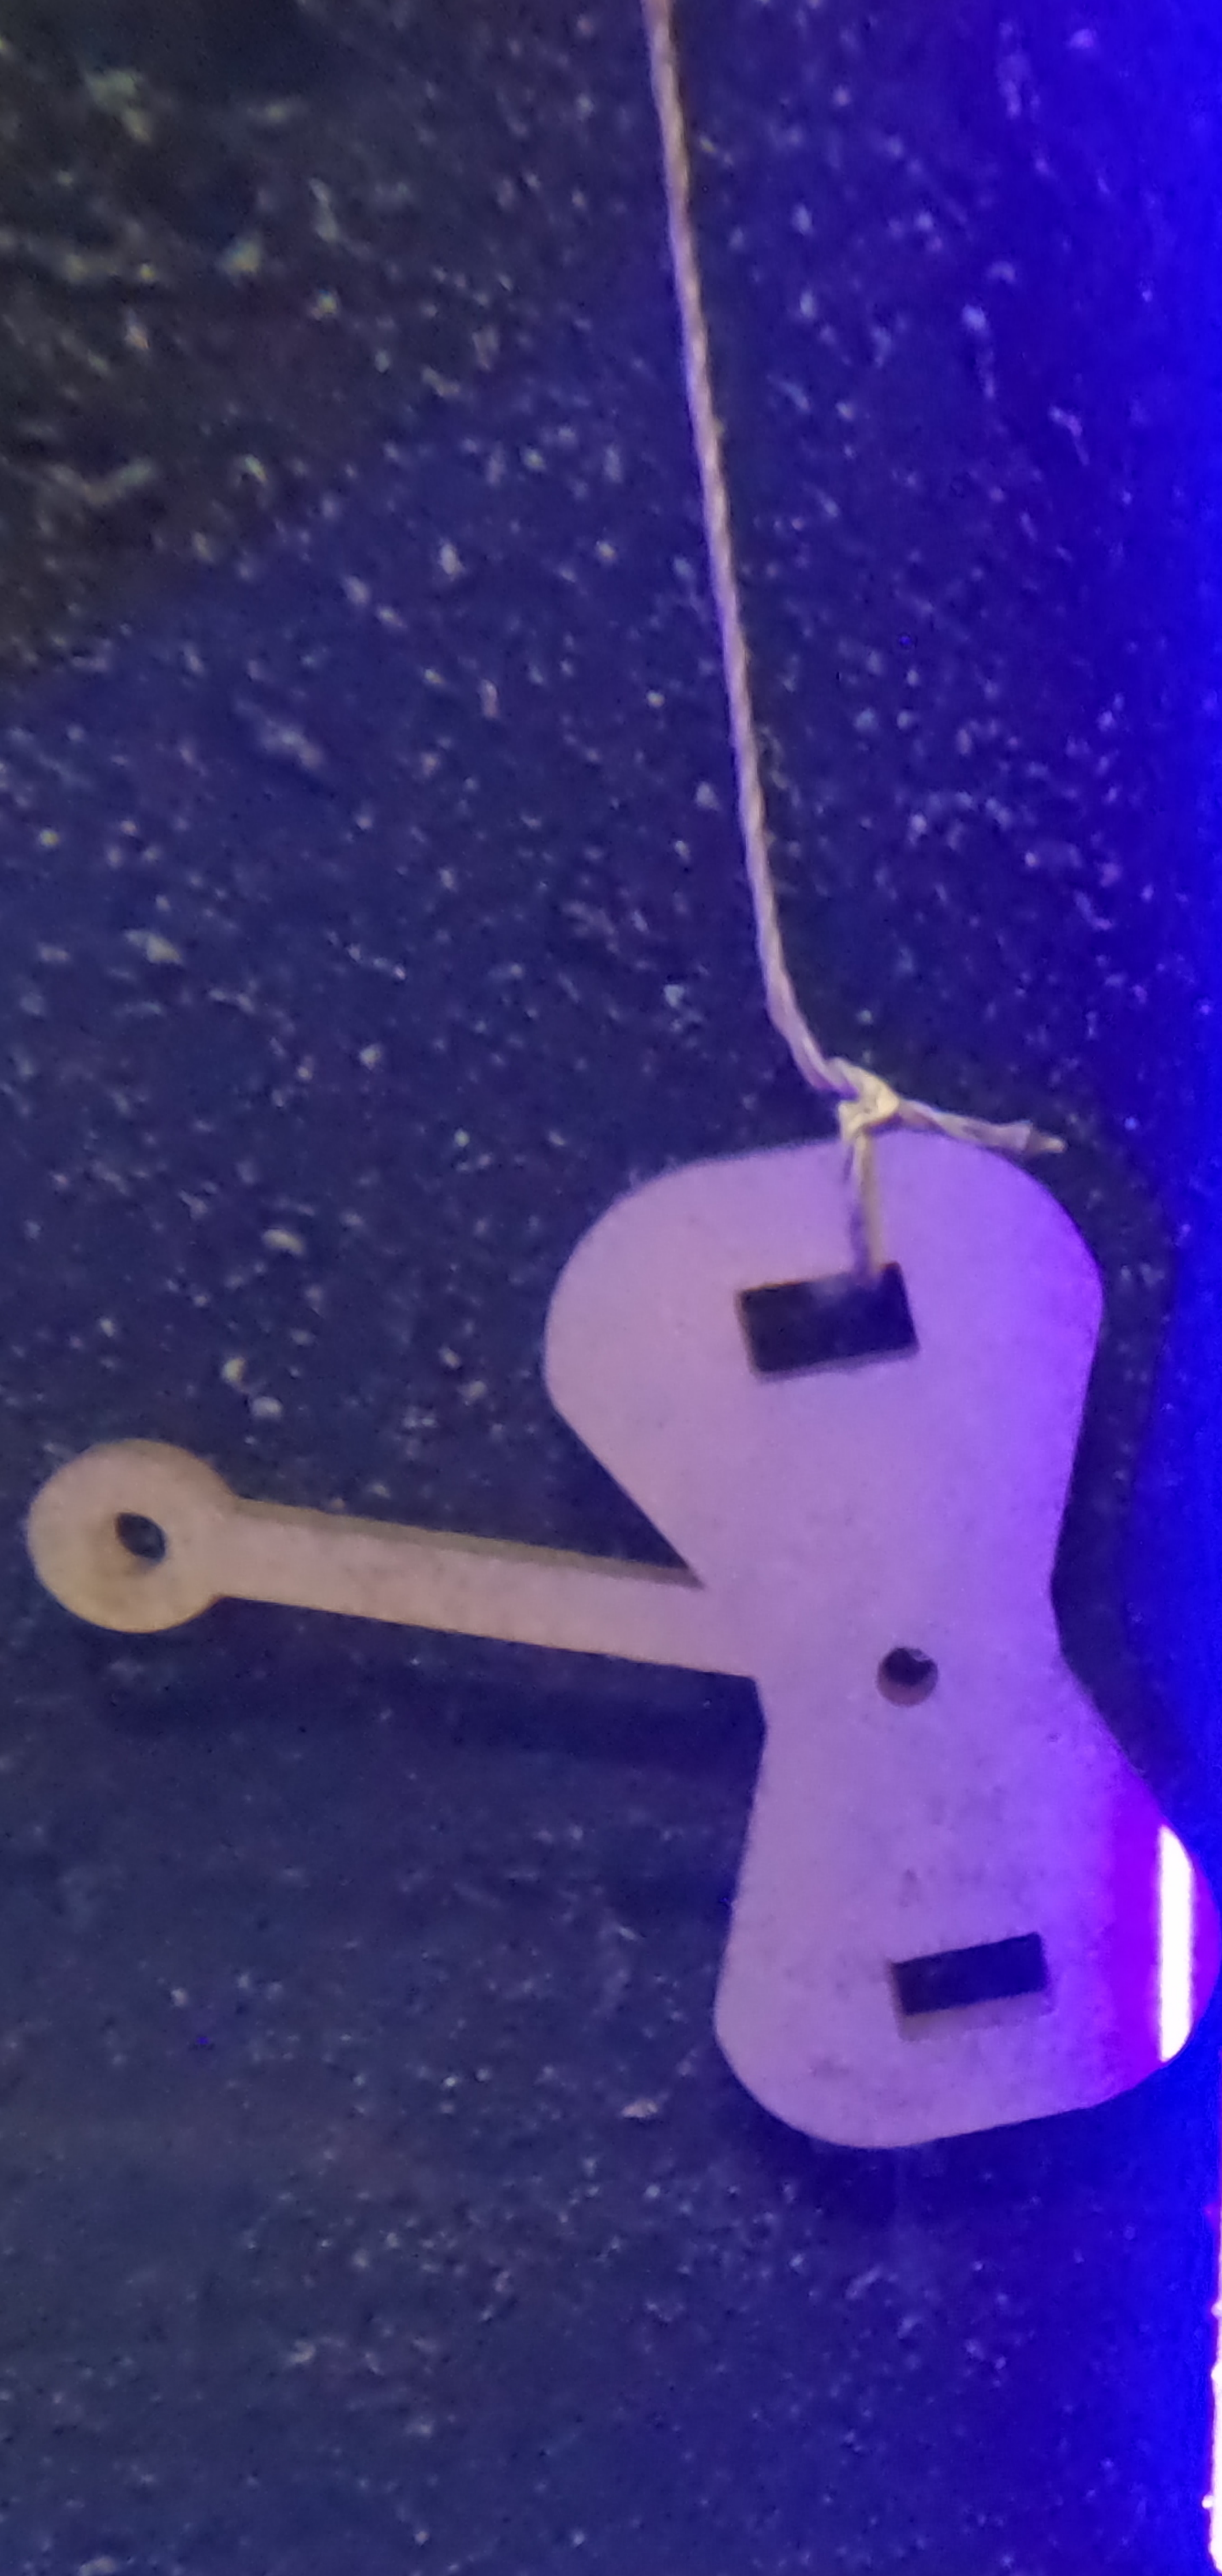

Supplement: Supplementary file 3163 [file G0015604.pdf › Level_2_1/G0015604.pdf]

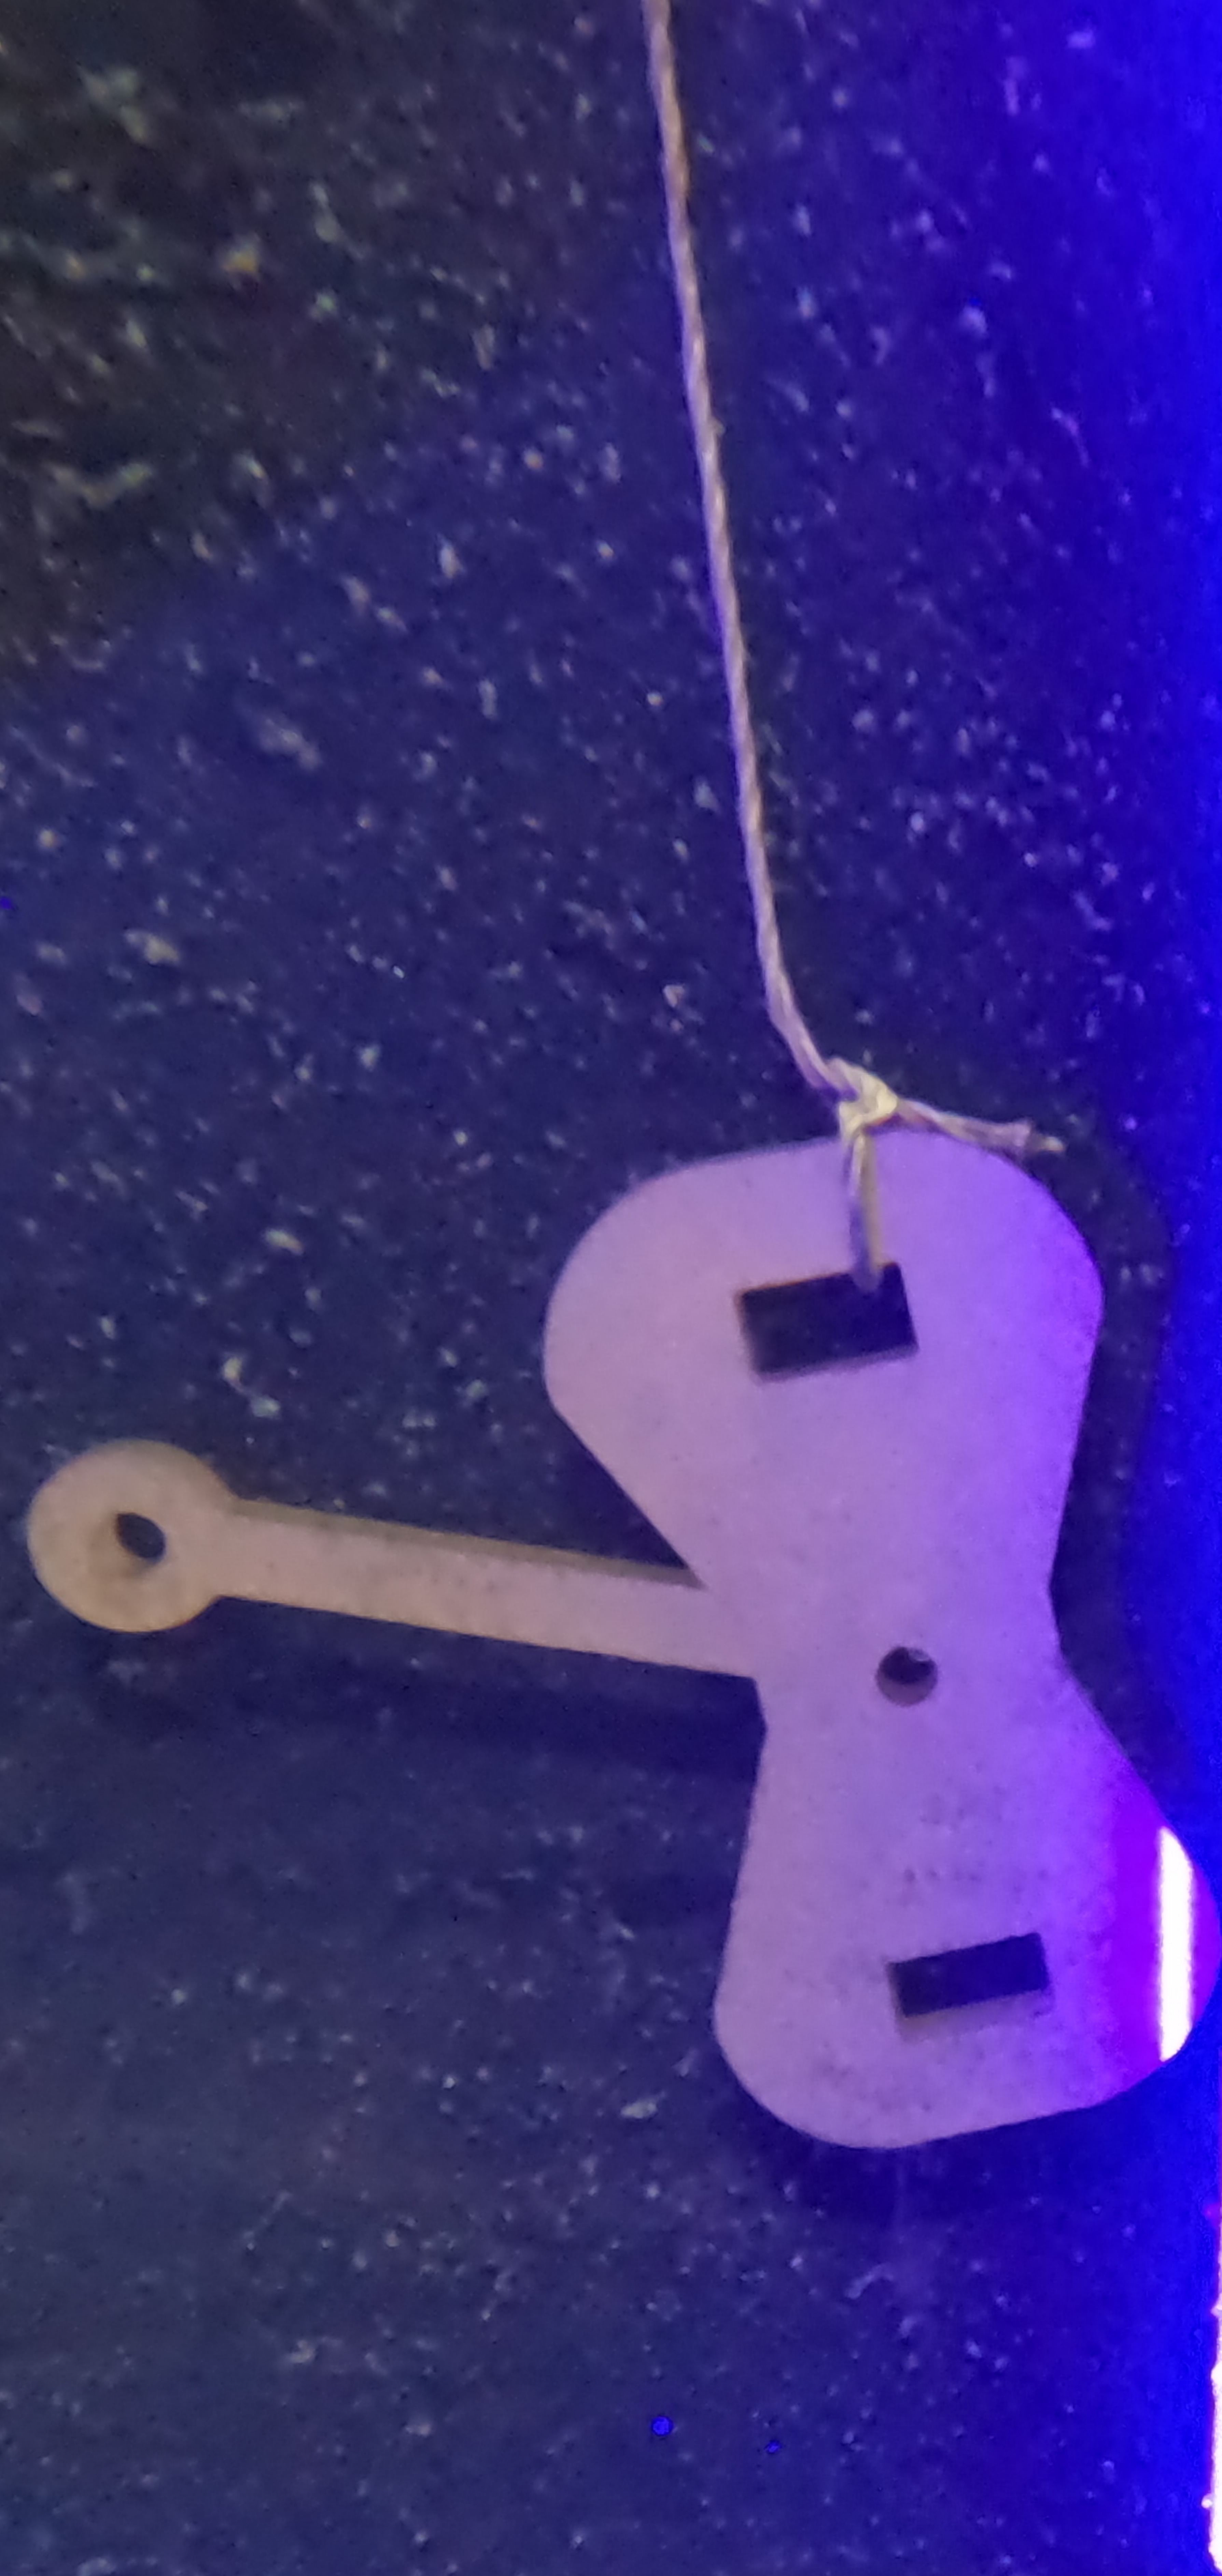

Supplement: Supplementary file 3164 [file G0015605.pdf › Level_2_1/G0015605.pdf]

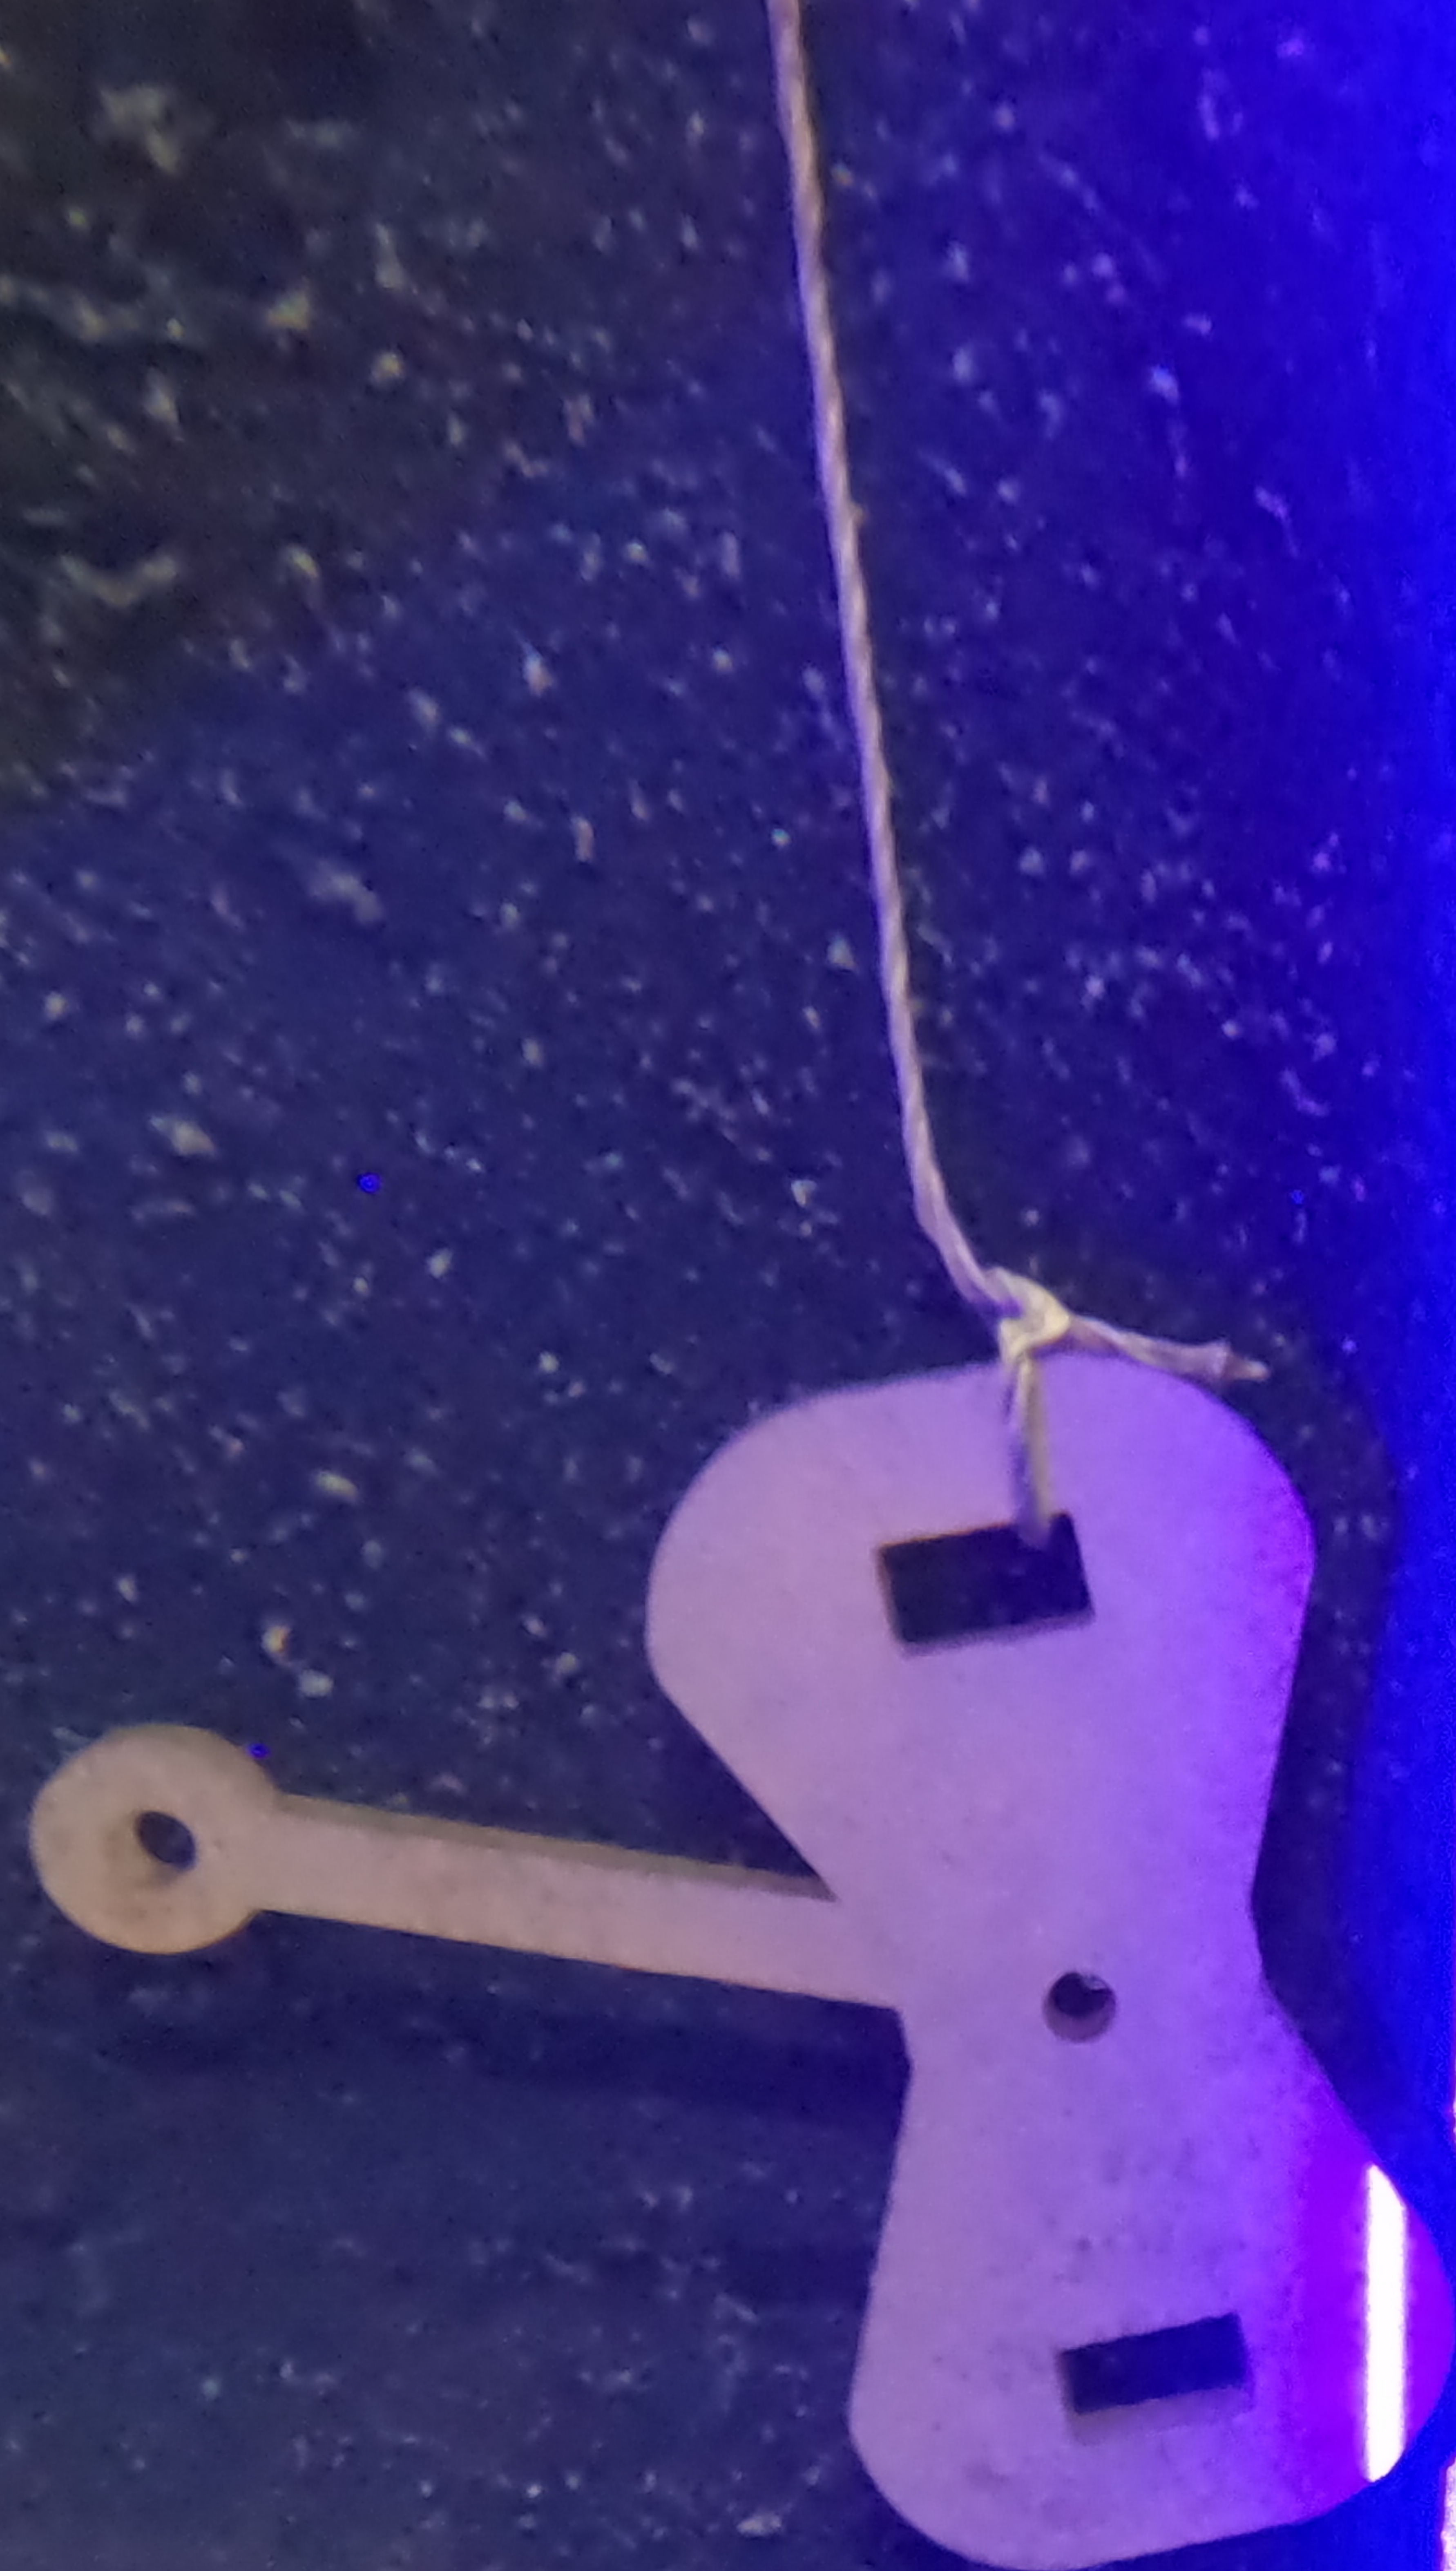

Supplement: Supplementary file 3165 [file G0015606.pdf › Level_2_1/G0015606.pdf]

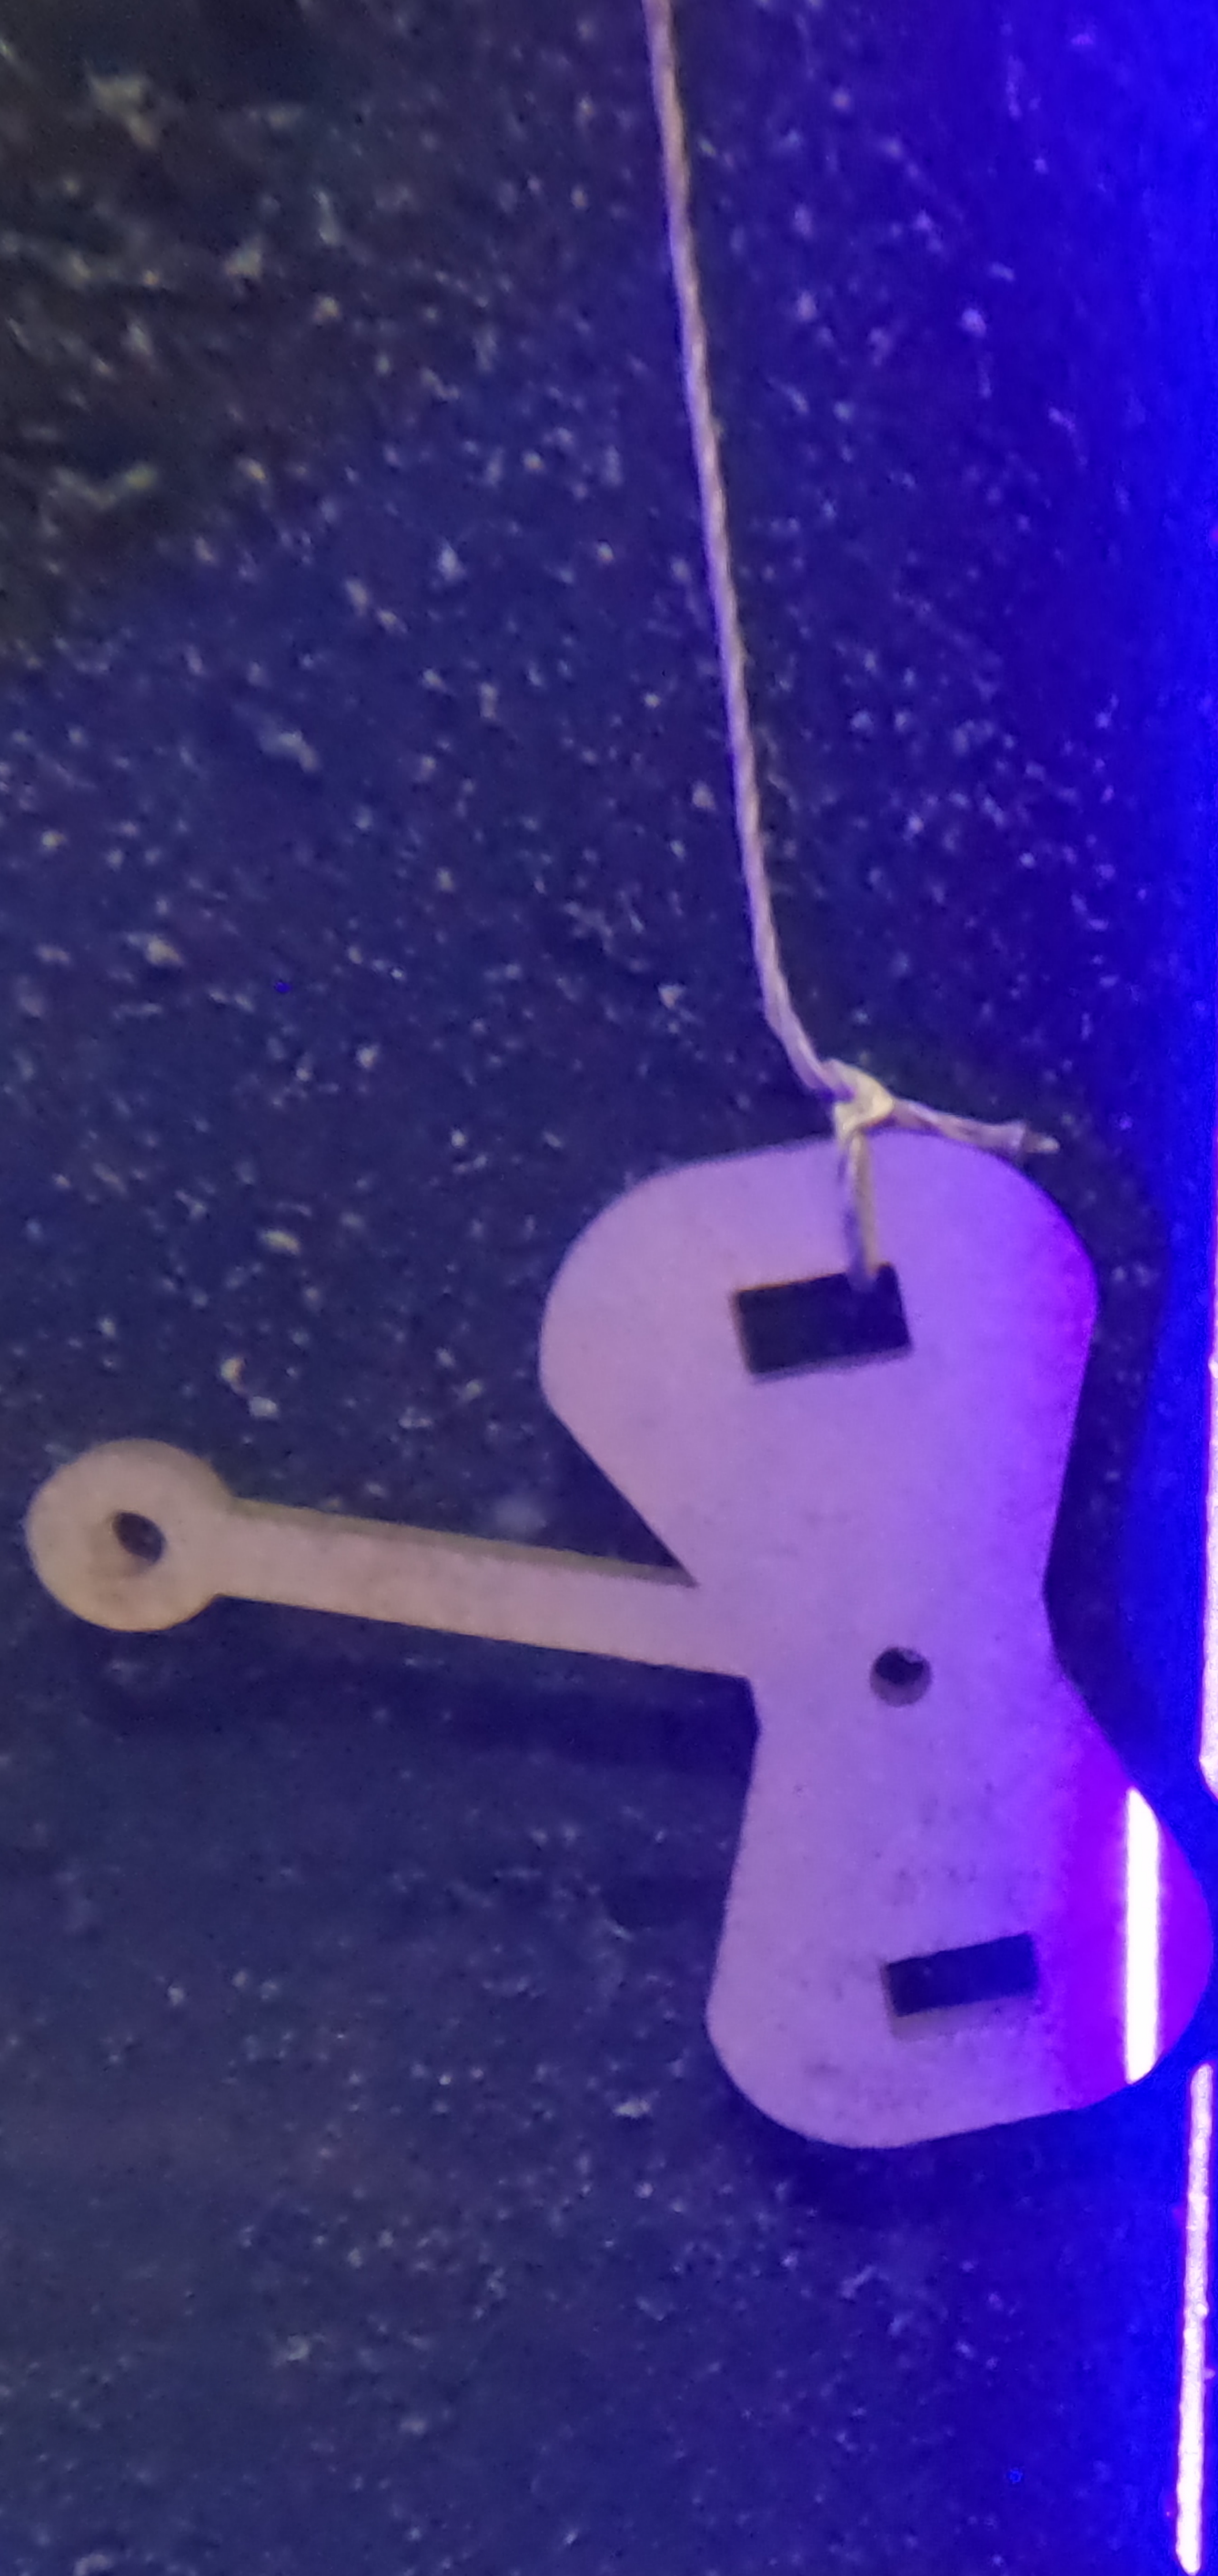

Supplement: Supplementary file 3166 [file G0015607.pdf › Level_2_1/G0015607.pdf]

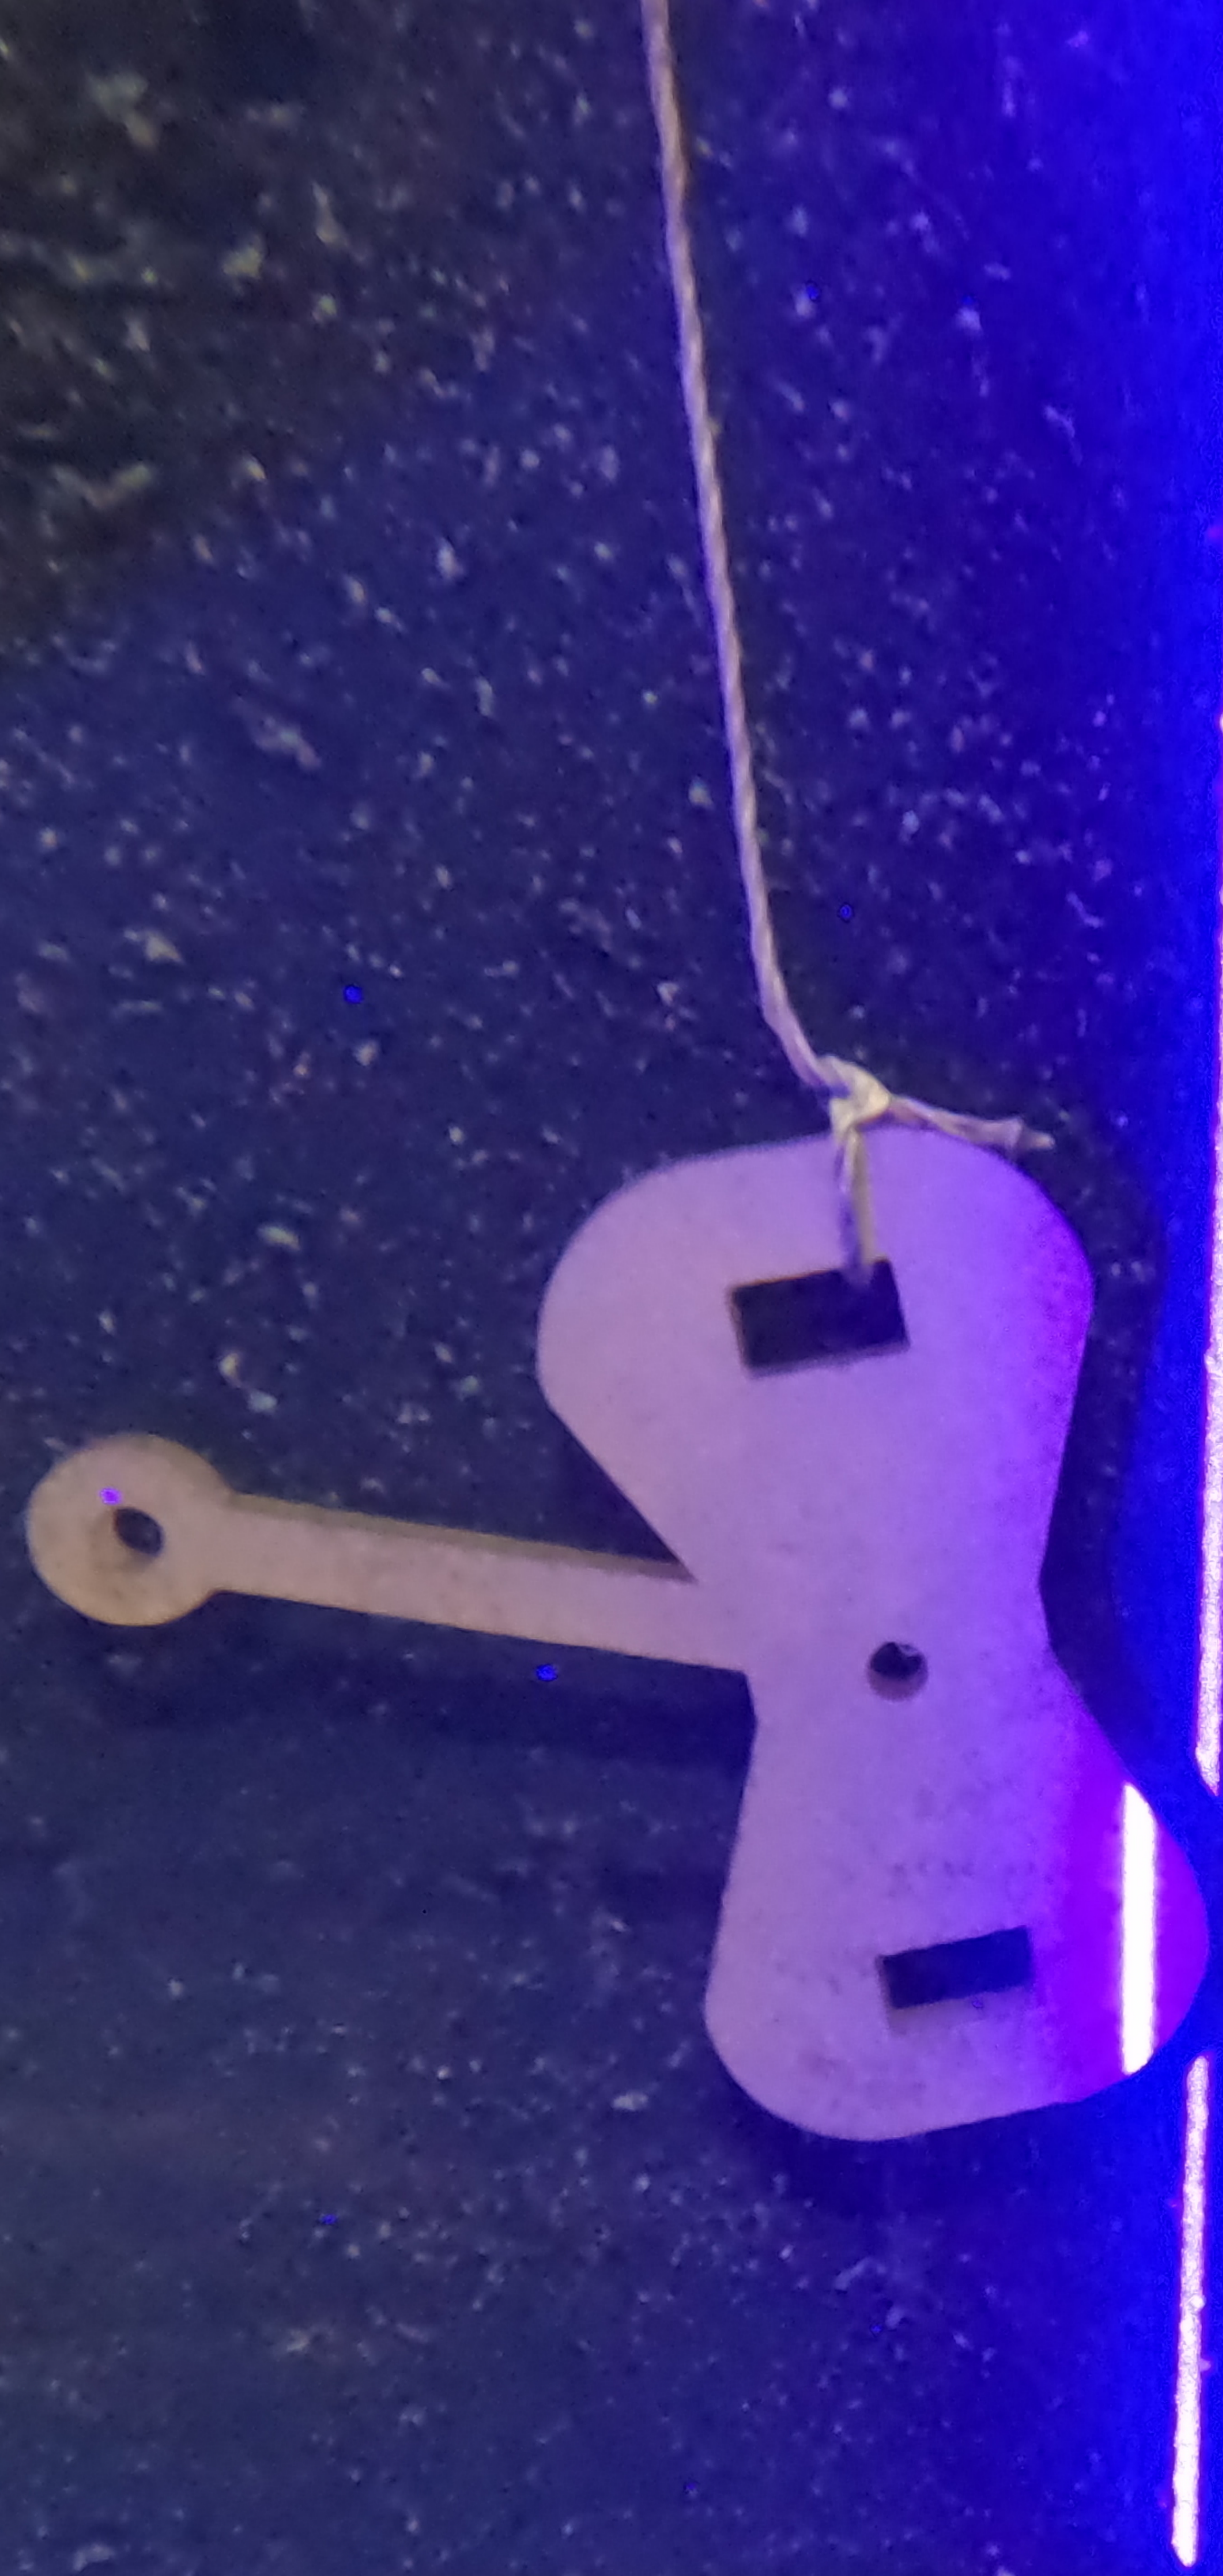

Supplement: Supplementary file 3167 [file G0015608.pdf › Level_2_1/G0015608.pdf]

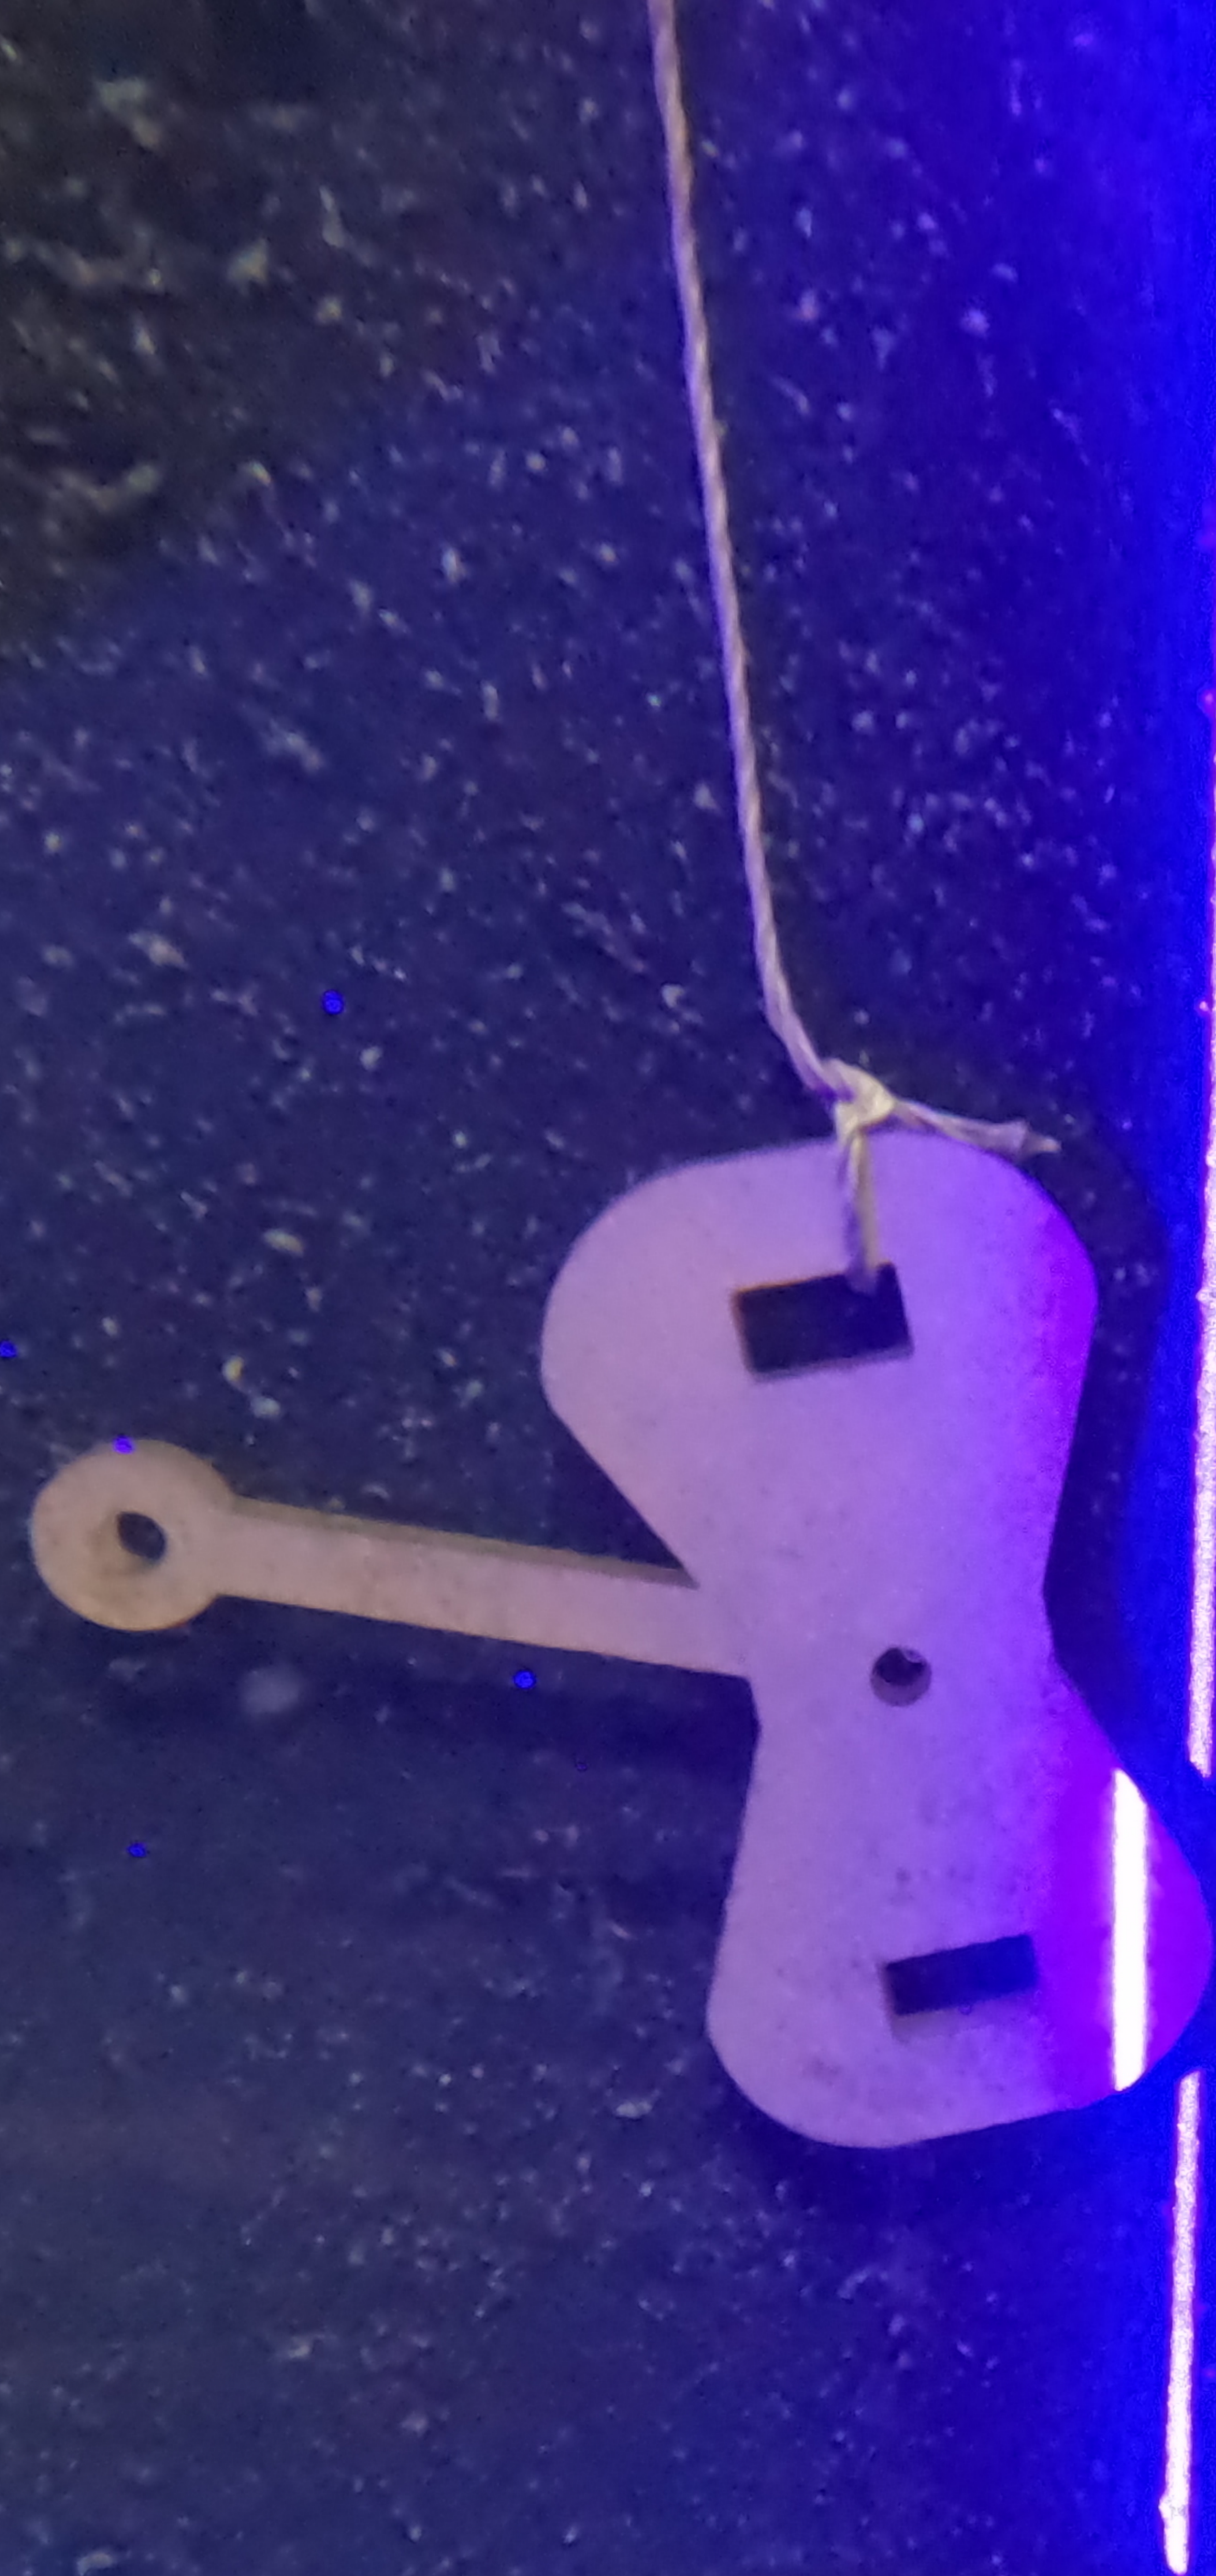

Supplement: Supplementary file 3168 [file G0015609.pdf › Level_2_1/G0015609.pdf]

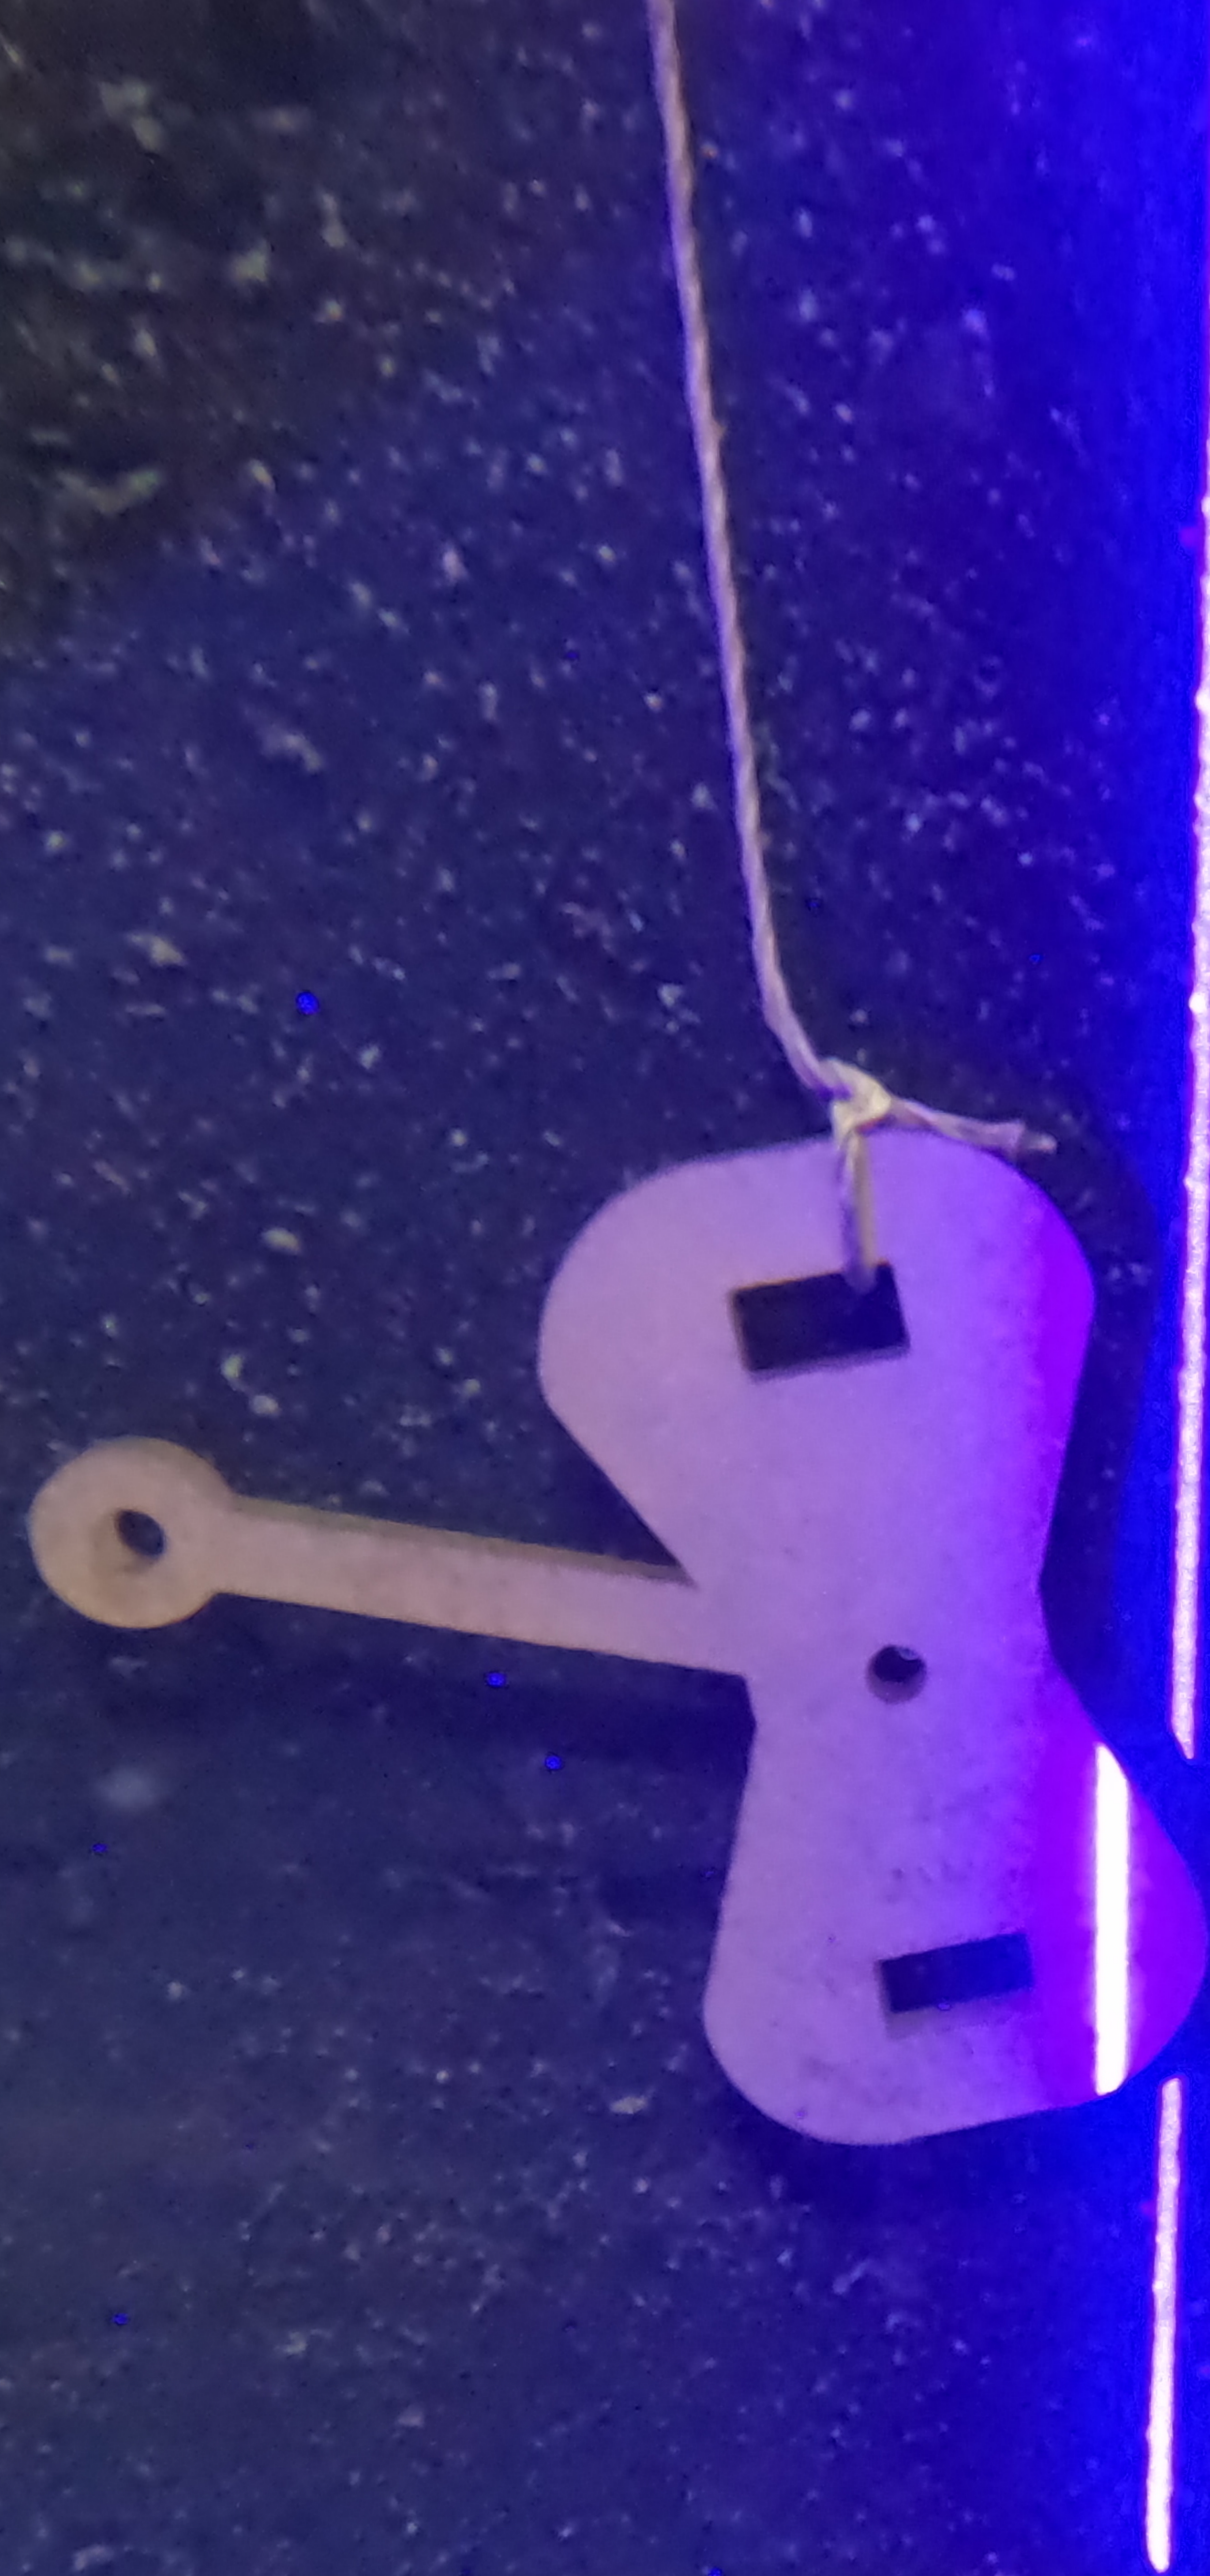

Supplement: Supplementary file 3169 [file G0015610.pdf › Level_2_1/G0015610.pdf]

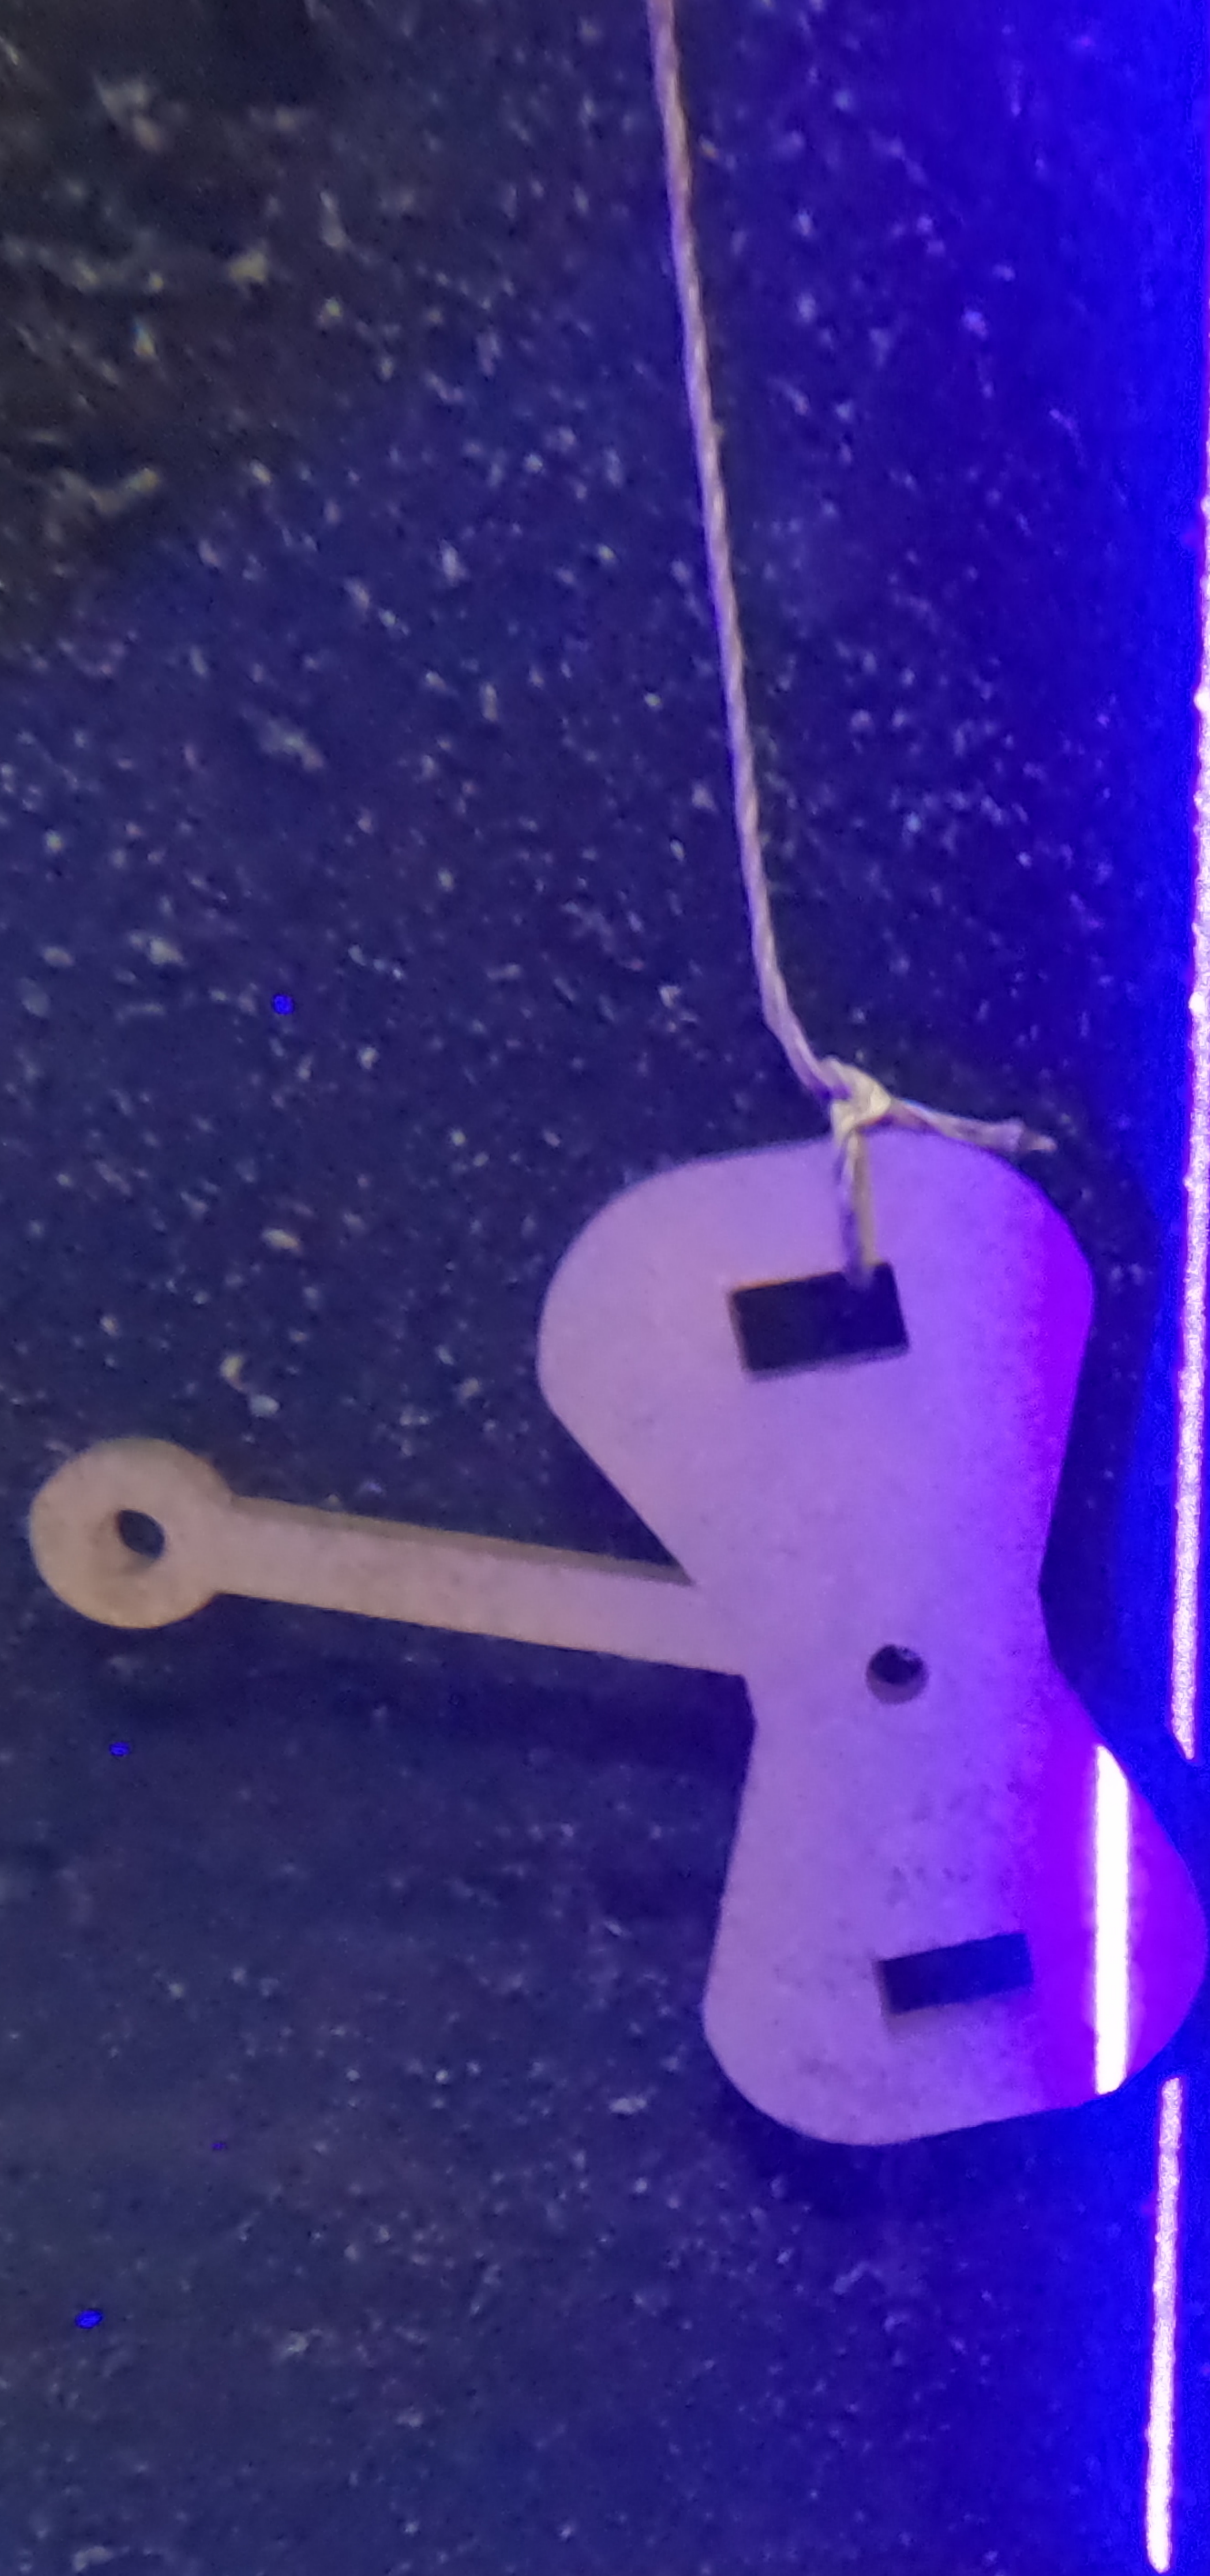

Supplement: Supplementary file 3170 [file G0015611.pdf › Level_2_1/G0015611.pdf]

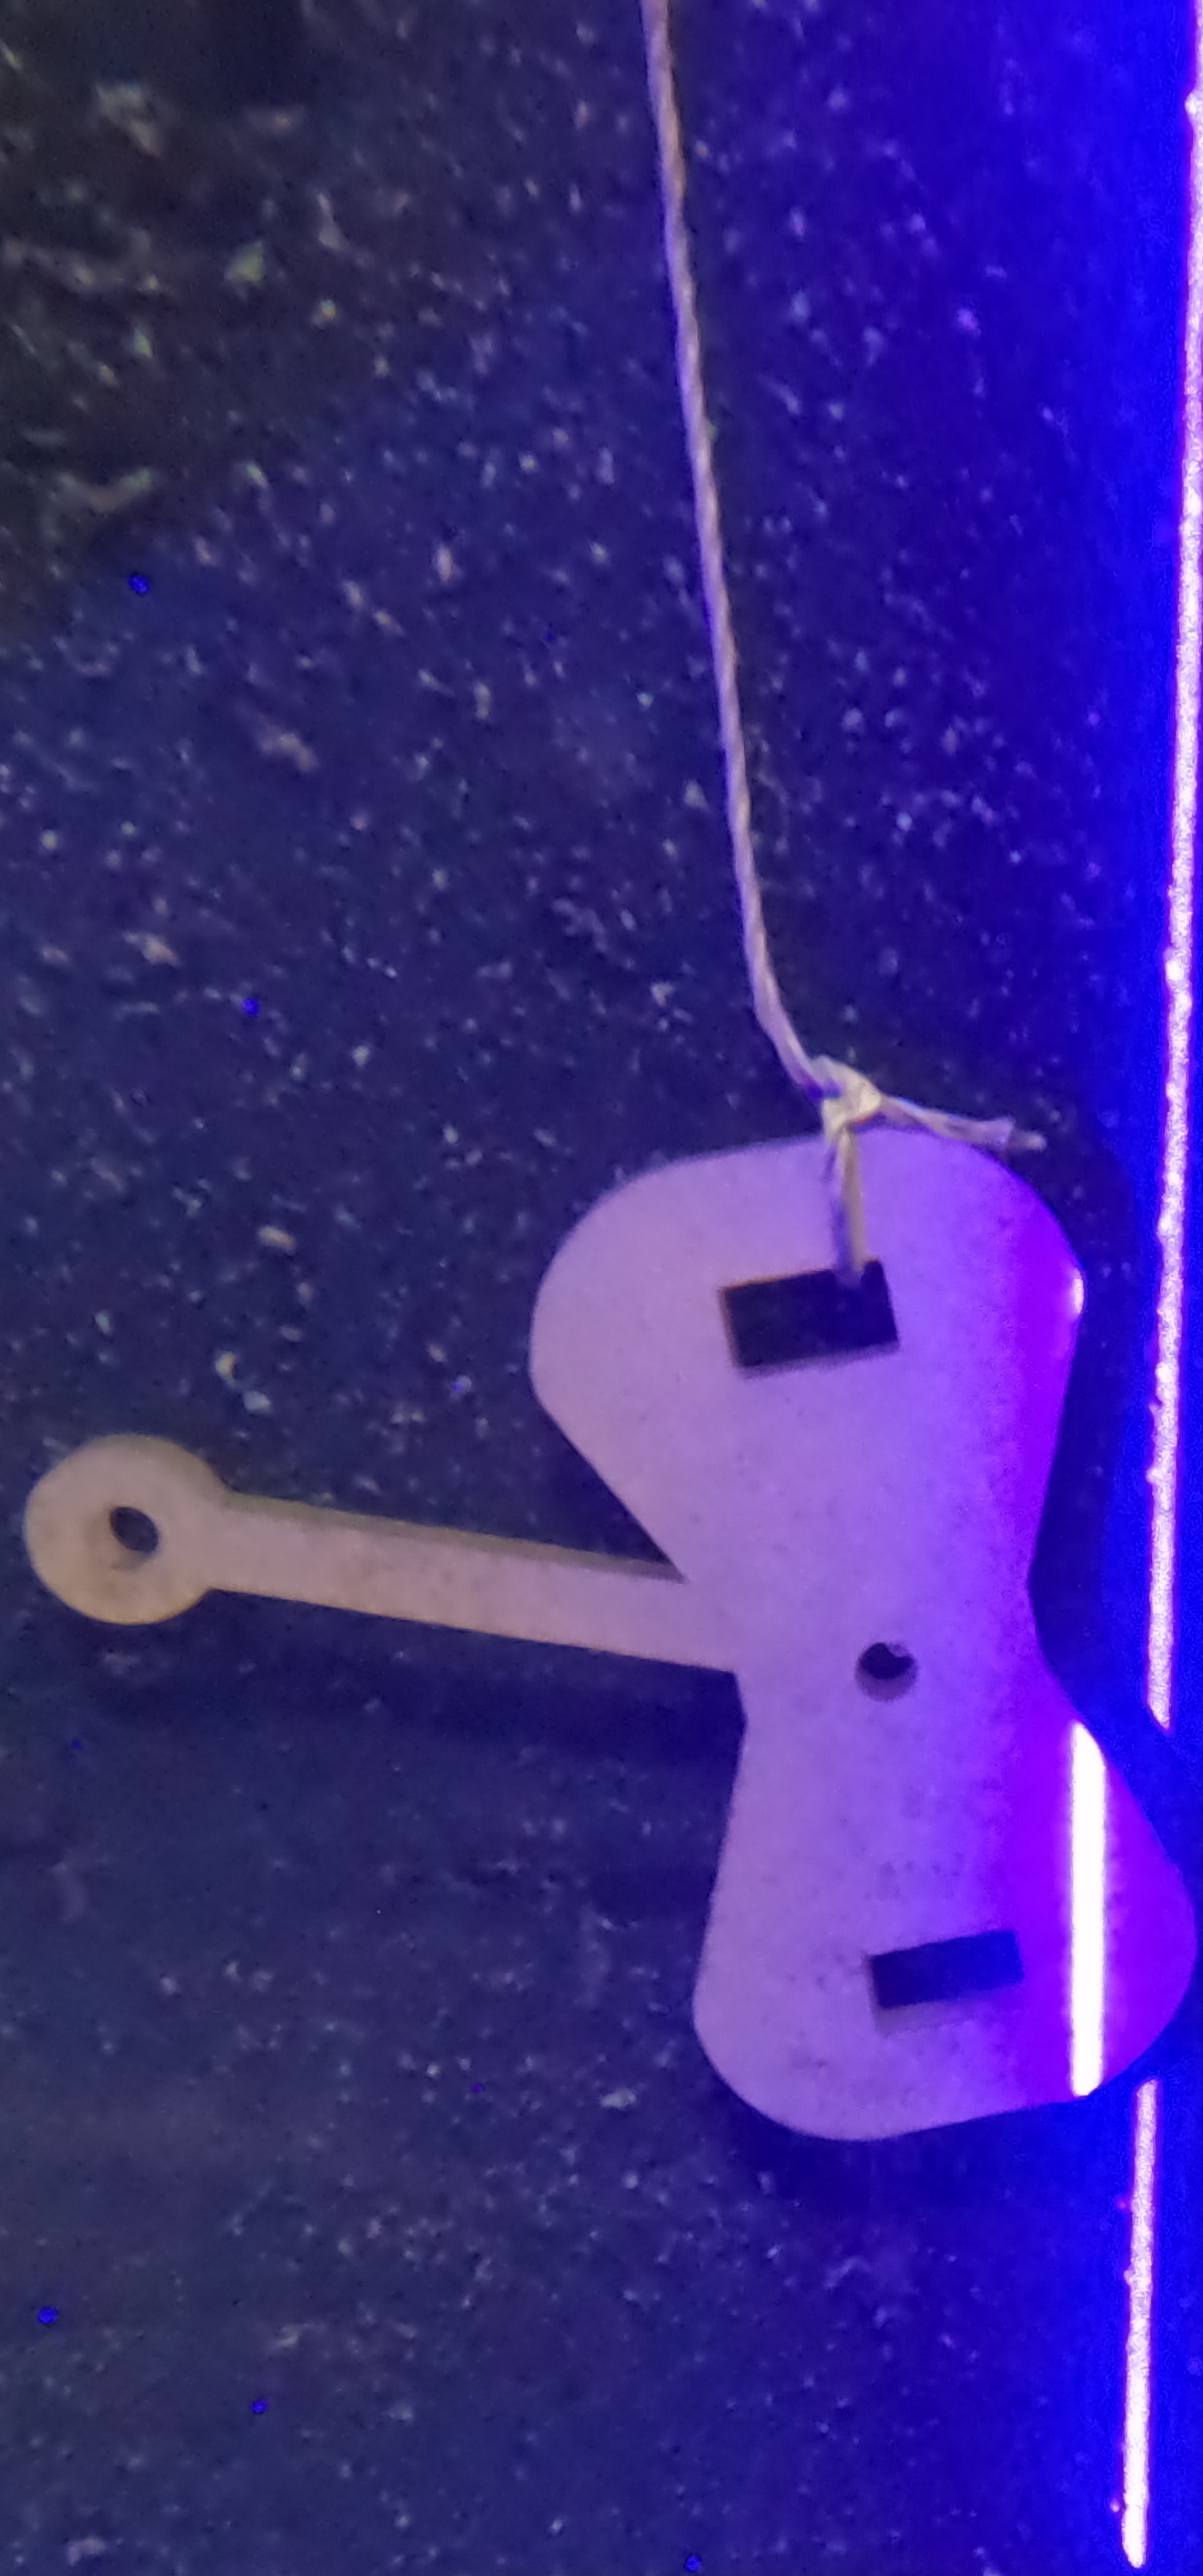

Supplement: Supplementary file 3171 [file G0015612.pdf › Level_2_1/G0015612.pdf]

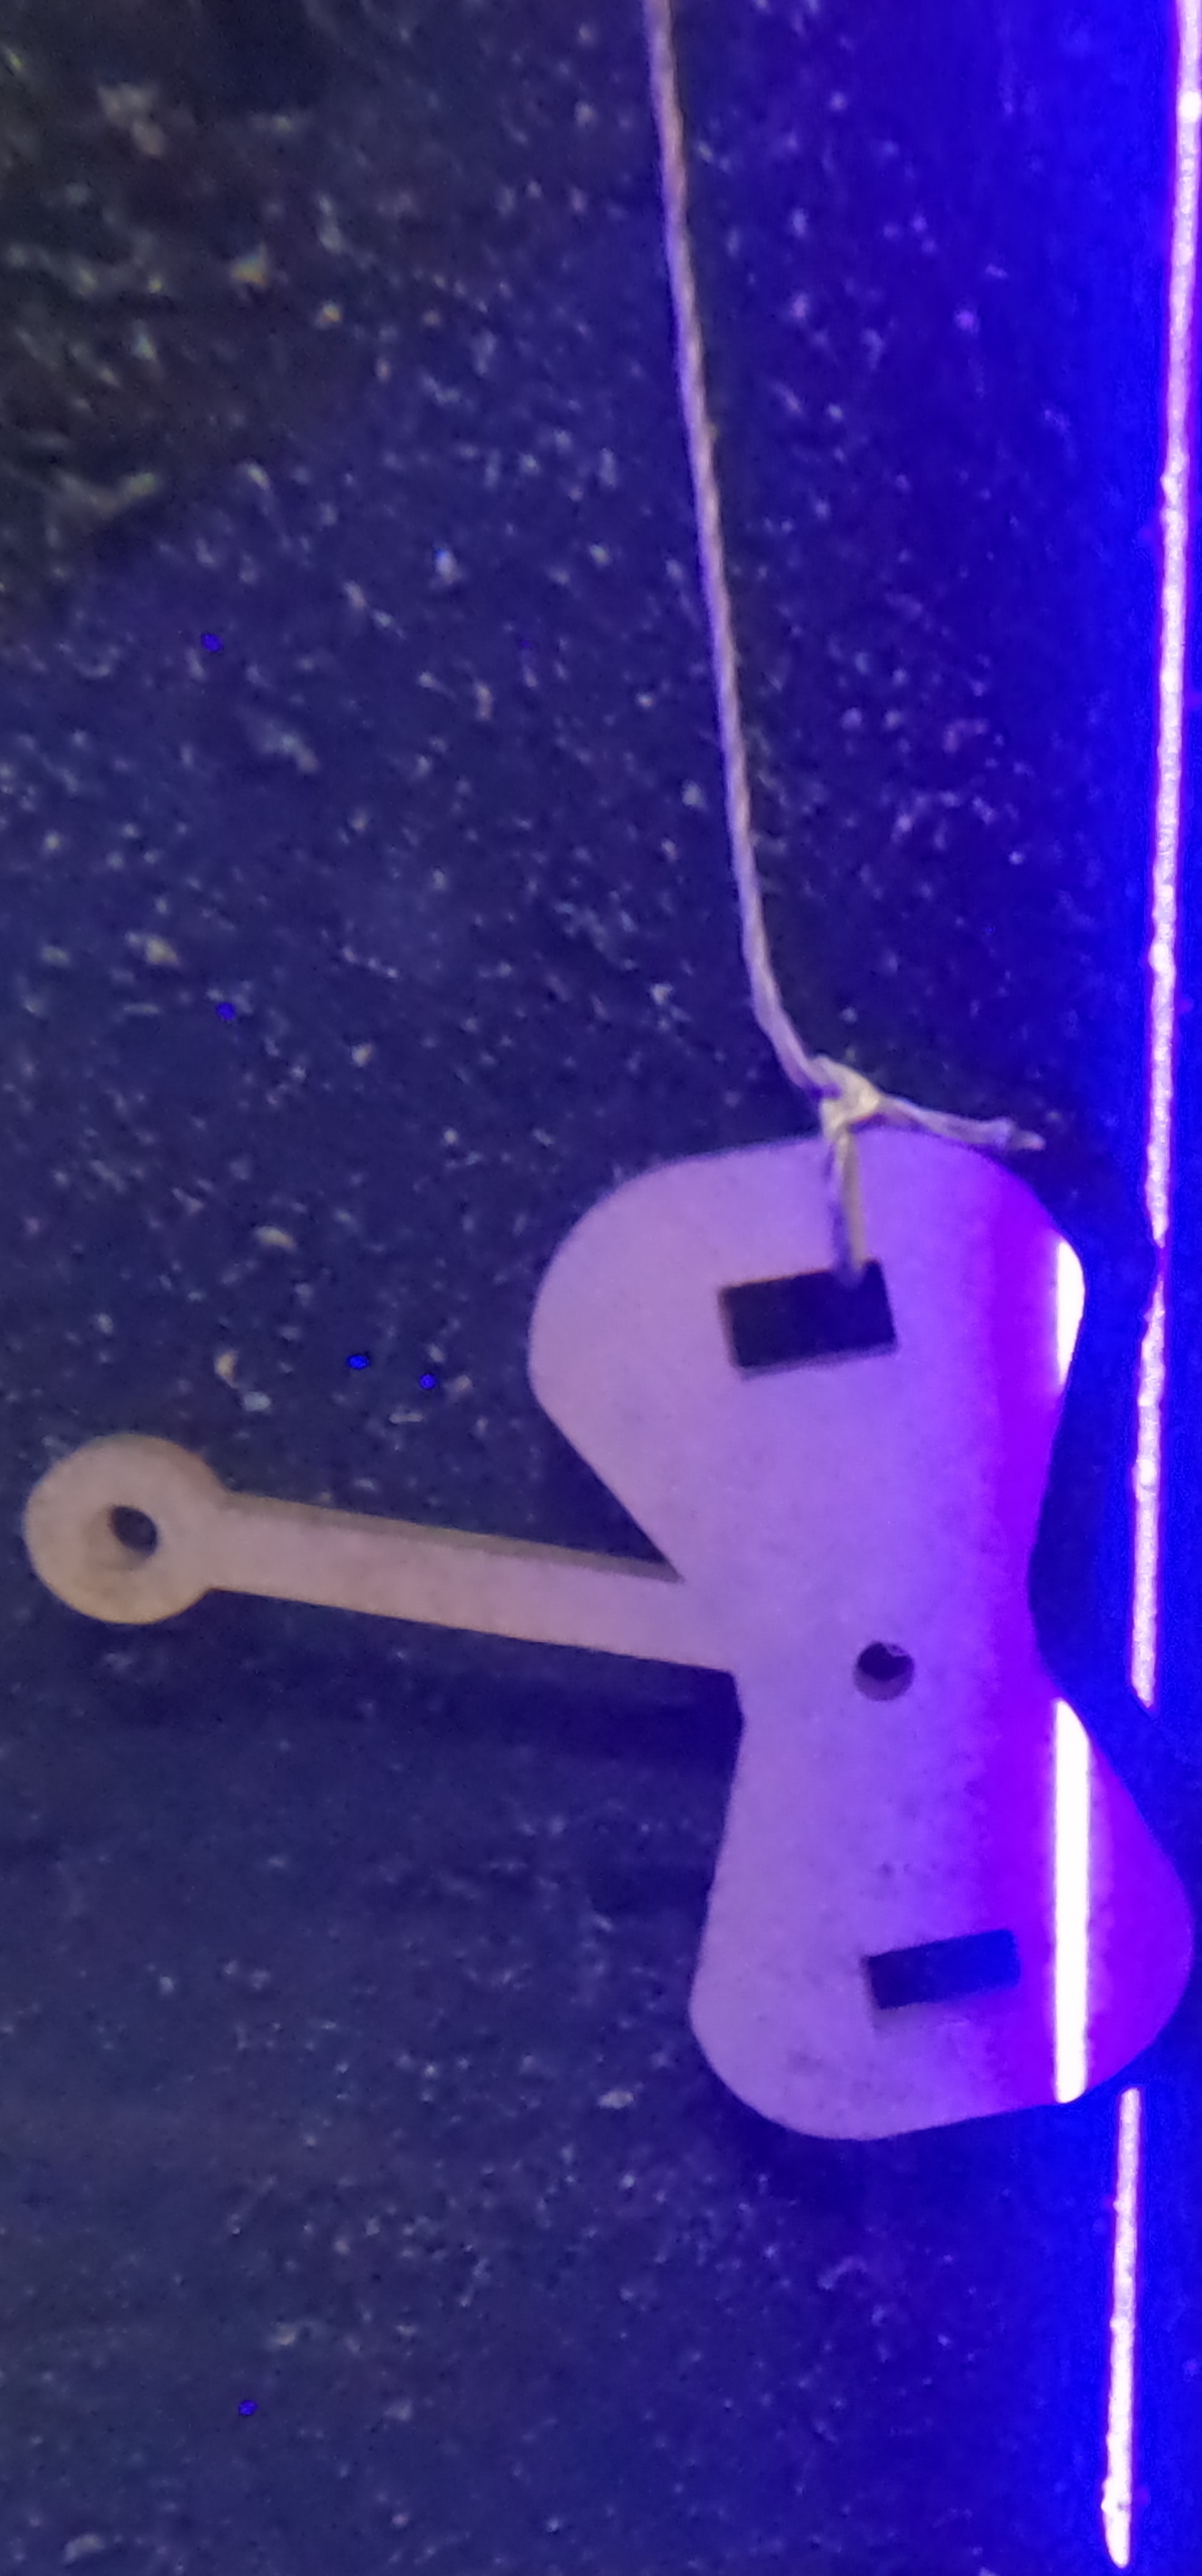

Supplement: Supplementary file 3172 [file G0015613.pdf › Level_2_1/G0015613.pdf]

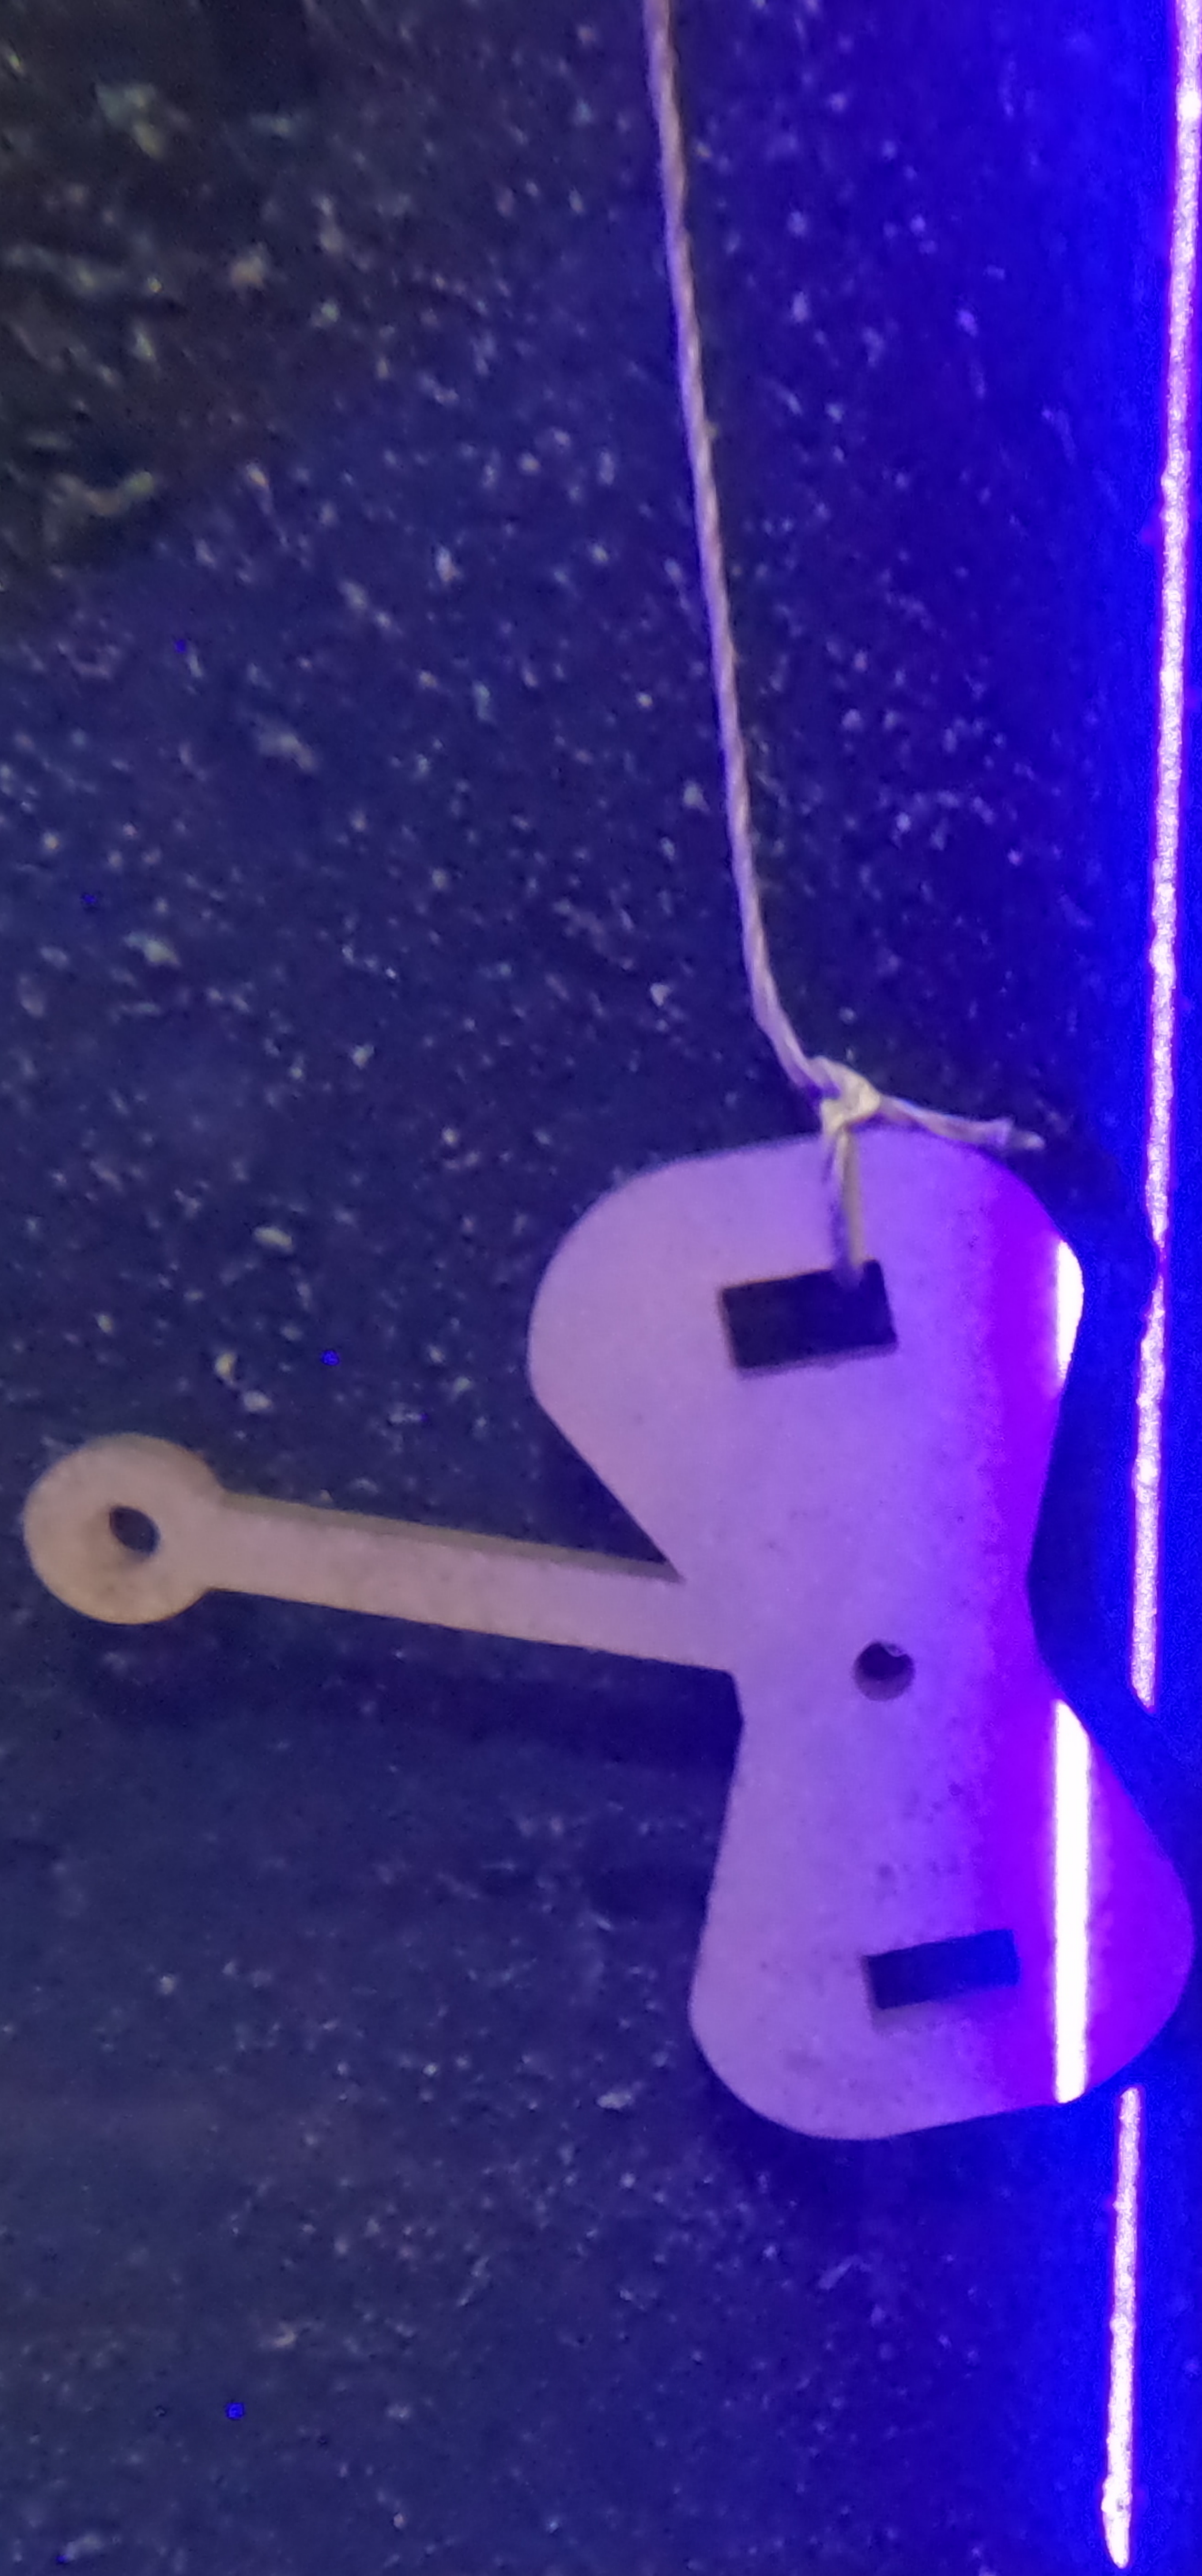

Supplement: Supplementary file 3173 [file G0015614.pdf › Level_2_1/G0015614.pdf]

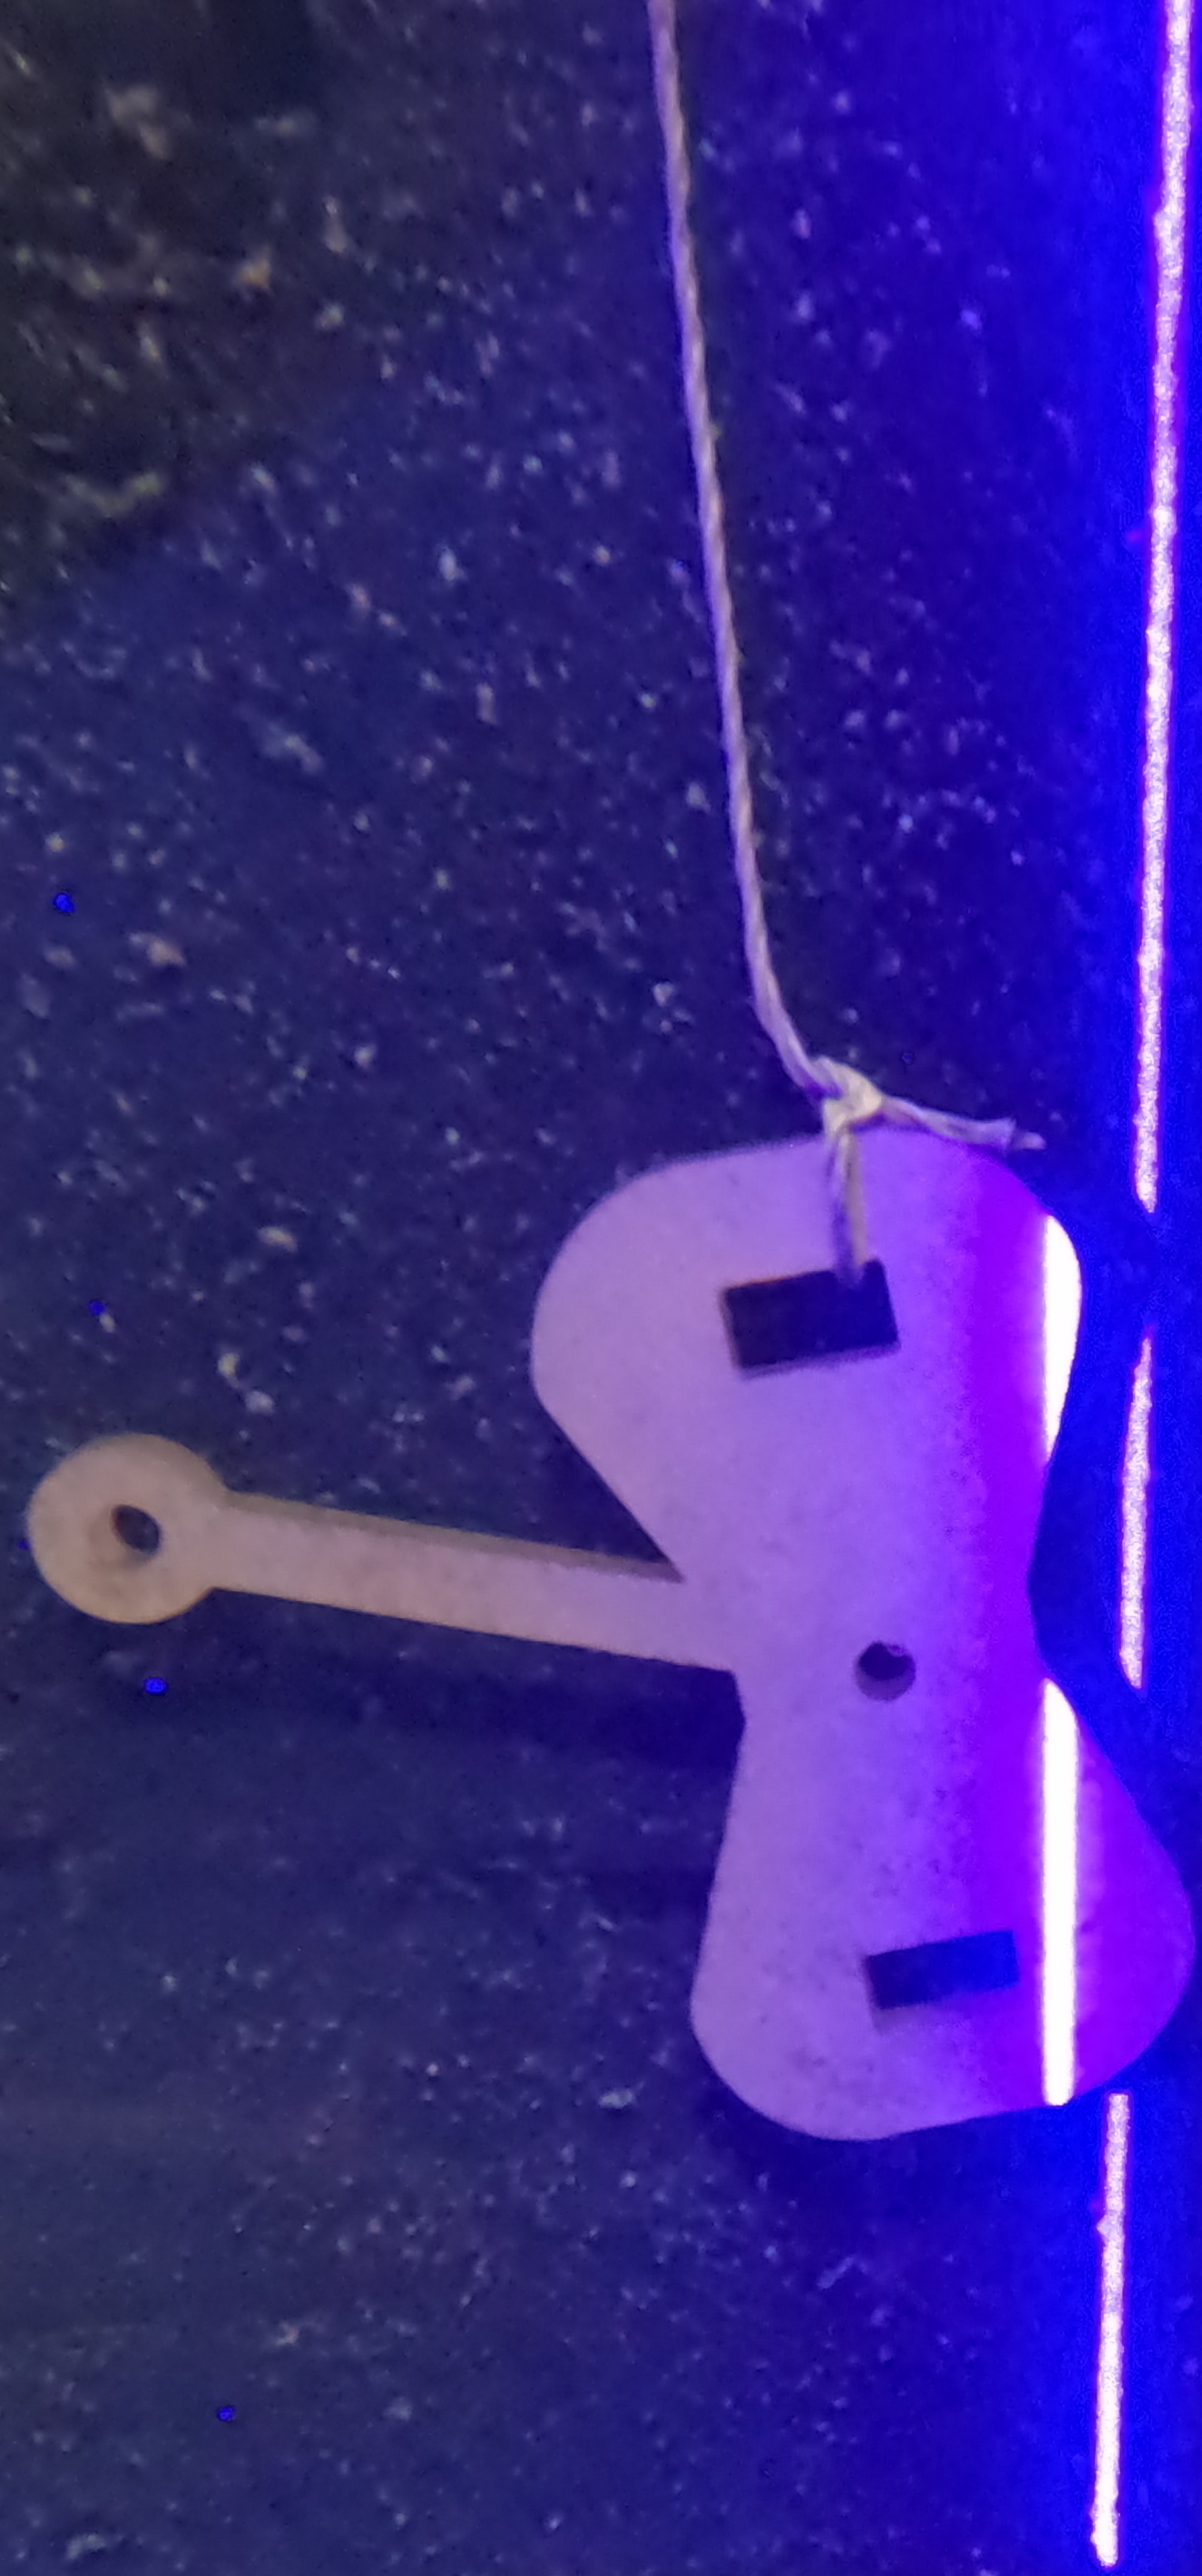

Supplement: Supplementary file 3174 [file G0015615.pdf › Level_2_1/G0015615.pdf]

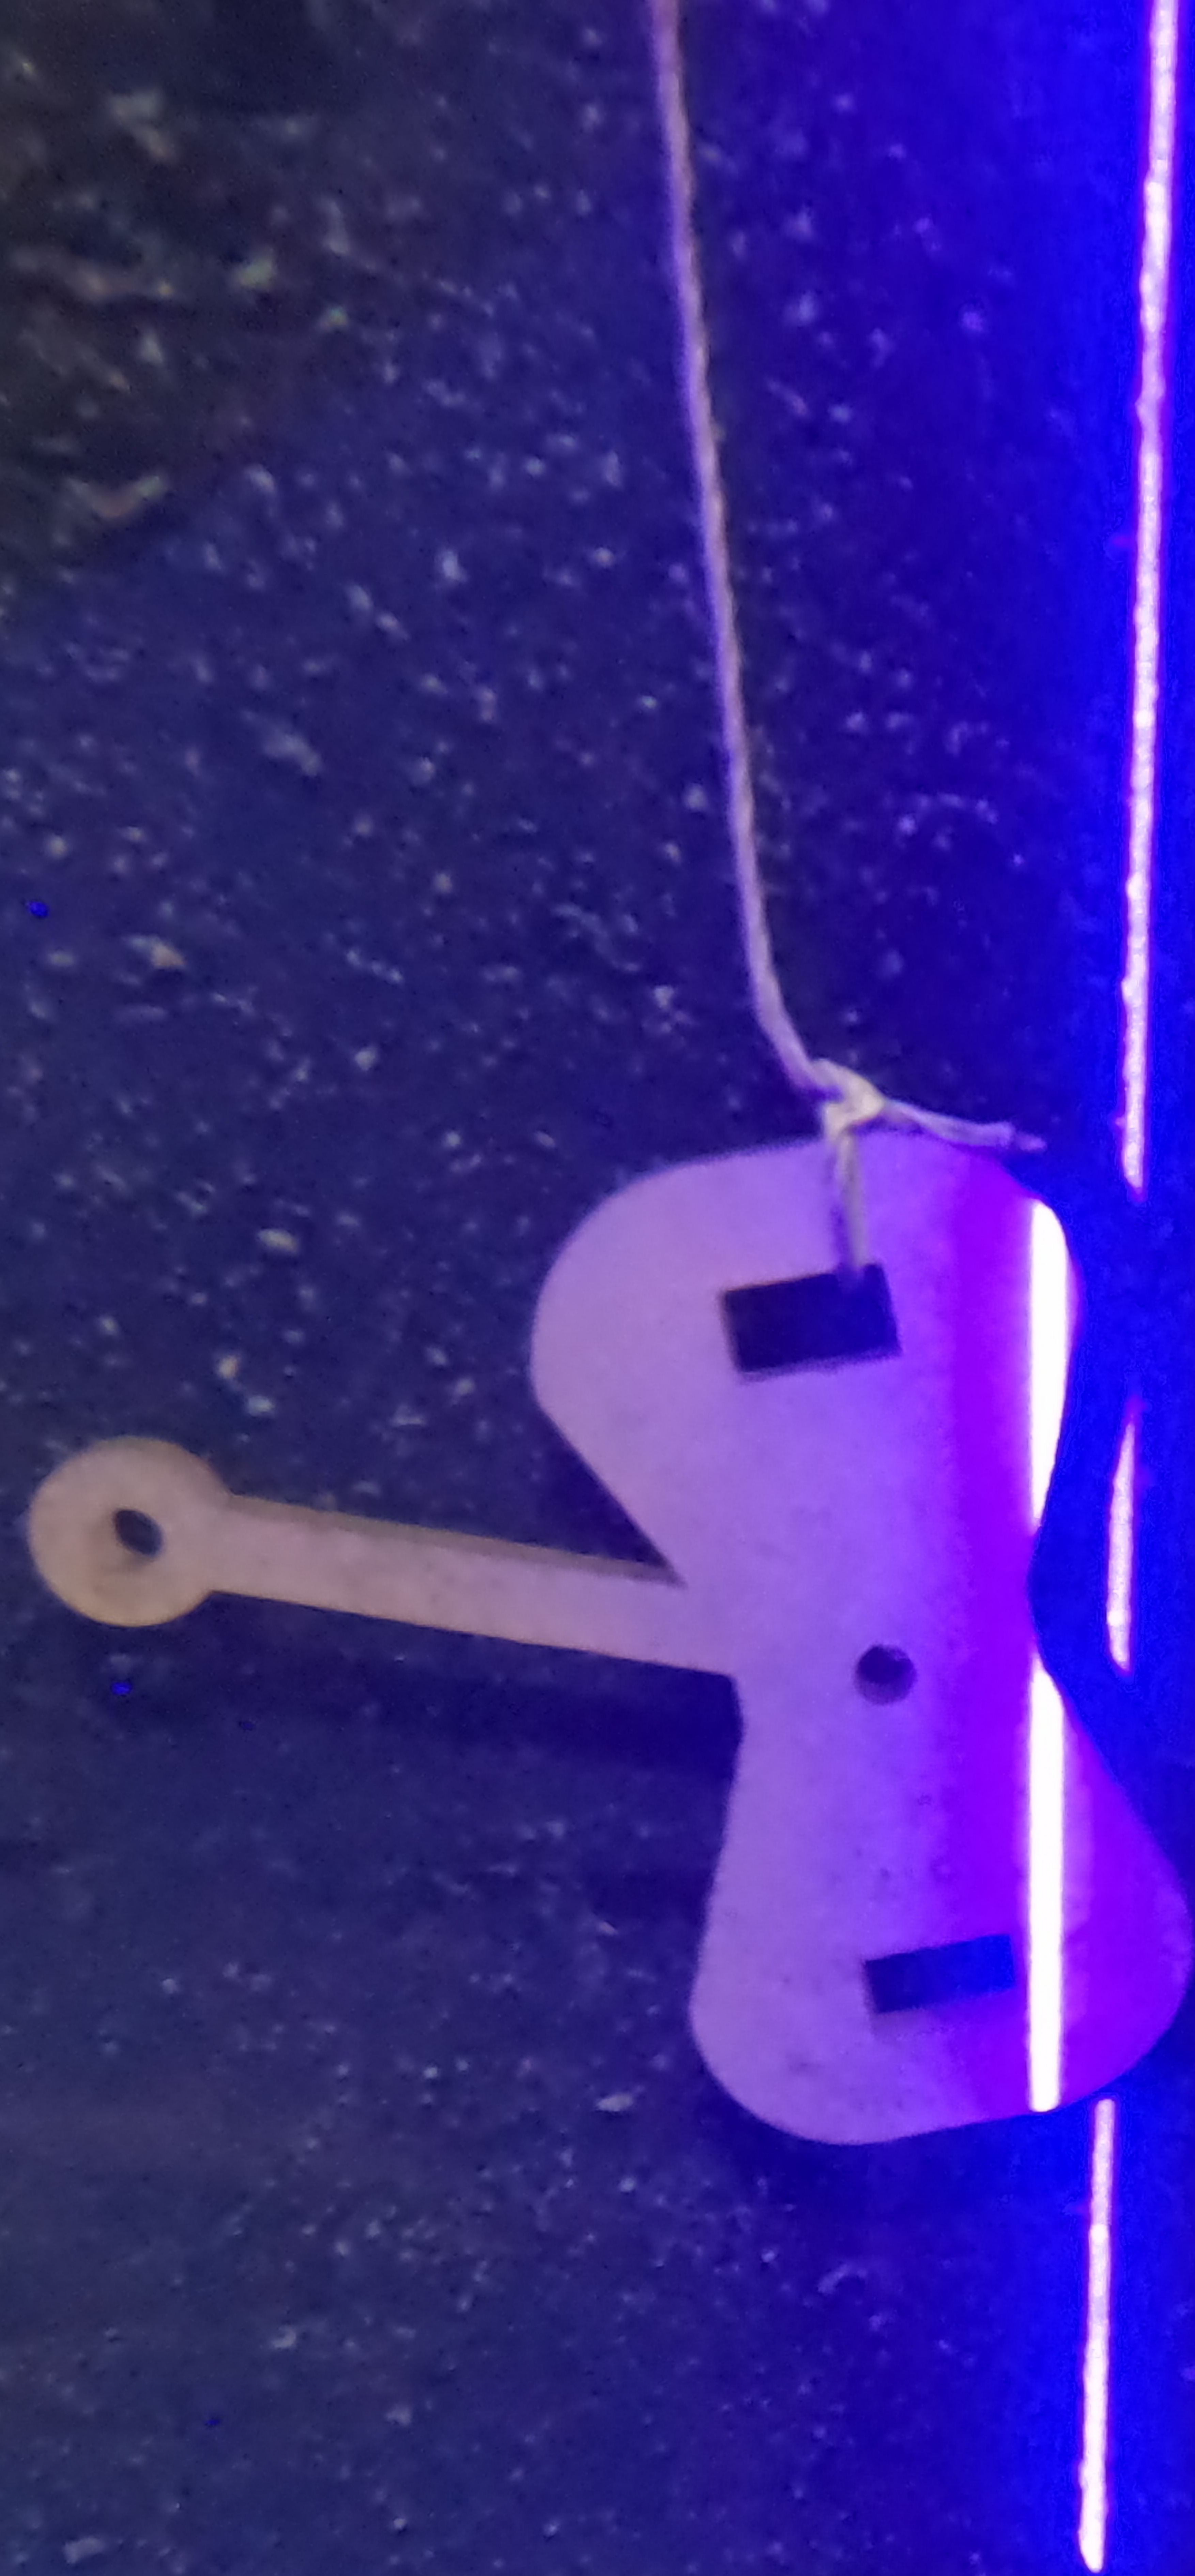

Supplement: Supplementary file 3175 [file G0015616.pdf › Level_2_1/G0015616.pdf]

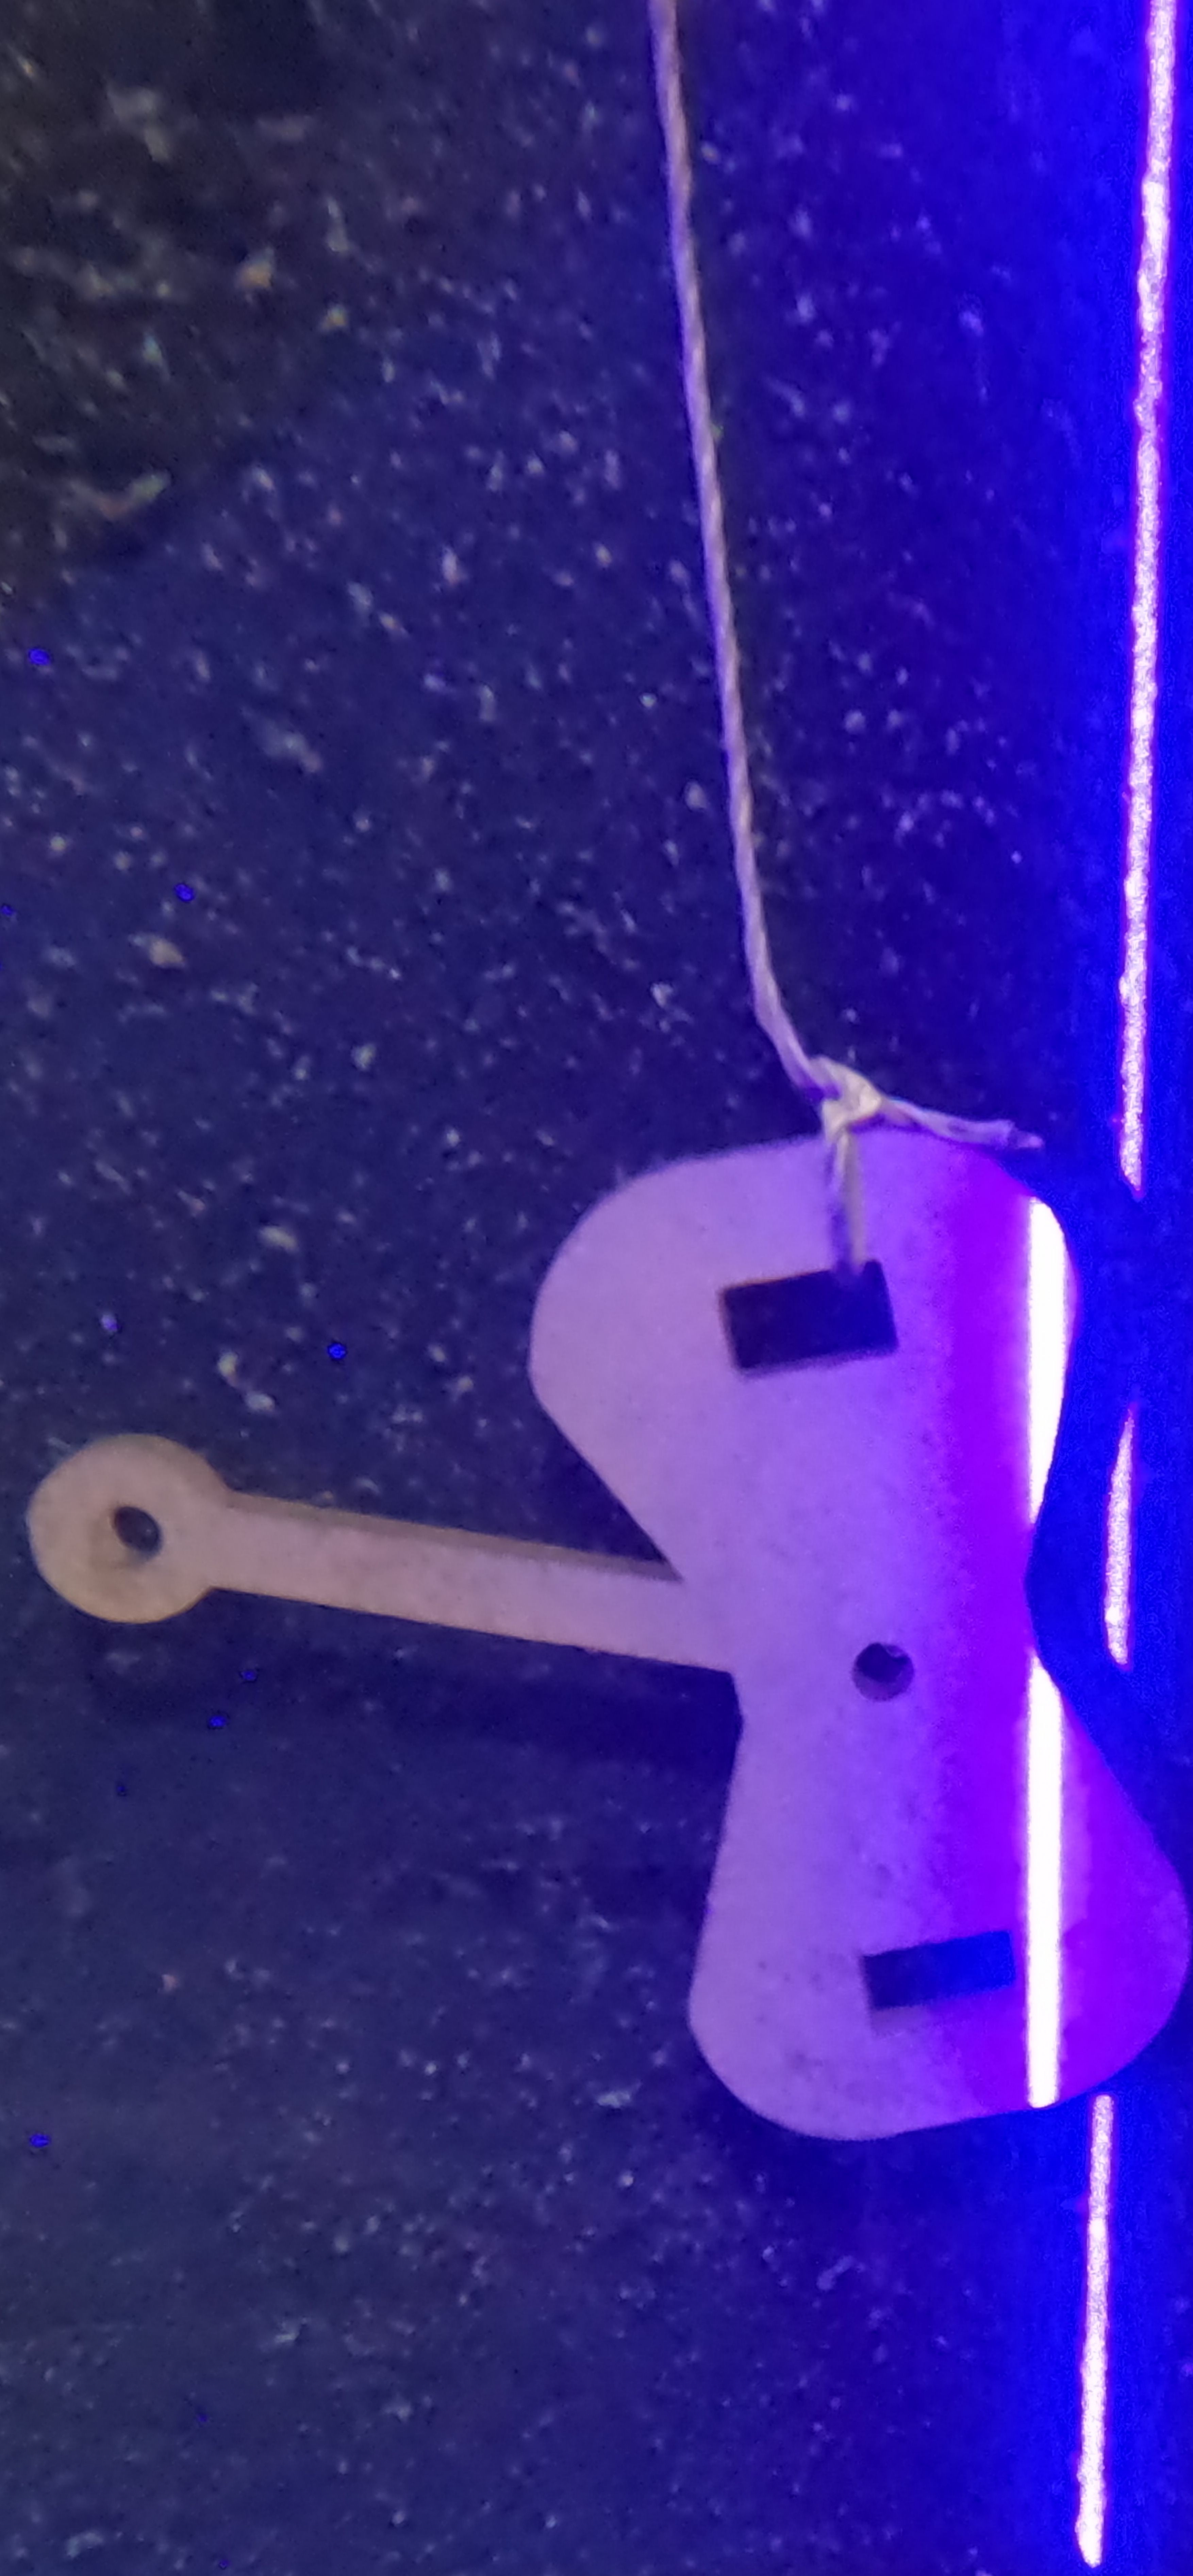

Supplement: Supplementary file 3176 [file G0015617.pdf › Level_2_1/G0015617.pdf]

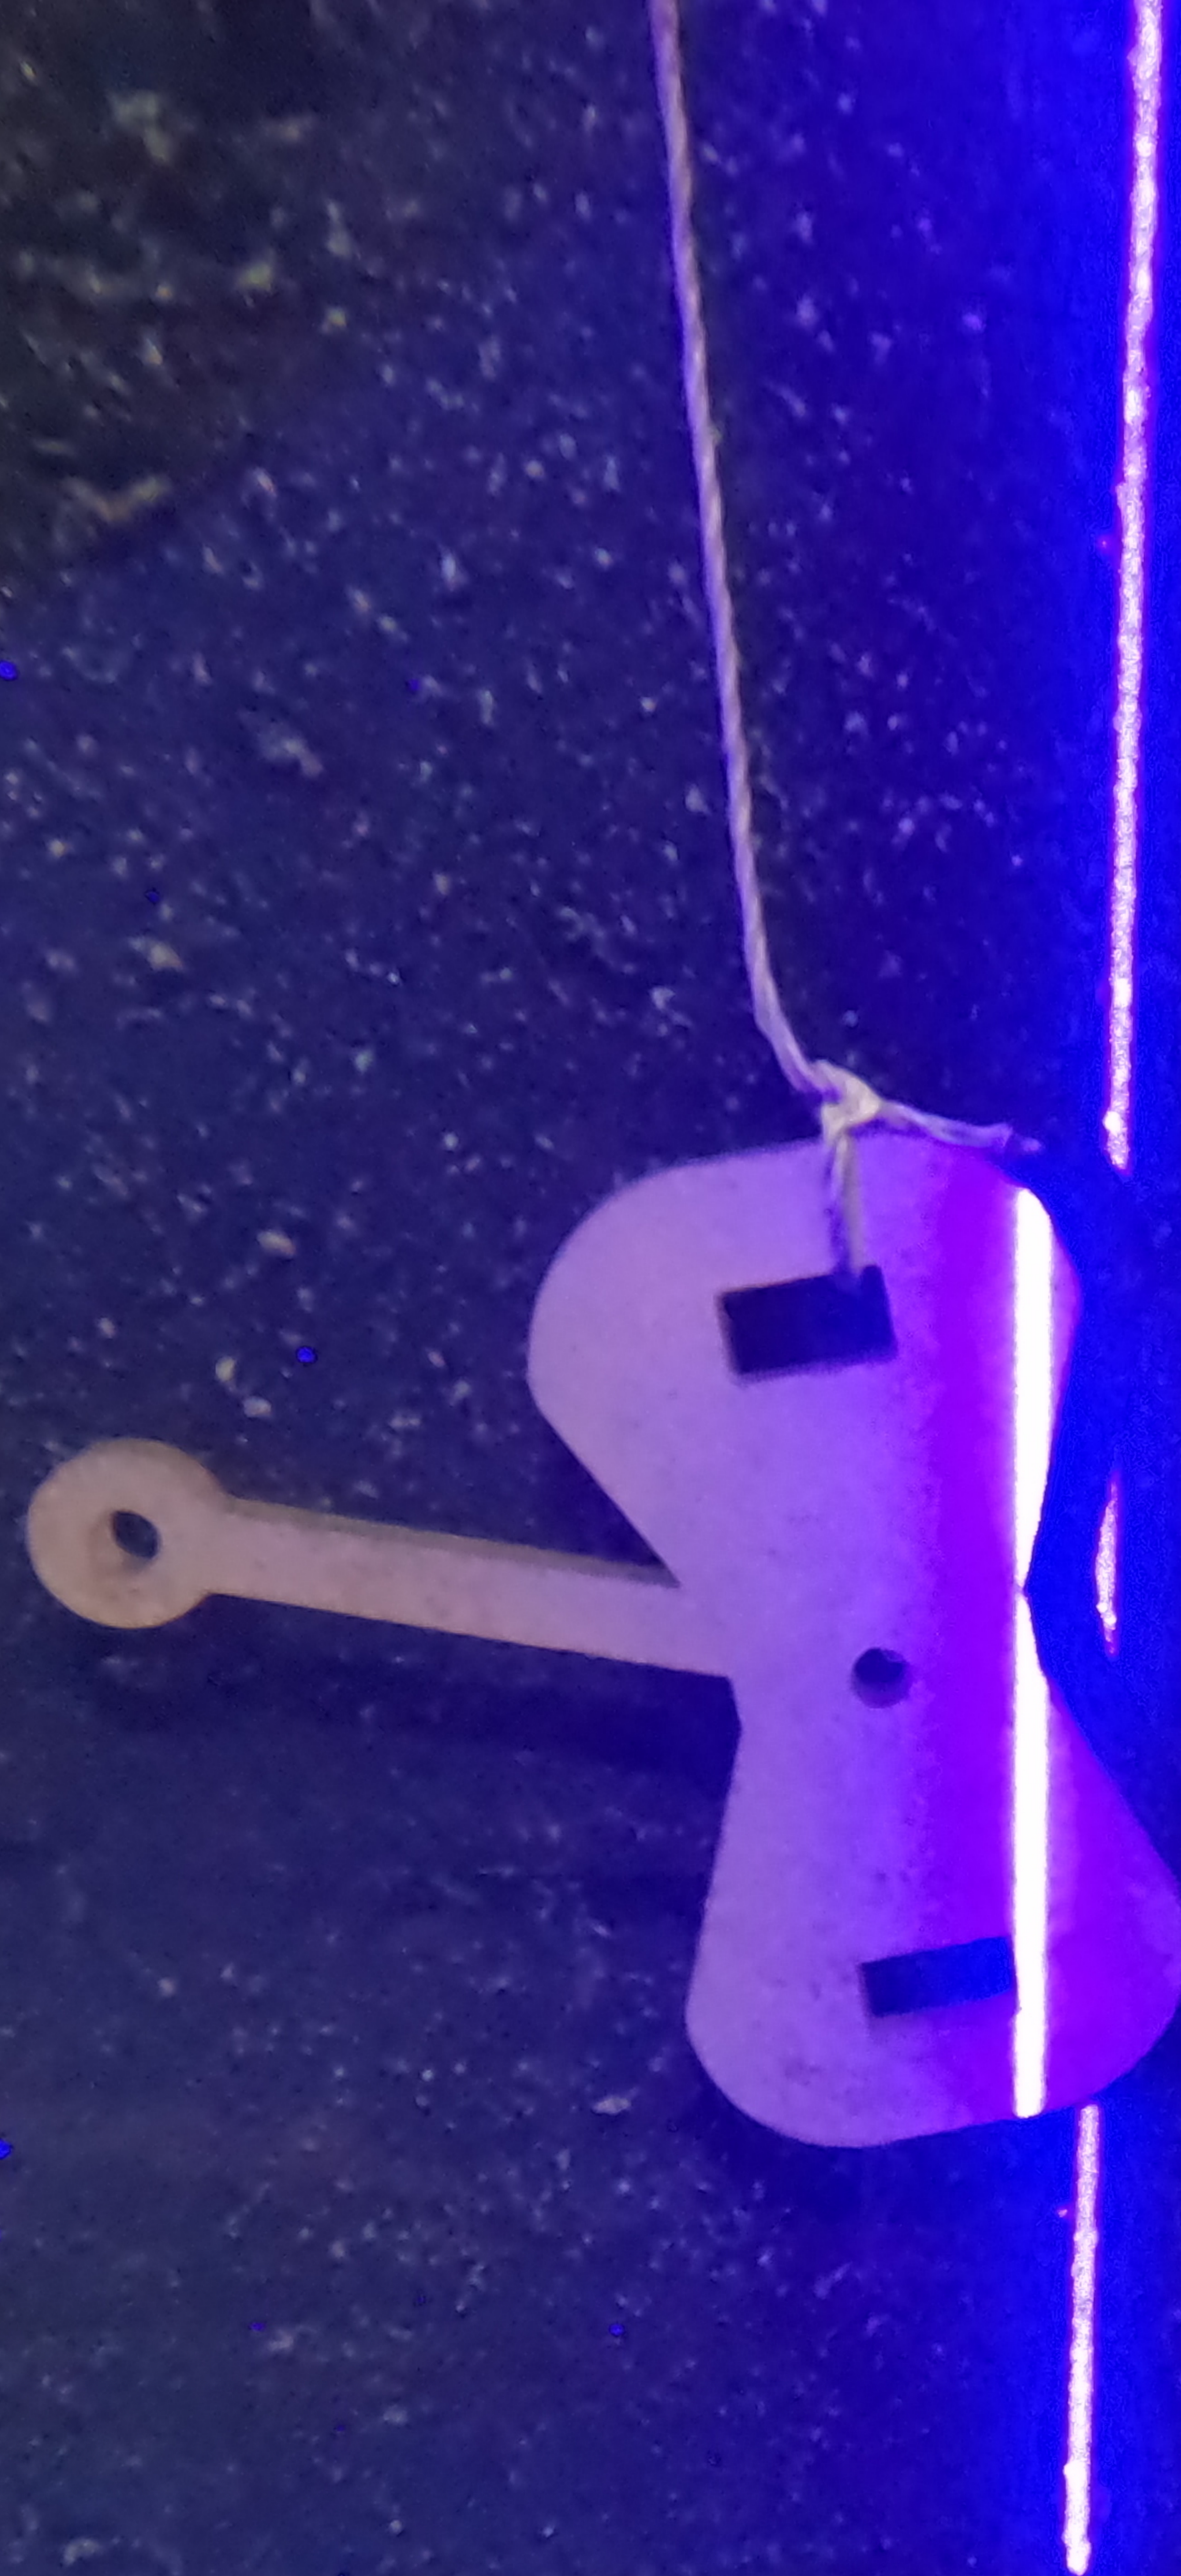

Supplement: Supplementary file 3177 [file G0015618.pdf › Level_2_1/G0015618.pdf]

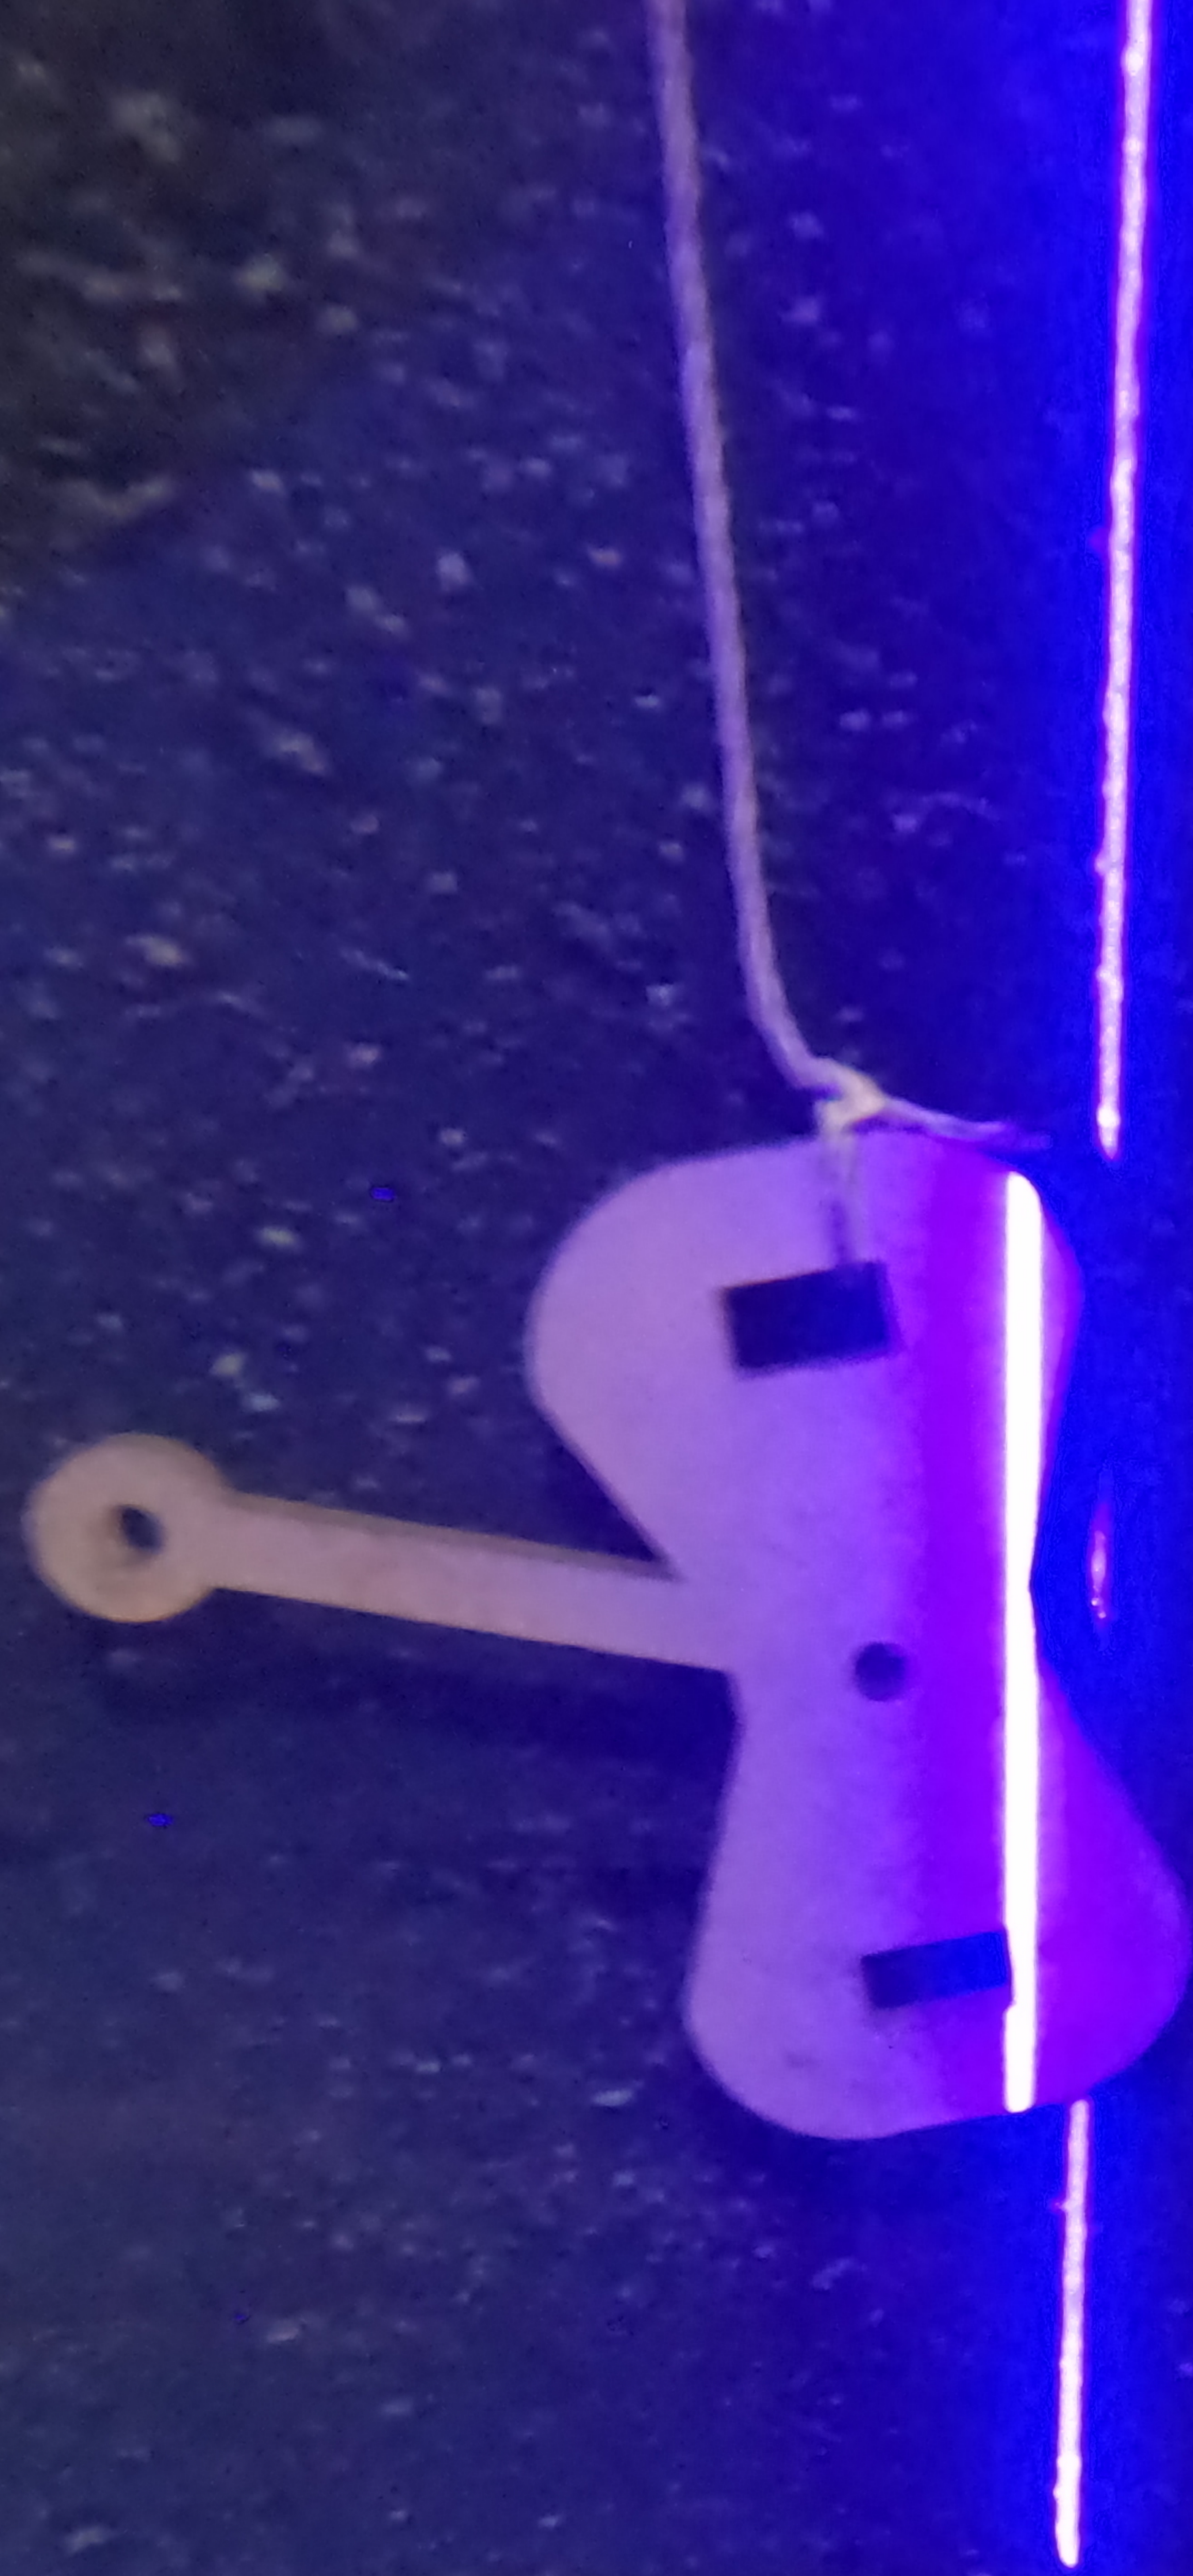

Supplement: Supplementary file 3178 [file G0015619.pdf › Level_2_1/G0015619.pdf]

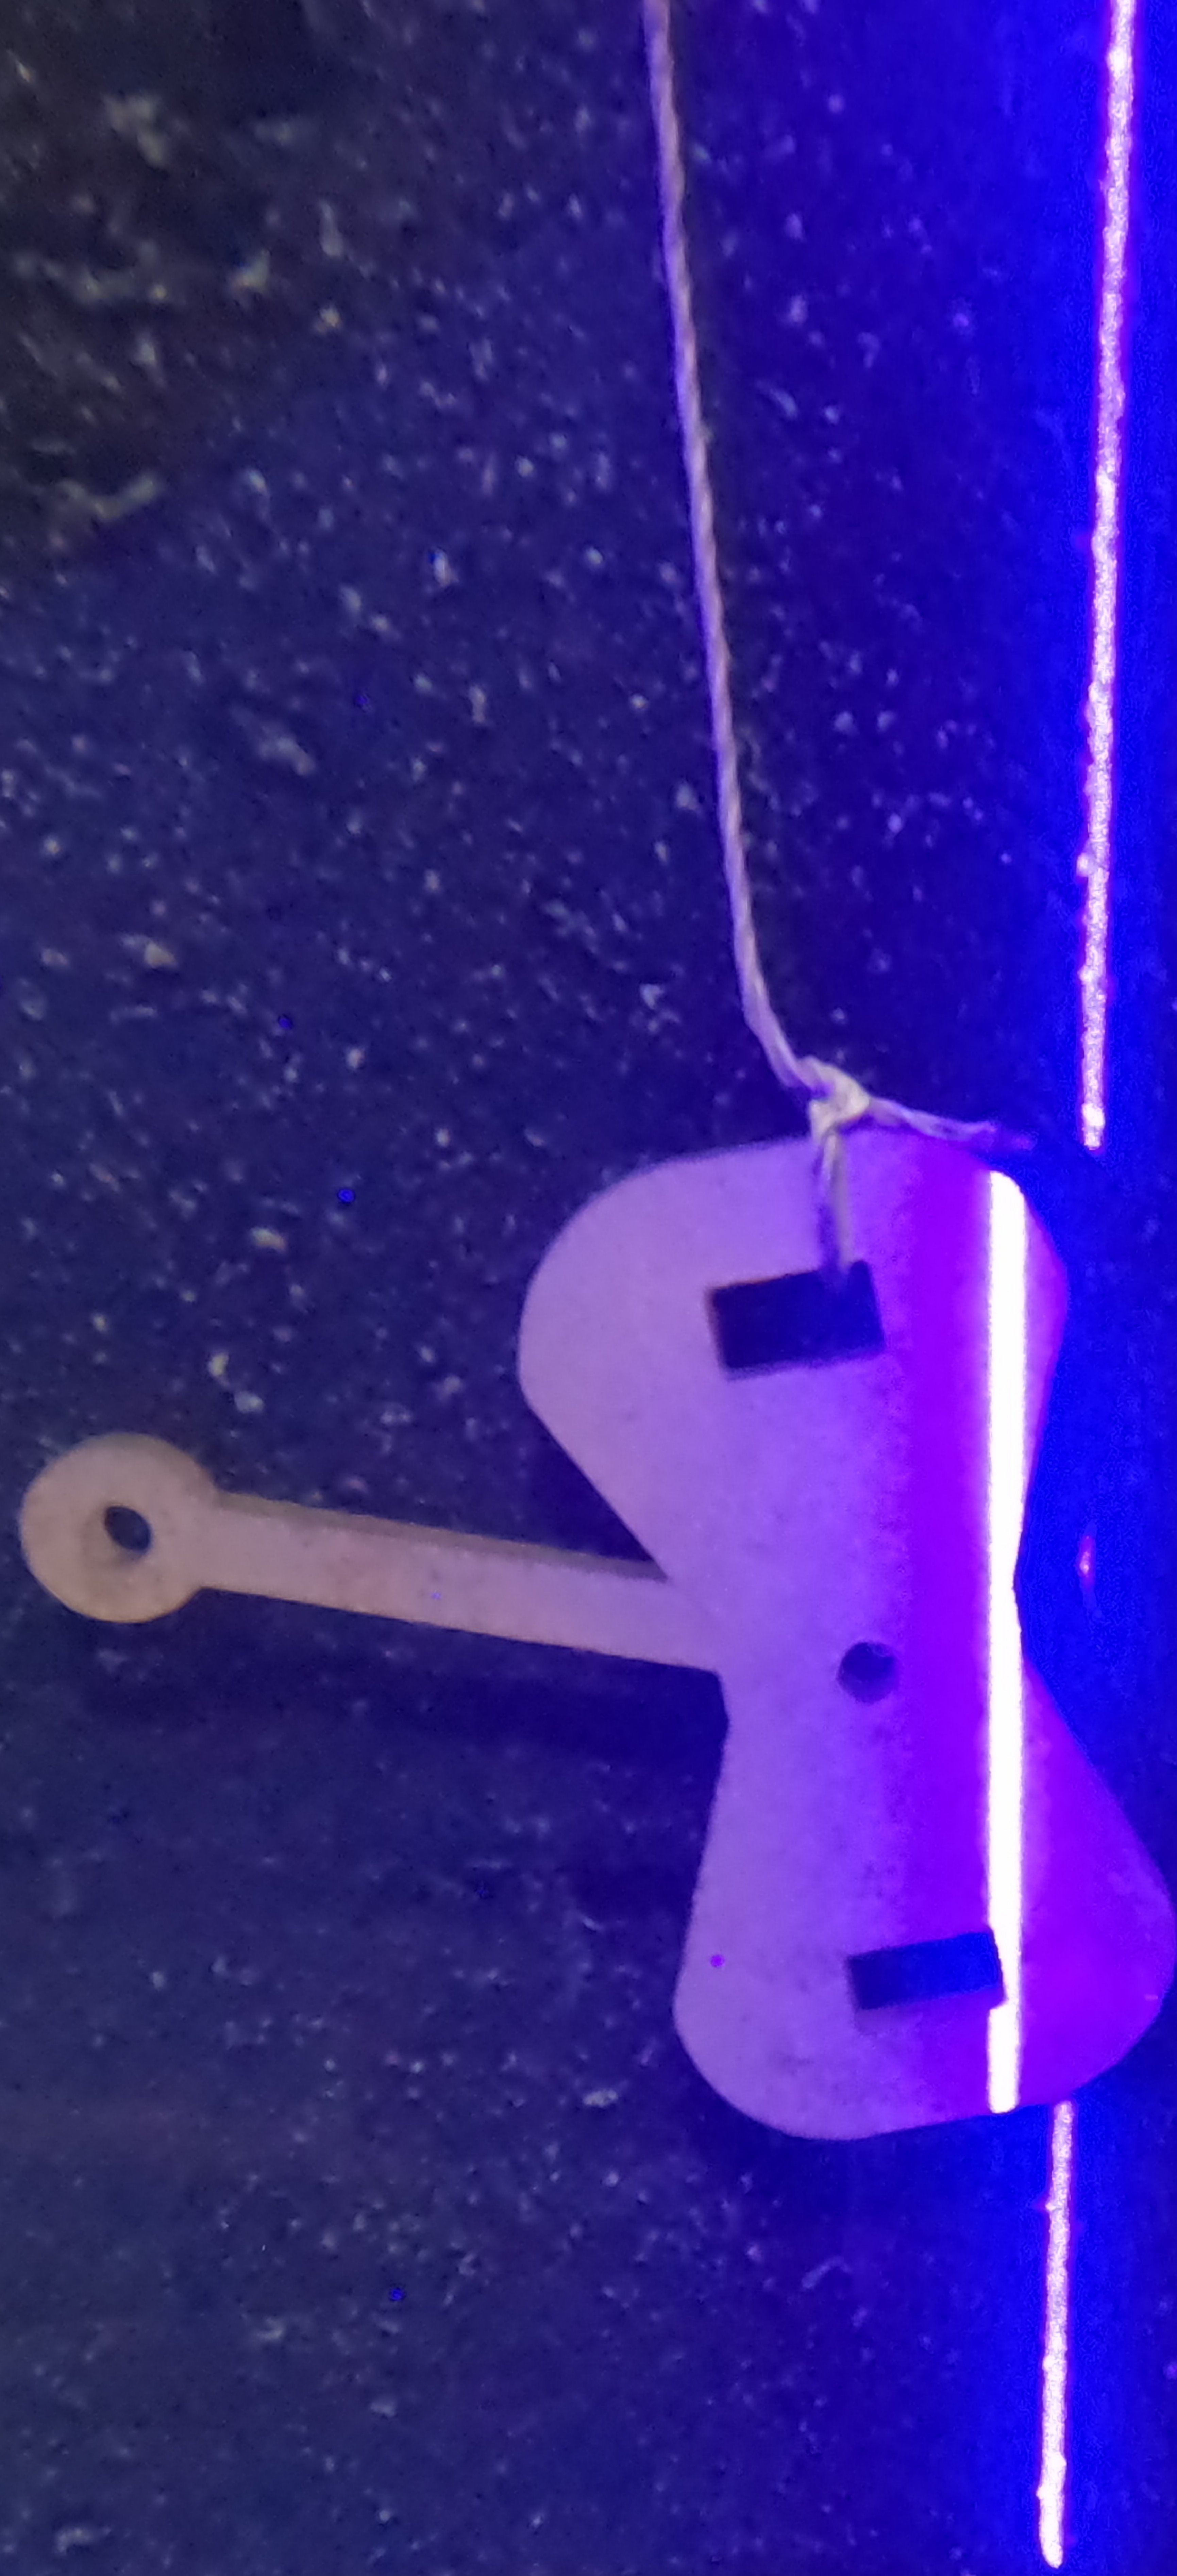

Supplement: Supplementary file 3179 [file G0015620.pdf › Level_2_1/G0015620.pdf]

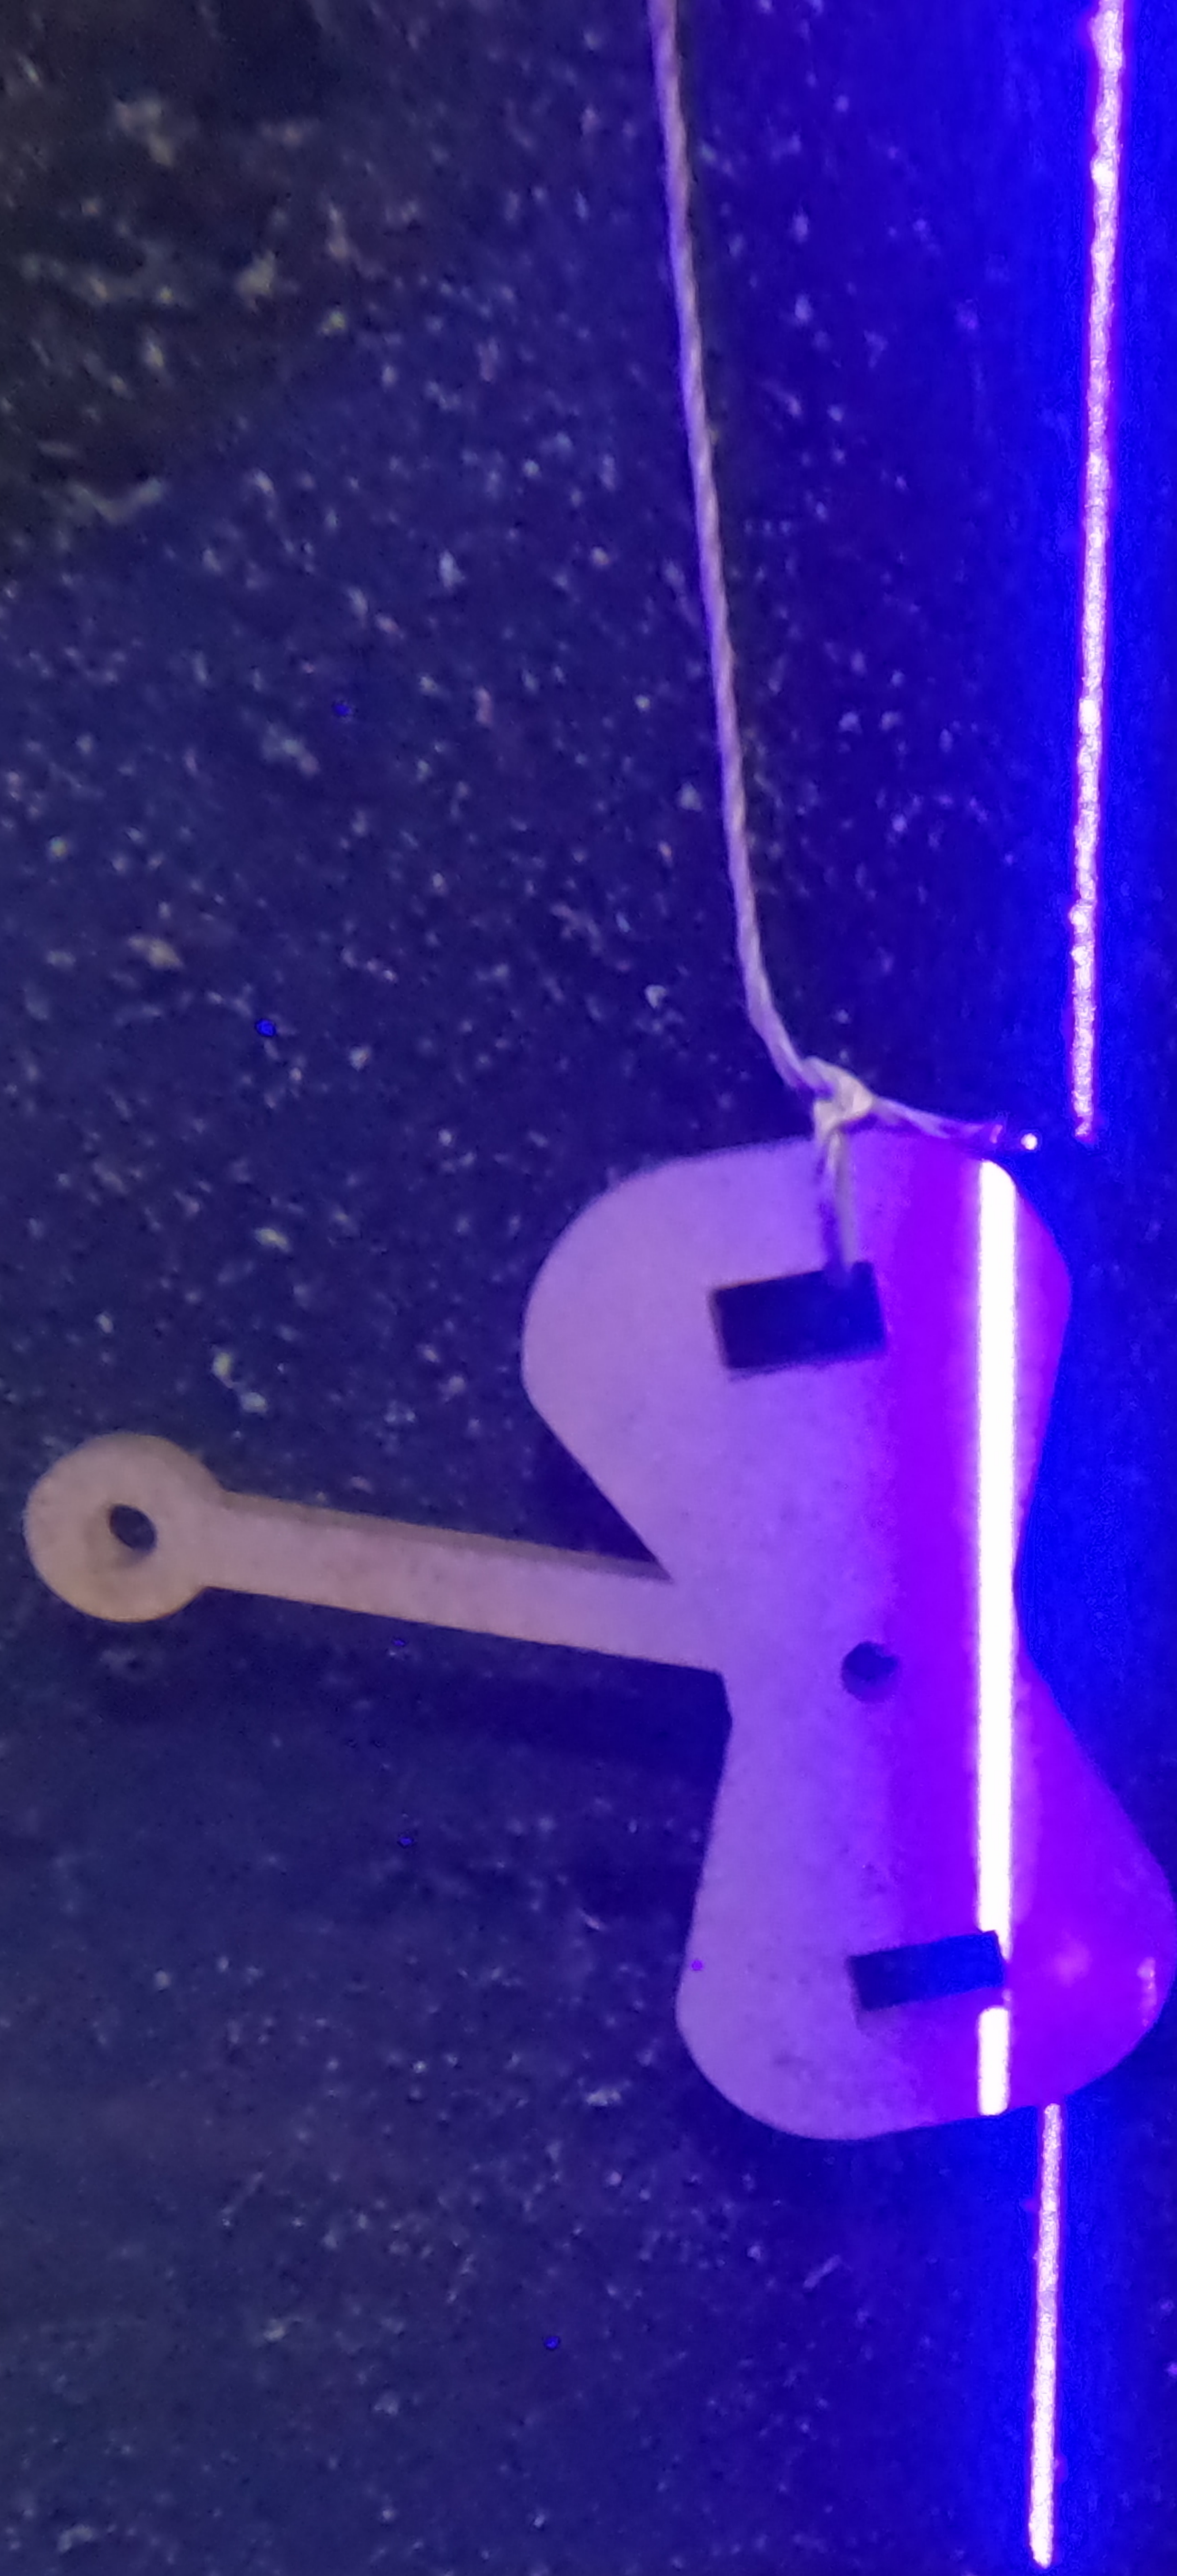

Supplement: Supplementary file 3180 [file G0015621.pdf › Level_2_1/G0015621.pdf]

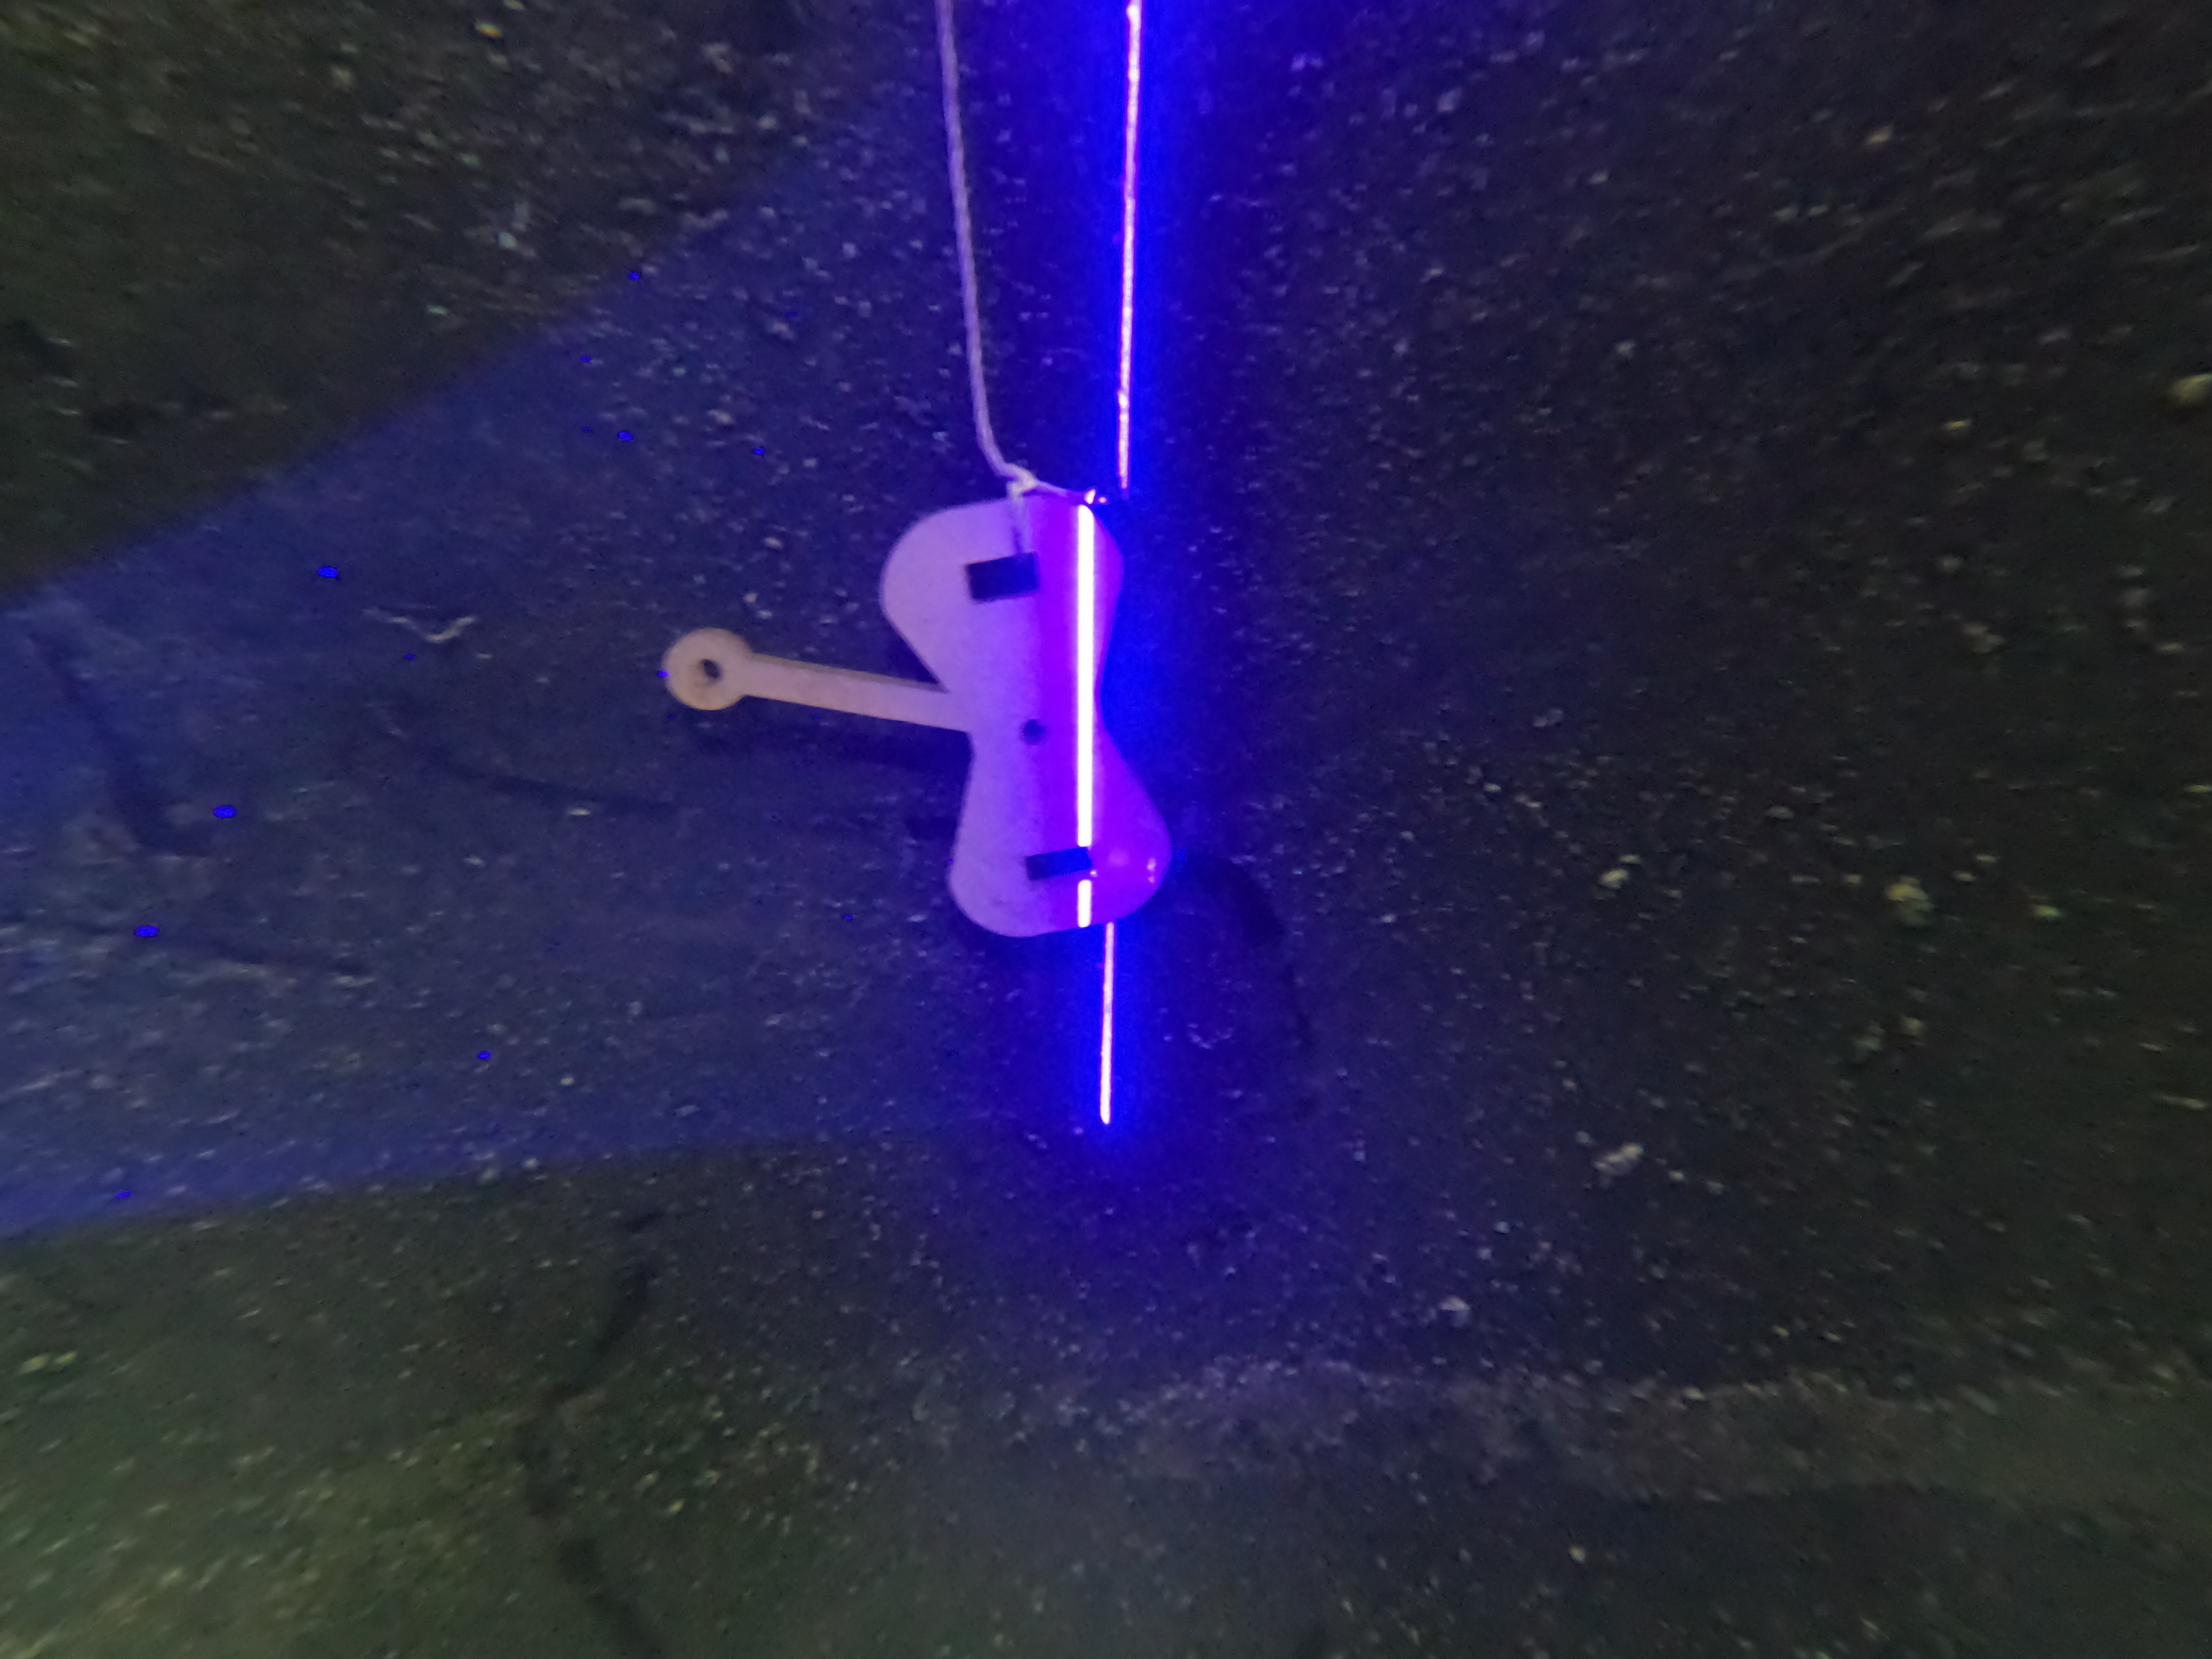

Supplement: Supplementary file 3181 [file G0015622.pdf › Level_2_1/G0015622.pdf]

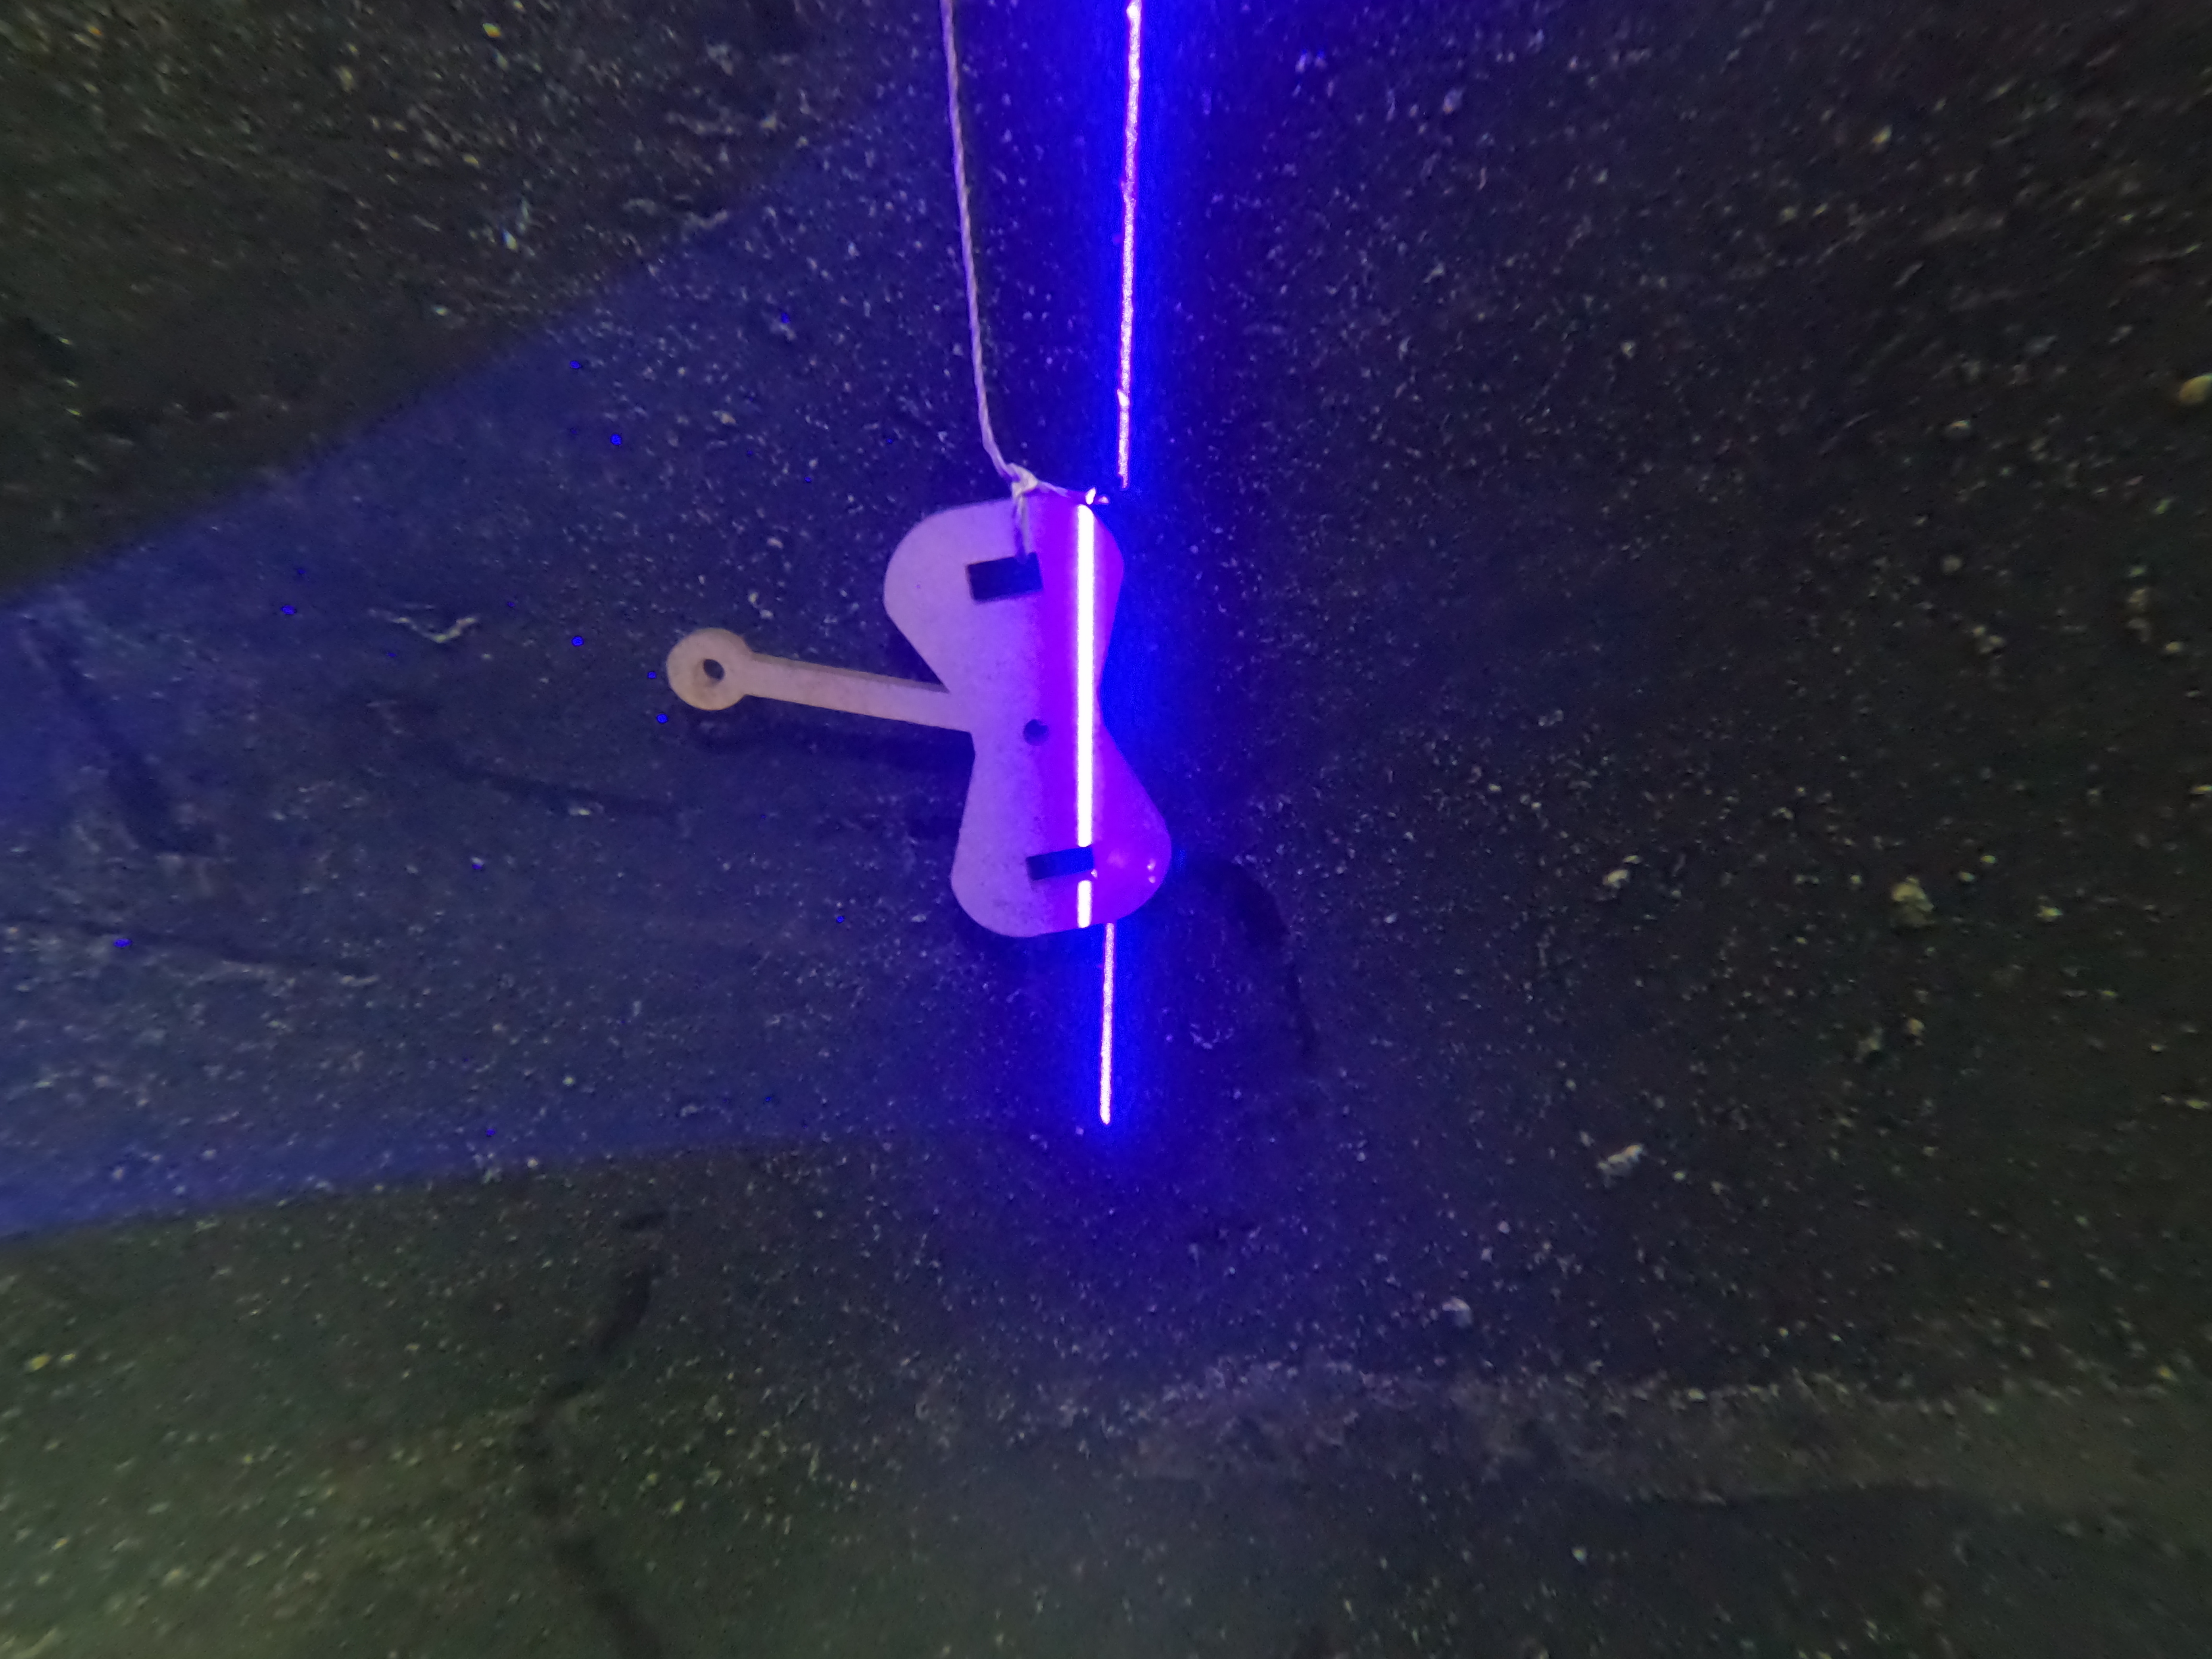

Supplement: Supplementary file 3182 [file G0015623.pdf › Level_2_1/G0015623.pdf]

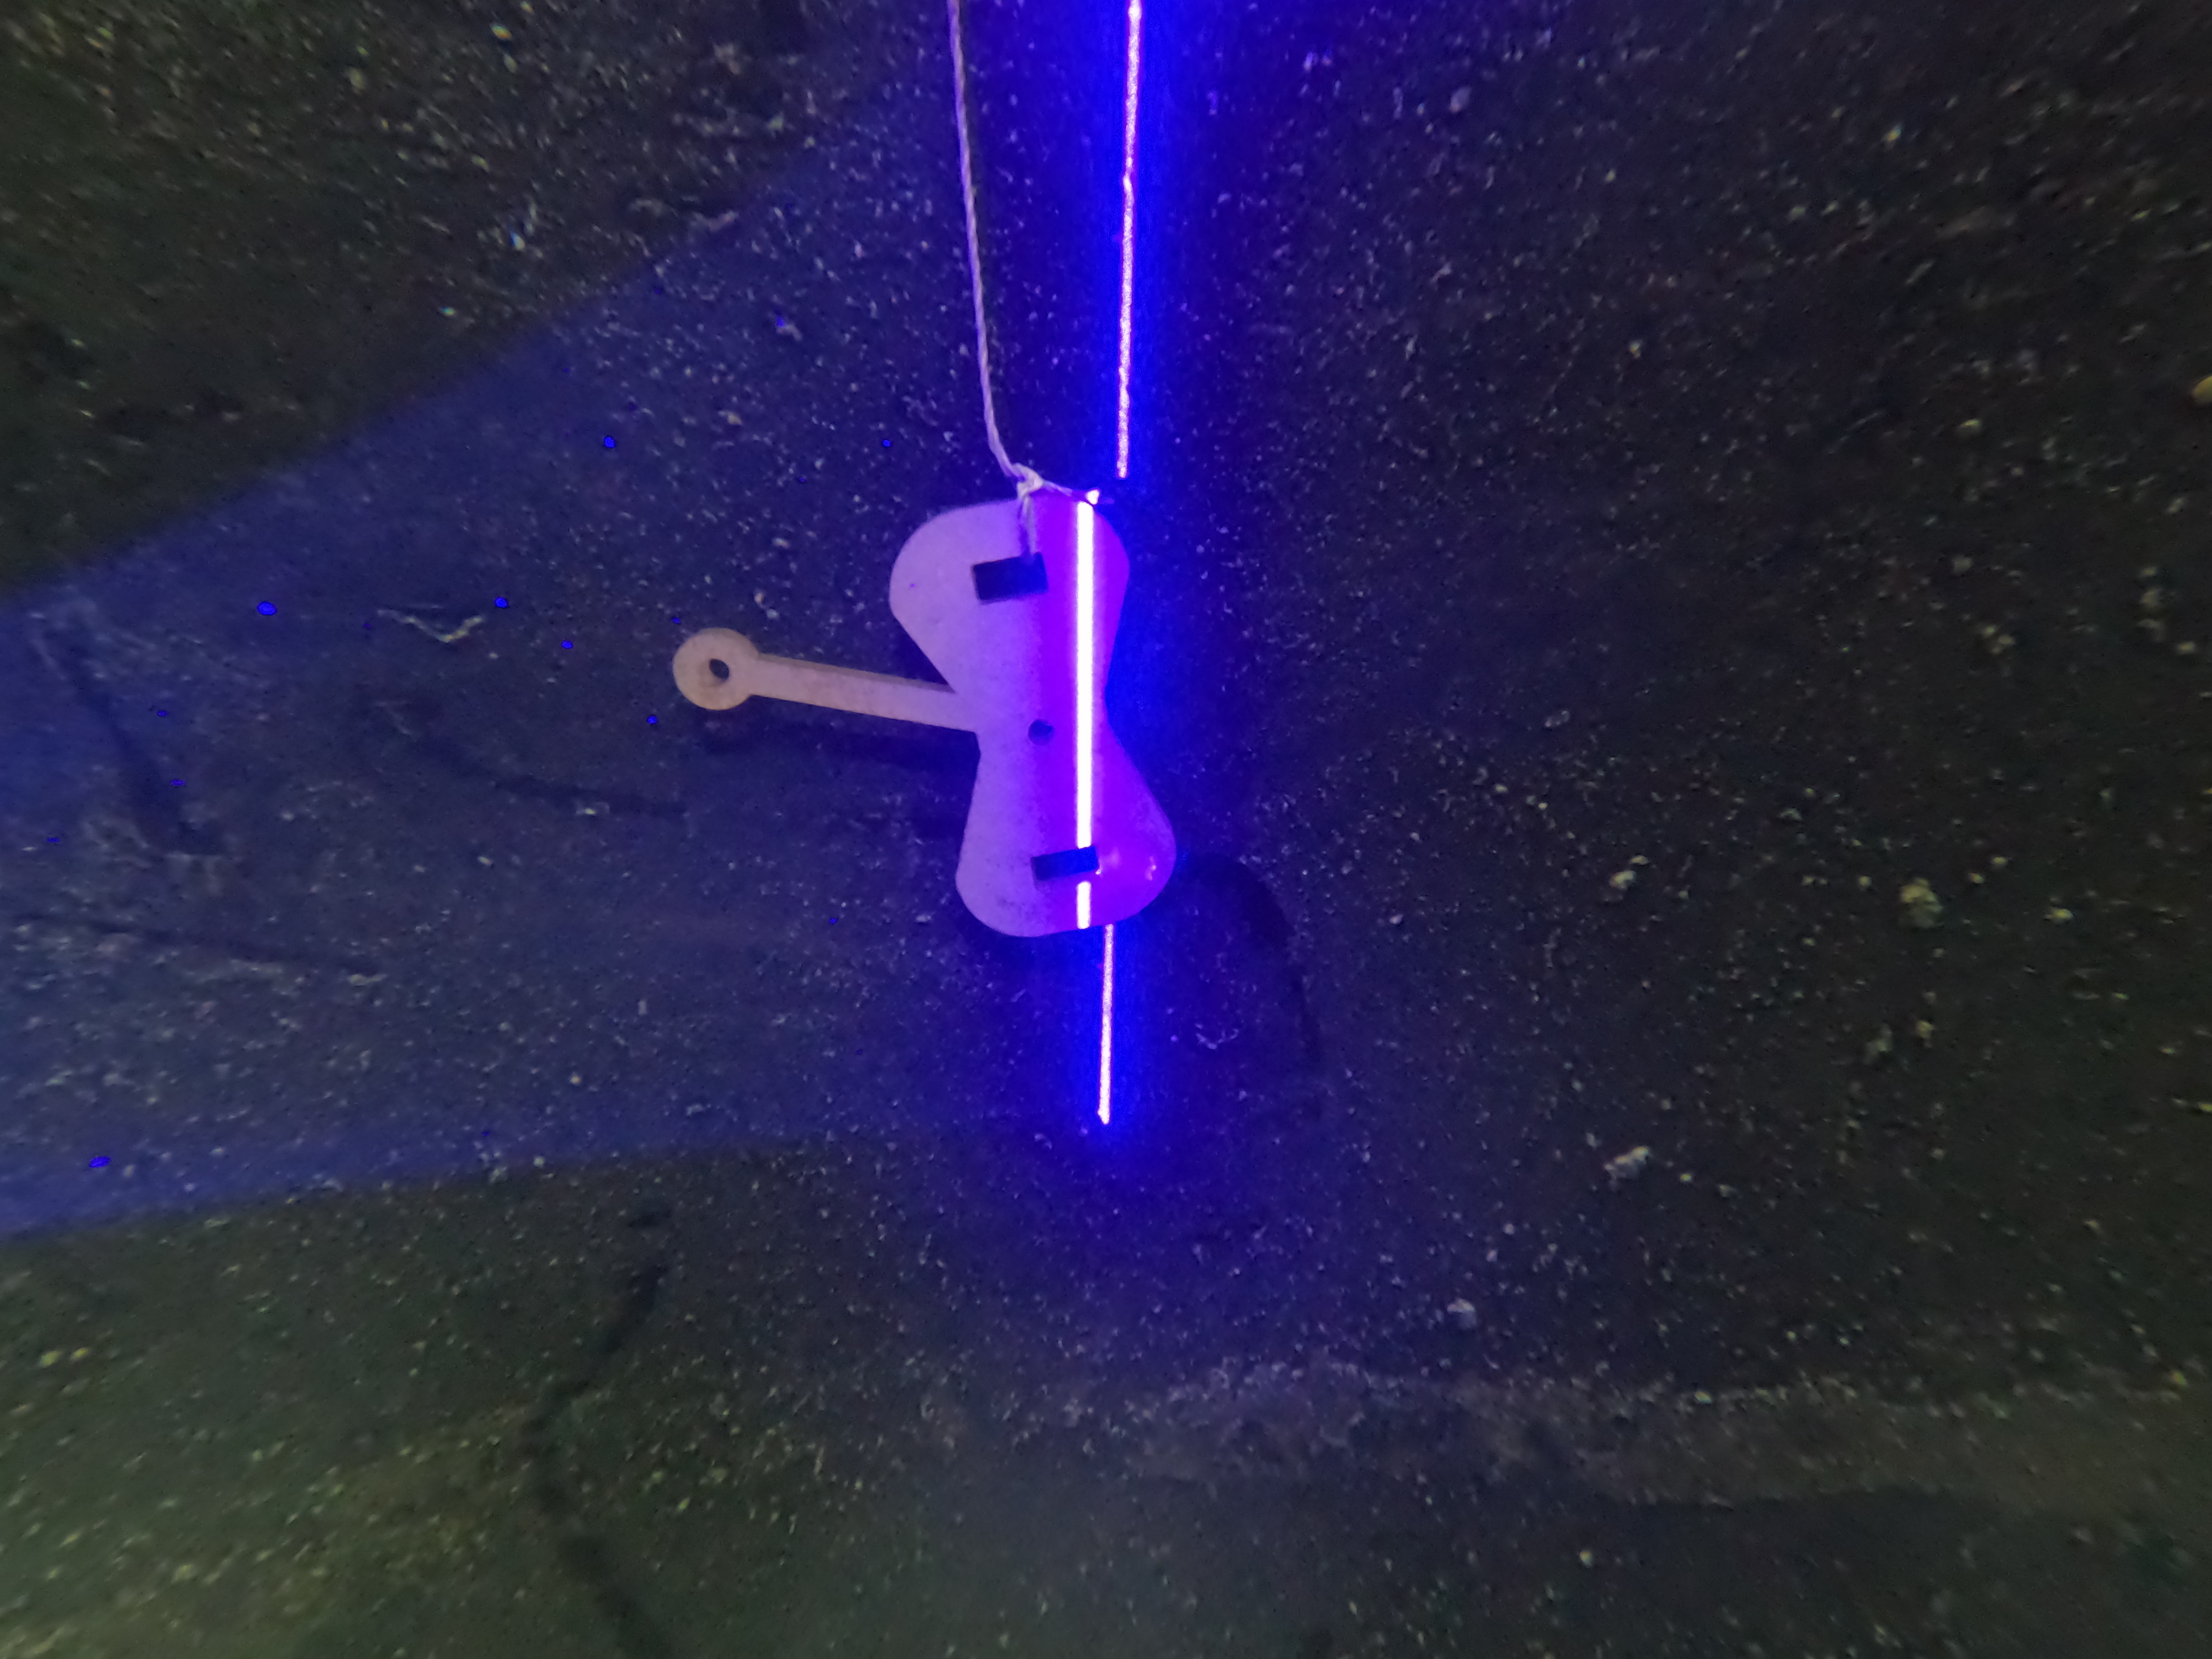

Supplement: Supplementary file 3183 [file G0015624.pdf › Level_2_1/G0015624.pdf]

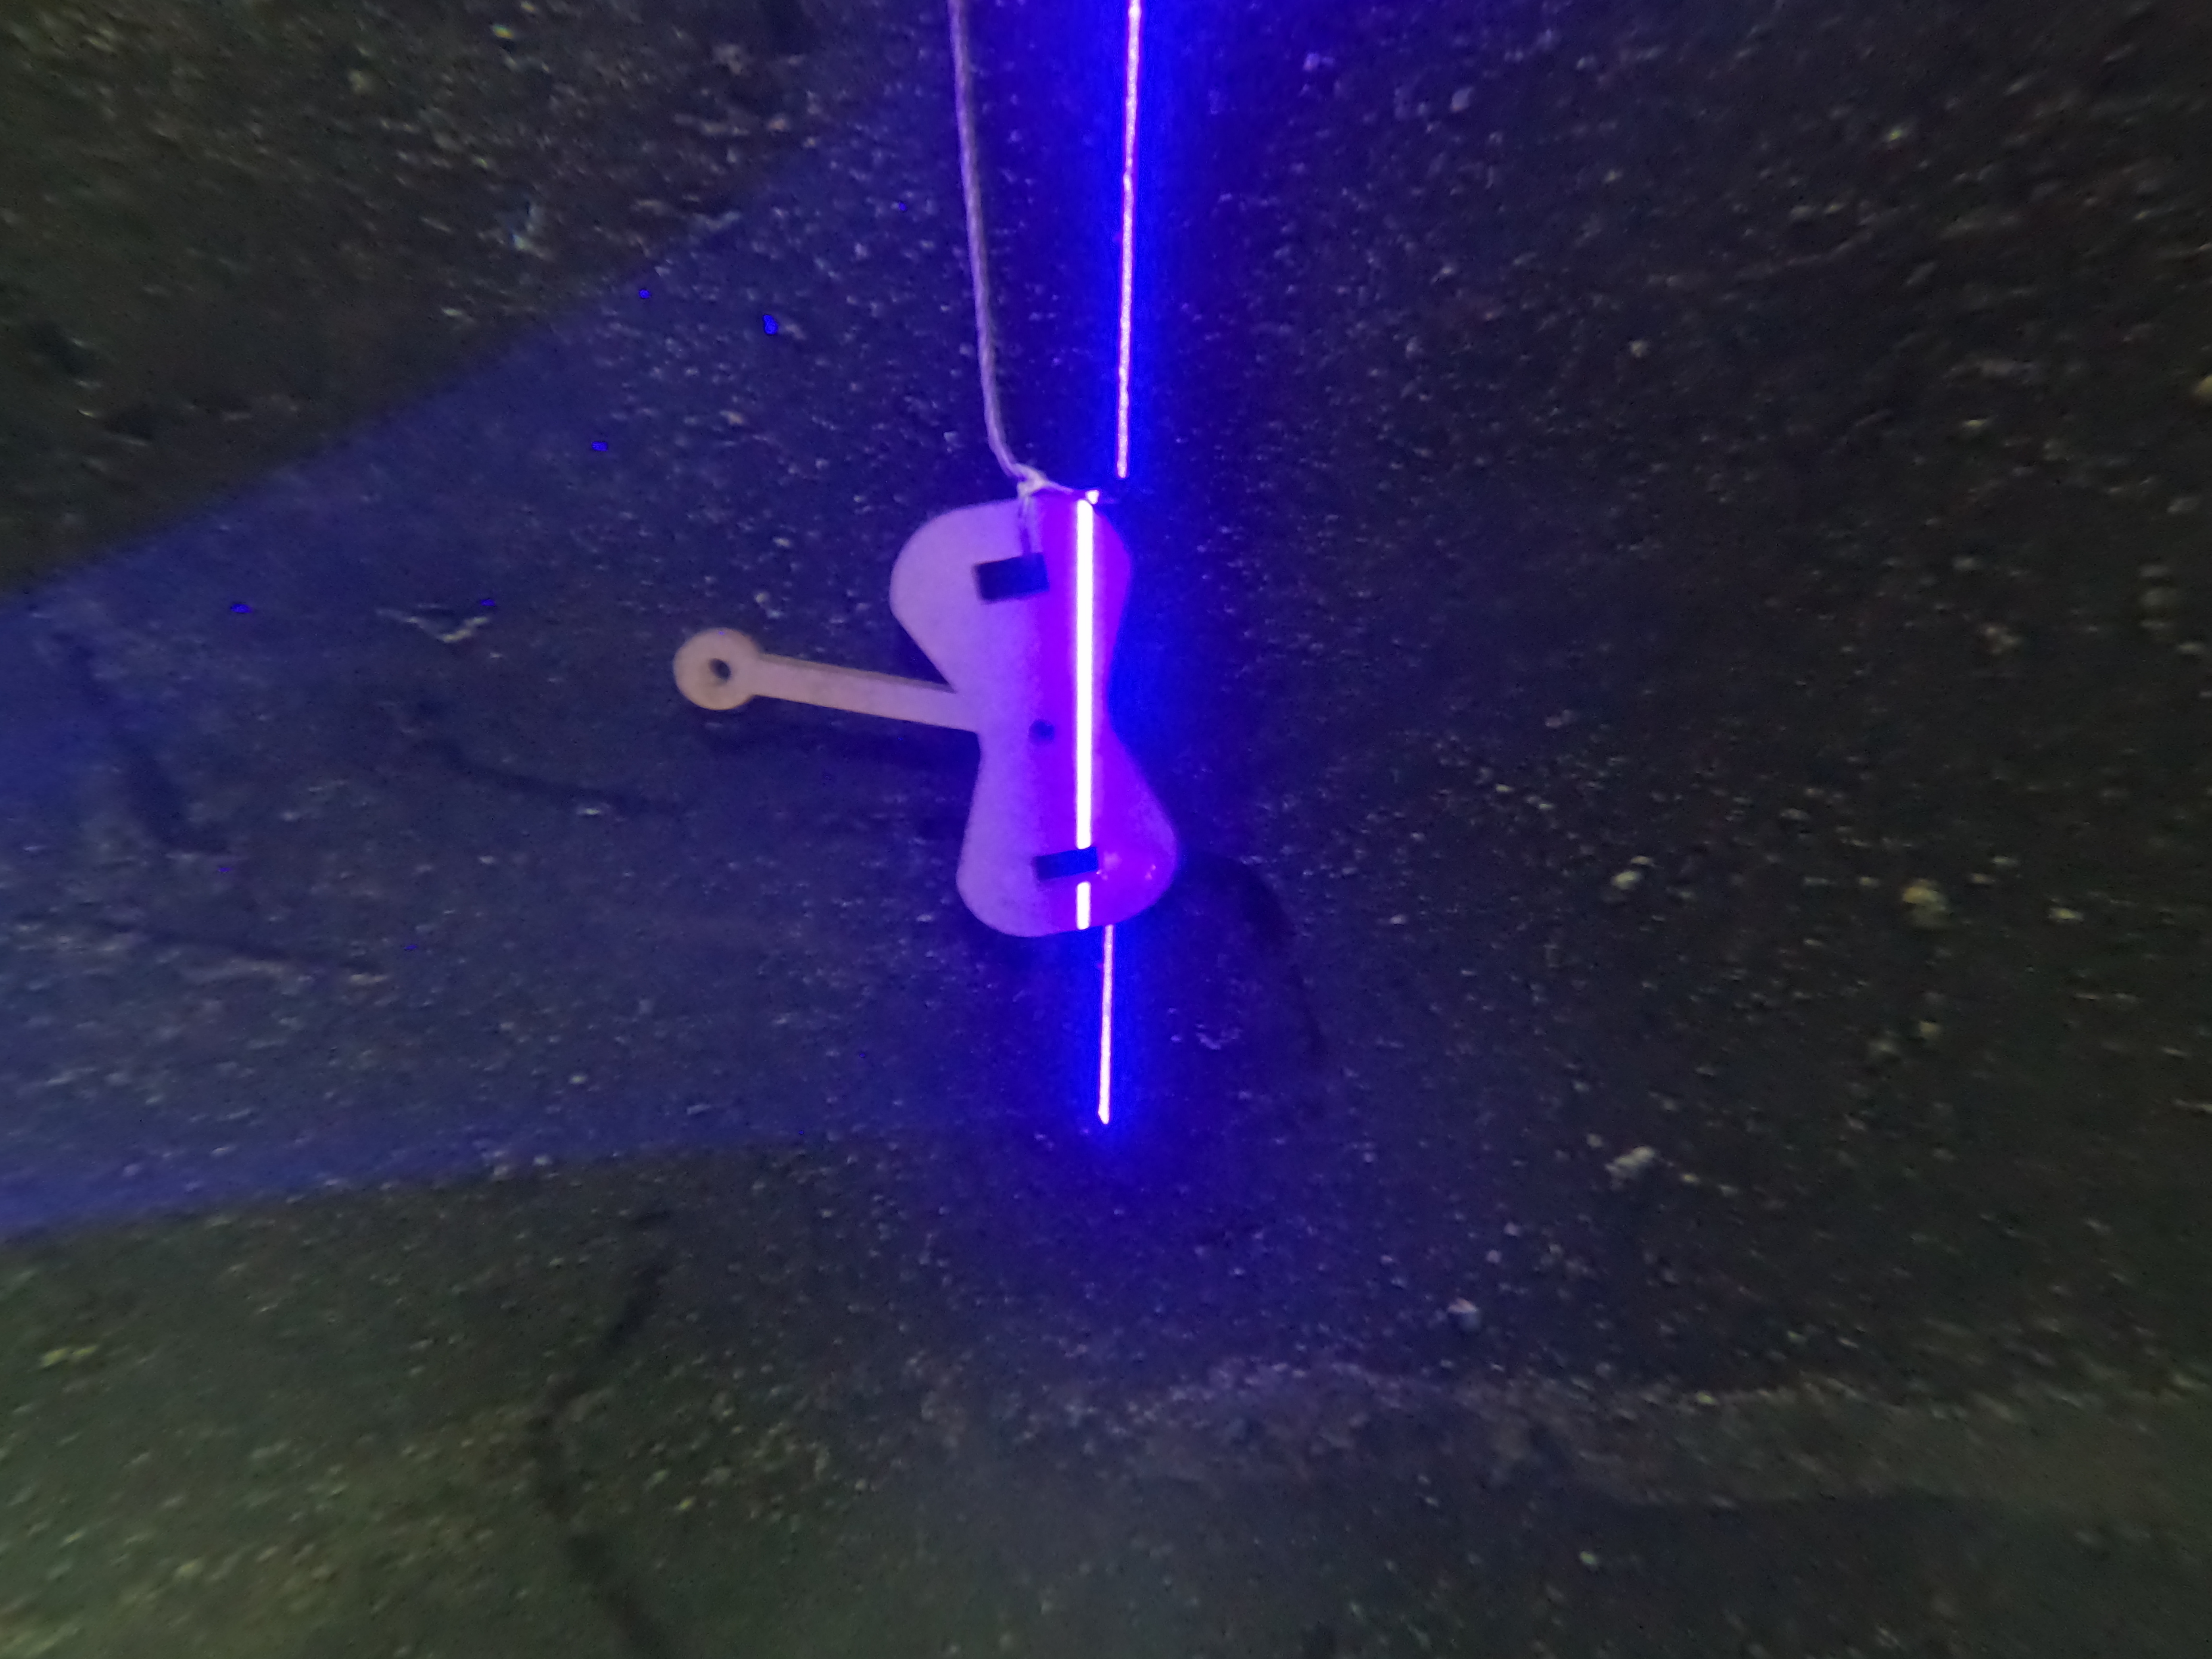

Supplement: Supplementary file 3184 [file G0015625.pdf › Level_2_1/G0015625.pdf]

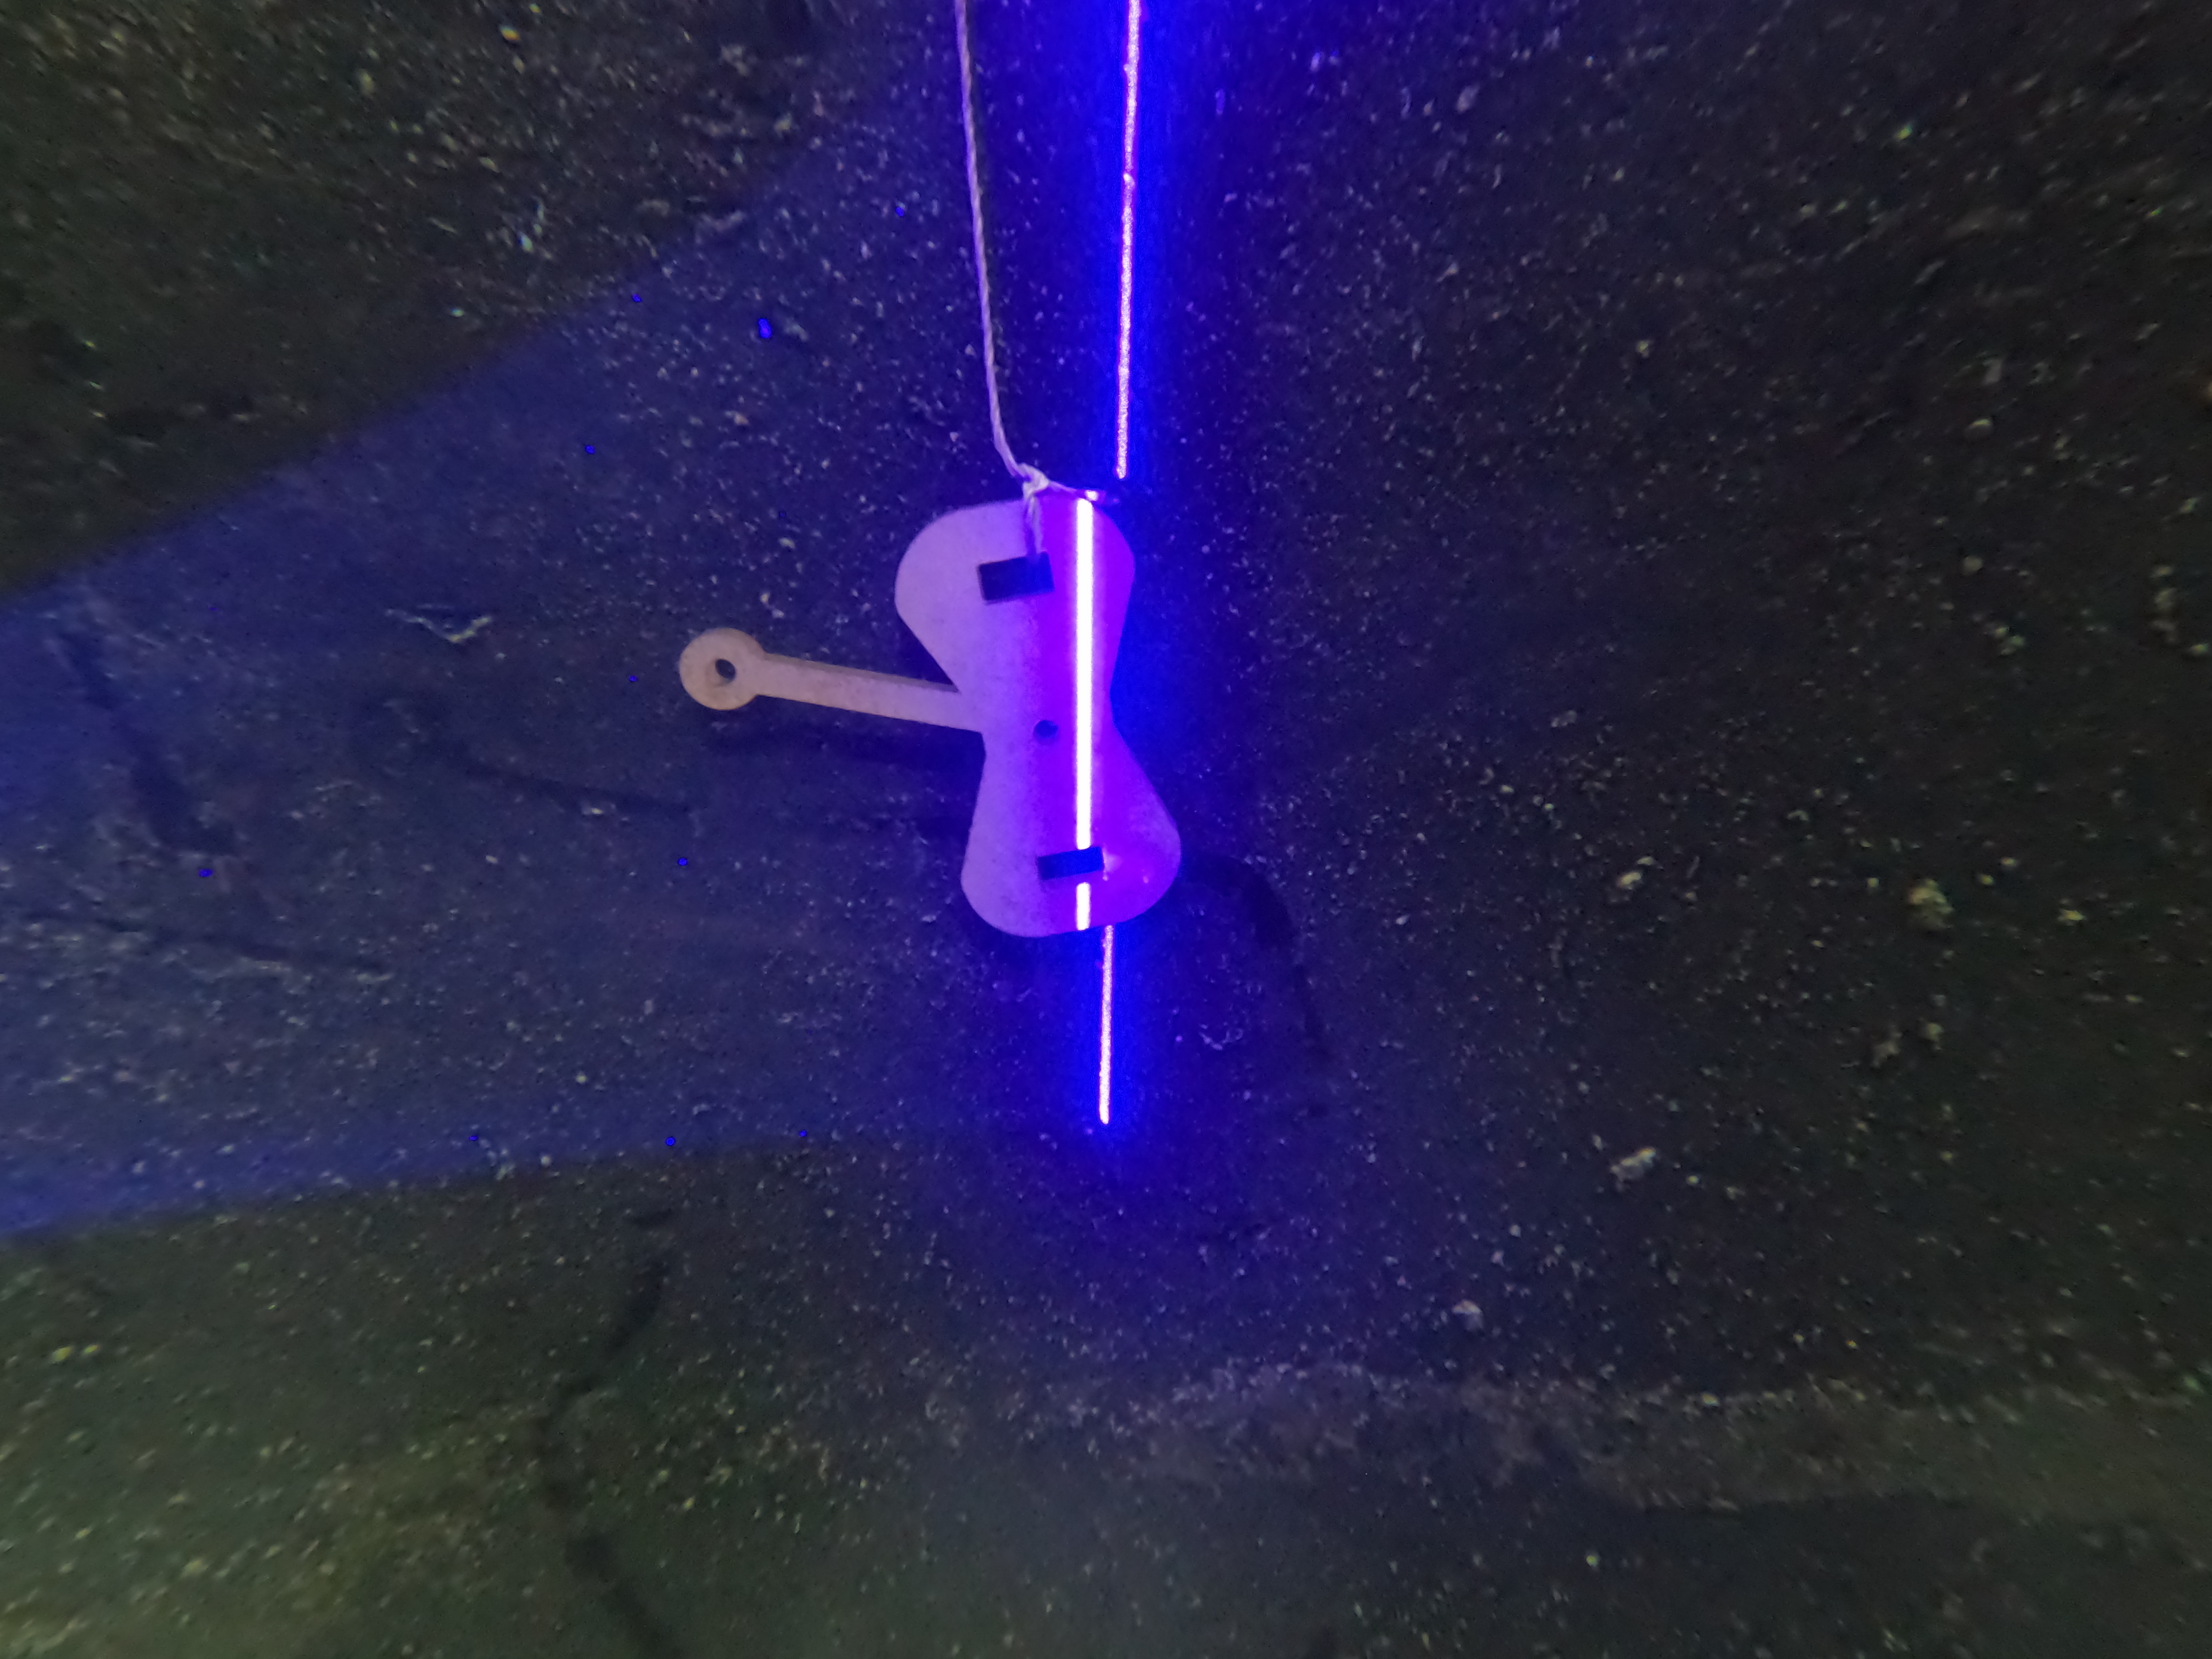

Supplement: Supplementary file 3185 [file G0015626.pdf › Level_2_1/G0015626.pdf]

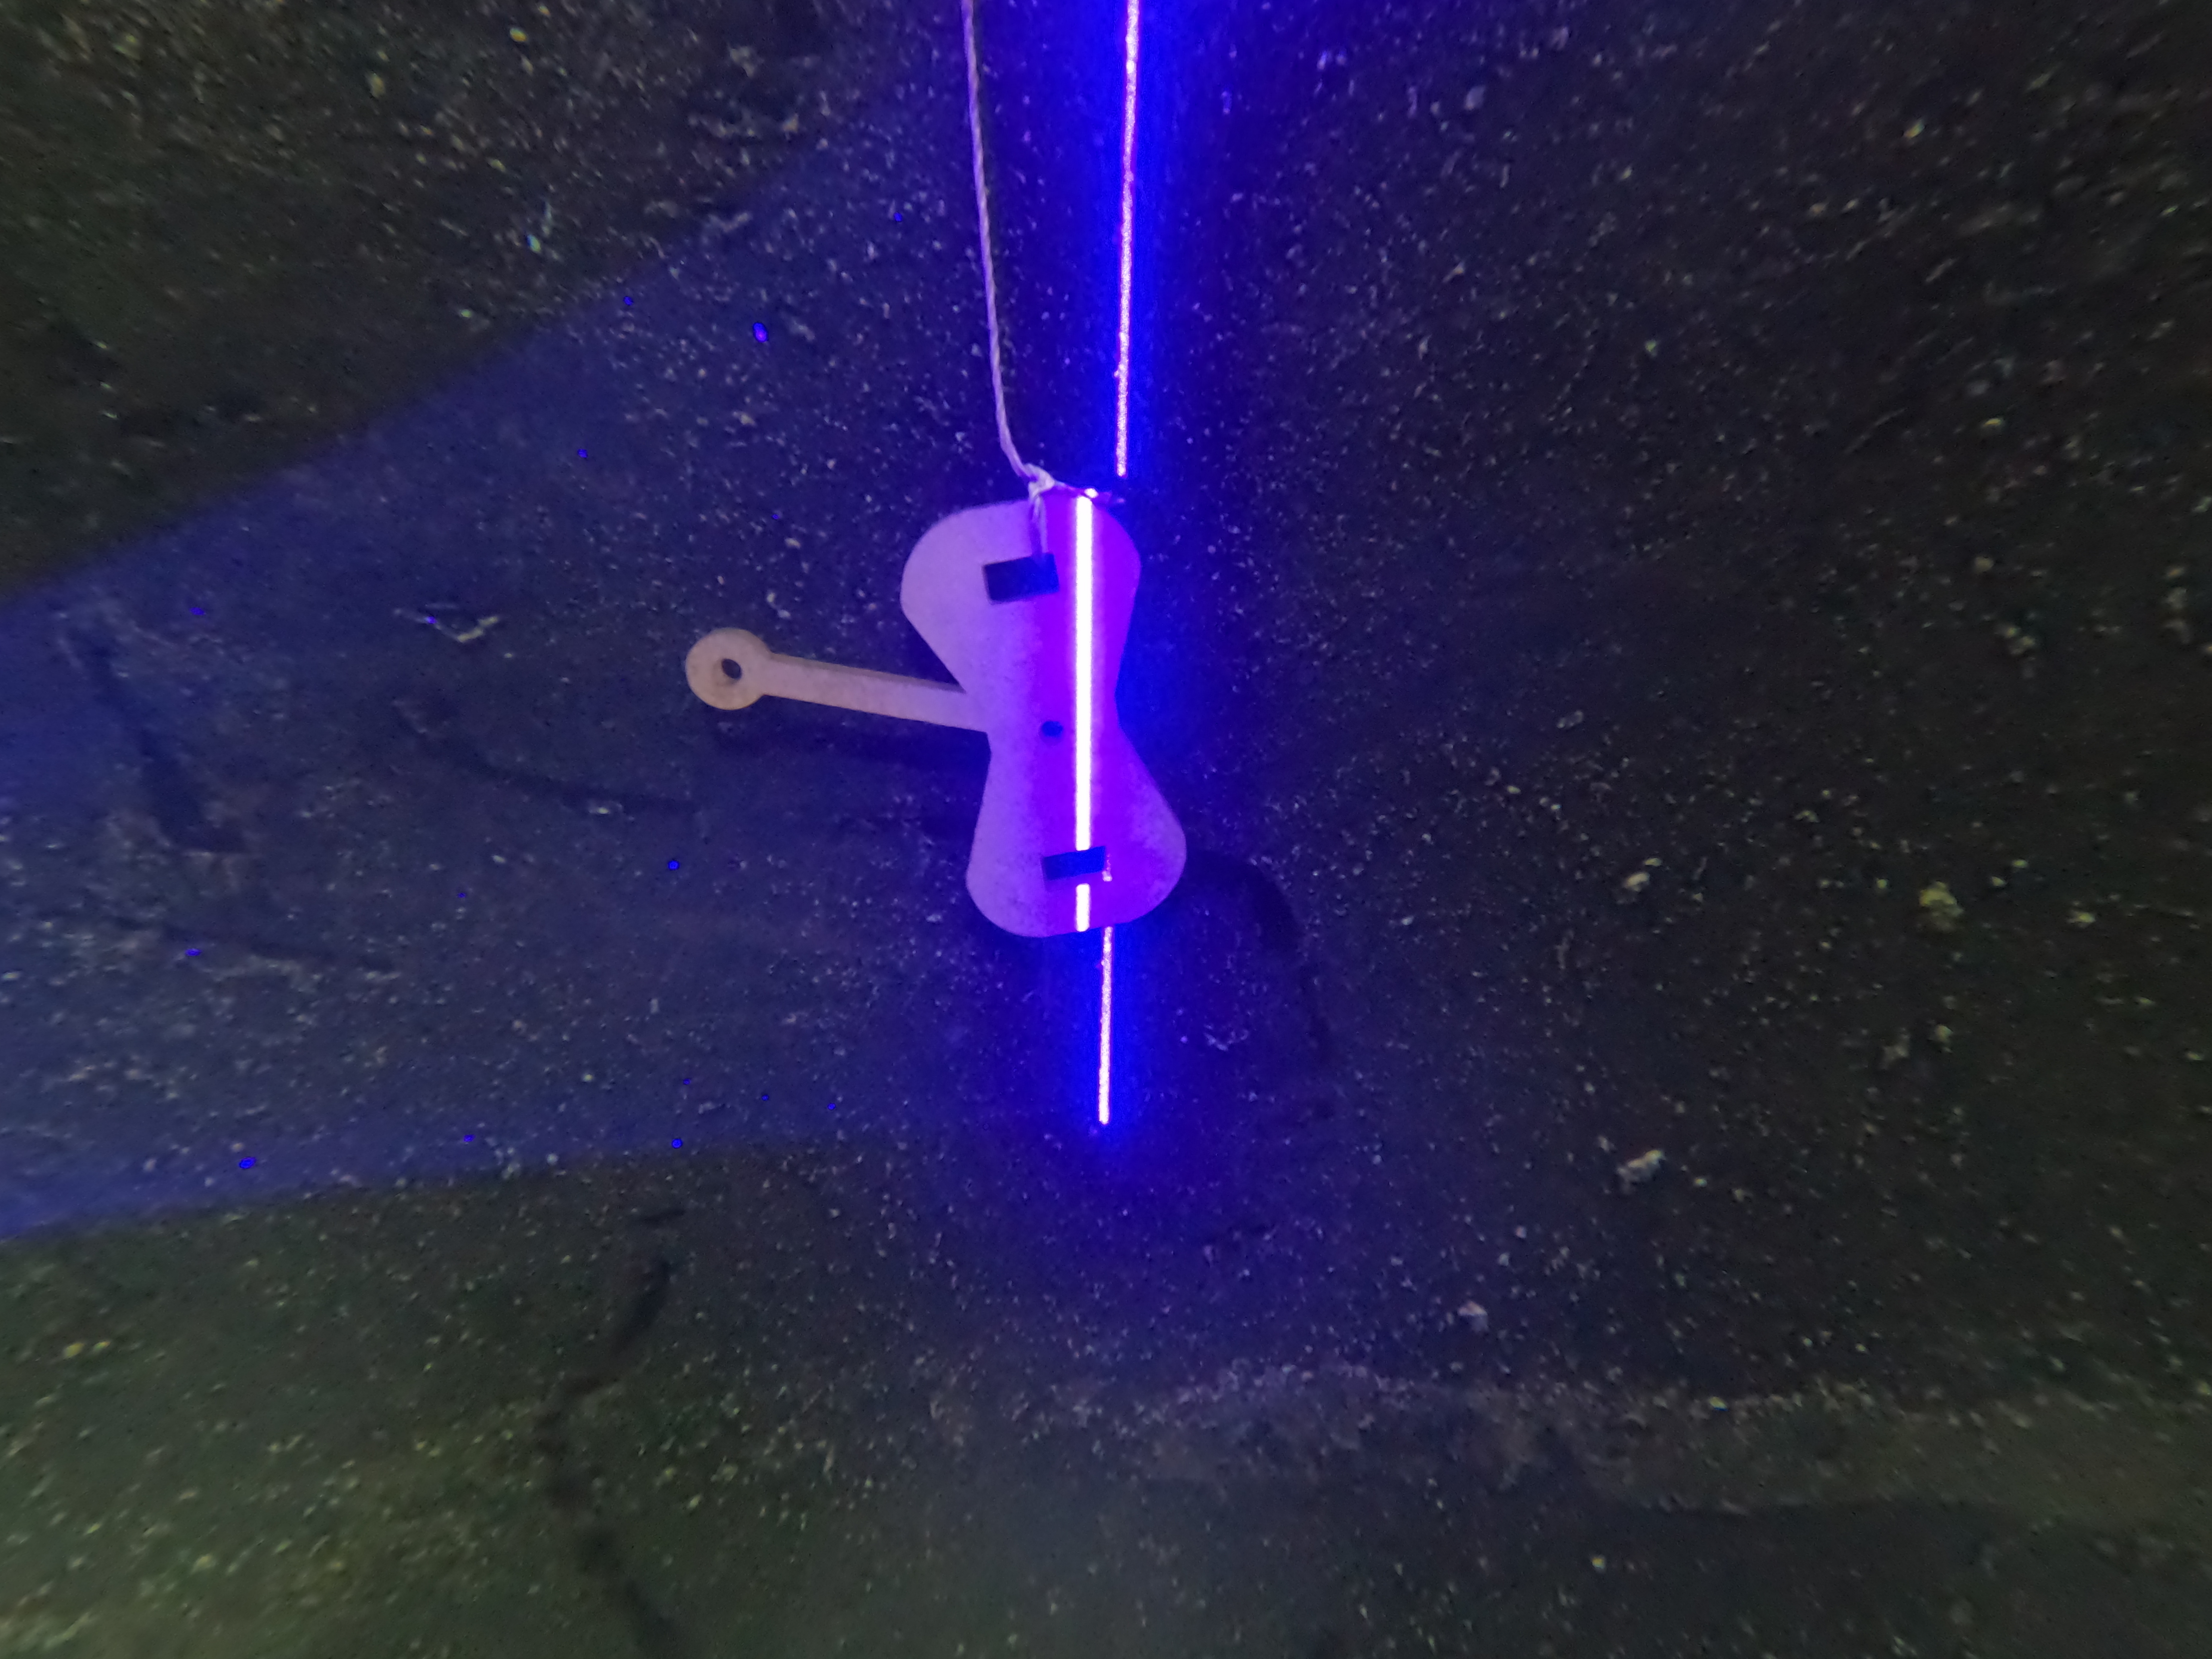

Supplement: Supplementary file 3186 [file G0015627.pdf › Level_2_1/G0015627.pdf]

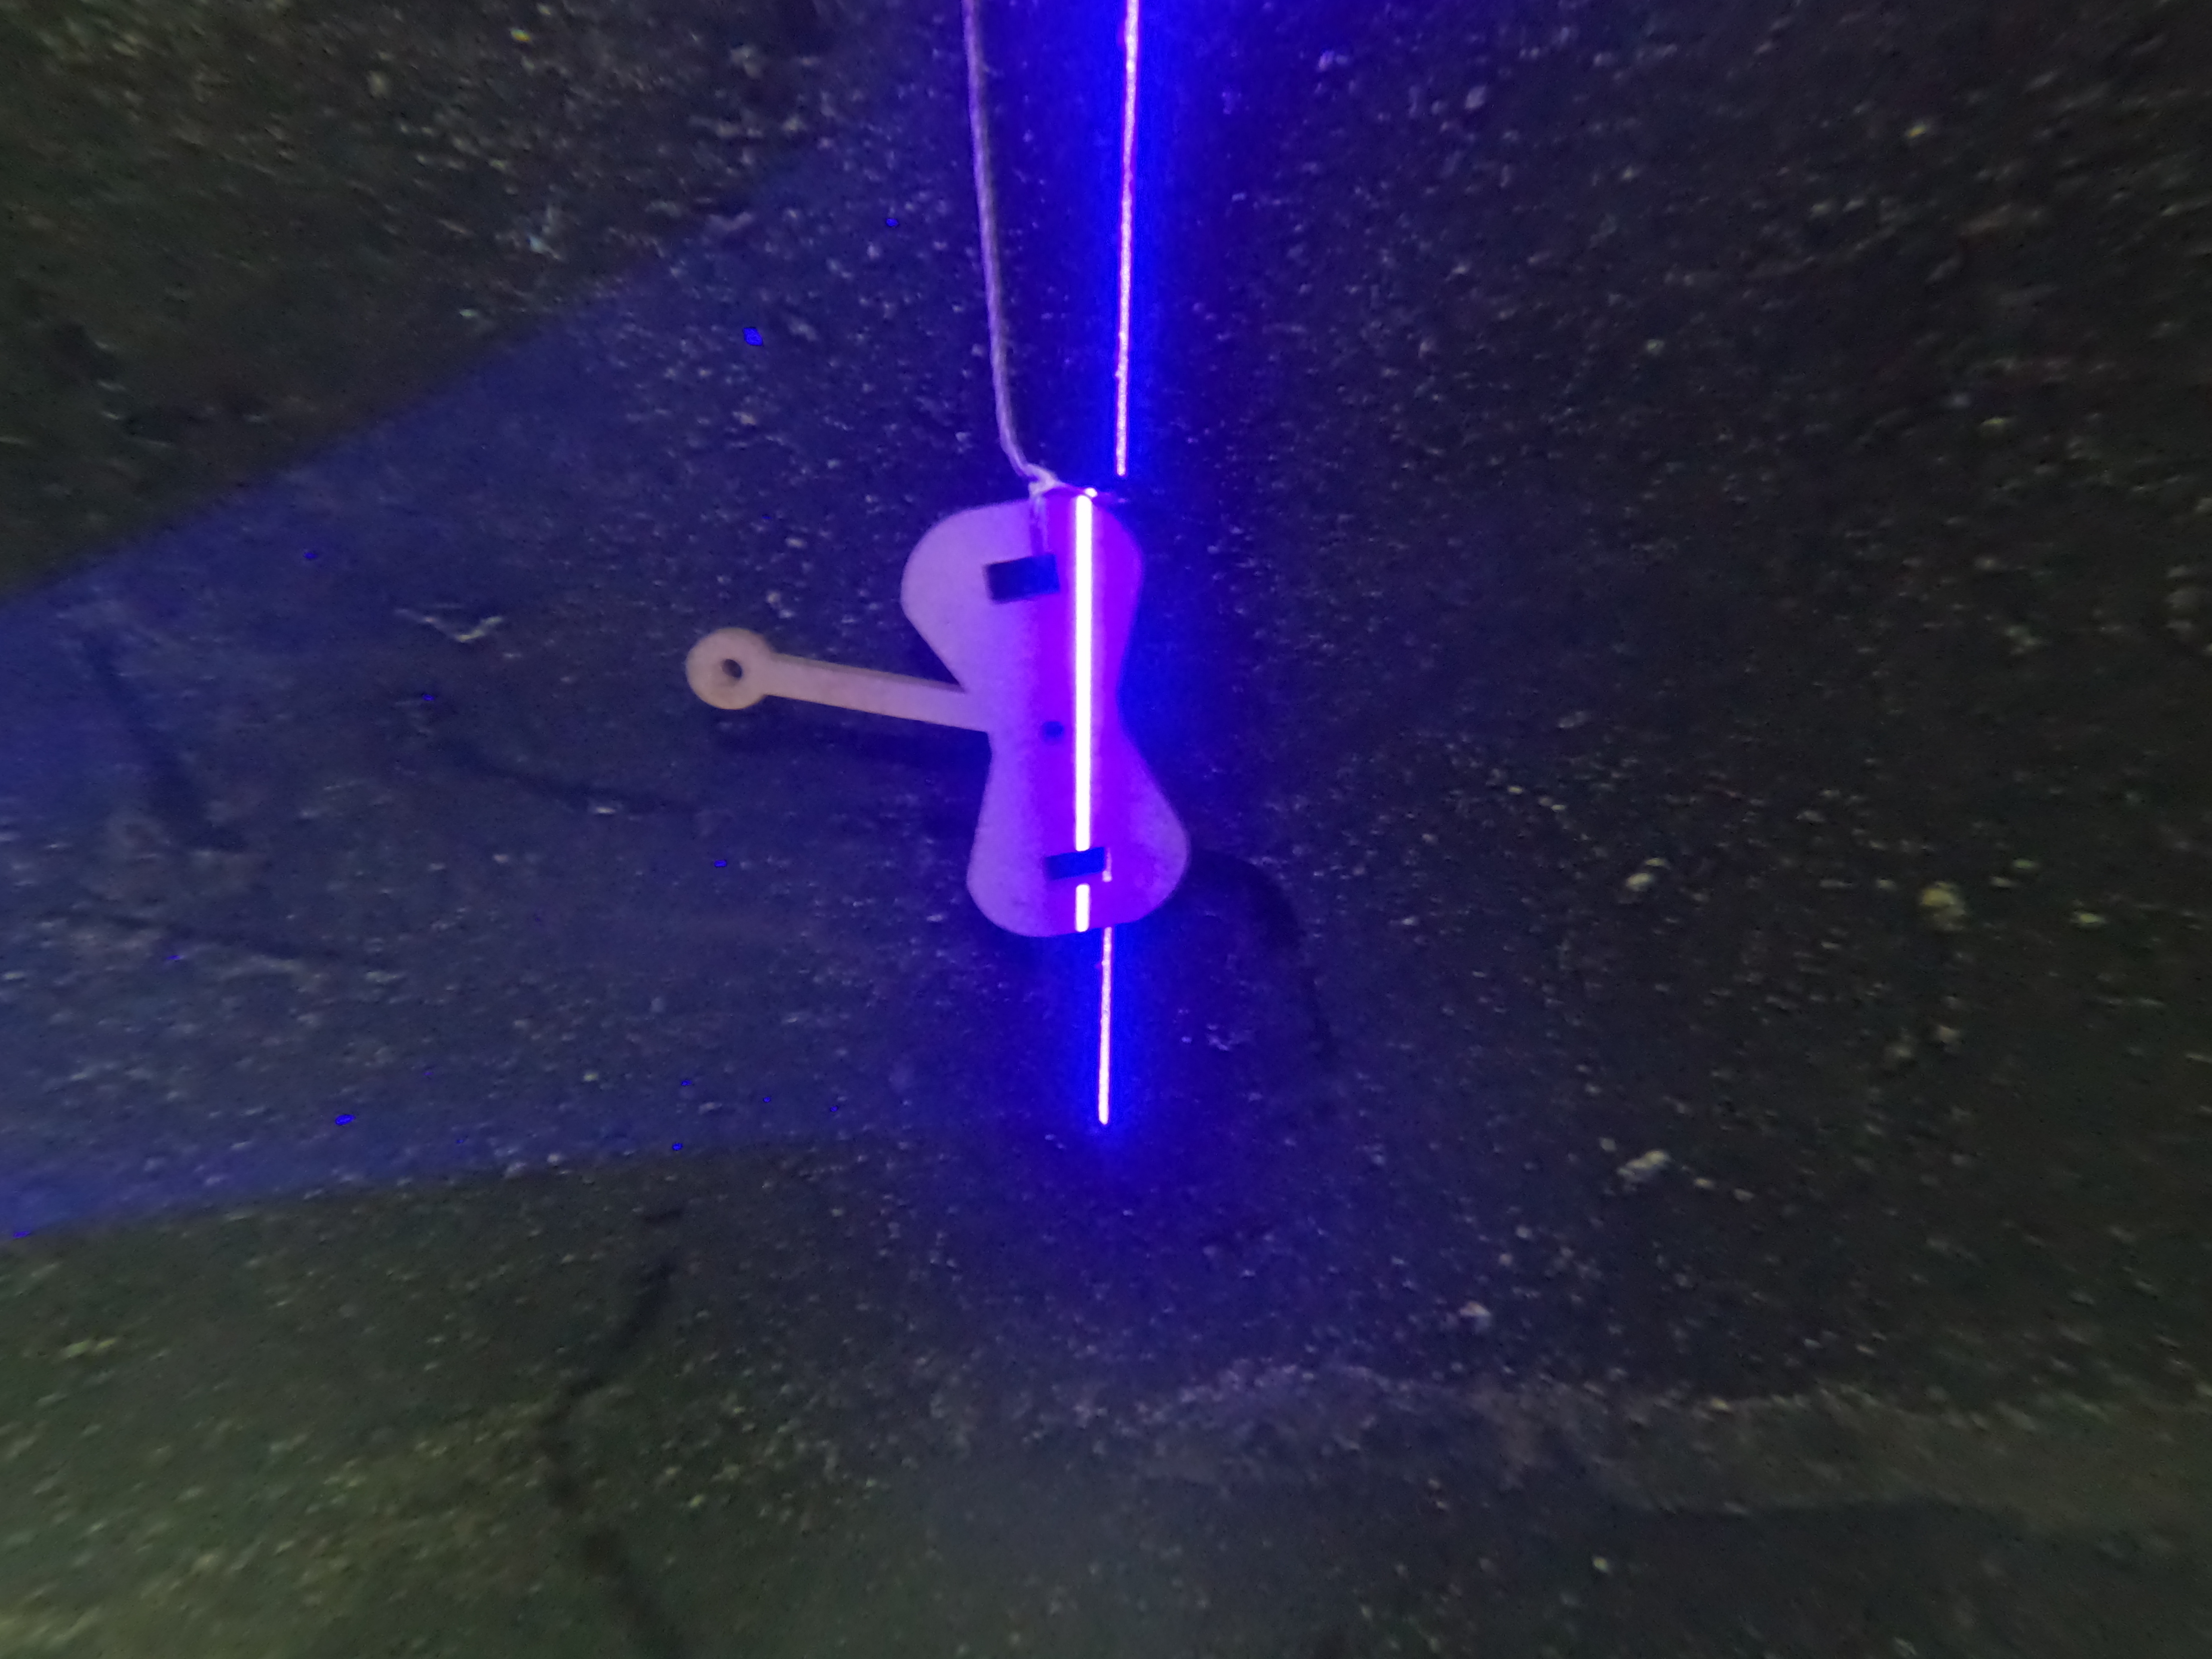

Supplement: Supplementary file 3187 [file G0015628.pdf › Level_2_1/G0015628.pdf]

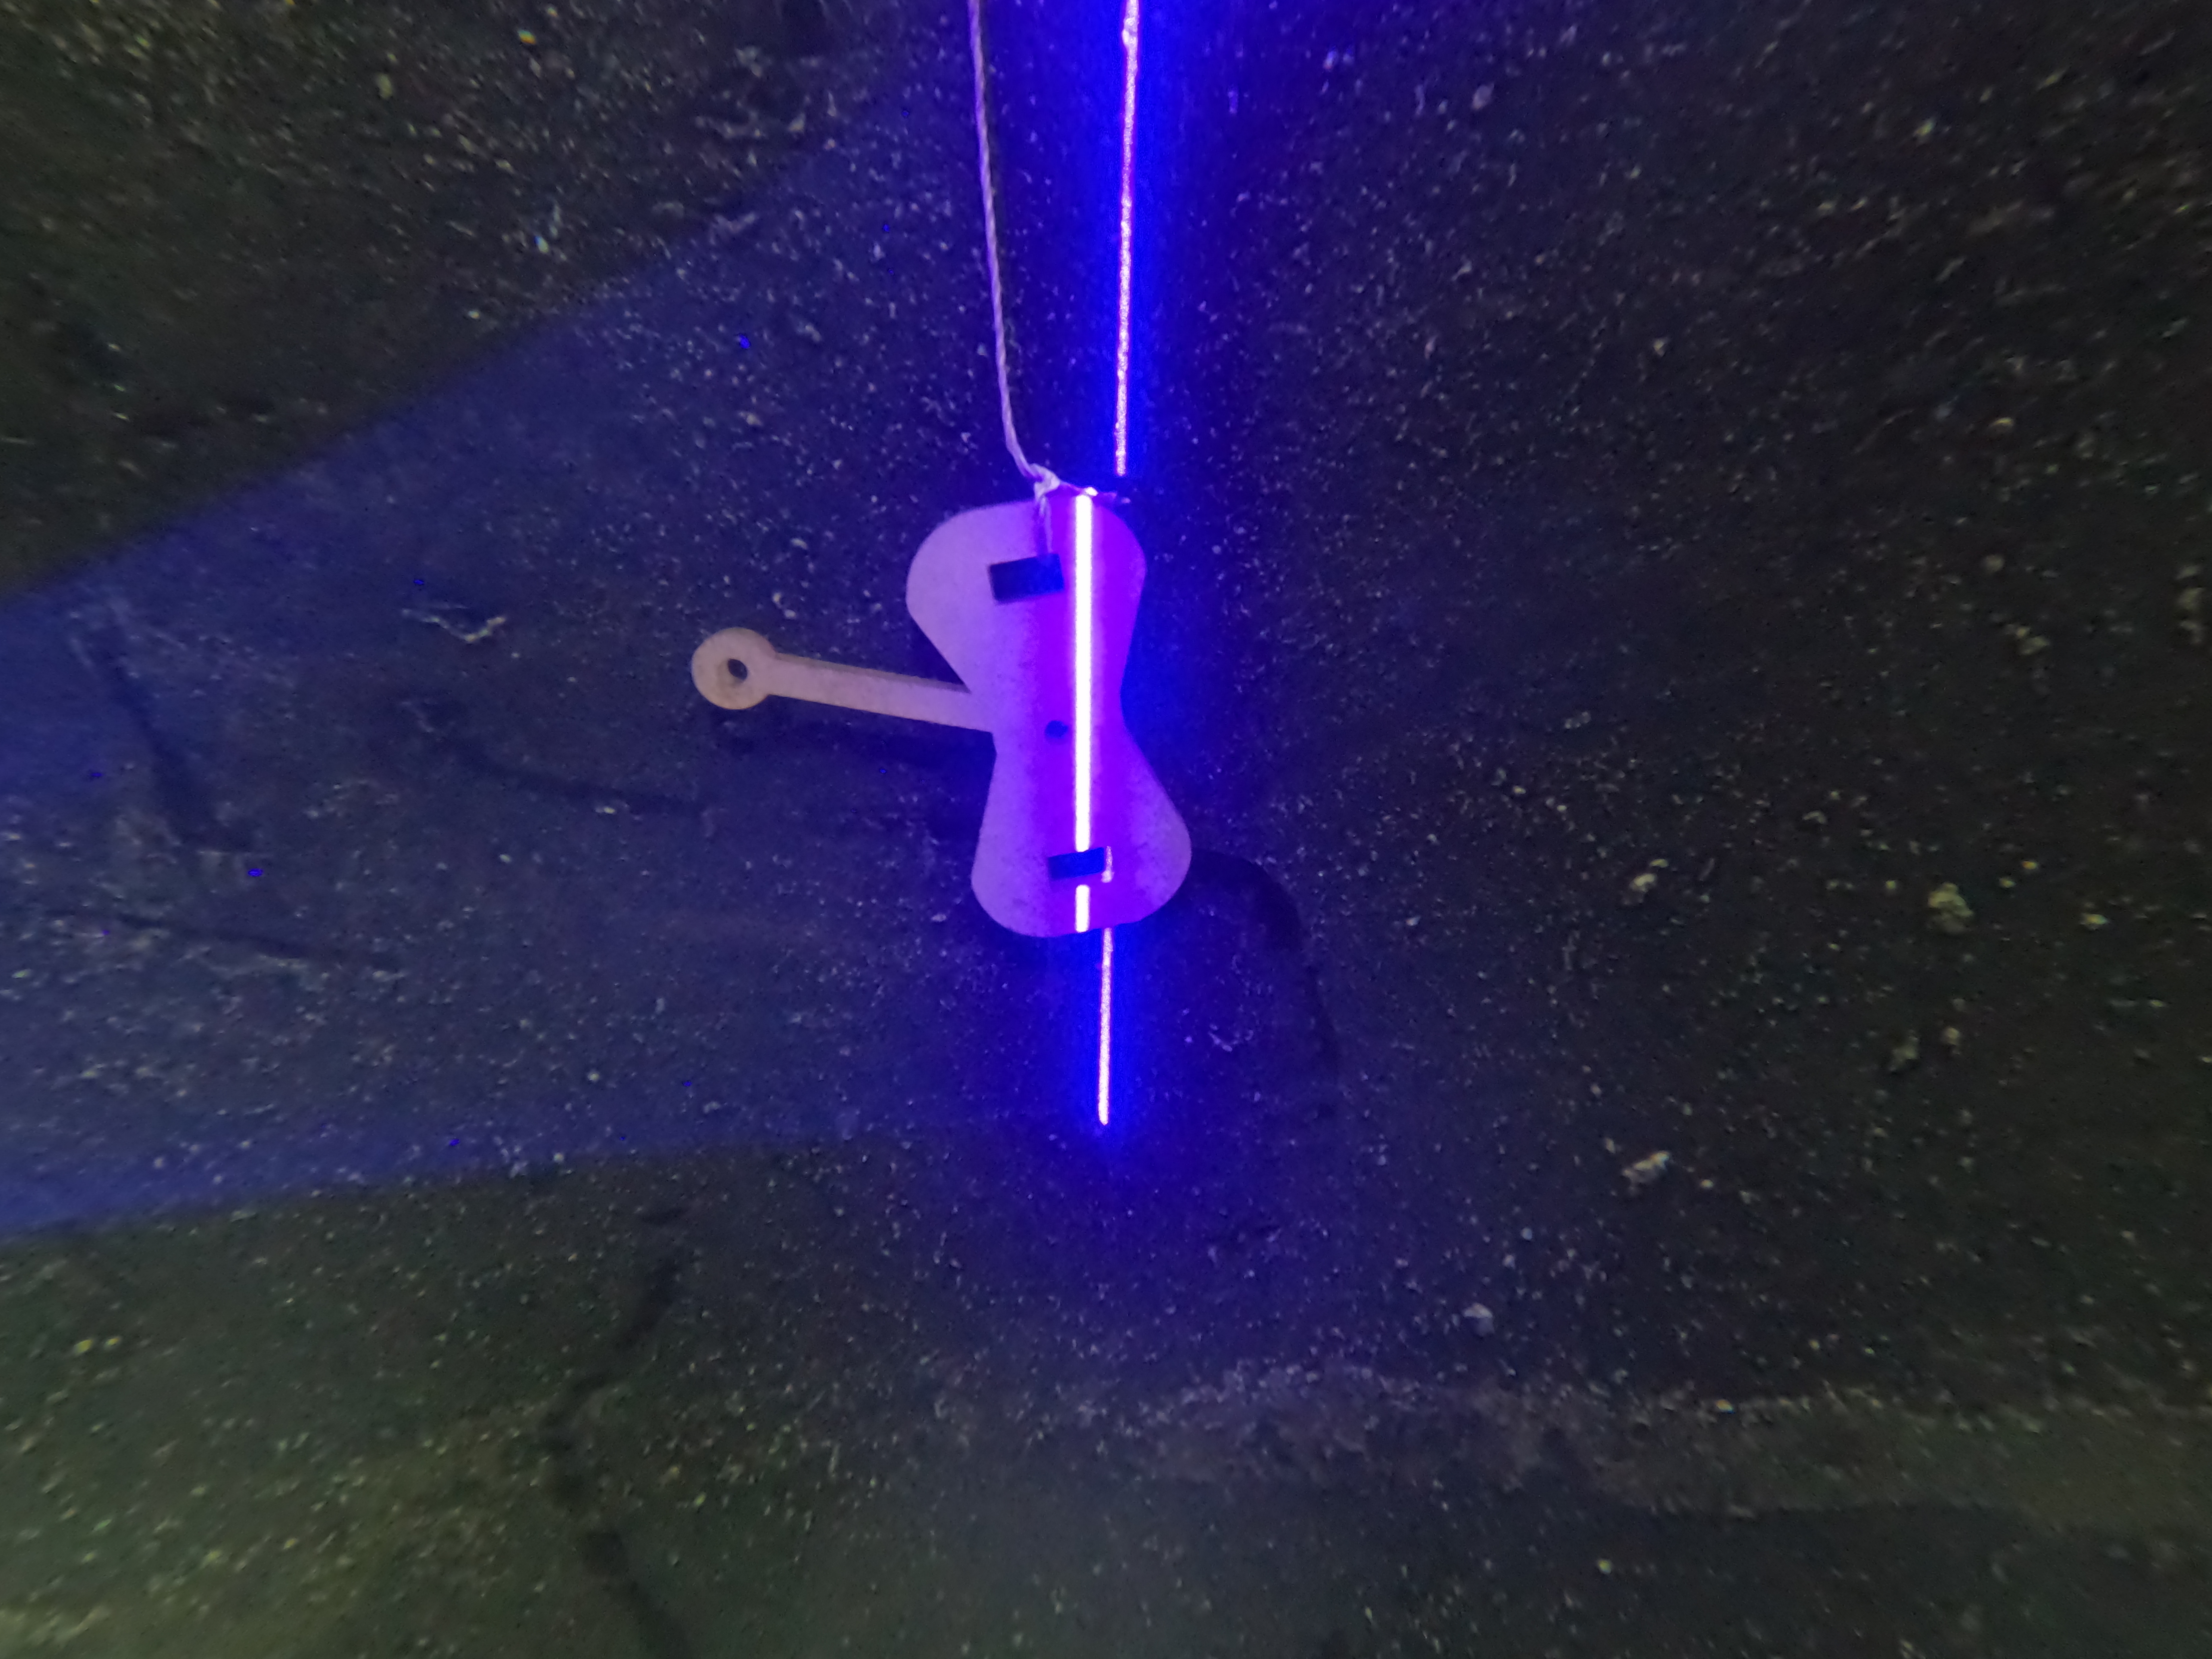

Supplement: Supplementary file 3188 [file G0015629.pdf › Level_2_1/G0015629.pdf]

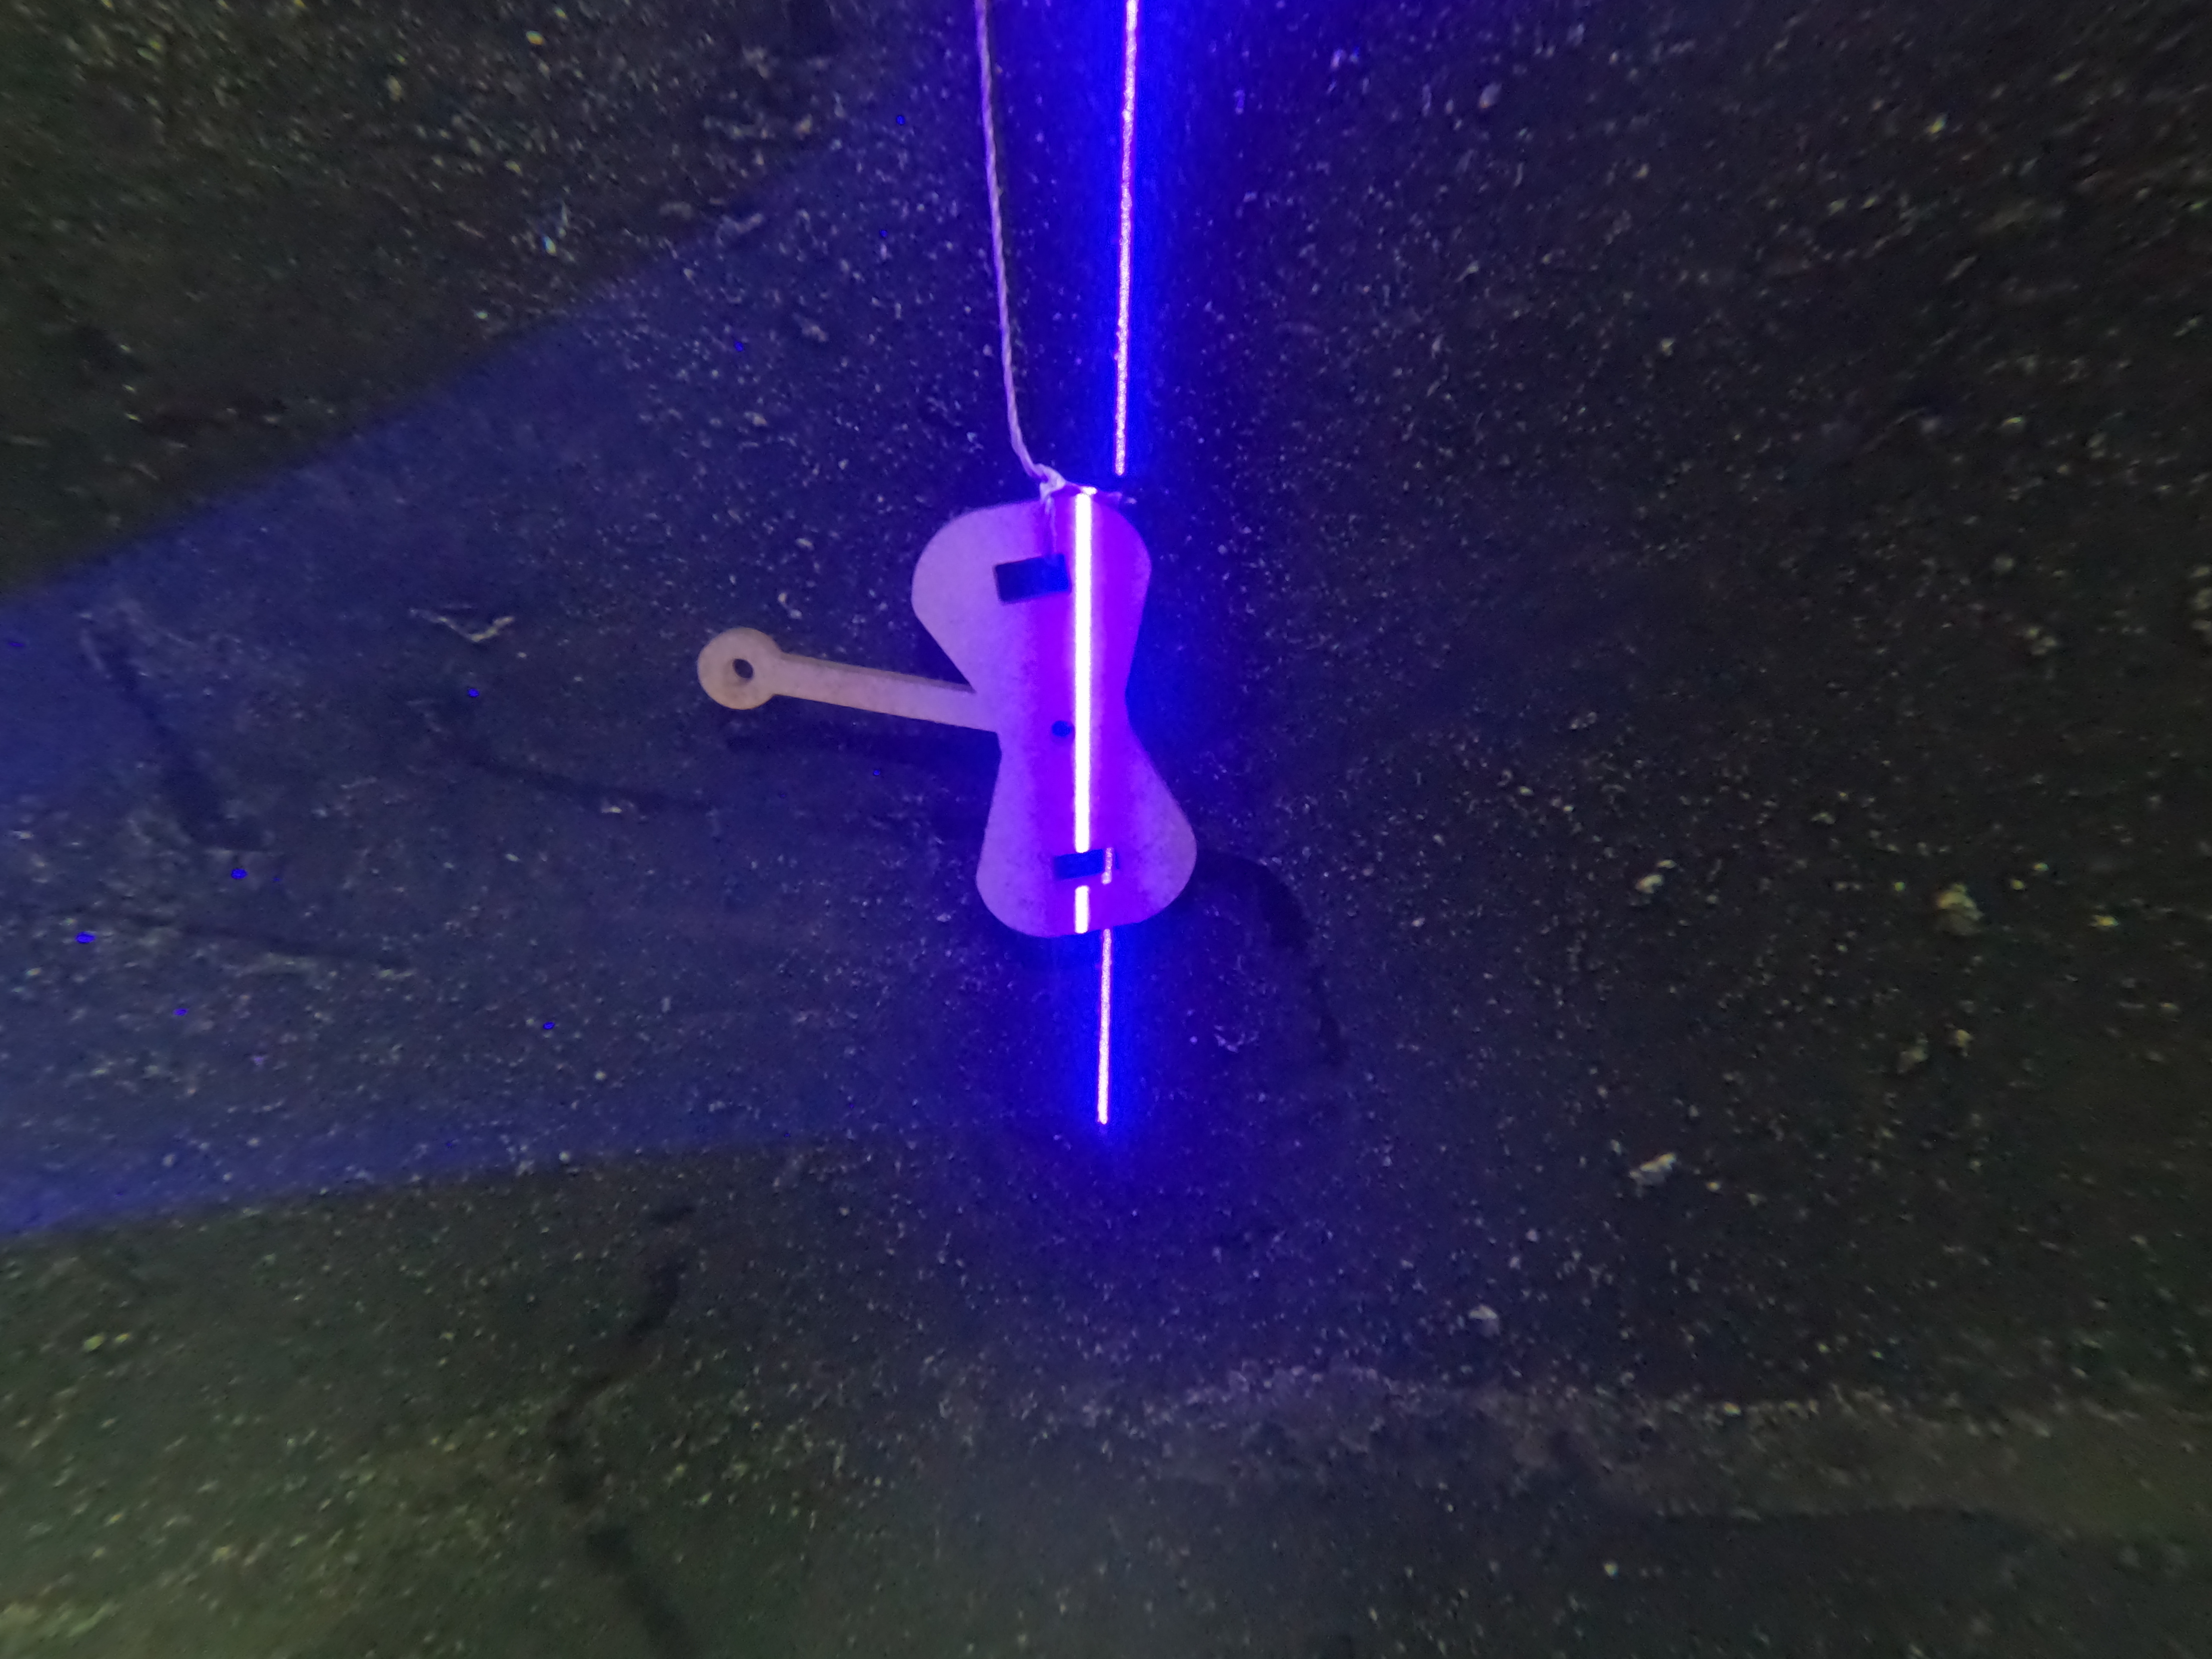

Supplement: Supplementary file 3189 [file G0015630.pdf › Level_2_1/G0015630.pdf]

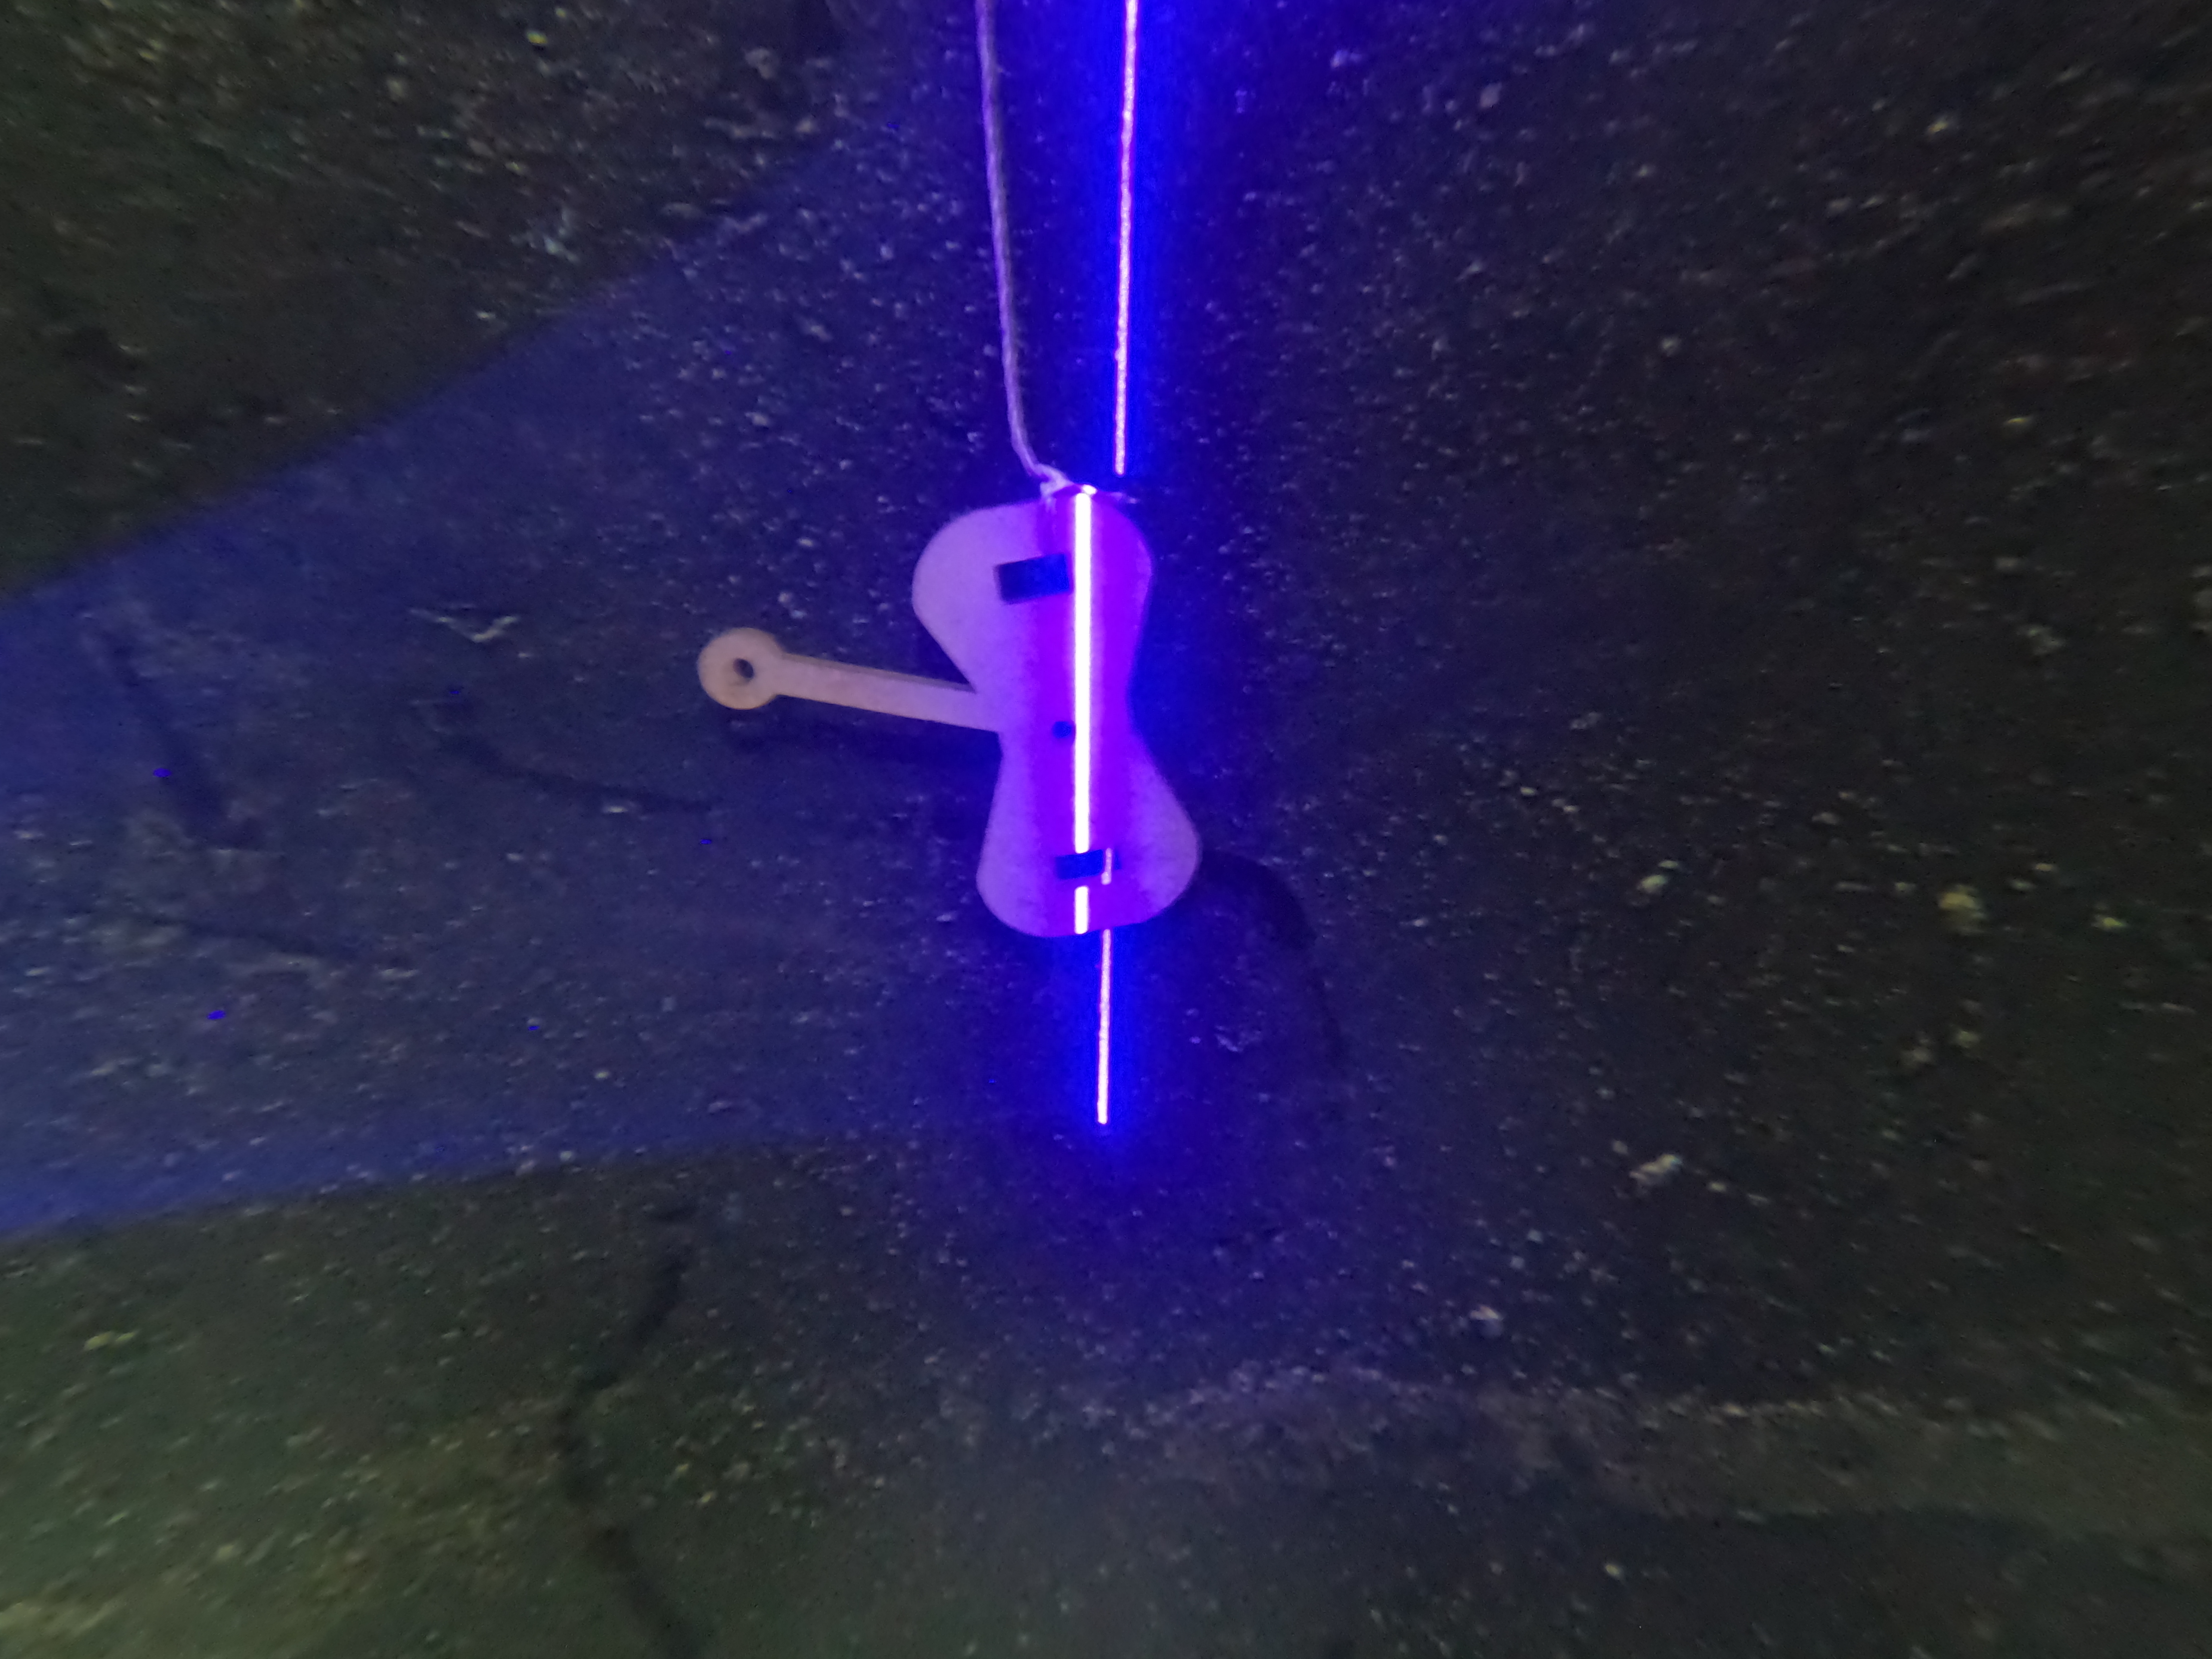

Supplement: Supplementary file 3190 [file G0015631.pdf › Level_2_1/G0015631.pdf]
