# Supplementary figures and images for: 3D reconstruction of shallow sea environment using direct system calibration and faint laser line extraction (part 32 of 35)
Source: Research Square preprint supplement (doi:10.21203/rs.3.rs-5262658/v1), 2024-12-02

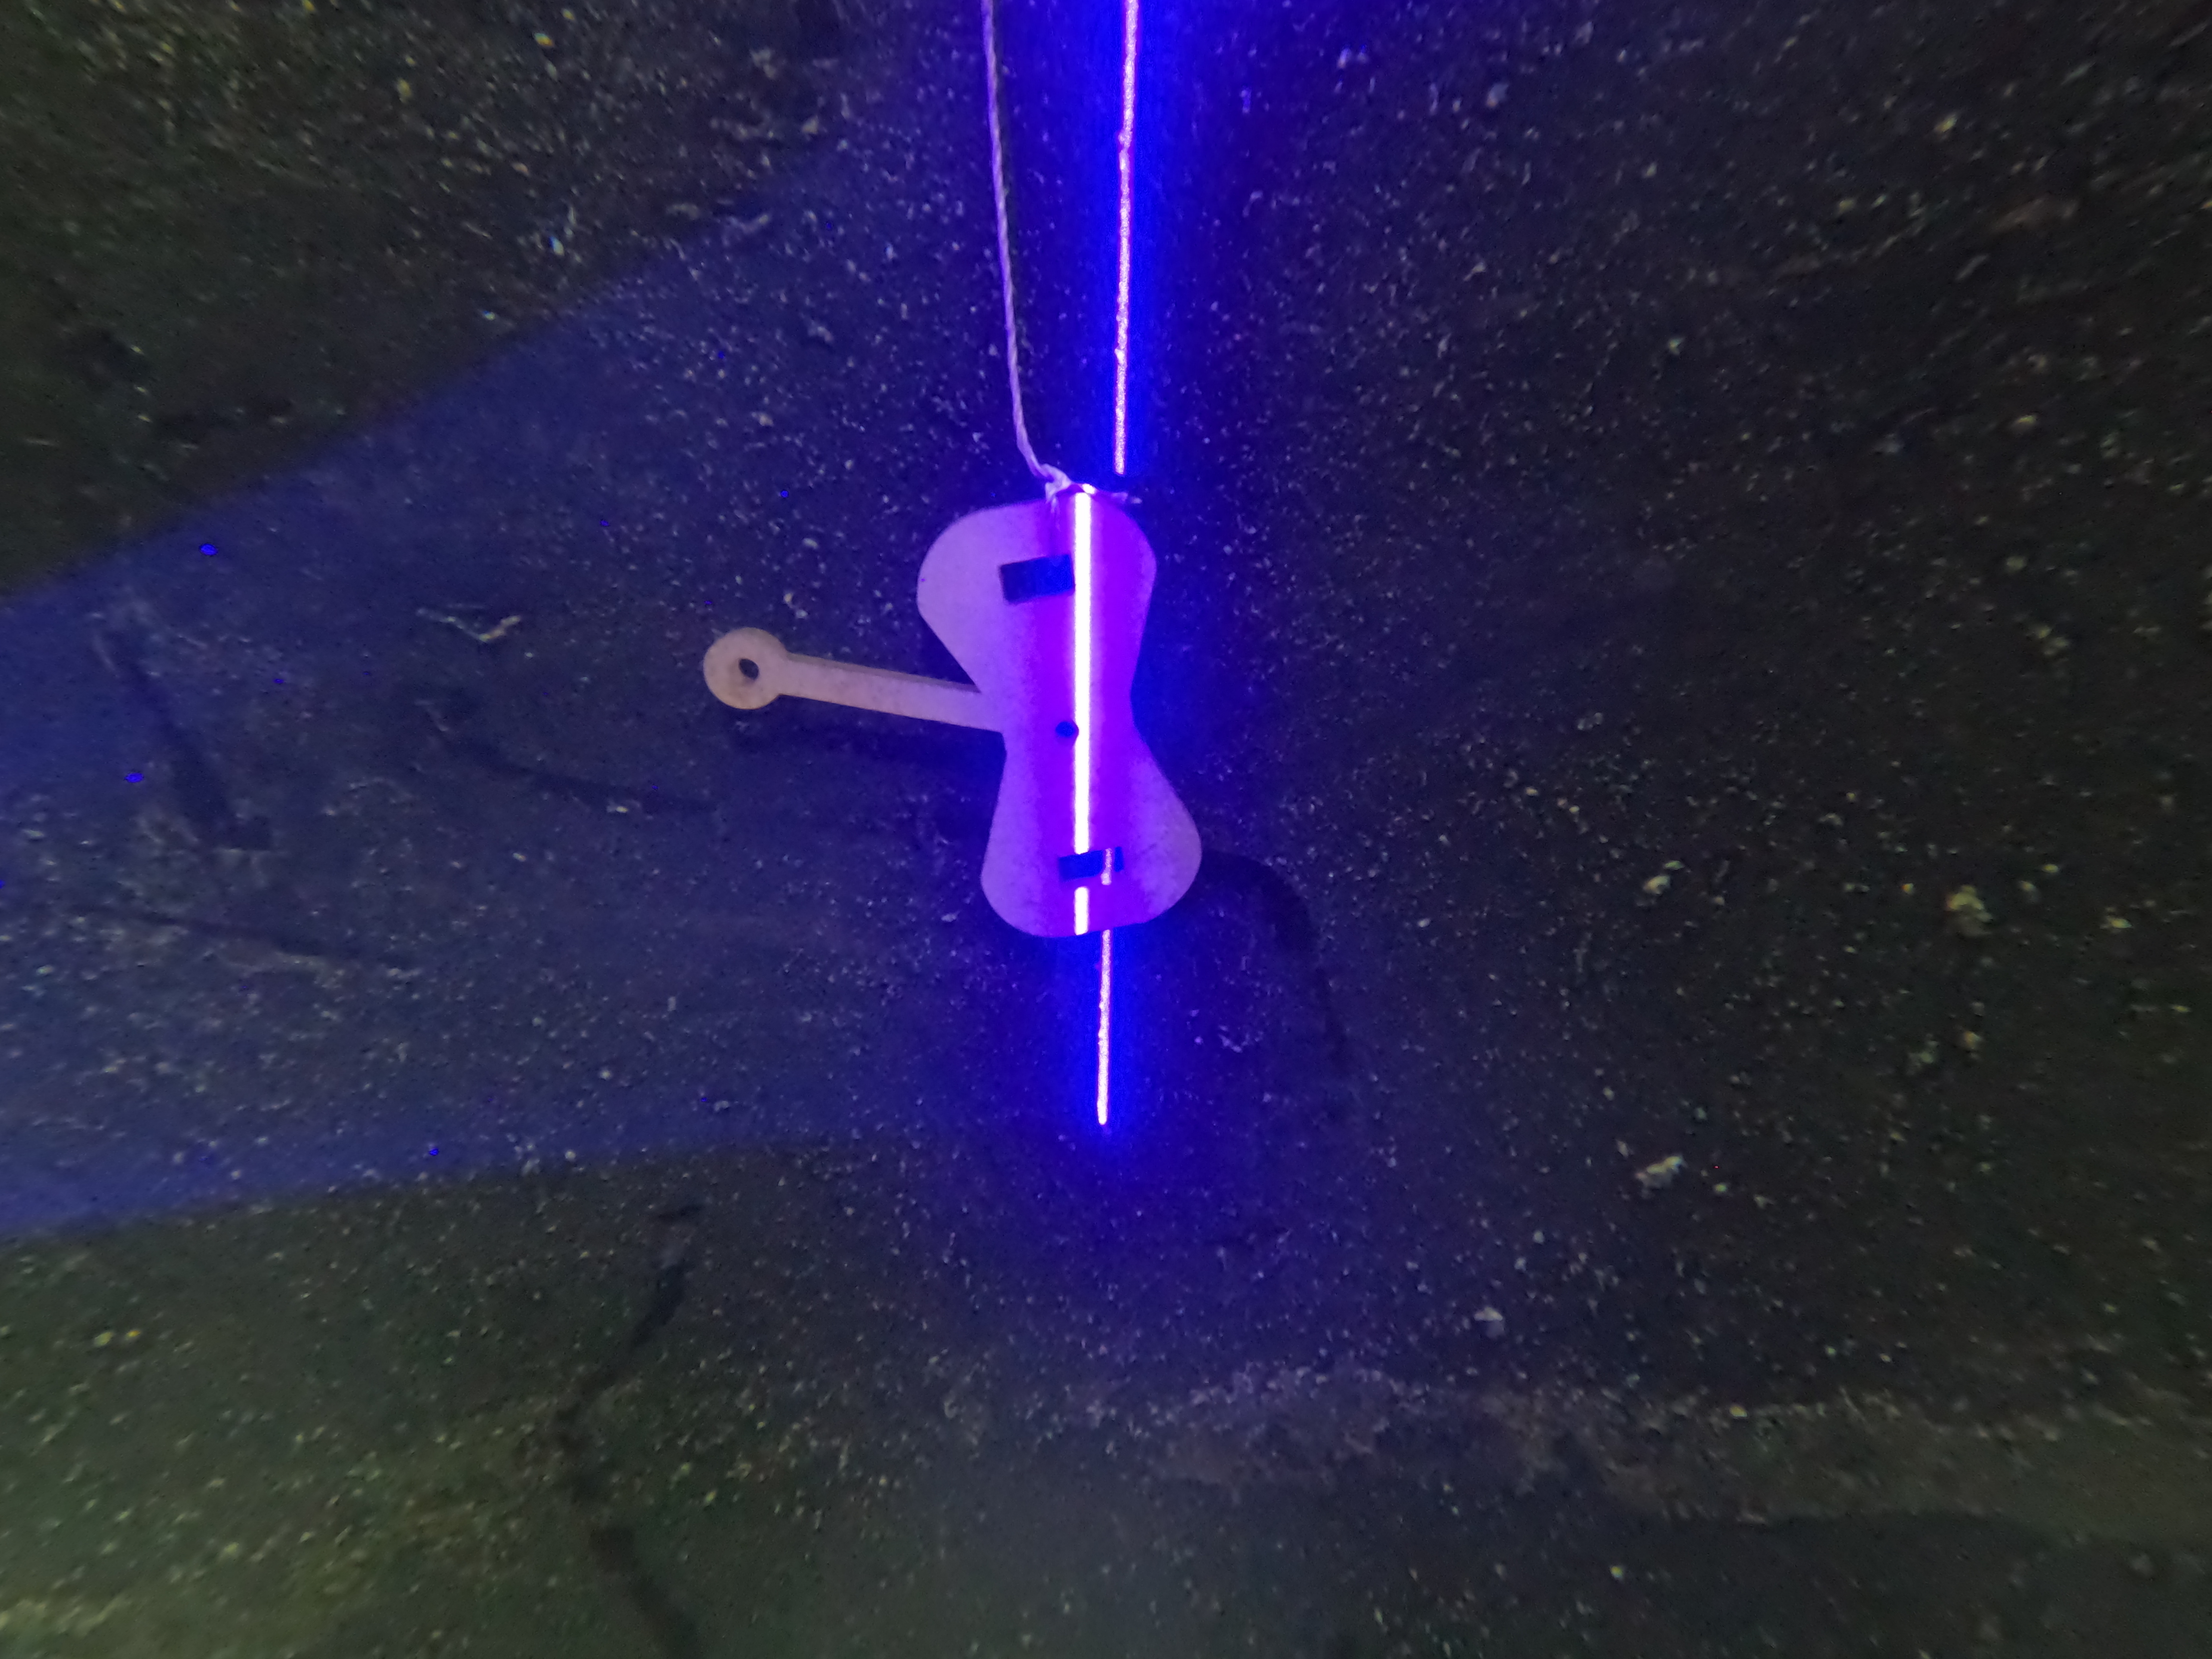

Supplement: Supplementary file 3191 [file G0015632.pdf › Level_2_1/G0015632.pdf]

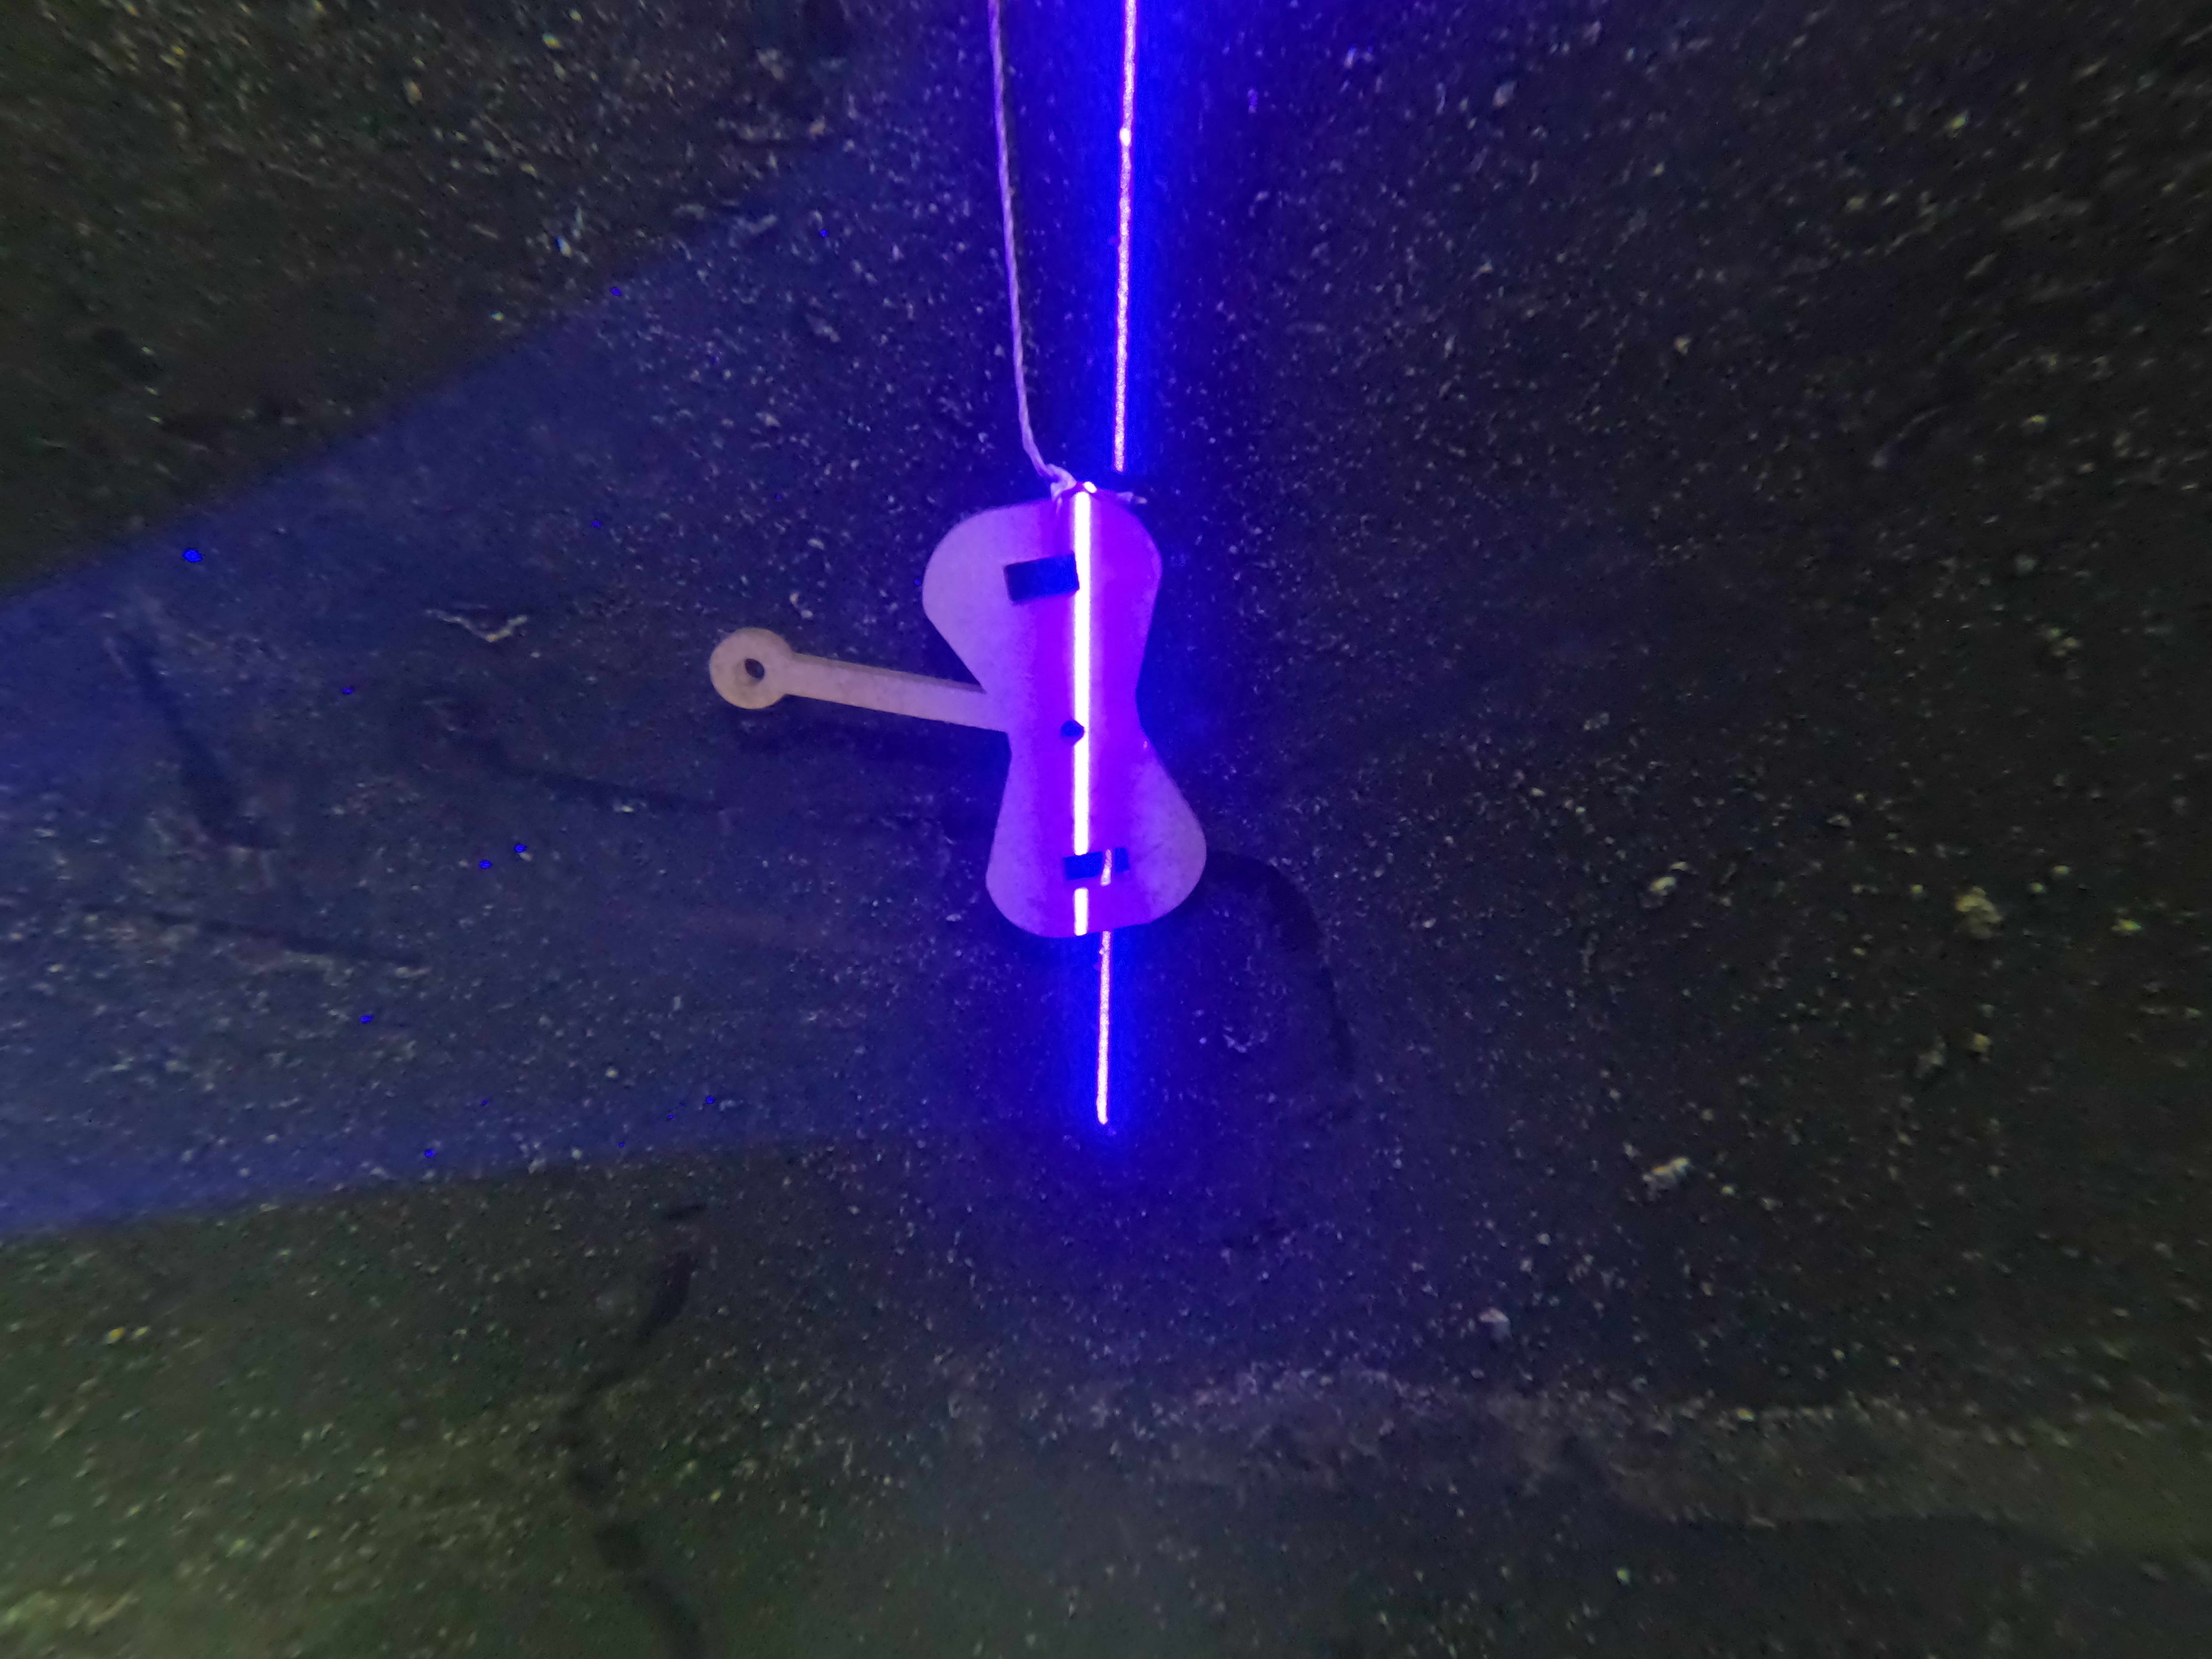

Supplement: Supplementary file 3192 [file G0015633.pdf › Level_2_1/G0015633.pdf]

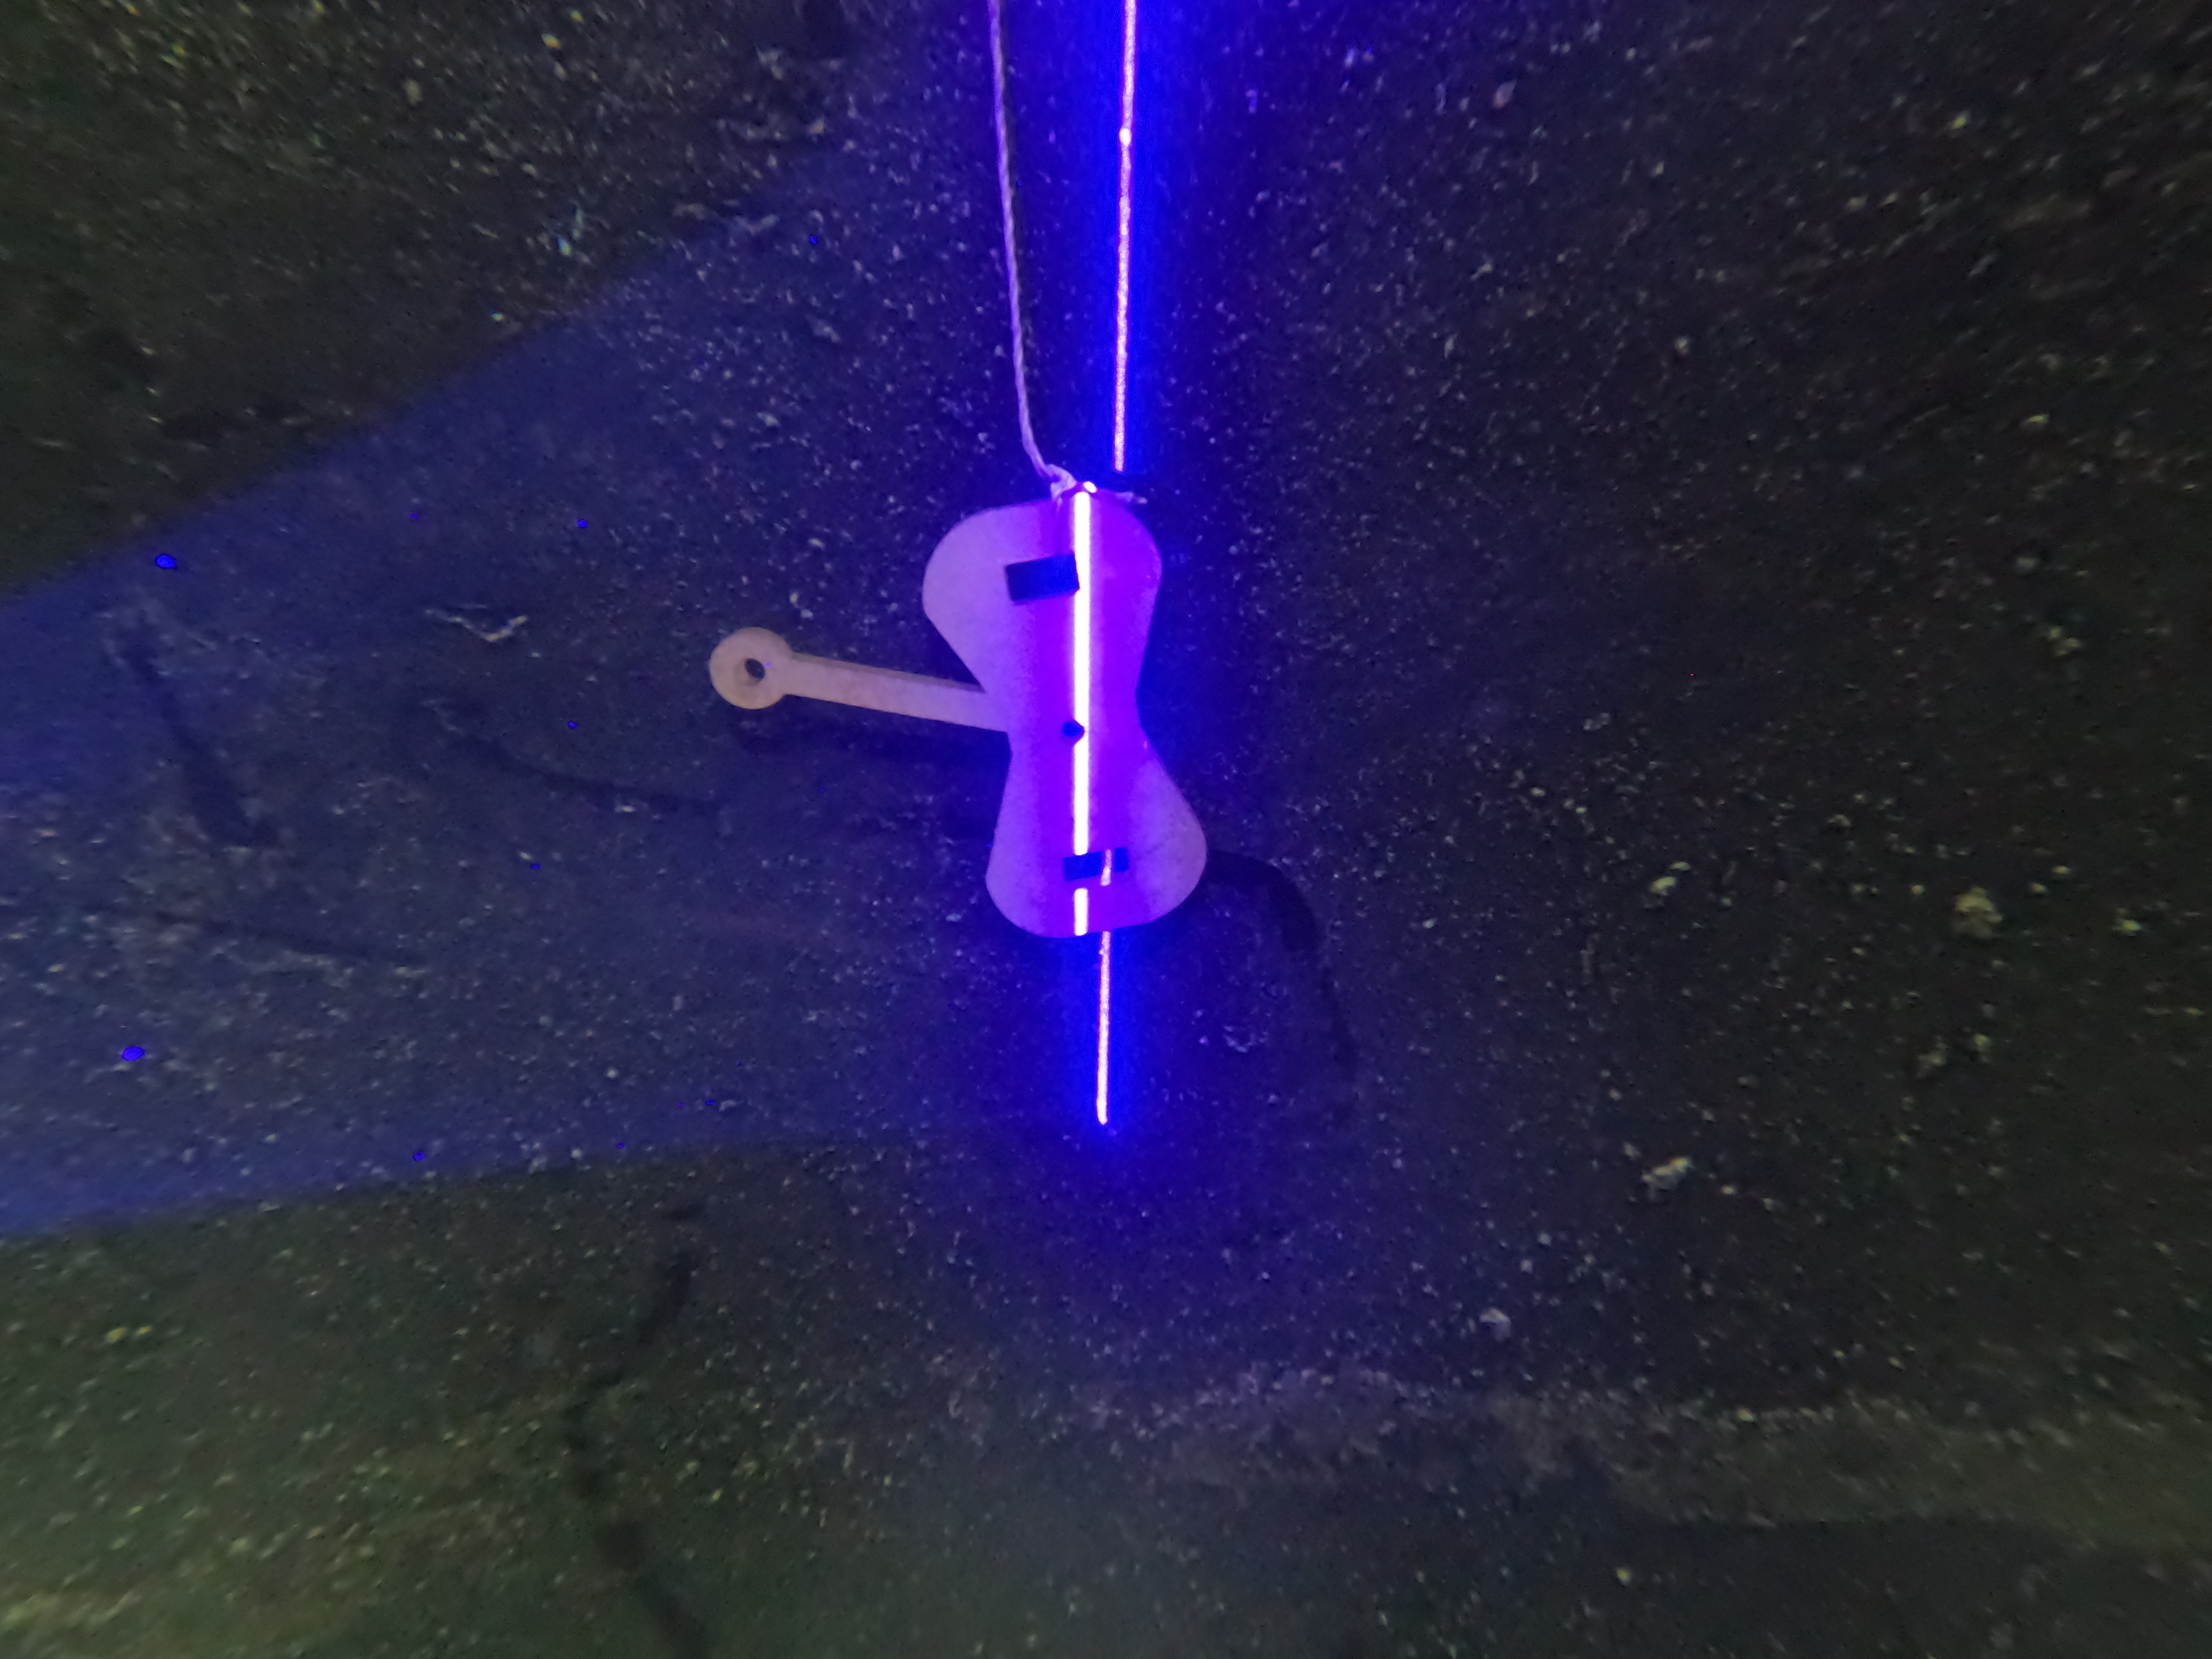

Supplement: Supplementary file 3193 [file G0015634.pdf › Level_2_1/G0015634.pdf]

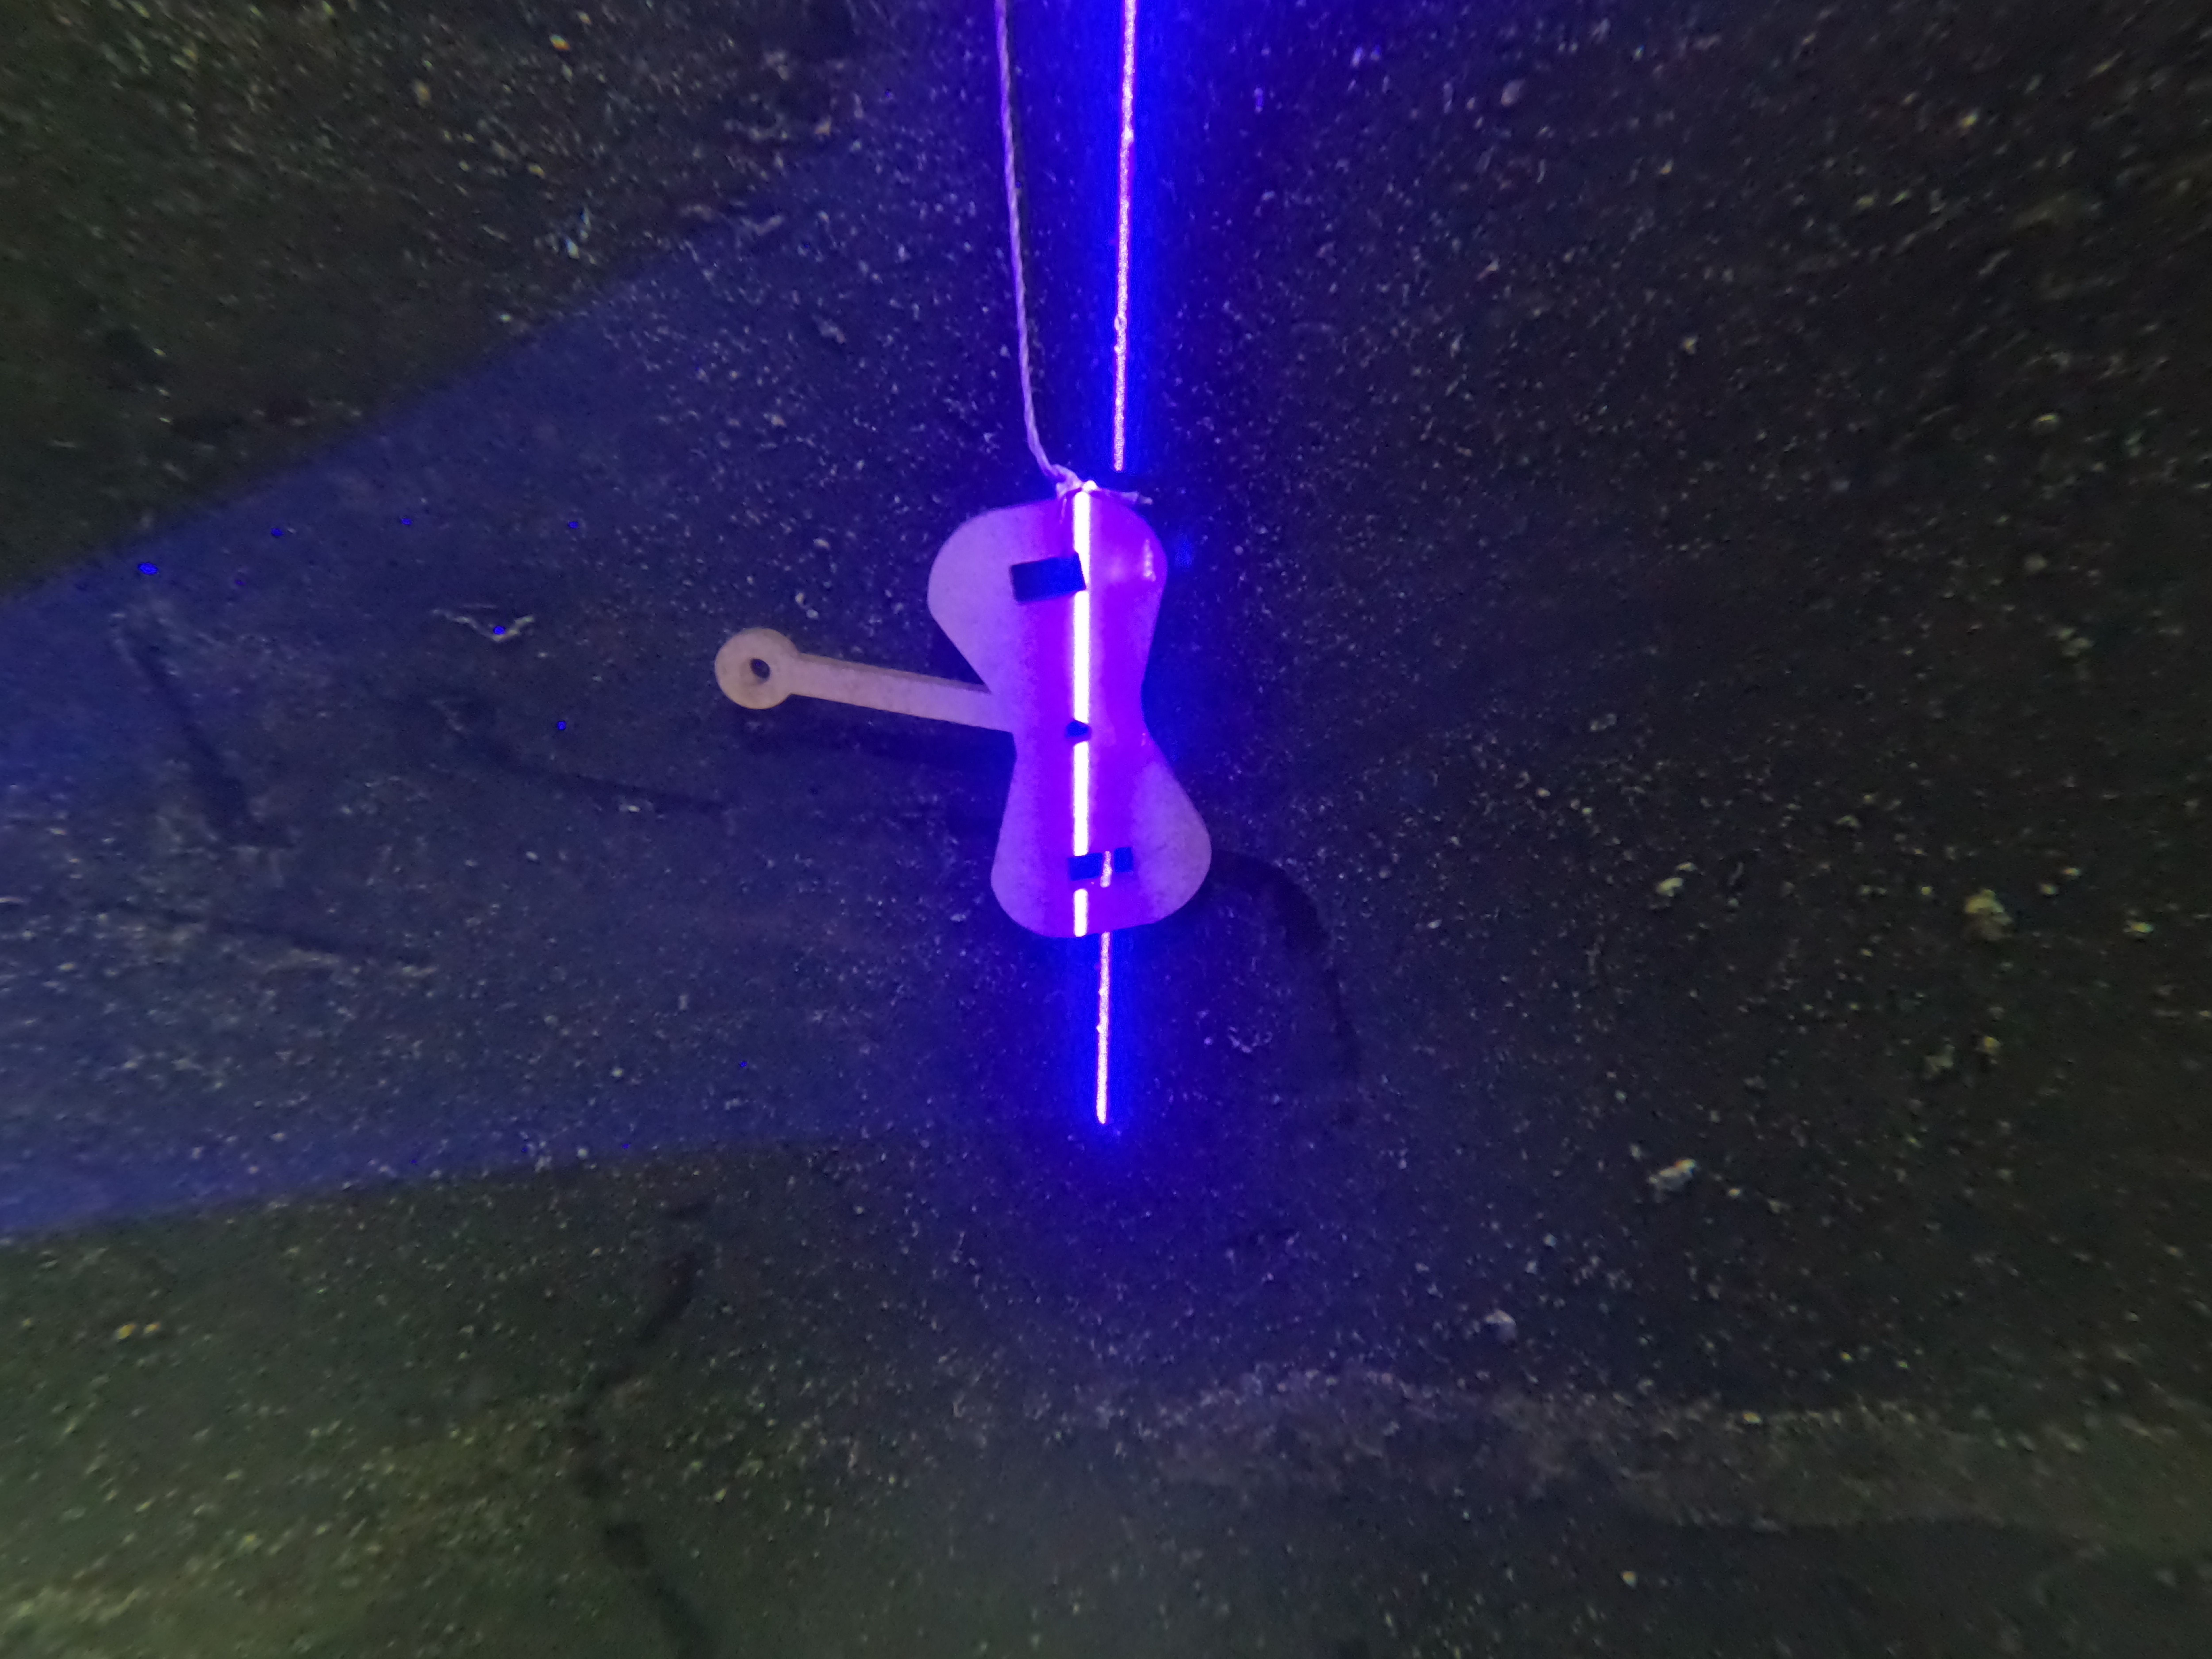

Supplement: Supplementary file 3194 [file G0015635.pdf › Level_2_1/G0015635.pdf]

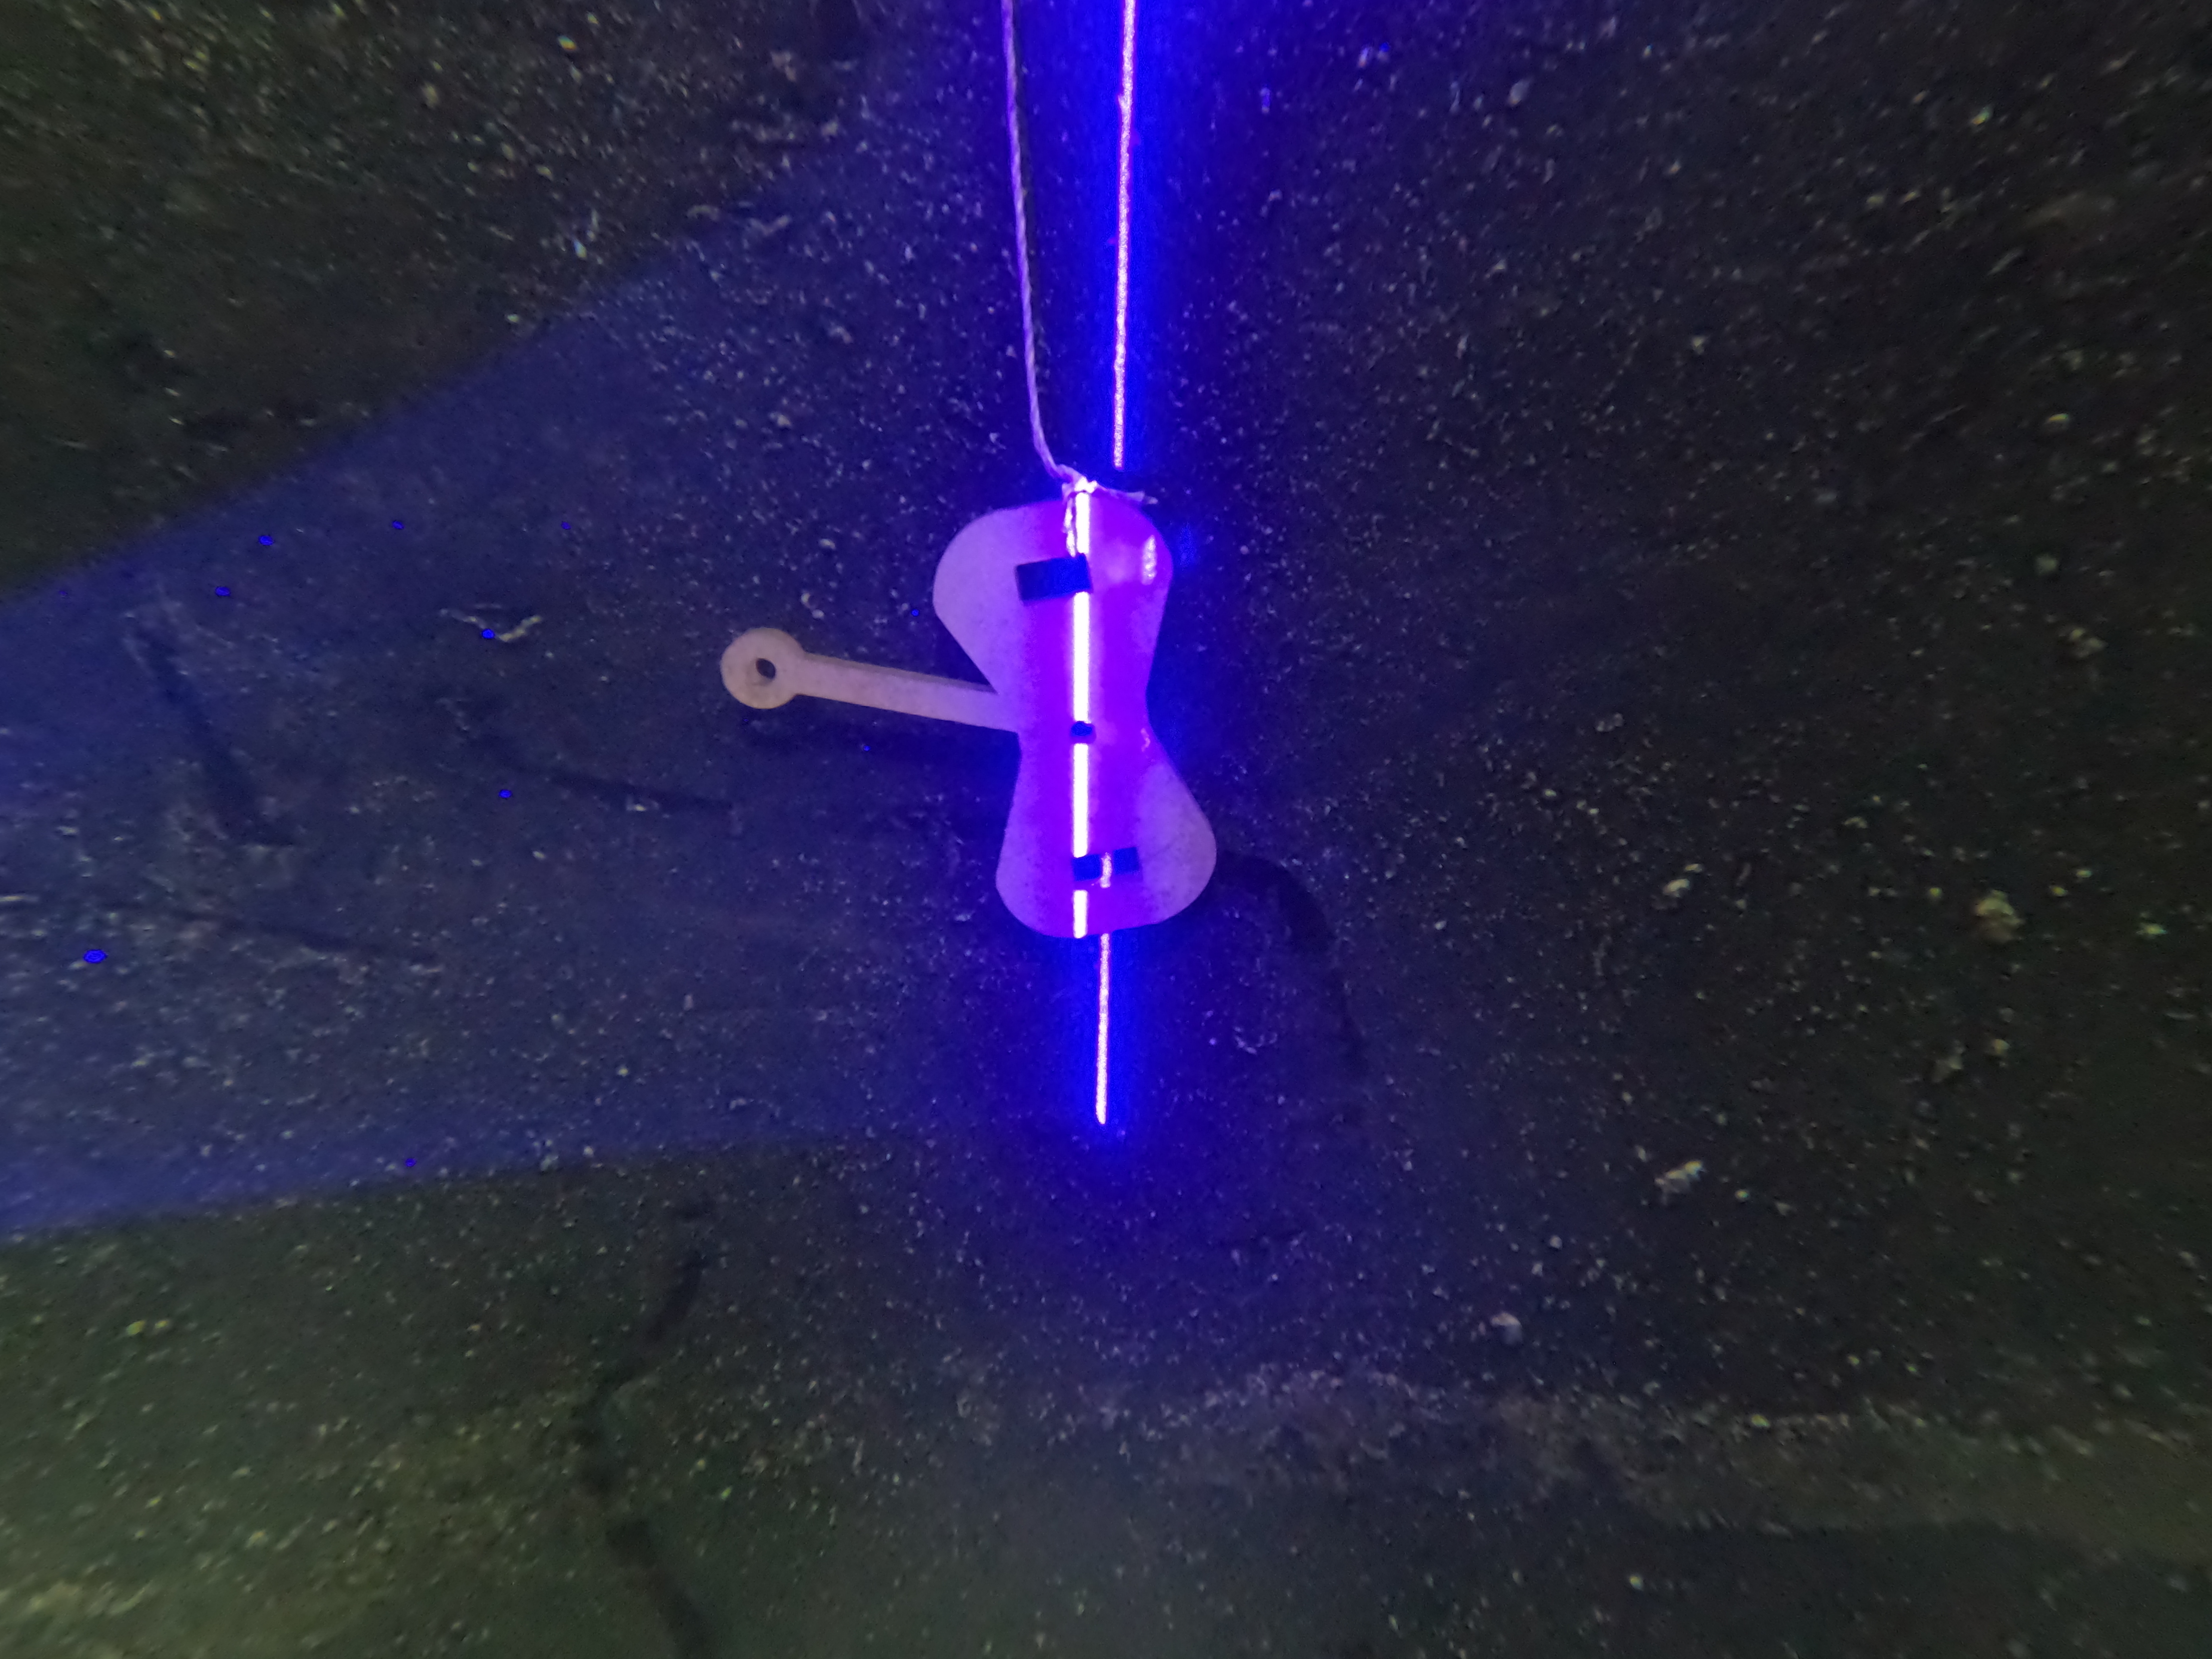

Supplement: Supplementary file 3195 [file G0015636.pdf › Level_2_1/G0015636.pdf]

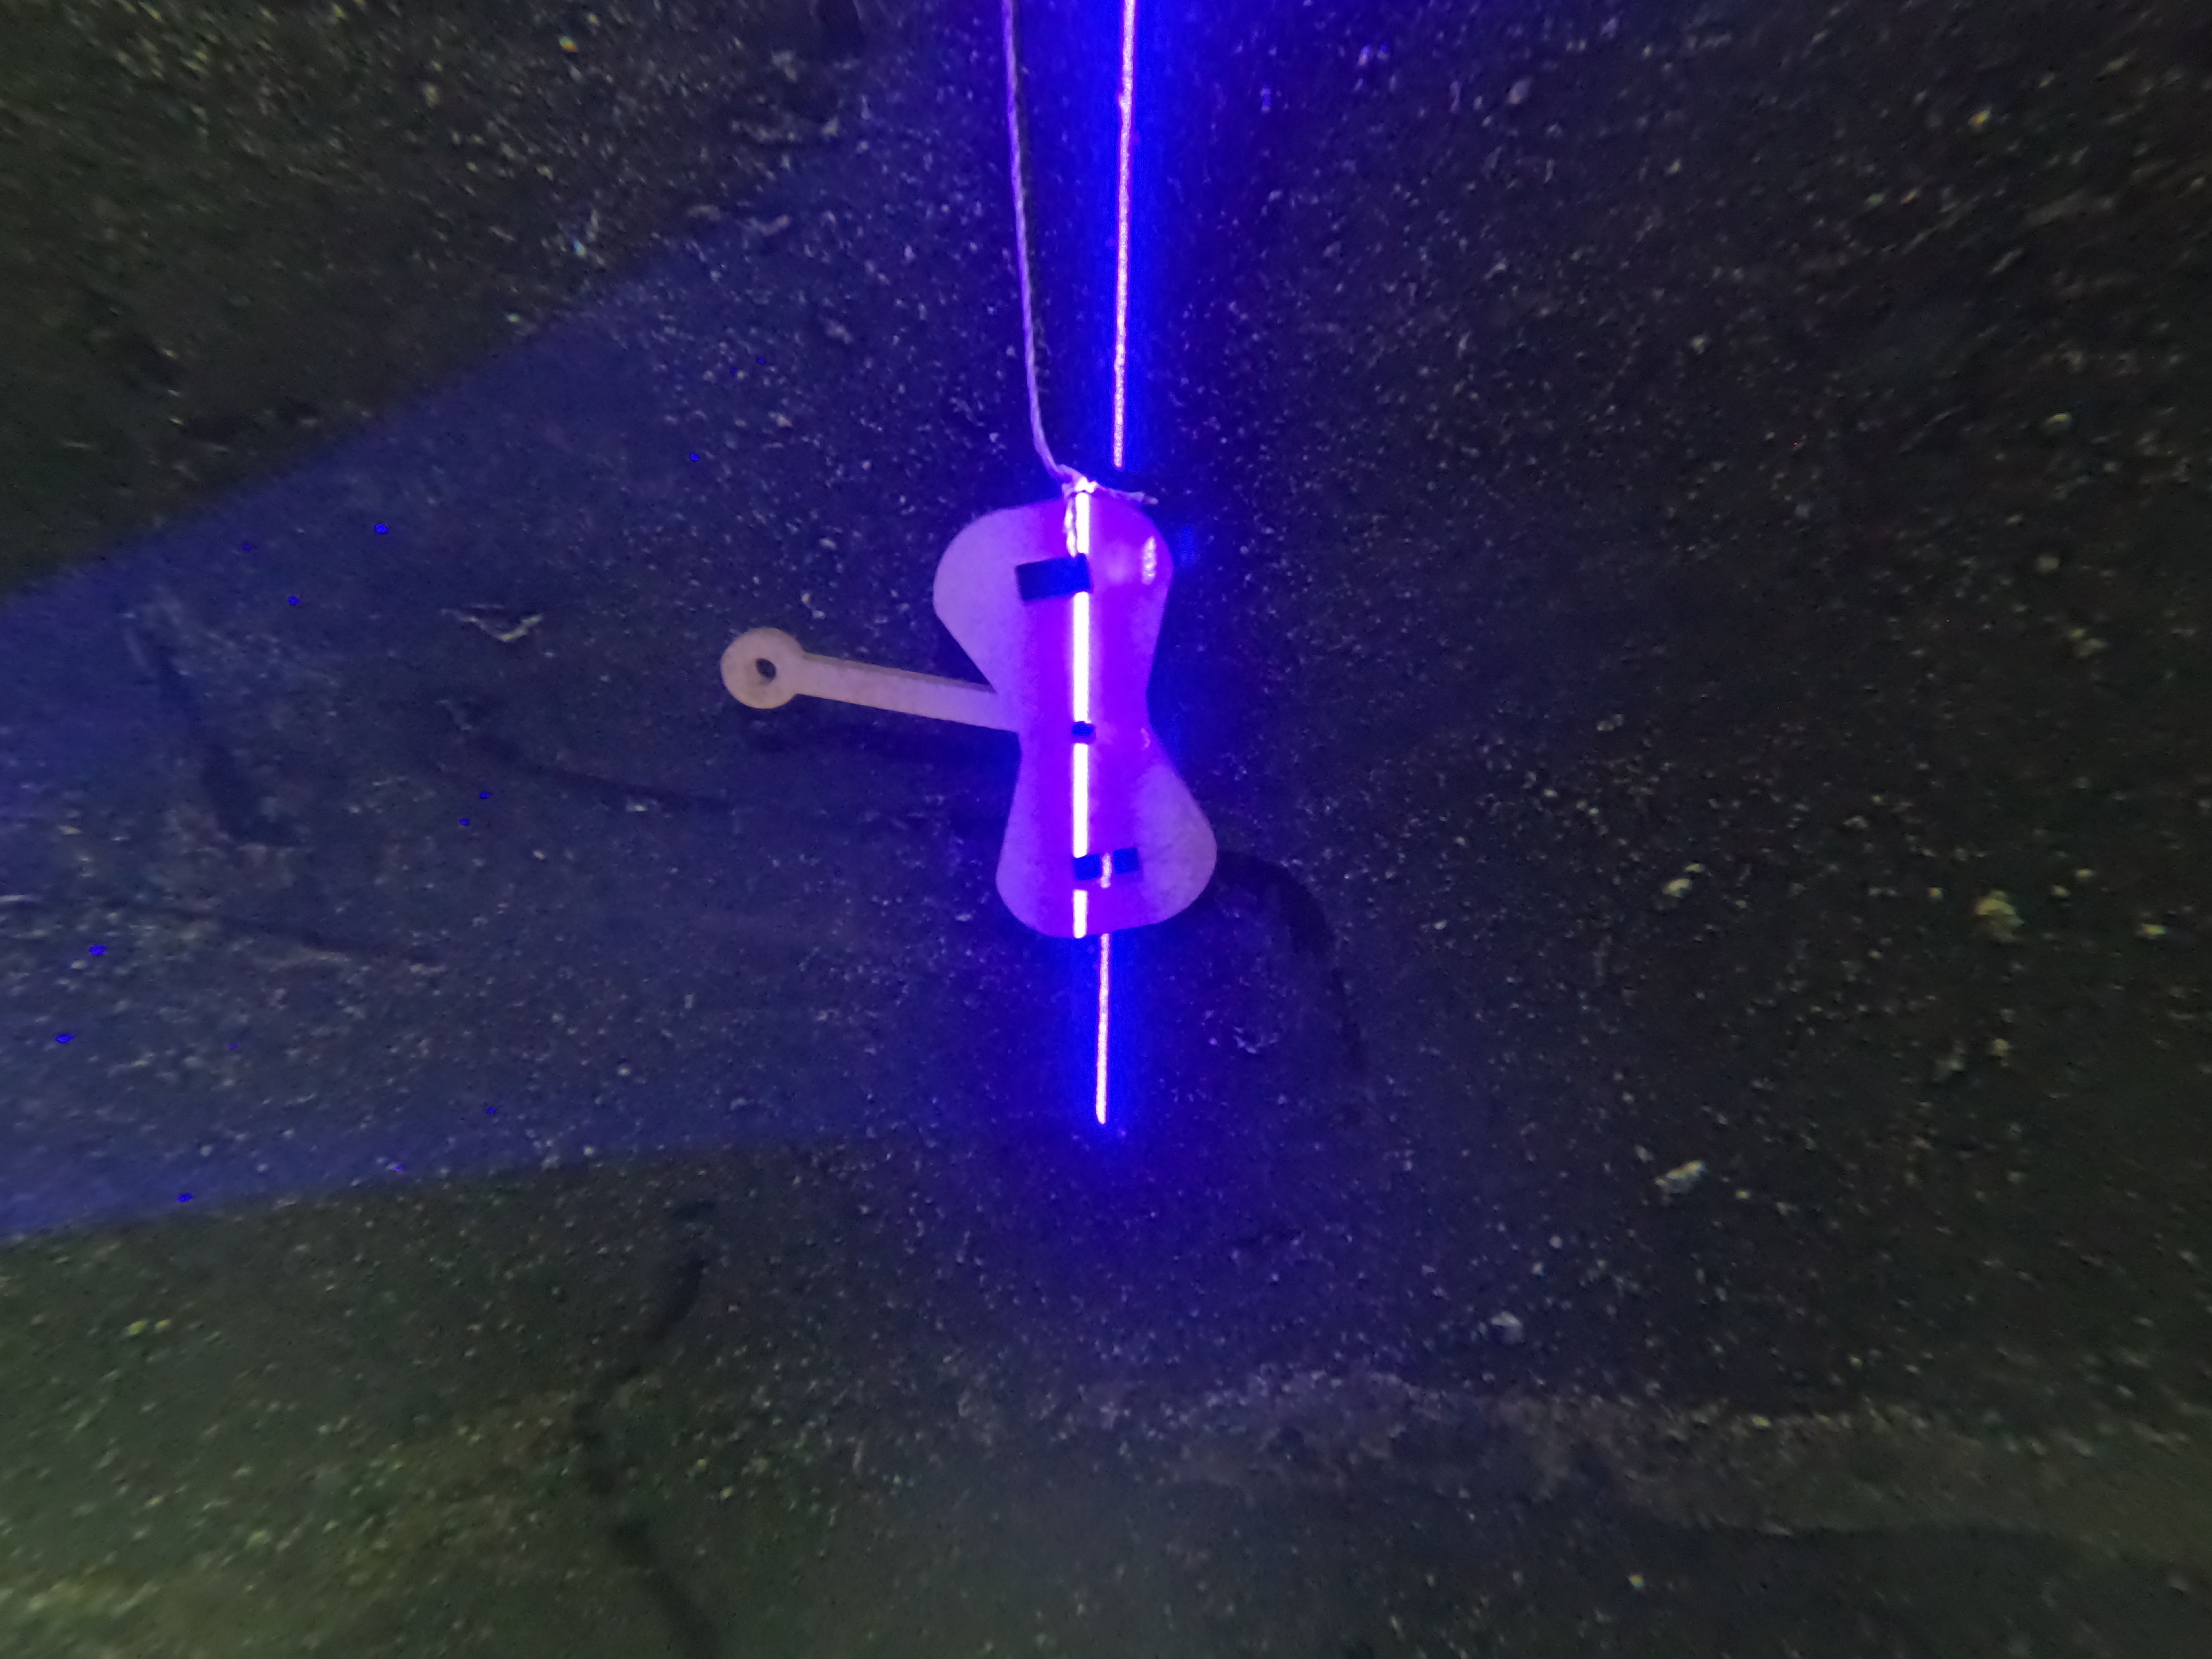

Supplement: Supplementary file 3196 [file G0015637.pdf › Level_2_1/G0015637.pdf]

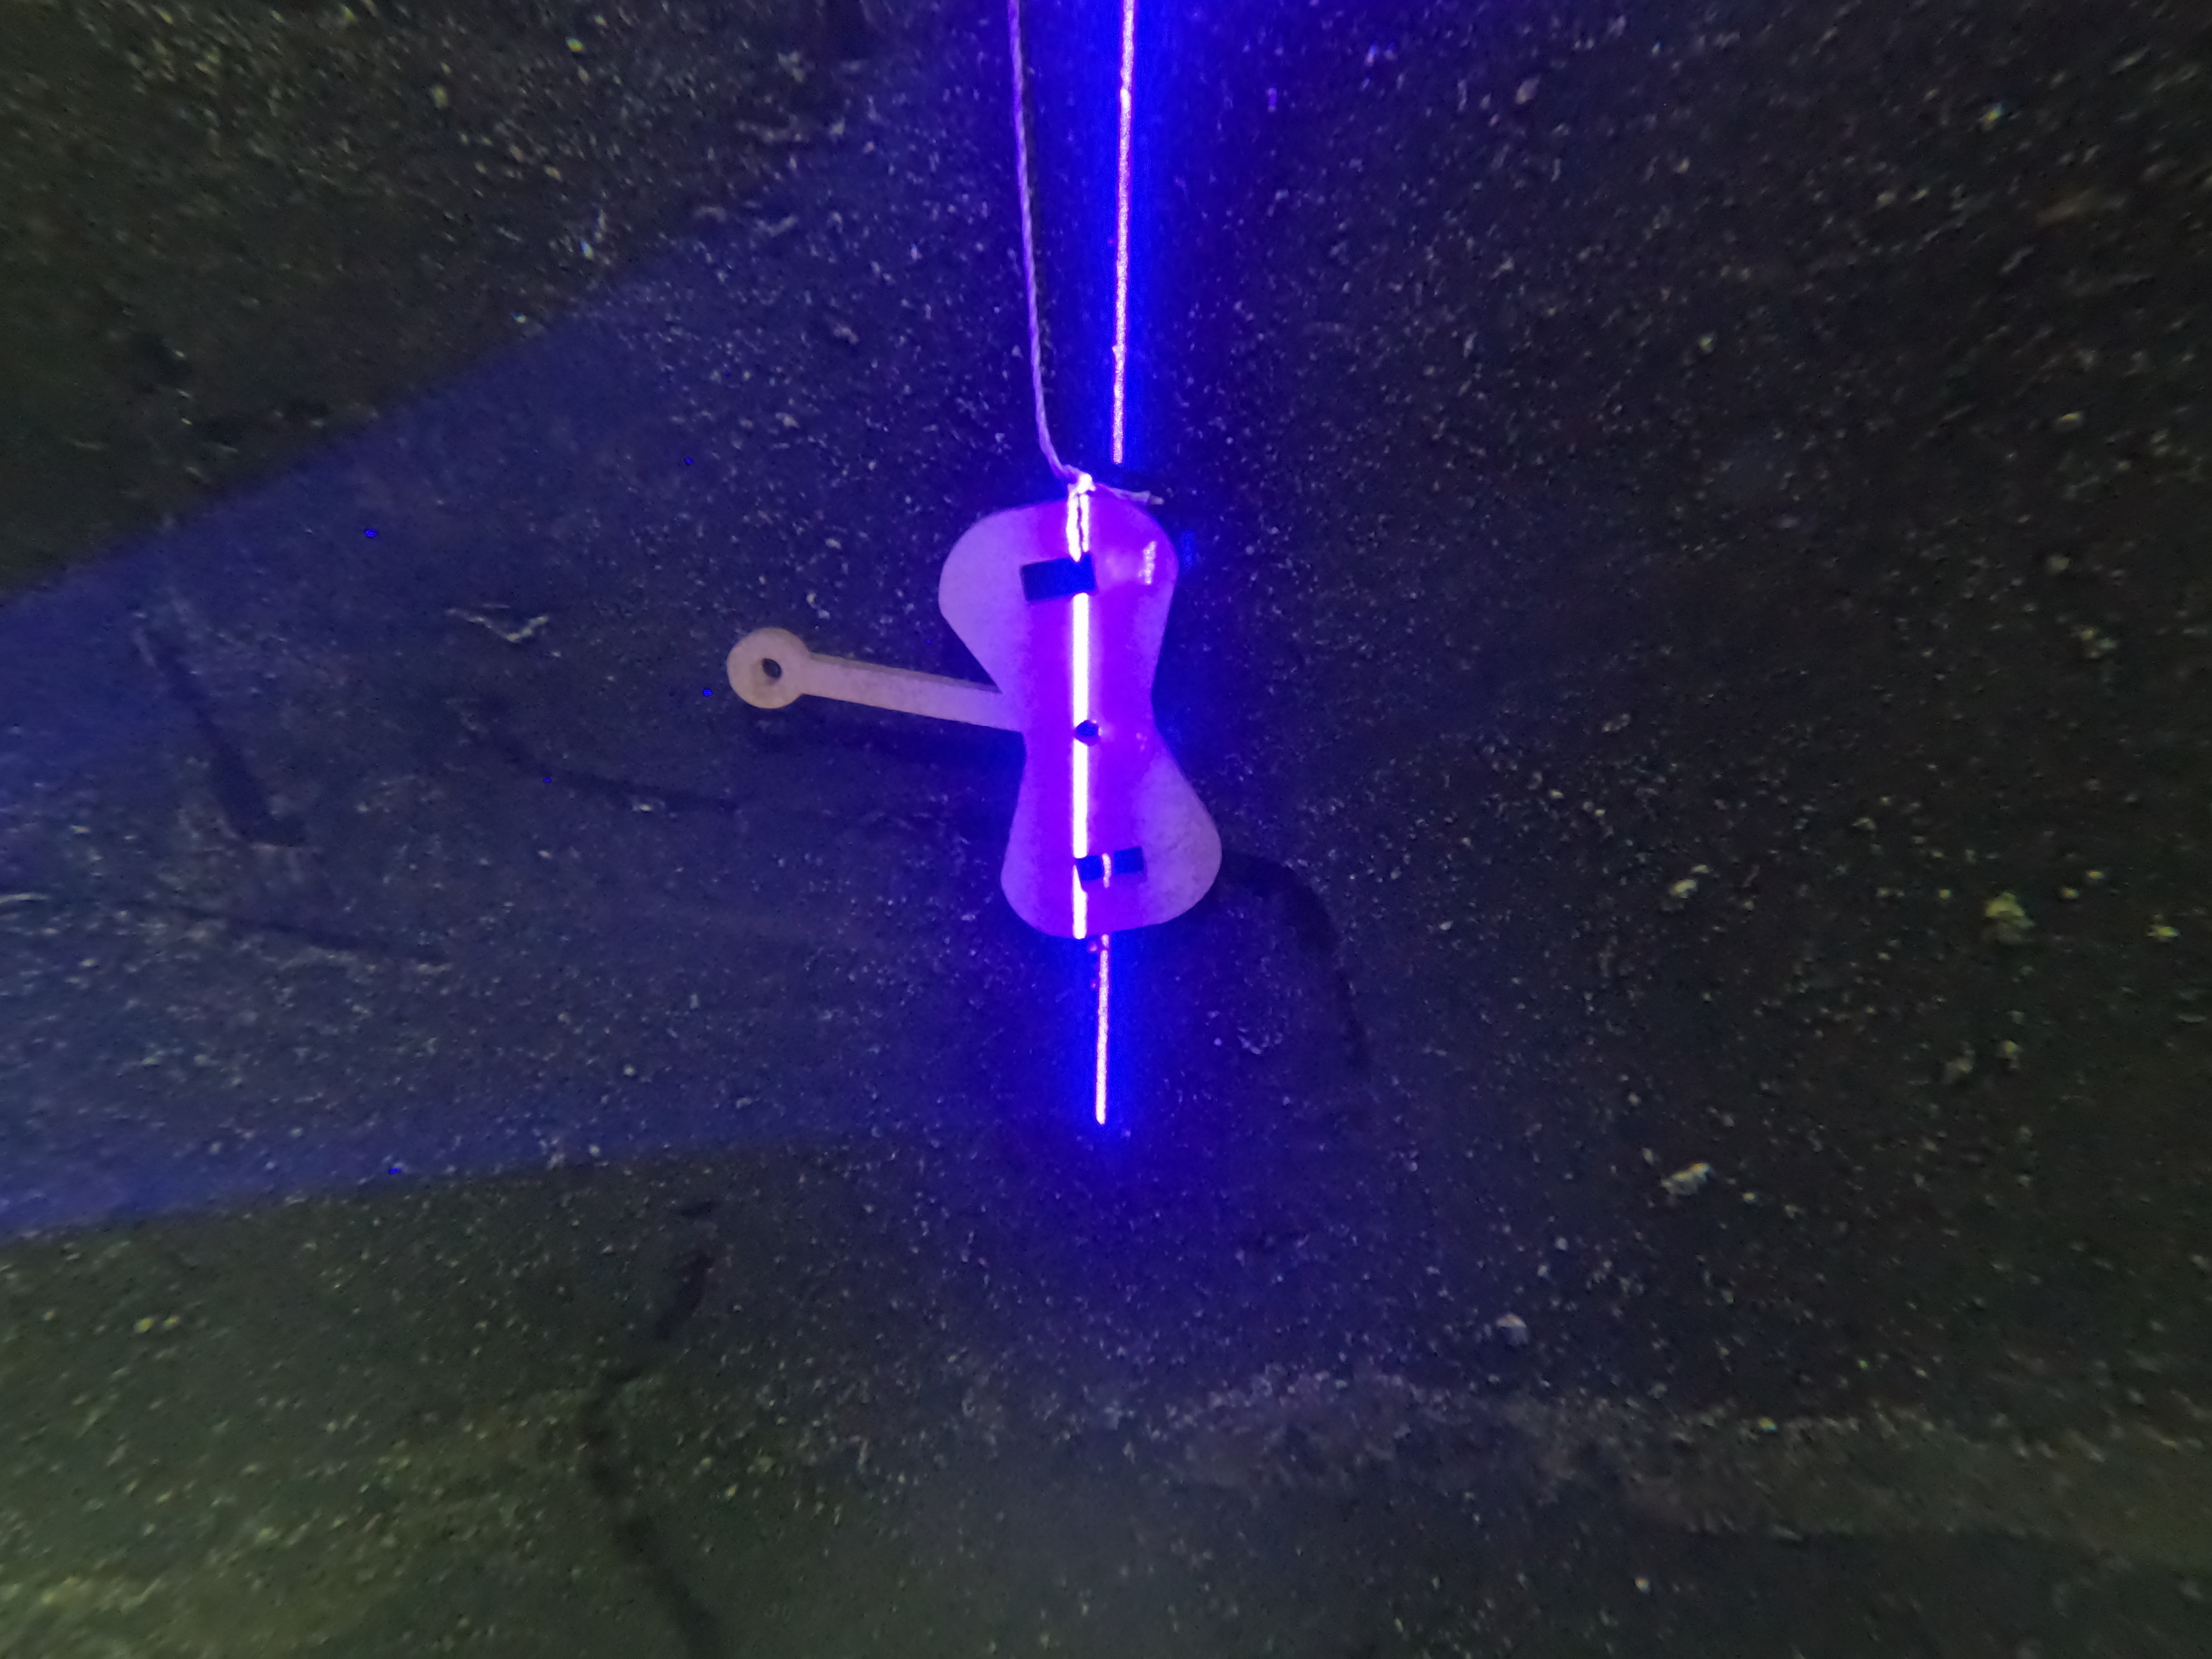

Supplement: Supplementary file 3197 [file G0015638.pdf › Level_2_1/G0015638.pdf]

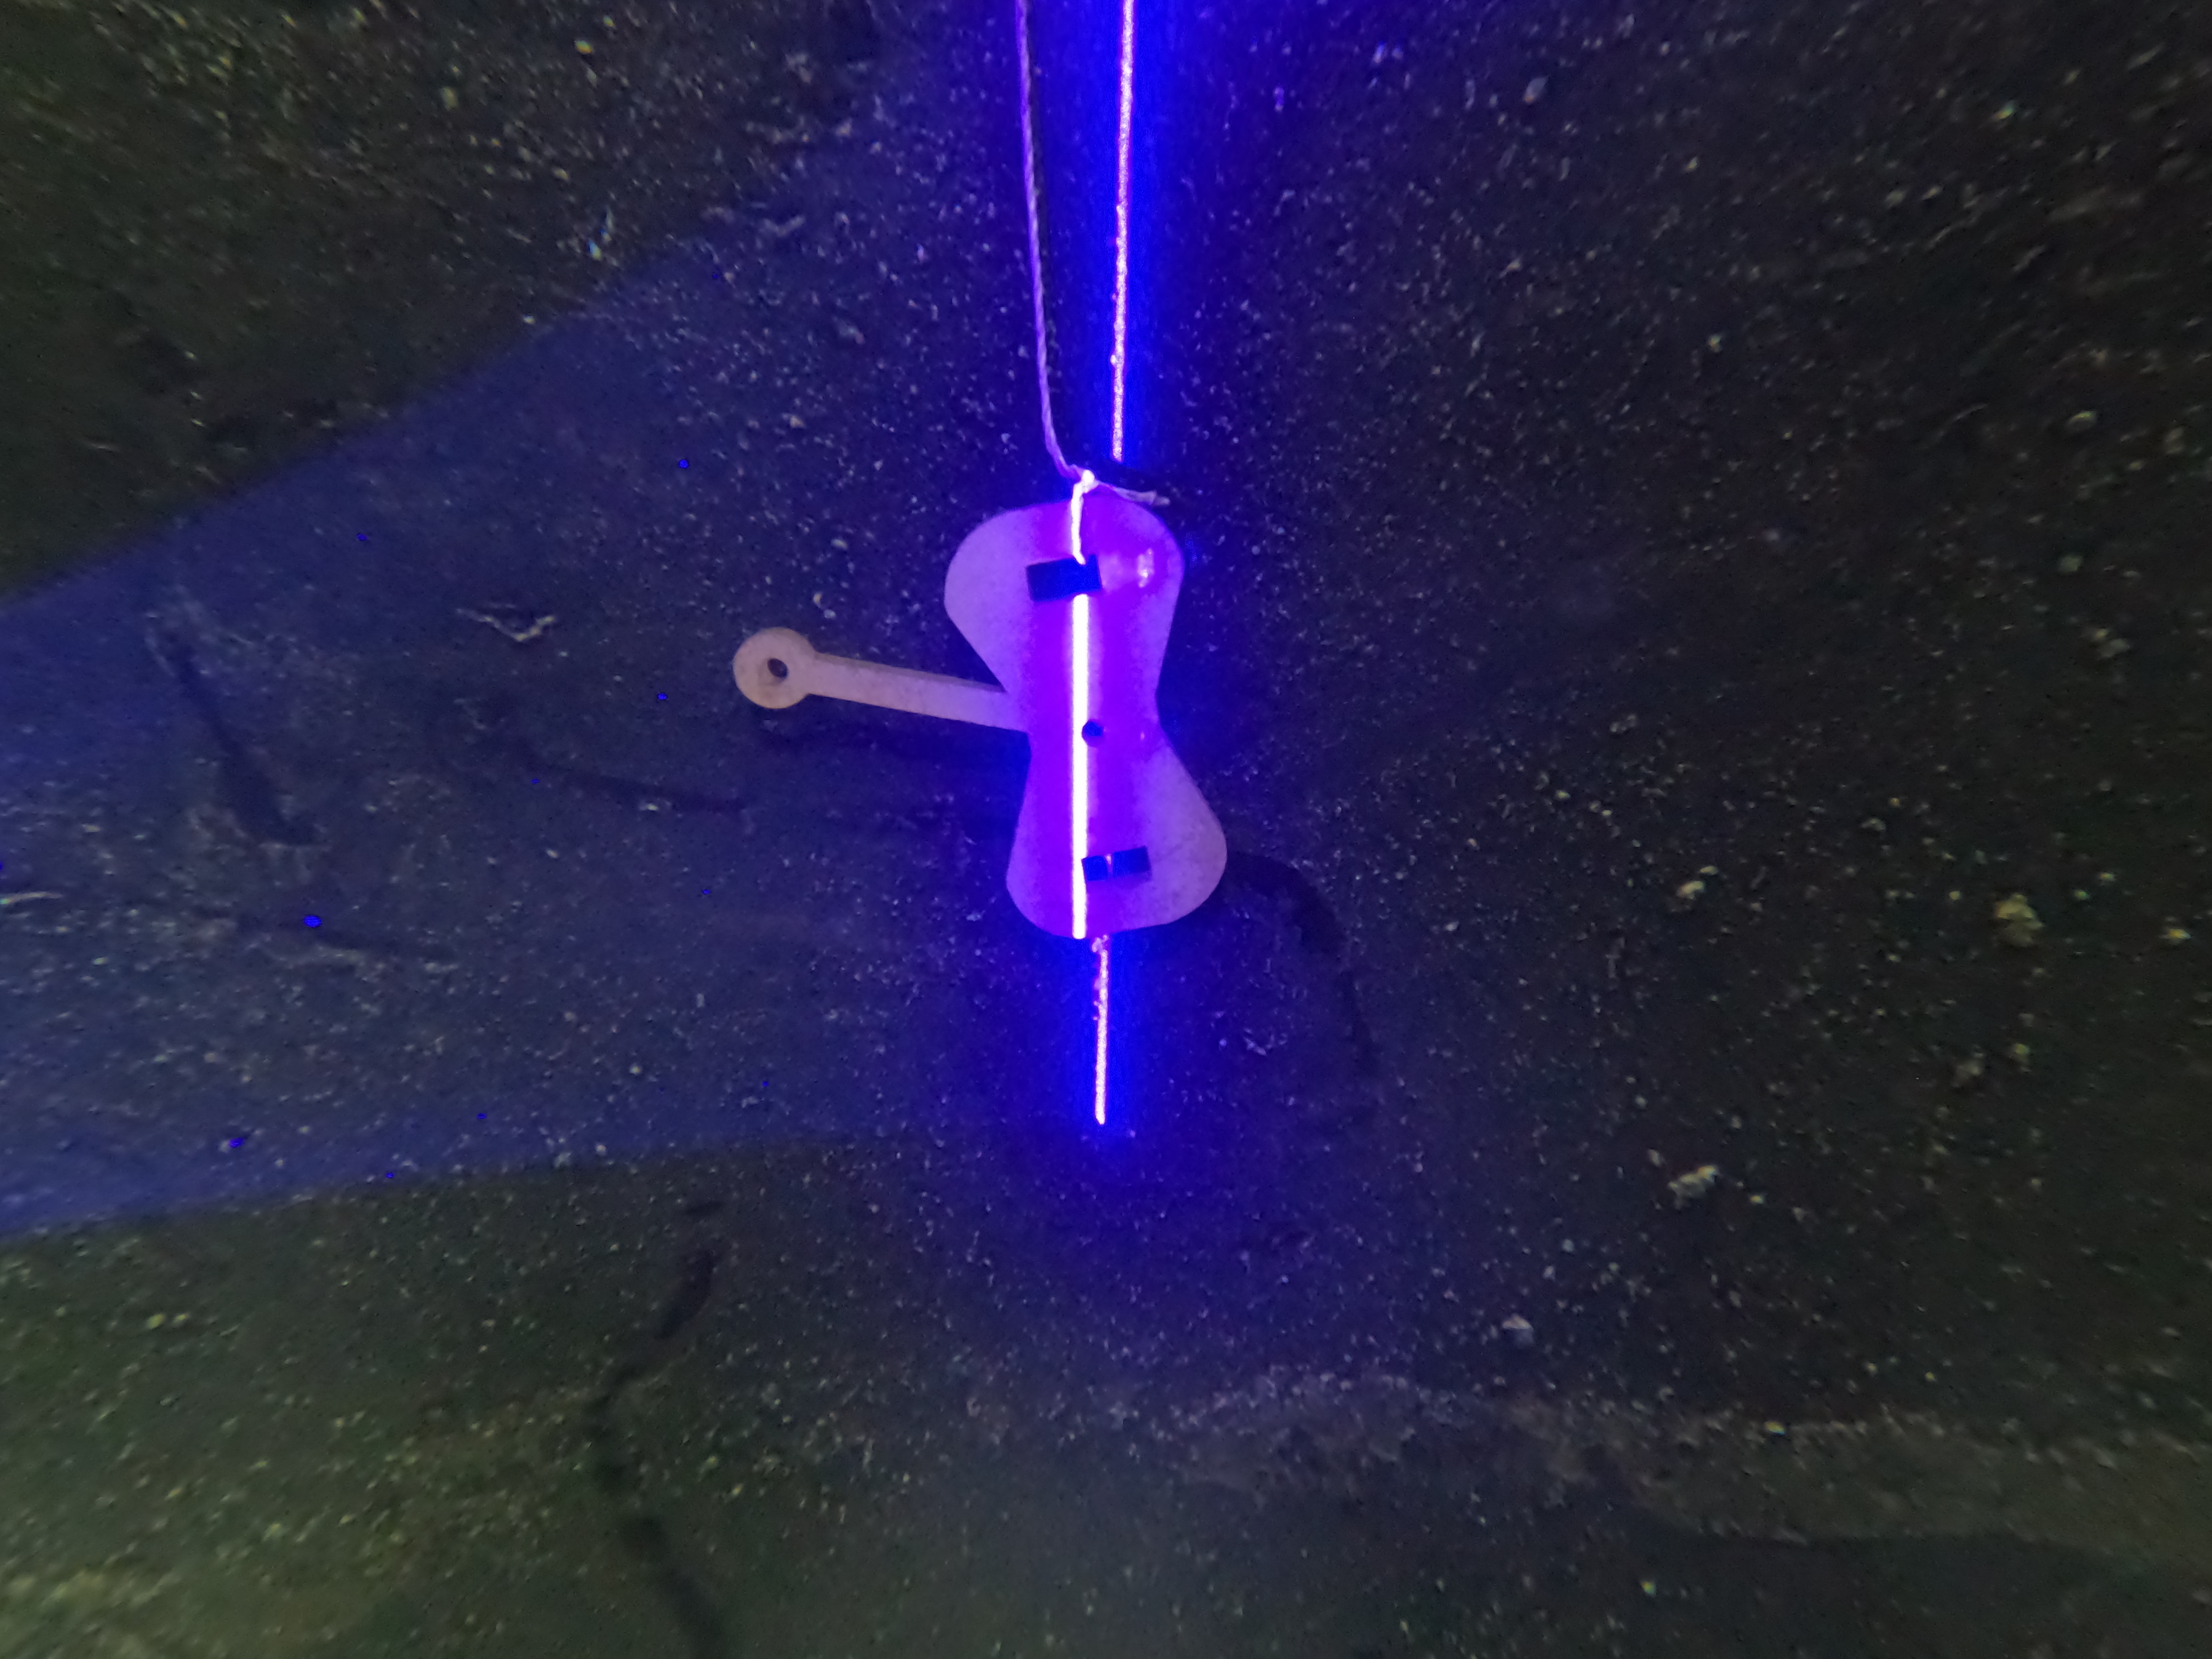

Supplement: Supplementary file 3198 [file G0015639.pdf › Level_2_1/G0015639.pdf]

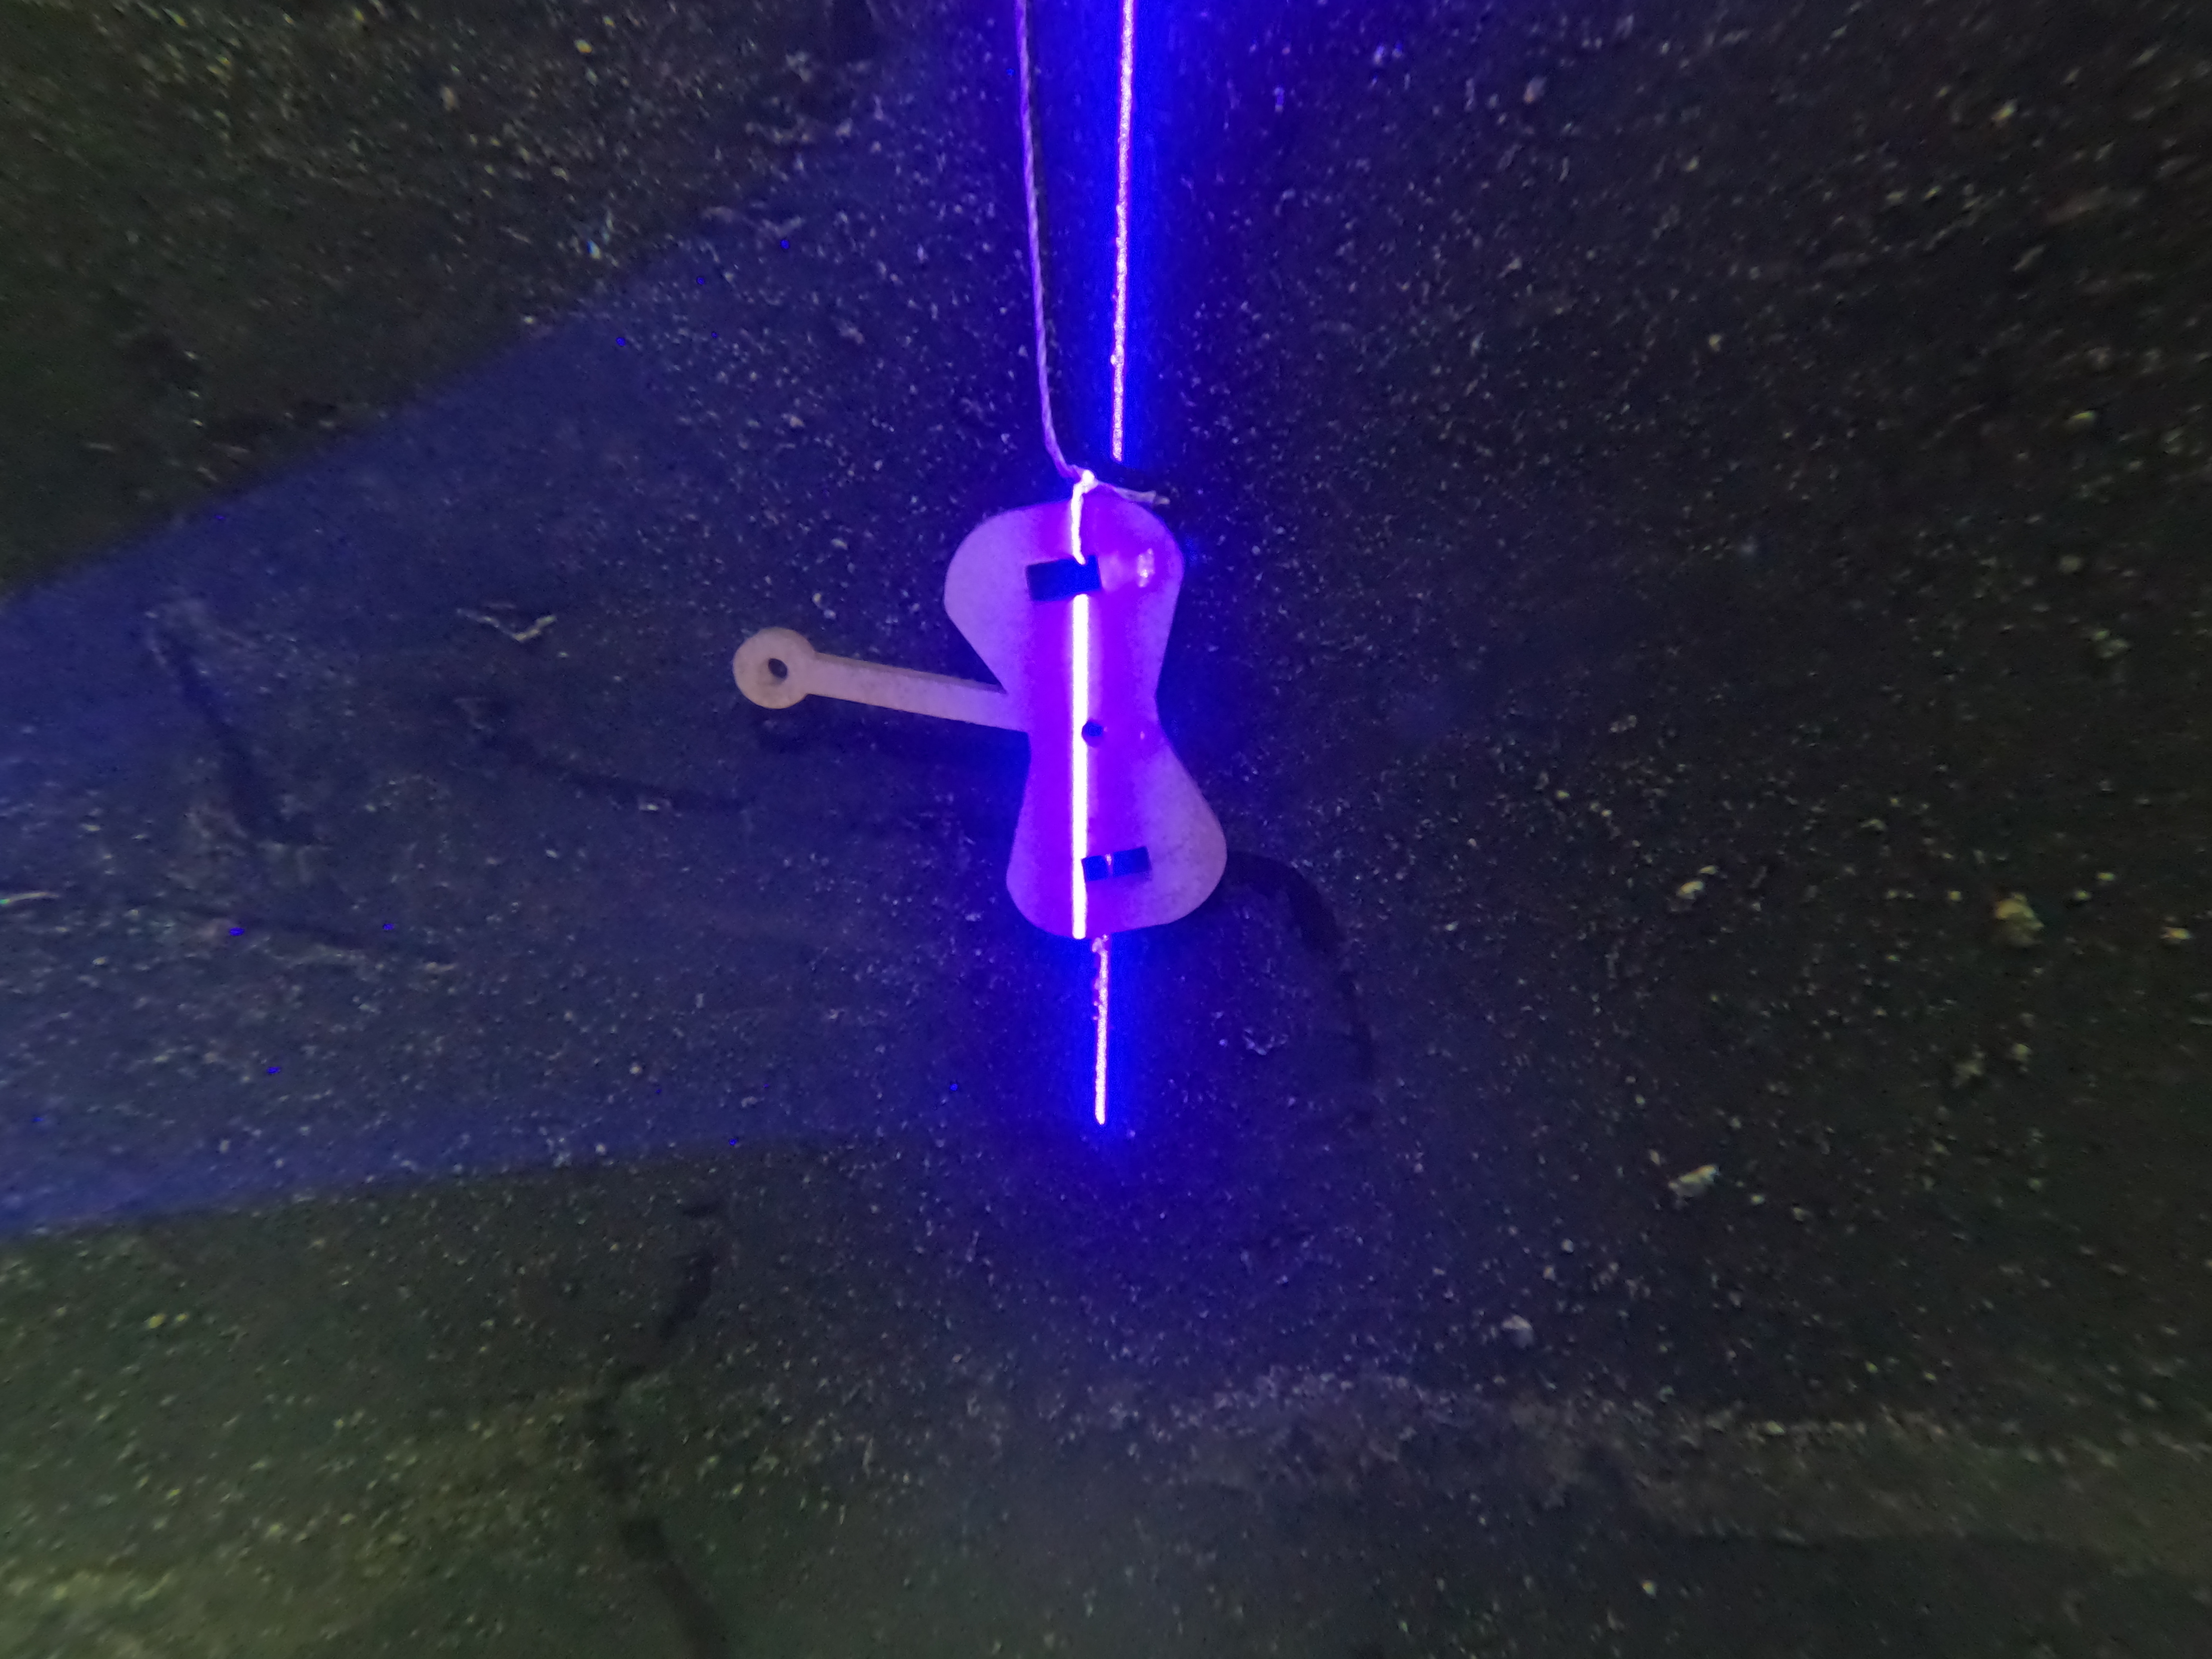

Supplement: Supplementary file 3199 [file G0015640.pdf › Level_2_1/G0015640.pdf]

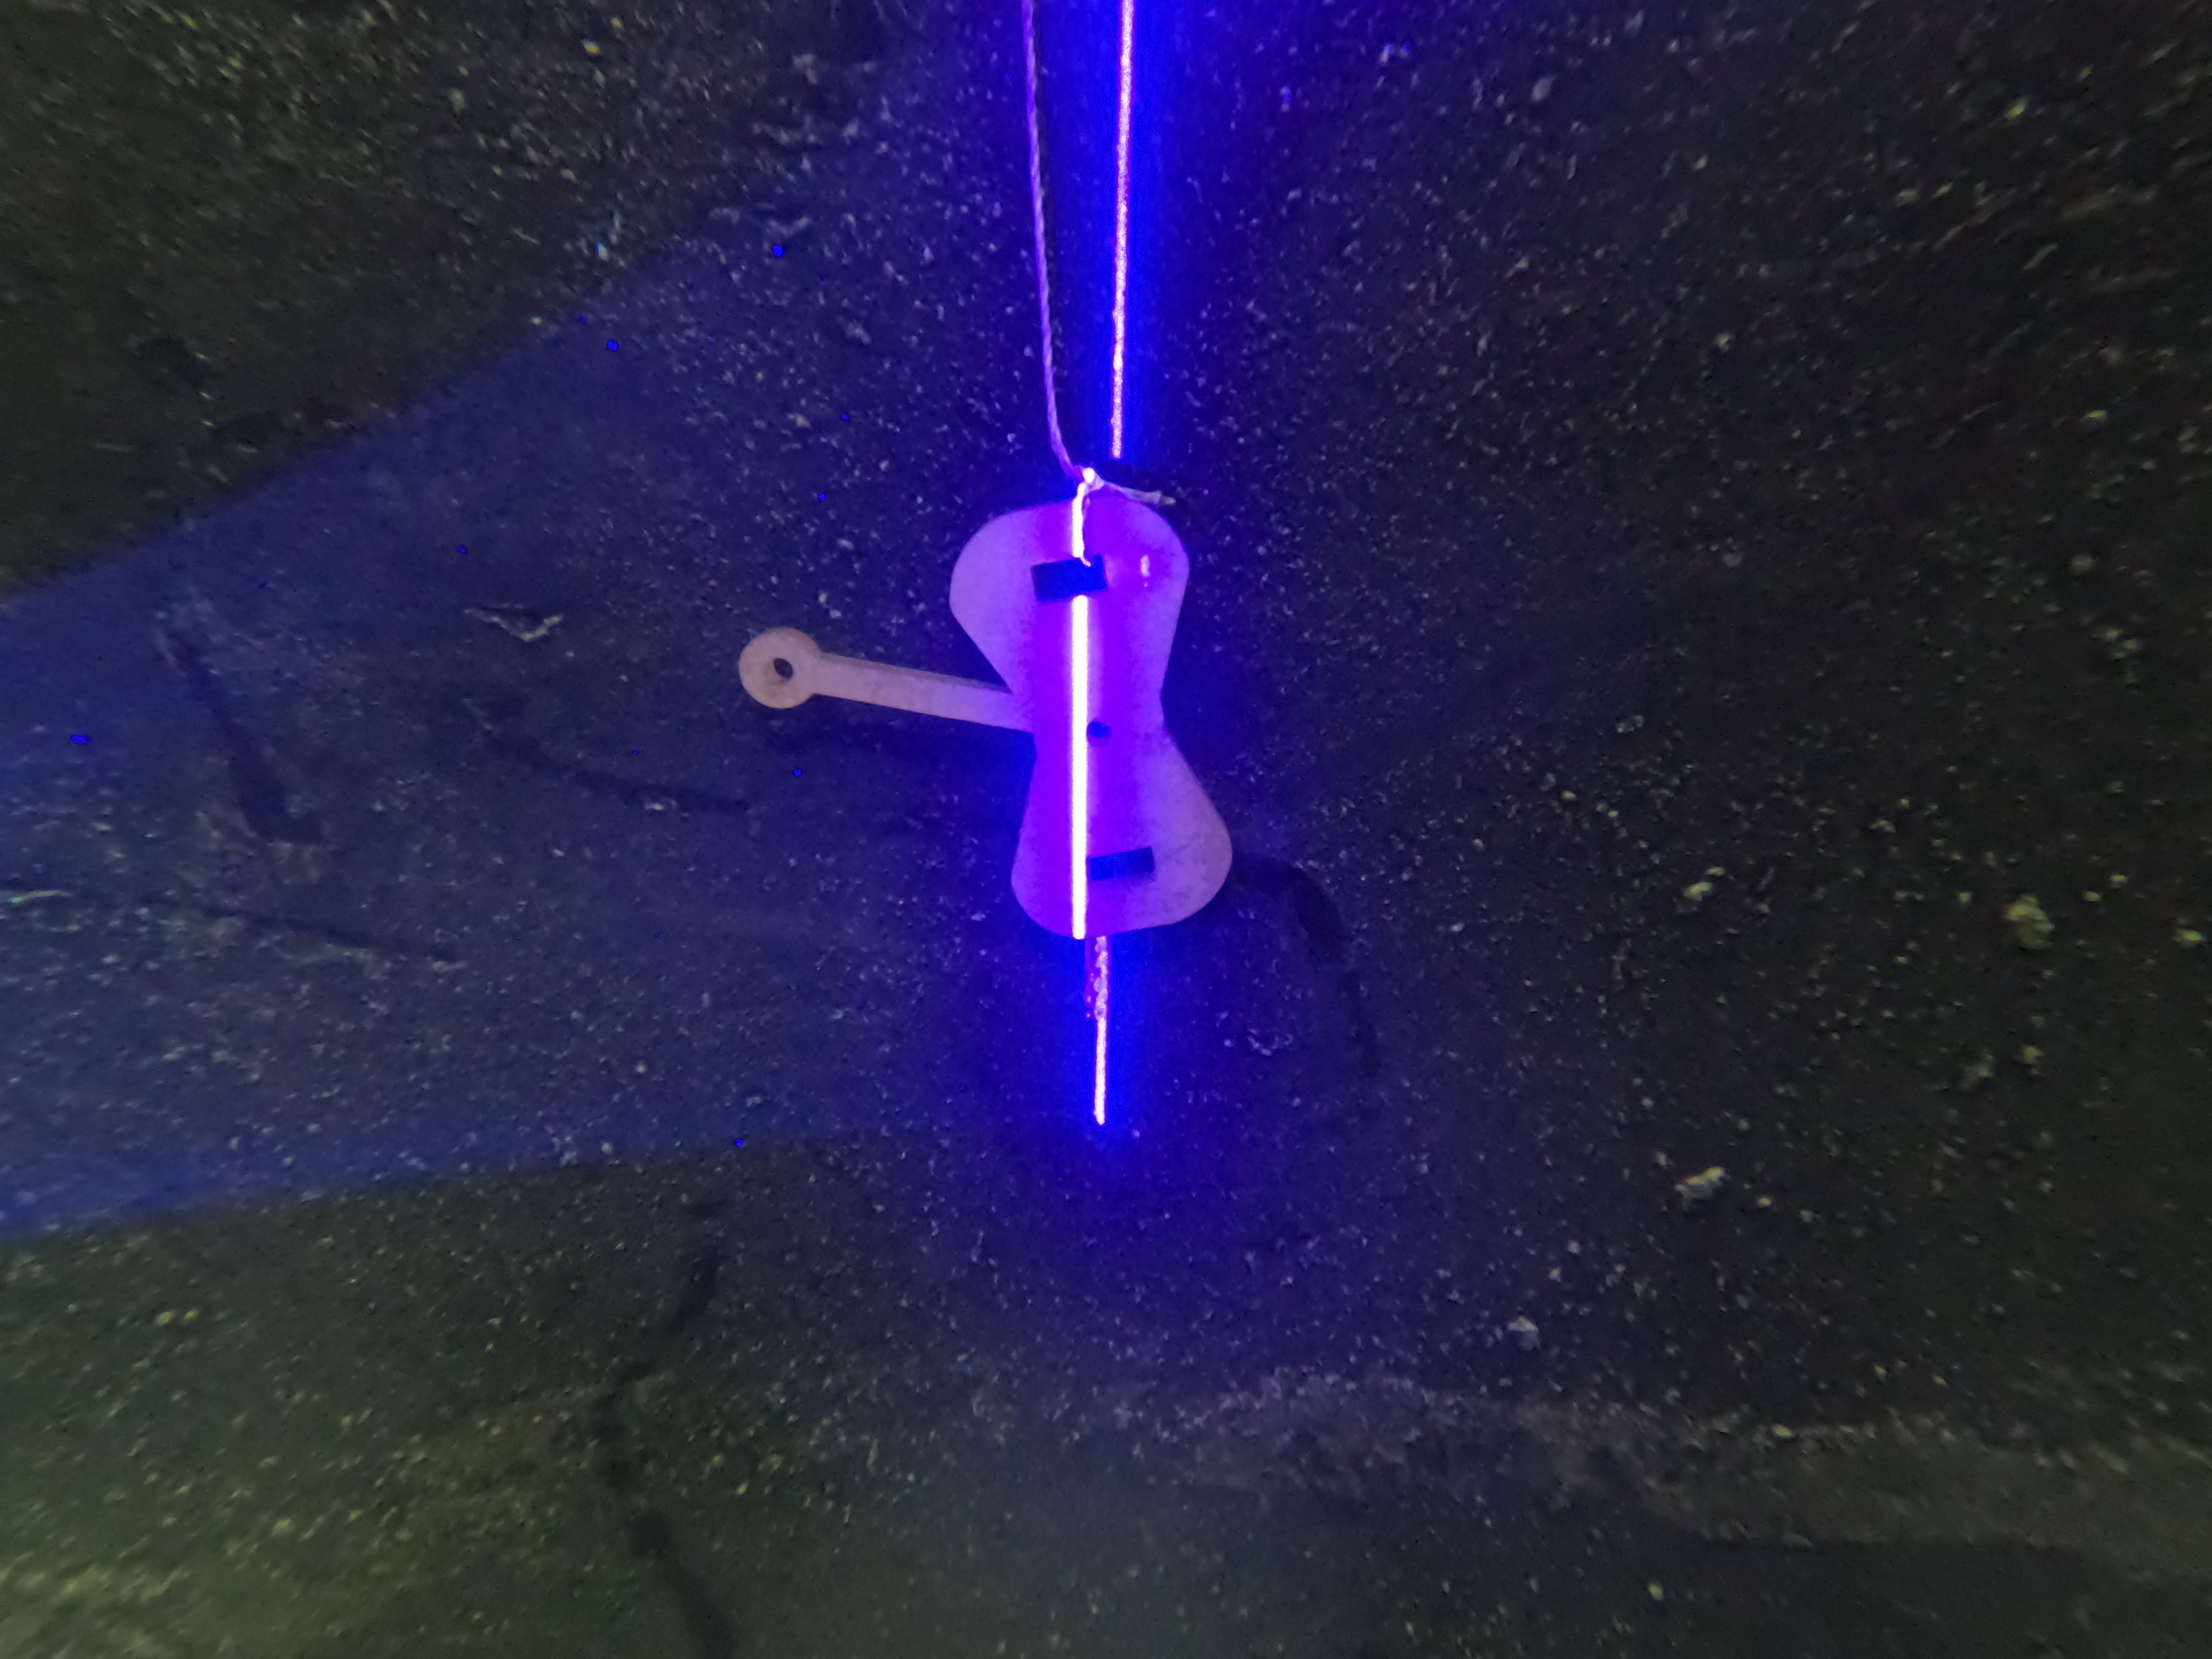

Supplement: Supplementary file 3200 [file G0015641.pdf › Level_2_1/G0015641.pdf]

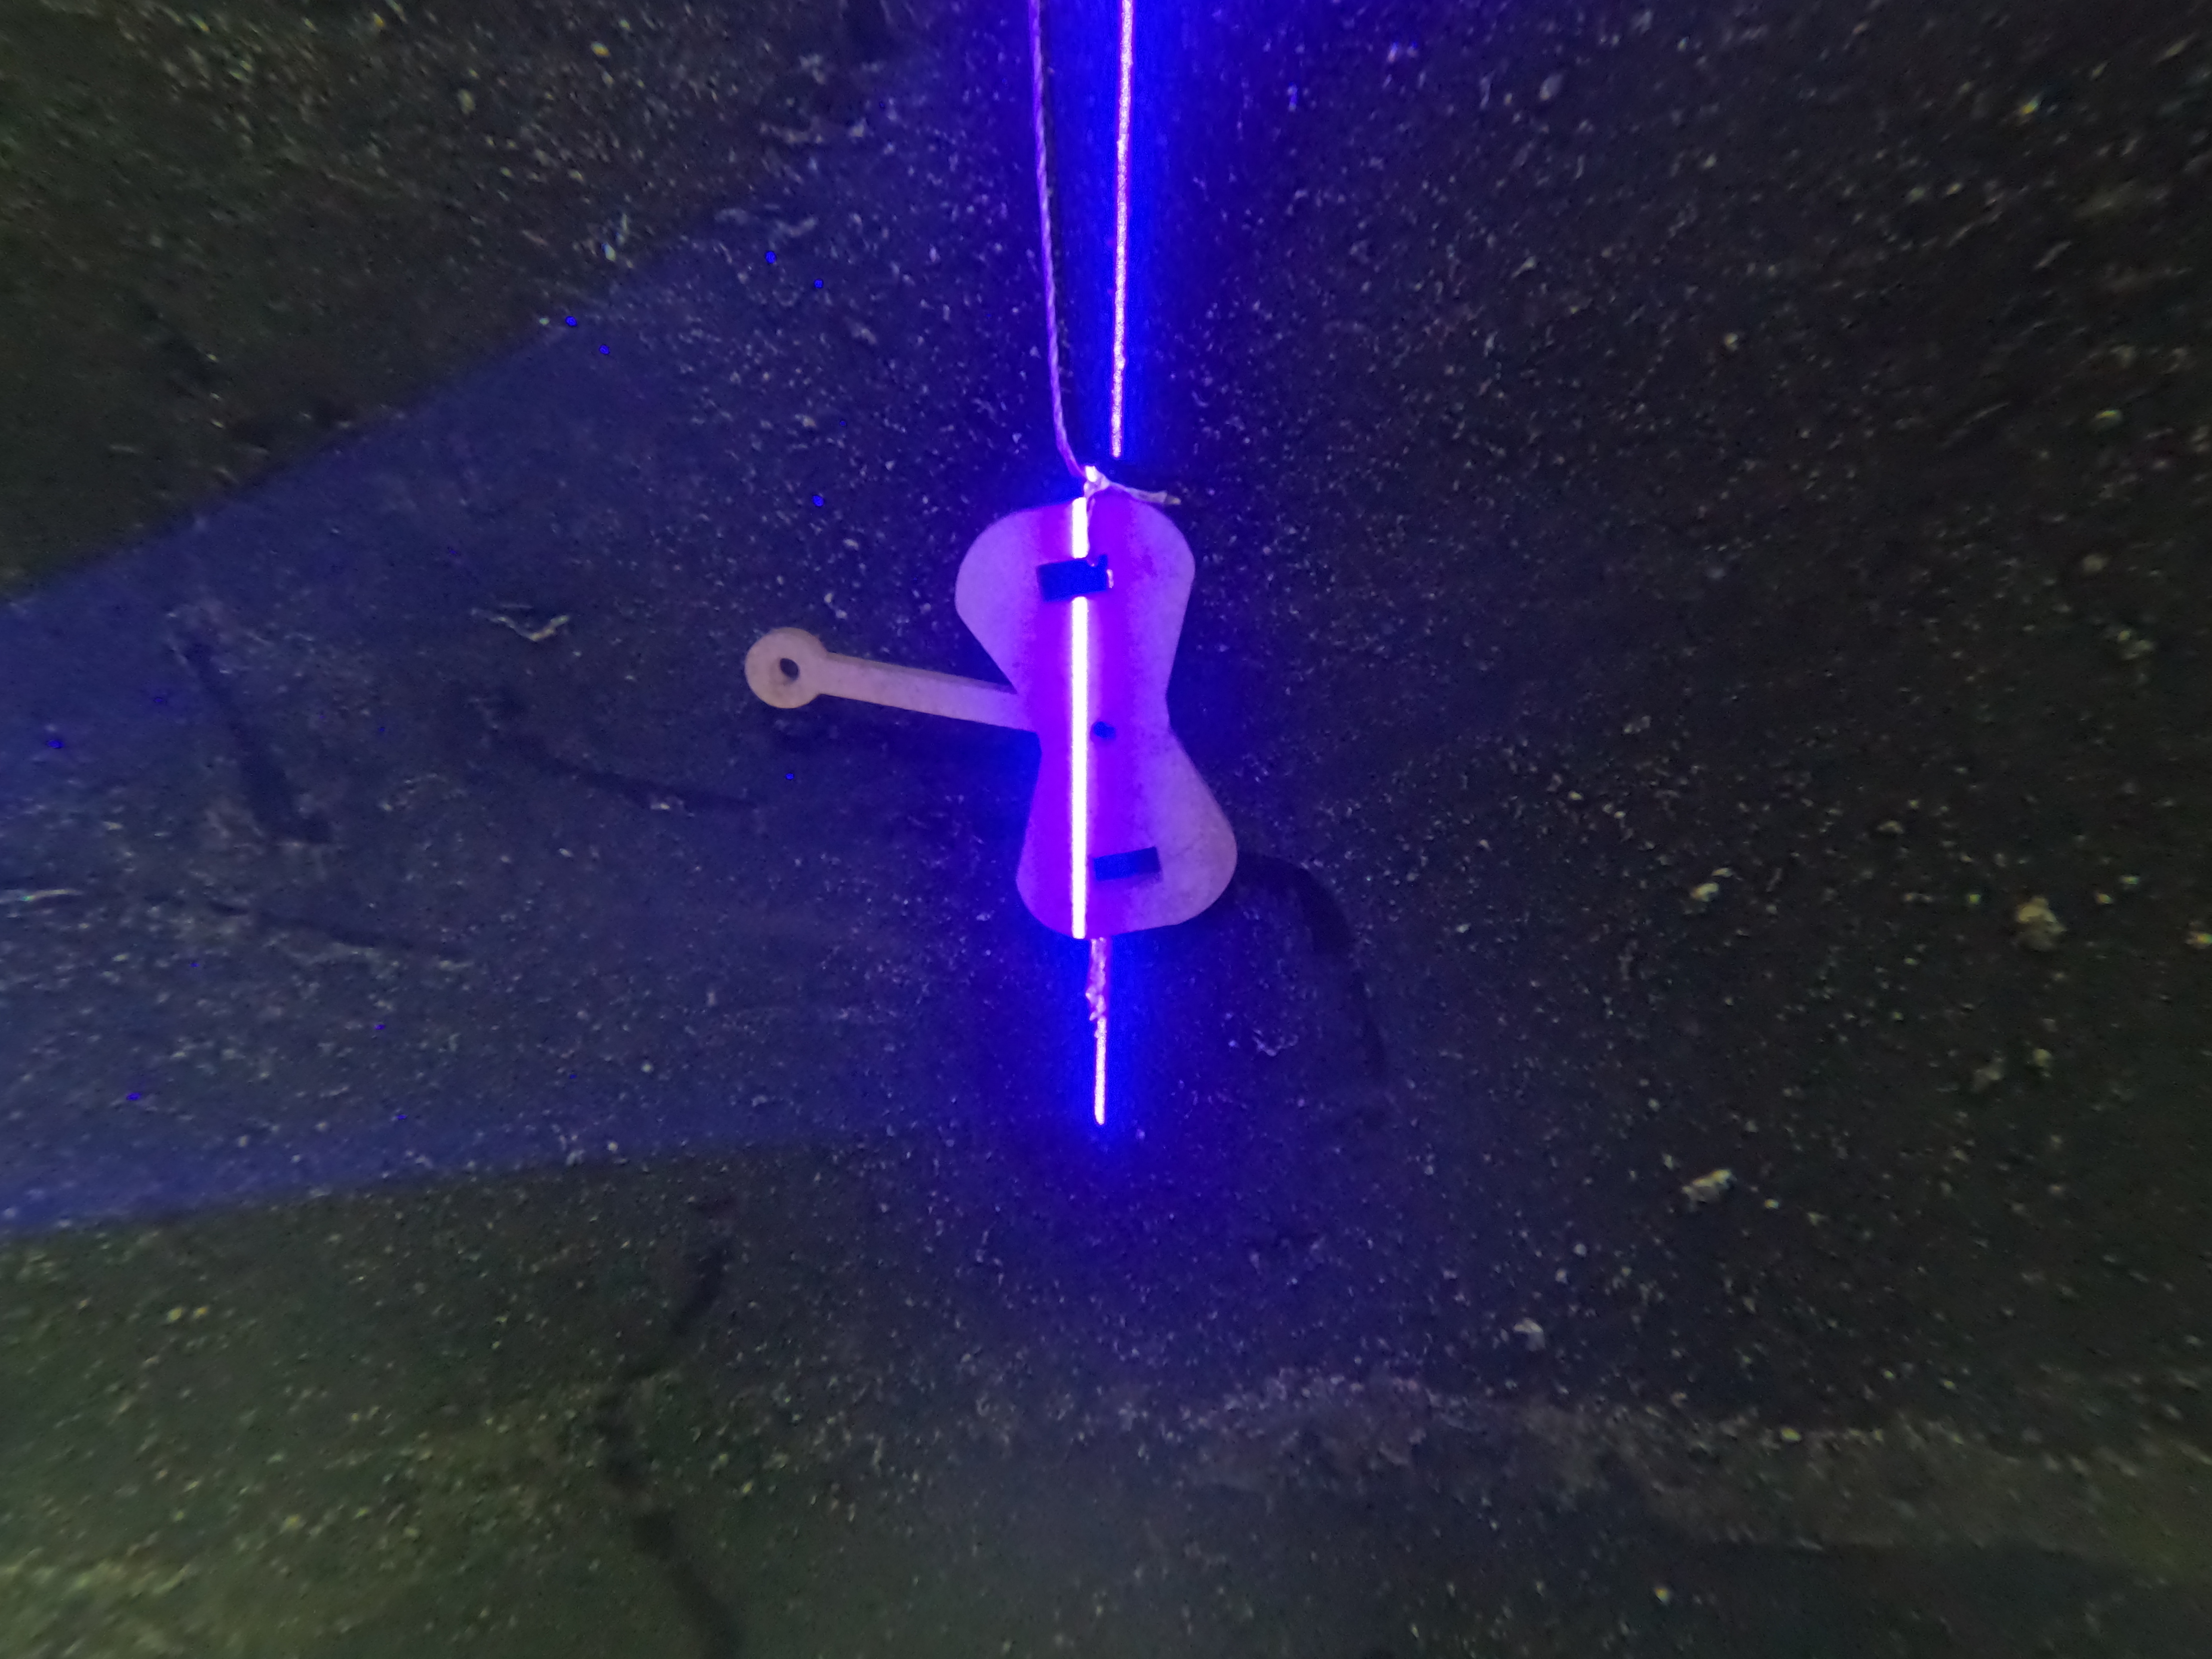

Supplement: Supplementary file 3201 [file G0015642.pdf › Level_2_1/G0015642.pdf]

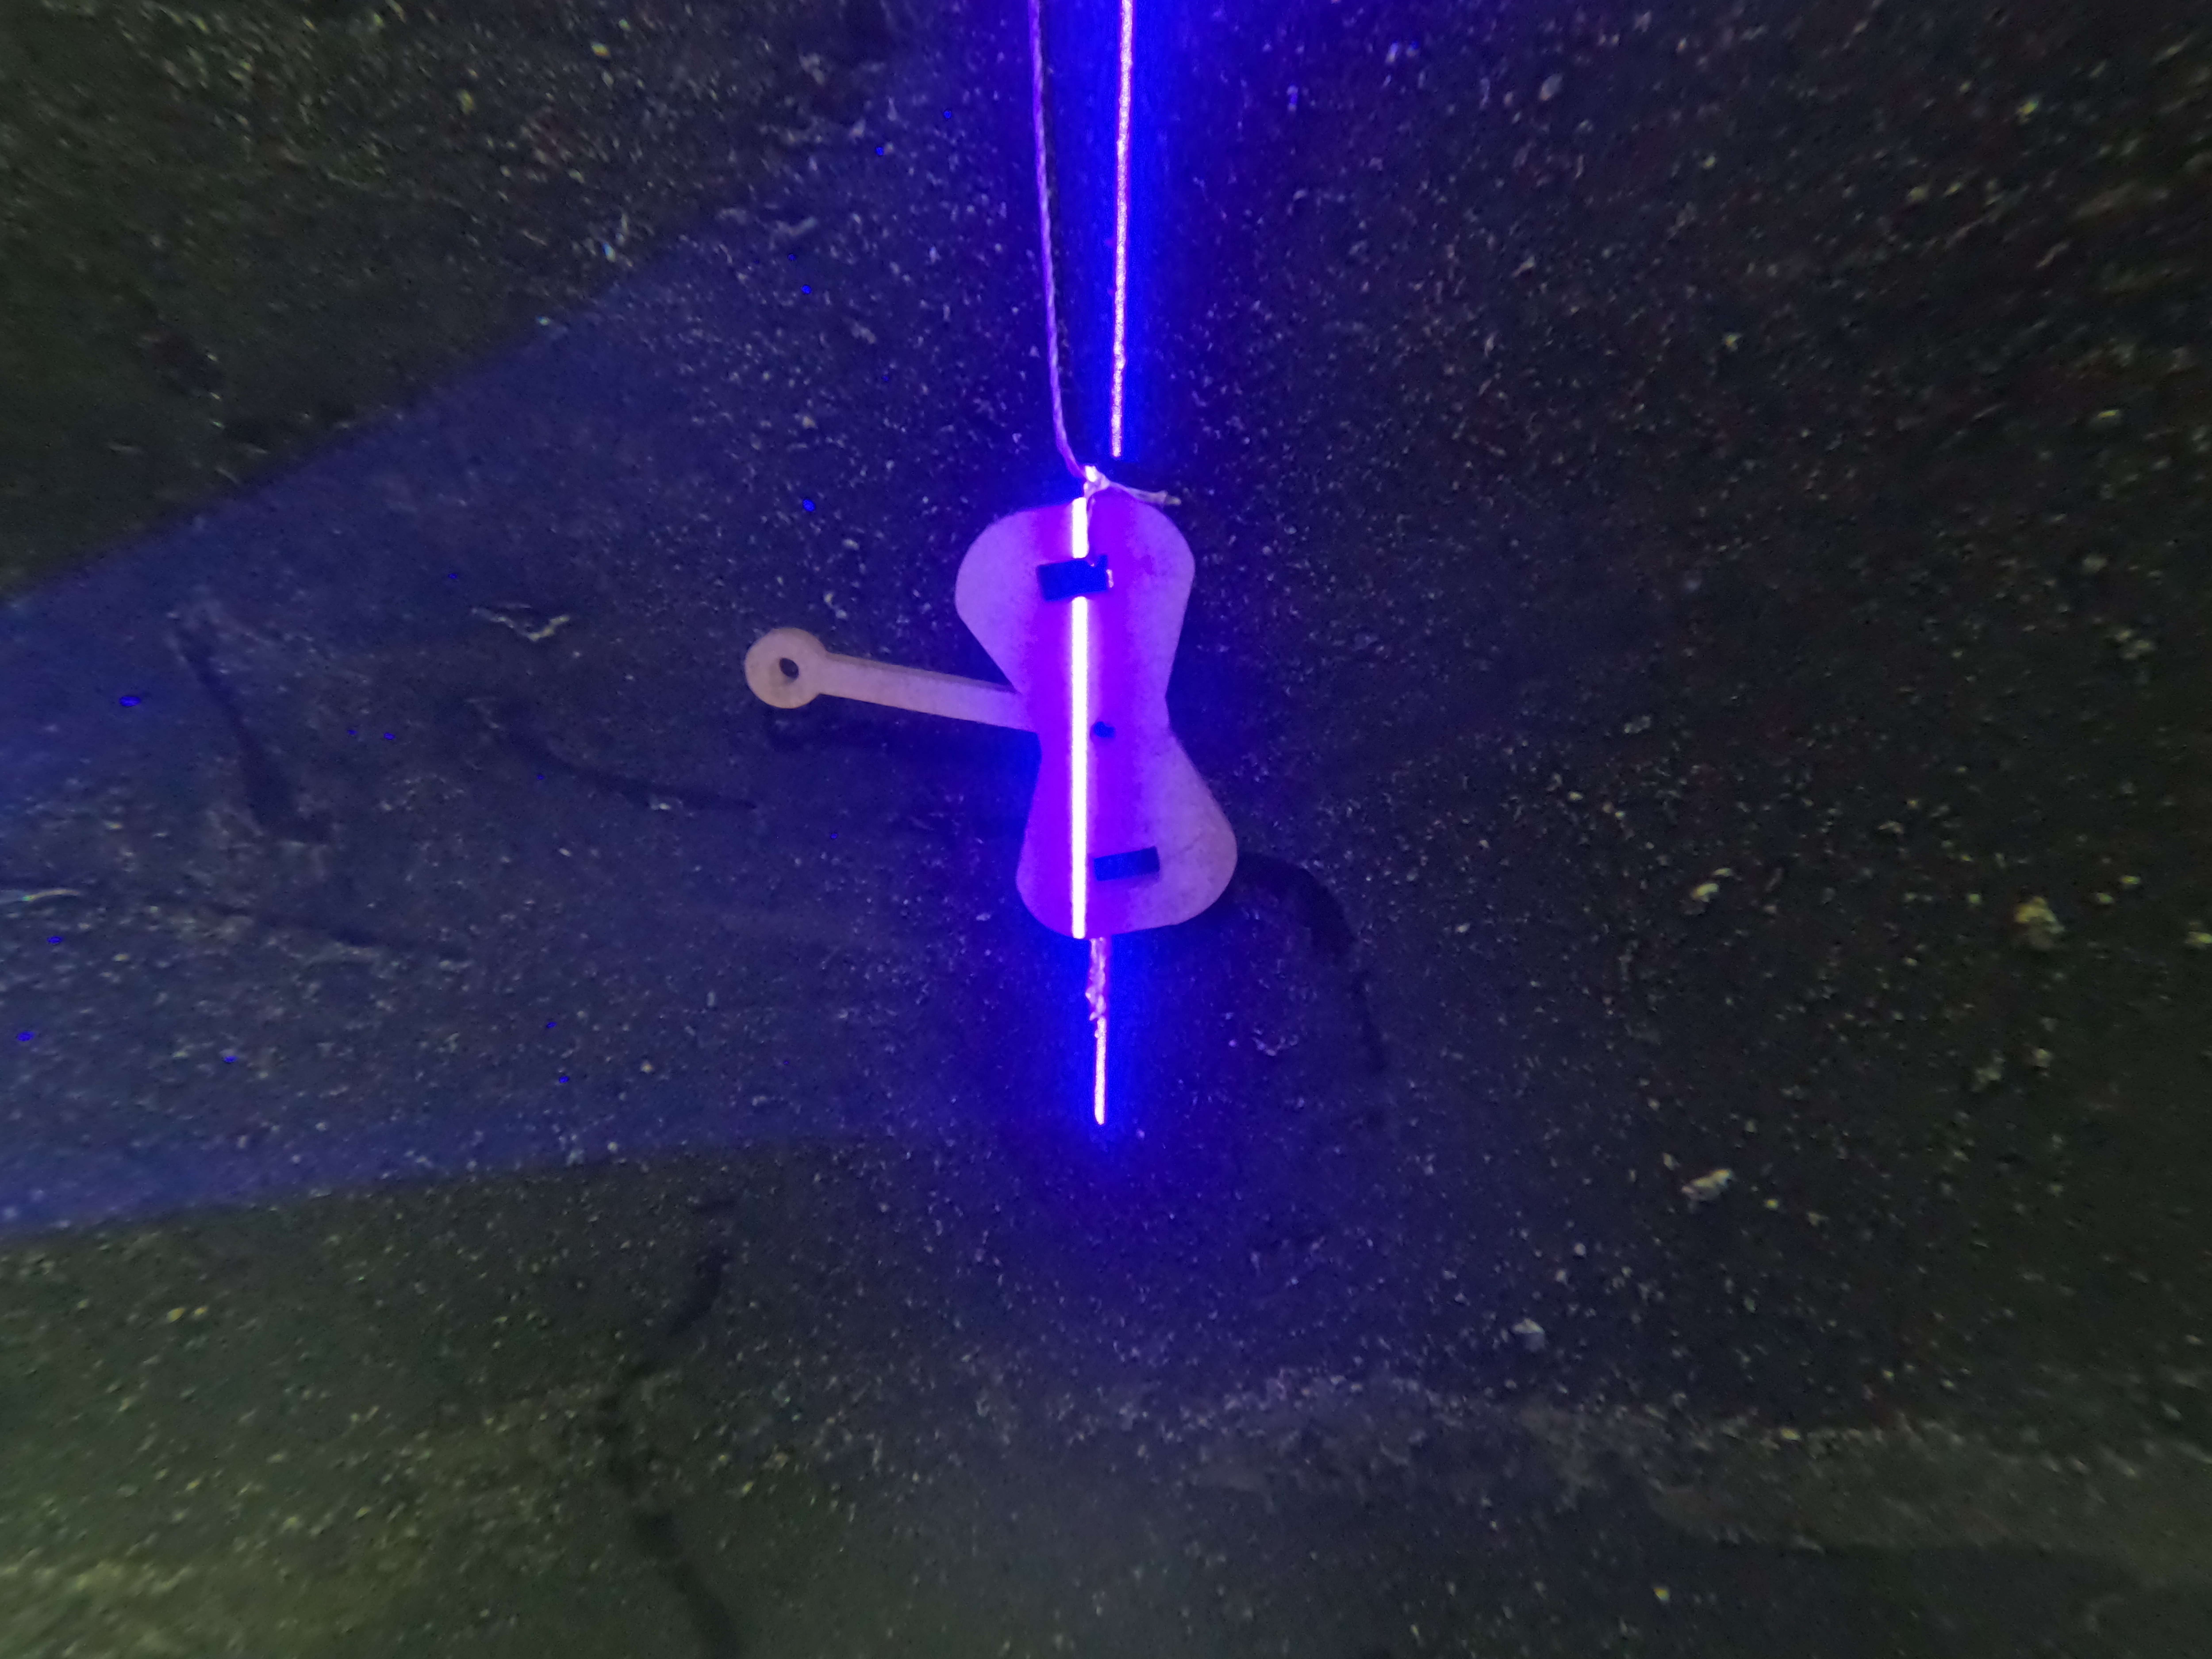

Supplement: Supplementary file 3202 [file G0015643.pdf › Level_2_1/G0015643.pdf]

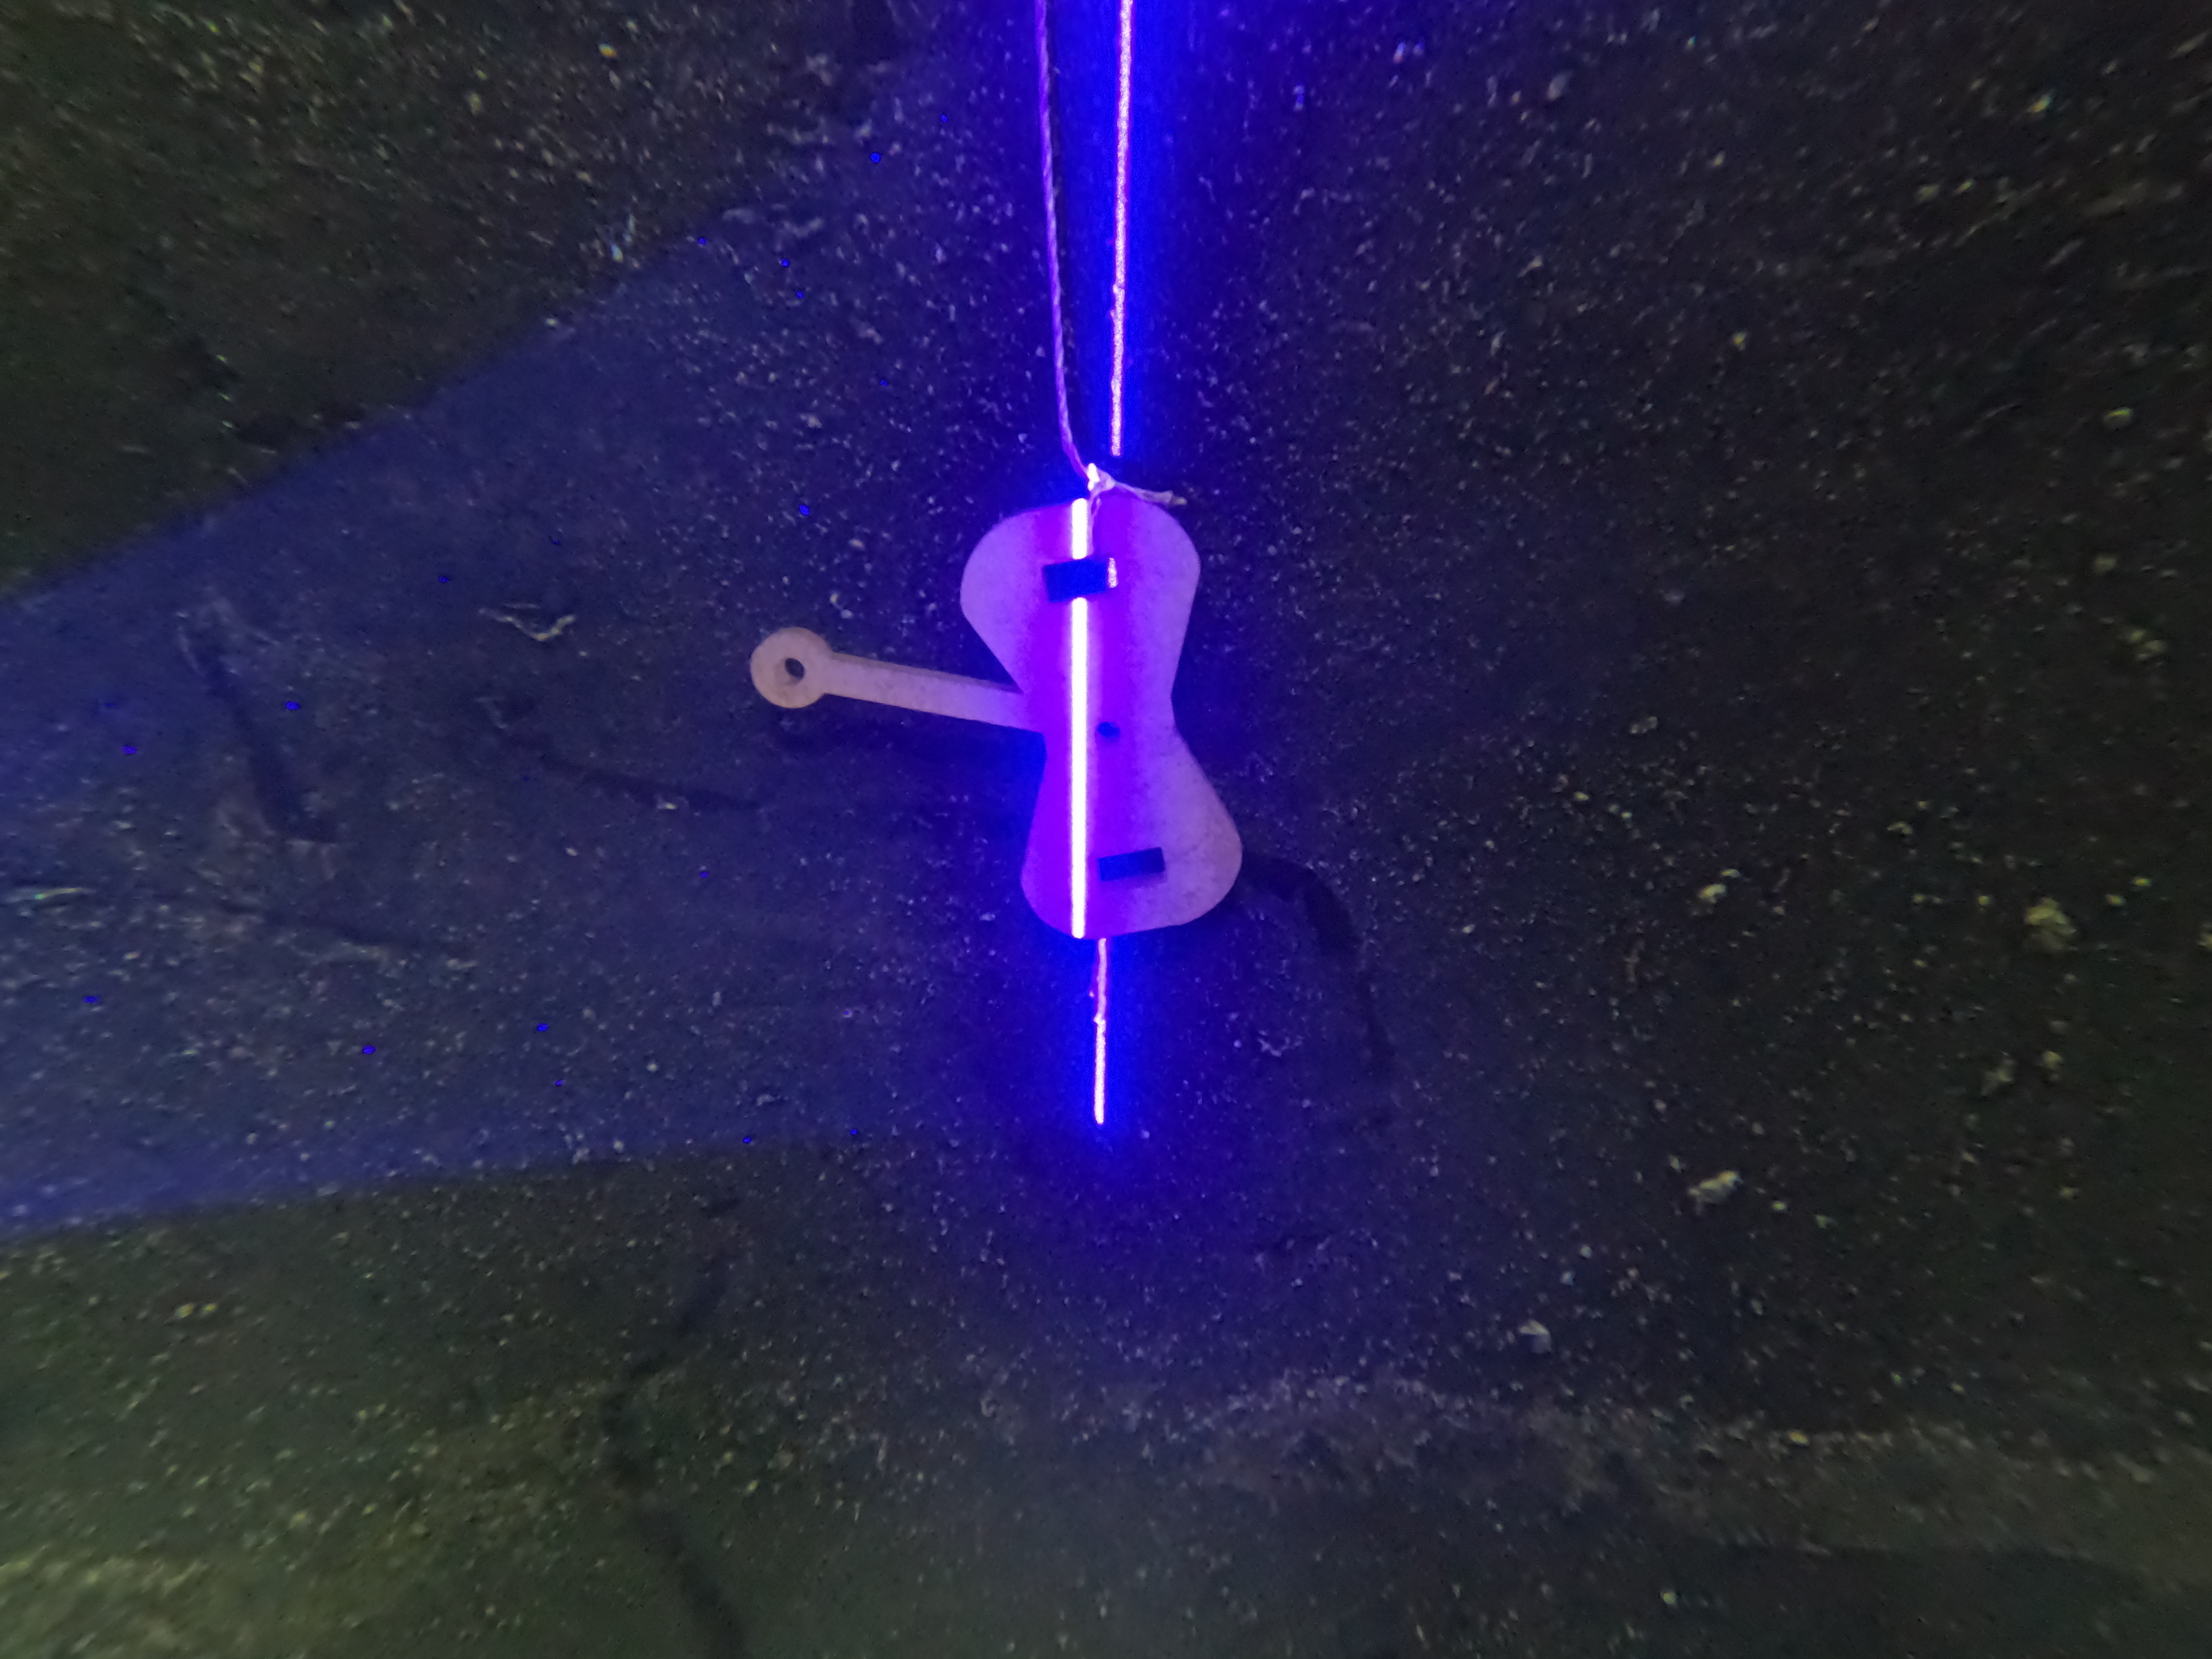

Supplement: Supplementary file 3203 [file G0015644.pdf › Level_2_1/G0015644.pdf]

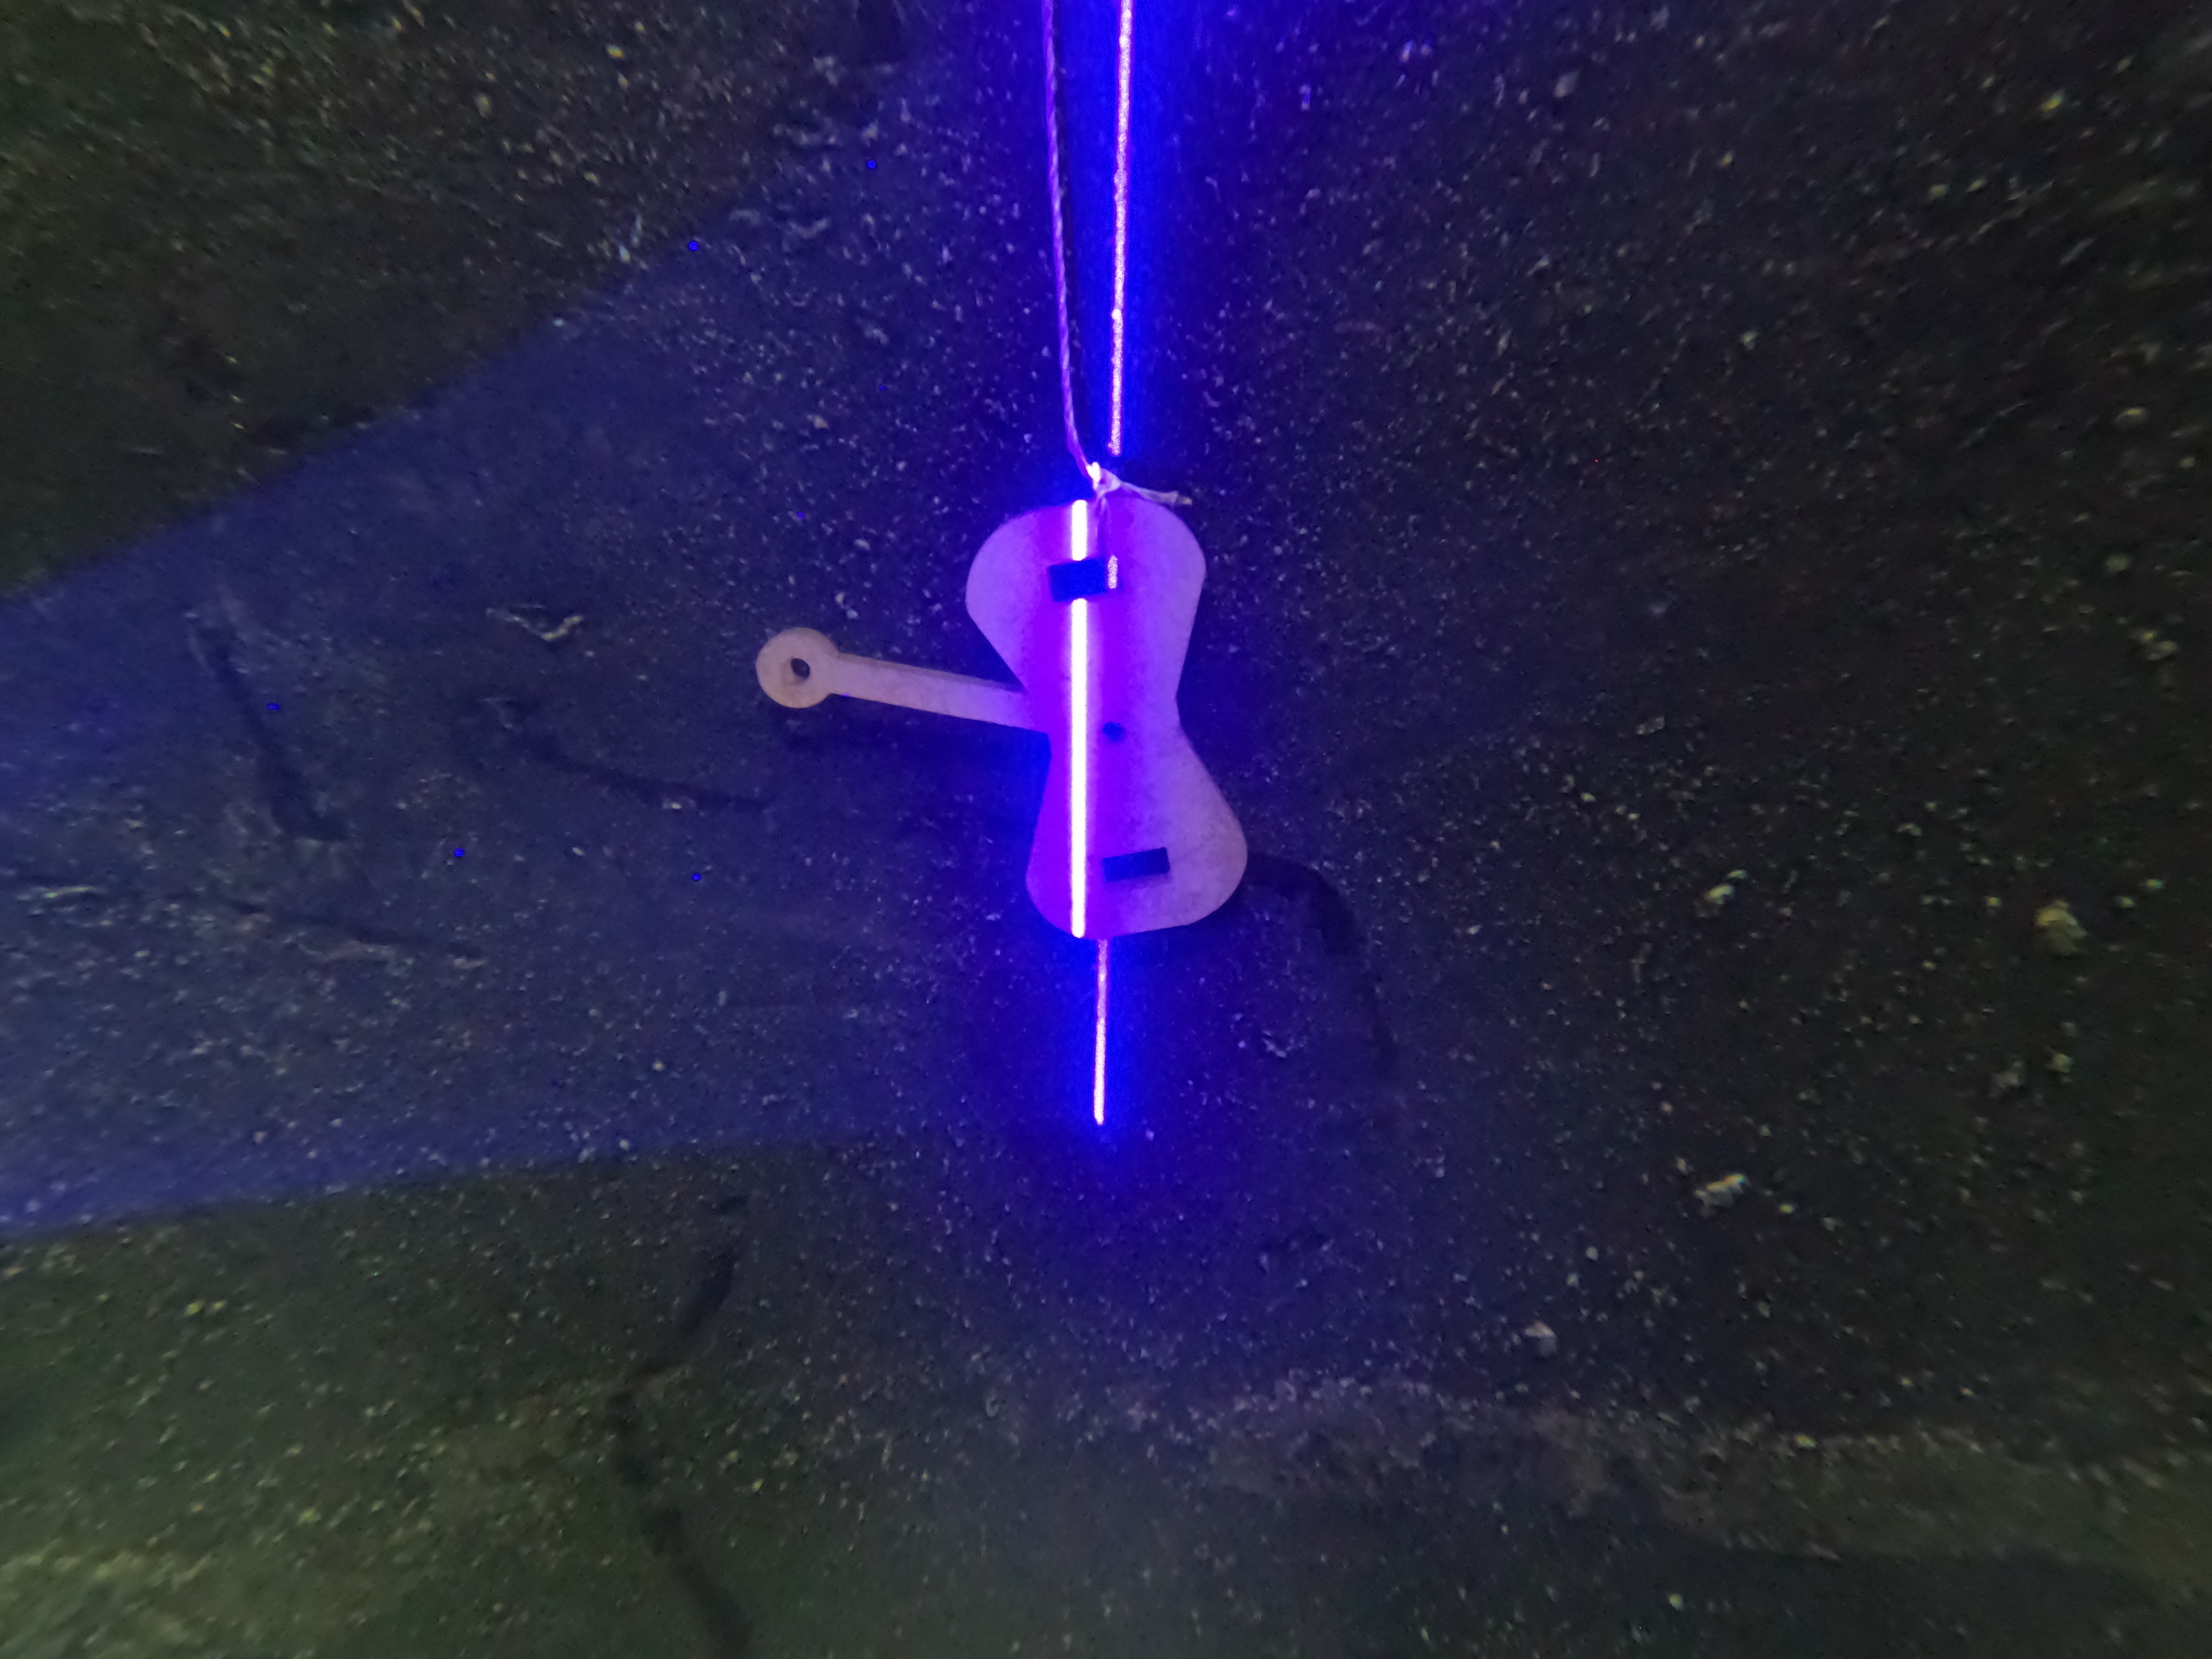

Supplement: Supplementary file 3204 [file G0015645.pdf › Level_2_1/G0015645.pdf]

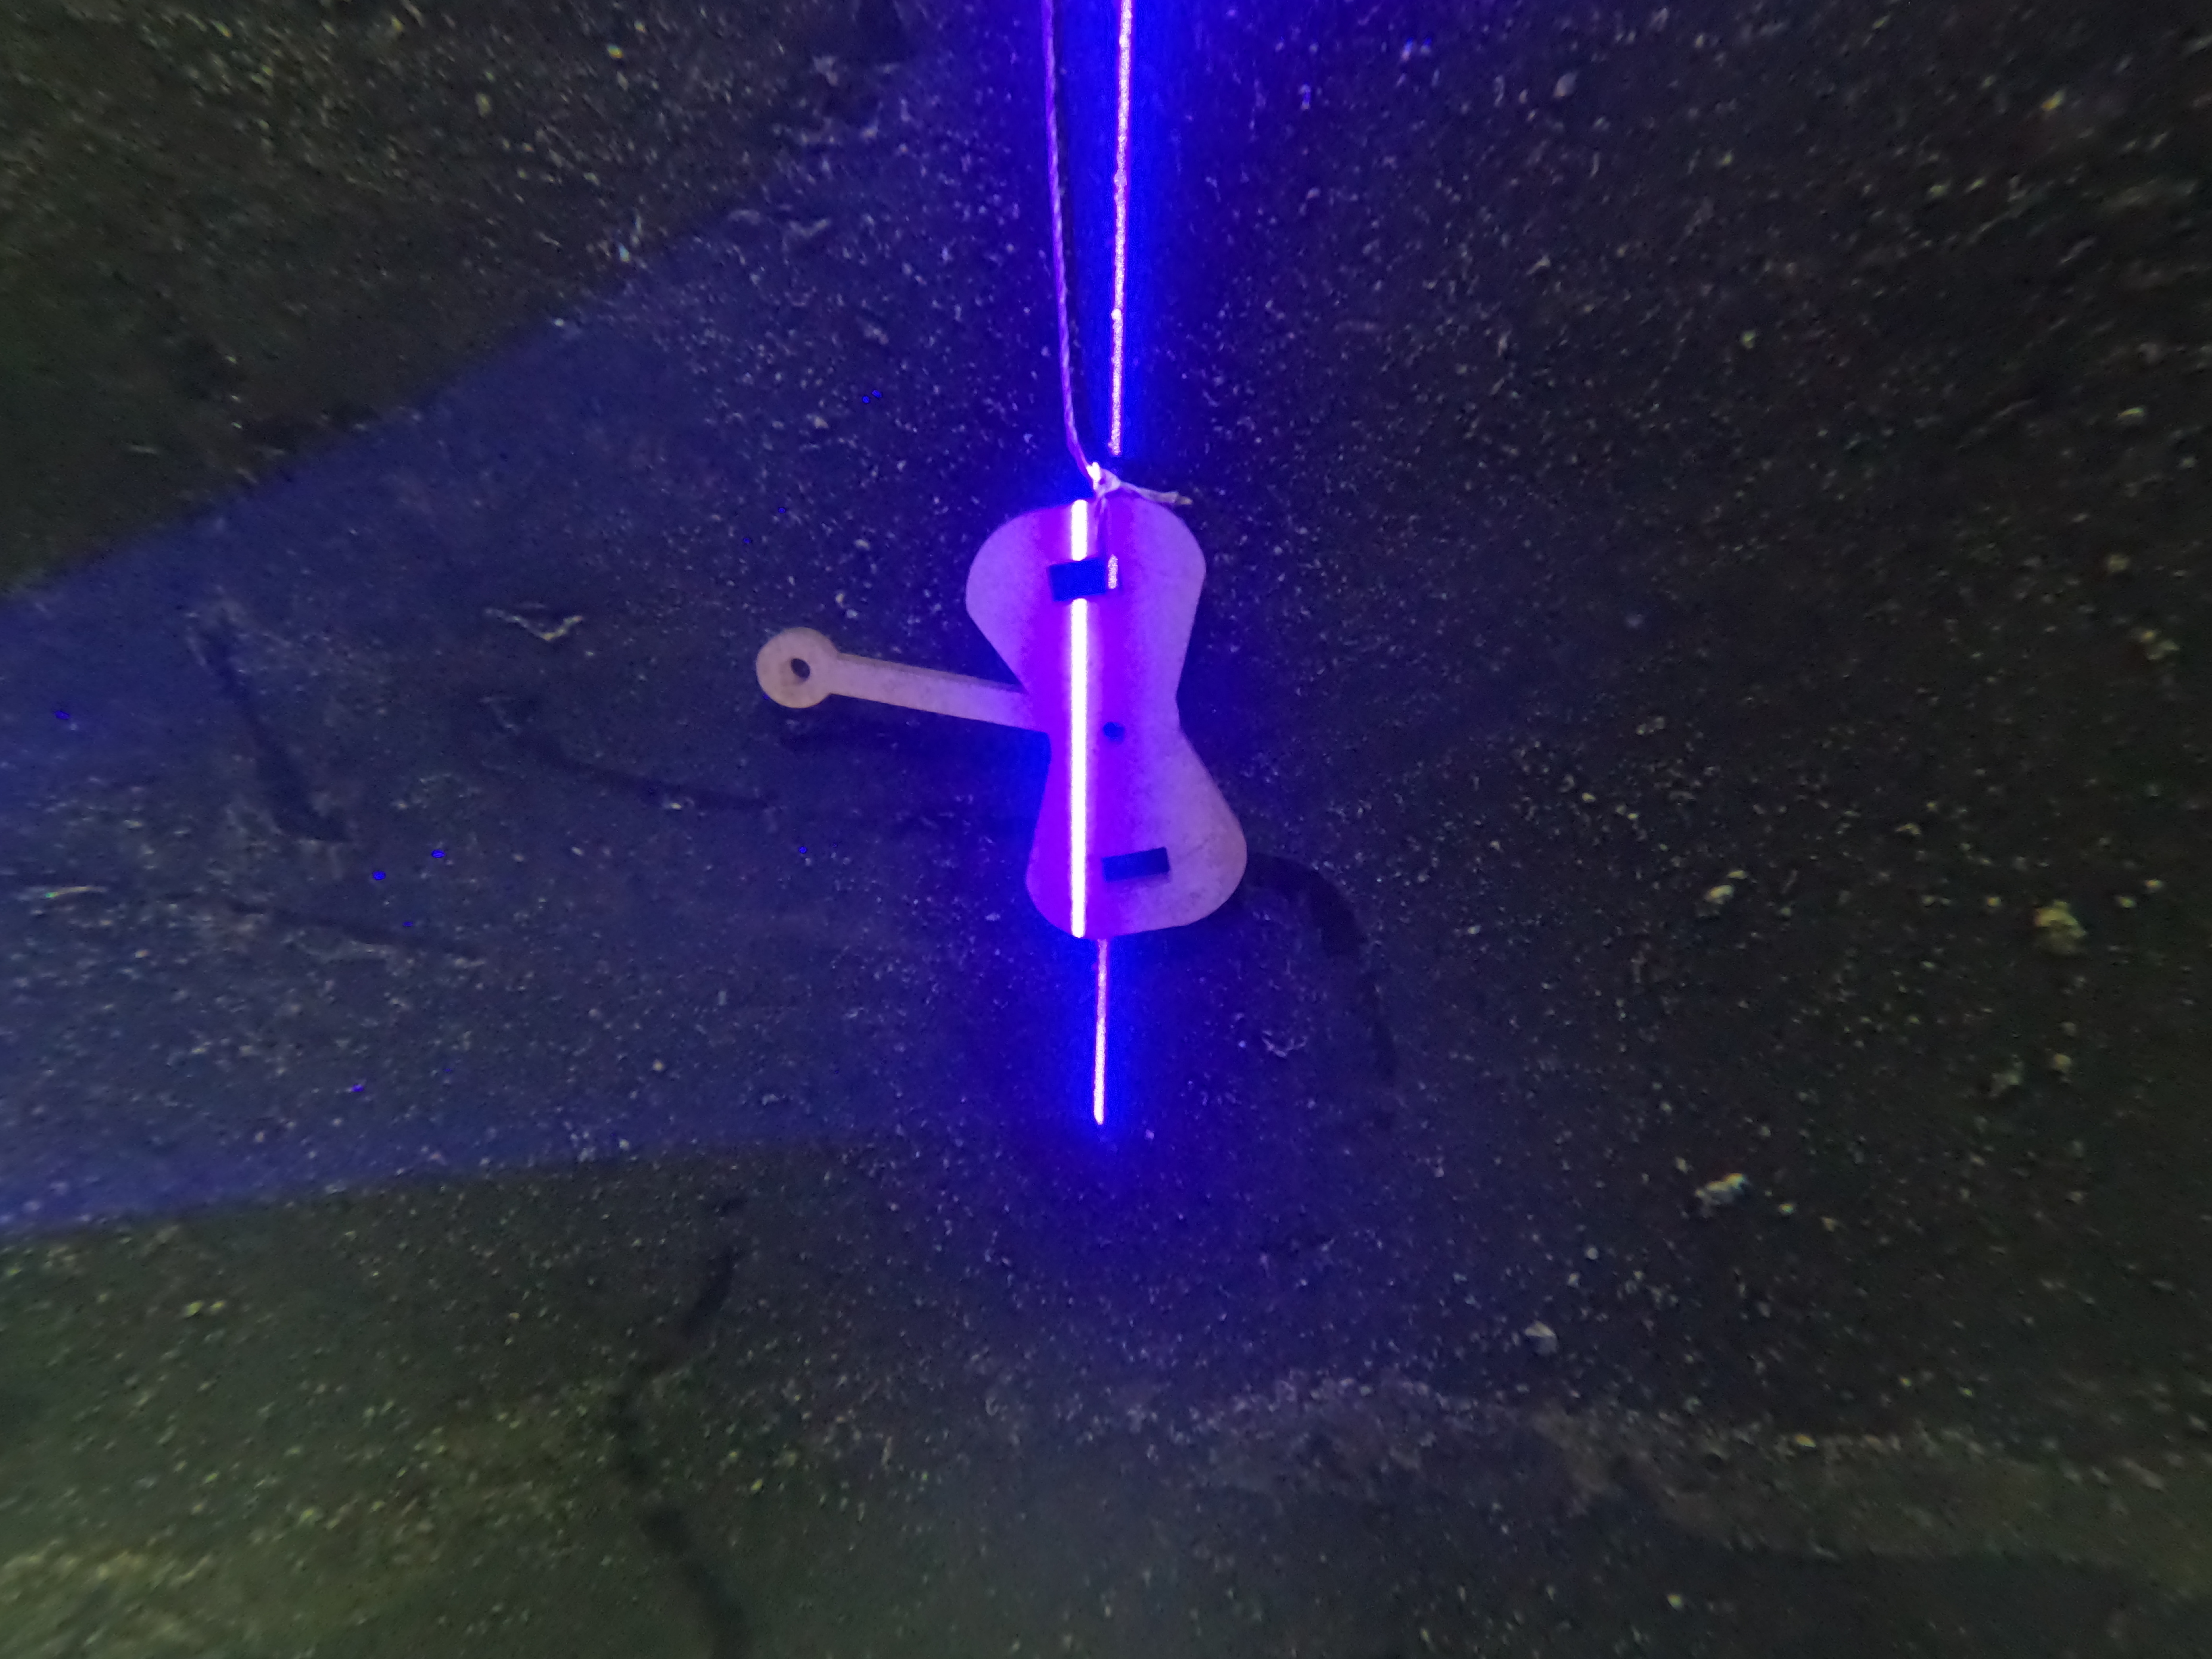

Supplement: Supplementary file 3205 [file G0015646.pdf › Level_2_1/G0015646.pdf]

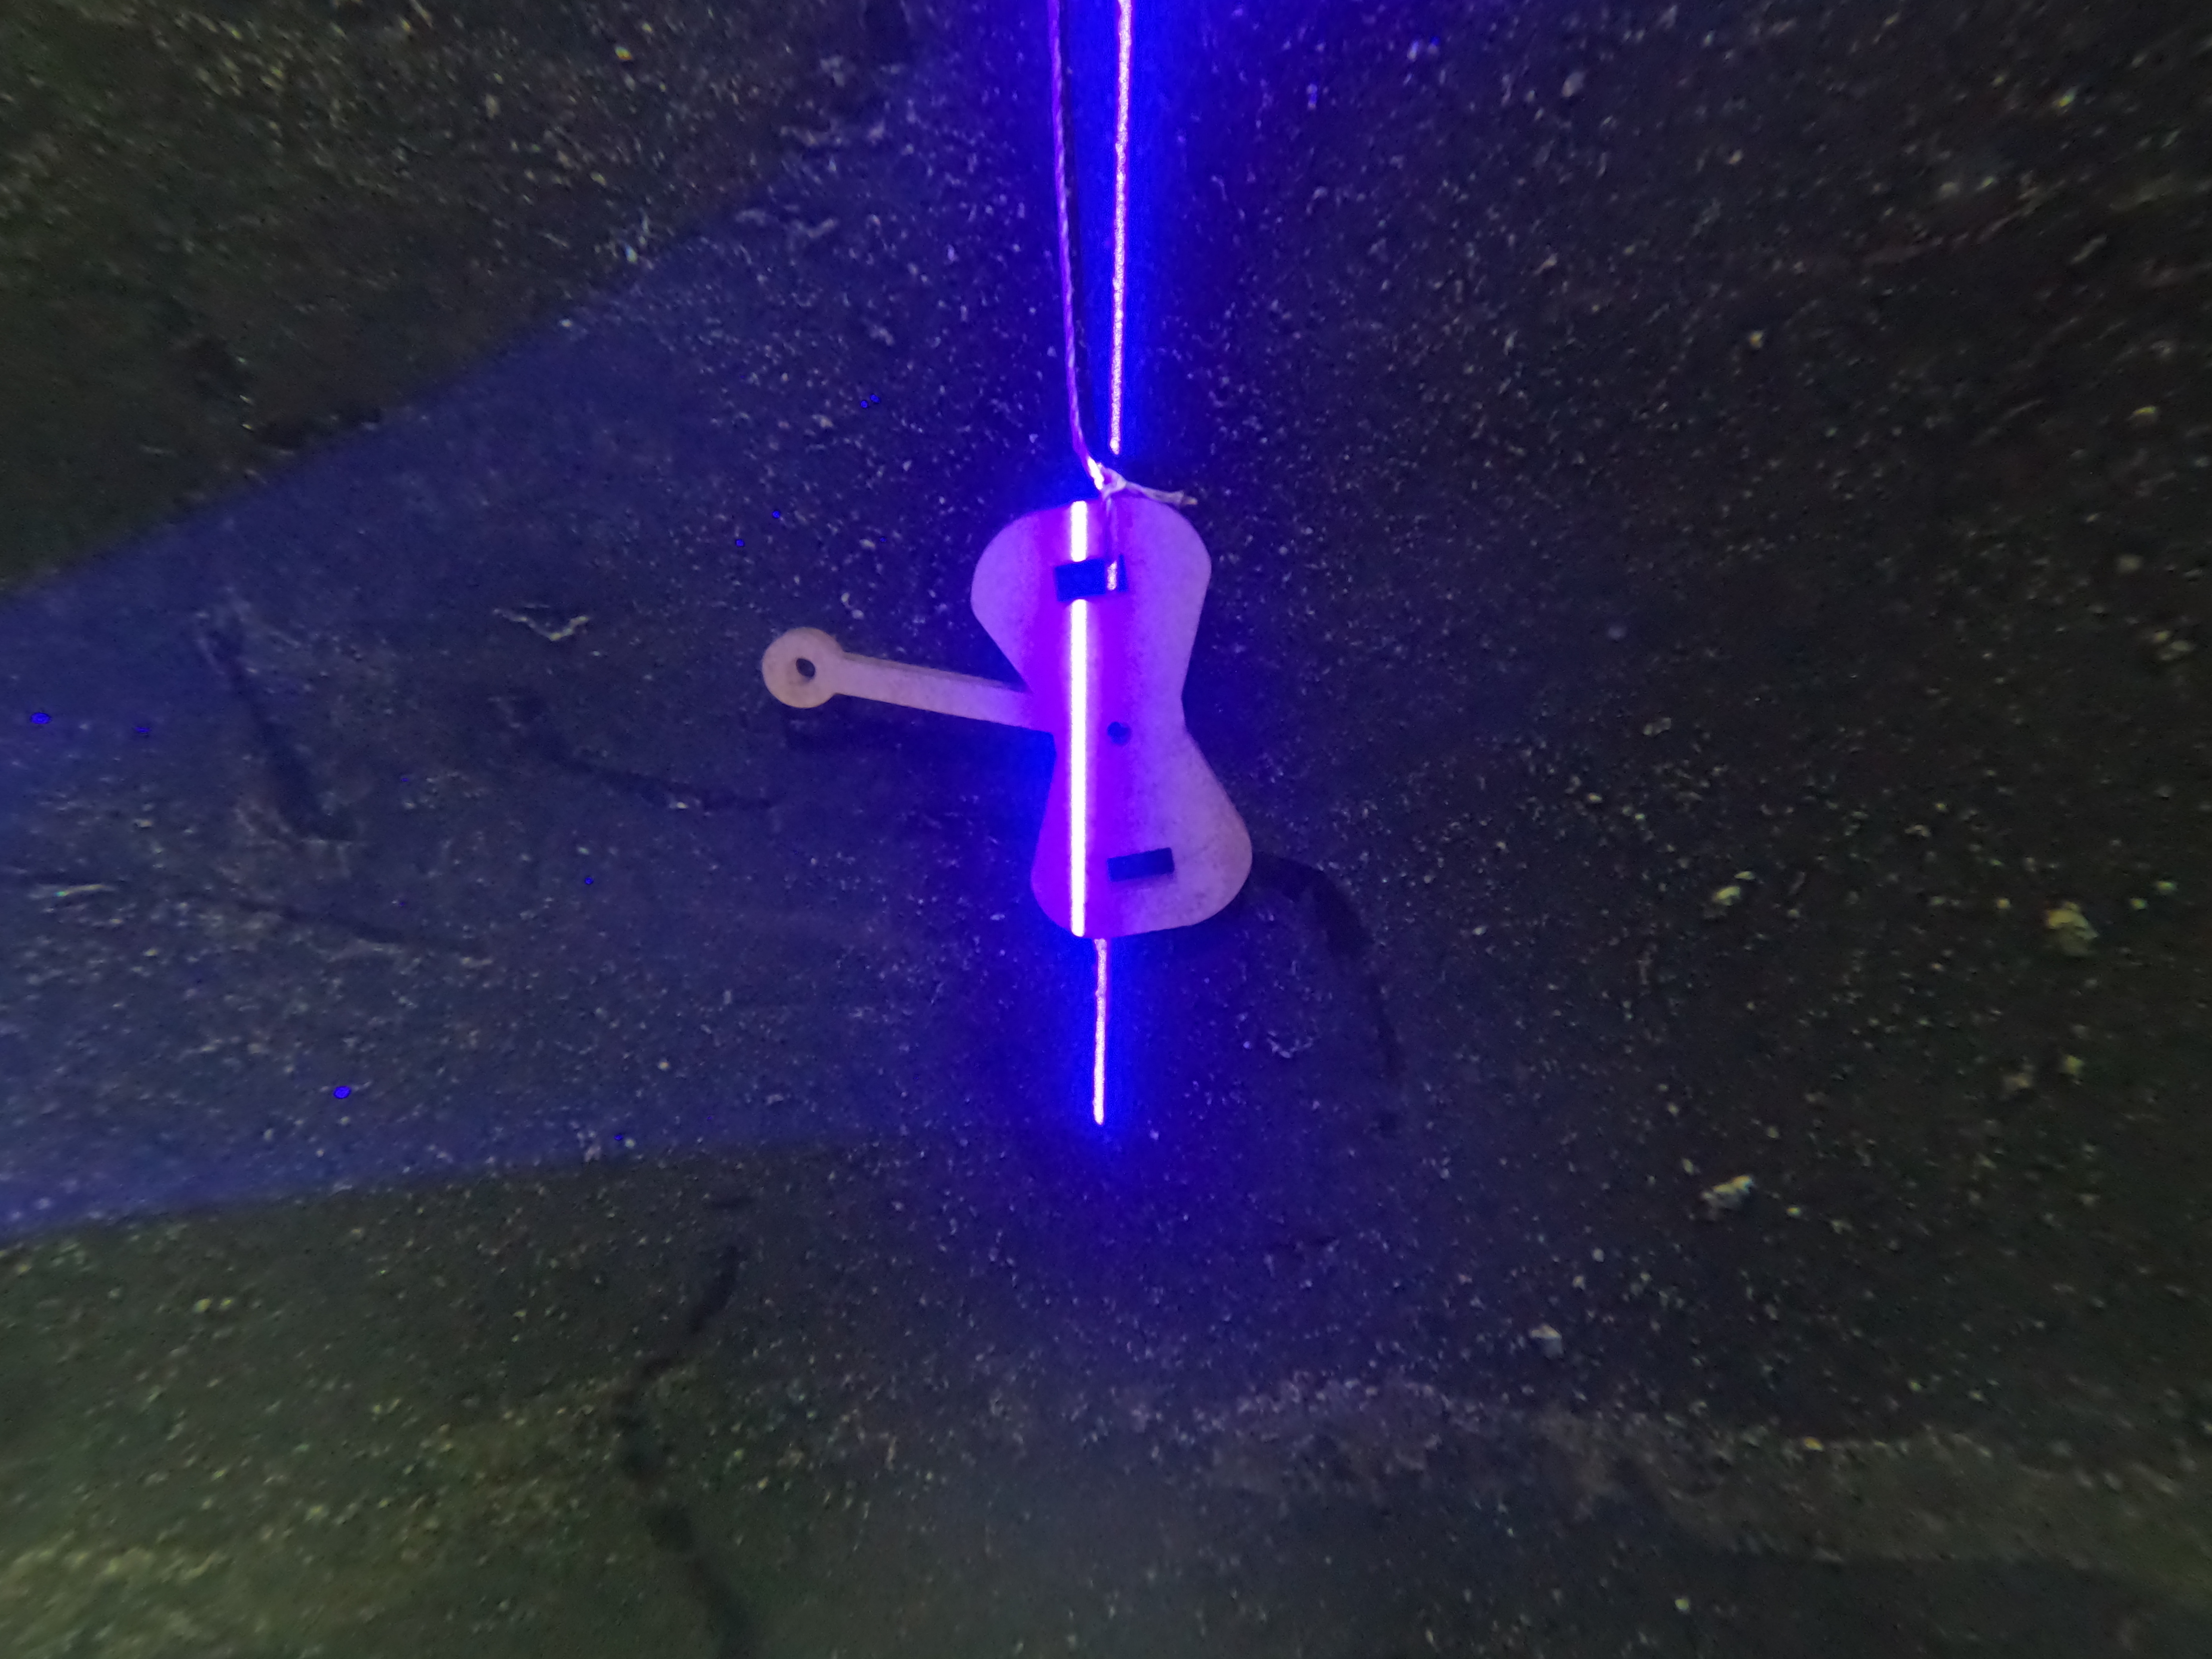

Supplement: Supplementary file 3206 [file G0015647.pdf › Level_2_1/G0015647.pdf]

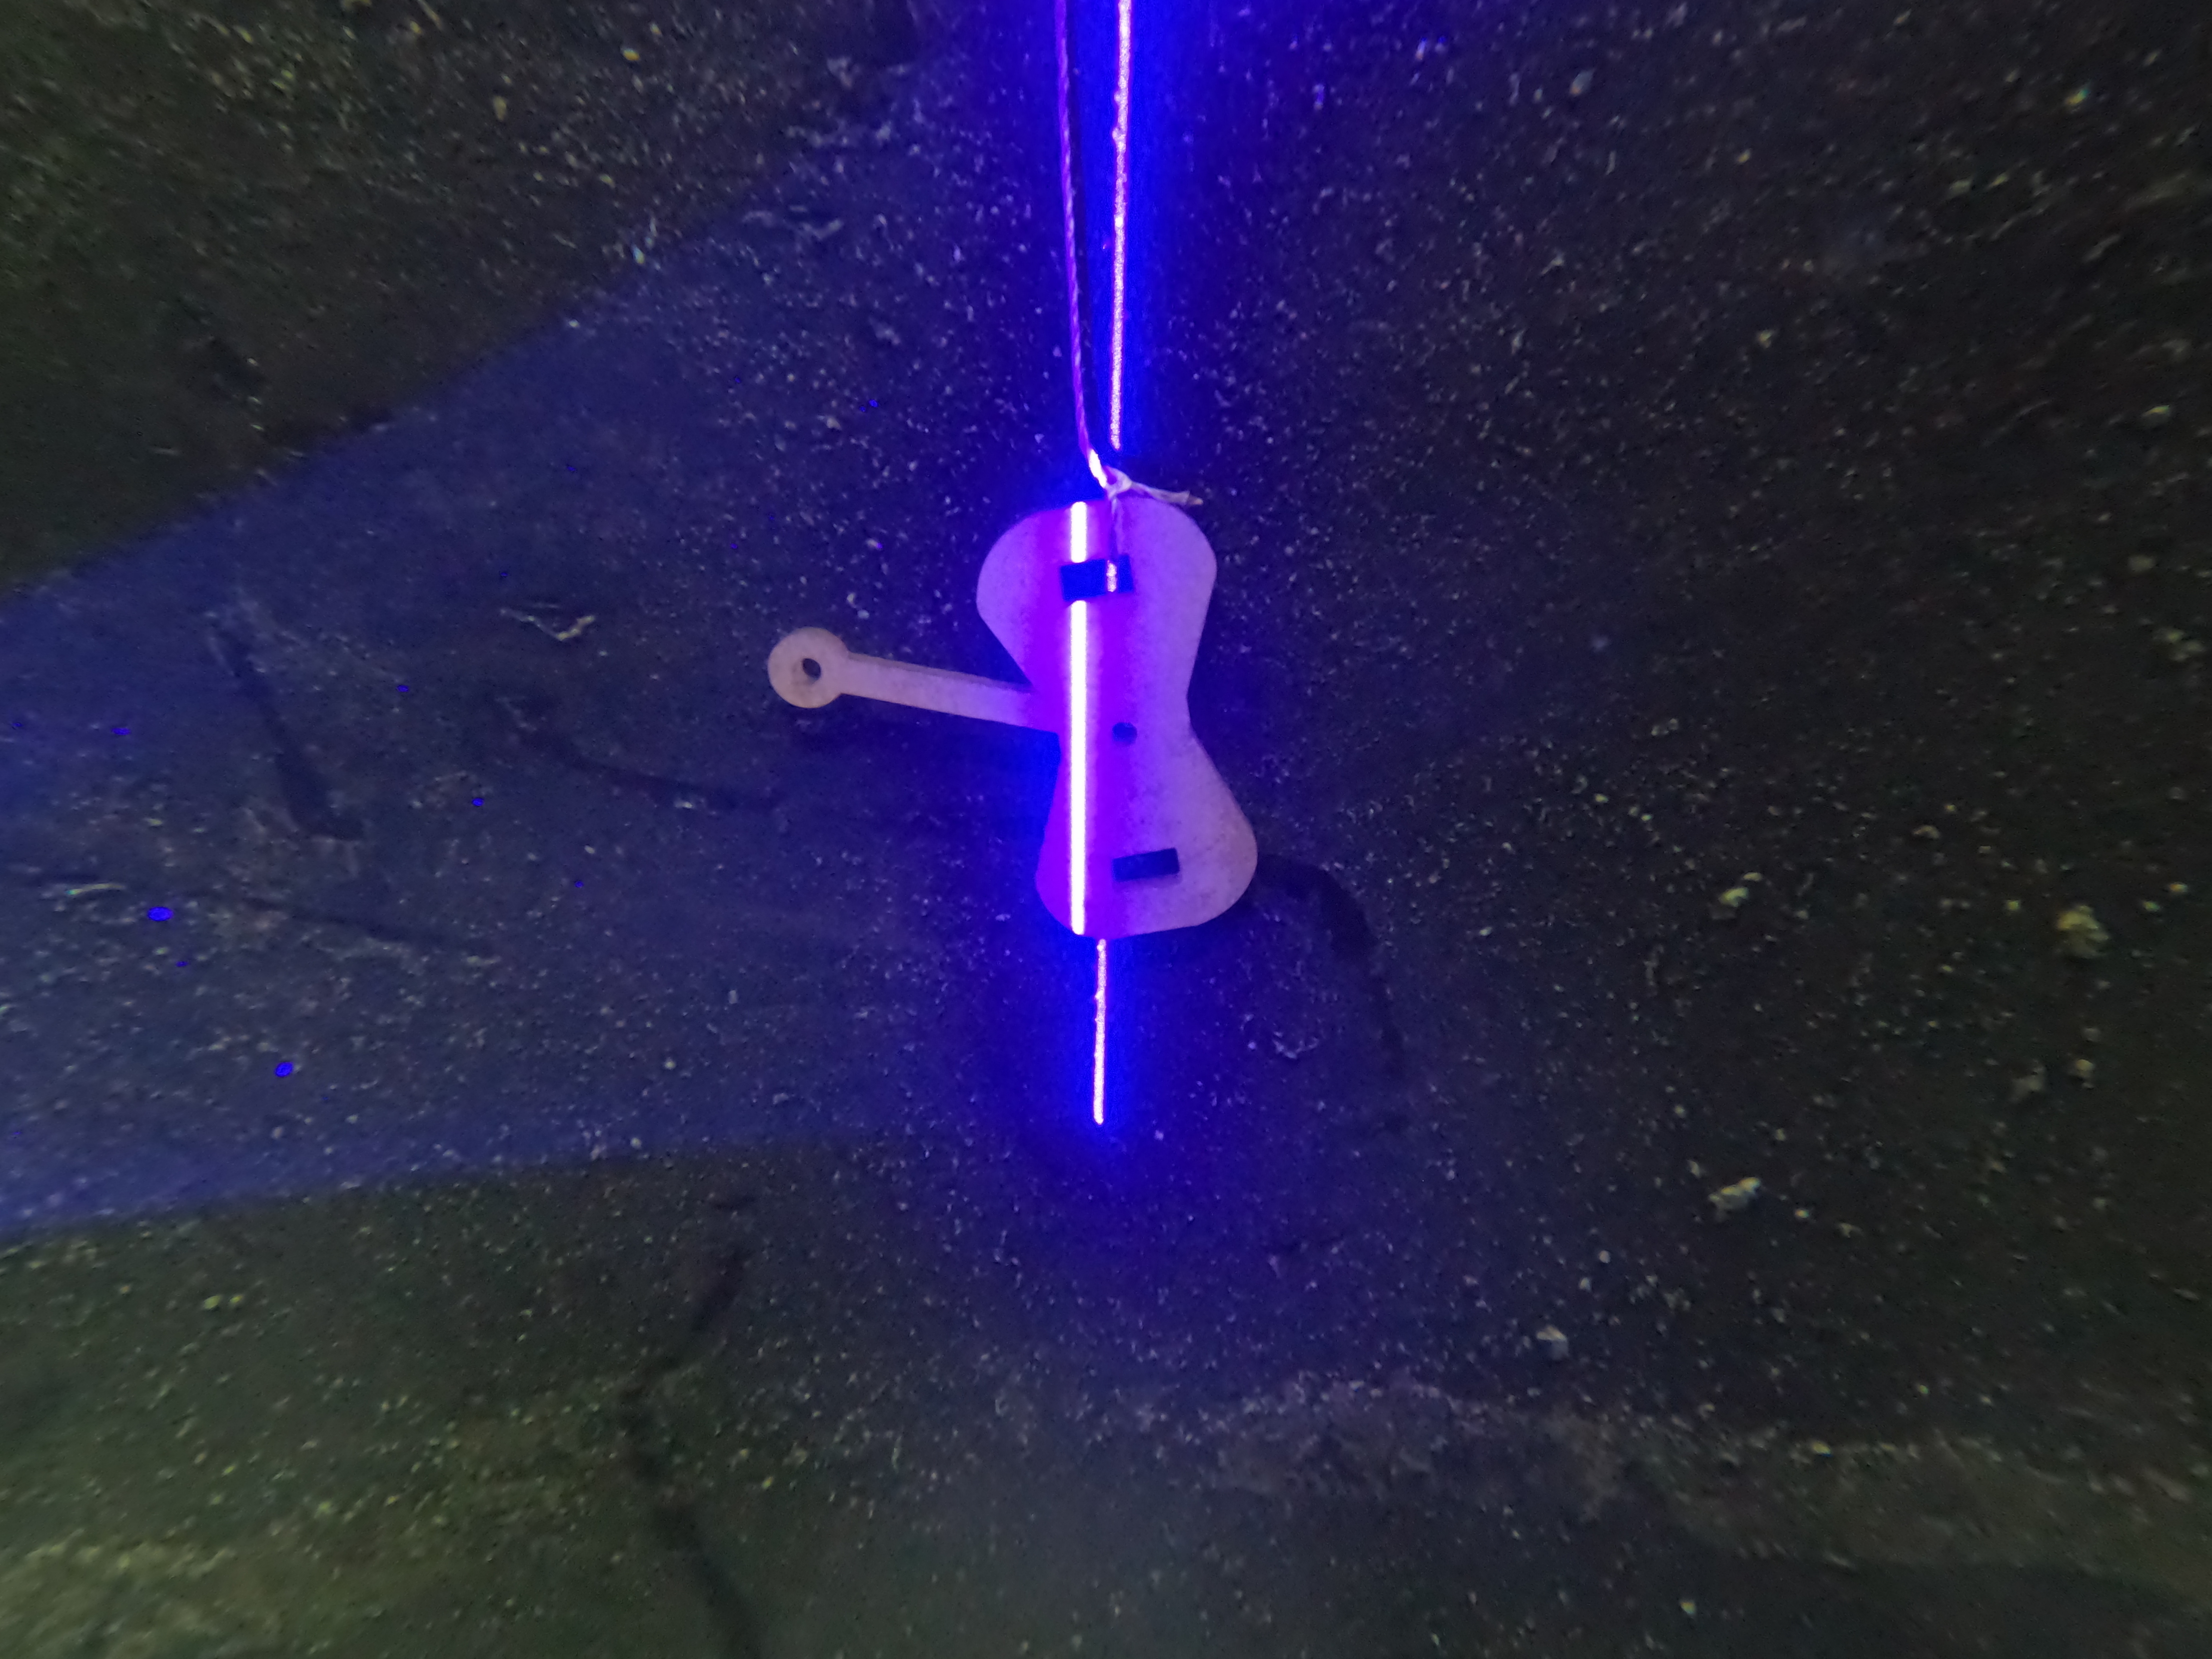

Supplement: Supplementary file 3207 [file G0015648.pdf › Level_2_1/G0015648.pdf]

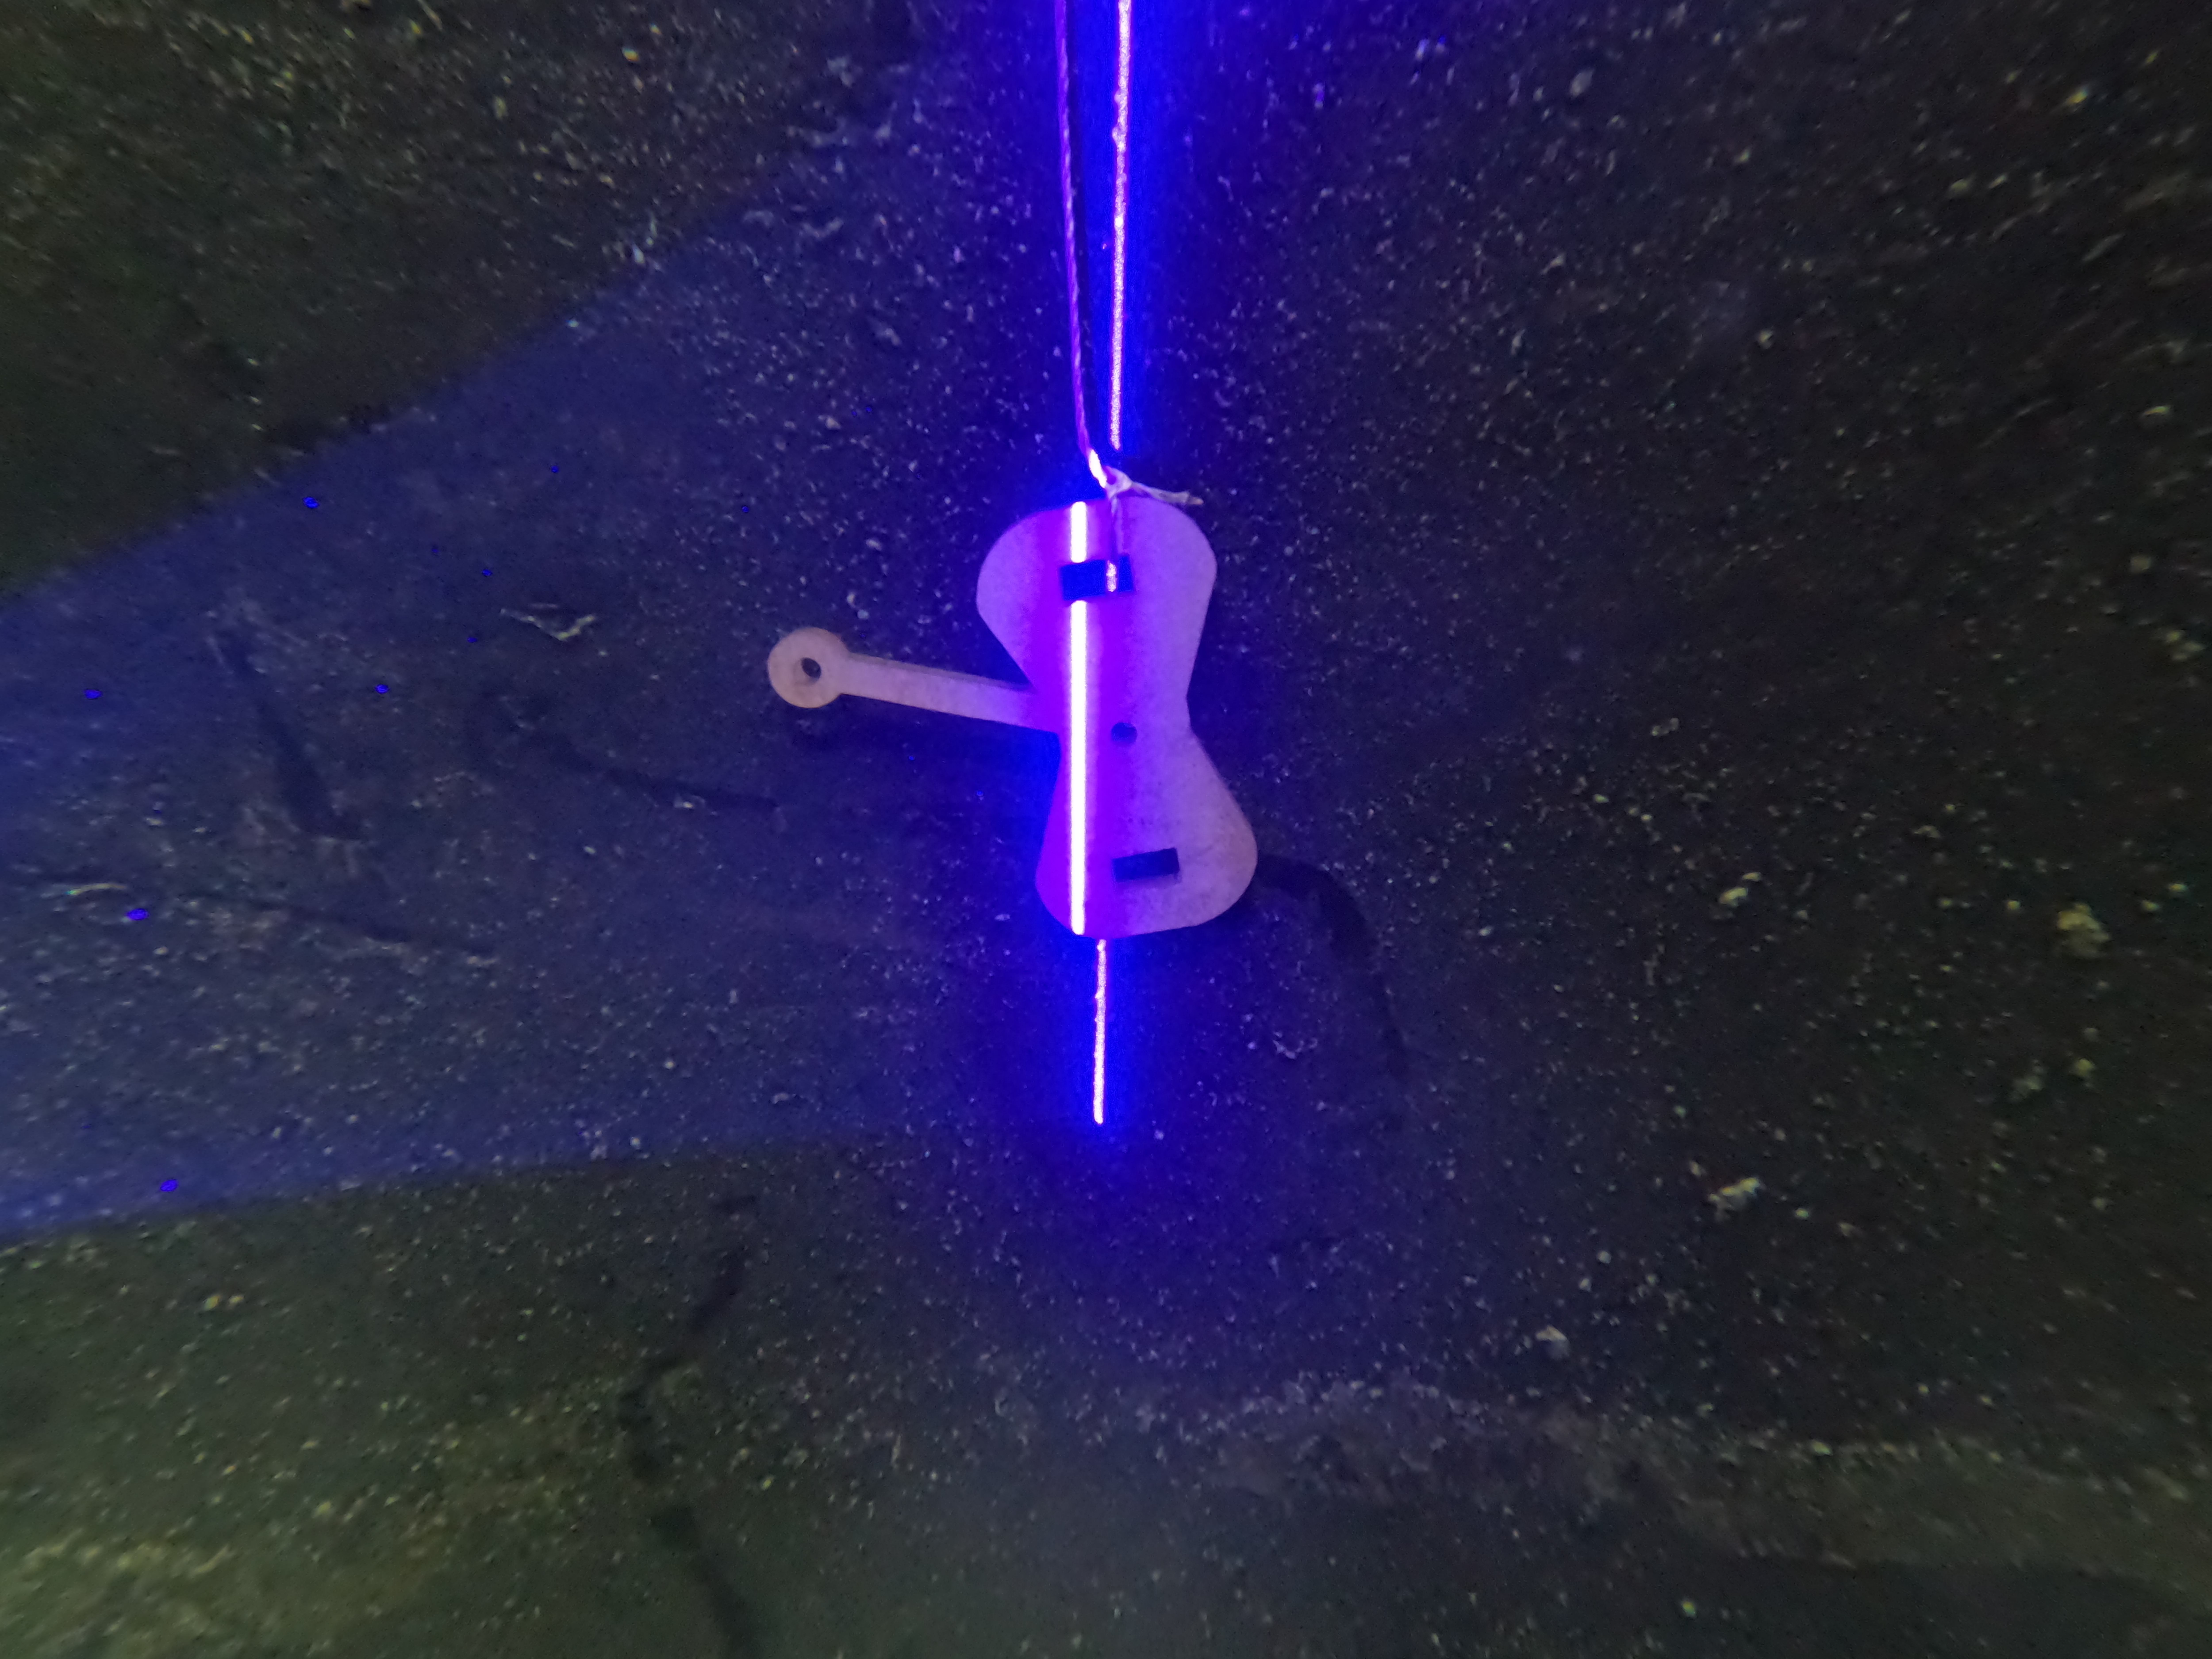

Supplement: Supplementary file 3208 [file G0015649.pdf › Level_2_1/G0015649.pdf]

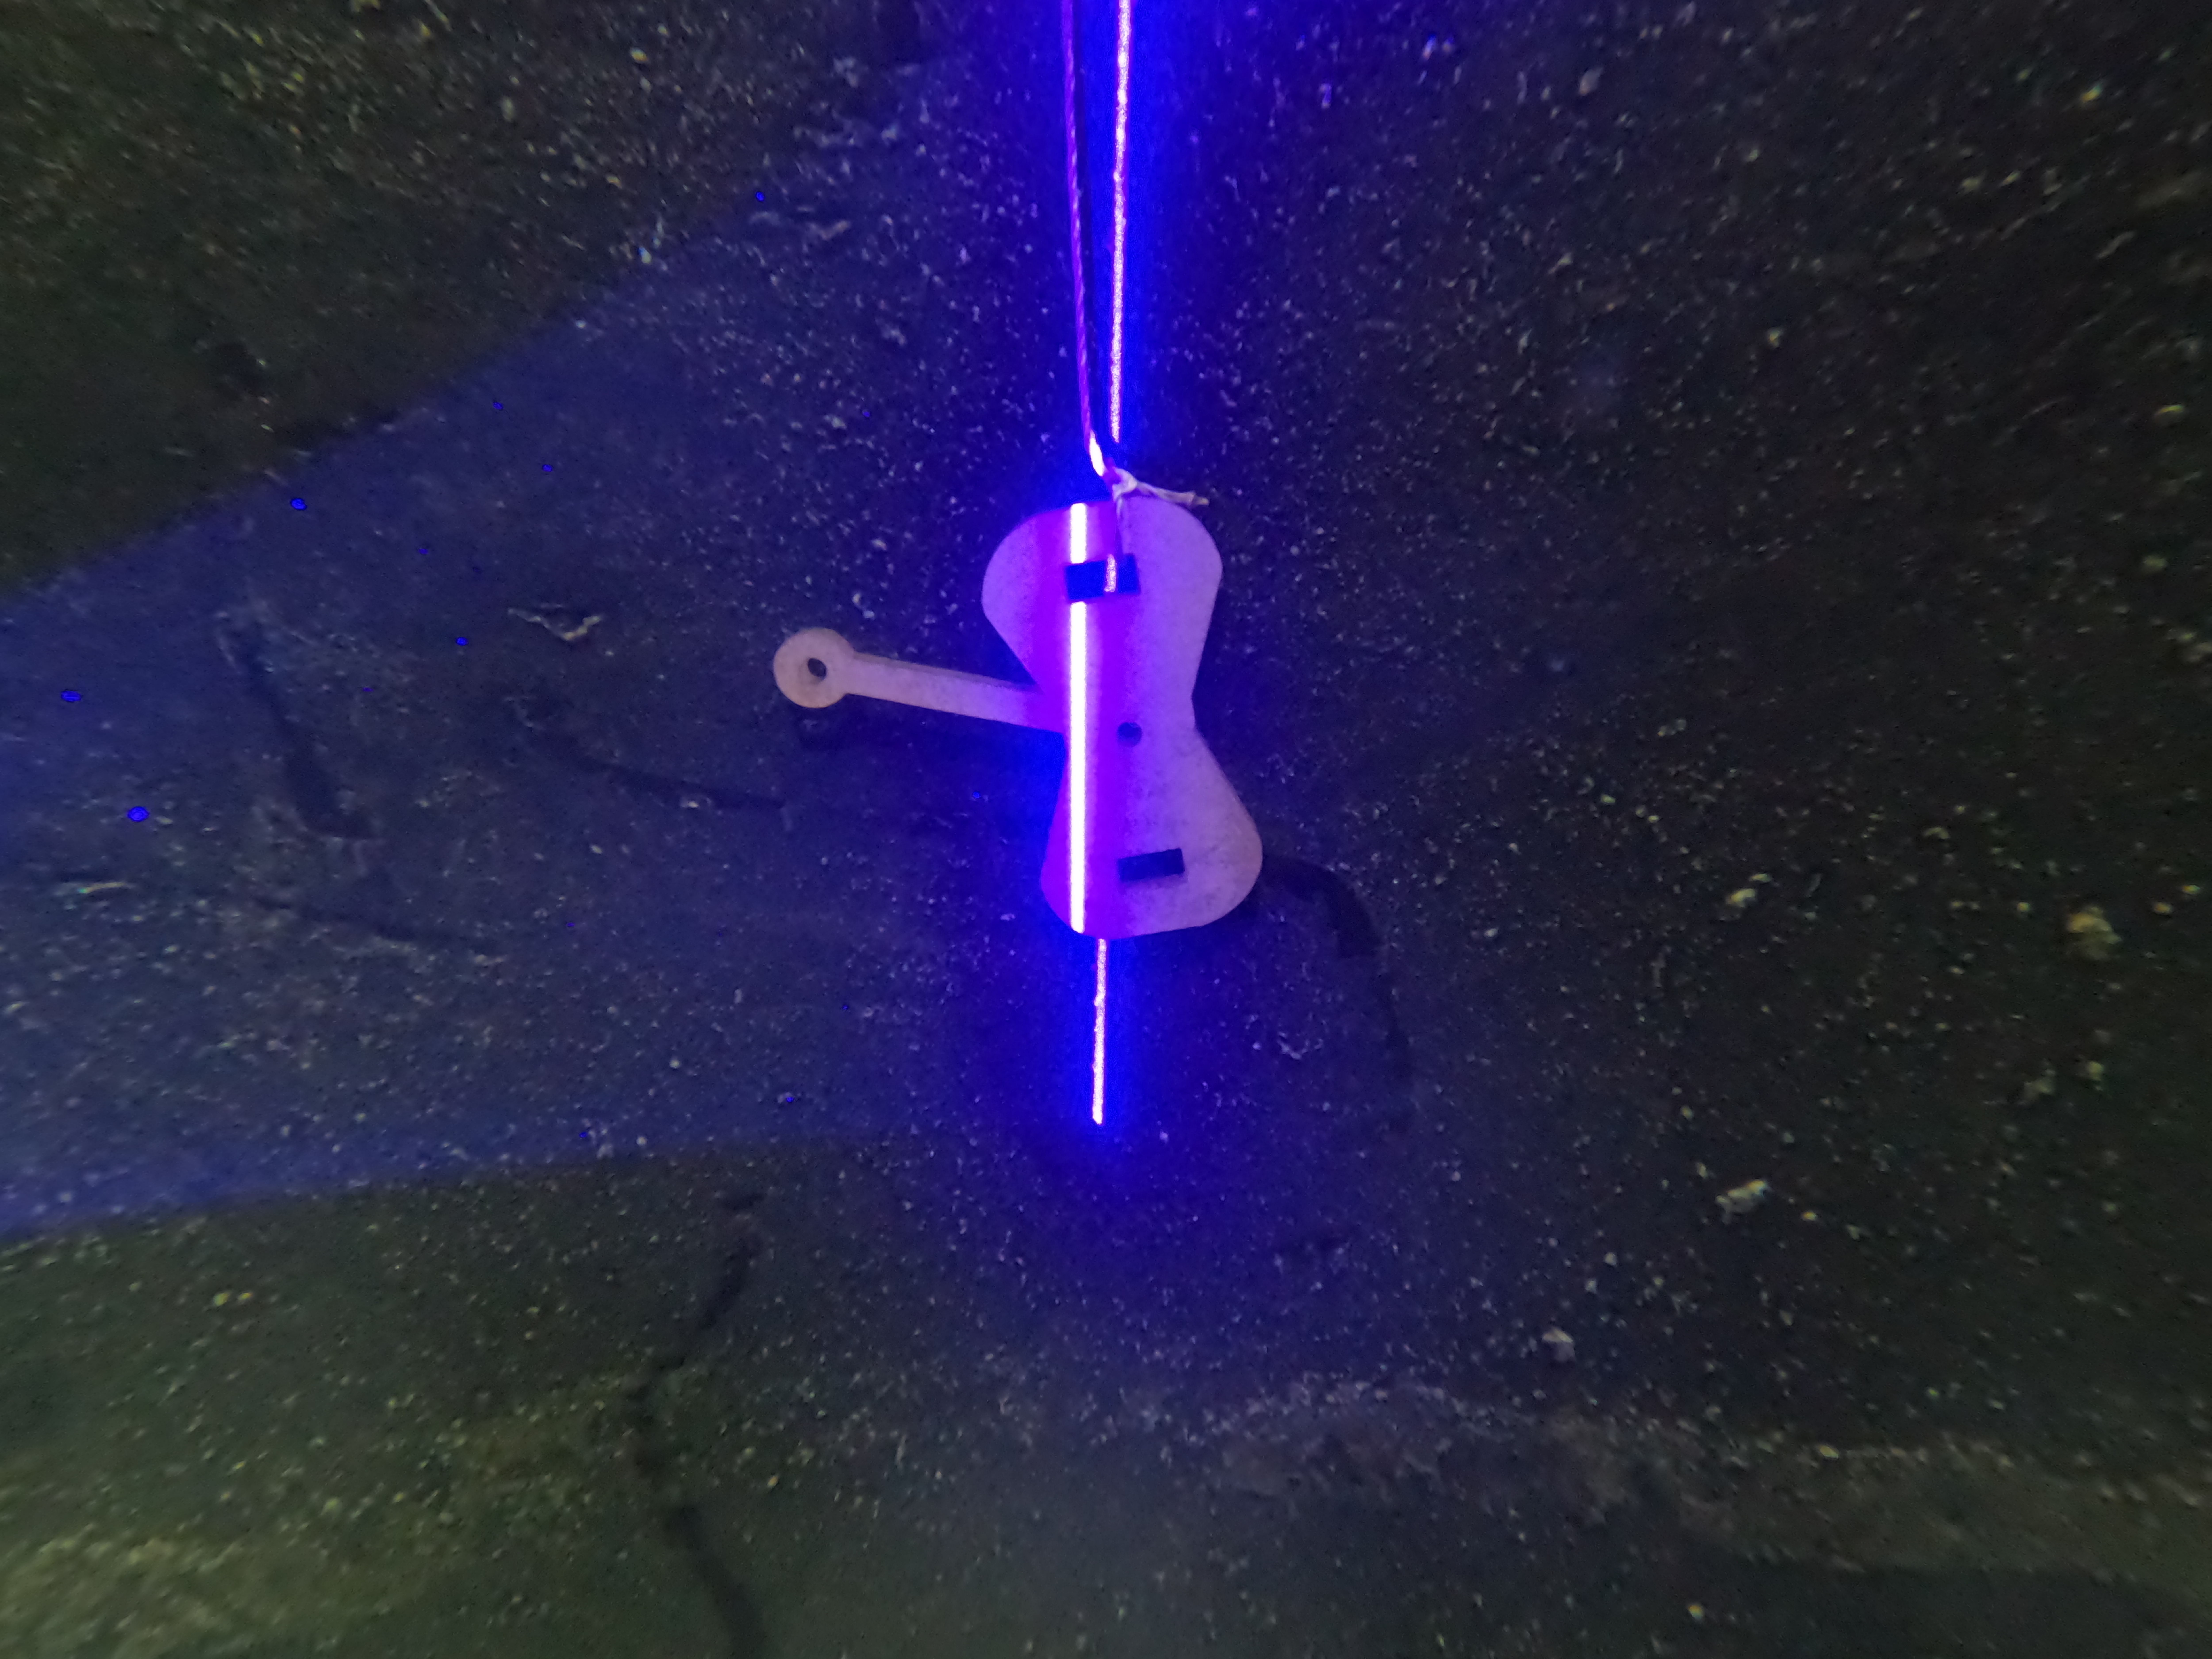

Supplement: Supplementary file 3209 [file G0015650.pdf › Level_2_1/G0015650.pdf]

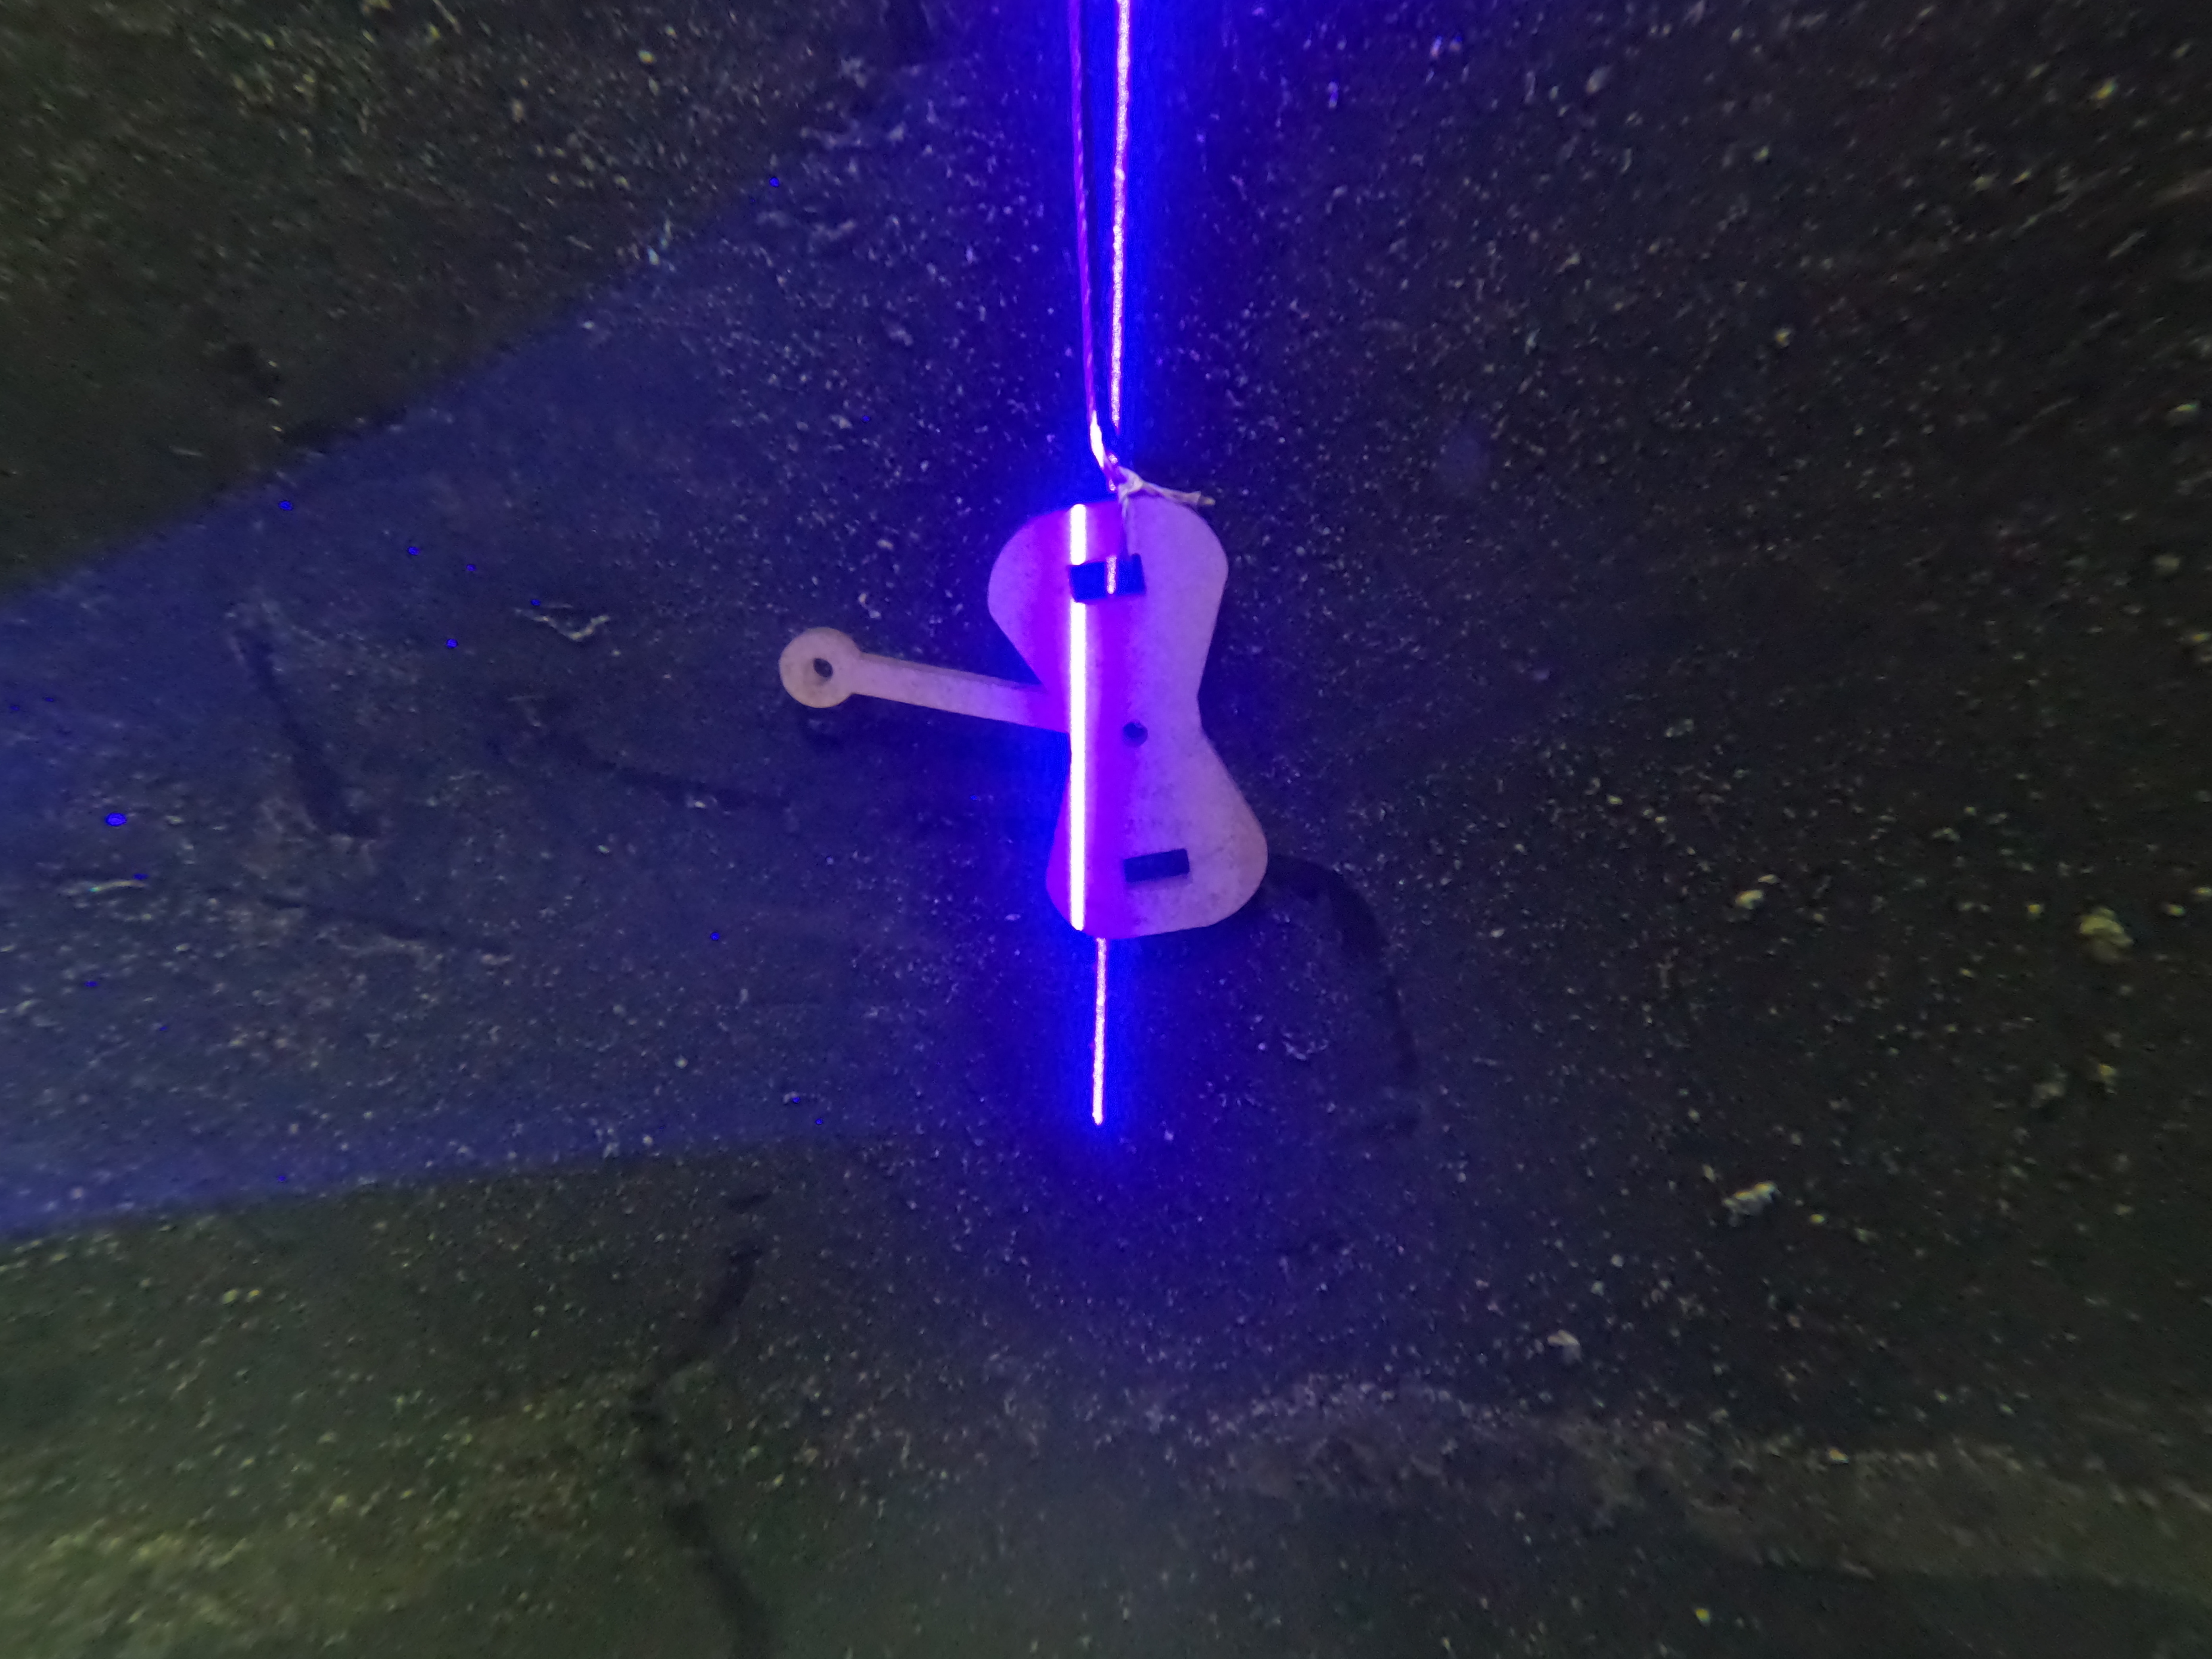

Supplement: Supplementary file 3210 [file G0015651.pdf › Level_2_1/G0015651.pdf]

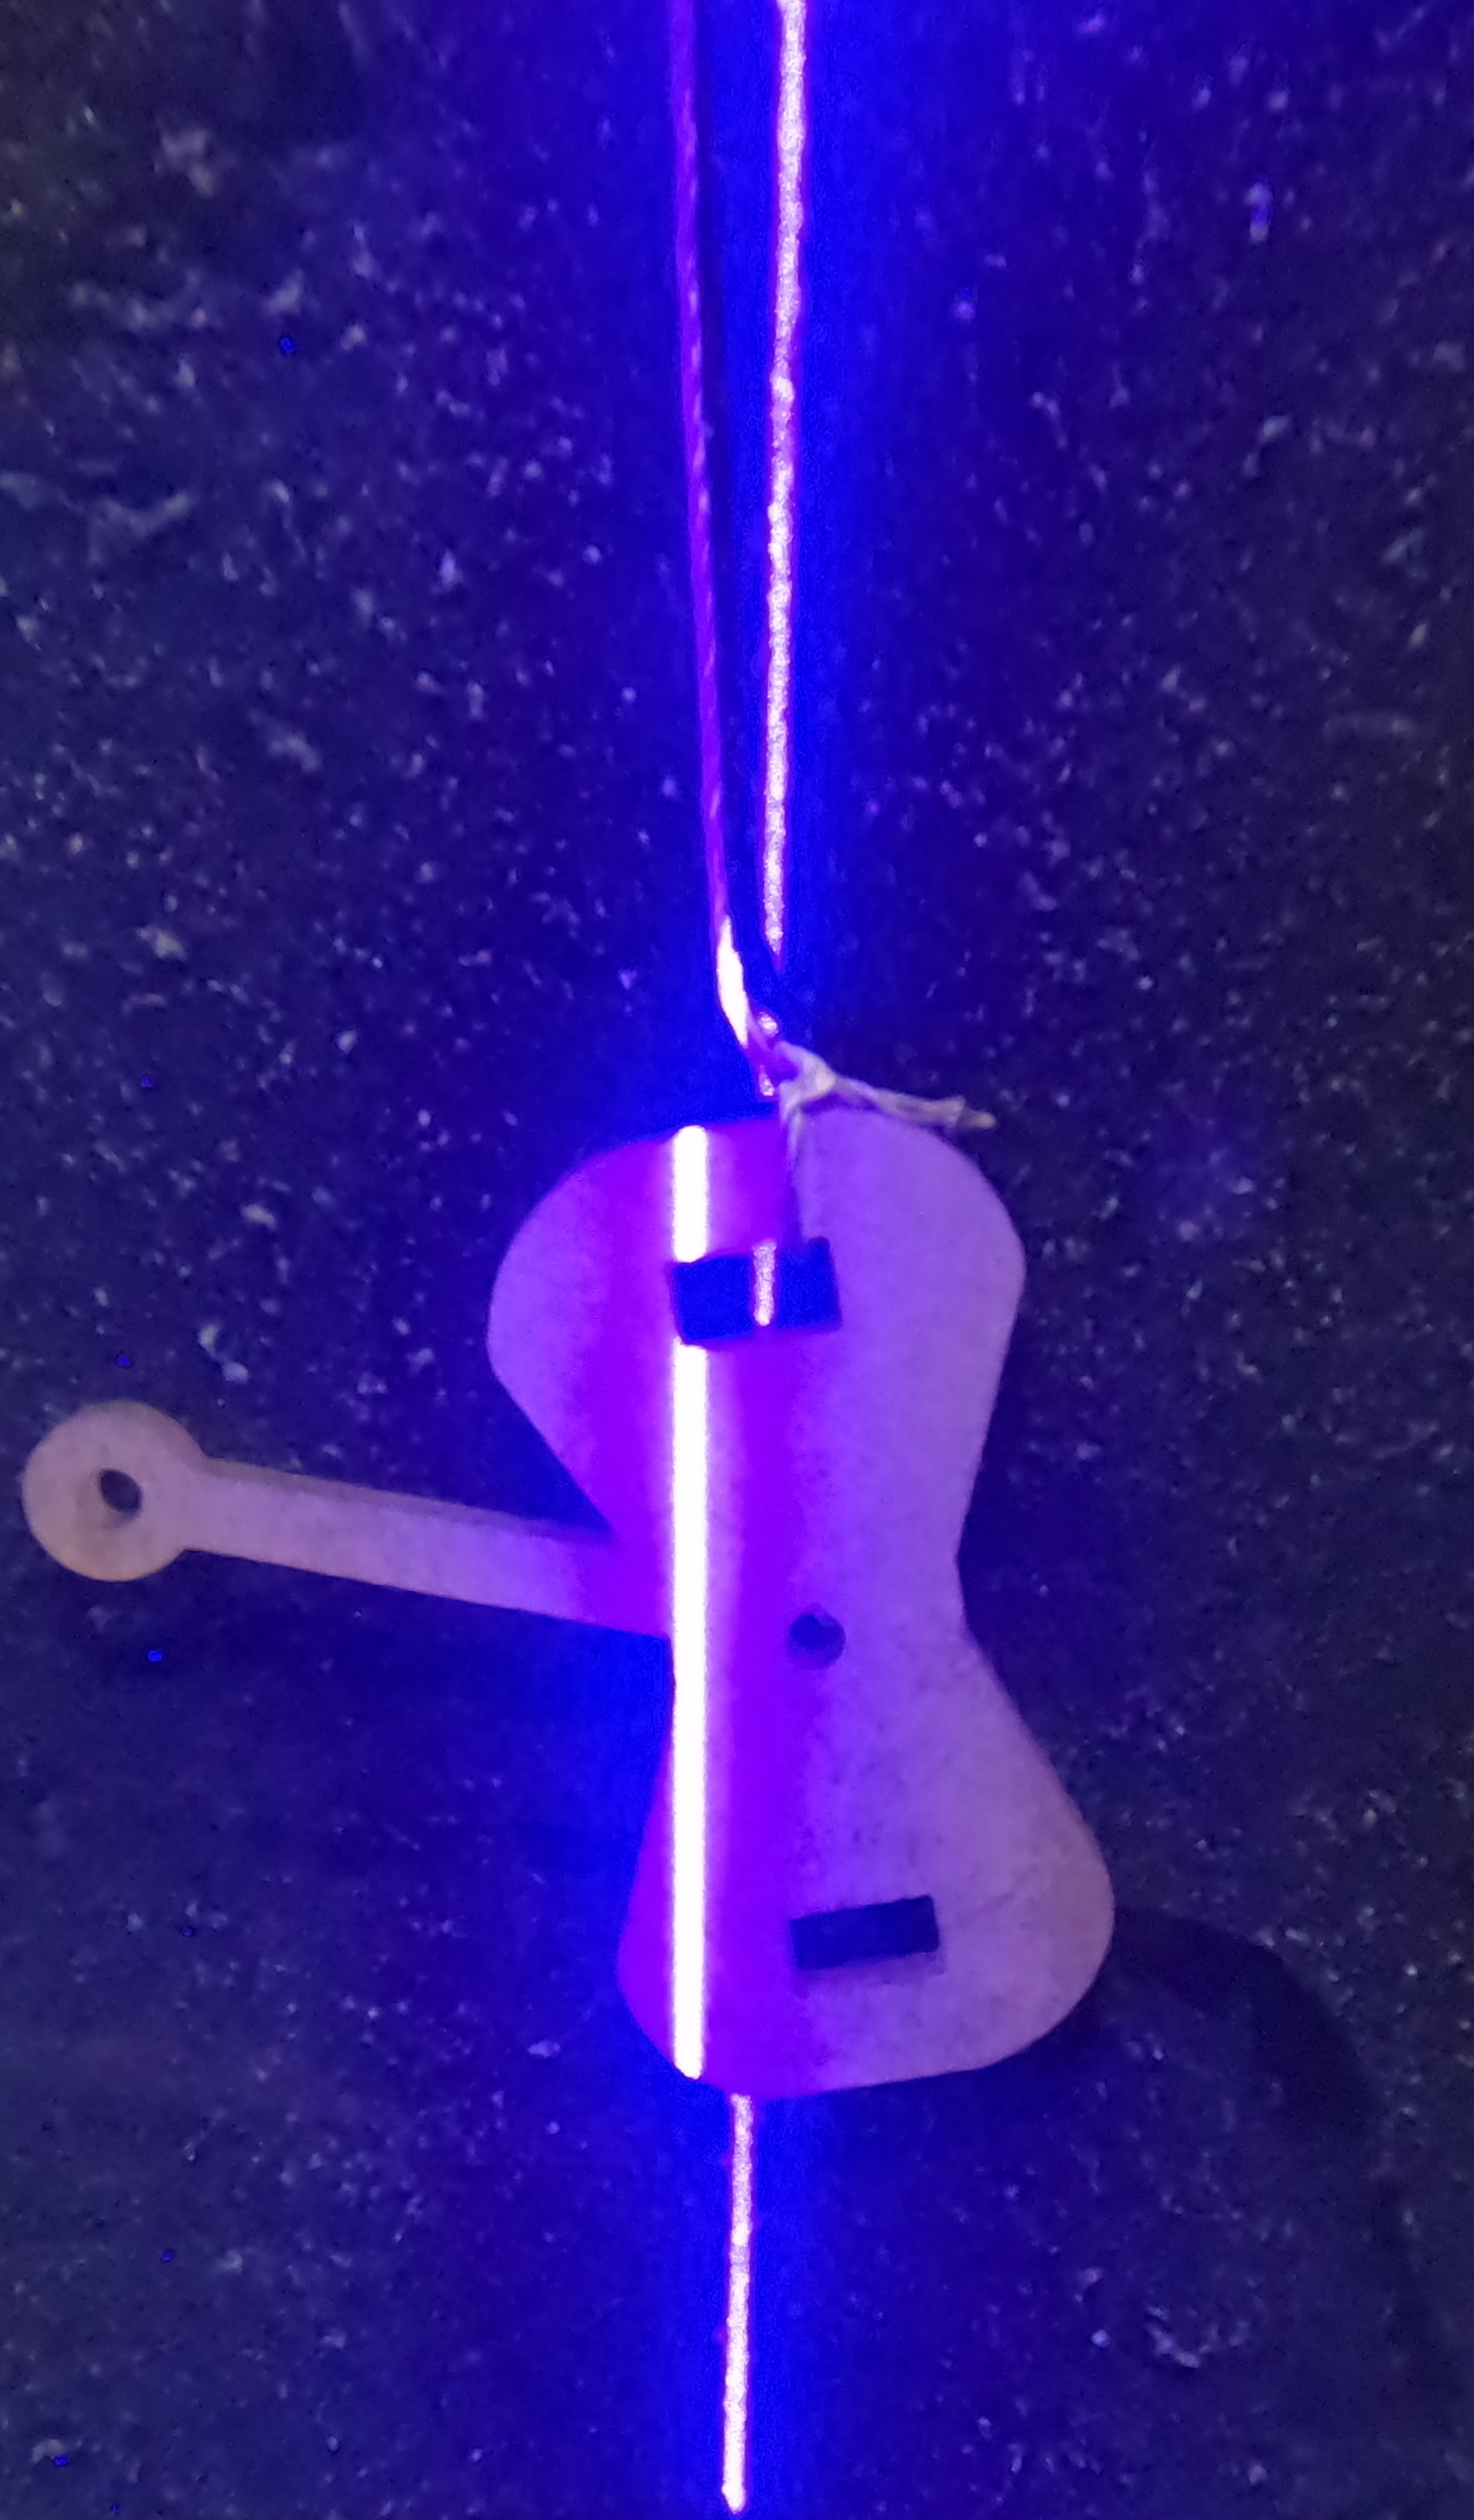

Supplement: Supplementary file 3211 [file G0015652.pdf › Level_2_1/G0015652.pdf]

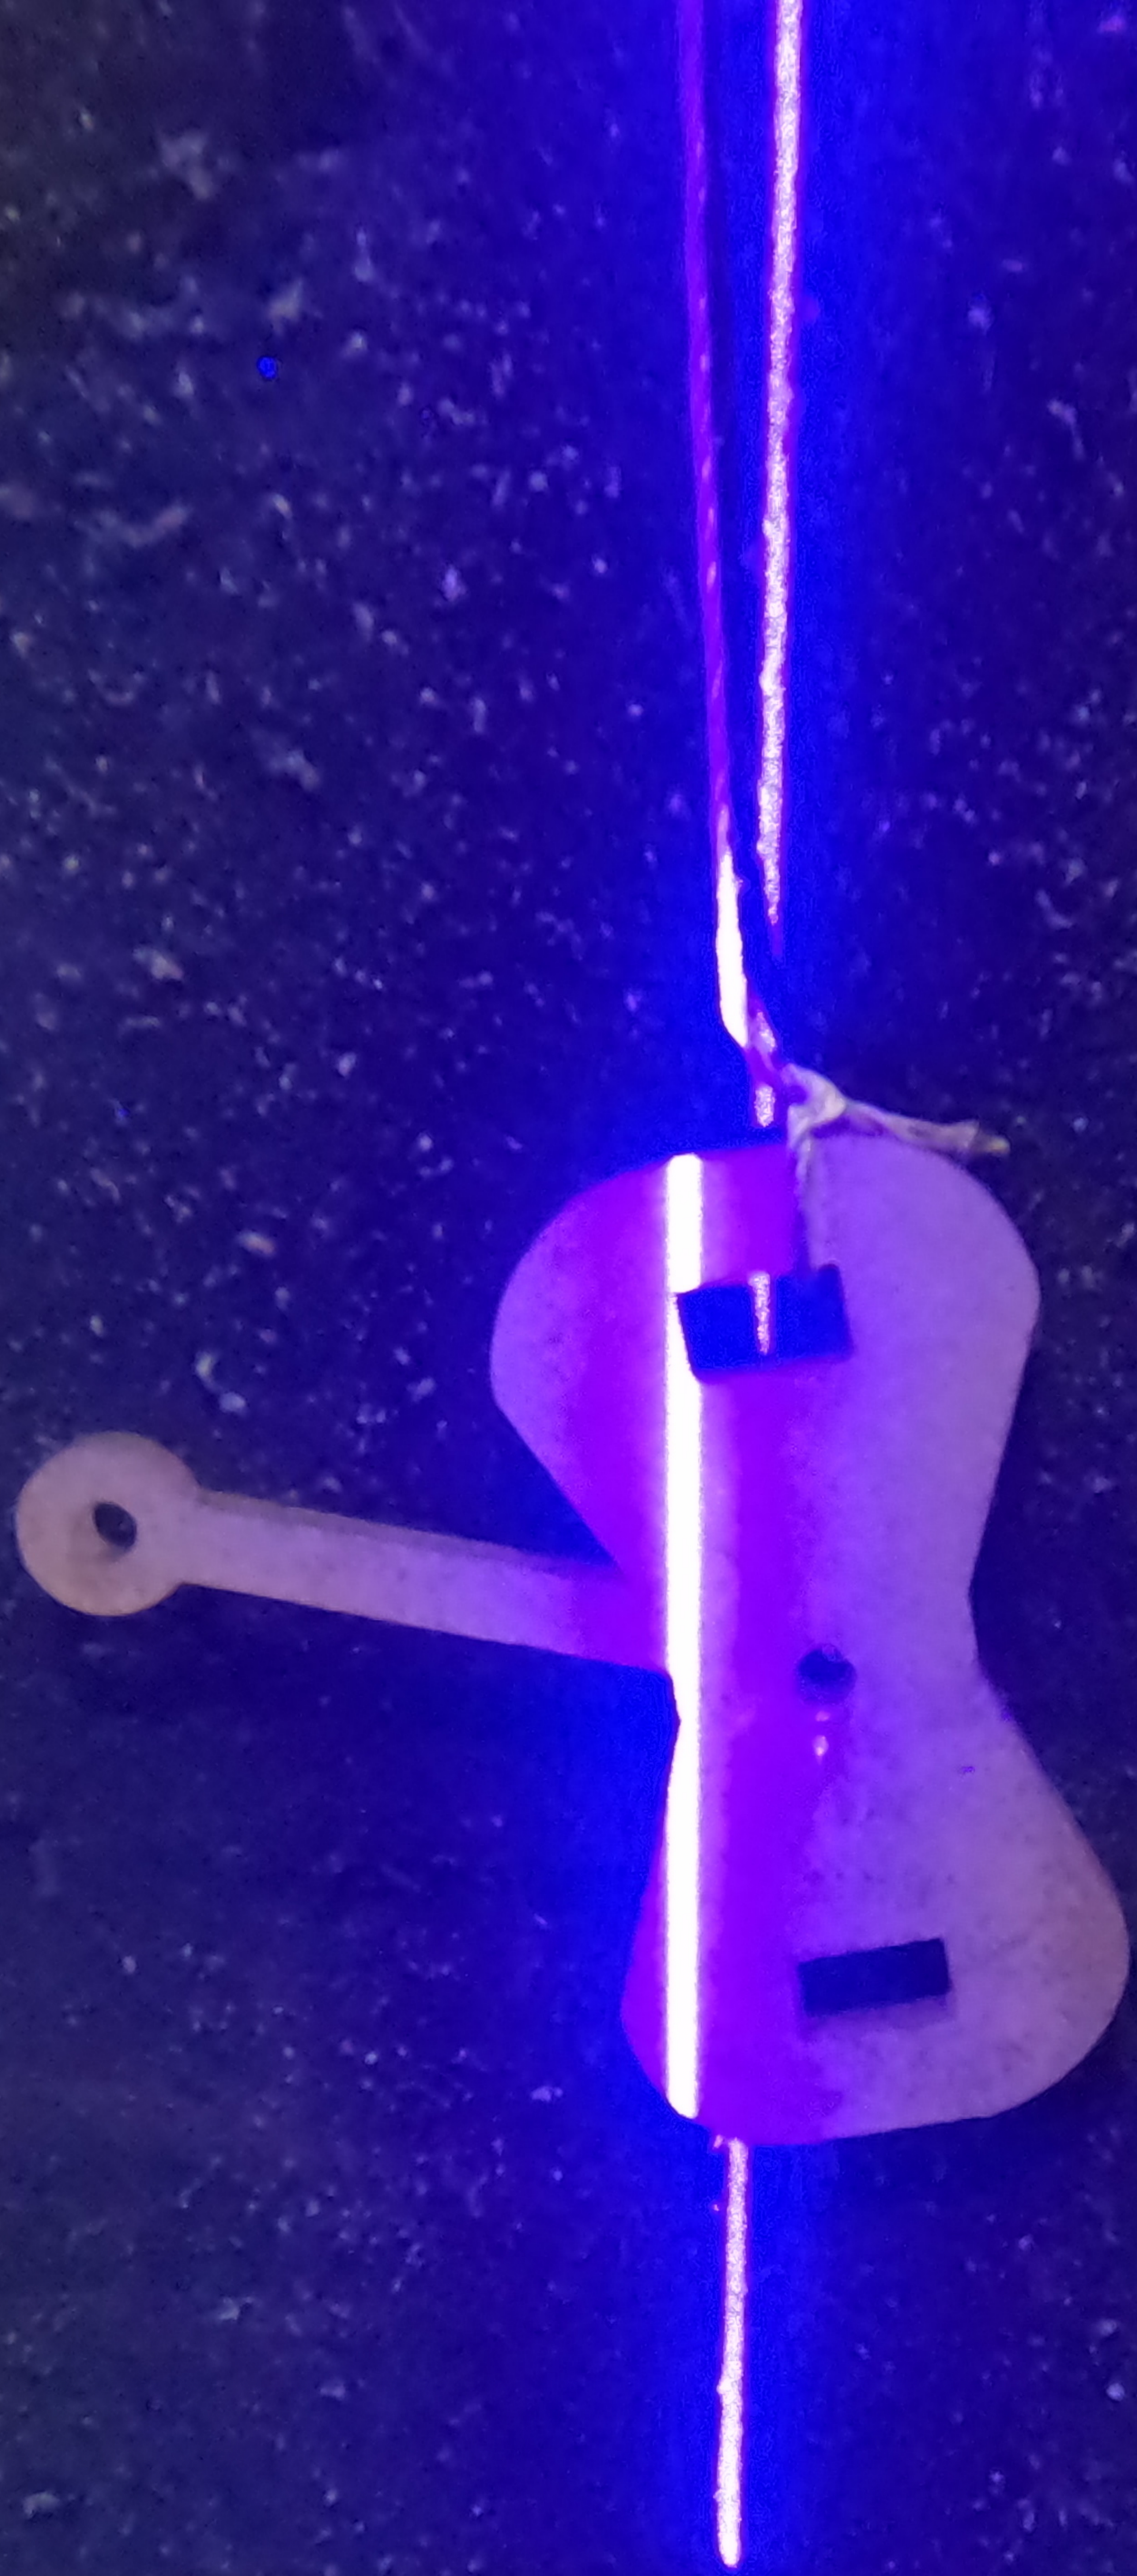

Supplement: Supplementary file 3212 [file G0015653.pdf › Level_2_1/G0015653.pdf]

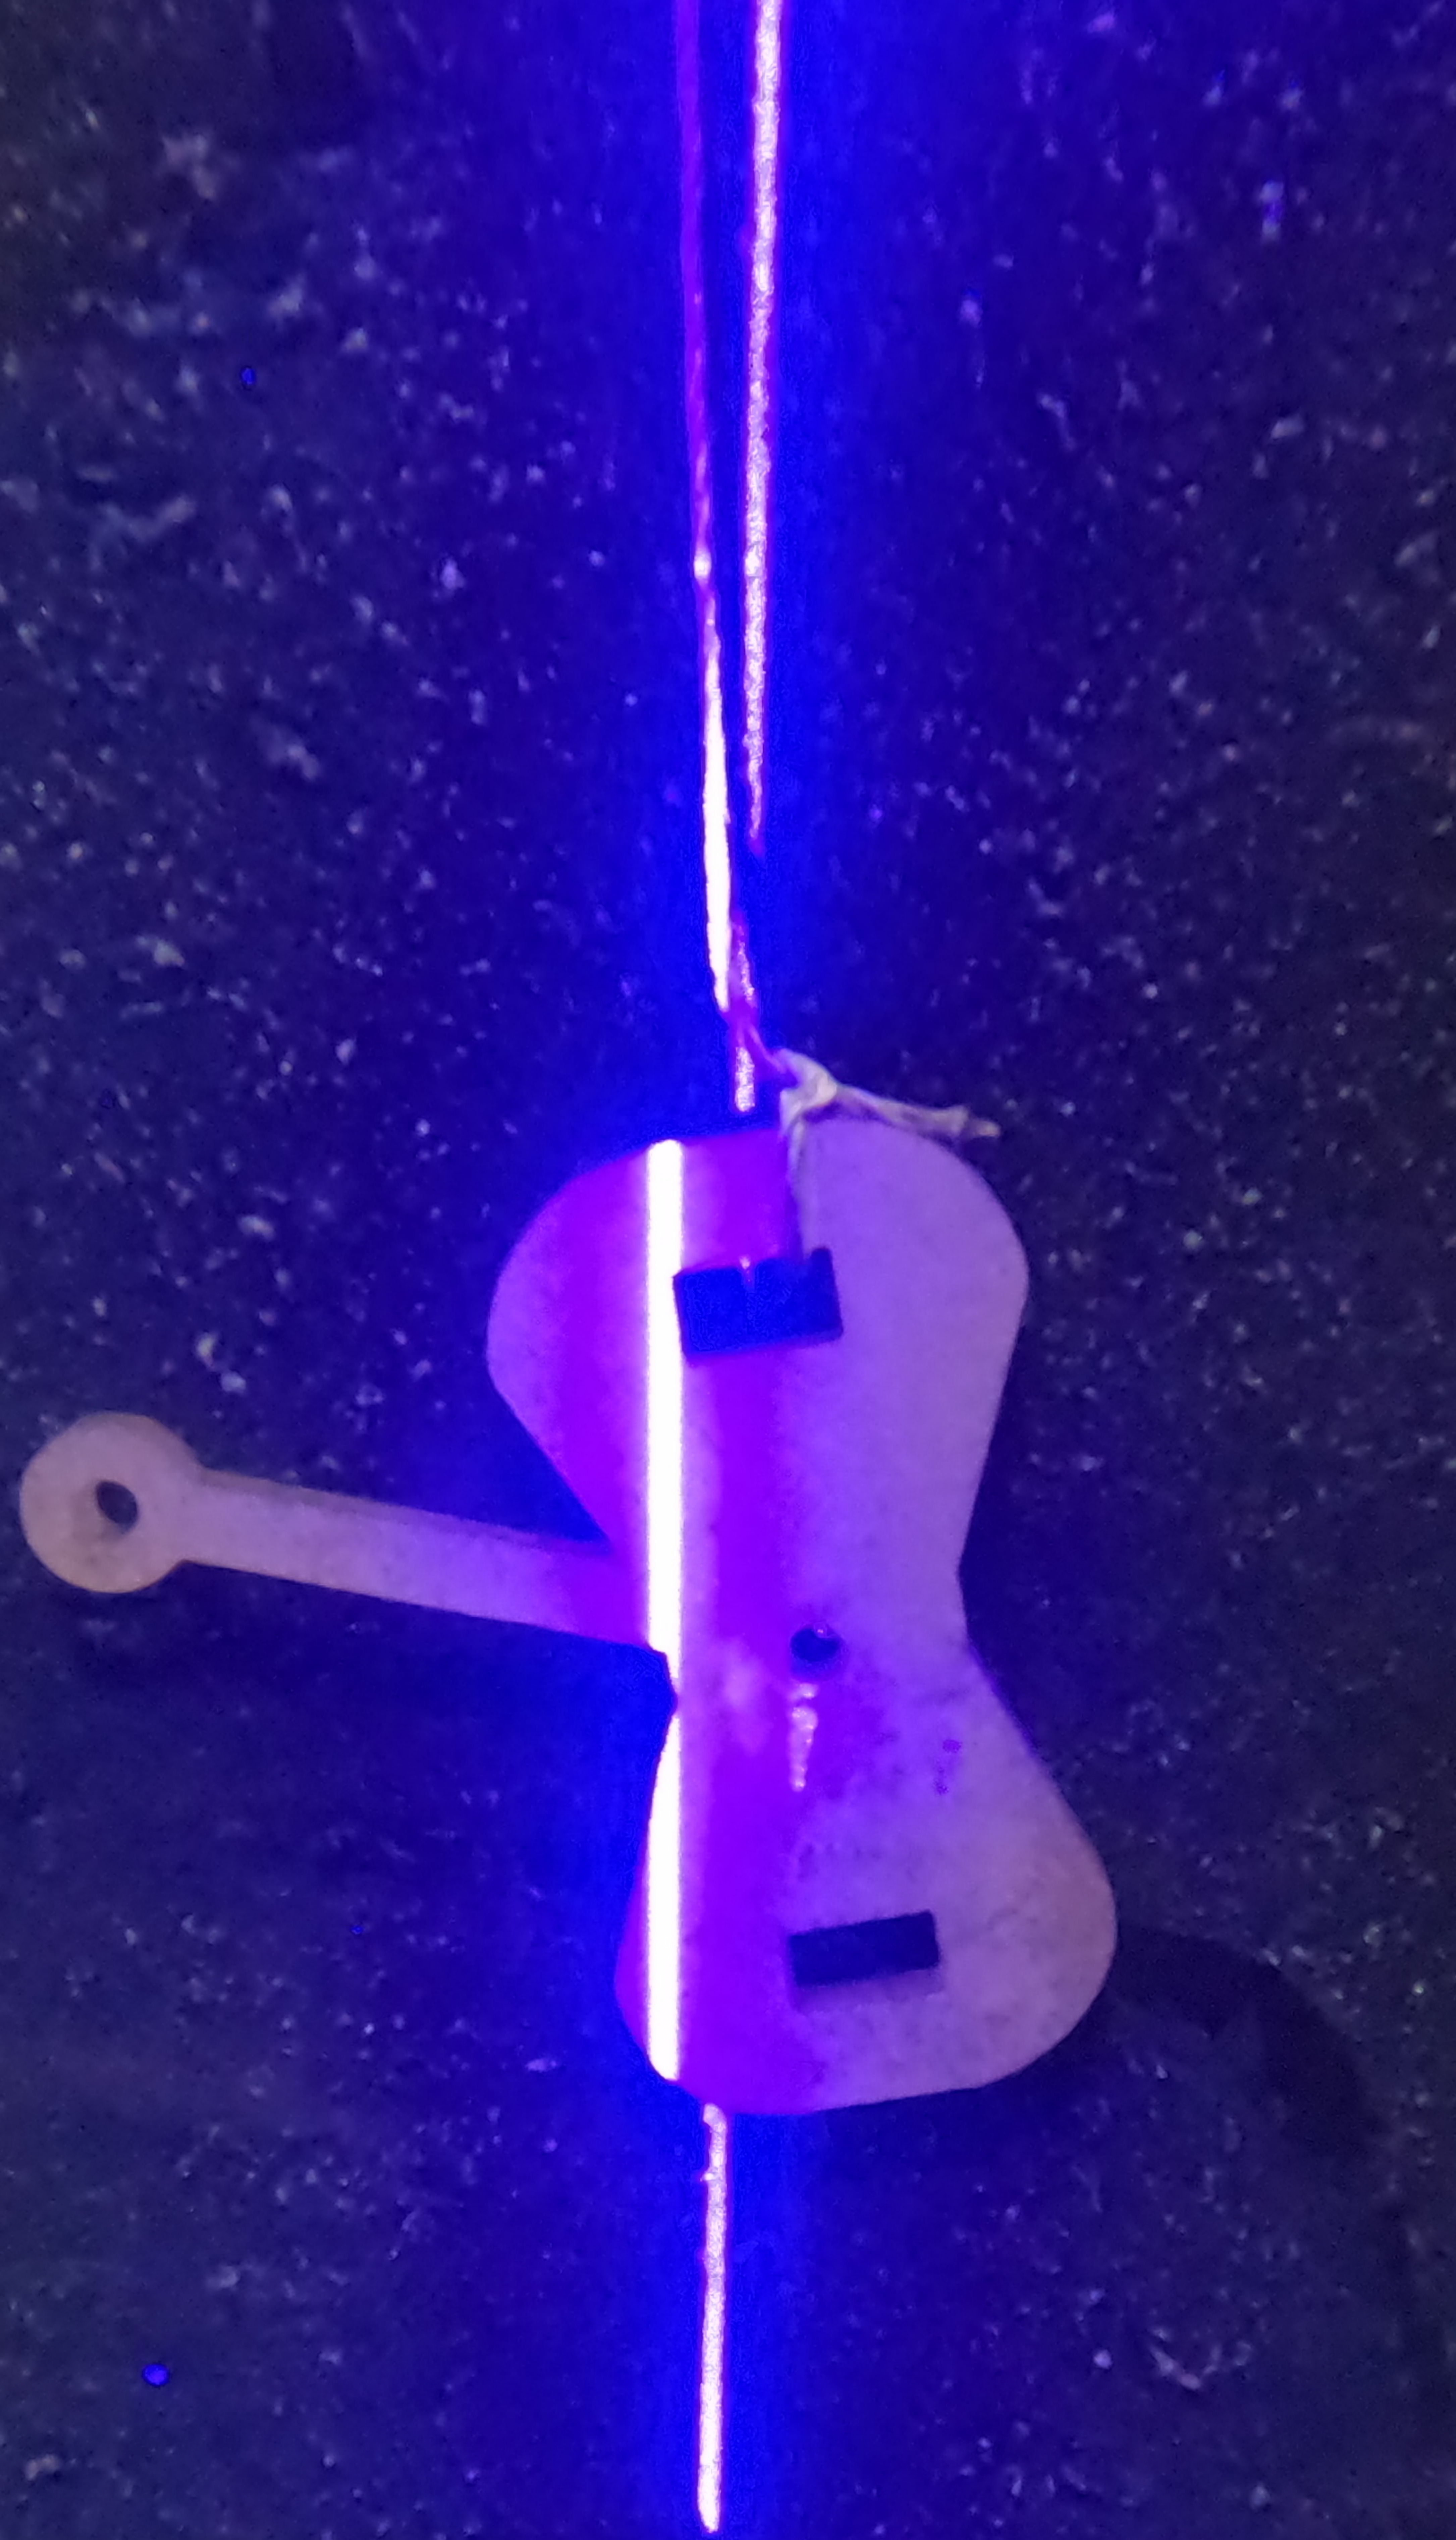

Supplement: Supplementary file 3213 [file G0015654.pdf › Level_2_1/G0015654.pdf]

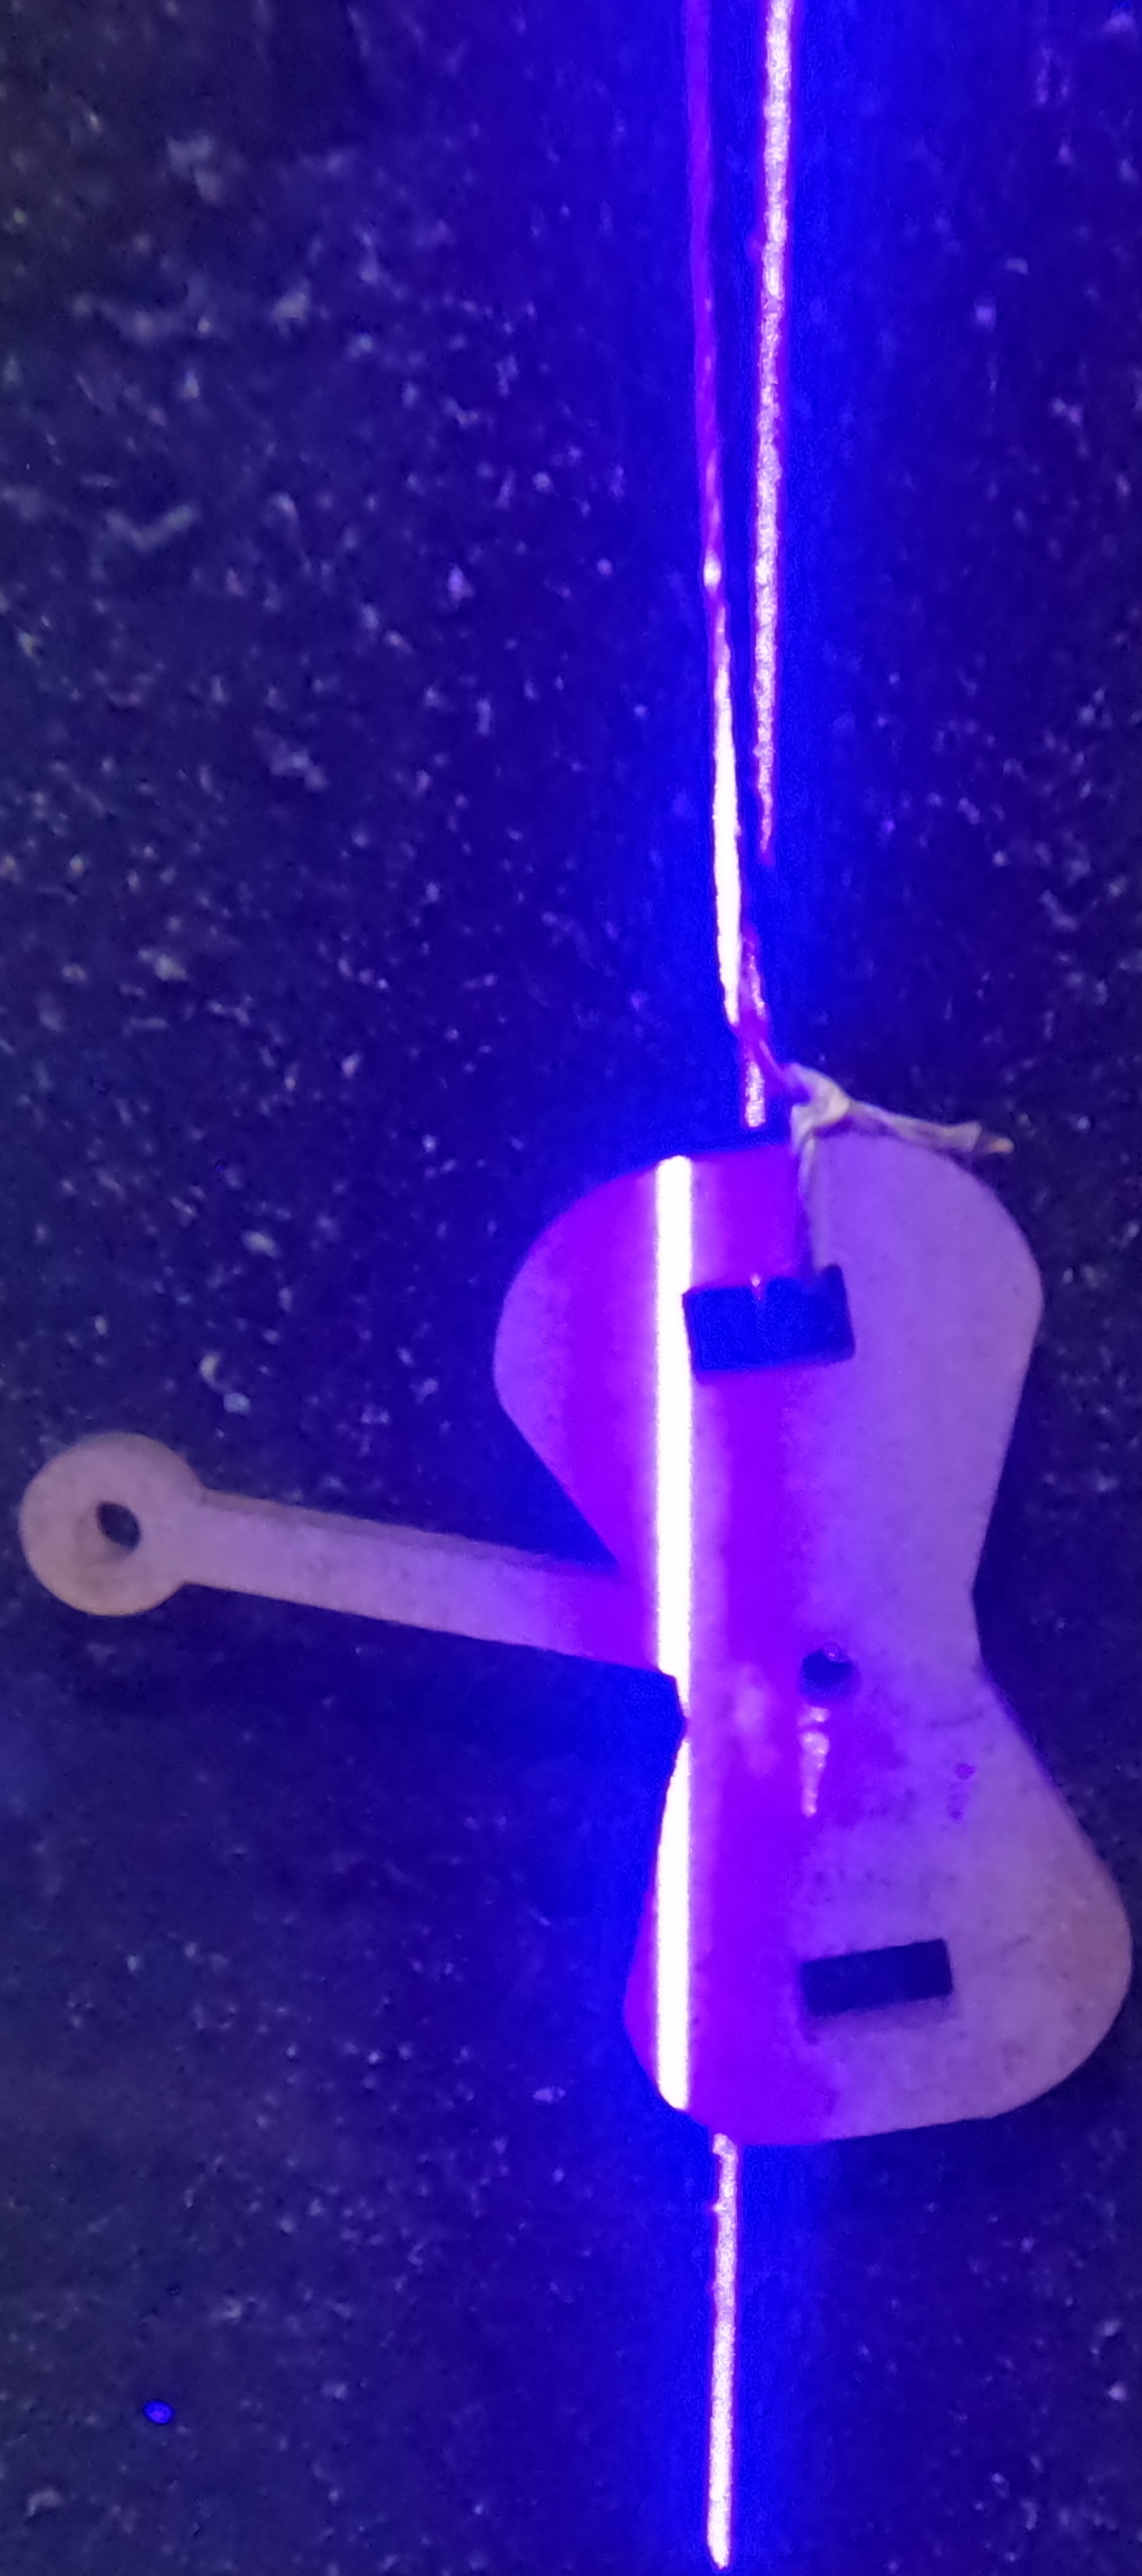

Supplement: Supplementary file 3214 [file G0015655.pdf › Level_2_1/G0015655.pdf]

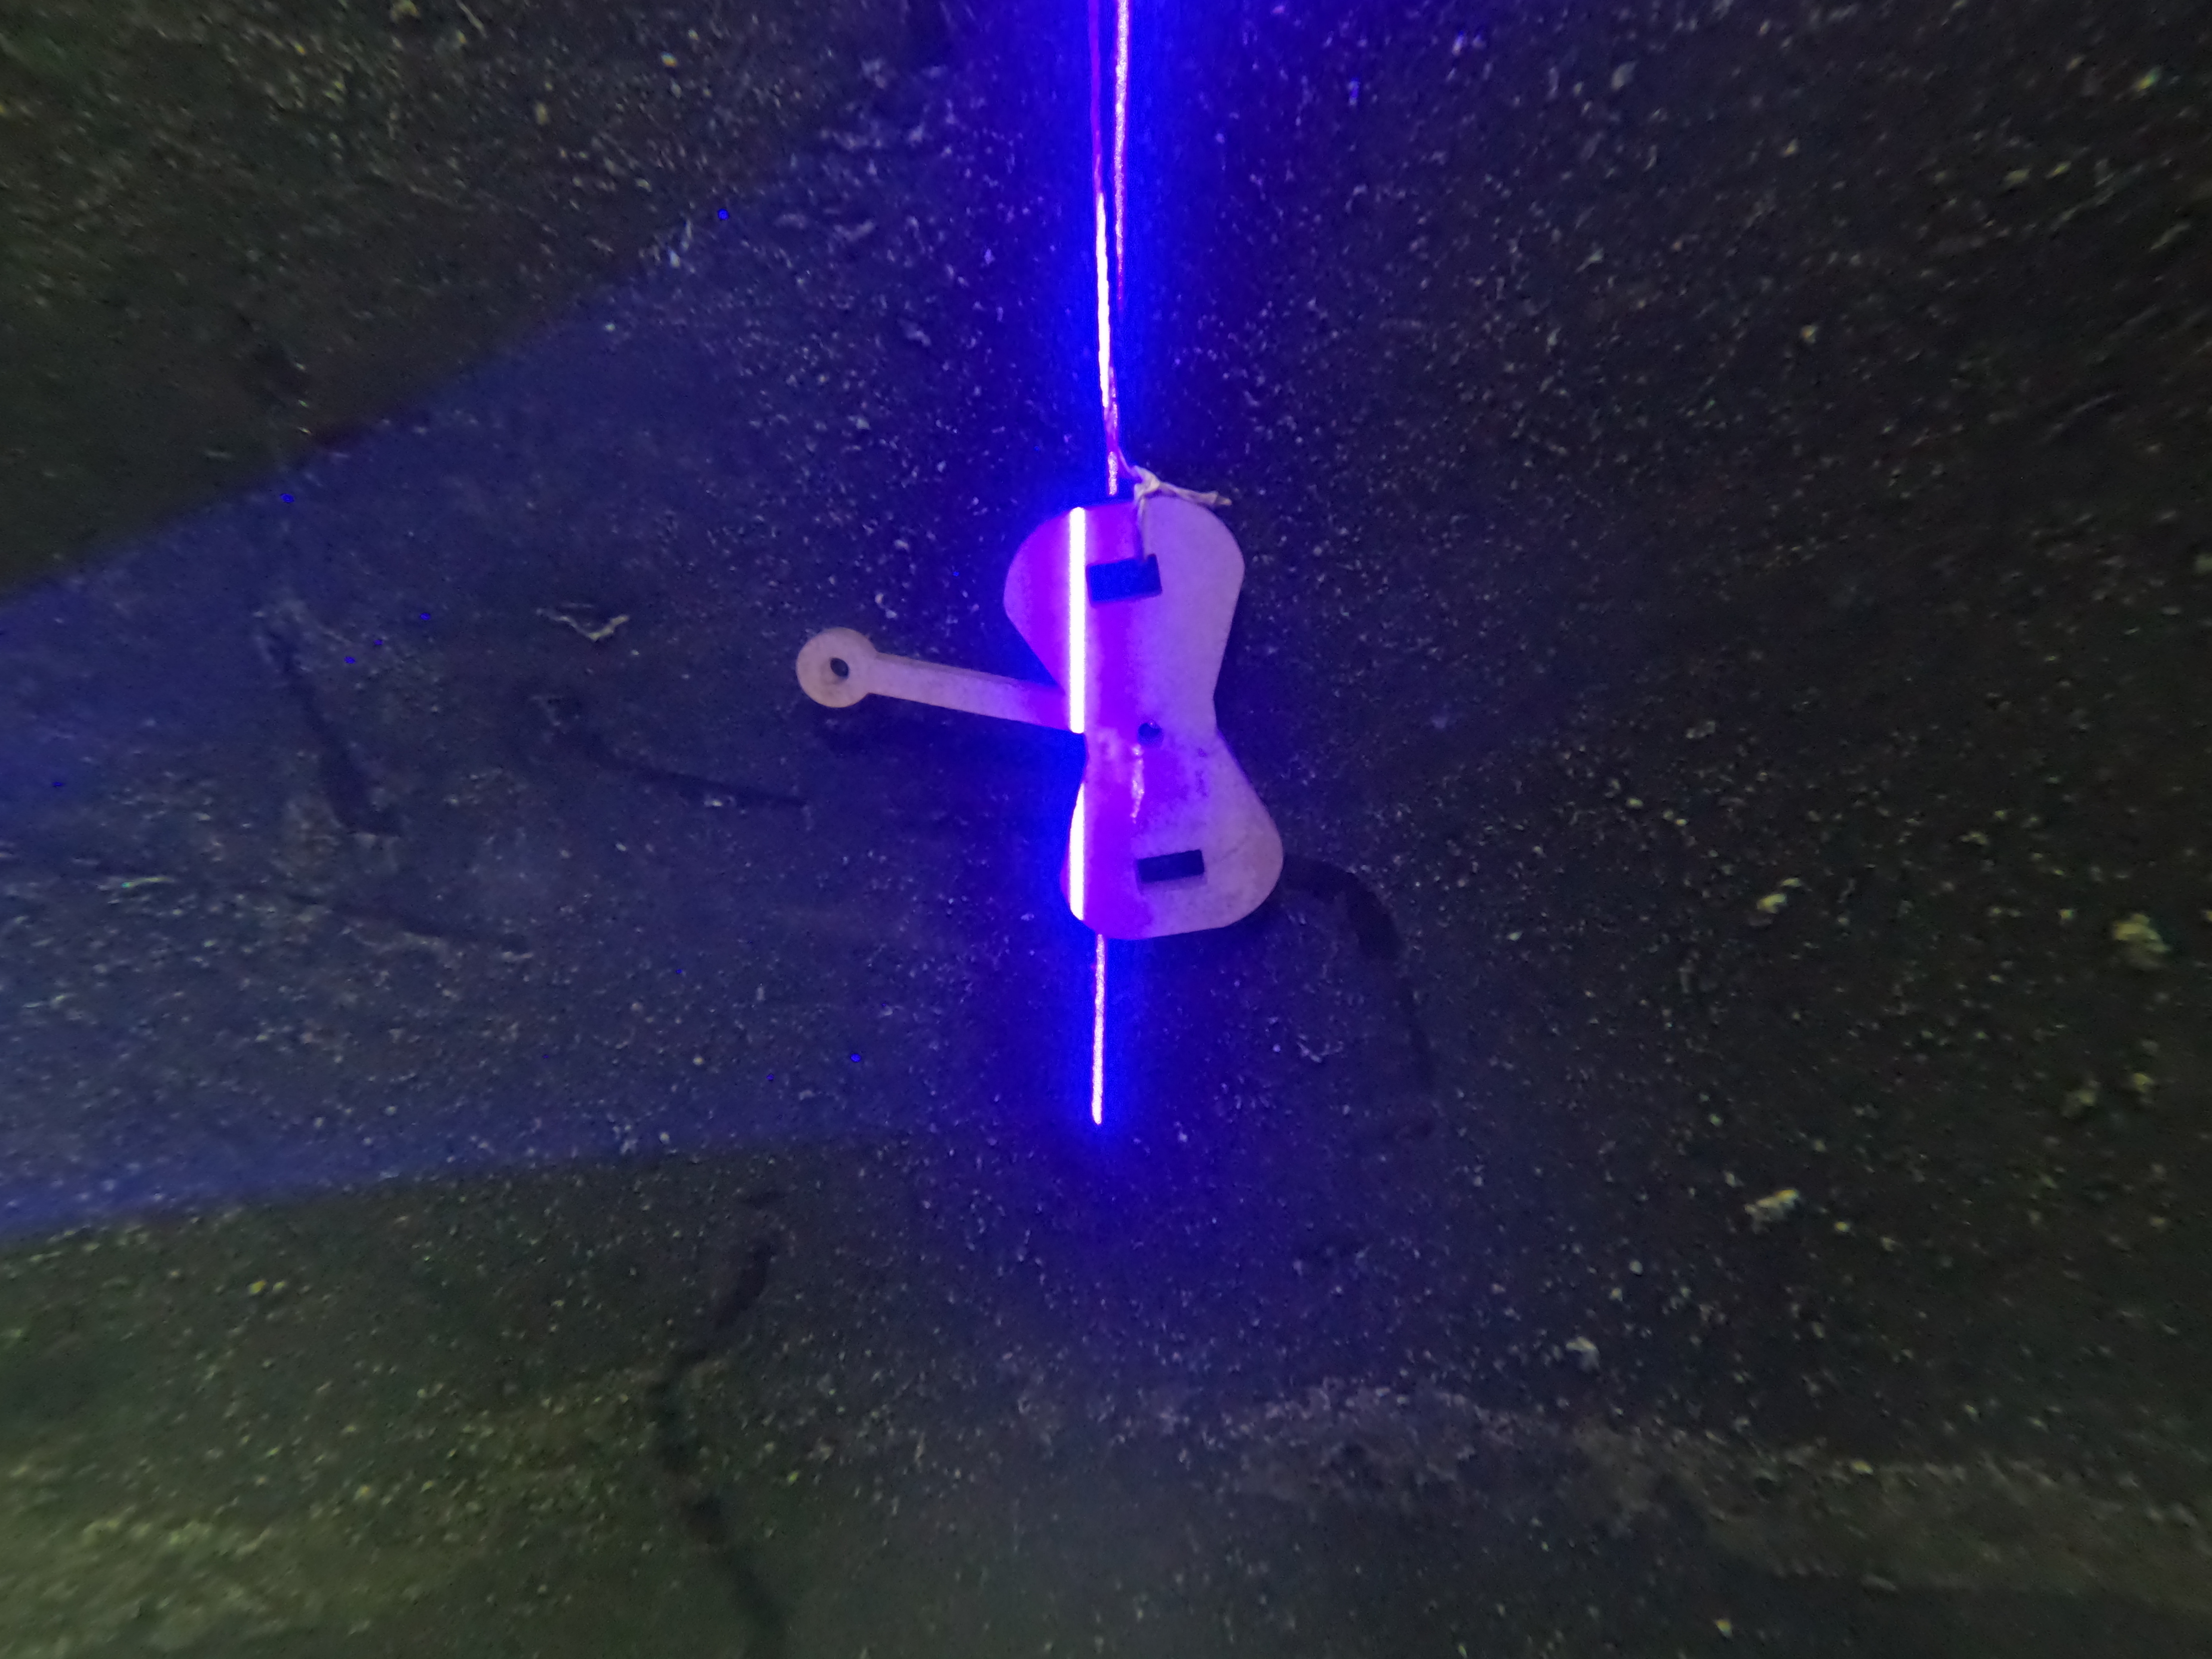

Supplement: Supplementary file 3215 [file G0015656.pdf › Level_2_1/G0015656.pdf]

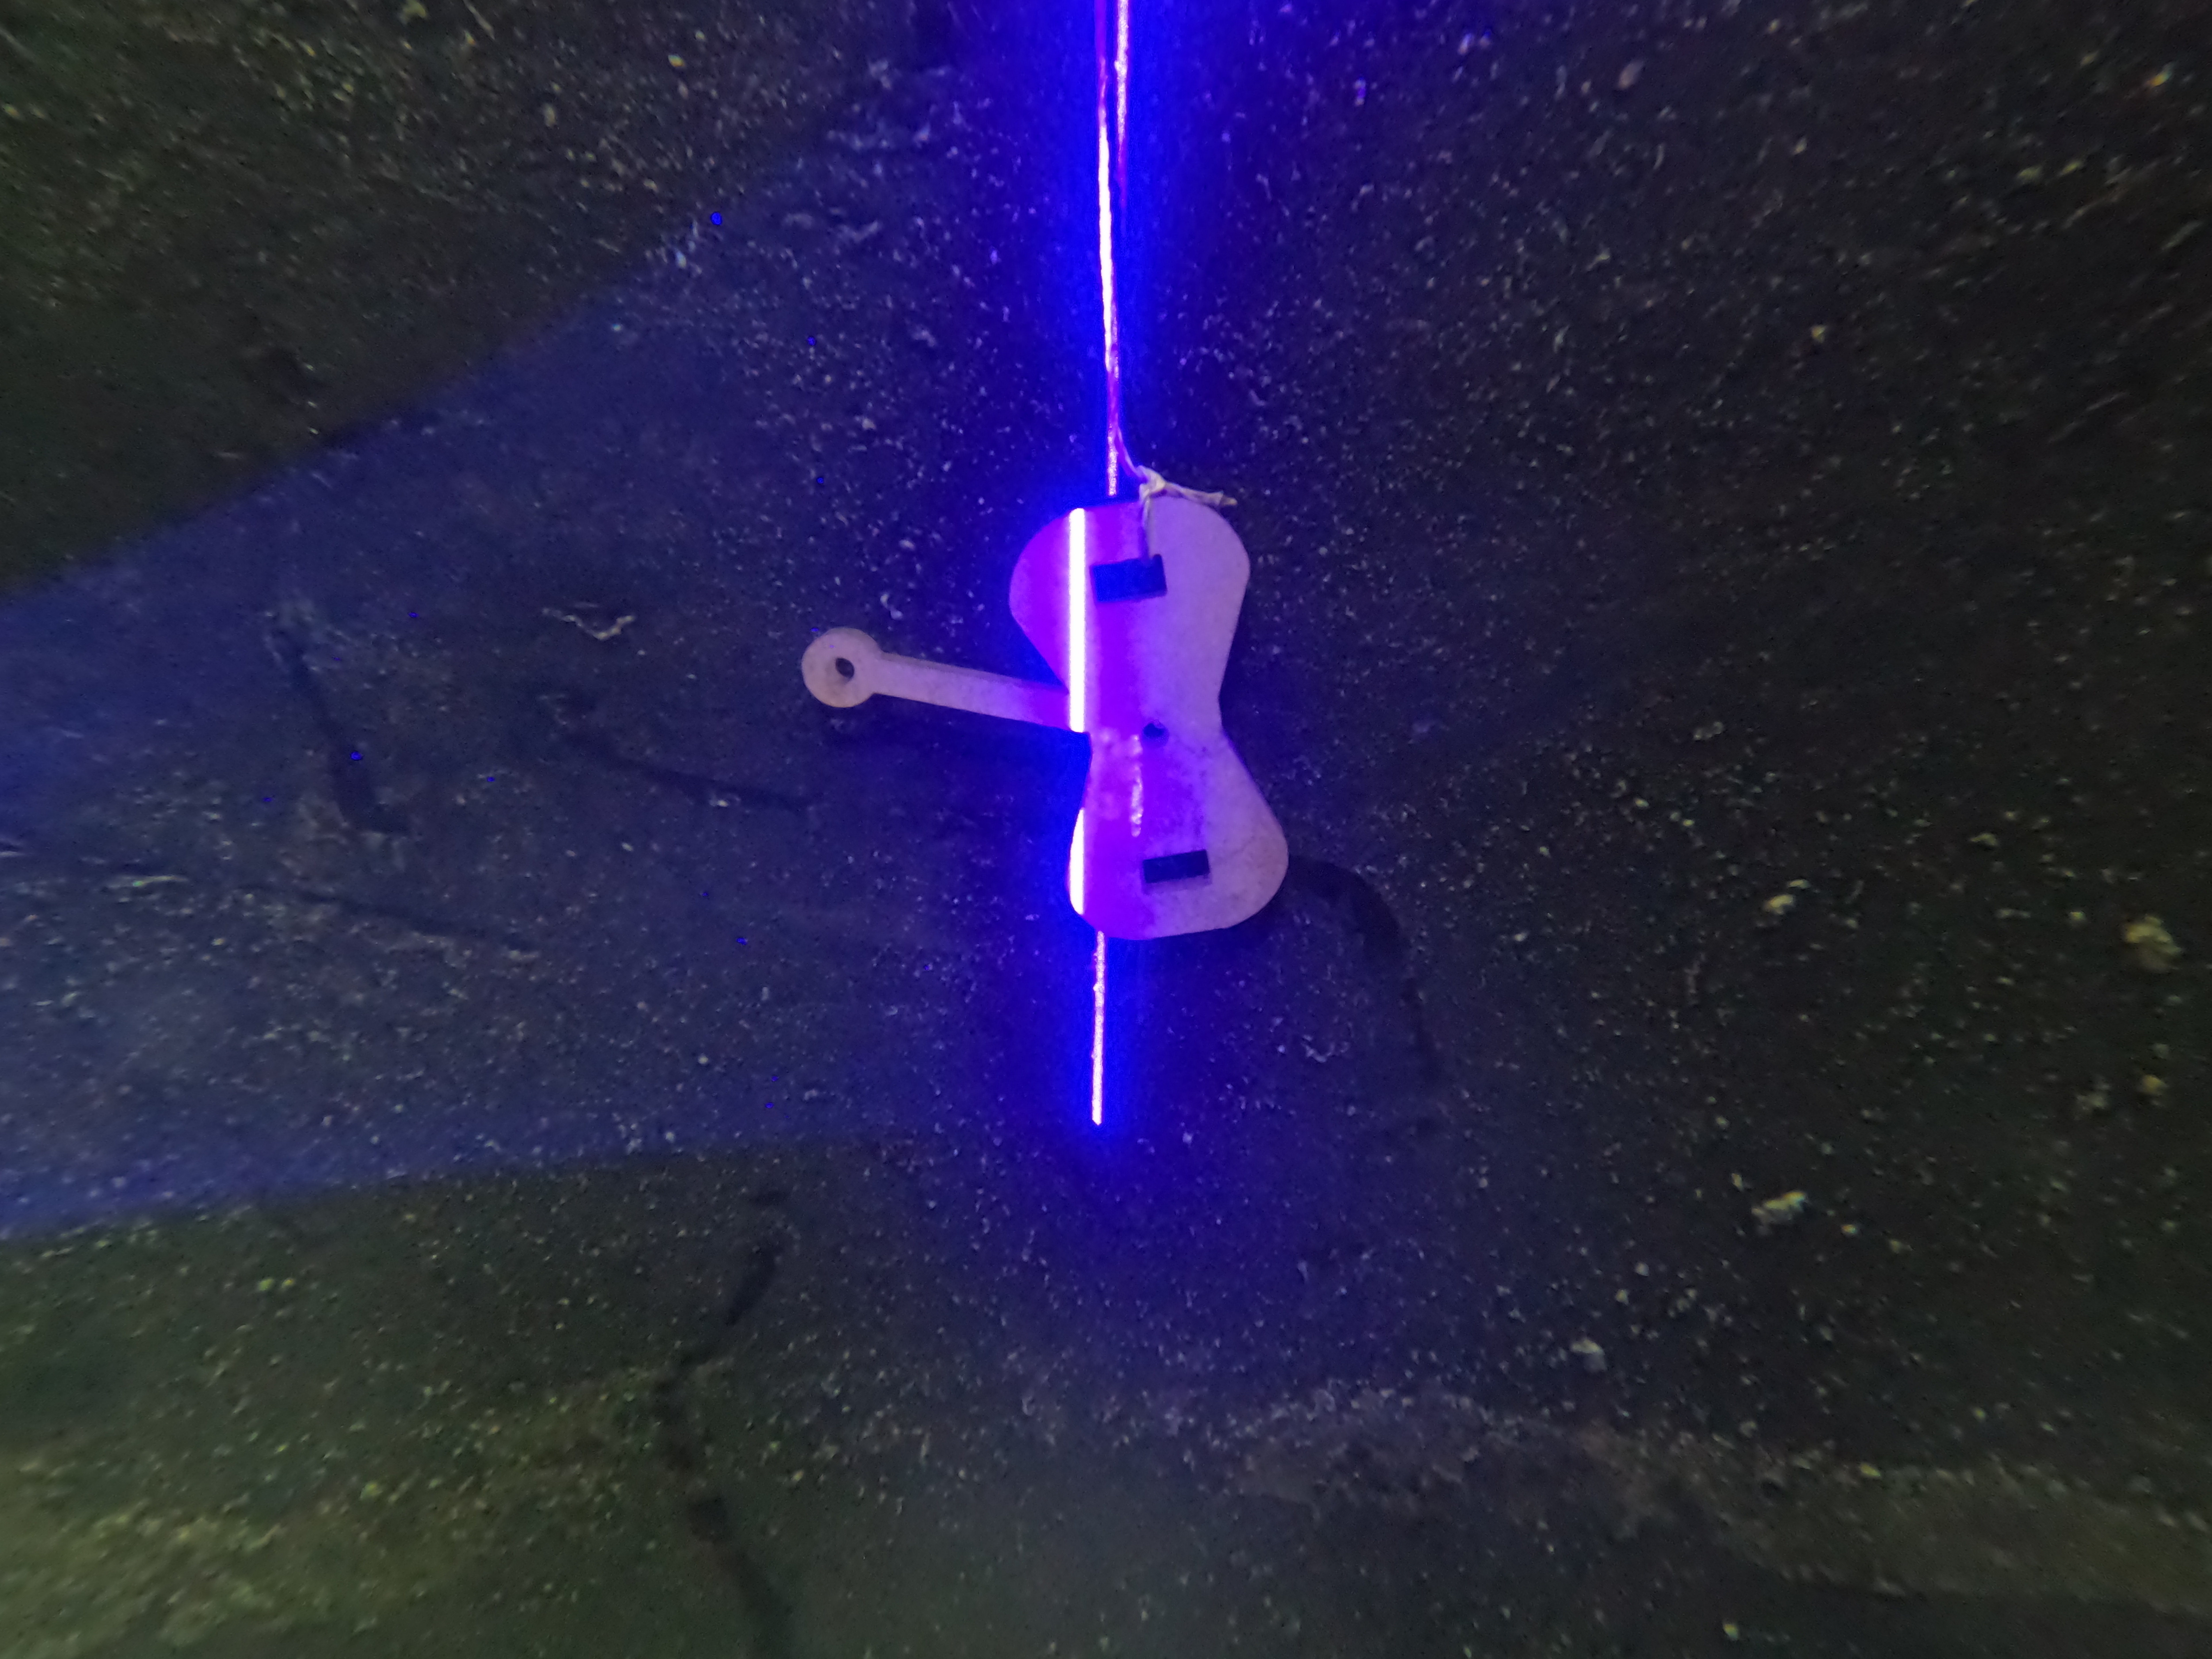

Supplement: Supplementary file 3216 [file G0015657.pdf › Level_2_1/G0015657.pdf]

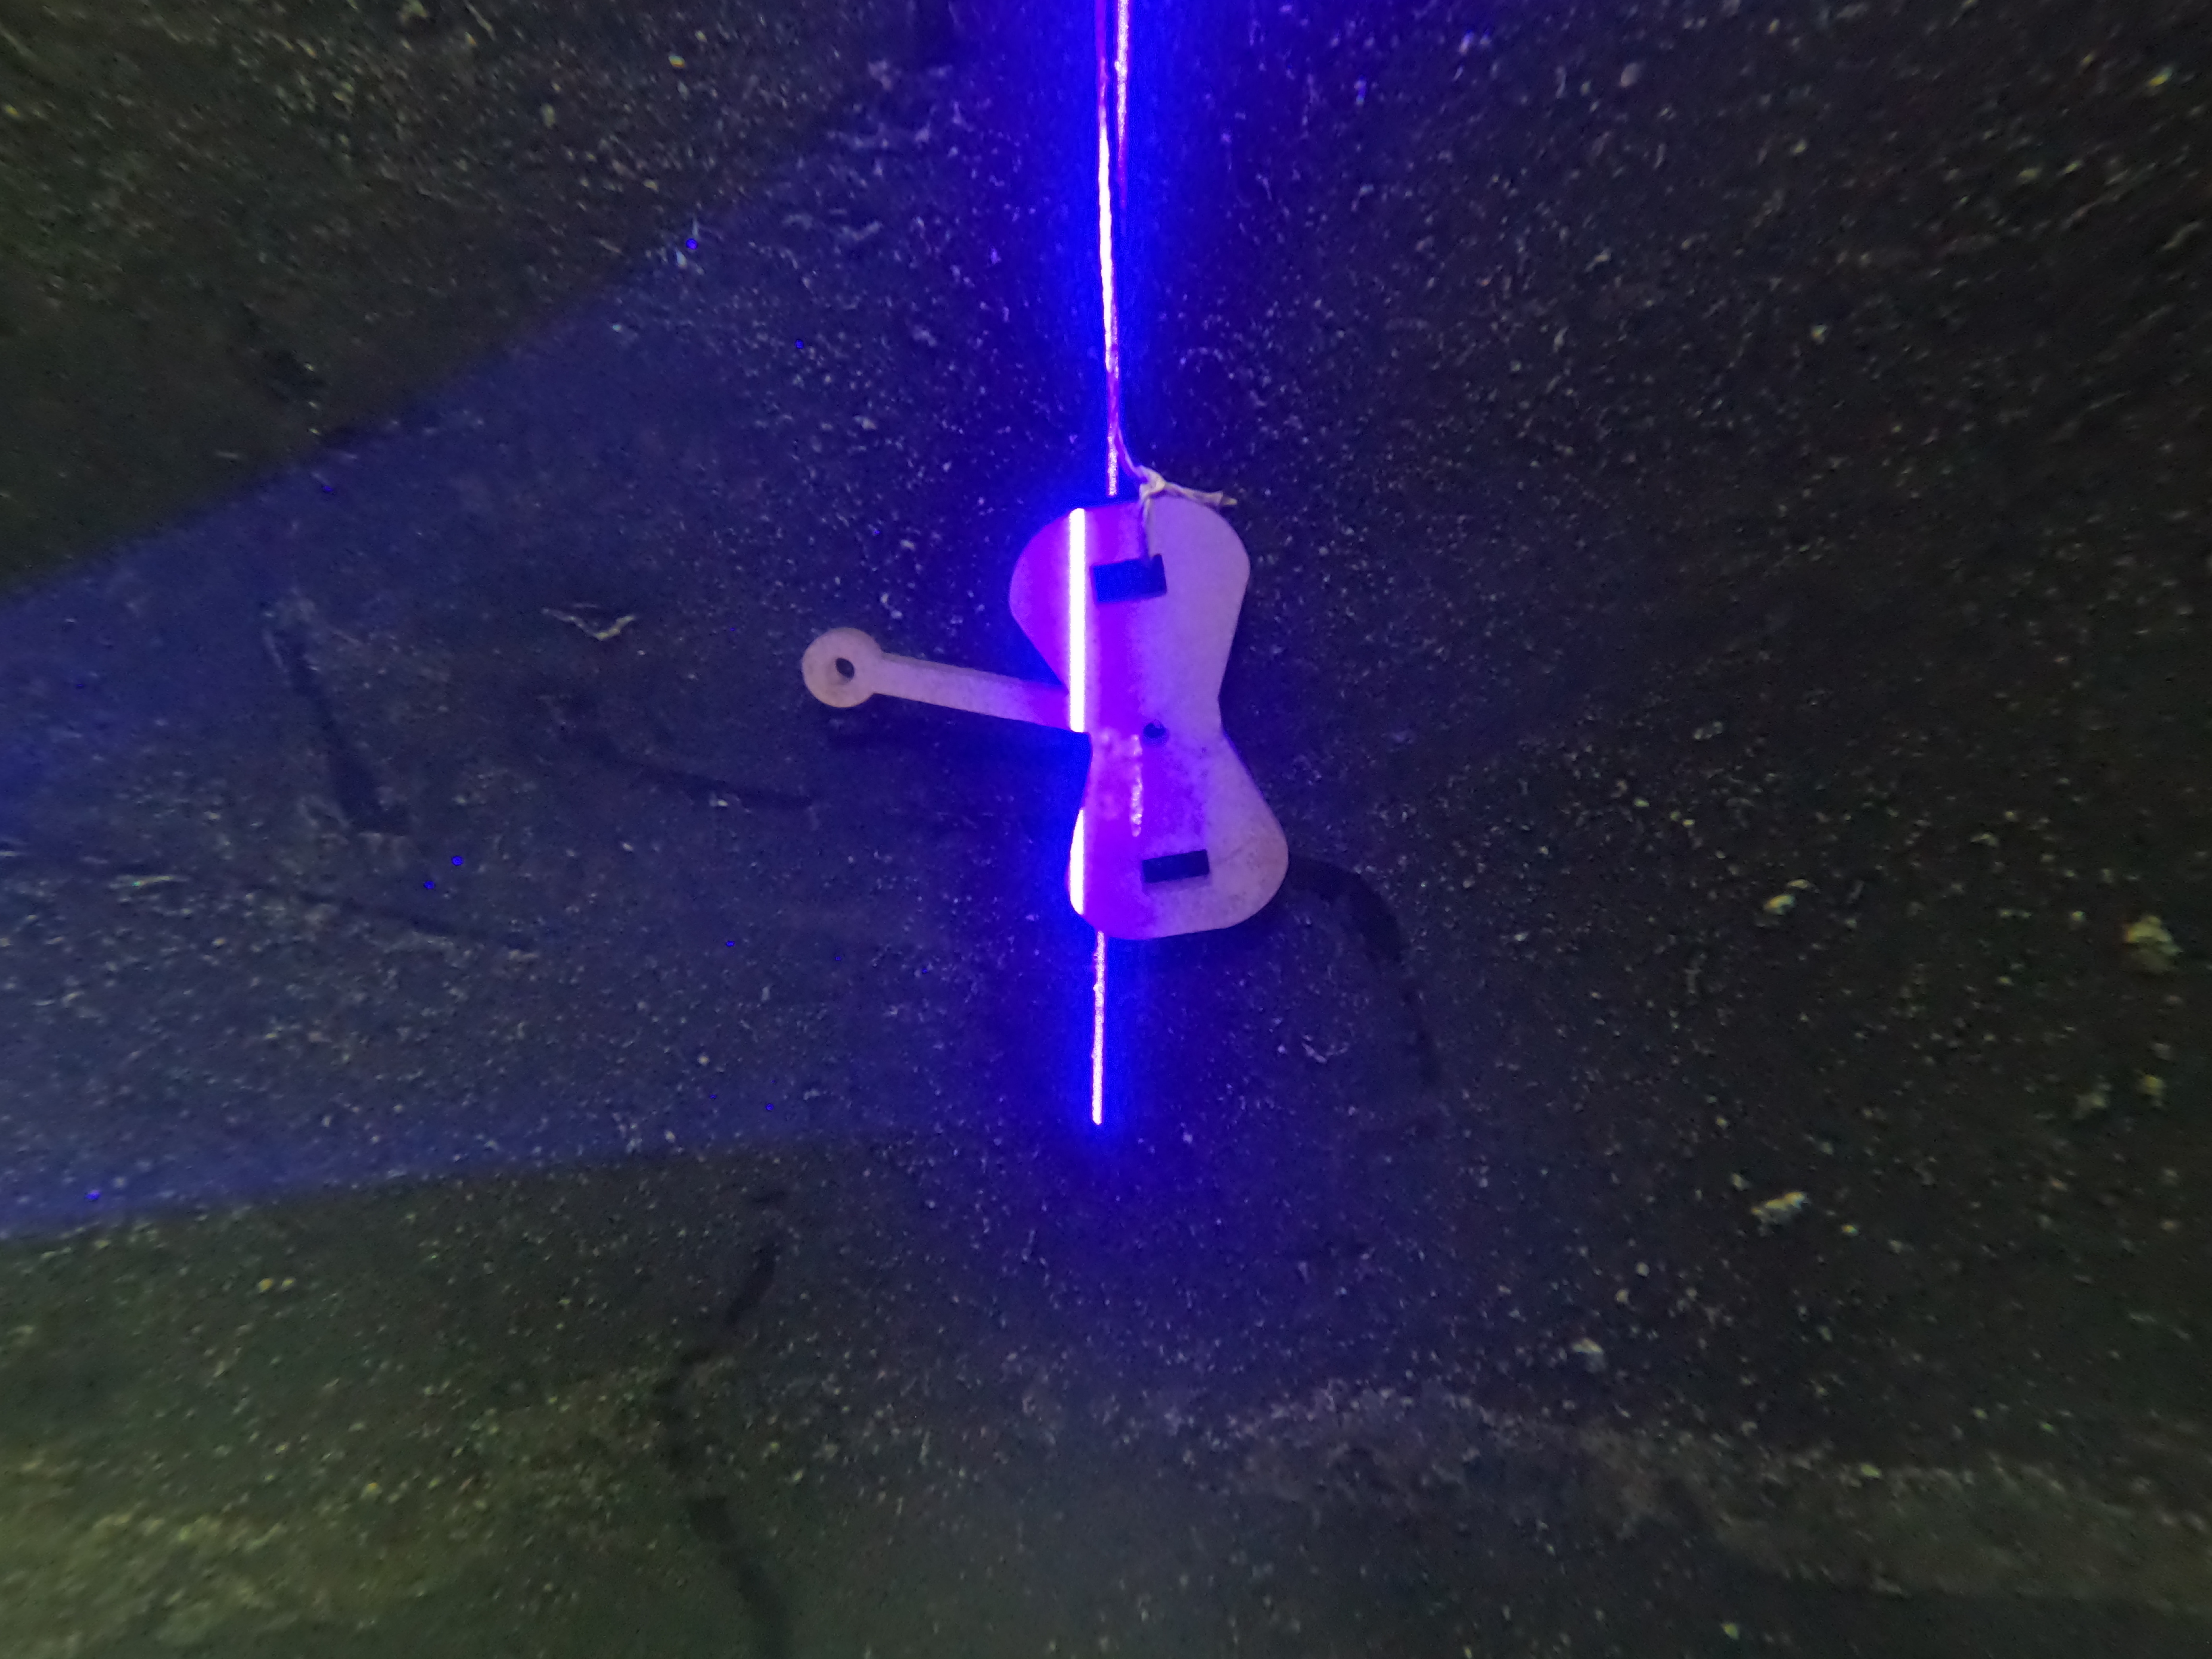

Supplement: Supplementary file 3217 [file G0015658.pdf › Level_2_1/G0015658.pdf]

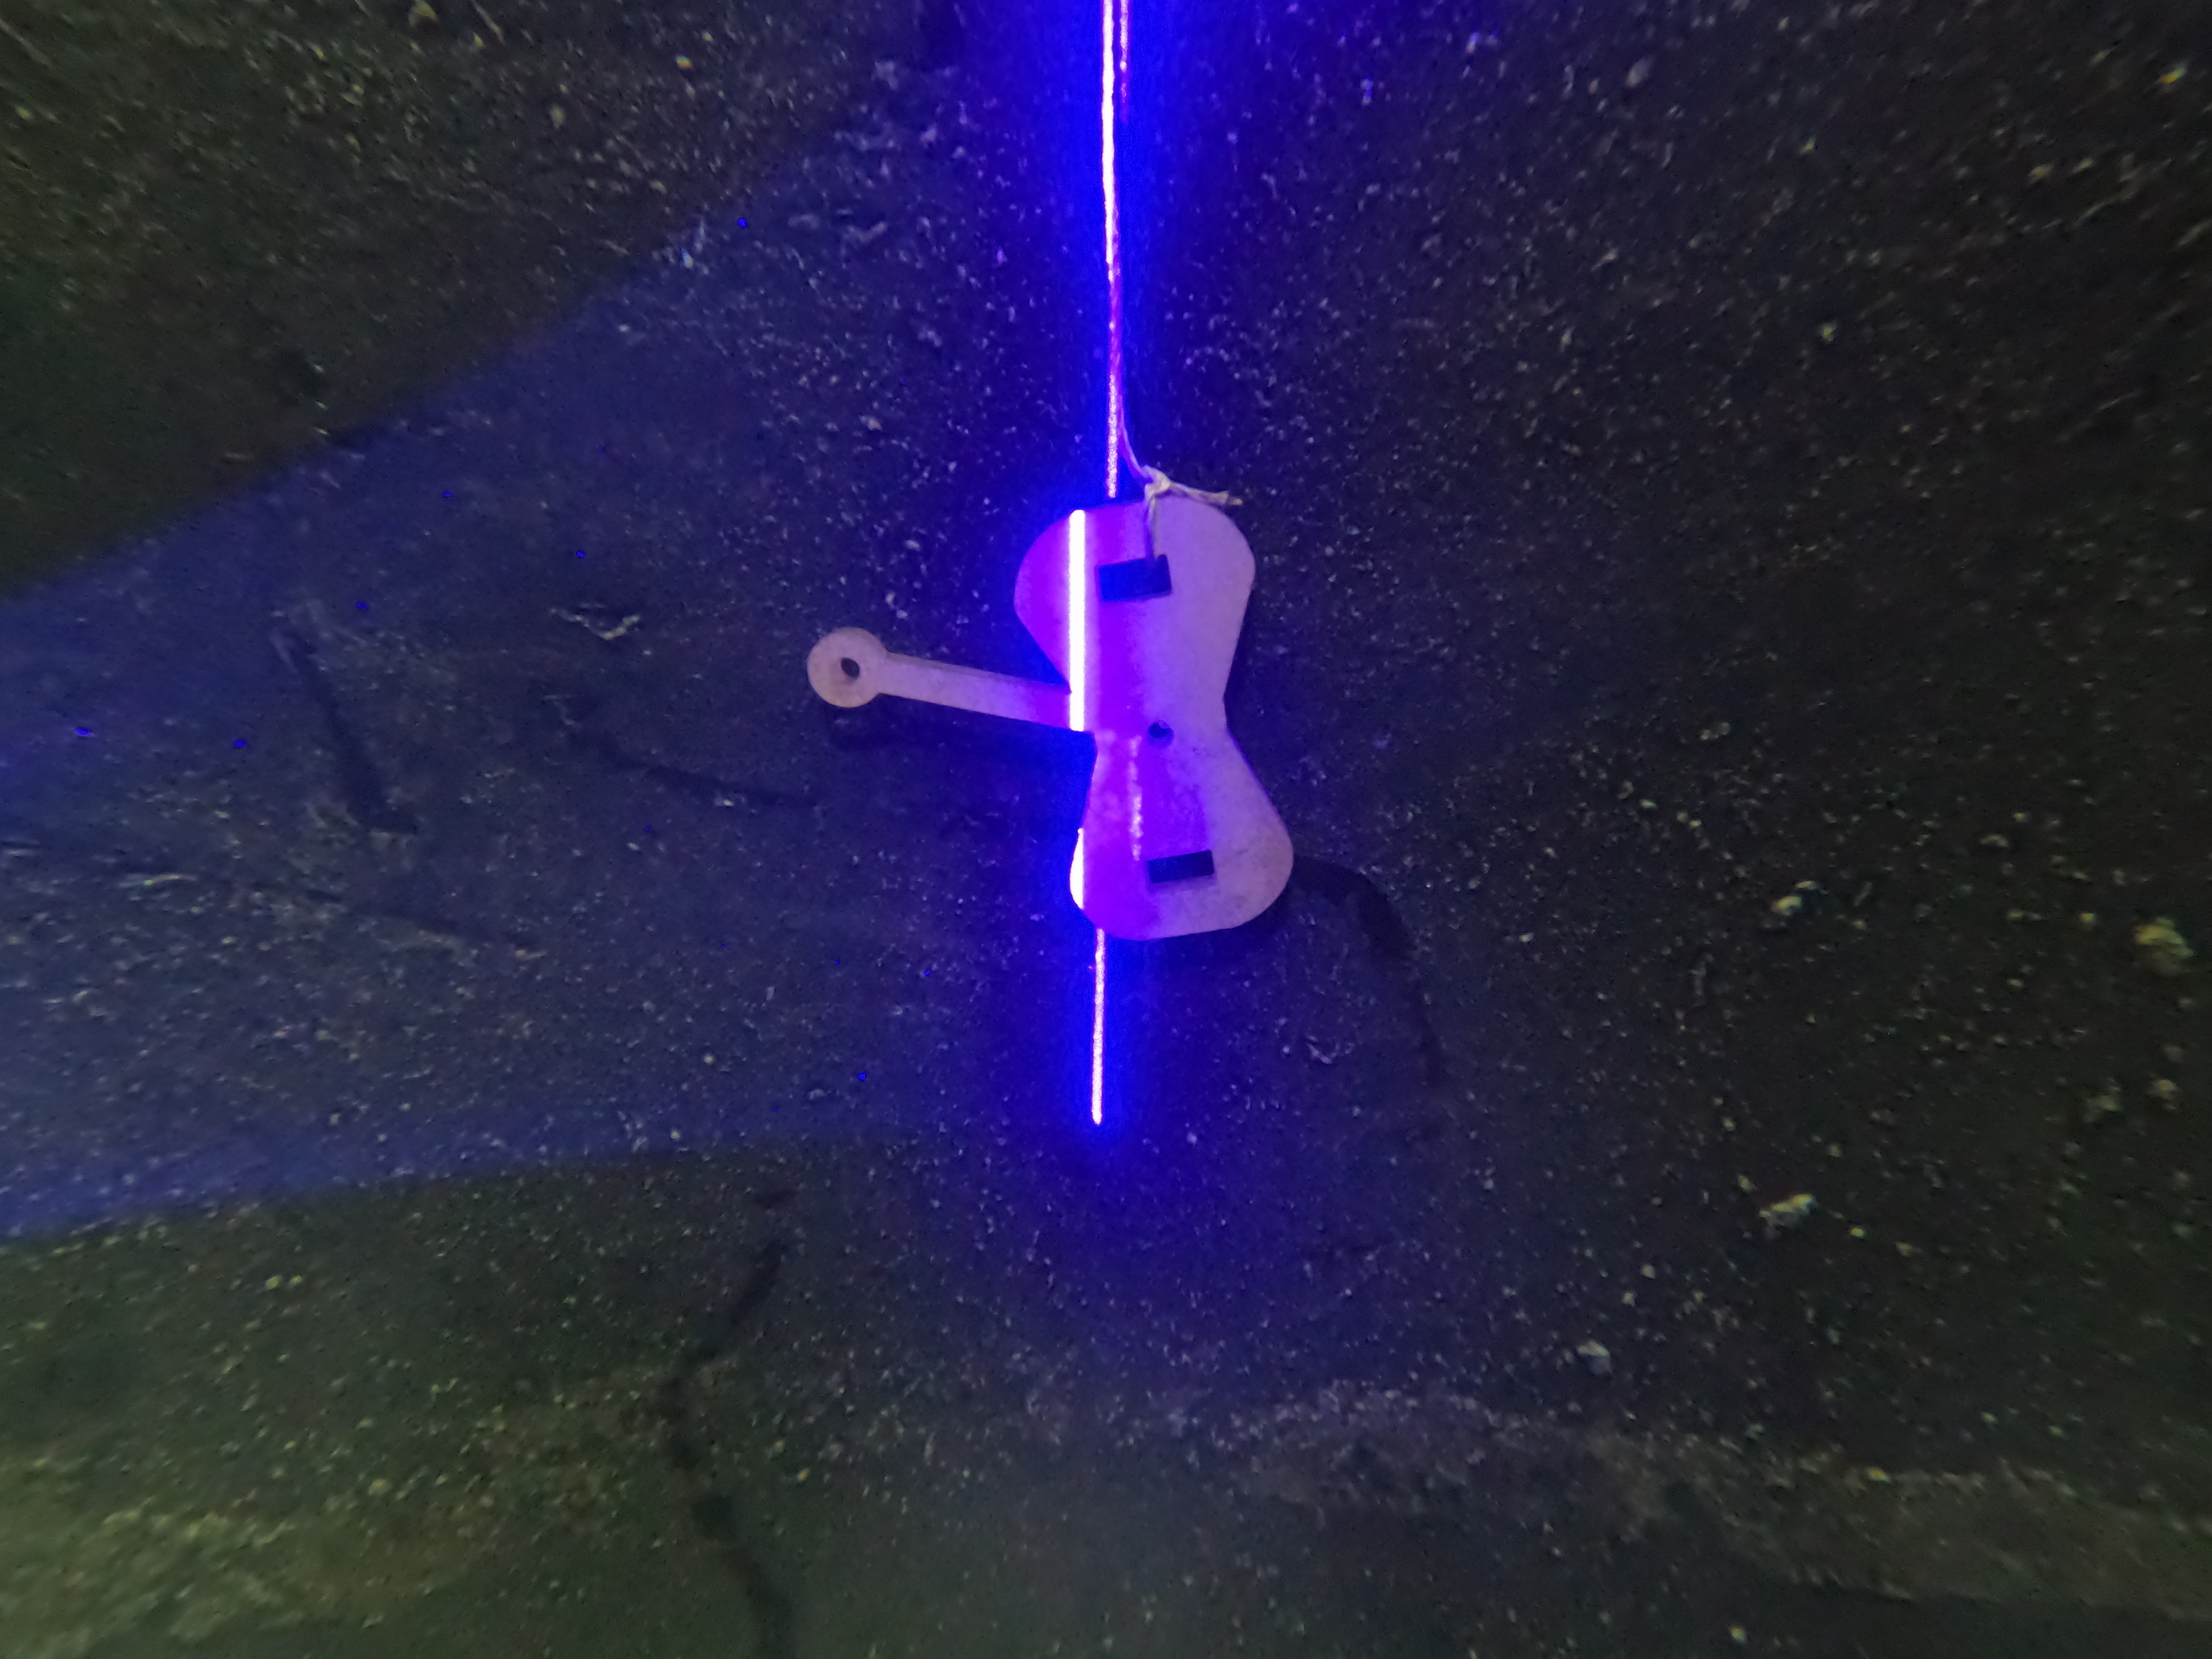

Supplement: Supplementary file 3218 [file G0015659.pdf › Level_2_1/G0015659.pdf]

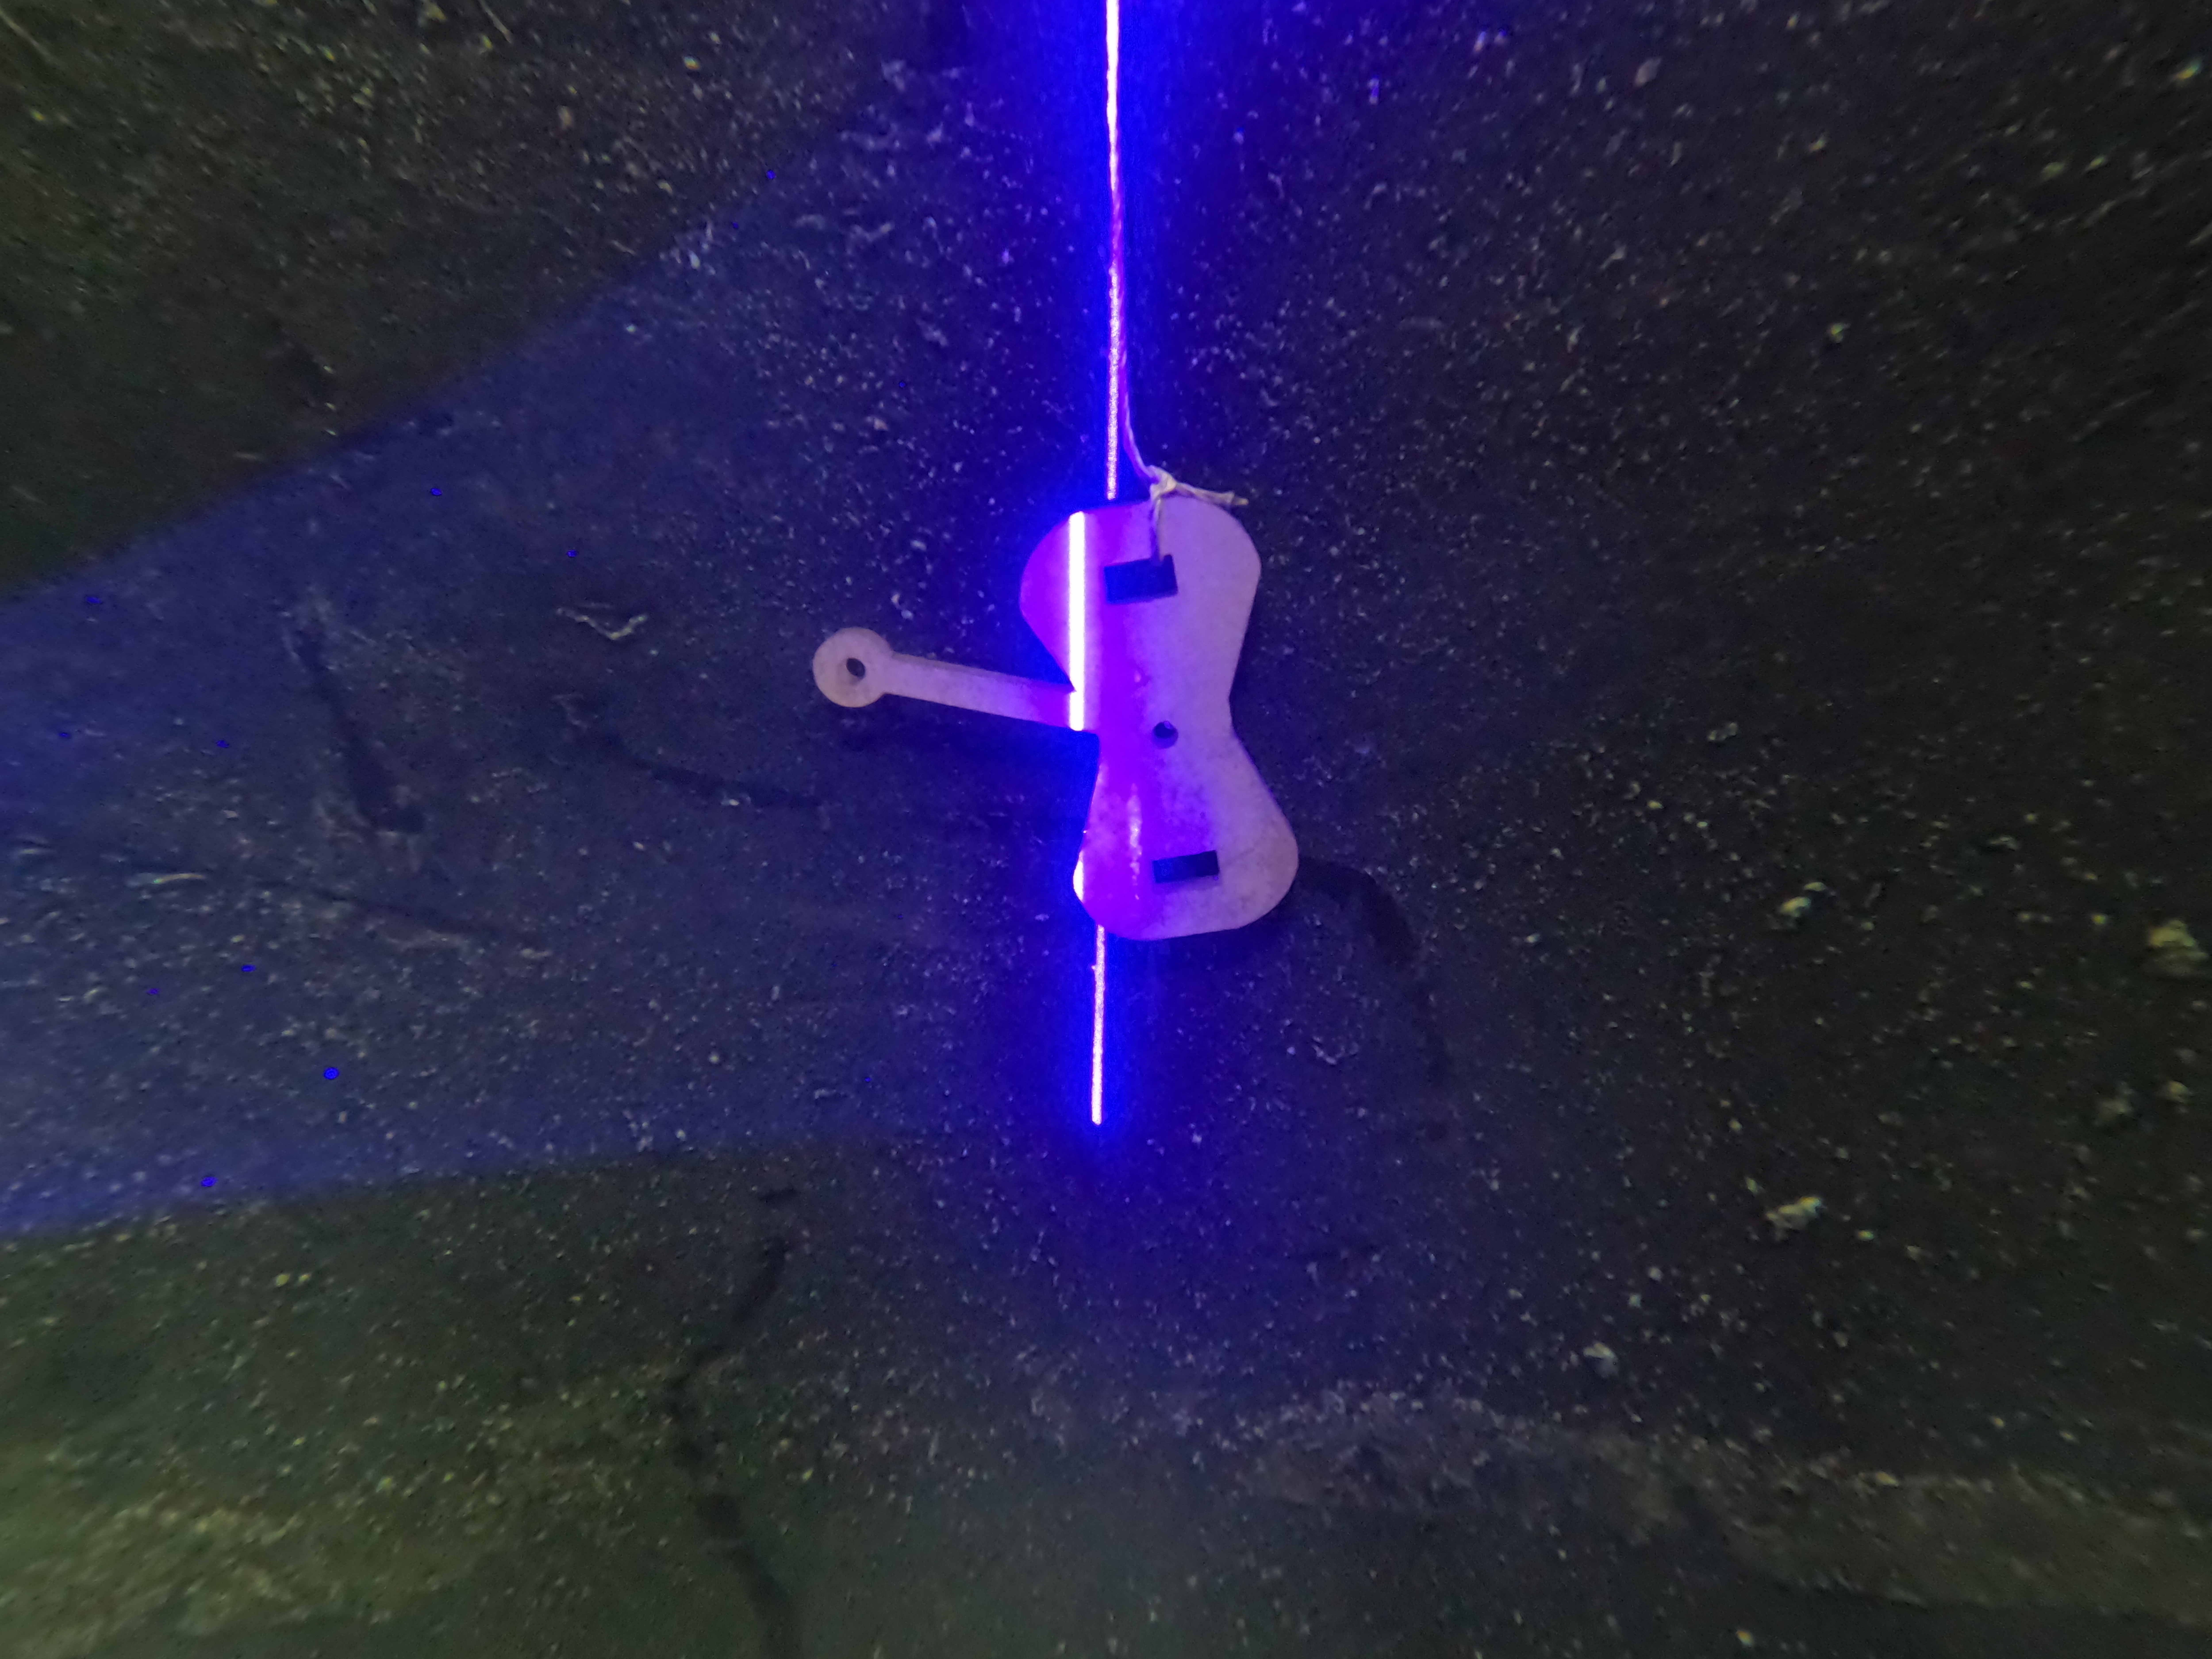

Supplement: Supplementary file 3219 [file G0015660.pdf › Level_2_1/G0015660.pdf]

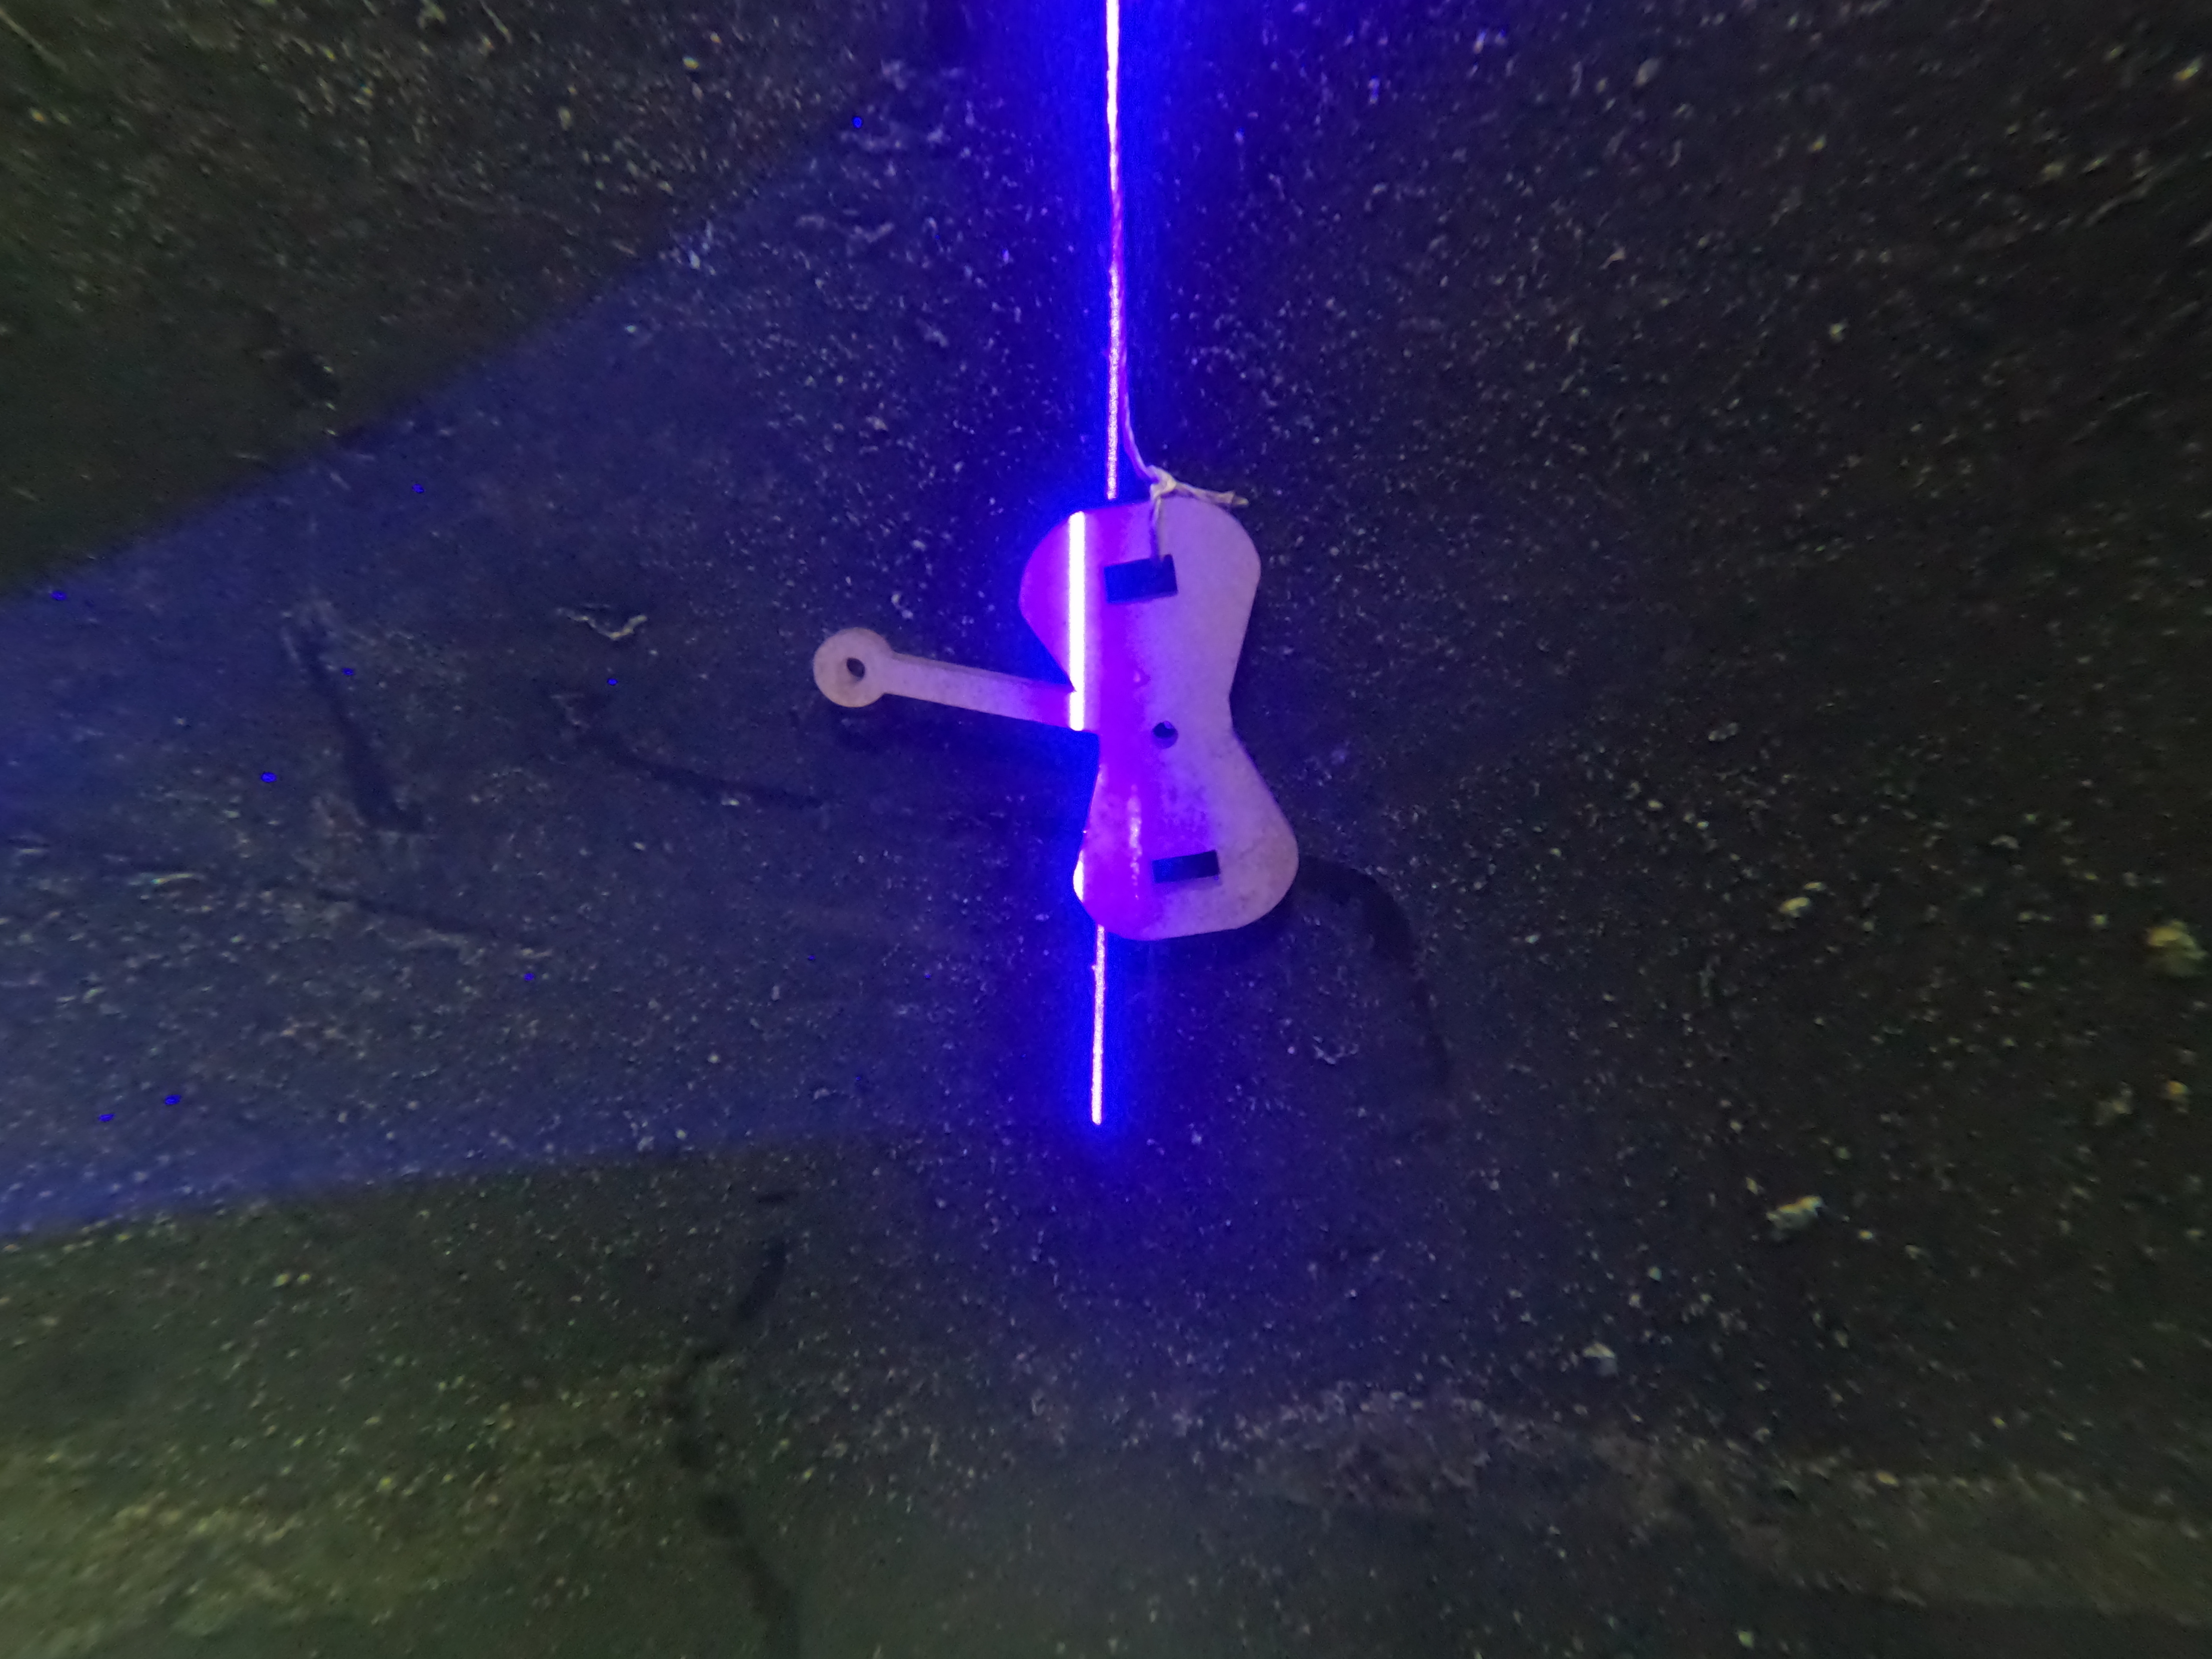

Supplement: Supplementary file 3220 [file G0015661.pdf › Level_2_1/G0015661.pdf]

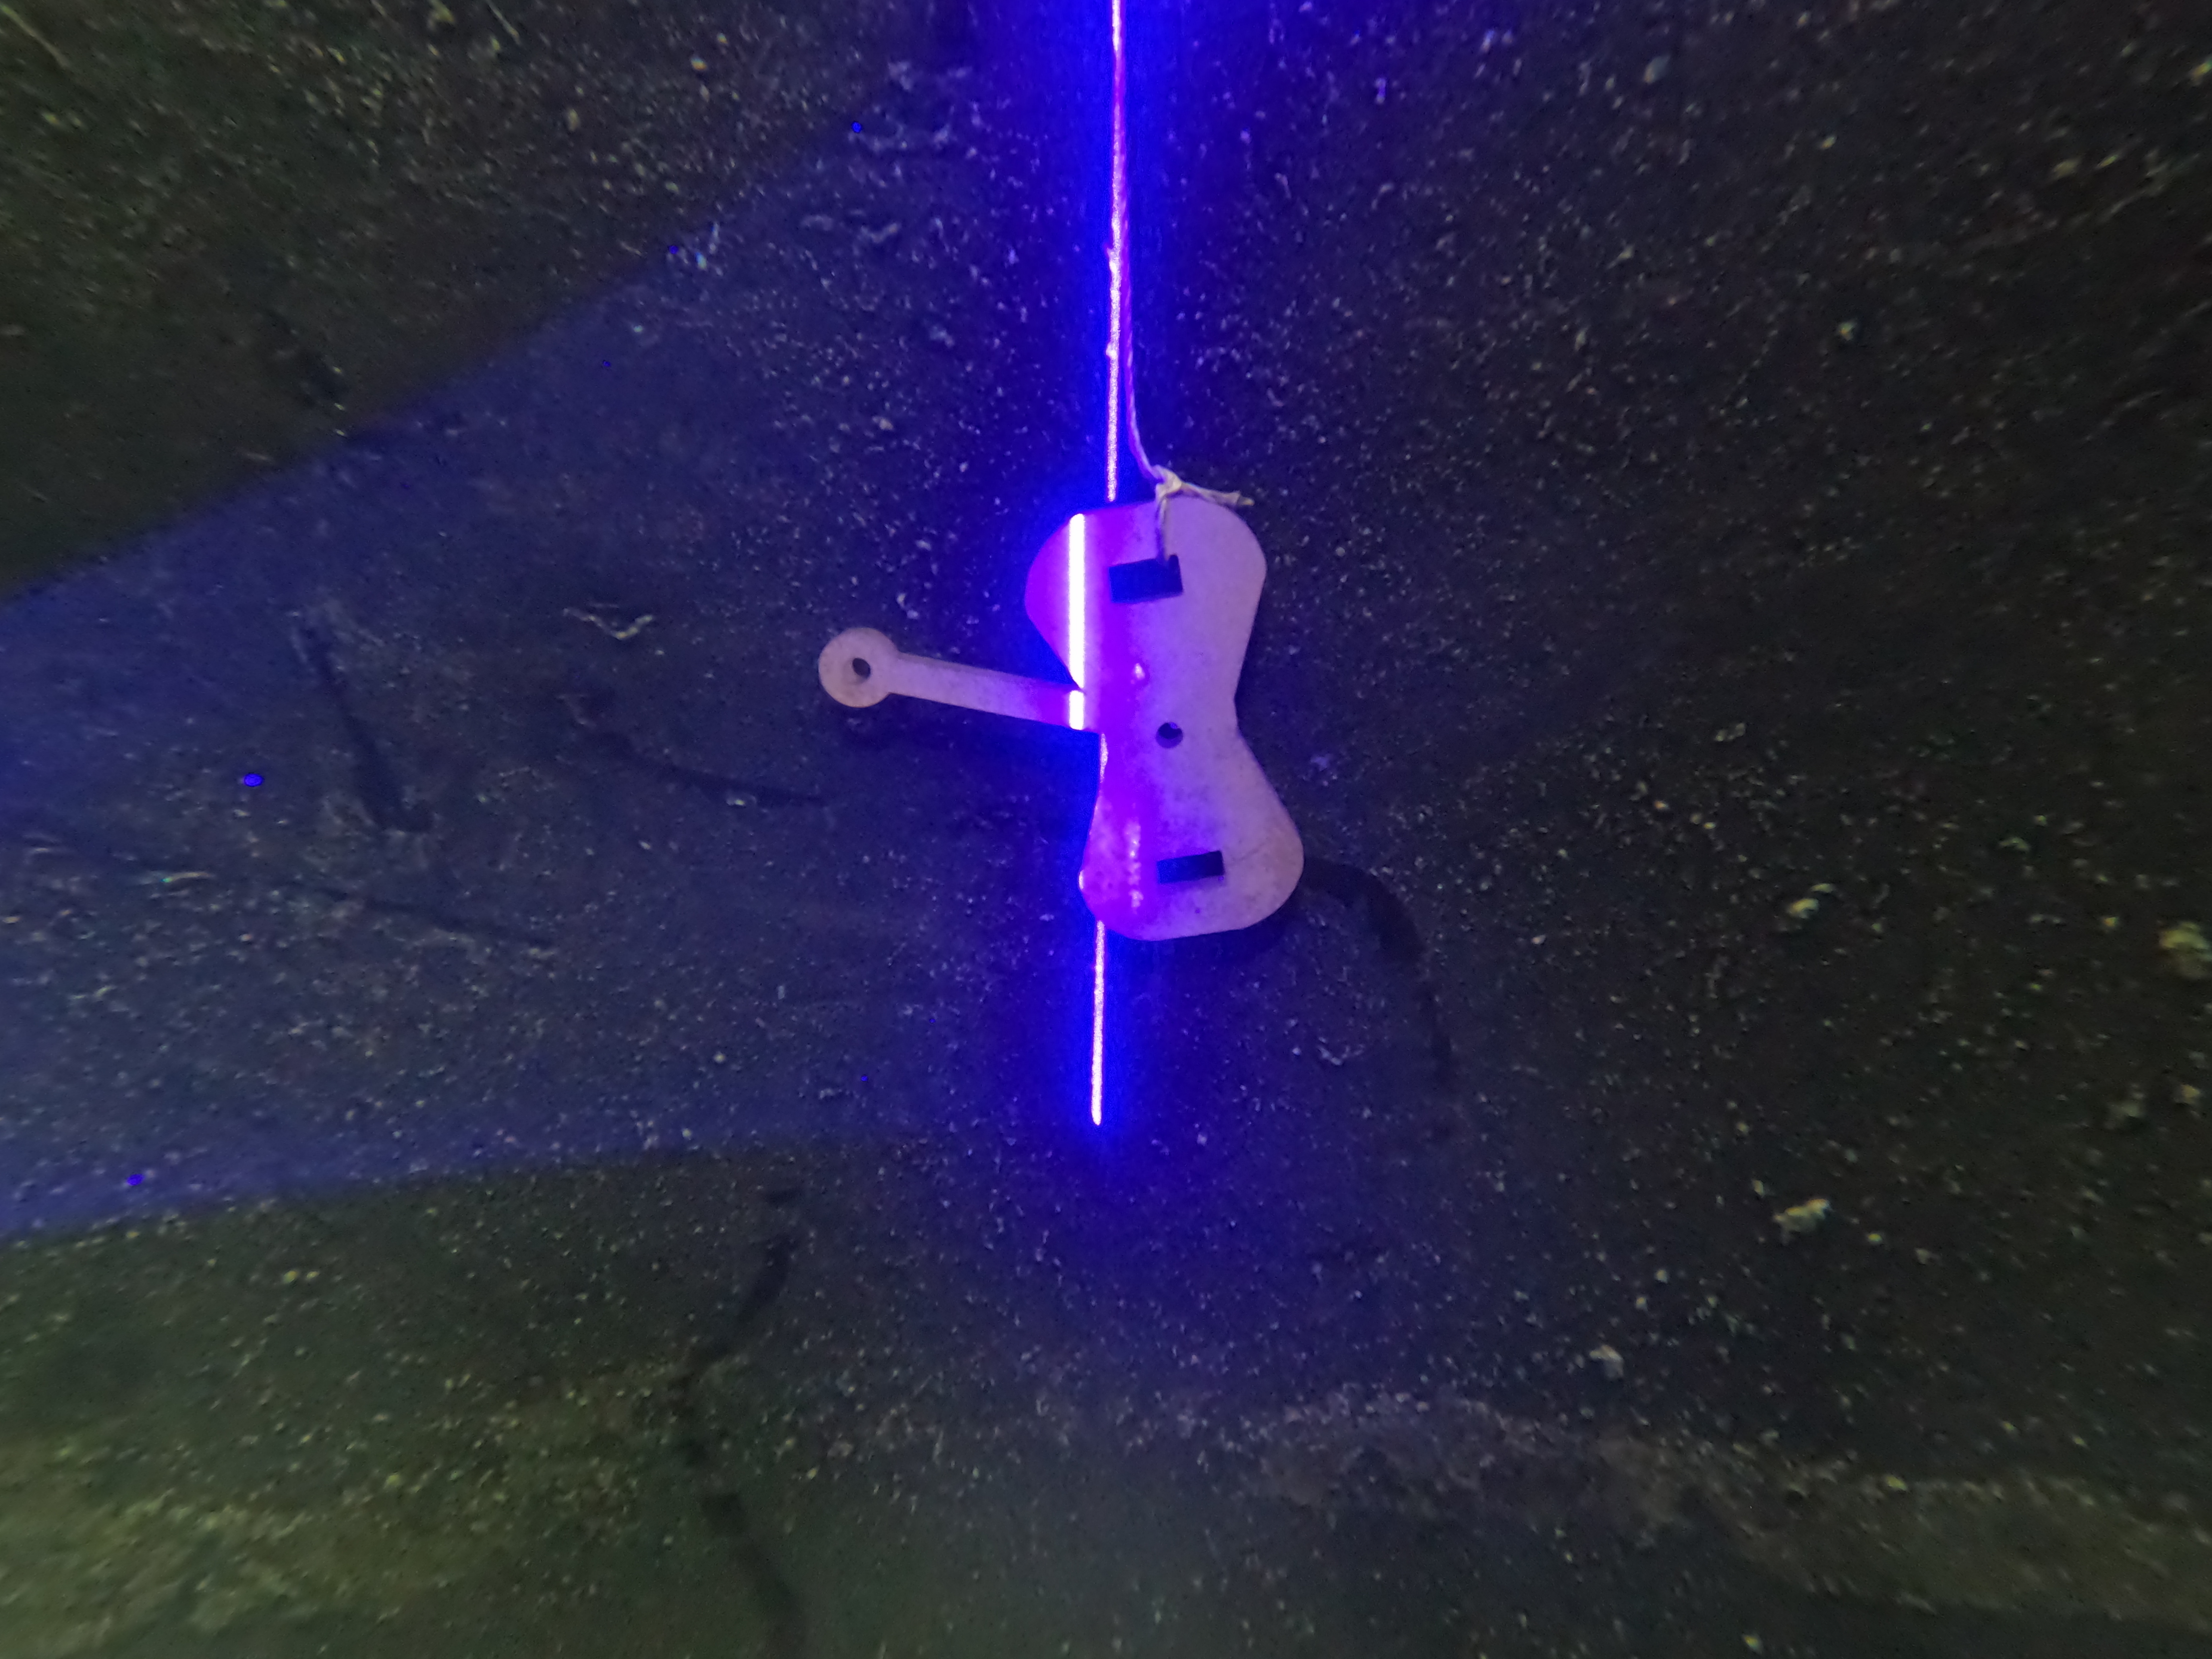

Supplement: Supplementary file 3221 [file G0015662.pdf › Level_2_1/G0015662.pdf]

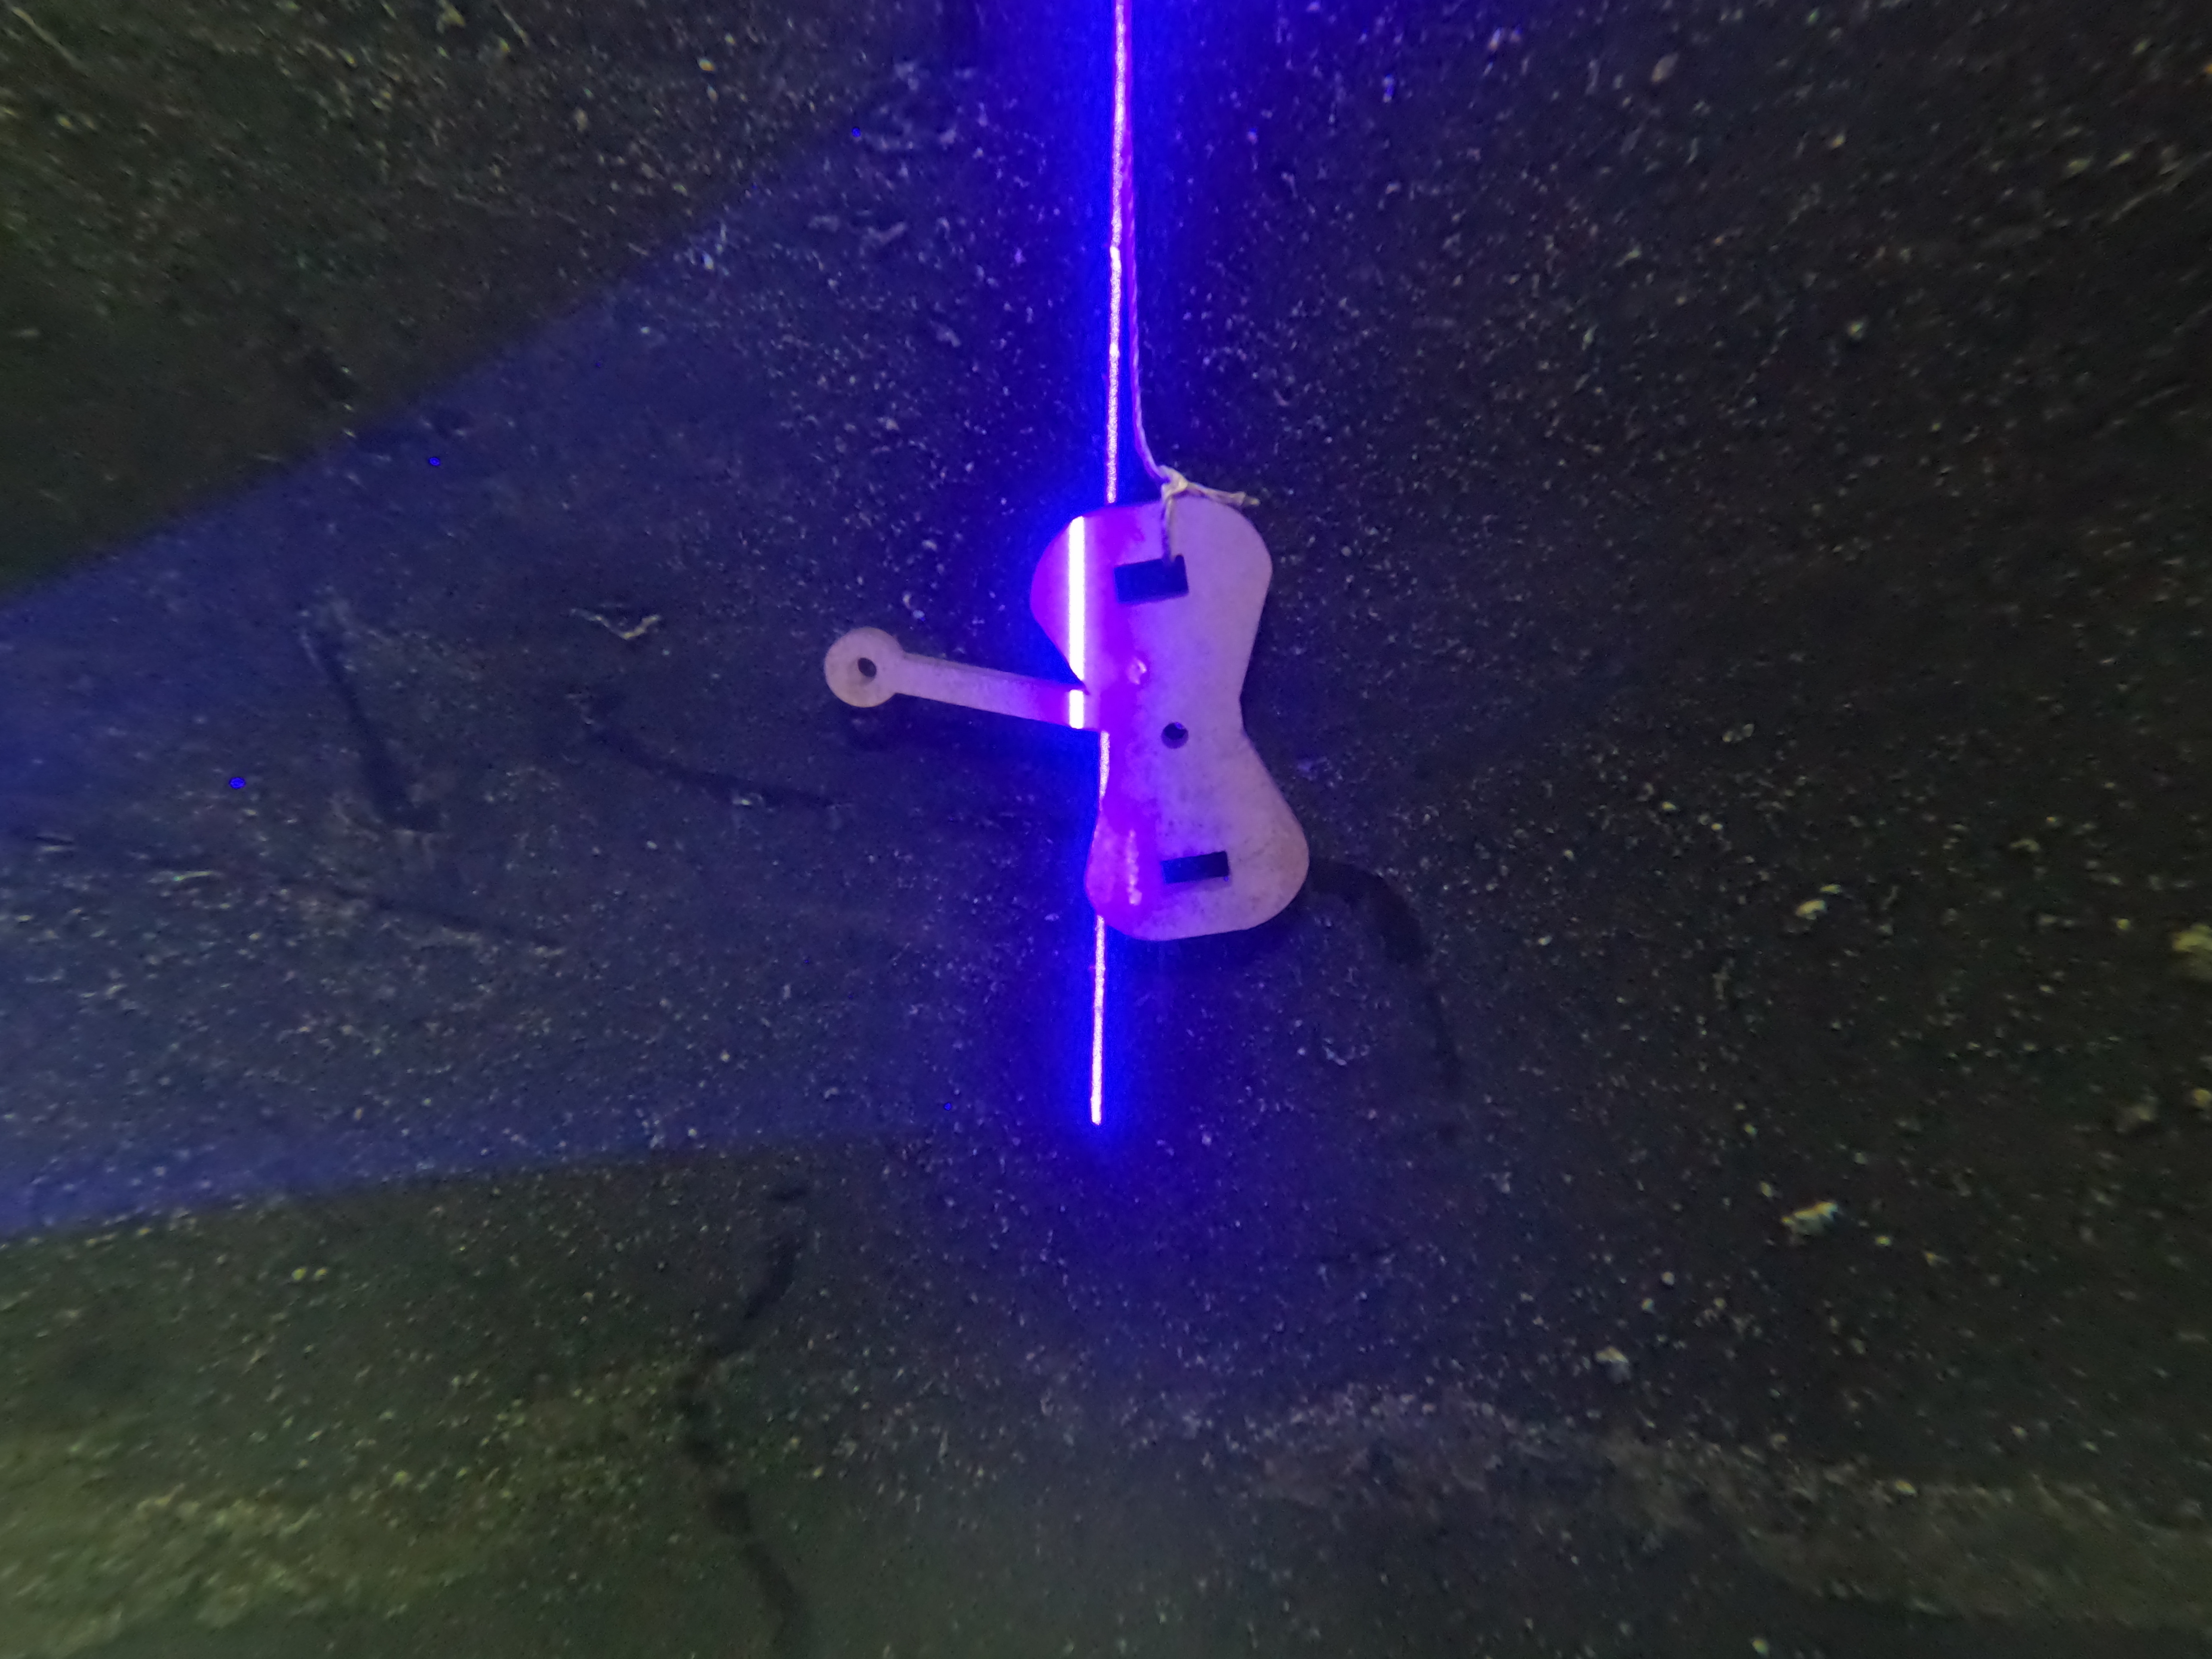

Supplement: Supplementary file 3222 [file G0015663.pdf › Level_2_1/G0015663.pdf]

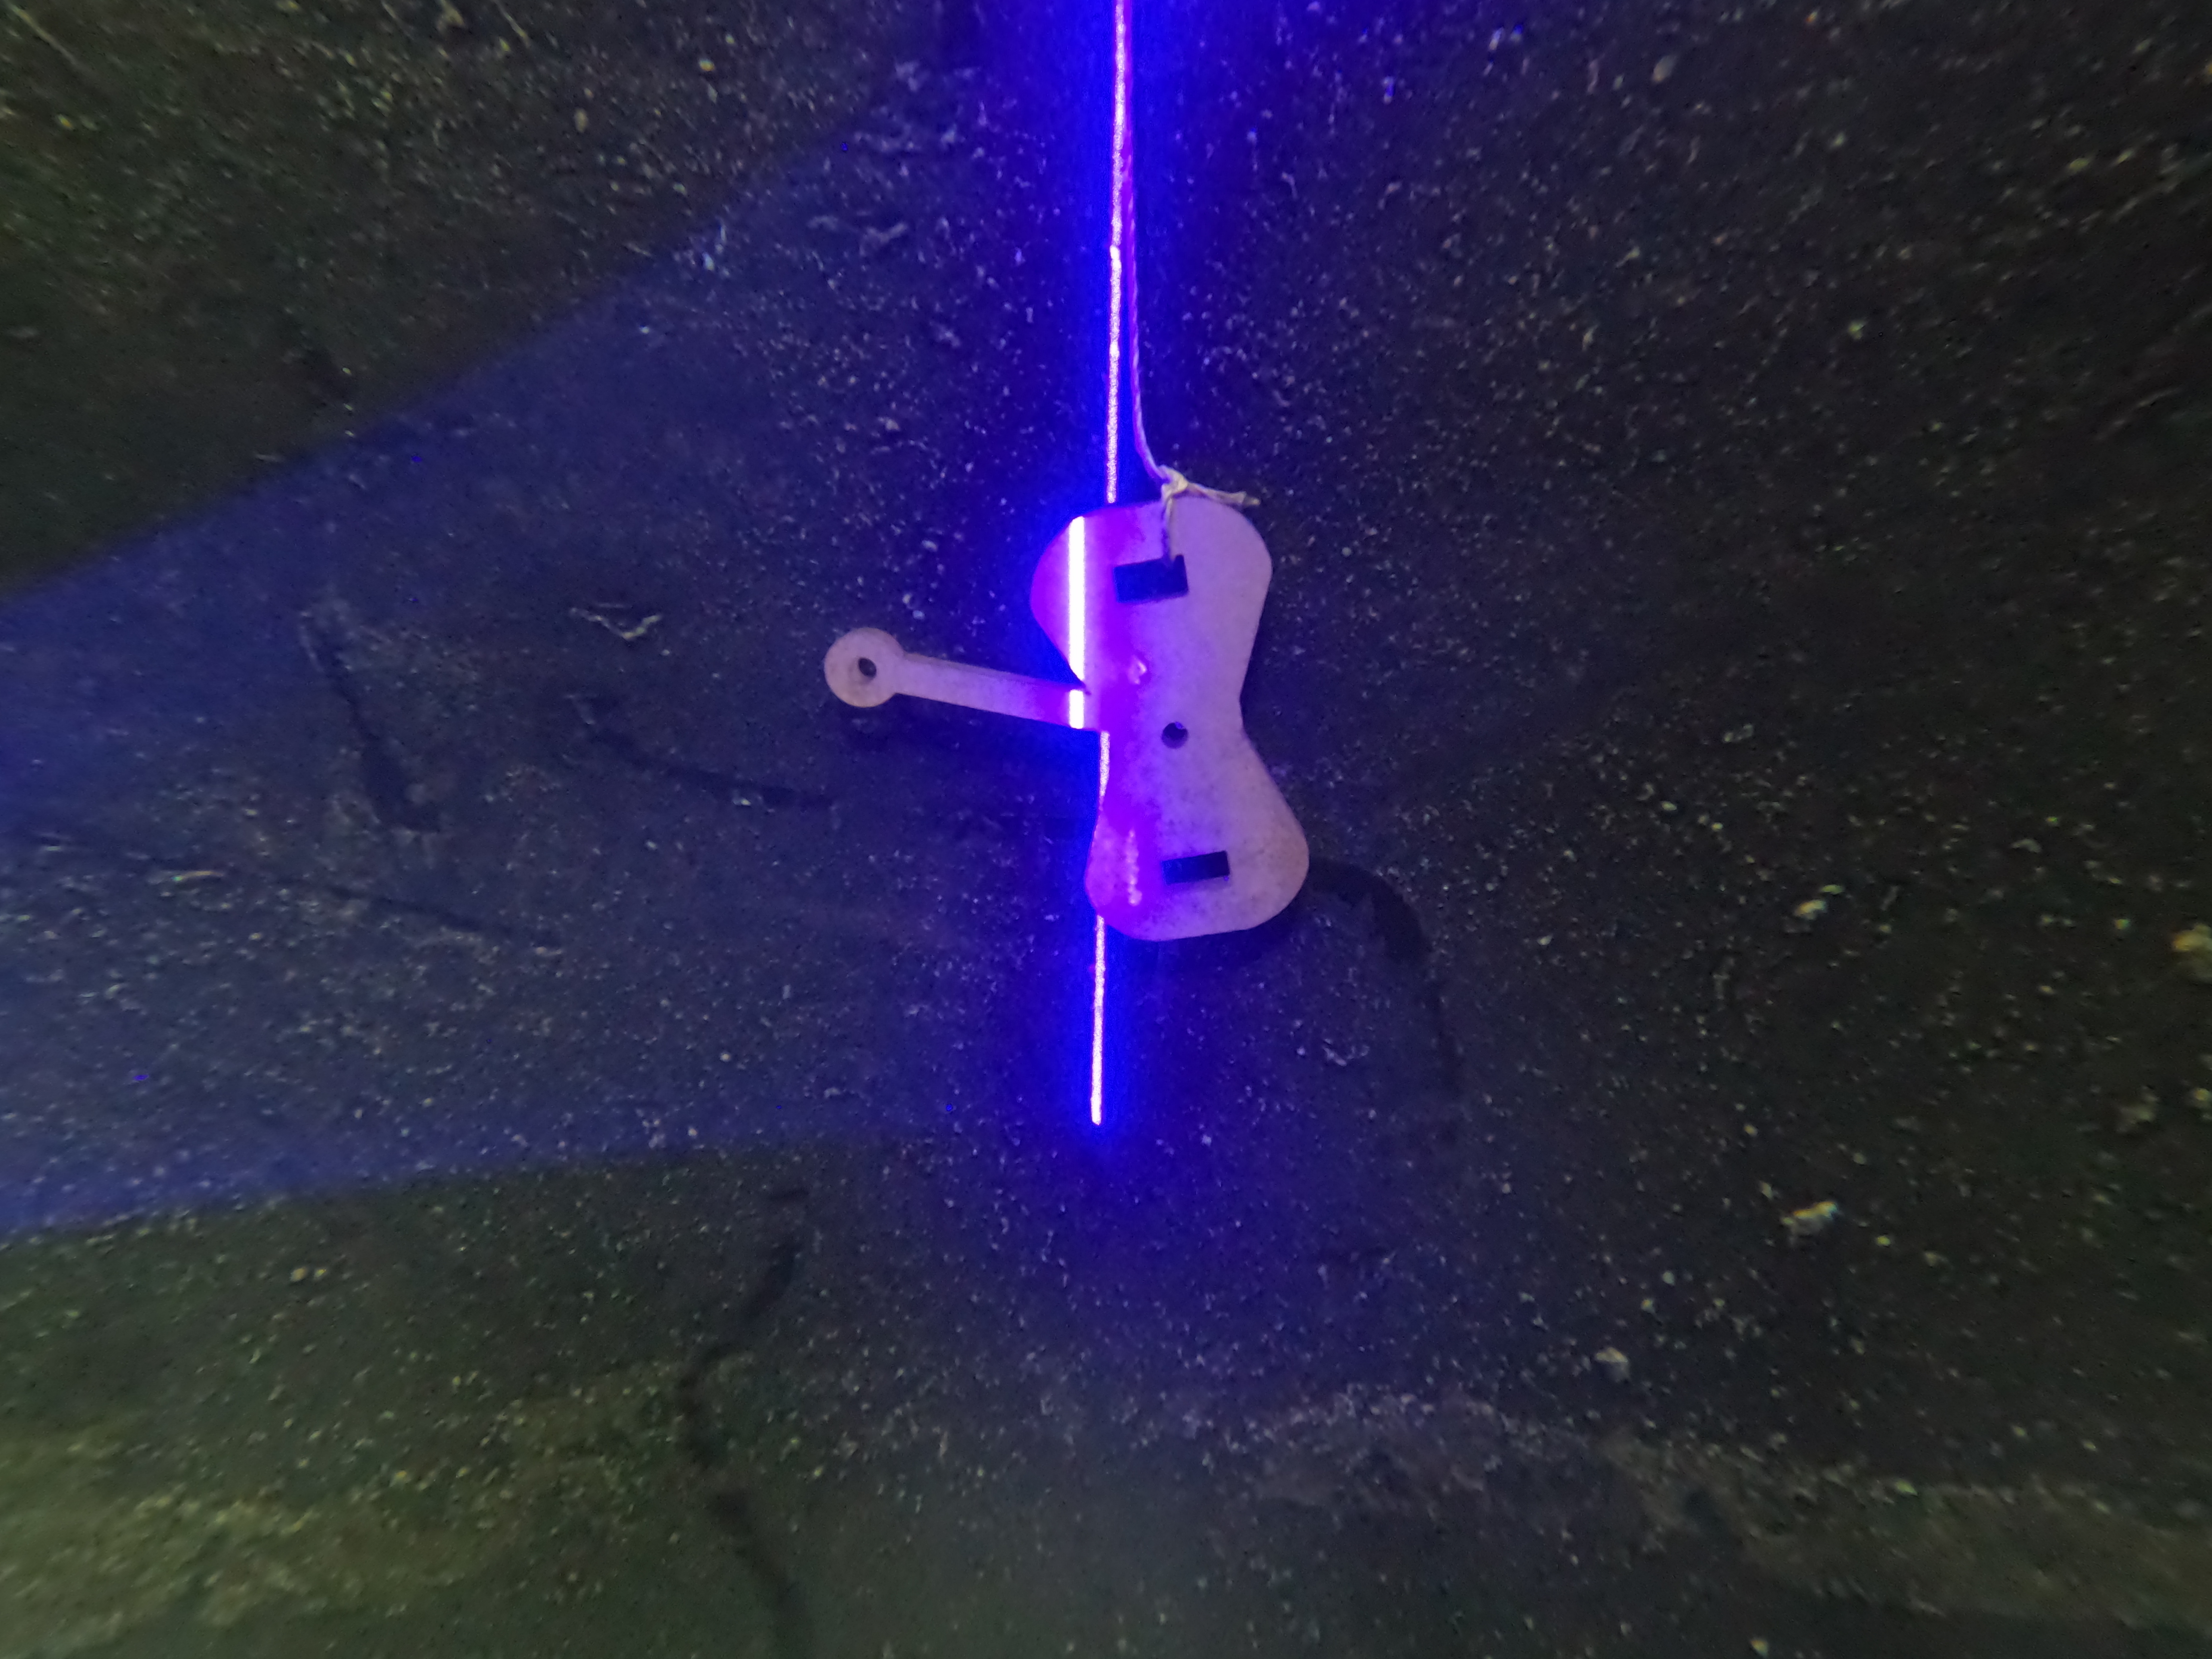

Supplement: Supplementary file 3223 [file G0015664.pdf › Level_2_1/G0015664.pdf]

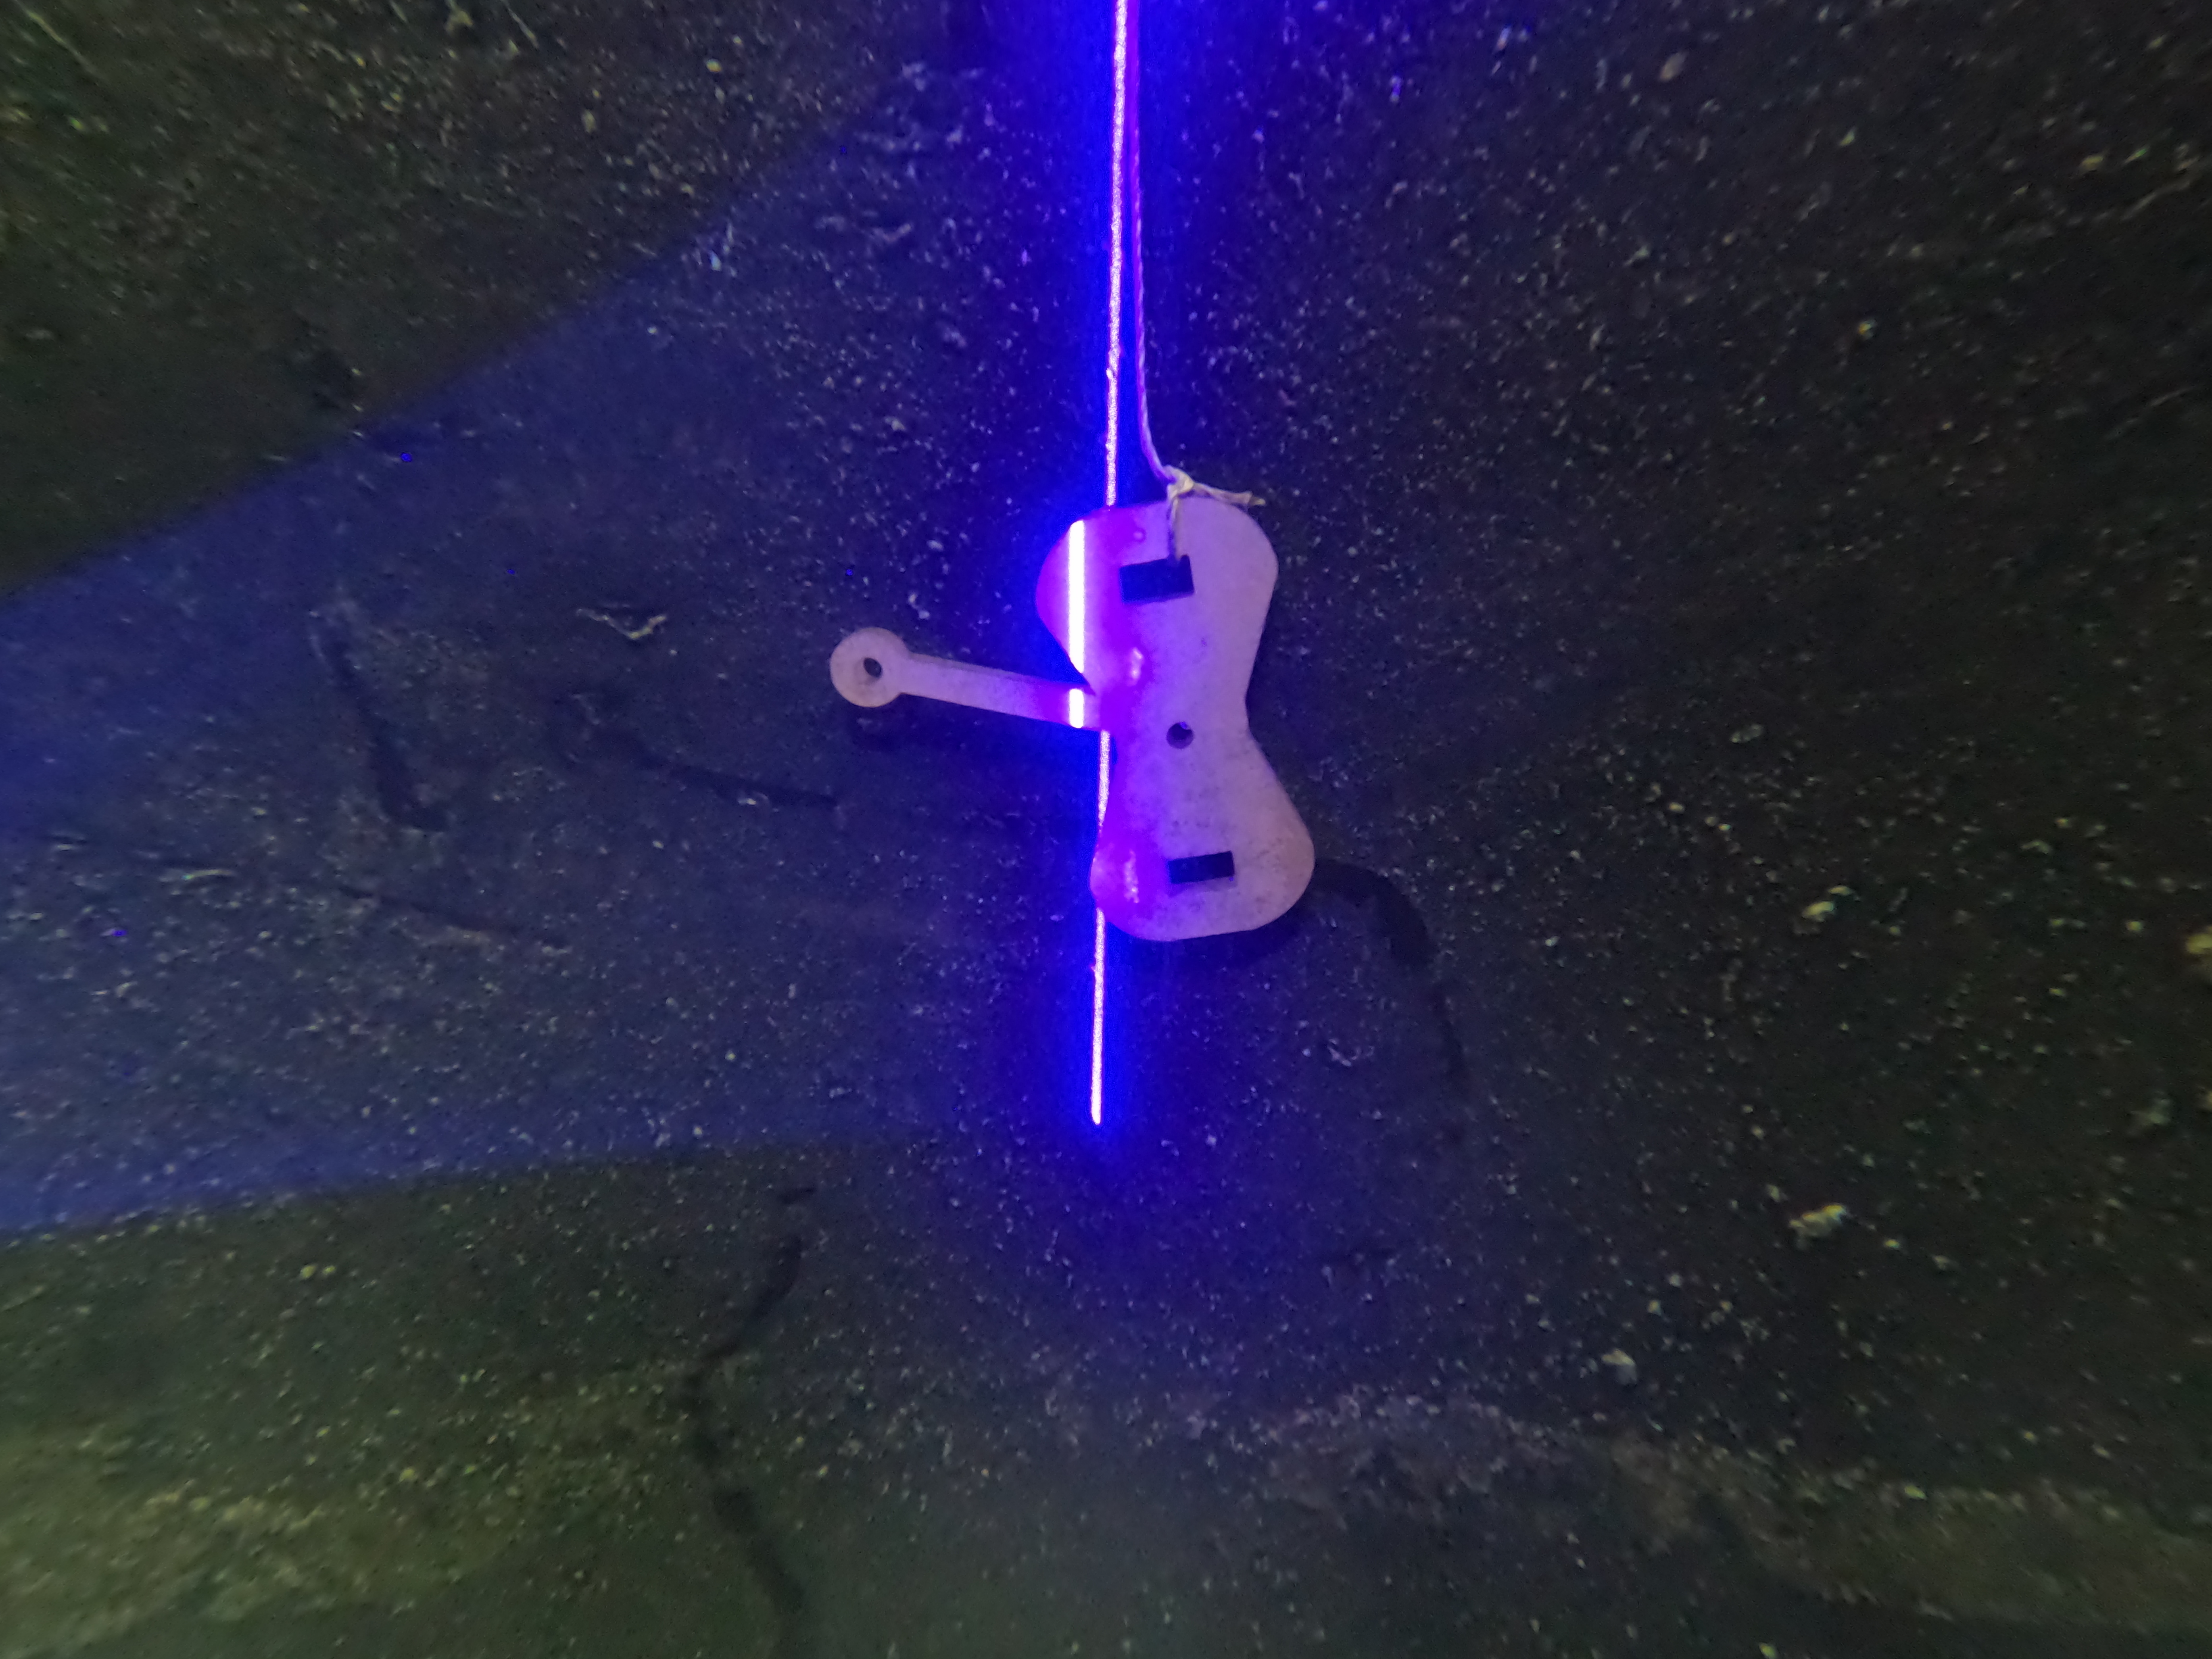

Supplement: Supplementary file 3224 [file G0015665.pdf › Level_2_1/G0015665.pdf]

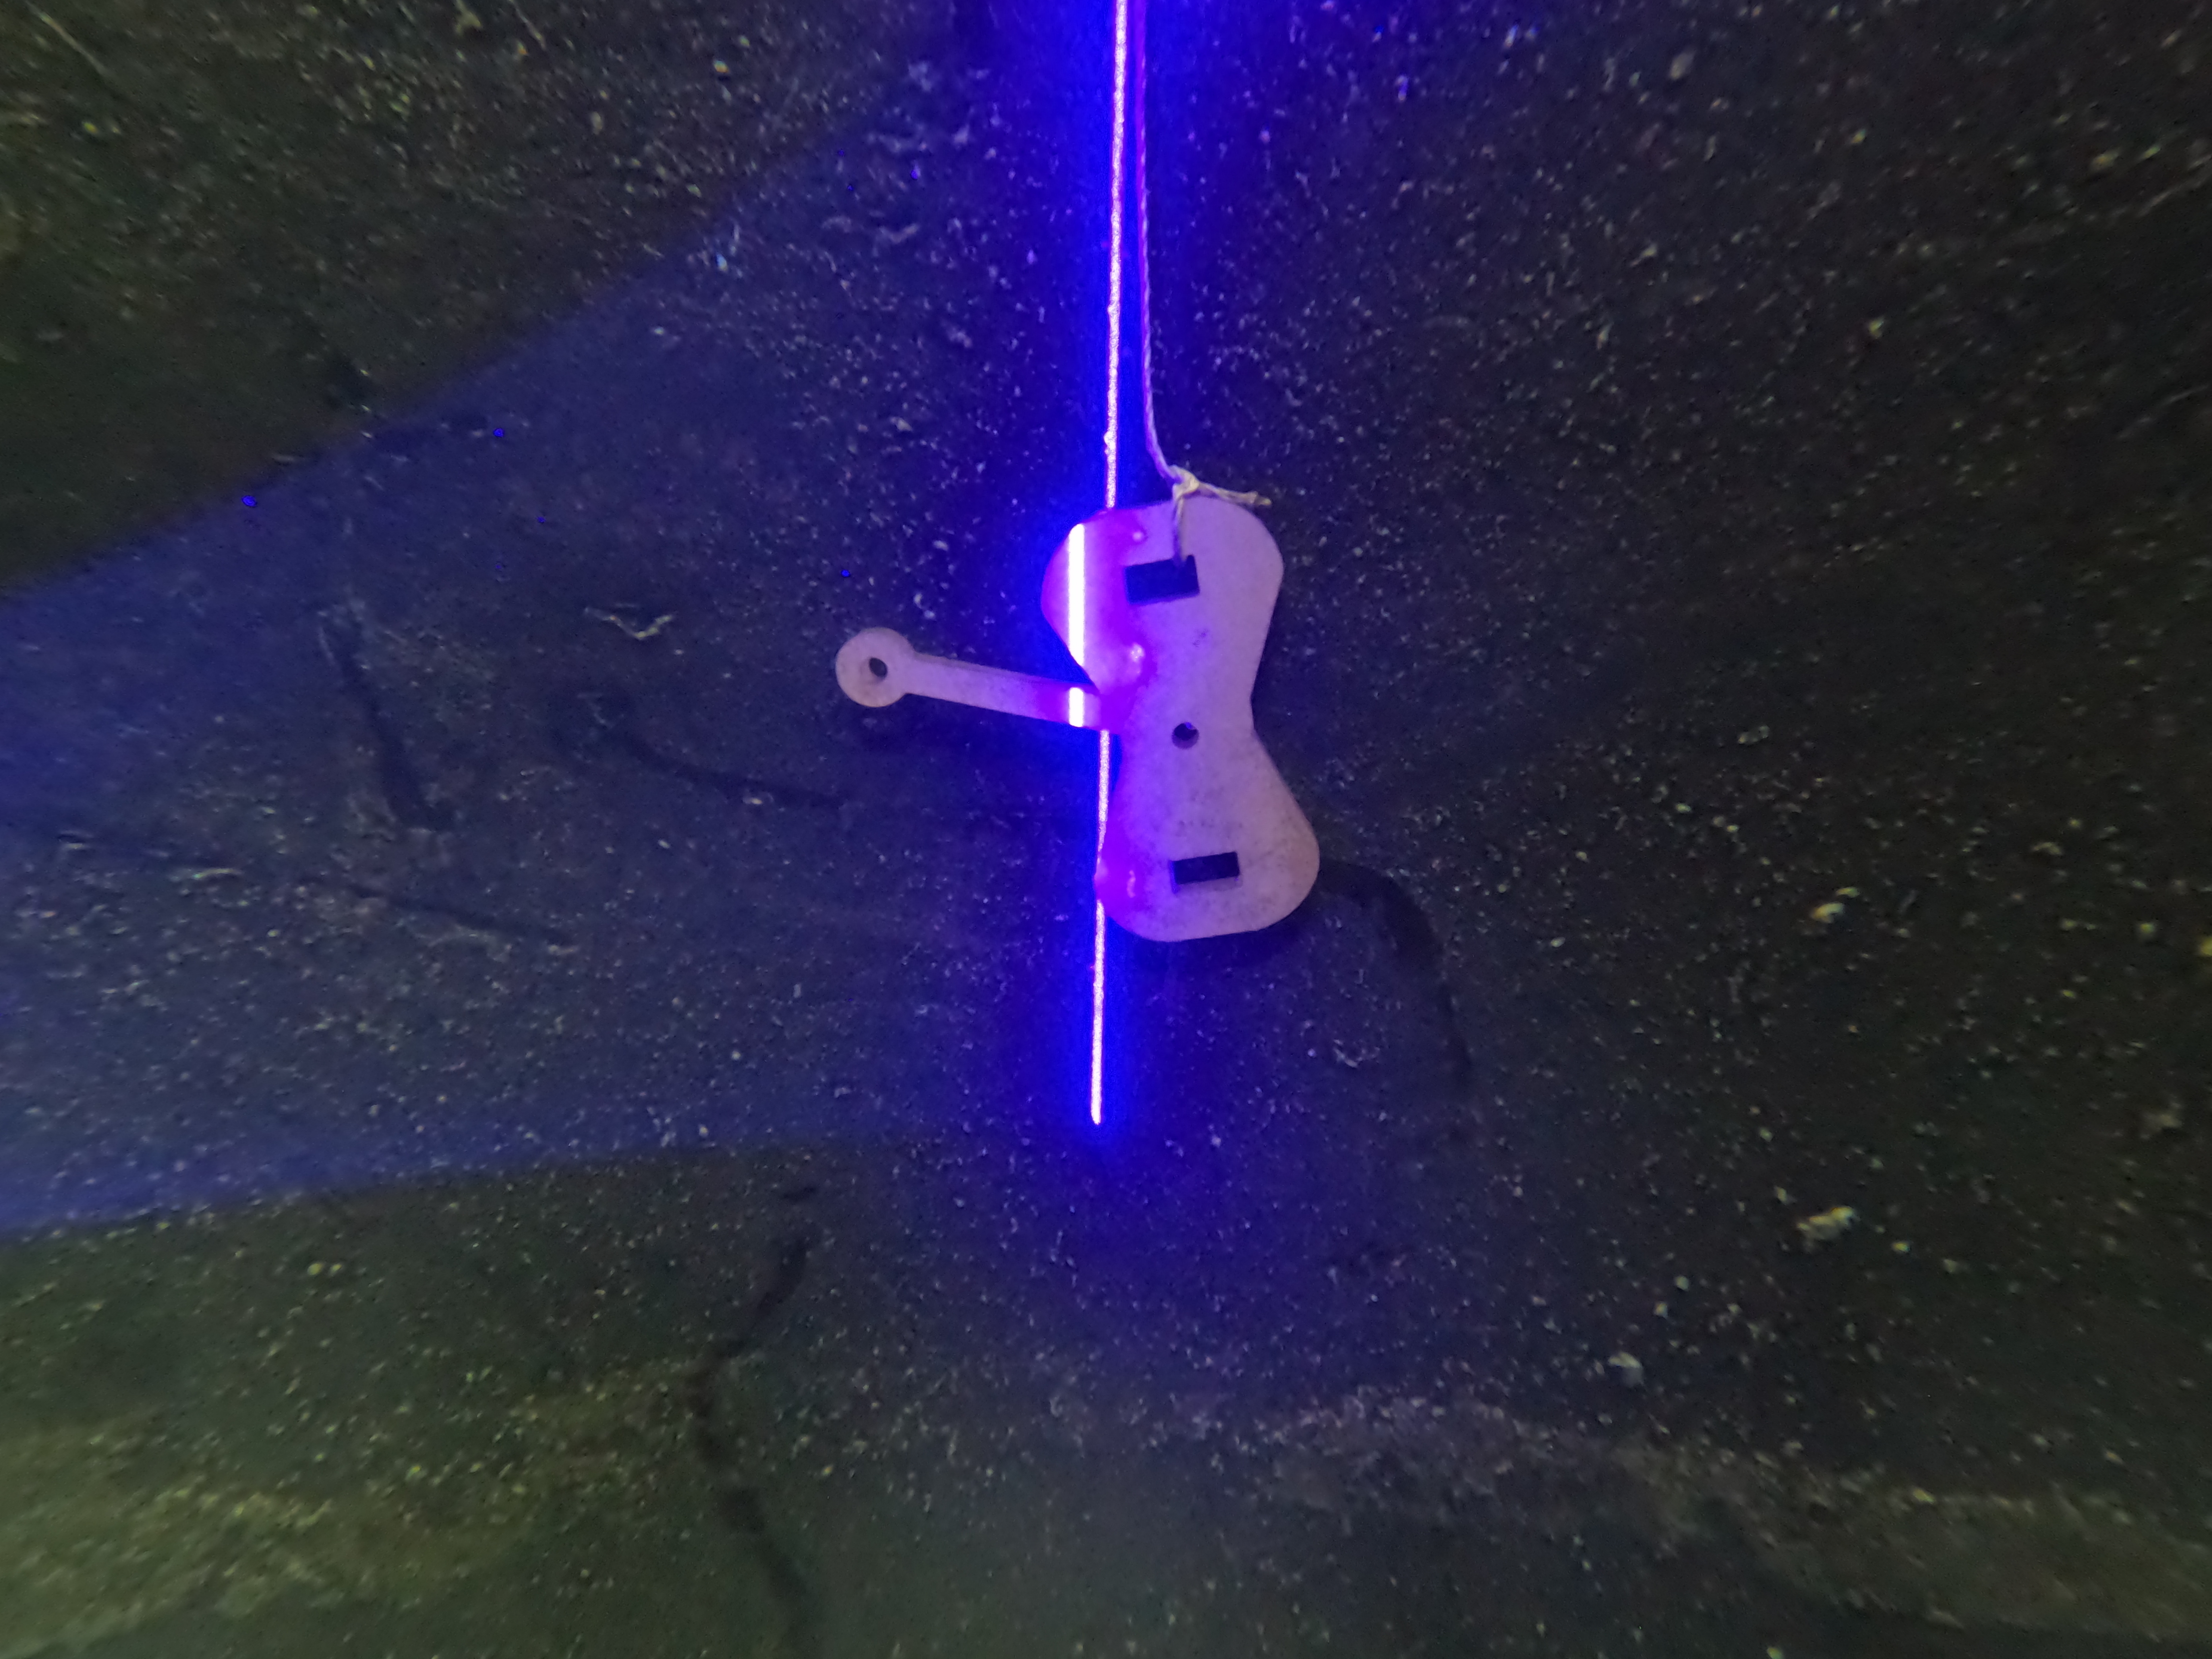

Supplement: Supplementary file 3225 [file G0015666.pdf › Level_2_1/G0015666.pdf]

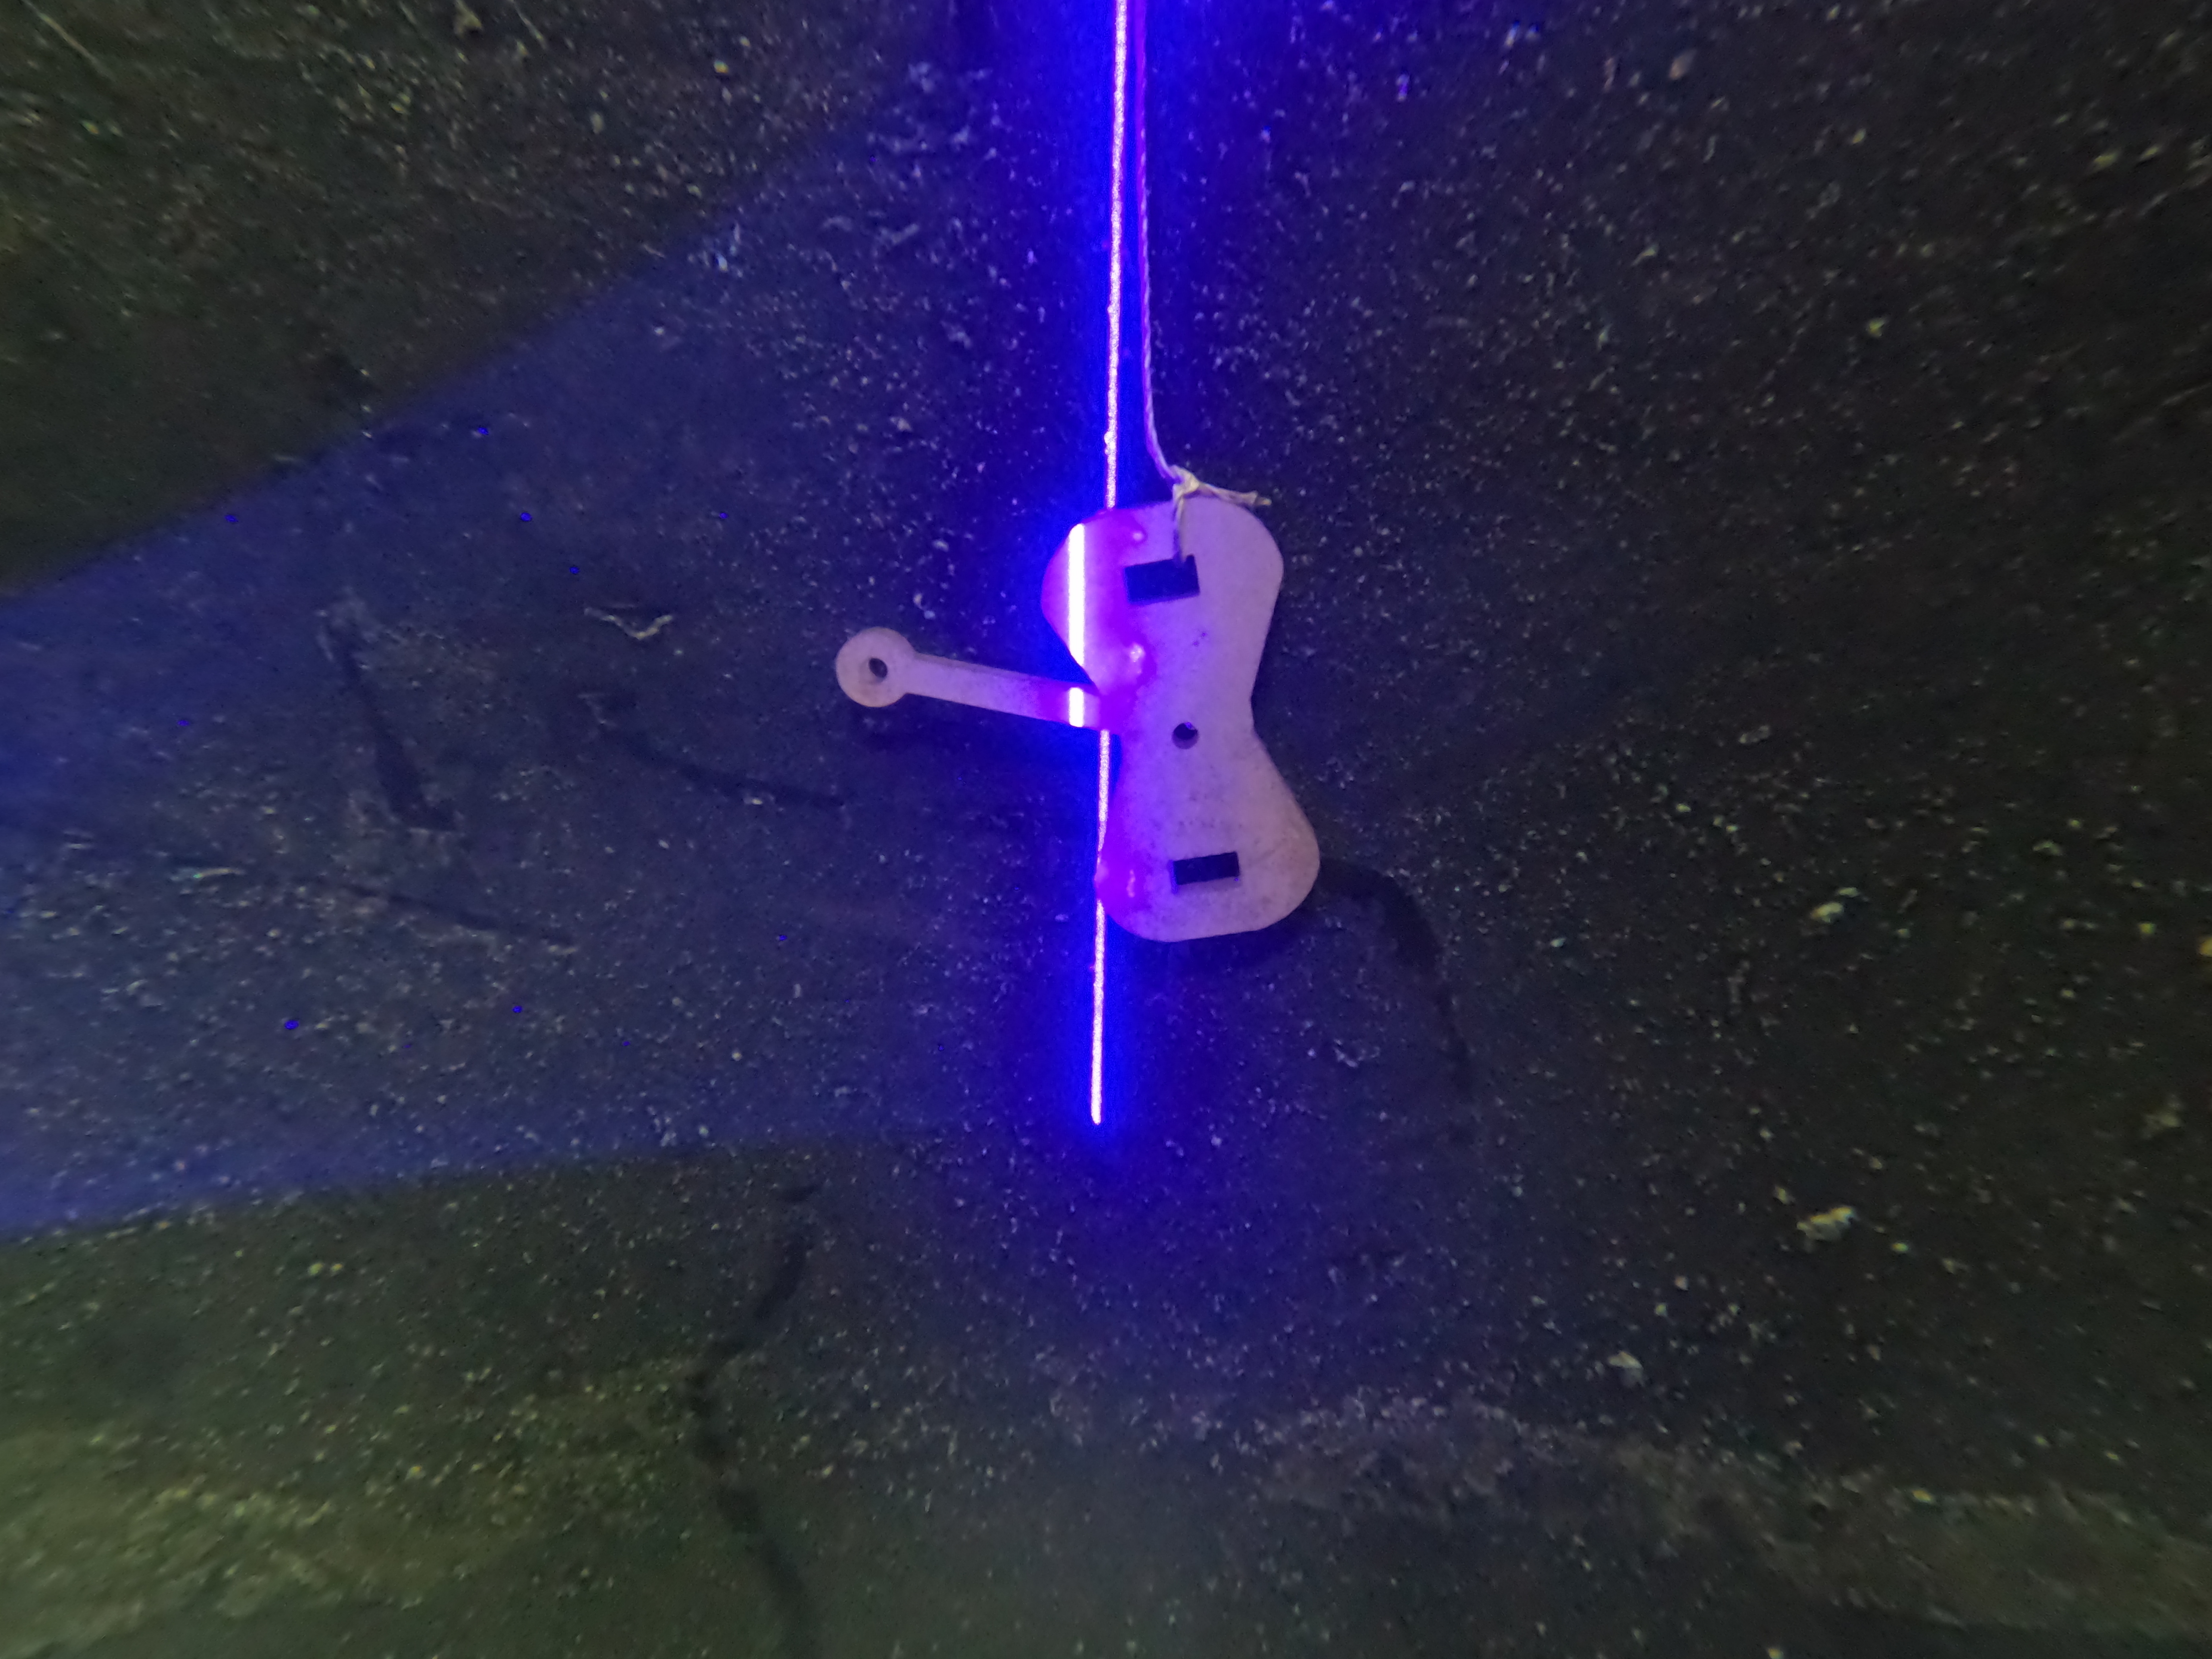

Supplement: Supplementary file 3226 [file G0015667.pdf › Level_2_1/G0015667.pdf]

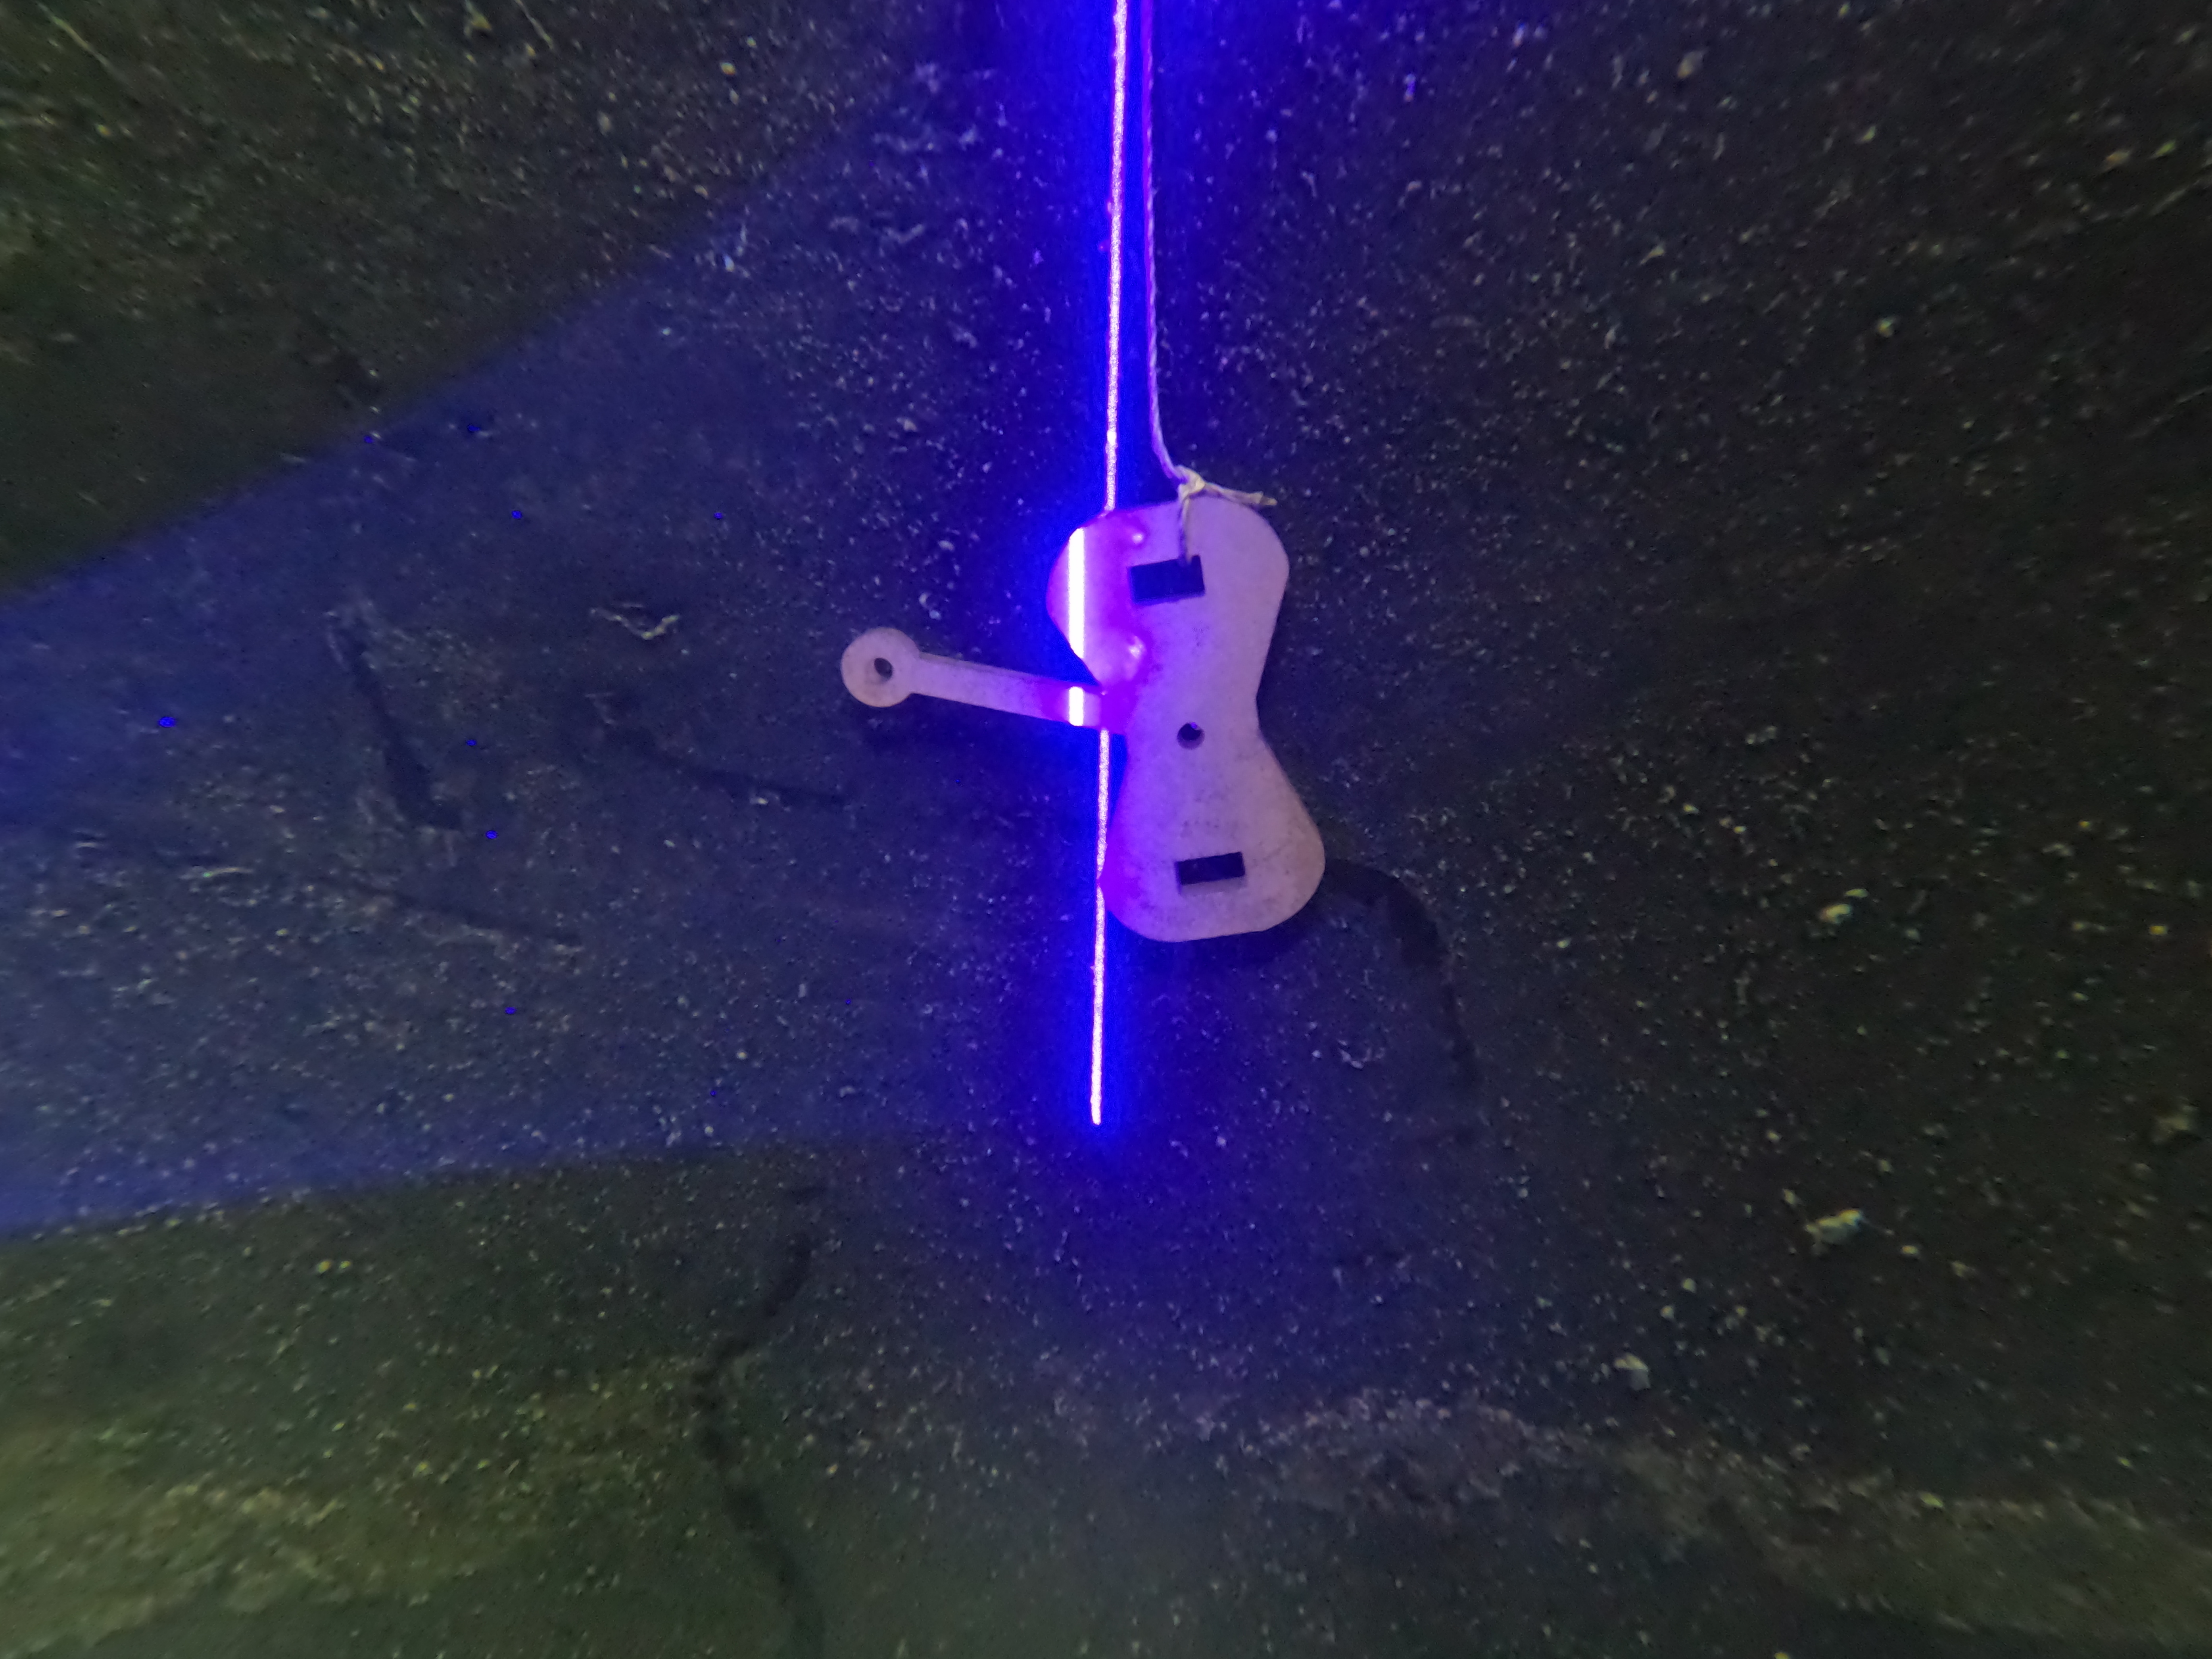

Supplement: Supplementary file 3227 [file G0015668.pdf › Level_2_1/G0015668.pdf]

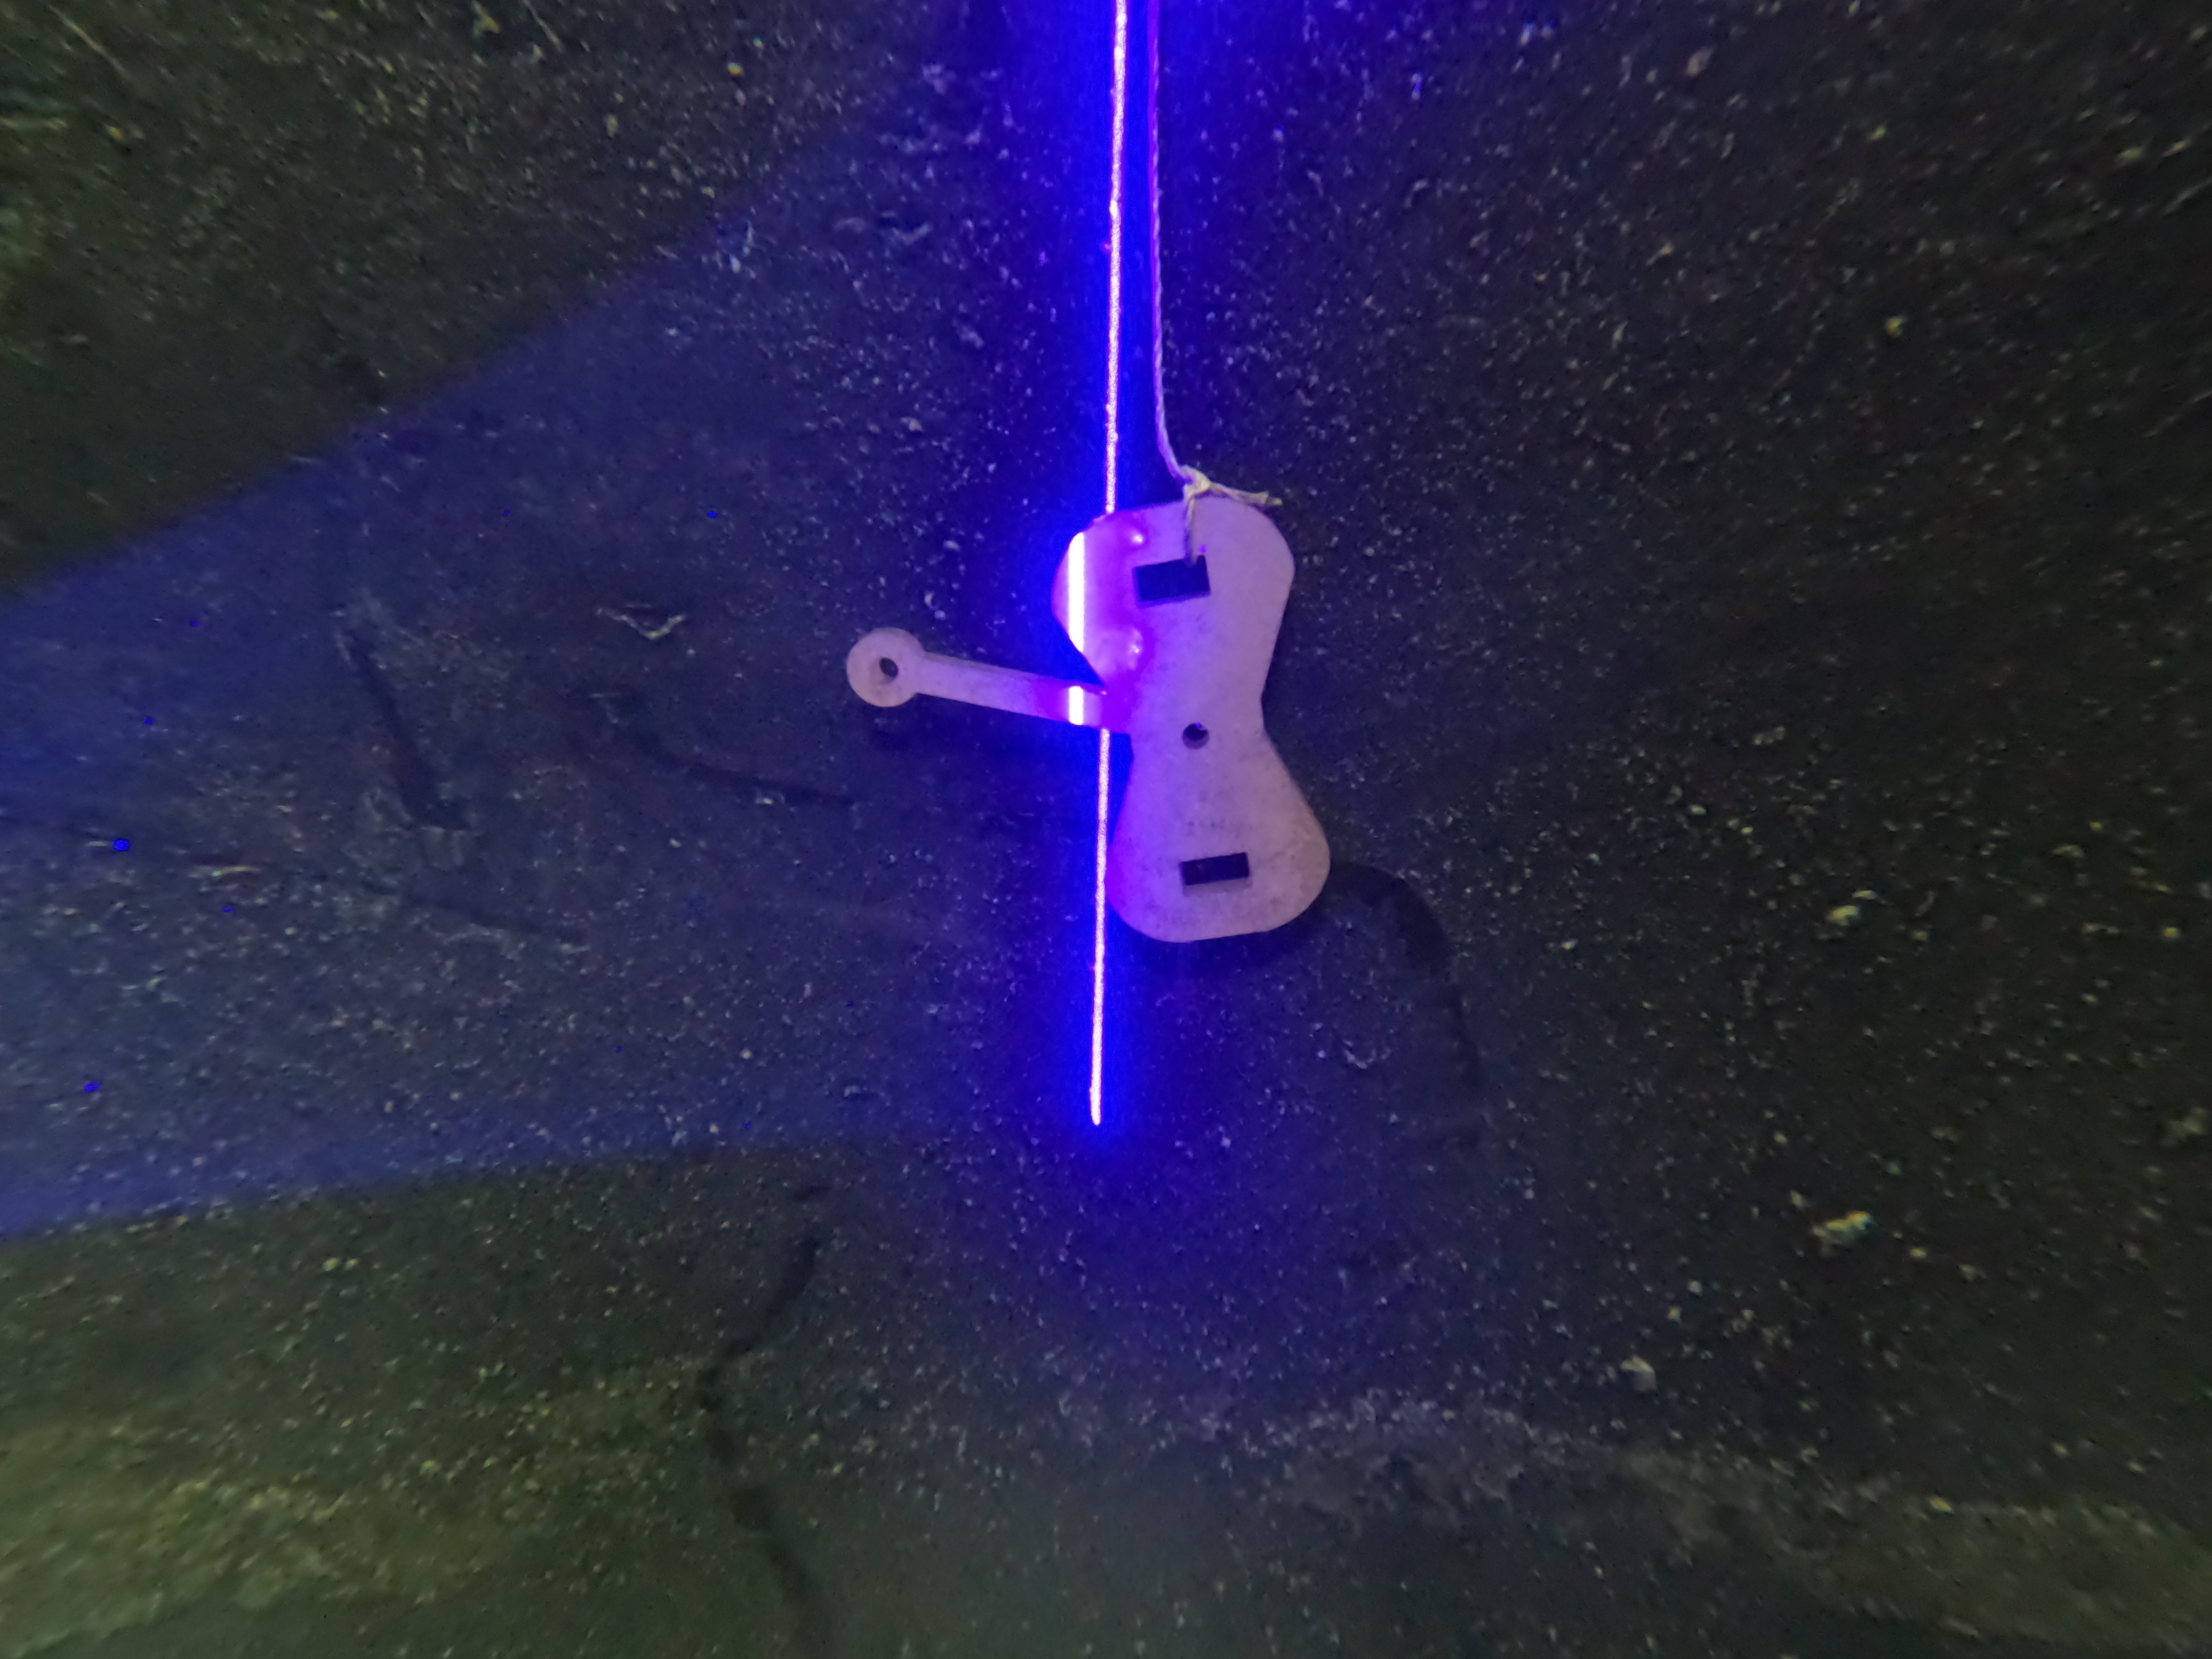

Supplement: Supplementary file 3228 [file G0015669.pdf › Level_2_1/G0015669.pdf]

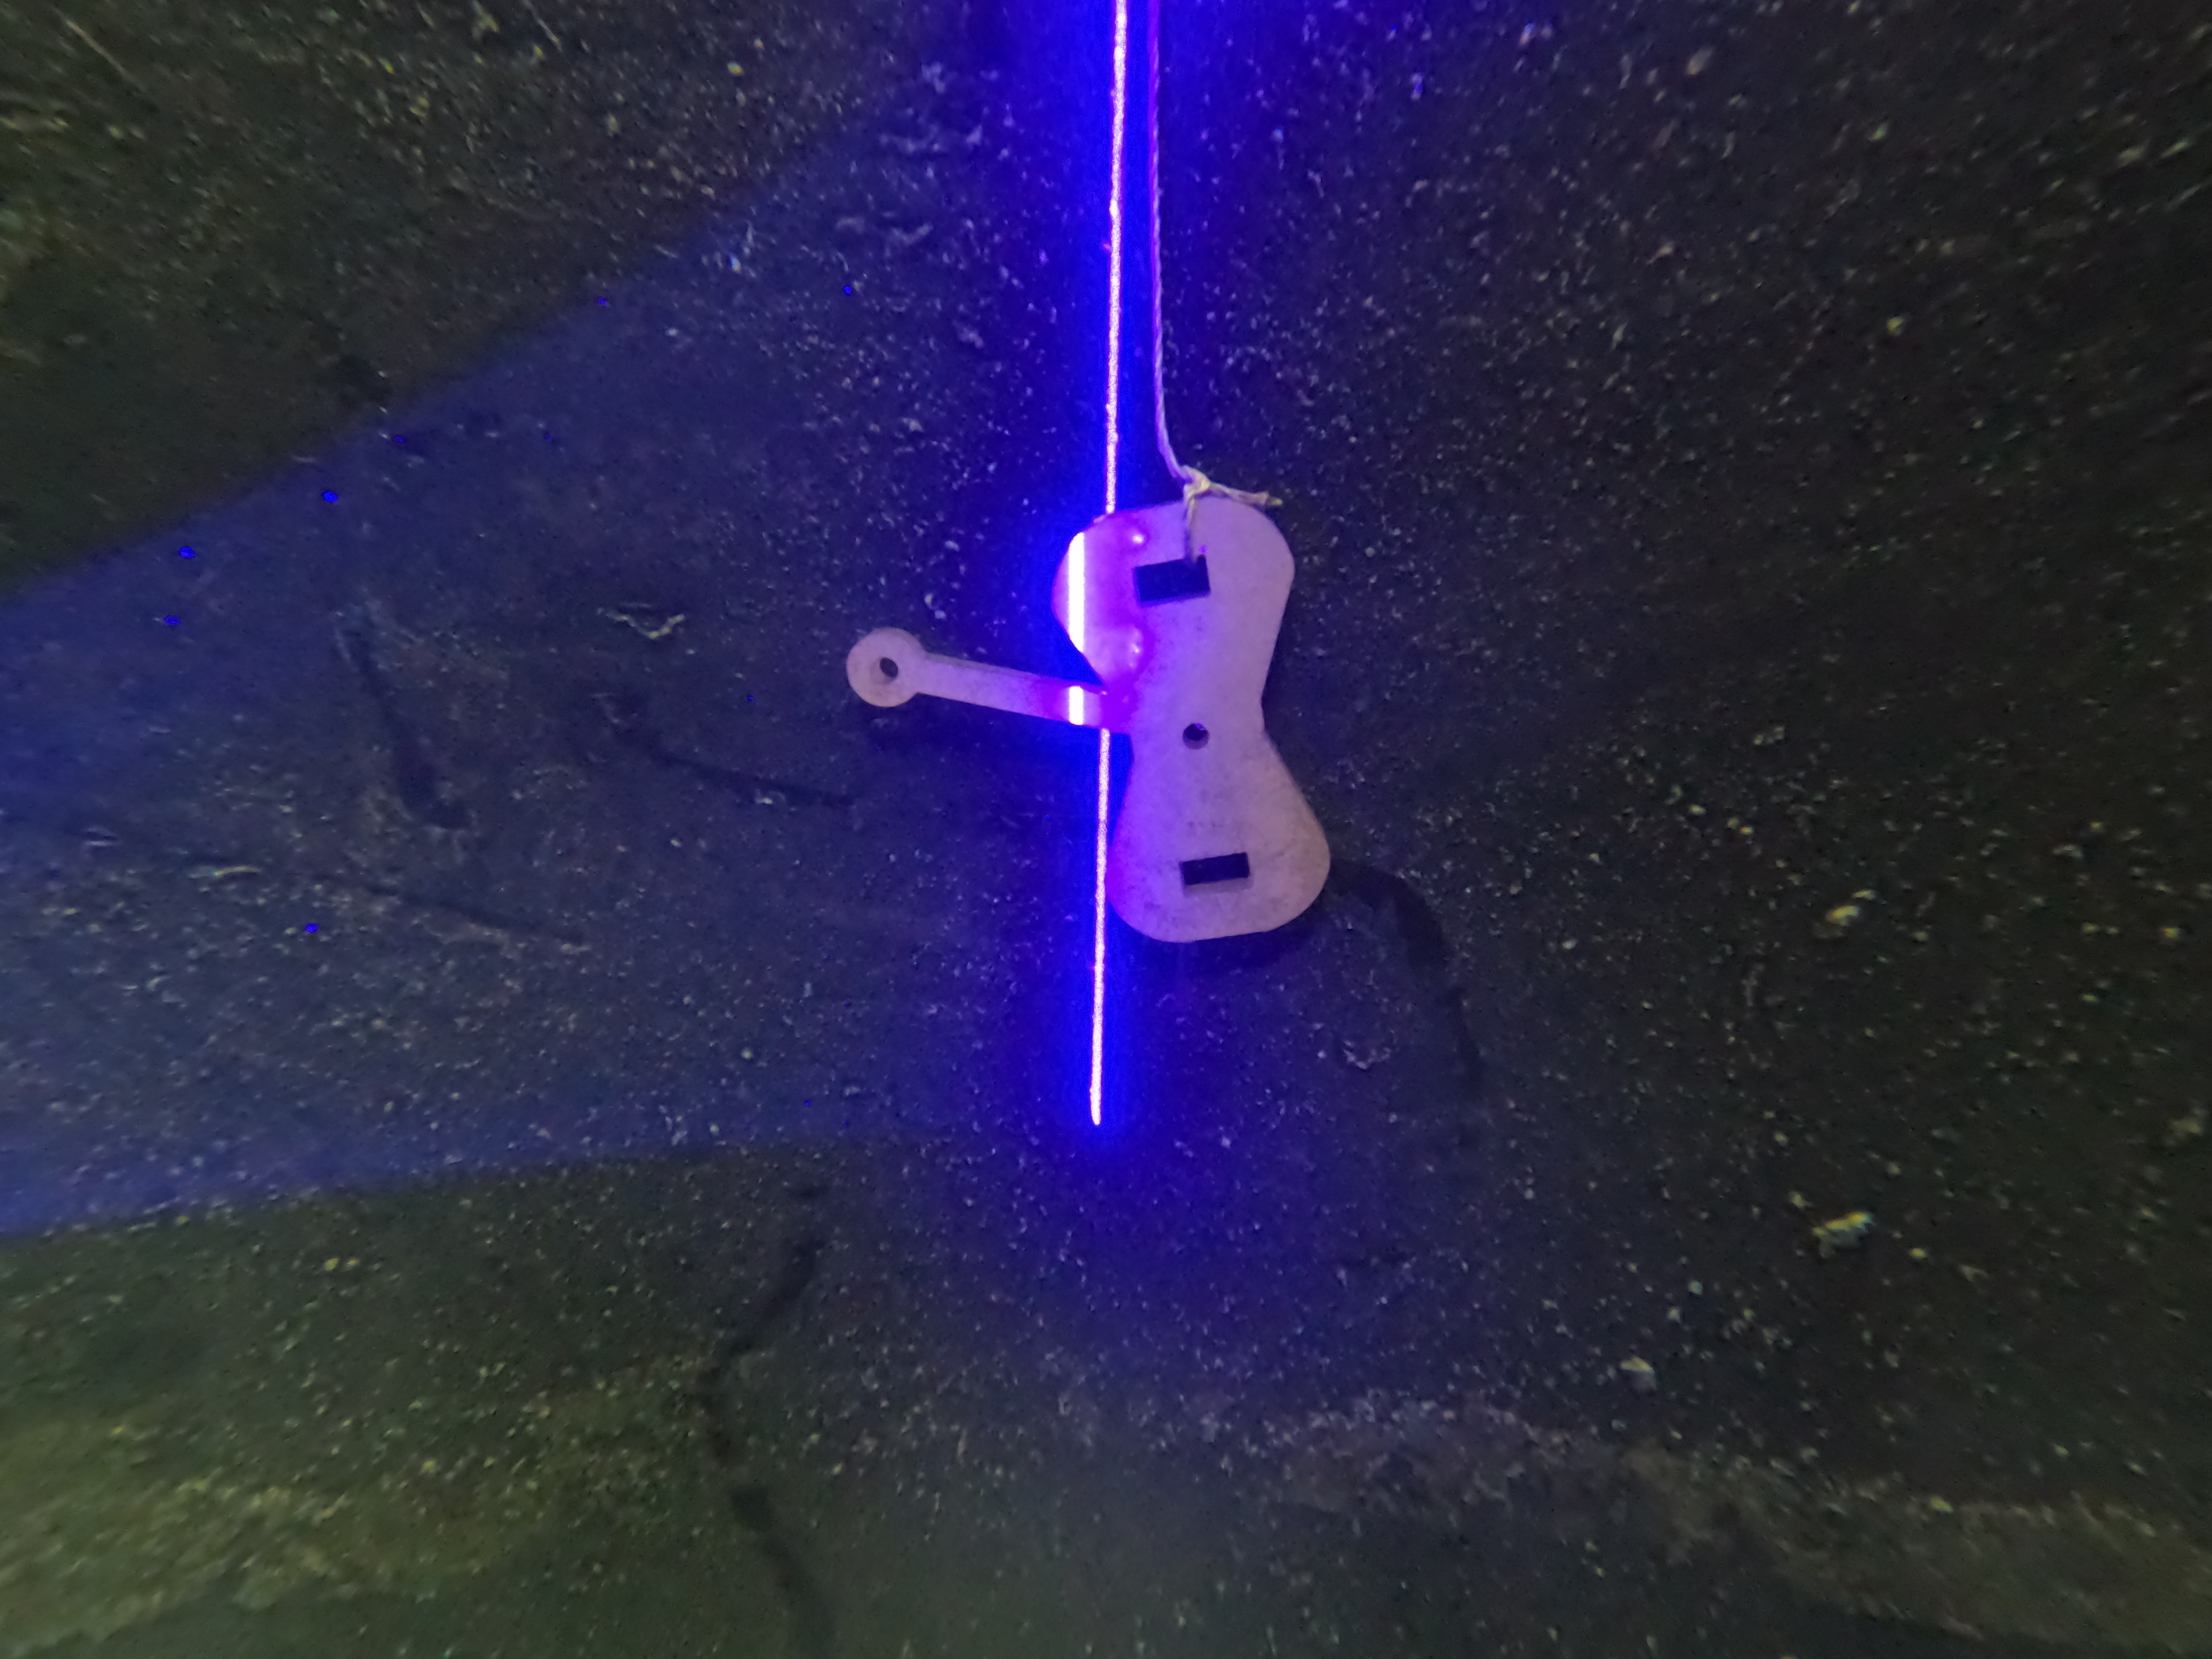

Supplement: Supplementary file 3229 [file G0015670.pdf › Level_2_1/G0015670.pdf]

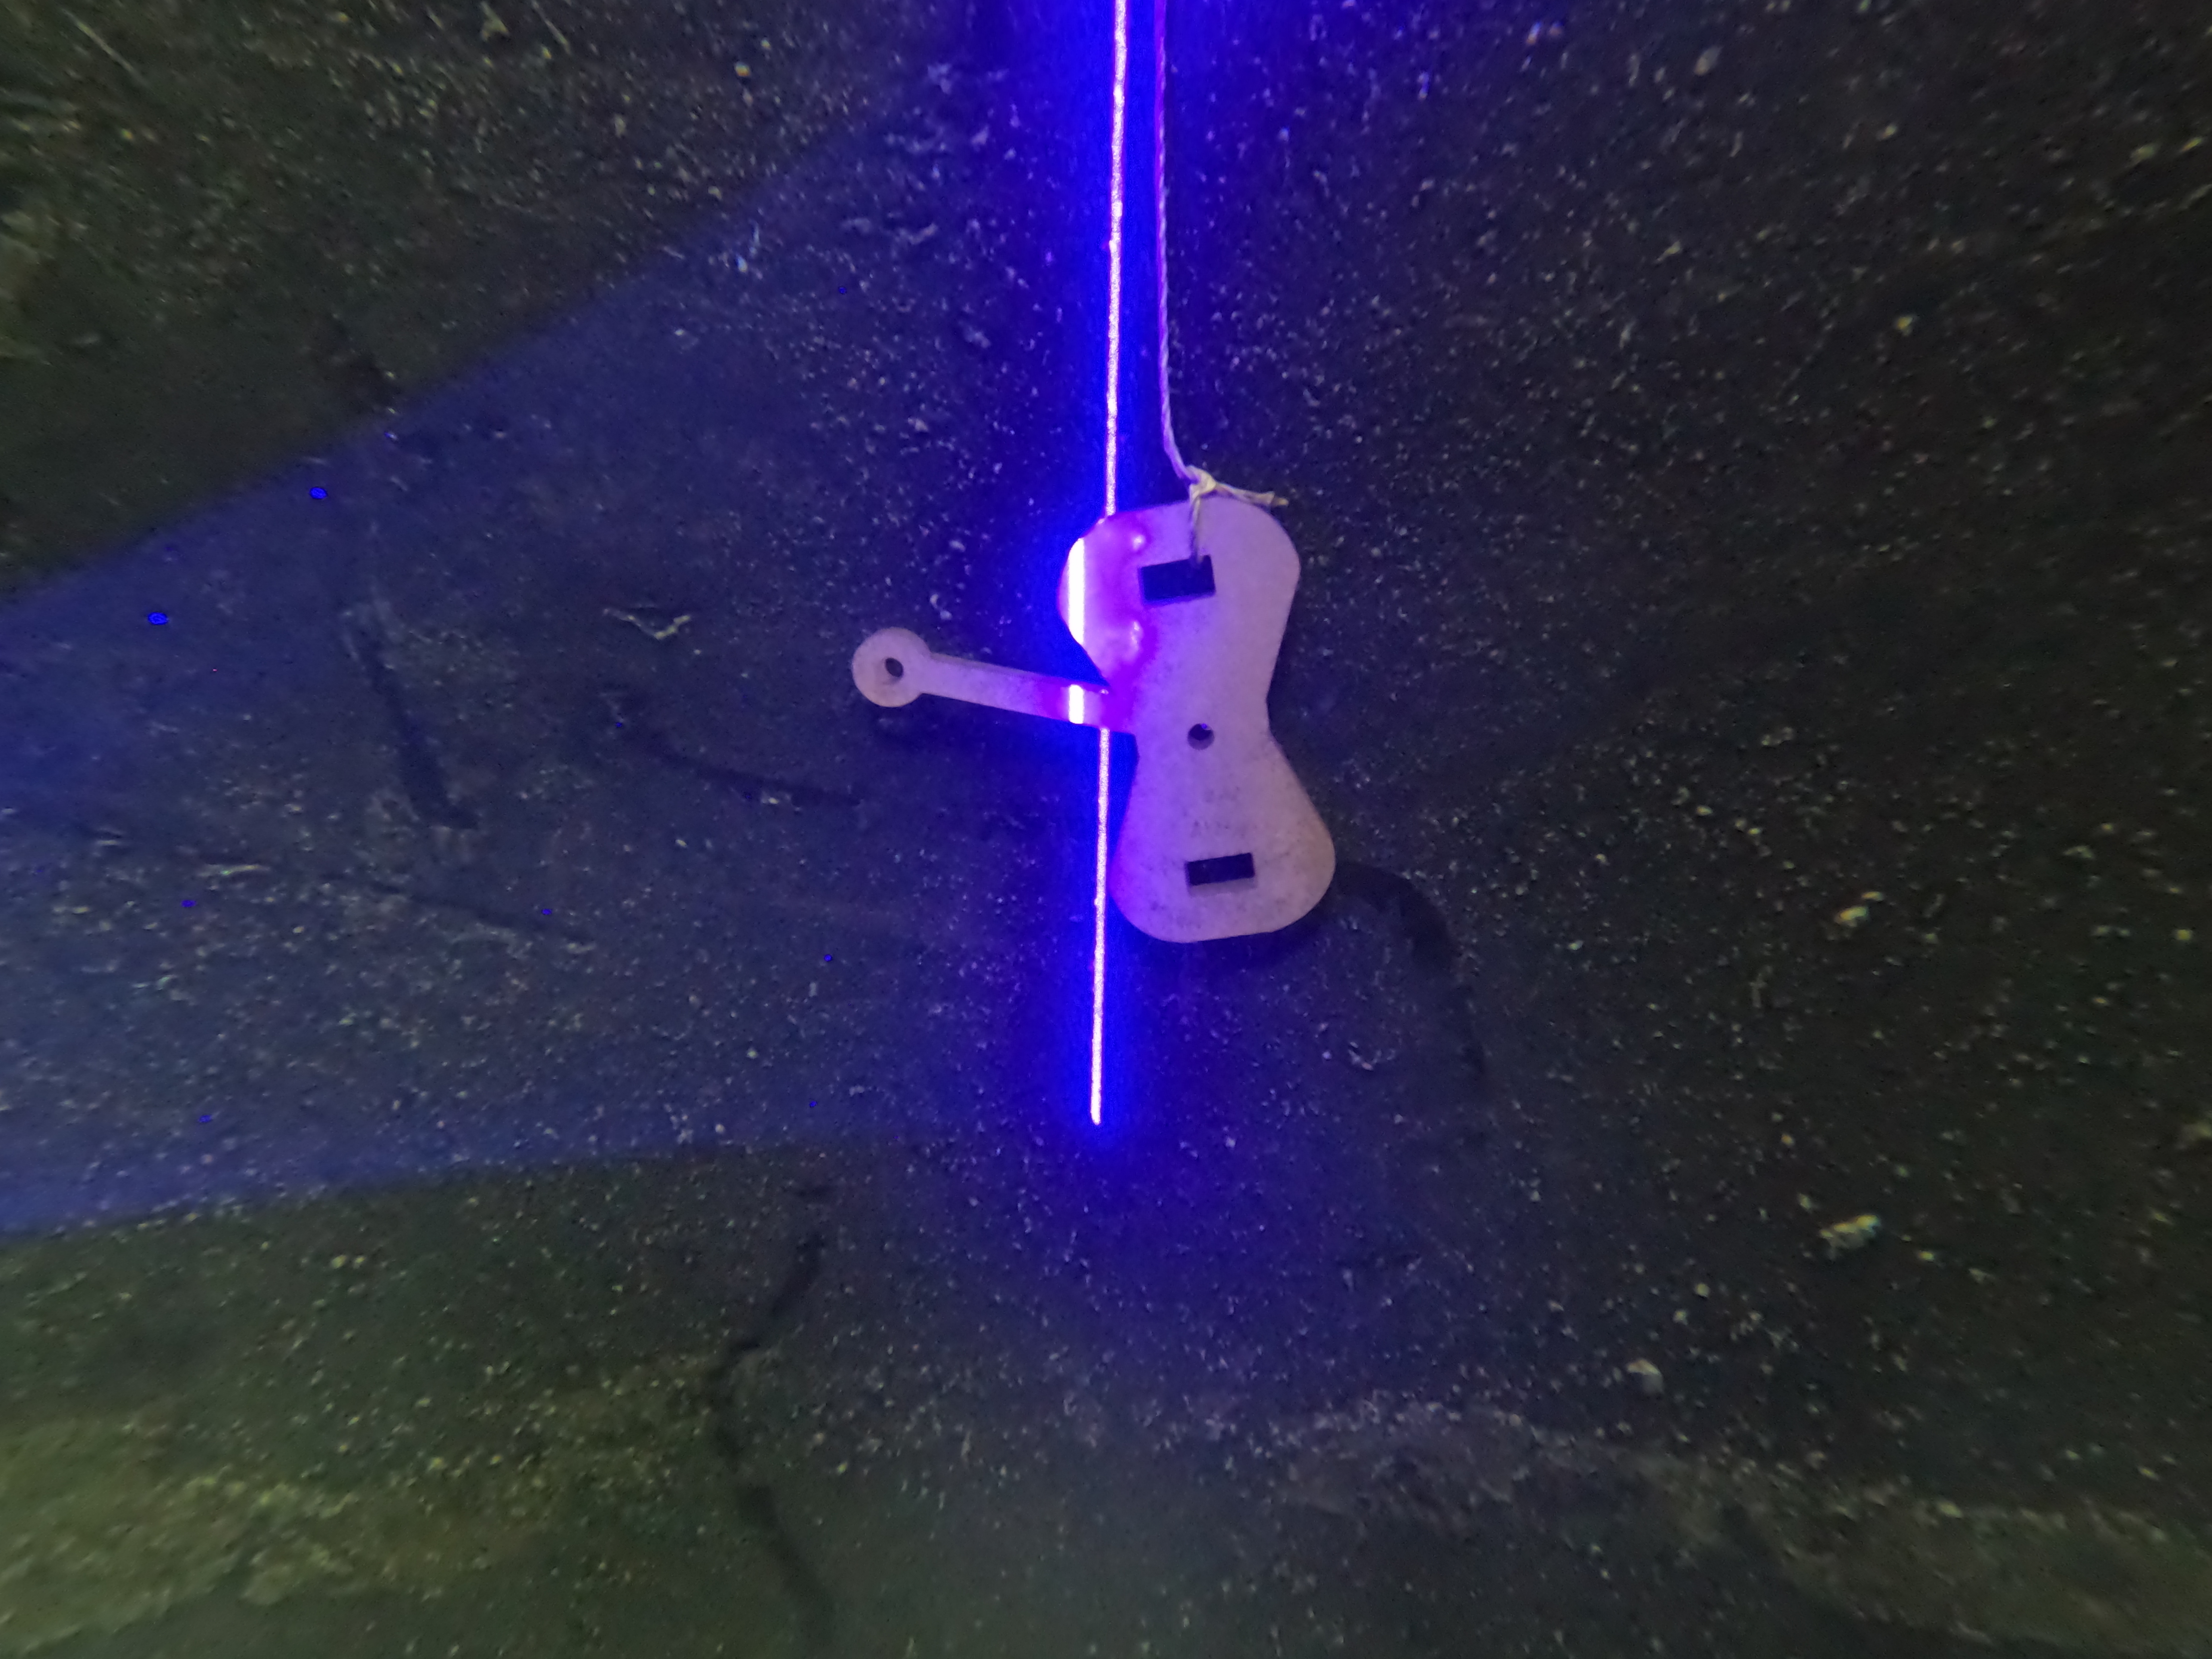

Supplement: Supplementary file 3230 [file G0015671.pdf › Level_2_1/G0015671.pdf]

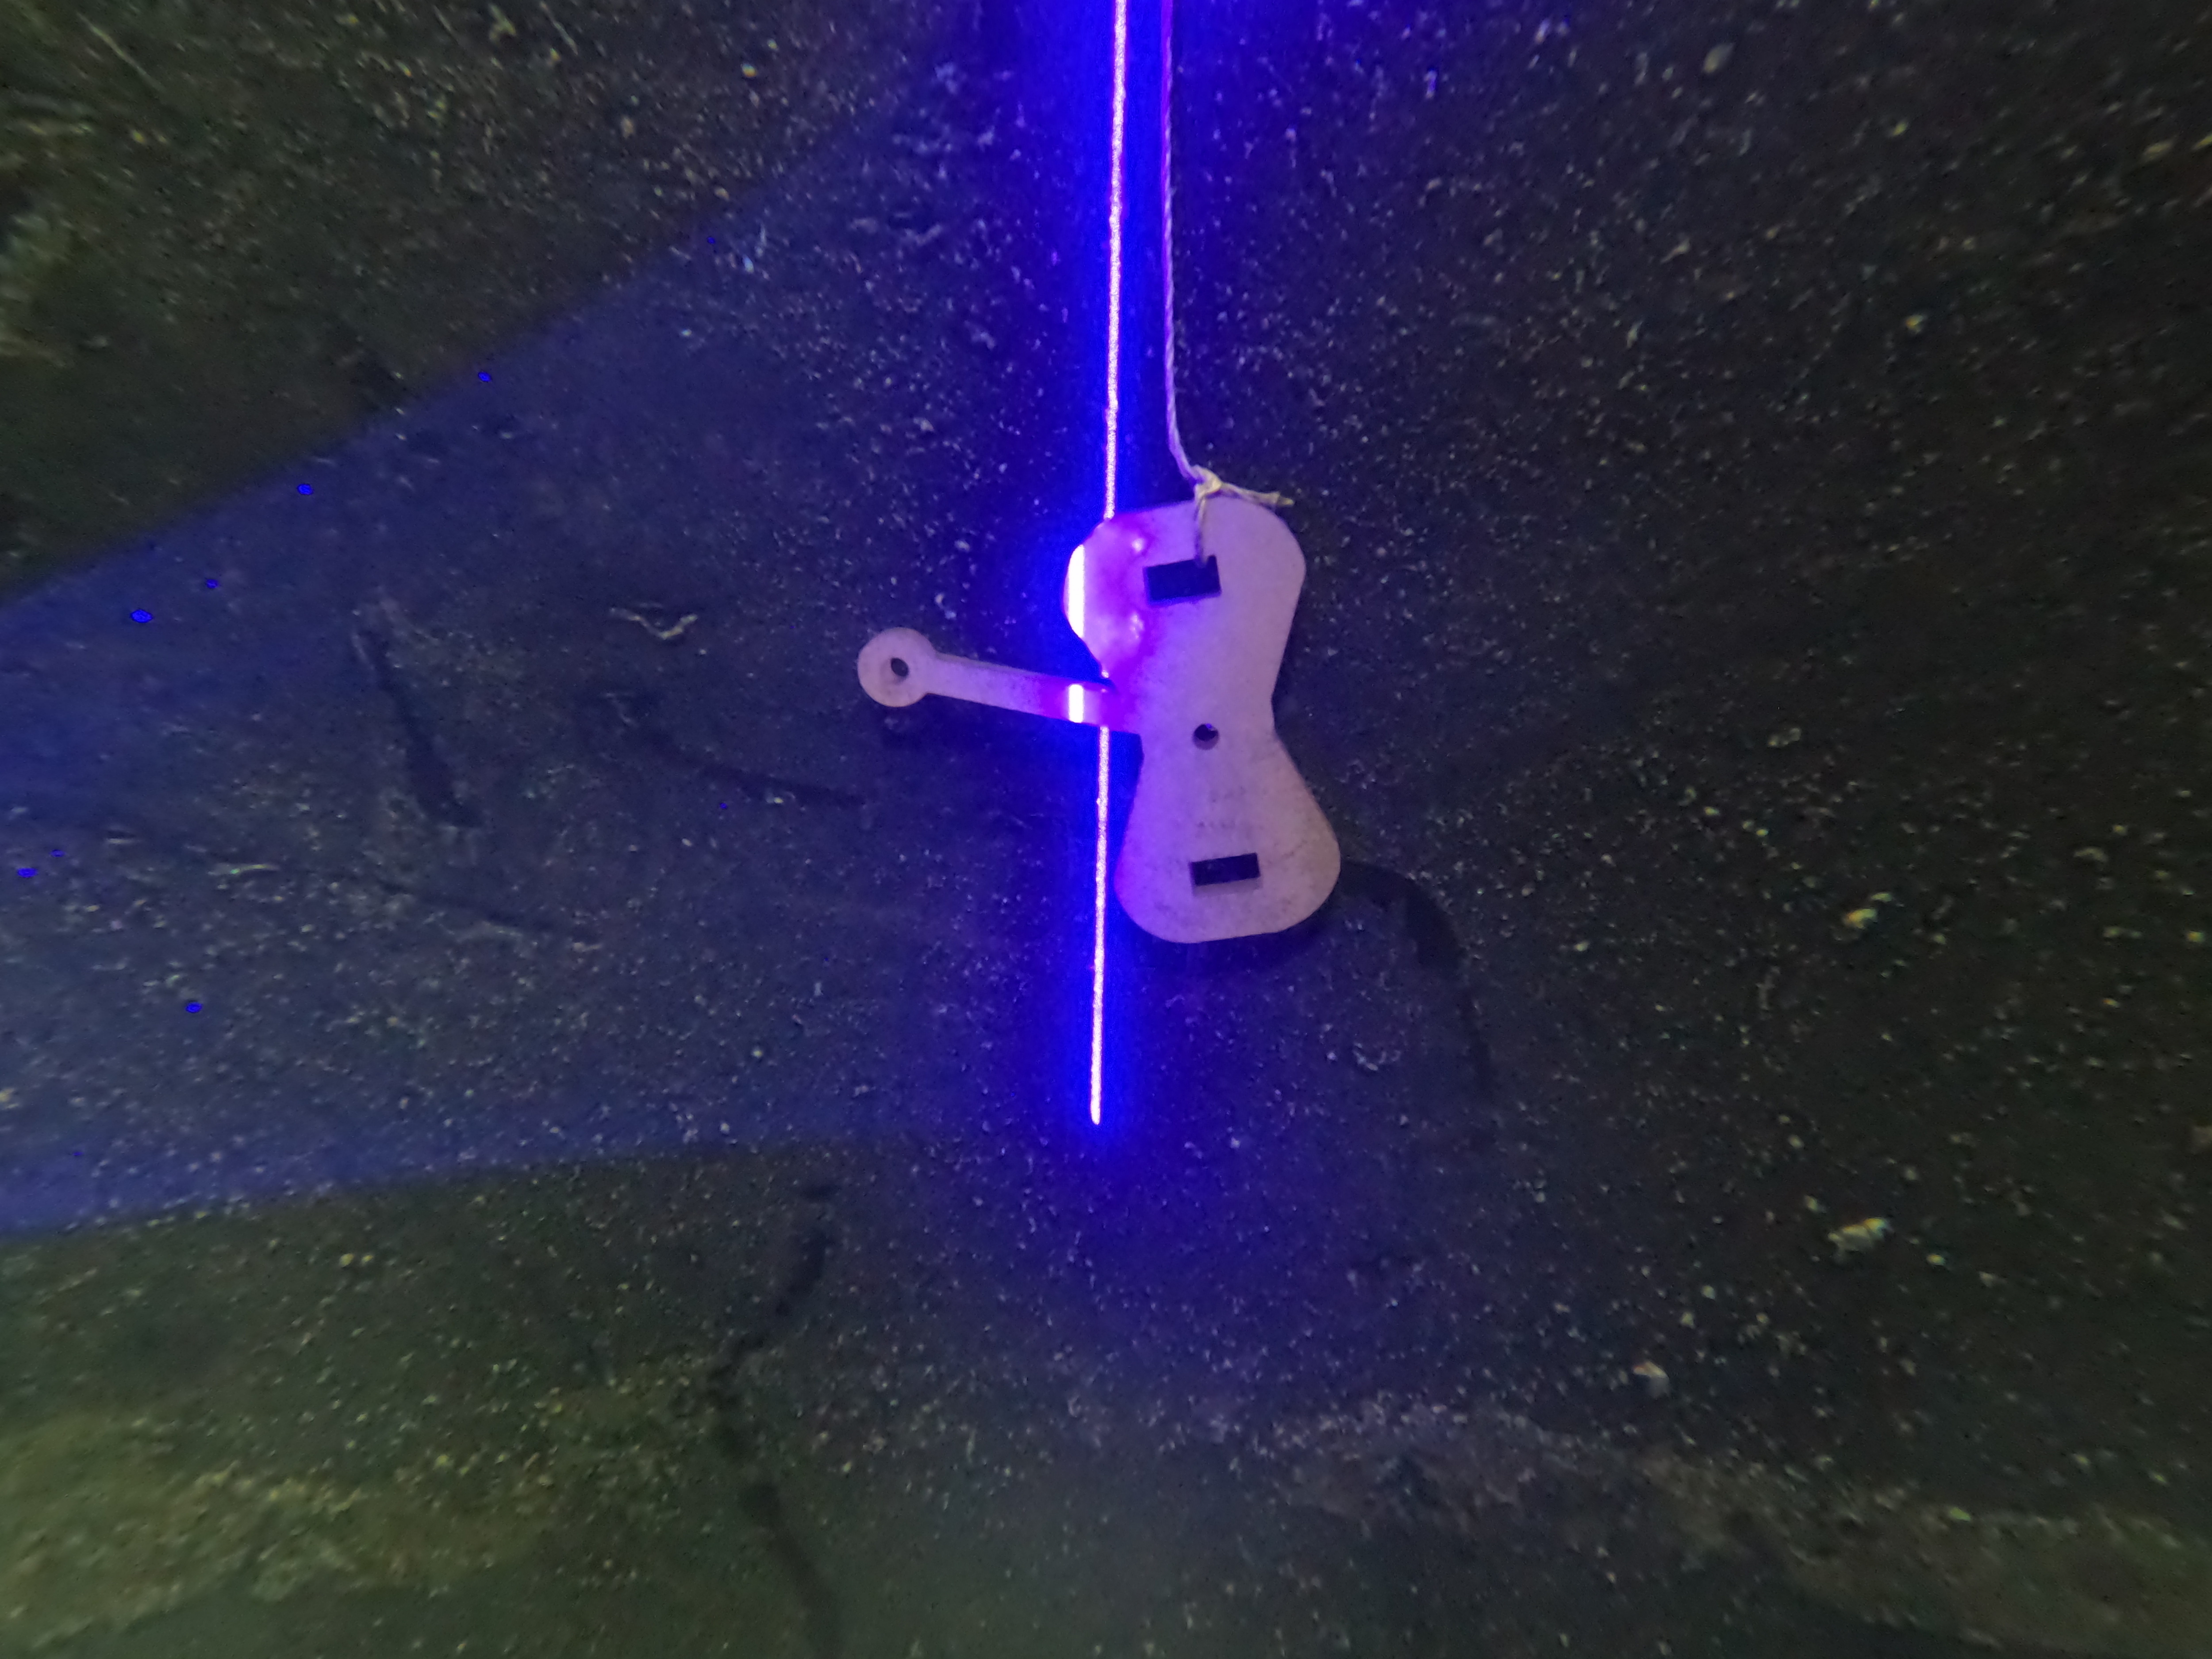

Supplement: Supplementary file 3231 [file G0015672.pdf › Level_2_1/G0015672.pdf]

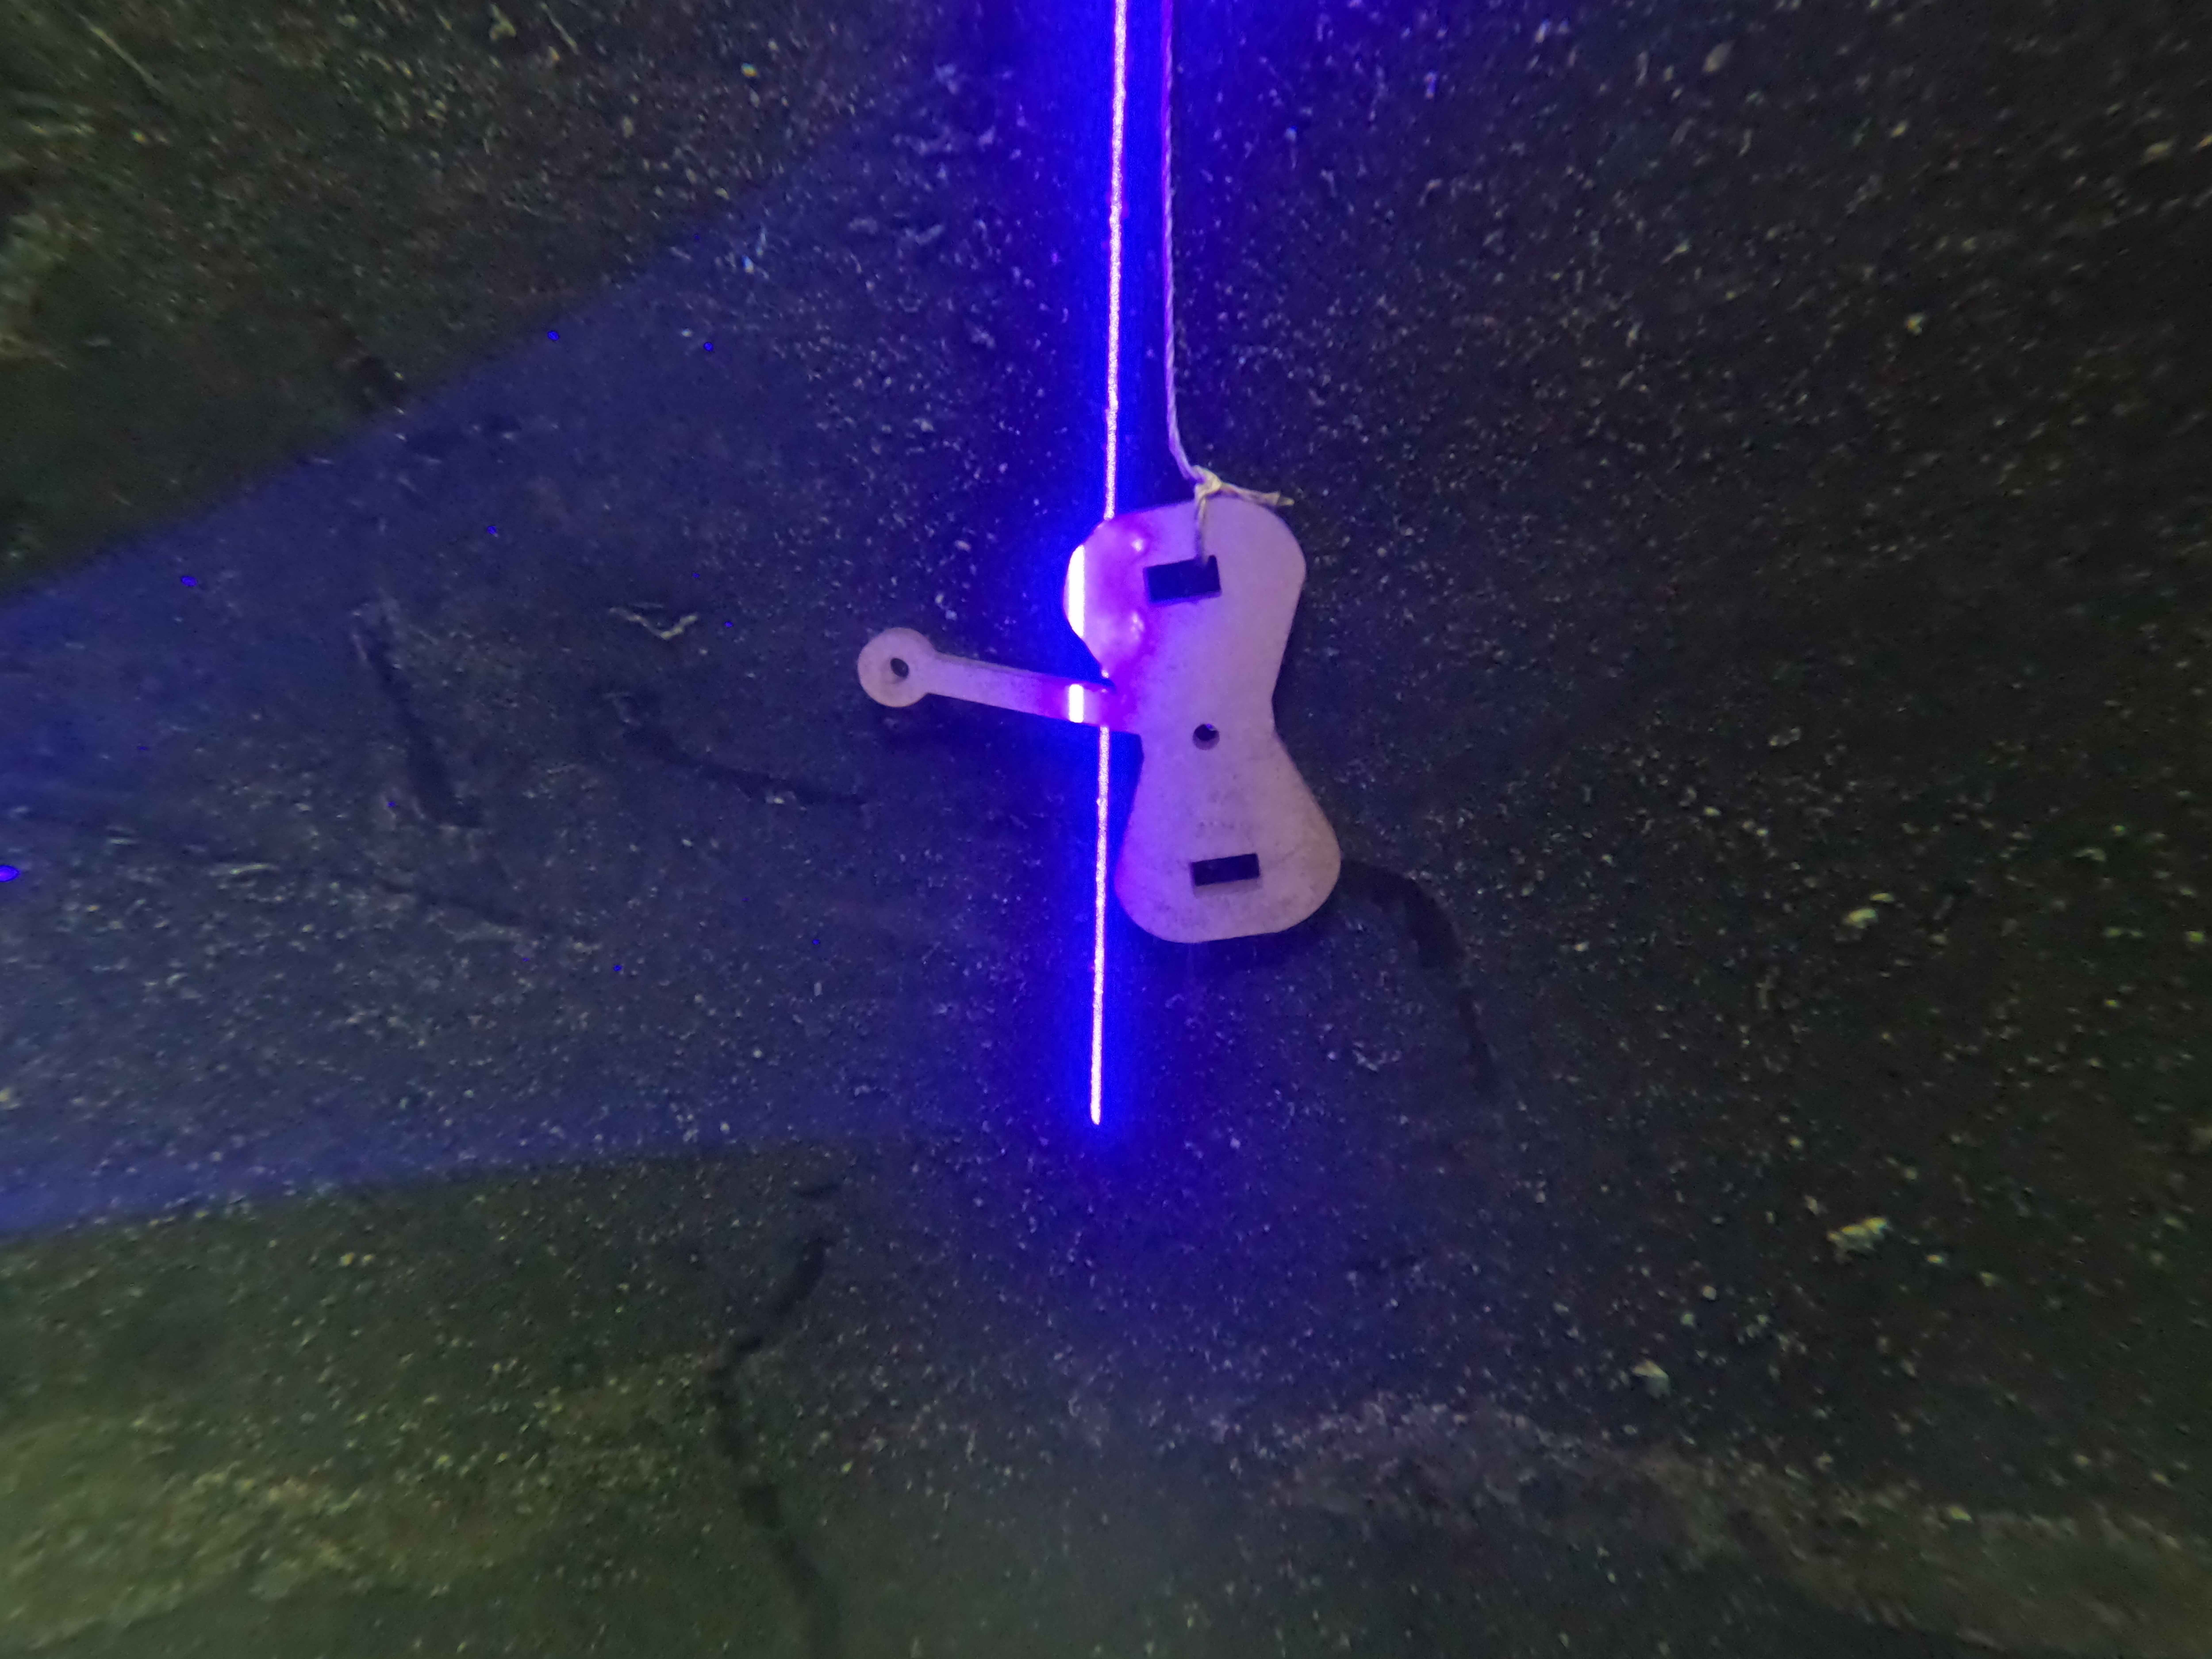

Supplement: Supplementary file 3232 [file G0015673.pdf › Level_2_1/G0015673.pdf]

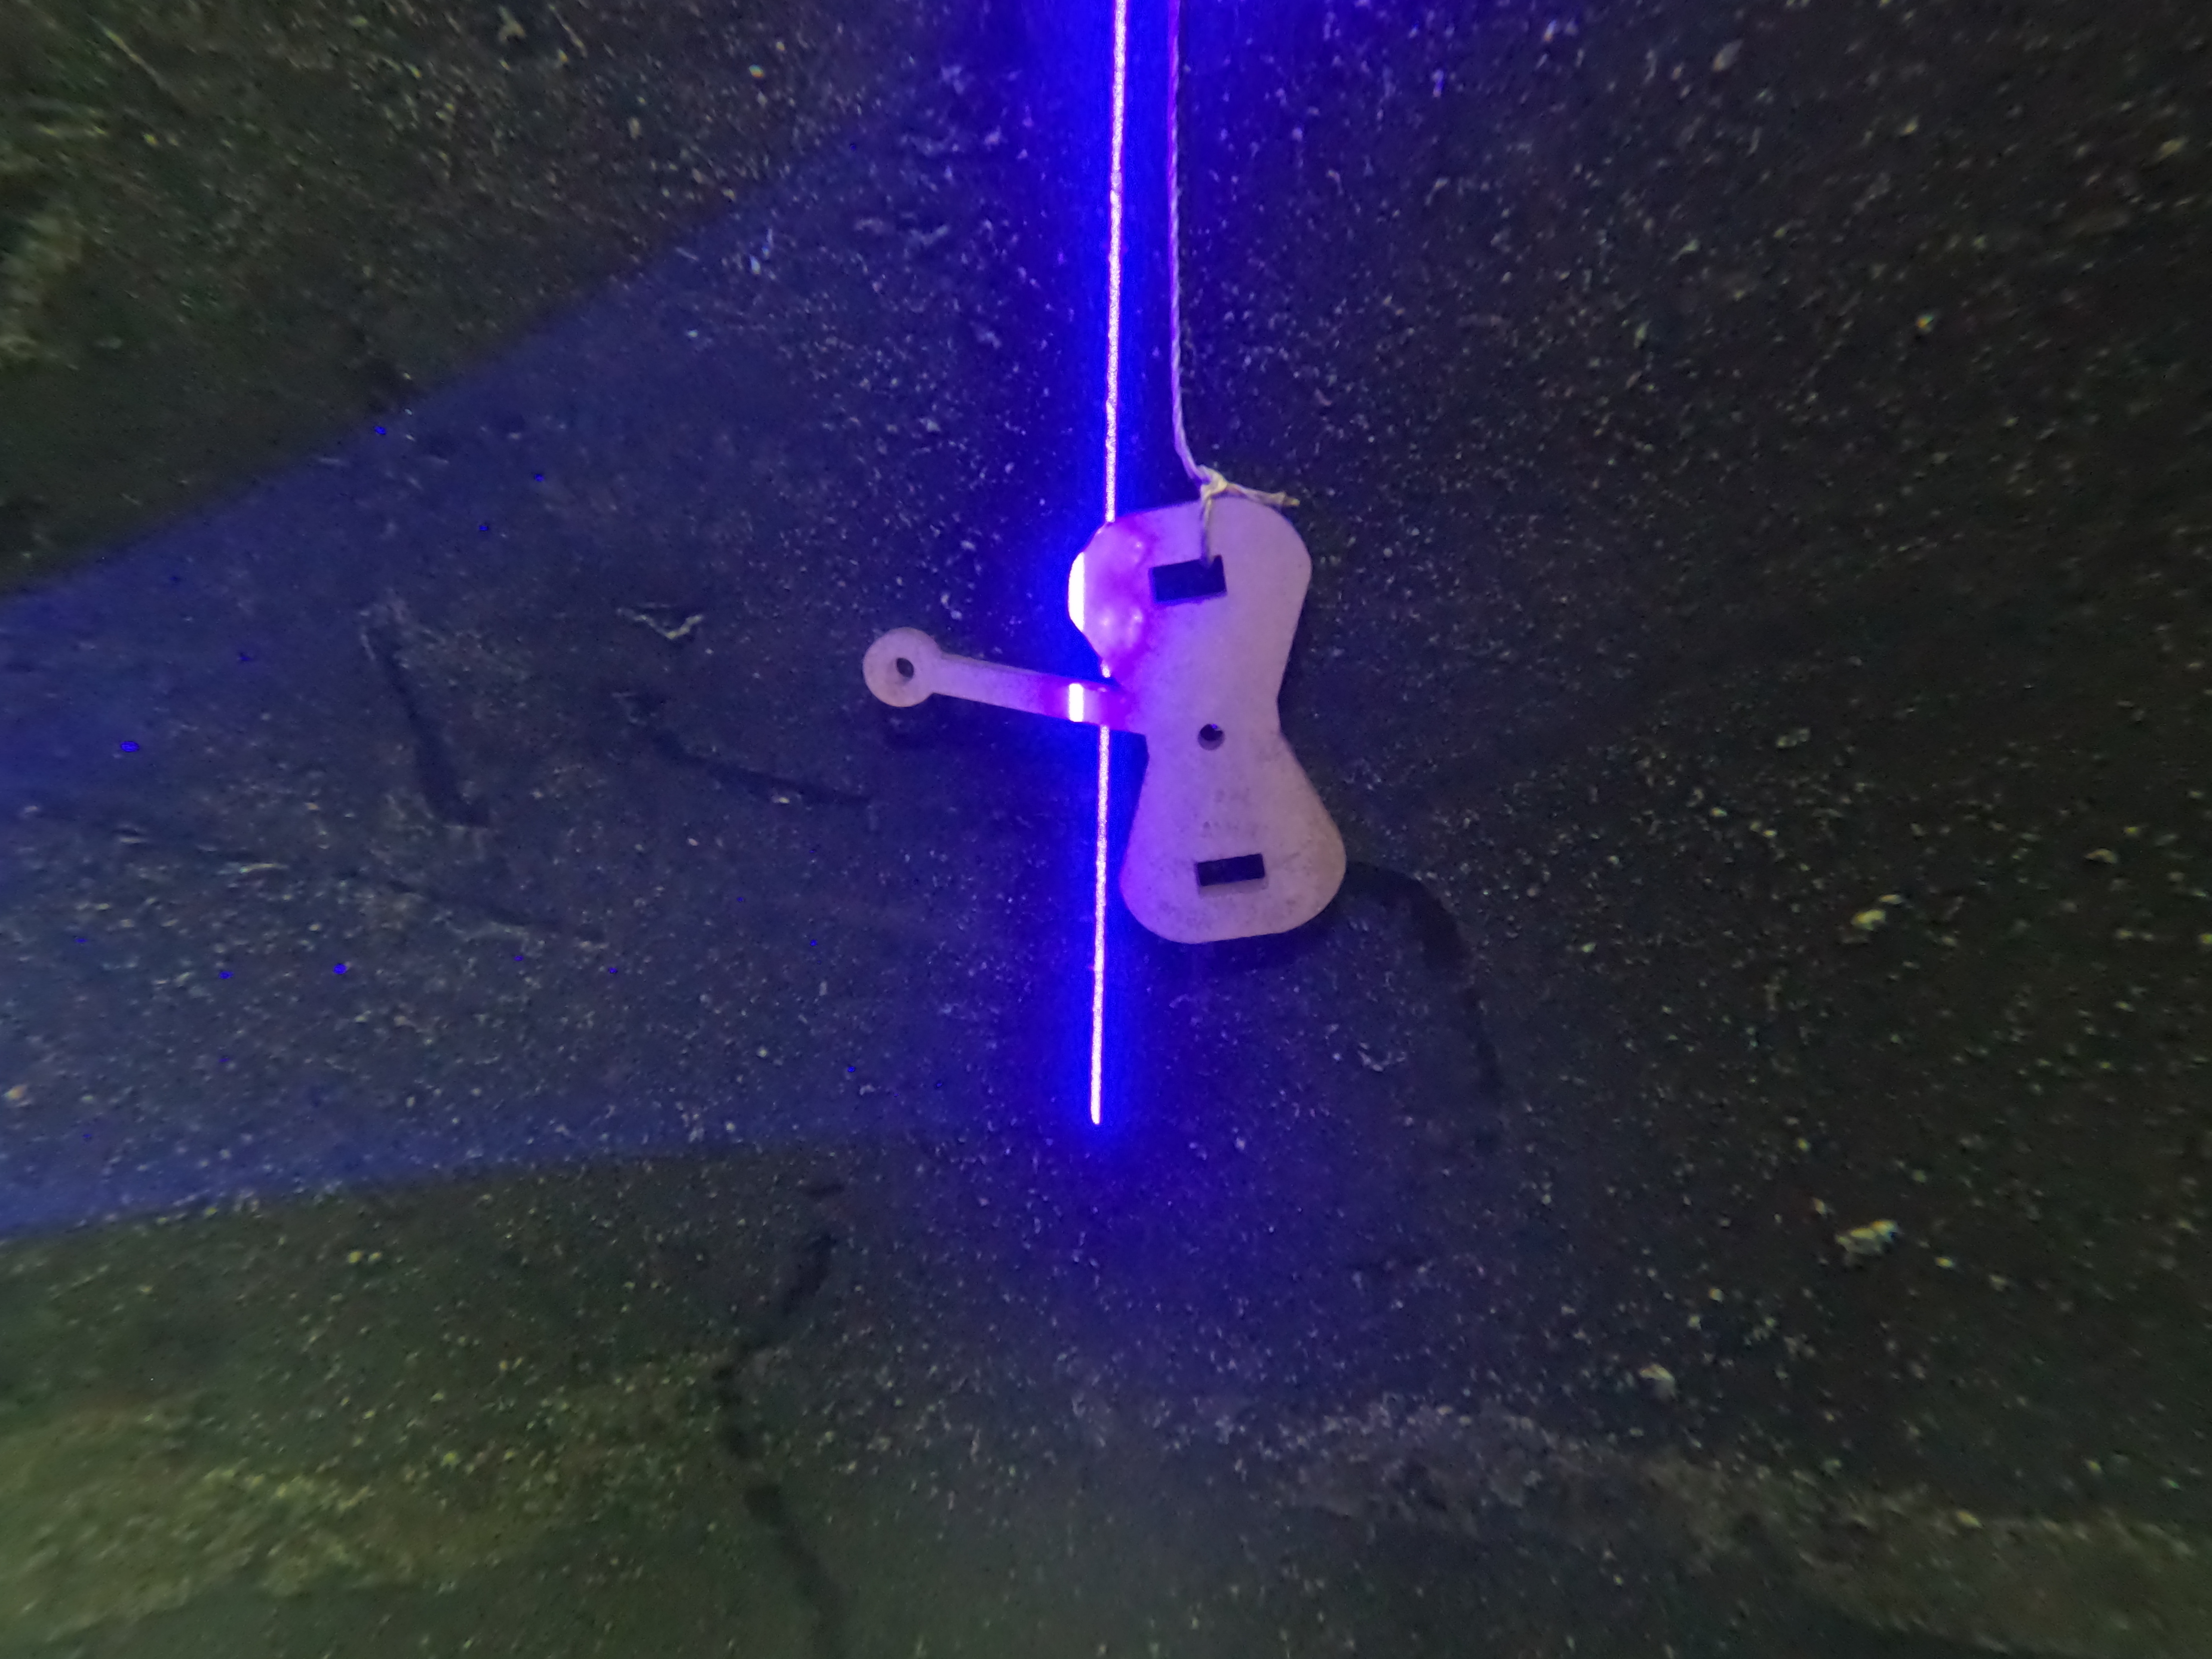

Supplement: Supplementary file 3233 [file G0015674.pdf › Level_2_1/G0015674.pdf]

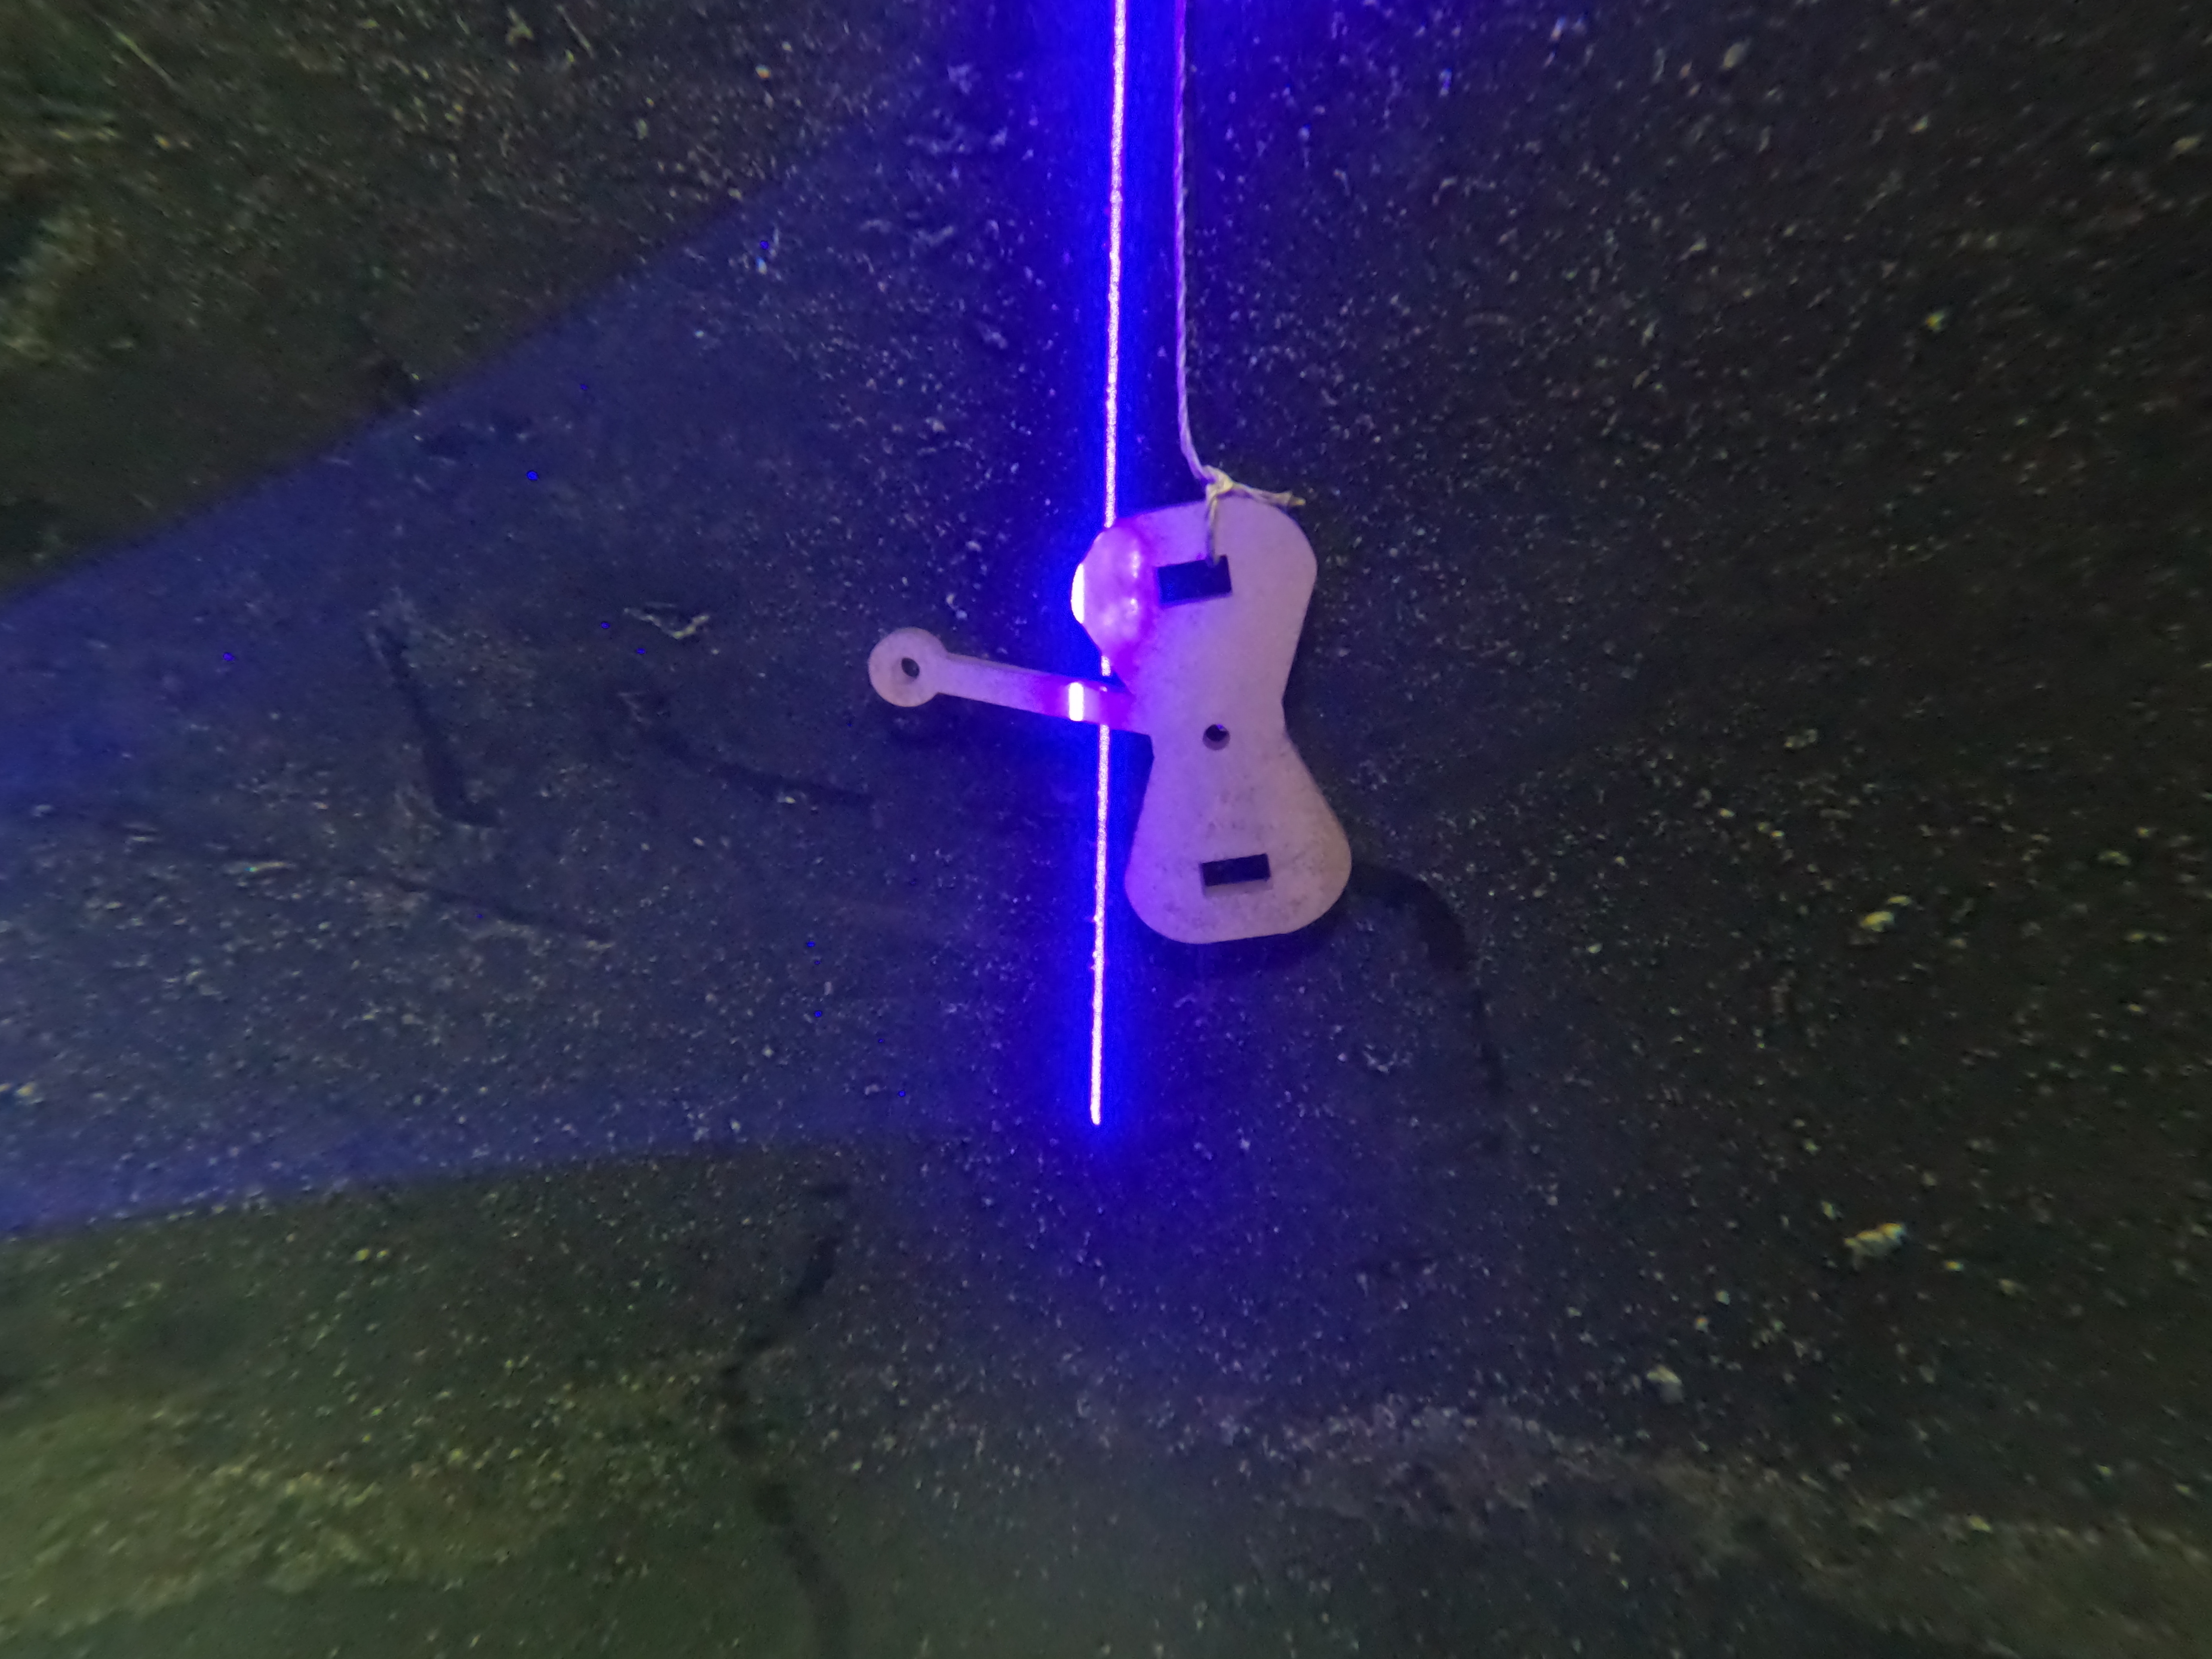

Supplement: Supplementary file 3234 [file G0015675.pdf › Level_2_1/G0015675.pdf]

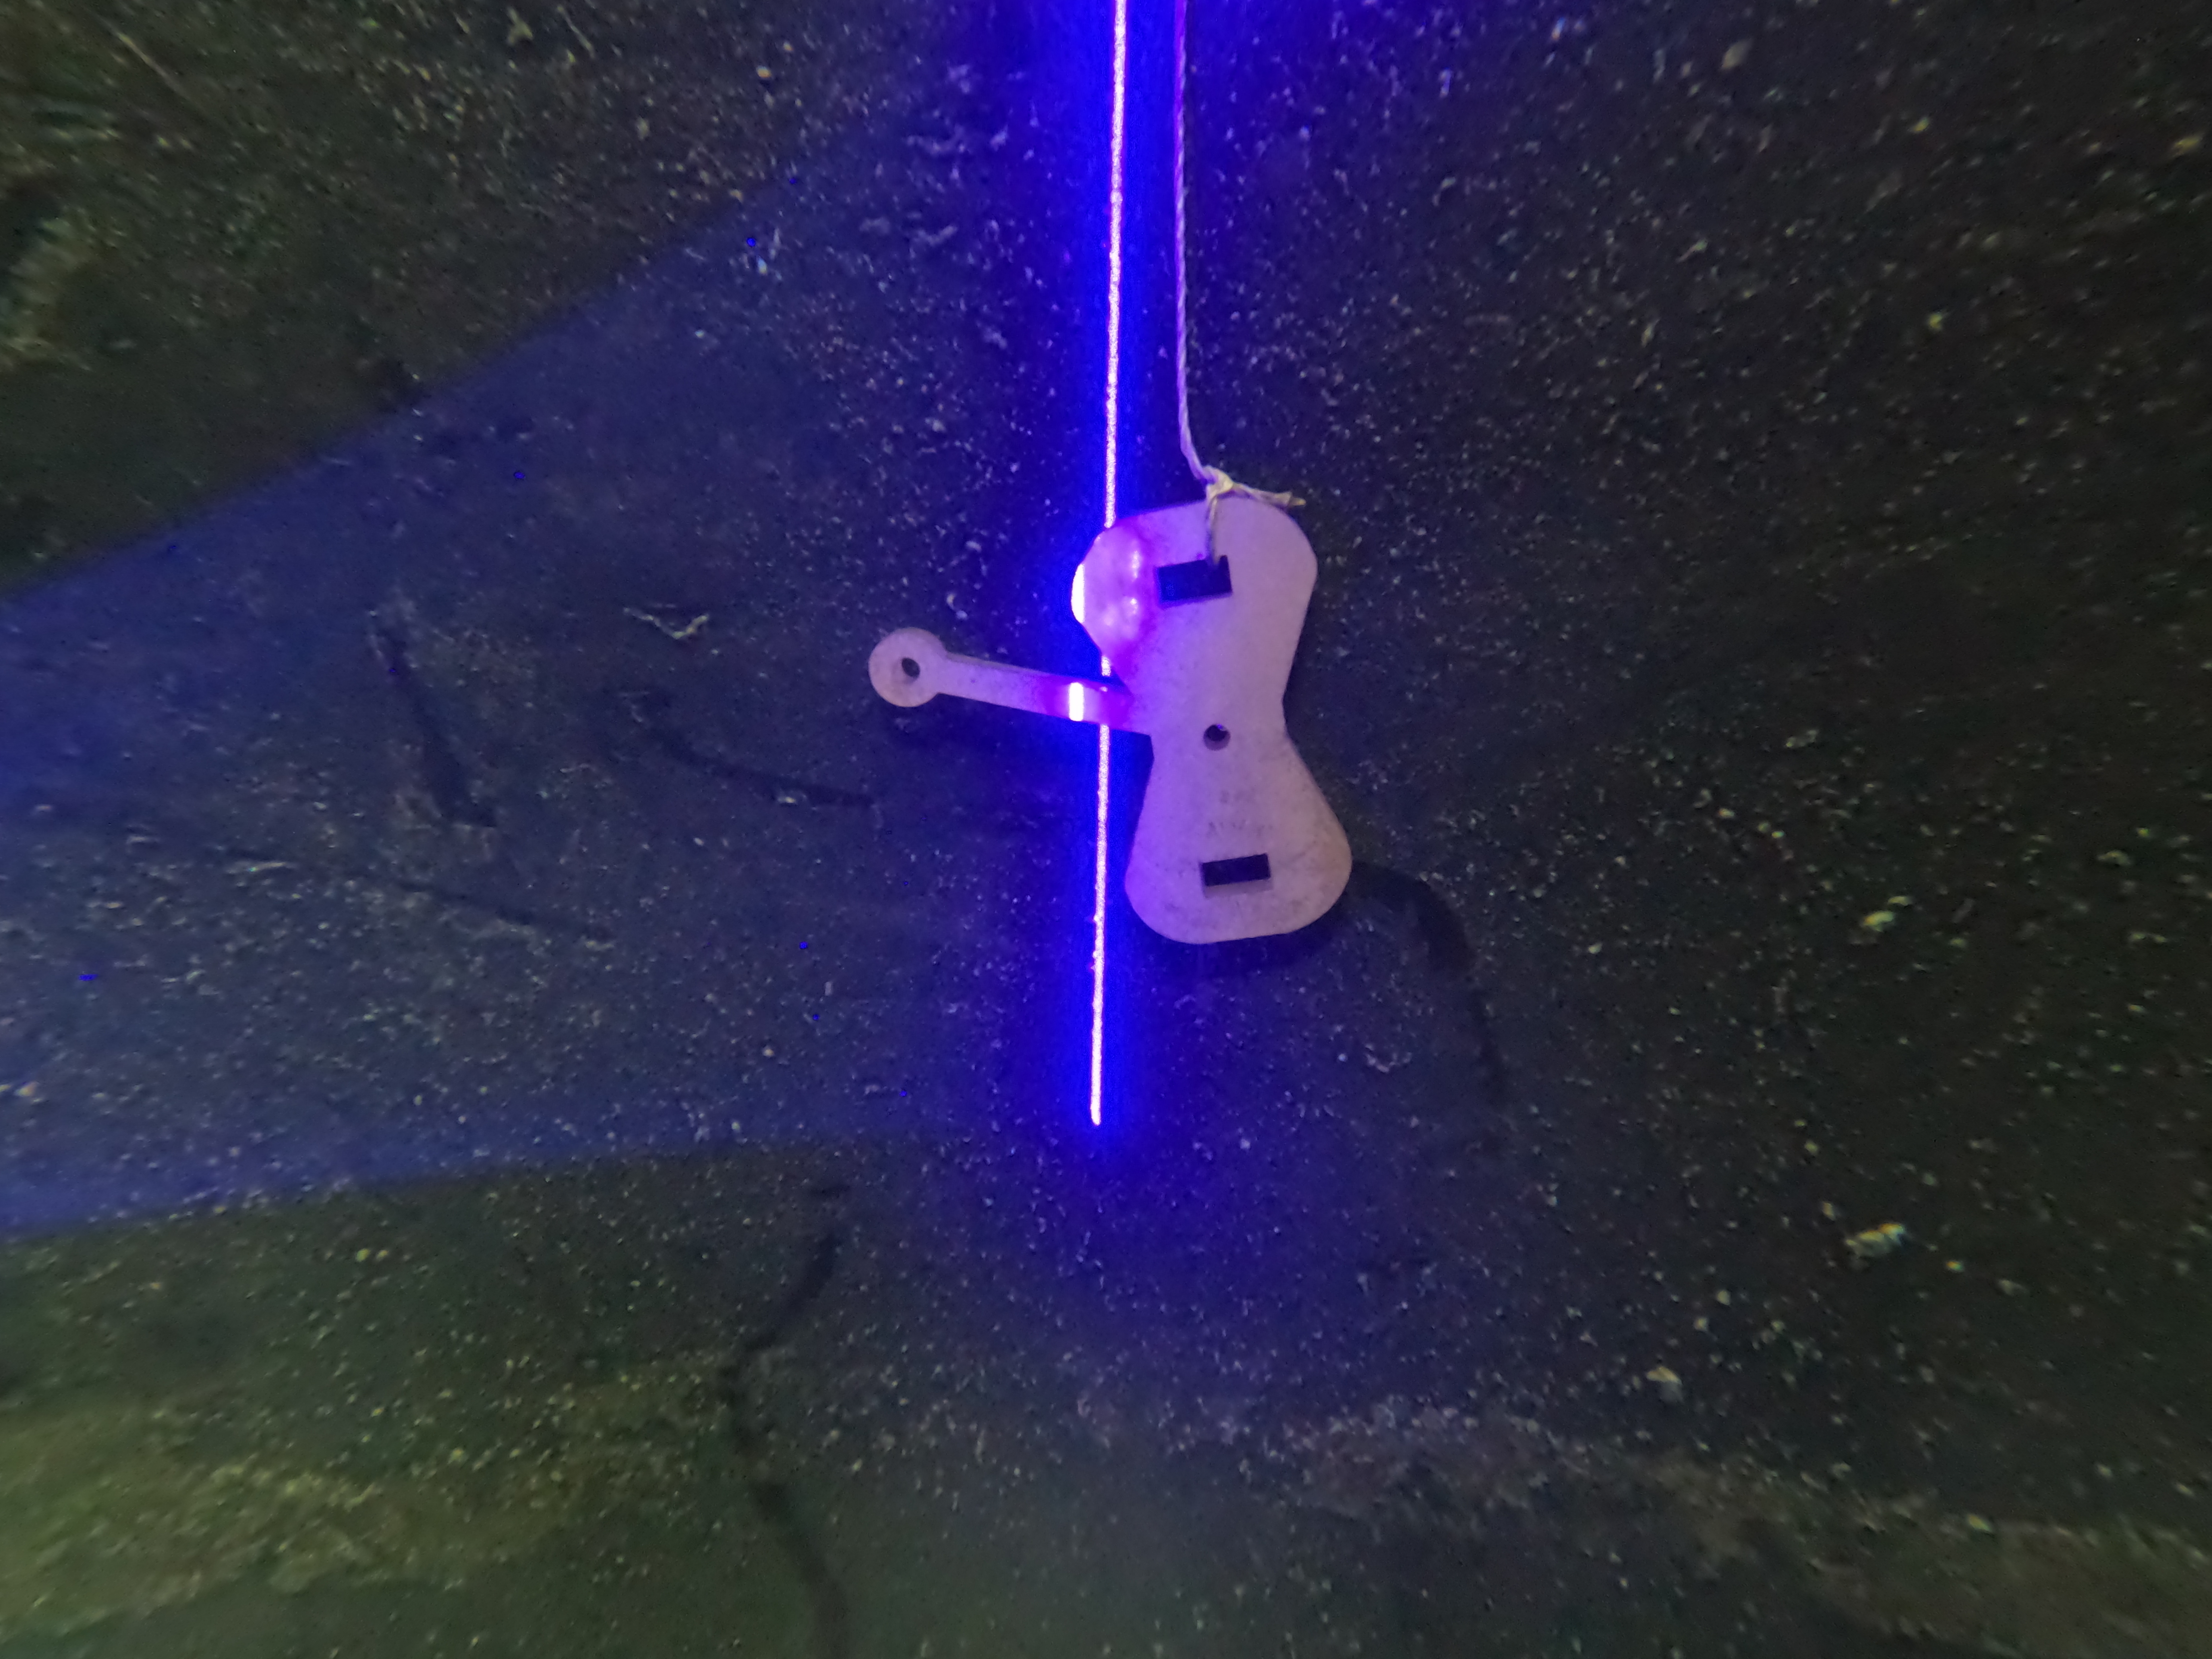

Supplement: Supplementary file 3235 [file G0015676.pdf › Level_2_1/G0015676.pdf]

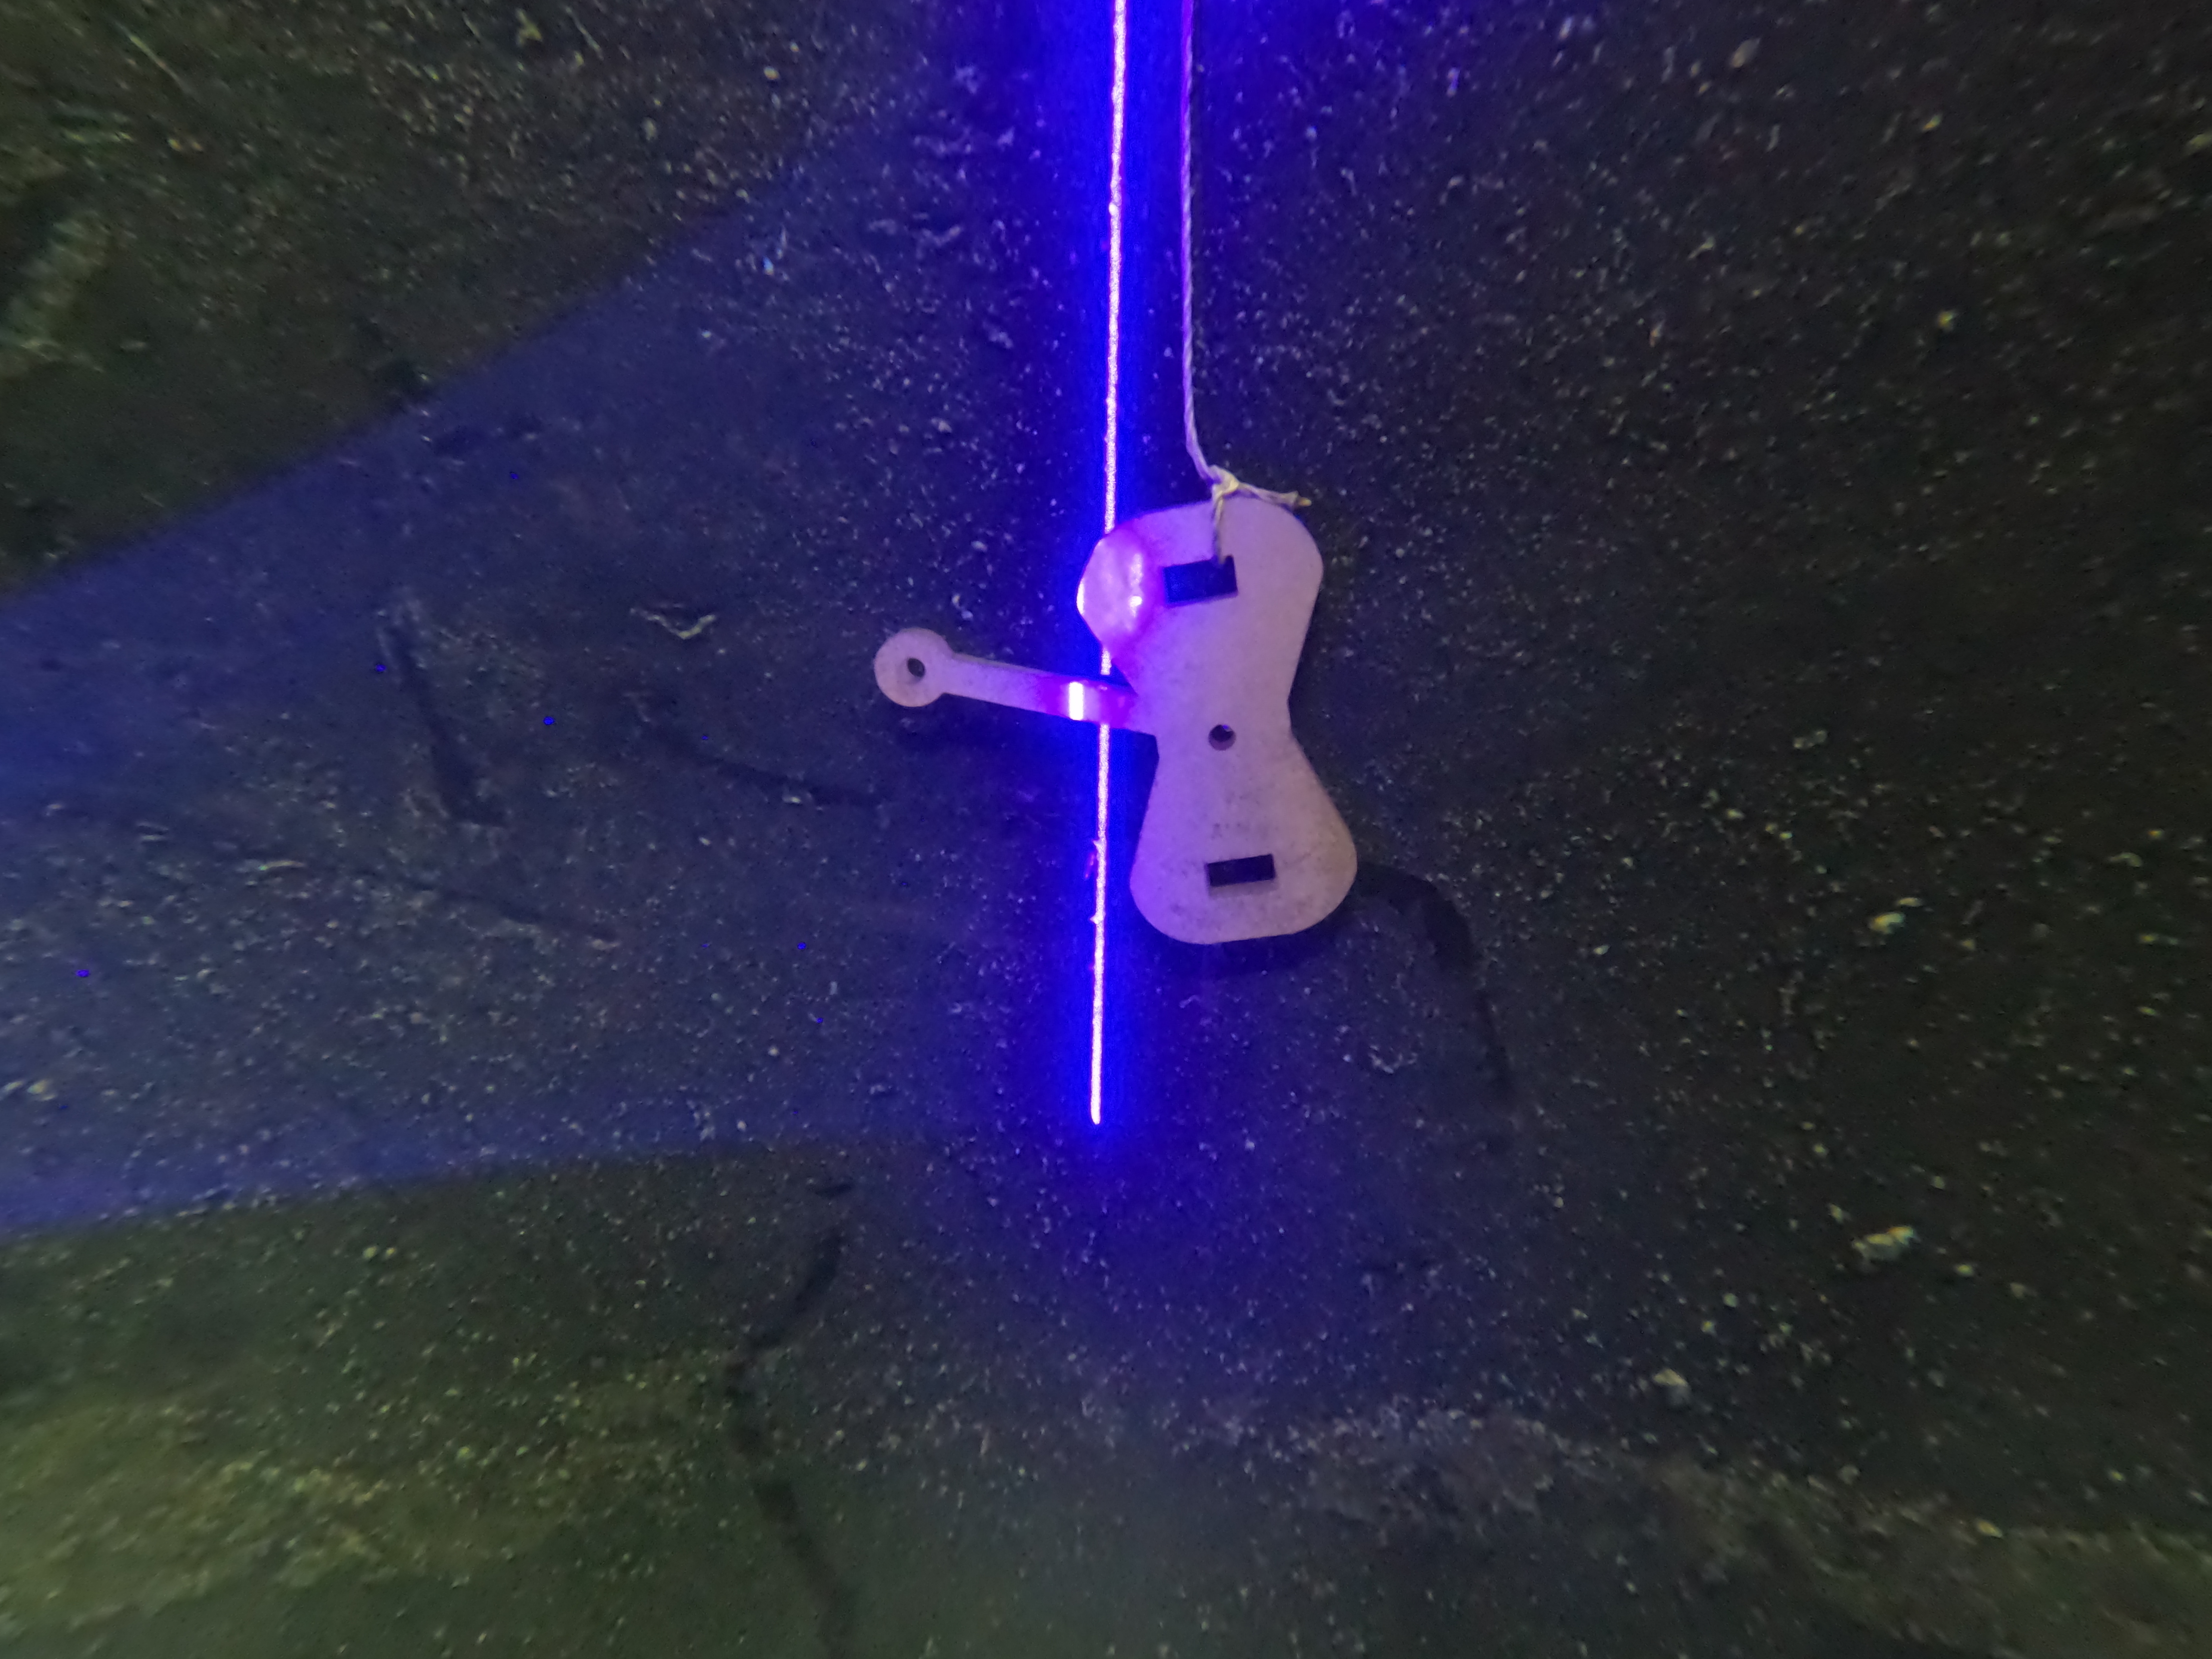

Supplement: Supplementary file 3236 [file G0015677.pdf › Level_2_1/G0015677.pdf]

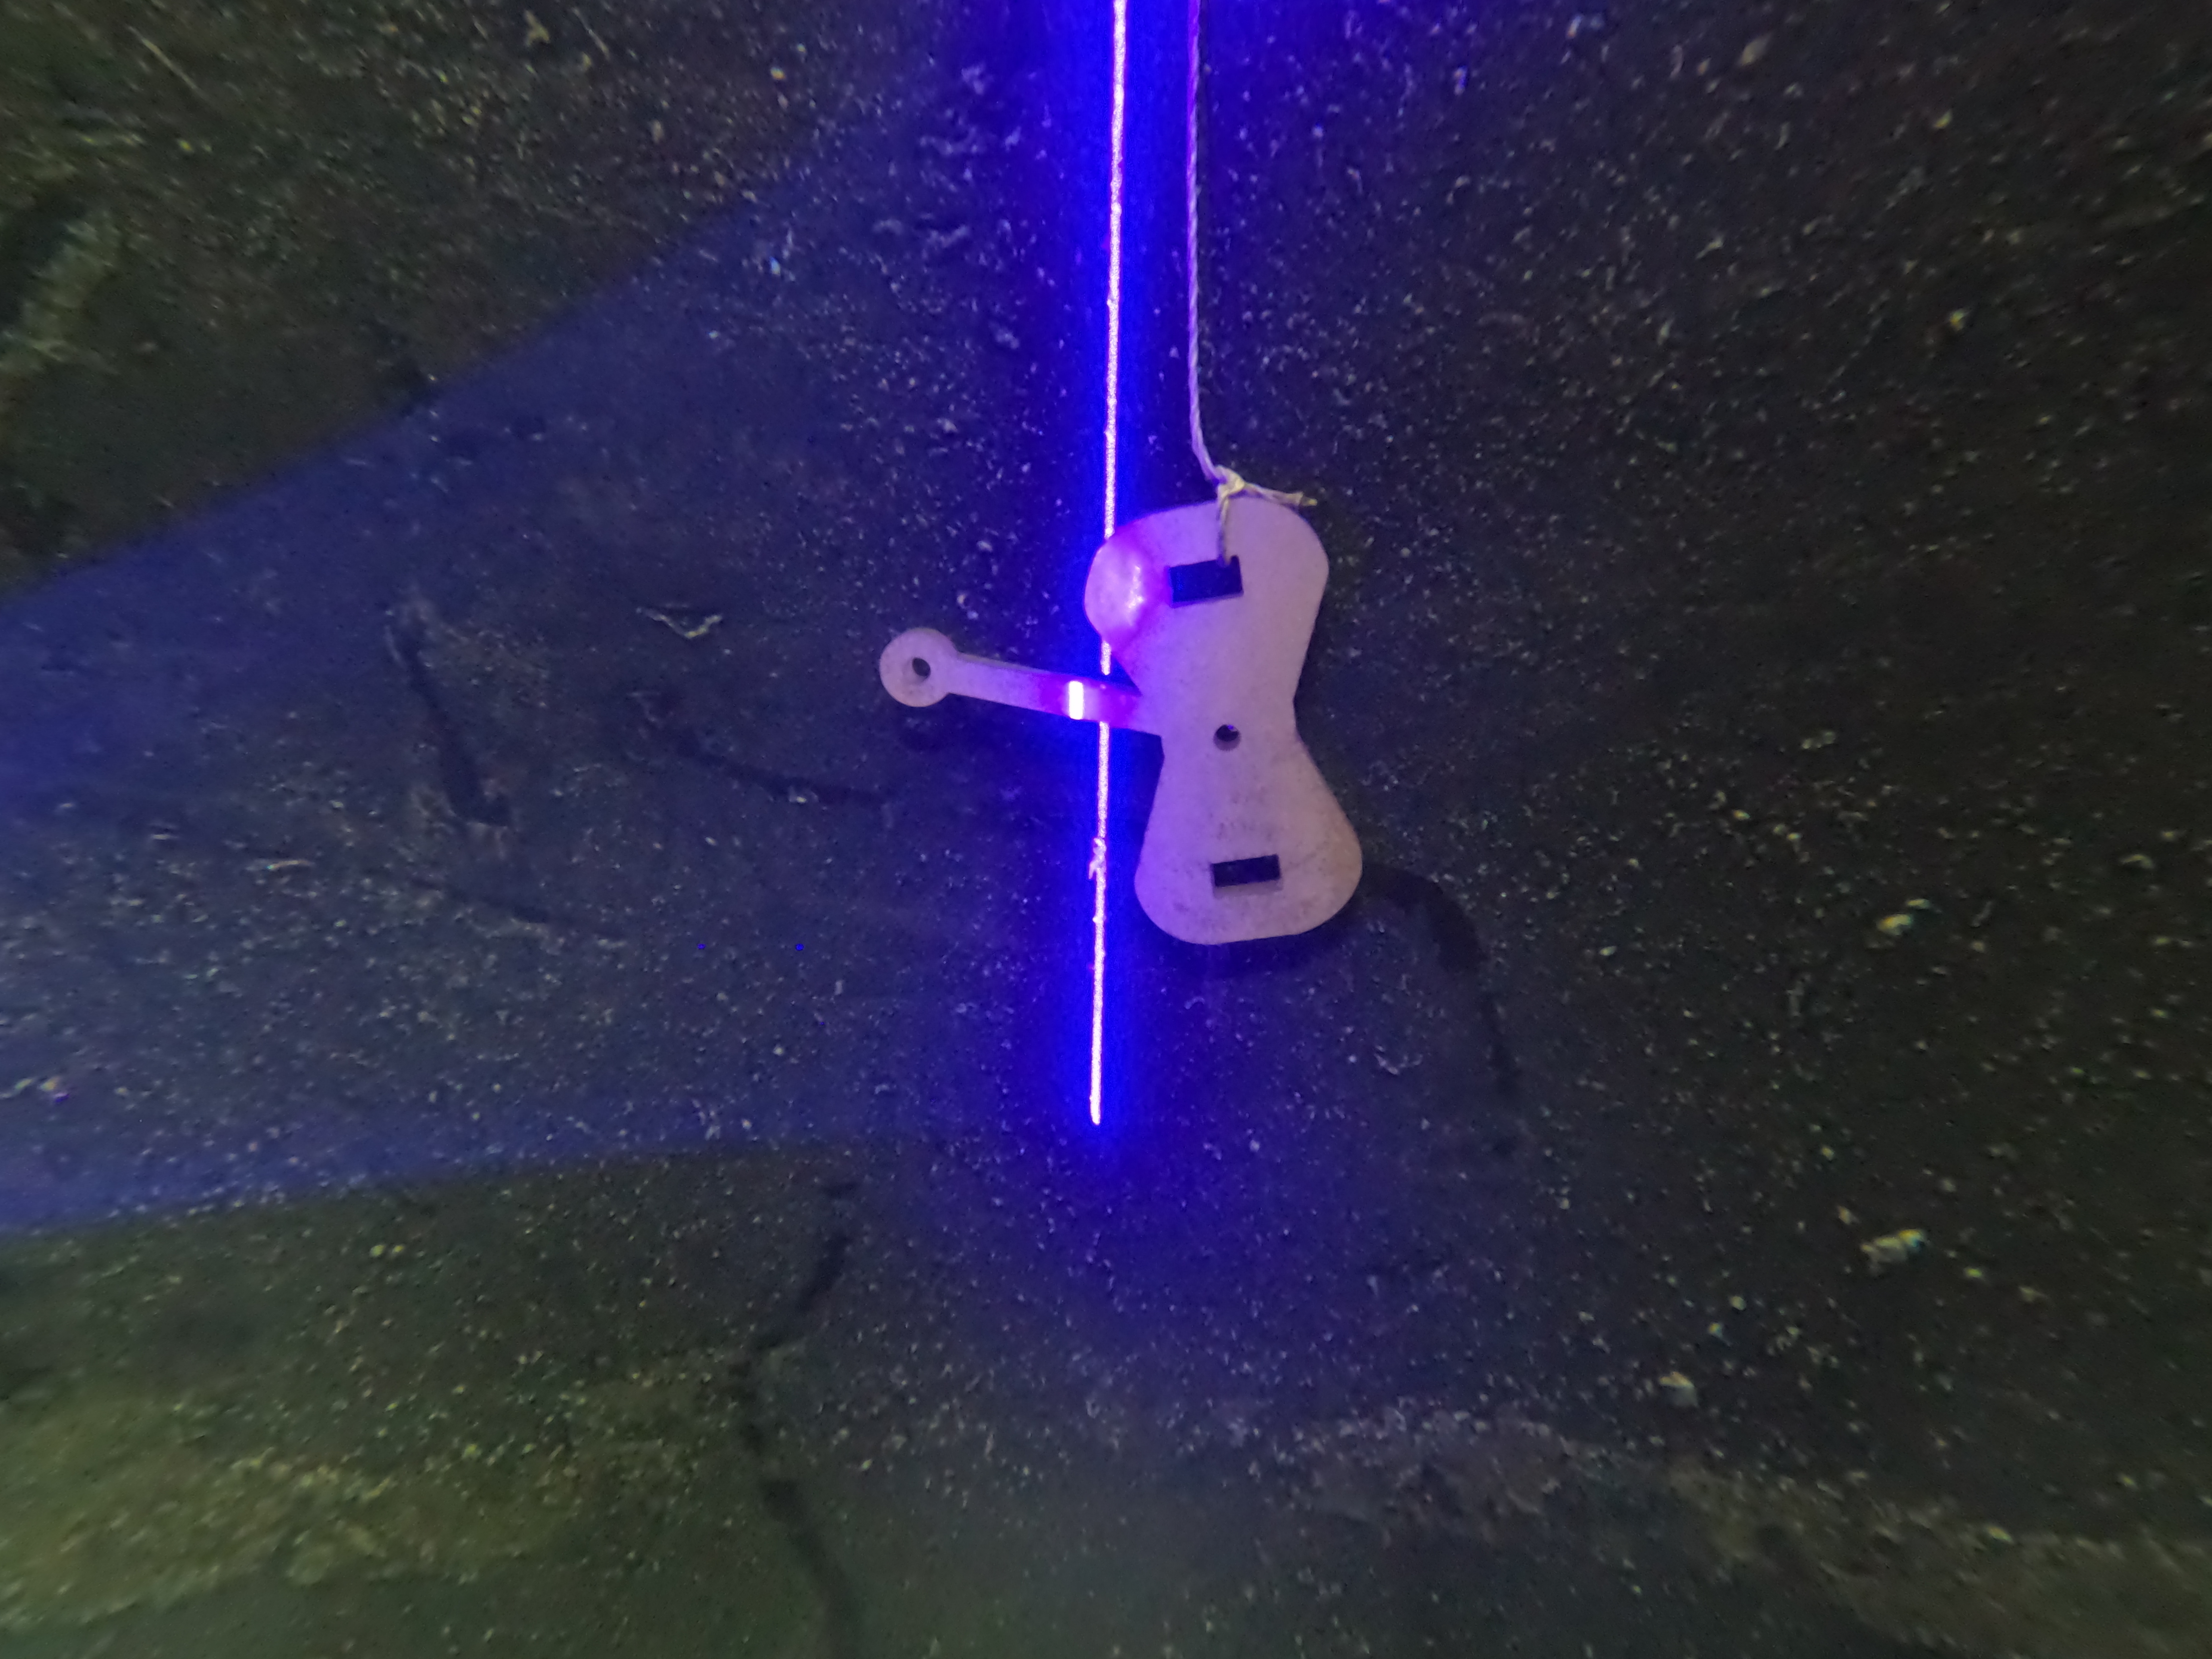

Supplement: Supplementary file 3237 [file G0015678.pdf › Level_2_1/G0015678.pdf]

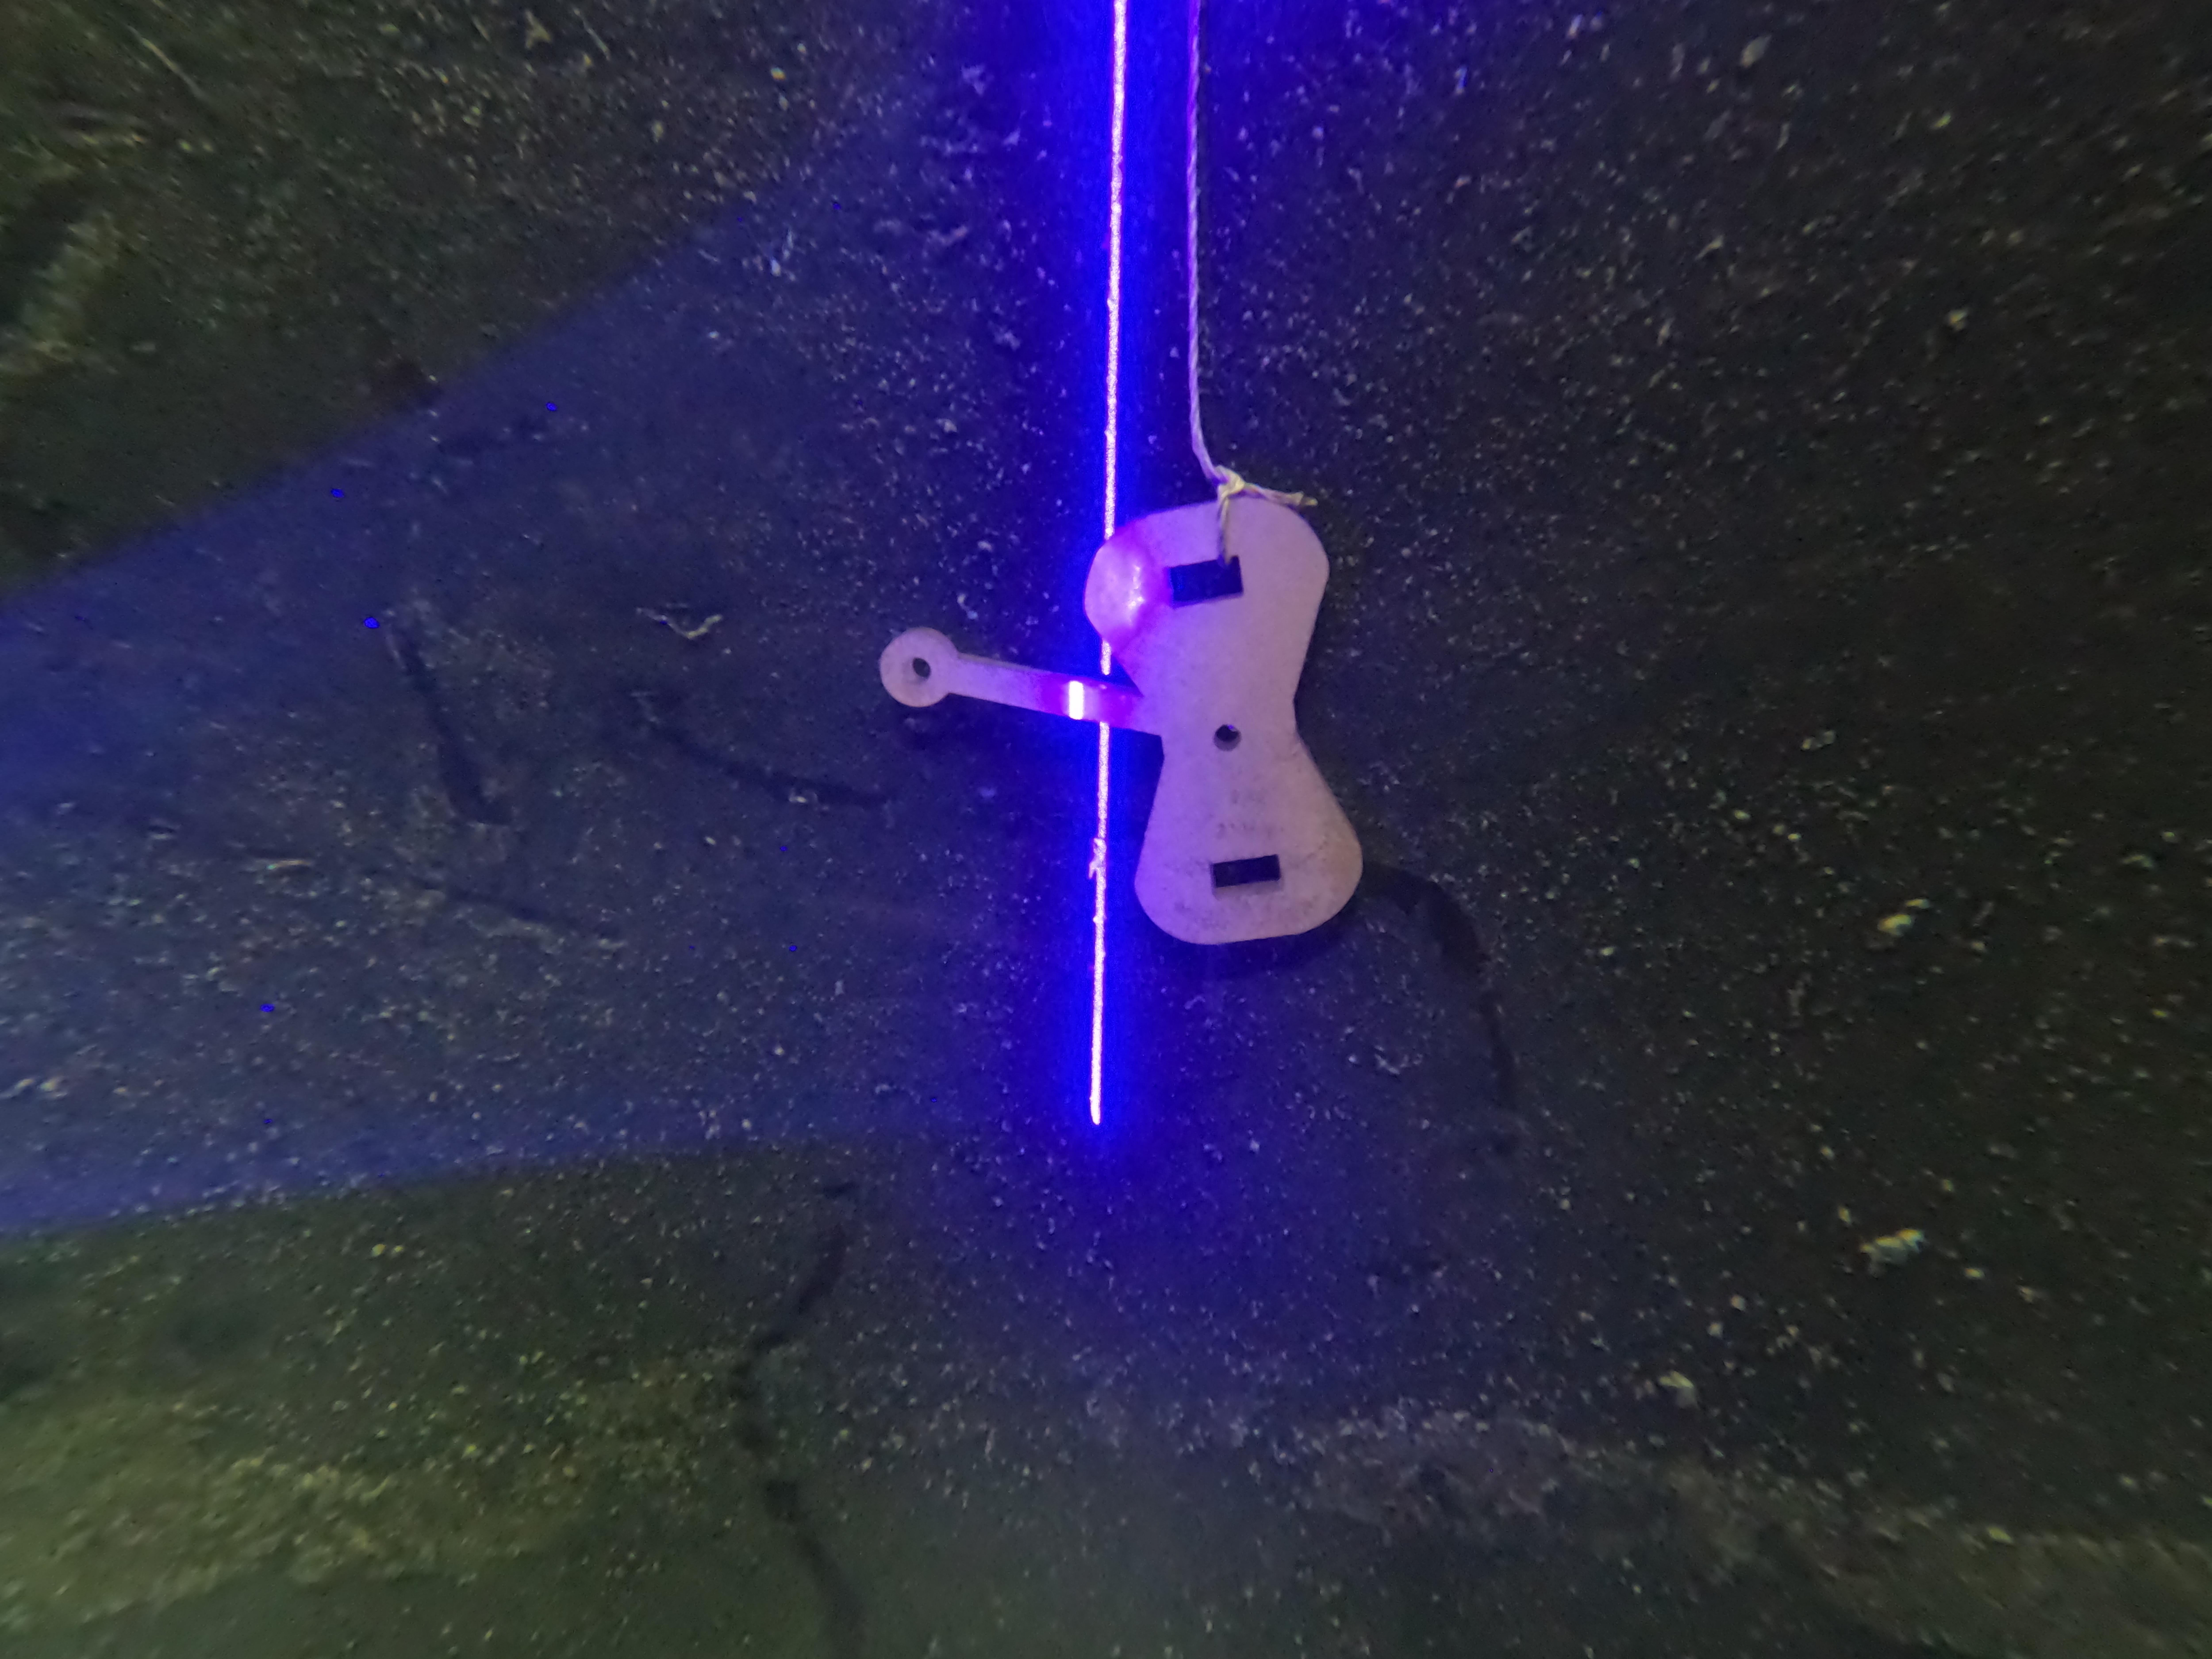

Supplement: Supplementary file 3238 [file G0015679.pdf › Level_2_1/G0015679.pdf]

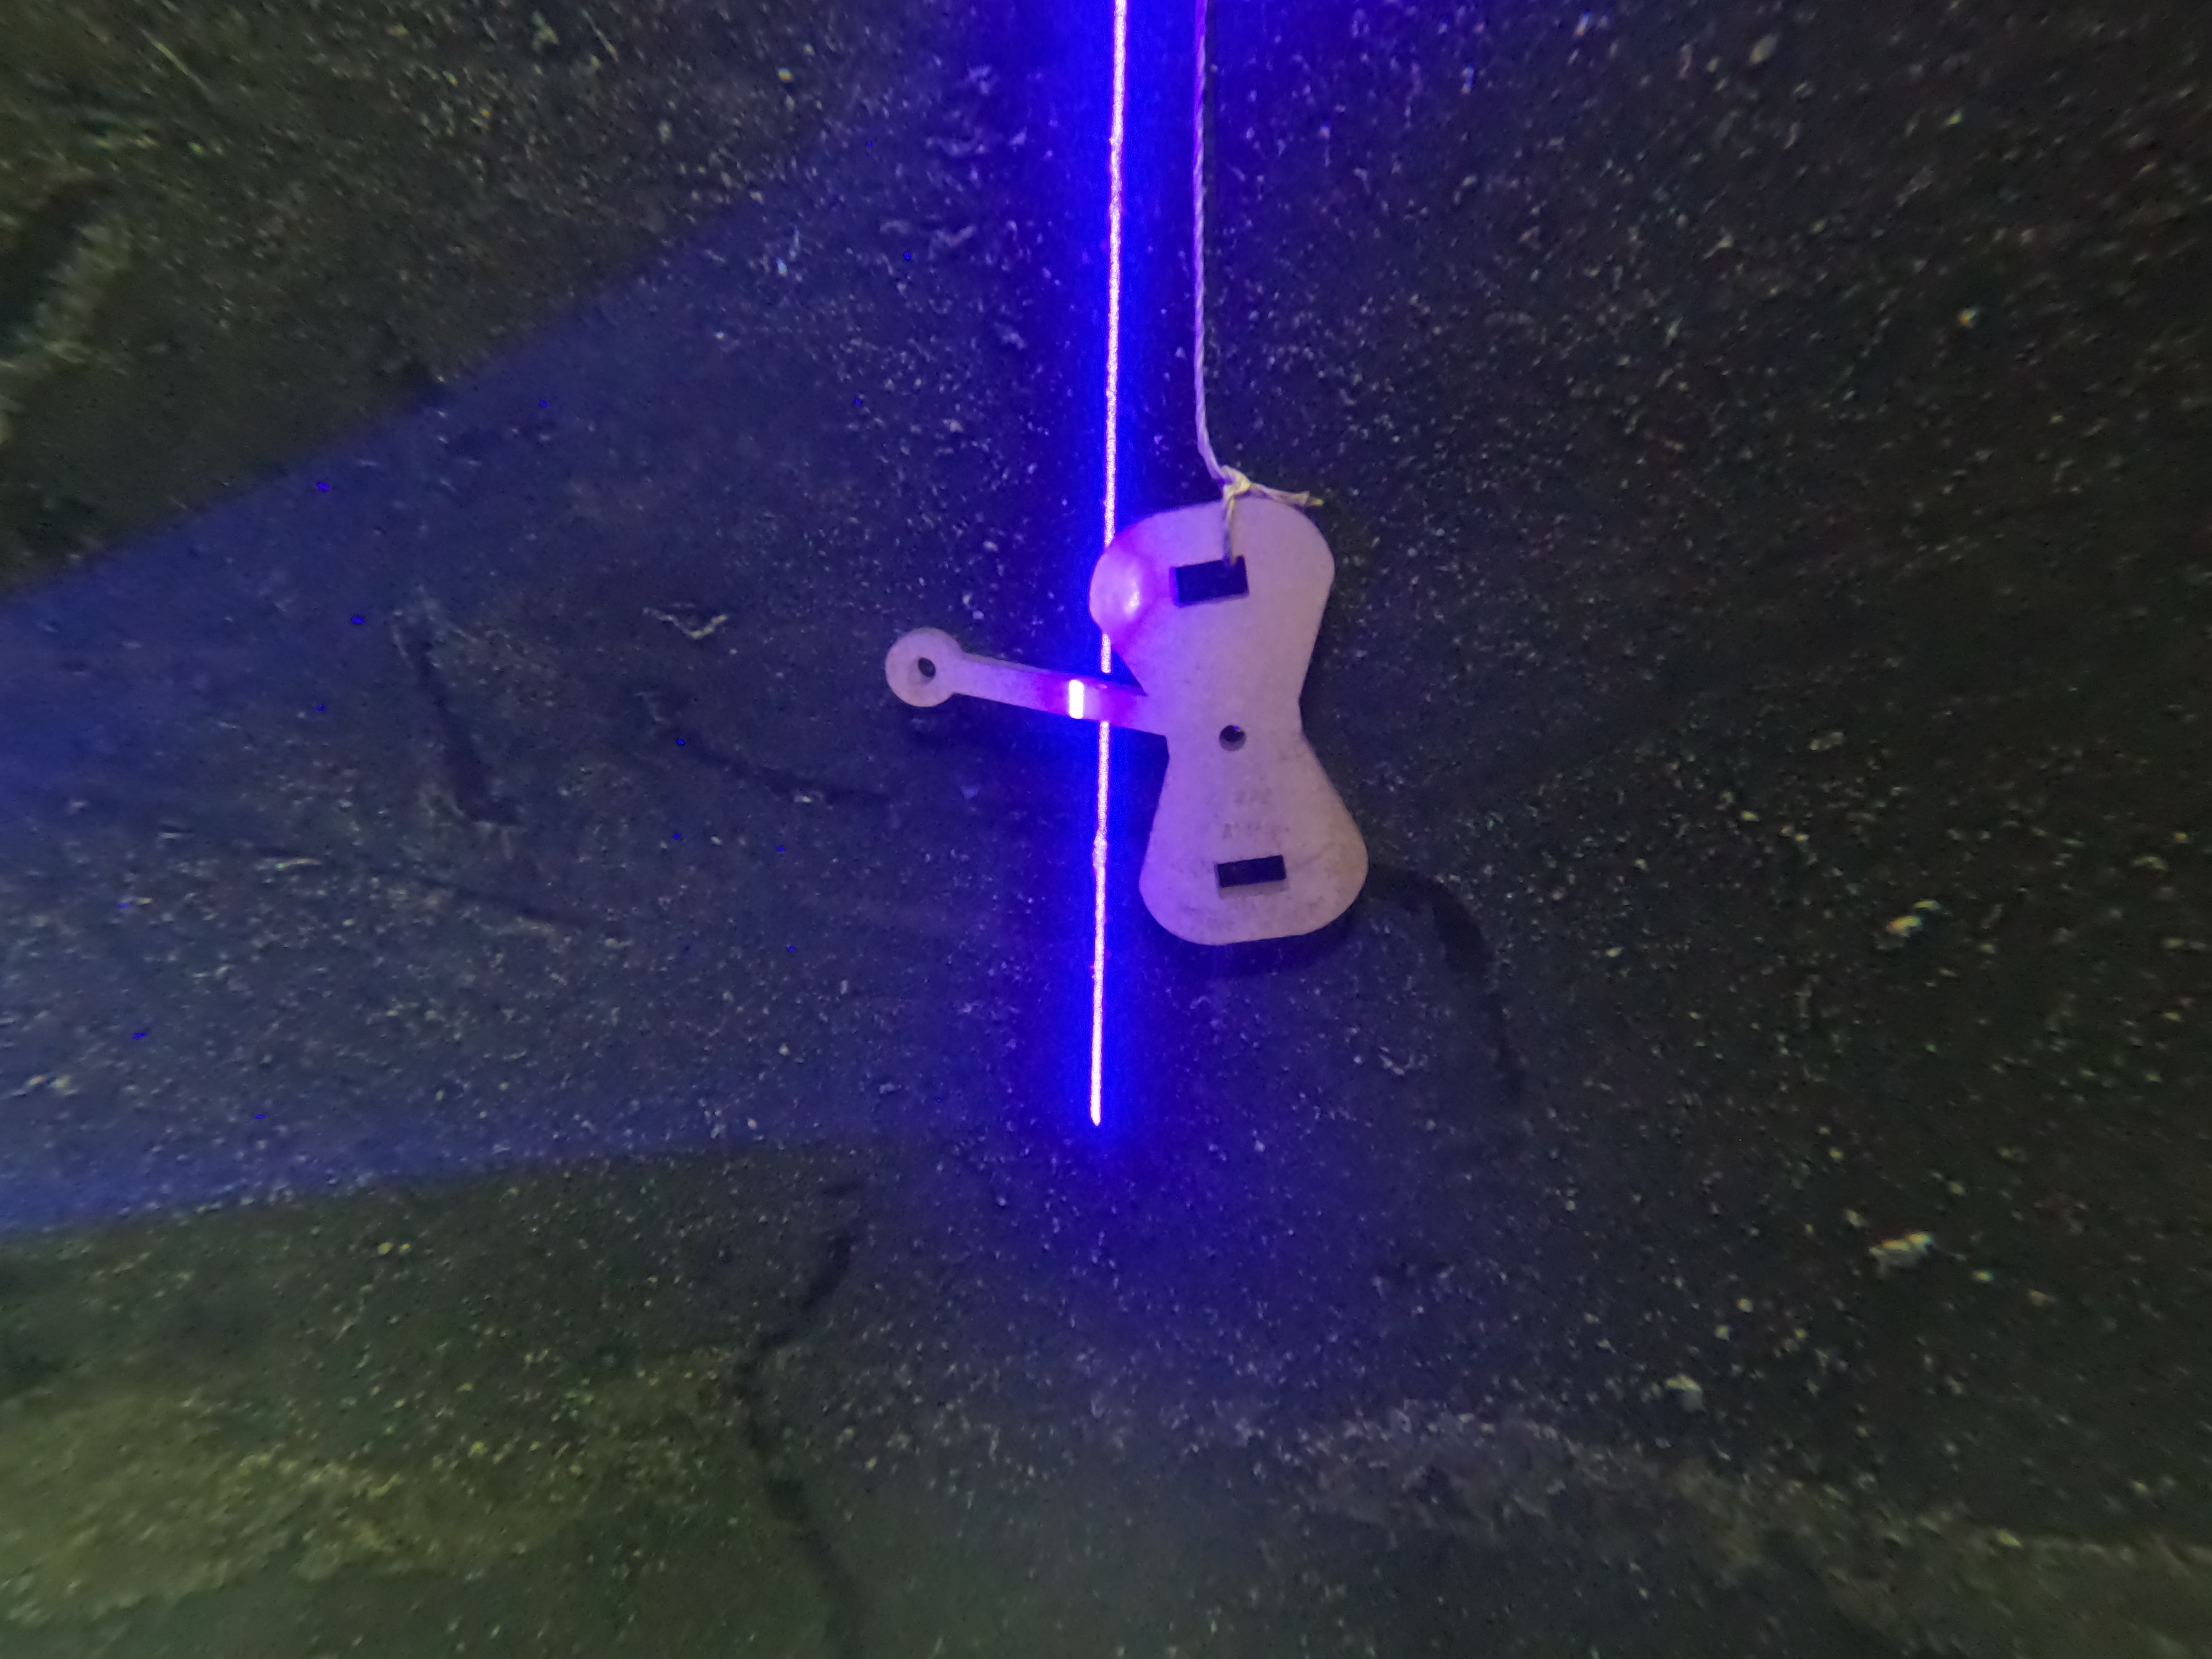

Supplement: Supplementary file 3239 [file G0015680.pdf › Level_2_1/G0015680.pdf]

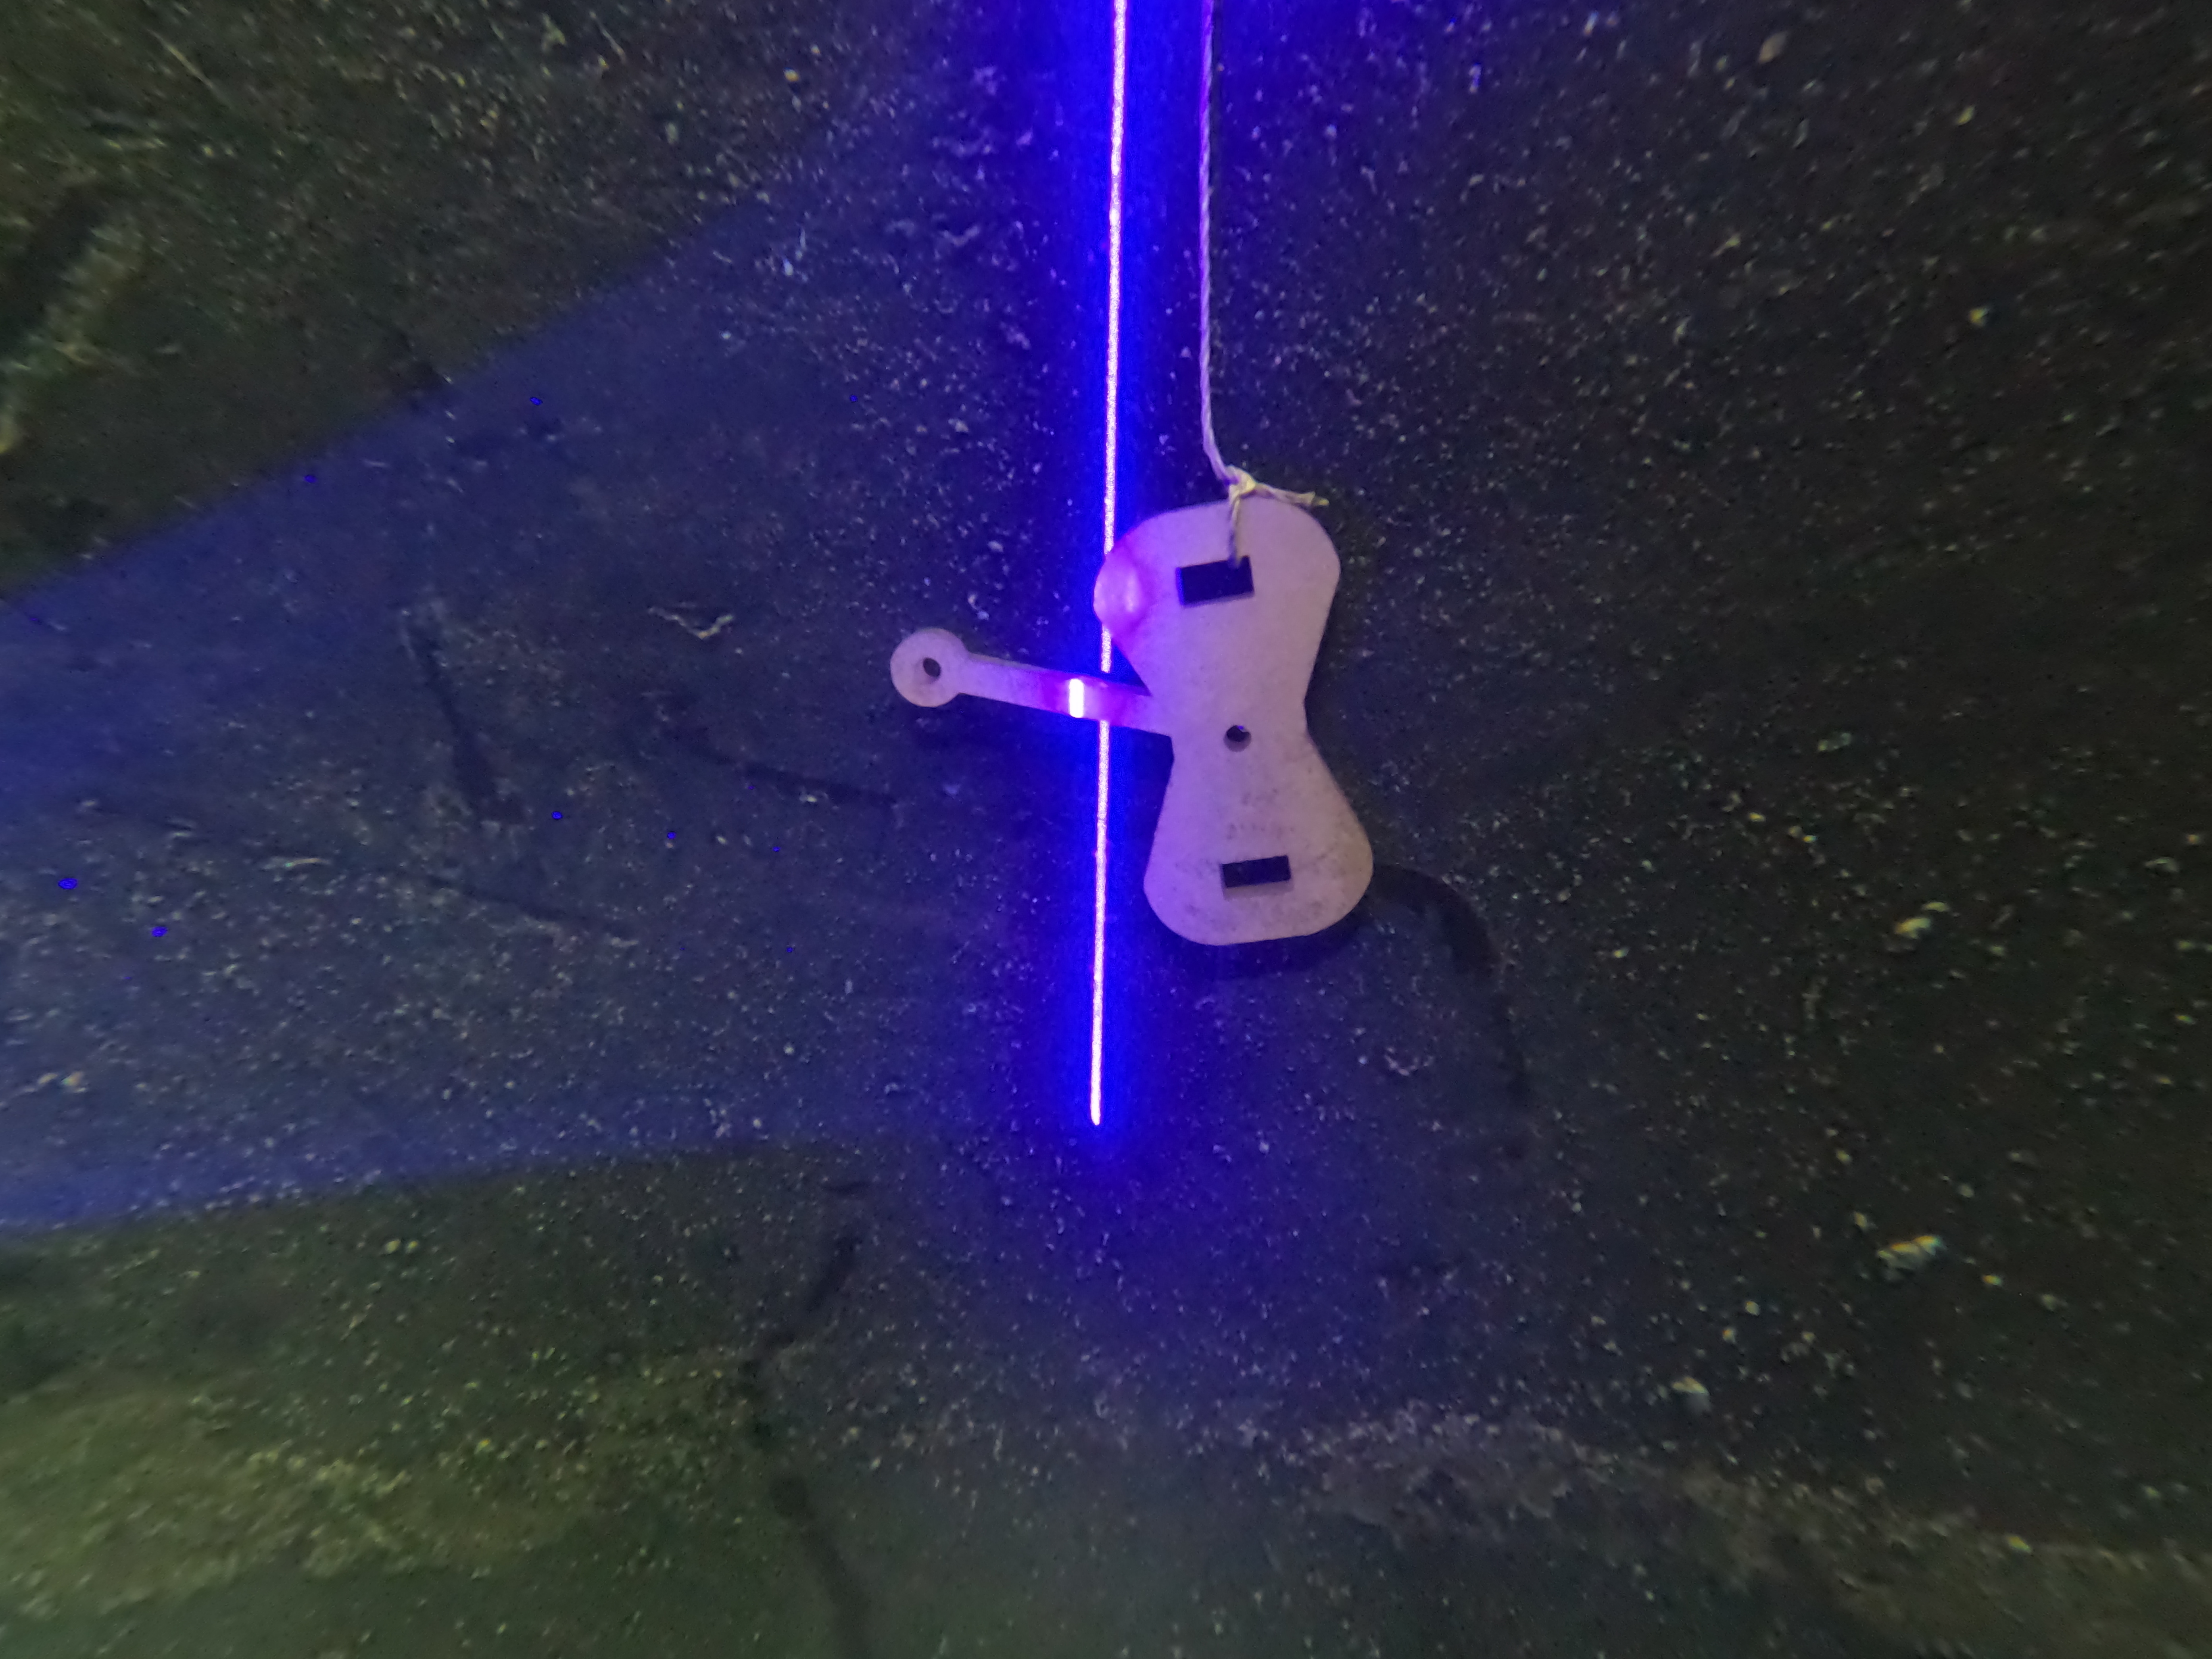

Supplement: Supplementary file 3240 [file G0015681.pdf › Level_2_1/G0015681.pdf]

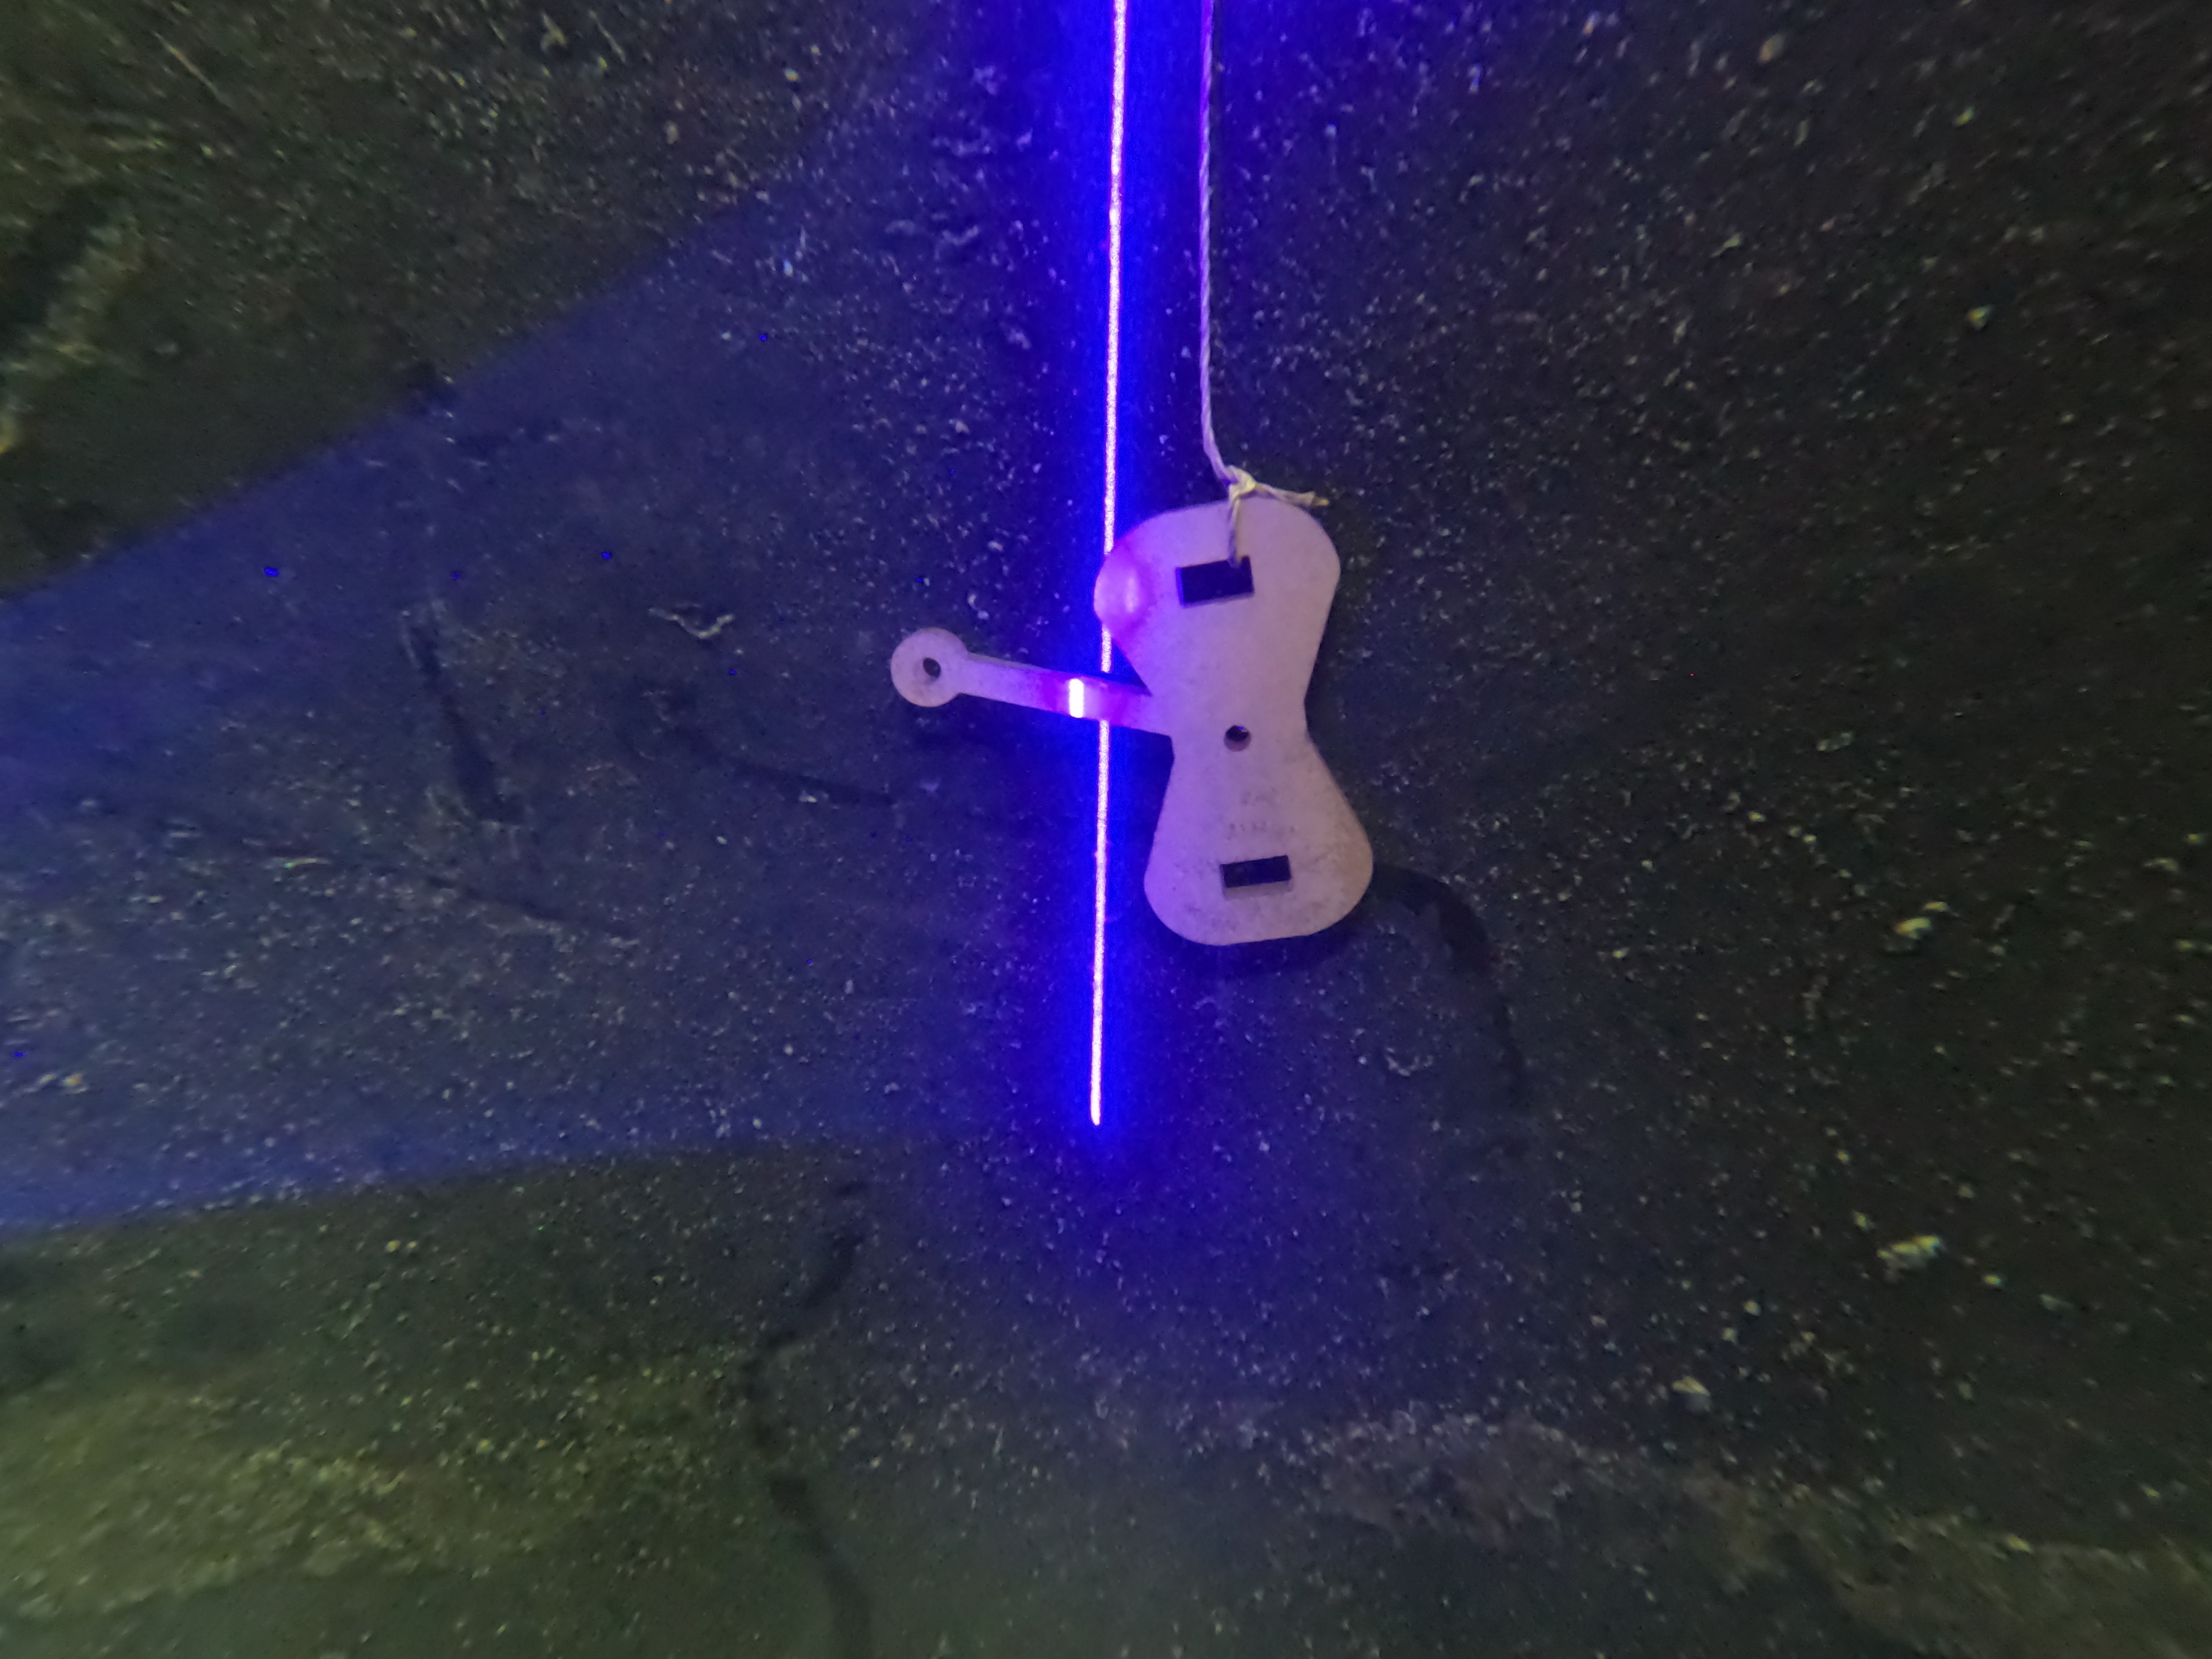

Supplement: Supplementary file 3241 [file G0015682.pdf › Level_2_1/G0015682.pdf]

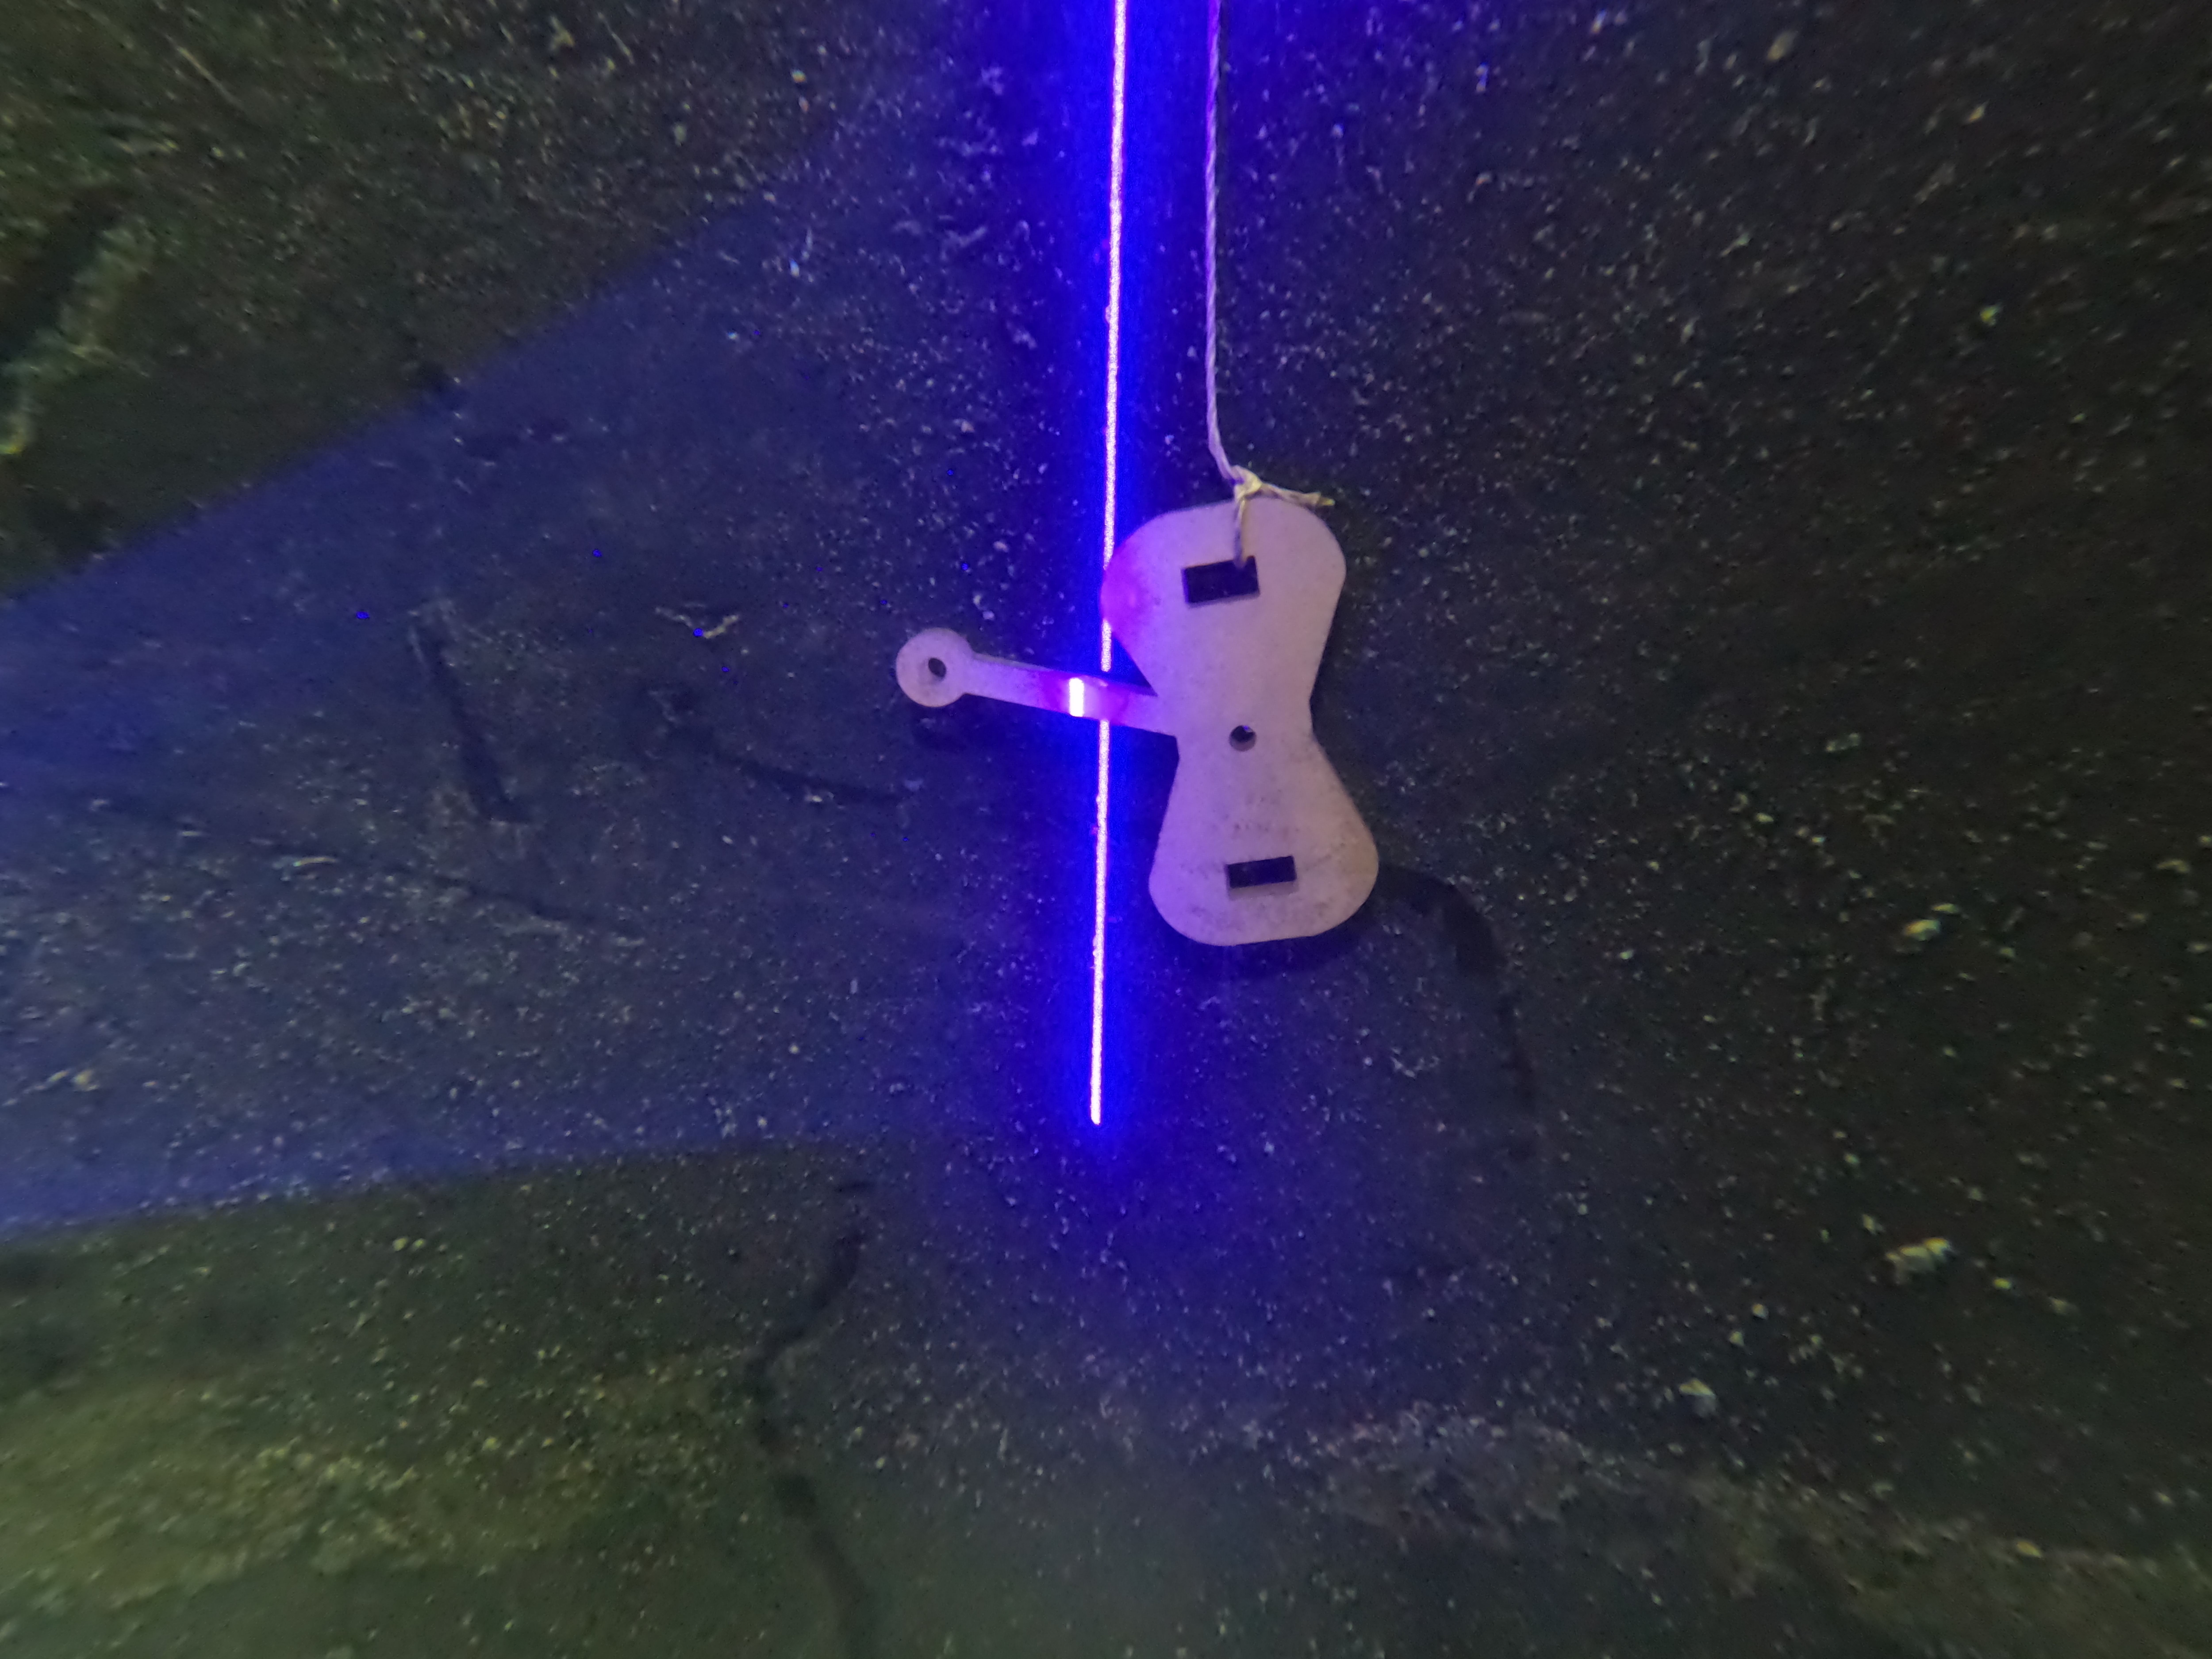

Supplement: Supplementary file 3242 [file G0015683.pdf › Level_2_1/G0015683.pdf]

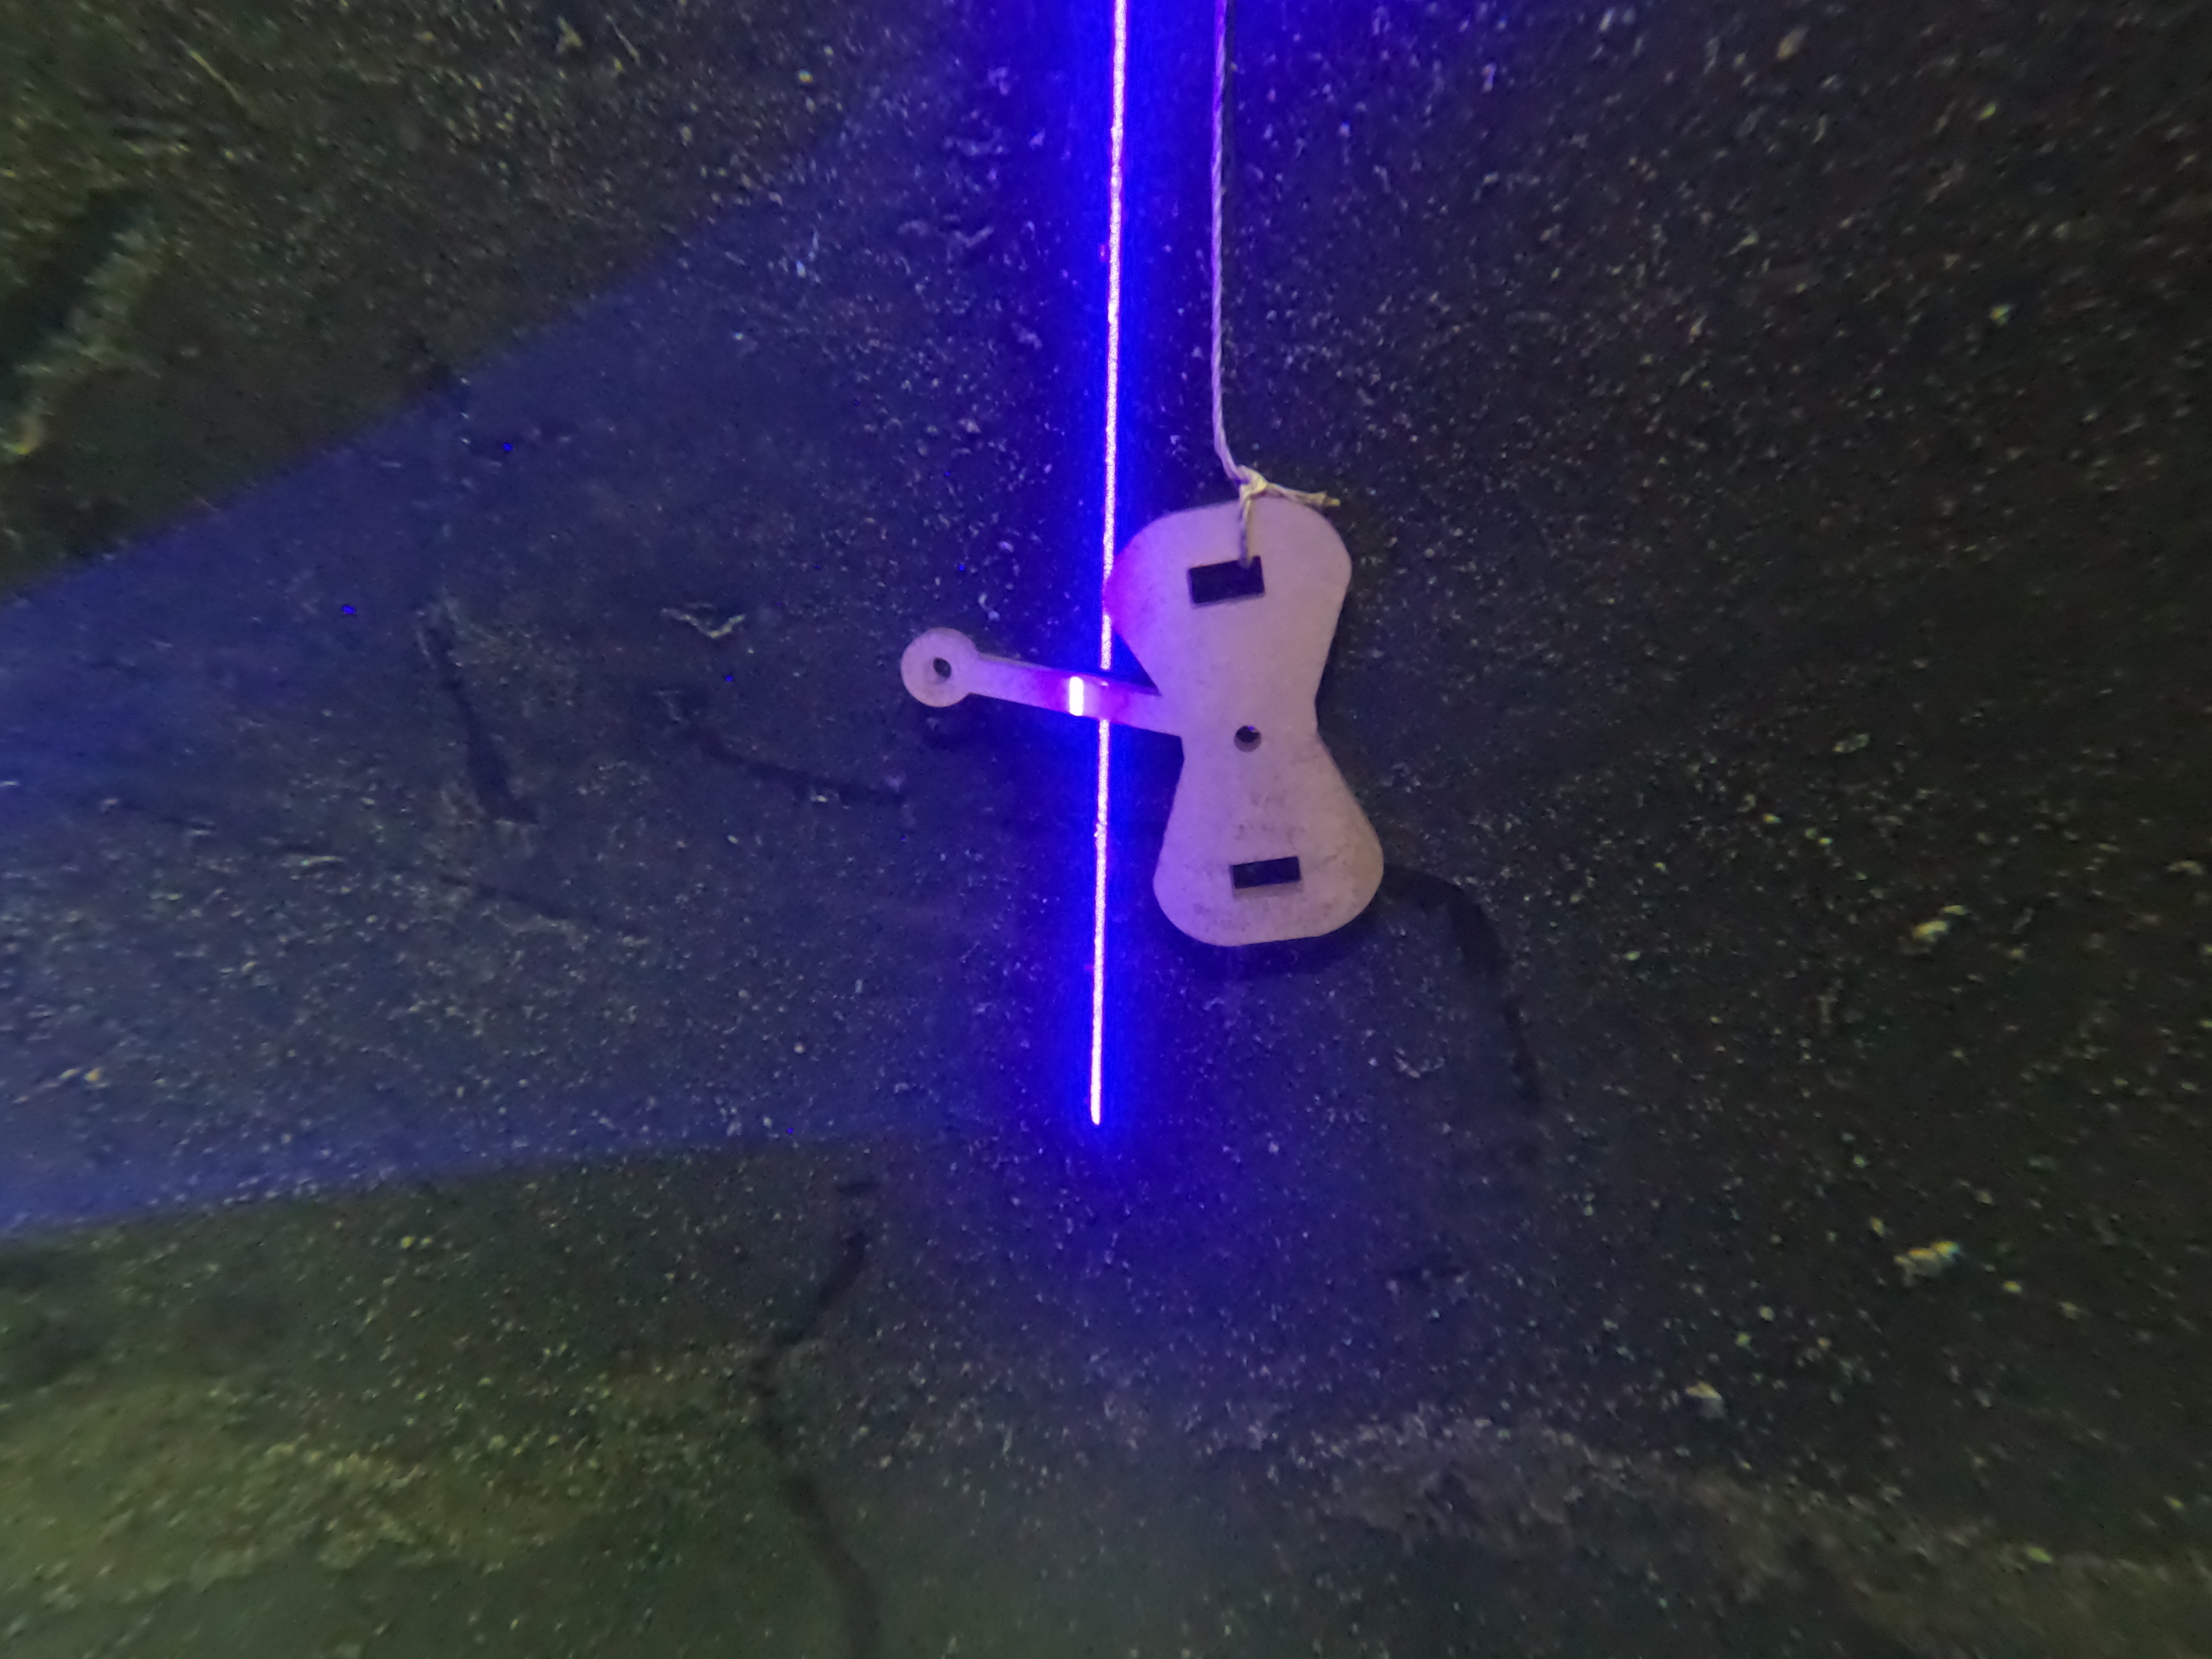

Supplement: Supplementary file 3243 [file G0015684.pdf › Level_2_1/G0015684.pdf]

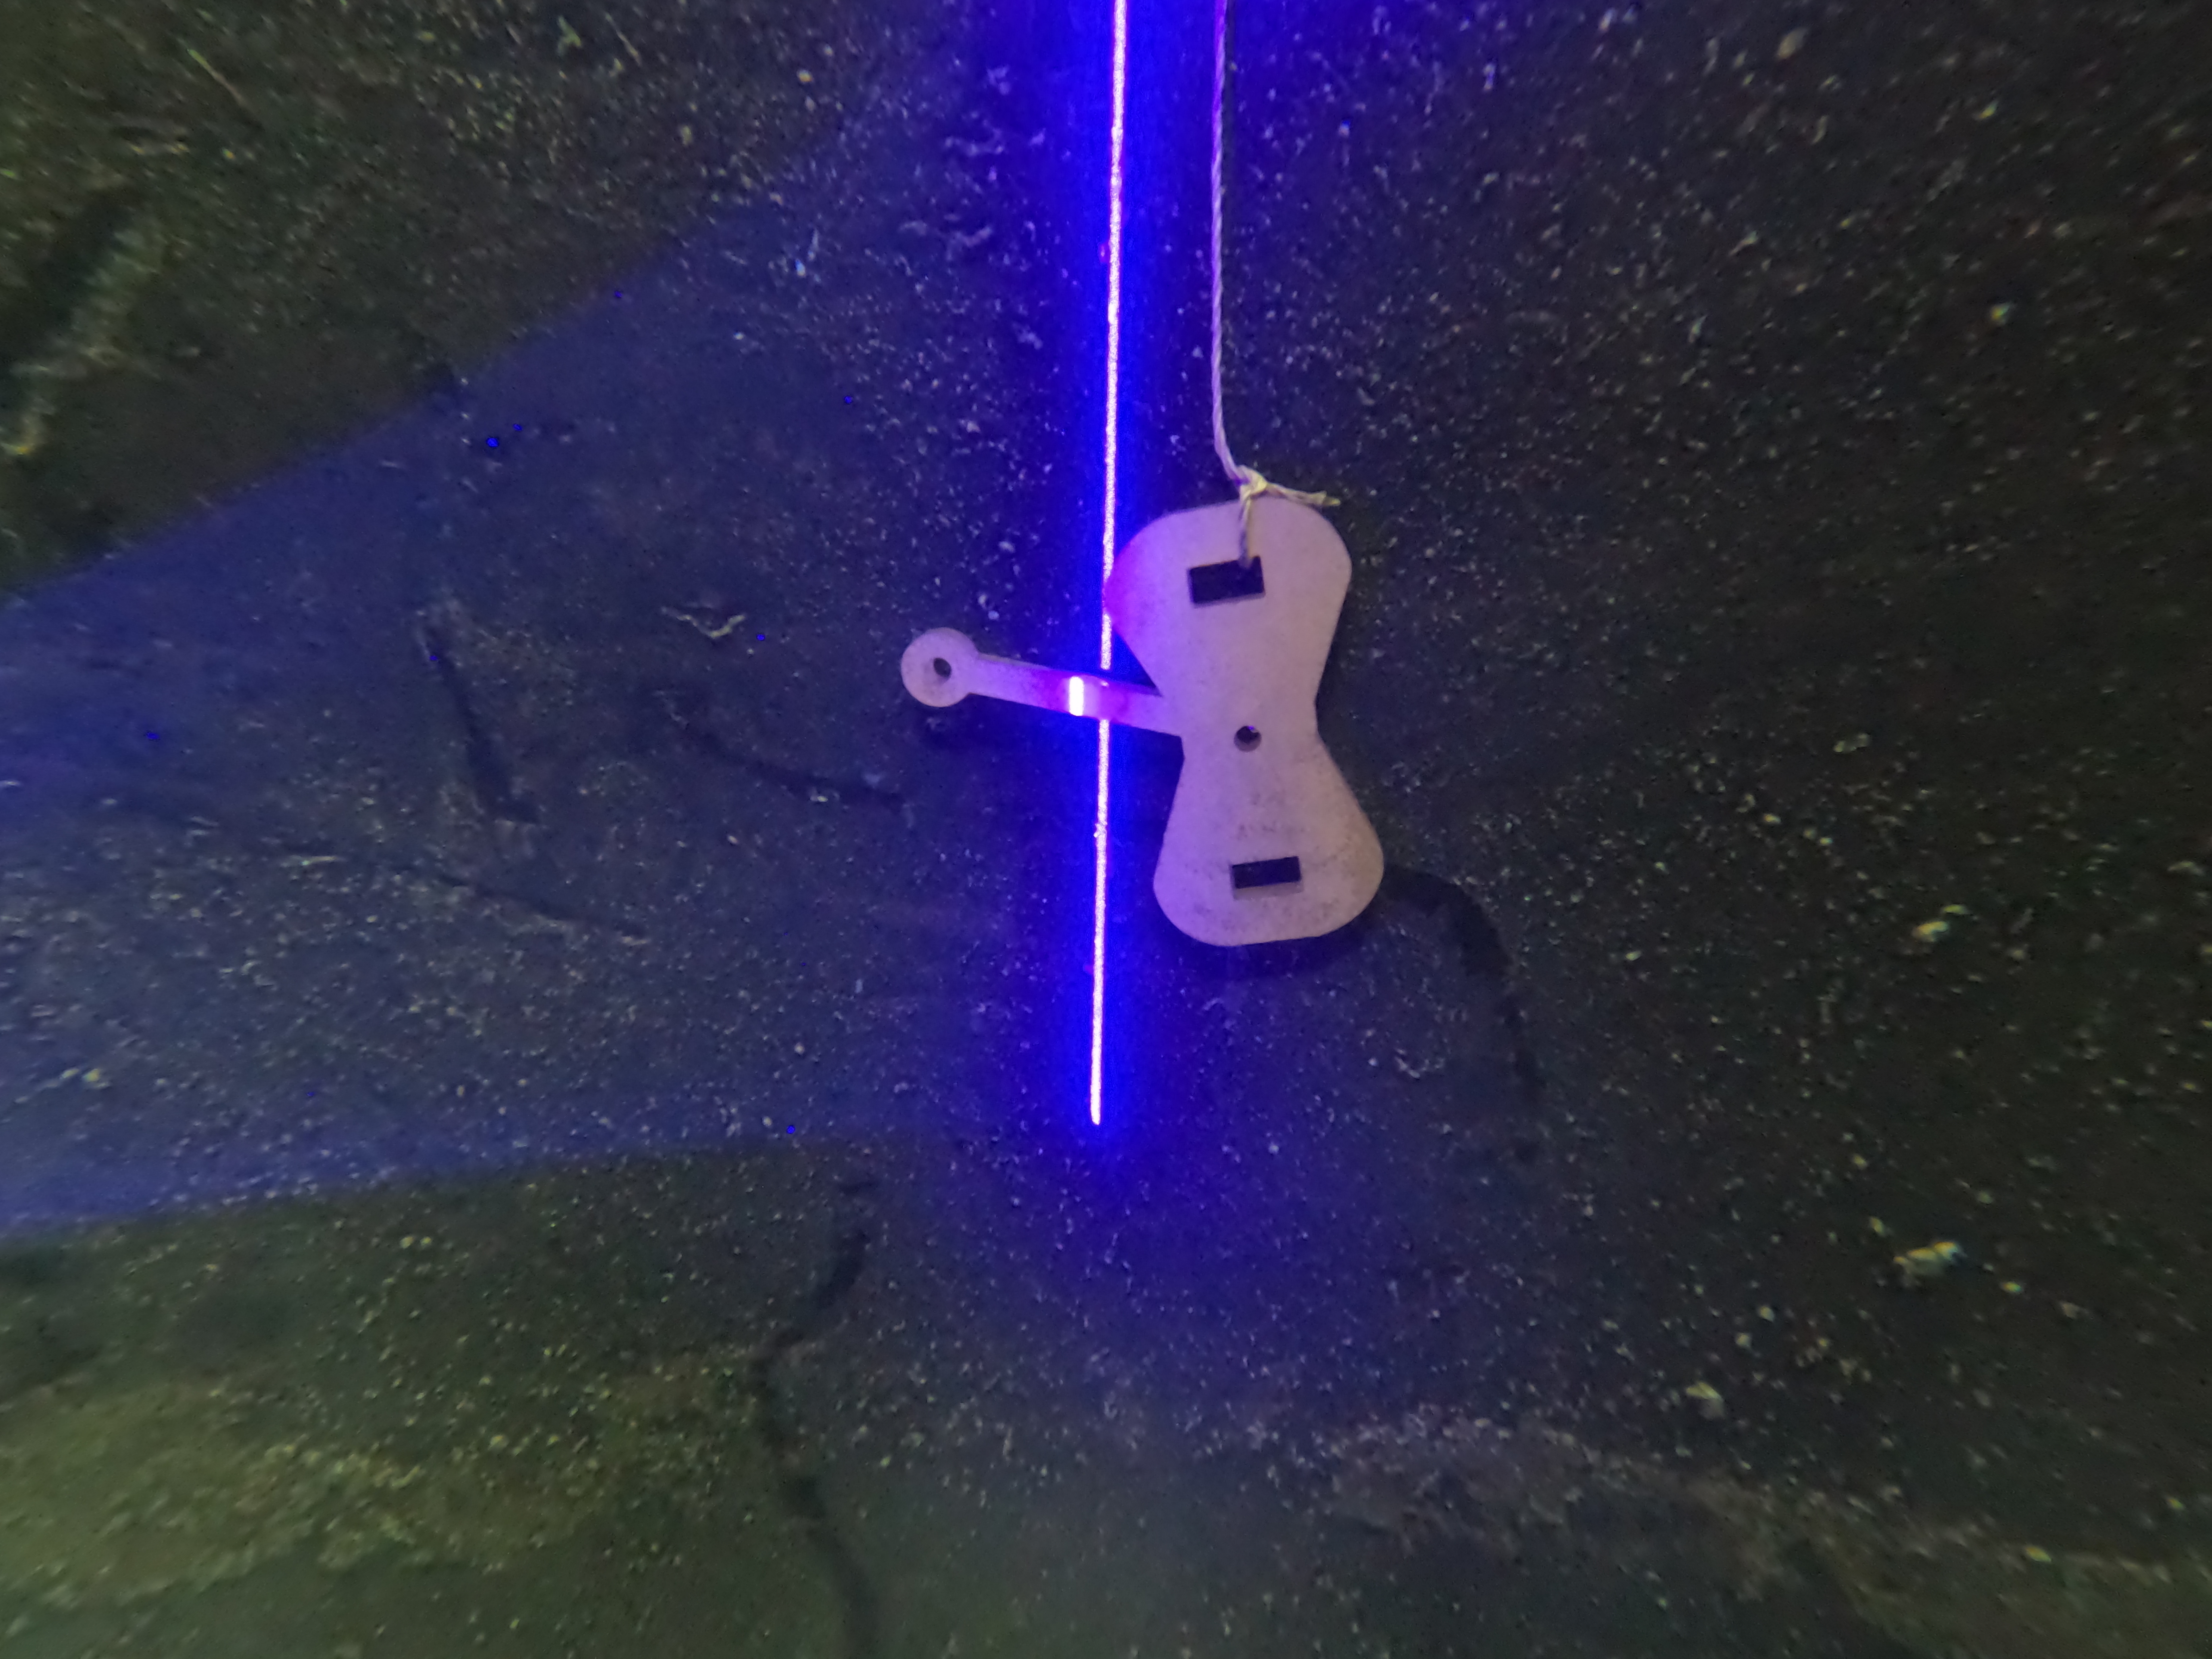

Supplement: Supplementary file 3244 [file G0015685.pdf › Level_2_1/G0015685.pdf]

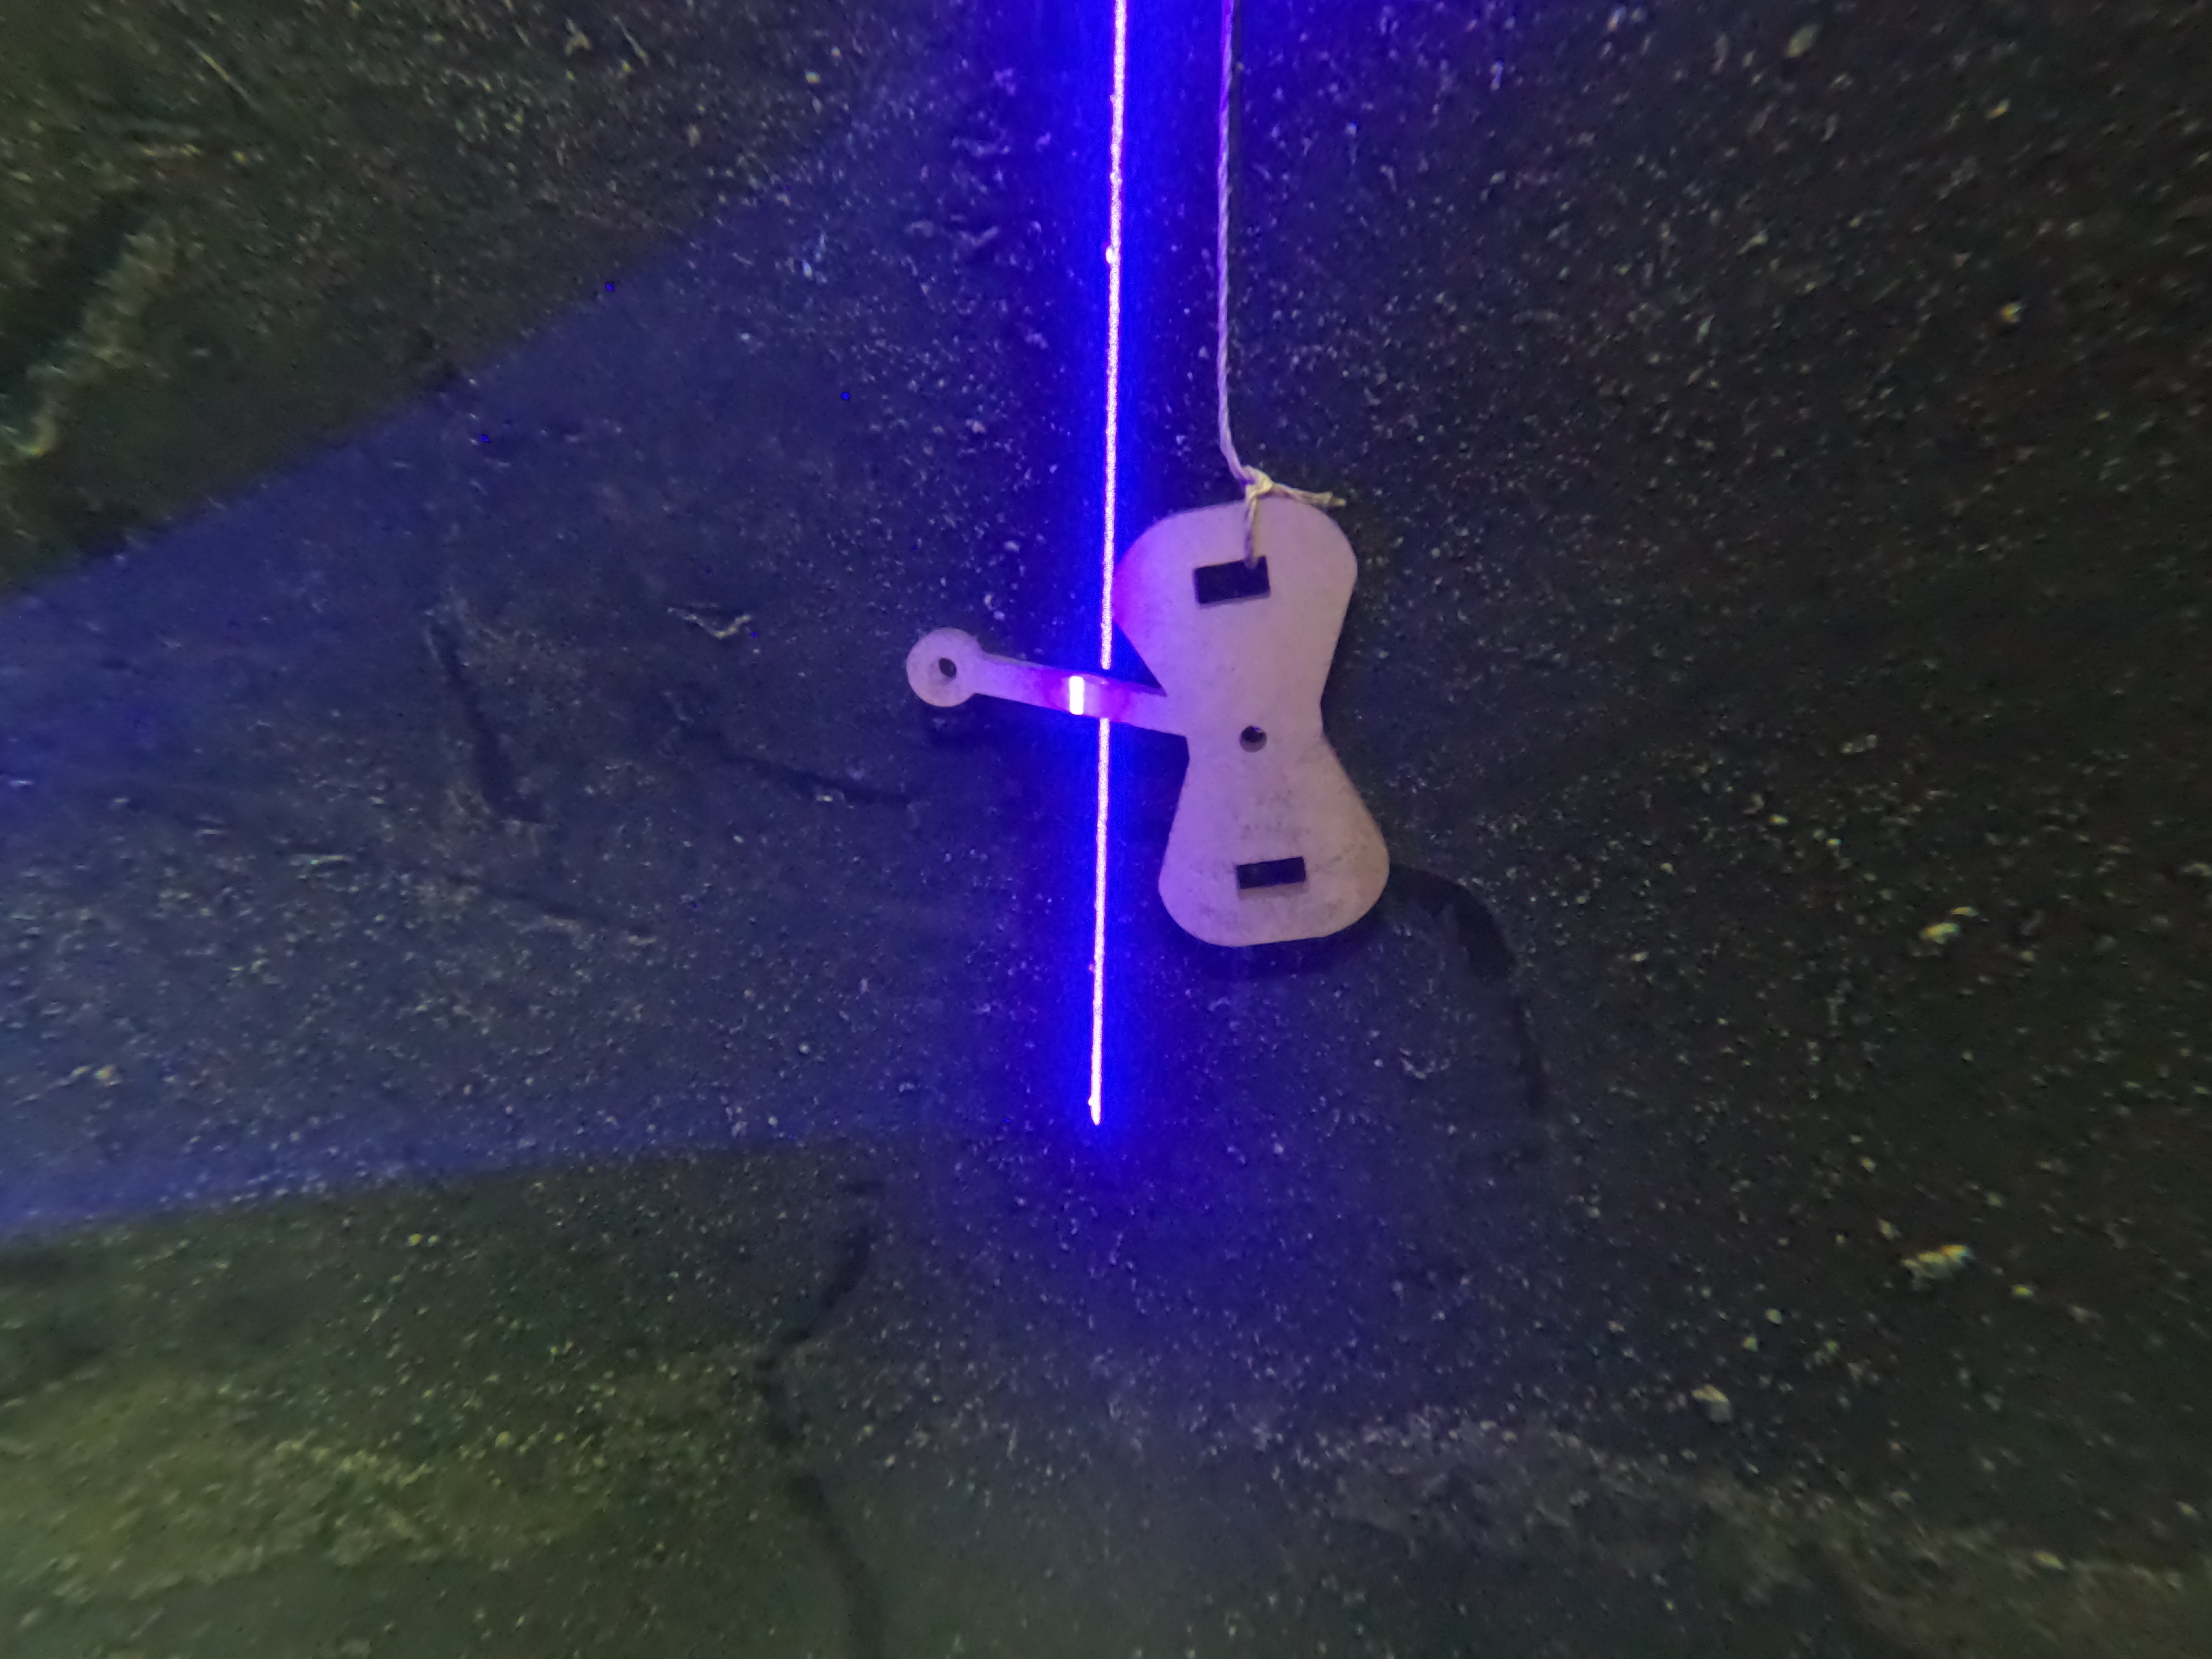

Supplement: Supplementary file 3245 [file G0015686.pdf › Level_2_1/G0015686.pdf]

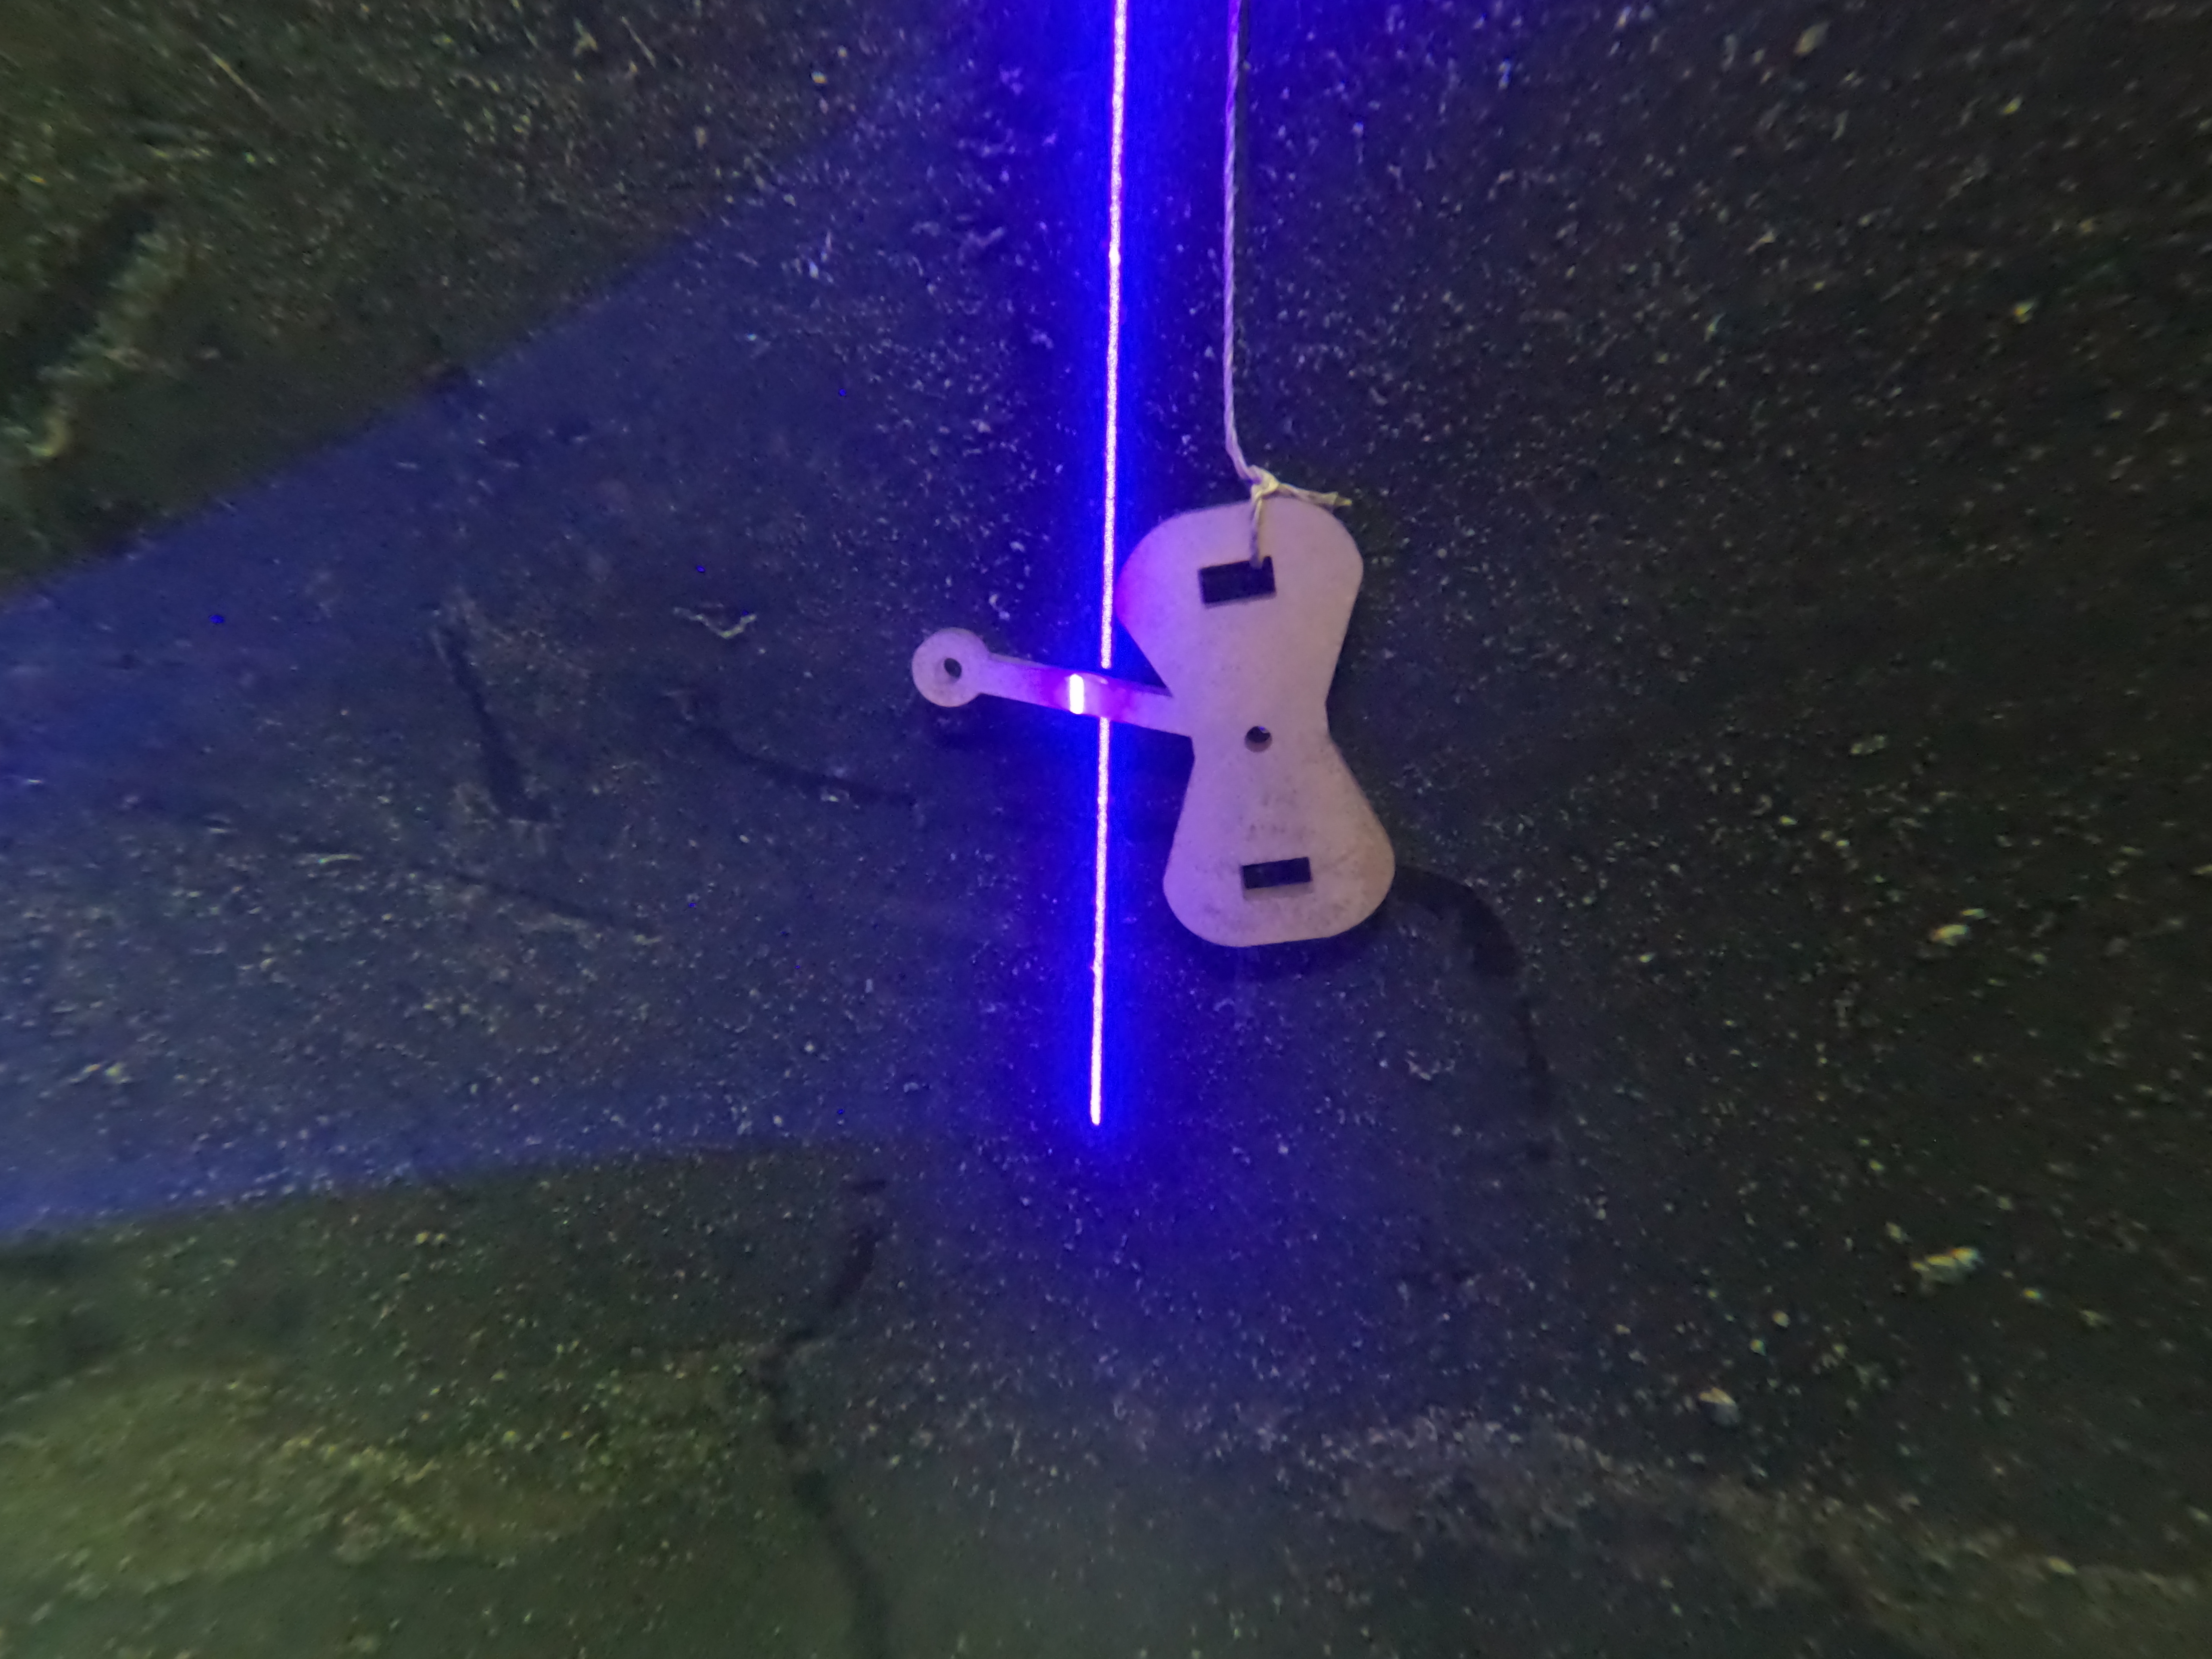

Supplement: Supplementary file 3246 [file G0015687.pdf › Level_2_1/G0015687.pdf]

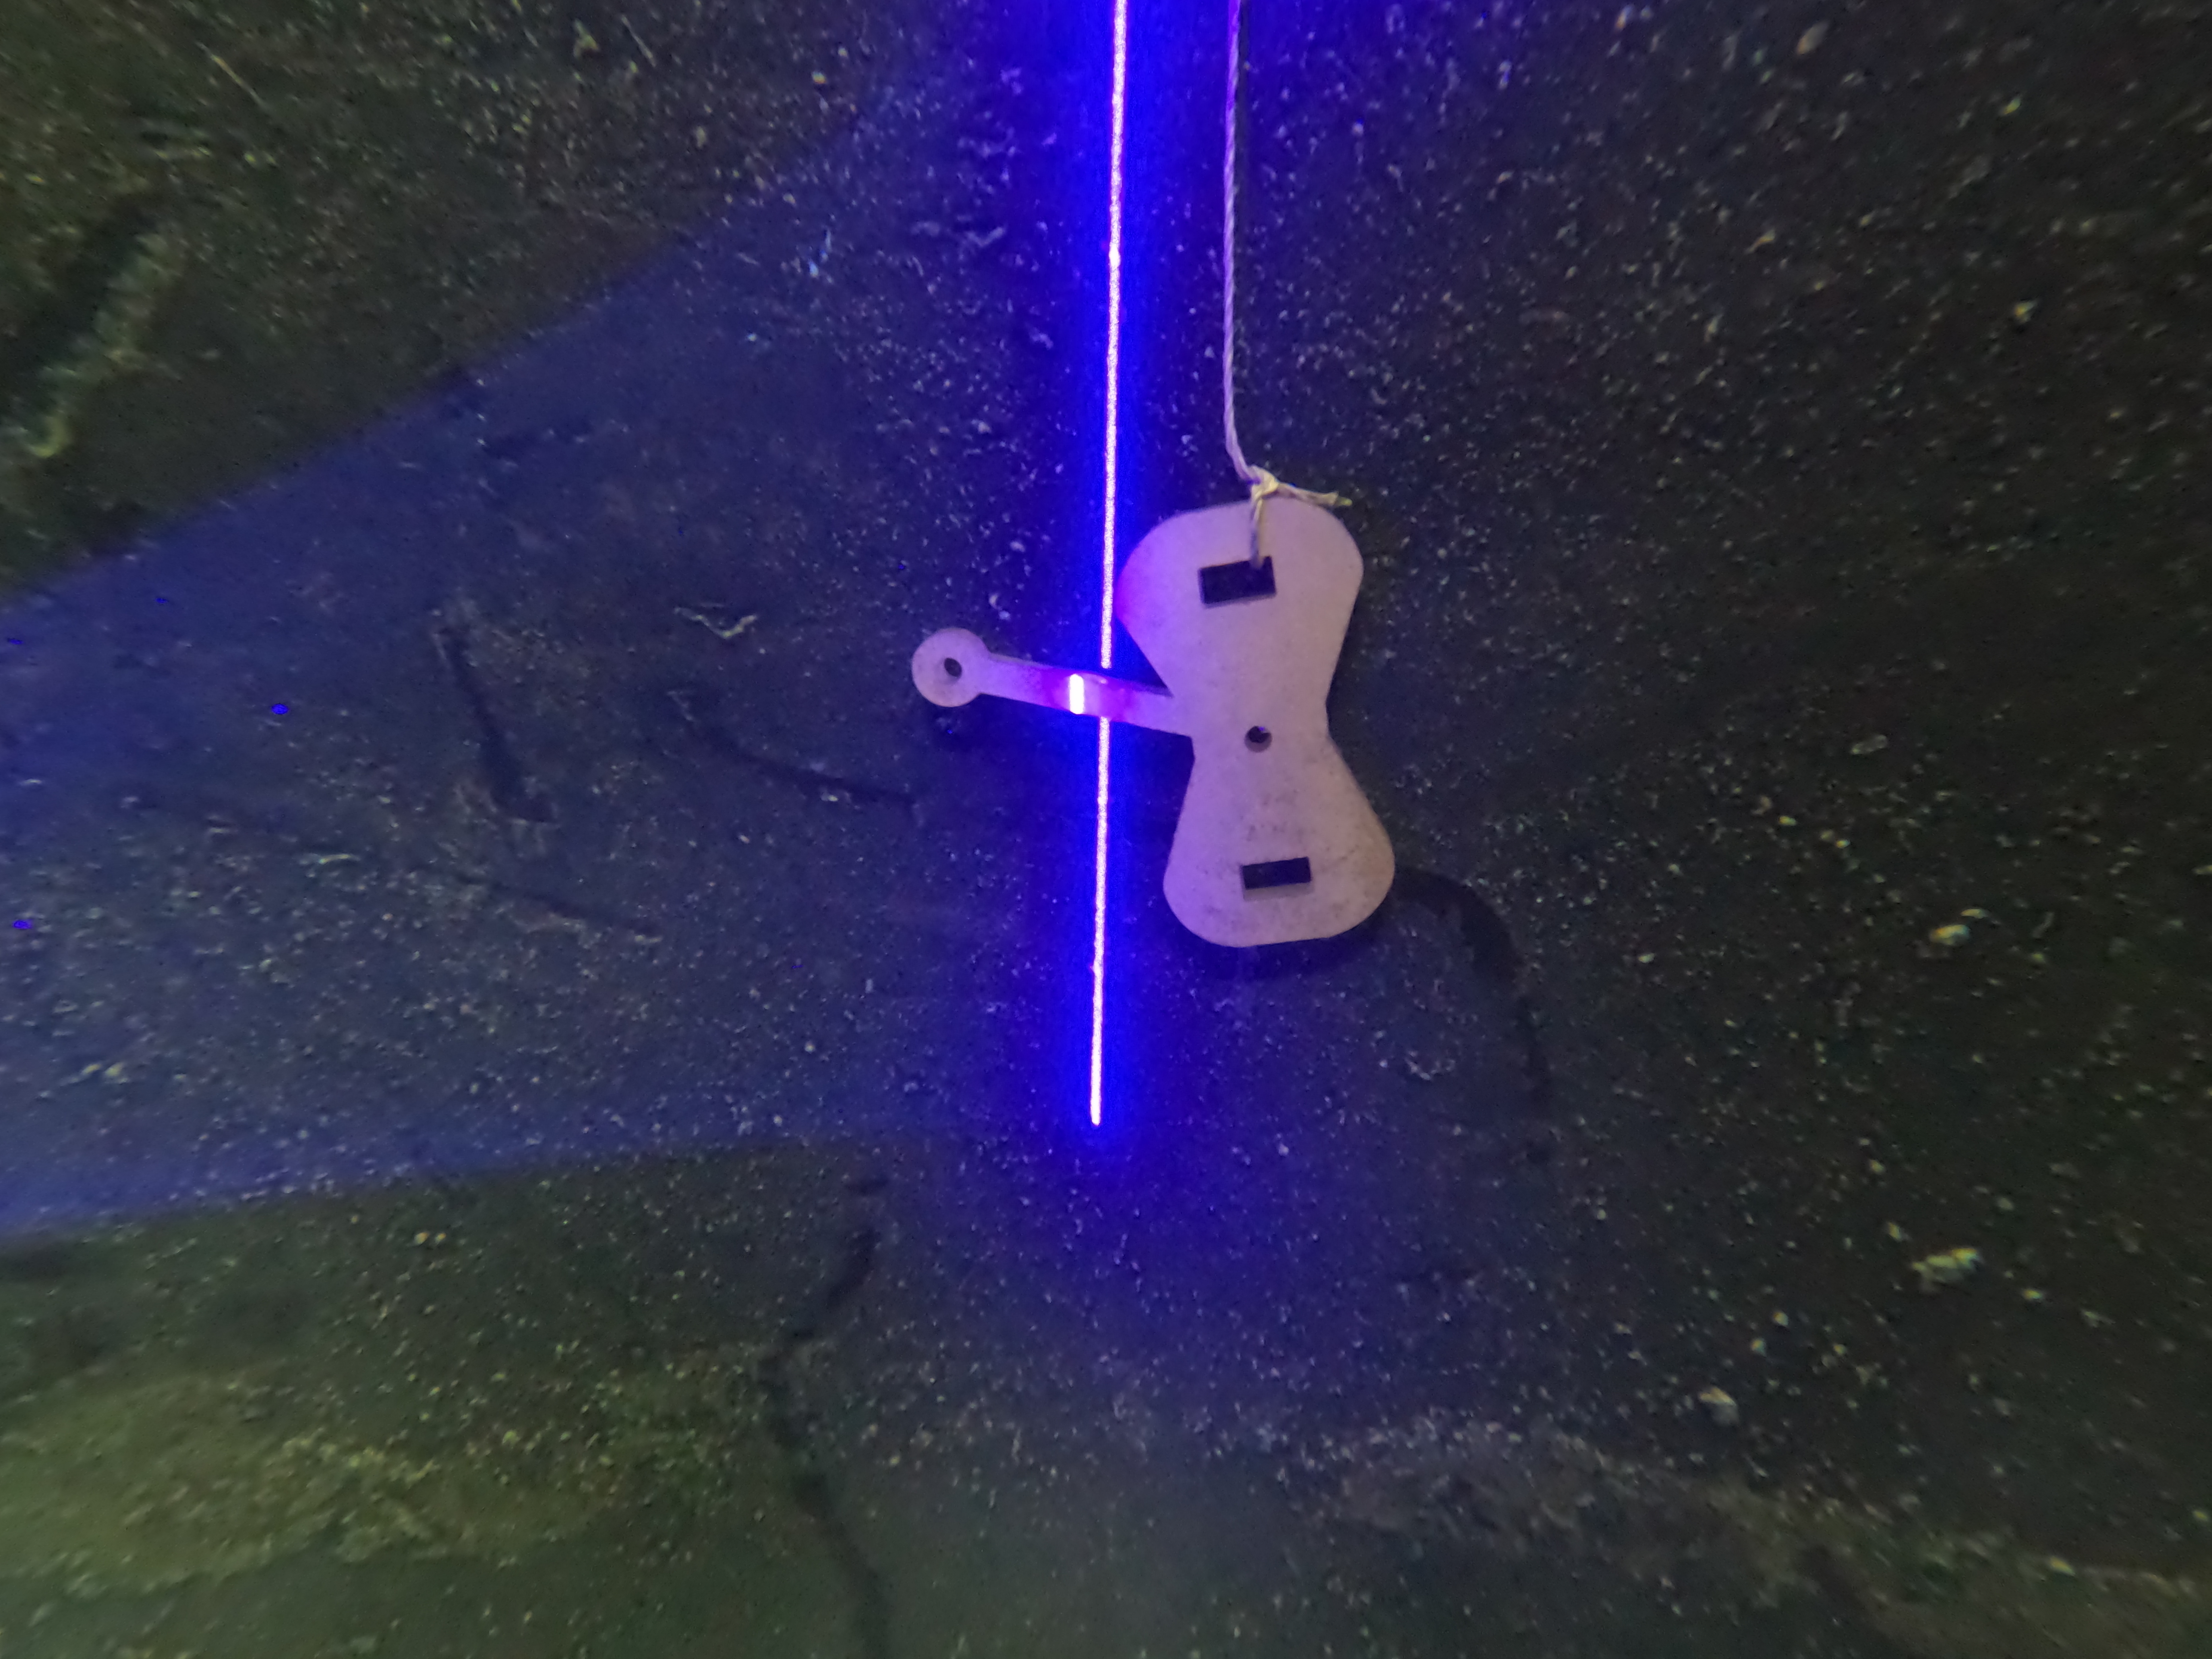

Supplement: Supplementary file 3247 [file G0015688.pdf › Level_2_1/G0015688.pdf]

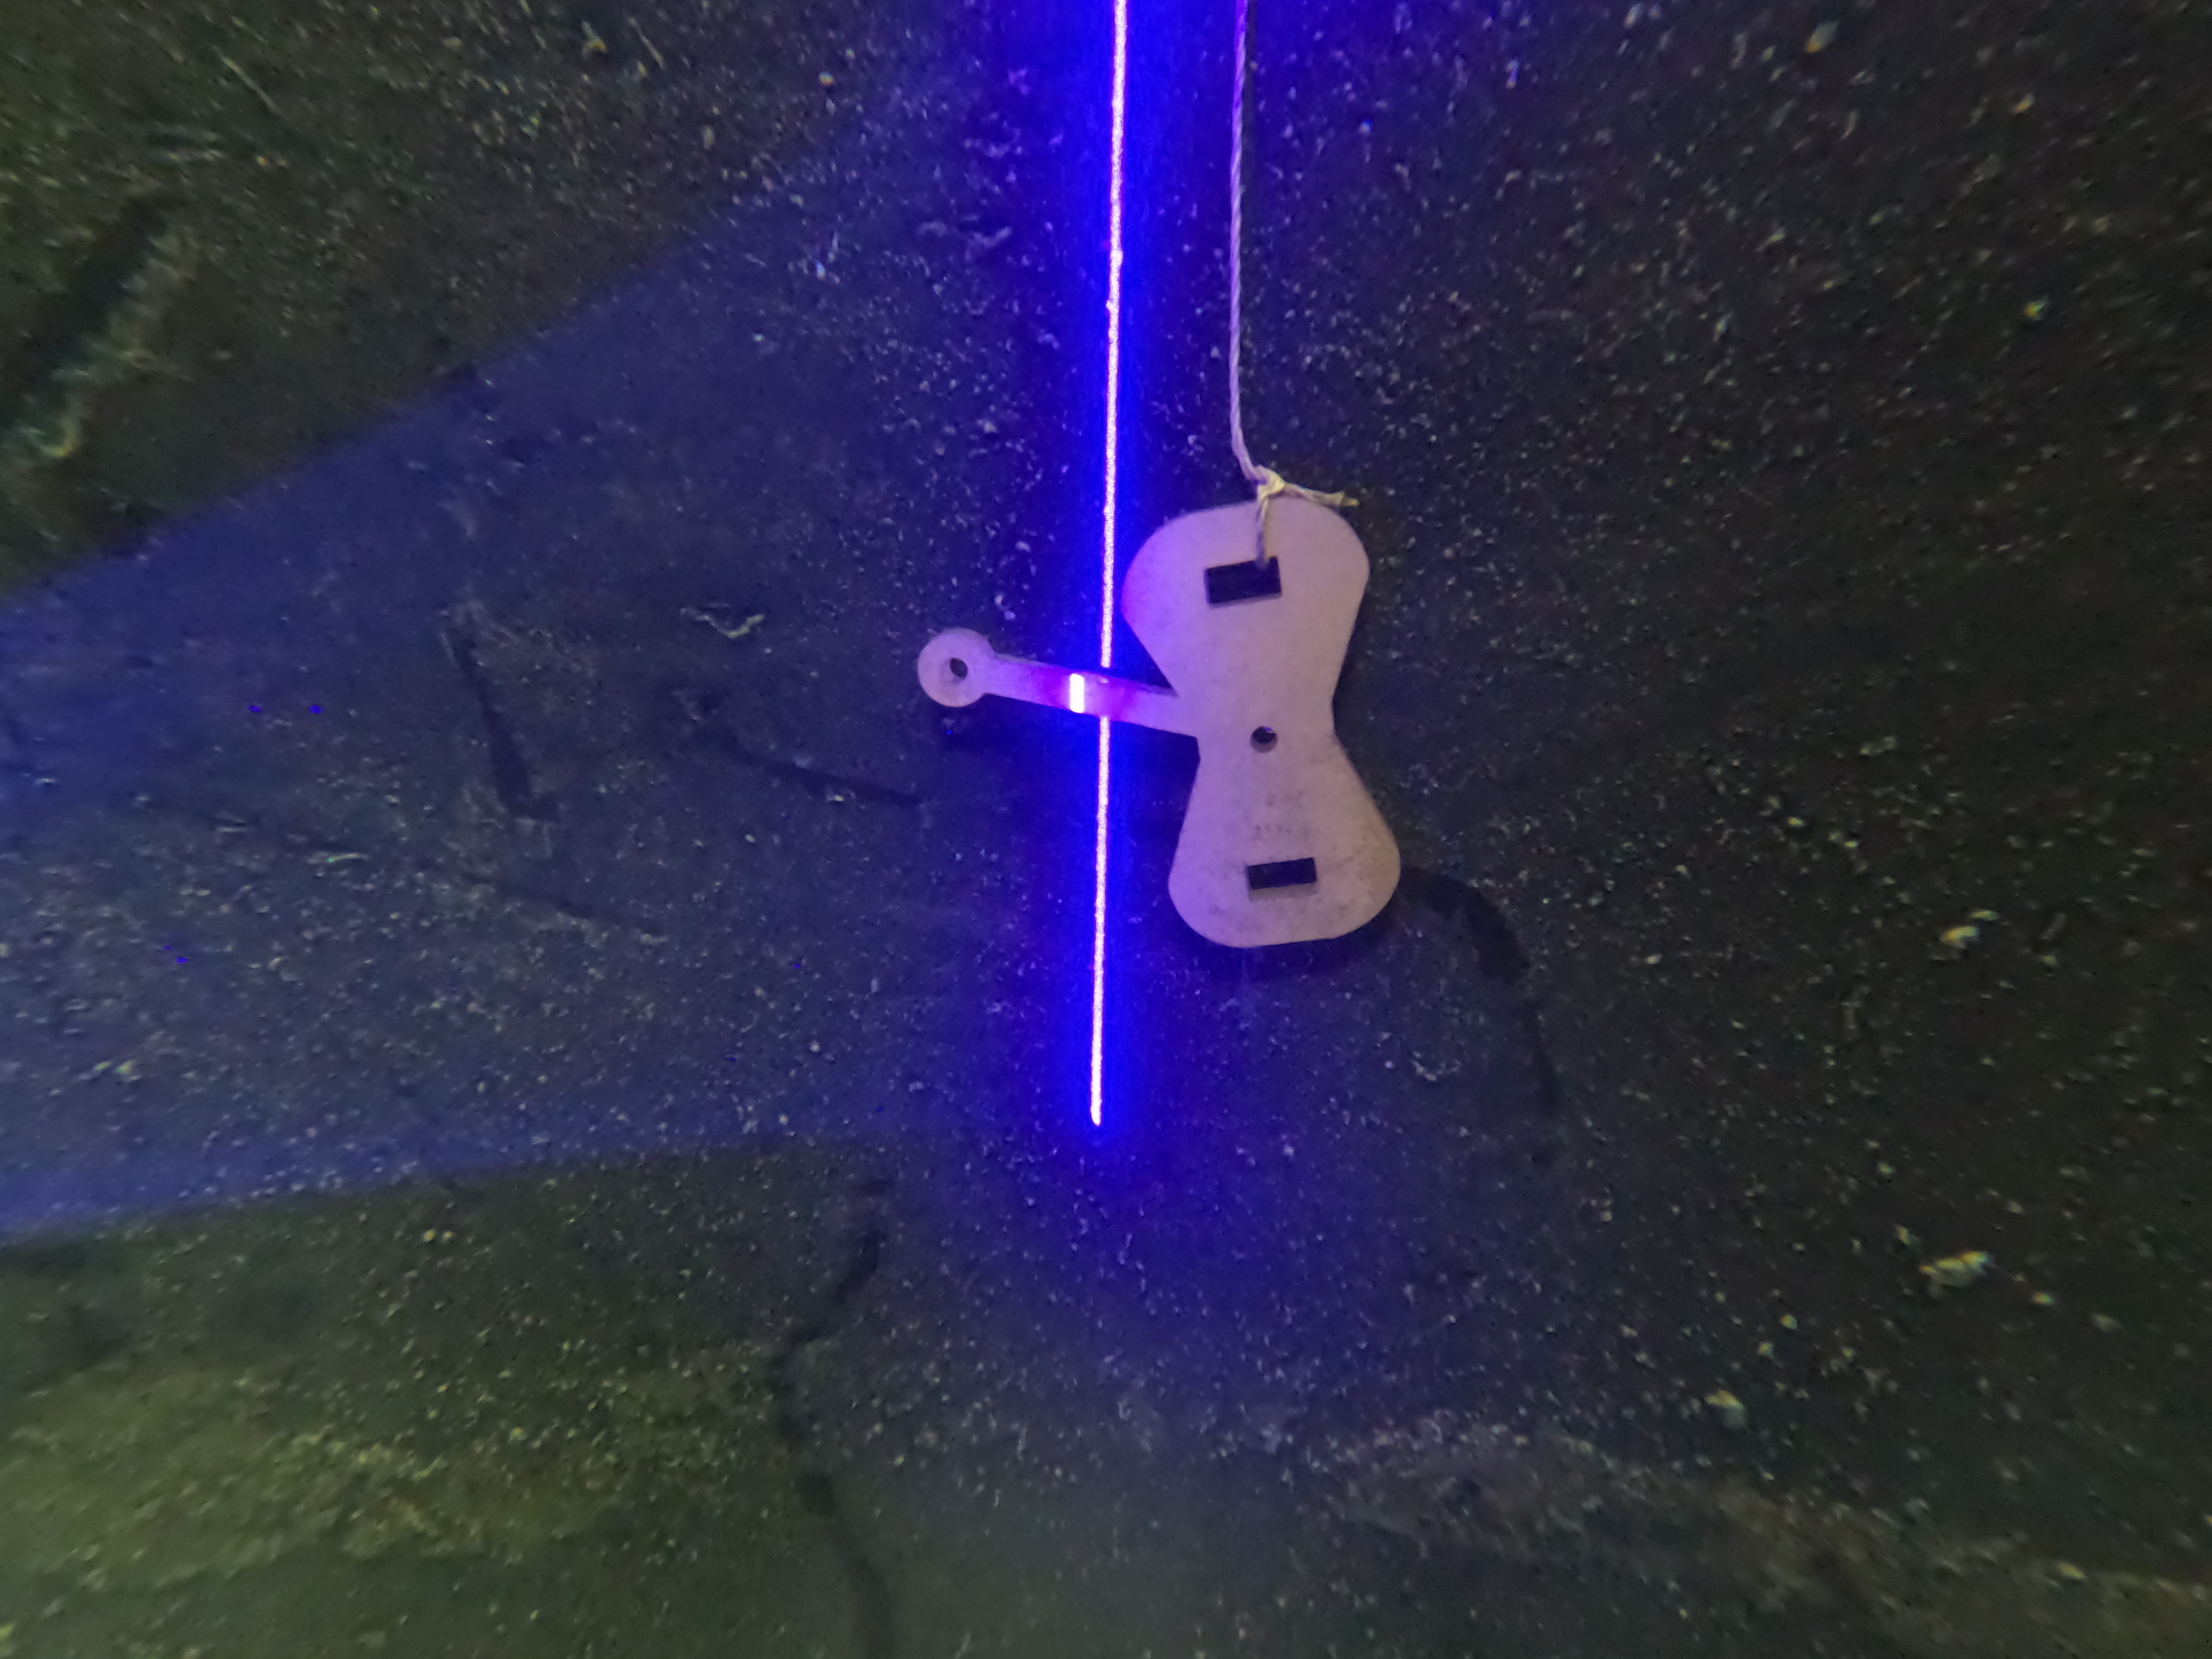

Supplement: Supplementary file 3248 [file G0015689.pdf › Level_2_1/G0015689.pdf]

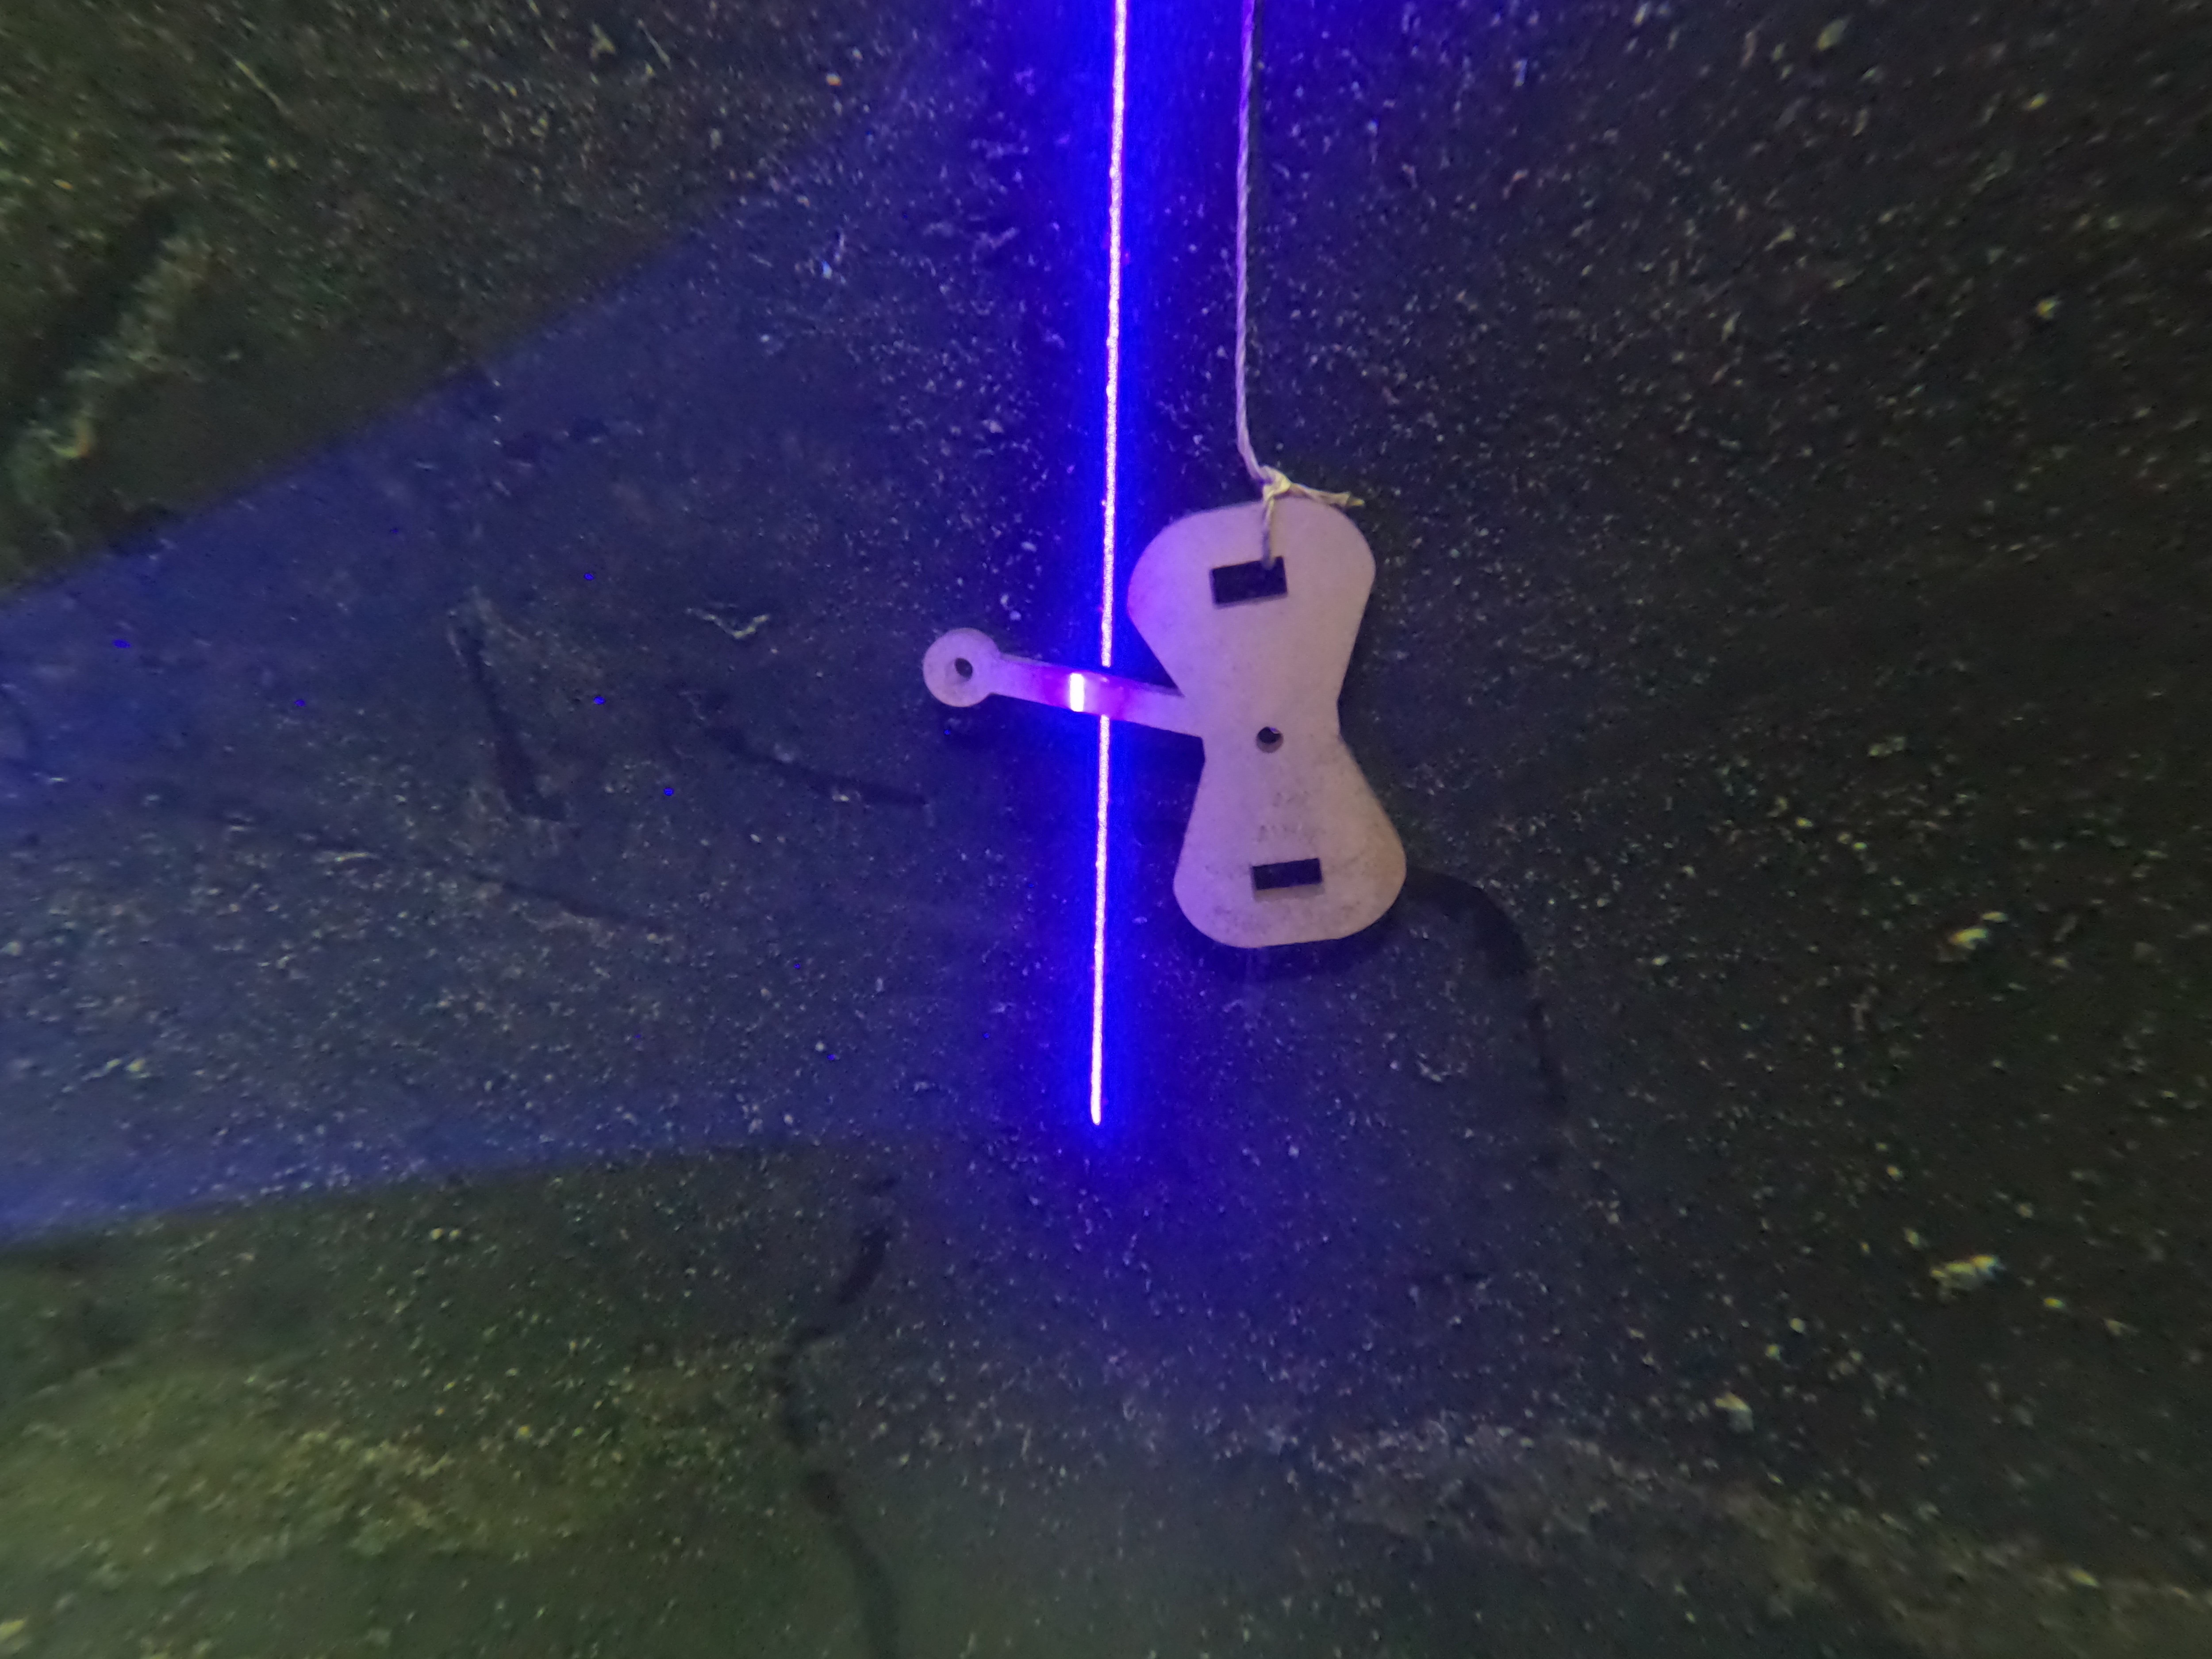

Supplement: Supplementary file 3249 [file G0015690.pdf › Level_2_1/G0015690.pdf]

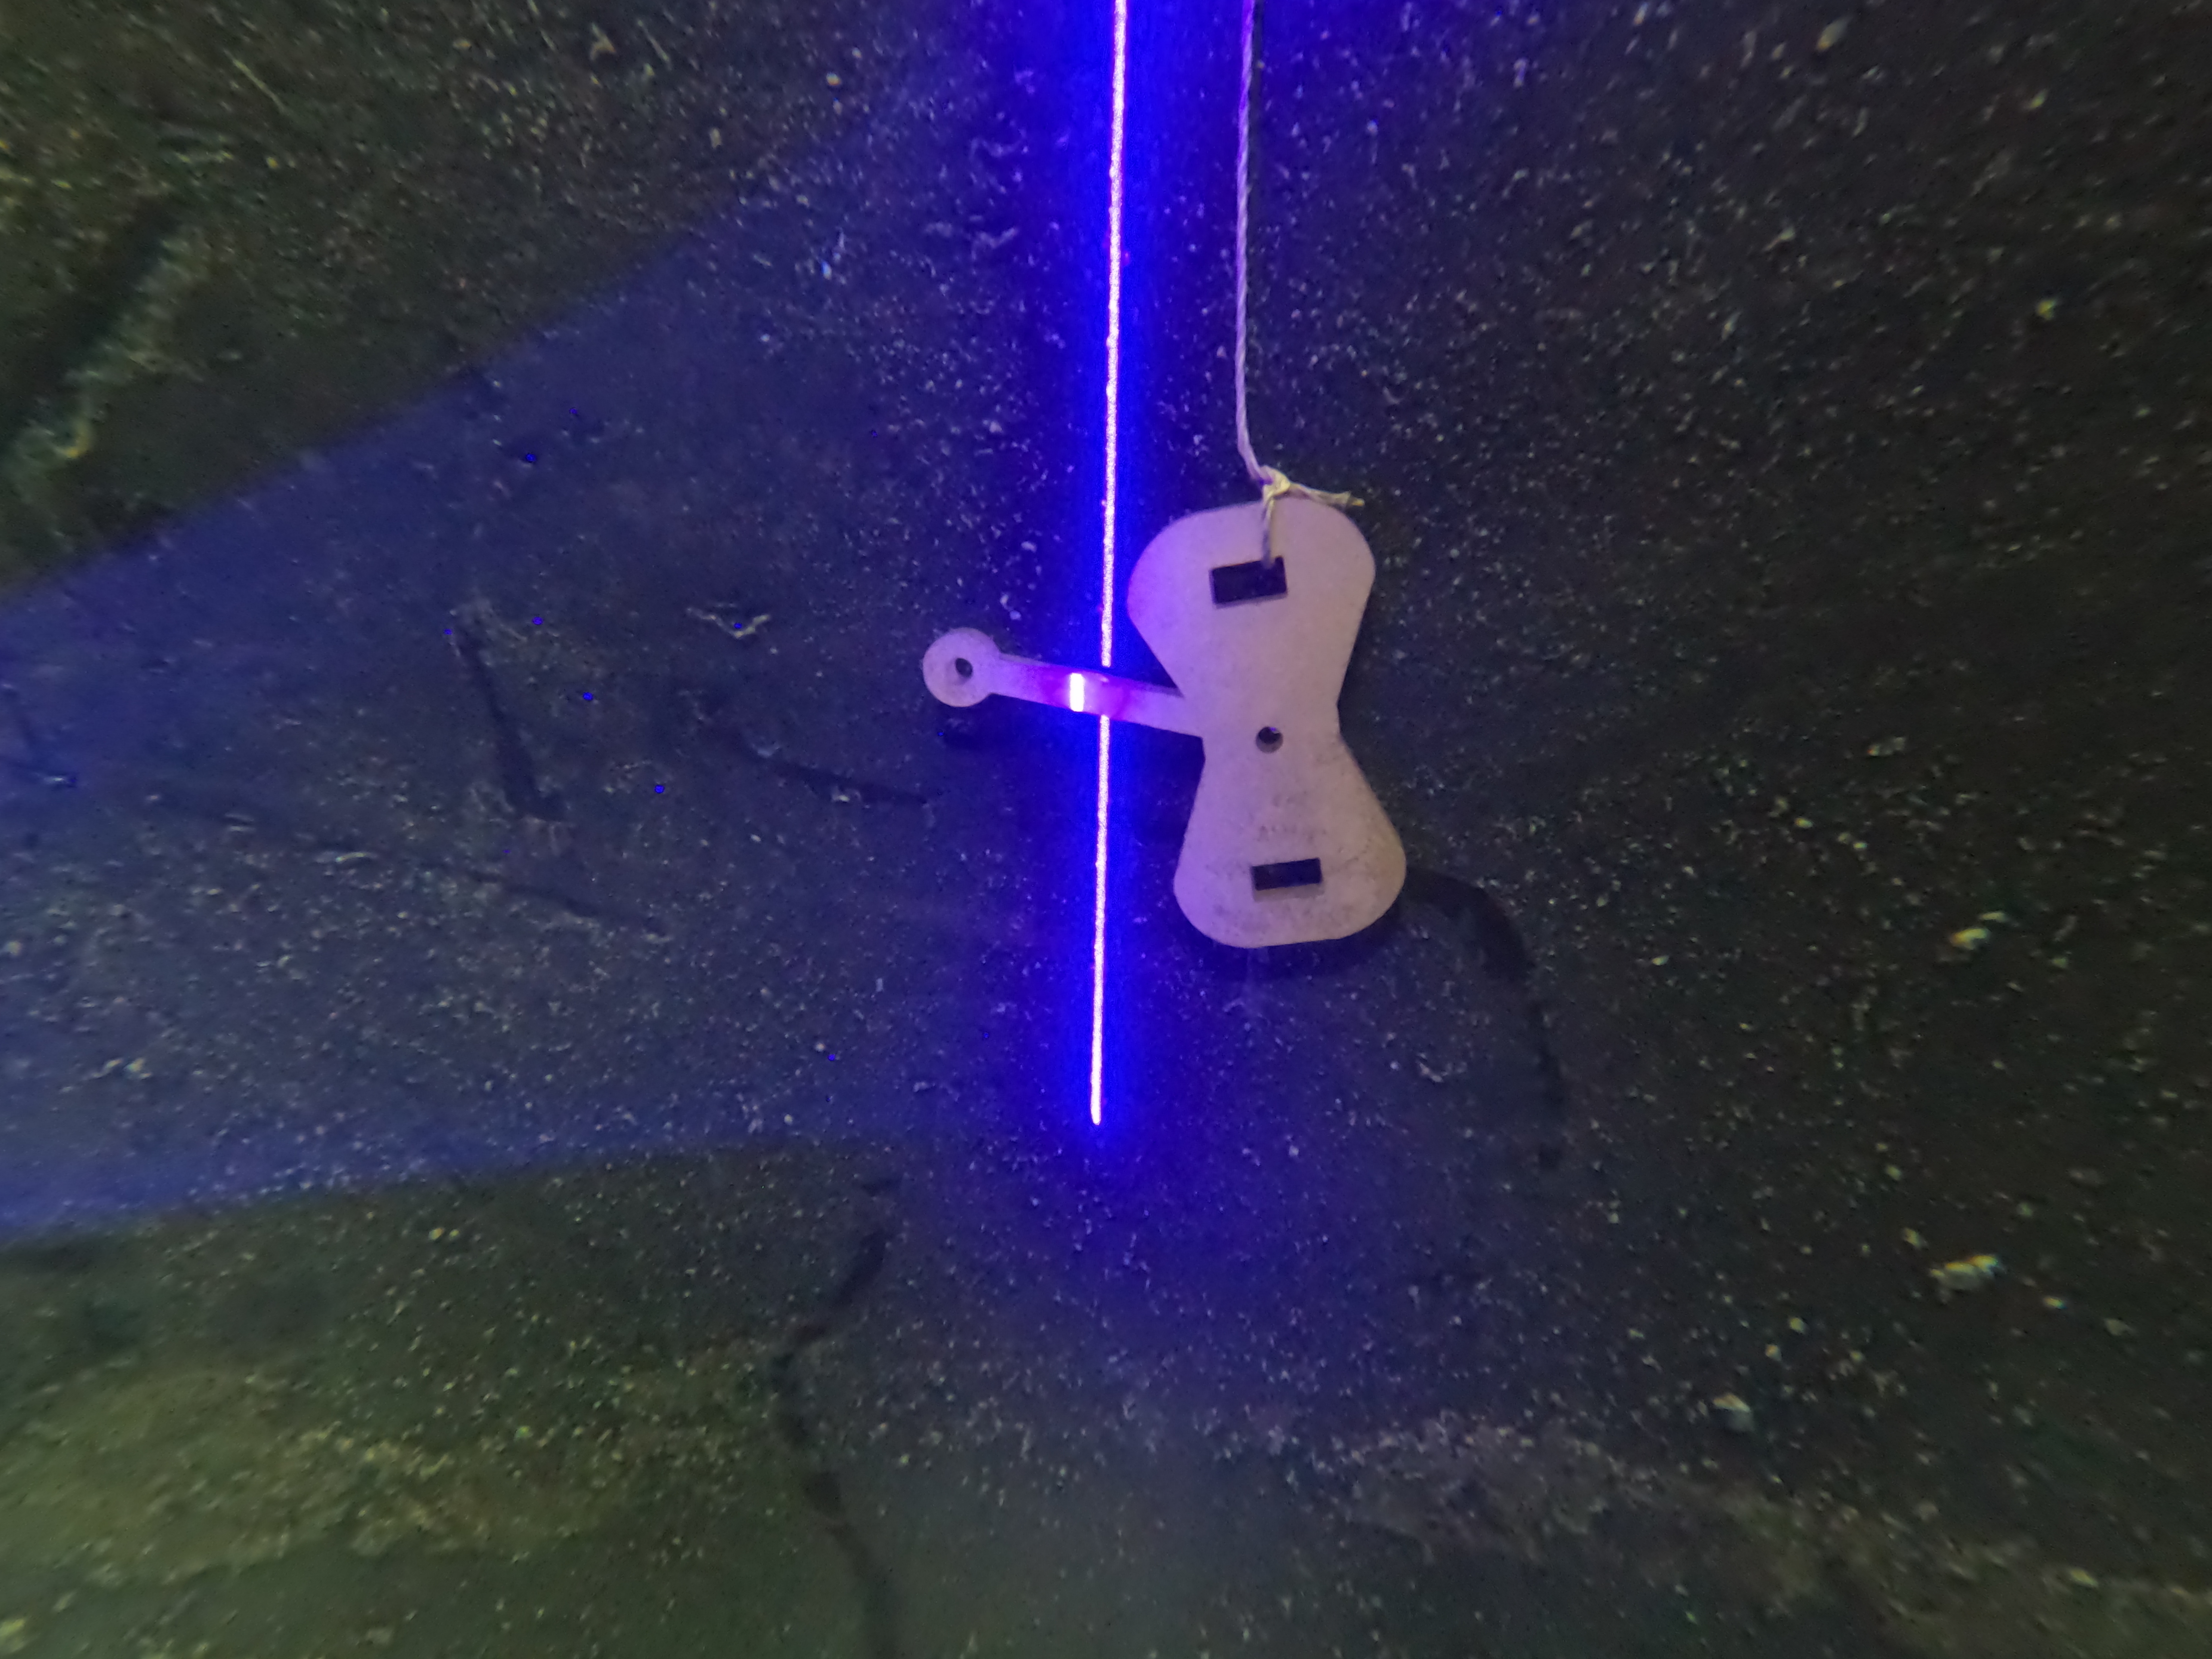

Supplement: Supplementary file 3250 [file G0015691.pdf › Level_2_1/G0015691.pdf]

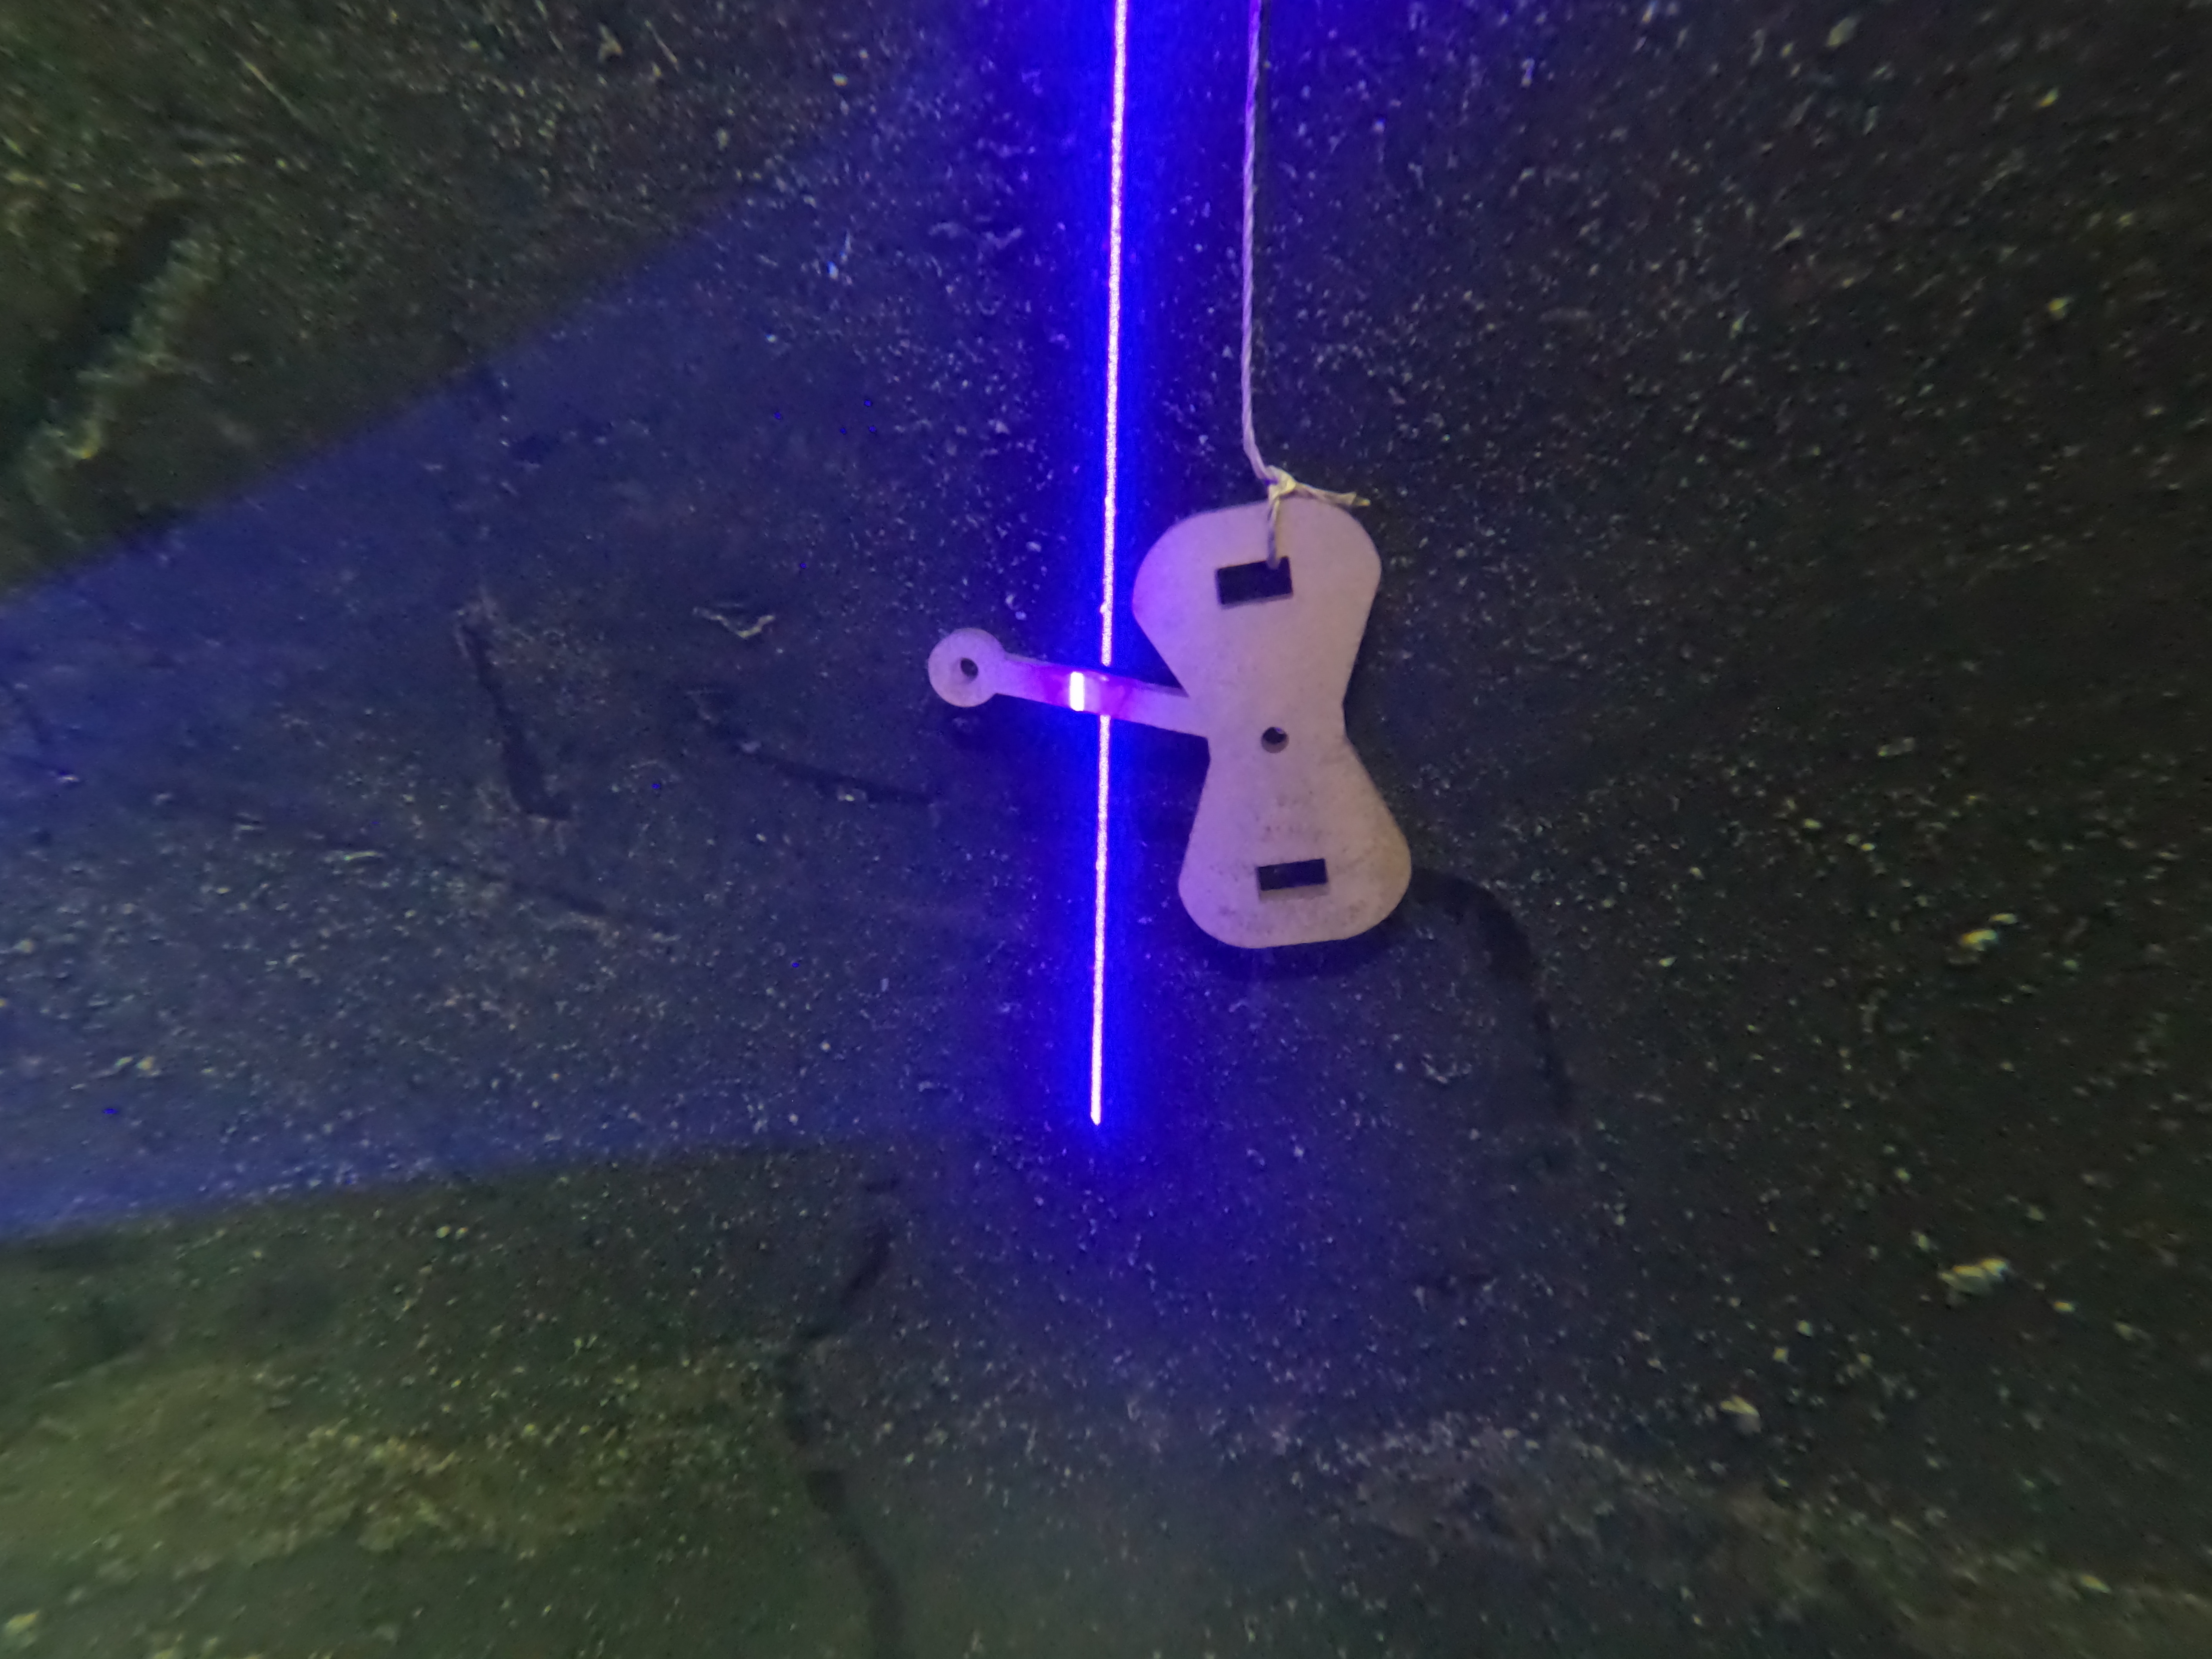

Supplement: Supplementary file 3251 [file G0015692.pdf › Level_2_1/G0015692.pdf]

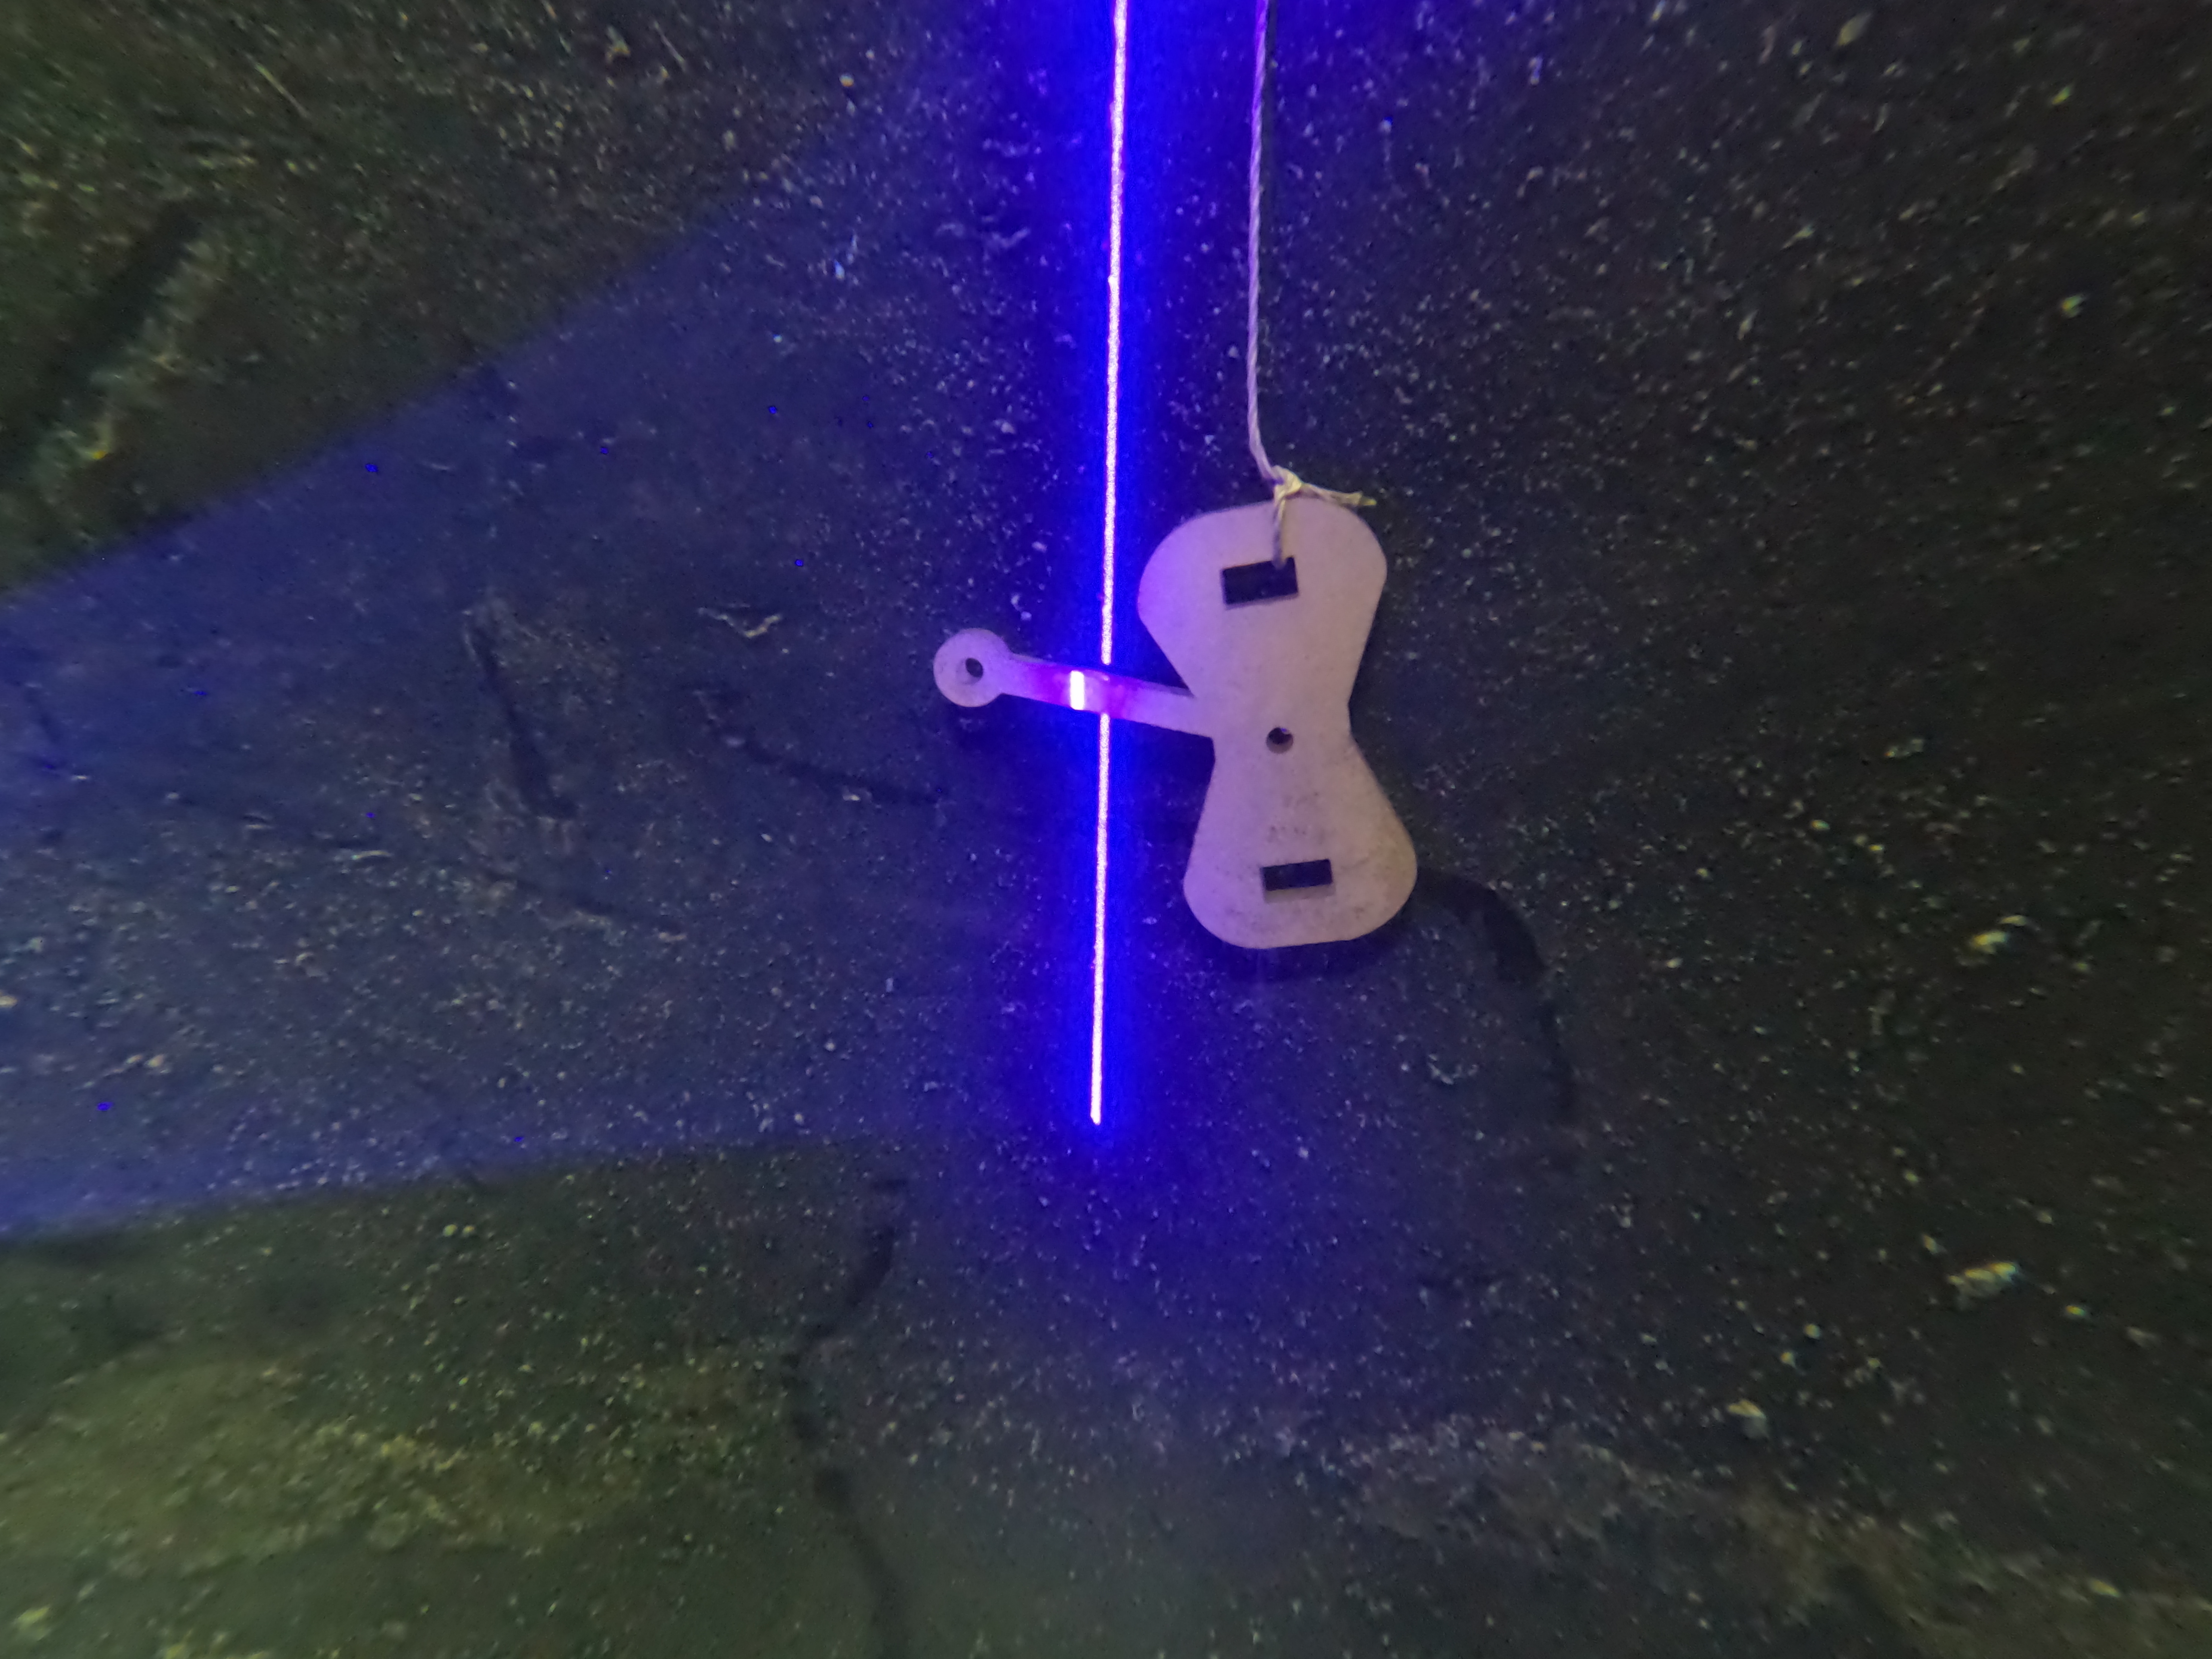

Supplement: Supplementary file 3252 [file G0015693.pdf › Level_2_1/G0015693.pdf]

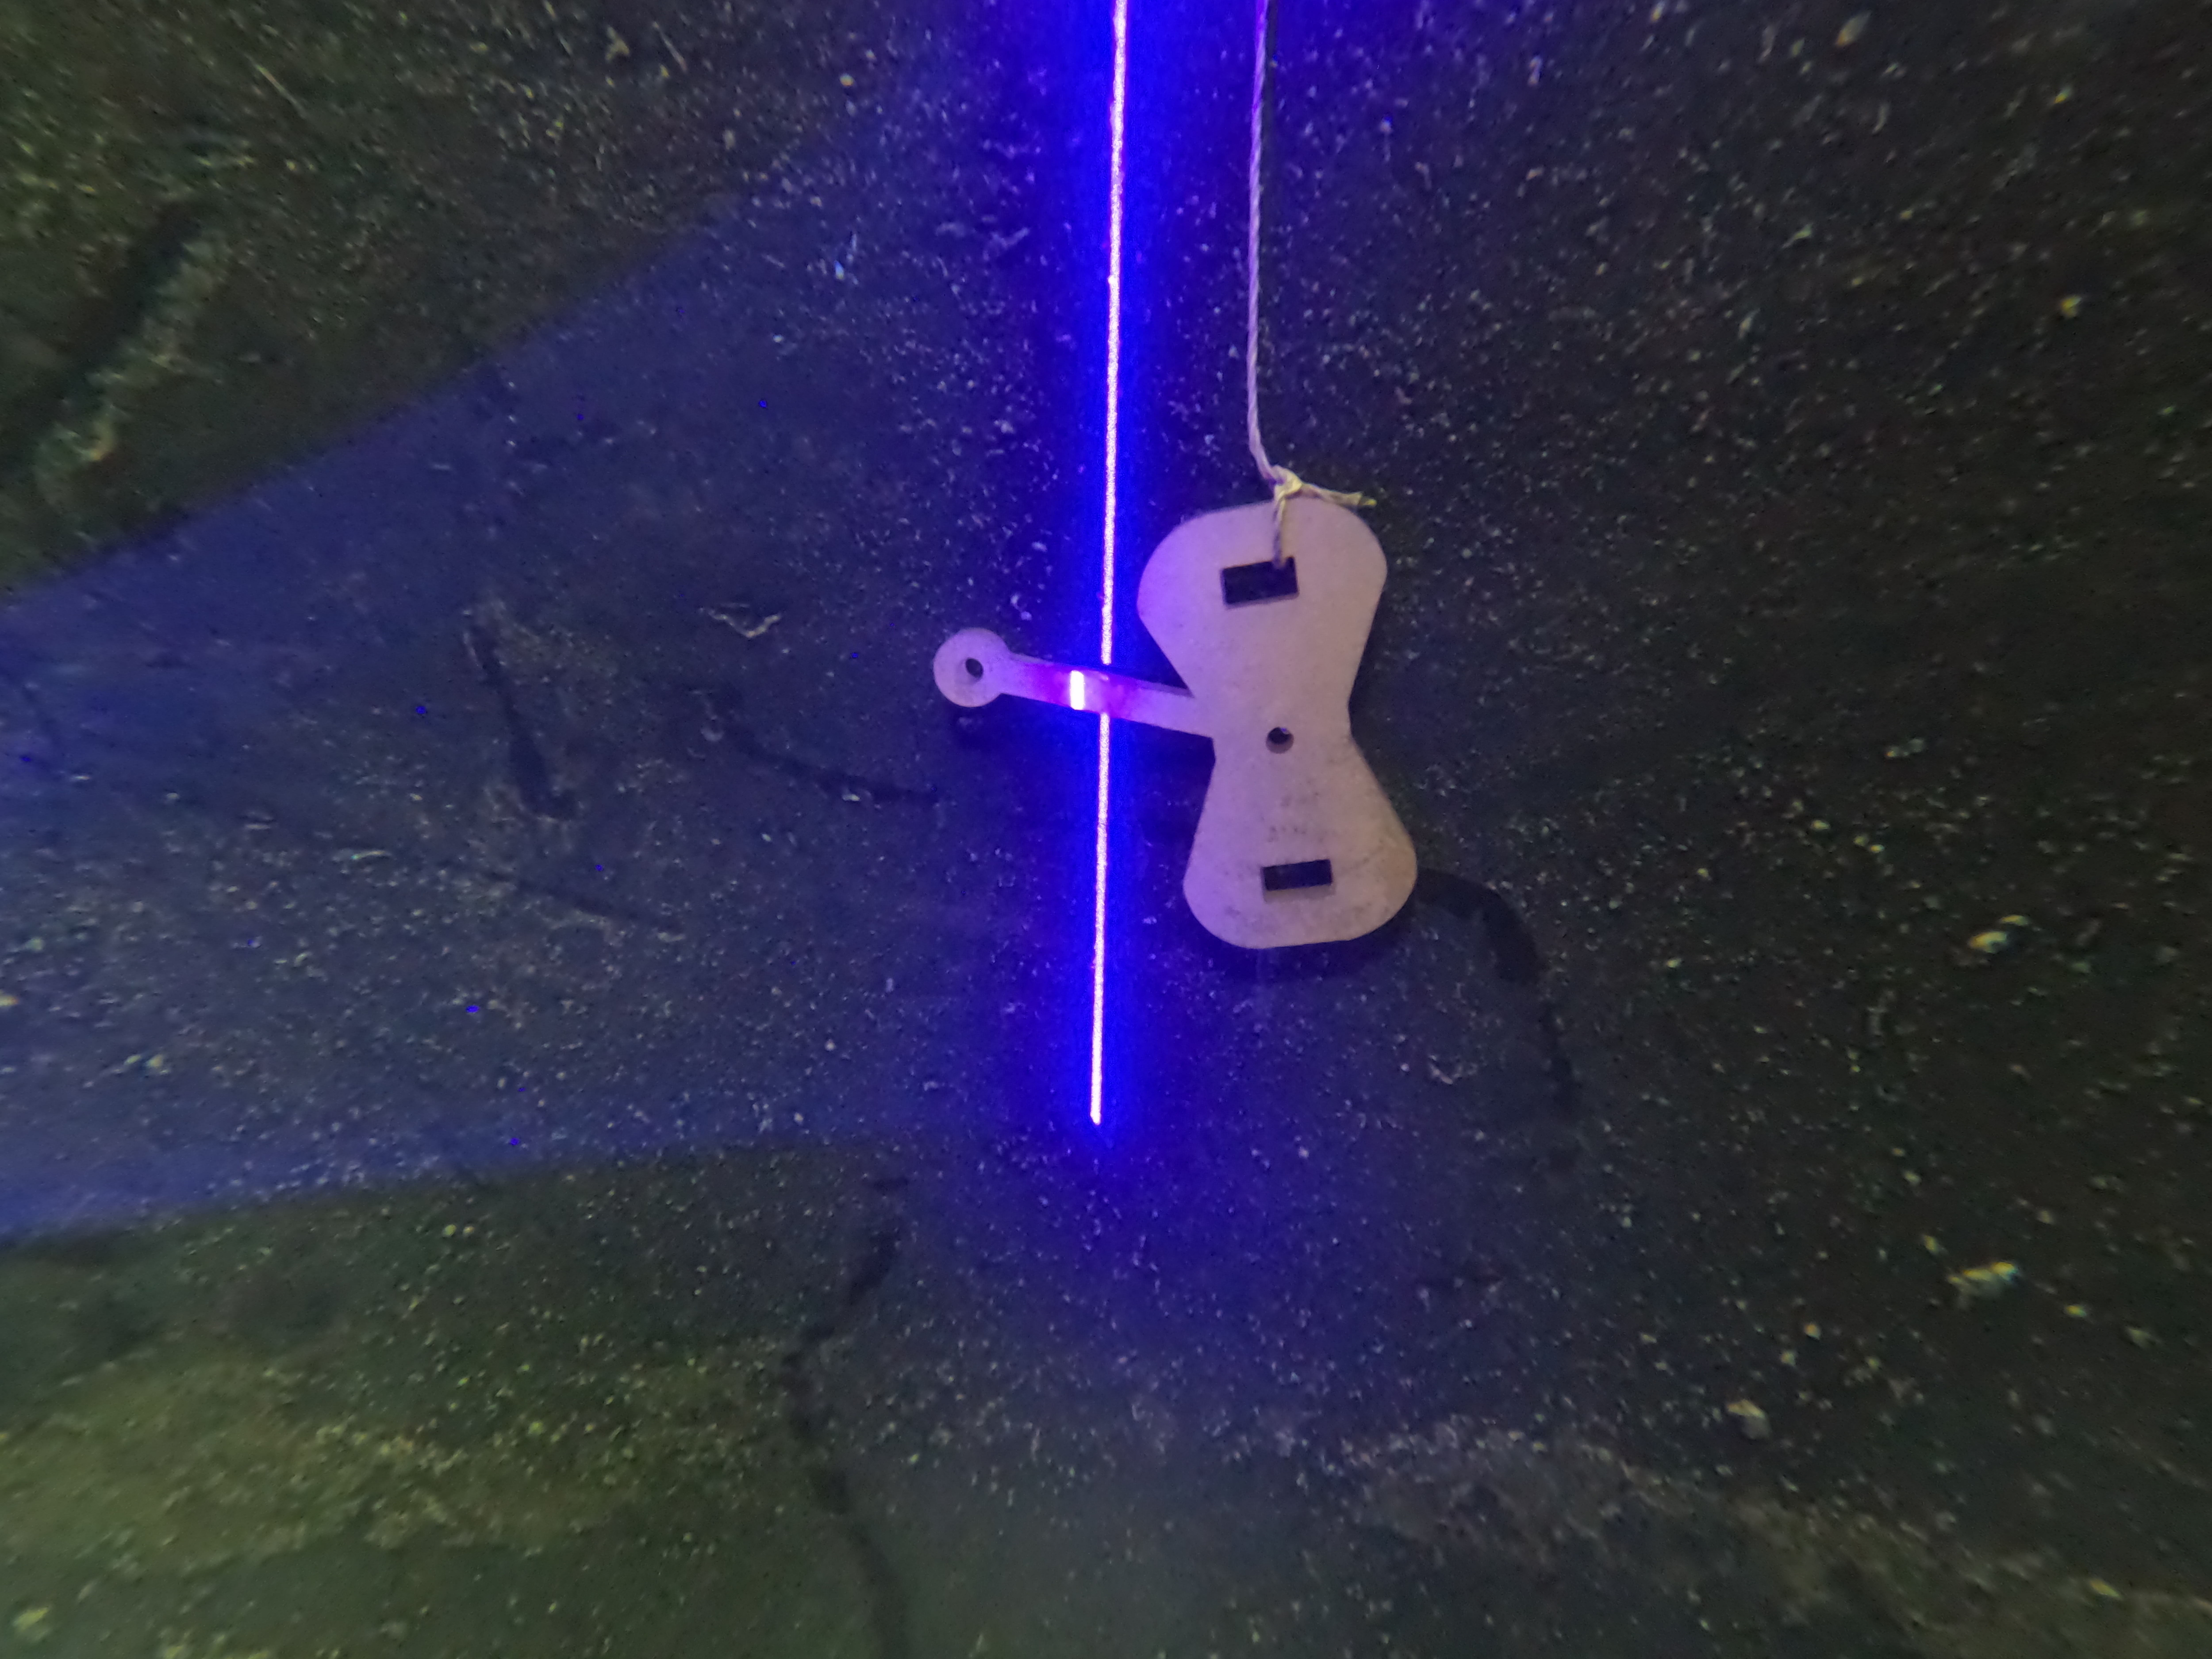

Supplement: Supplementary file 3253 [file G0015694.pdf › Level_2_1/G0015694.pdf]

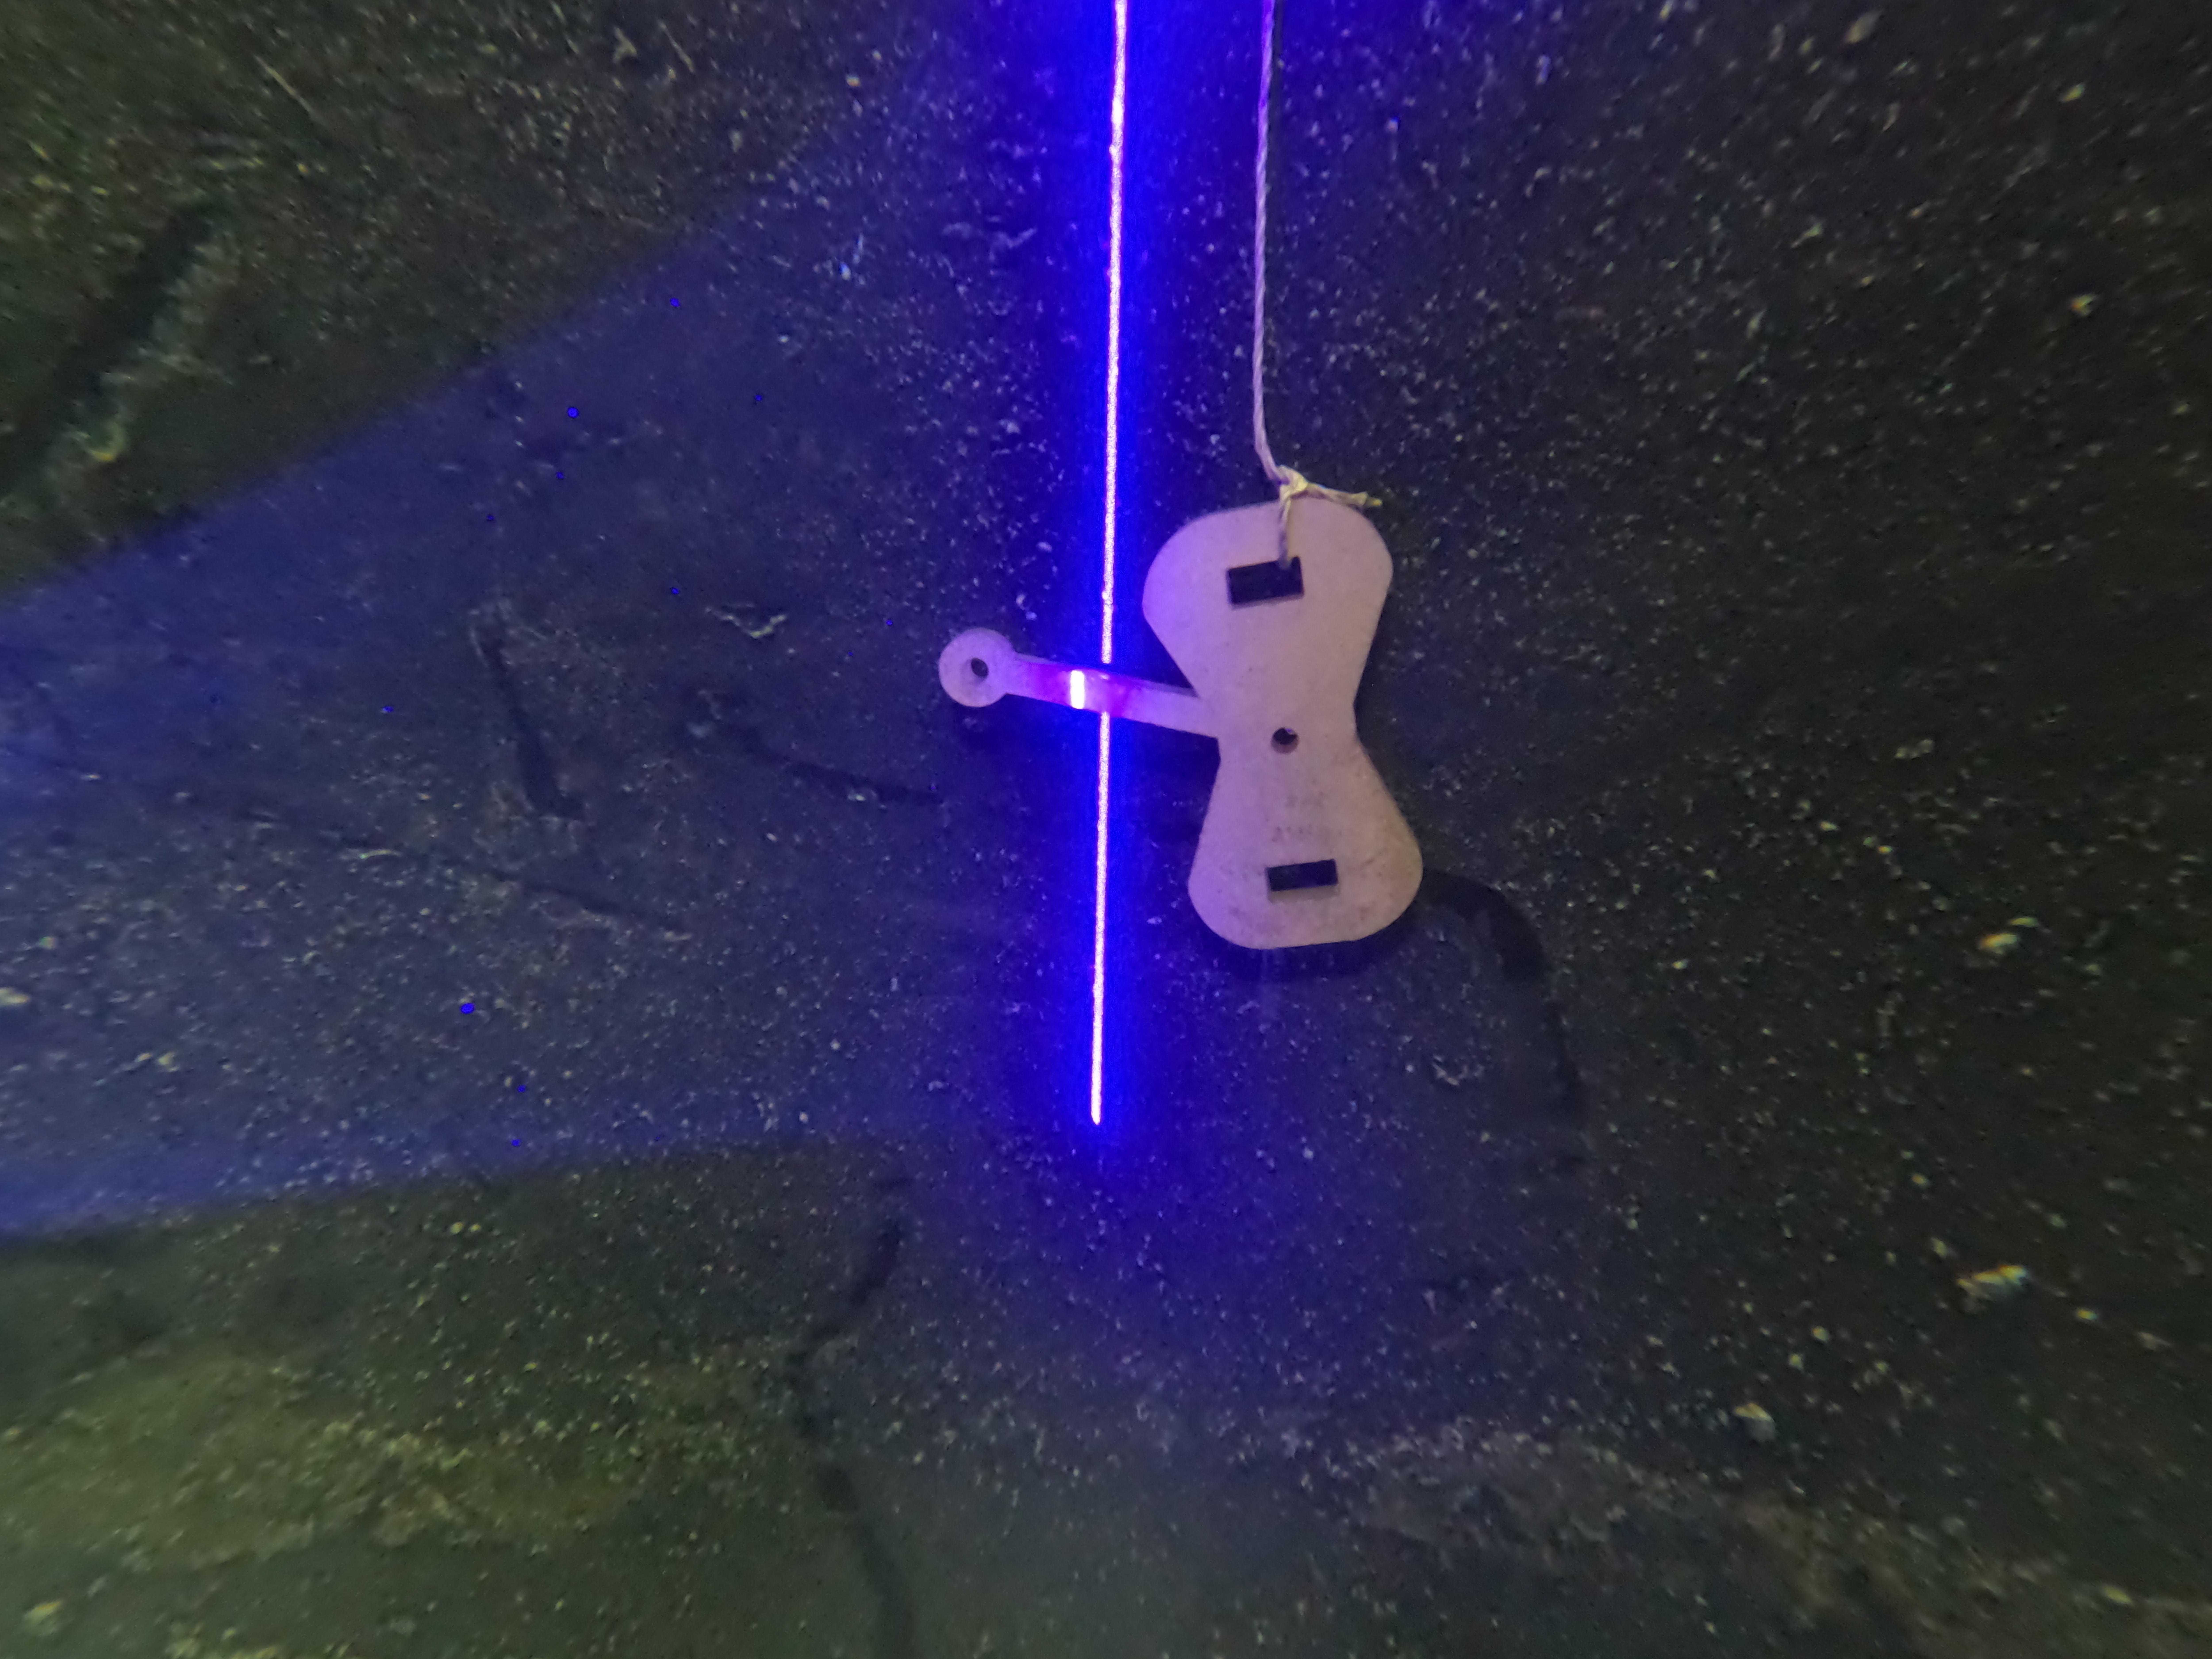

Supplement: Supplementary file 3254 [file G0015695.pdf › Level_2_1/G0015695.pdf]

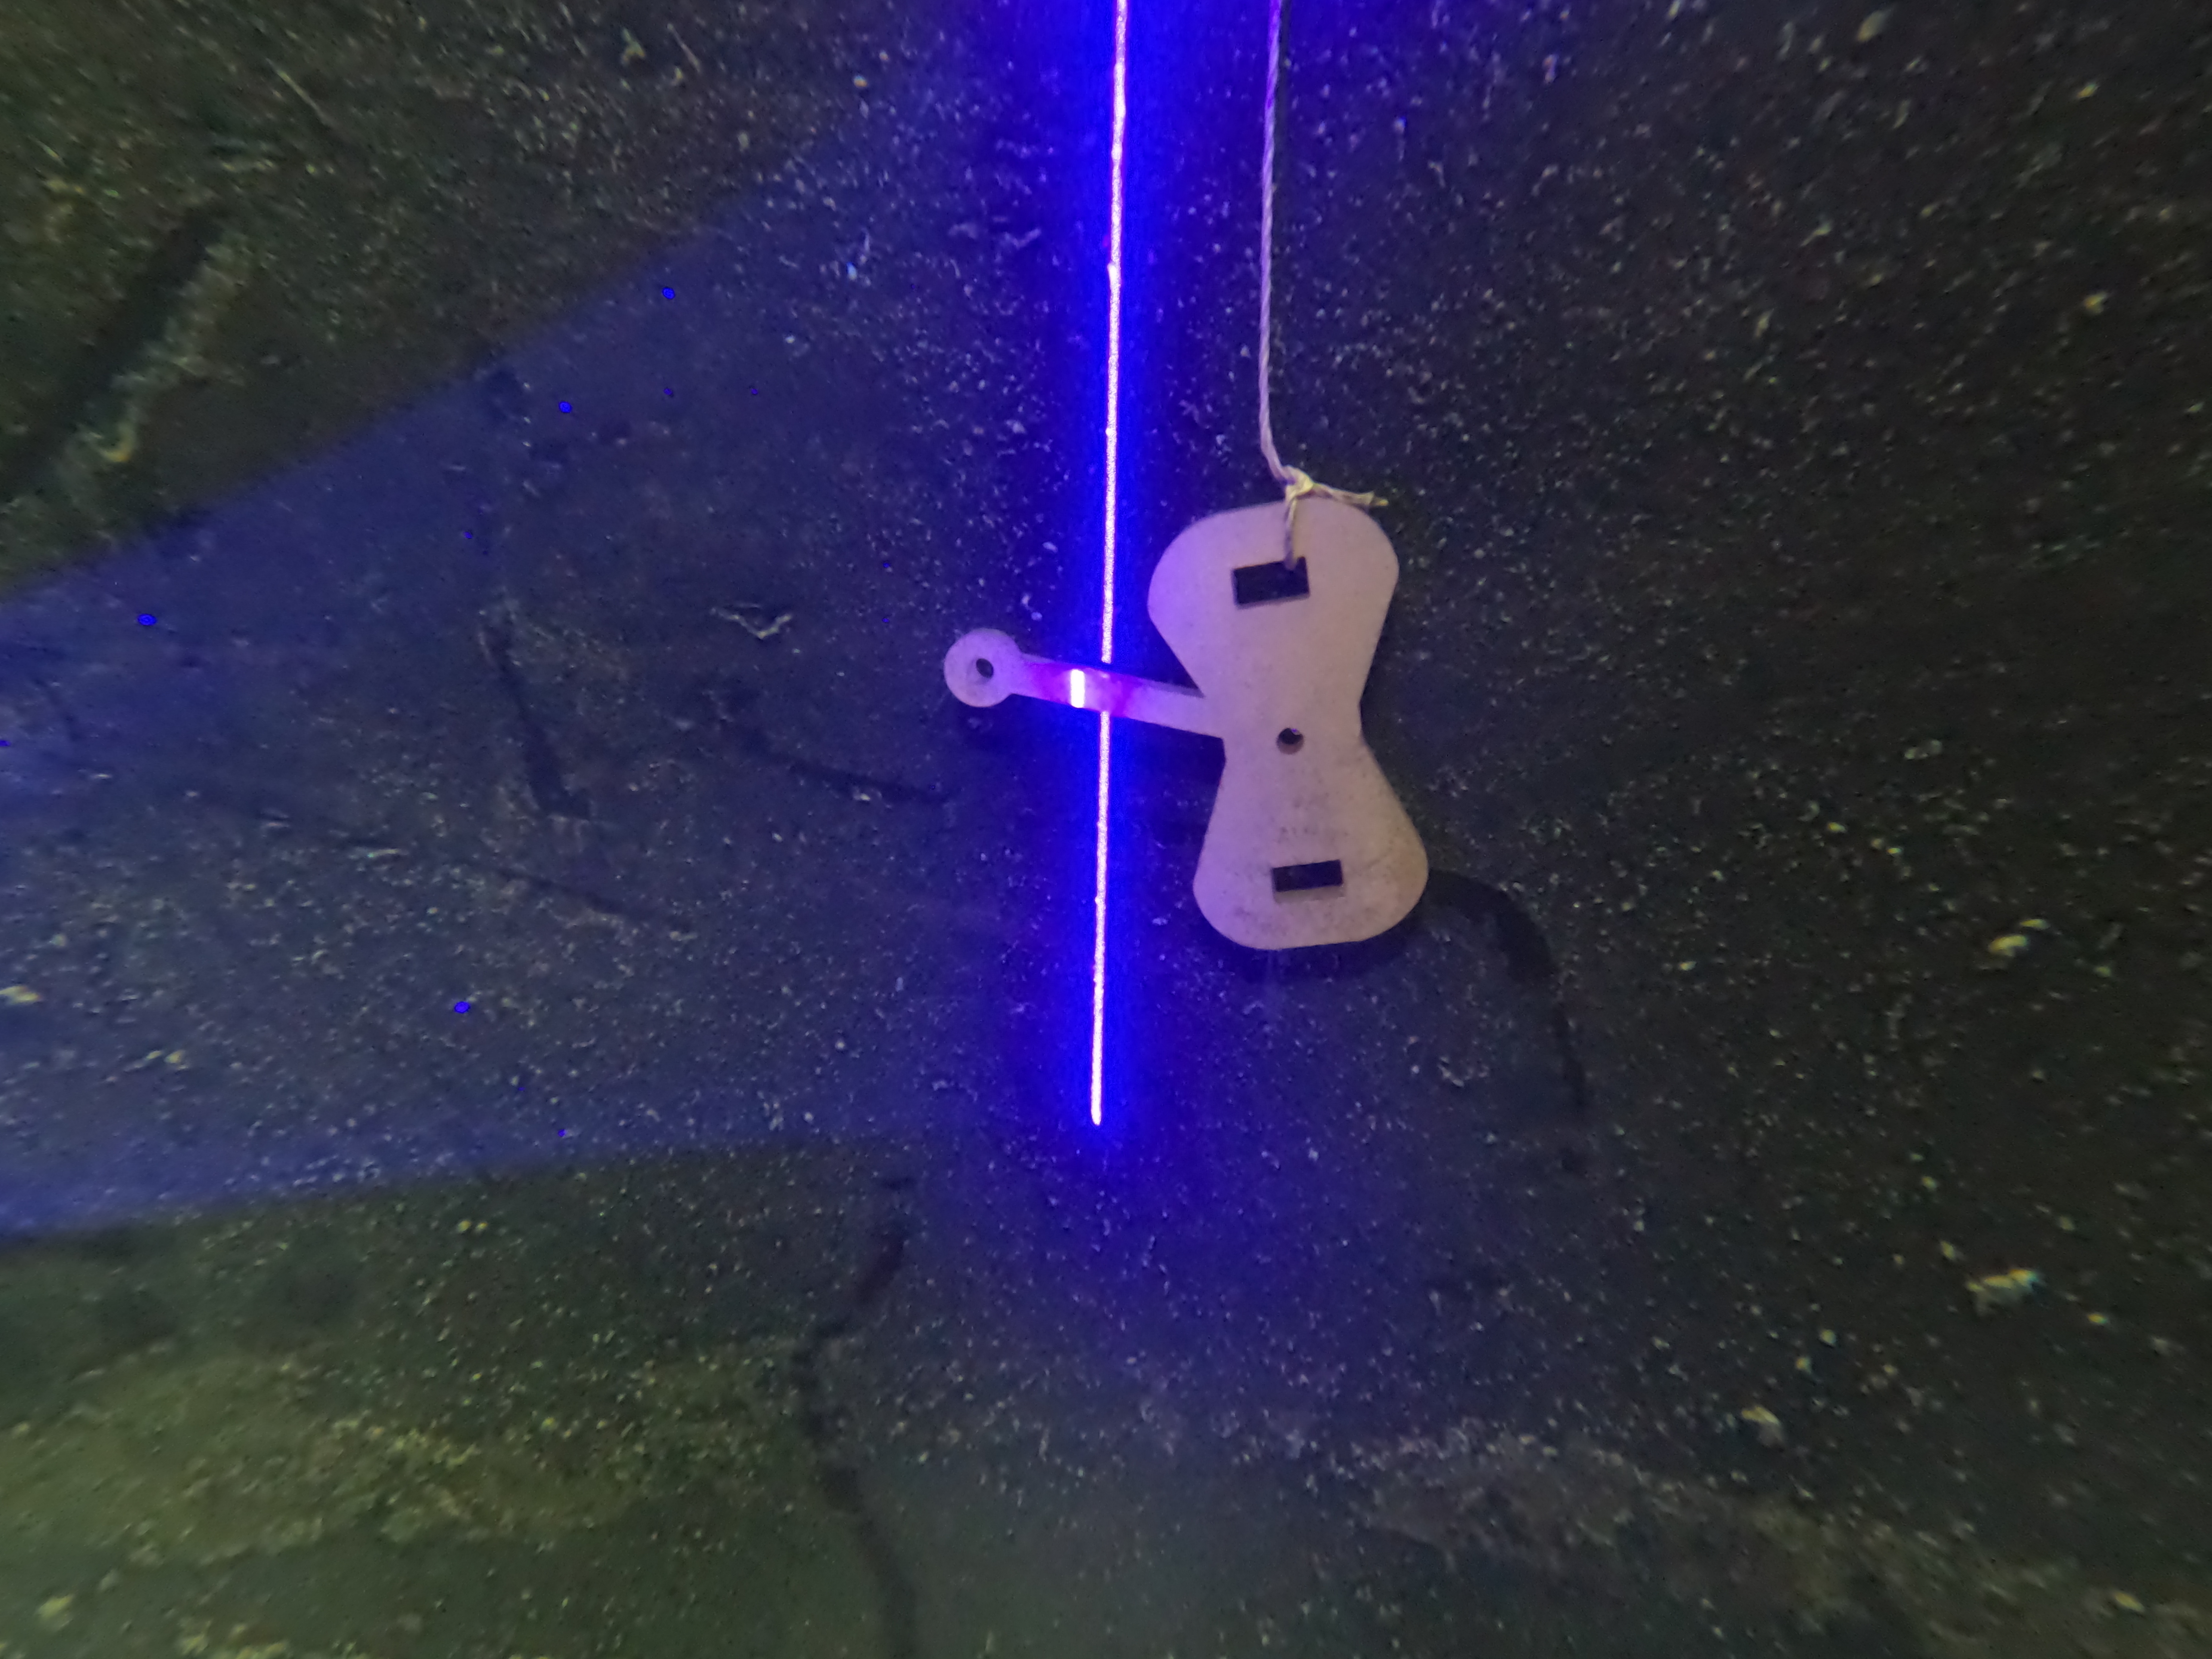

Supplement: Supplementary file 3255 [file G0015696.pdf › Level_2_1/G0015696.pdf]

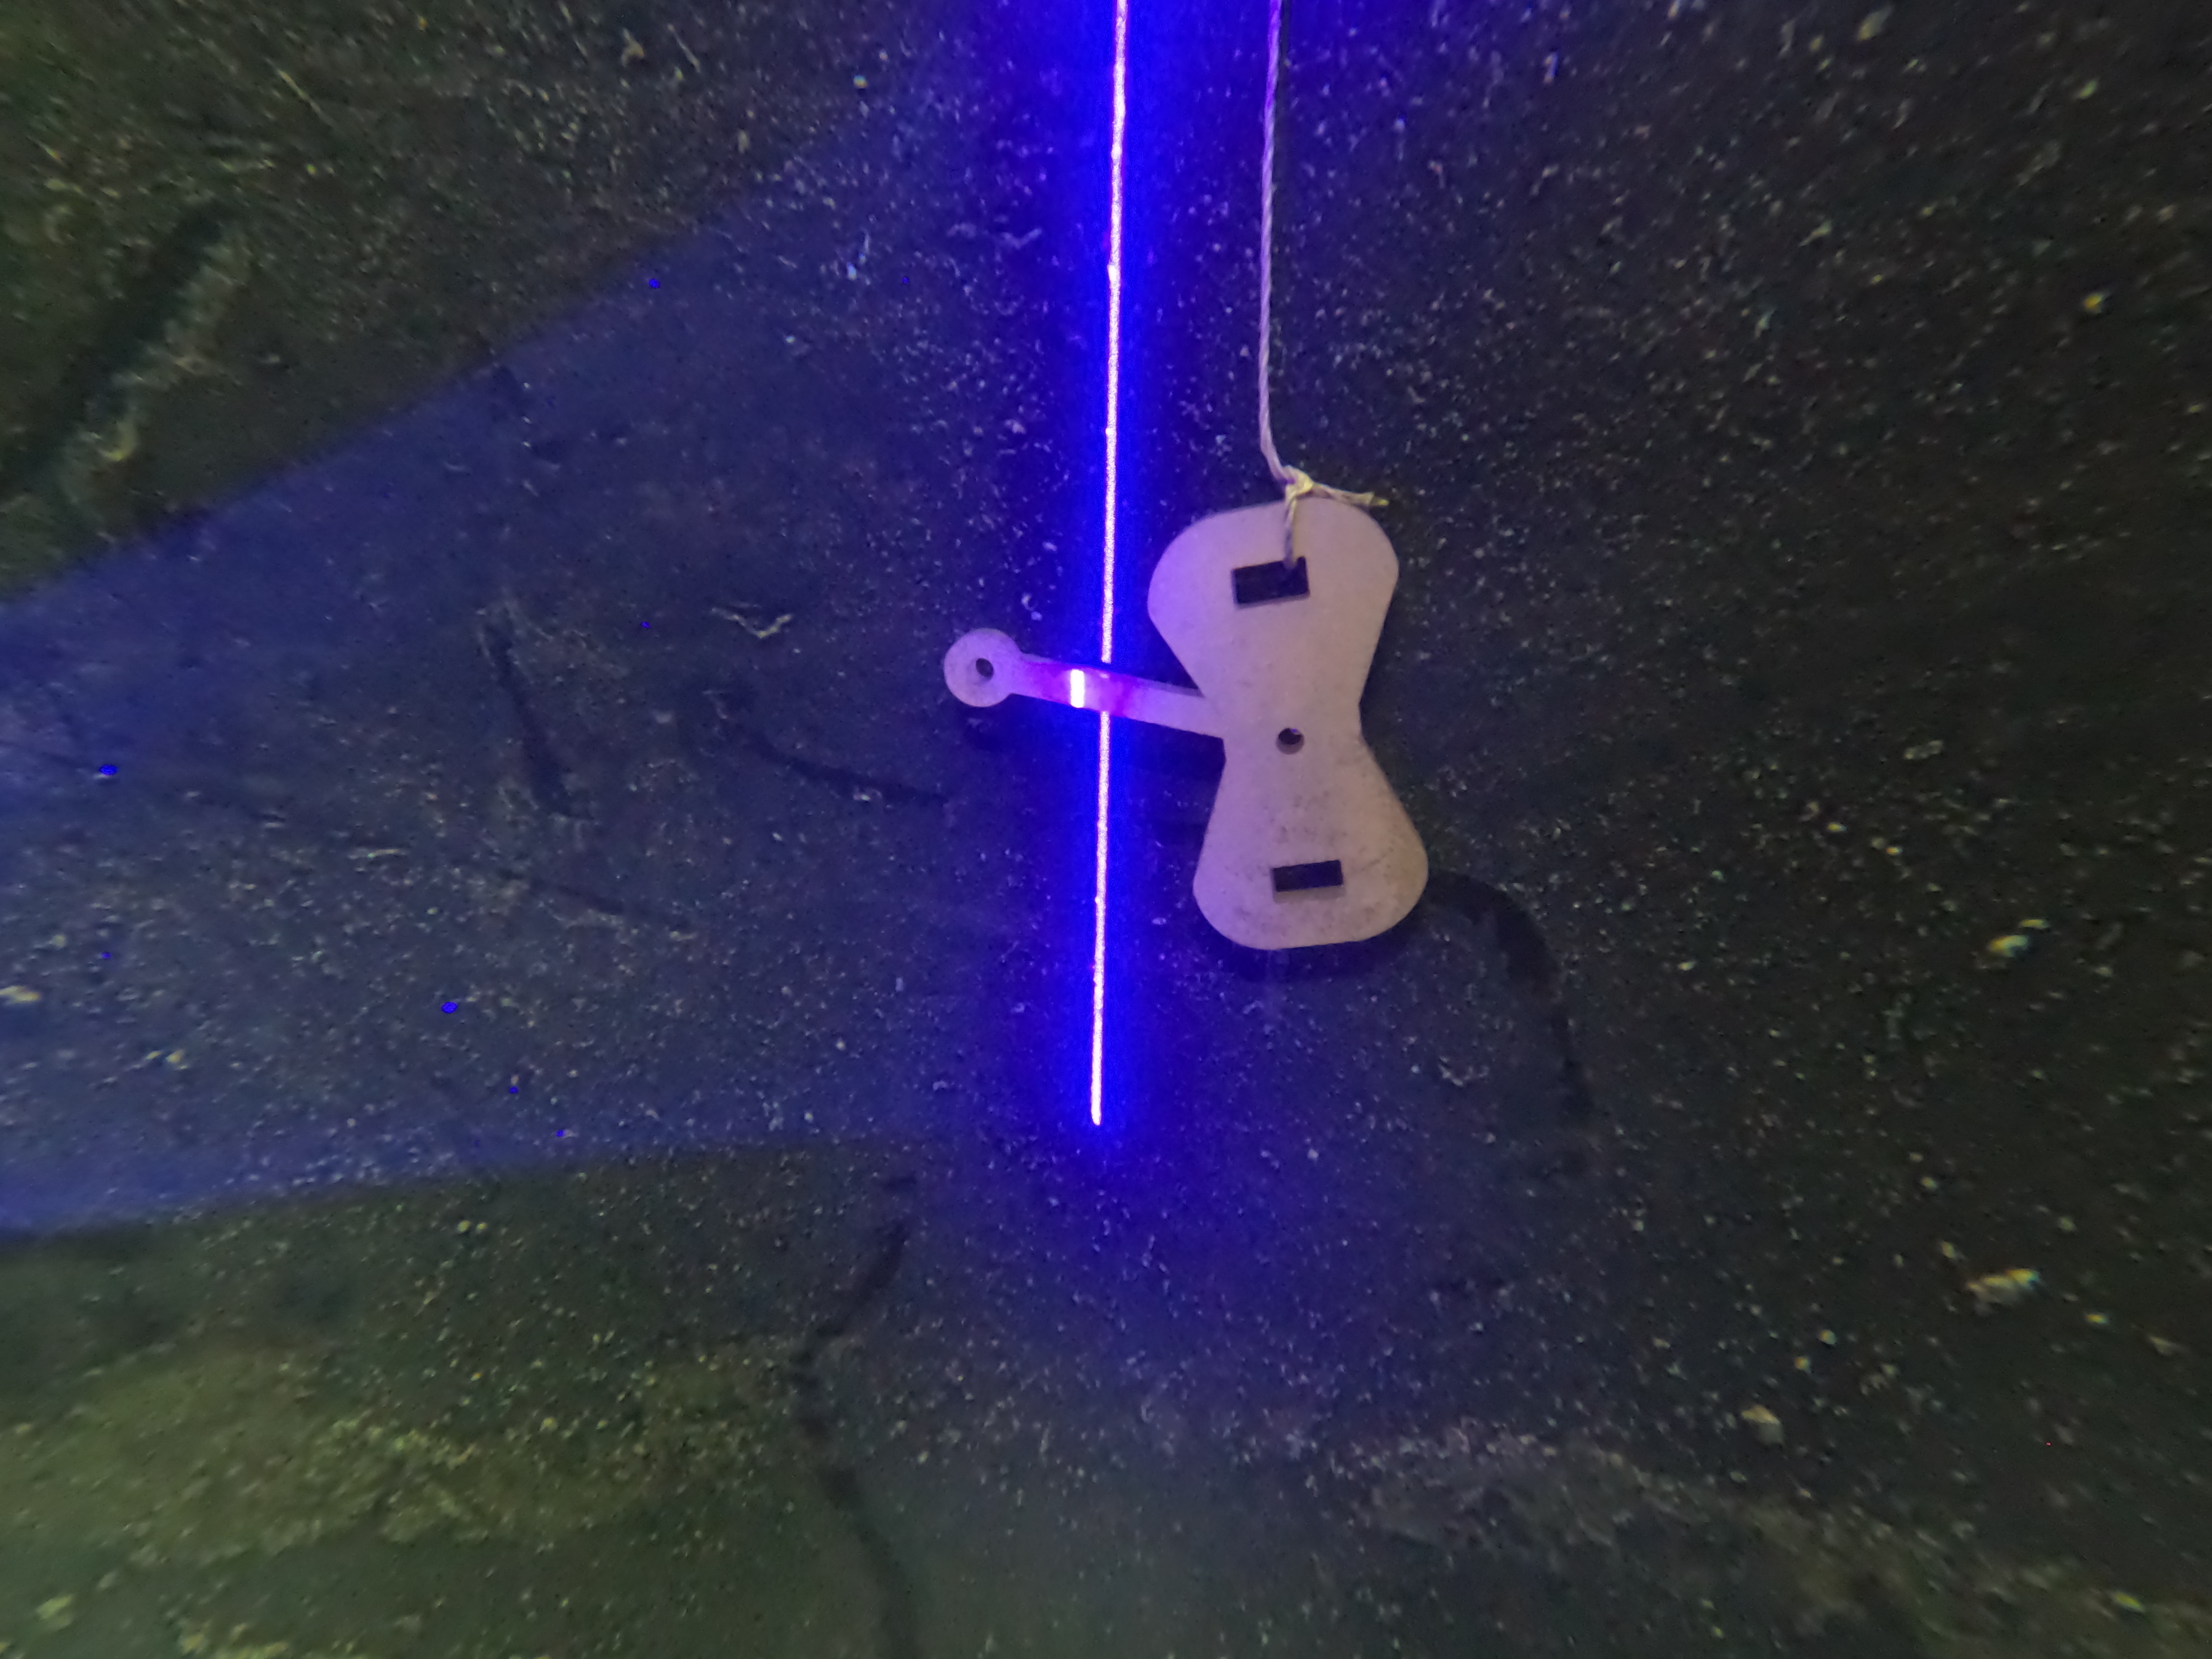

Supplement: Supplementary file 3256 [file G0015697.pdf › Level_2_1/G0015697.pdf]

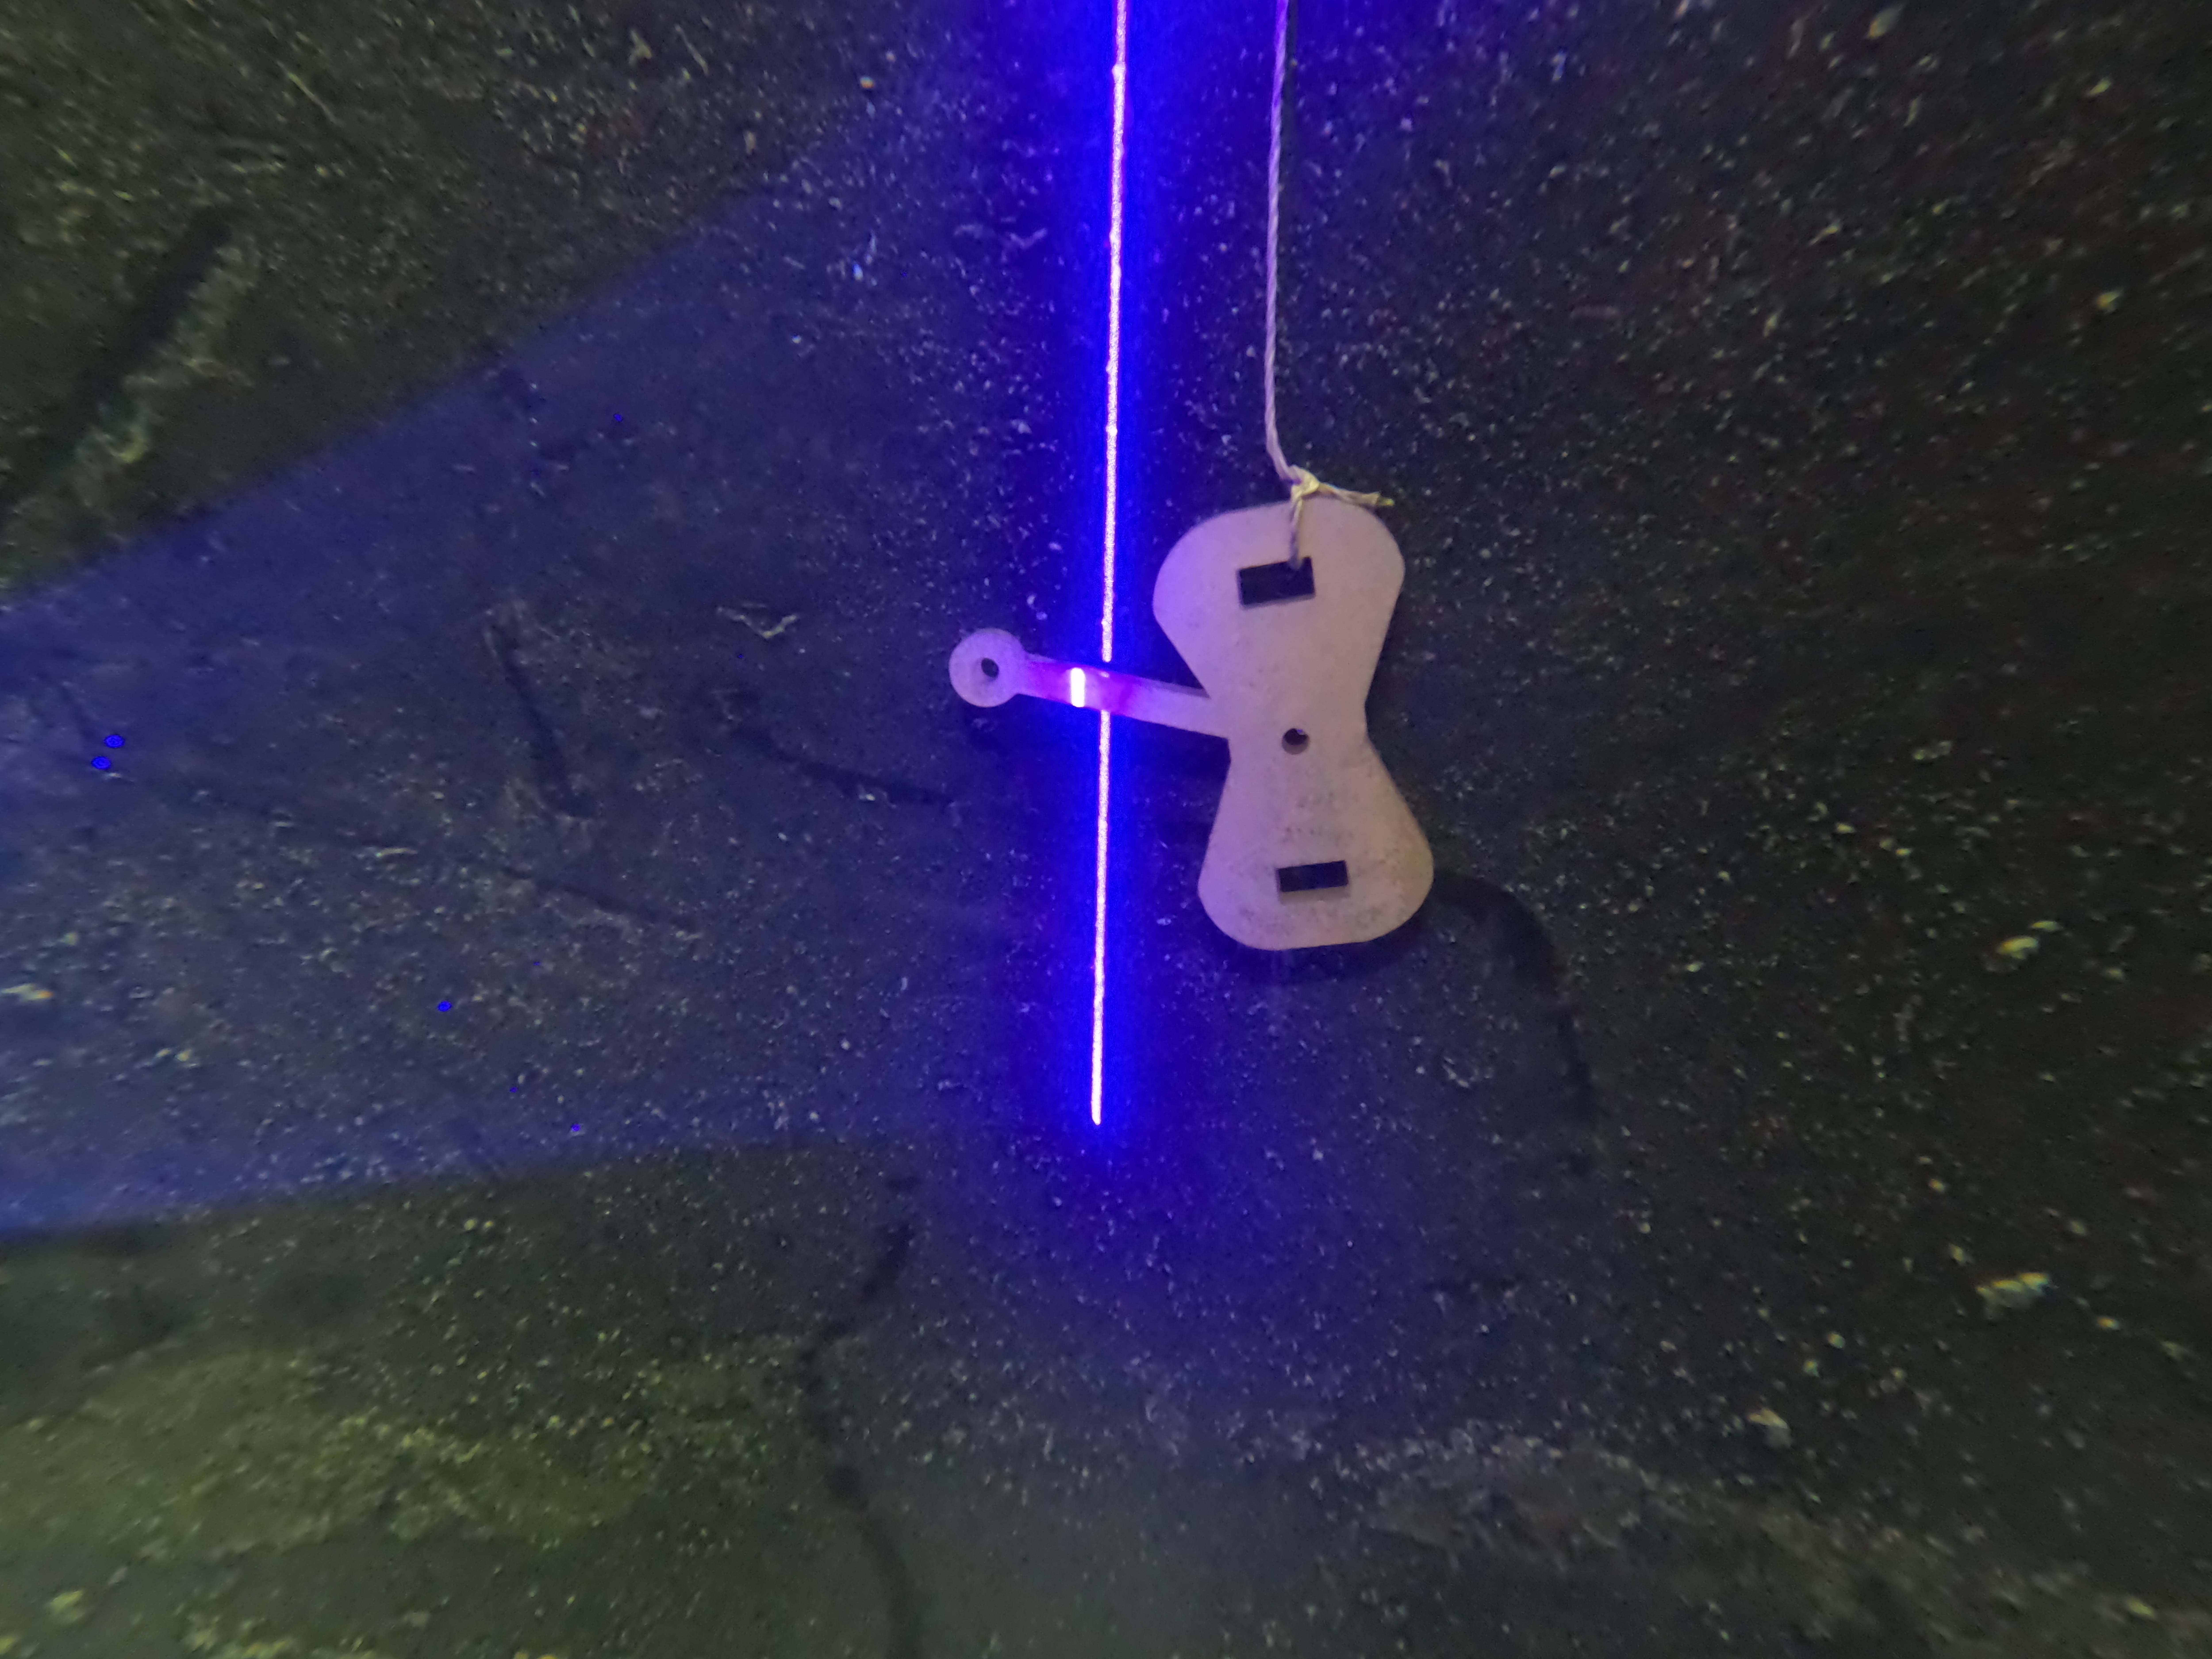

Supplement: Supplementary file 3257 [file G0015698.pdf › Level_2_1/G0015698.pdf]

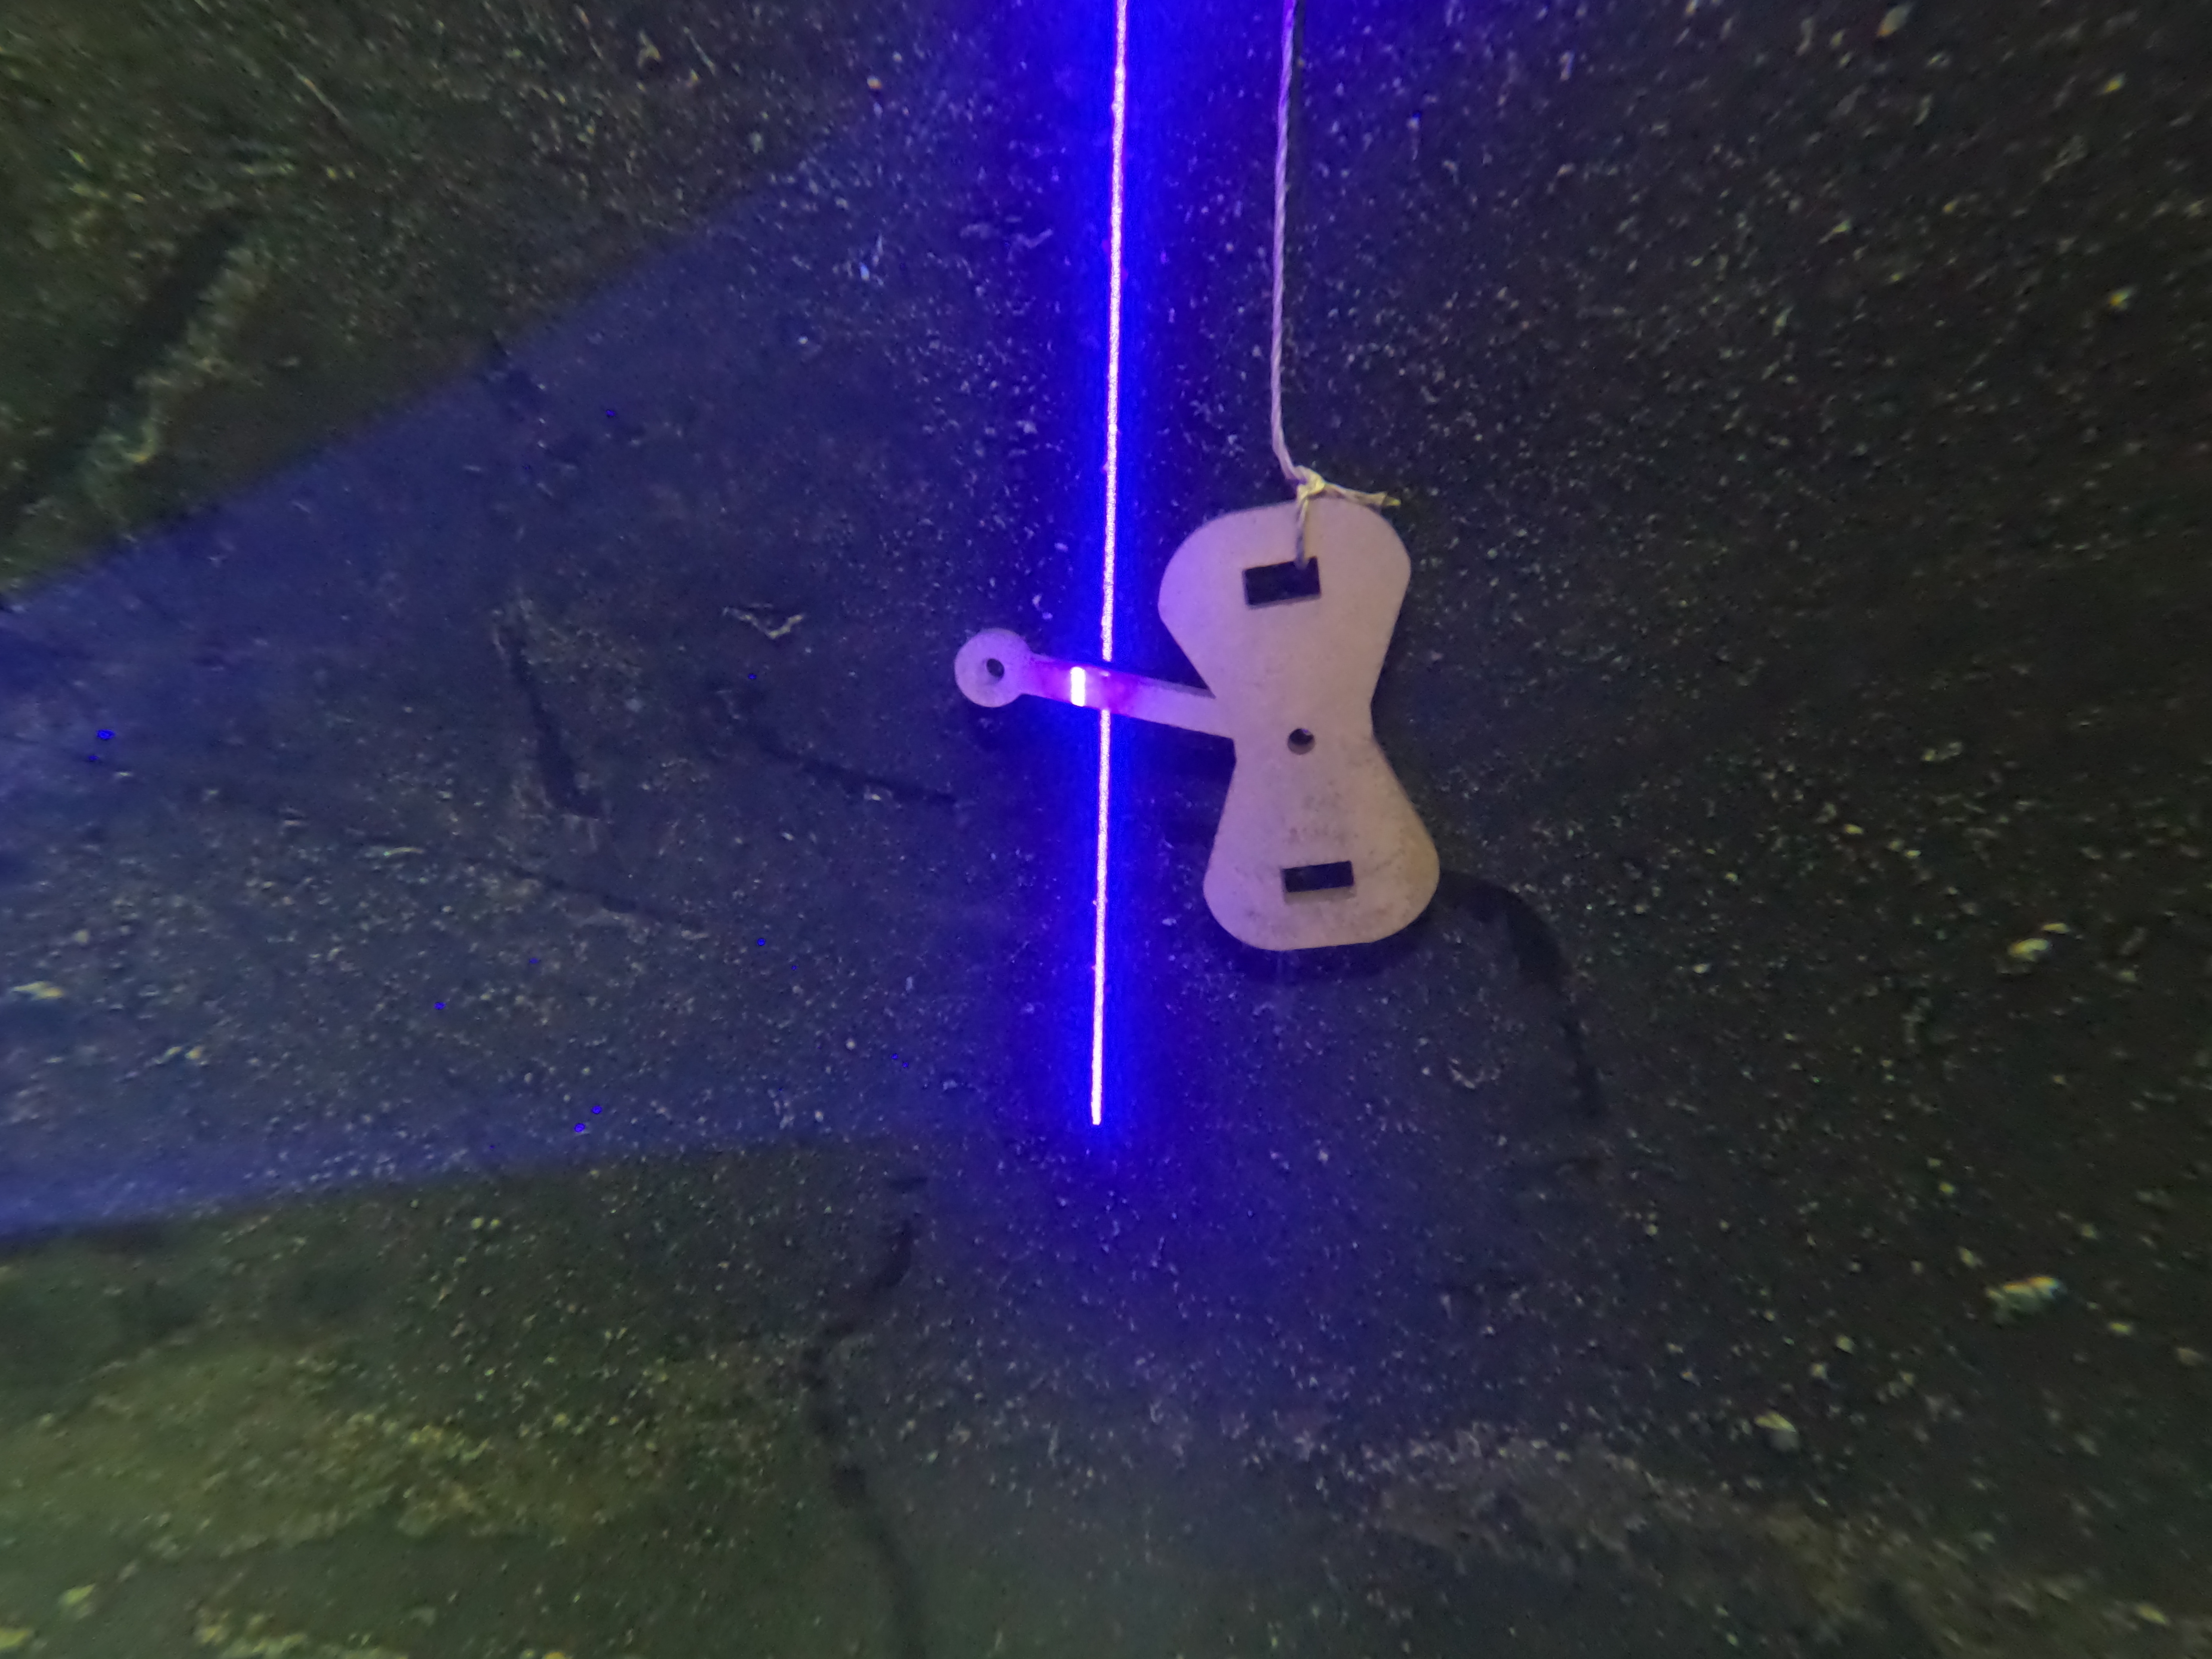

Supplement: Supplementary file 3258 [file G0015699.pdf › Level_2_1/G0015699.pdf]

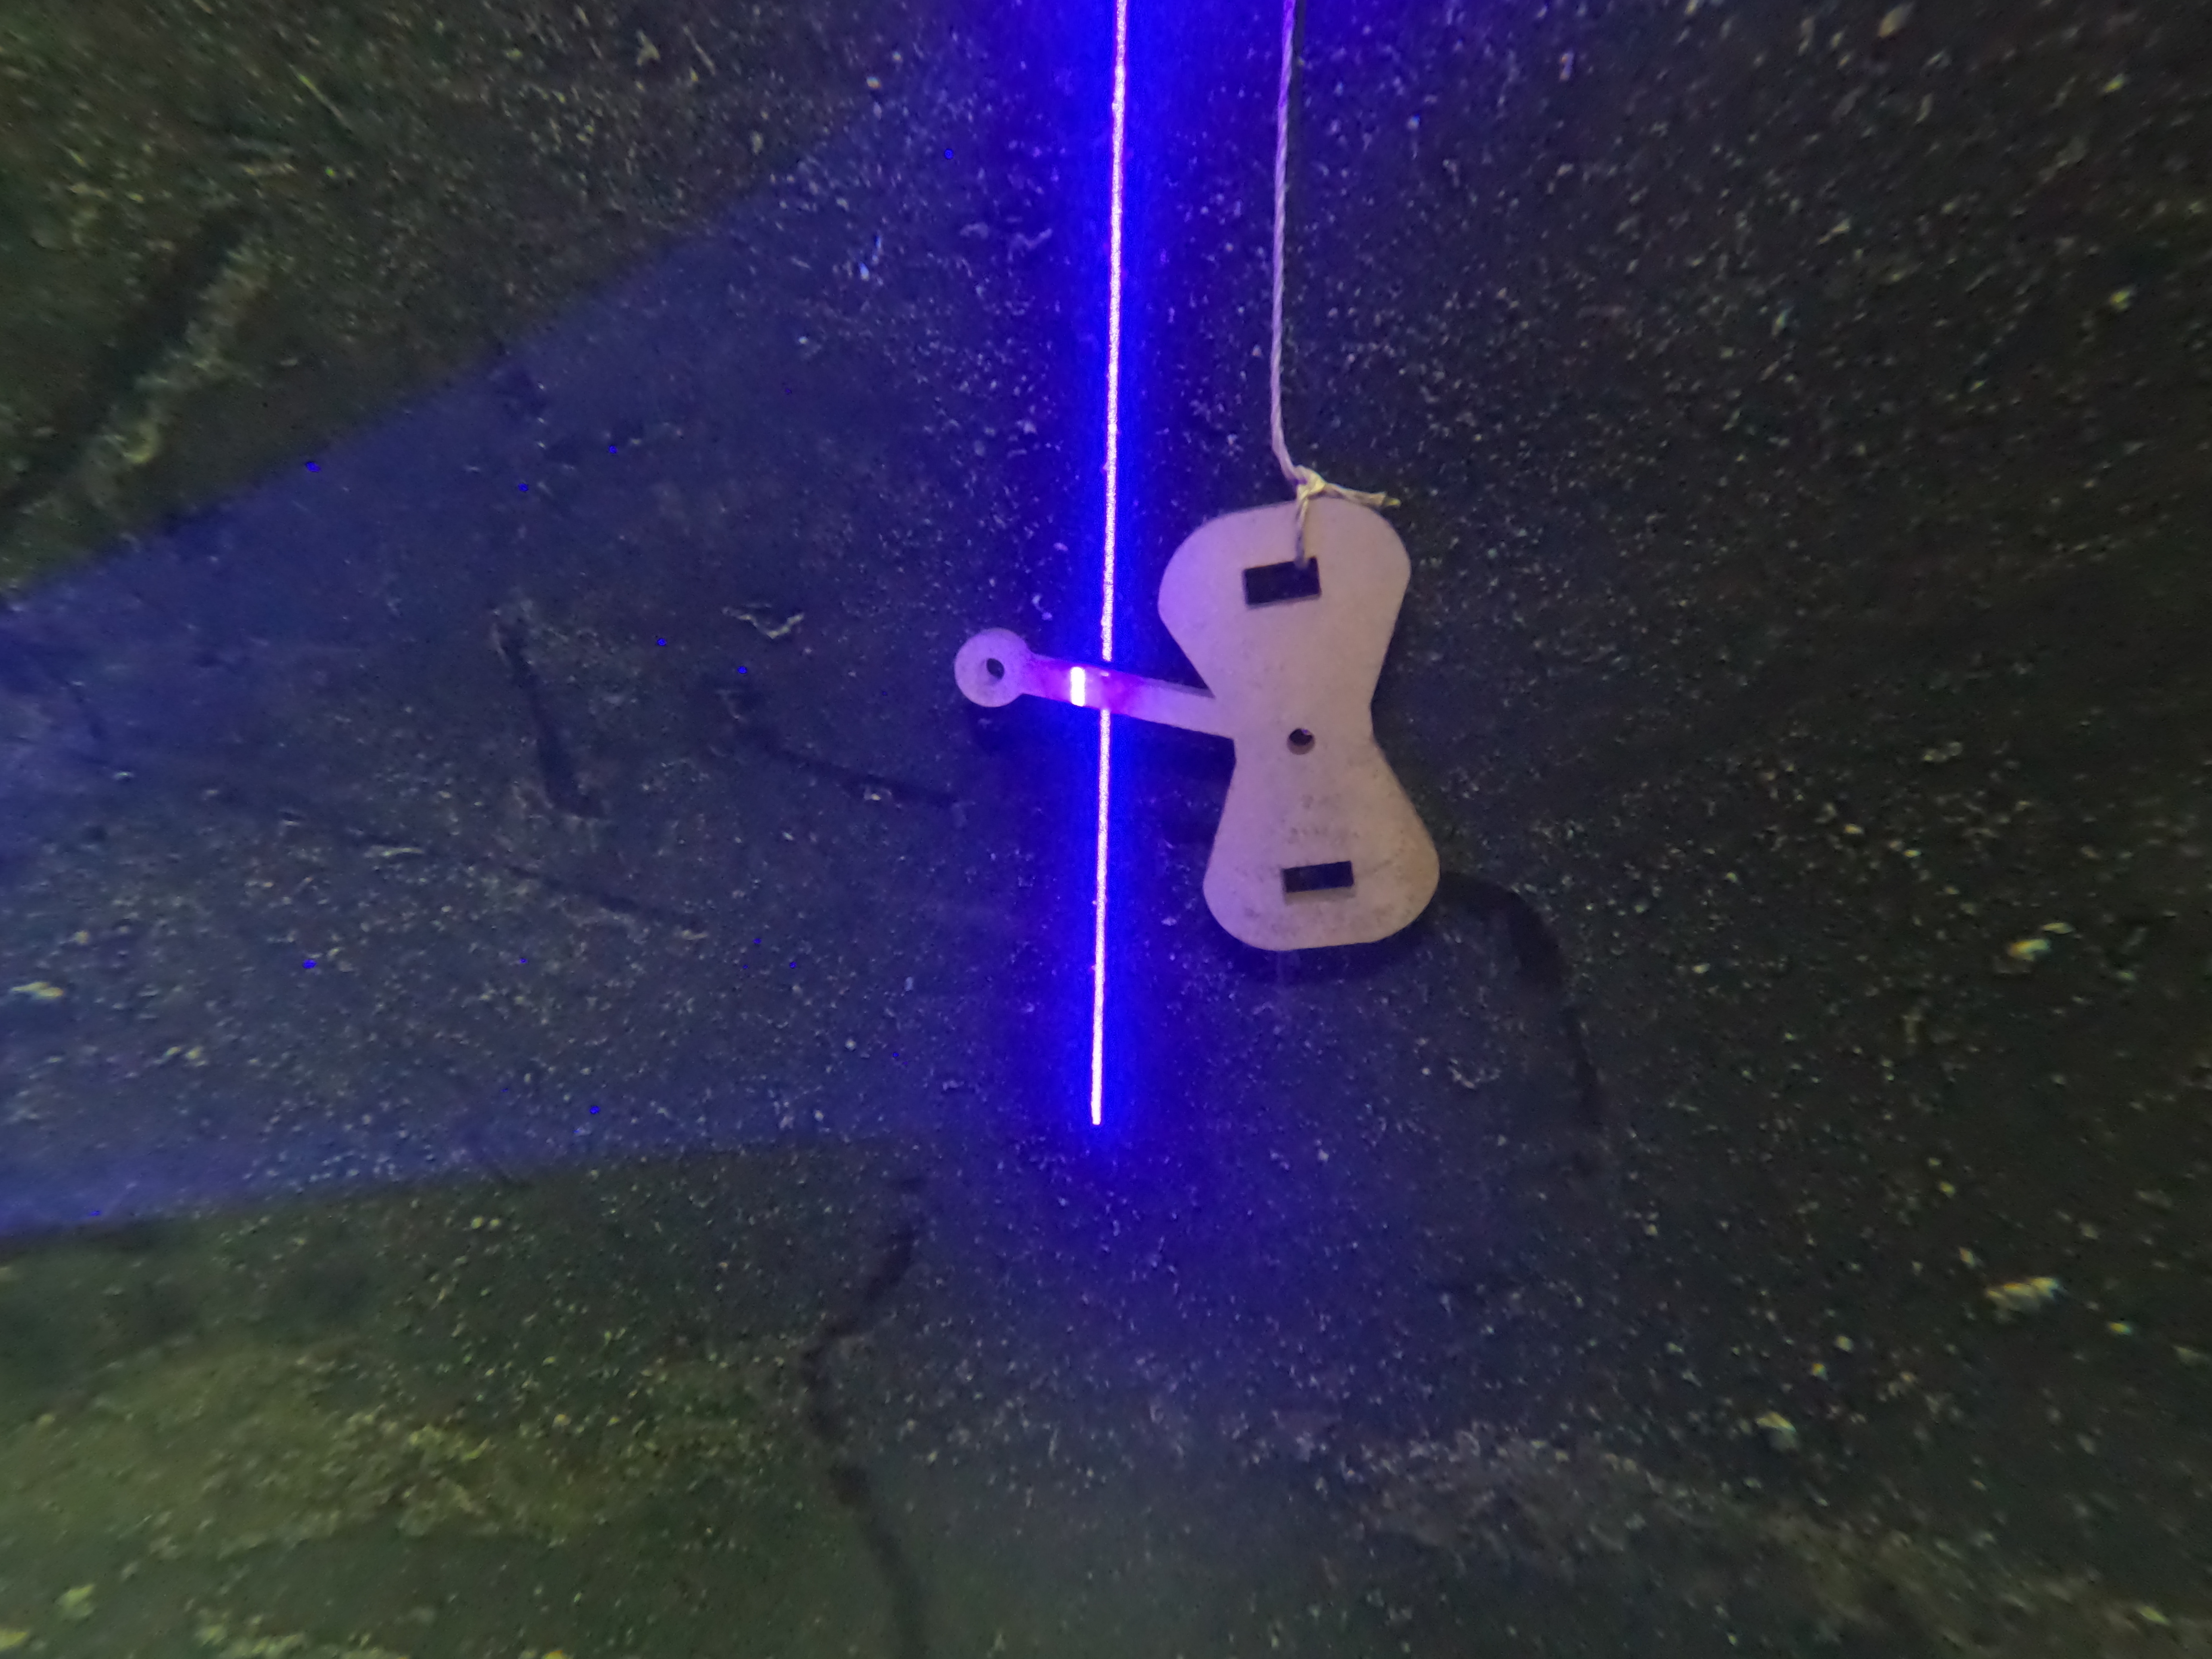

Supplement: Supplementary file 3259 [file G0015700.pdf › Level_2_1/G0015700.pdf]

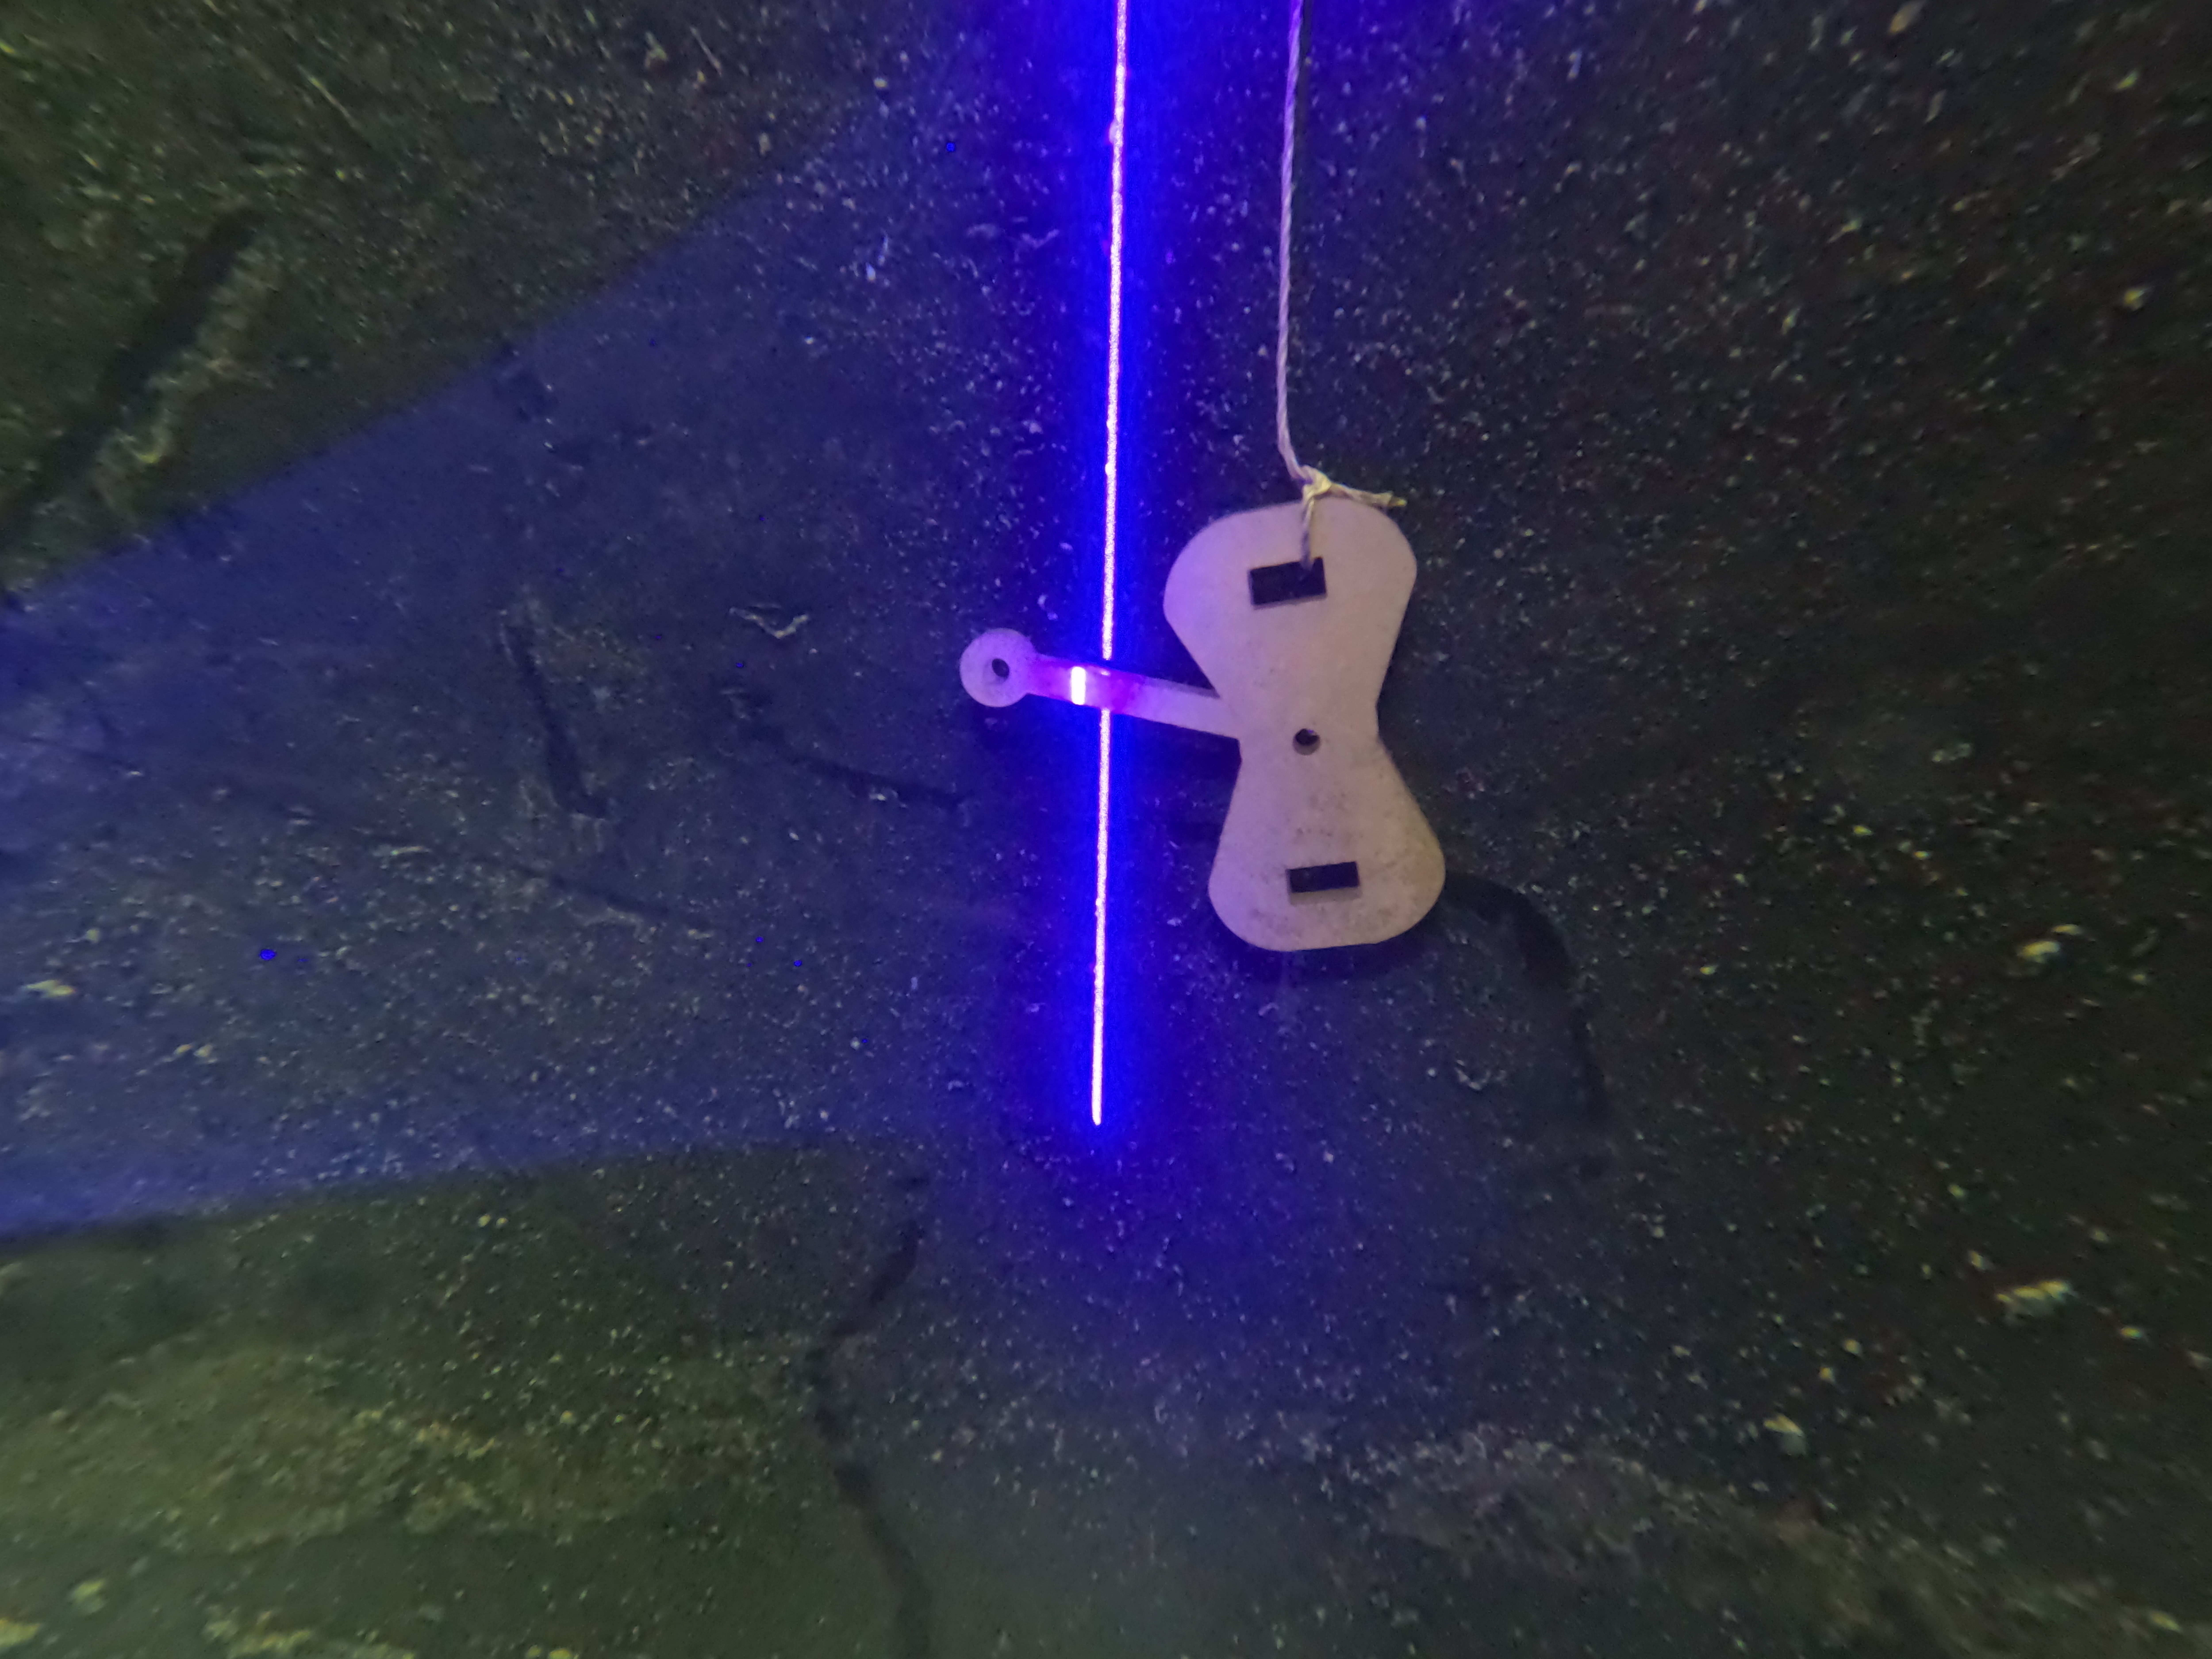

Supplement: Supplementary file 3260 [file G0015701.pdf › Level_2_1/G0015701.pdf]

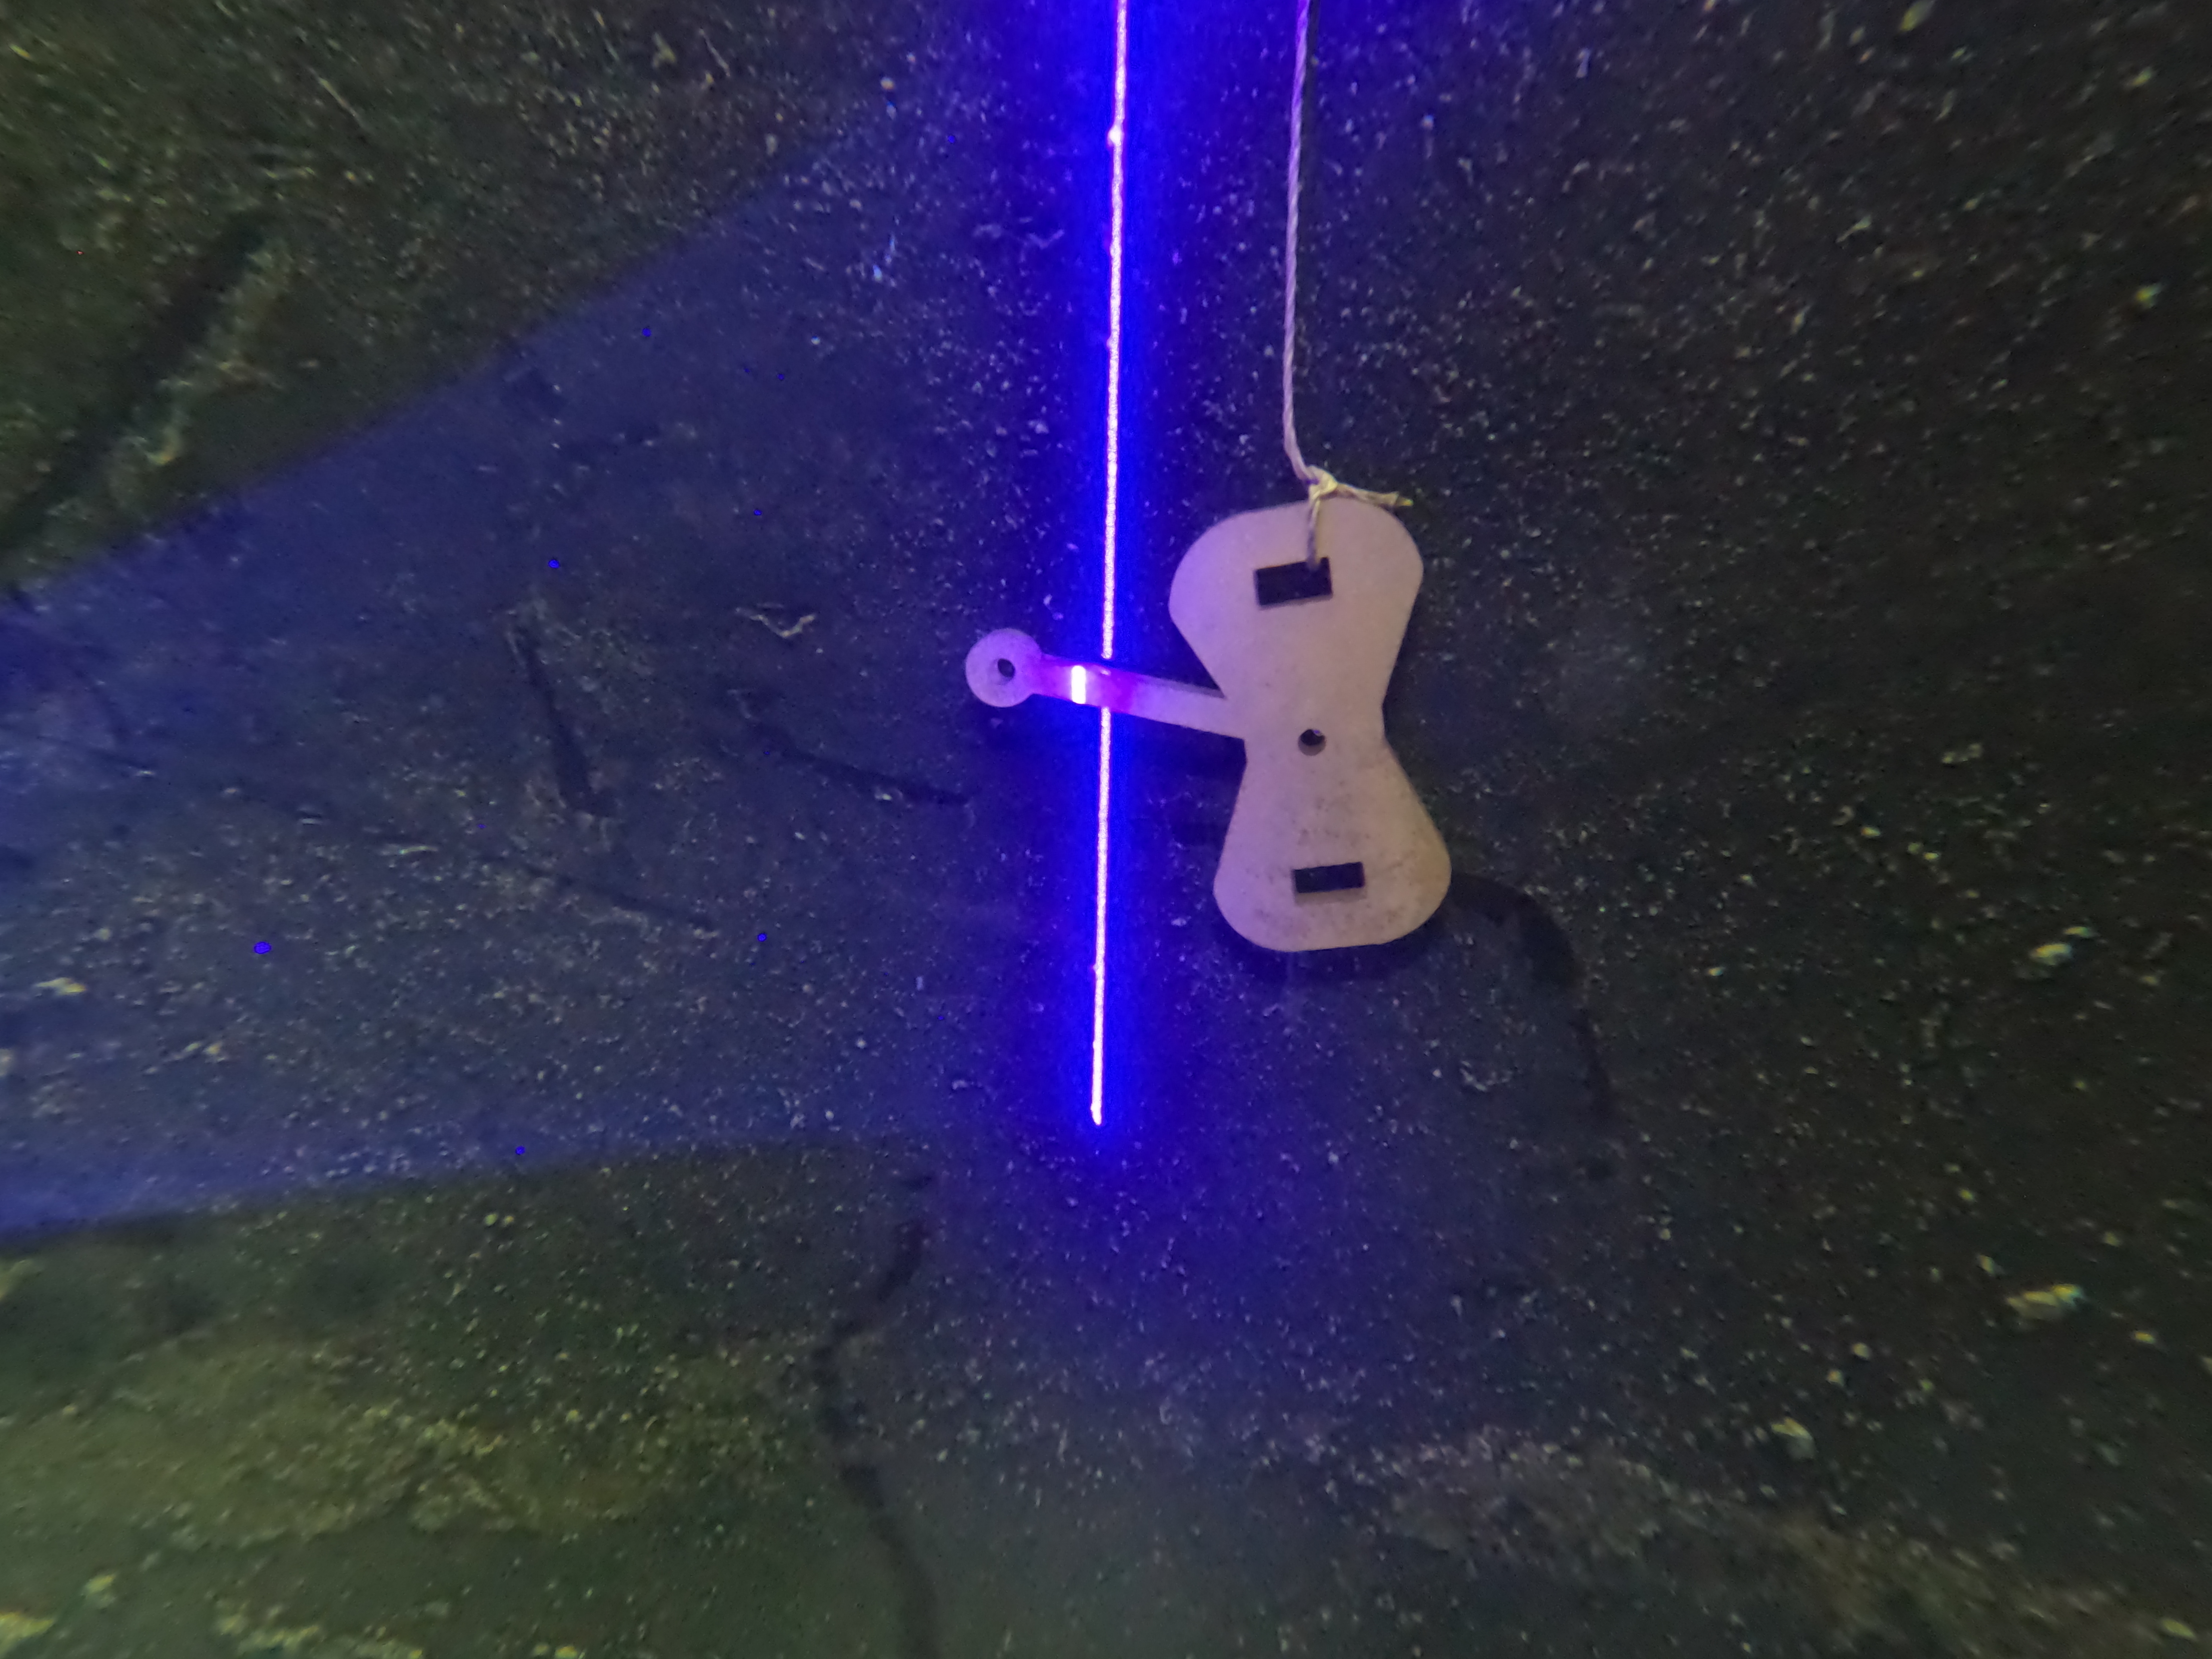

Supplement: Supplementary file 3261 [file G0015702.pdf › Level_2_1/G0015702.pdf]

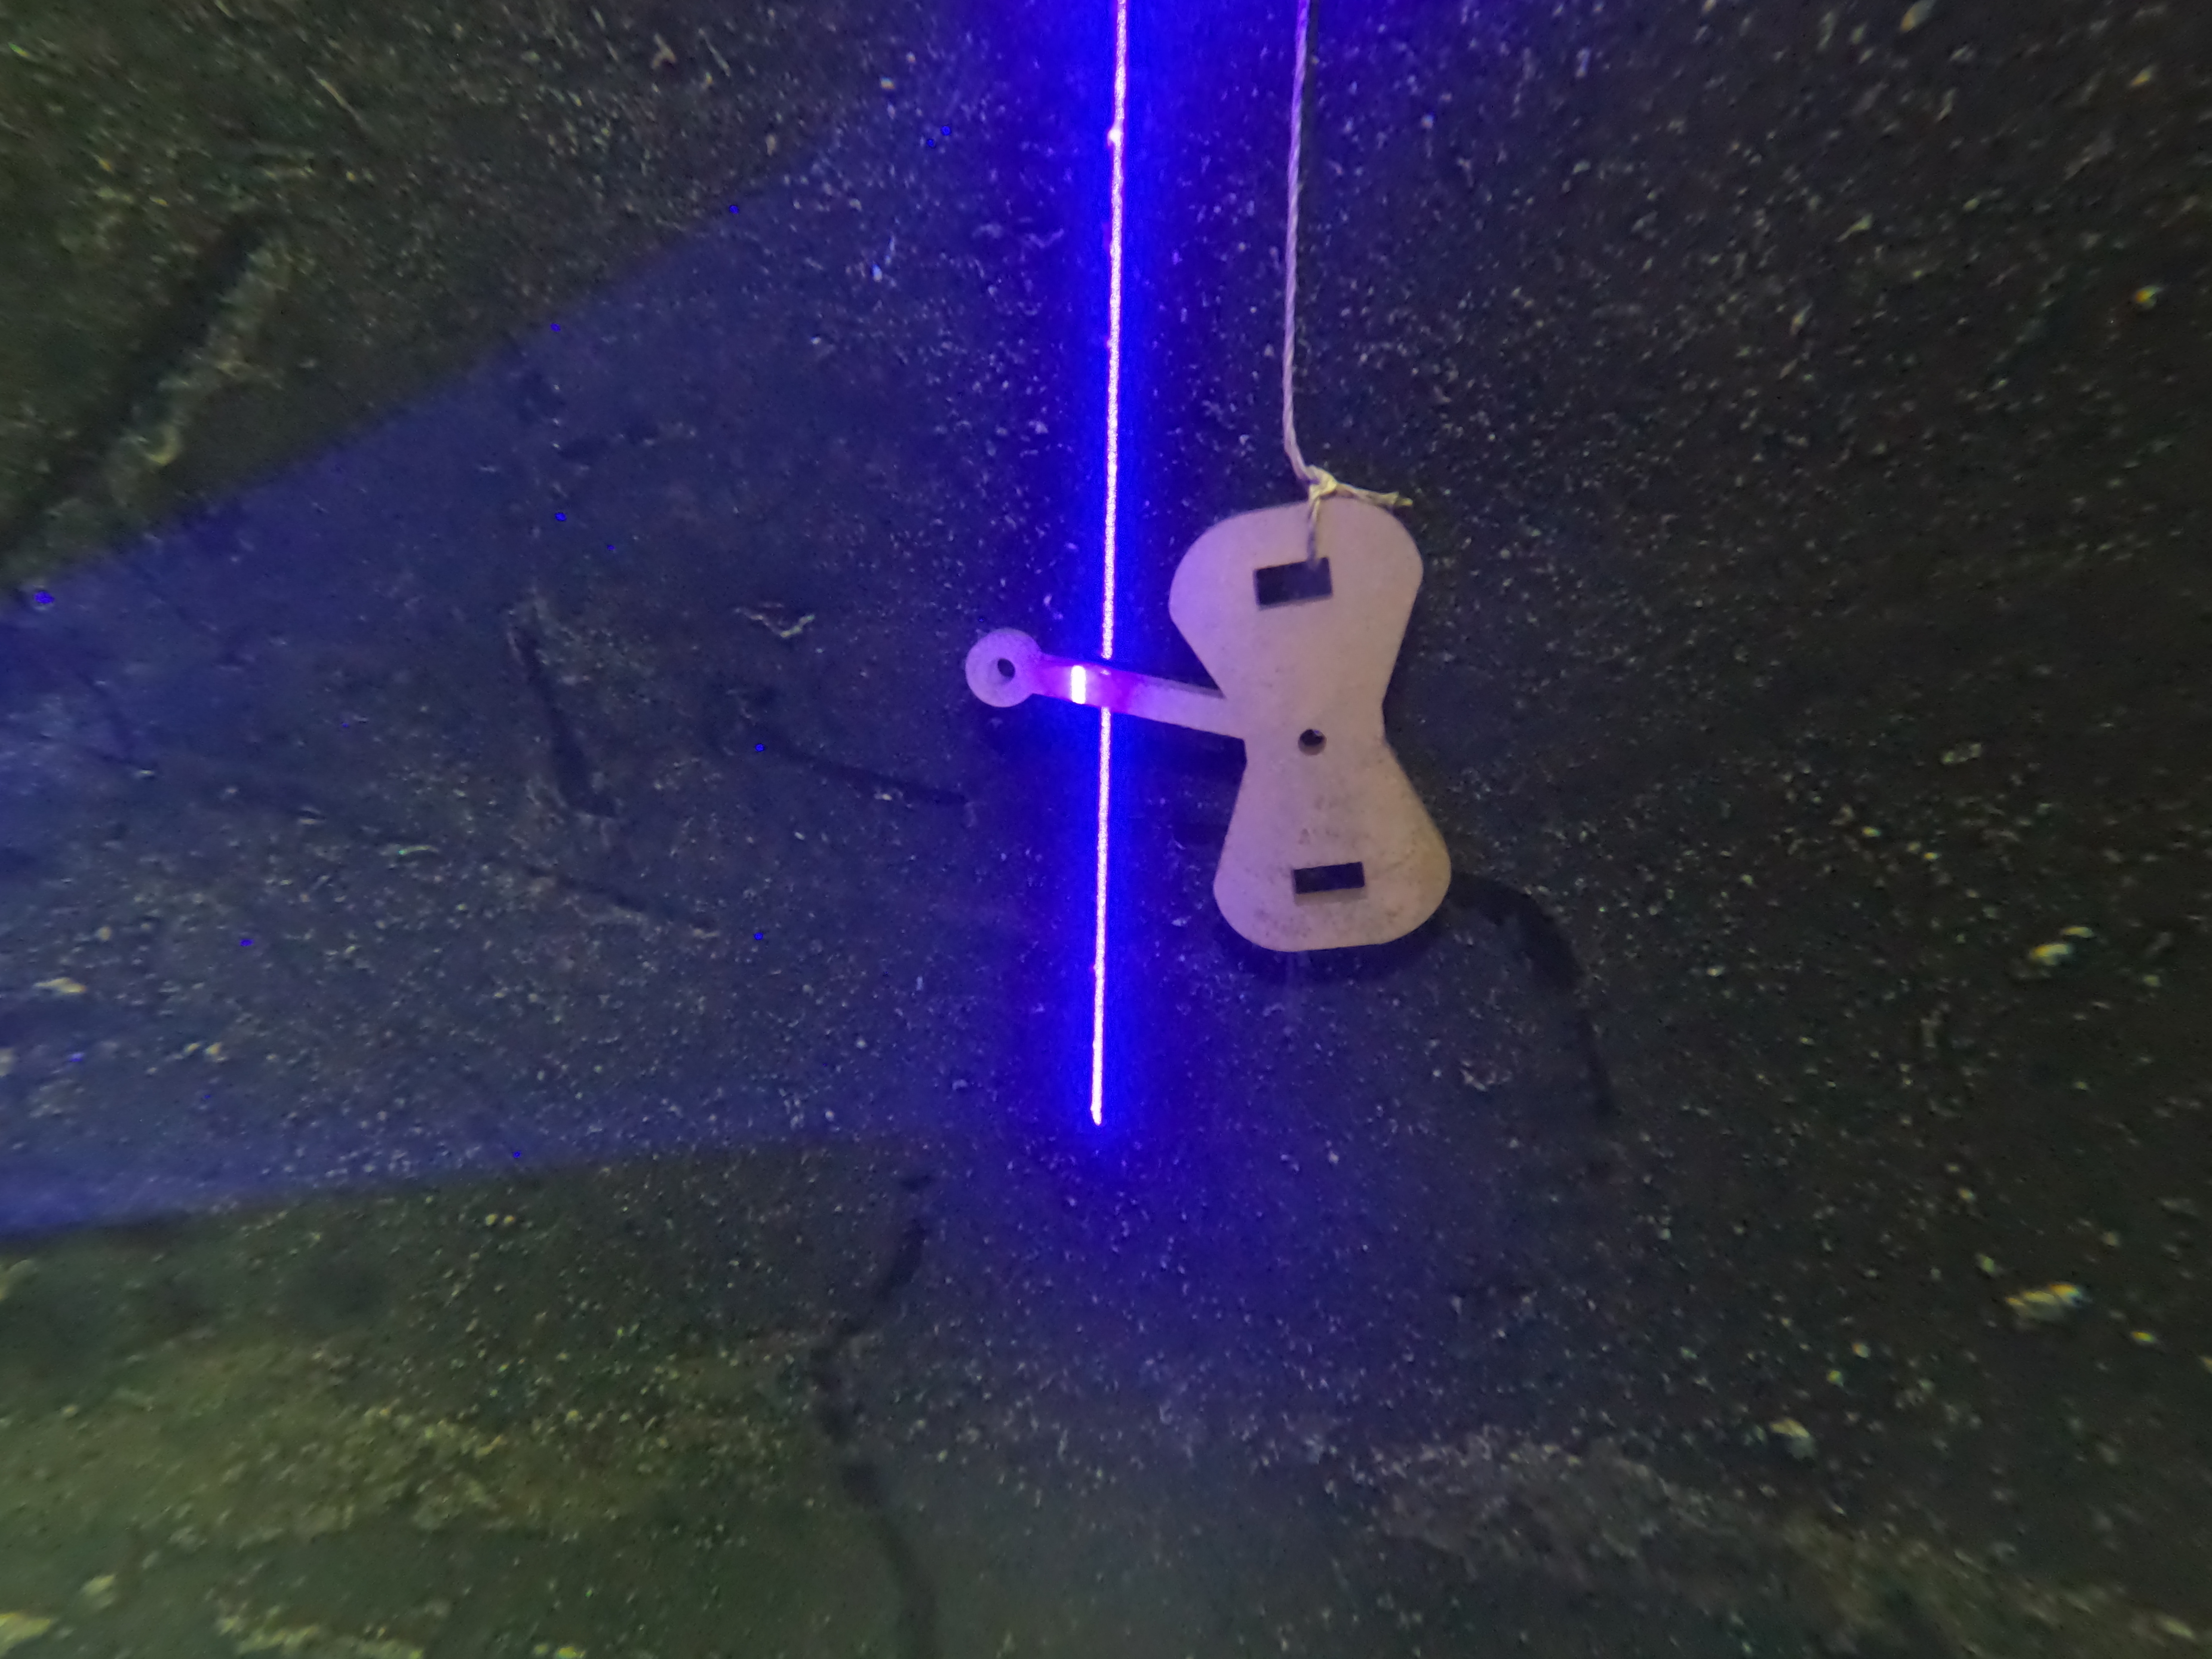

Supplement: Supplementary file 3262 [file G0015703.pdf › Level_2_1/G0015703.pdf]

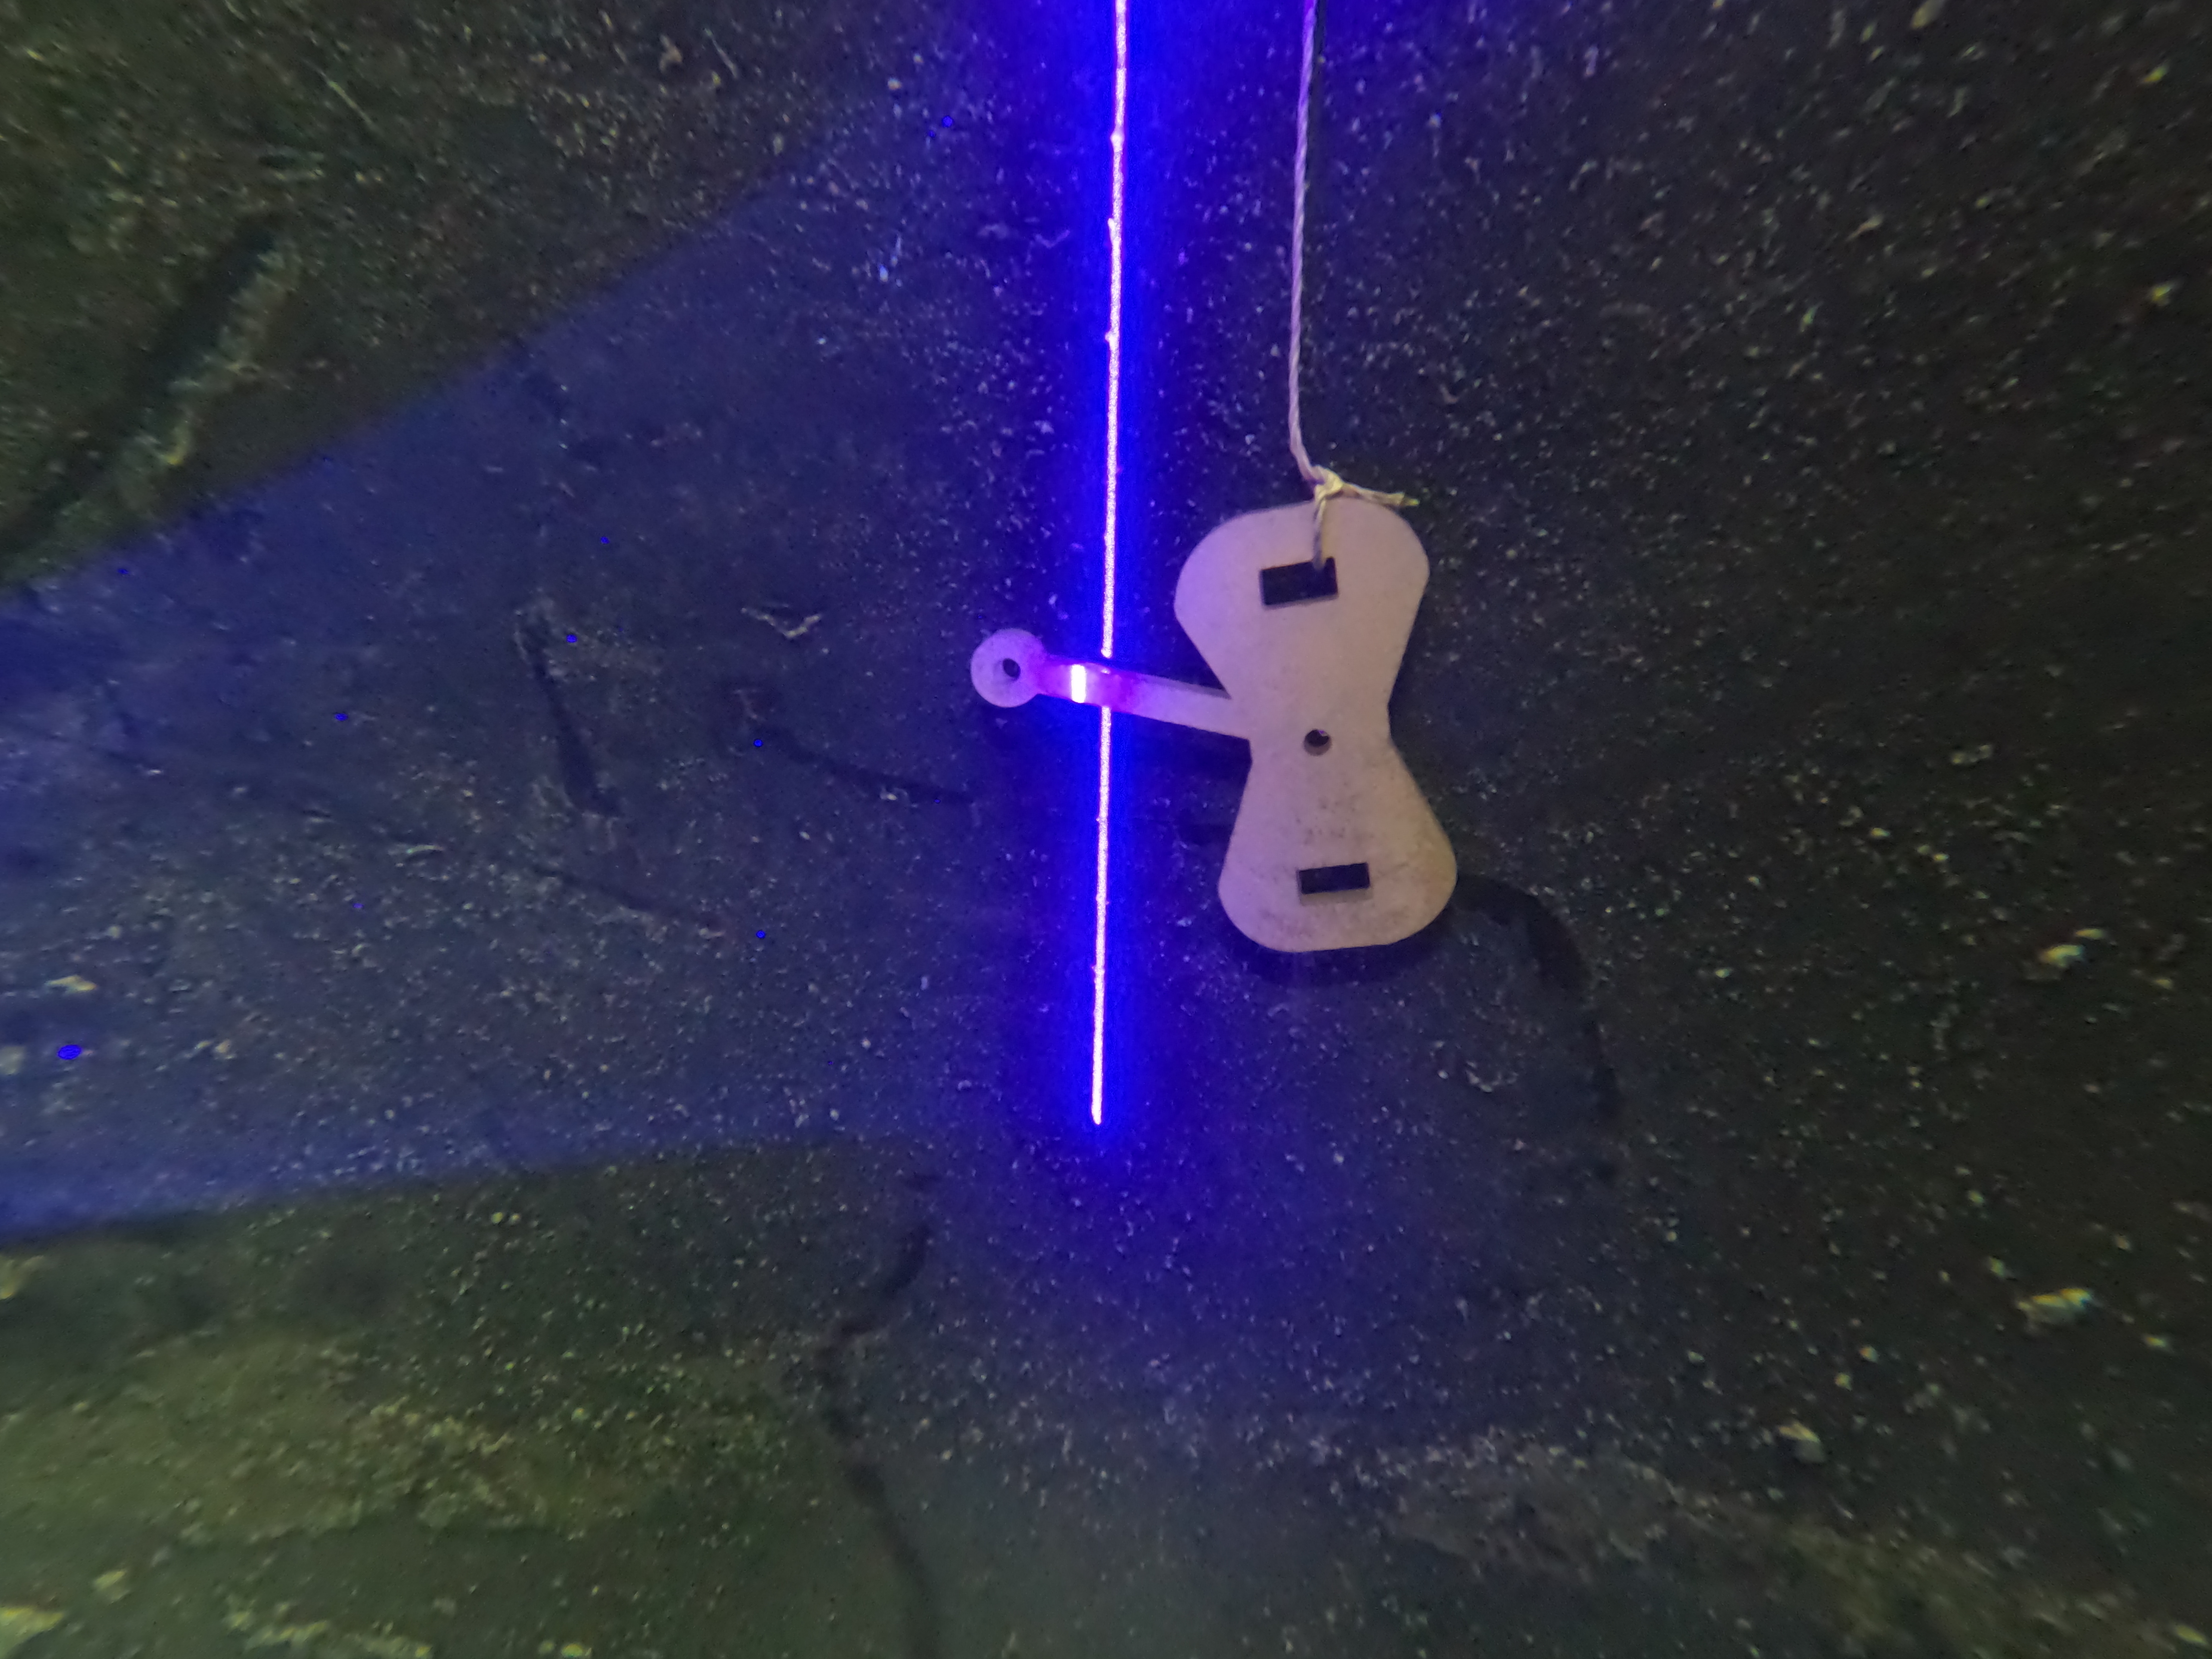

Supplement: Supplementary file 3263 [file G0015704.pdf › Level_2_1/G0015704.pdf]

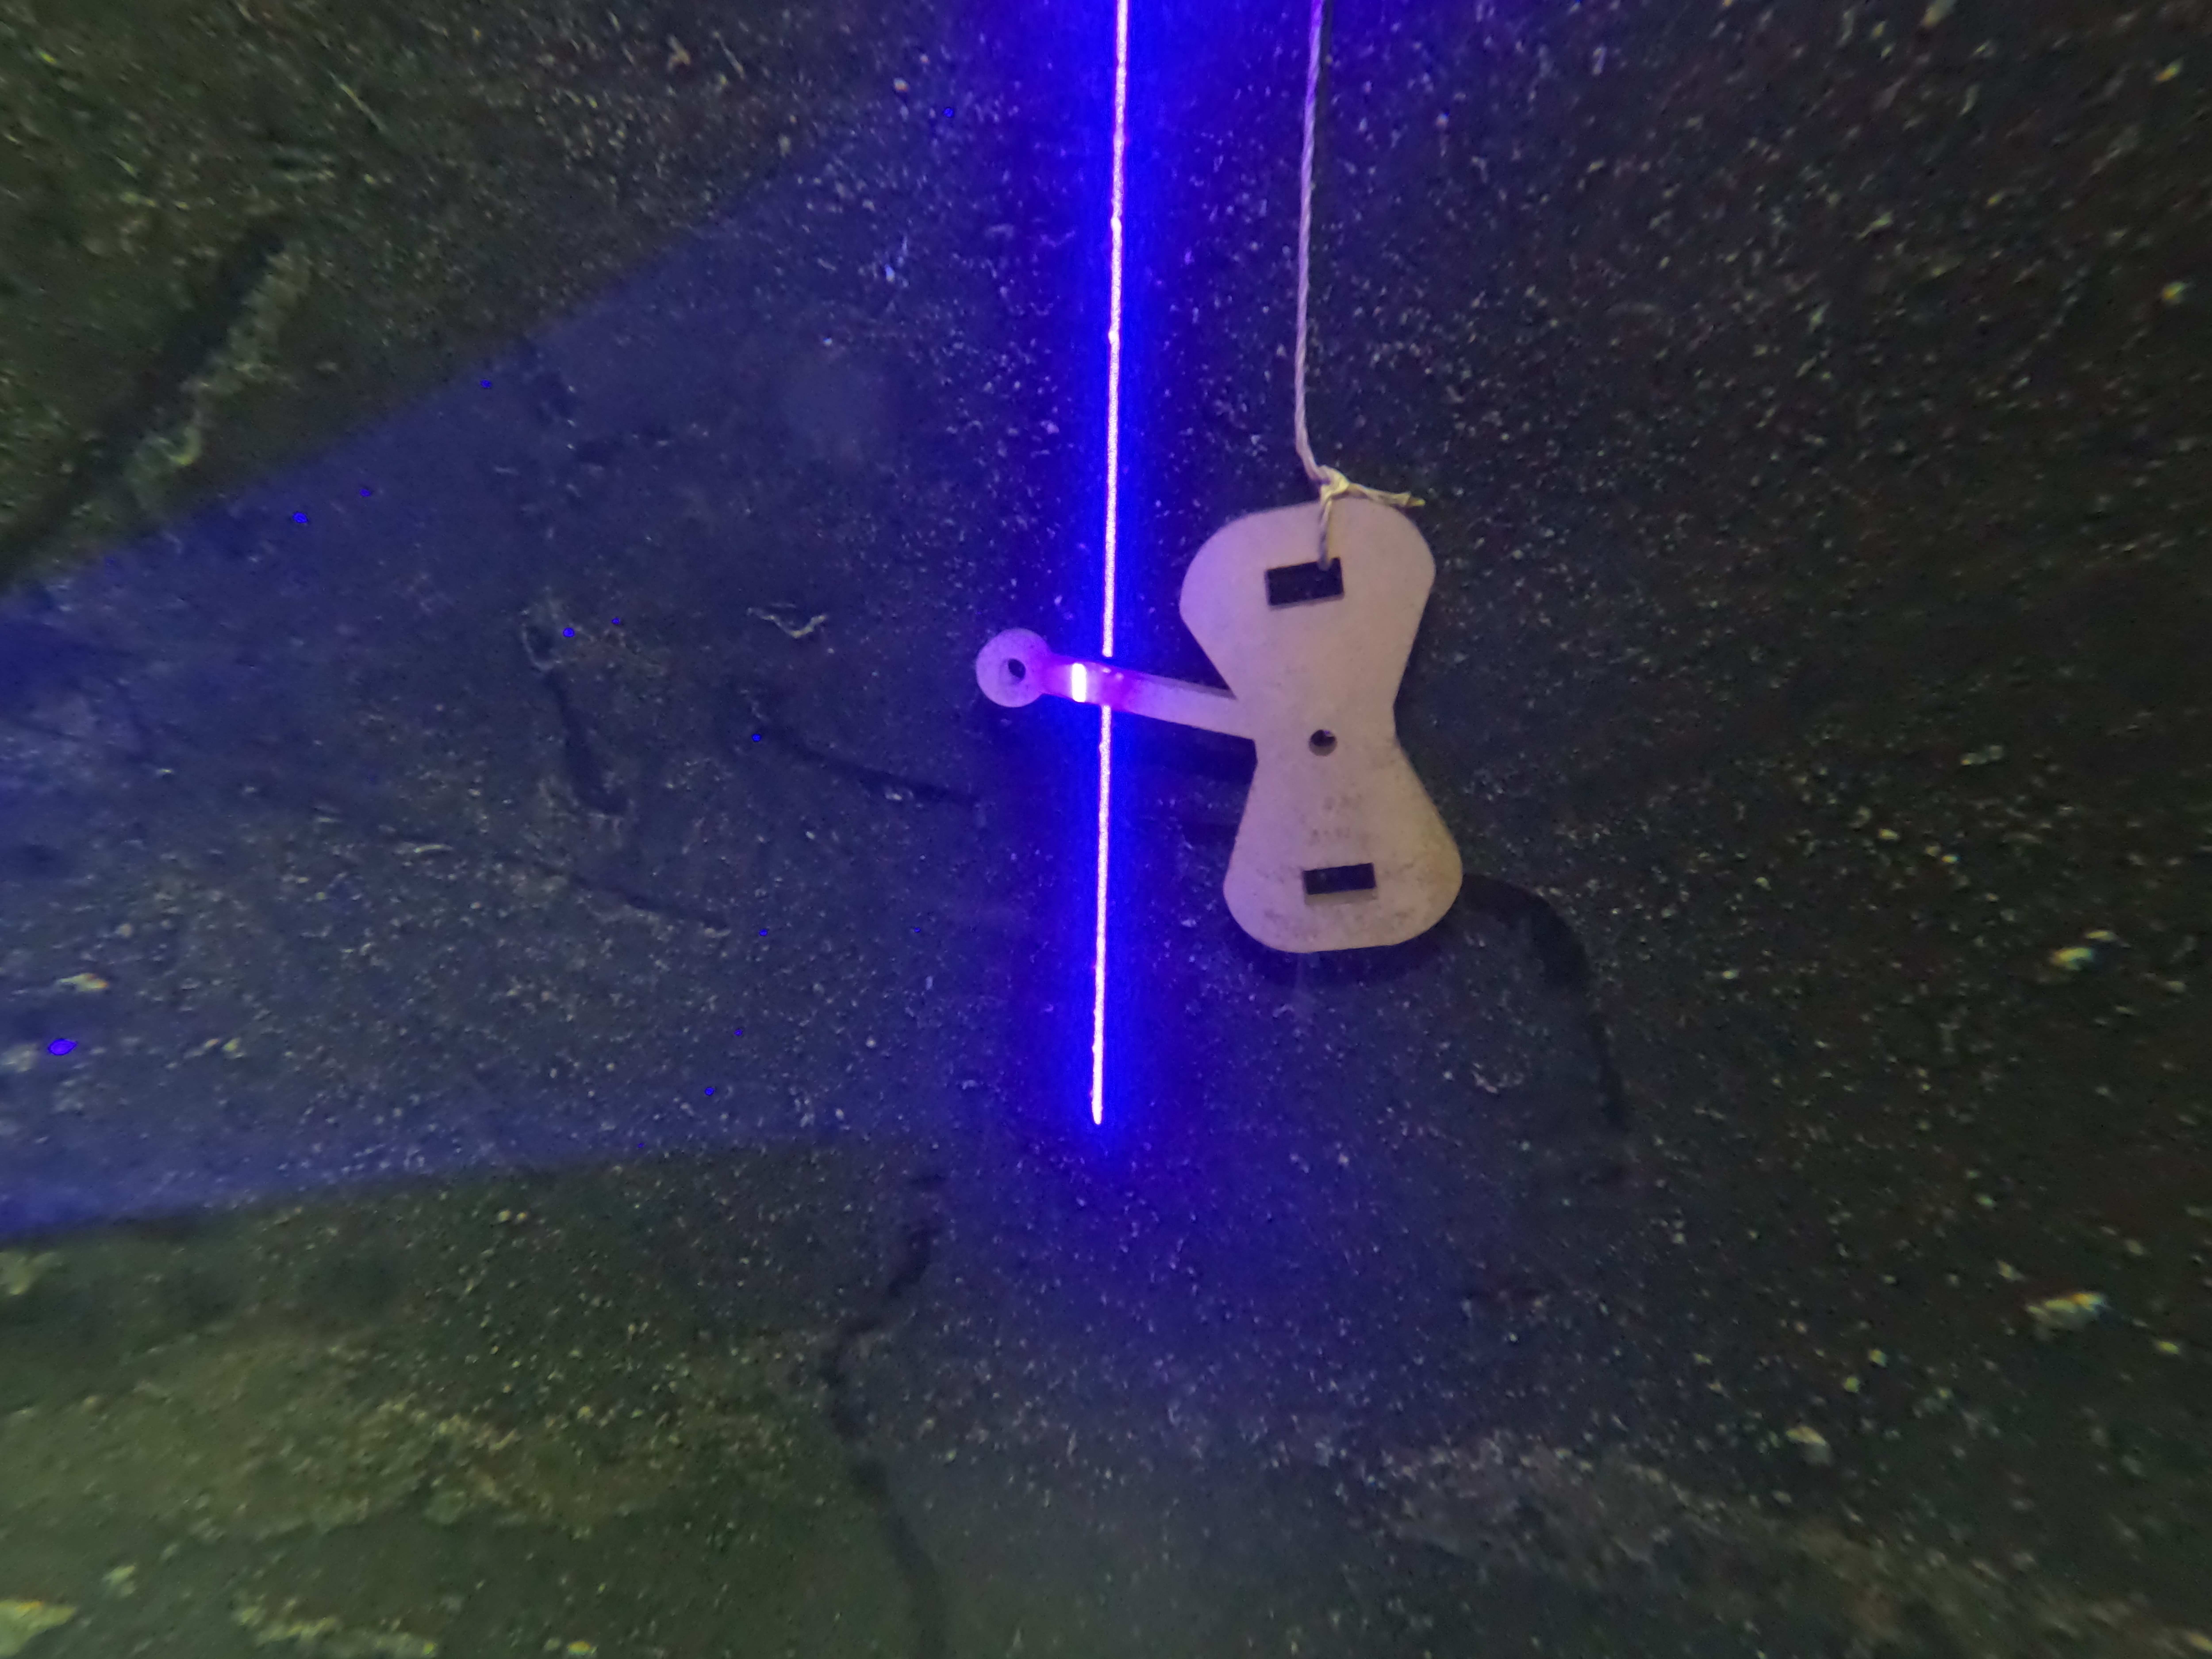

Supplement: Supplementary file 3264 [file G0015705.pdf › Level_2_1/G0015705.pdf]

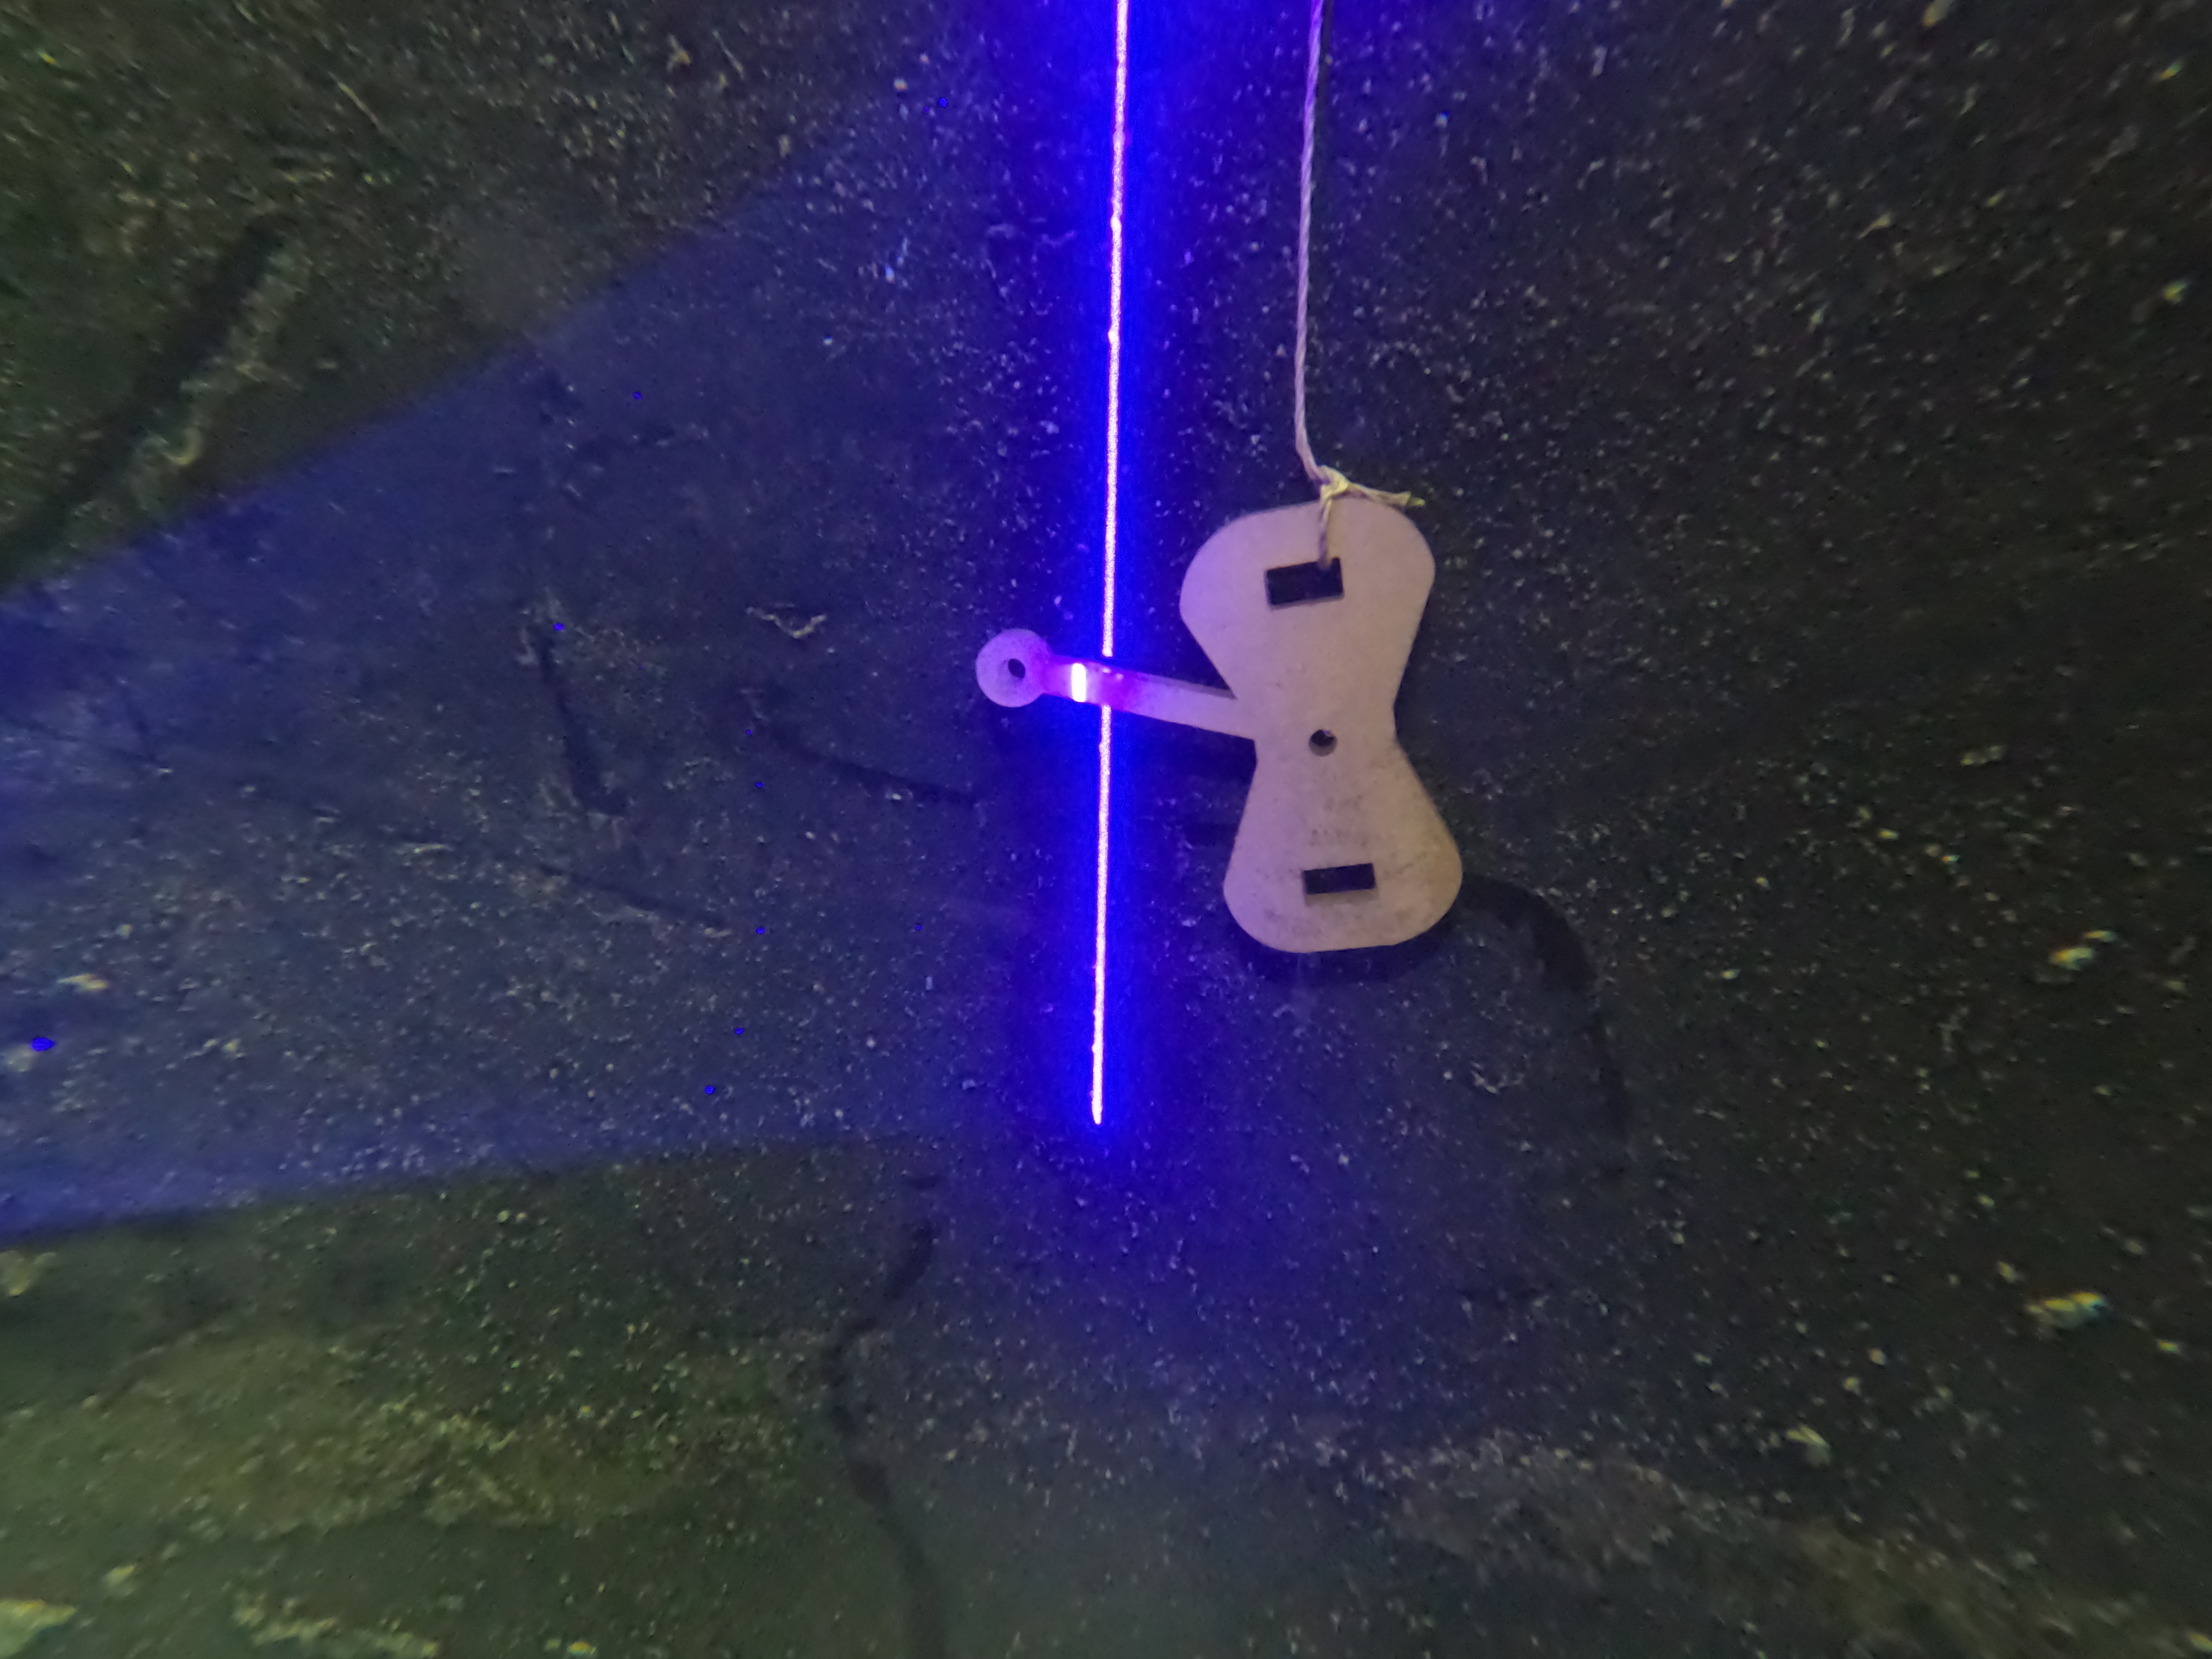

Supplement: Supplementary file 3265 [file G0015706.pdf › Level_2_1/G0015706.pdf]

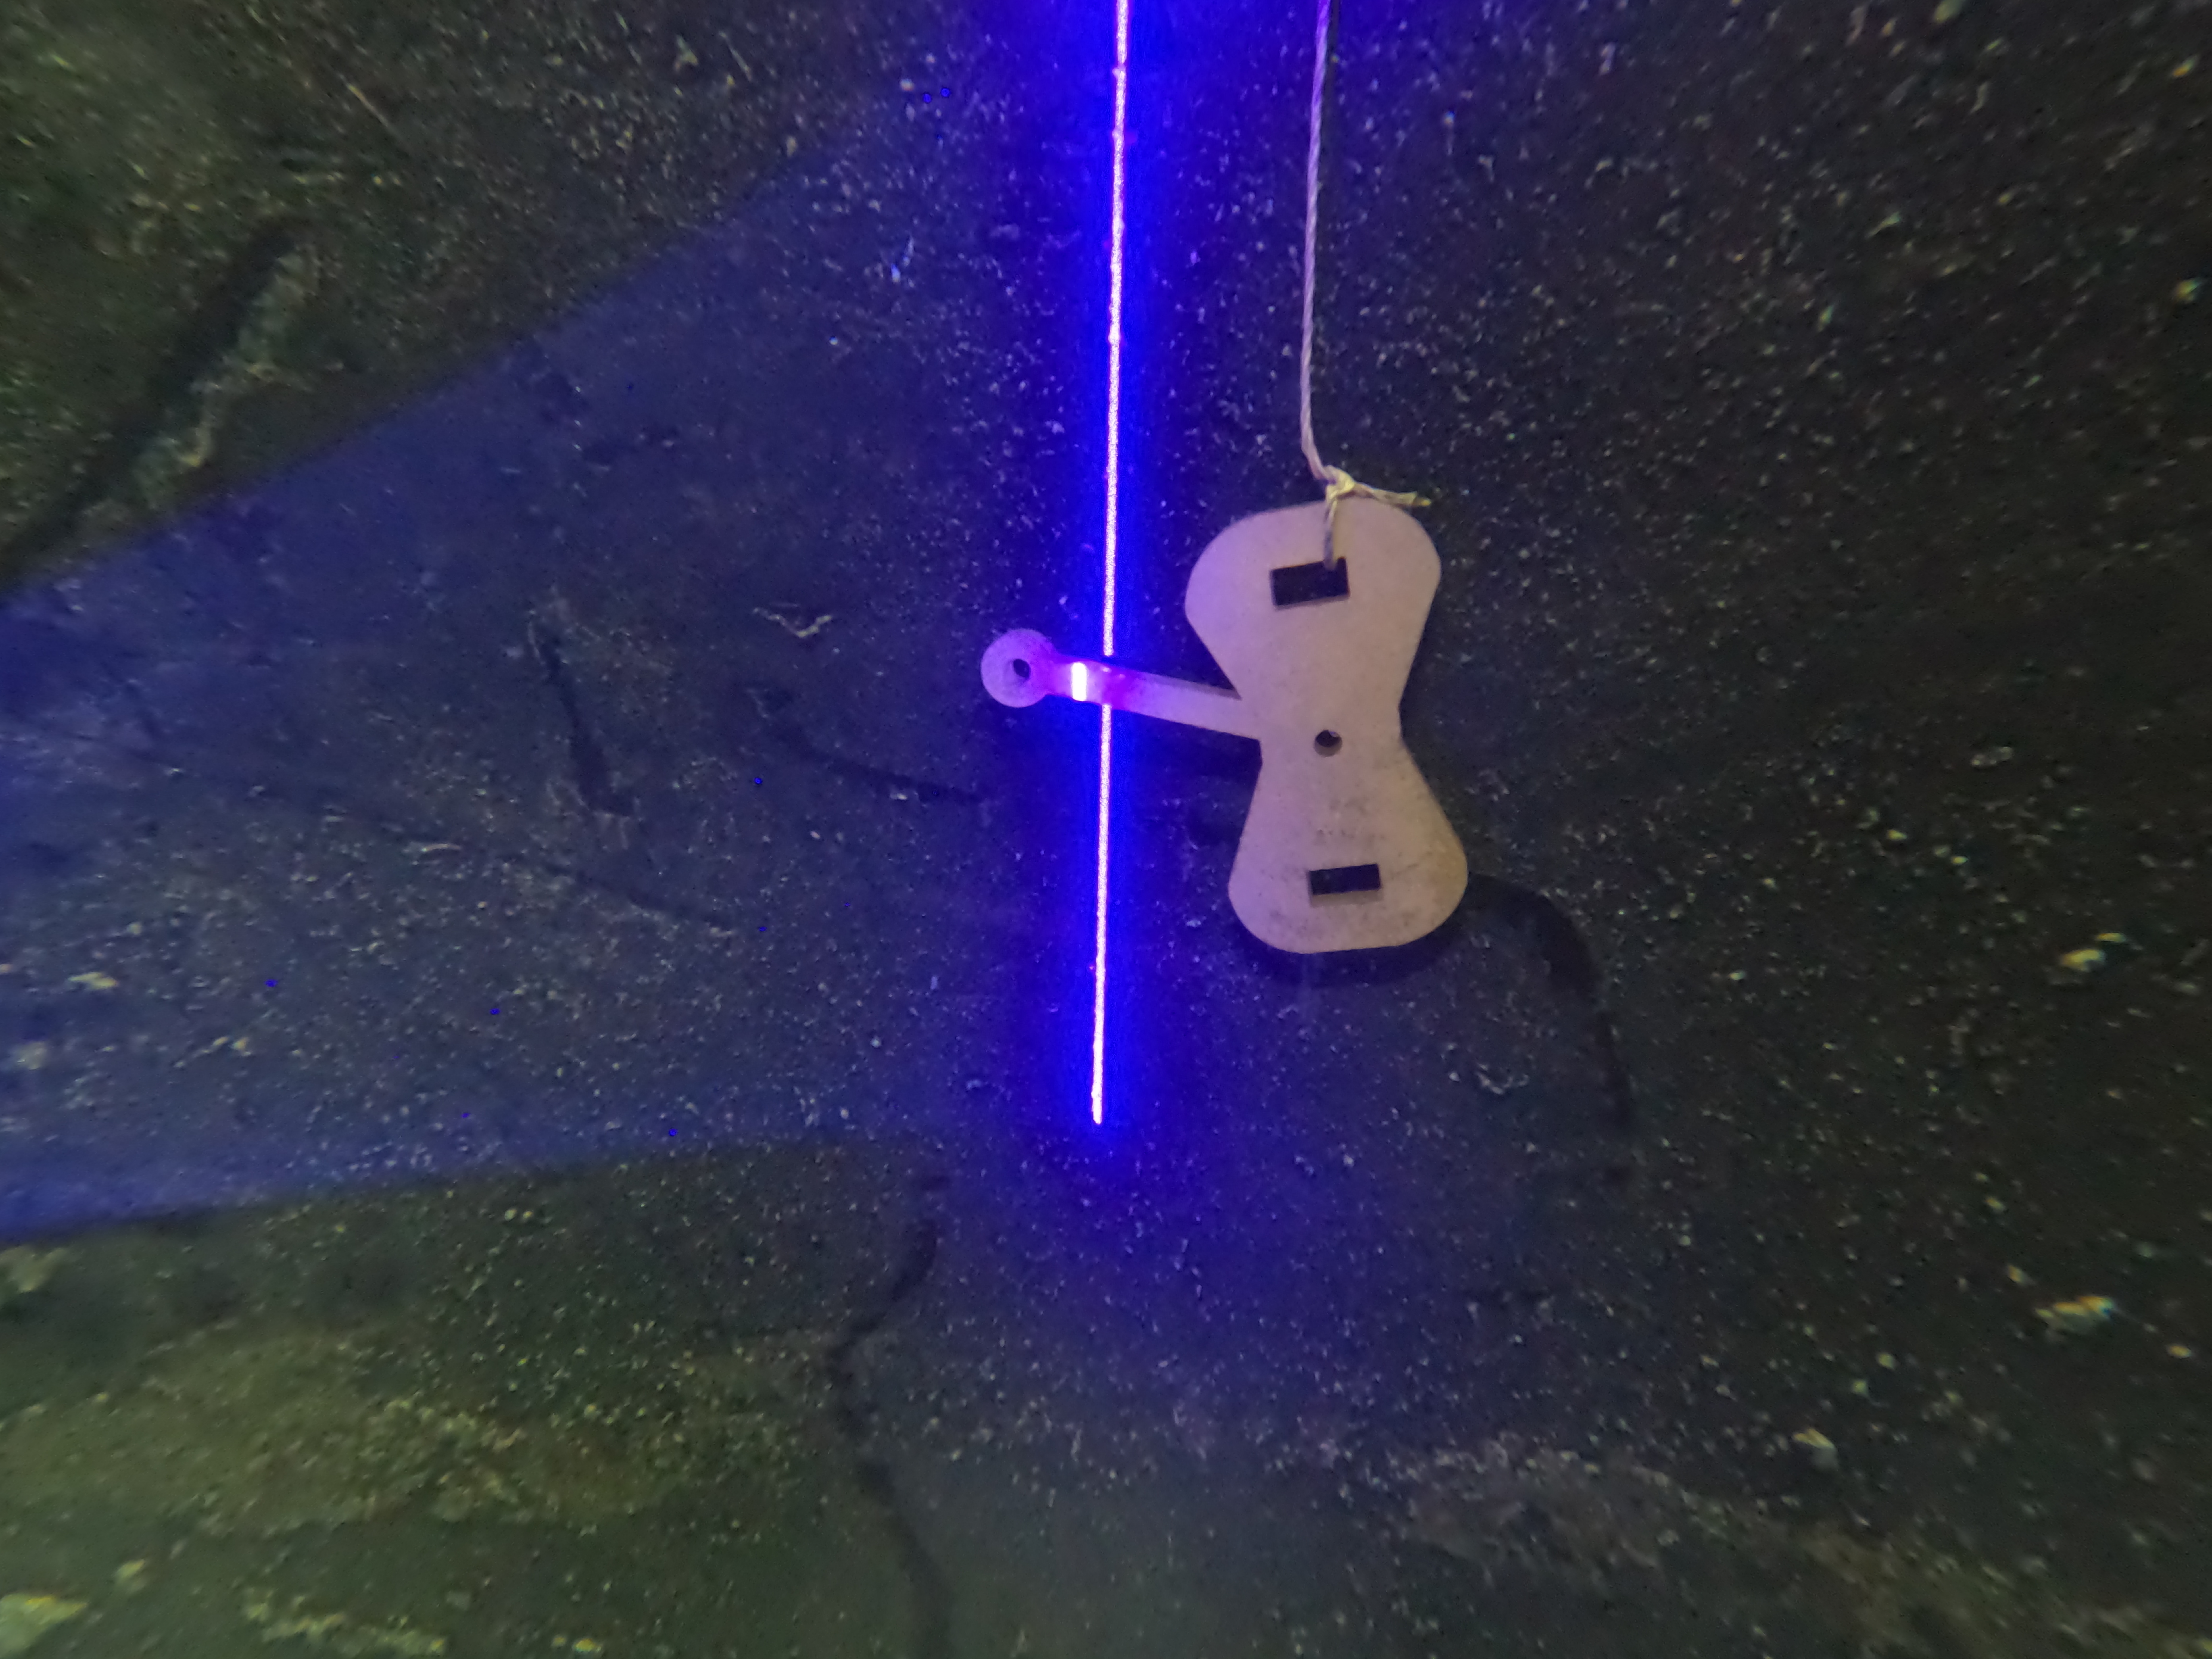

Supplement: Supplementary file 3266 [file G0015707.pdf › Level_2_1/G0015707.pdf]

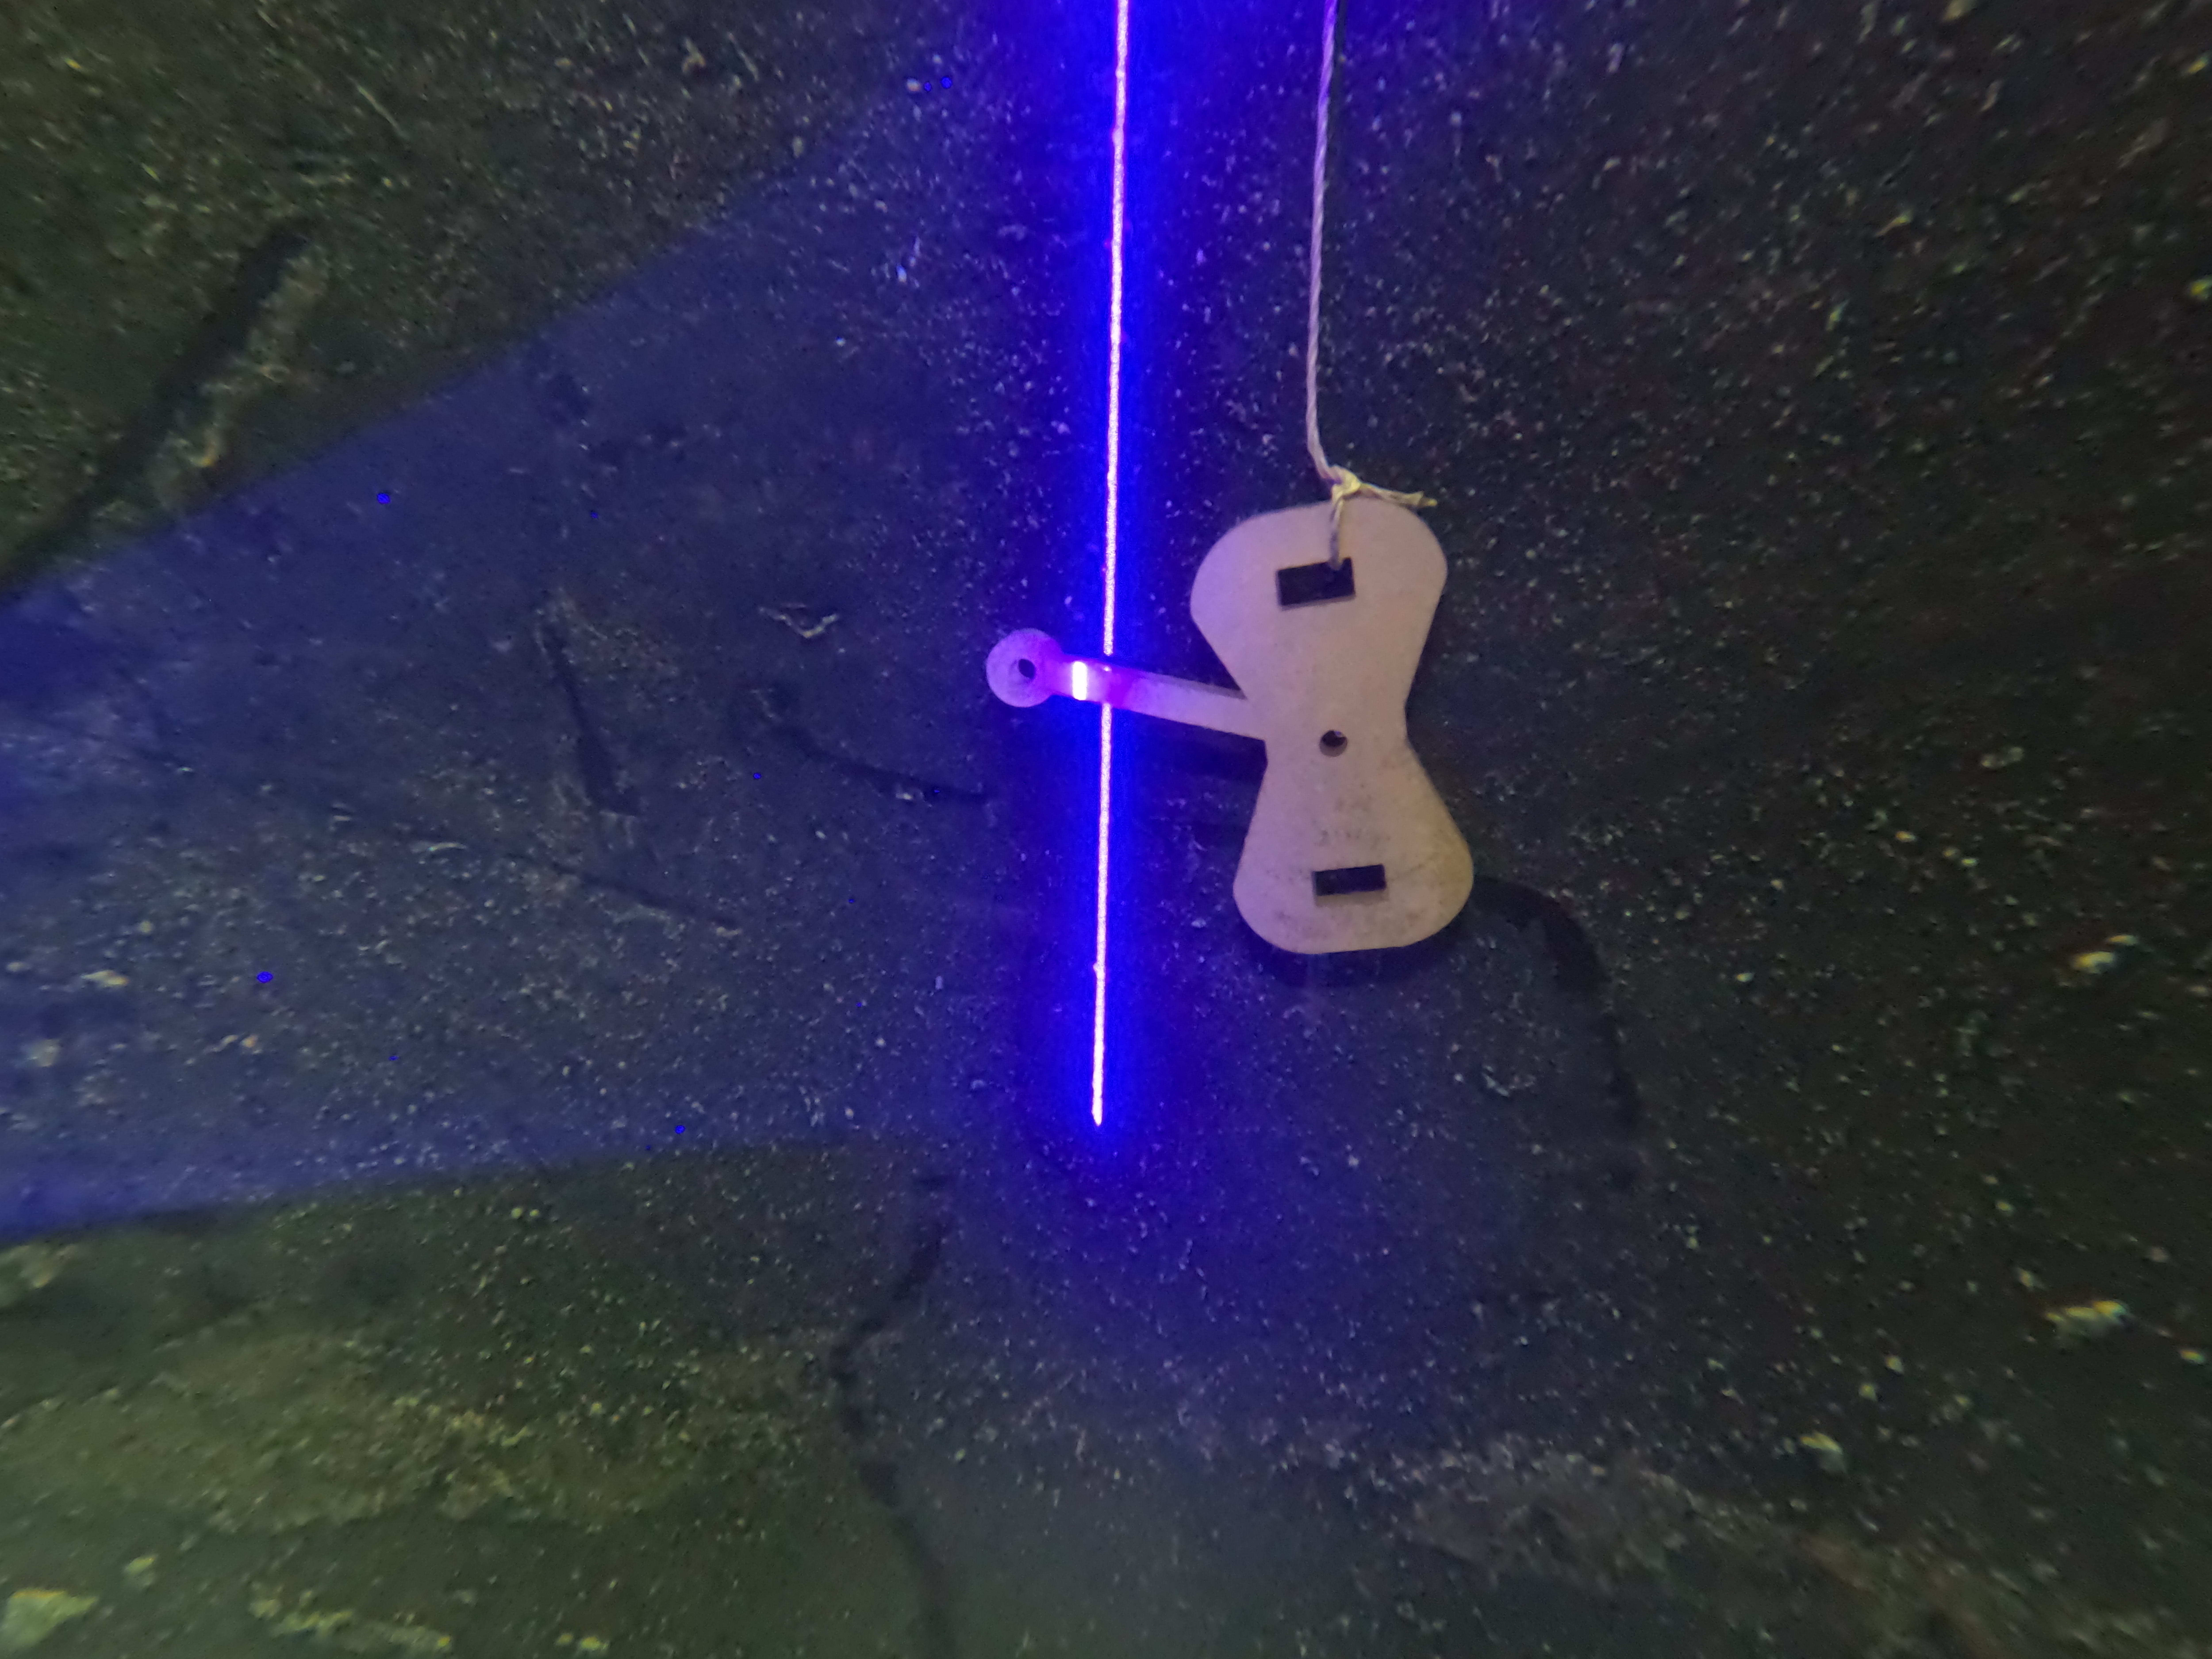

Supplement: Supplementary file 3267 [file G0015708.pdf › Level_2_1/G0015708.pdf]

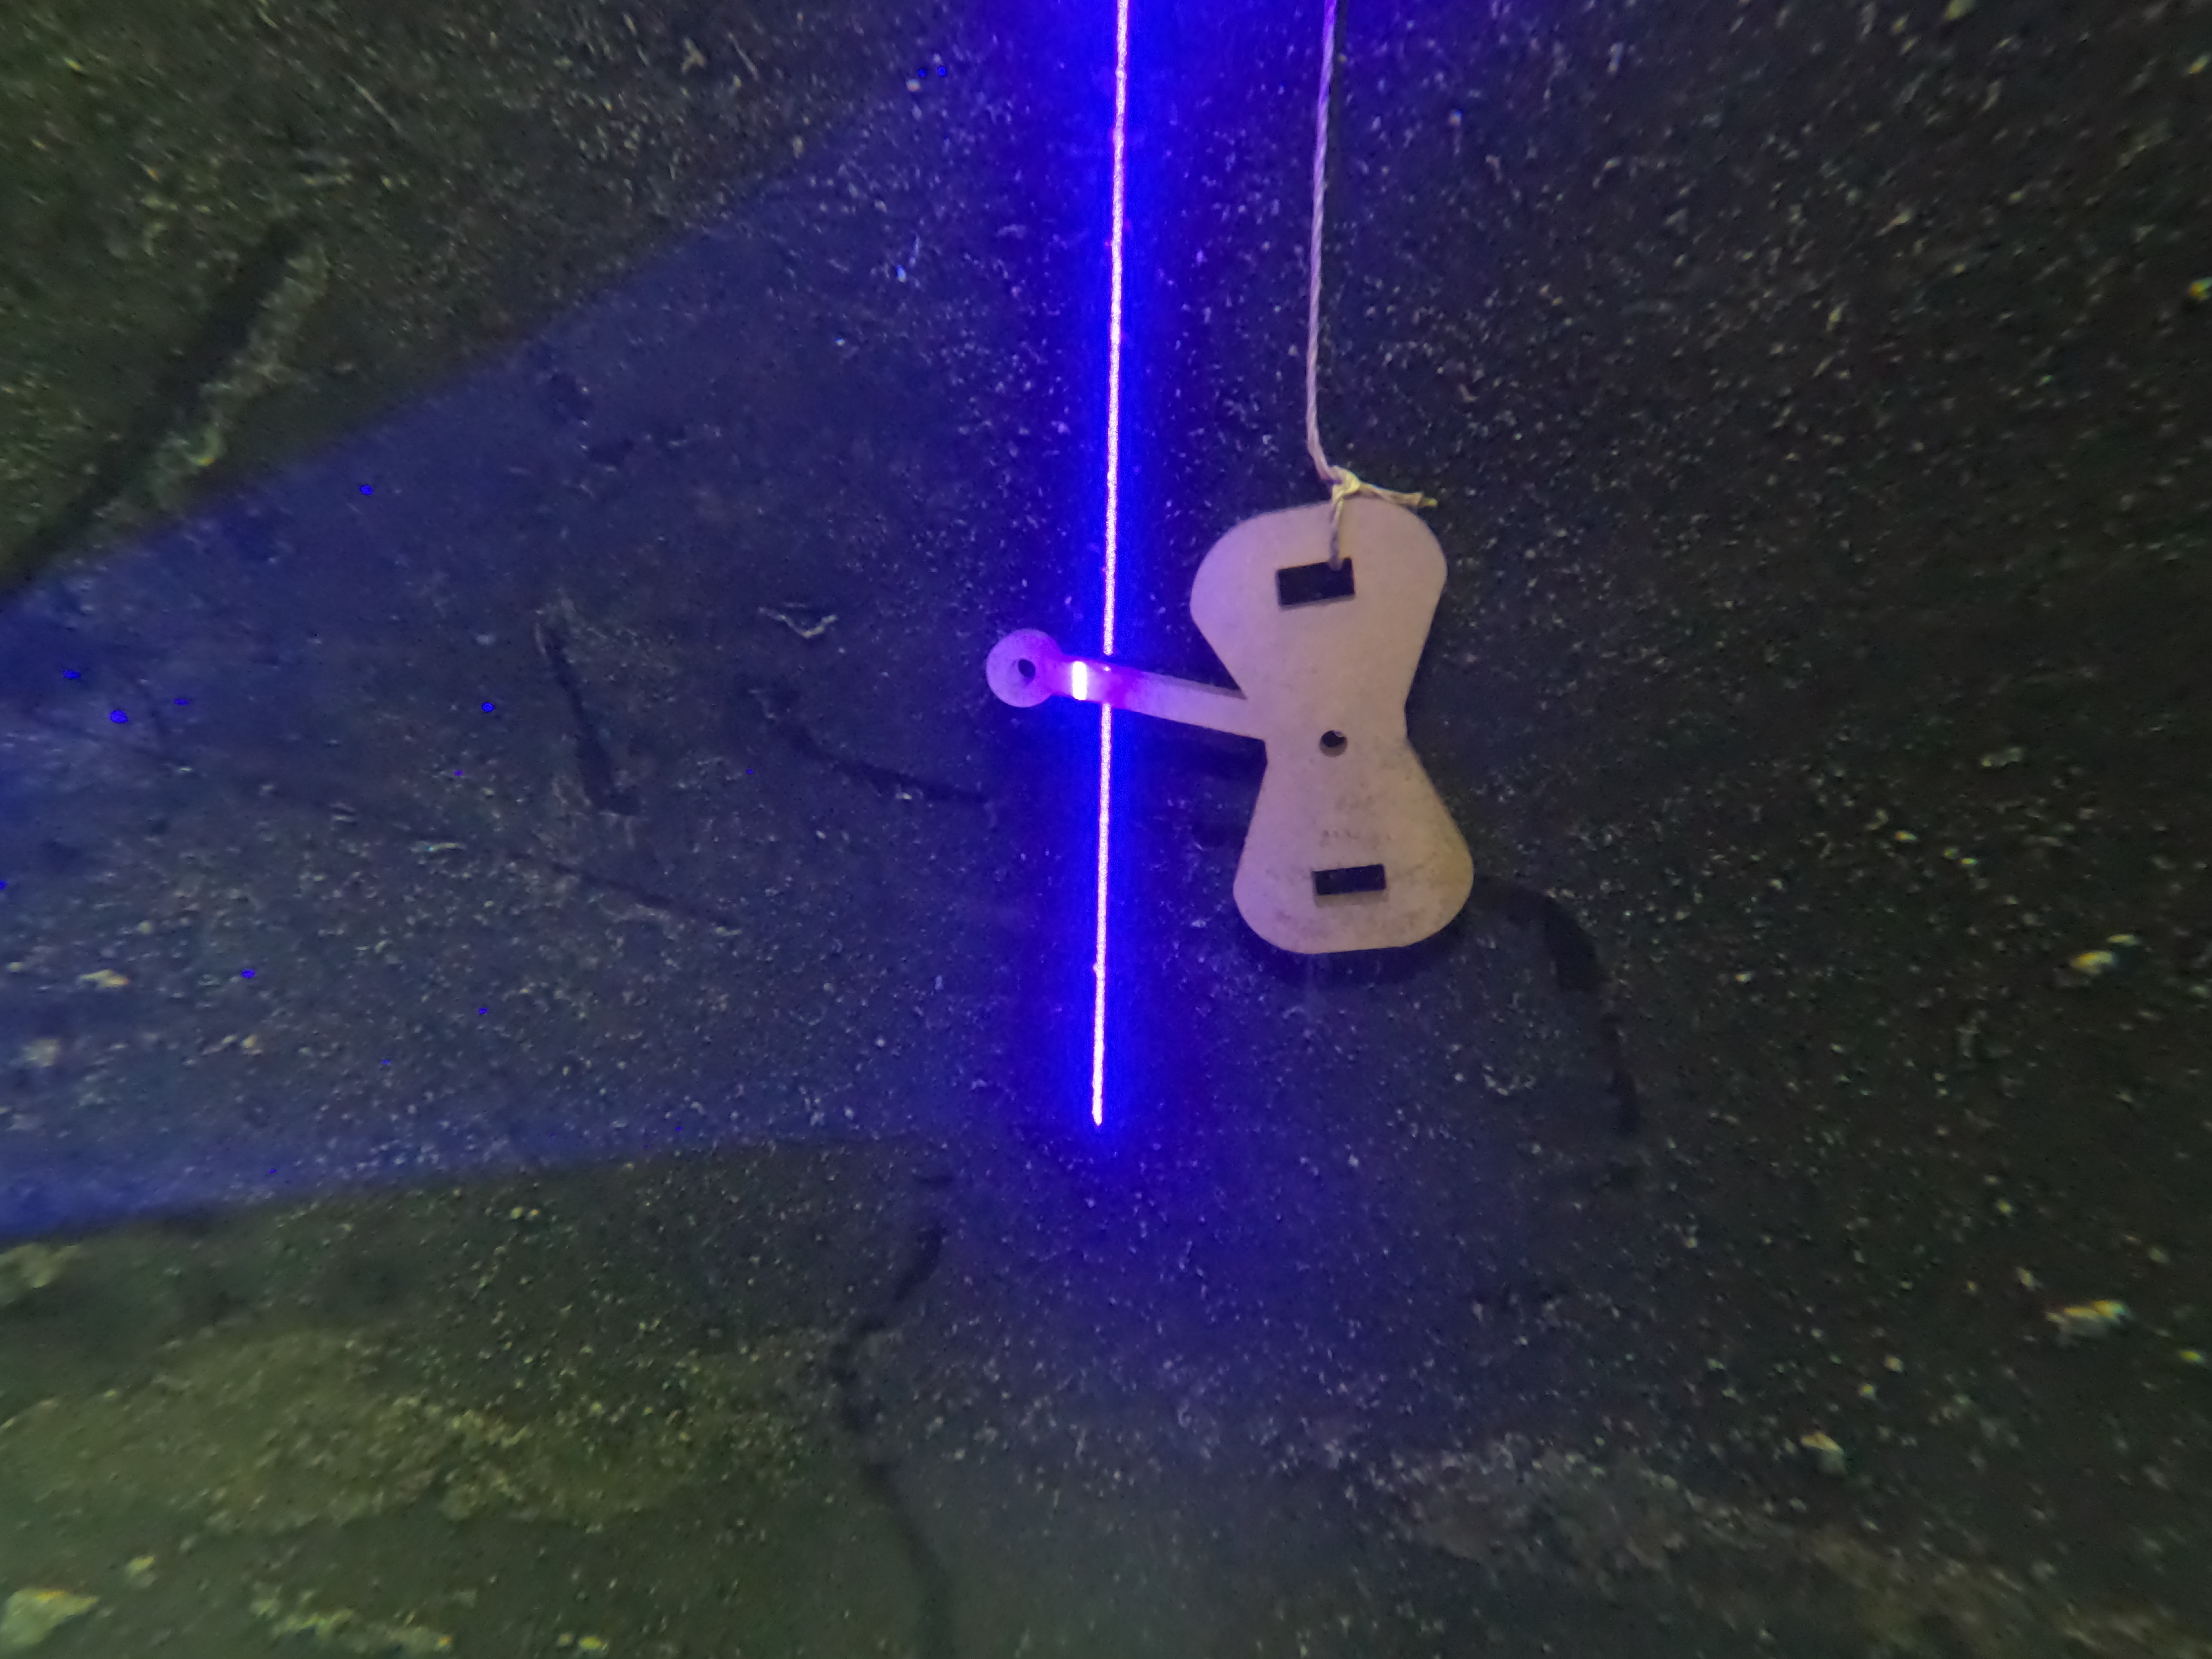

Supplement: Supplementary file 3268 [file G0015709.pdf › Level_2_1/G0015709.pdf]

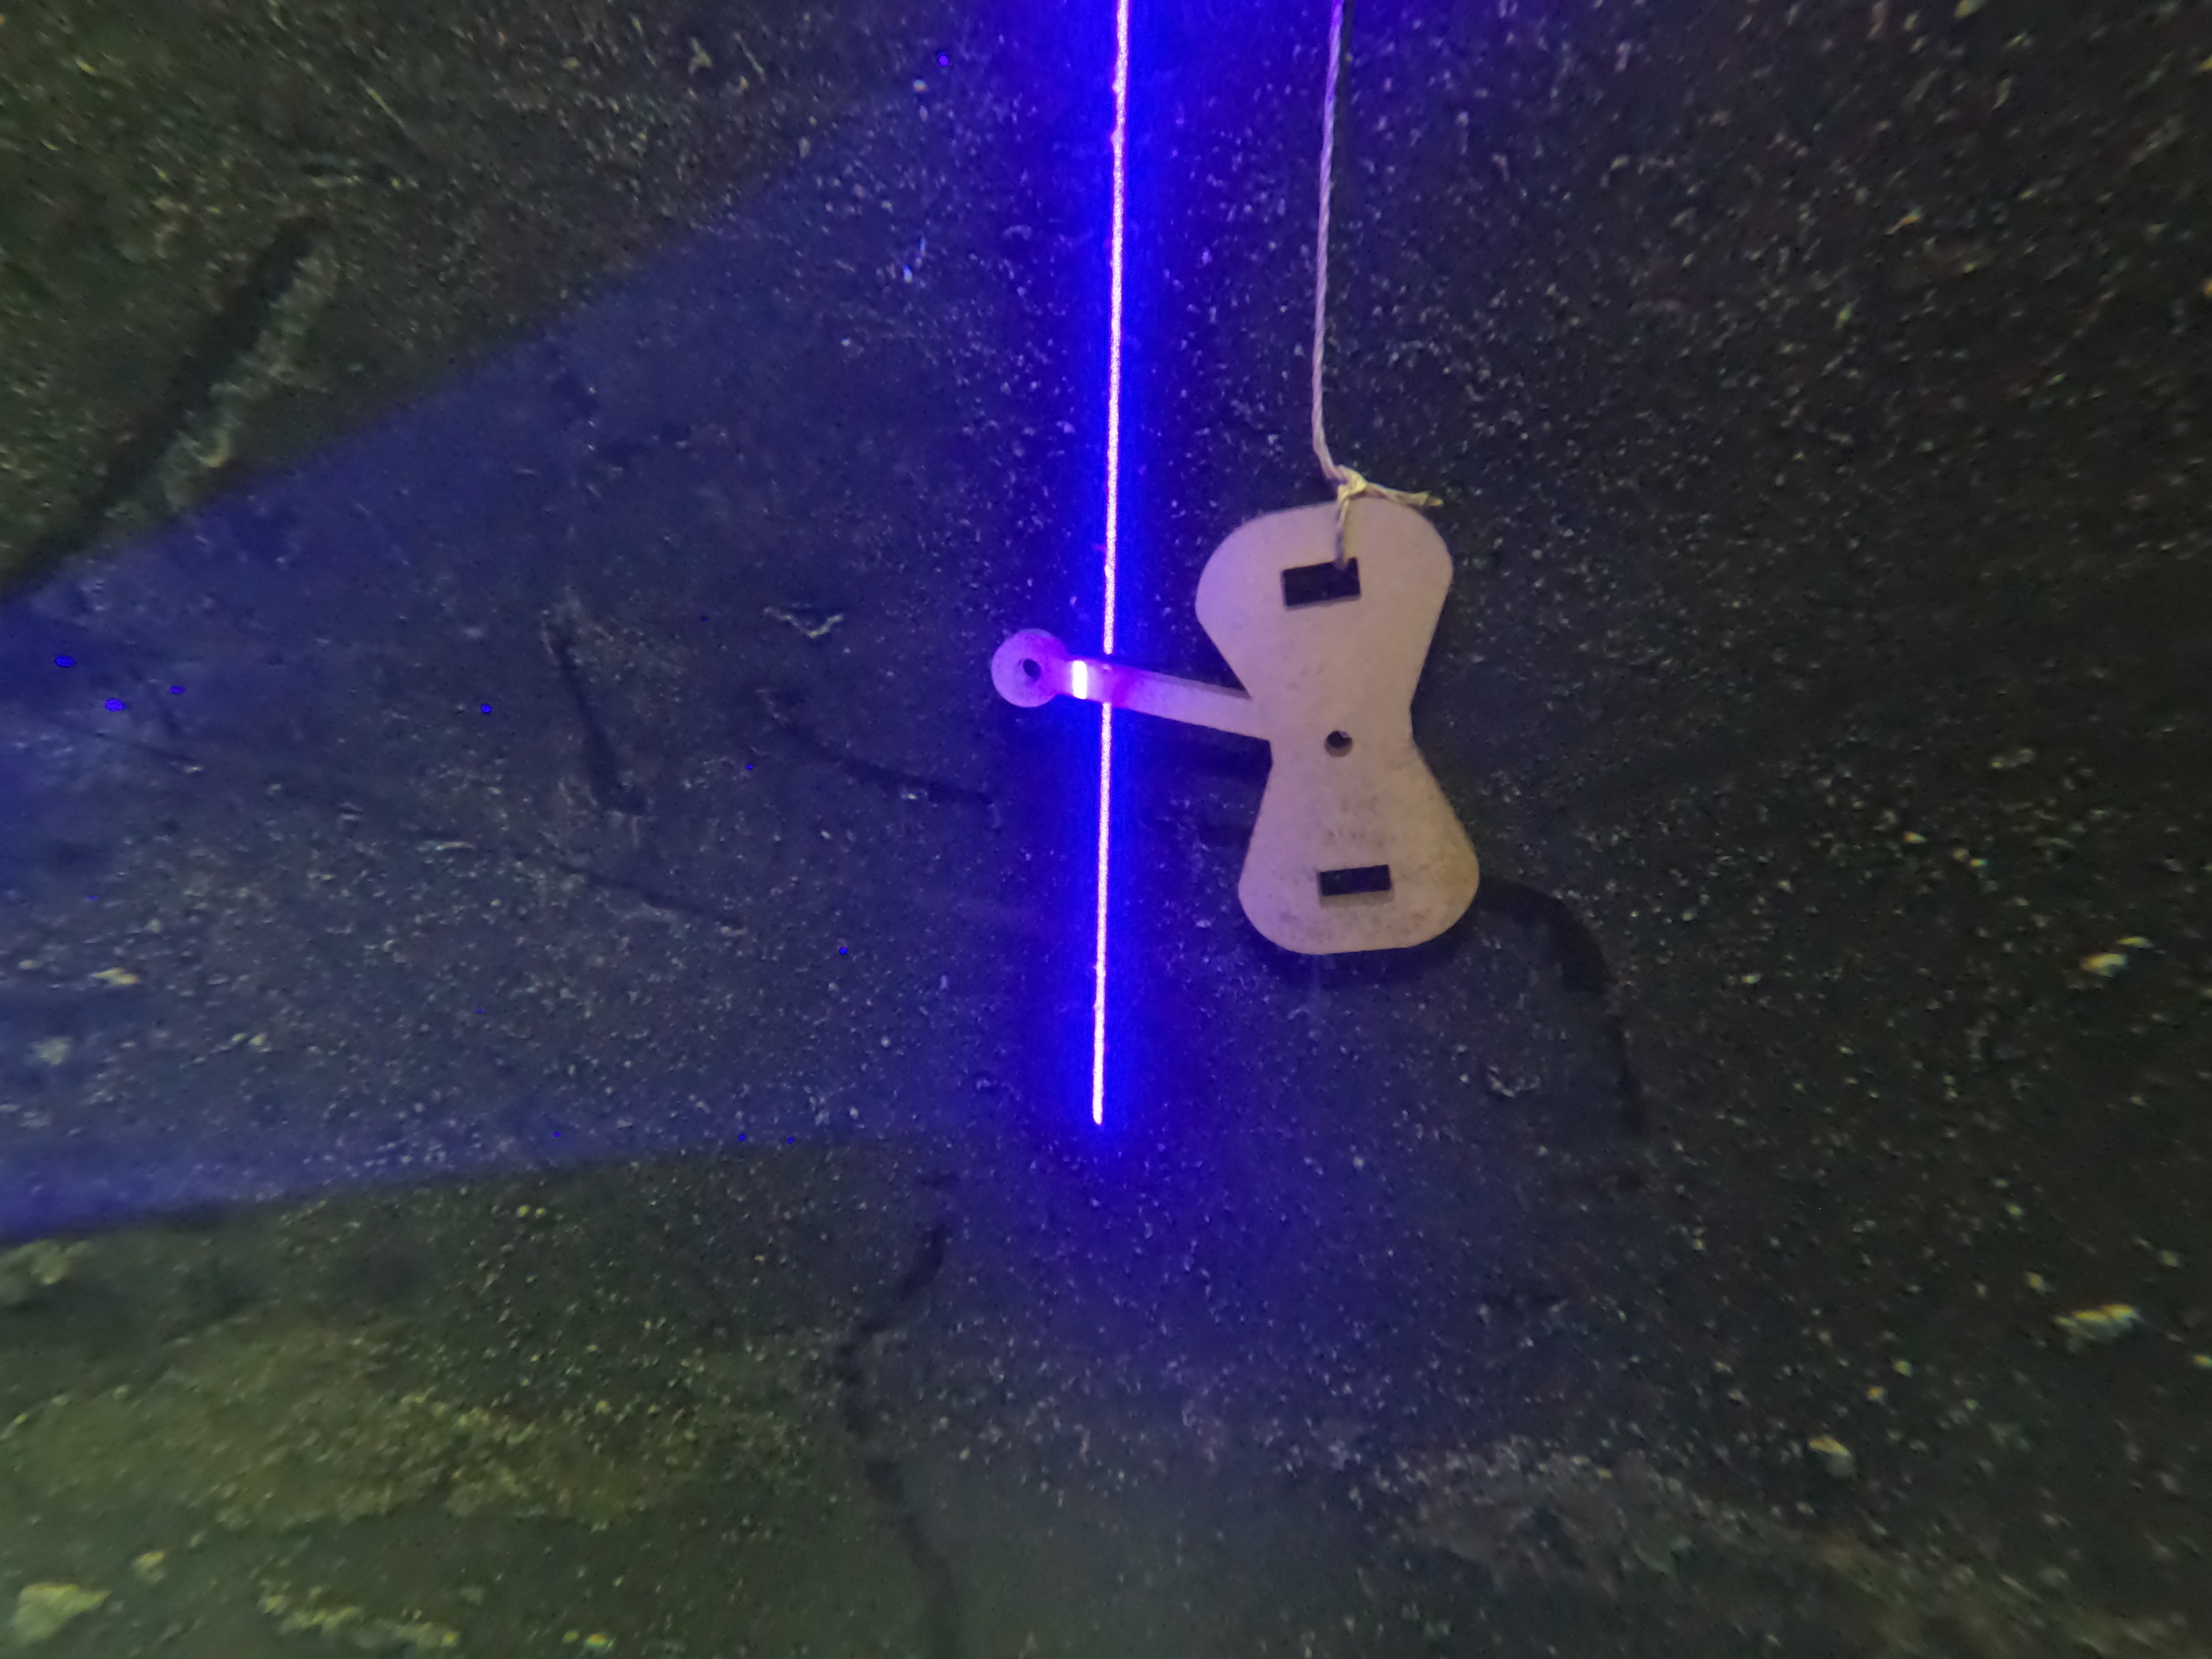

Supplement: Supplementary file 3269 [file G0015710.pdf › Level_2_1/G0015710.pdf]

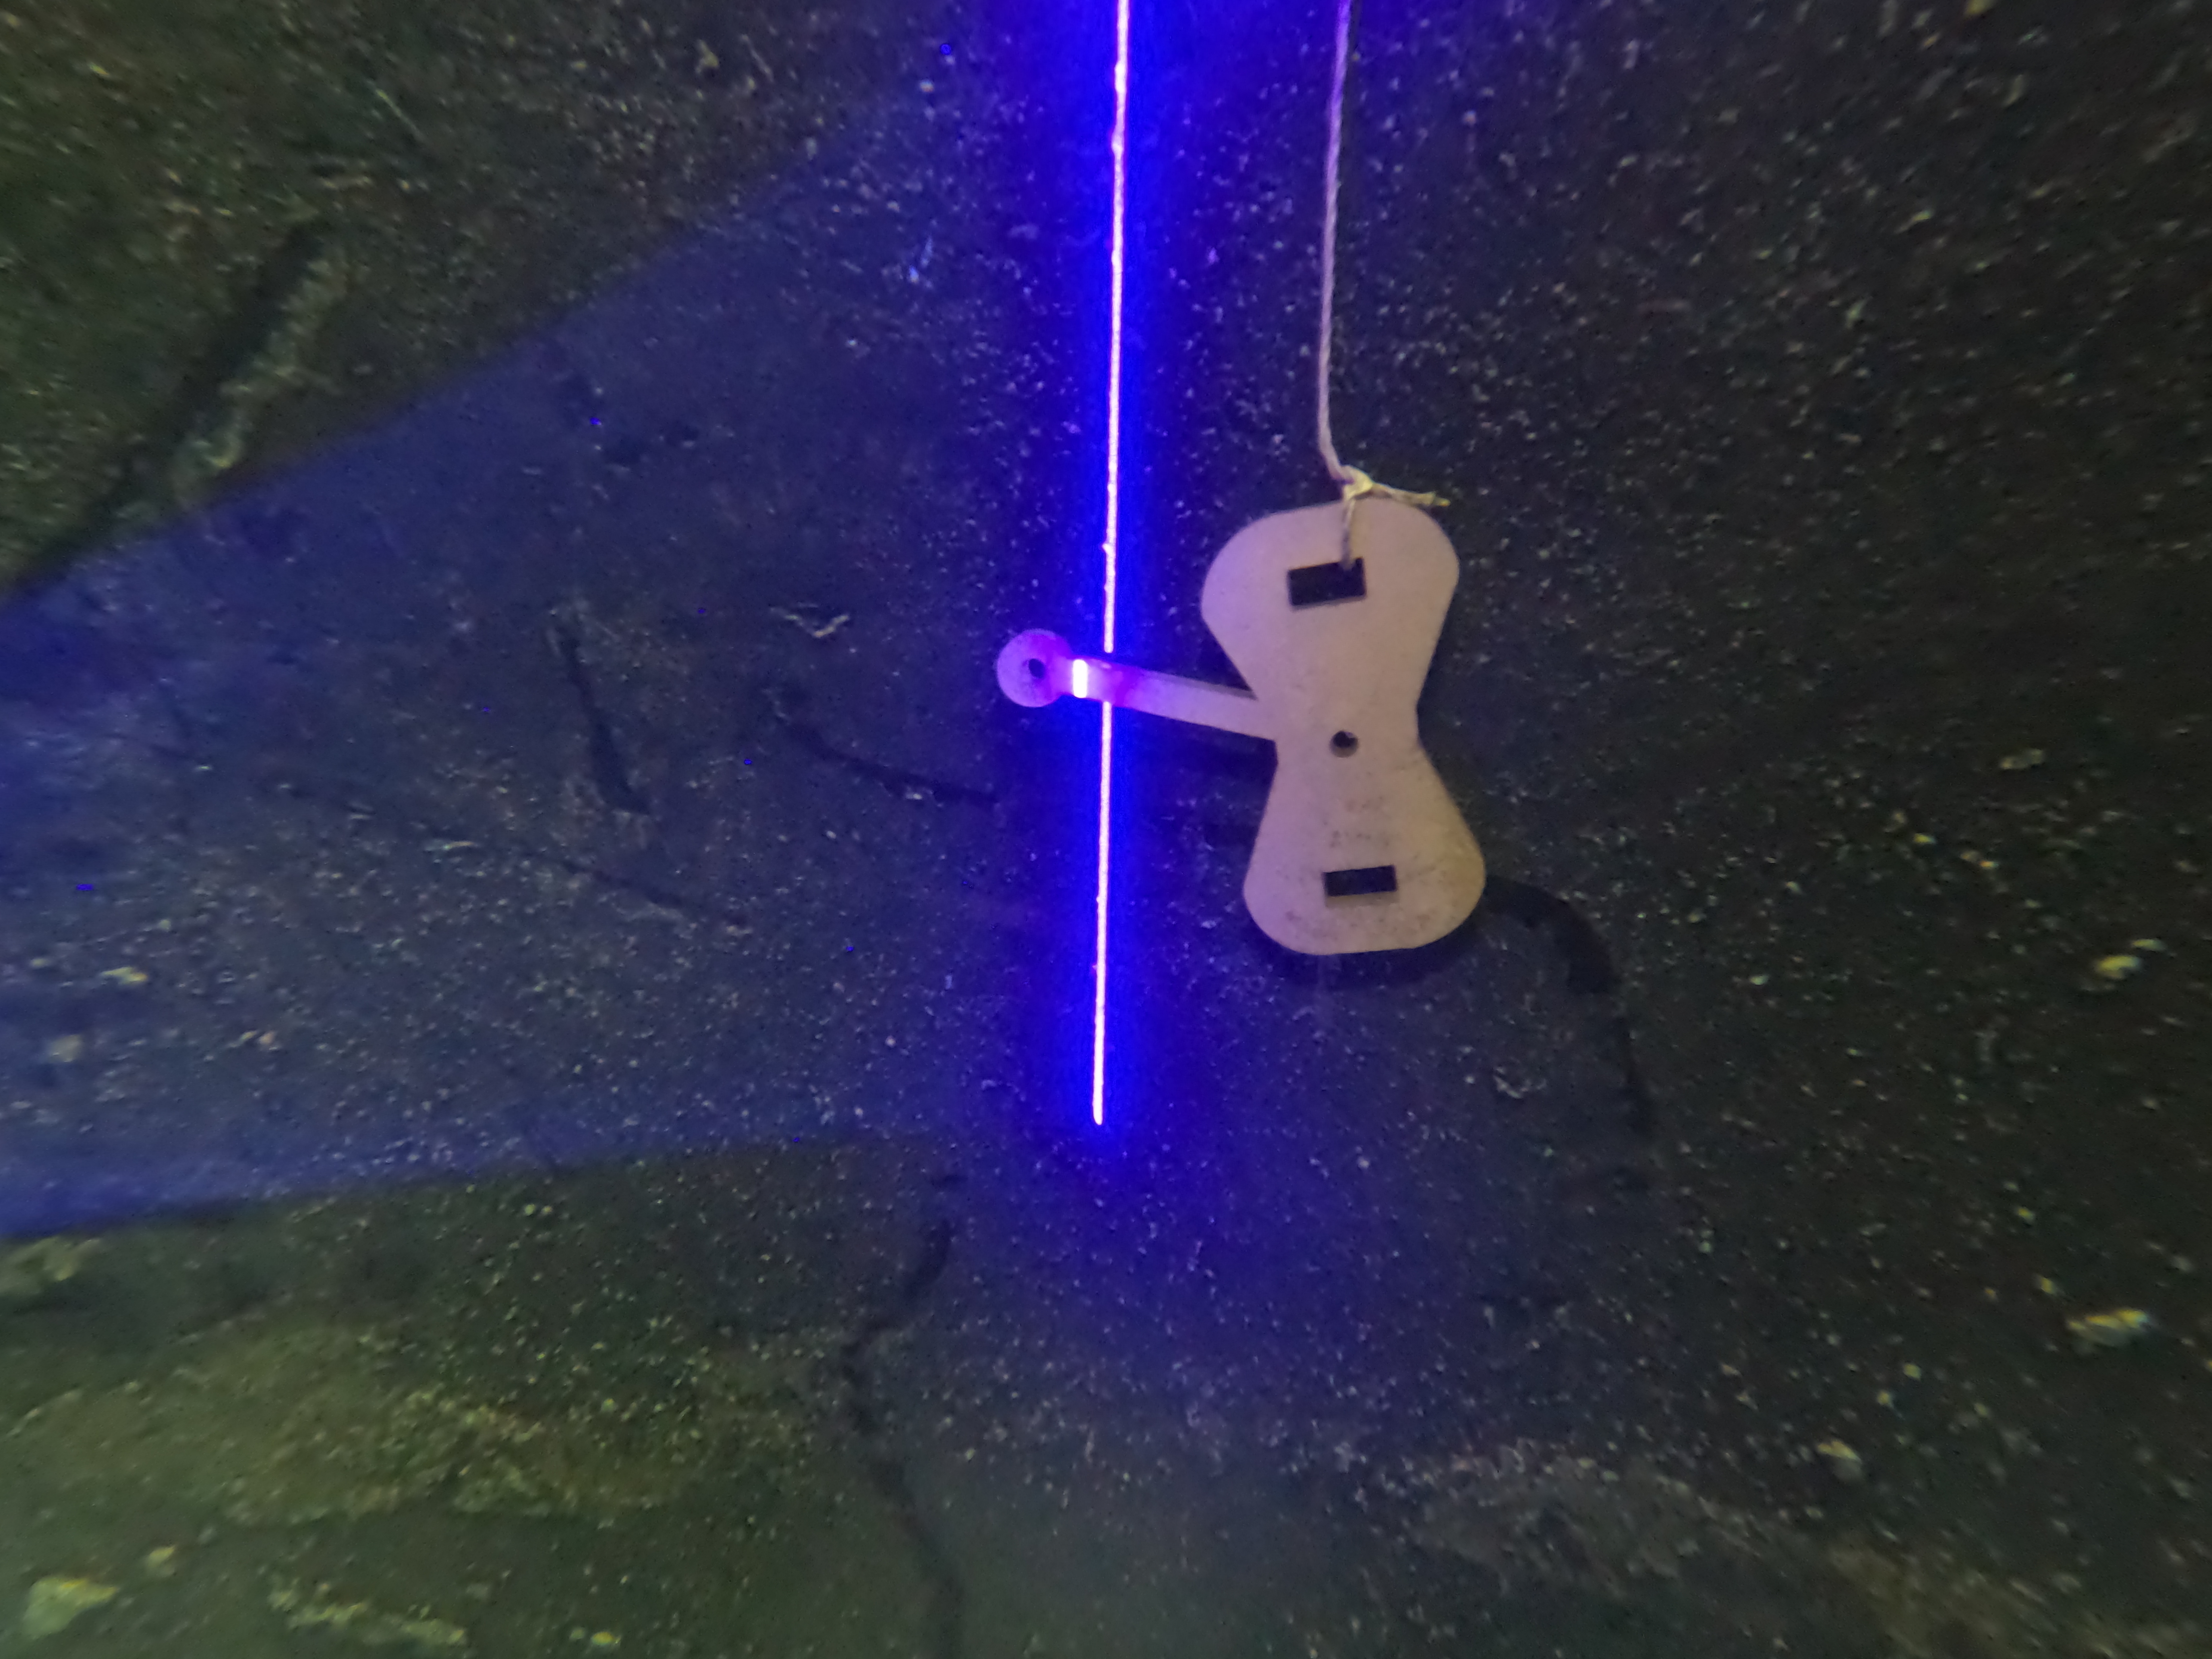

Supplement: Supplementary file 3270 [file G0015711.pdf › Level_2_1/G0015711.pdf]

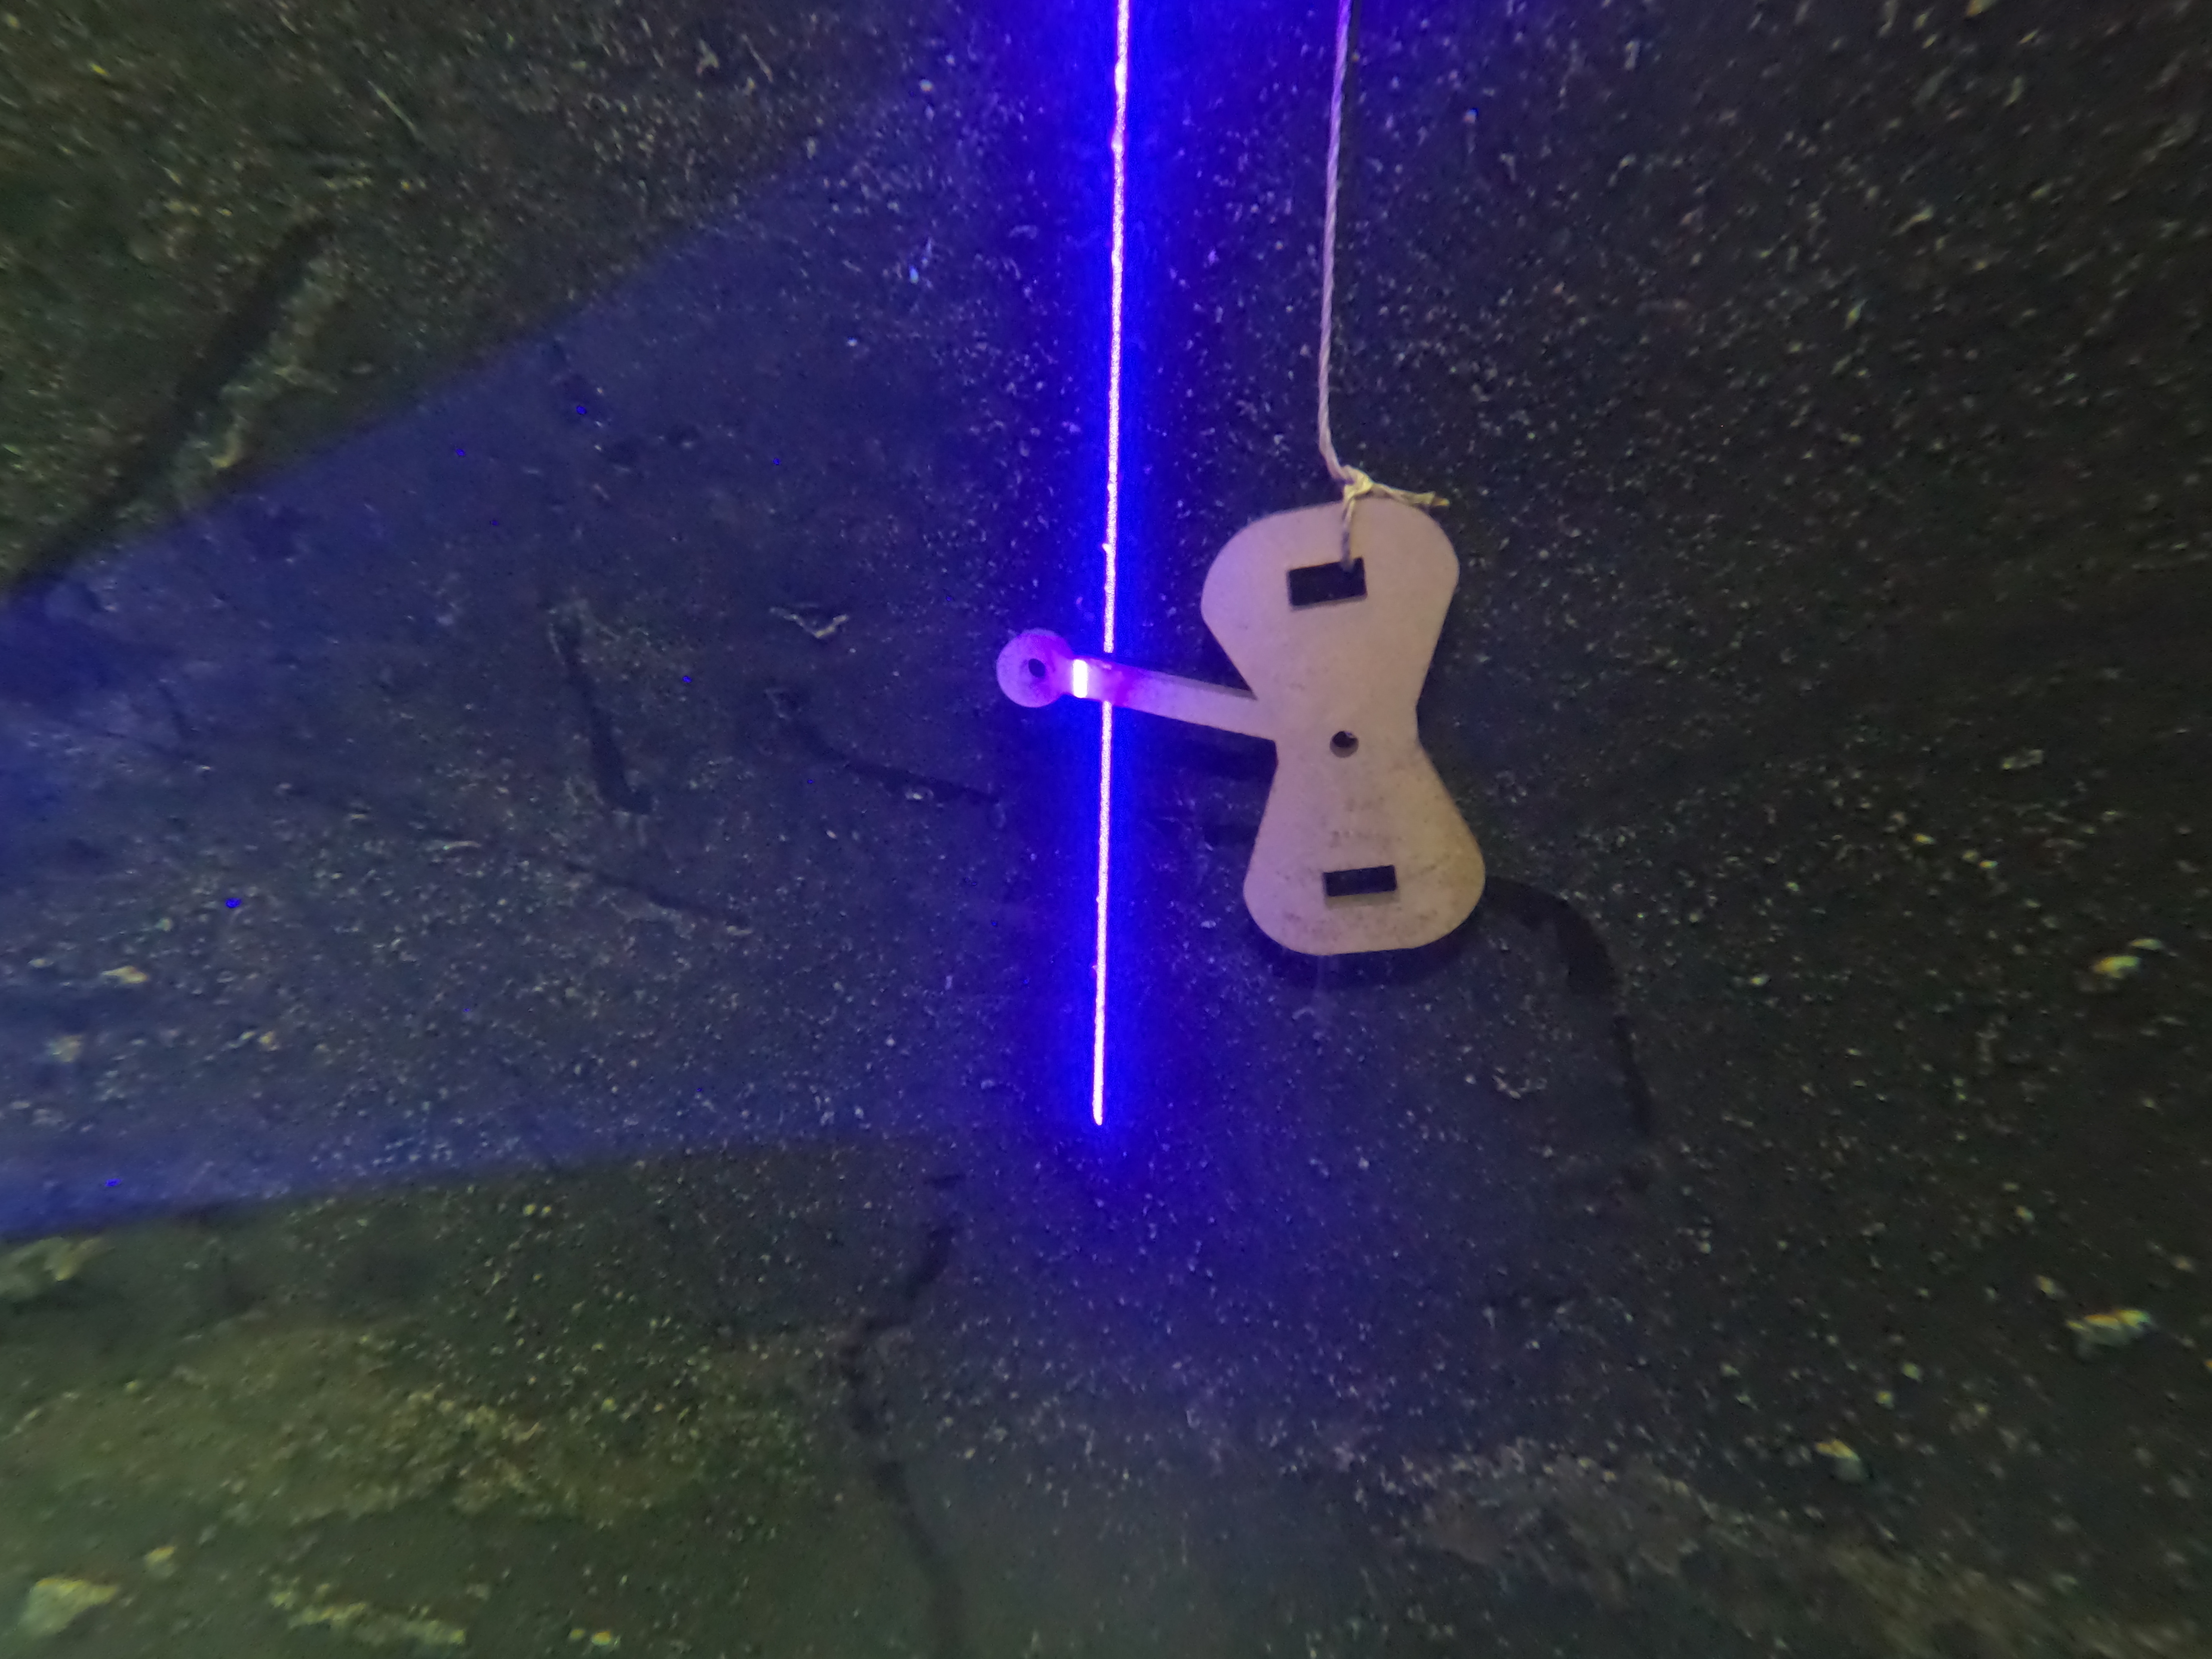

Supplement: Supplementary file 3271 [file G0015712.pdf › Level_2_1/G0015712.pdf]

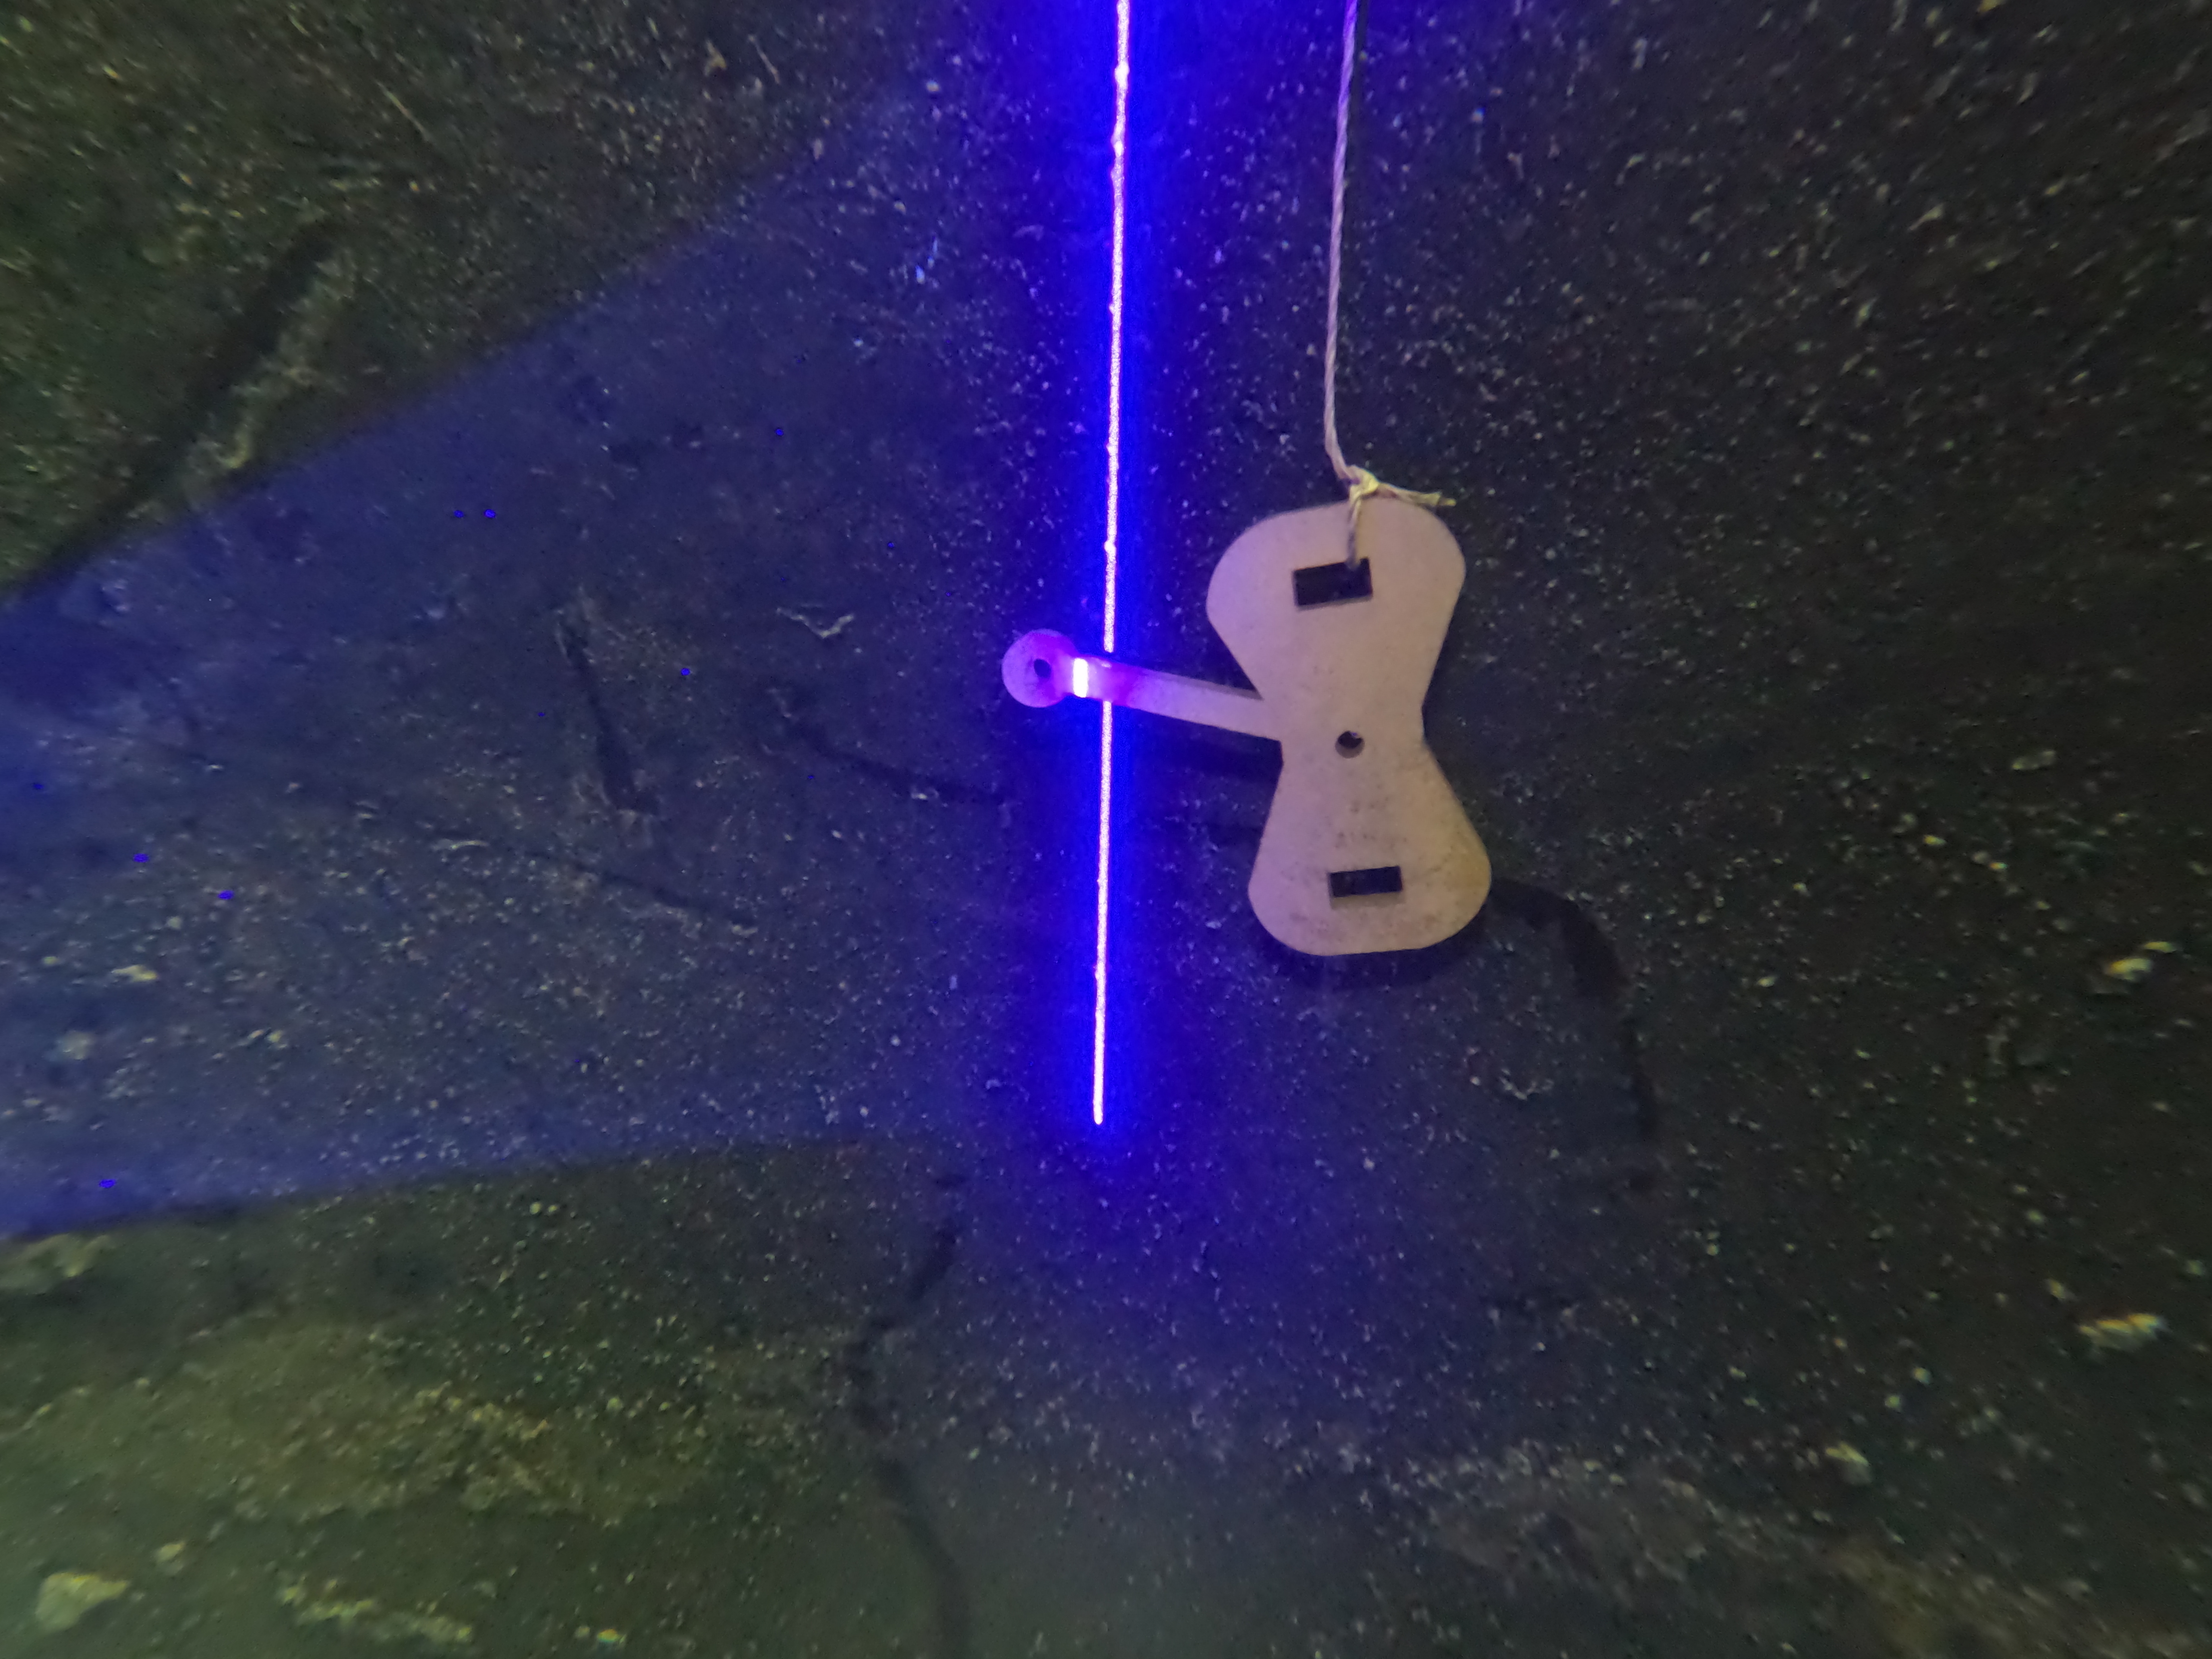

Supplement: Supplementary file 3272 [file G0015713.pdf › Level_2_1/G0015713.pdf]

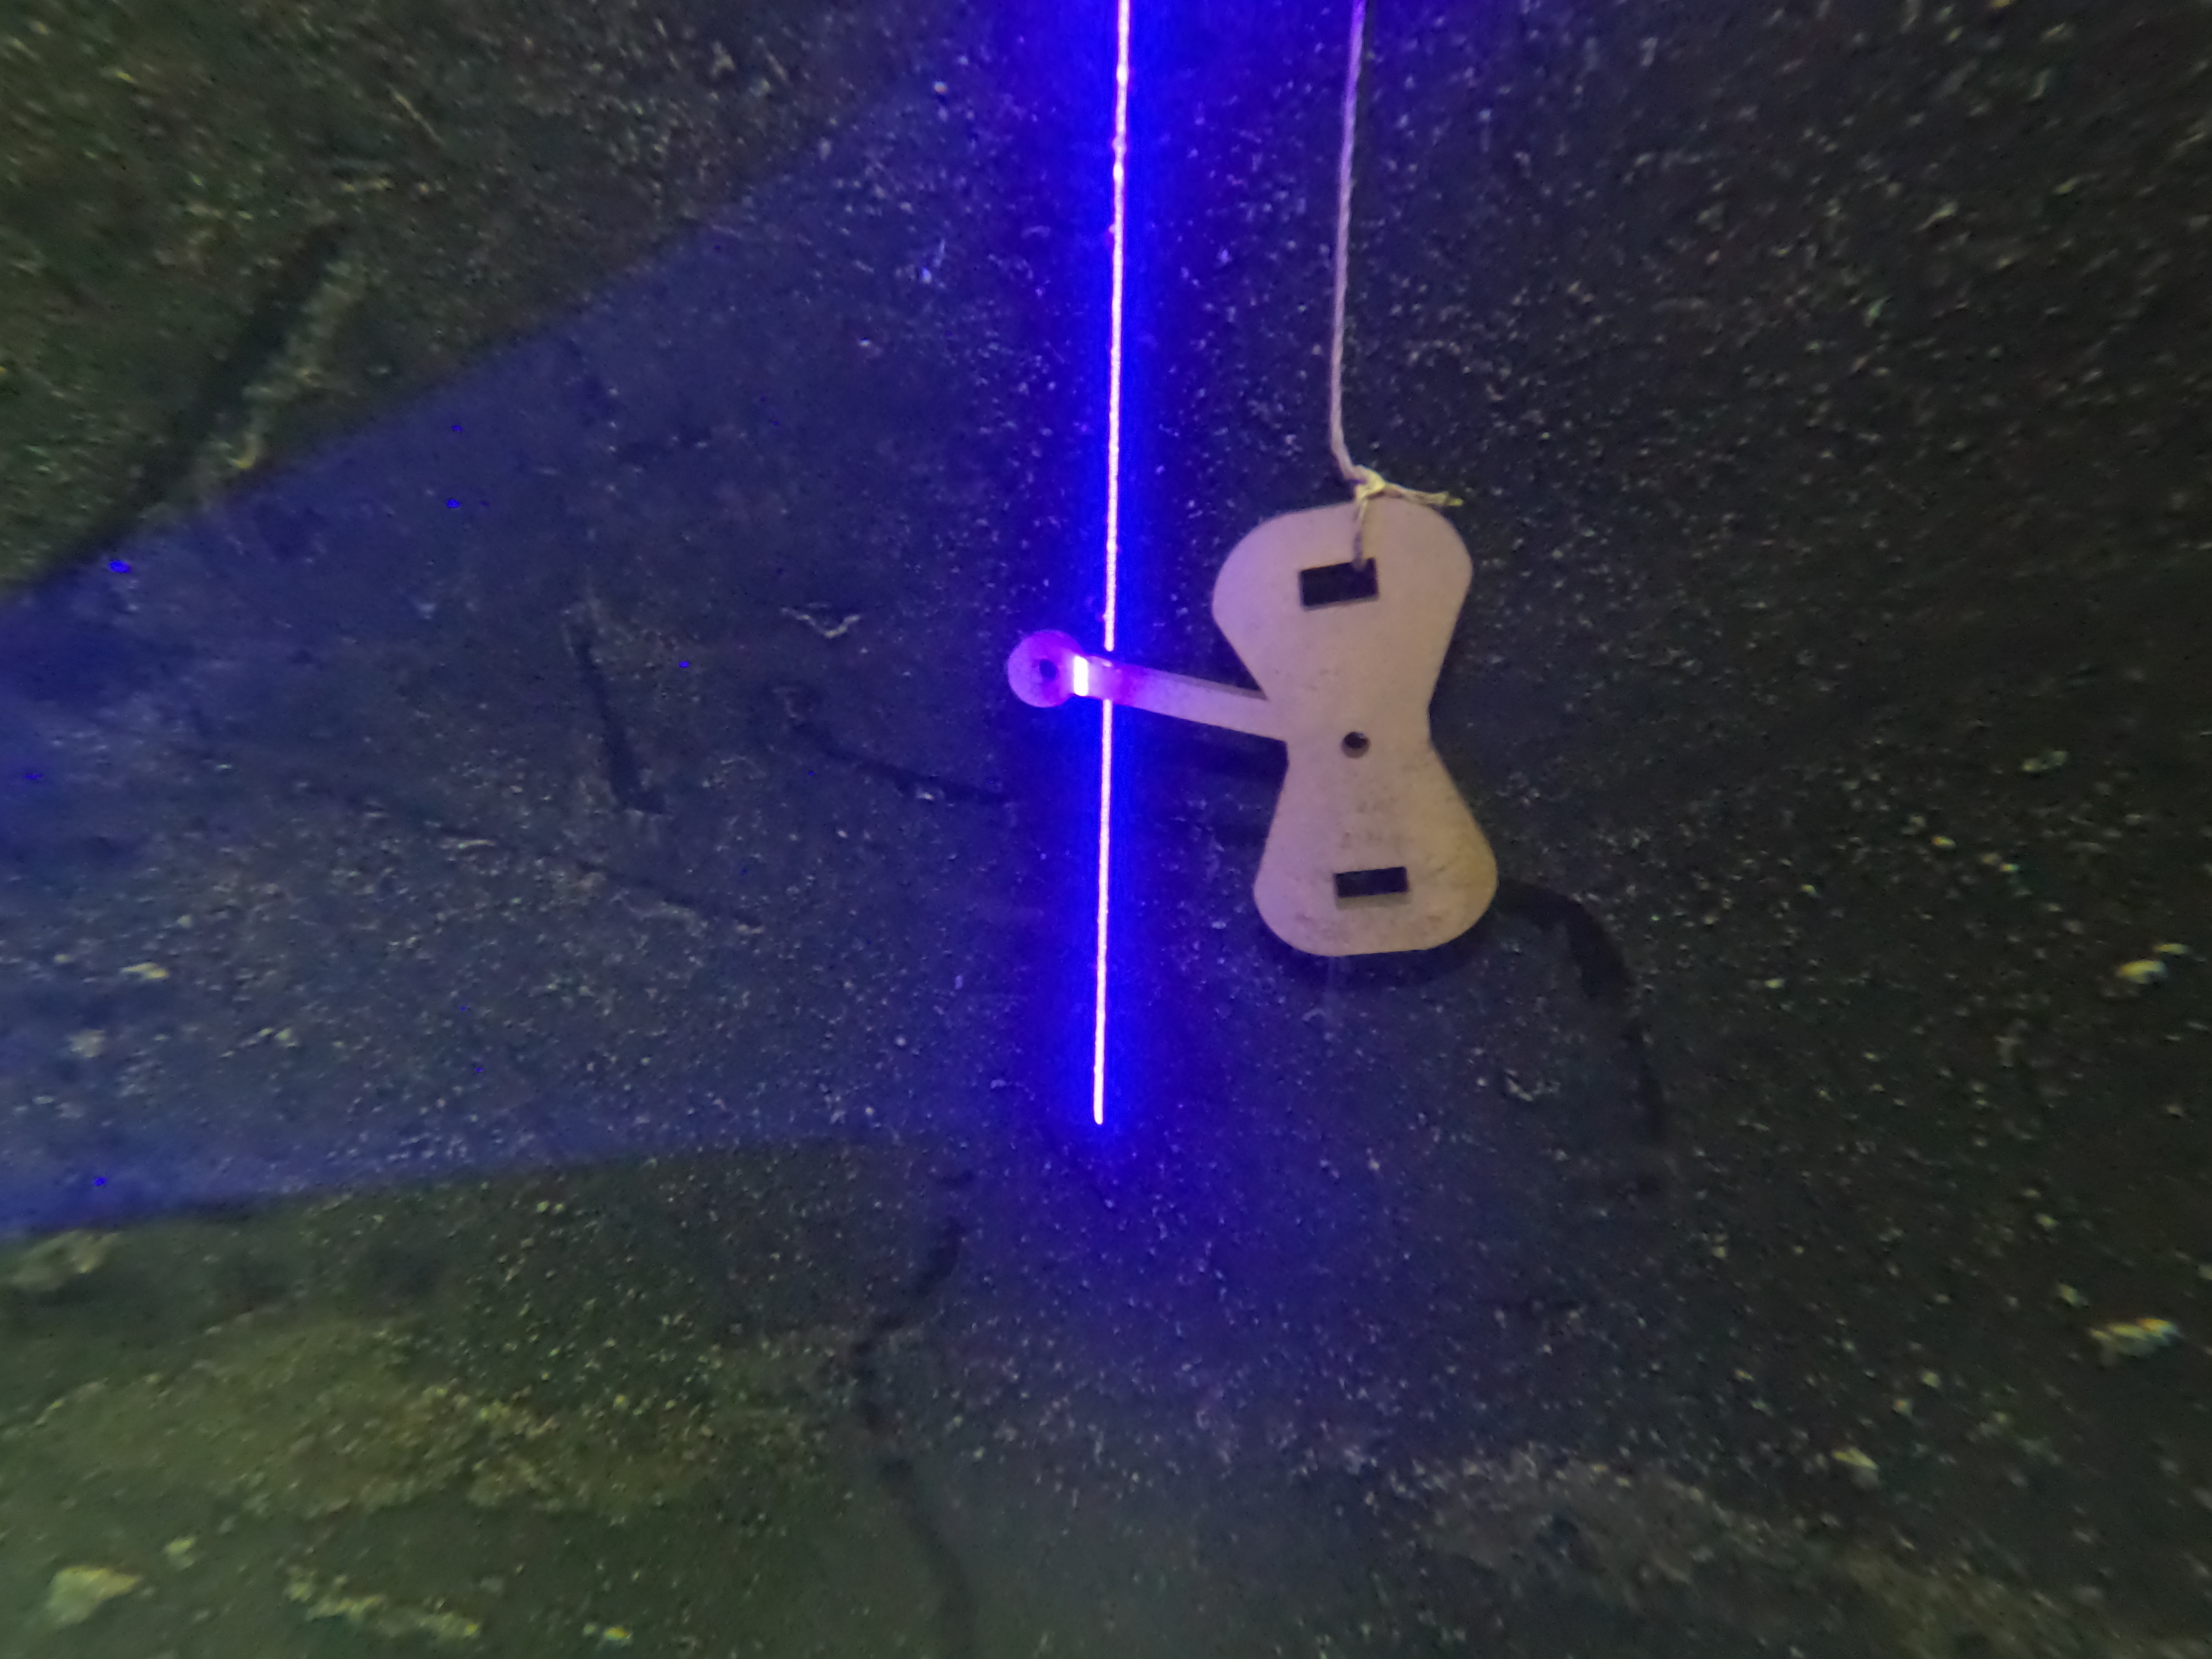

Supplement: Supplementary file 3273 [file G0015714.pdf › Level_2_1/G0015714.pdf]

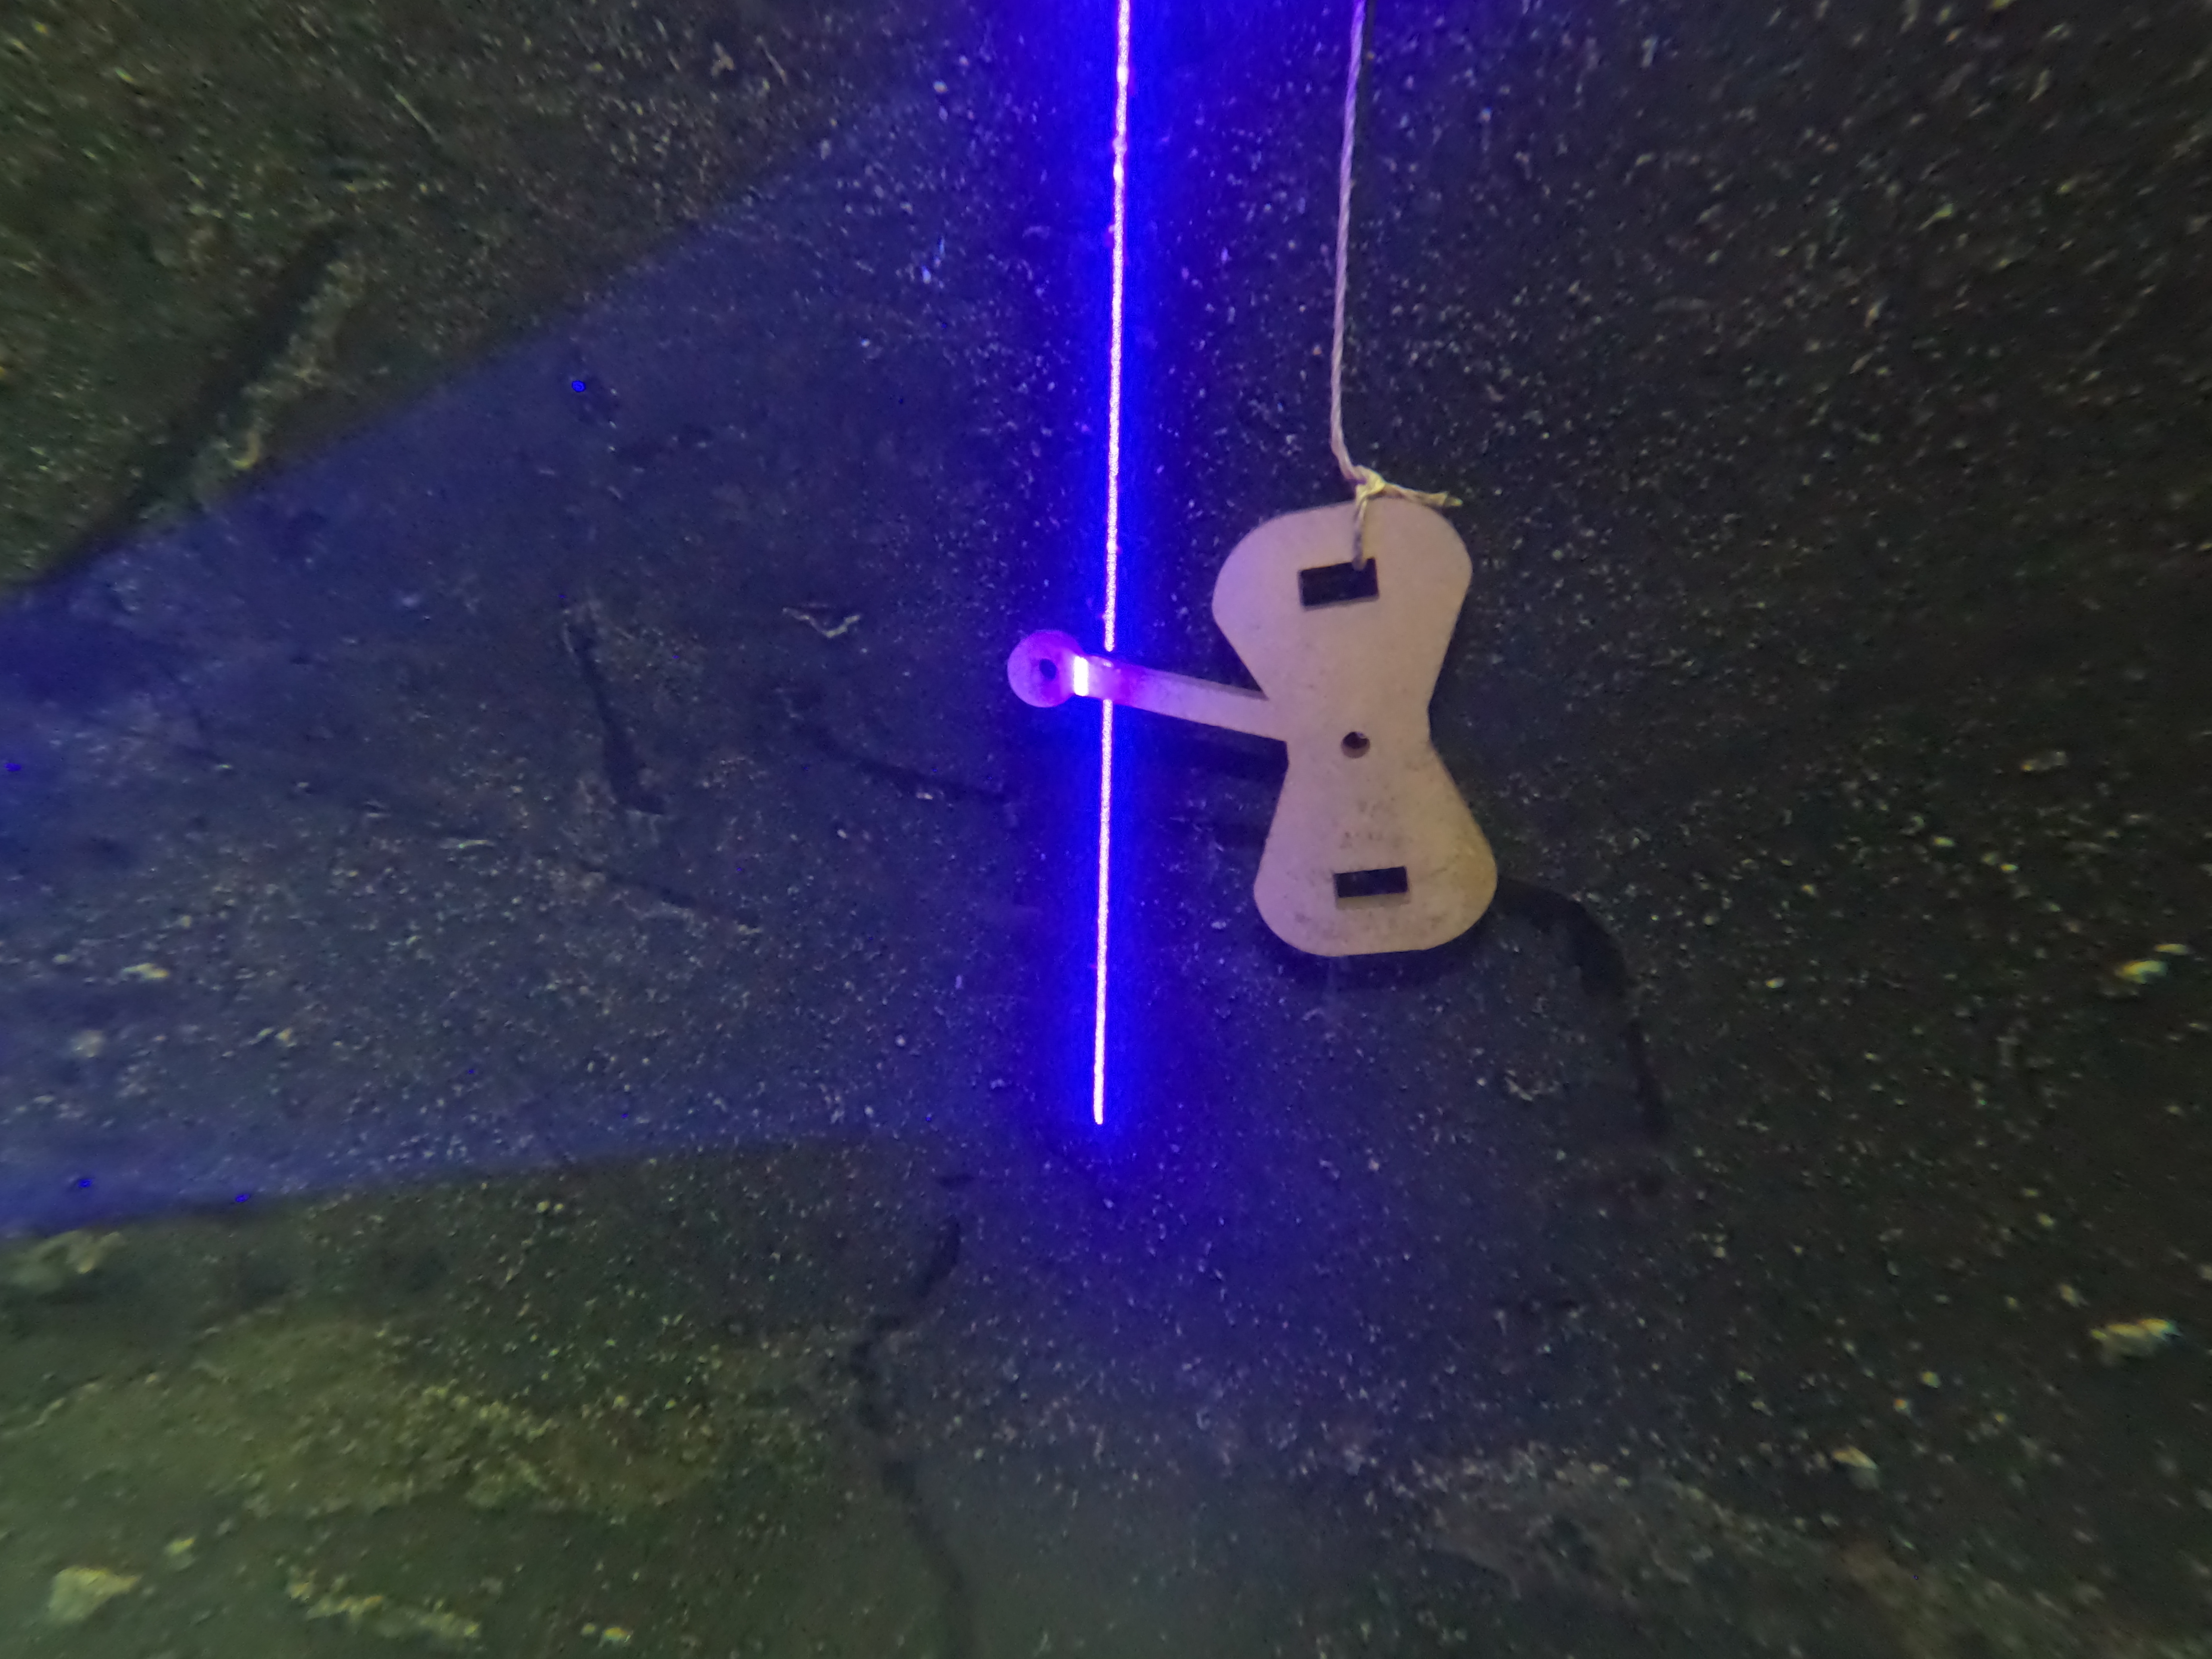

Supplement: Supplementary file 3274 [file G0015715.pdf › Level_2_1/G0015715.pdf]

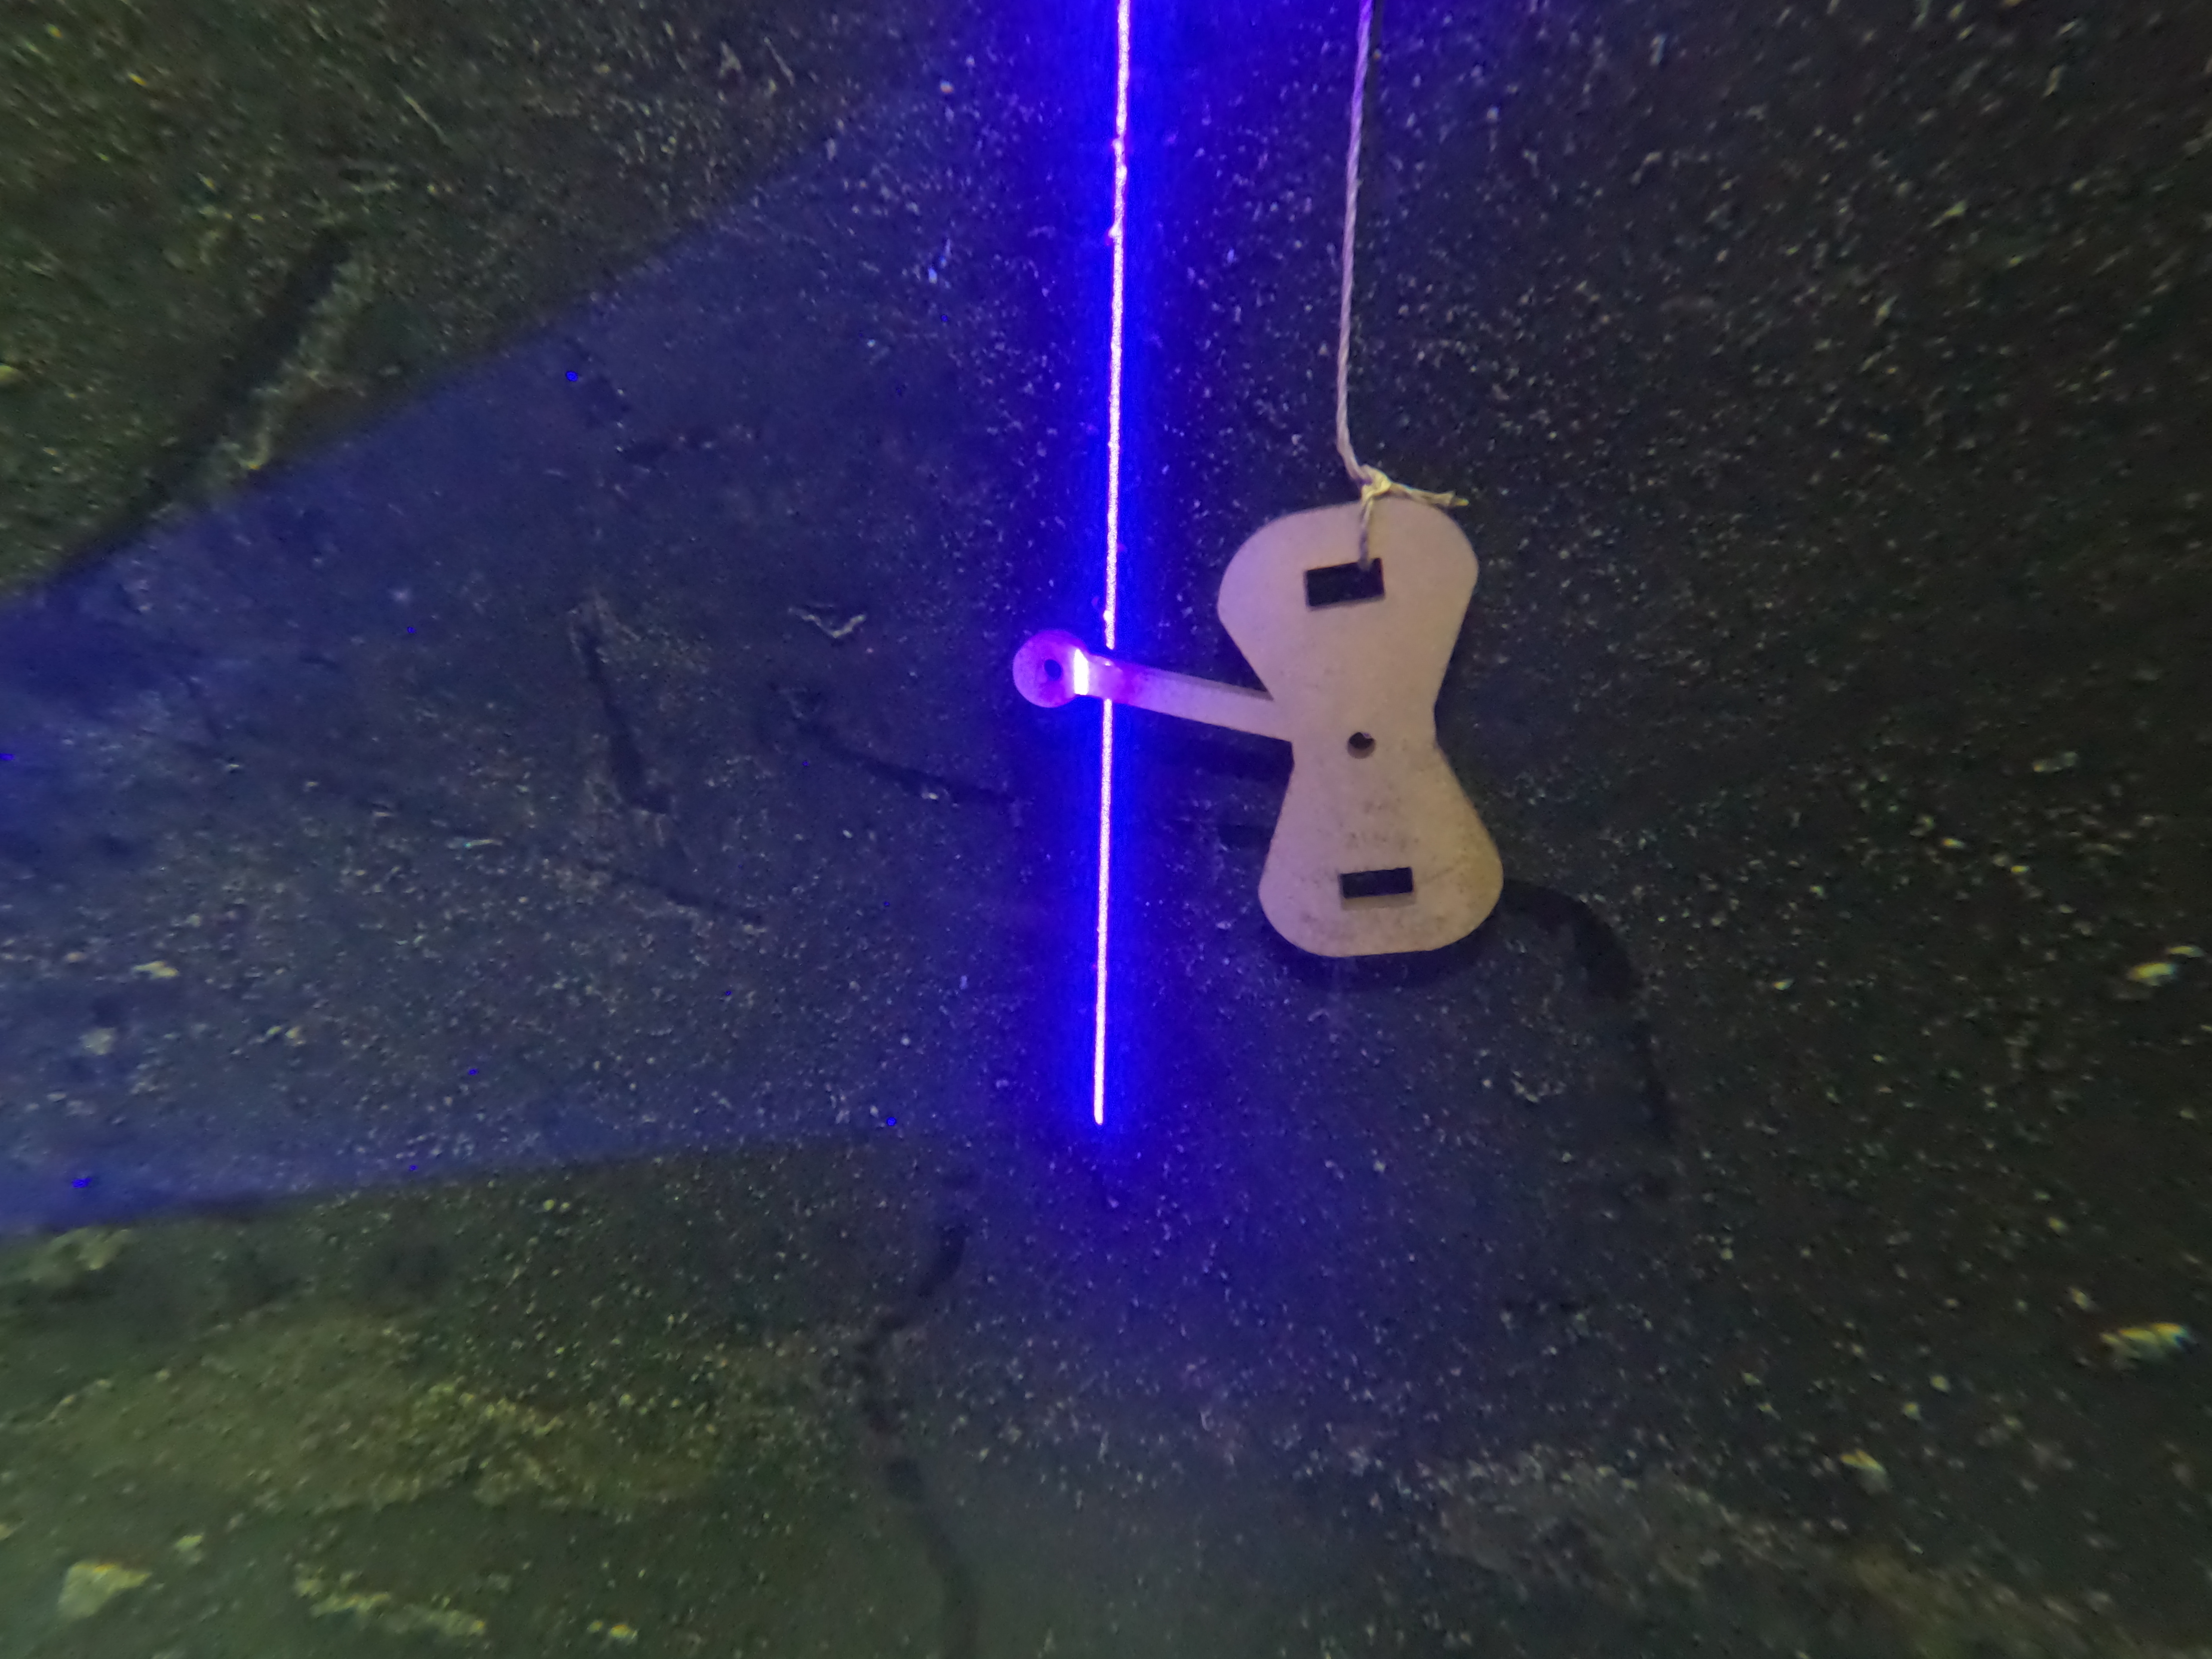

Supplement: Supplementary file 3275 [file G0015716.pdf › Level_2_1/G0015716.pdf]

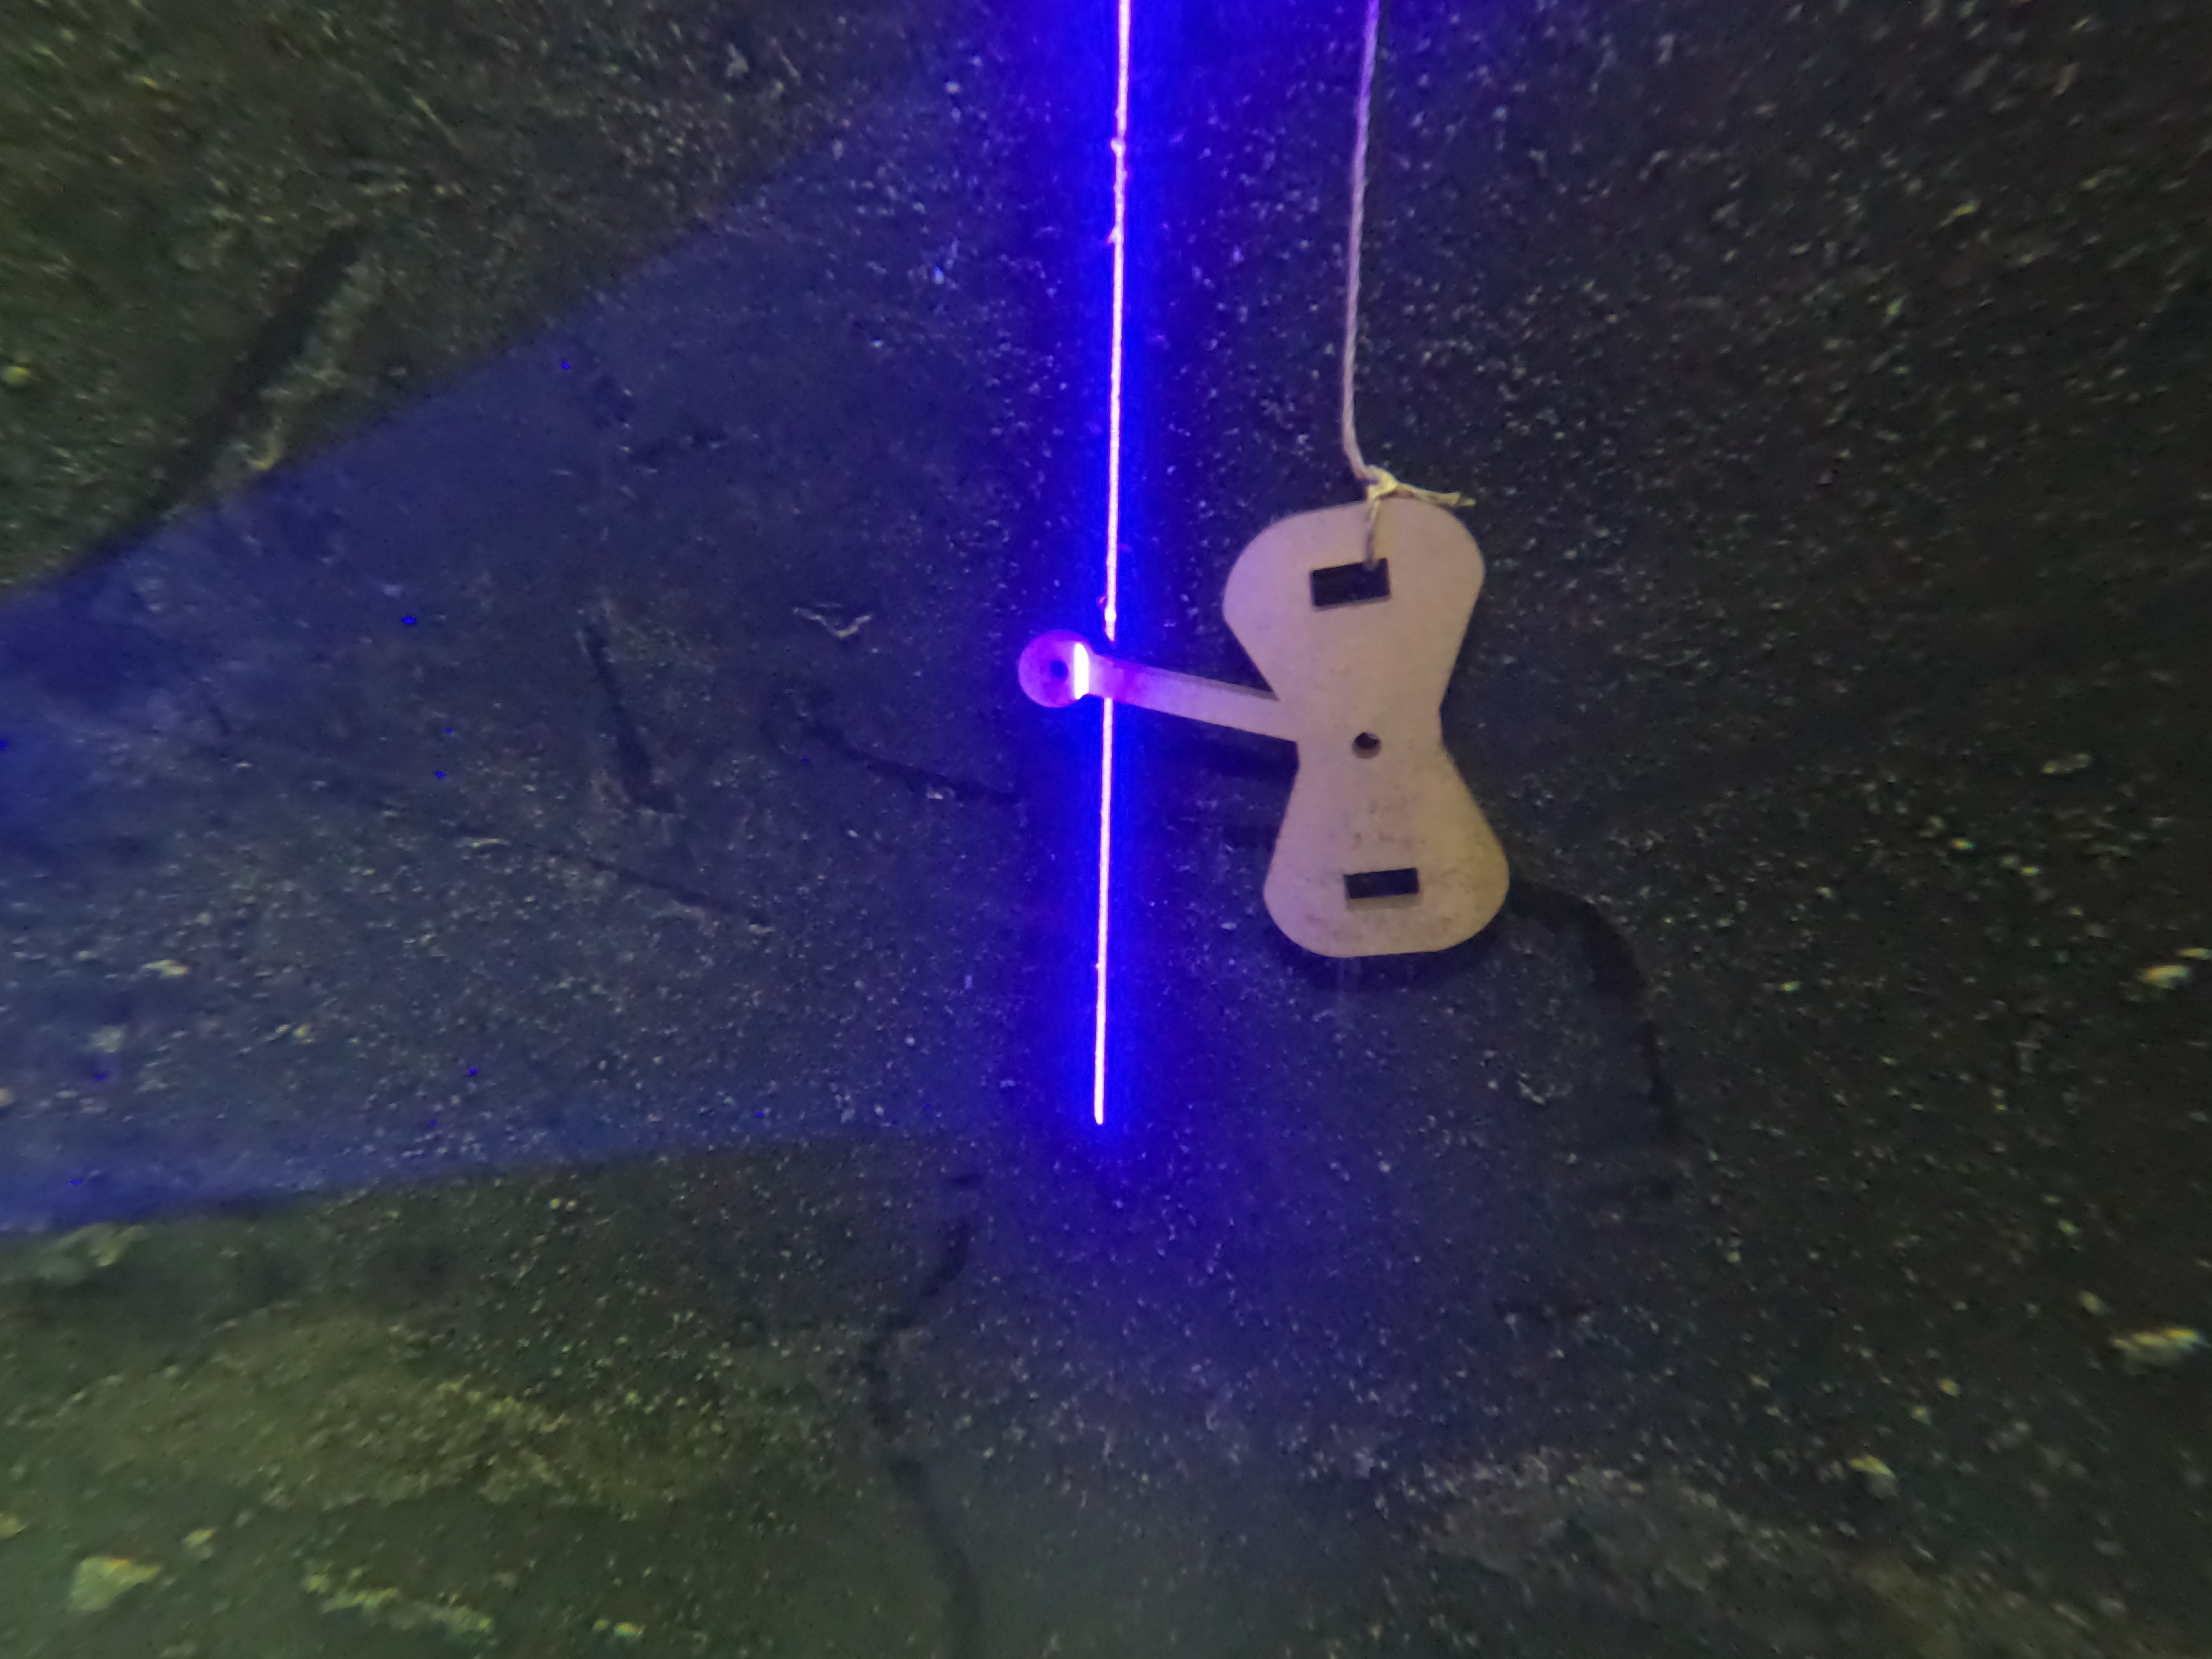

Supplement: Supplementary file 3276 [file G0015717.pdf › Level_2_1/G0015717.pdf]

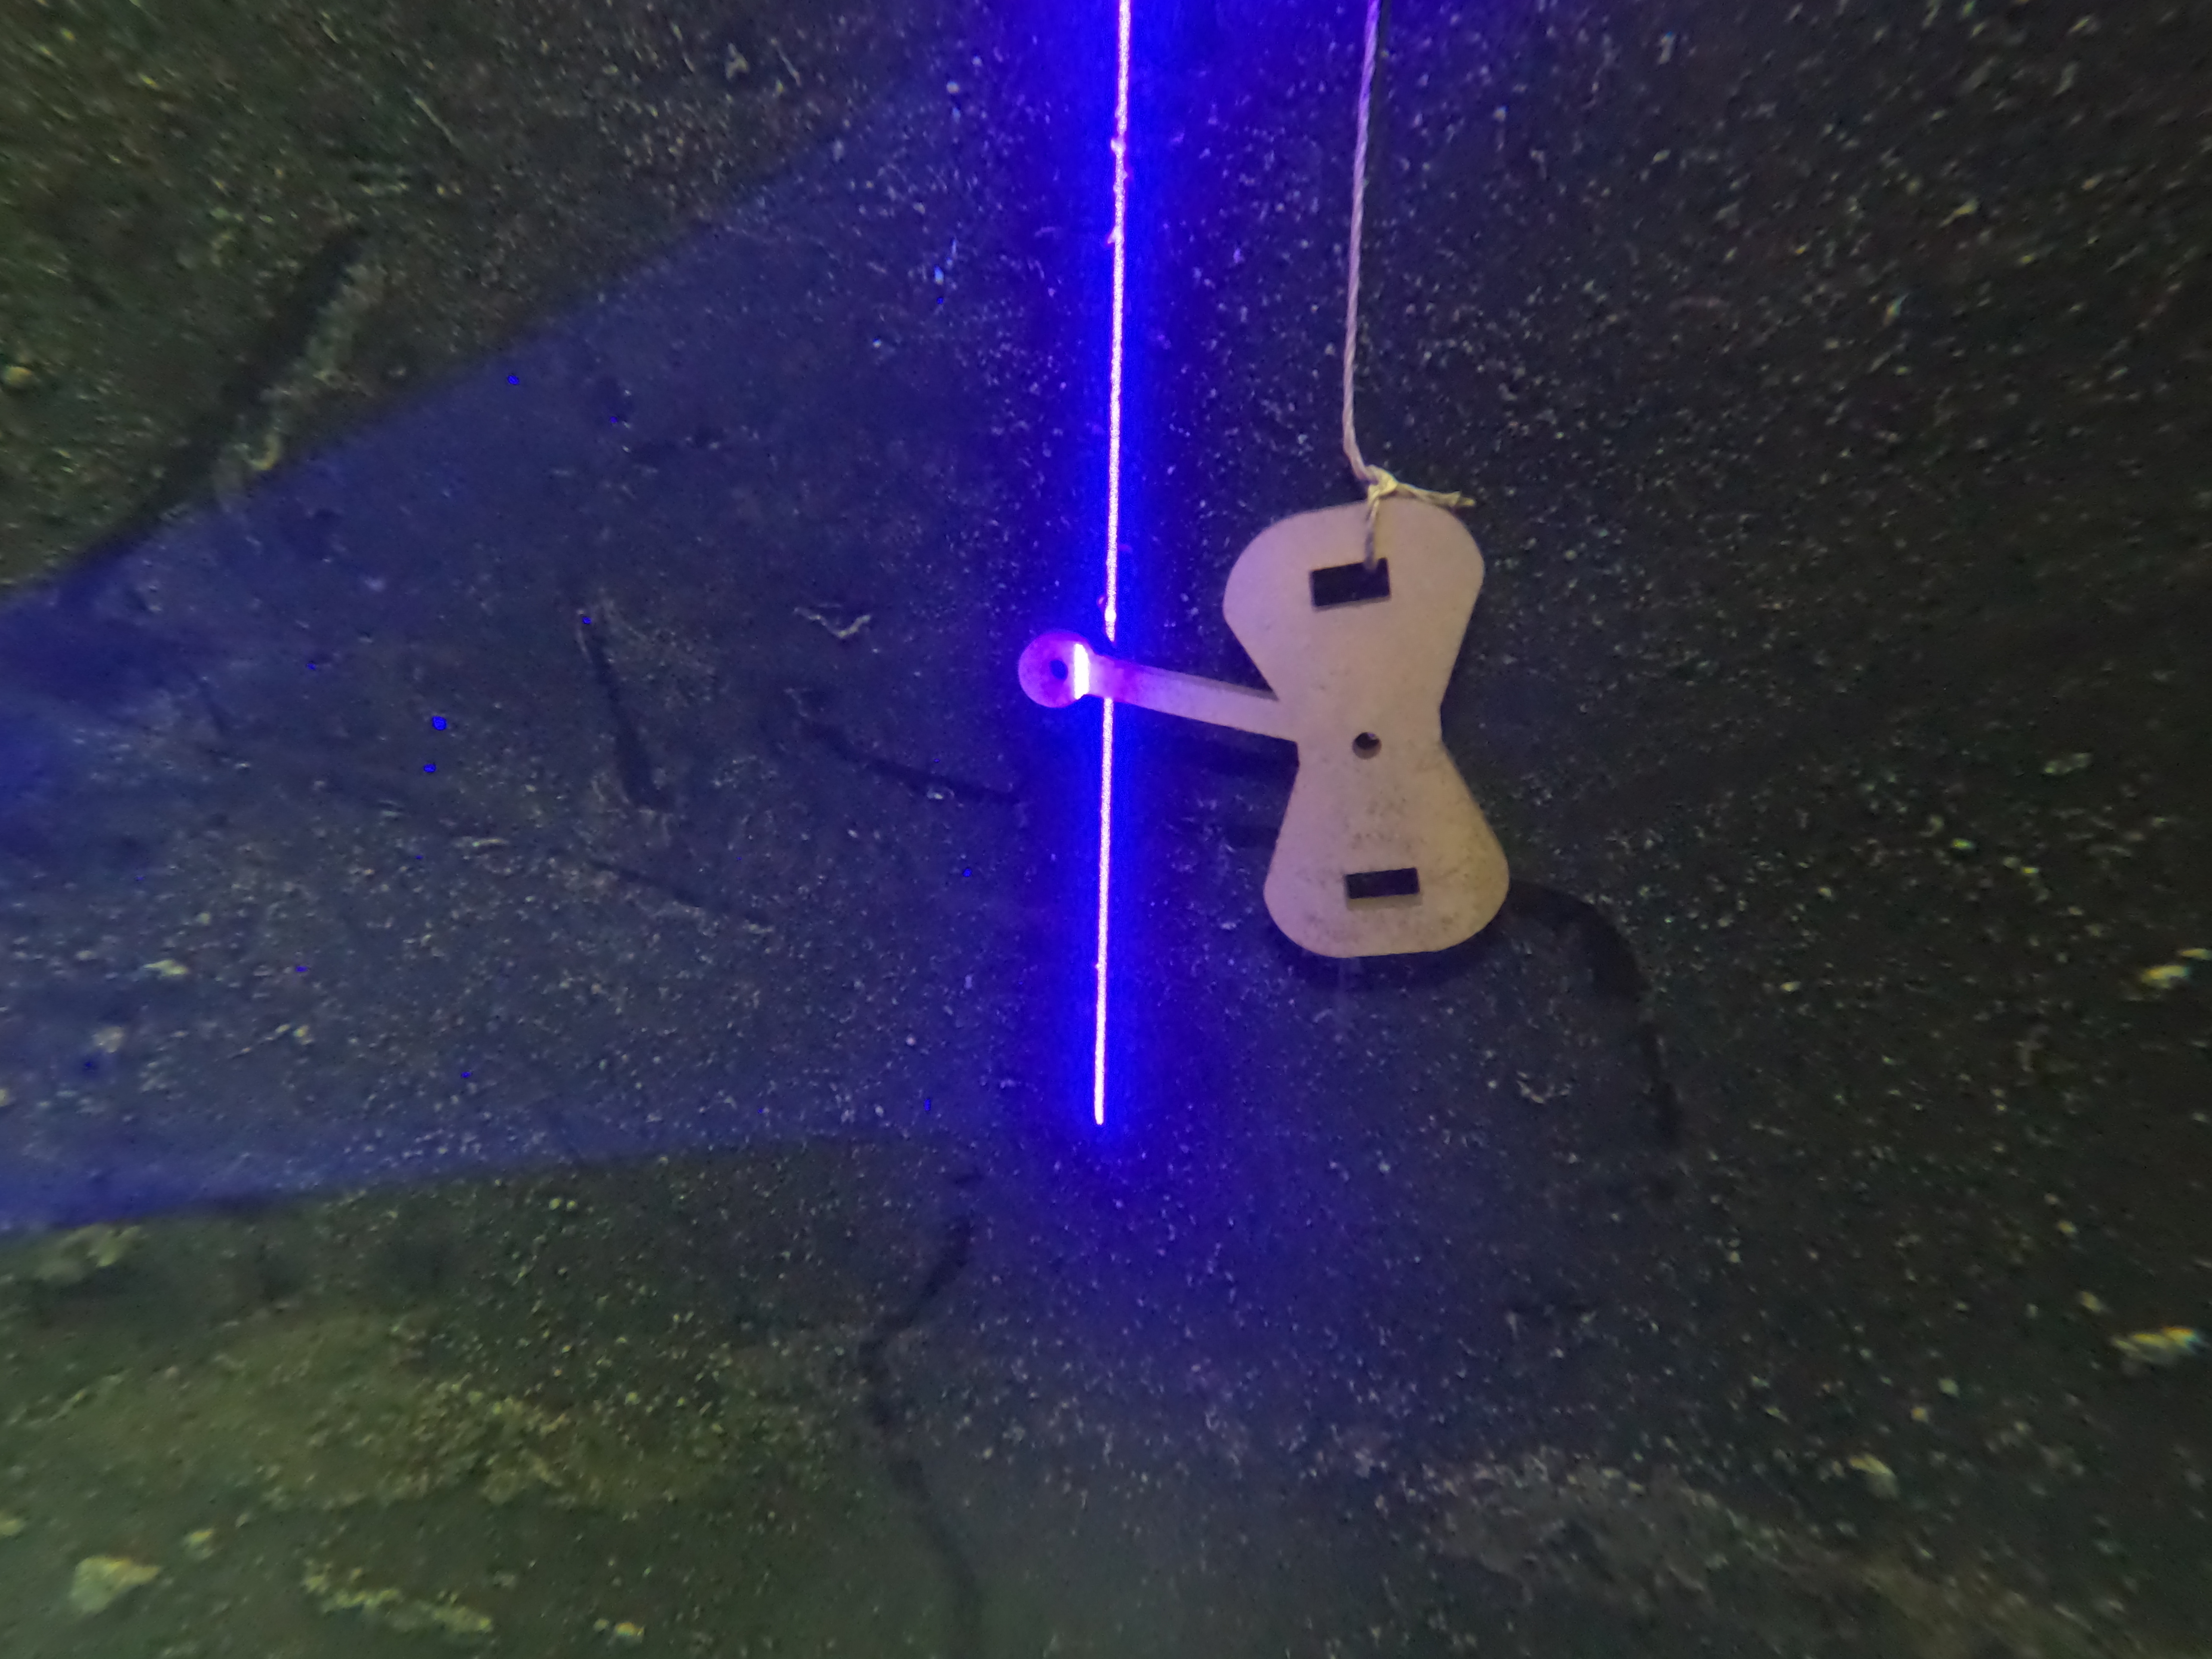

Supplement: Supplementary file 3277 [file G0015718.pdf › Level_2_1/G0015718.pdf]

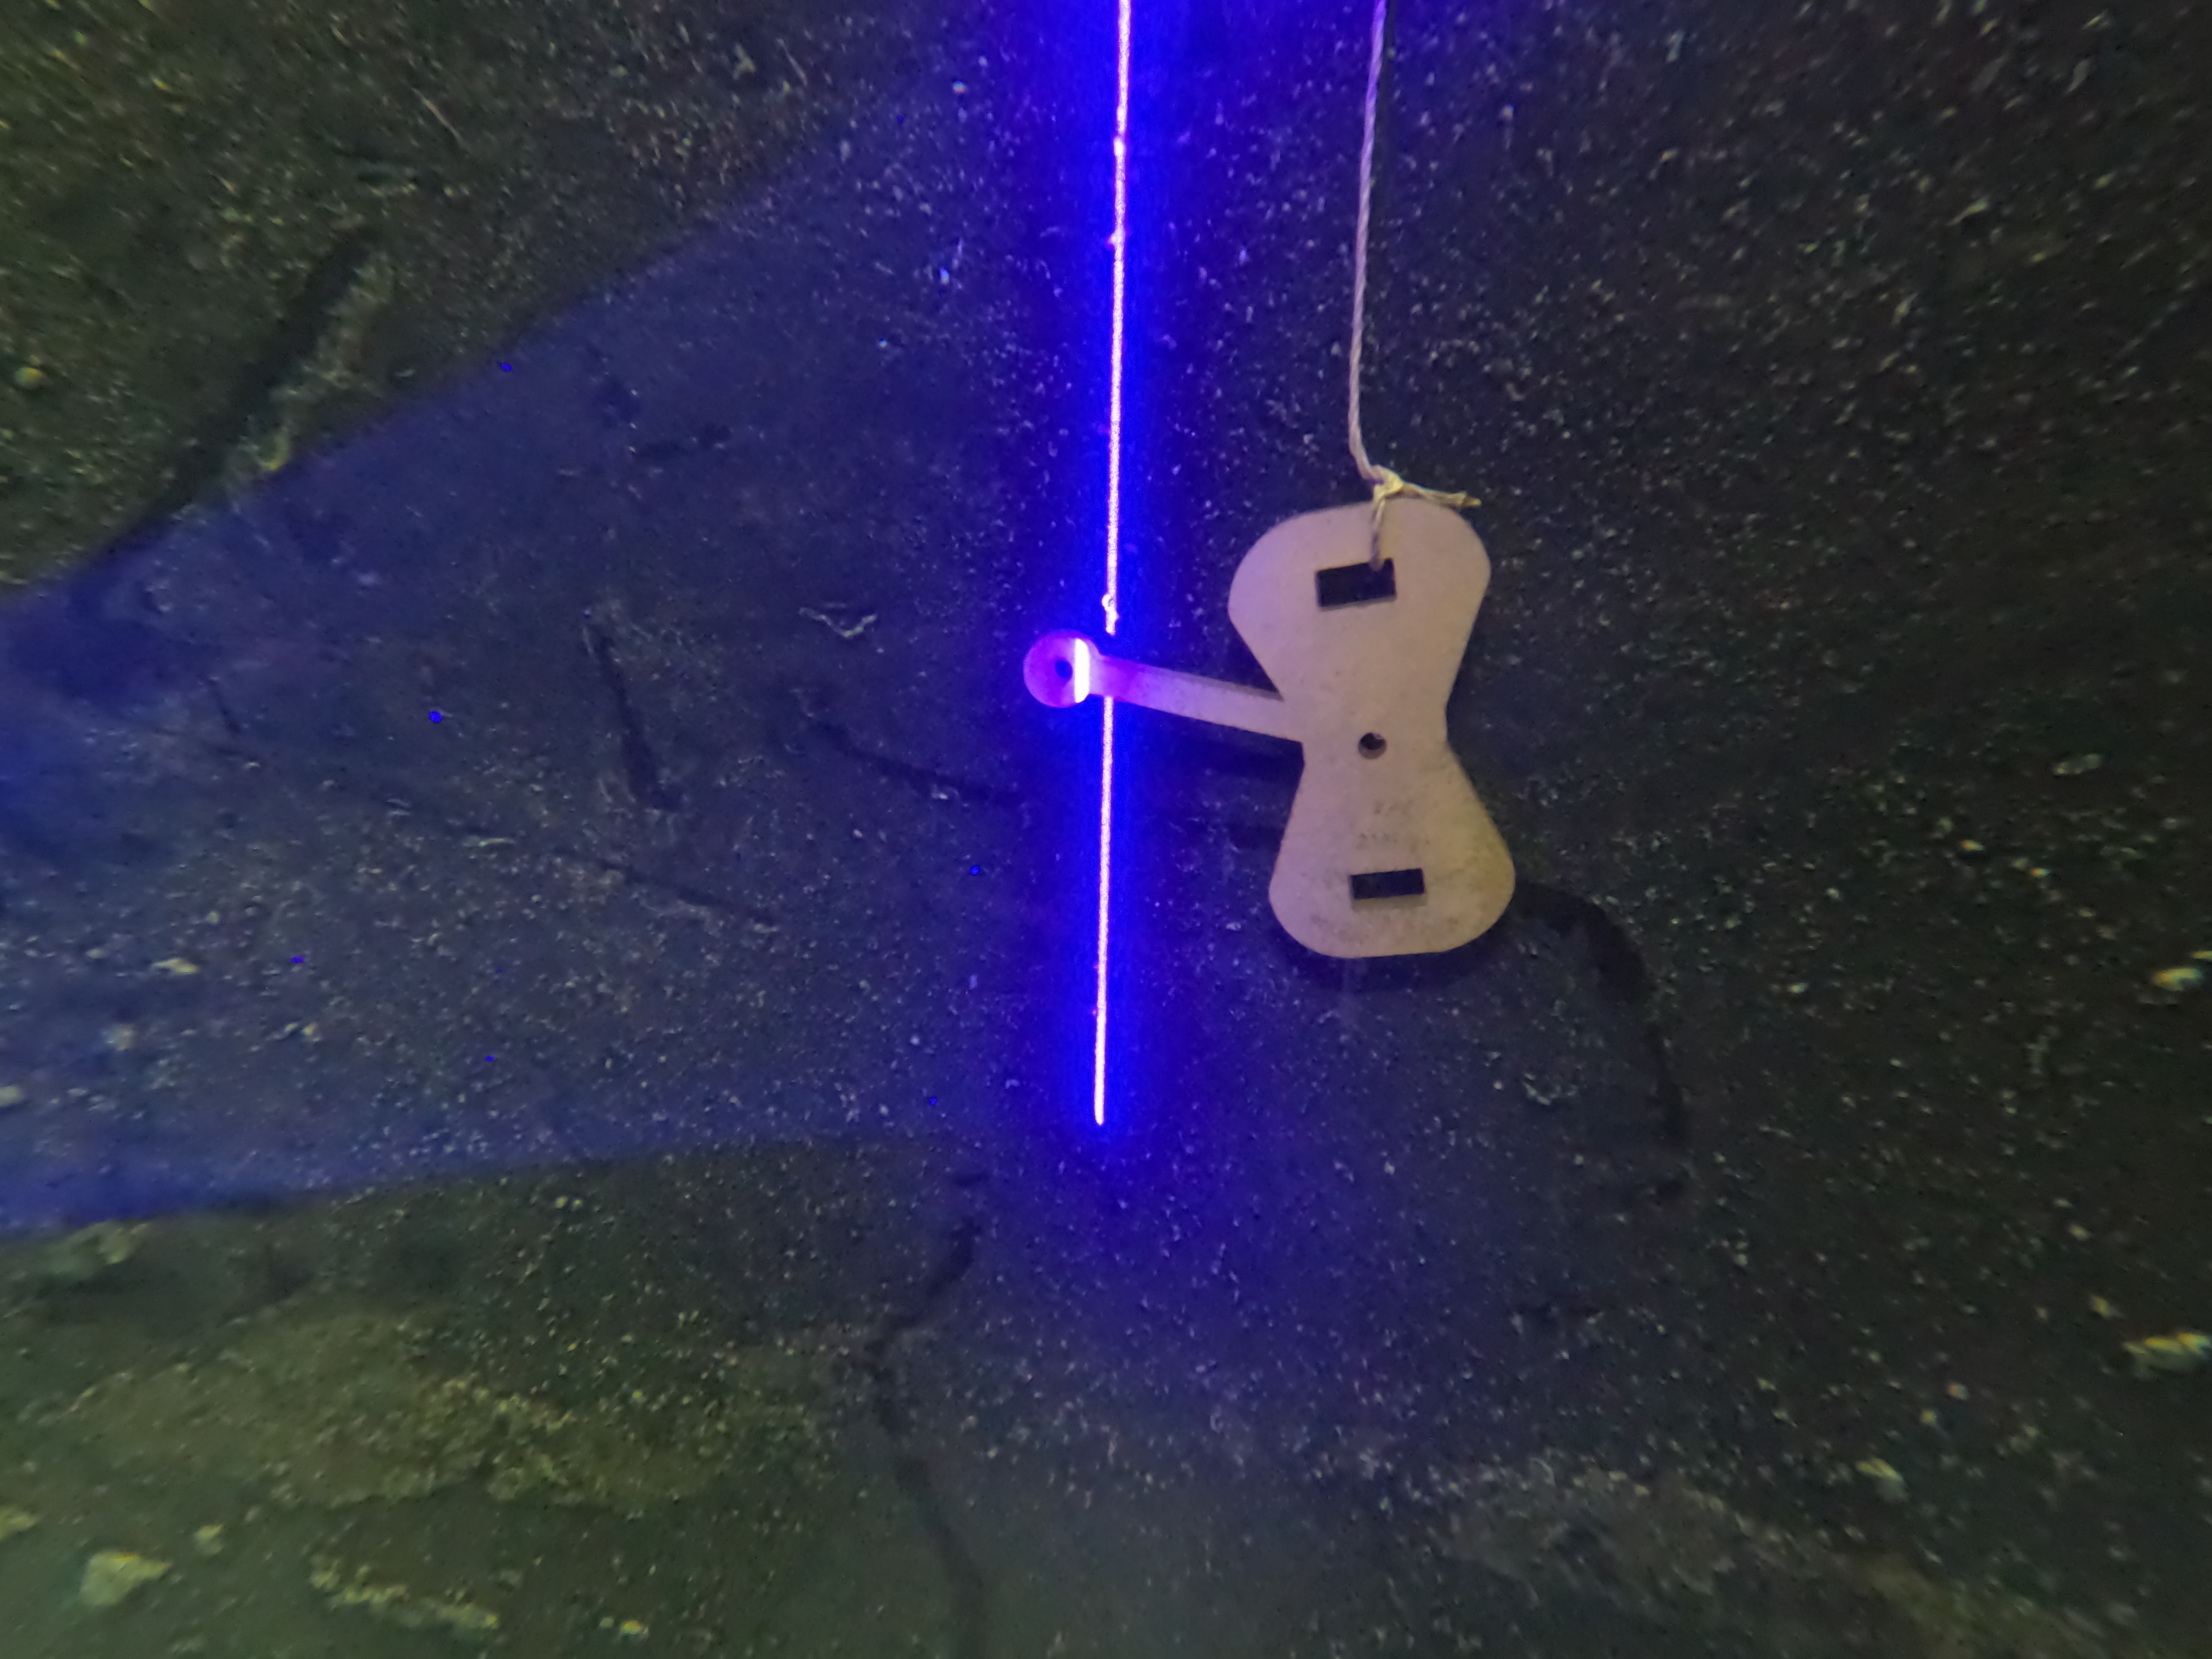

Supplement: Supplementary file 3278 [file G0015719.pdf › Level_2_1/G0015719.pdf]

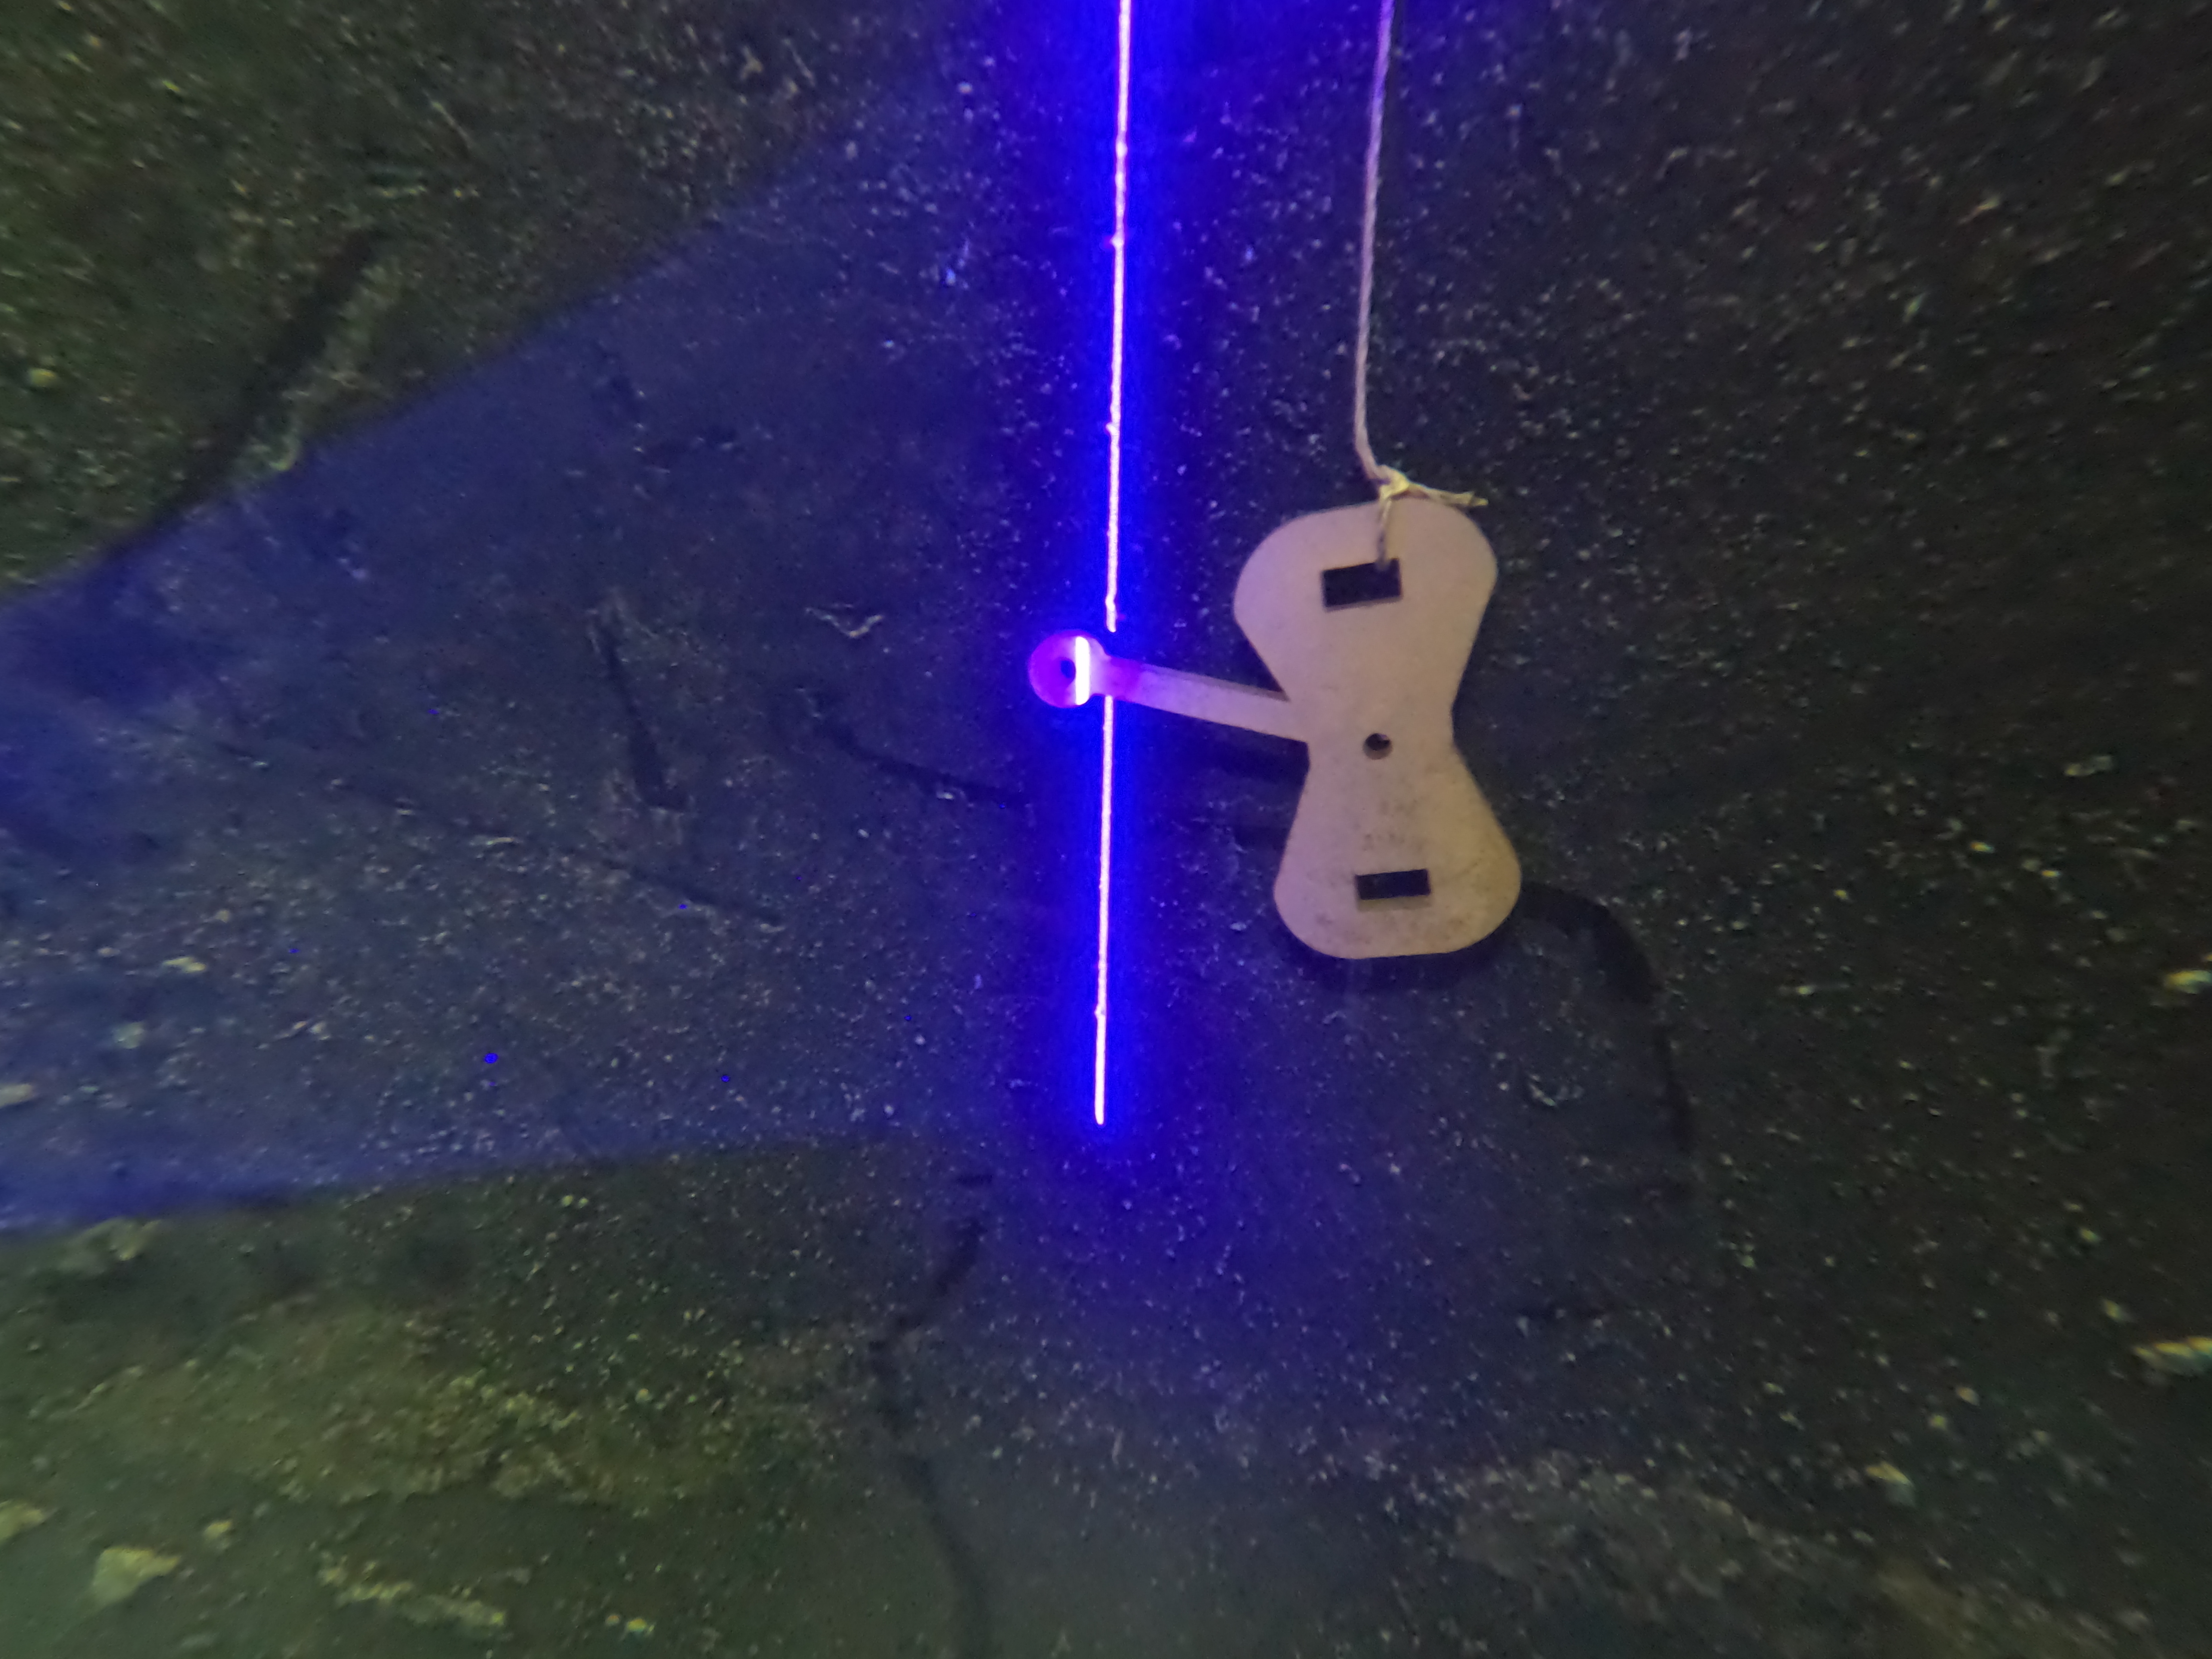

Supplement: Supplementary file 3279 [file G0015720.pdf › Level_2_1/G0015720.pdf]

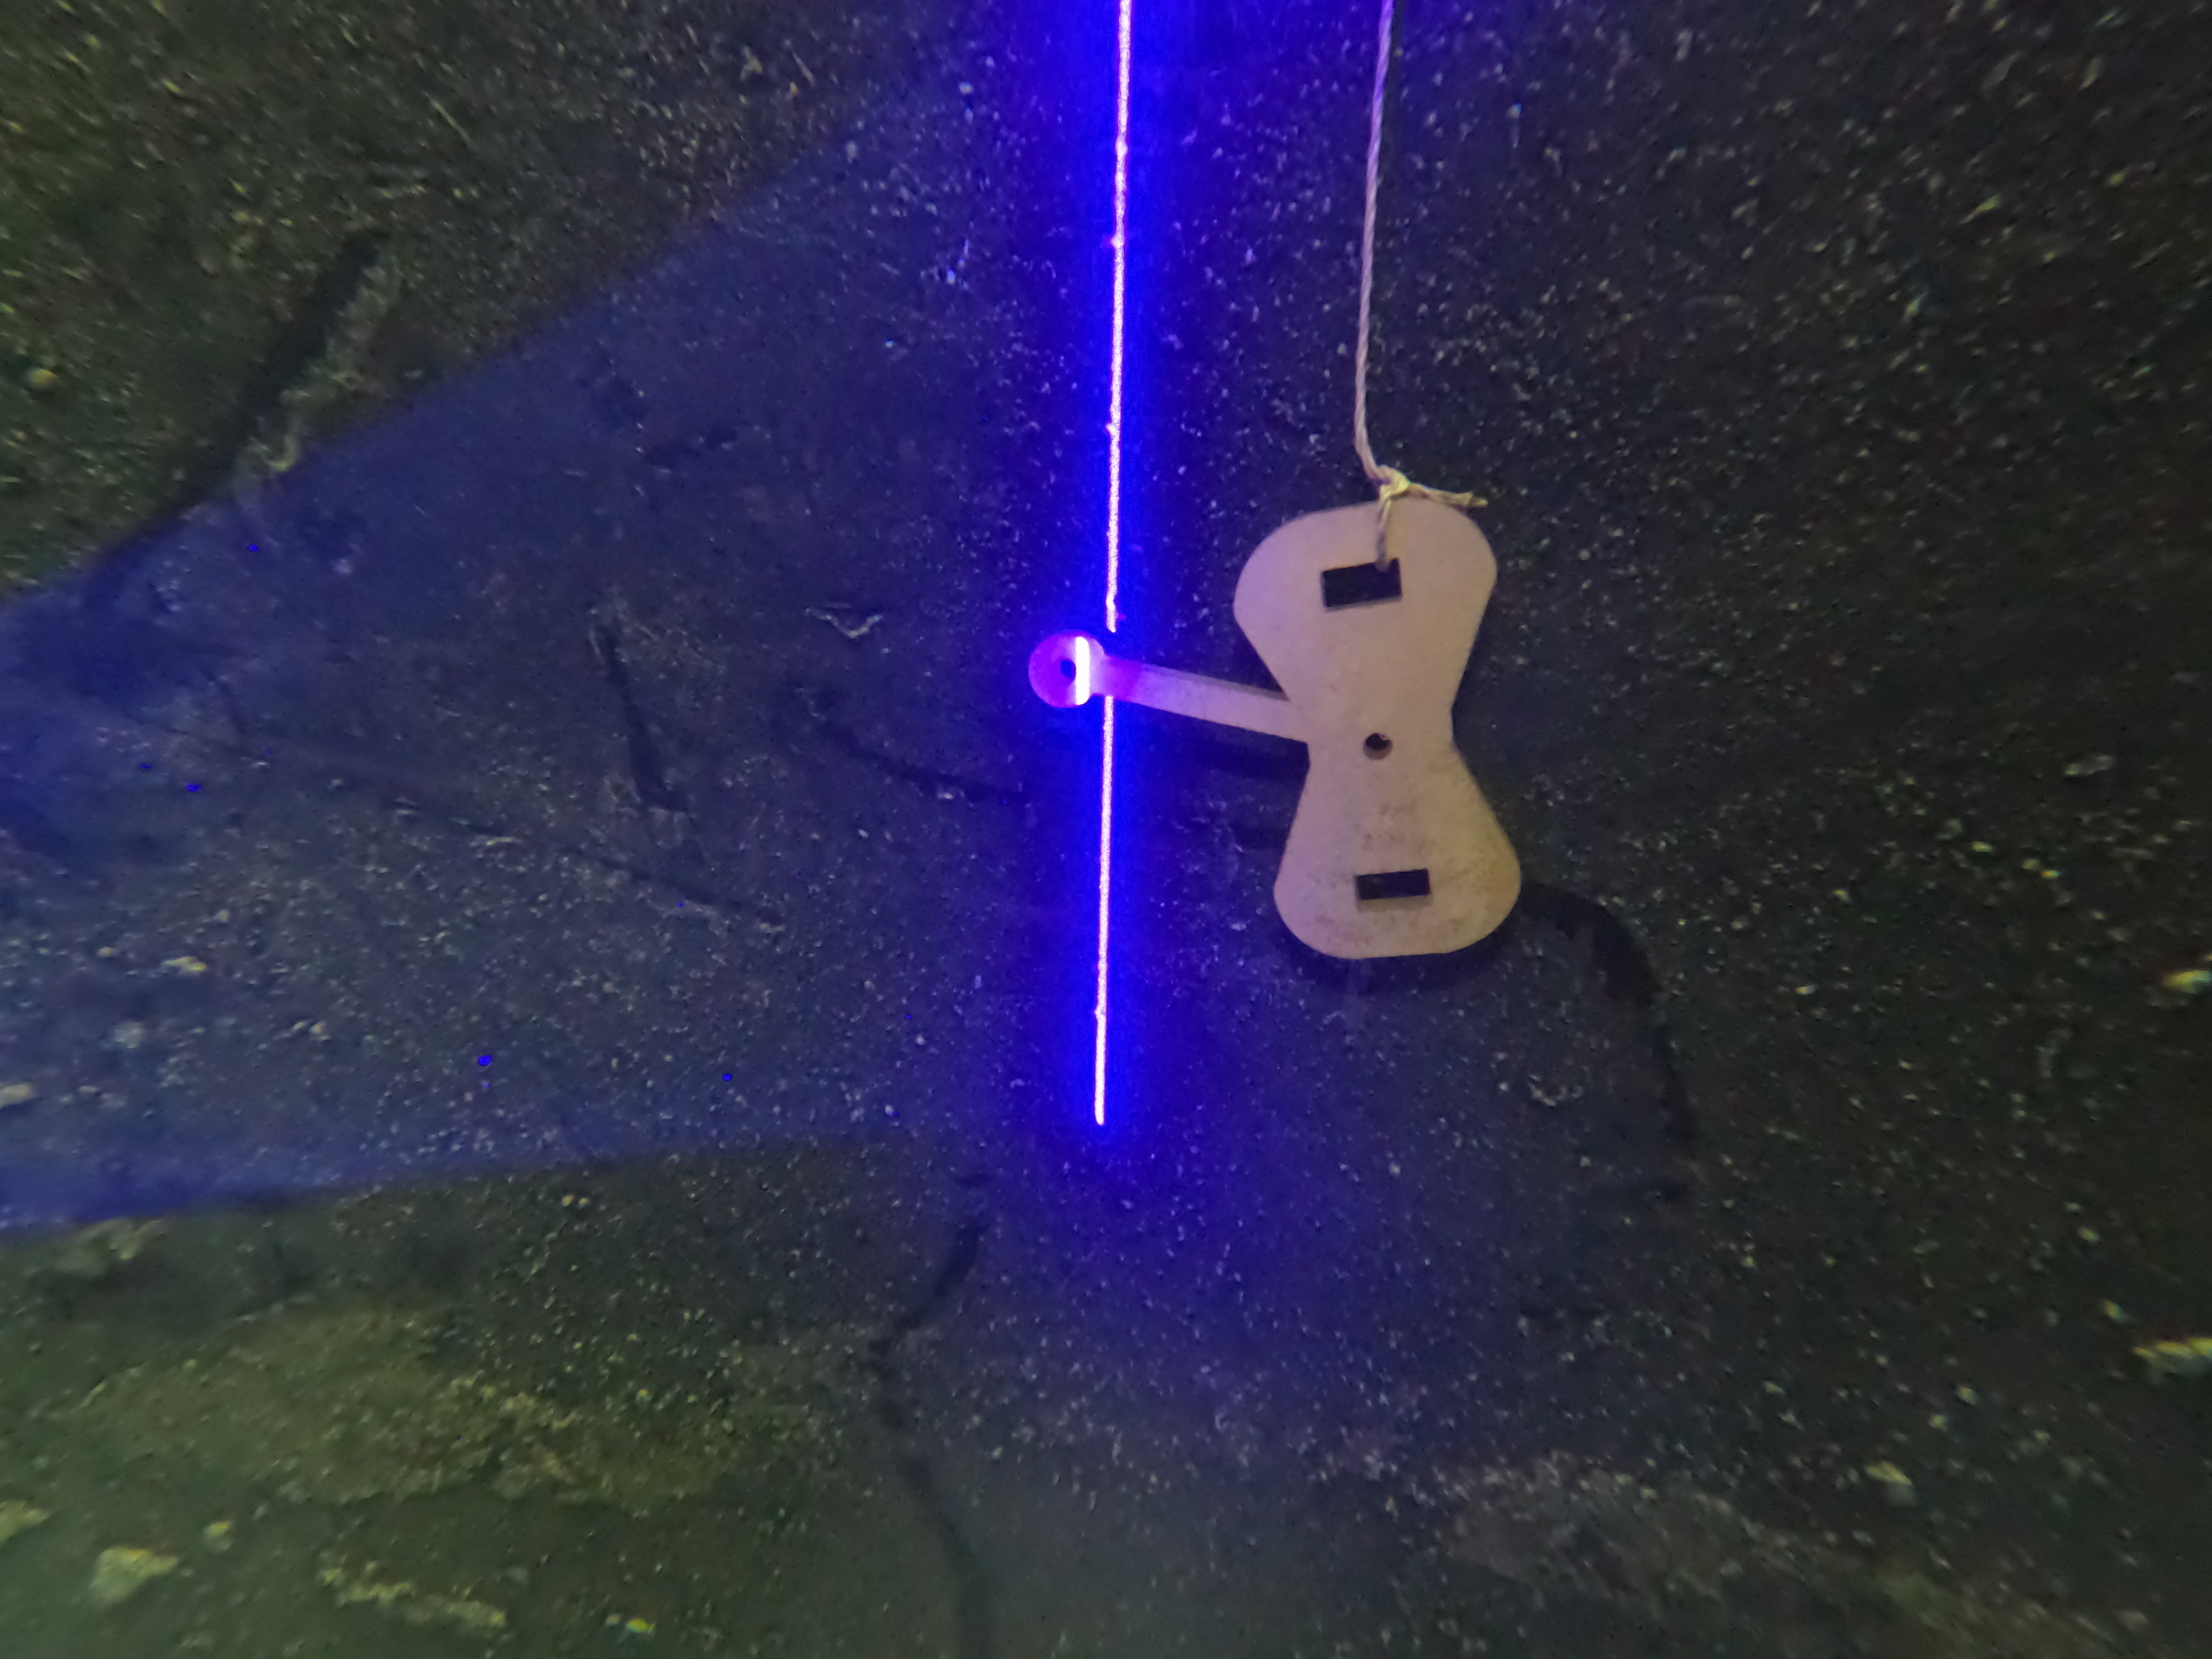

Supplement: Supplementary file 3280 [file G0015721.pdf › Level_2_1/G0015721.pdf]

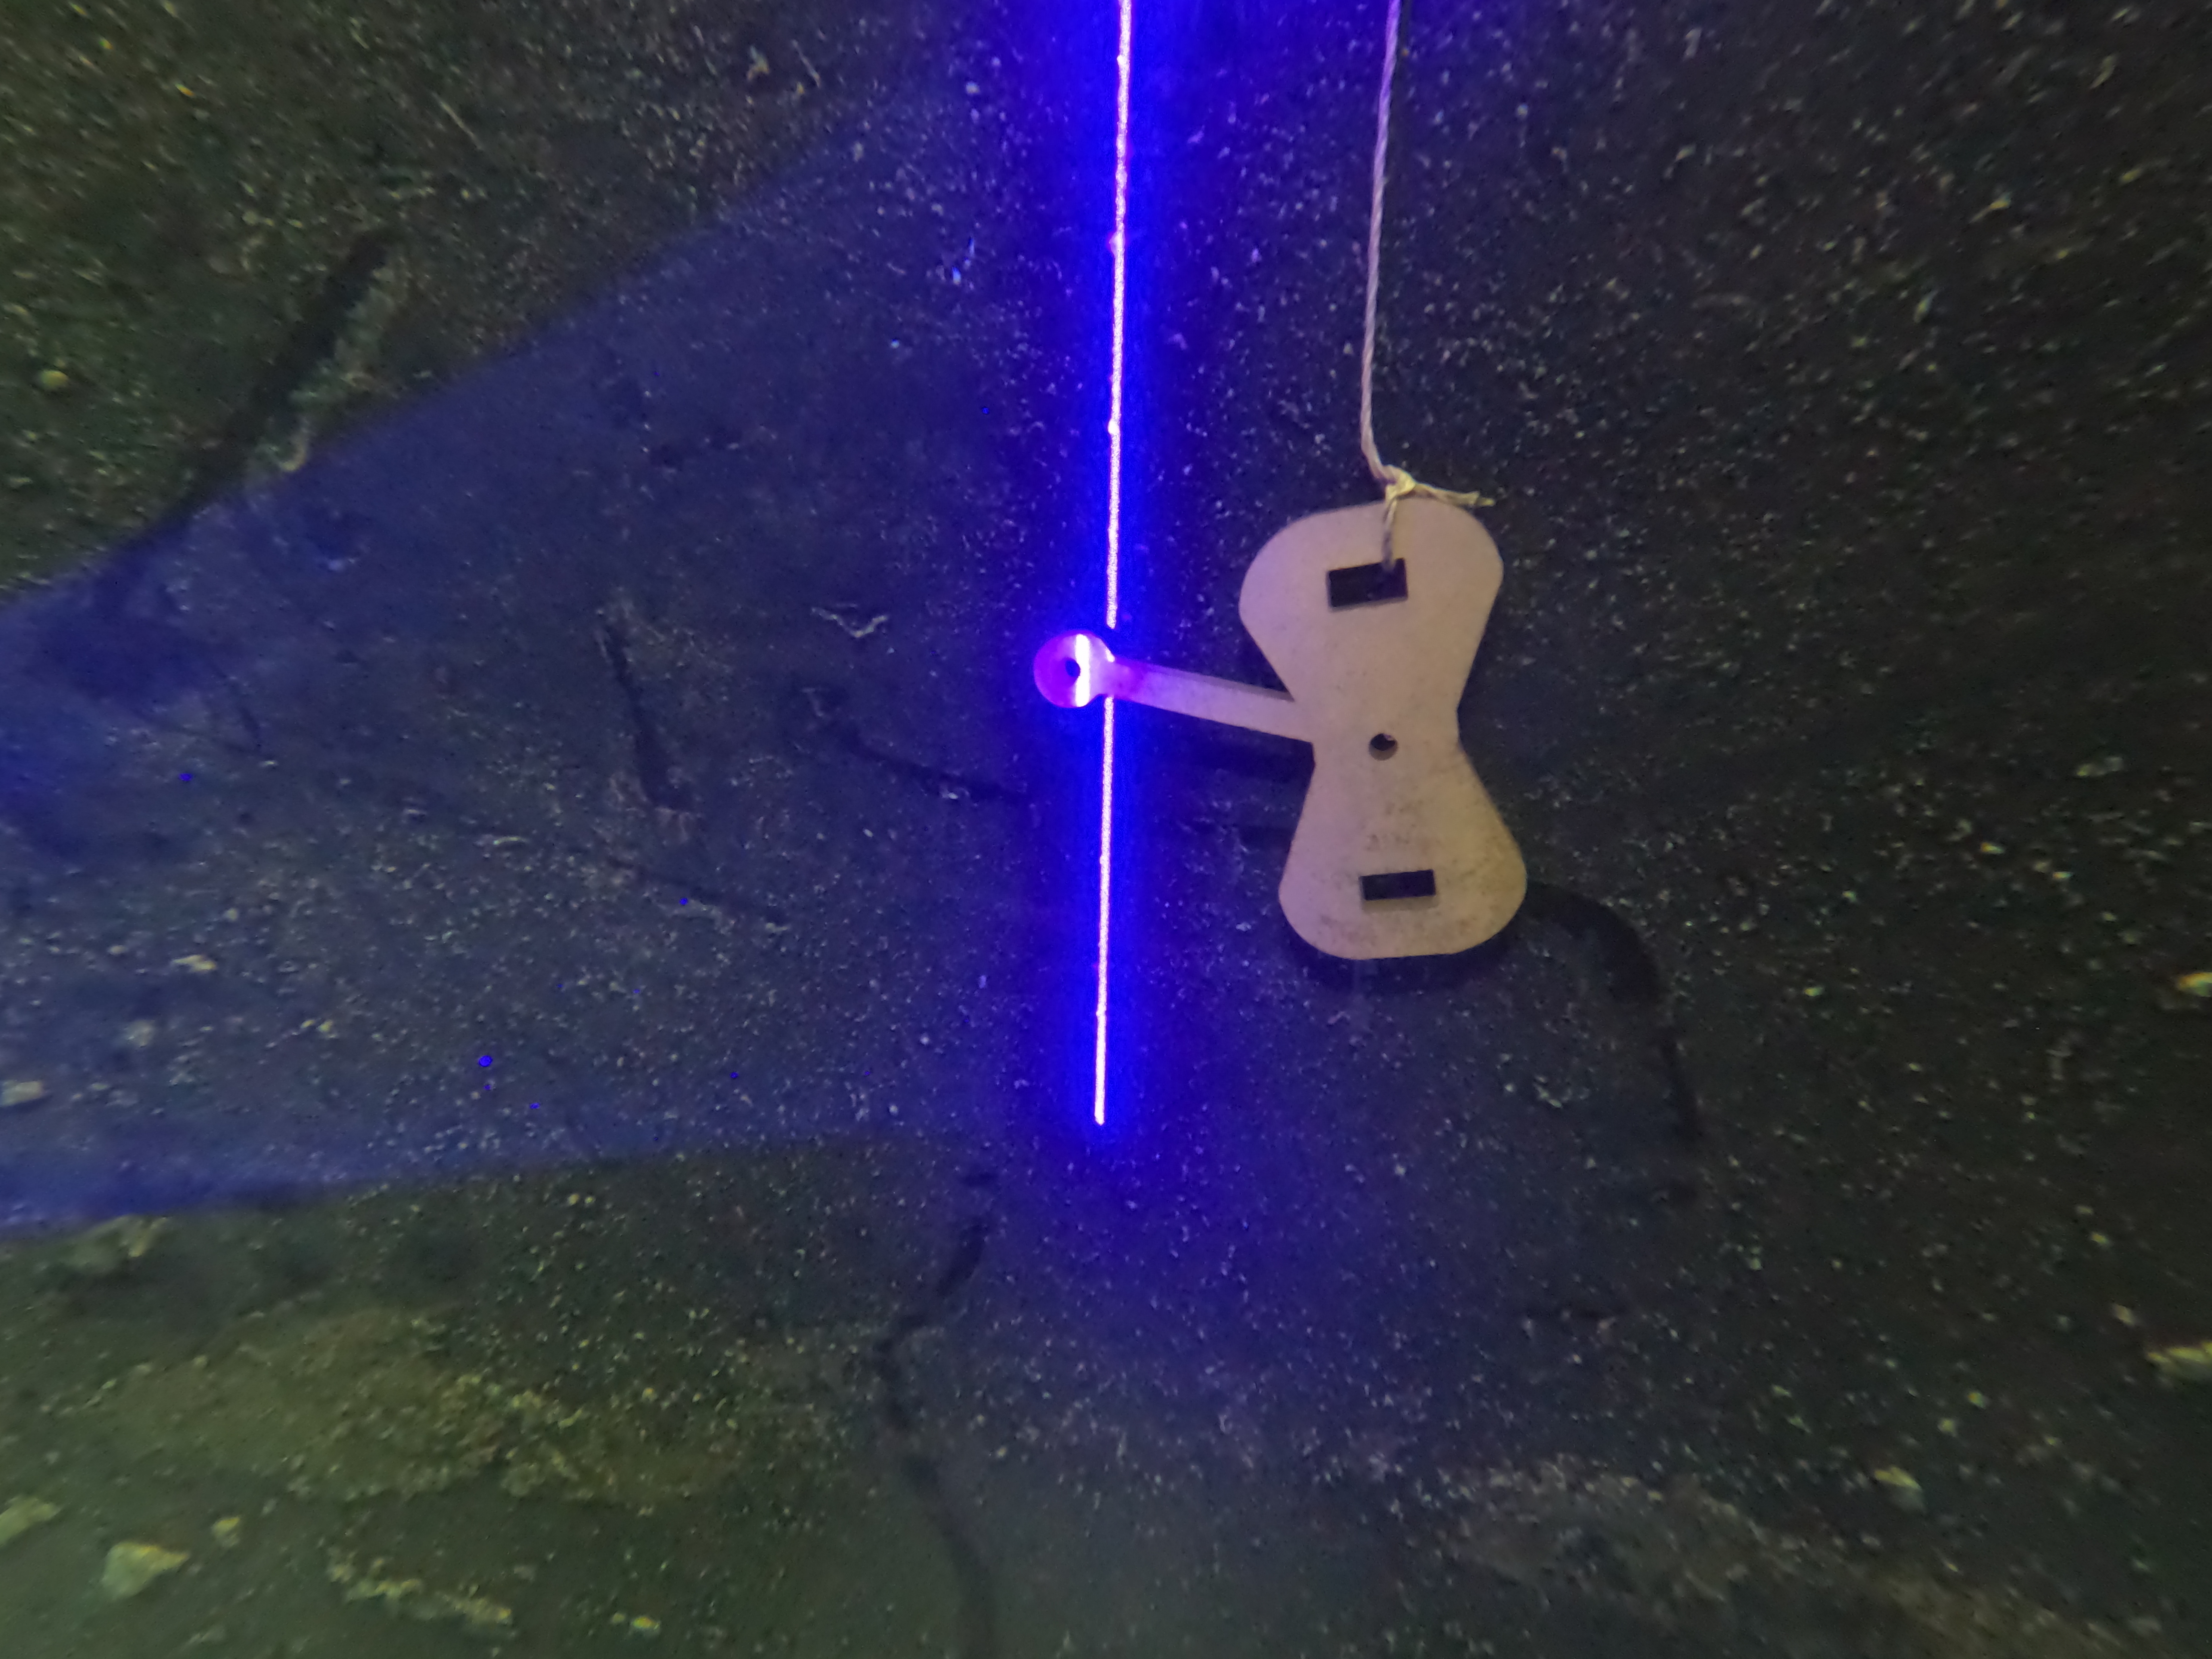

Supplement: Supplementary file 3281 [file G0015722.pdf › Level_2_1/G0015722.pdf]

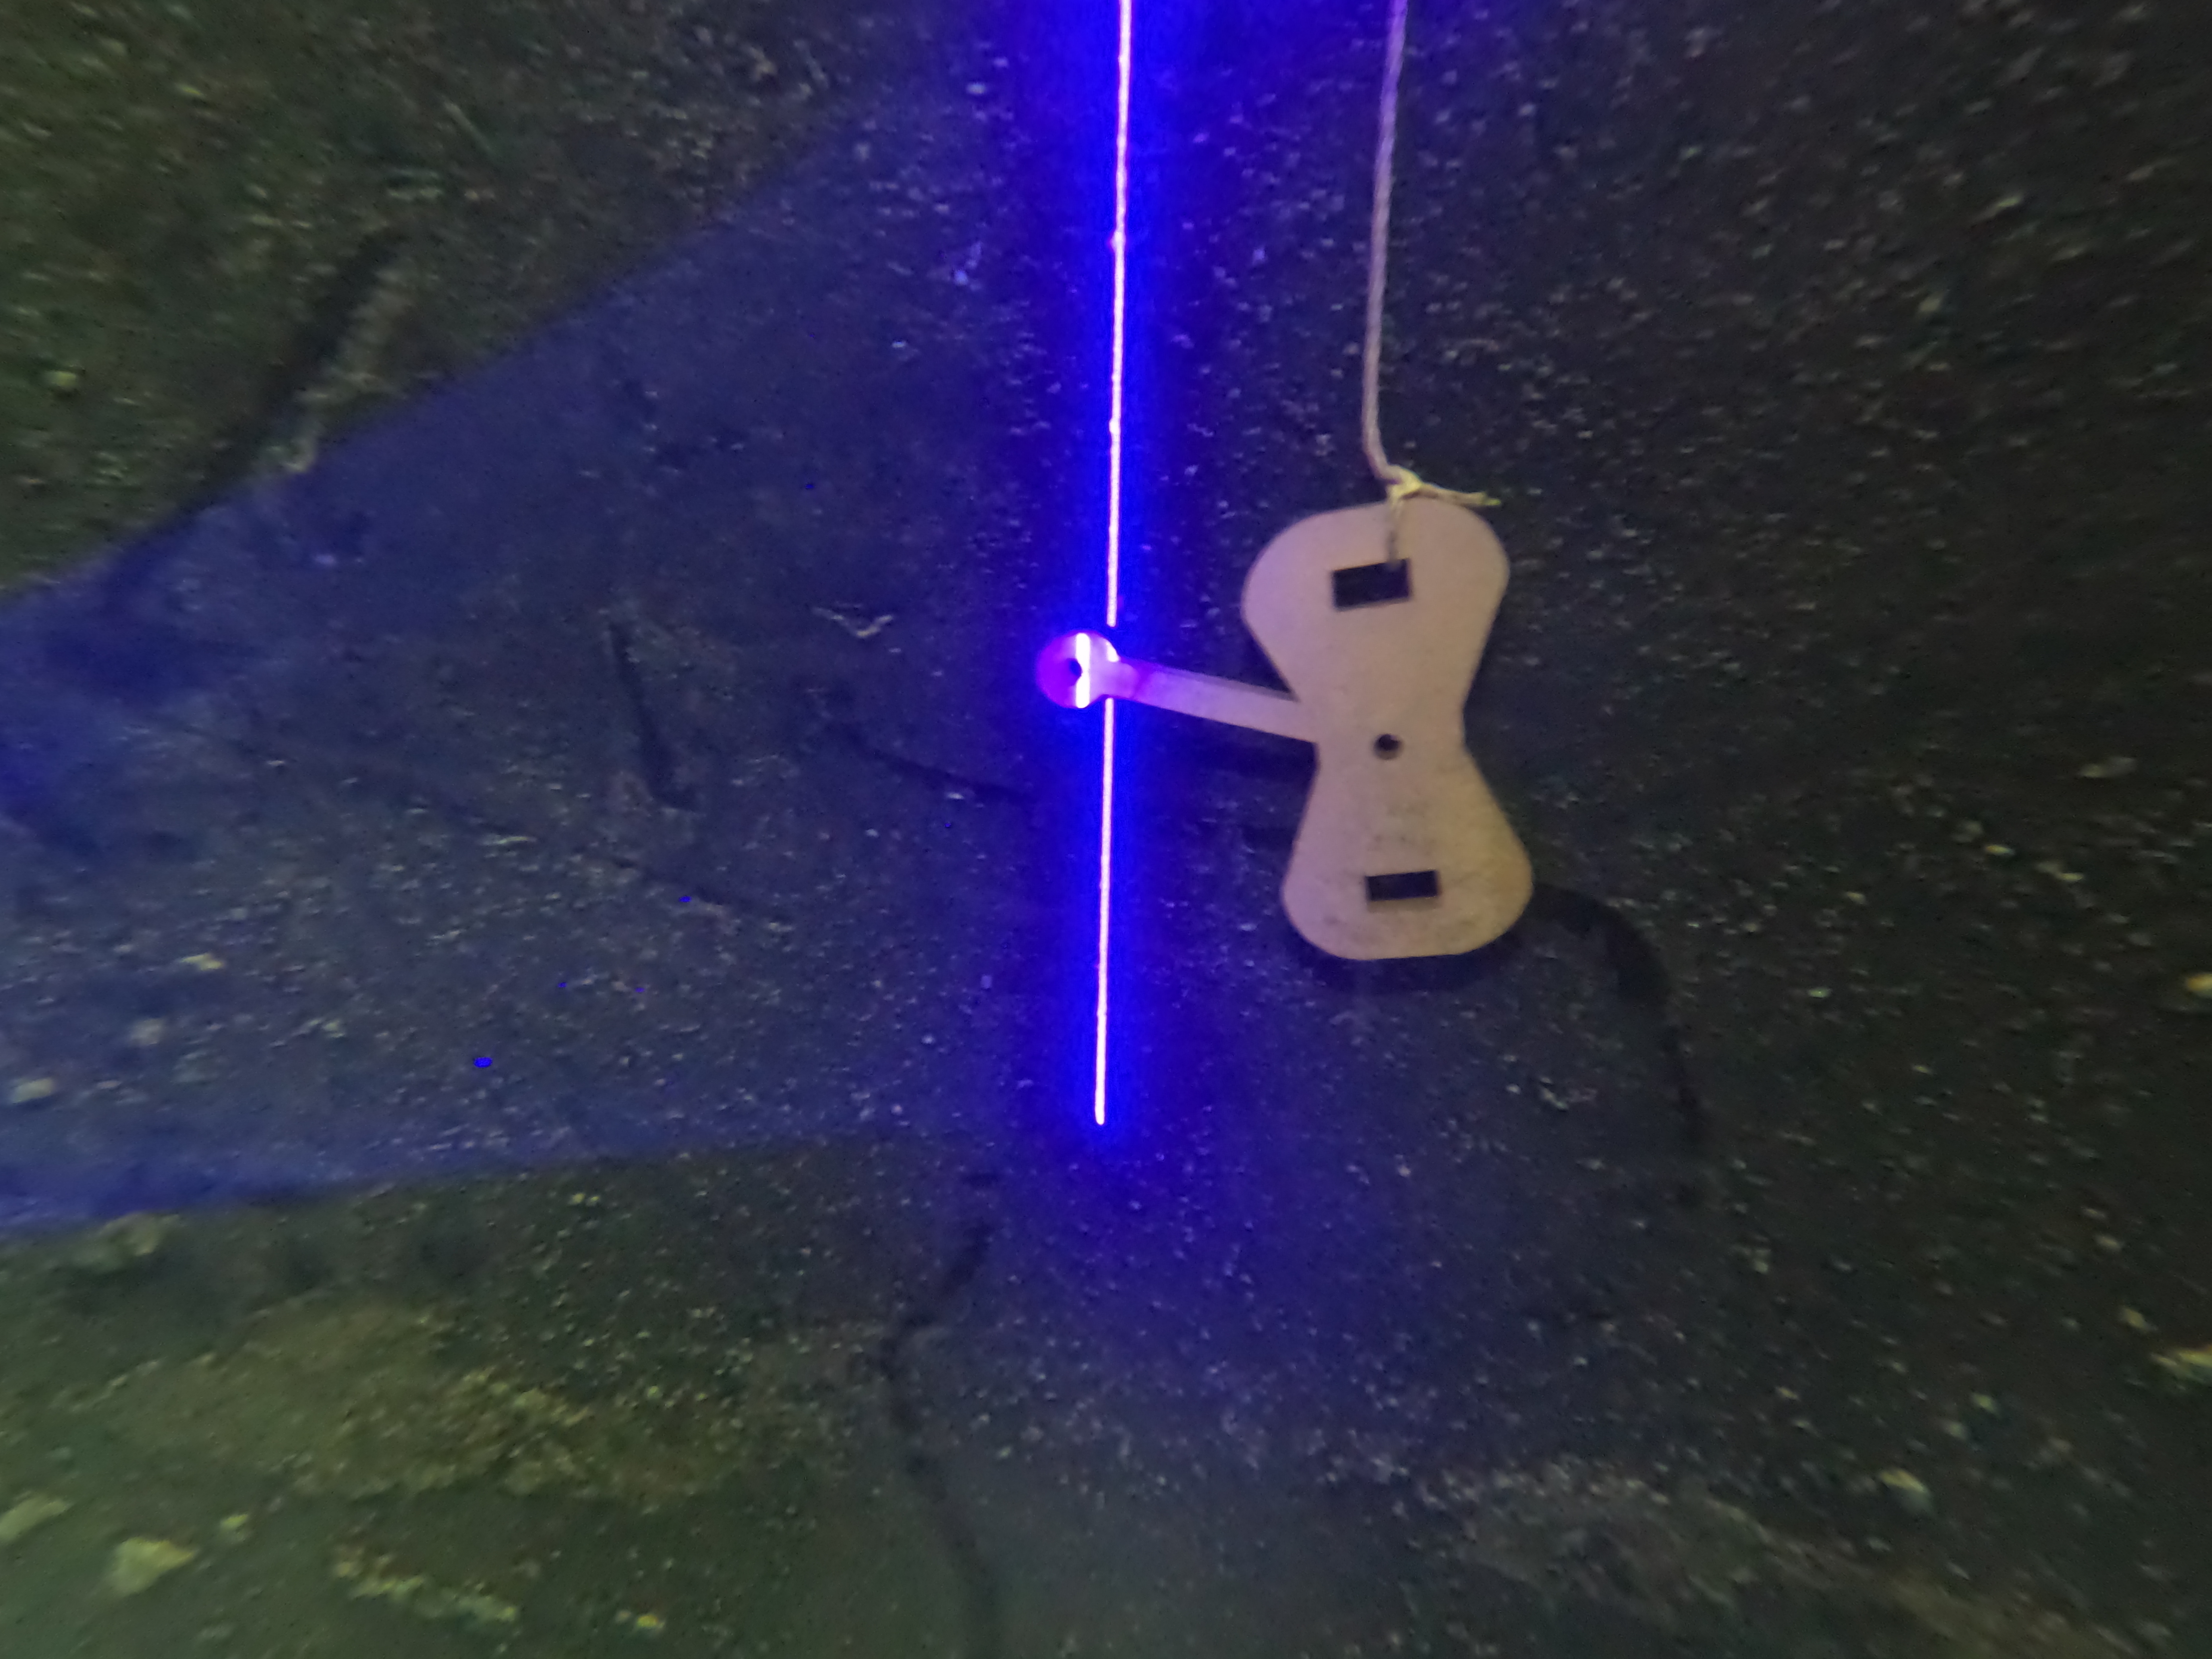

Supplement: Supplementary file 3282 [file G0015723.pdf › Level_2_1/G0015723.pdf]

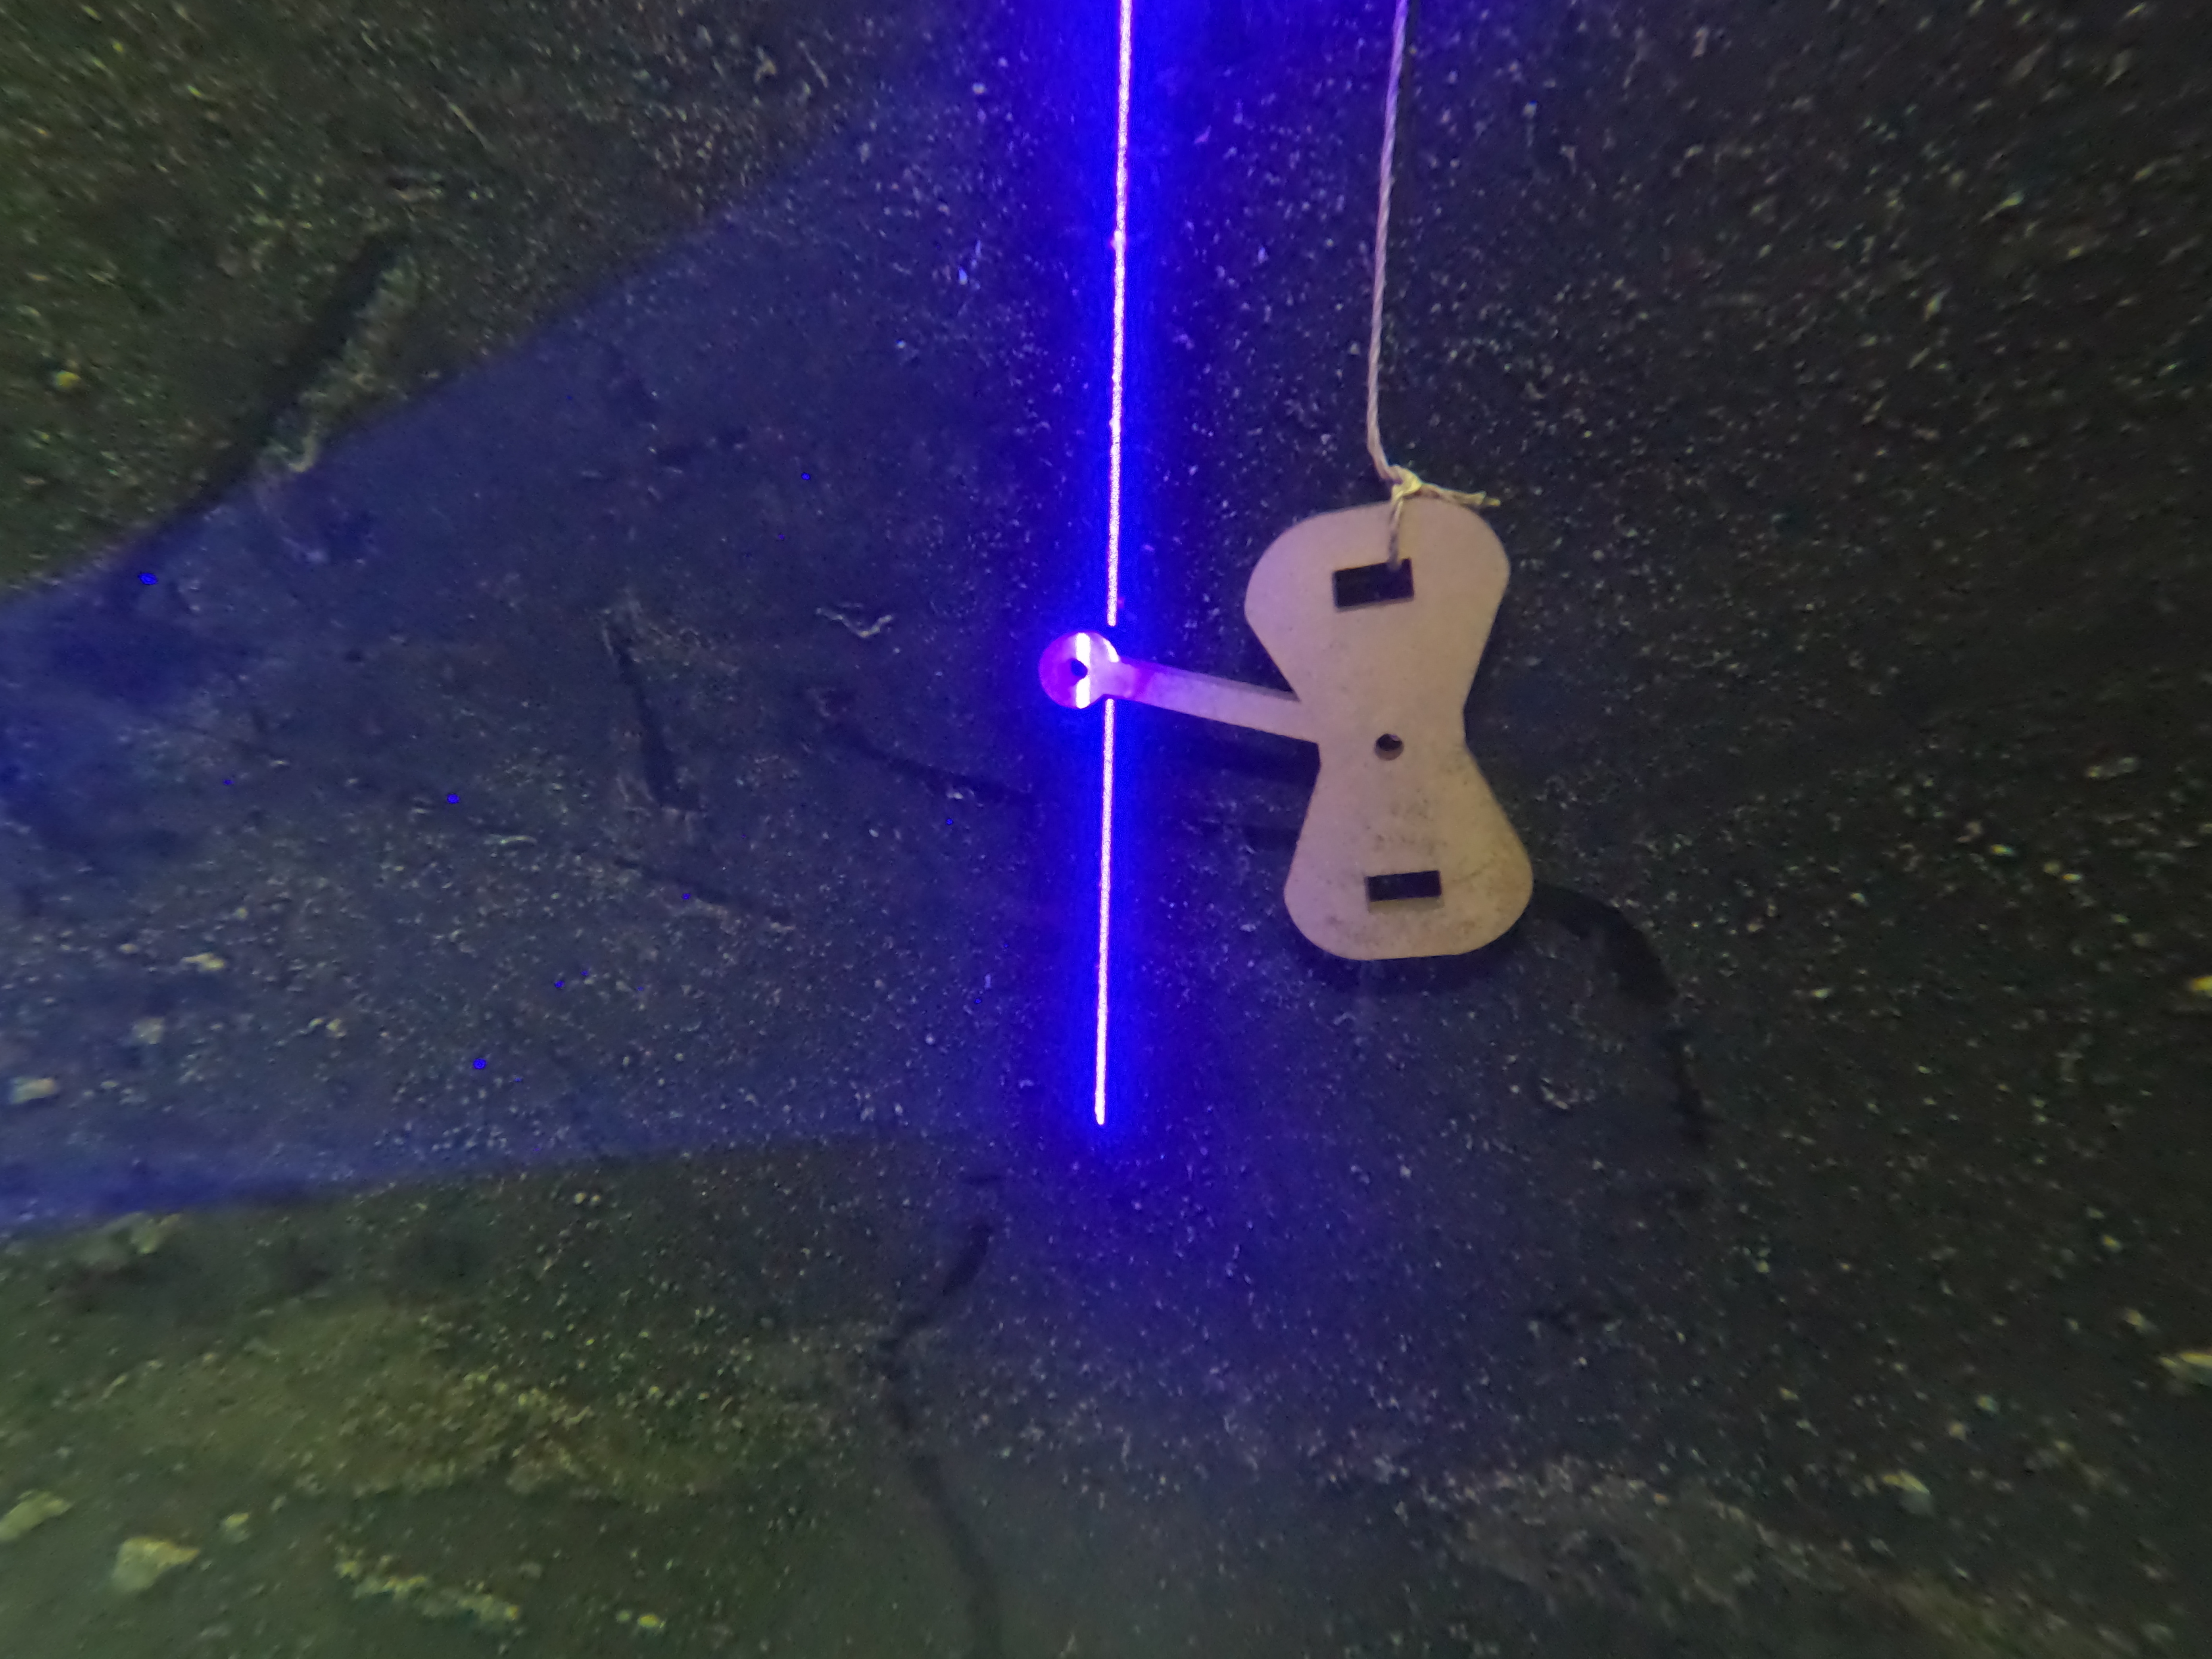

Supplement: Supplementary file 3283 [file G0015724.pdf › Level_2_1/G0015724.pdf]

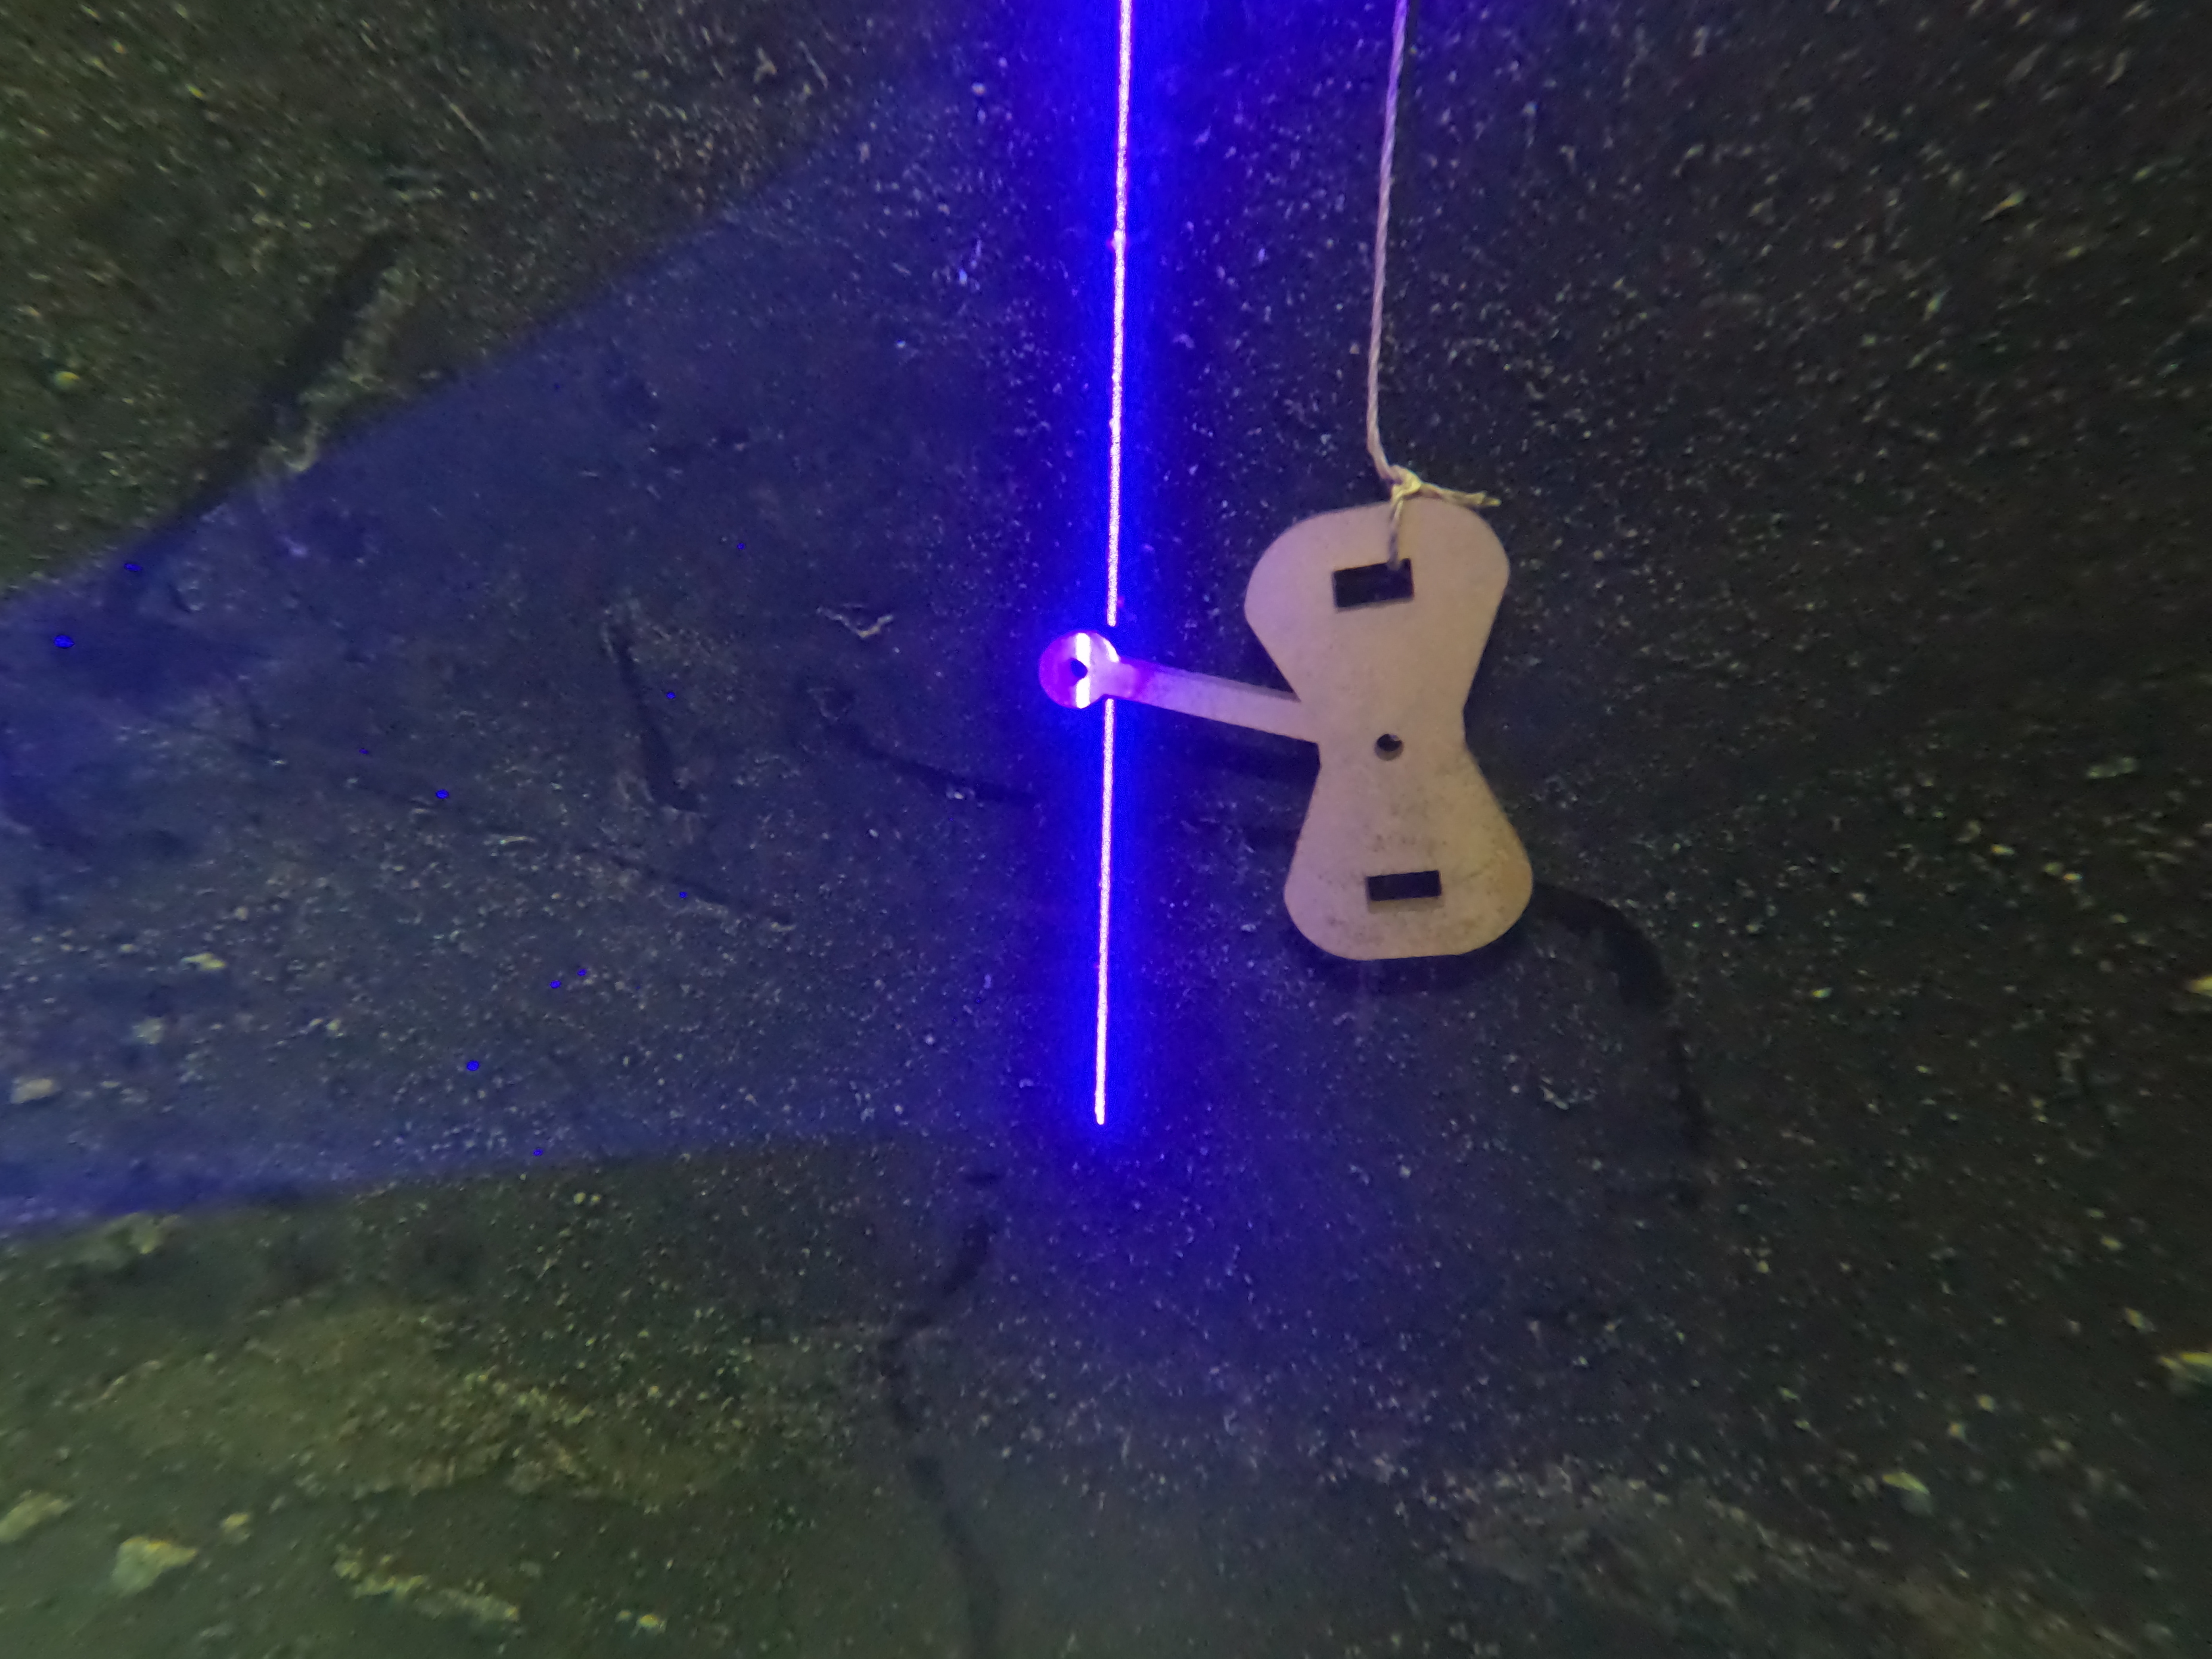

Supplement: Supplementary file 3284 [file G0015725.pdf › Level_2_1/G0015725.pdf]

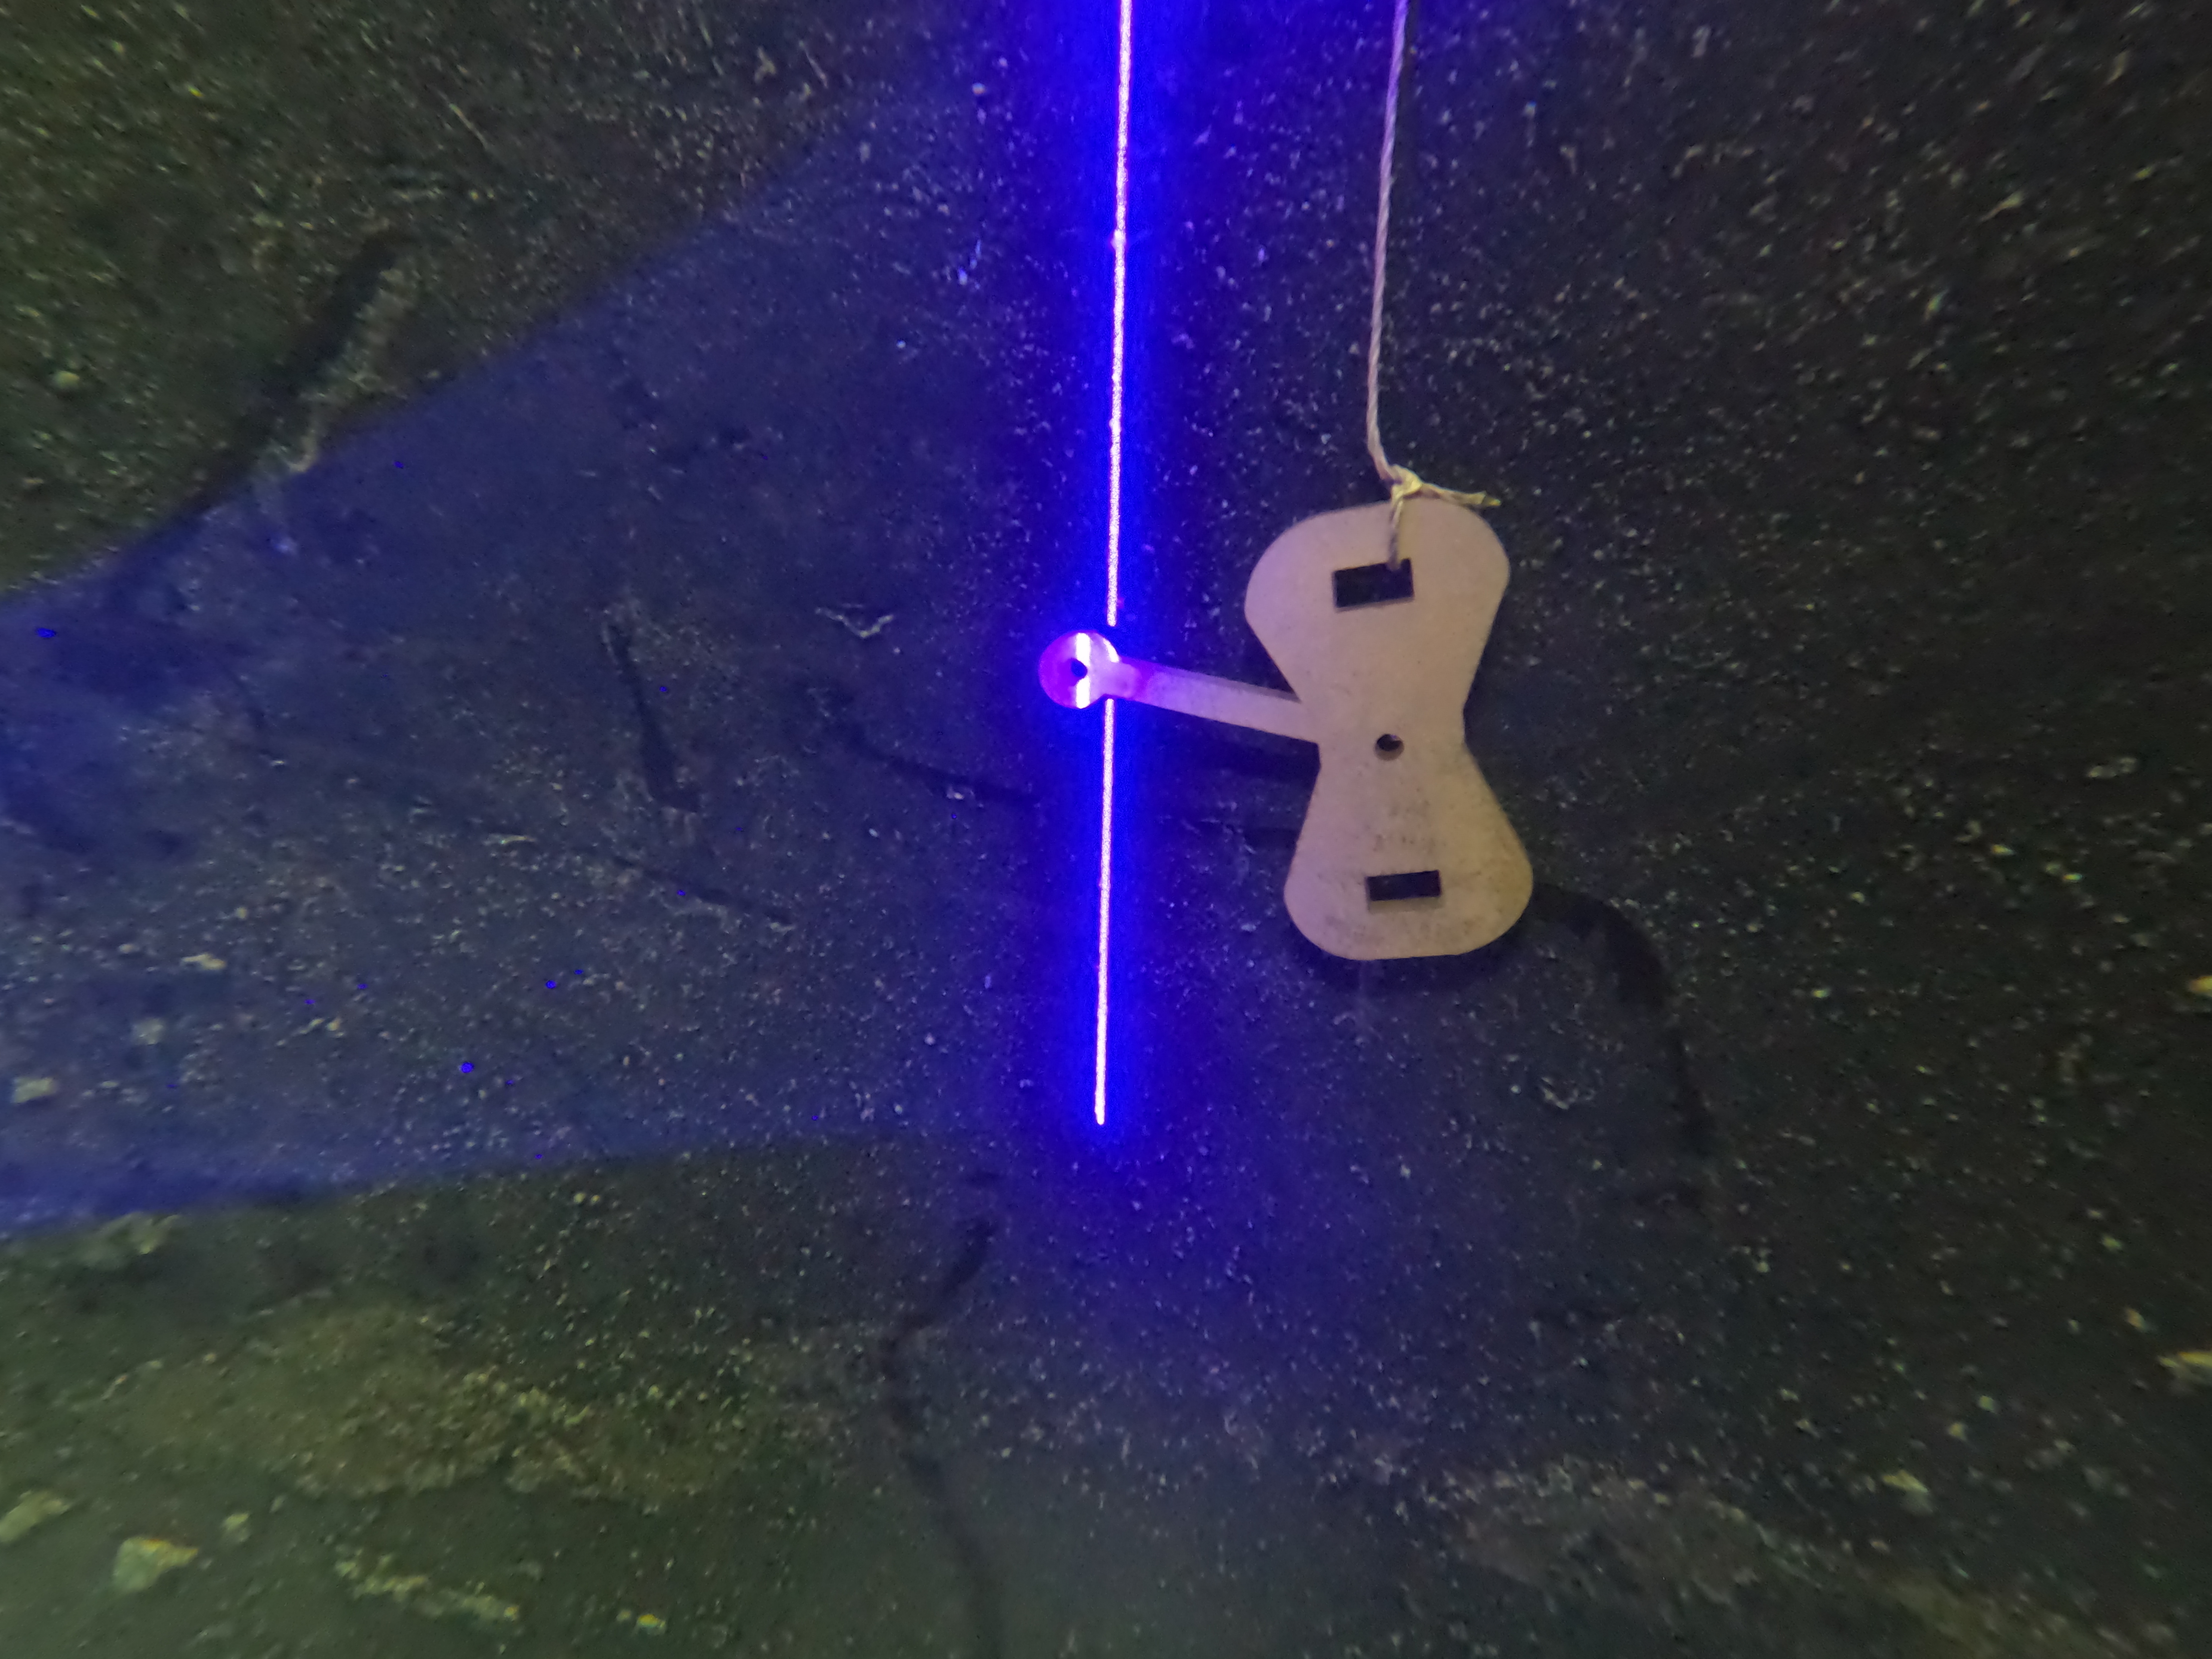

Supplement: Supplementary file 3285 [file G0015726.pdf › Level_2_1/G0015726.pdf]

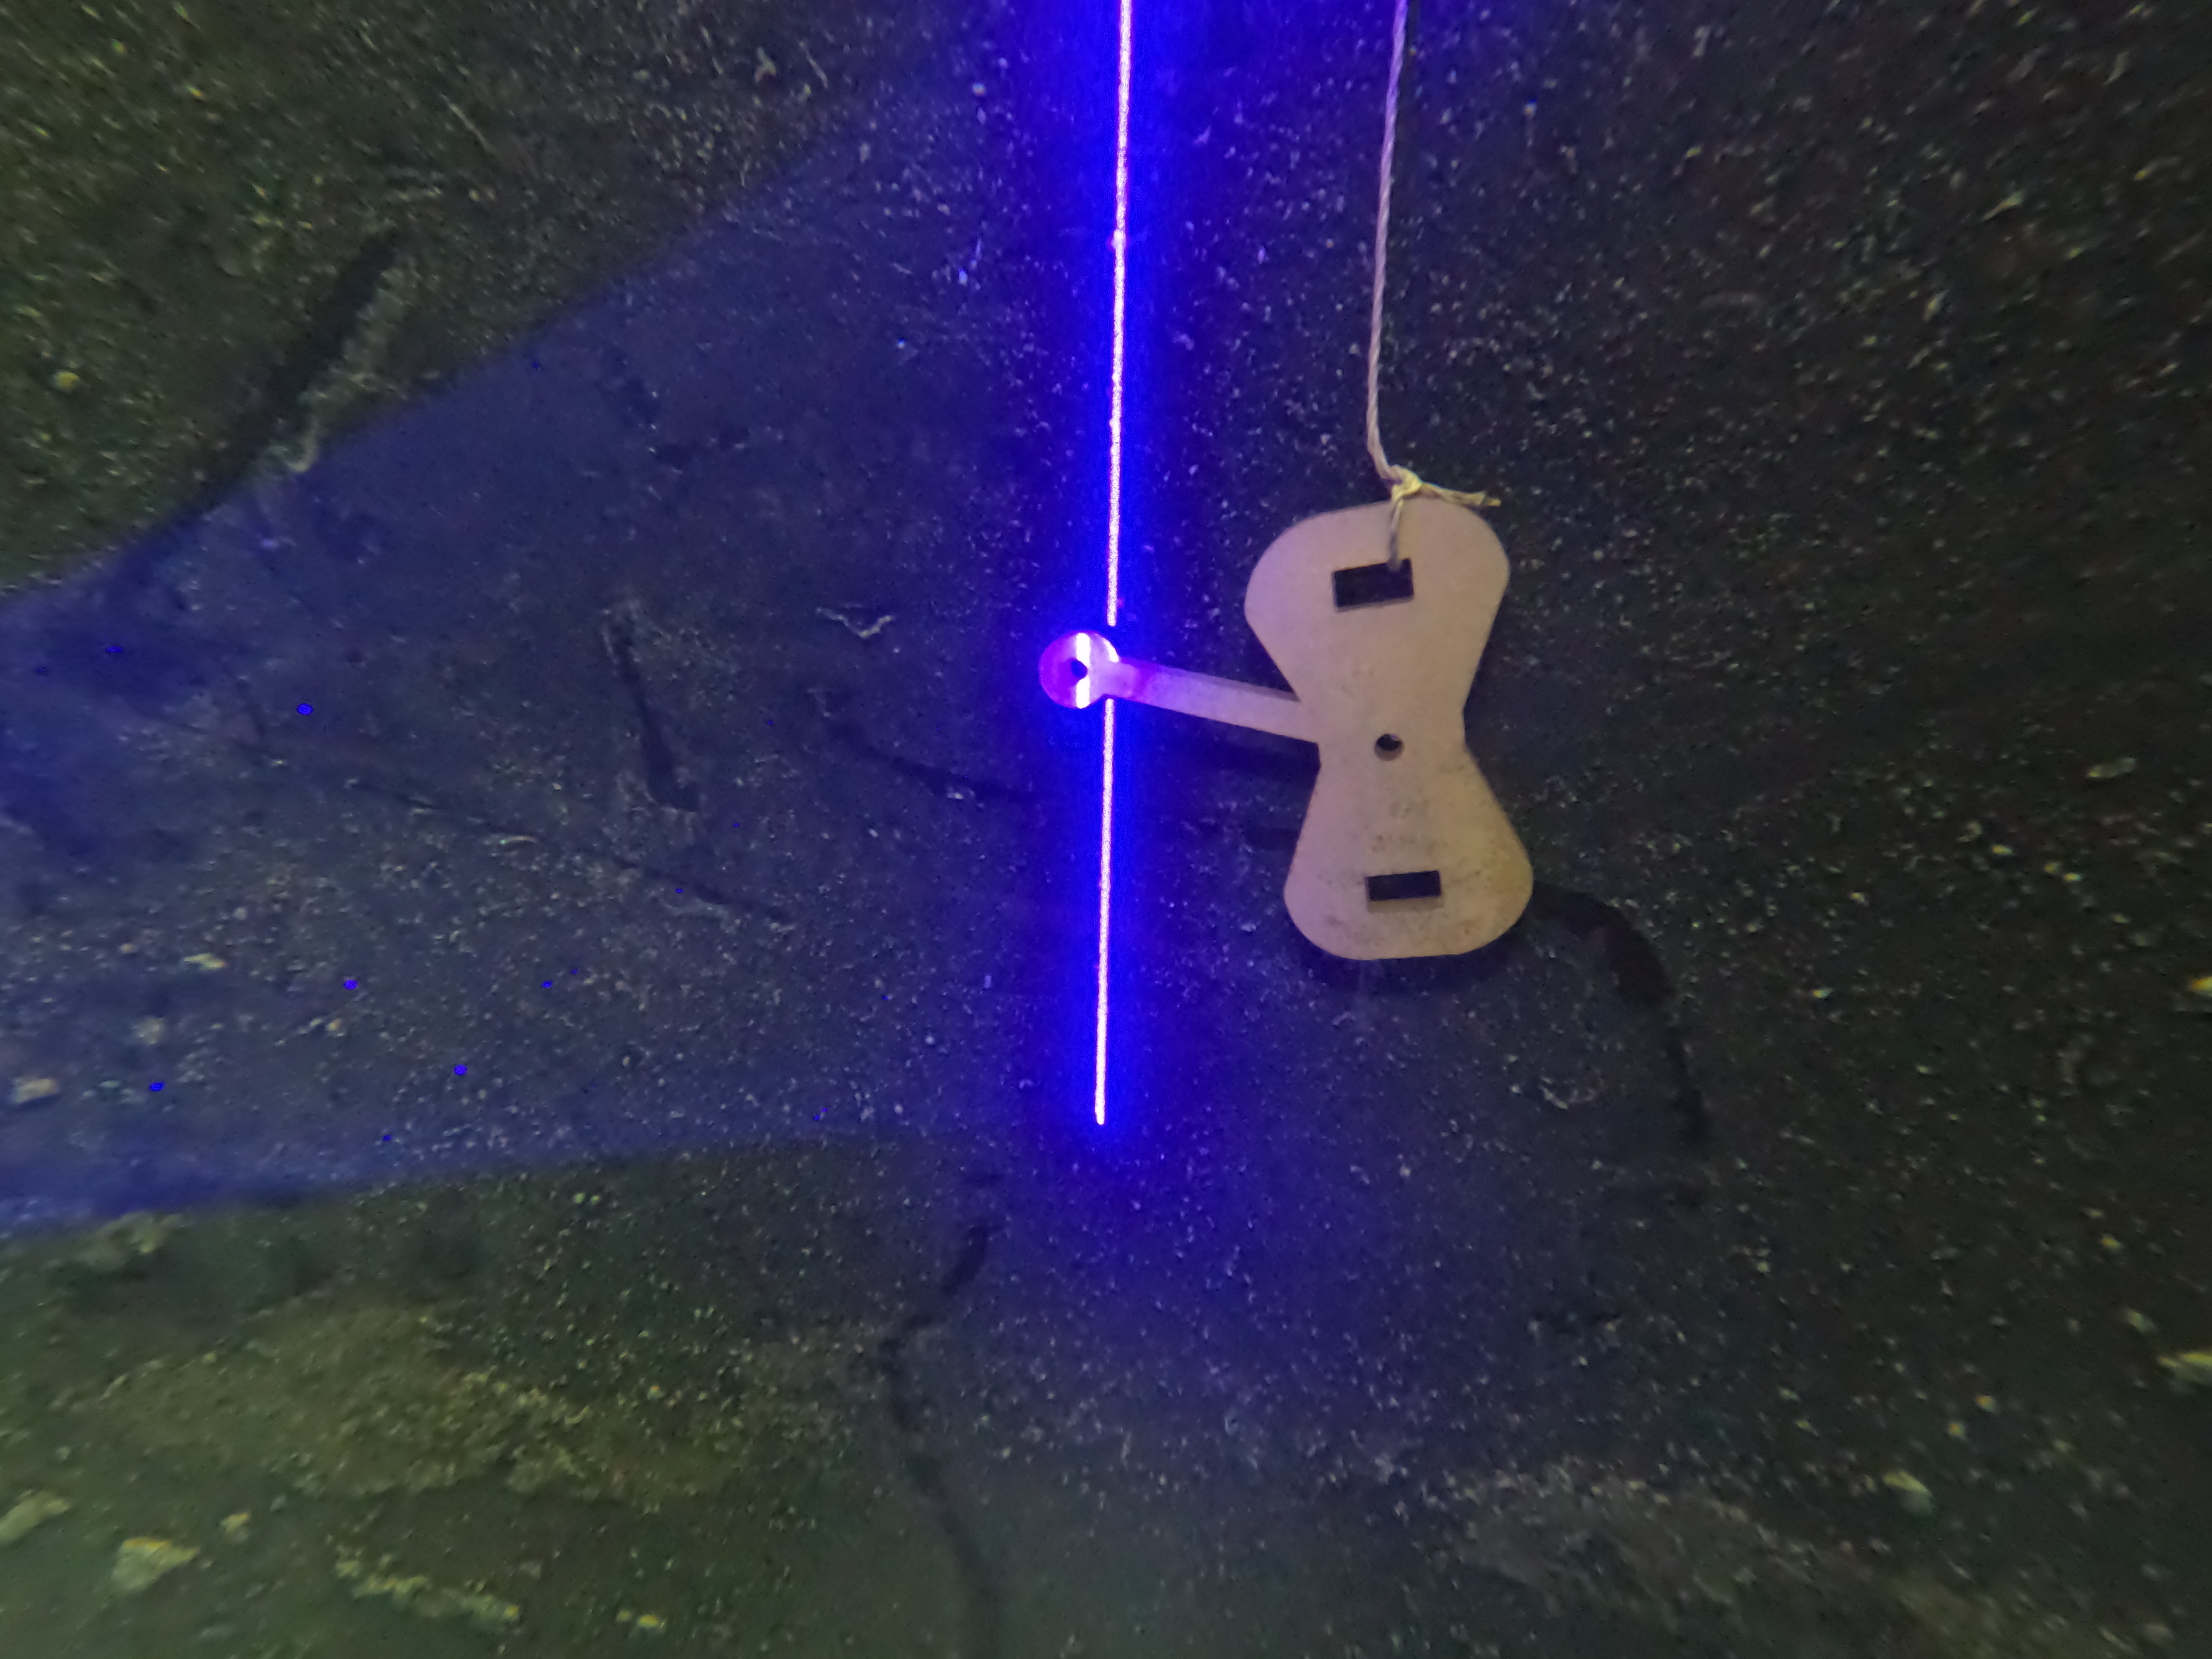

Supplement: Supplementary file 3286 [file G0015727.pdf › Level_2_1/G0015727.pdf]

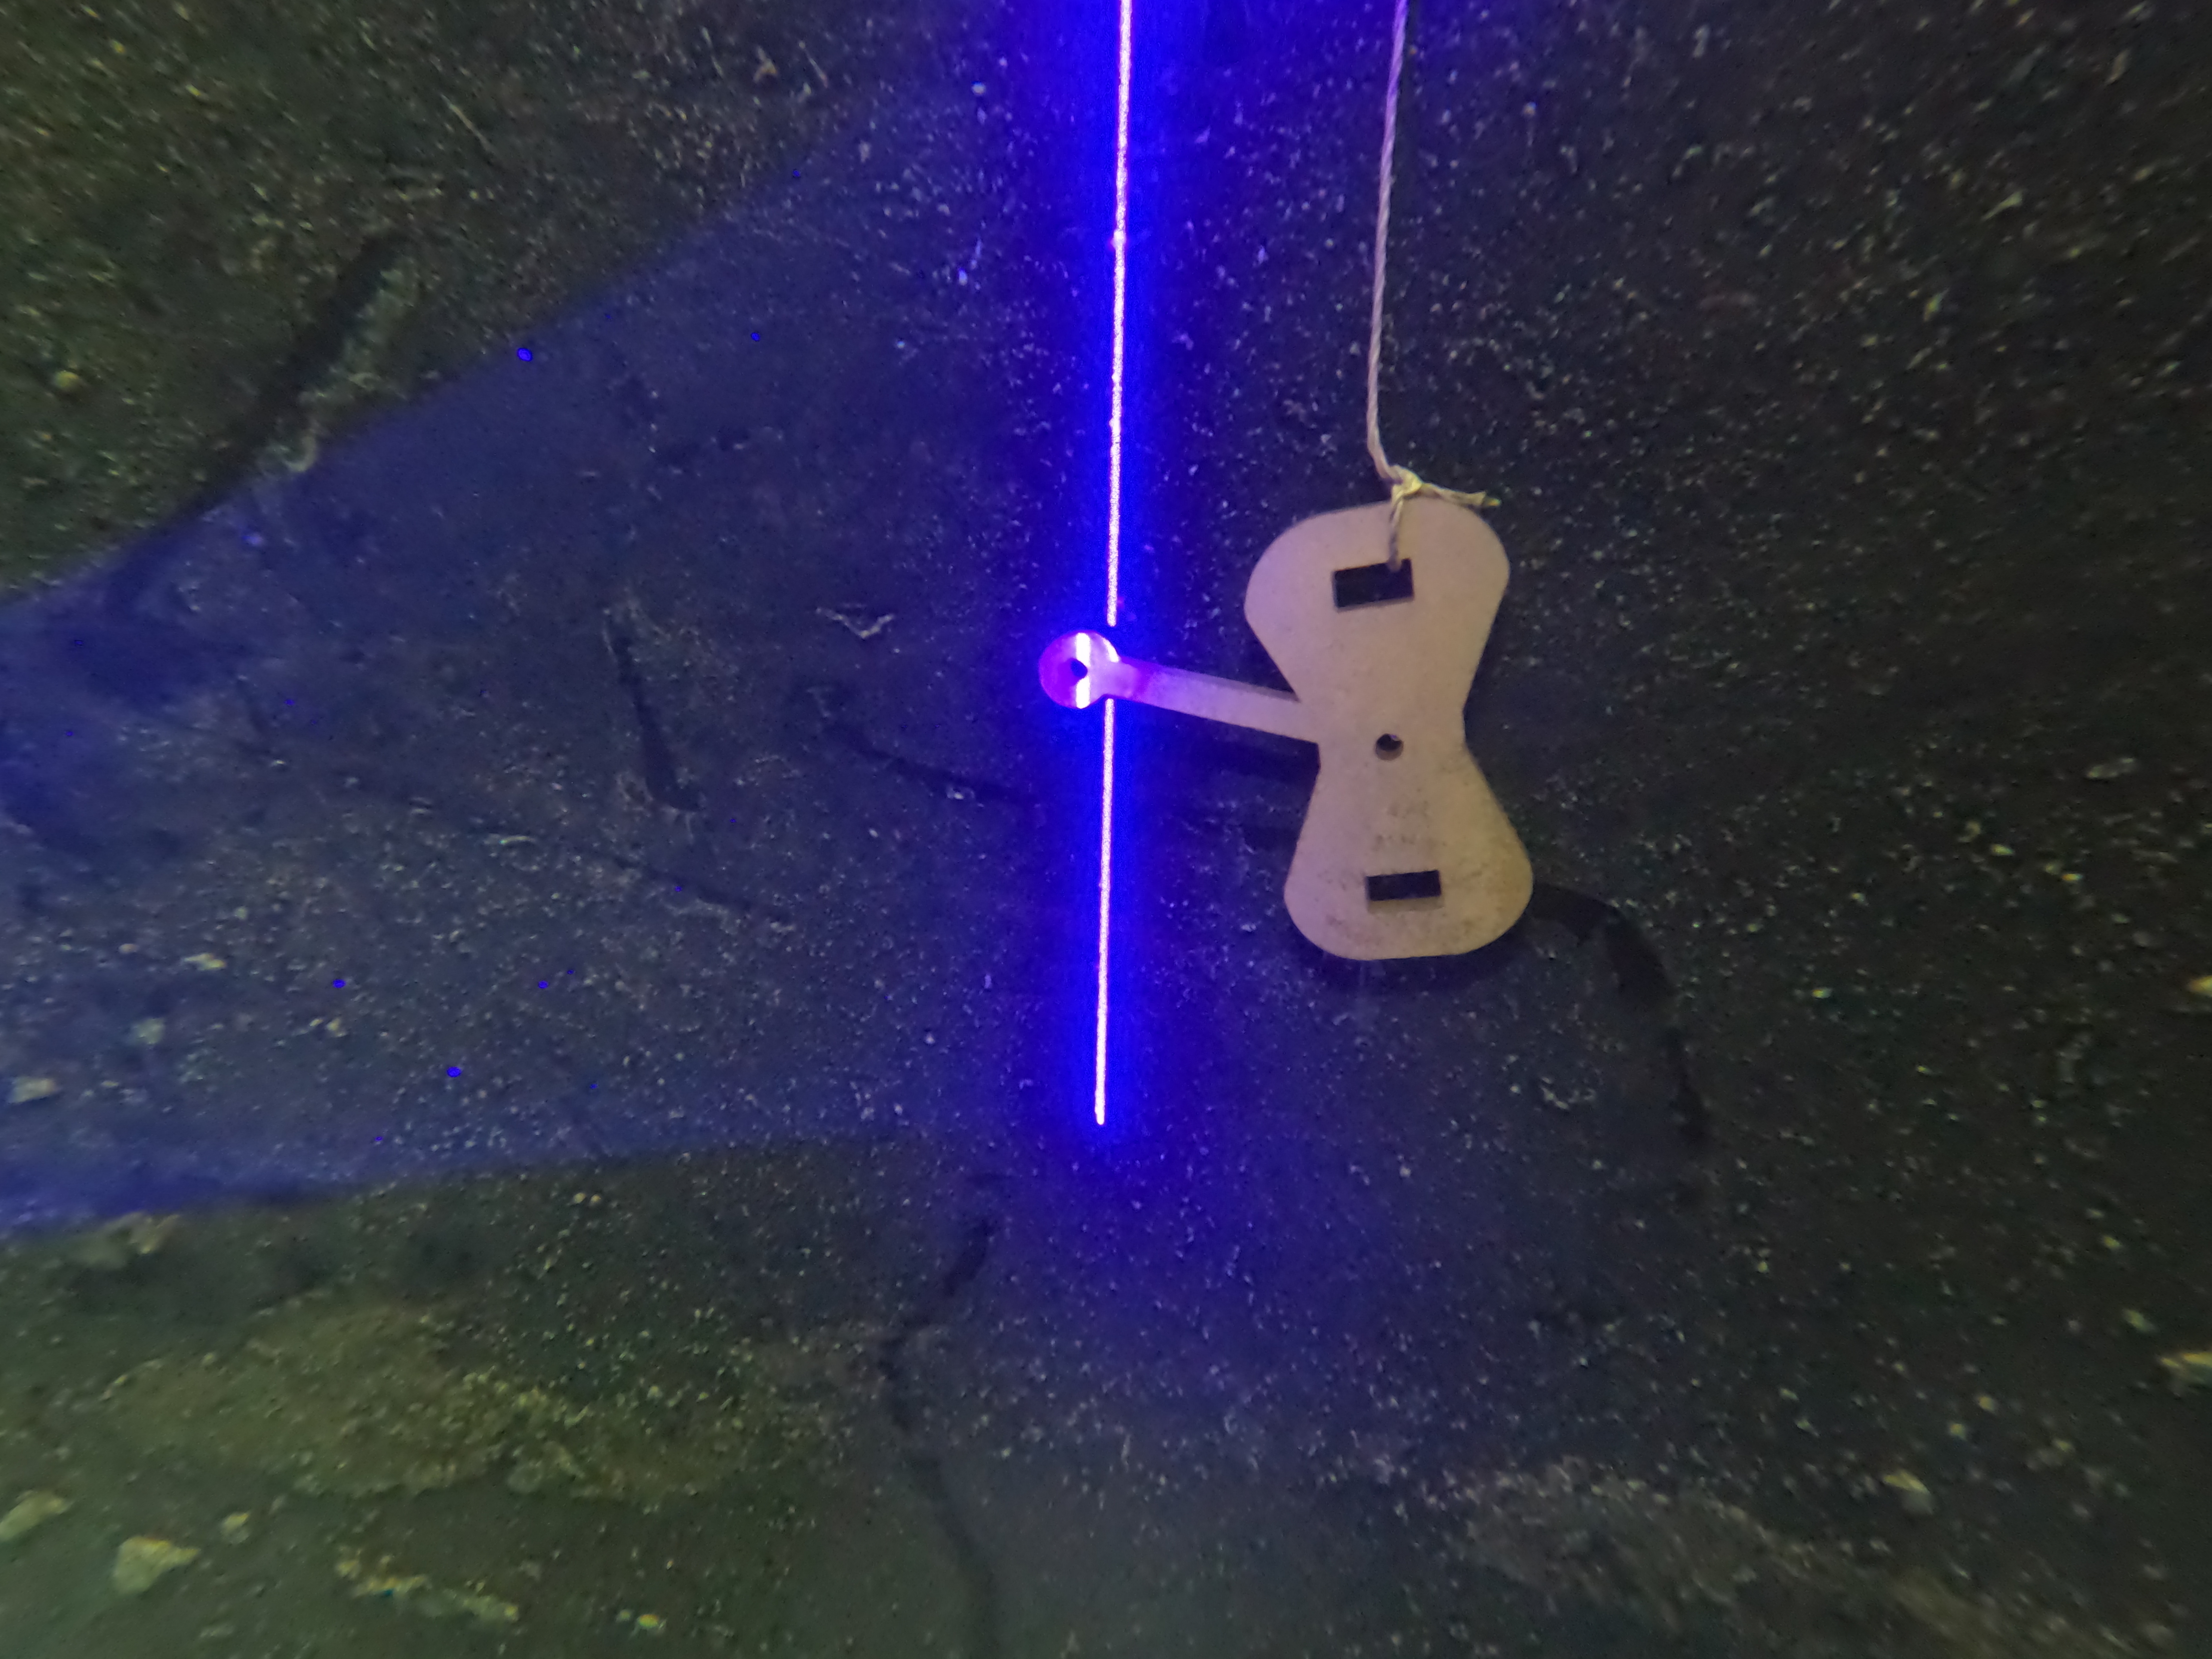

Supplement: Supplementary file 3287 [file G0015728.pdf › Level_2_1/G0015728.pdf]

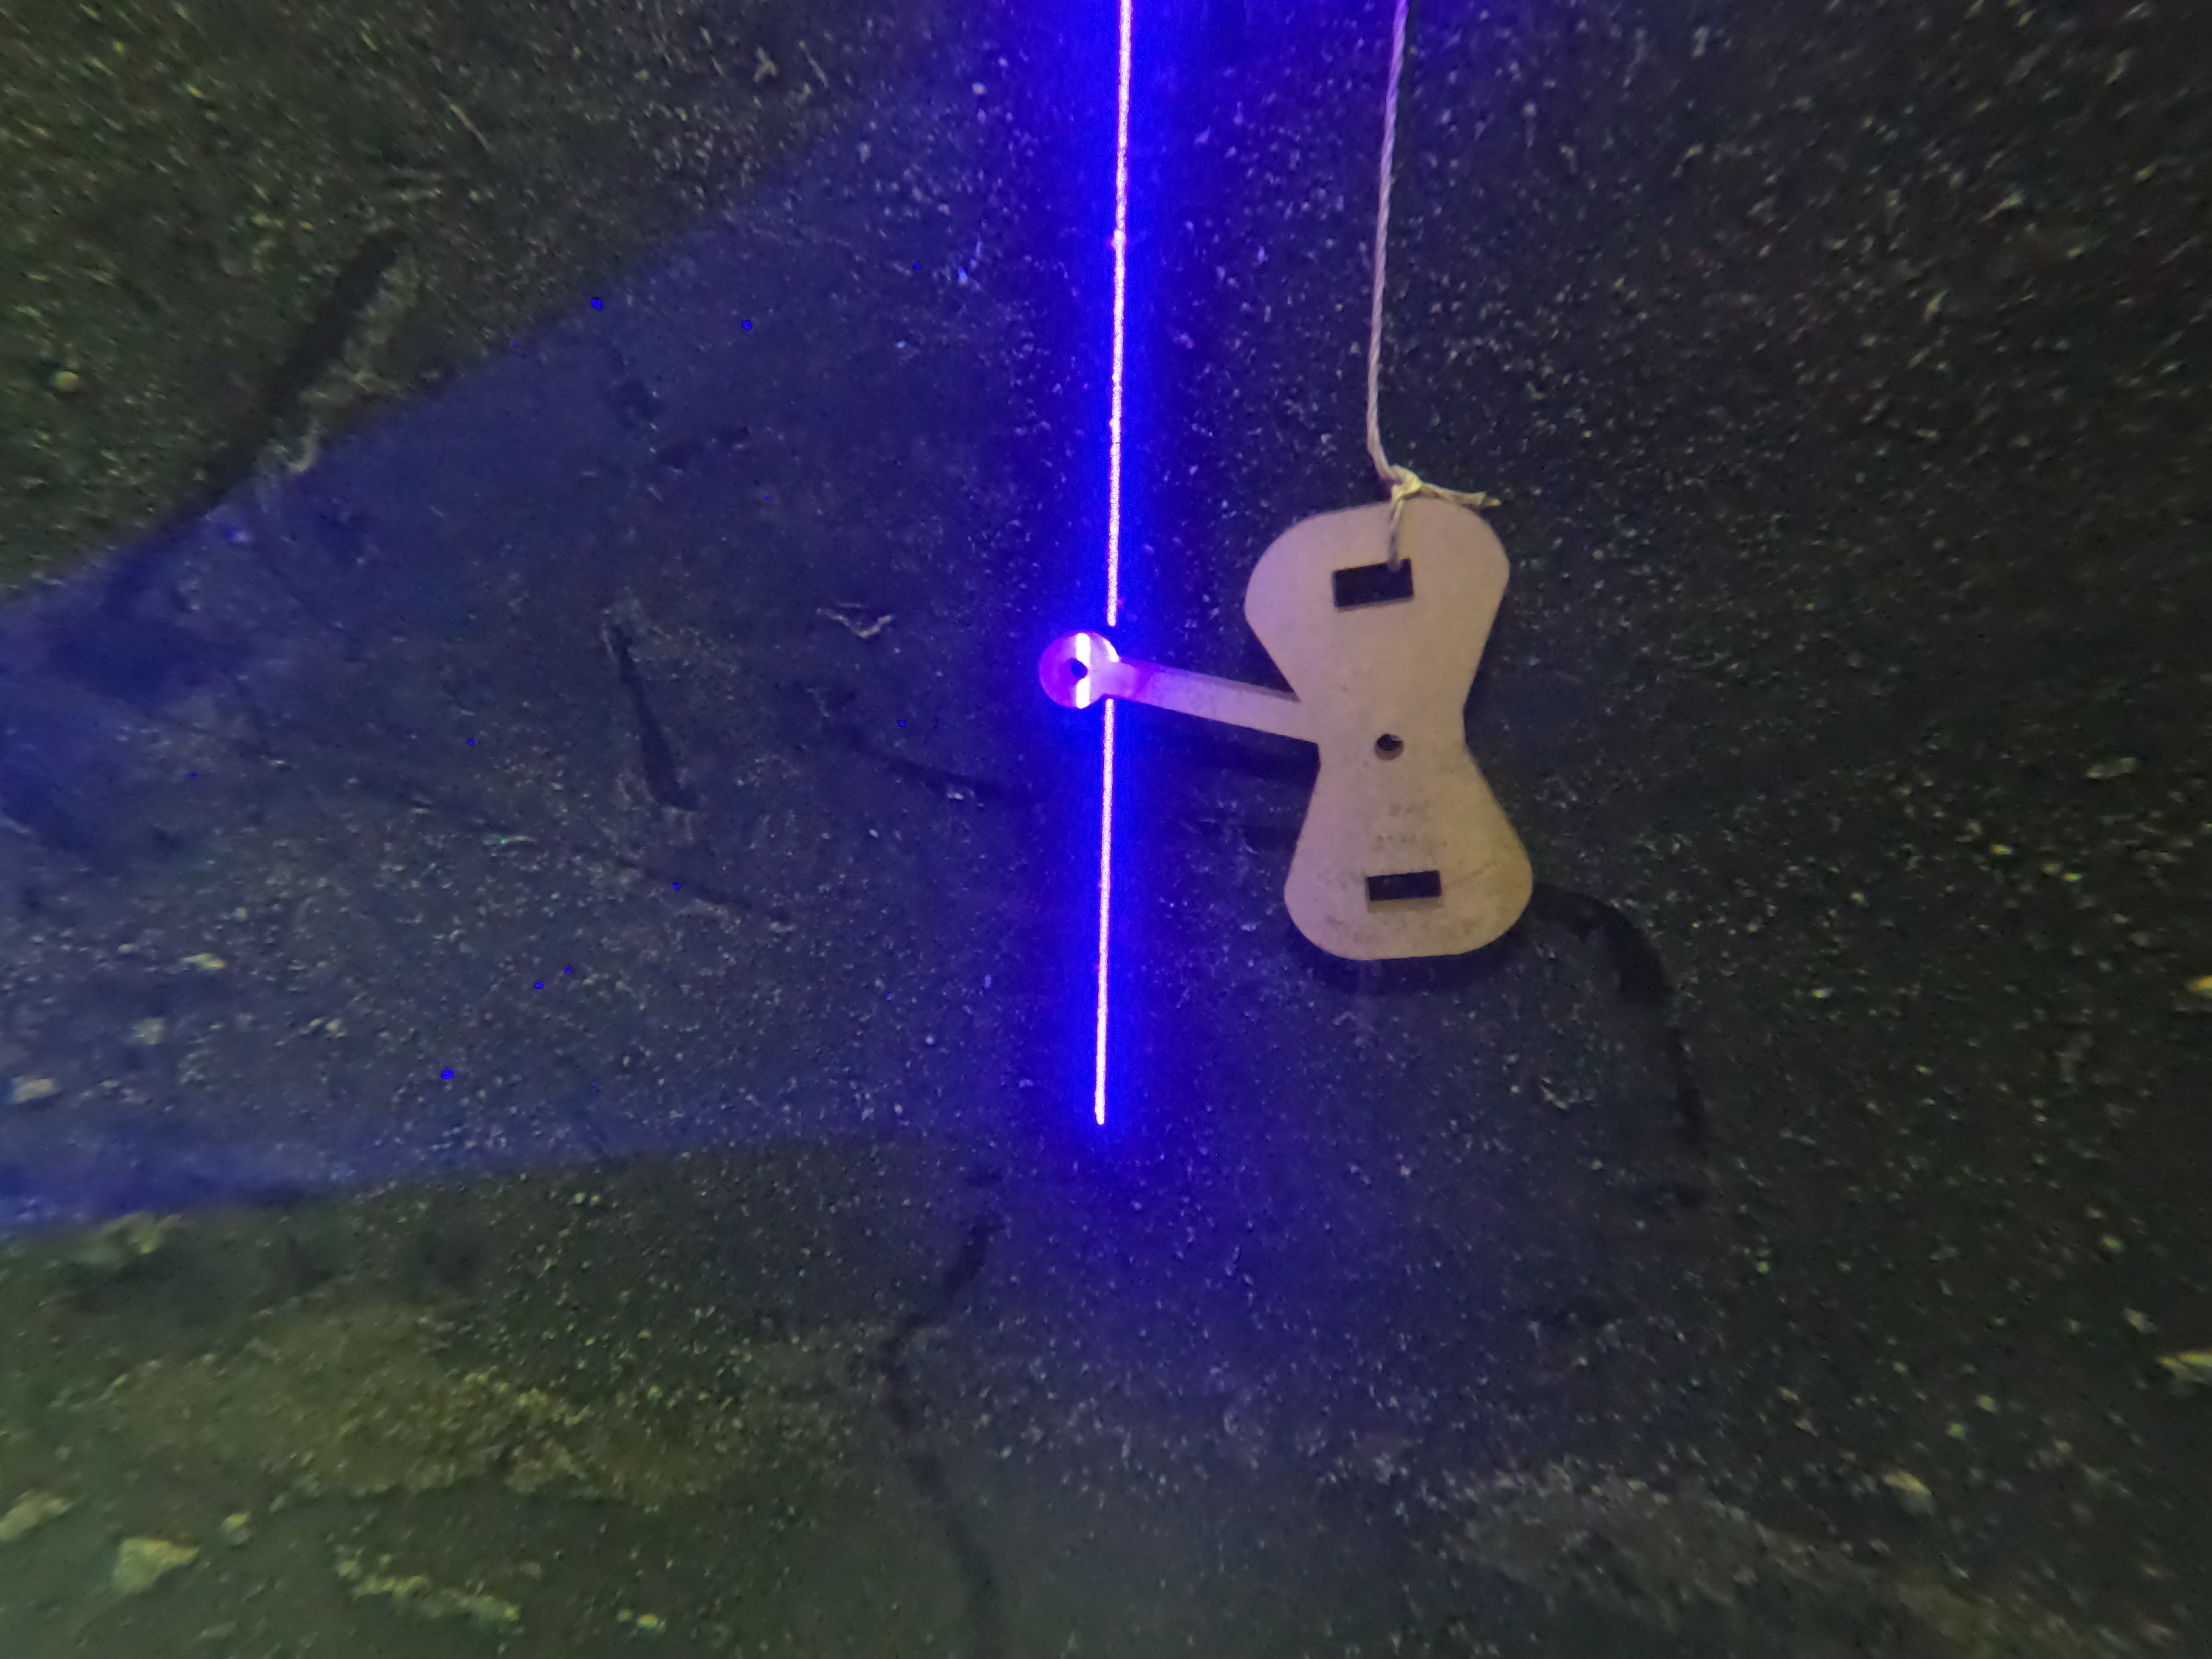

Supplement: Supplementary file 3288 [file G0015729.pdf › Level_2_1/G0015729.pdf]

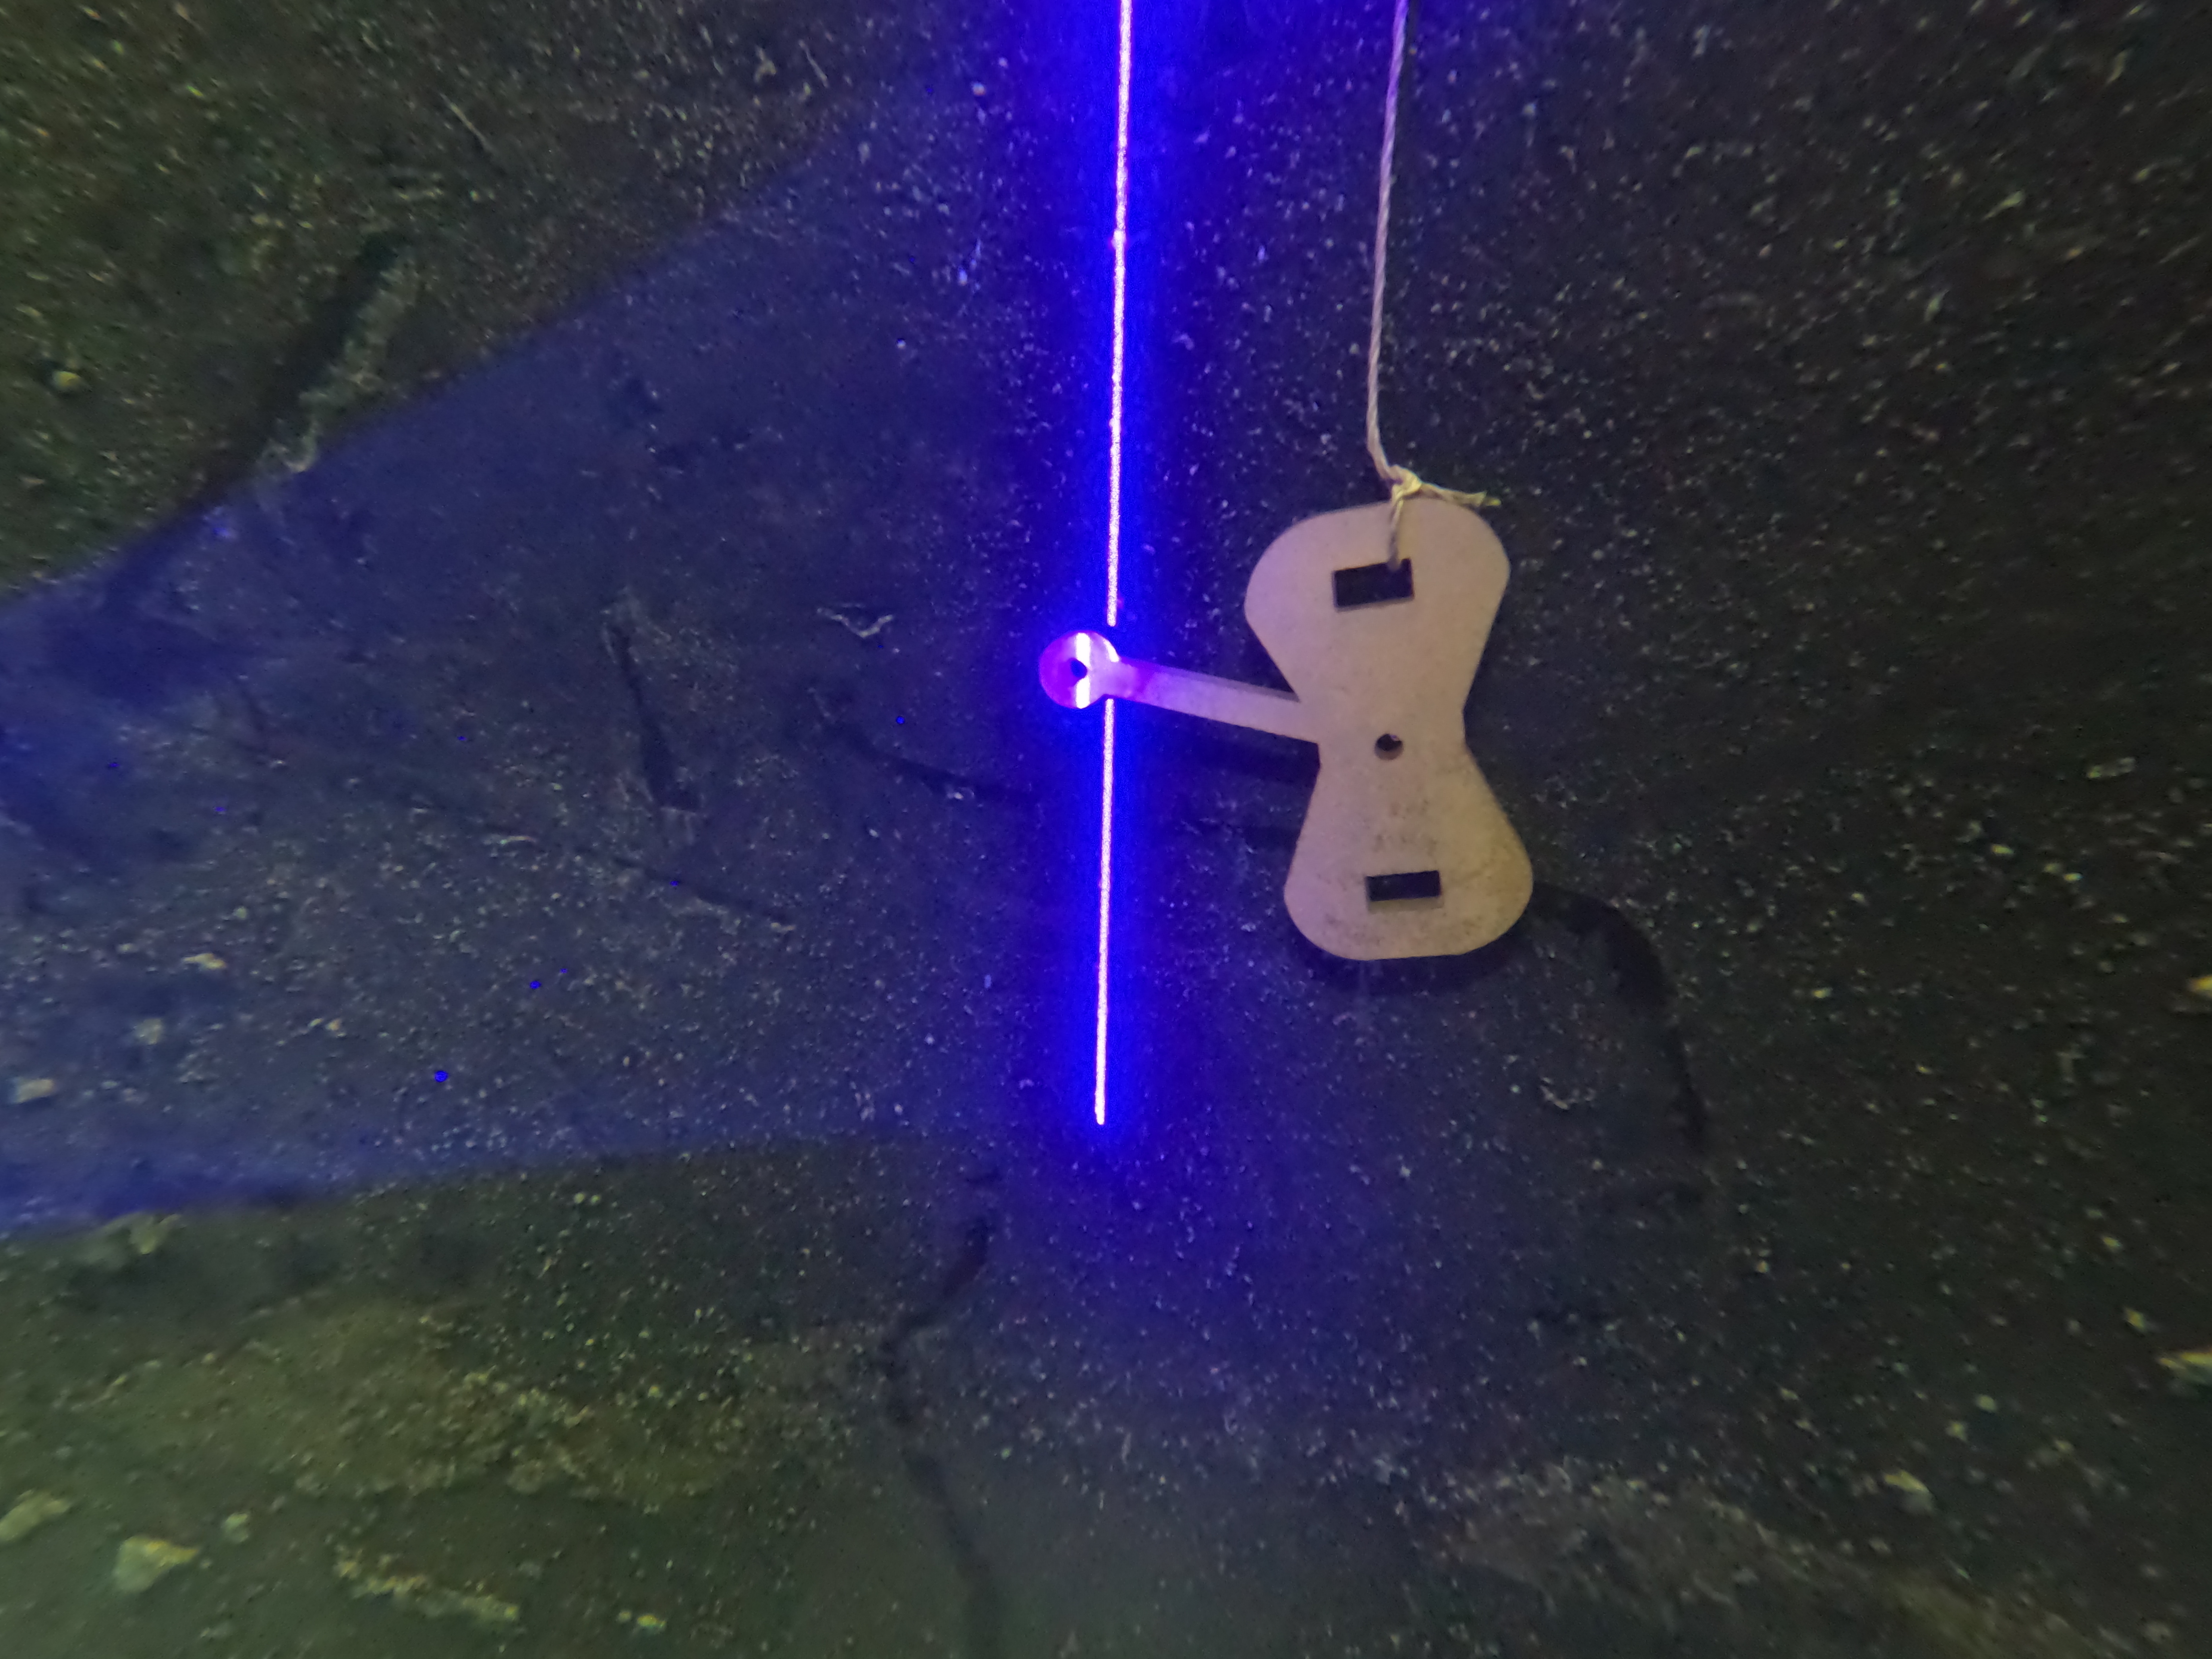

Supplement: Supplementary file 3289 [file G0015730.pdf › Level_2_1/G0015730.pdf]

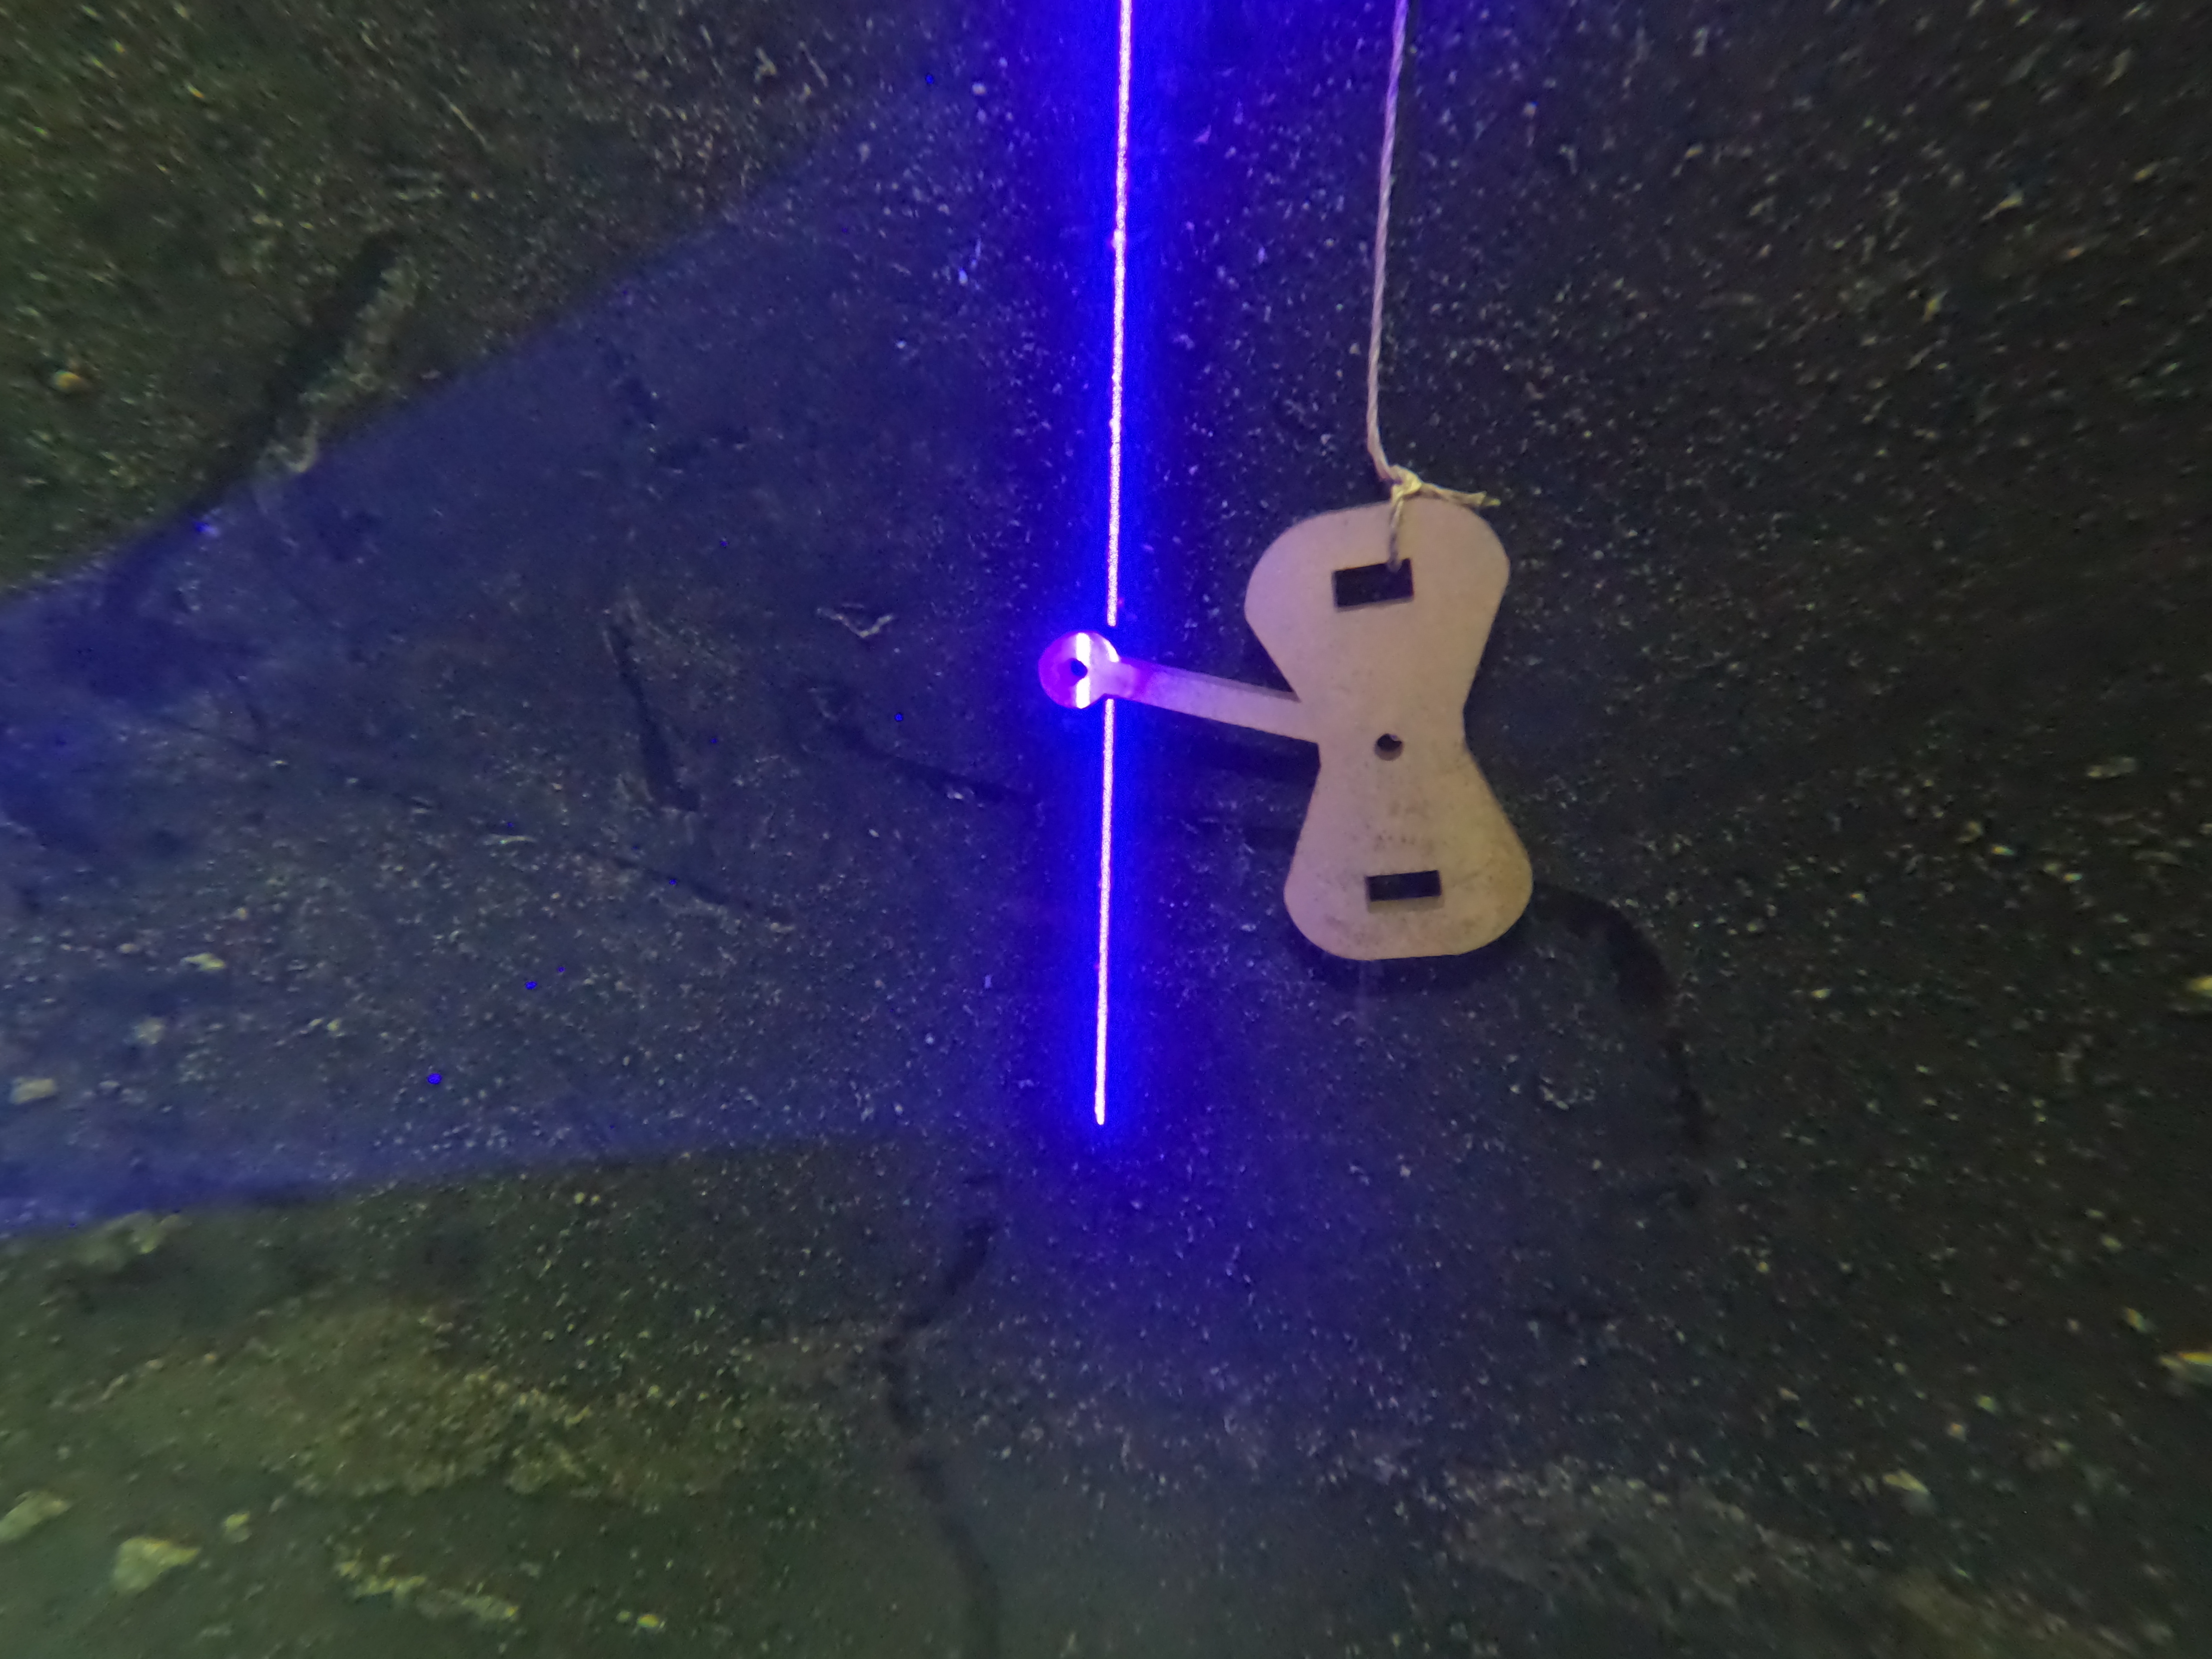

Supplement: Supplementary file 3290 [file G0015731.pdf › Level_2_1/G0015731.pdf]
