# Supplementary figures and images for: 3D reconstruction of shallow sea environment using direct system calibration and faint laser line extraction (part 33 of 35)
Source: Research Square preprint supplement (doi:10.21203/rs.3.rs-5262658/v1), 2024-12-02

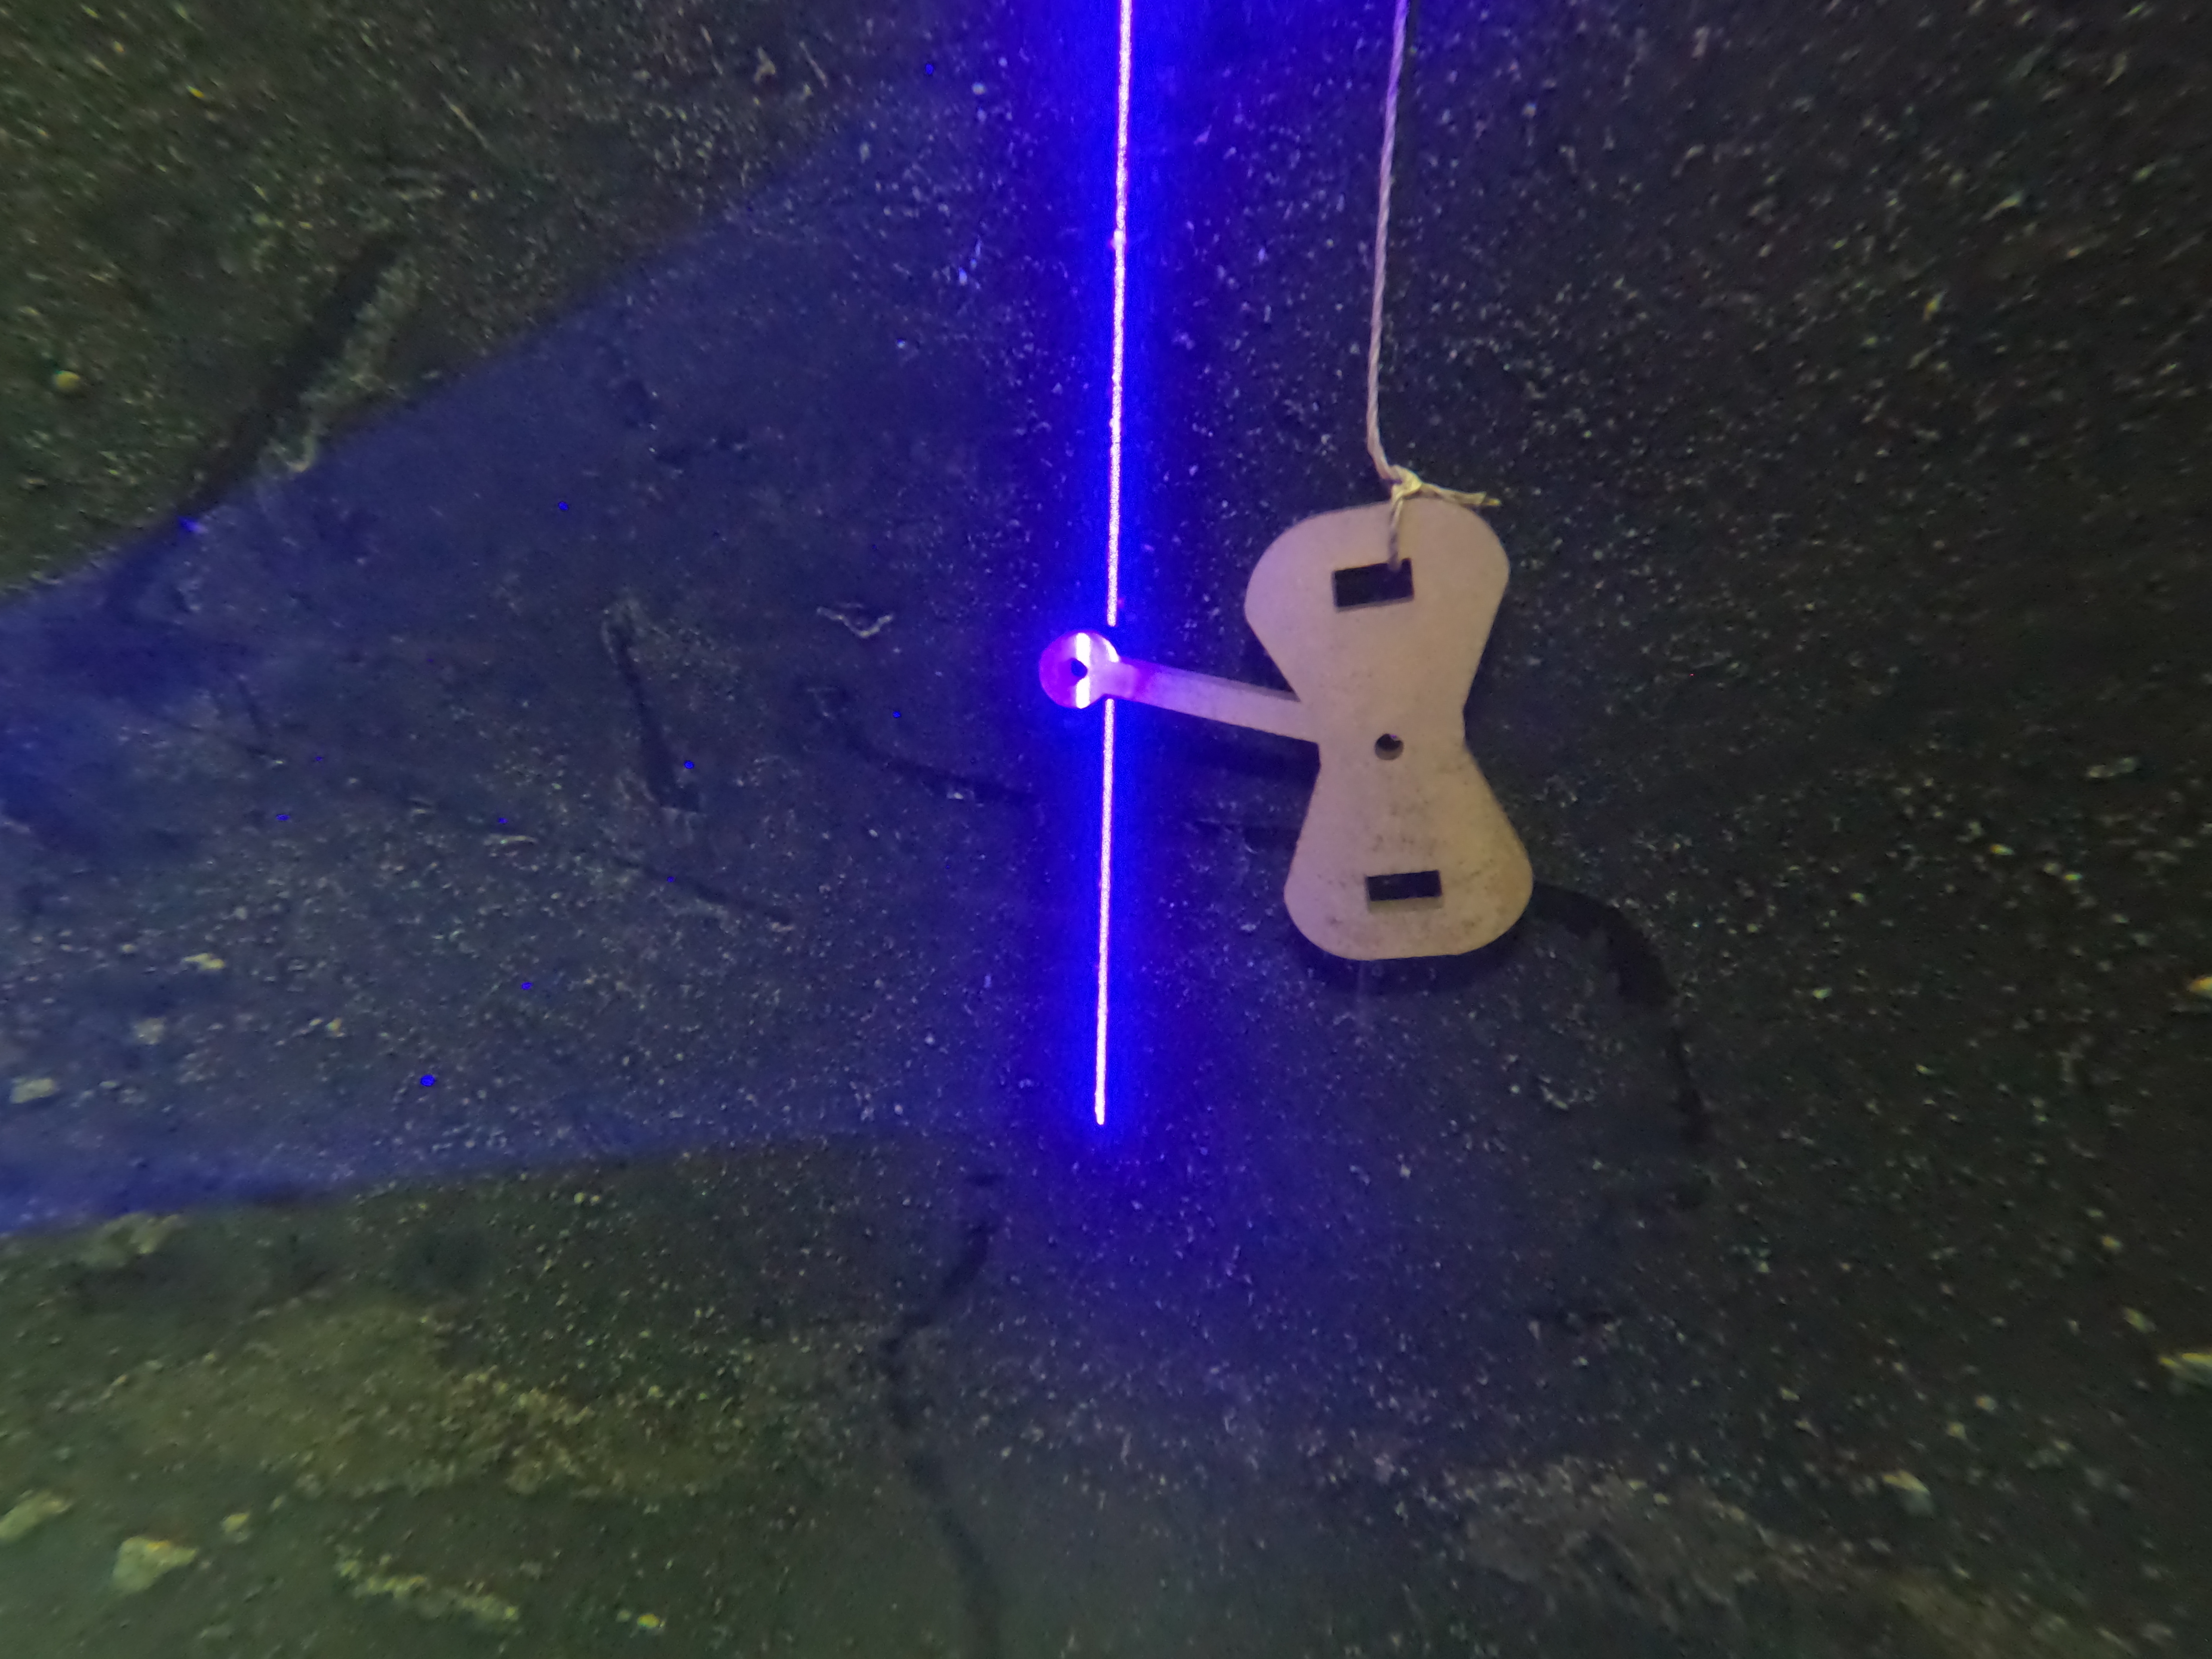

Supplement: Supplementary file 3291 [file G0015732.pdf › Level_2_1/G0015732.pdf]

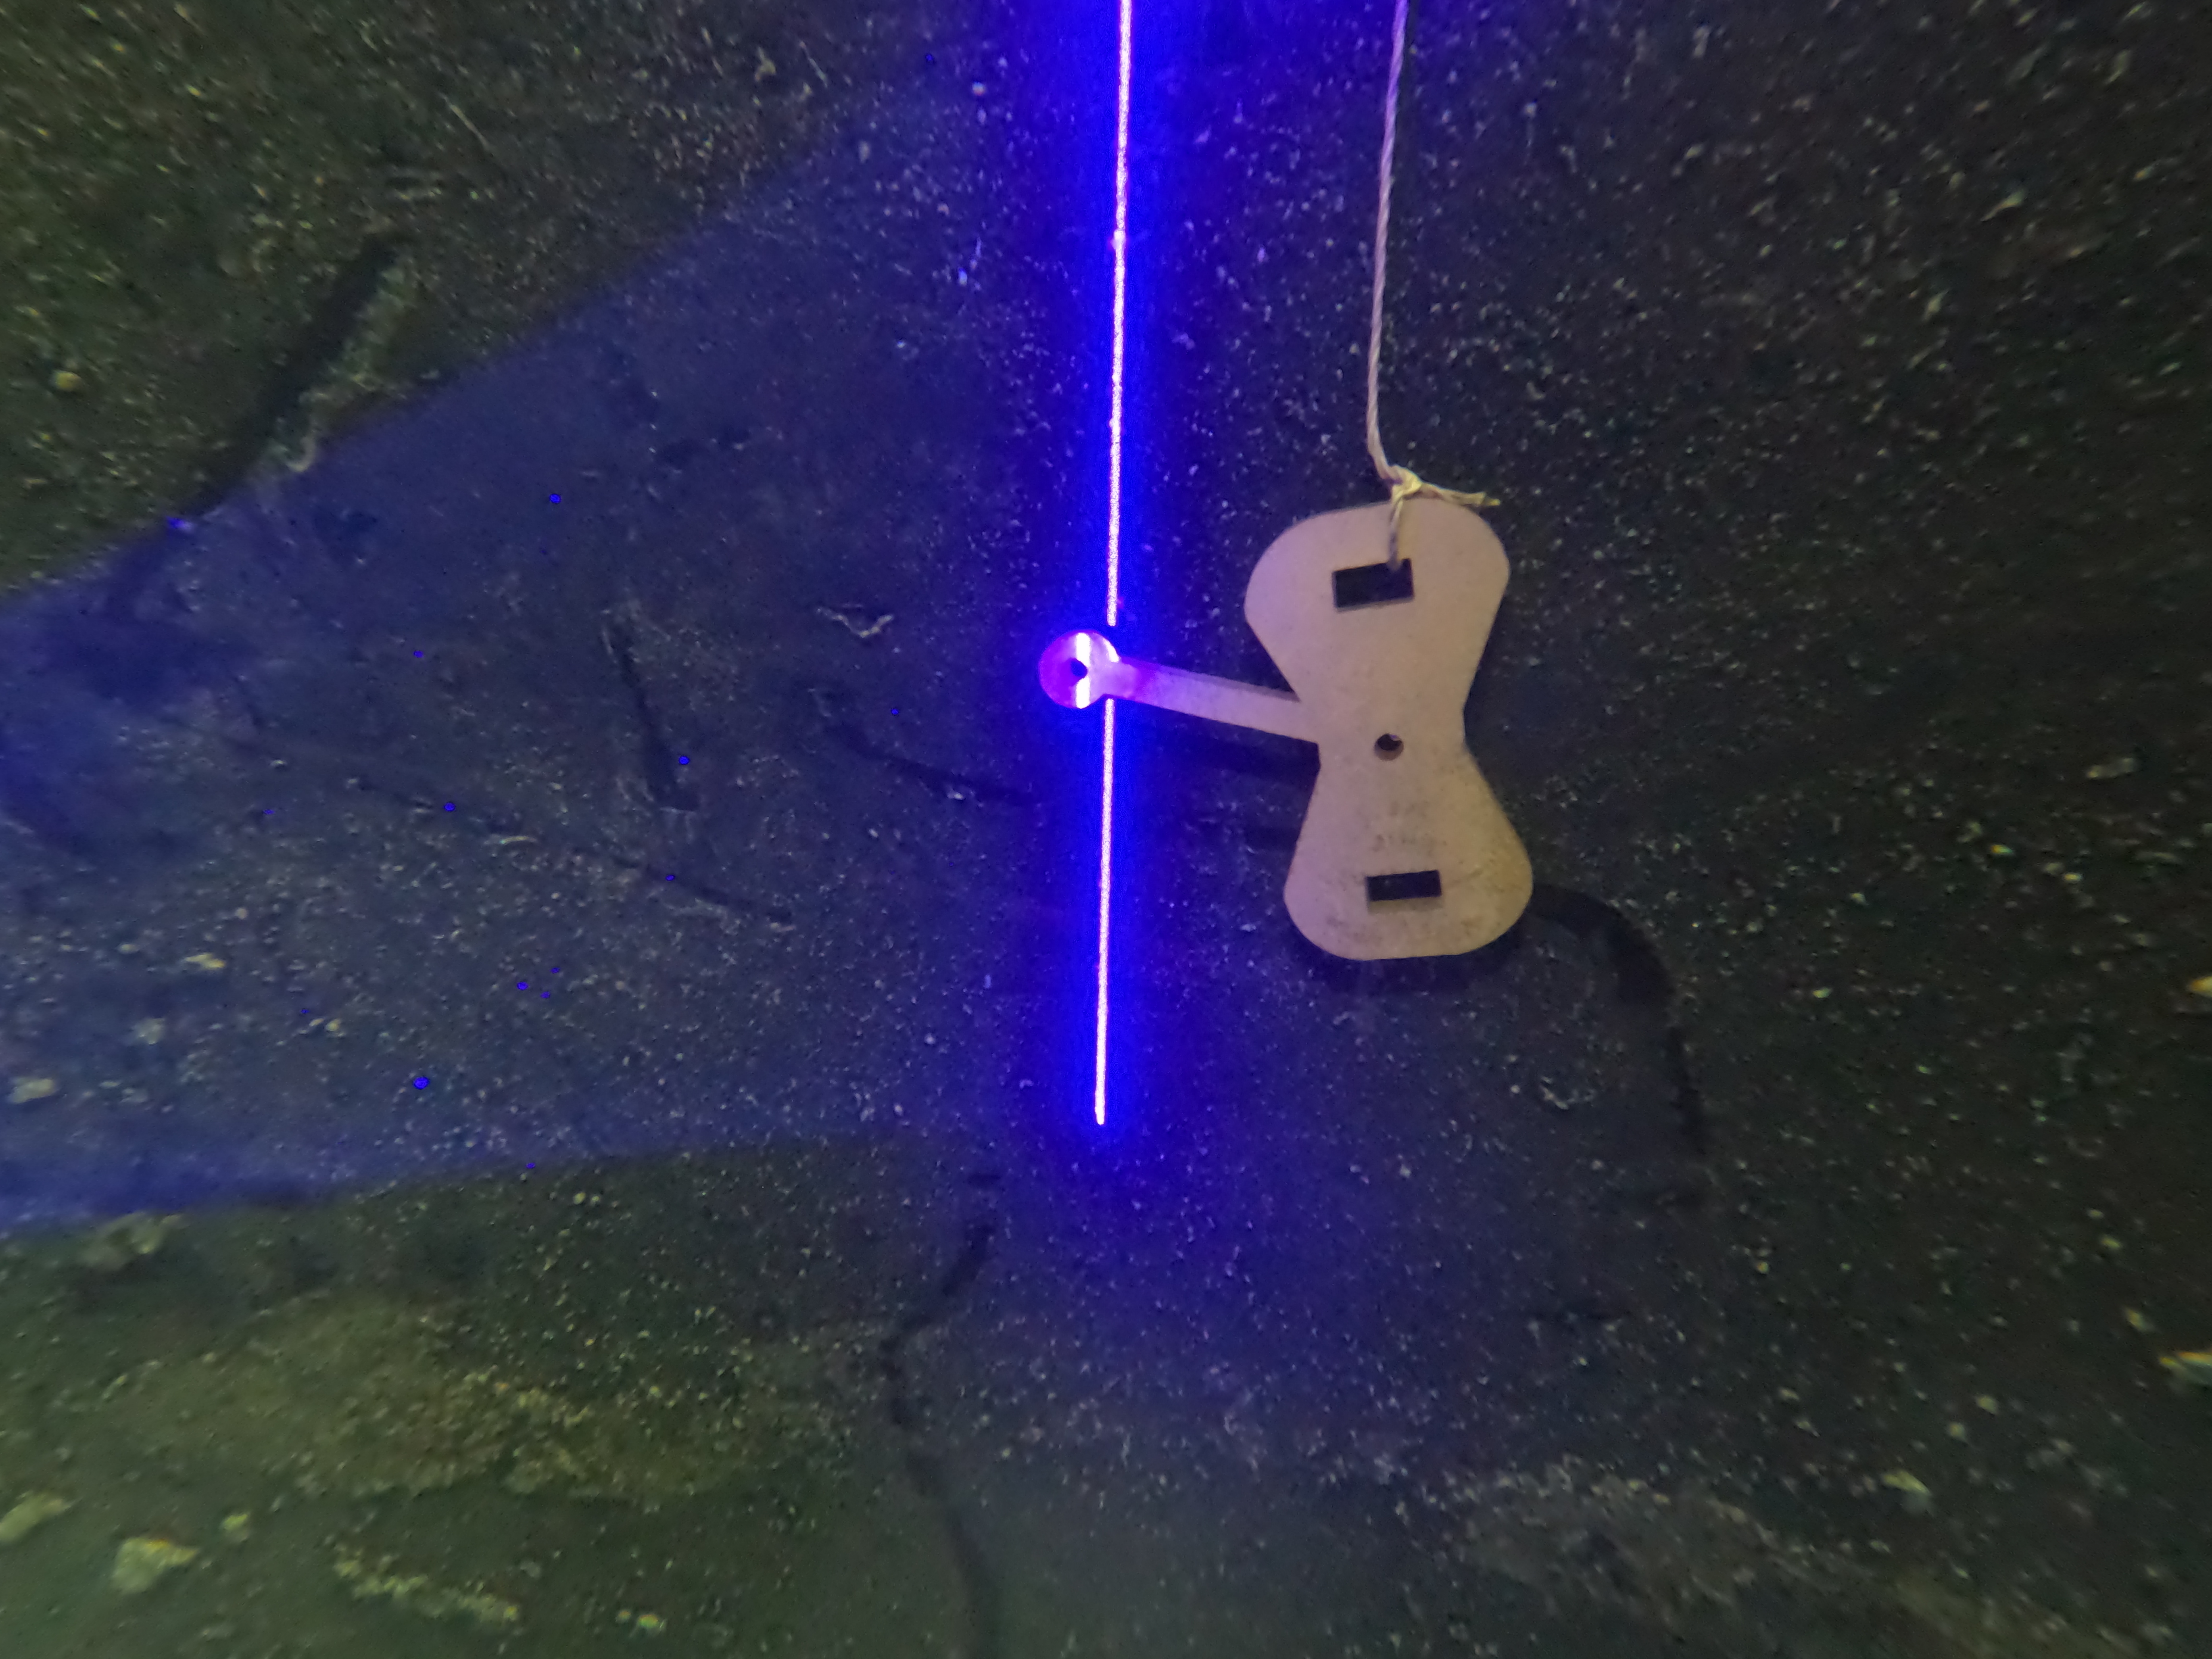

Supplement: Supplementary file 3292 [file G0015733.pdf › Level_2_1/G0015733.pdf]

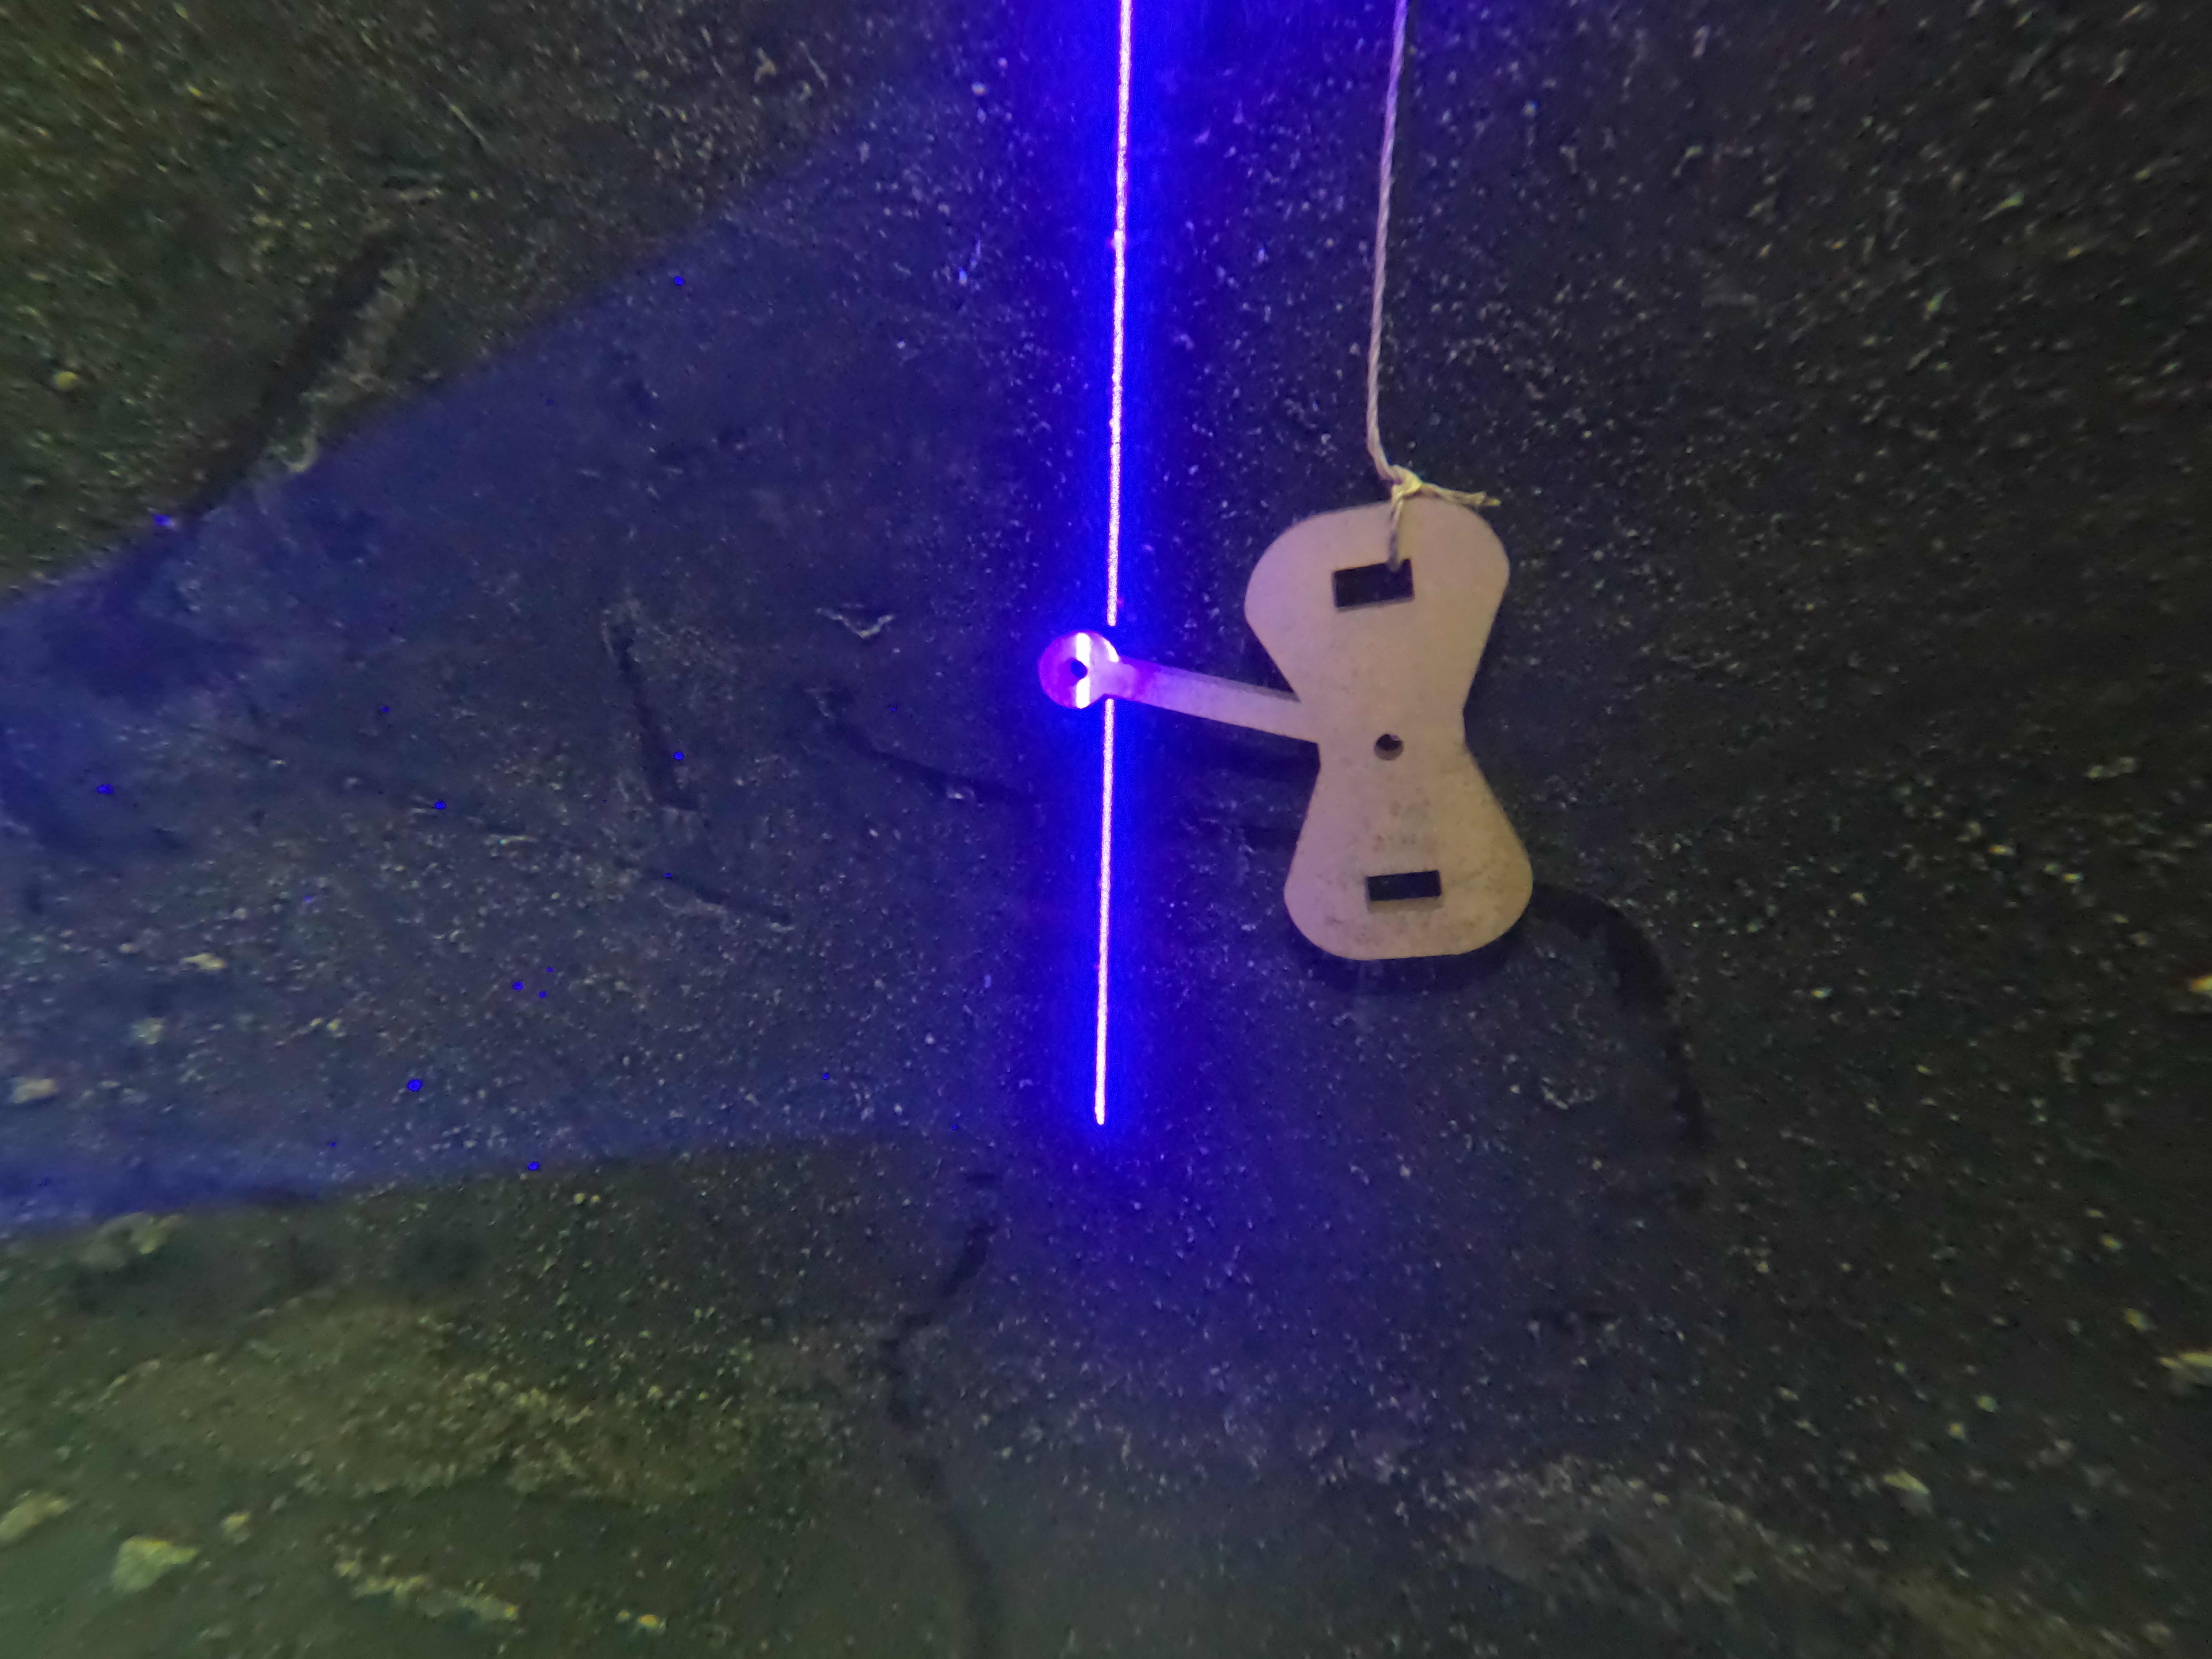

Supplement: Supplementary file 3293 [file G0015734.pdf › Level_2_1/G0015734.pdf]

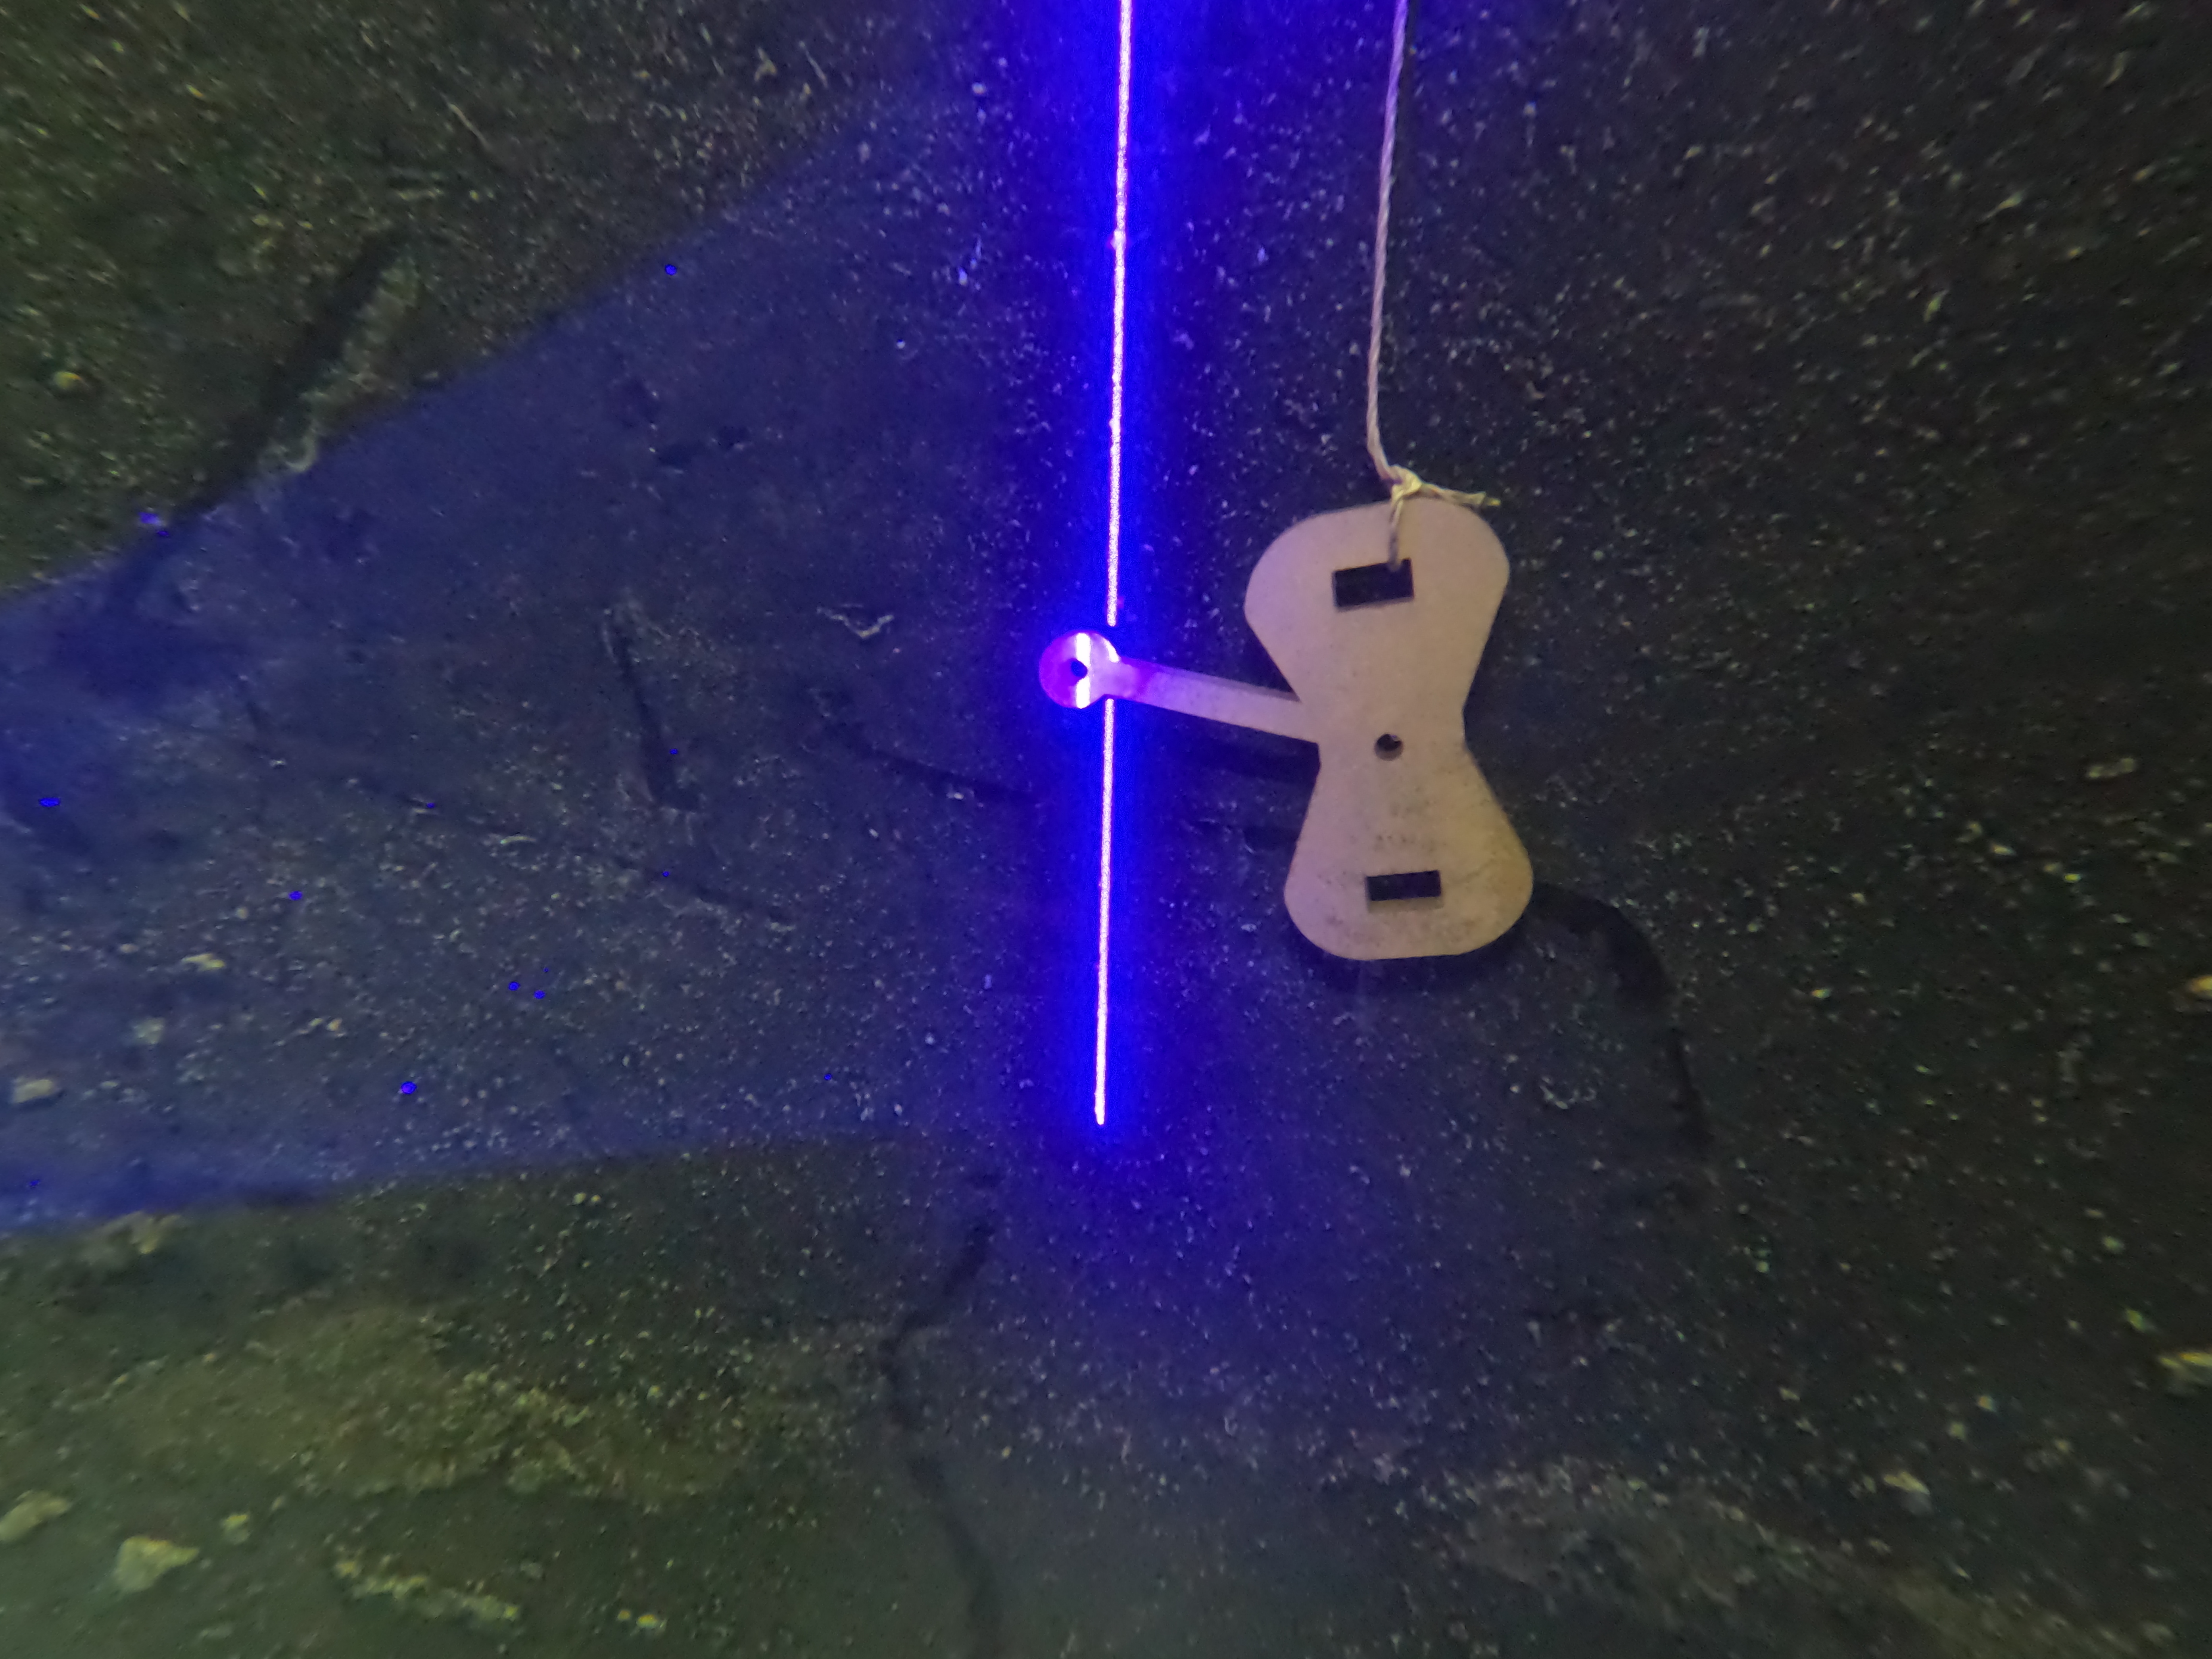

Supplement: Supplementary file 3294 [file G0015735.pdf › Level_2_1/G0015735.pdf]

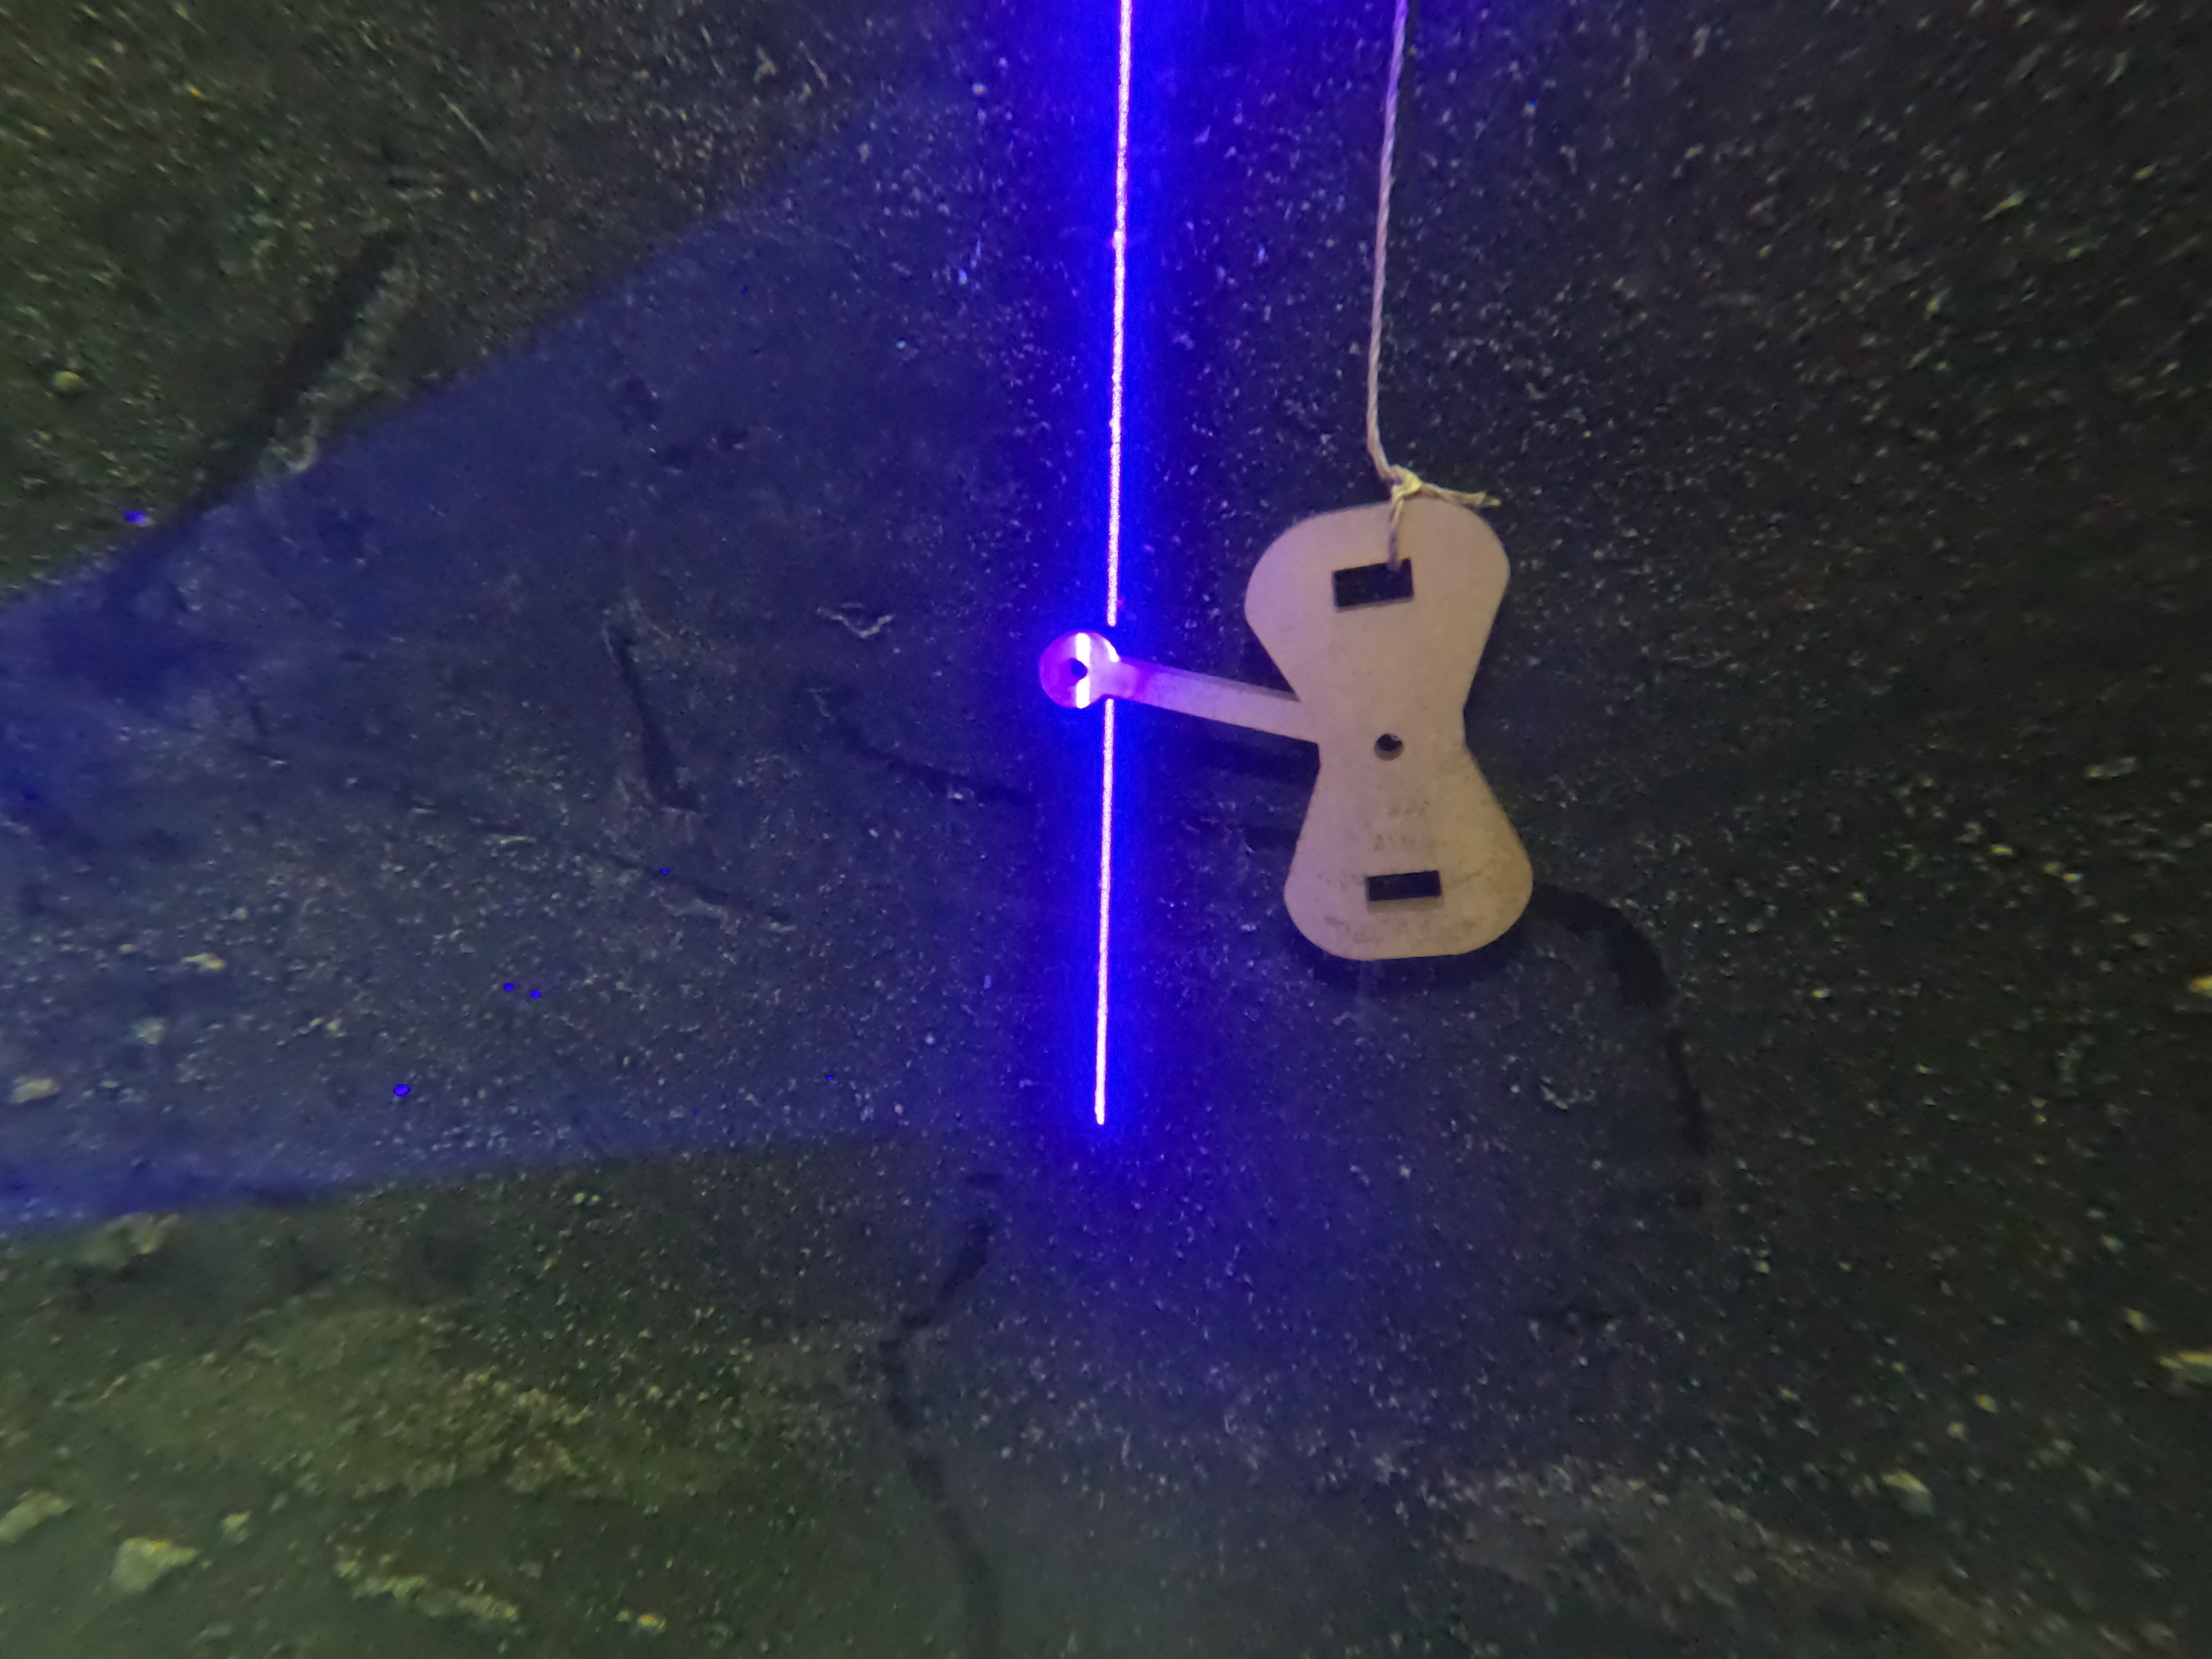

Supplement: Supplementary file 3295 [file G0015736.pdf › Level_2_1/G0015736.pdf]

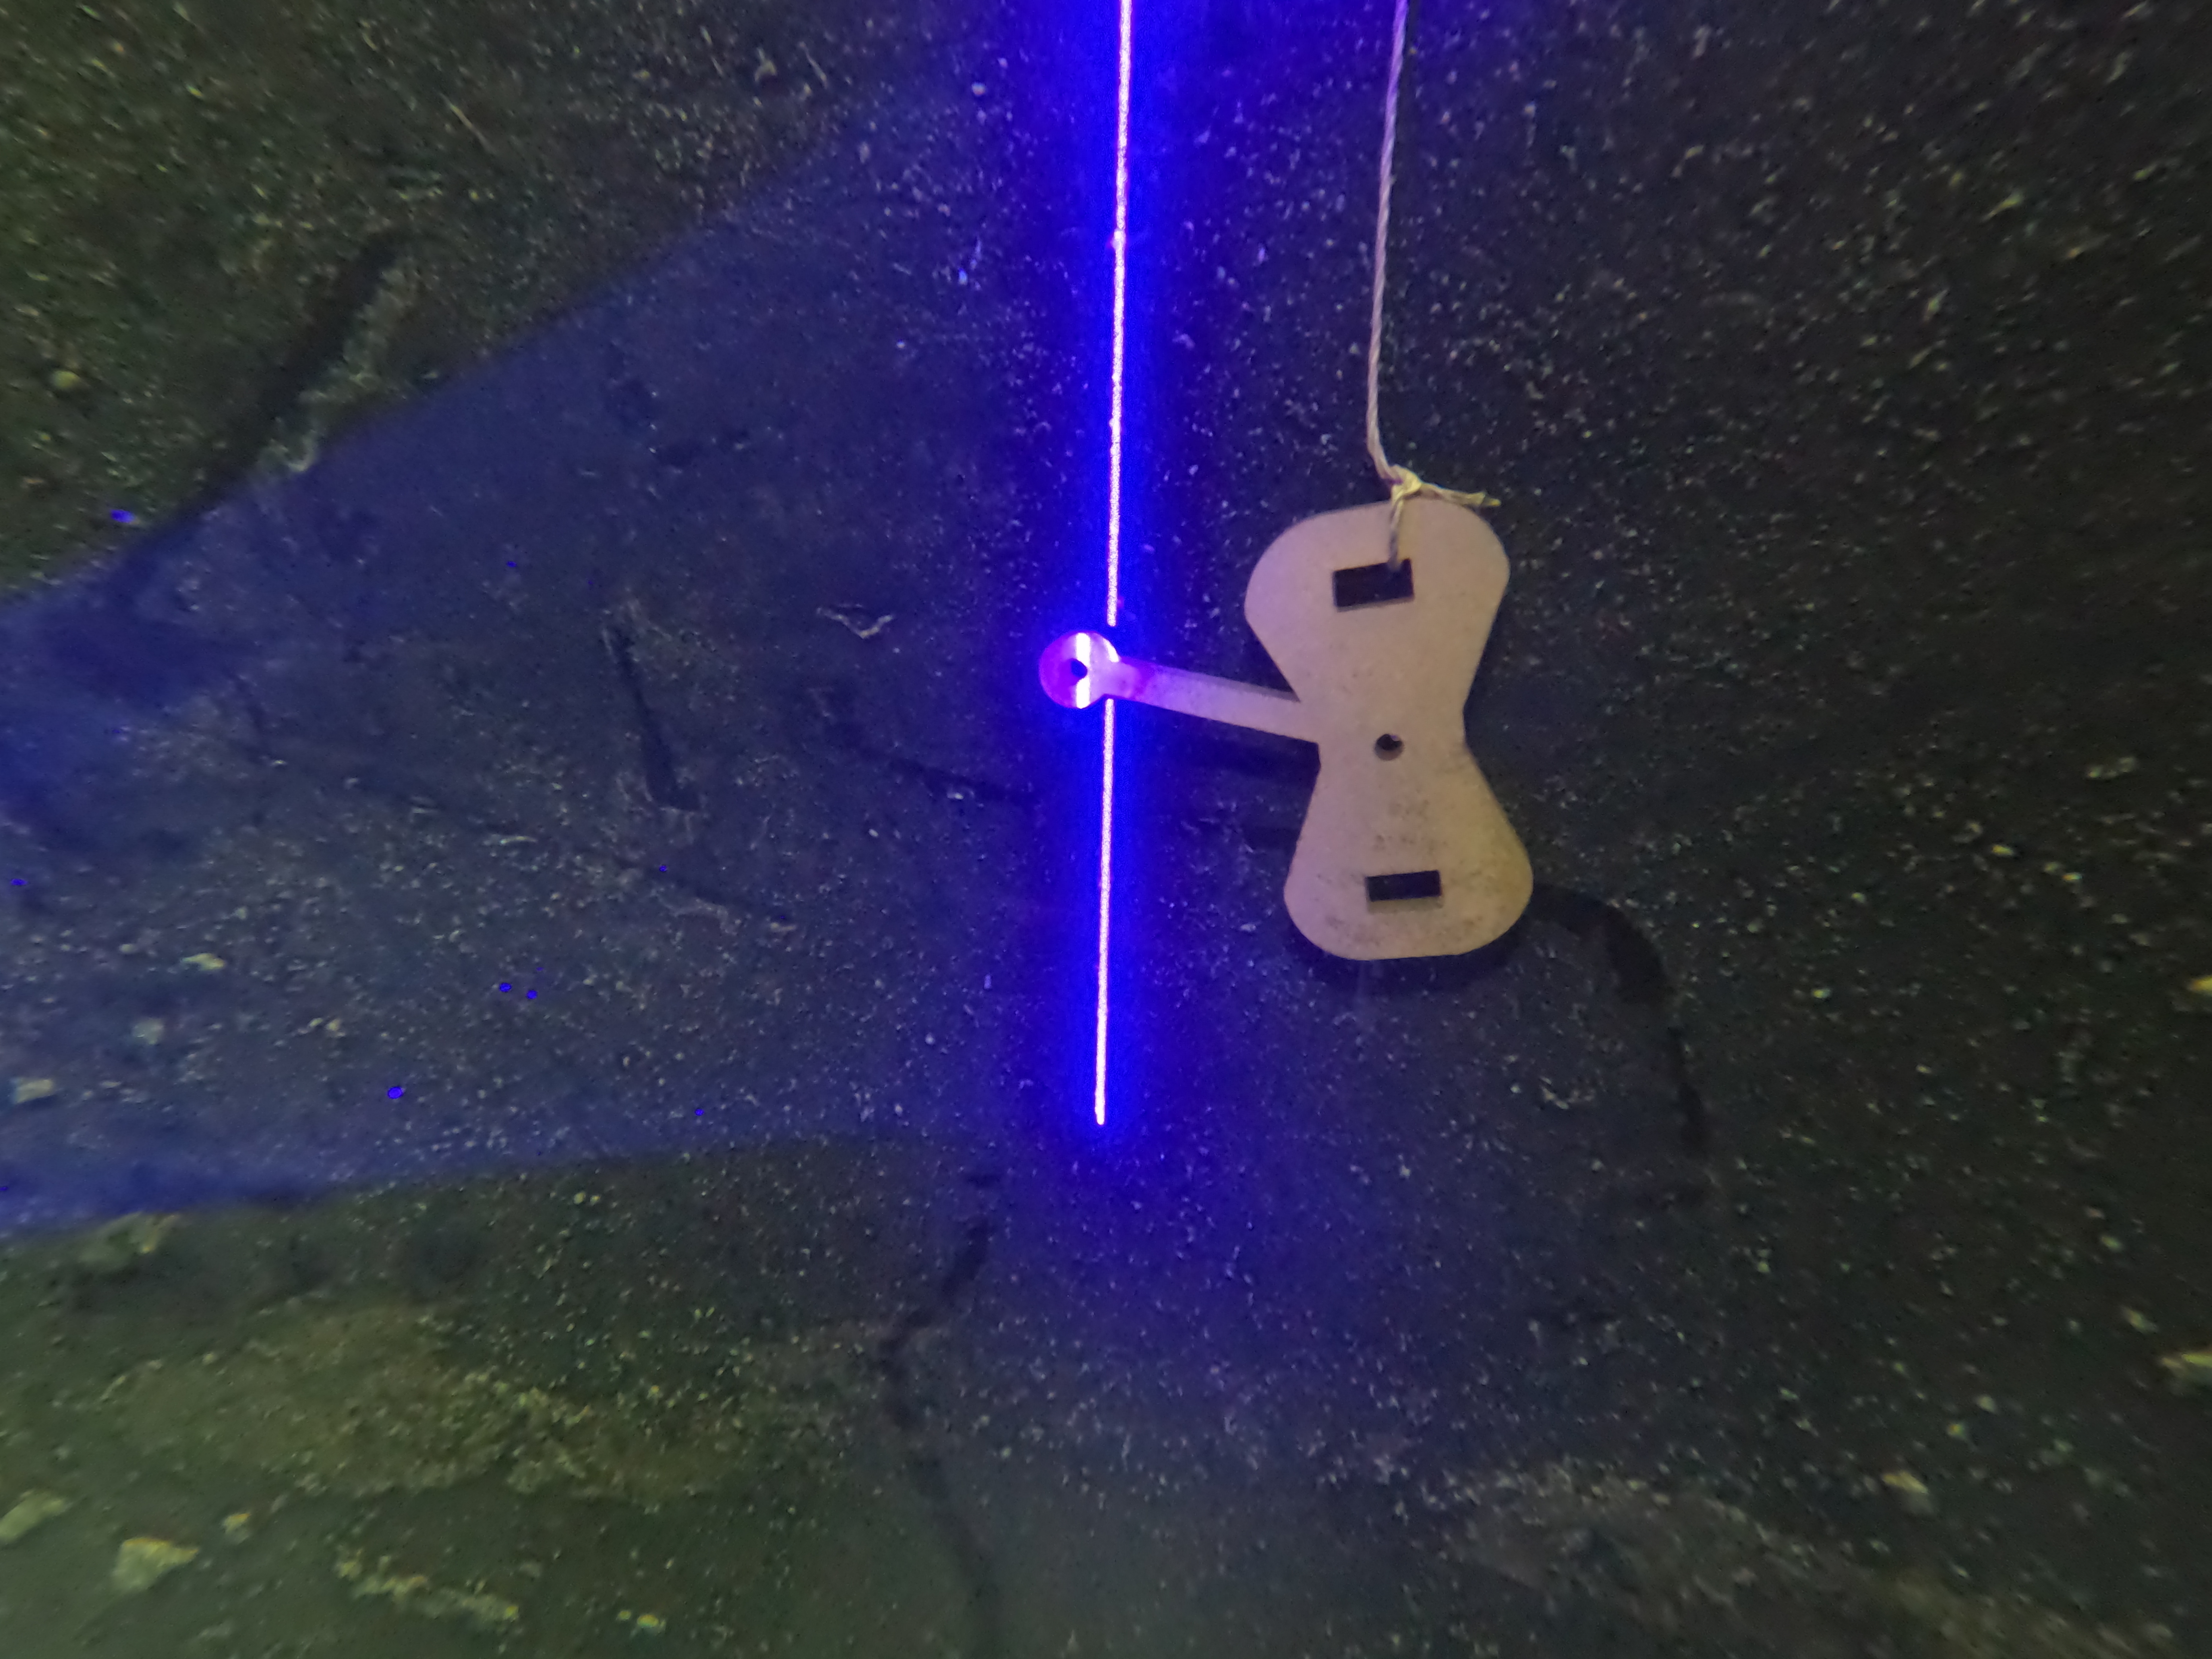

Supplement: Supplementary file 3296 [file G0015737.pdf › Level_2_1/G0015737.pdf]

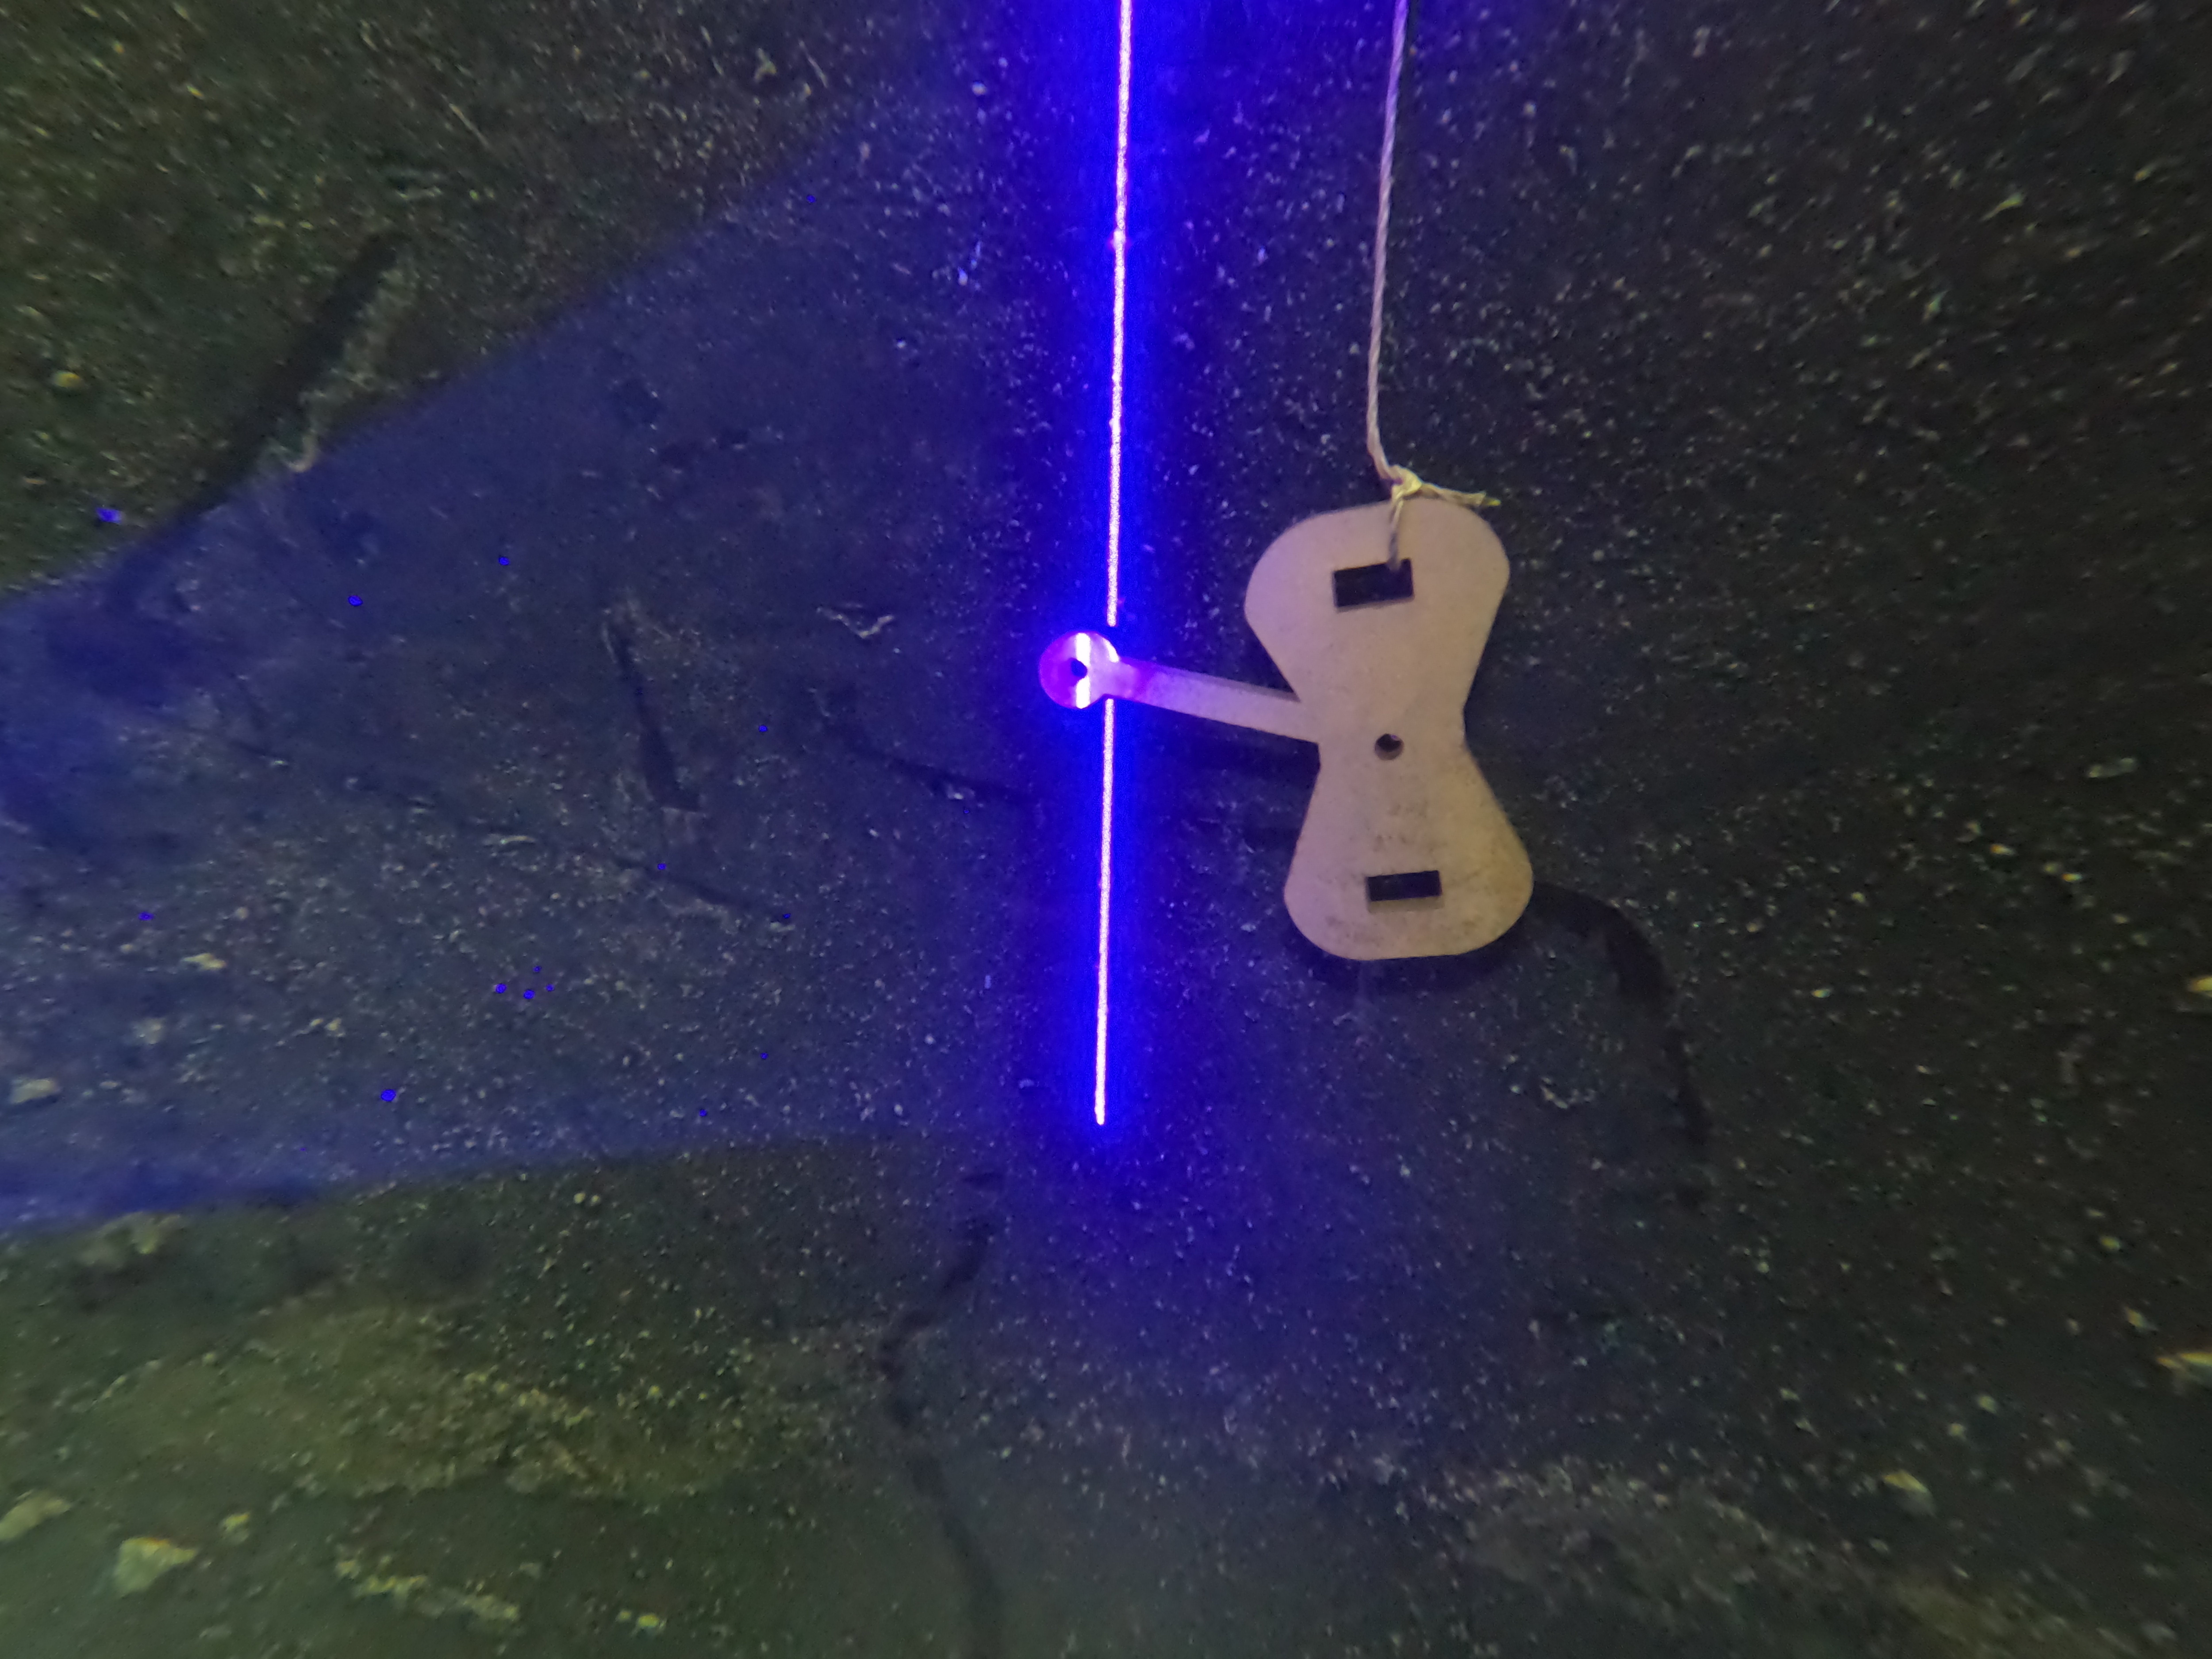

Supplement: Supplementary file 3297 [file G0015738.pdf › Level_2_1/G0015738.pdf]

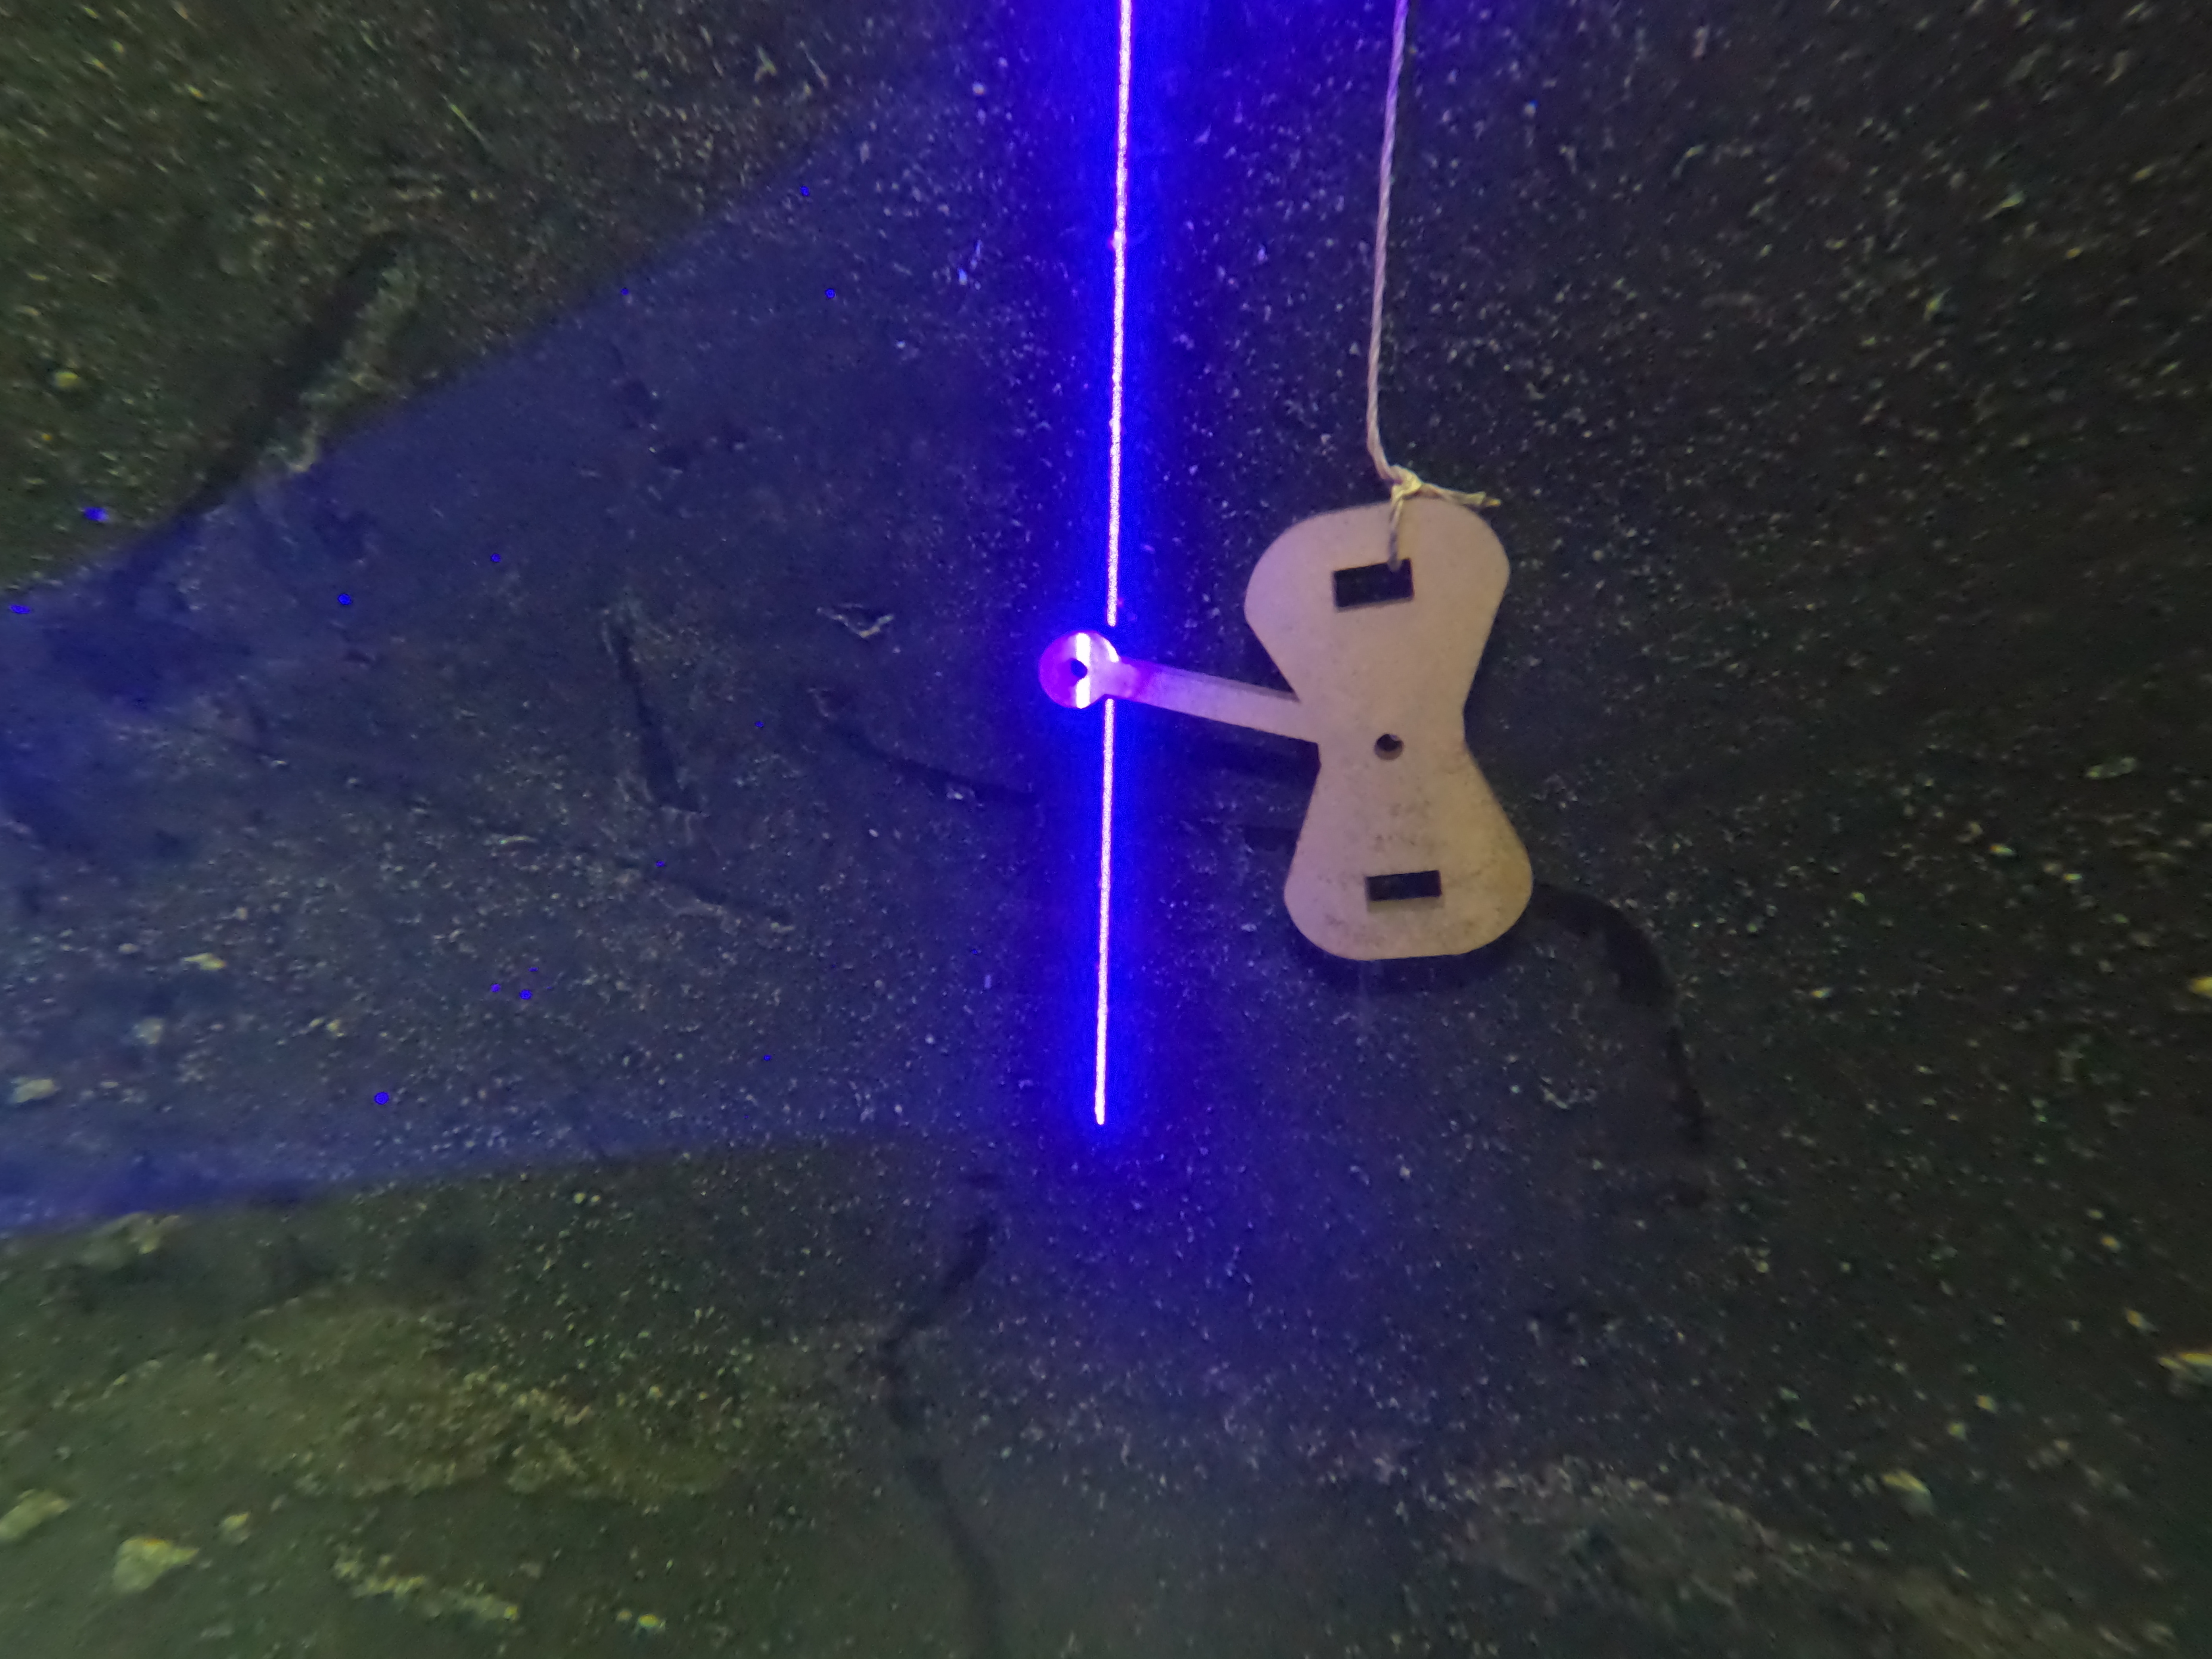

Supplement: Supplementary file 3298 [file G0015739.pdf › Level_2_1/G0015739.pdf]

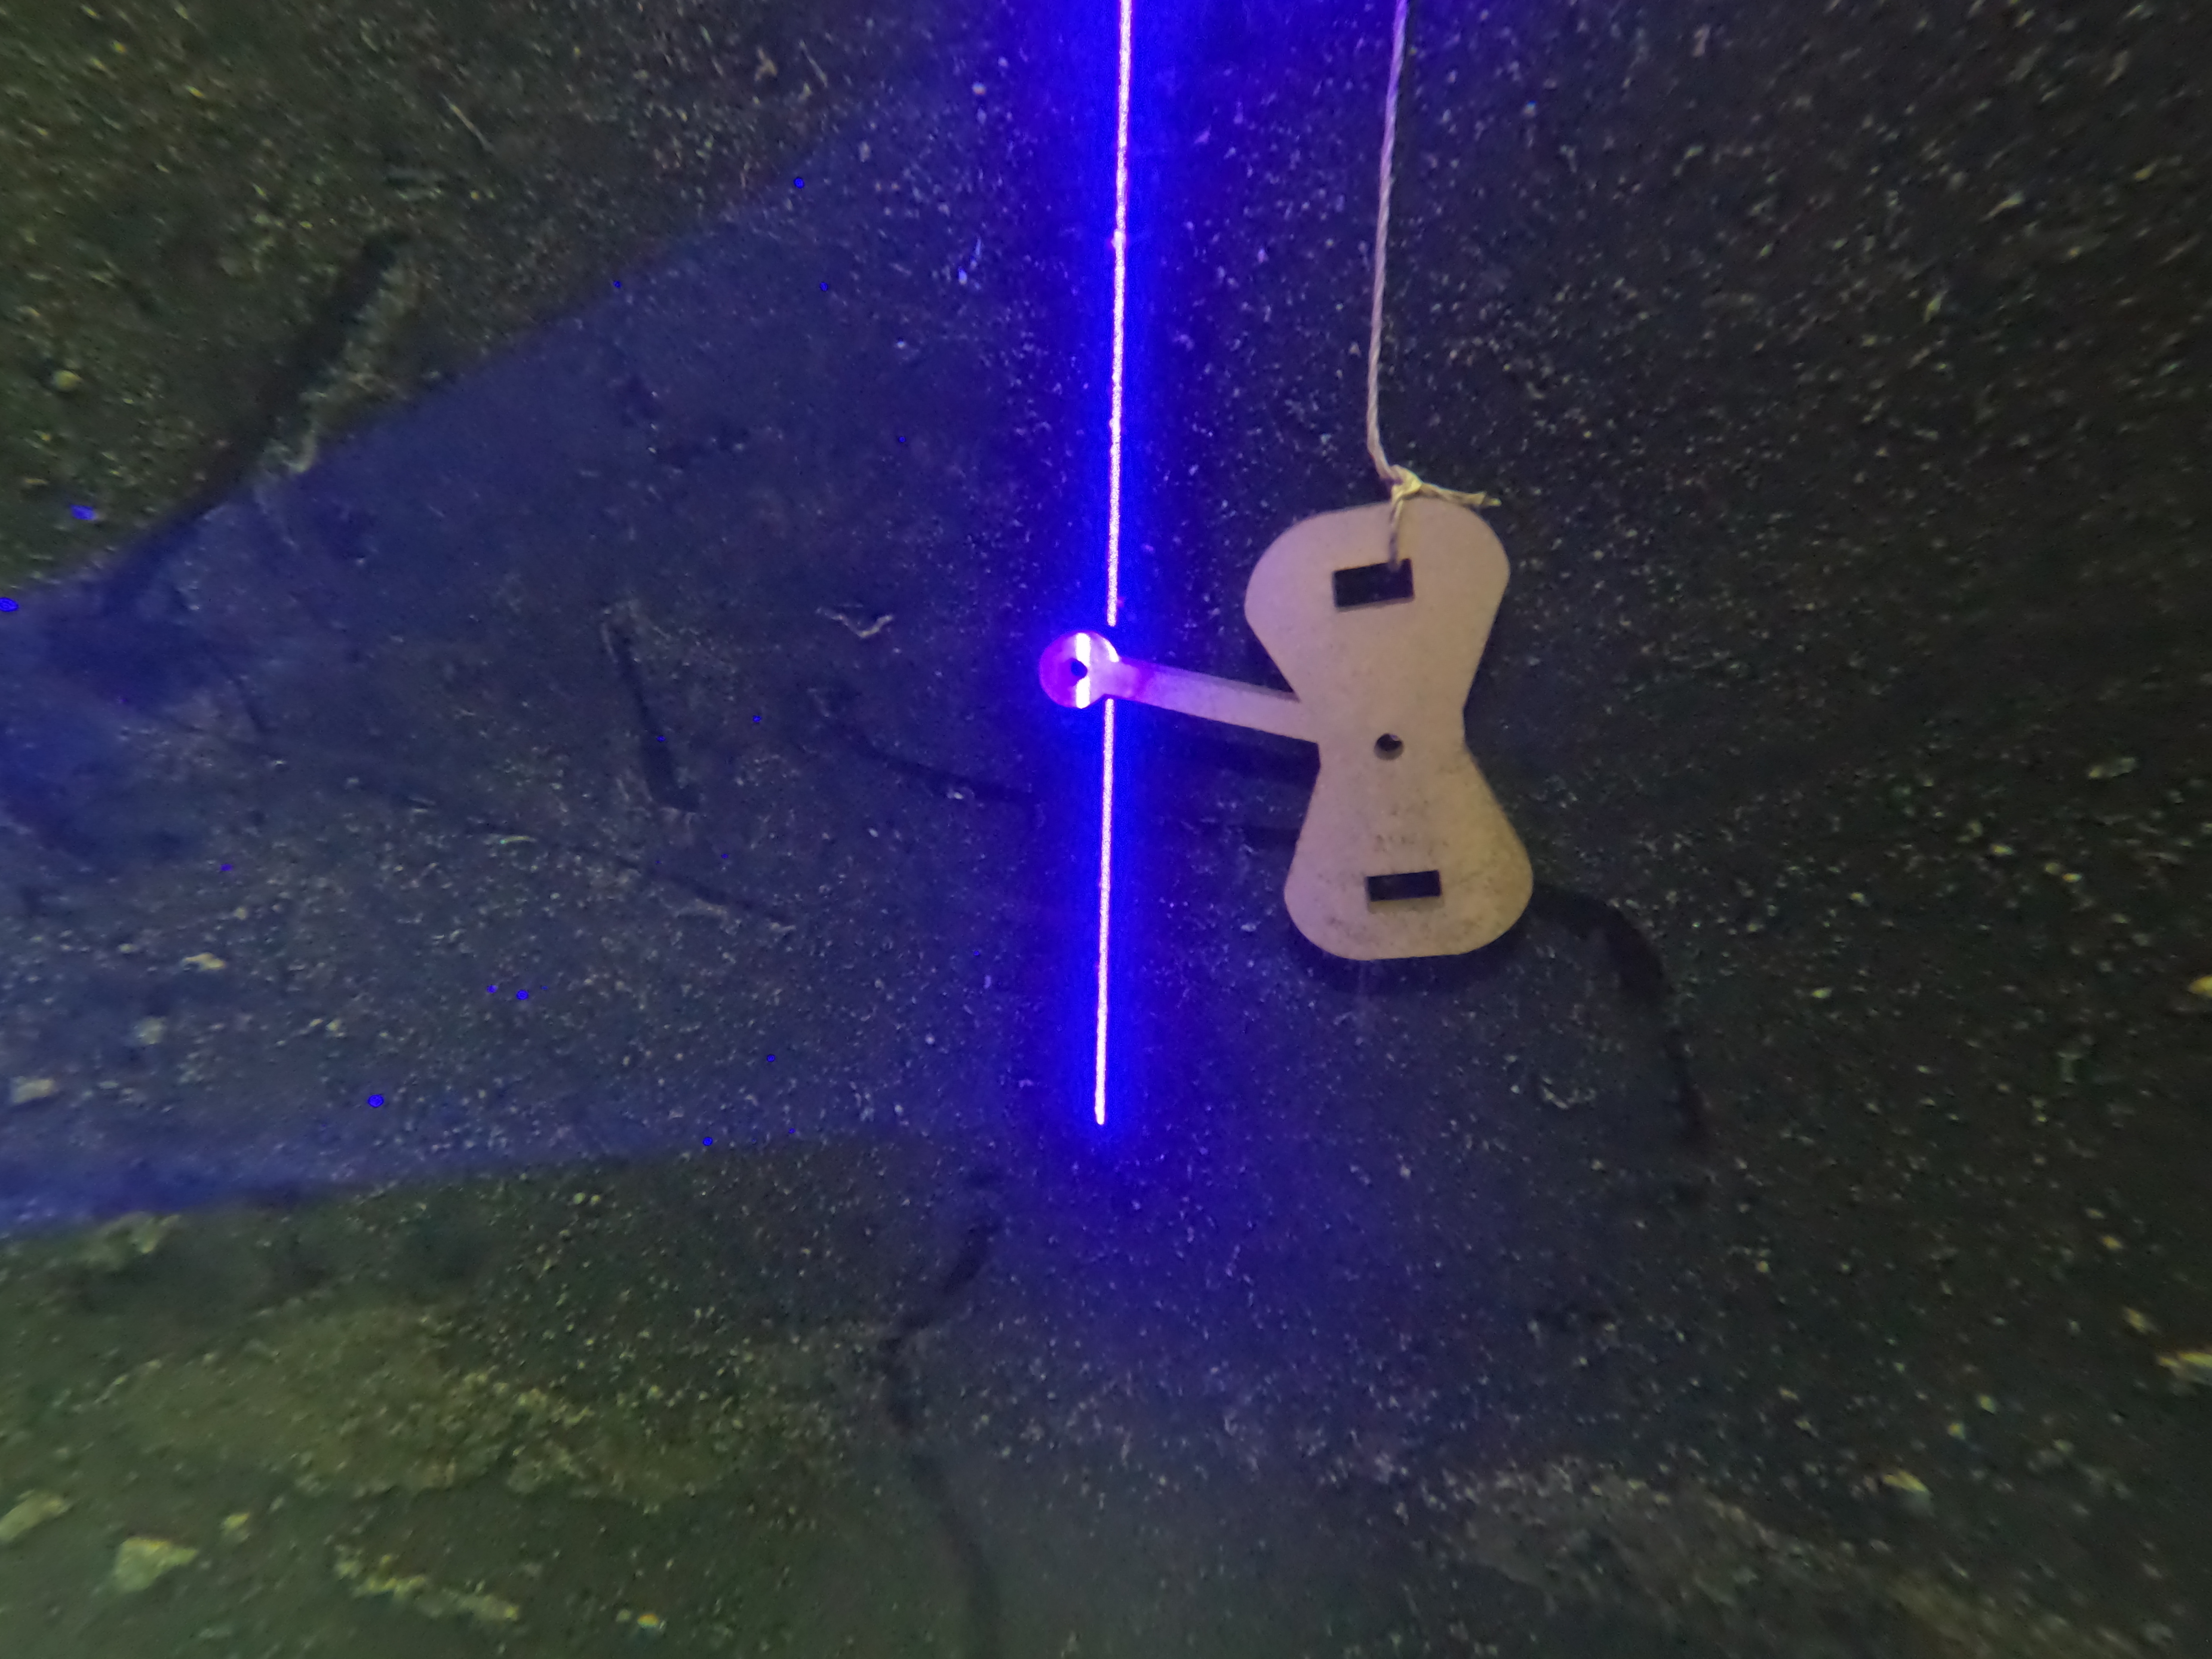

Supplement: Supplementary file 3299 [file G0015740.pdf › Level_2_1/G0015740.pdf]

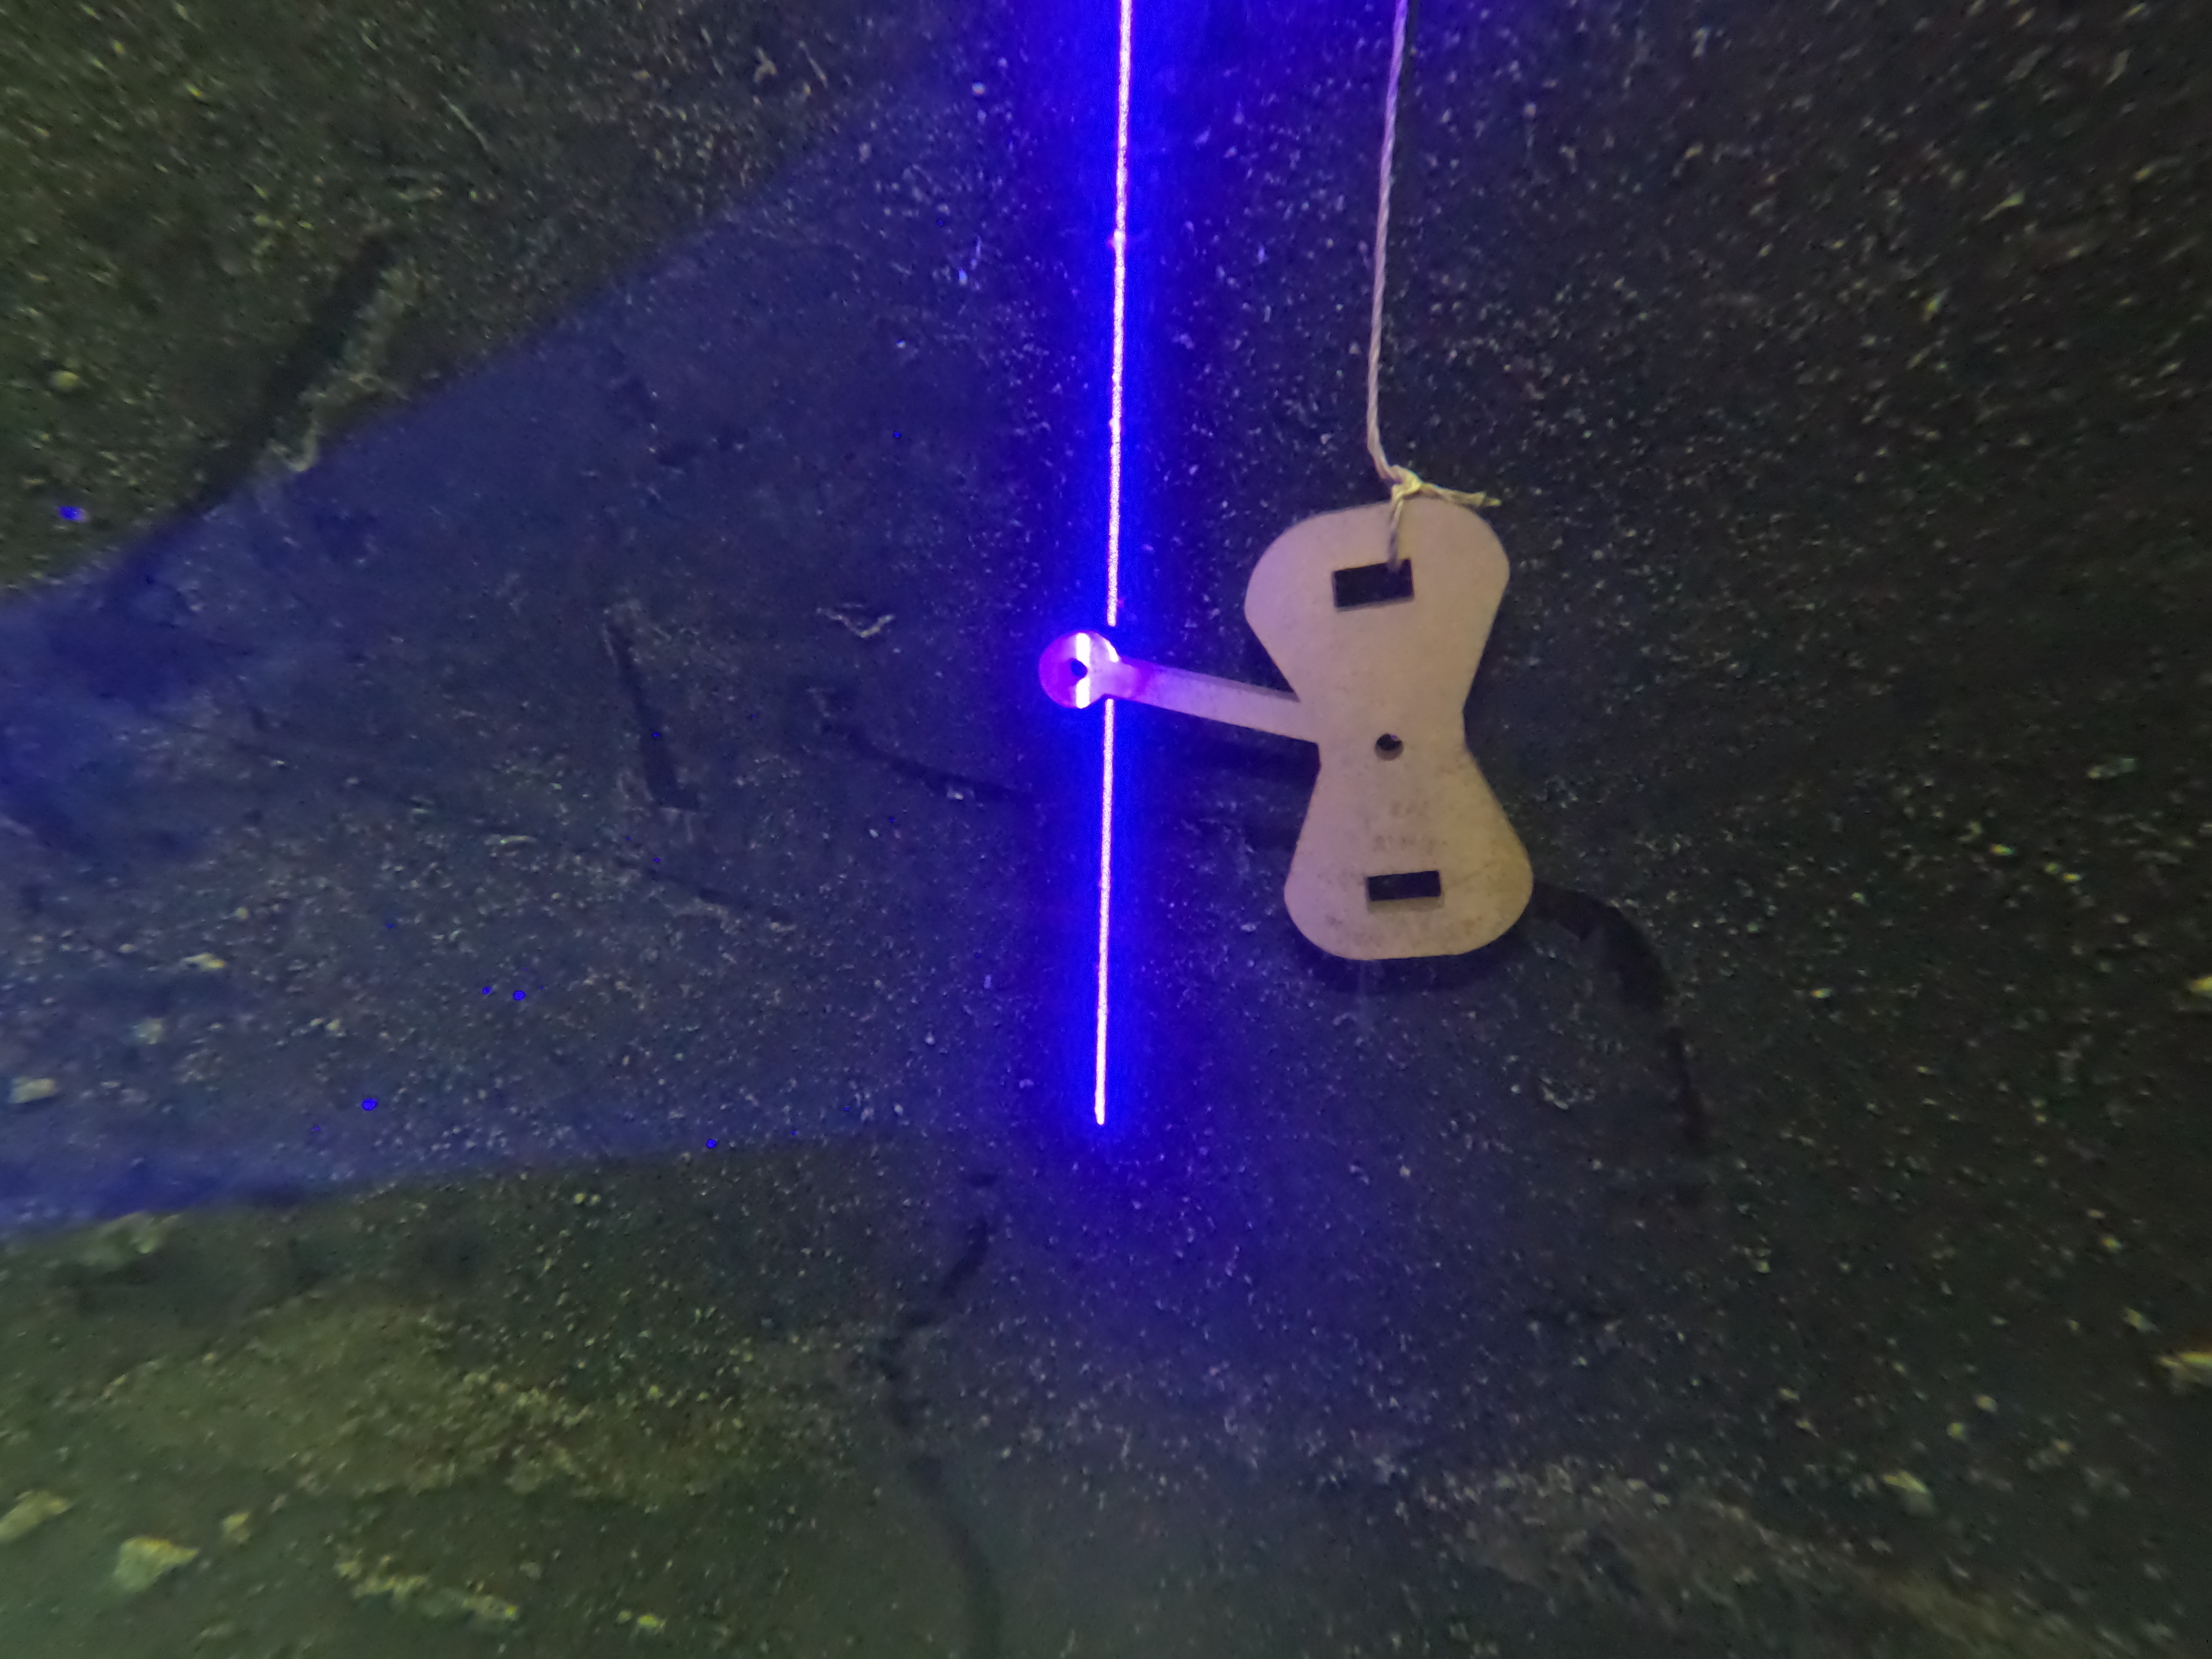

Supplement: Supplementary file 3300 [file G0015741.pdf › Level_2_1/G0015741.pdf]

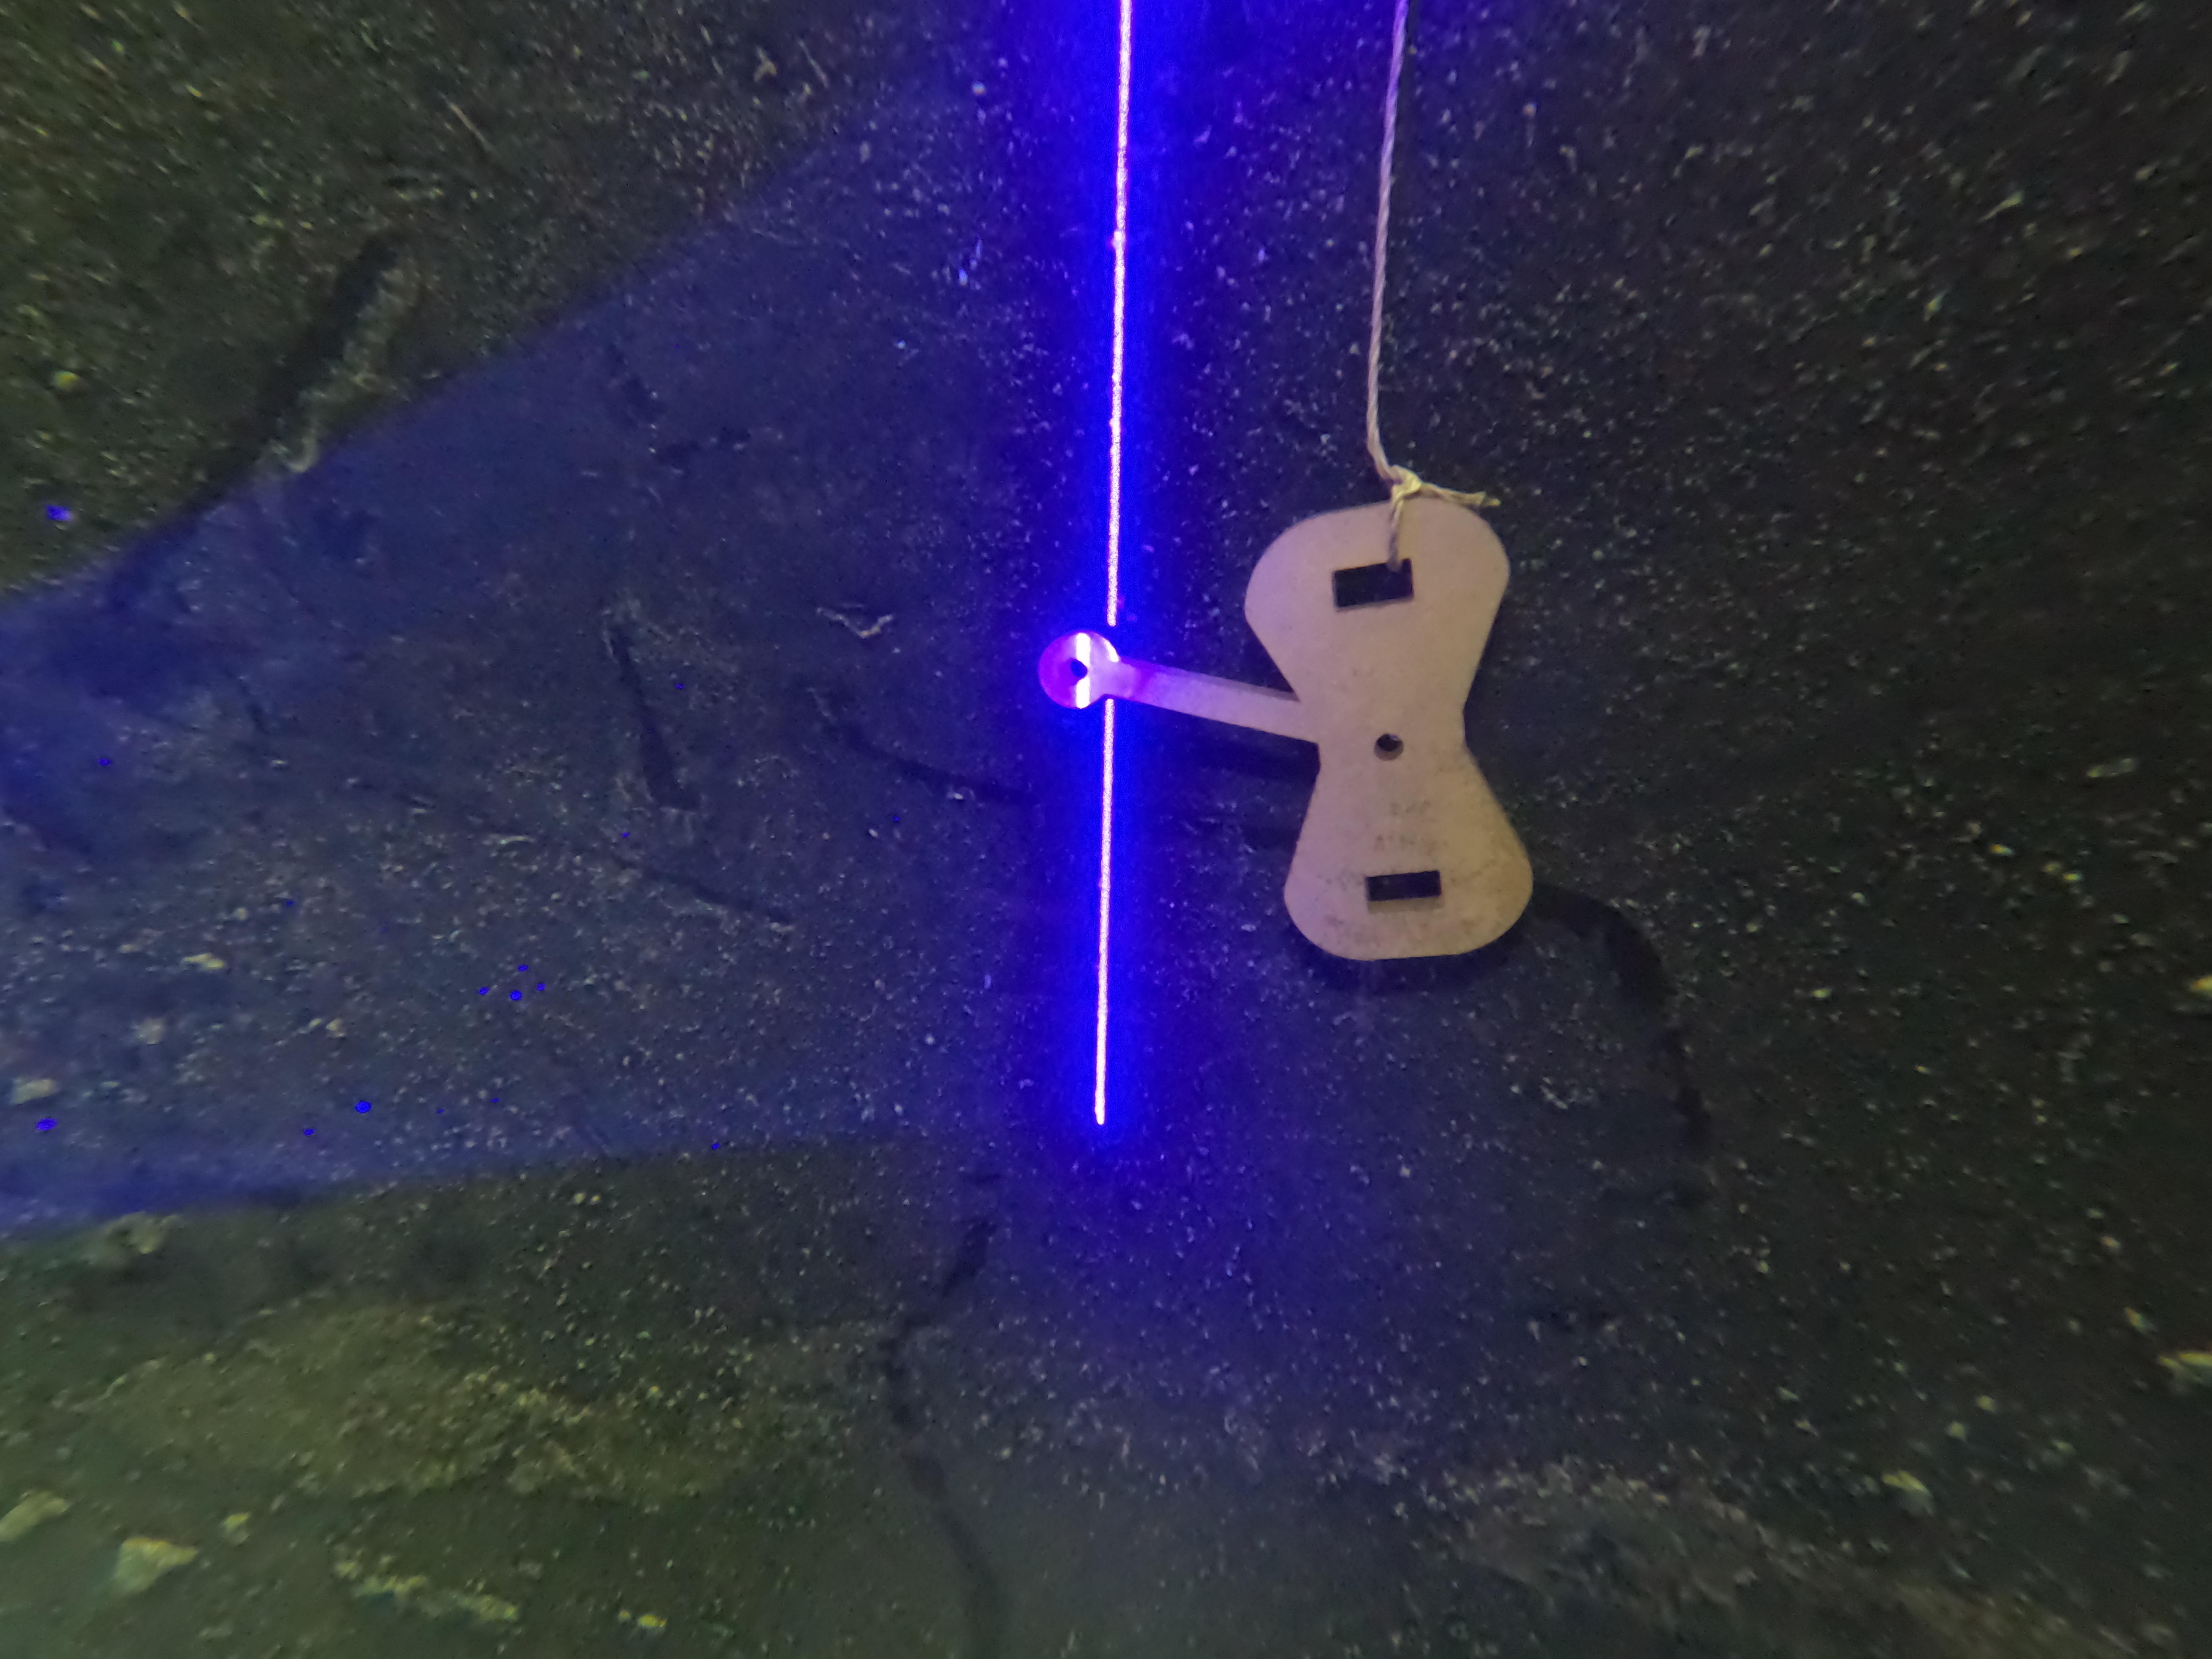

Supplement: Supplementary file 3301 [file G0015742.pdf › Level_2_1/G0015742.pdf]

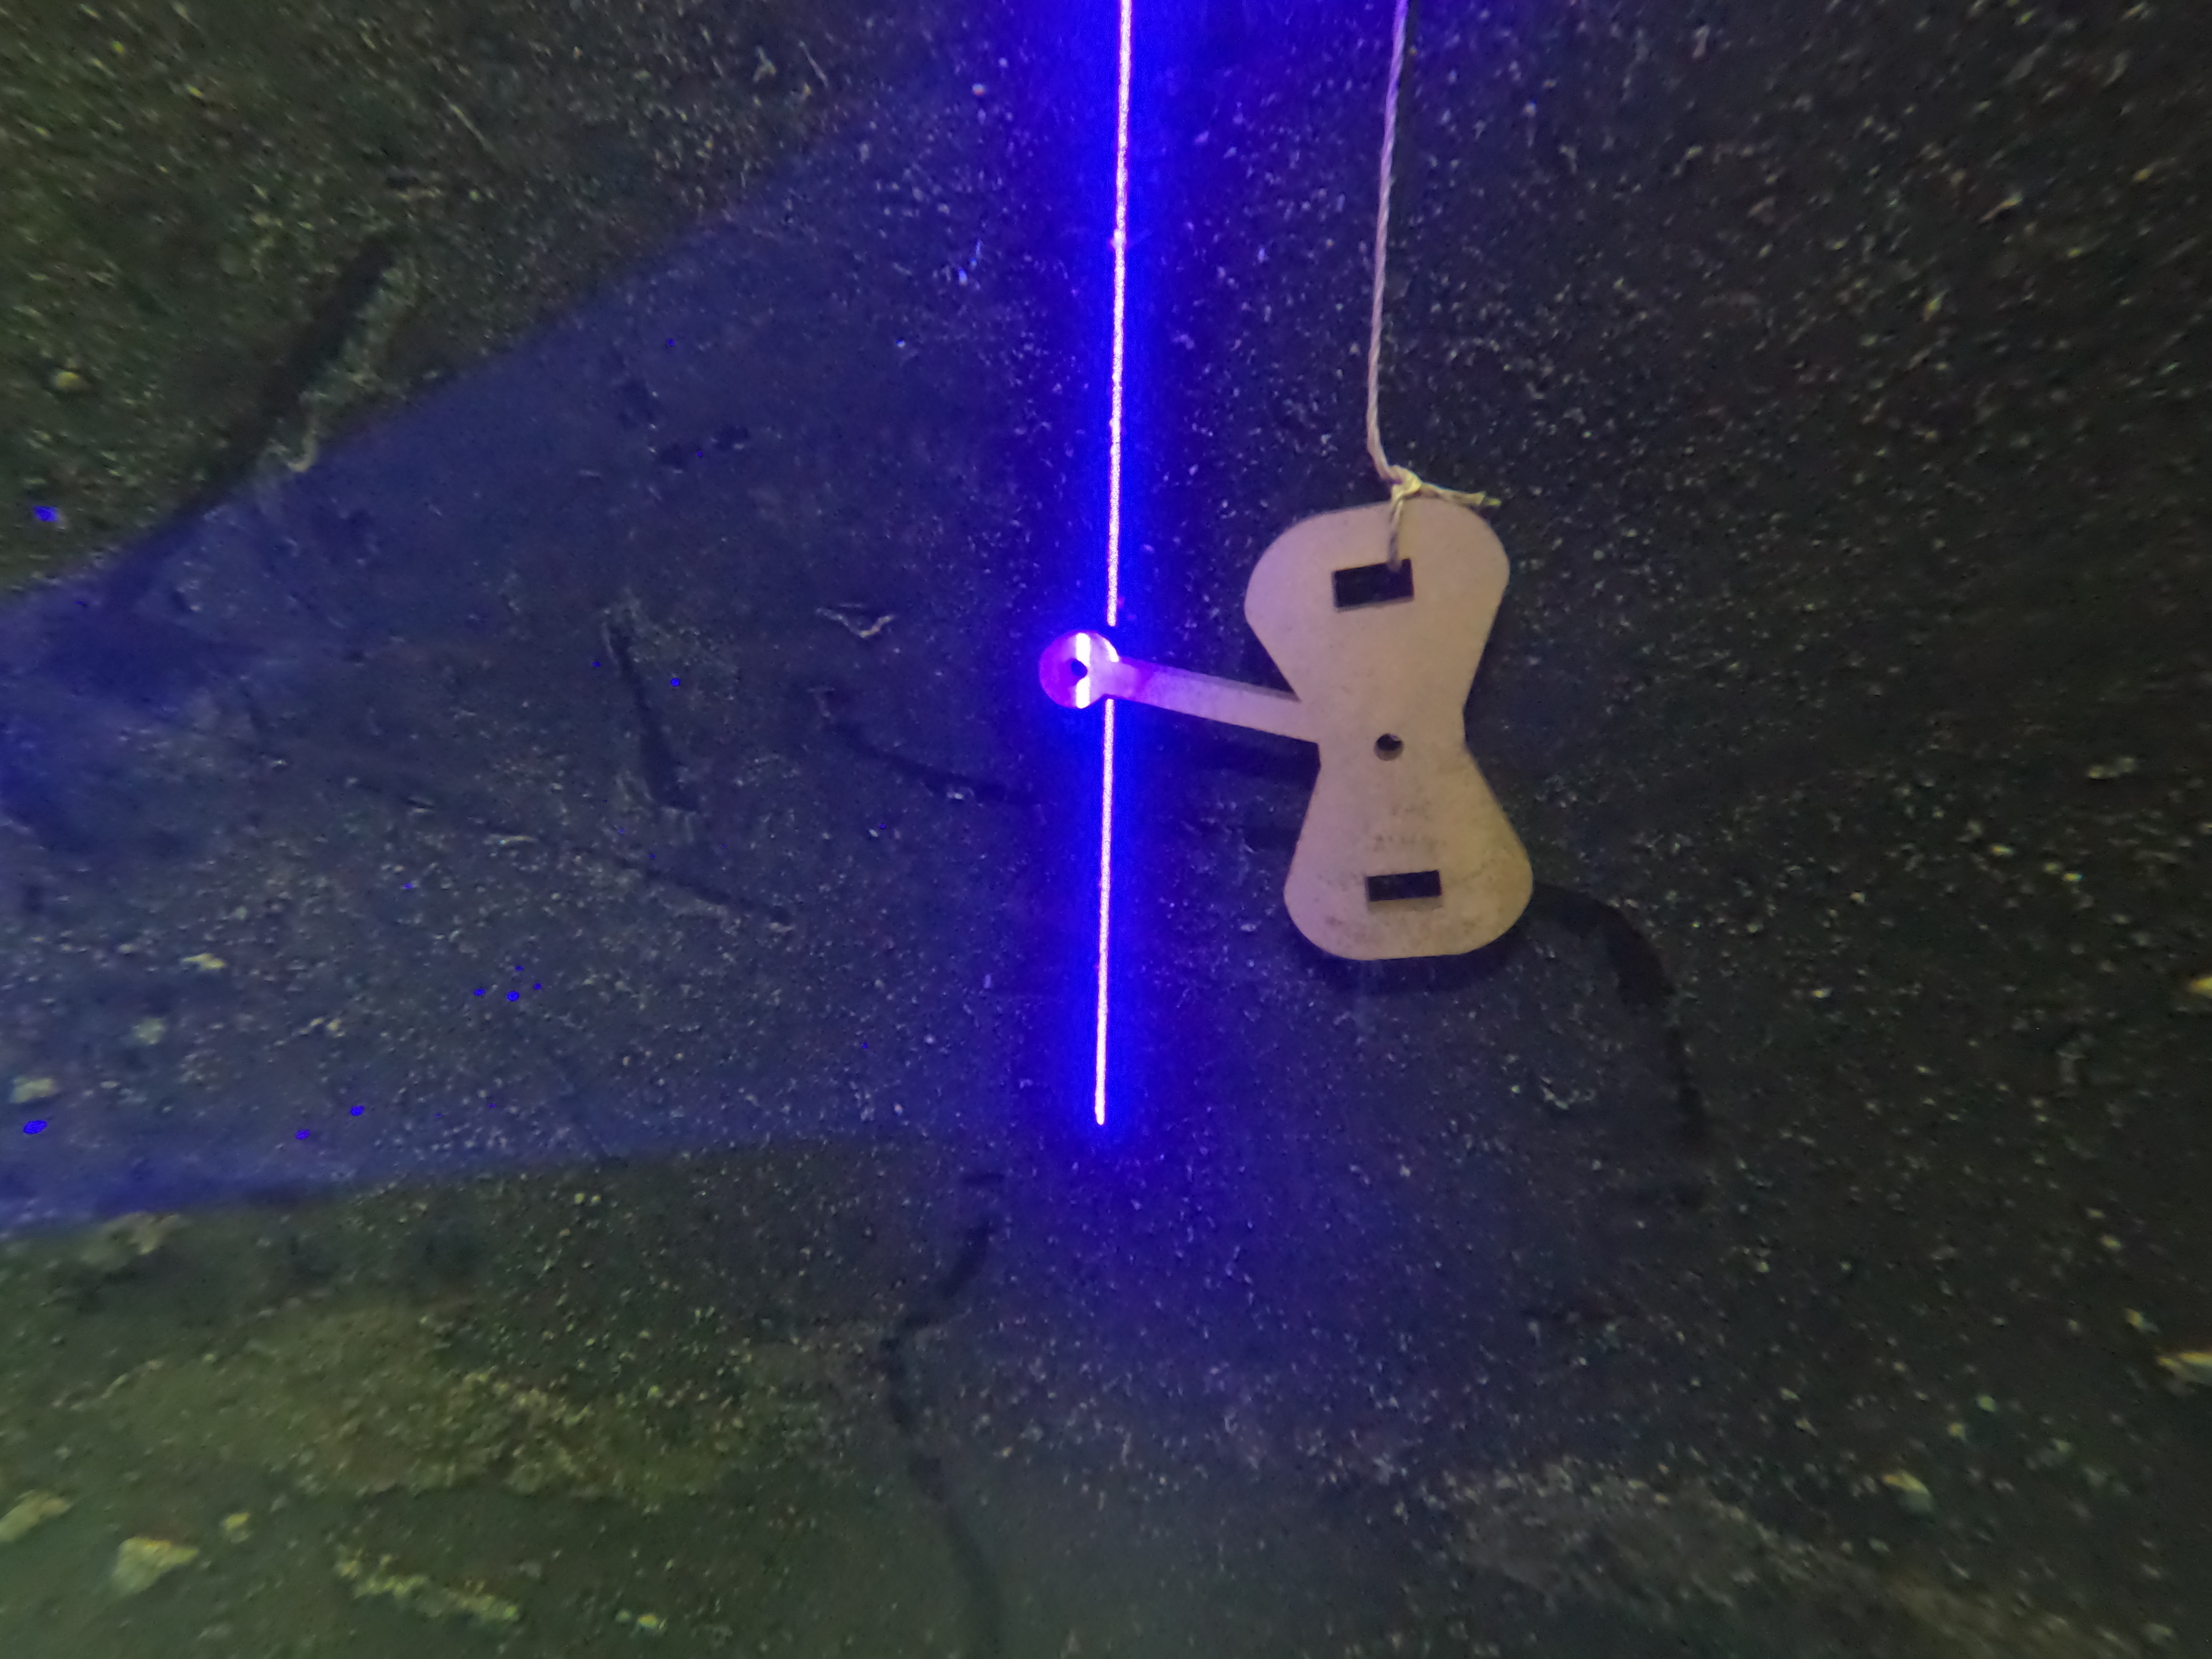

Supplement: Supplementary file 3302 [file G0015743.pdf › Level_2_1/G0015743.pdf]

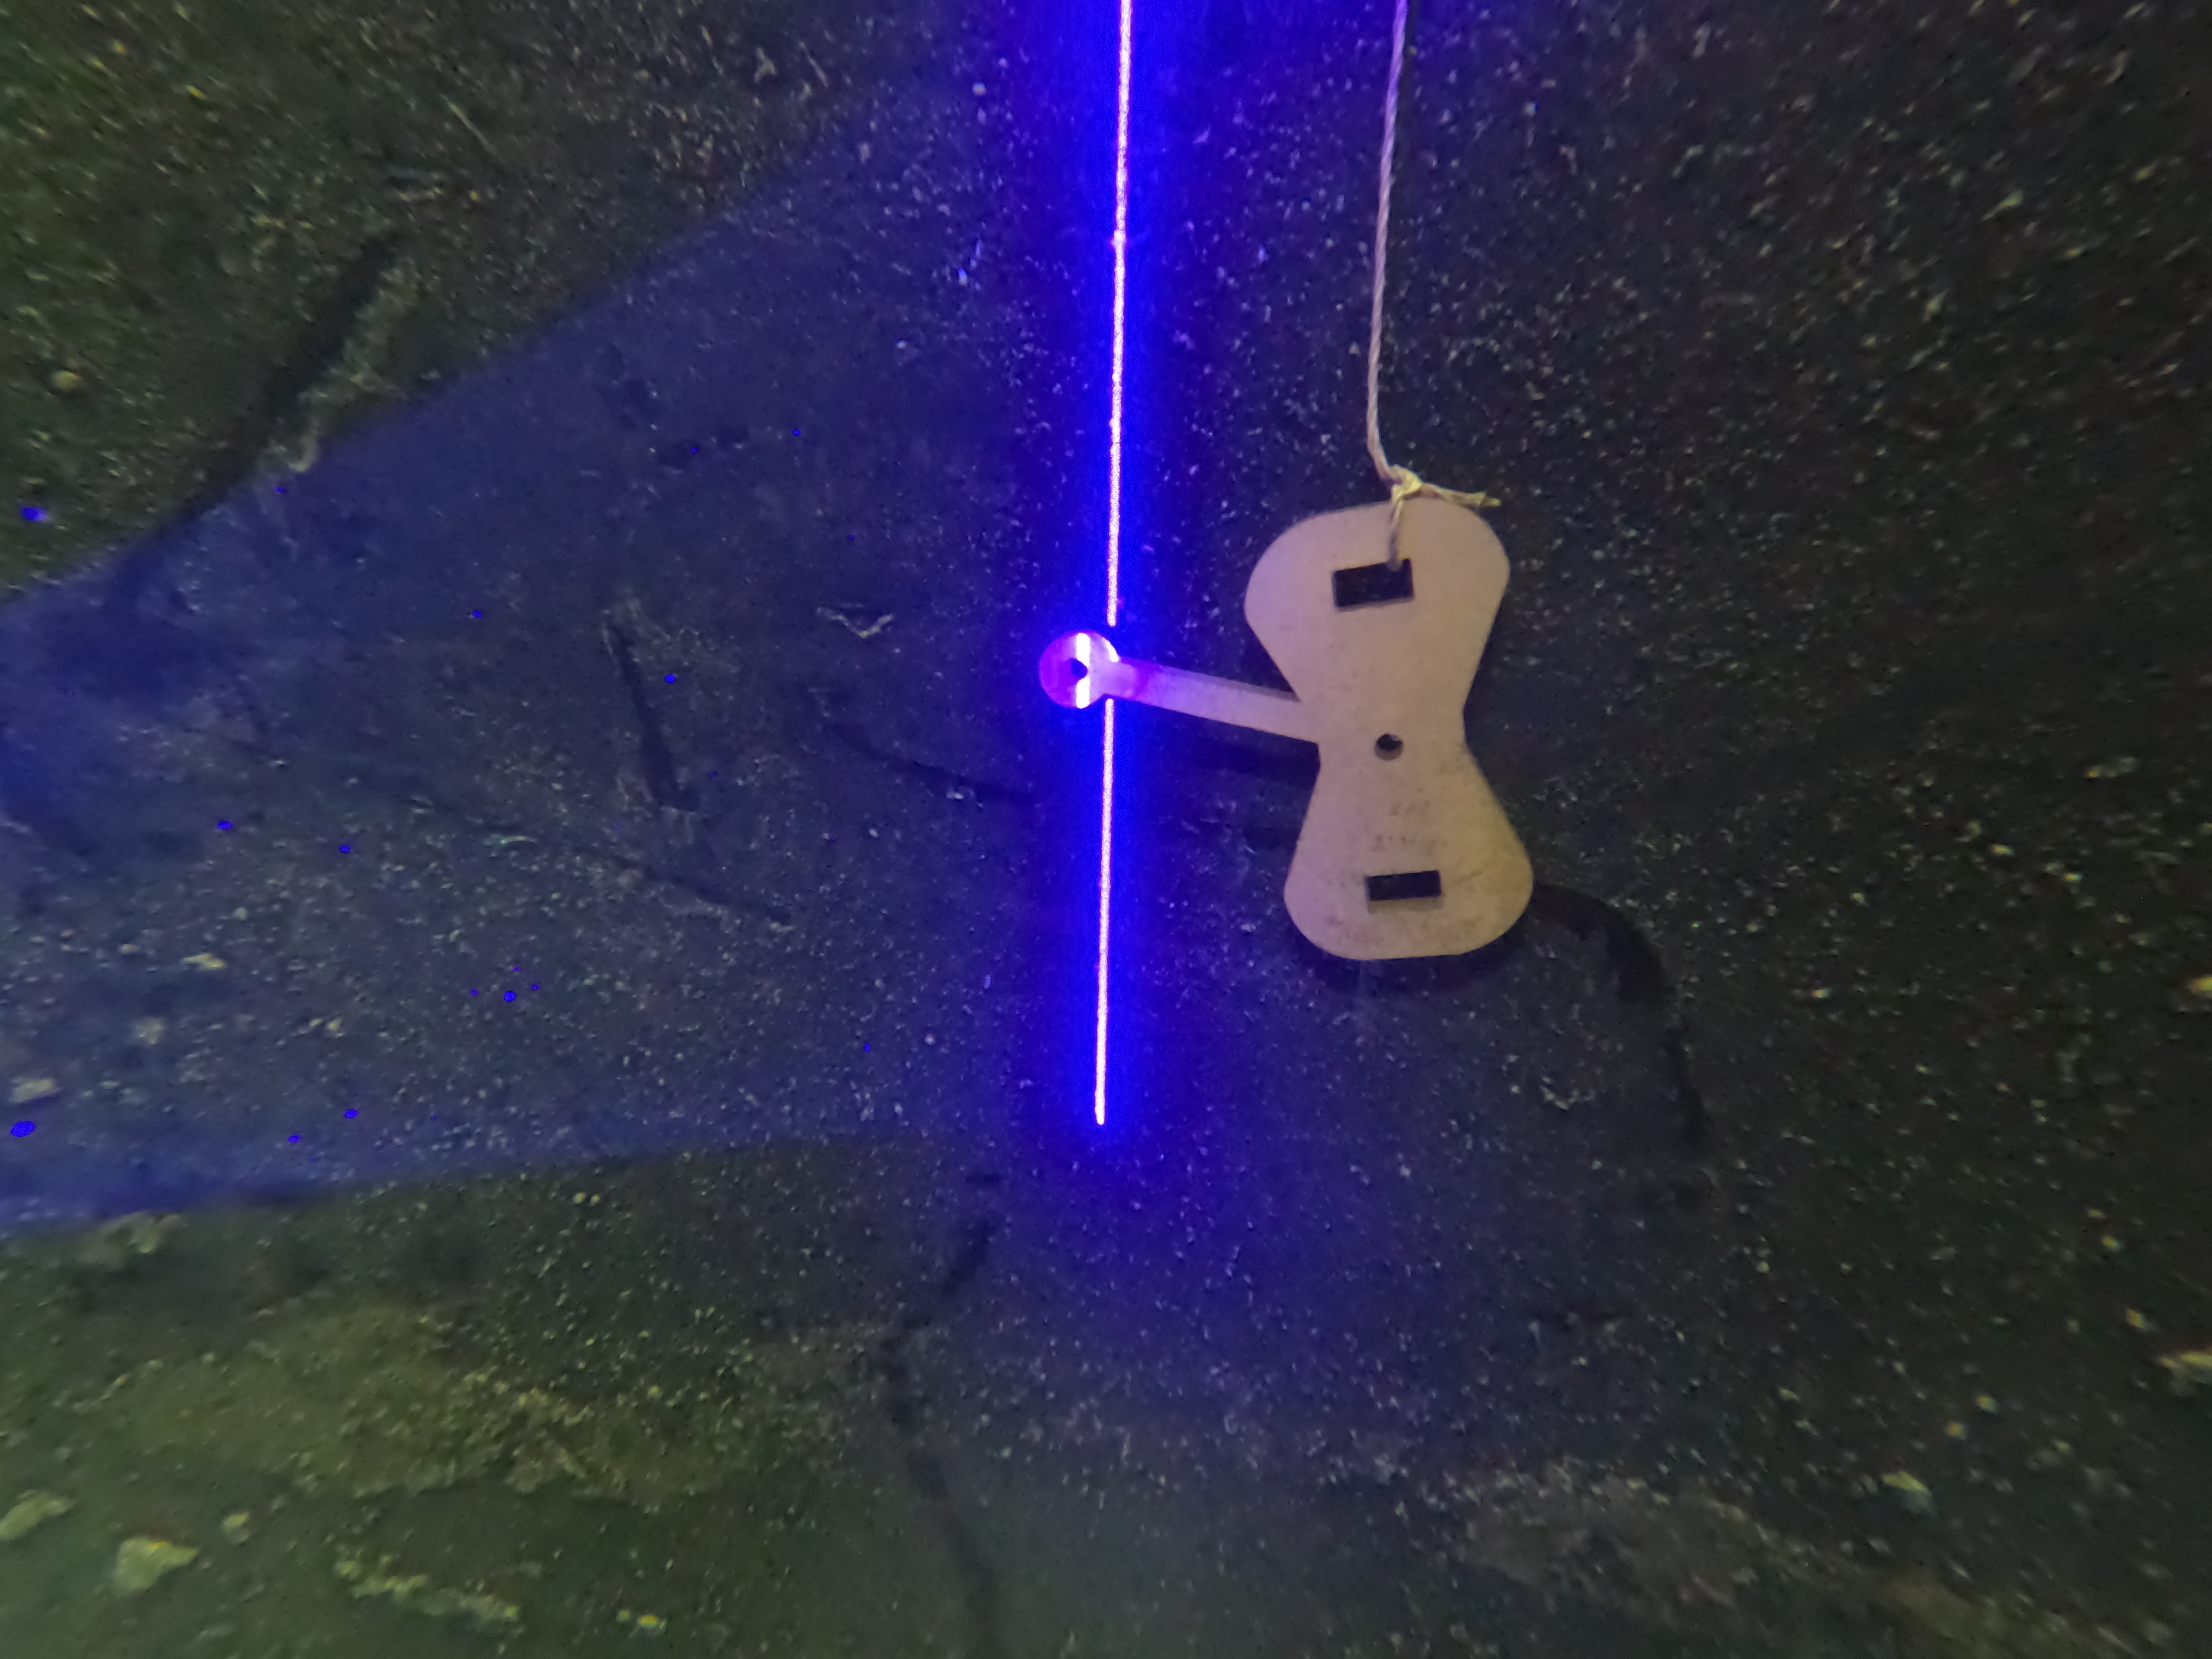

Supplement: Supplementary file 3303 [file G0015744.pdf › Level_2_1/G0015744.pdf]

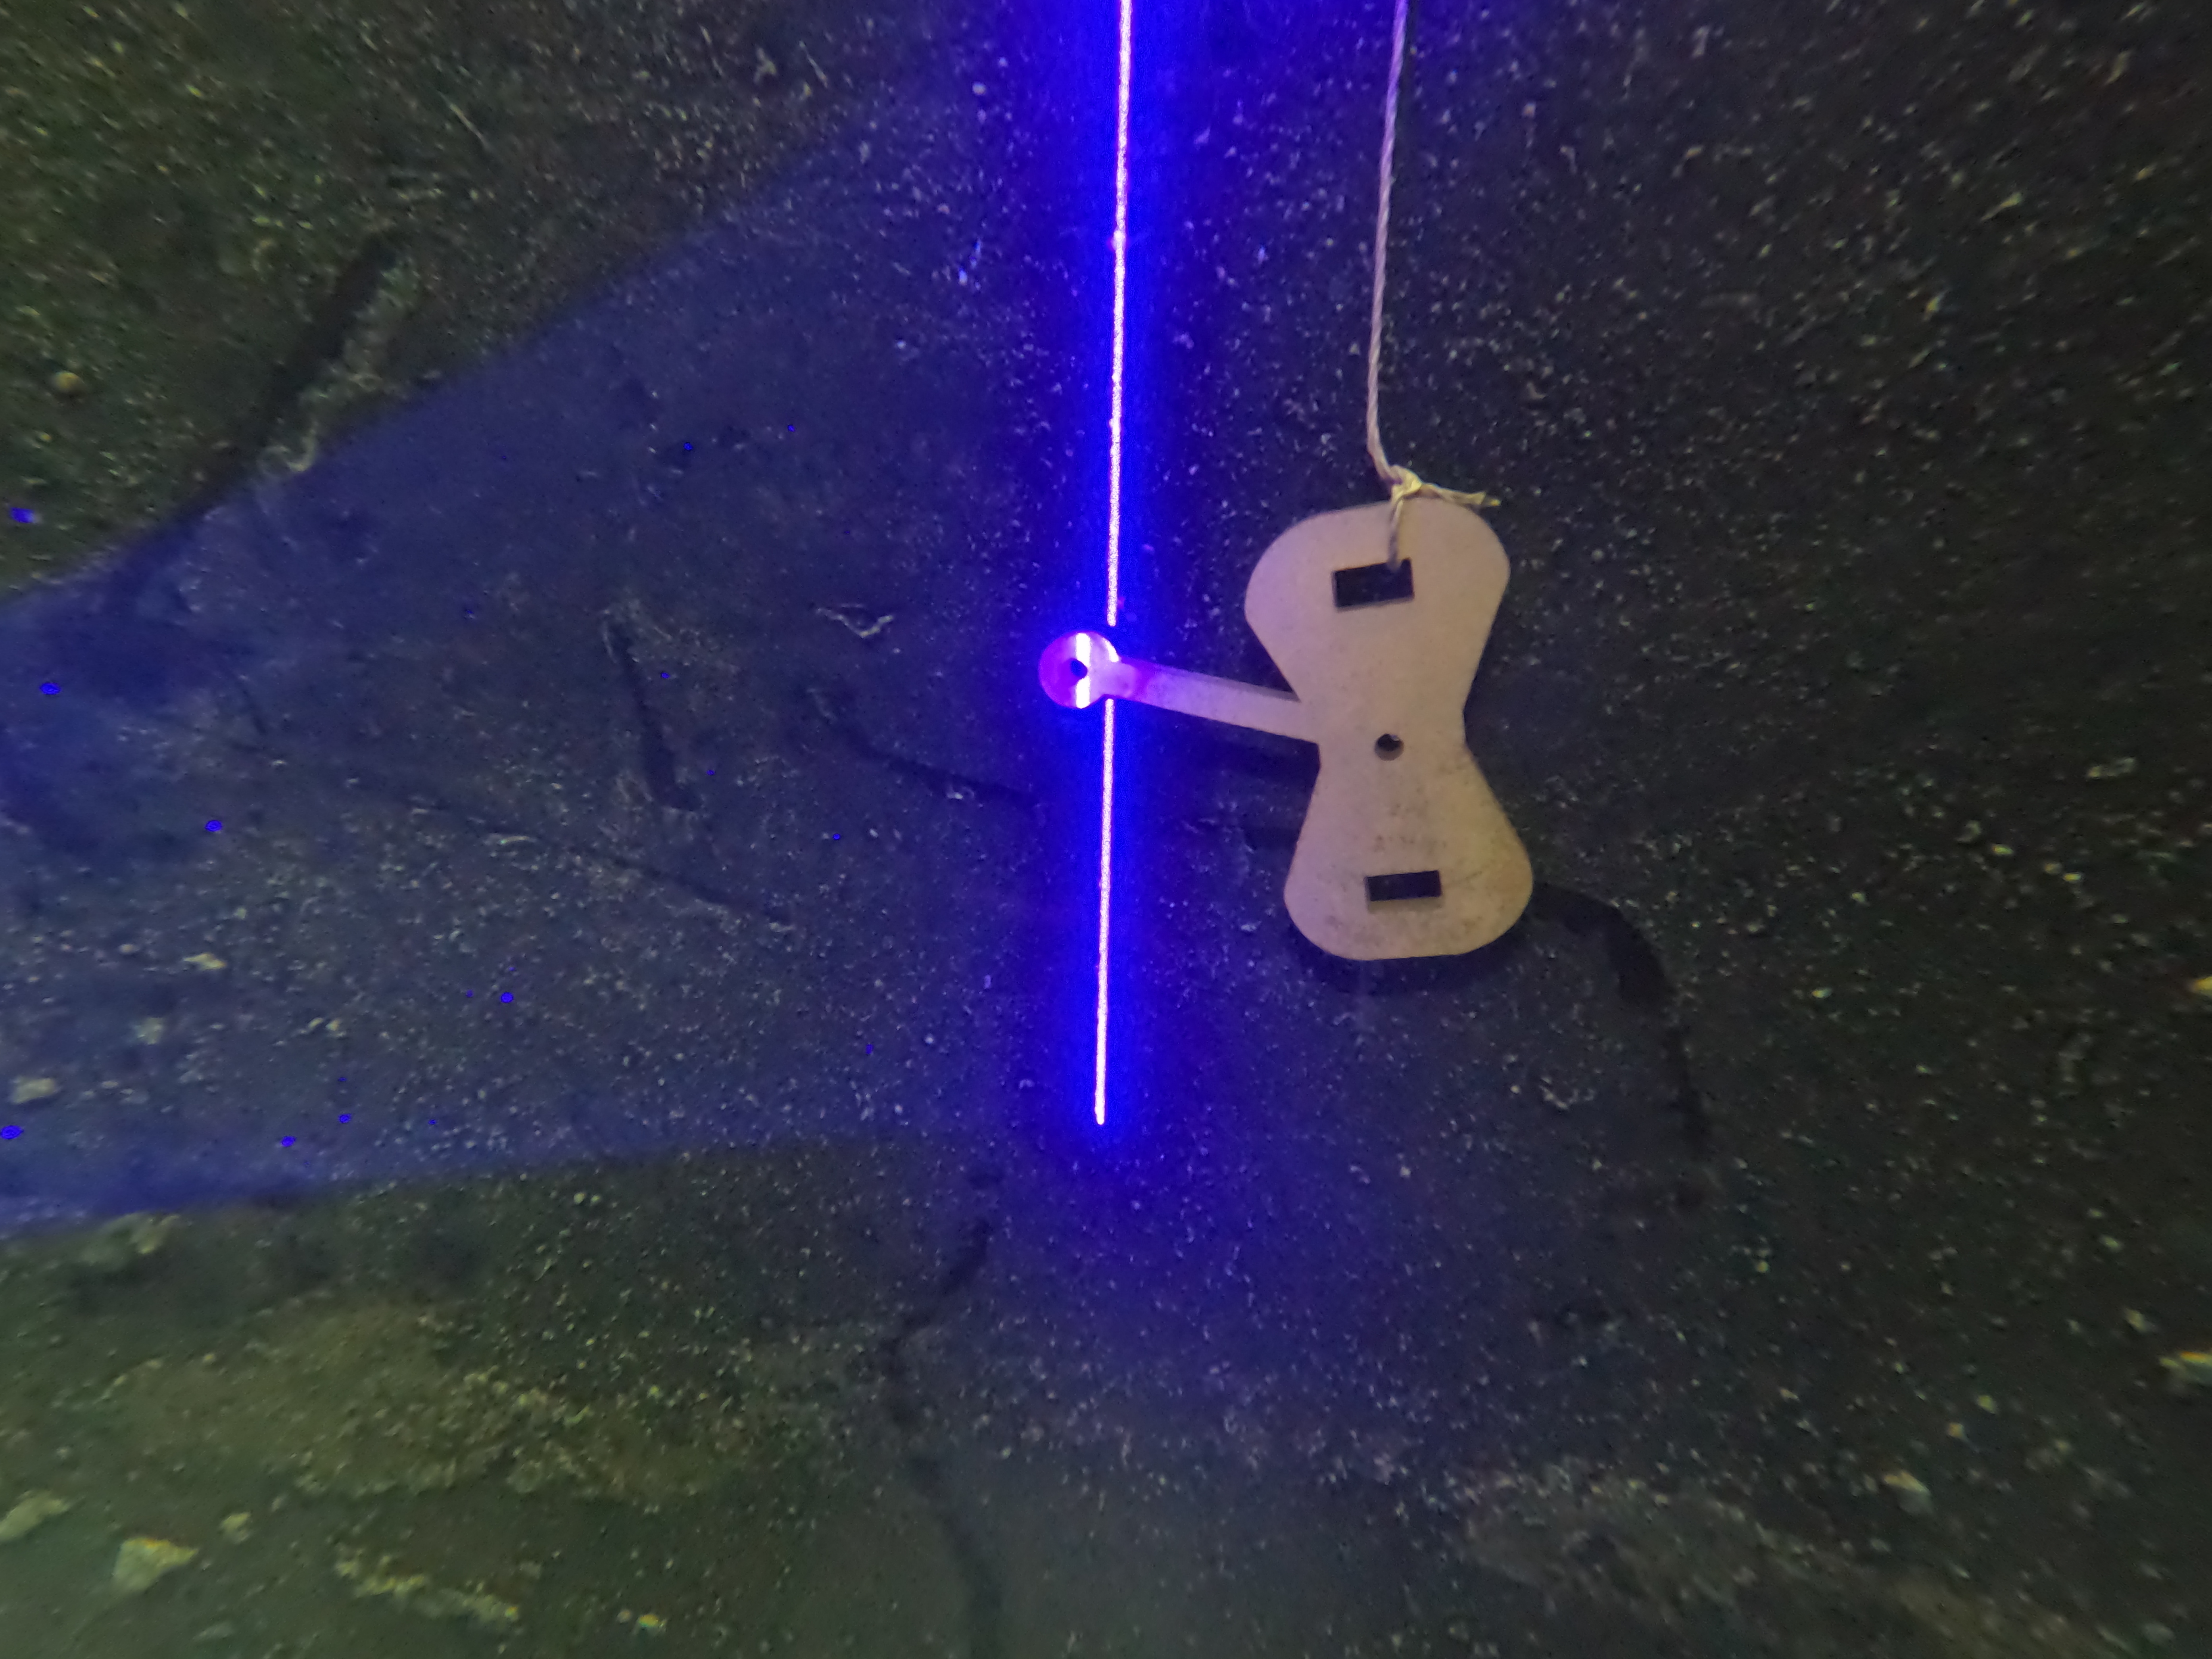

Supplement: Supplementary file 3304 [file G0015745.pdf › Level_2_1/G0015745.pdf]

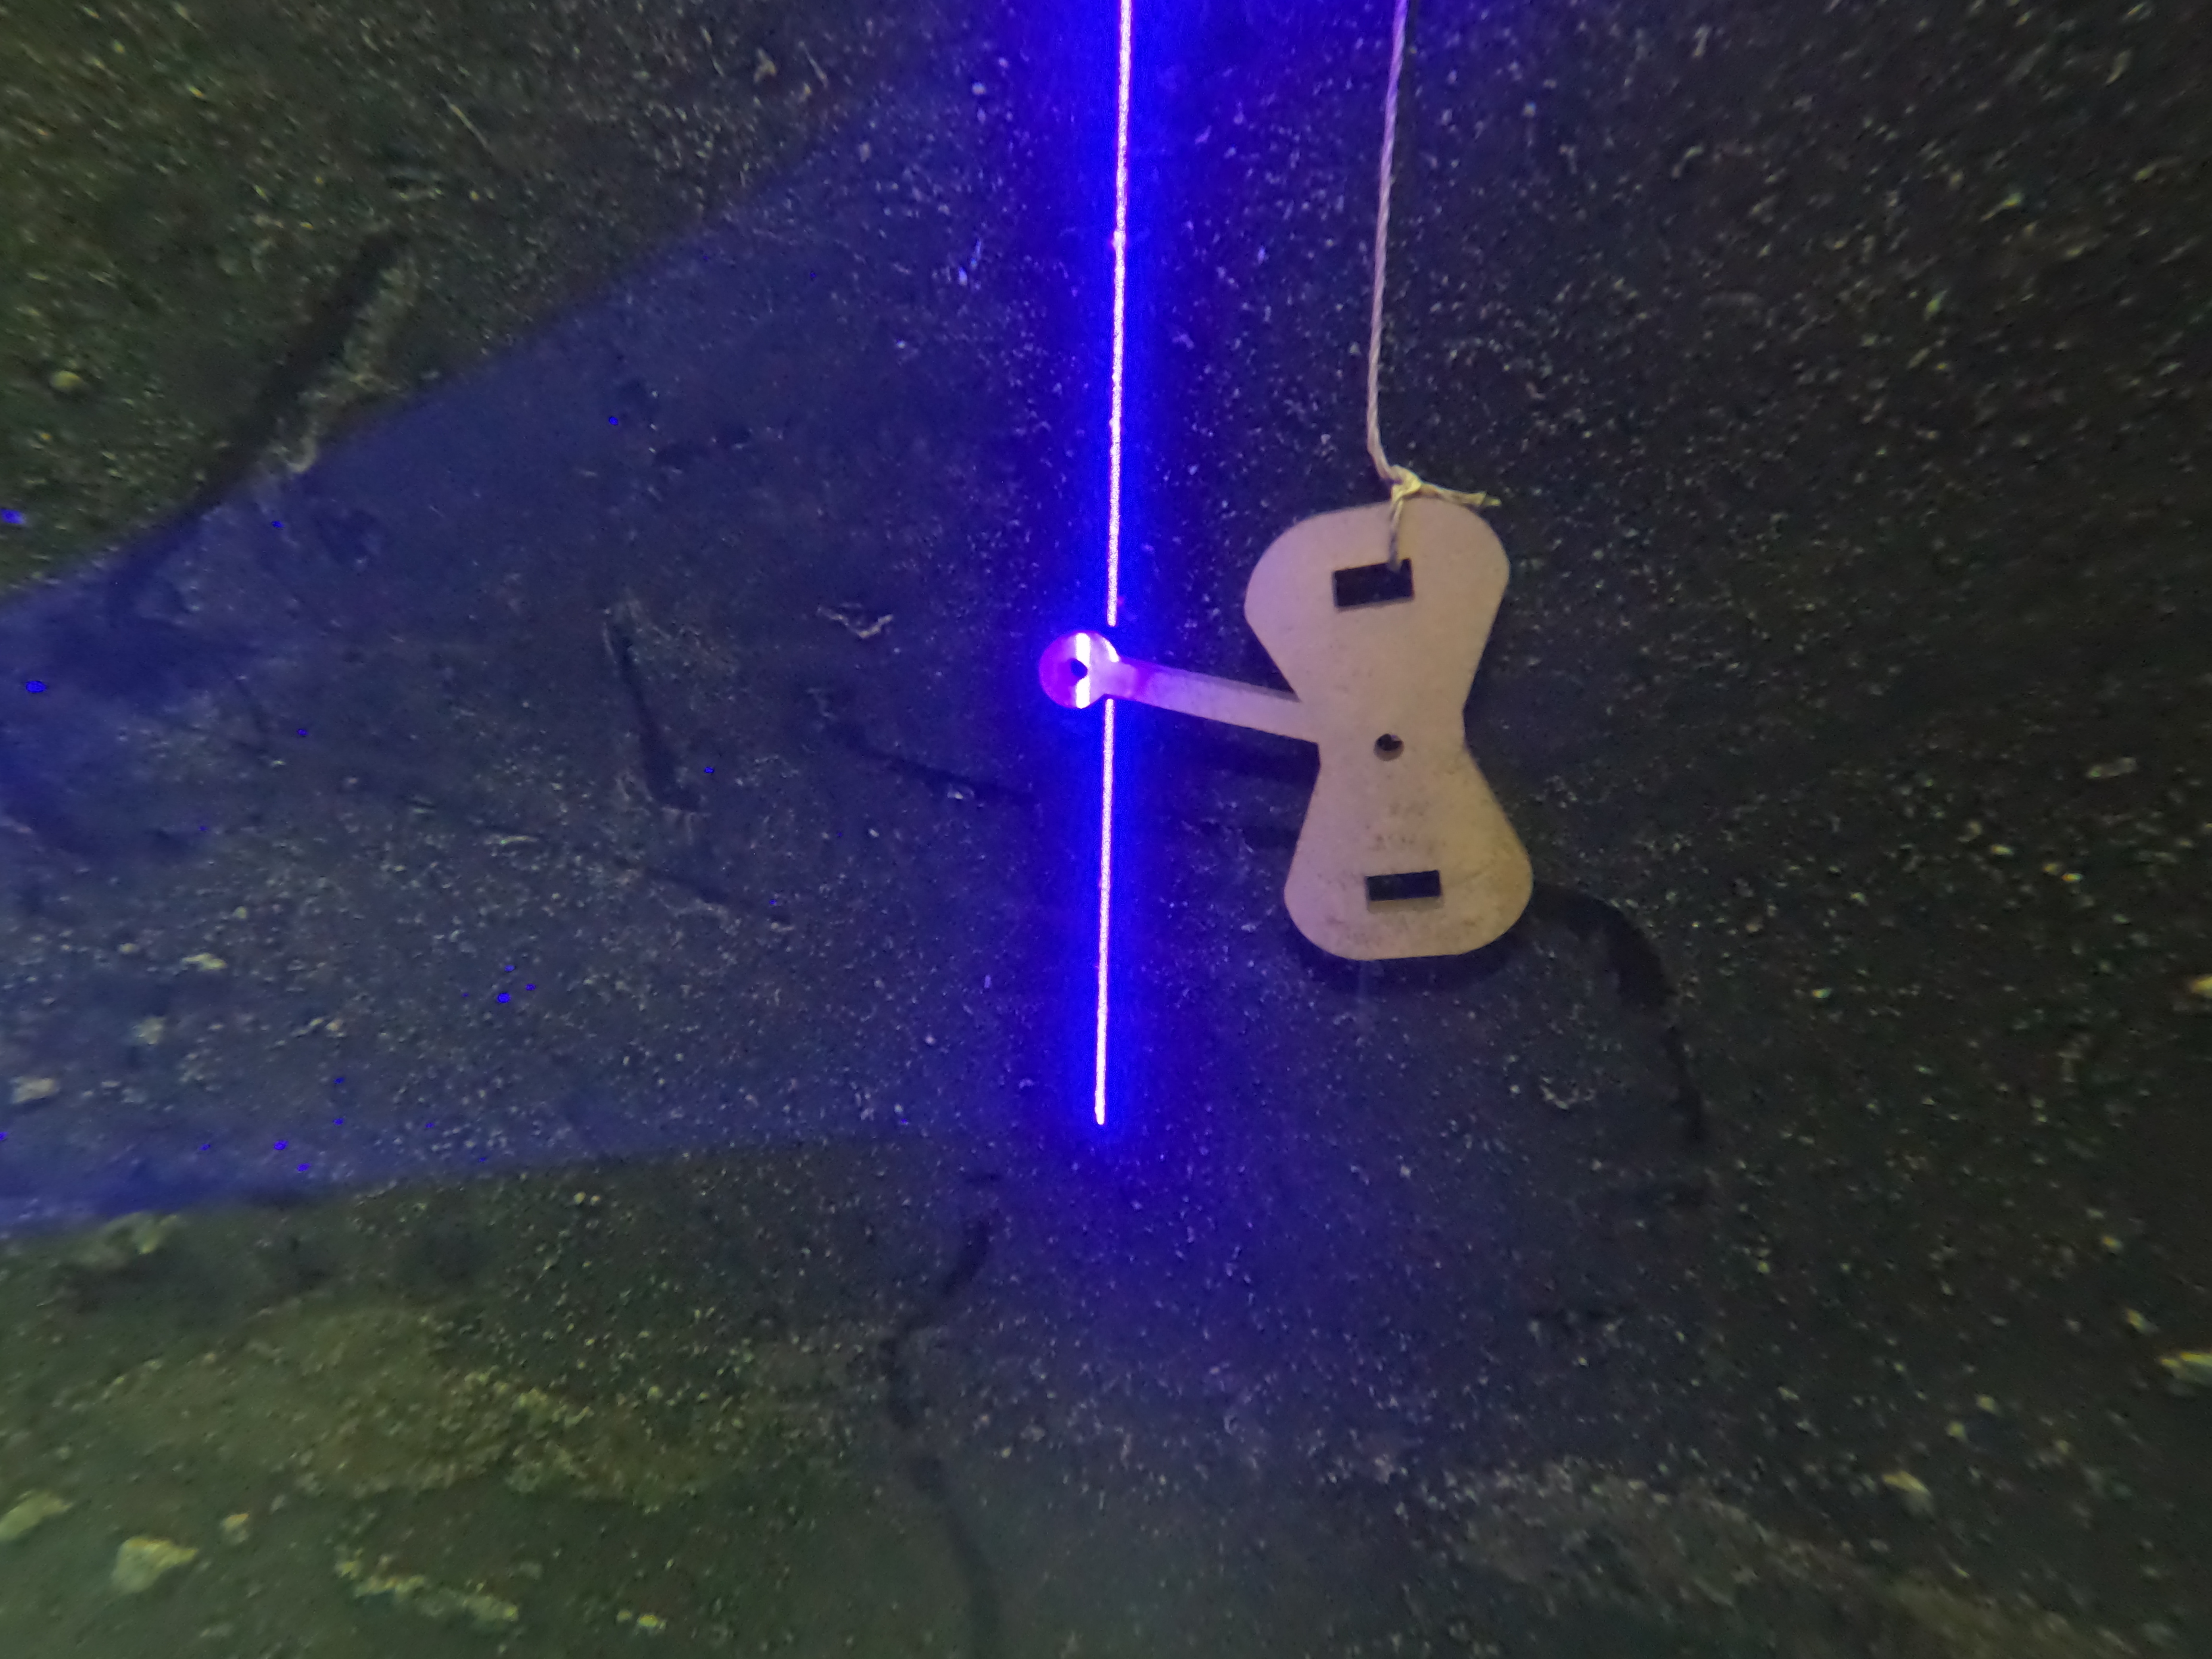

Supplement: Supplementary file 3305 [file G0015746.pdf › Level_2_1/G0015746.pdf]

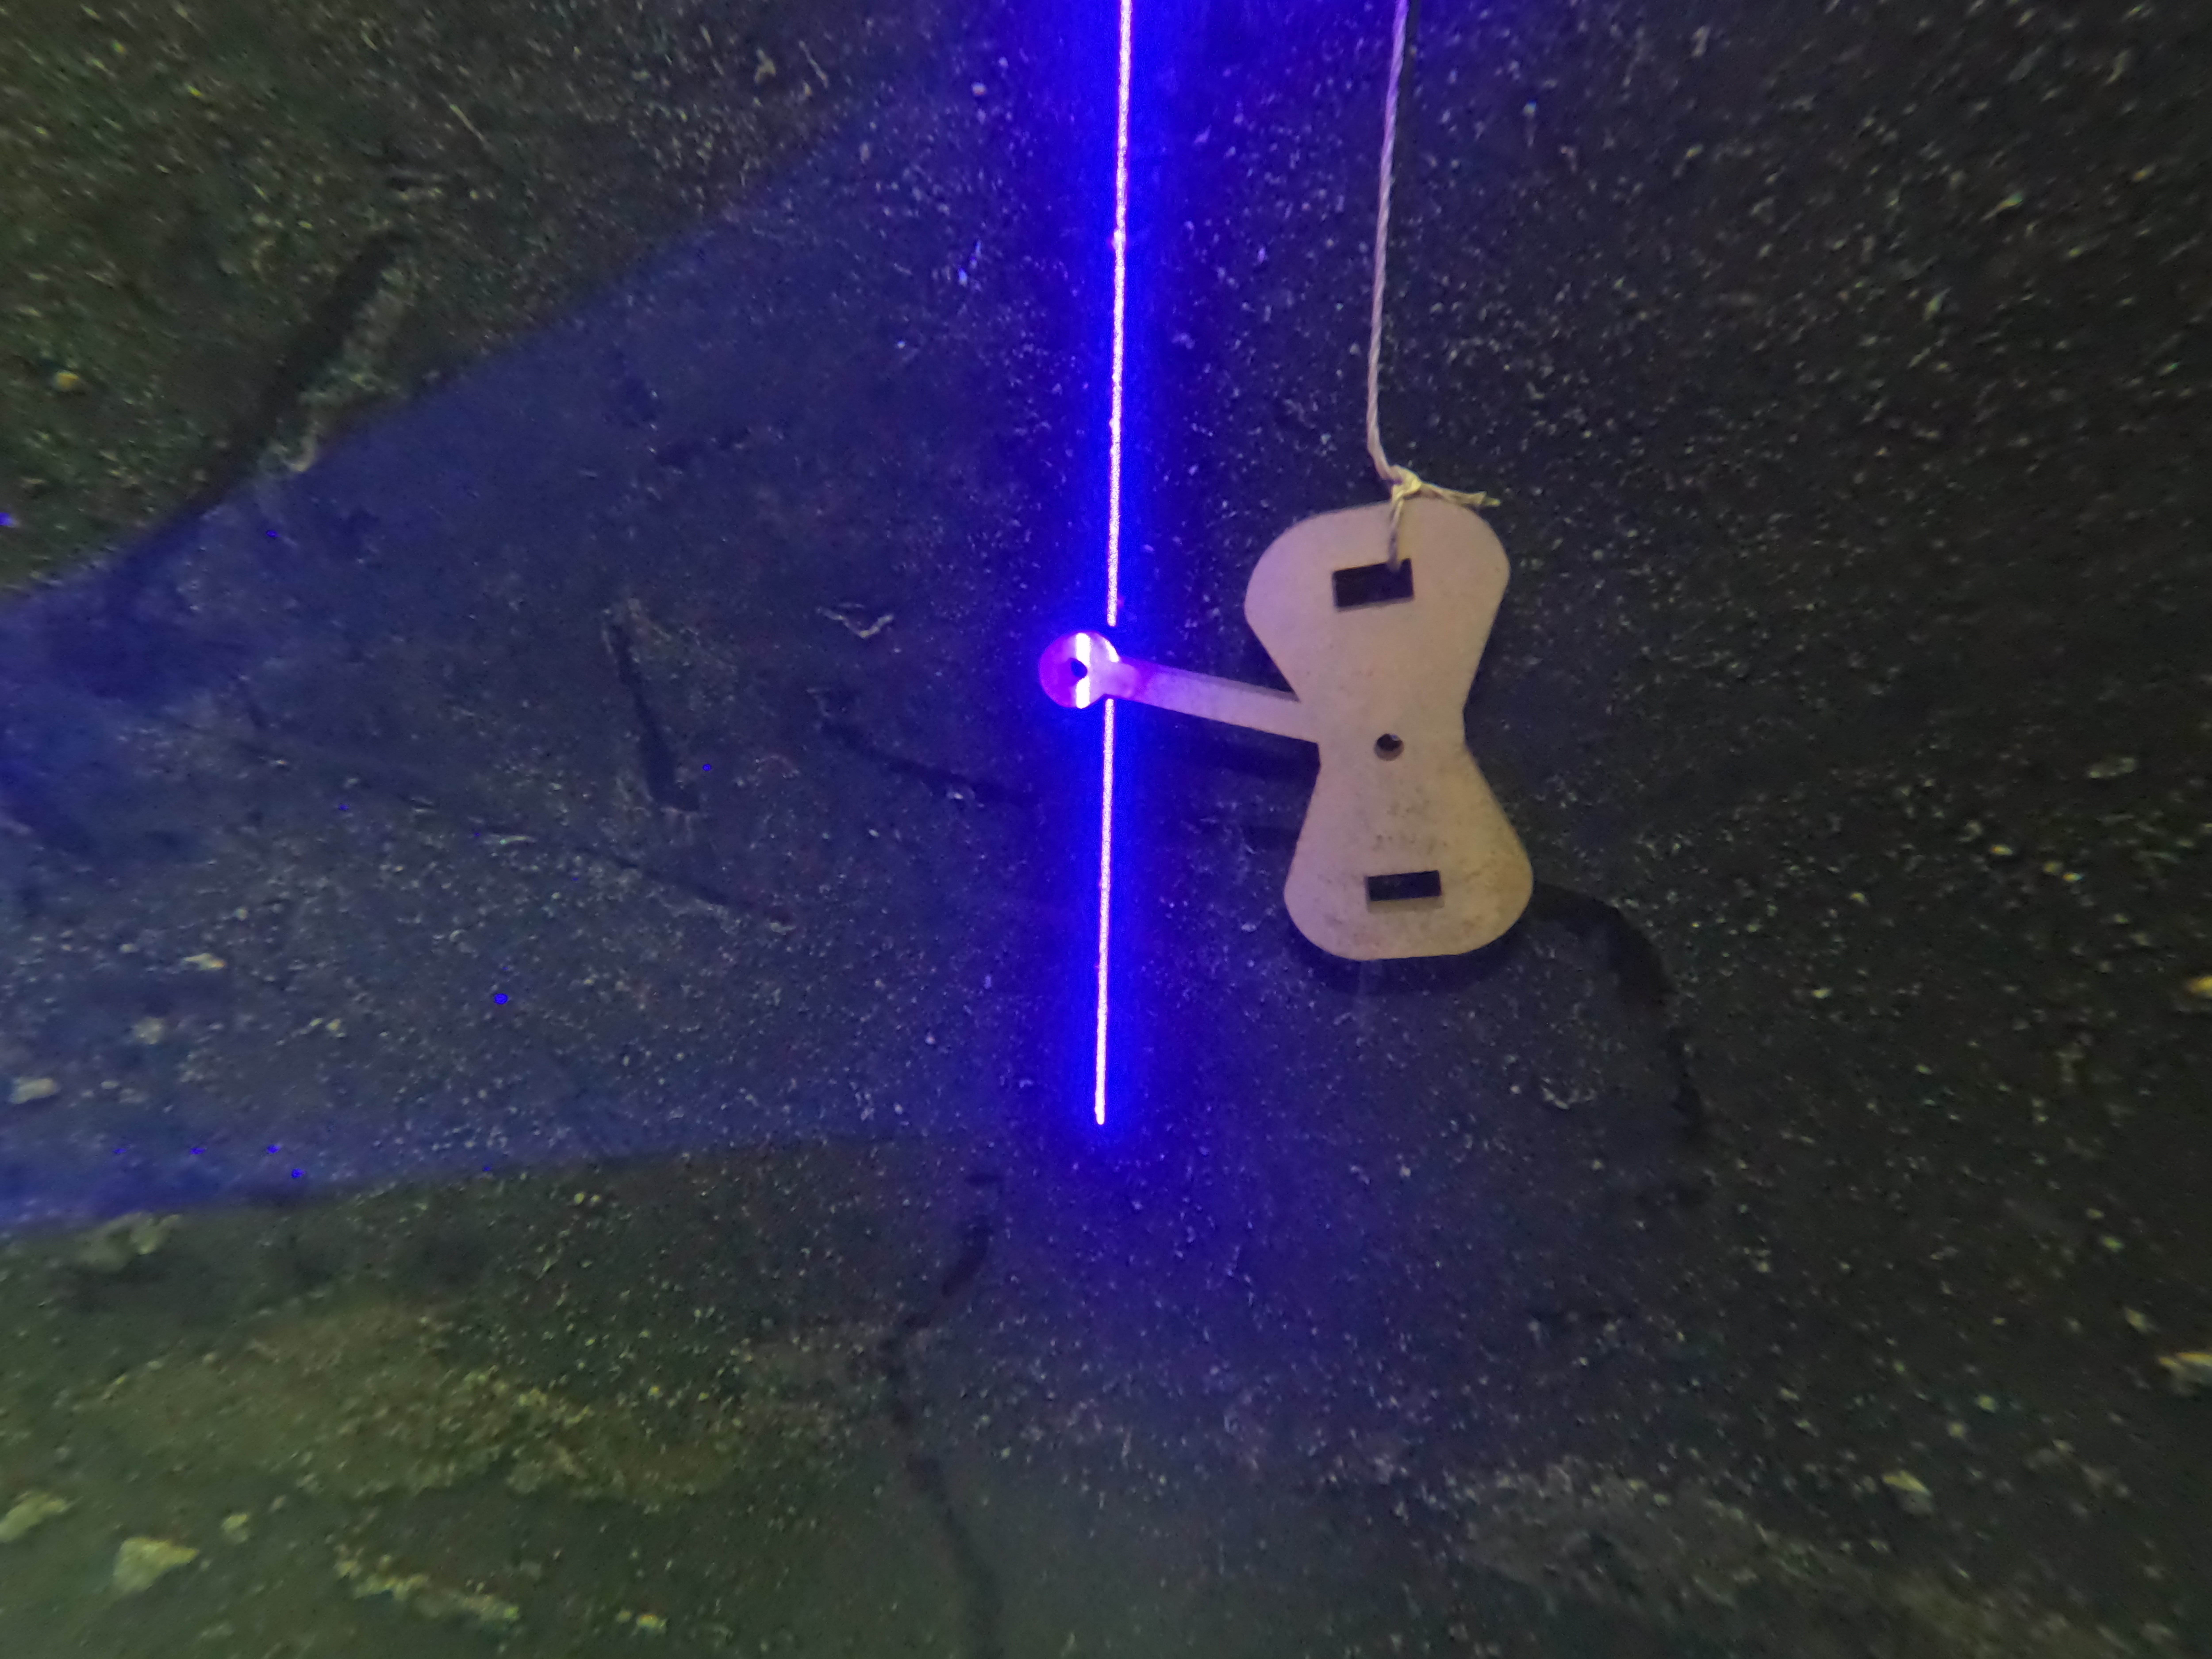

Supplement: Supplementary file 3306 [file G0015747.pdf › Level_2_1/G0015747.pdf]

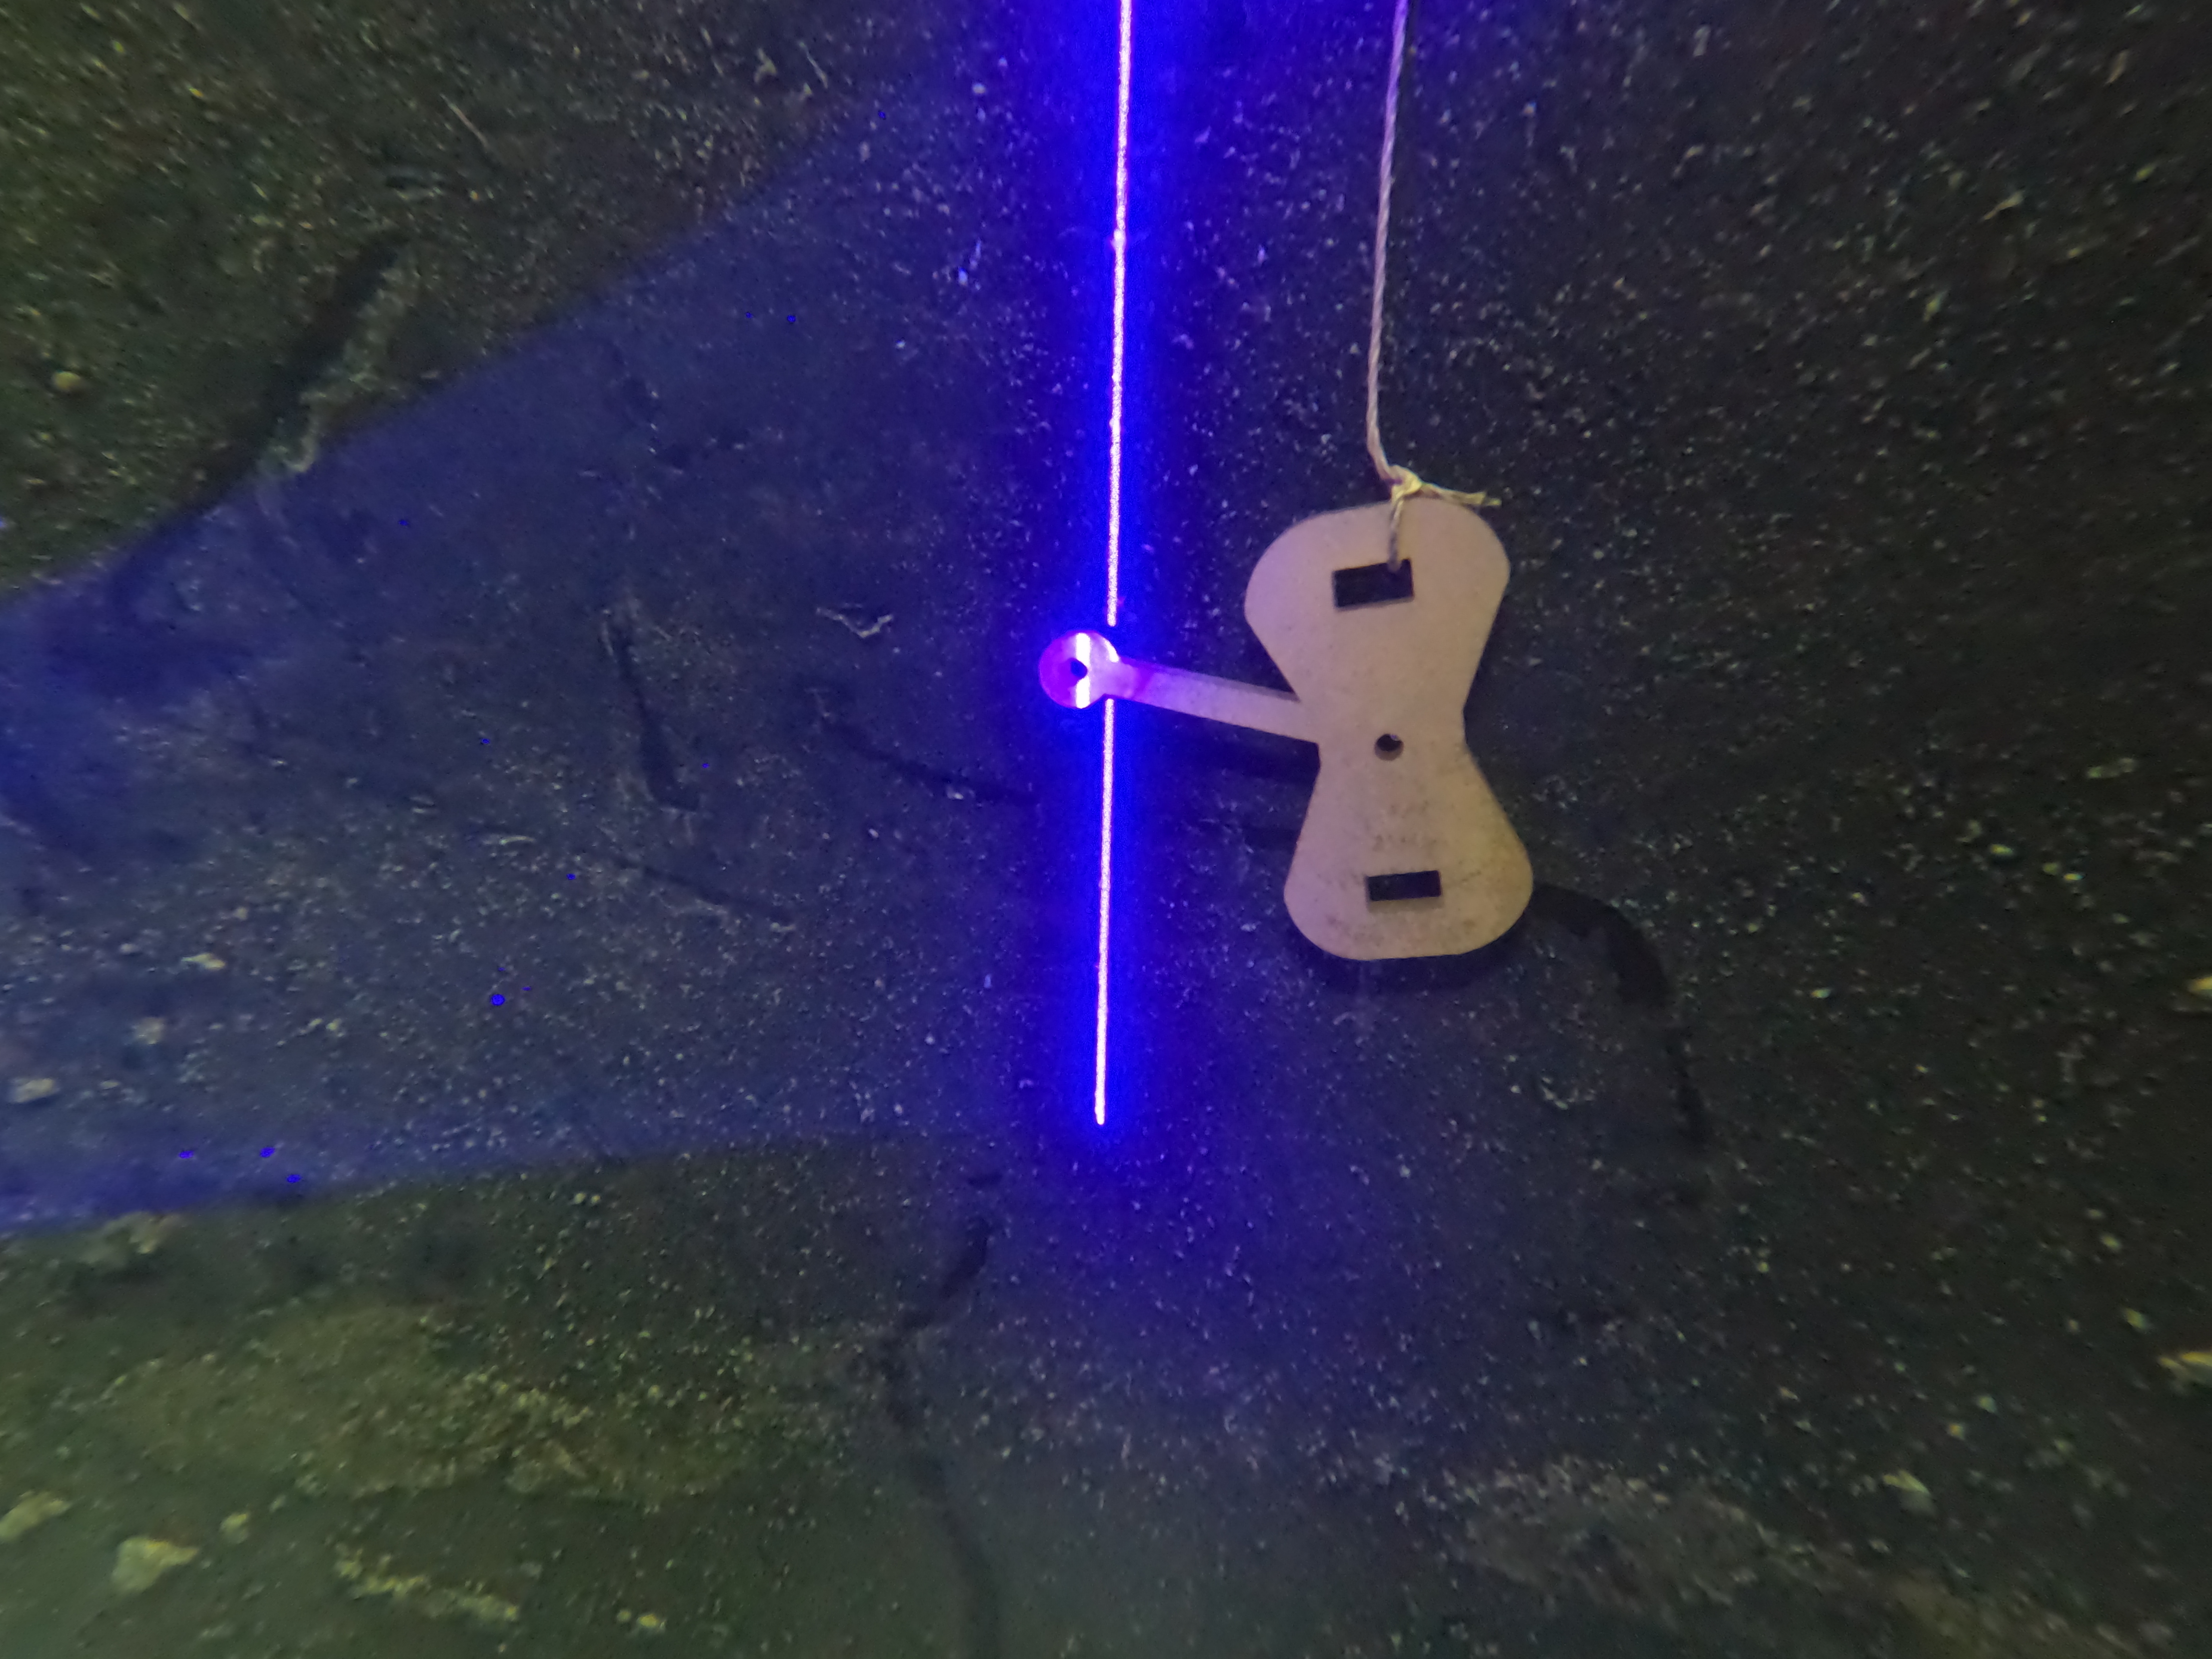

Supplement: Supplementary file 3307 [file G0015748.pdf › Level_2_1/G0015748.pdf]

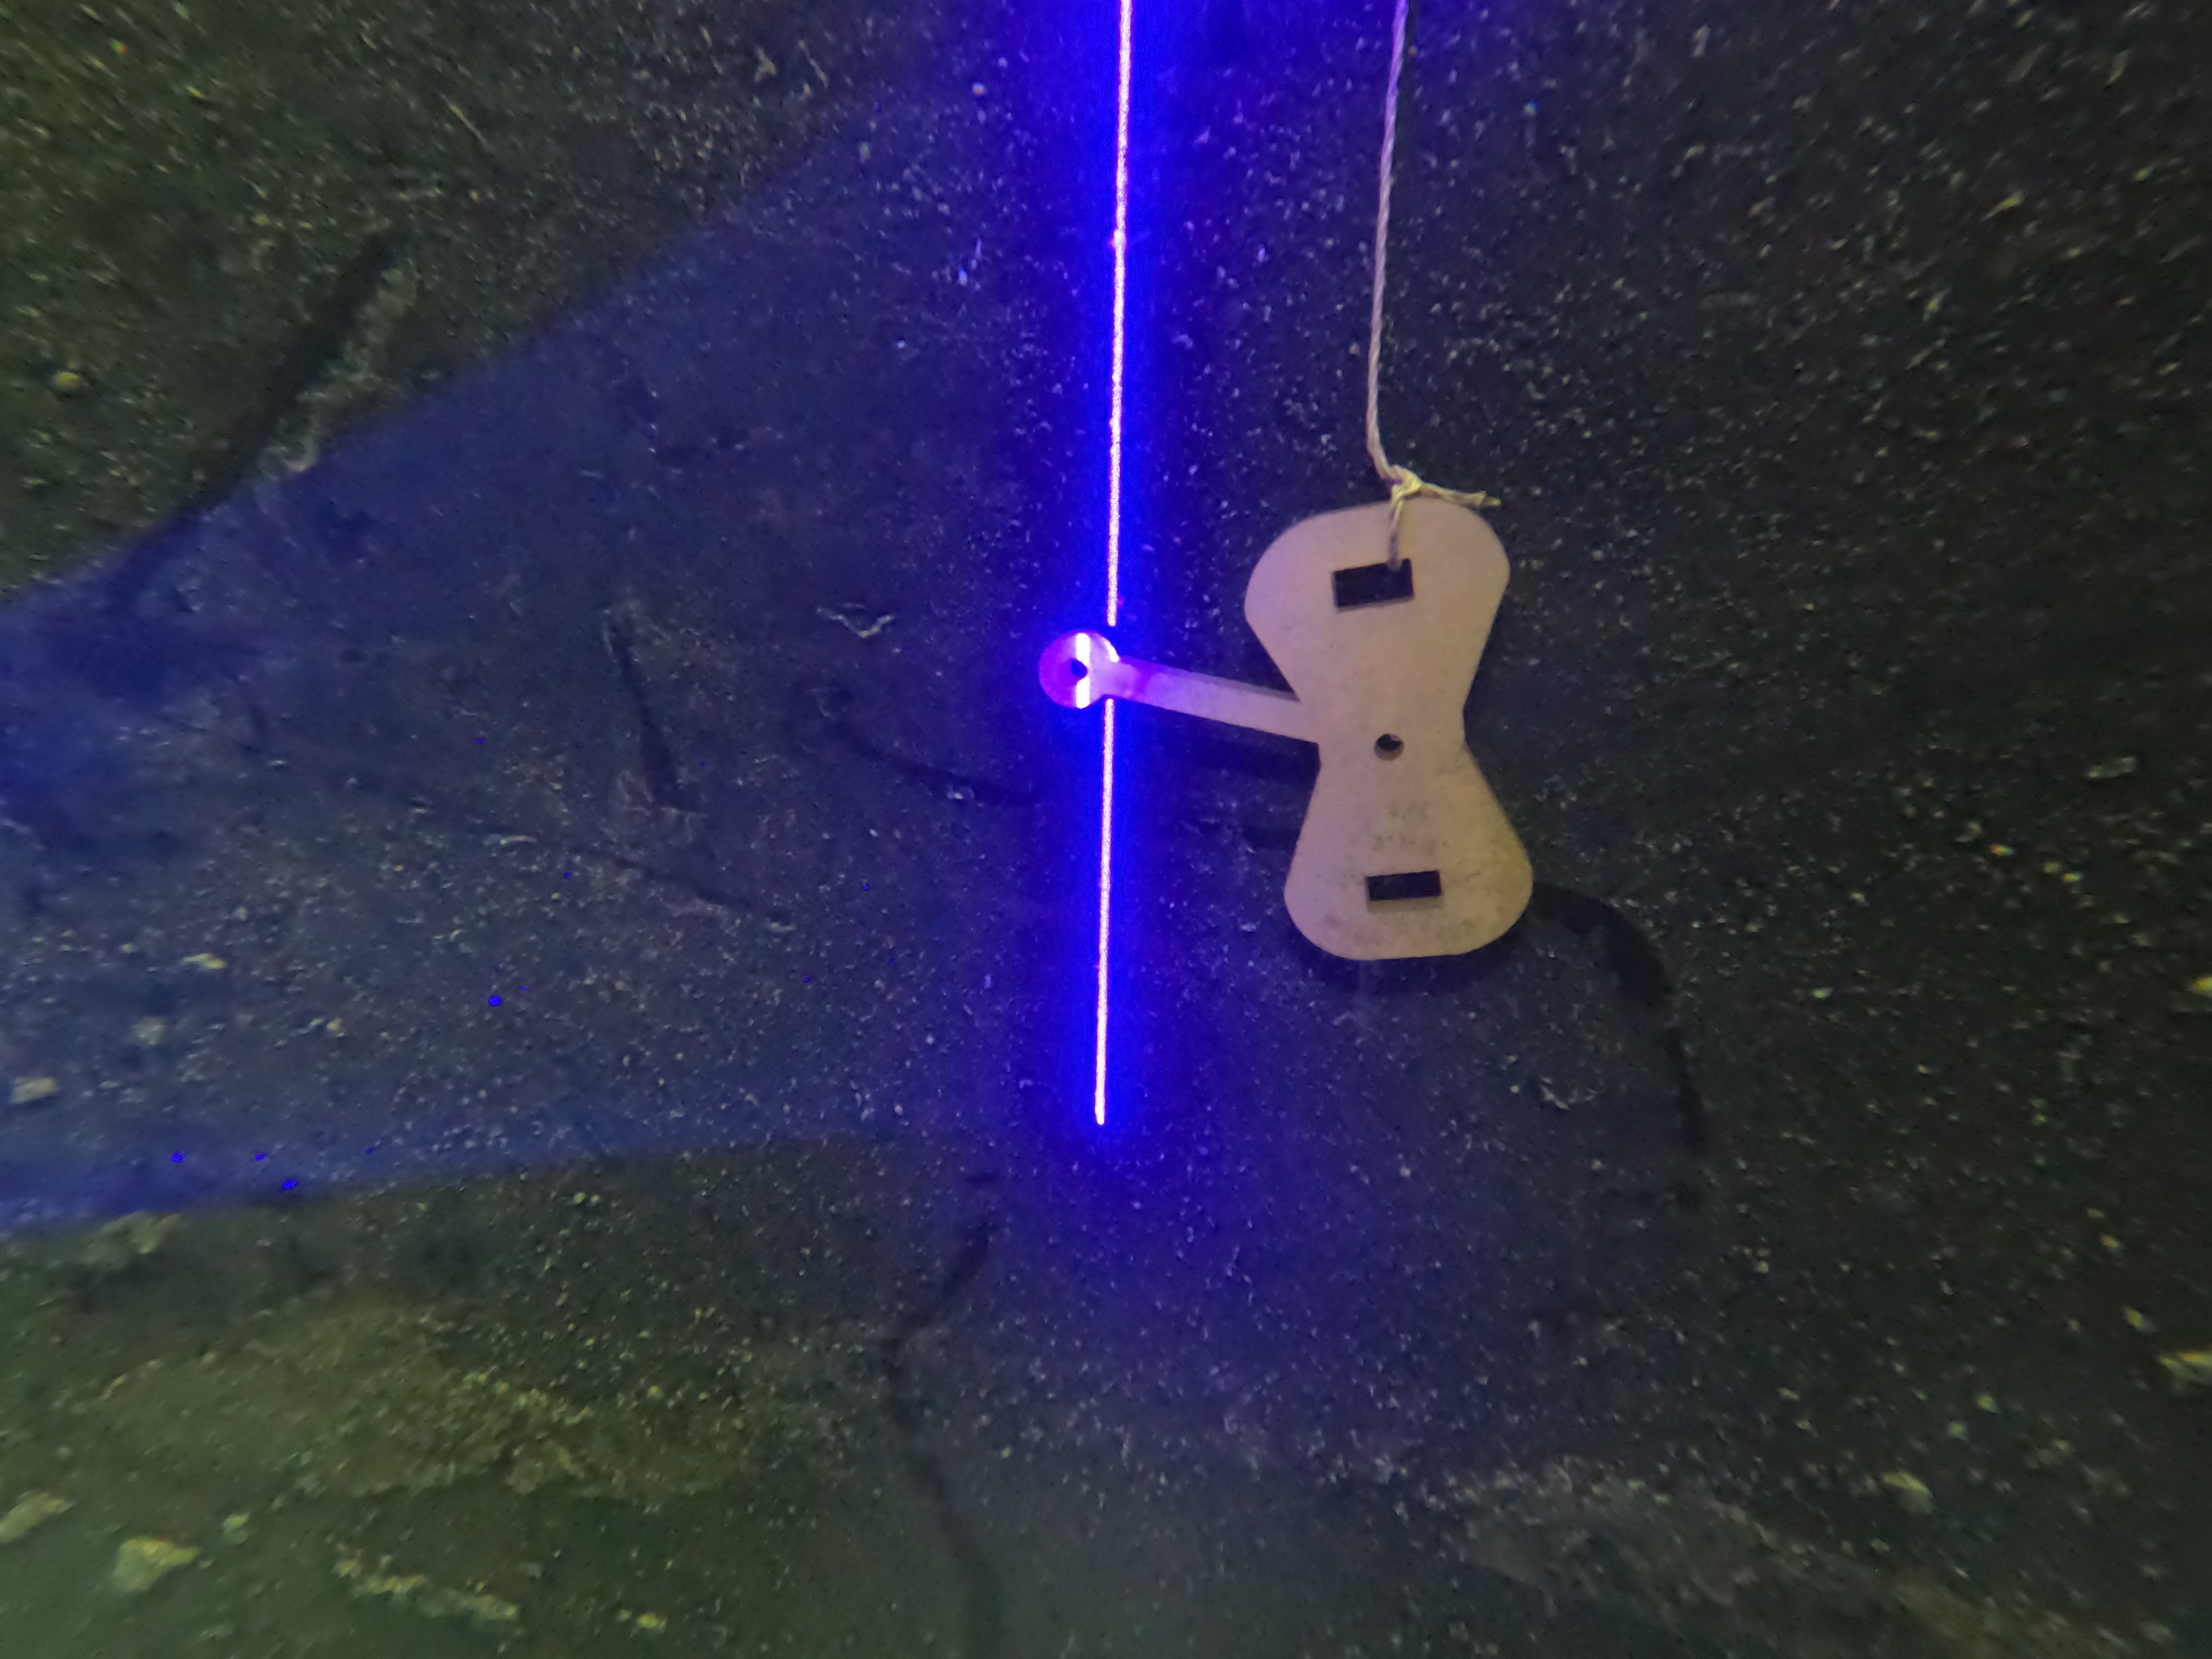

Supplement: Supplementary file 3308 [file G0015749.pdf › Level_2_1/G0015749.pdf]

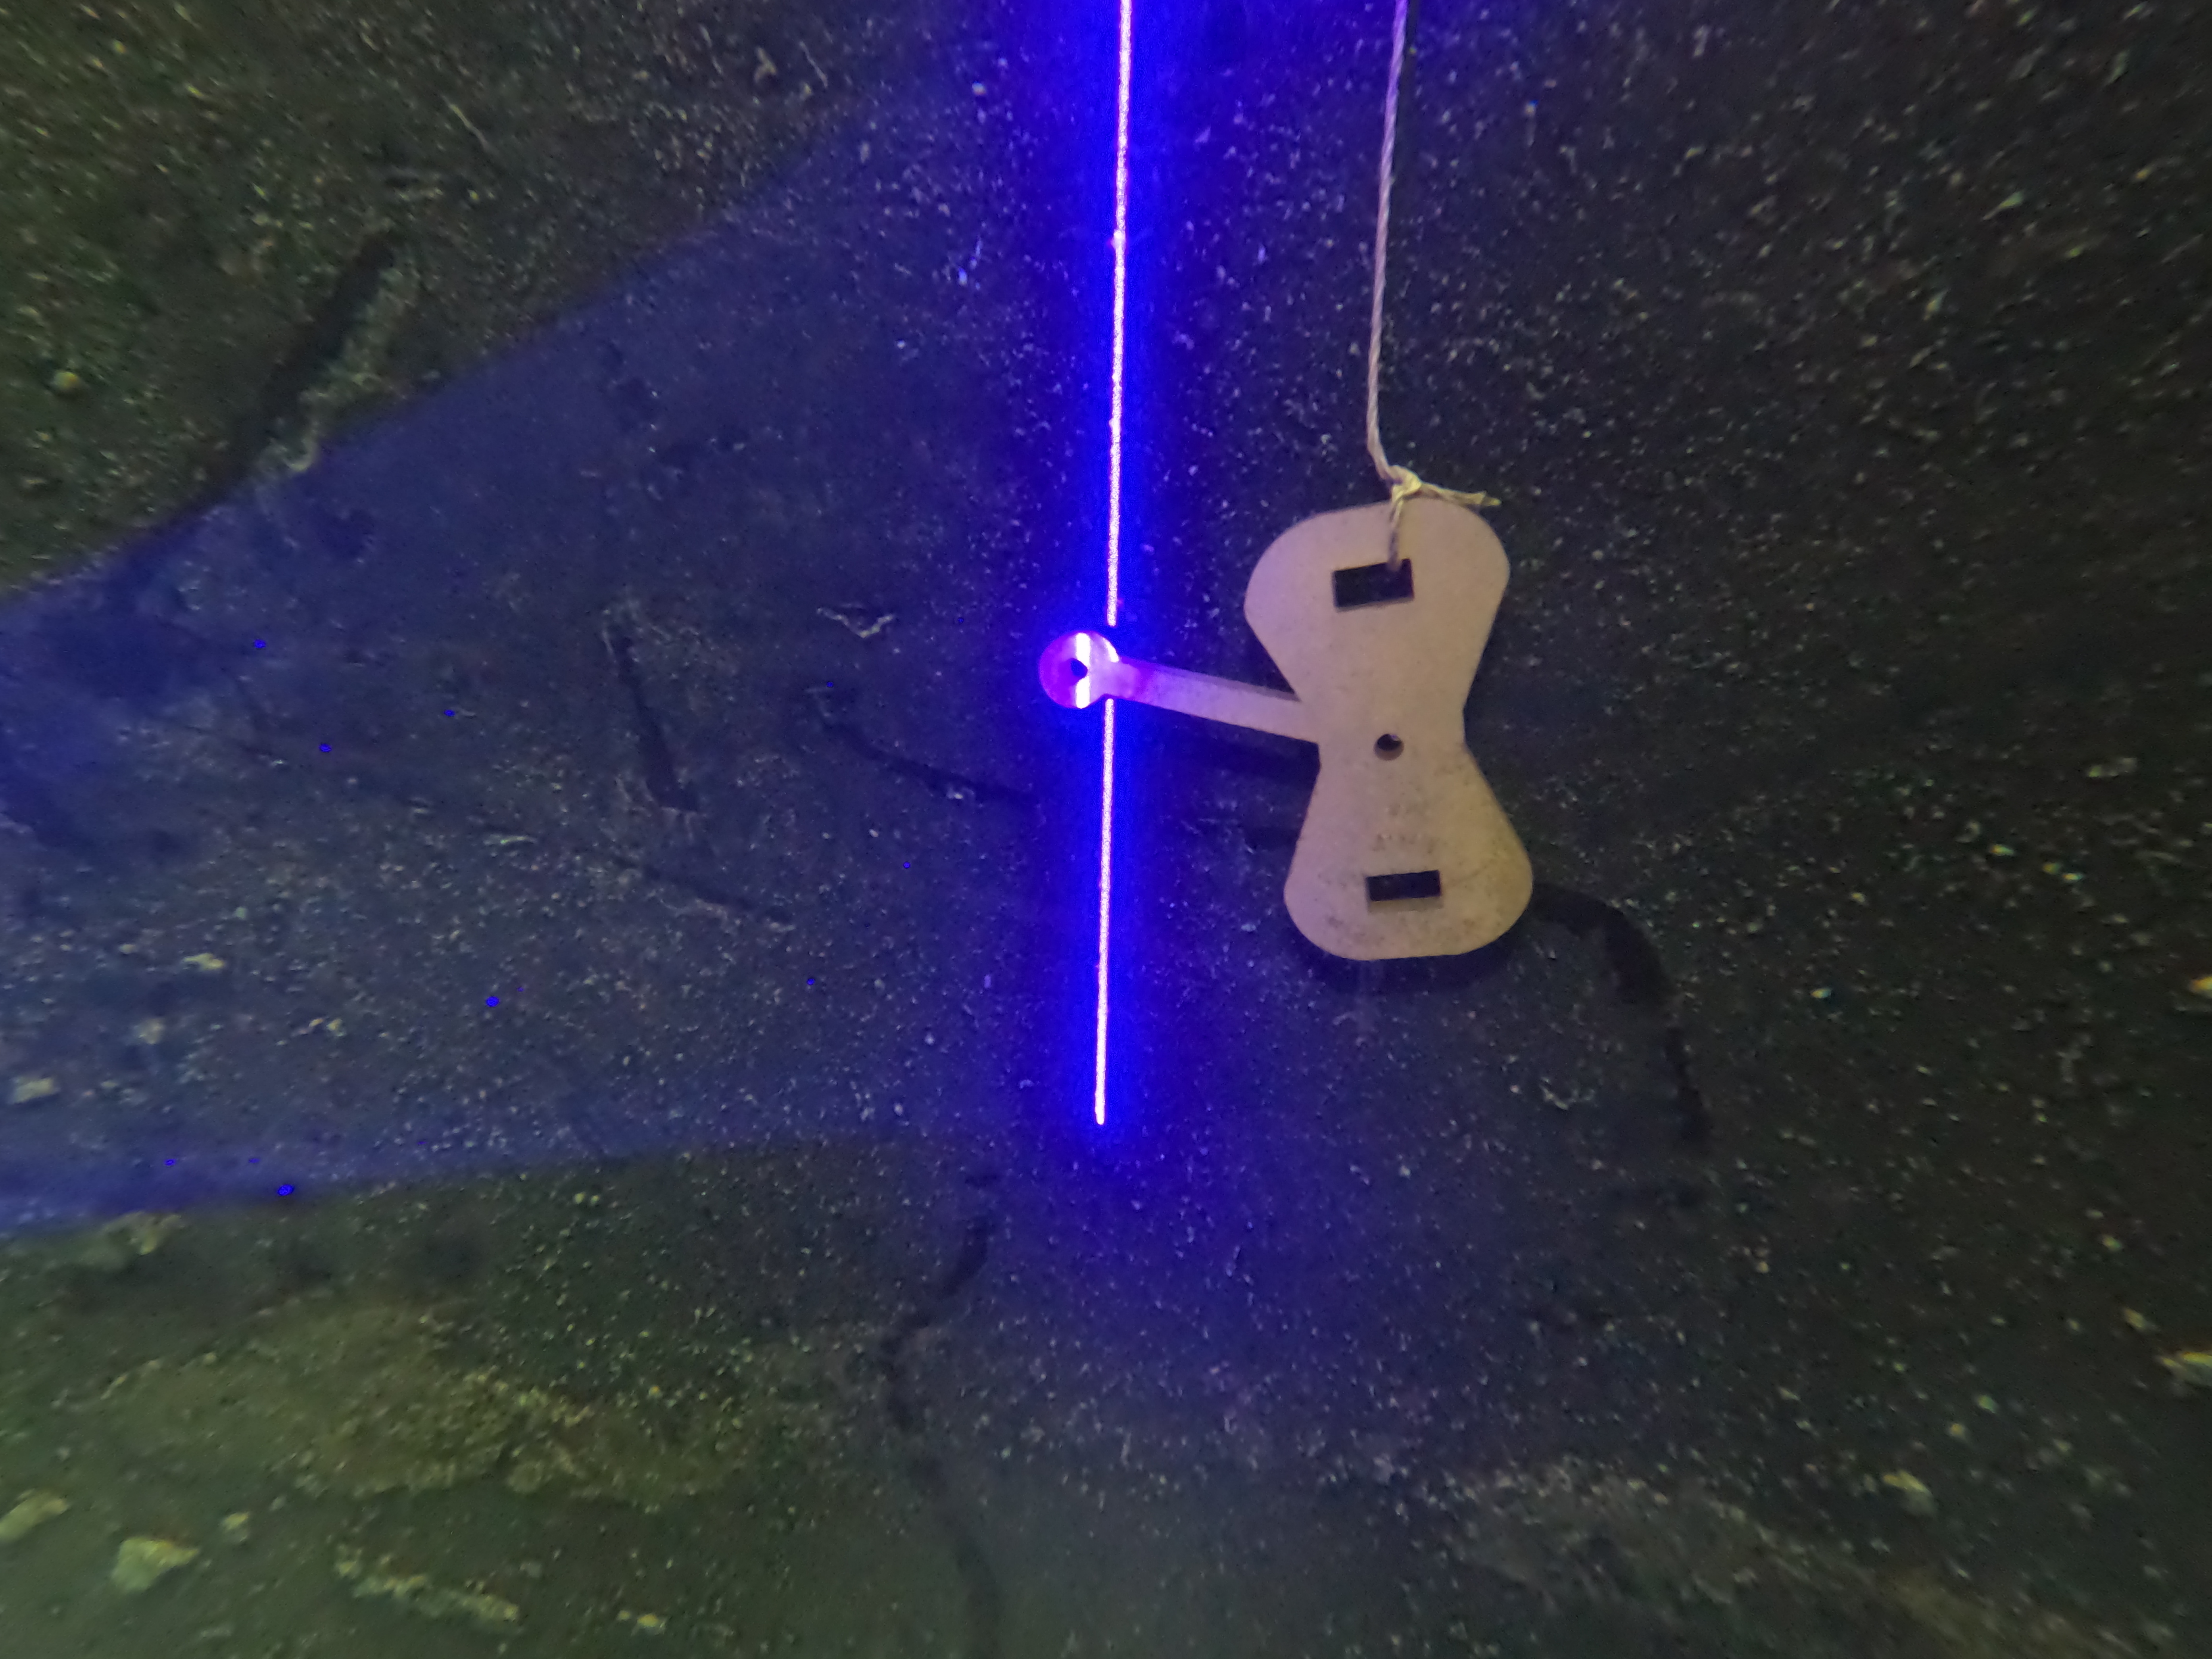

Supplement: Supplementary file 3309 [file G0015750.pdf › Level_2_1/G0015750.pdf]

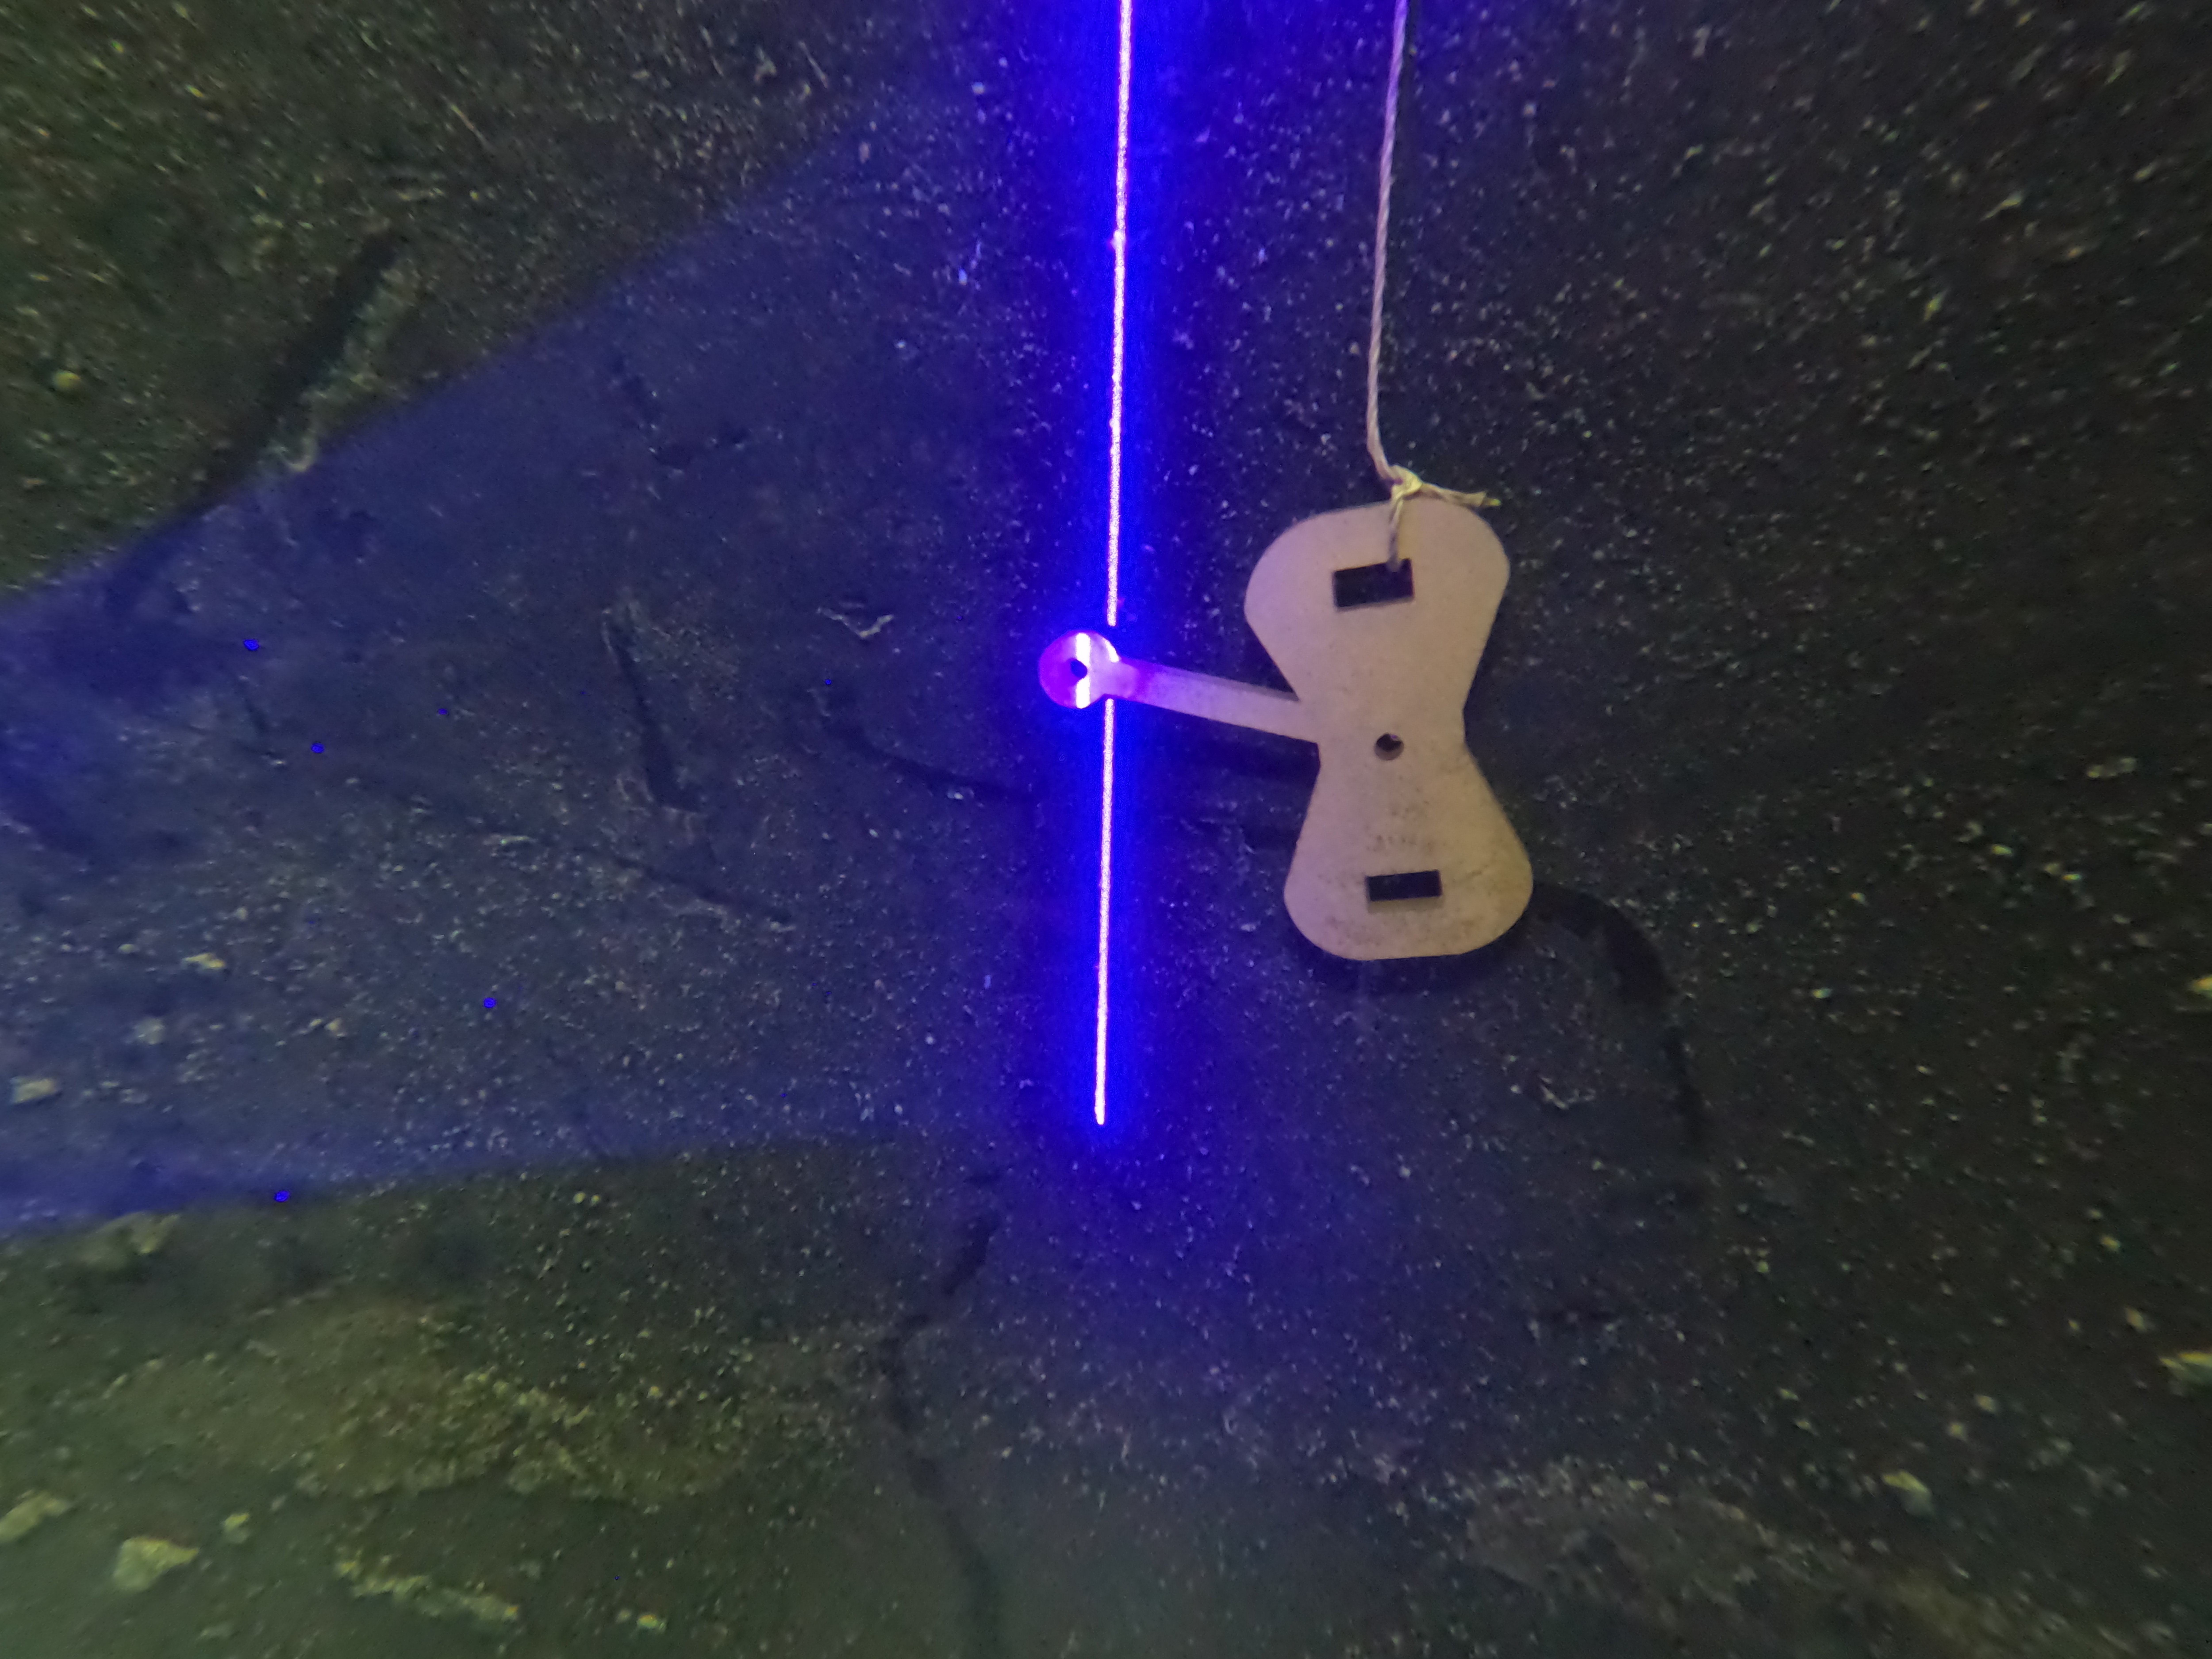

Supplement: Supplementary file 3310 [file G0015751.pdf › Level_2_1/G0015751.pdf]

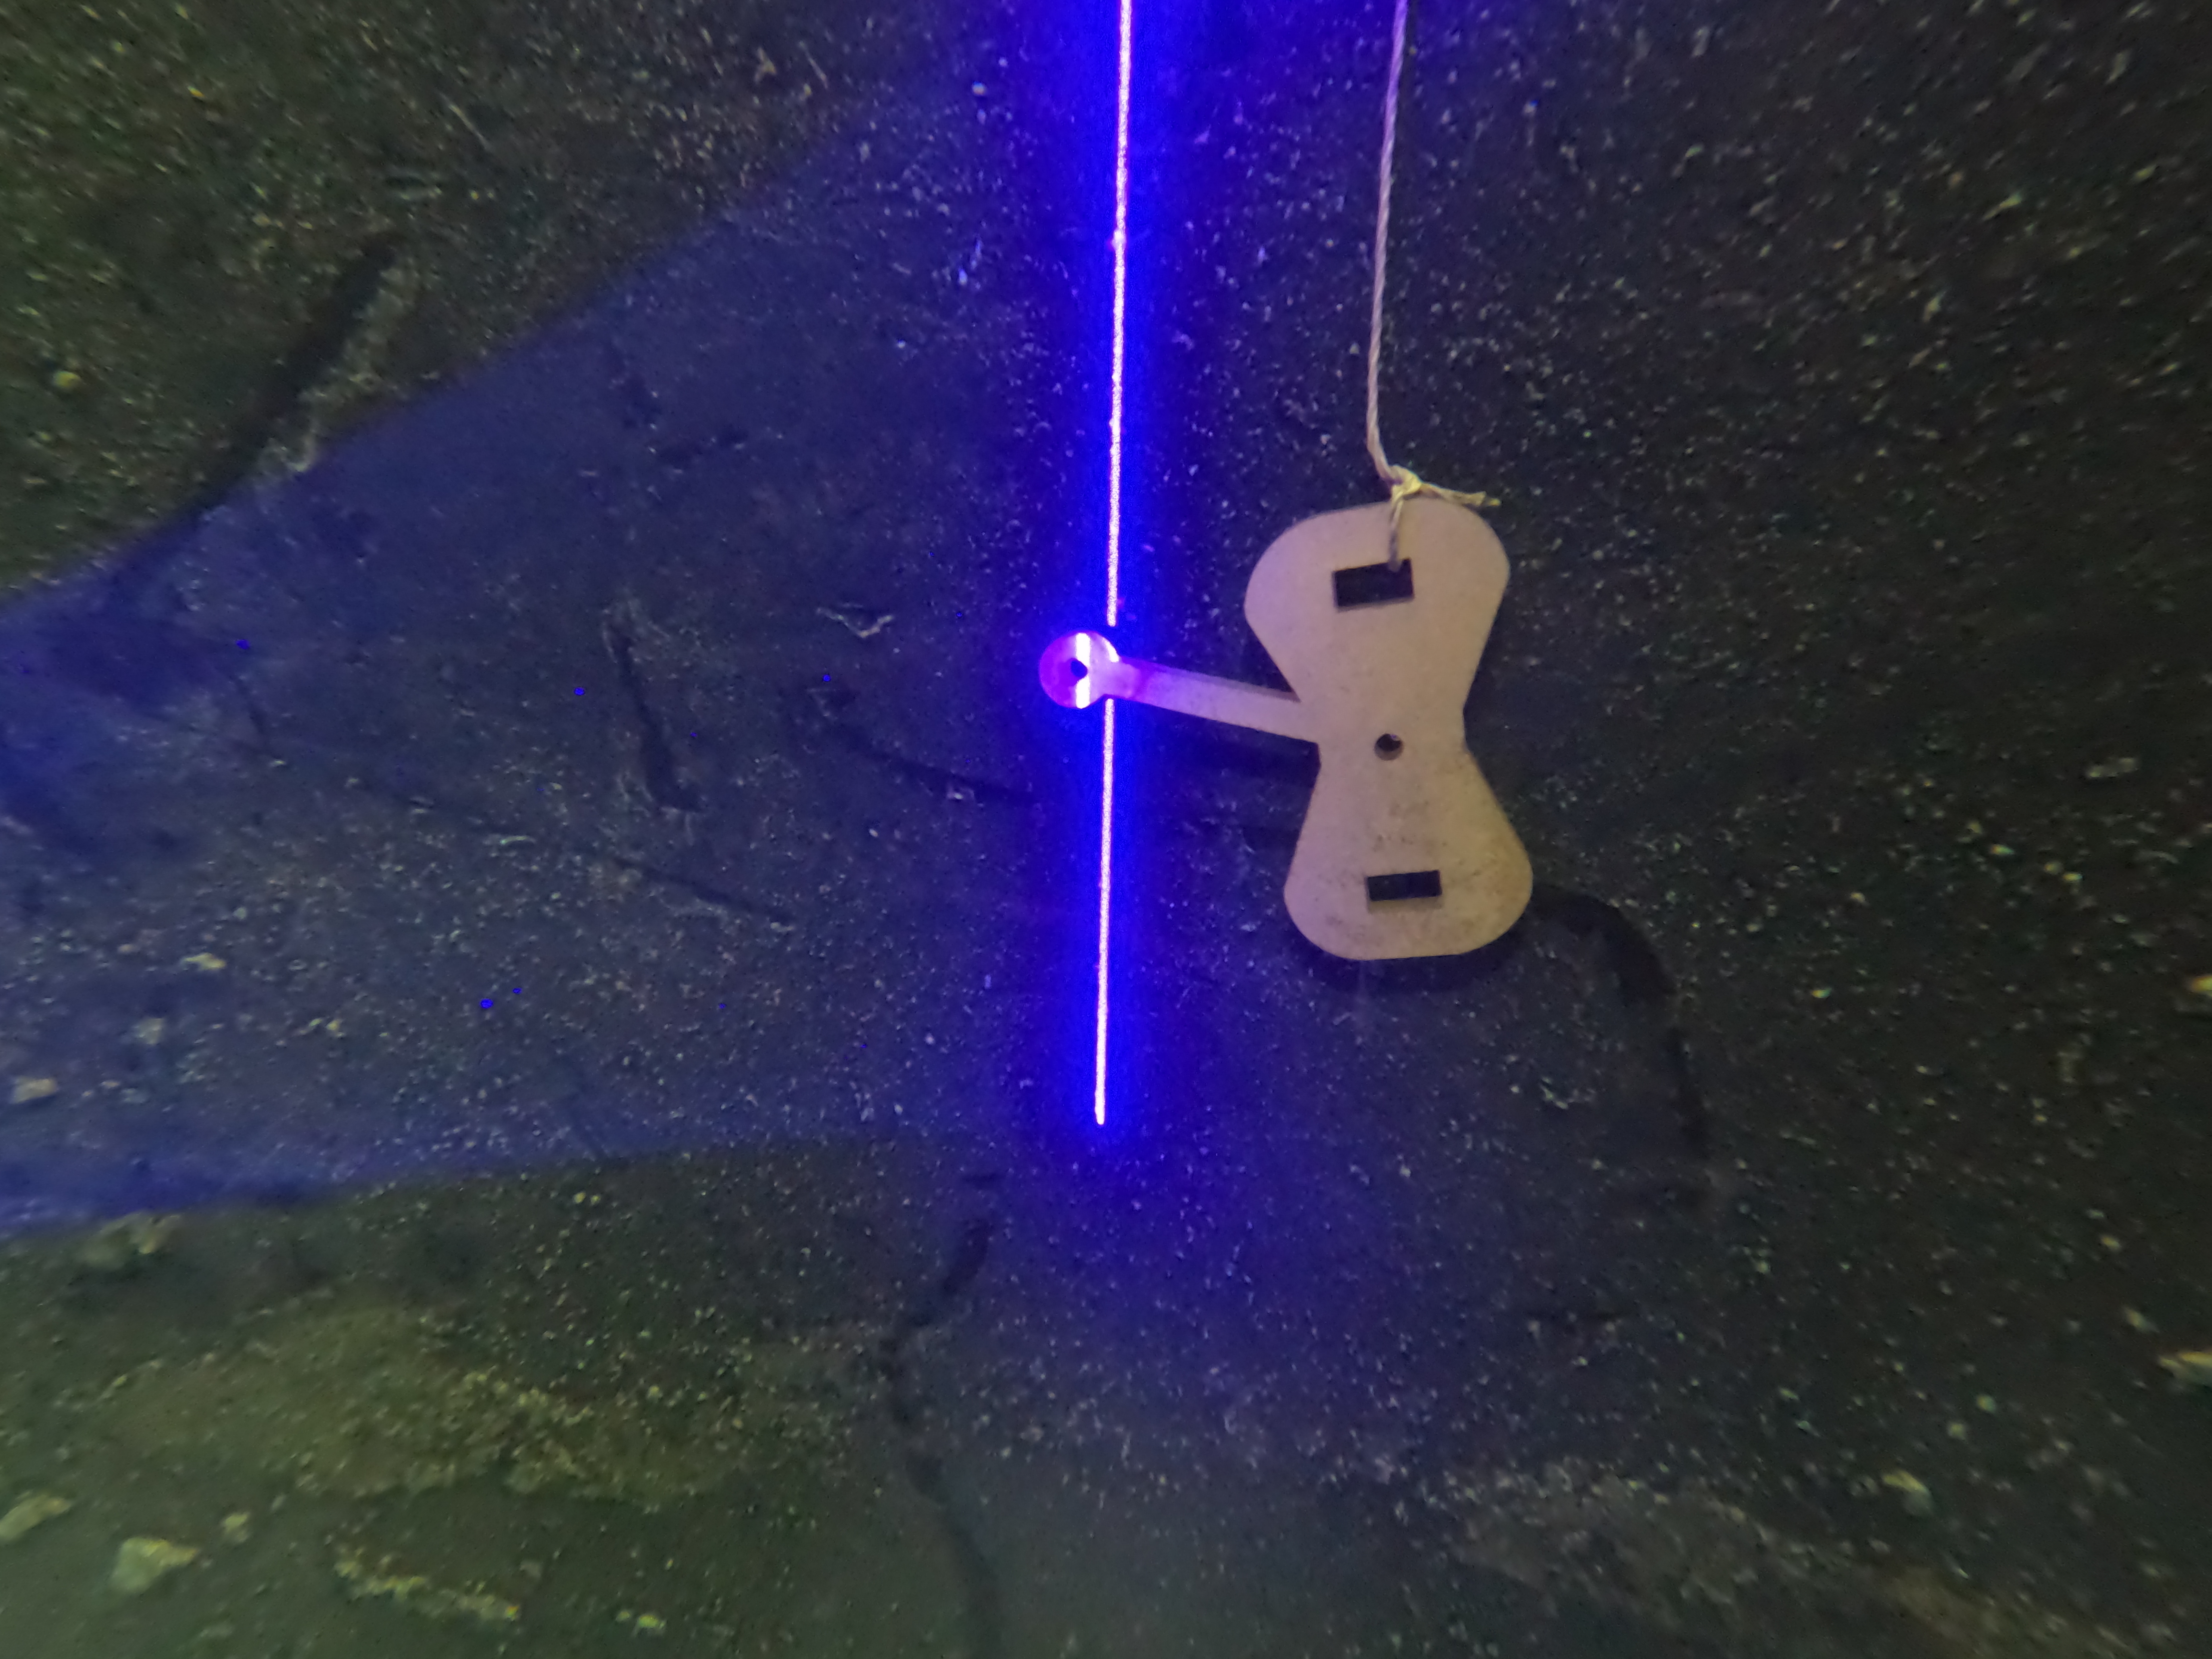

Supplement: Supplementary file 3311 [file G0015752.pdf › Level_2_1/G0015752.pdf]

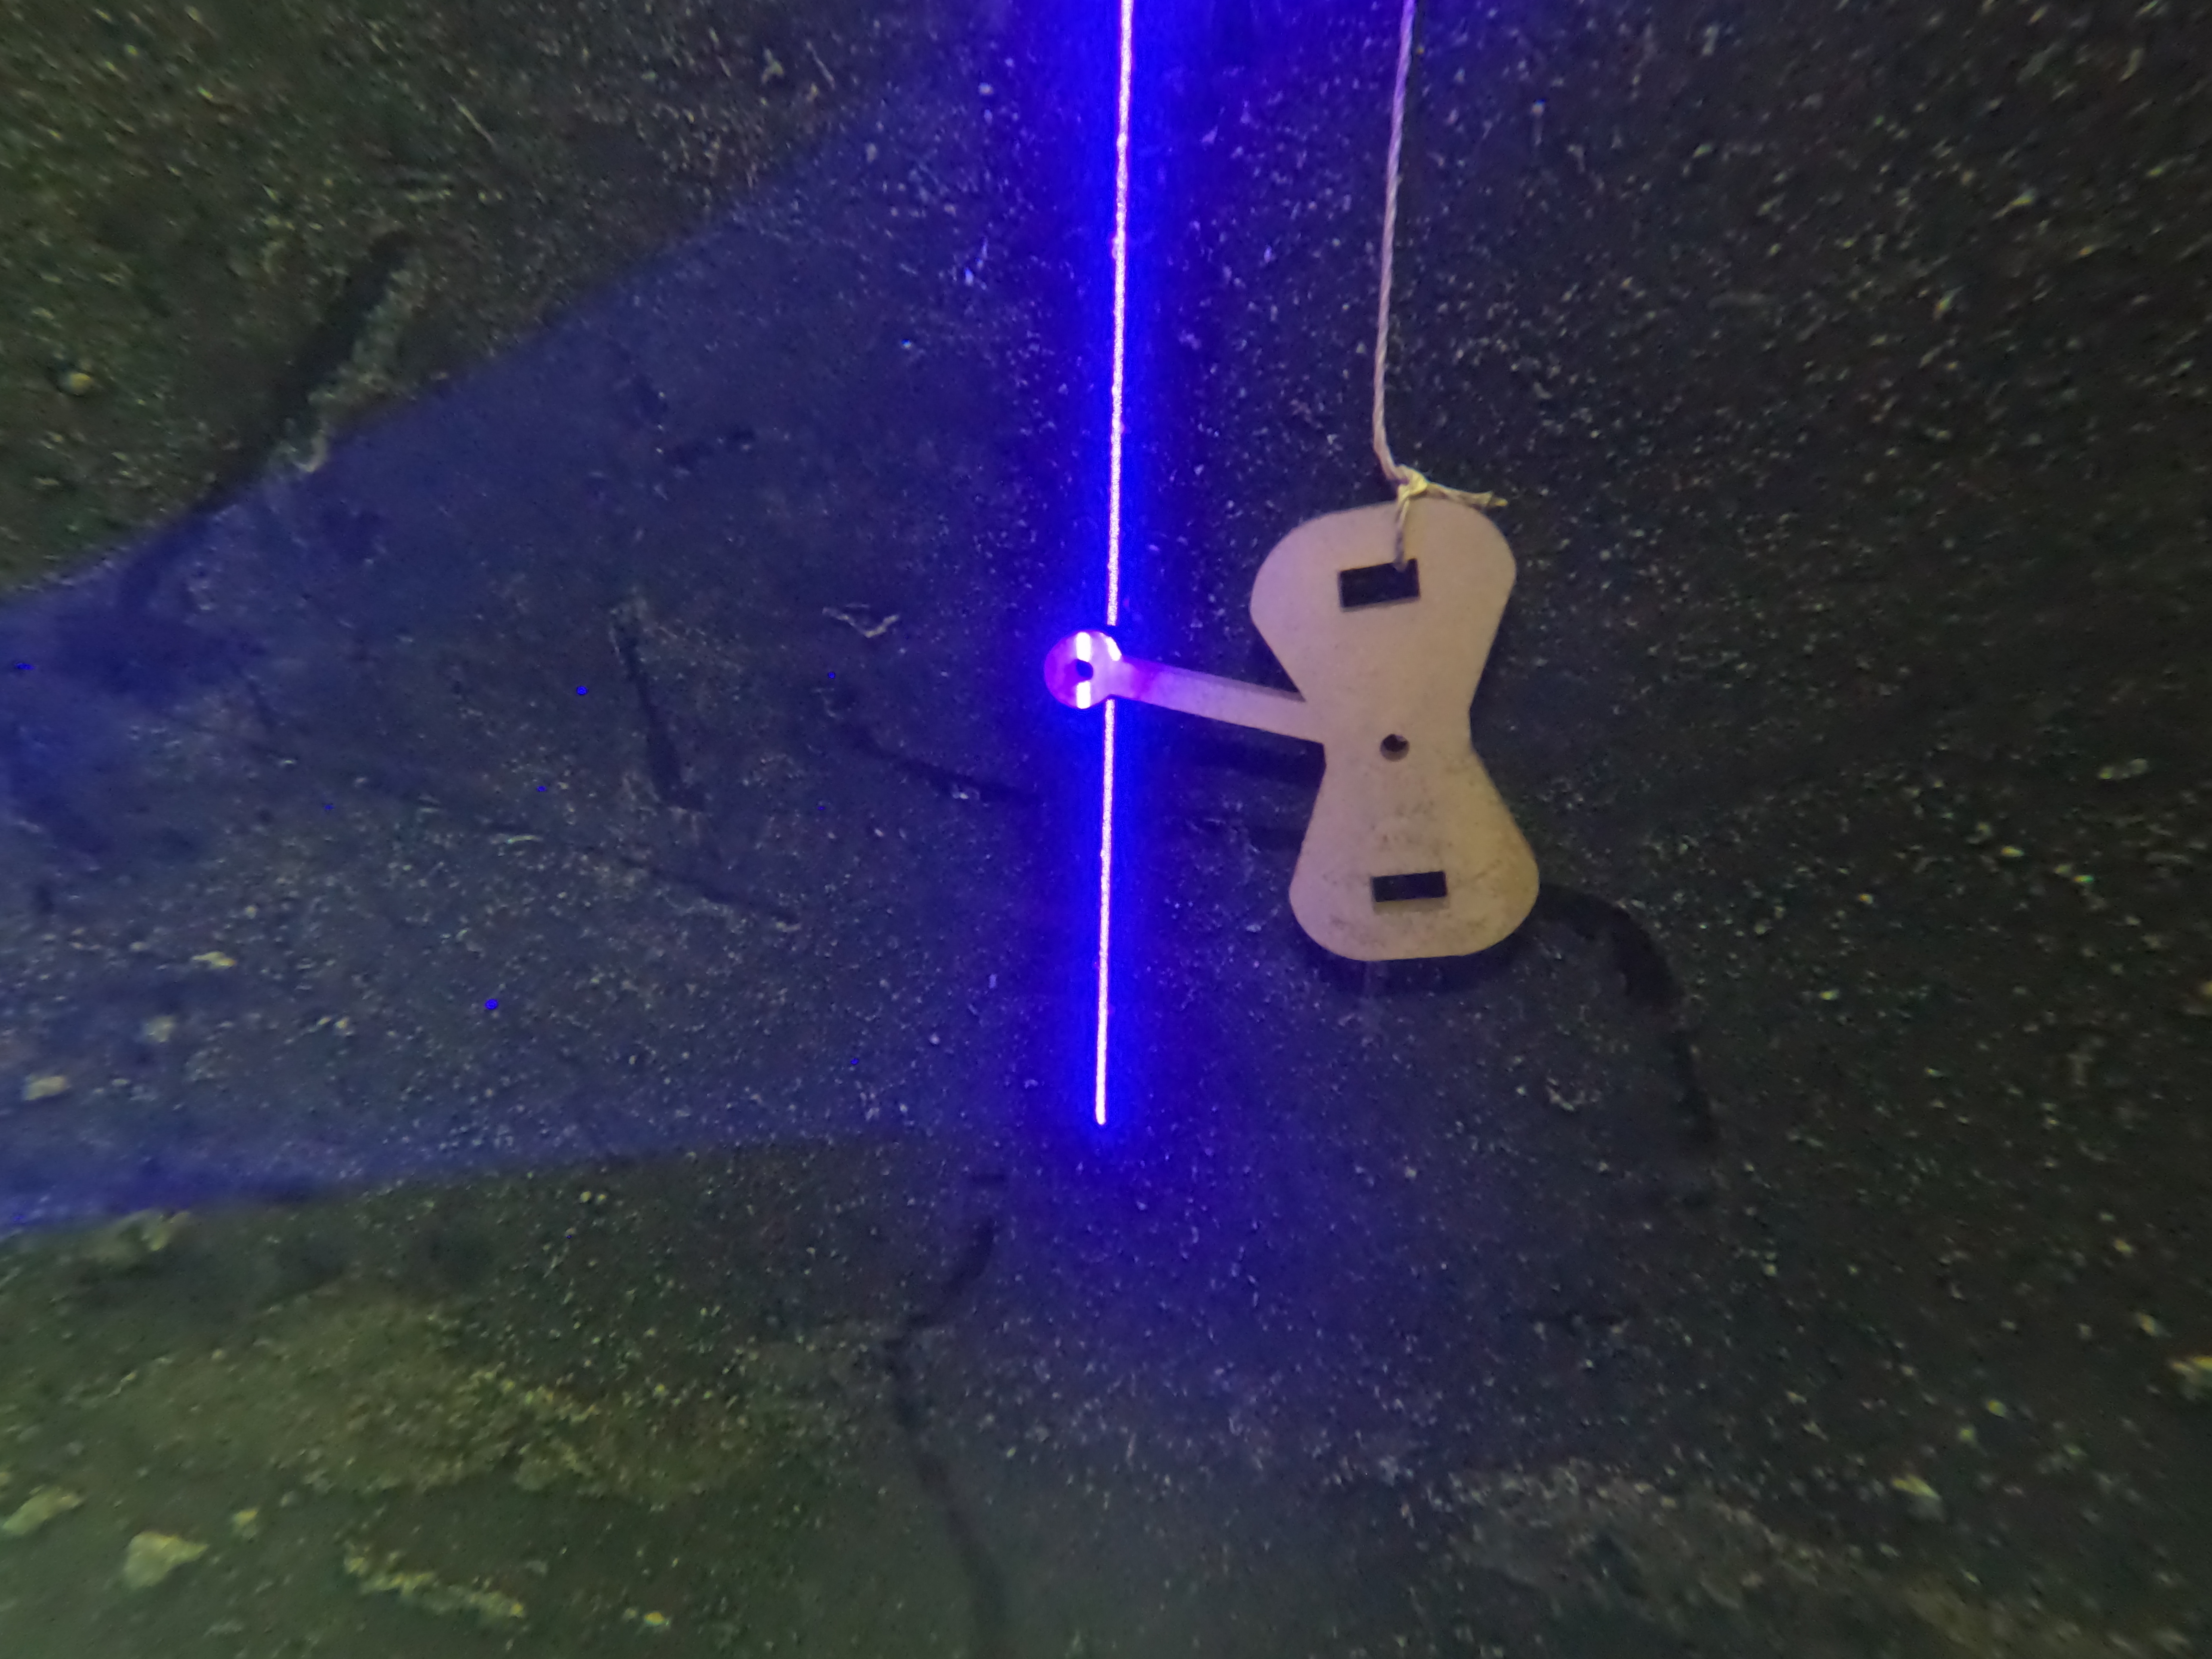

Supplement: Supplementary file 3312 [file G0015753.pdf › Level_2_1/G0015753.pdf]

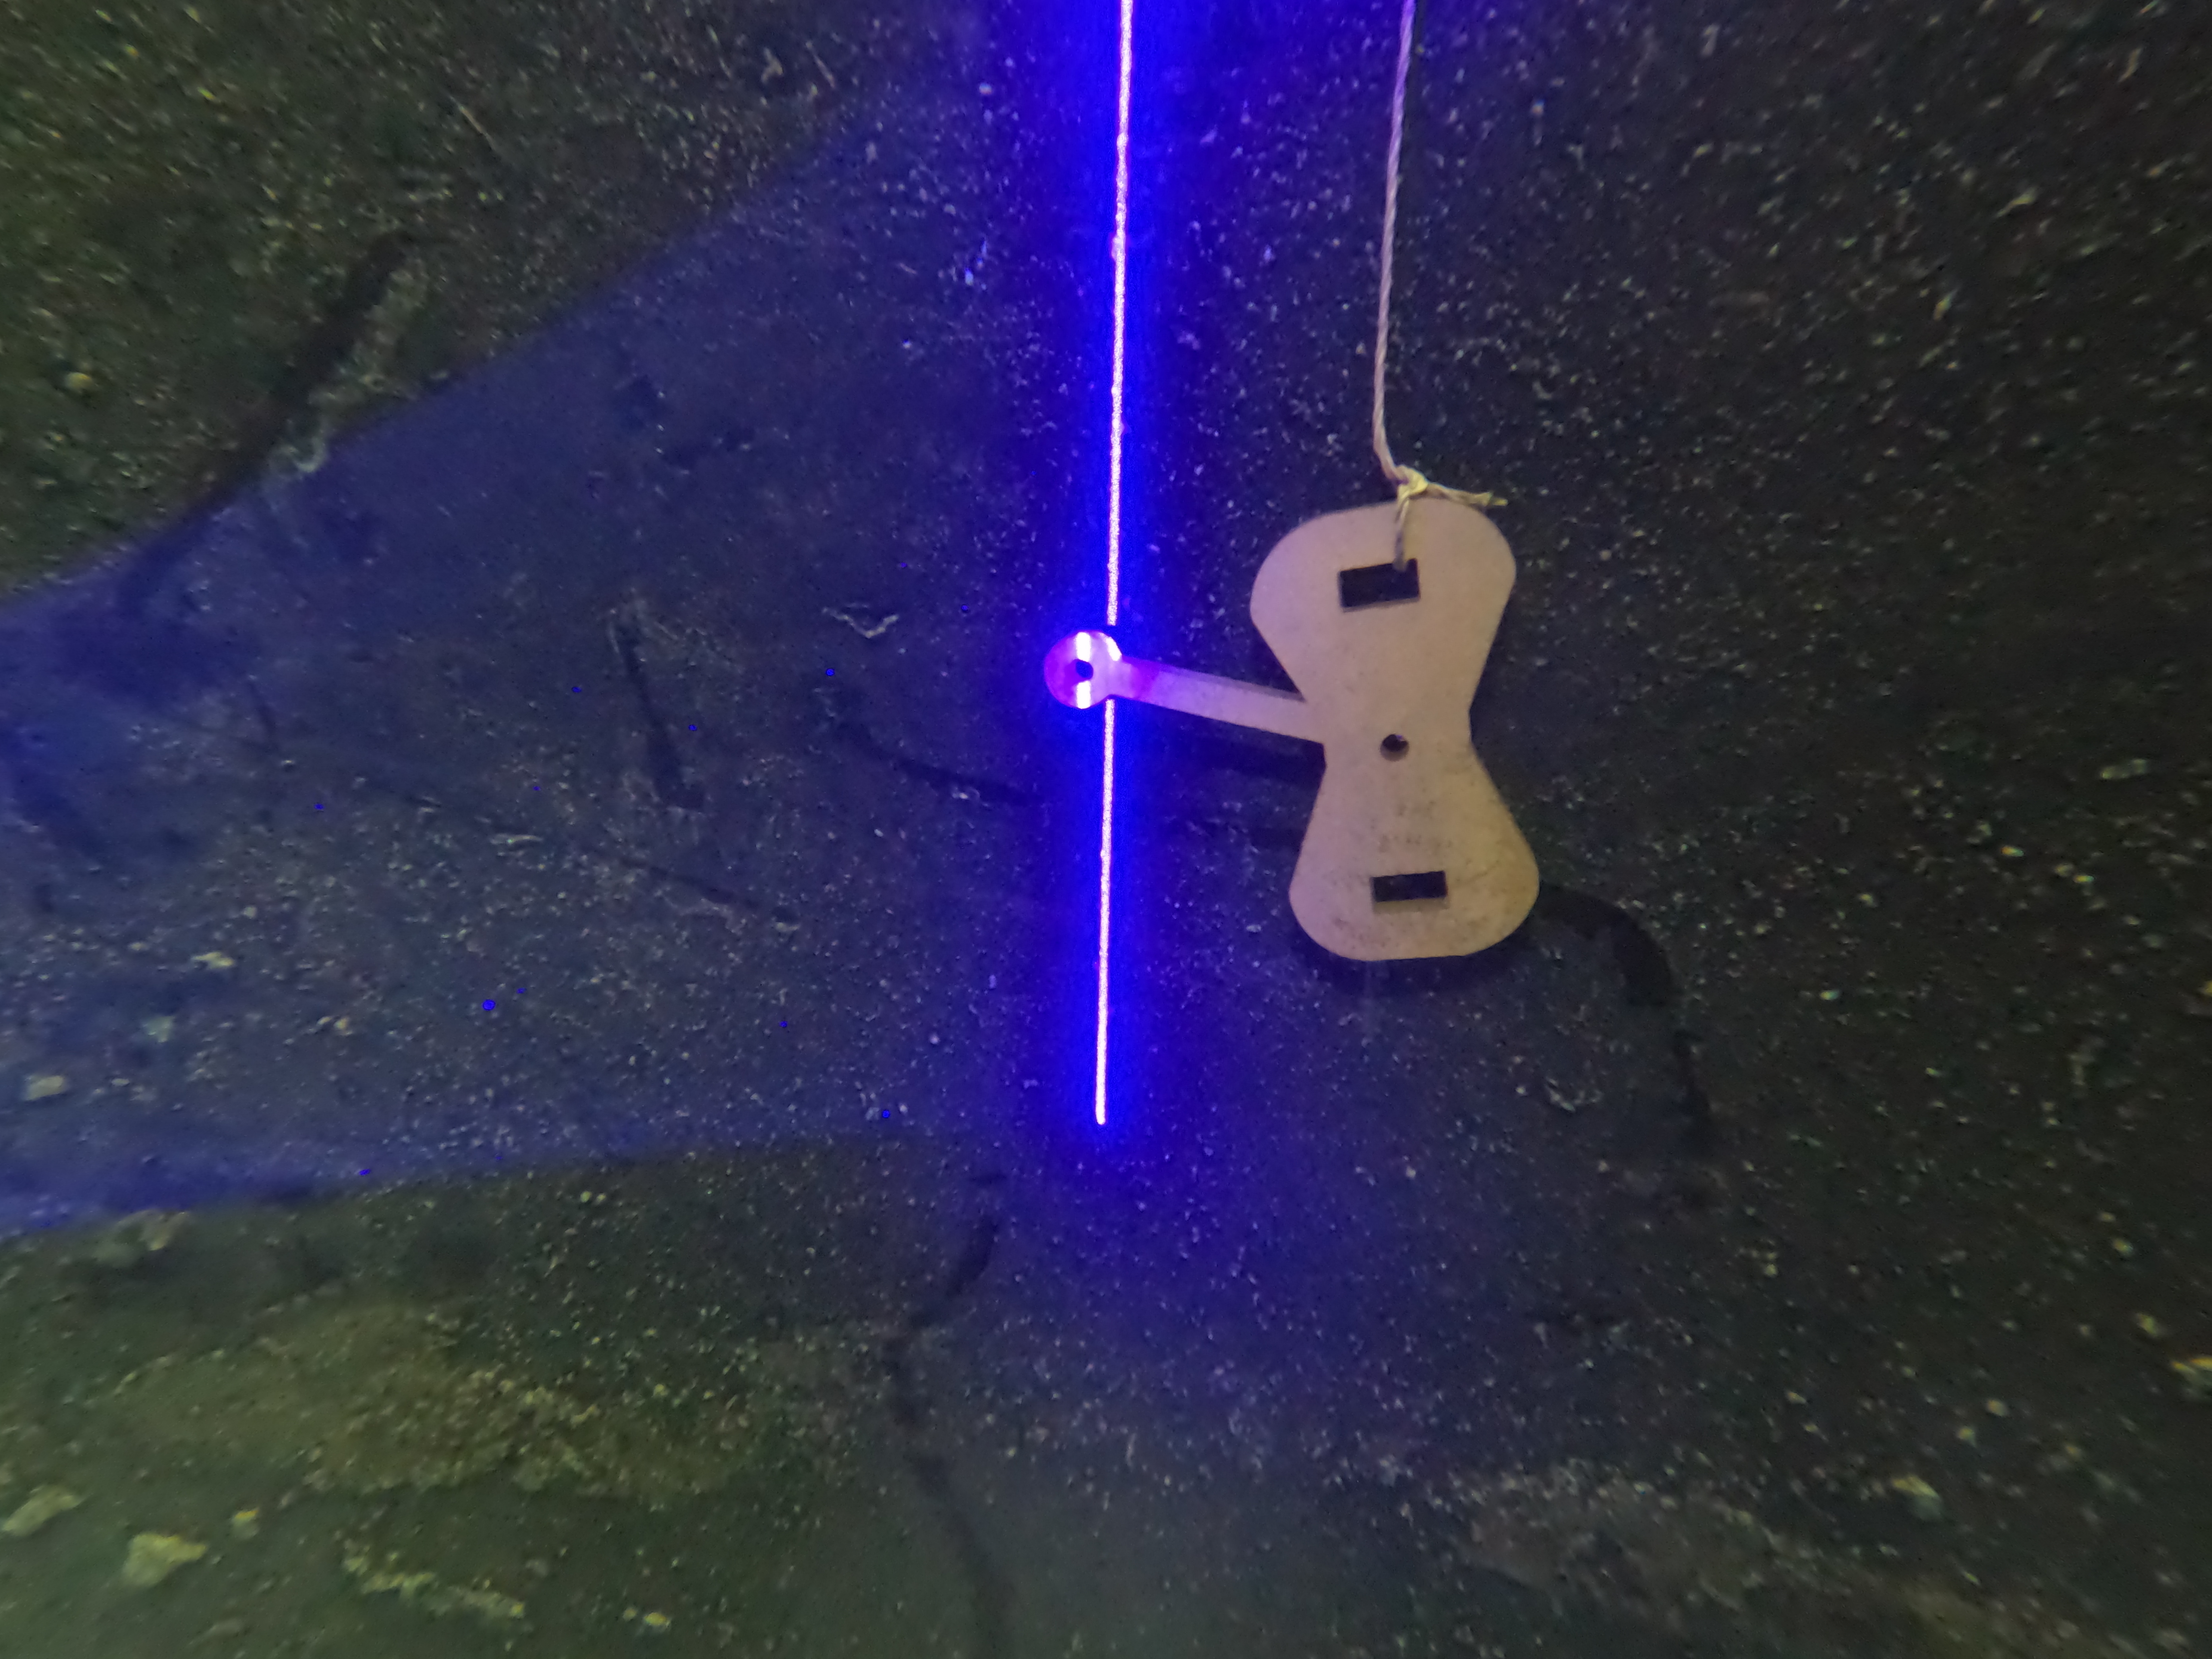

Supplement: Supplementary file 3313 [file G0015754.pdf › Level_2_1/G0015754.pdf]

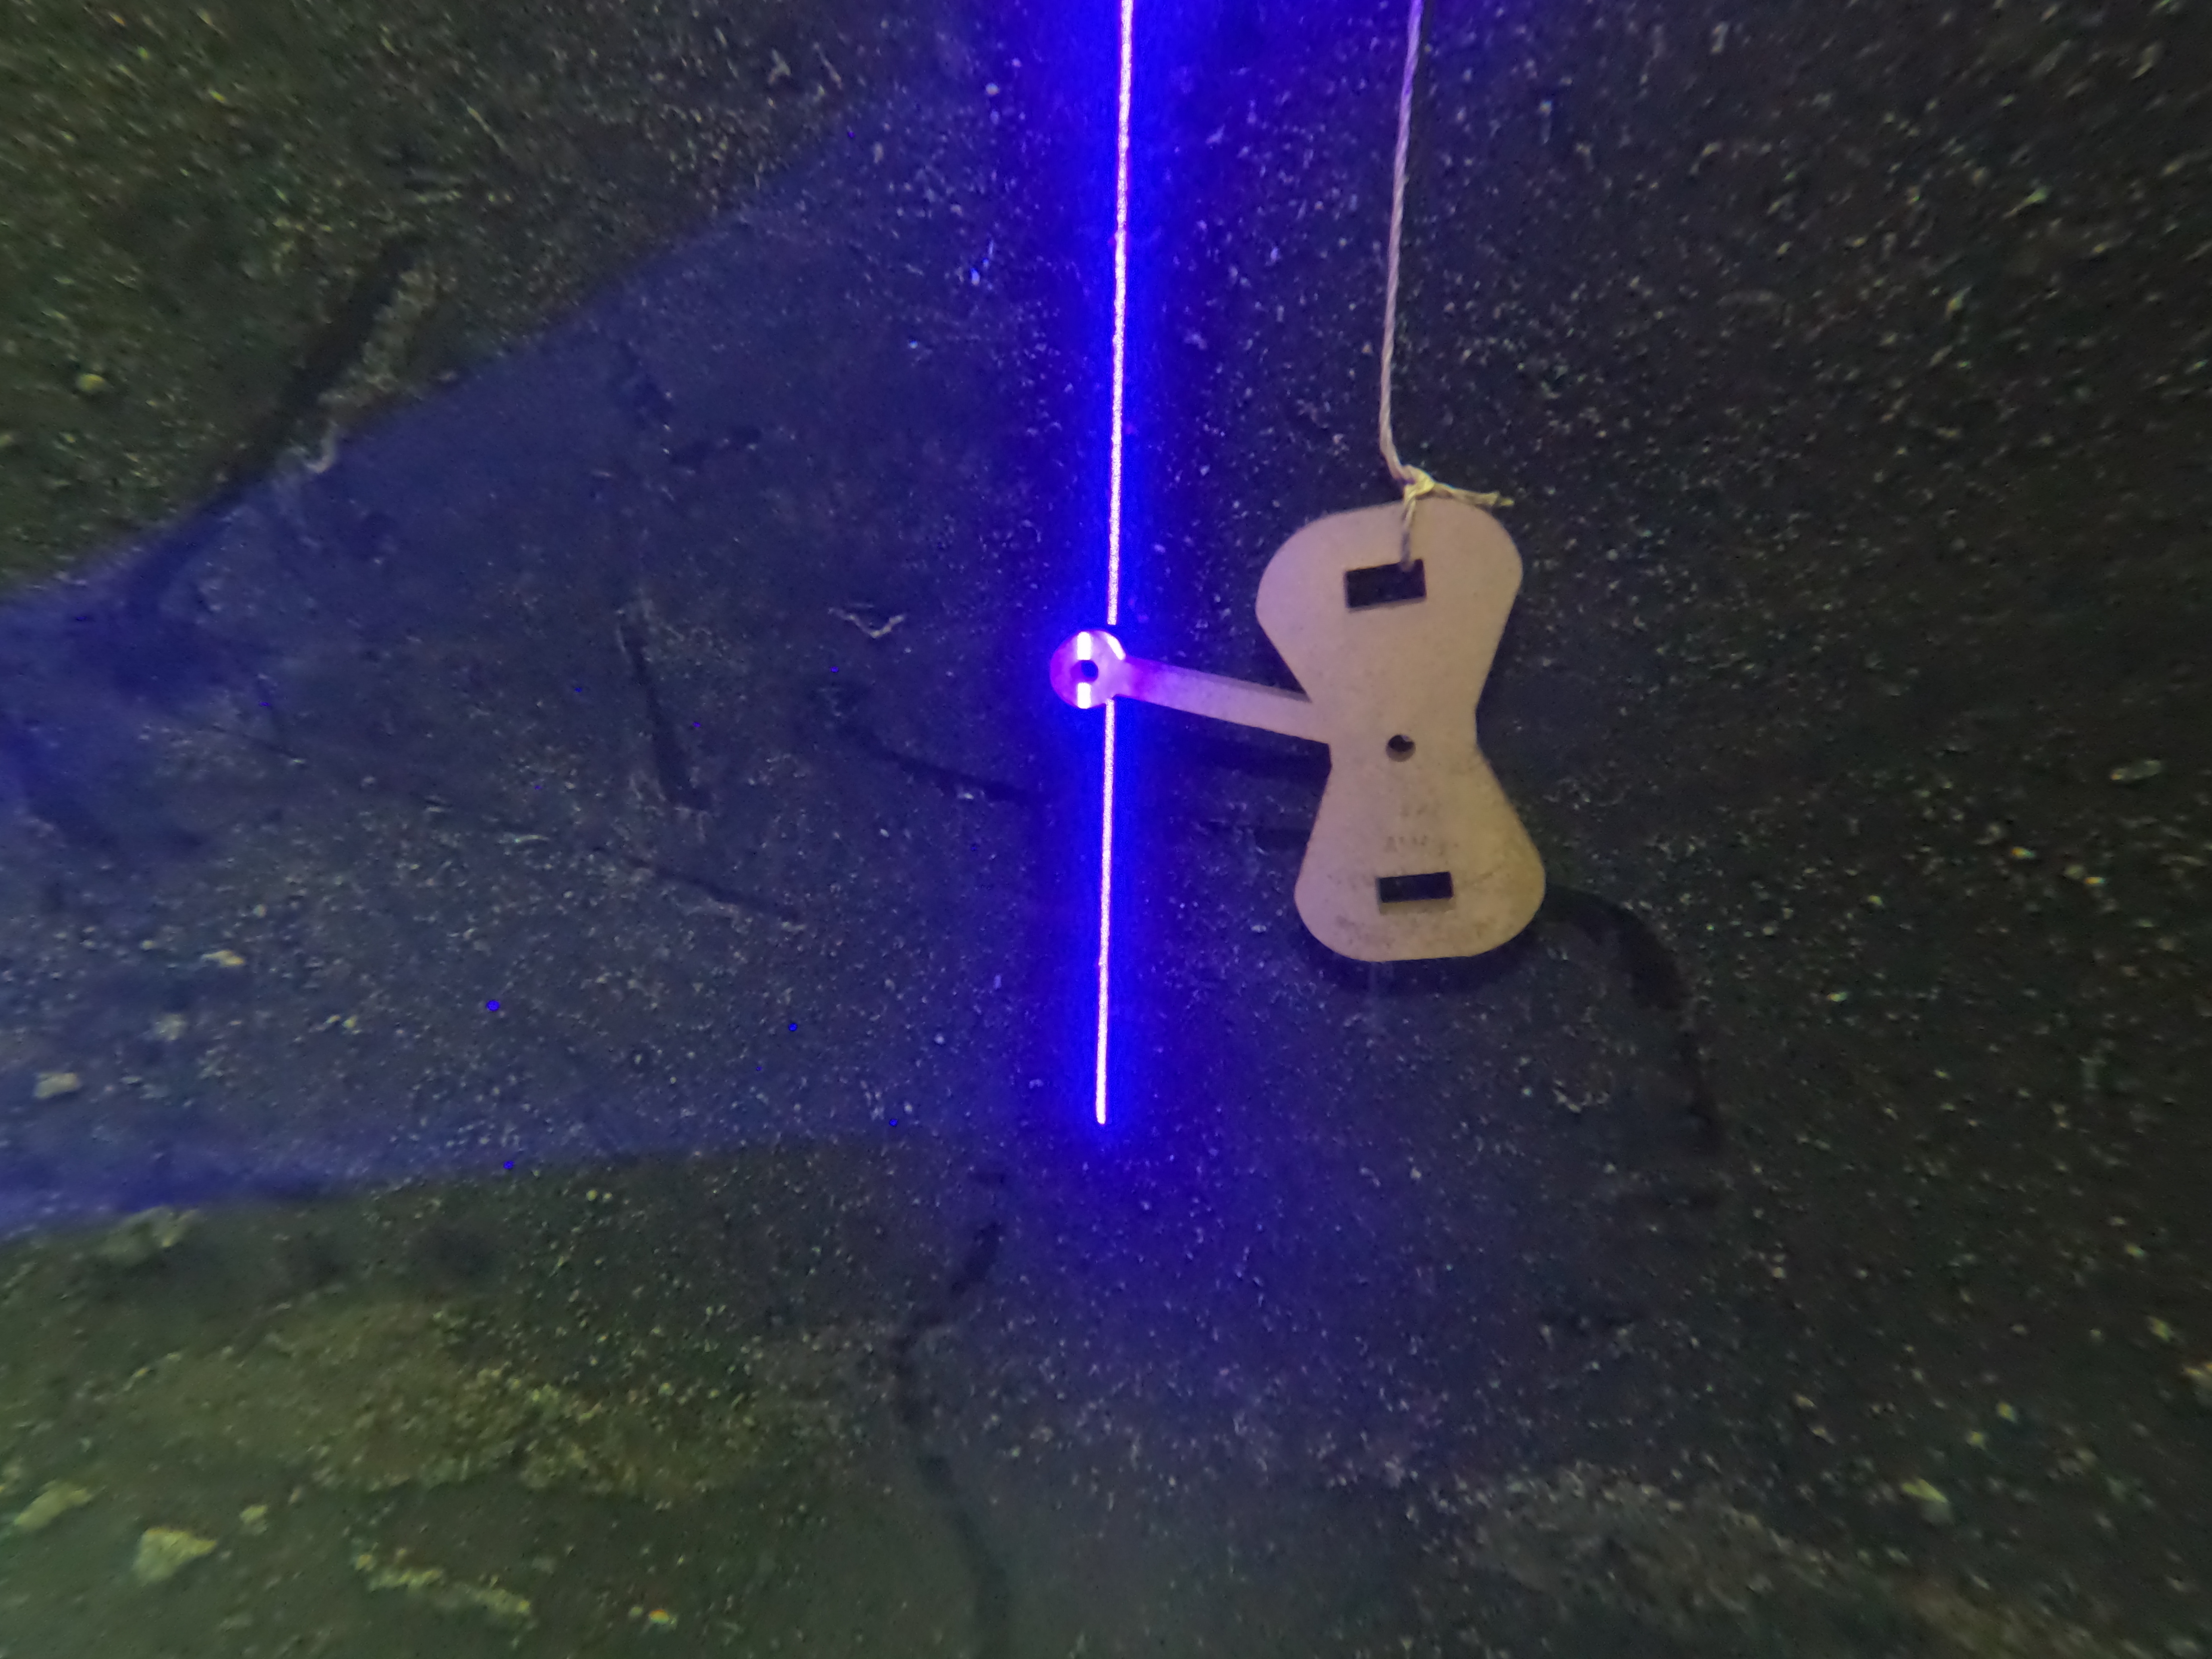

Supplement: Supplementary file 3314 [file G0015755.pdf › Level_2_1/G0015755.pdf]

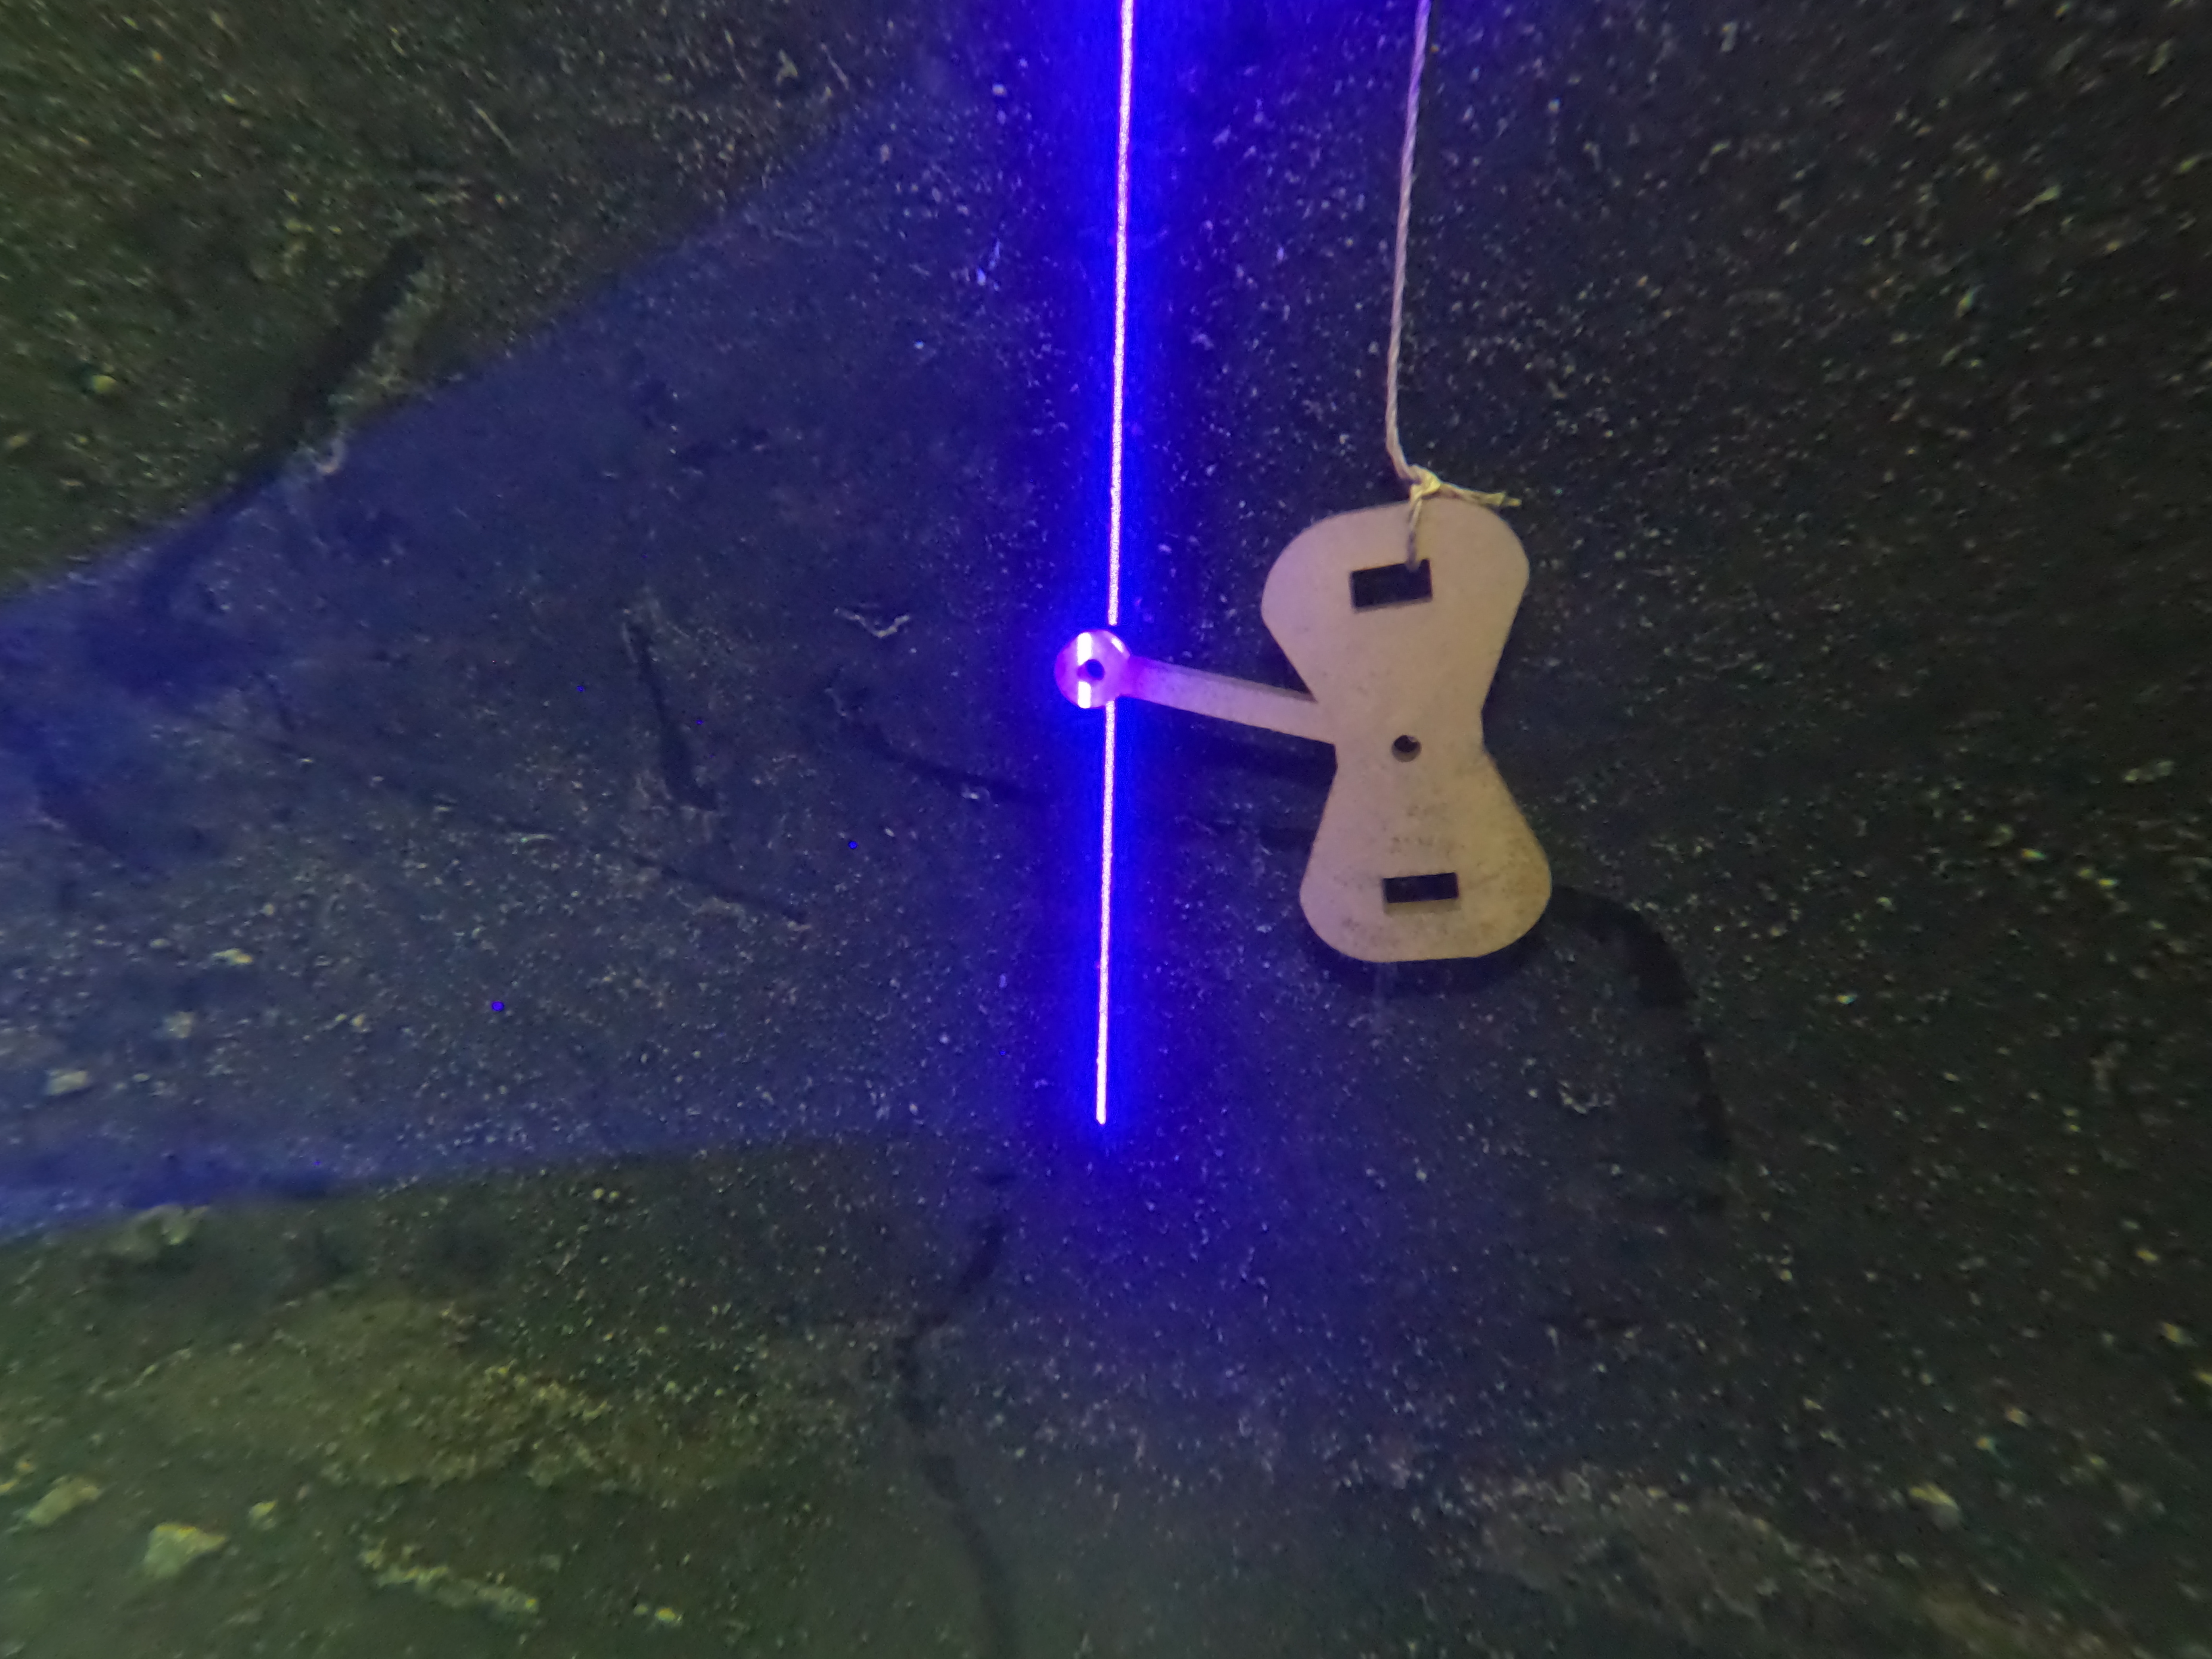

Supplement: Supplementary file 3315 [file G0015756.pdf › Level_2_1/G0015756.pdf]

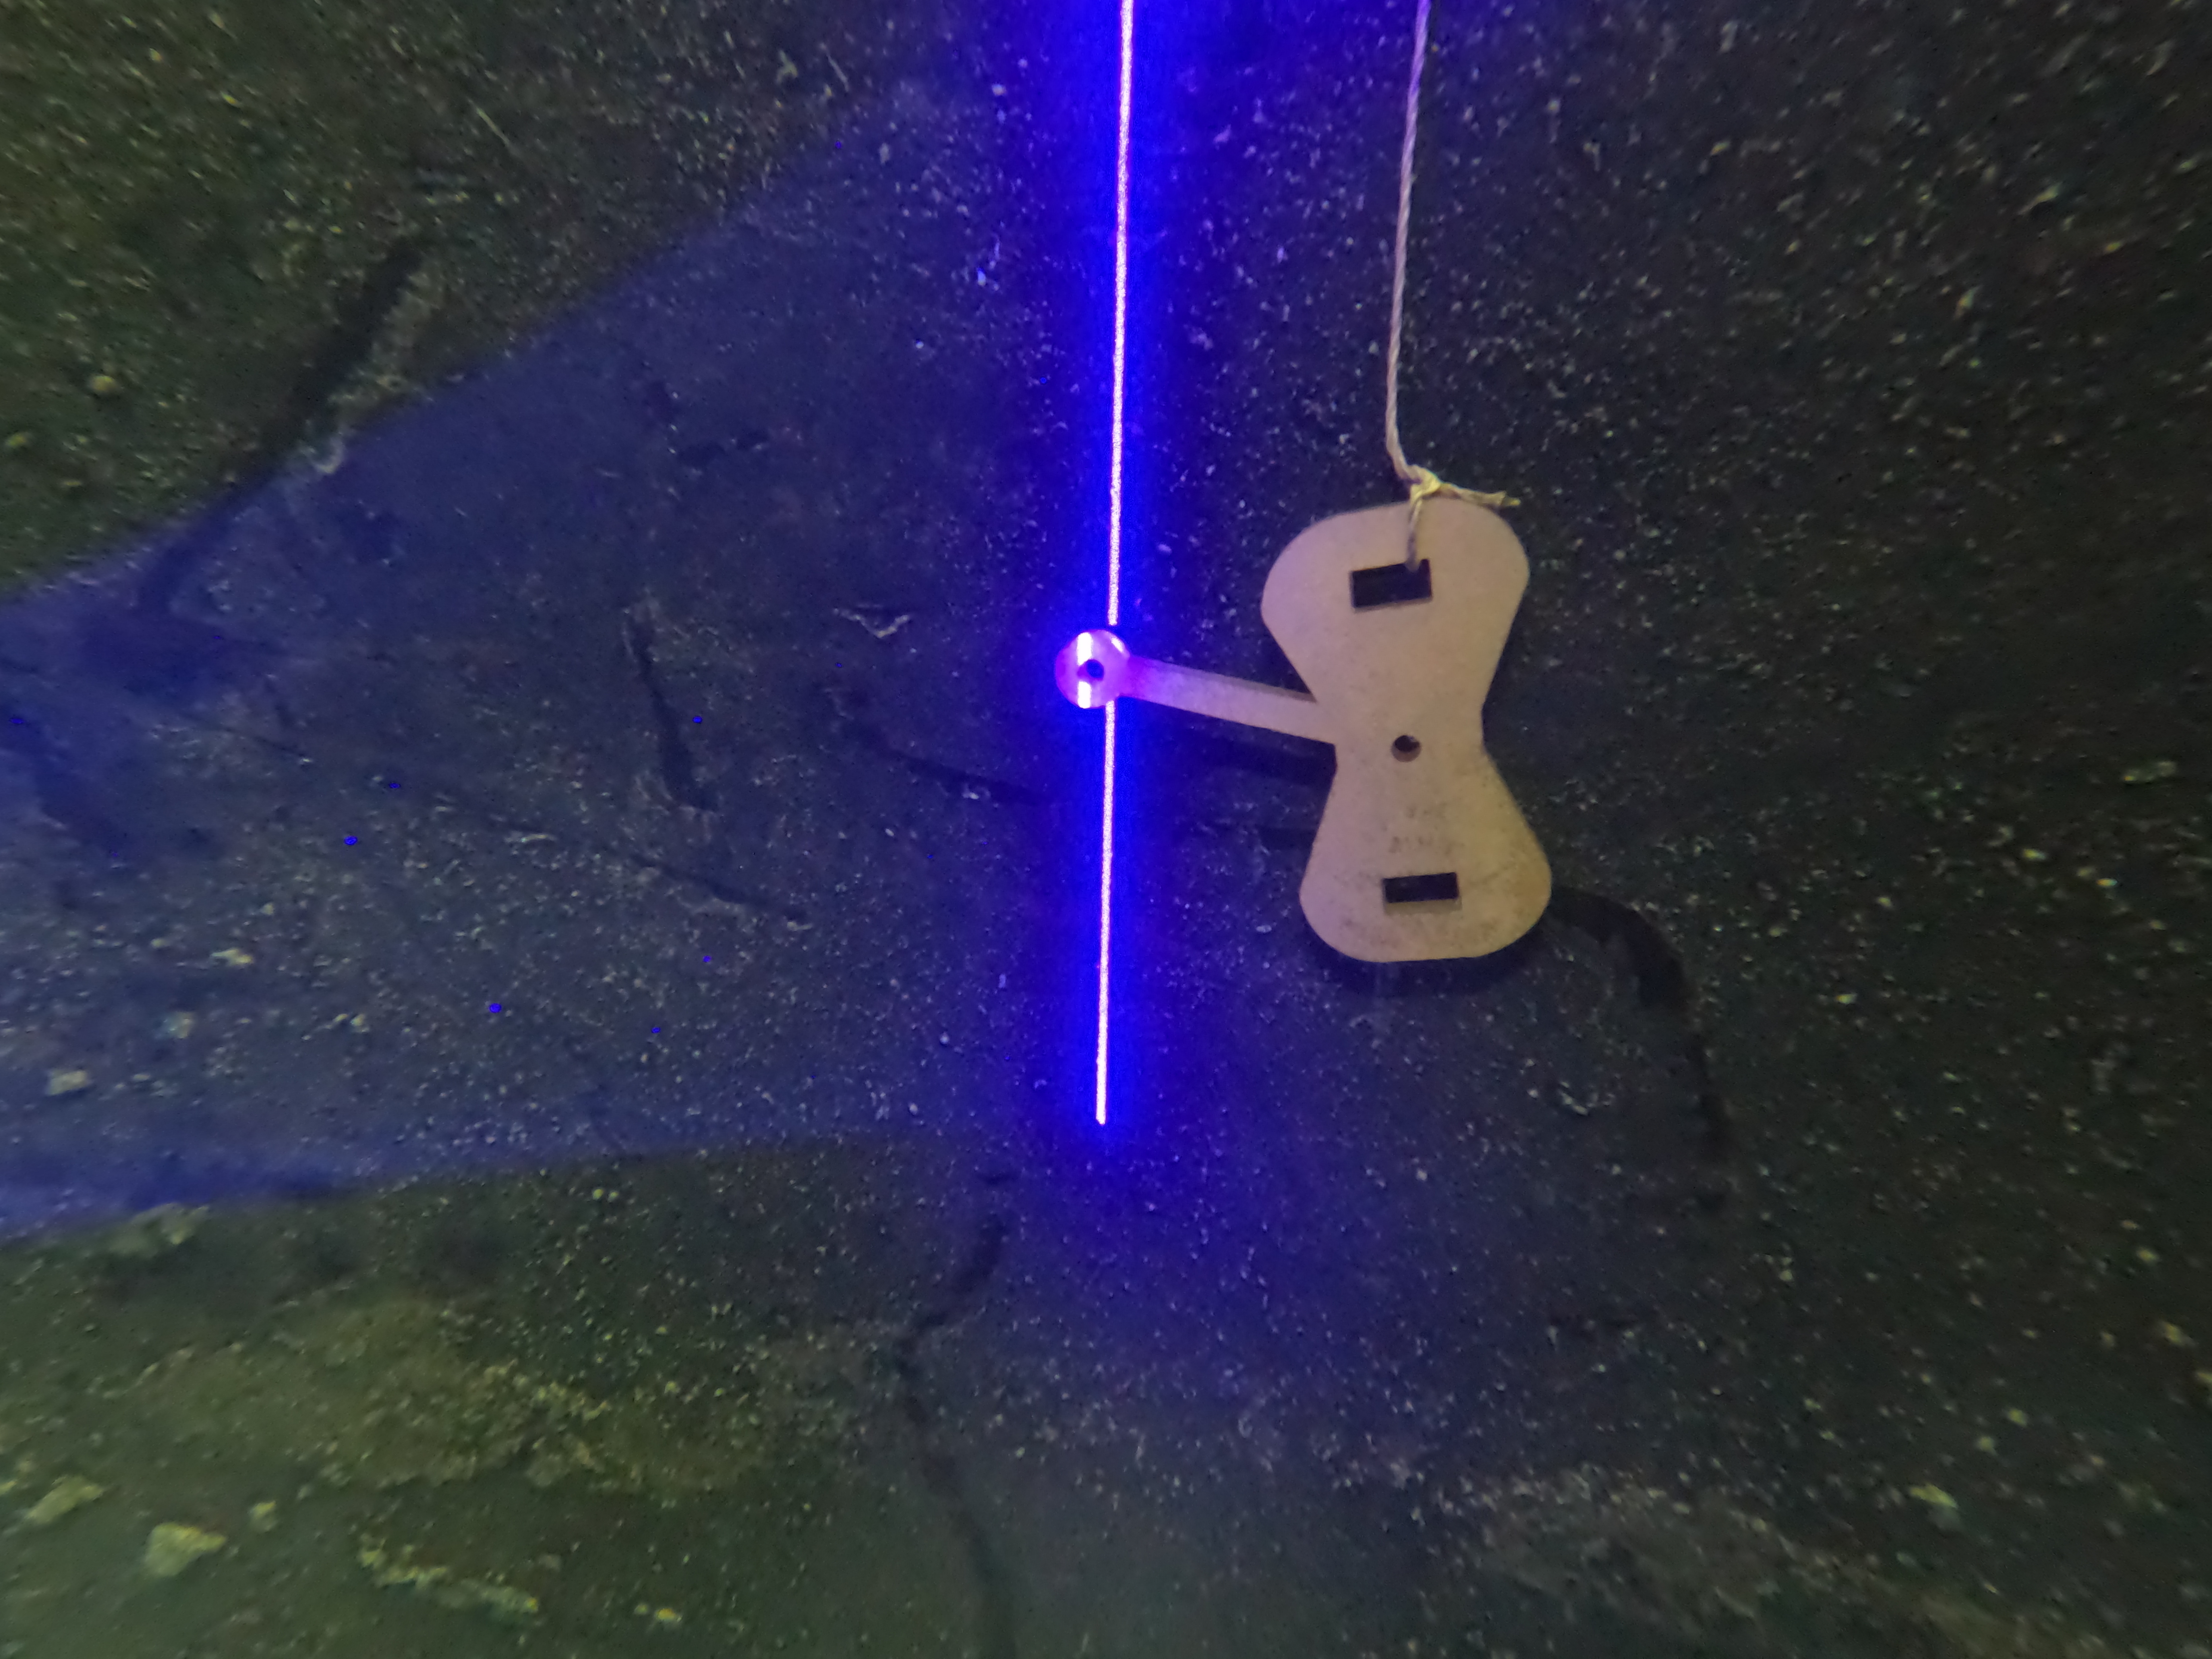

Supplement: Supplementary file 3316 [file G0015757.pdf › Level_2_1/G0015757.pdf]

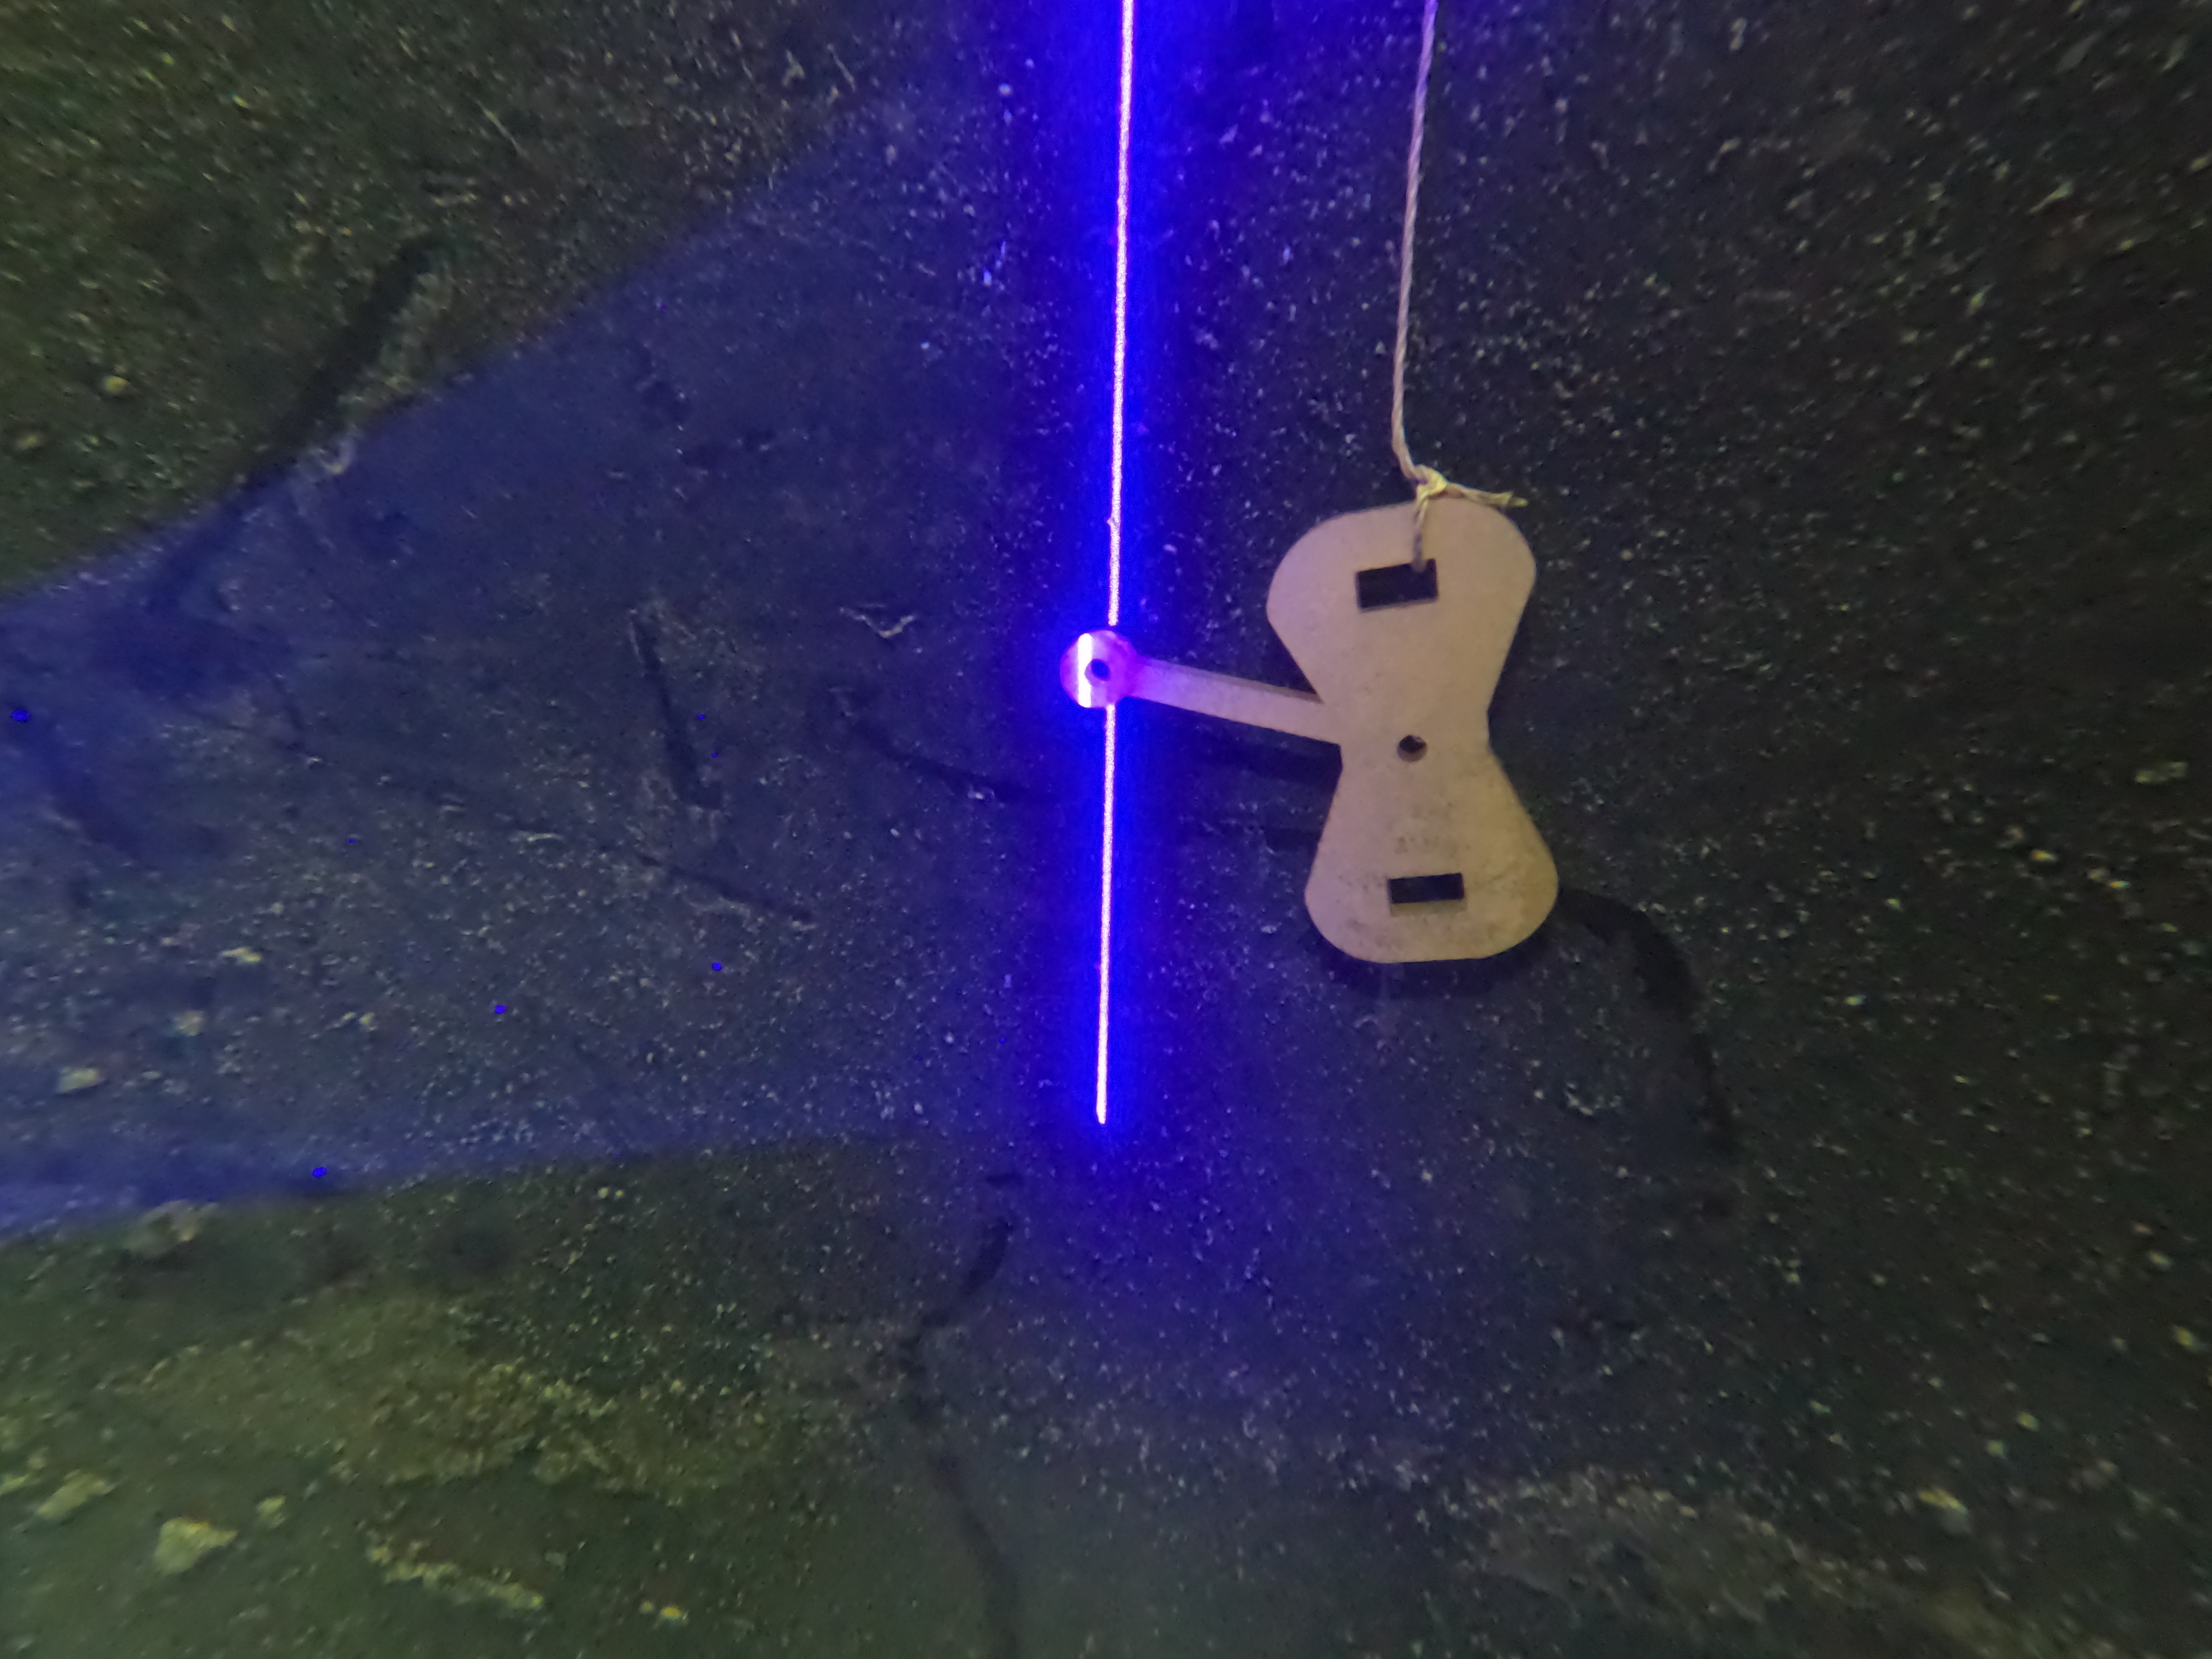

Supplement: Supplementary file 3317 [file G0015758.pdf › Level_2_1/G0015758.pdf]

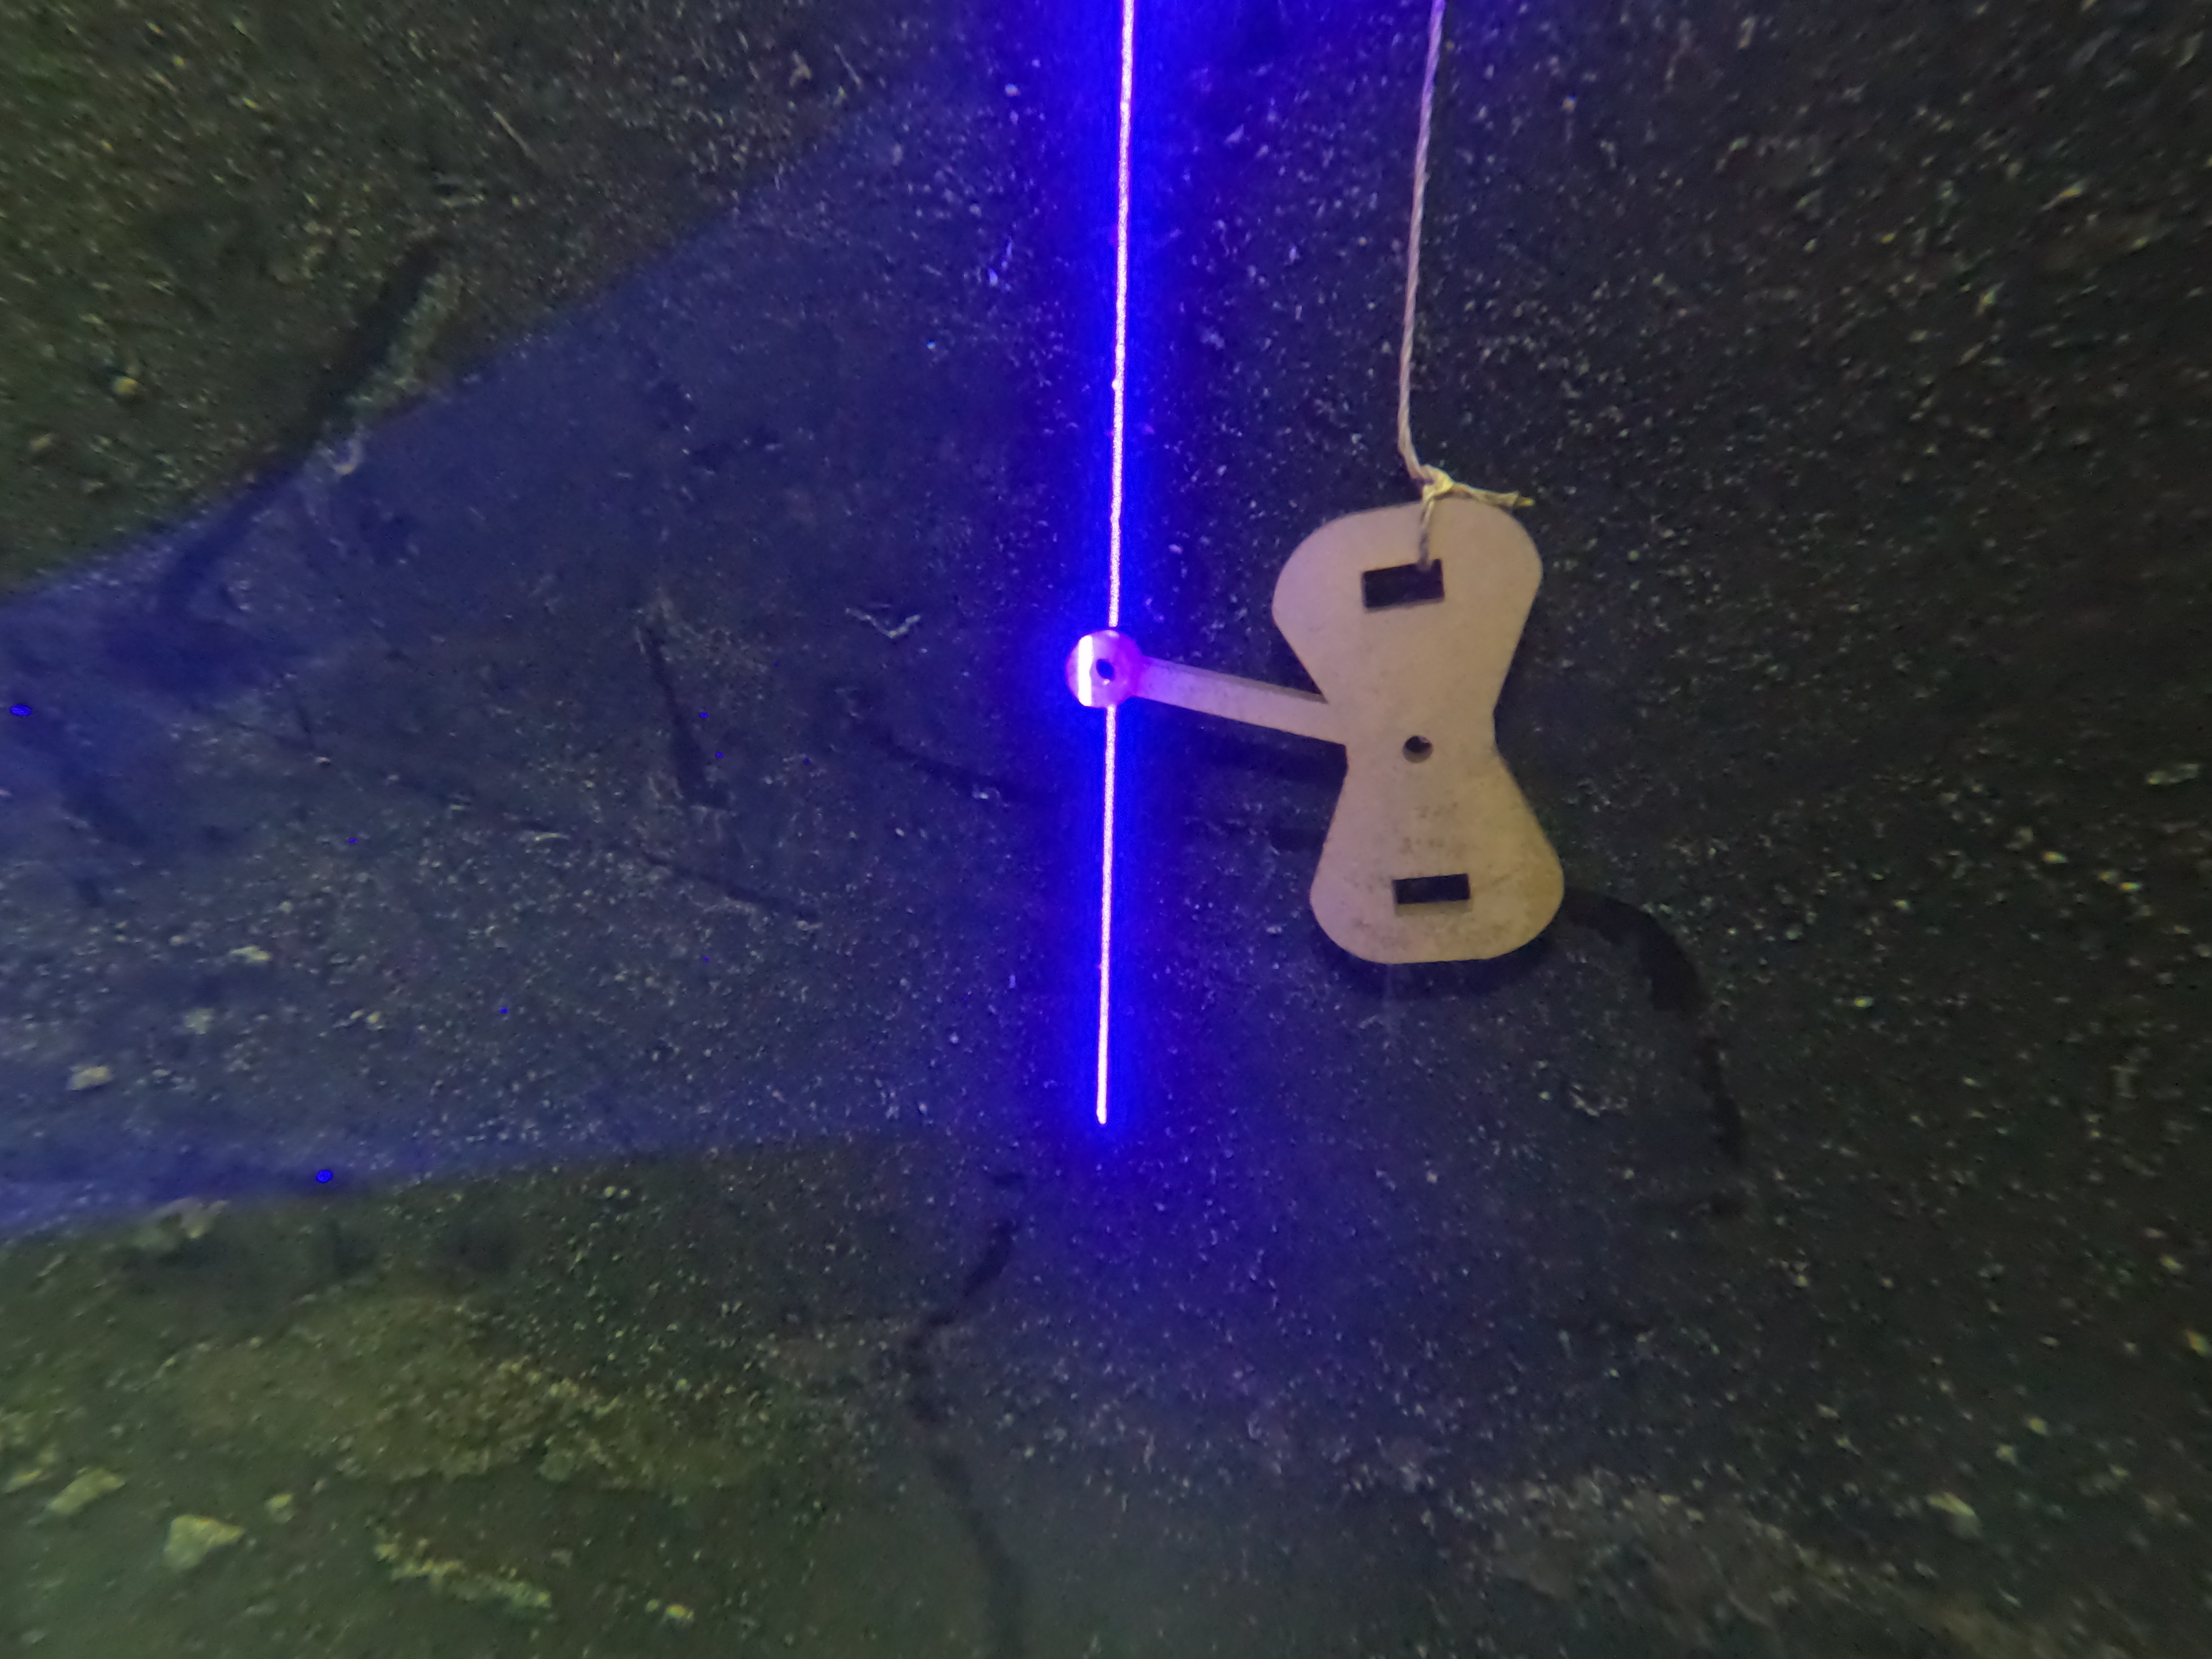

Supplement: Supplementary file 3318 [file G0015759.pdf › Level_2_1/G0015759.pdf]

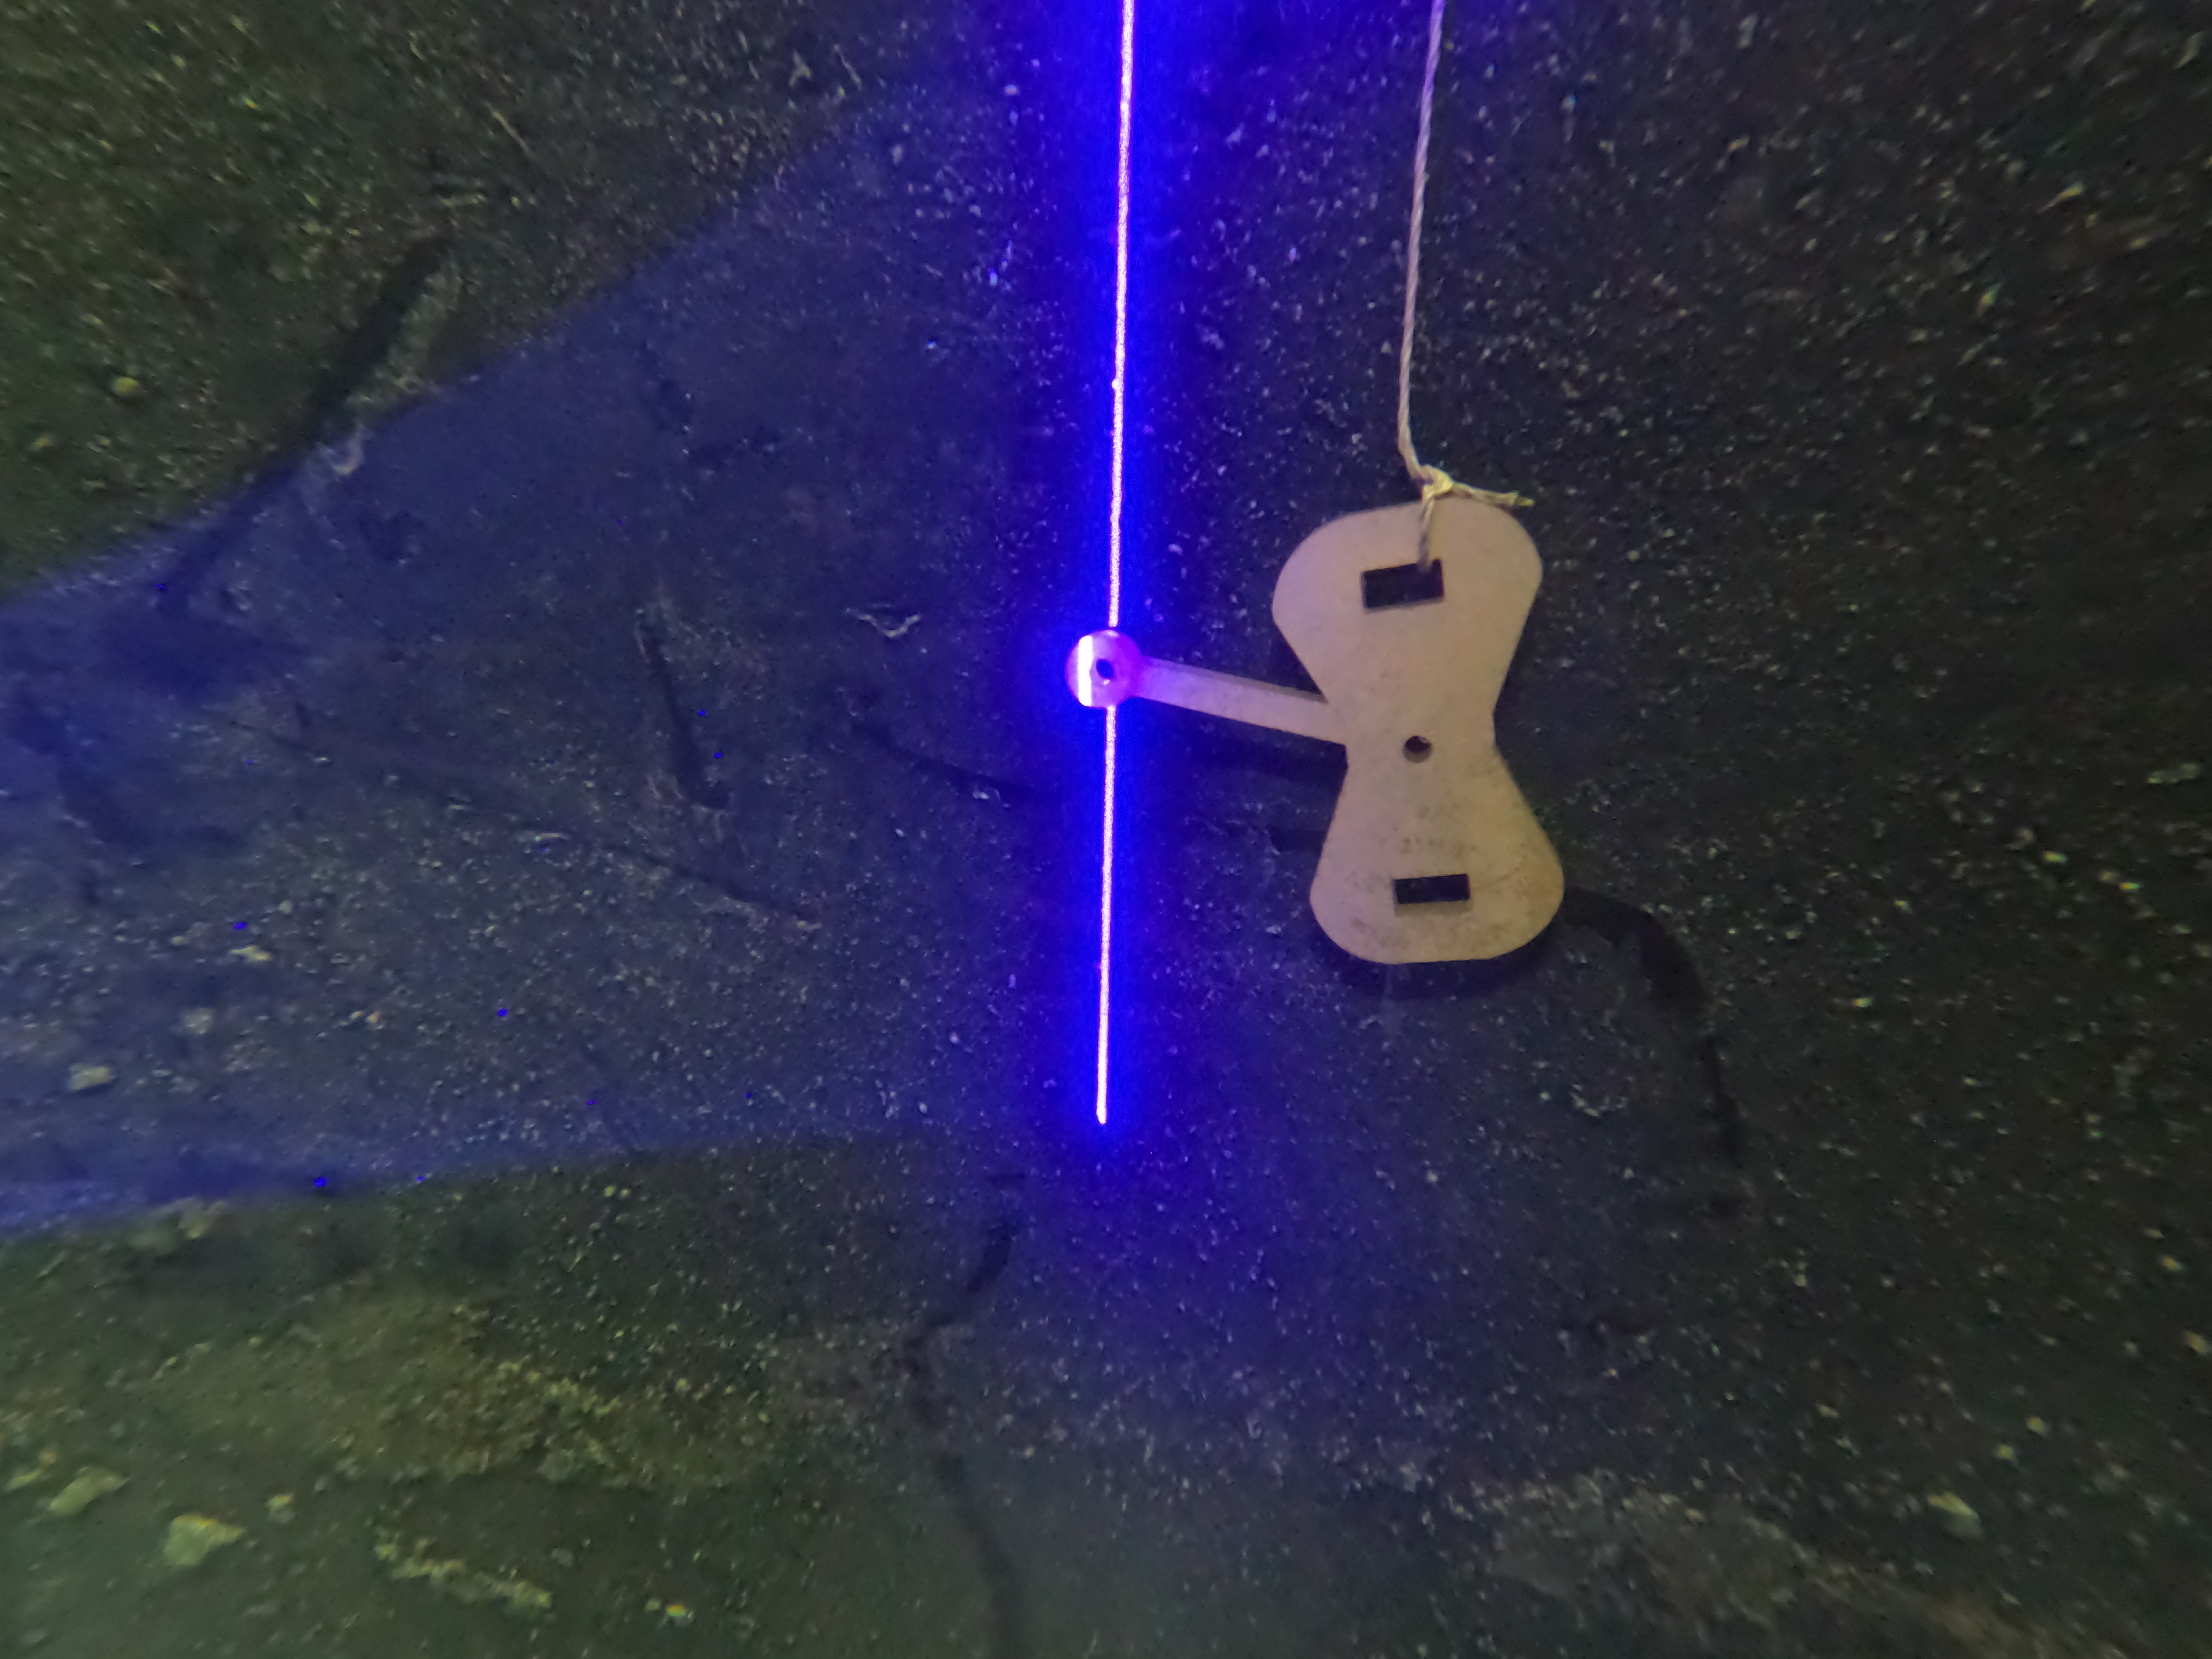

Supplement: Supplementary file 3319 [file G0015760.pdf › Level_2_1/G0015760.pdf]

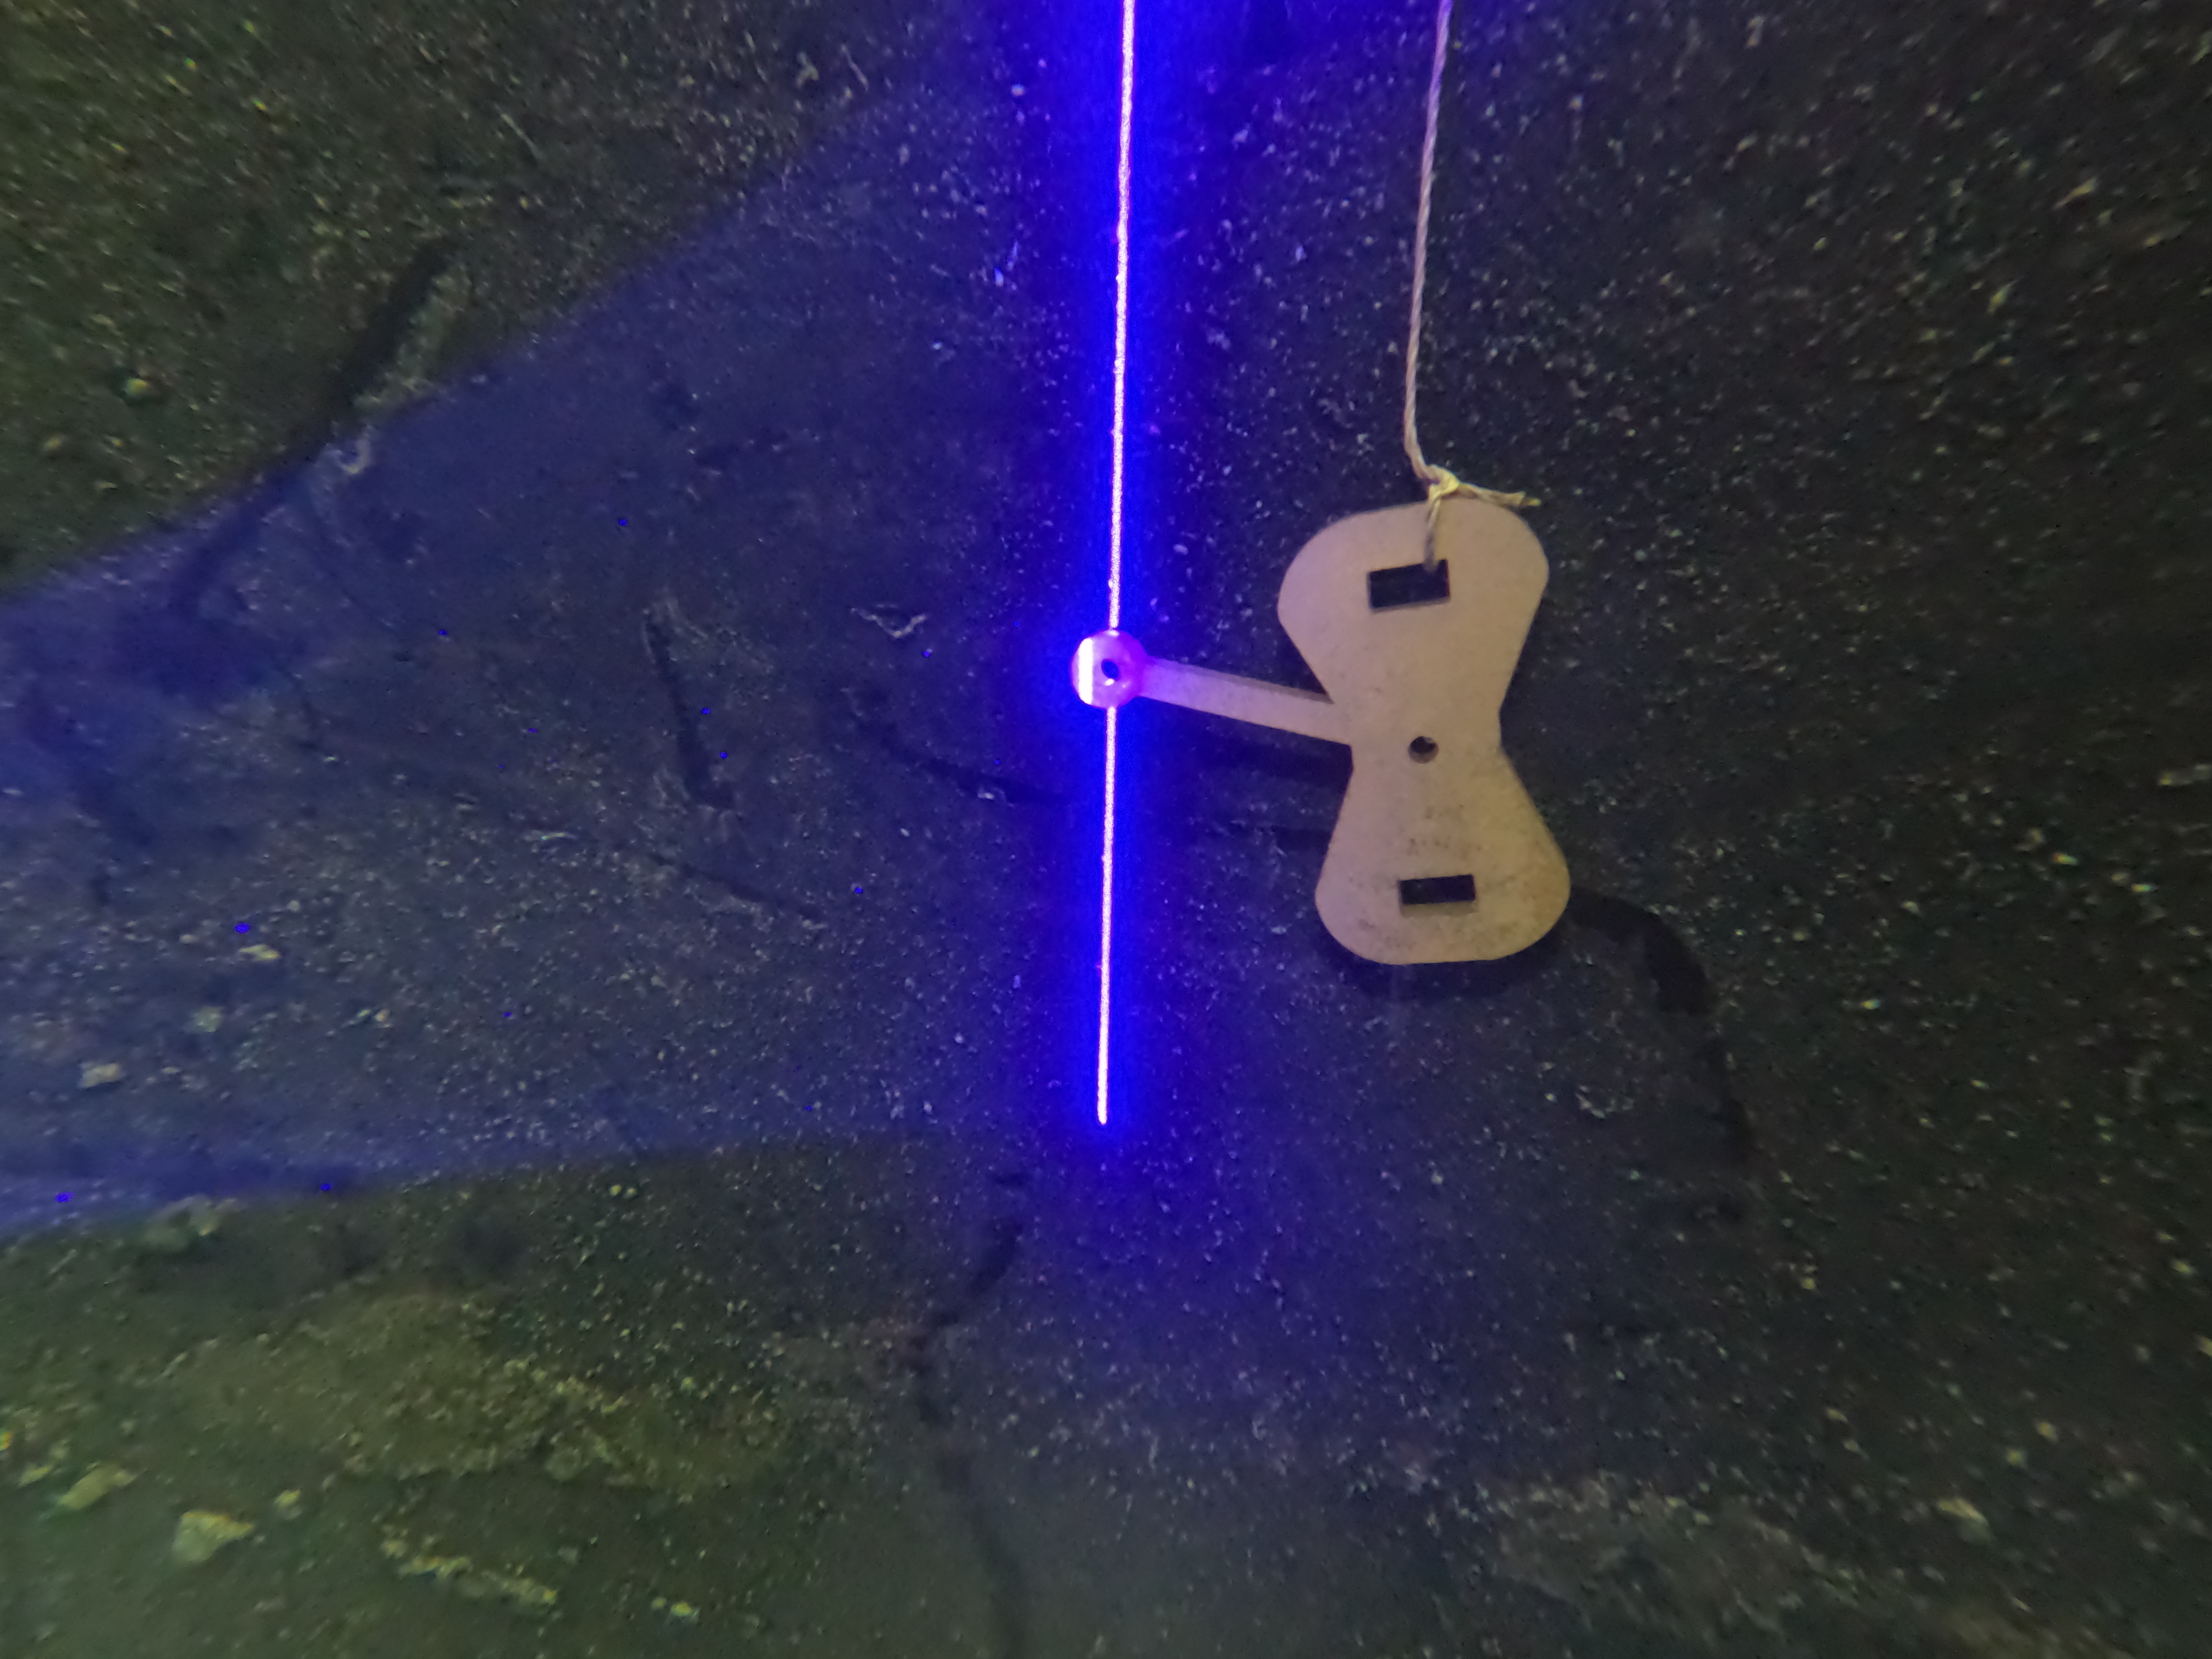

Supplement: Supplementary file 3320 [file G0015761.pdf › Level_2_1/G0015761.pdf]

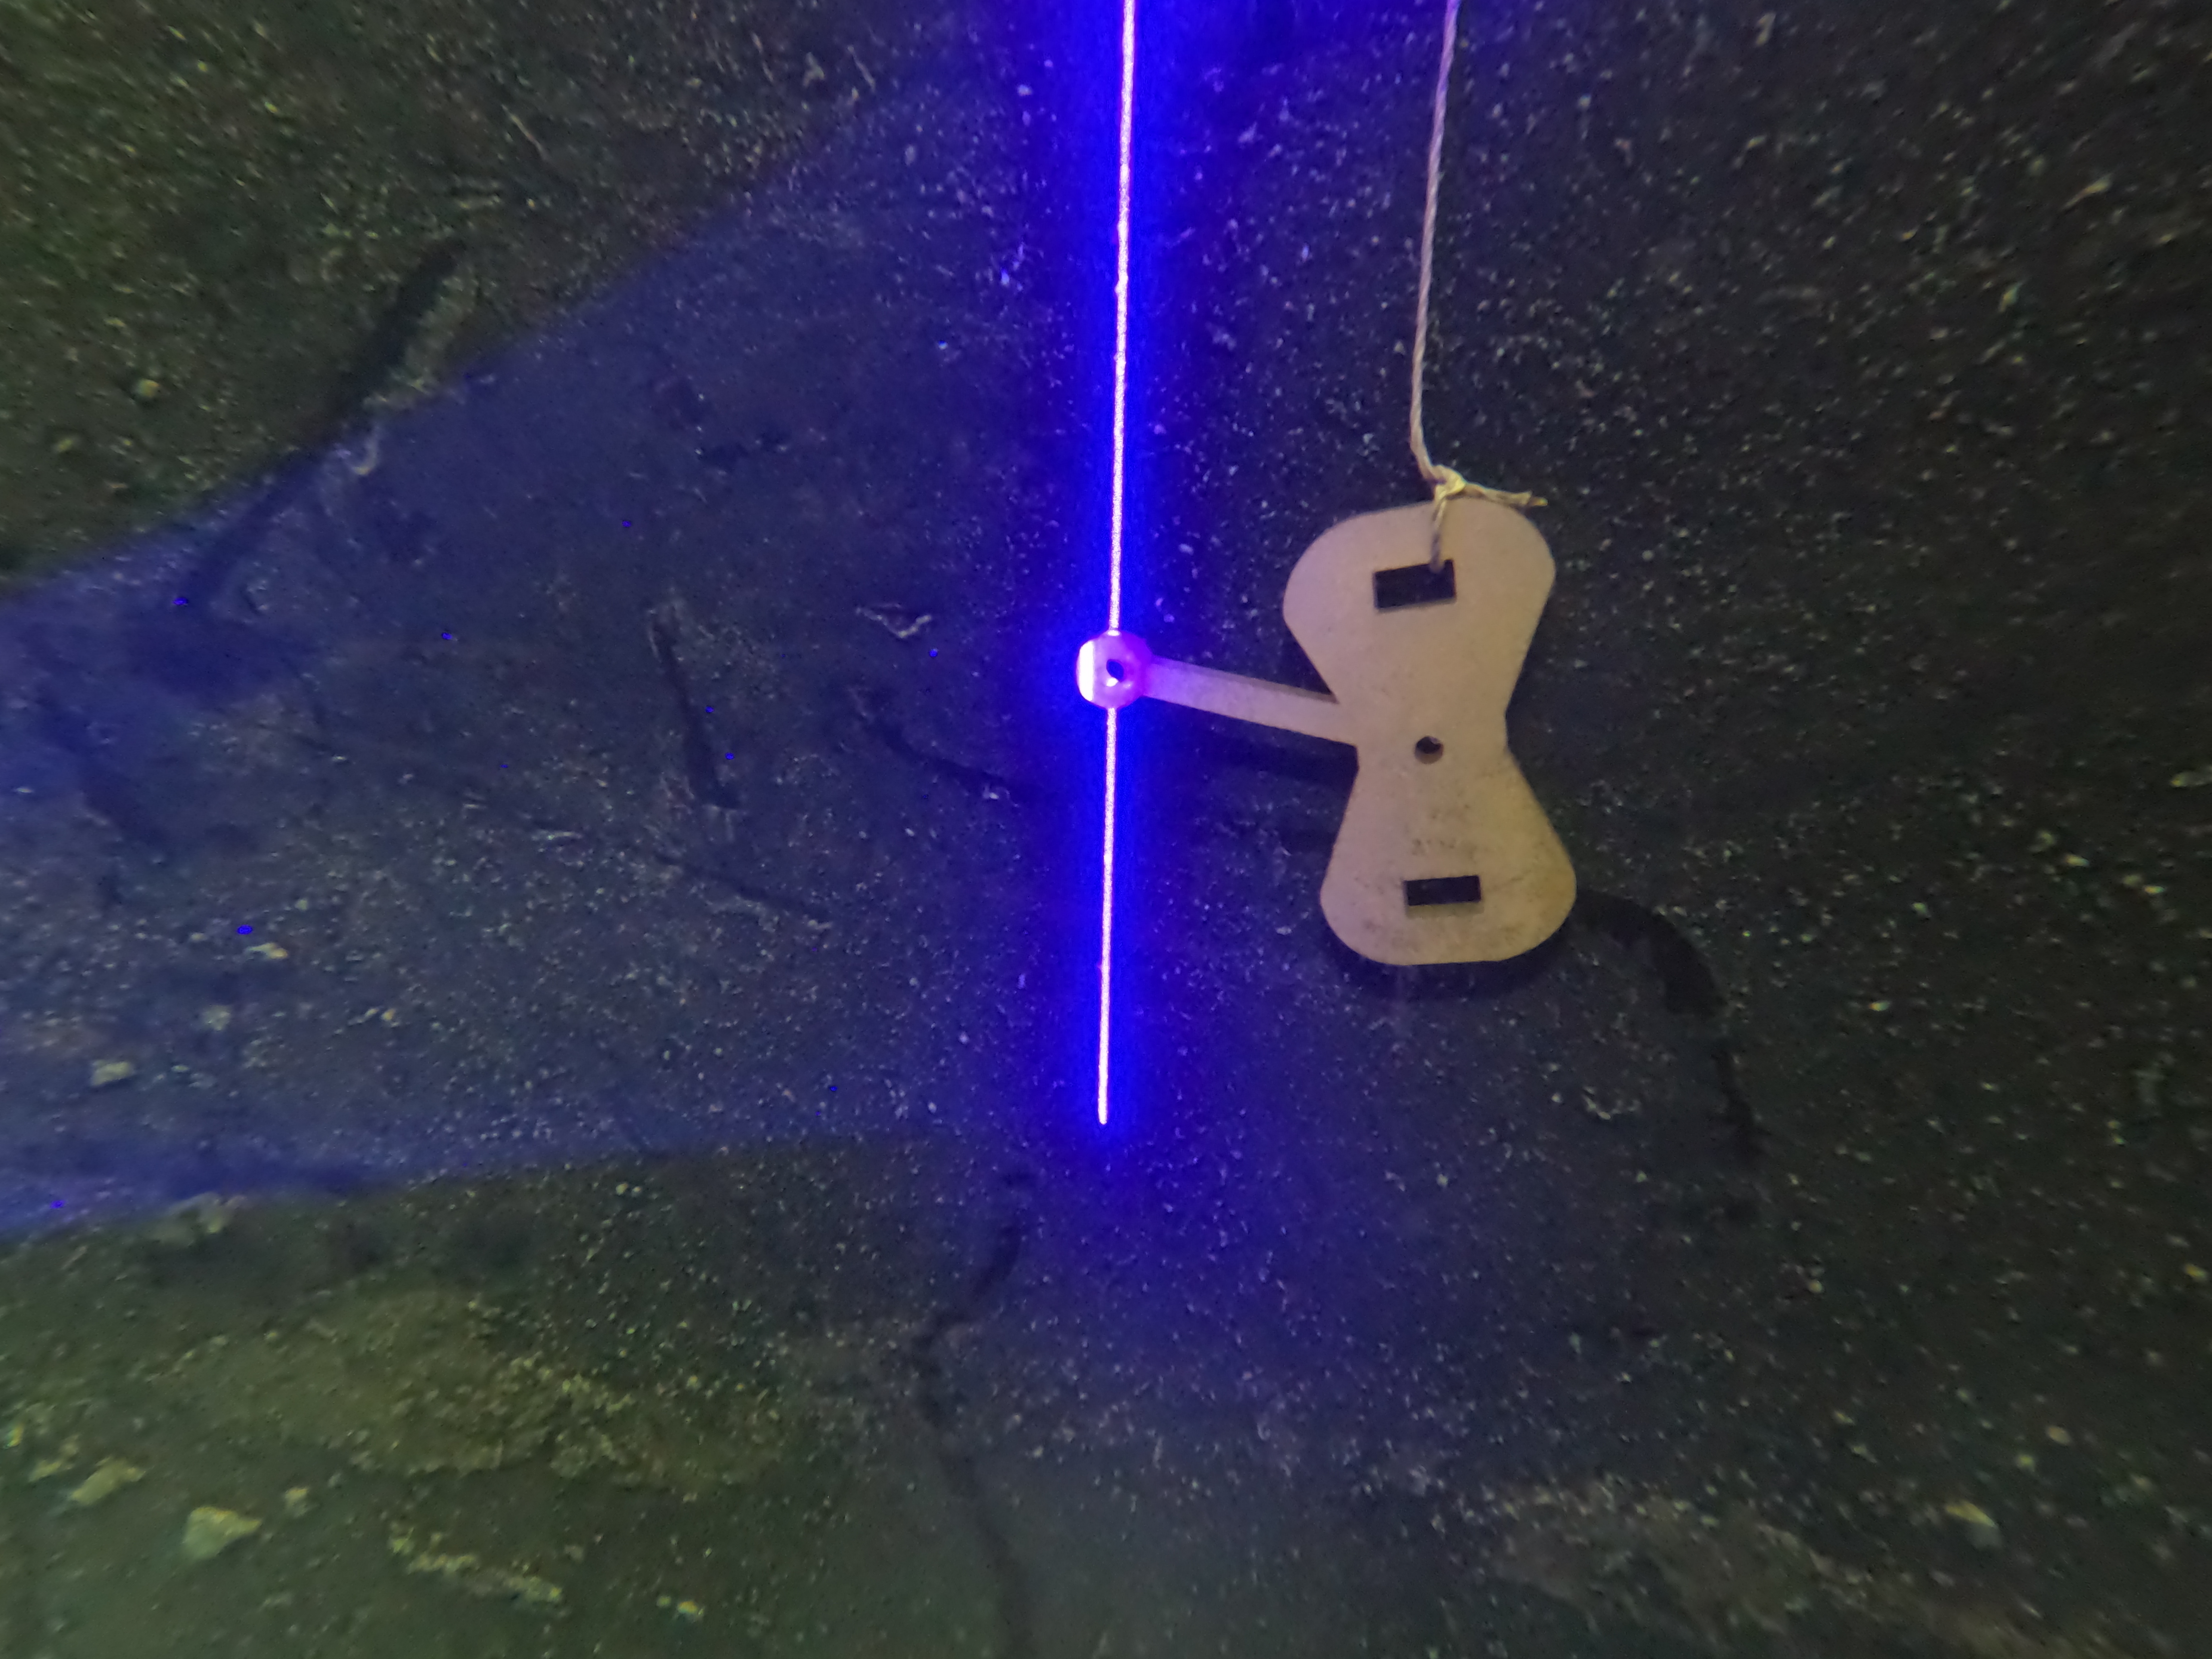

Supplement: Supplementary file 3321 [file G0015762.pdf › Level_2_1/G0015762.pdf]

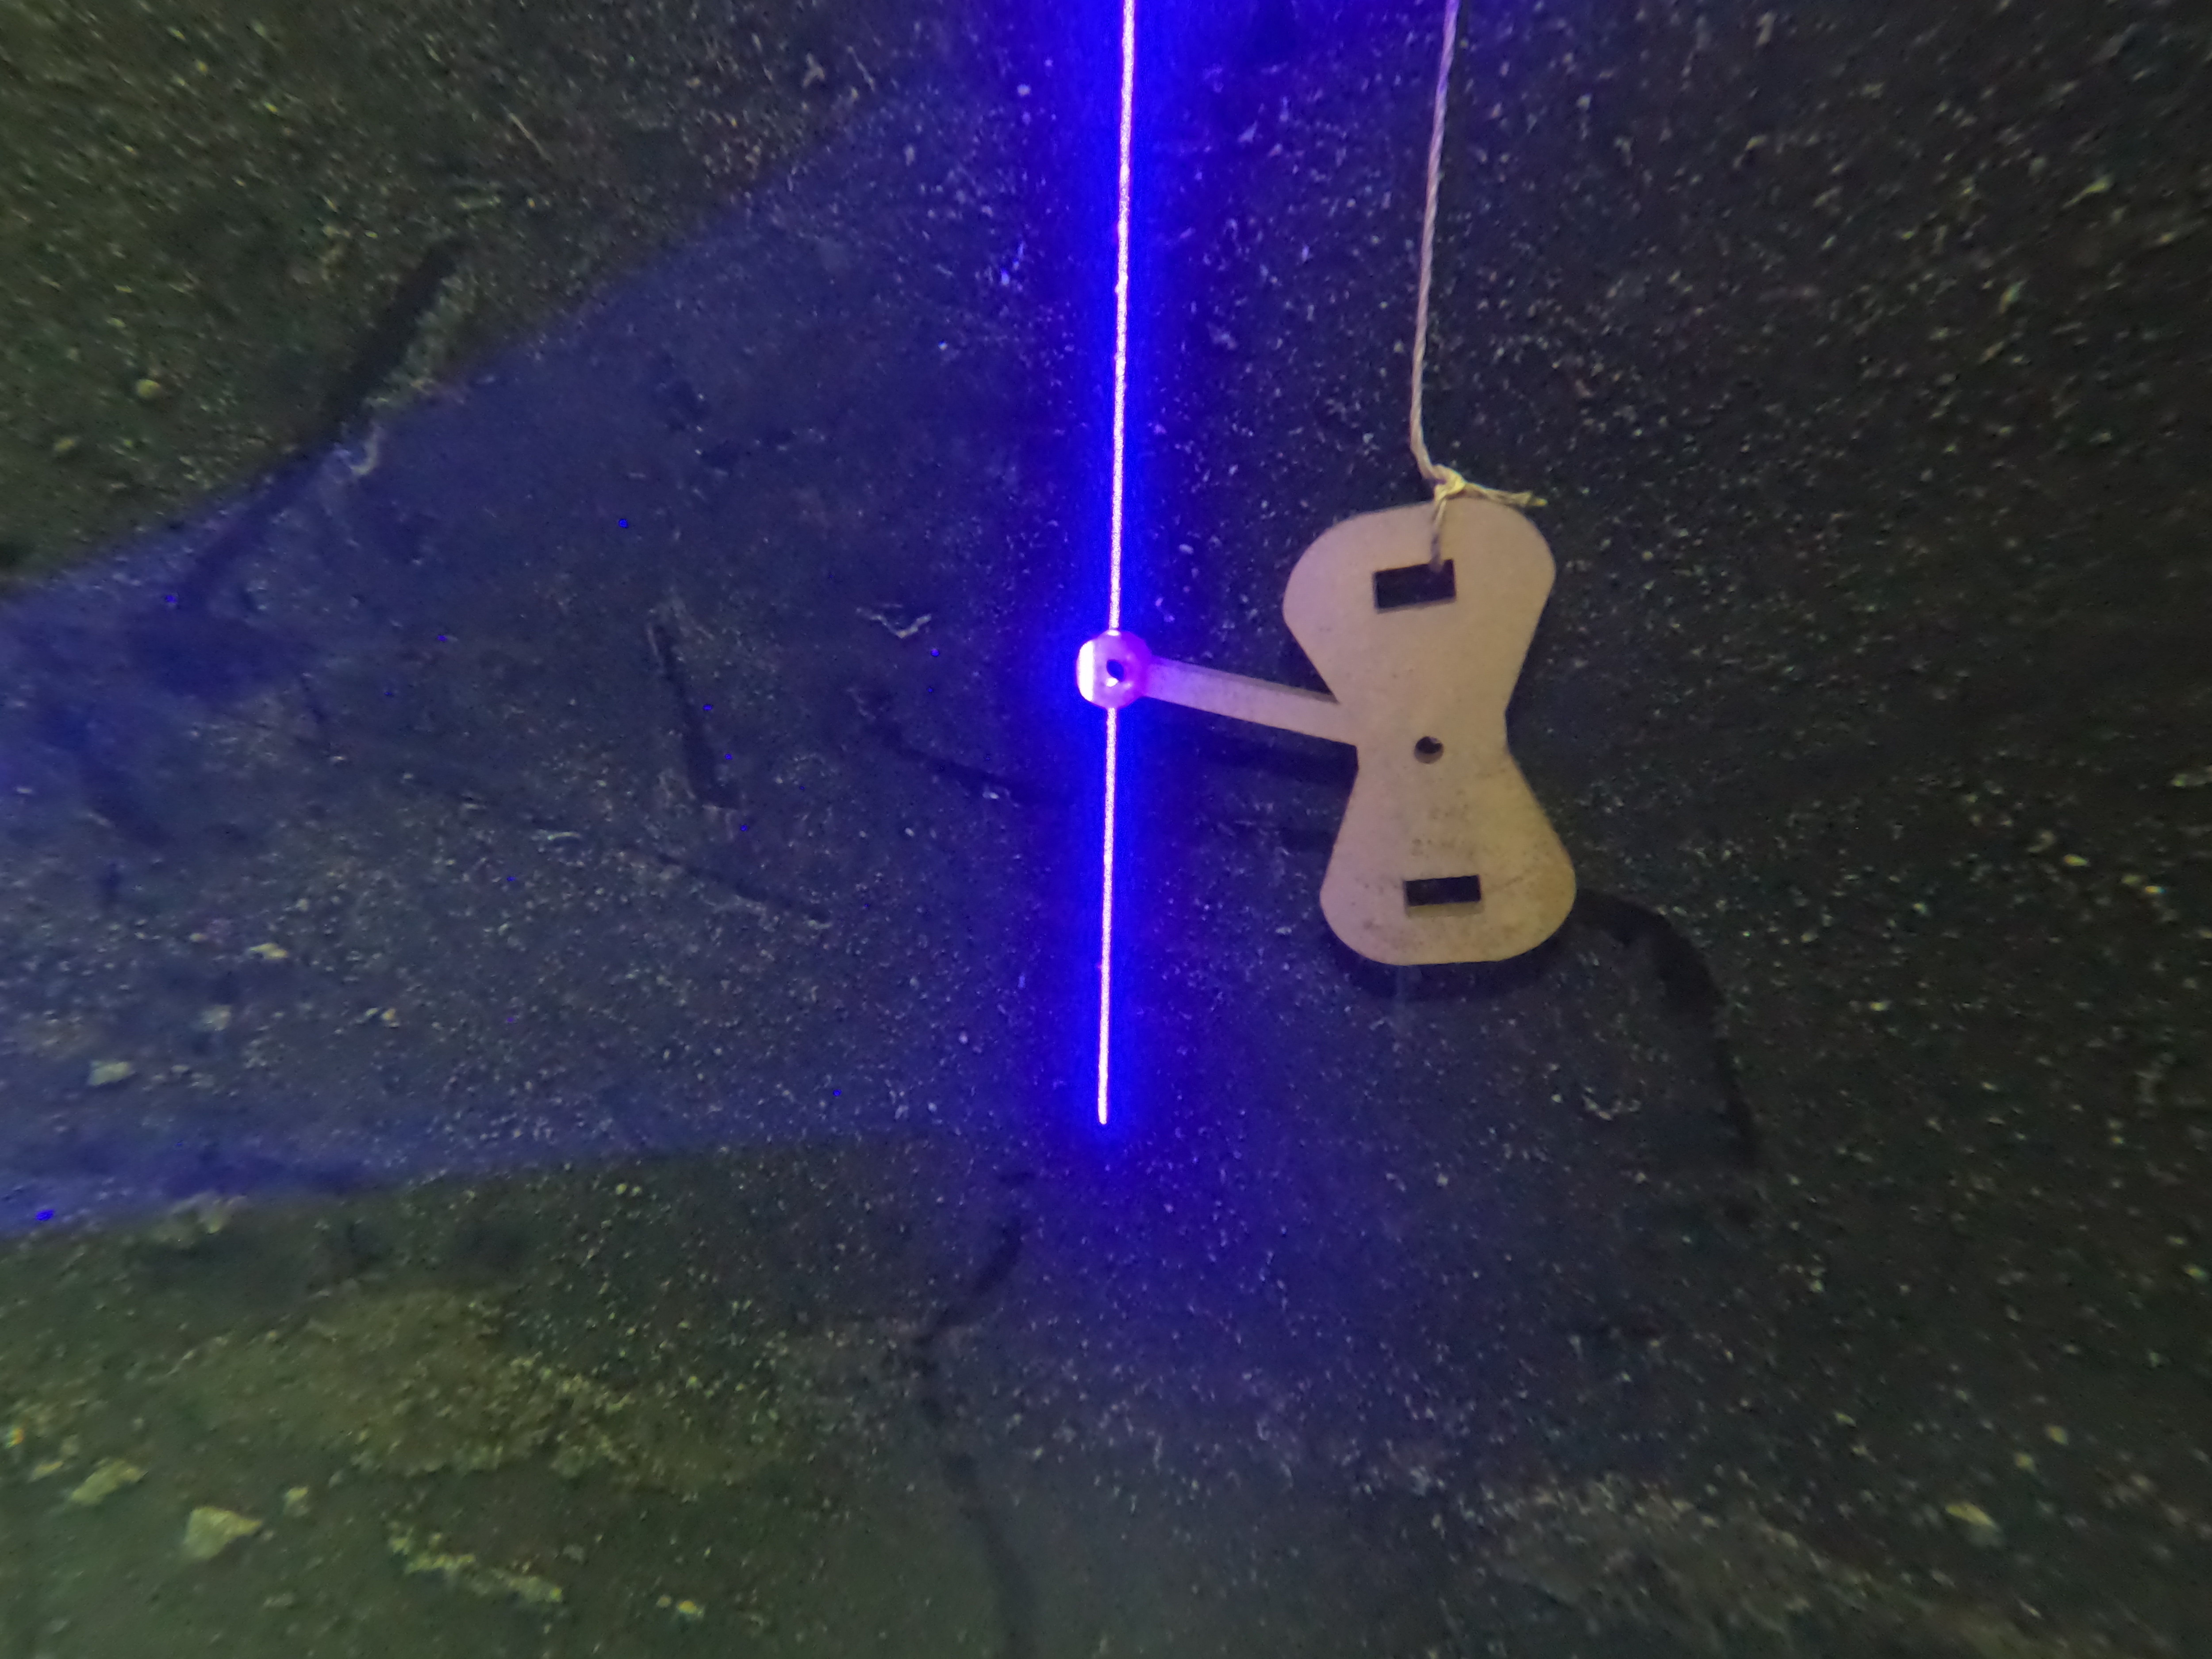

Supplement: Supplementary file 3322 [file G0015763.pdf › Level_2_1/G0015763.pdf]

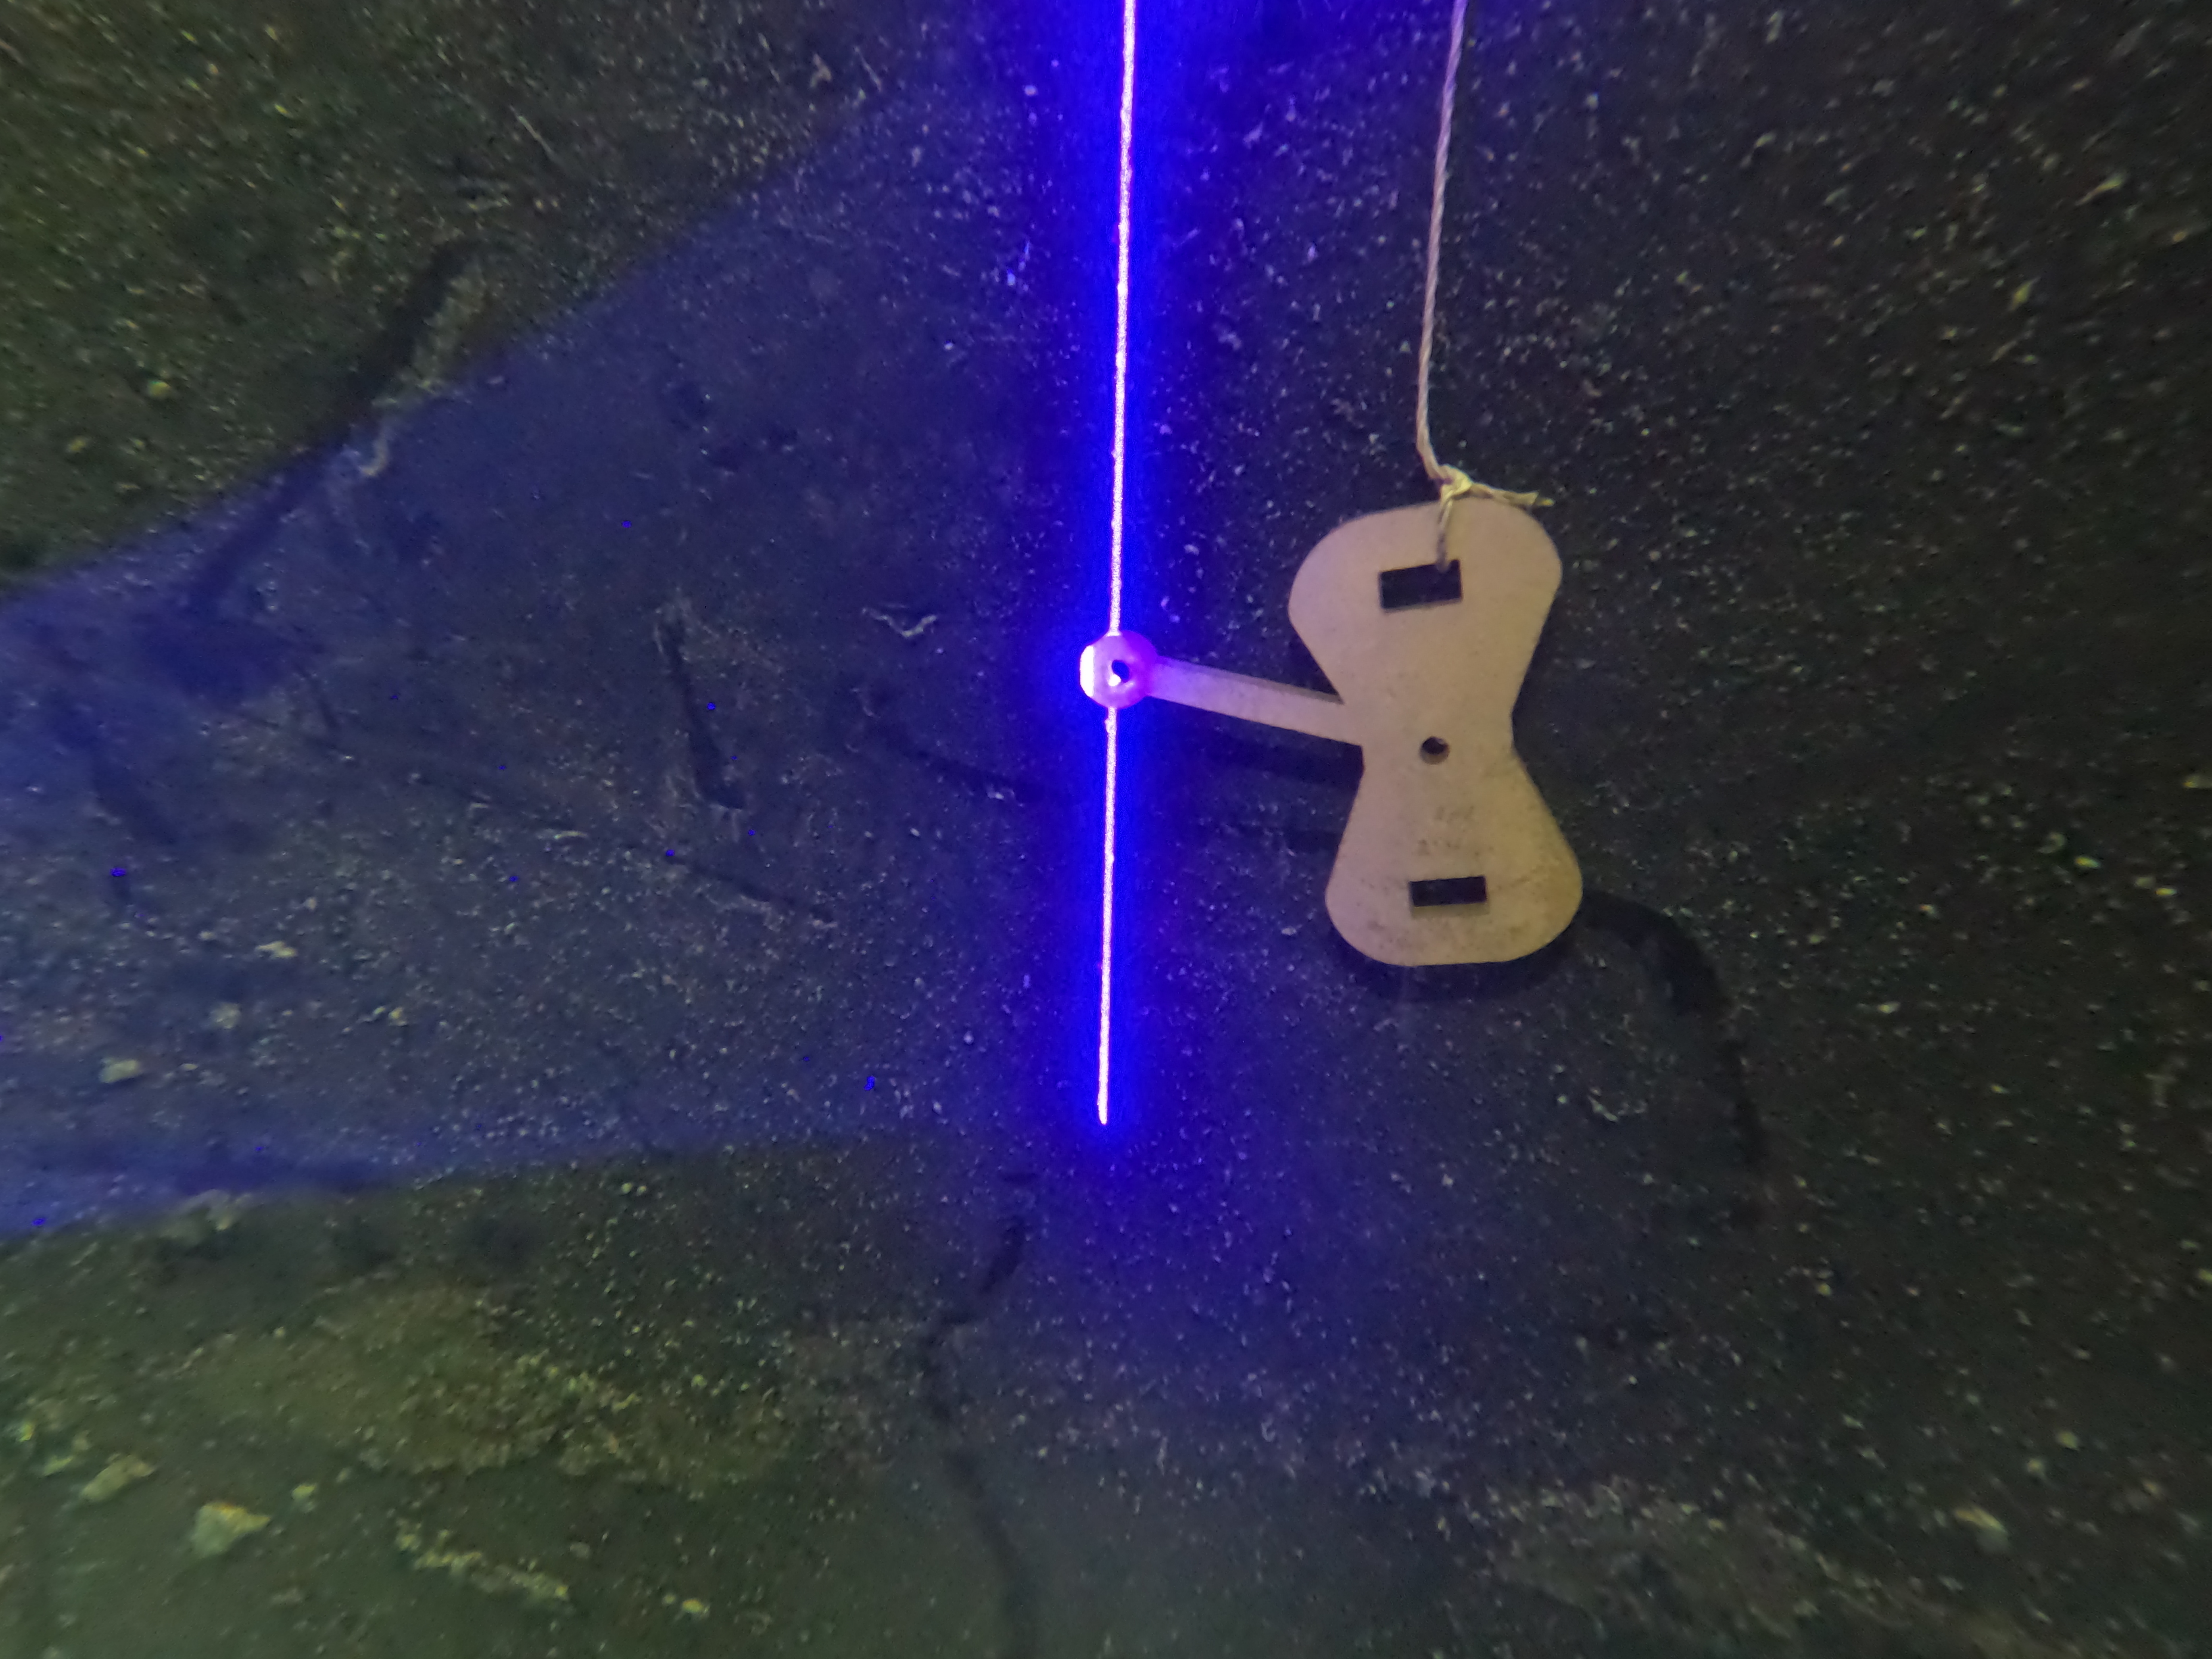

Supplement: Supplementary file 3323 [file G0015764.pdf › Level_2_1/G0015764.pdf]

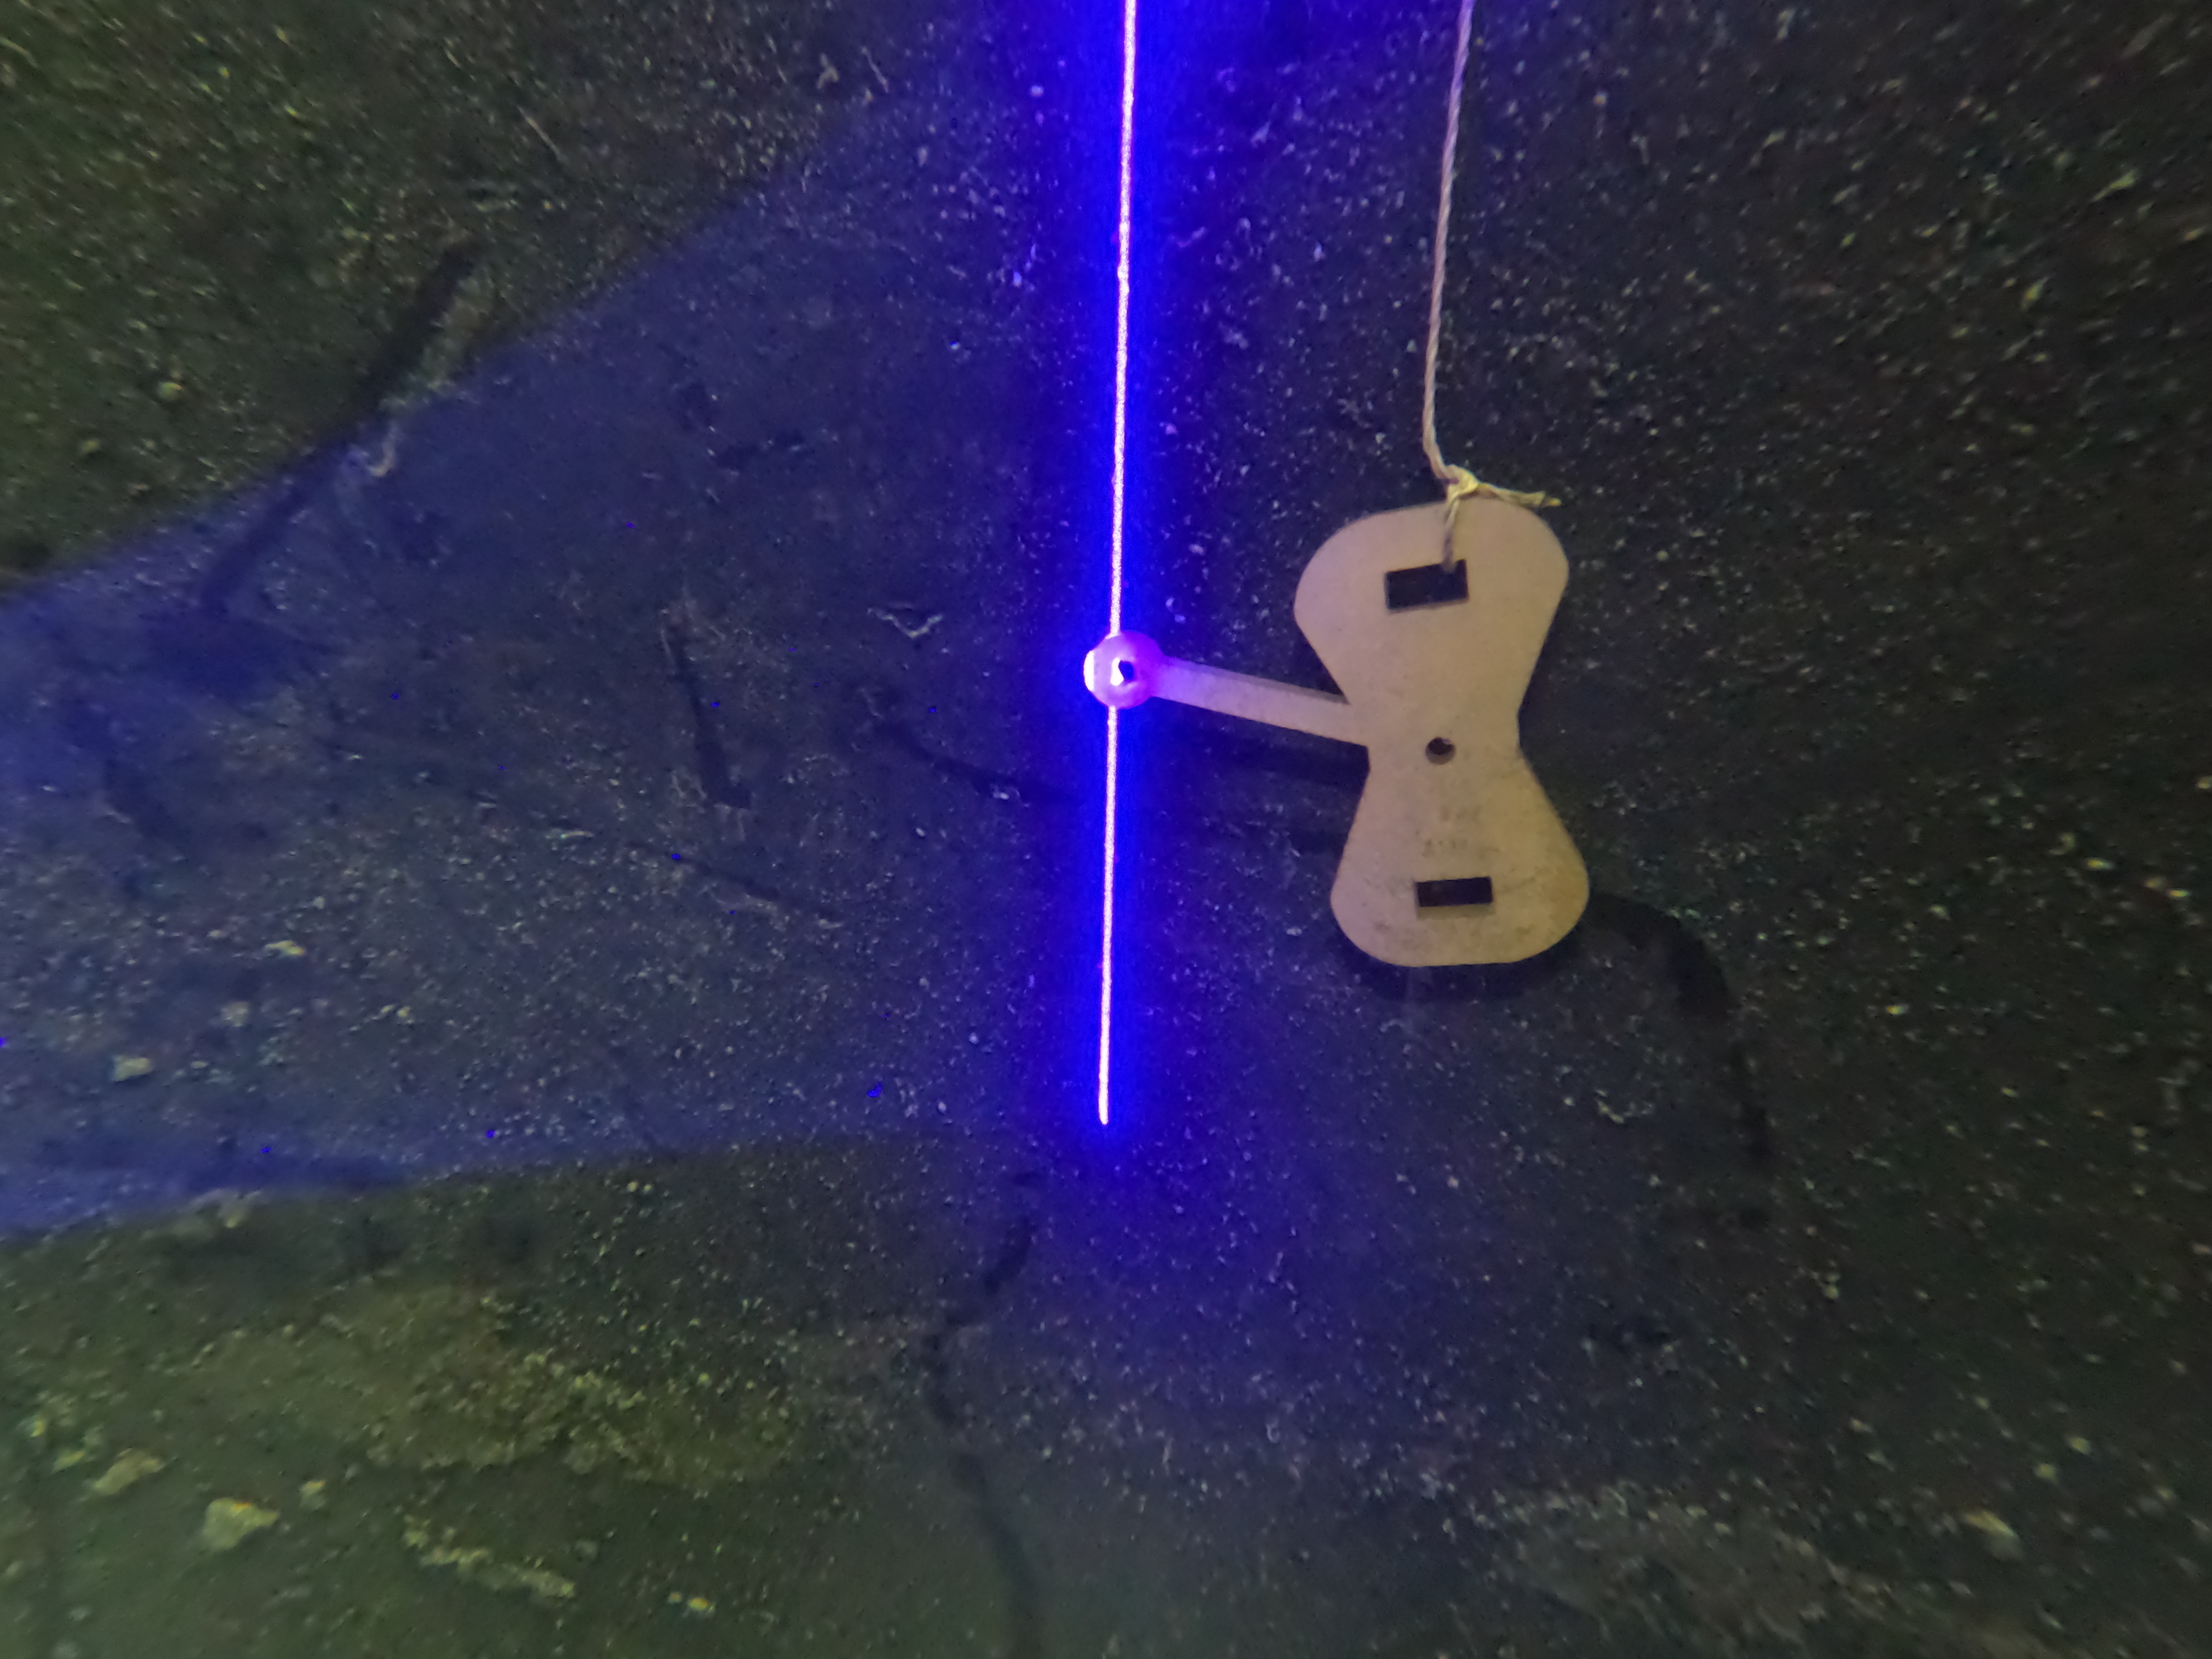

Supplement: Supplementary file 3324 [file G0015765.pdf › Level_2_1/G0015765.pdf]

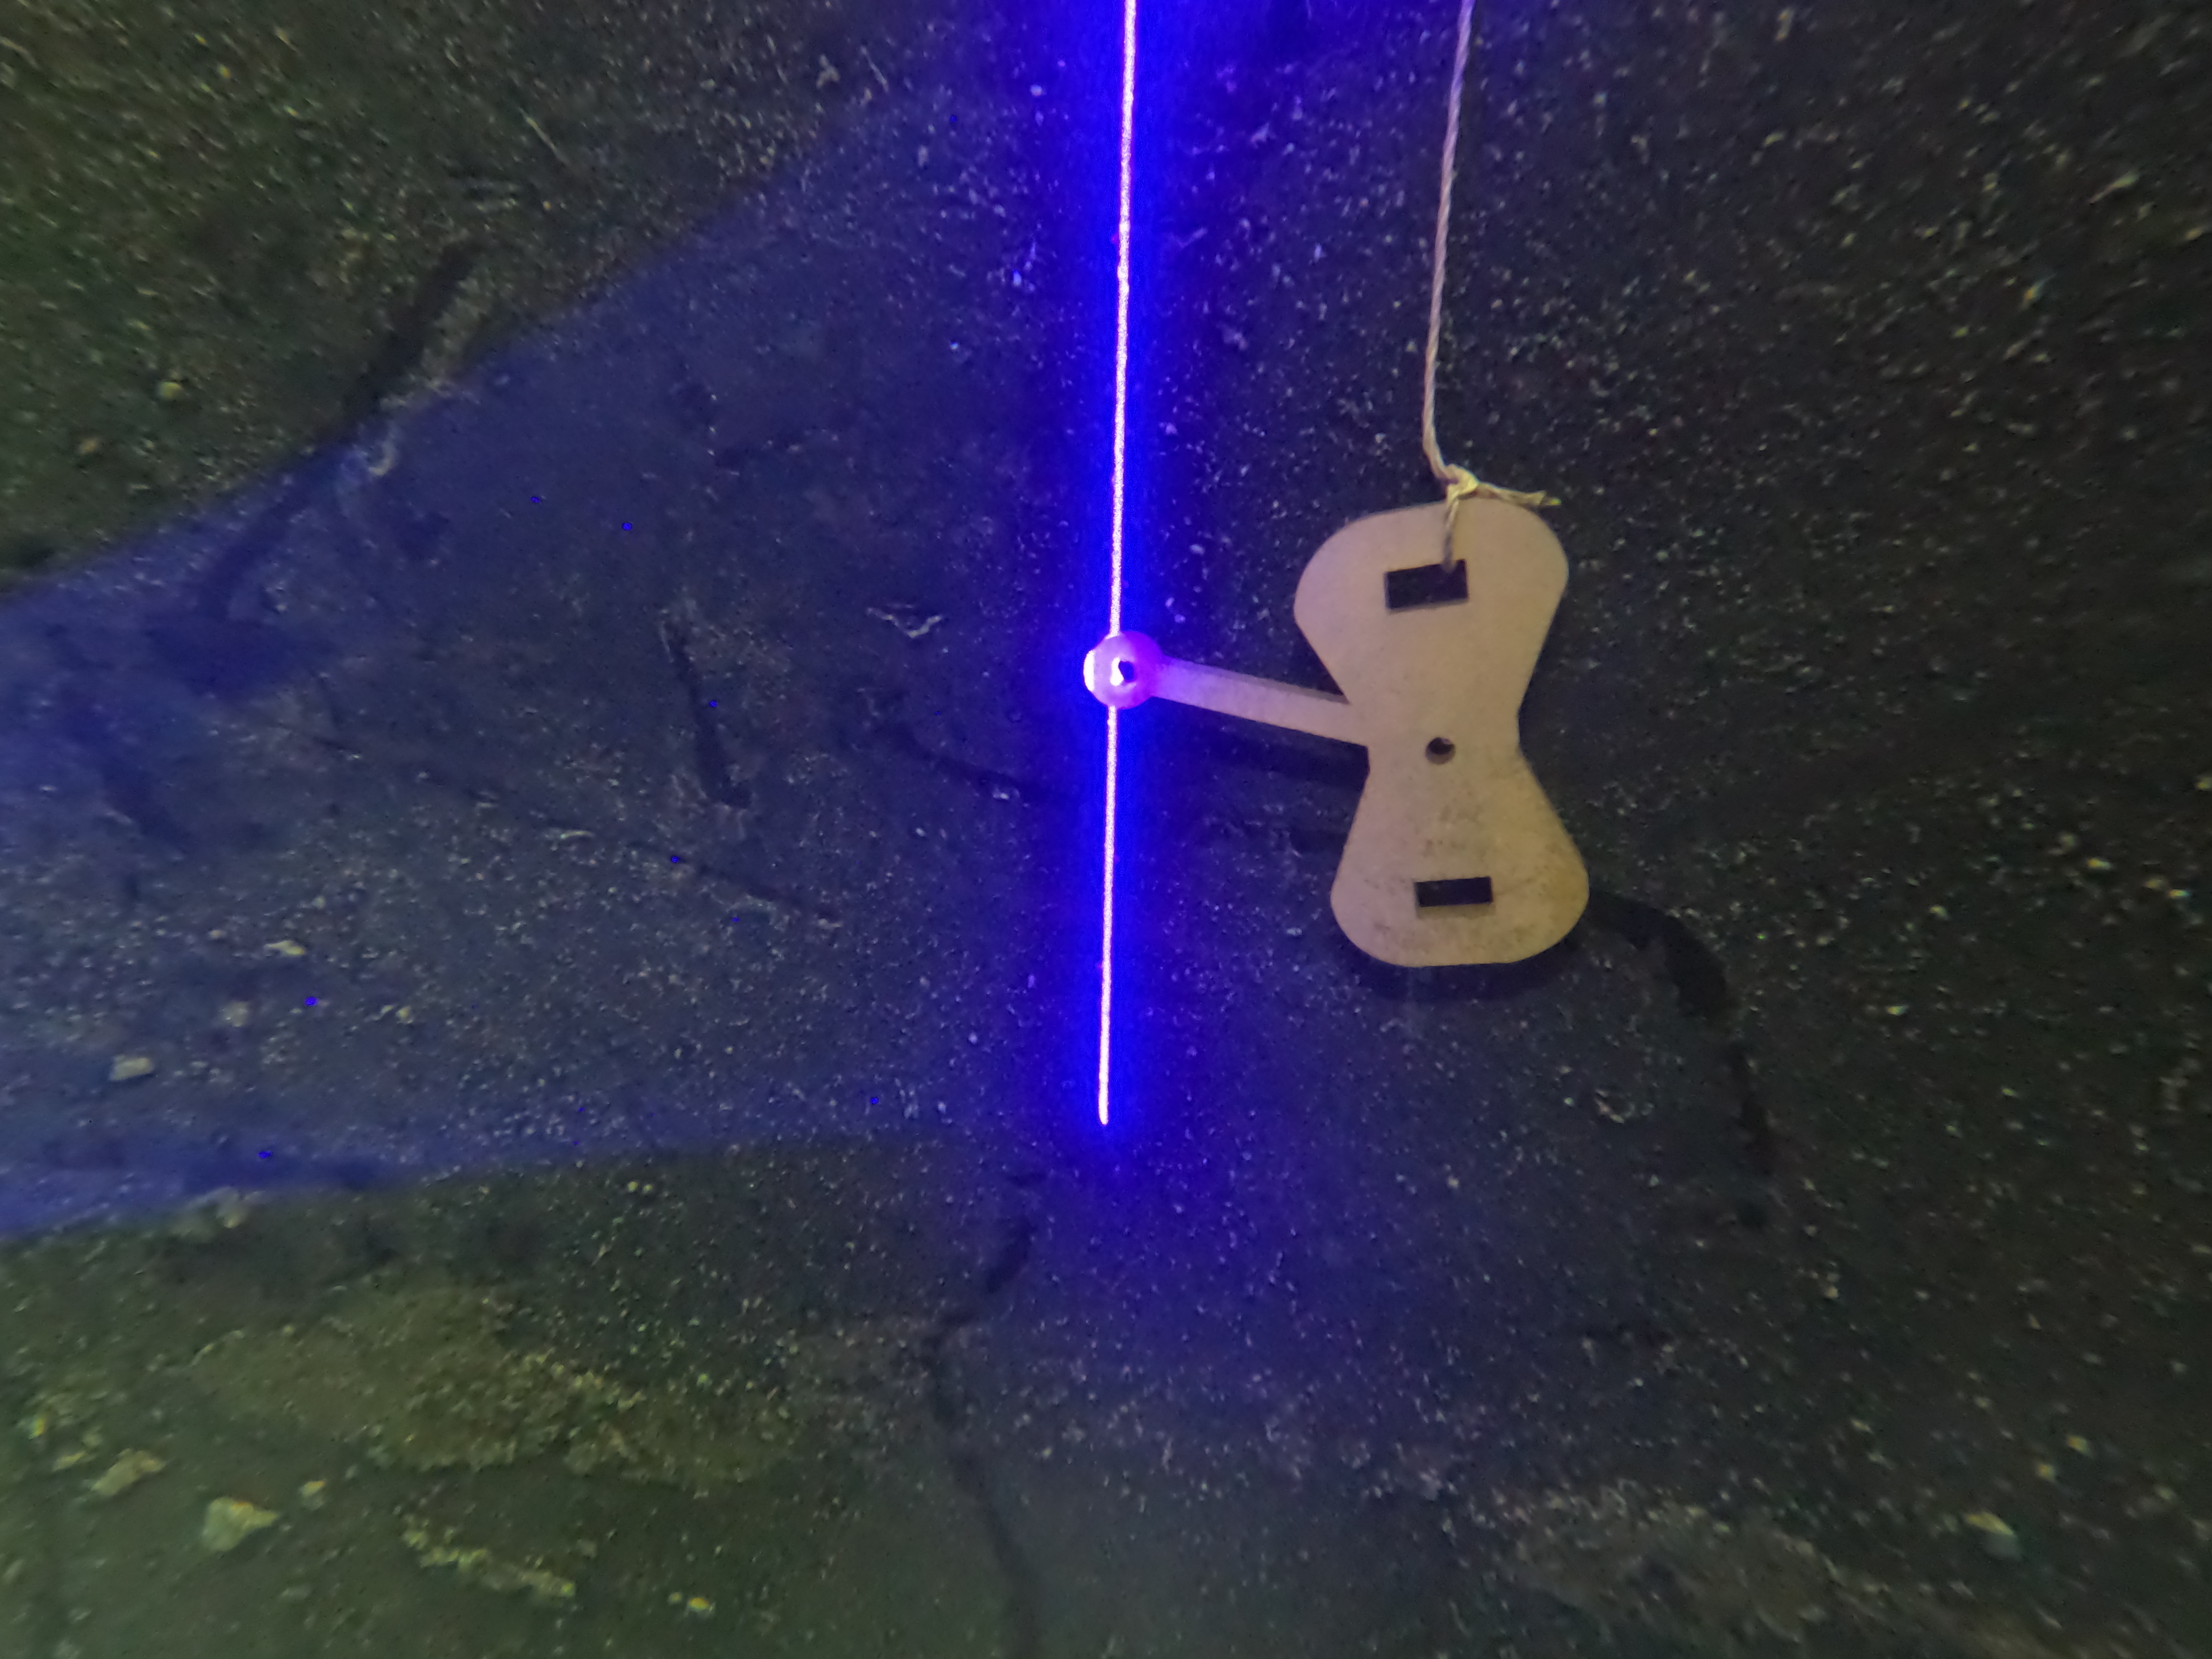

Supplement: Supplementary file 3325 [file G0015766.pdf › Level_2_1/G0015766.pdf]

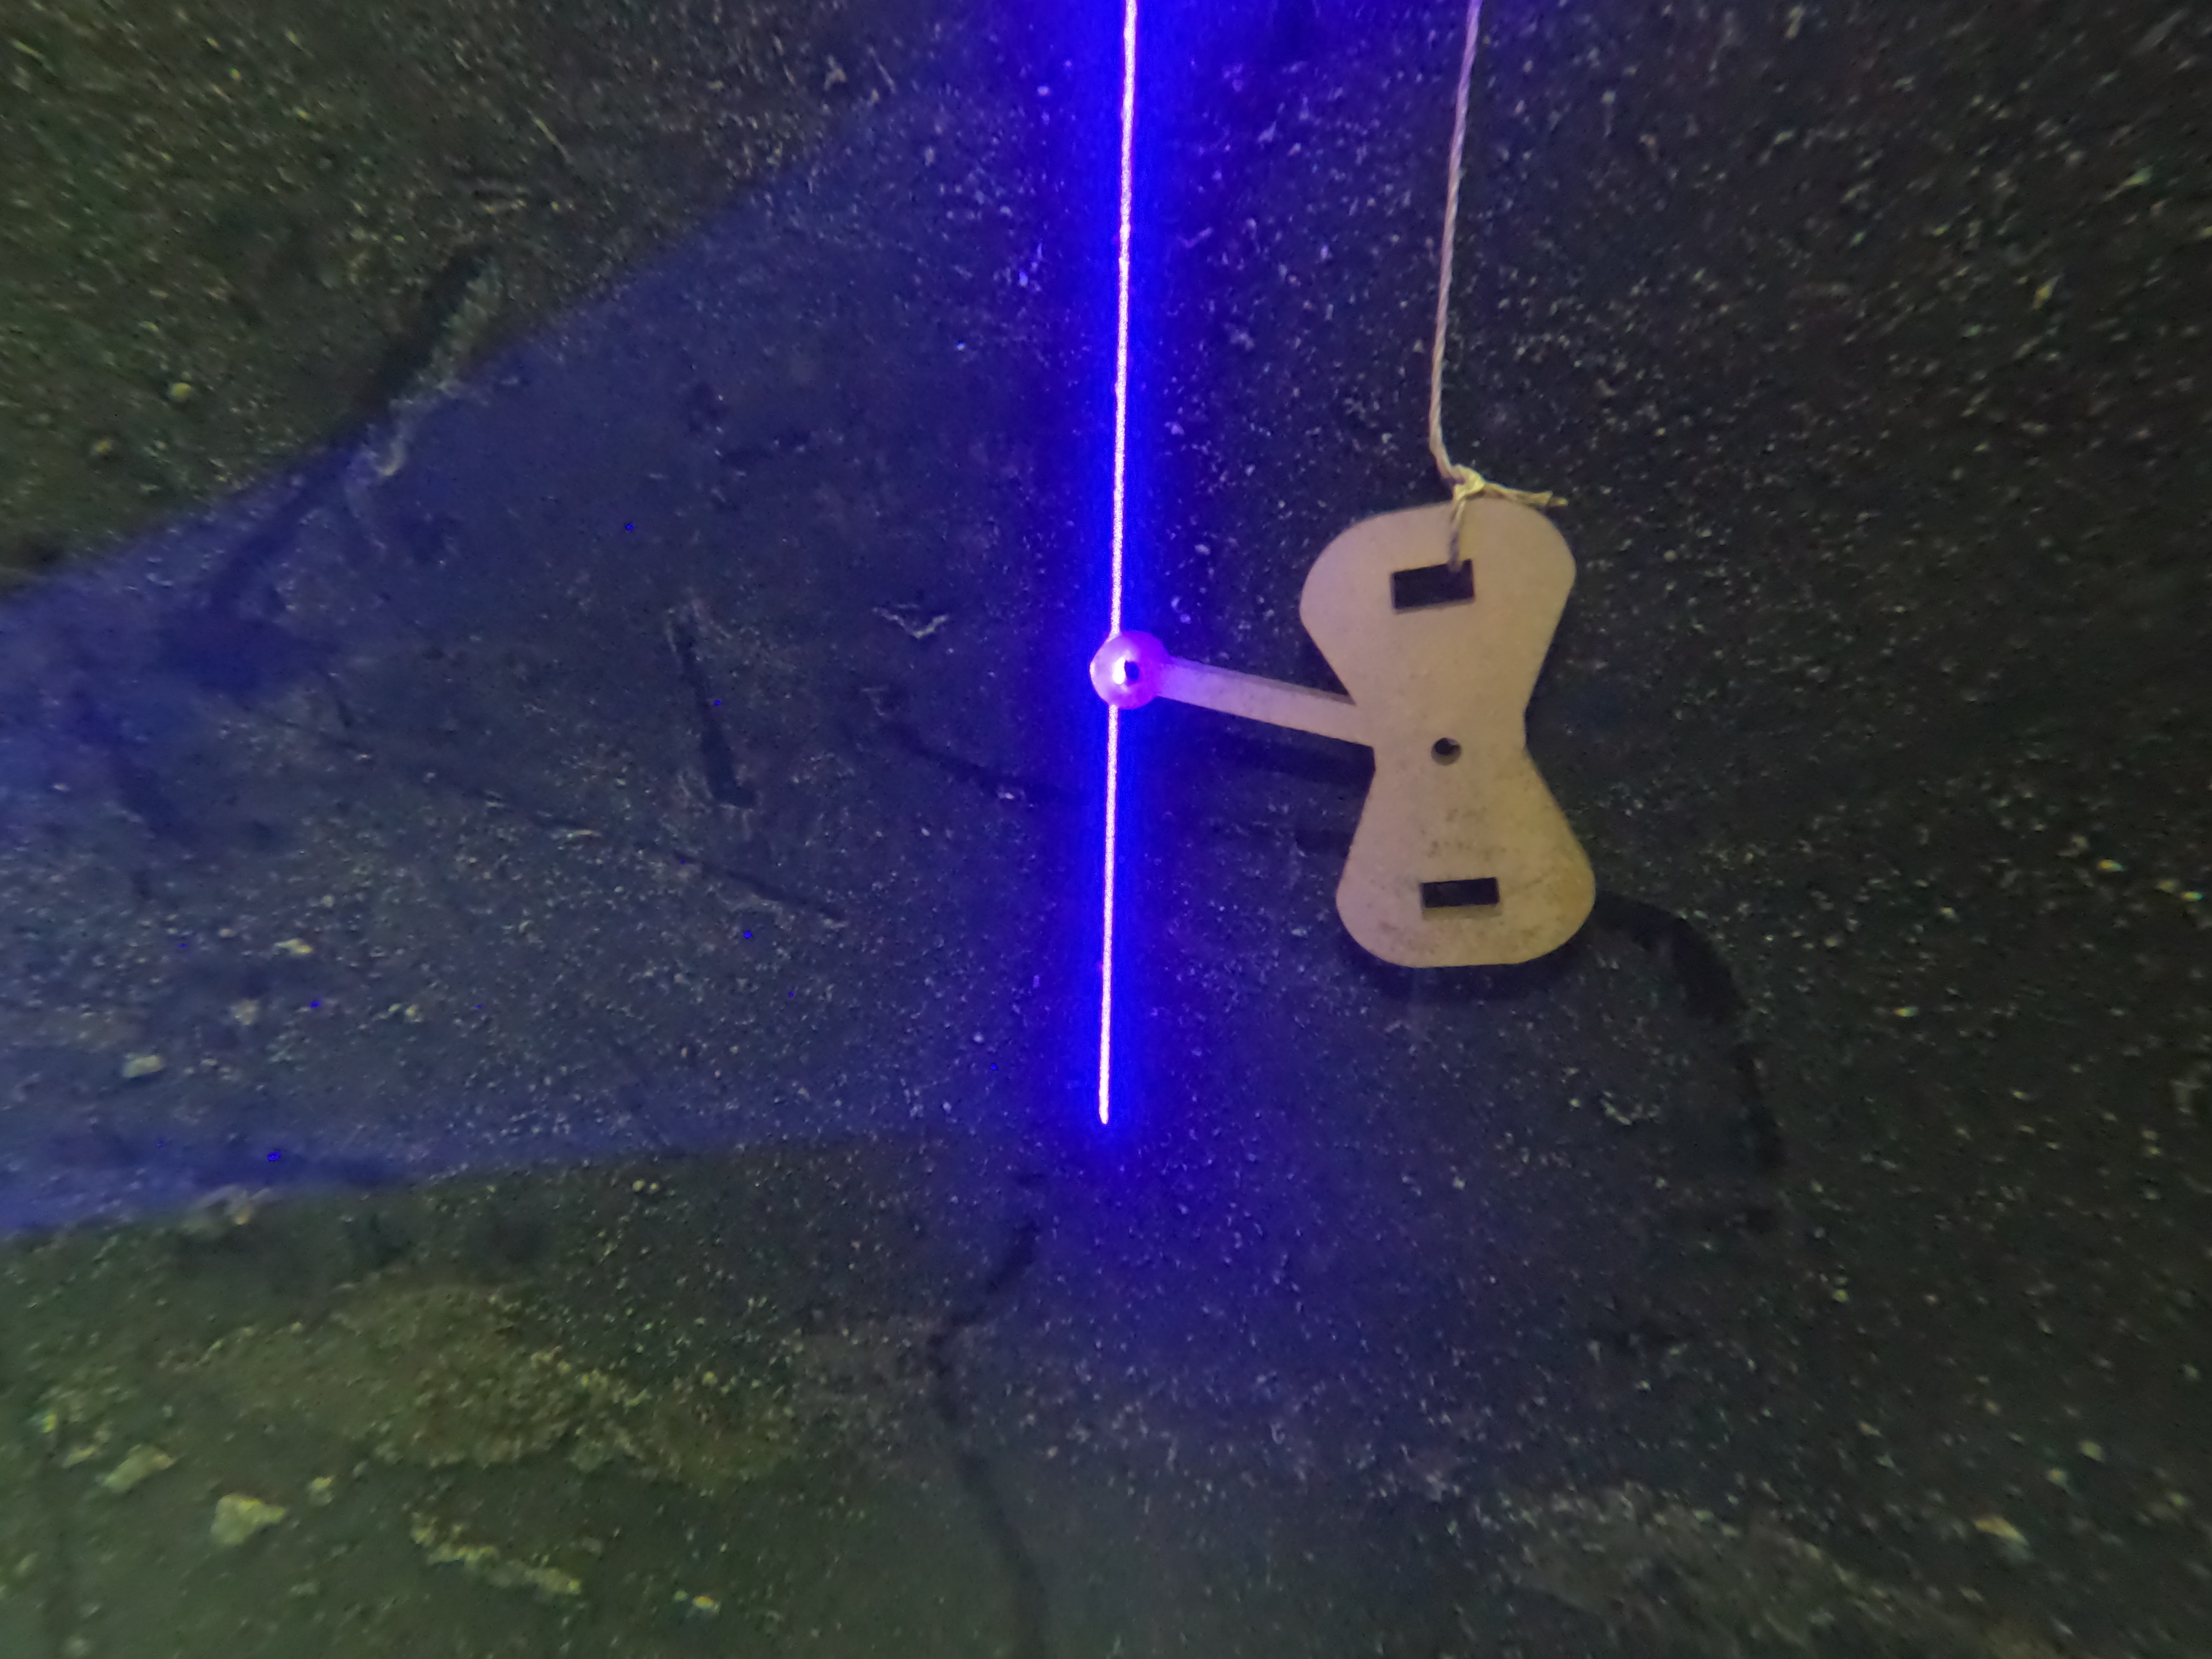

Supplement: Supplementary file 3326 [file G0015767.pdf › Level_2_1/G0015767.pdf]

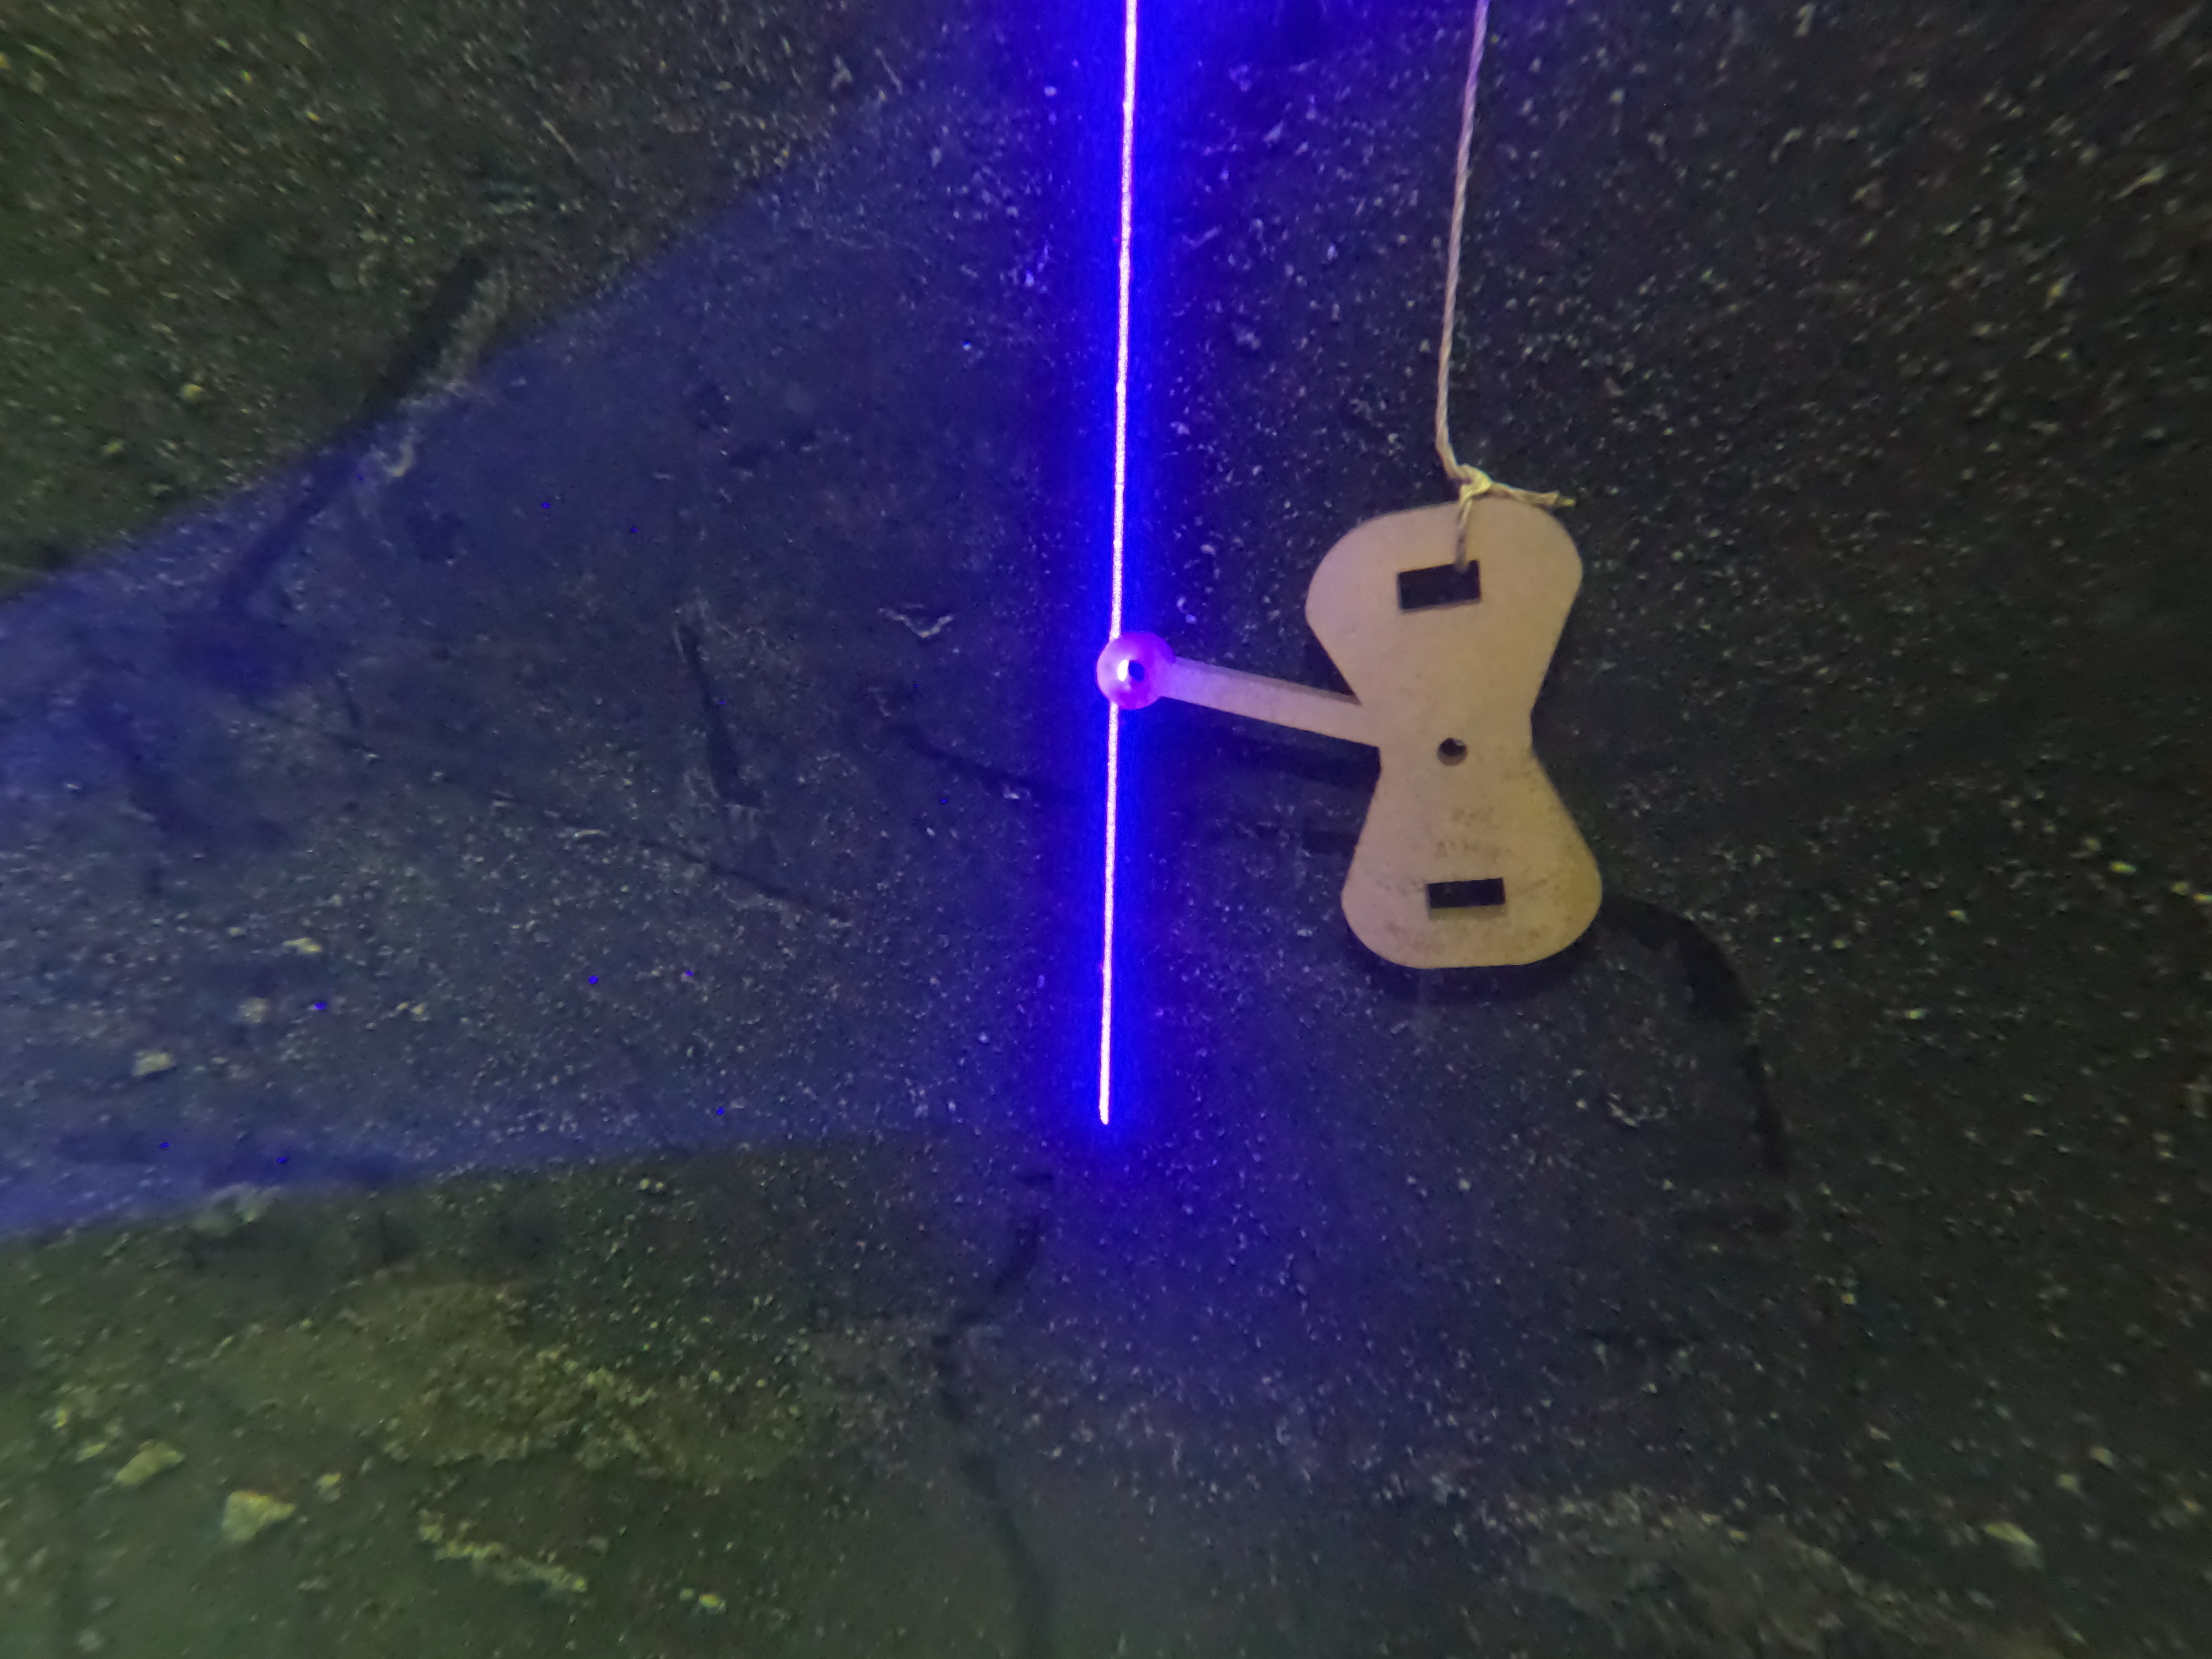

Supplement: Supplementary file 3327 [file G0015768.pdf › Level_2_1/G0015768.pdf]

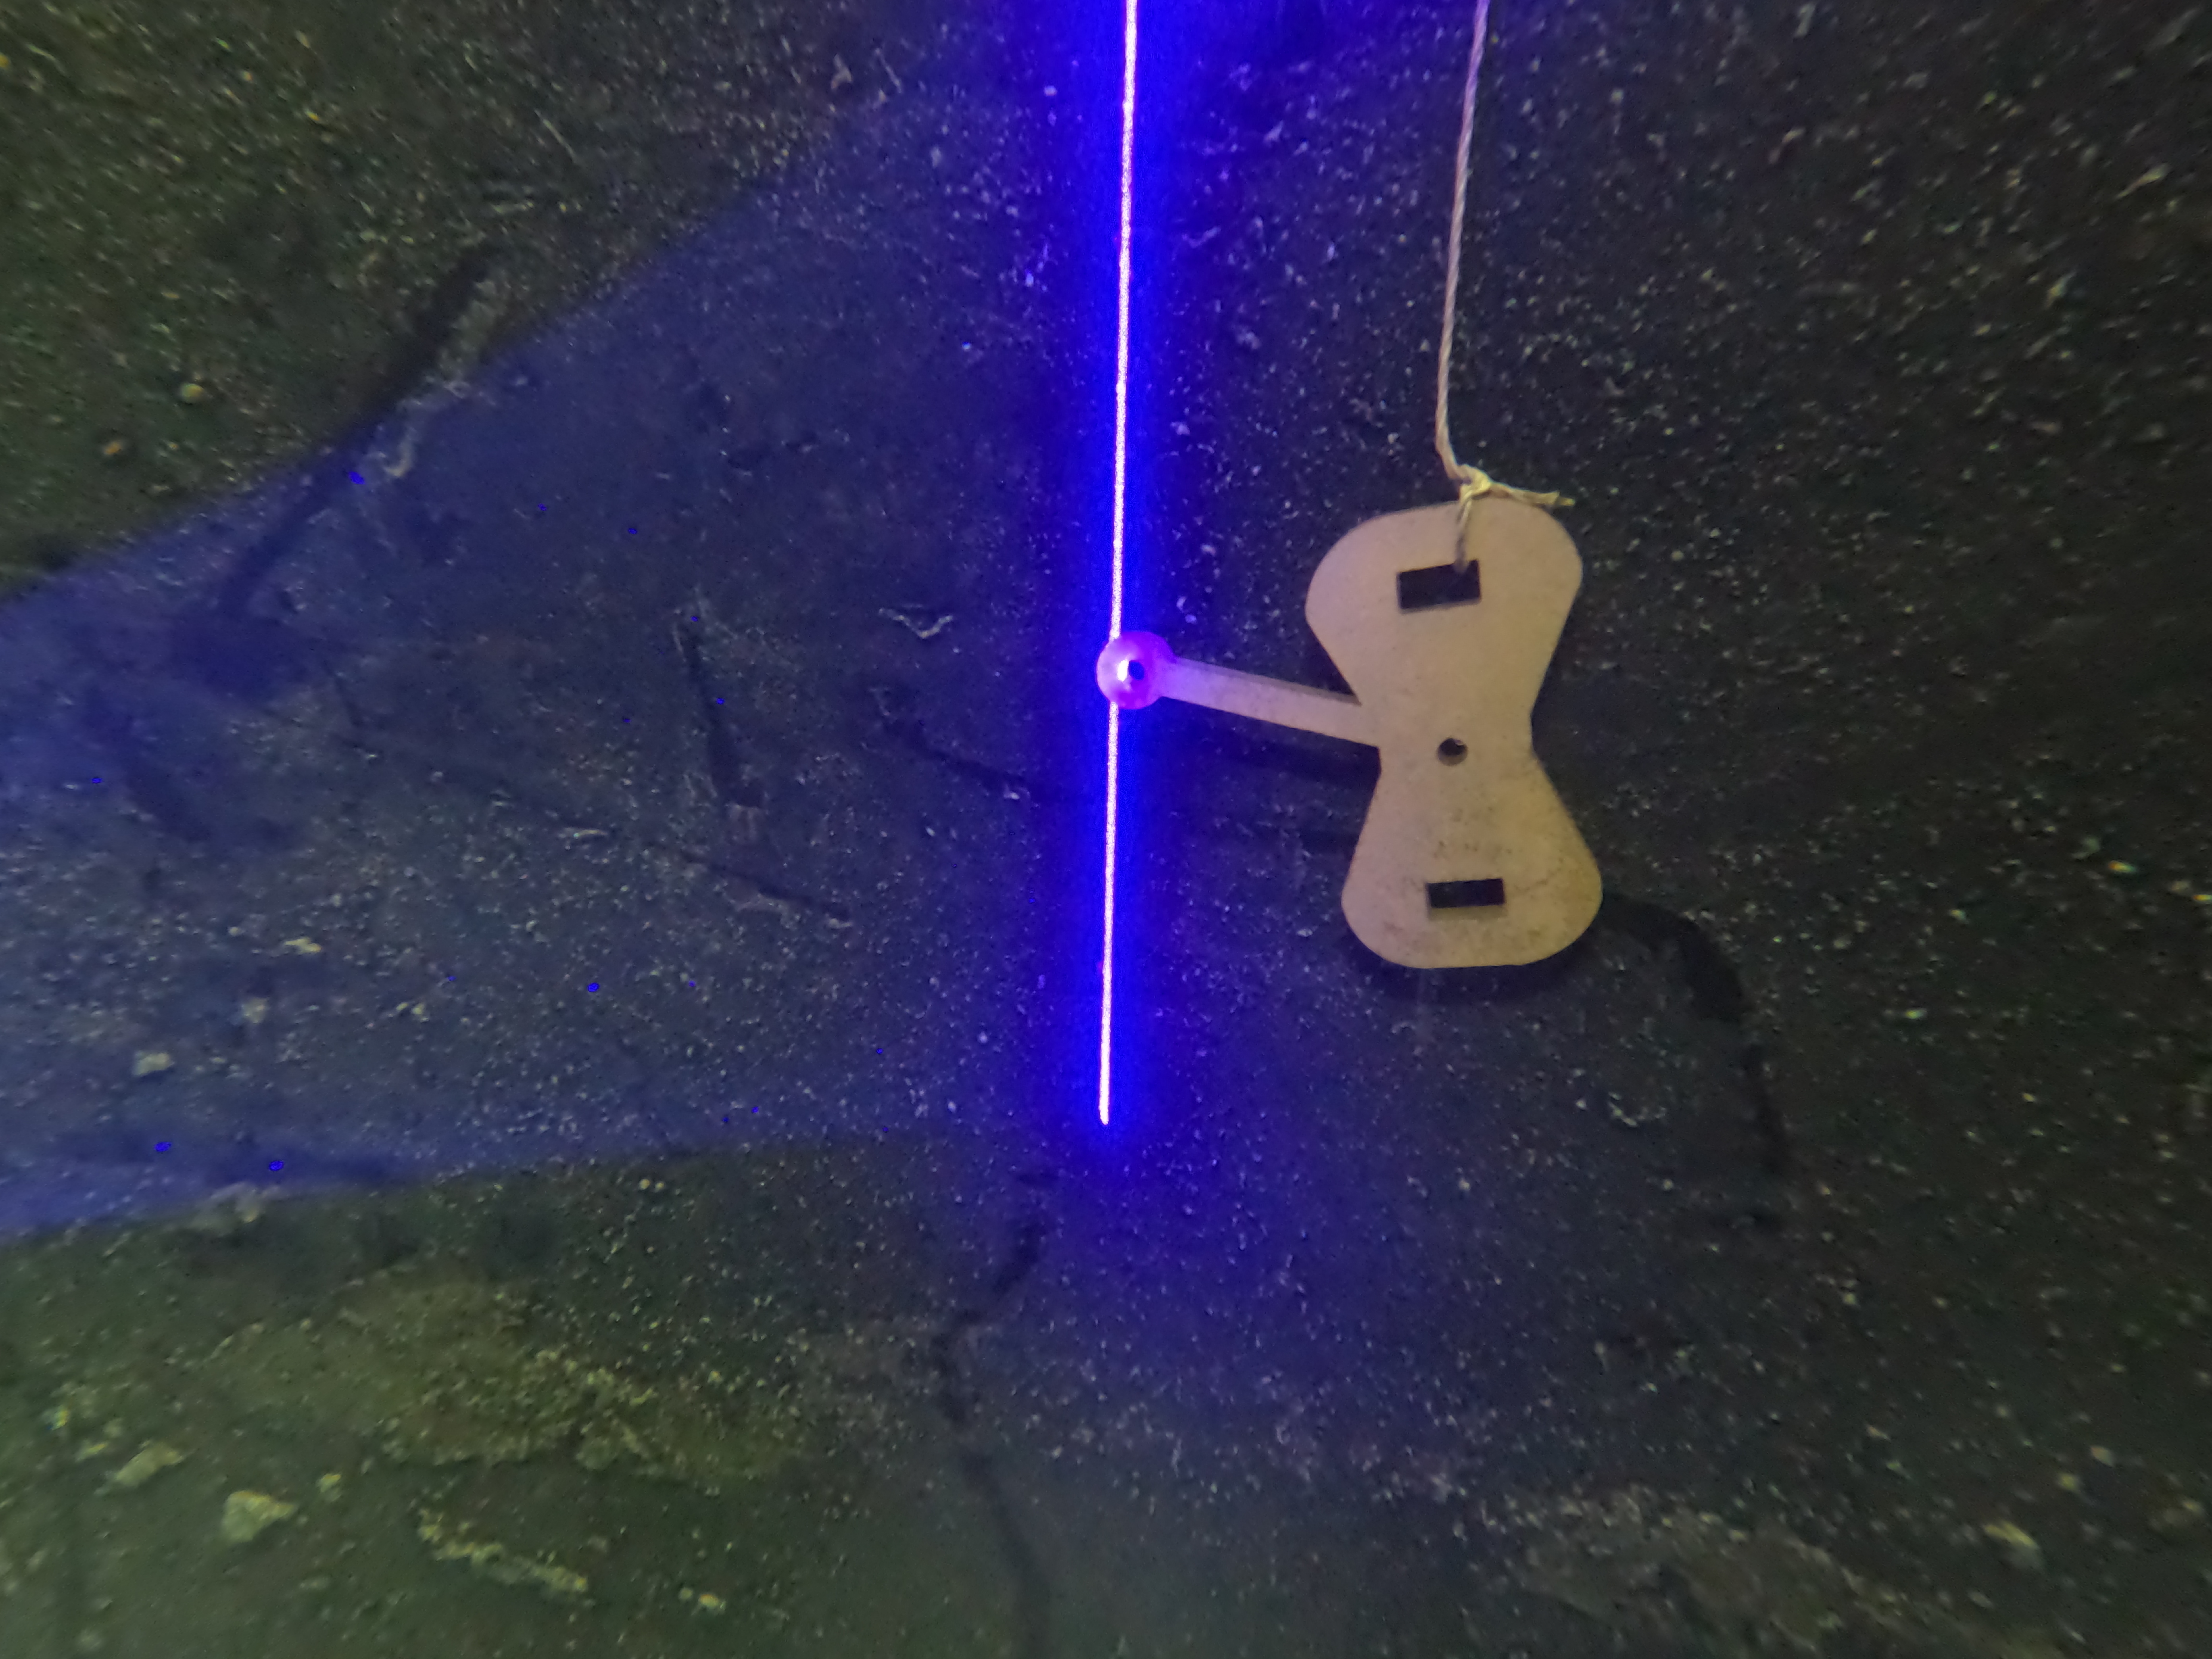

Supplement: Supplementary file 3328 [file G0015769.pdf › Level_2_1/G0015769.pdf]

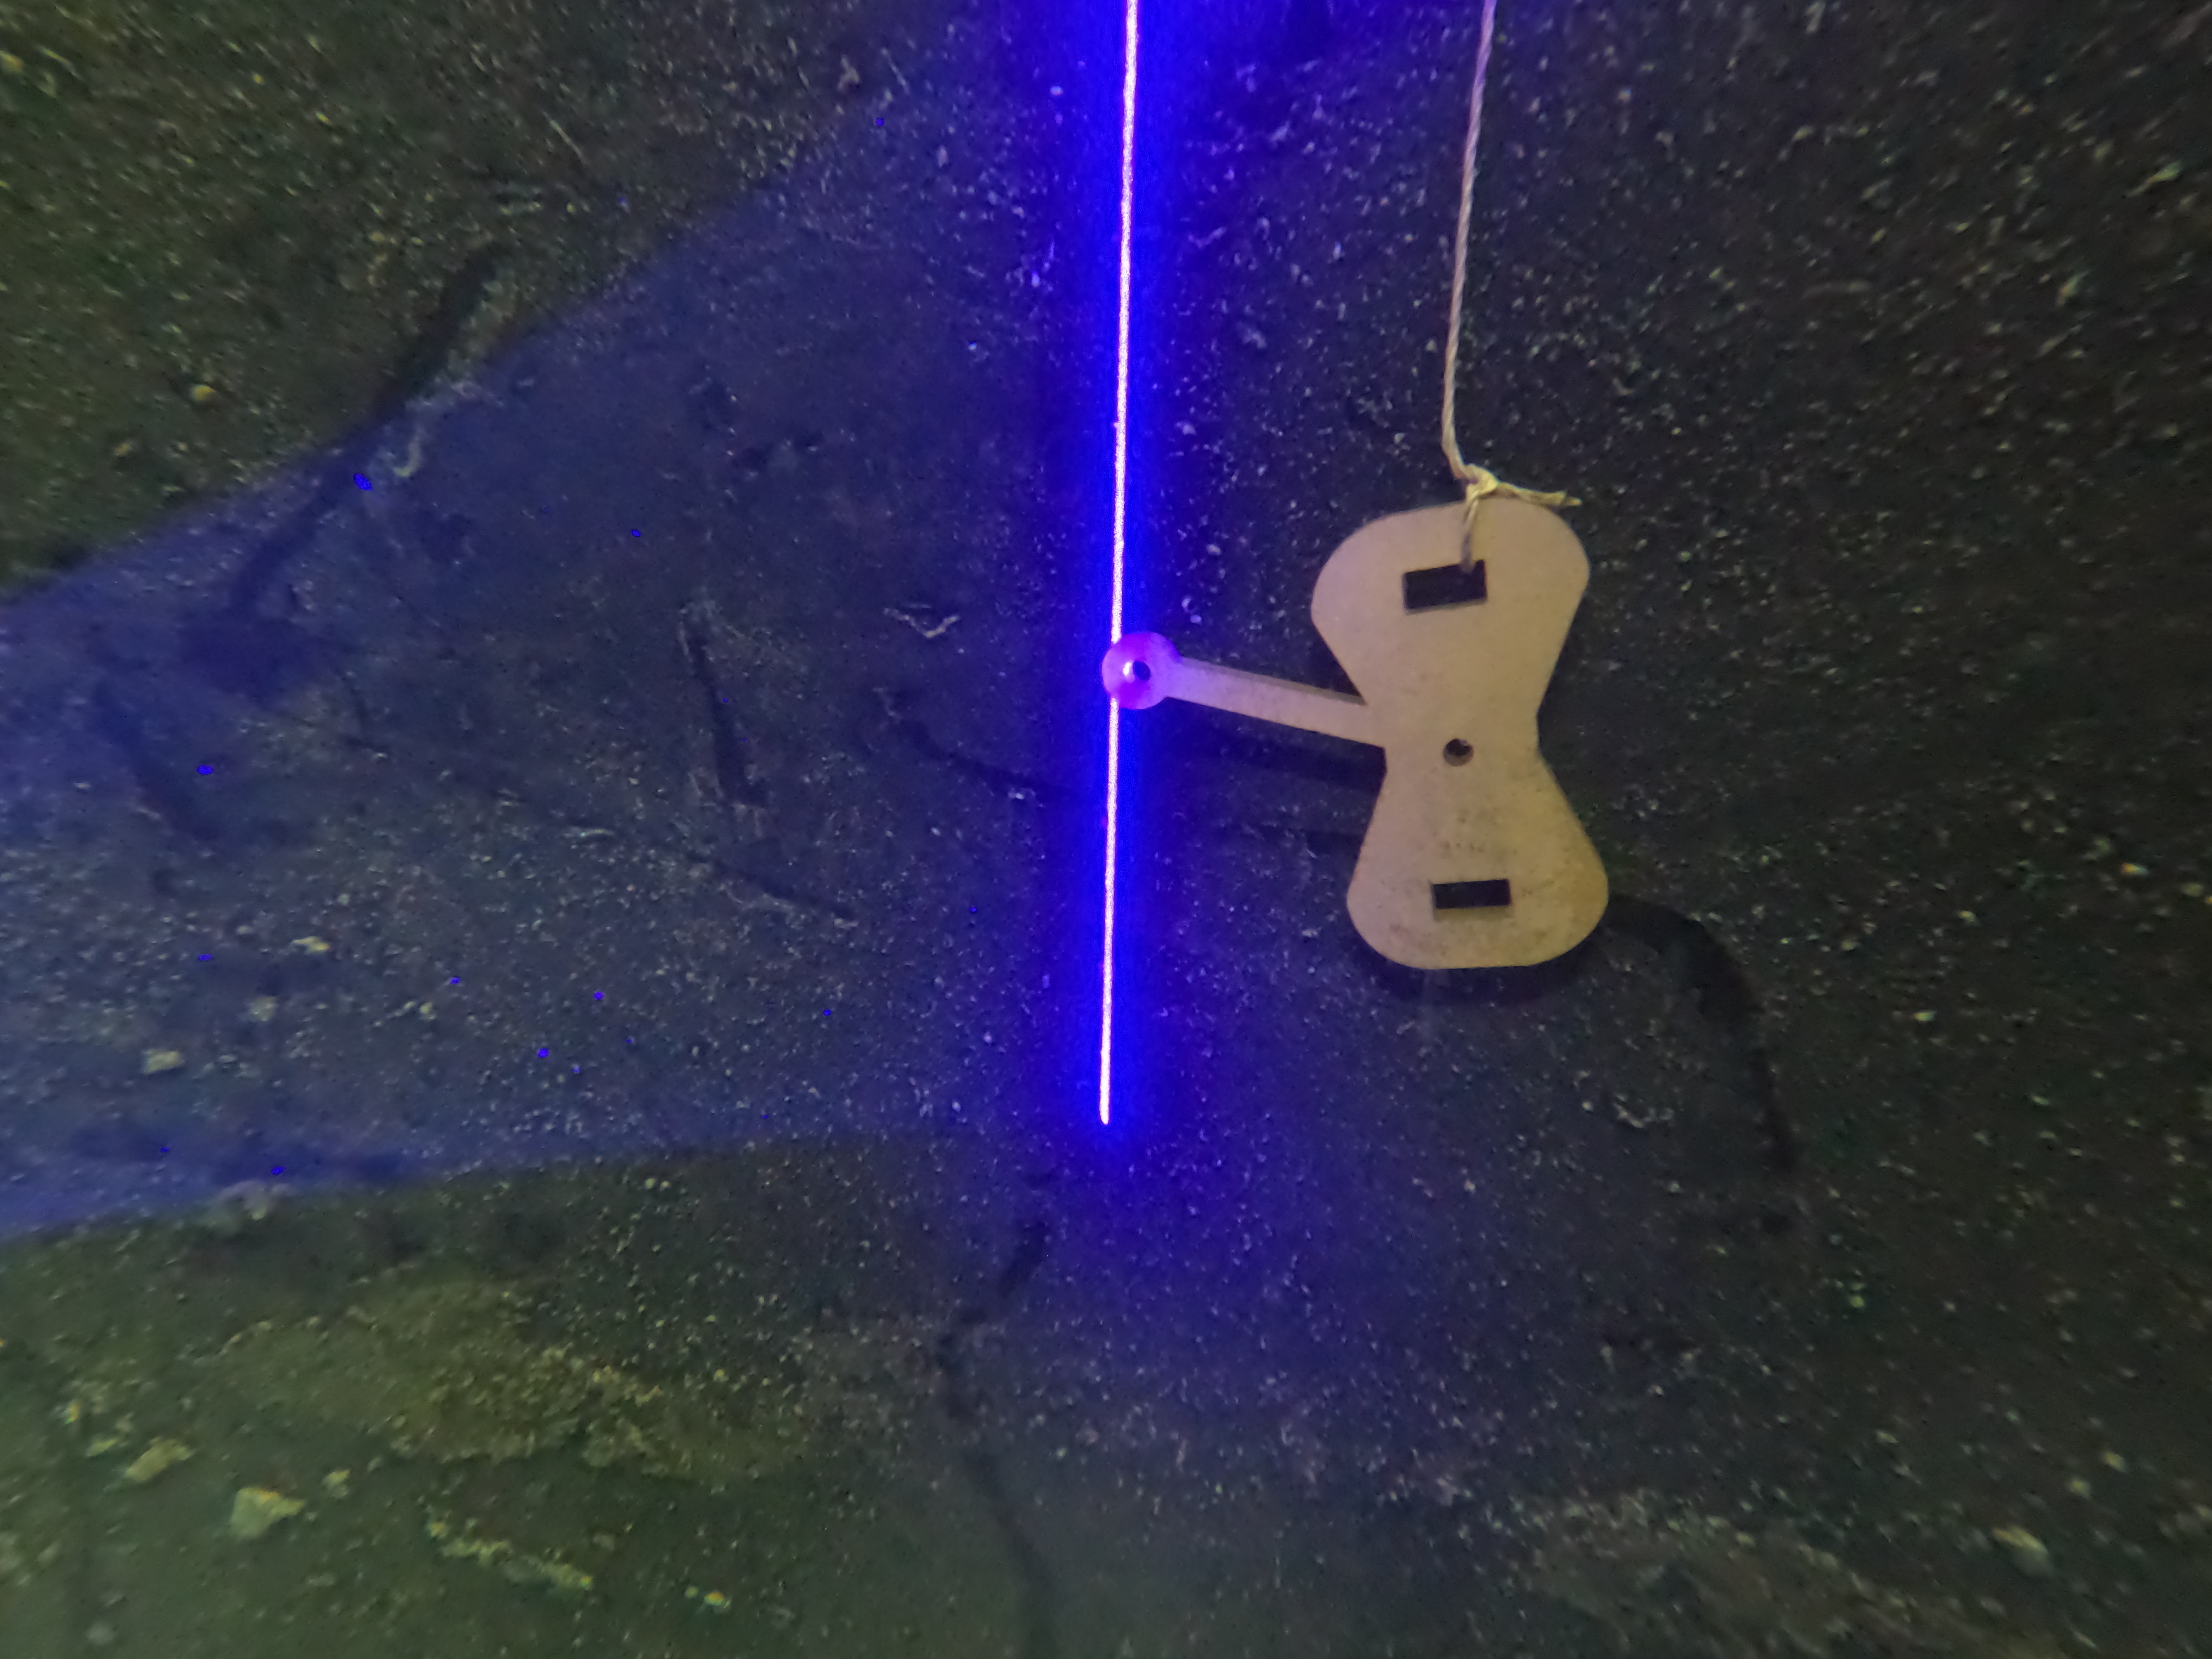

Supplement: Supplementary file 3329 [file G0015770.pdf › Level_2_1/G0015770.pdf]

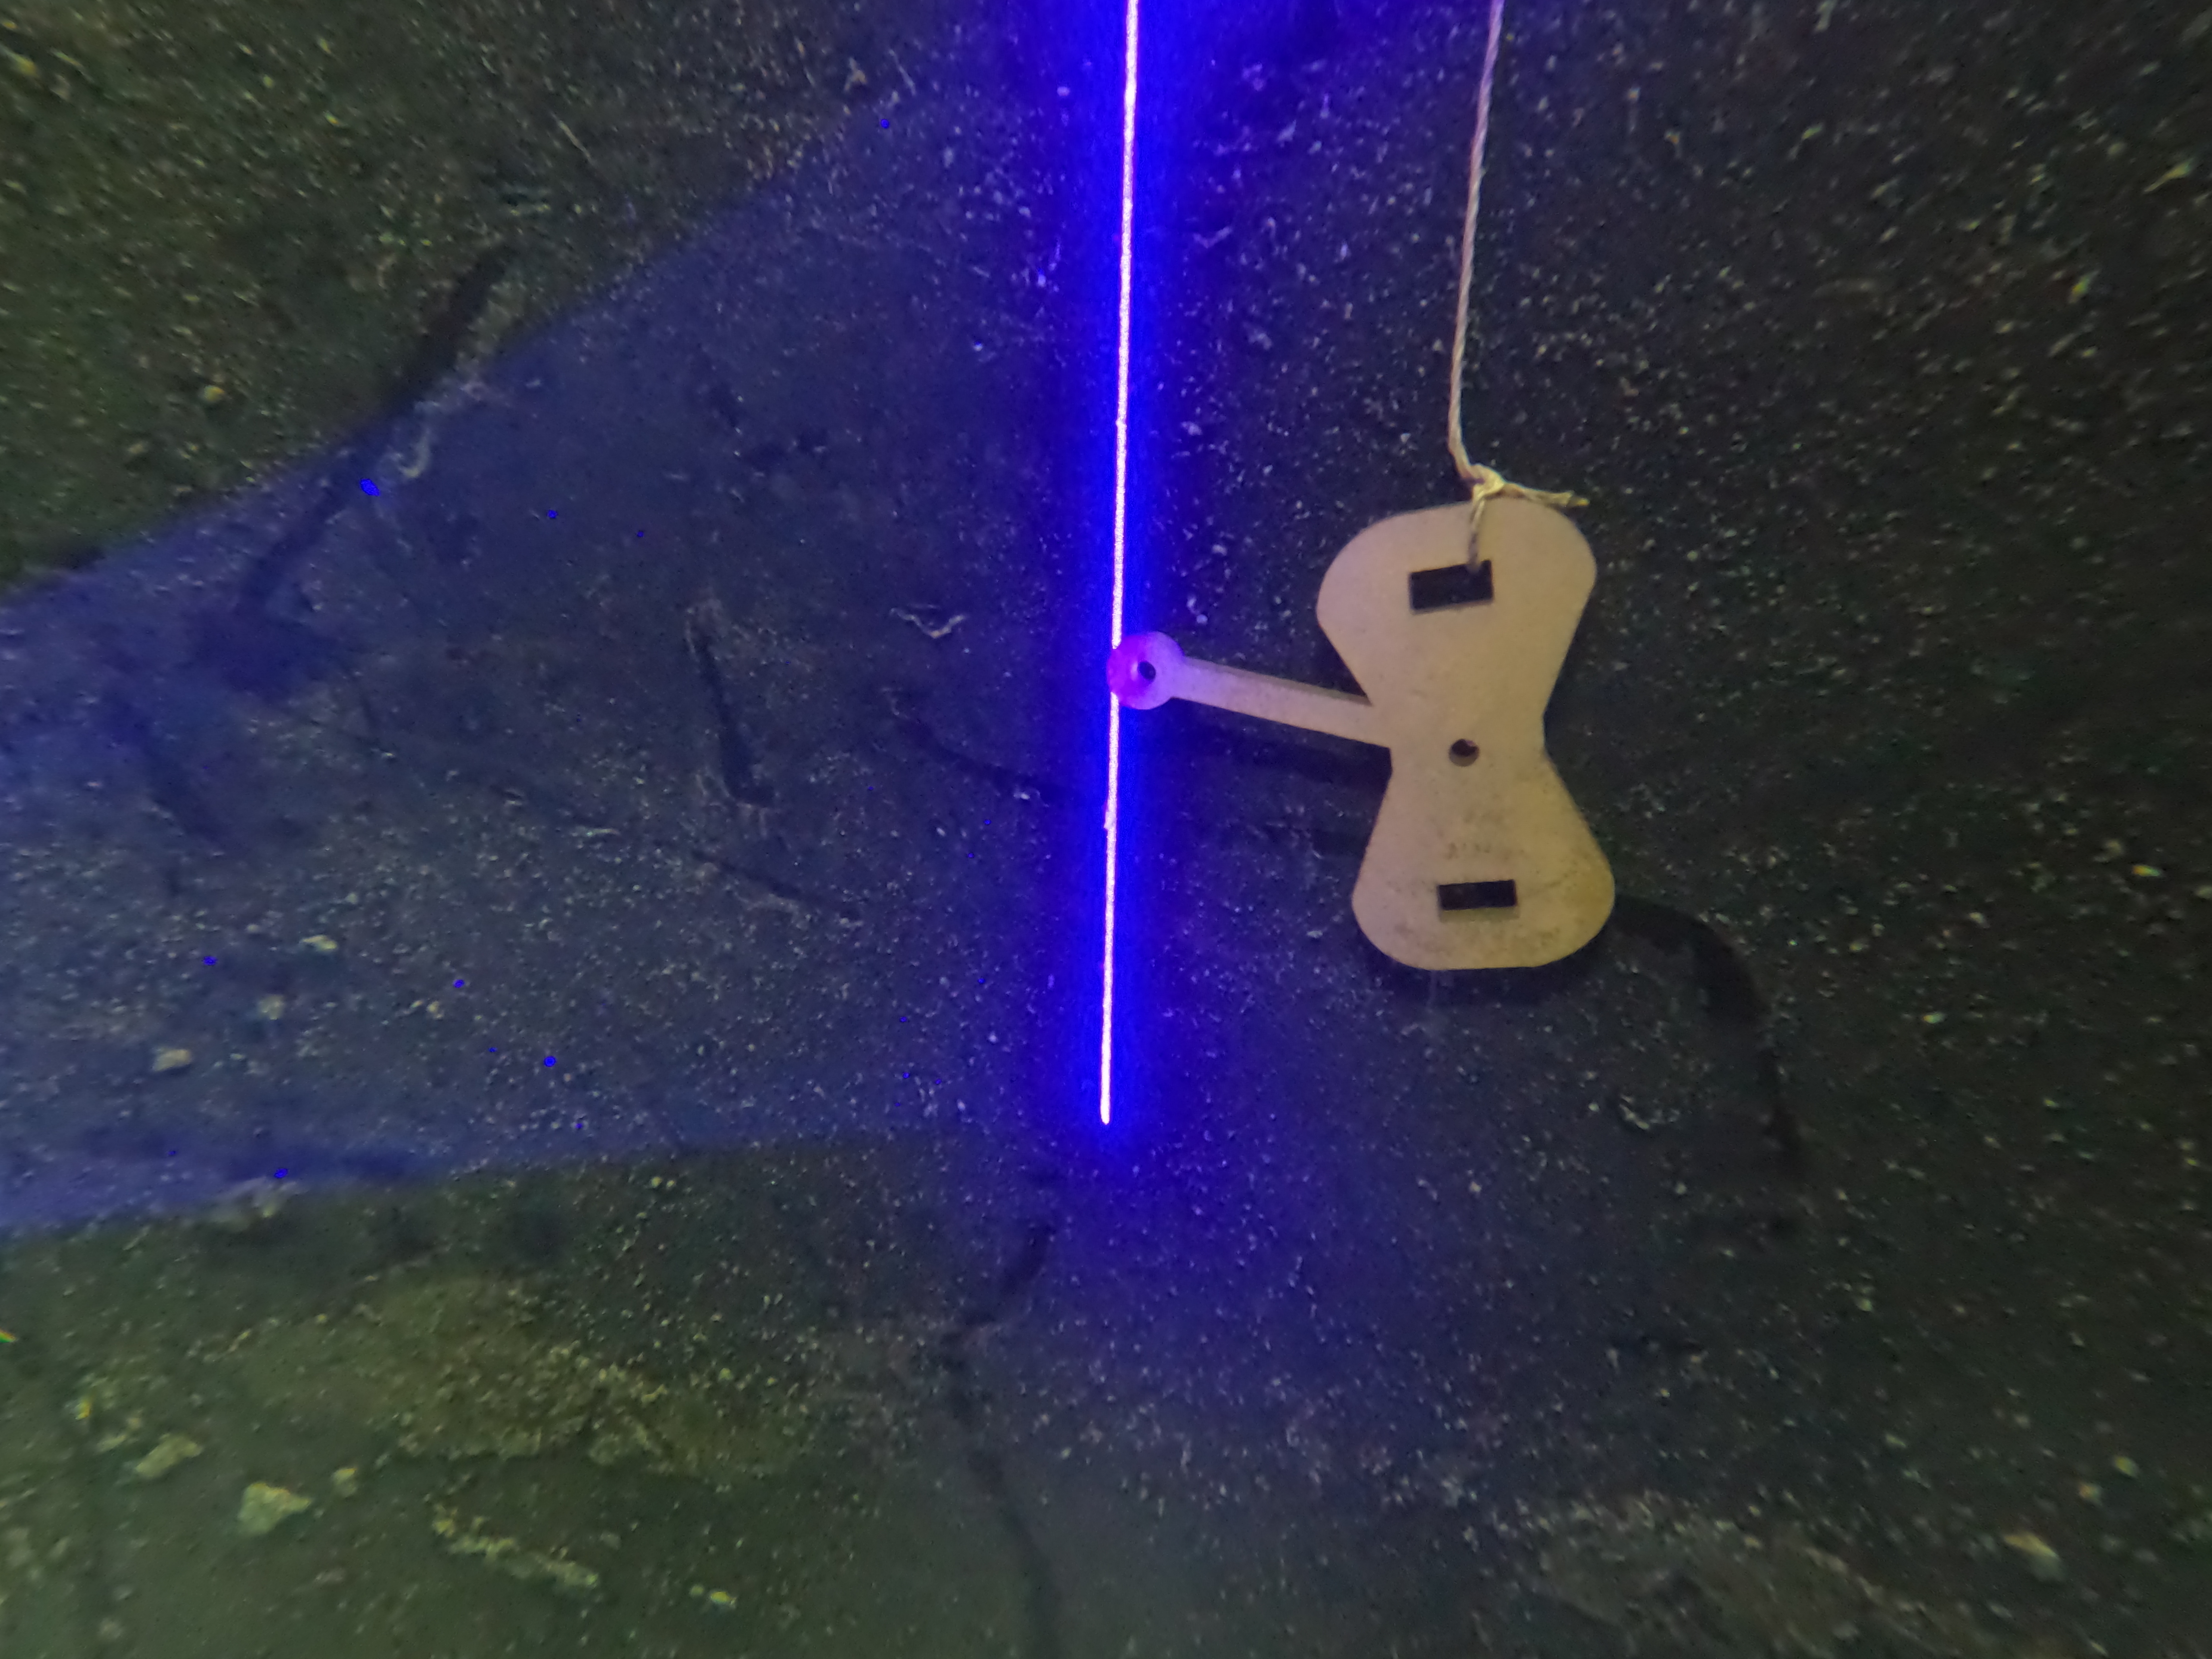

Supplement: Supplementary file 3330 [file G0015771.pdf › Level_2_1/G0015771.pdf]

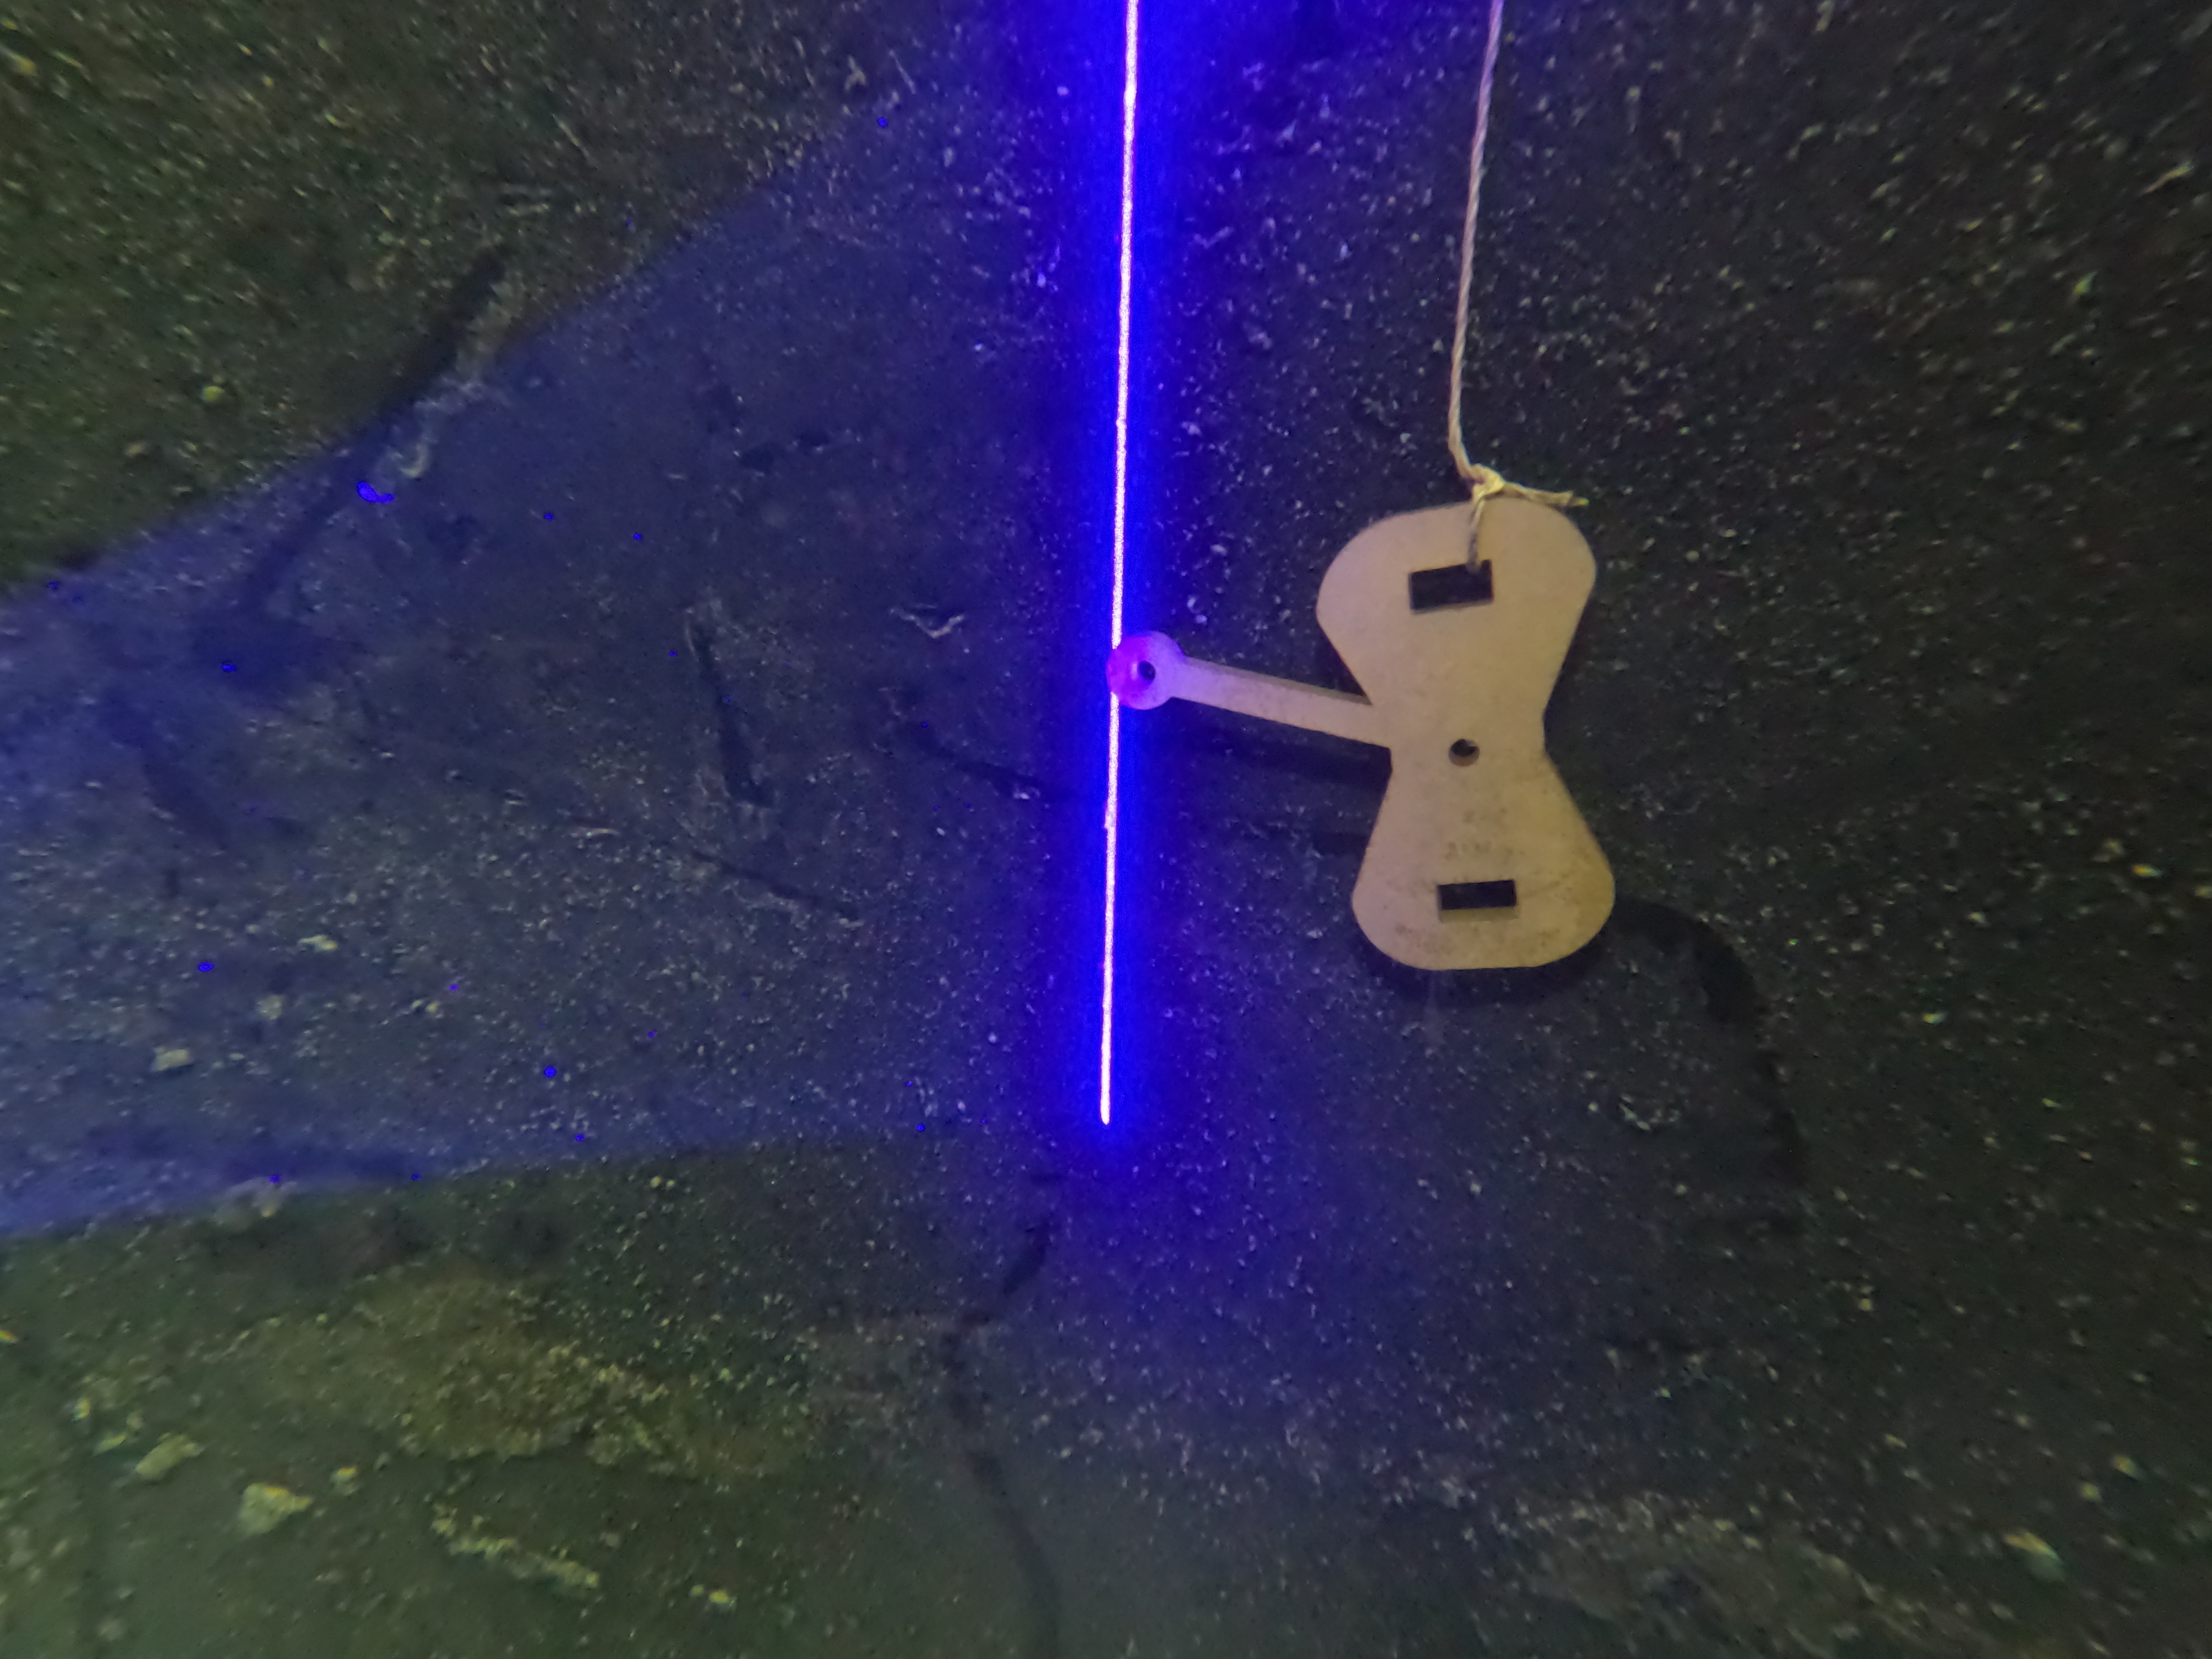

Supplement: Supplementary file 3331 [file G0015772.pdf › Level_2_1/G0015772.pdf]

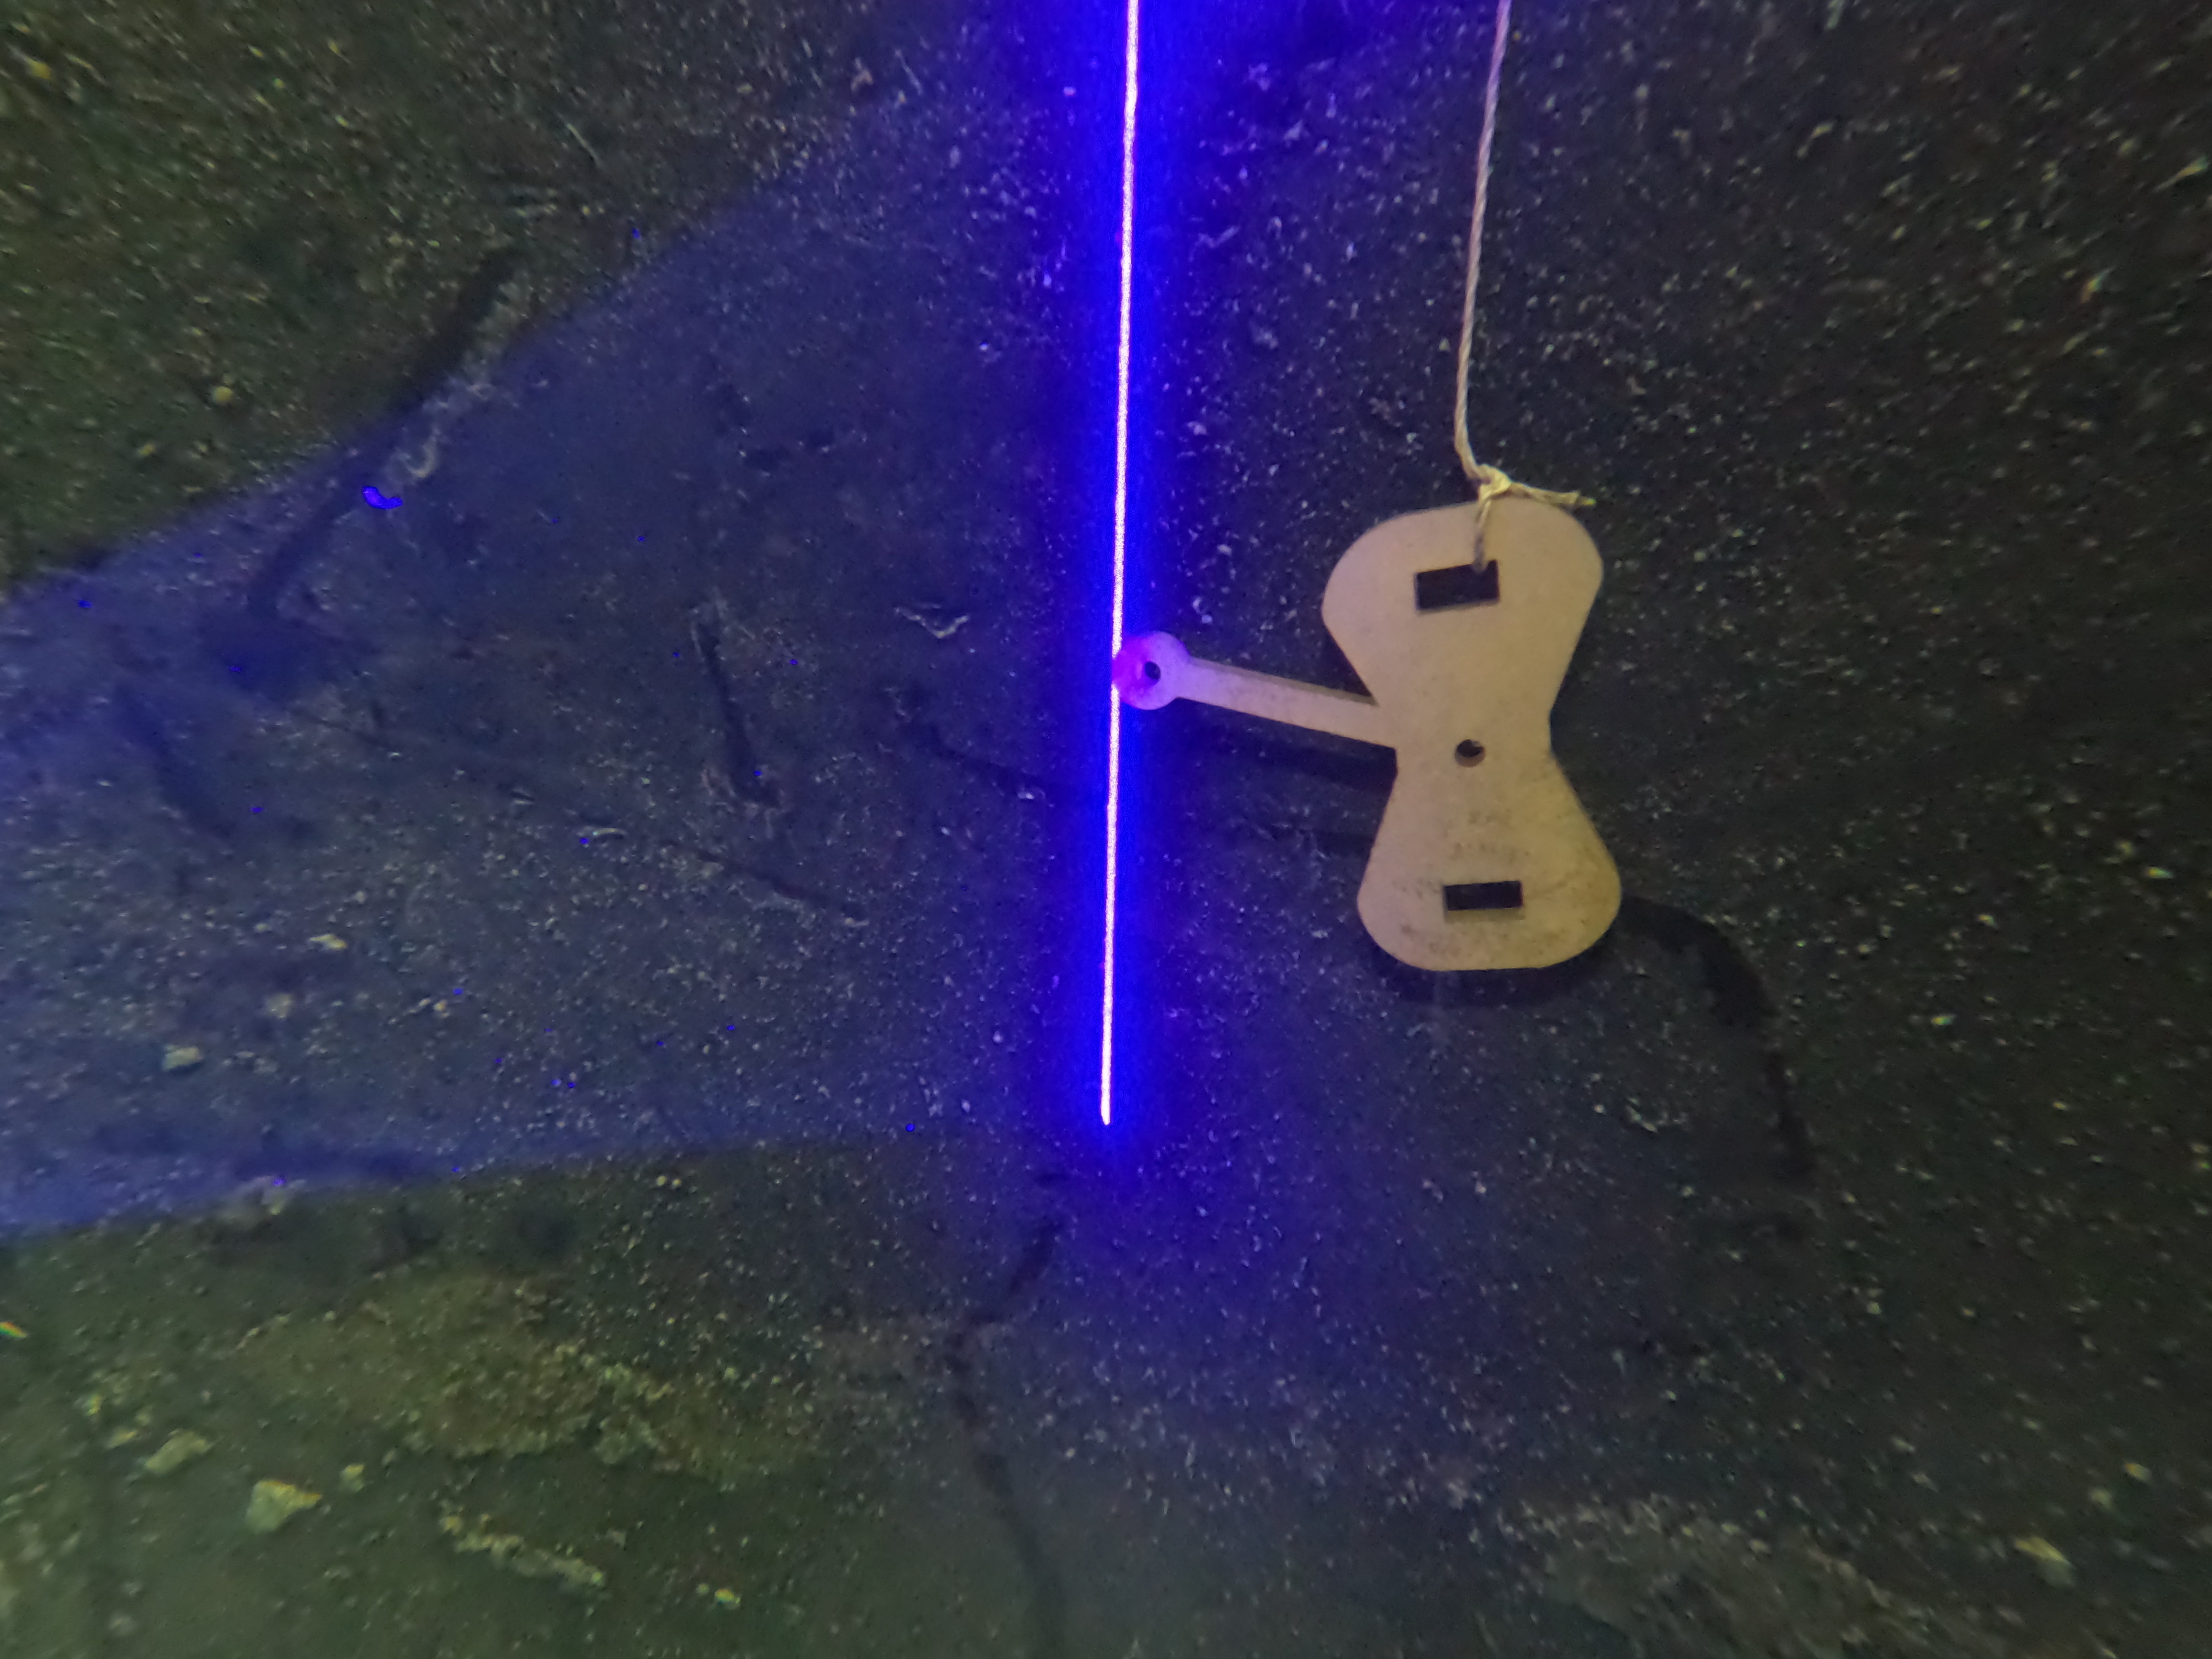

Supplement: Supplementary file 3332 [file G0015773.pdf › Level_2_1/G0015773.pdf]

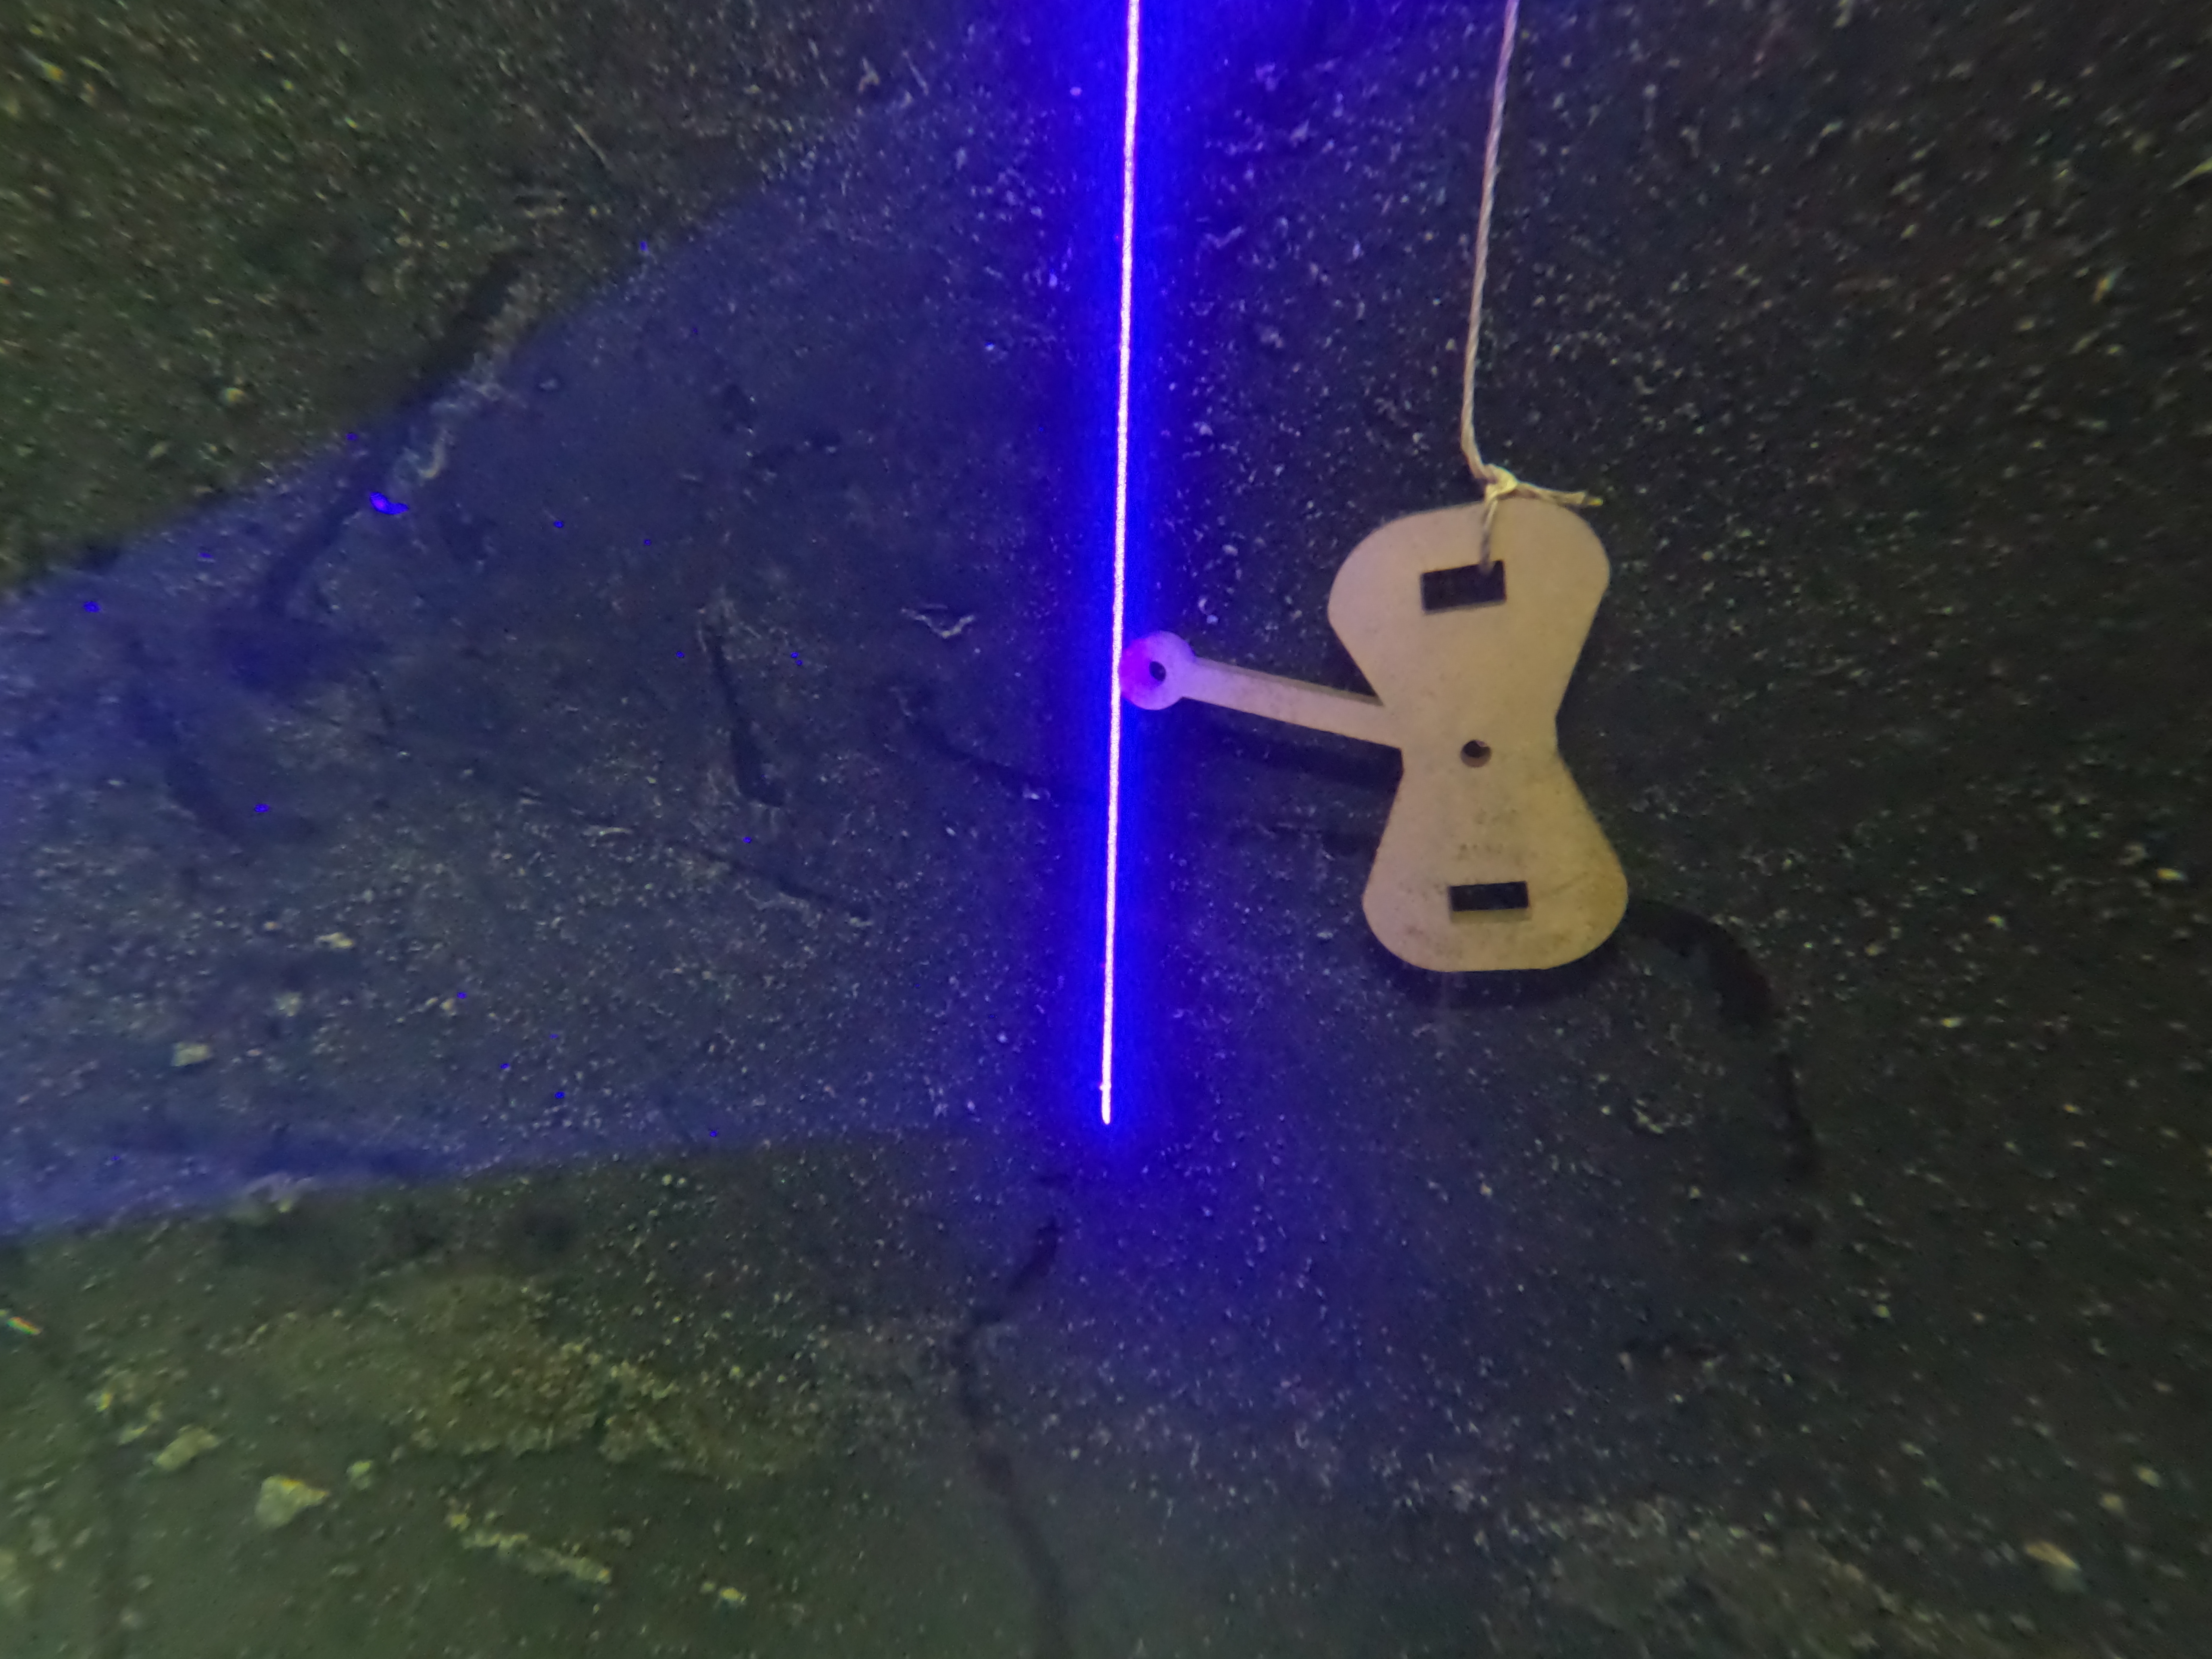

Supplement: Supplementary file 3333 [file G0015774.pdf › Level_2_1/G0015774.pdf]

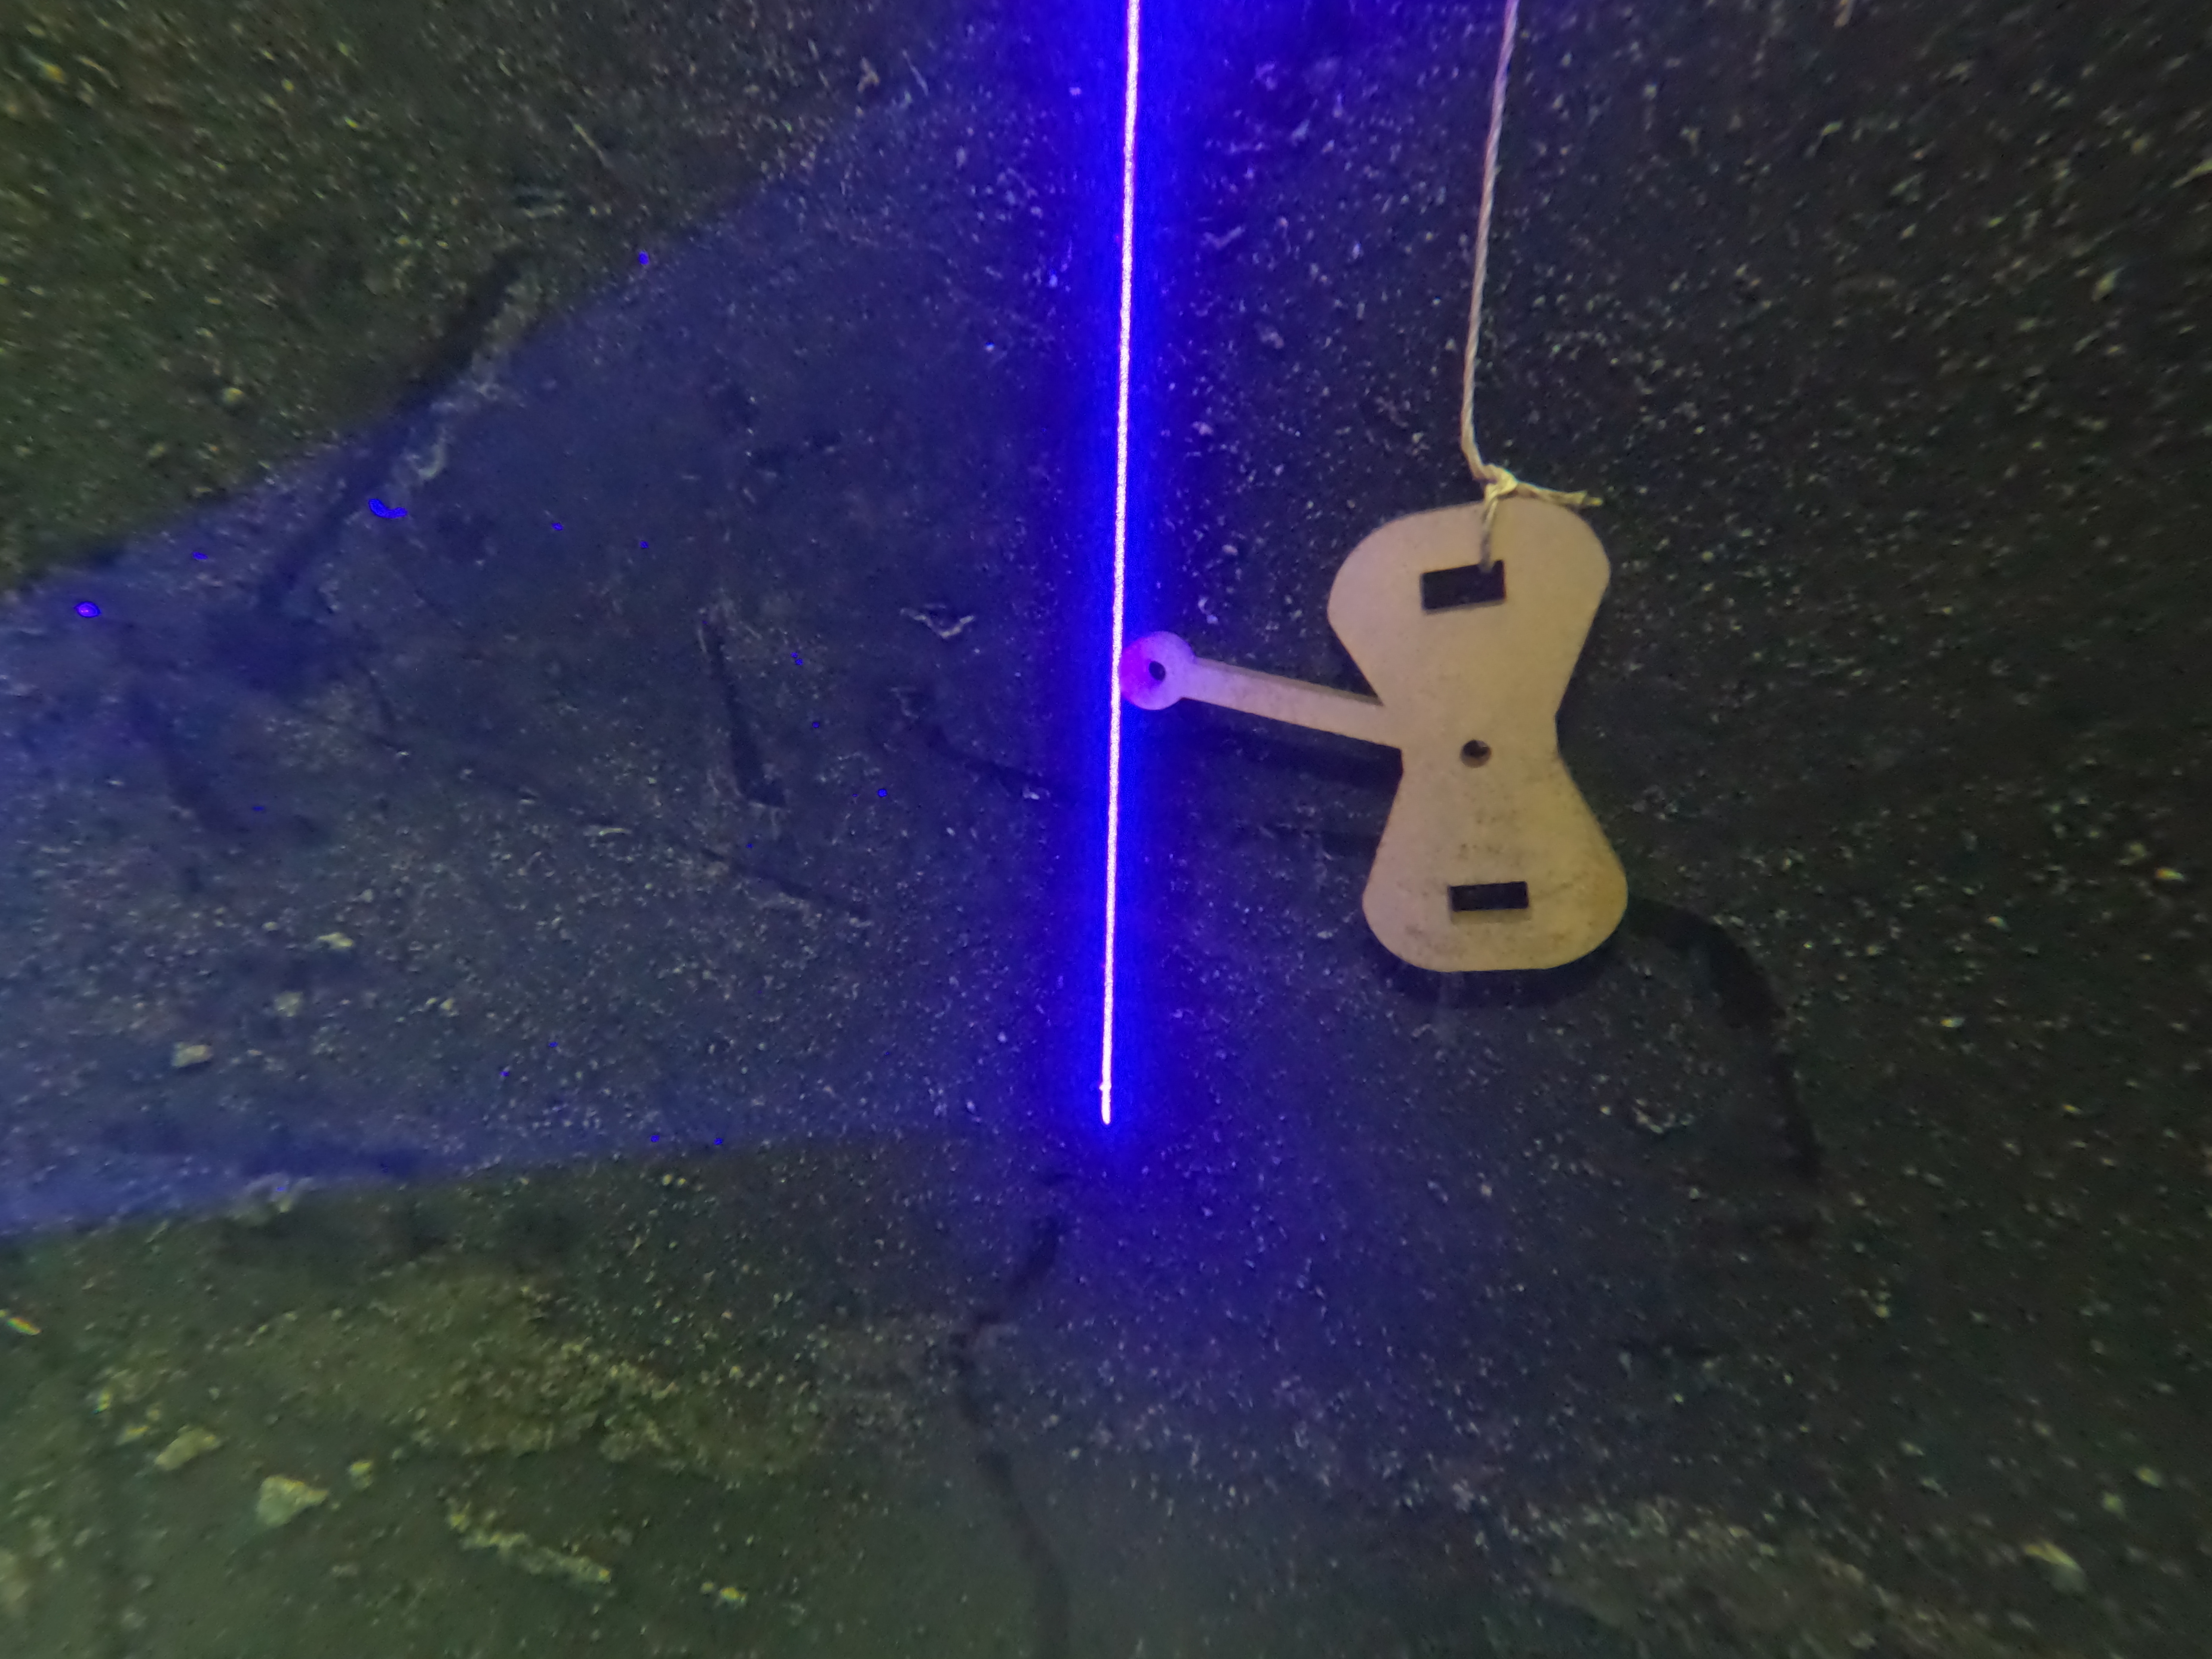

Supplement: Supplementary file 3334 [file G0015775.pdf › Level_2_1/G0015775.pdf]

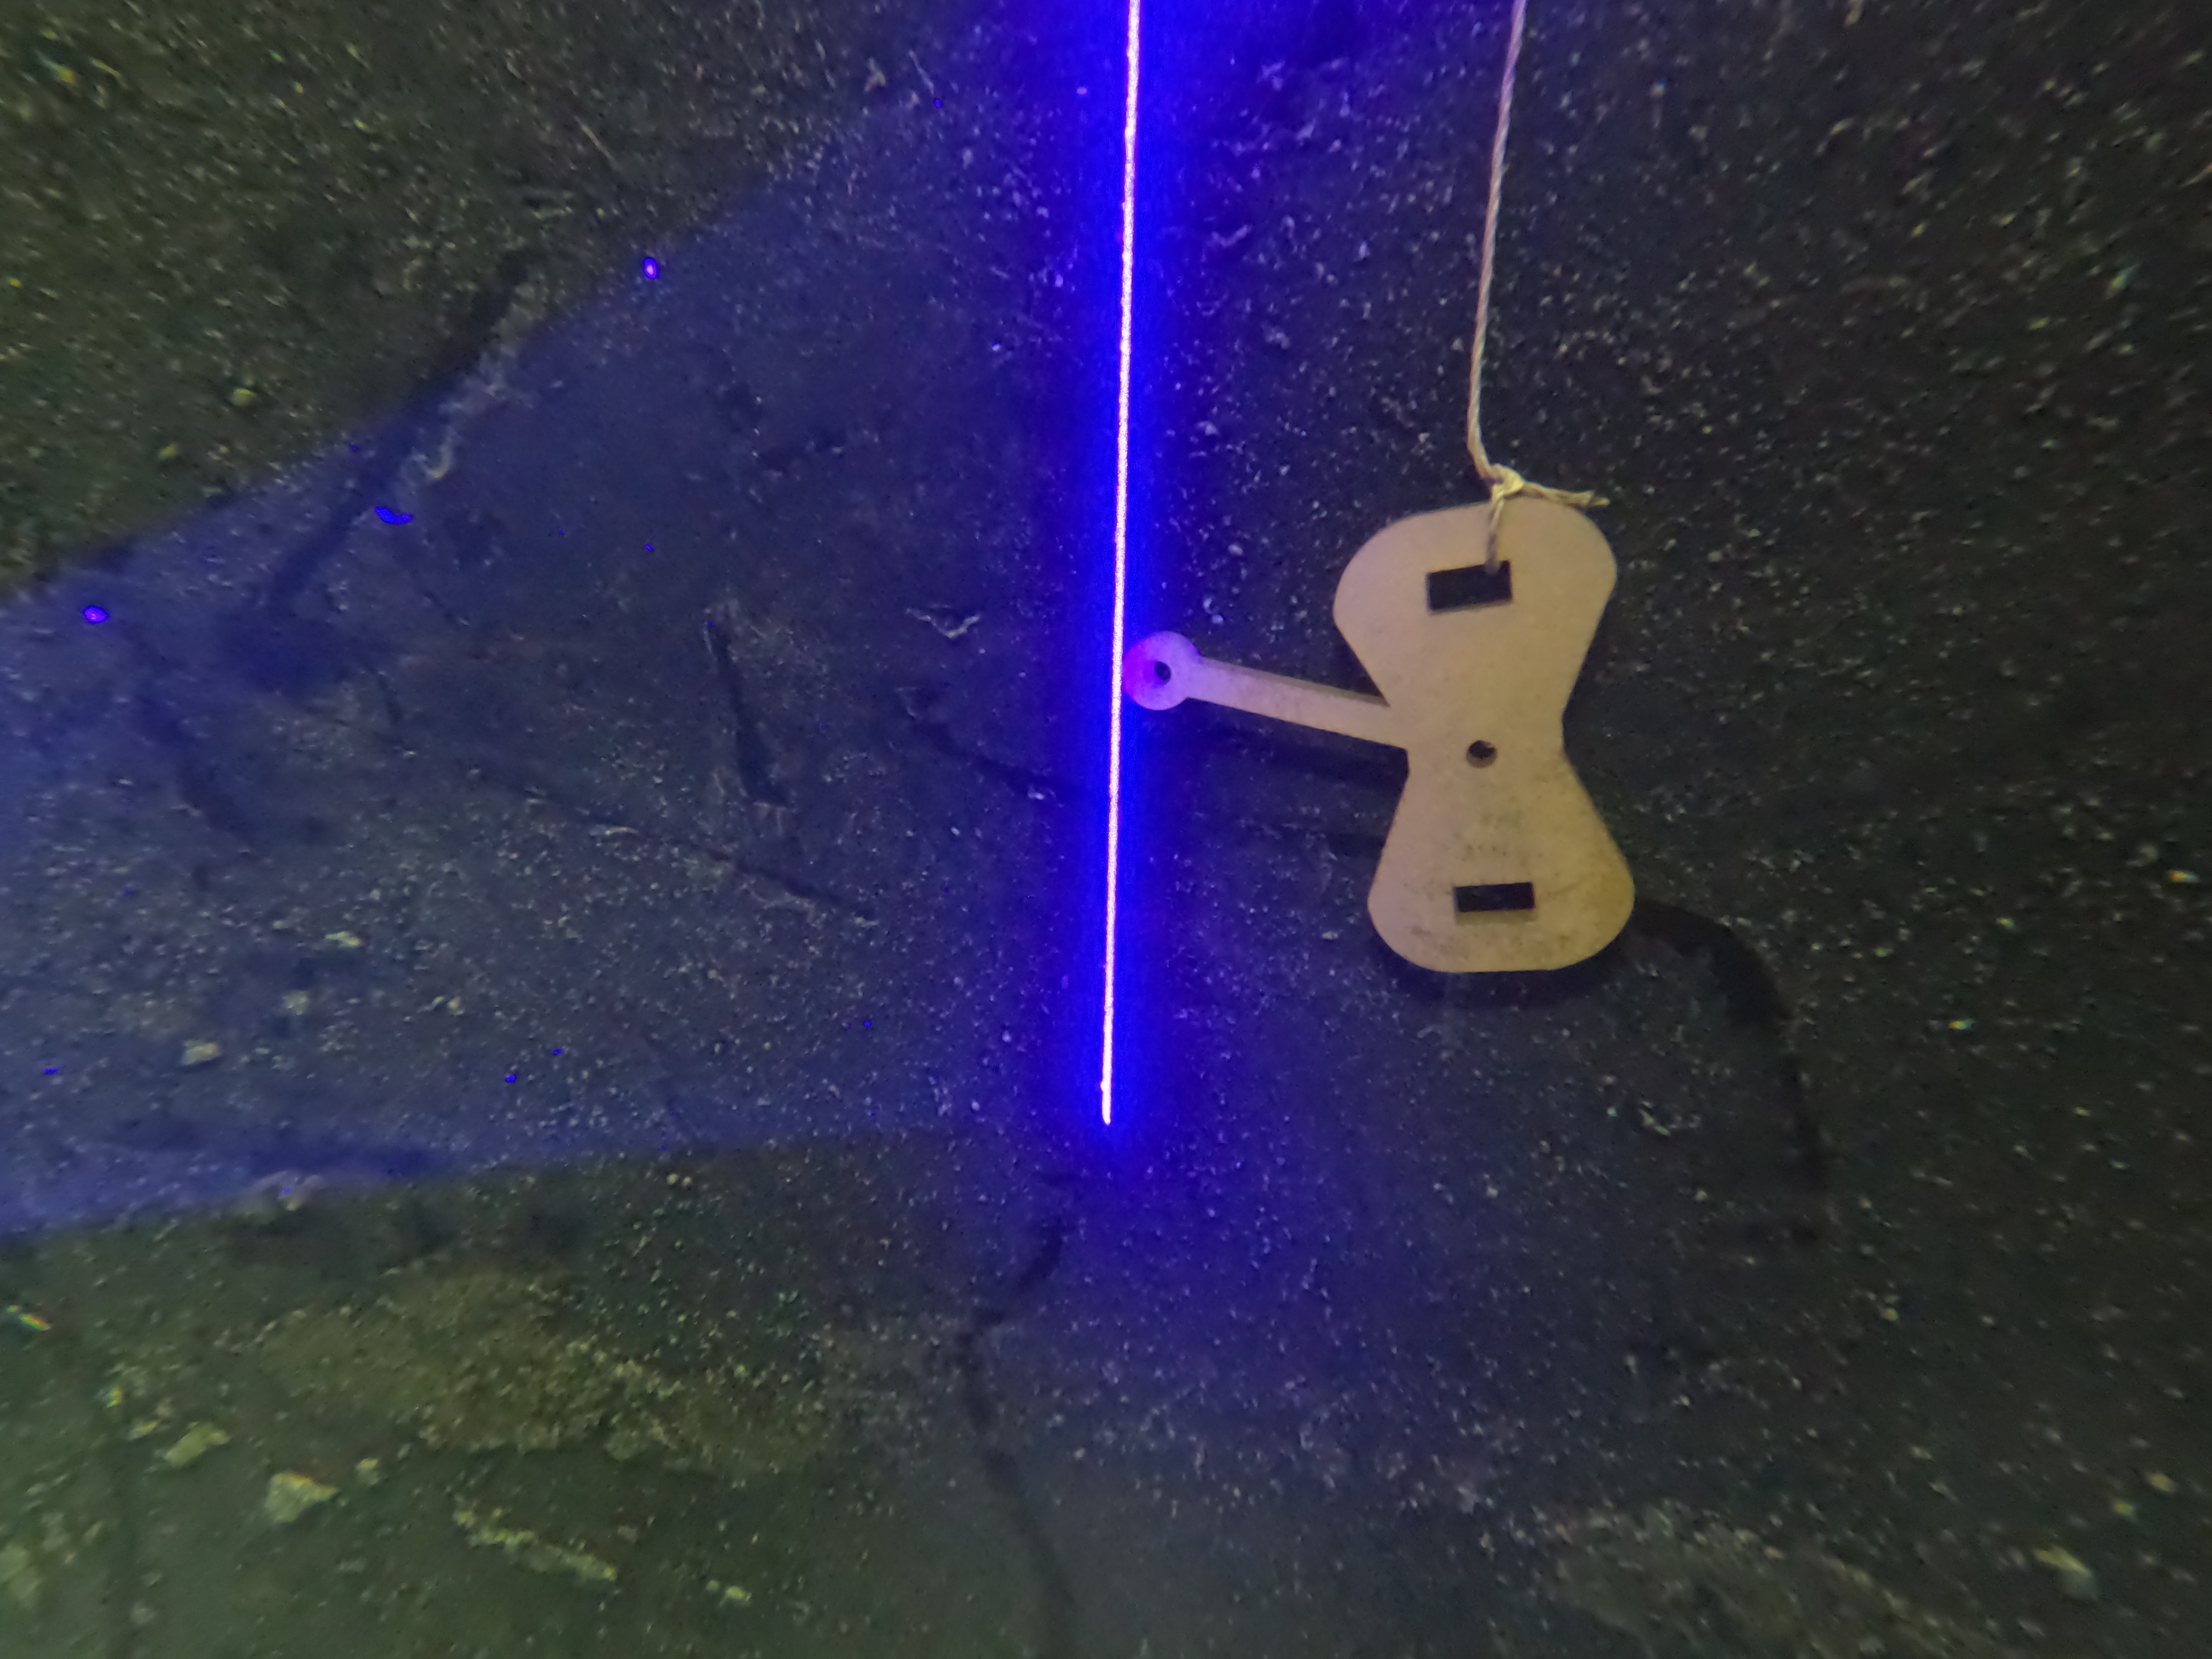

Supplement: Supplementary file 3335 [file G0015776.pdf › Level_2_1/G0015776.pdf]

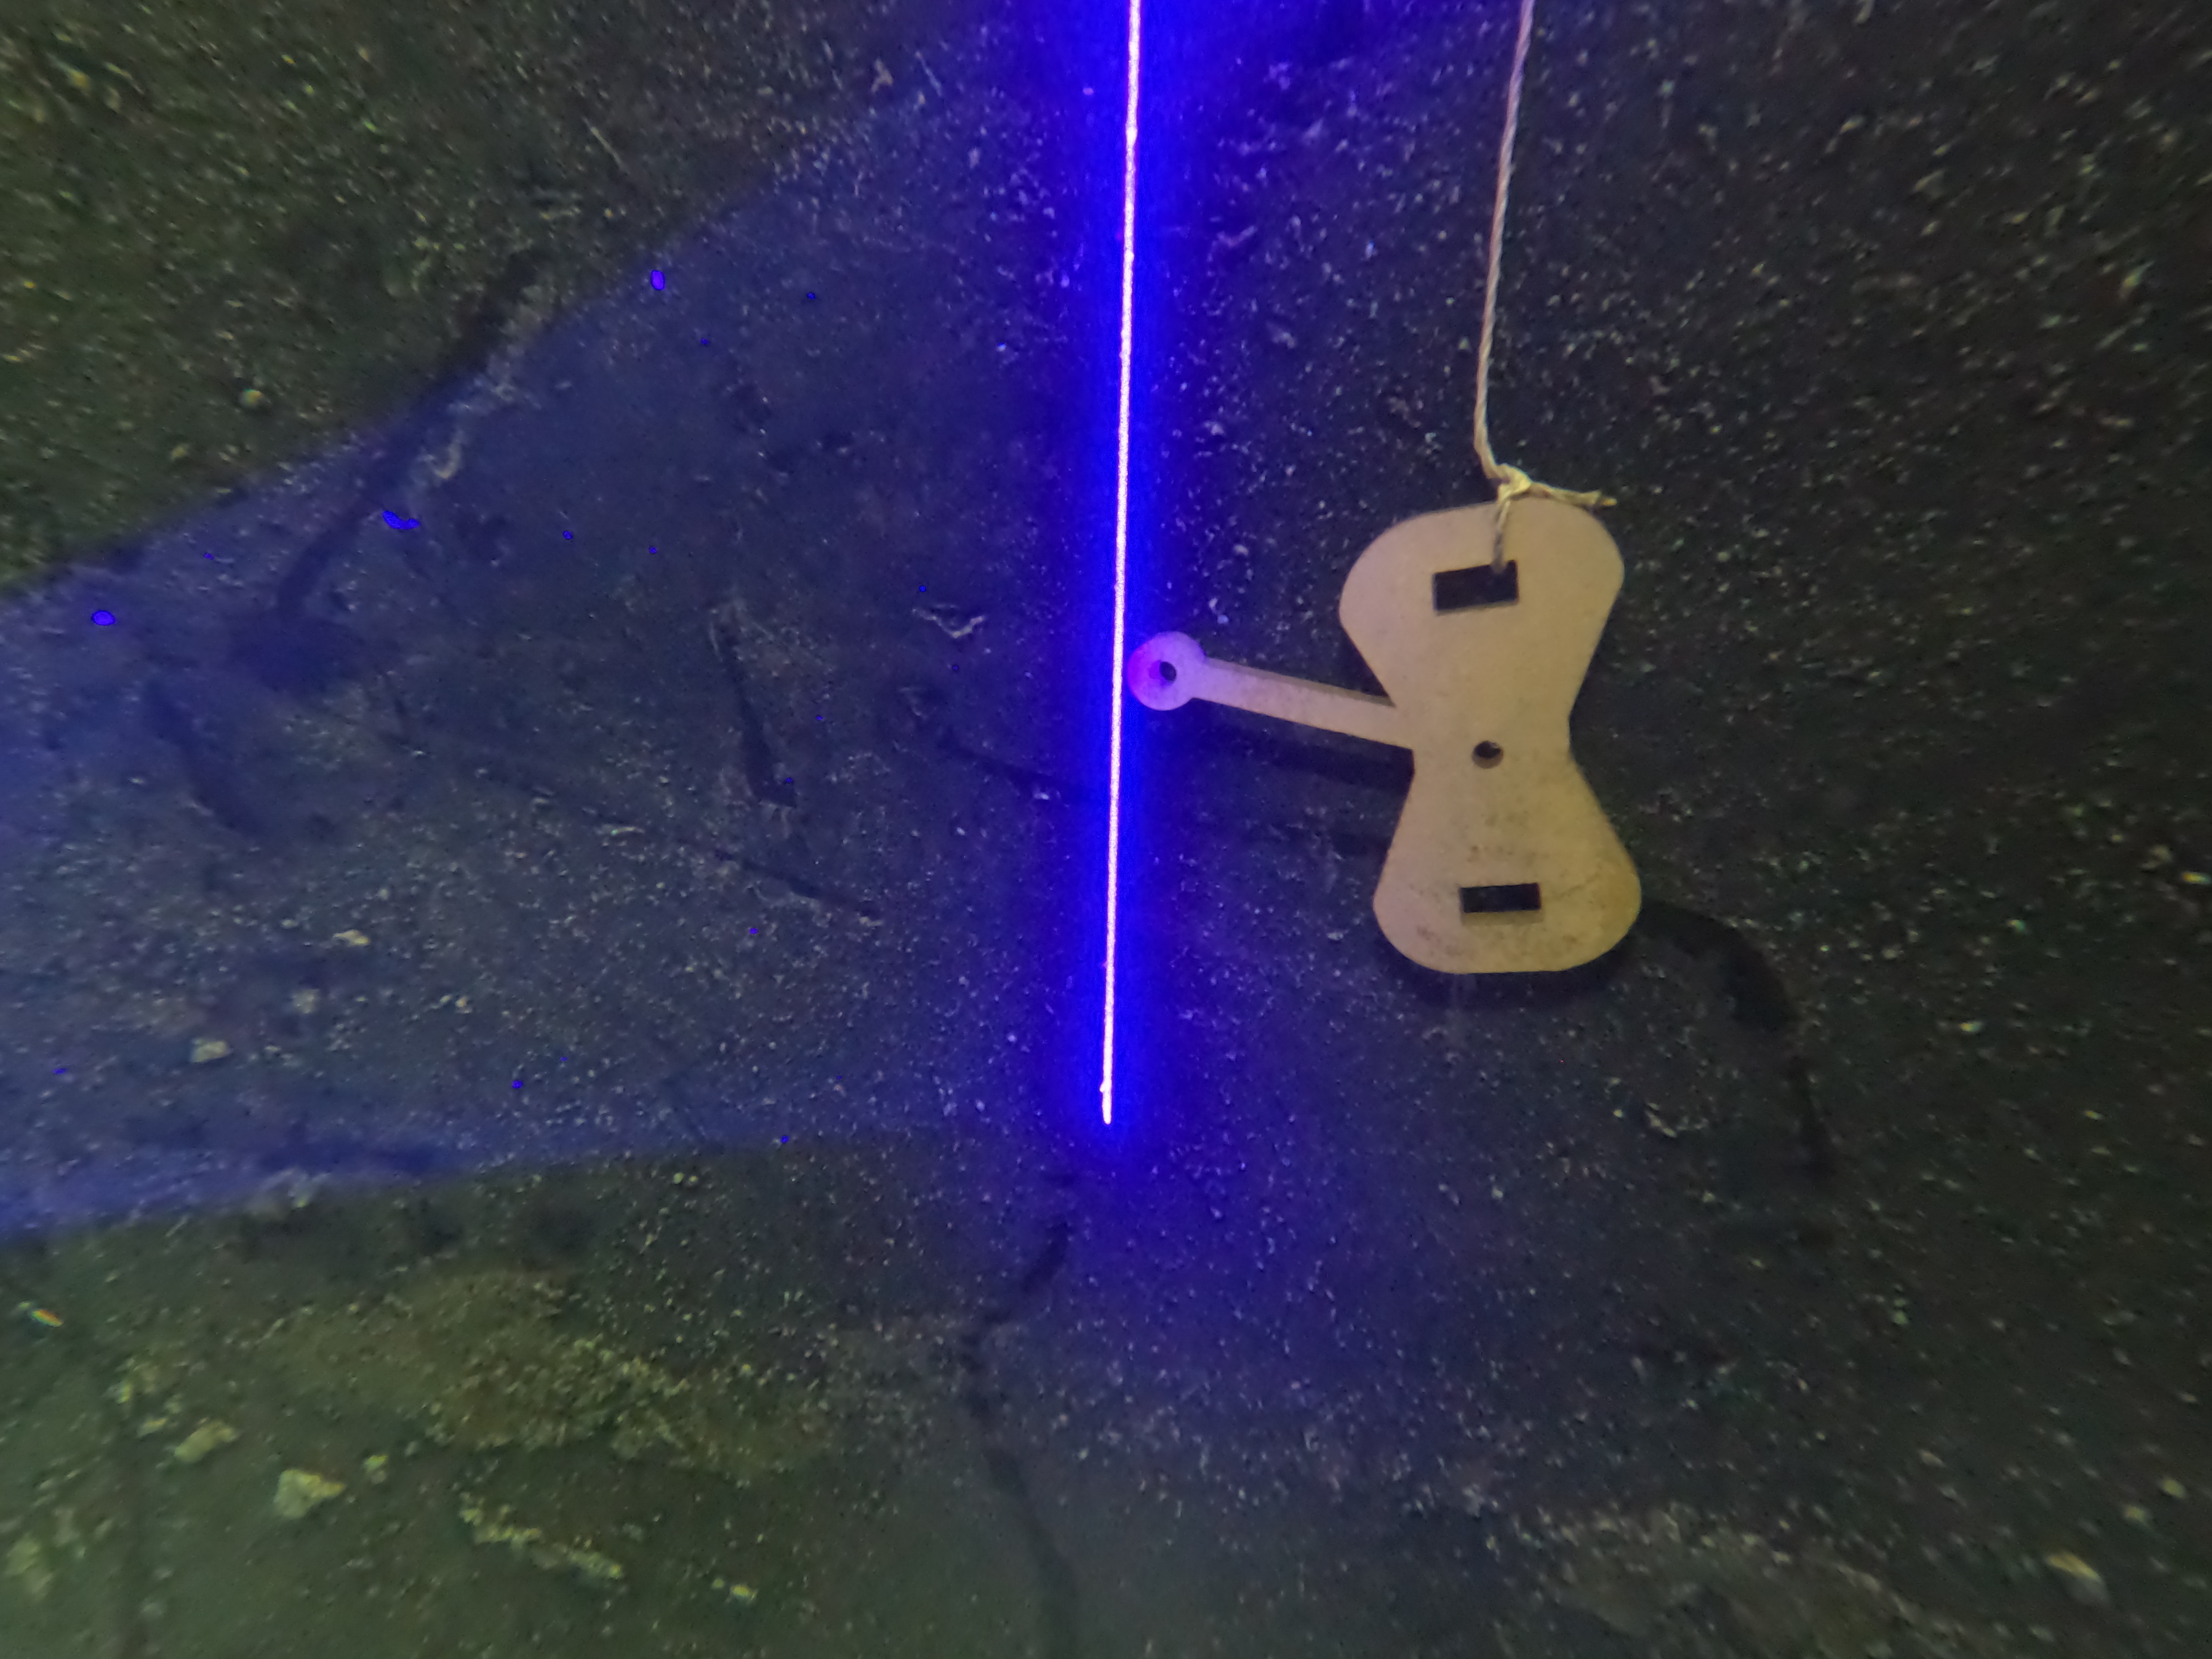

Supplement: Supplementary file 3336 [file G0015777.pdf › Level_2_1/G0015777.pdf]

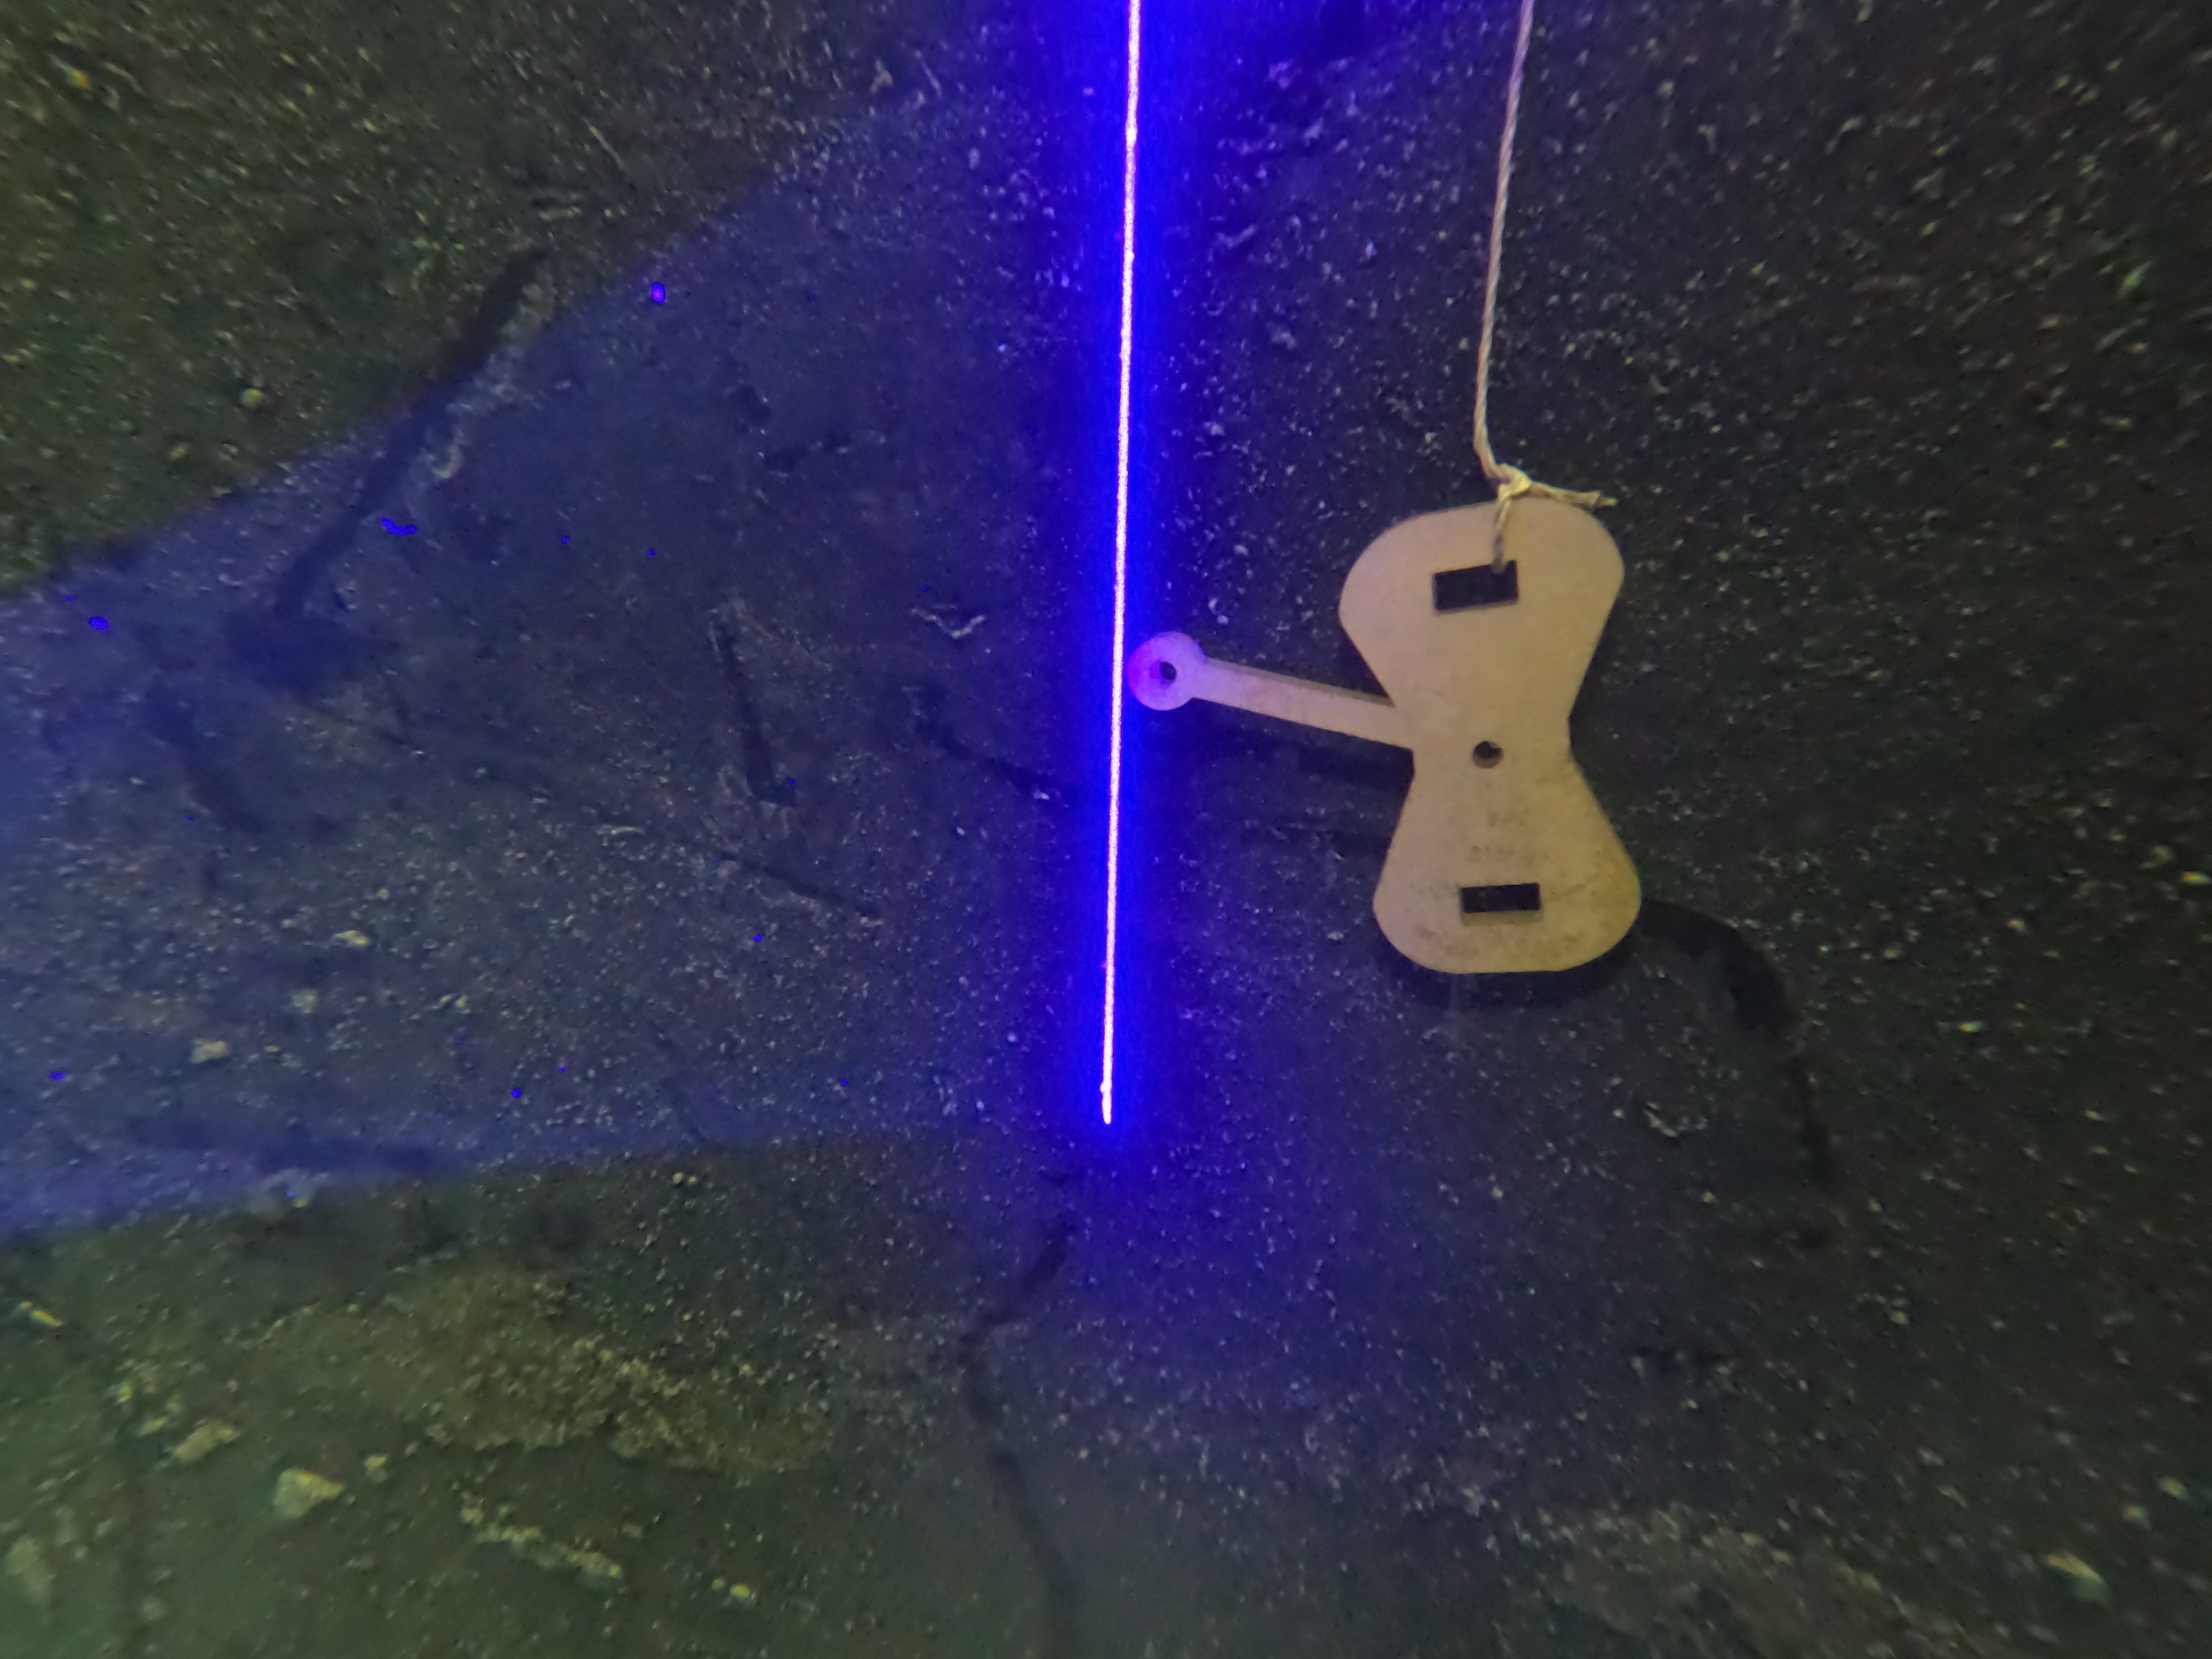

Supplement: Supplementary file 3337 [file G0015778.pdf › Level_2_1/G0015778.pdf]

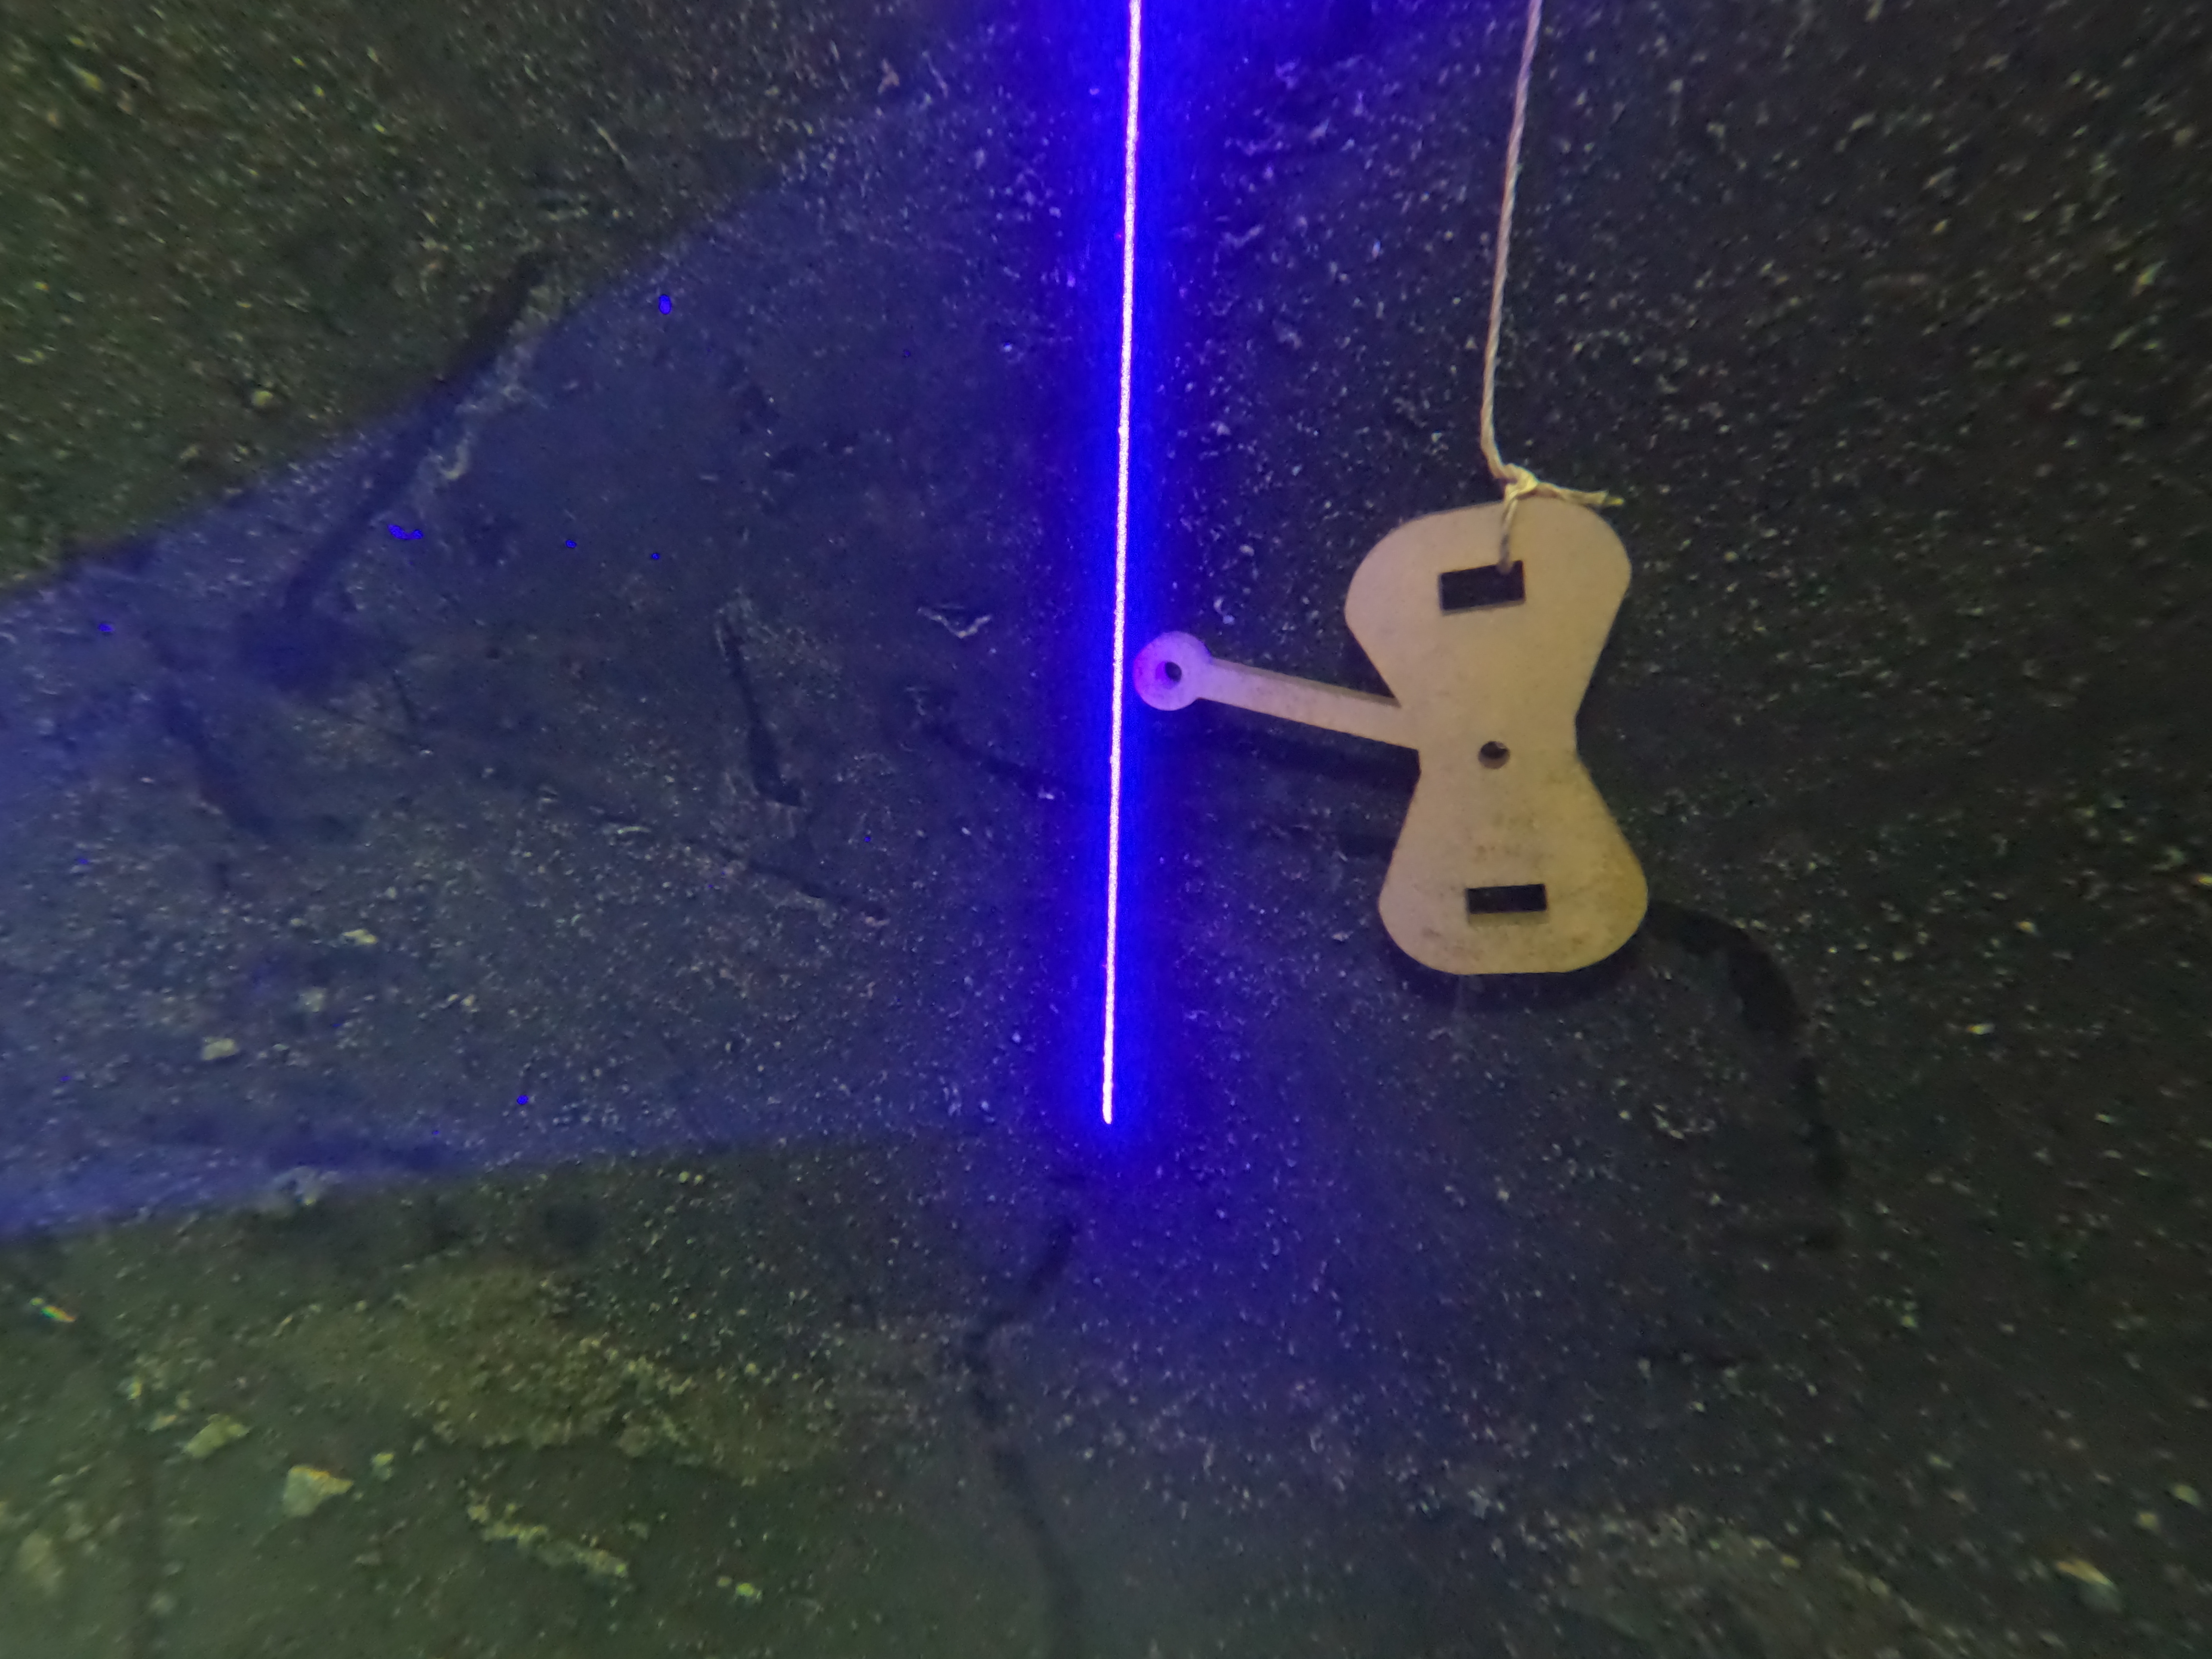

Supplement: Supplementary file 3338 [file G0015779.pdf › Level_2_1/G0015779.pdf]

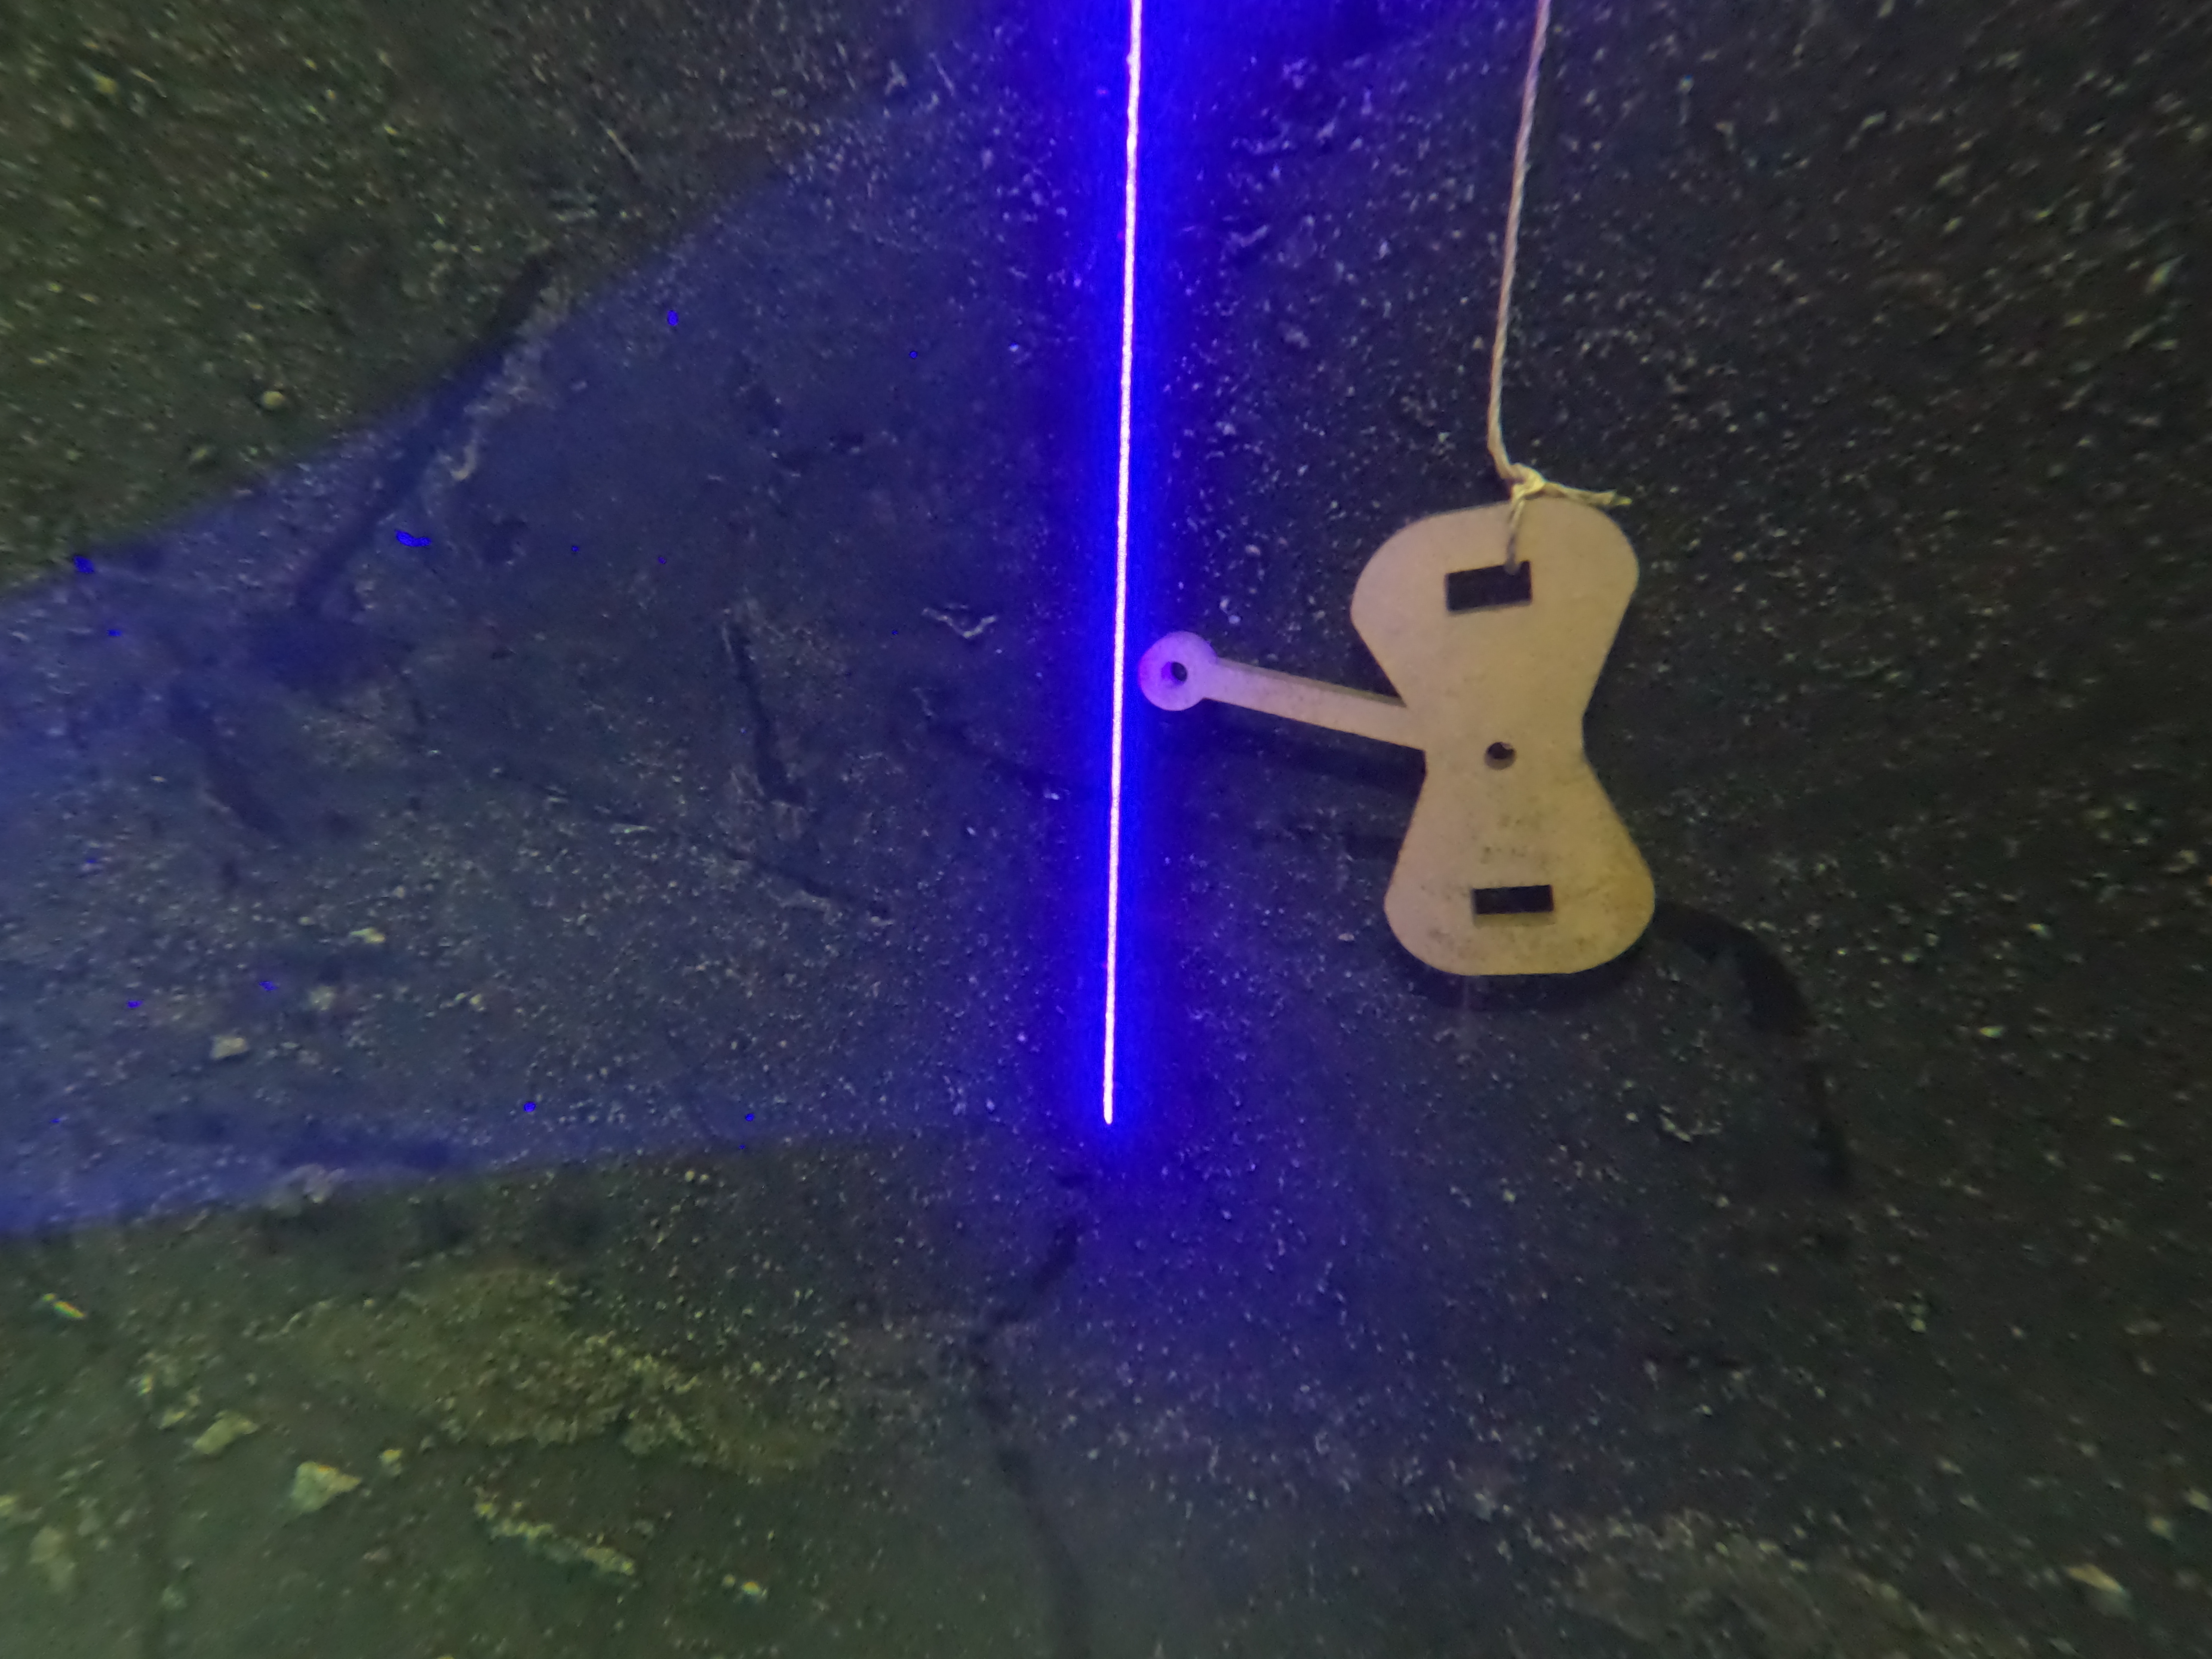

Supplement: Supplementary file 3339 [file G0015780.pdf › Level_2_1/G0015780.pdf]

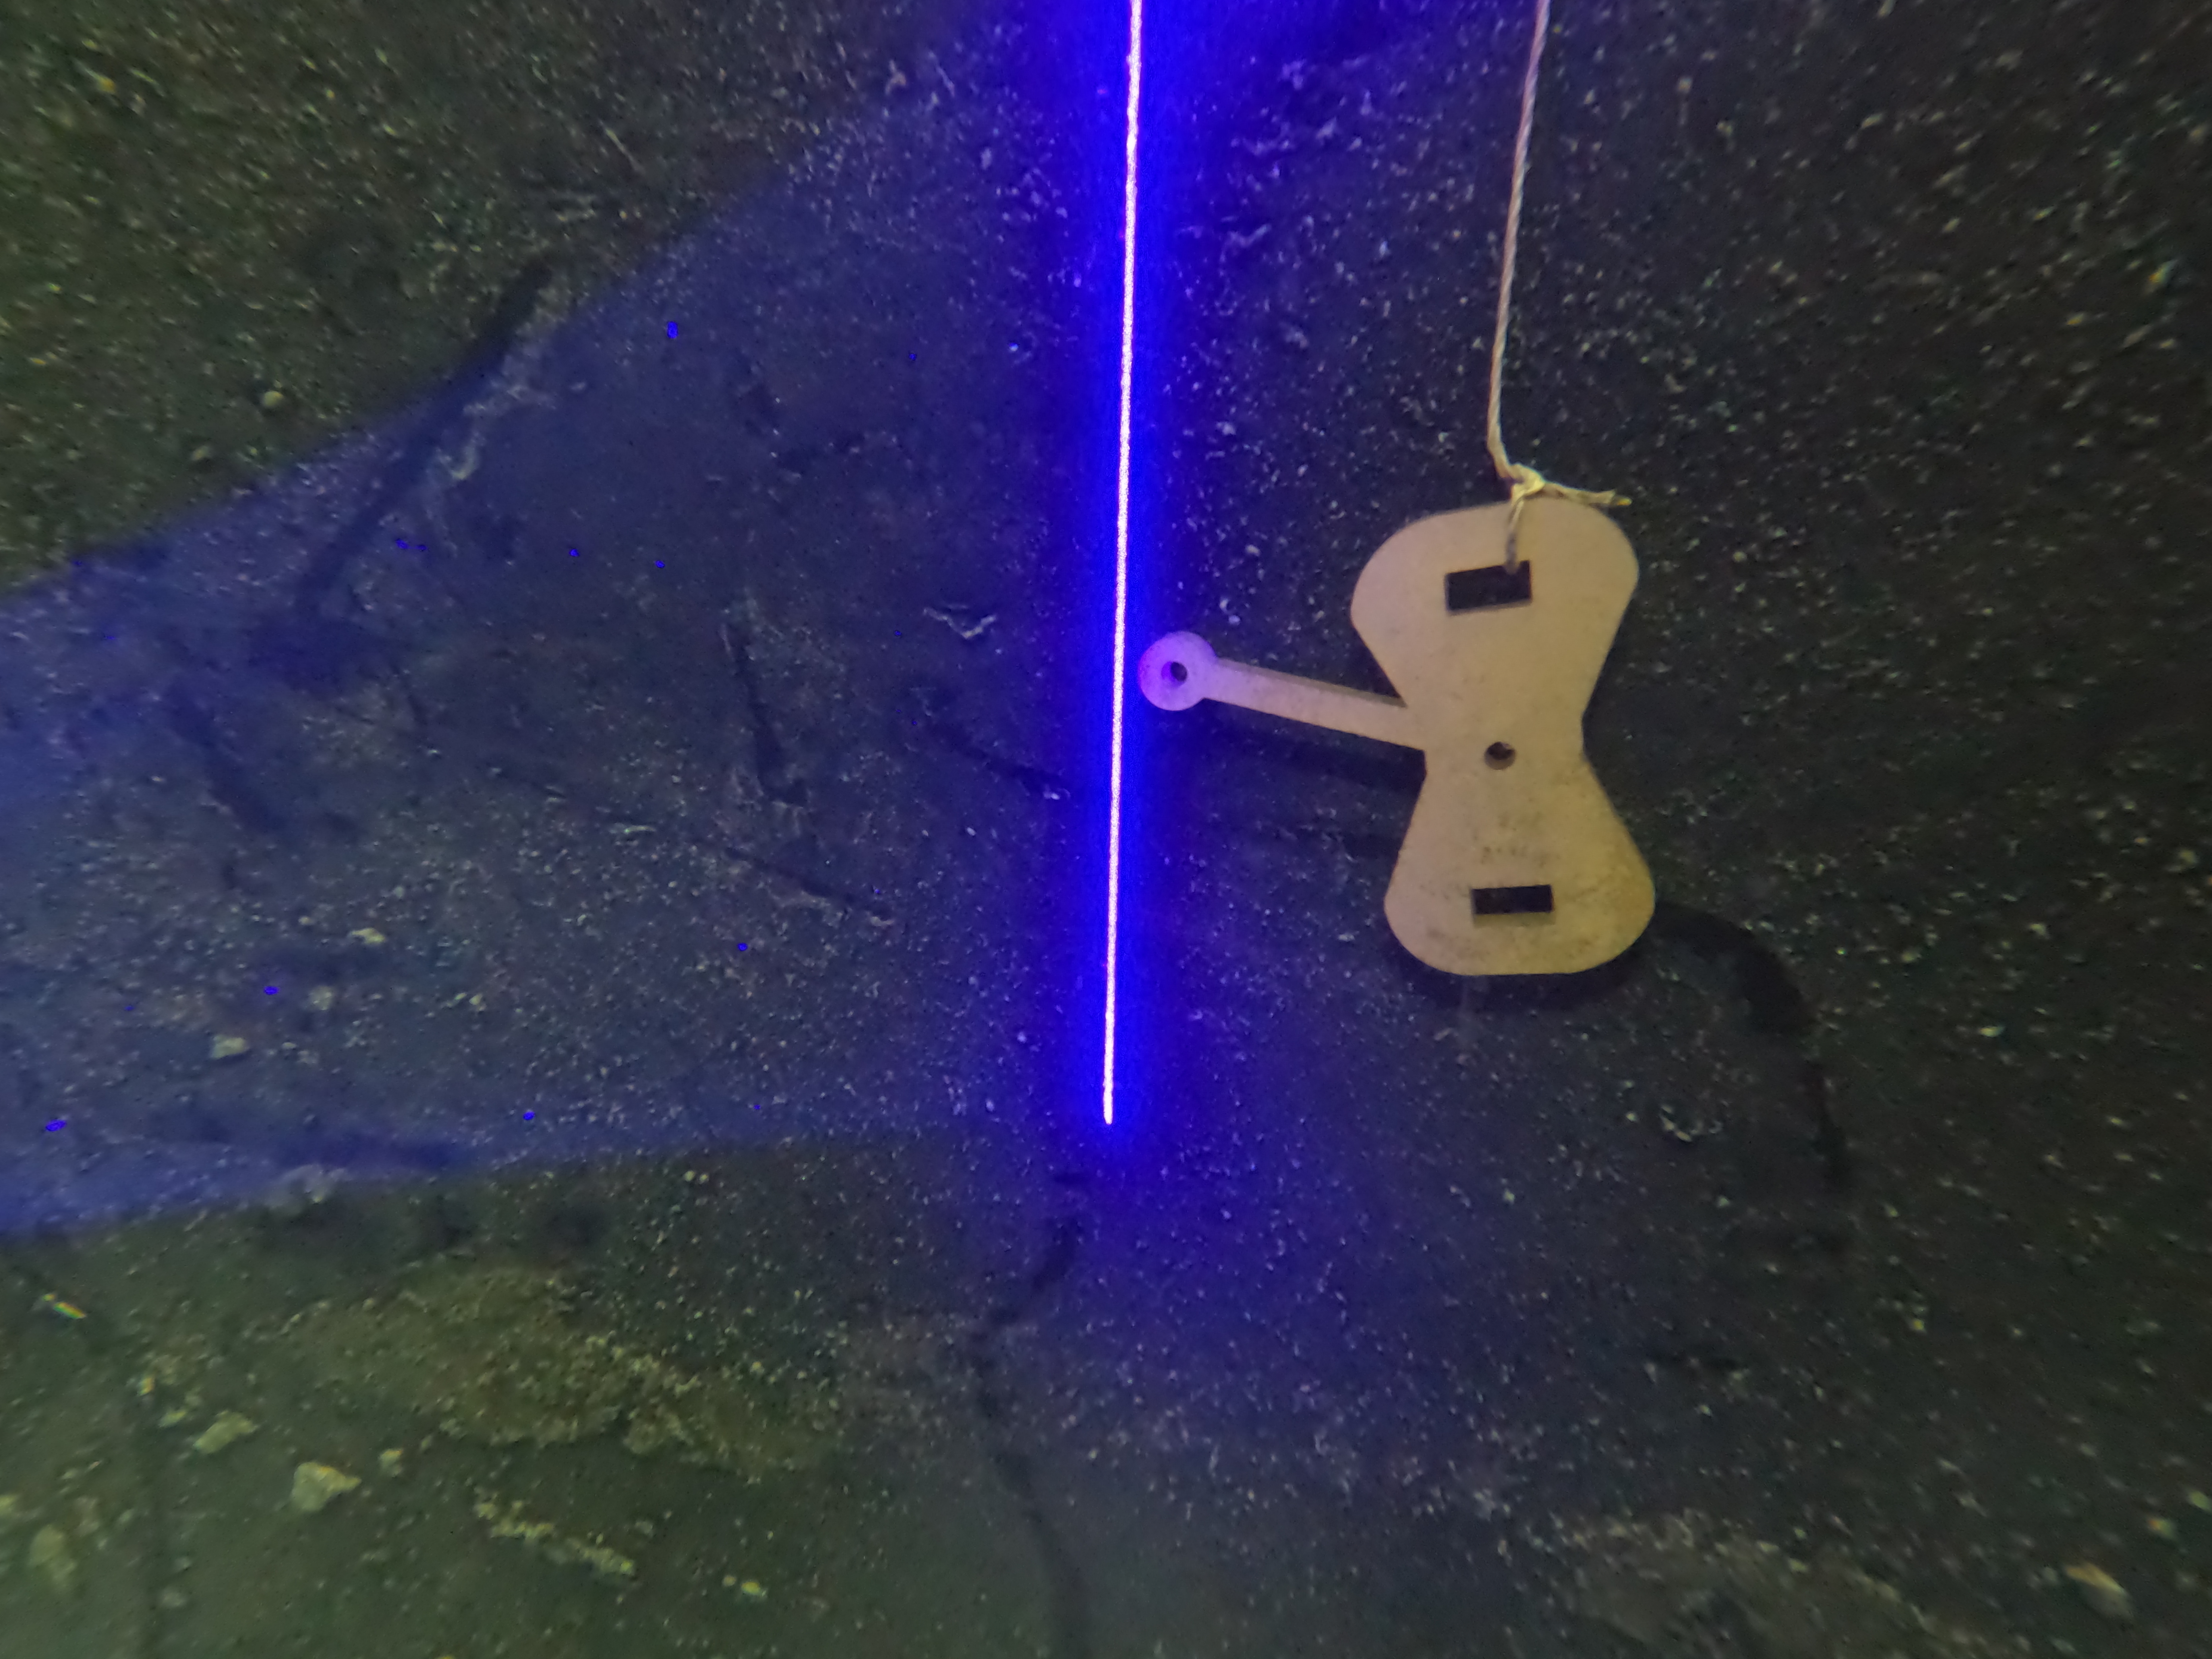

Supplement: Supplementary file 3340 [file G0015781.pdf › Level_2_1/G0015781.pdf]

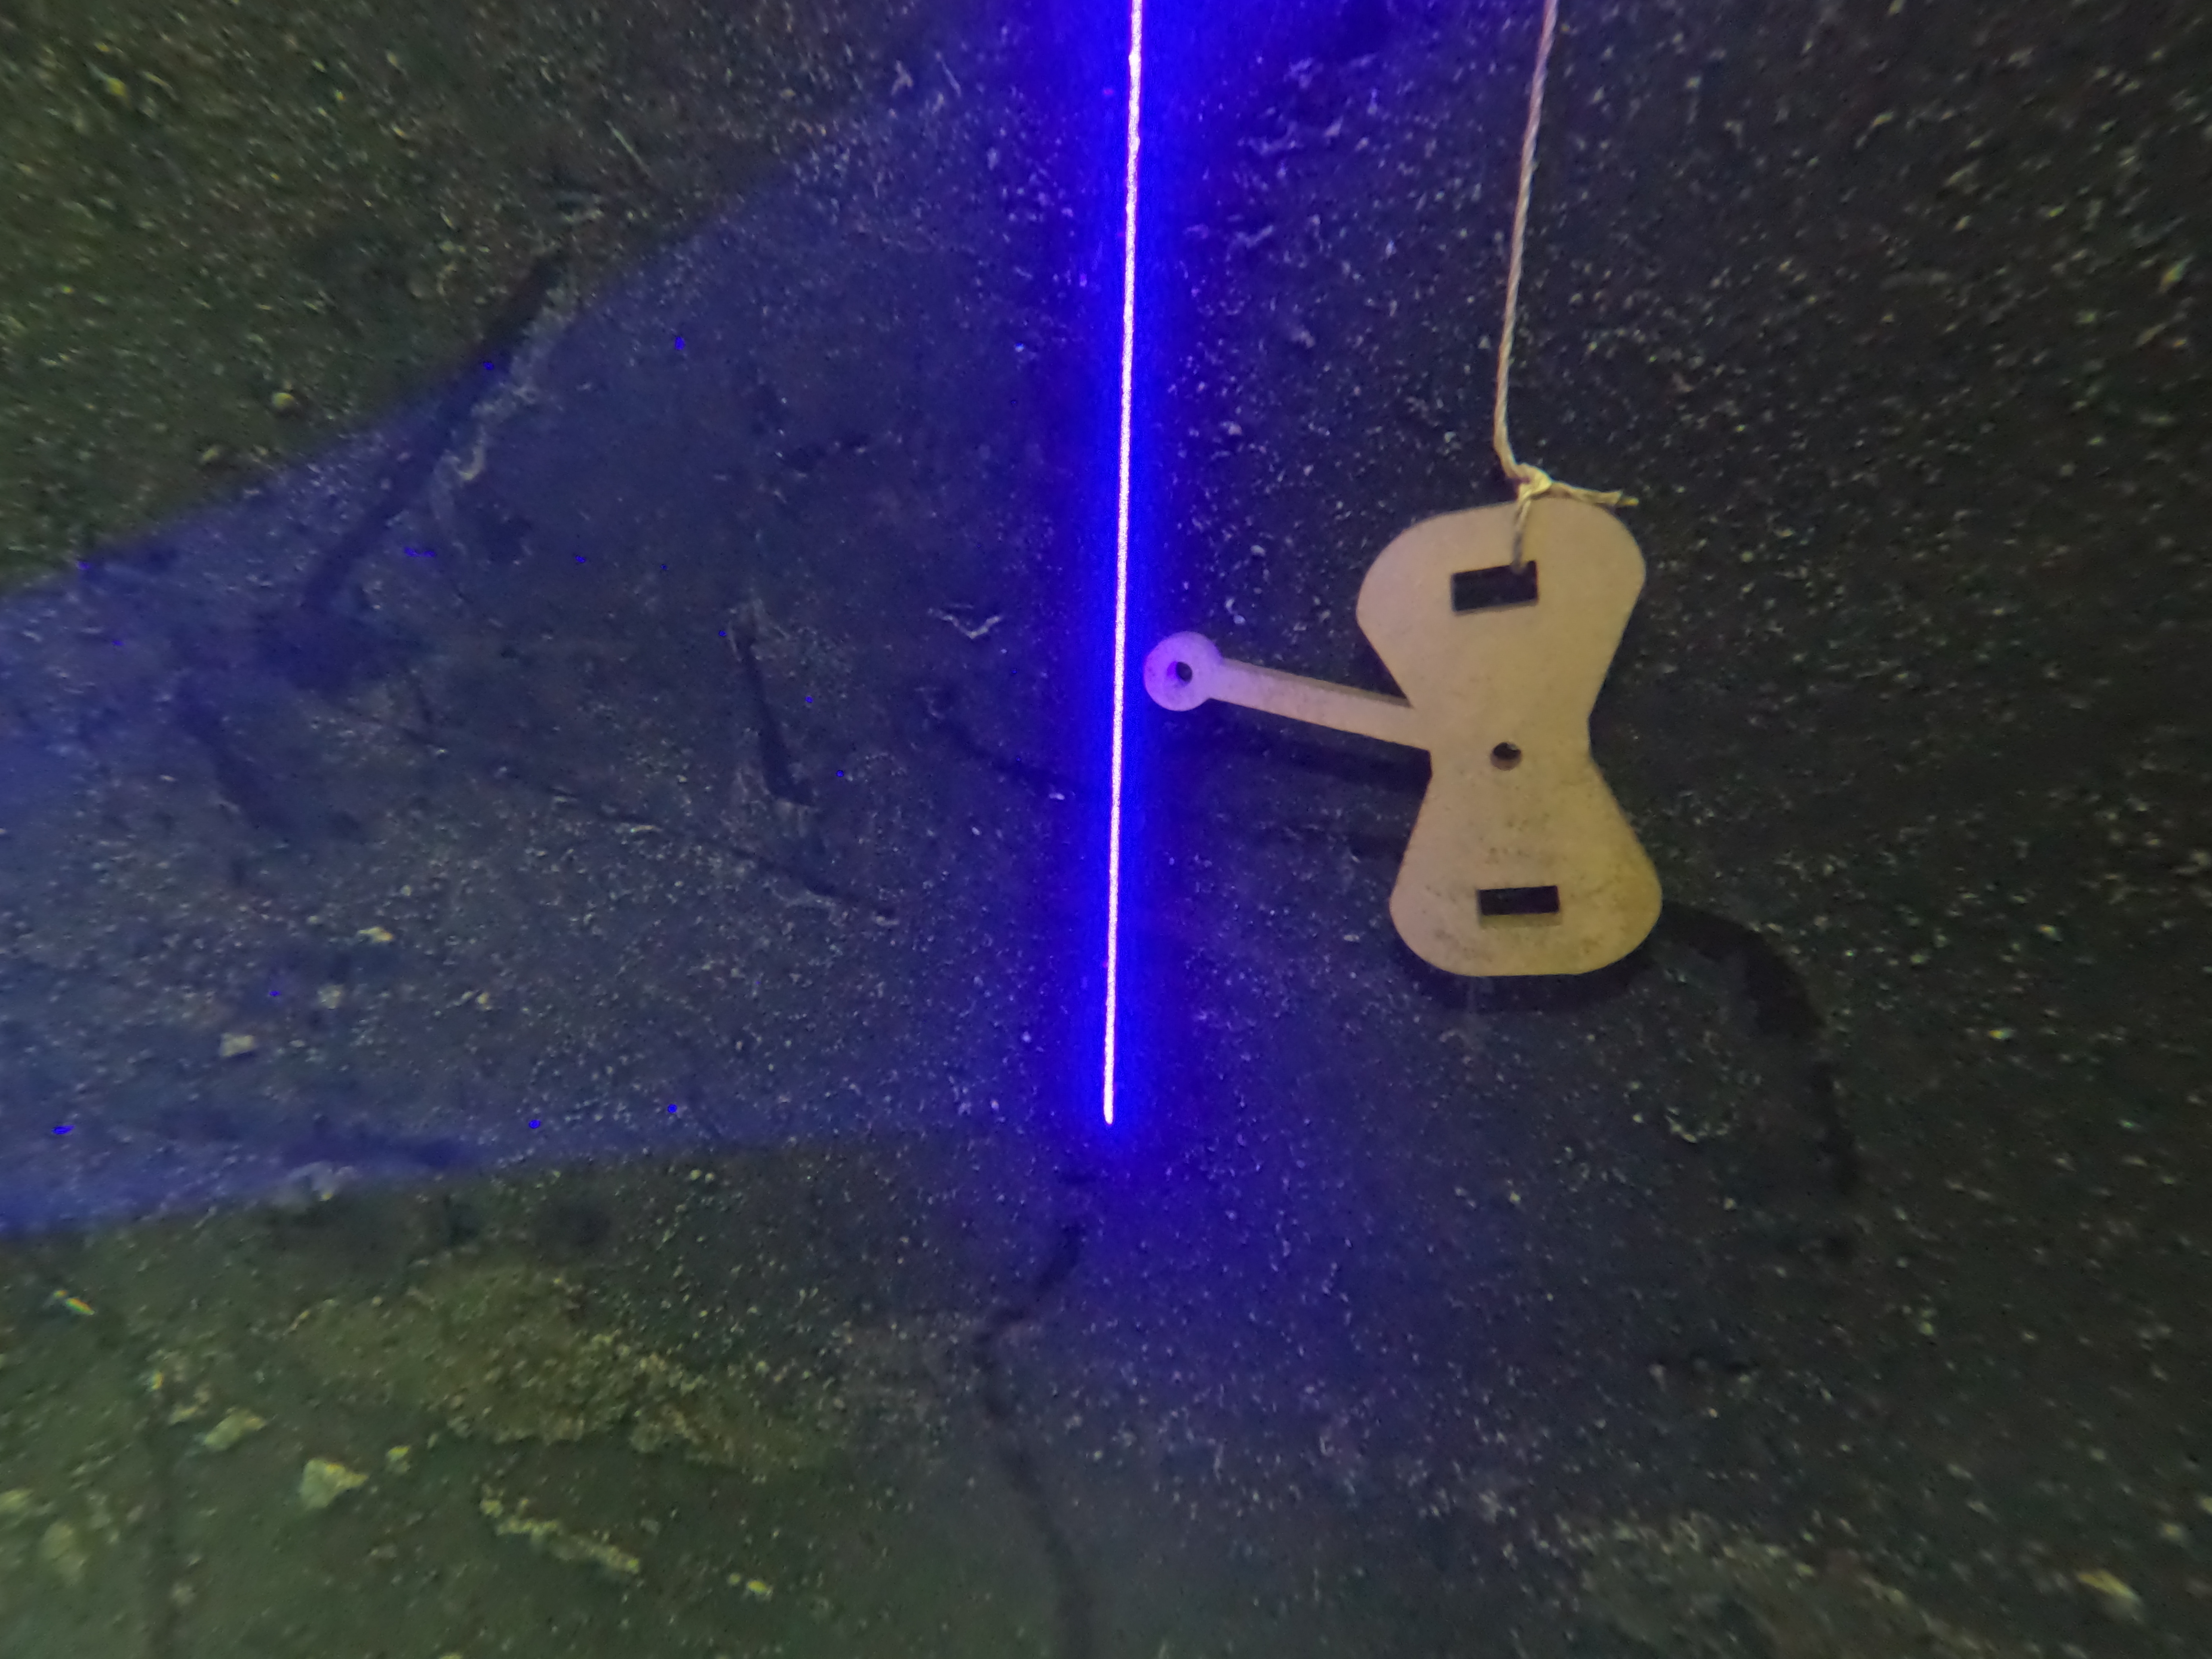

Supplement: Supplementary file 3341 [file G0015782.pdf › Level_2_1/G0015782.pdf]

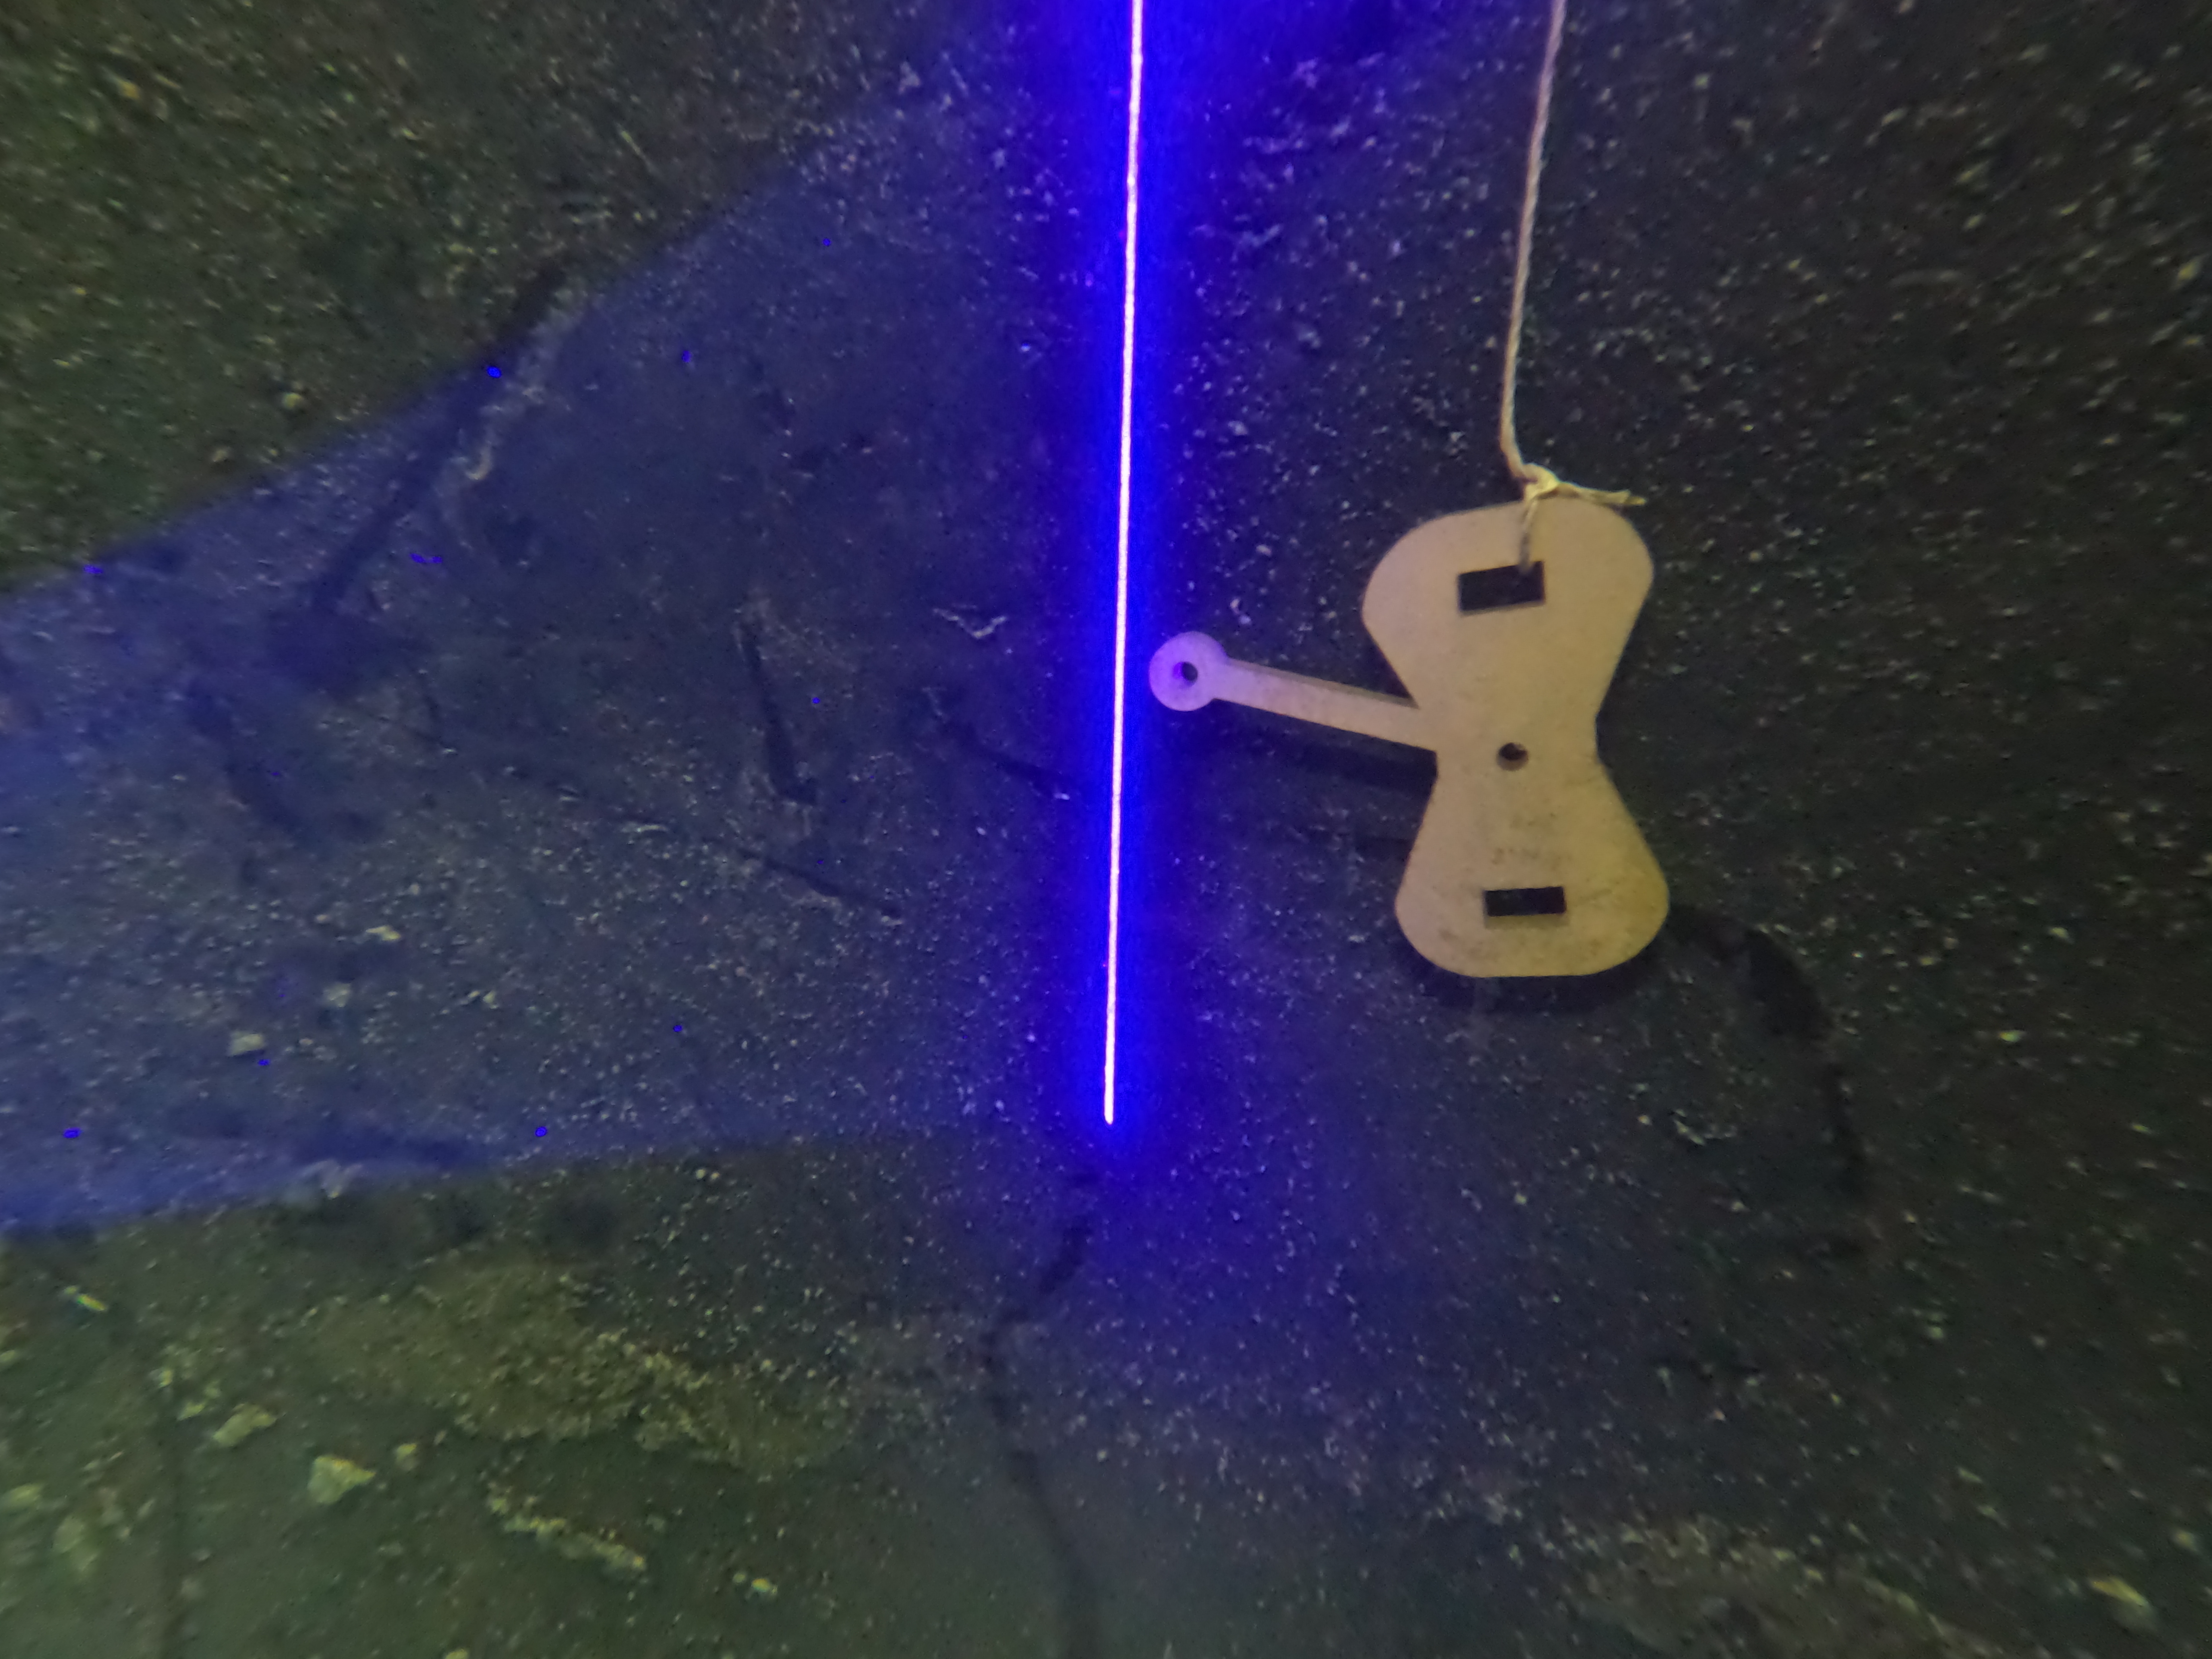

Supplement: Supplementary file 3342 [file G0015783.pdf › Level_2_1/G0015783.pdf]

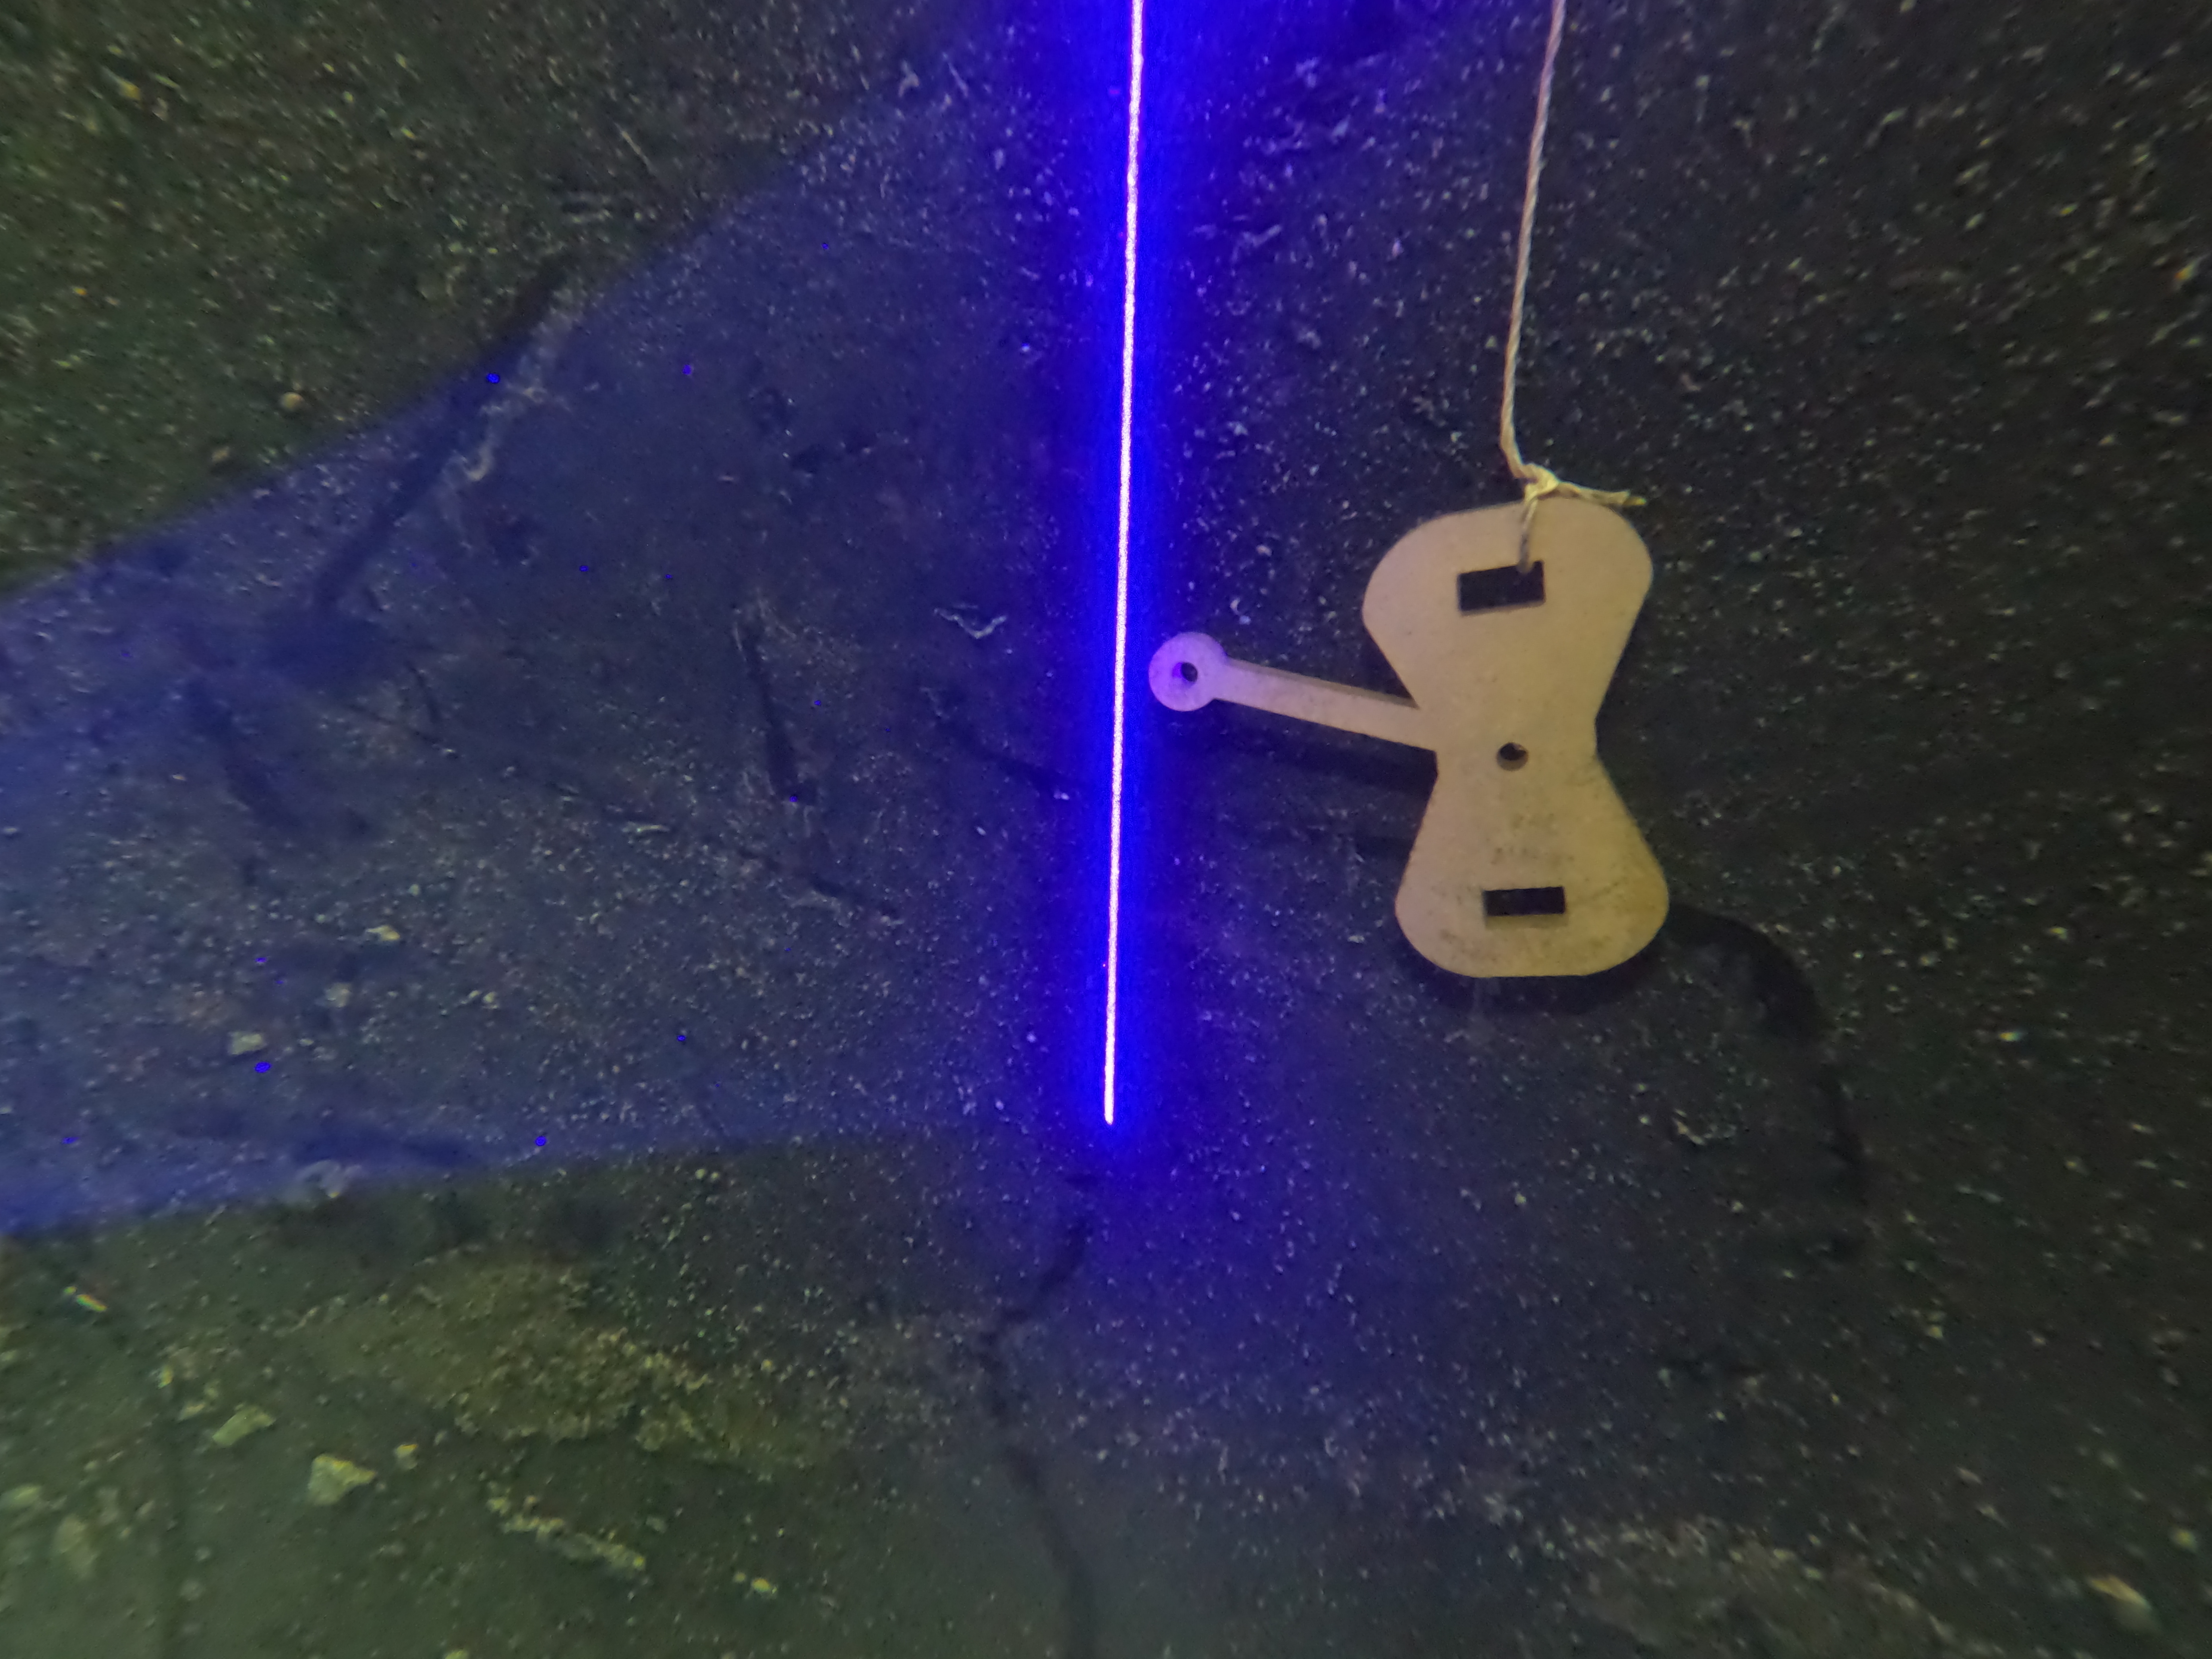

Supplement: Supplementary file 3343 [file G0015784.pdf › Level_2_1/G0015784.pdf]

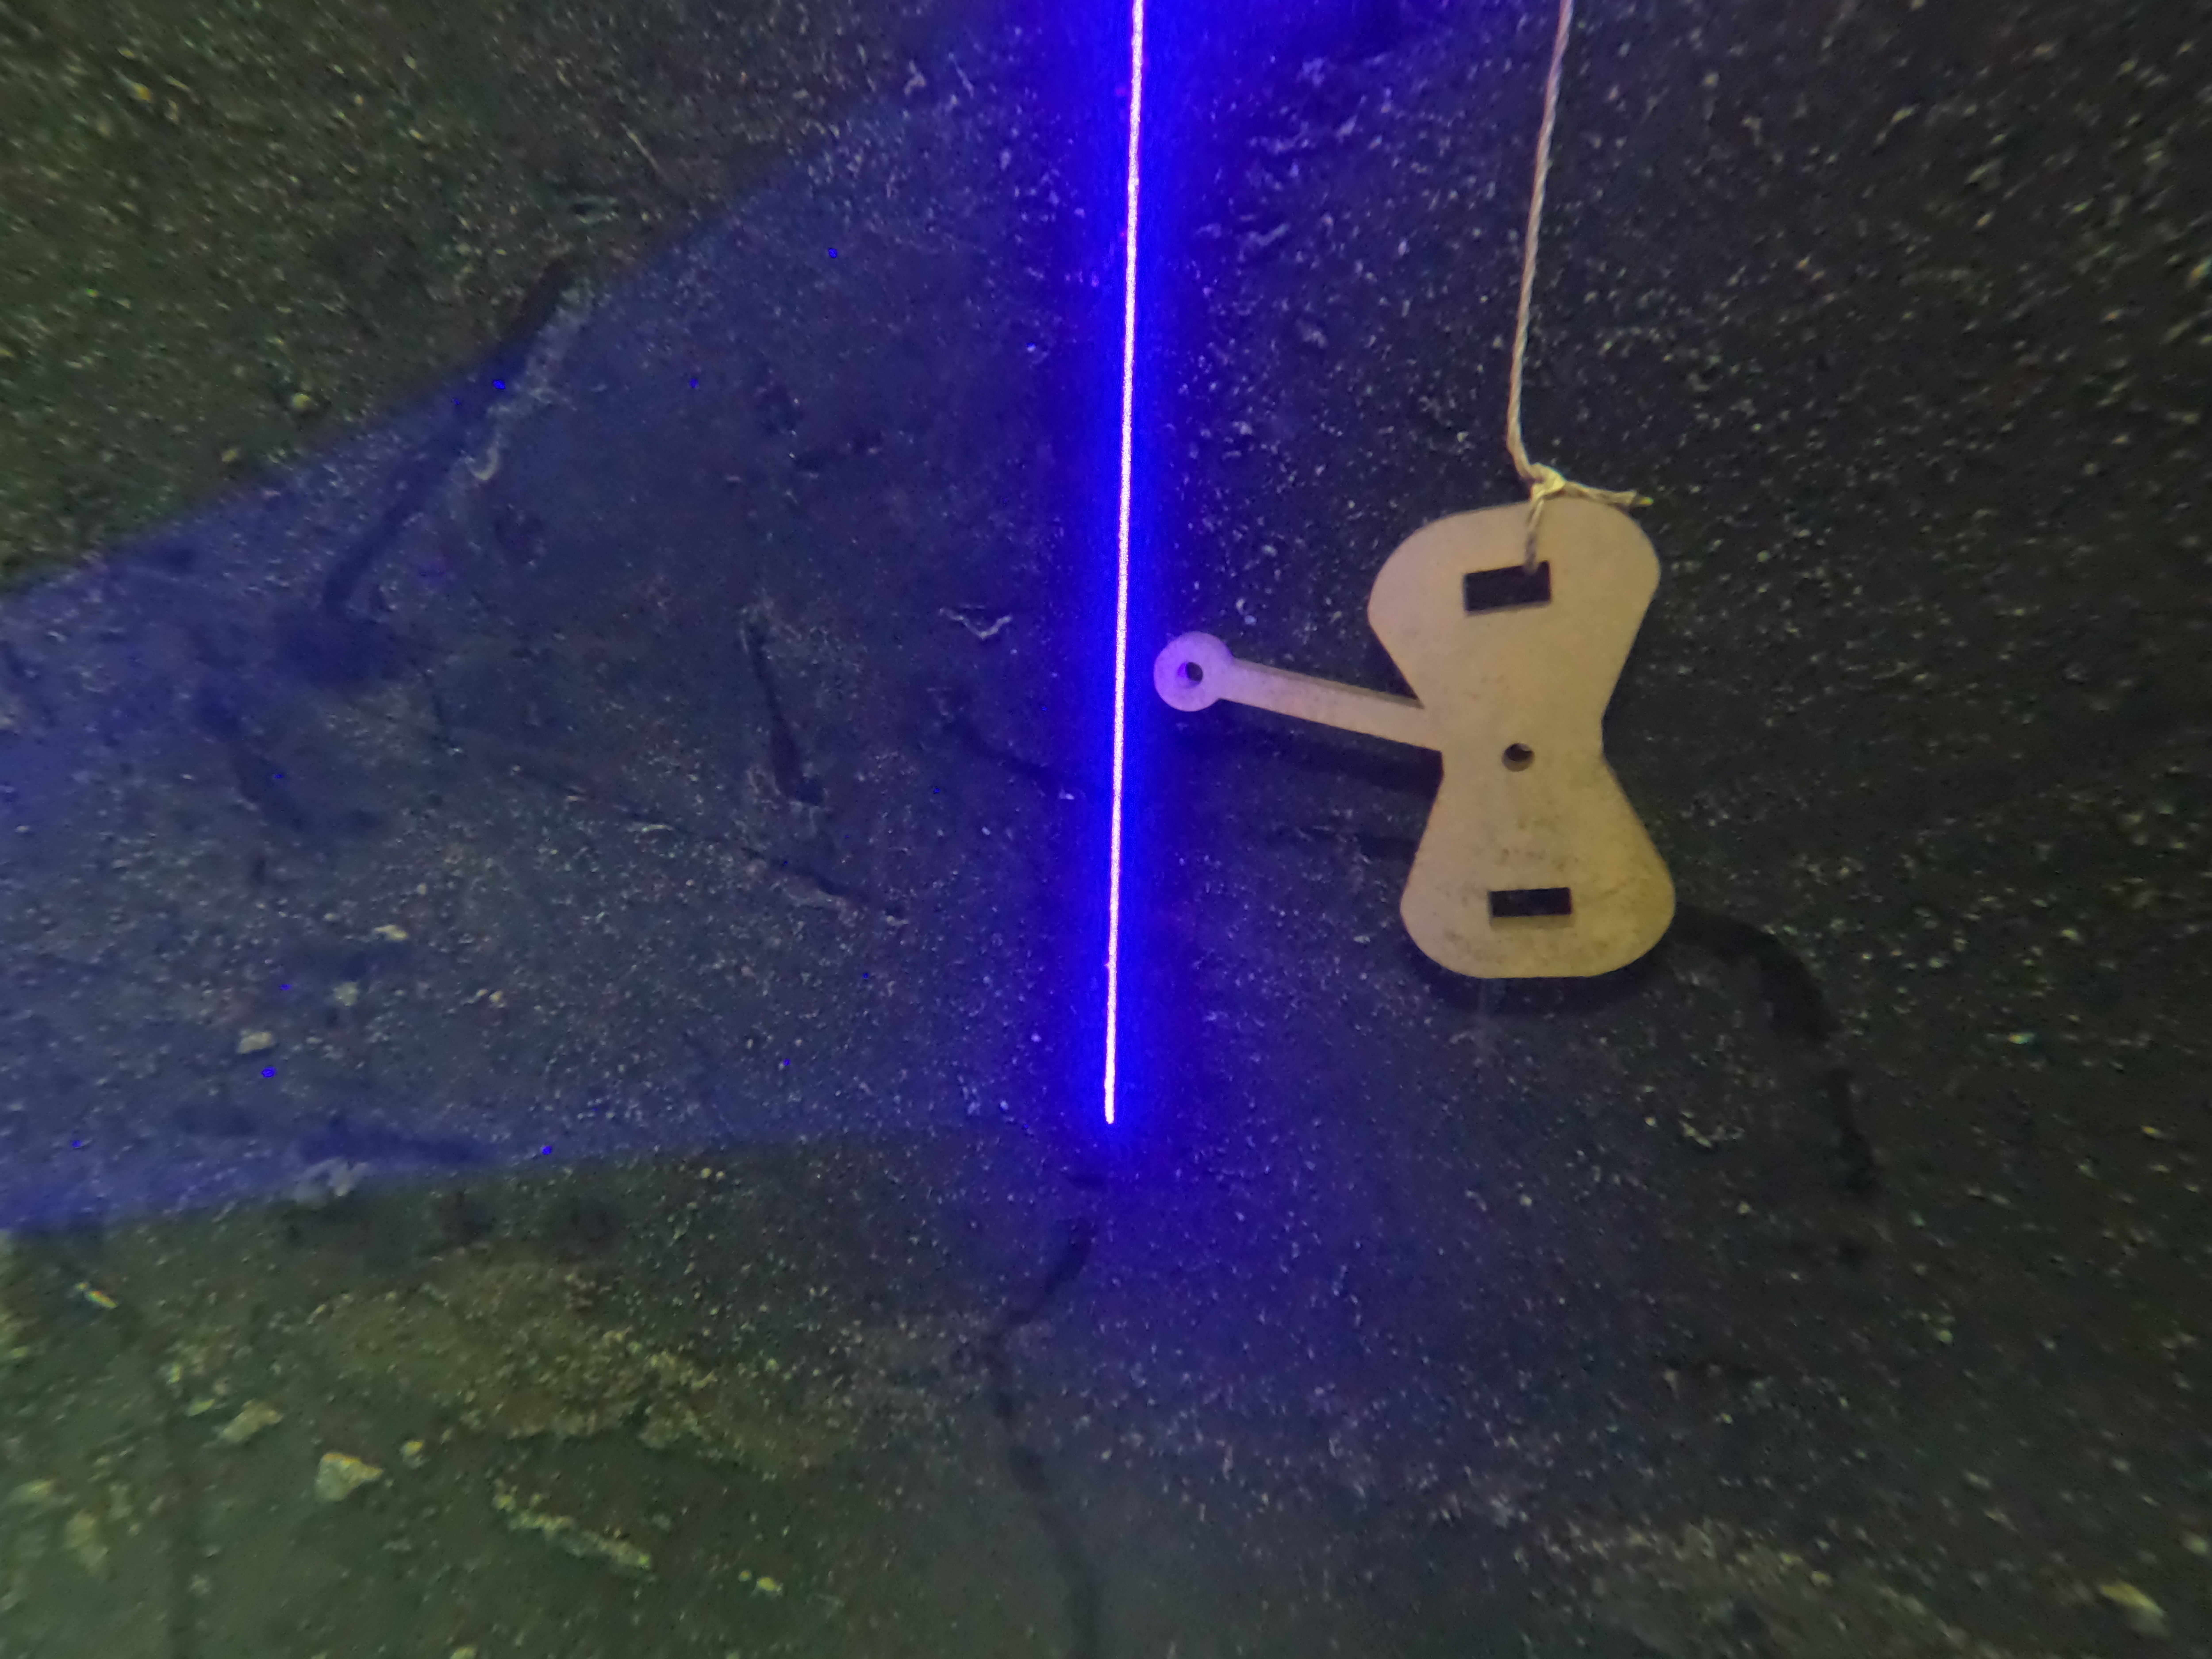

Supplement: Supplementary file 3344 [file G0015785.pdf › Level_2_1/G0015785.pdf]

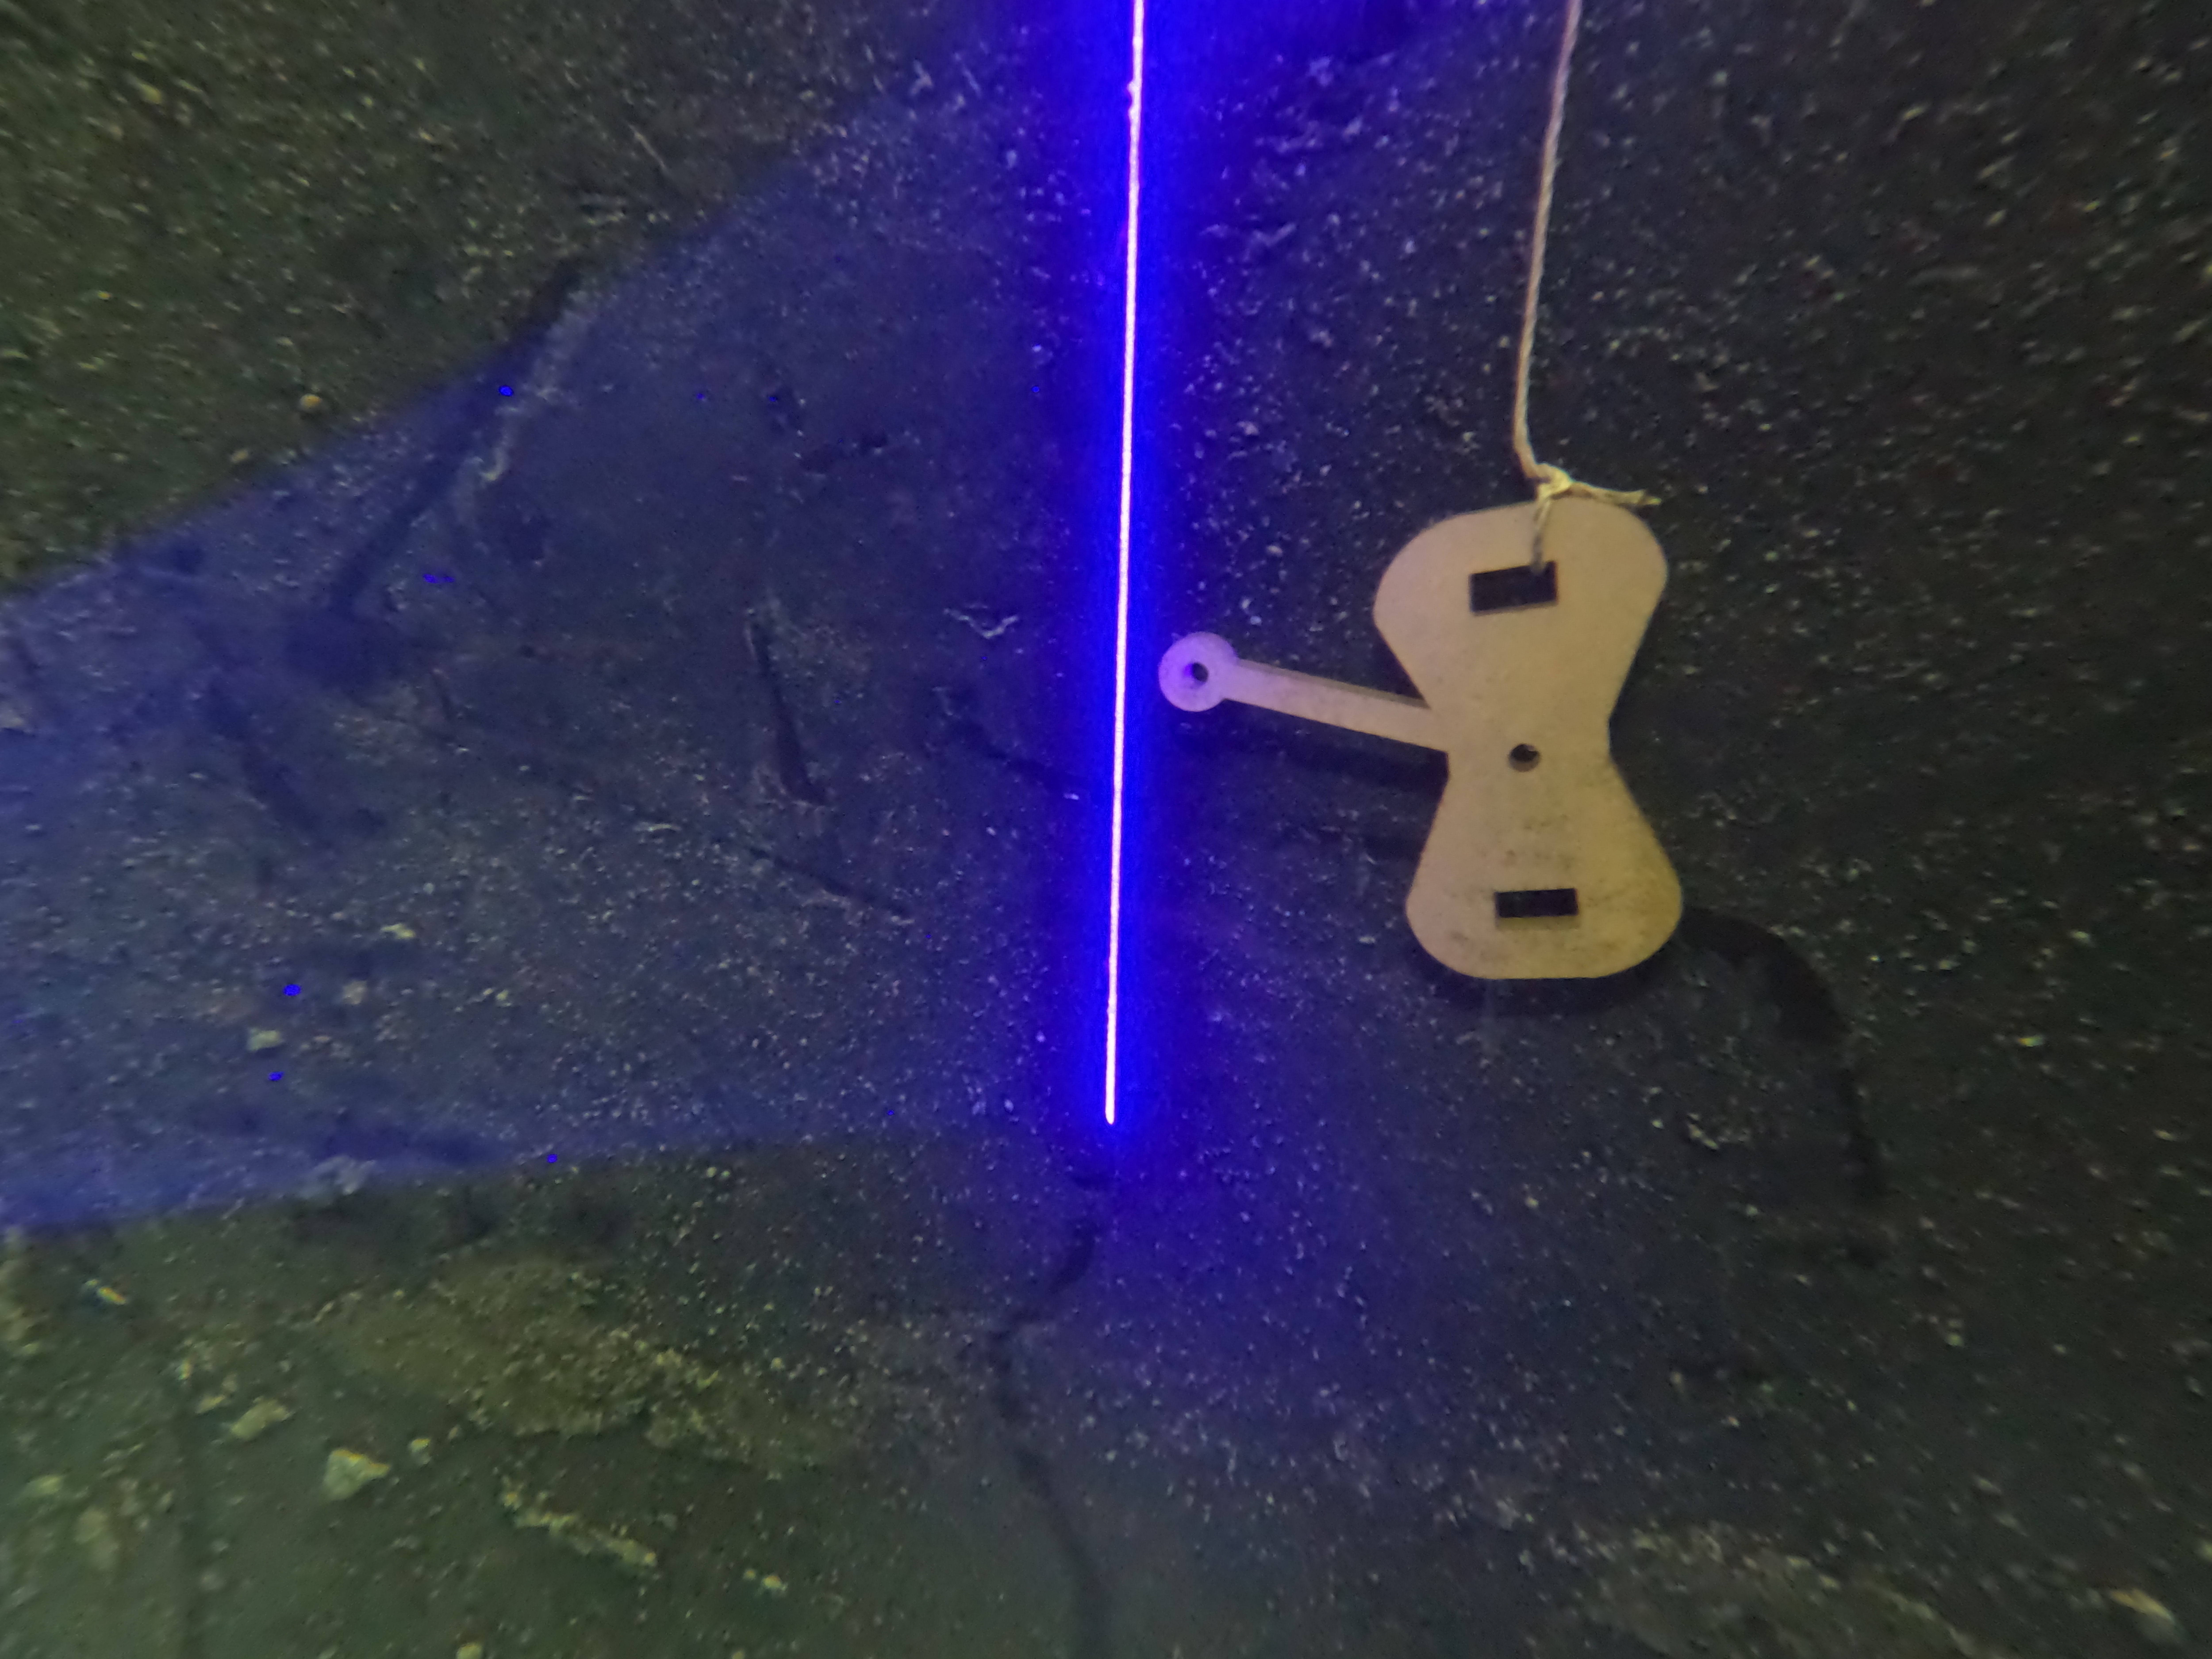

Supplement: Supplementary file 3345 [file G0015786.pdf › Level_2_1/G0015786.pdf]

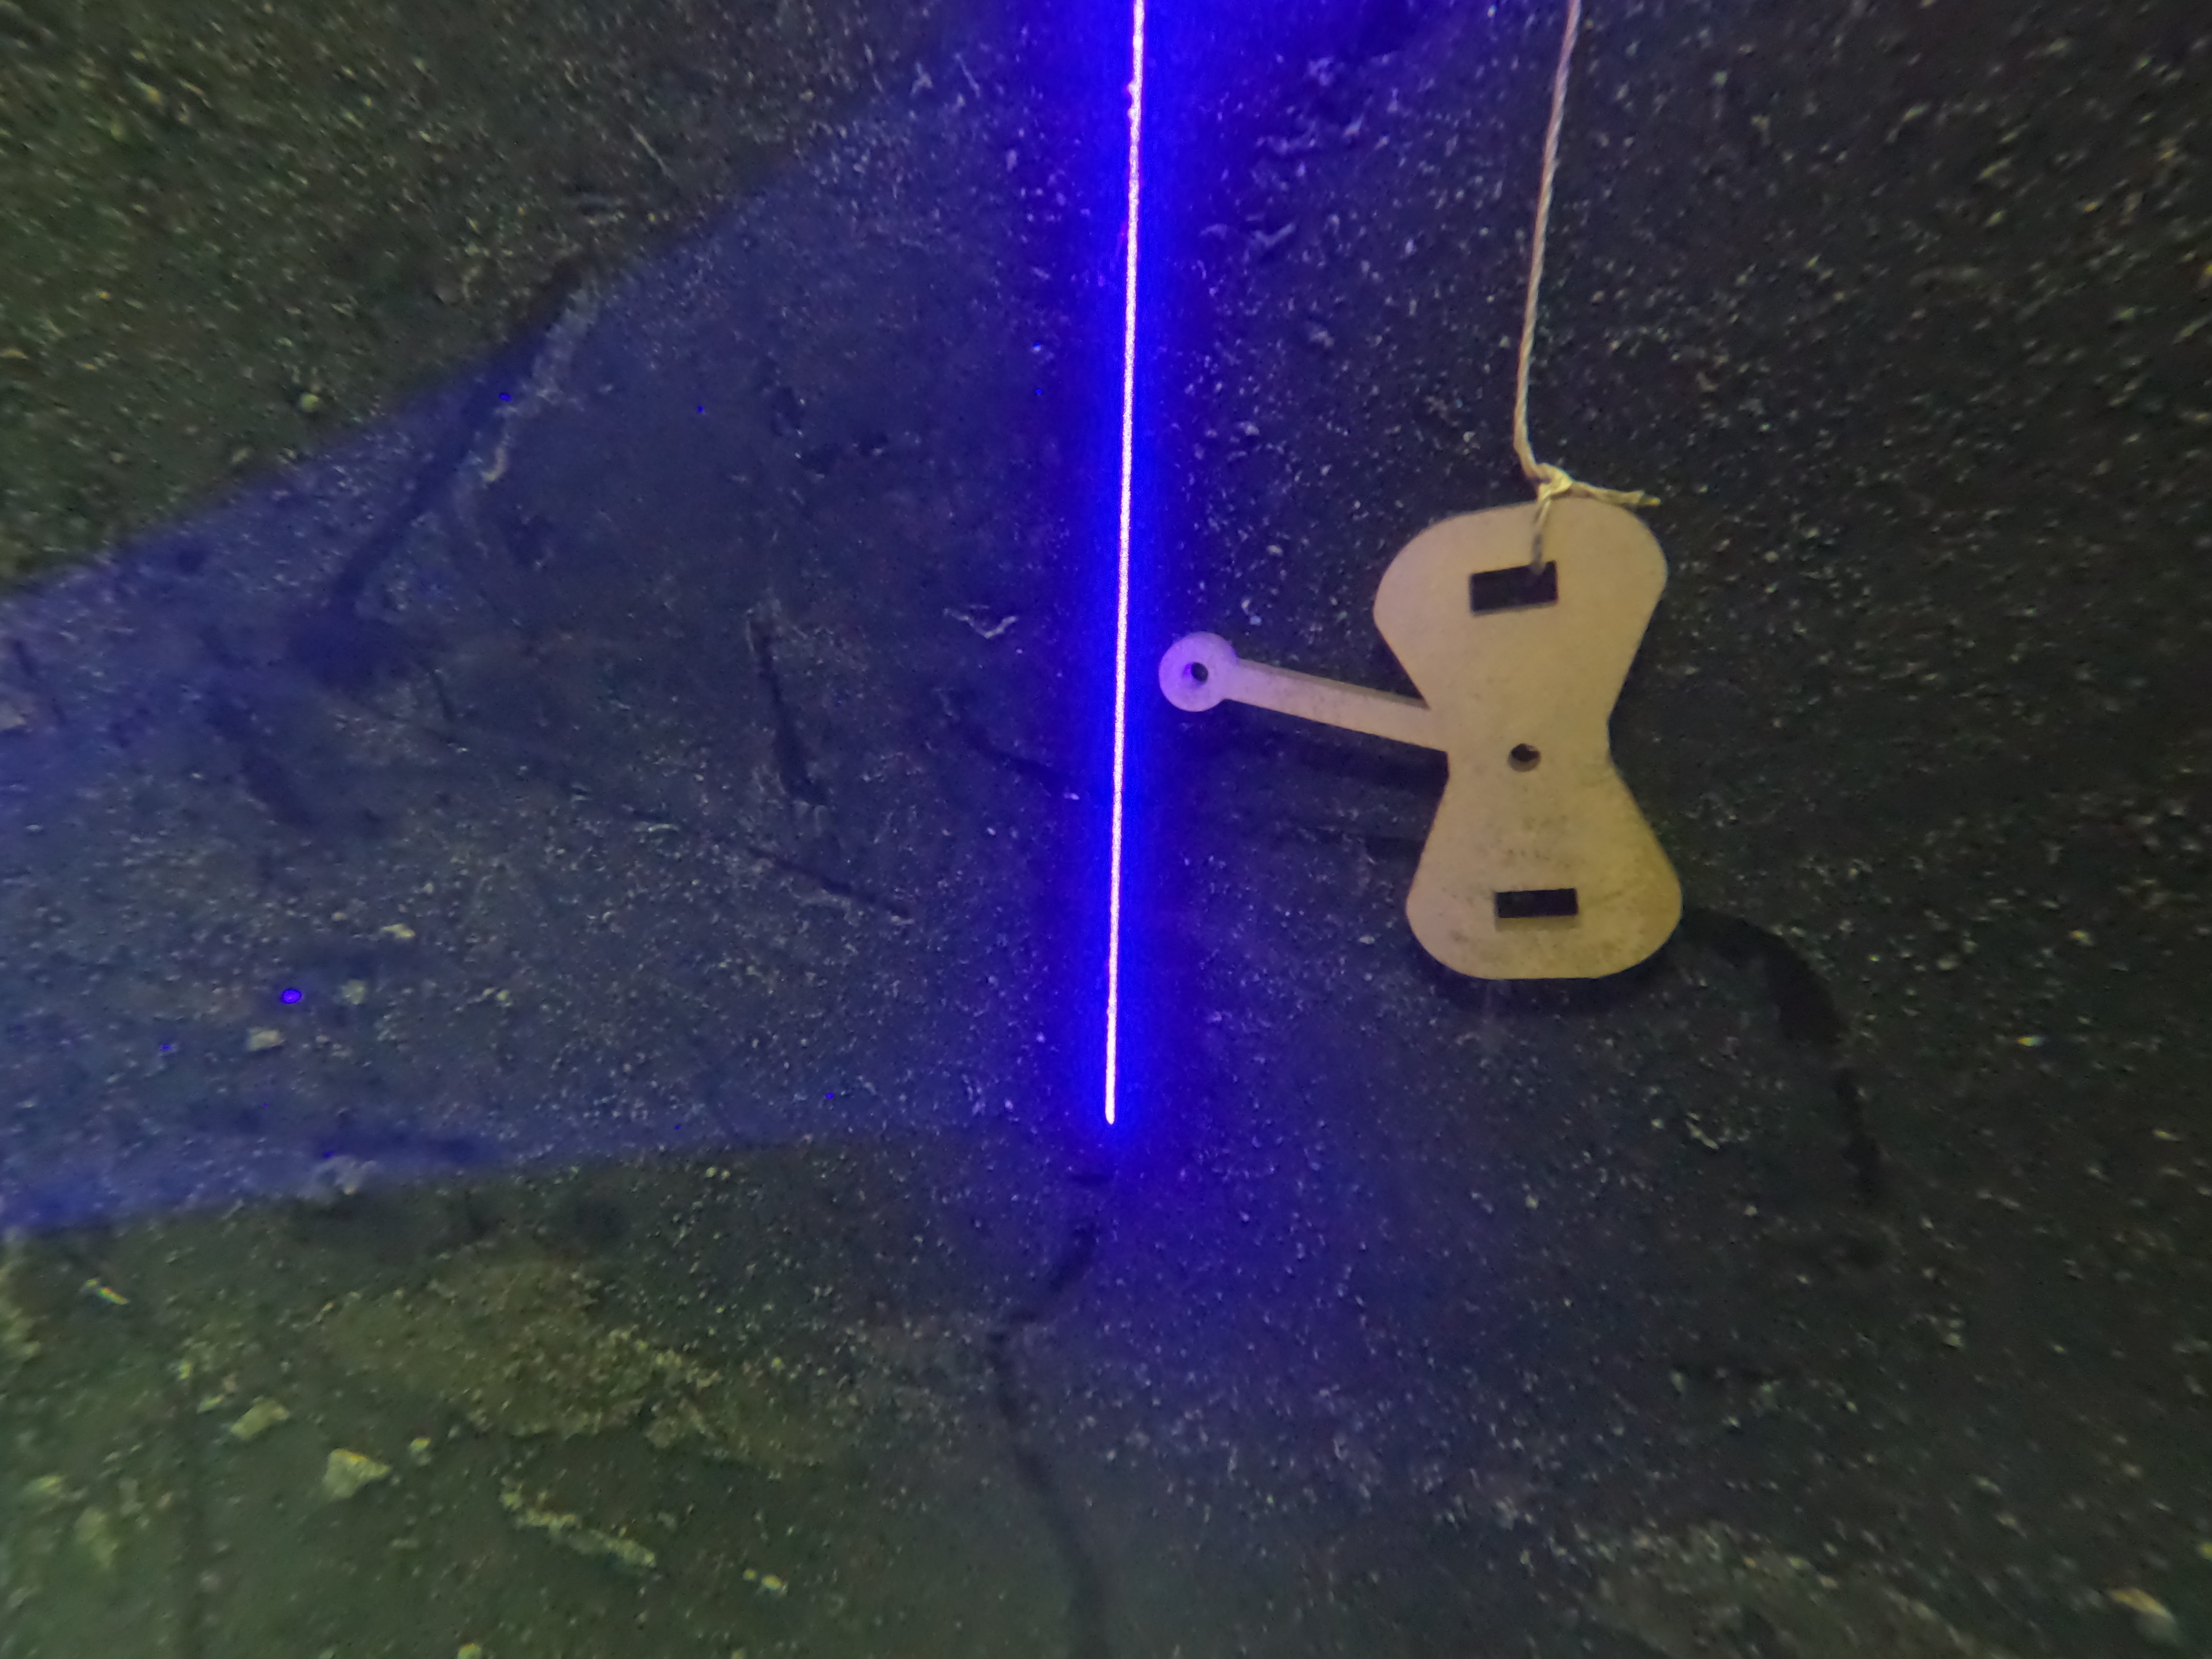

Supplement: Supplementary file 3346 [file G0015787.pdf › Level_2_1/G0015787.pdf]

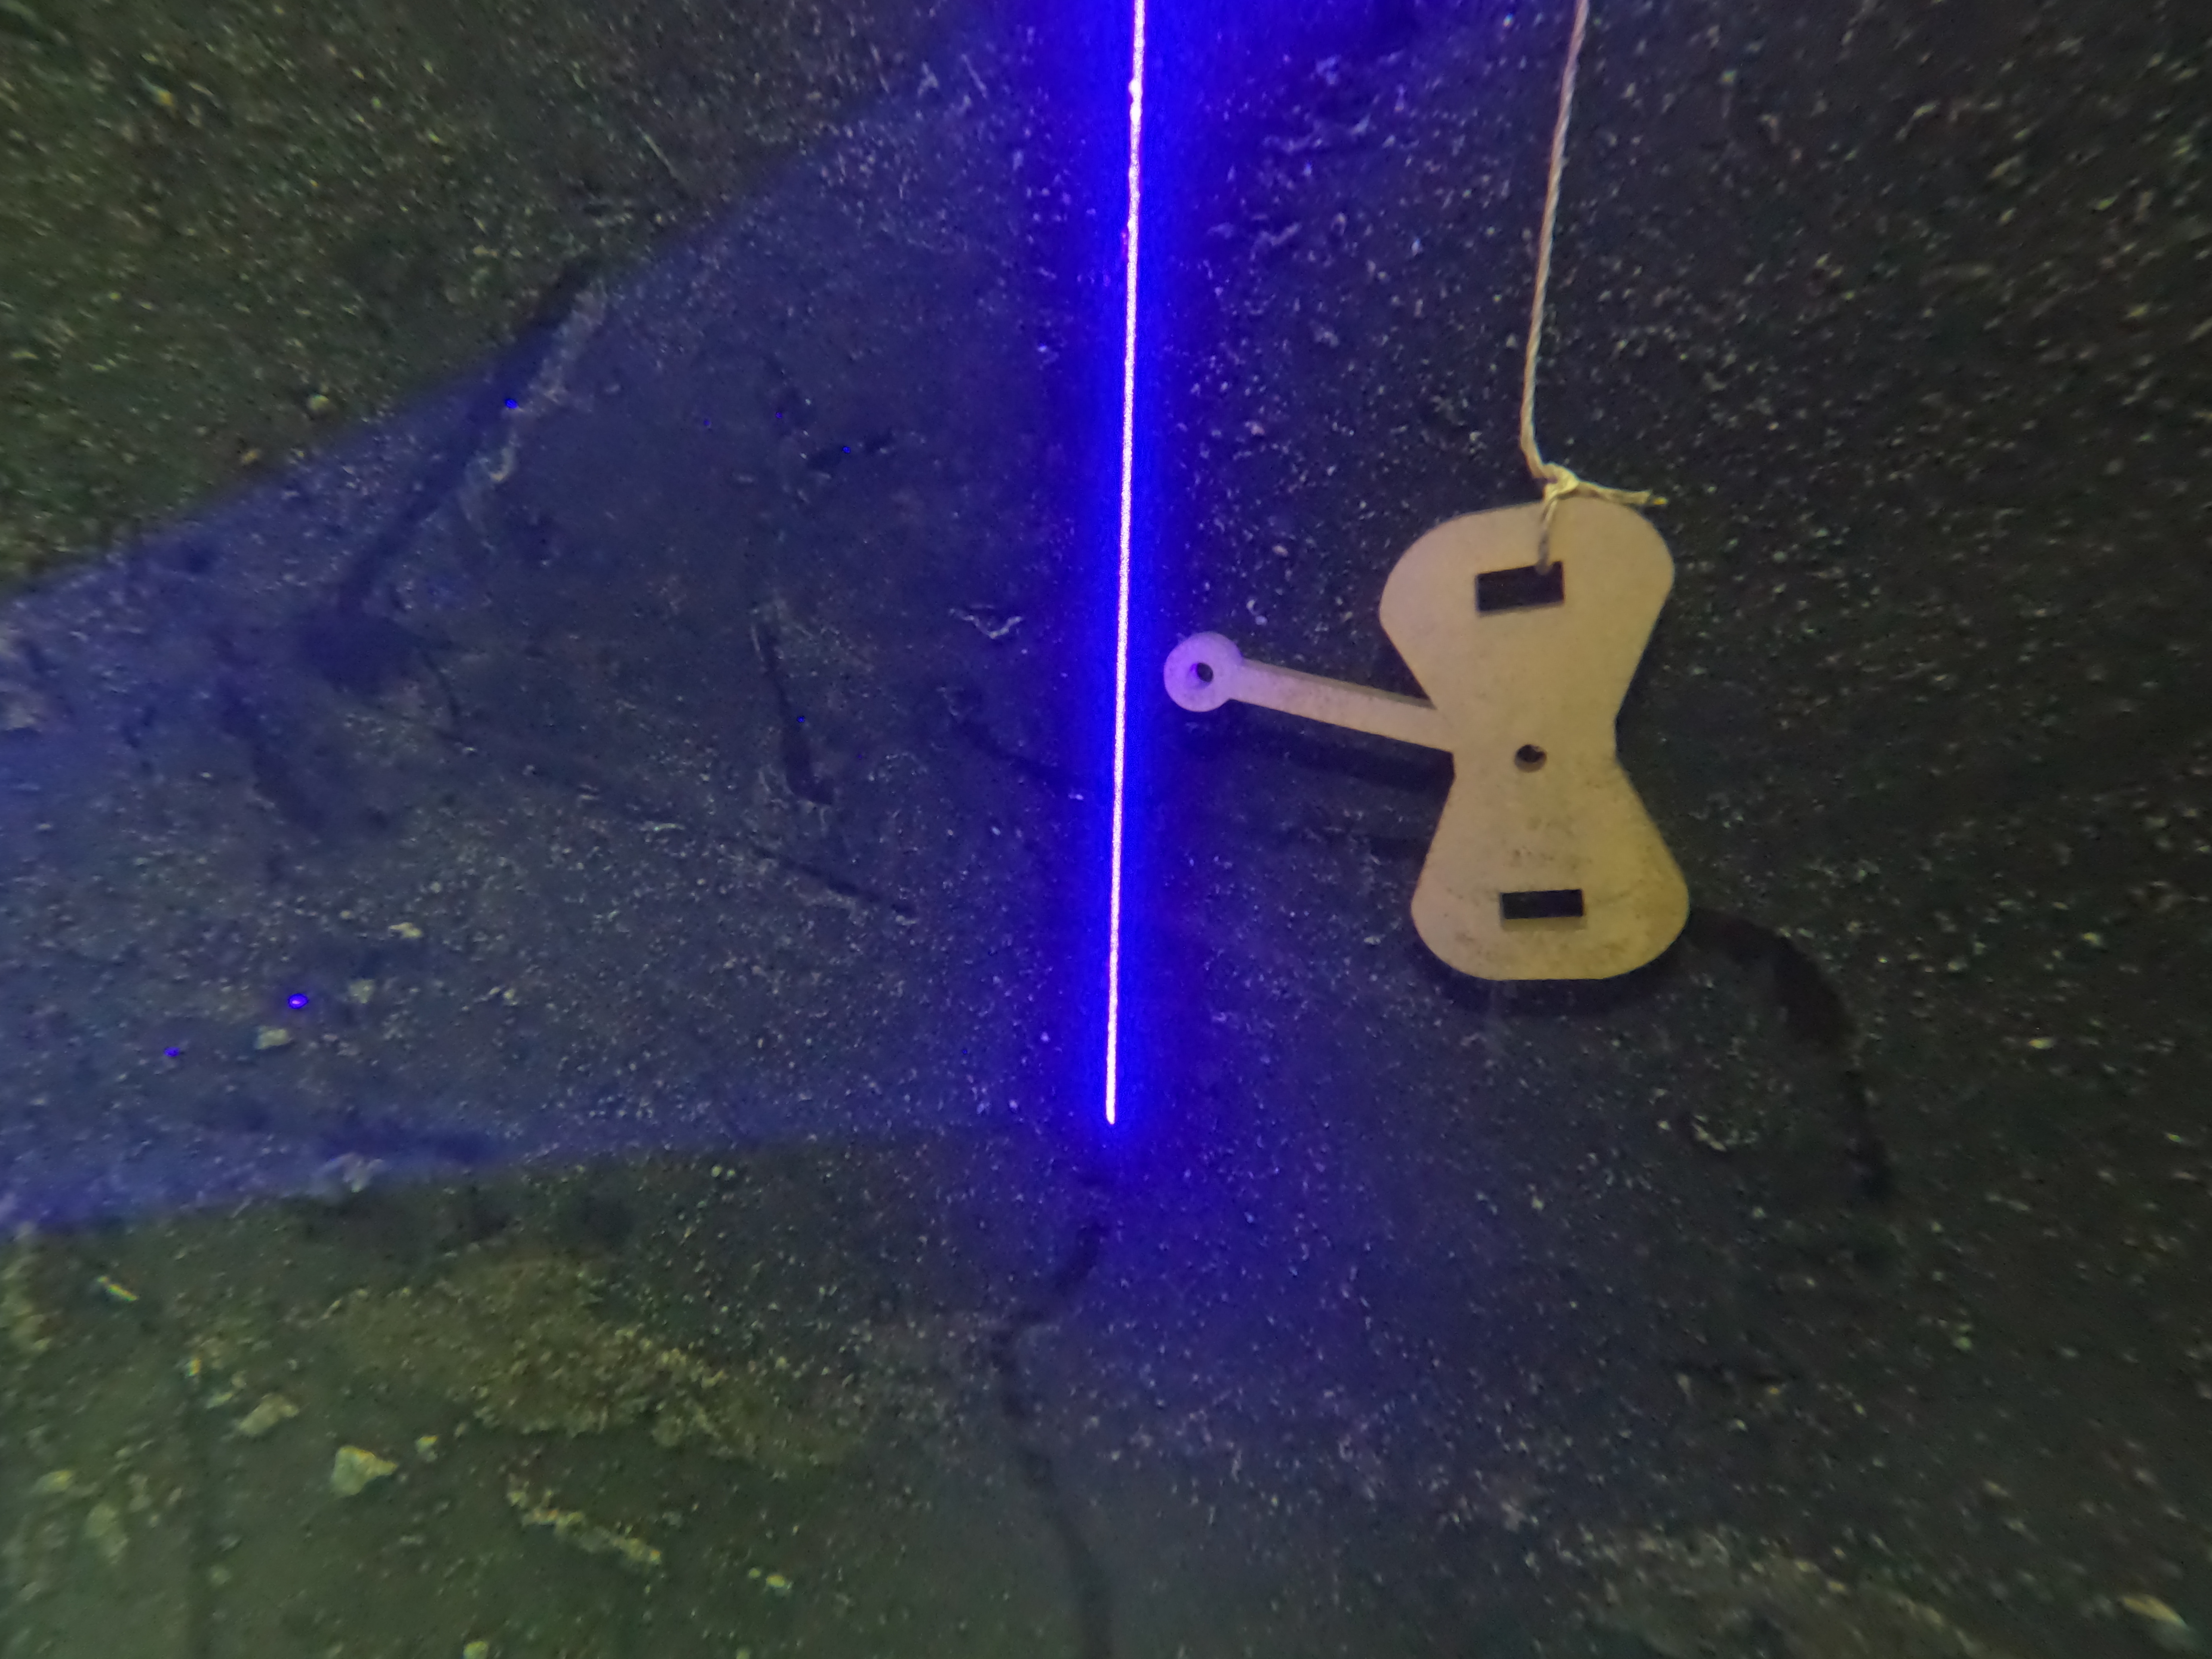

Supplement: Supplementary file 3347 [file G0015788.pdf › Level_2_1/G0015788.pdf]

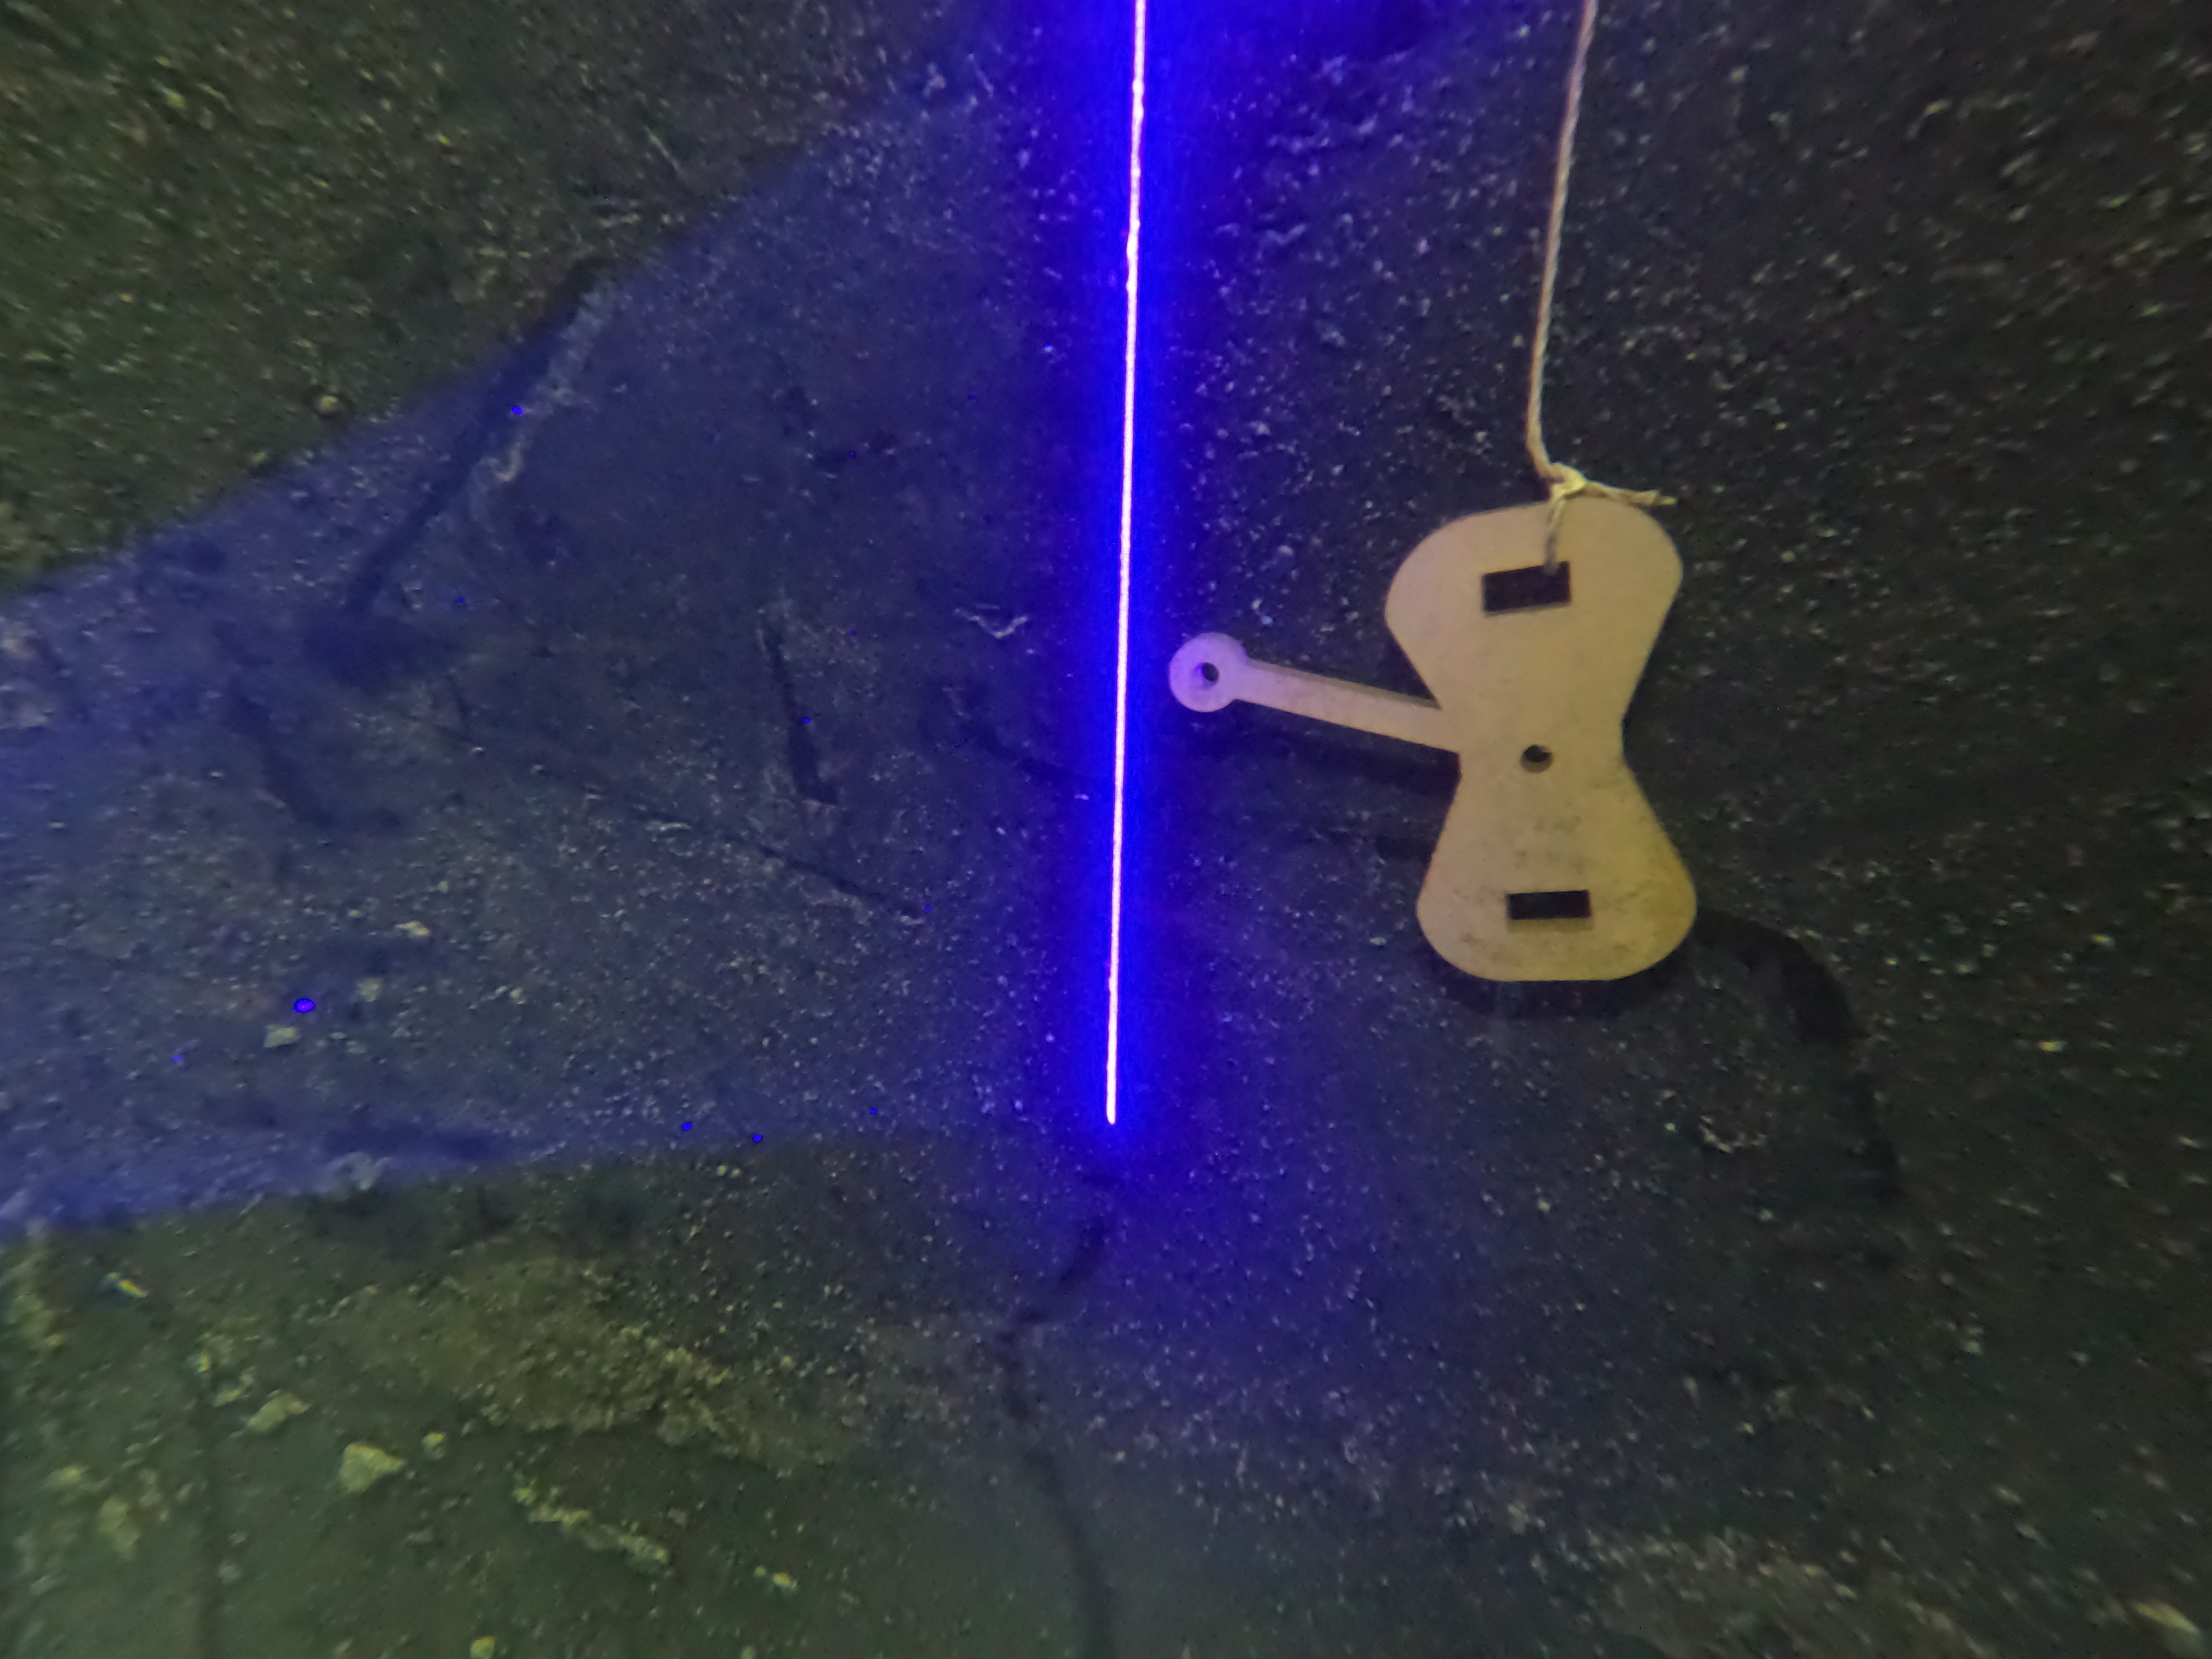

Supplement: Supplementary file 3348 [file G0015789.pdf › Level_2_1/G0015789.pdf]

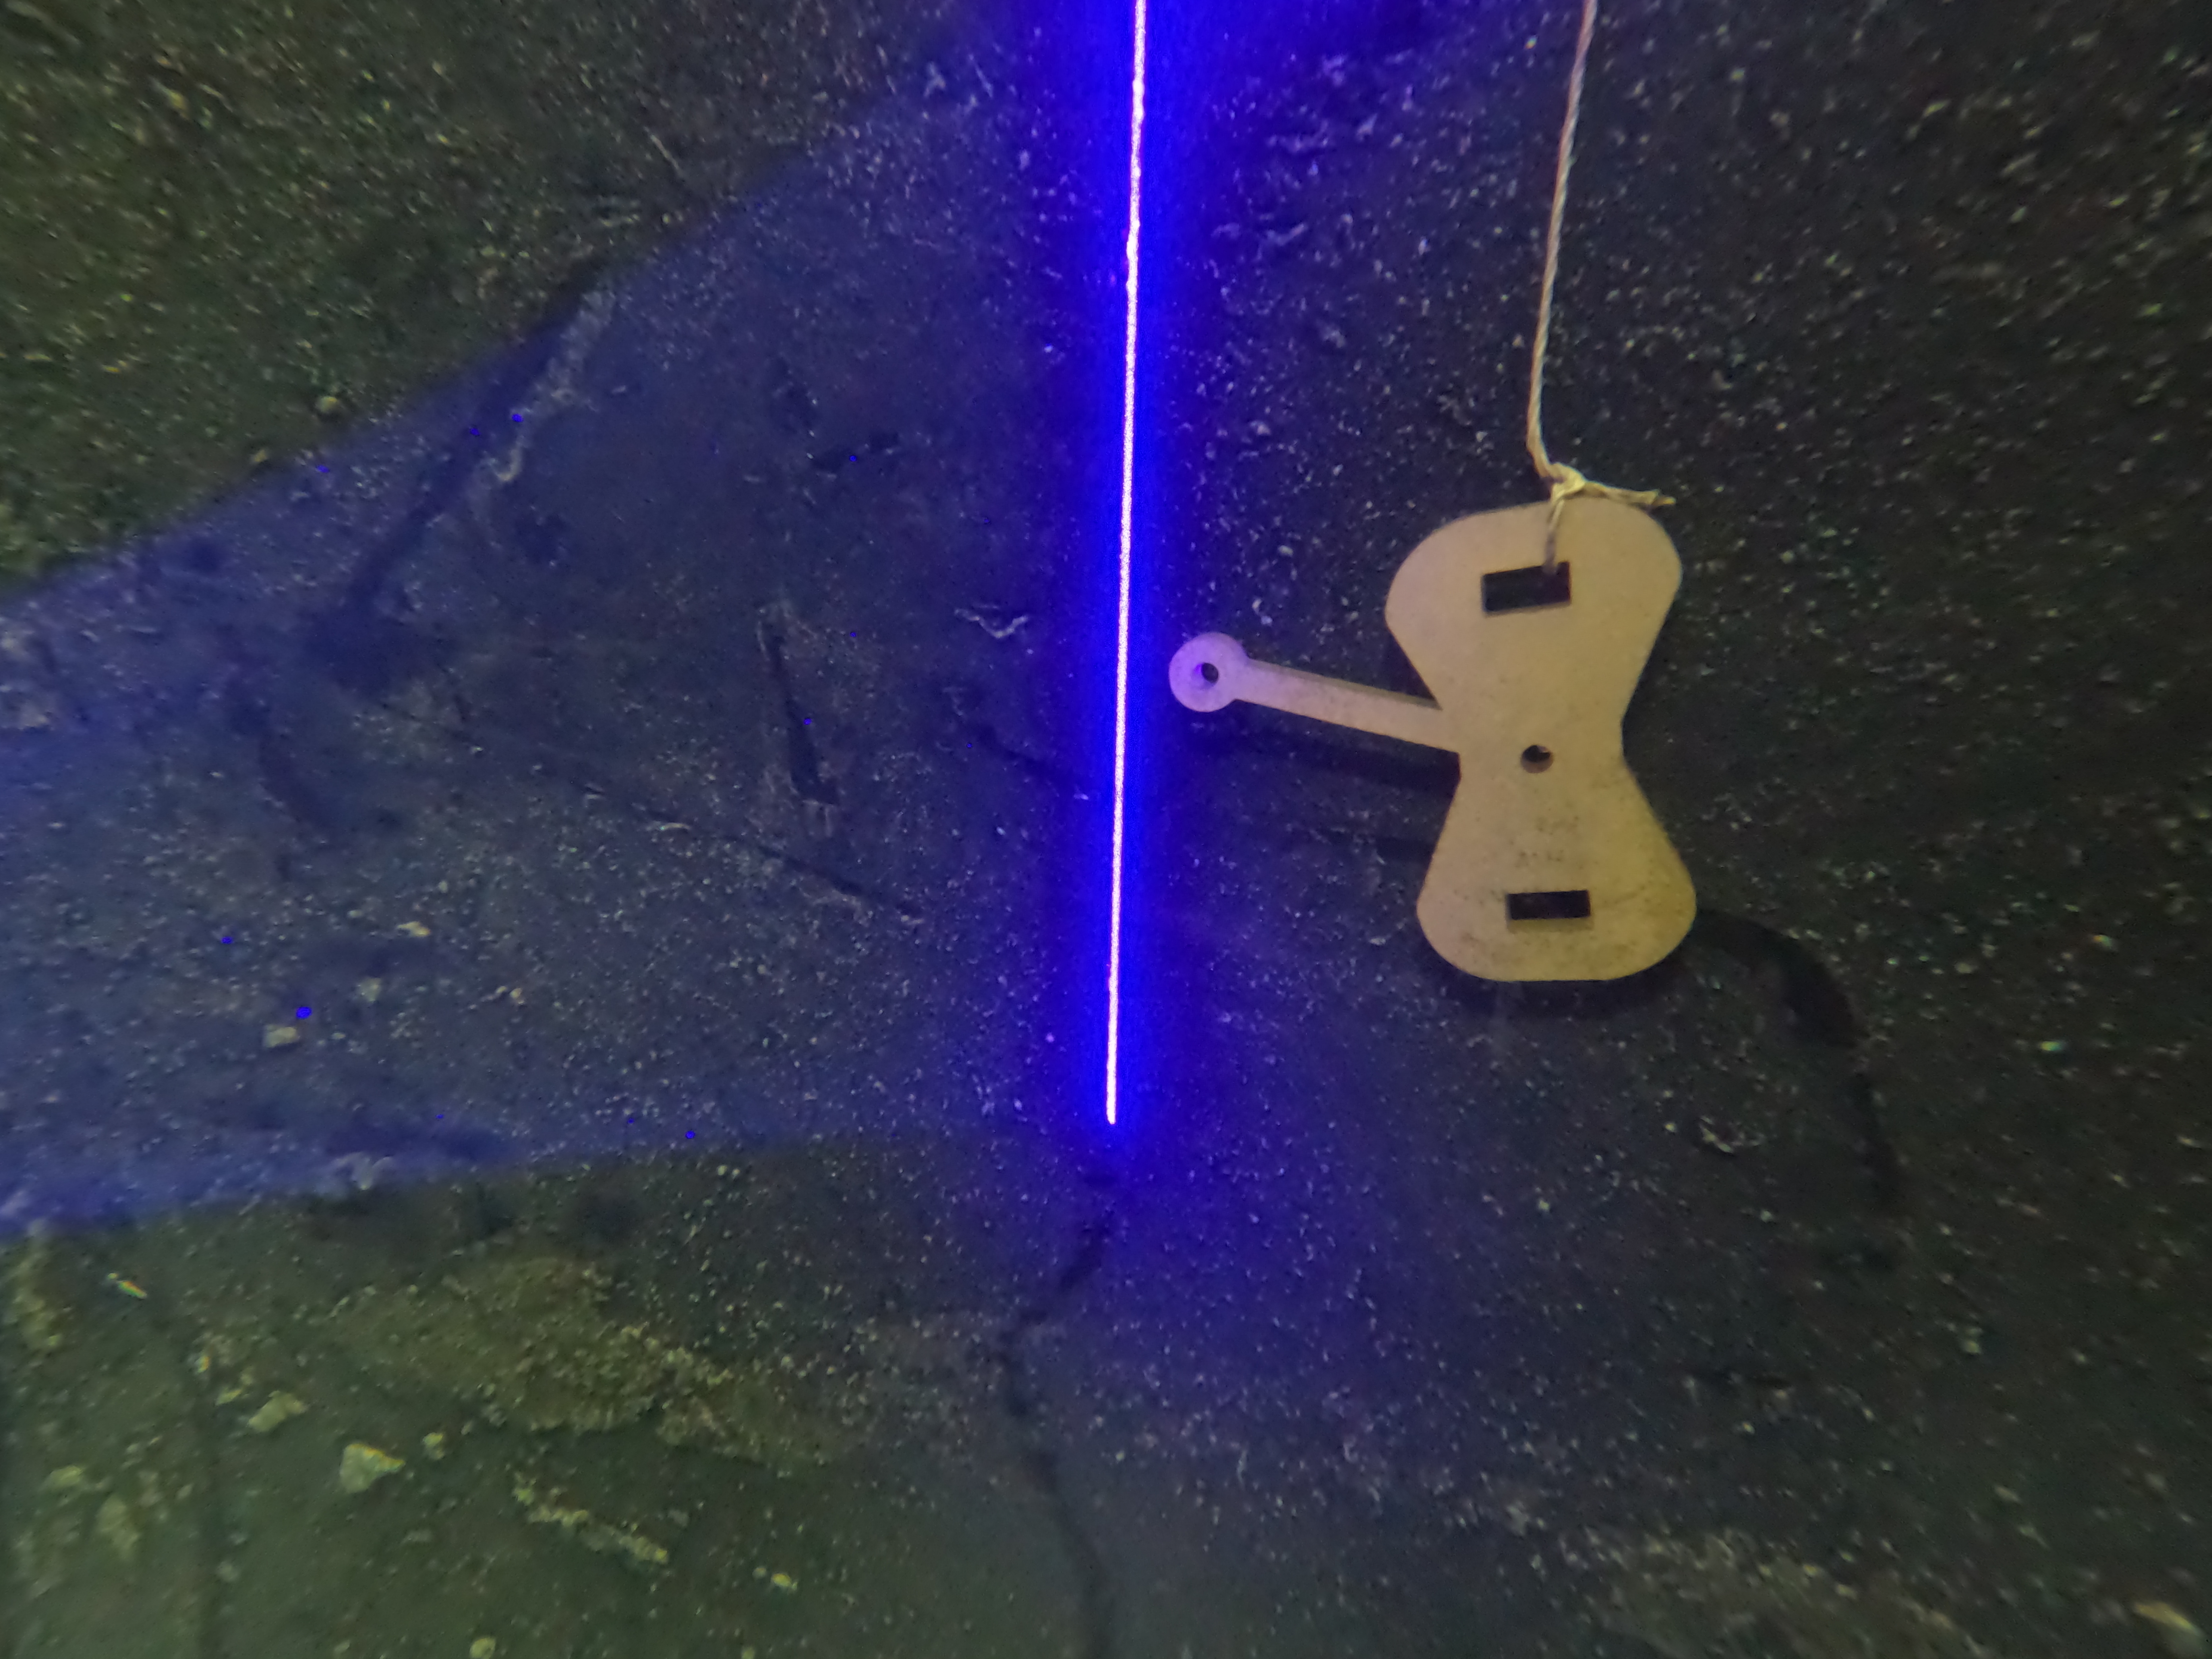

Supplement: Supplementary file 3349 [file G0015790.pdf › Level_2_1/G0015790.pdf]

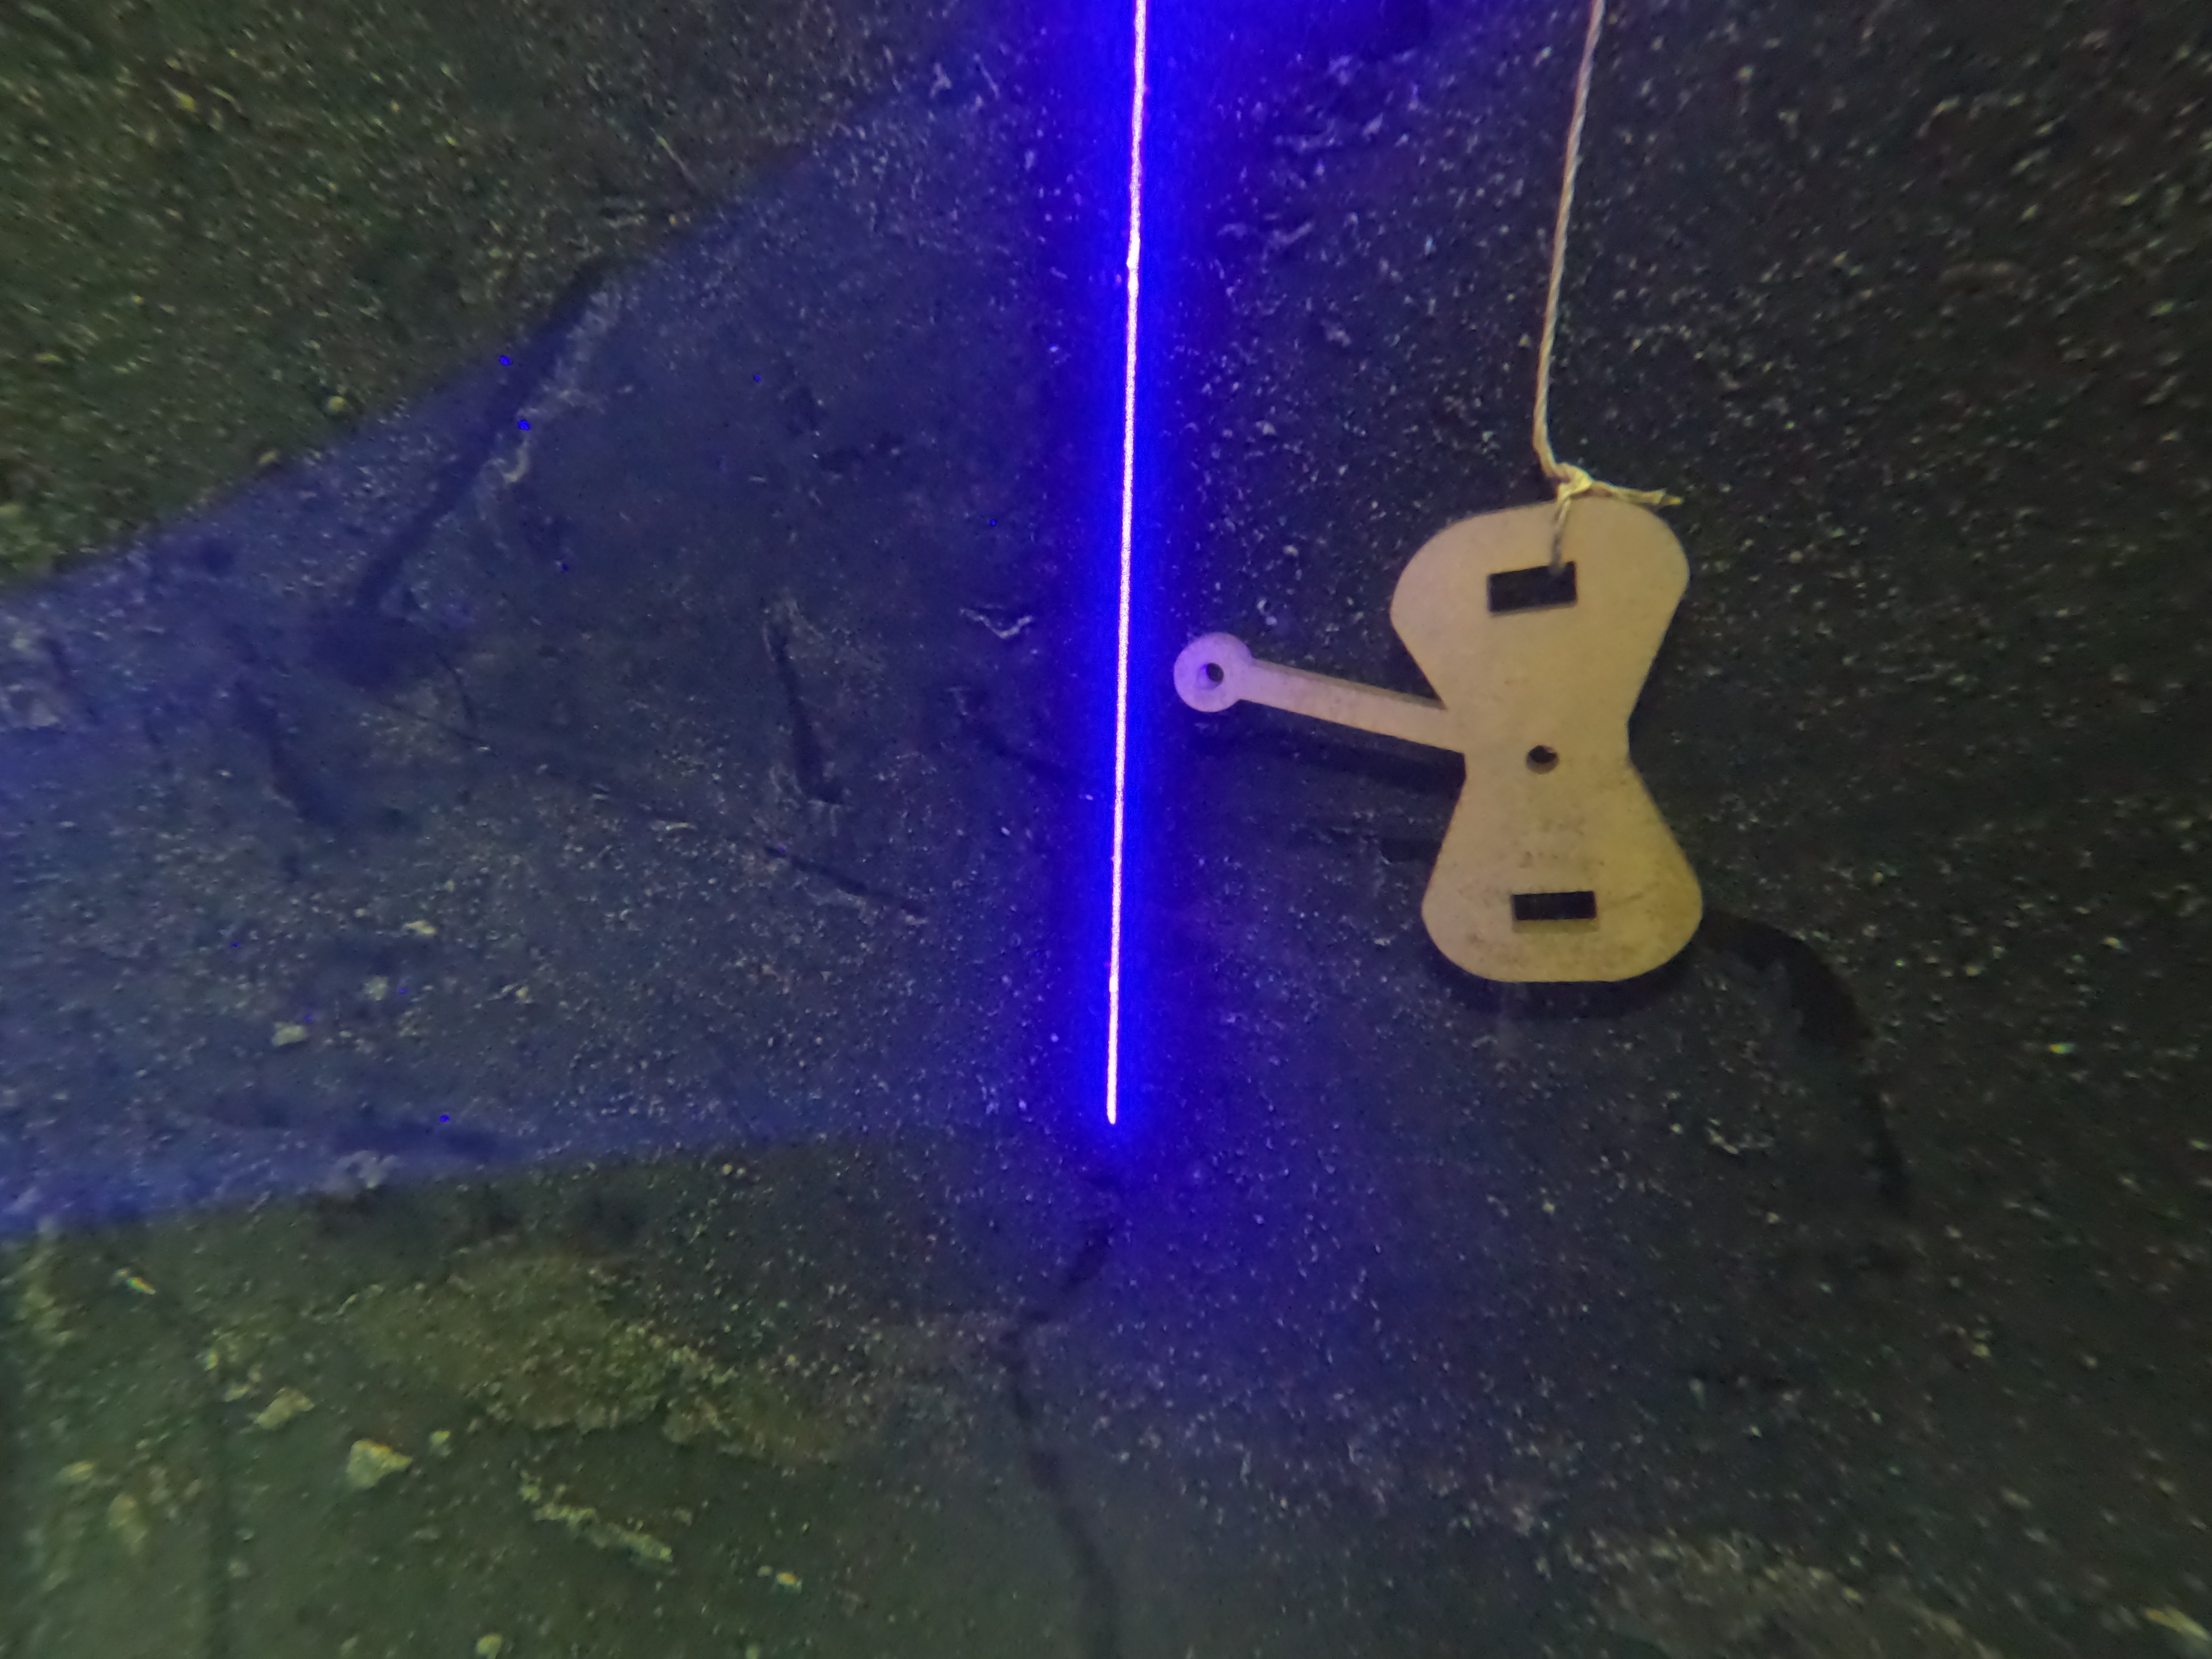

Supplement: Supplementary file 3350 [file G0015791.pdf › Level_2_1/G0015791.pdf]

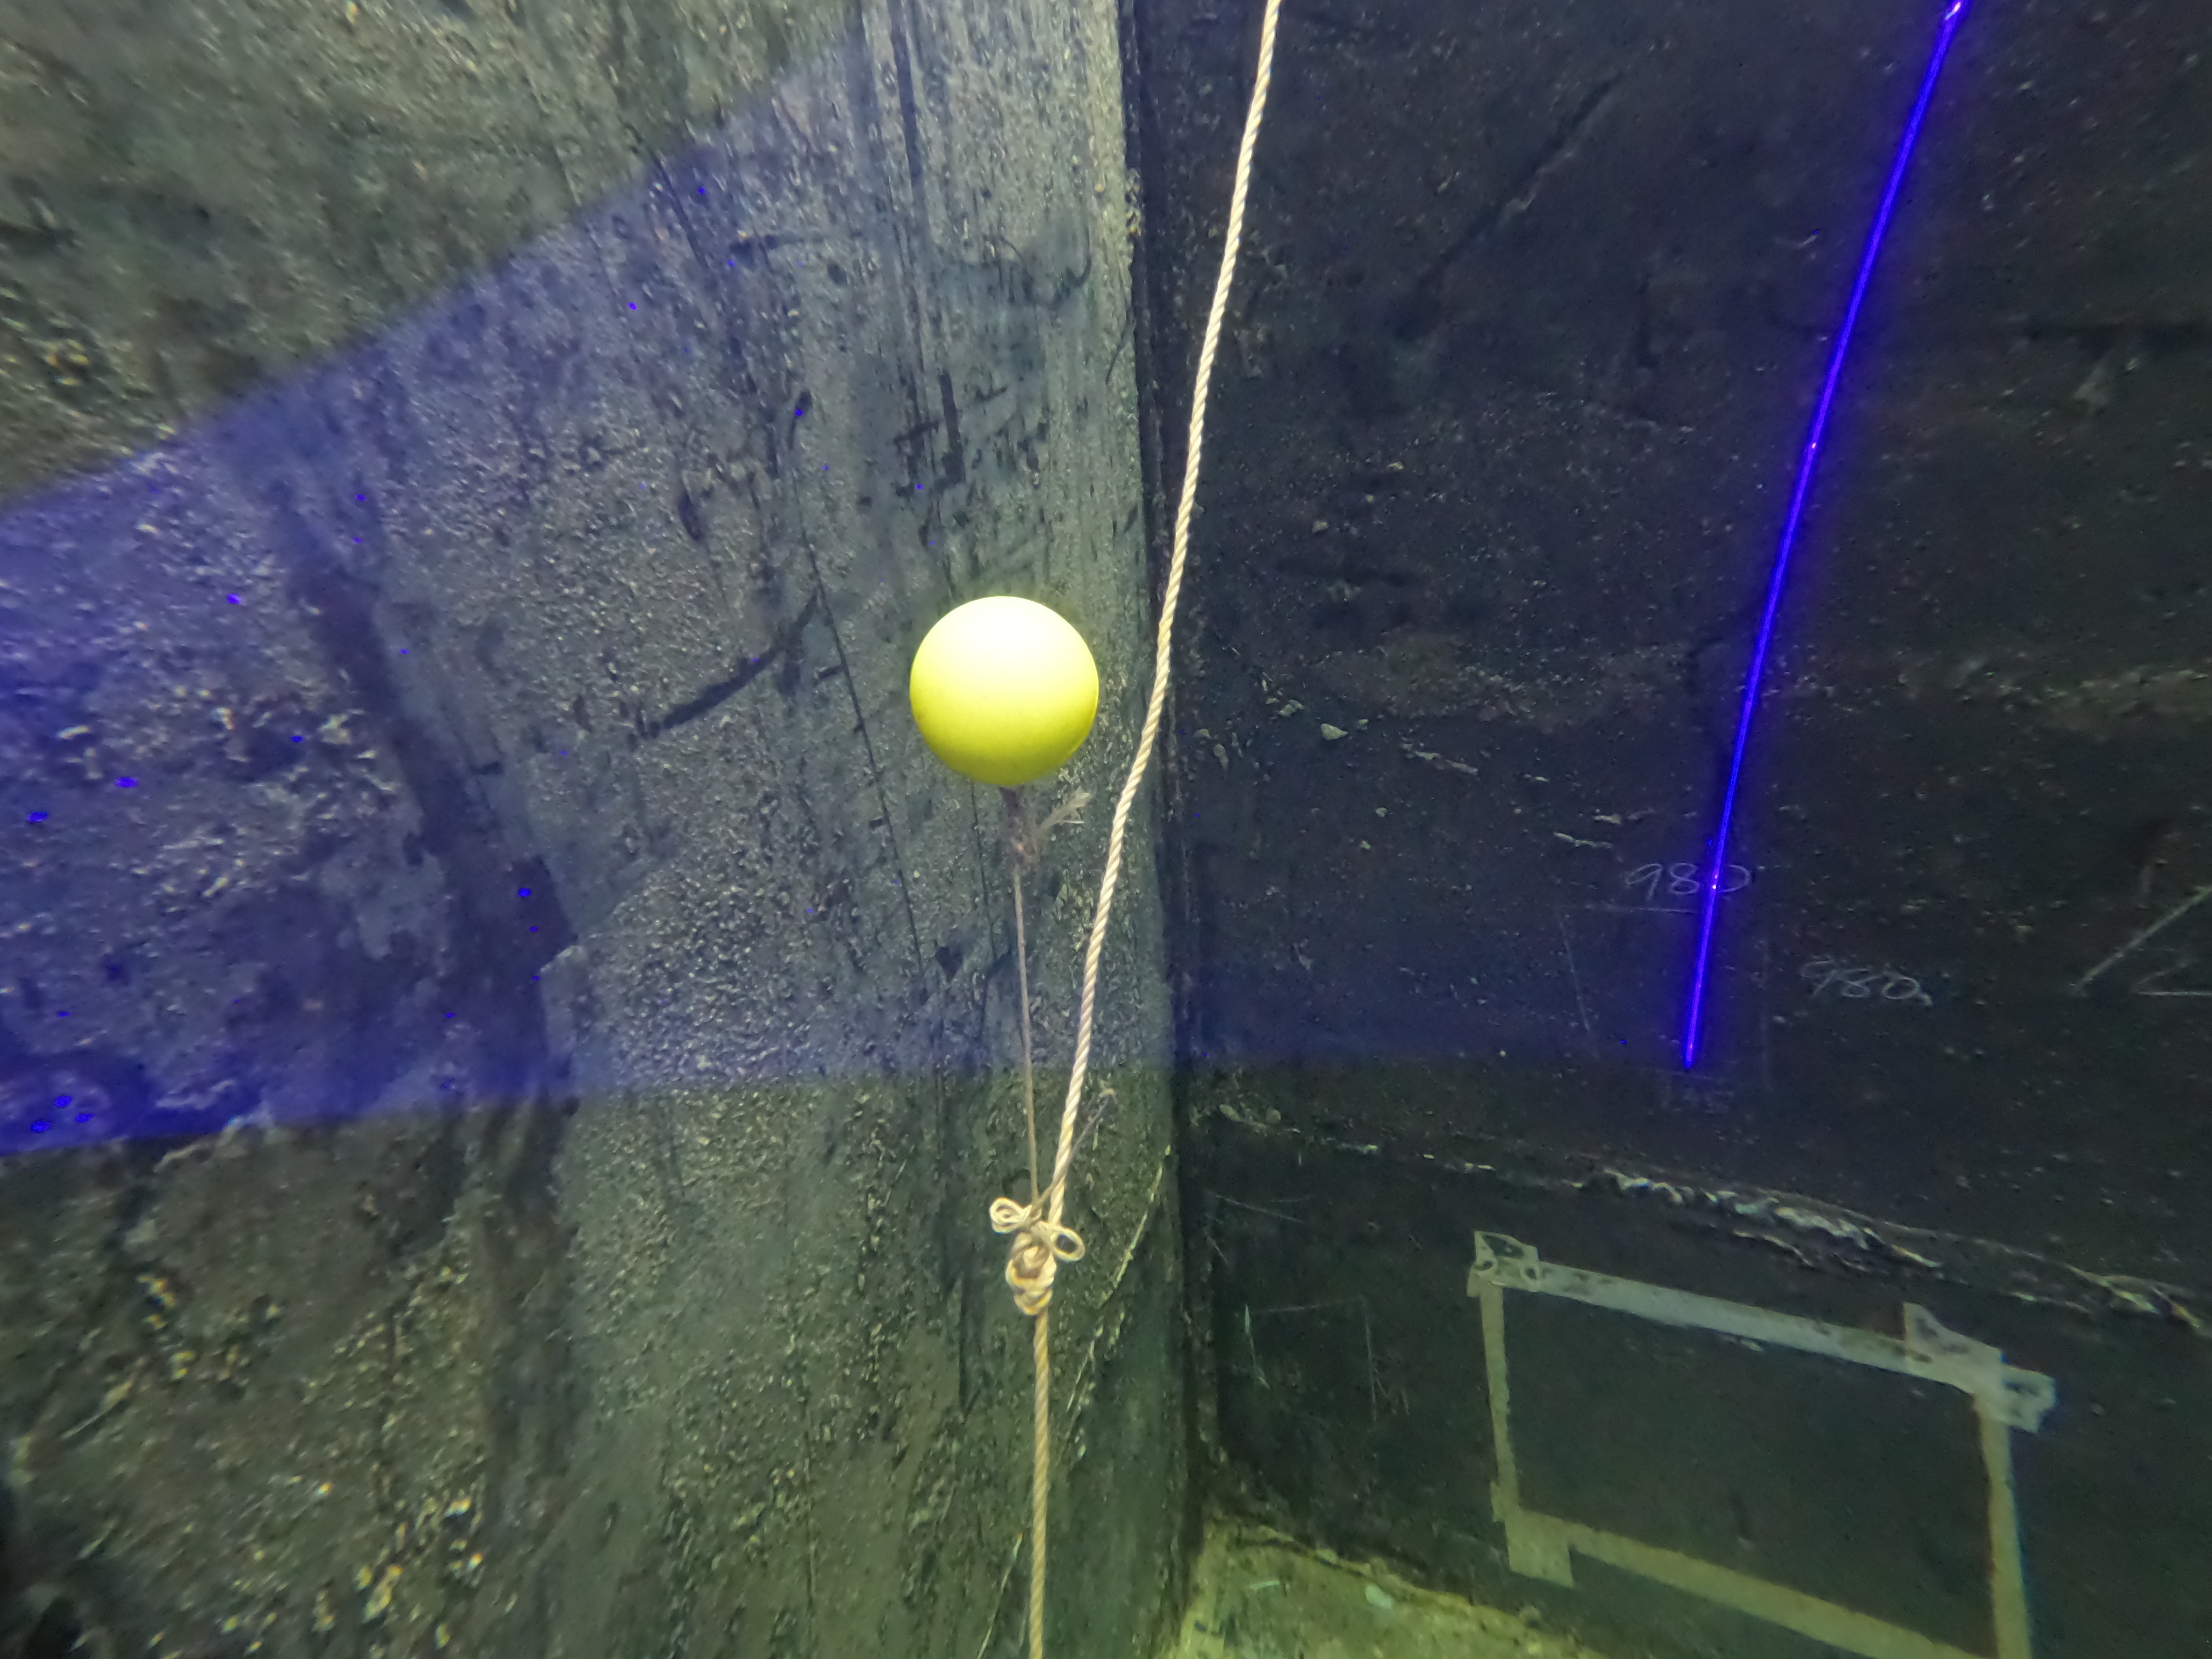

Supplement: Supplementary file 3351 [file G0034055.pdf › 8/G0034055.pdf]

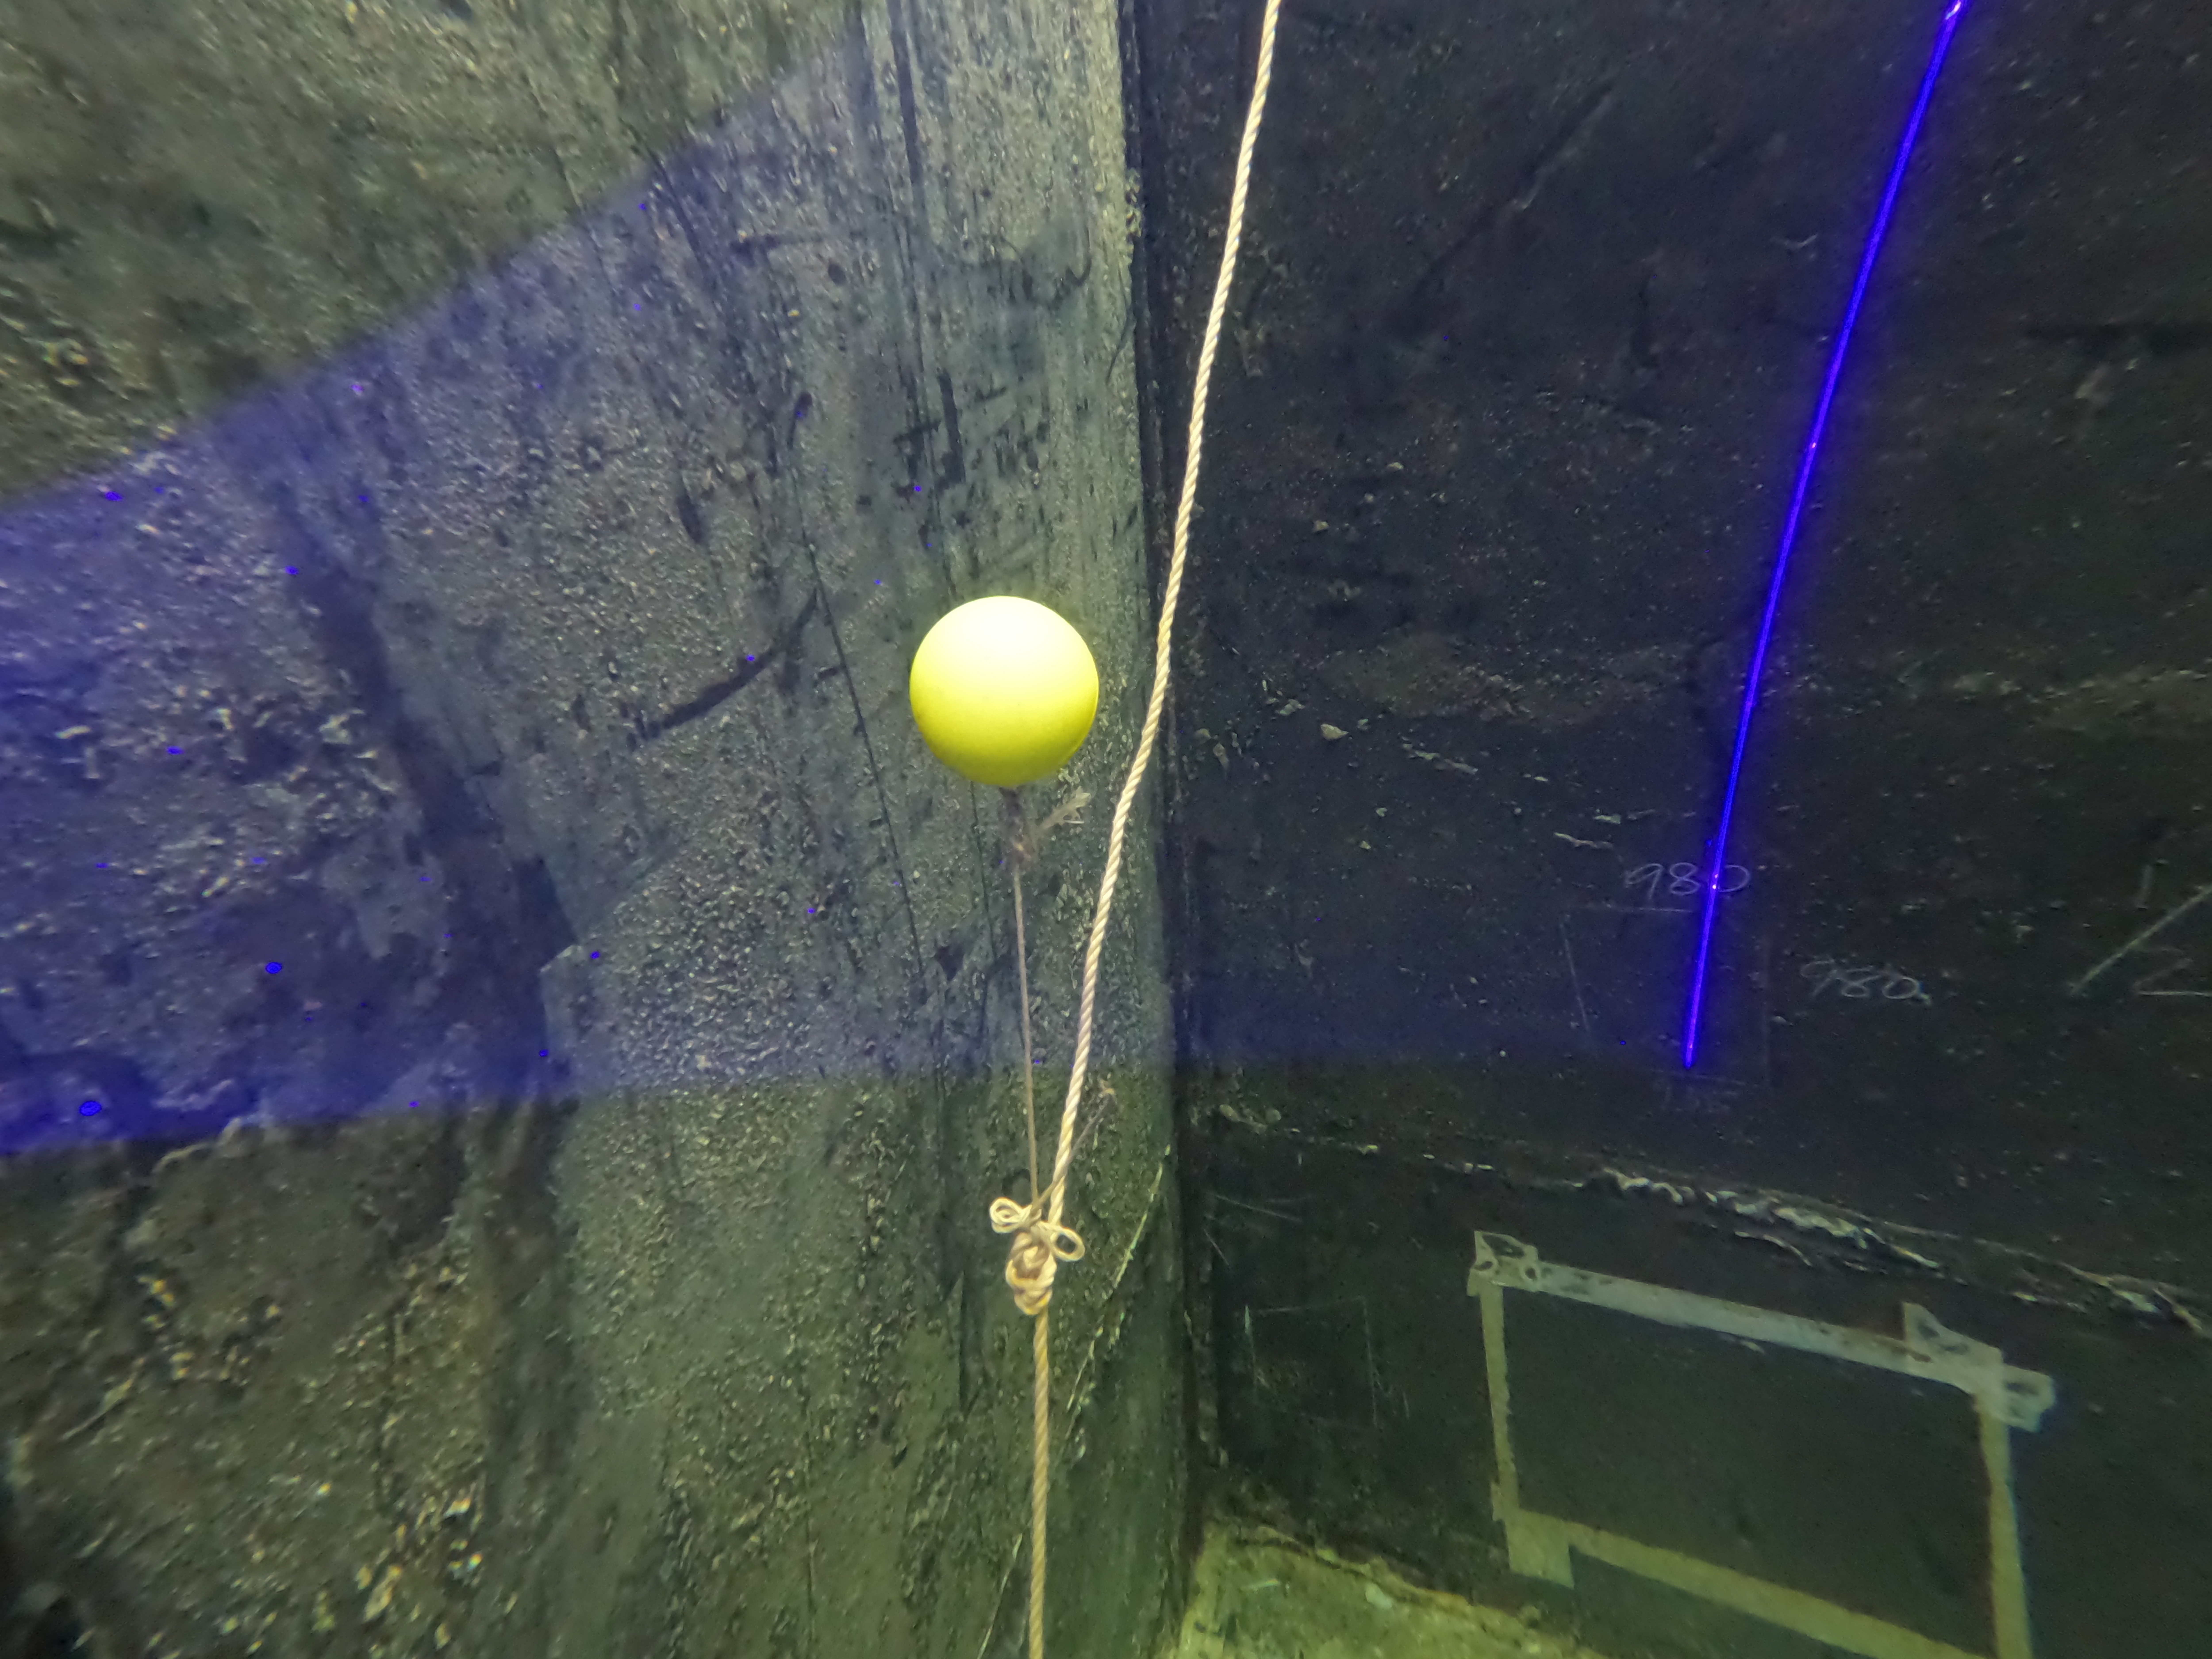

Supplement: Supplementary file 3352 [file G0034056.pdf › 8/G0034056.pdf]

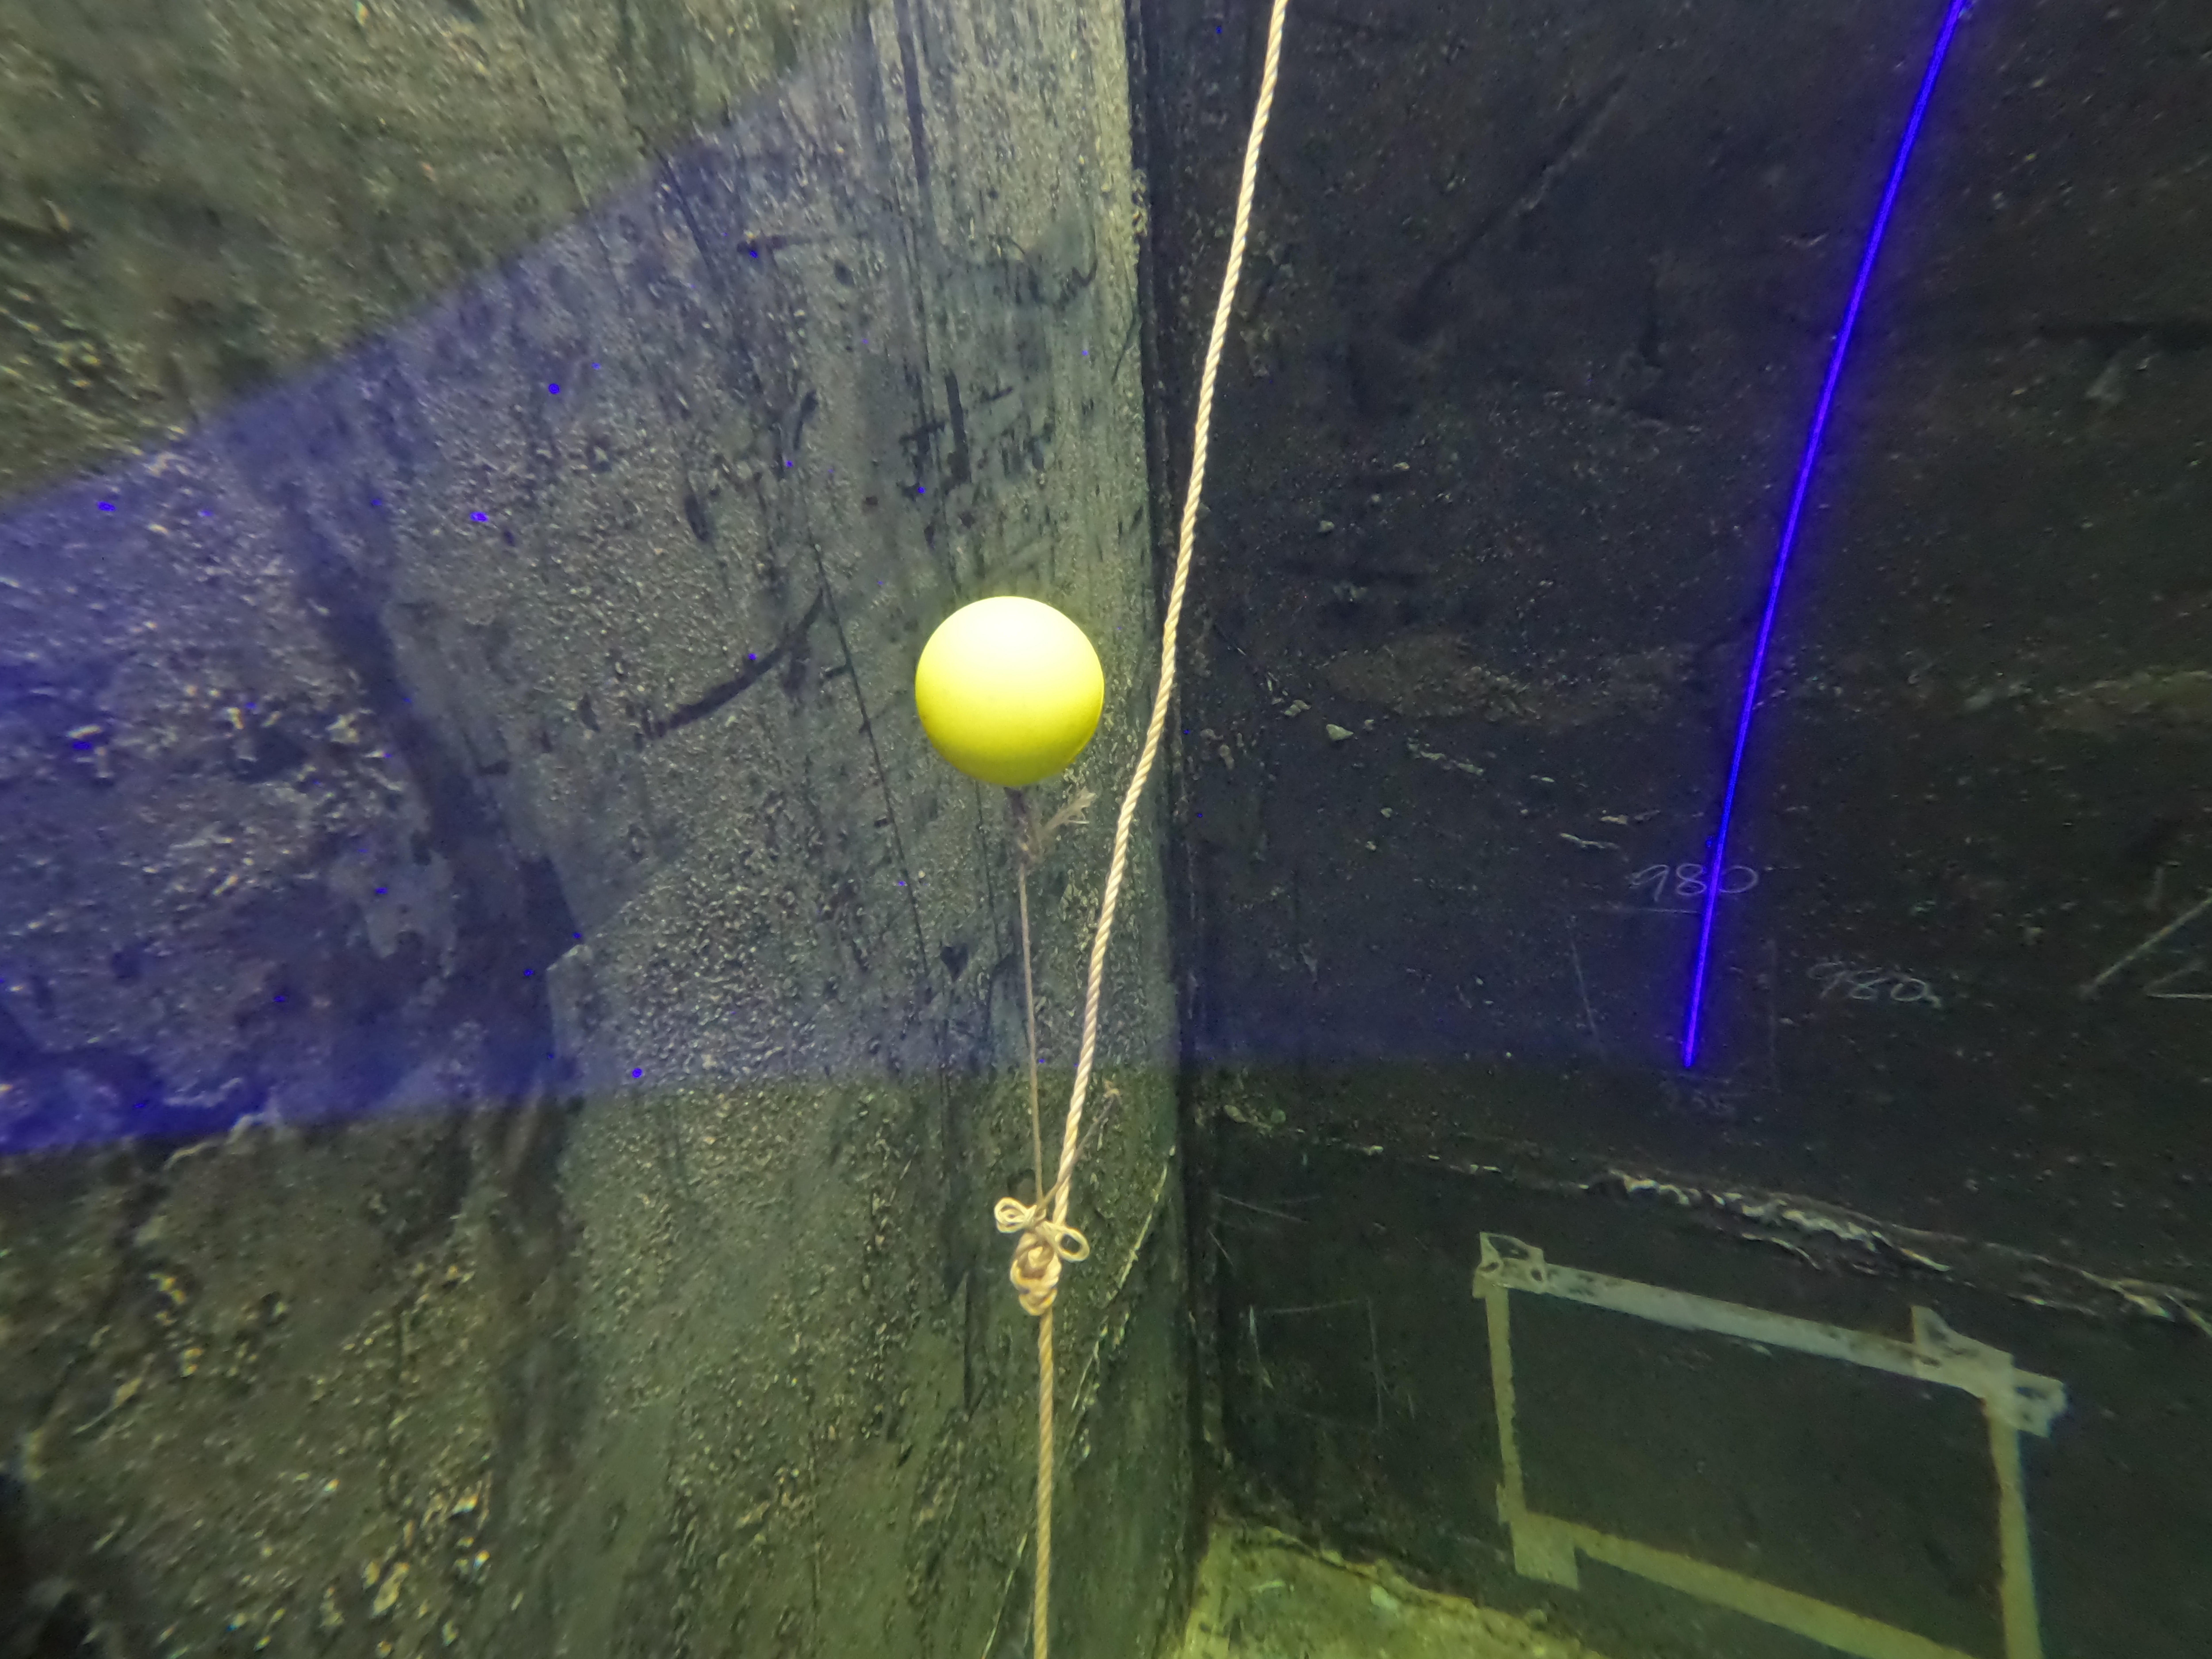

Supplement: Supplementary file 3353 [file G0034057.pdf › 8/G0034057.pdf]

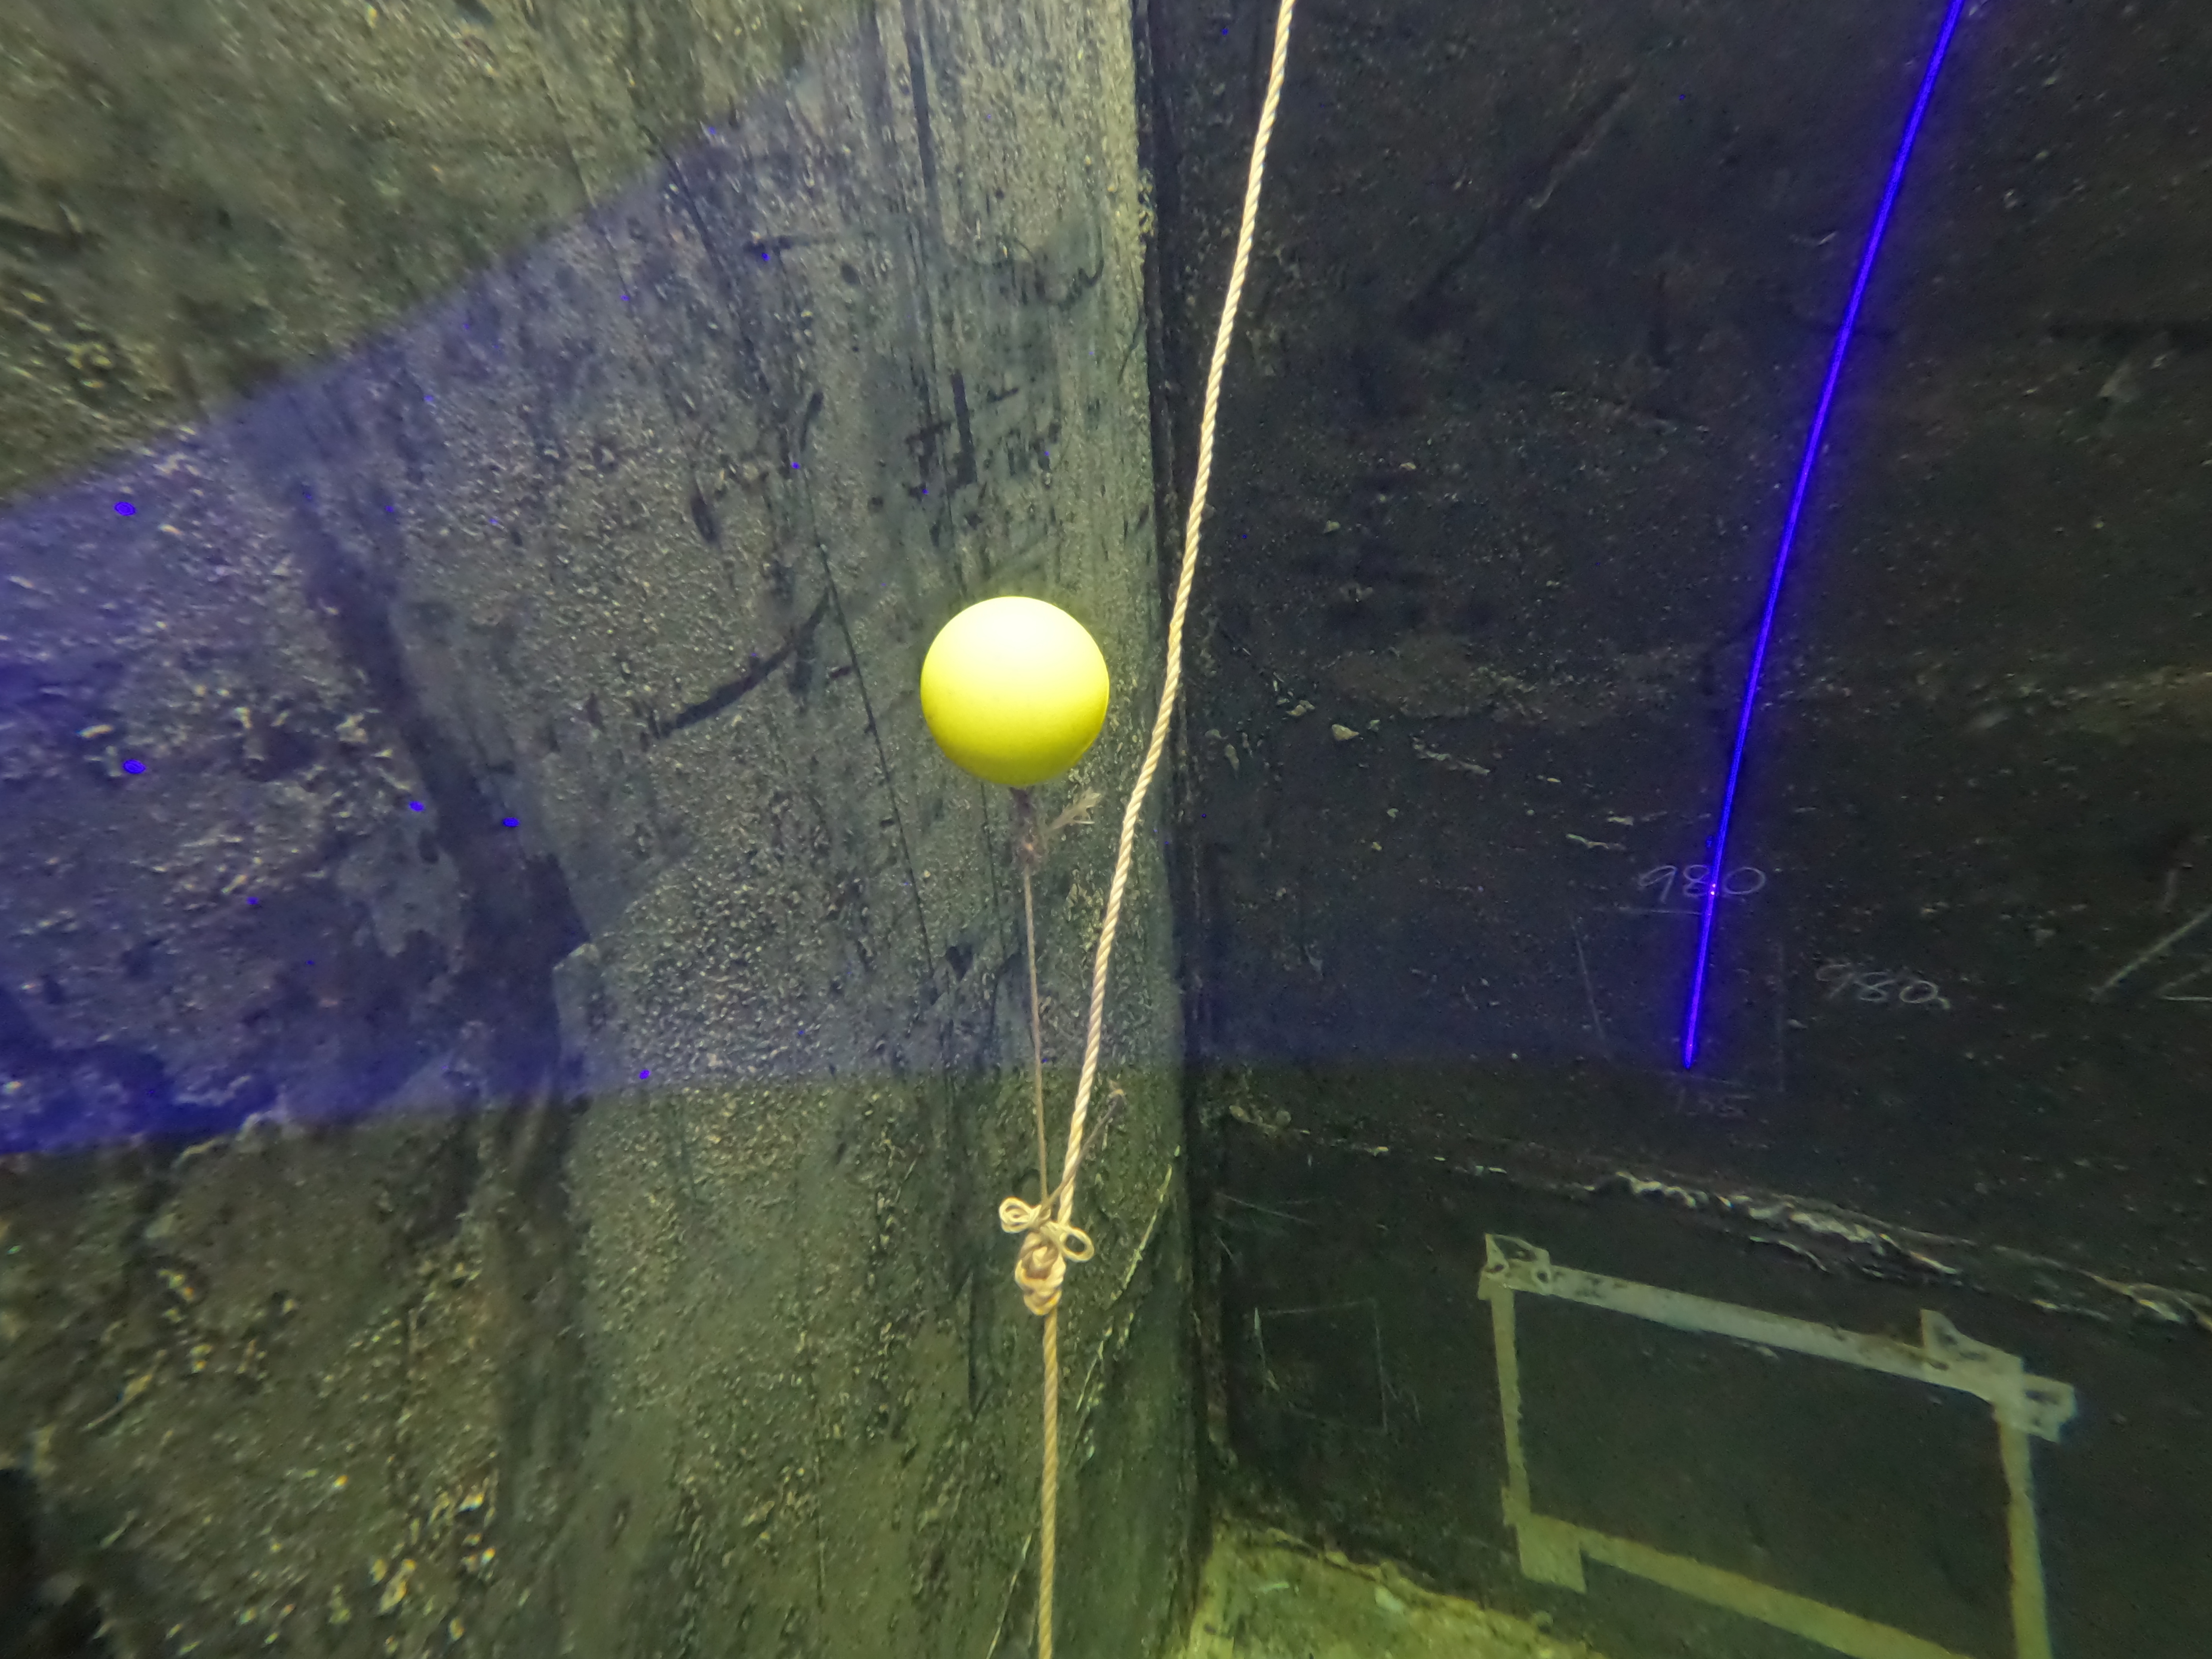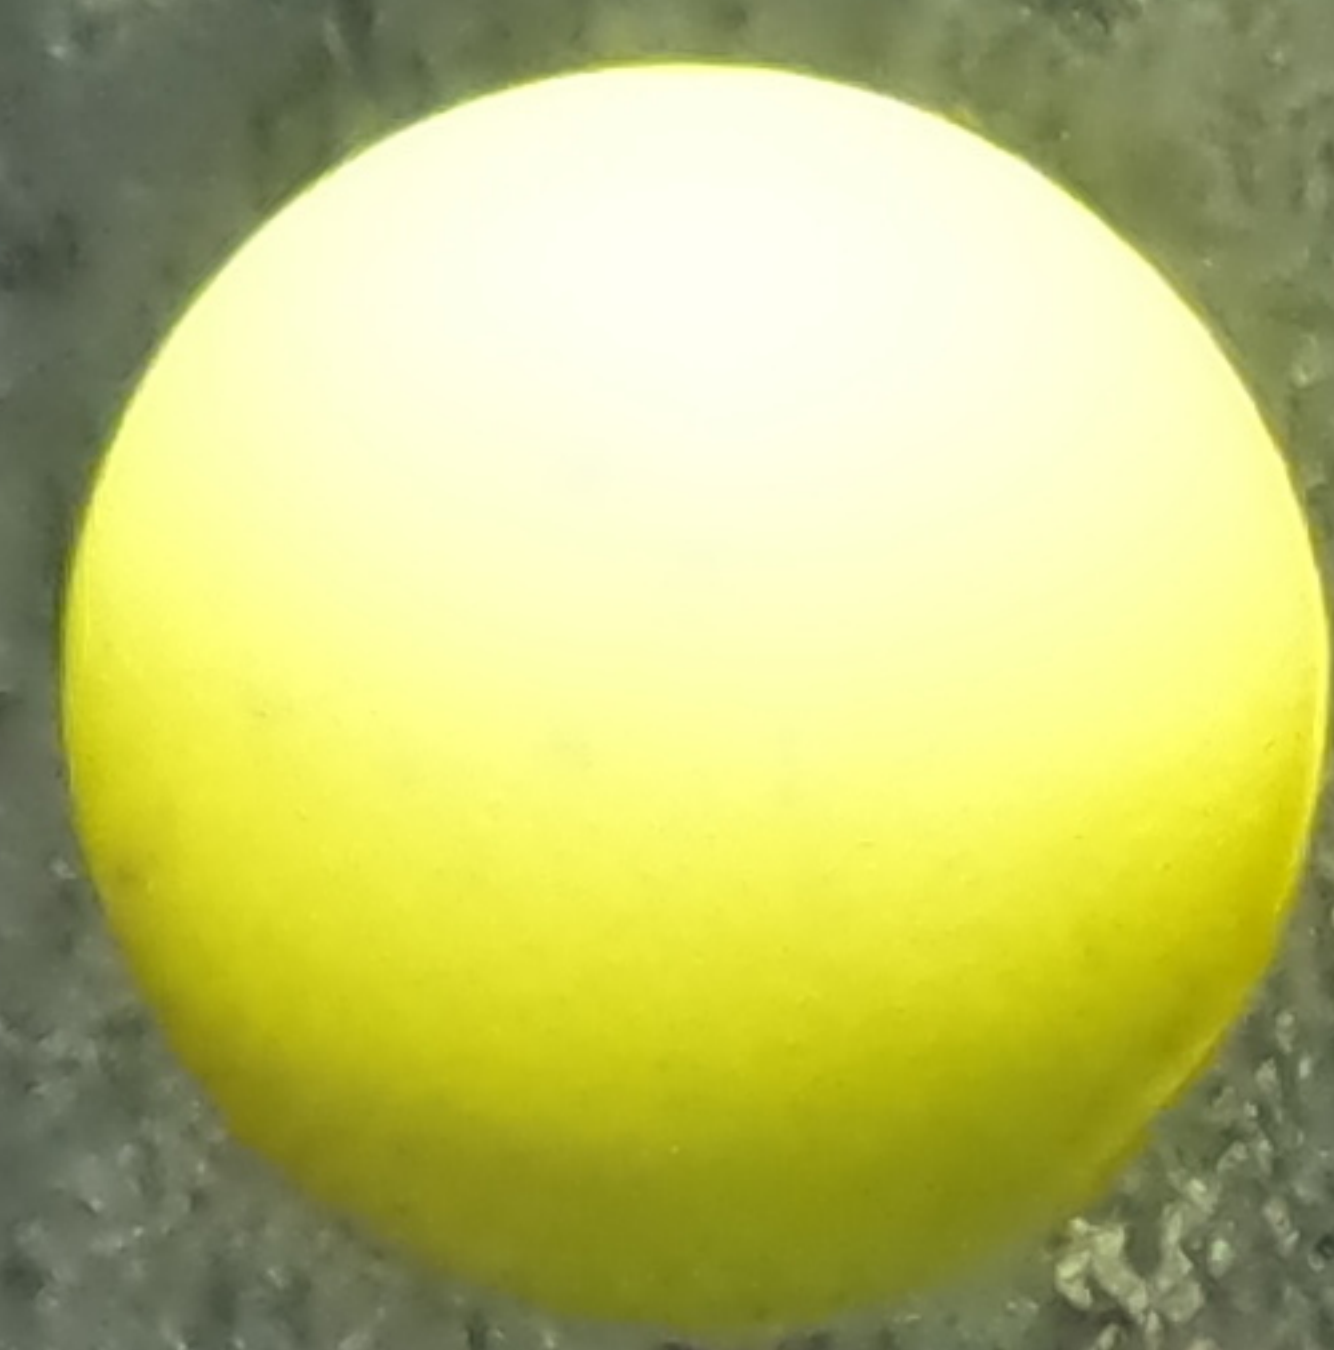

980

980

155

Supplement: Supplementary file 3354 [file G0034058.pdf › 8/G0034058.pdf]

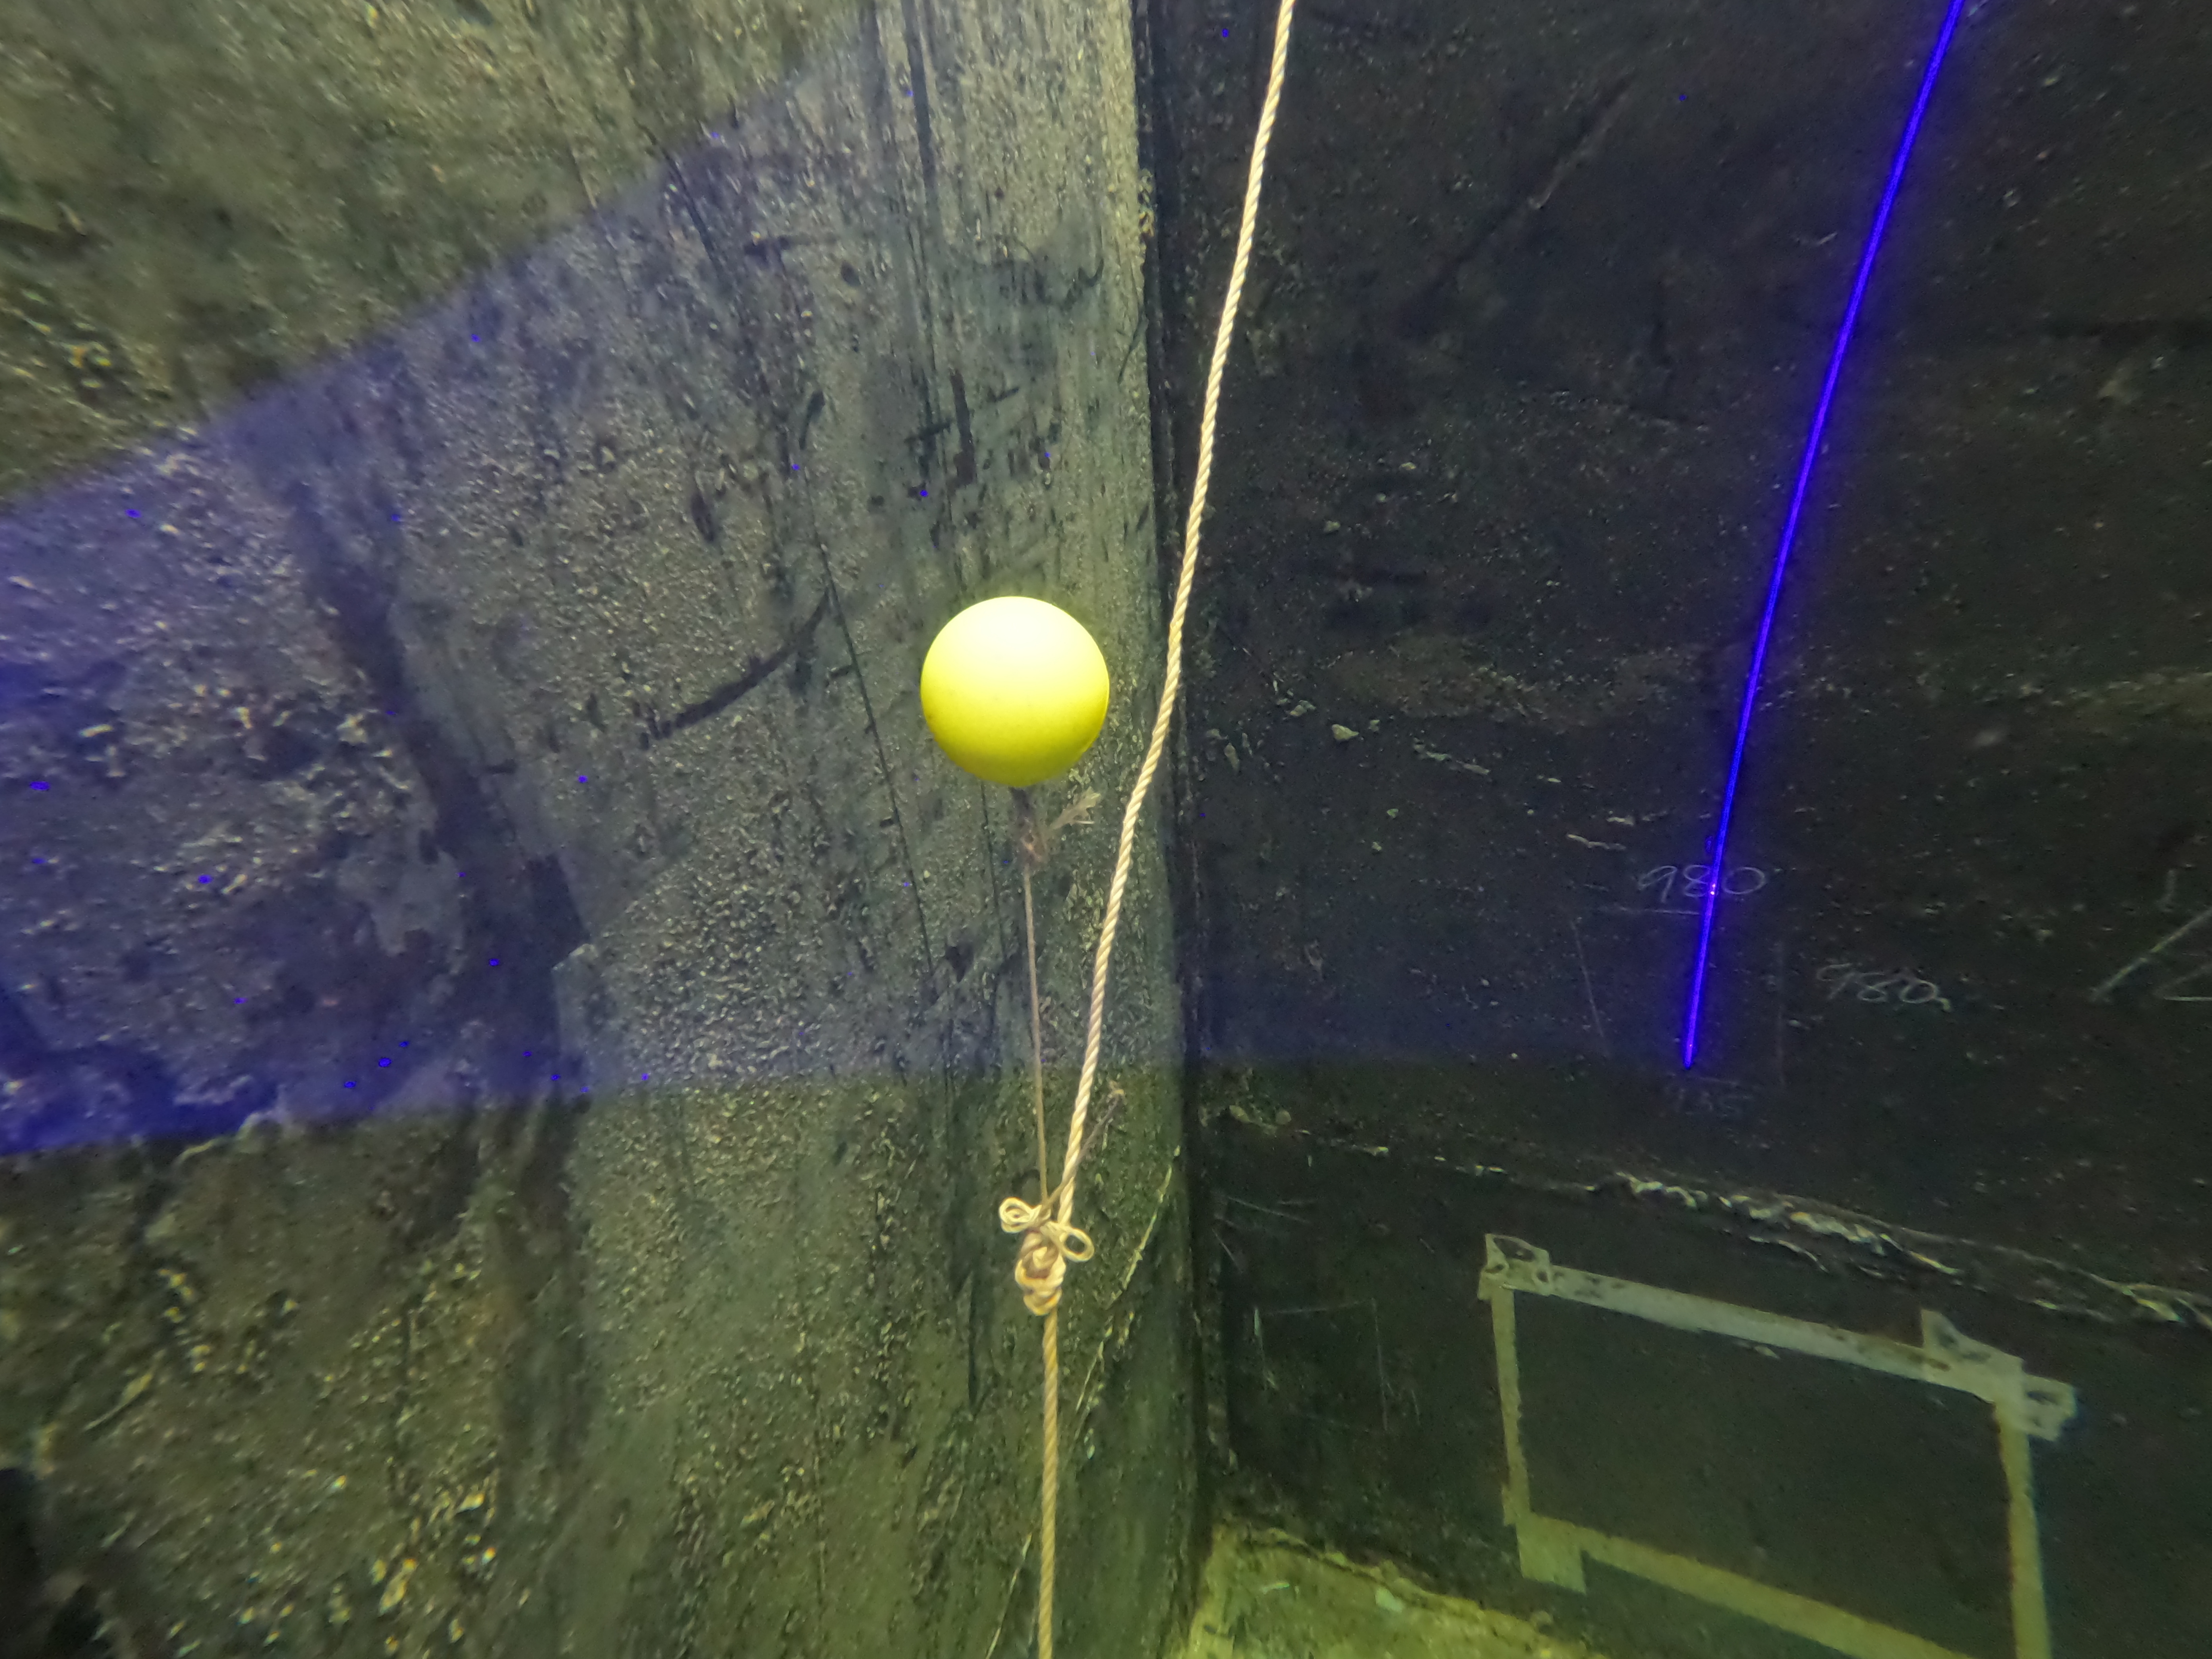

Supplement: Supplementary file 3355 [file G0034059.pdf › 8/G0034059.pdf]

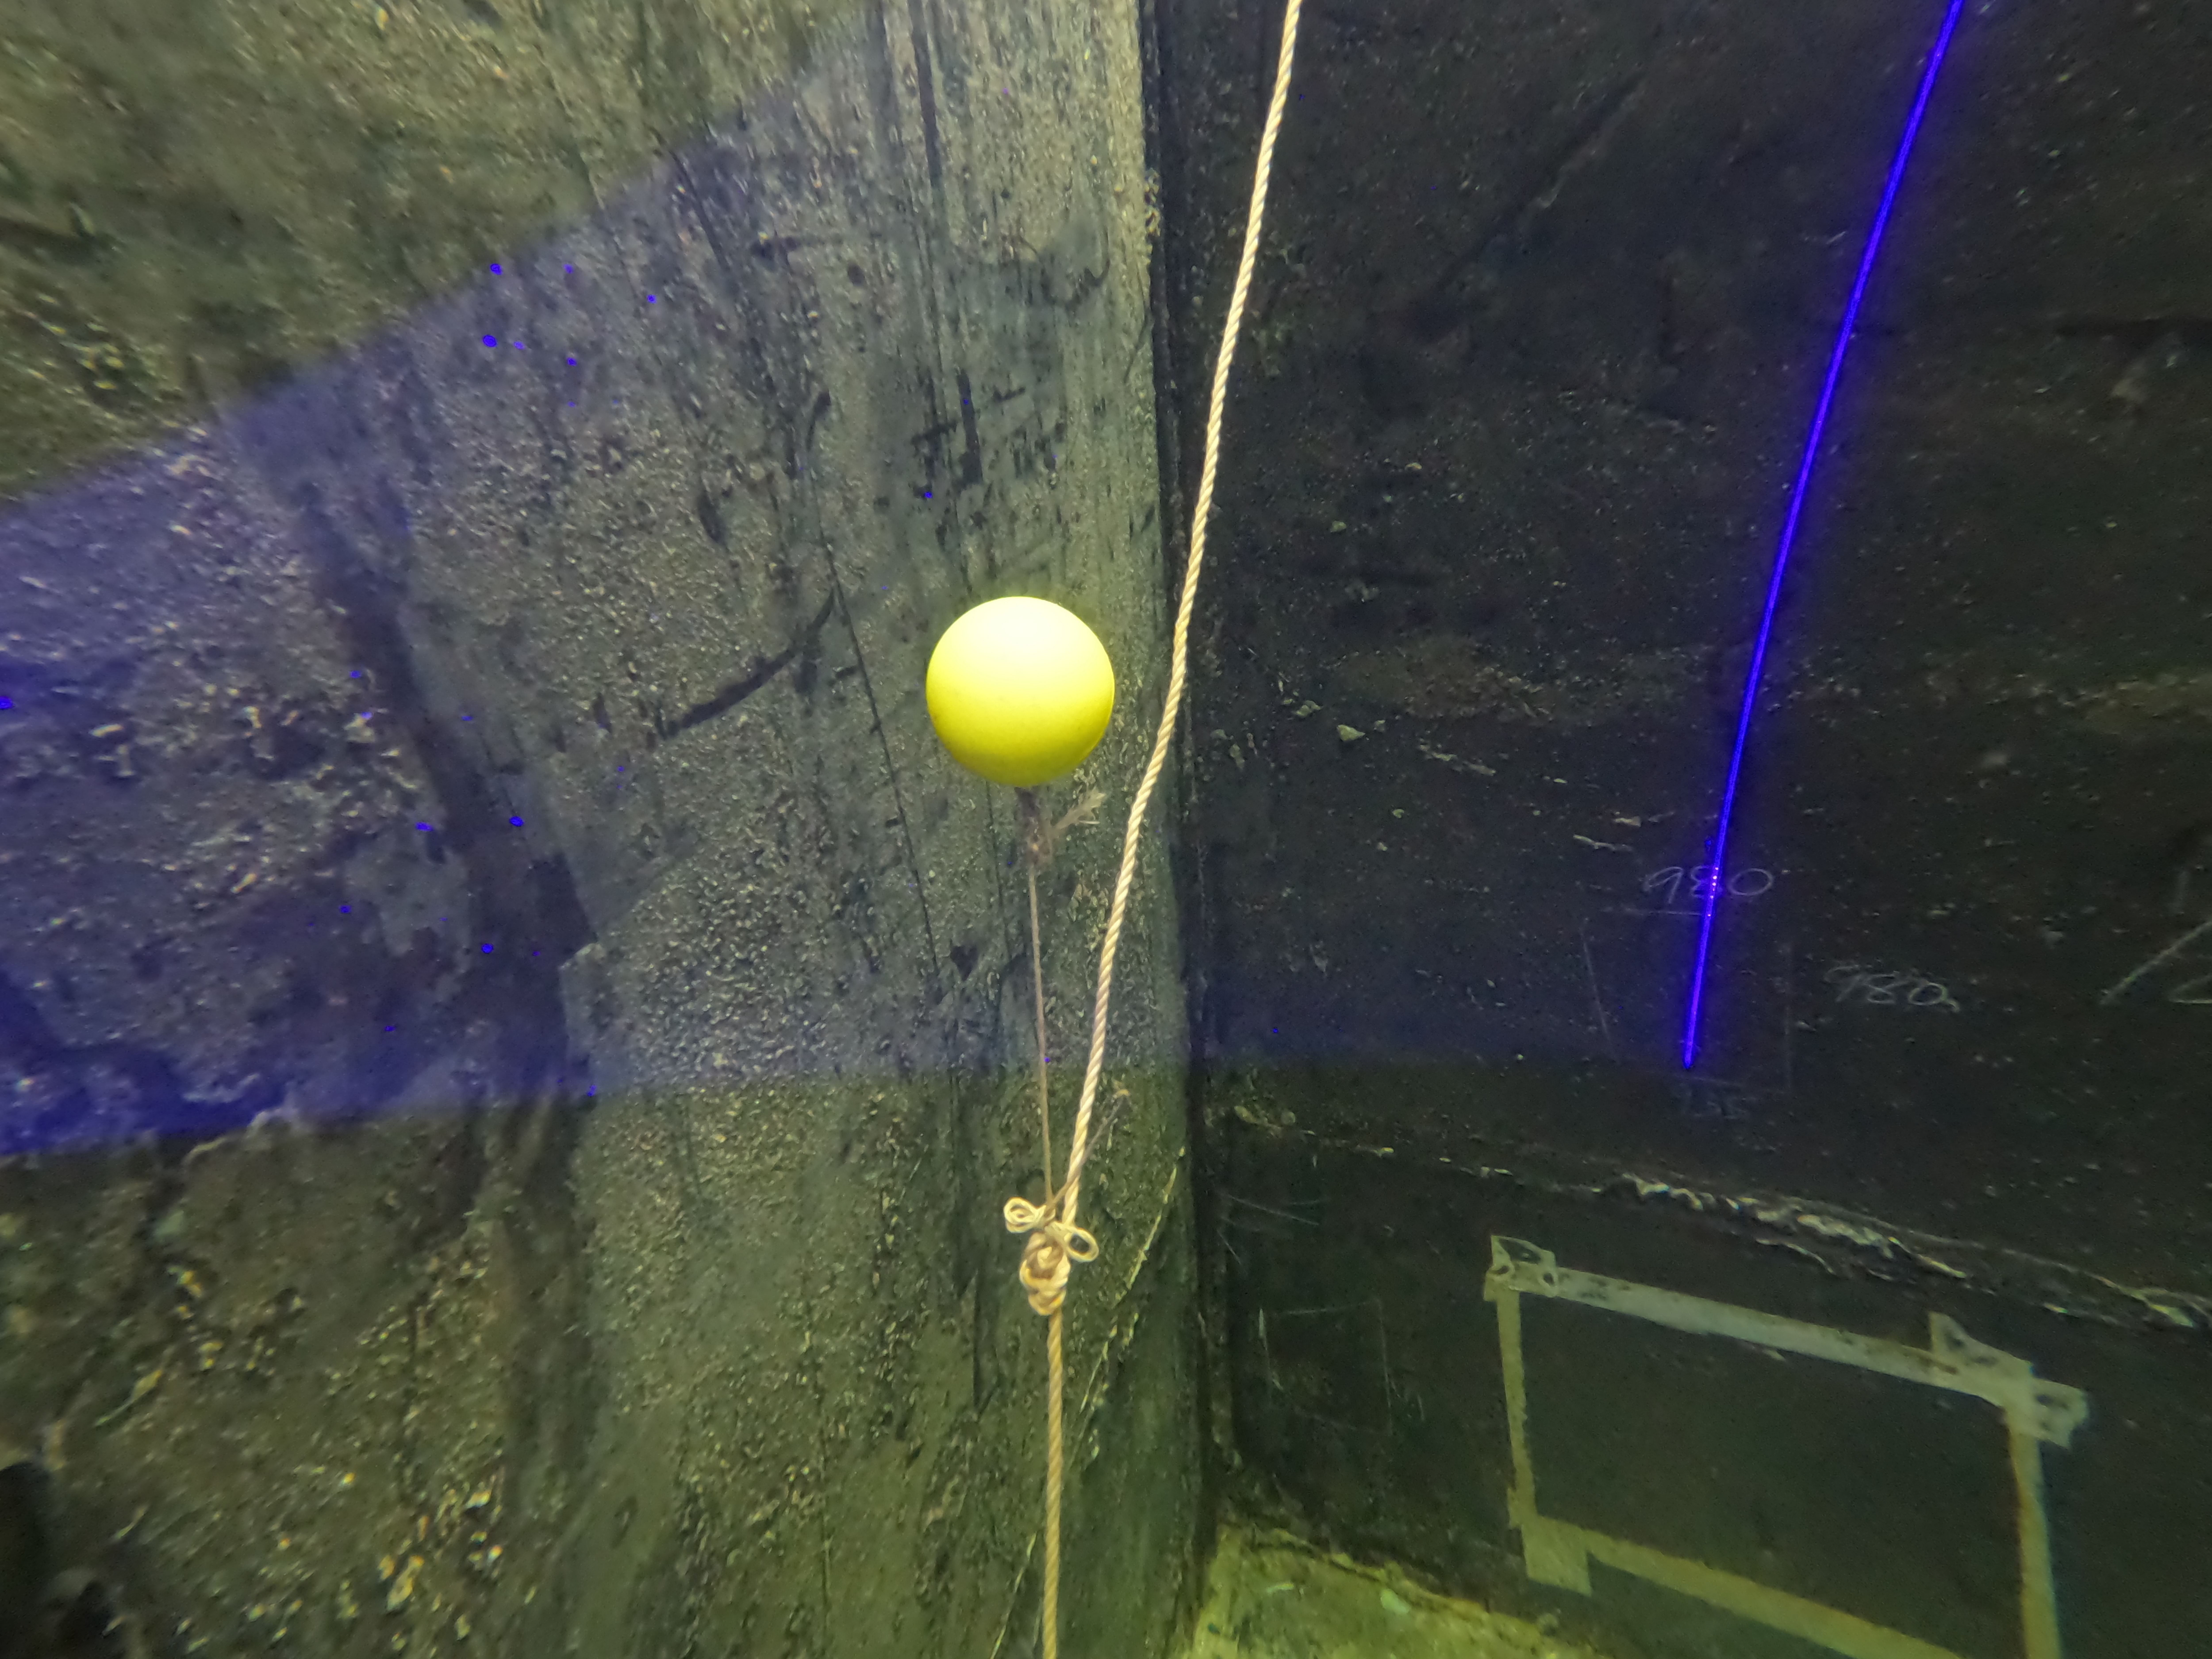

Supplement: Supplementary file 3356 [file G0034060.pdf › 8/G0034060.pdf]

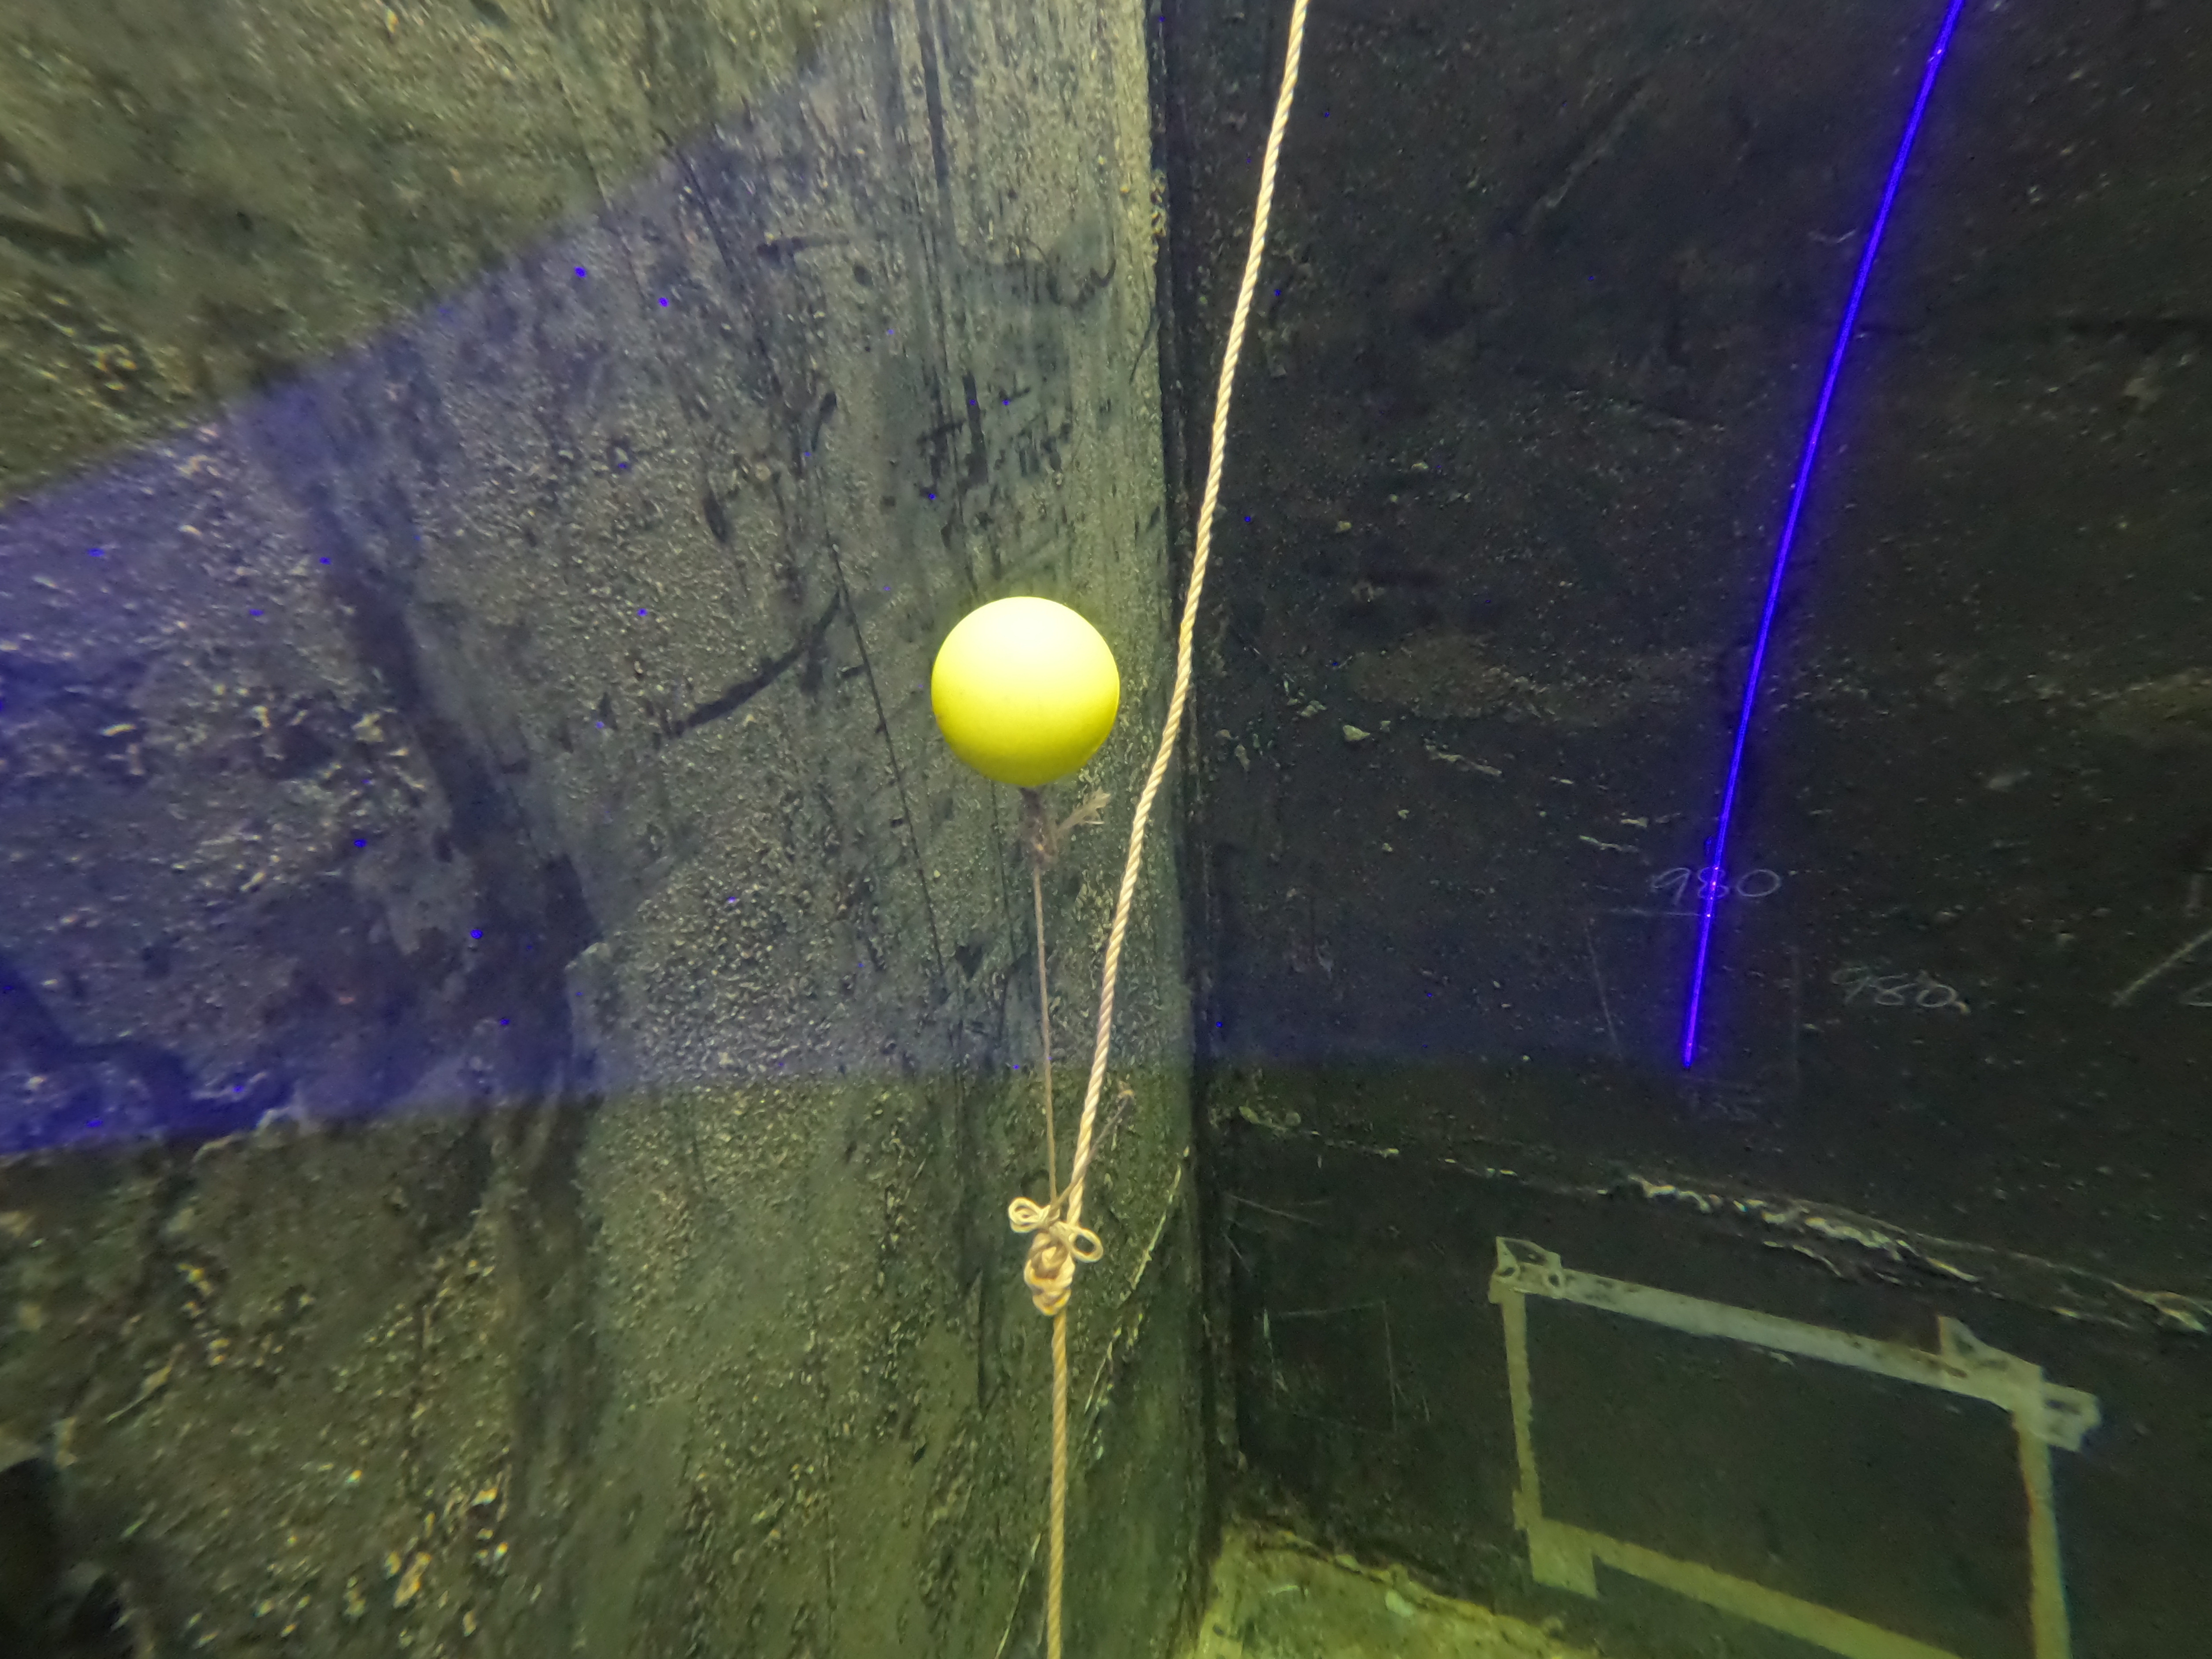

Supplement: Supplementary file 3357 [file G0034061.pdf › 8/G0034061.pdf]

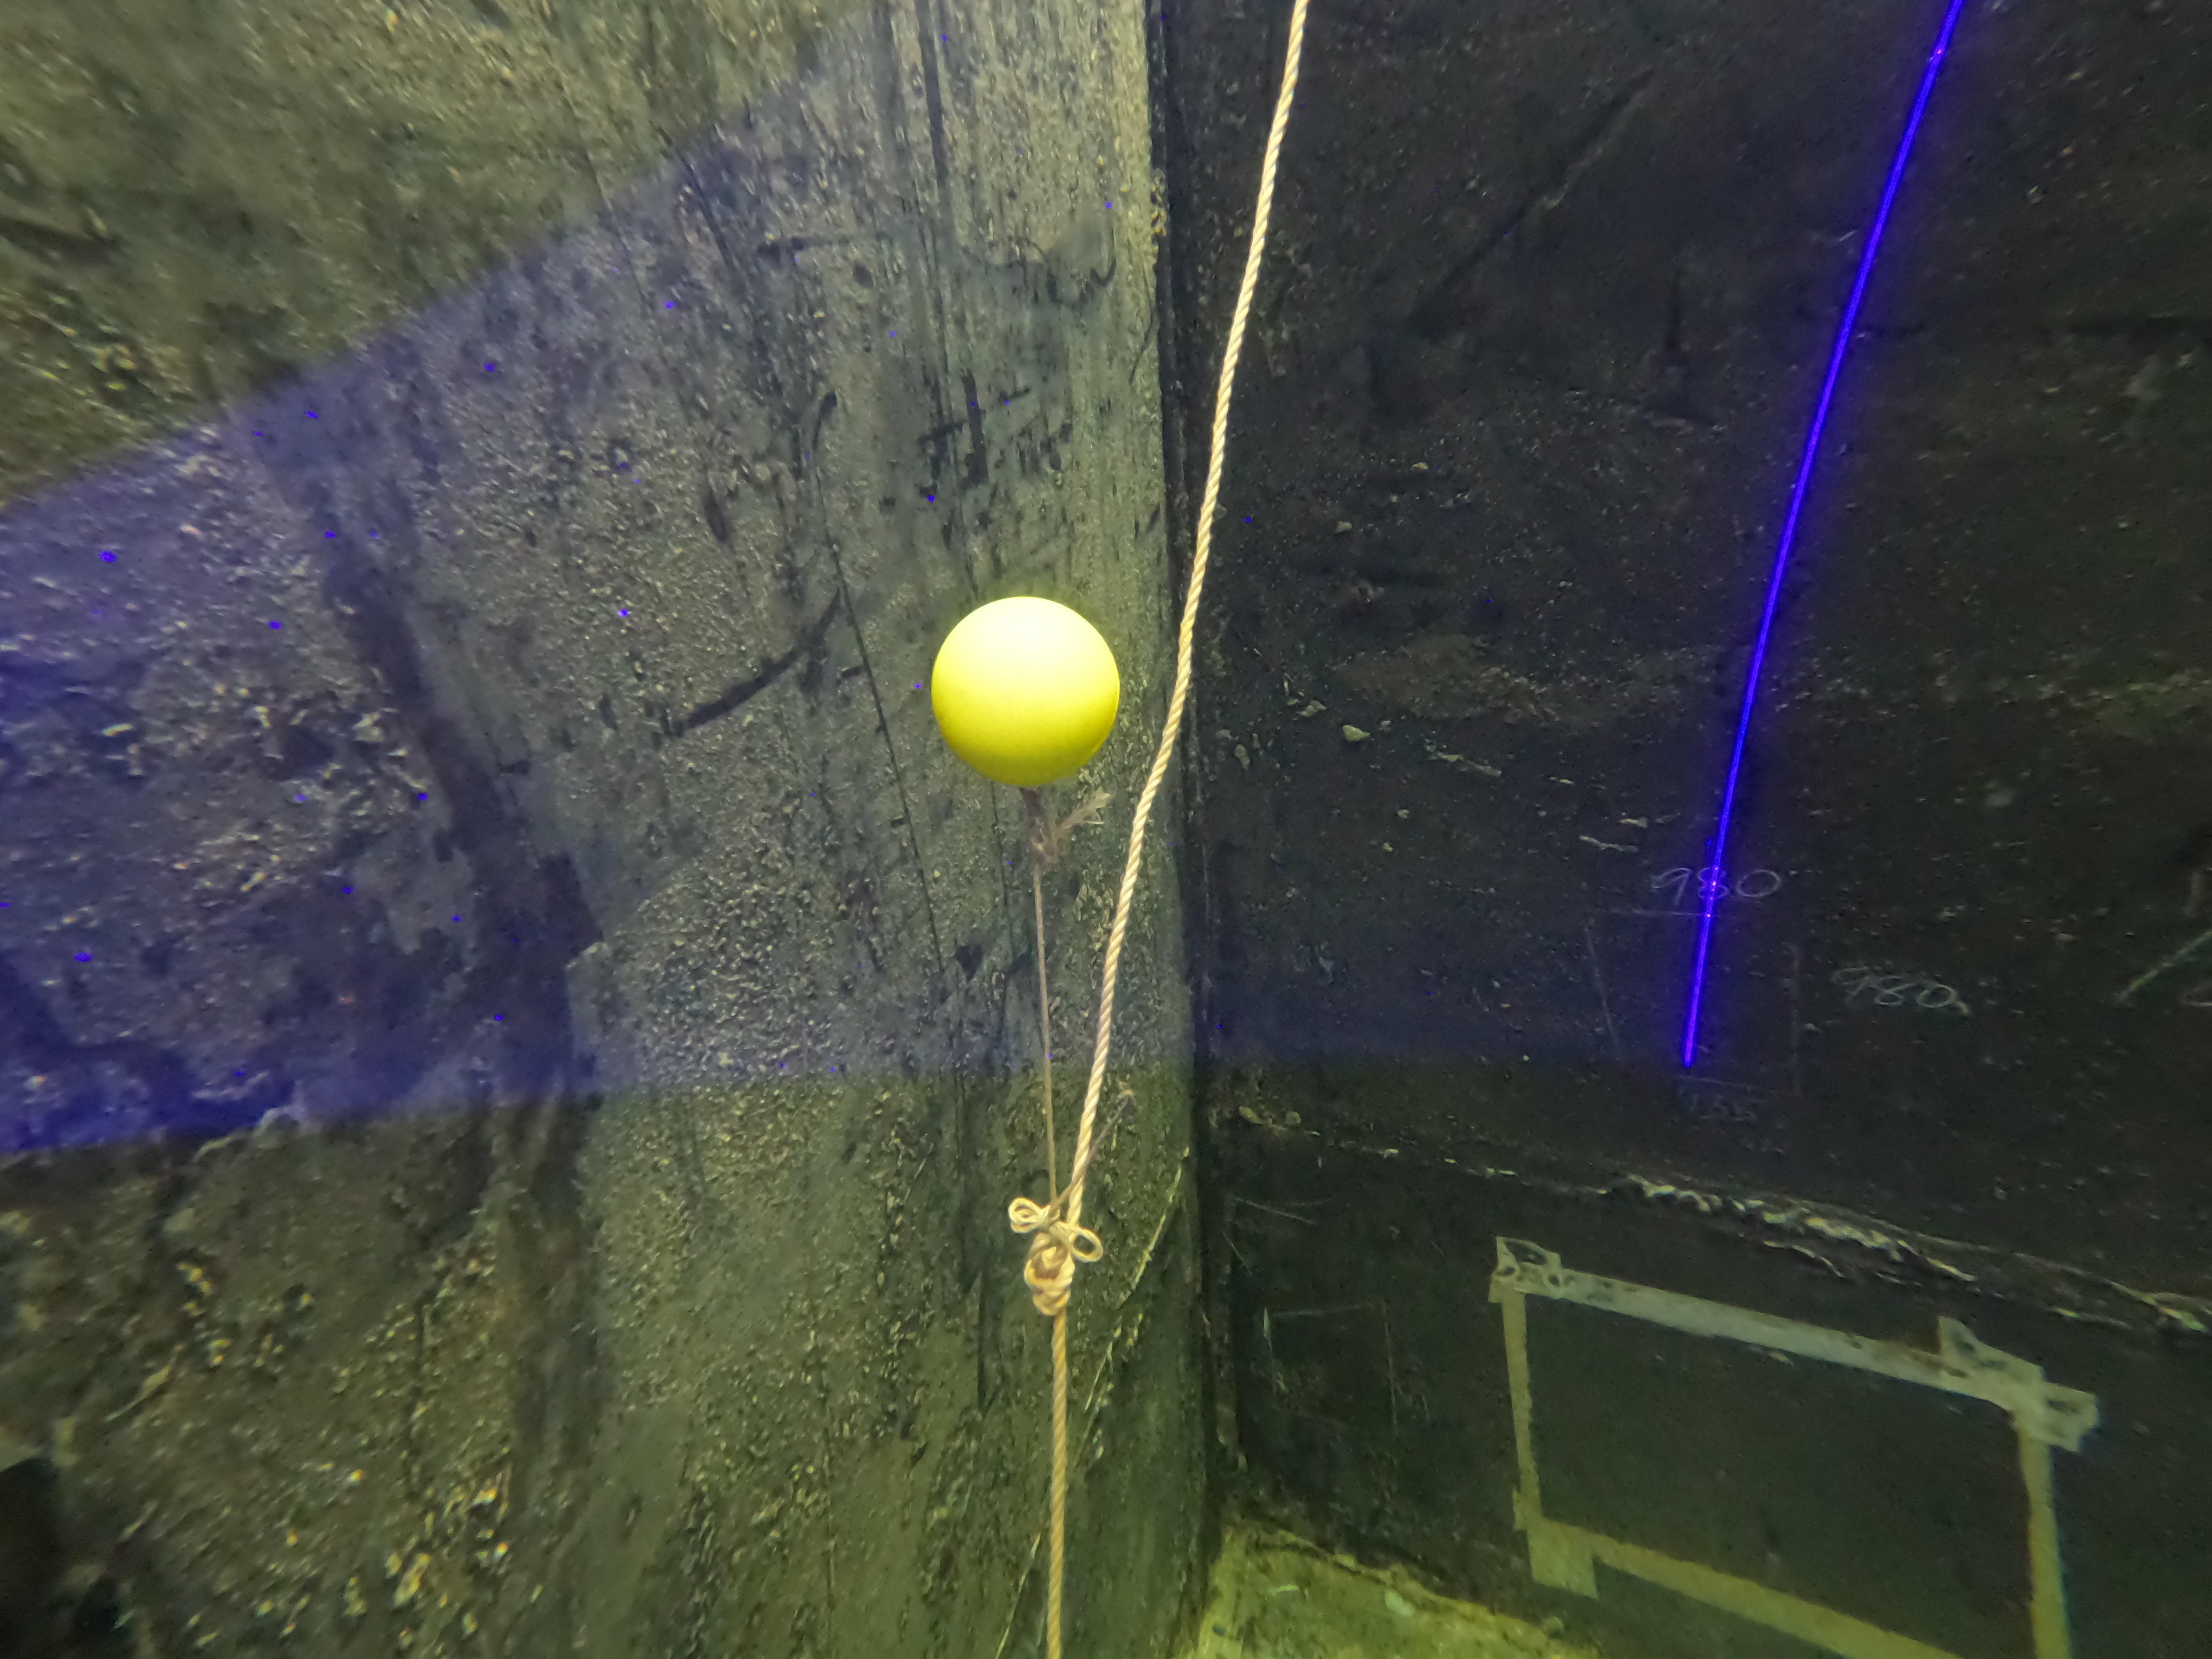

Supplement: Supplementary file 3358 [file G0034062.pdf › 8/G0034062.pdf]

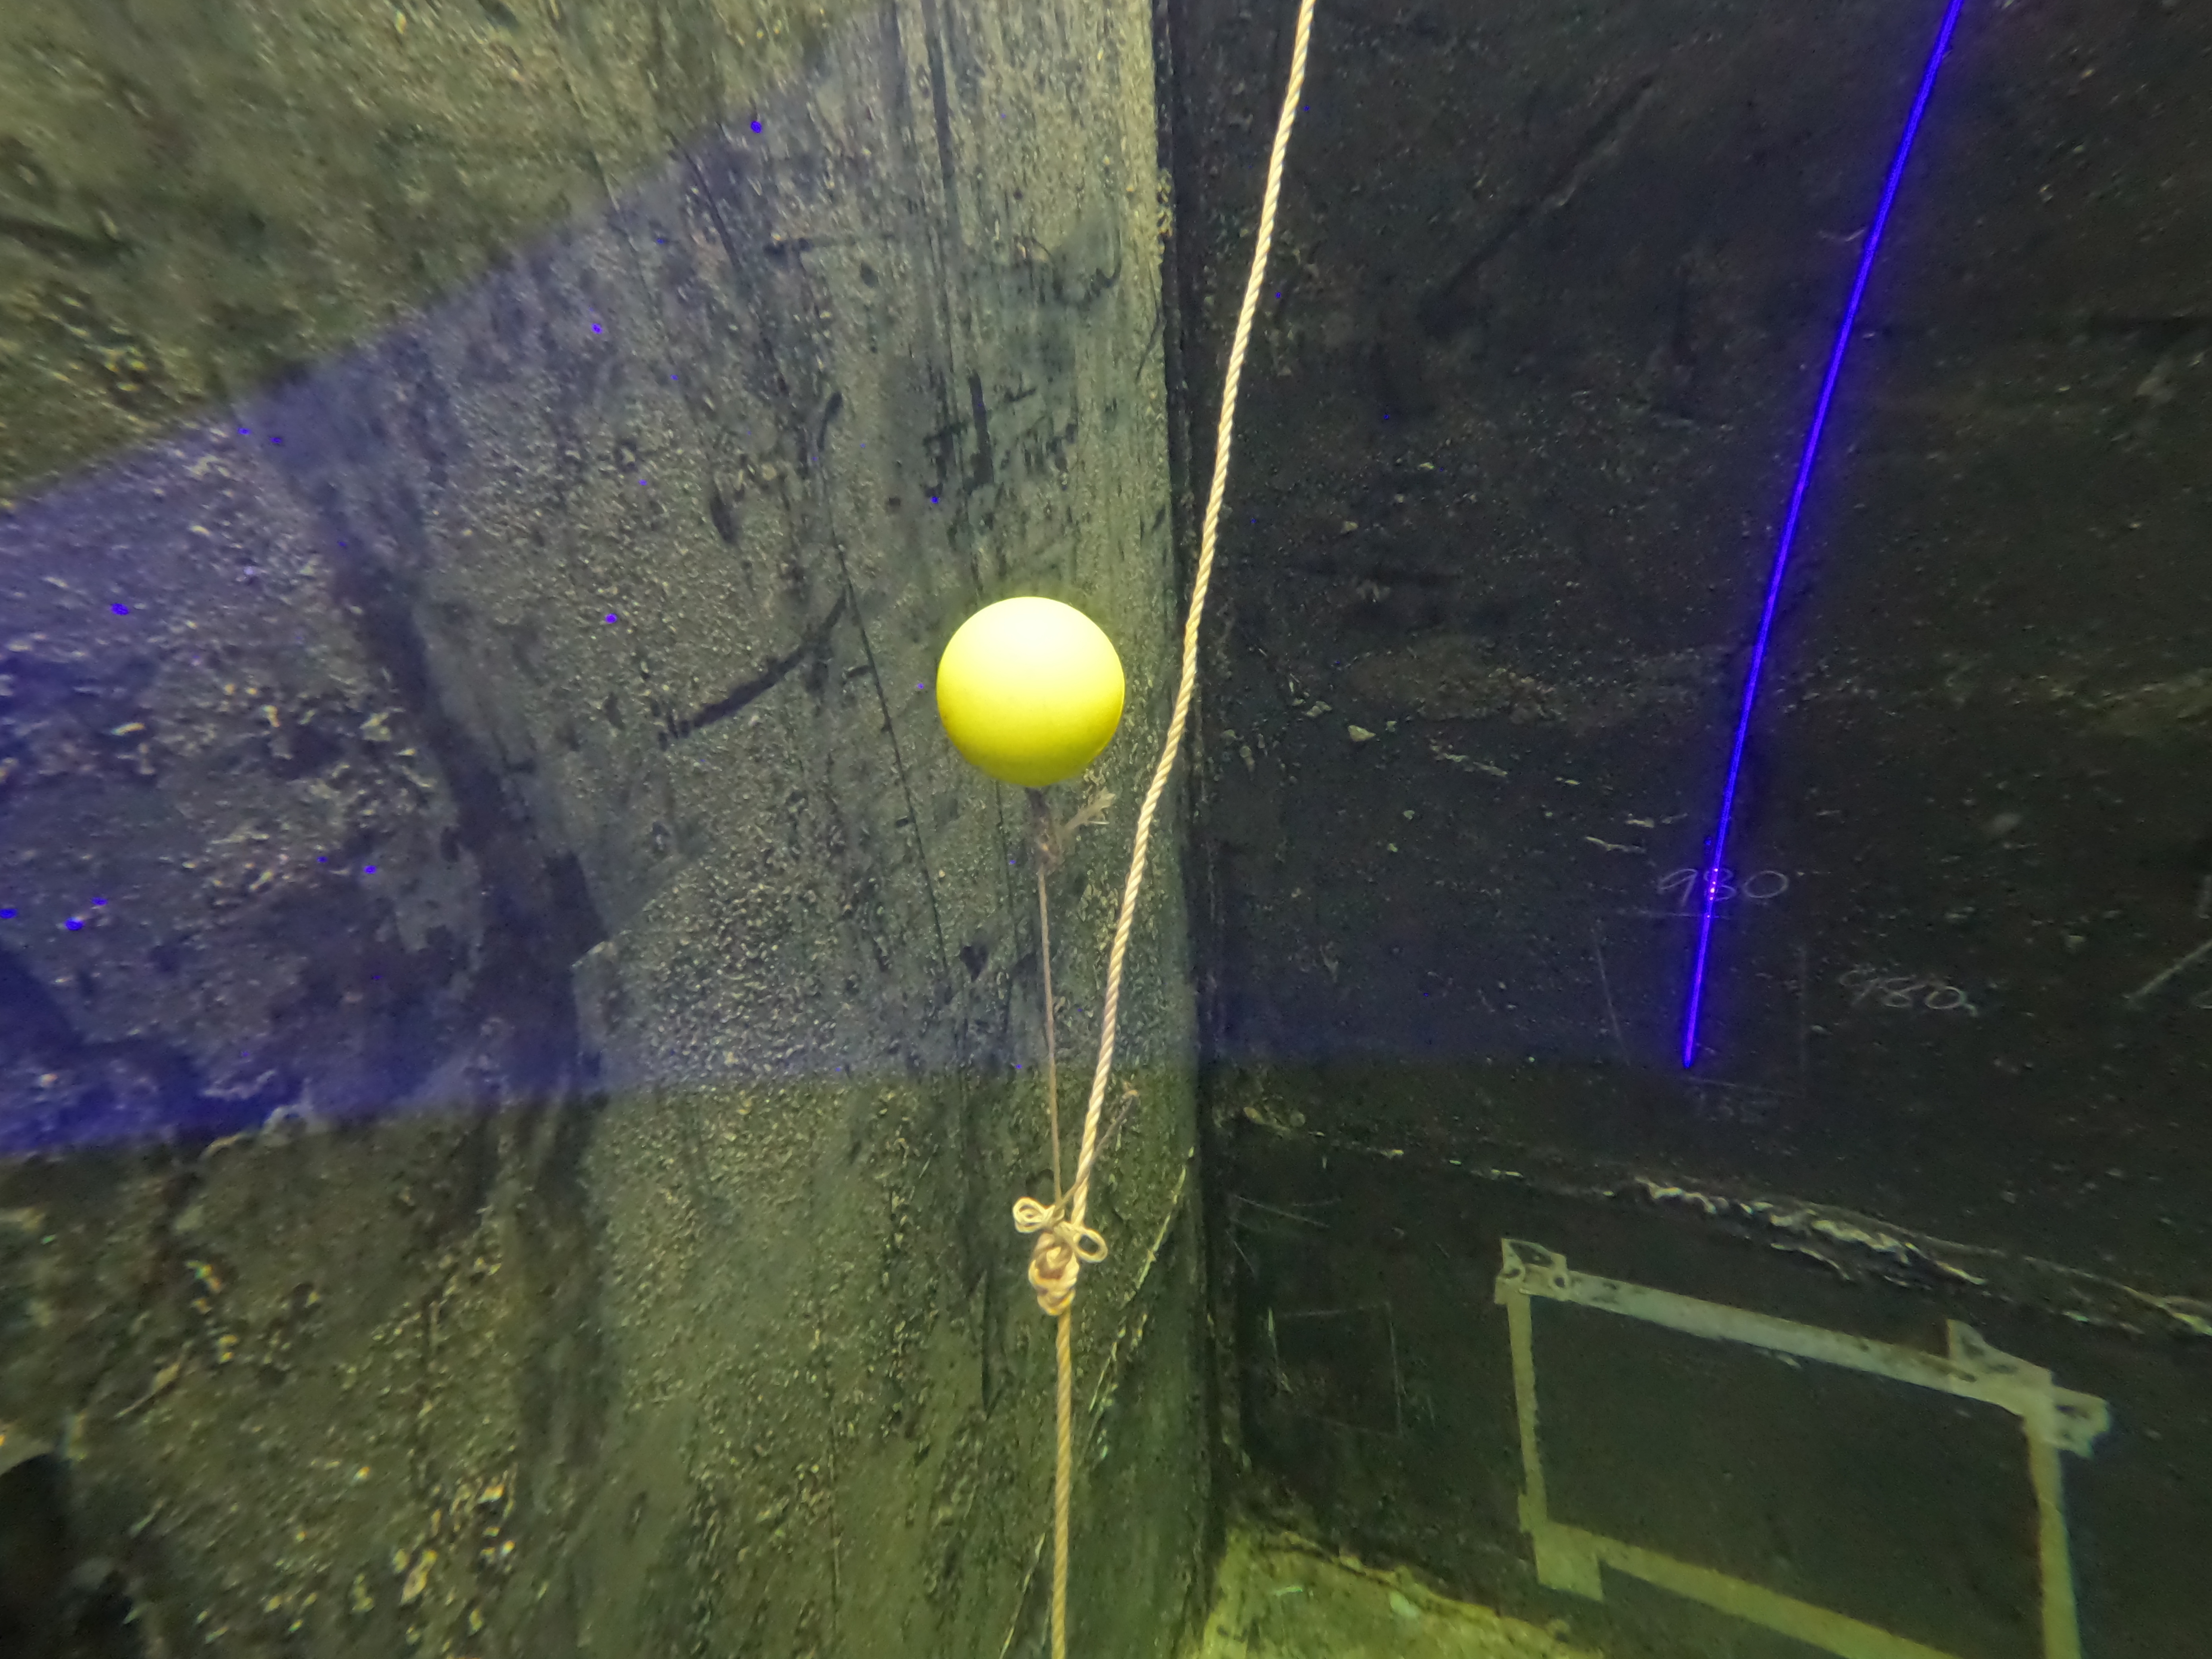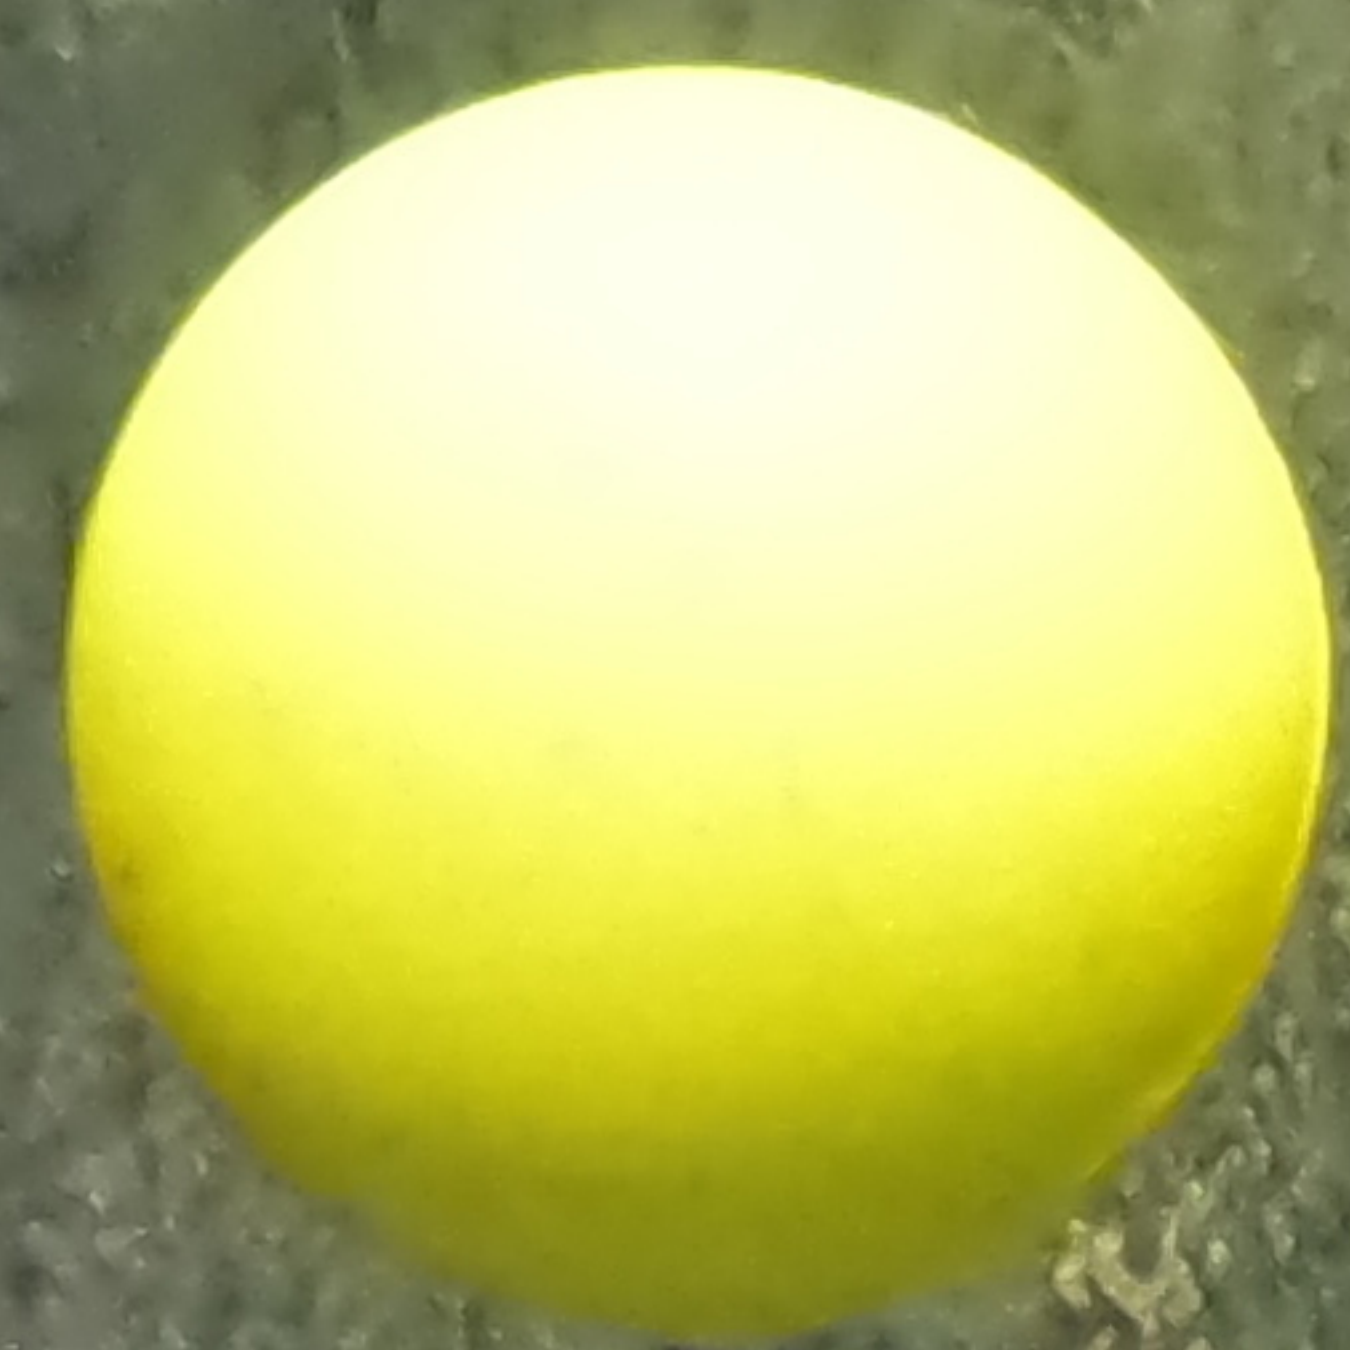

930

980

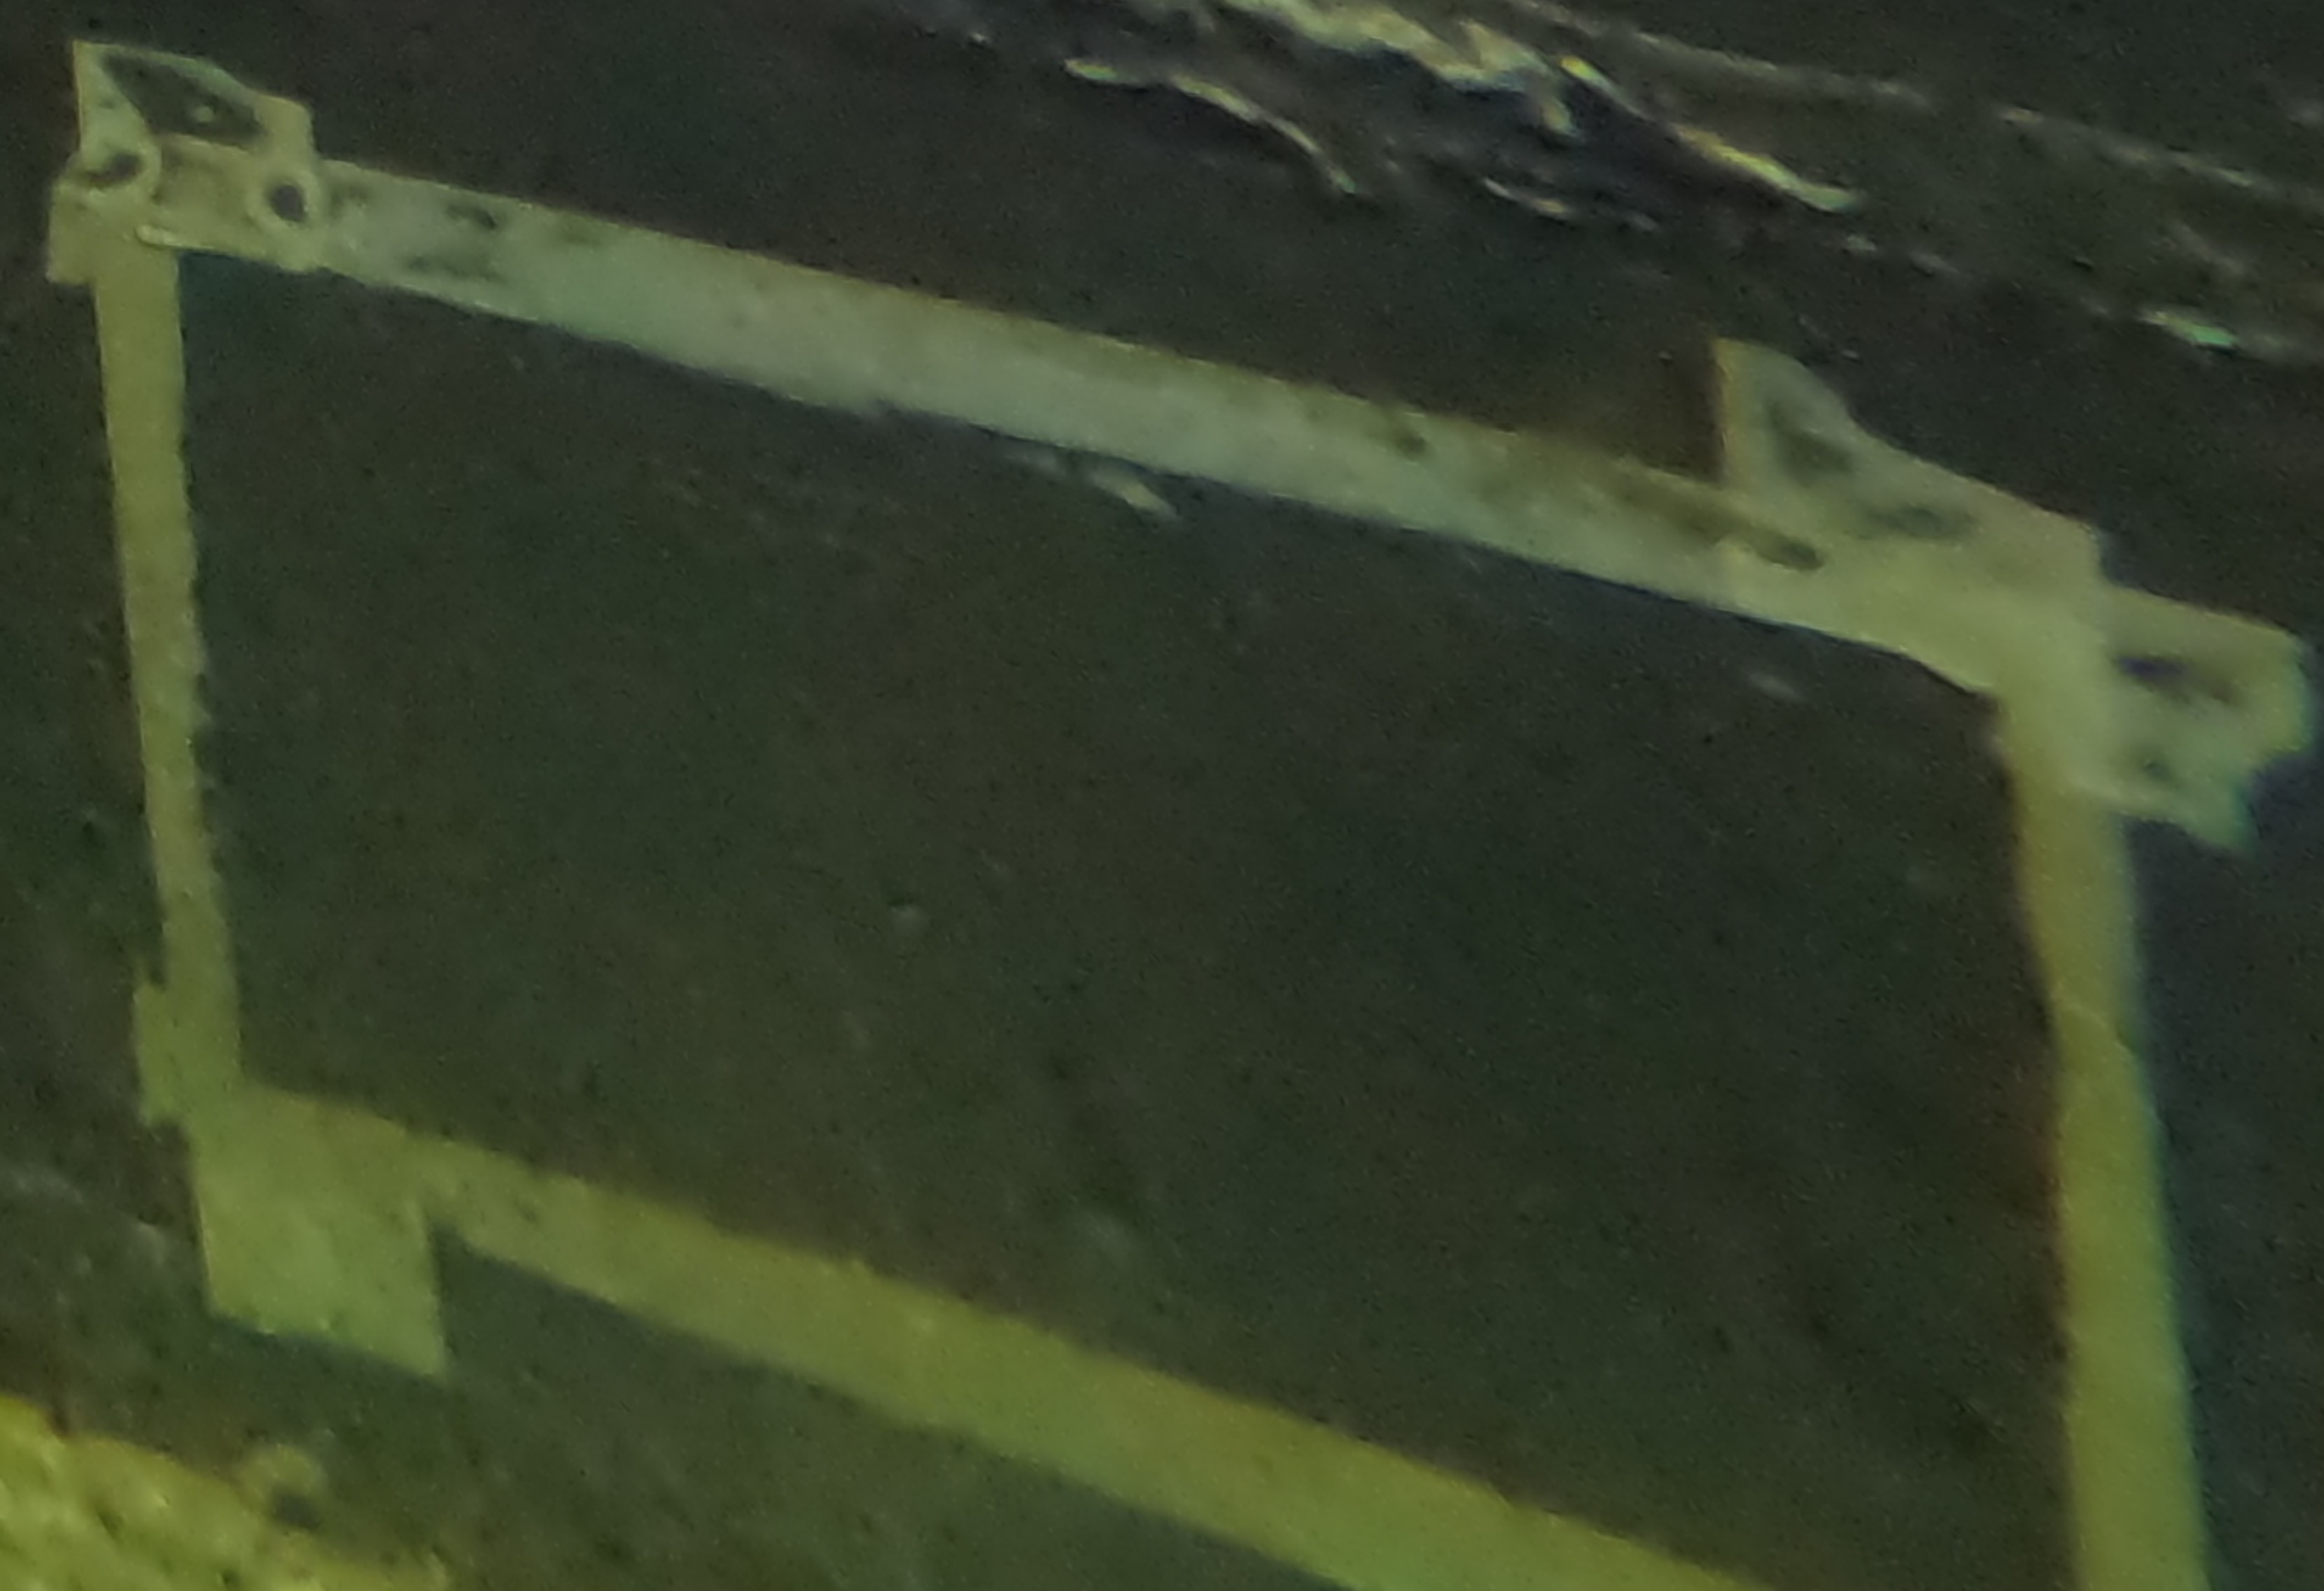

Supplement: Supplementary file 3359 [file G0034063.pdf › 8/G0034063.pdf]

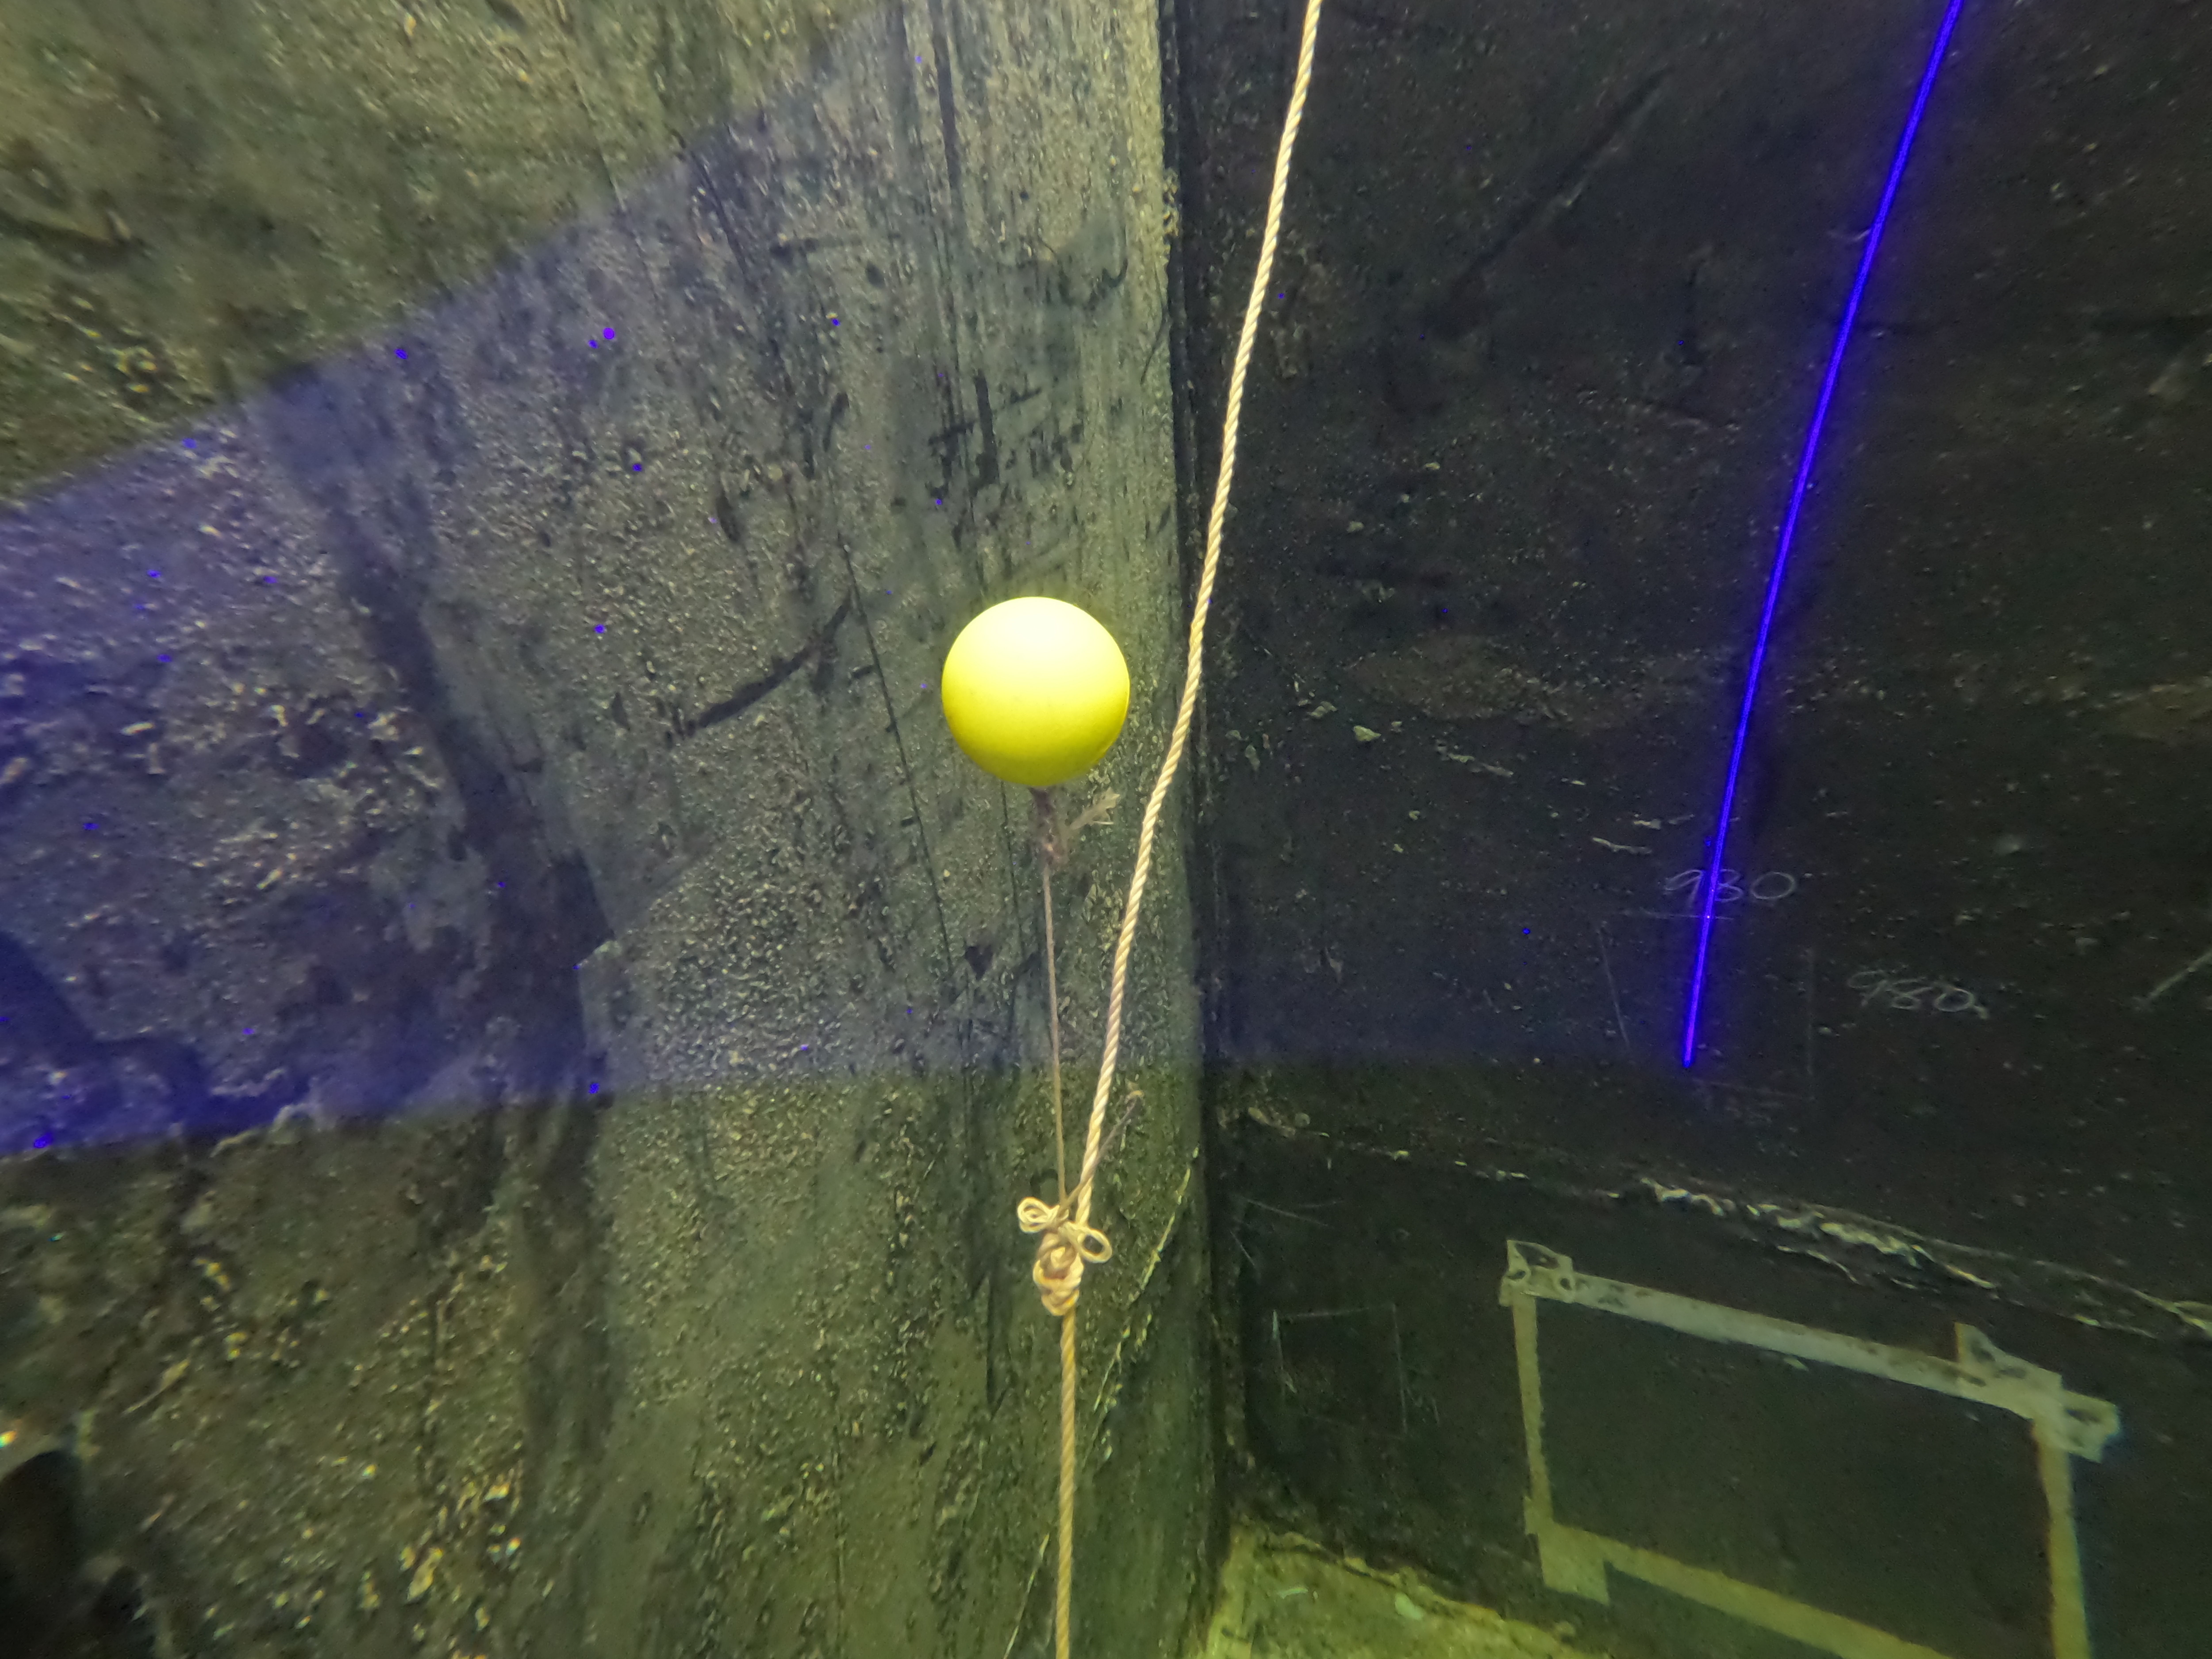

Supplement: Supplementary file 3360 [file G0034064.pdf › 8/G0034064.pdf]

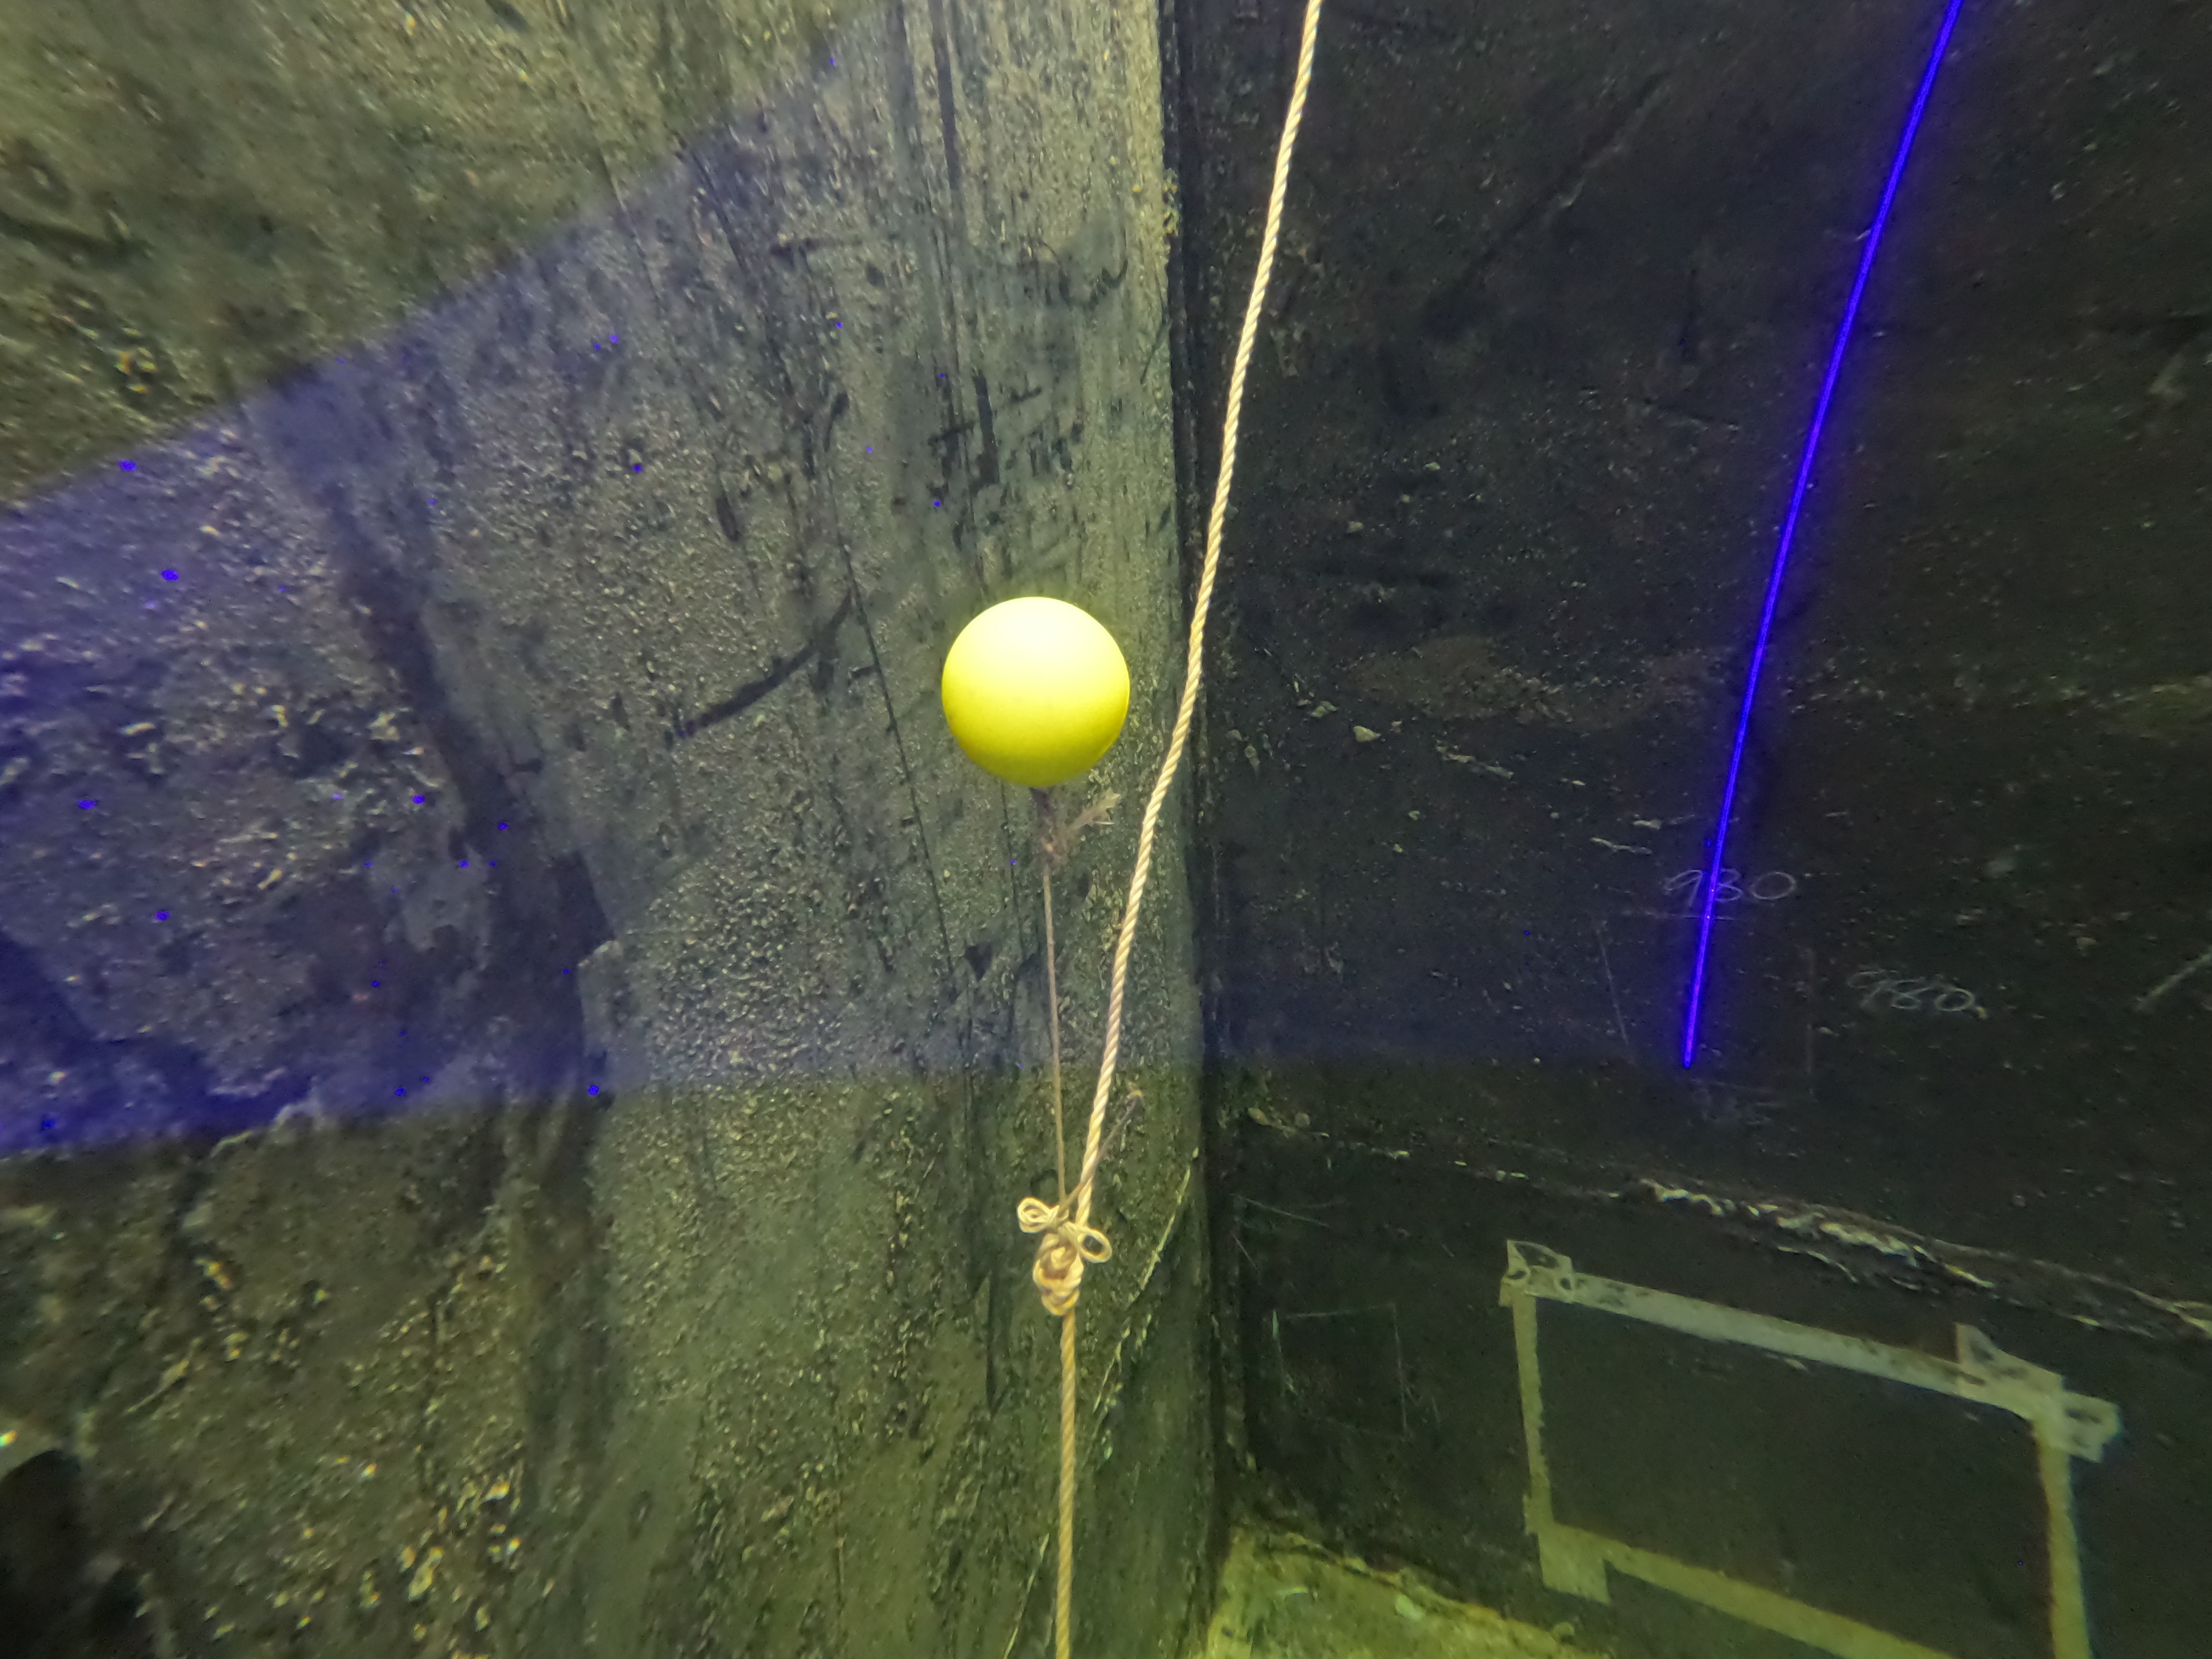

Supplement: Supplementary file 3361 [file G0034065.pdf › 8/G0034065.pdf]

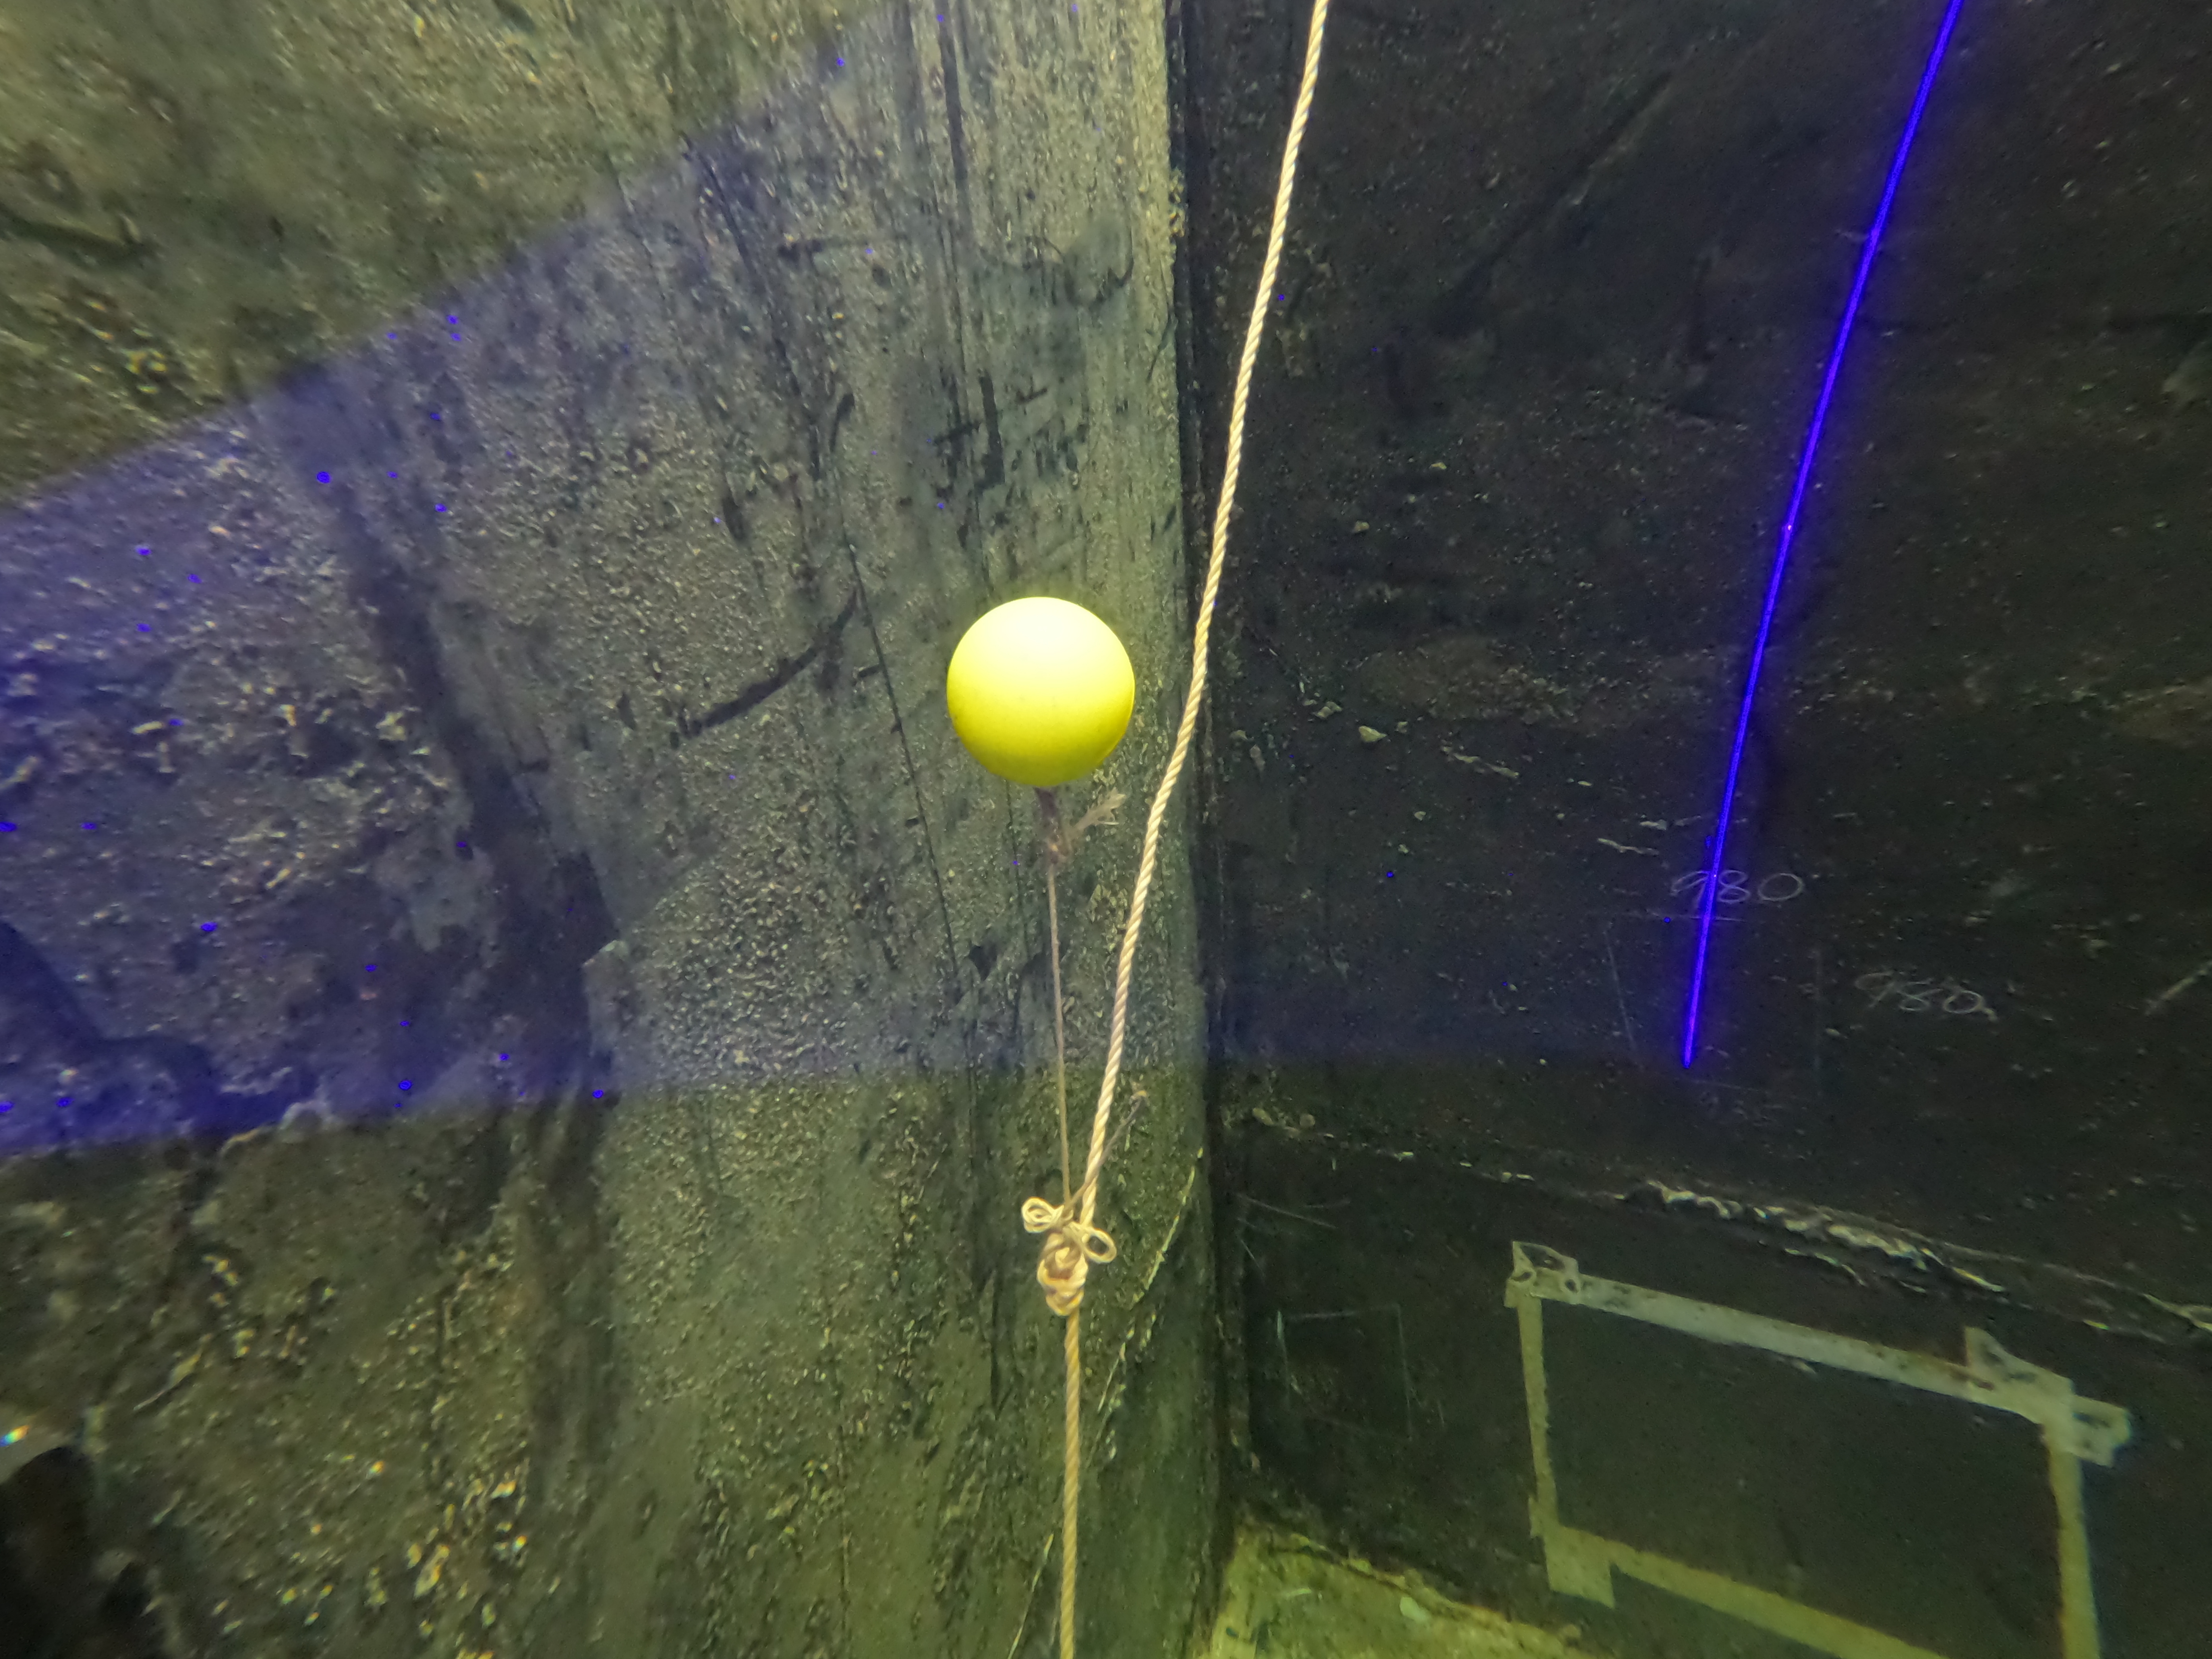

Supplement: Supplementary file 3362 [file G0034066.pdf › 8/G0034066.pdf]

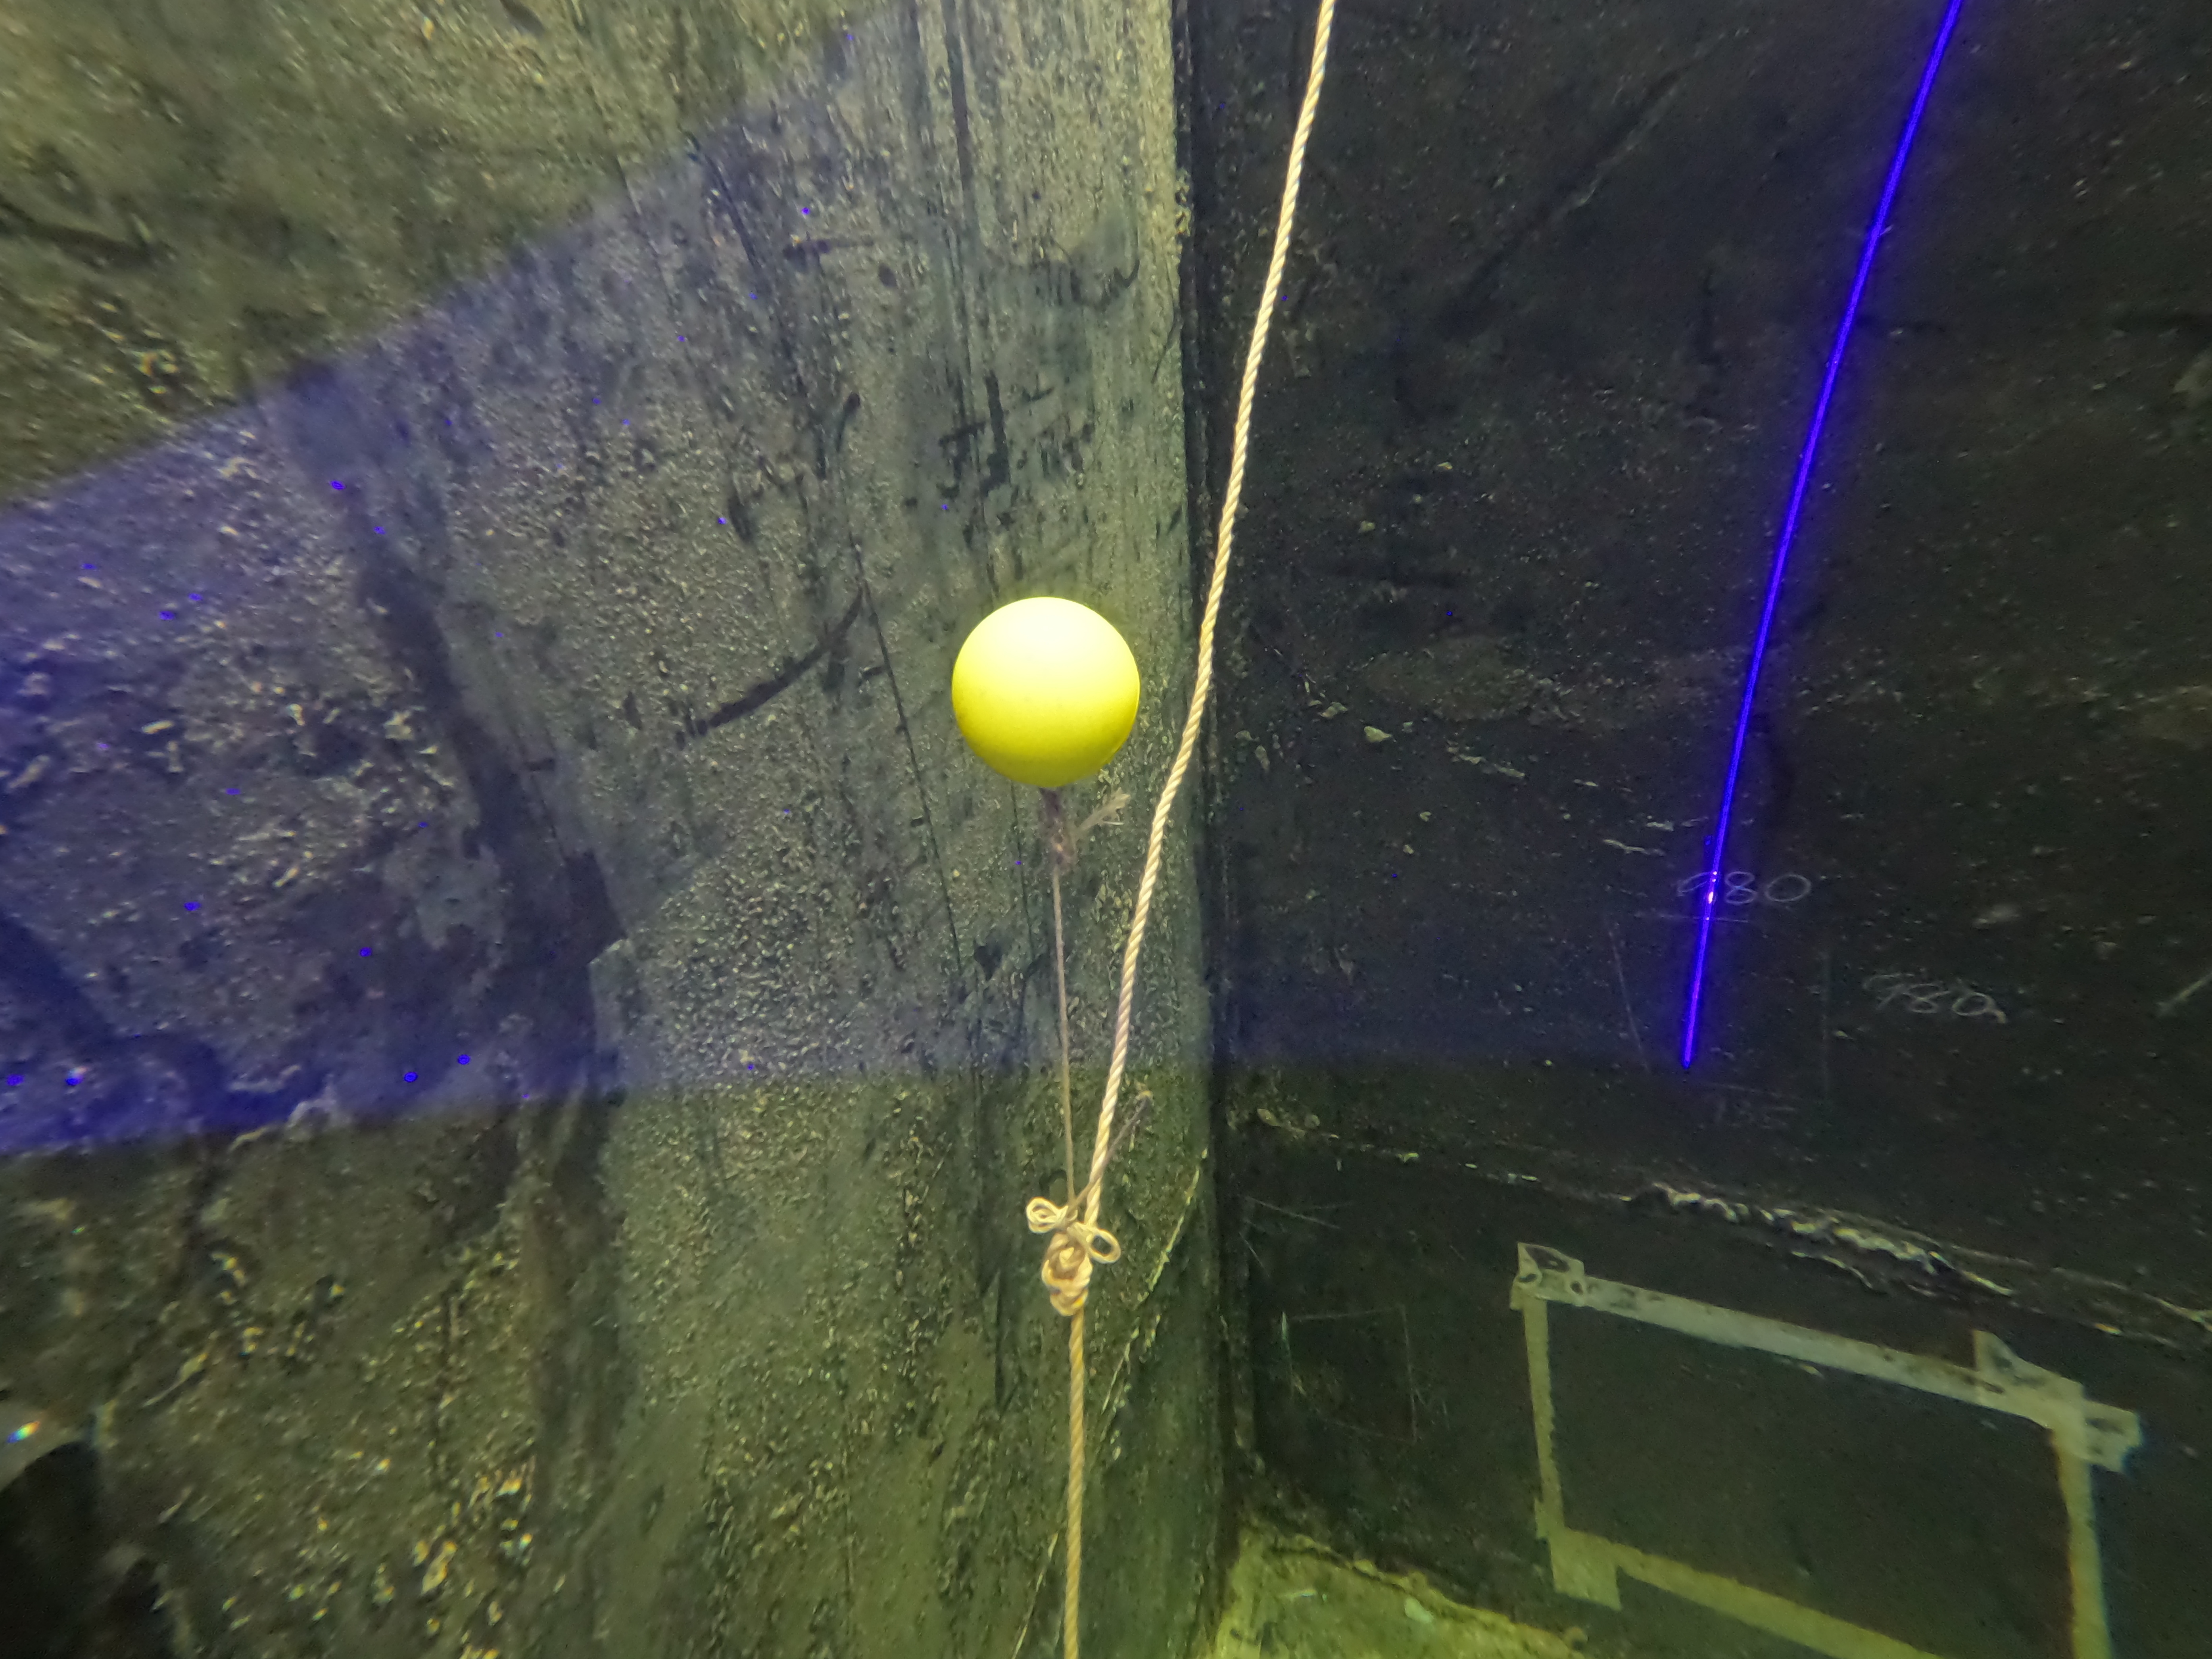

Supplement: Supplementary file 3363 [file G0034067.pdf › 8/G0034067.pdf]

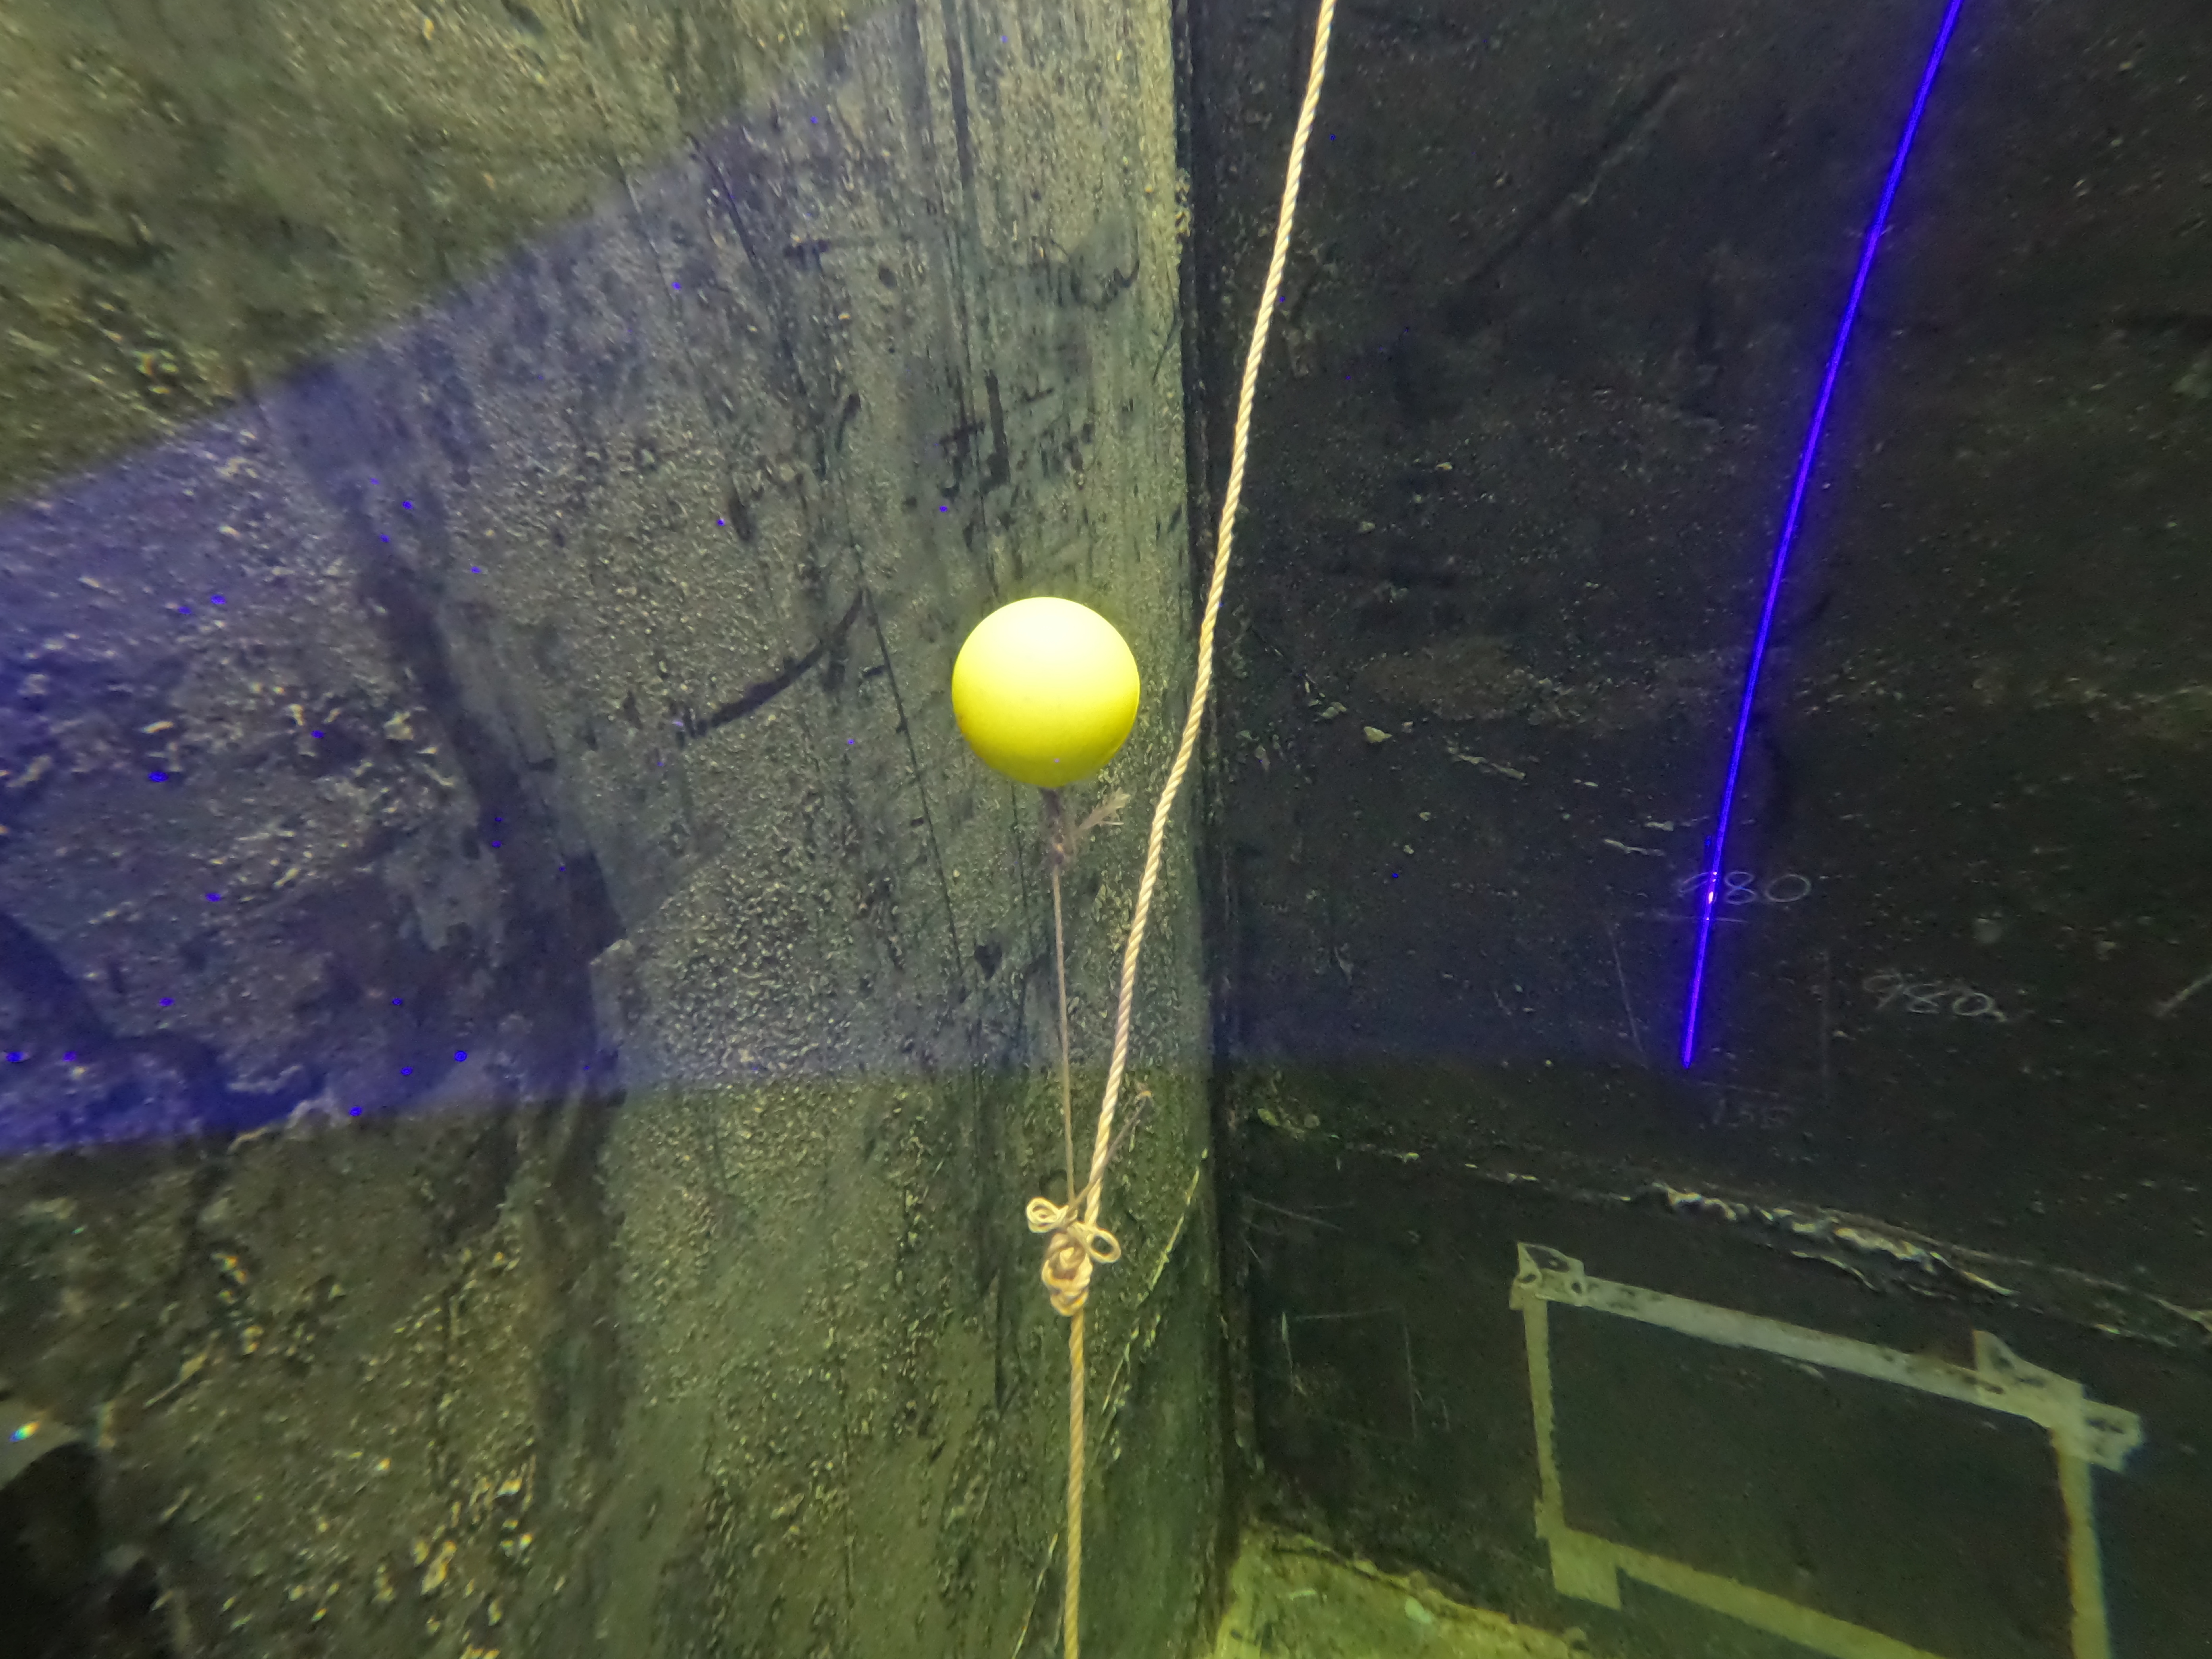

Supplement: Supplementary file 3364 [file G0034068.pdf › 8/G0034068.pdf]

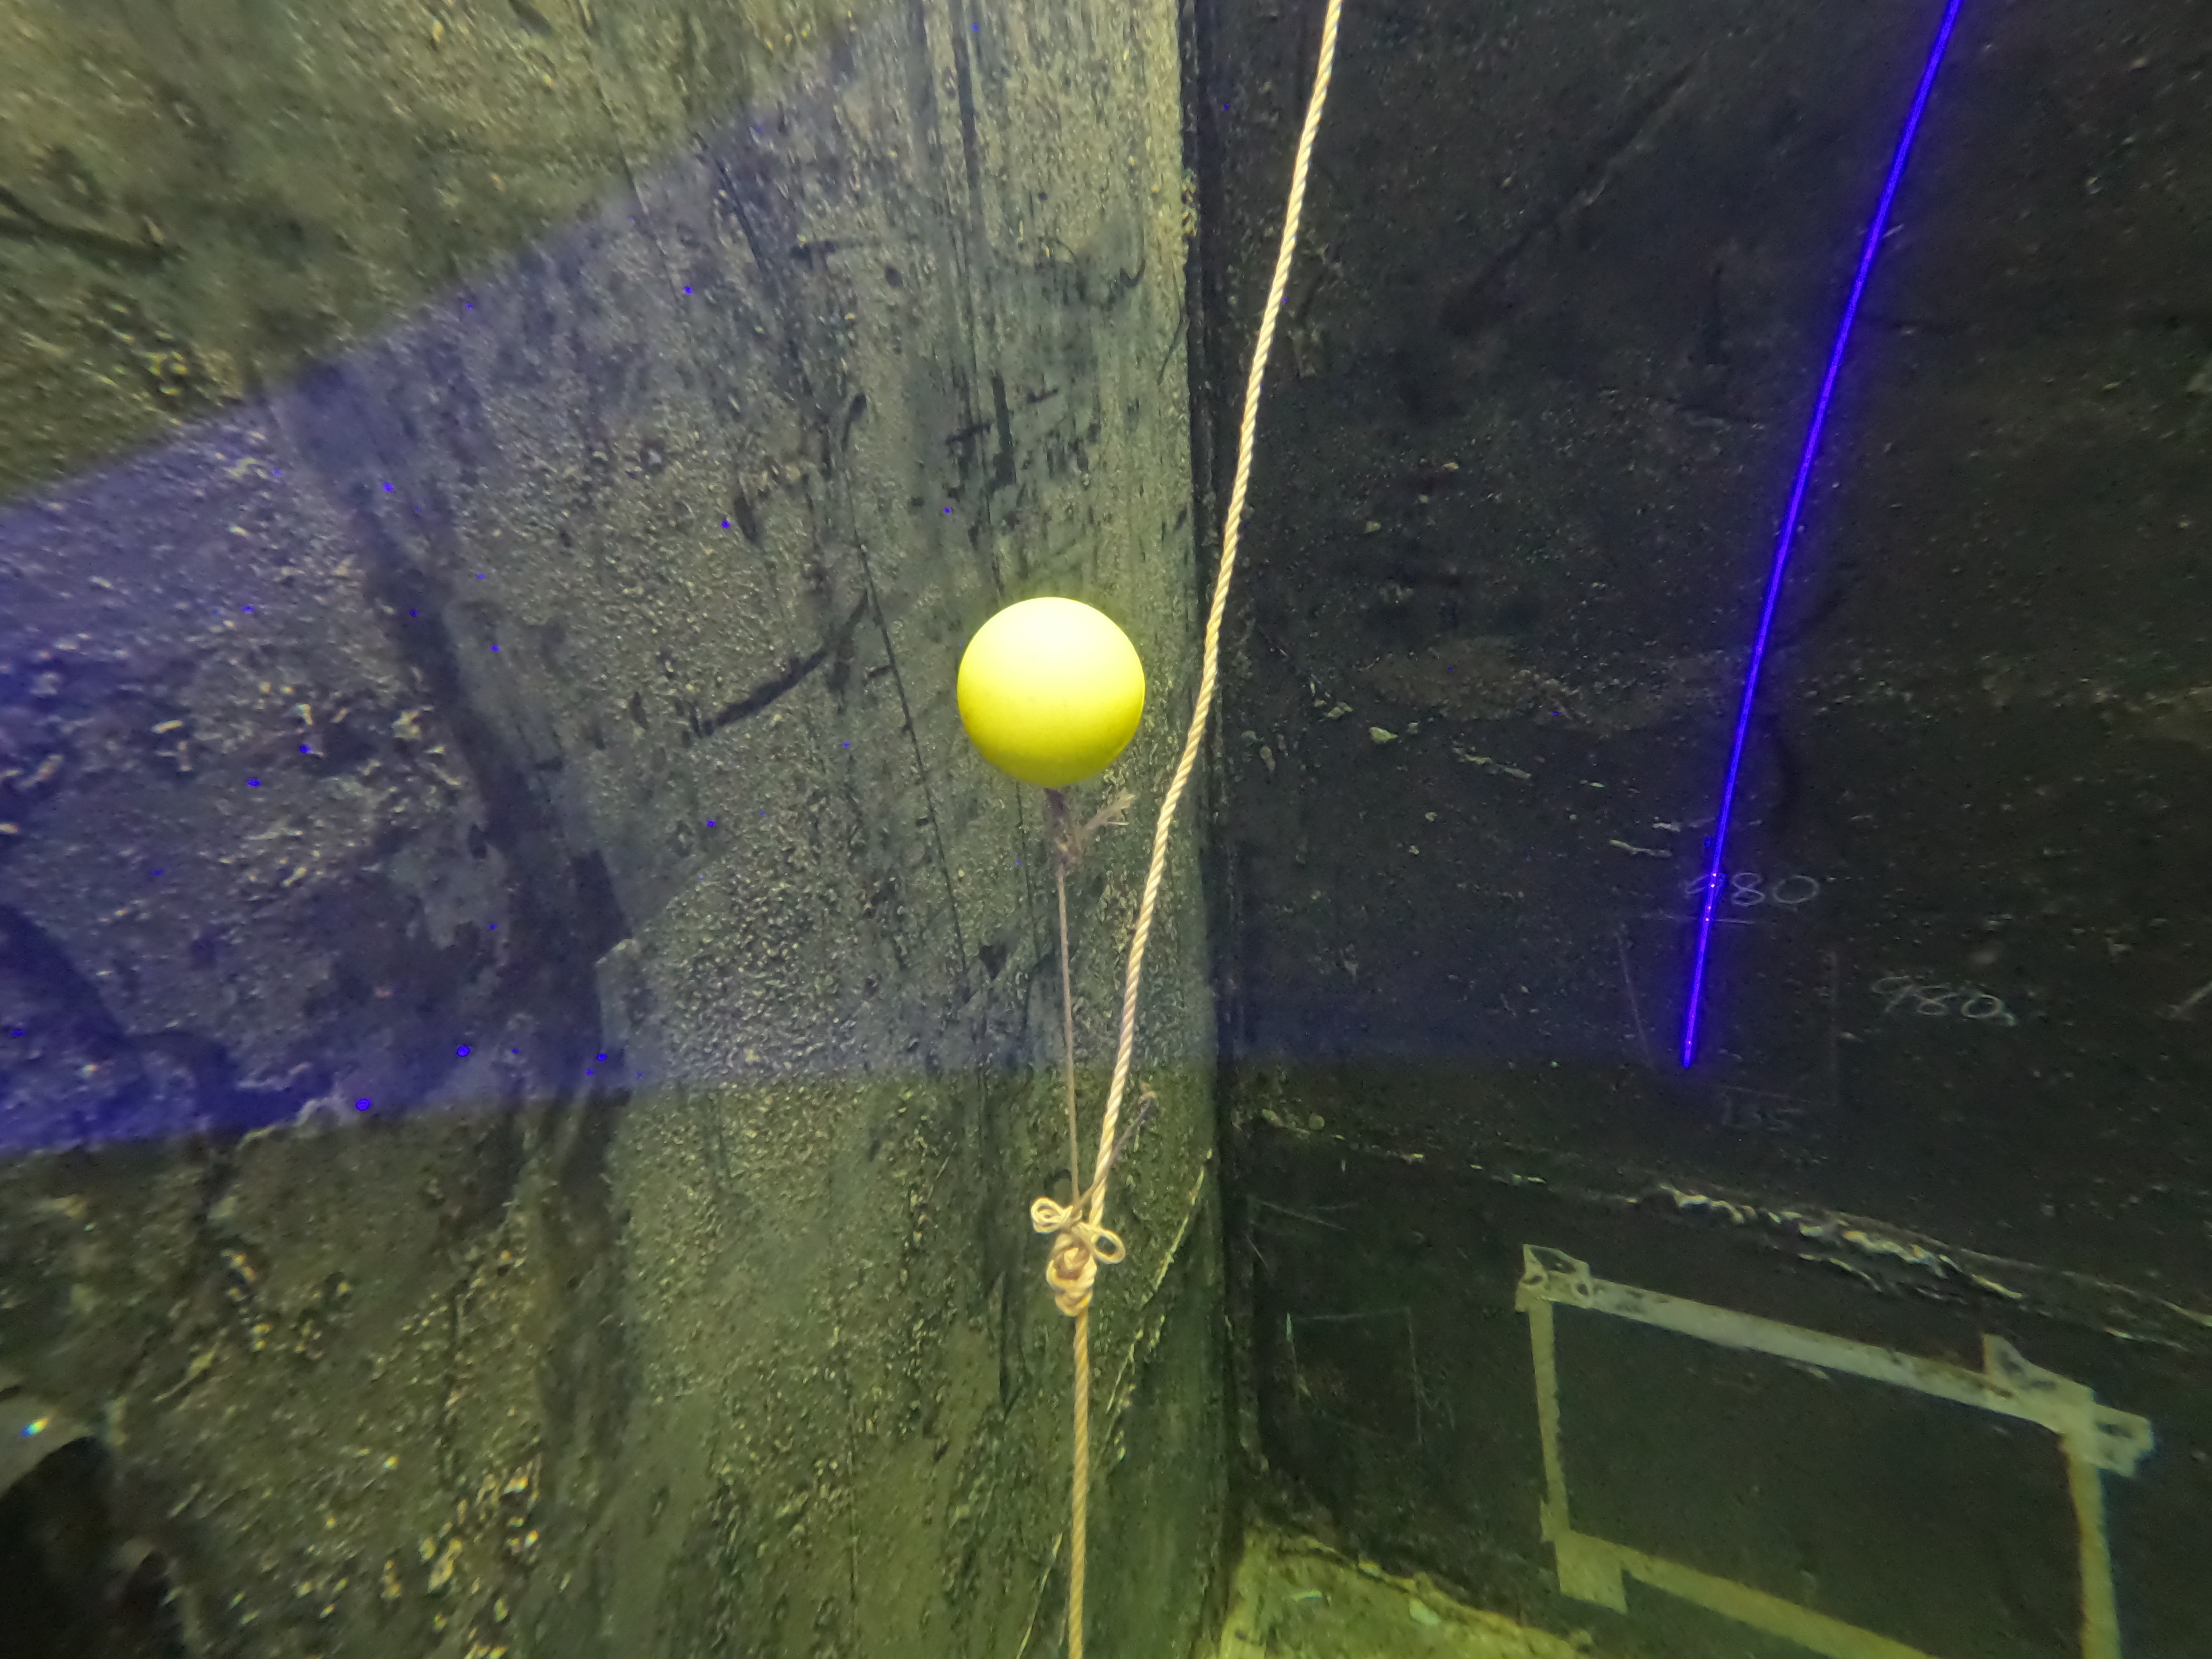

Supplement: Supplementary file 3365 [file G0034069.pdf › 8/G0034069.pdf]

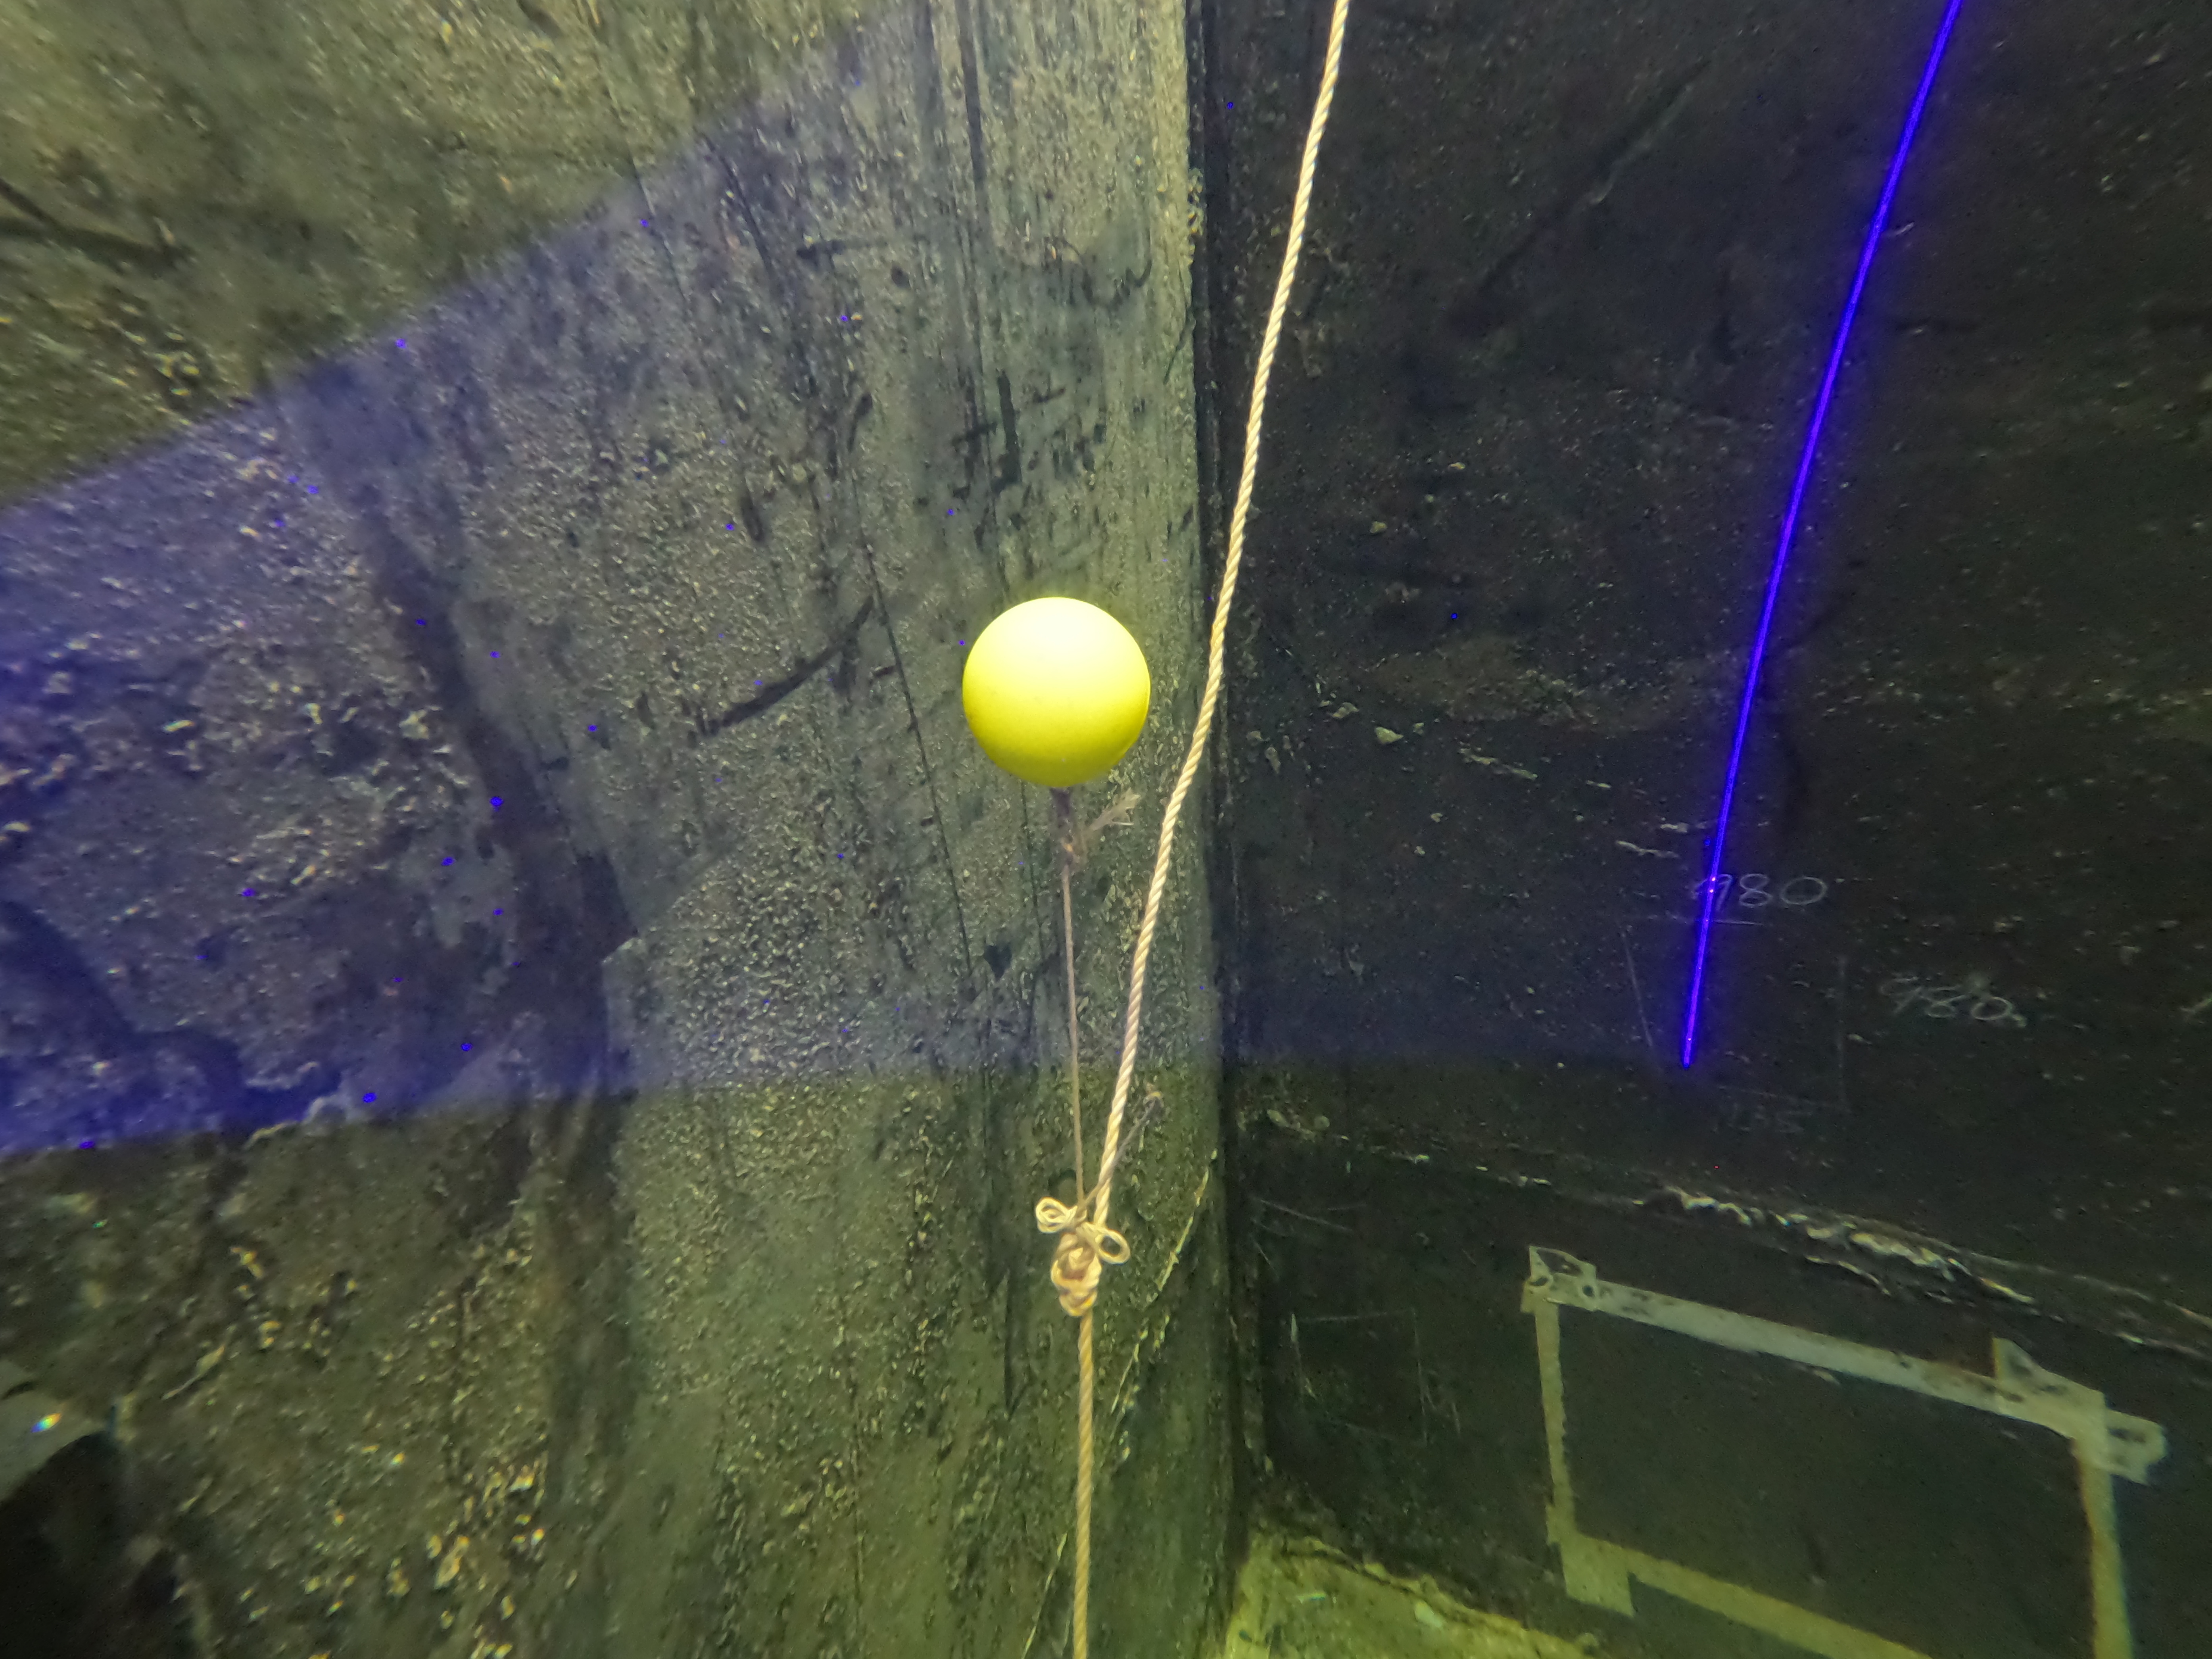

Supplement: Supplementary file 3366 [file G0034070.pdf › 8/G0034070.pdf]

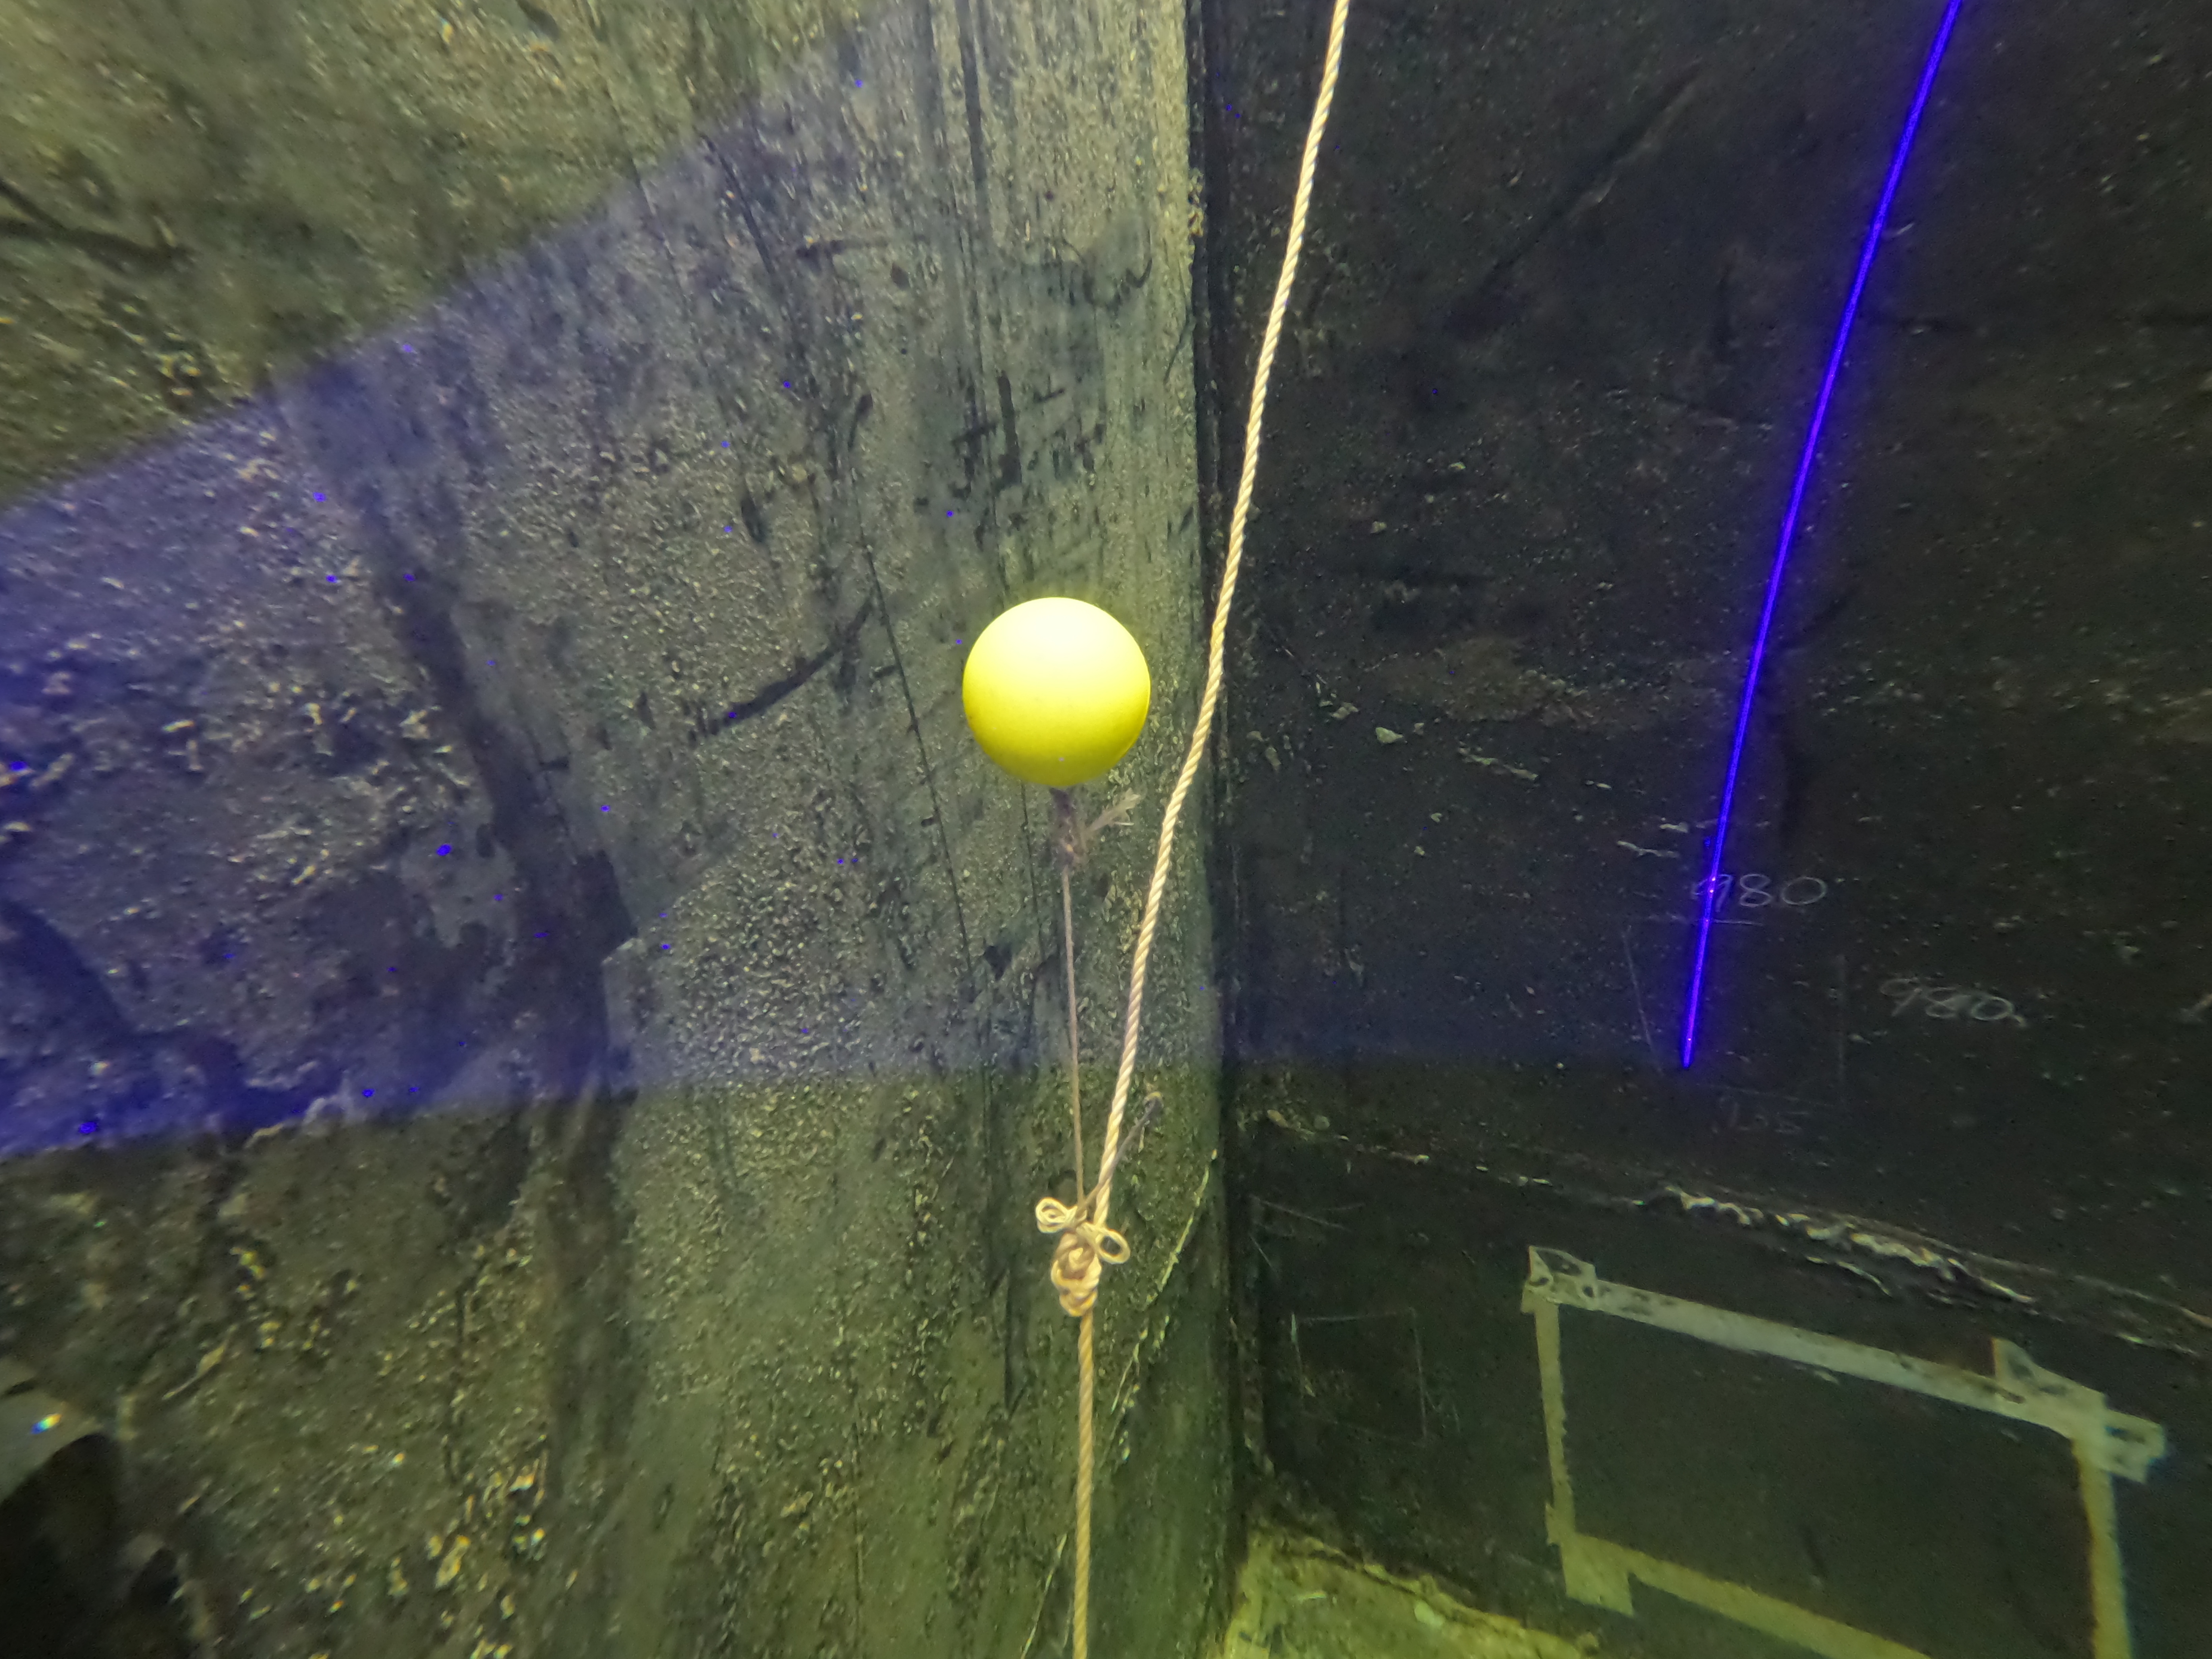

Supplement: Supplementary file 3367 [file G0034071.pdf › 8/G0034071.pdf]

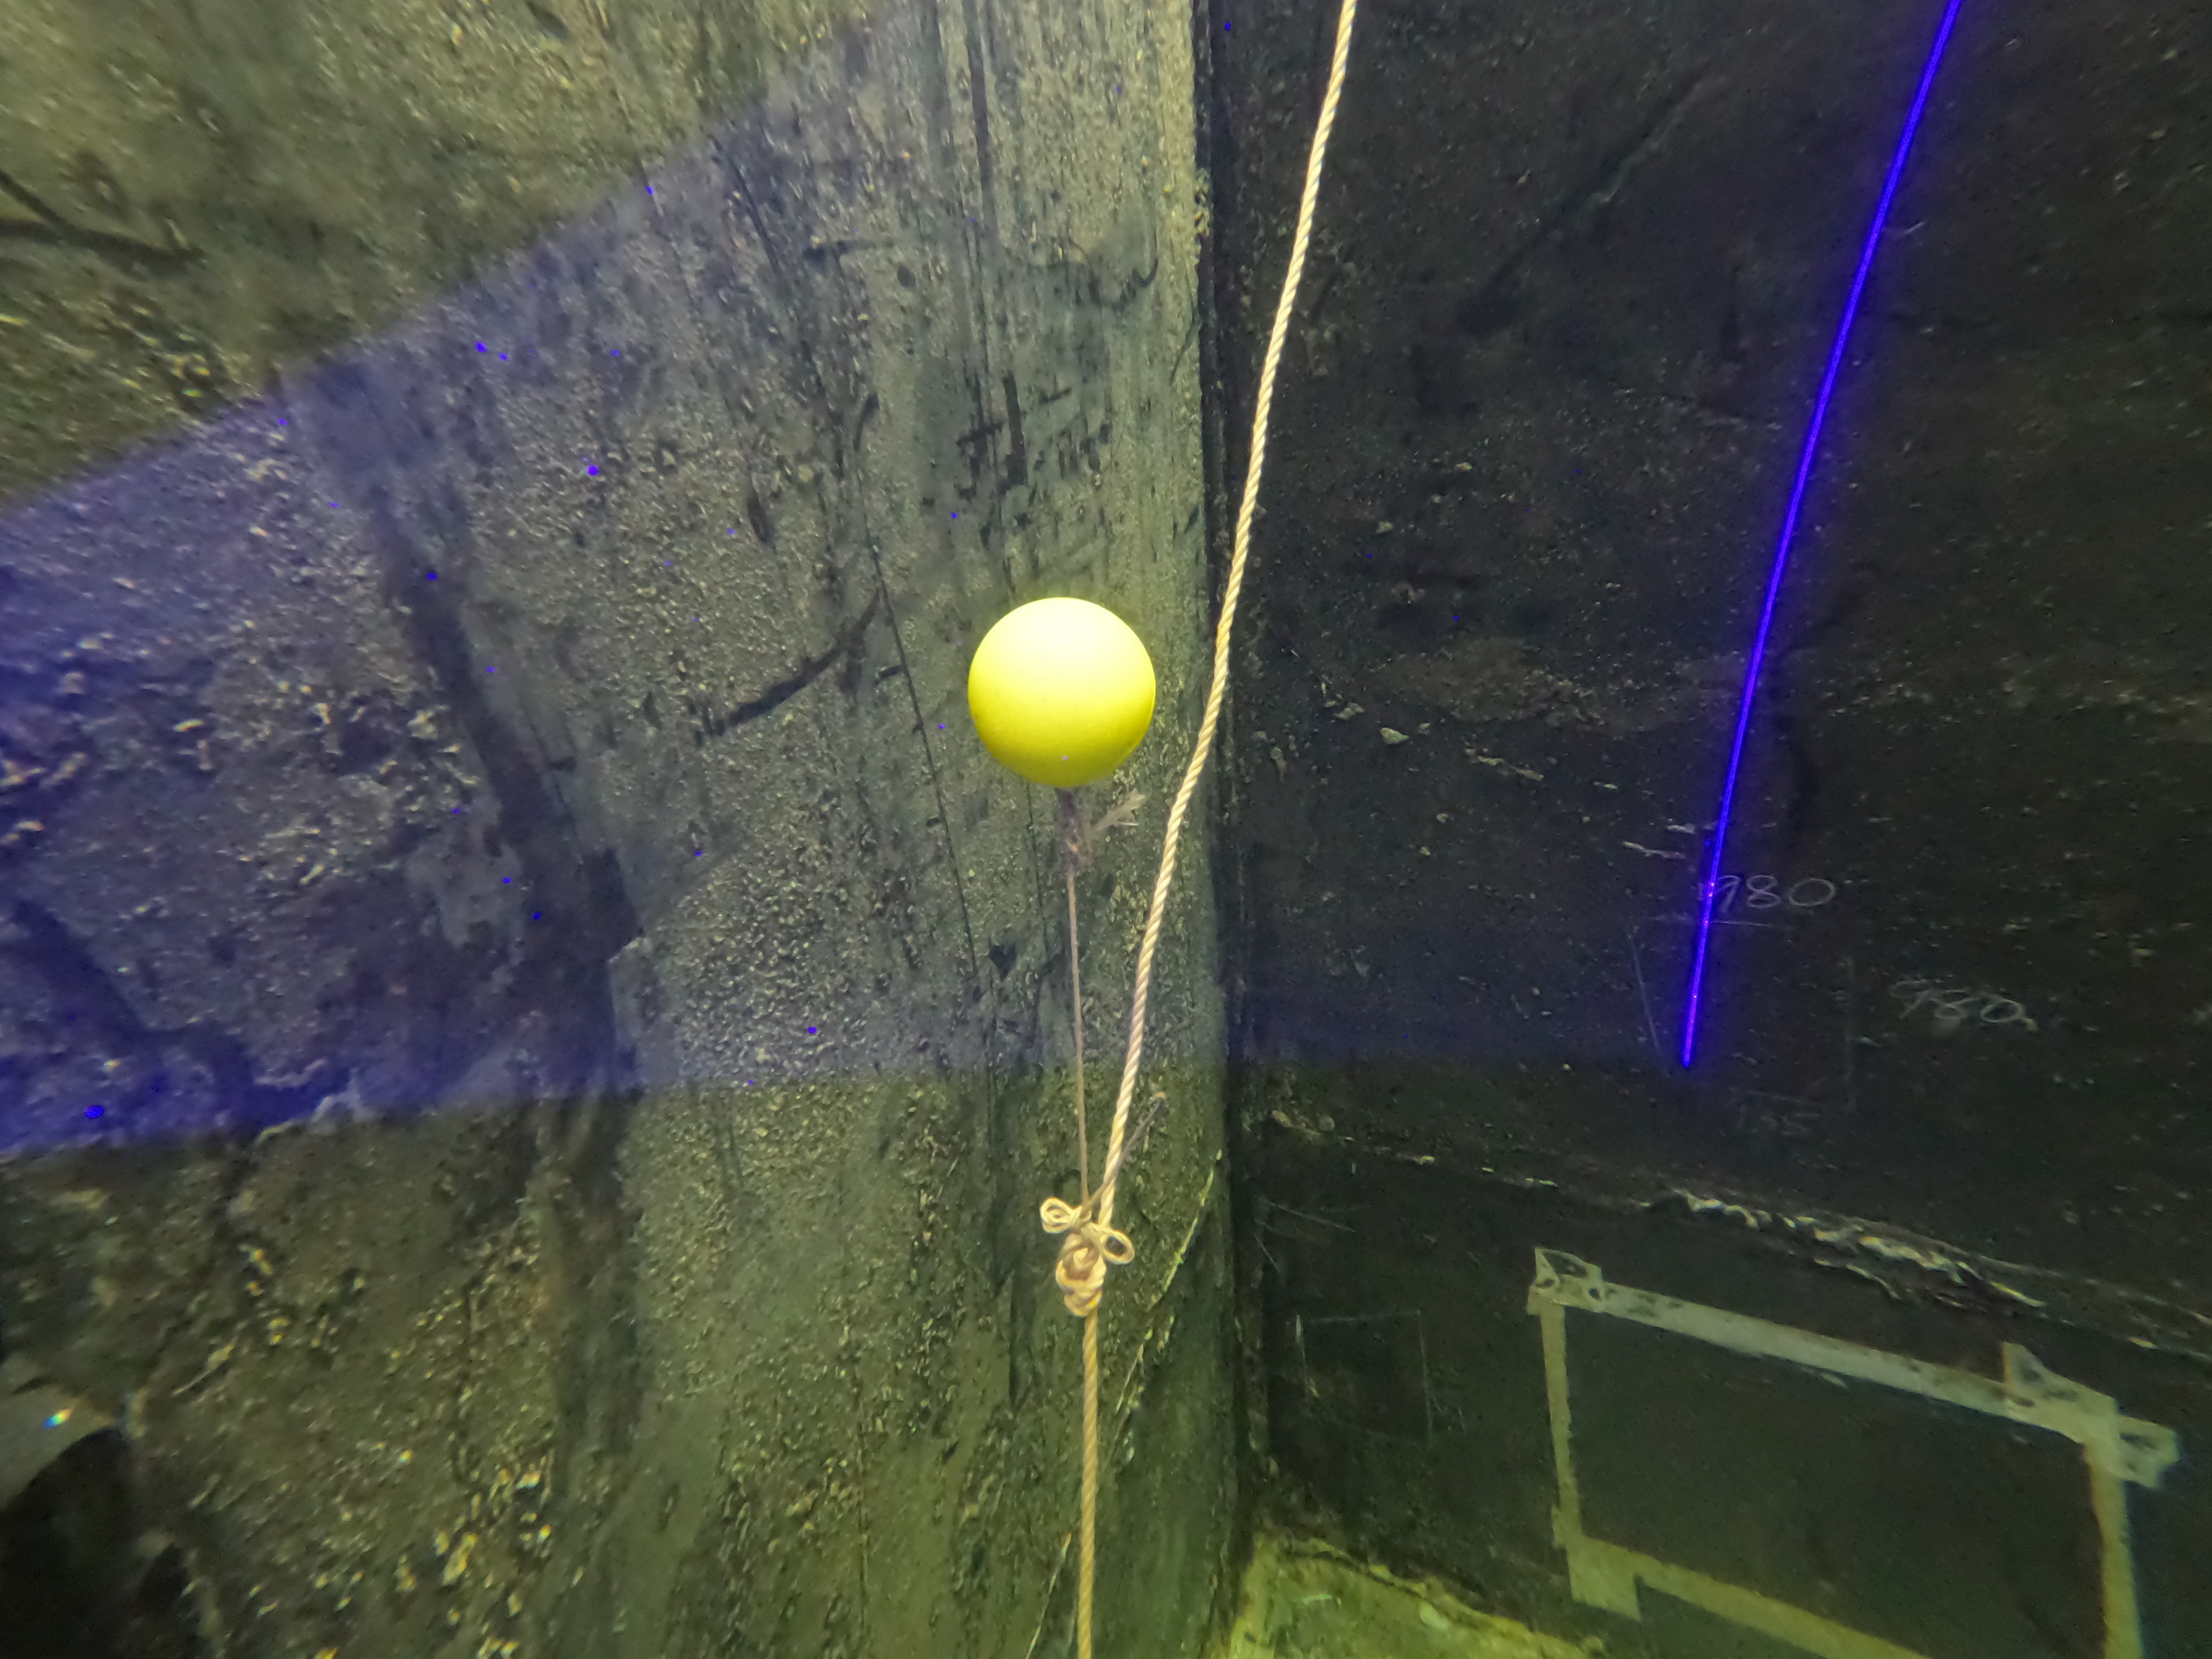

Supplement: Supplementary file 3368 [file G0034072.pdf › 8/G0034072.pdf]

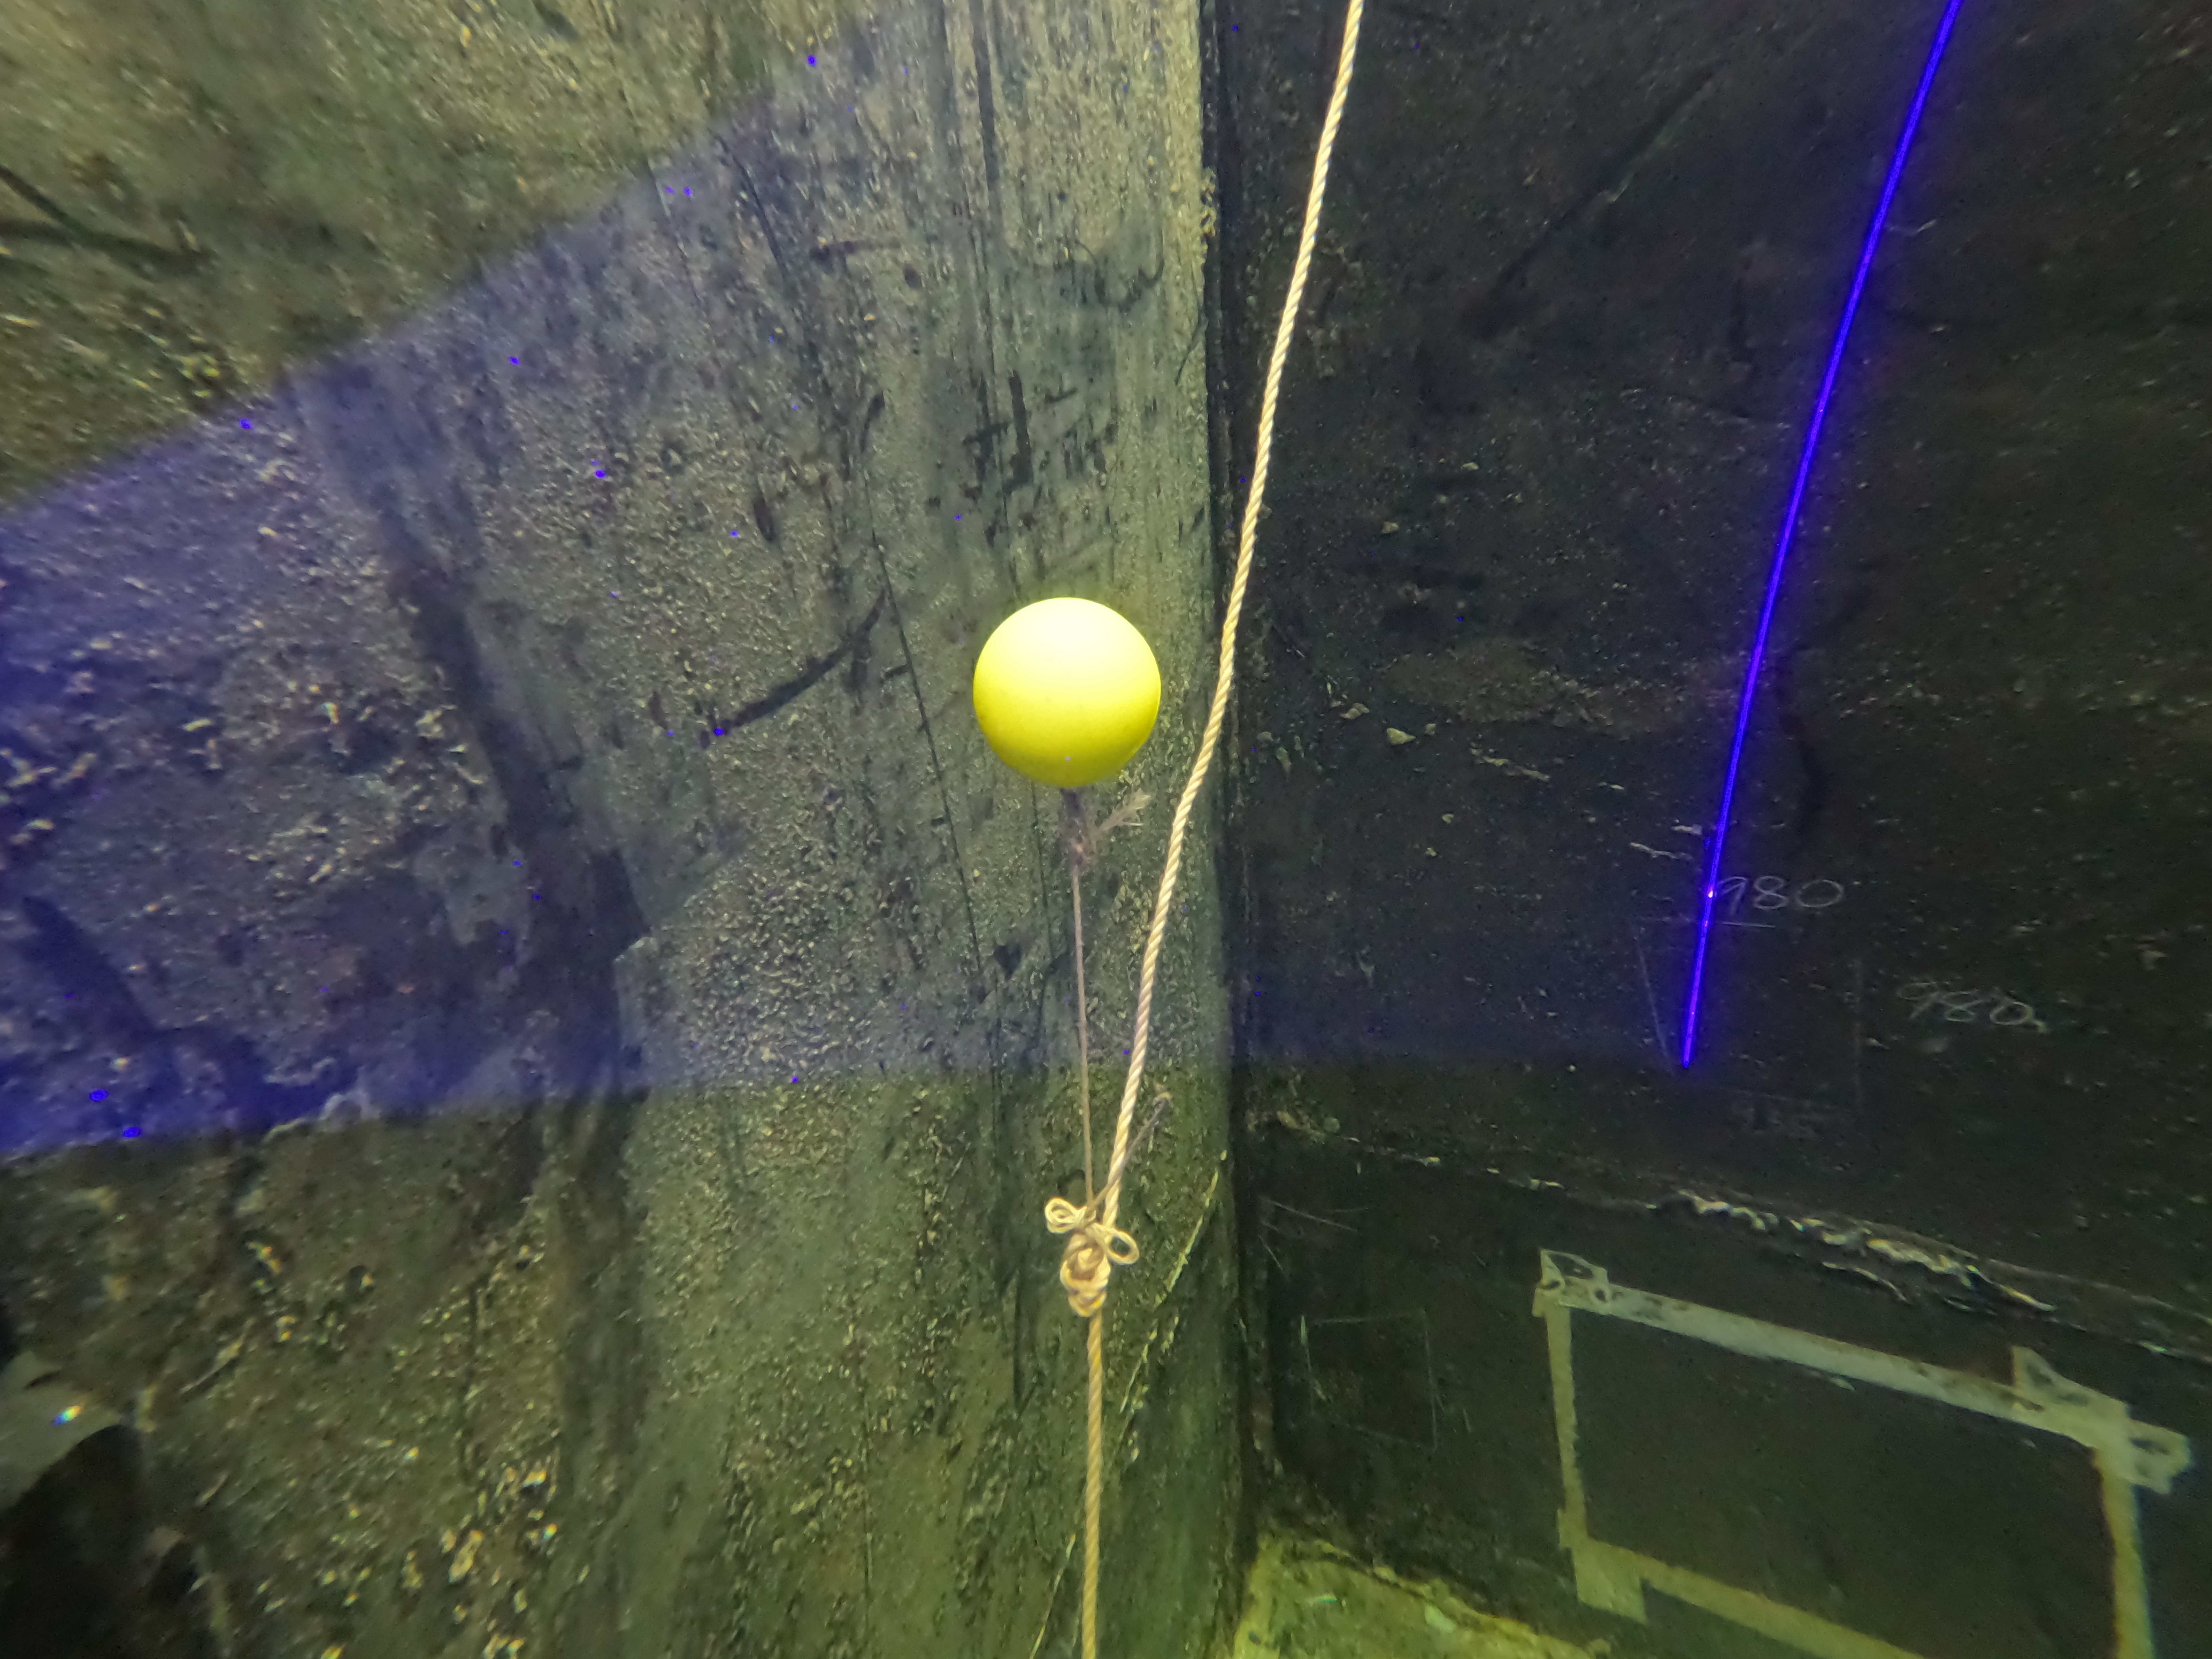

Supplement: Supplementary file 3369 [file G0034073.pdf › 8/G0034073.pdf]

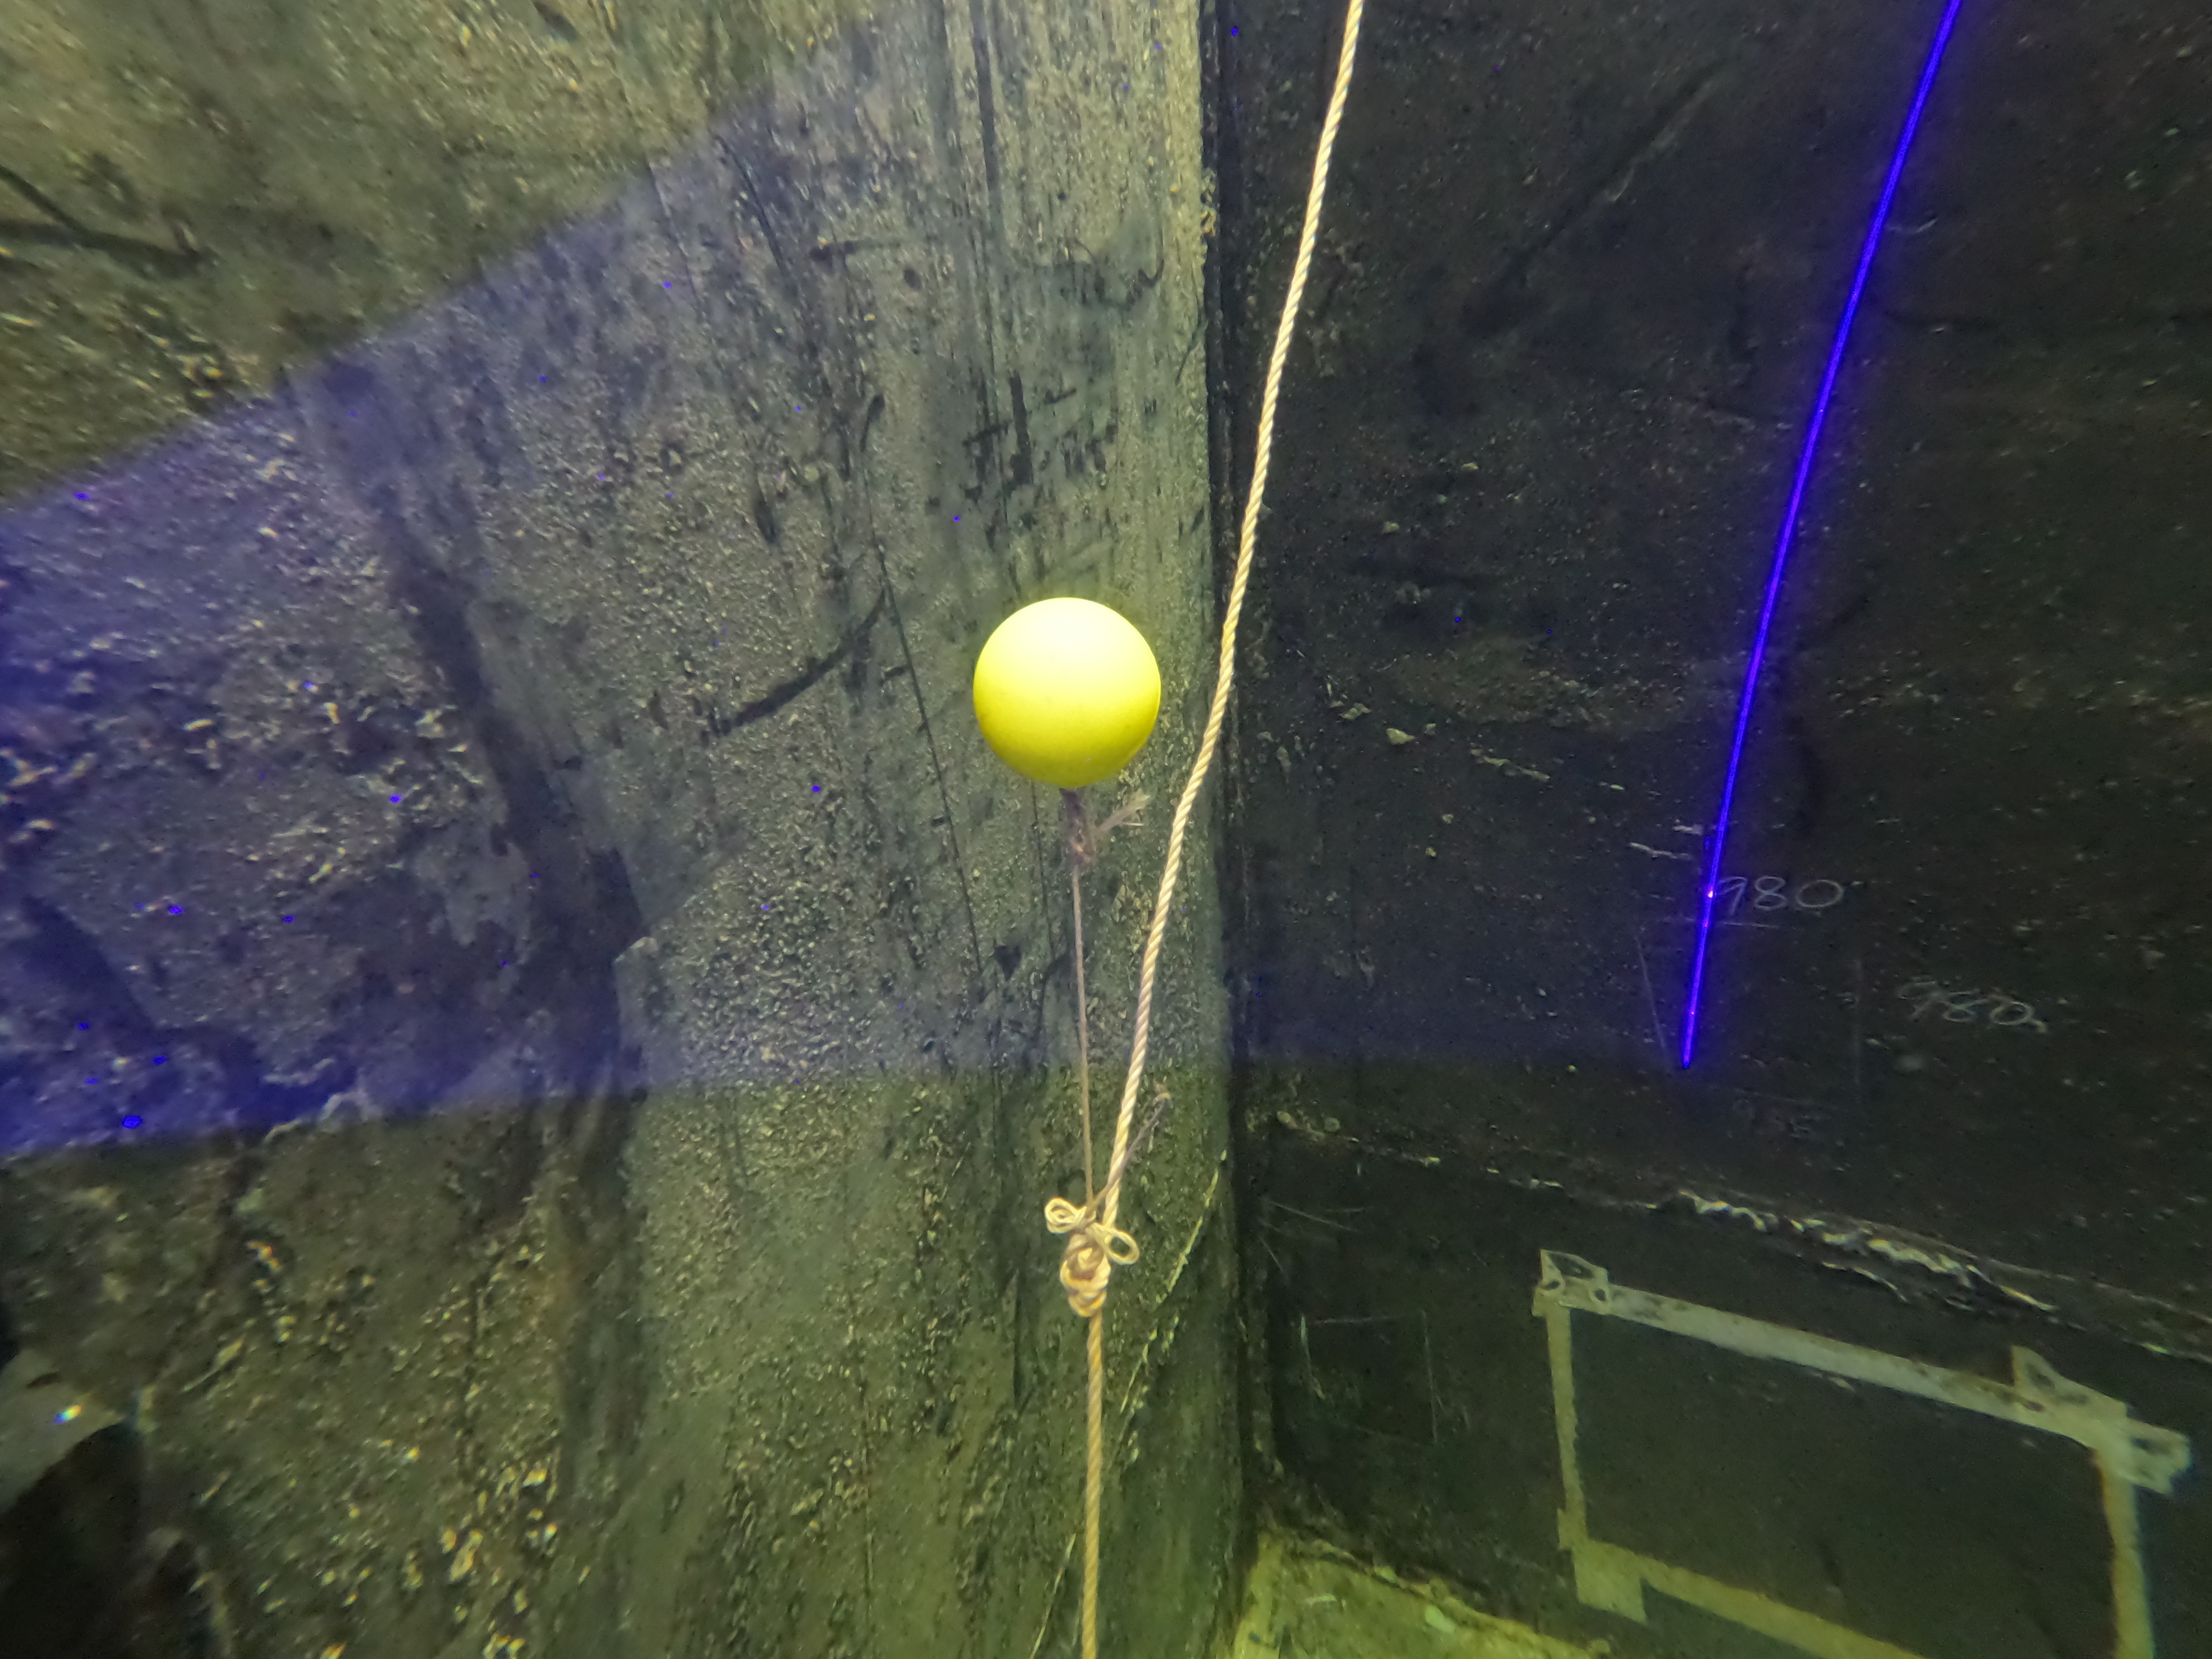

Supplement: Supplementary file 3370 [file G0034074.pdf › 8/G0034074.pdf]

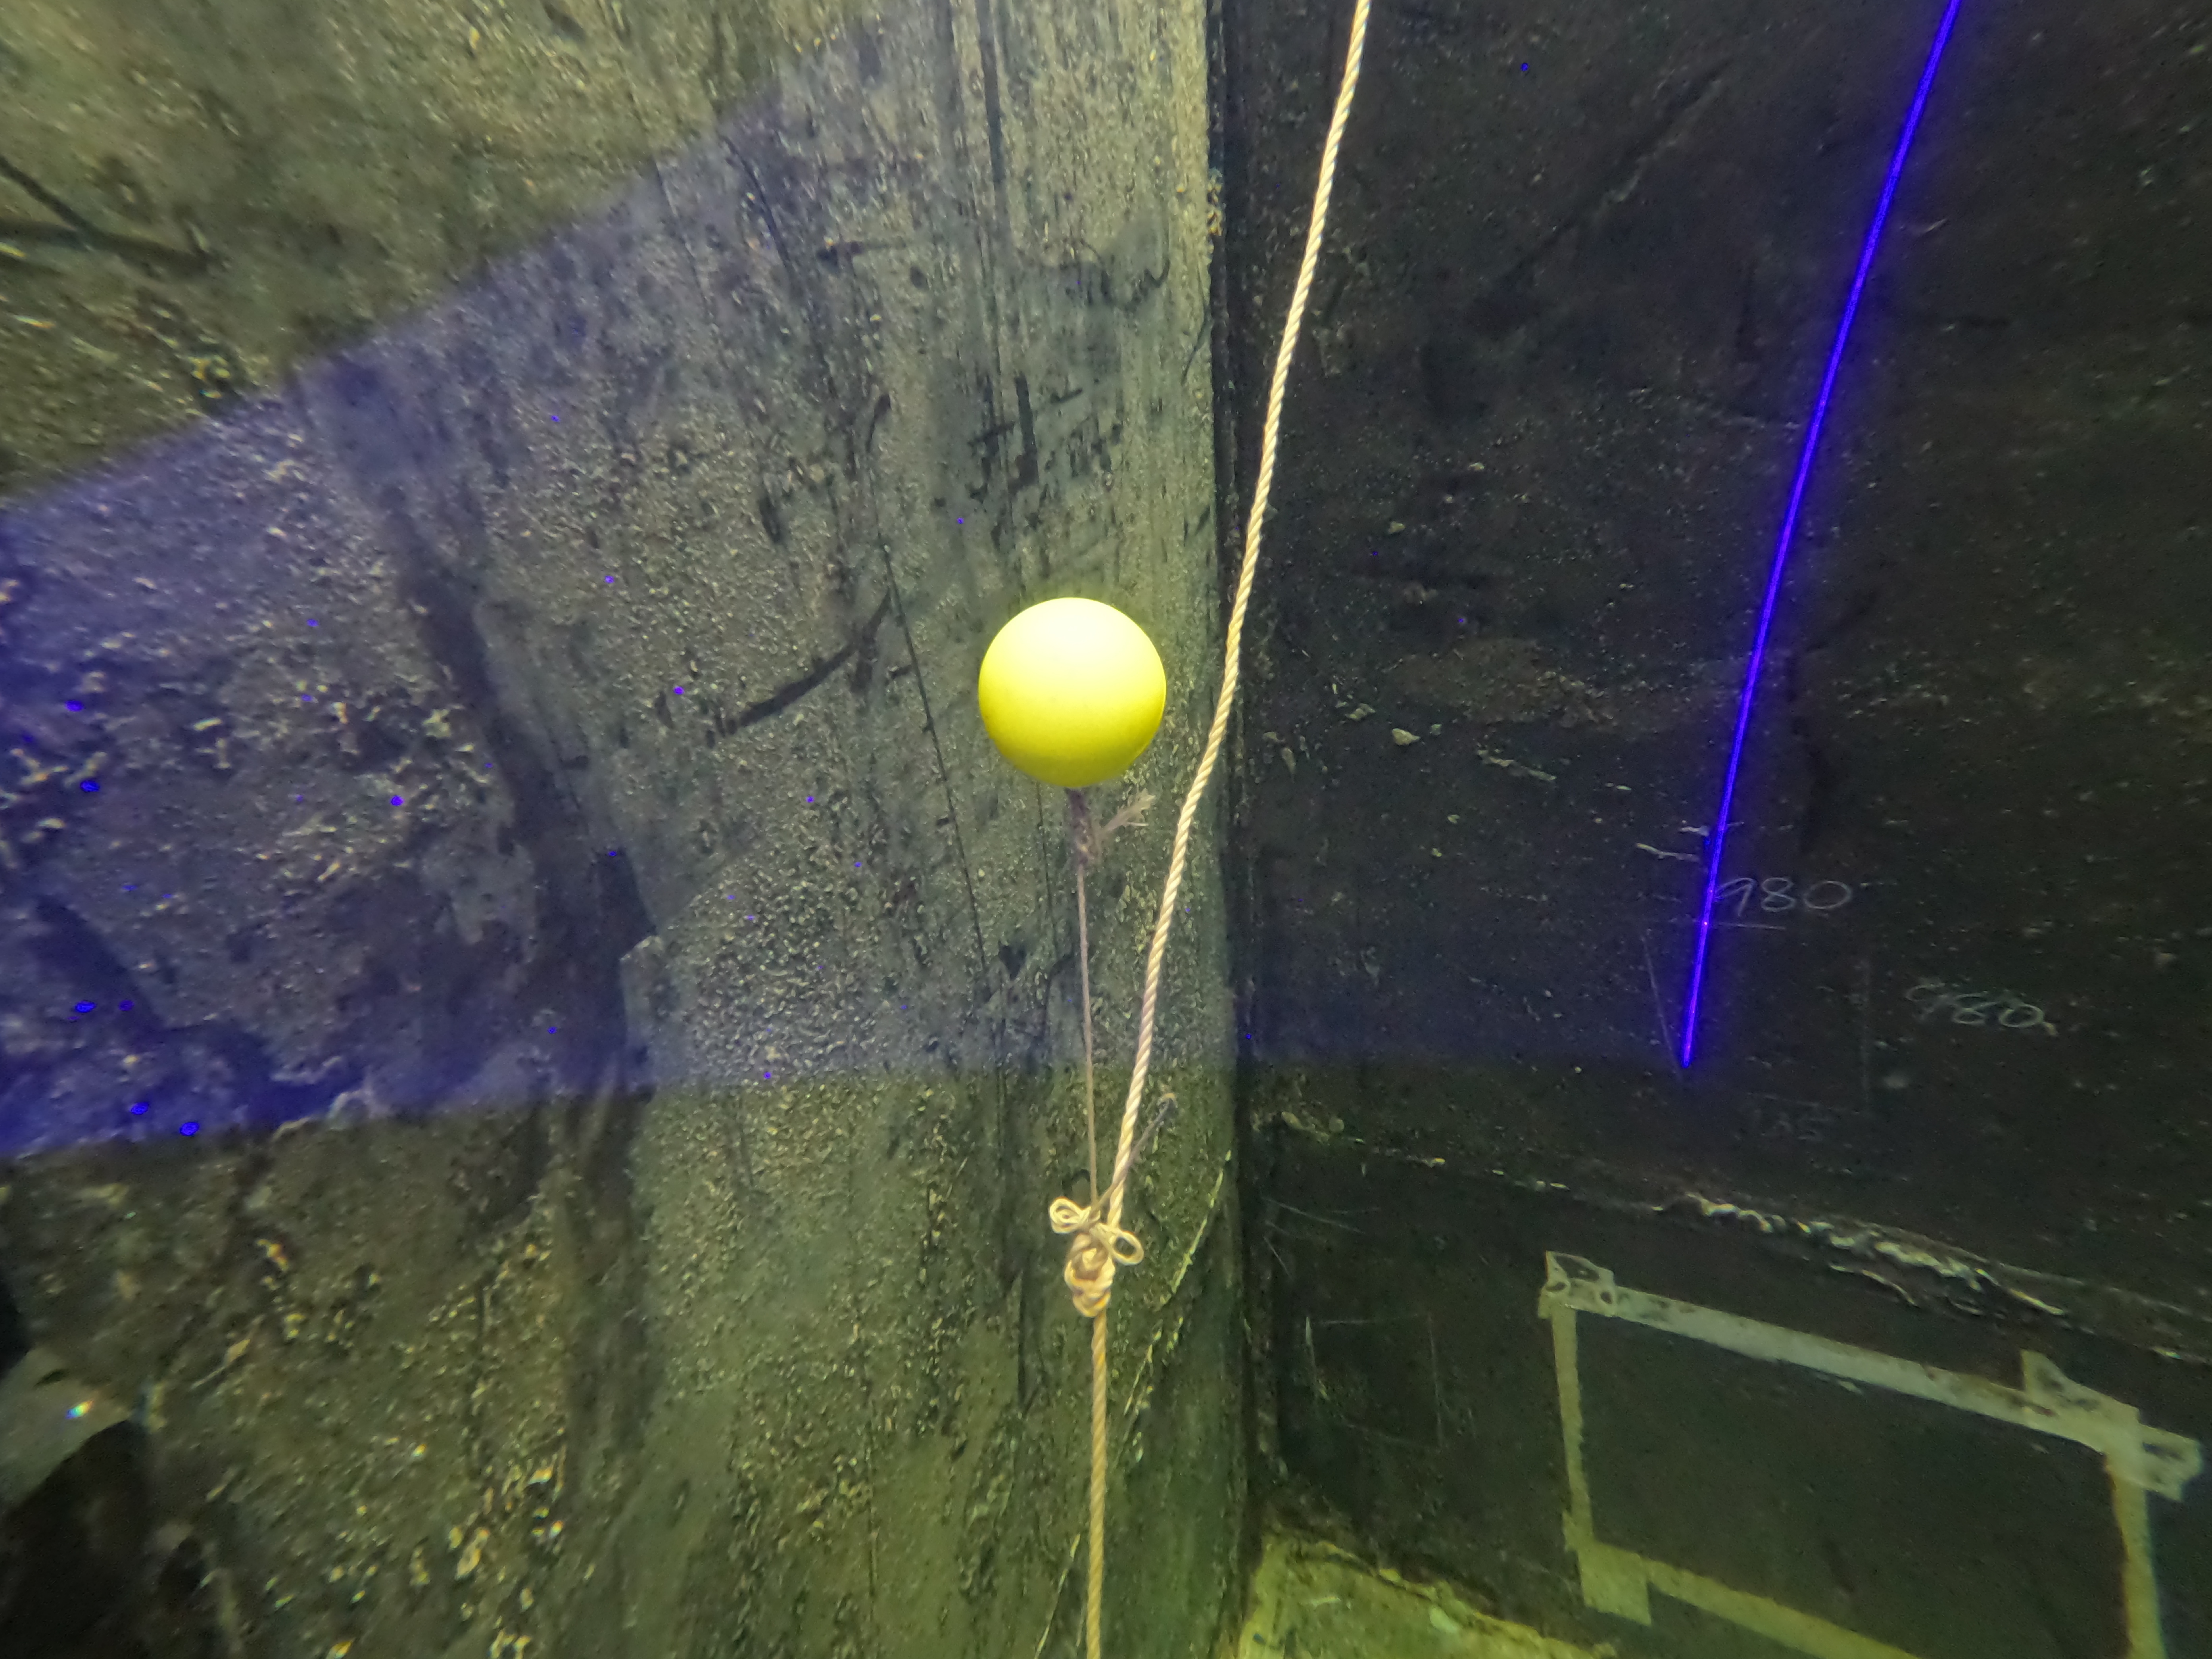

Supplement: Supplementary file 3371 [file G0034075.pdf › 8/G0034075.pdf]

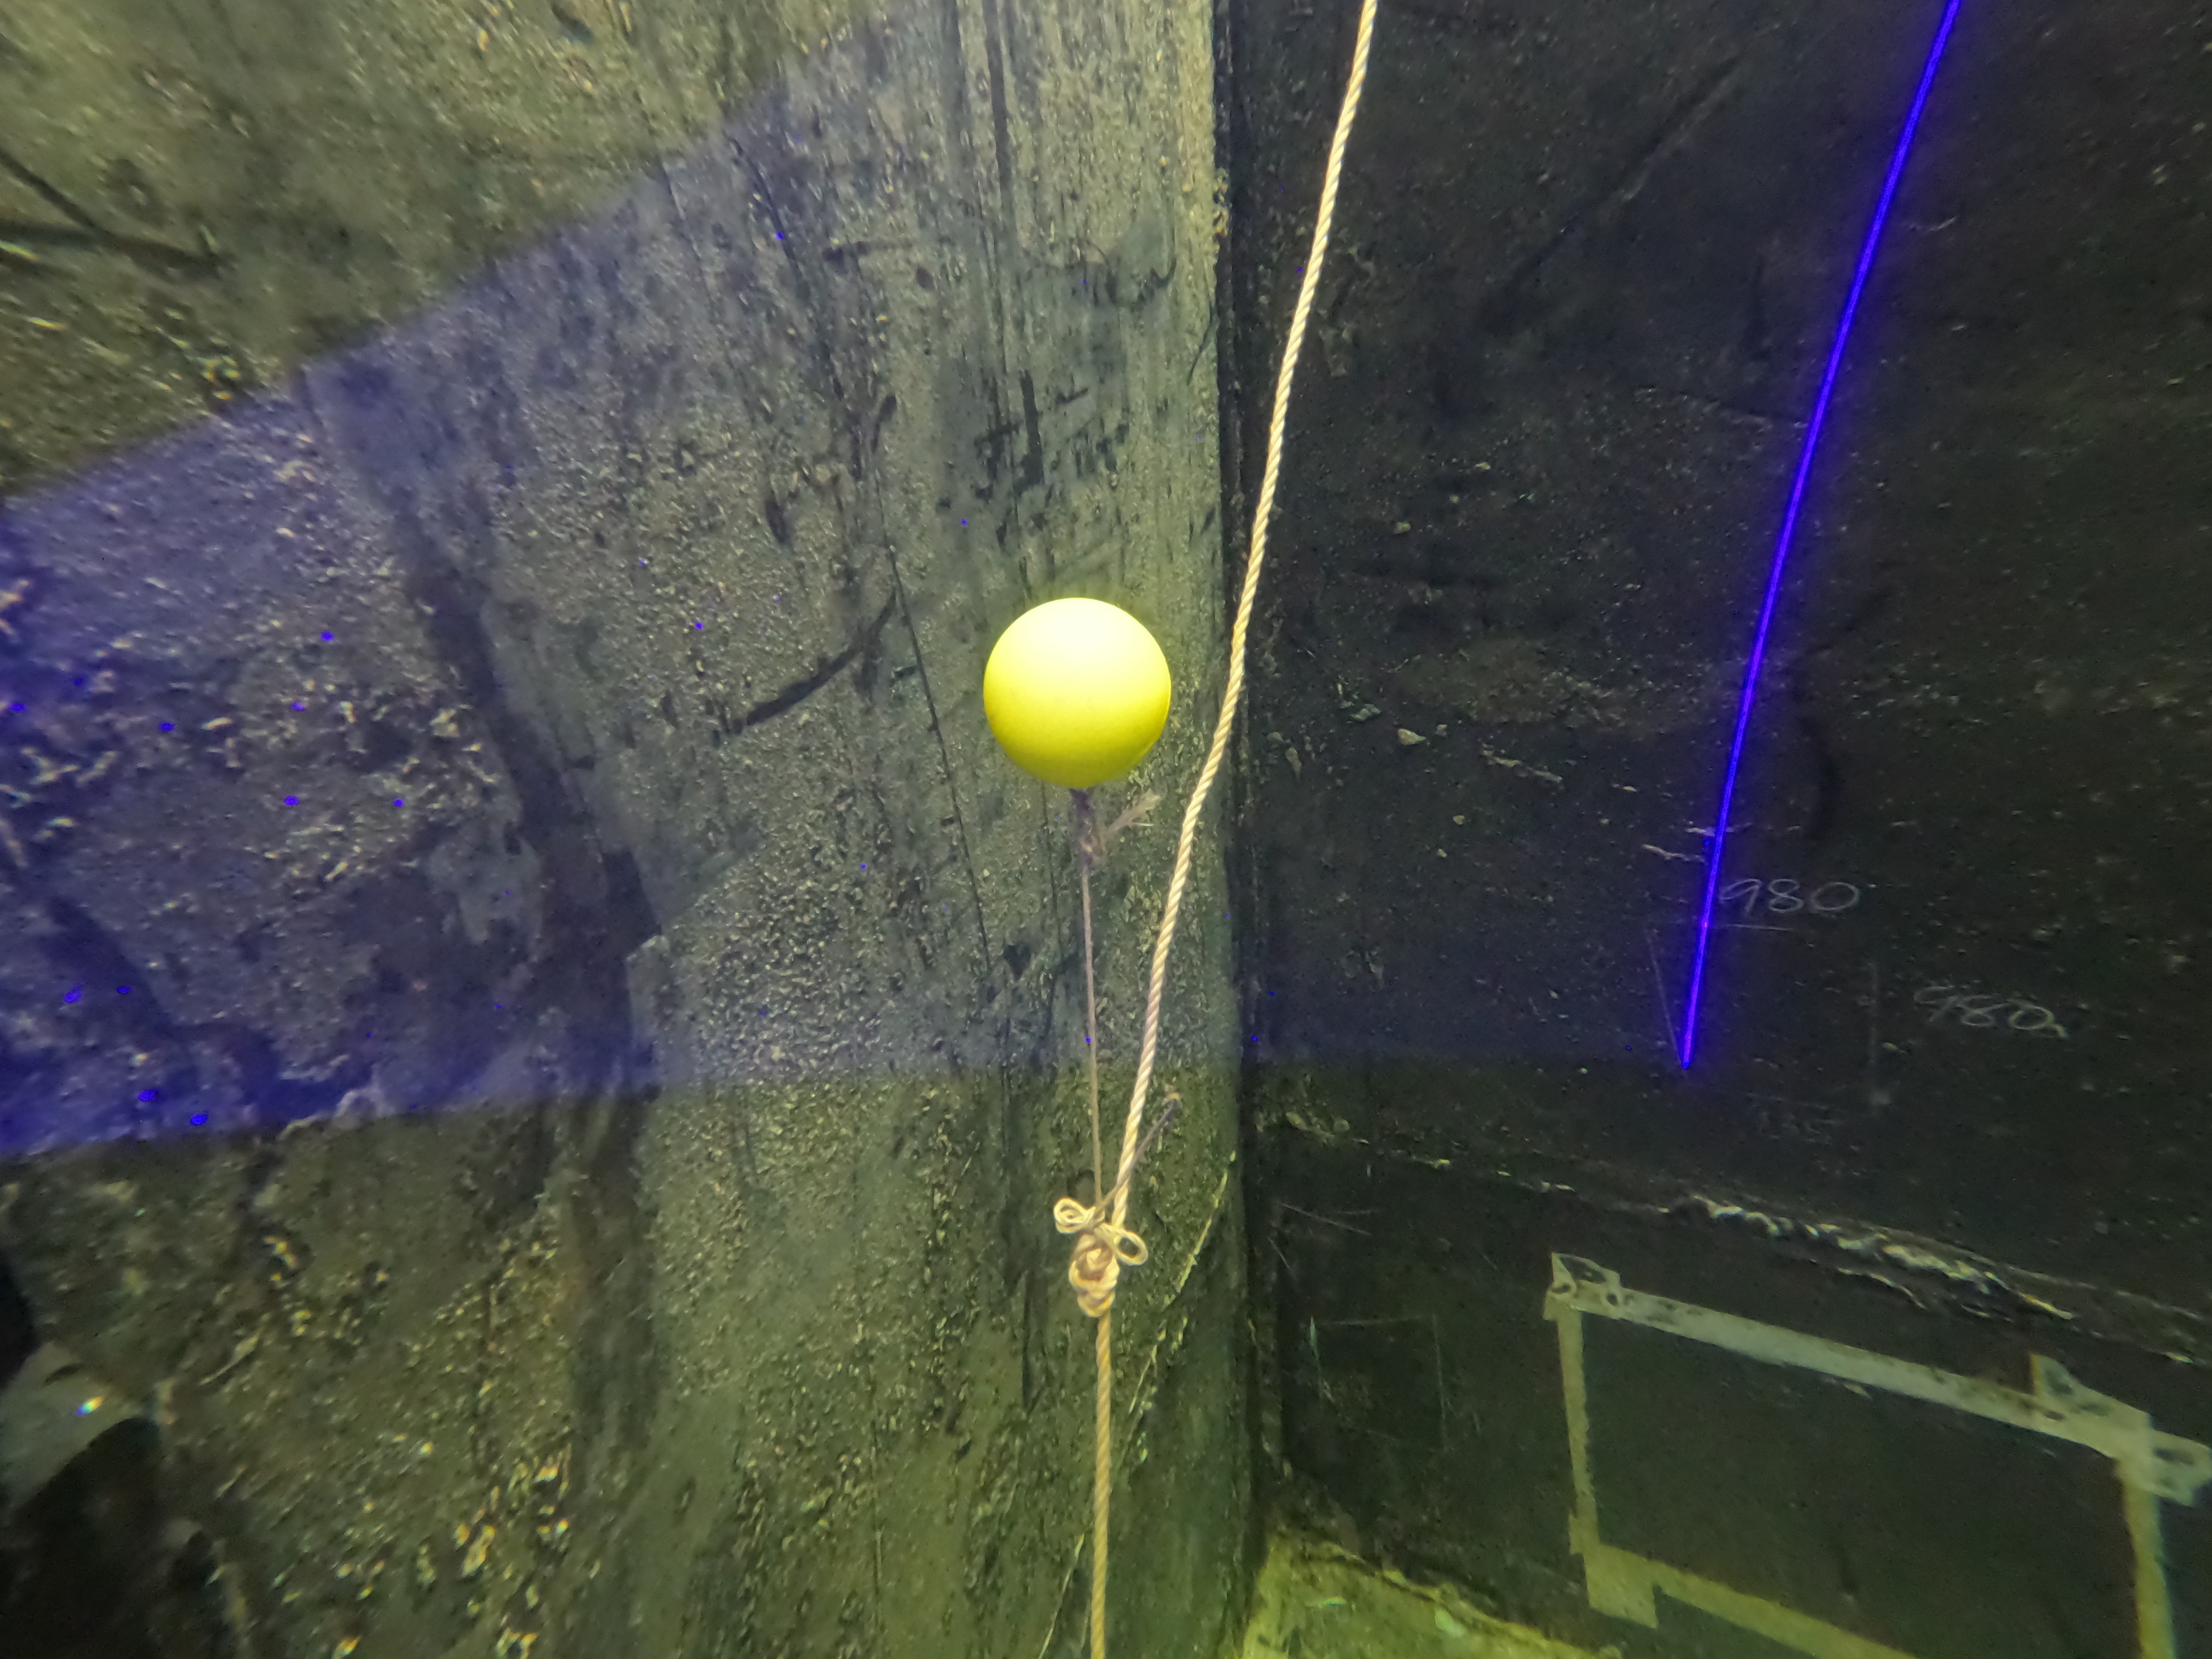

Supplement: Supplementary file 3372 [file G0034076.pdf › 8/G0034076.pdf]

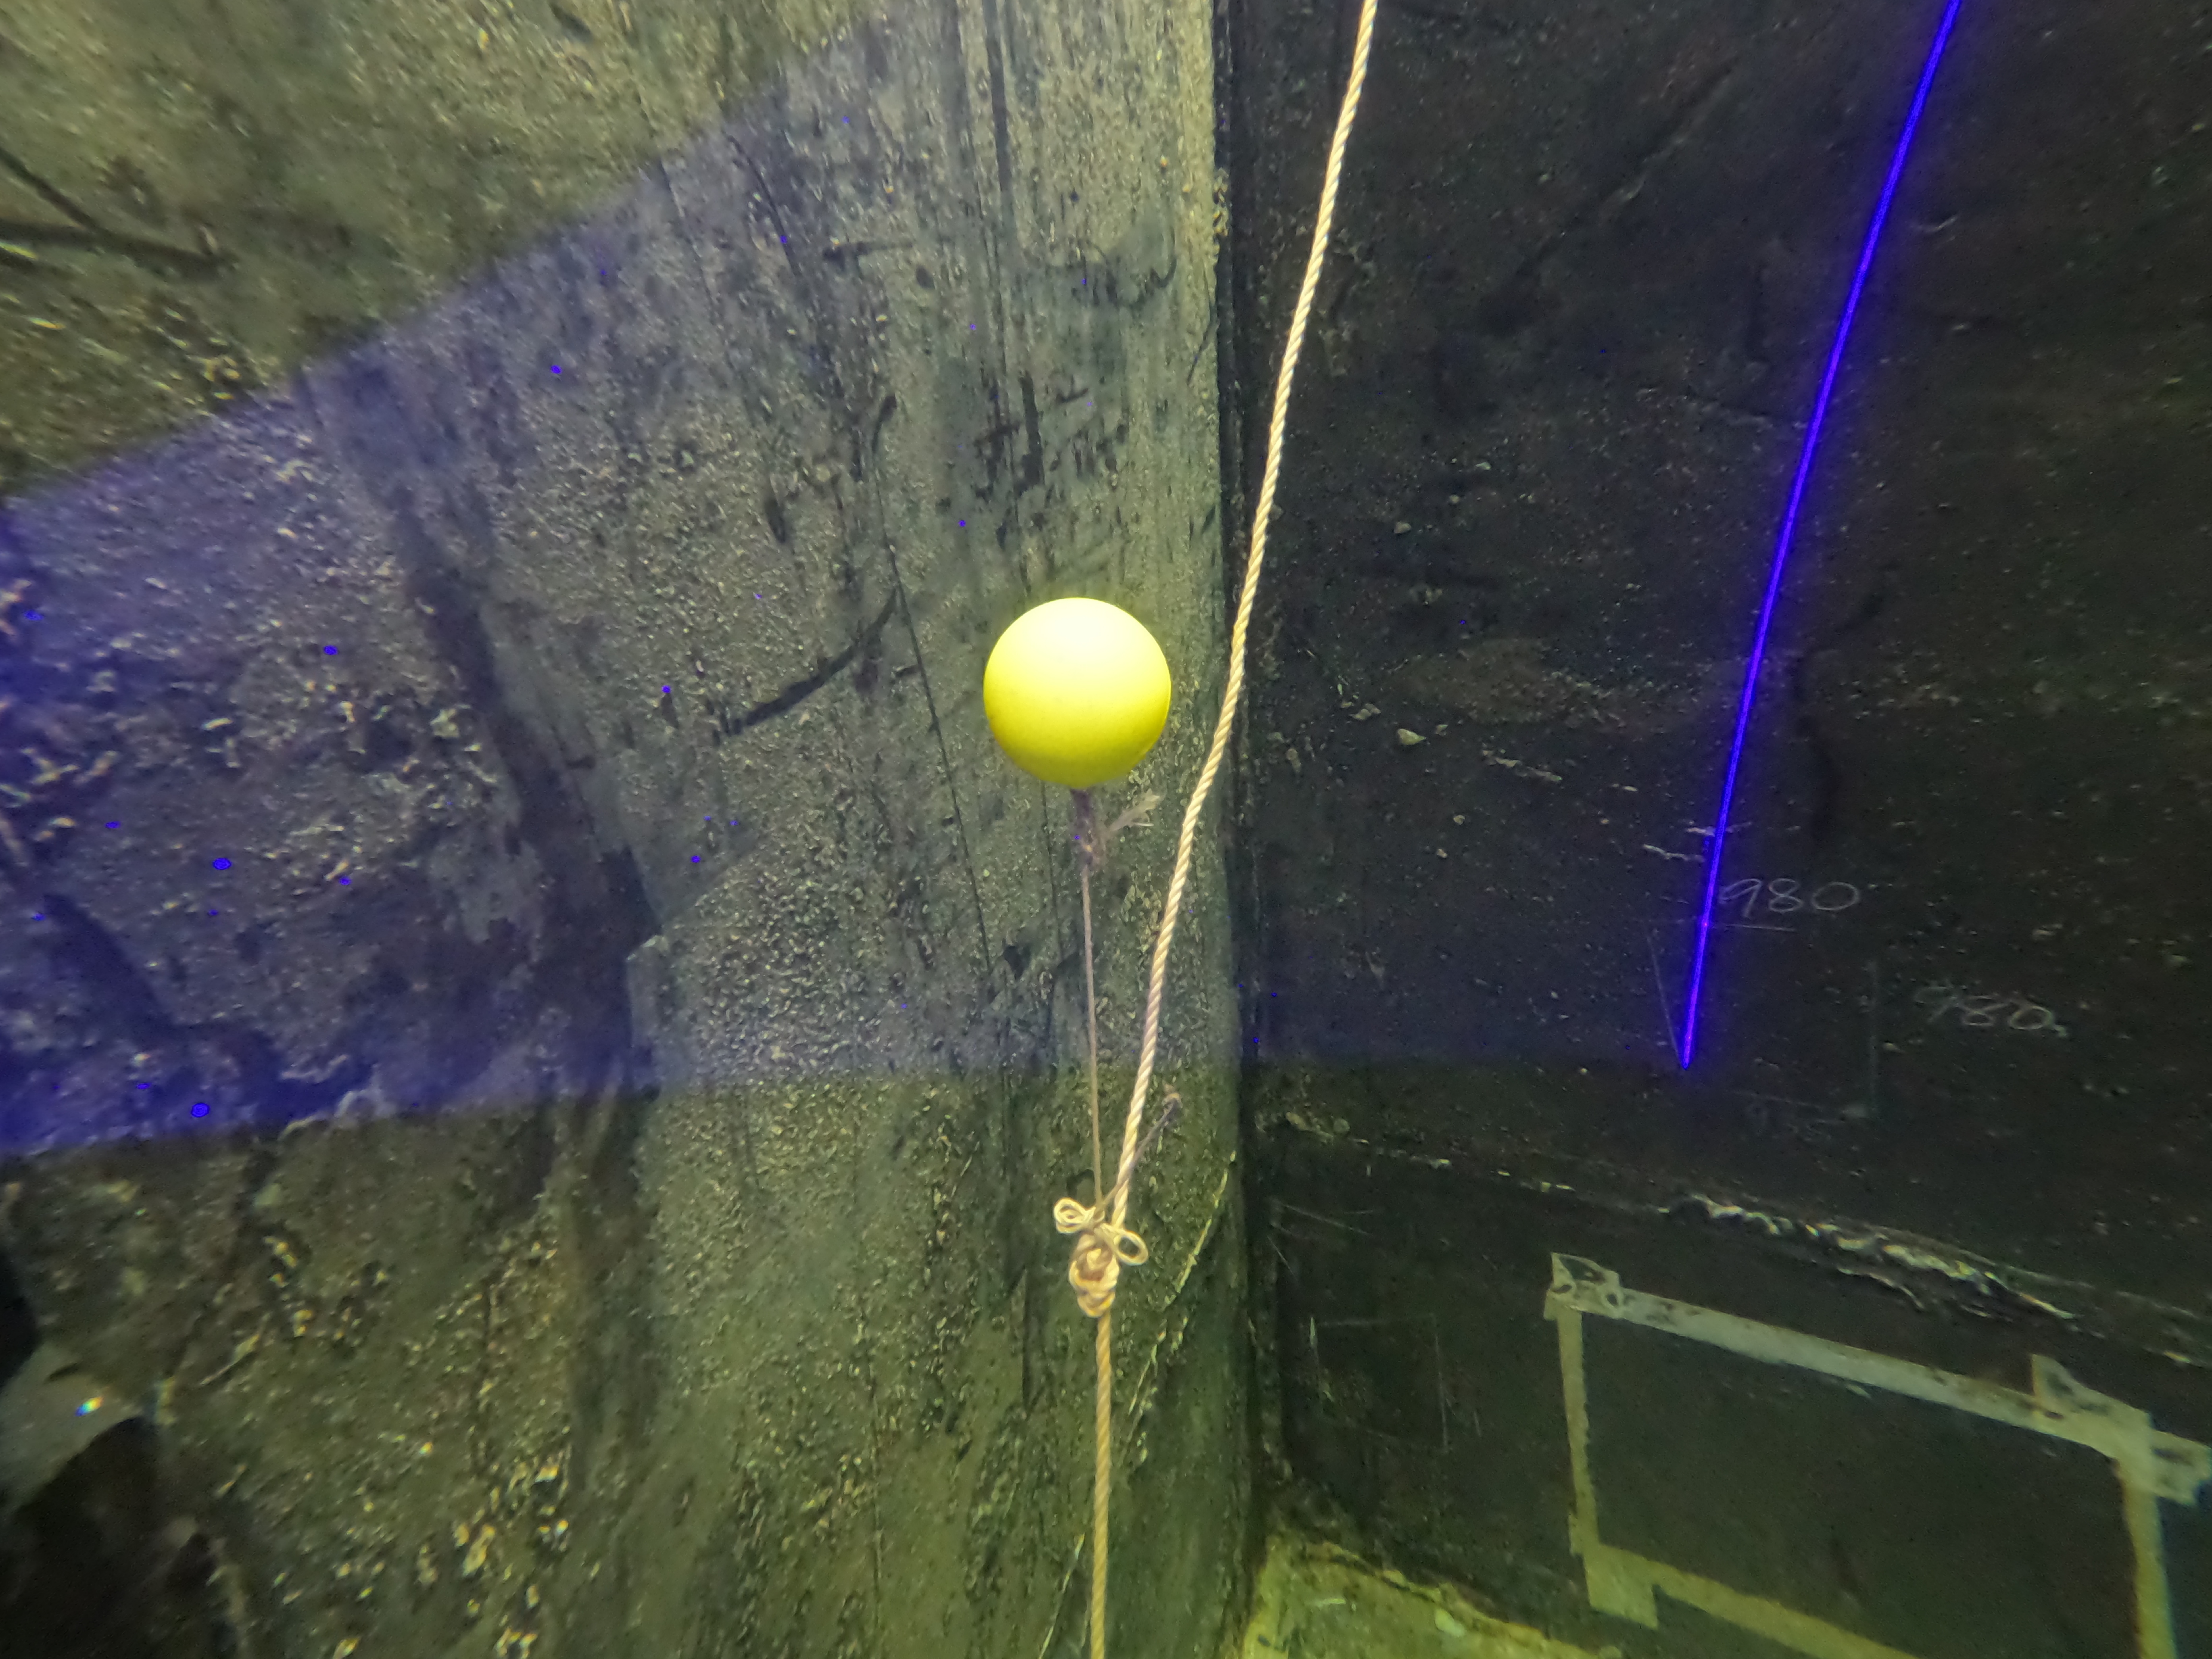

Supplement: Supplementary file 3373 [file G0034077.pdf › 8/G0034077.pdf]

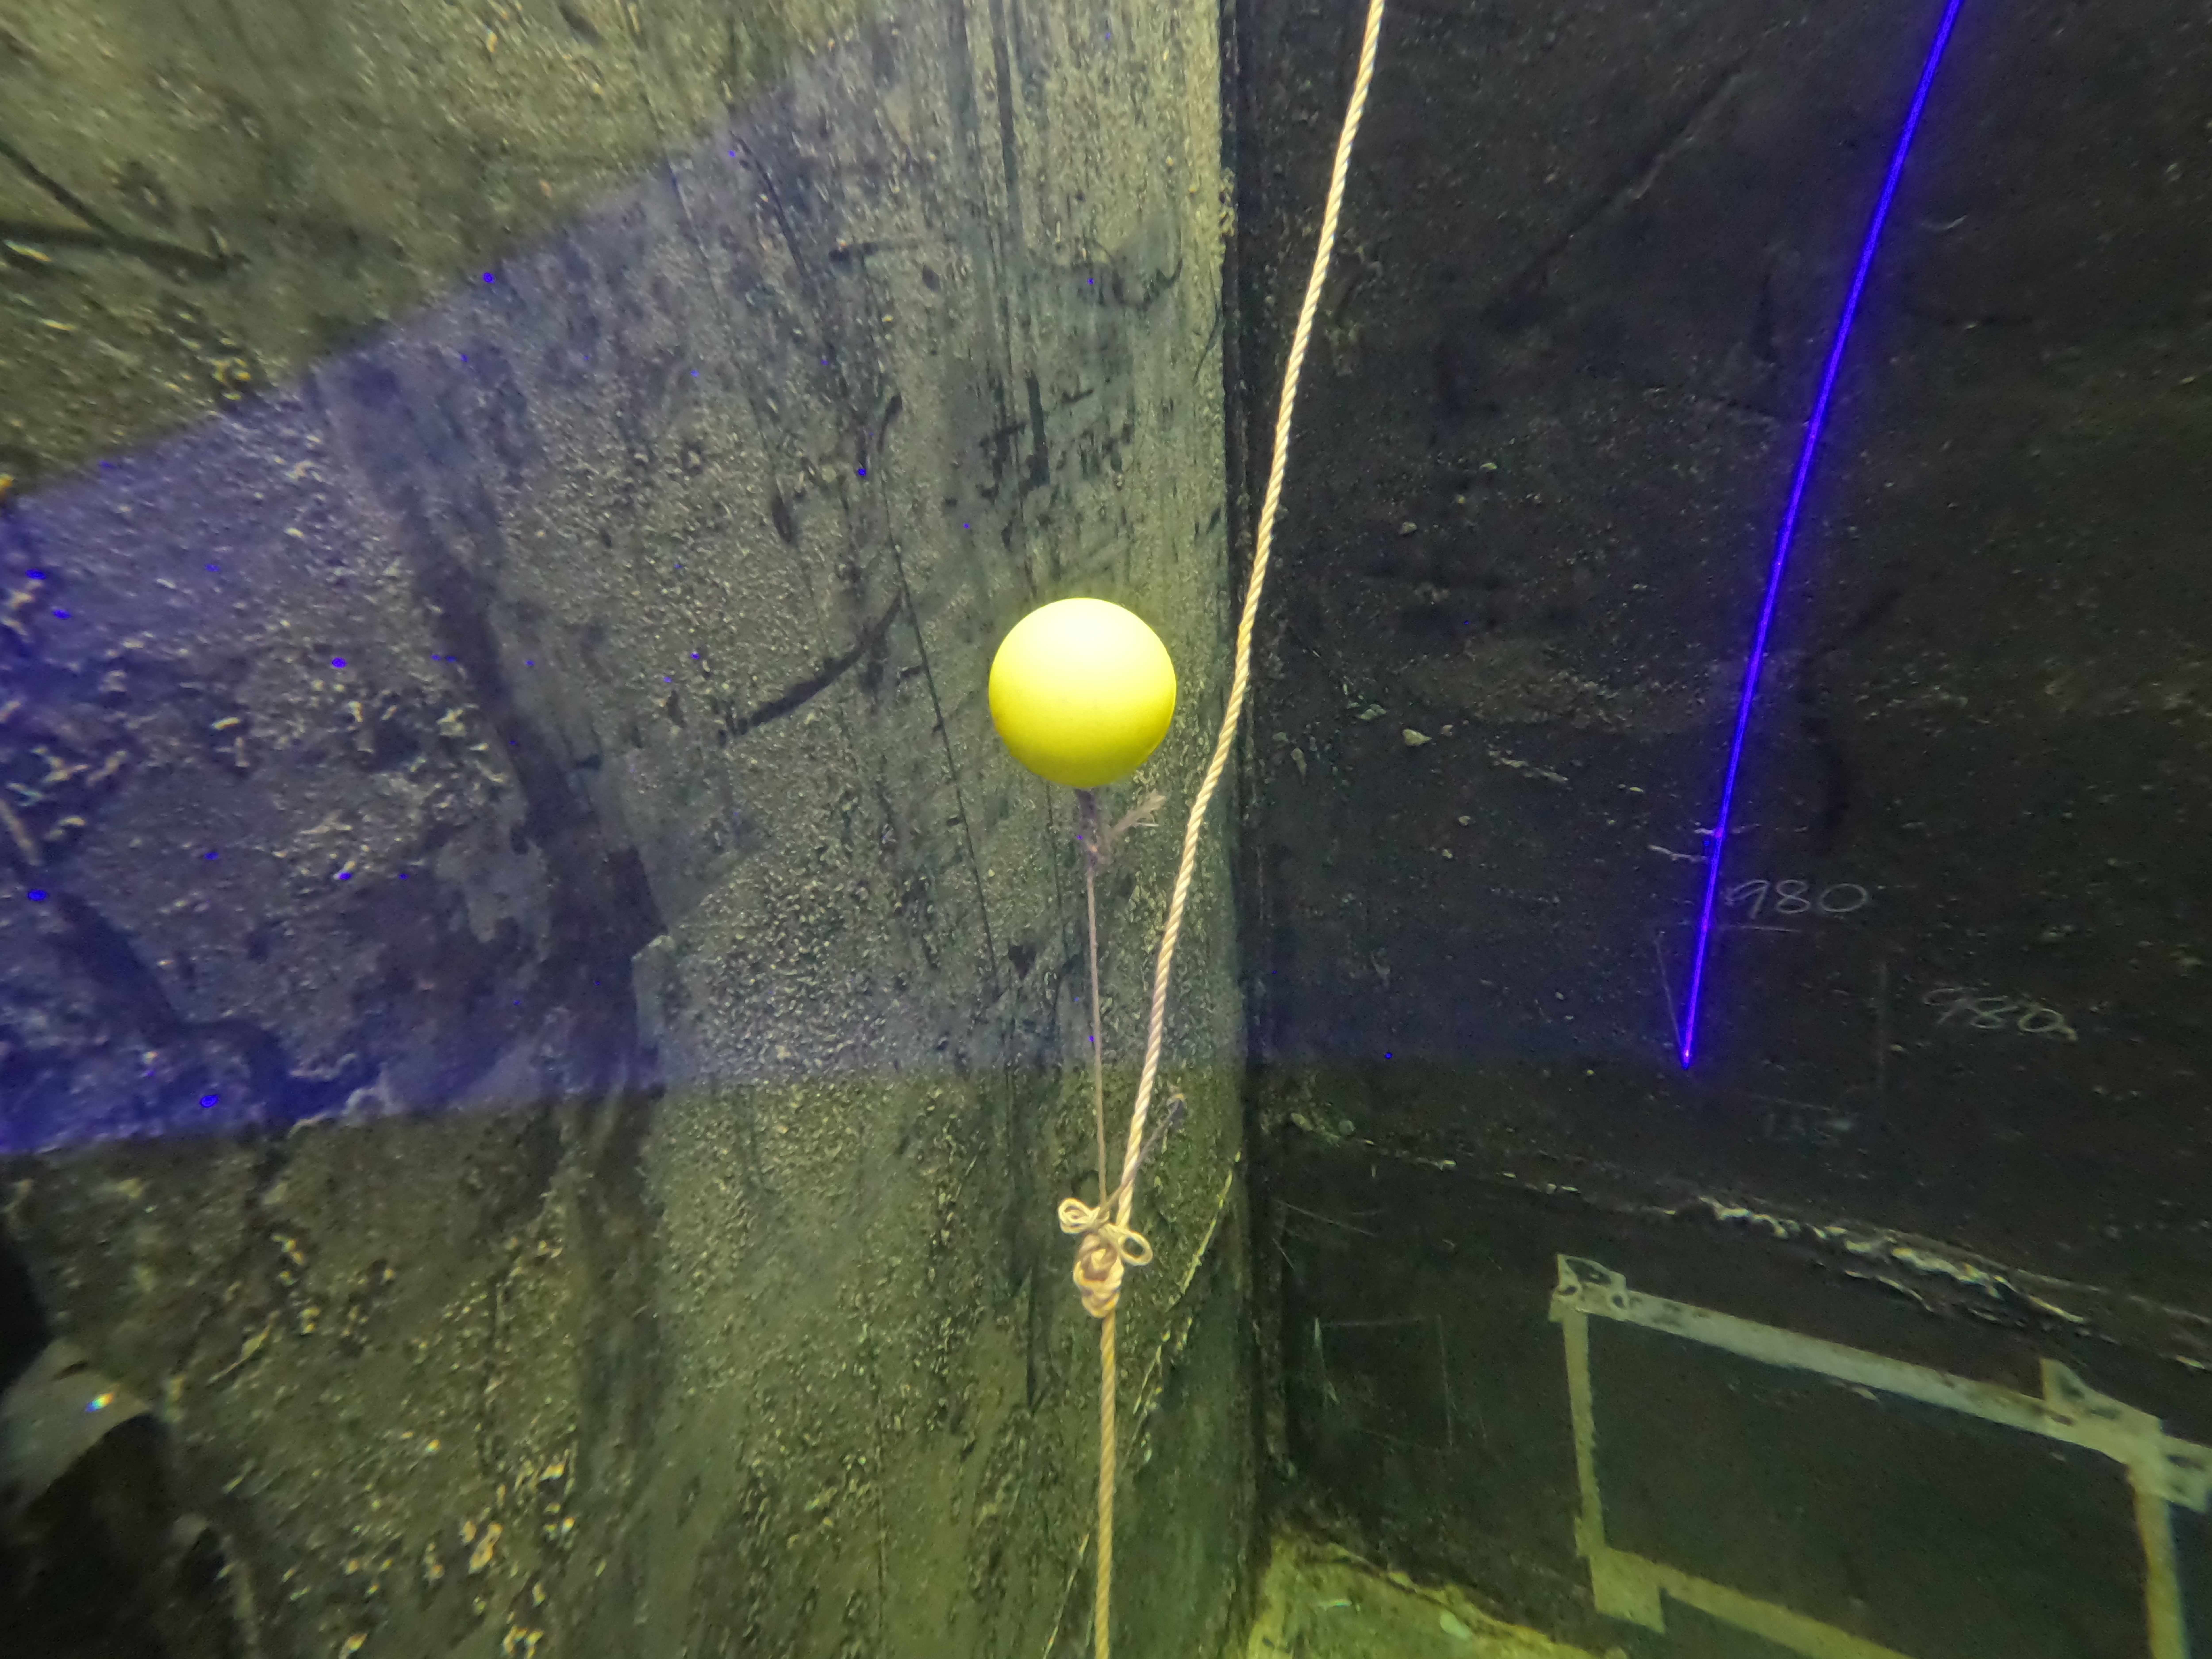

Supplement: Supplementary file 3374 [file G0034078.pdf › 8/G0034078.pdf]

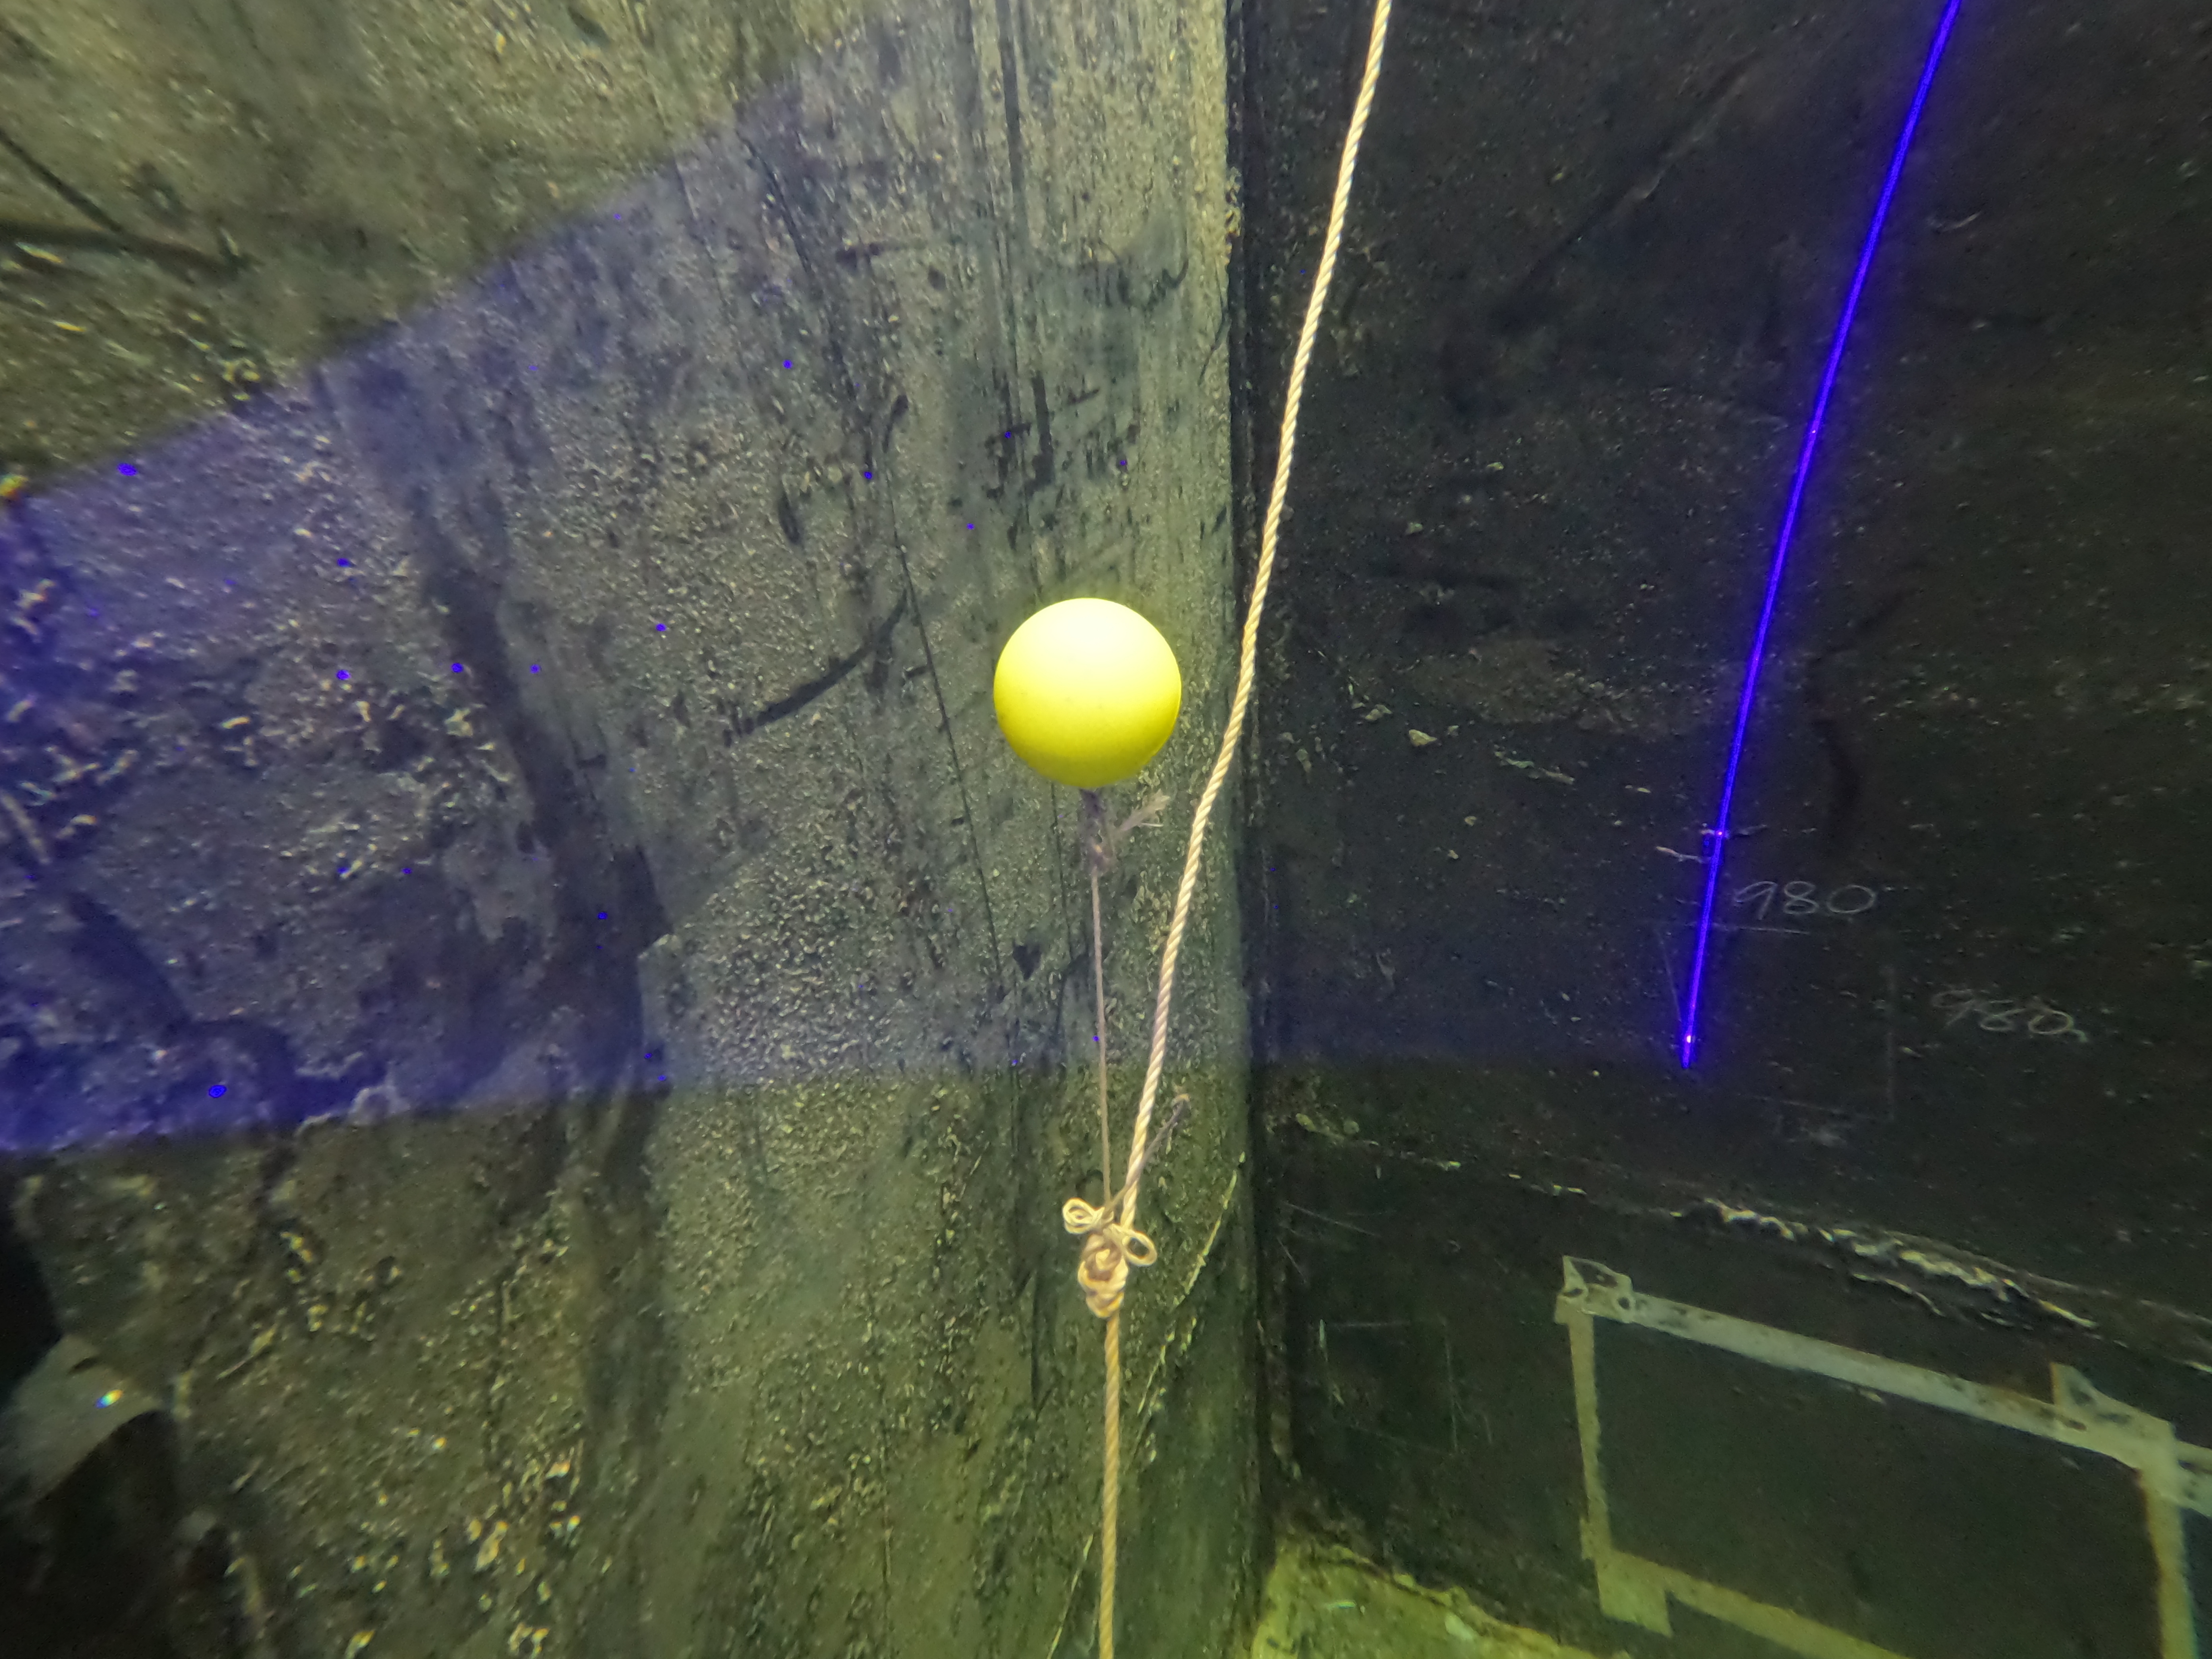

Supplement: Supplementary file 3375 [file G0034079.pdf › 8/G0034079.pdf]

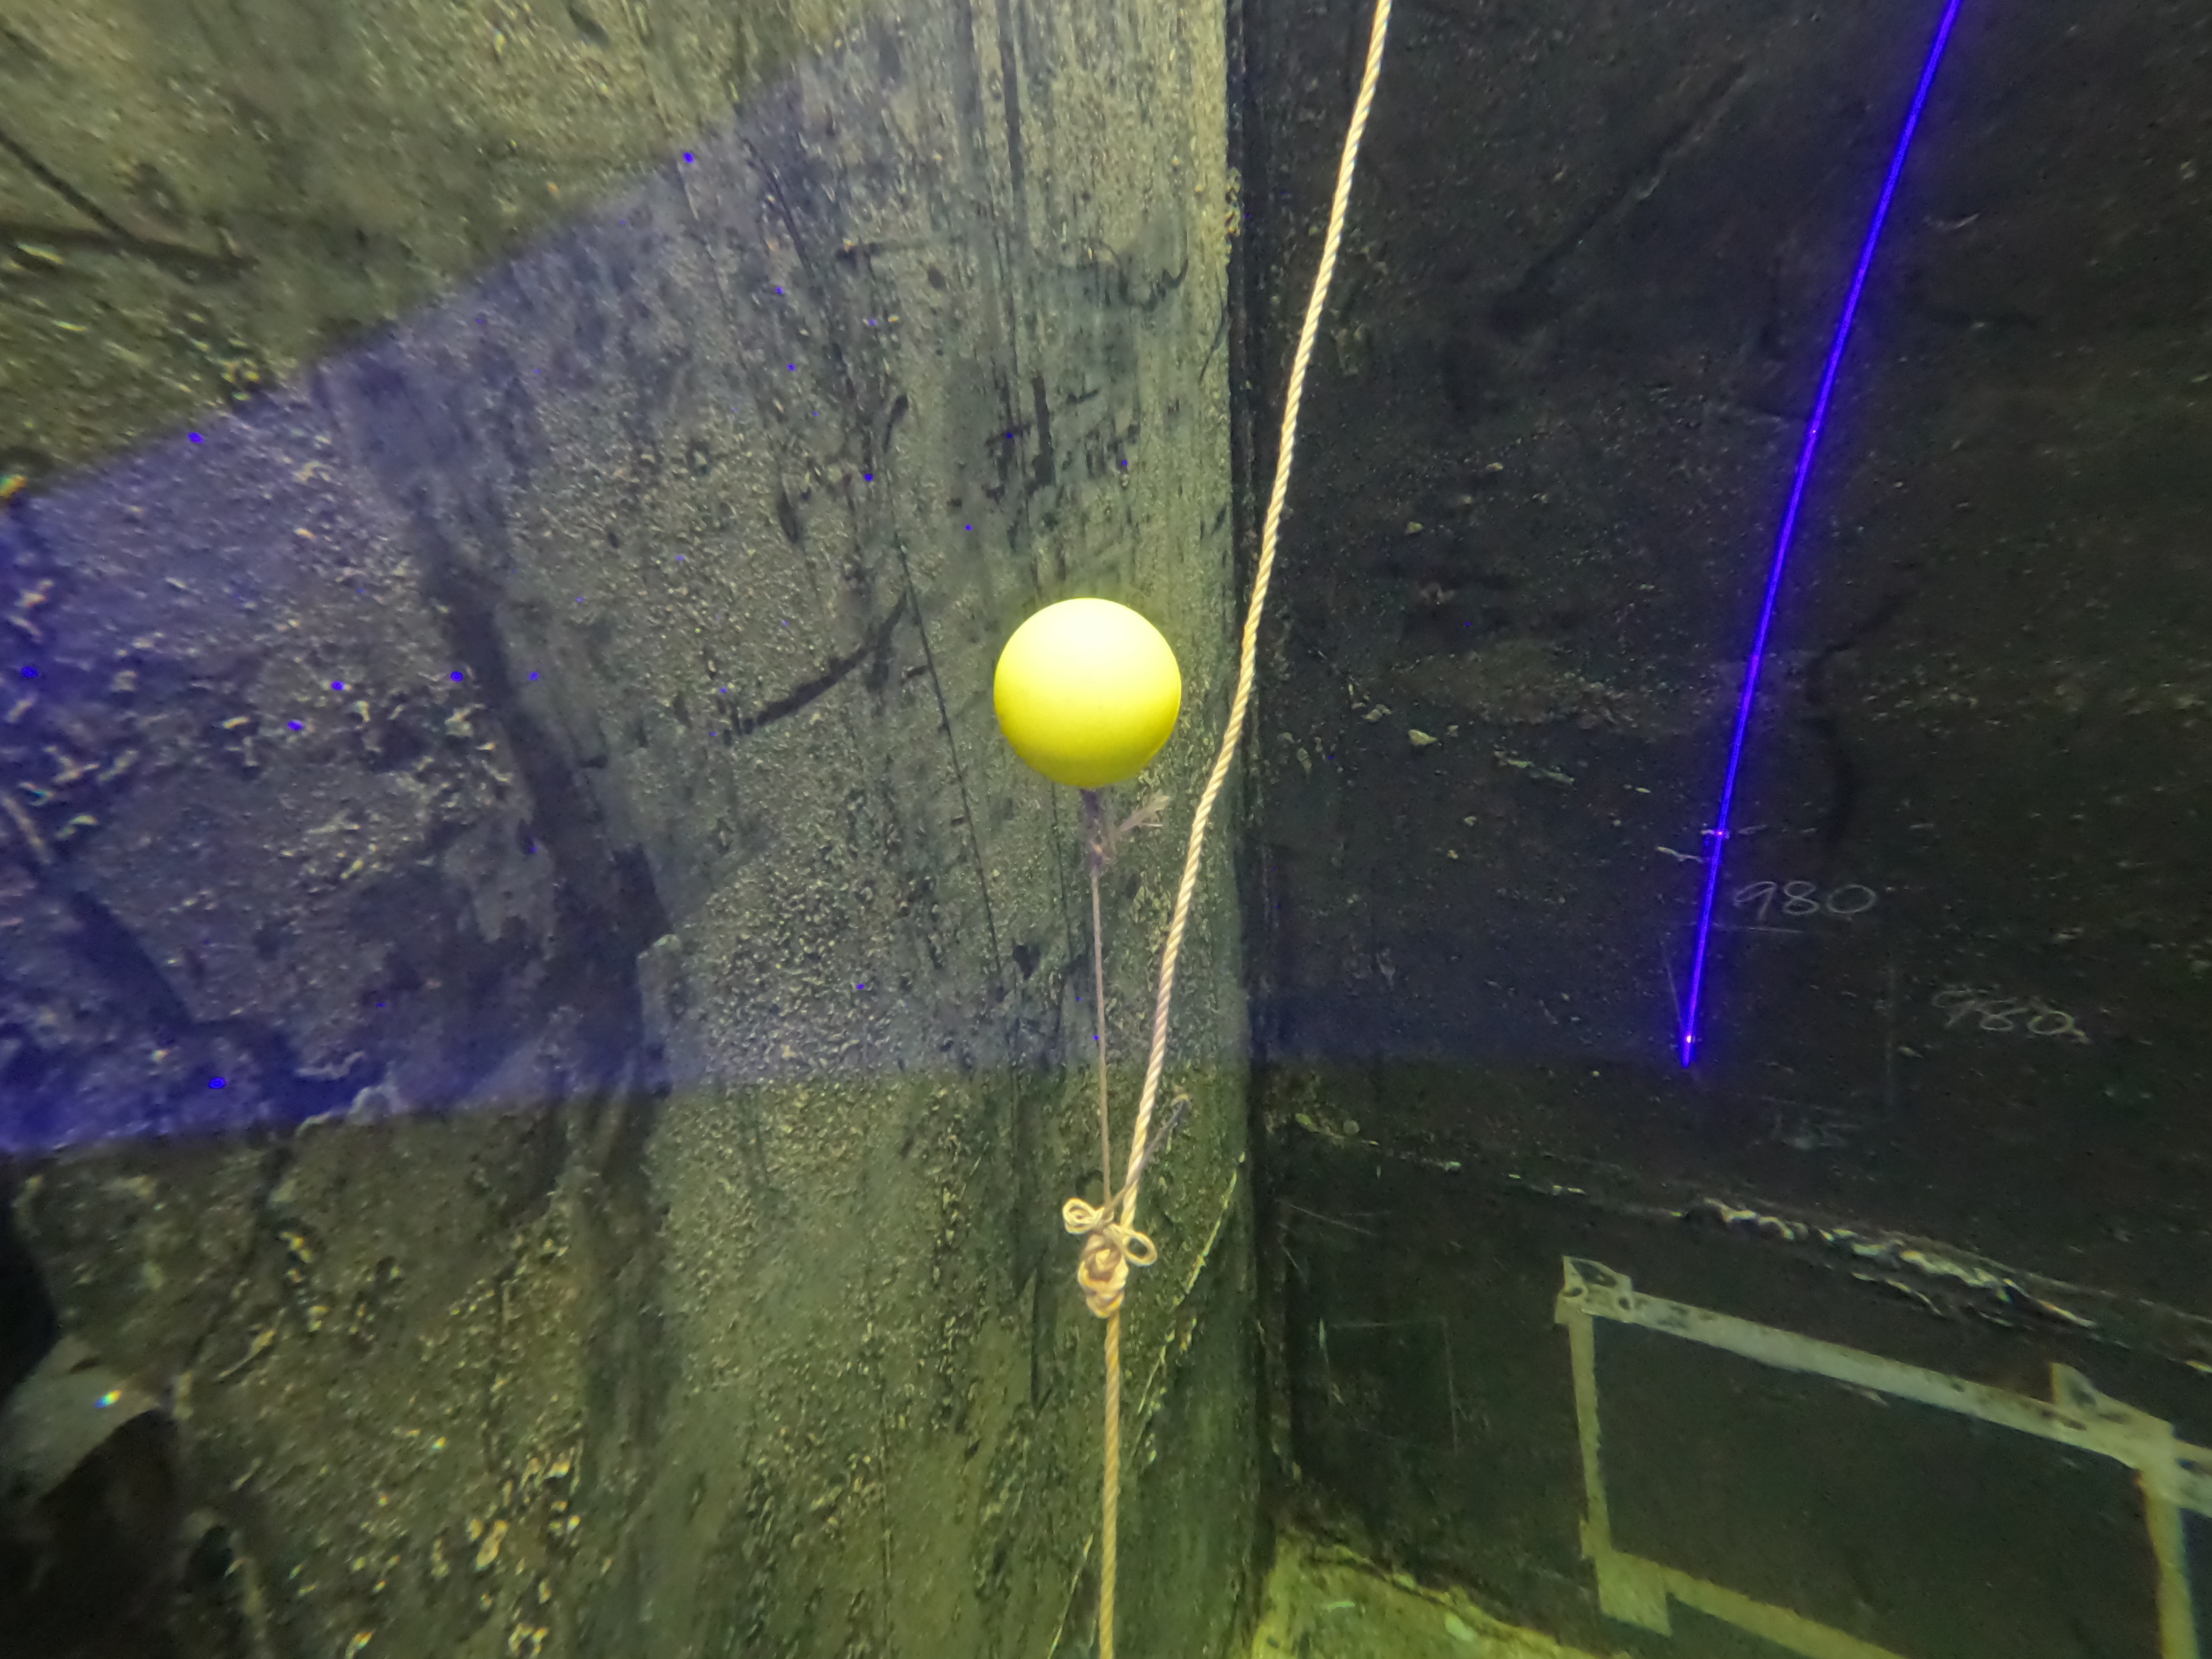

Supplement: Supplementary file 3376 [file G0034080.pdf › 8/G0034080.pdf]

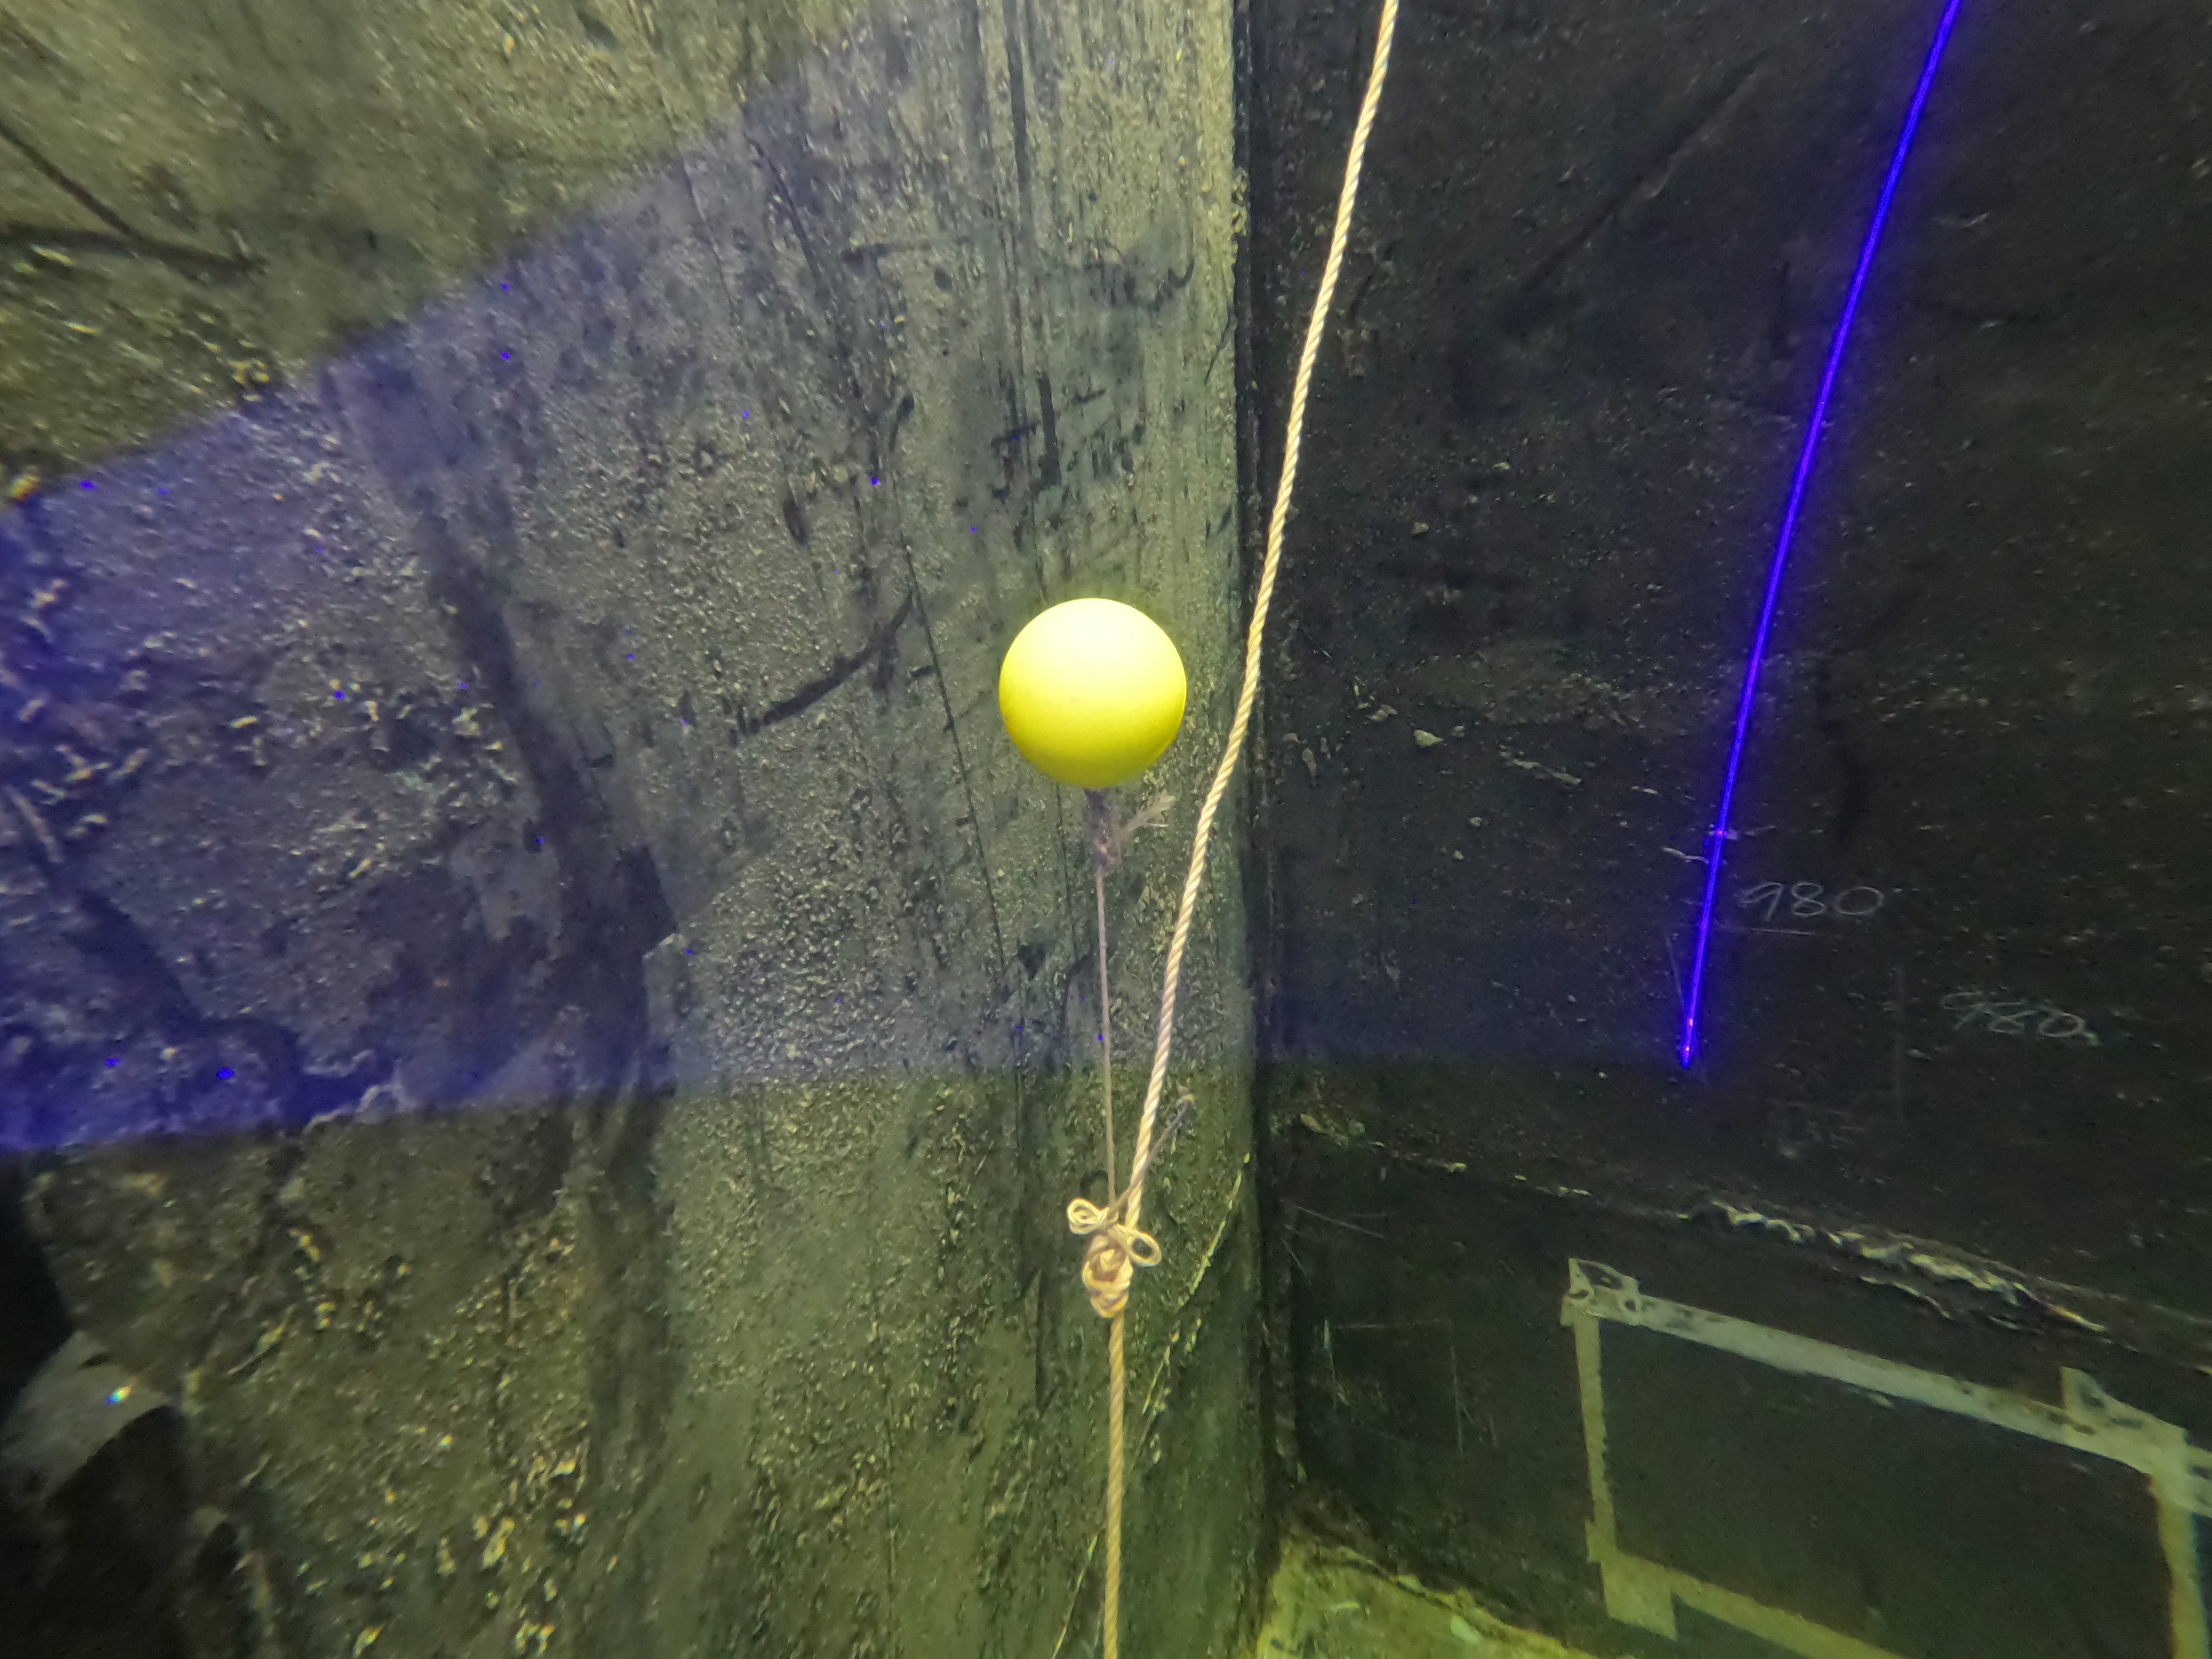

Supplement: Supplementary file 3377 [file G0034081.pdf › 8/G0034081.pdf]

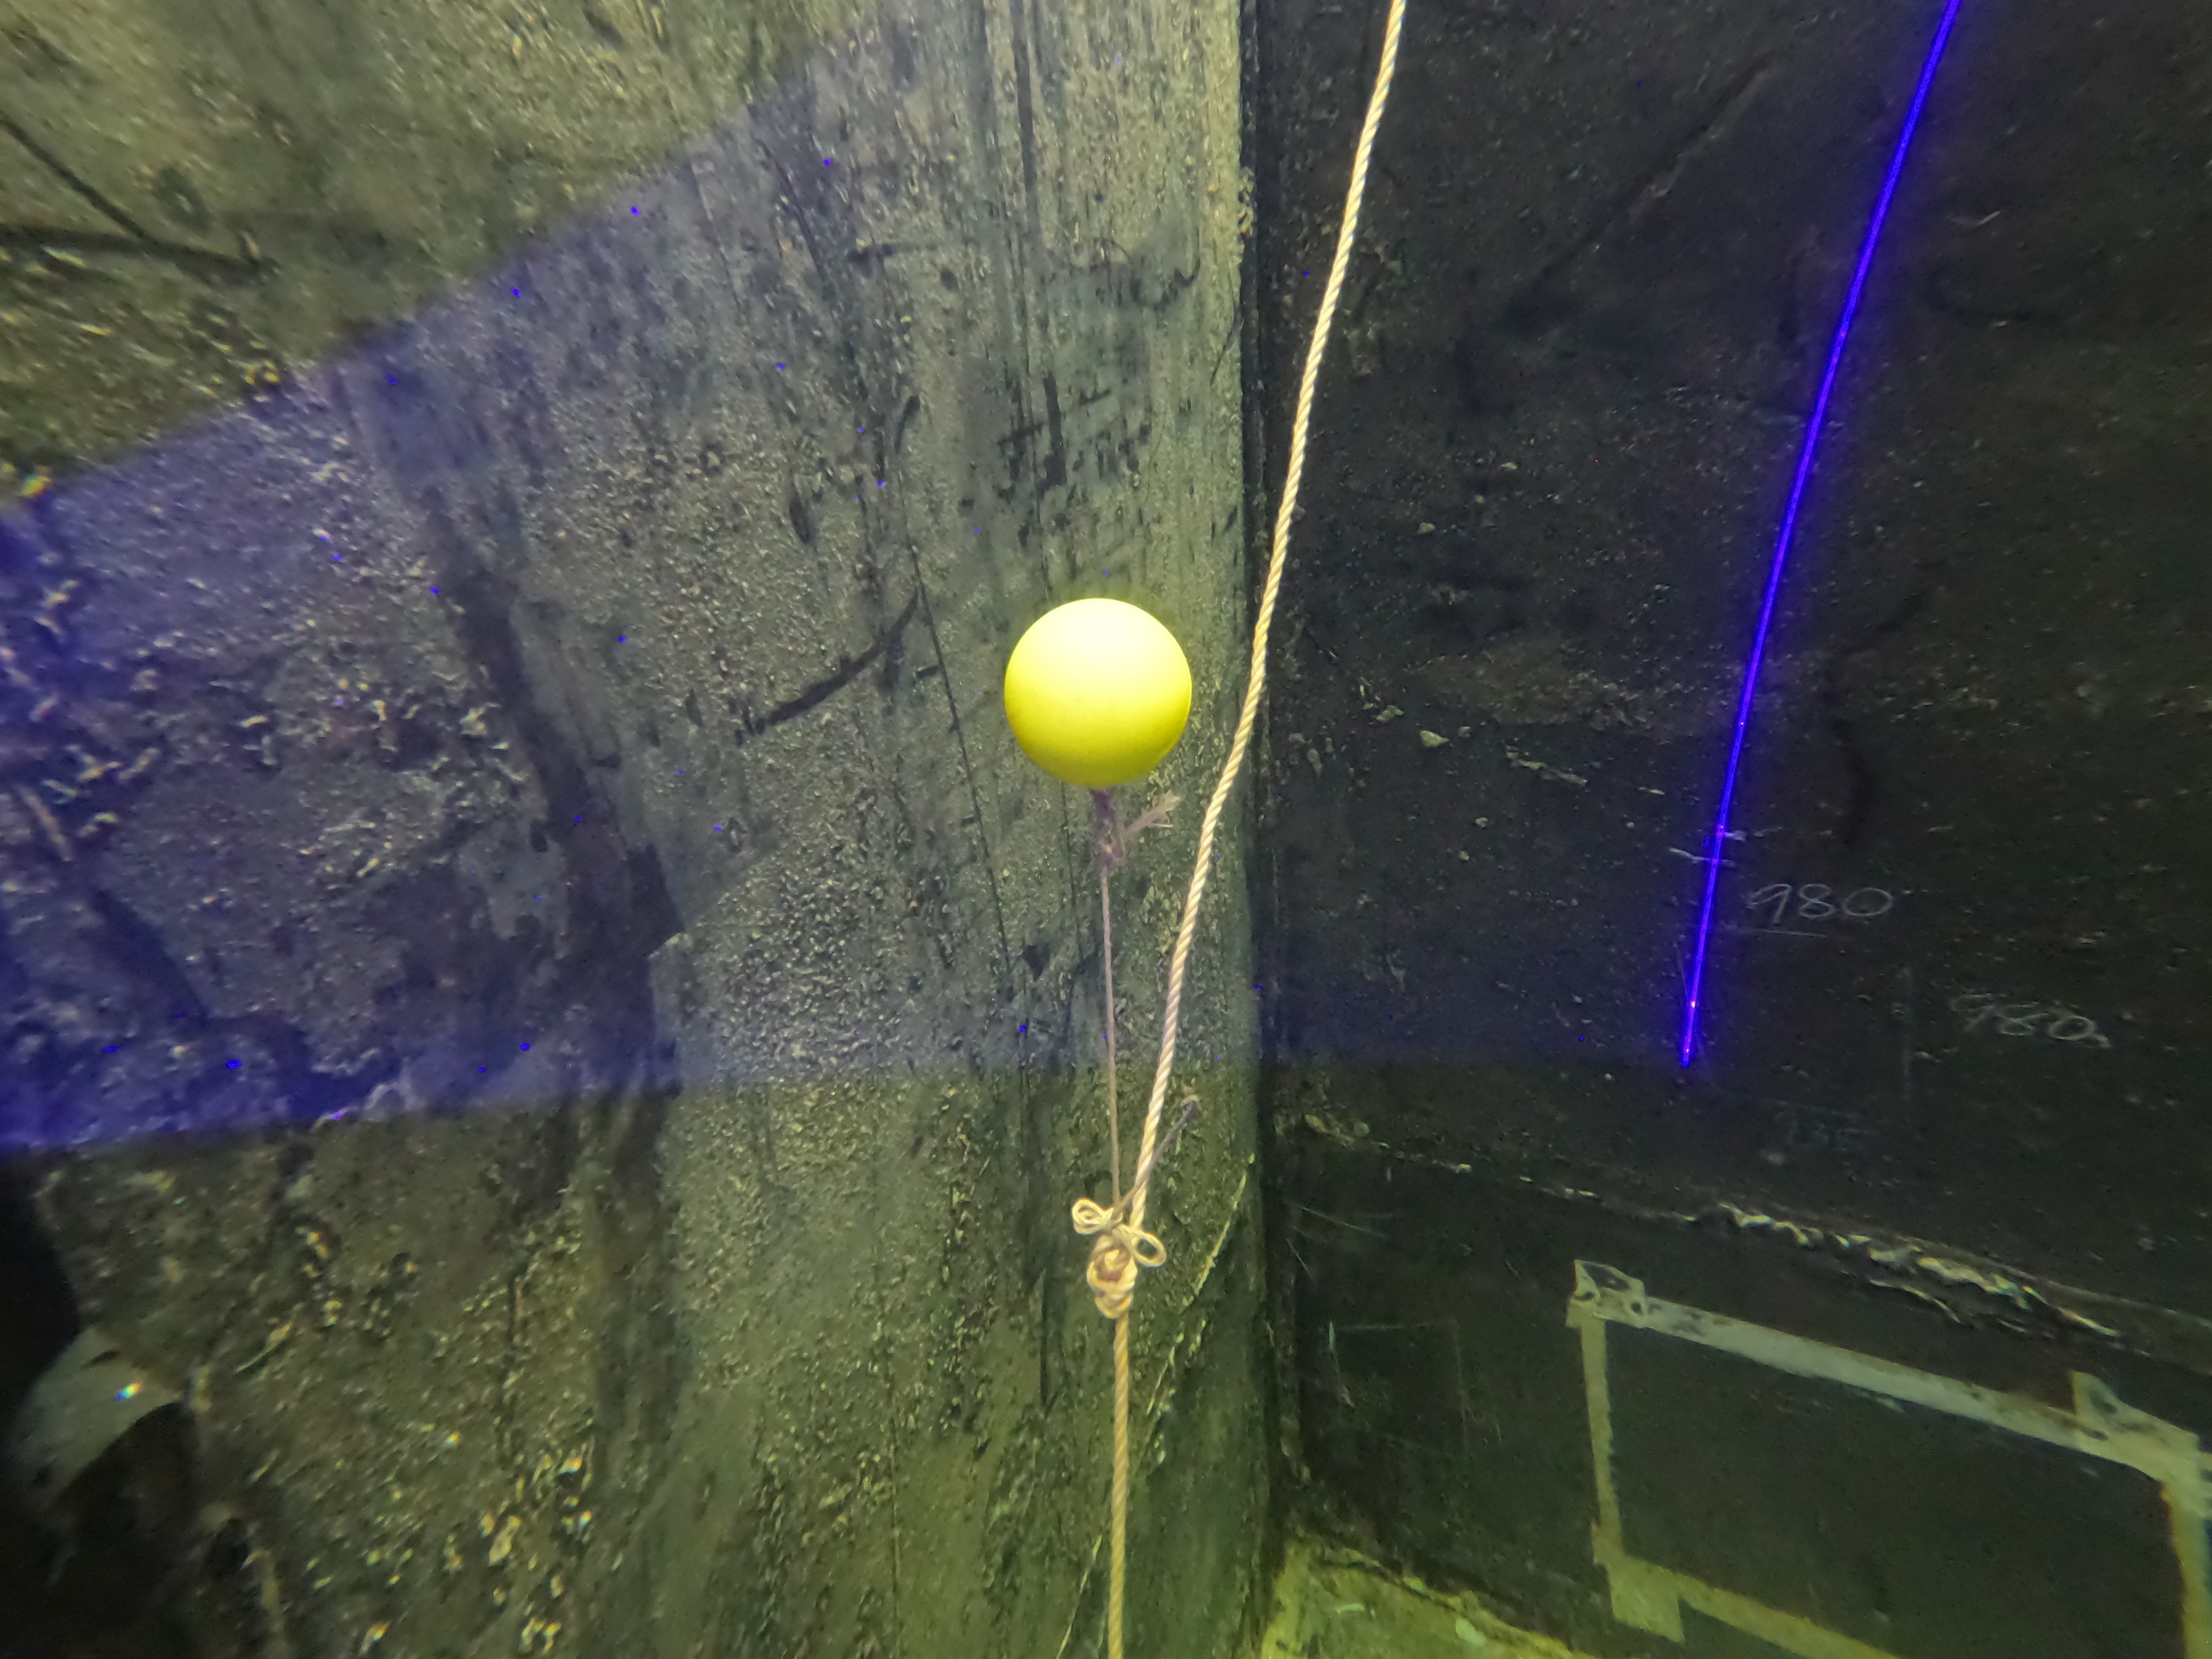

Supplement: Supplementary file 3378 [file G0034082.pdf › 8/G0034082.pdf]

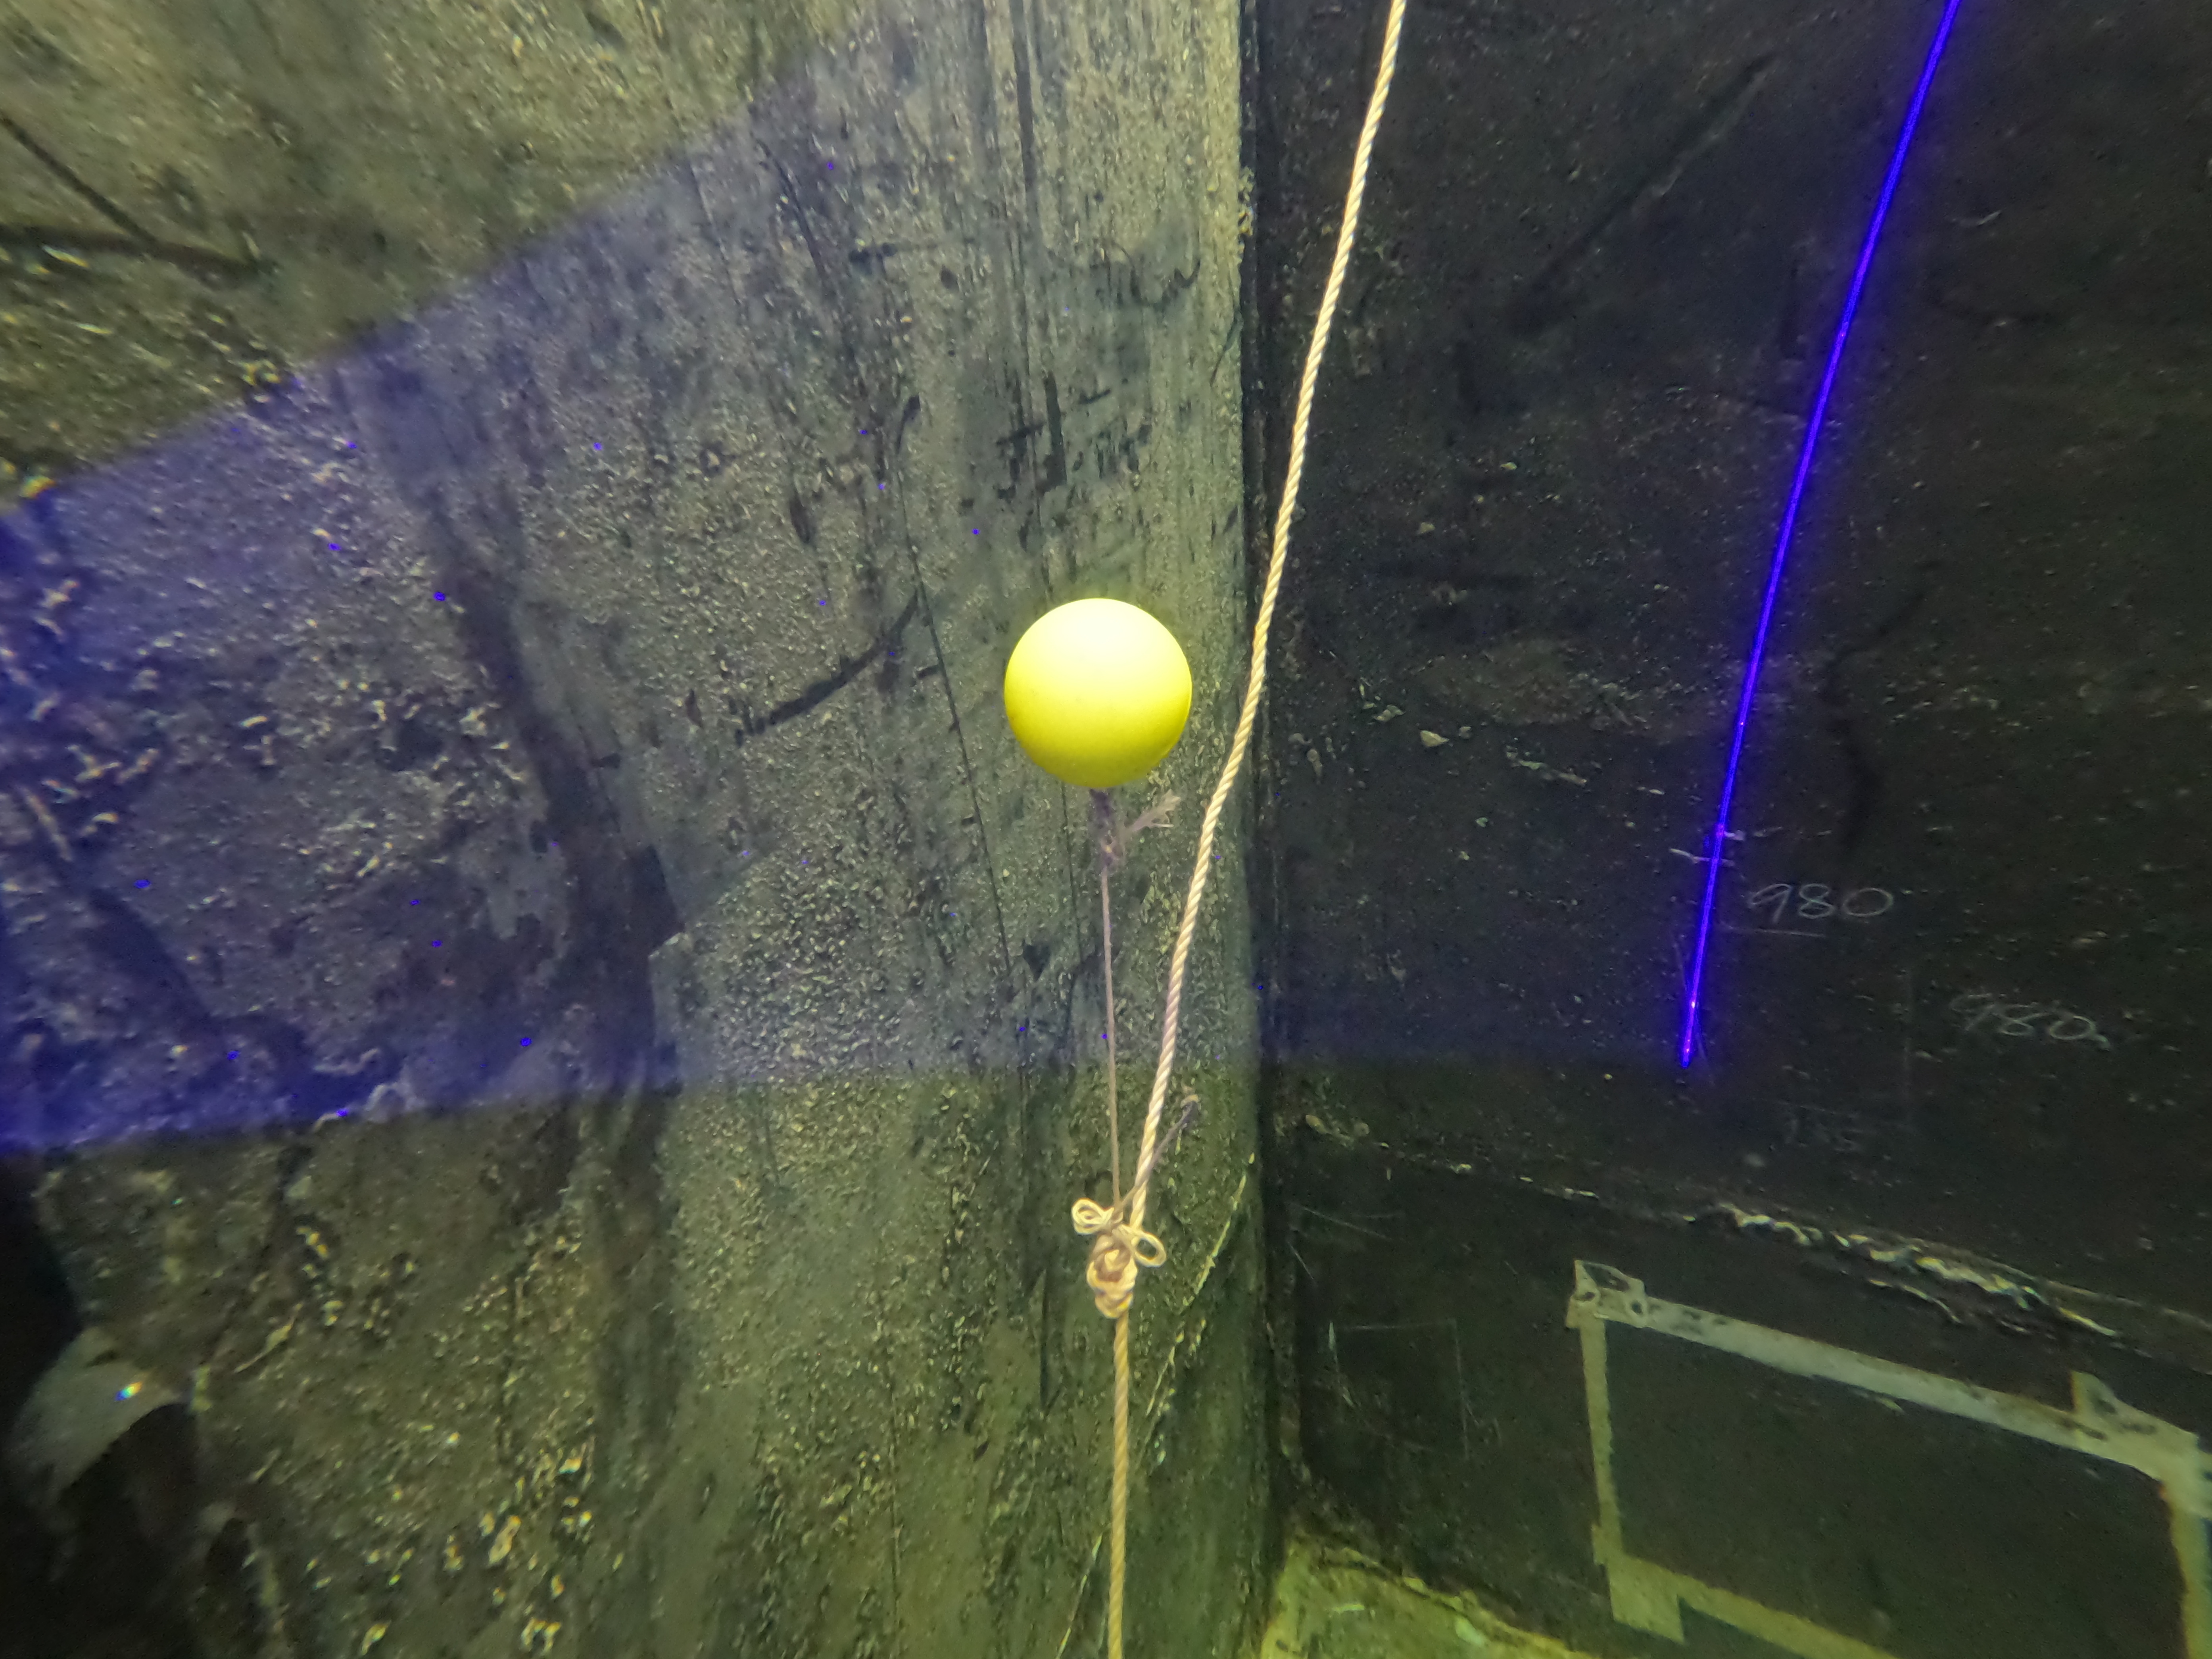

Supplement: Supplementary file 3379 [file G0034083.pdf › 8/G0034083.pdf]

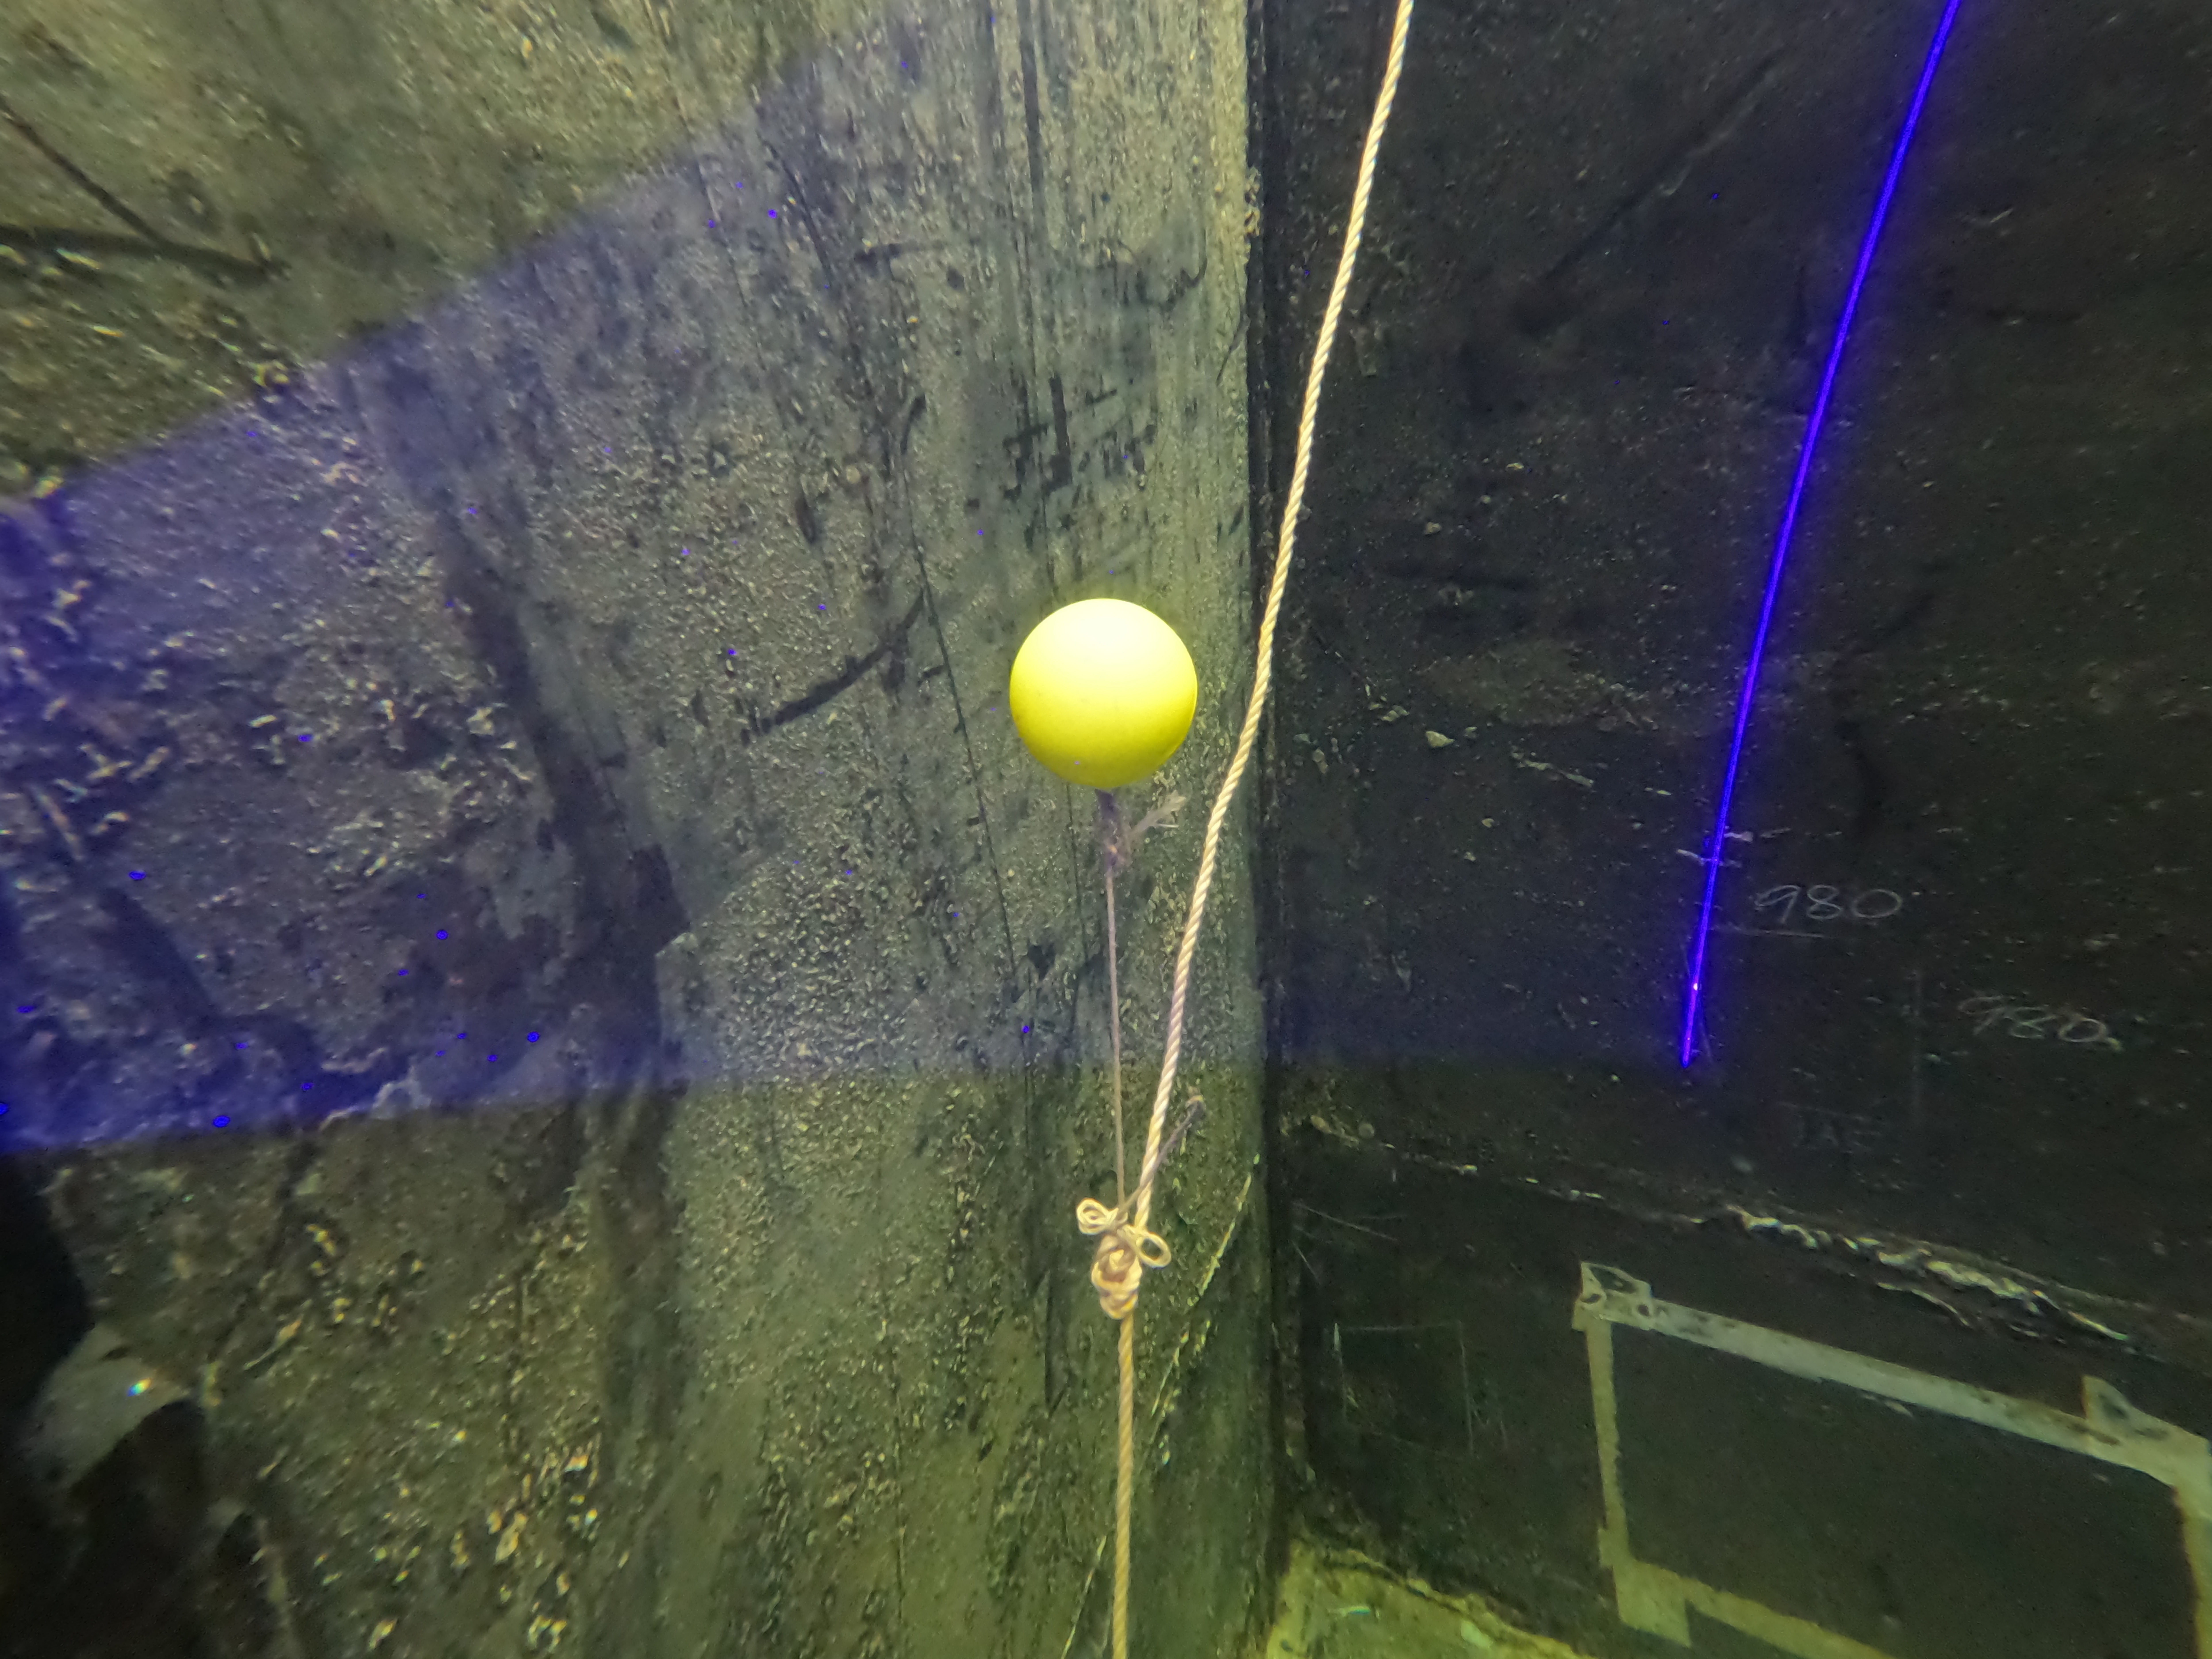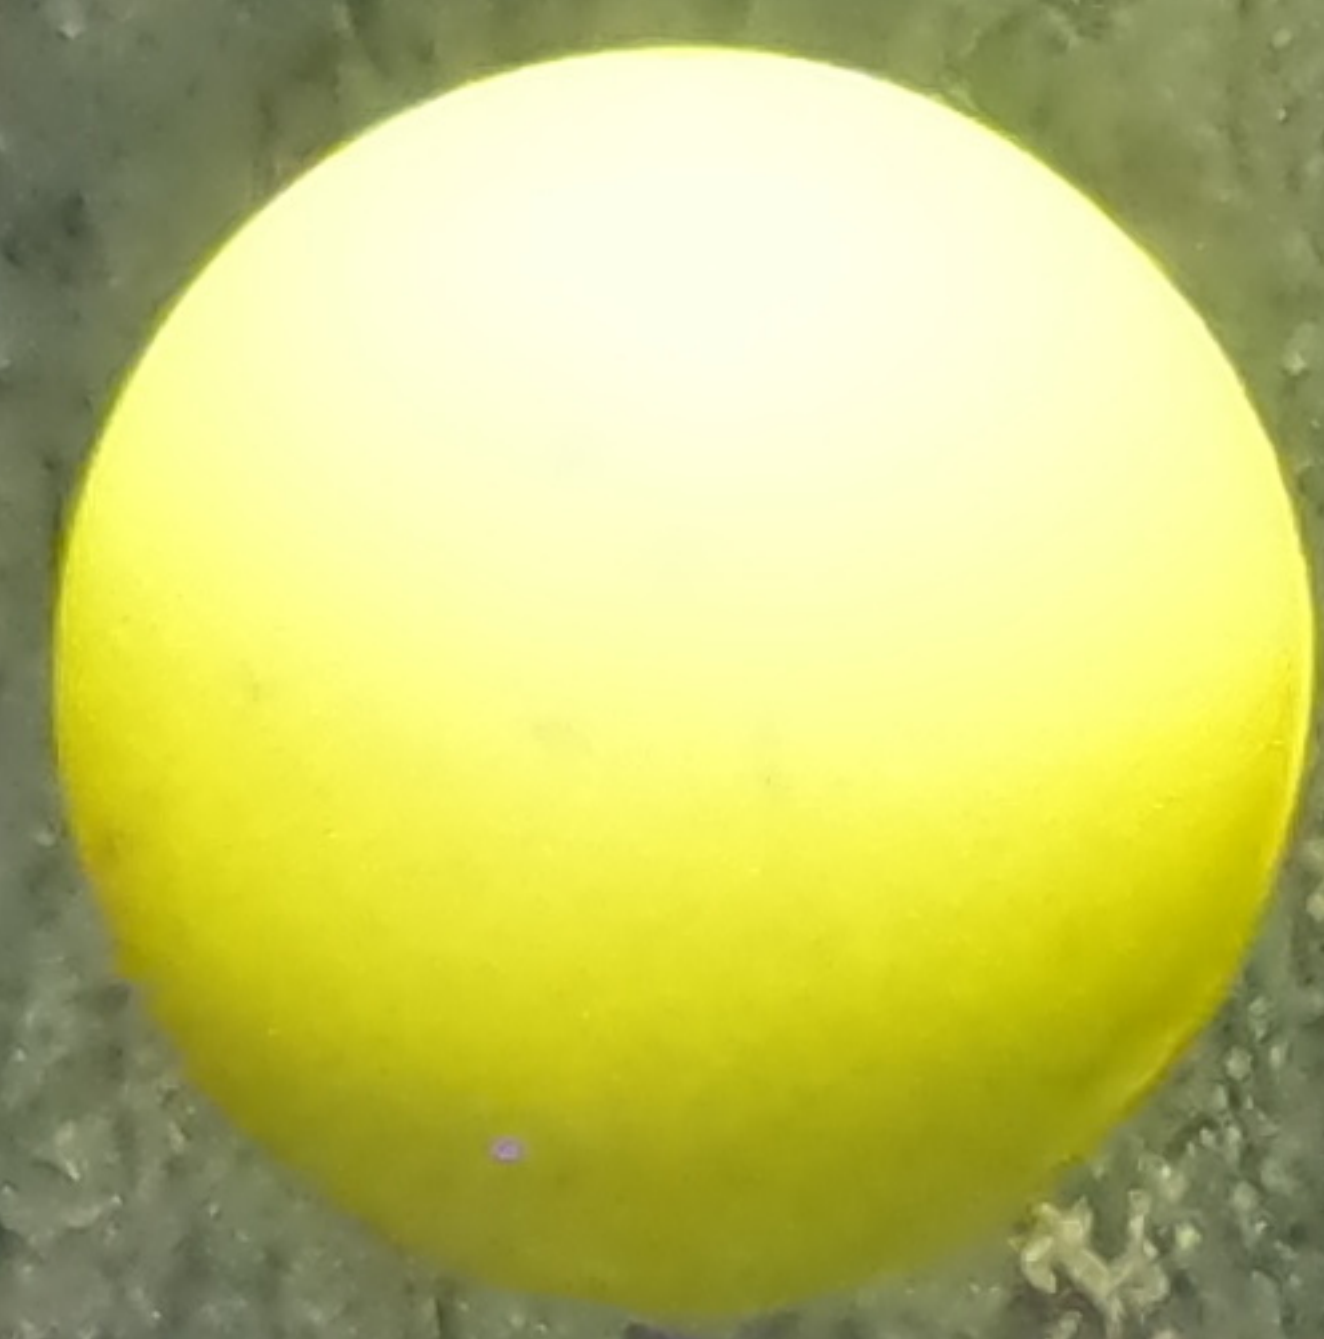

980

980

Supplement: Supplementary file 3380 [file G0034084.pdf › 8/G0034084.pdf]

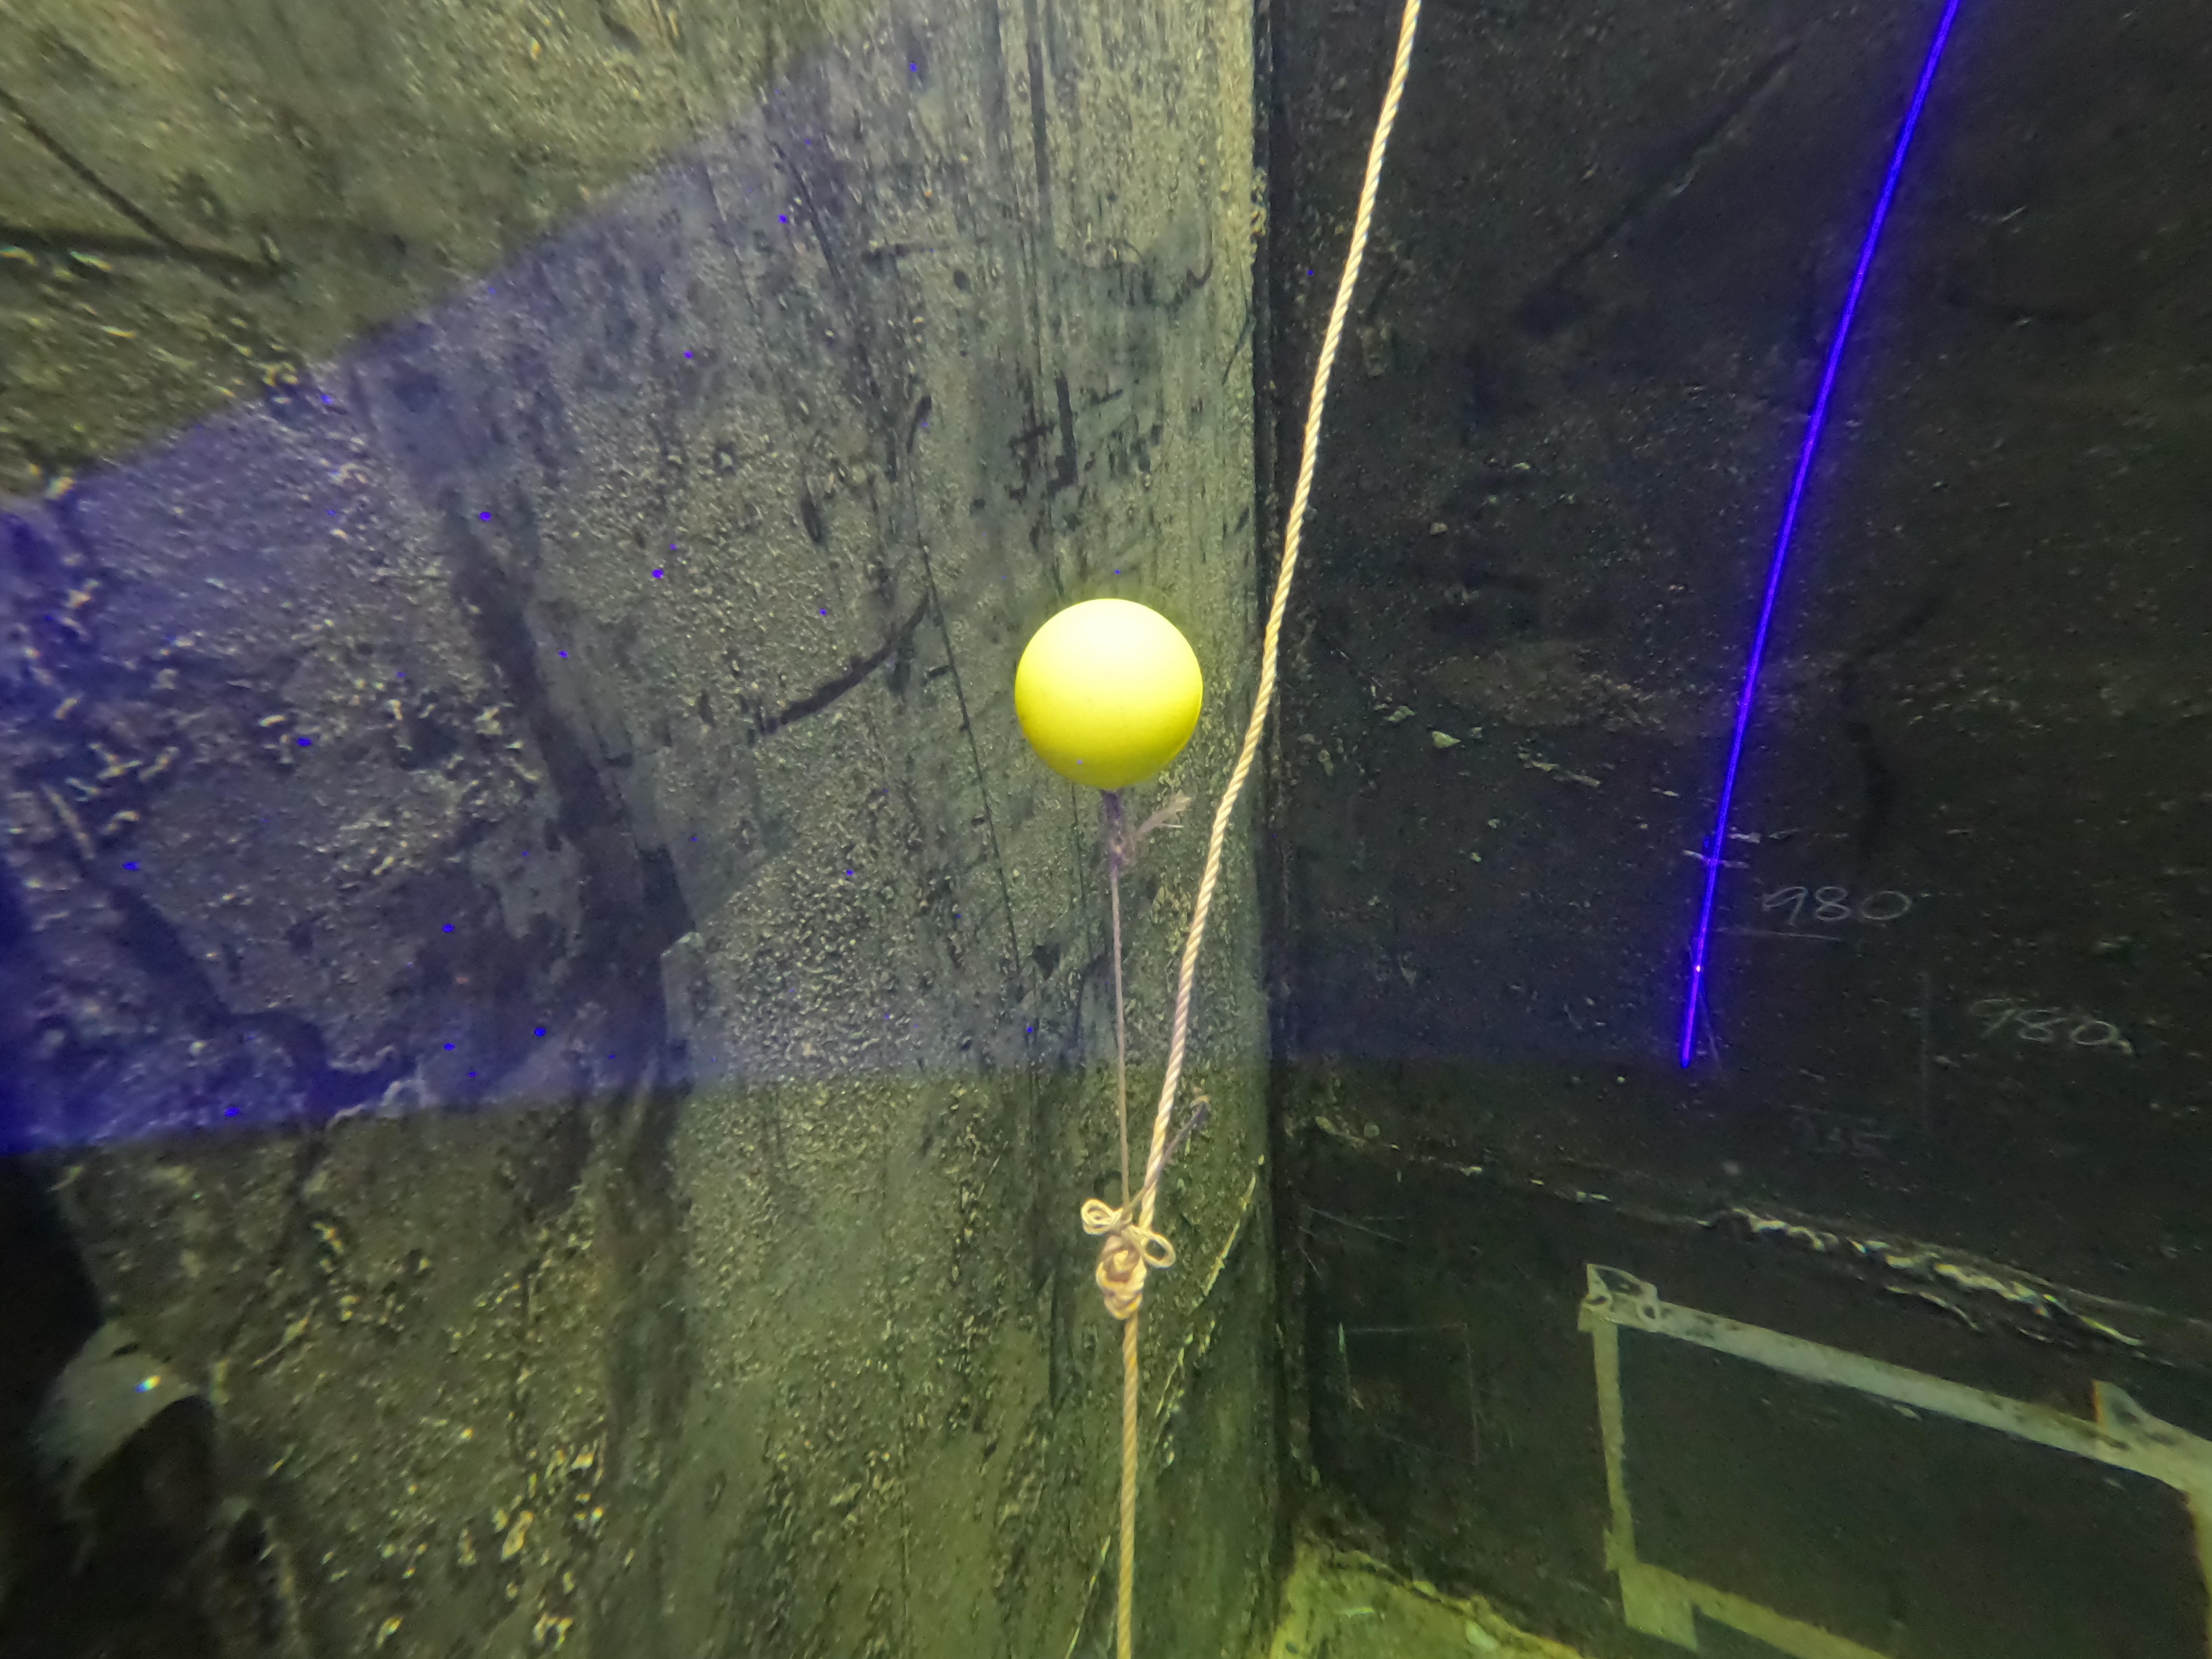

Supplement: Supplementary file 3381 [file G0034085.pdf › 8/G0034085.pdf]

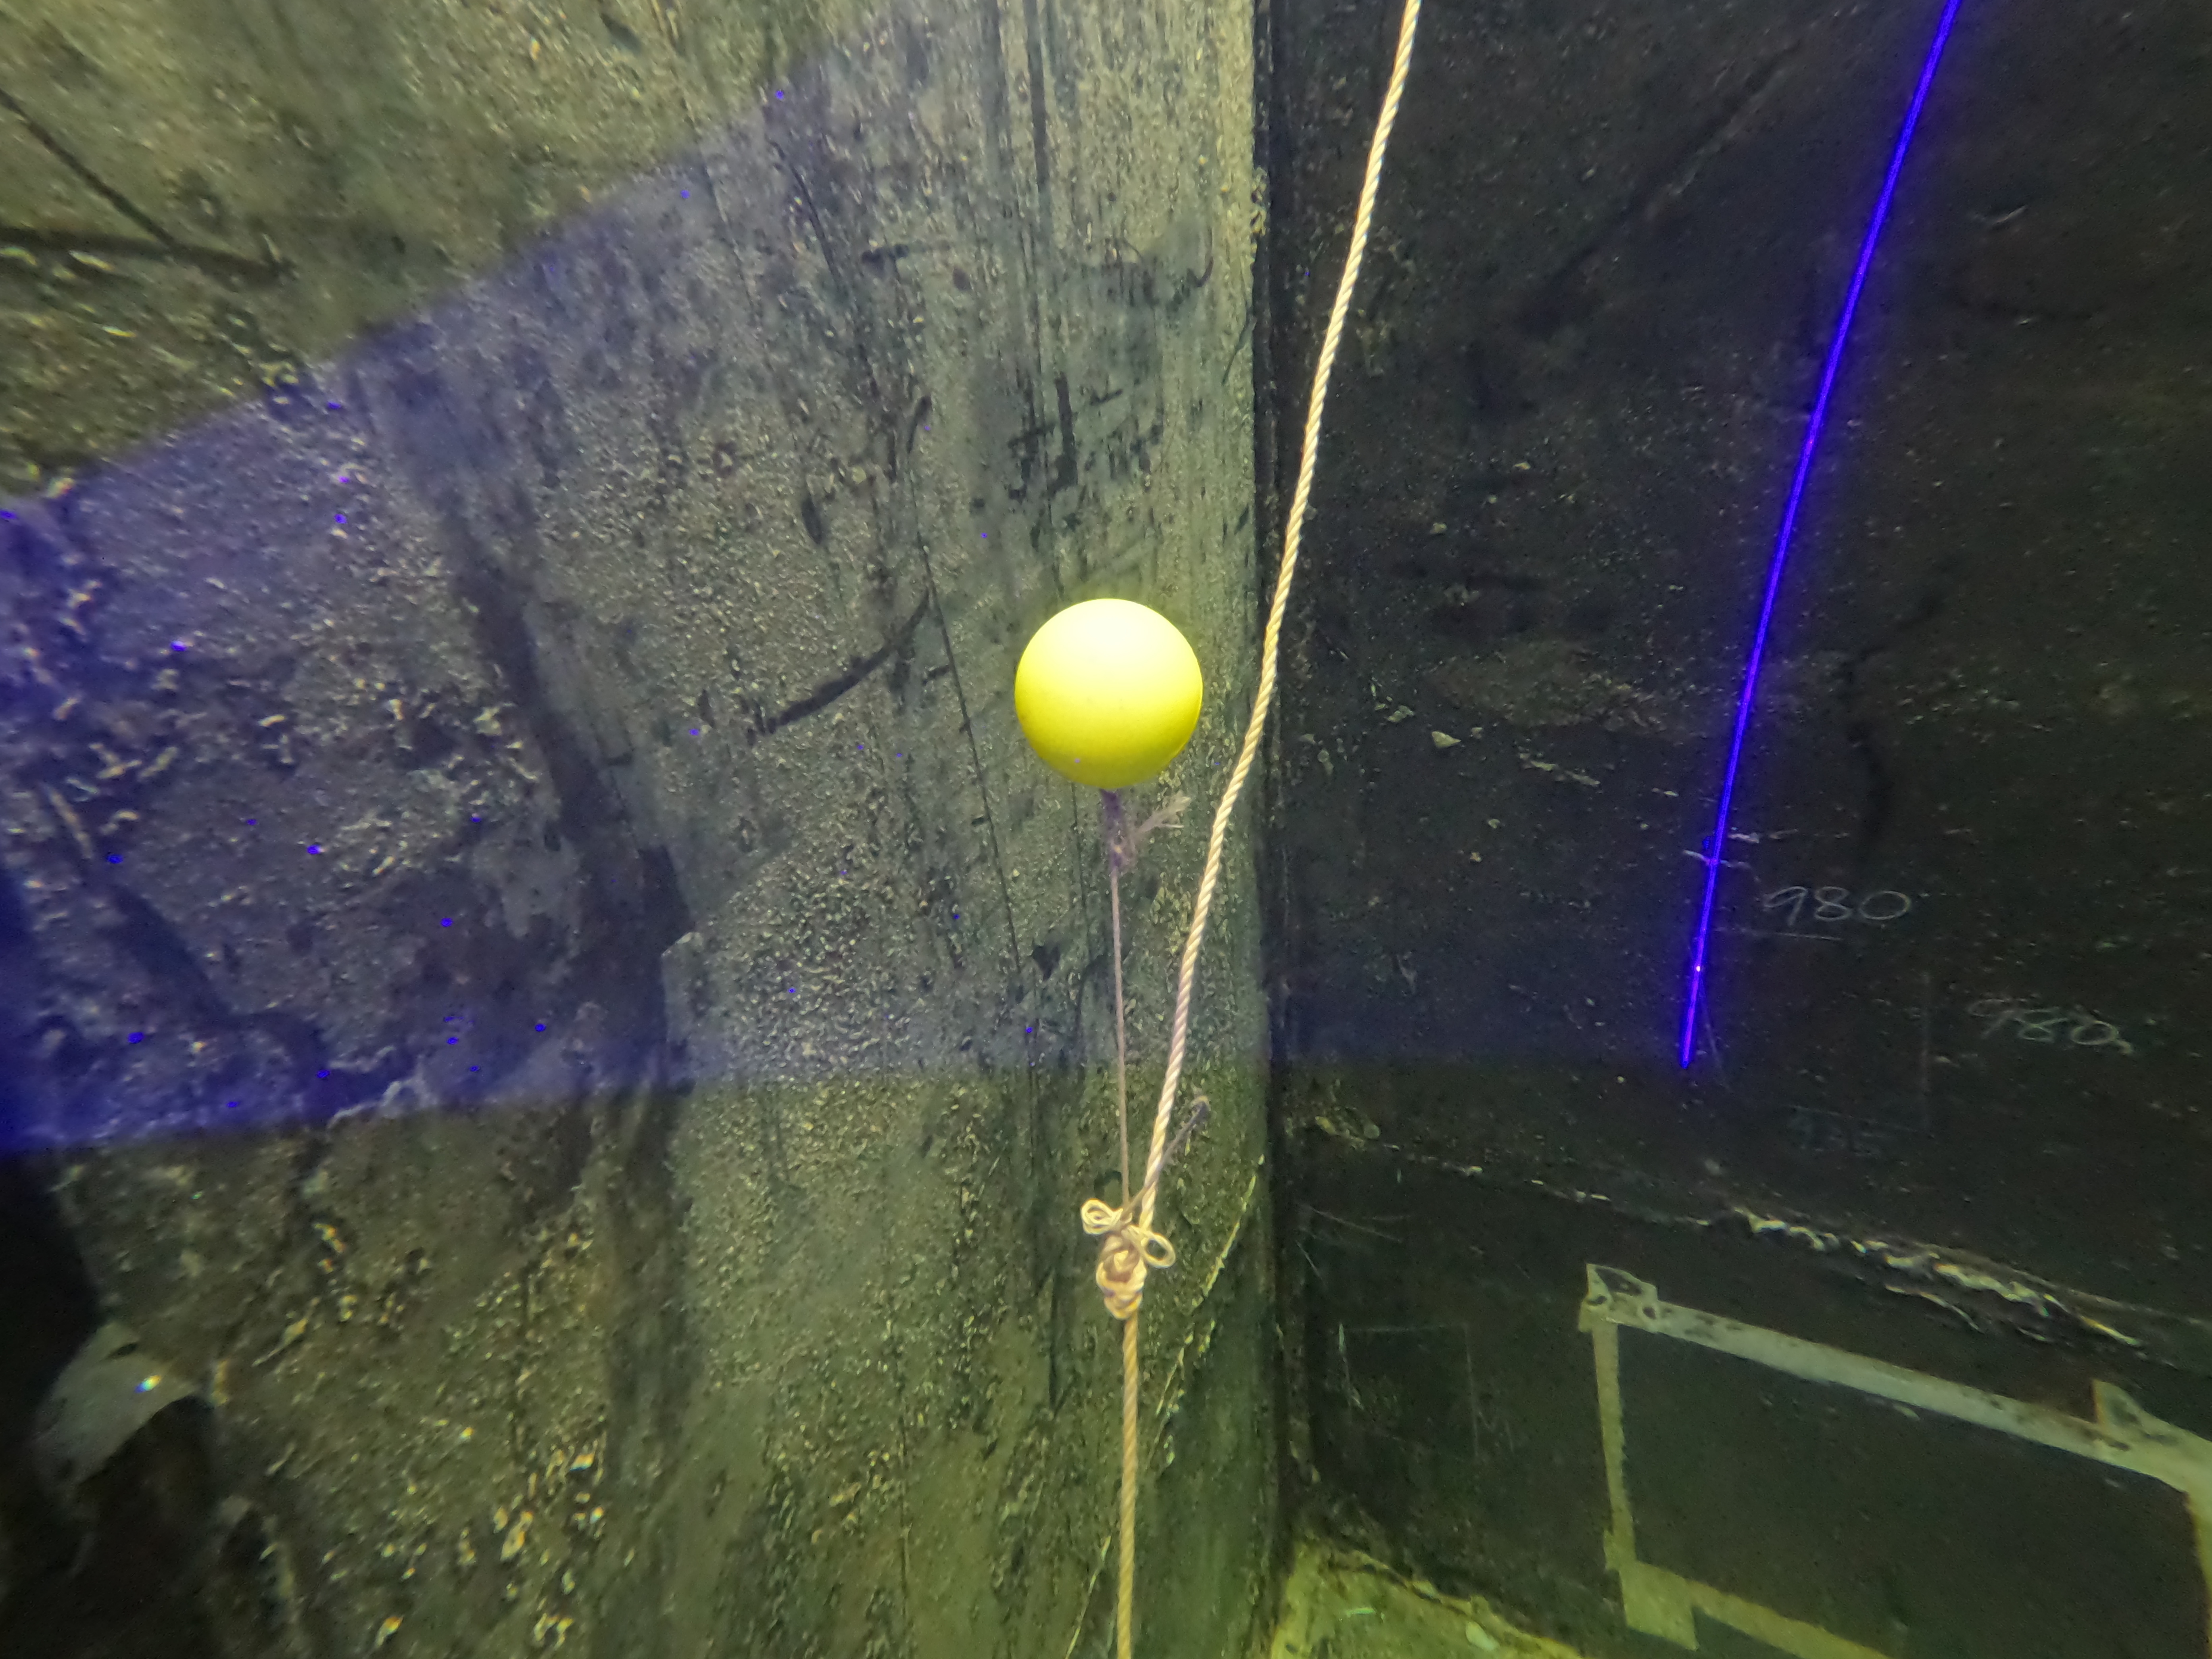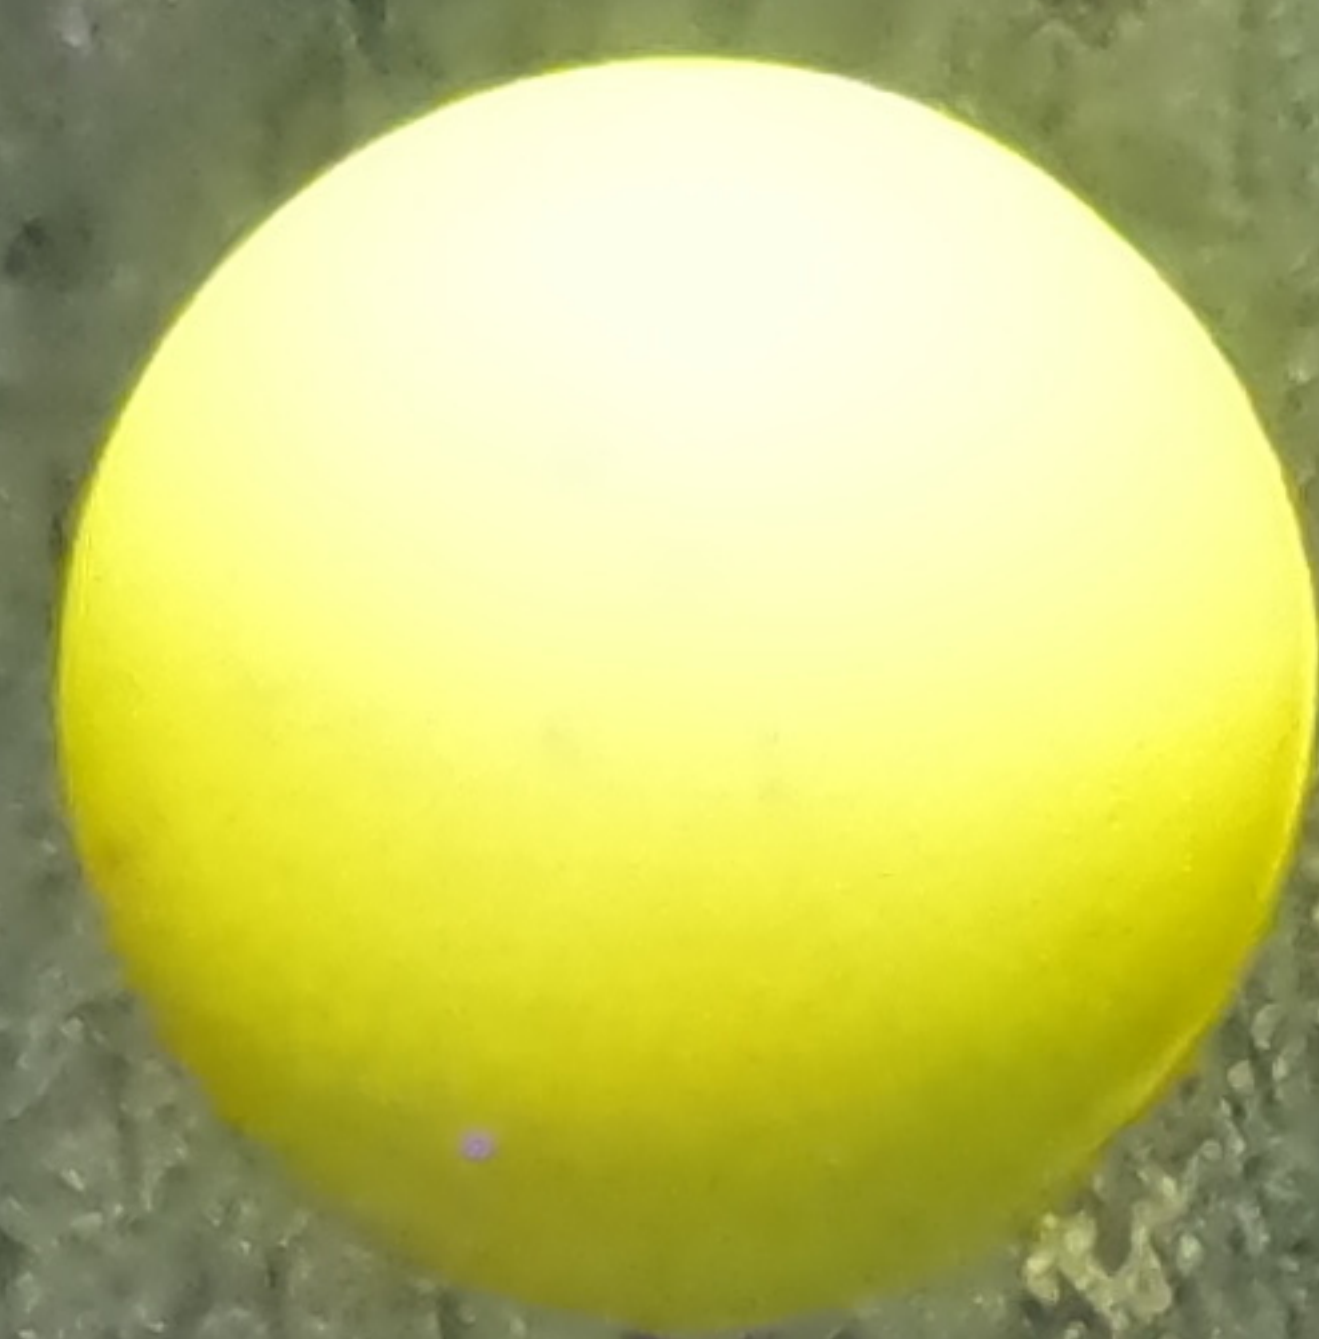

980

980

Supplement: Supplementary file 3382 [file G0034086.pdf › 8/G0034086.pdf]

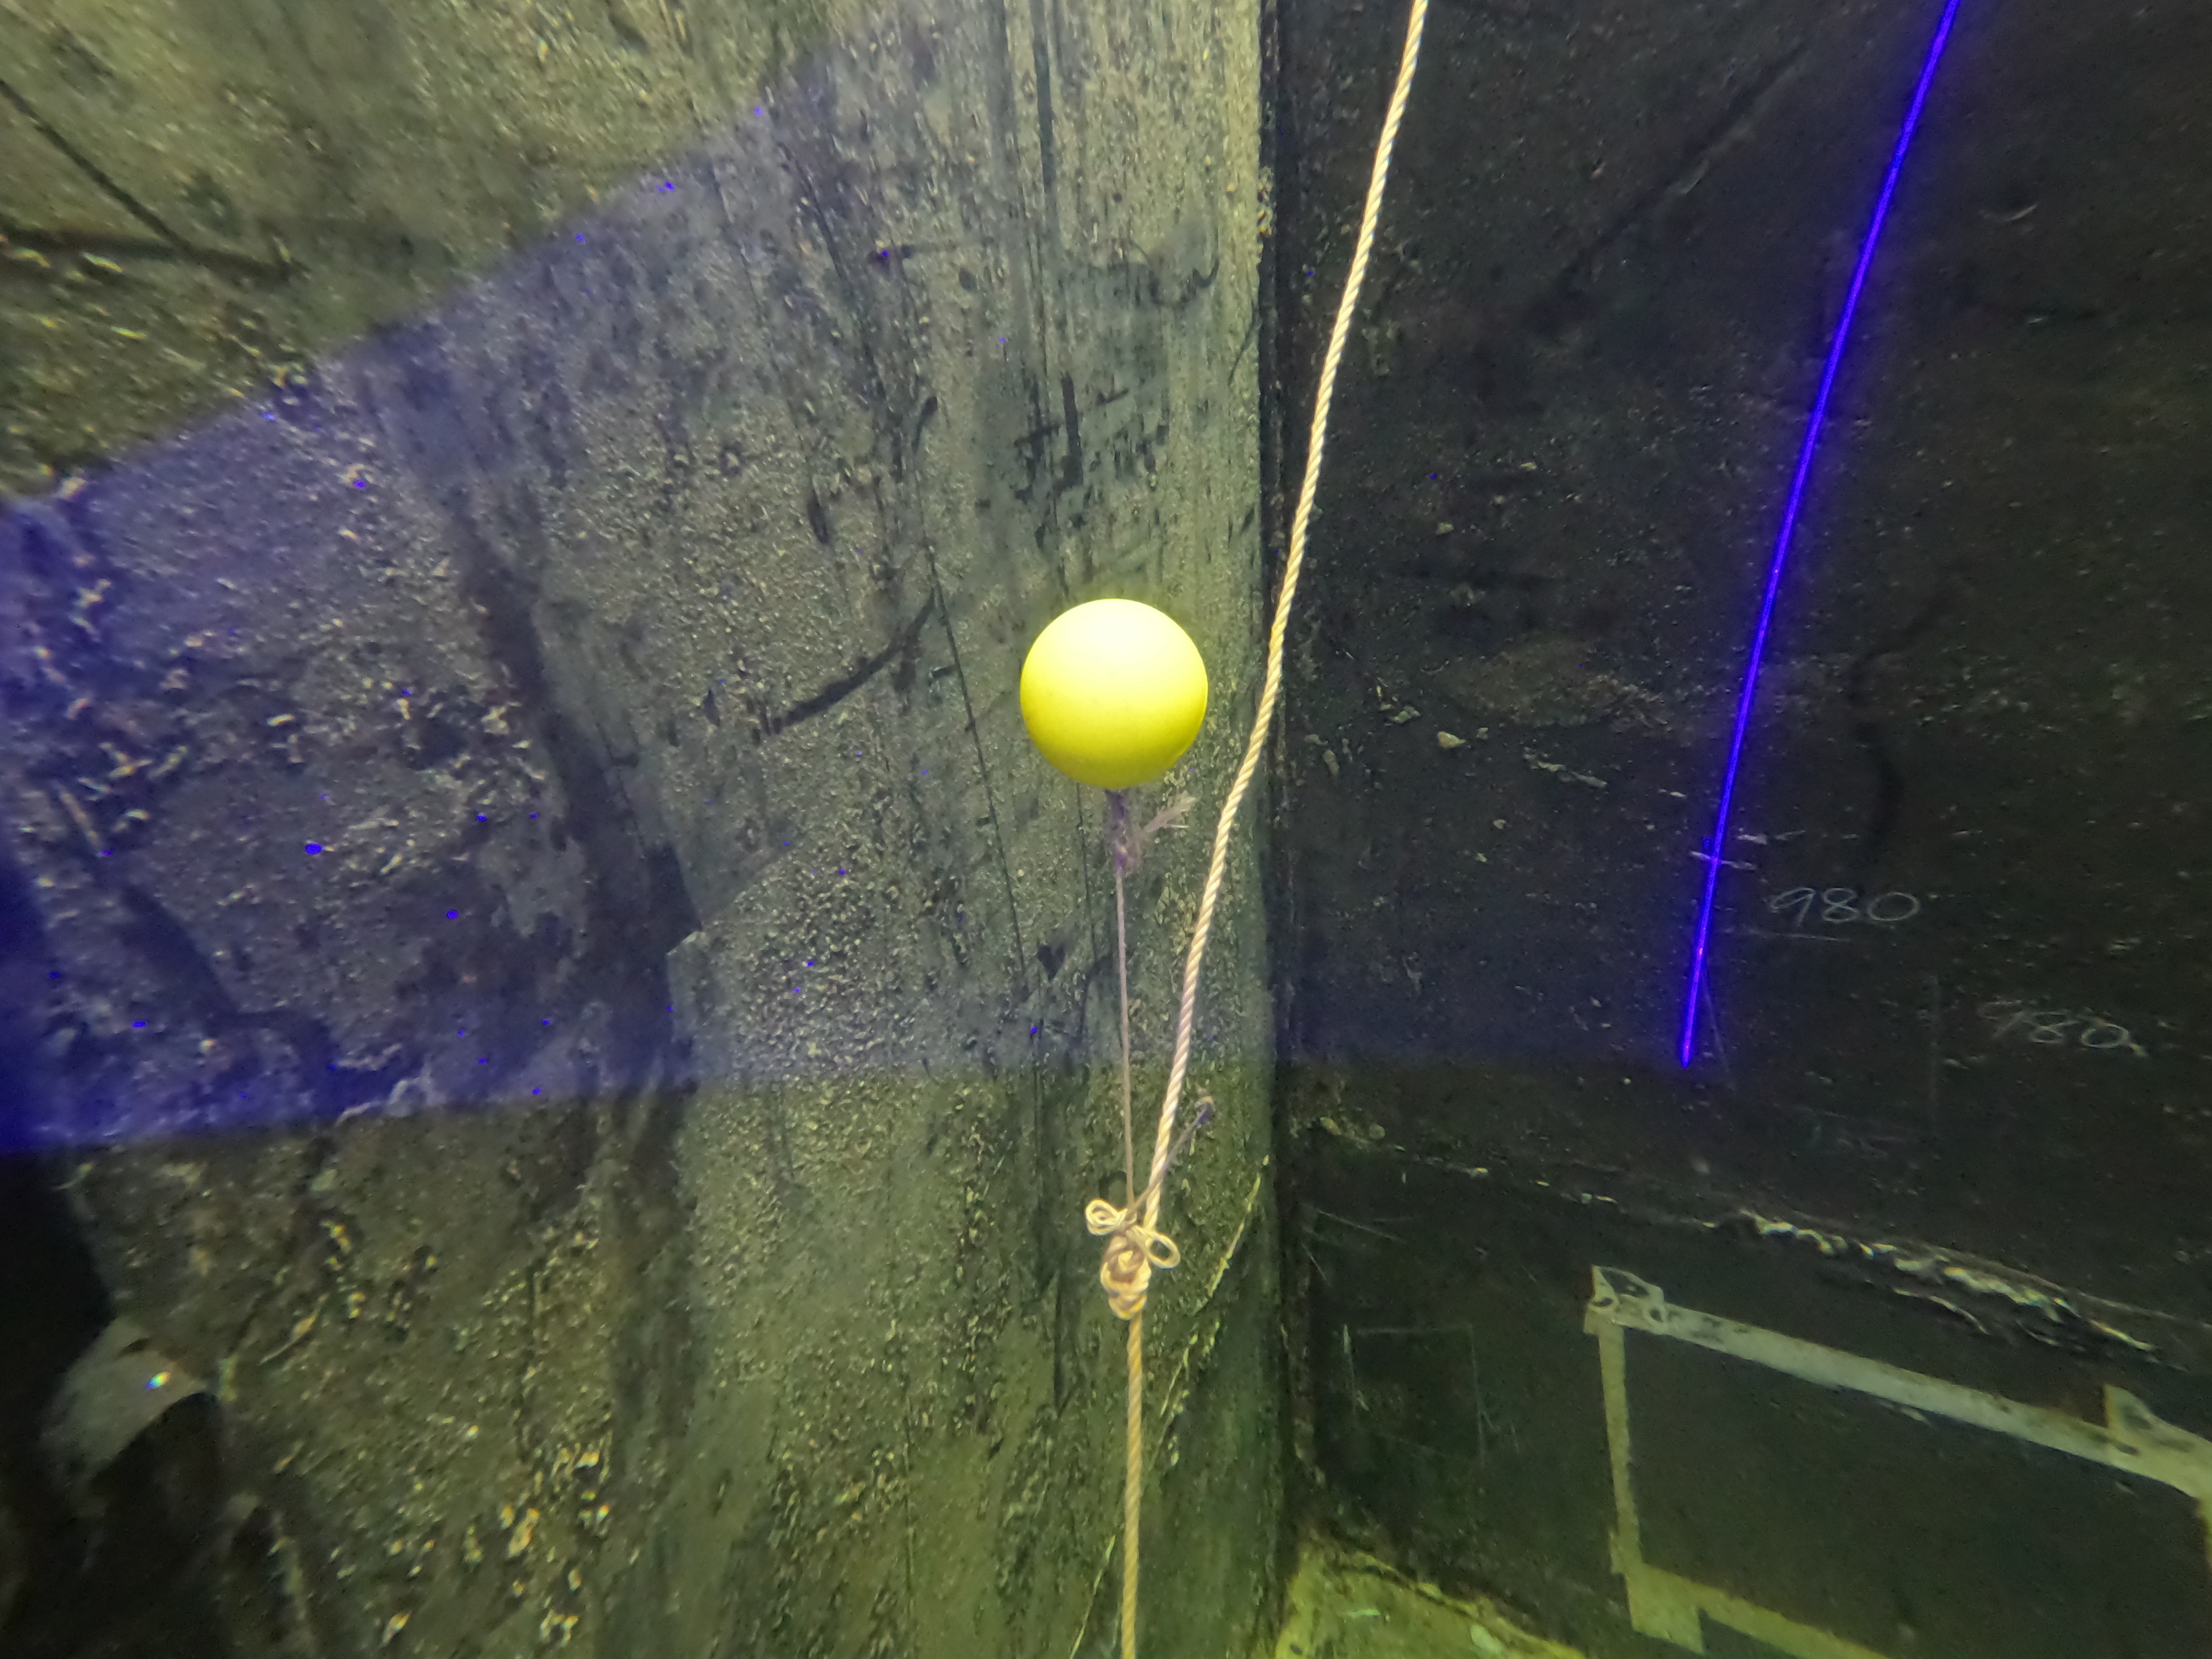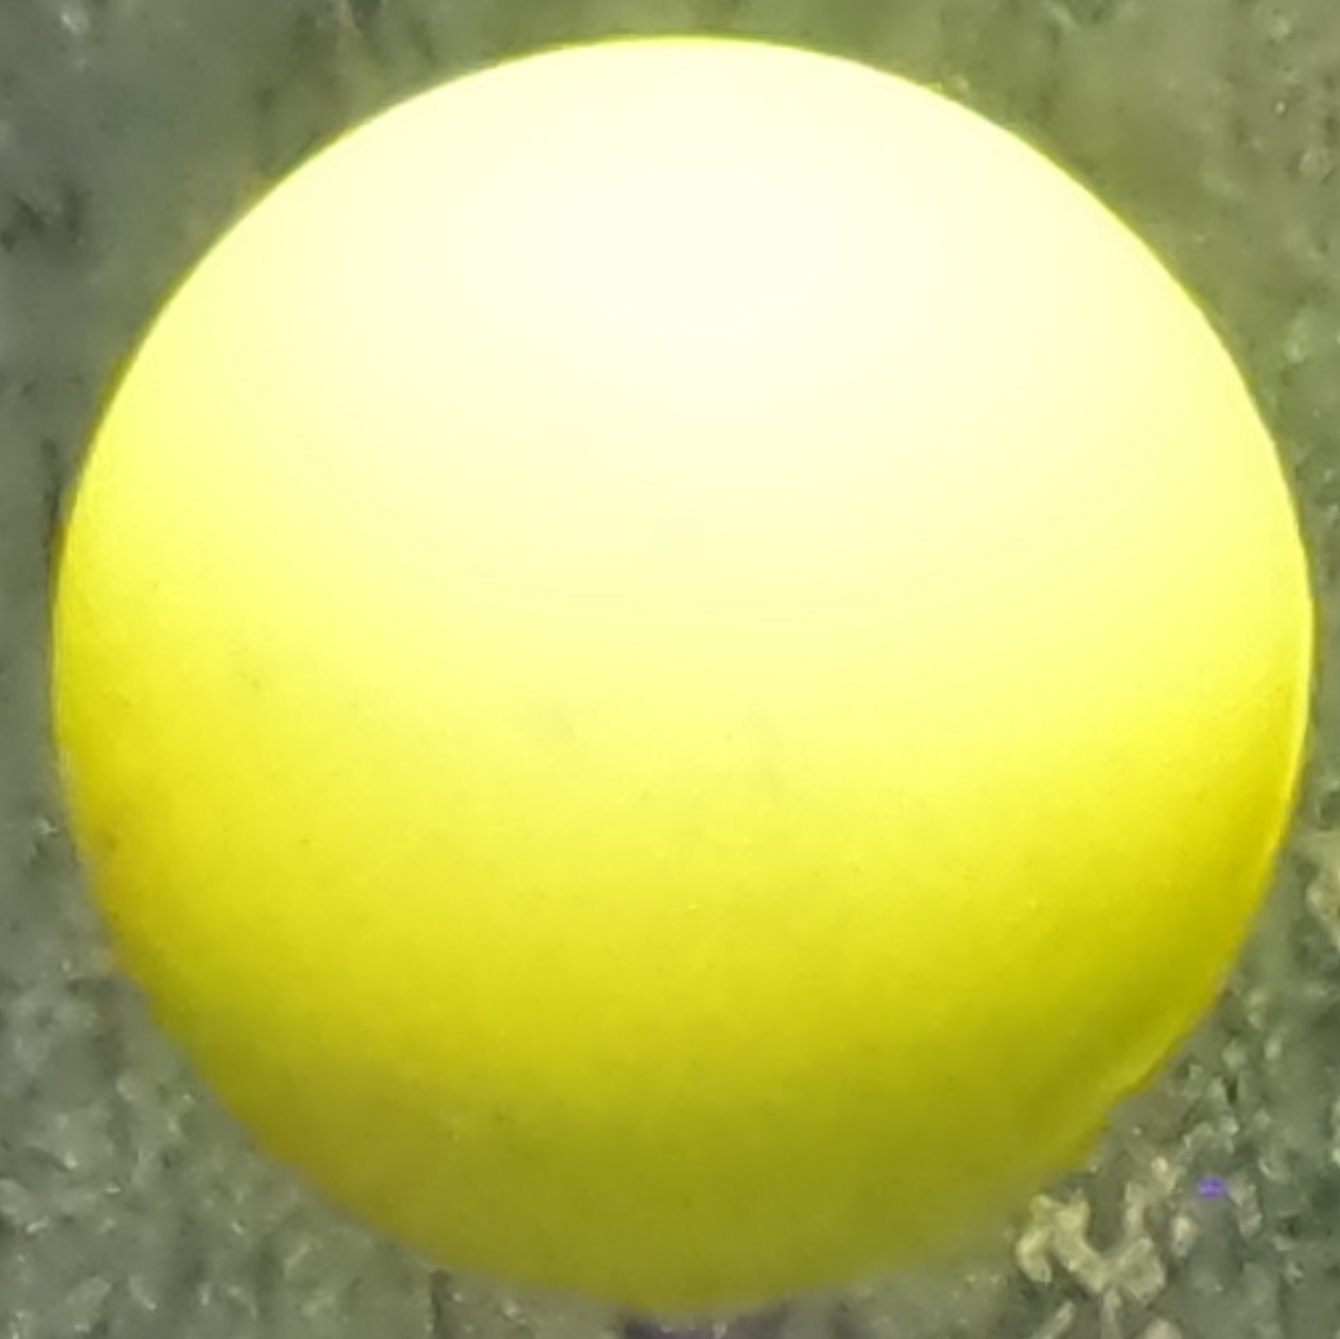

980

980

Supplement: Supplementary file 3383 [file G0034087.pdf › 8/G0034087.pdf]

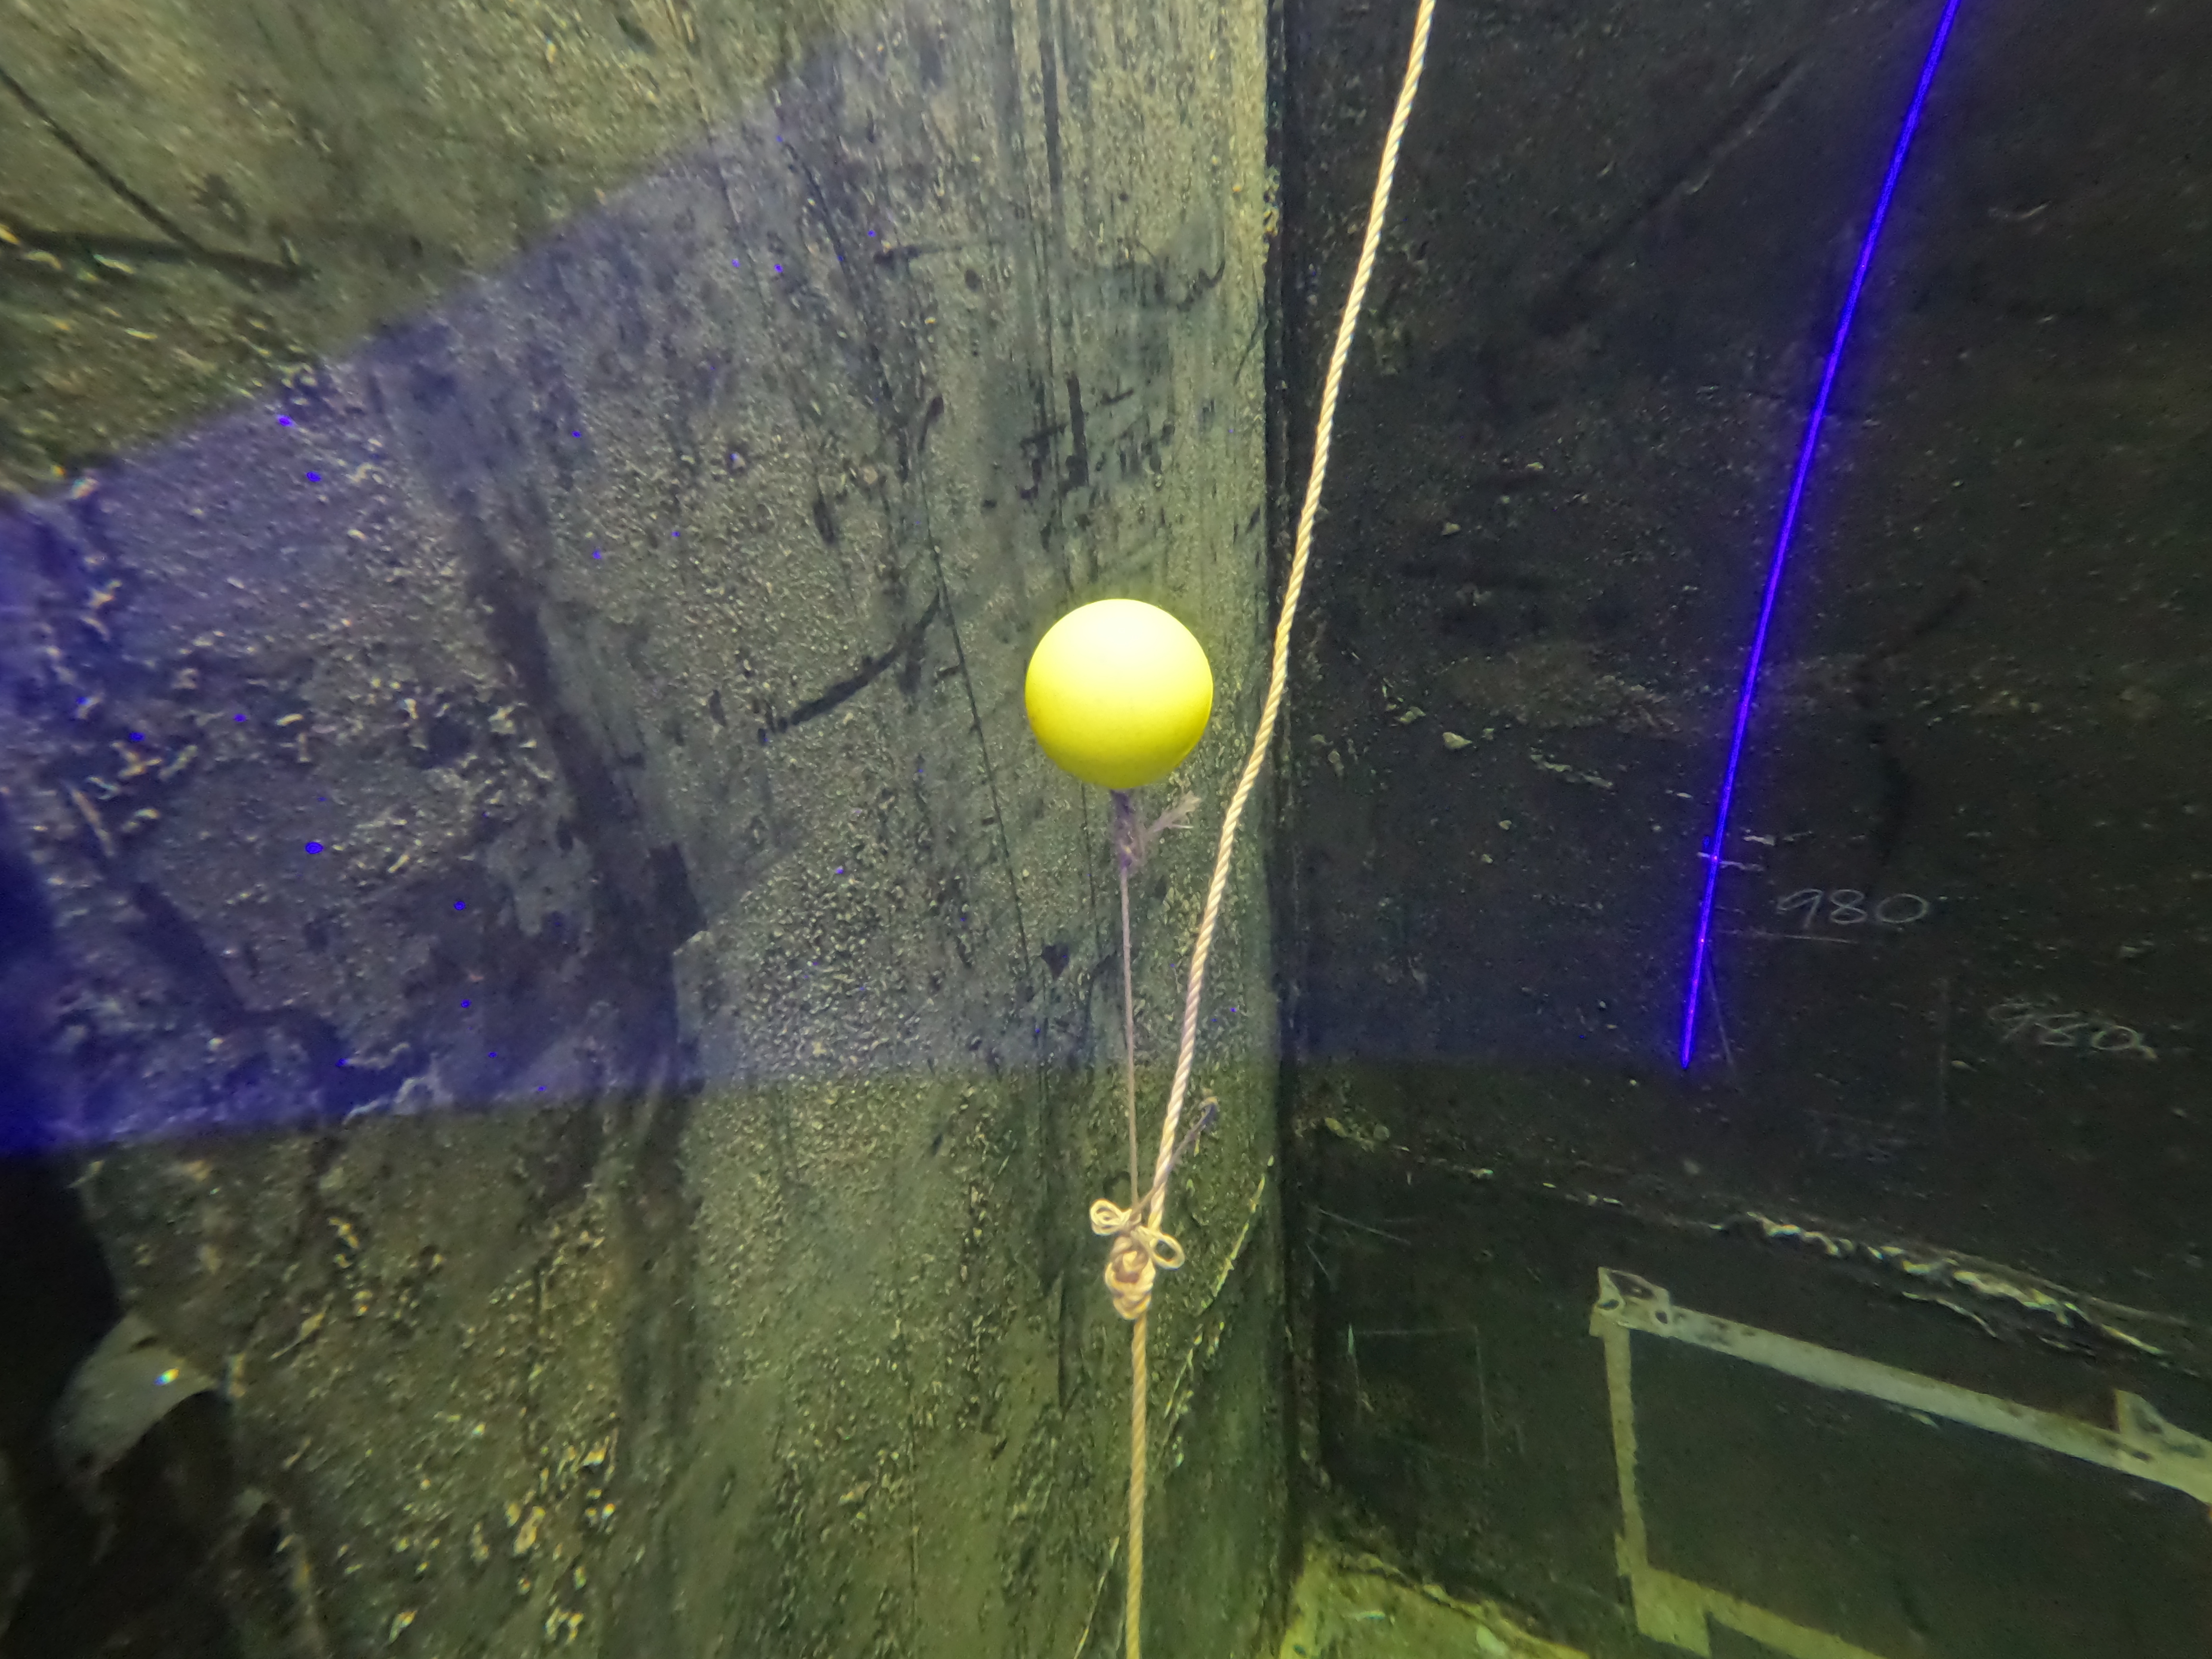

Supplement: Supplementary file 3384 [file G0034088.pdf › 8/G0034088.pdf]

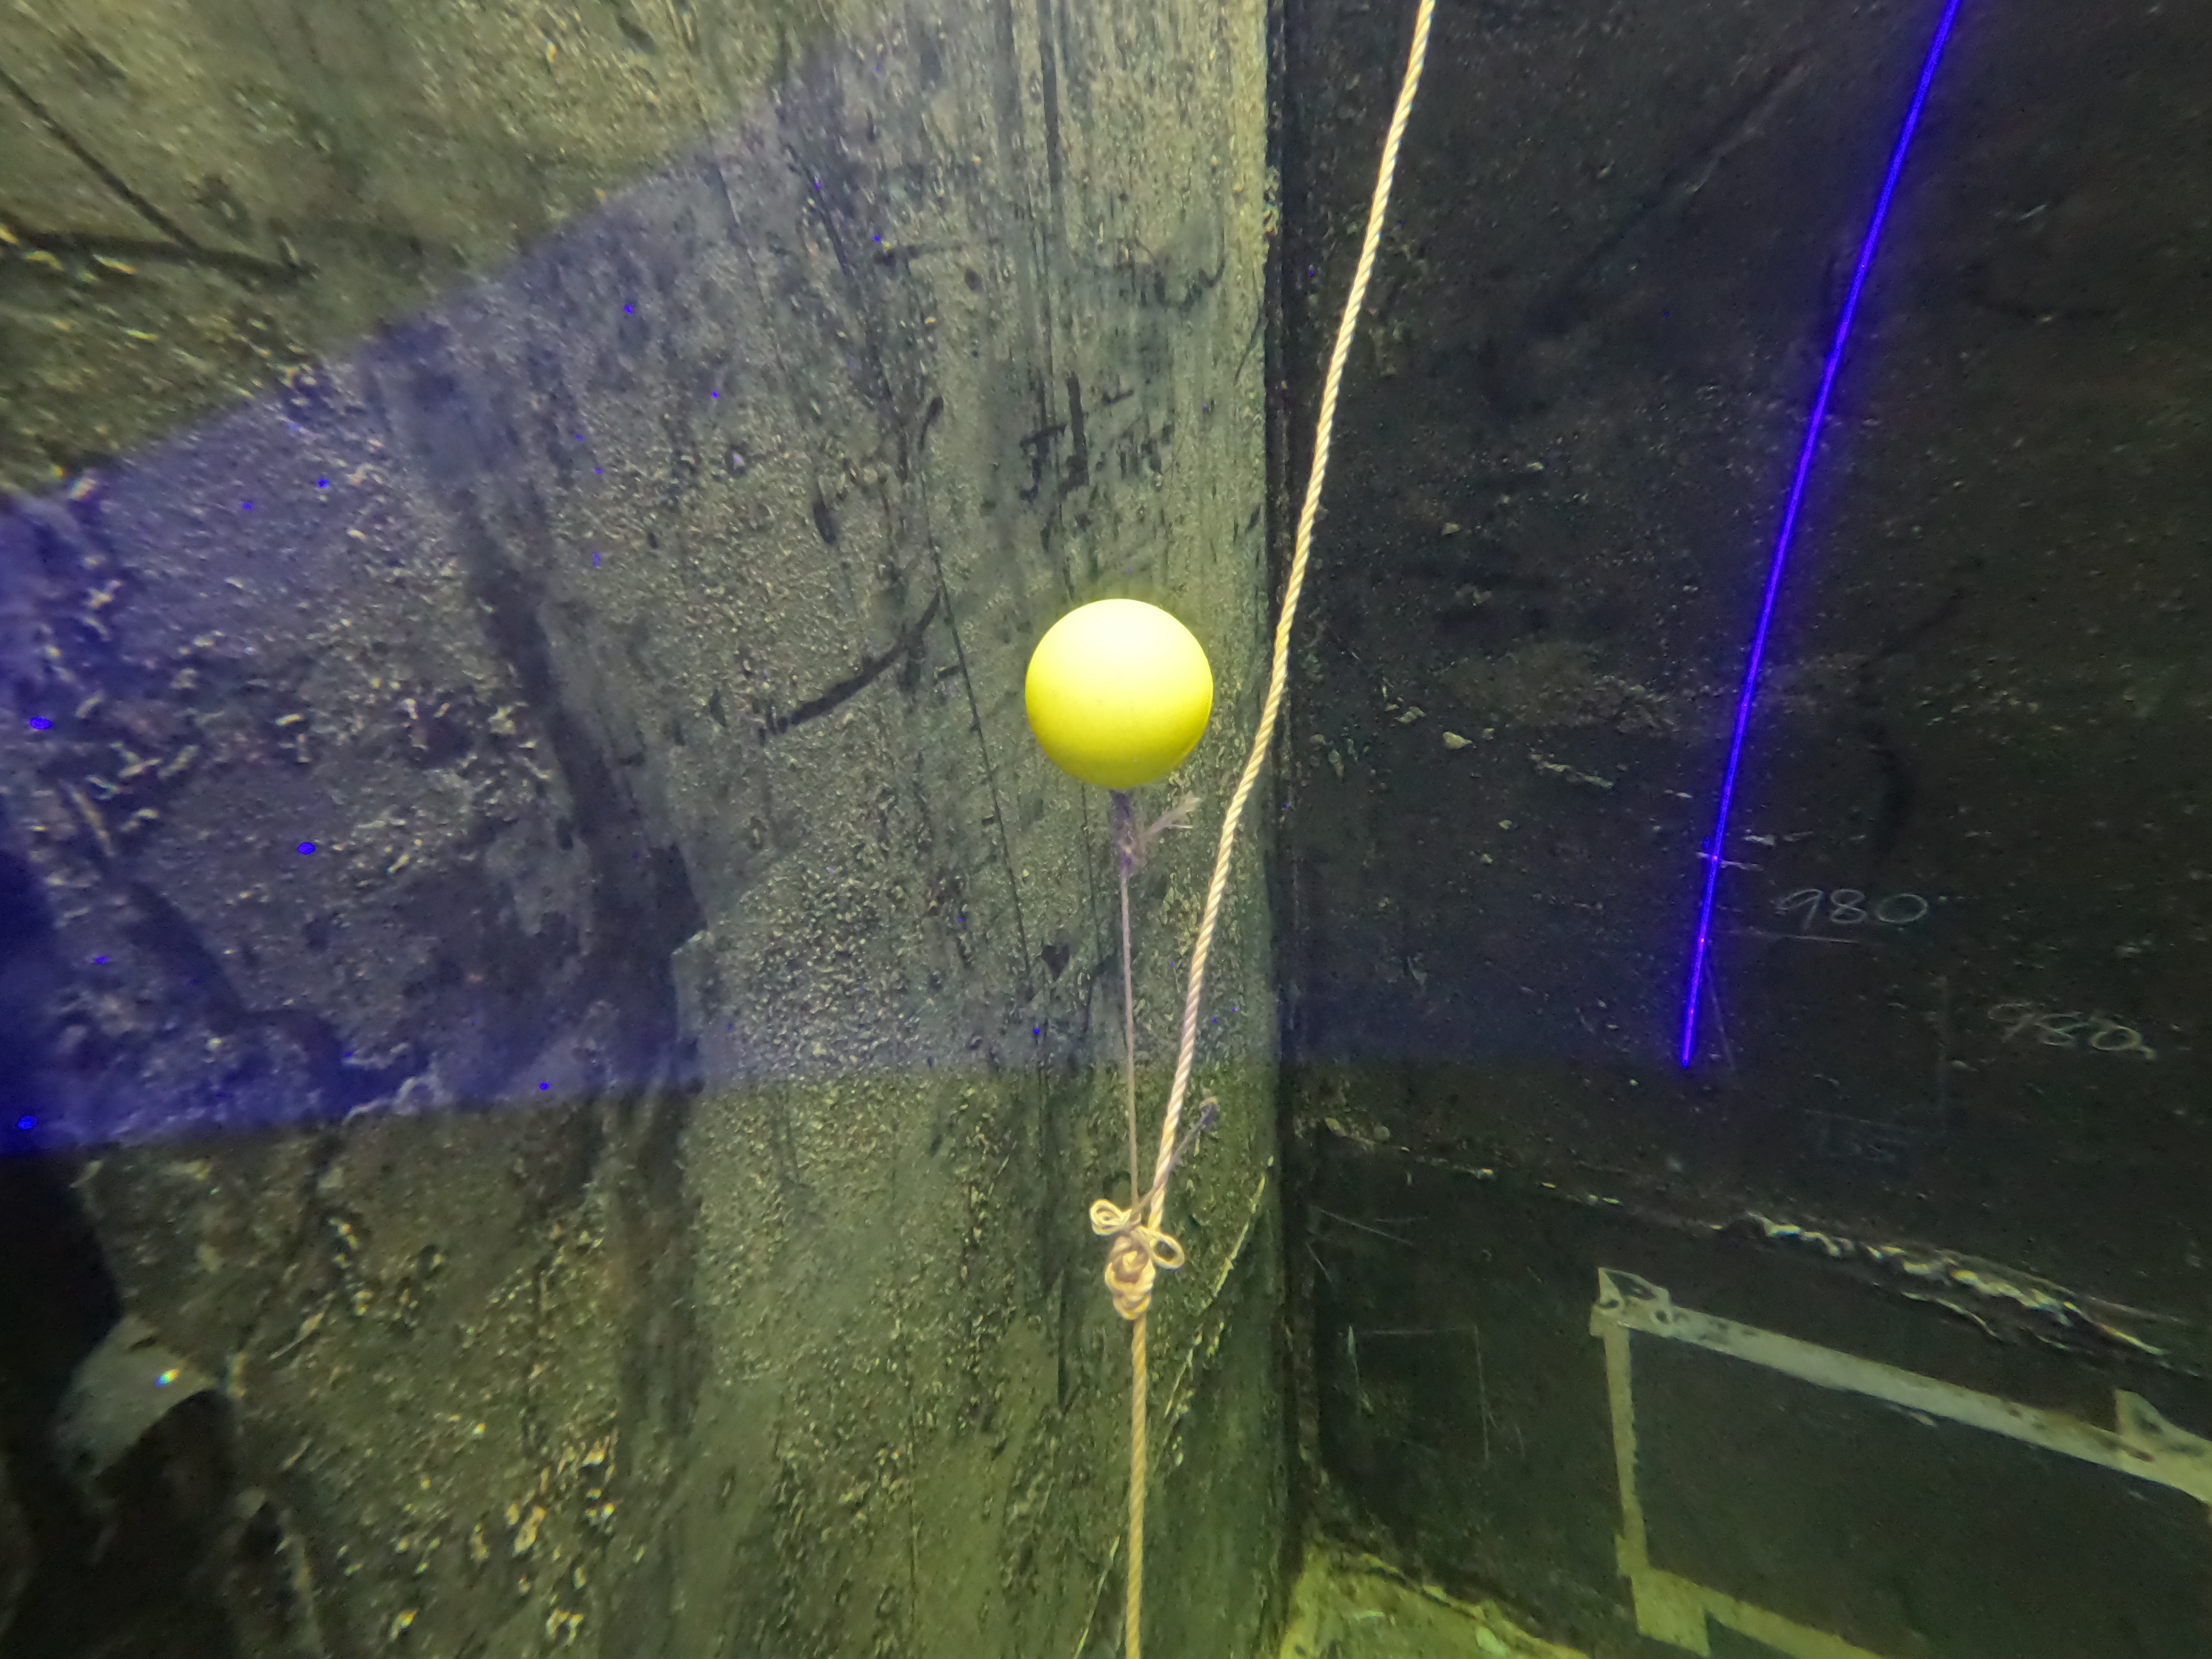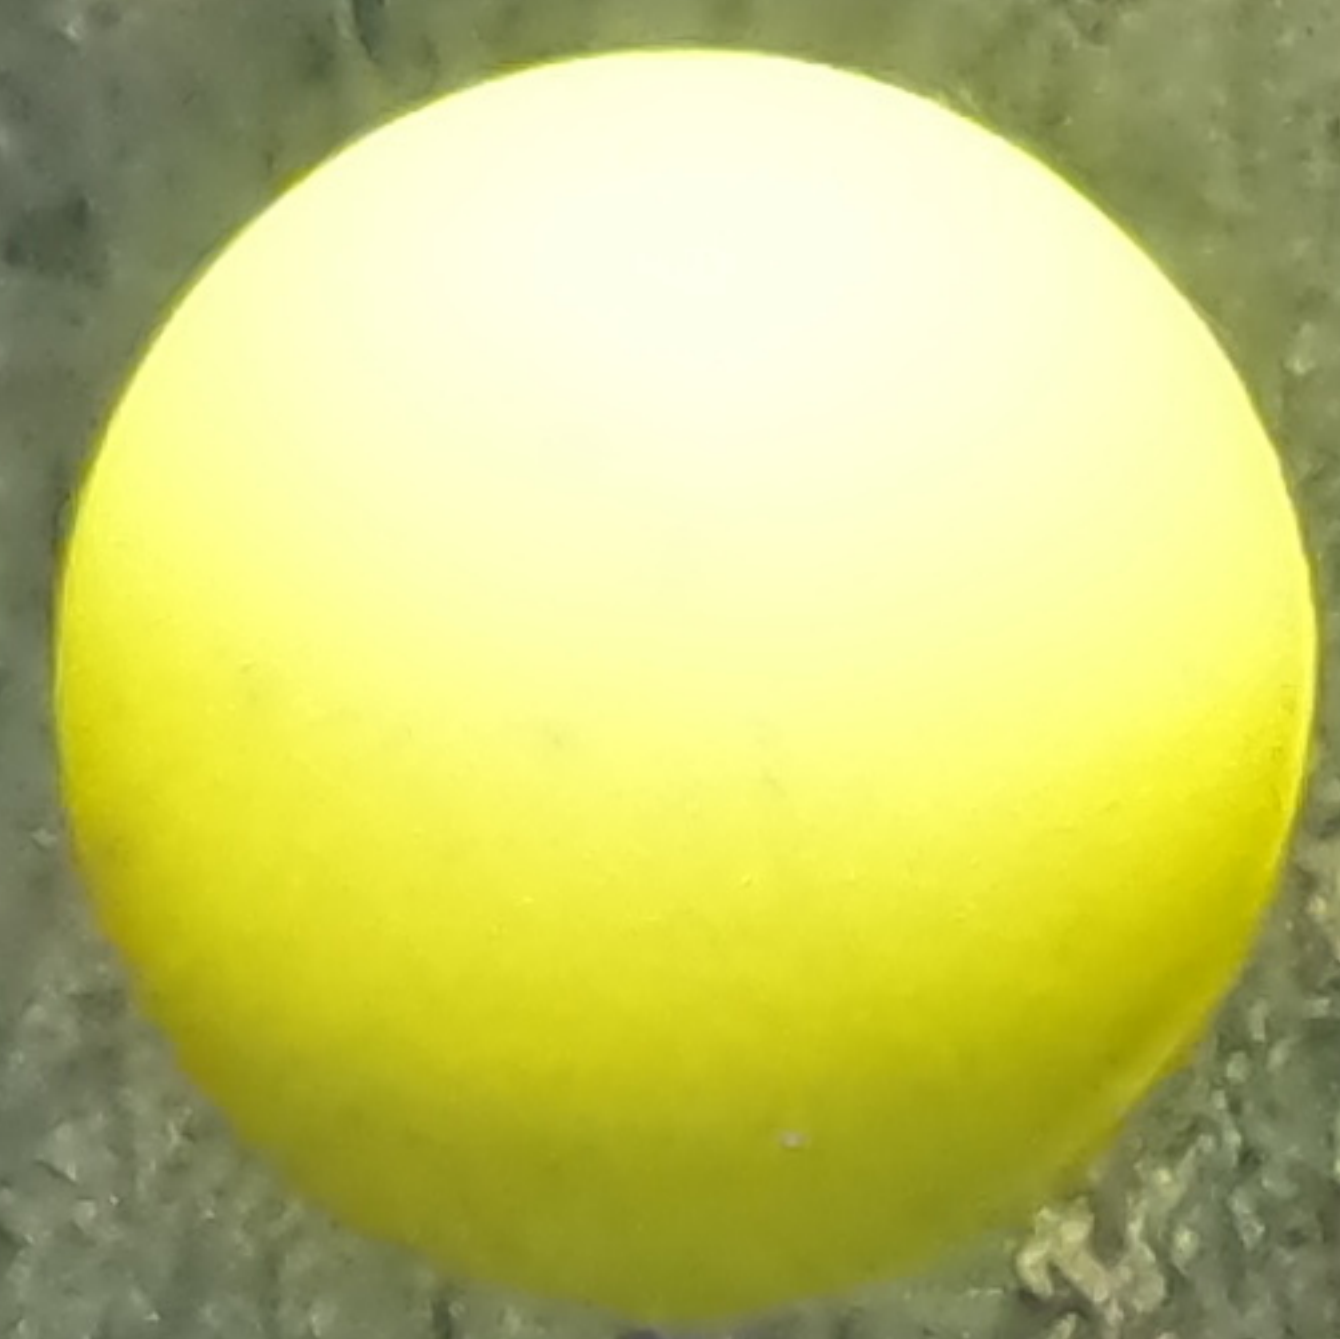

980

980

Supplement: Supplementary file 3385 [file G0034089.pdf › 8/G0034089.pdf]

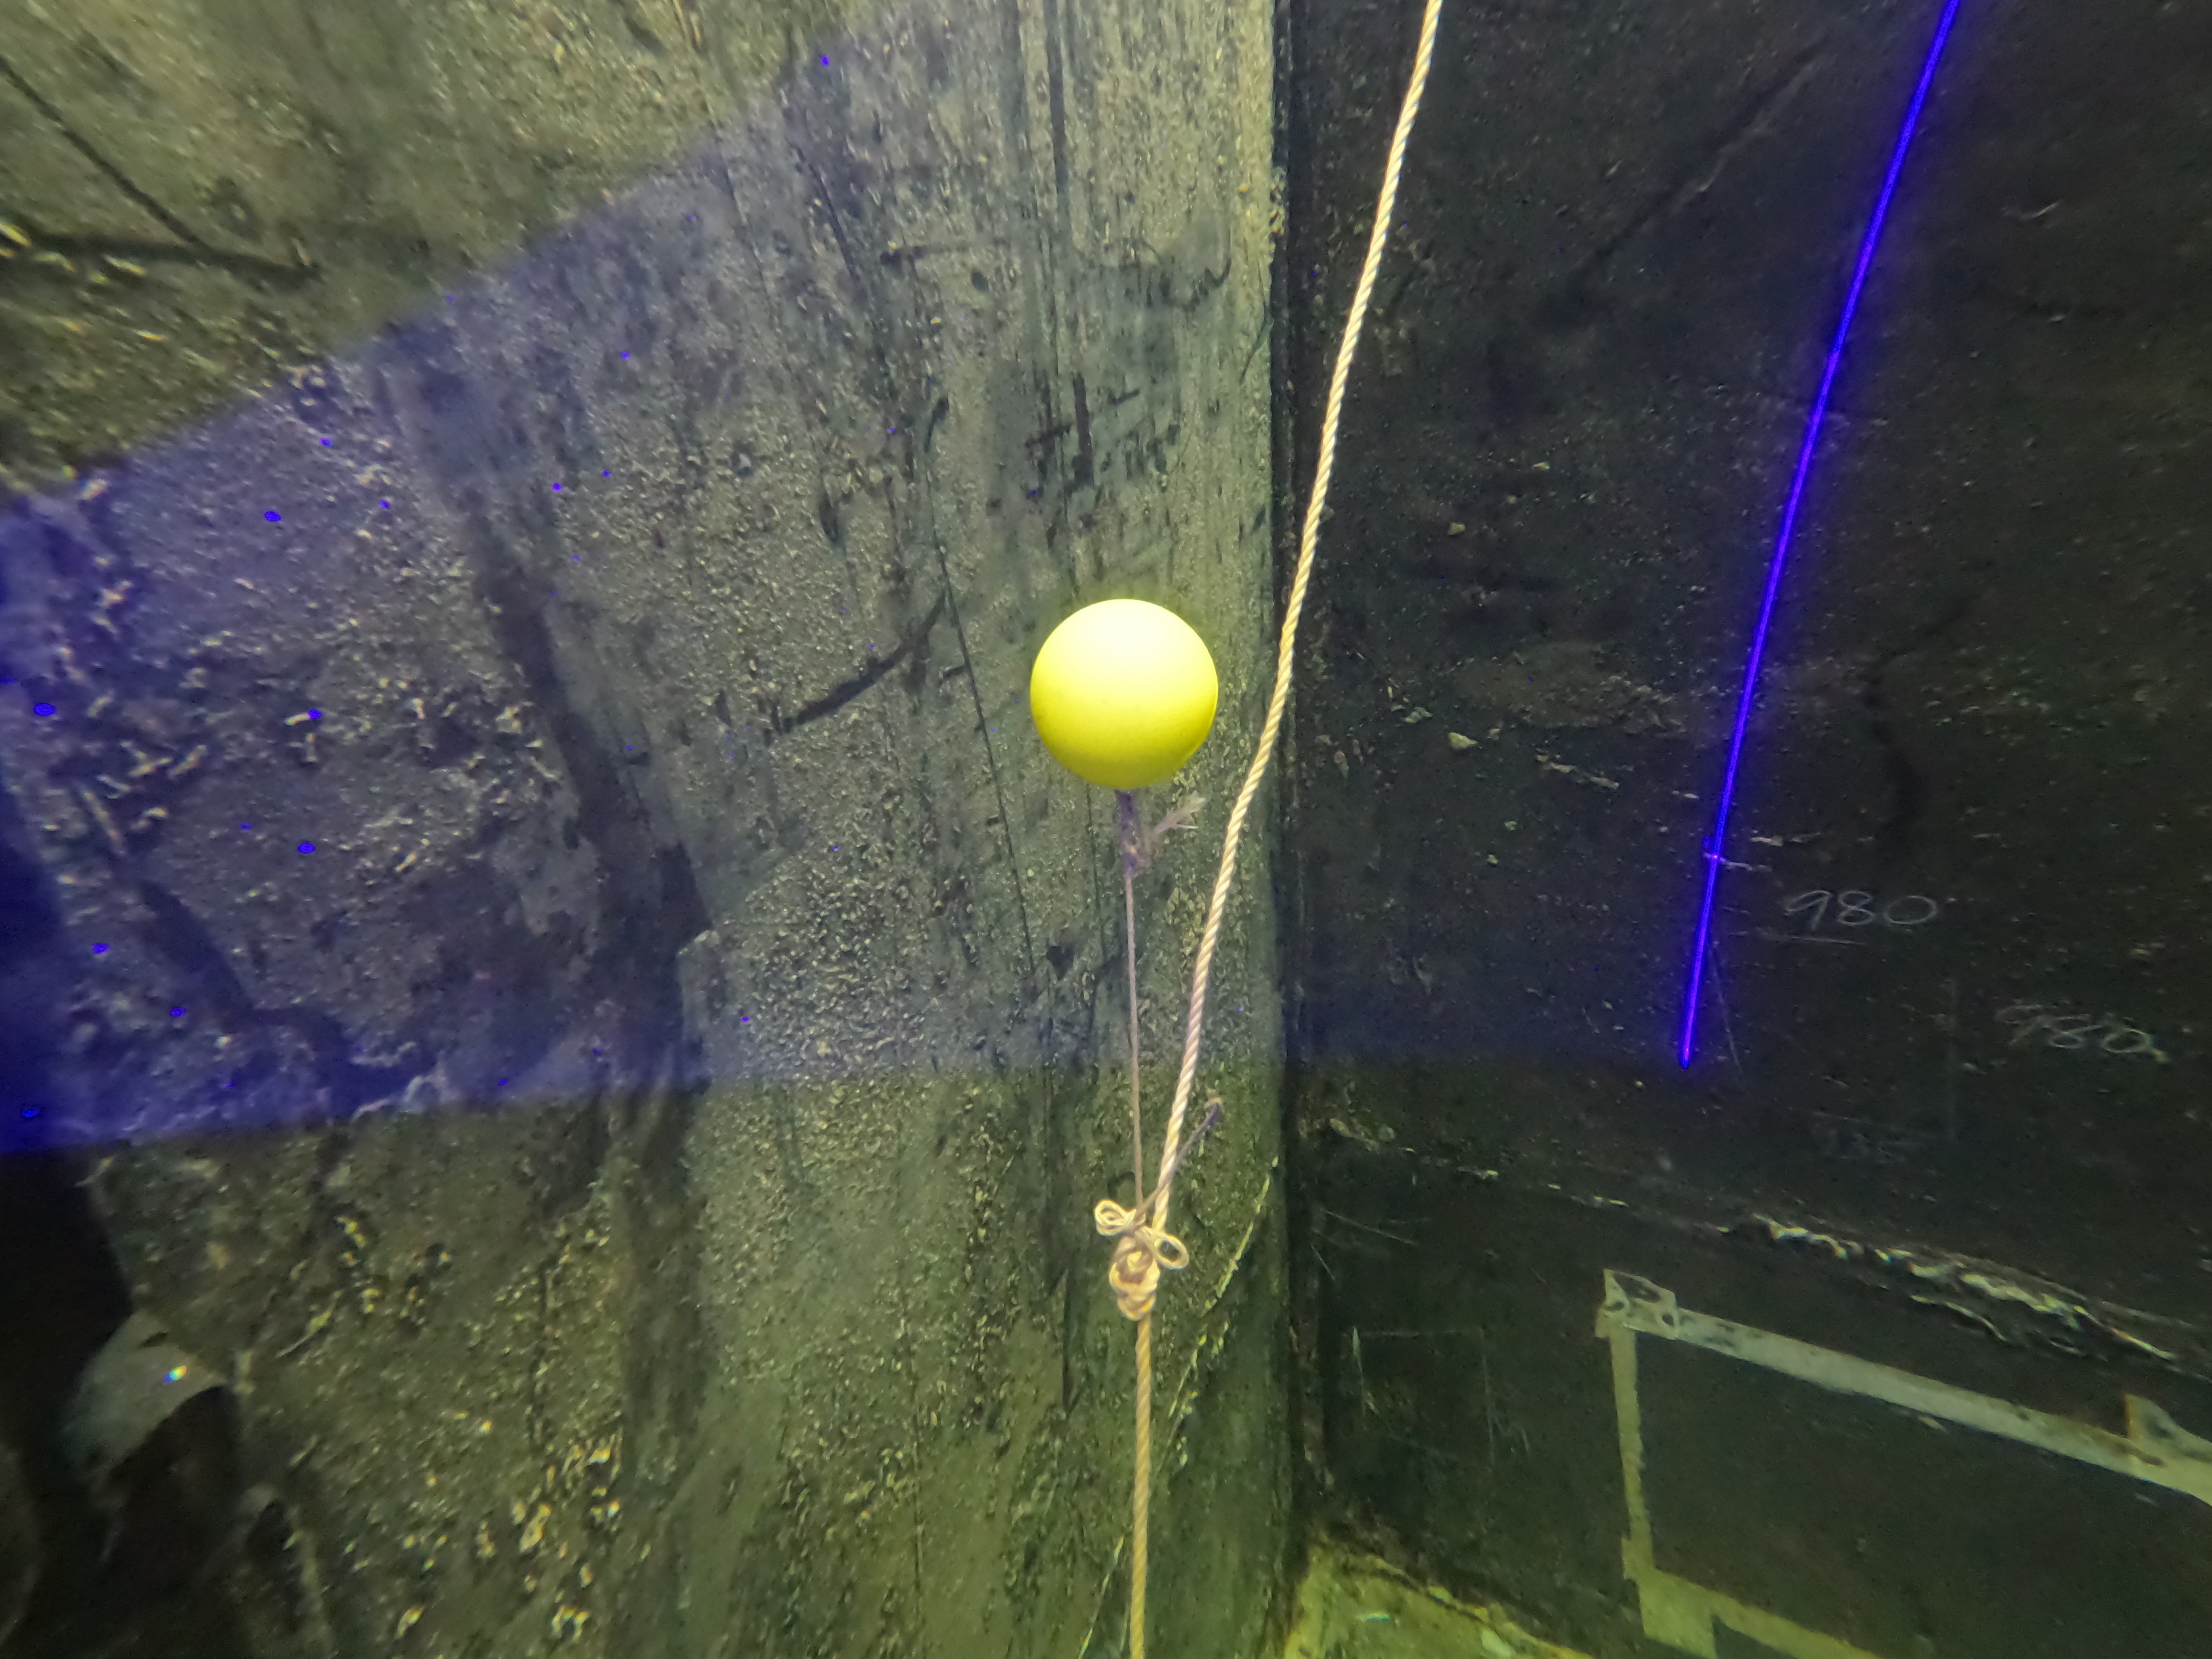

Supplement: Supplementary file 3386 [file G0034090.pdf › 8/G0034090.pdf]

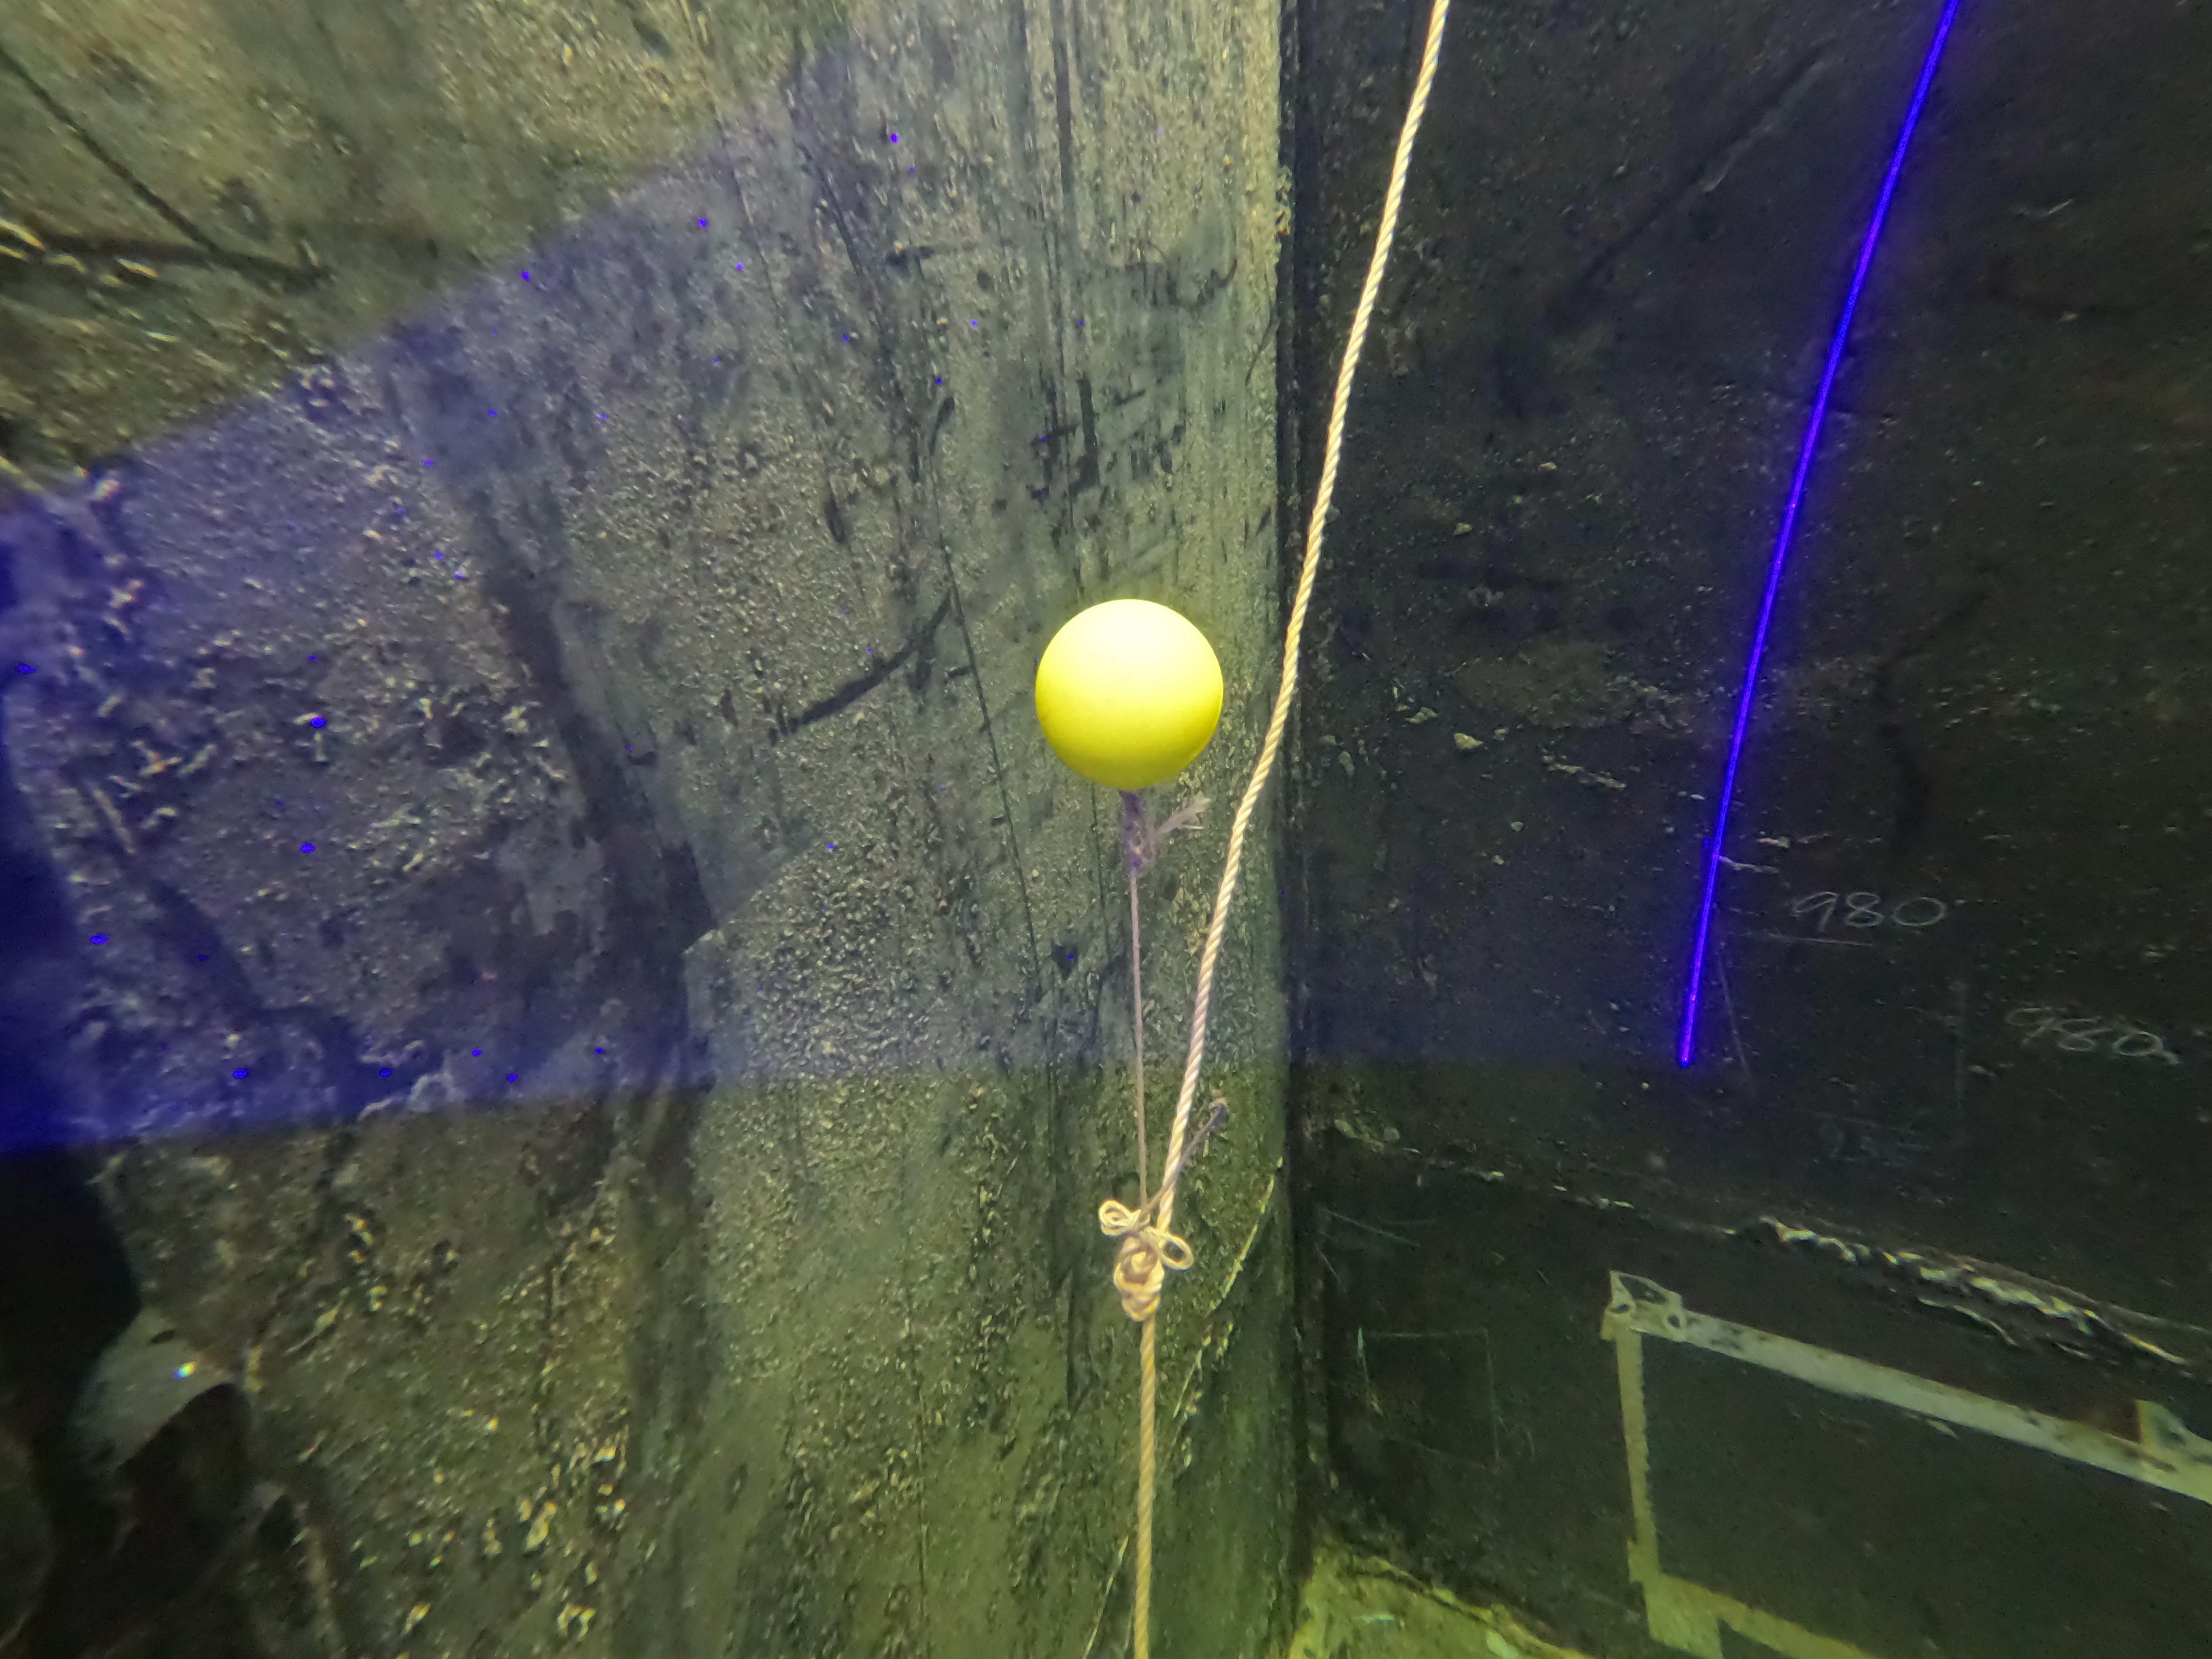

Supplement: Supplementary file 3387 [file G0034091.pdf › 8/G0034091.pdf]

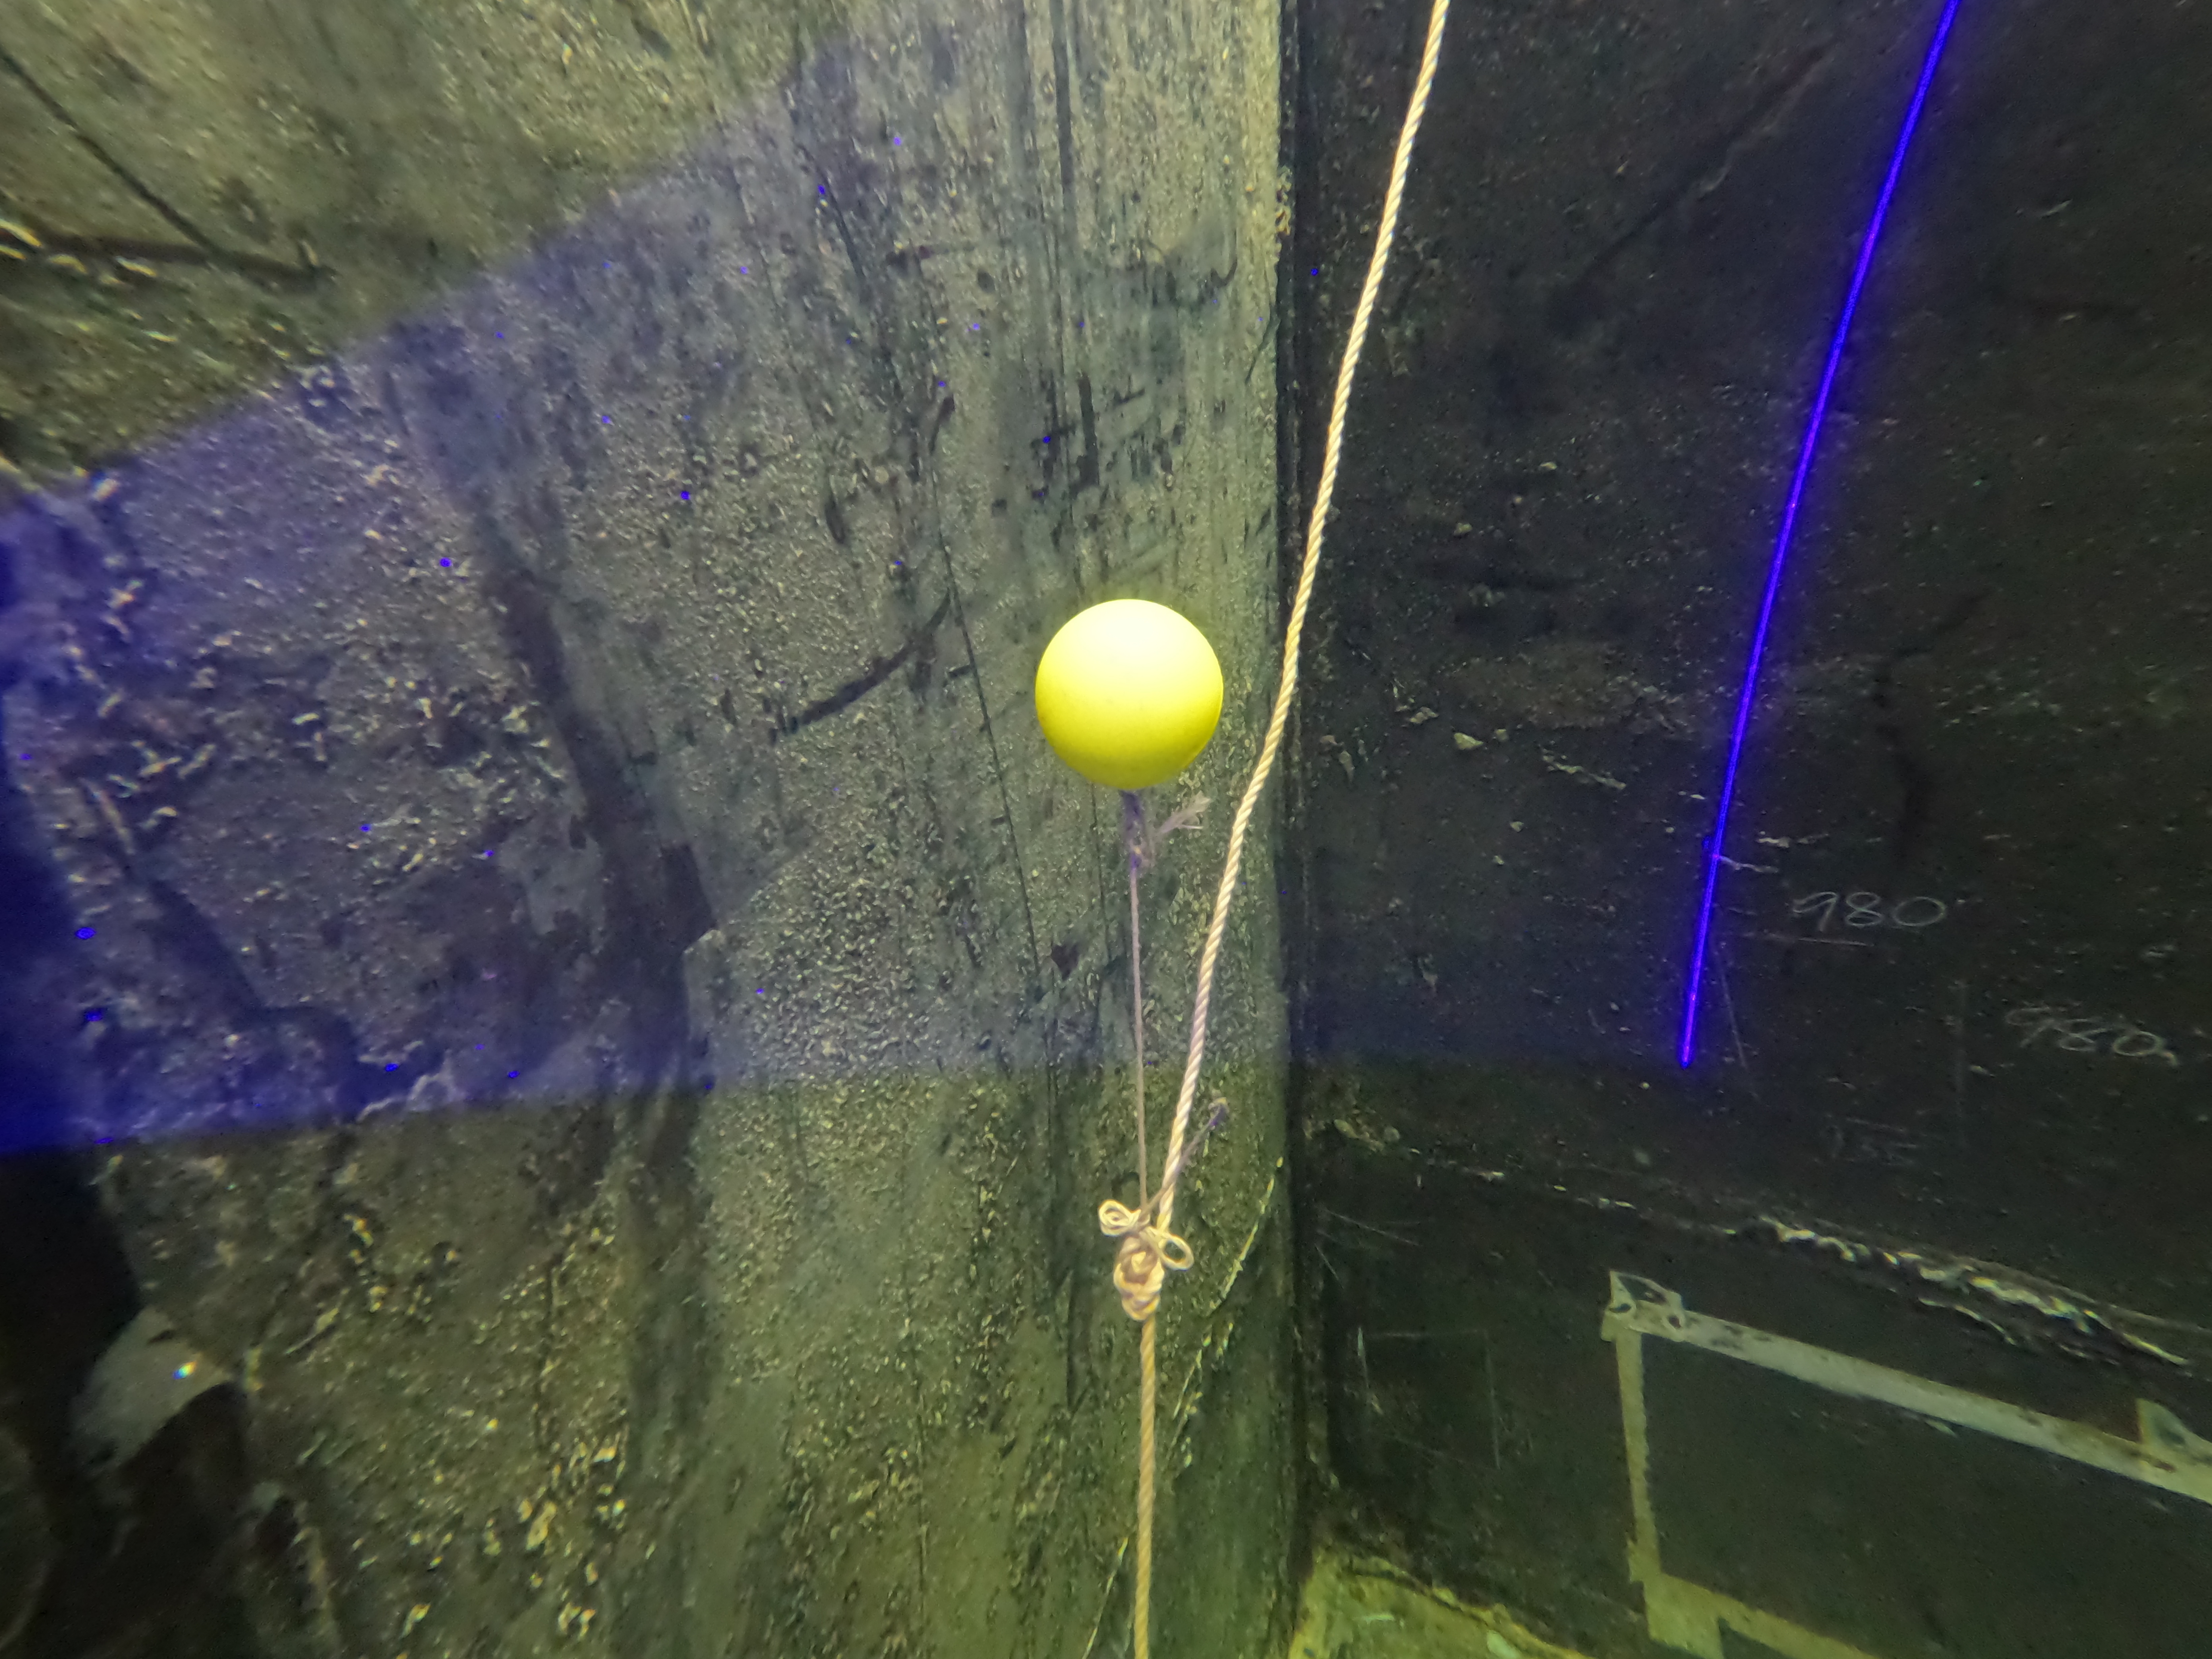

Supplement: Supplementary file 3388 [file G0034092.pdf › 8/G0034092.pdf]

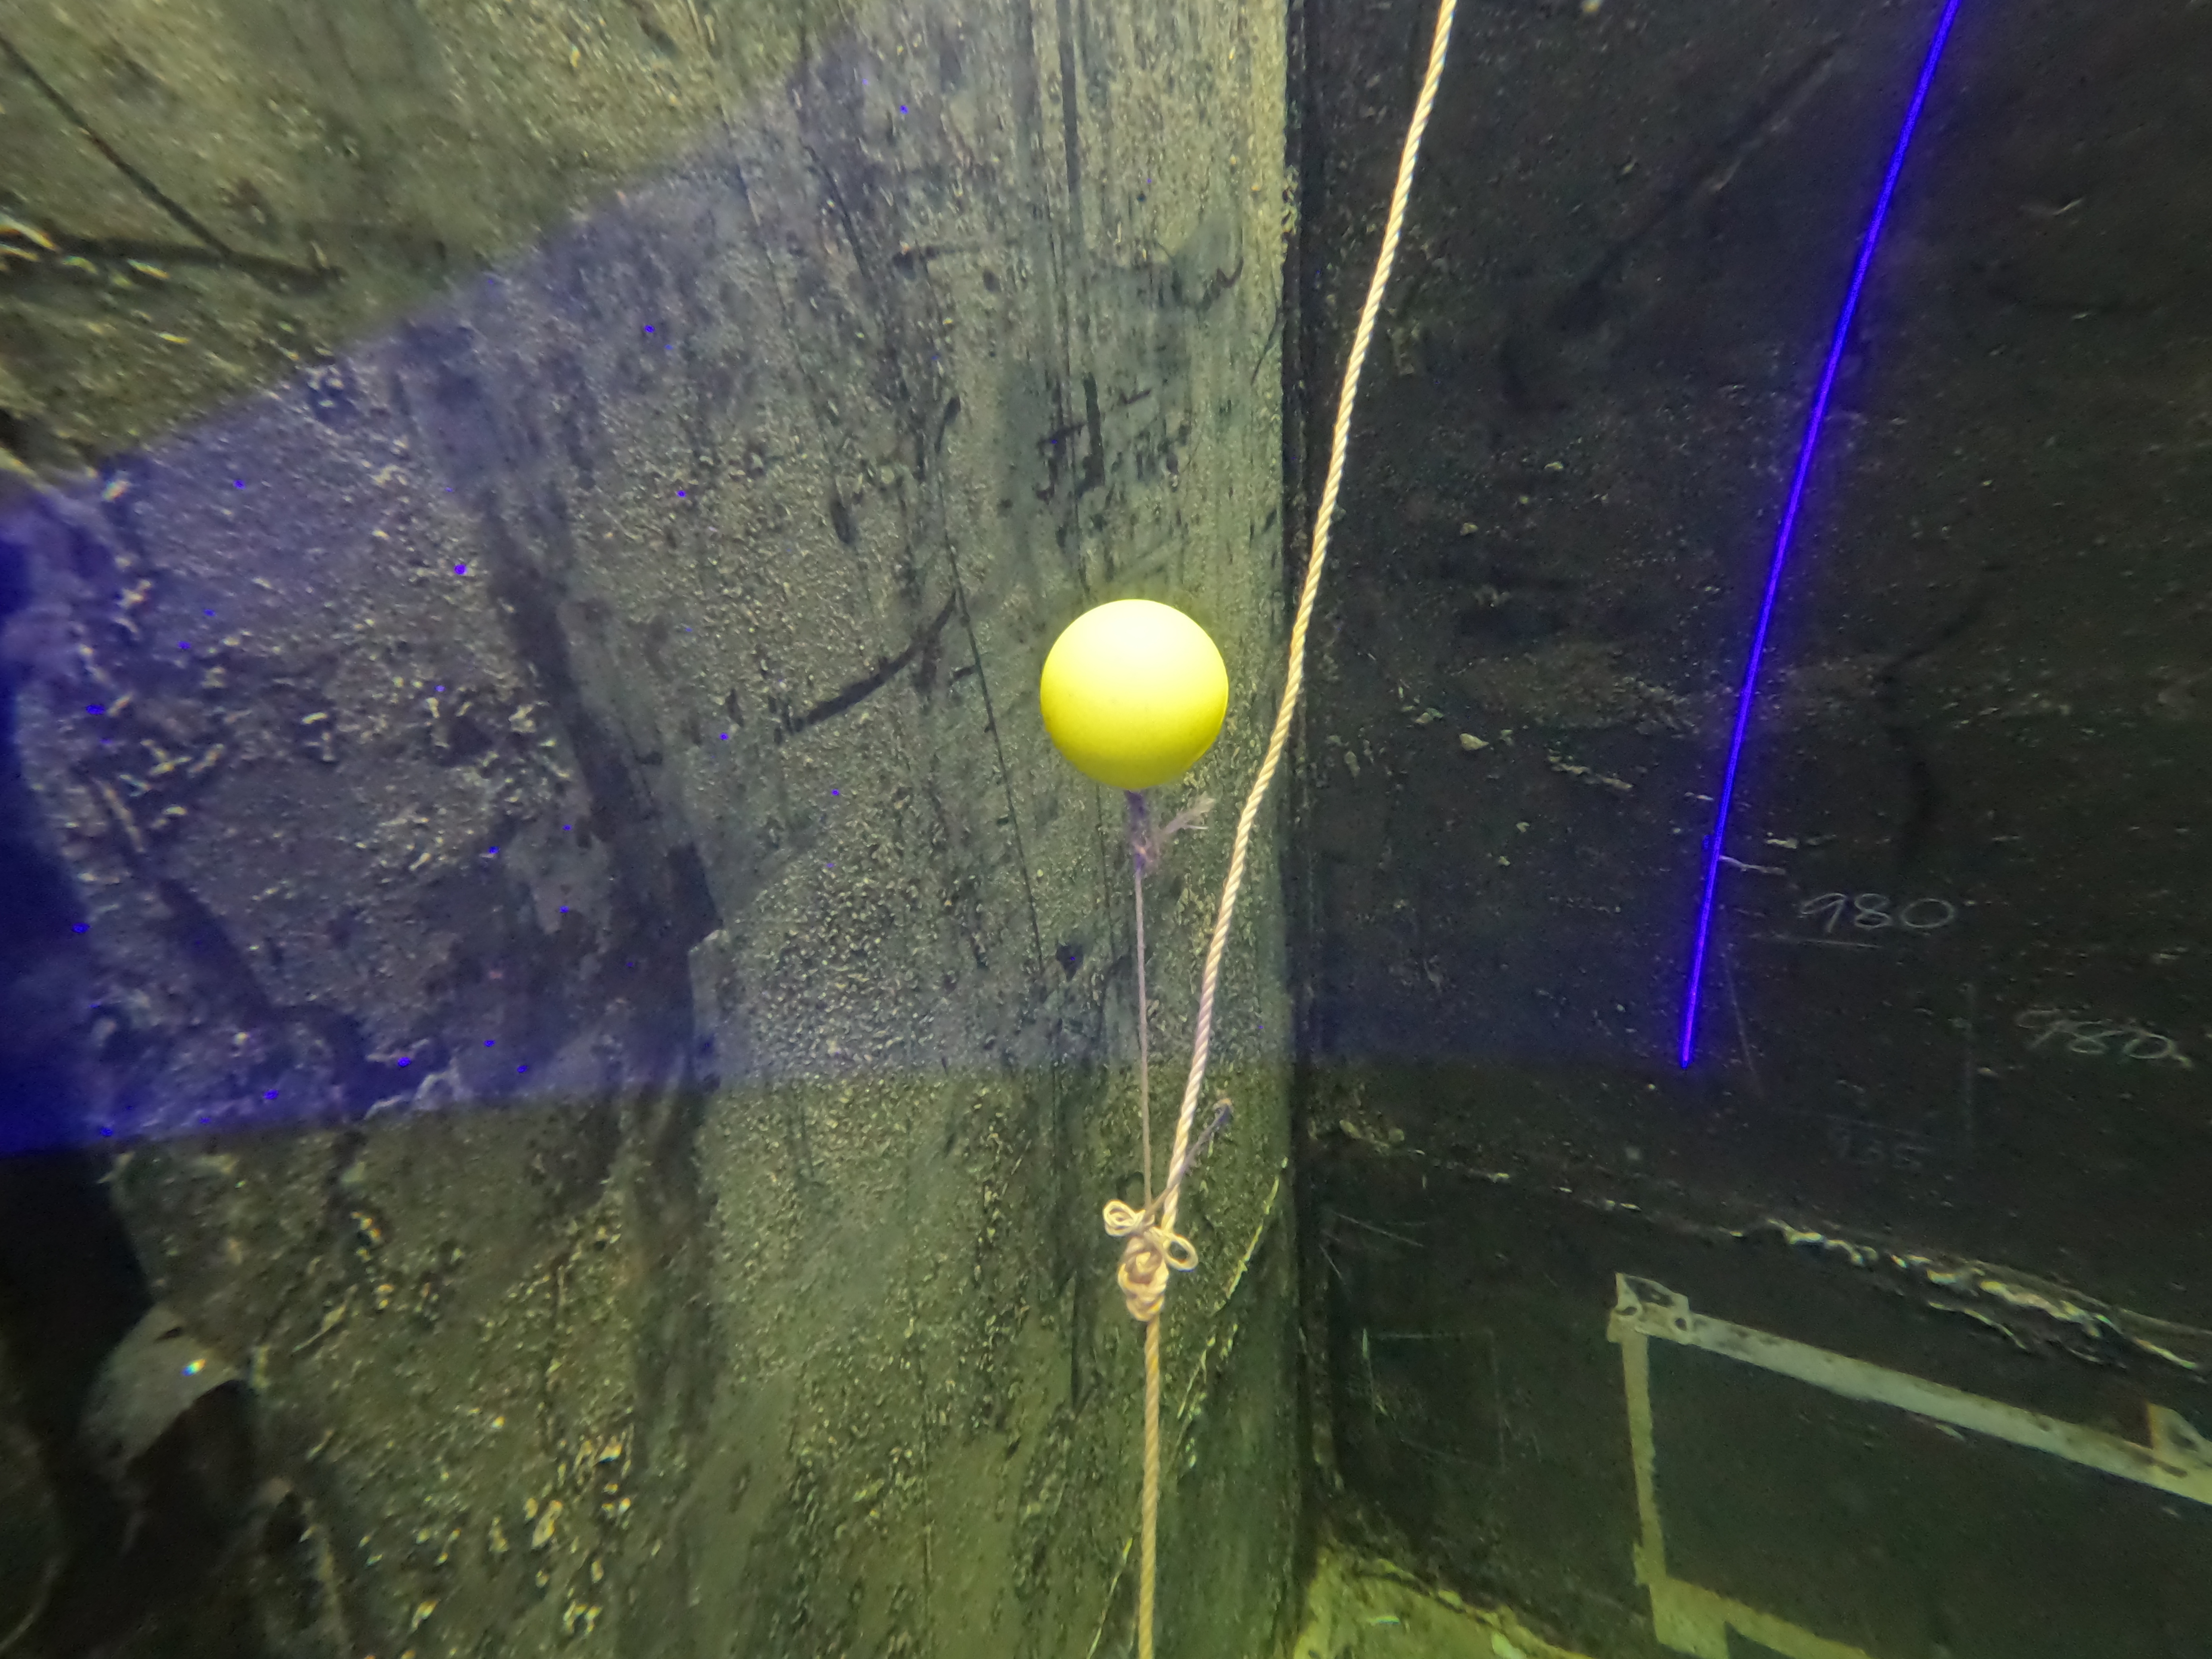

Supplement: Supplementary file 3389 [file G0034093.pdf › 8/G0034093.pdf]

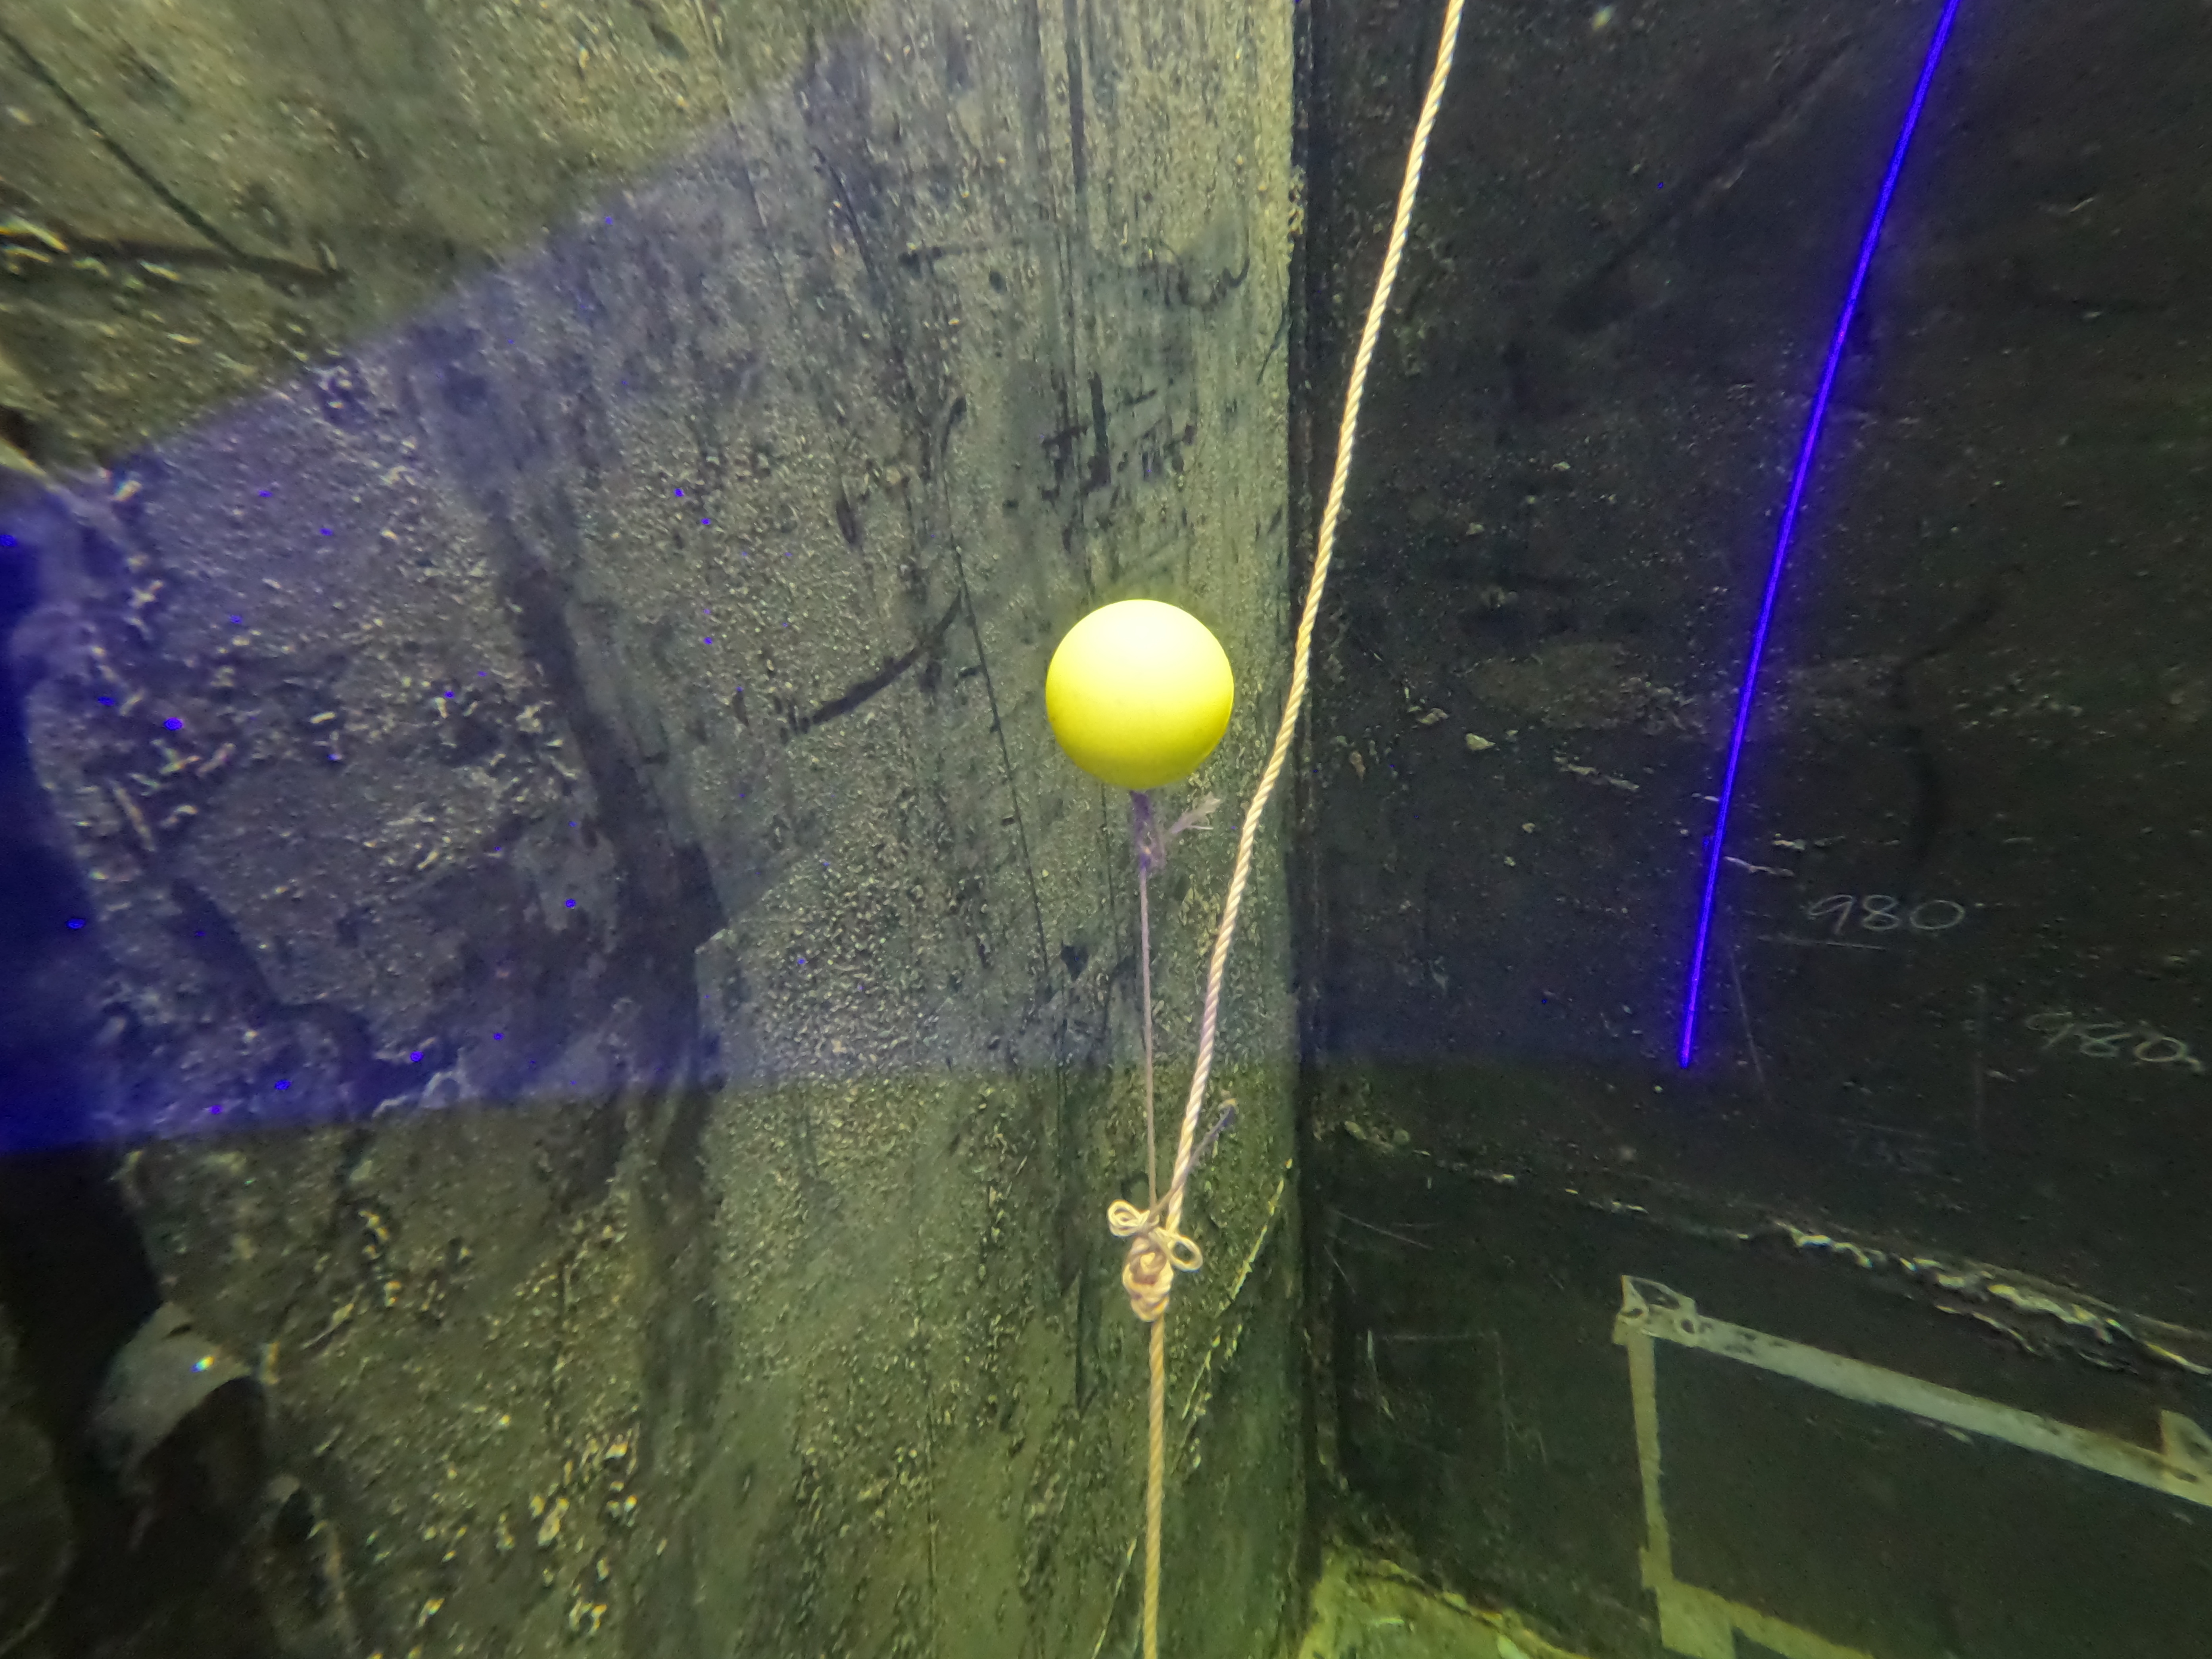

Supplement: Supplementary file 3390 [file G0034094.pdf › 8/G0034094.pdf]
