# Supplementary figures and images for: 3D reconstruction of shallow sea environment using direct system calibration and faint laser line extraction (part 34 of 35)
Source: Research Square preprint supplement (doi:10.21203/rs.3.rs-5262658/v1), 2024-12-02

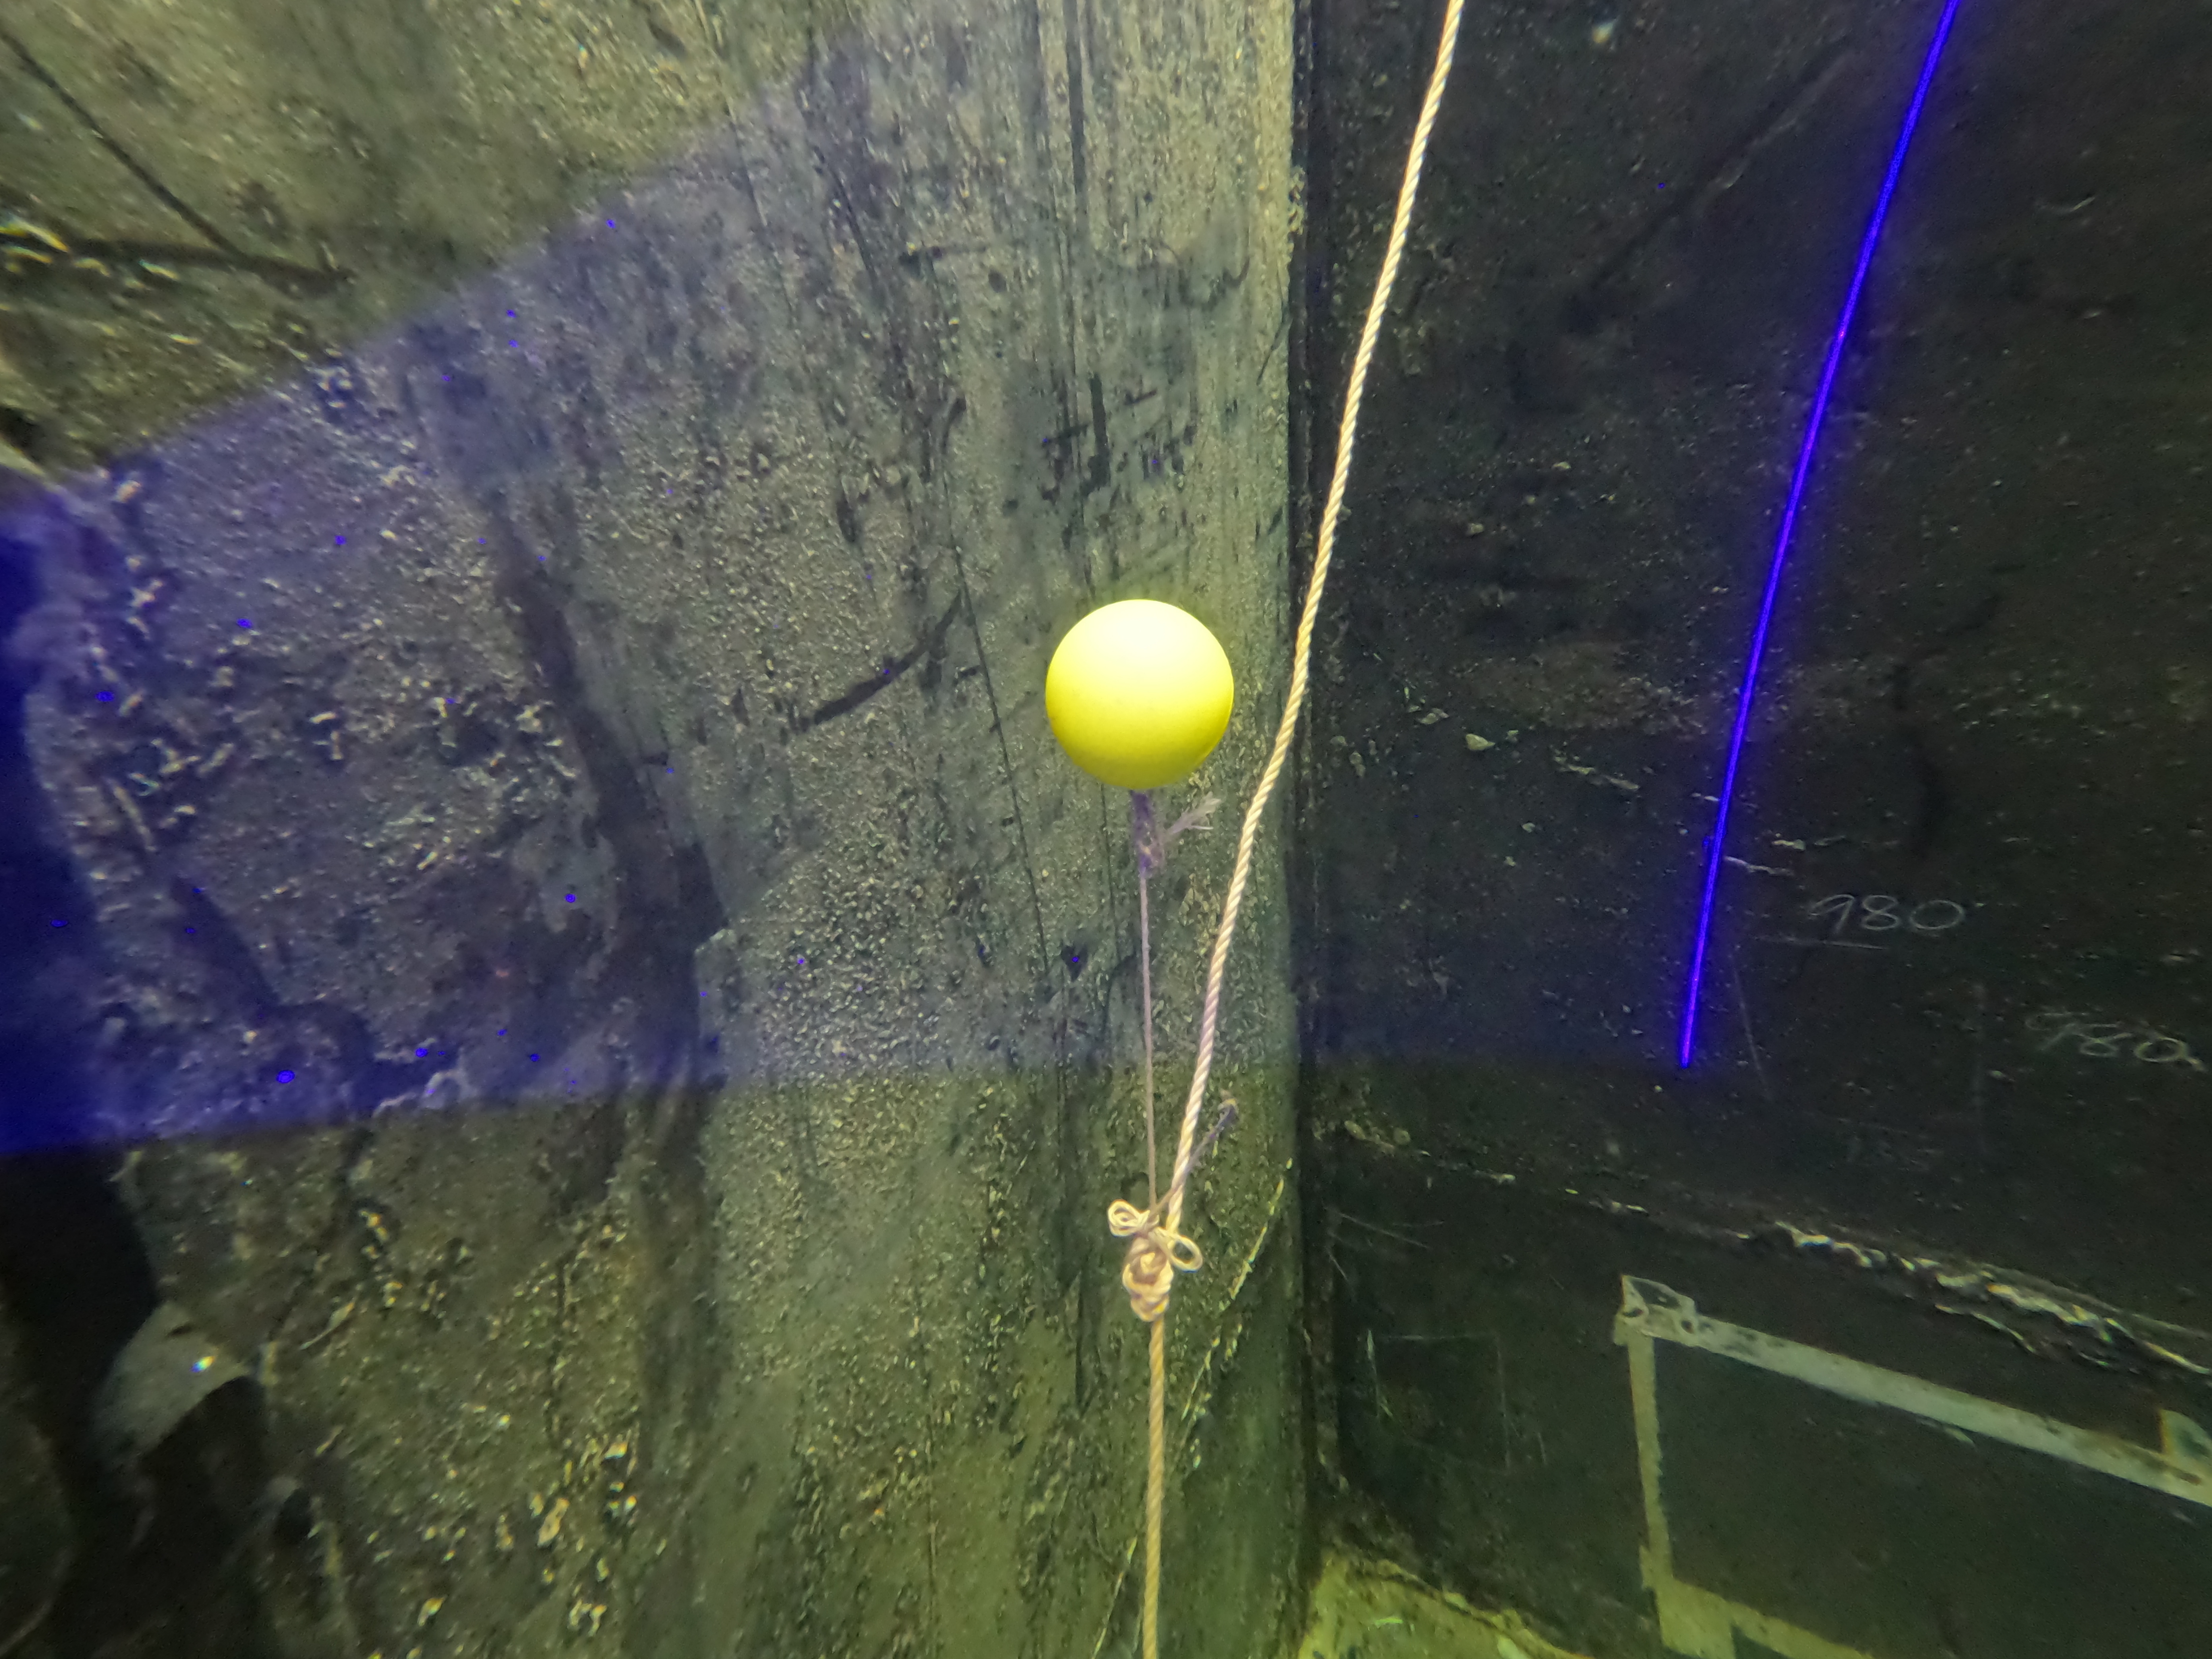

Supplement: Supplementary file 3391 [file G0034095.pdf › 8/G0034095.pdf]

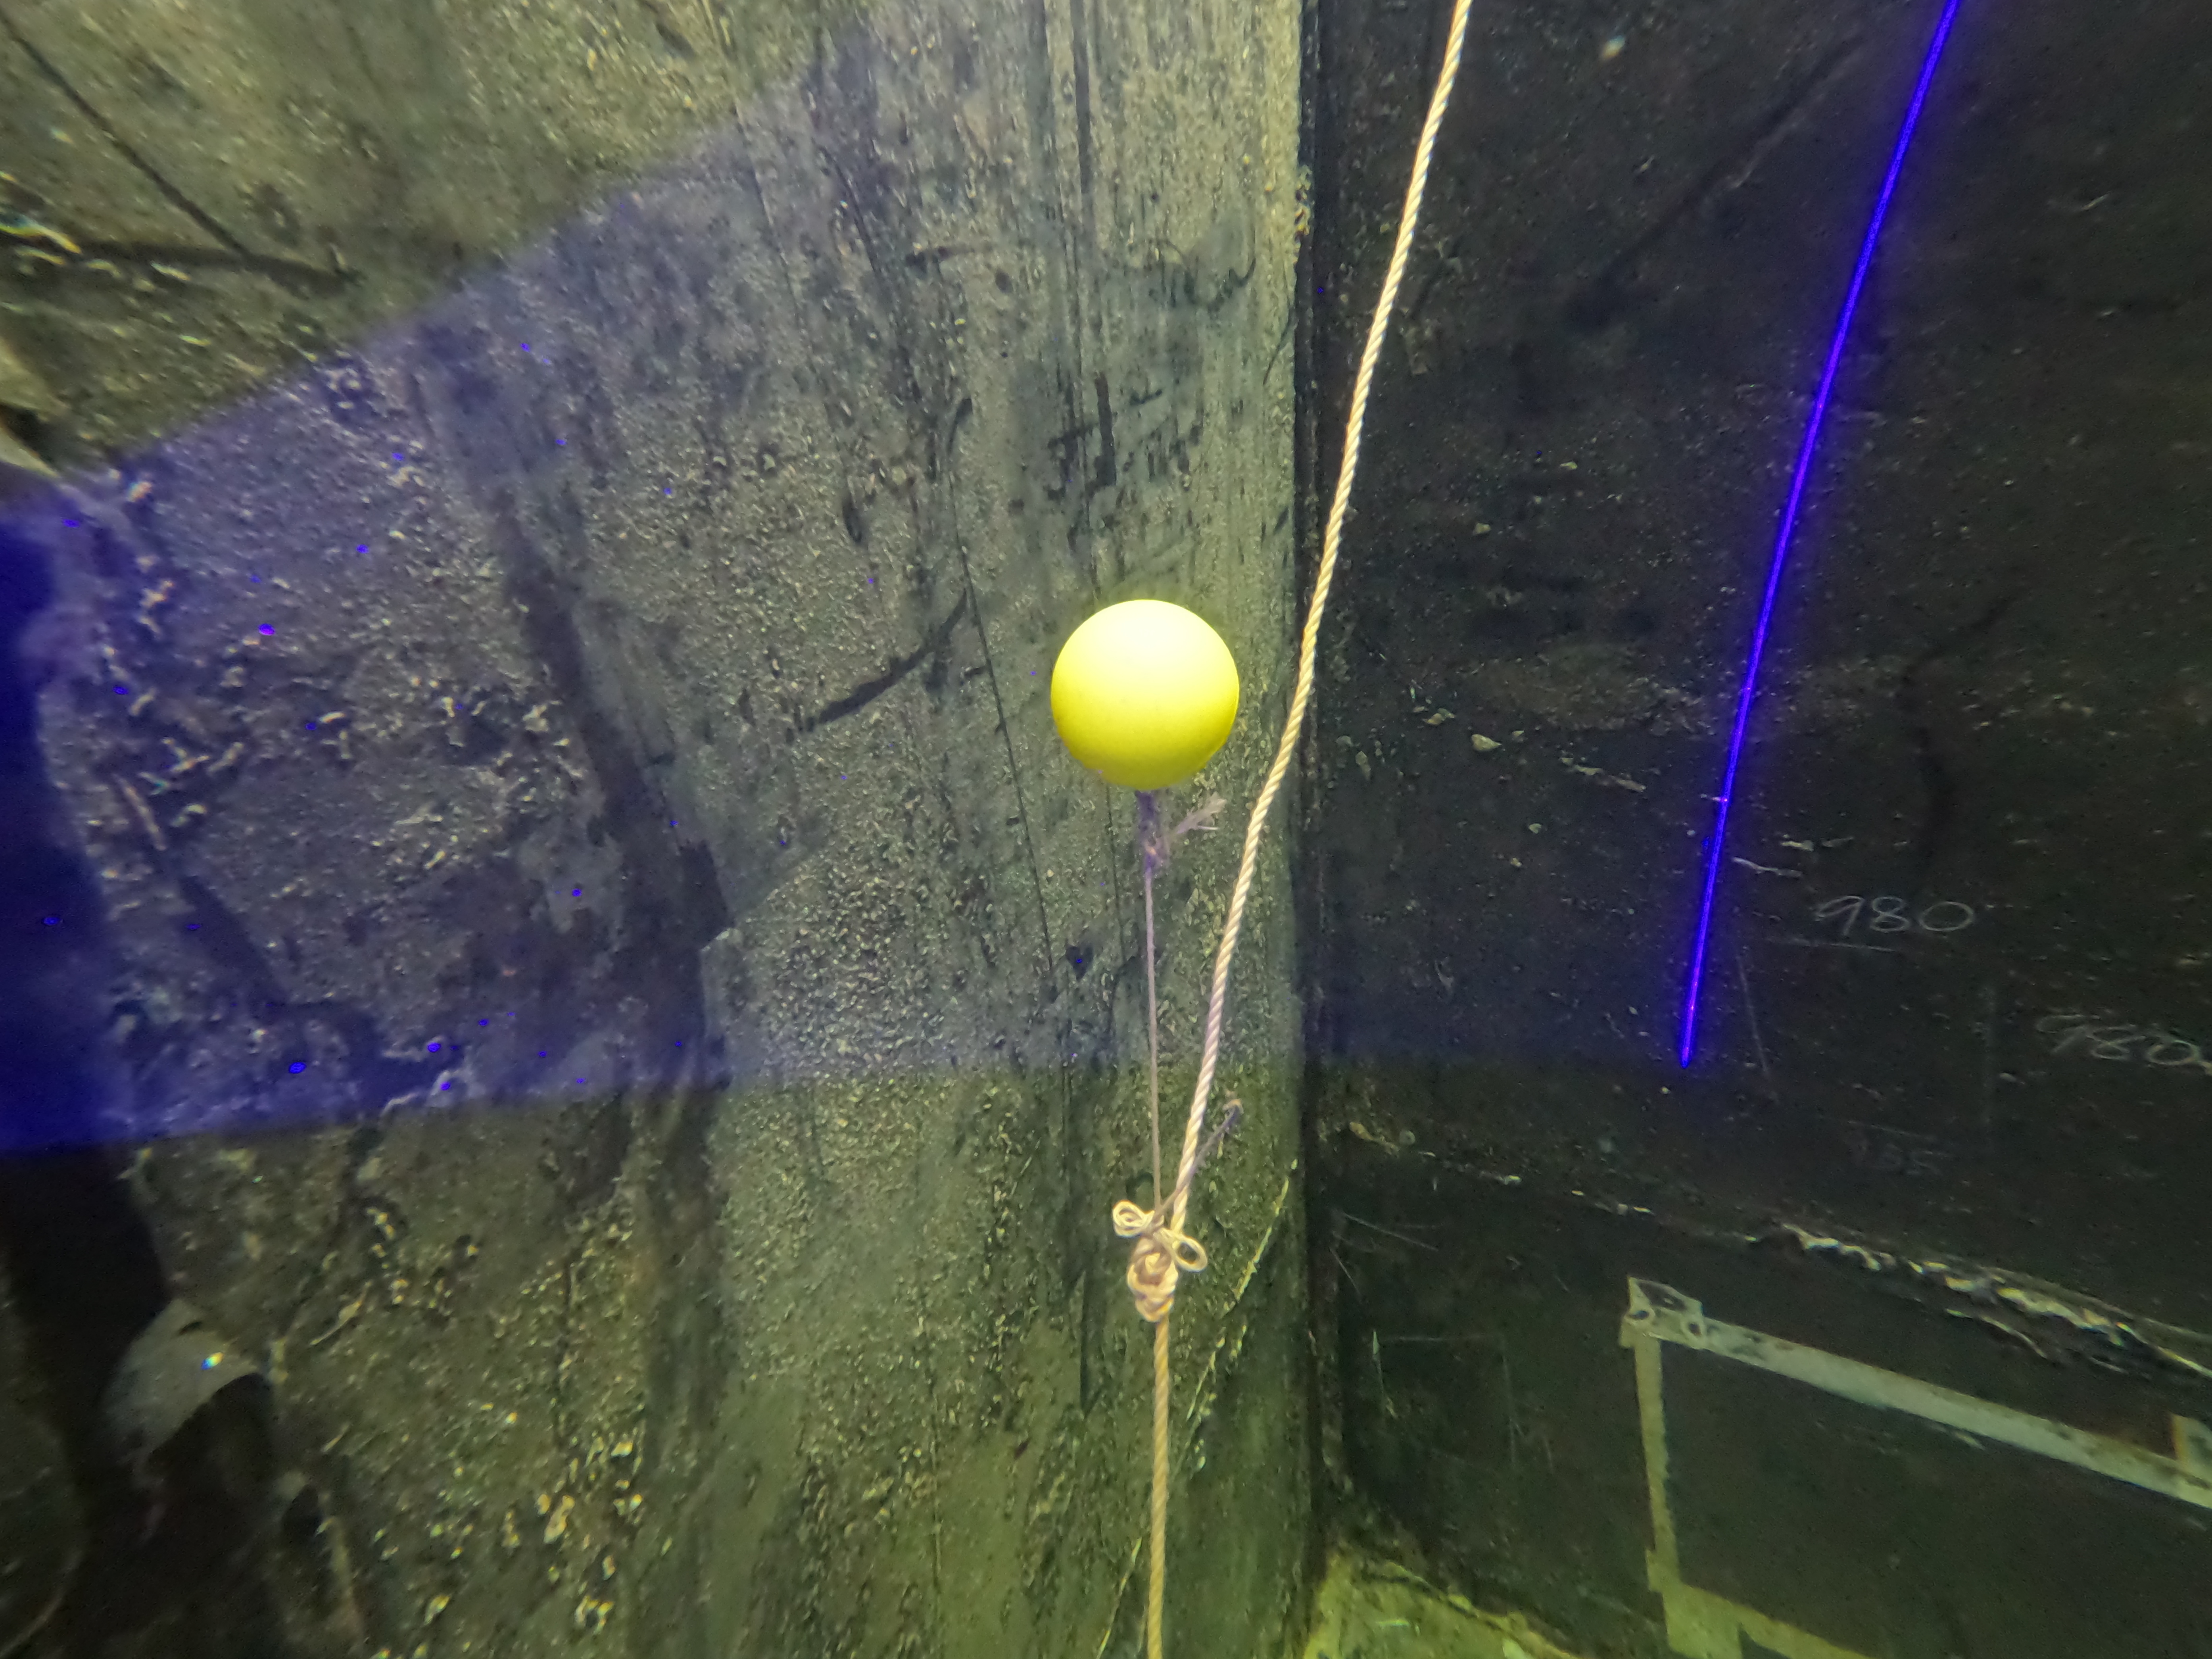

Supplement: Supplementary file 3392 [file G0034096.pdf › 8/G0034096.pdf]

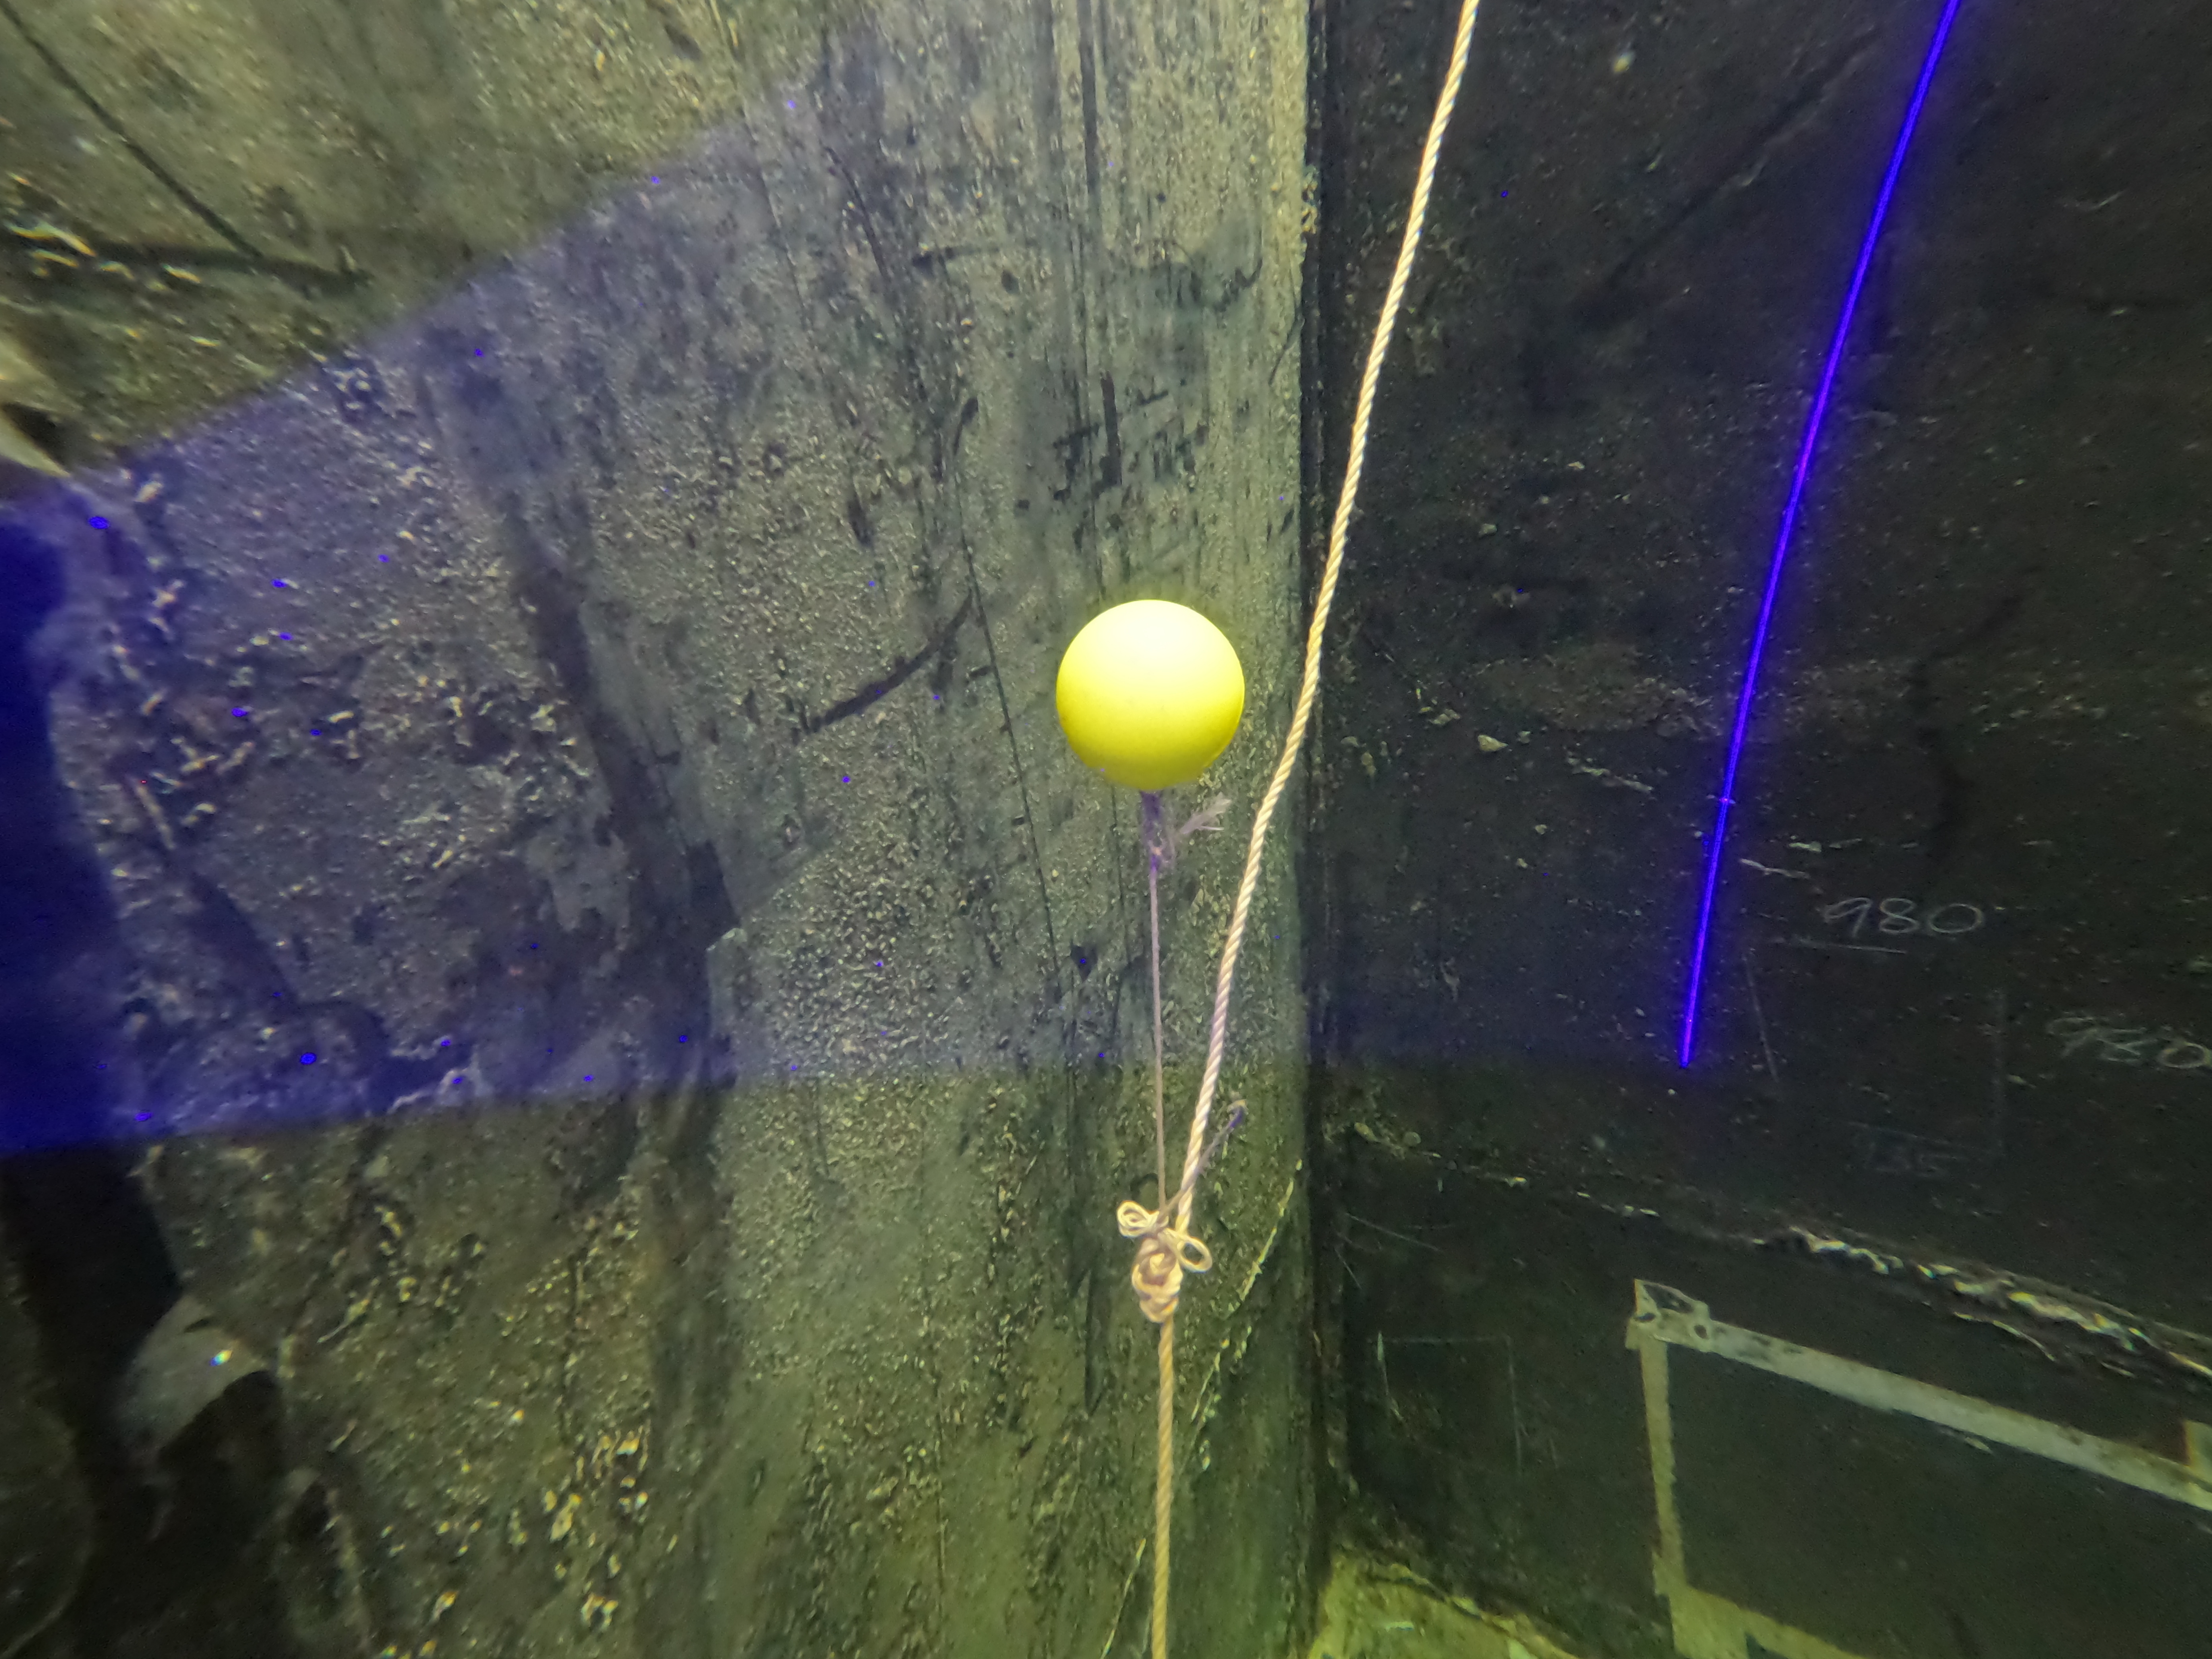

Supplement: Supplementary file 3393 [file G0034097.pdf › 8/G0034097.pdf]

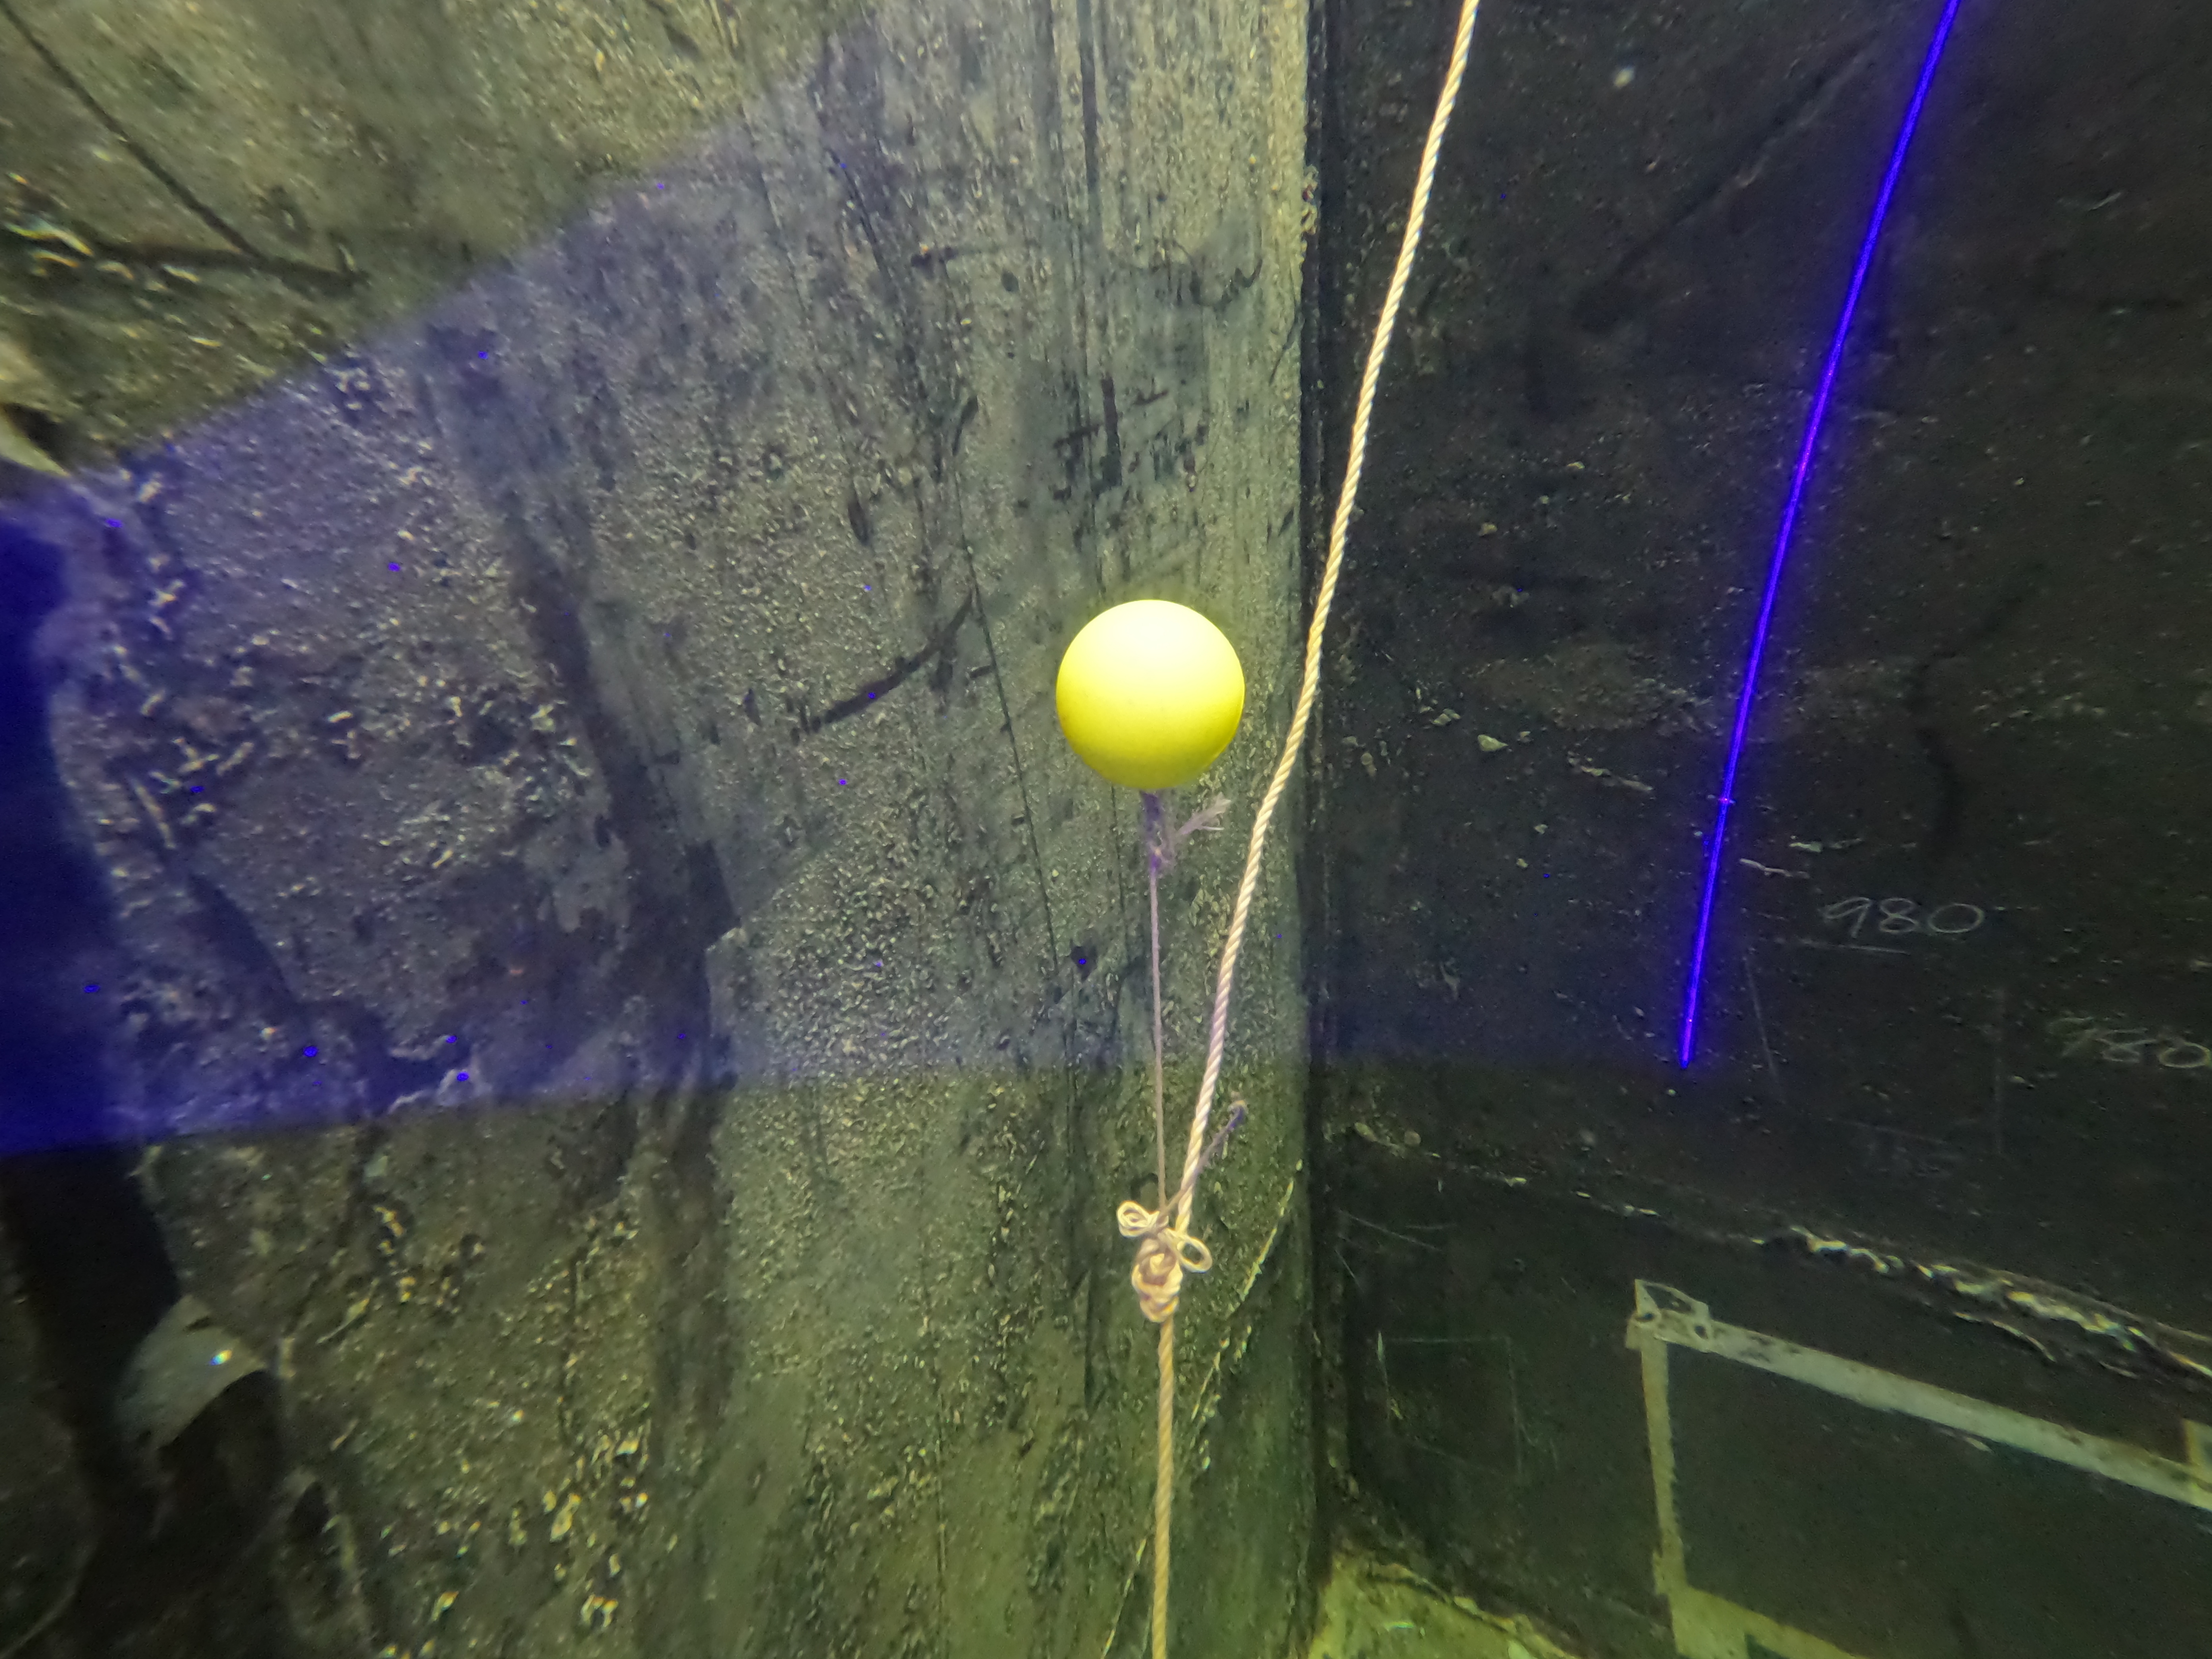

Supplement: Supplementary file 3394 [file G0034098.pdf › 8/G0034098.pdf]

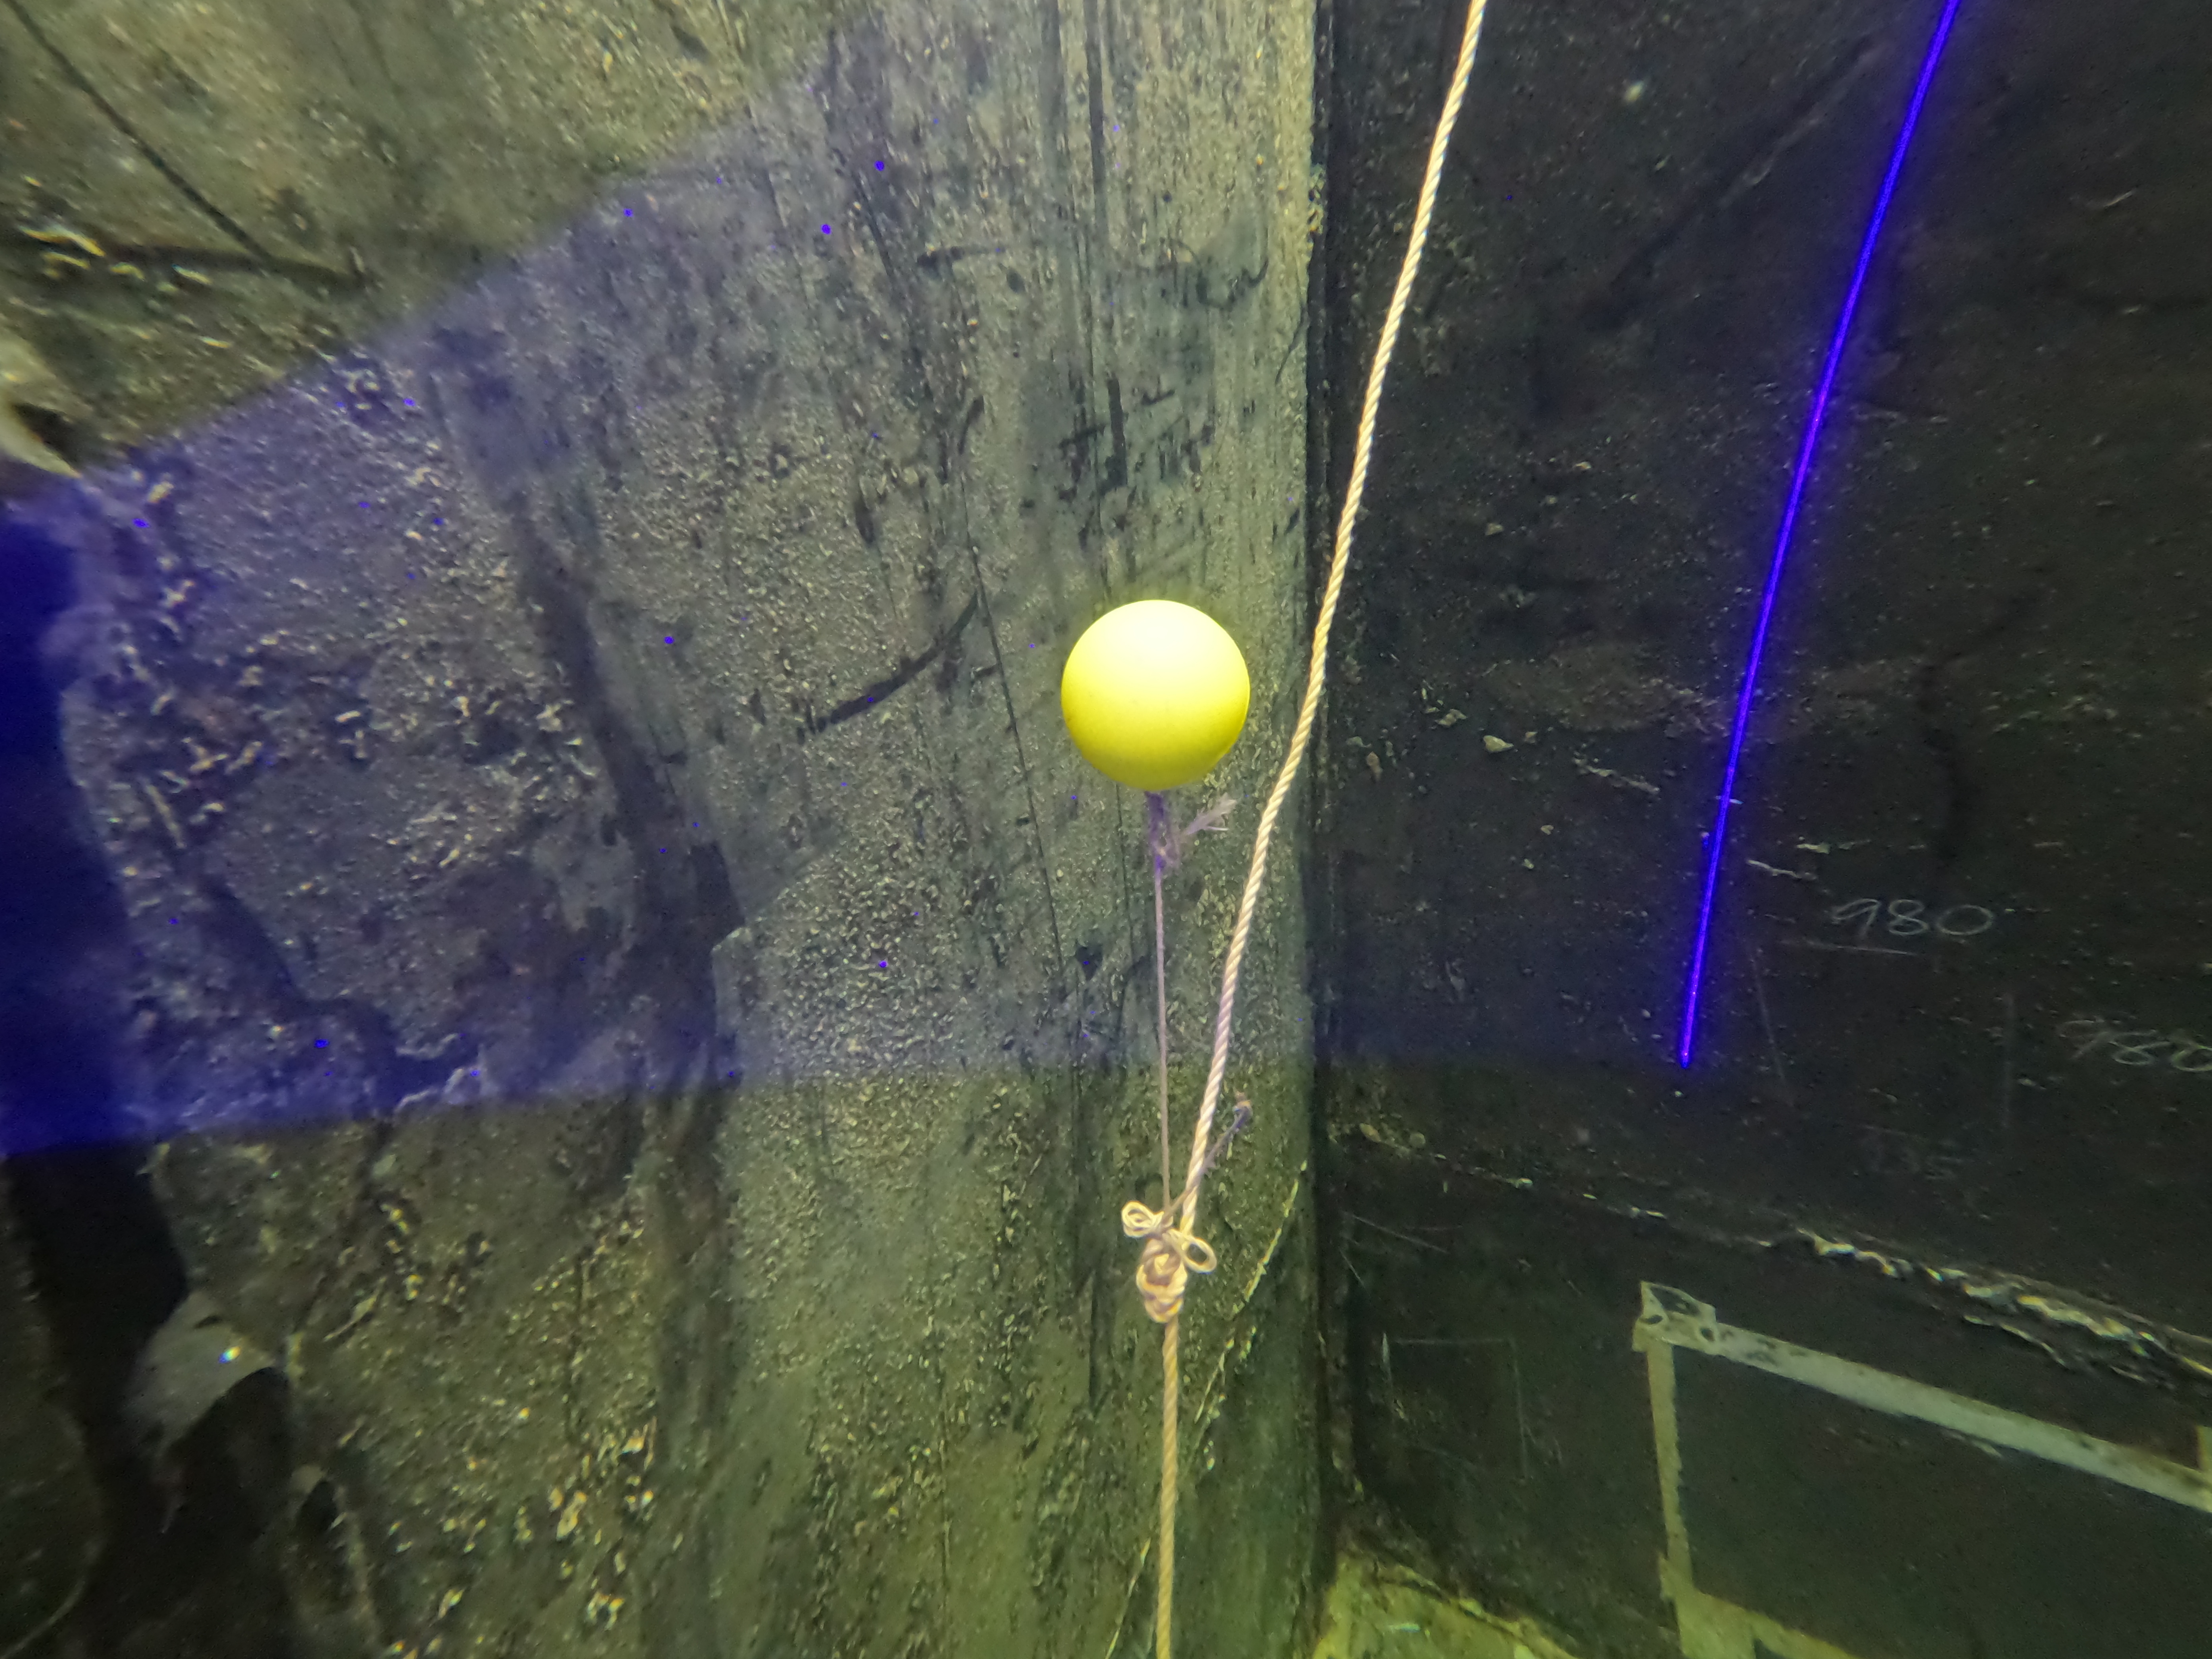

Supplement: Supplementary file 3395 [file G0034099.pdf › 8/G0034099.pdf]

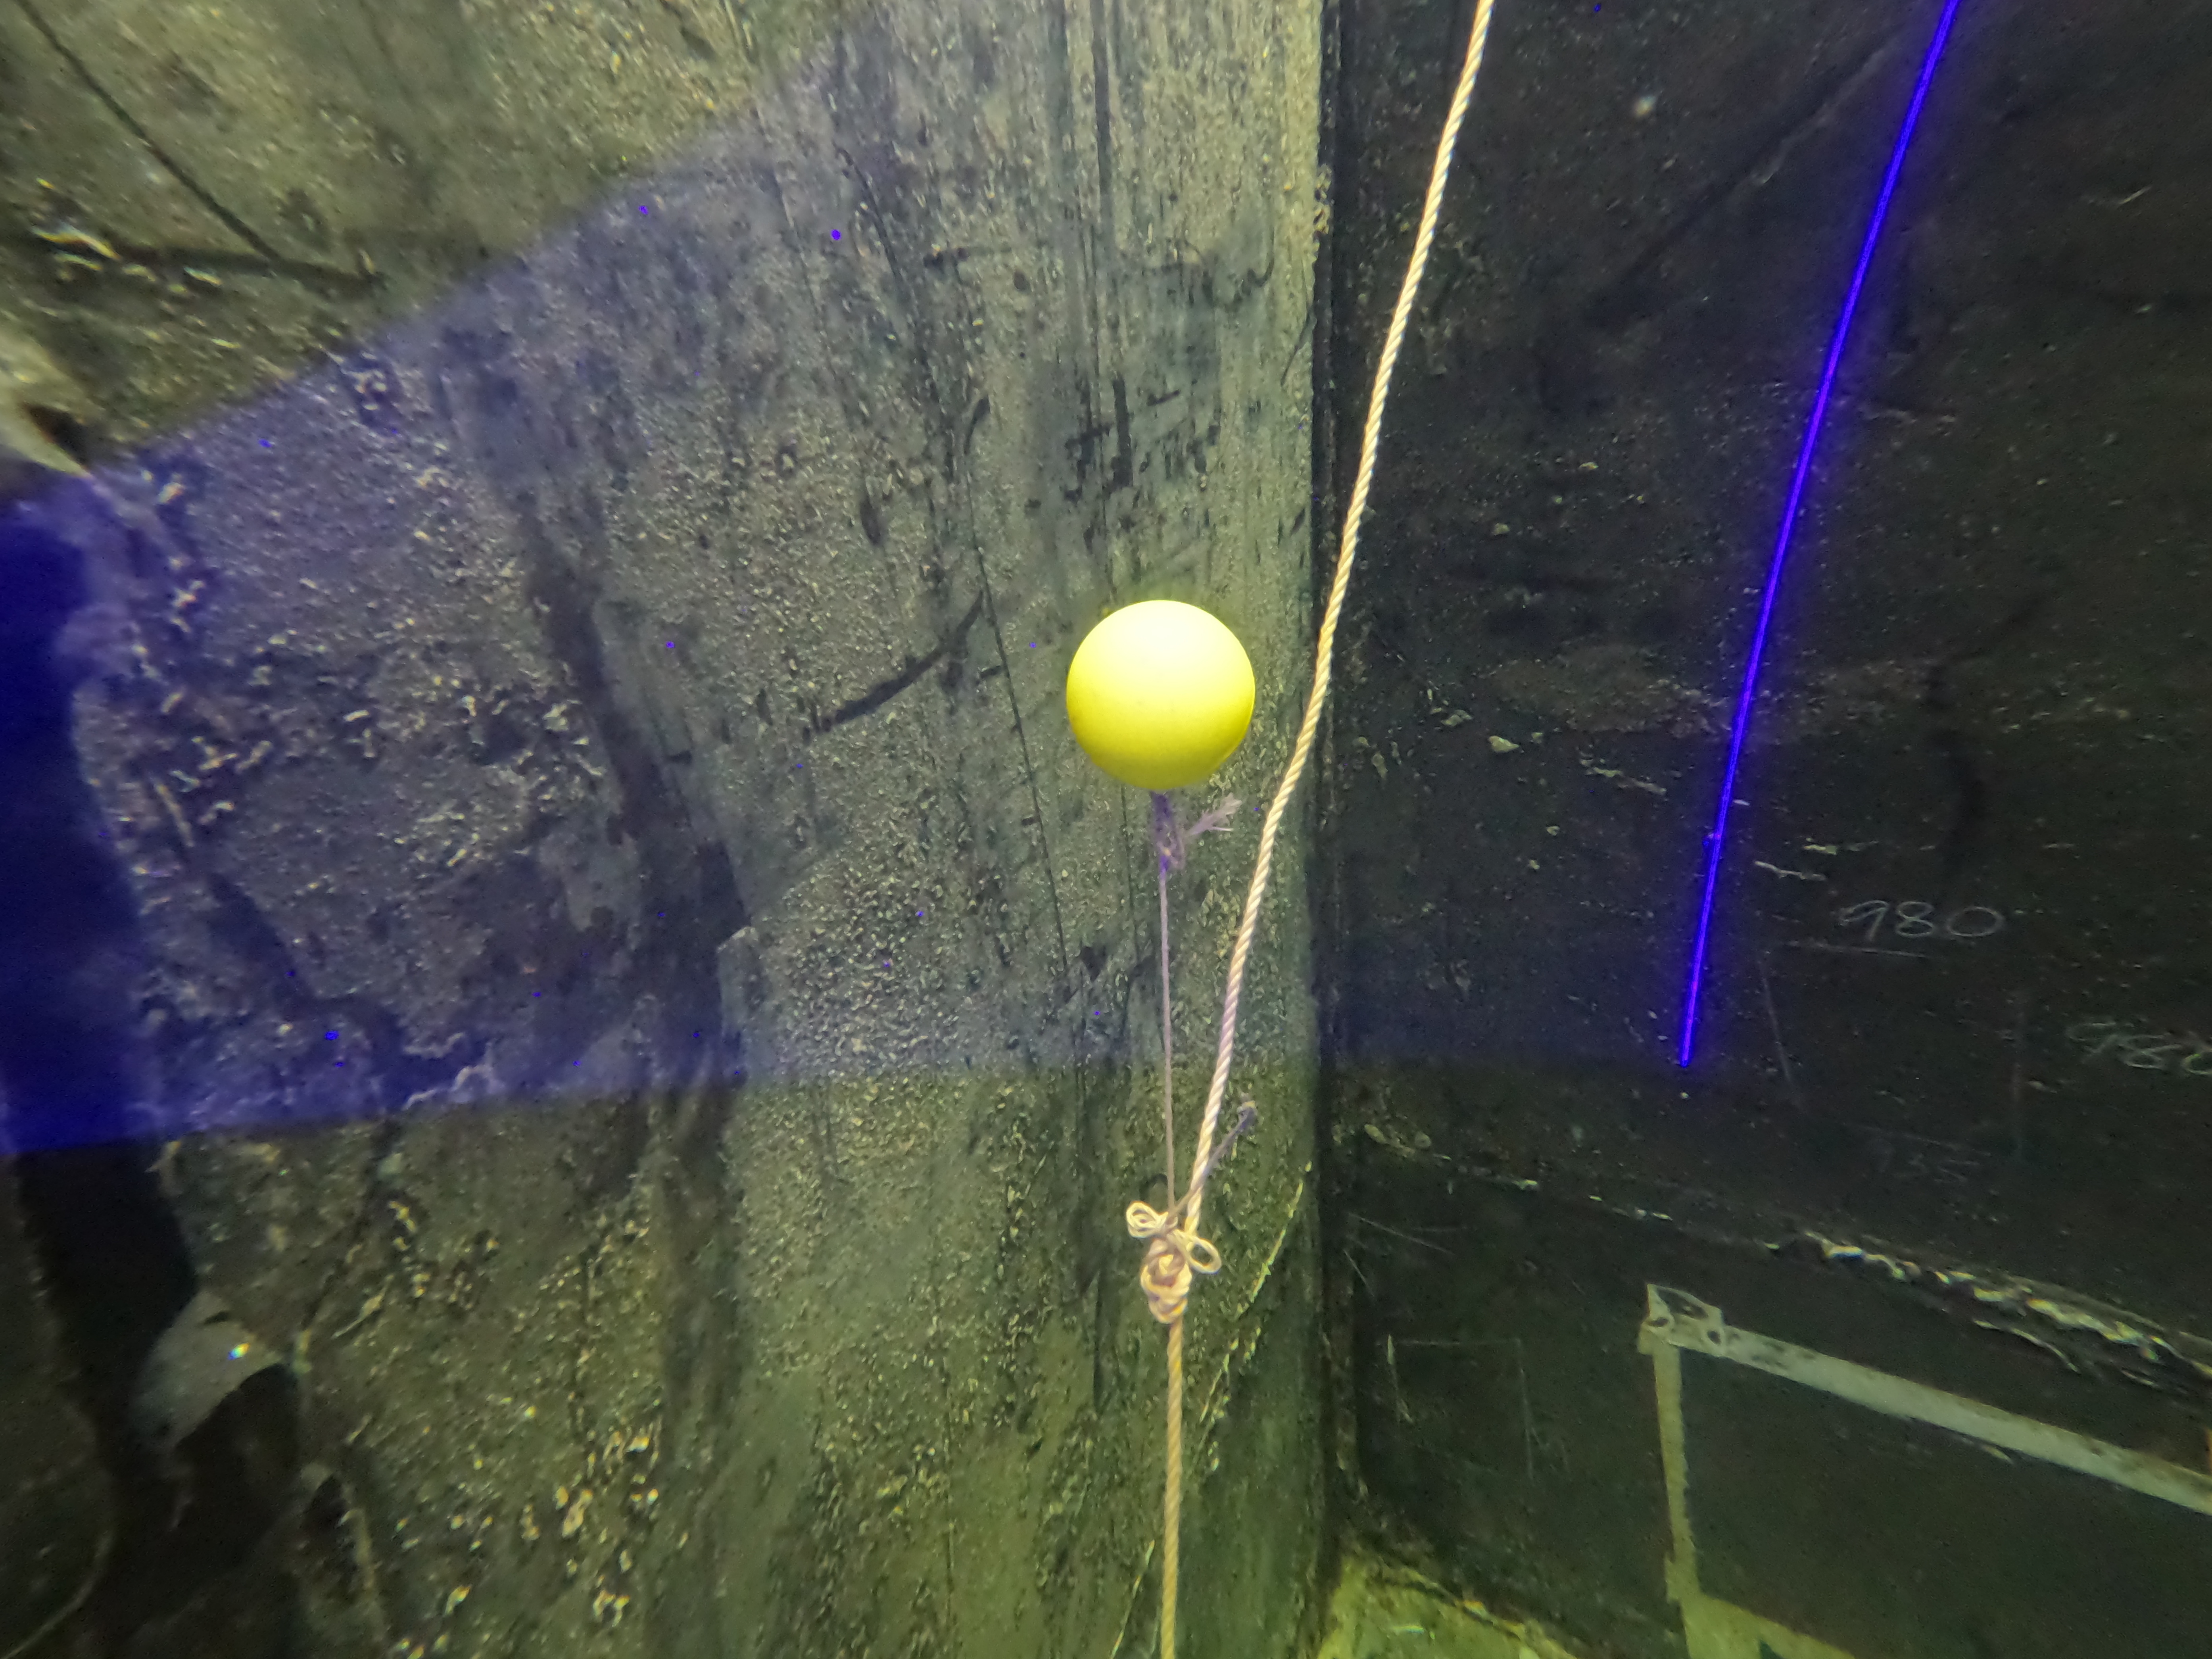

Supplement: Supplementary file 3396 [file G0034100.pdf › 8/G0034100.pdf]

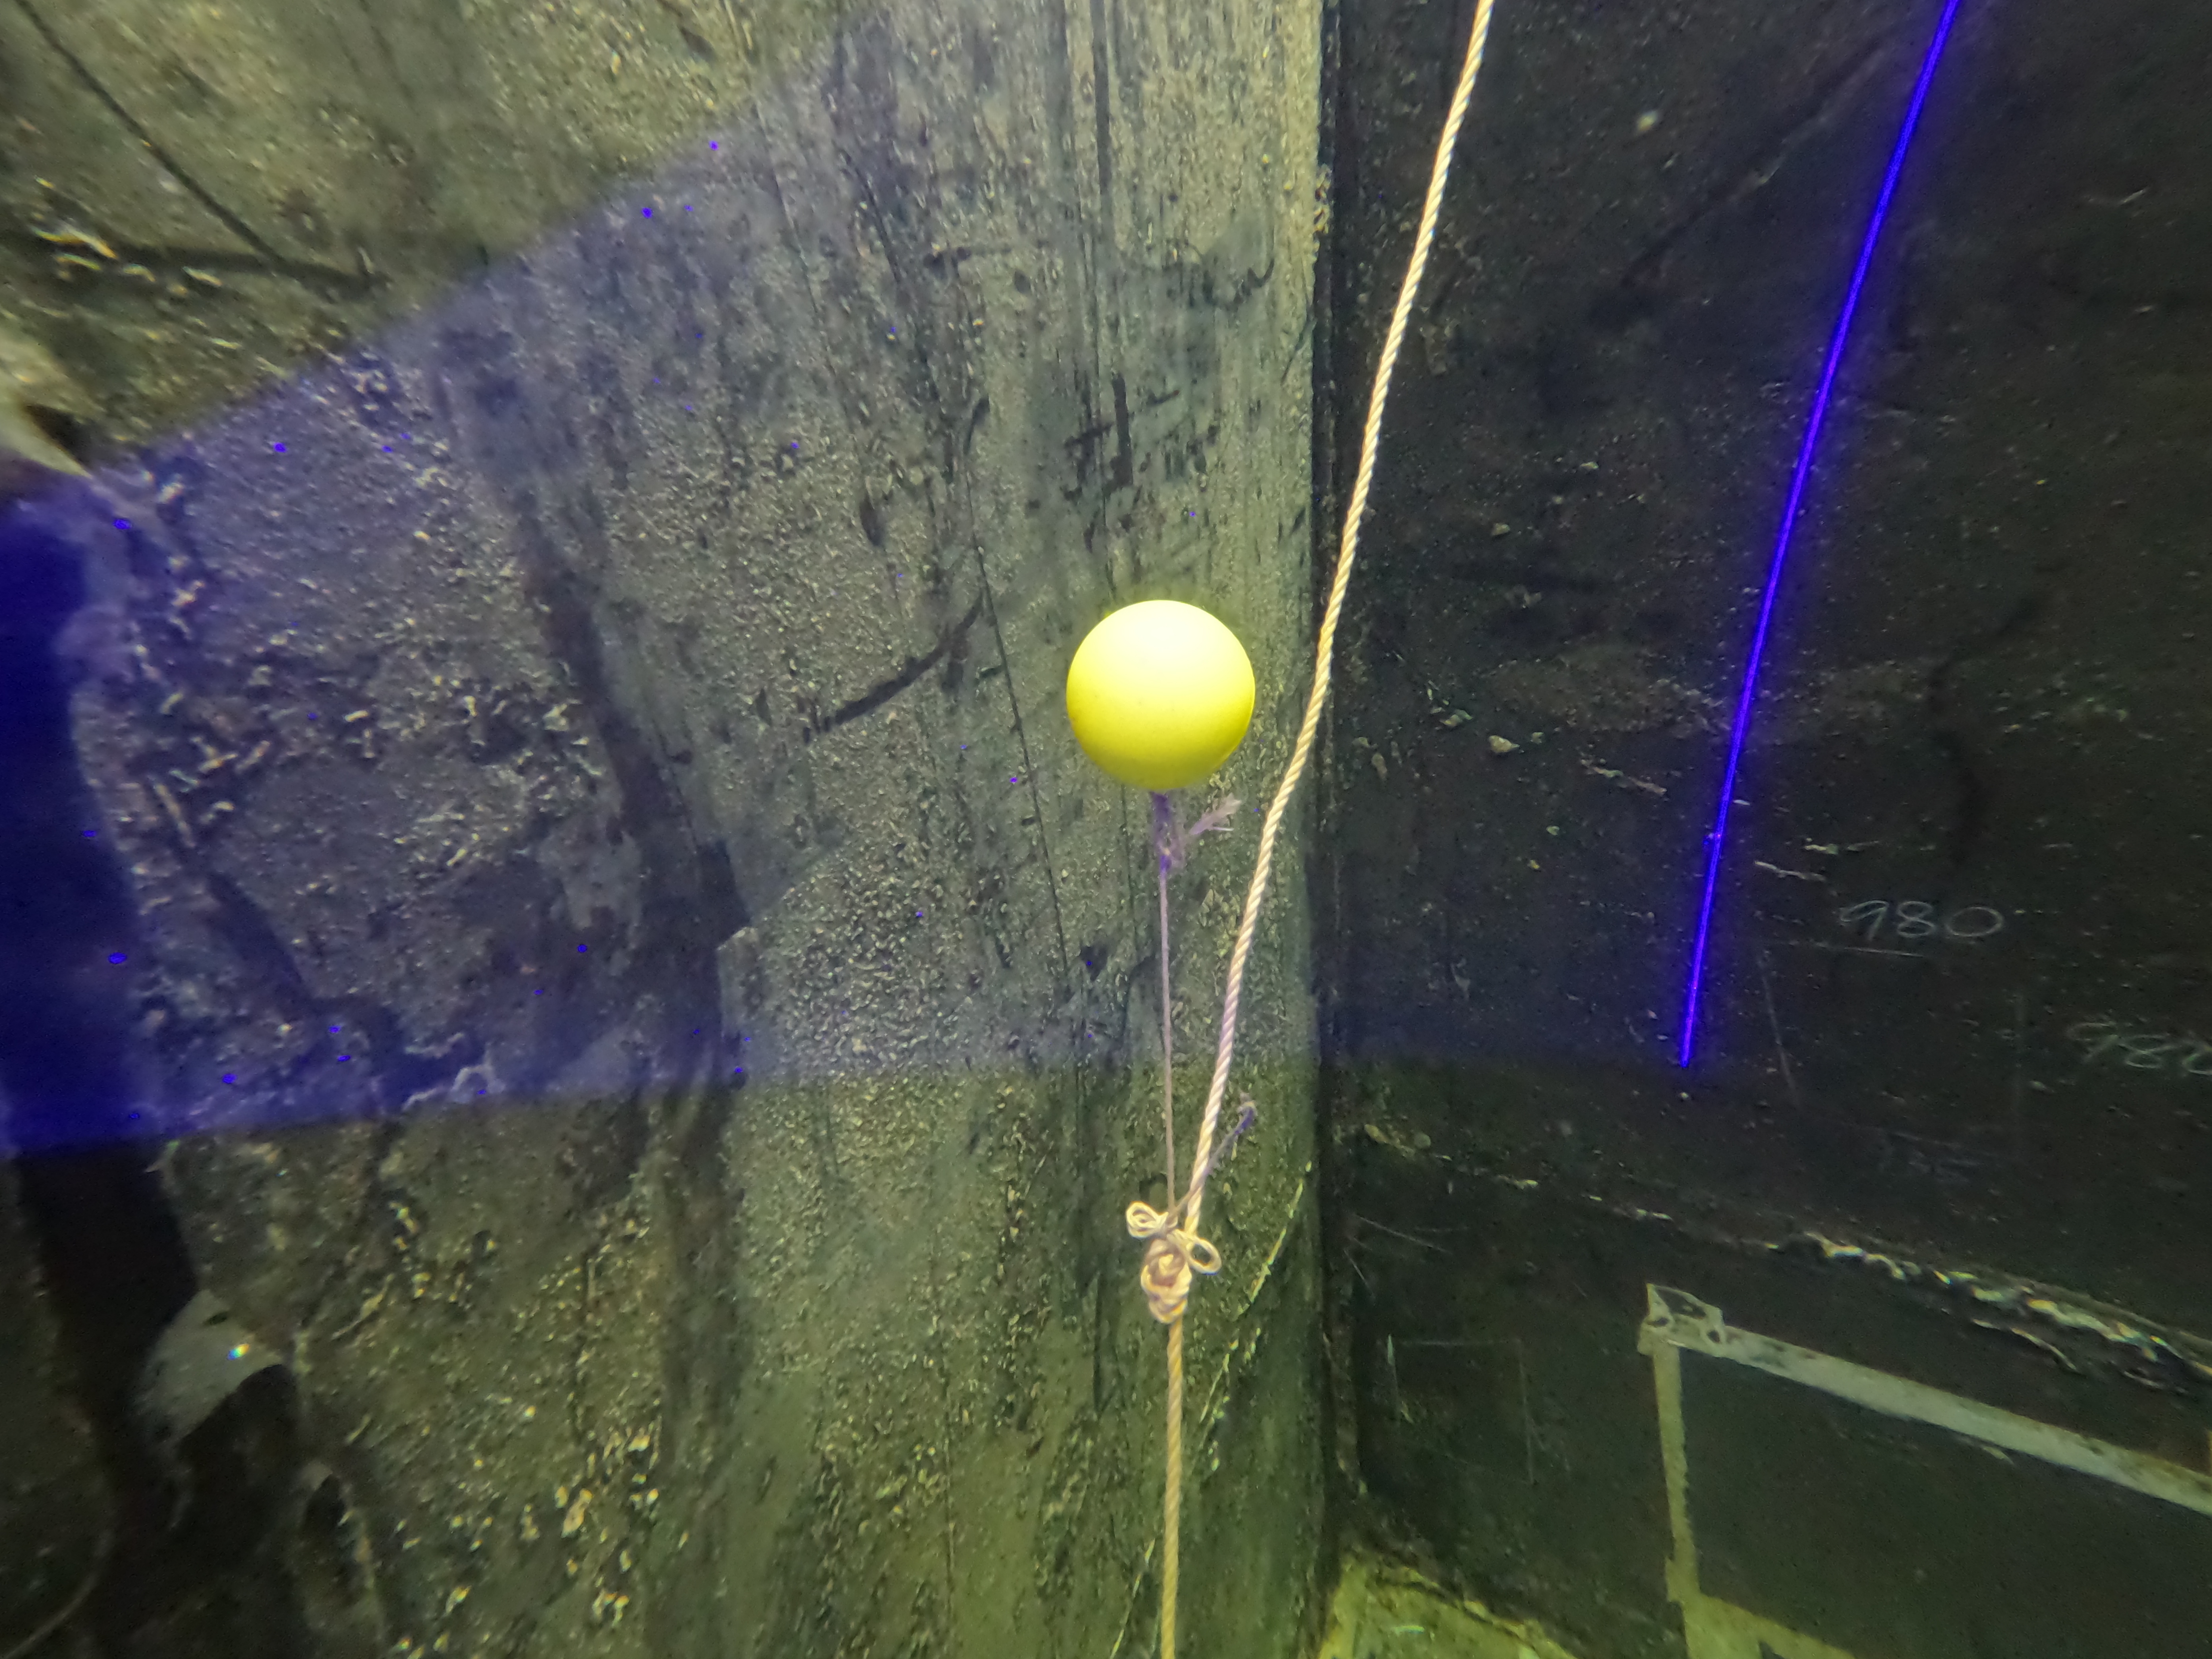

Supplement: Supplementary file 3397 [file G0034101.pdf › 8/G0034101.pdf]

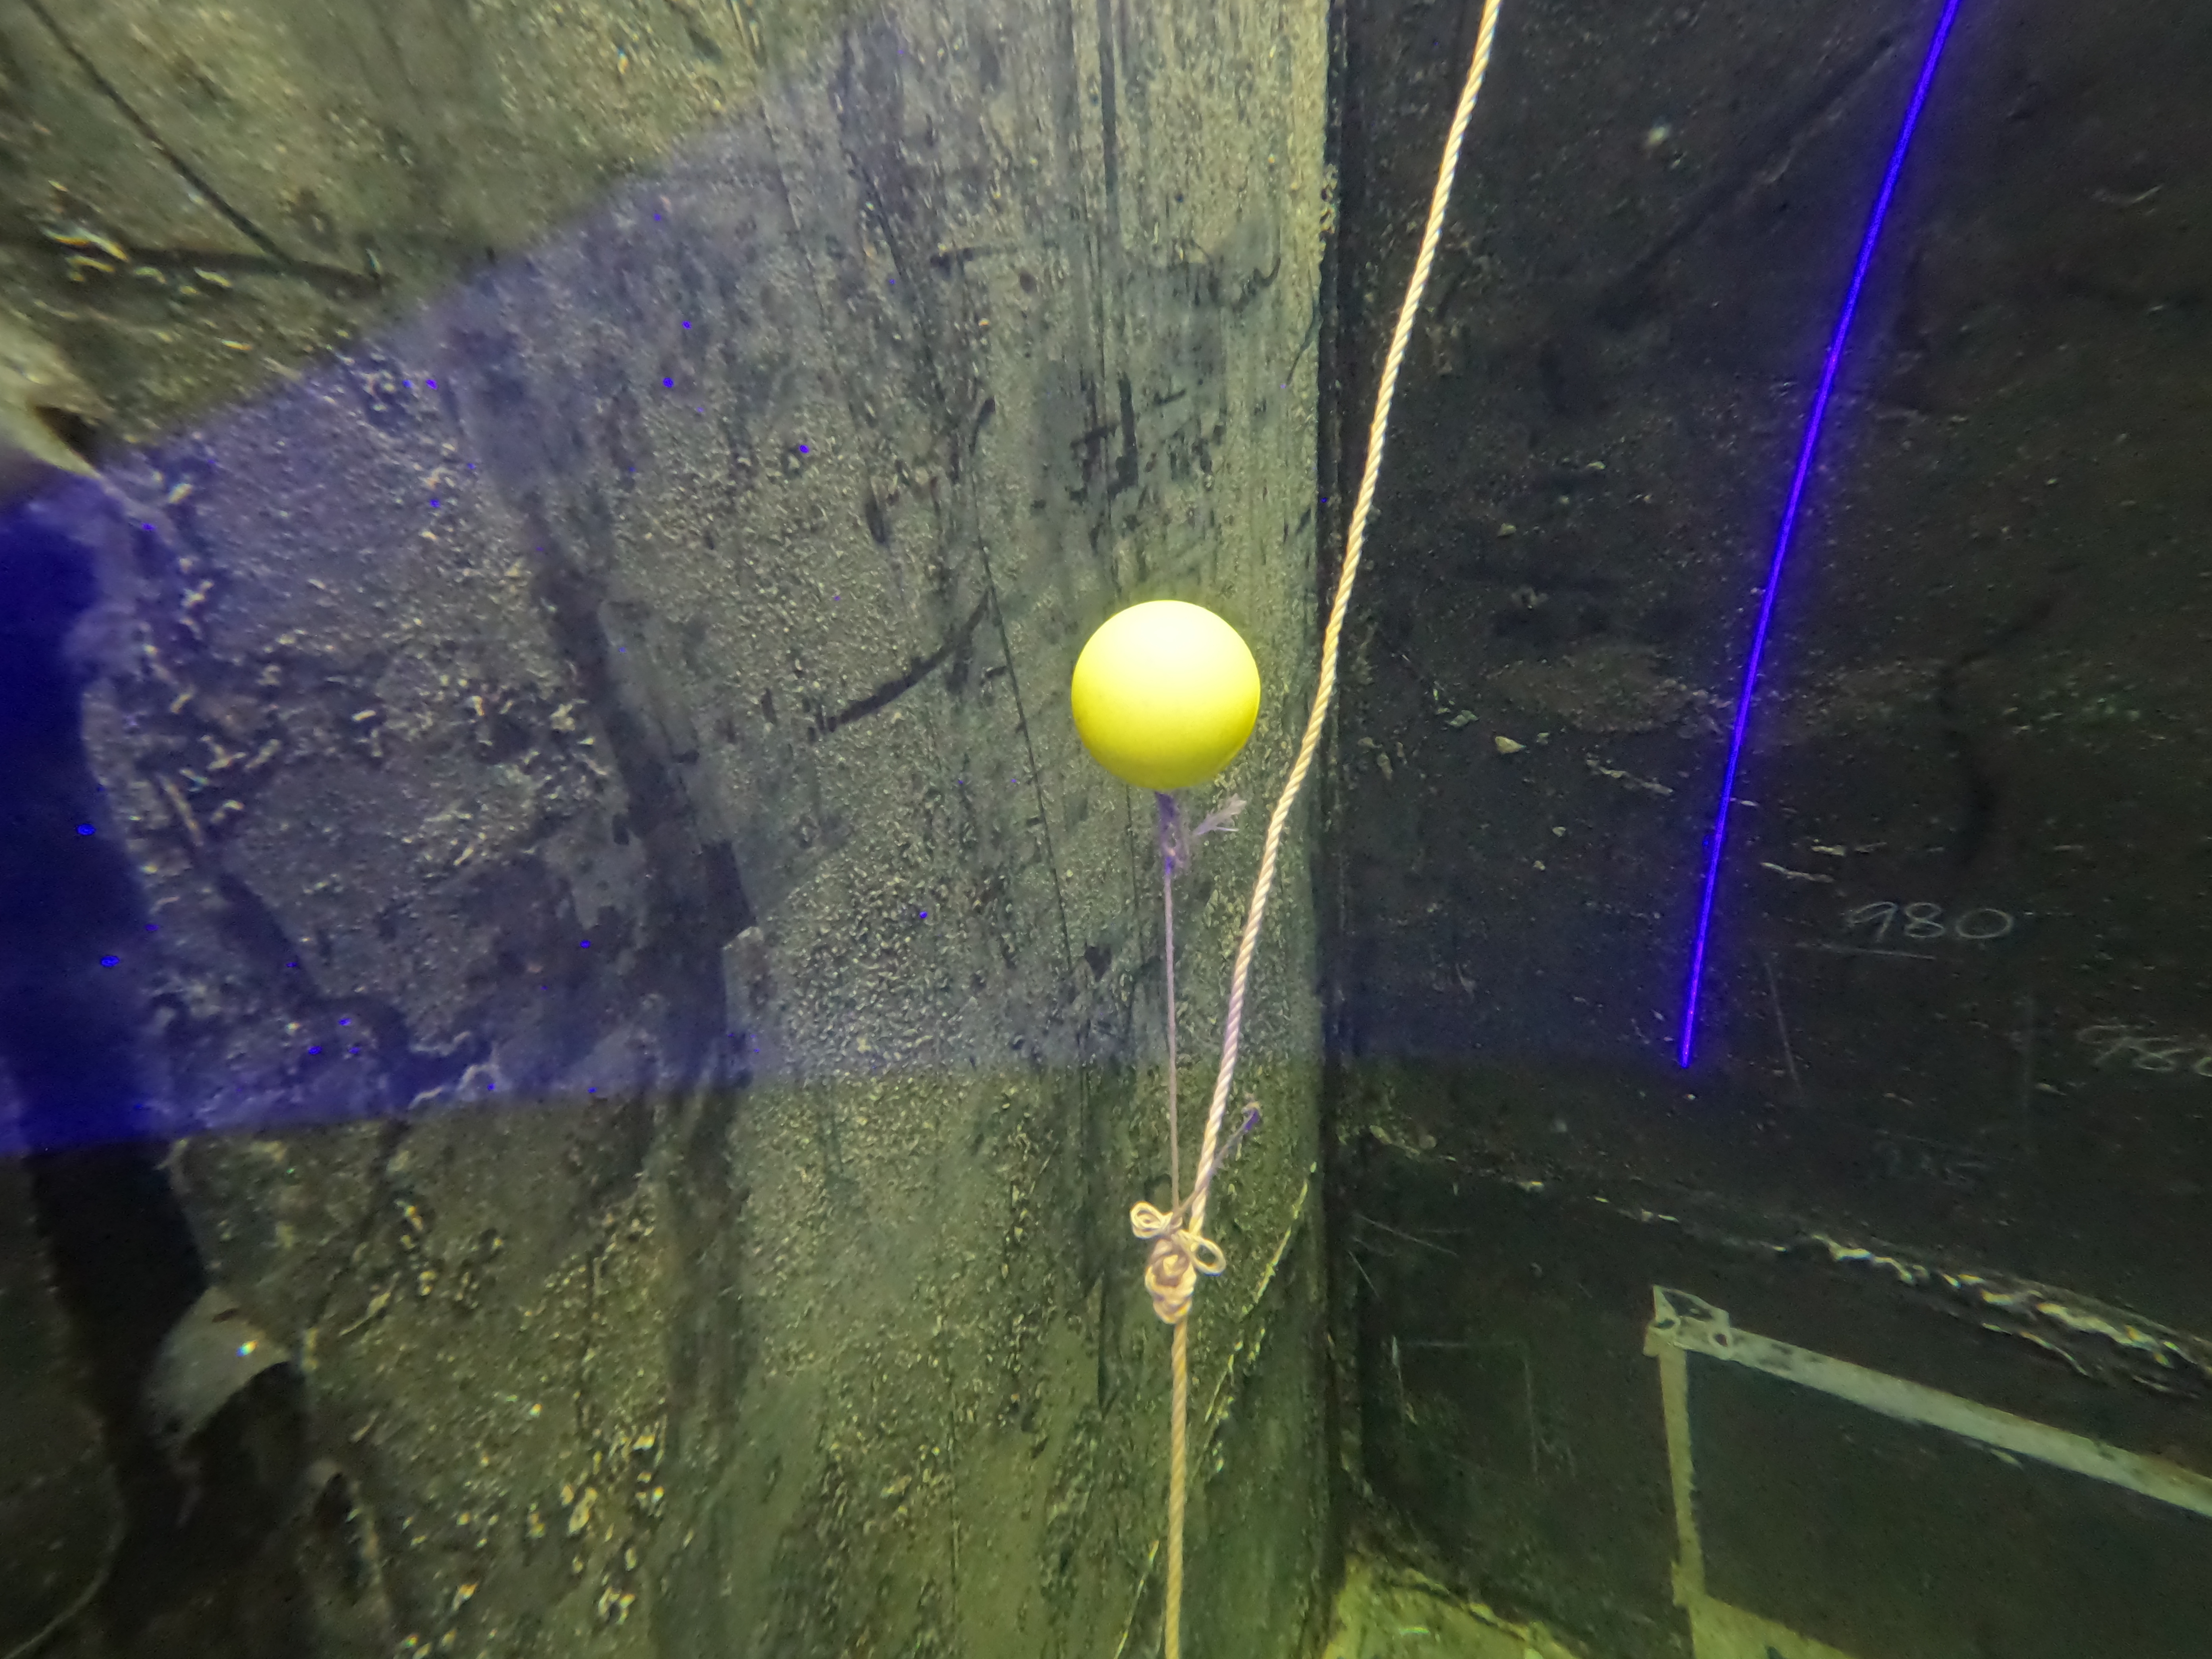

Supplement: Supplementary file 3398 [file G0034102.pdf › 8/G0034102.pdf]

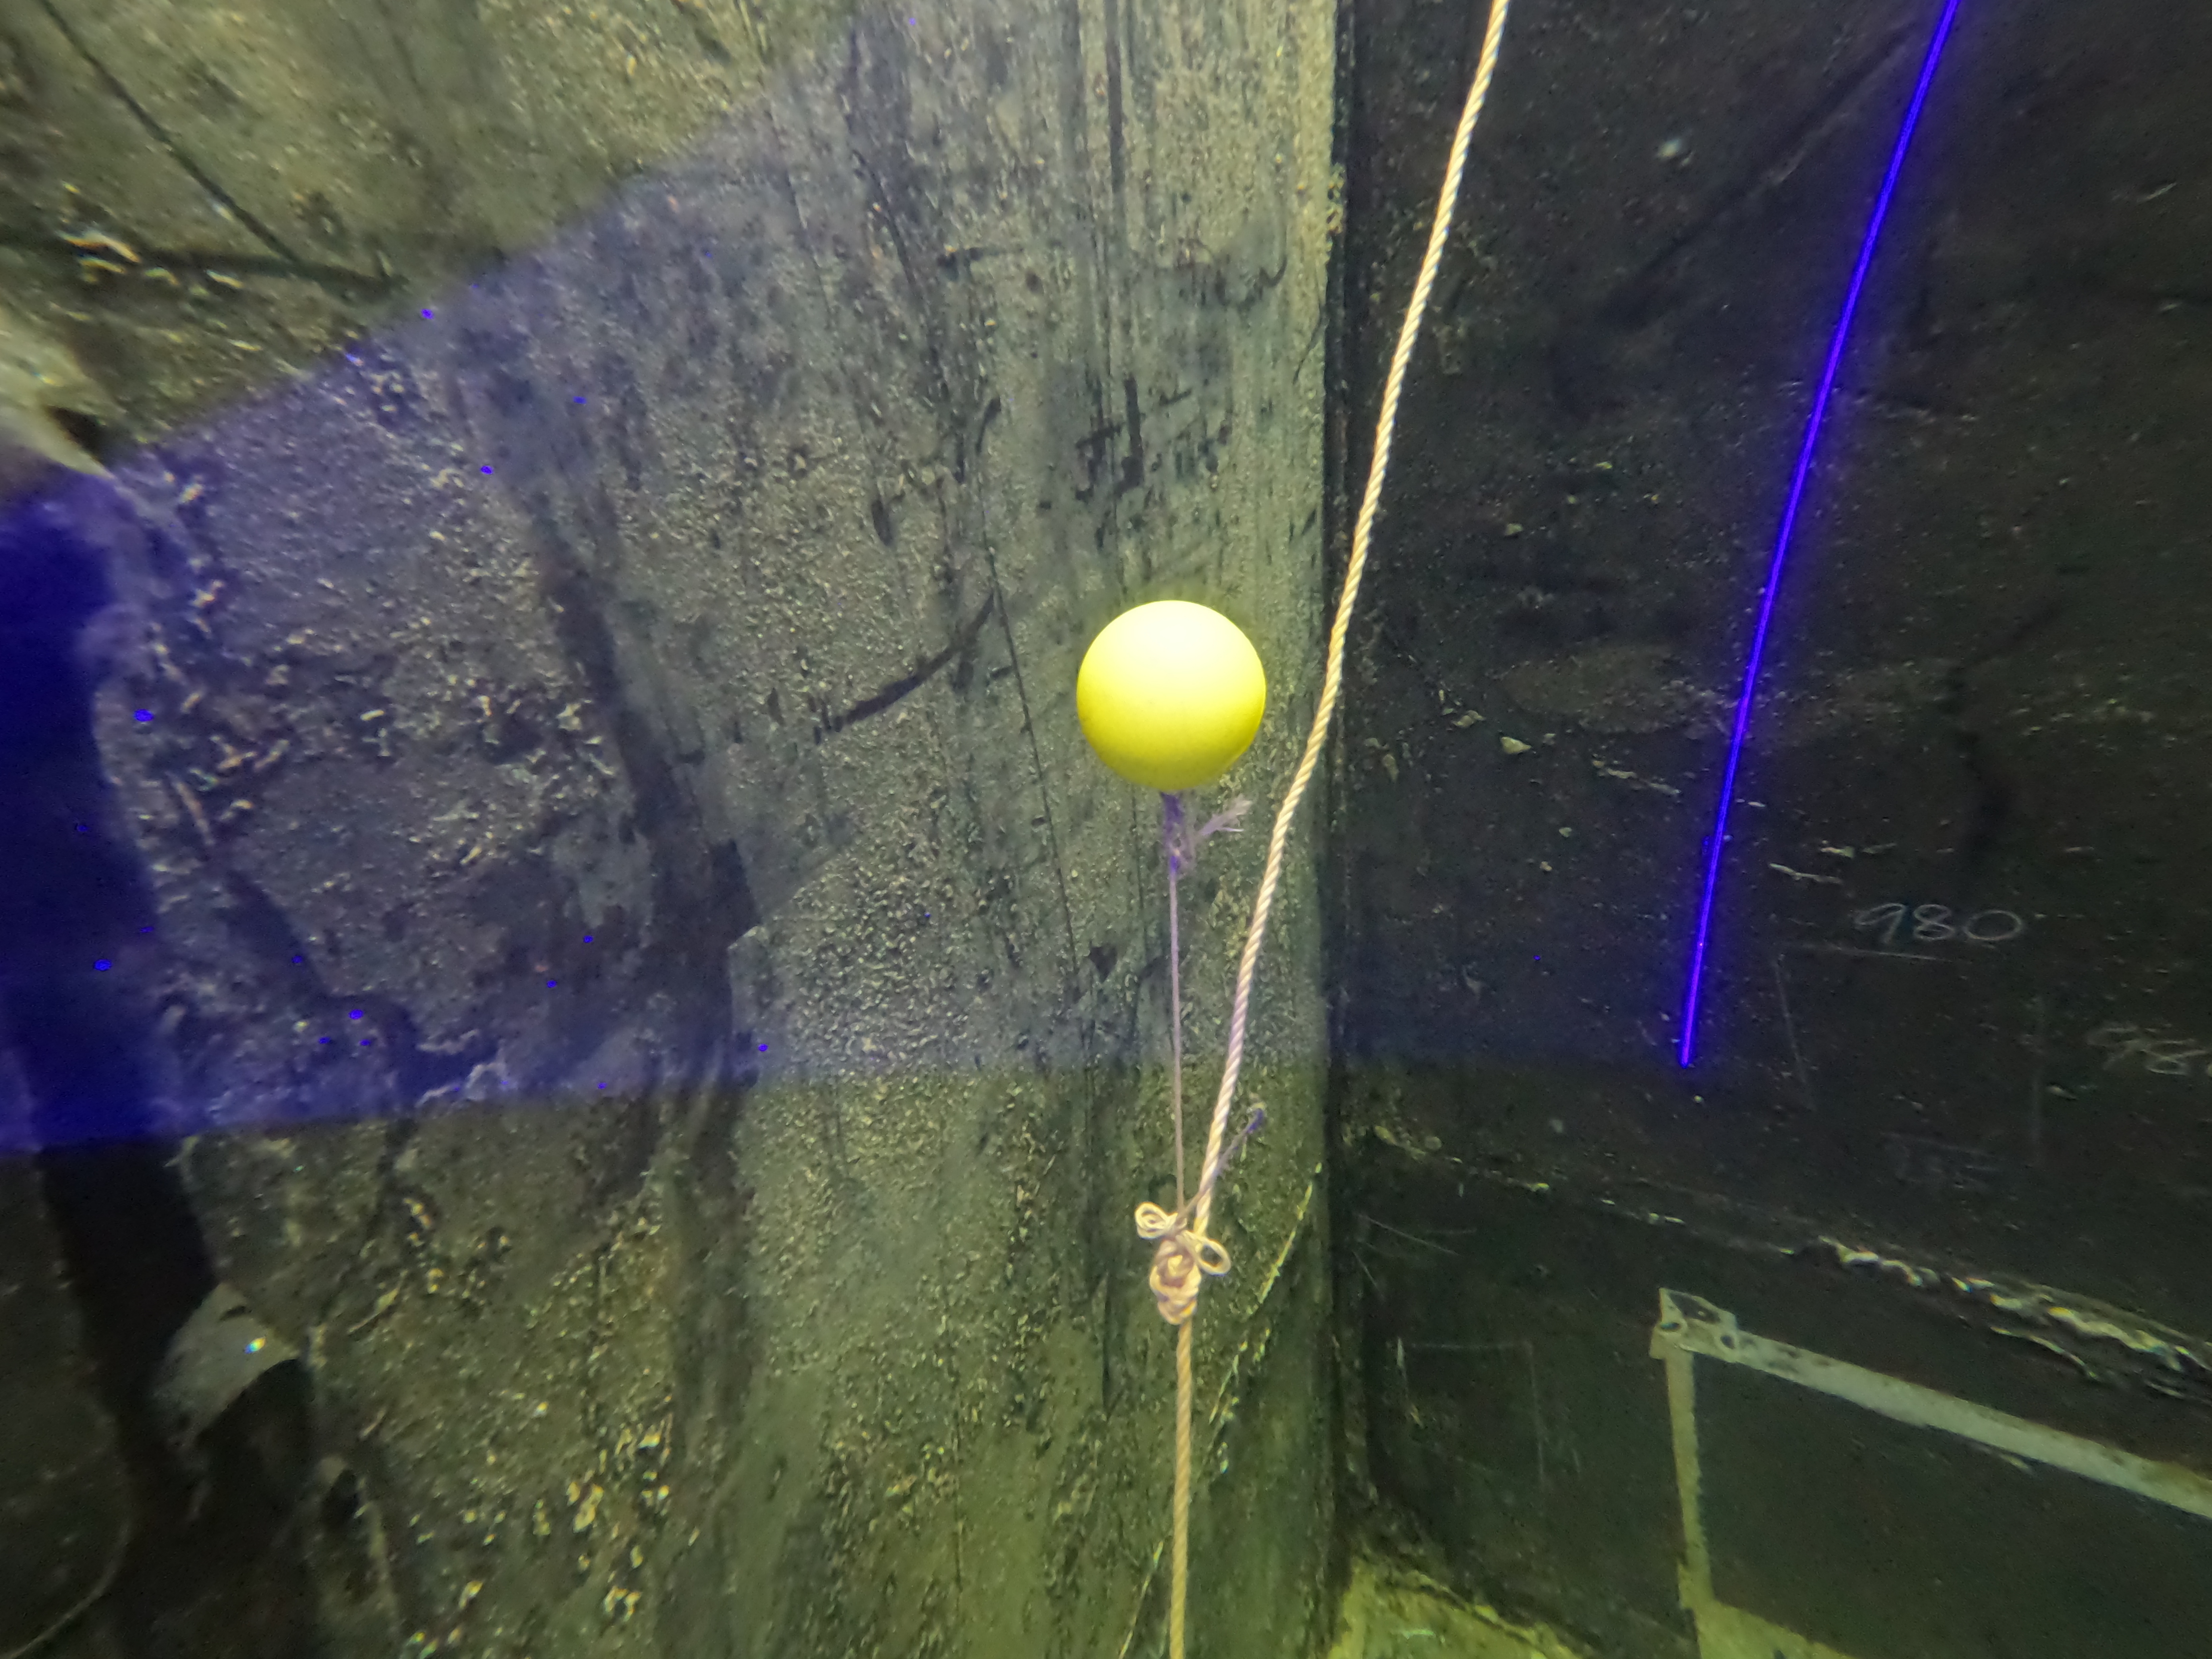

Supplement: Supplementary file 3399 [file G0034103.pdf › 8/G0034103.pdf]

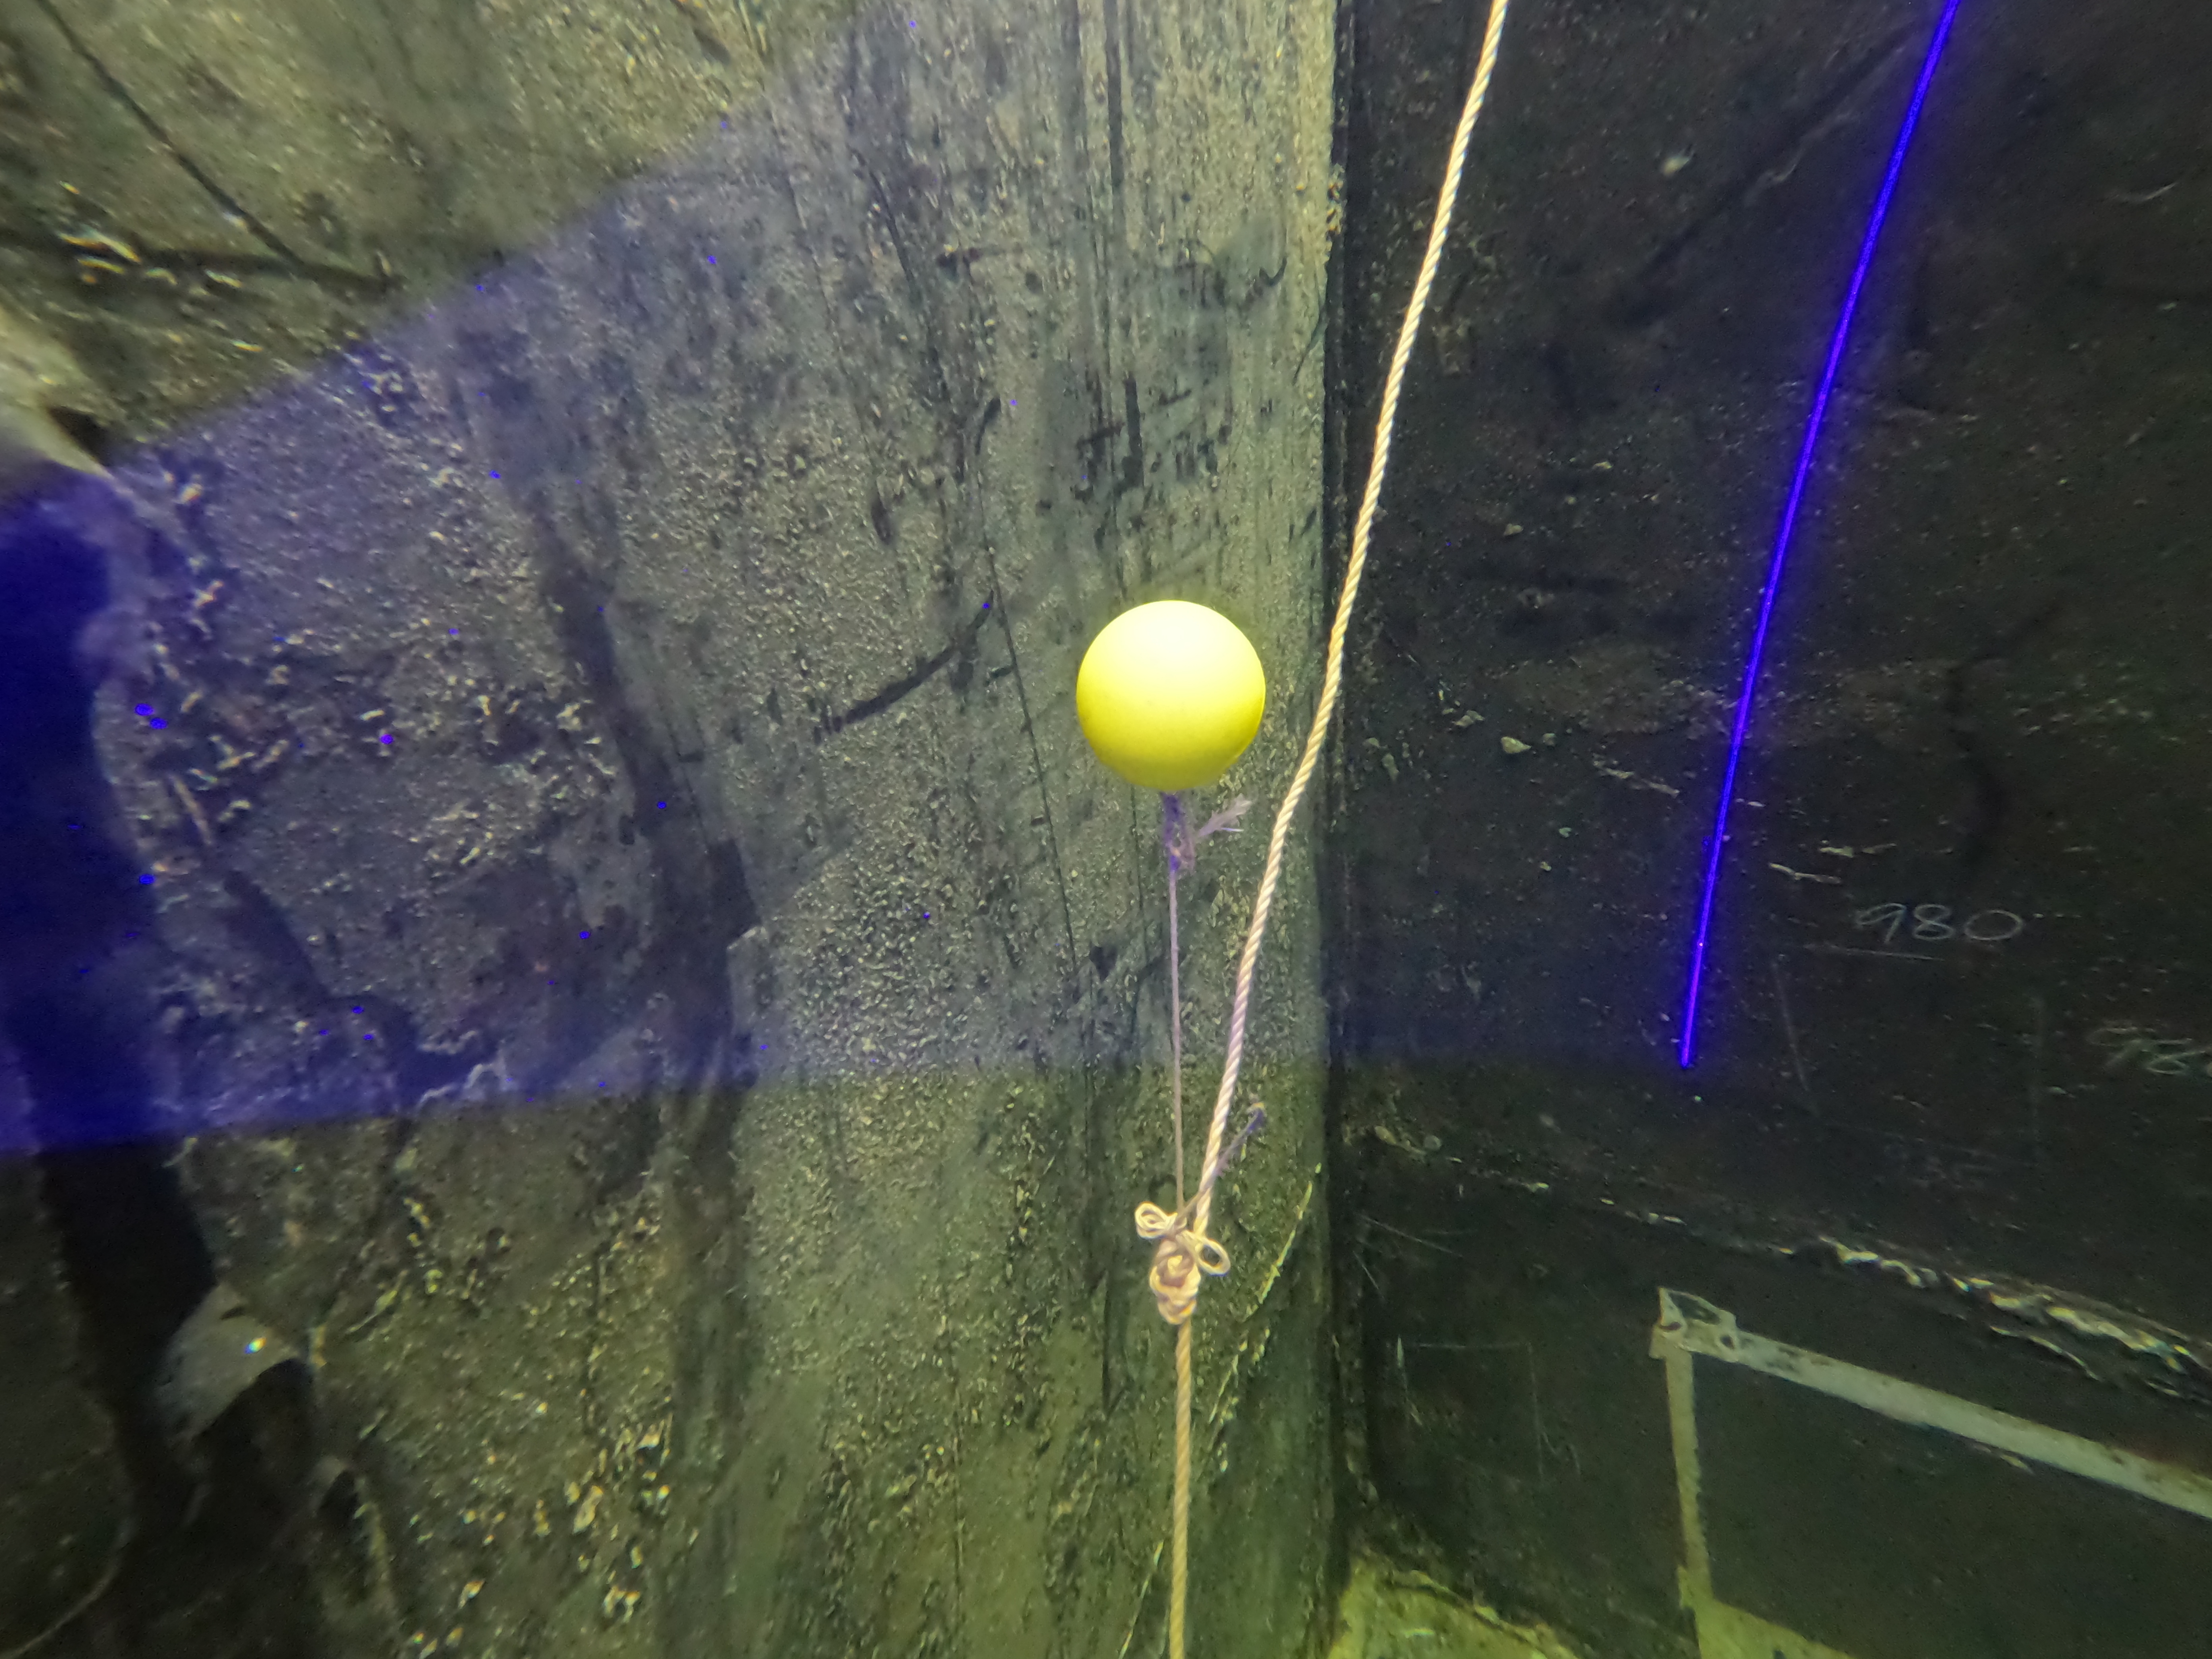

Supplement: Supplementary file 3400 [file G0034104.pdf › 8/G0034104.pdf]

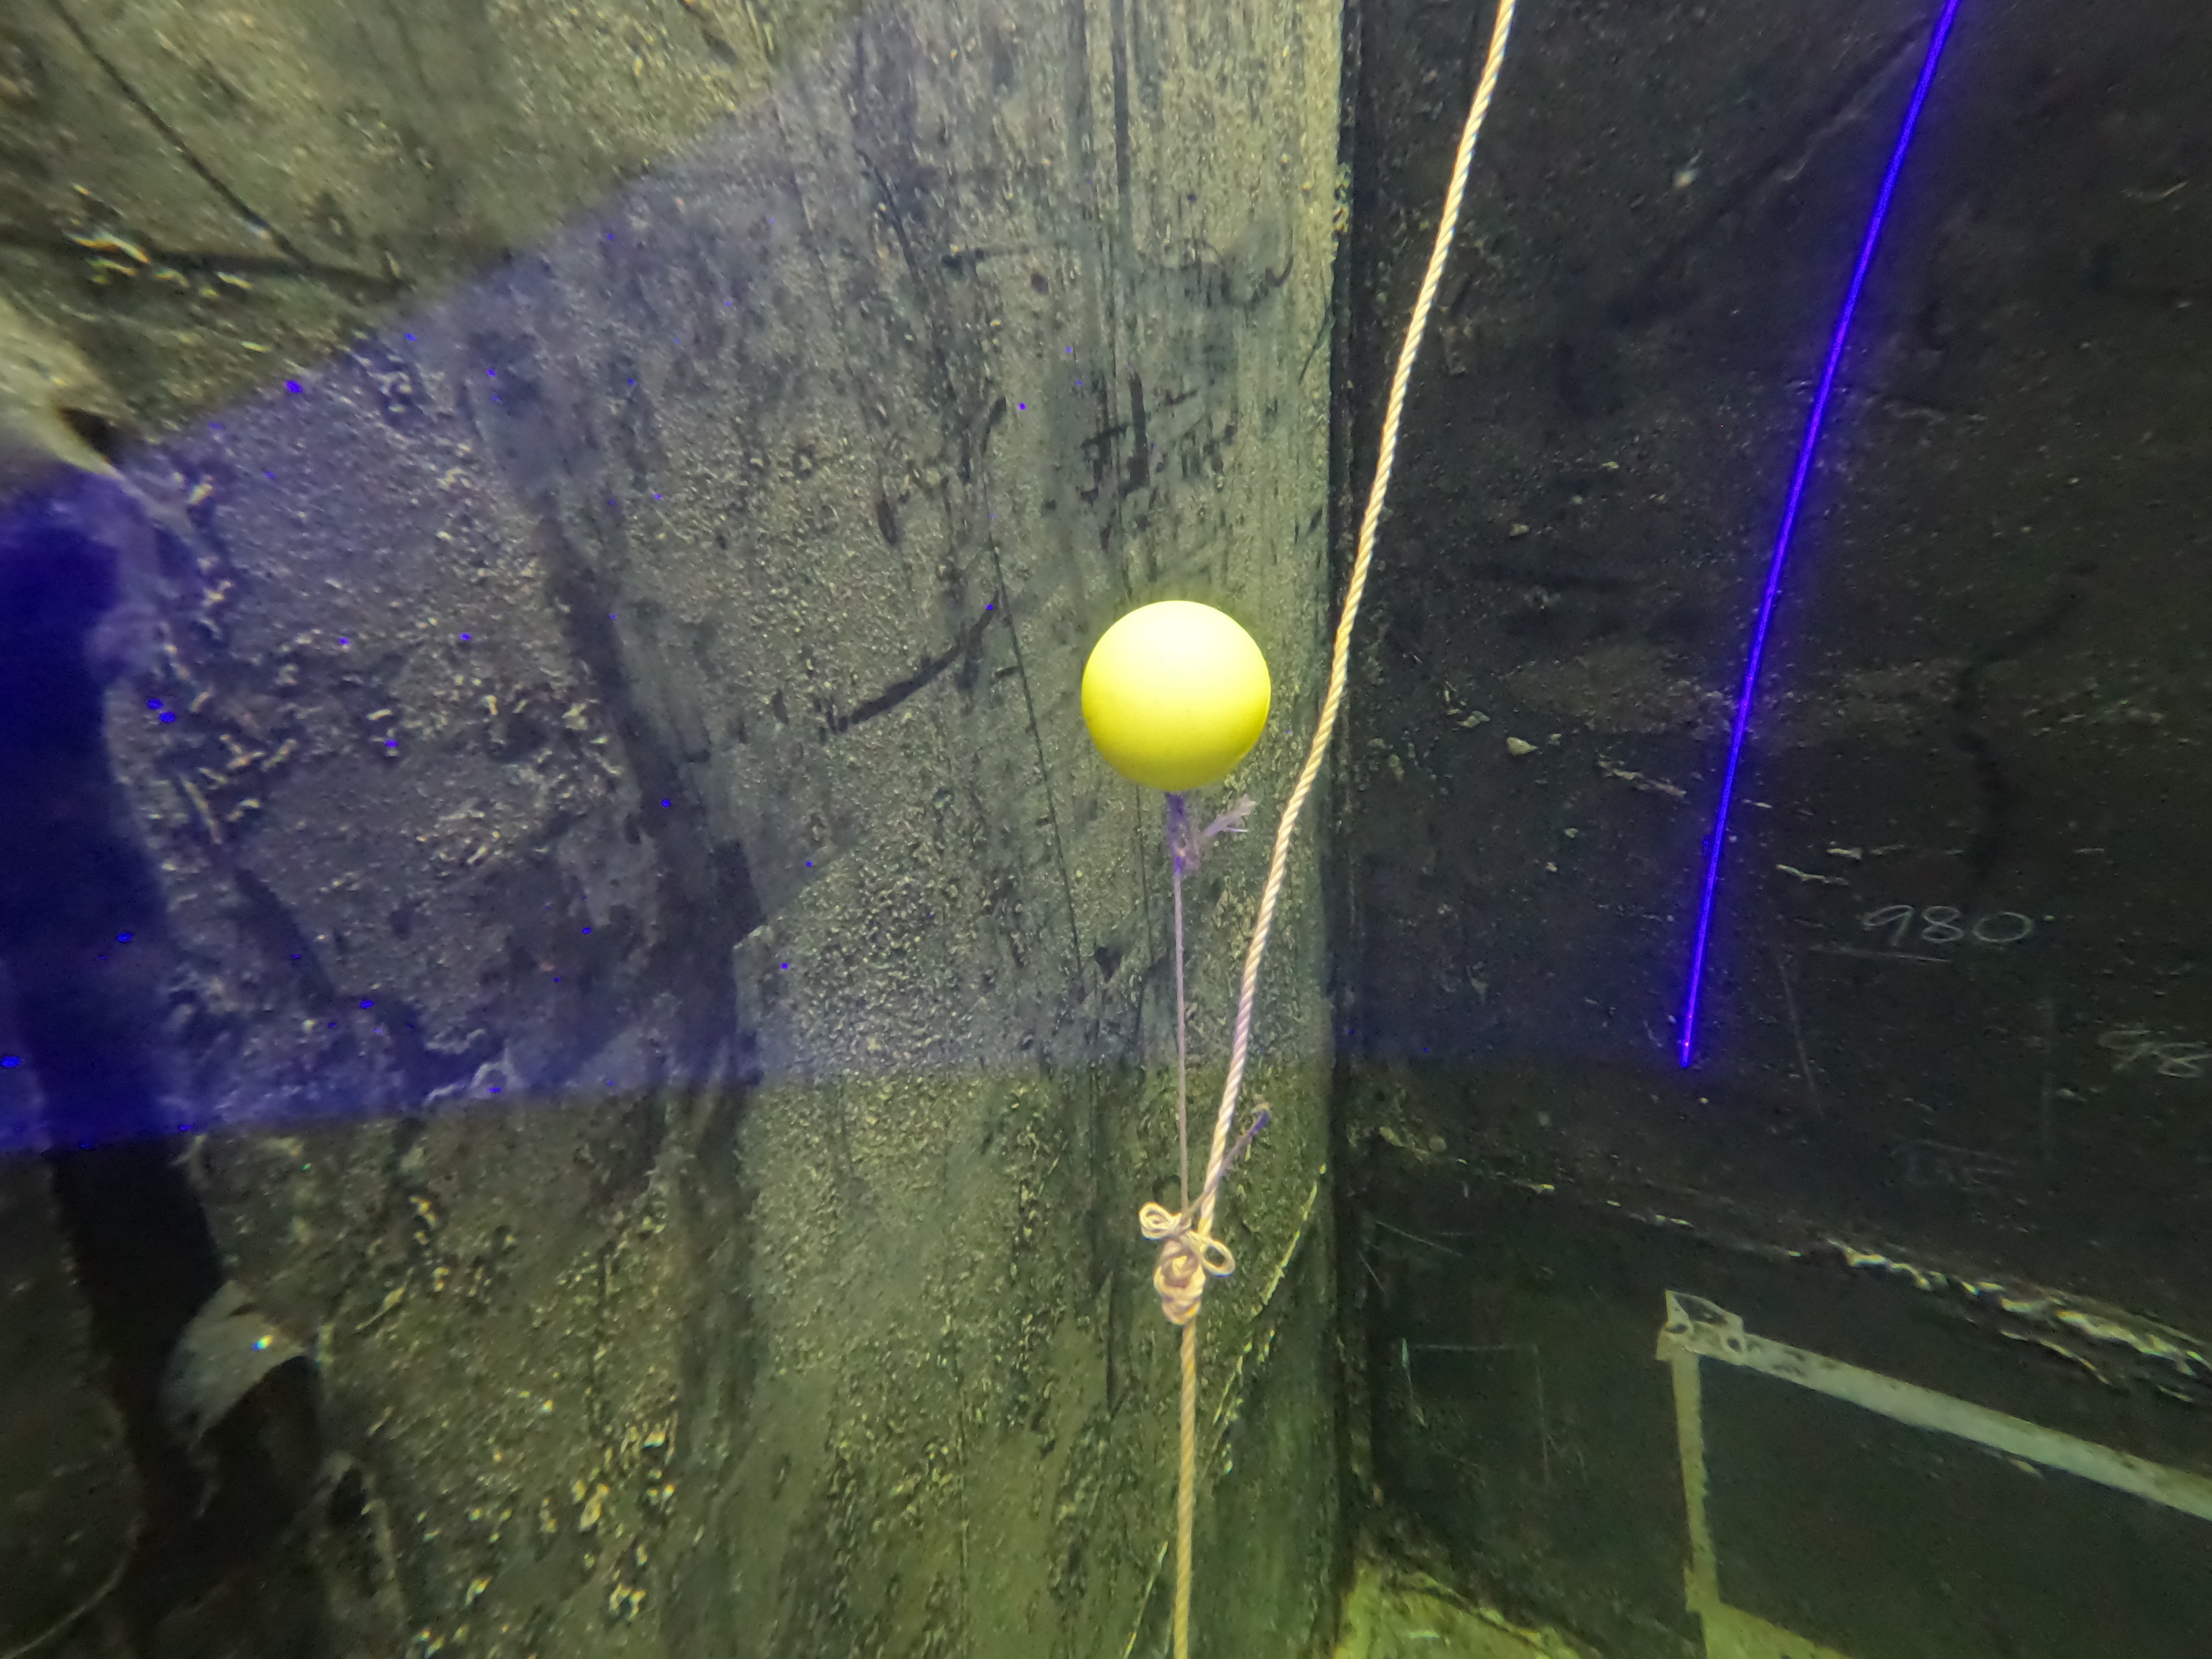

Supplement: Supplementary file 3401 [file G0034105.pdf › 8/G0034105.pdf]

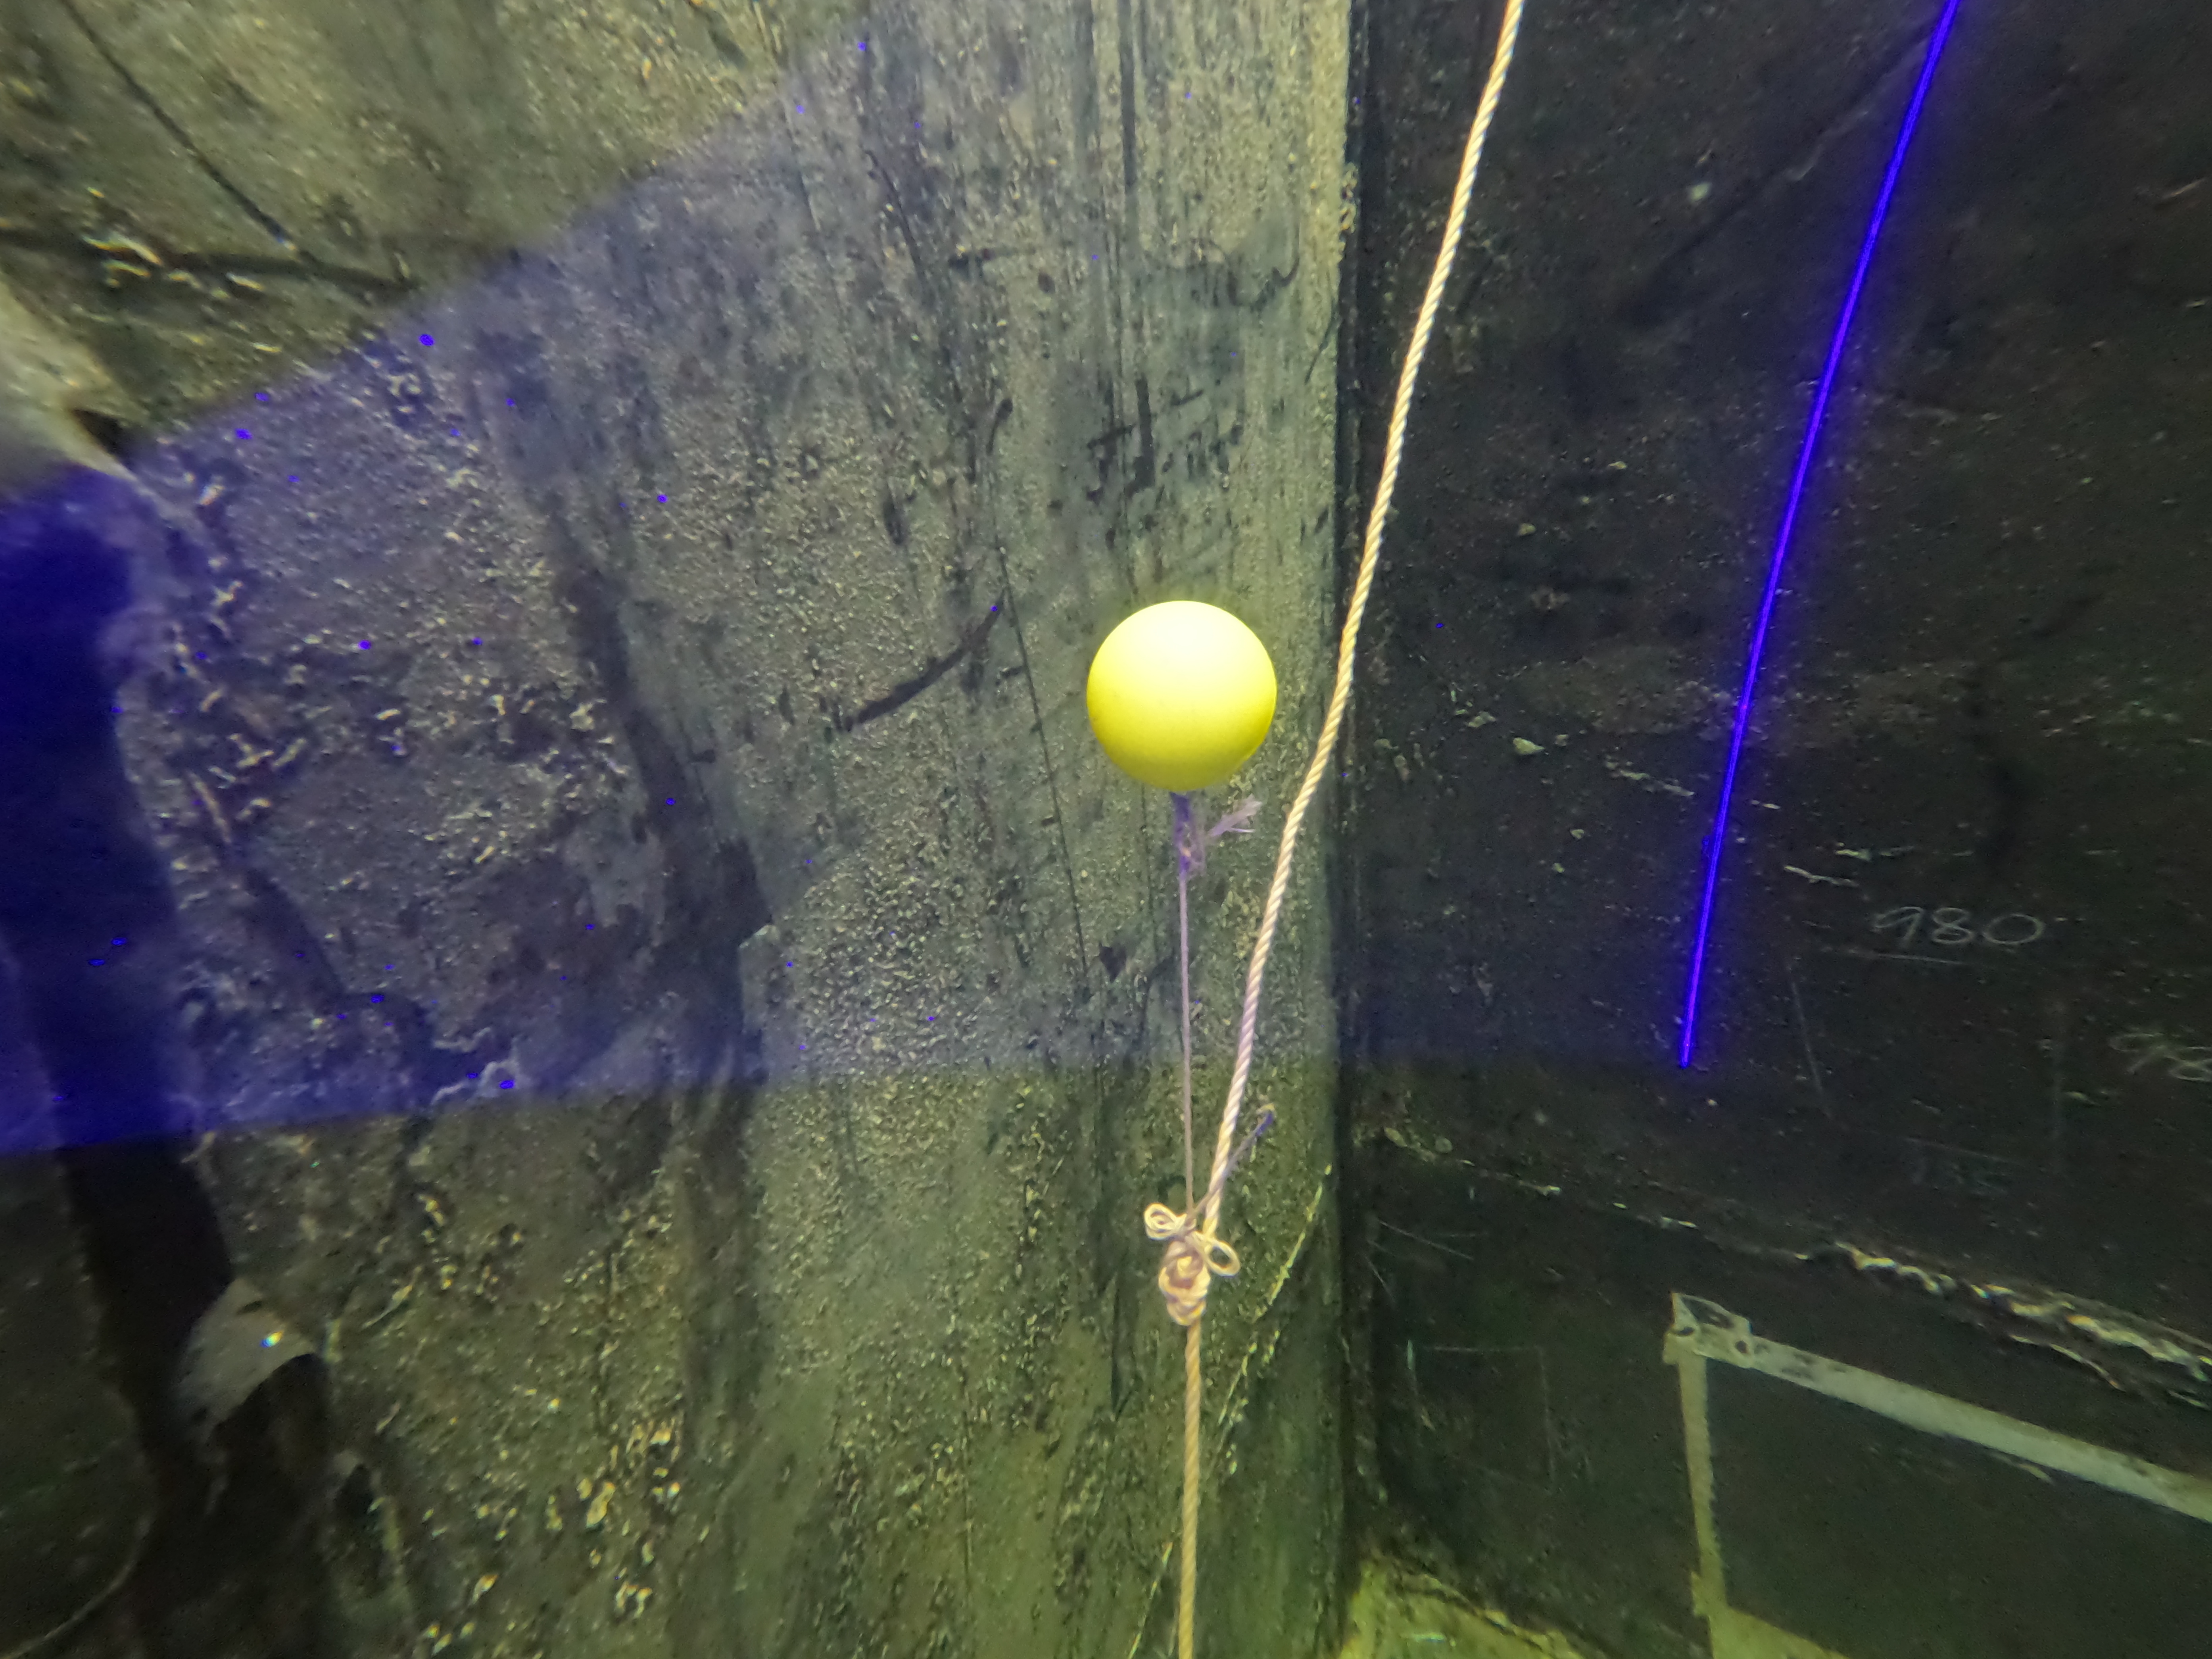

Supplement: Supplementary file 3402 [file G0034106.pdf › 8/G0034106.pdf]

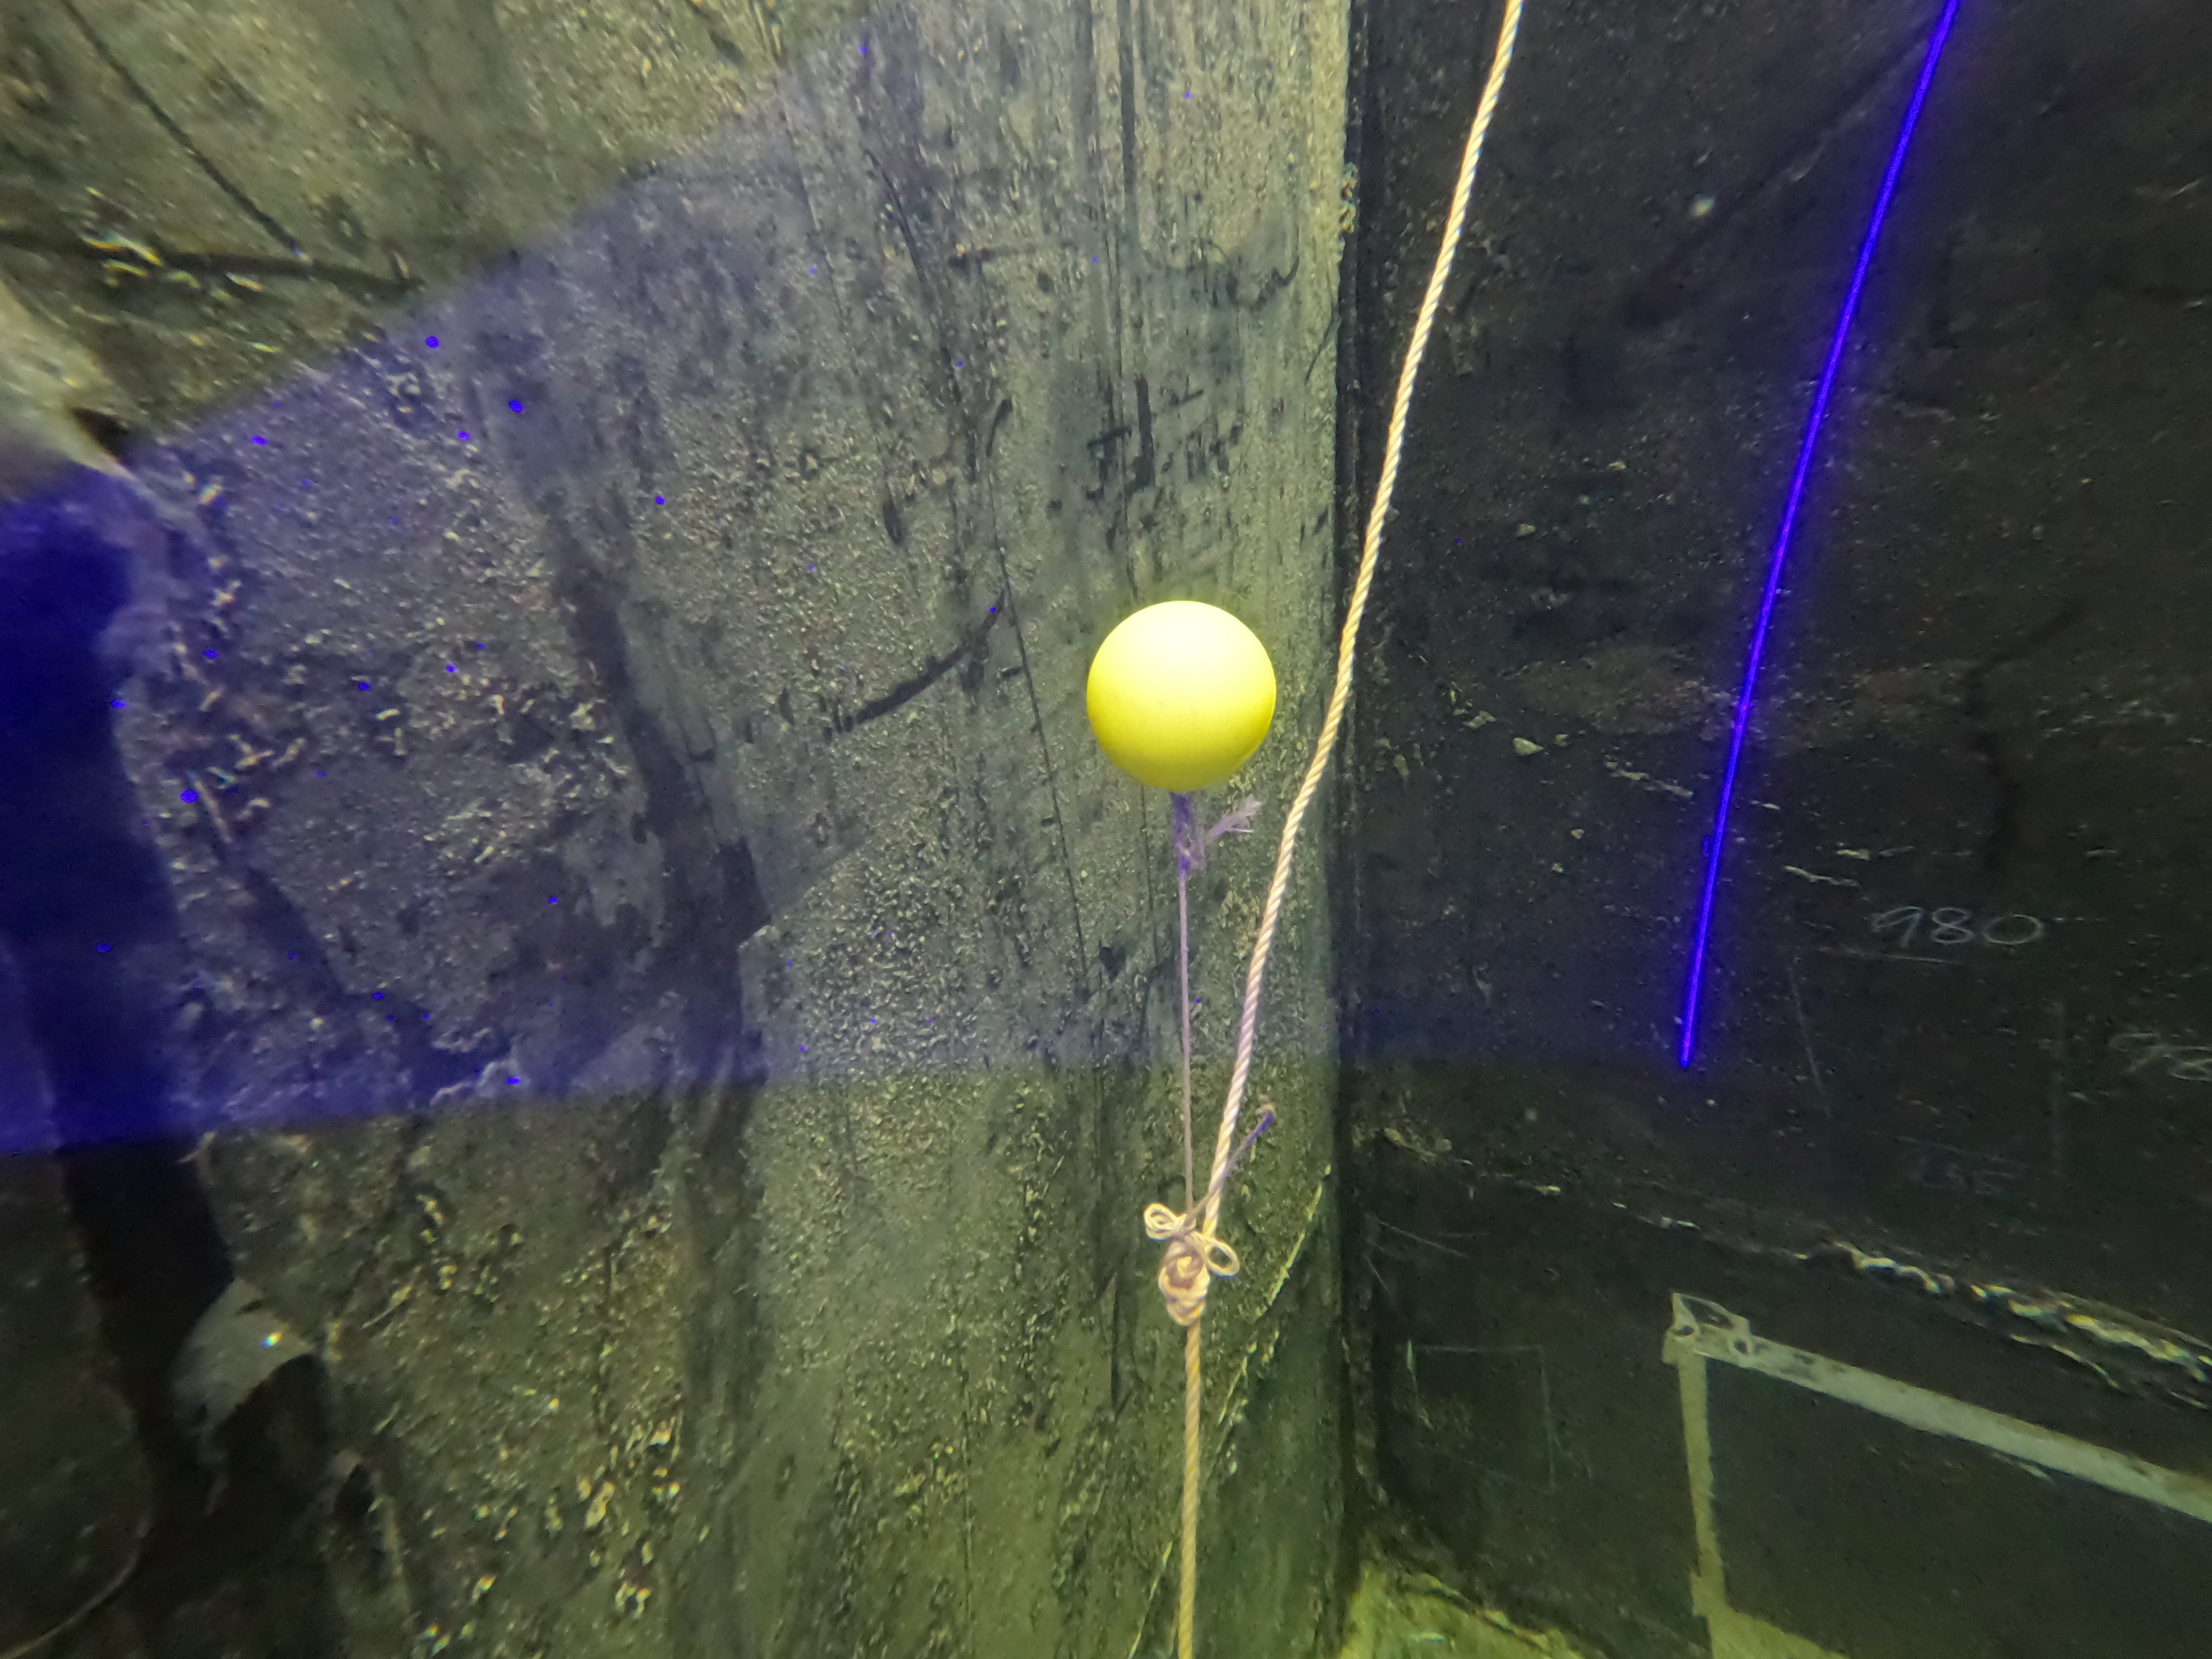

Supplement: Supplementary file 3403 [file G0034107.pdf › 8/G0034107.pdf]

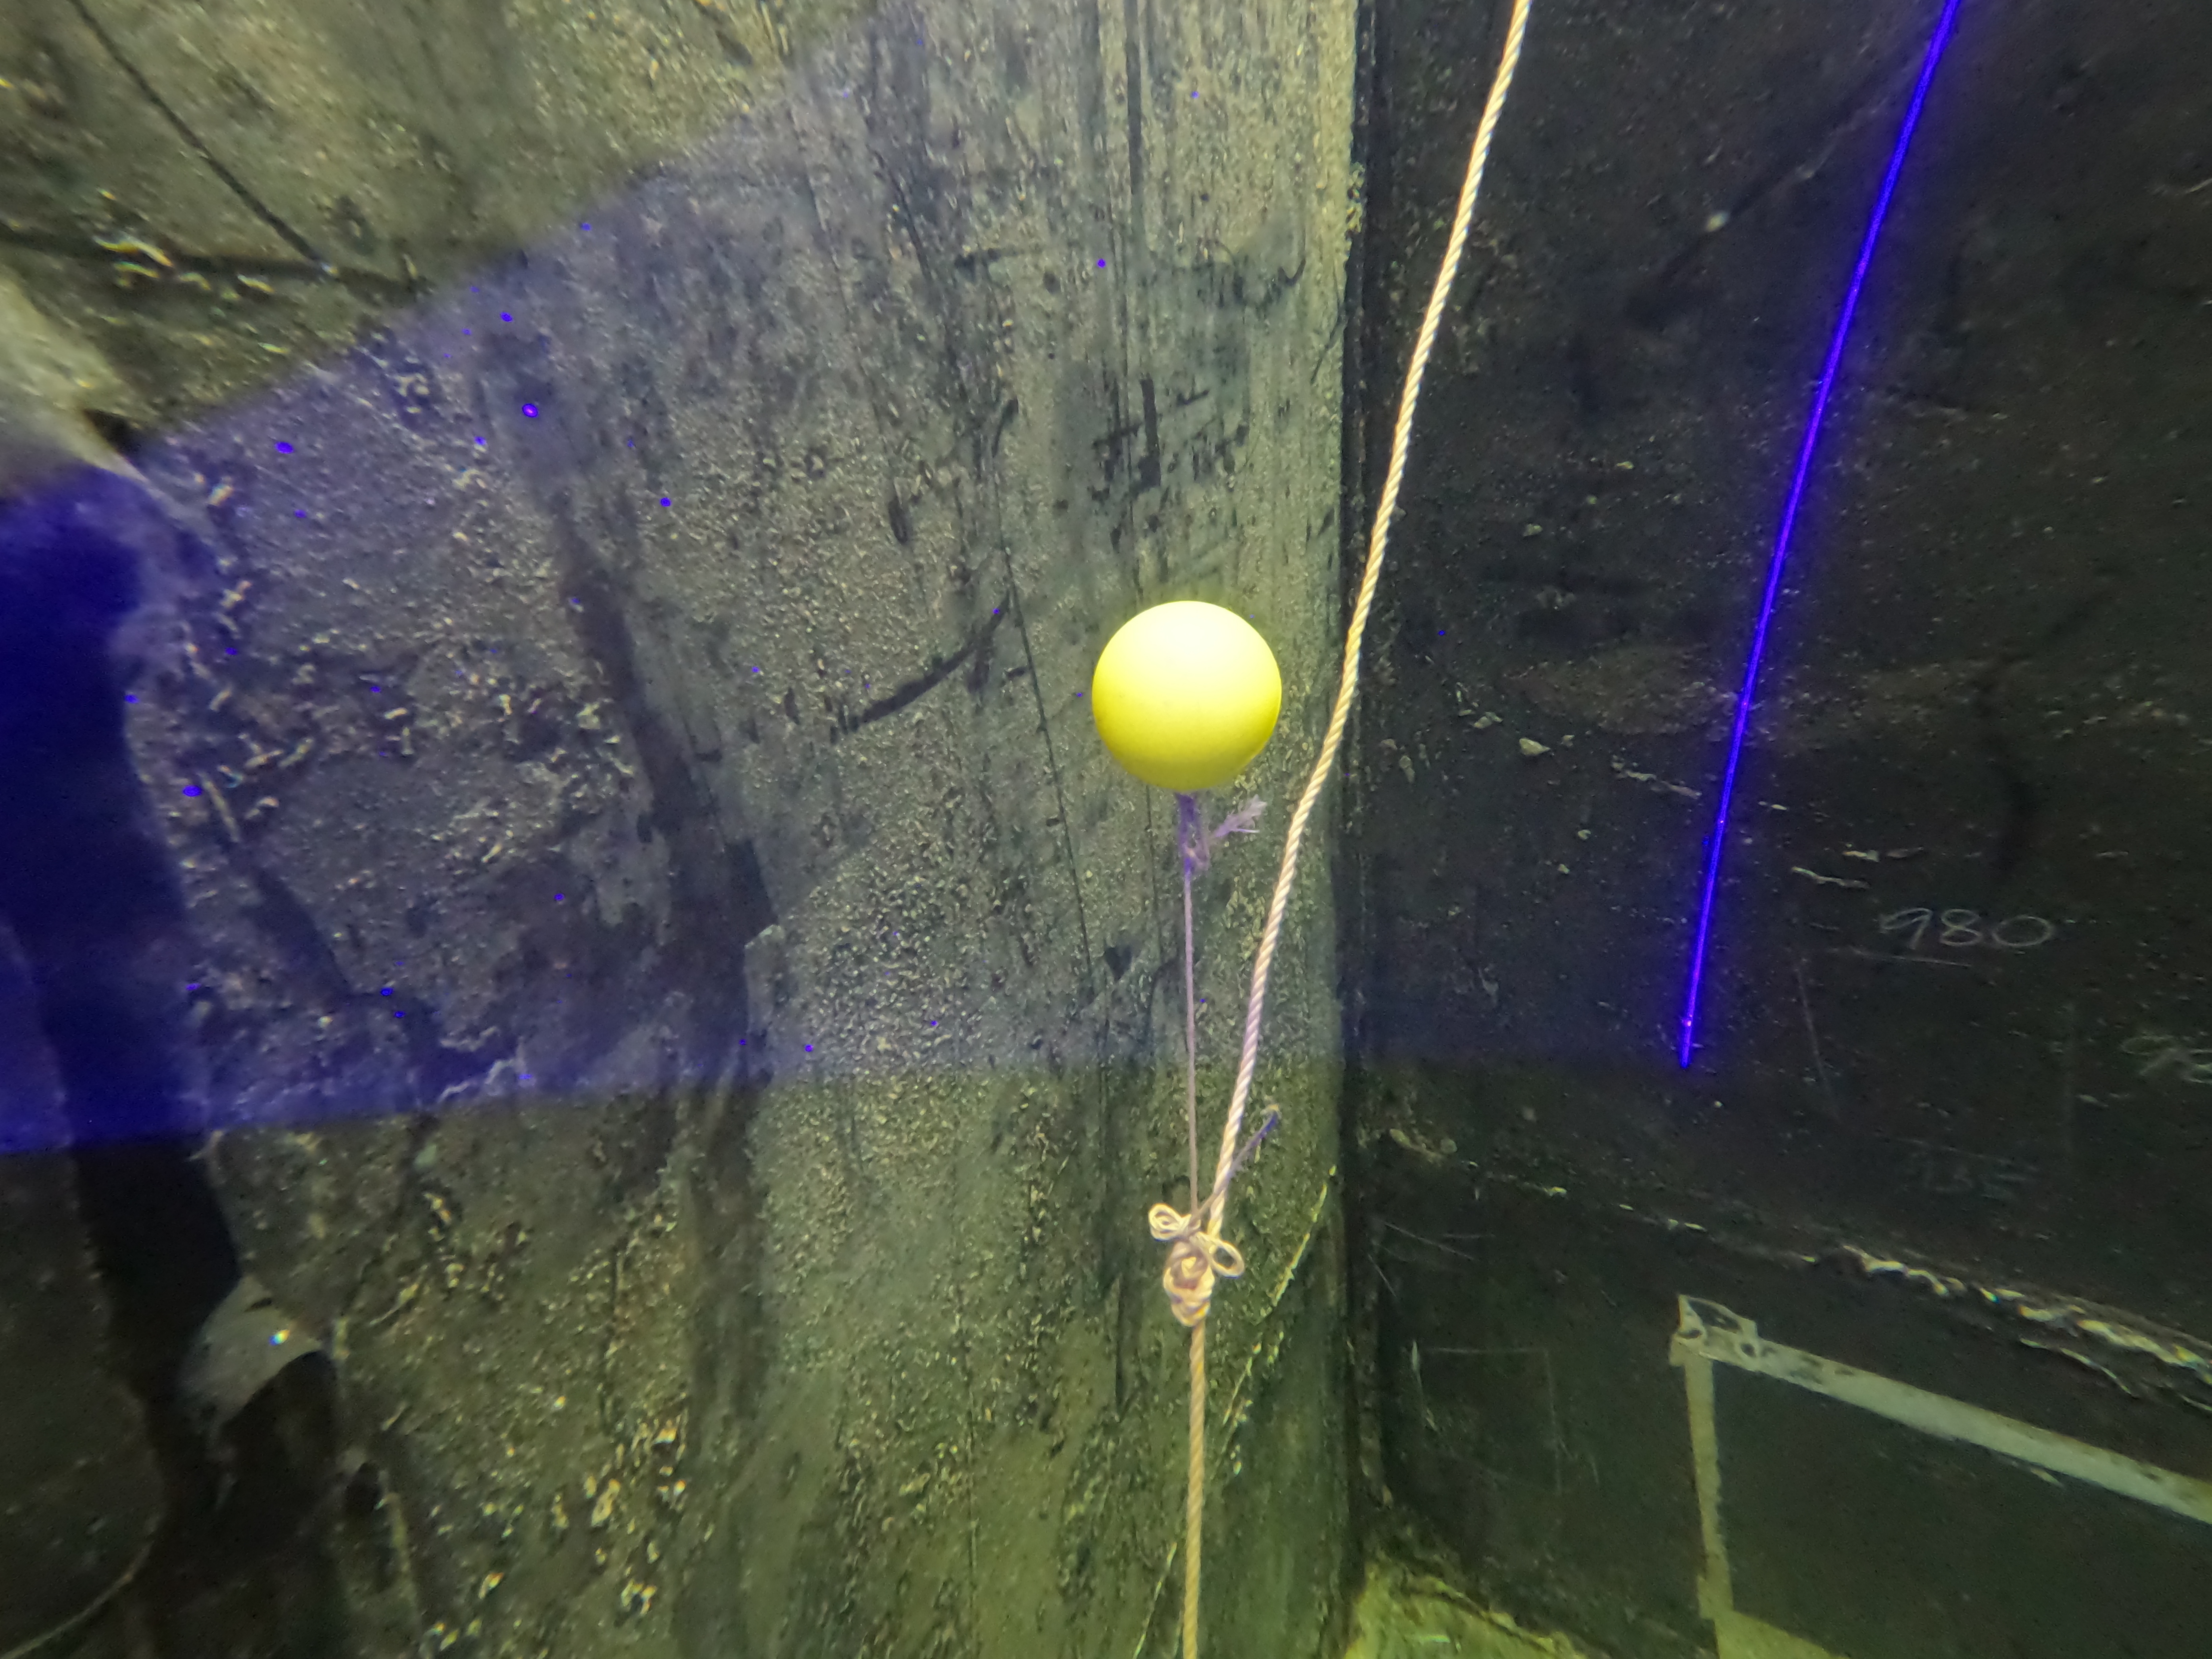

Supplement: Supplementary file 3404 [file G0034108.pdf › 8/G0034108.pdf]

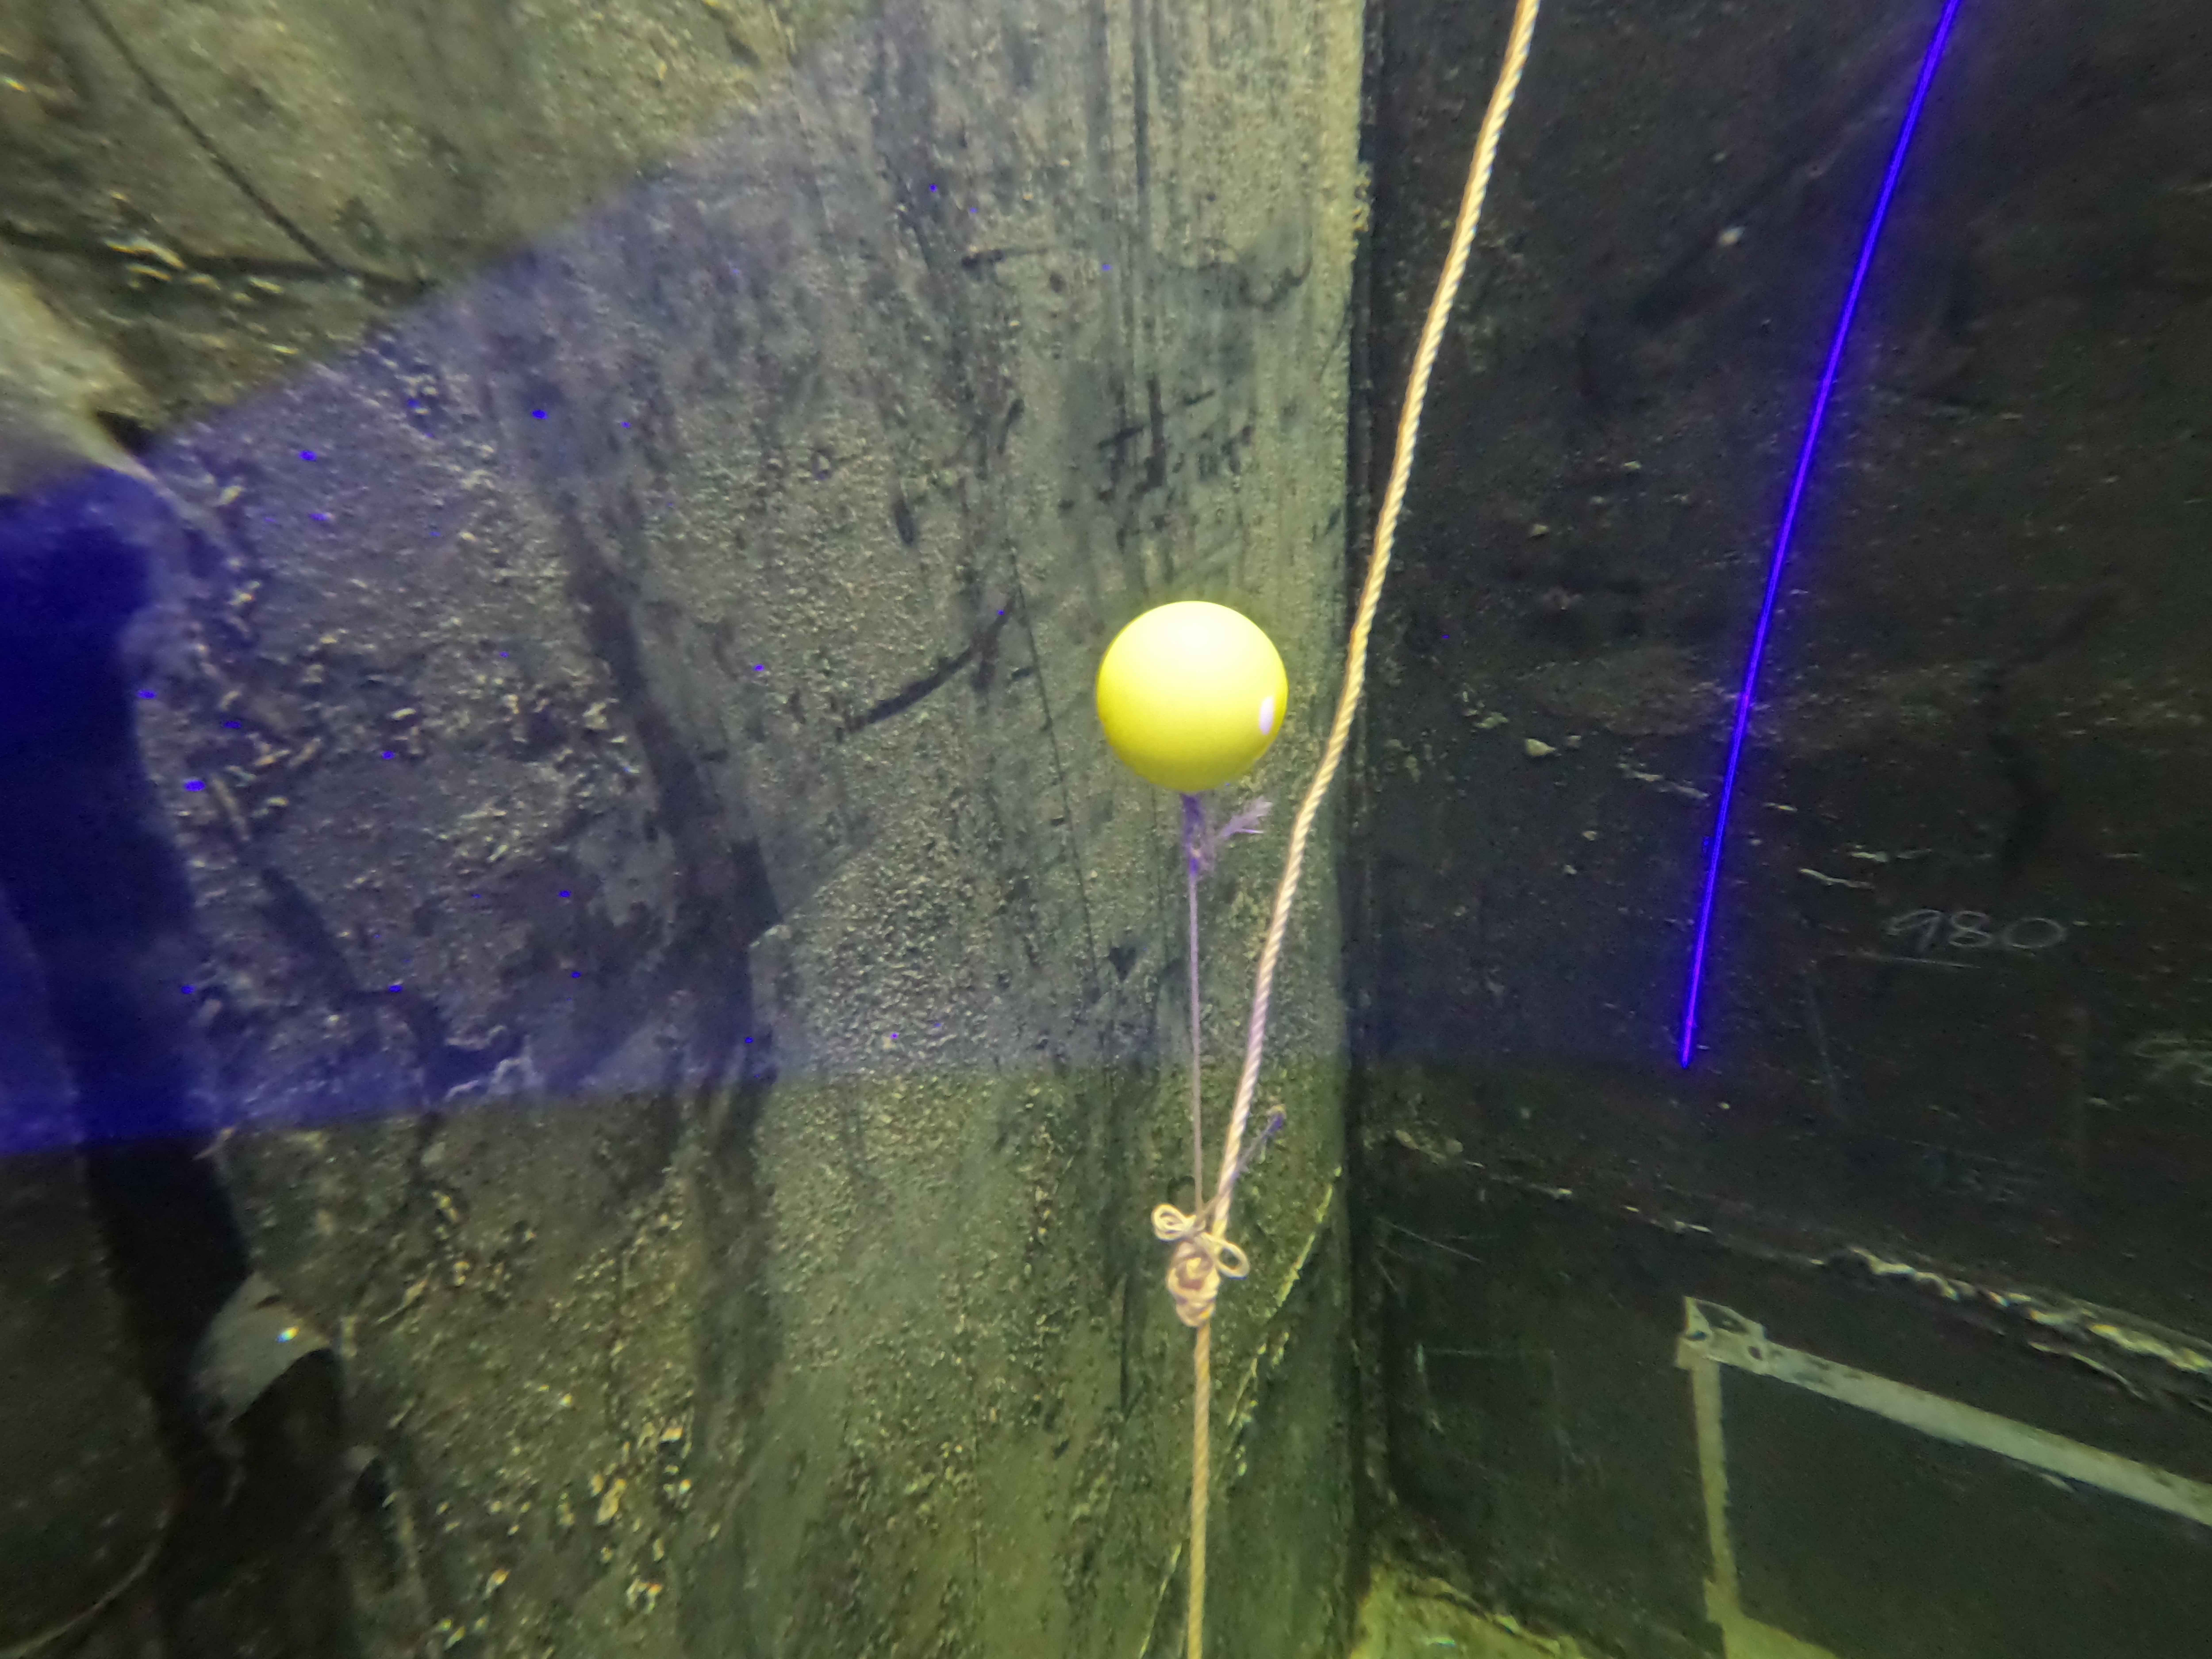

Supplement: Supplementary file 3405 [file G0034109.pdf › 8/G0034109.pdf]

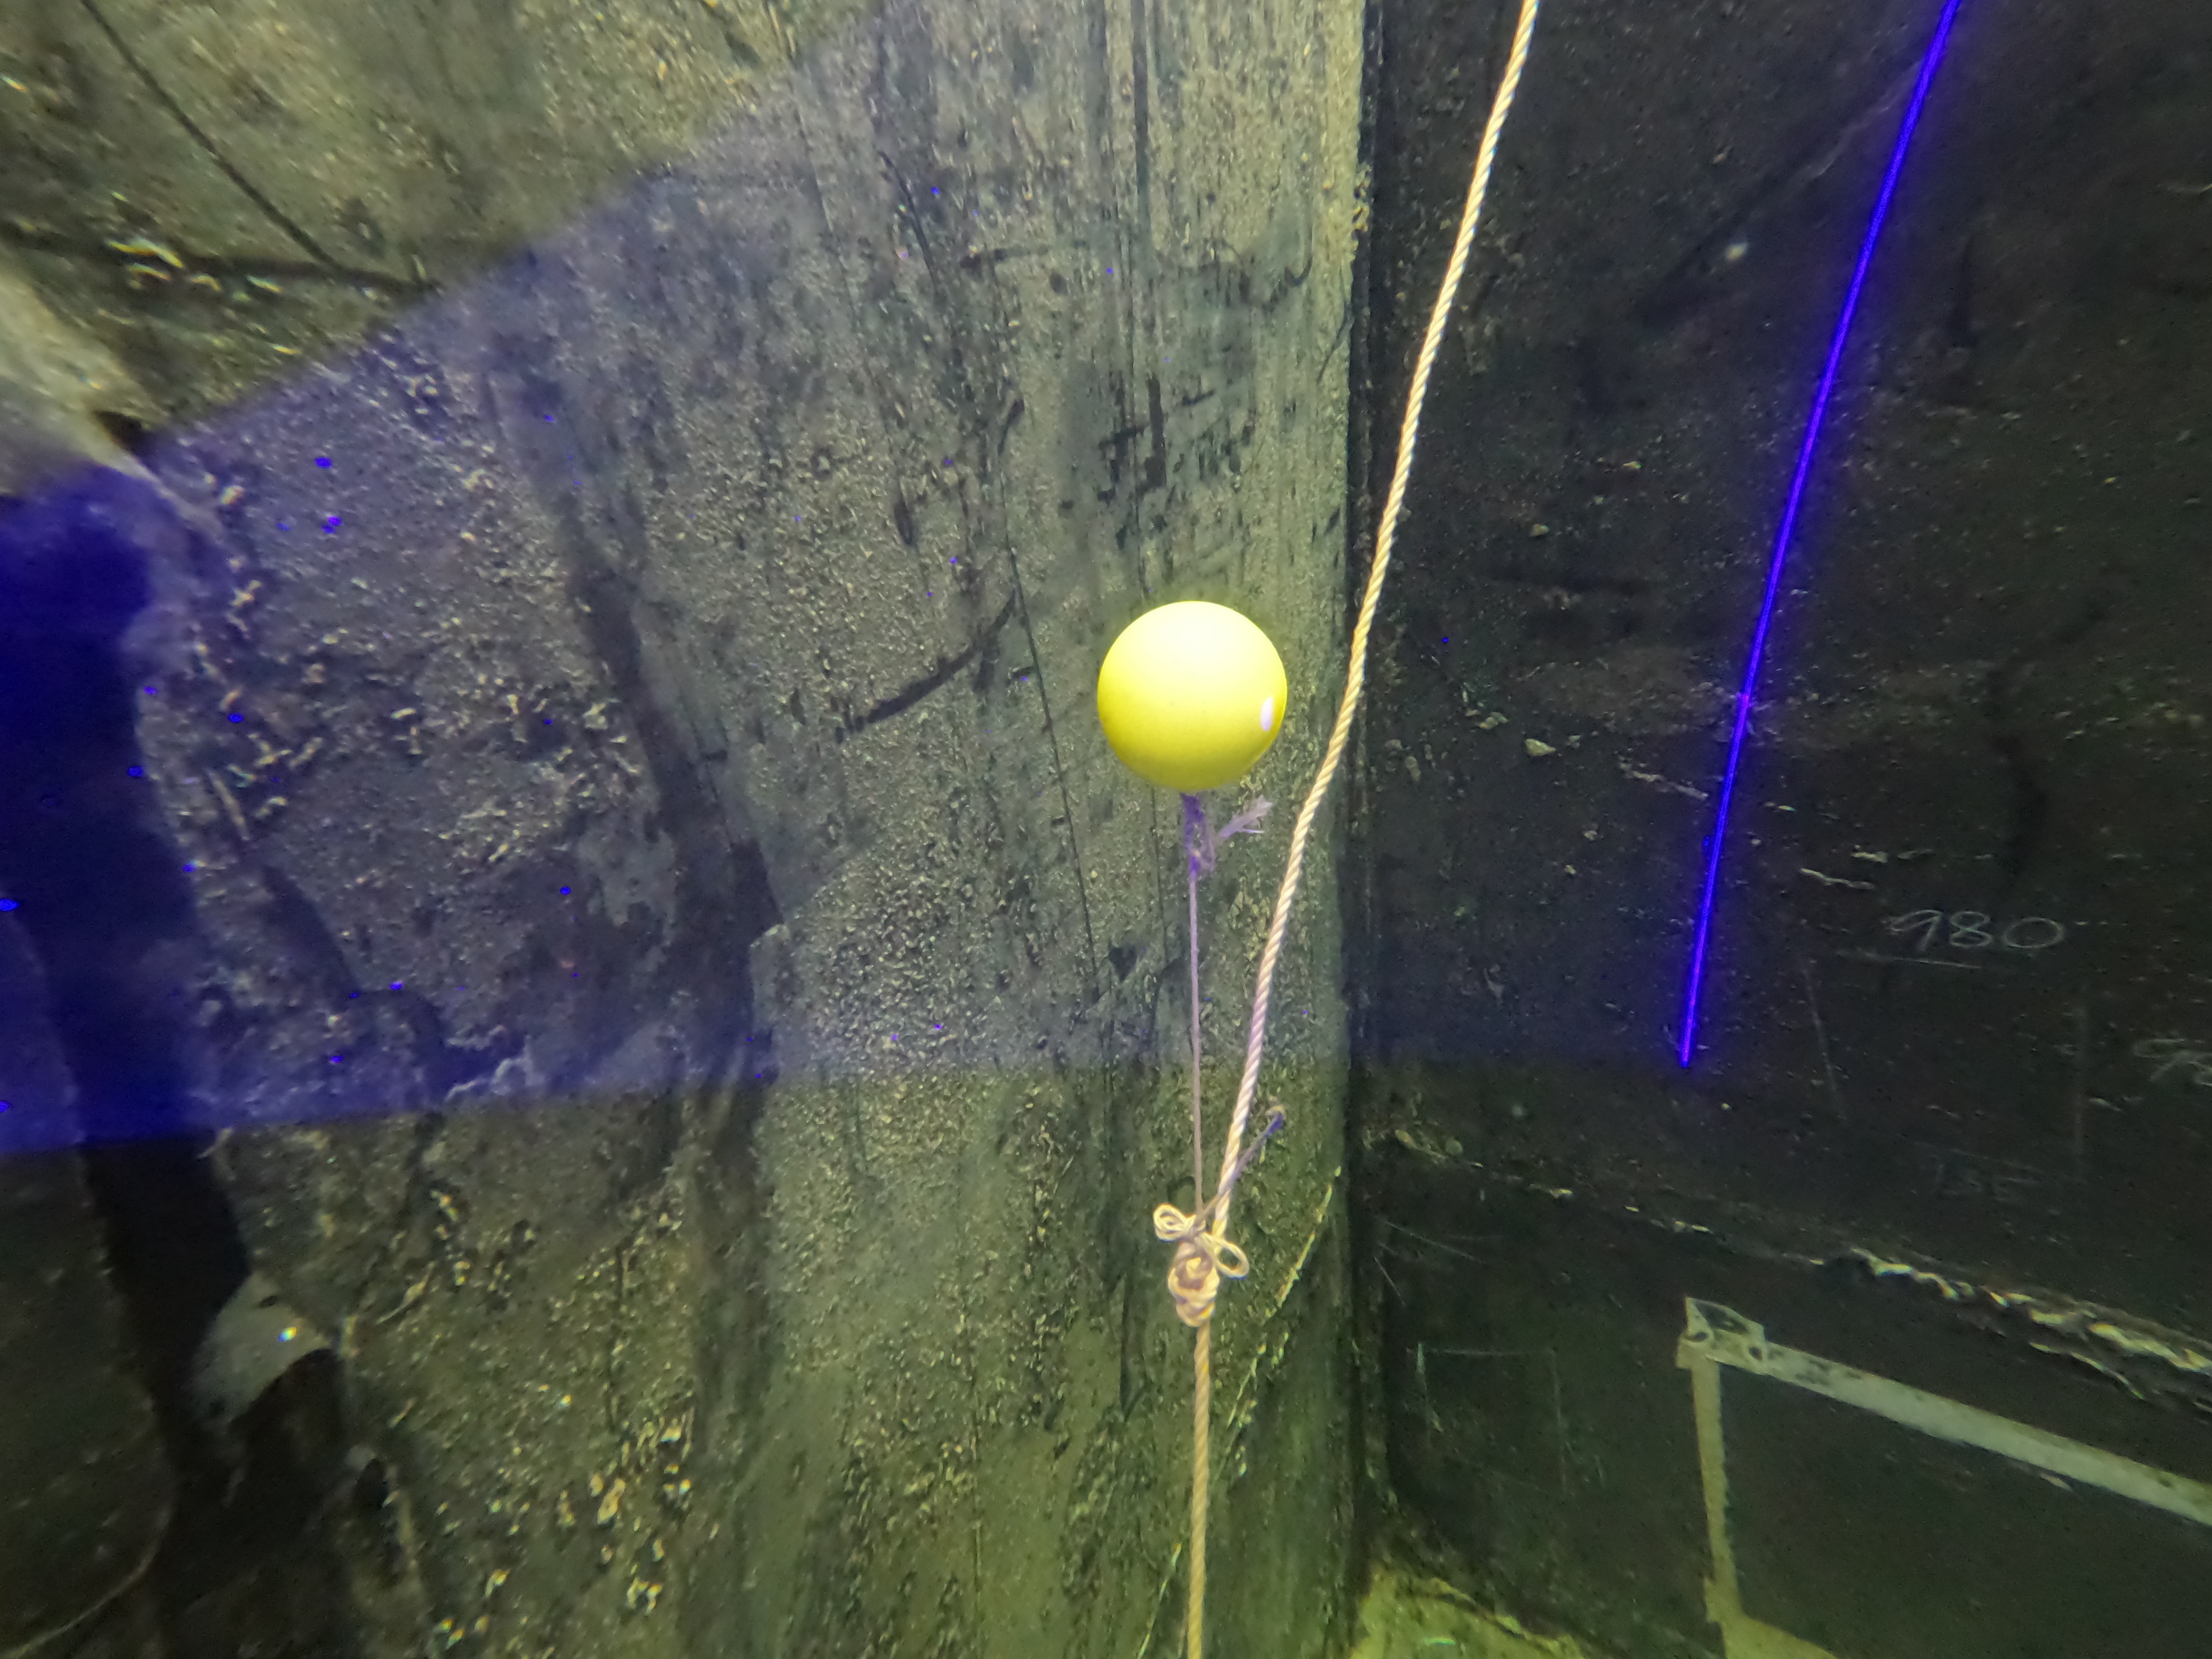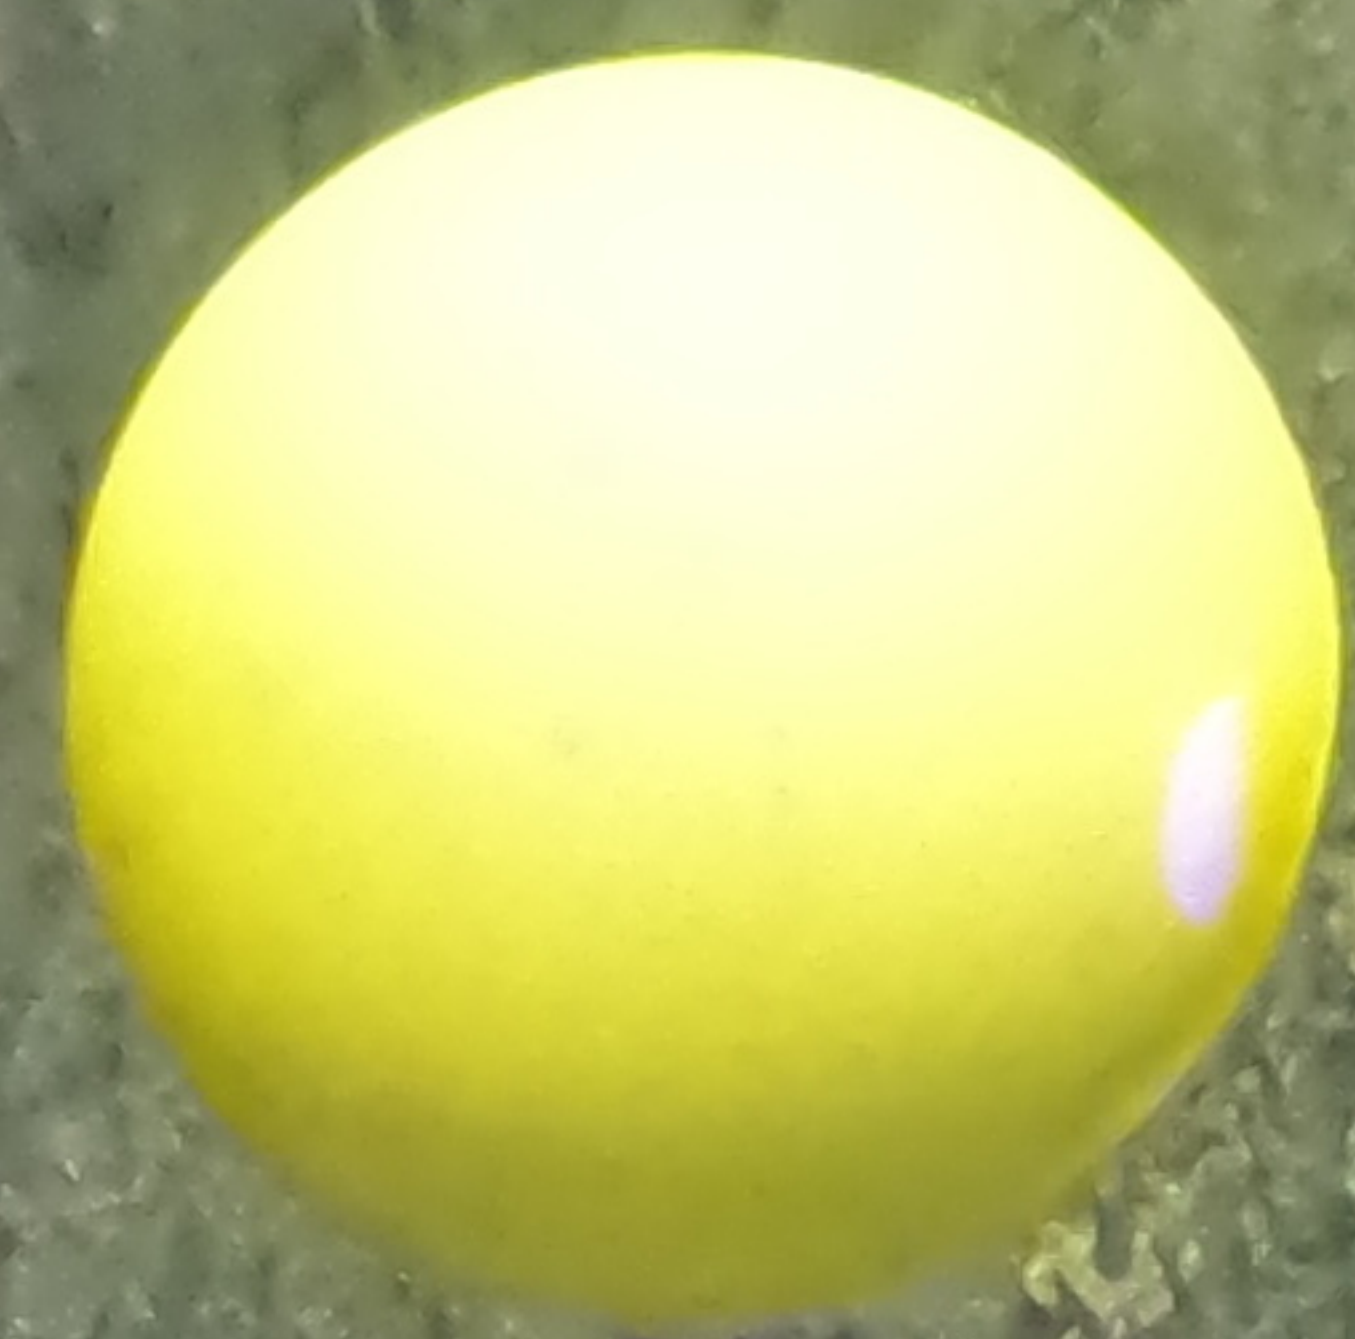

980

Supplement: Supplementary file 3406 [file G0034110.pdf › 8/G0034110.pdf]

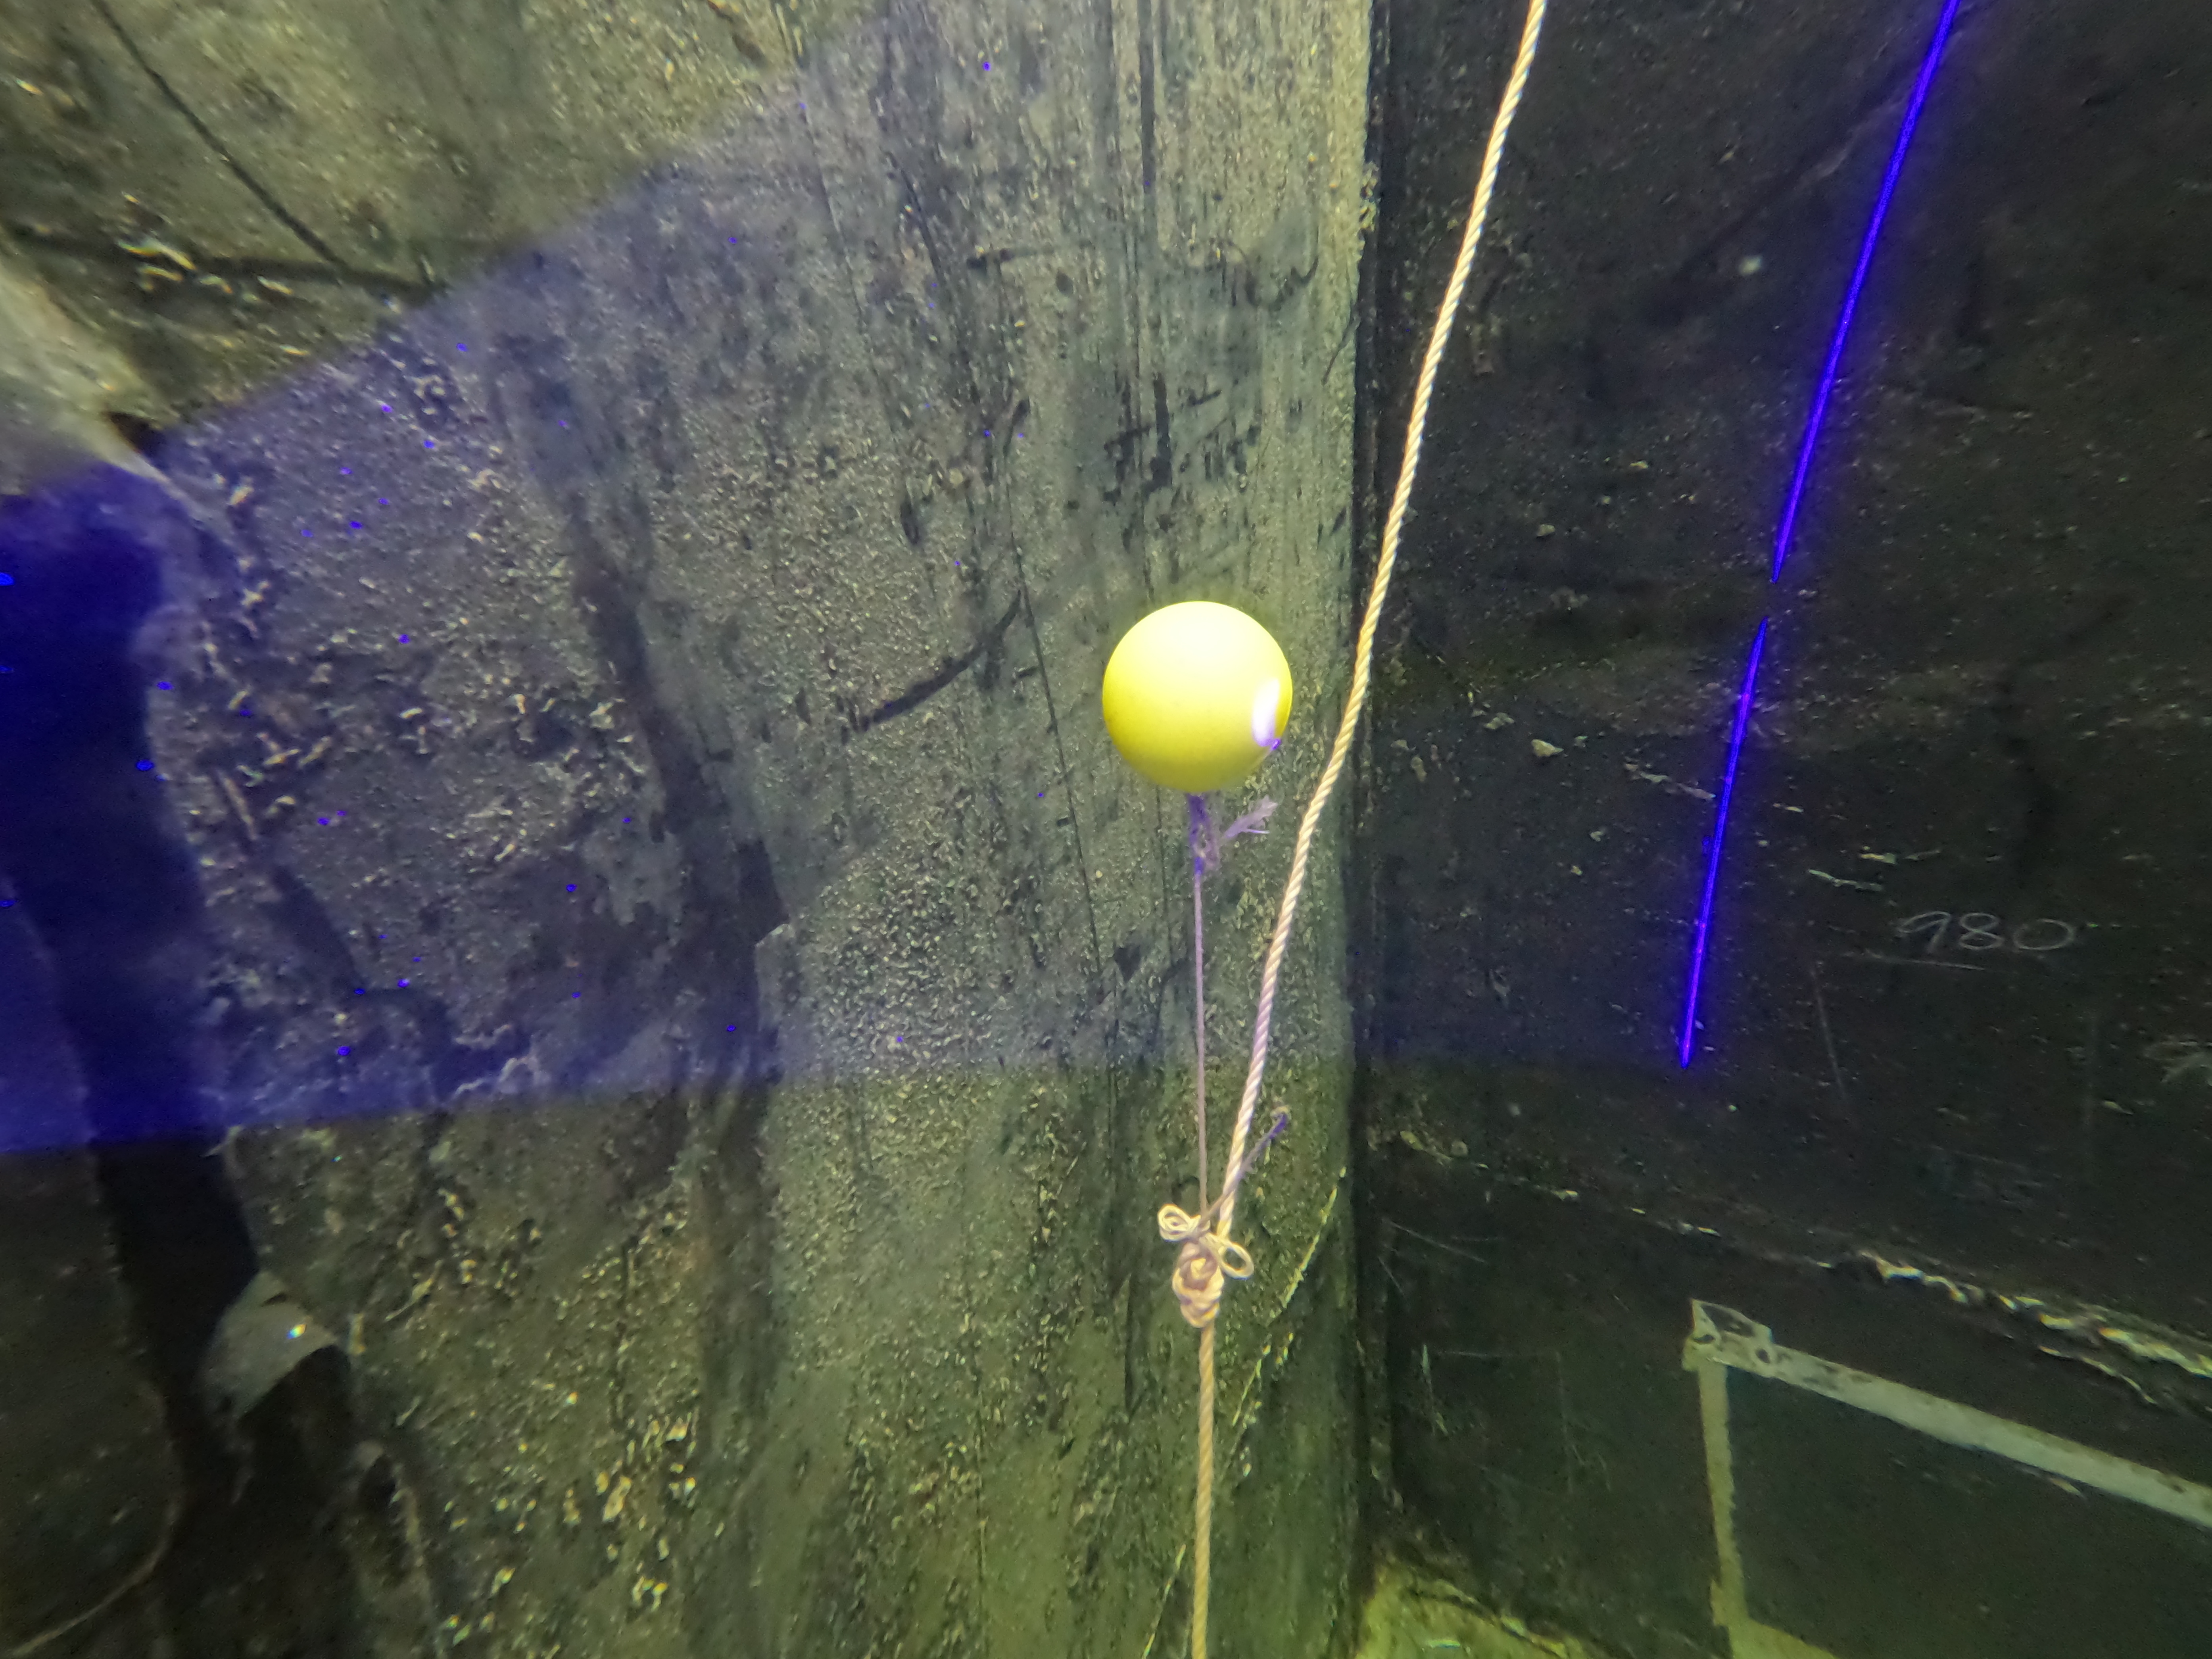

980

Supplement: Supplementary file 3407 [file G0034111.pdf › 8/G0034111.pdf]

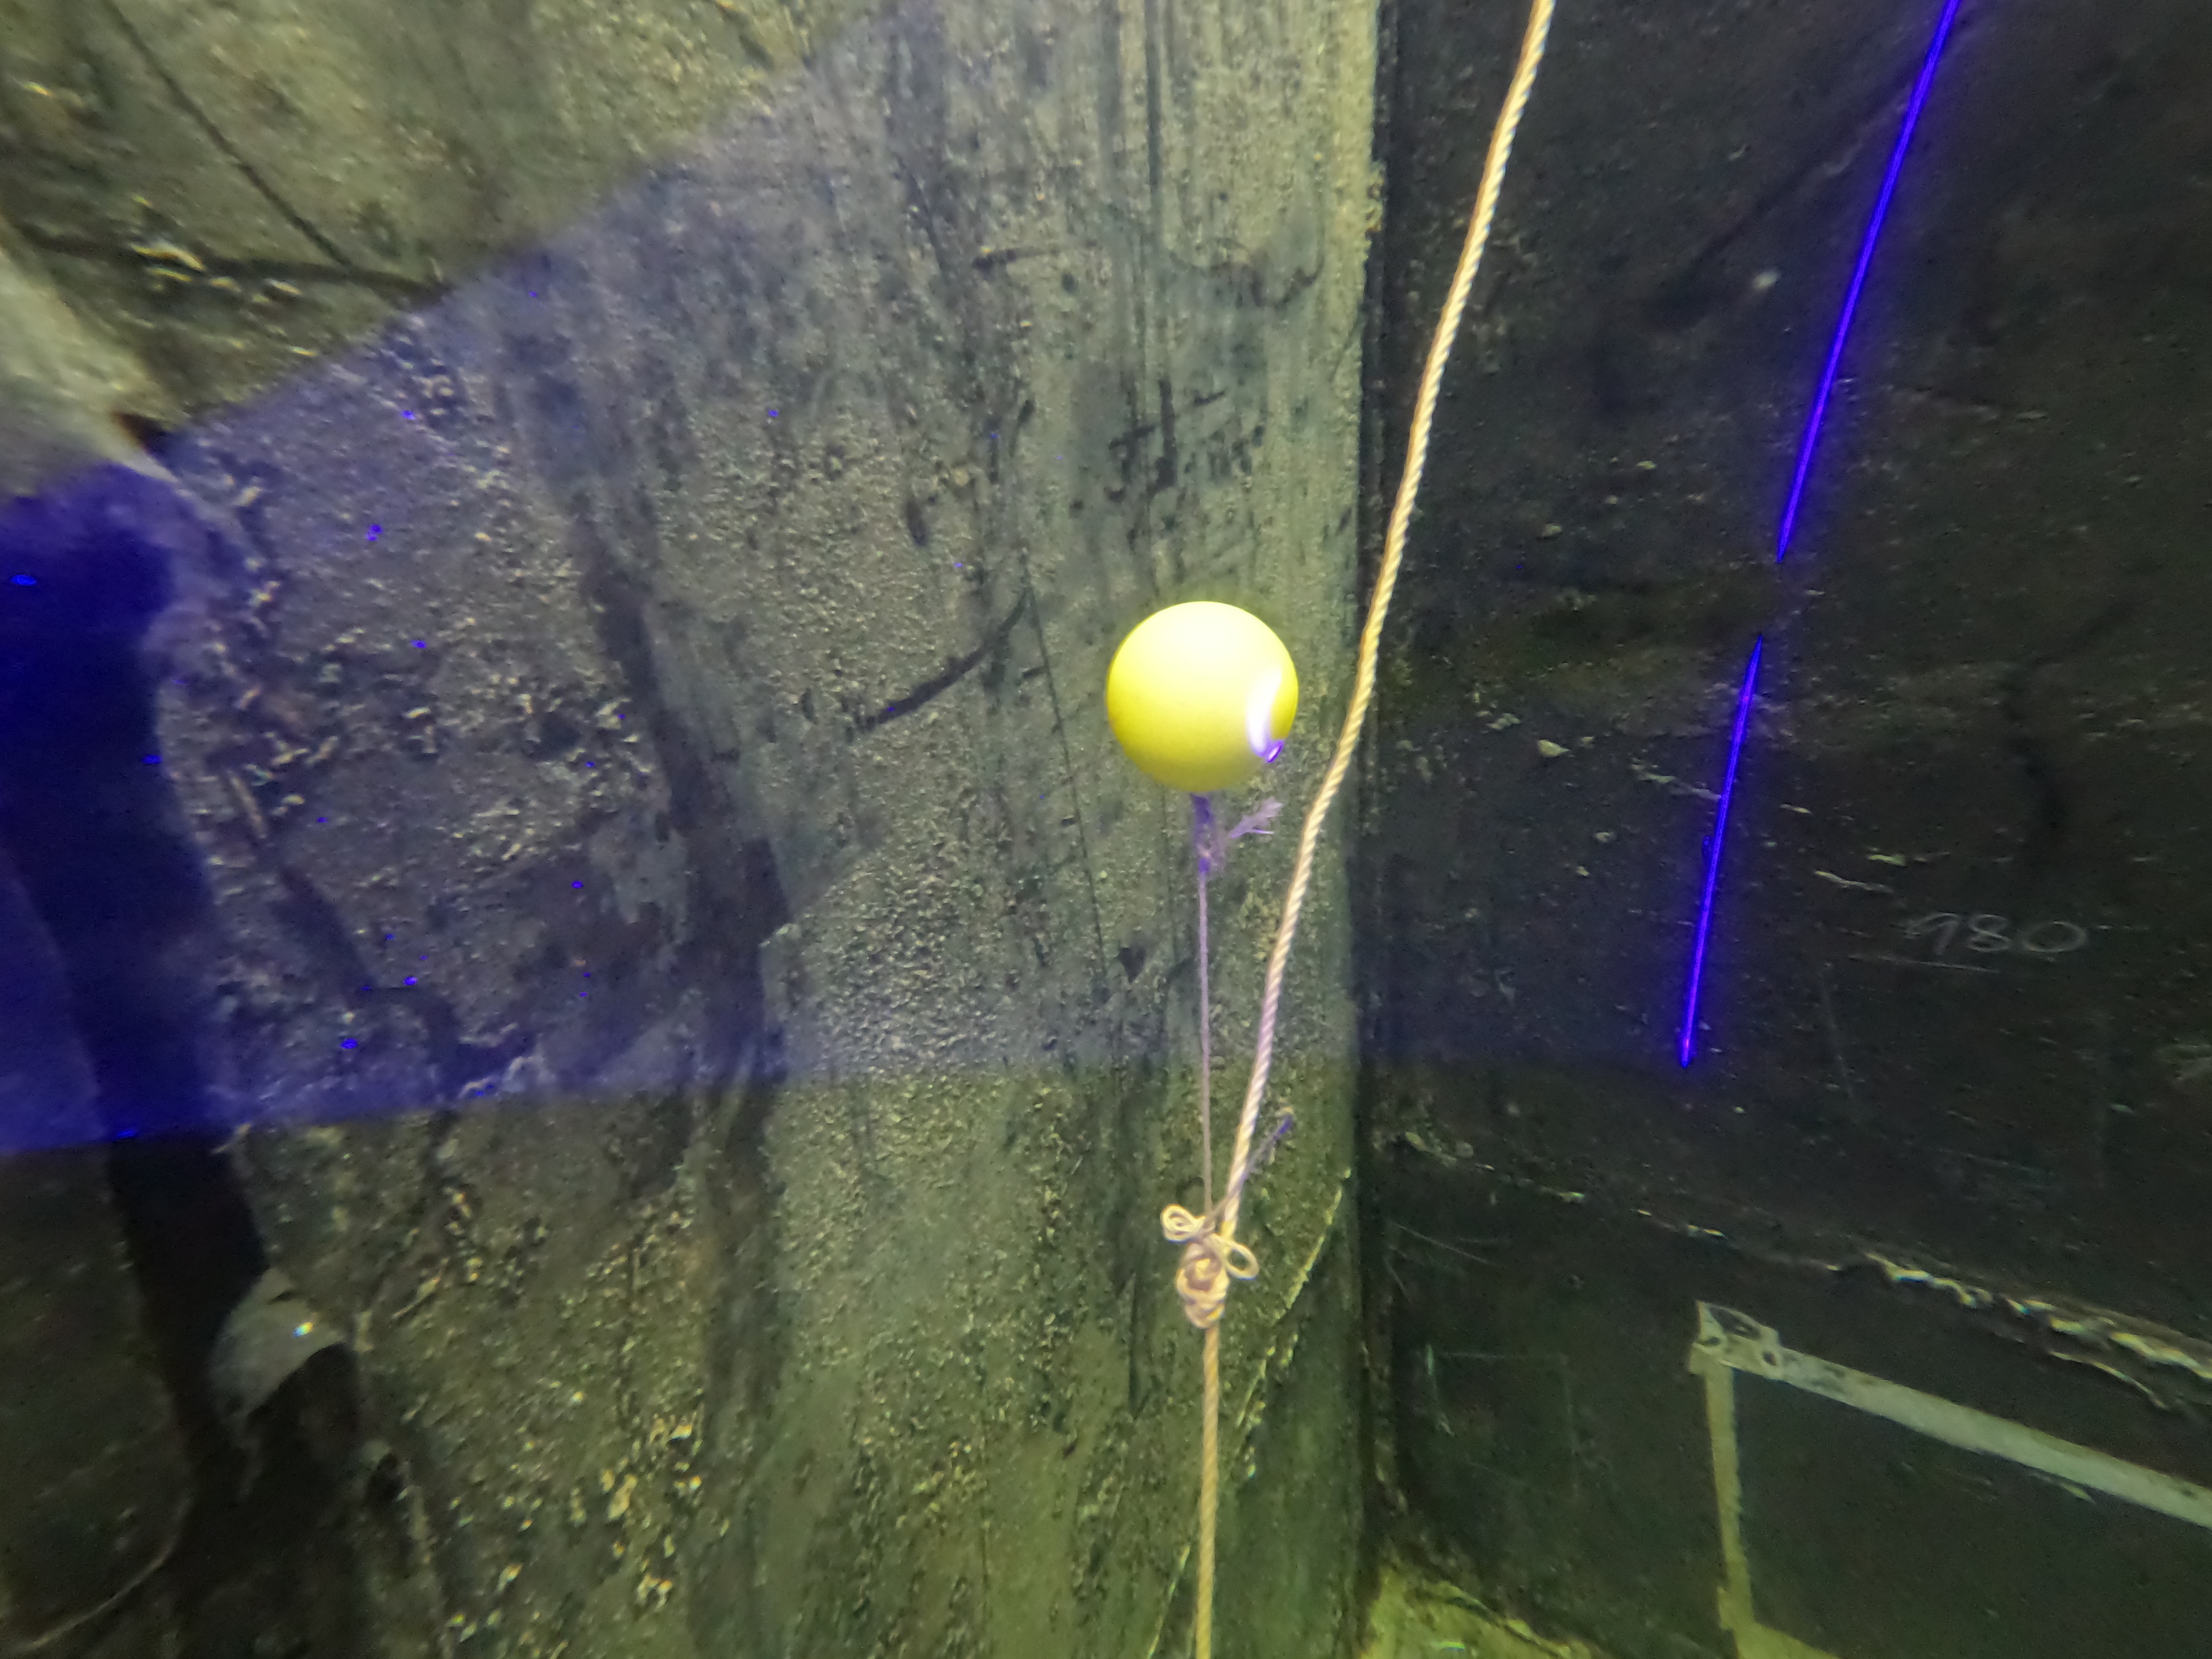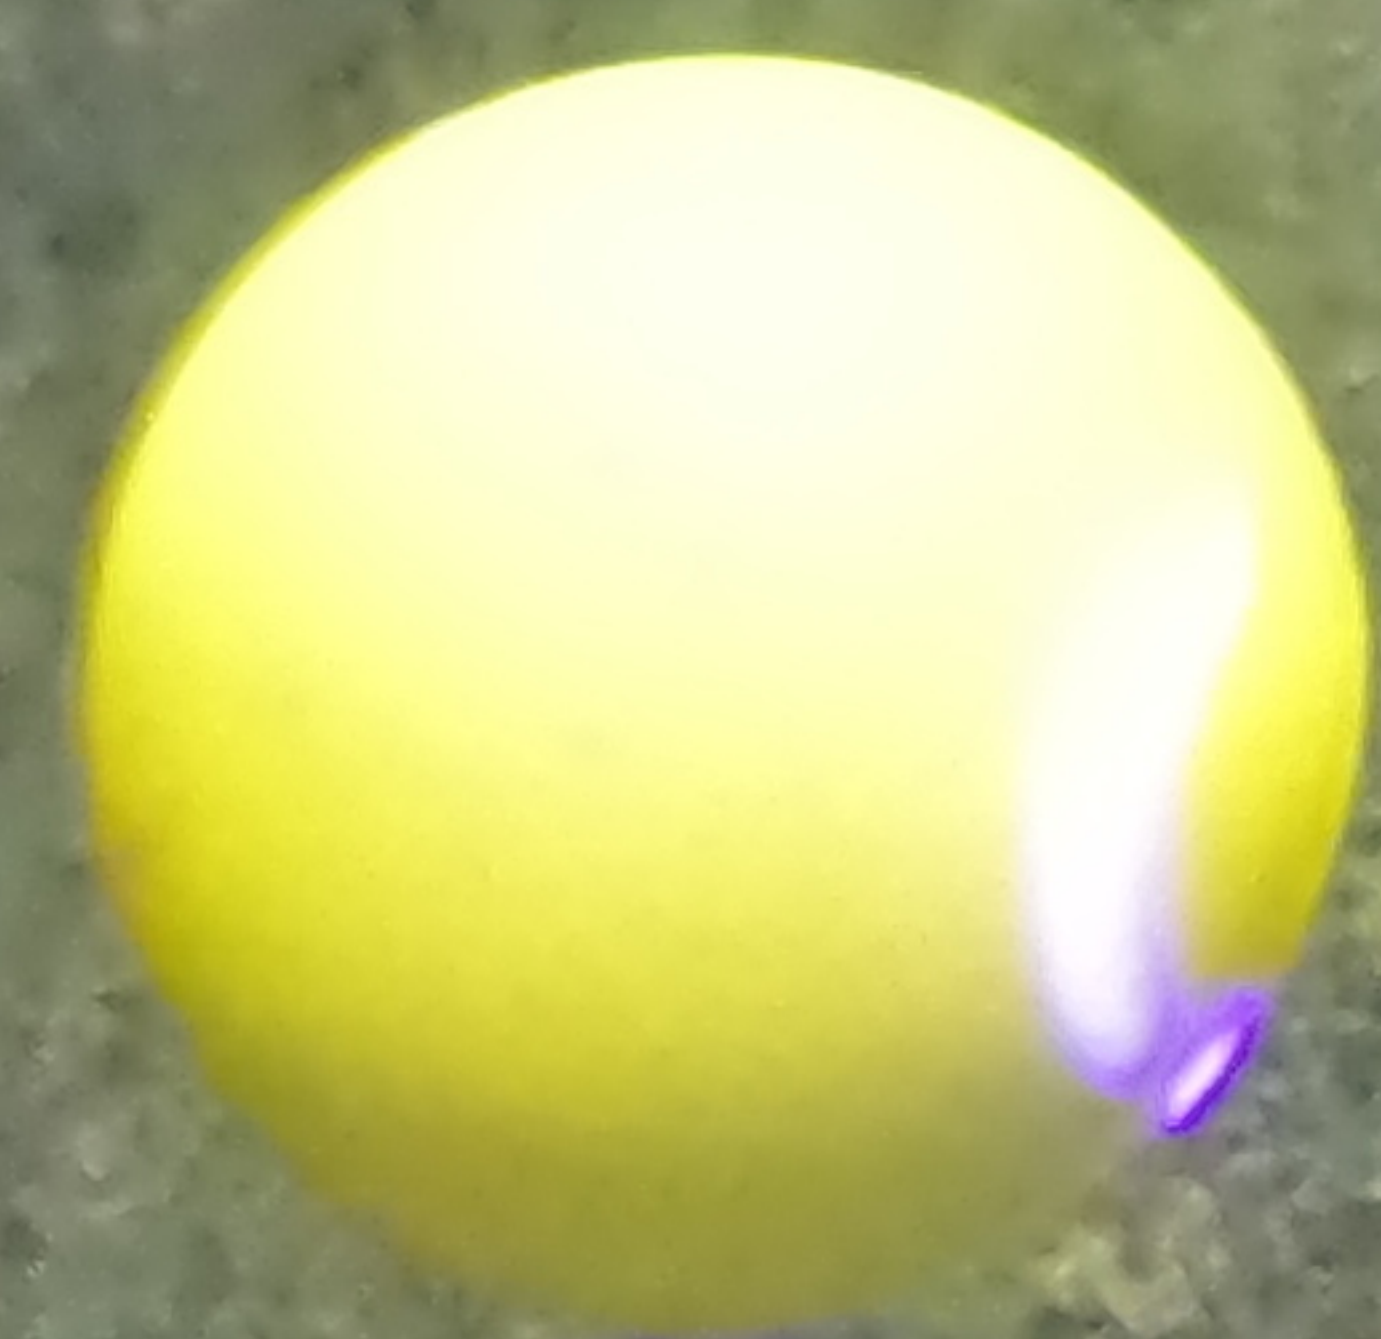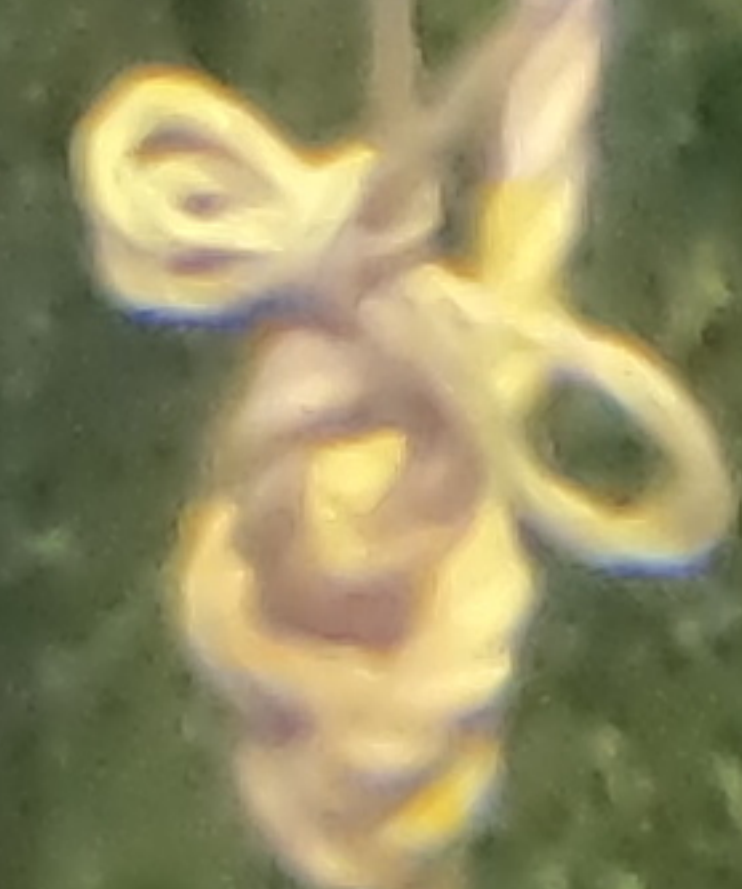

980

Supplement: Supplementary file 3408 [file G0034112.pdf › 8/G0034112.pdf]

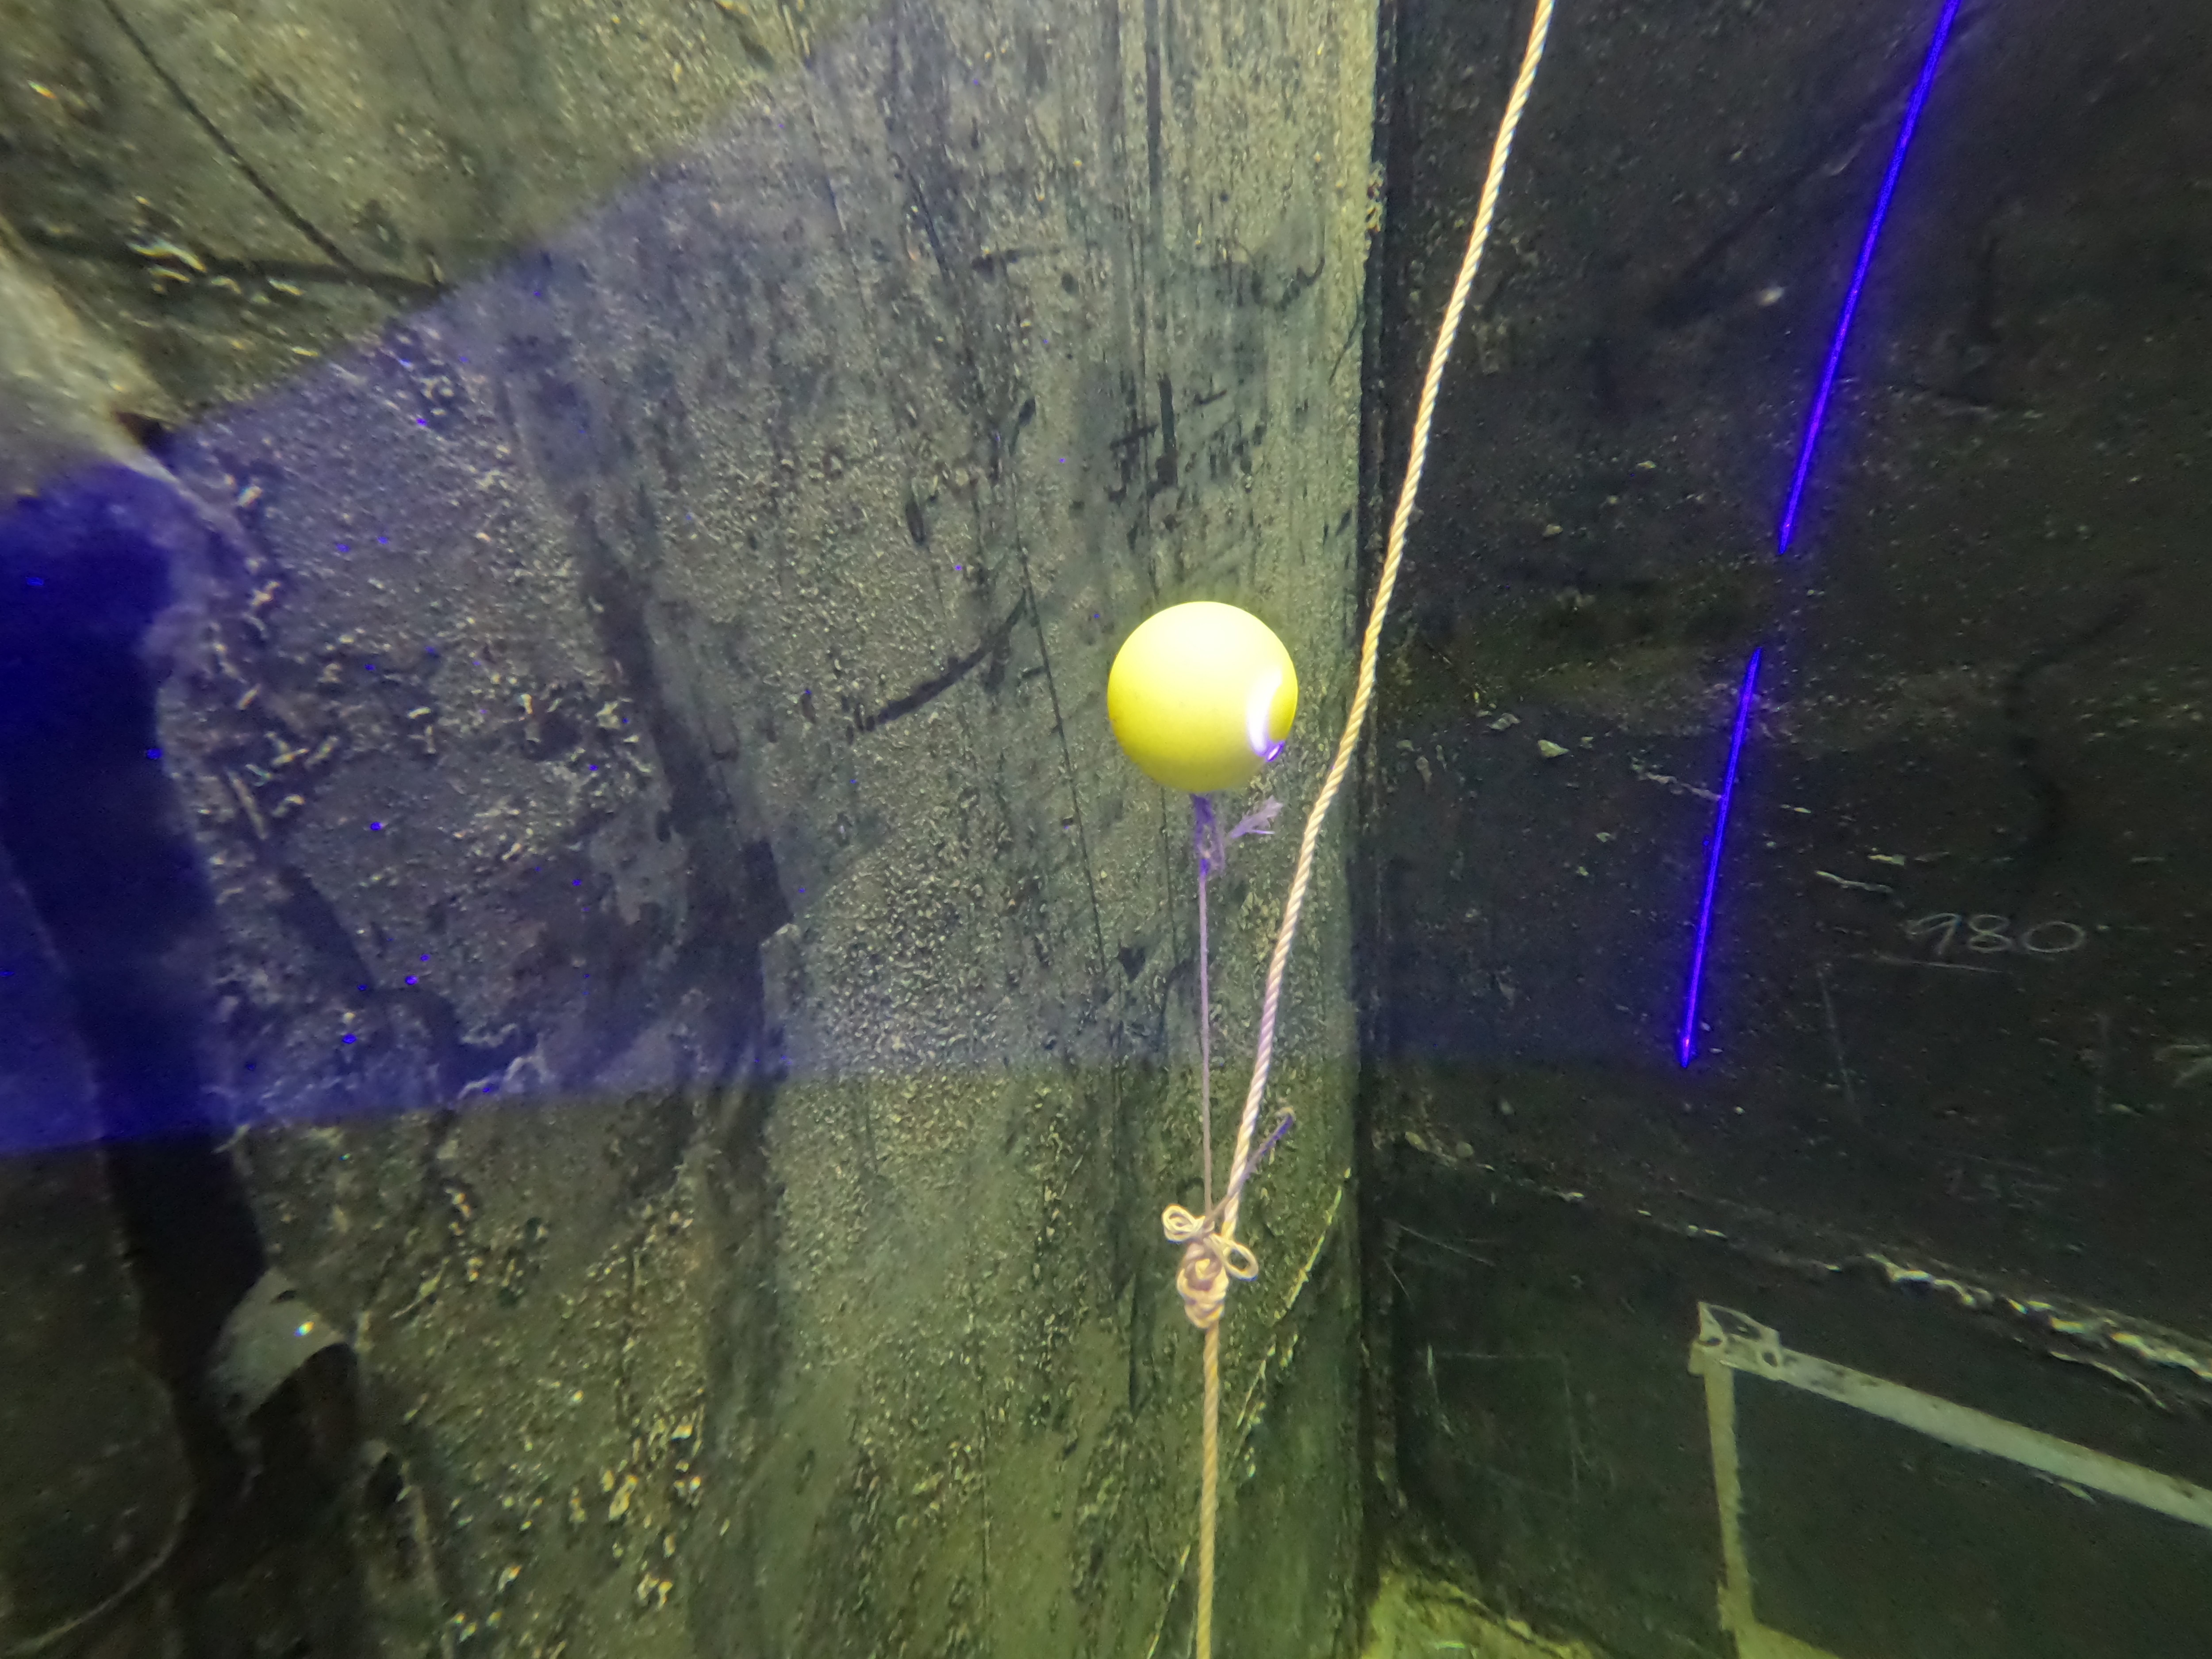

Supplement: Supplementary file 3409 [file G0034113.pdf › 8/G0034113.pdf]

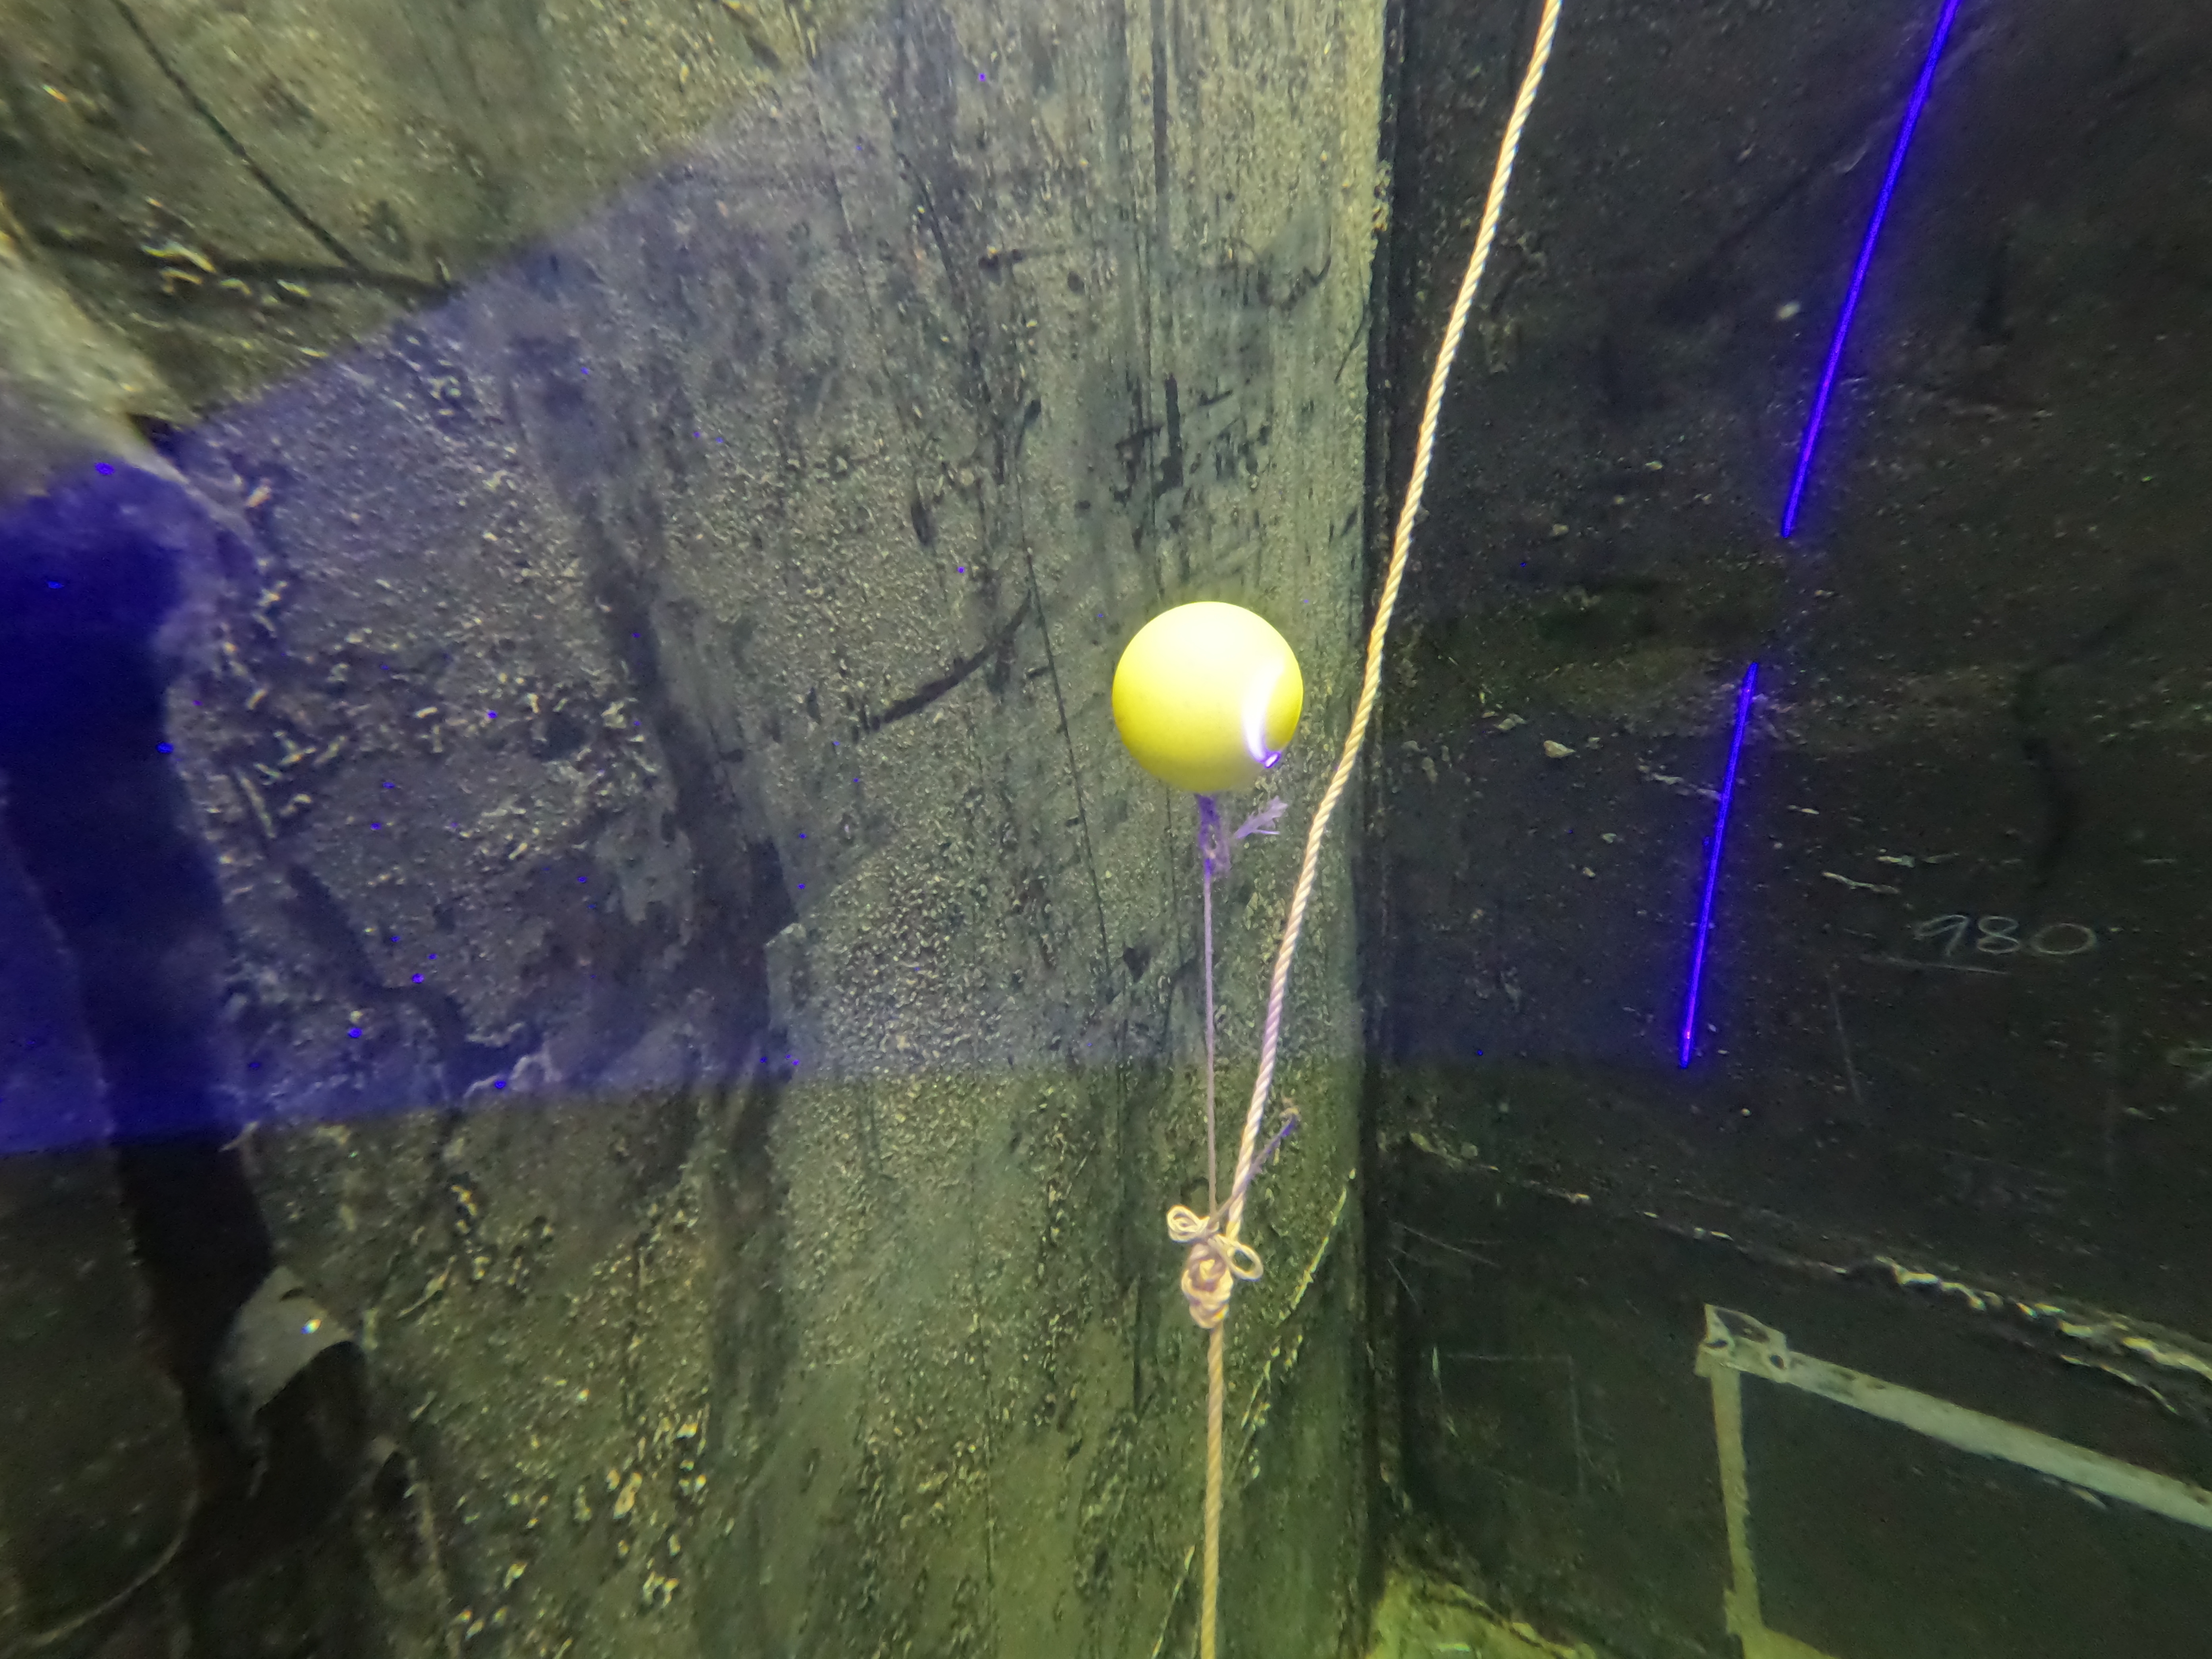

980

Supplement: Supplementary file 3410 [file G0034114.pdf › 8/G0034114.pdf]

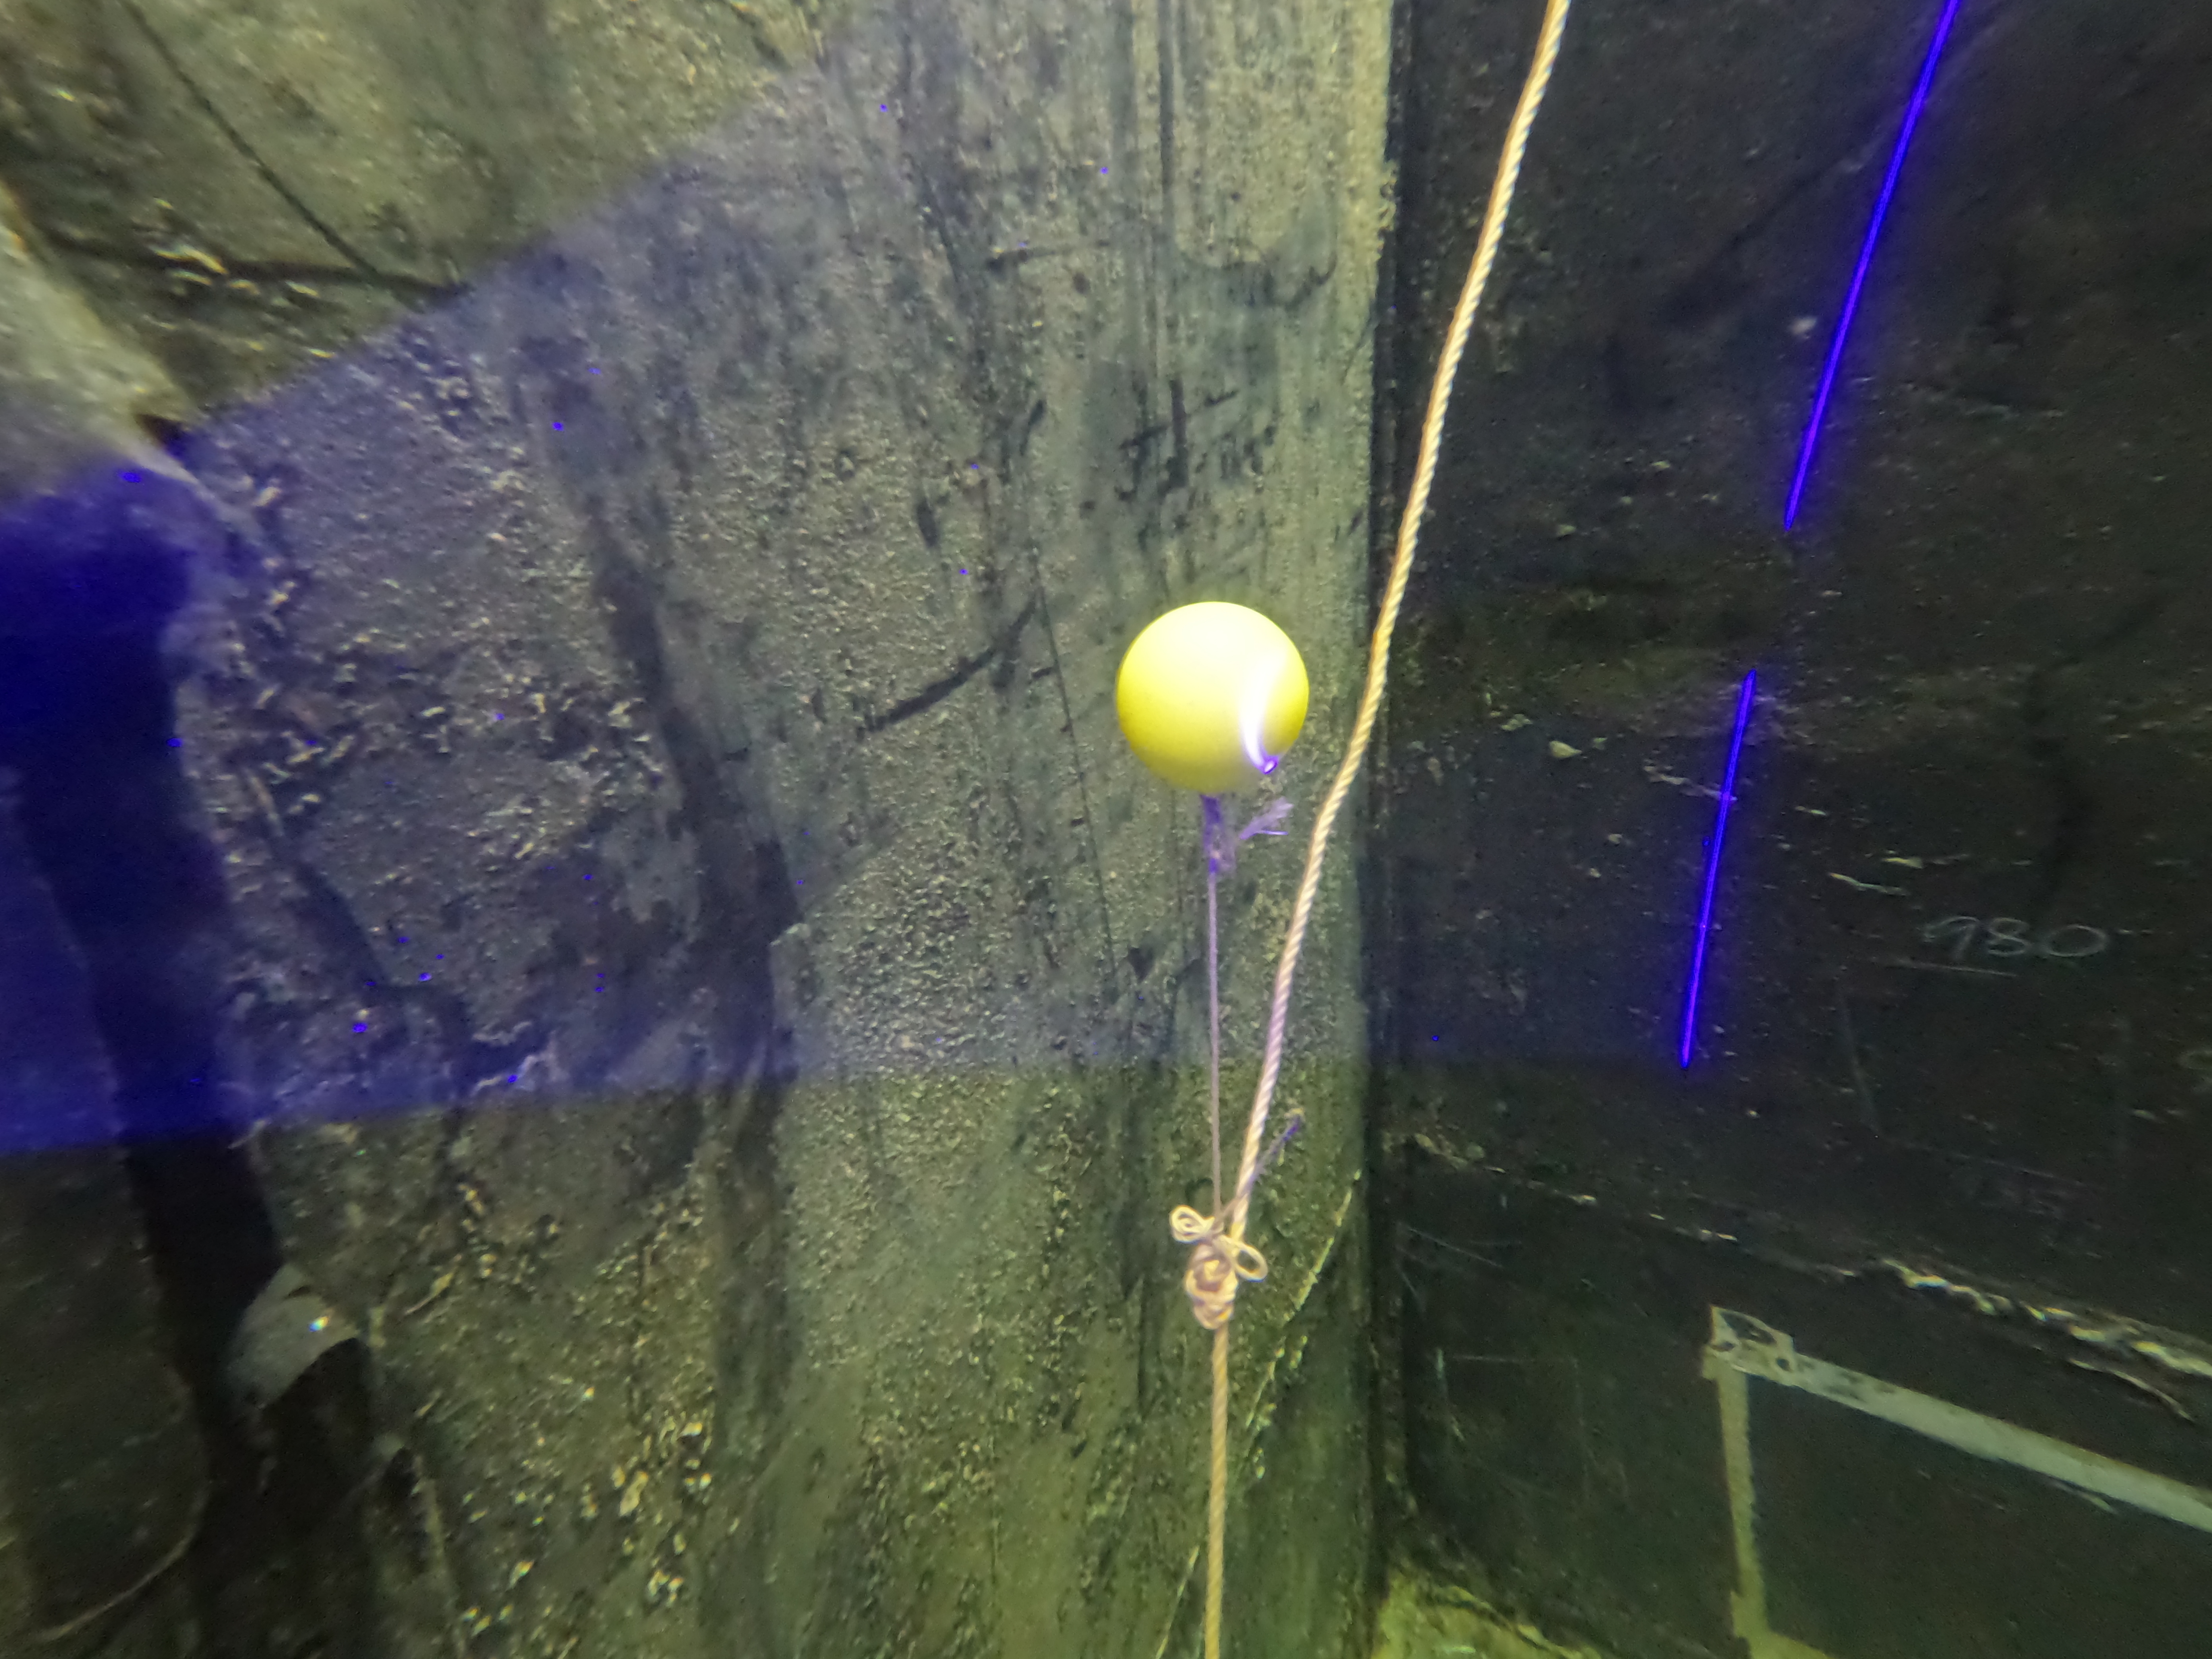

Supplement: Supplementary file 3411 [file G0034115.pdf › 8/G0034115.pdf]

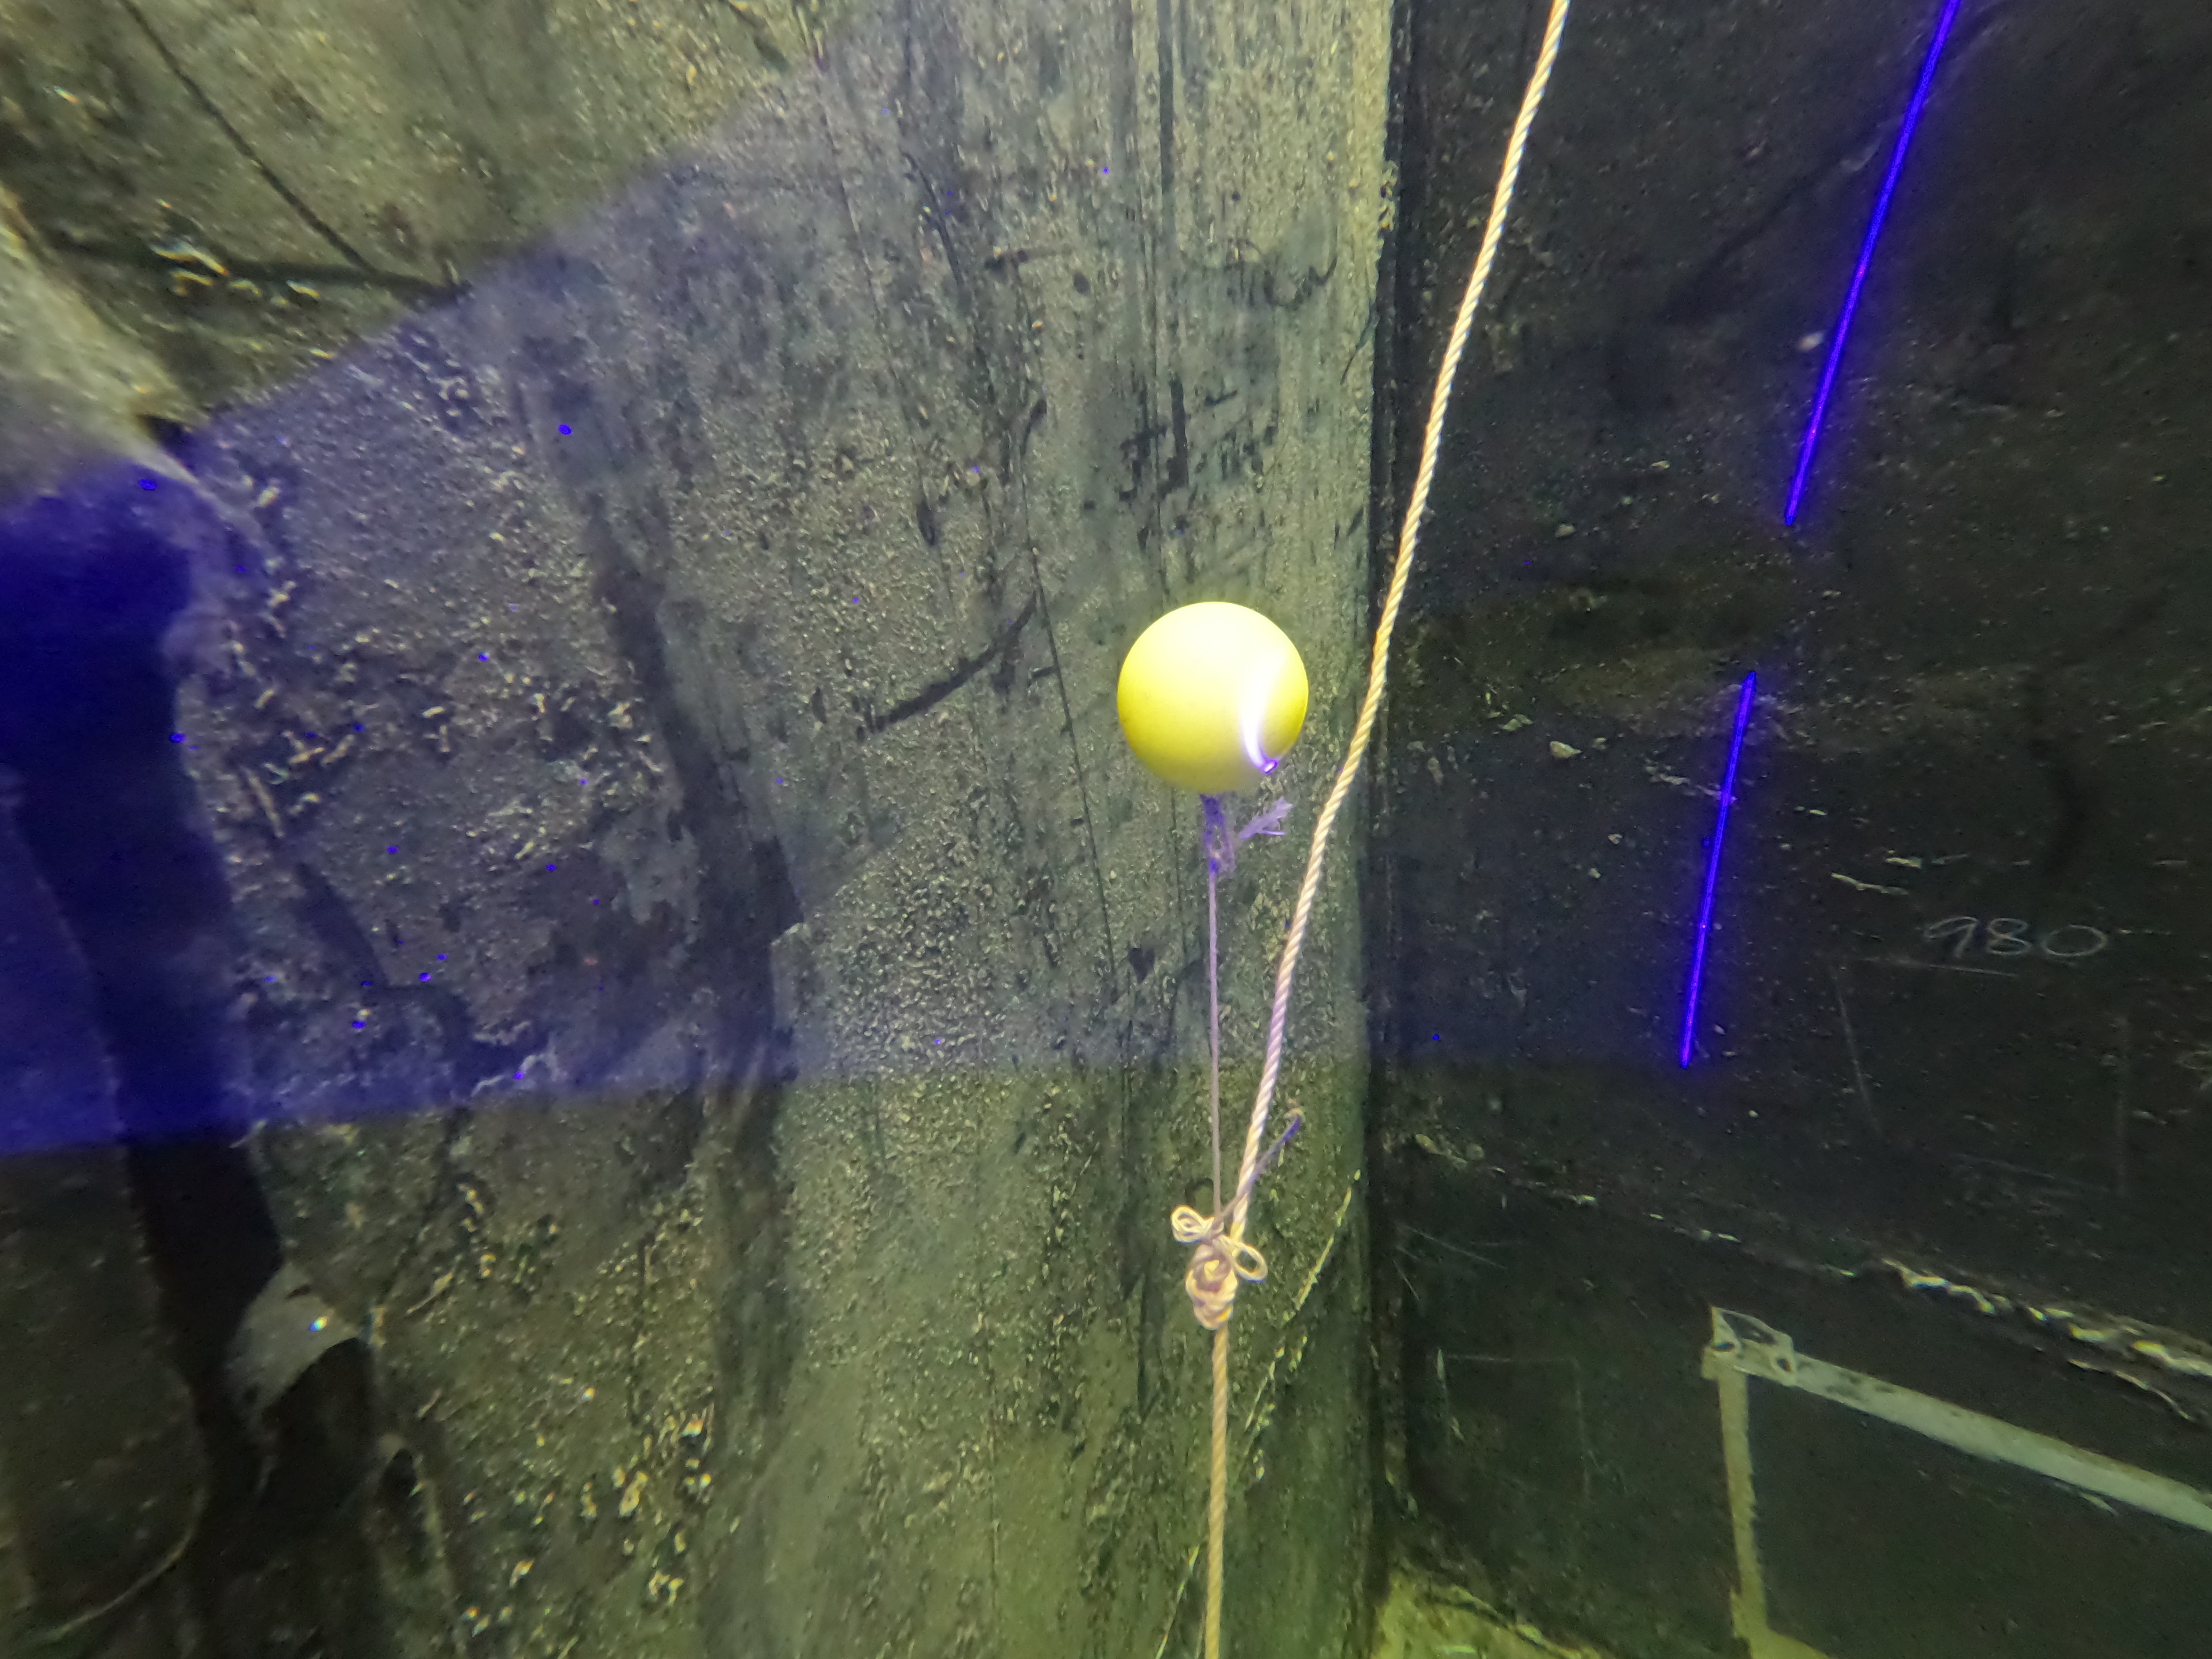

Supplement: Supplementary file 3412 [file G0034116.pdf › 8/G0034116.pdf]

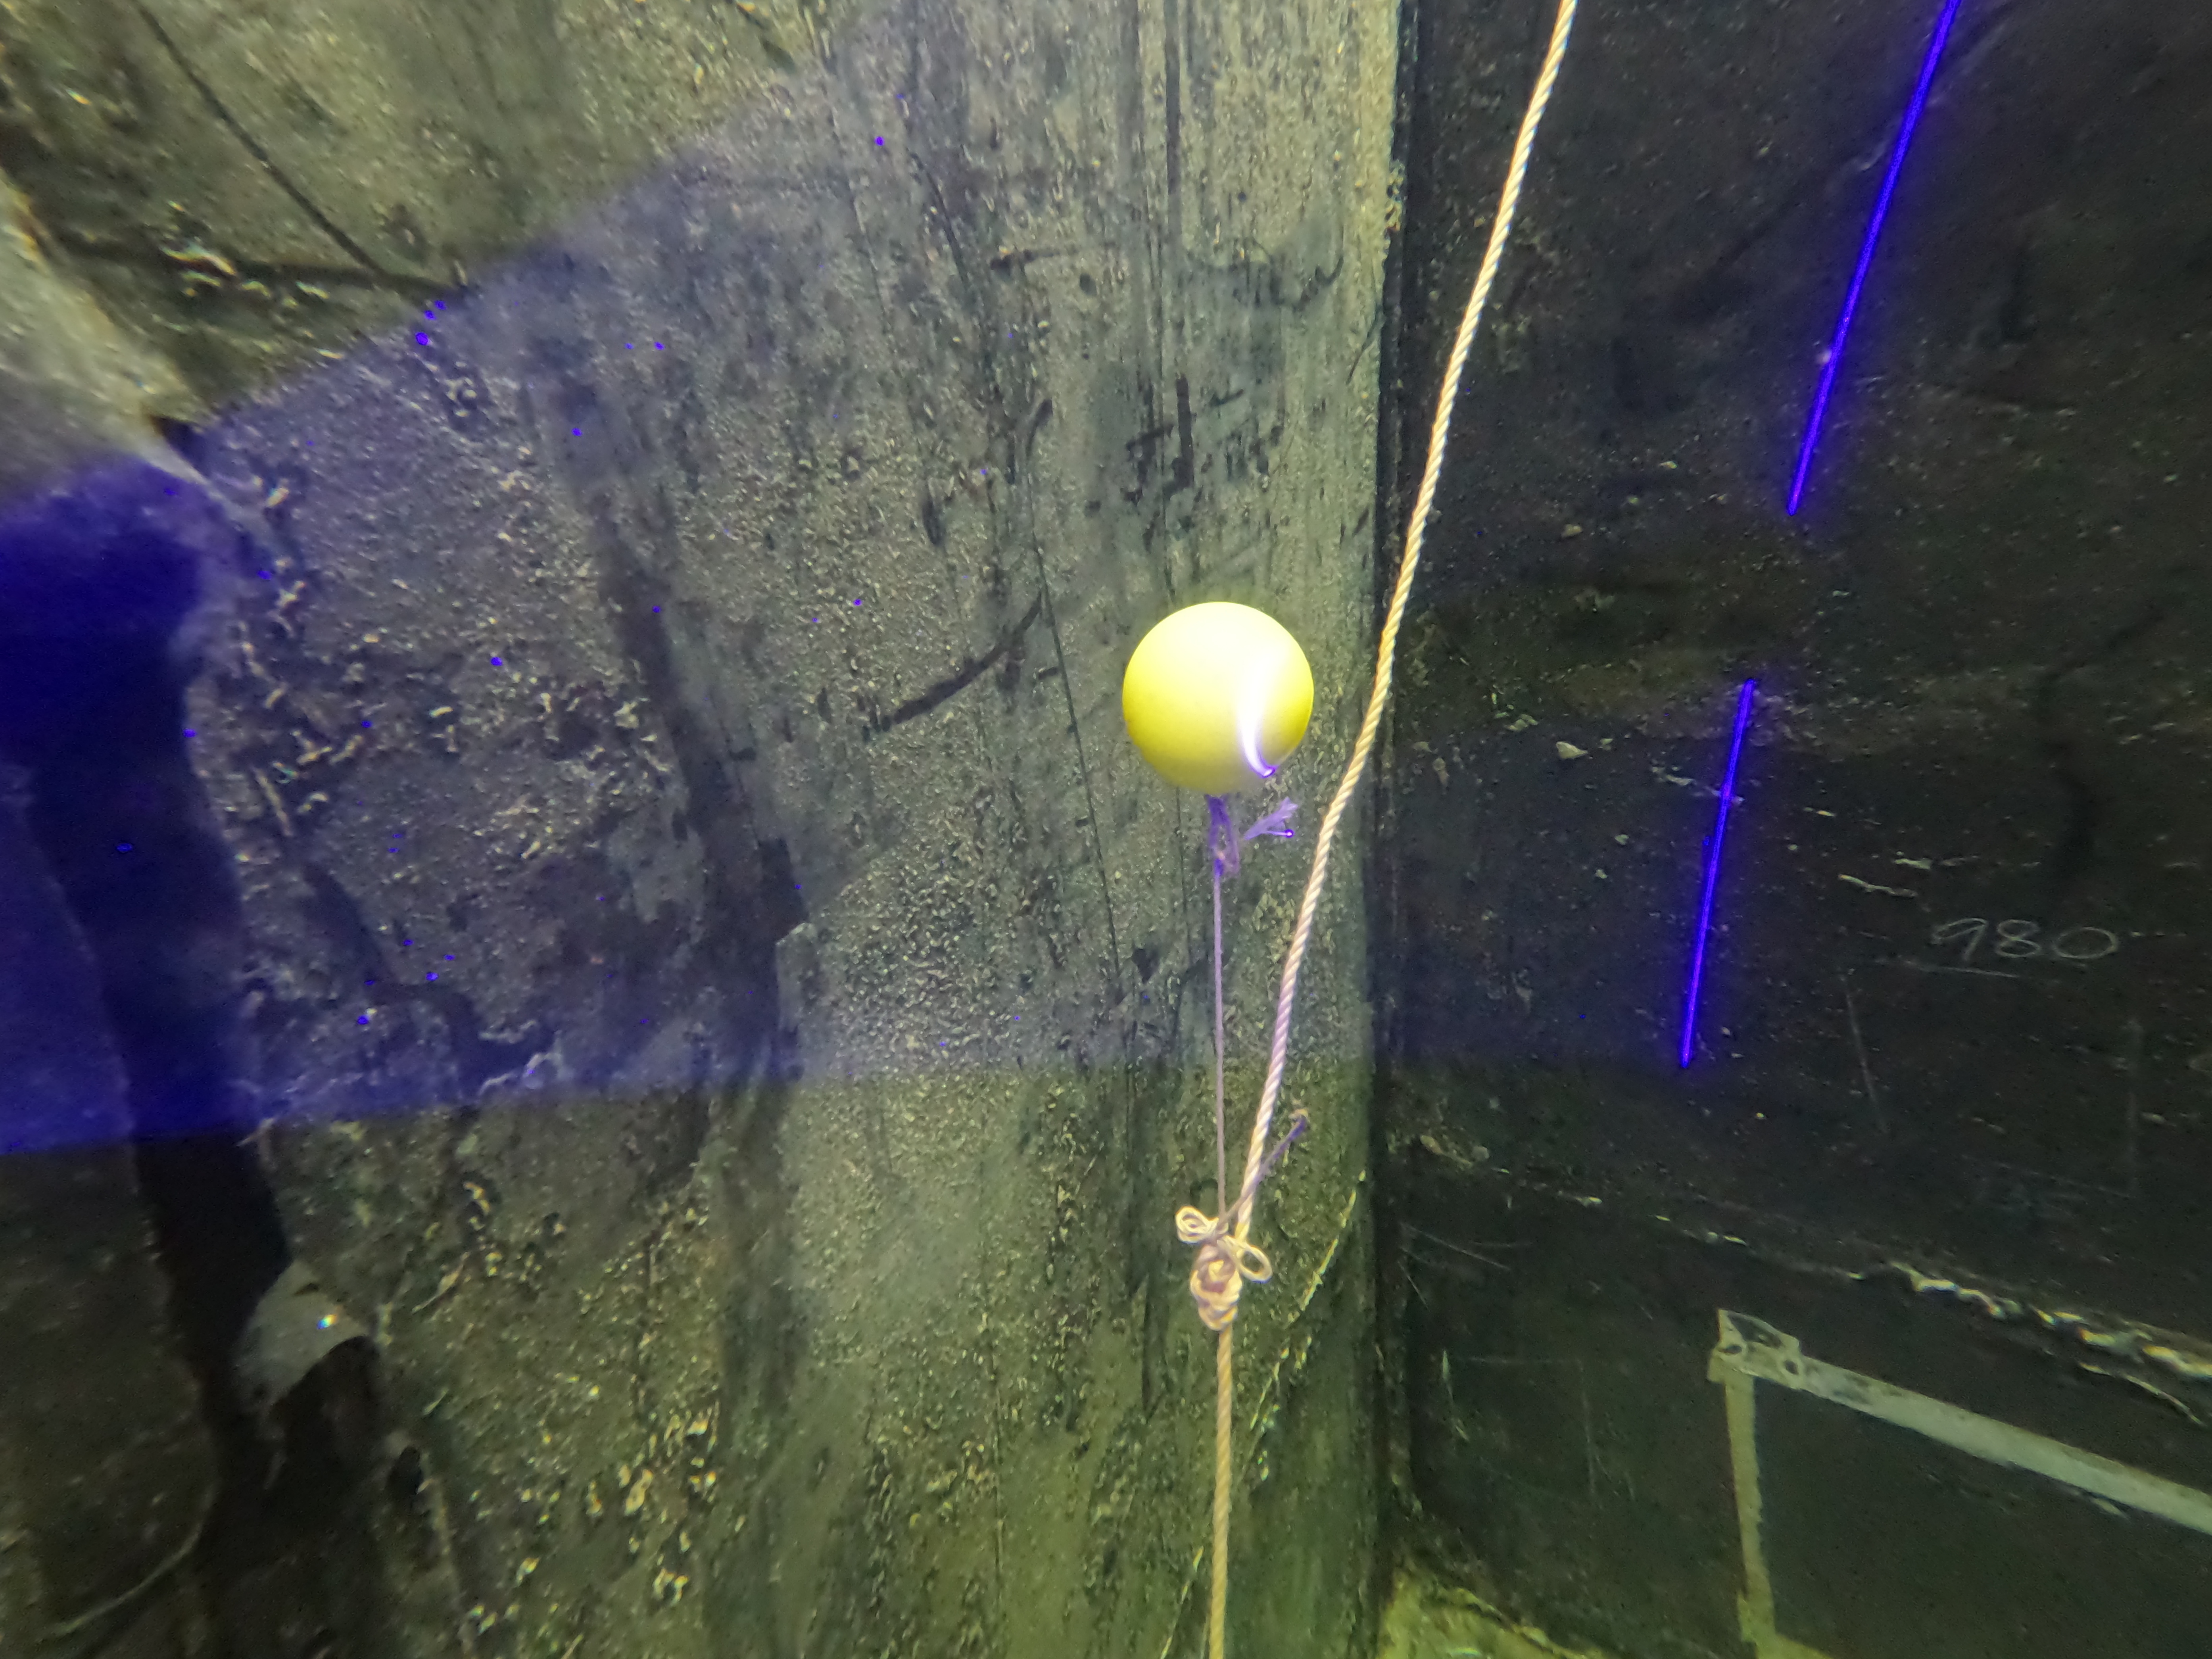

Supplement: Supplementary file 3413 [file G0034117.pdf › 8/G0034117.pdf]

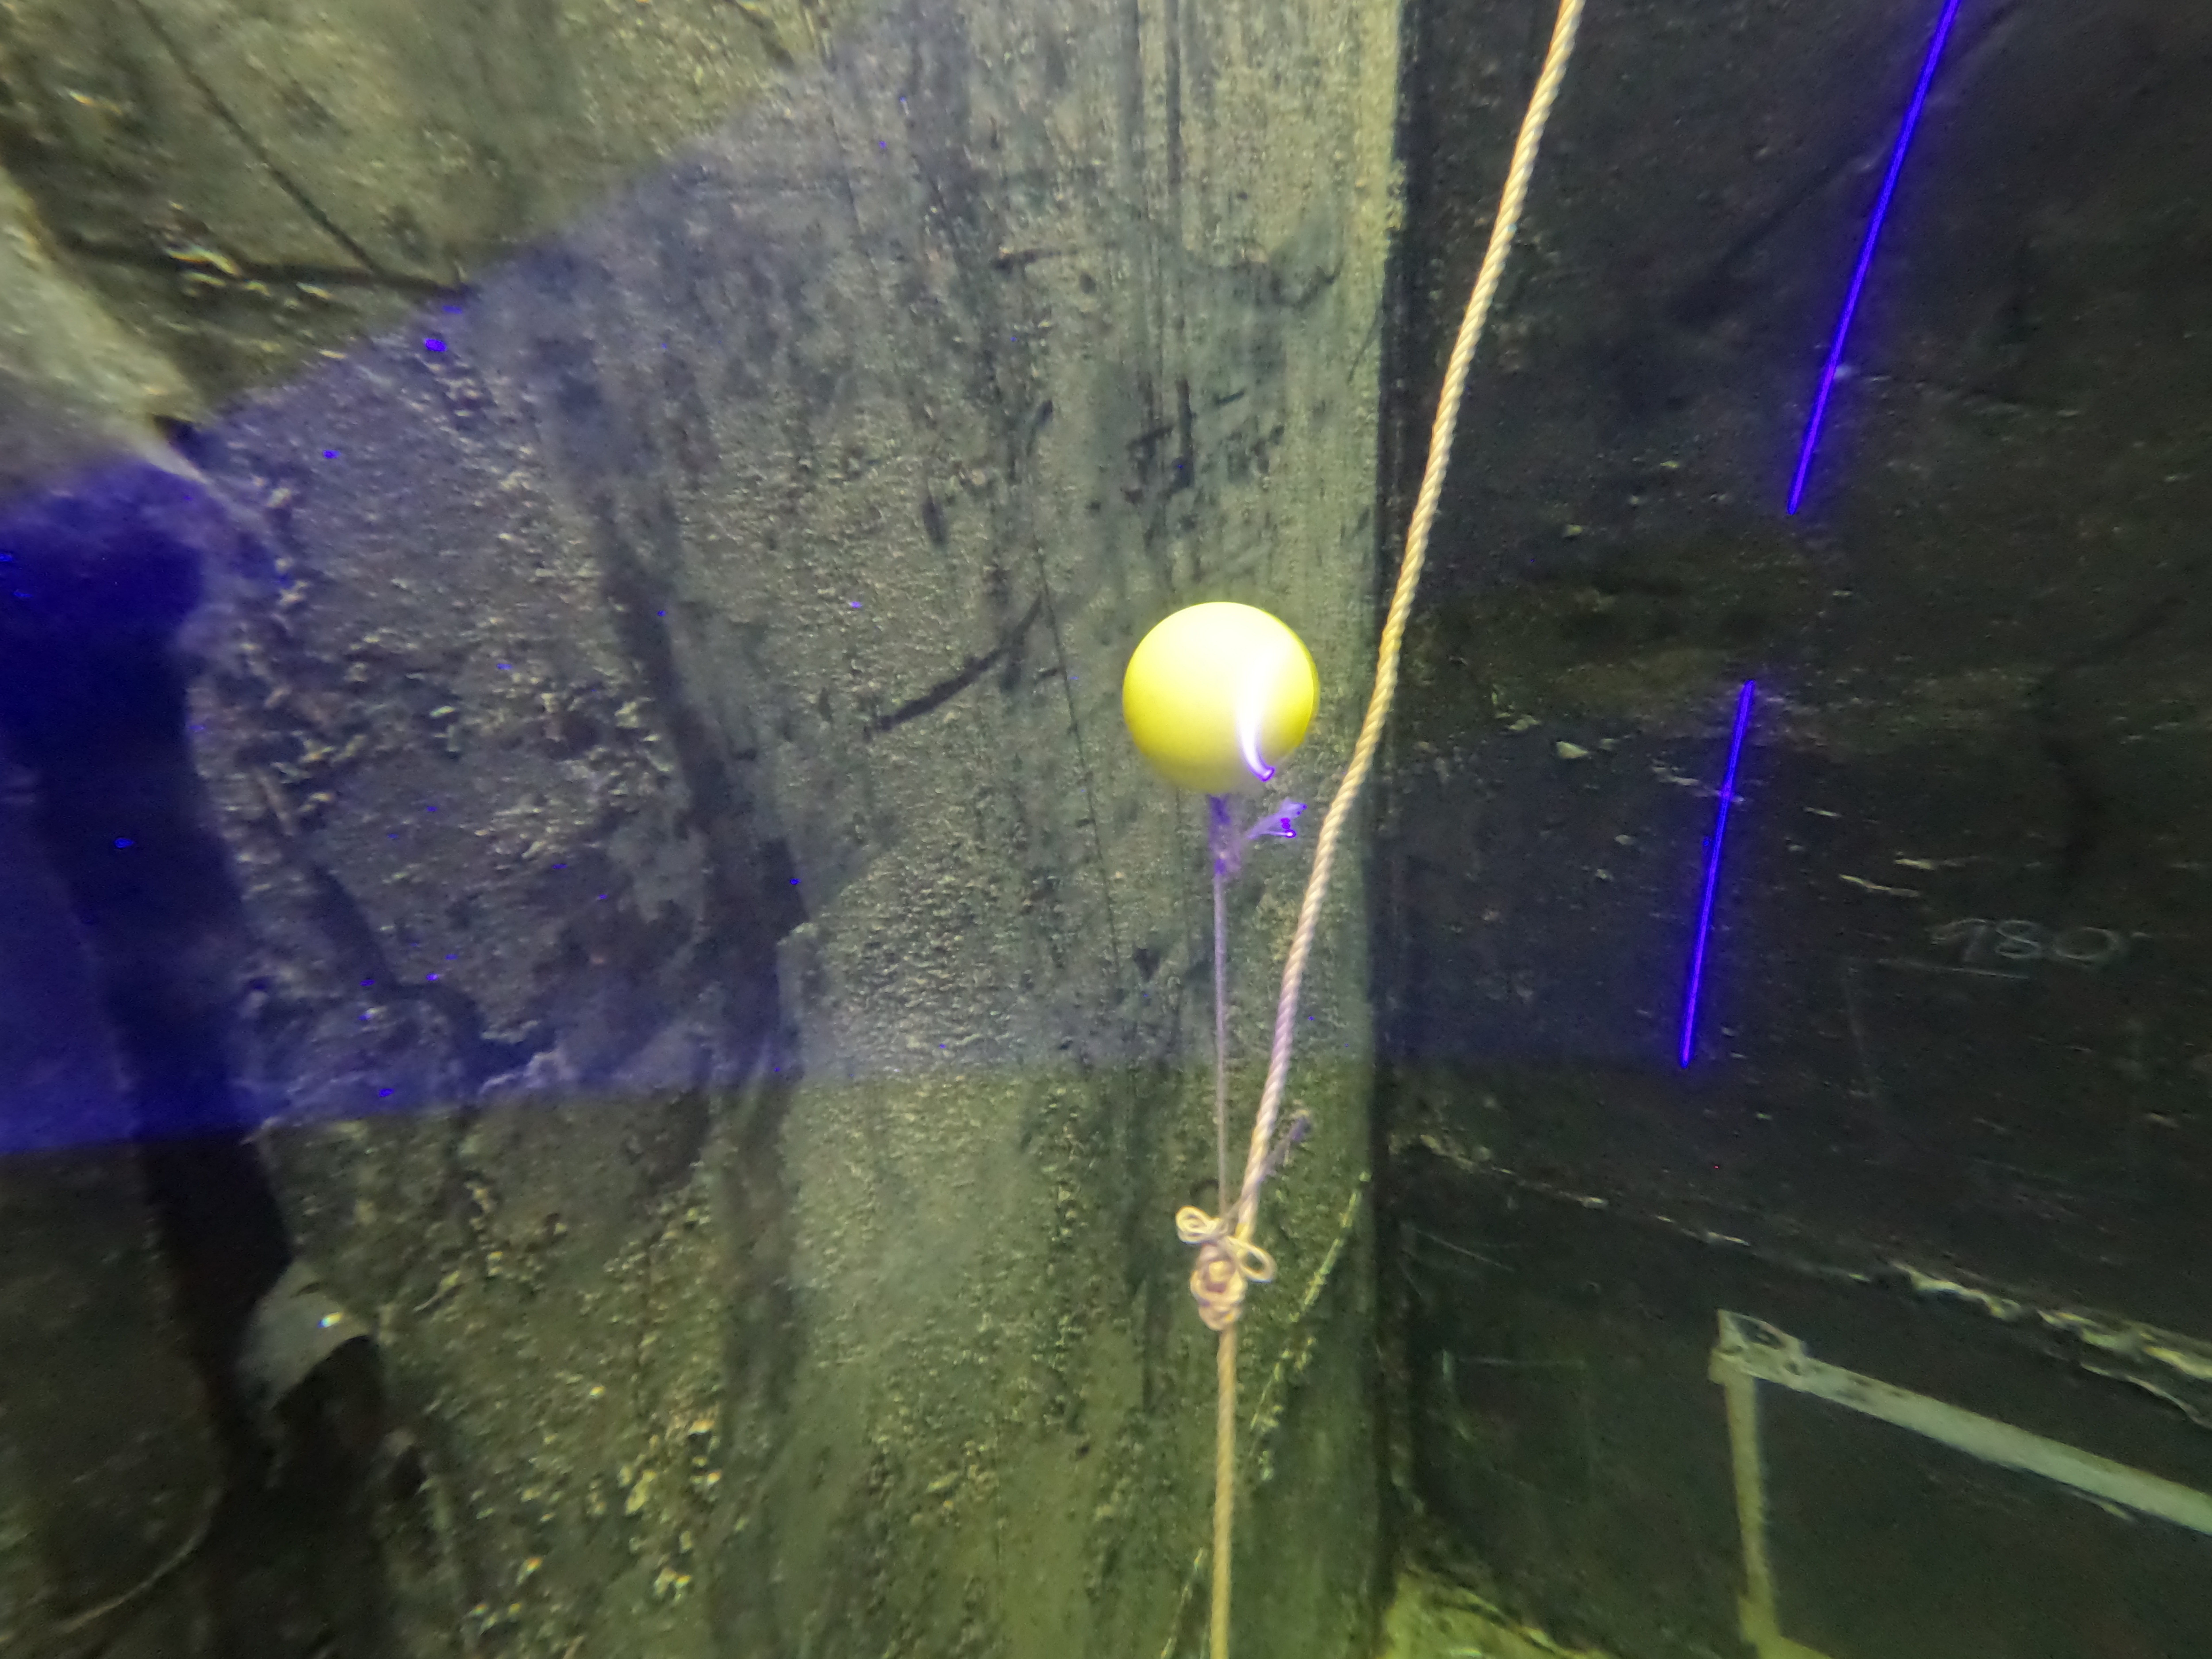

Supplement: Supplementary file 3414 [file G0034118.pdf › 8/G0034118.pdf]

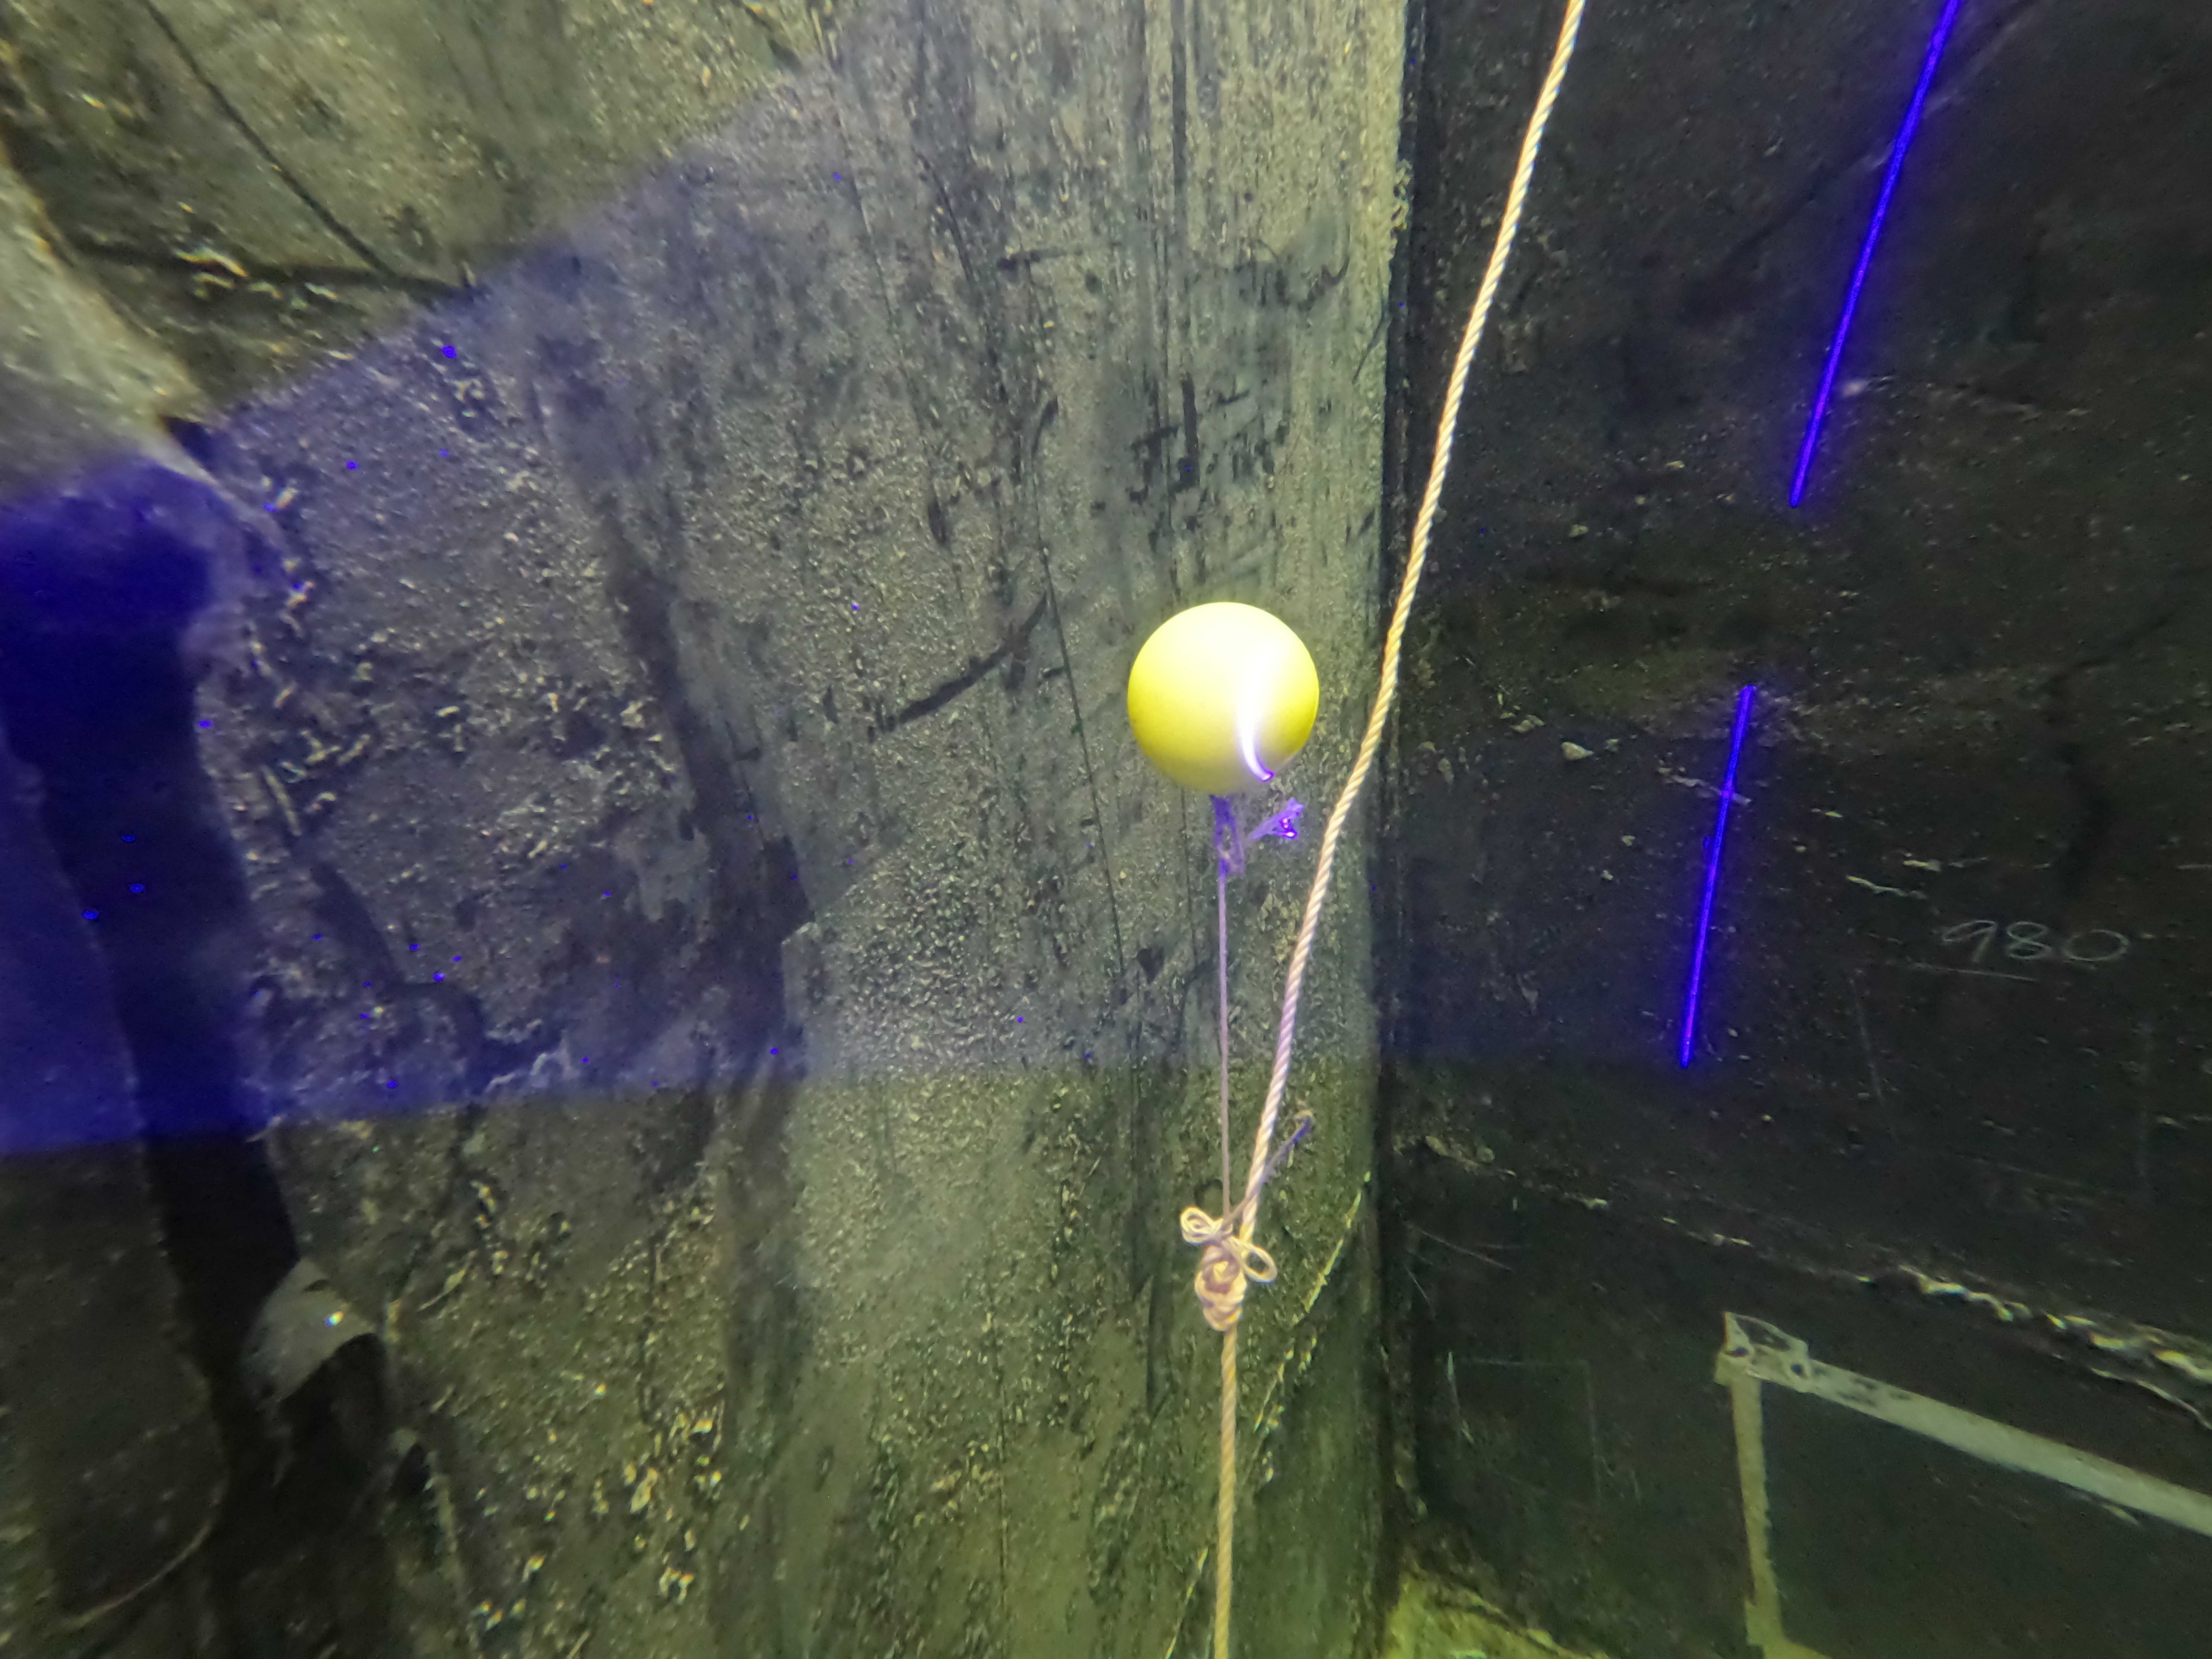

980

Supplement: Supplementary file 3415 [file G0034119.pdf › 8/G0034119.pdf]

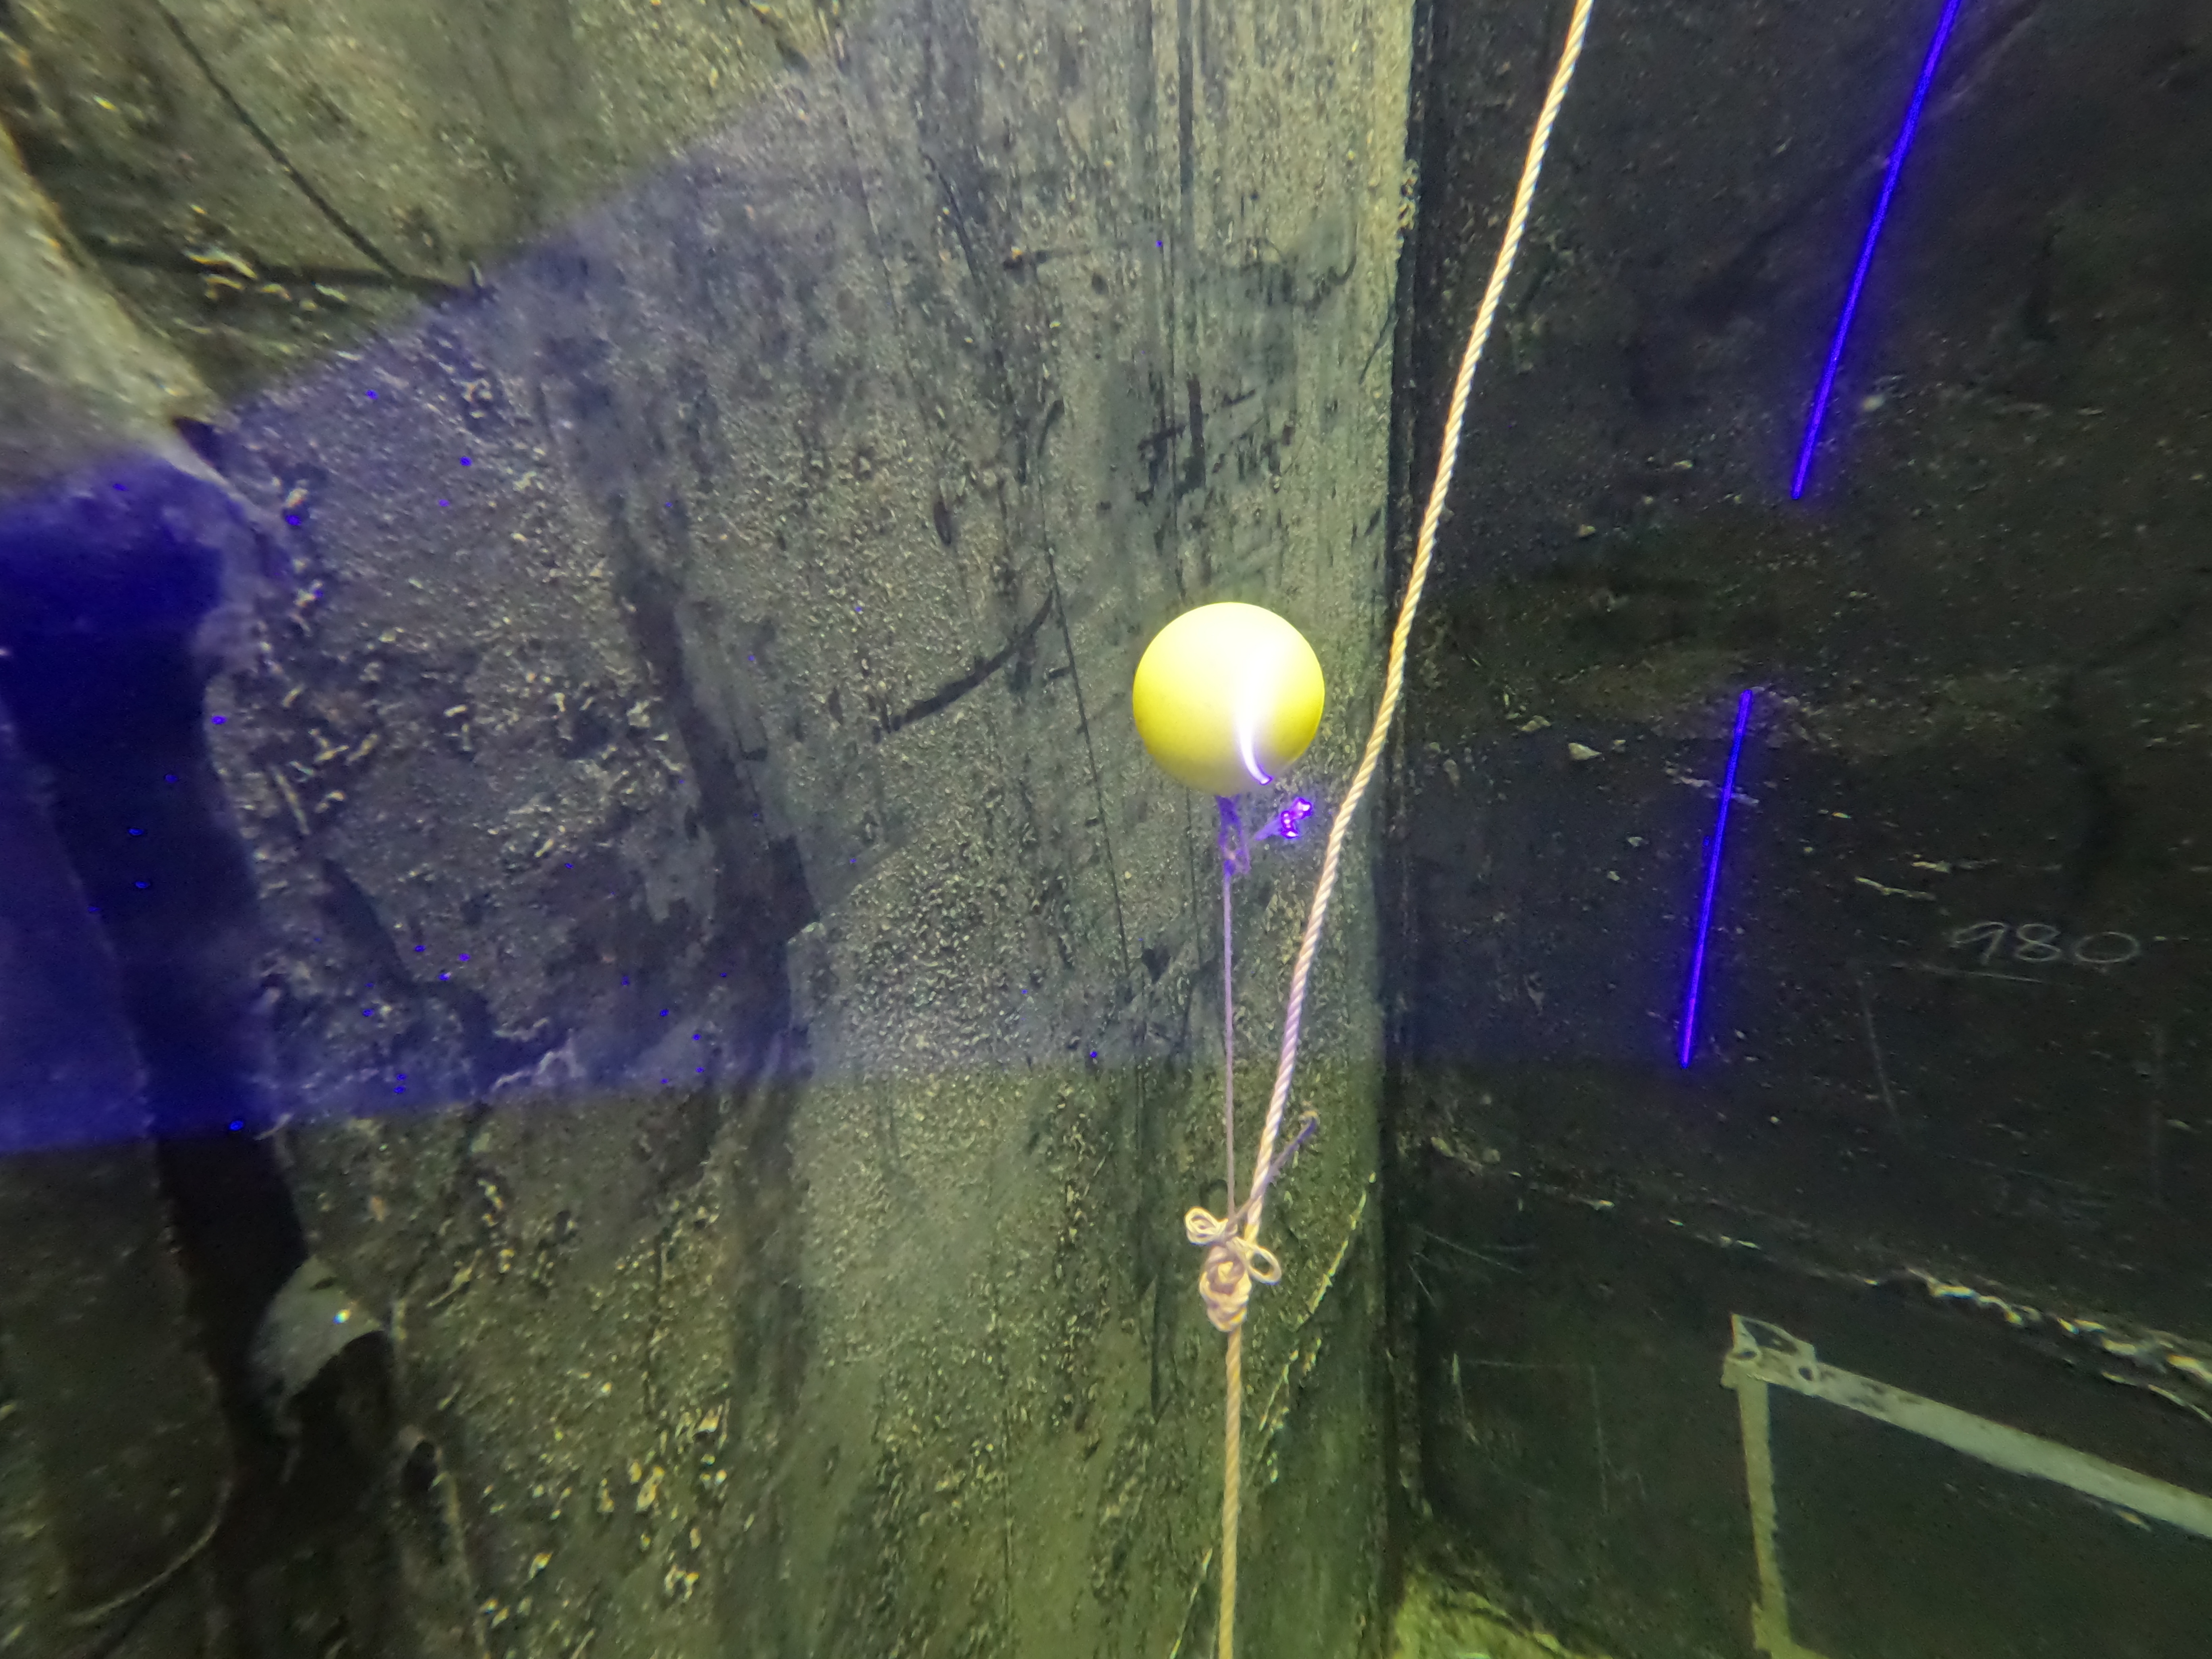

Supplement: Supplementary file 3416 [file G0034120.pdf › 8/G0034120.pdf]

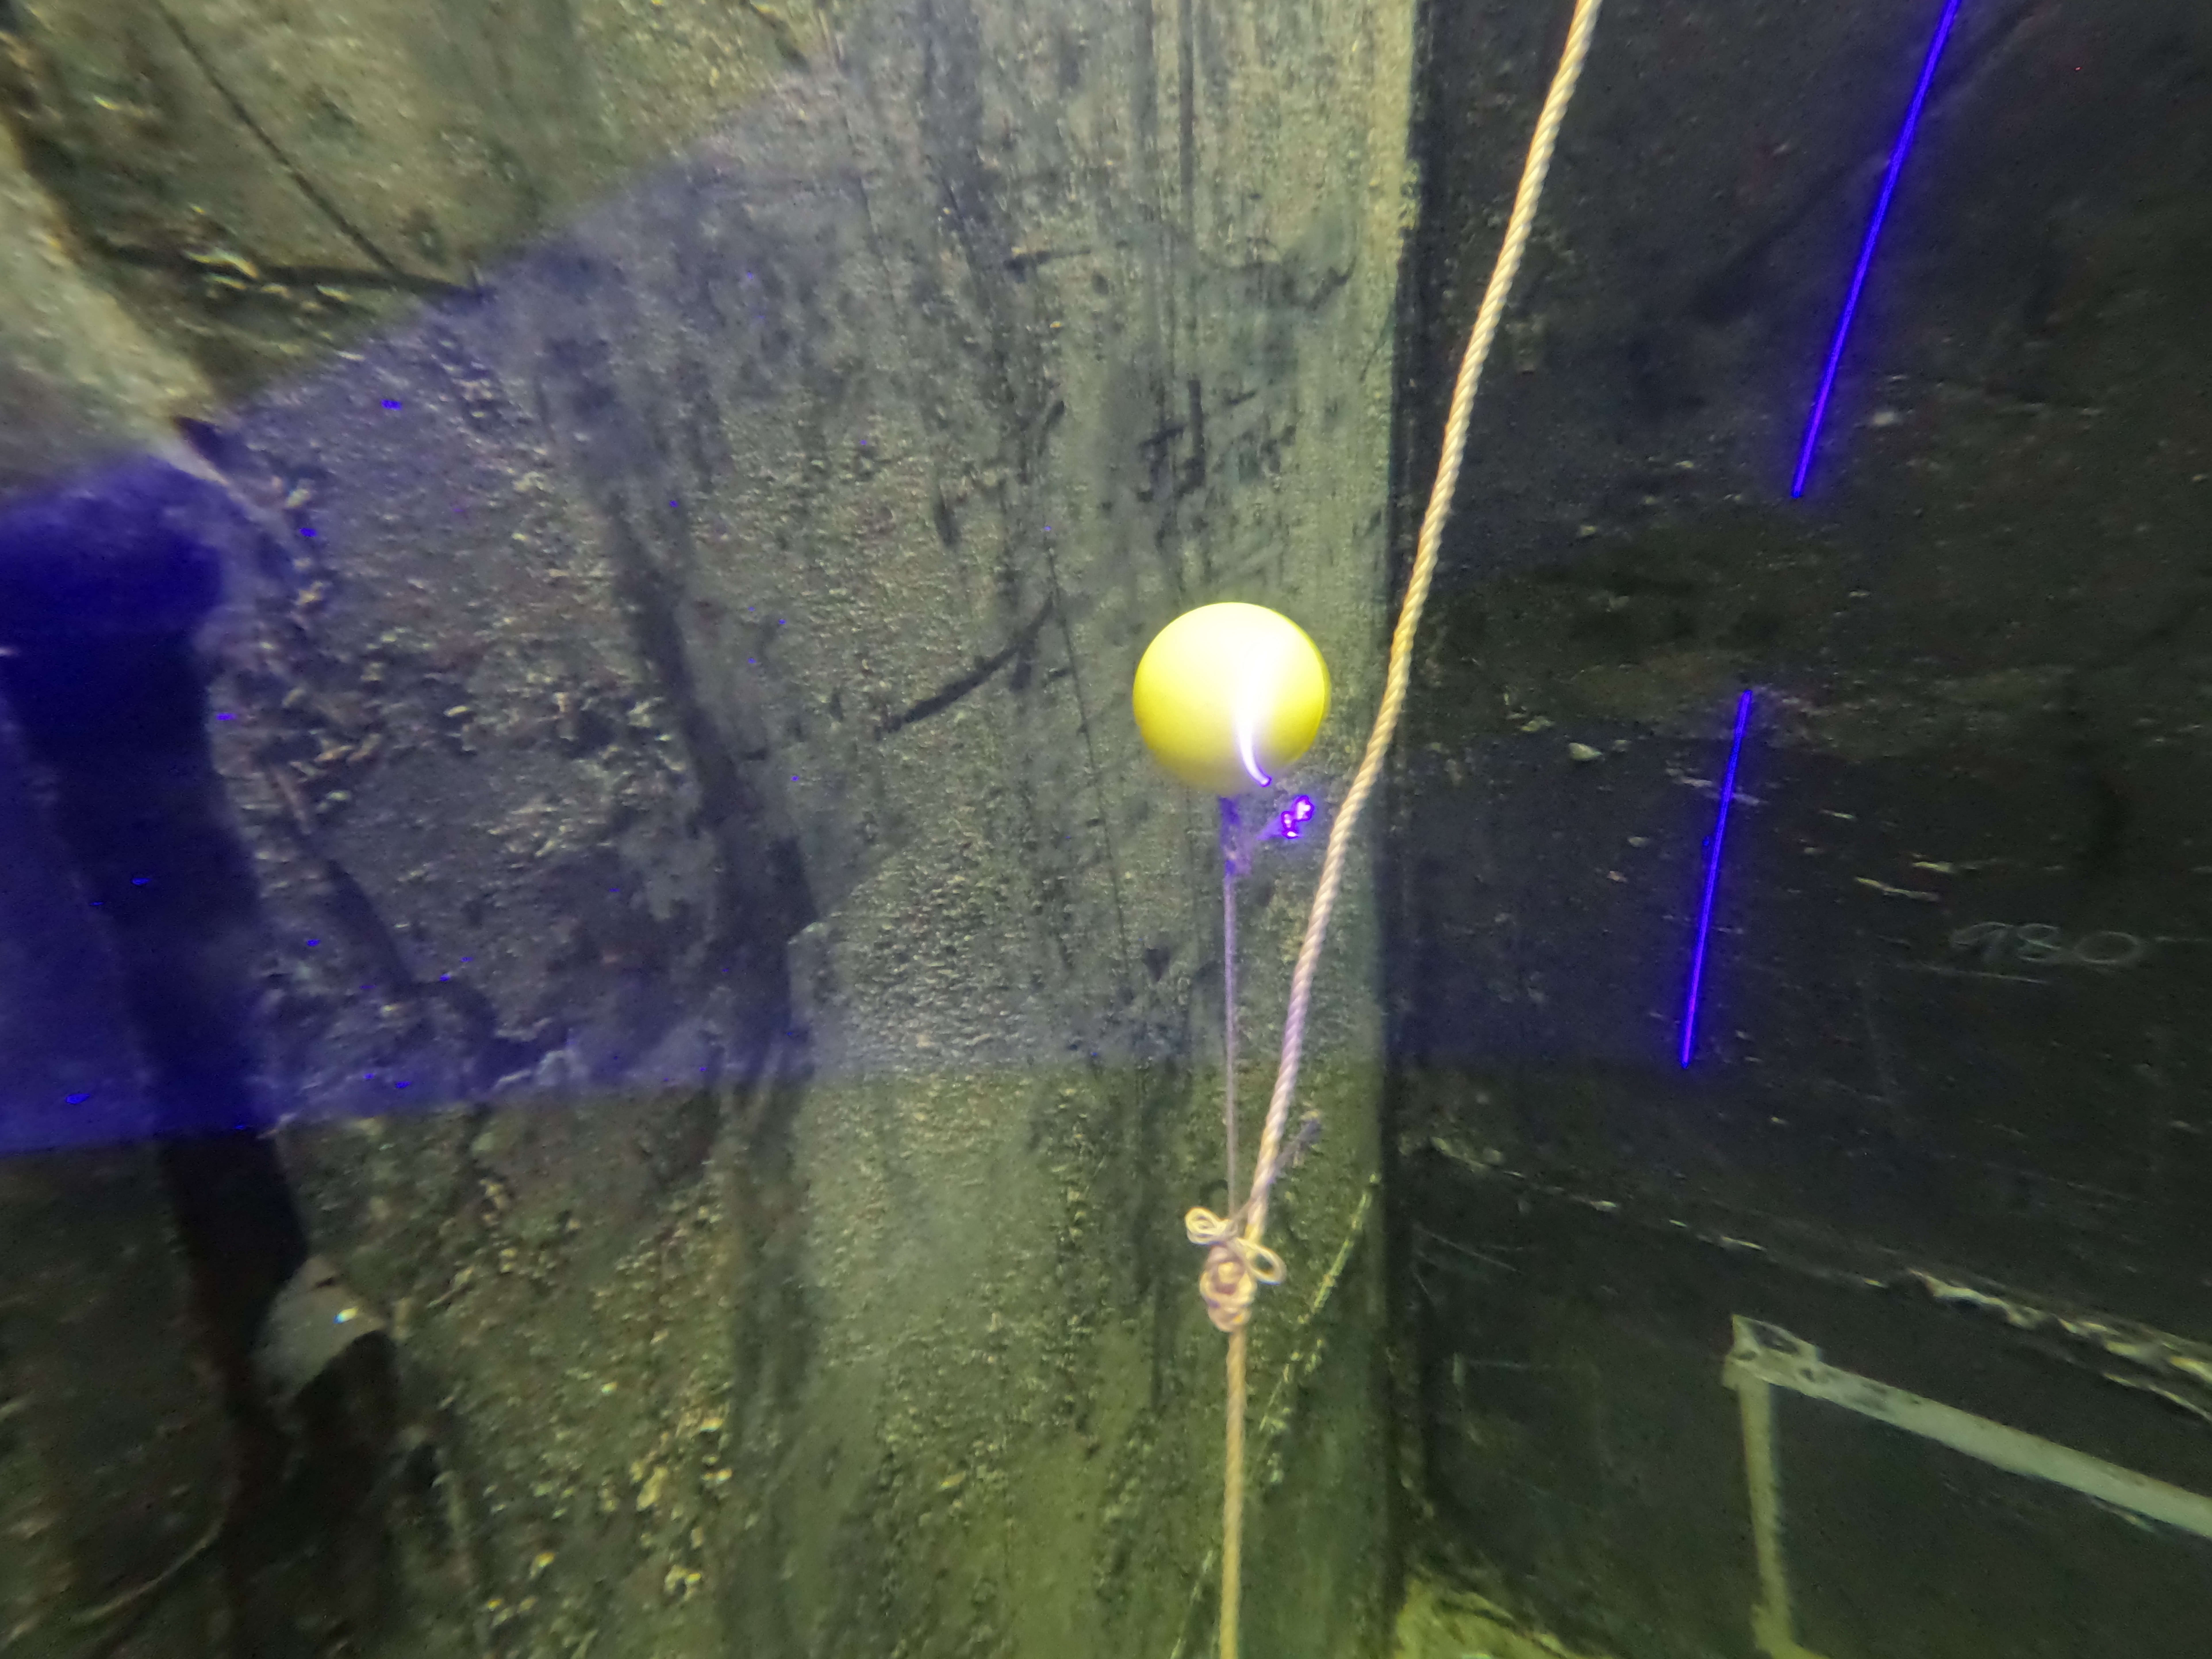

Supplement: Supplementary file 3417 [file G0034121.pdf › 8/G0034121.pdf]

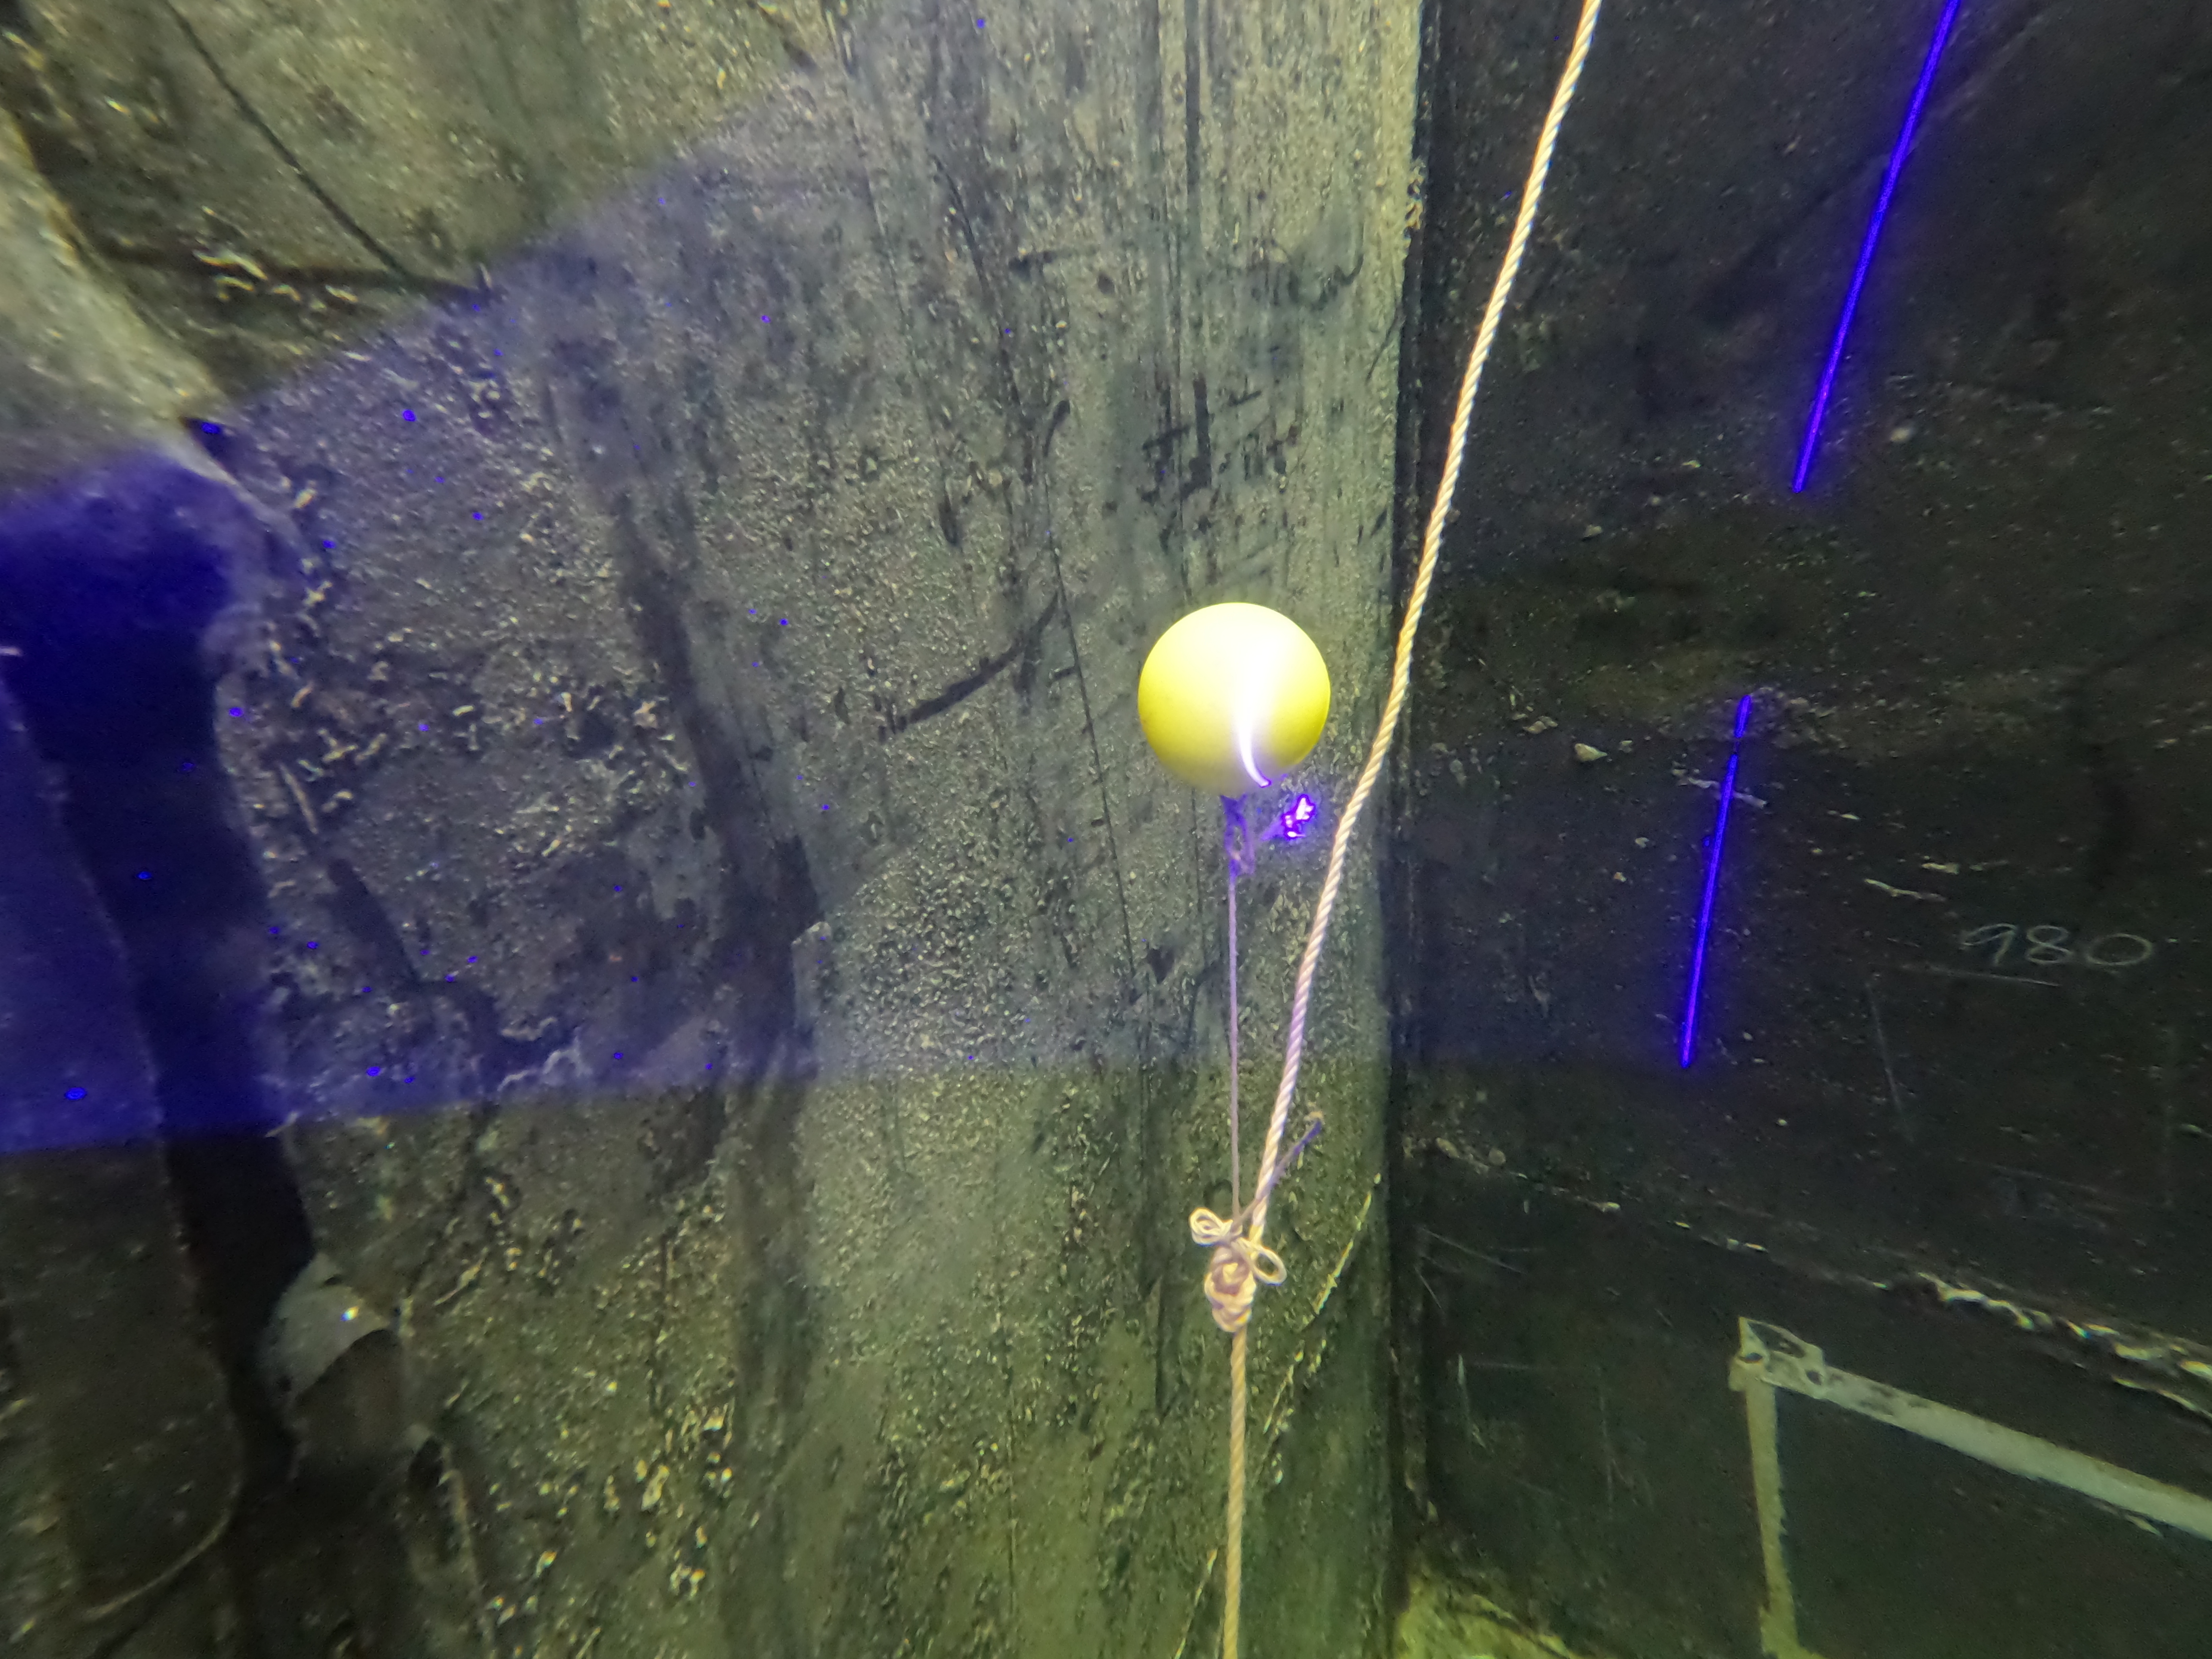

Supplement: Supplementary file 3418 [file G0034122.pdf › 8/G0034122.pdf]

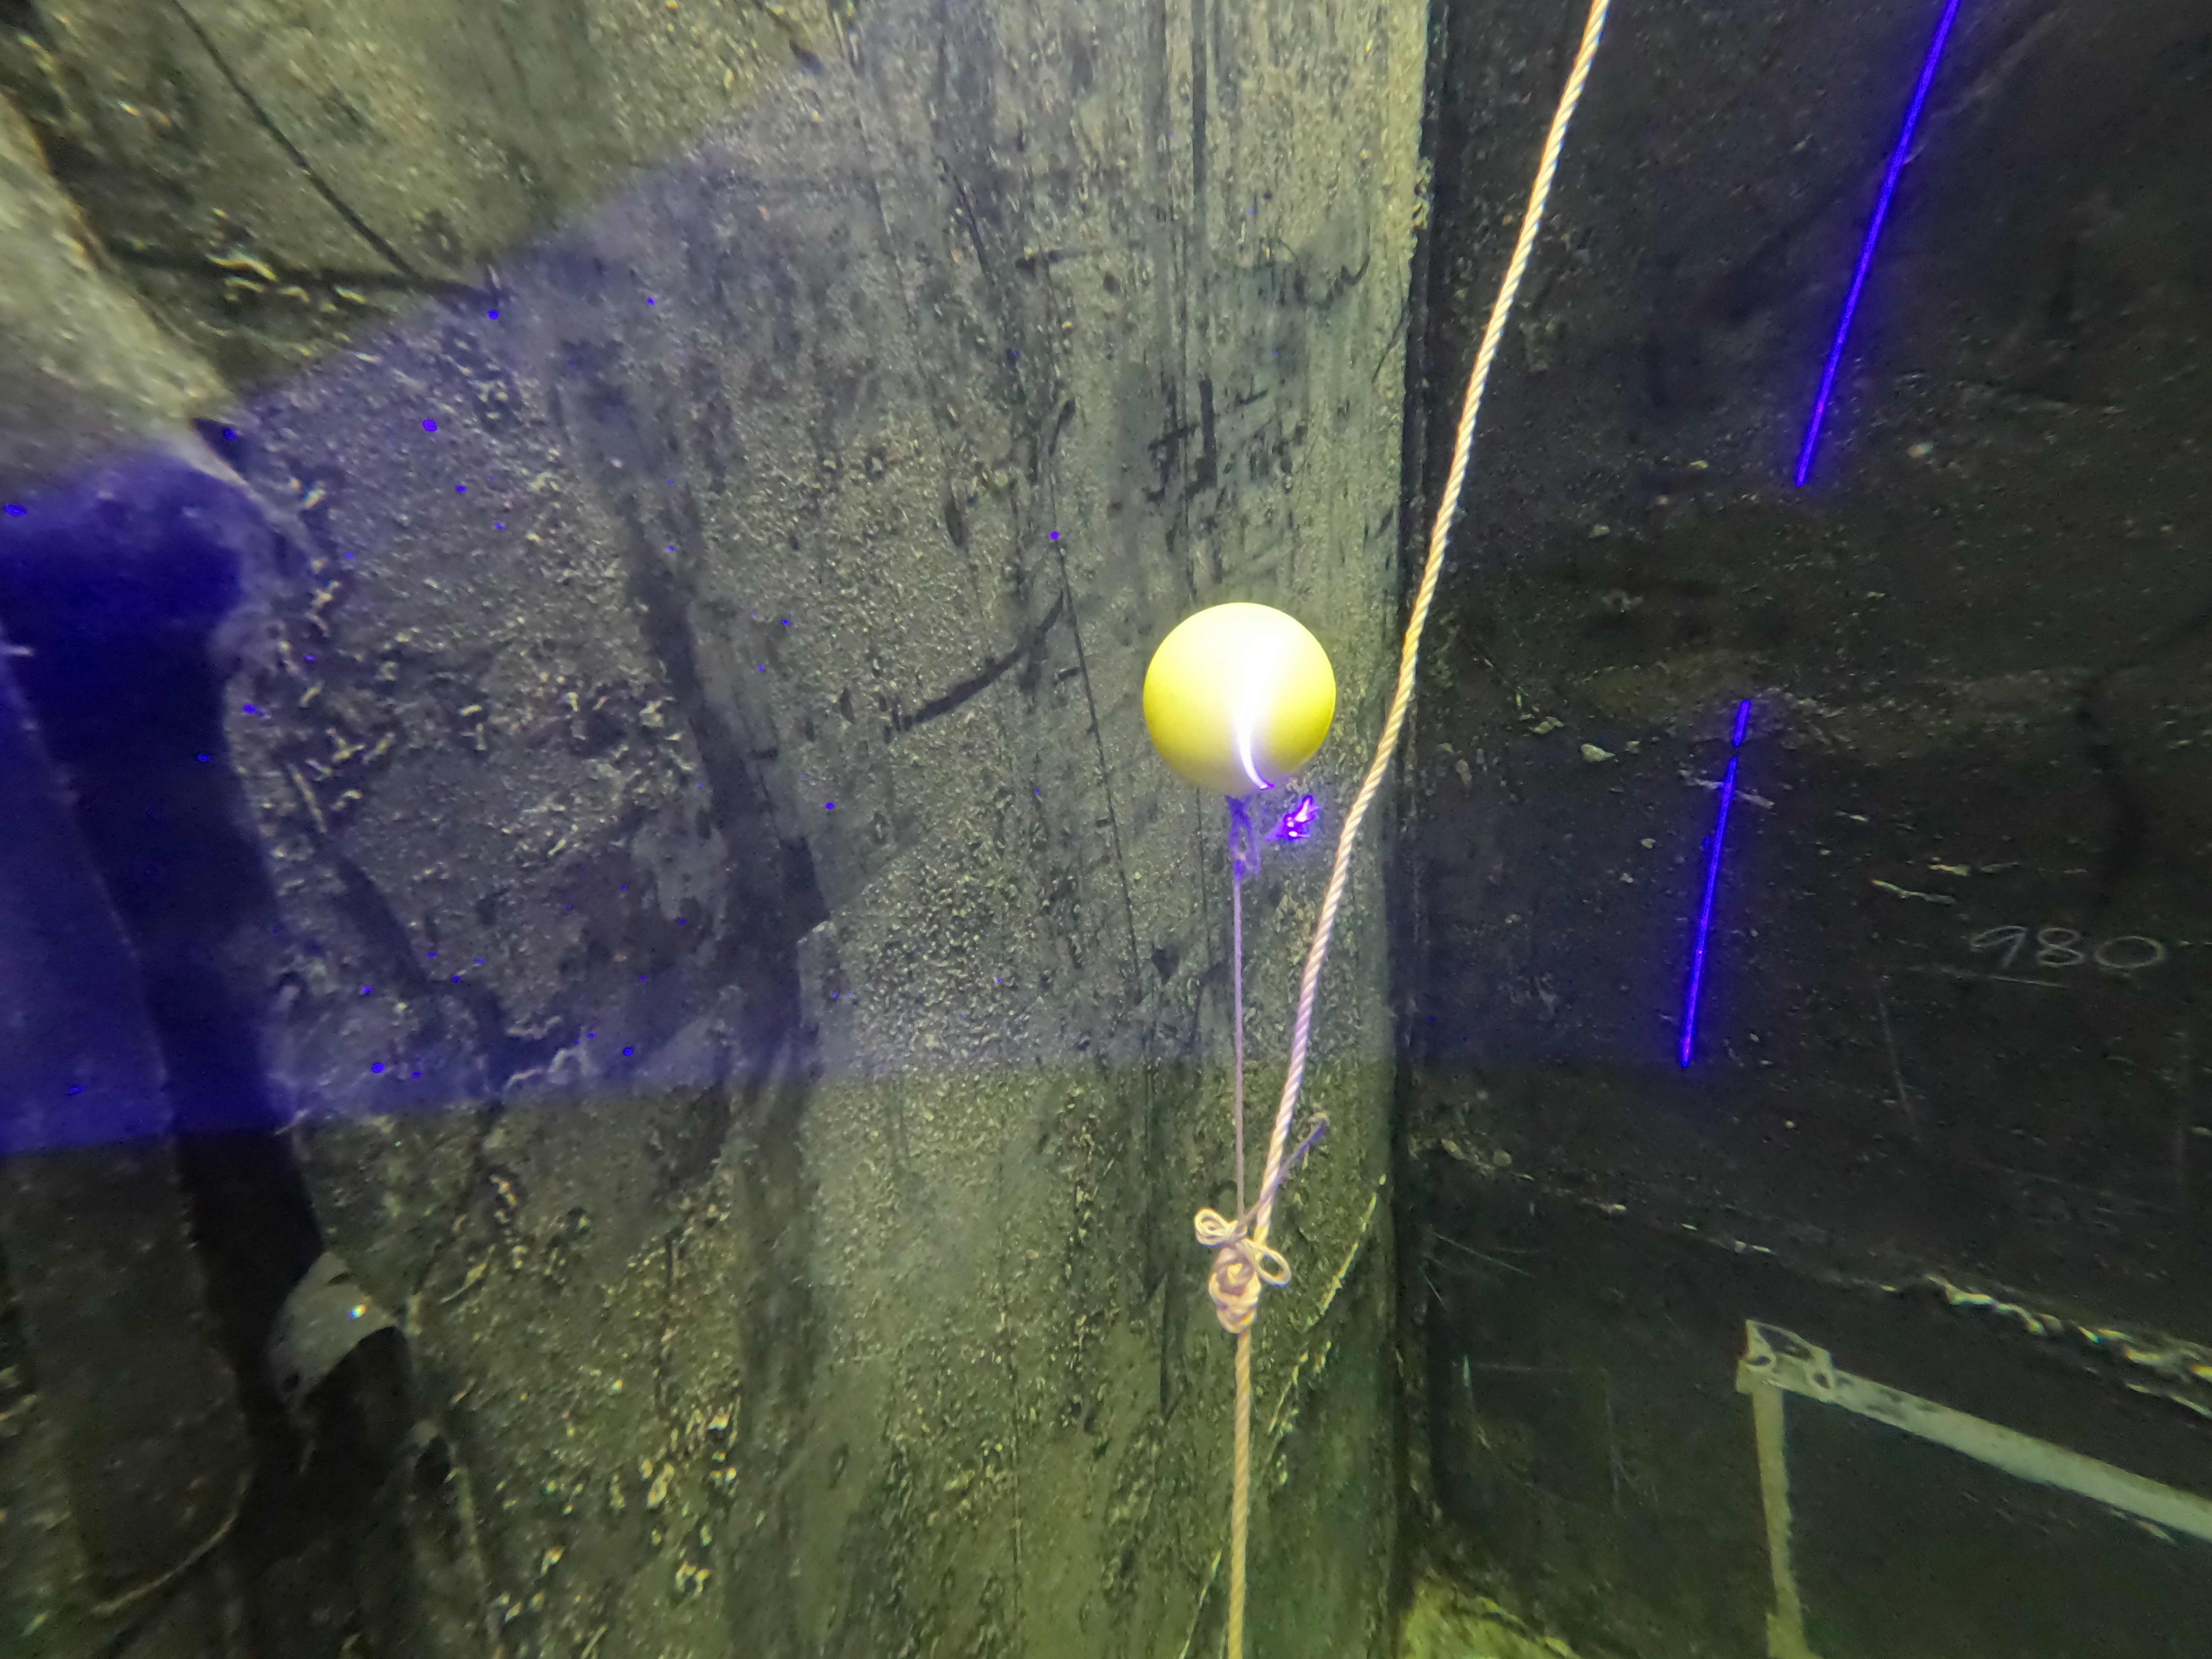

980

Supplement: Supplementary file 3419 [file G0034123.pdf › 8/G0034123.pdf]

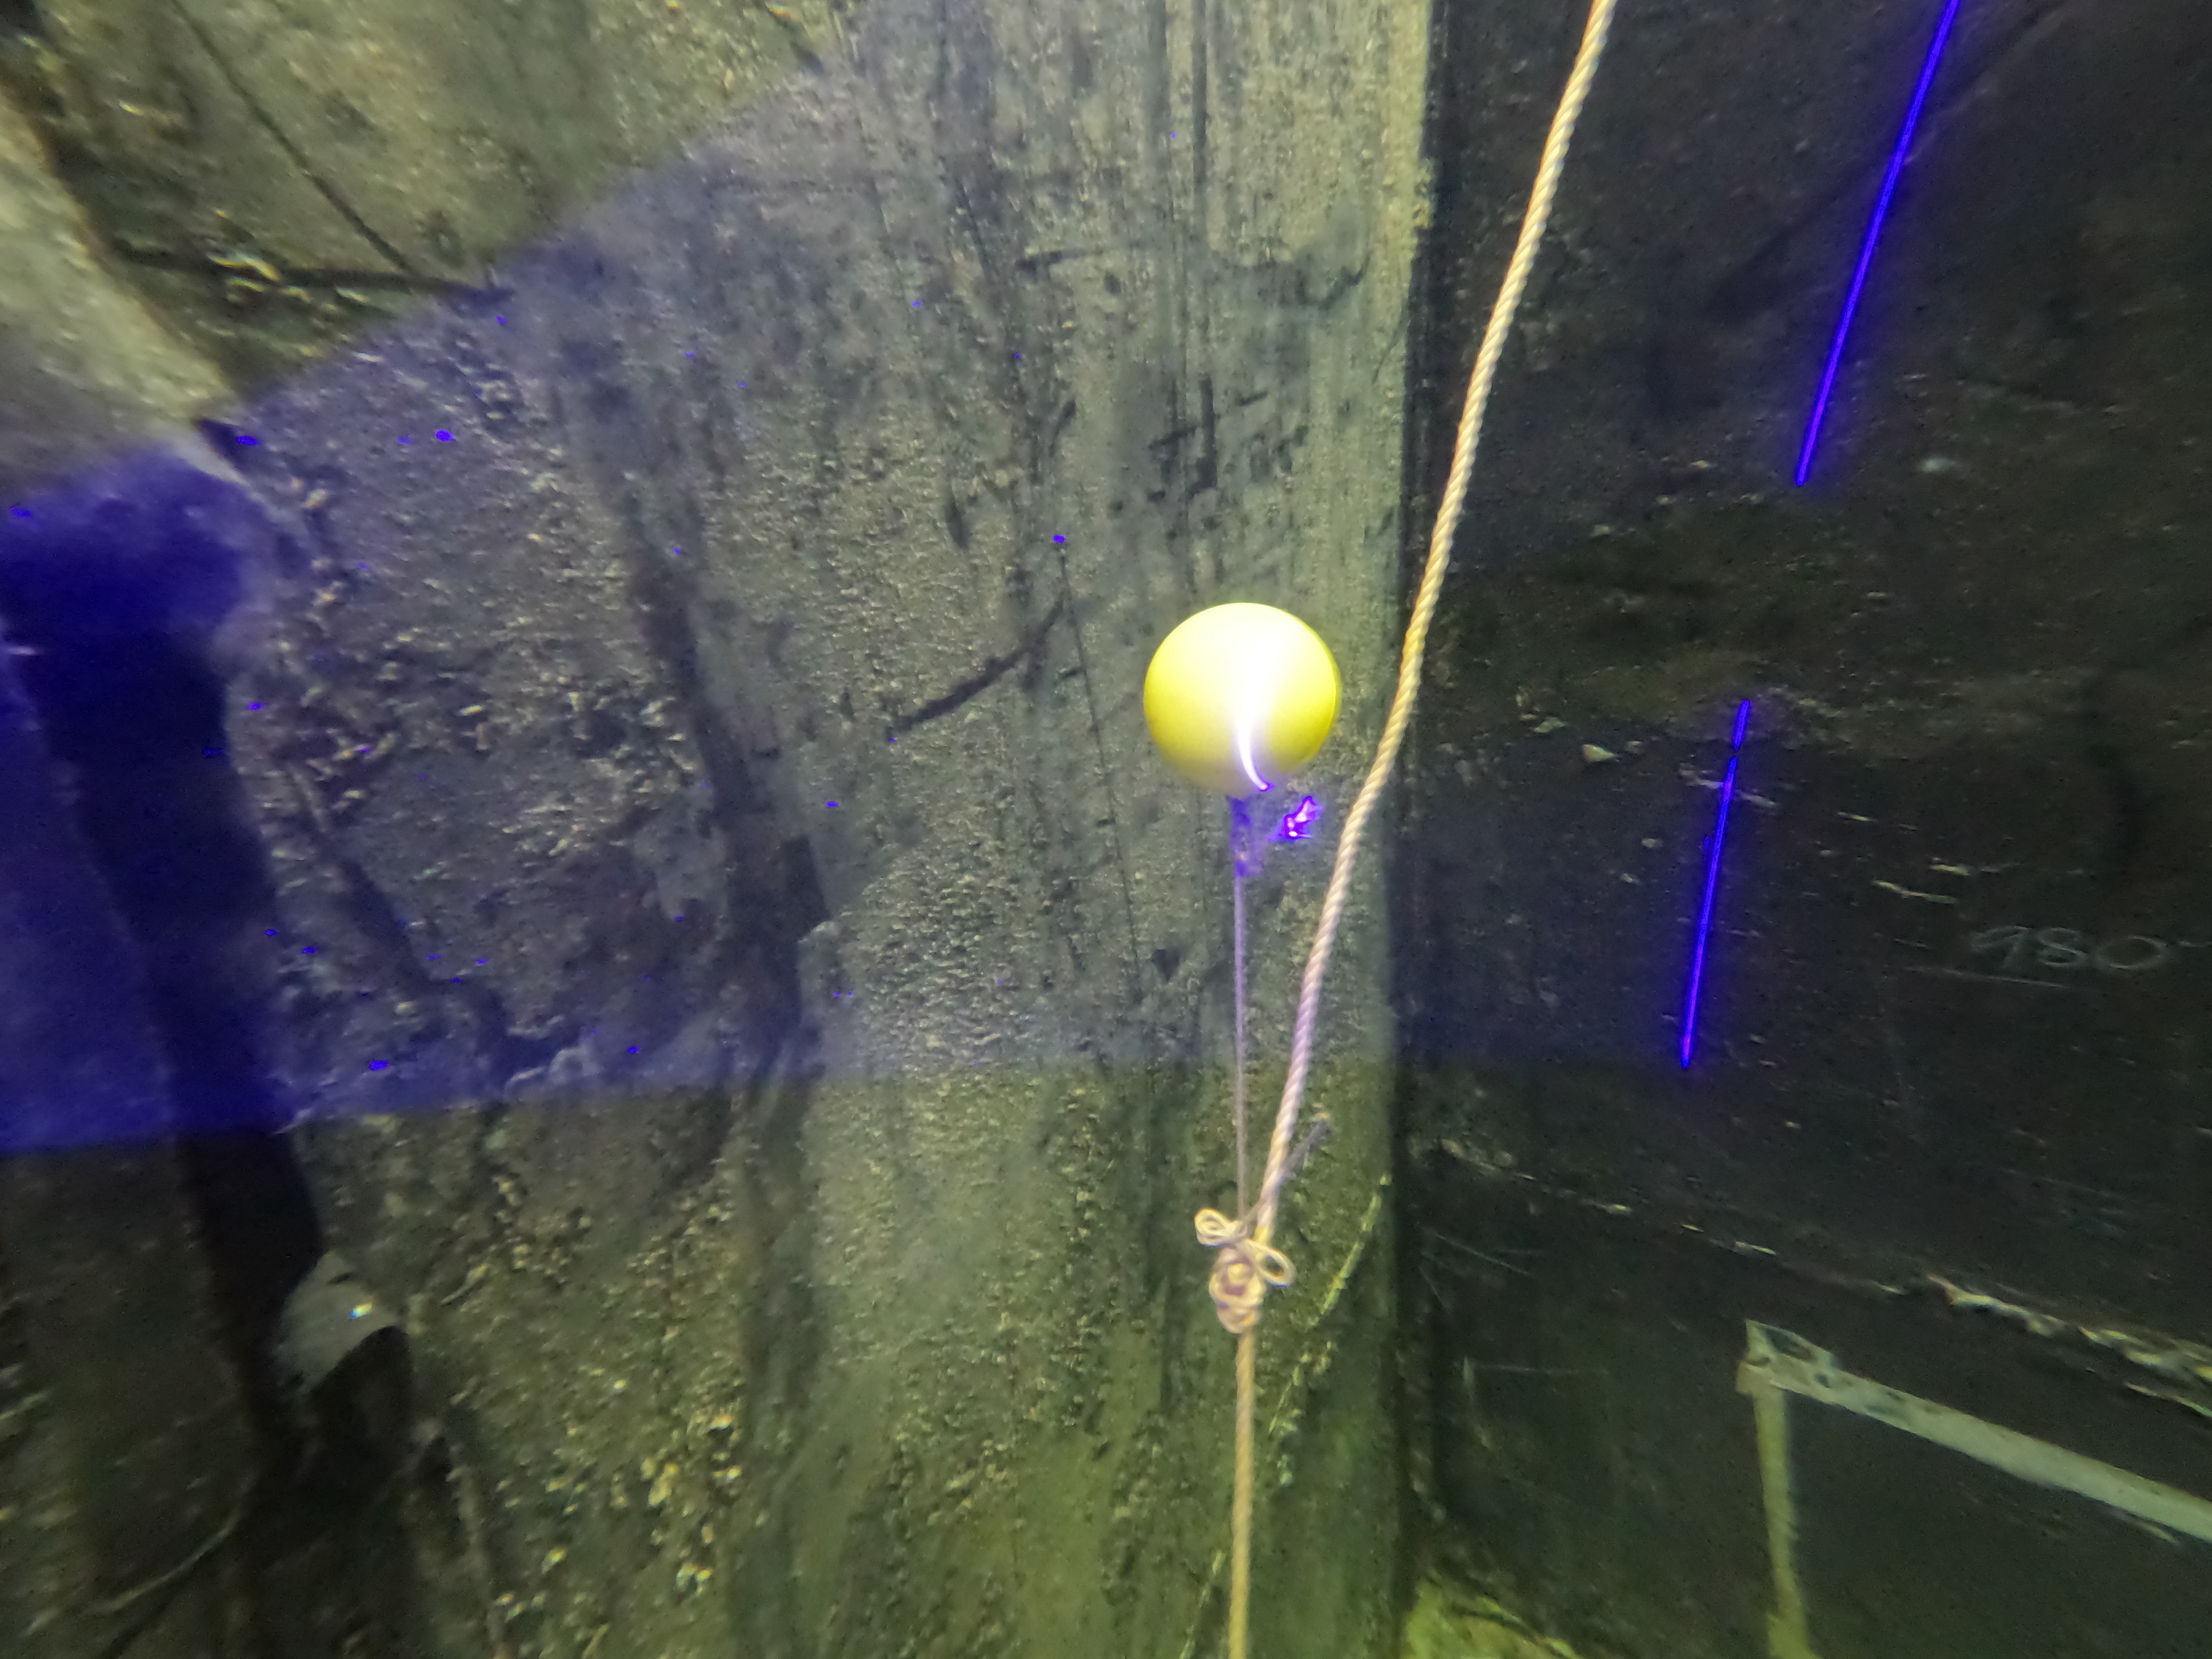

Supplement: Supplementary file 3420 [file G0034124.pdf › 8/G0034124.pdf]

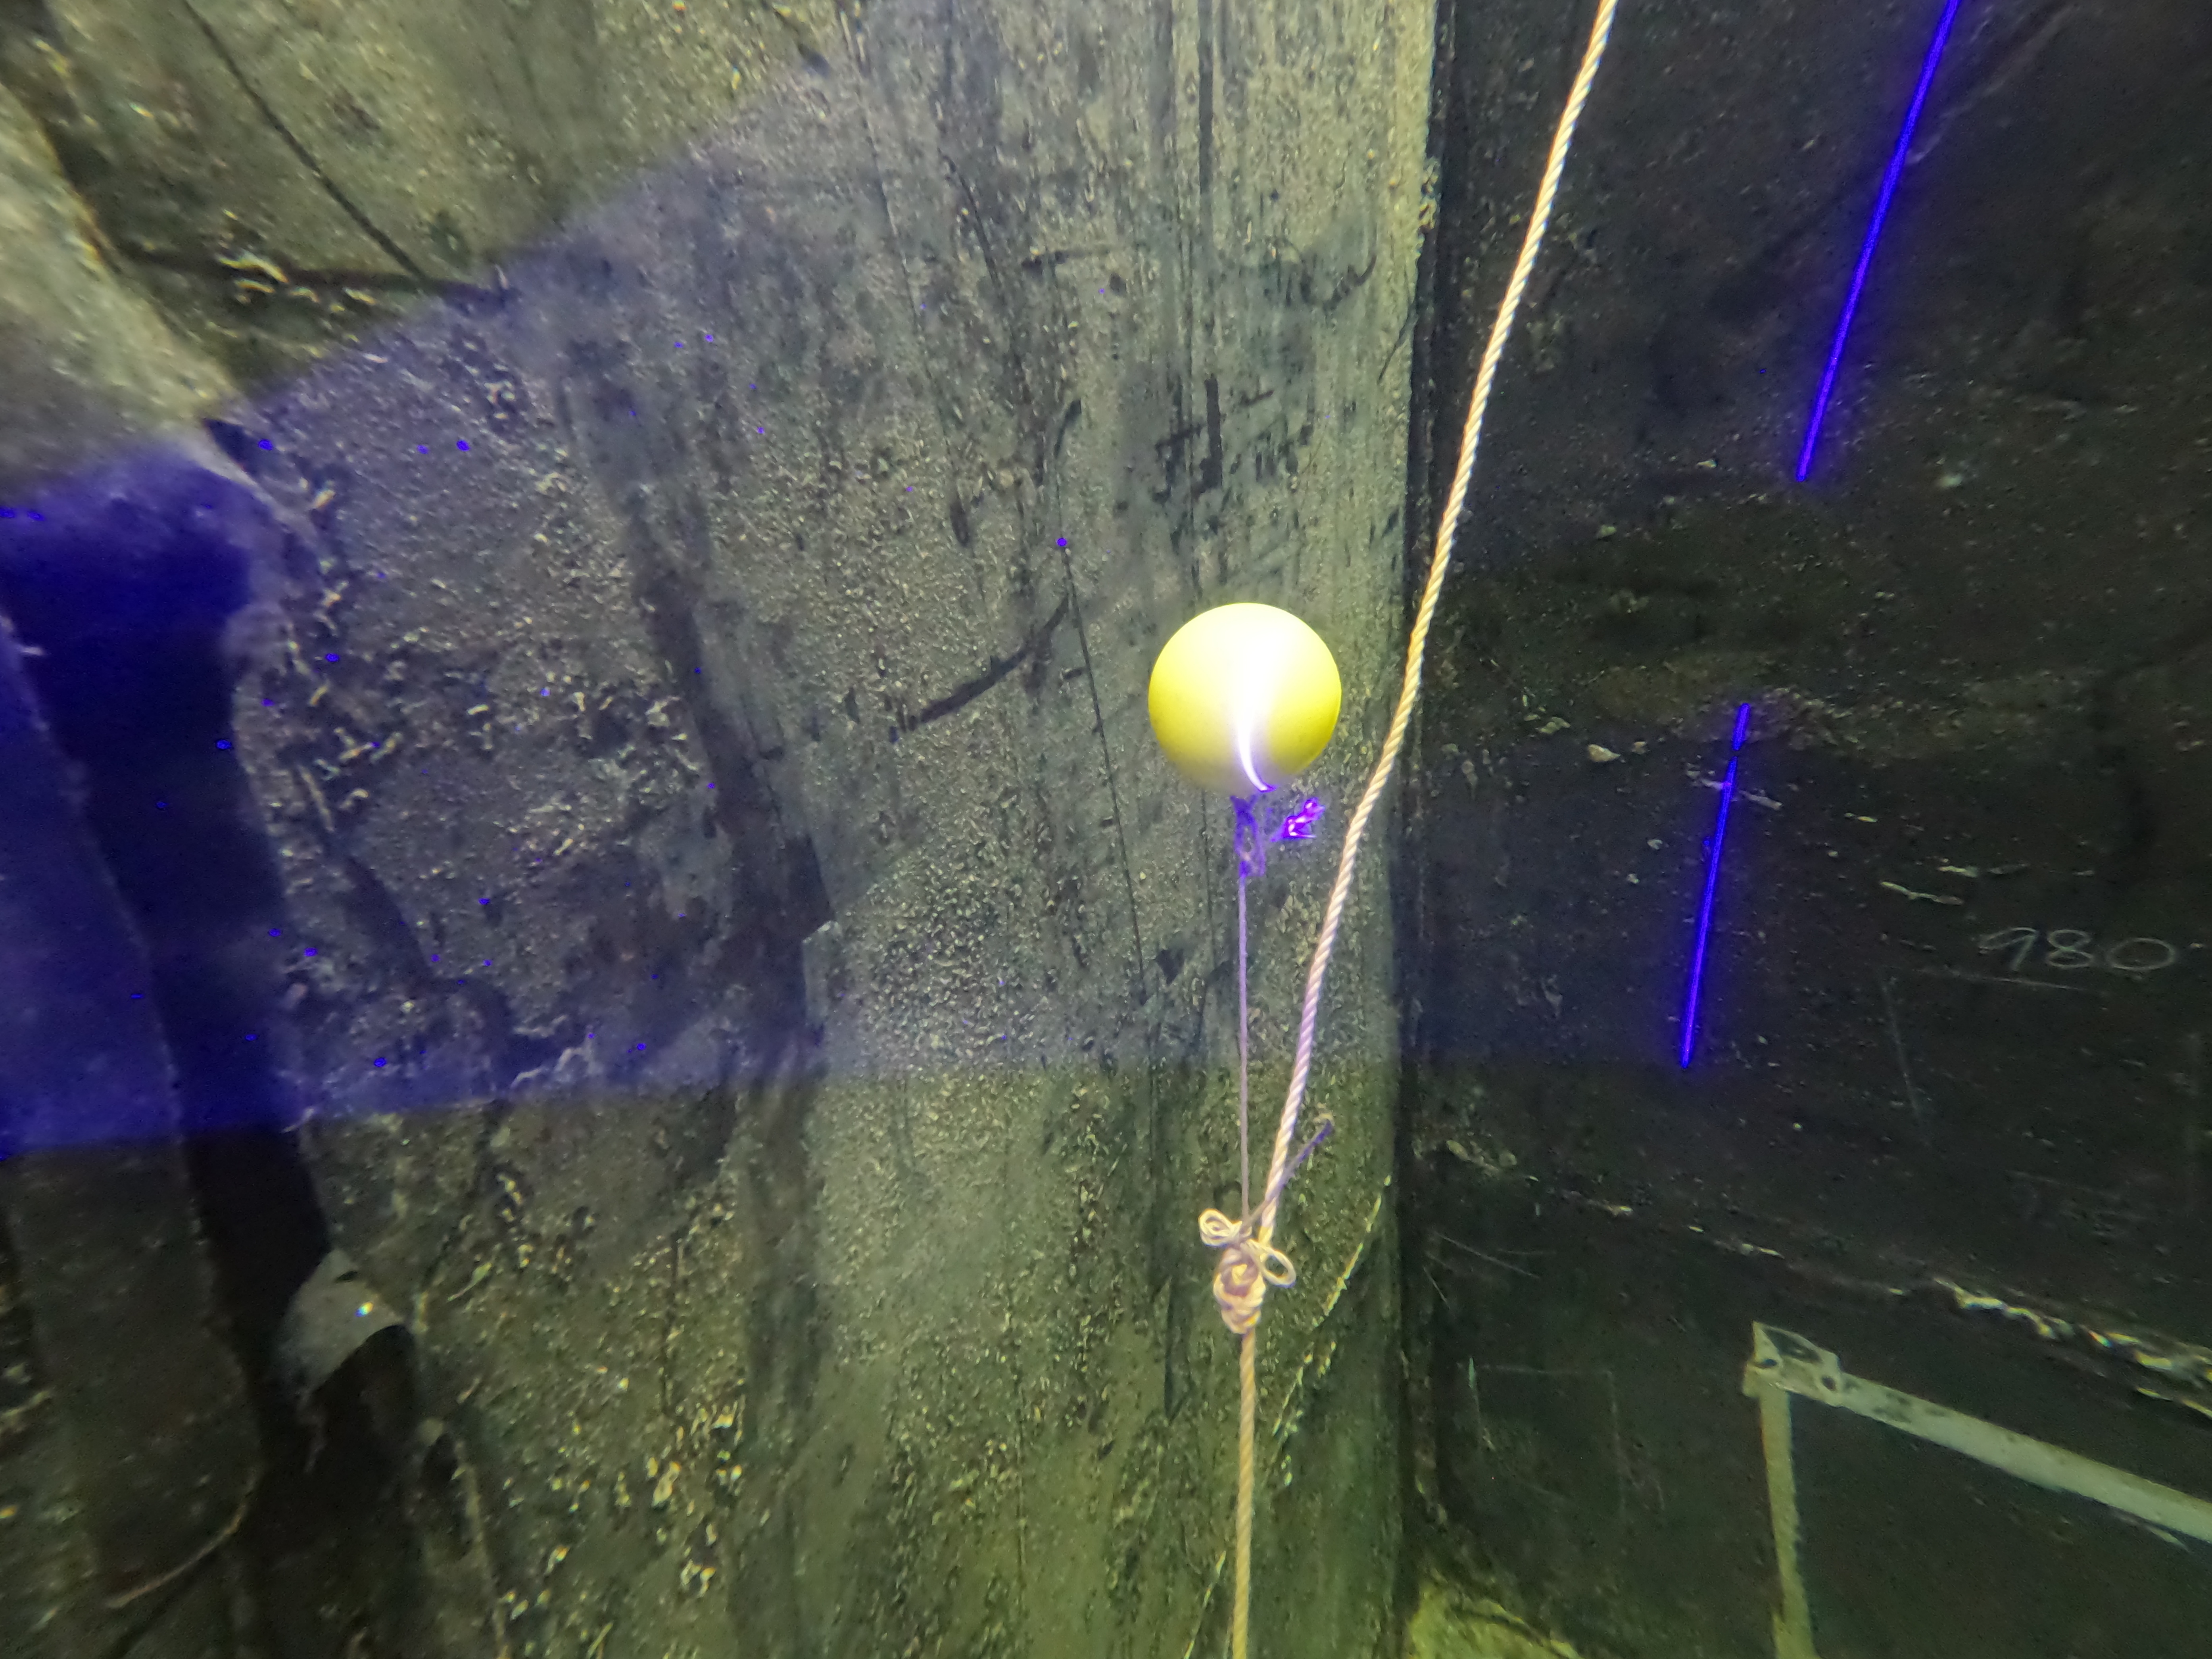

Supplement: Supplementary file 3421 [file G0034125.pdf › 8/G0034125.pdf]

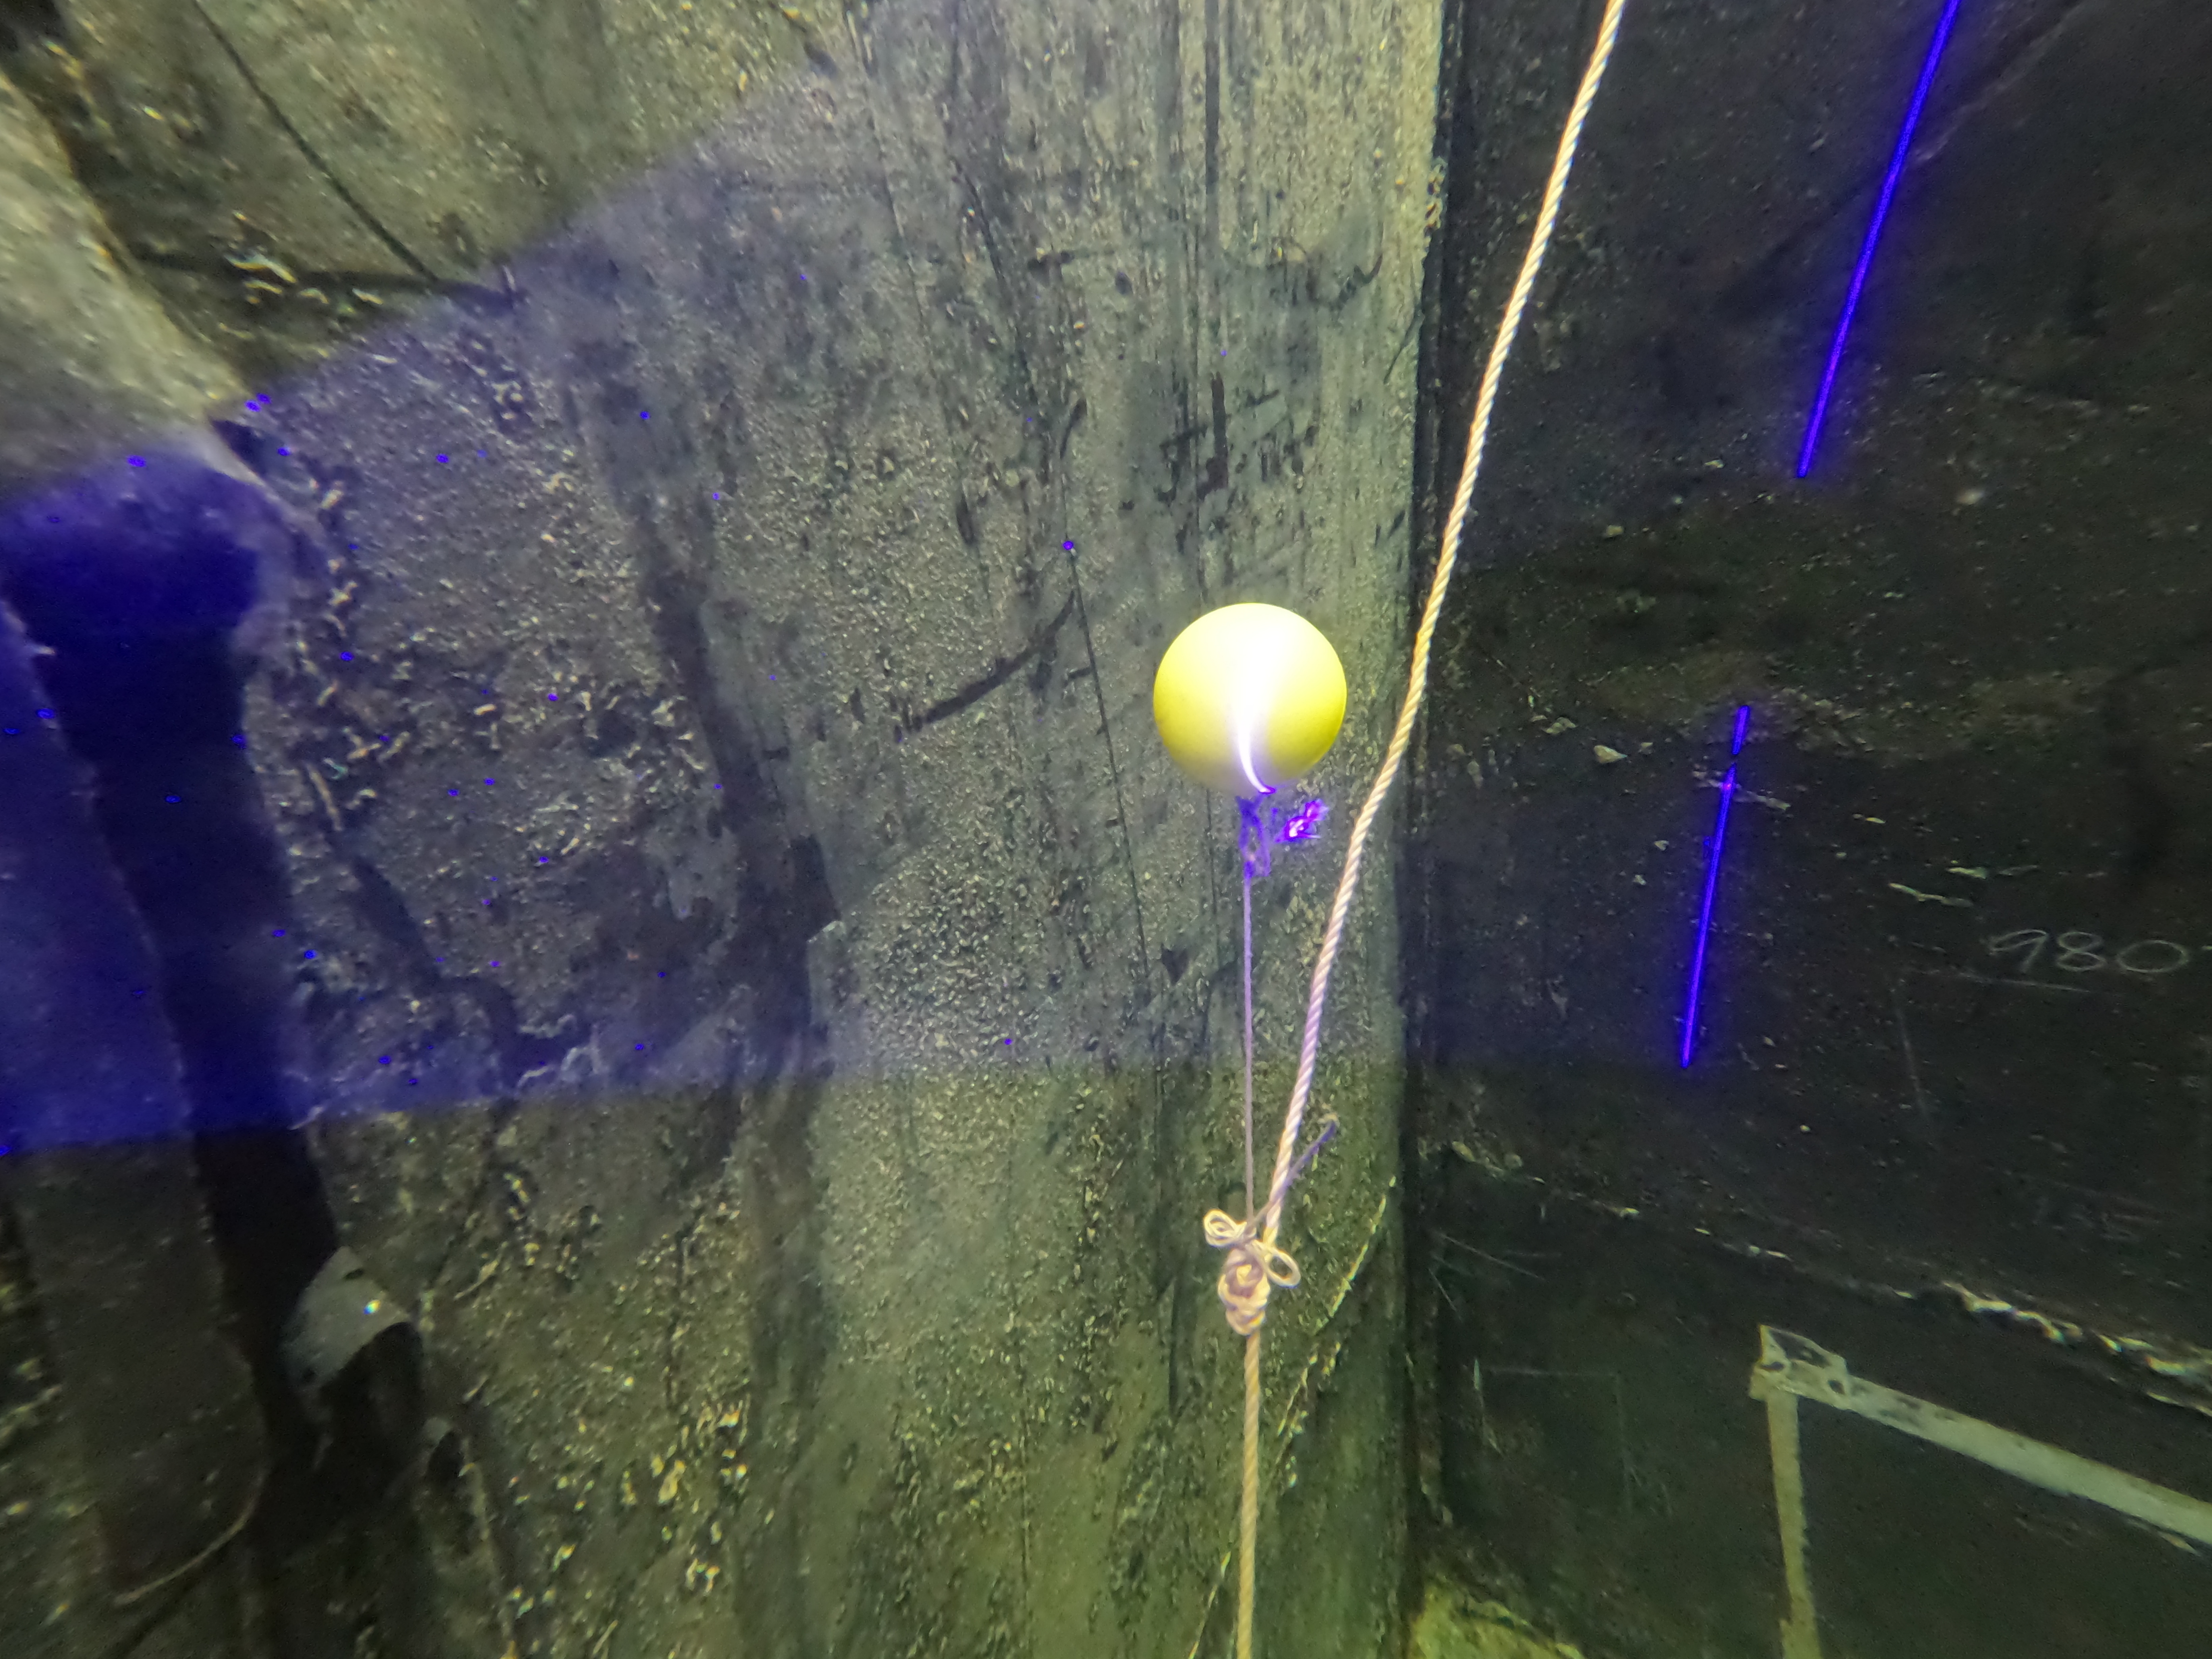

Supplement: Supplementary file 3422 [file G0034126.pdf › 8/G0034126.pdf]

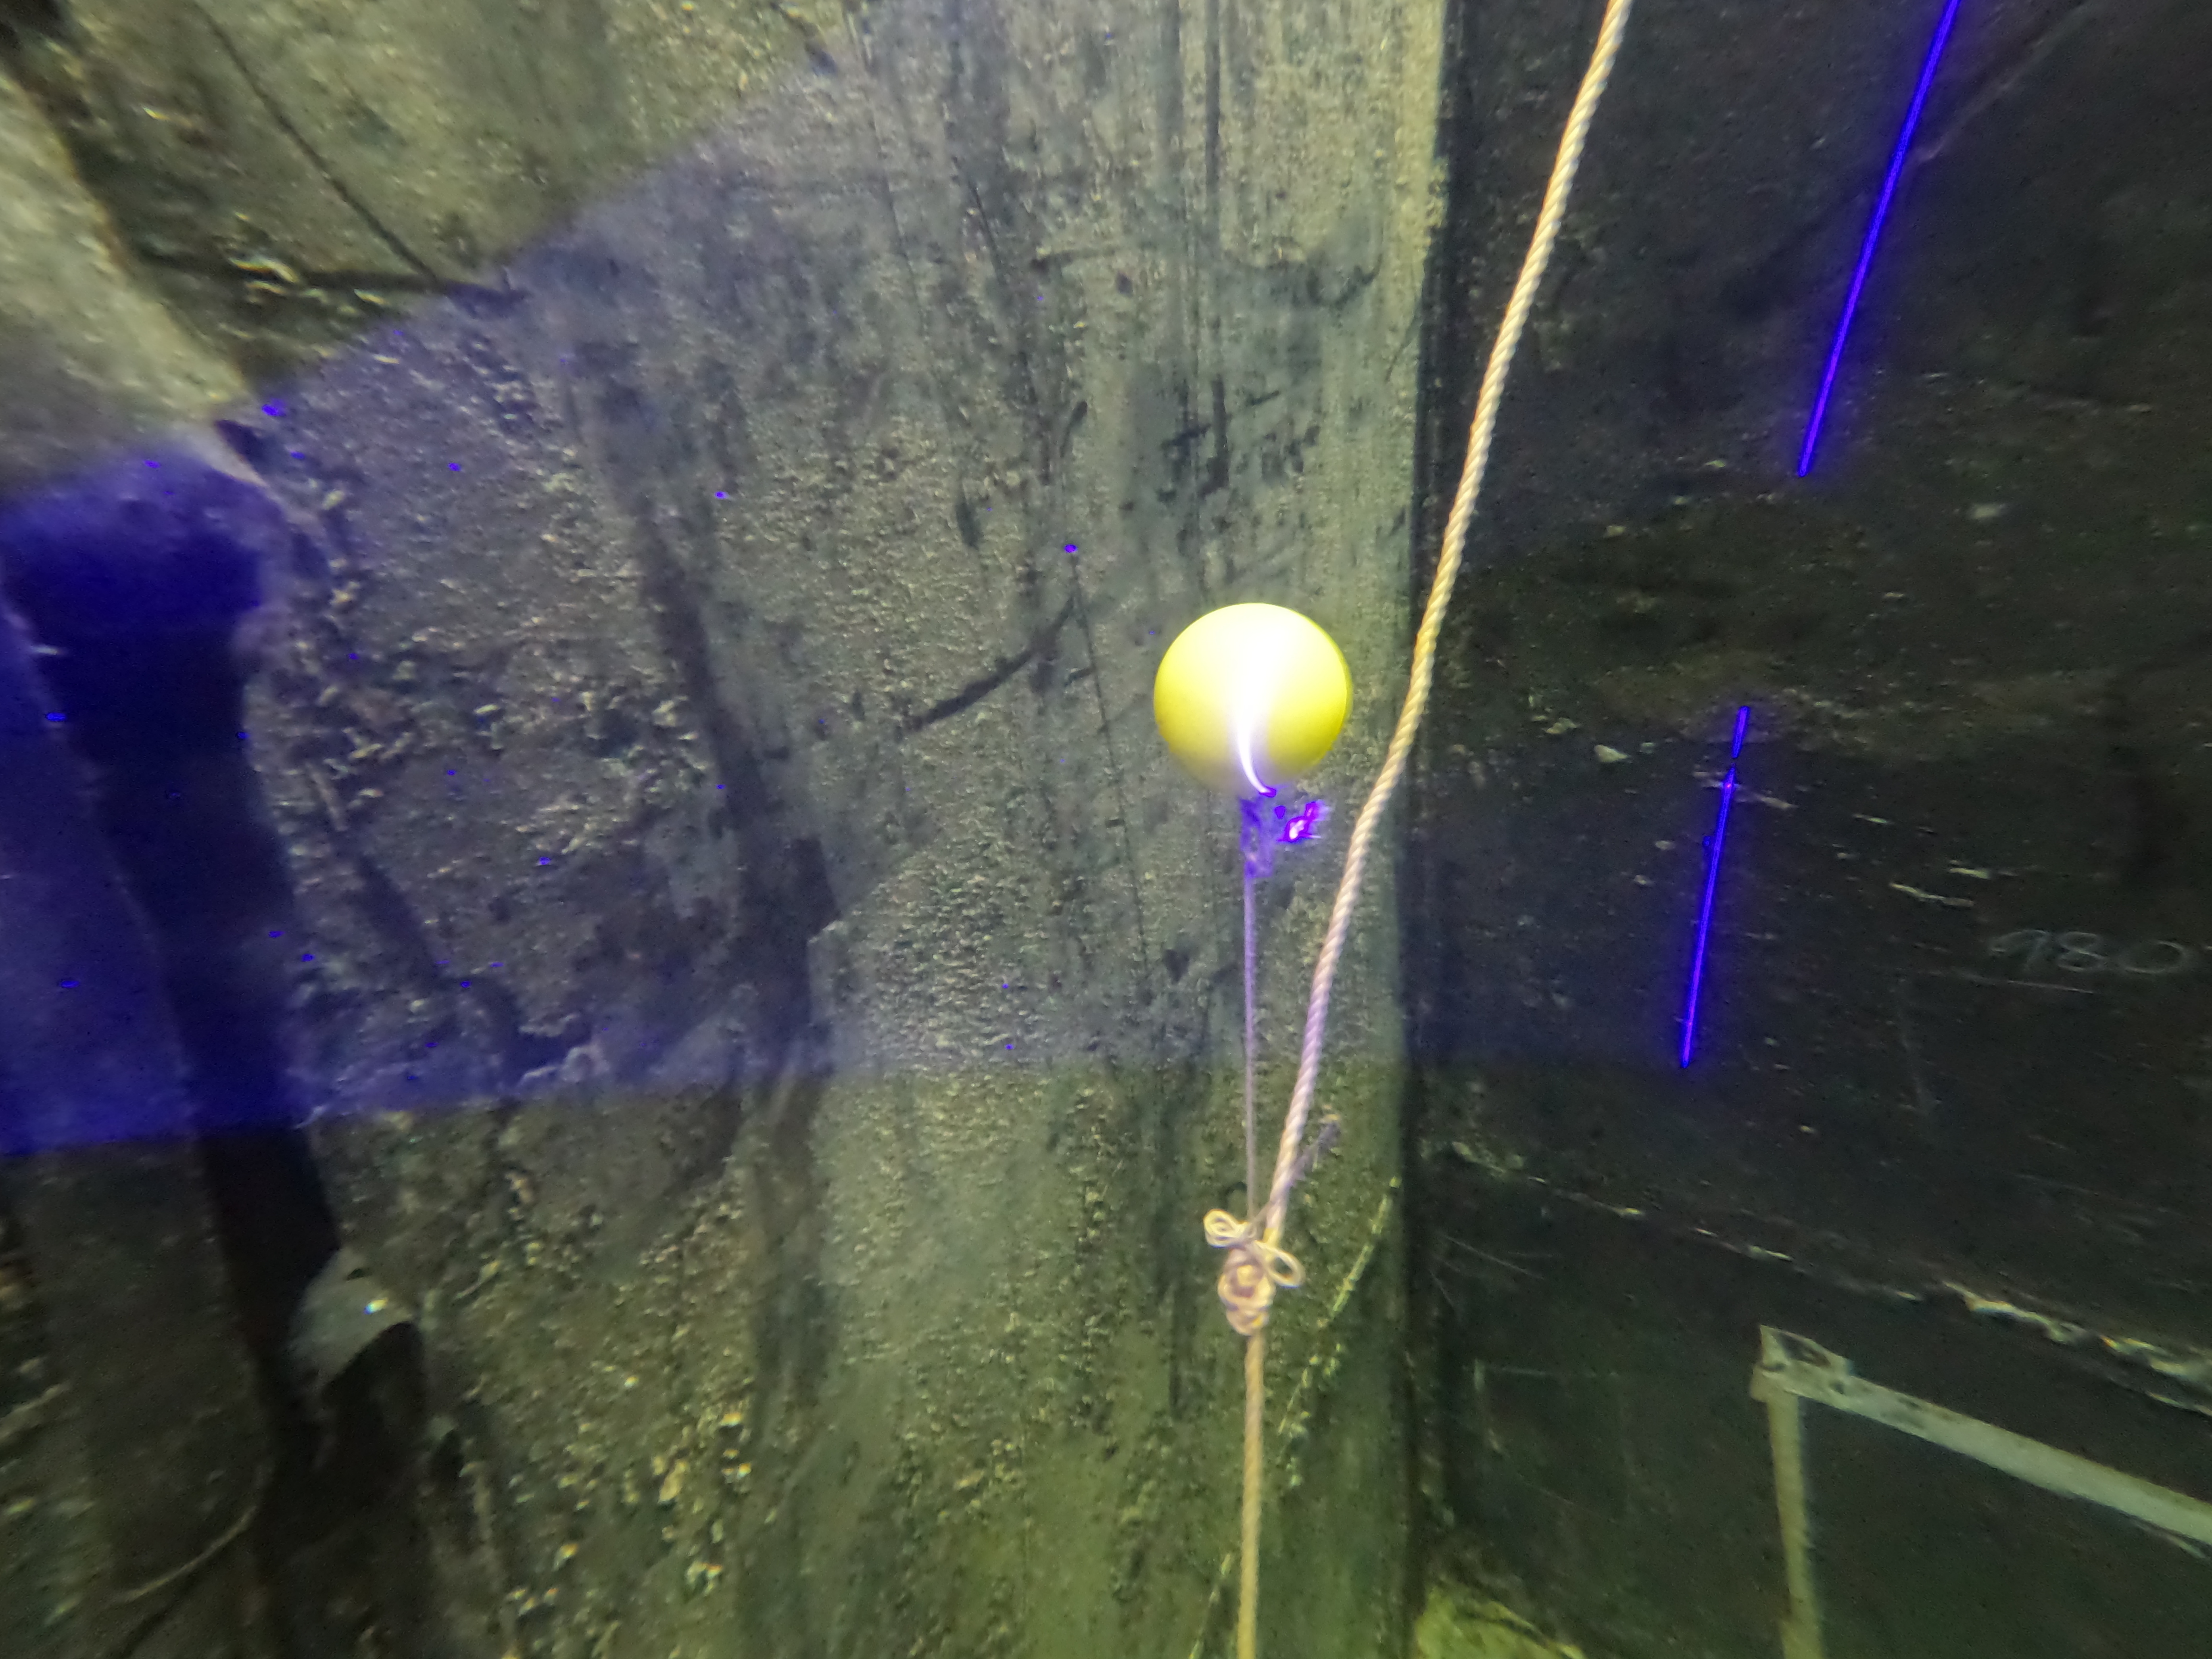

Supplement: Supplementary file 3423 [file G0034127.pdf › 8/G0034127.pdf]

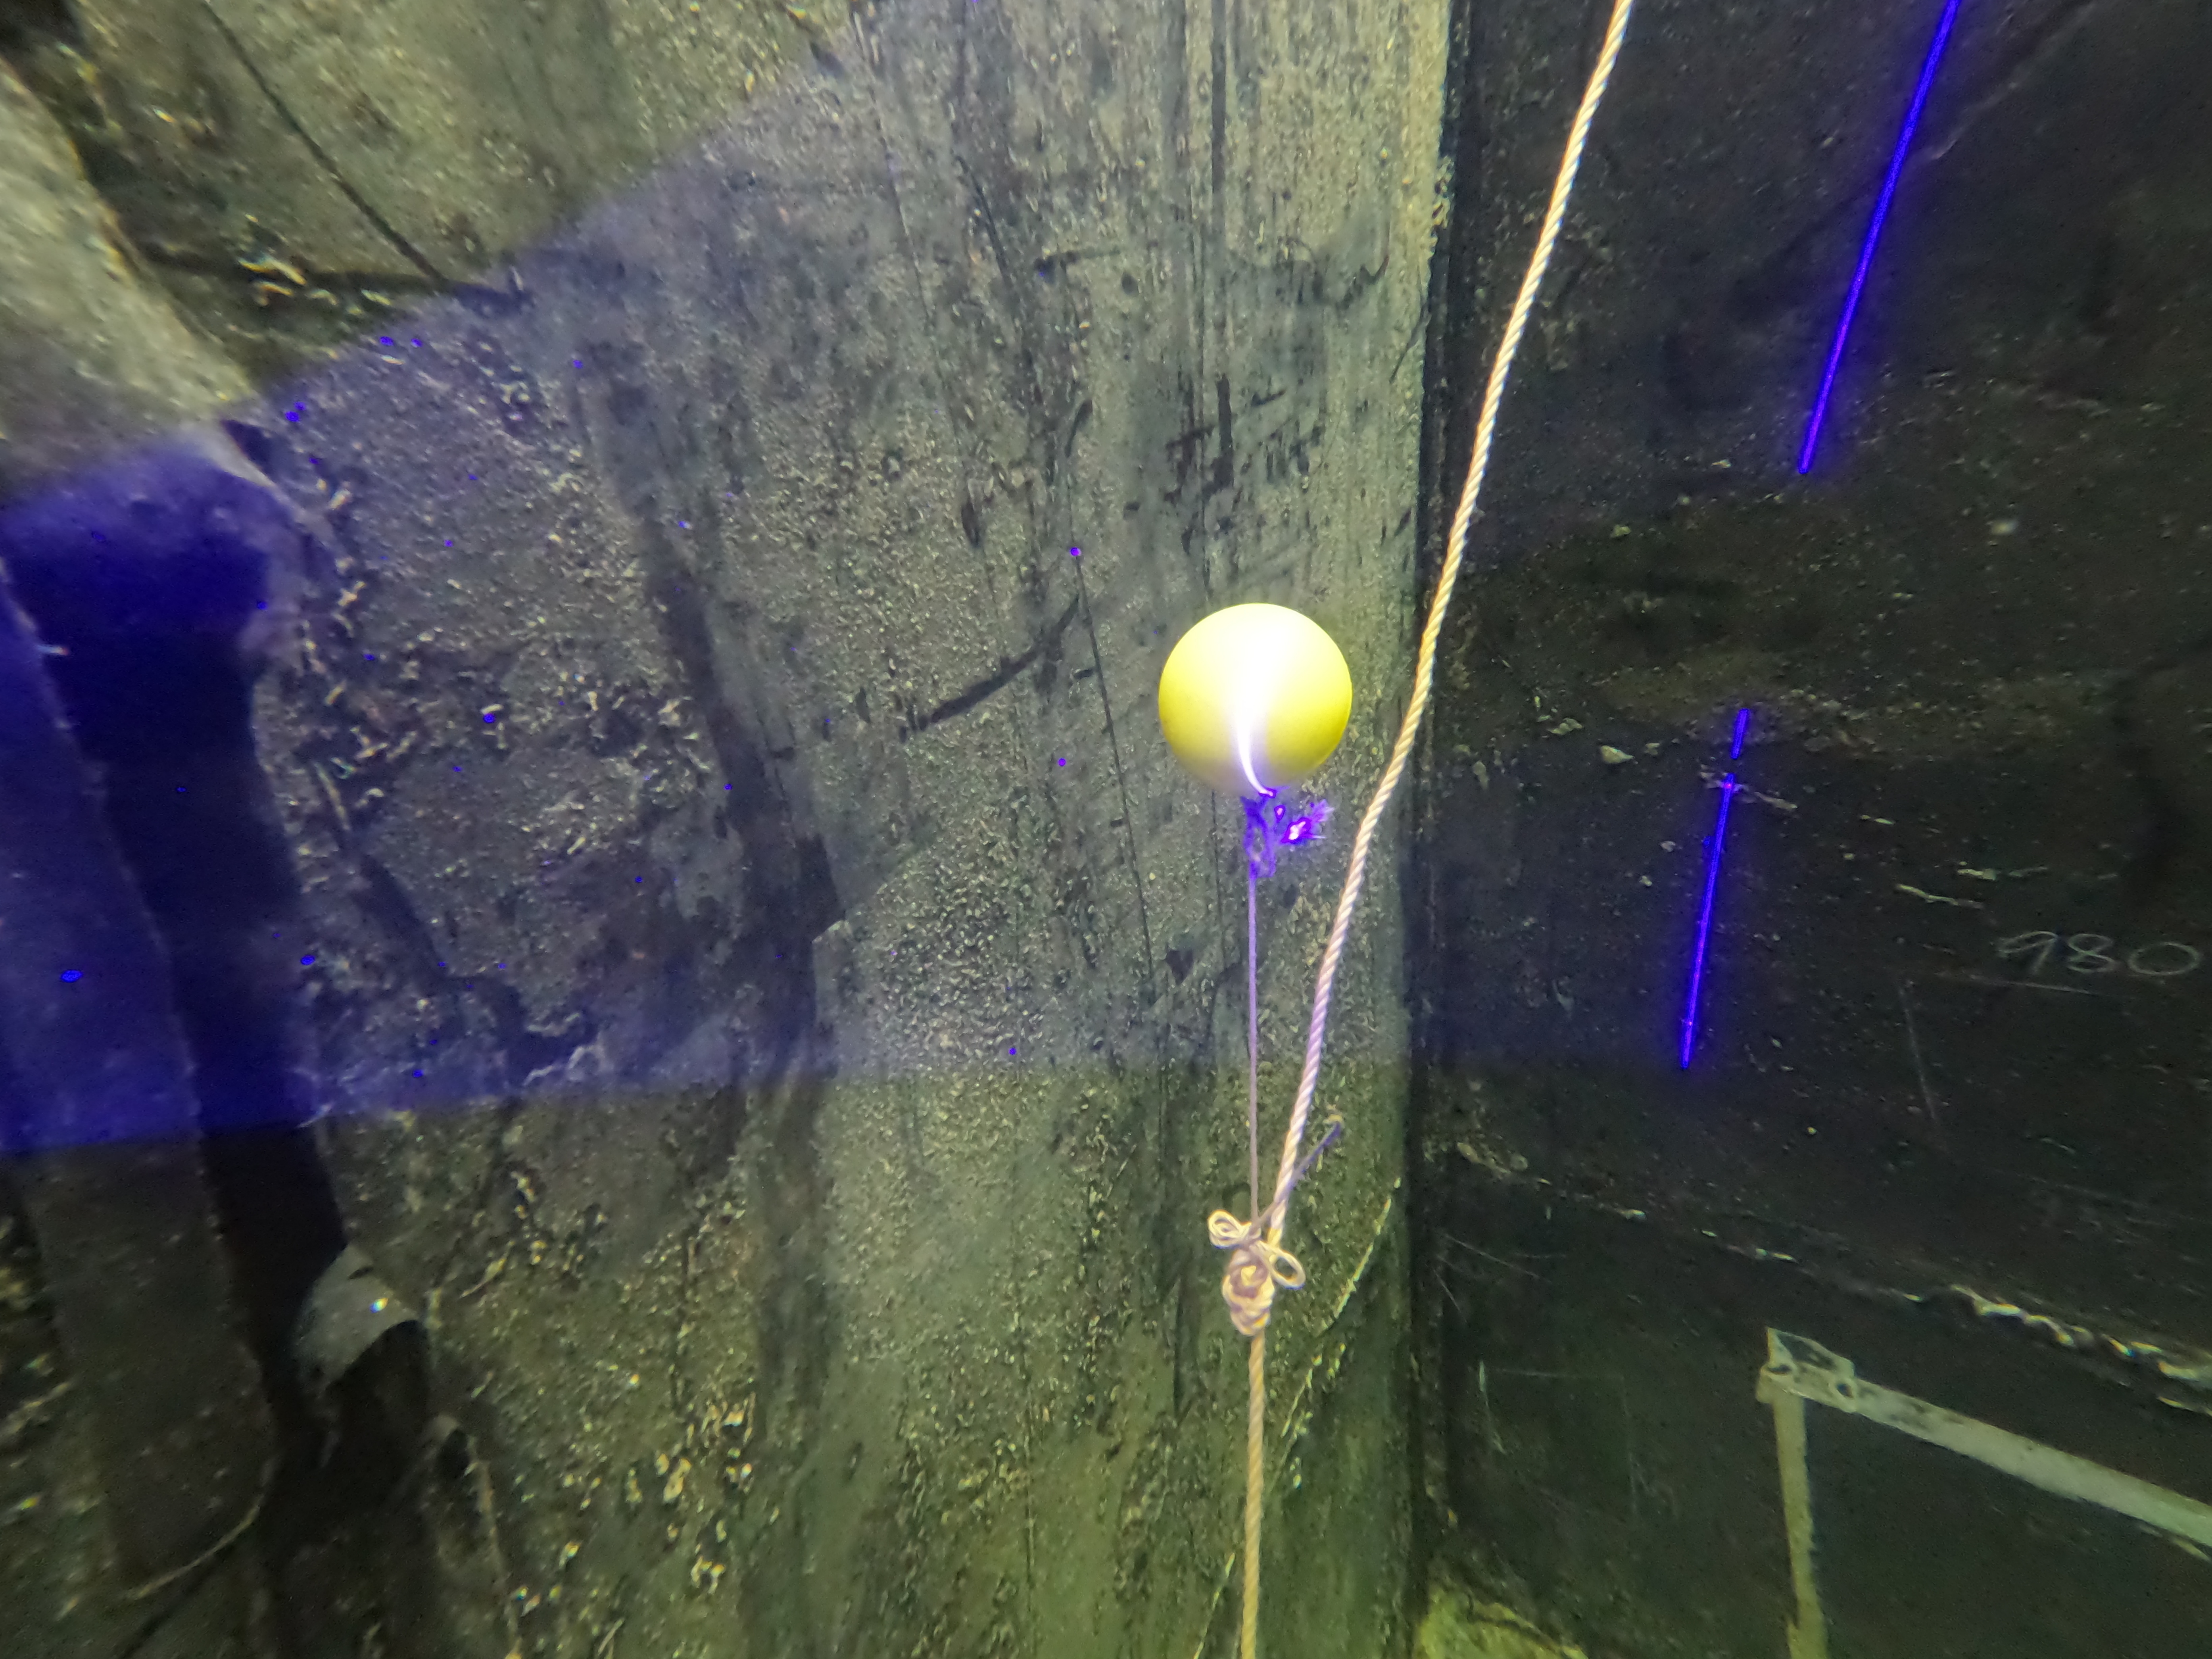

Supplement: Supplementary file 3424 [file G0034128.pdf › 8/G0034128.pdf]

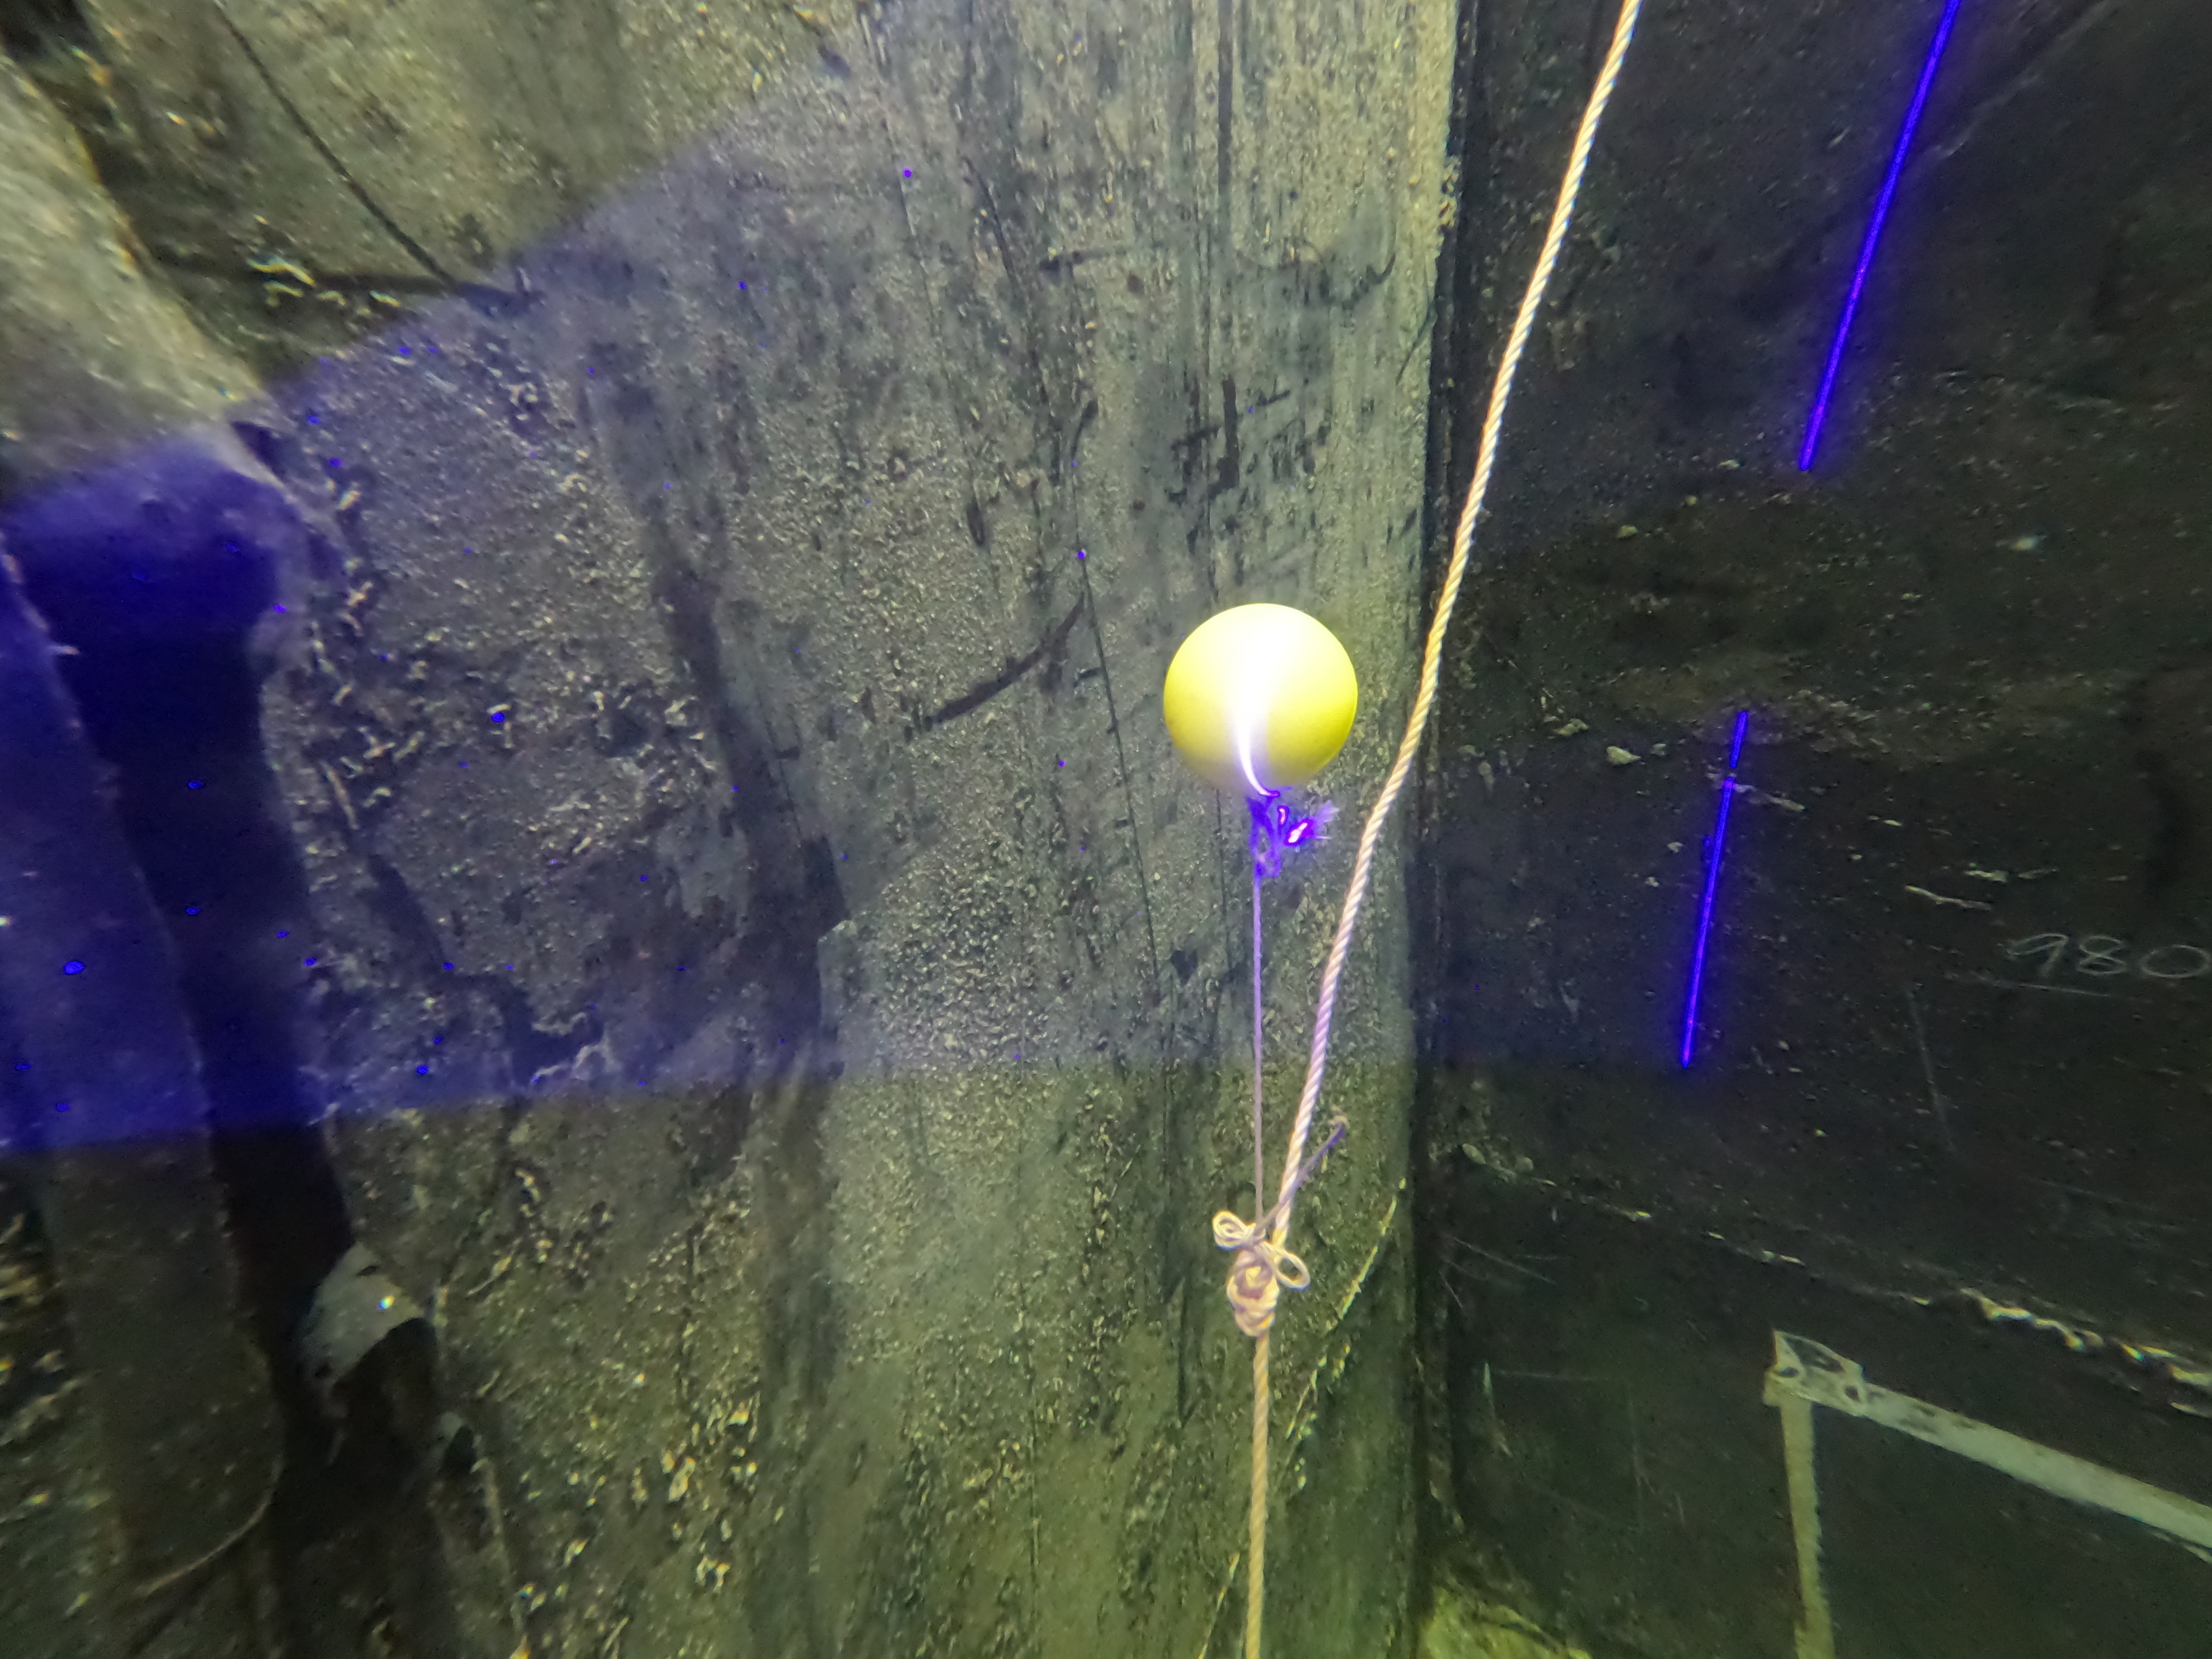

980

Supplement: Supplementary file 3425 [file G0034129.pdf › 8/G0034129.pdf]

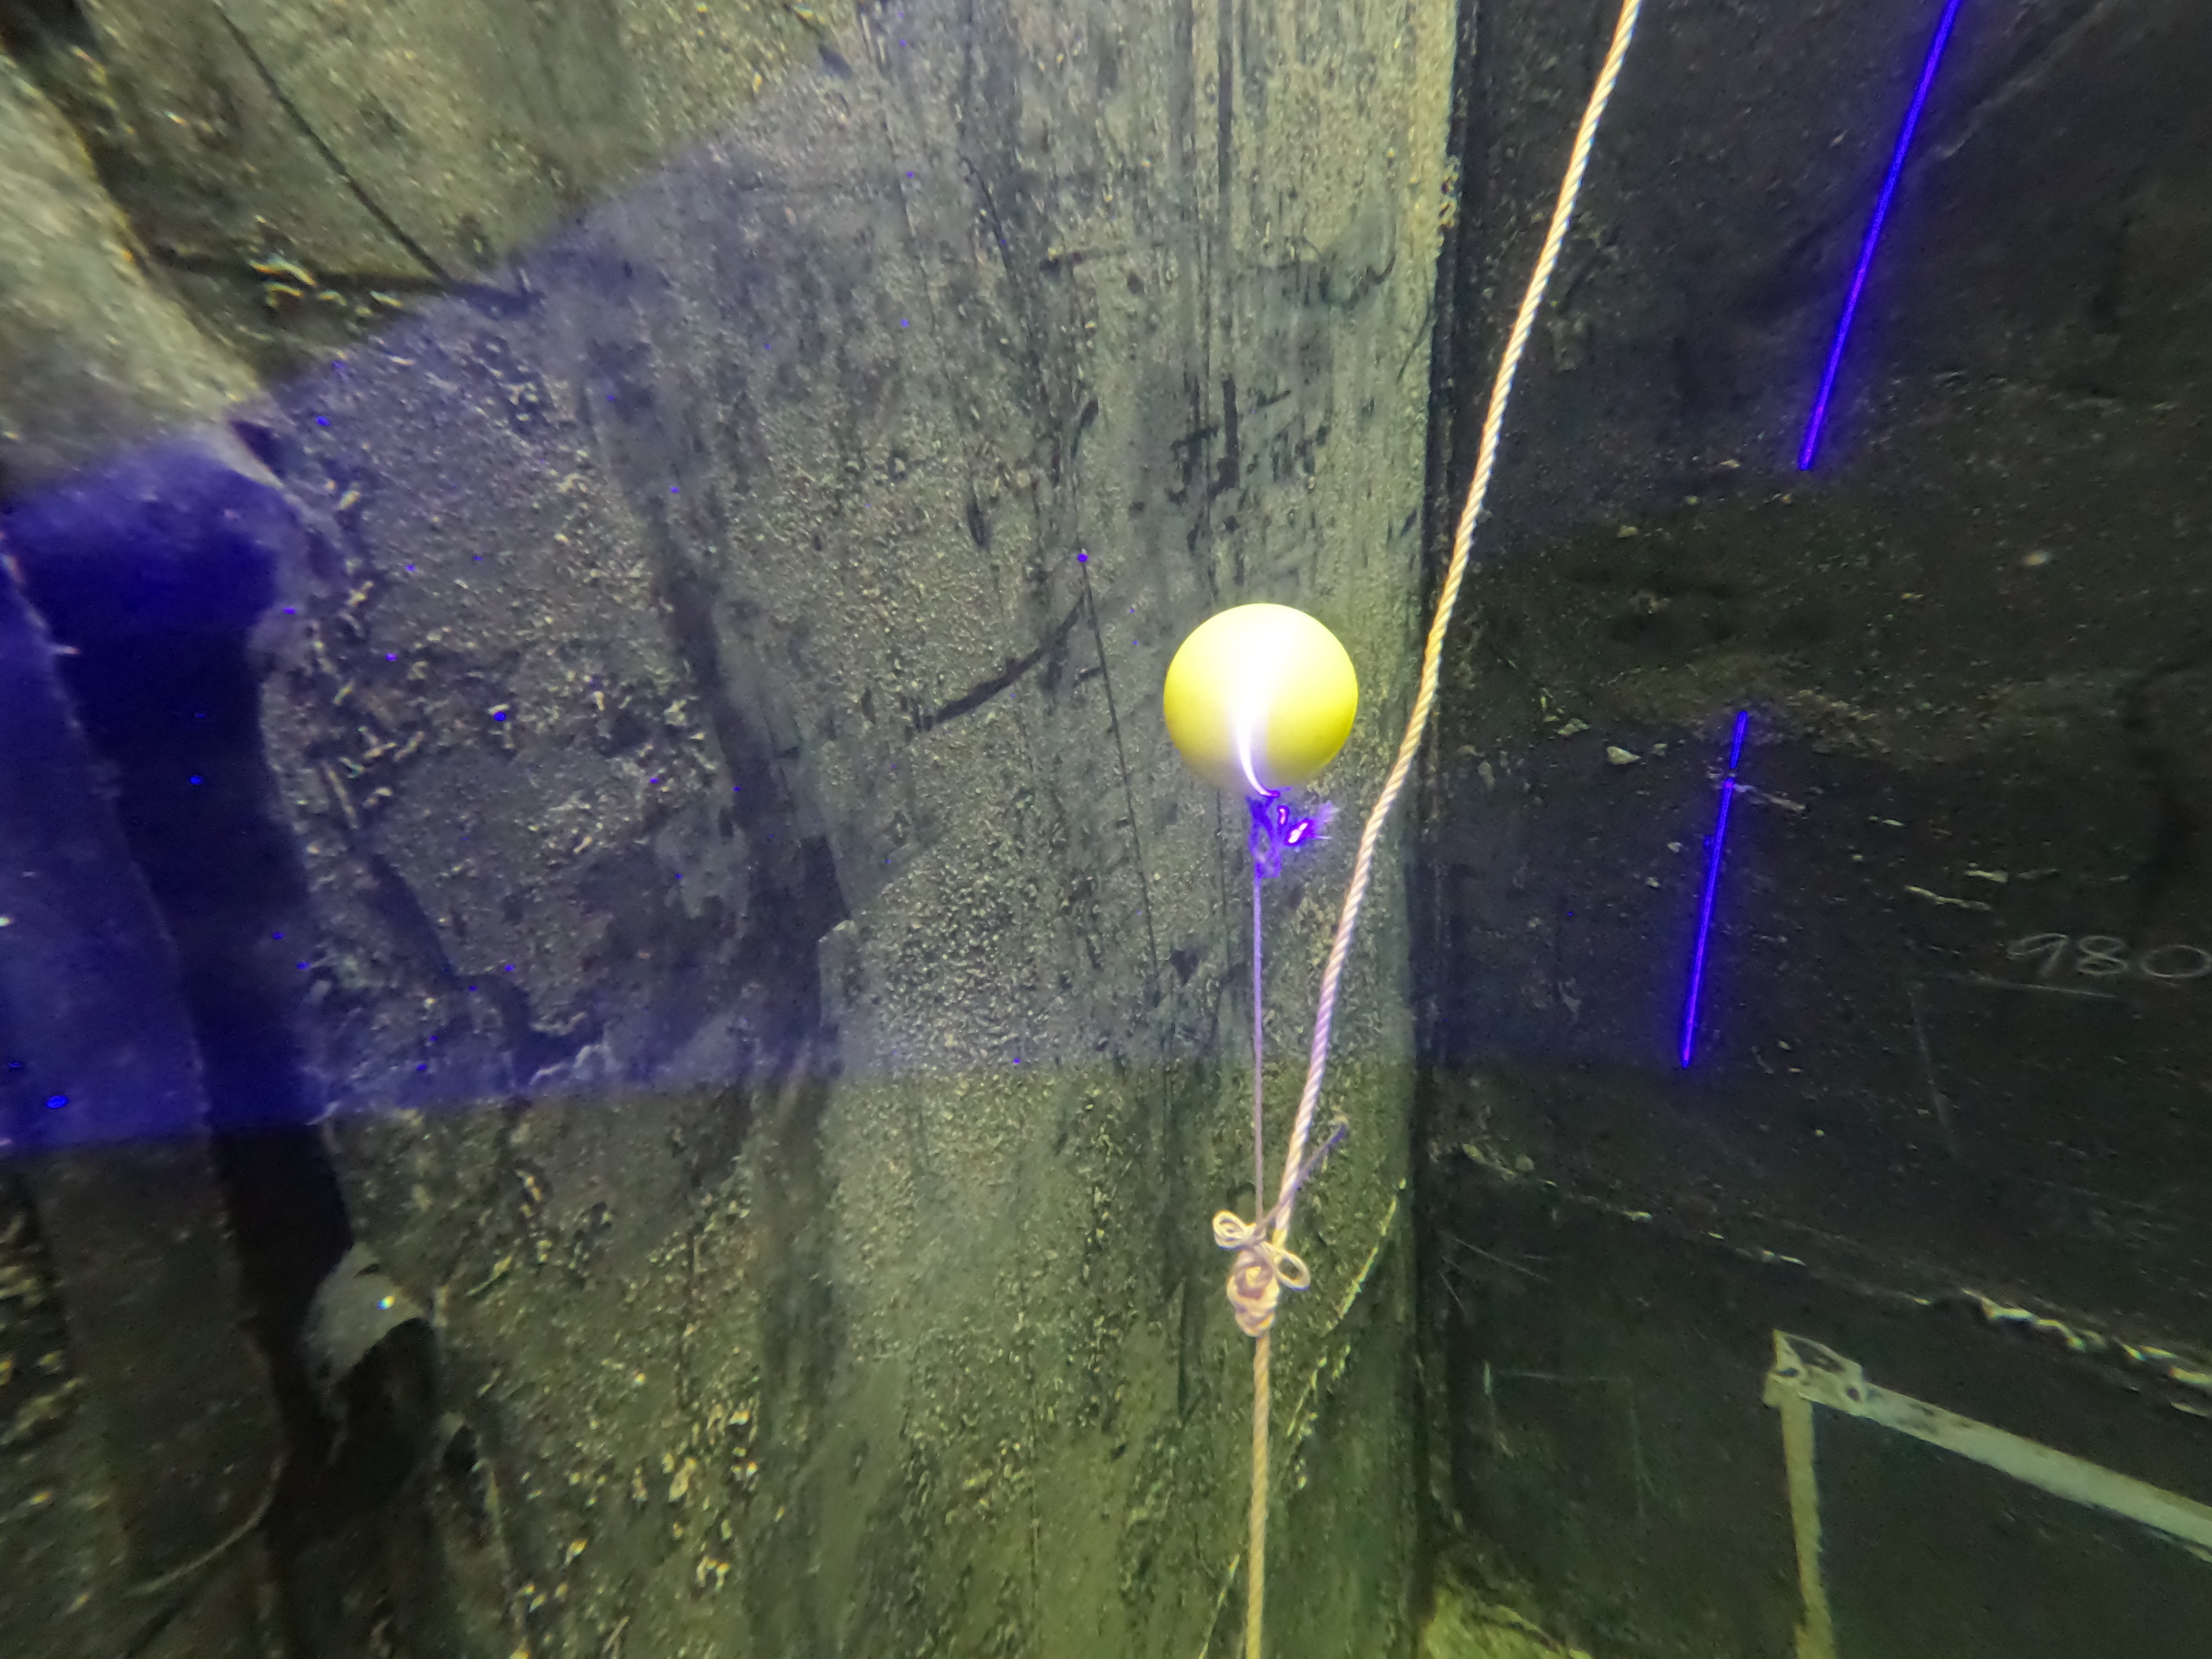

Supplement: Supplementary file 3426 [file G0034130.pdf › 8/G0034130.pdf]

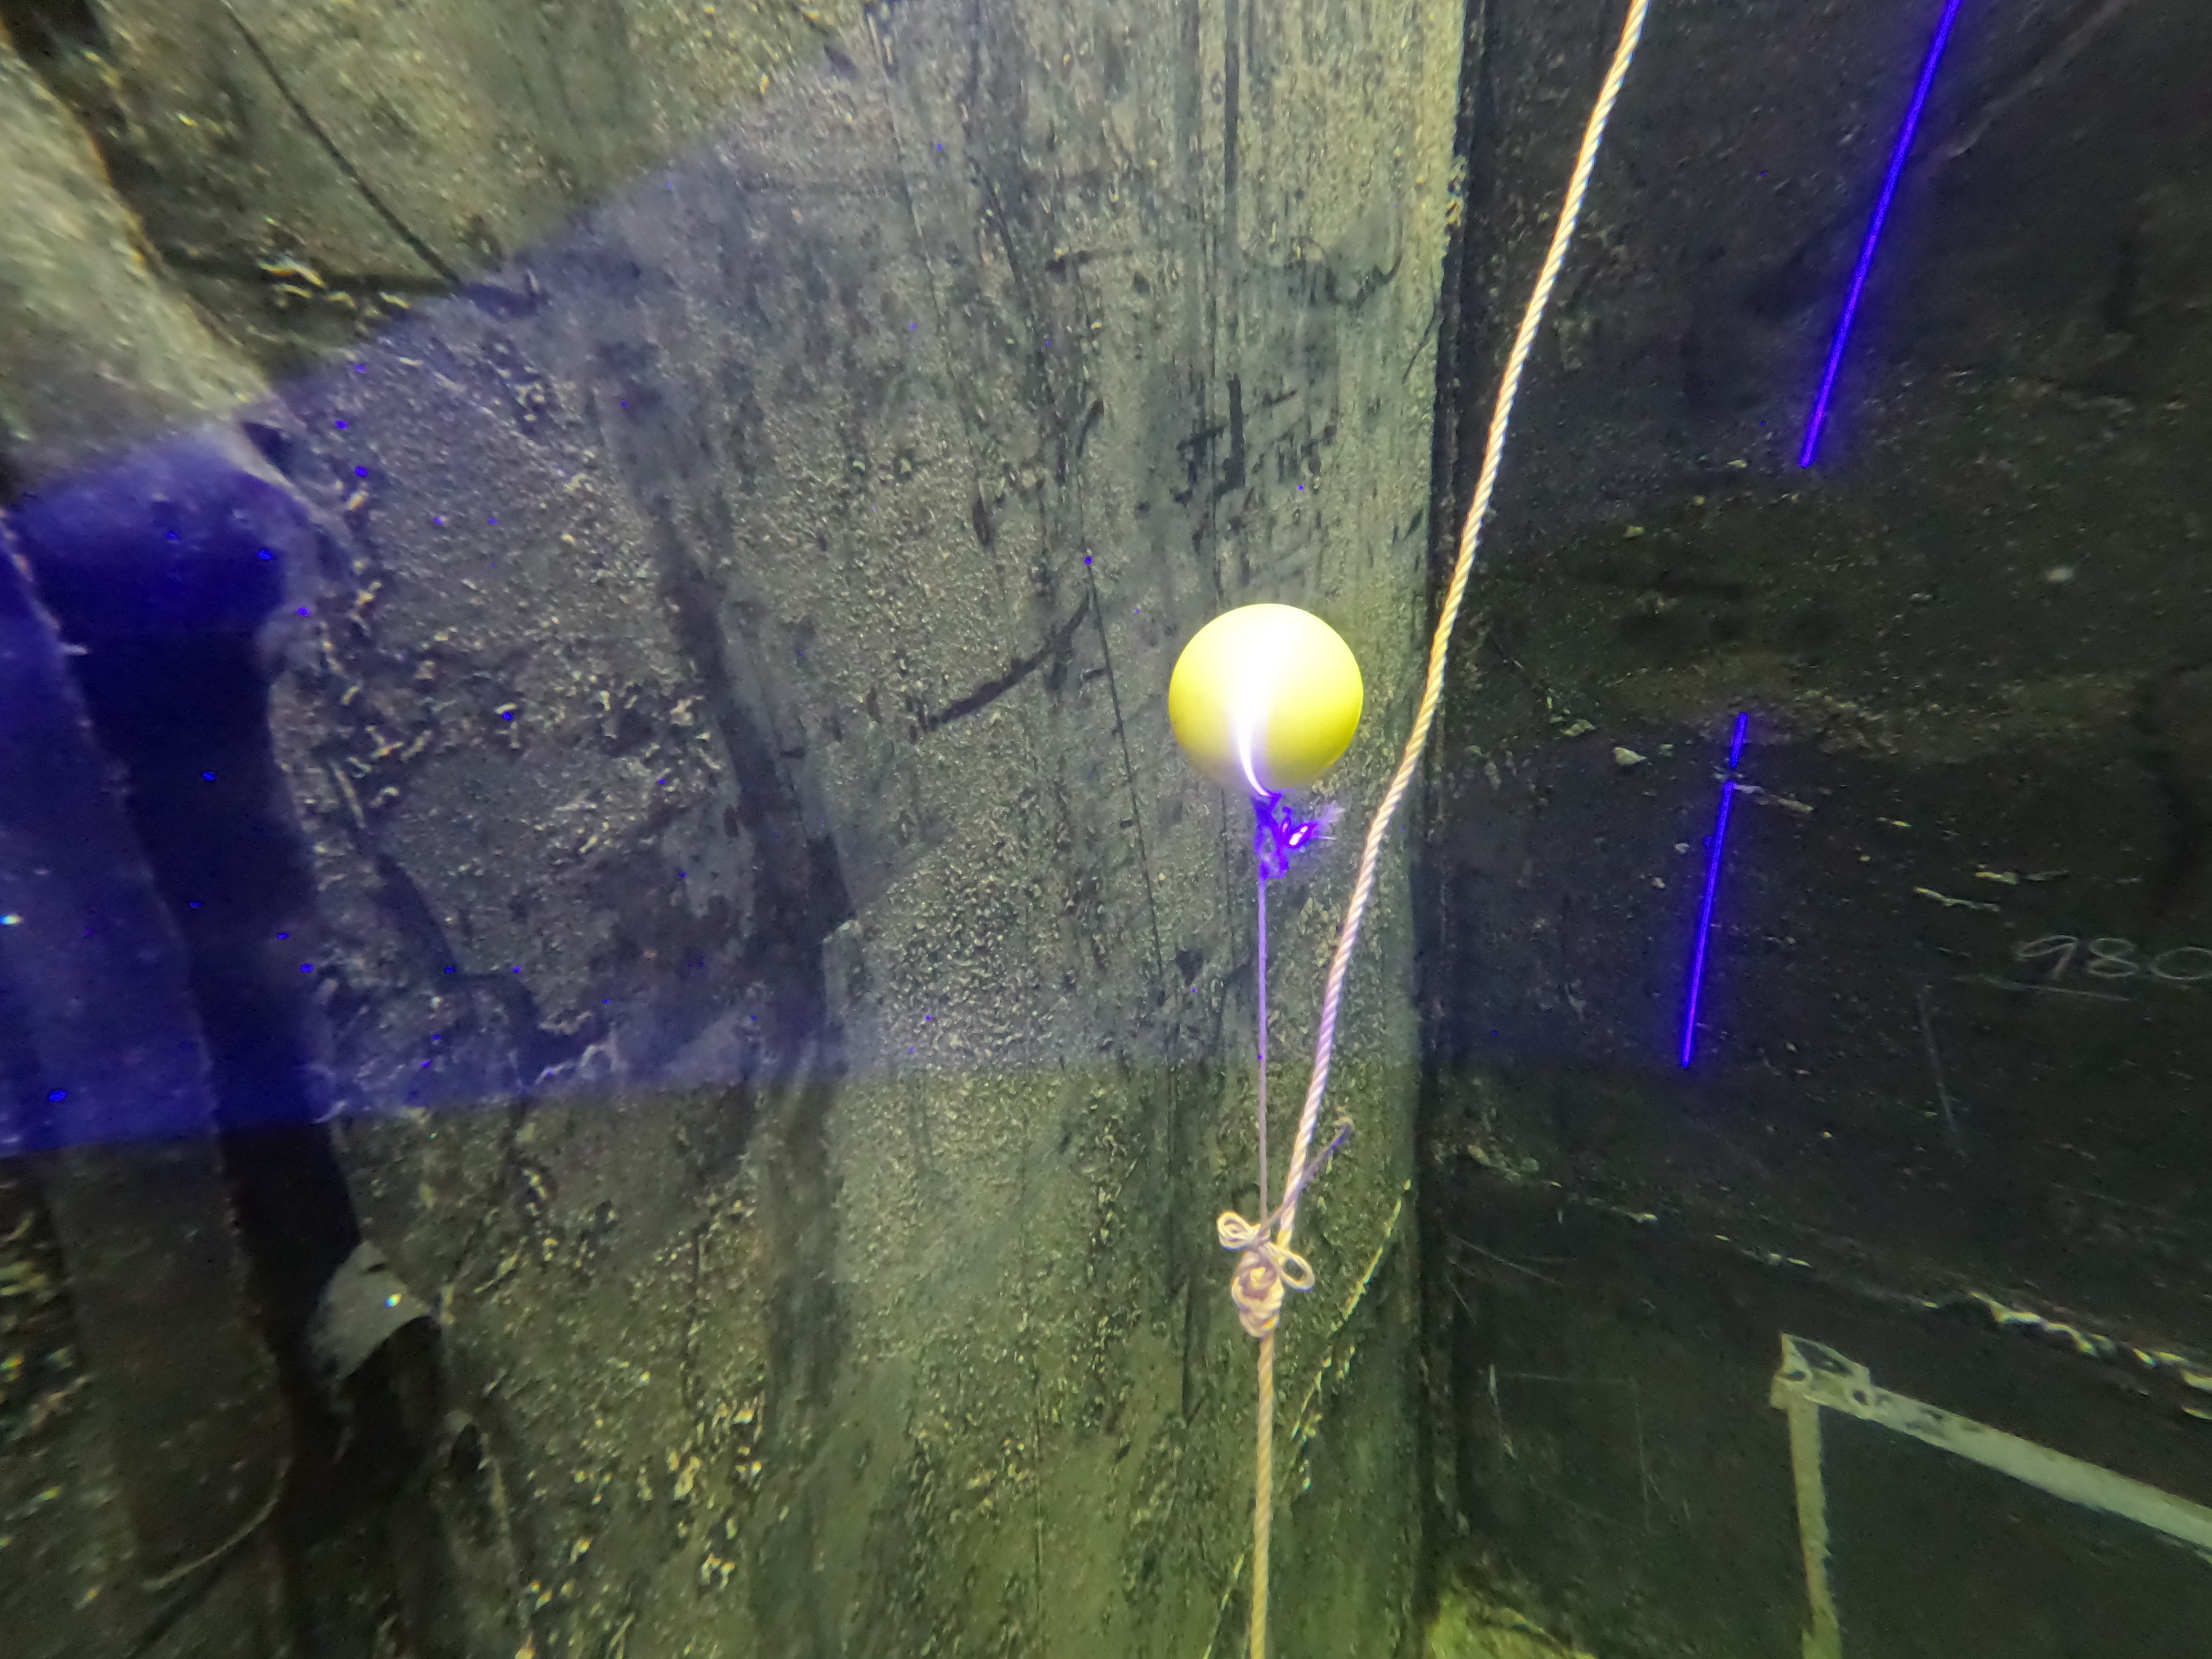

Supplement: Supplementary file 3427 [file G0034131.pdf › 8/G0034131.pdf]

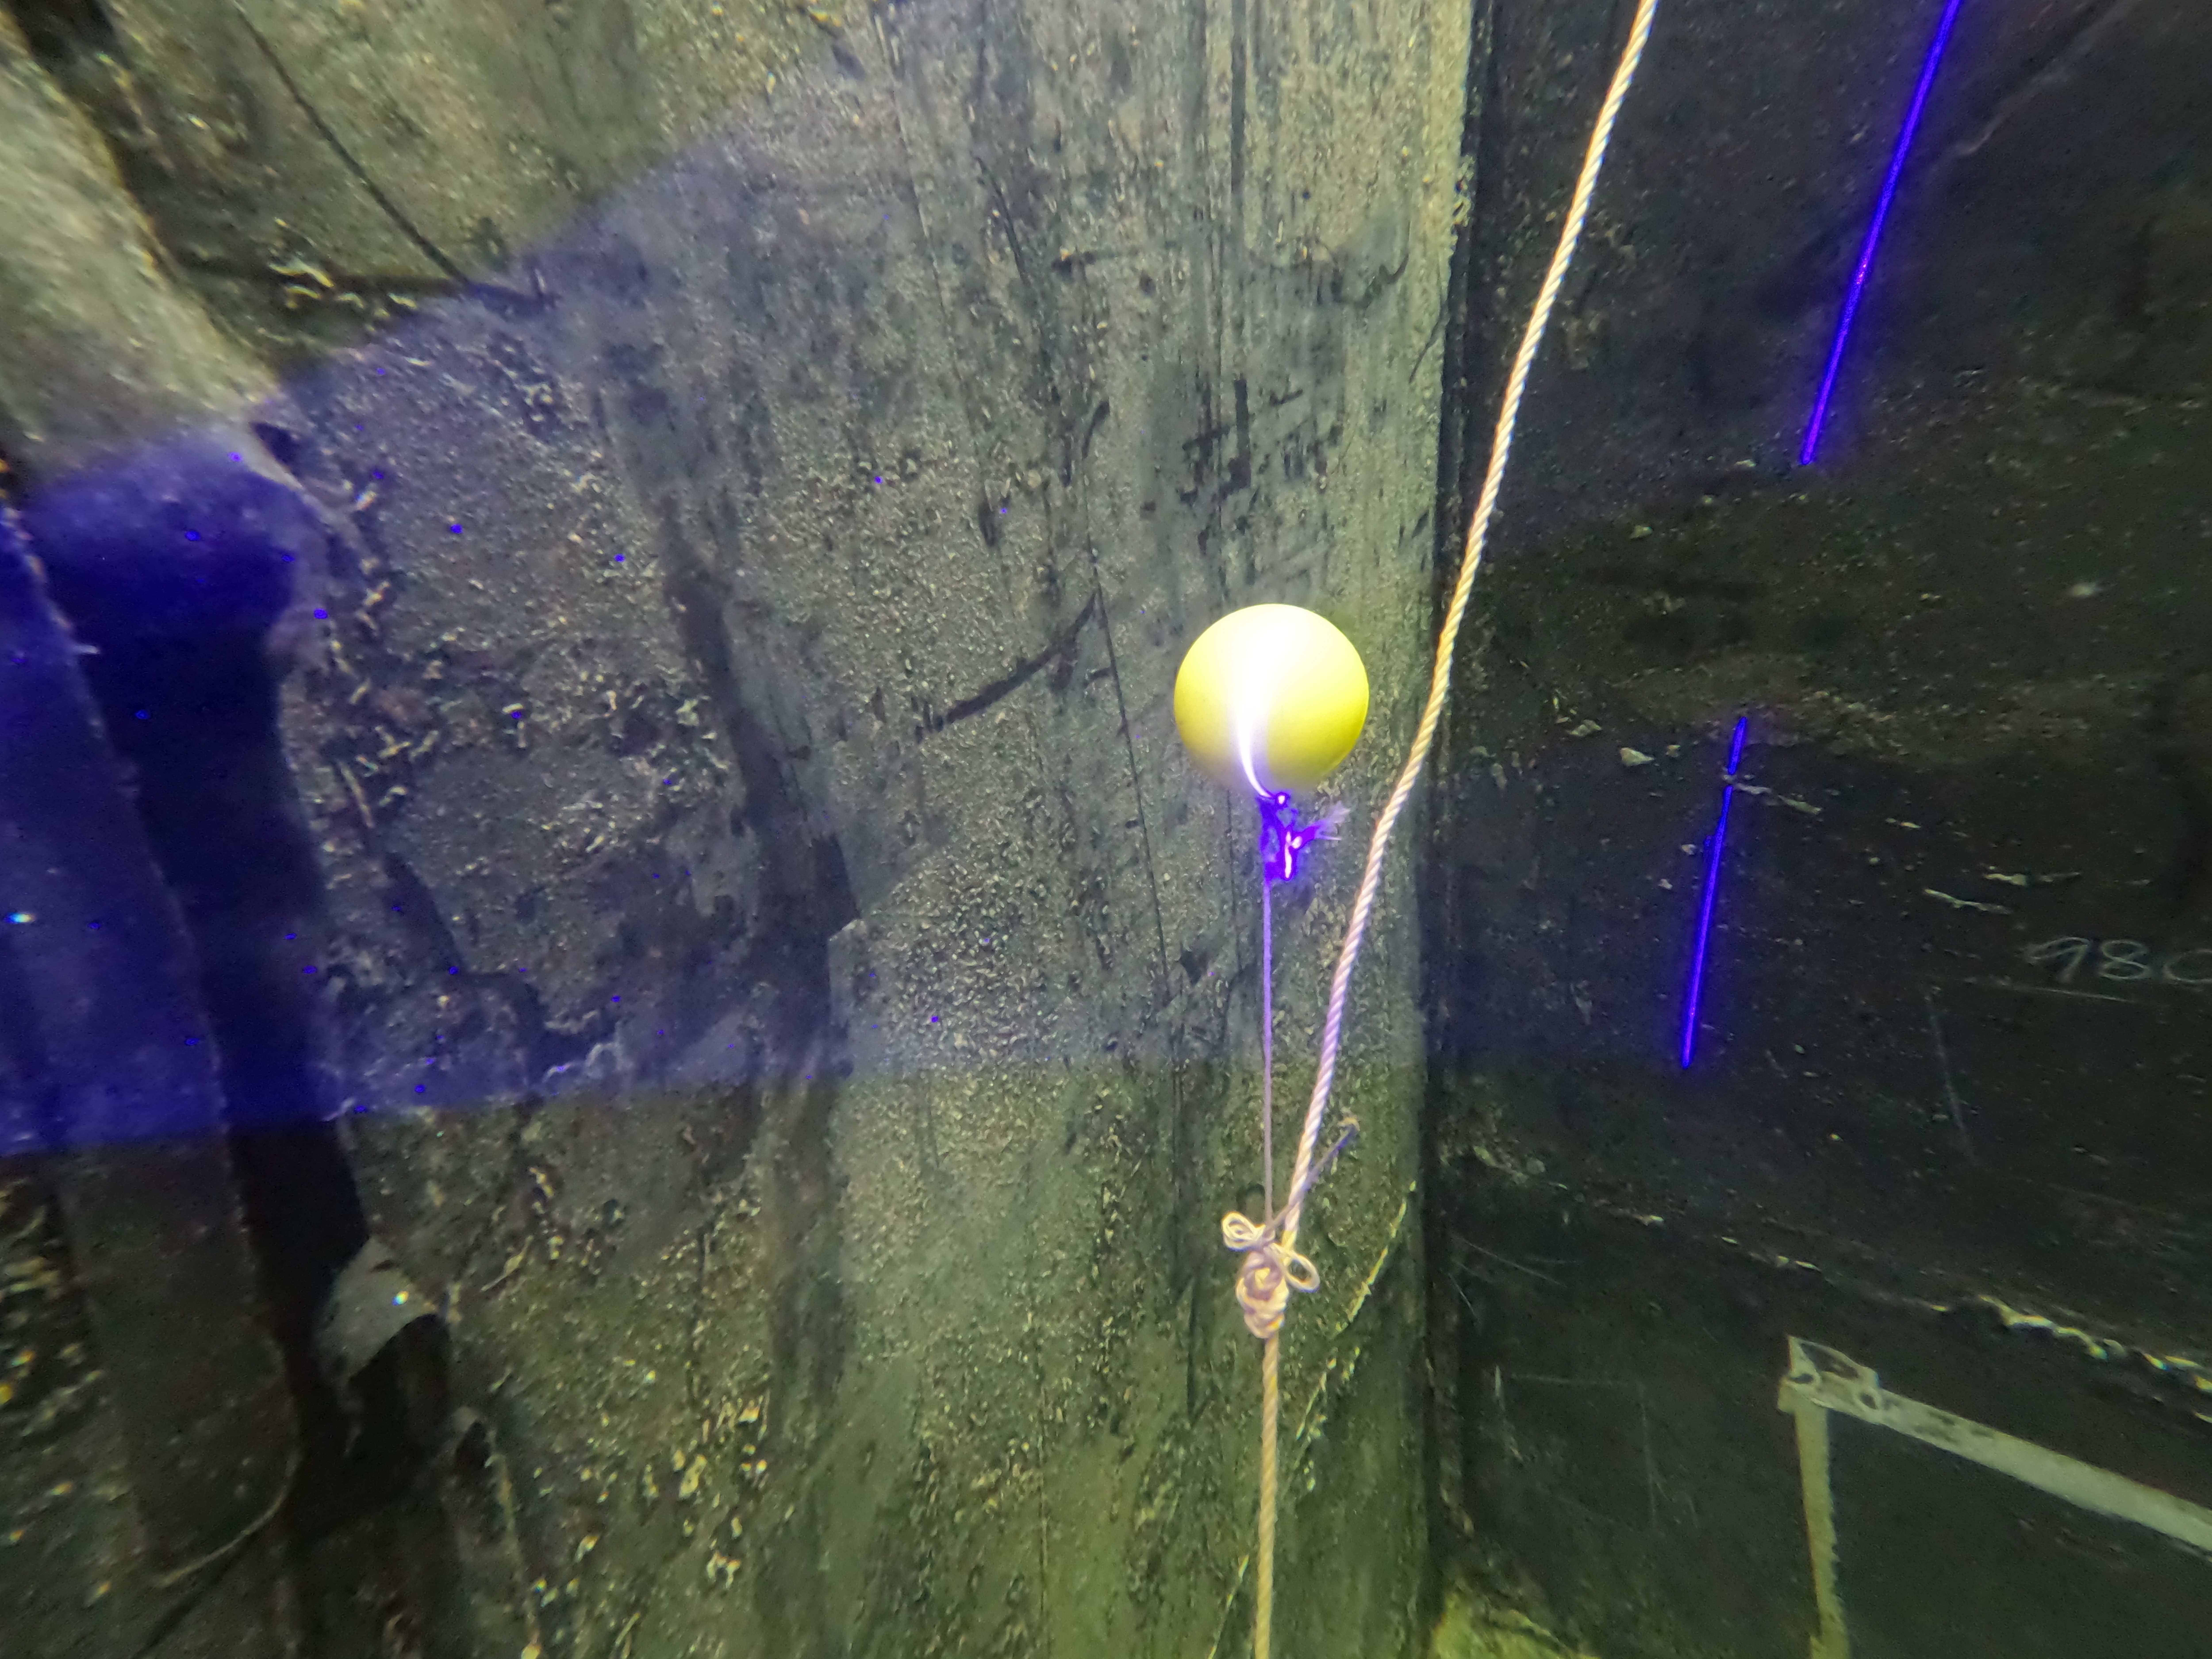

Supplement: Supplementary file 3428 [file G0034132.pdf › 8/G0034132.pdf]

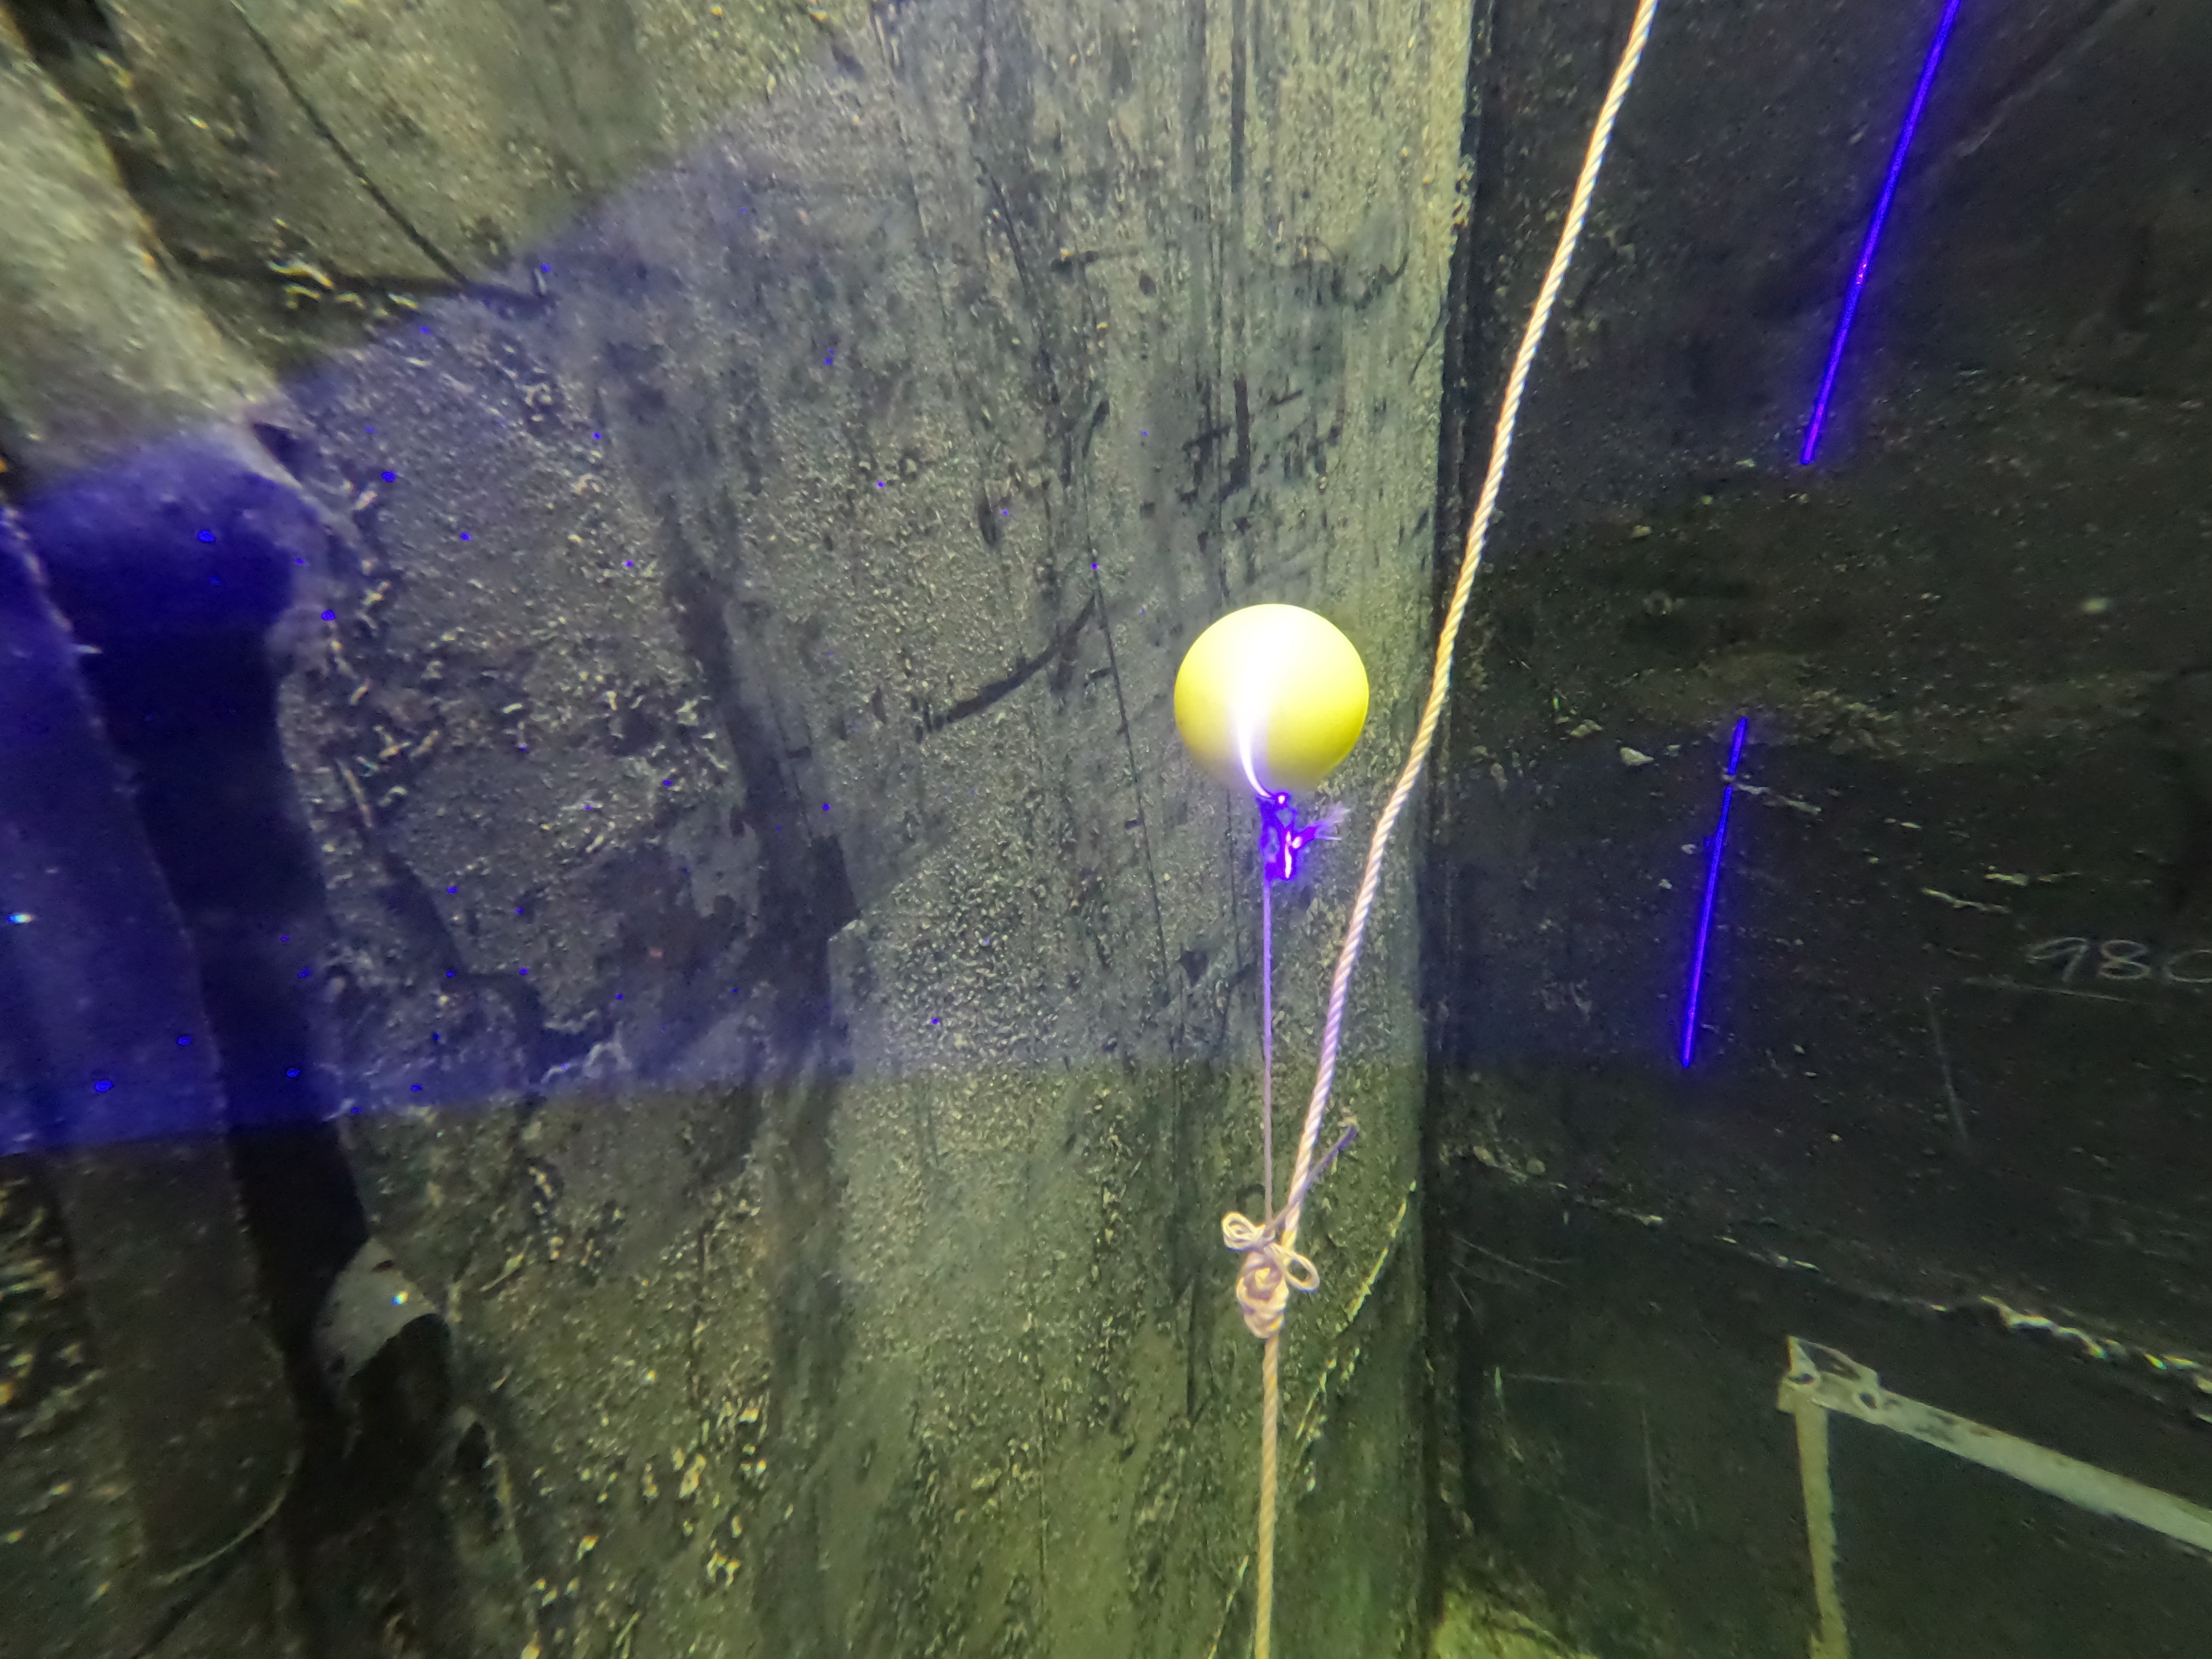

Supplement: Supplementary file 3429 [file G0034133.pdf › 8/G0034133.pdf]

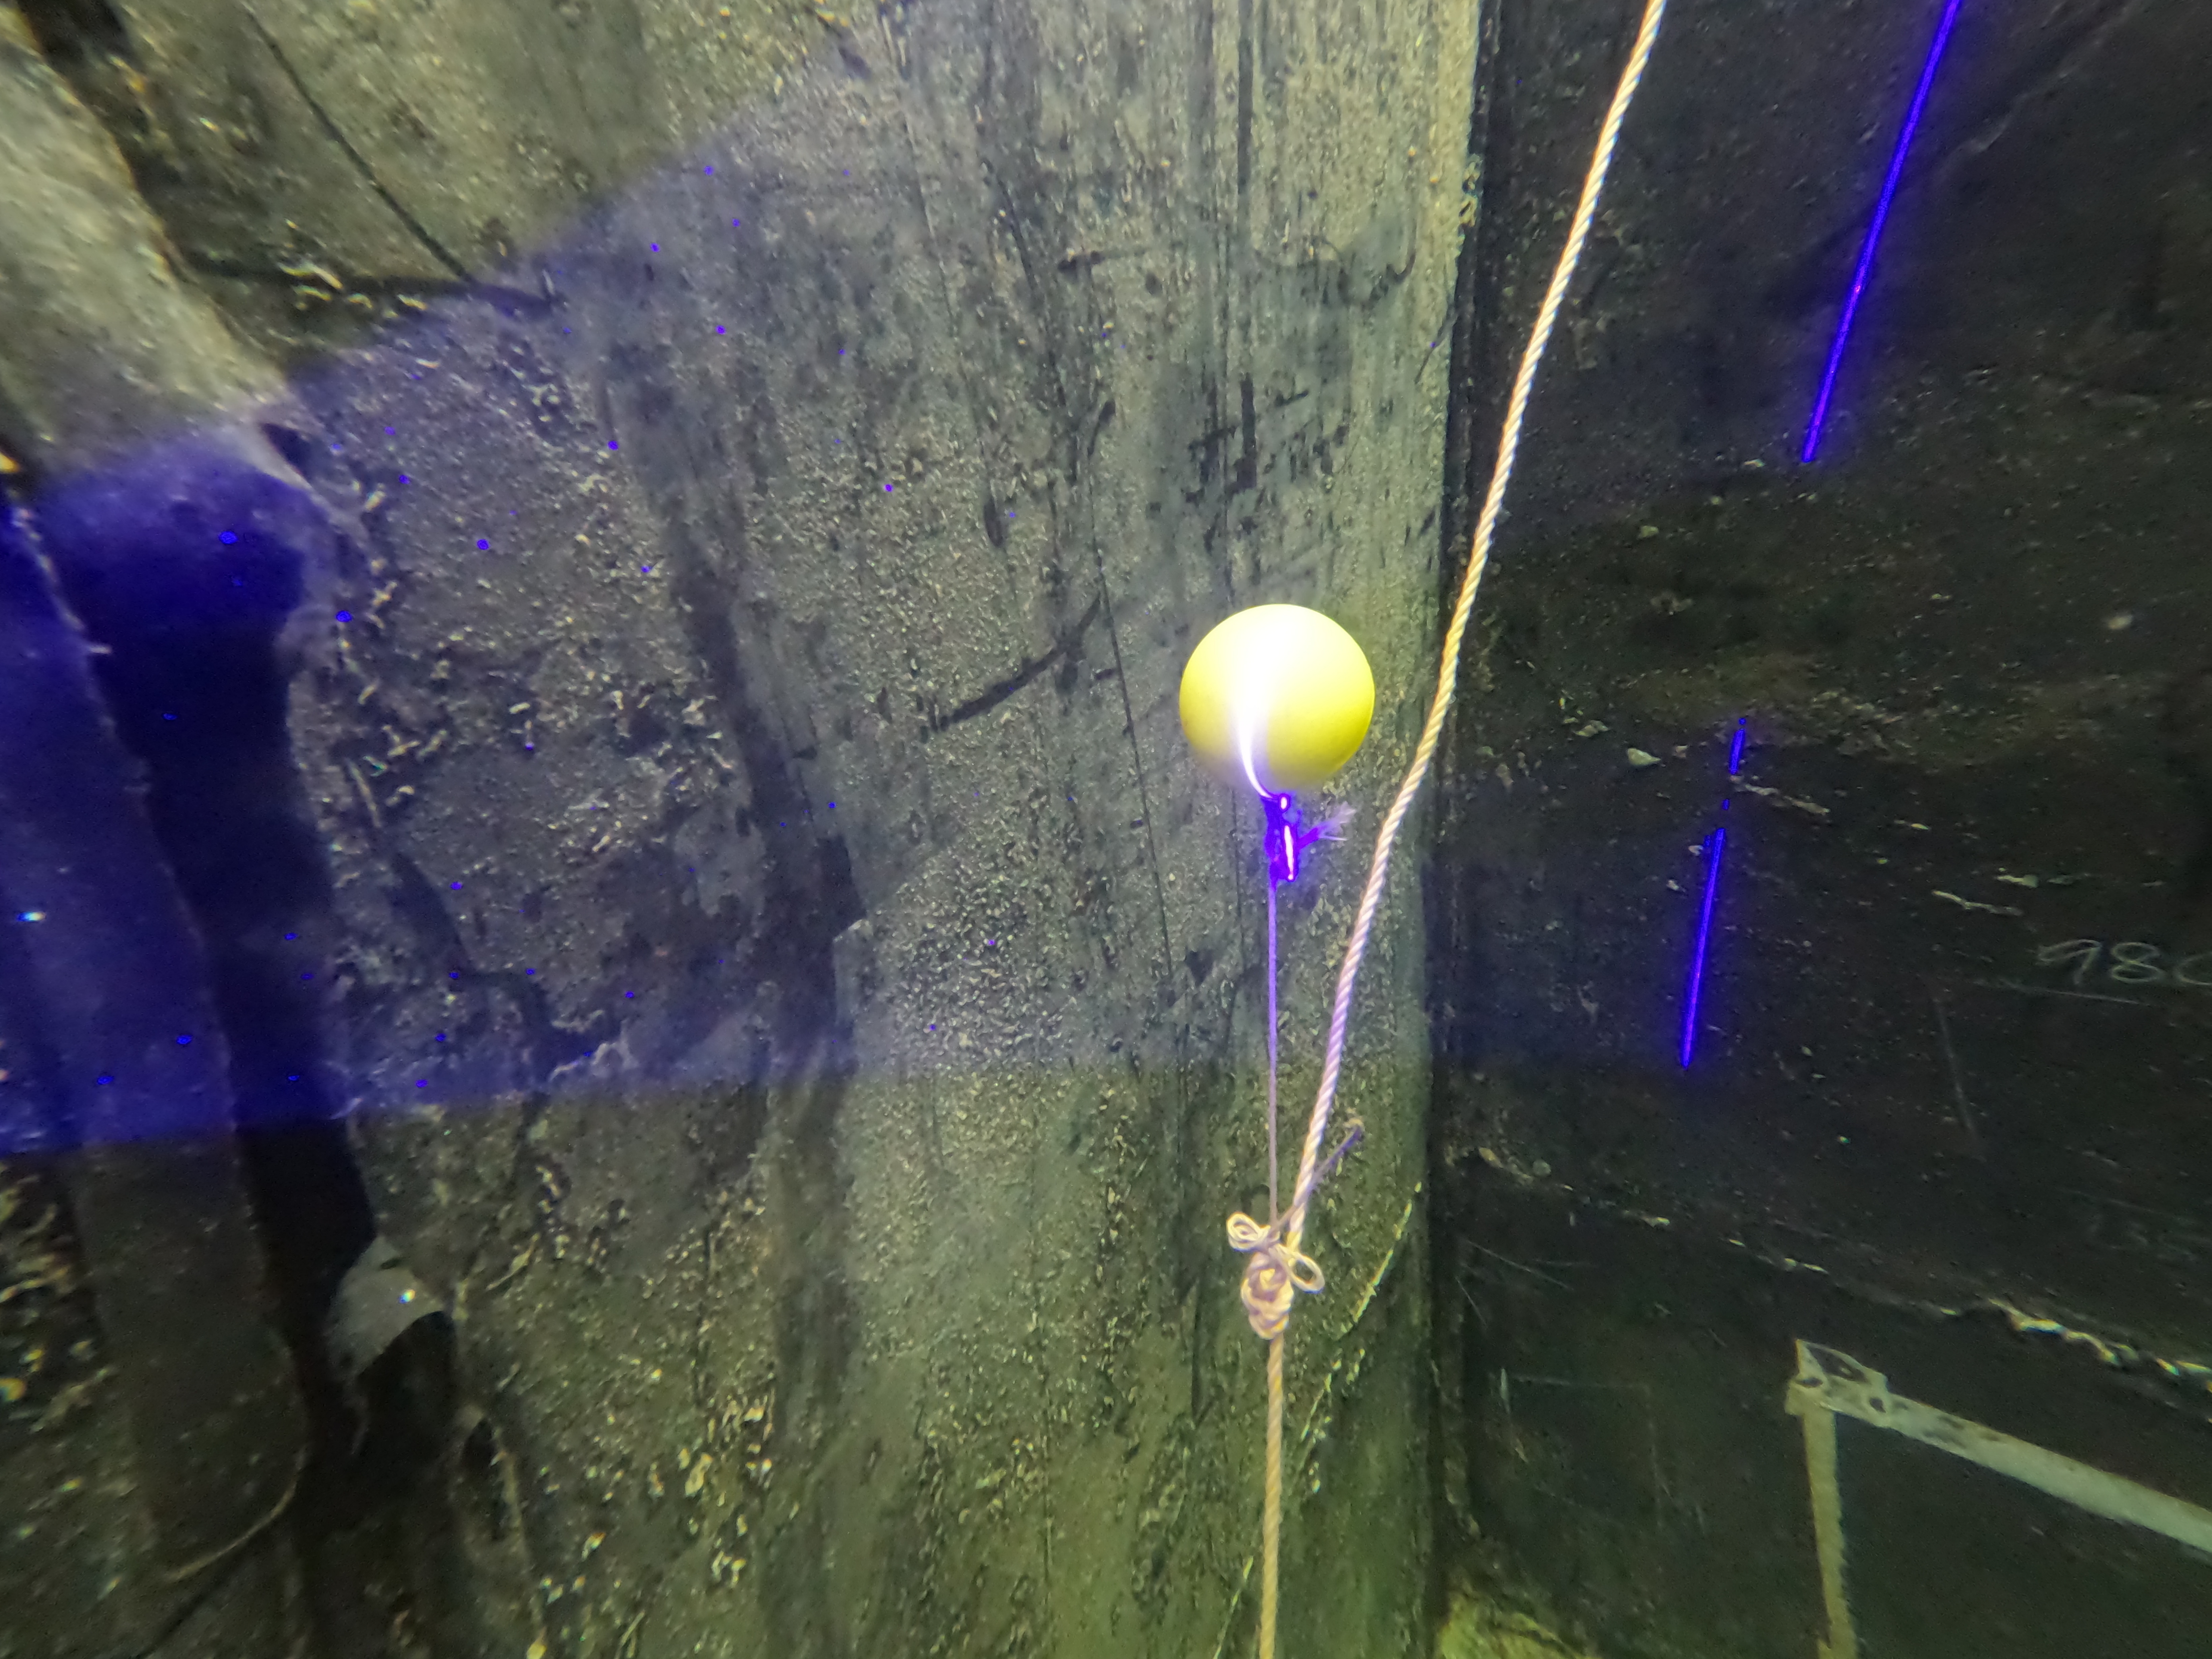

Supplement: Supplementary file 3430 [file G0034134.pdf › 8/G0034134.pdf]

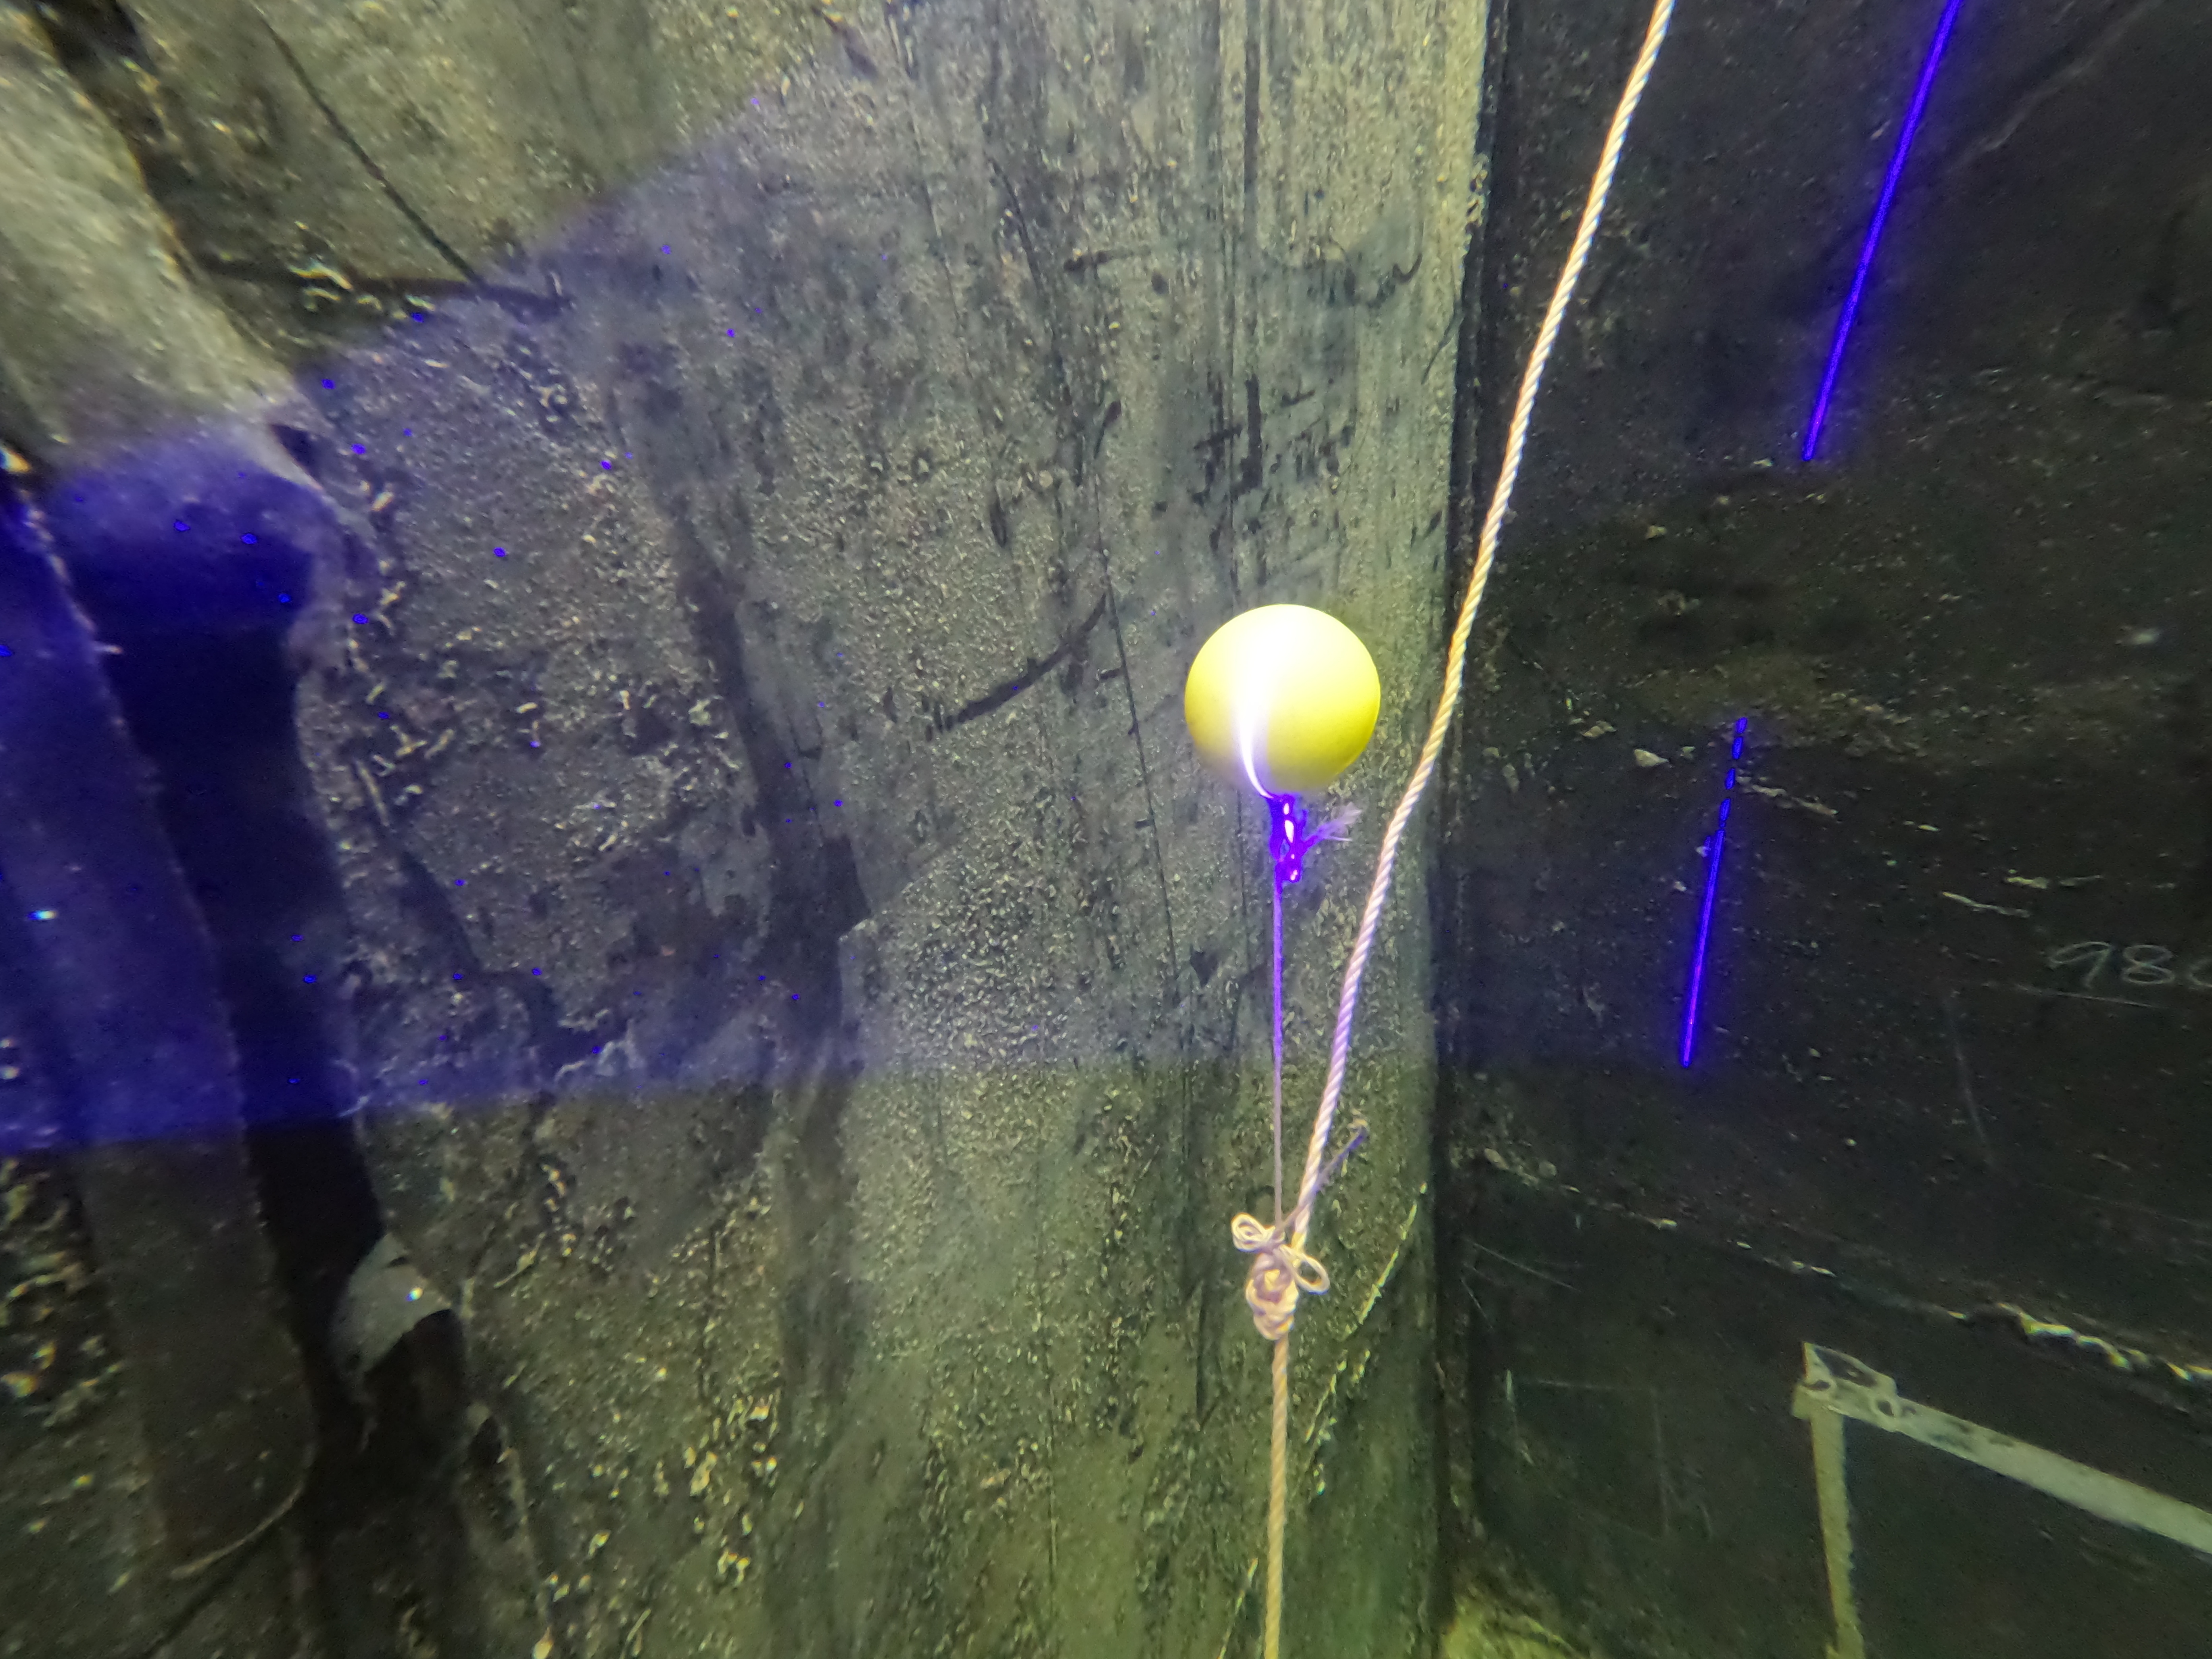

Supplement: Supplementary file 3431 [file G0034135.pdf › 8/G0034135.pdf]

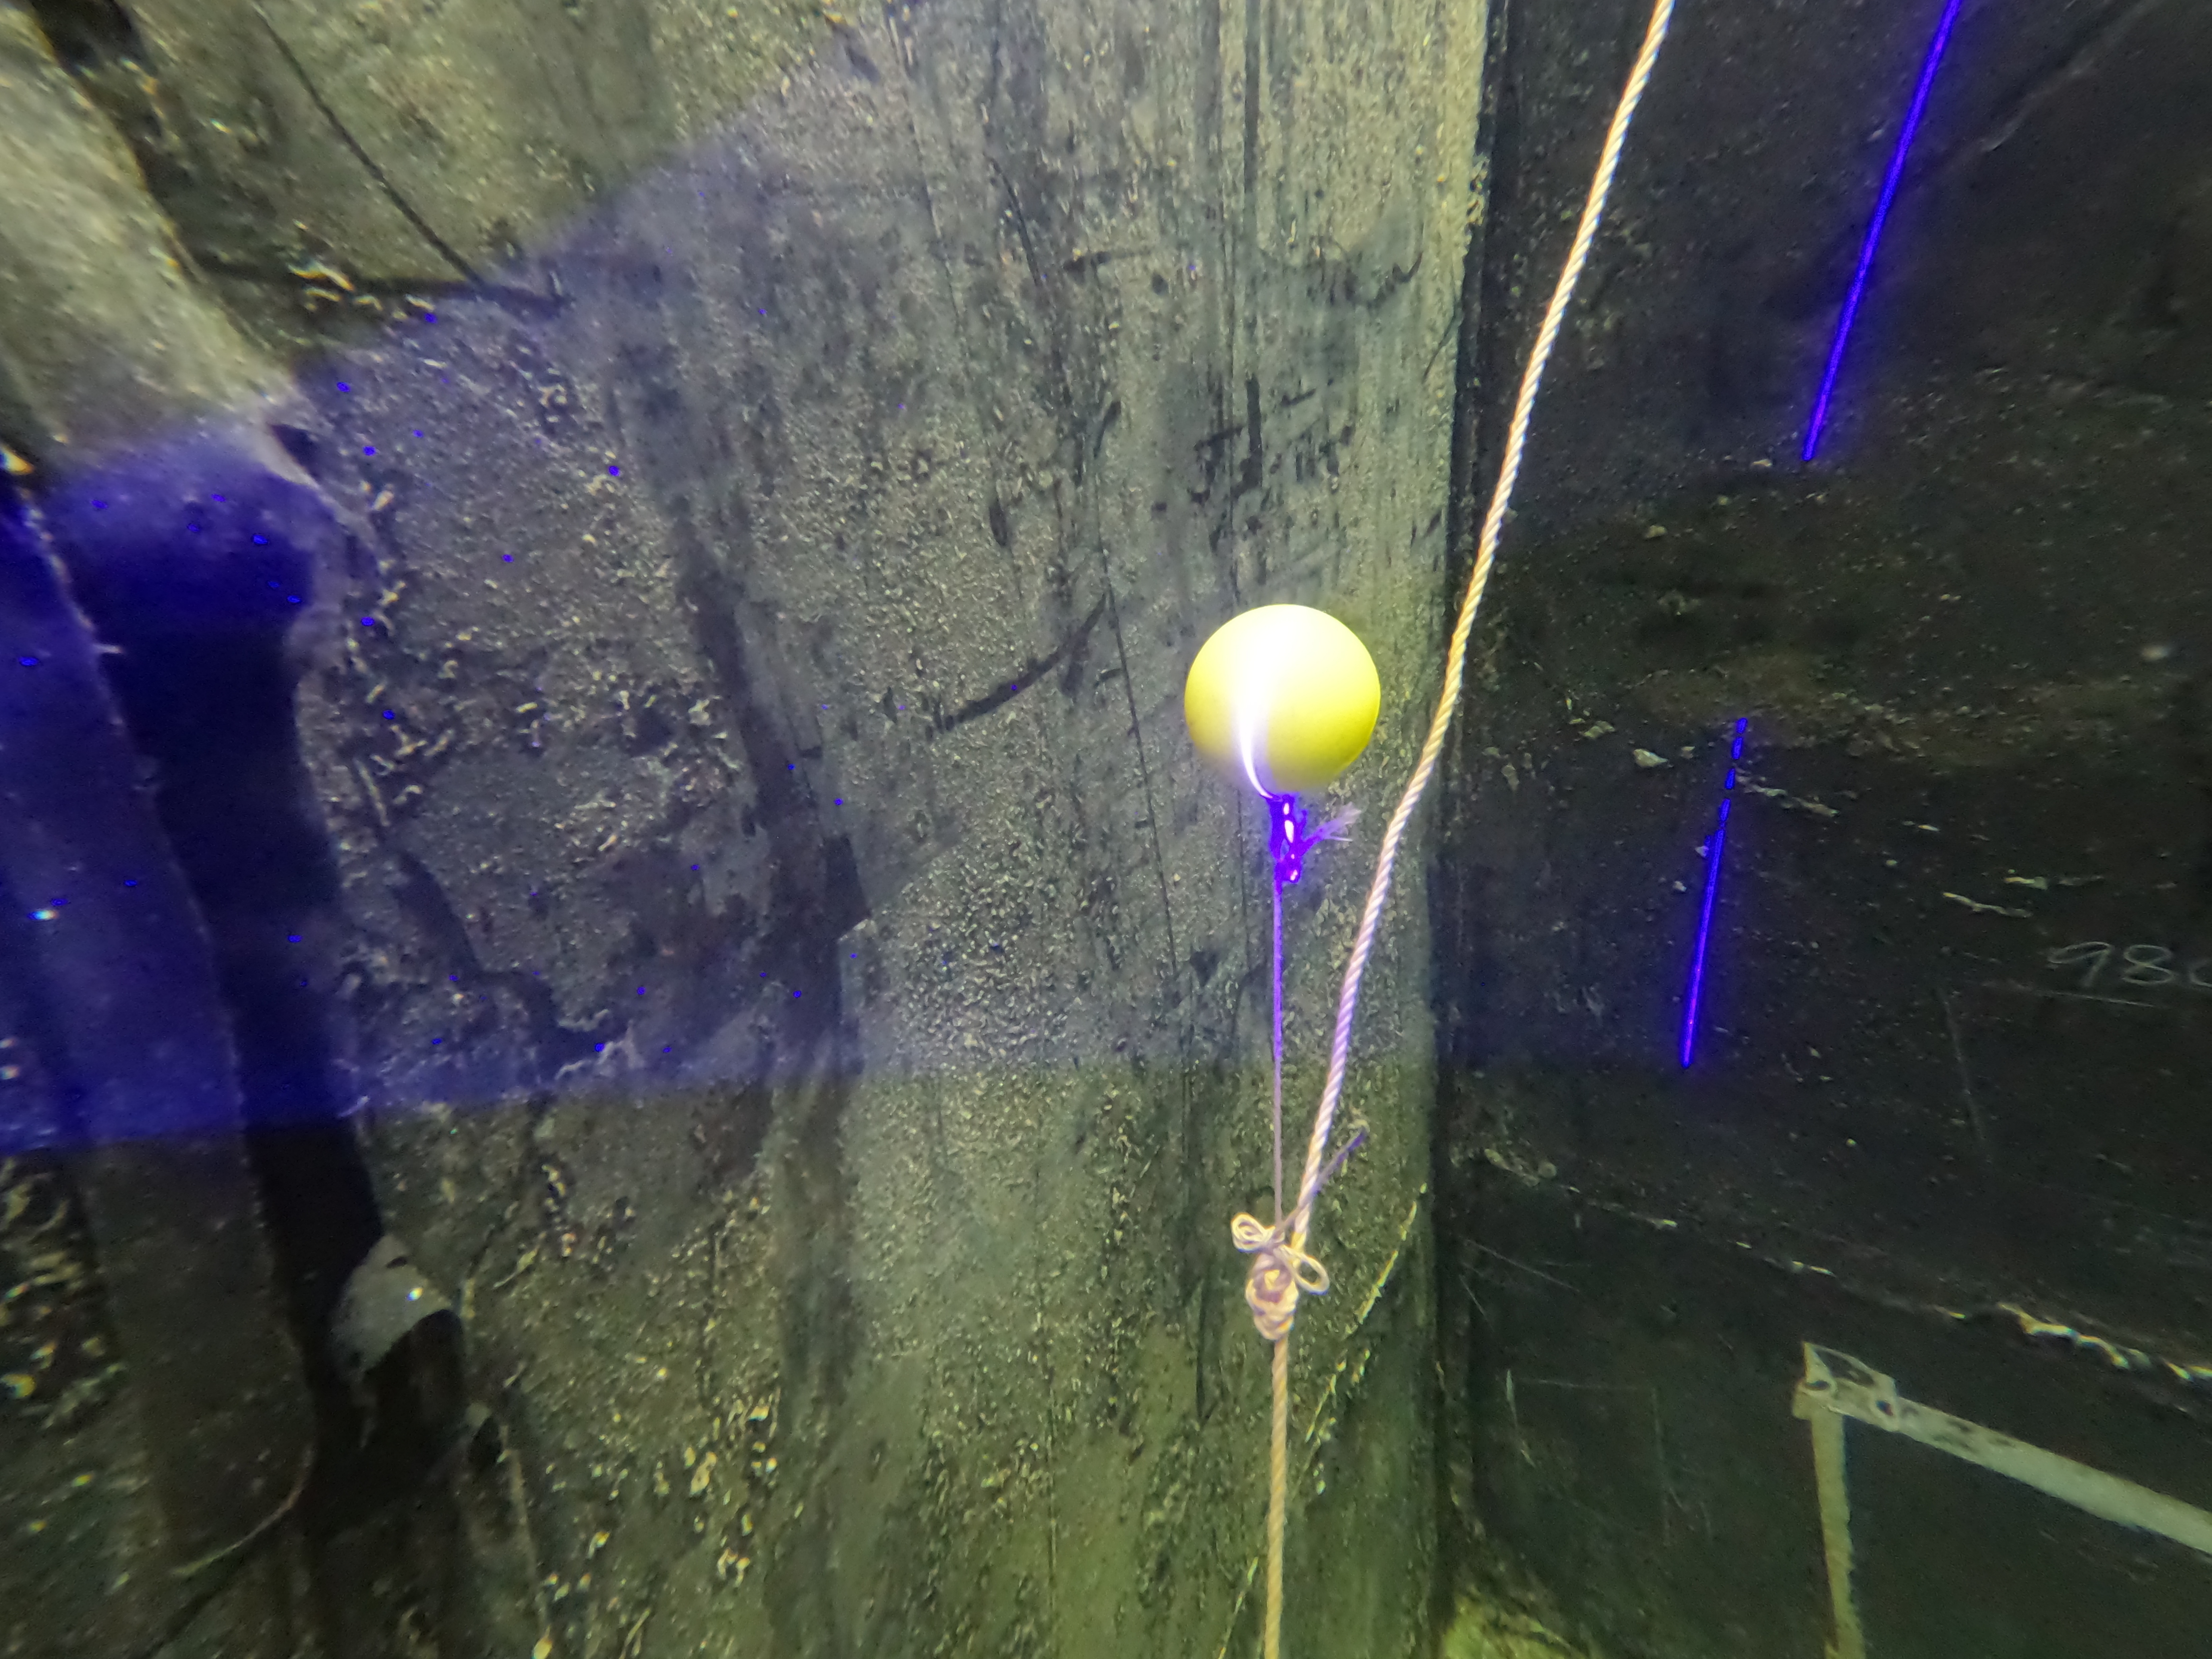

Supplement: Supplementary file 3432 [file G0034136.pdf › 8/G0034136.pdf]

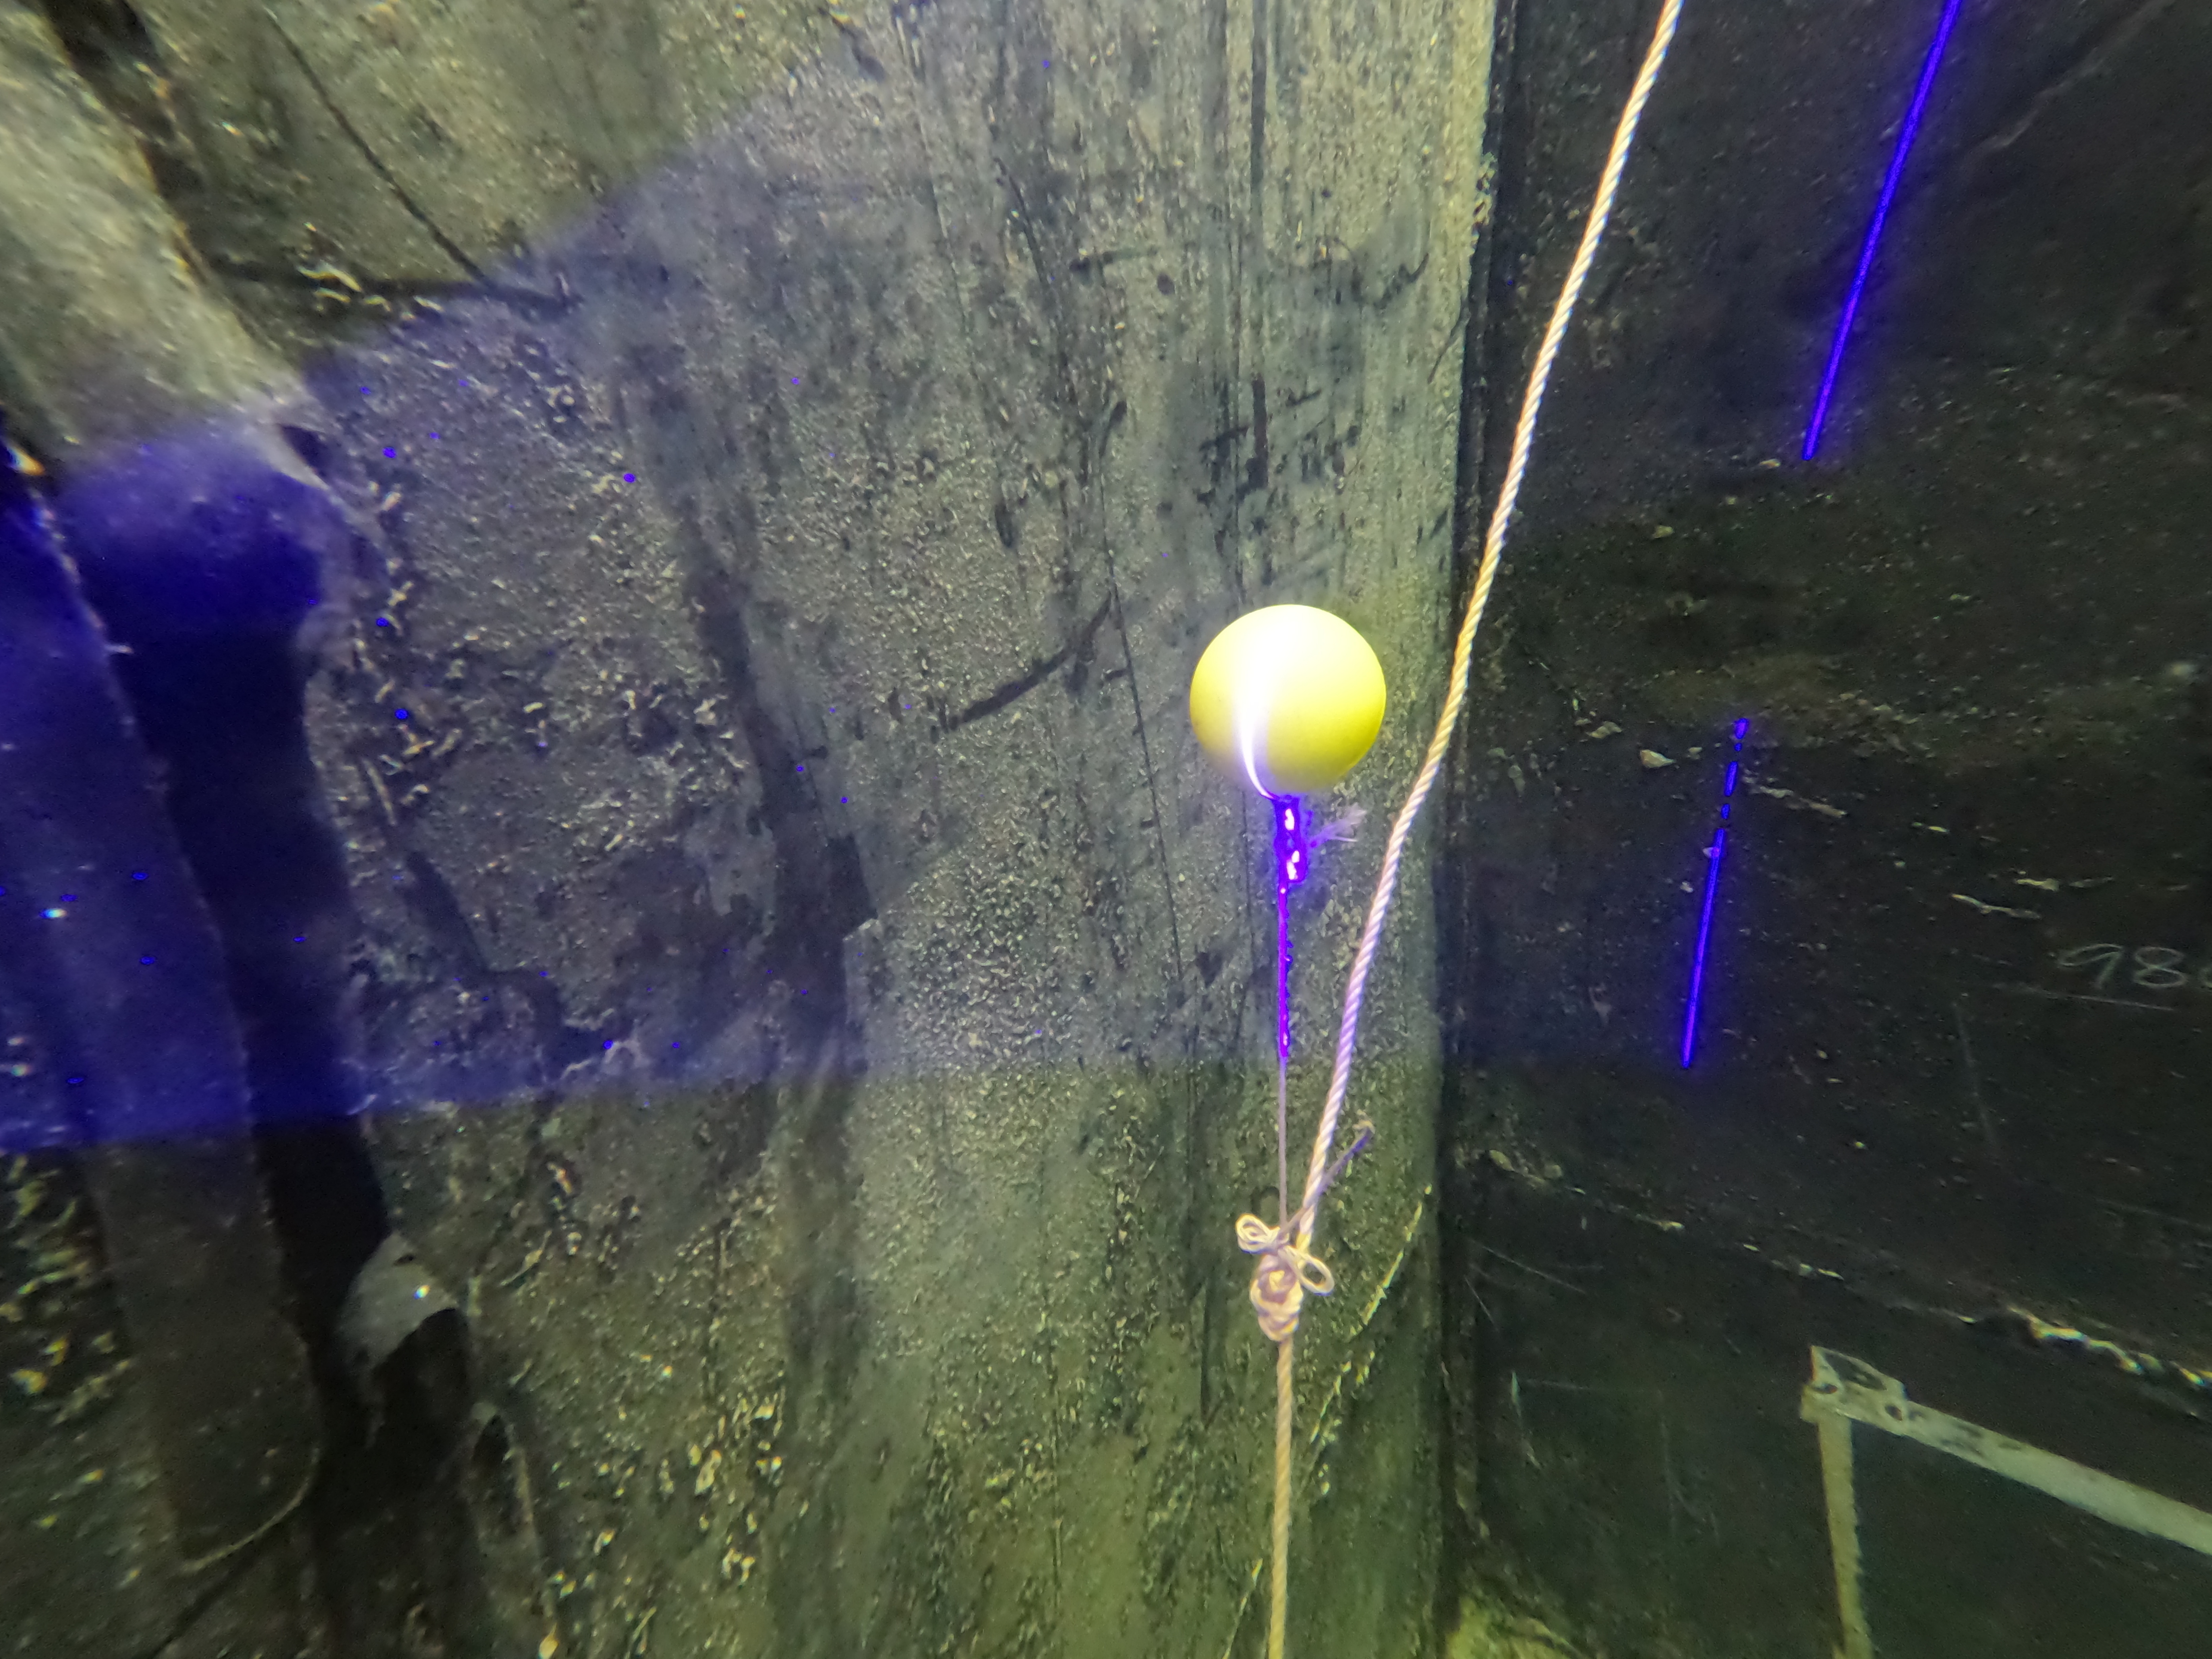

Supplement: Supplementary file 3433 [file G0034137.pdf › 8/G0034137.pdf]

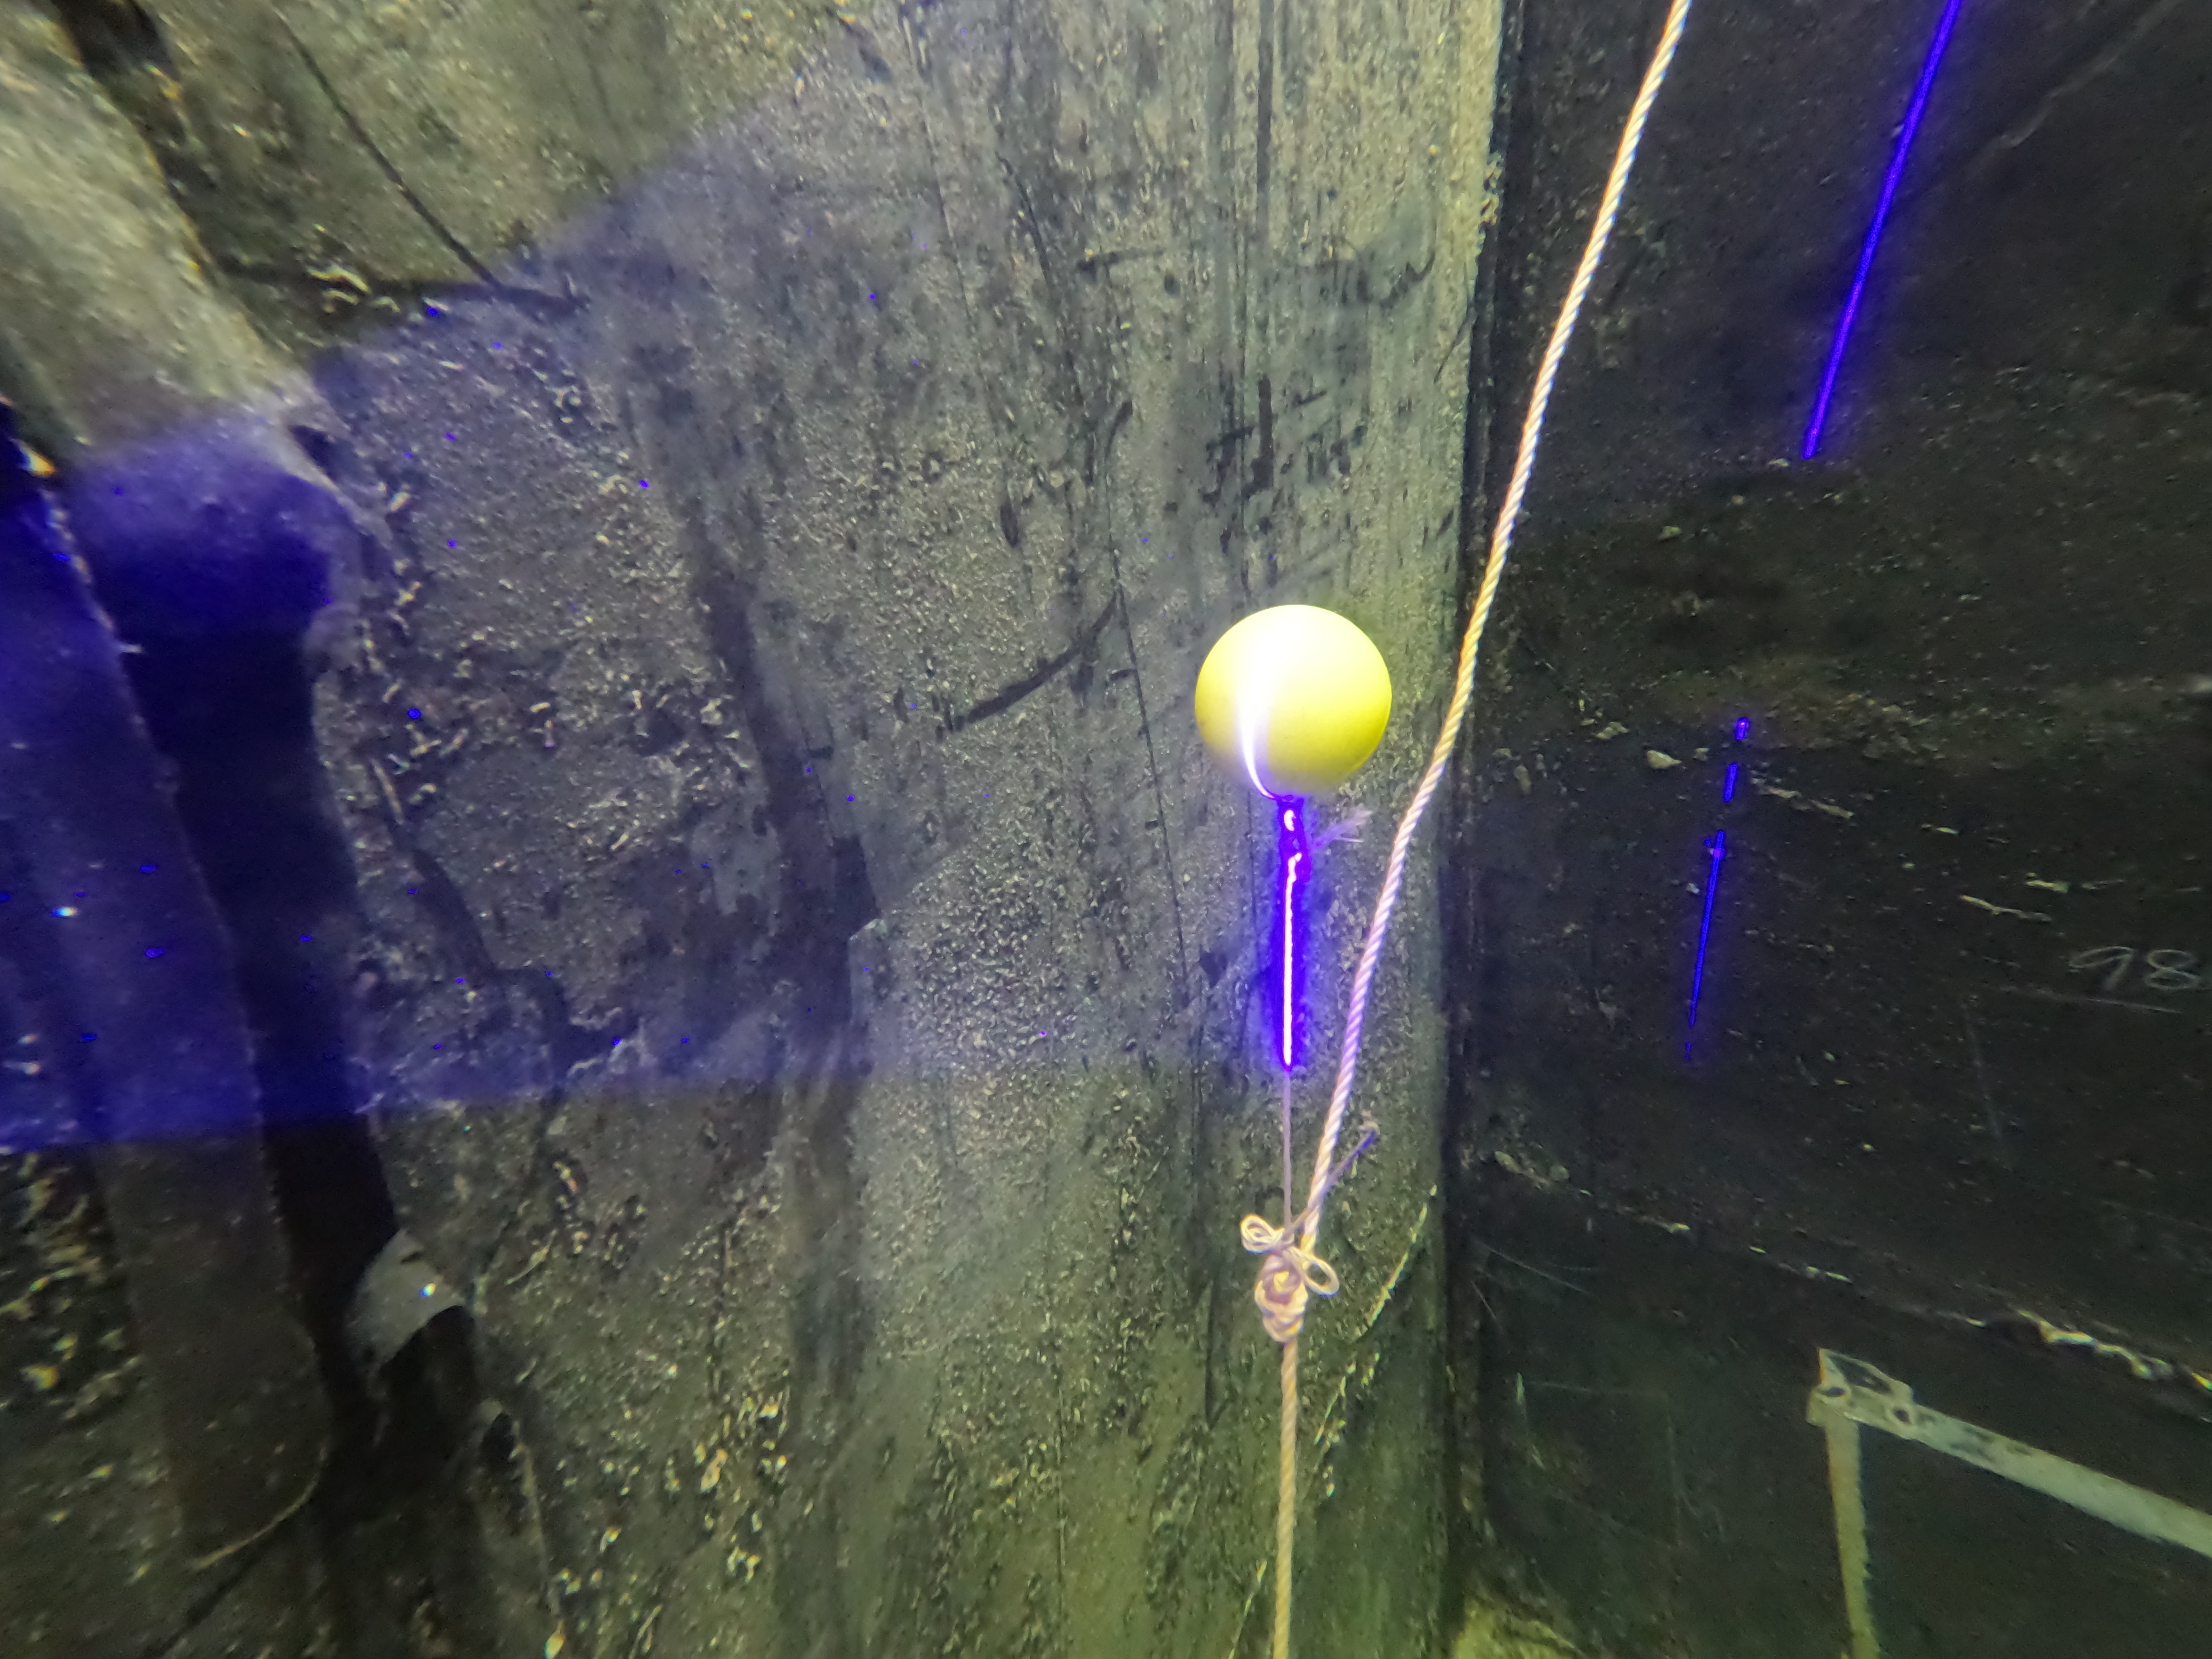

Supplement: Supplementary file 3434 [file G0034138.pdf › 8/G0034138.pdf]

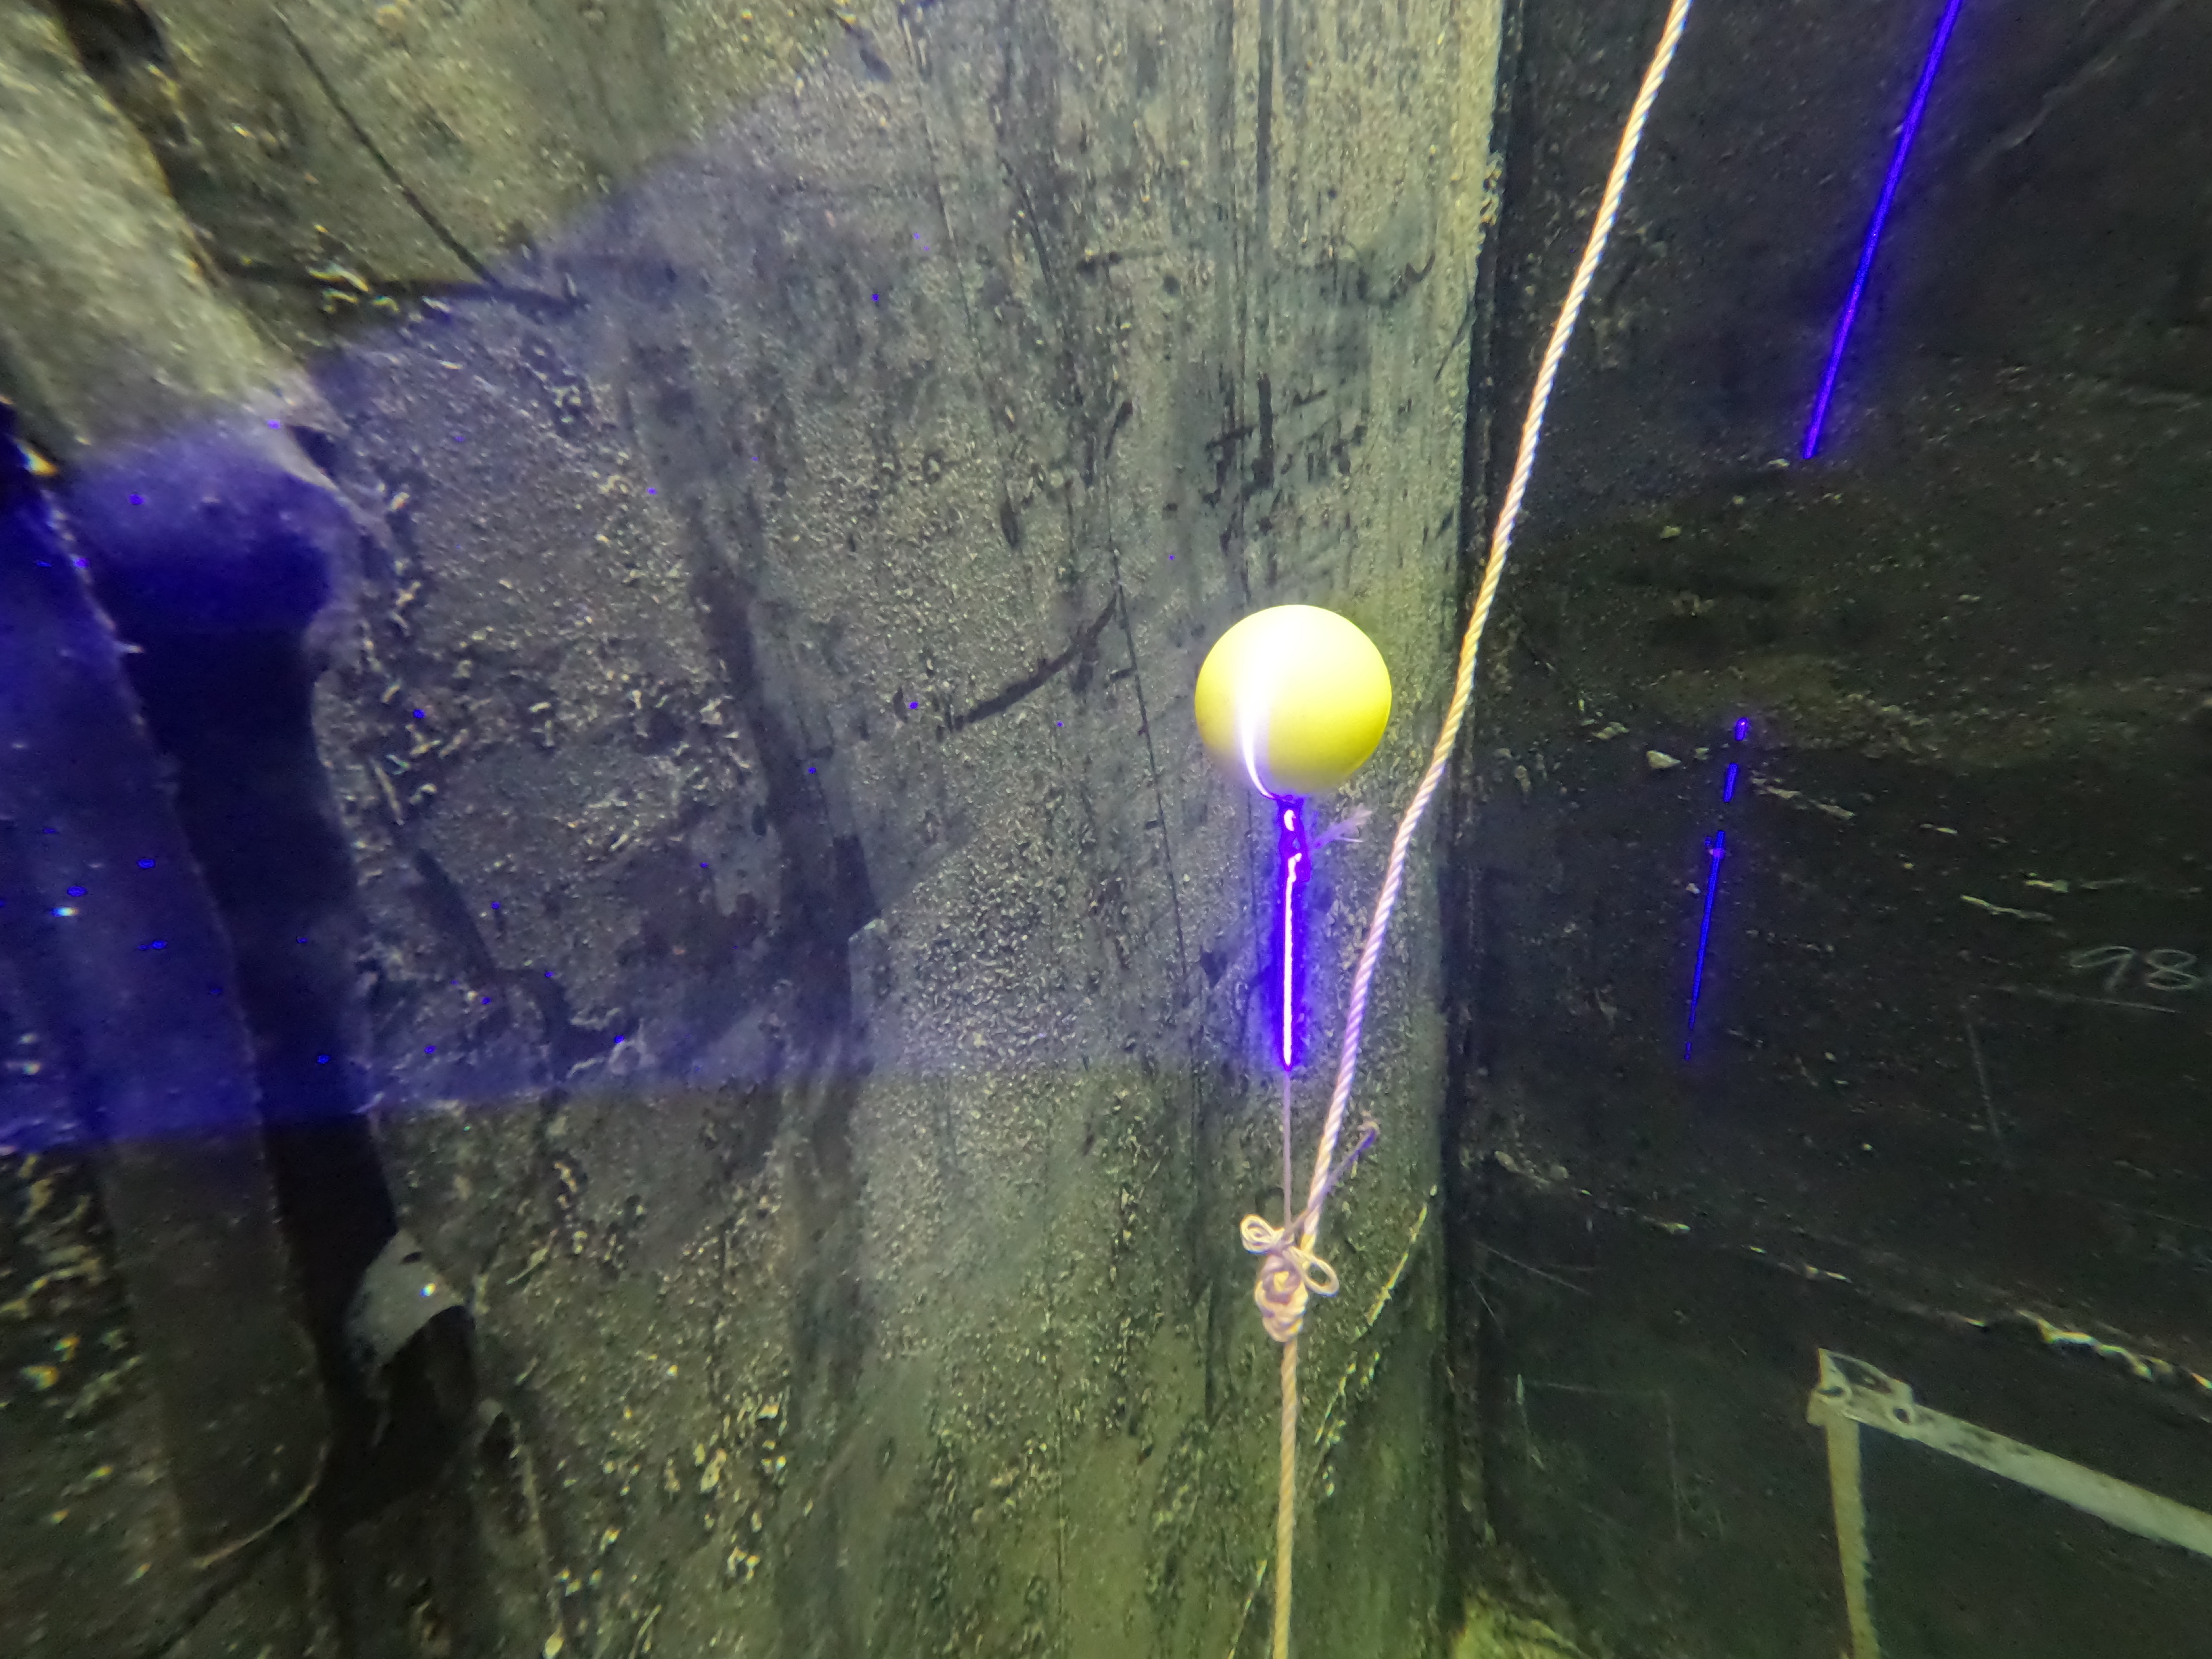

Supplement: Supplementary file 3435 [file G0034139.pdf › 8/G0034139.pdf]

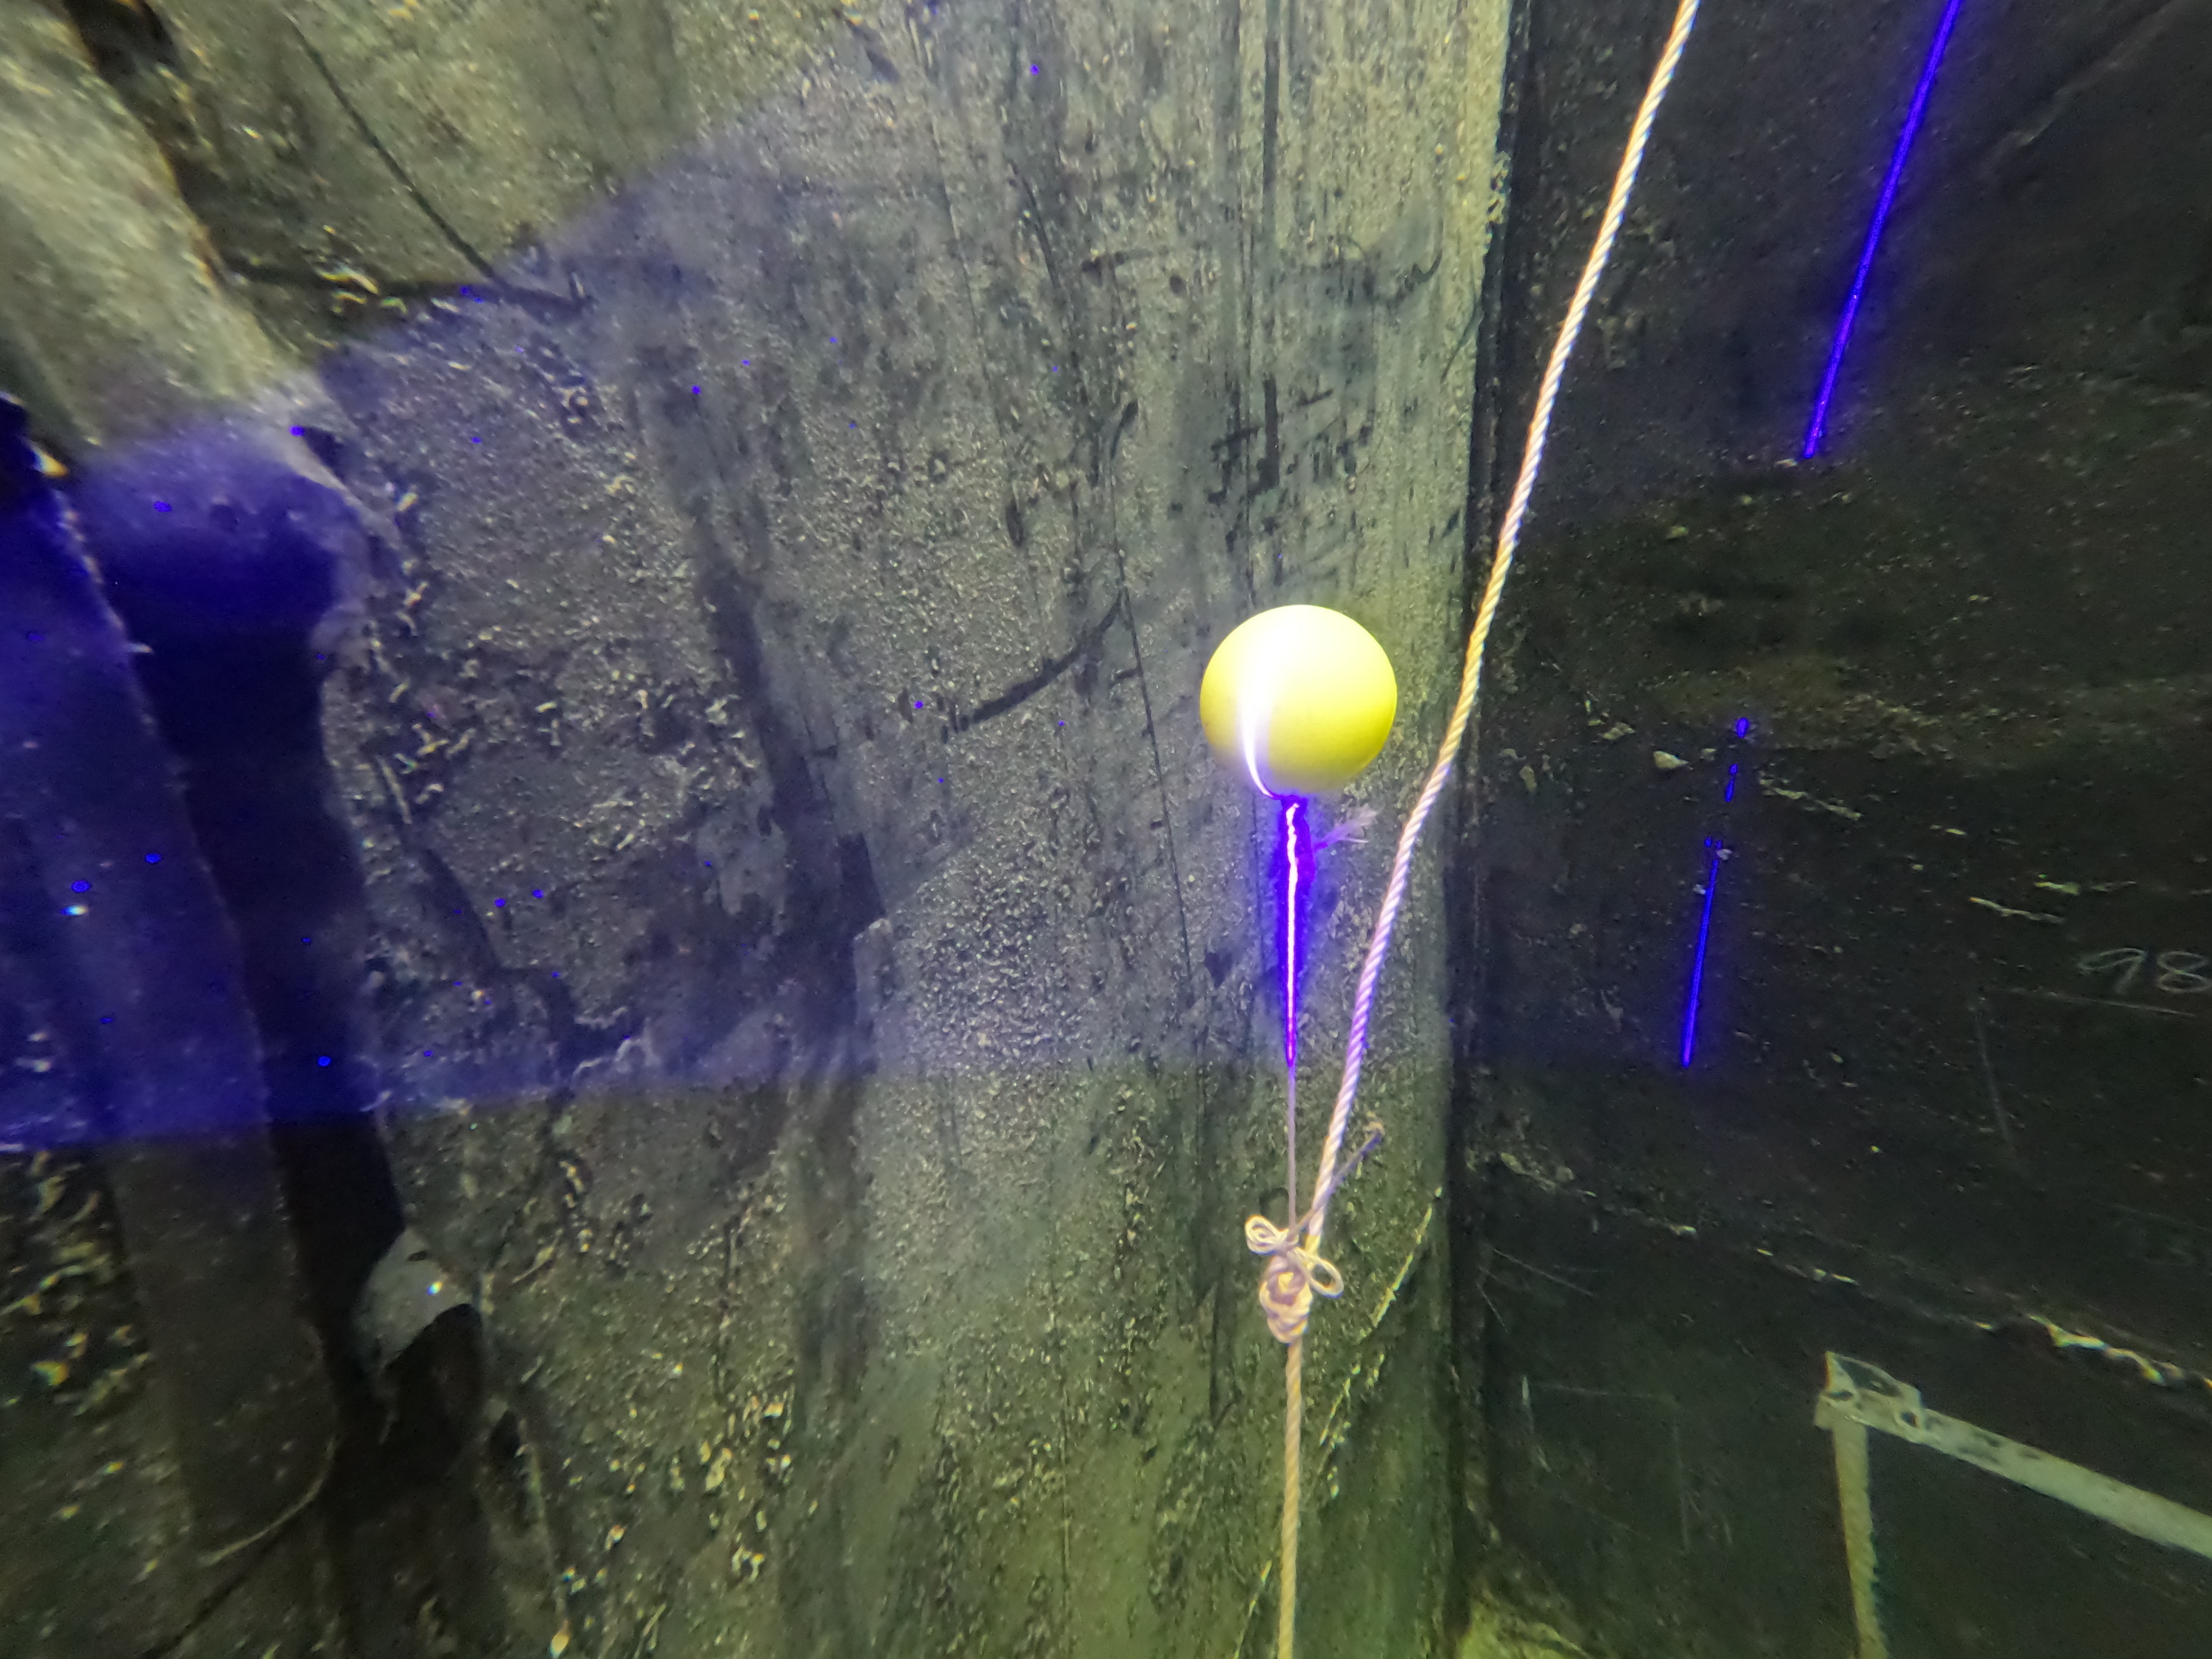

Supplement: Supplementary file 3436 [file G0034140.pdf › 8/G0034140.pdf]

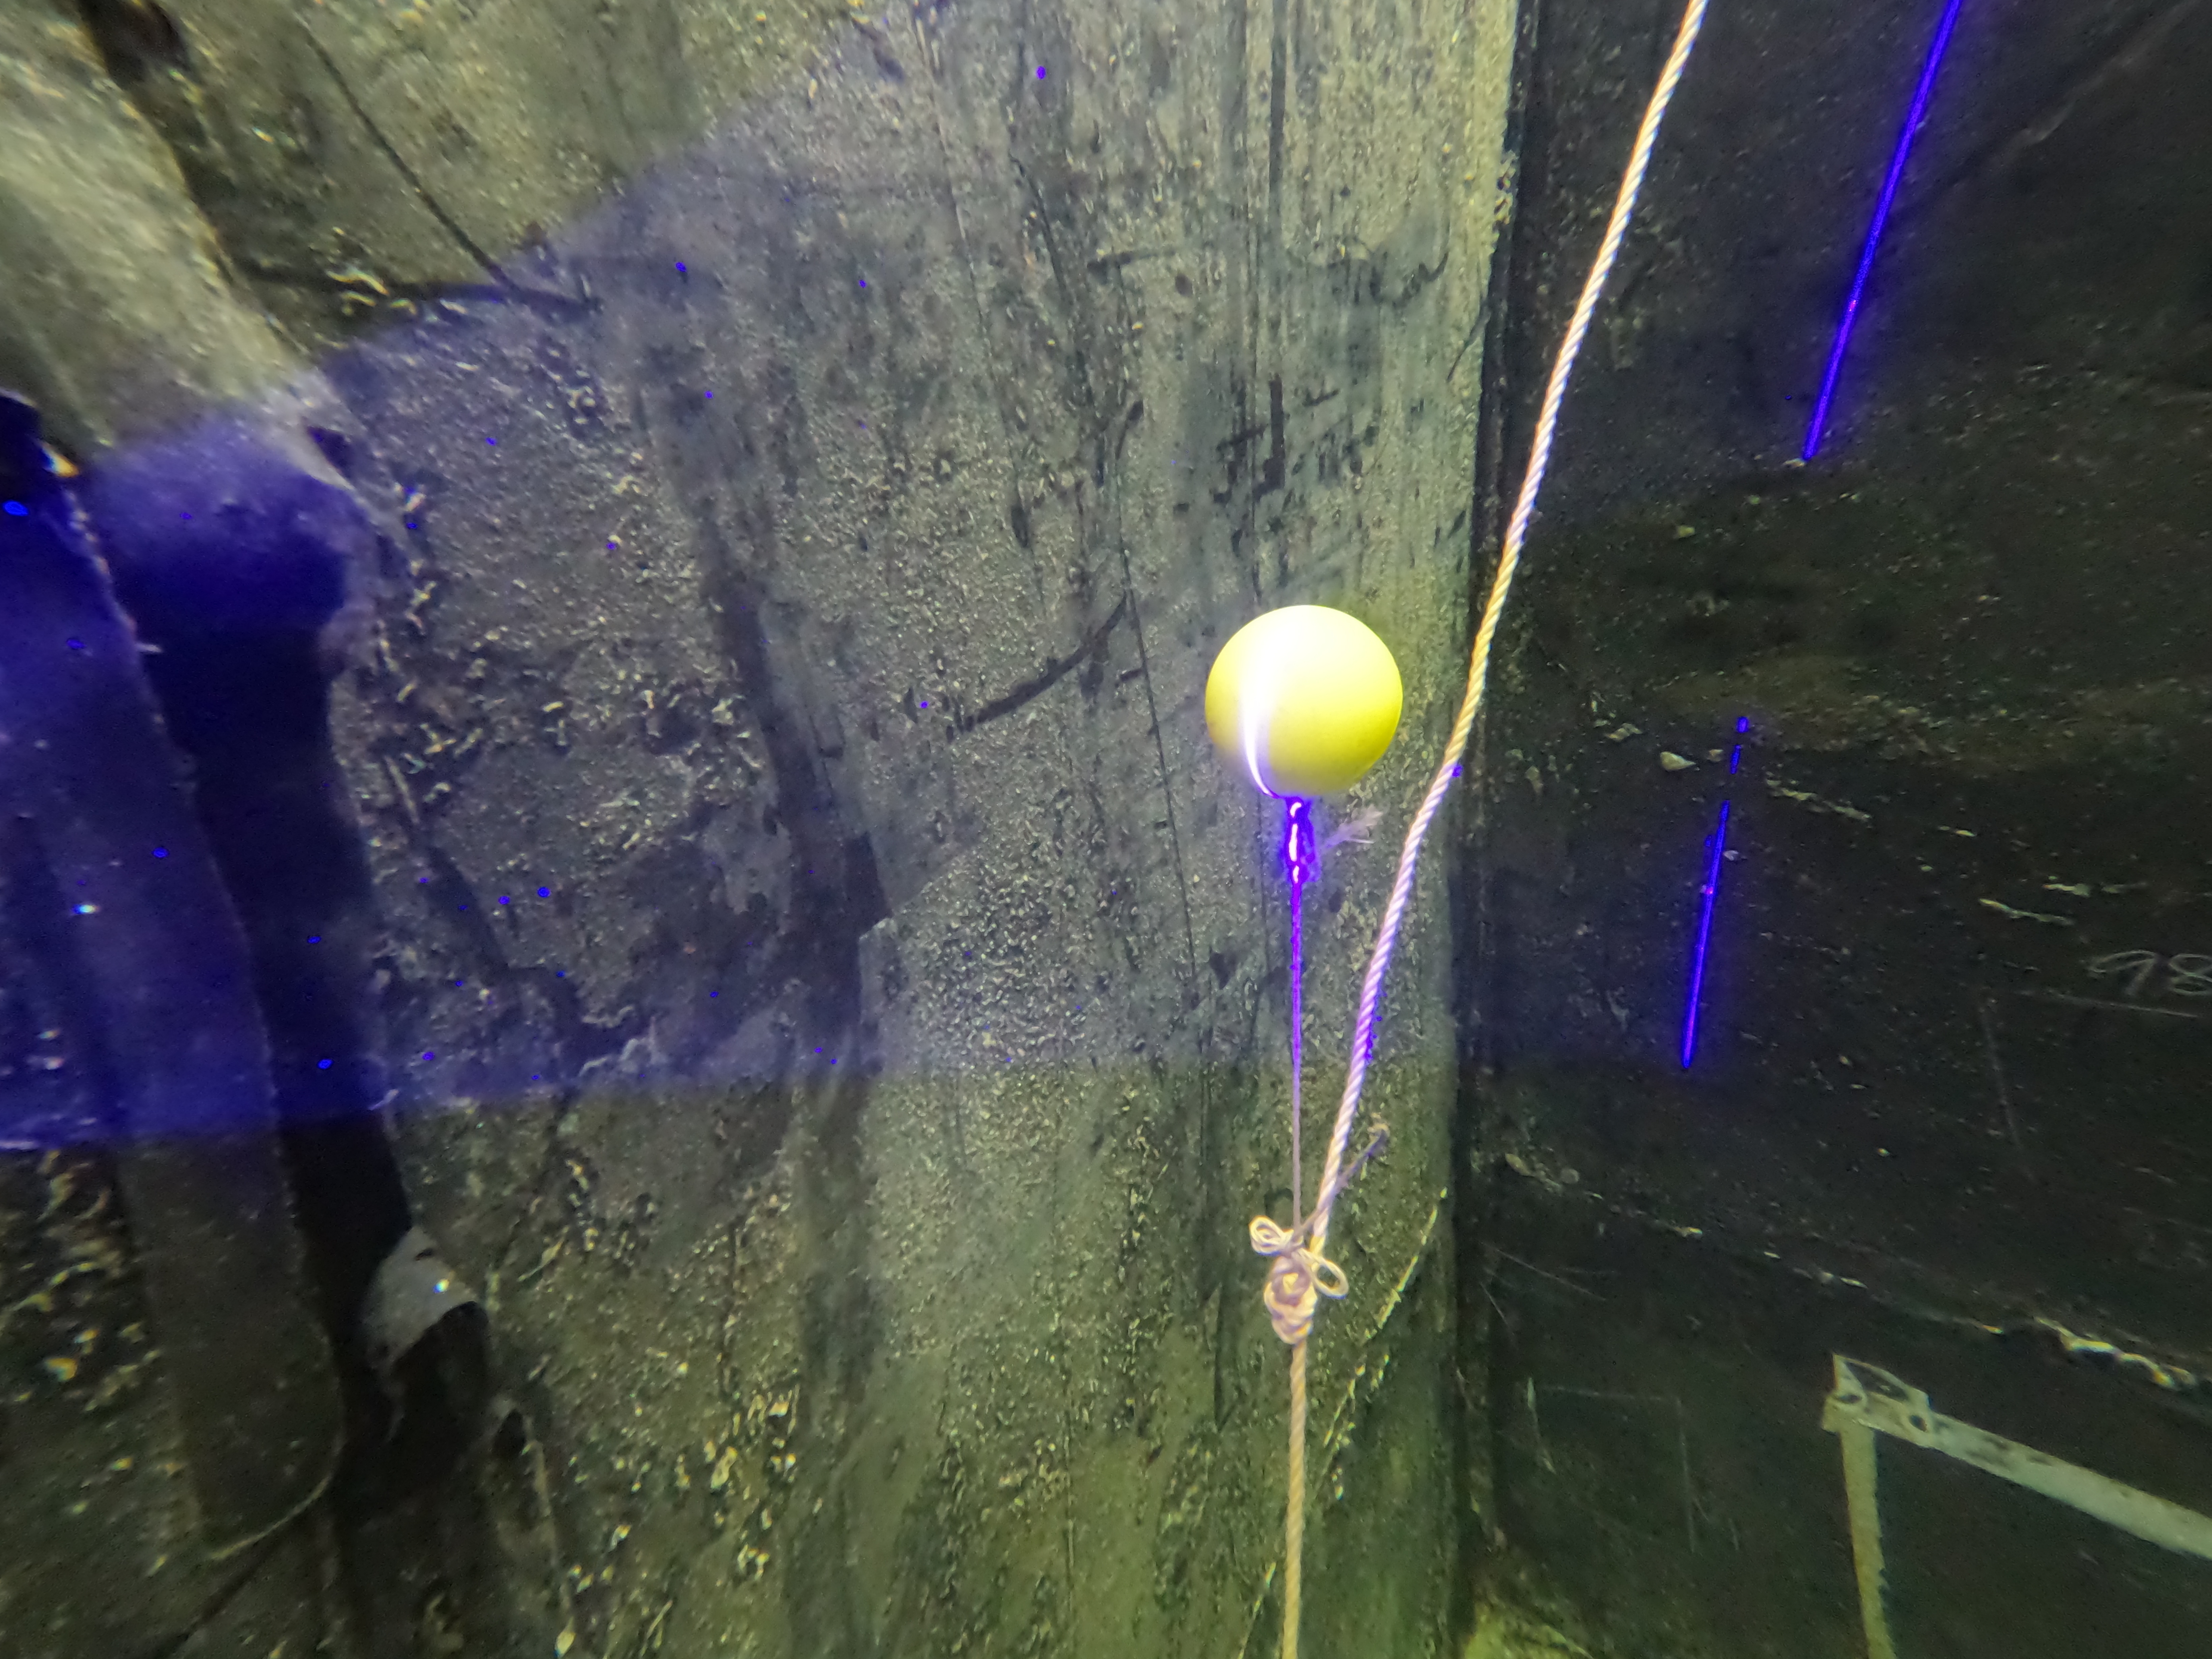

Supplement: Supplementary file 3437 [file G0034141.pdf › 8/G0034141.pdf]

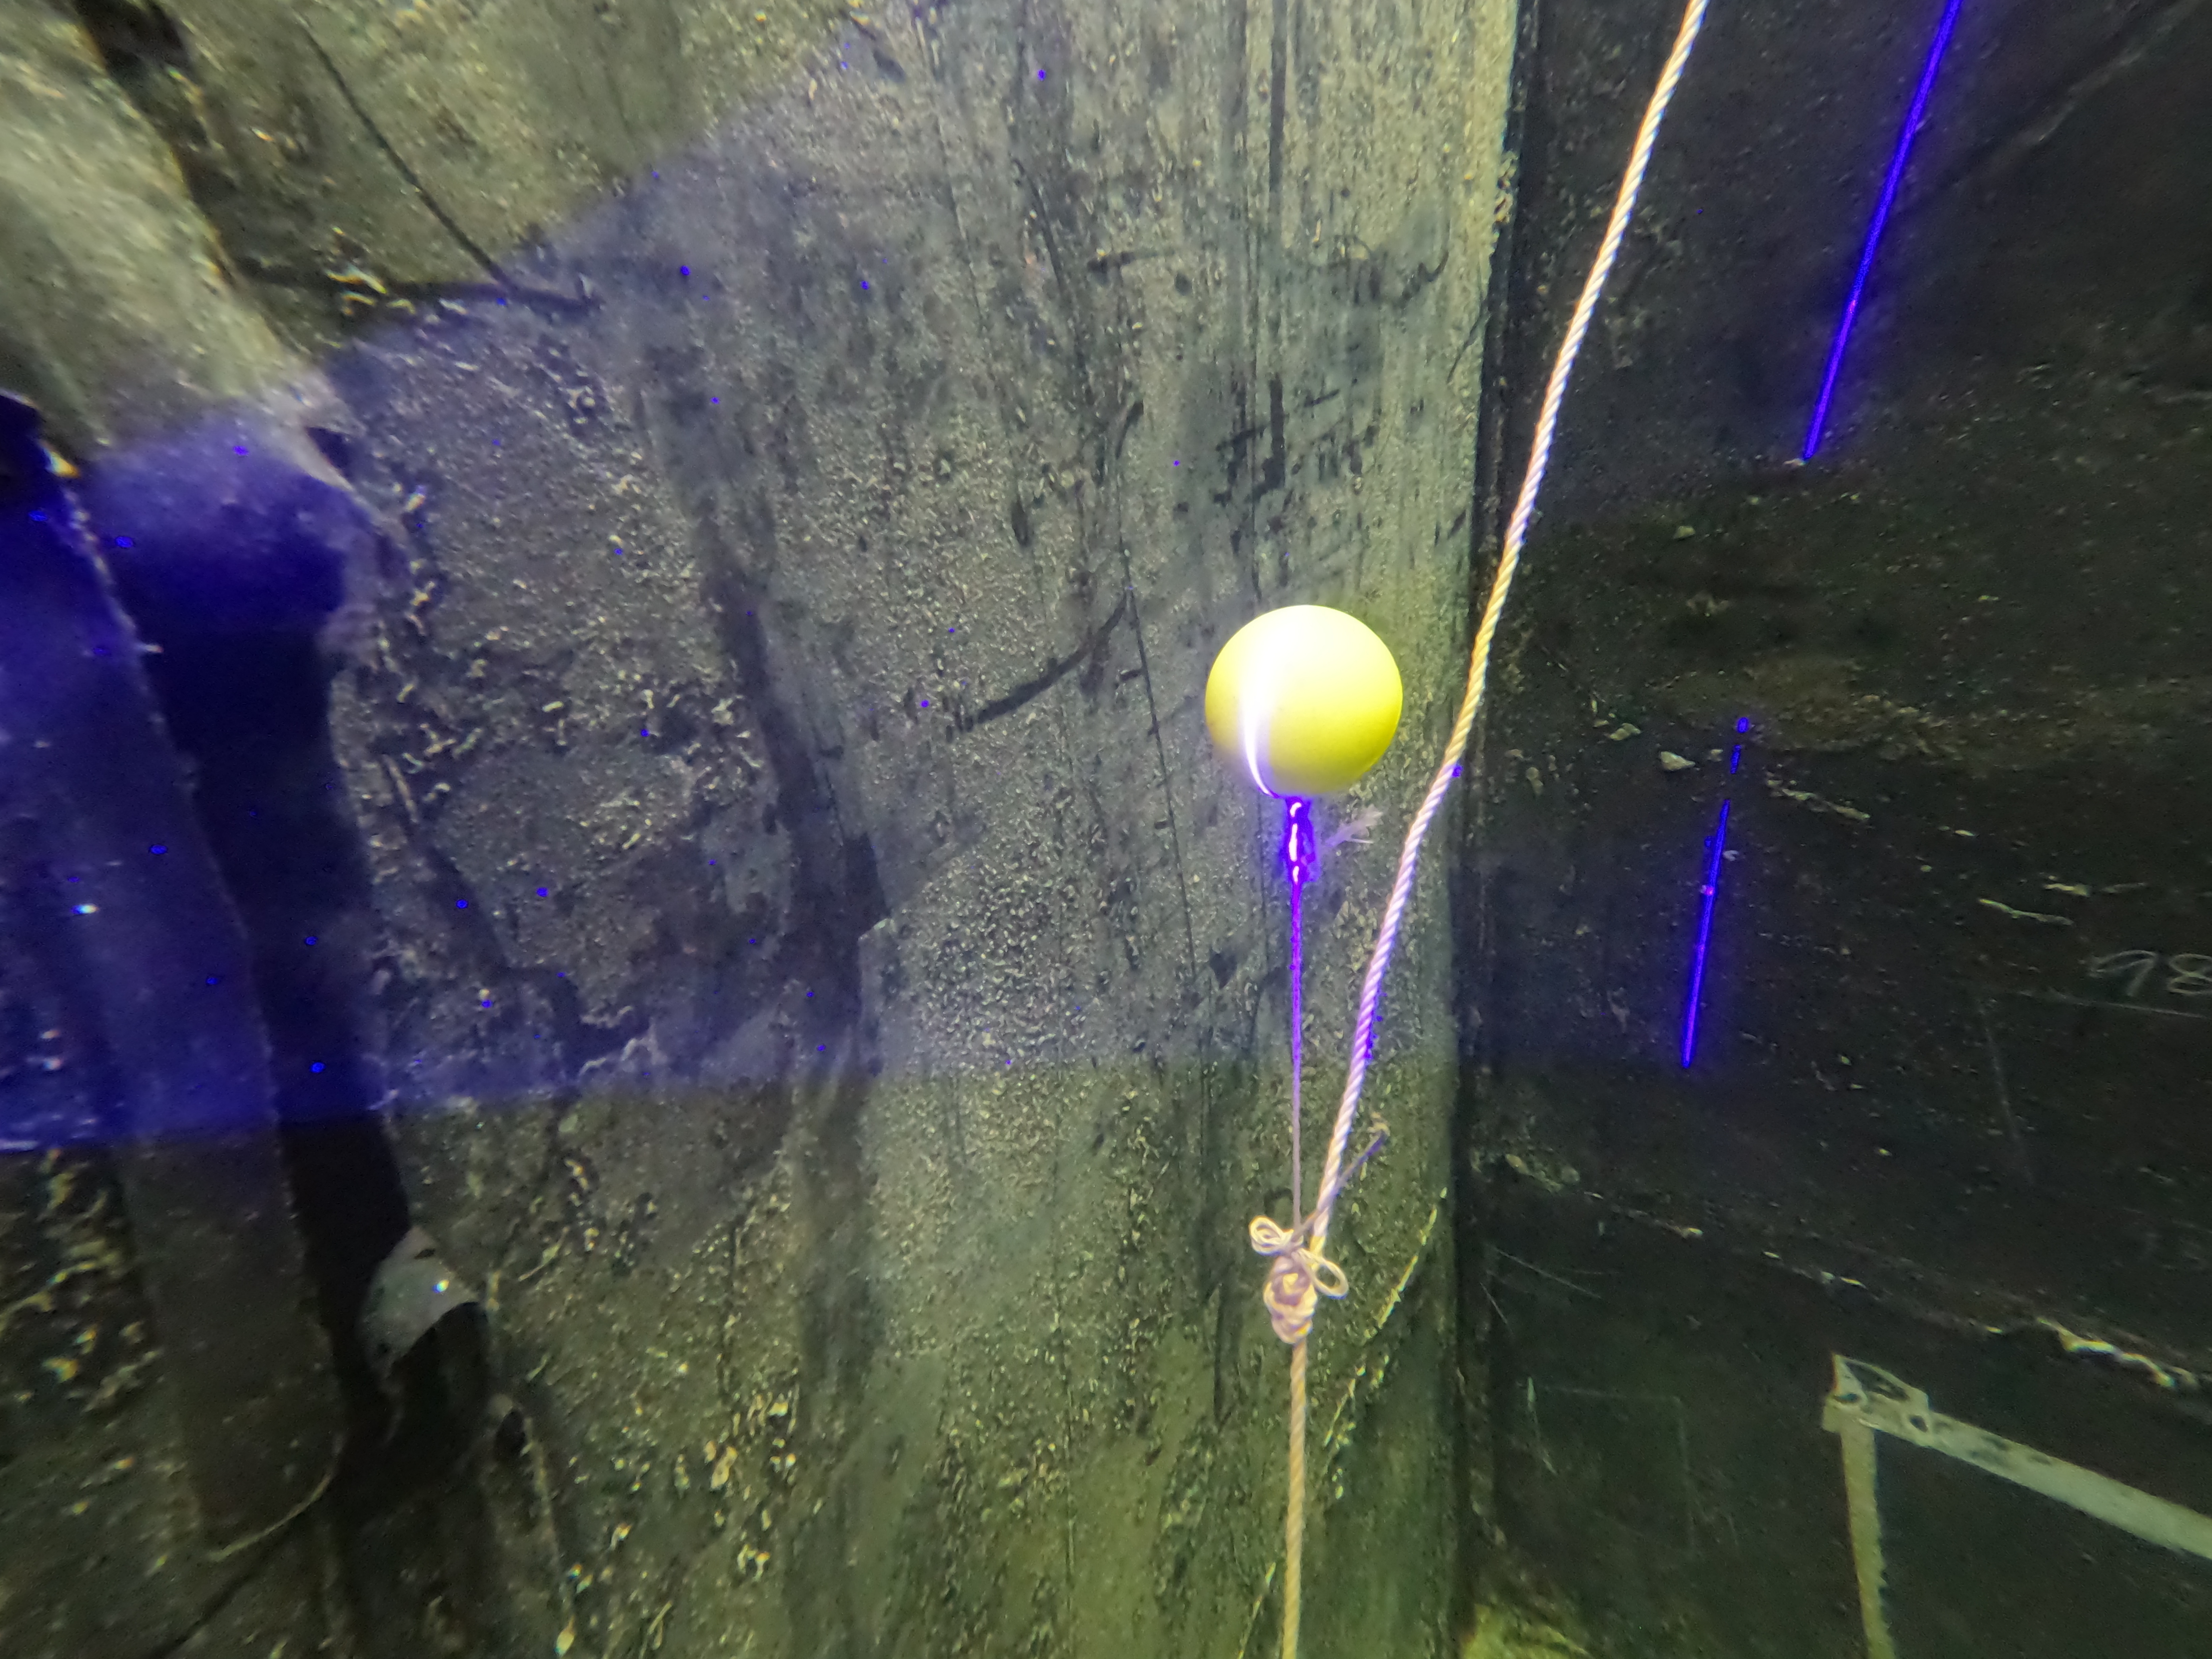

Supplement: Supplementary file 3438 [file G0034142.pdf › 8/G0034142.pdf]

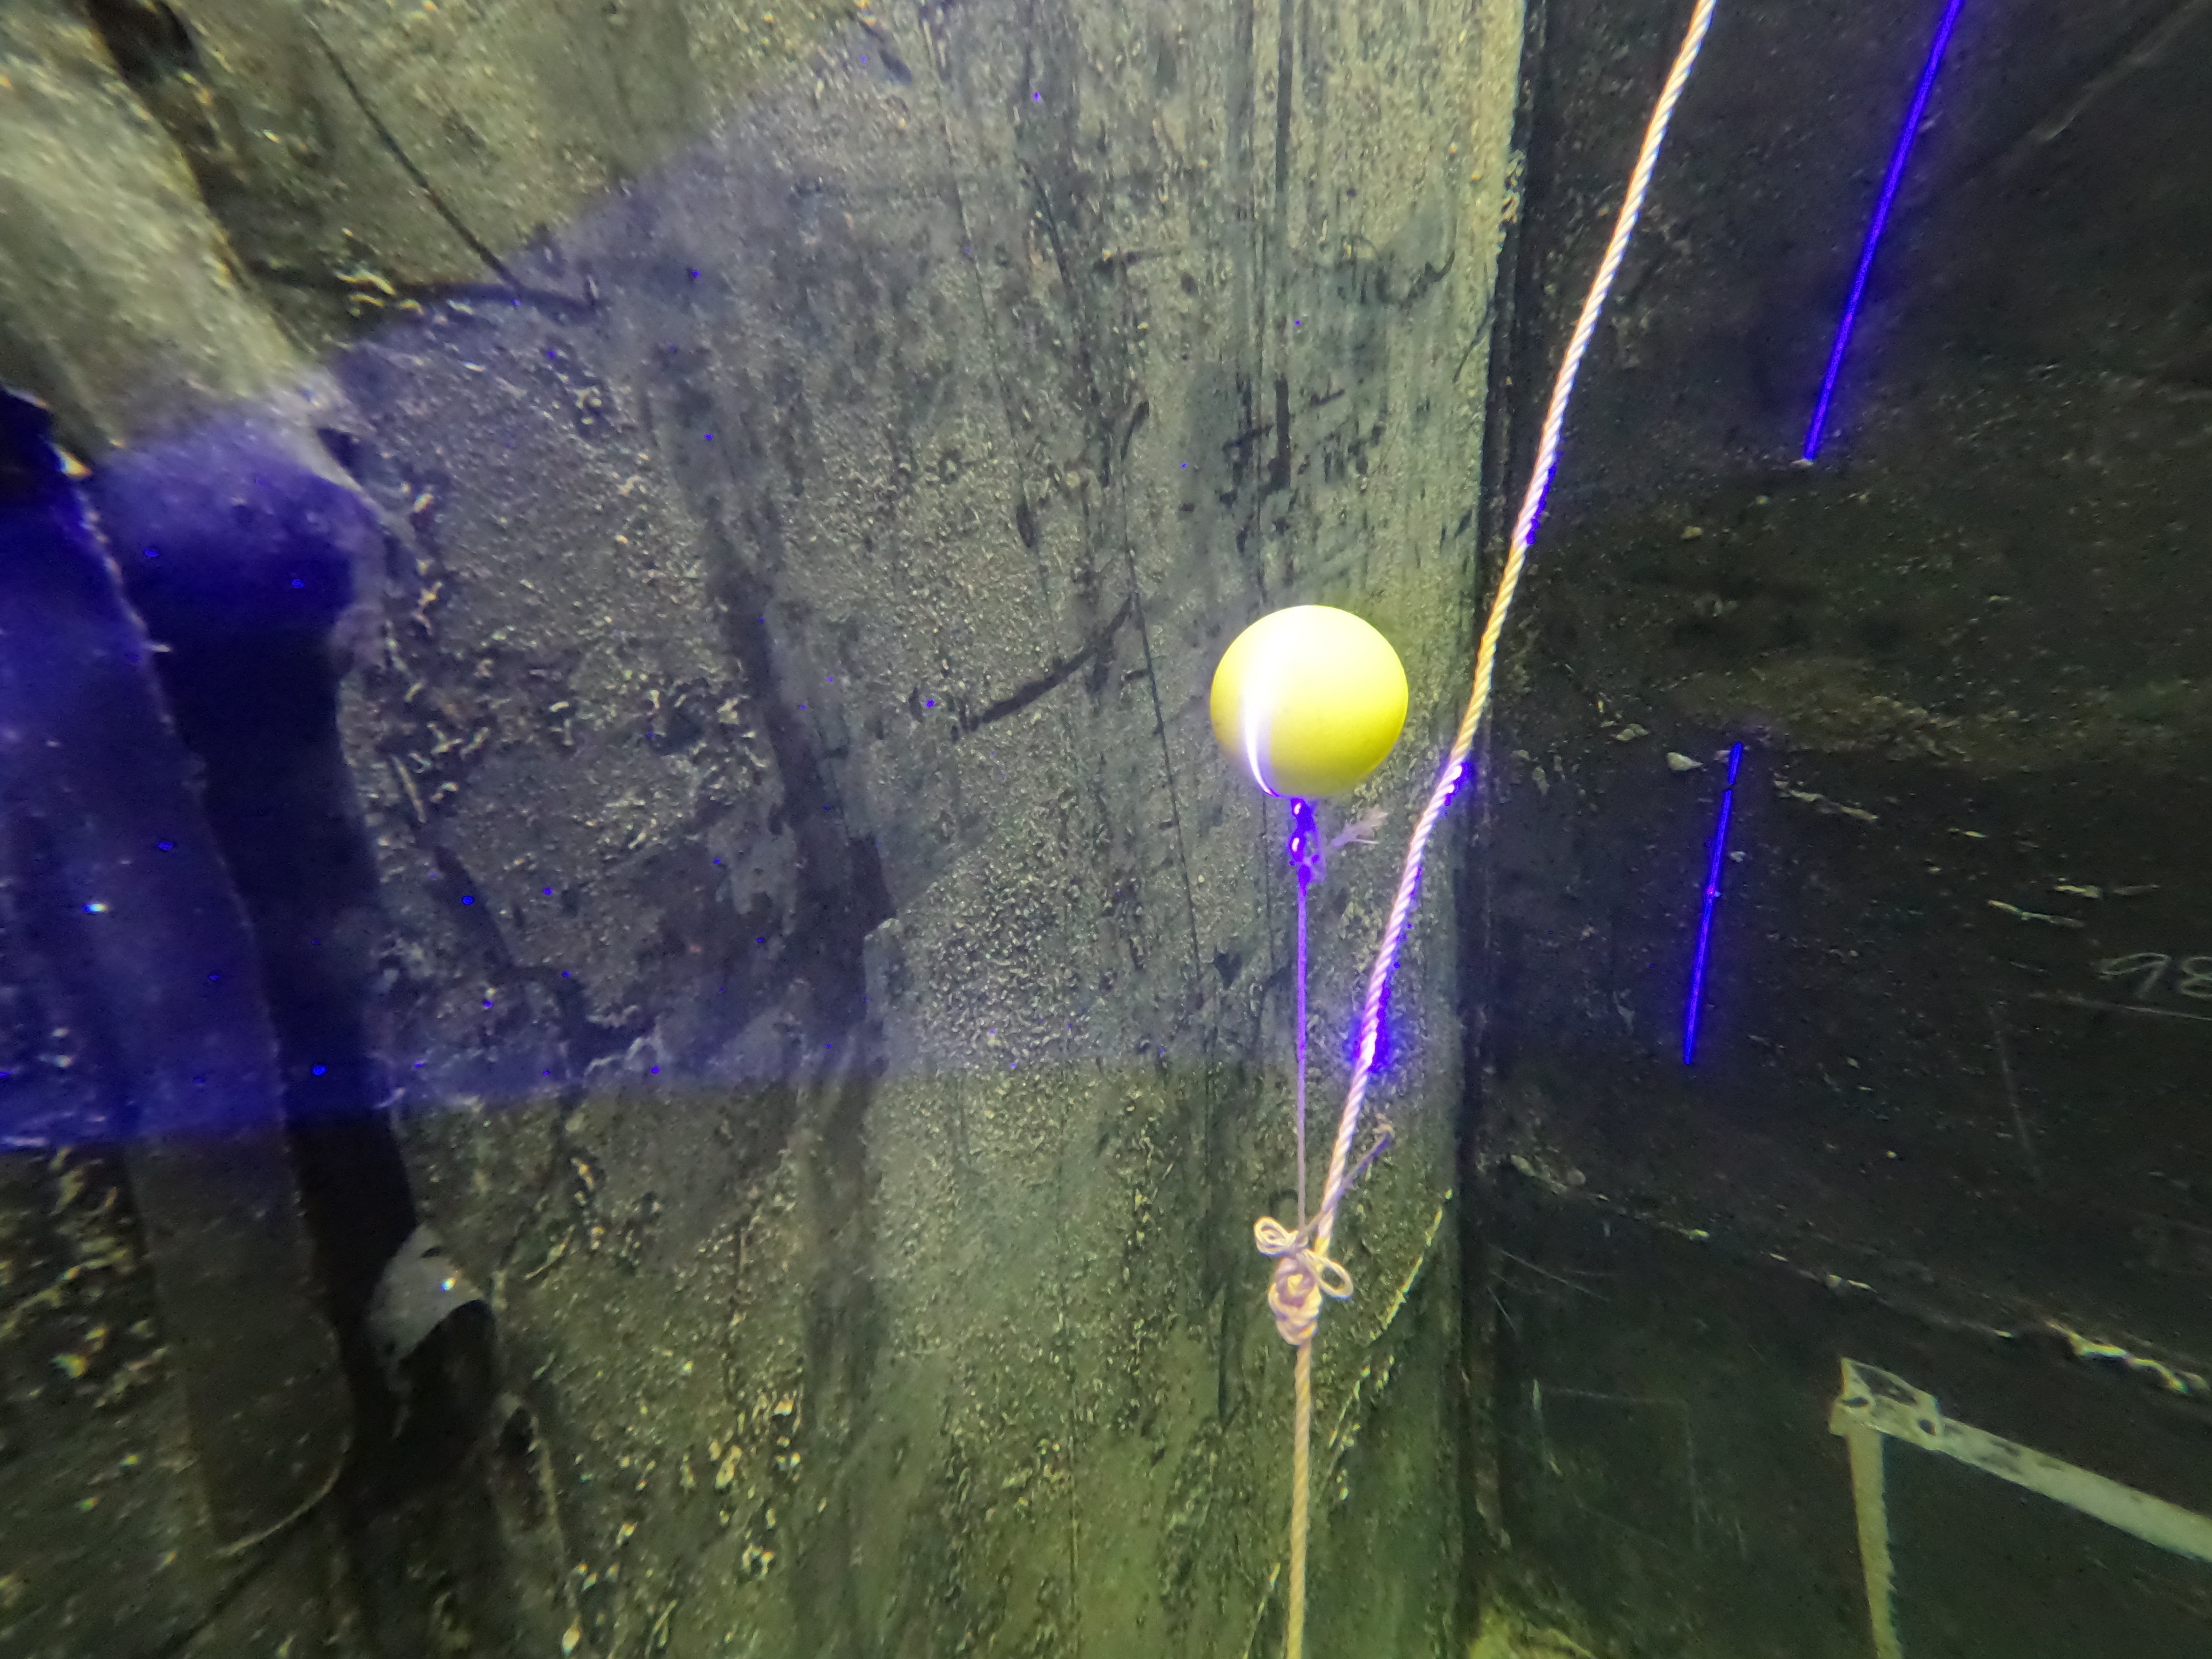

Supplement: Supplementary file 3439 [file G0034143.pdf › 8/G0034143.pdf]

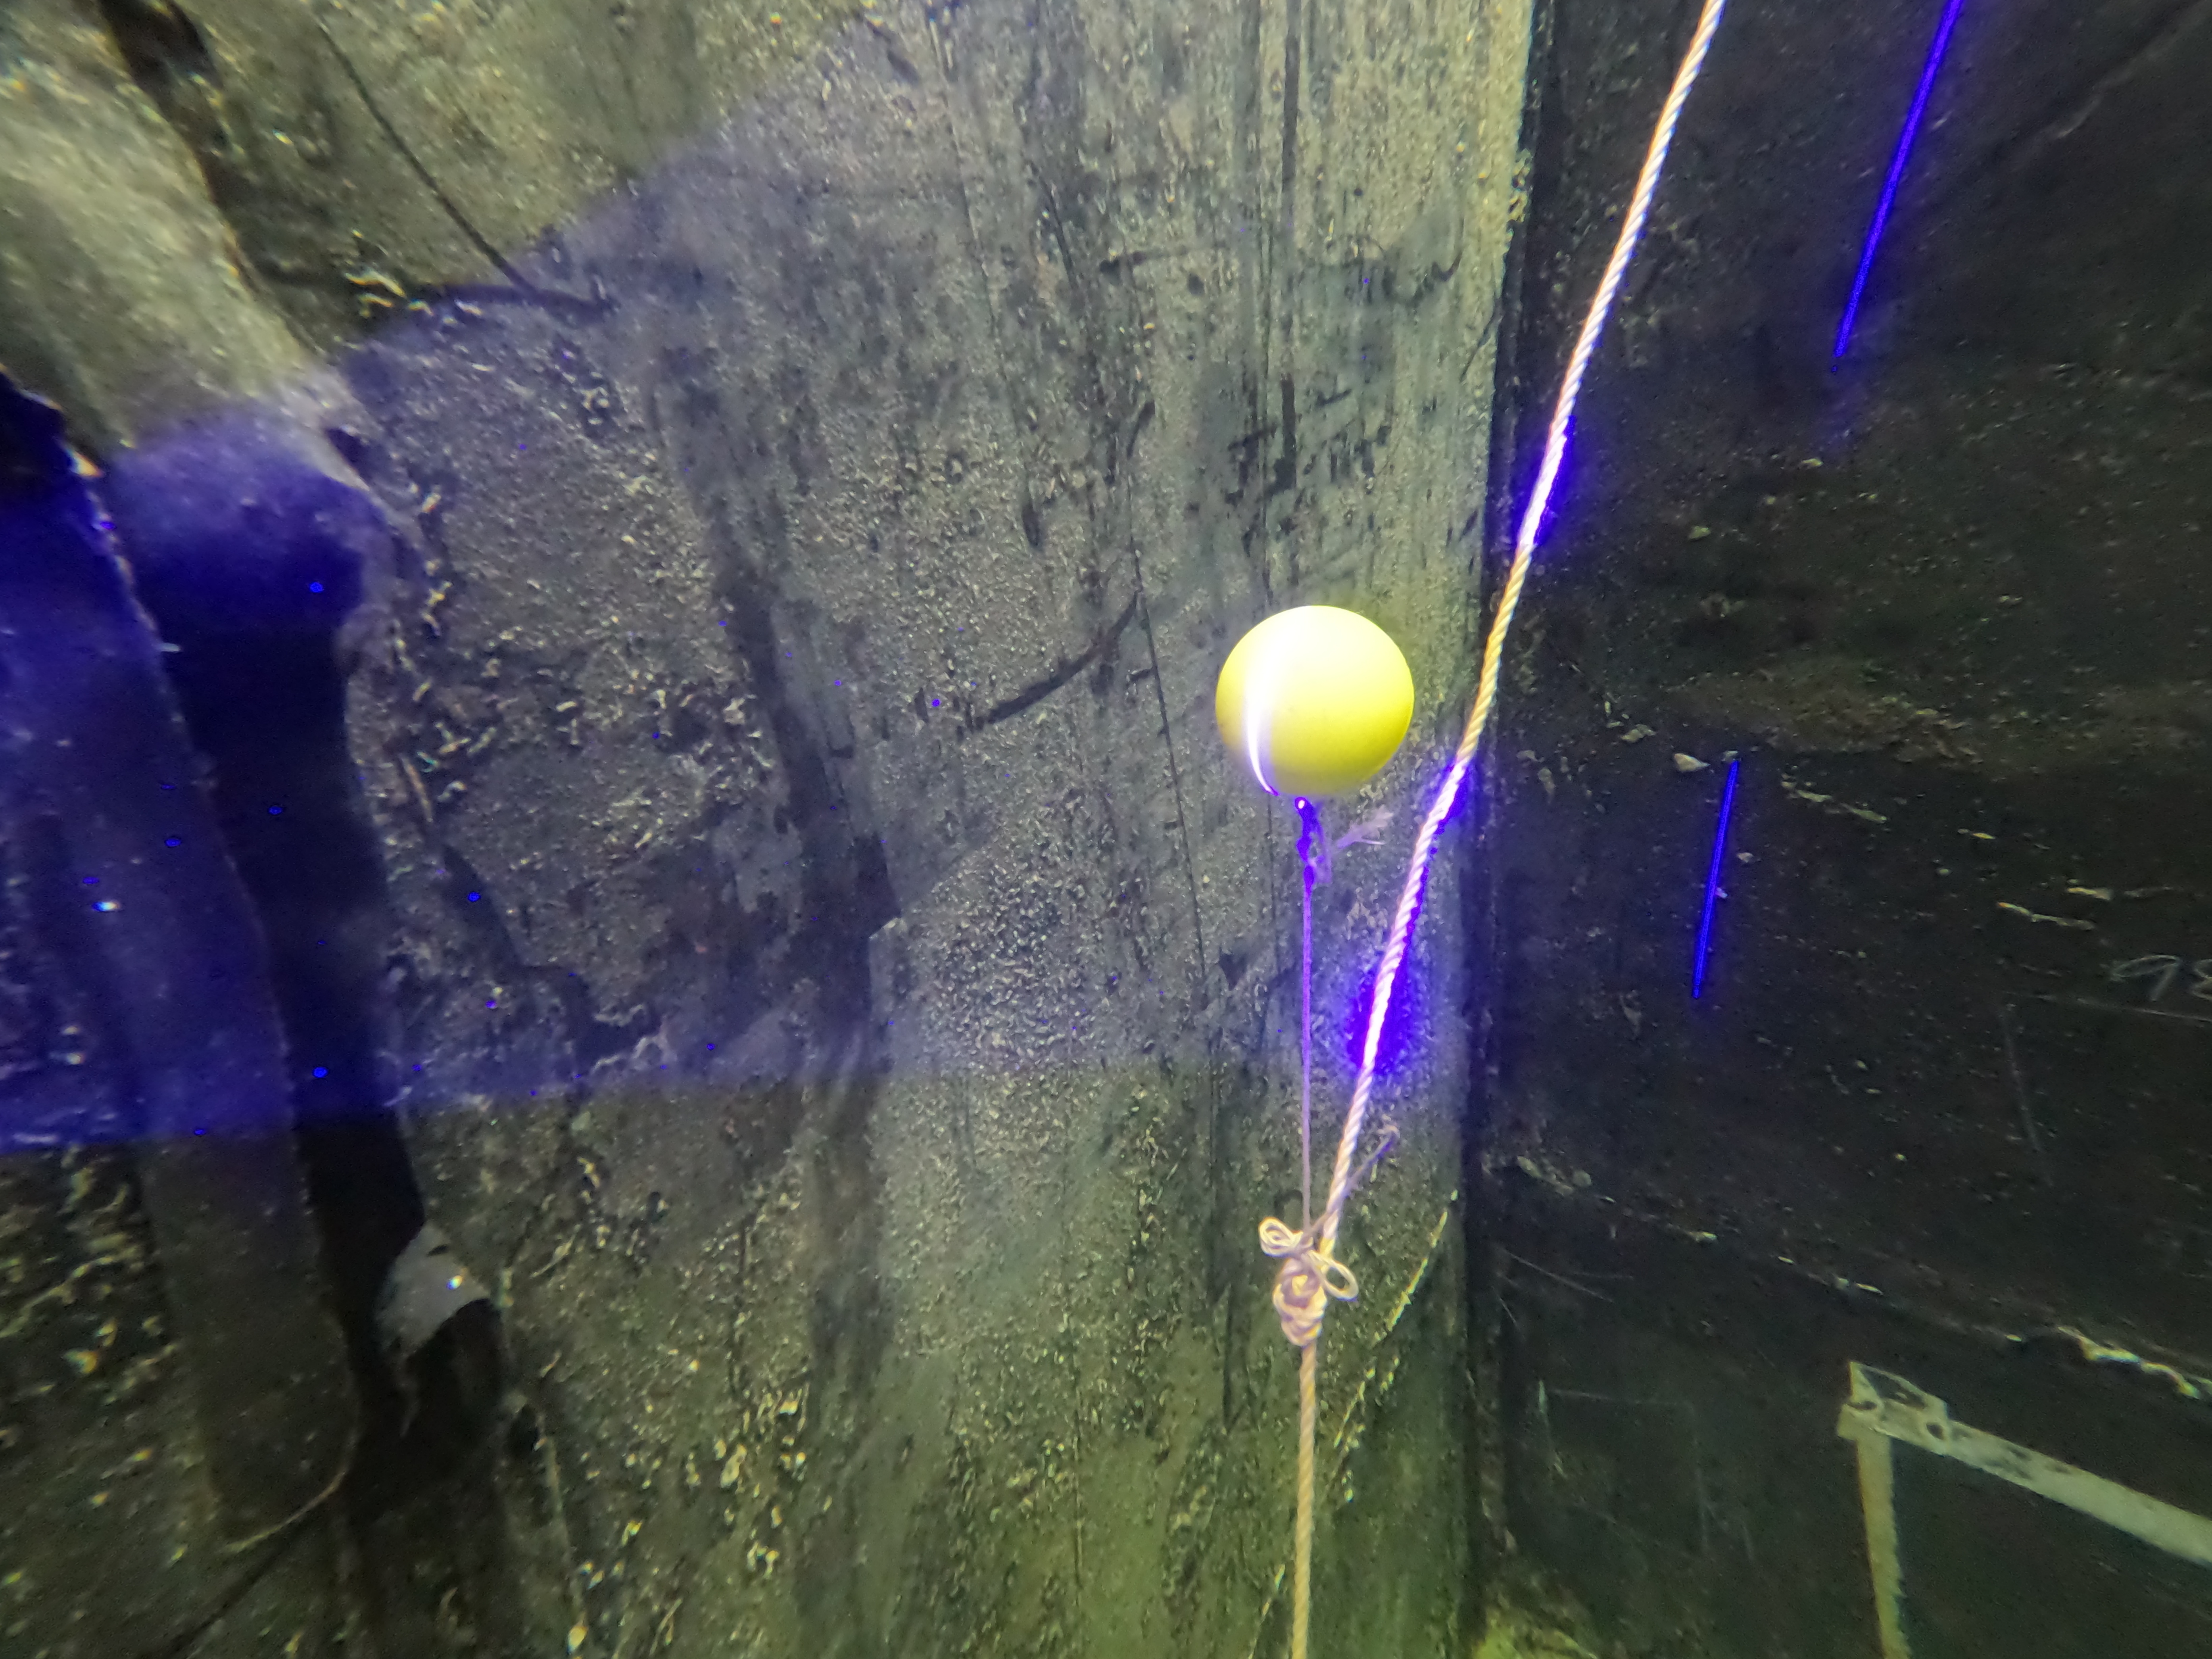

Supplement: Supplementary file 3440 [file G0034144.pdf › 8/G0034144.pdf]

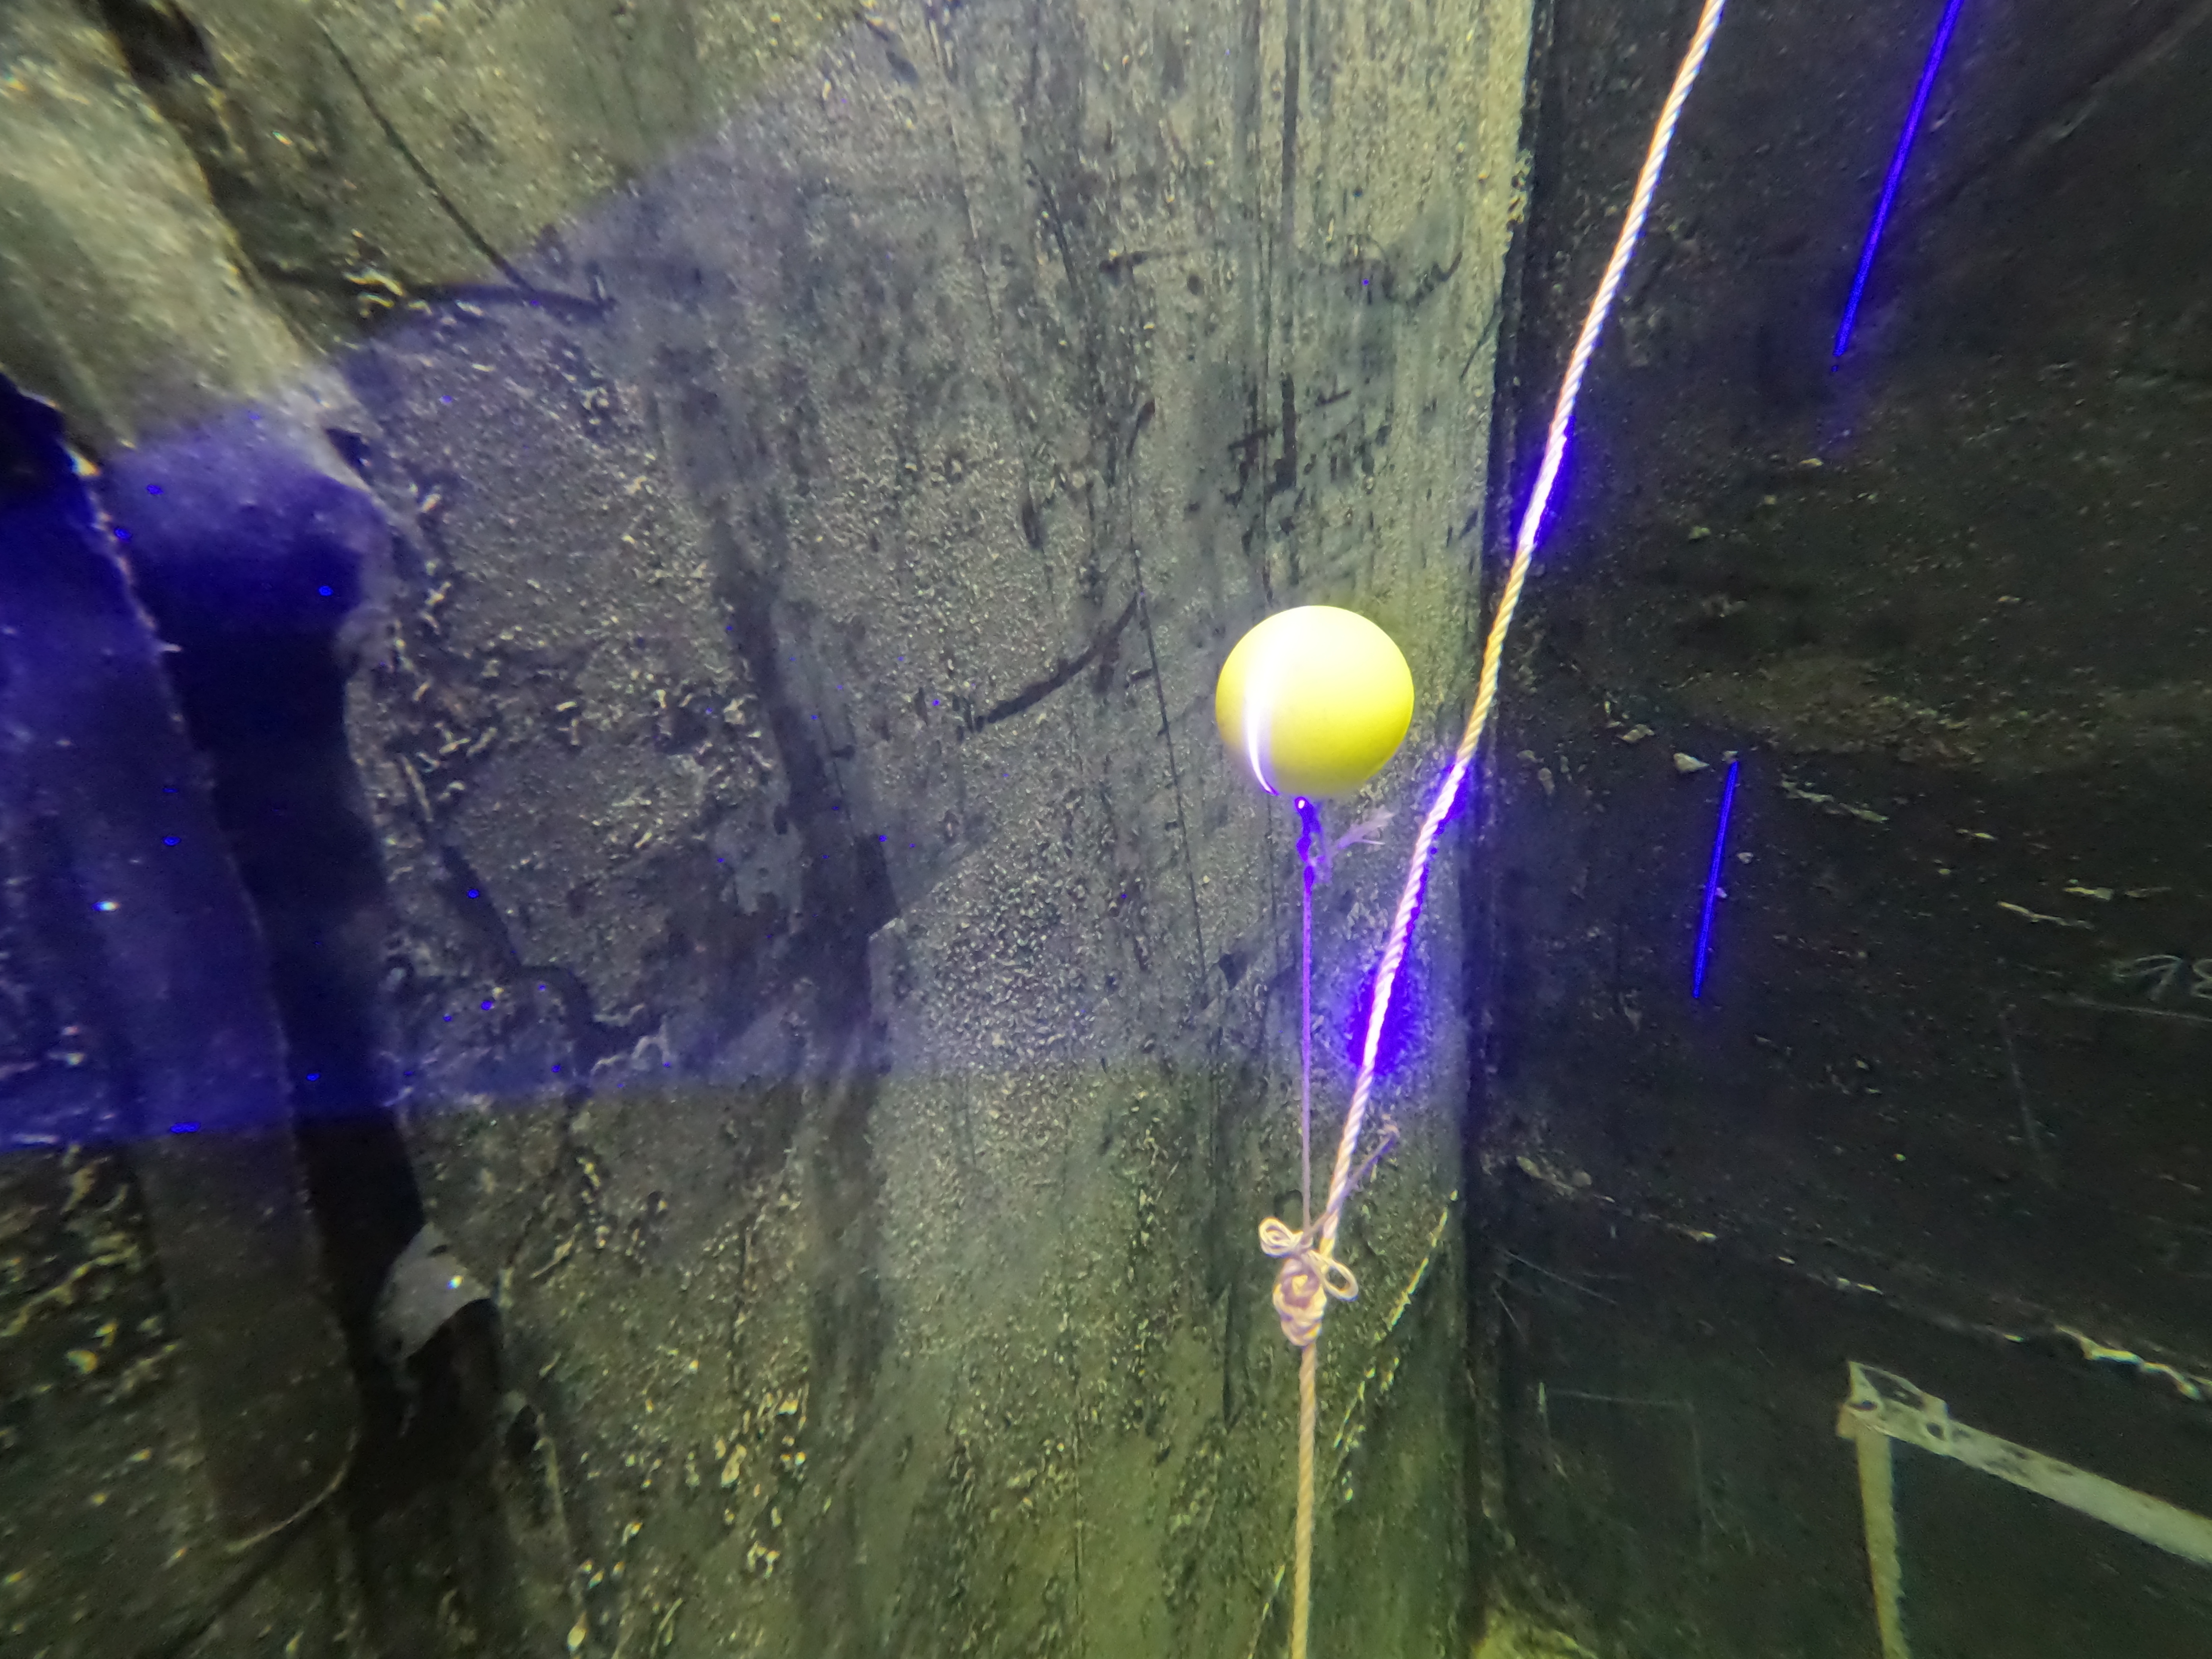

Supplement: Supplementary file 3441 [file G0034145.pdf › 8/G0034145.pdf]

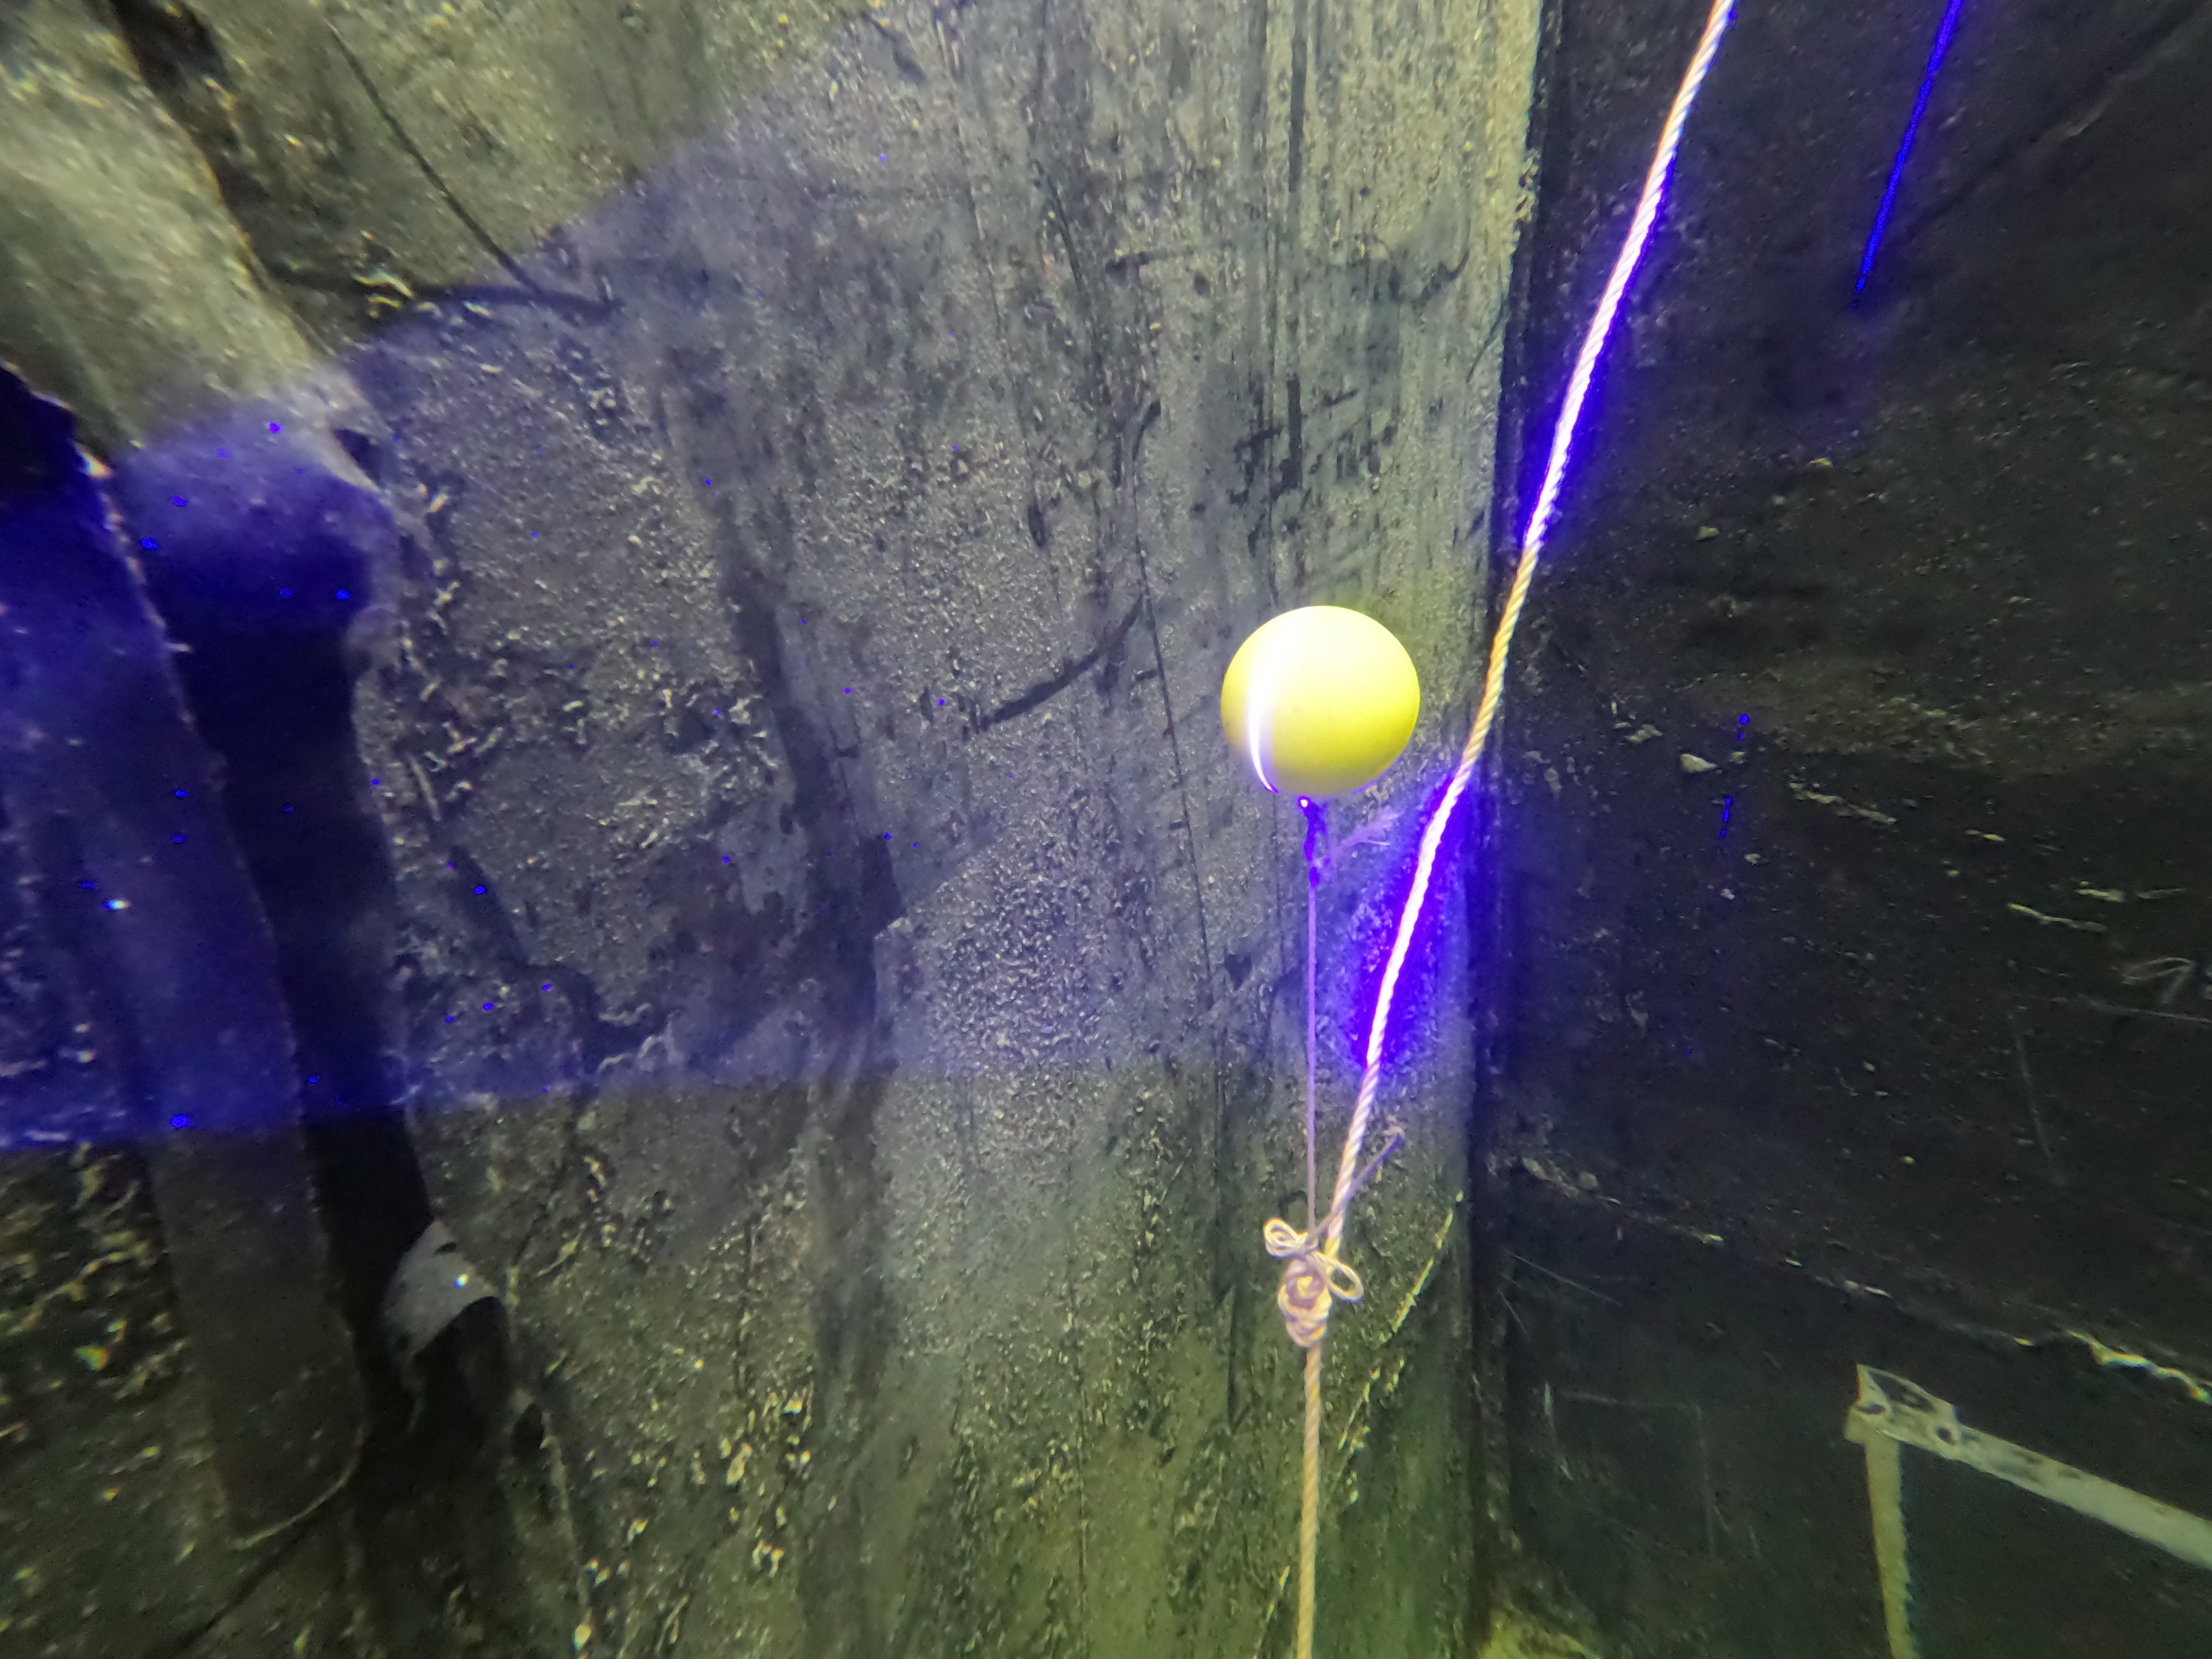

Supplement: Supplementary file 3442 [file G0034146.pdf › 8/G0034146.pdf]

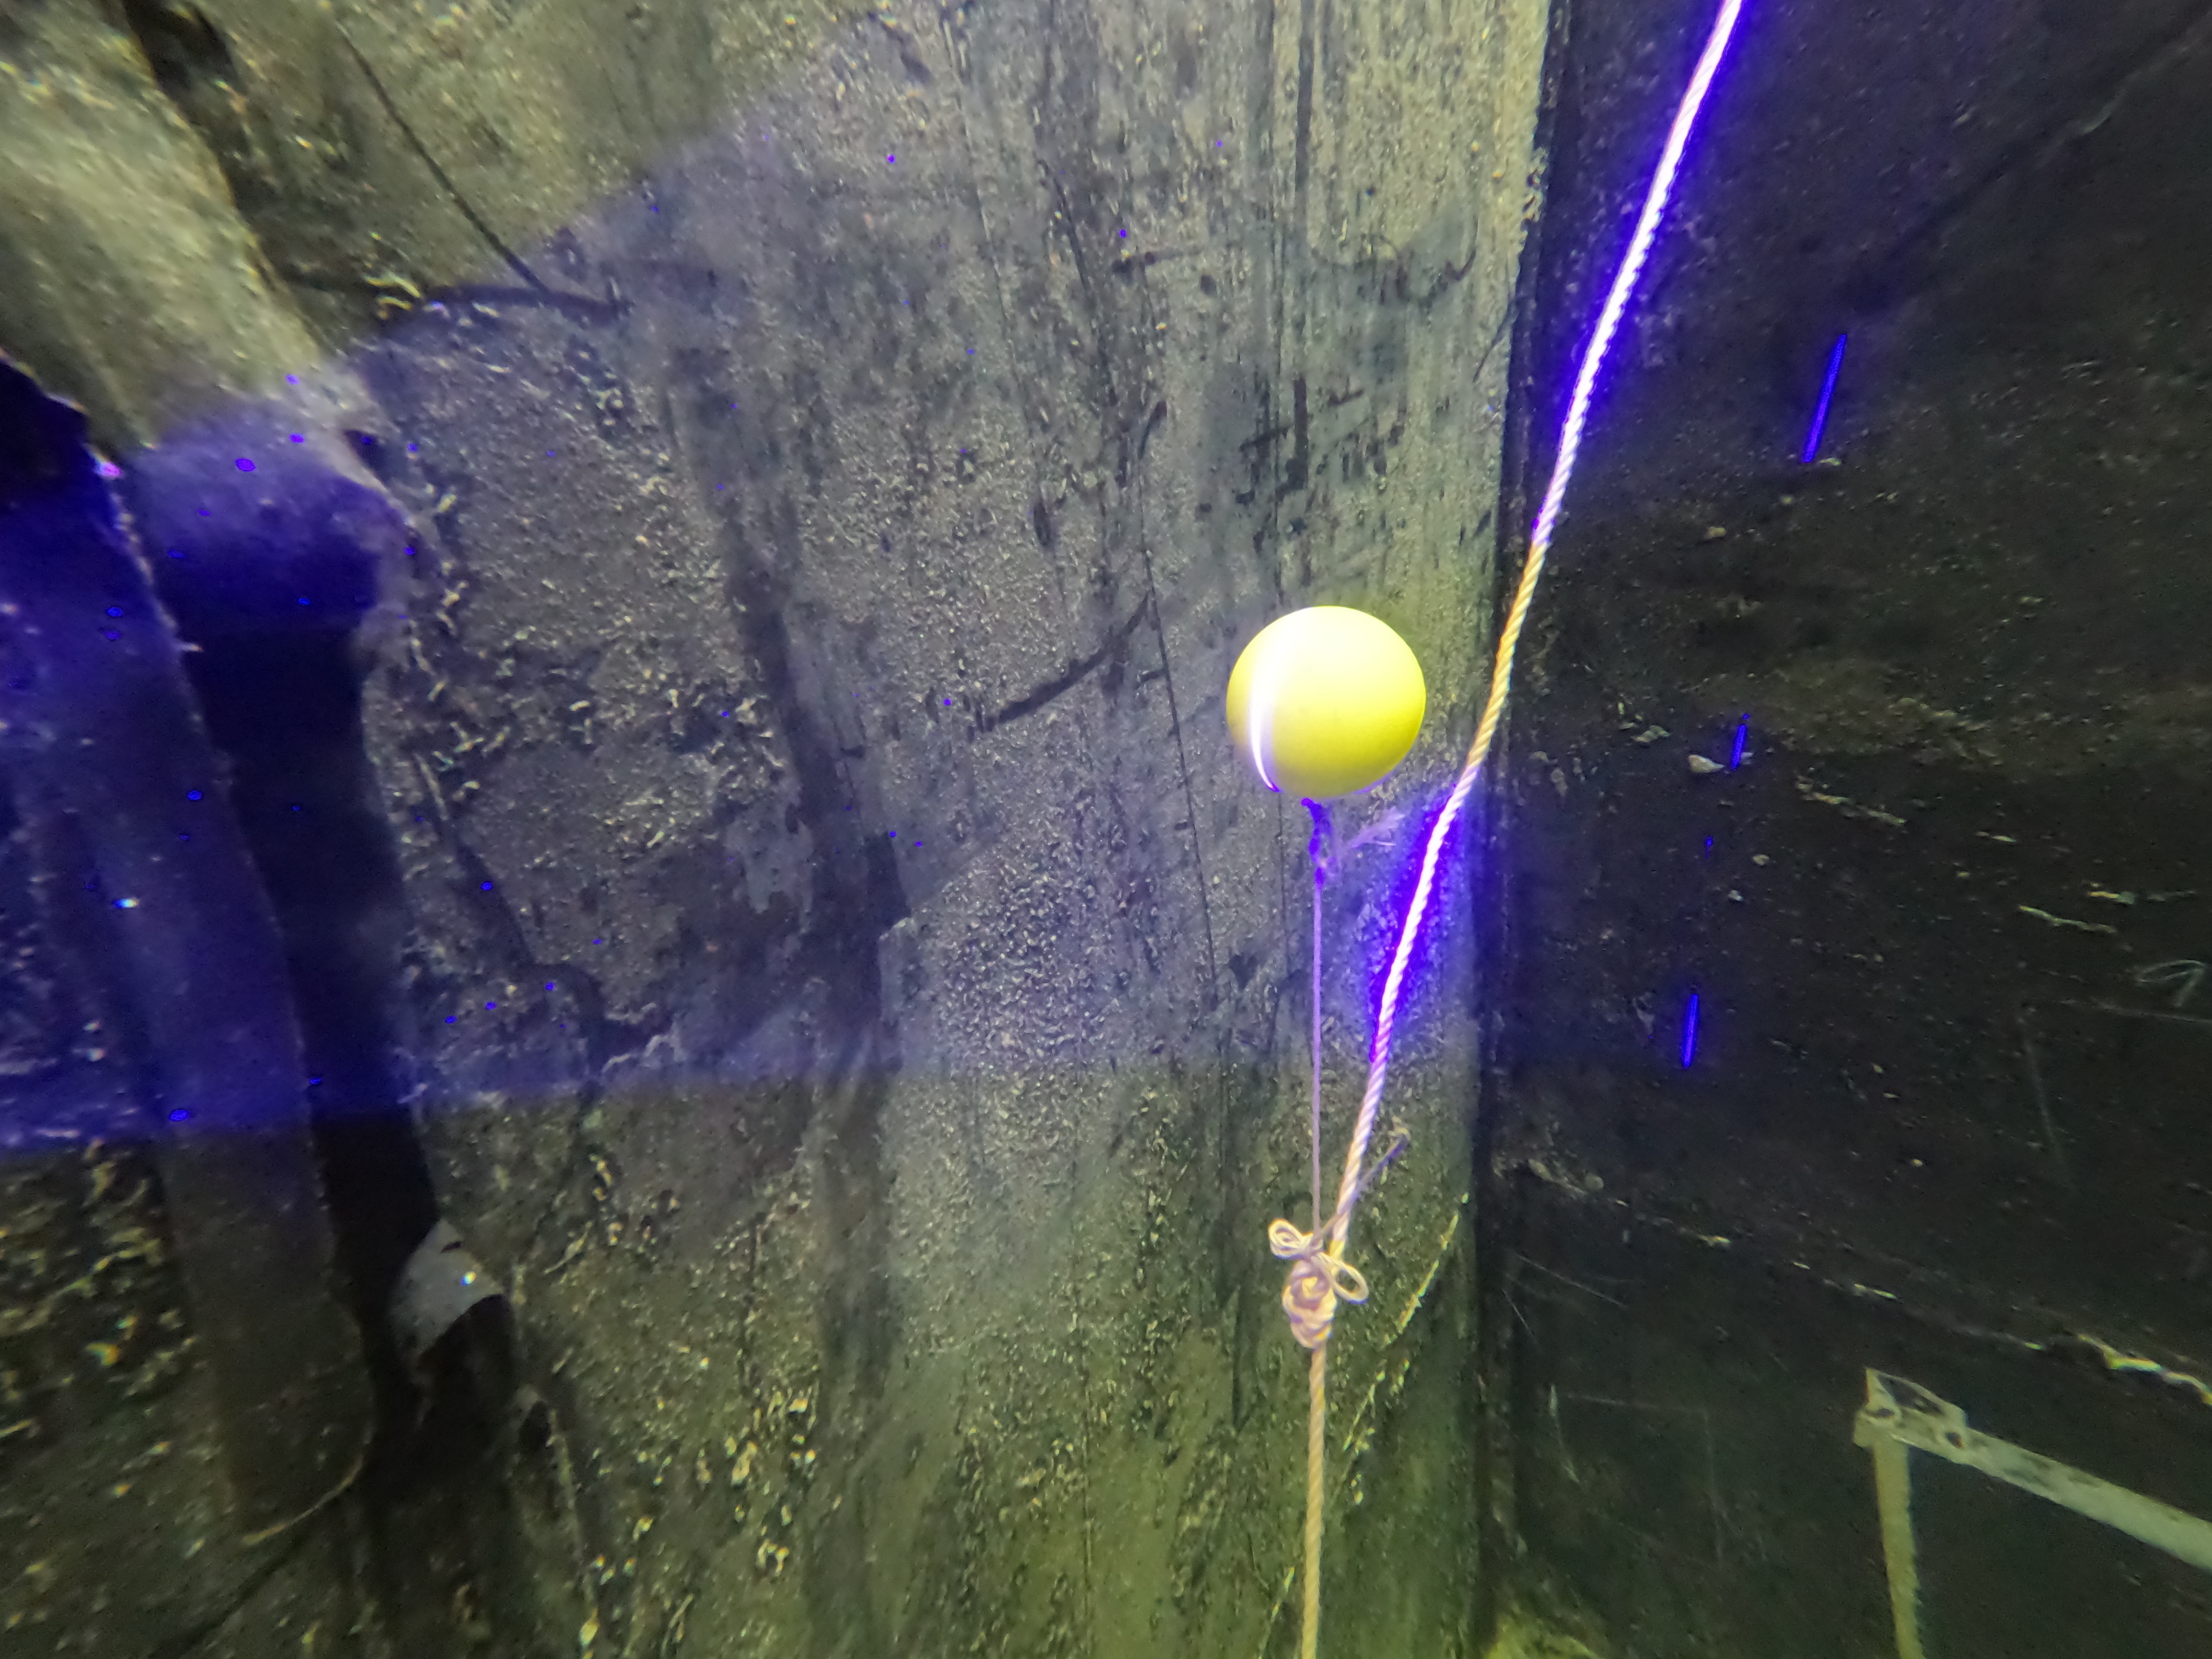

Supplement: Supplementary file 3443 [file G0034147.pdf › 8/G0034147.pdf]

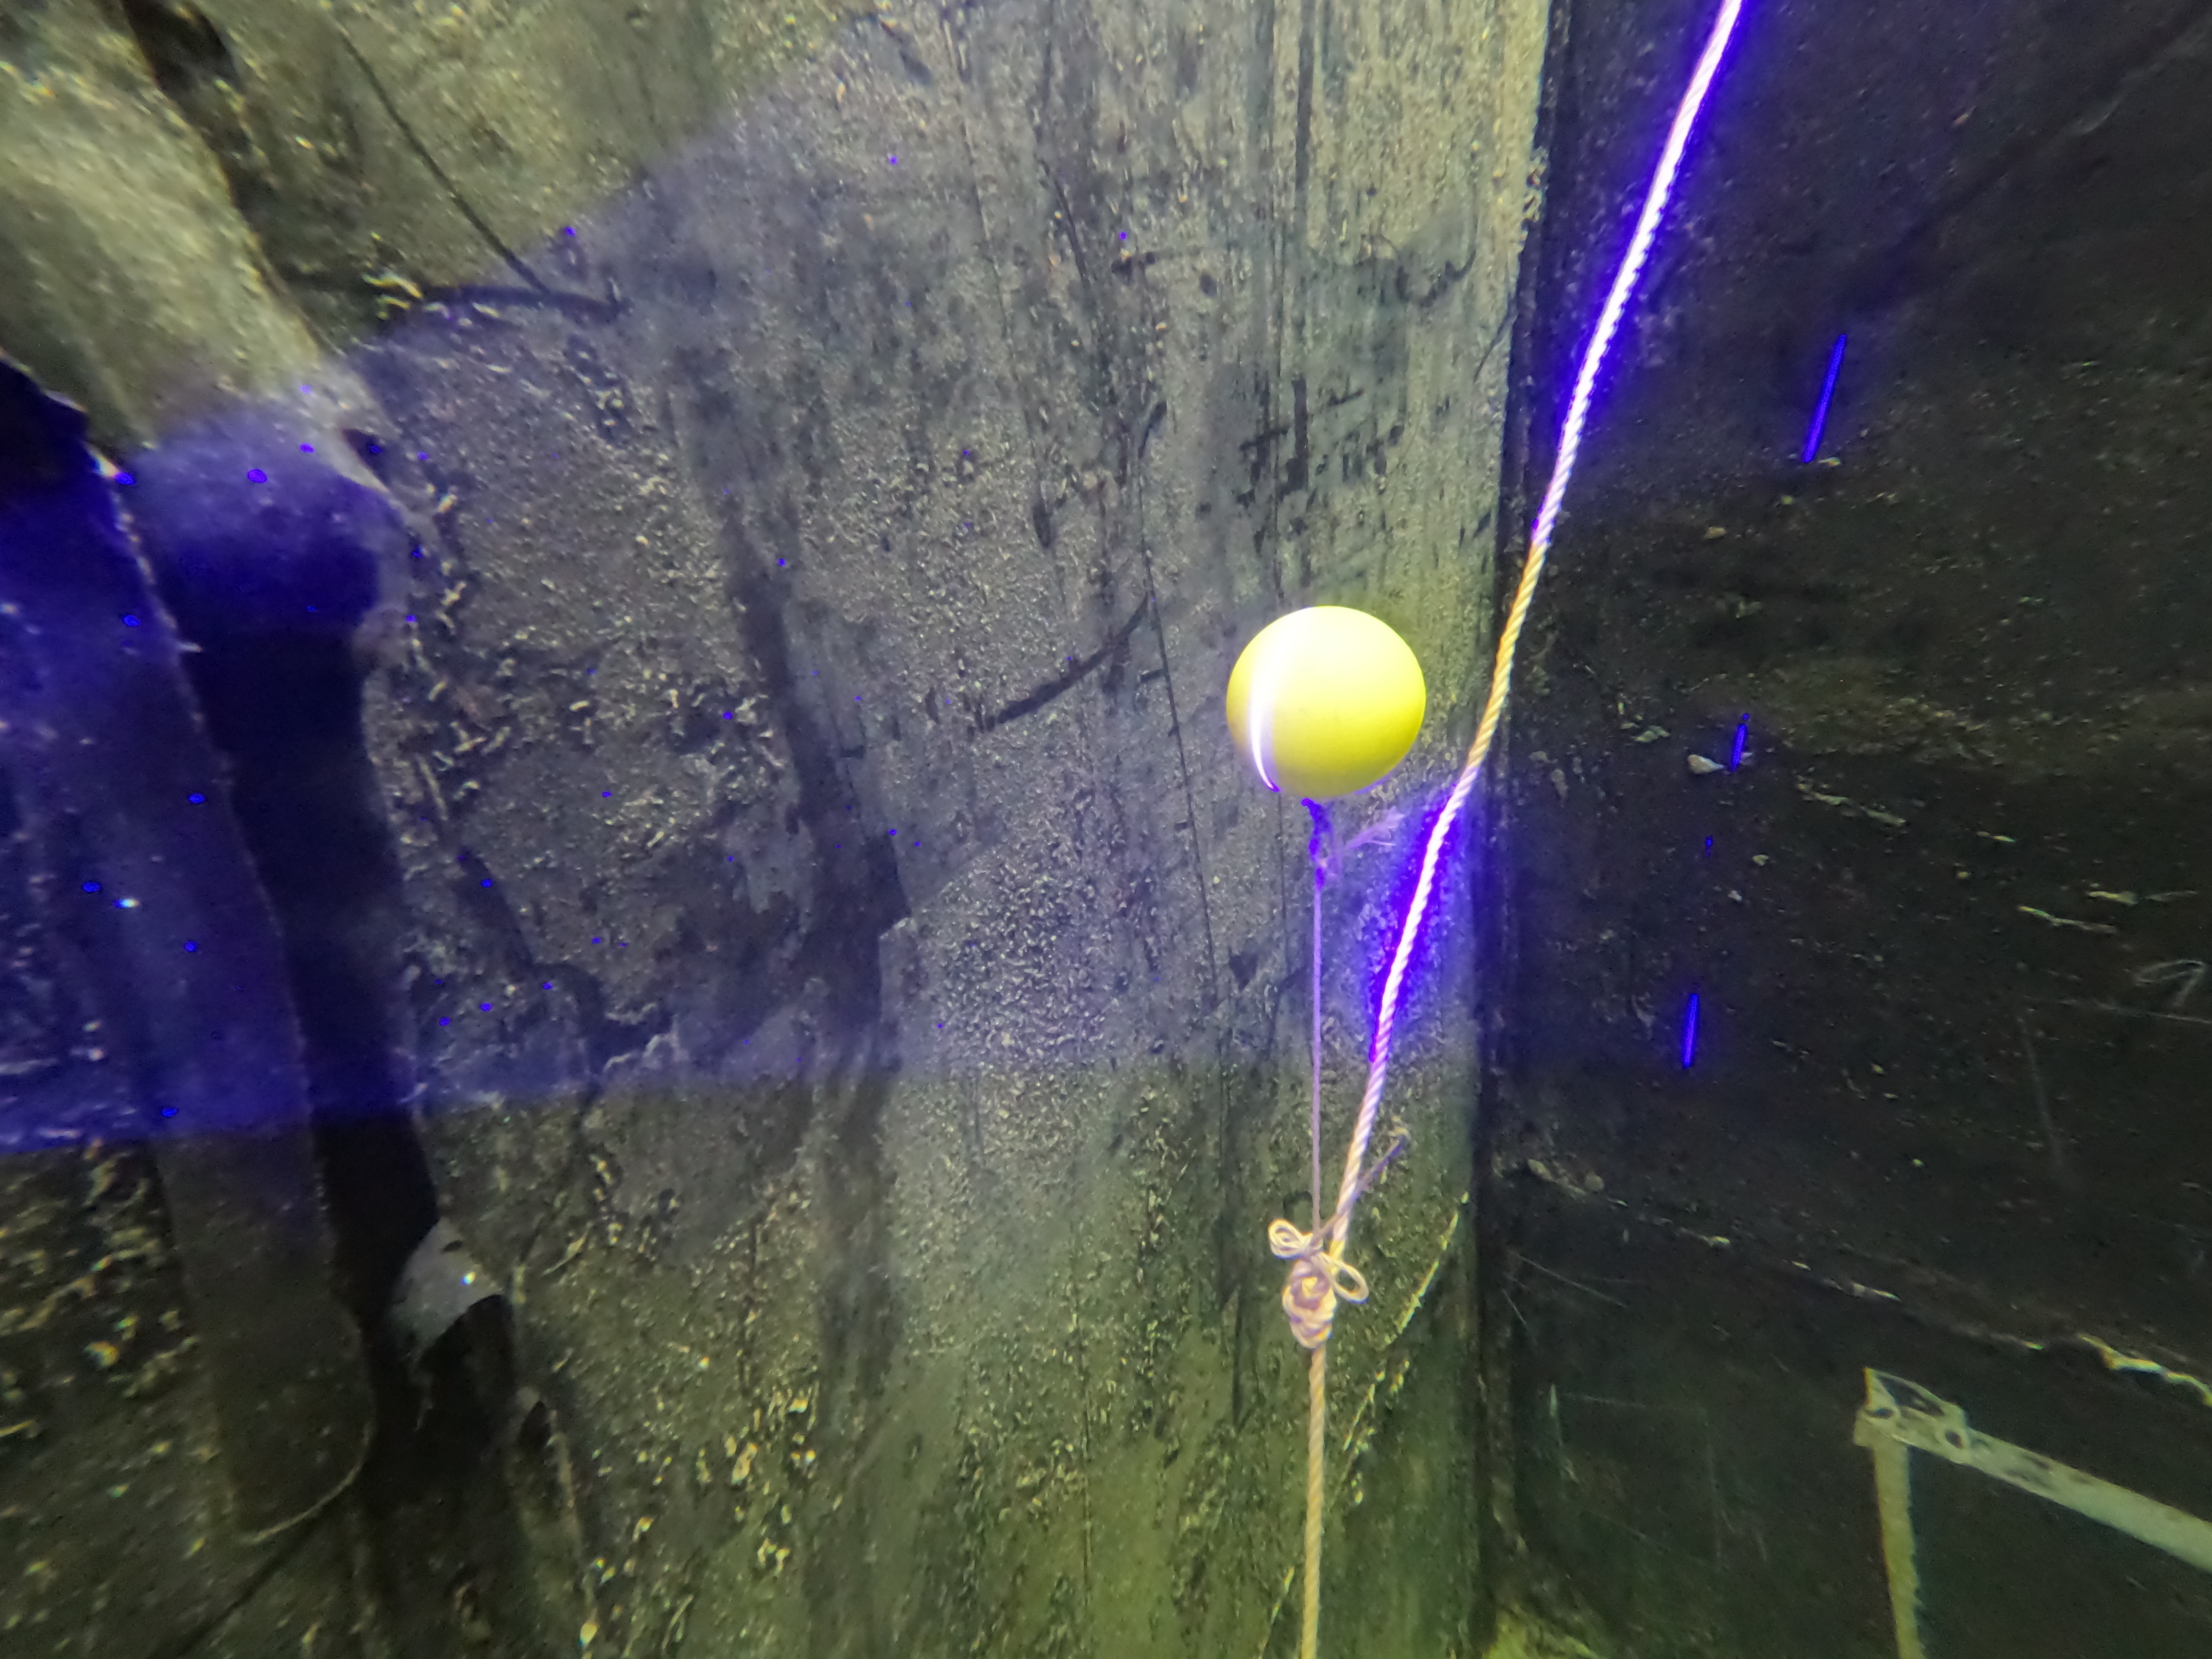

Supplement: Supplementary file 3444 [file G0034148.pdf › 8/G0034148.pdf]

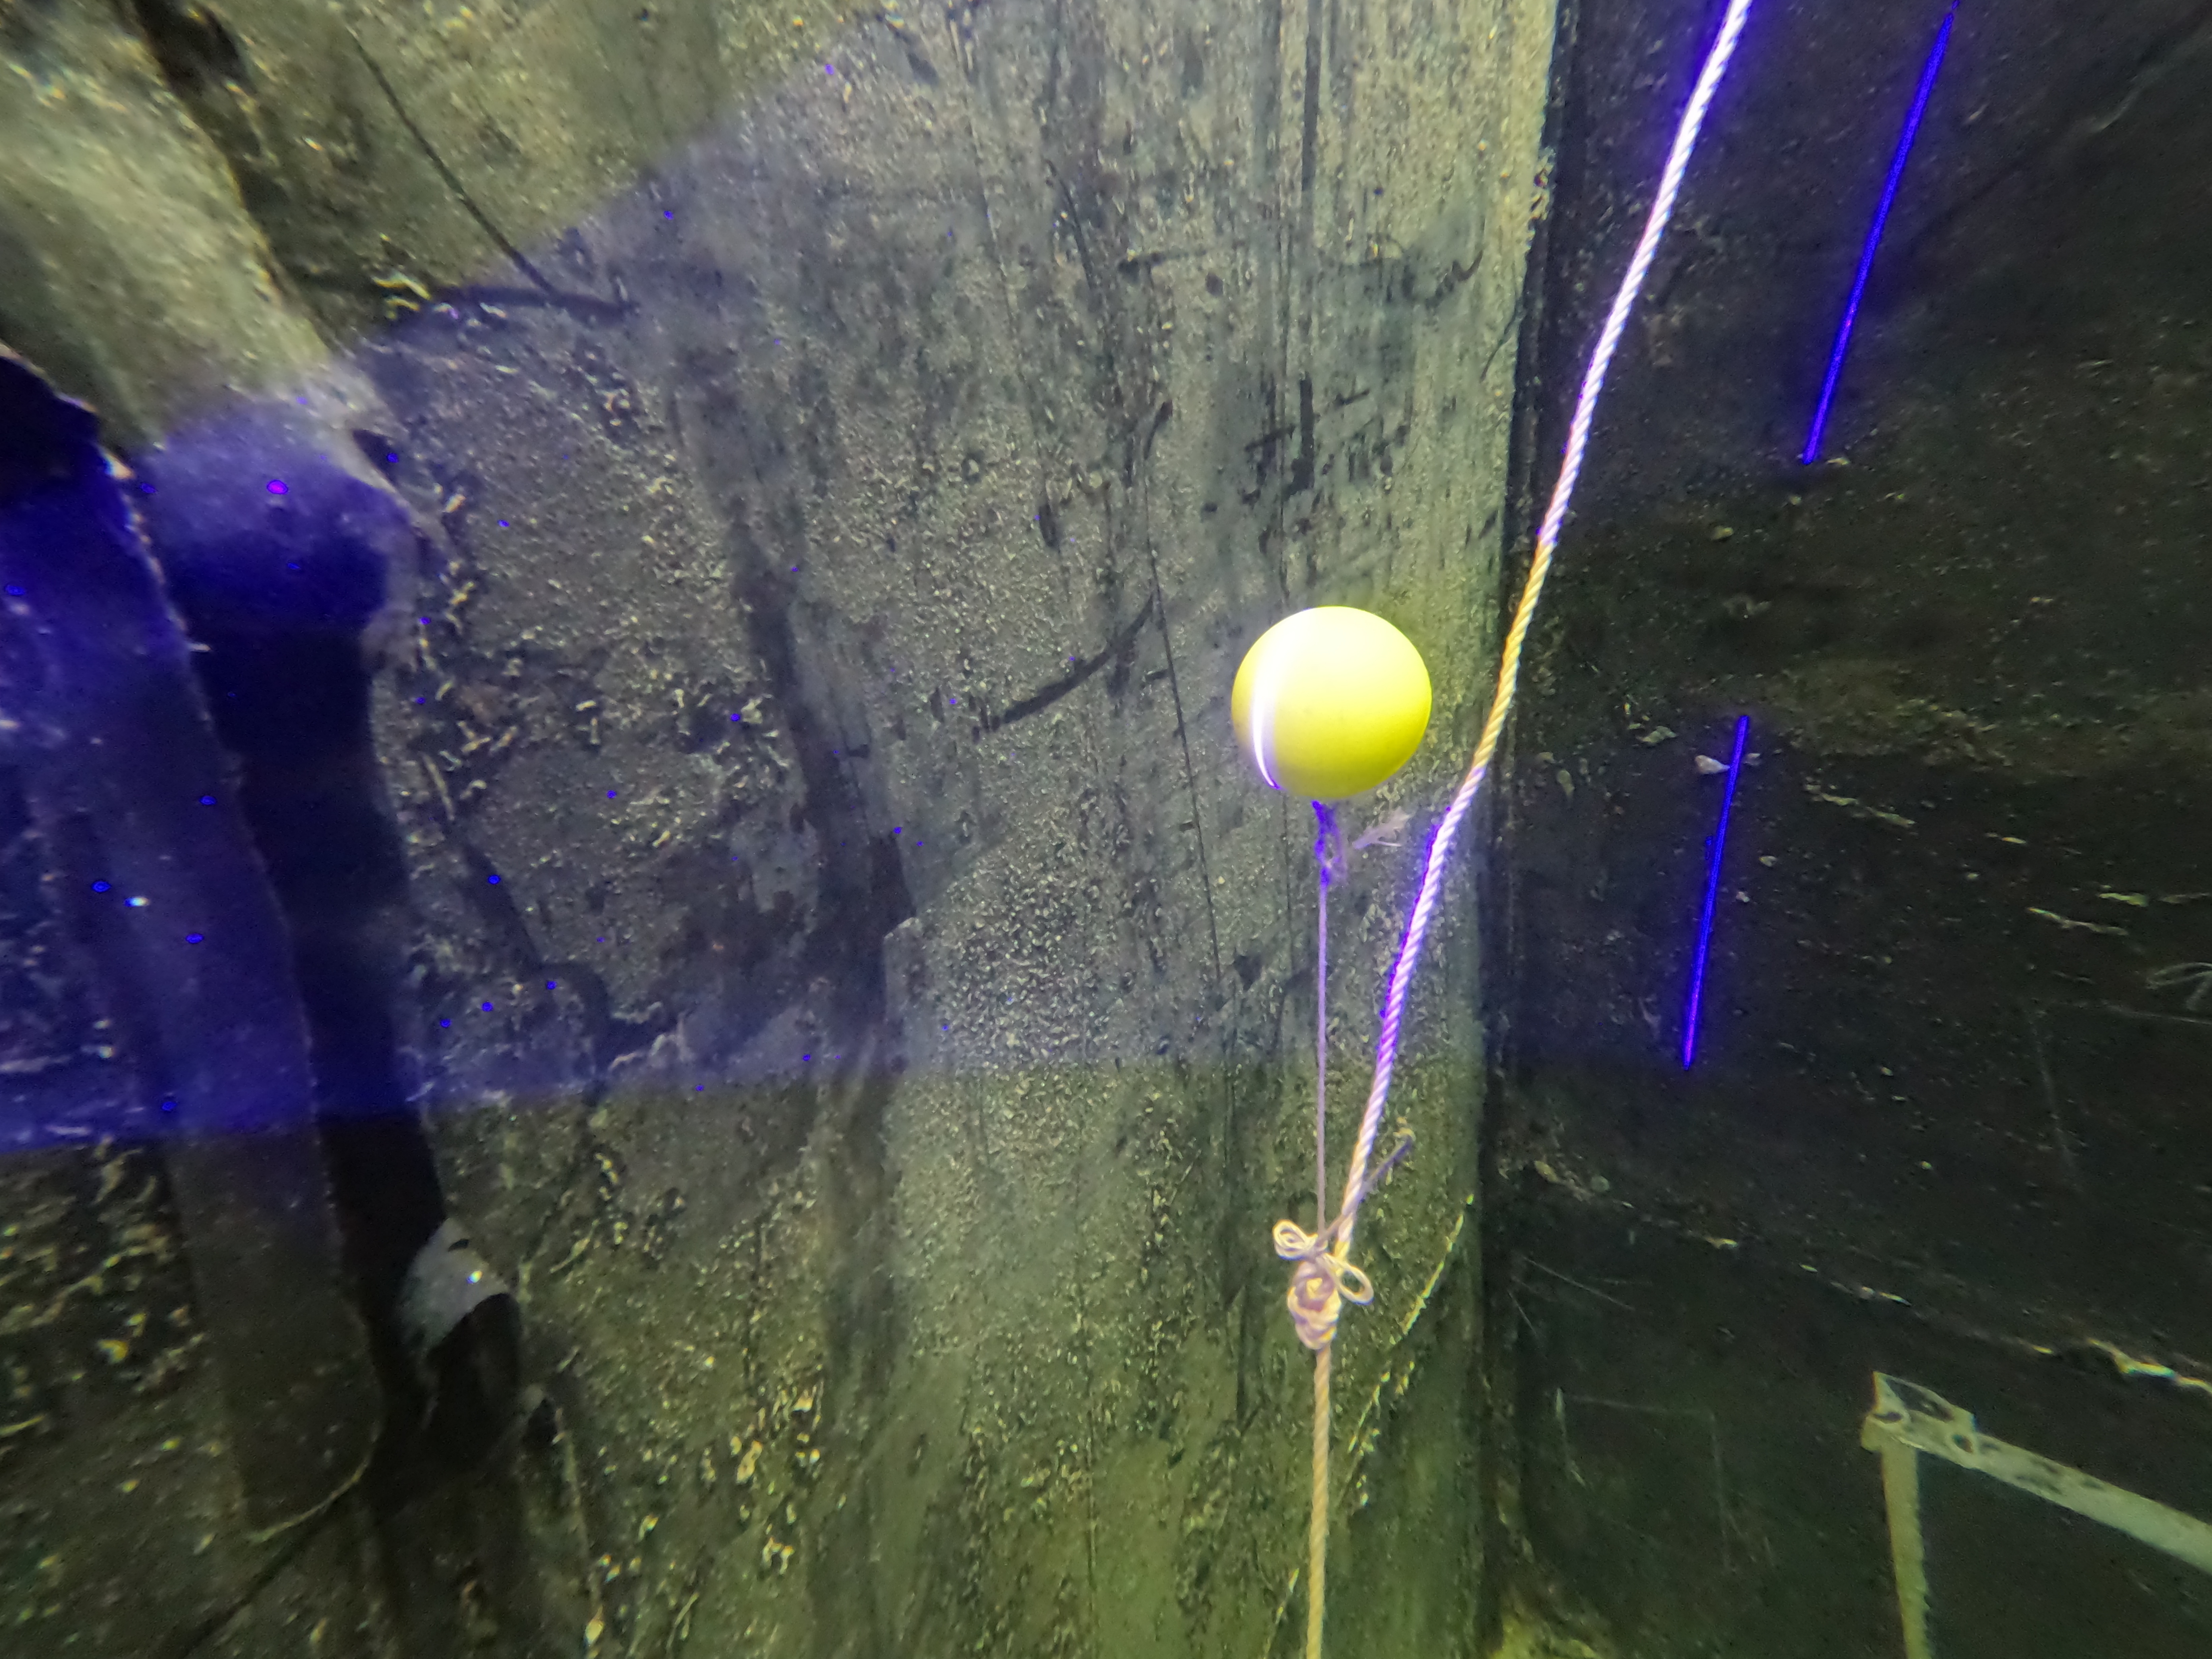

Supplement: Supplementary file 3445 [file G0034149.pdf › 8/G0034149.pdf]

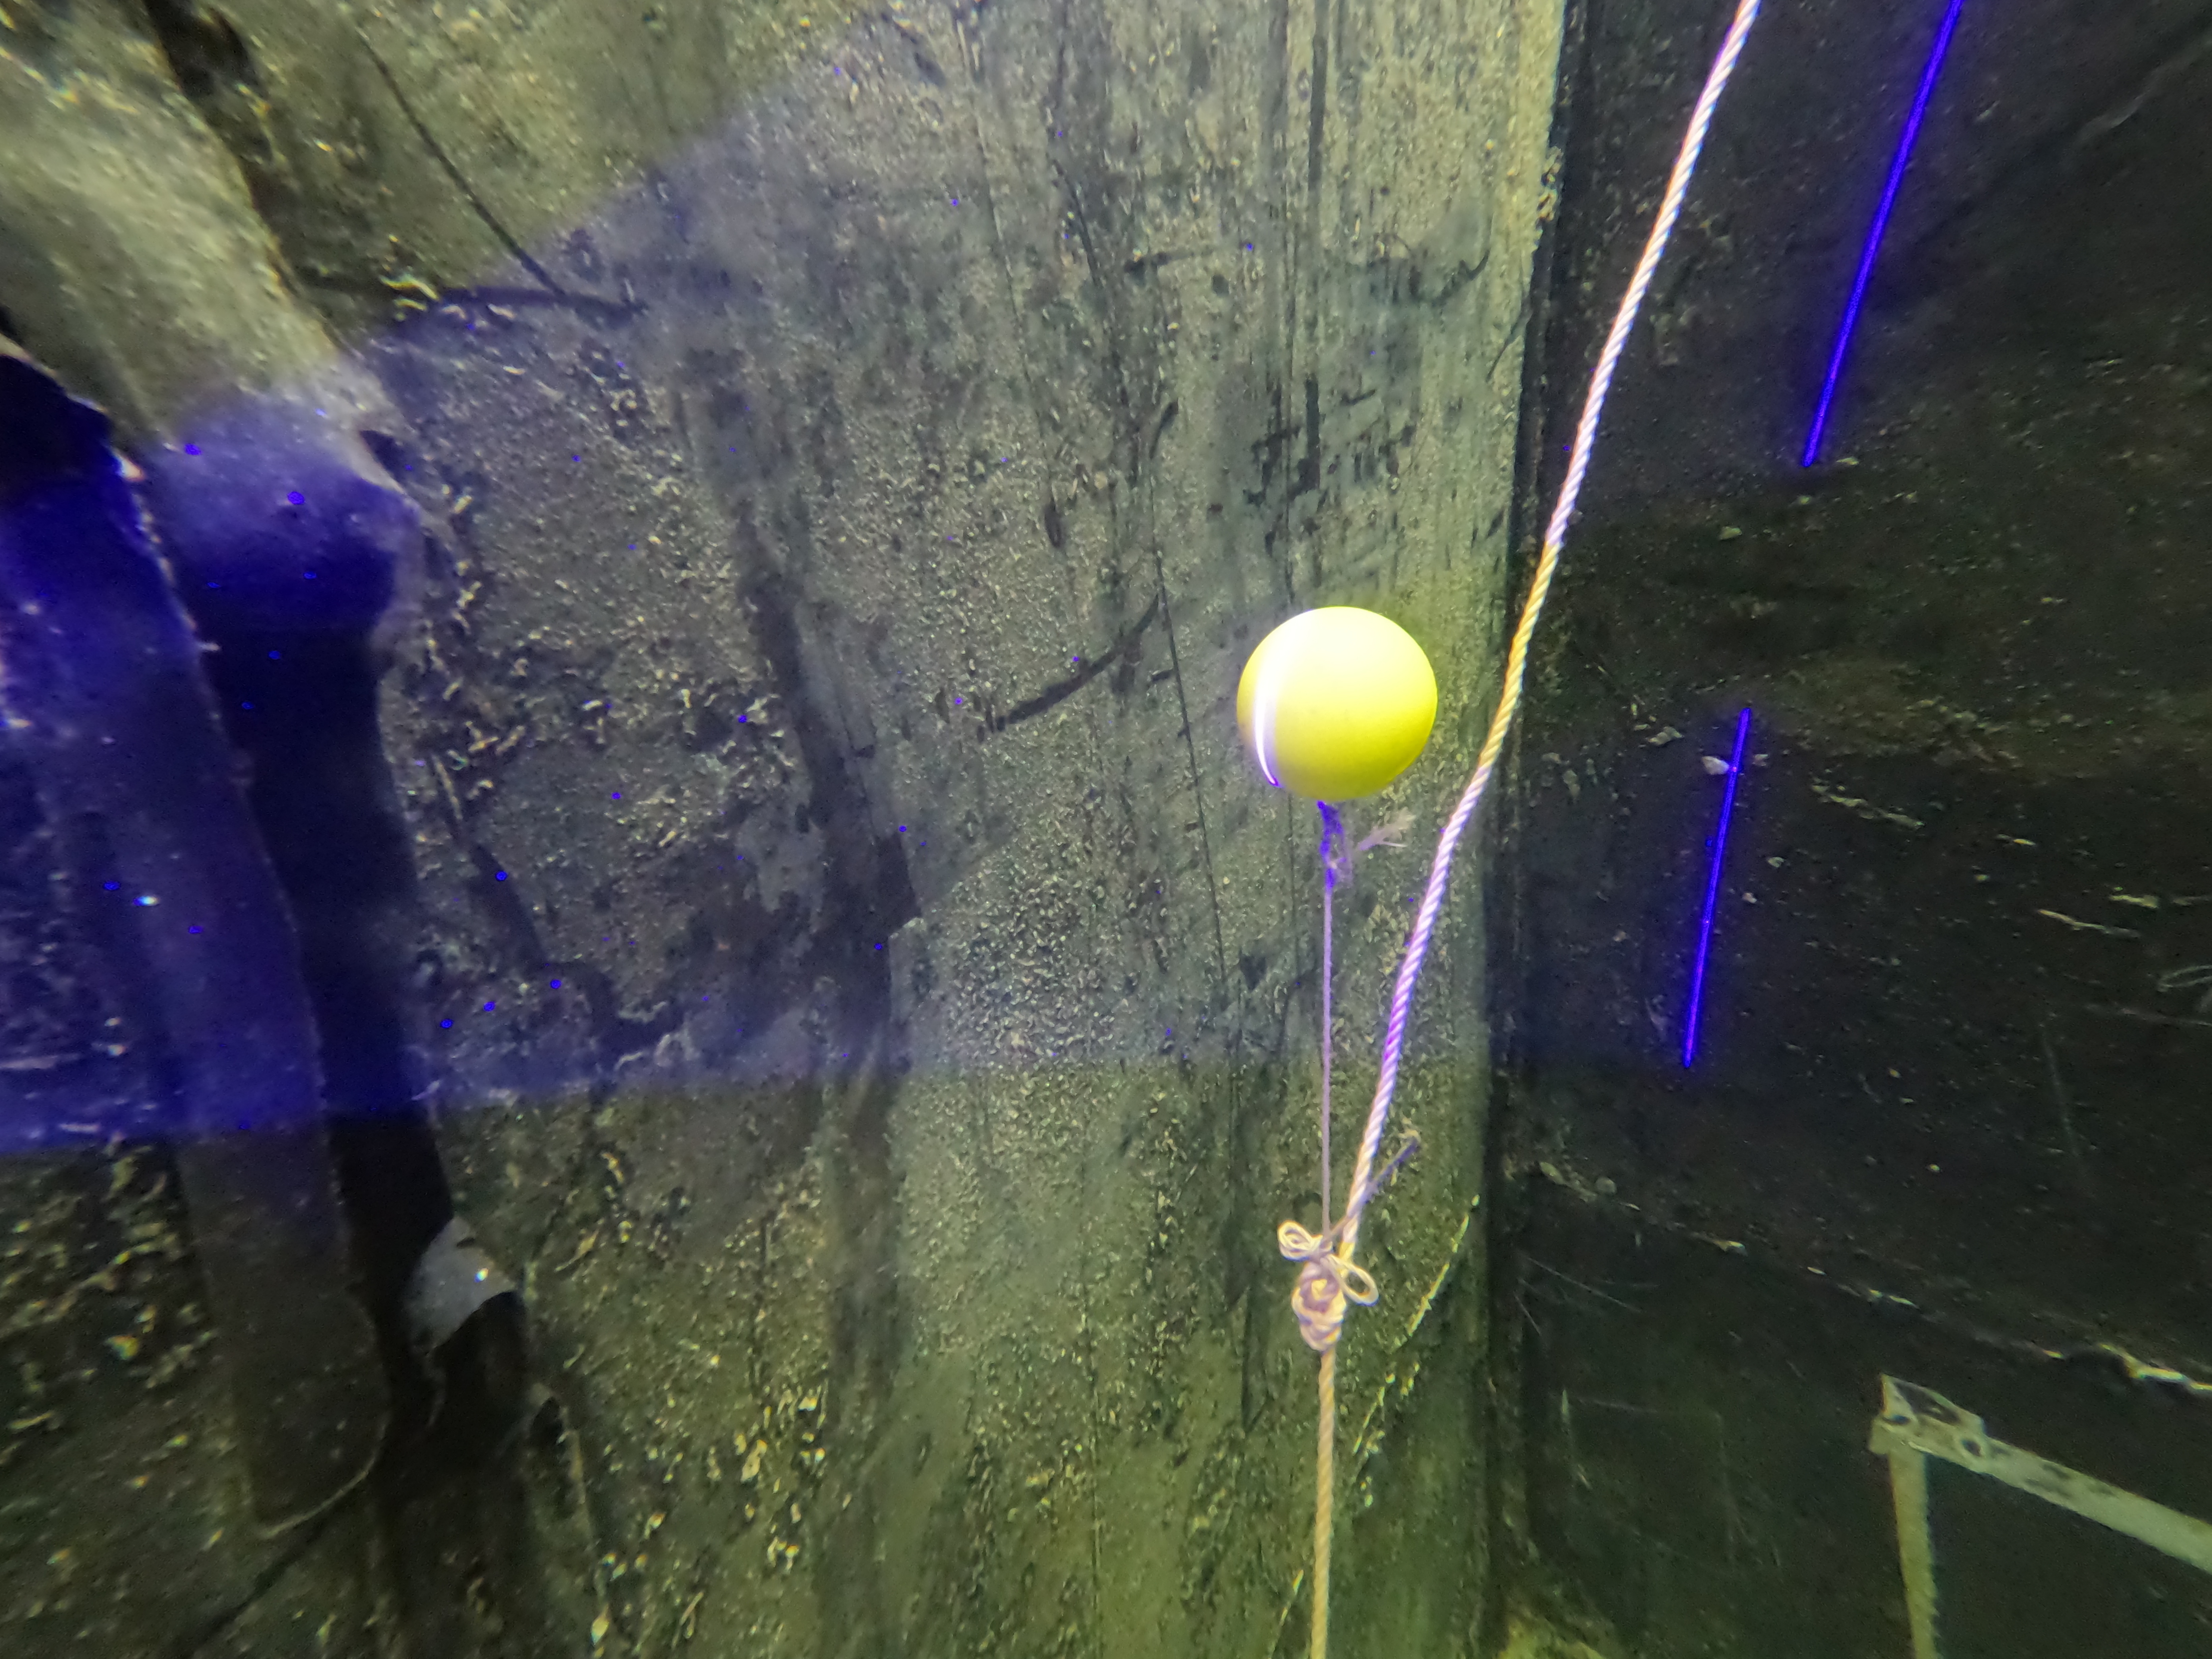

Supplement: Supplementary file 3446 [file G0034150.pdf › 8/G0034150.pdf]

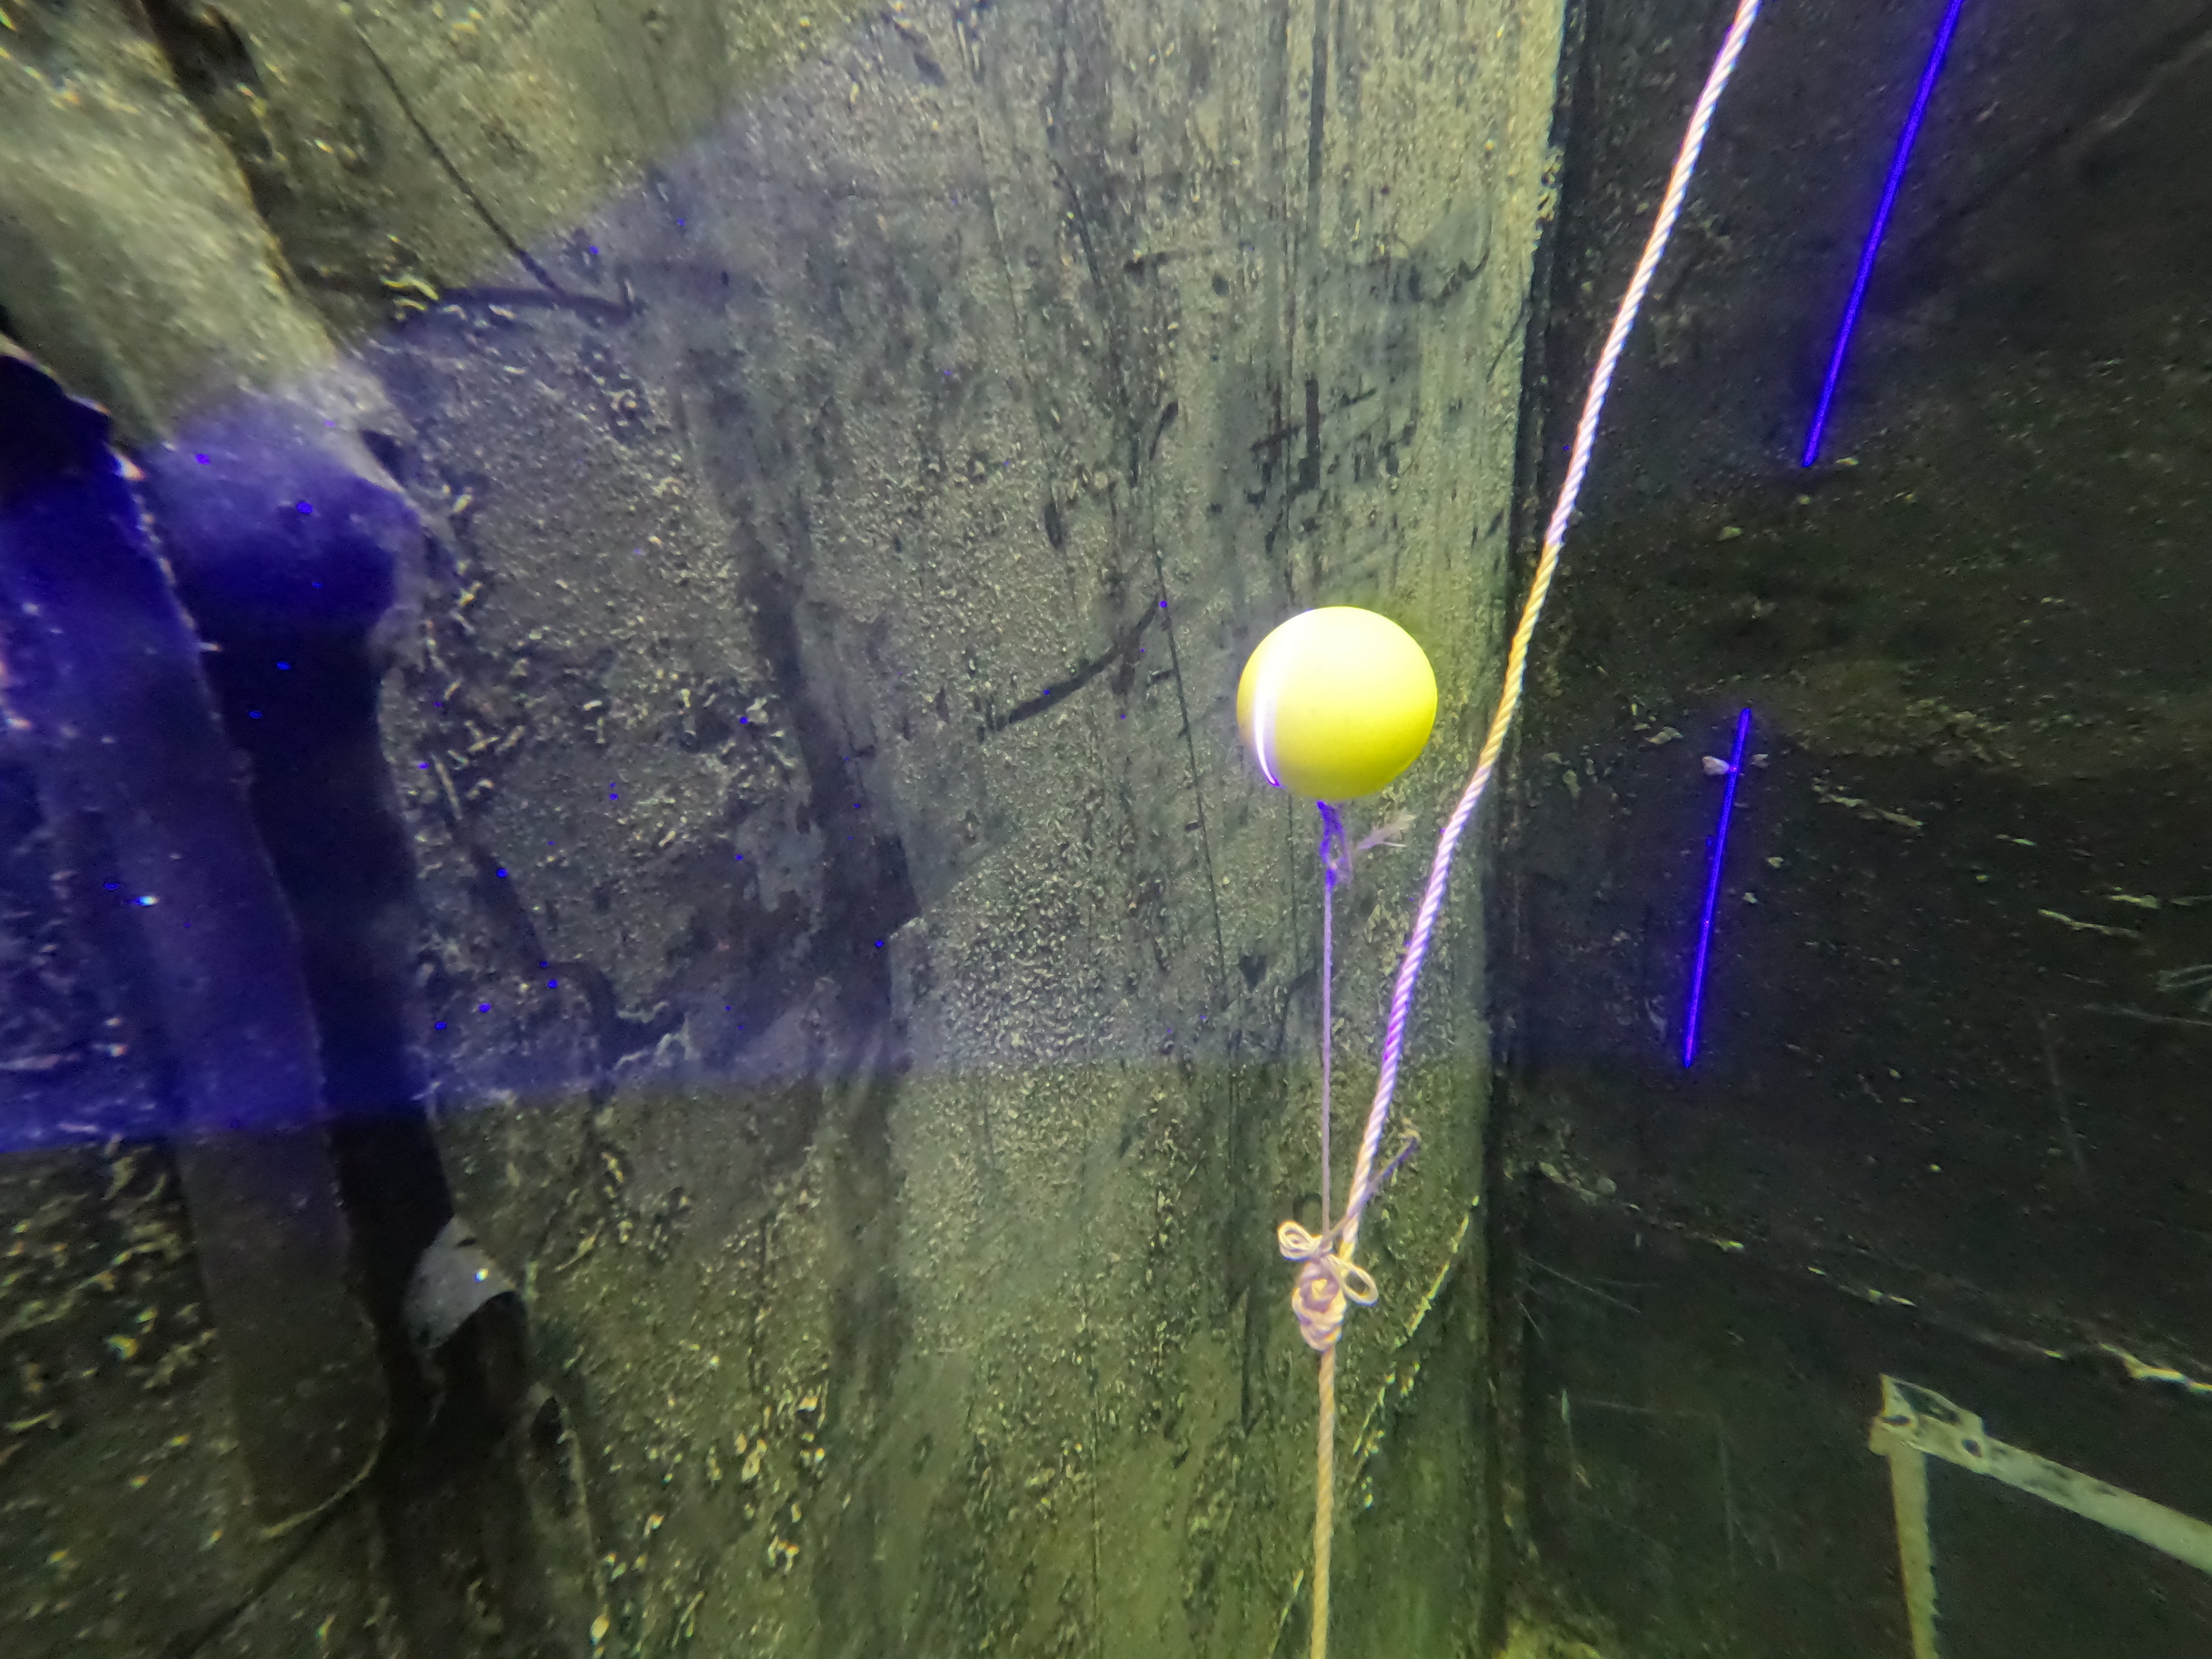

Supplement: Supplementary file 3447 [file G0034151.pdf › 8/G0034151.pdf]

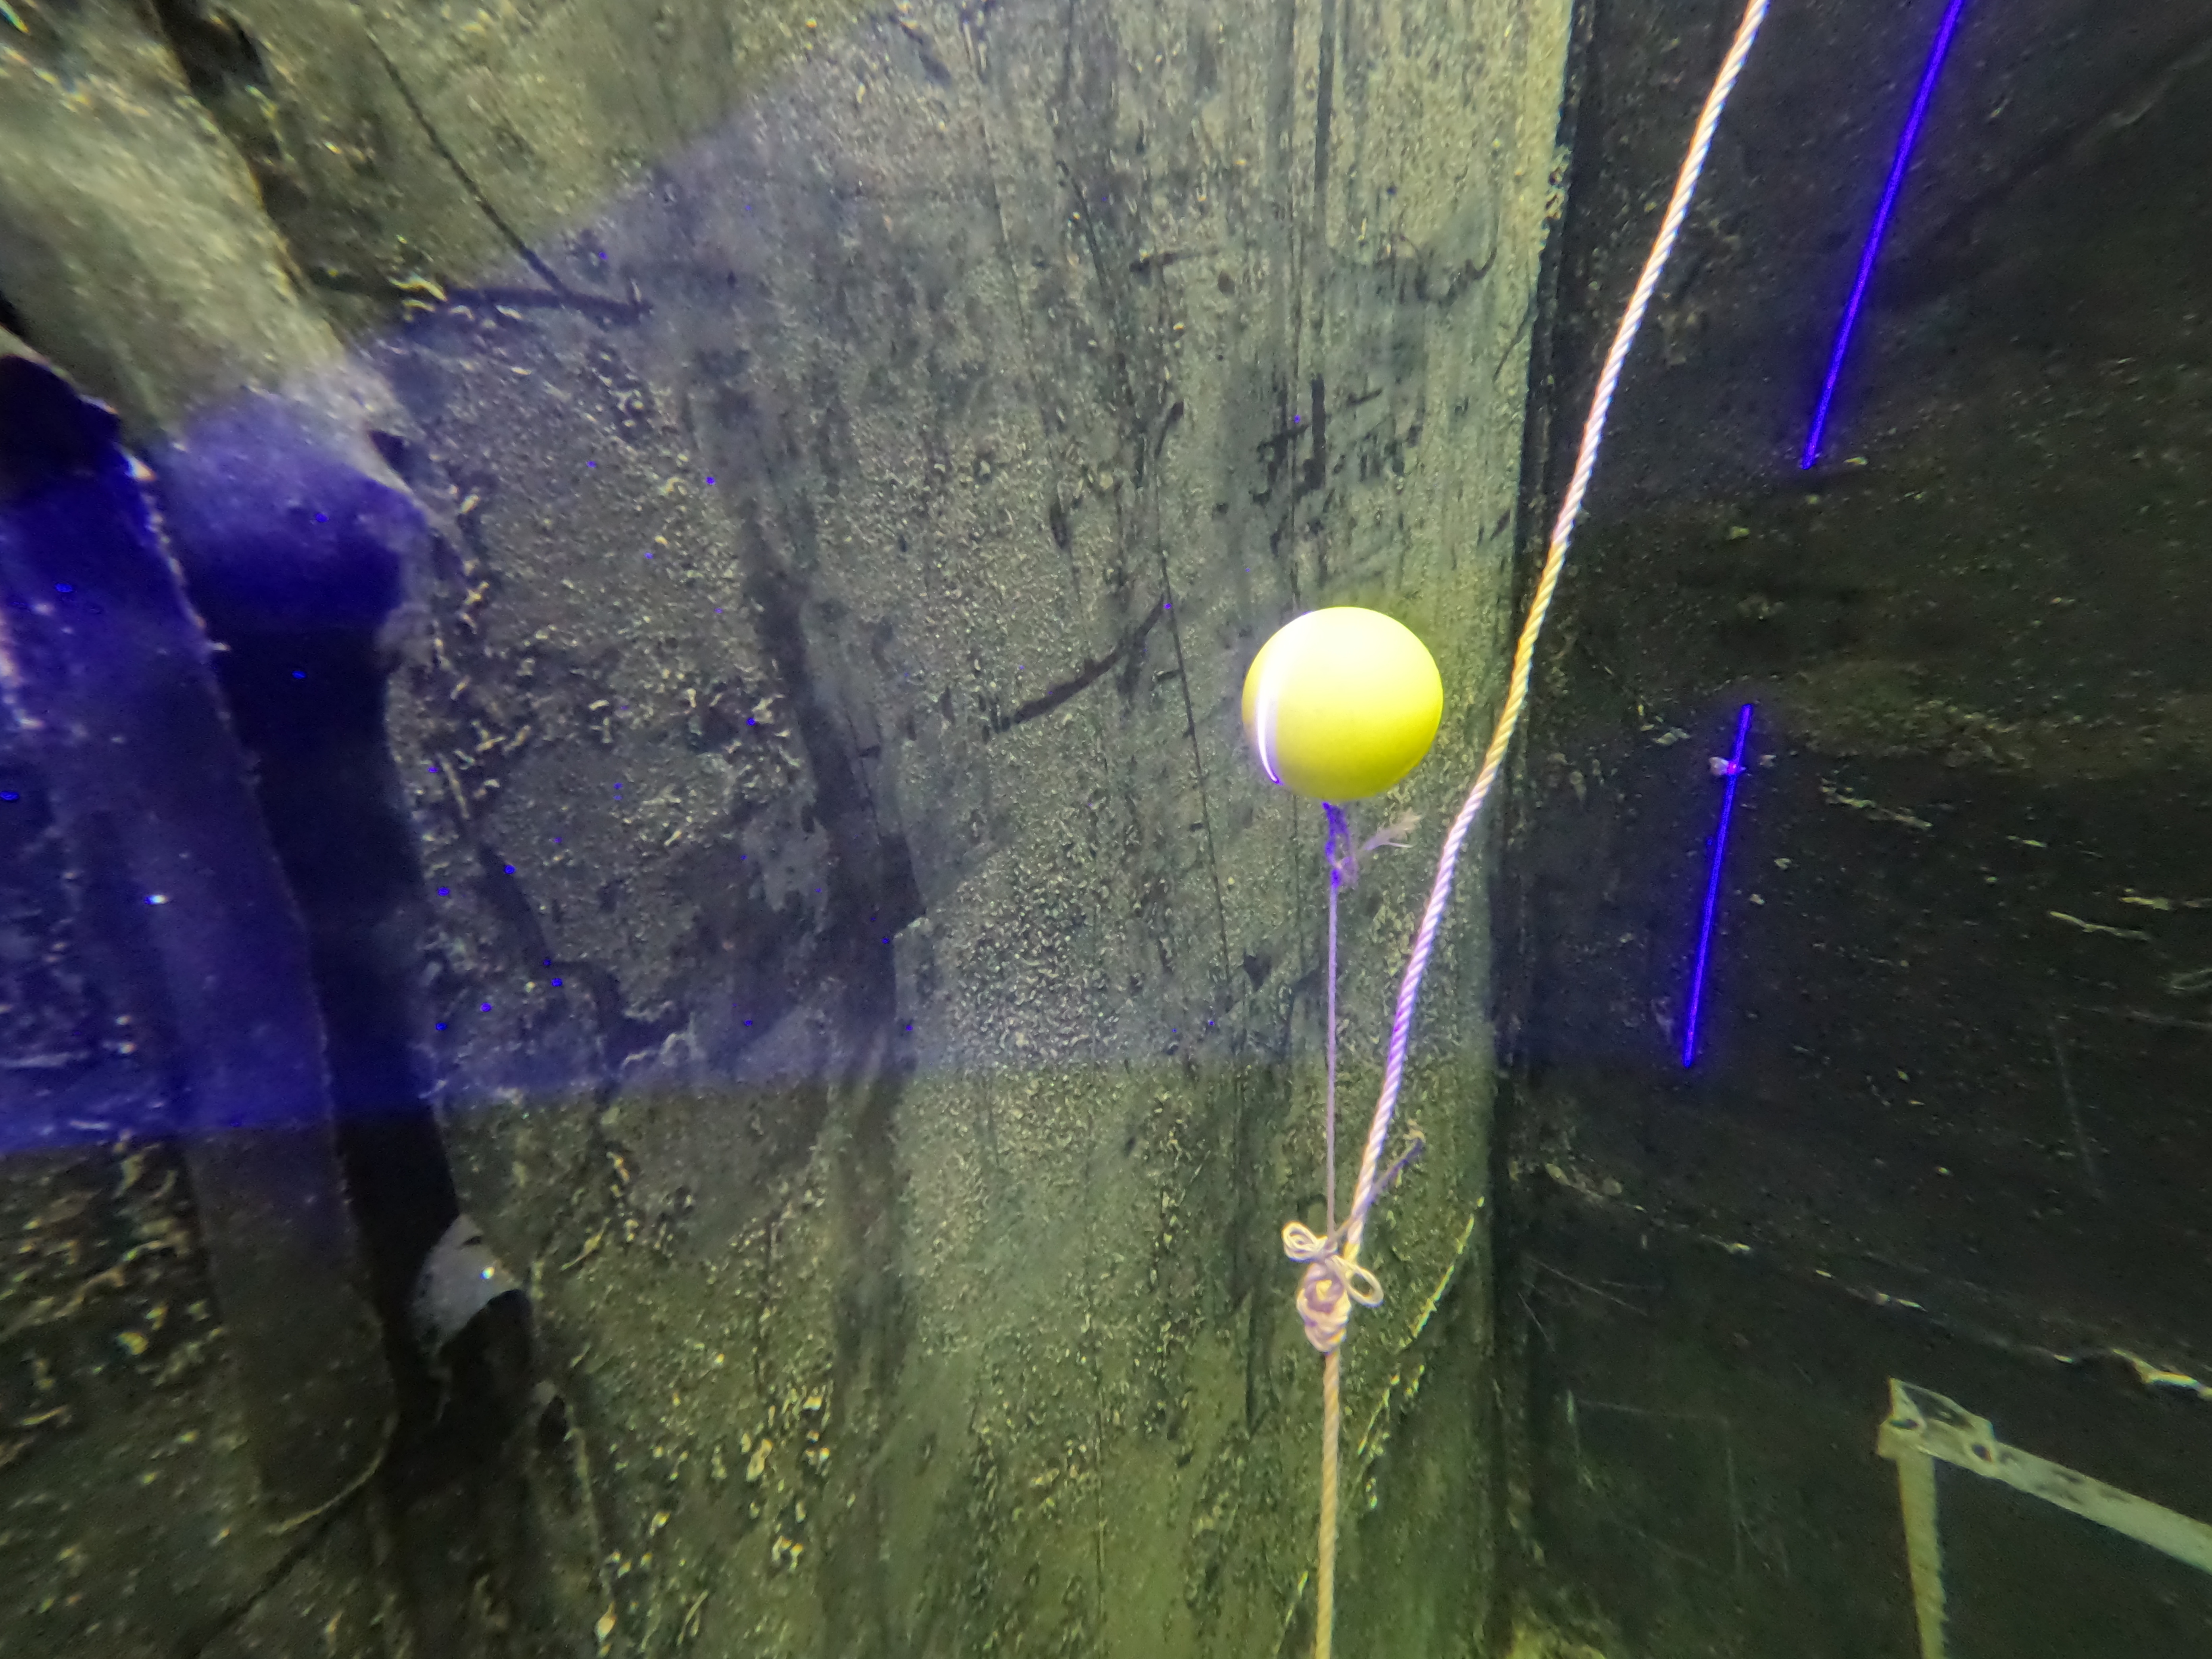

Supplement: Supplementary file 3448 [file G0034152.pdf › 8/G0034152.pdf]

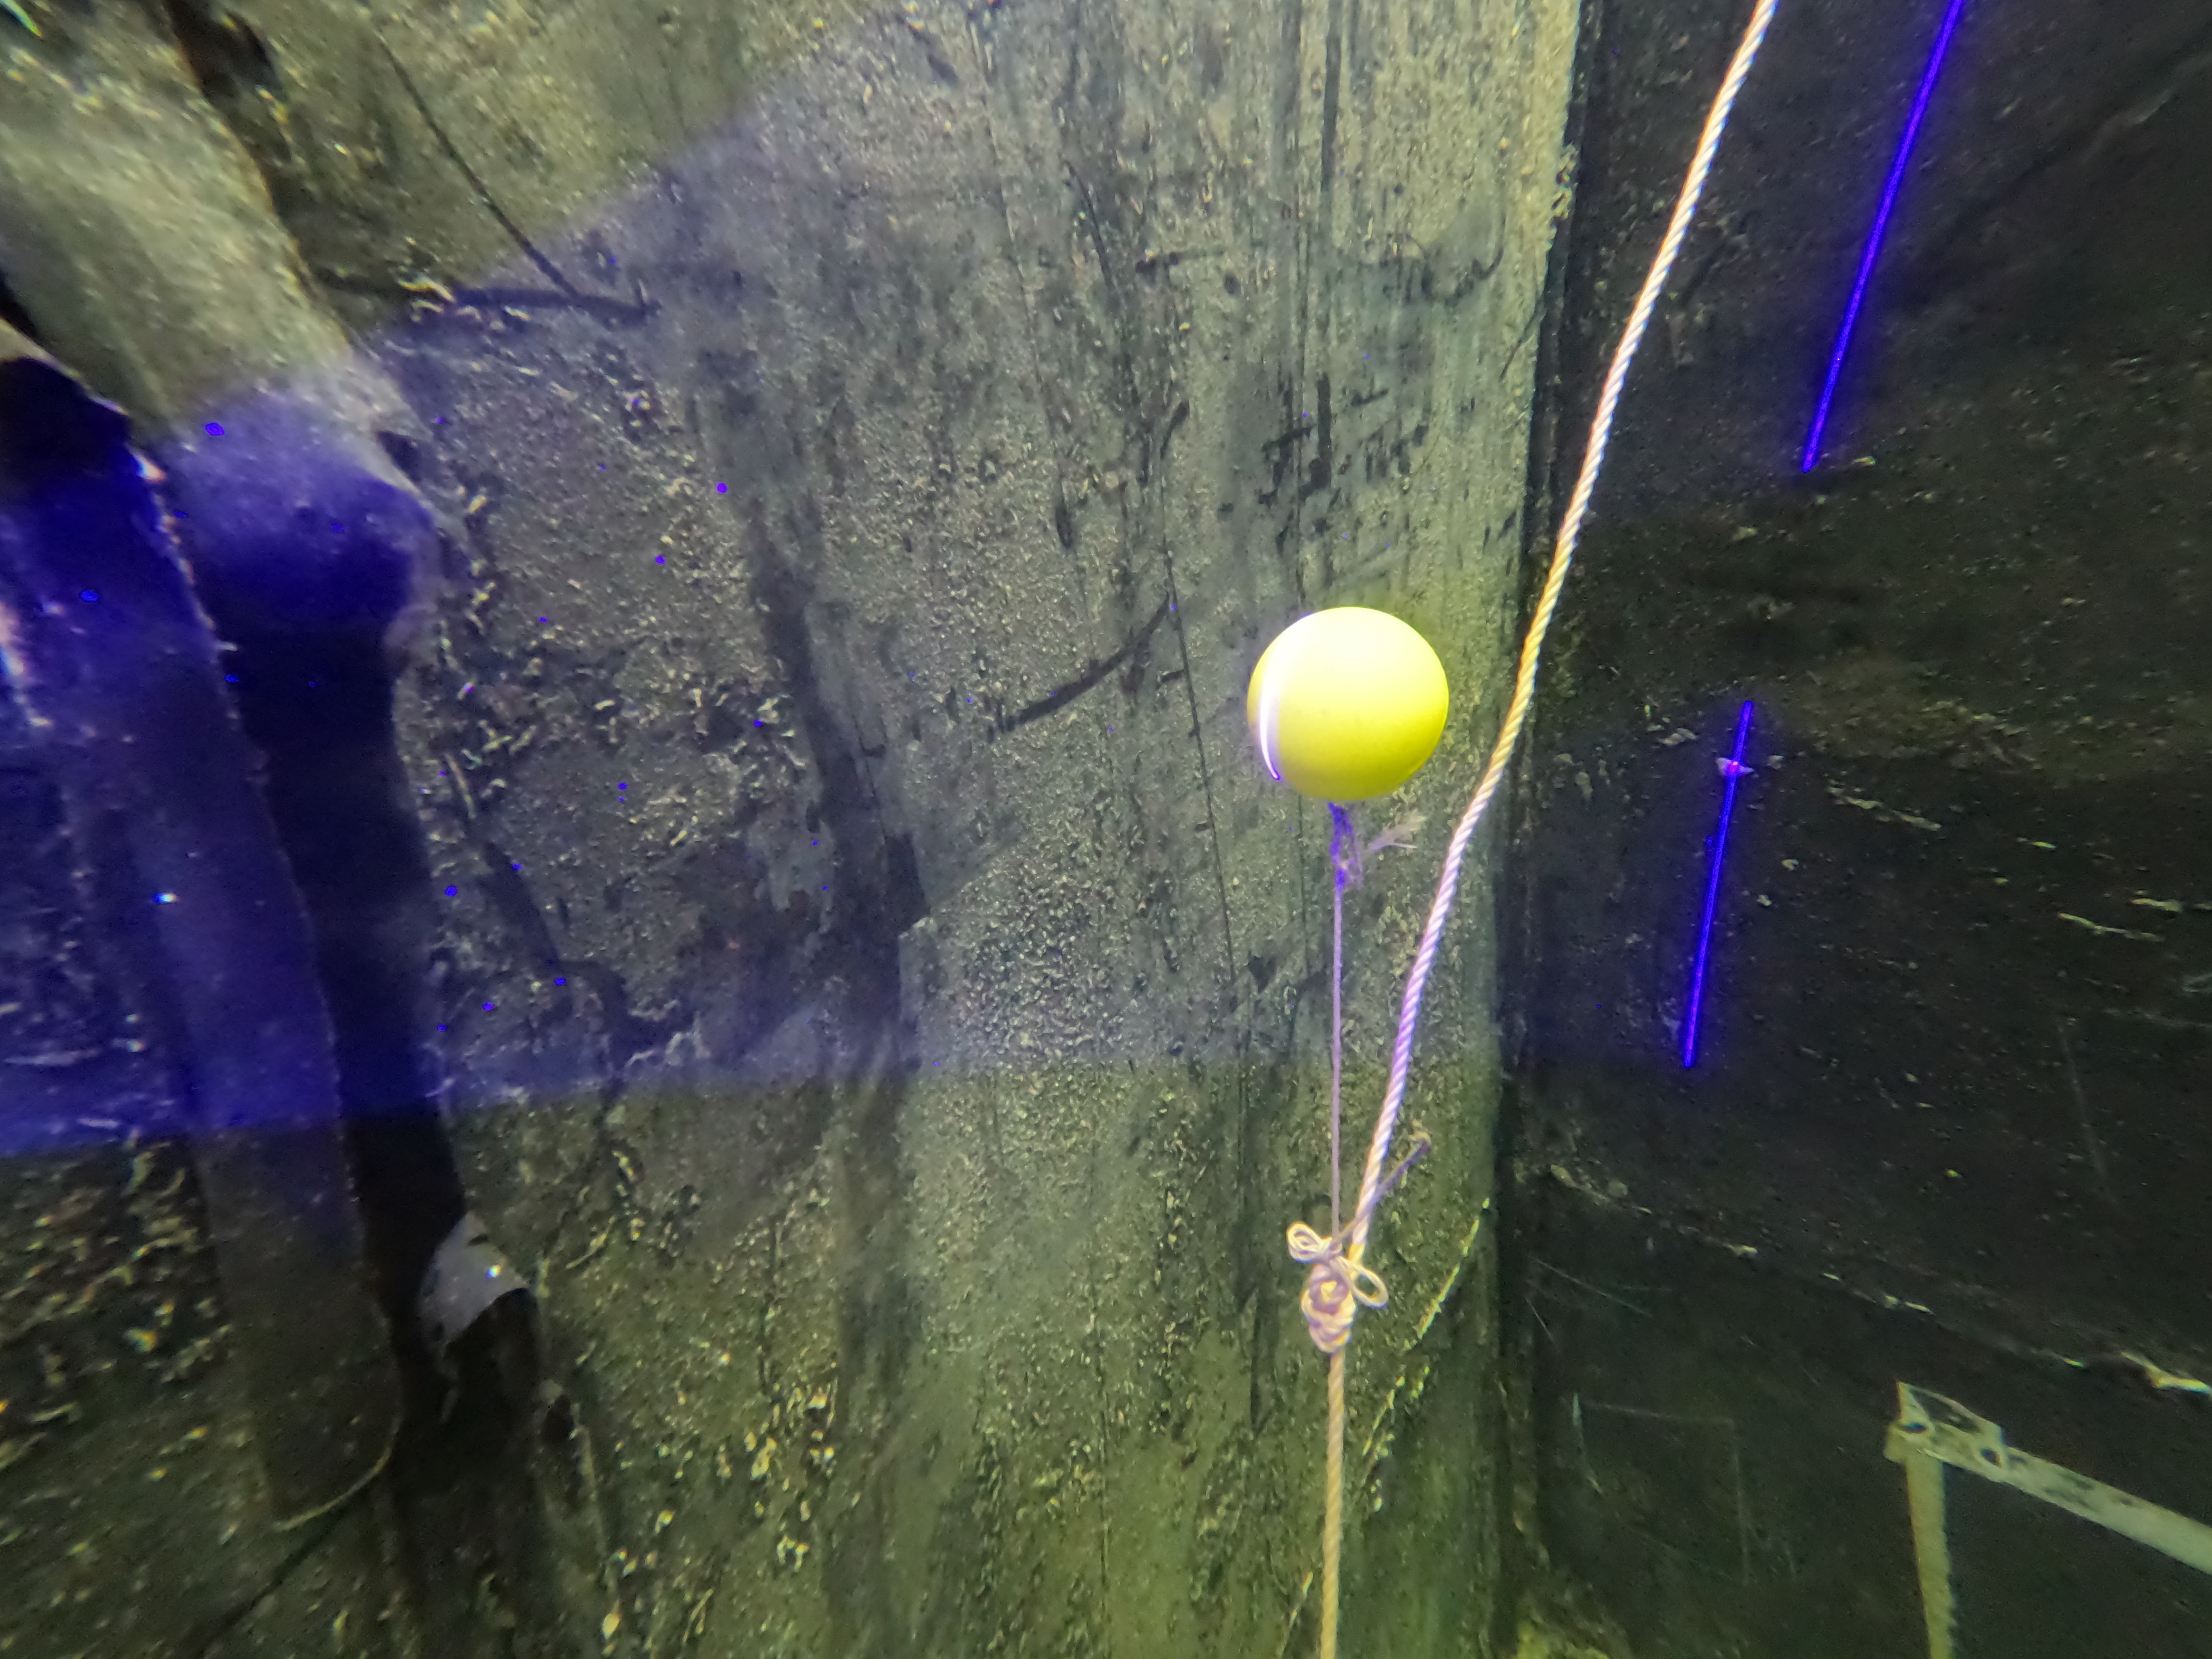

Supplement: Supplementary file 3449 [file G0034153.pdf › 8/G0034153.pdf]

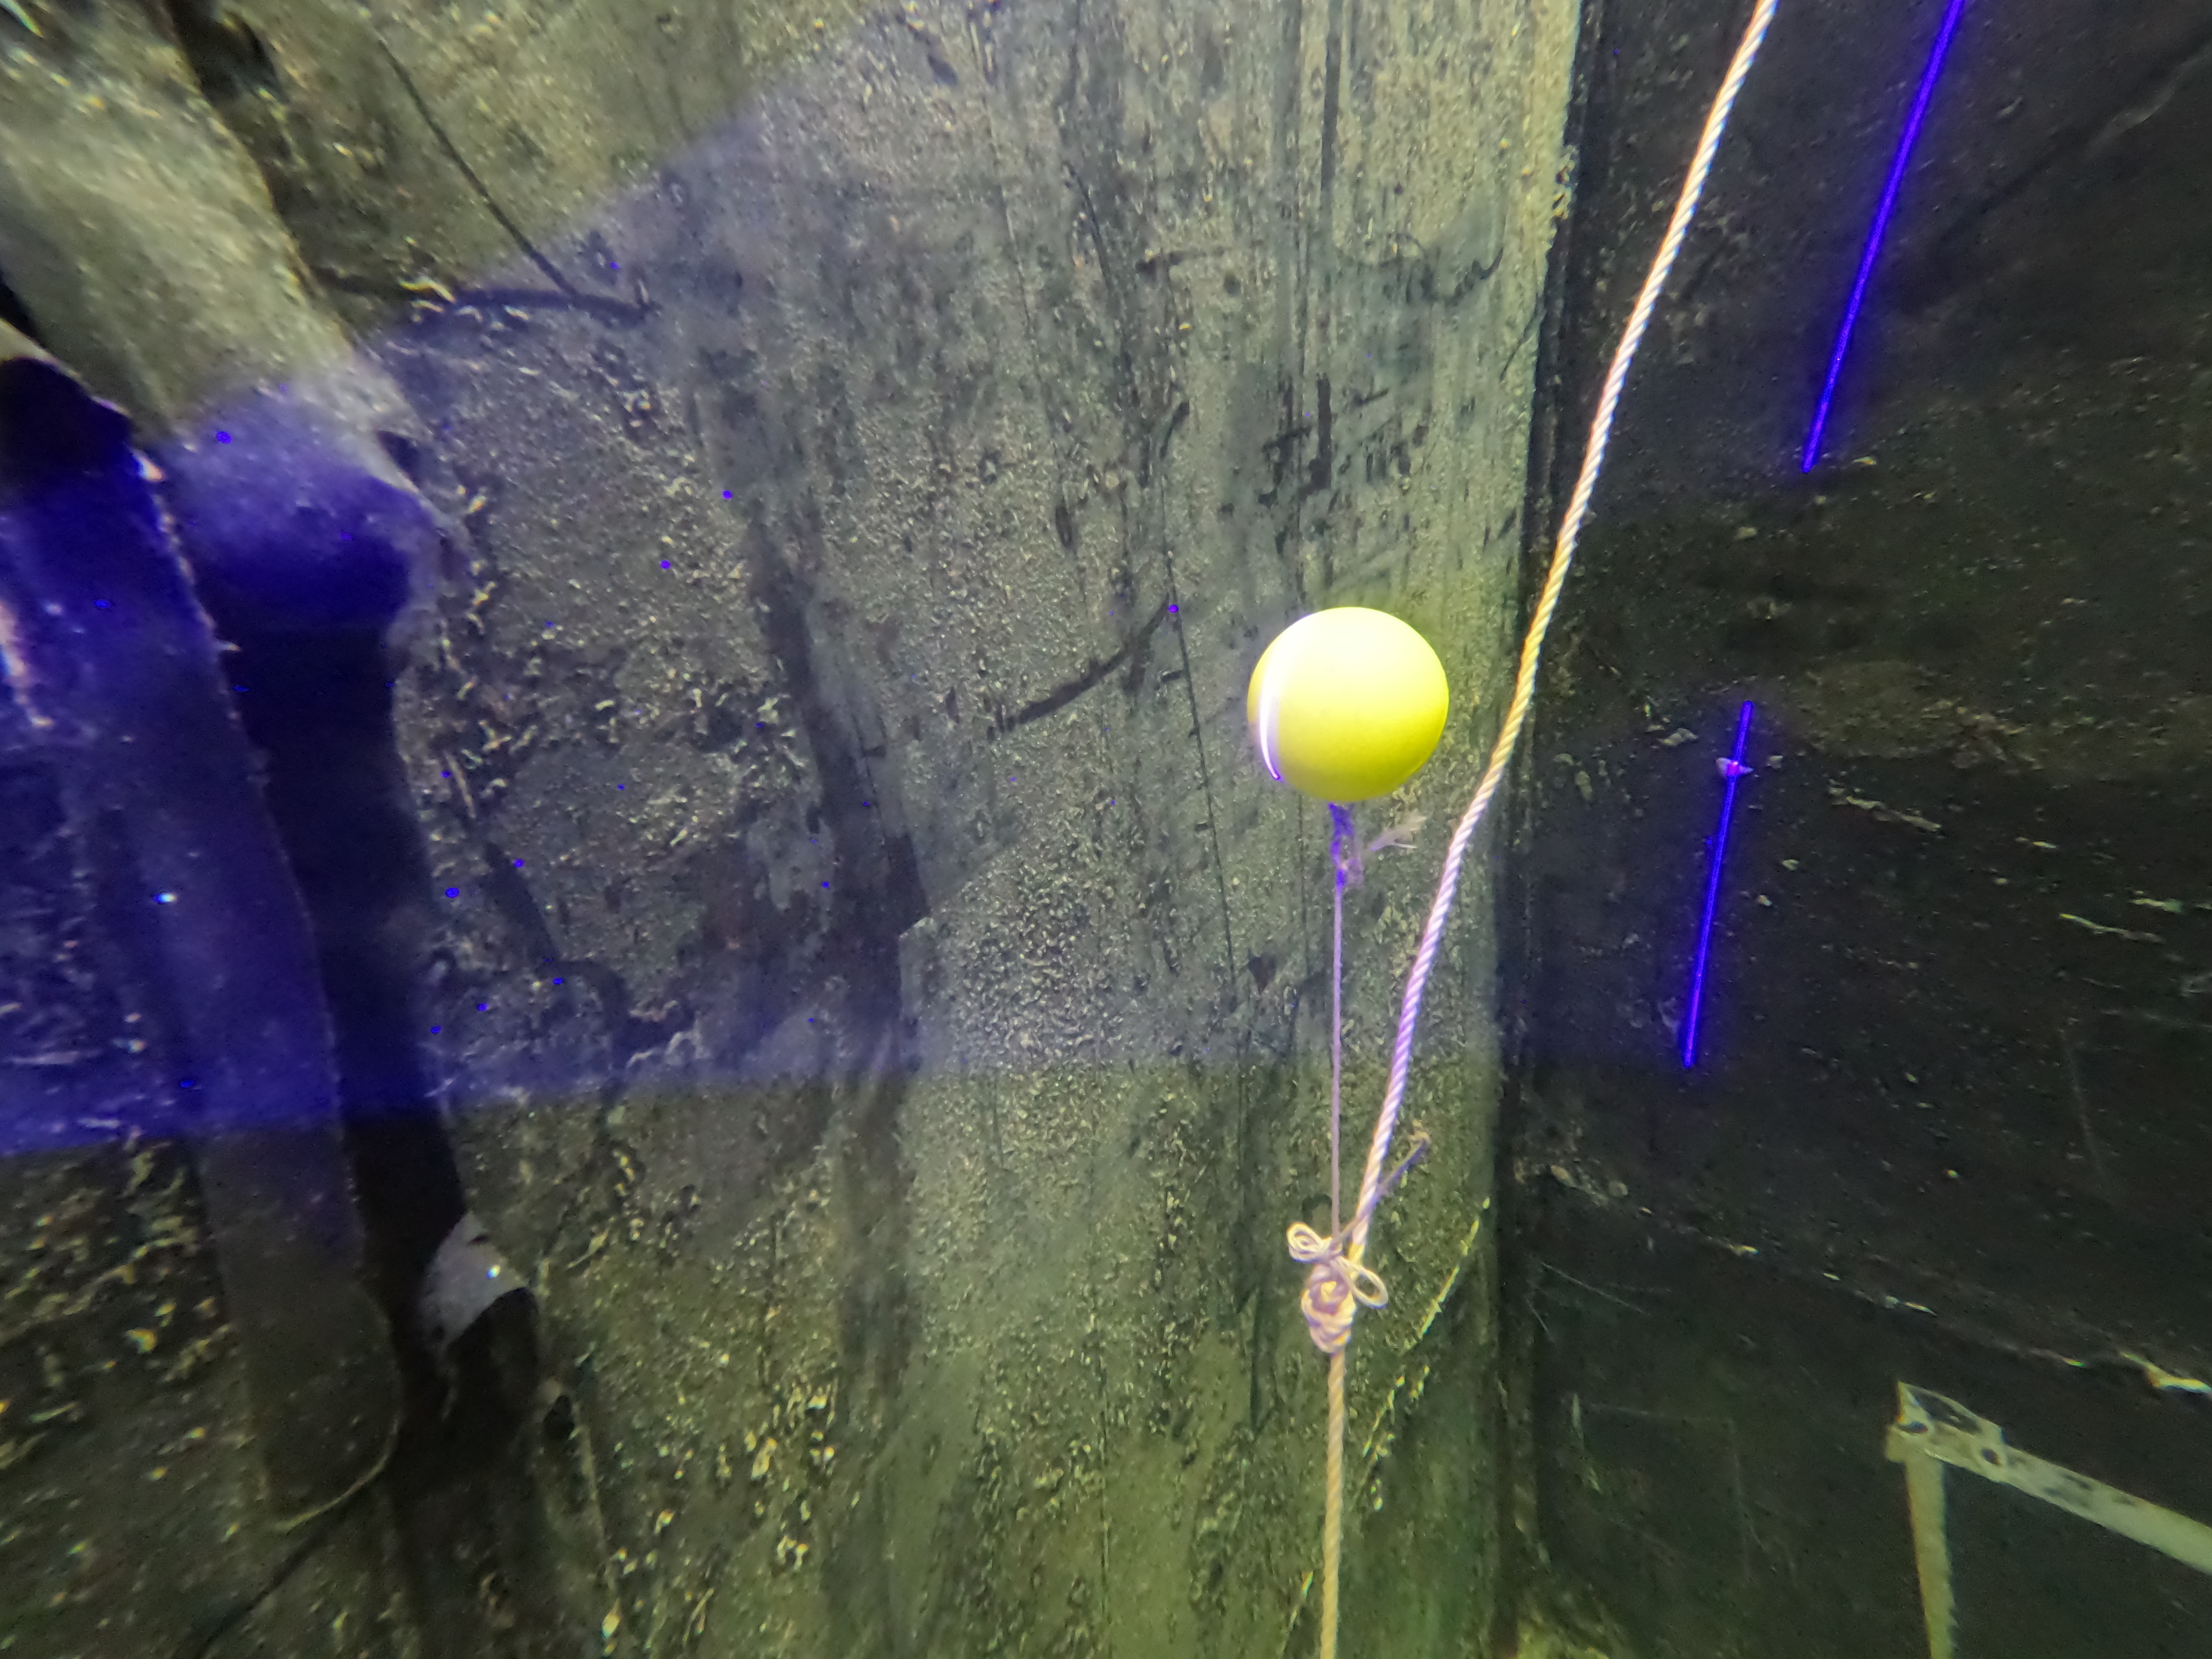

Supplement: Supplementary file 3450 [file G0034154.pdf › 8/G0034154.pdf]

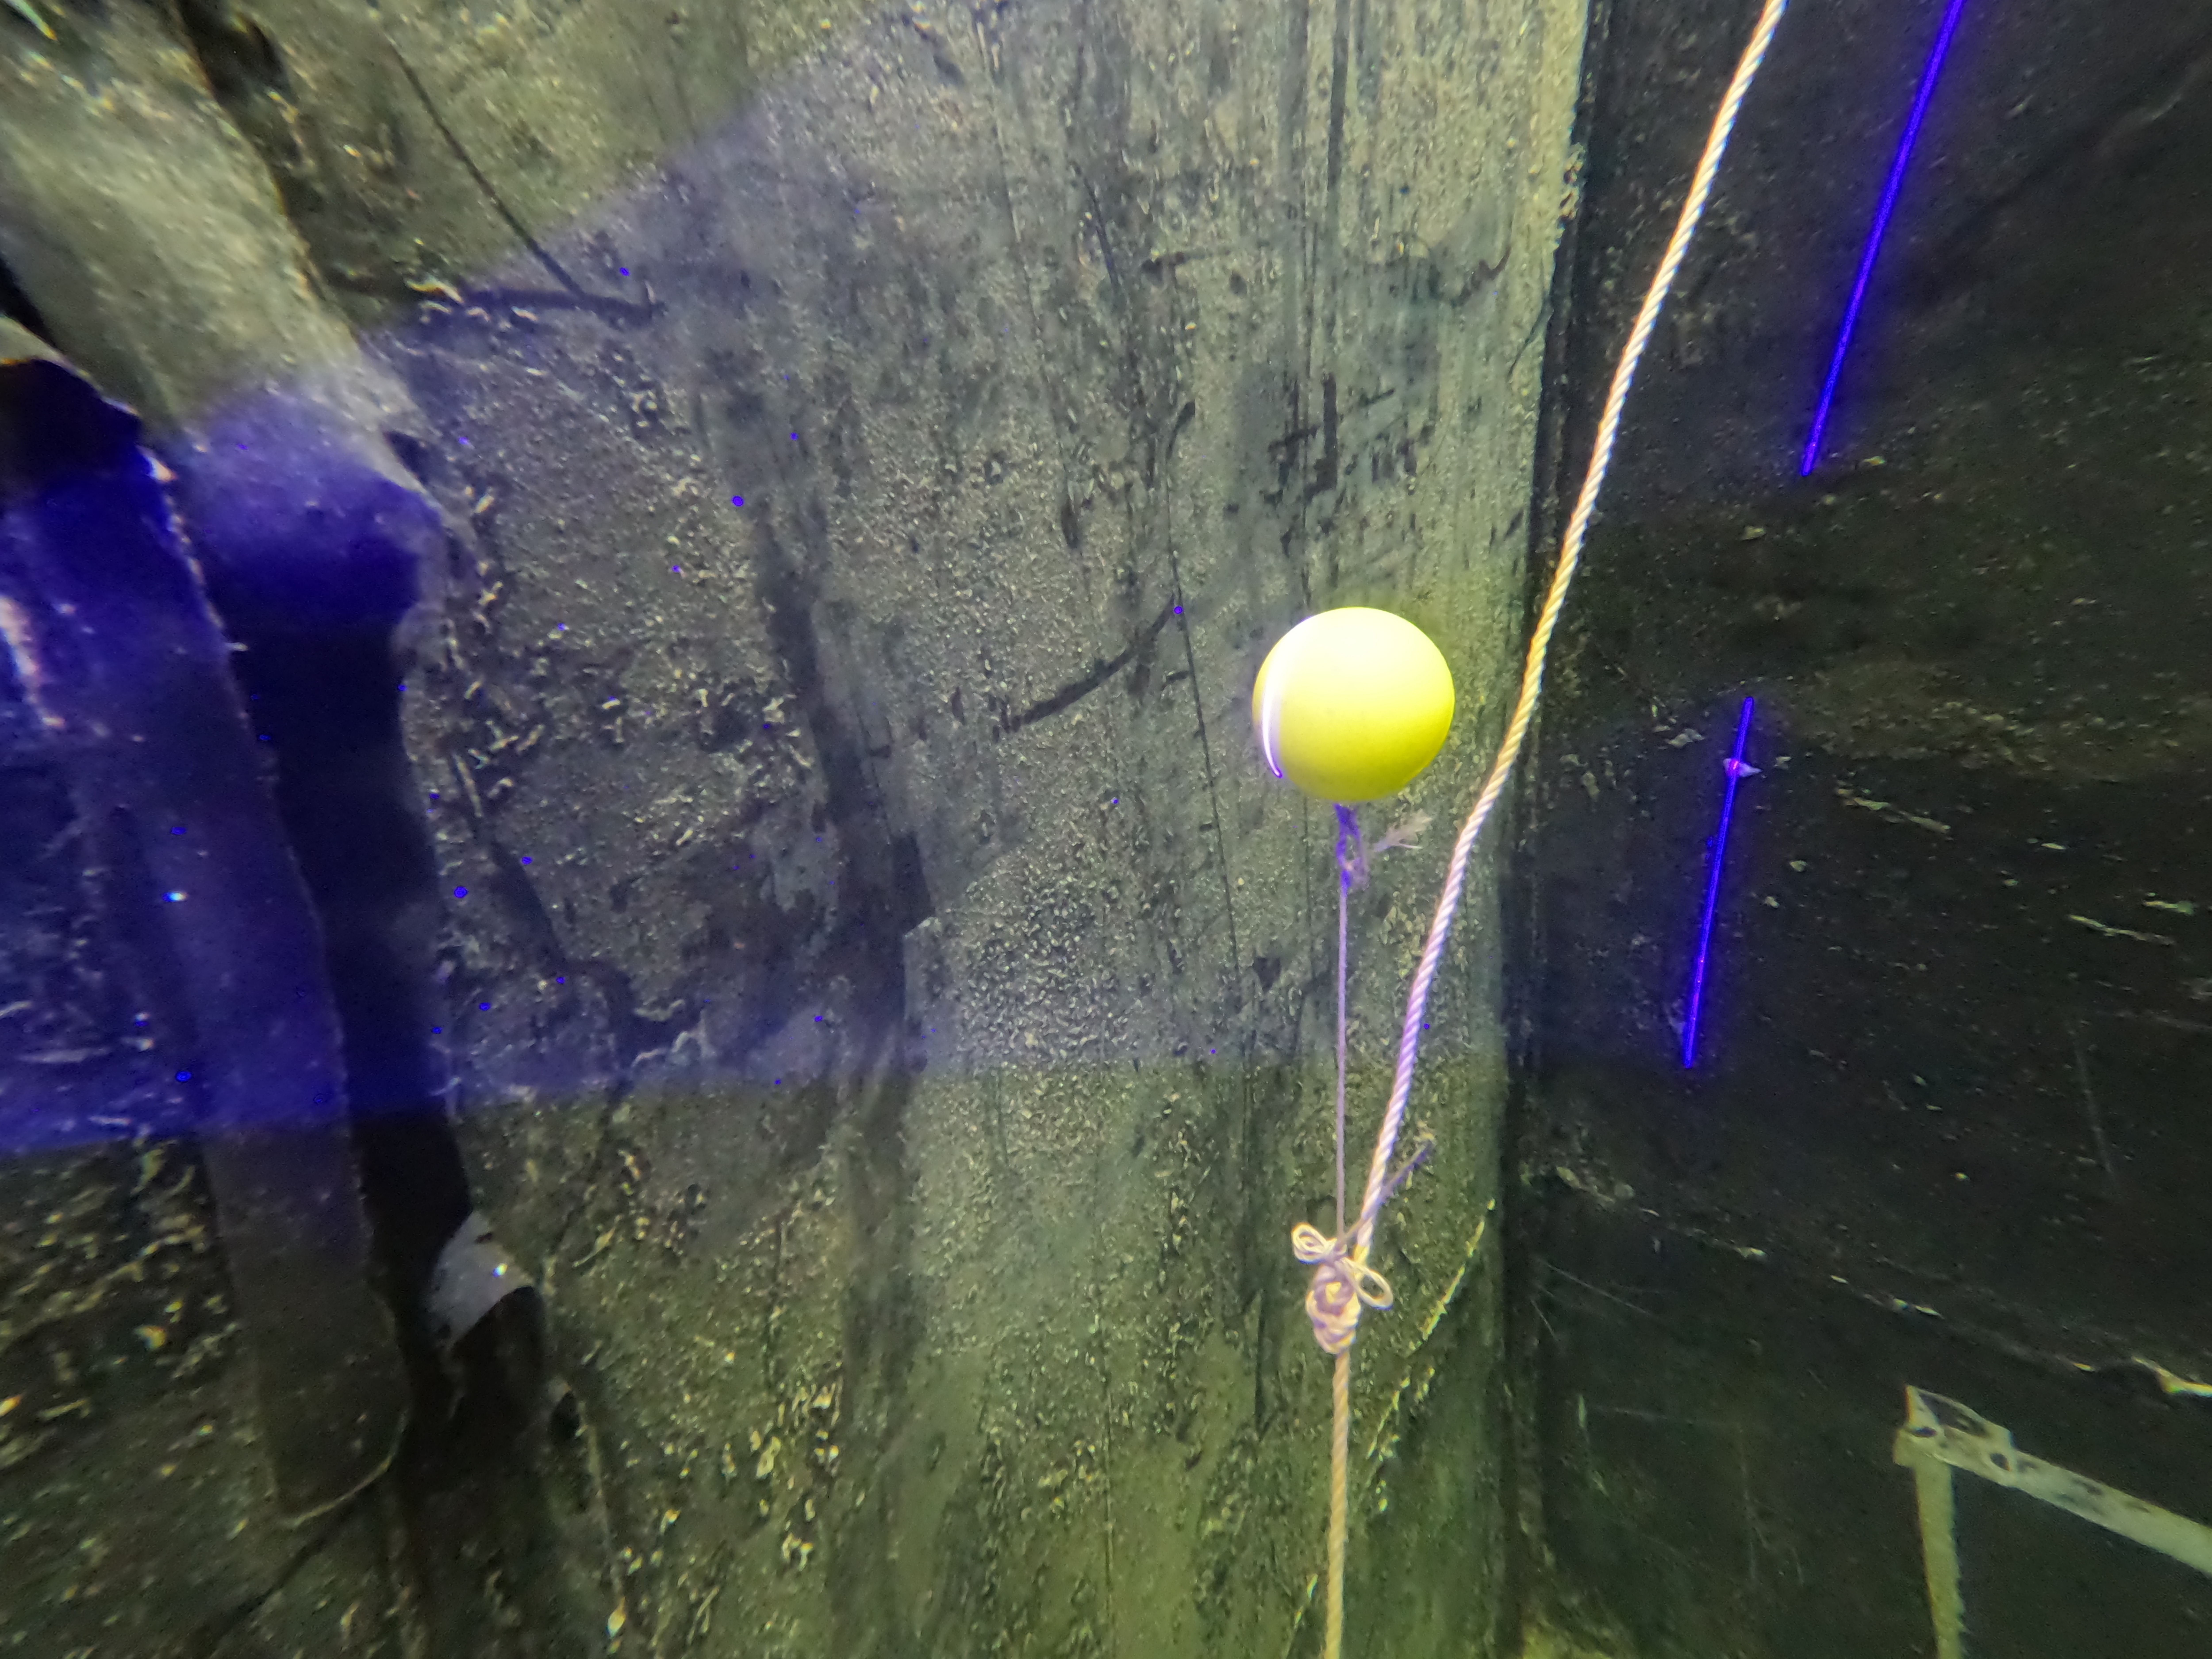

Supplement: Supplementary file 3451 [file G0034155.pdf › 8/G0034155.pdf]

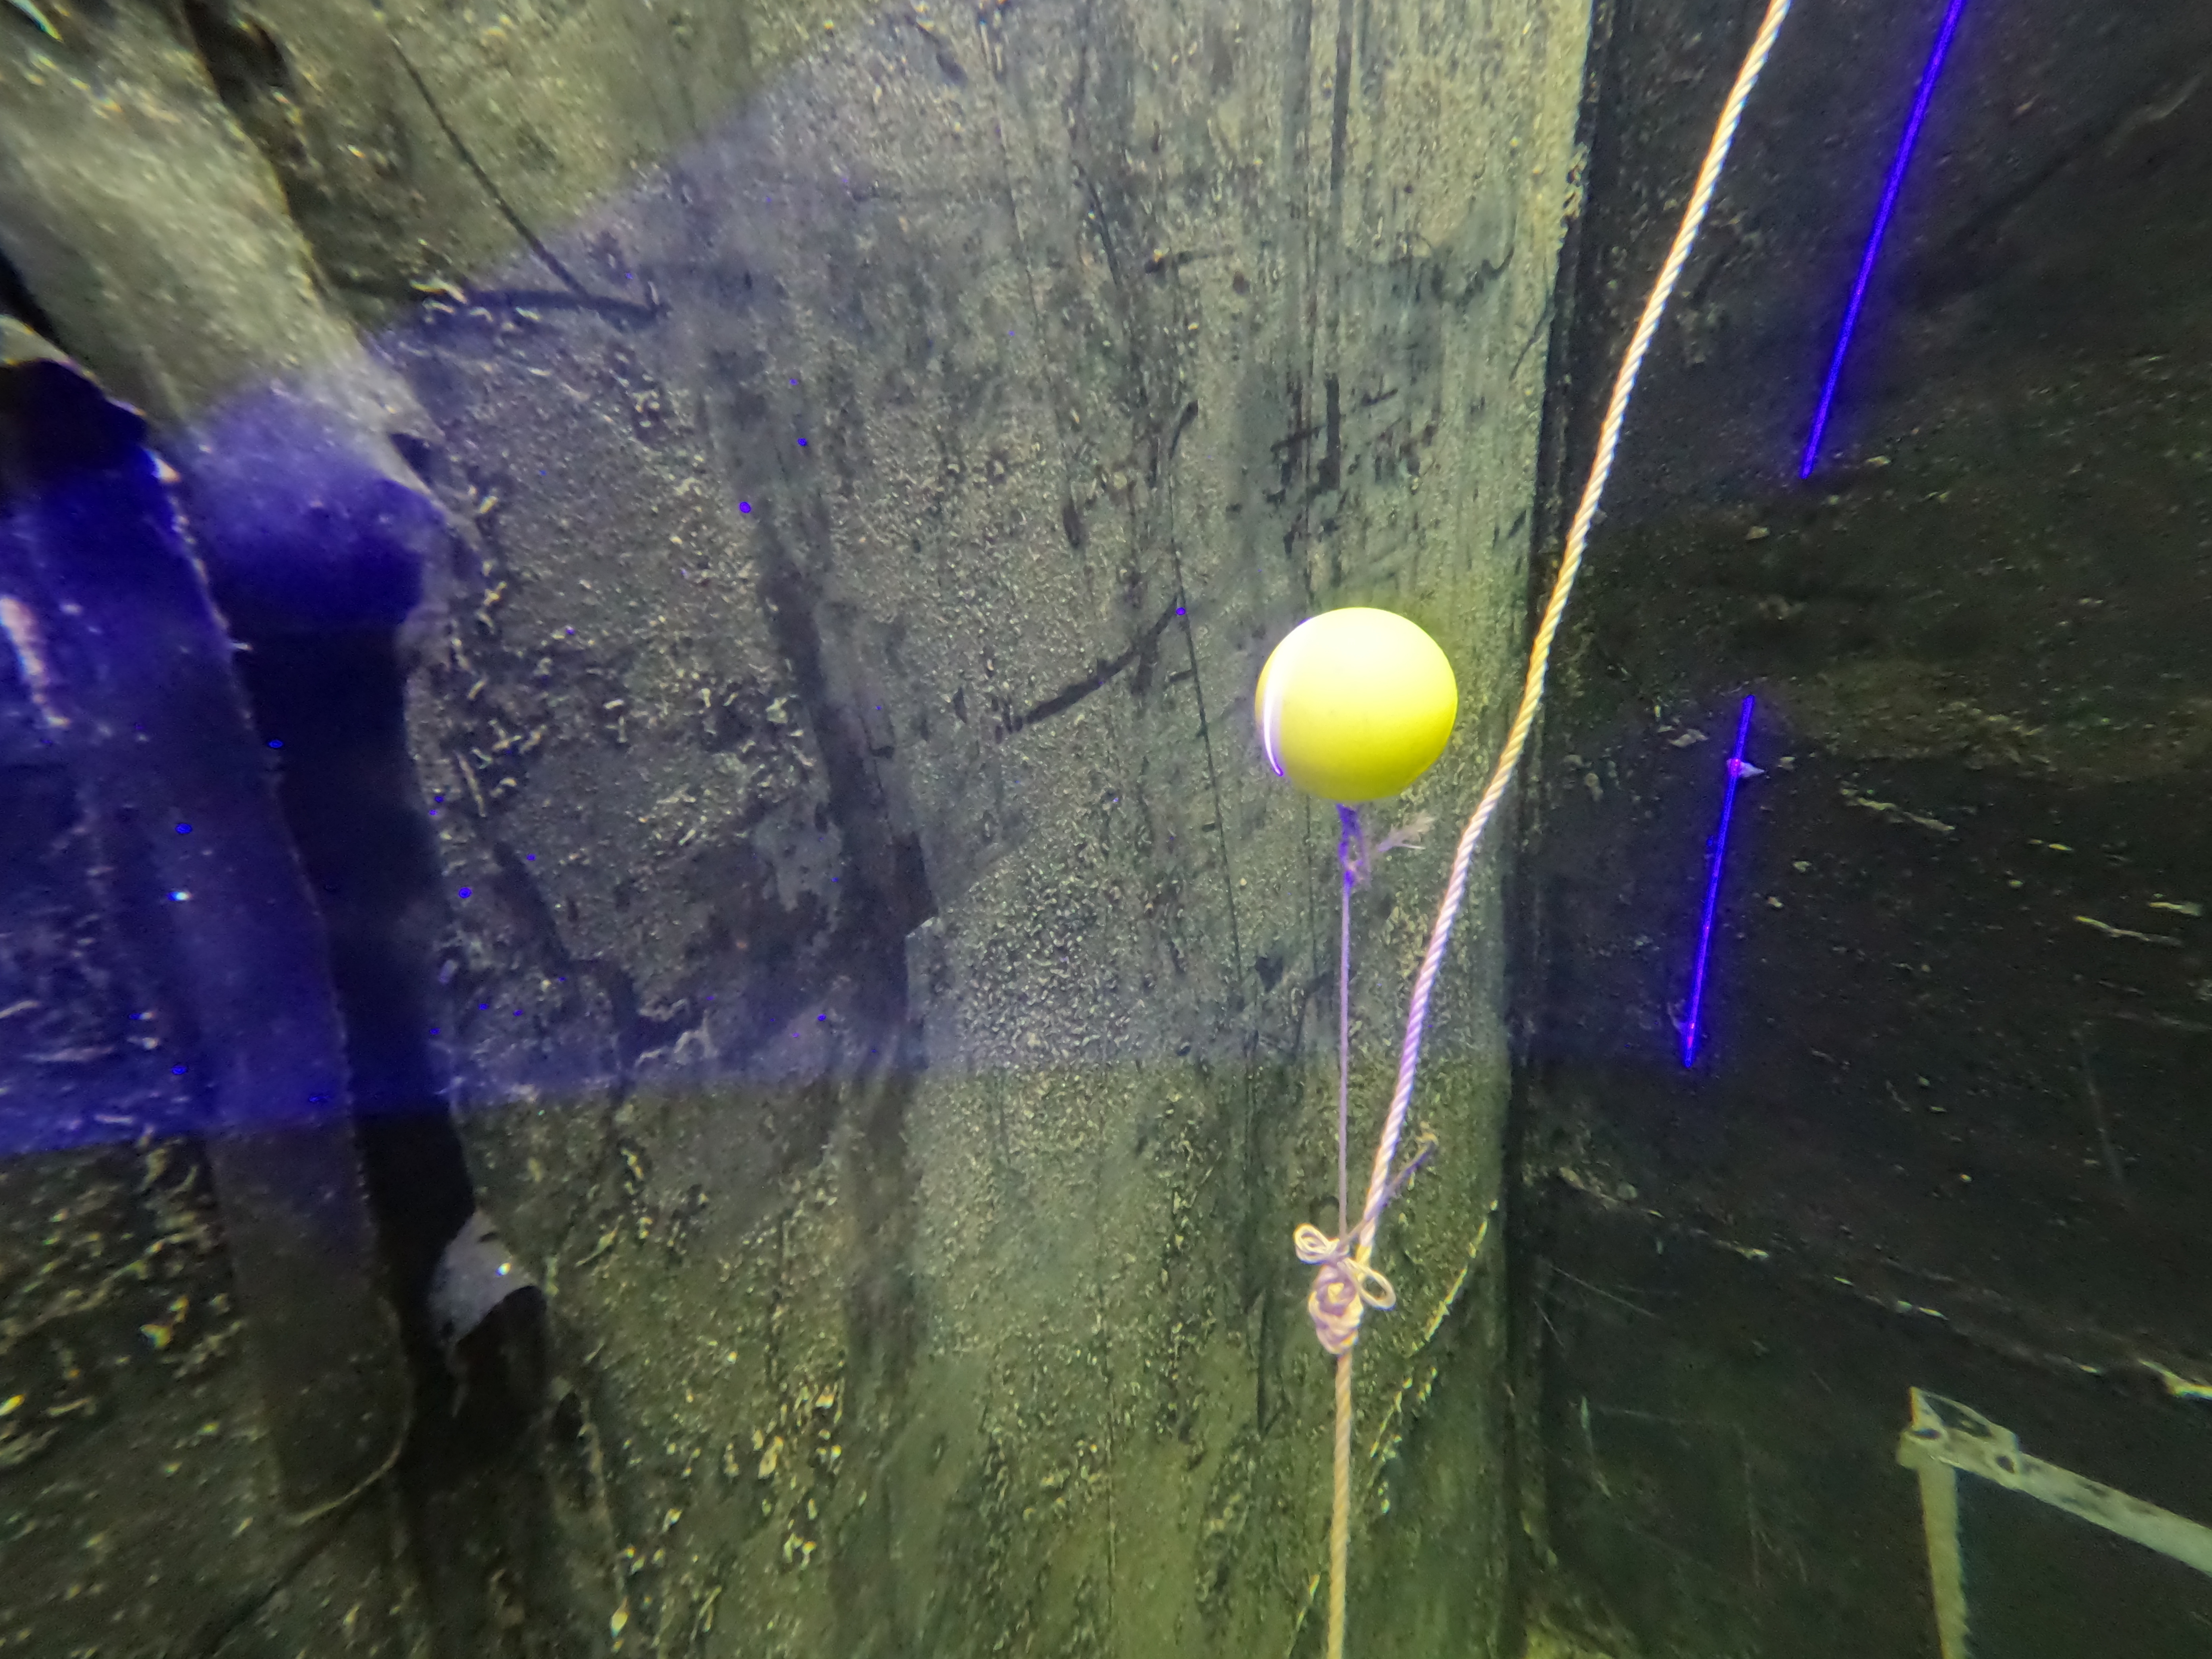

Supplement: Supplementary file 3452 [file G0034156.pdf › 8/G0034156.pdf]

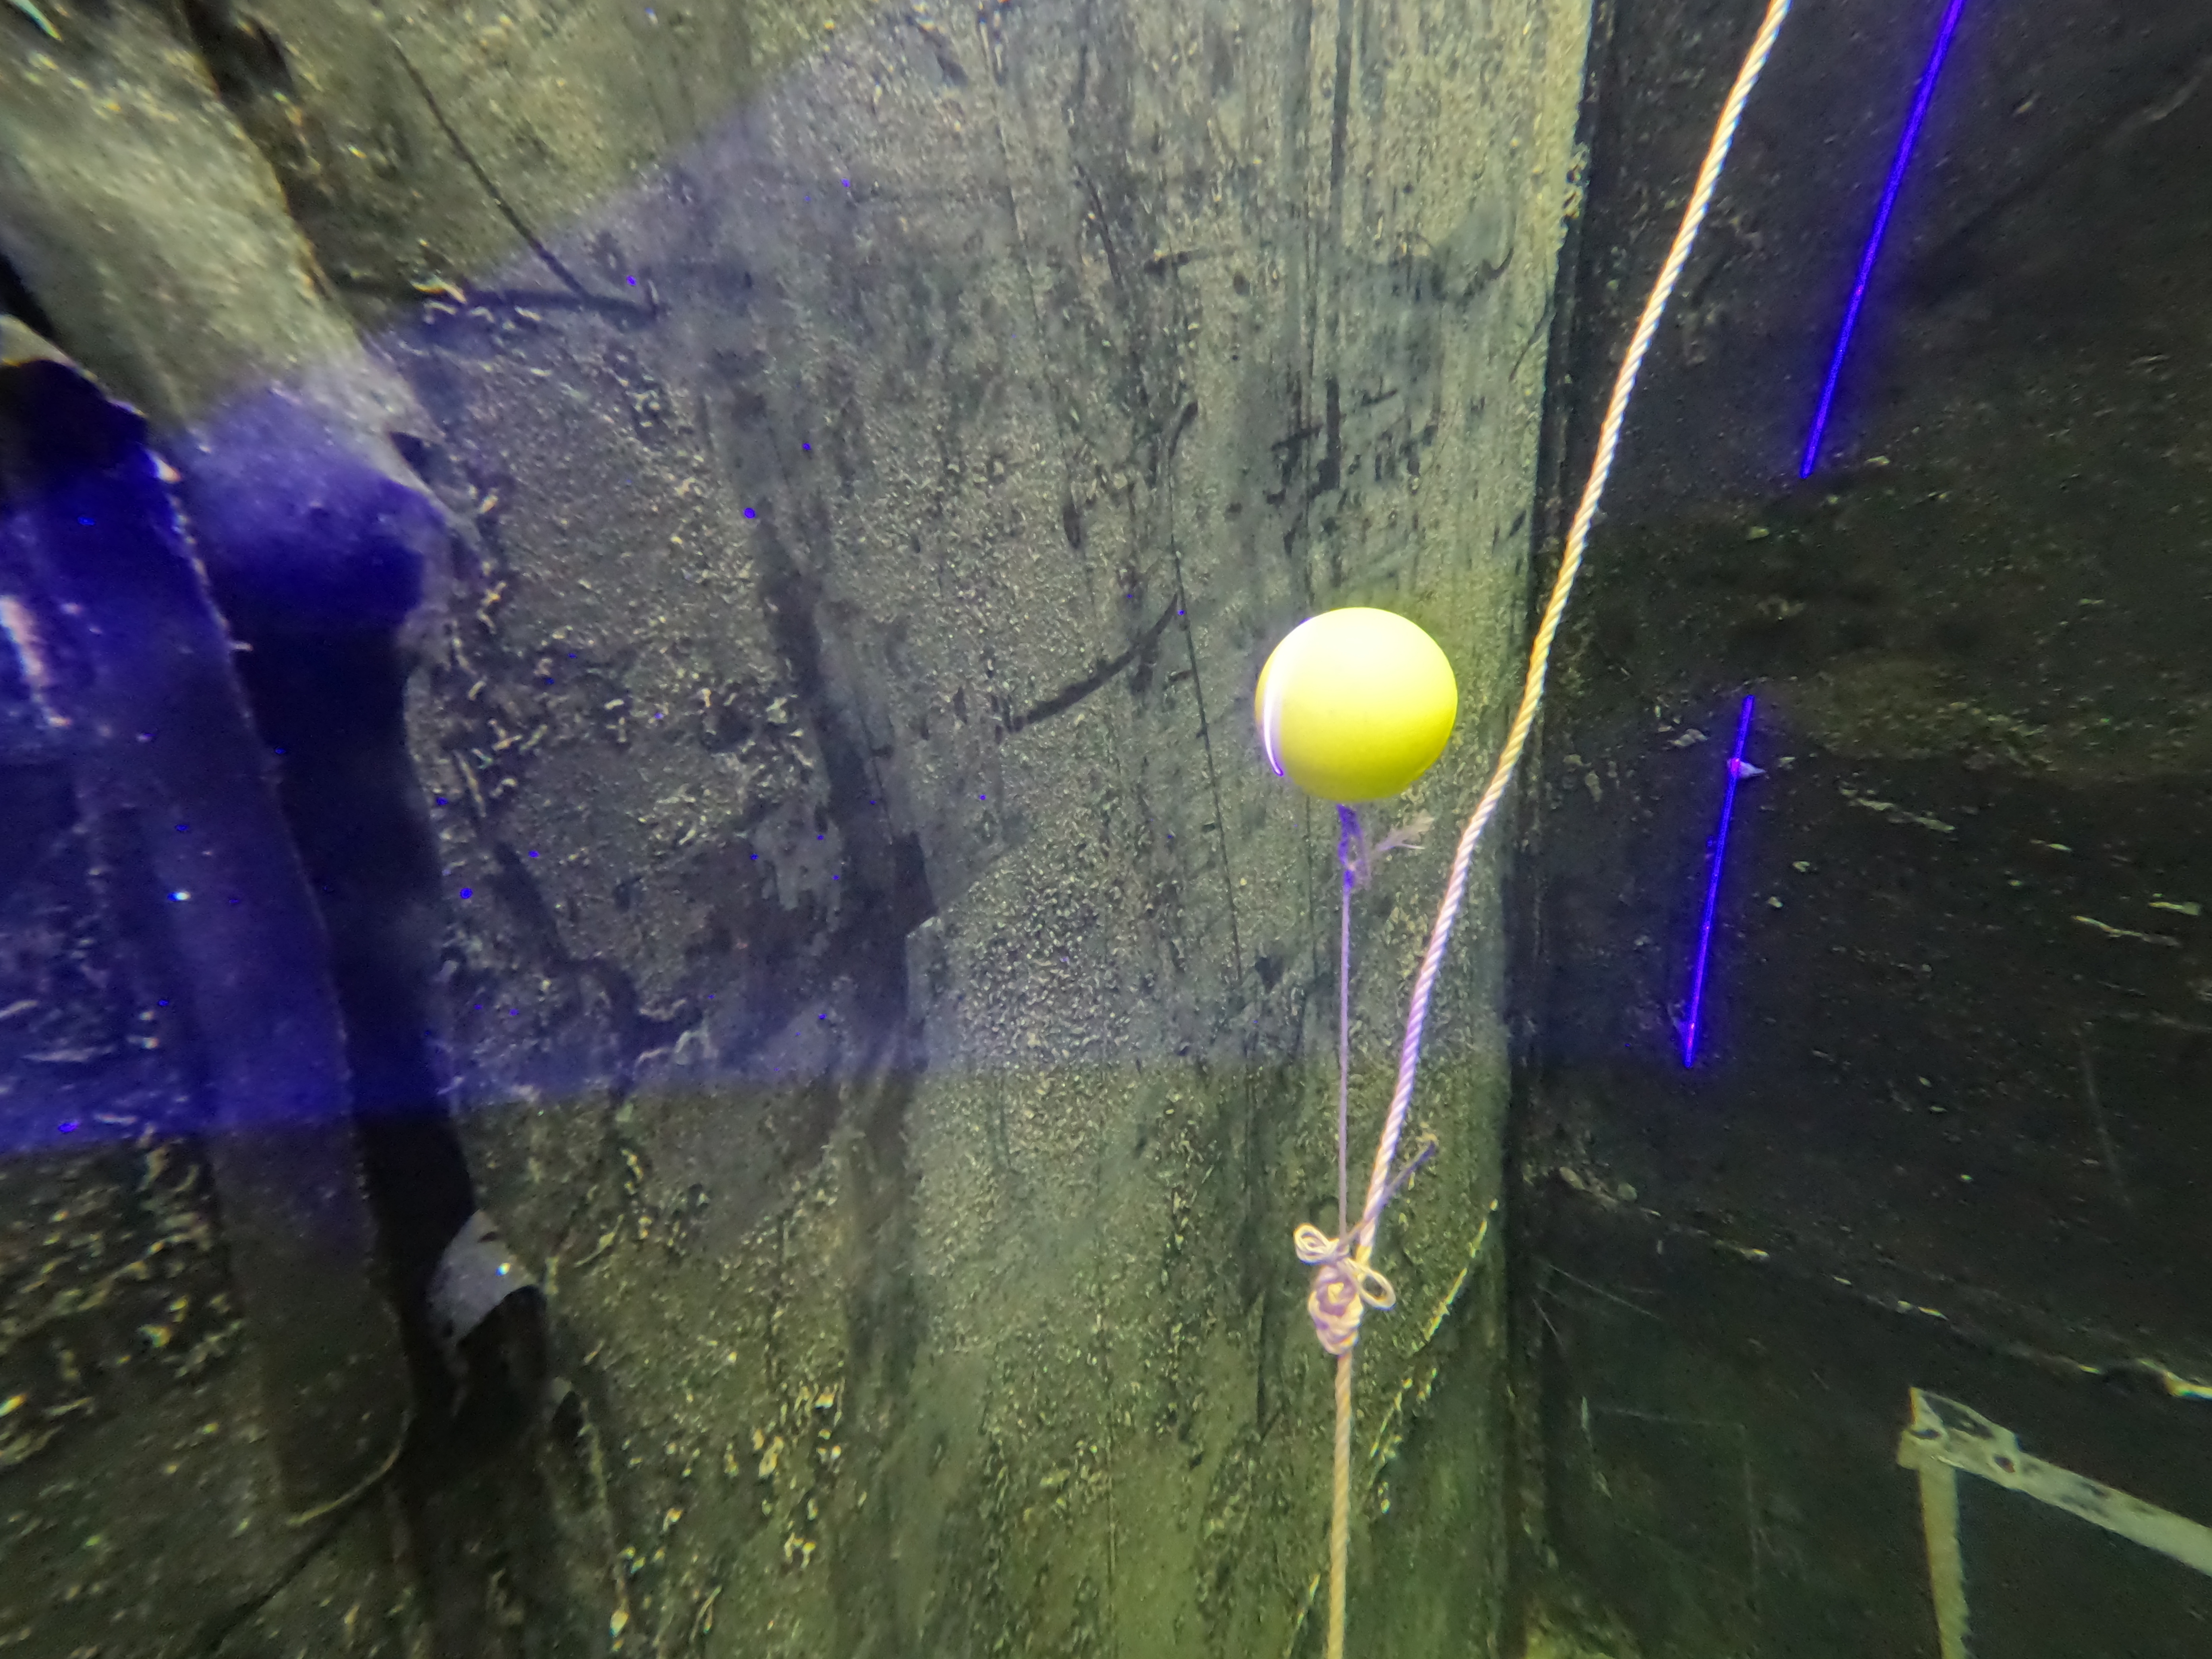

Supplement: Supplementary file 3453 [file G0034157.pdf › 8/G0034157.pdf]

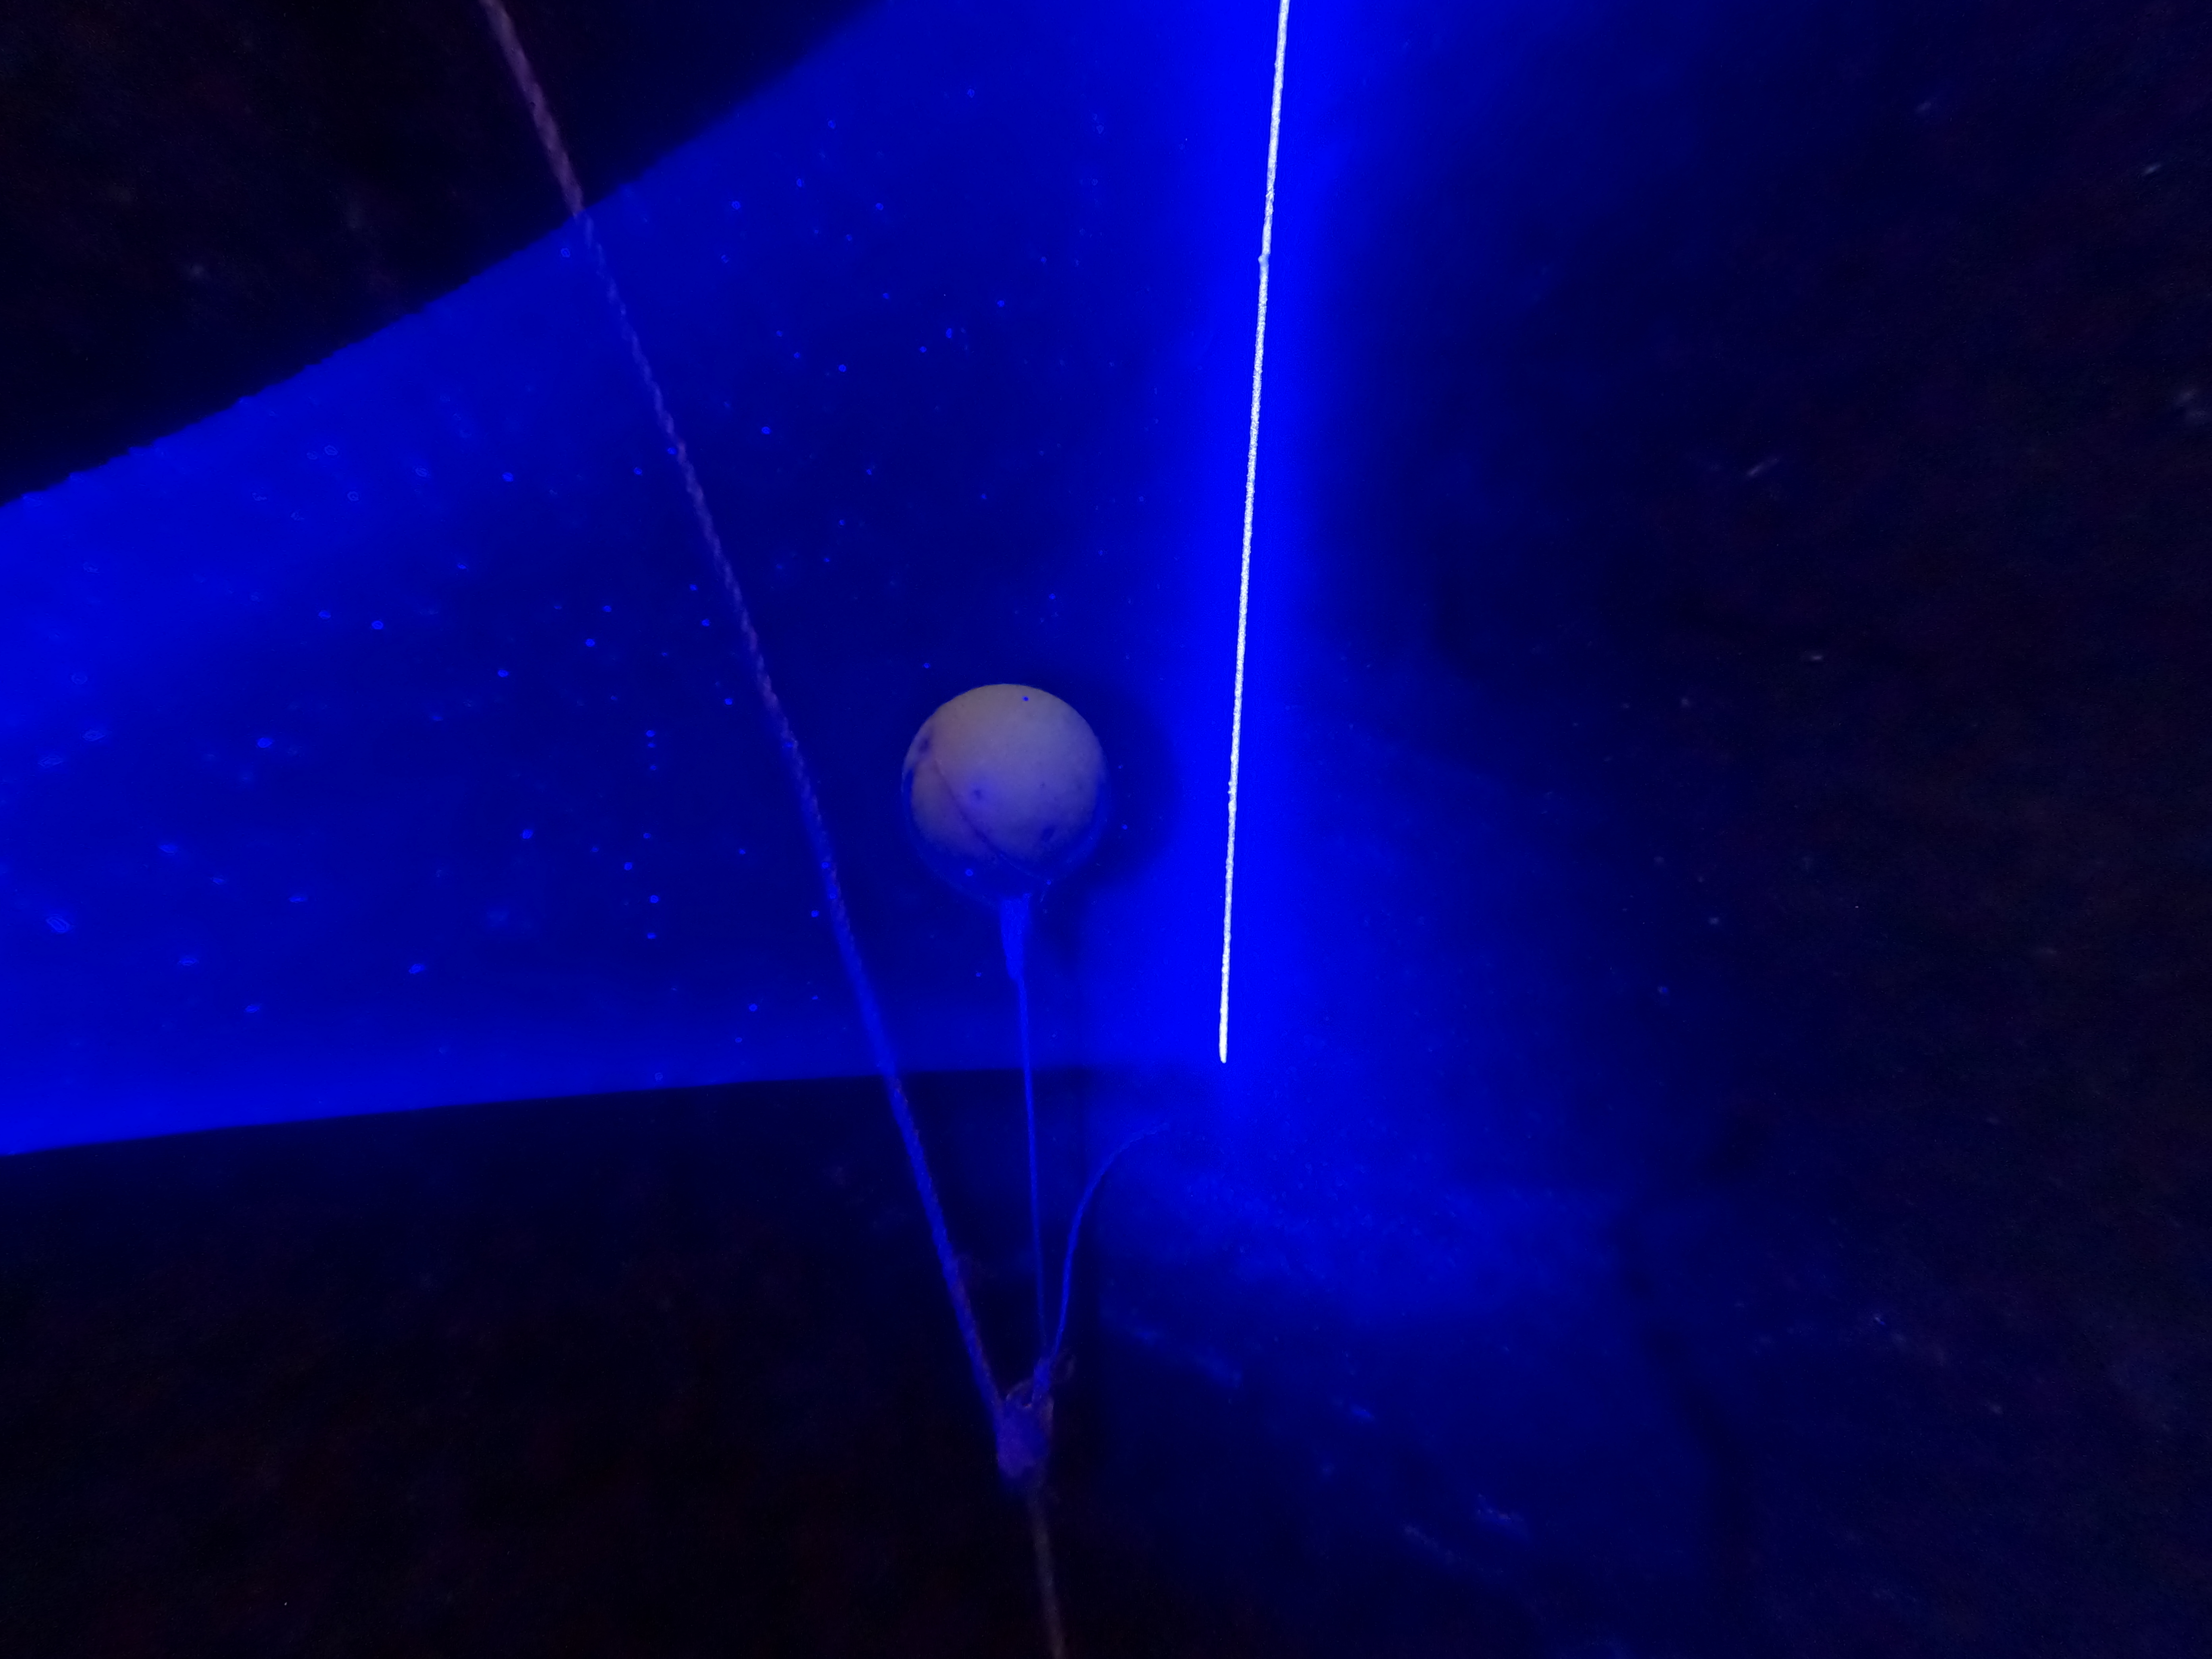

Supplement: Supplementary file 3454 [file G0030678.pdf › Level_1_1/G0030678.pdf]

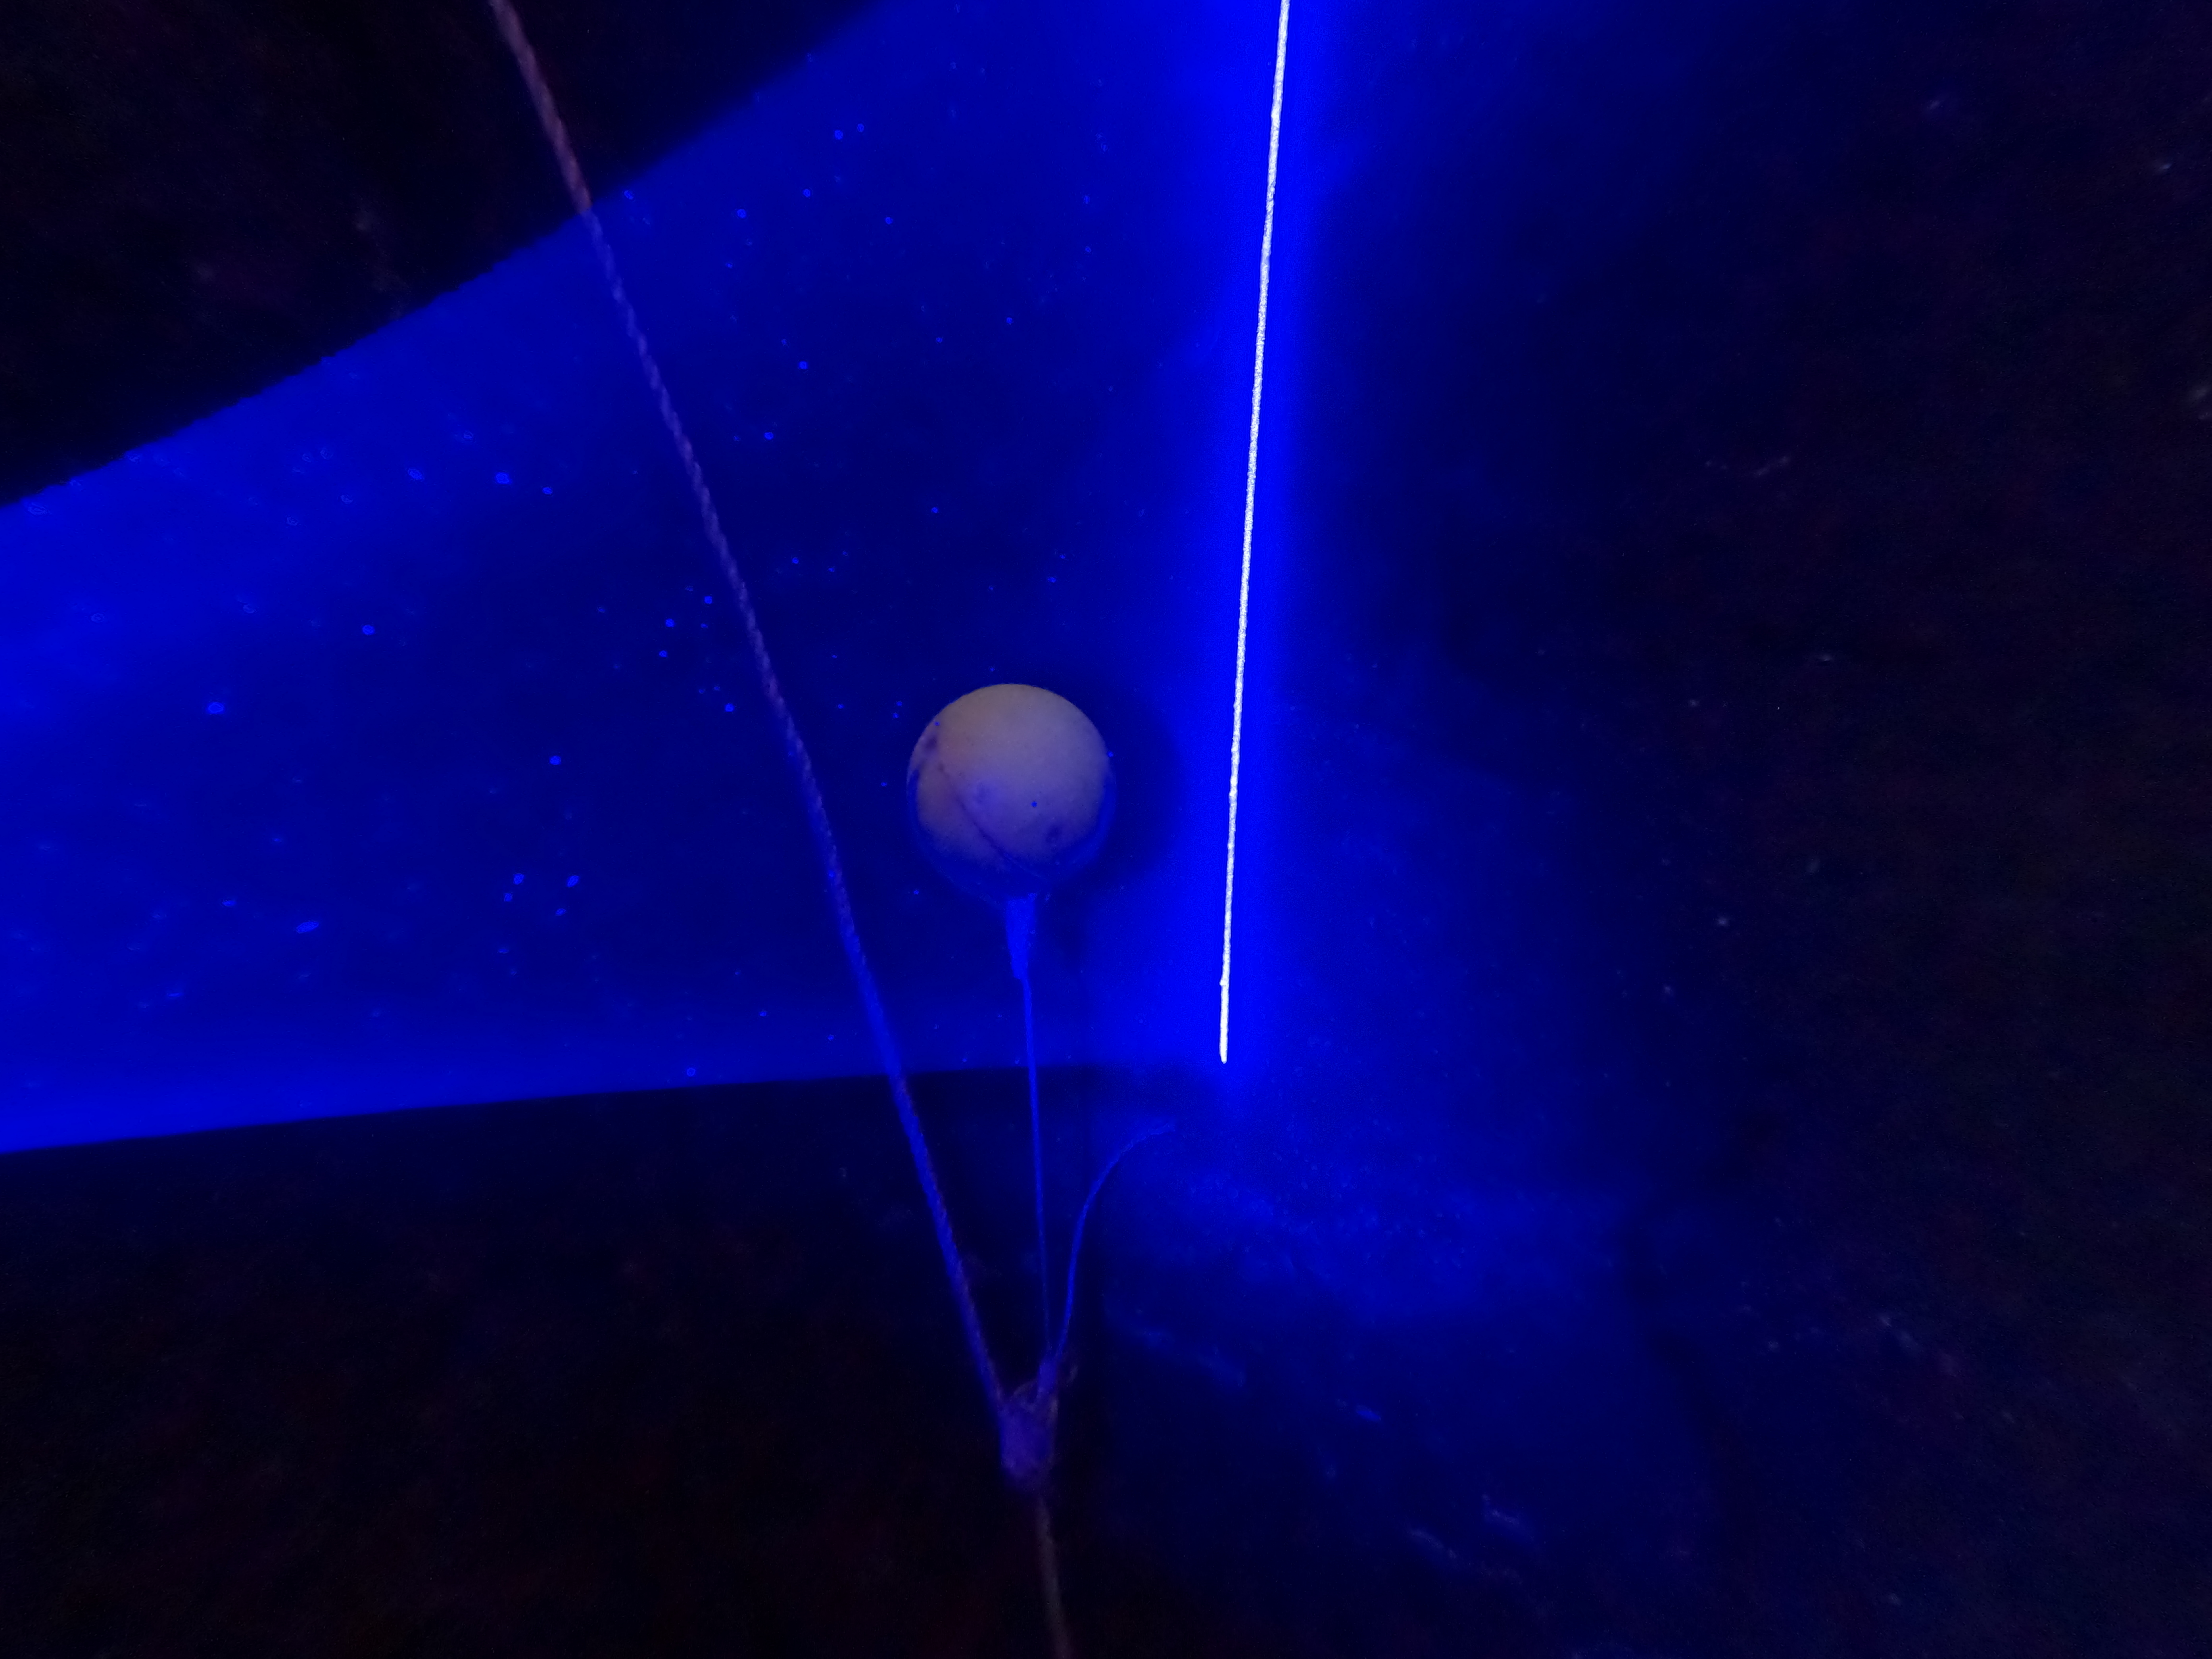

Supplement: Supplementary file 3455 [file G0030679.pdf › Level_1_1/G0030679.pdf]

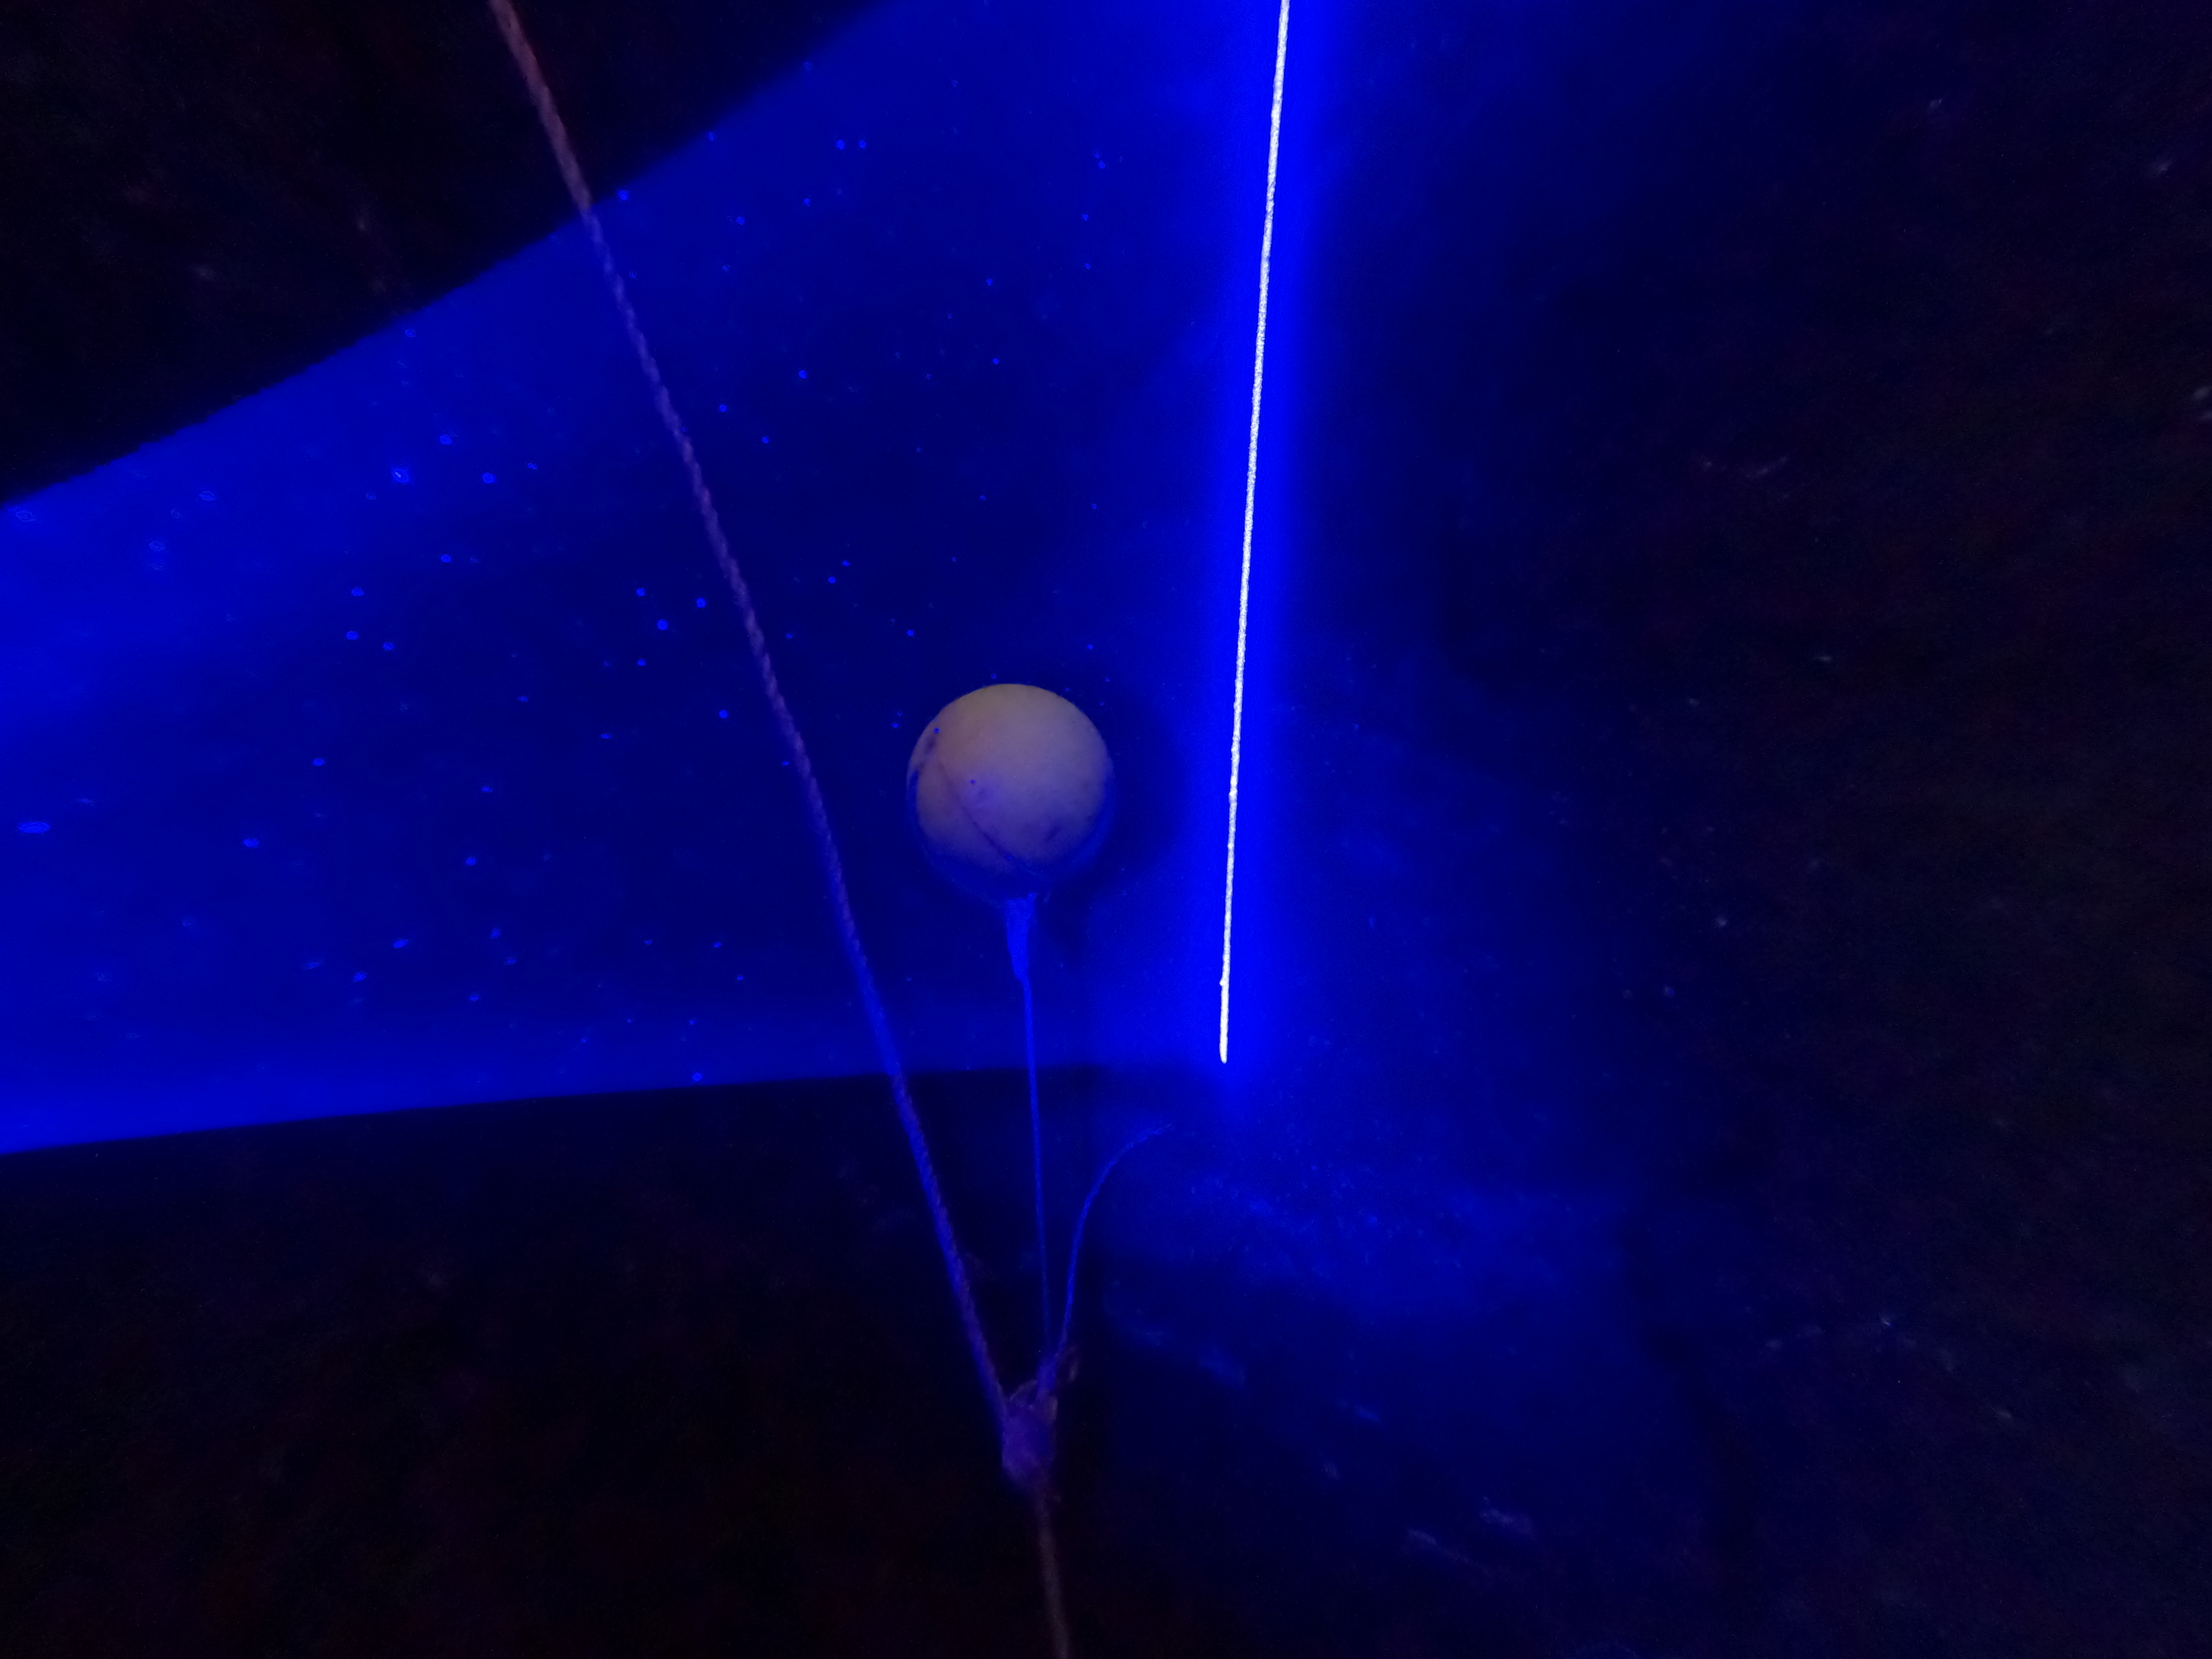

Supplement: Supplementary file 3456 [file G0030680.pdf › Level_1_1/G0030680.pdf]

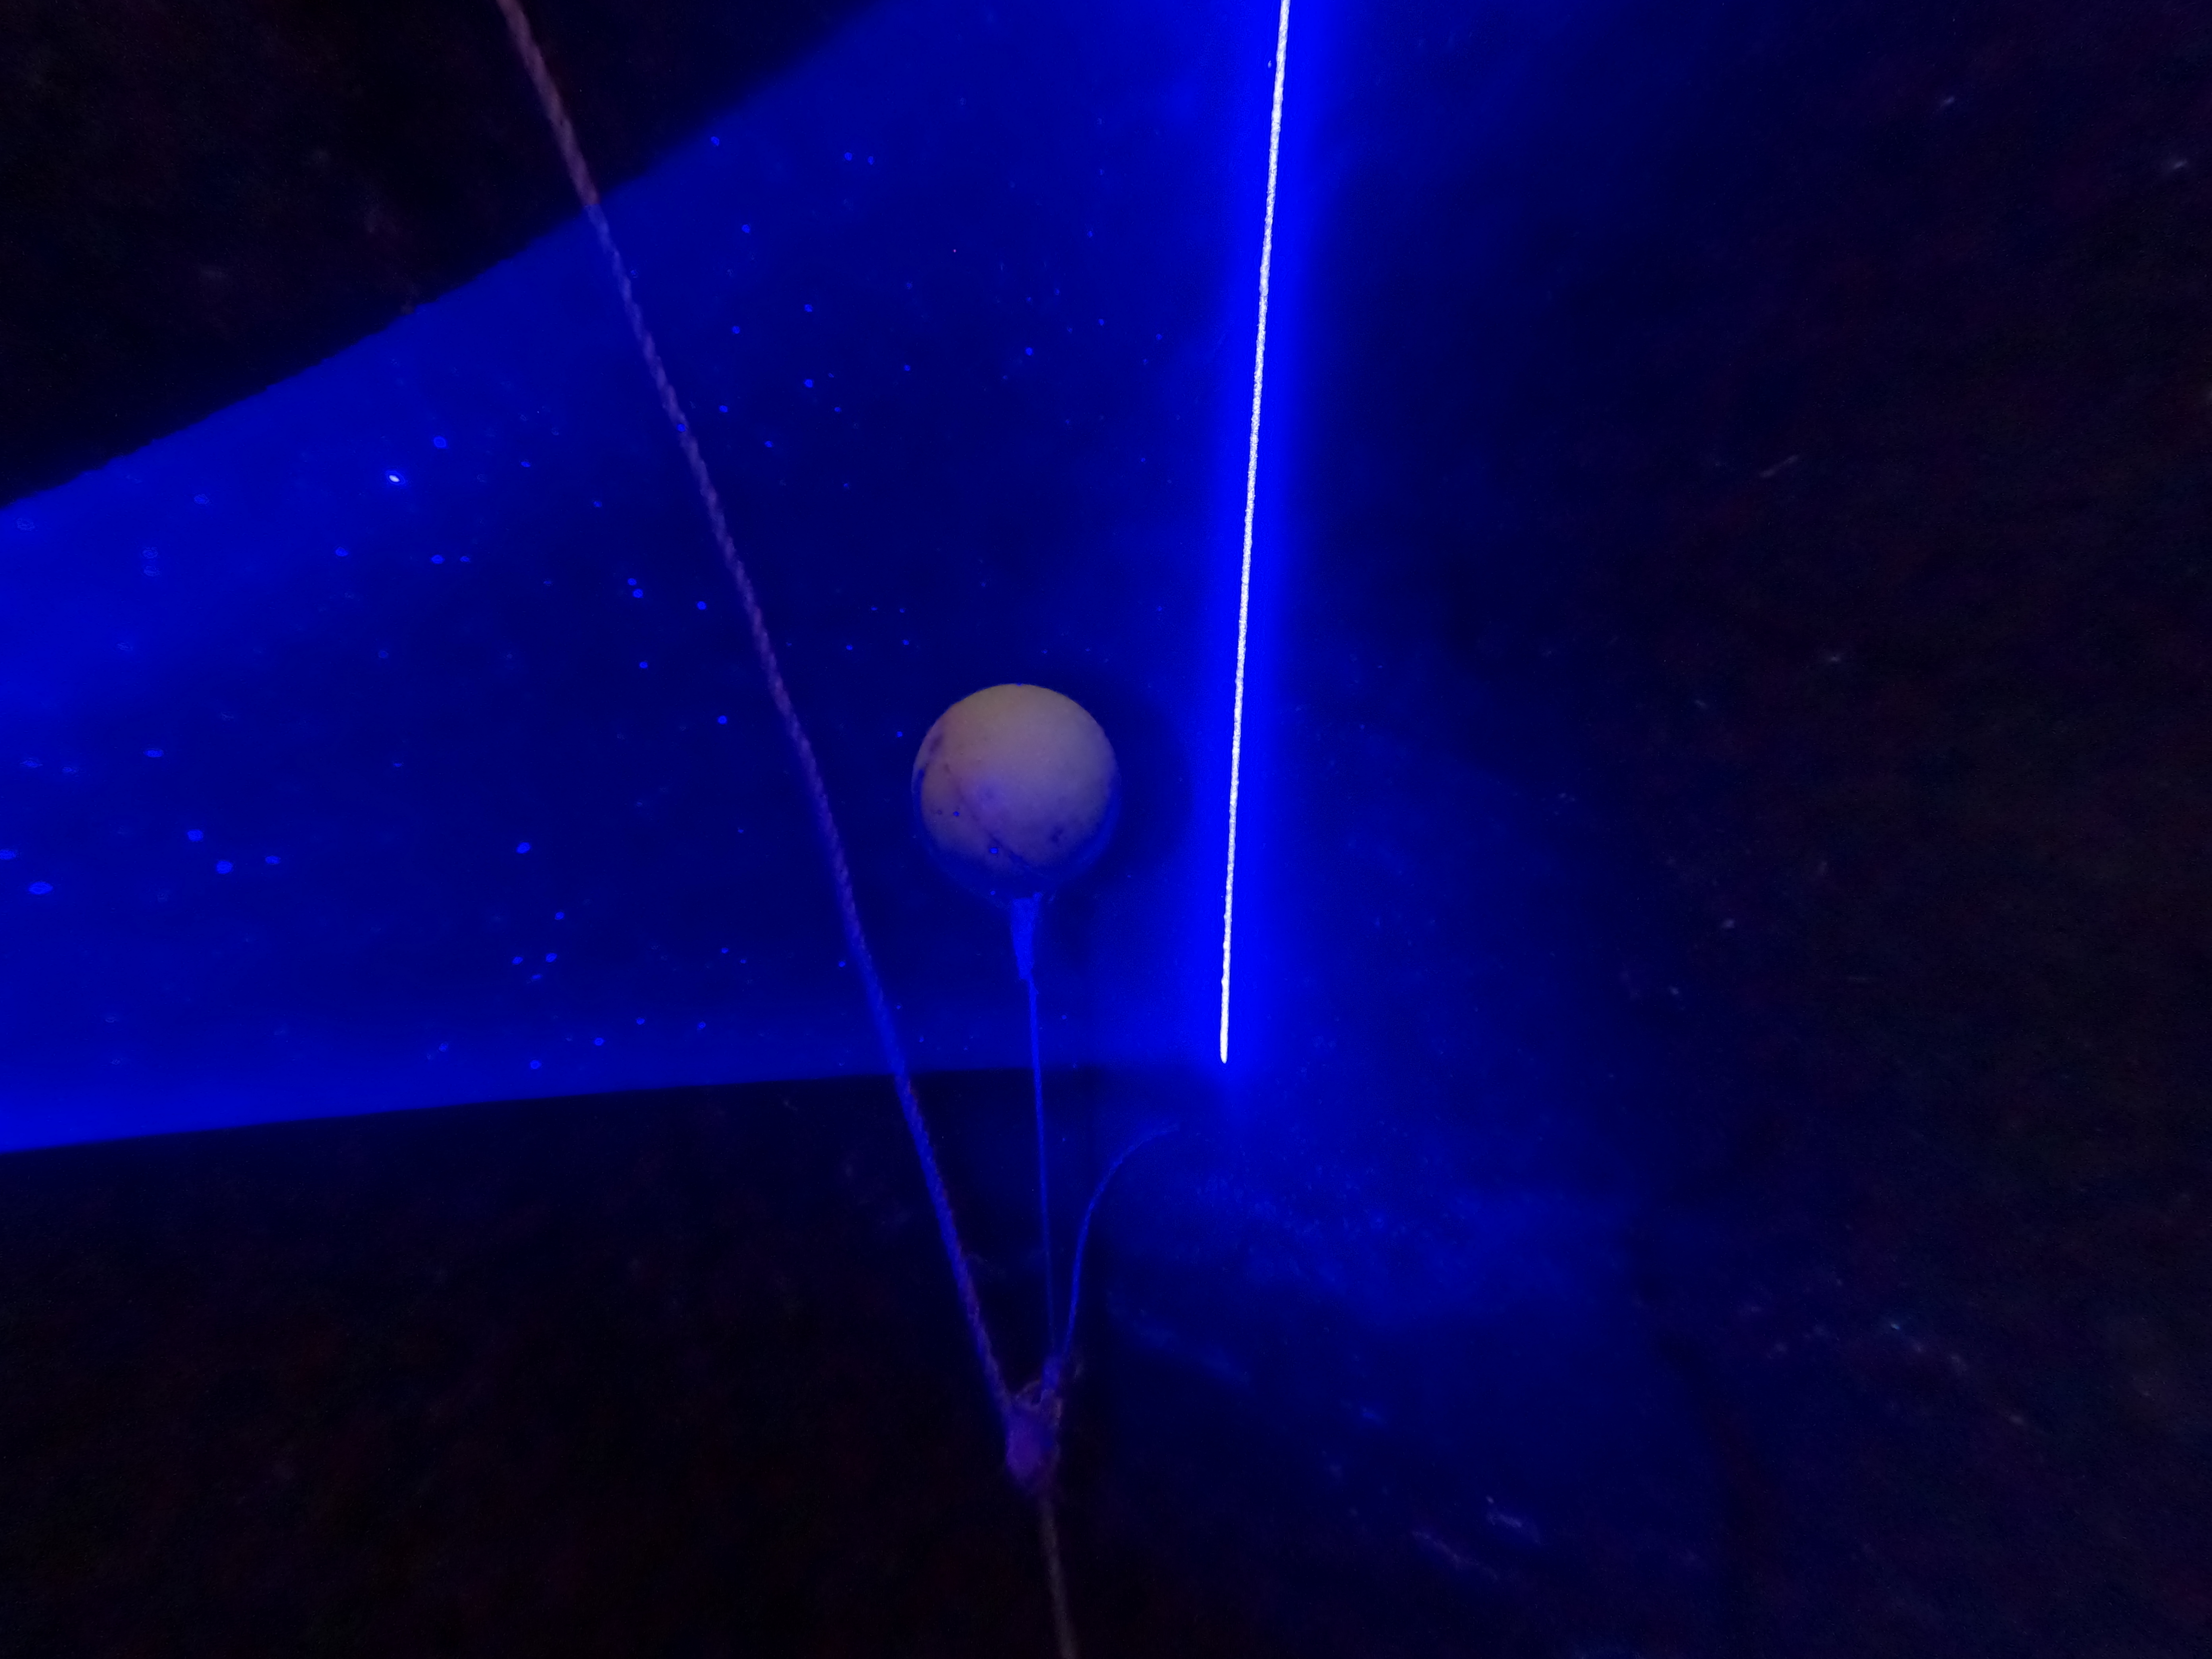

Supplement: Supplementary file 3457 [file G0030681.pdf › Level_1_1/G0030681.pdf]

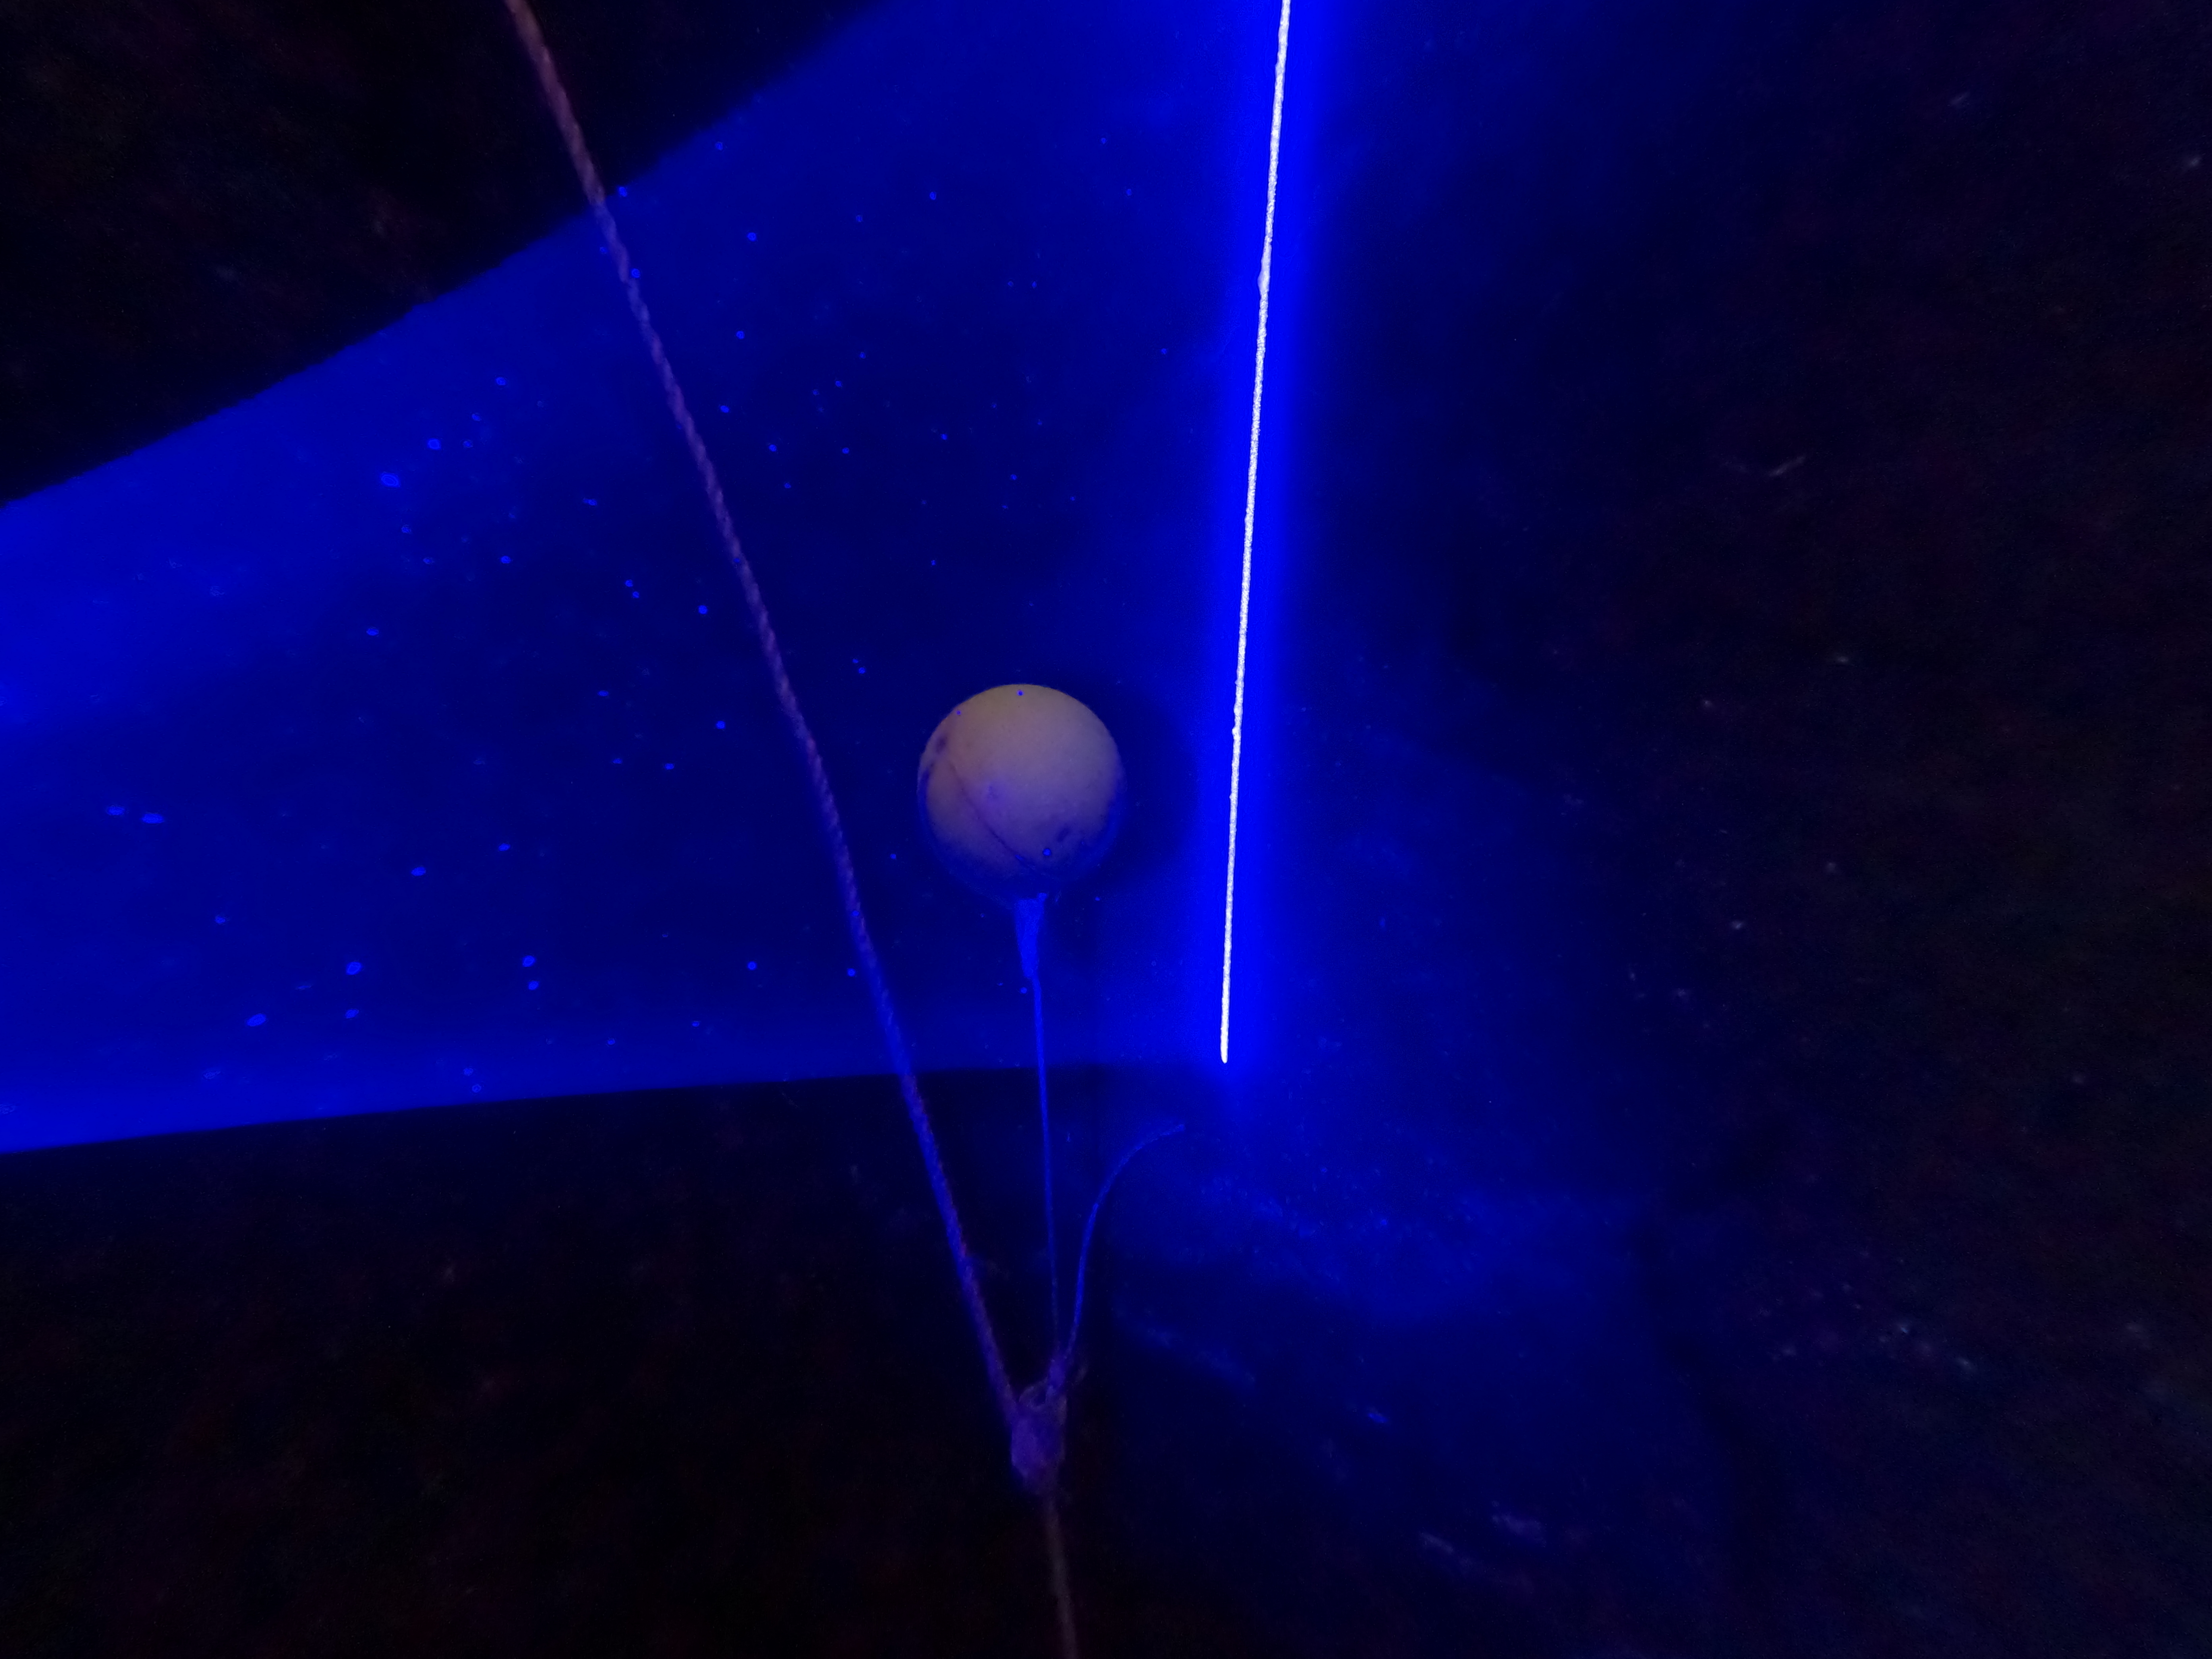

Supplement: Supplementary file 3458 [file G0030682.pdf › Level_1_1/G0030682.pdf]

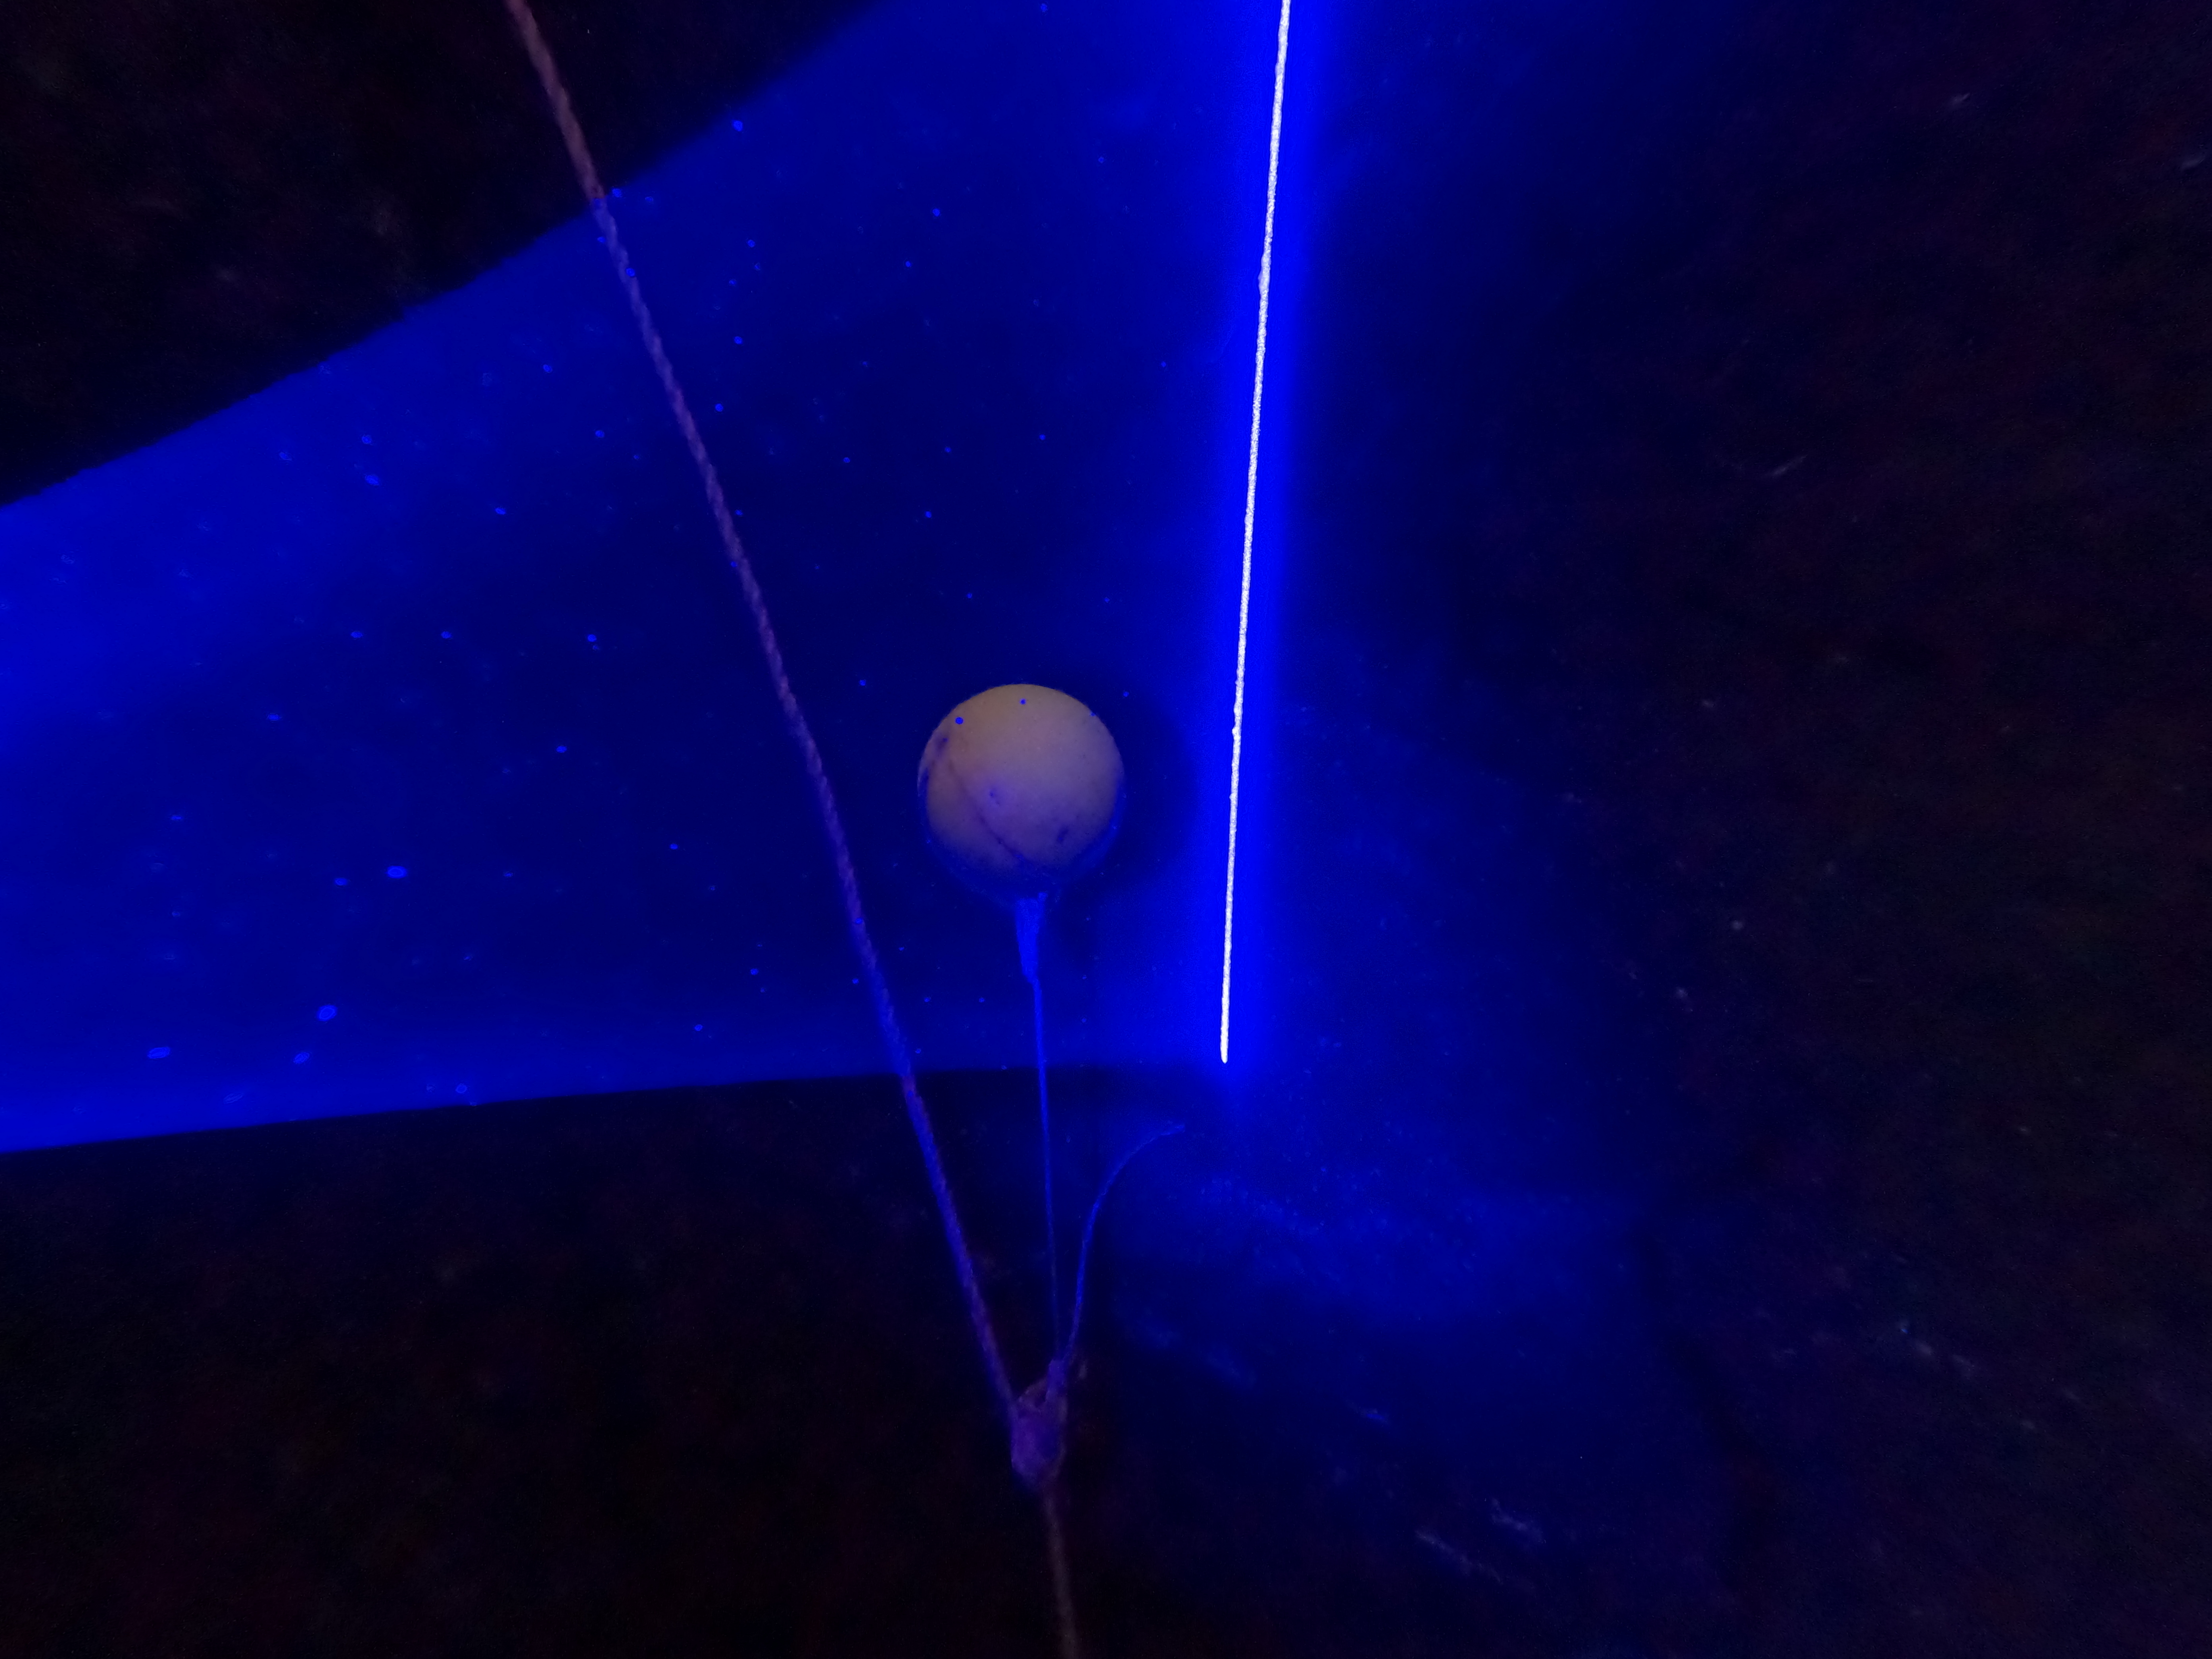

Supplement: Supplementary file 3459 [file G0030683.pdf › Level_1_1/G0030683.pdf]

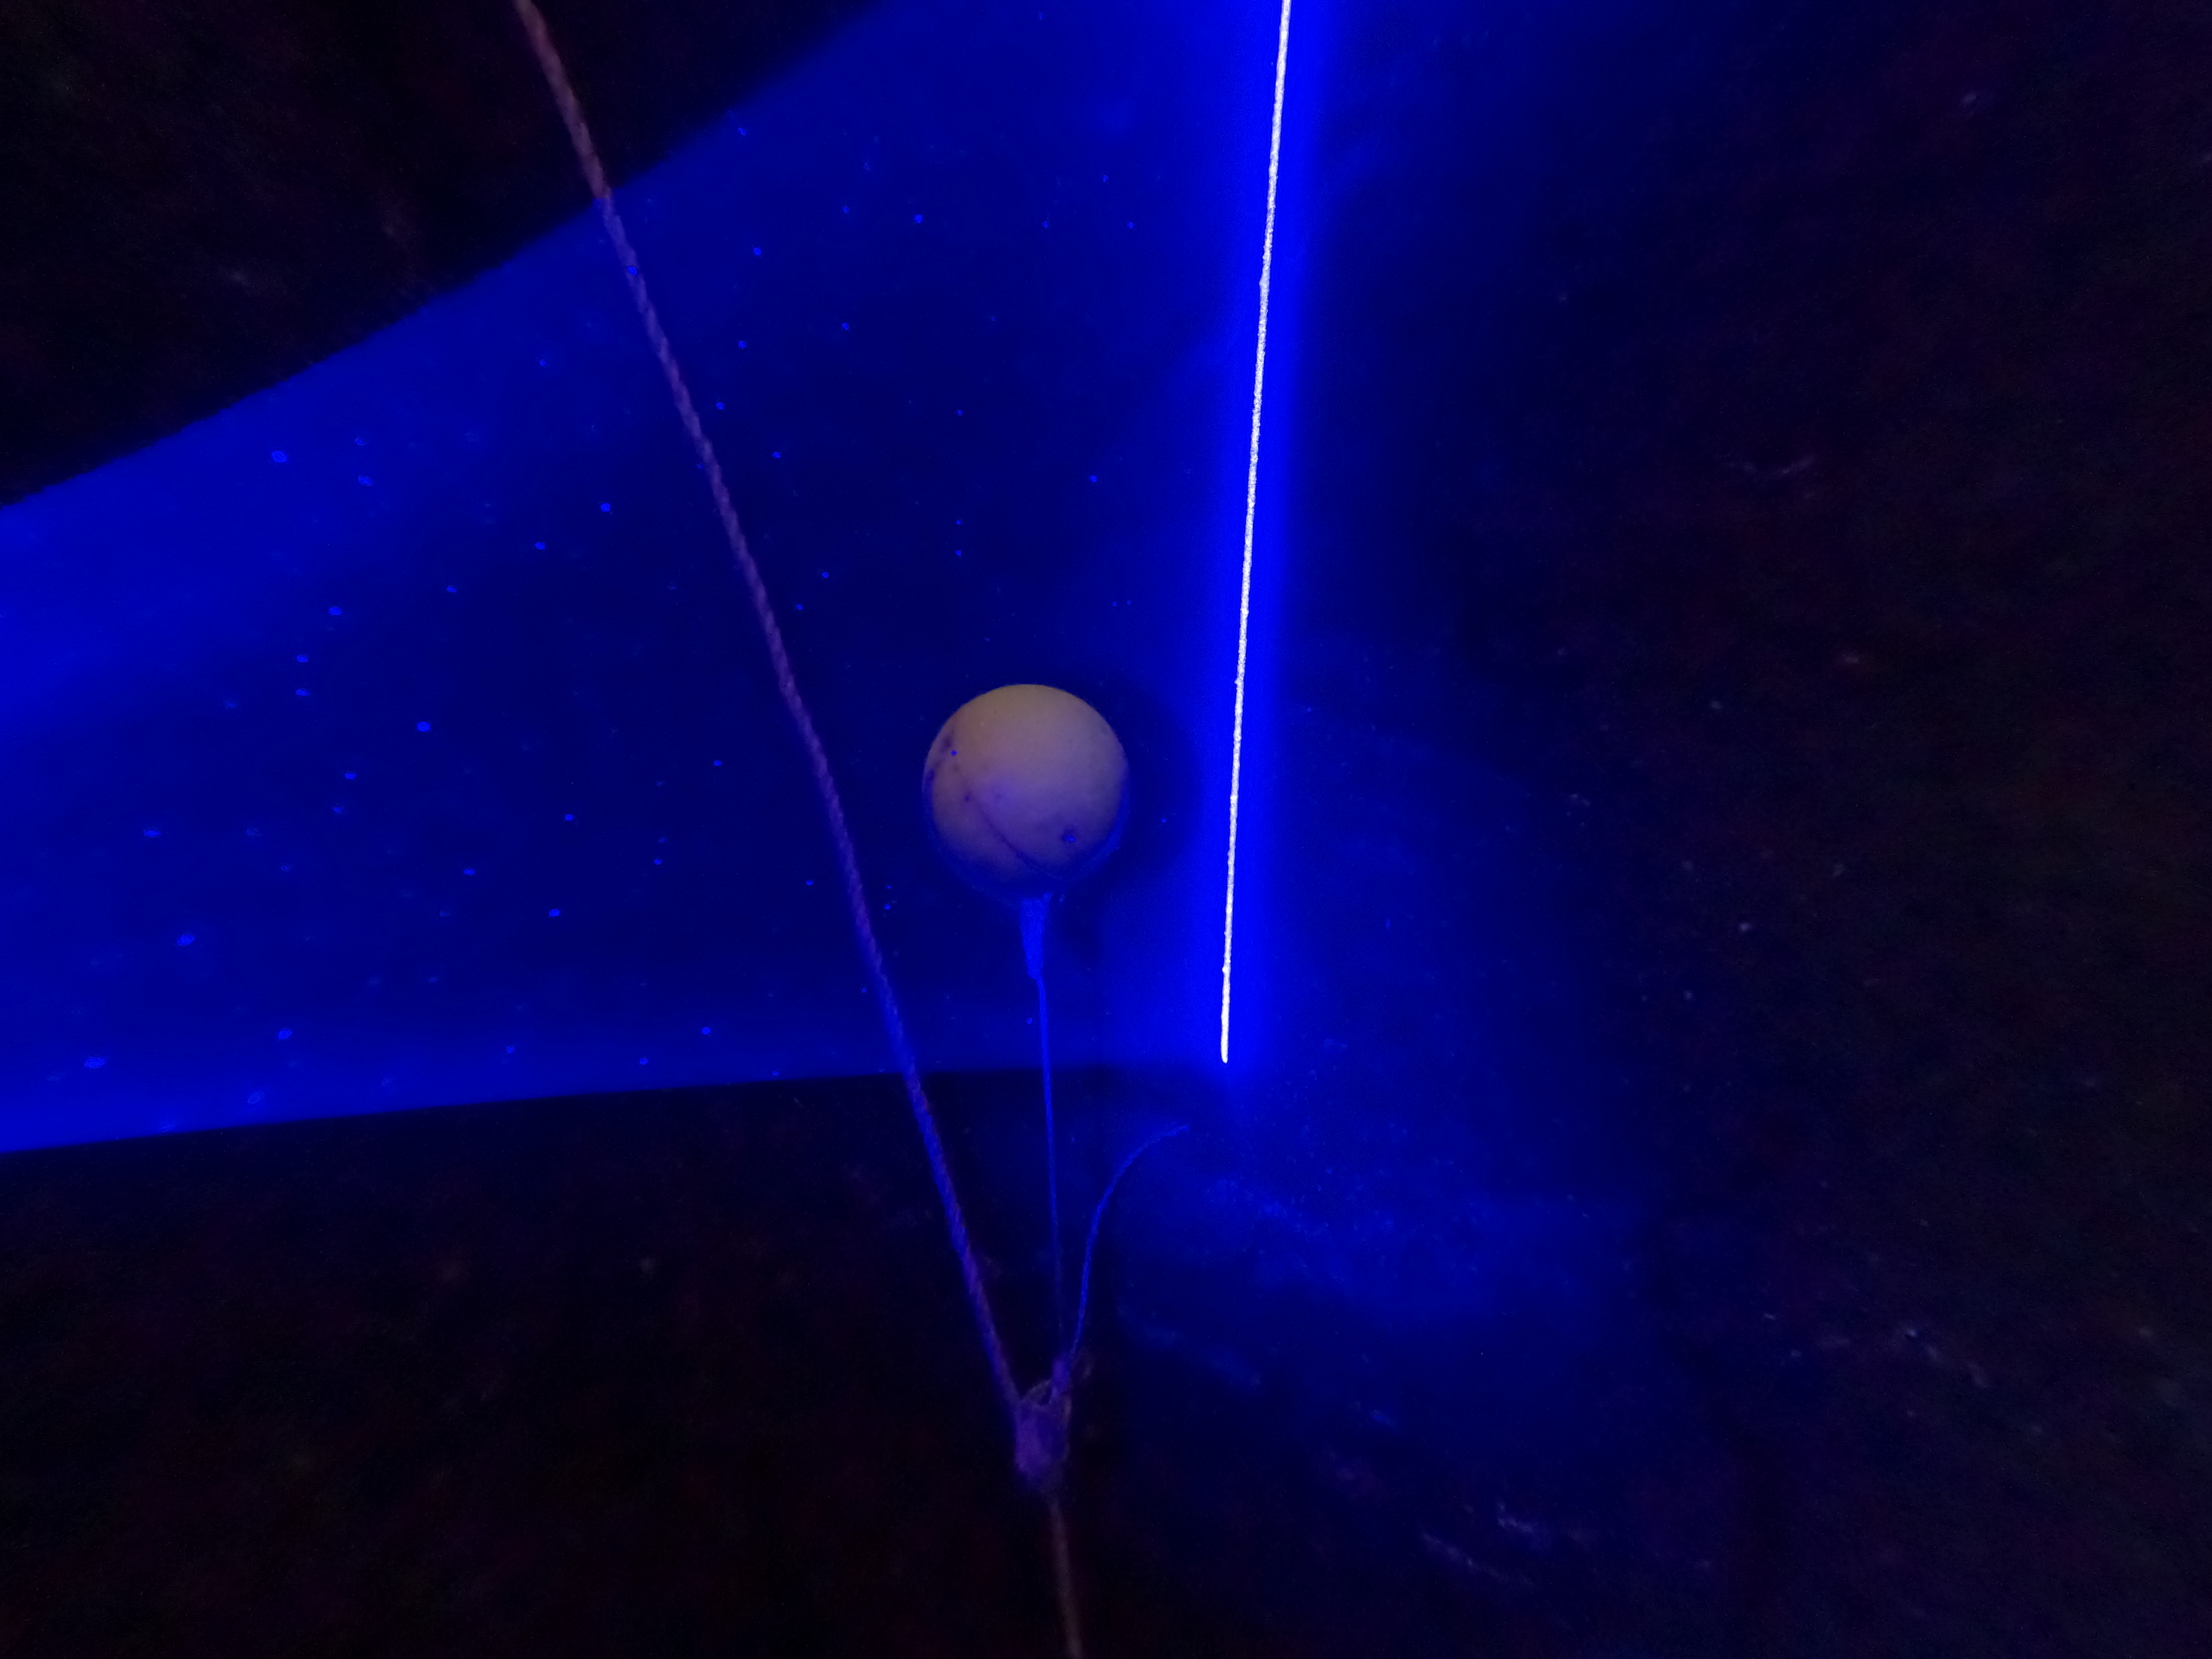

Supplement: Supplementary file 3460 [file G0030684.pdf › Level_1_1/G0030684.pdf]

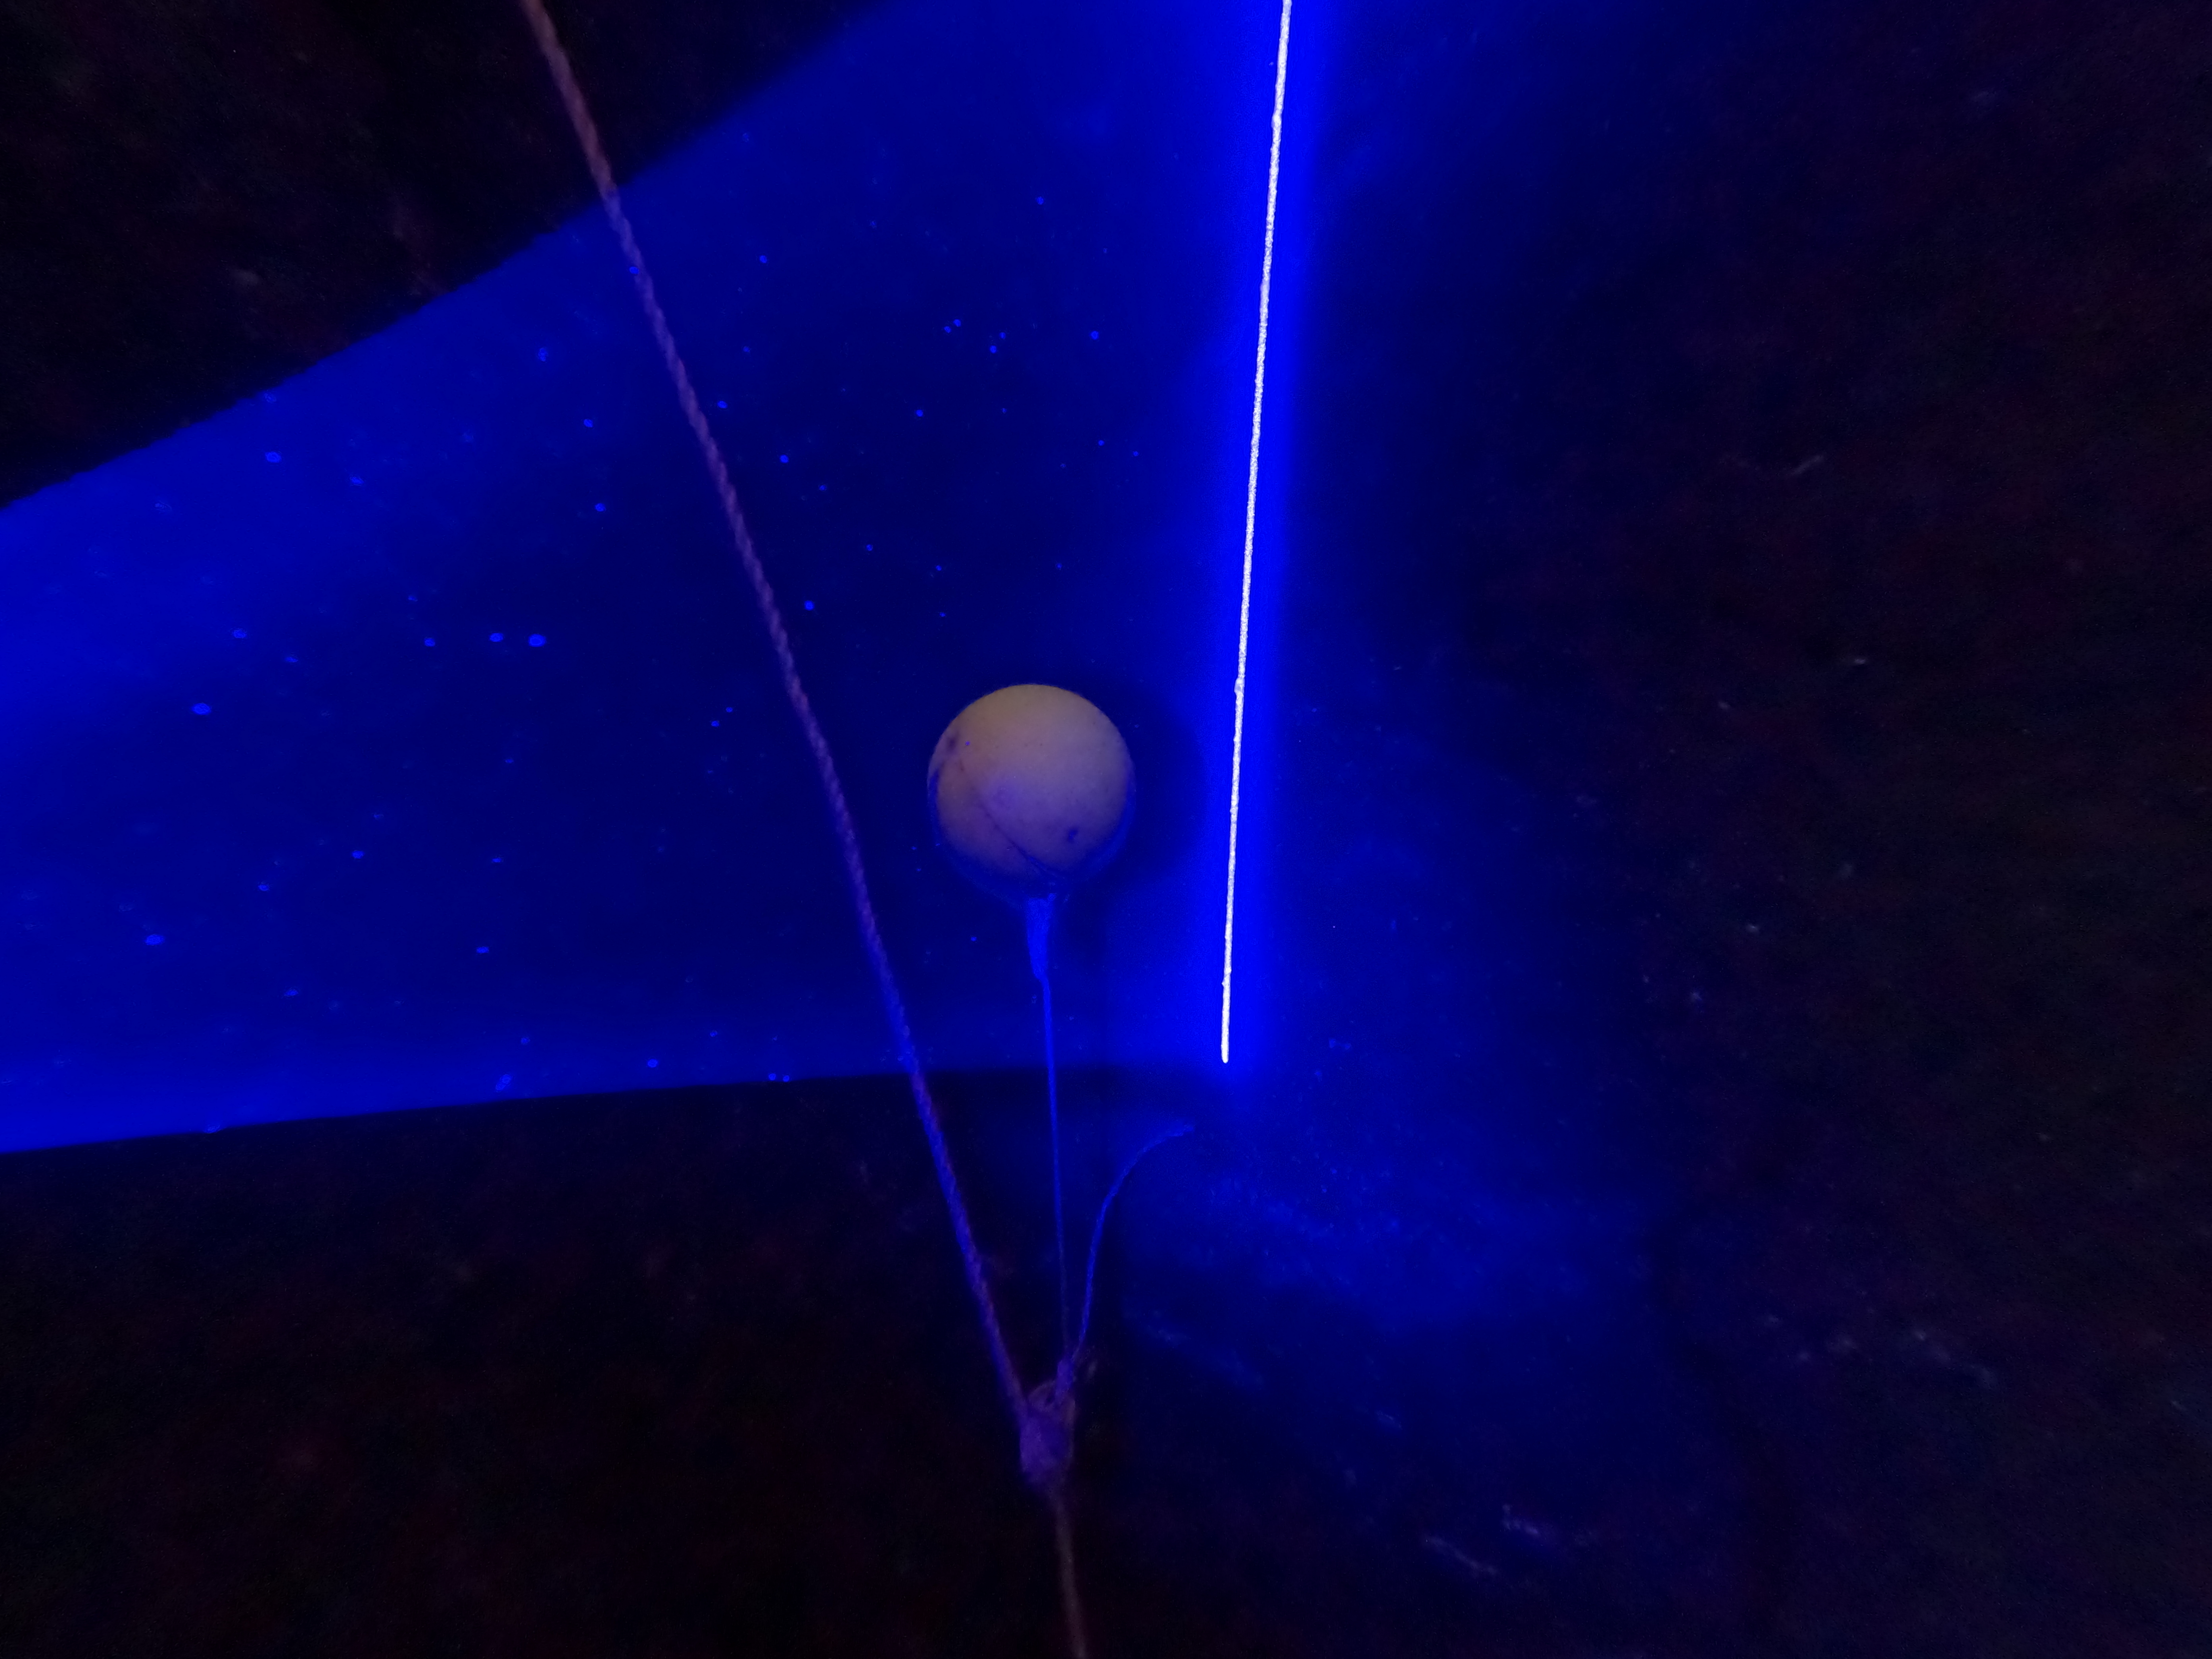

Supplement: Supplementary file 3461 [file G0030685.pdf › Level_1_1/G0030685.pdf]

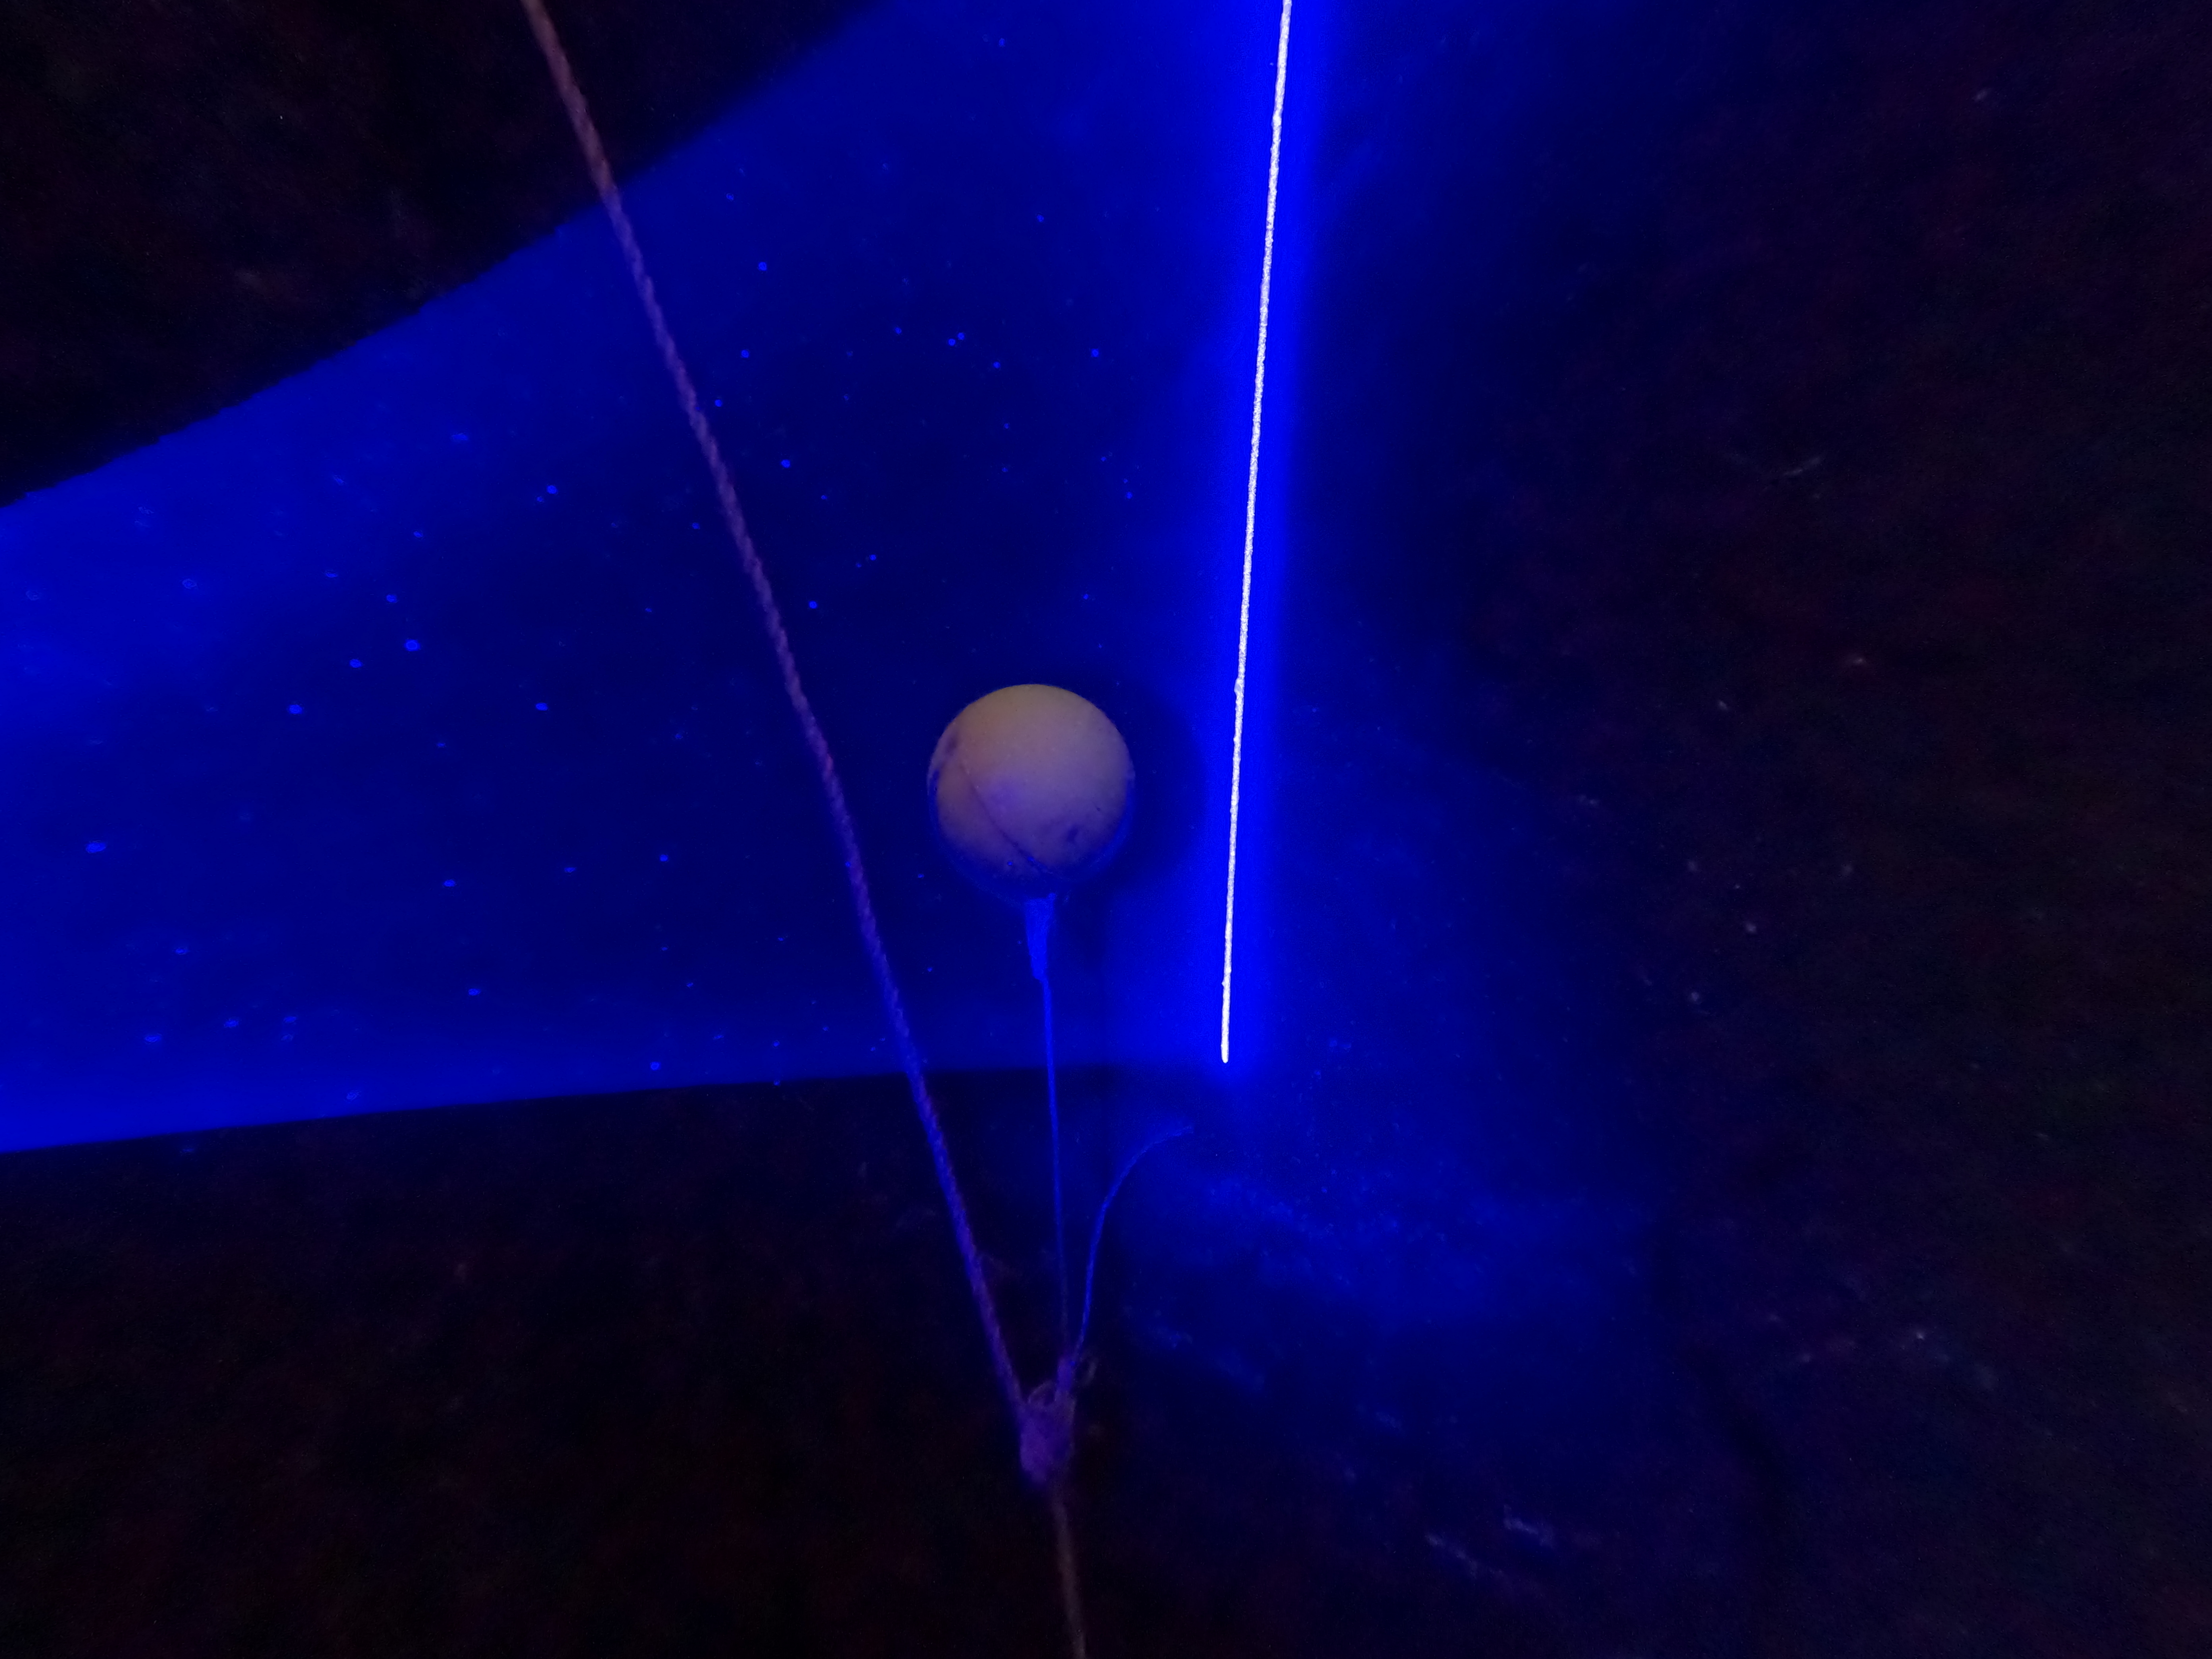

Supplement: Supplementary file 3462 [file G0030686.pdf › Level_1_1/G0030686.pdf]

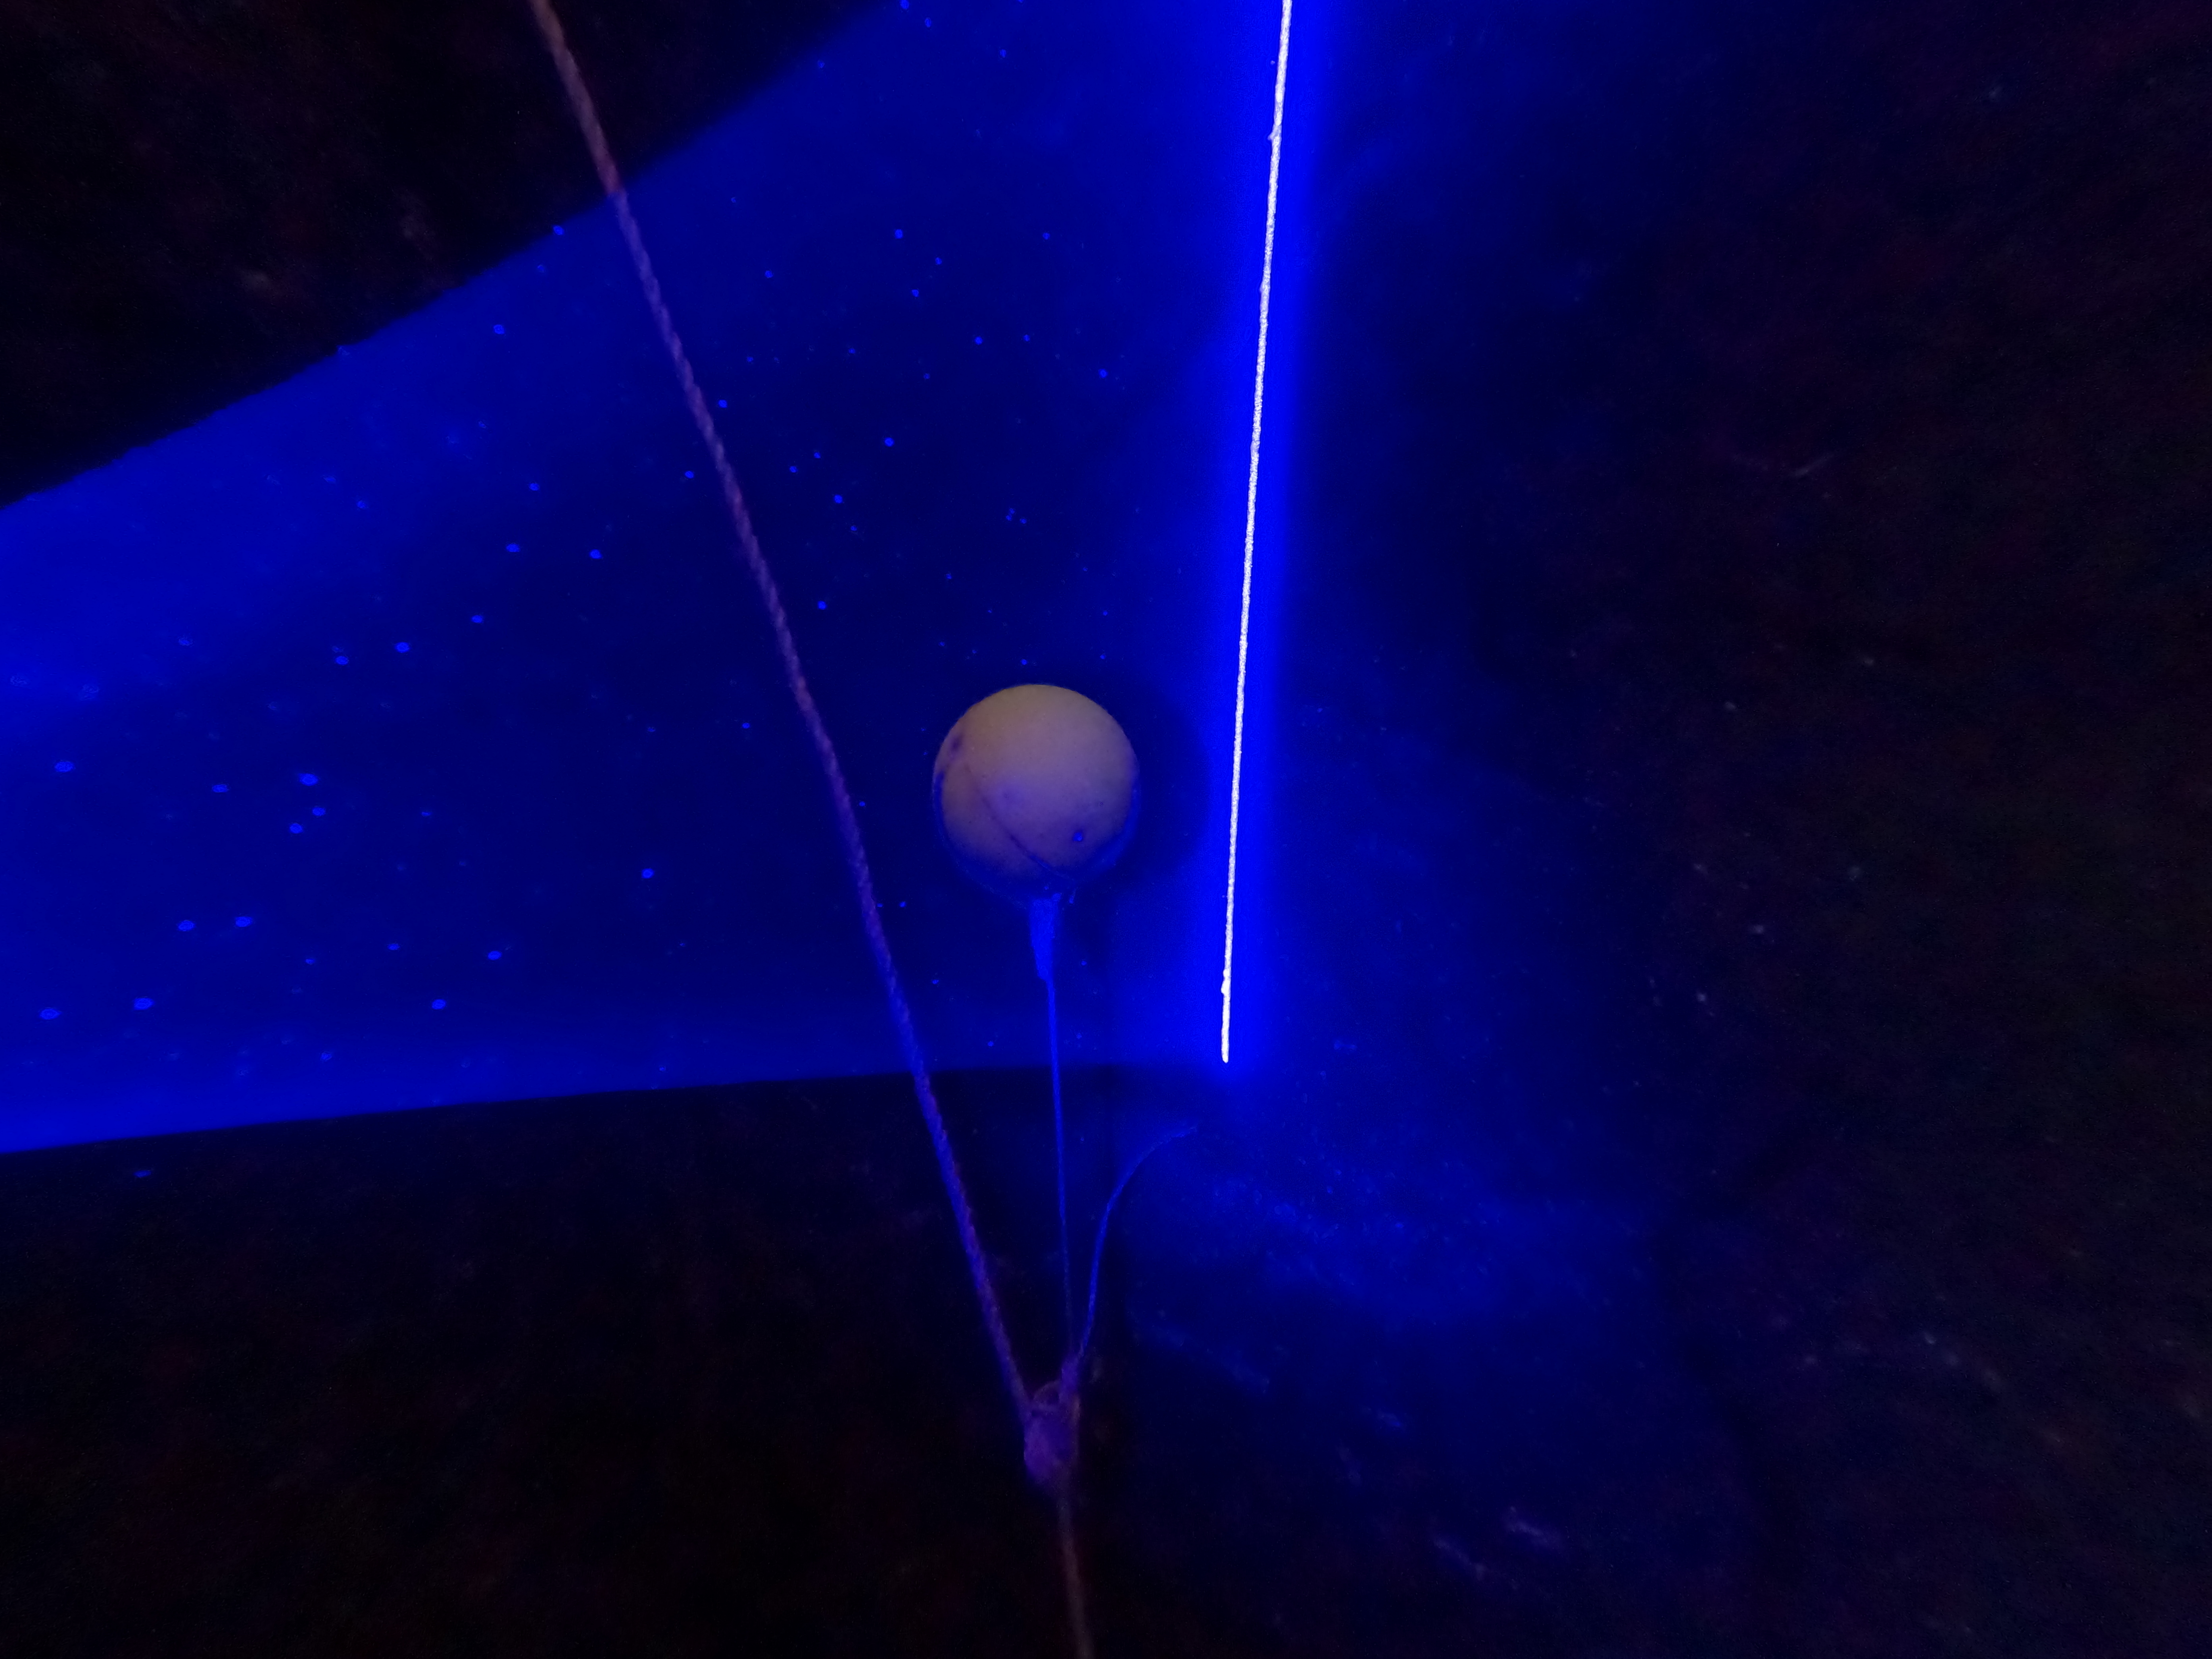

Supplement: Supplementary file 3463 [file G0030687.pdf › Level_1_1/G0030687.pdf]

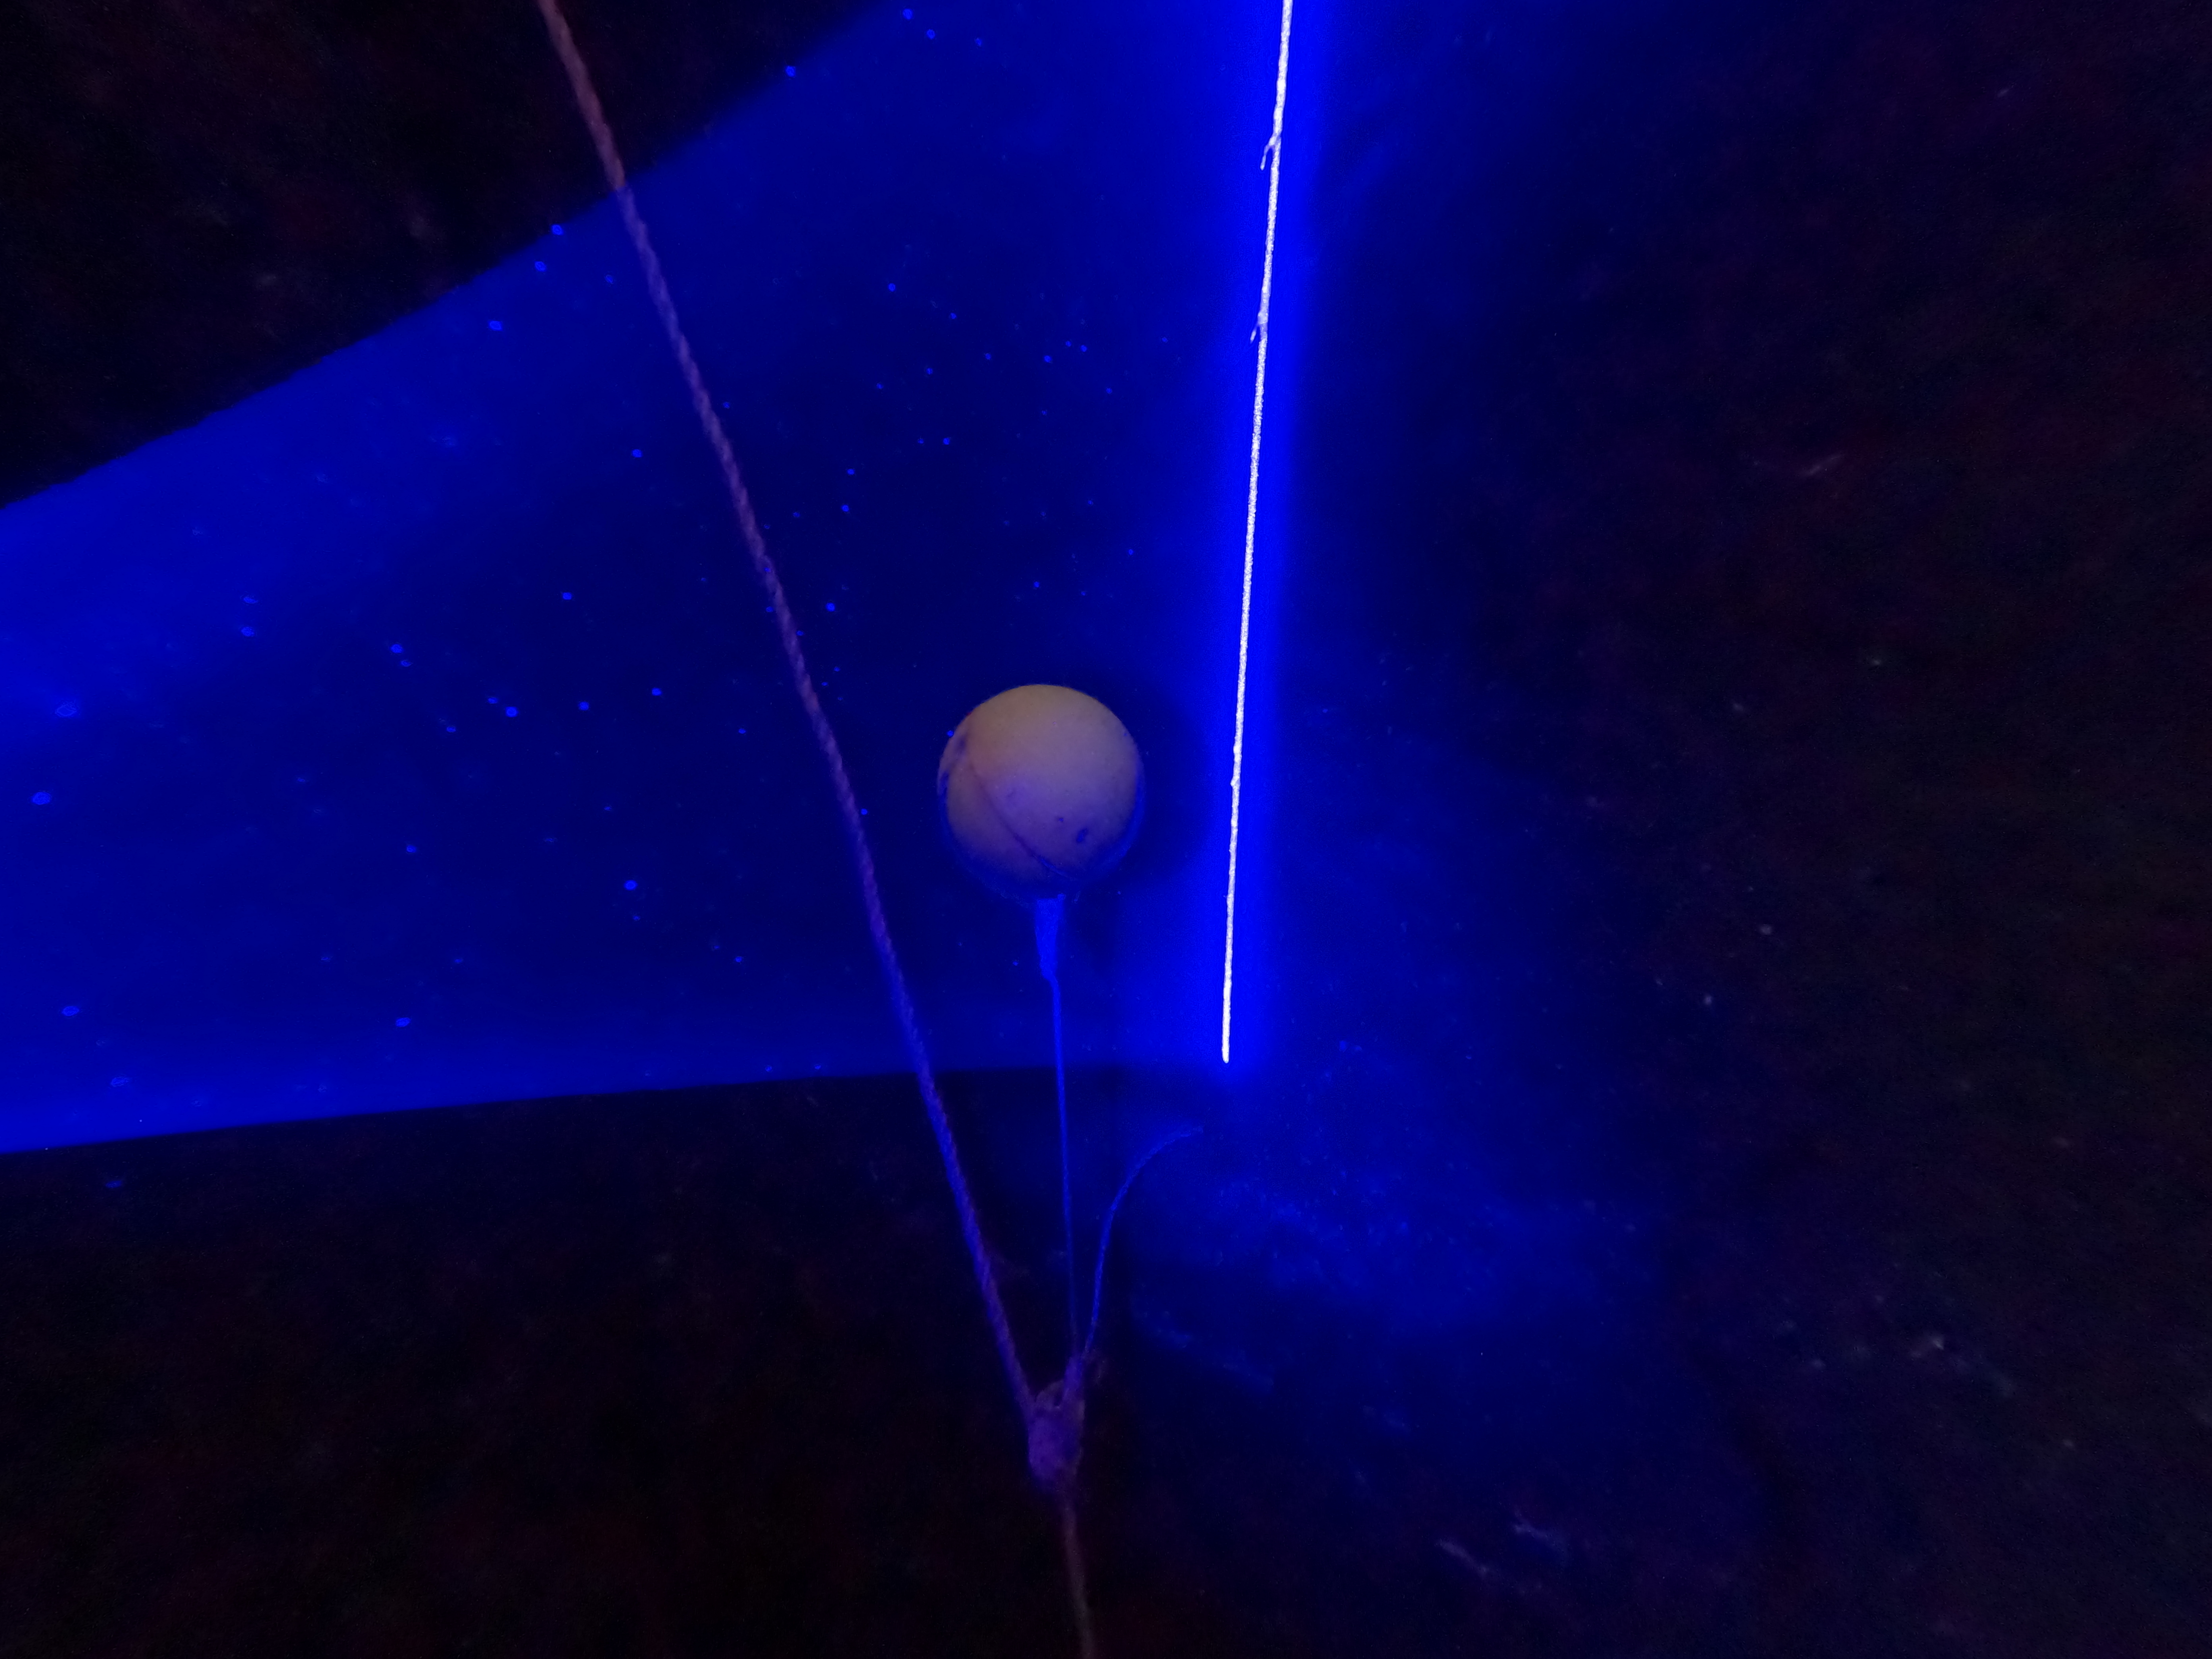

Supplement: Supplementary file 3464 [file G0030688.pdf › Level_1_1/G0030688.pdf]

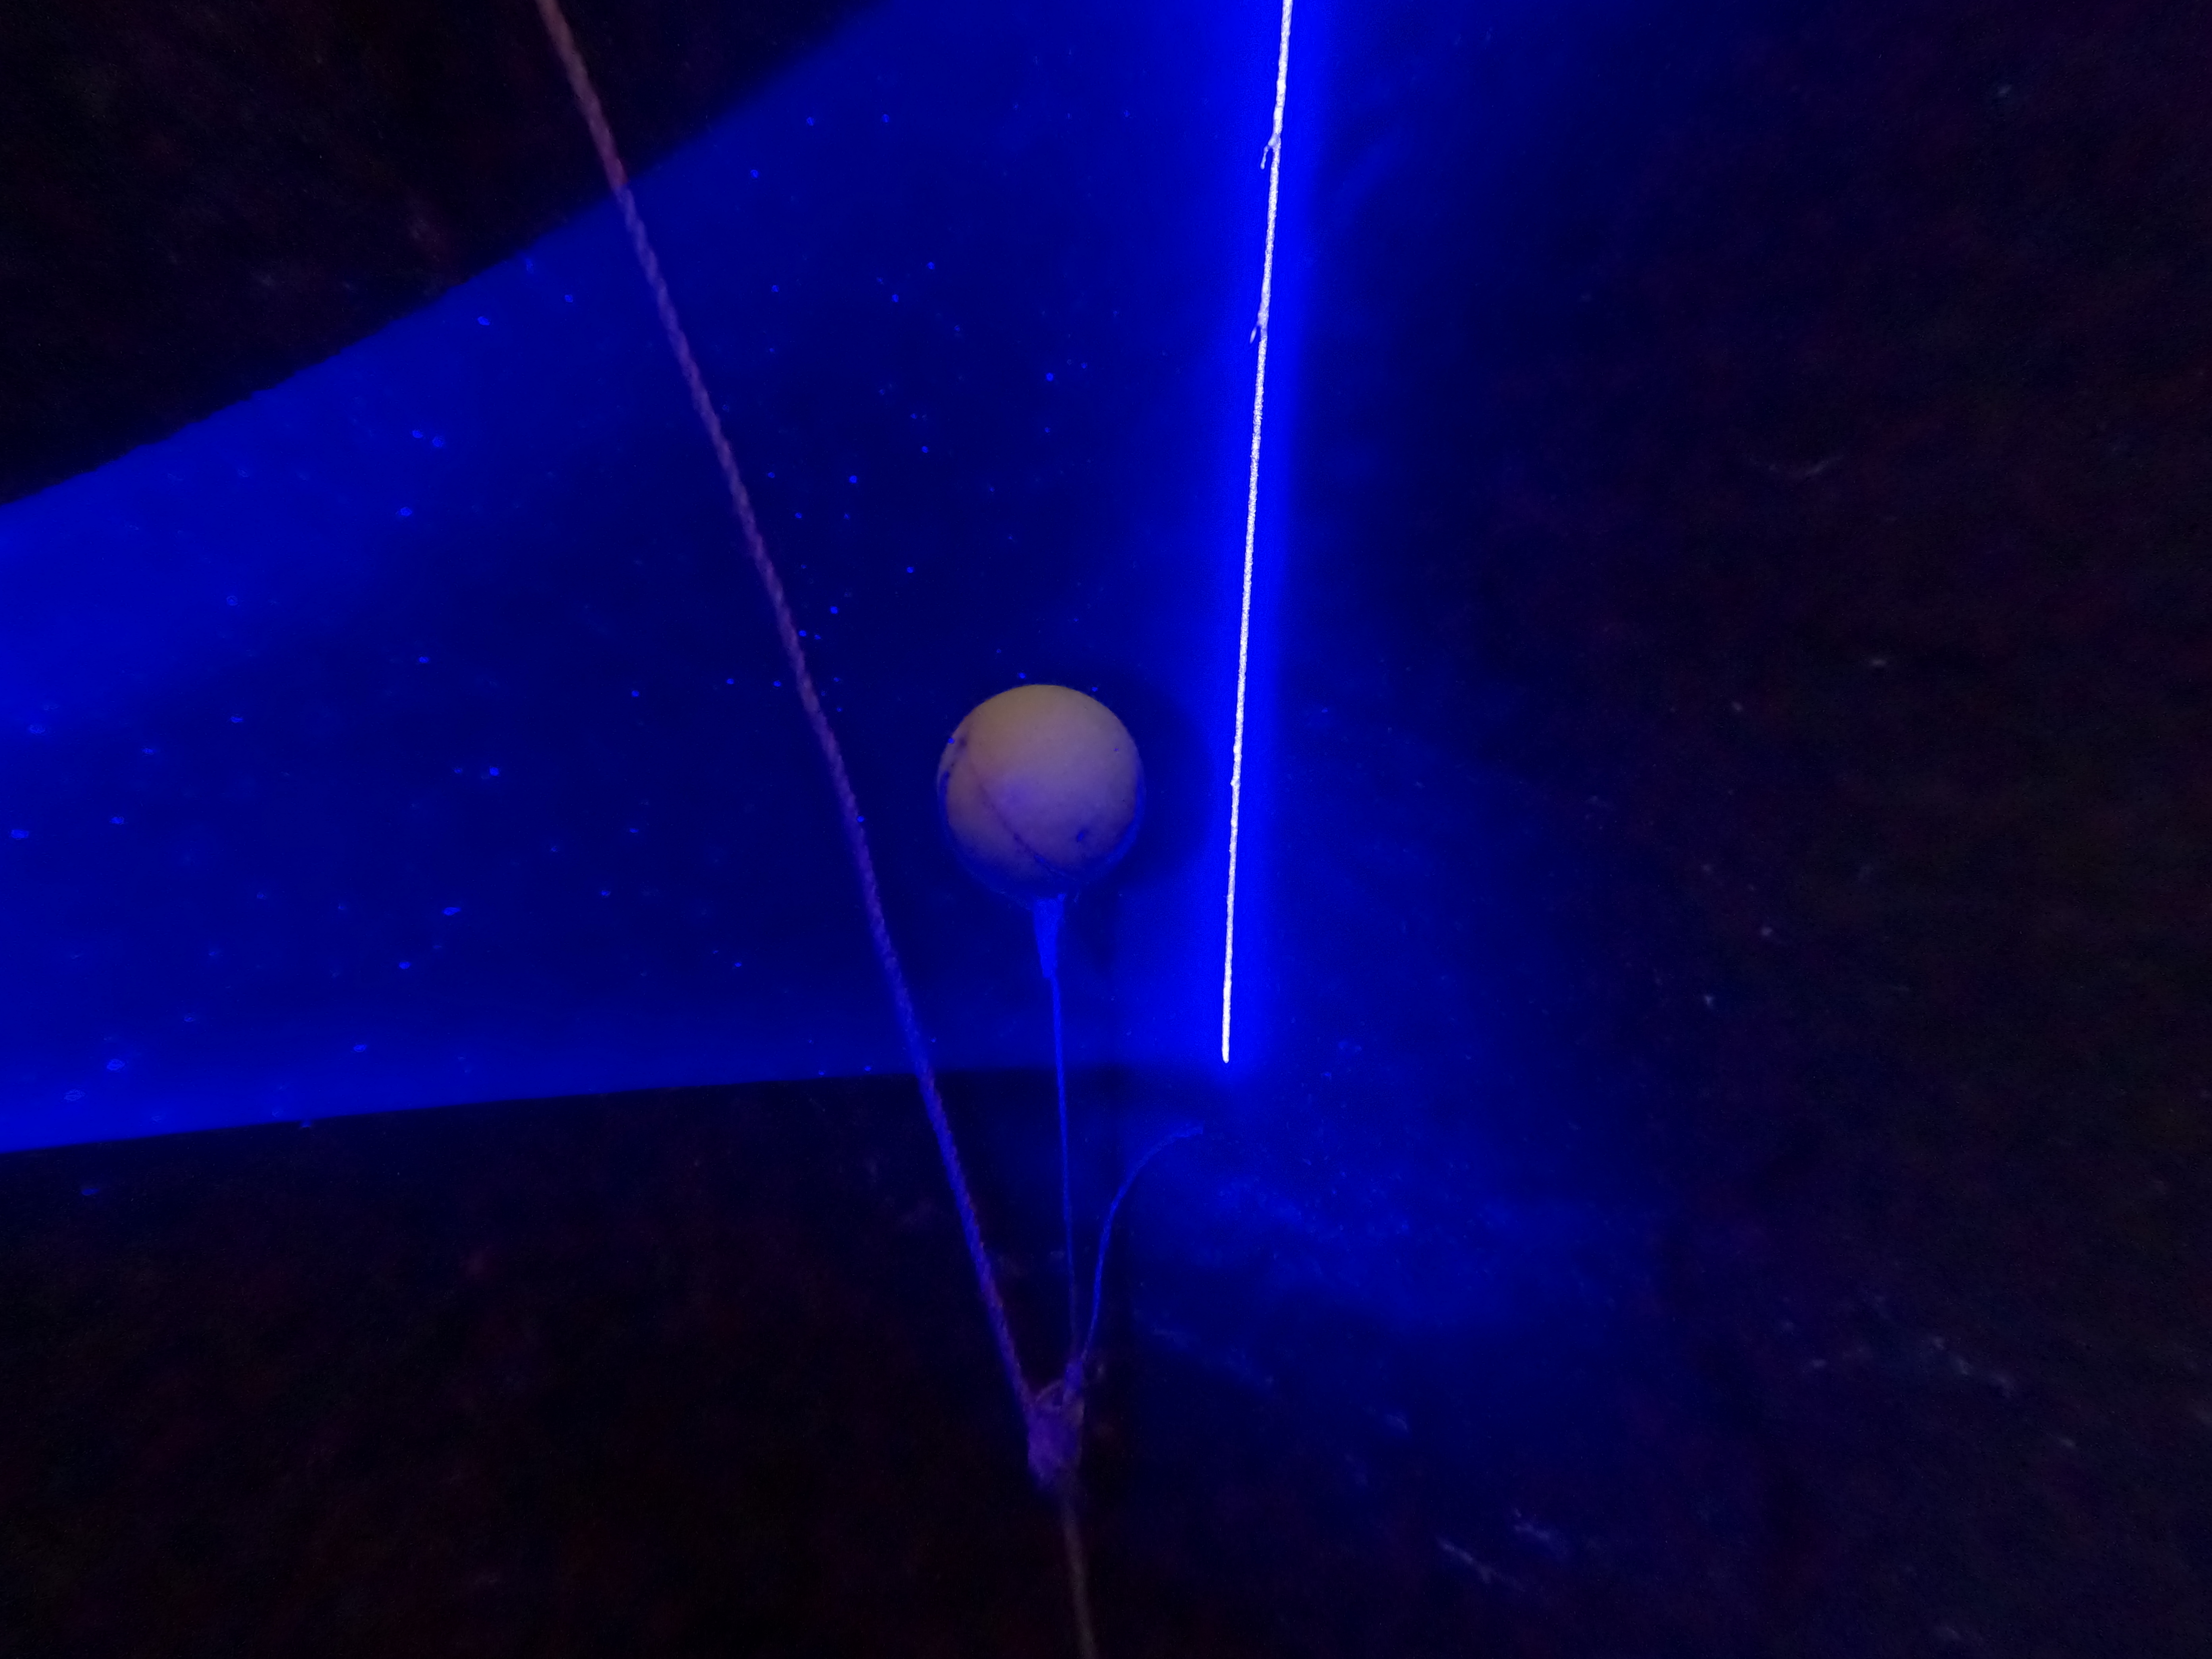

Supplement: Supplementary file 3465 [file G0030689.pdf › Level_1_1/G0030689.pdf]

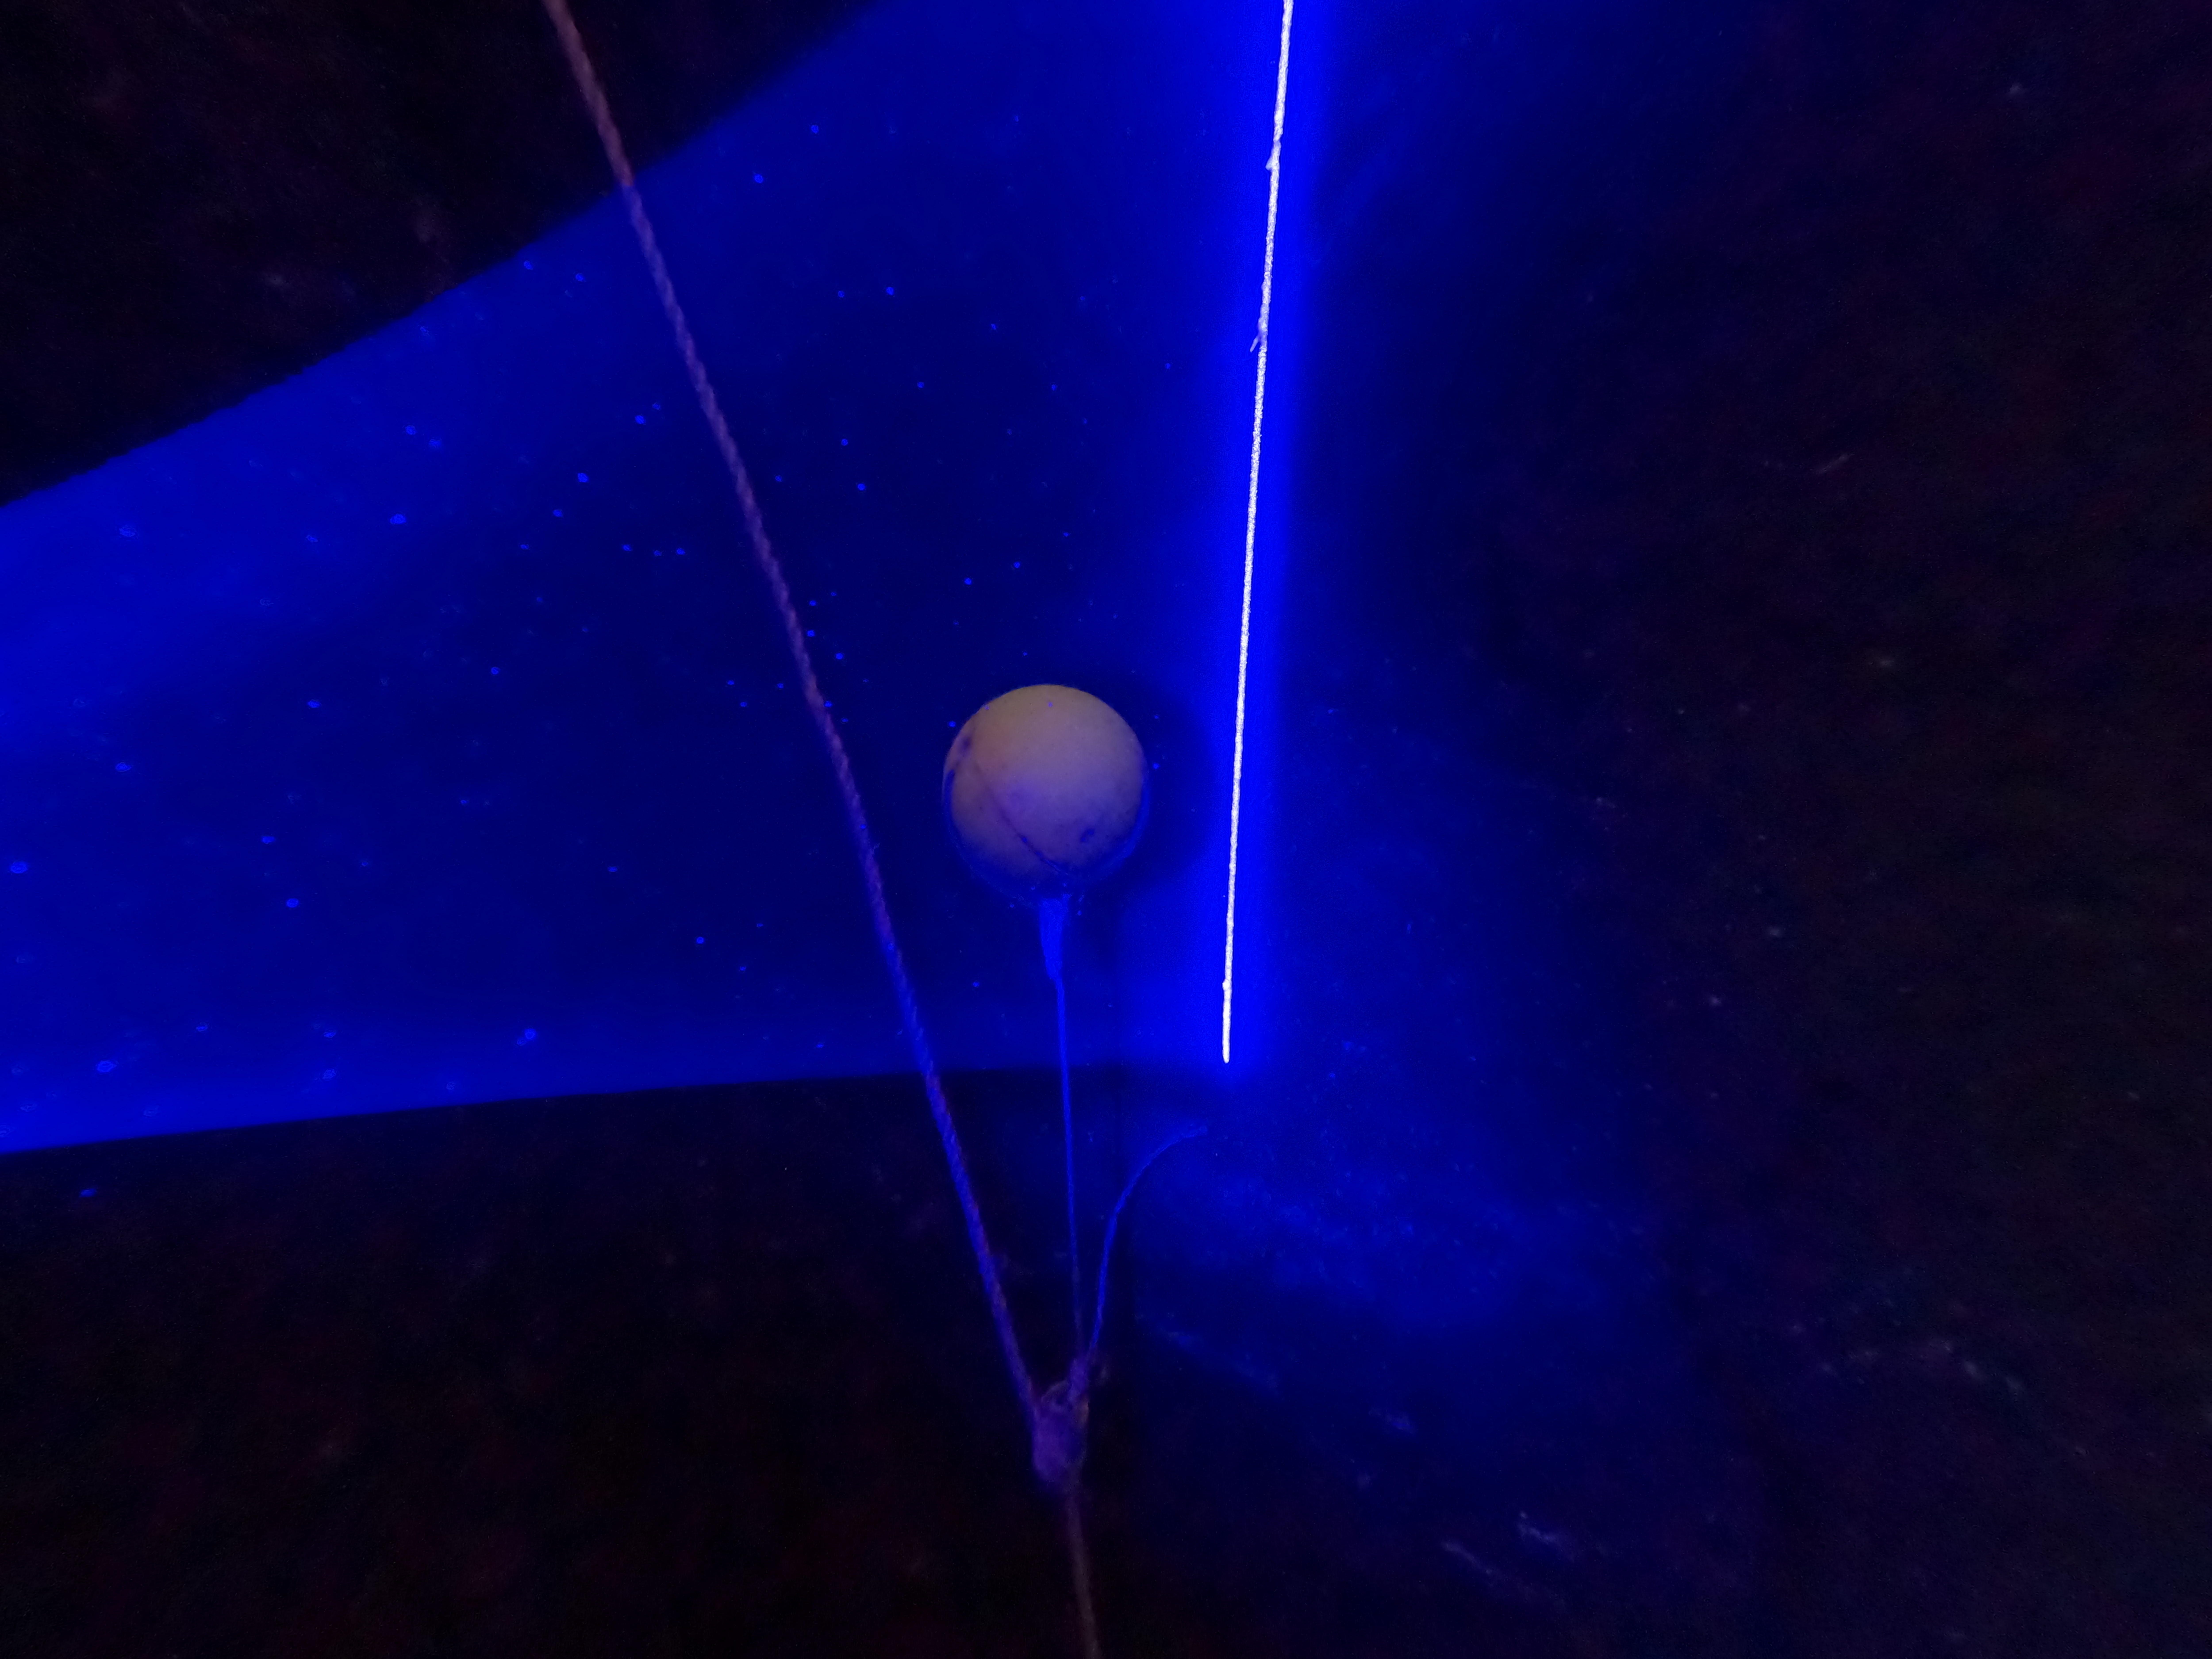

Supplement: Supplementary file 3466 [file G0030690.pdf › Level_1_1/G0030690.pdf]

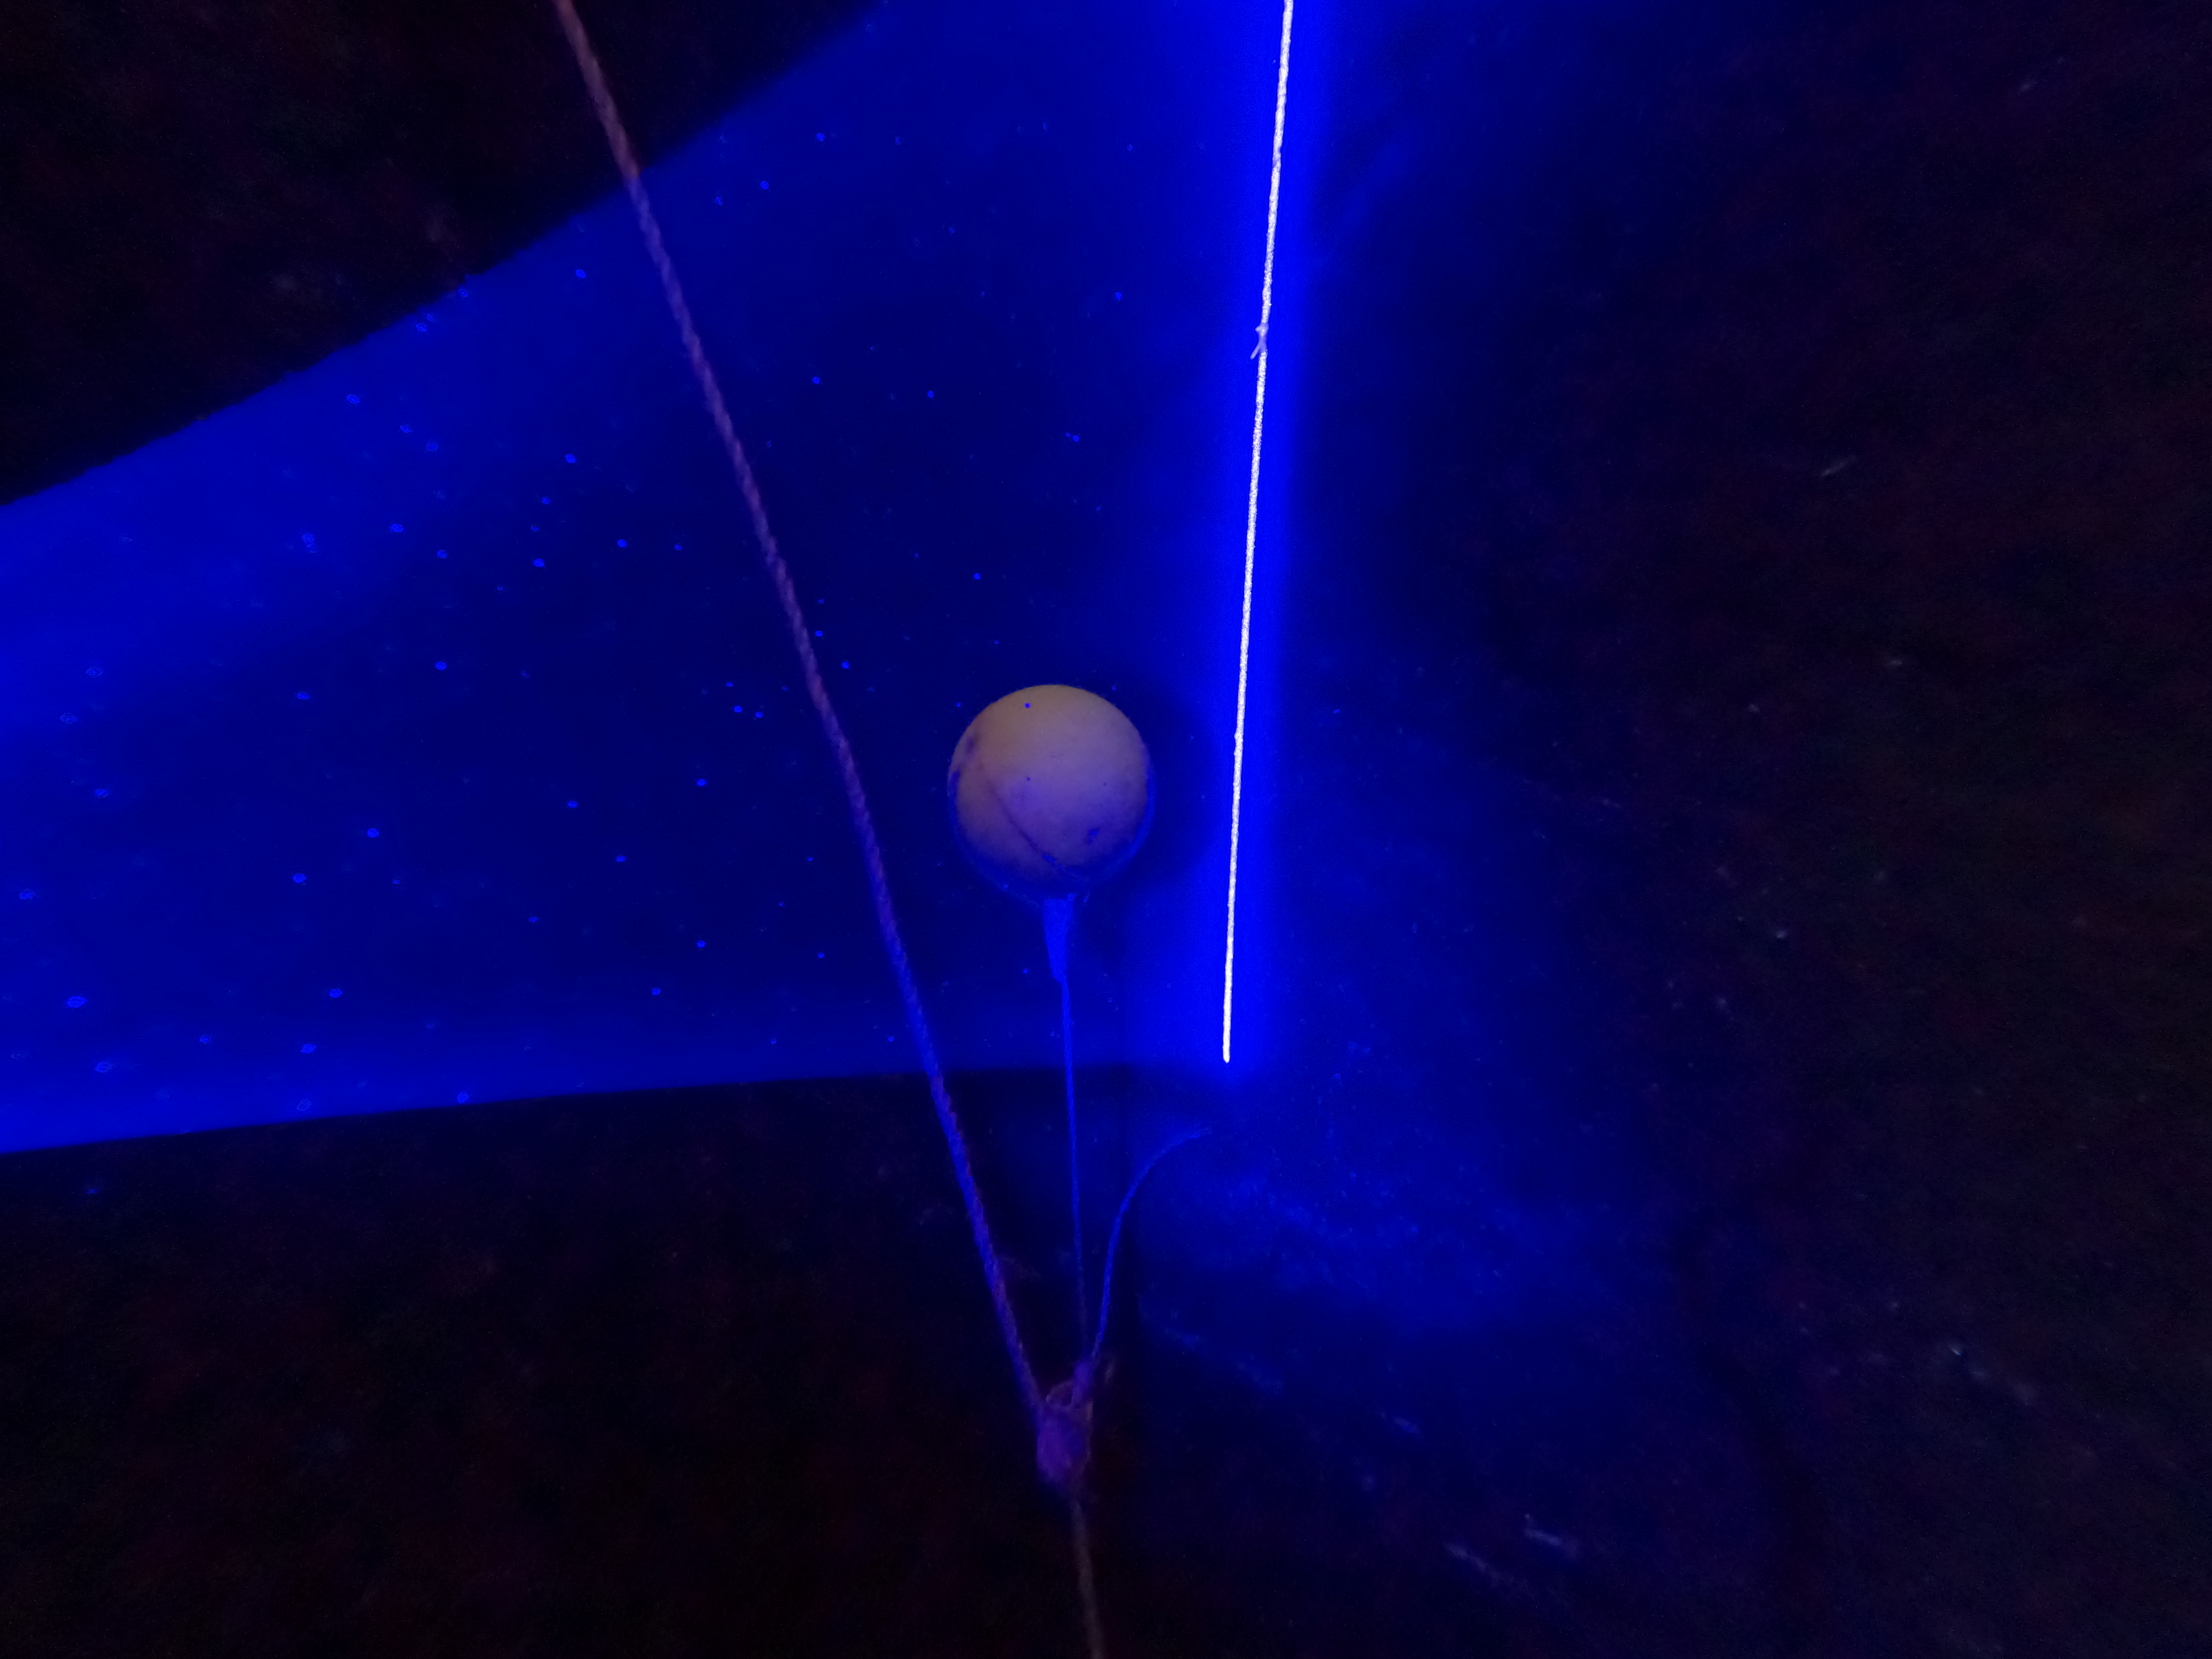

Supplement: Supplementary file 3467 [file G0030691.pdf › Level_1_1/G0030691.pdf]

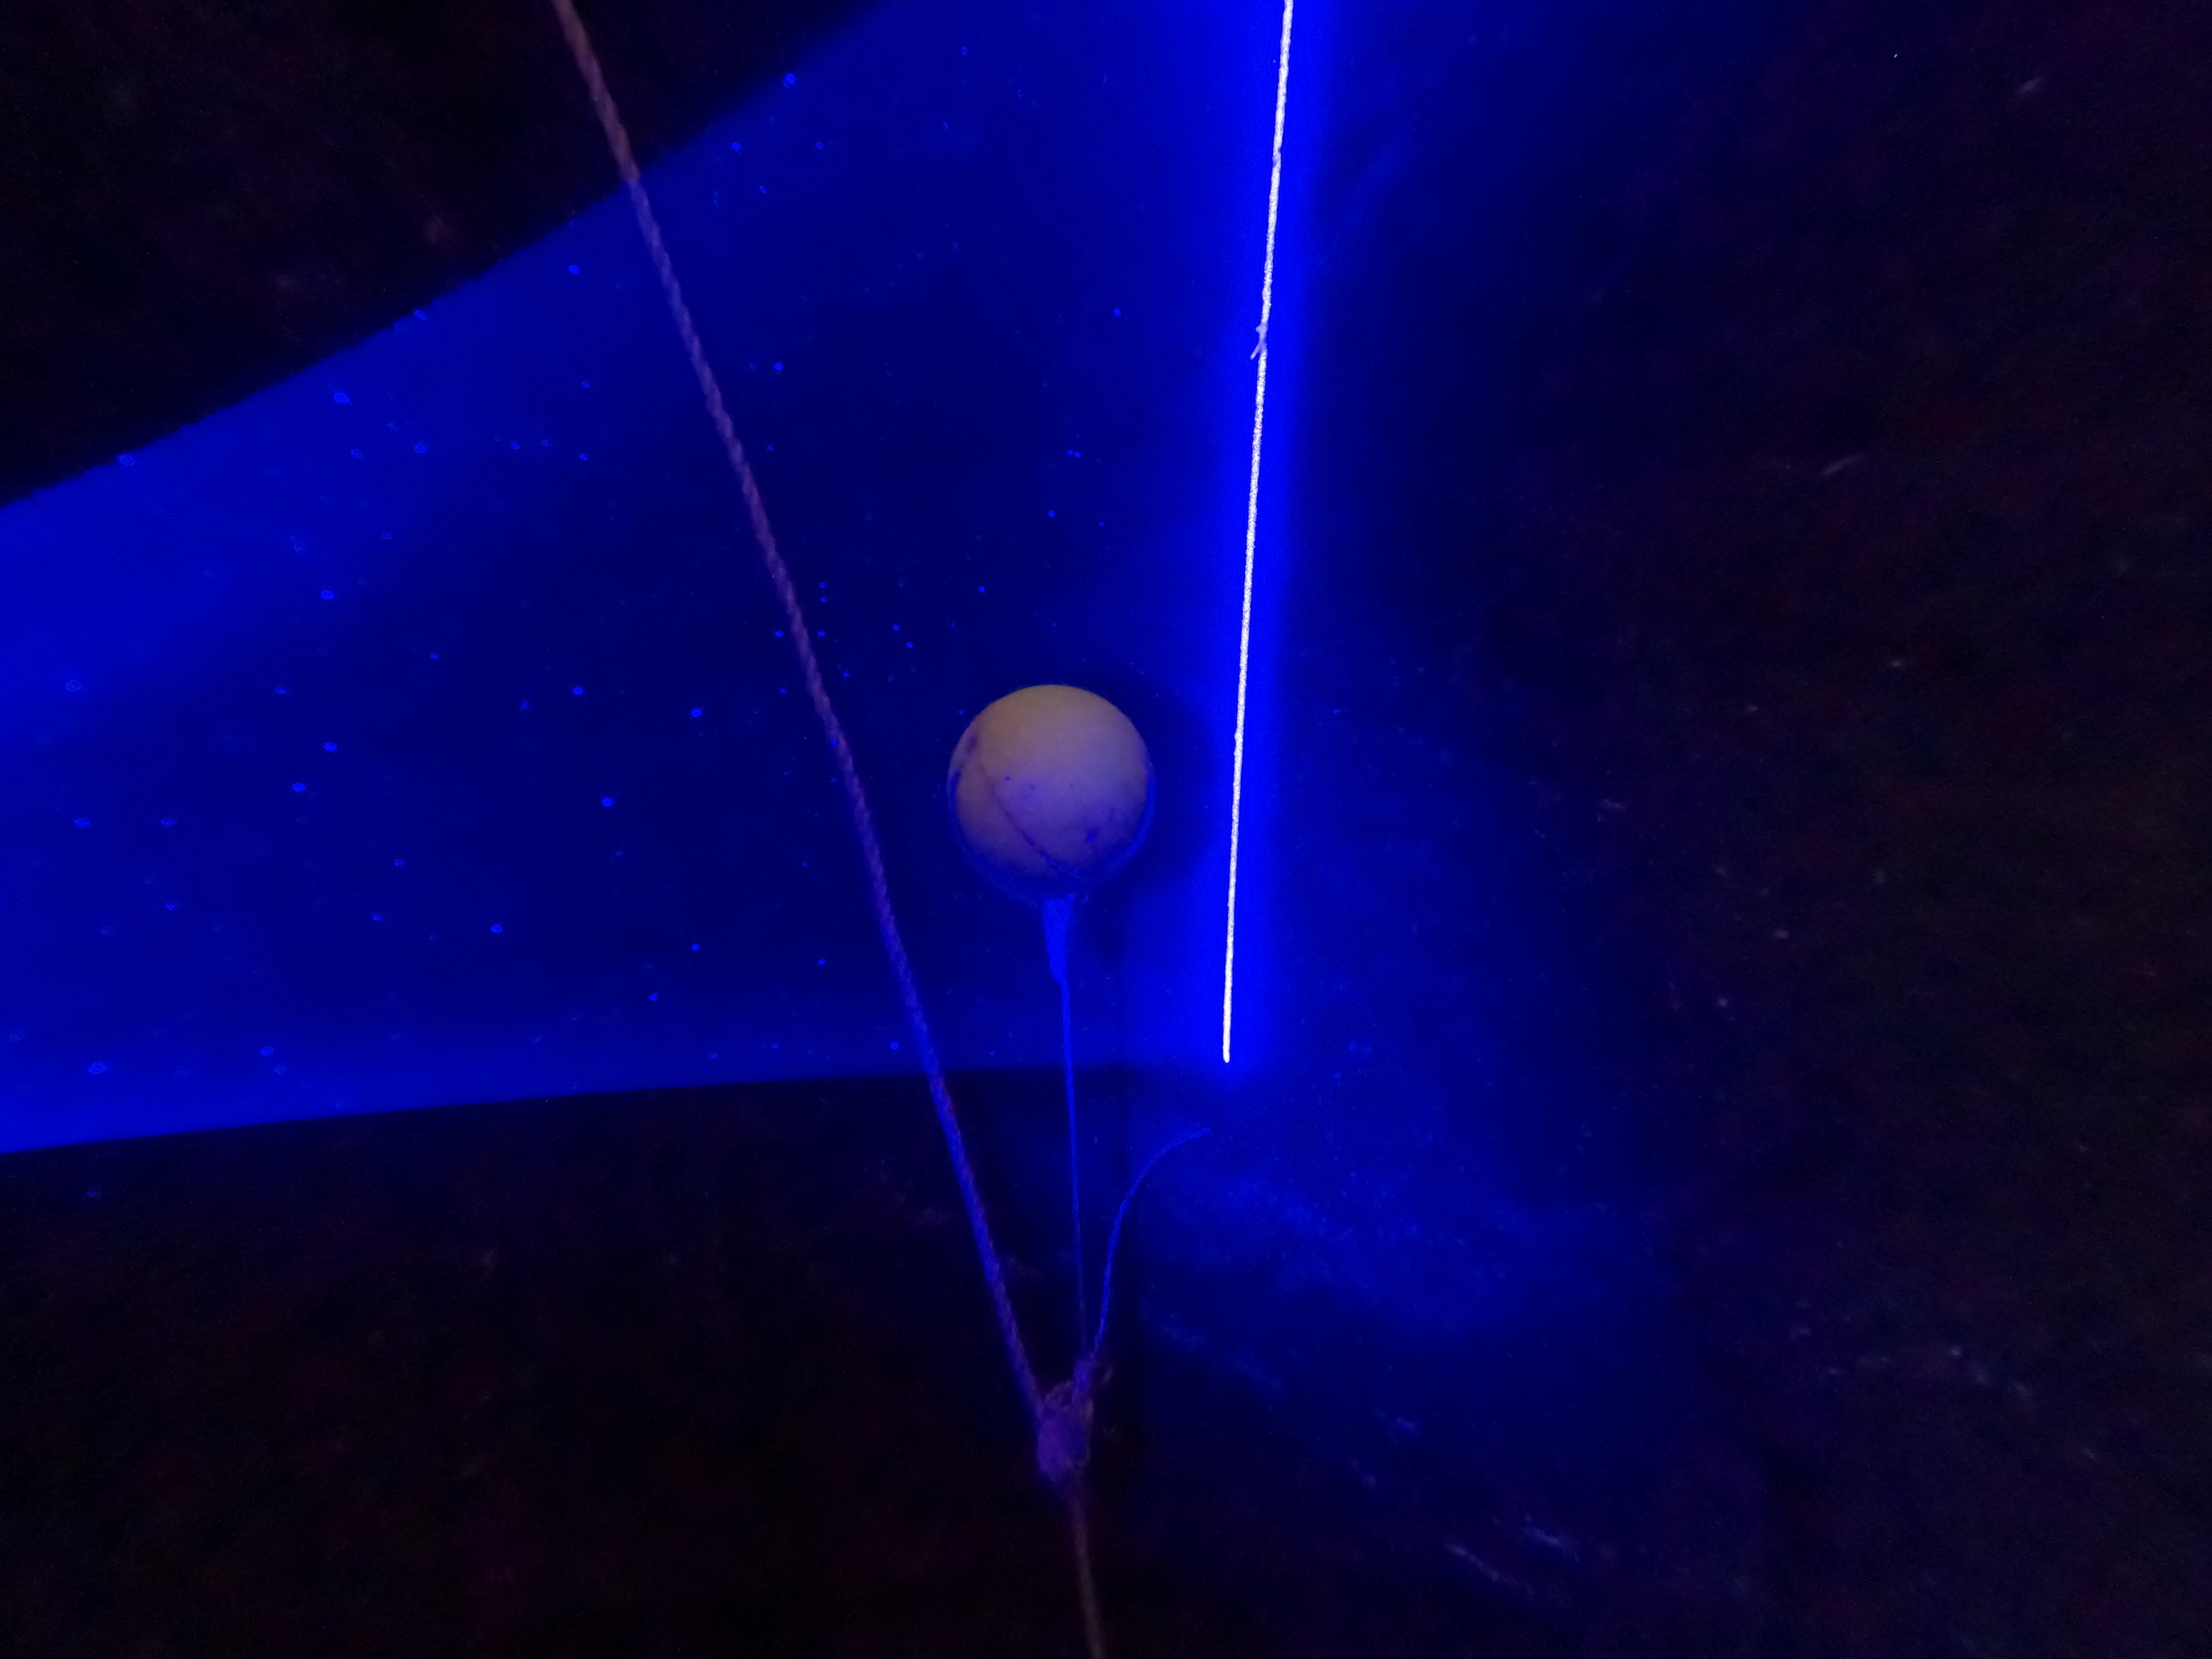

Supplement: Supplementary file 3468 [file G0030692.pdf › Level_1_1/G0030692.pdf]

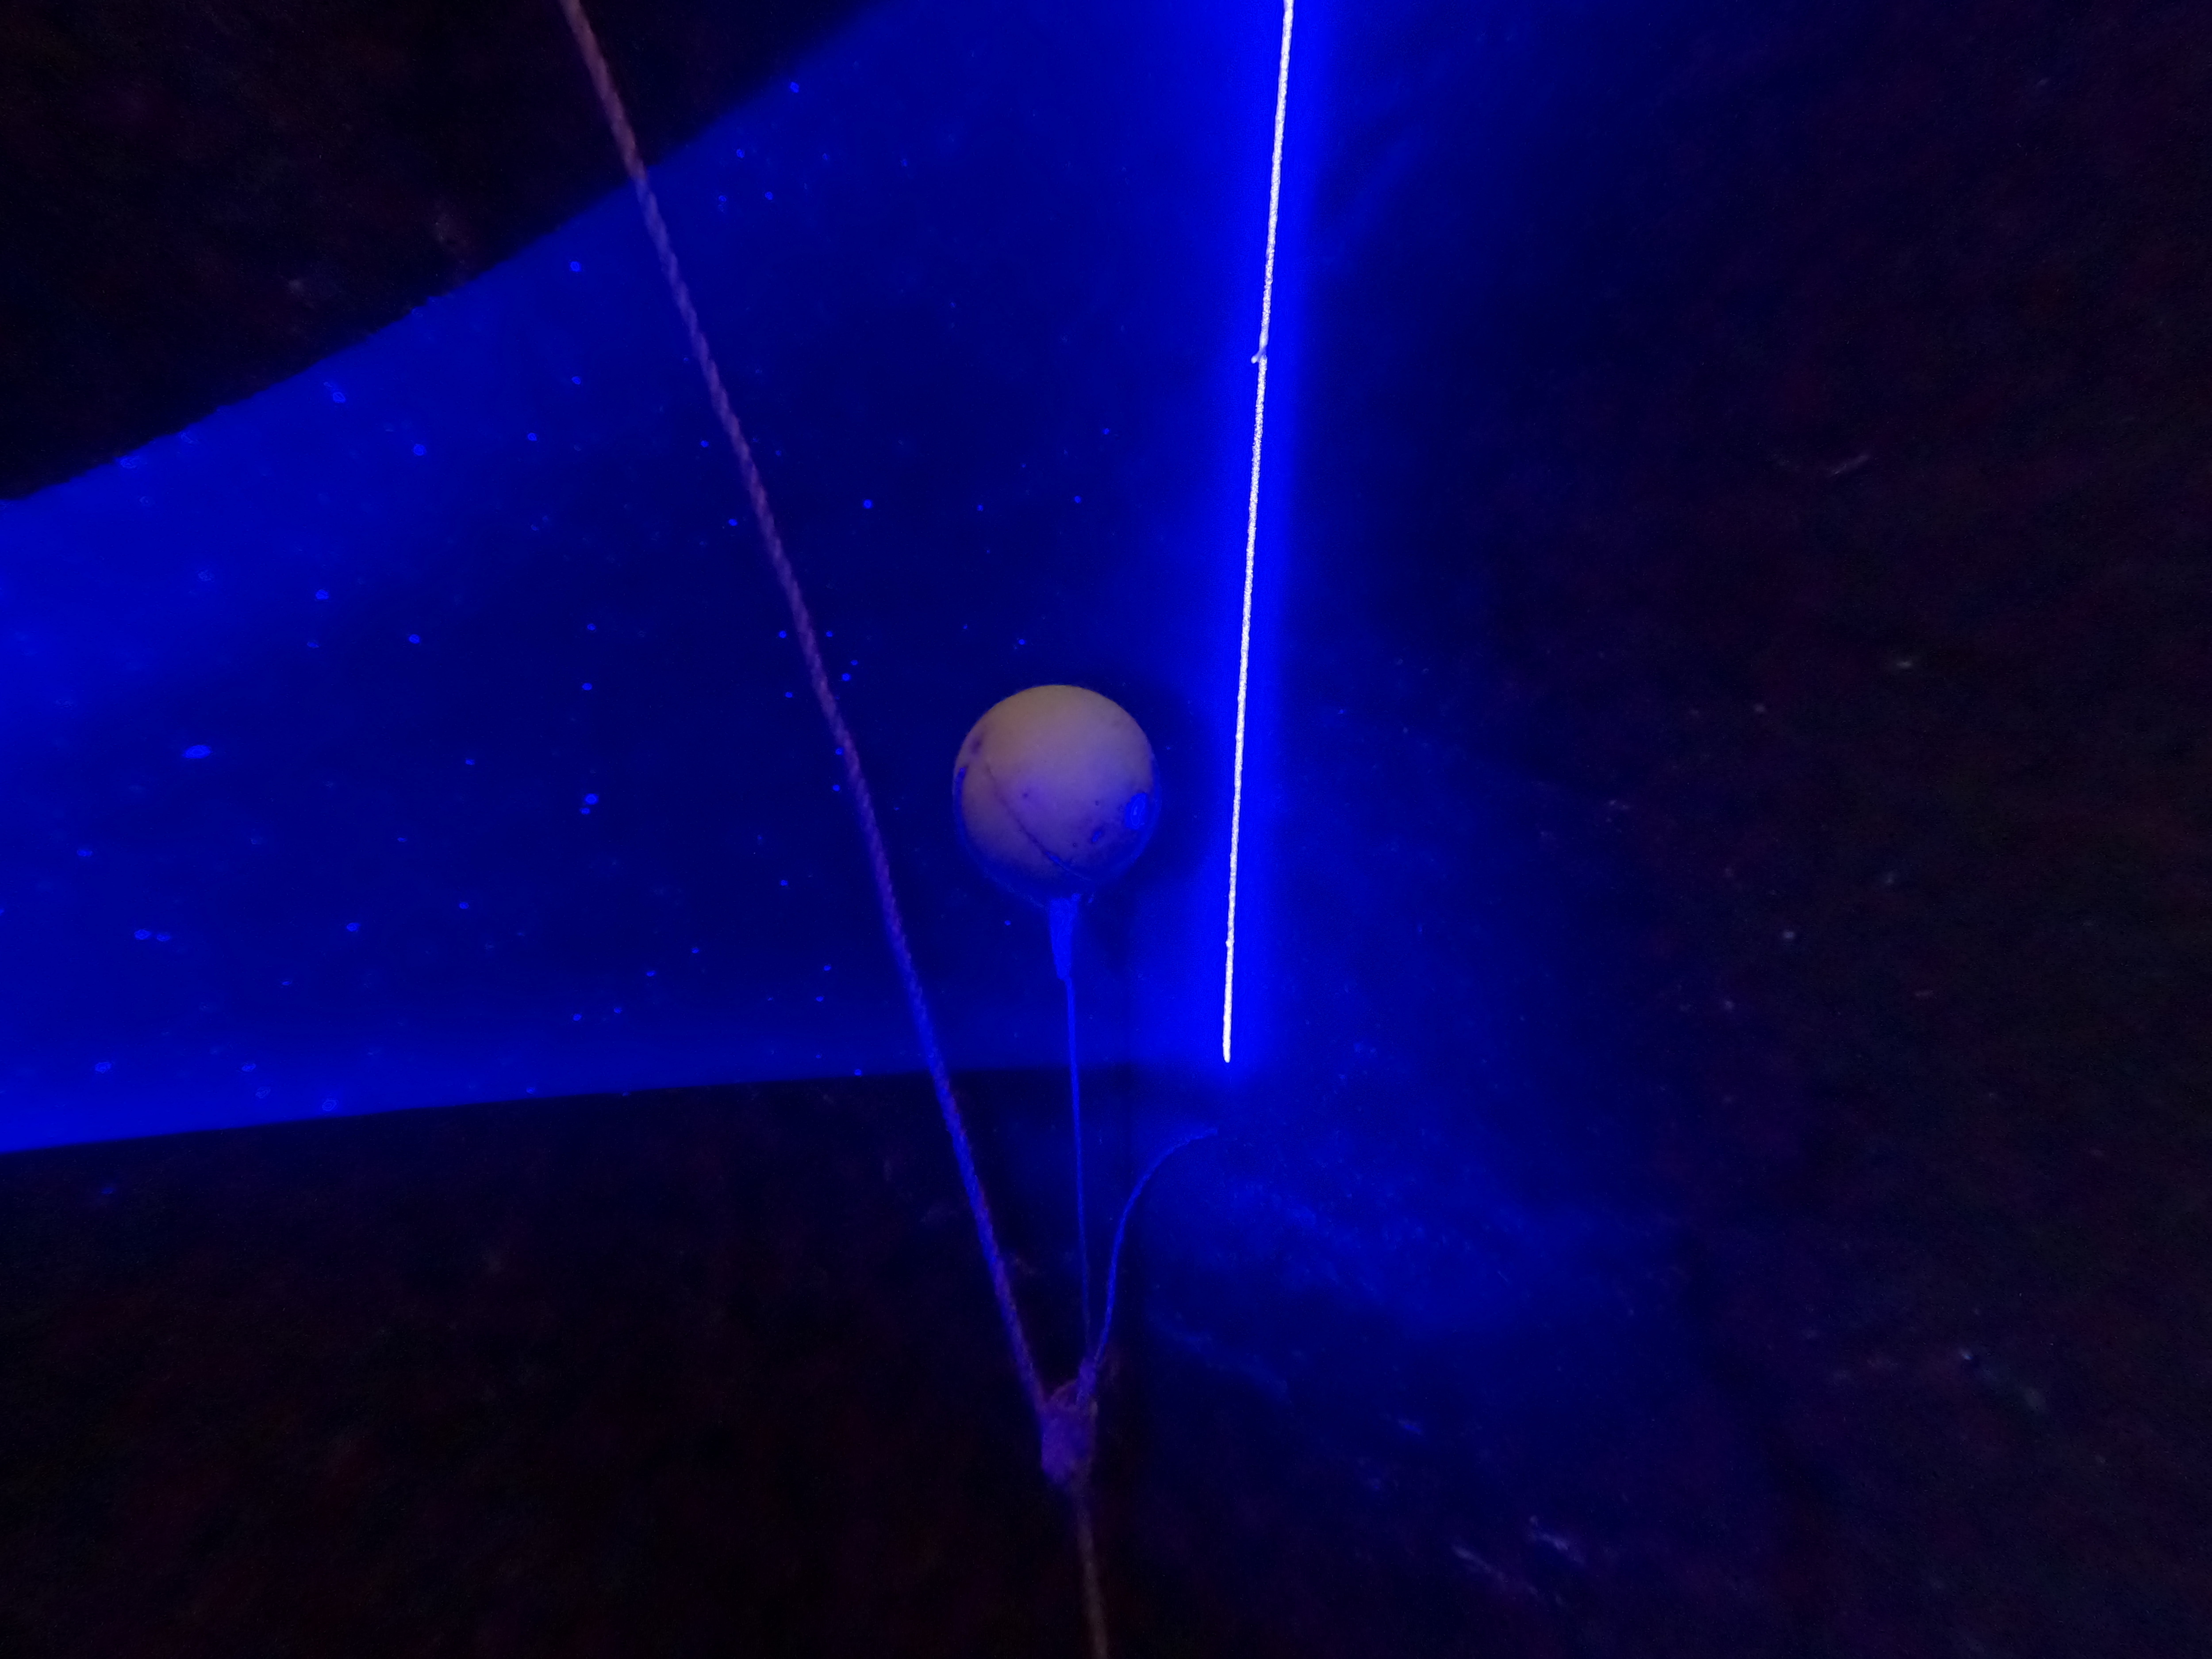

Supplement: Supplementary file 3469 [file G0030693.pdf › Level_1_1/G0030693.pdf]

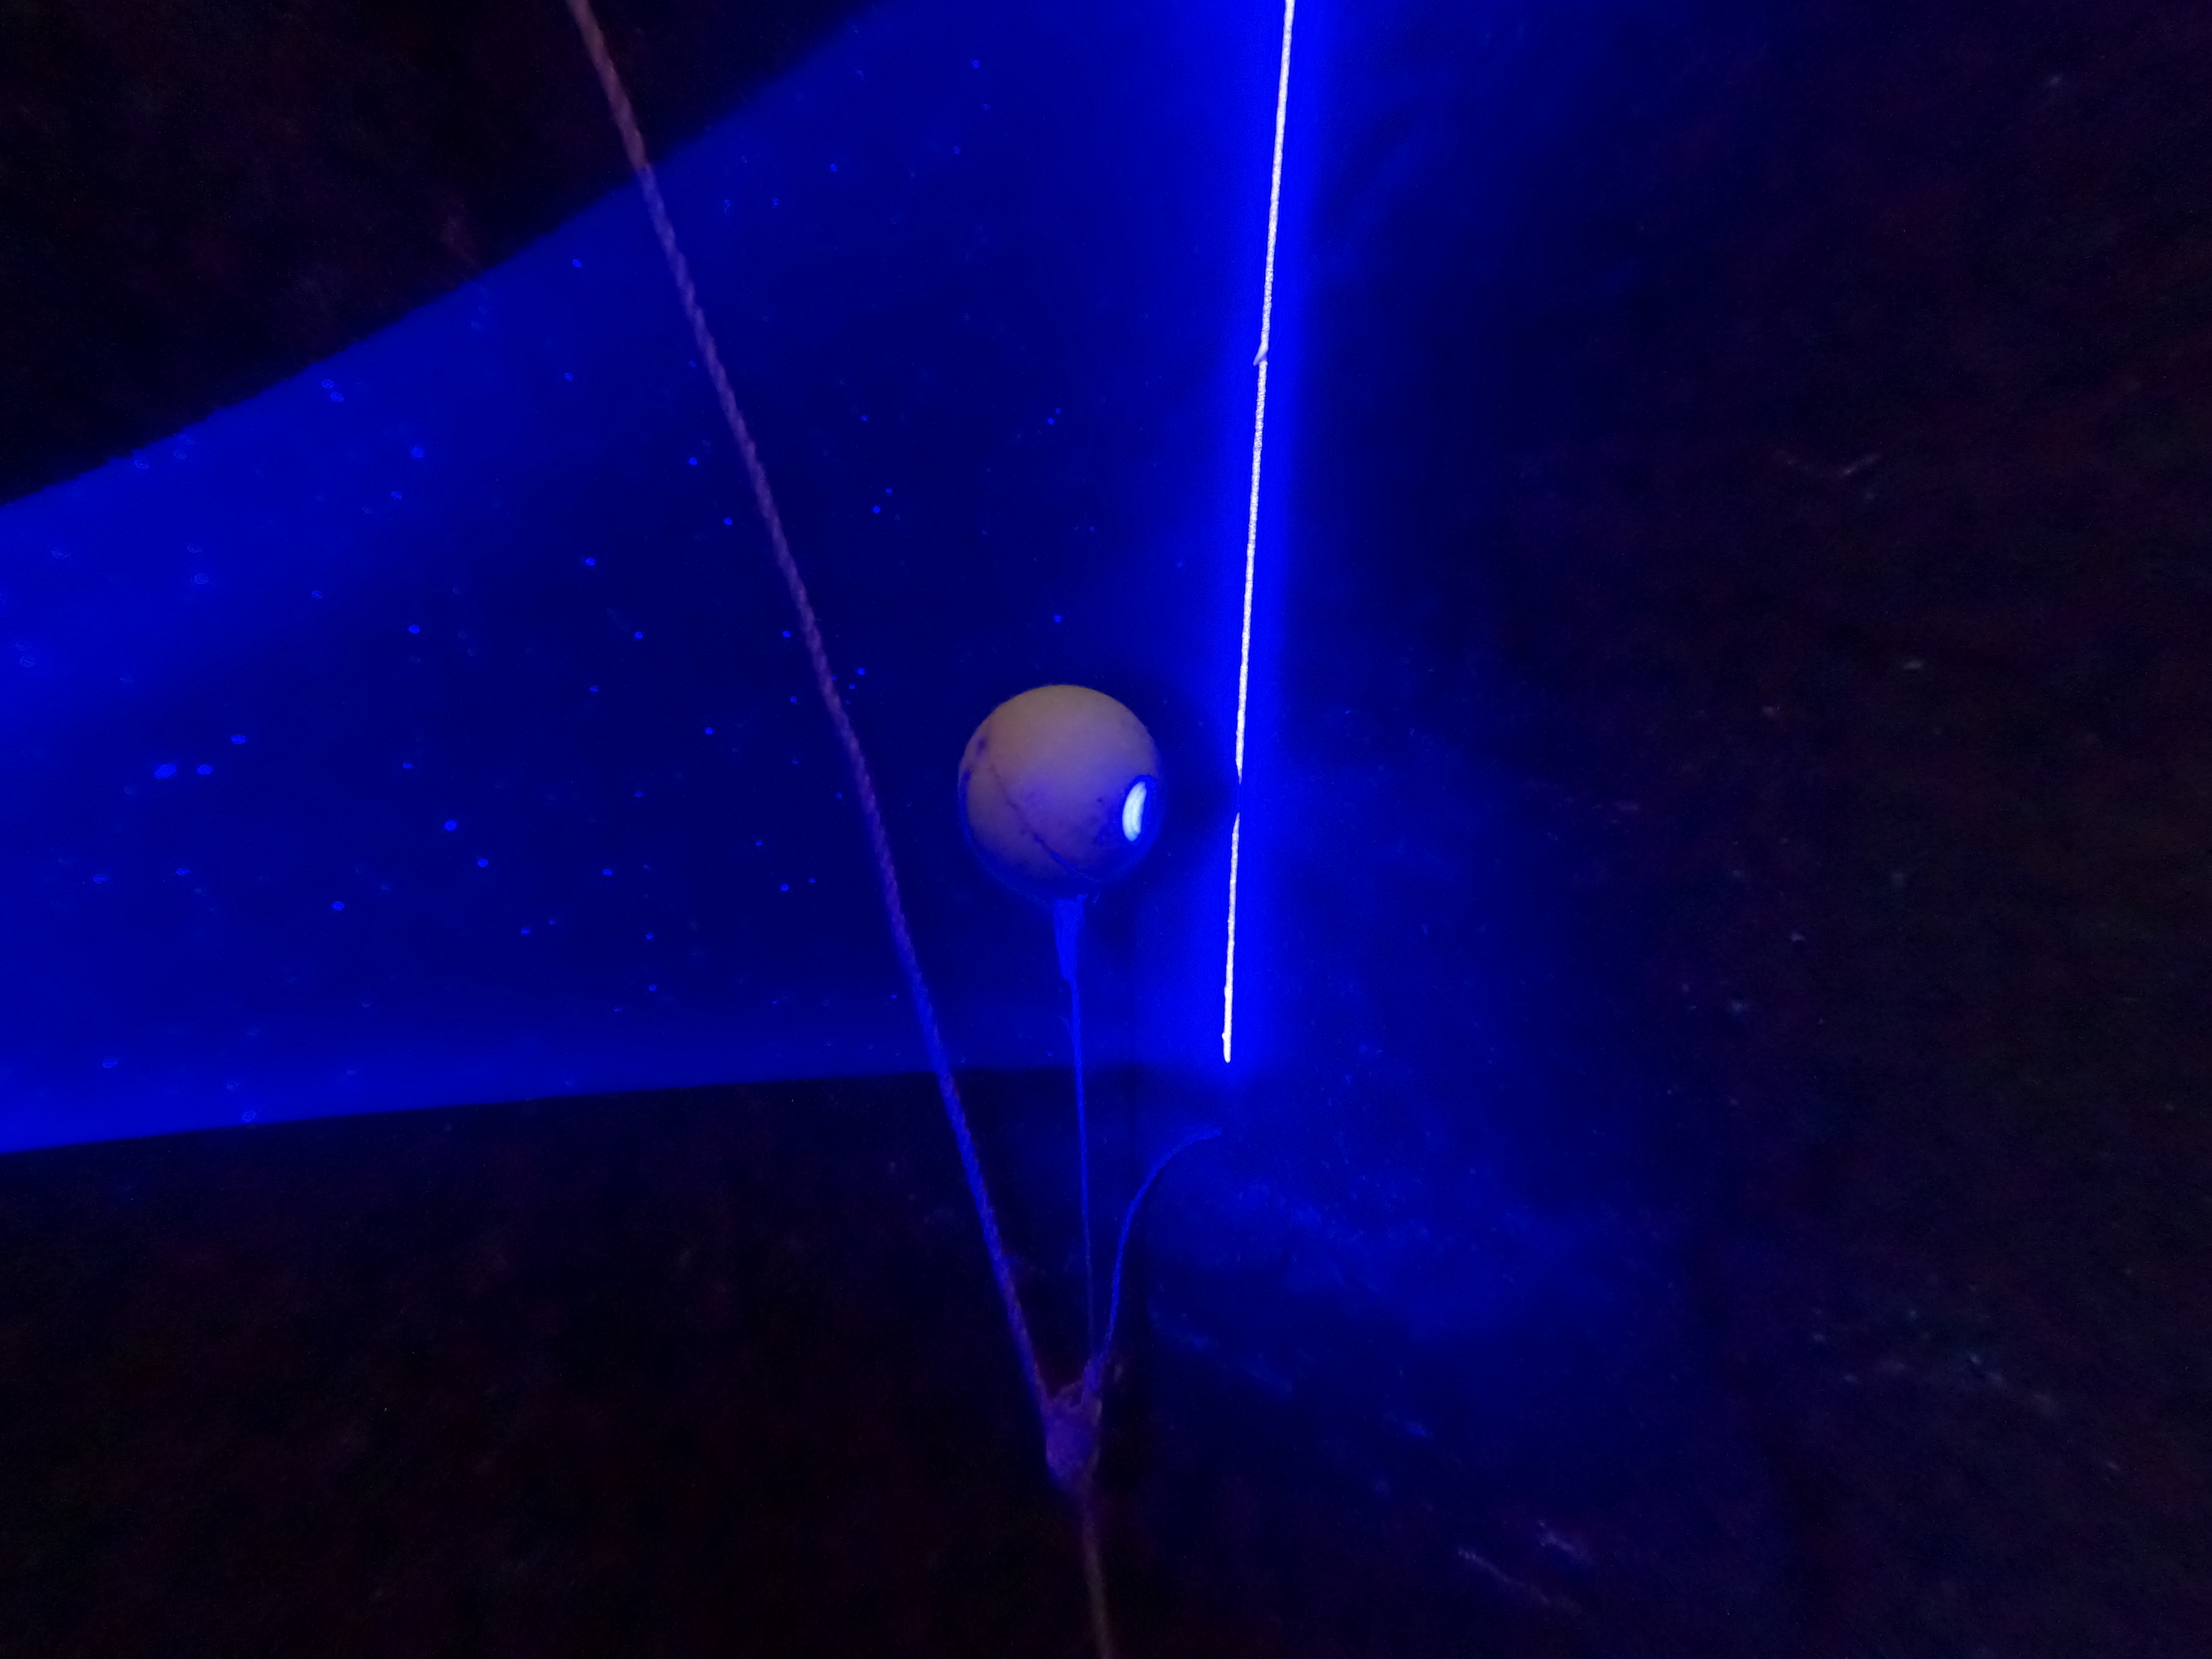

Supplement: Supplementary file 3470 [file G0030694.pdf › Level_1_1/G0030694.pdf]

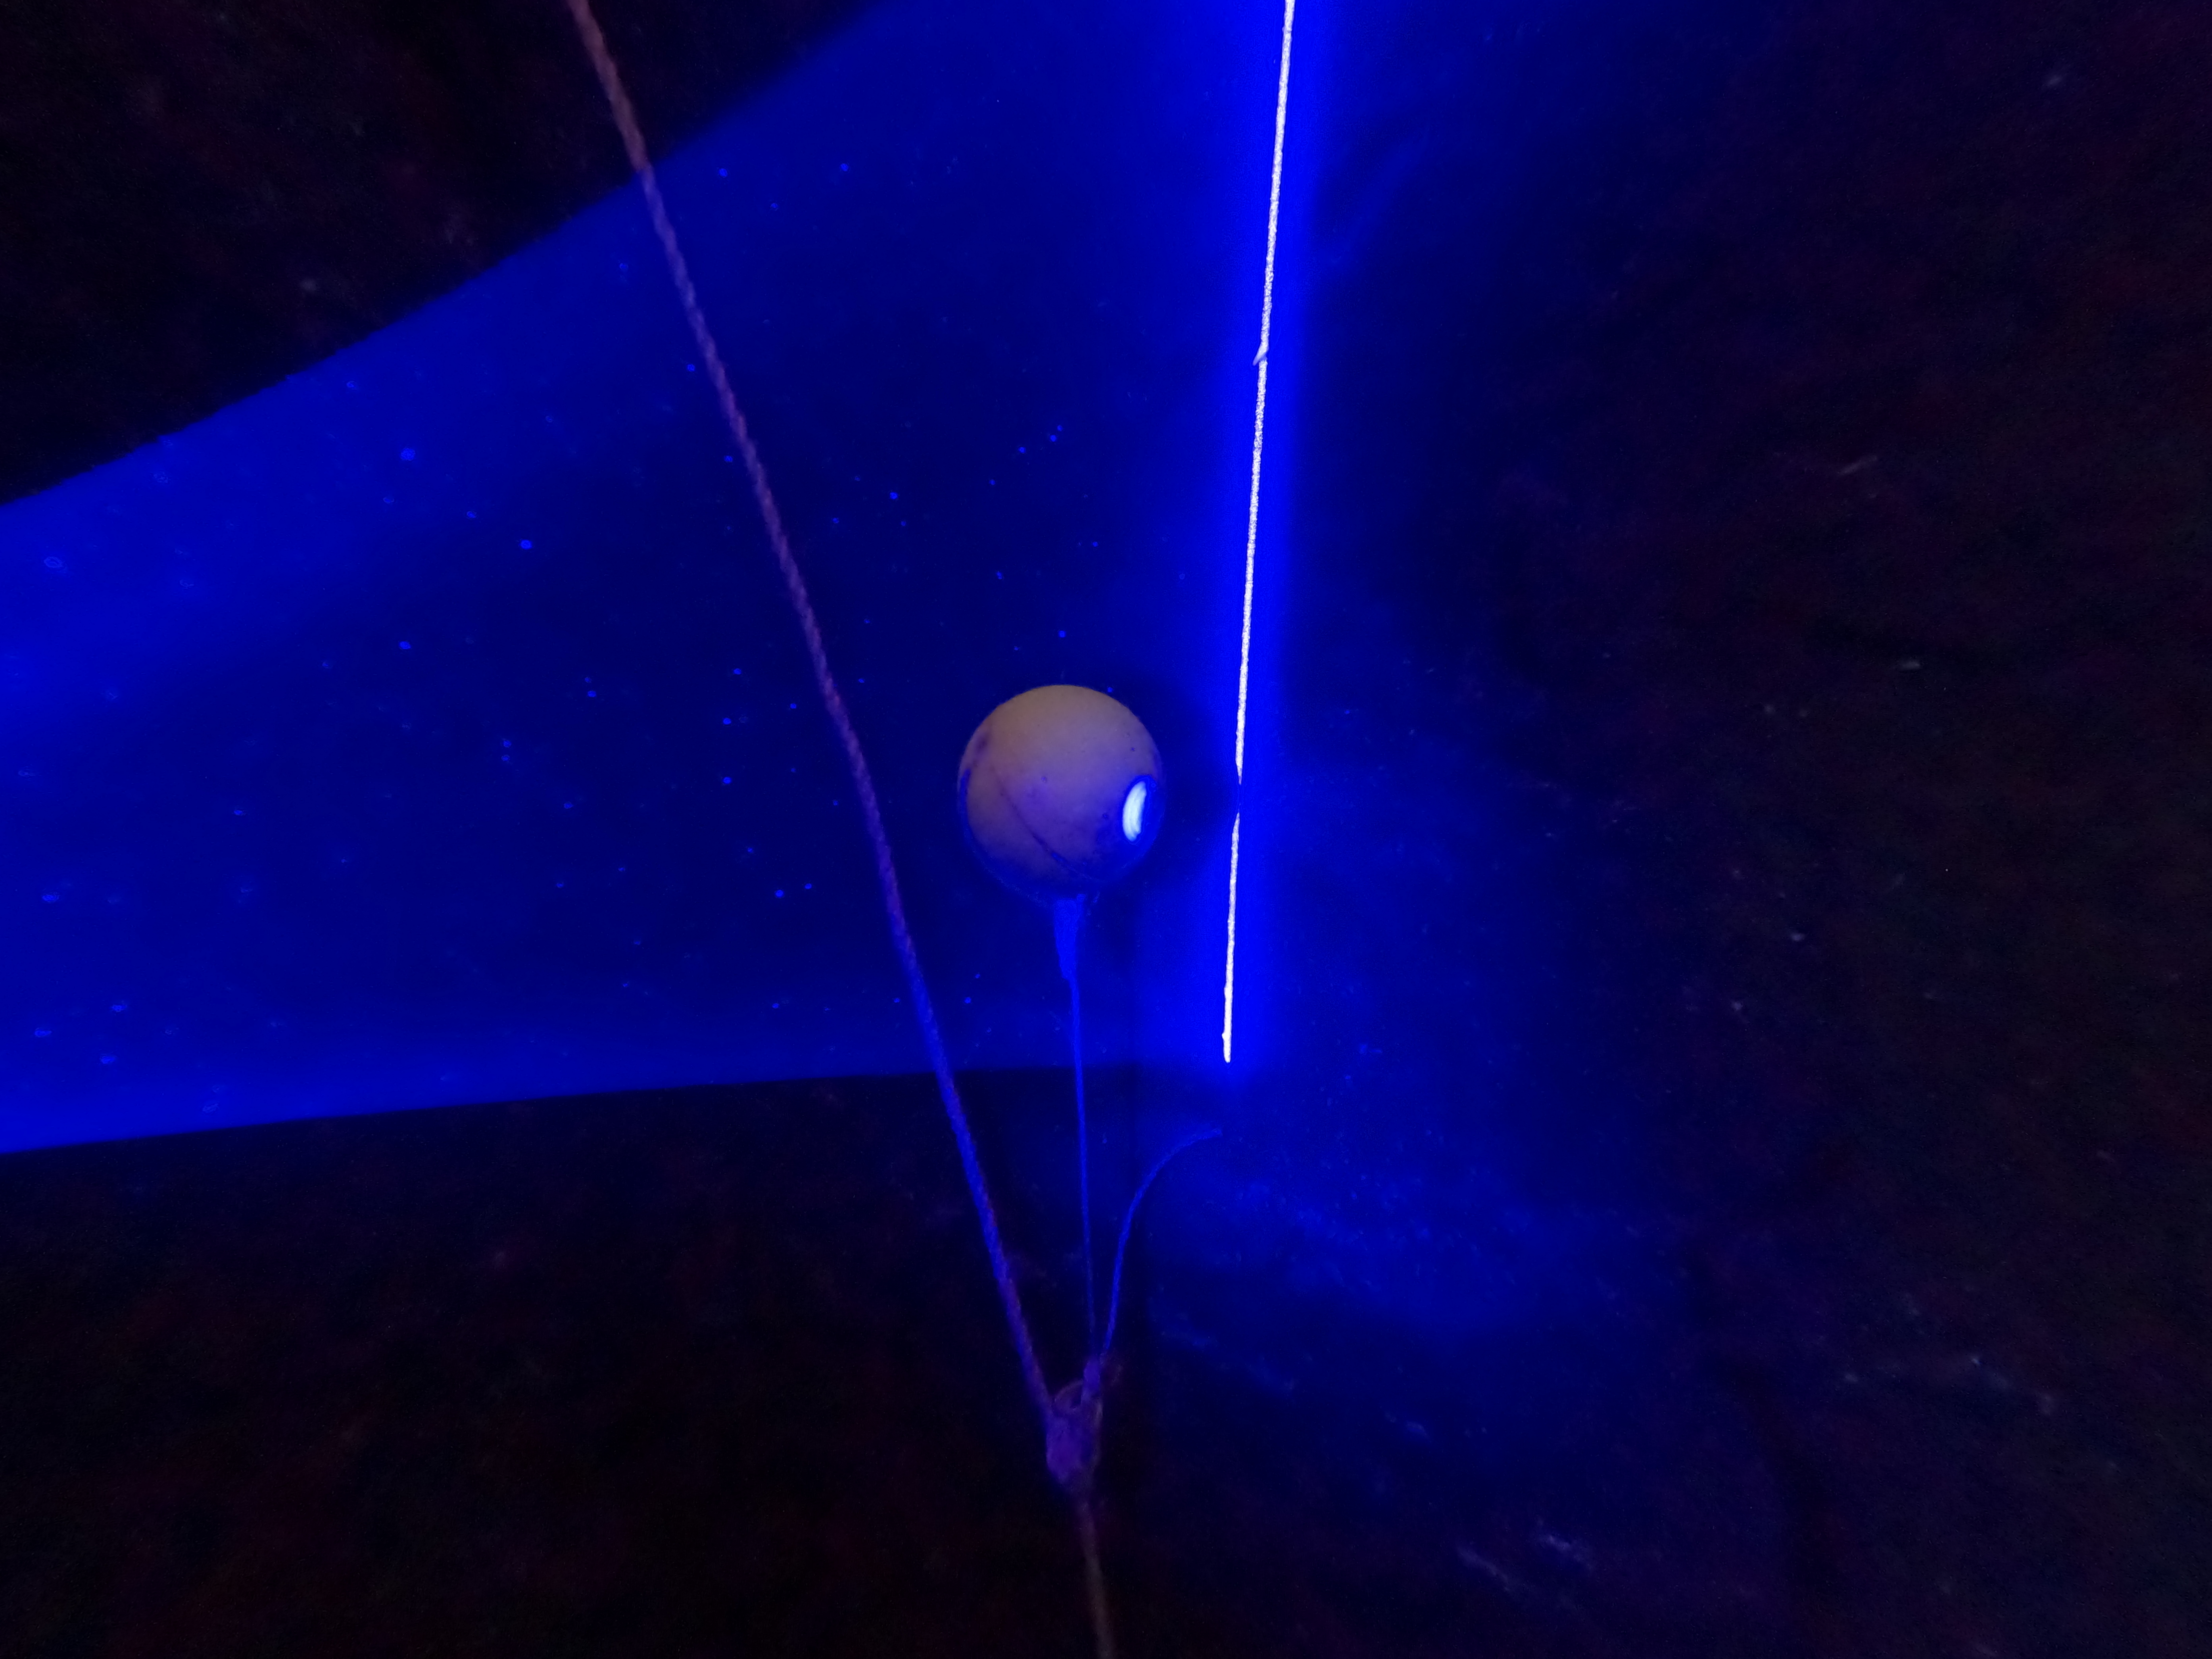

Supplement: Supplementary file 3471 [file G0030695.pdf › Level_1_1/G0030695.pdf]

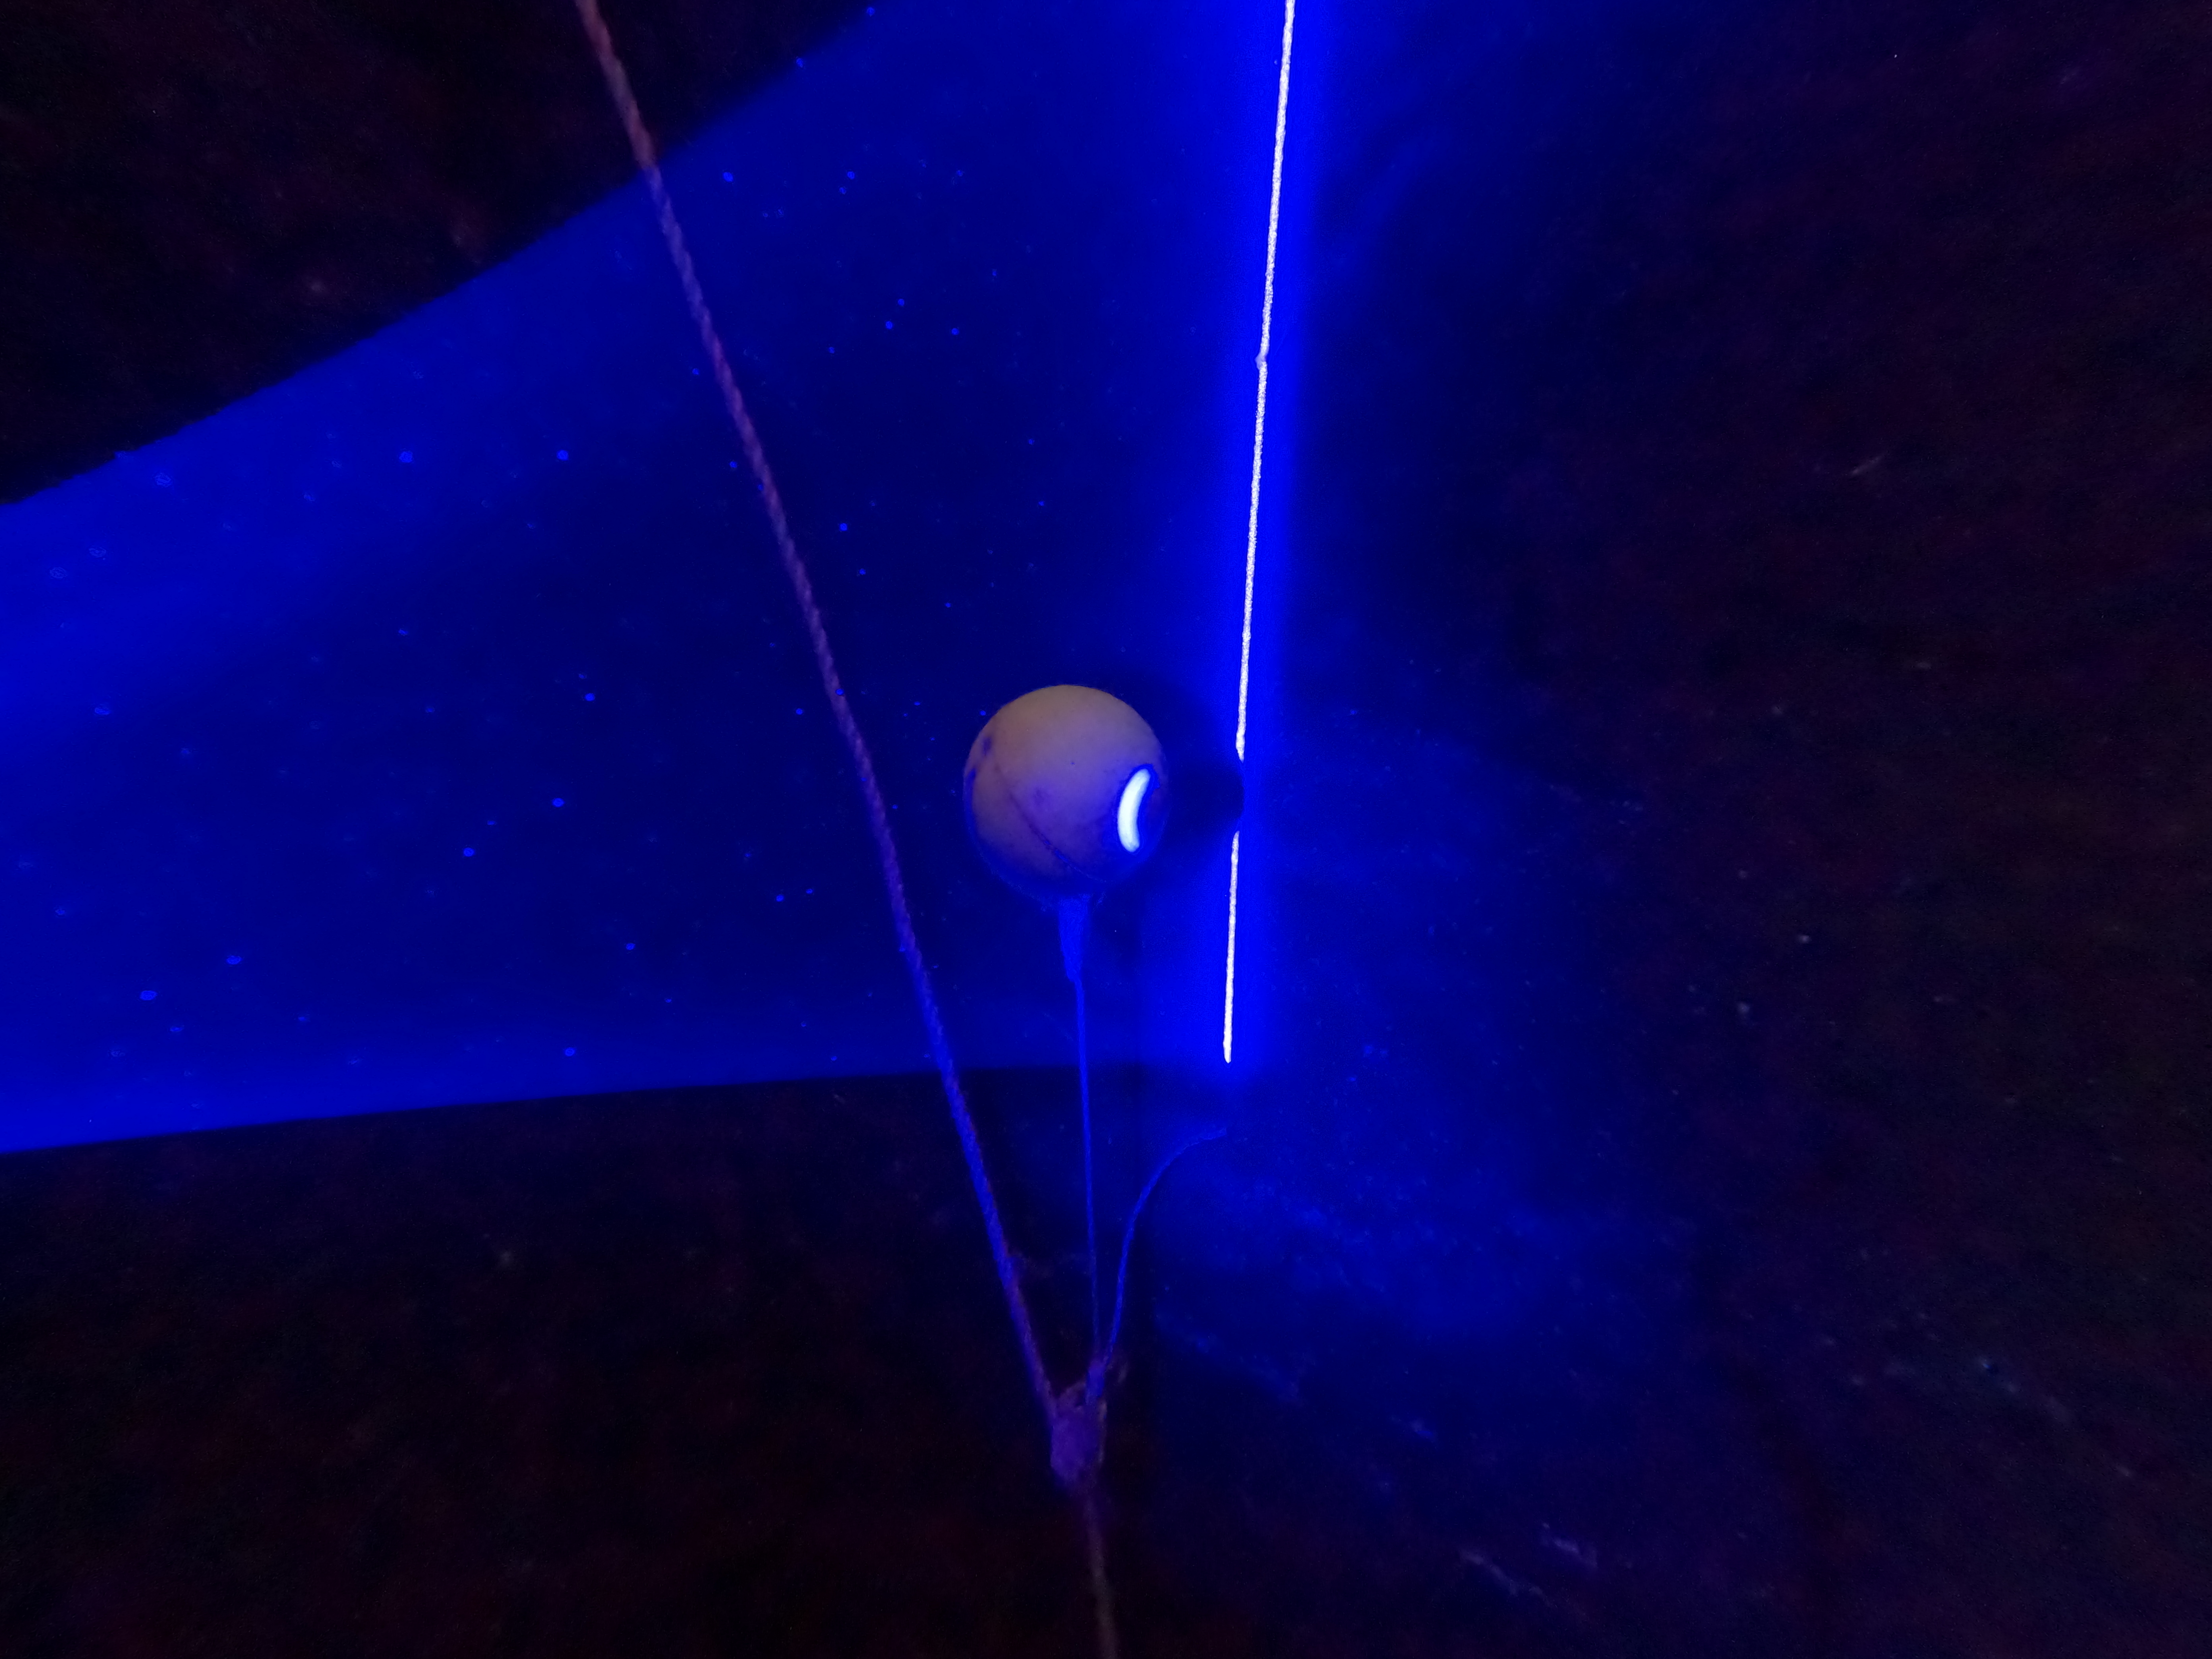

Supplement: Supplementary file 3472 [file G0030696.pdf › Level_1_1/G0030696.pdf]

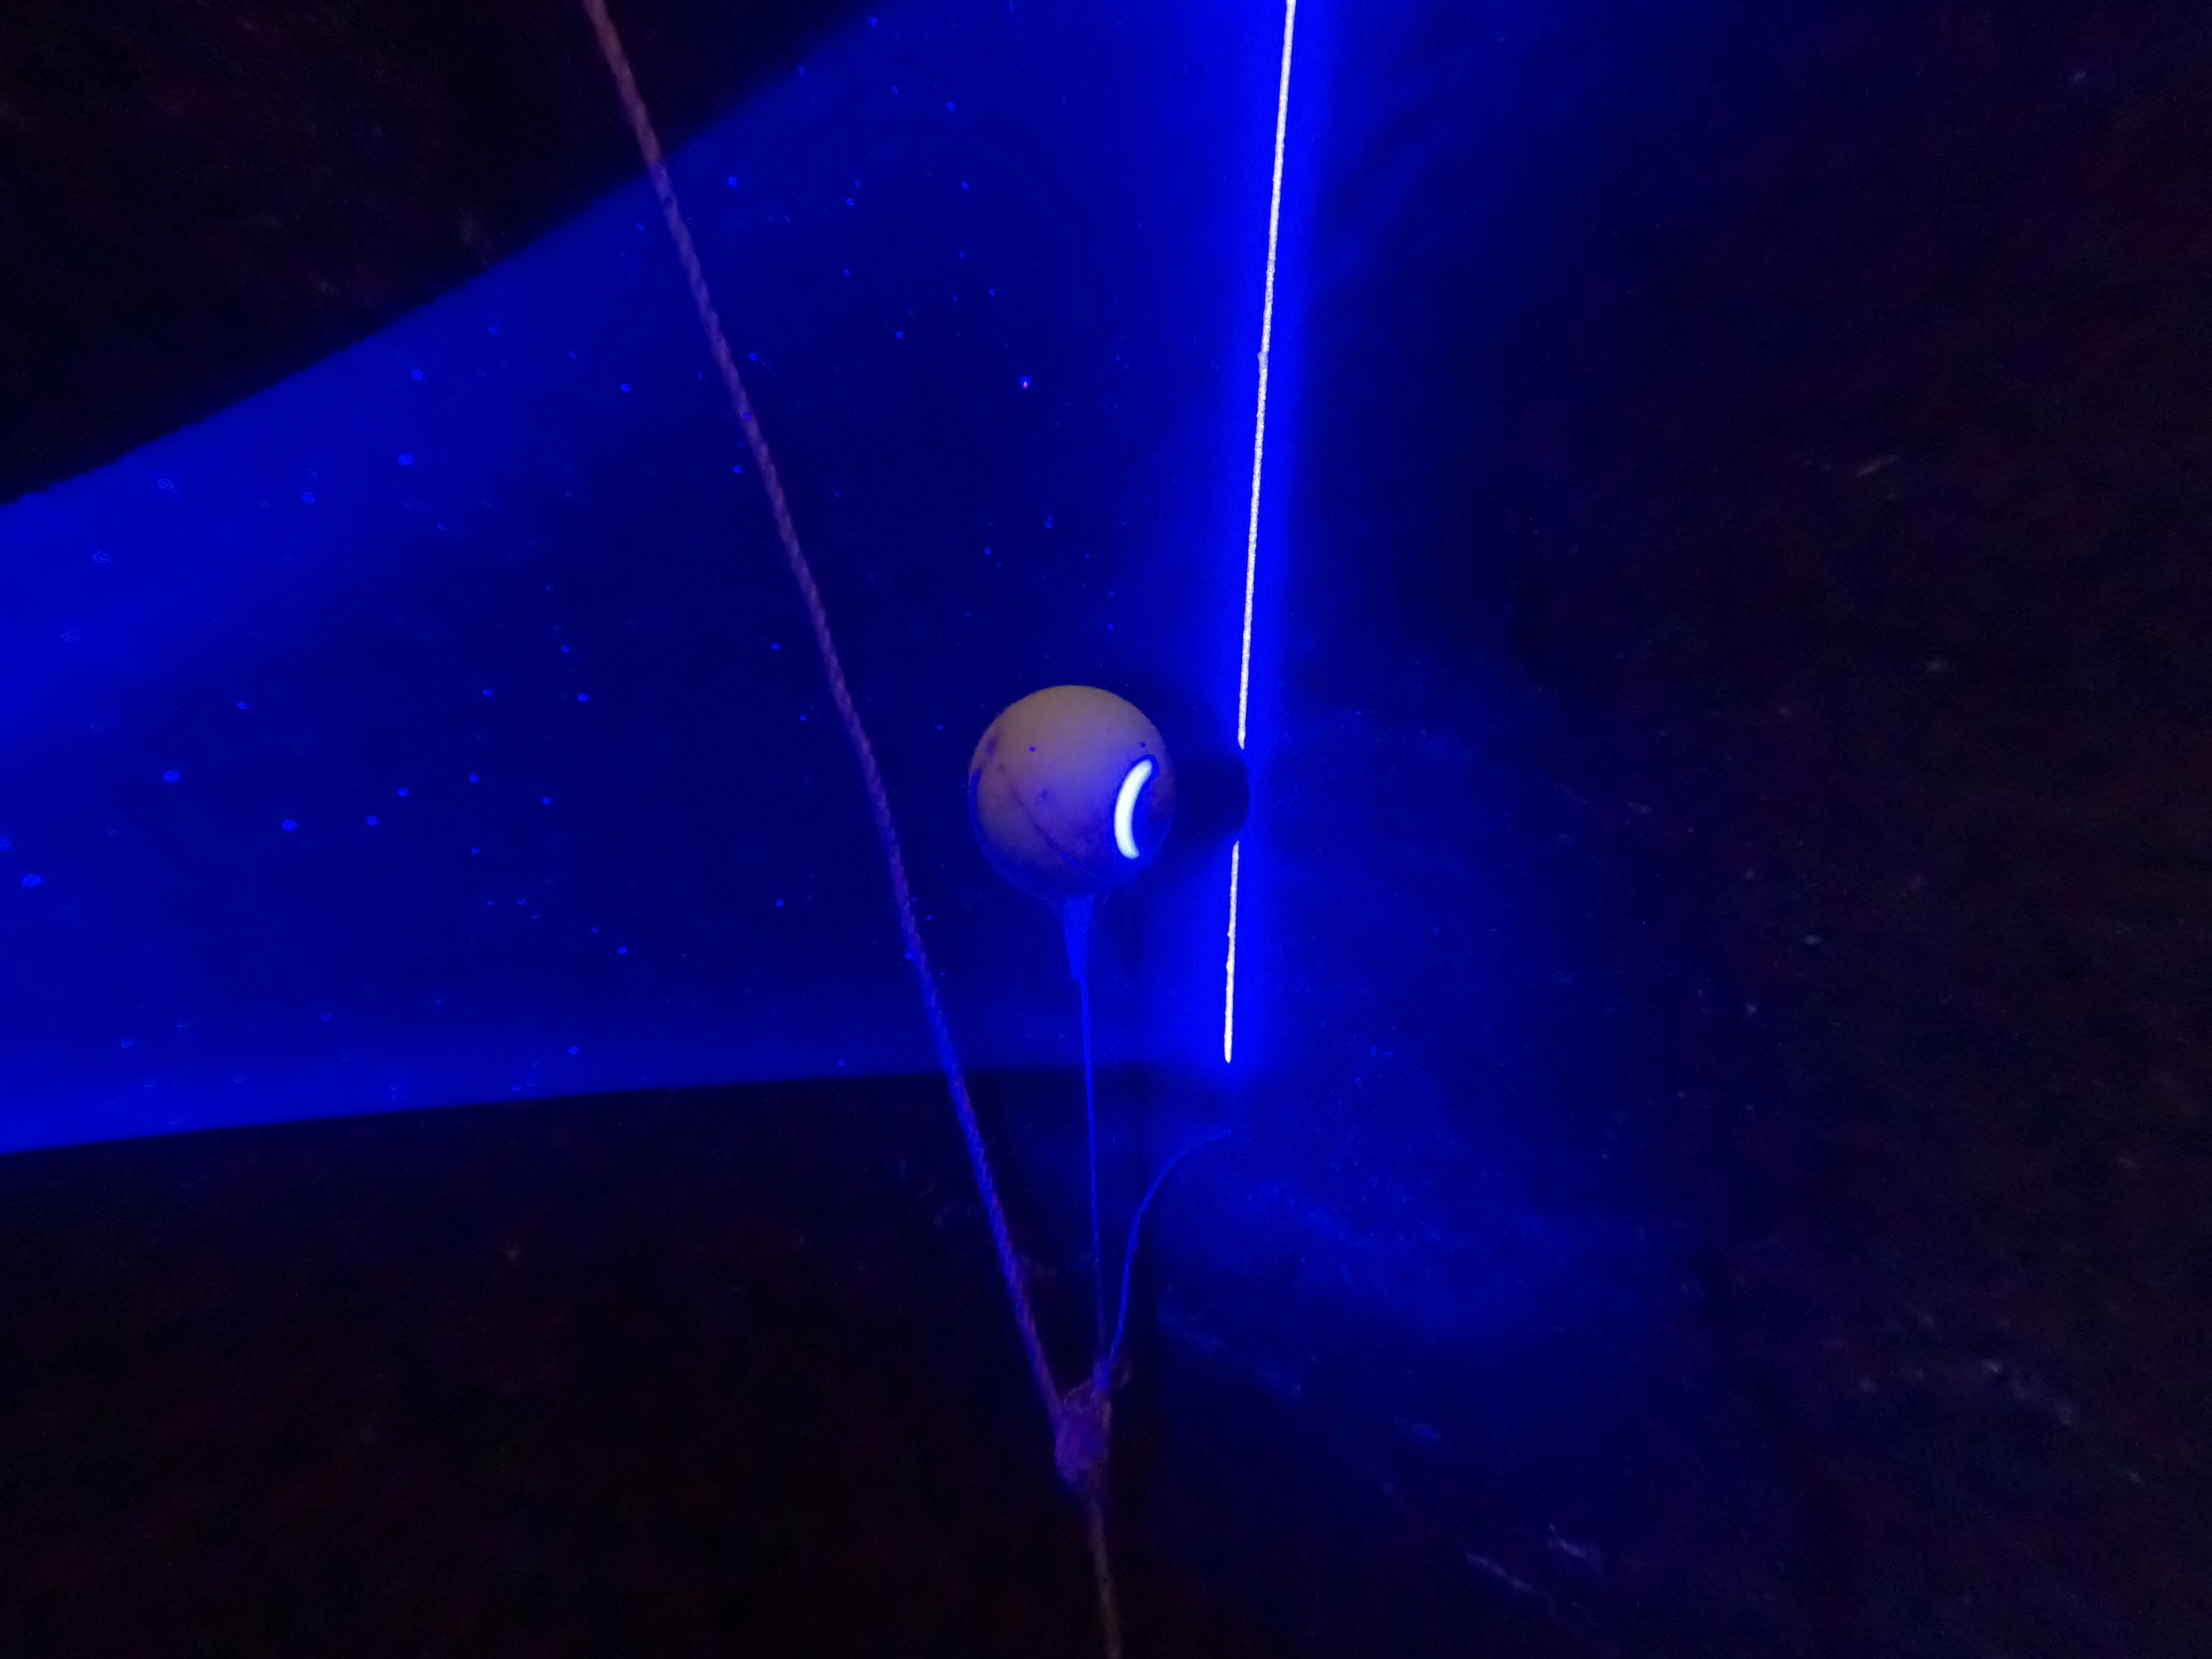

Supplement: Supplementary file 3473 [file G0030697.pdf › Level_1_1/G0030697.pdf]

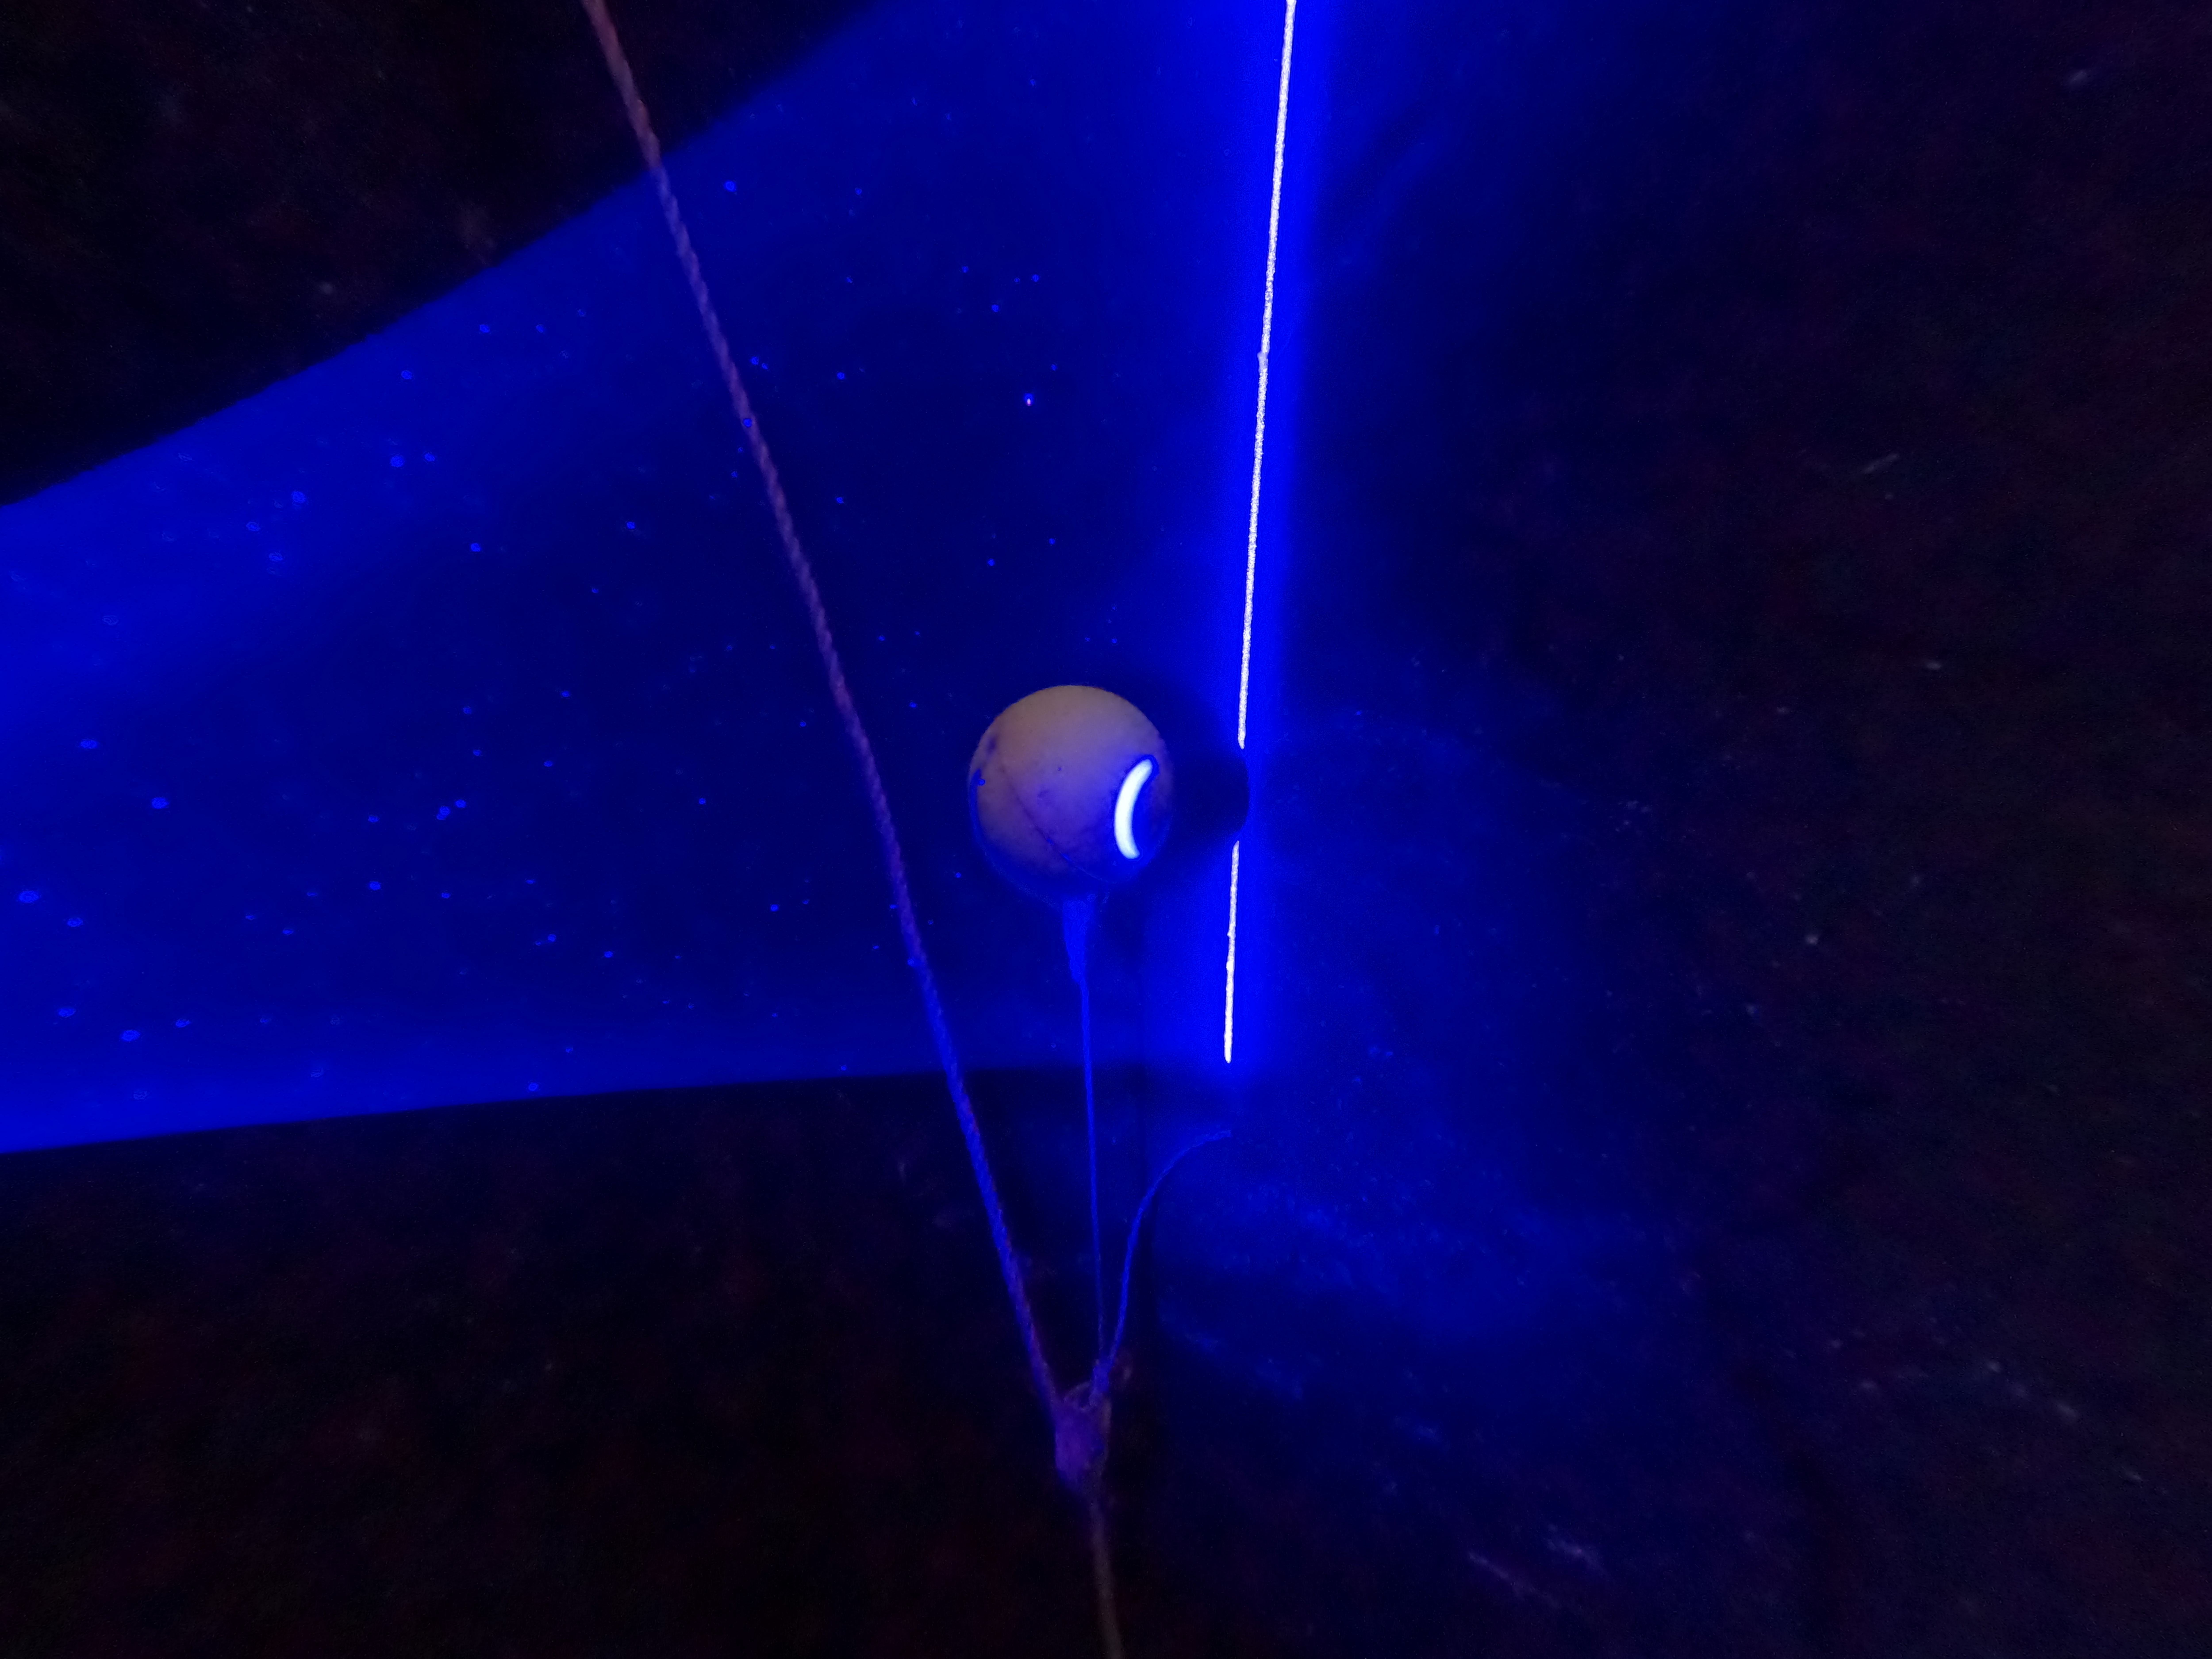

Supplement: Supplementary file 3474 [file G0030698.pdf › Level_1_1/G0030698.pdf]

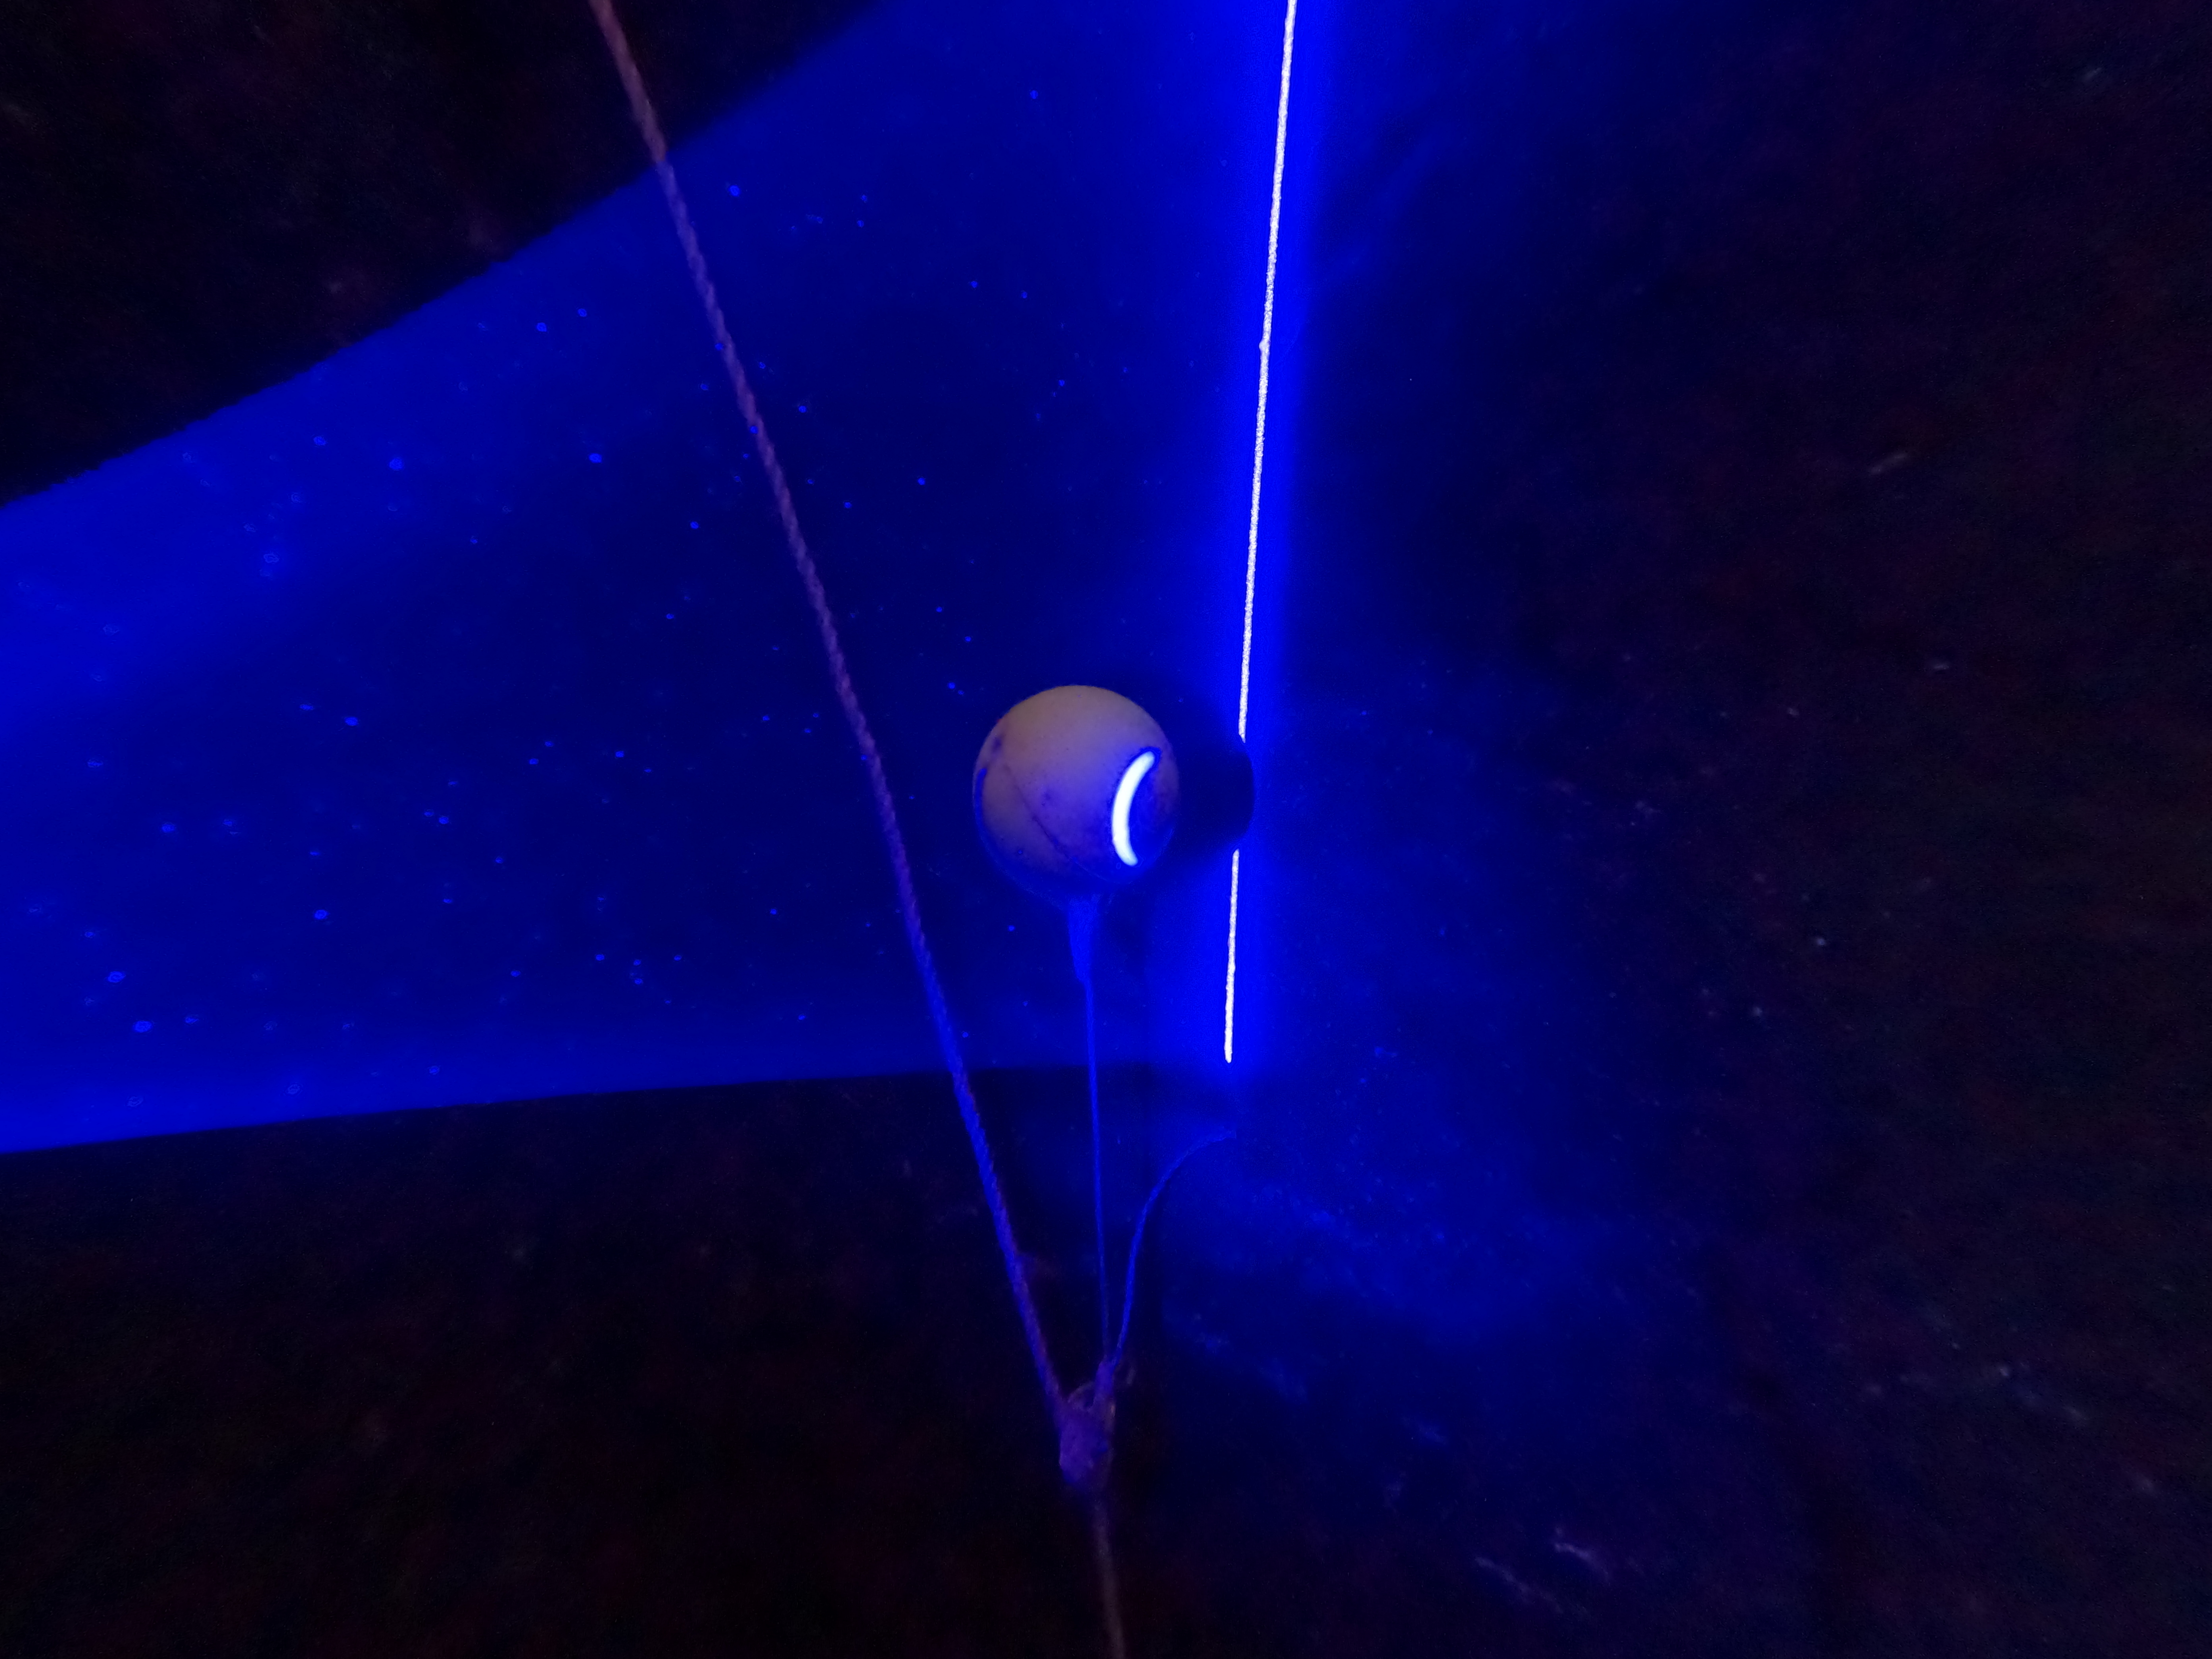

Supplement: Supplementary file 3475 [file G0030699.pdf › Level_1_1/G0030699.pdf]

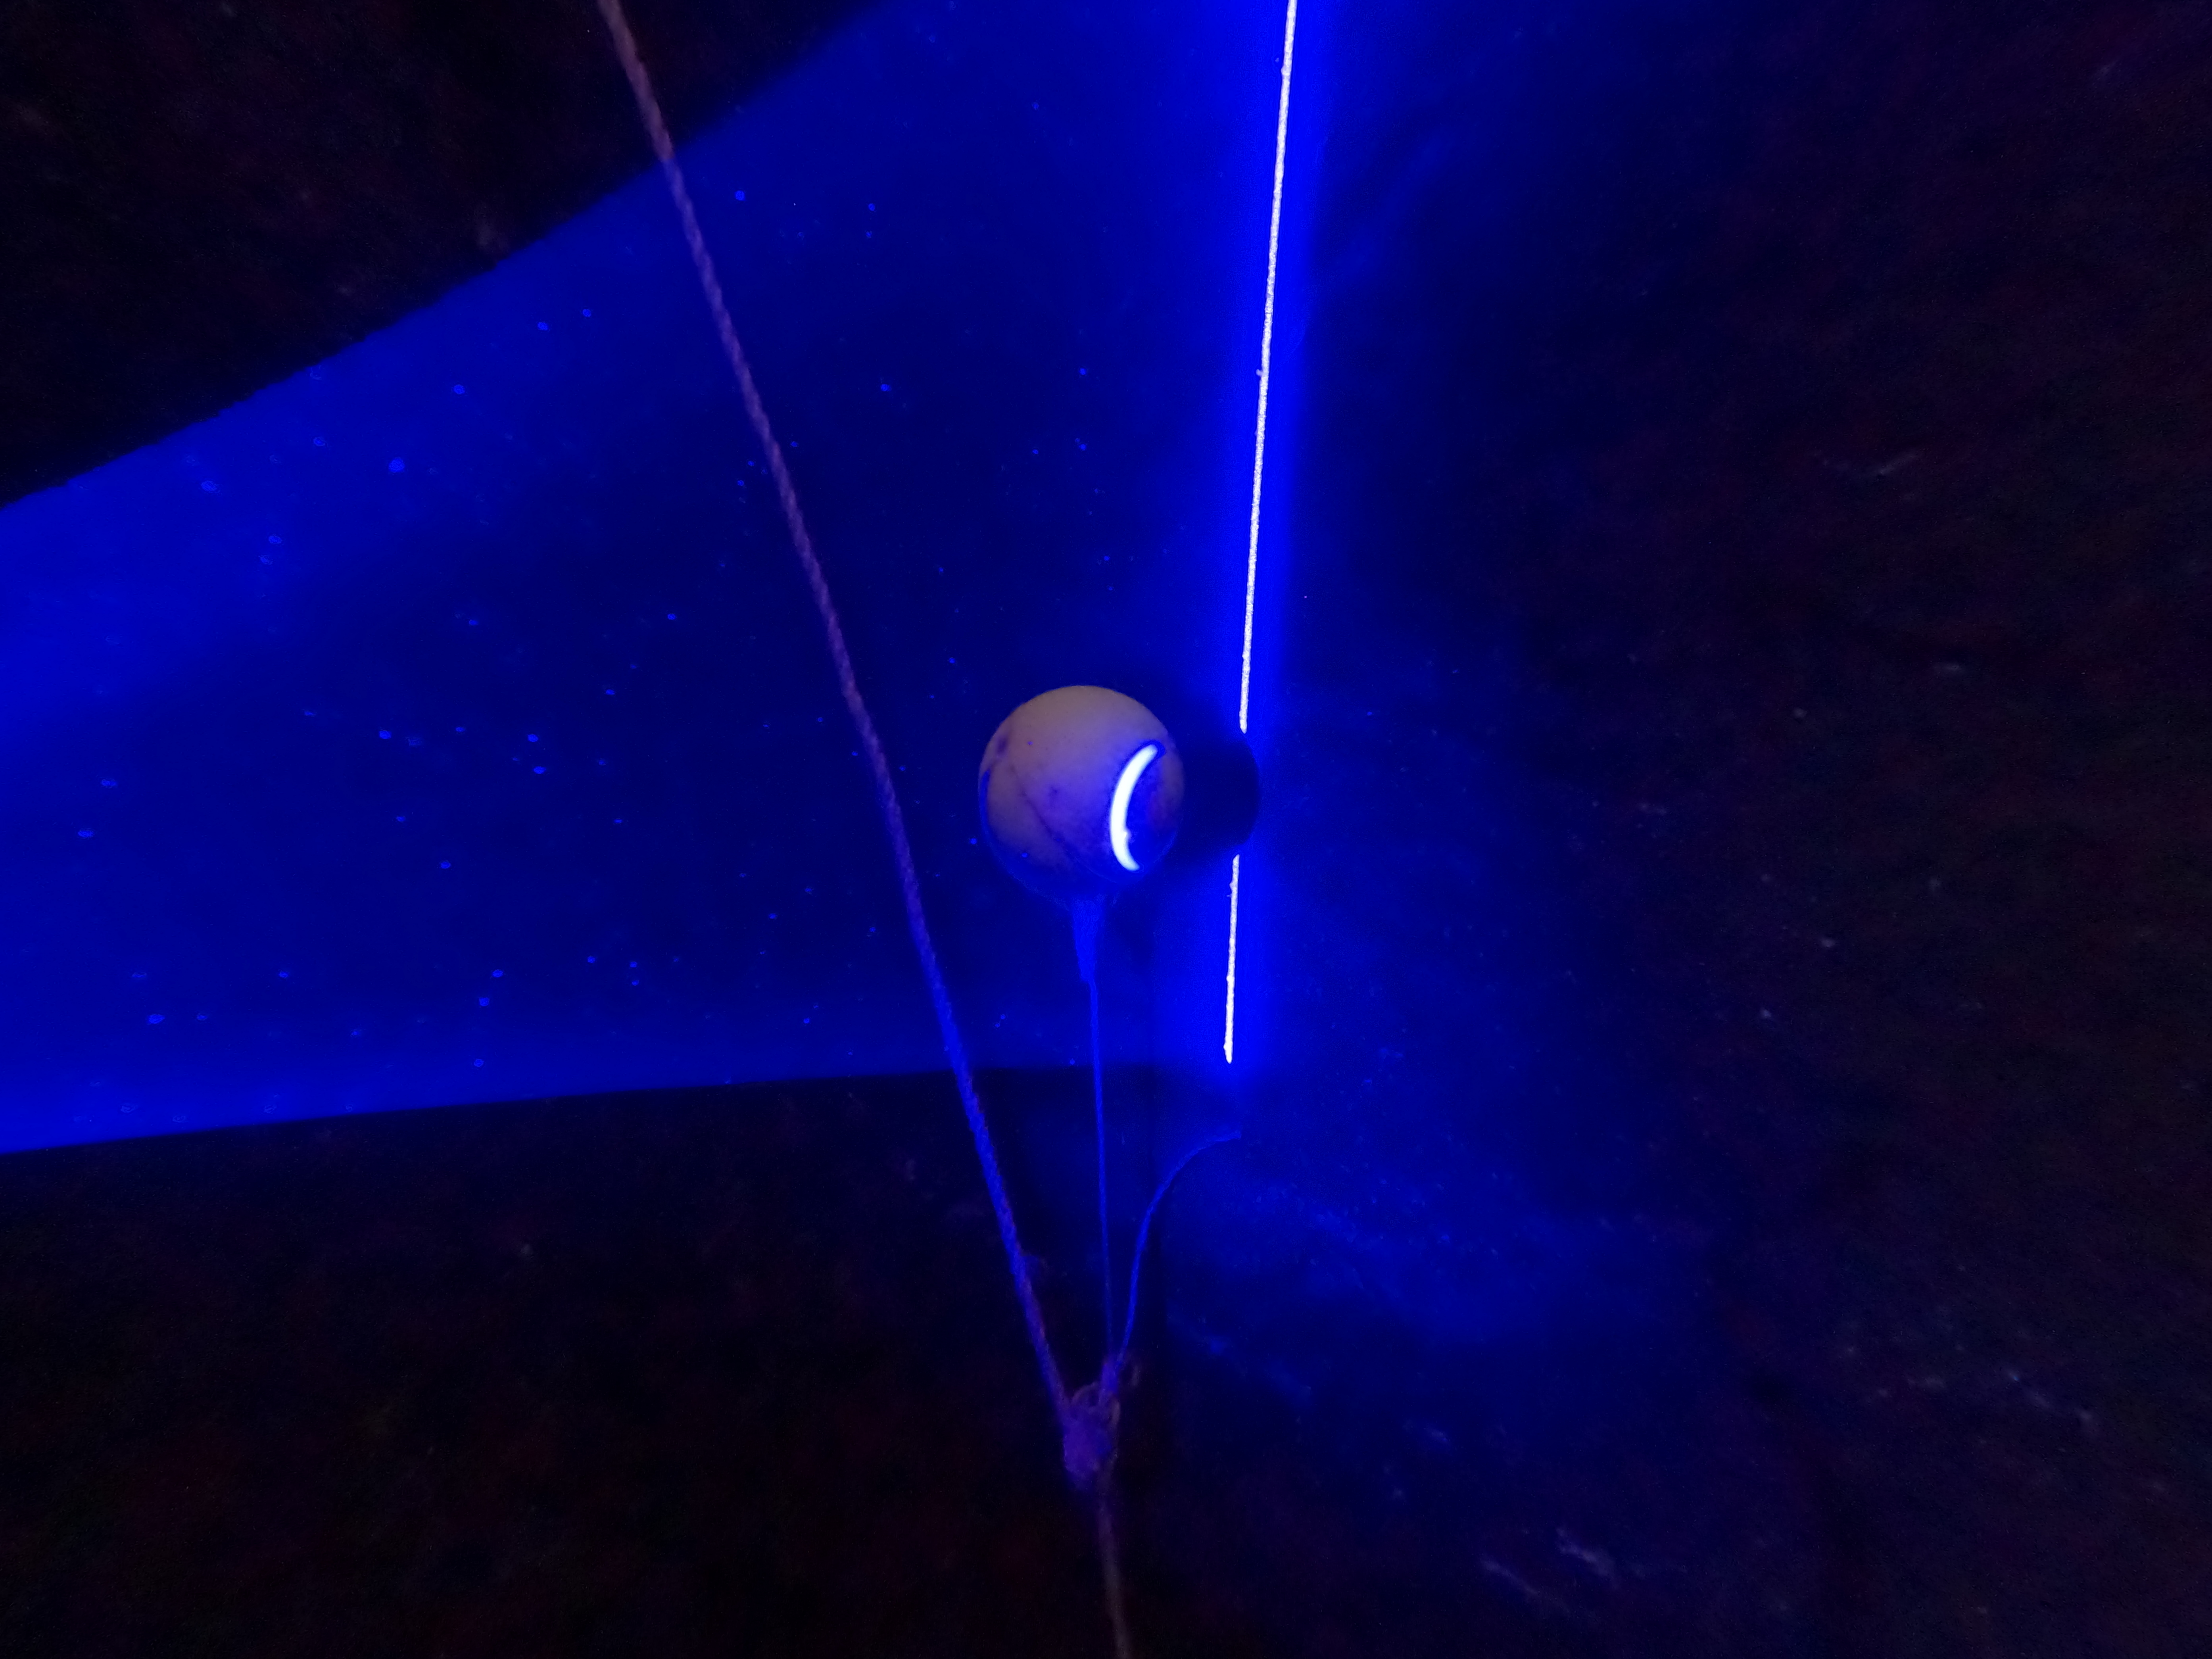

Supplement: Supplementary file 3476 [file G0030700.pdf › Level_1_1/G0030700.pdf]

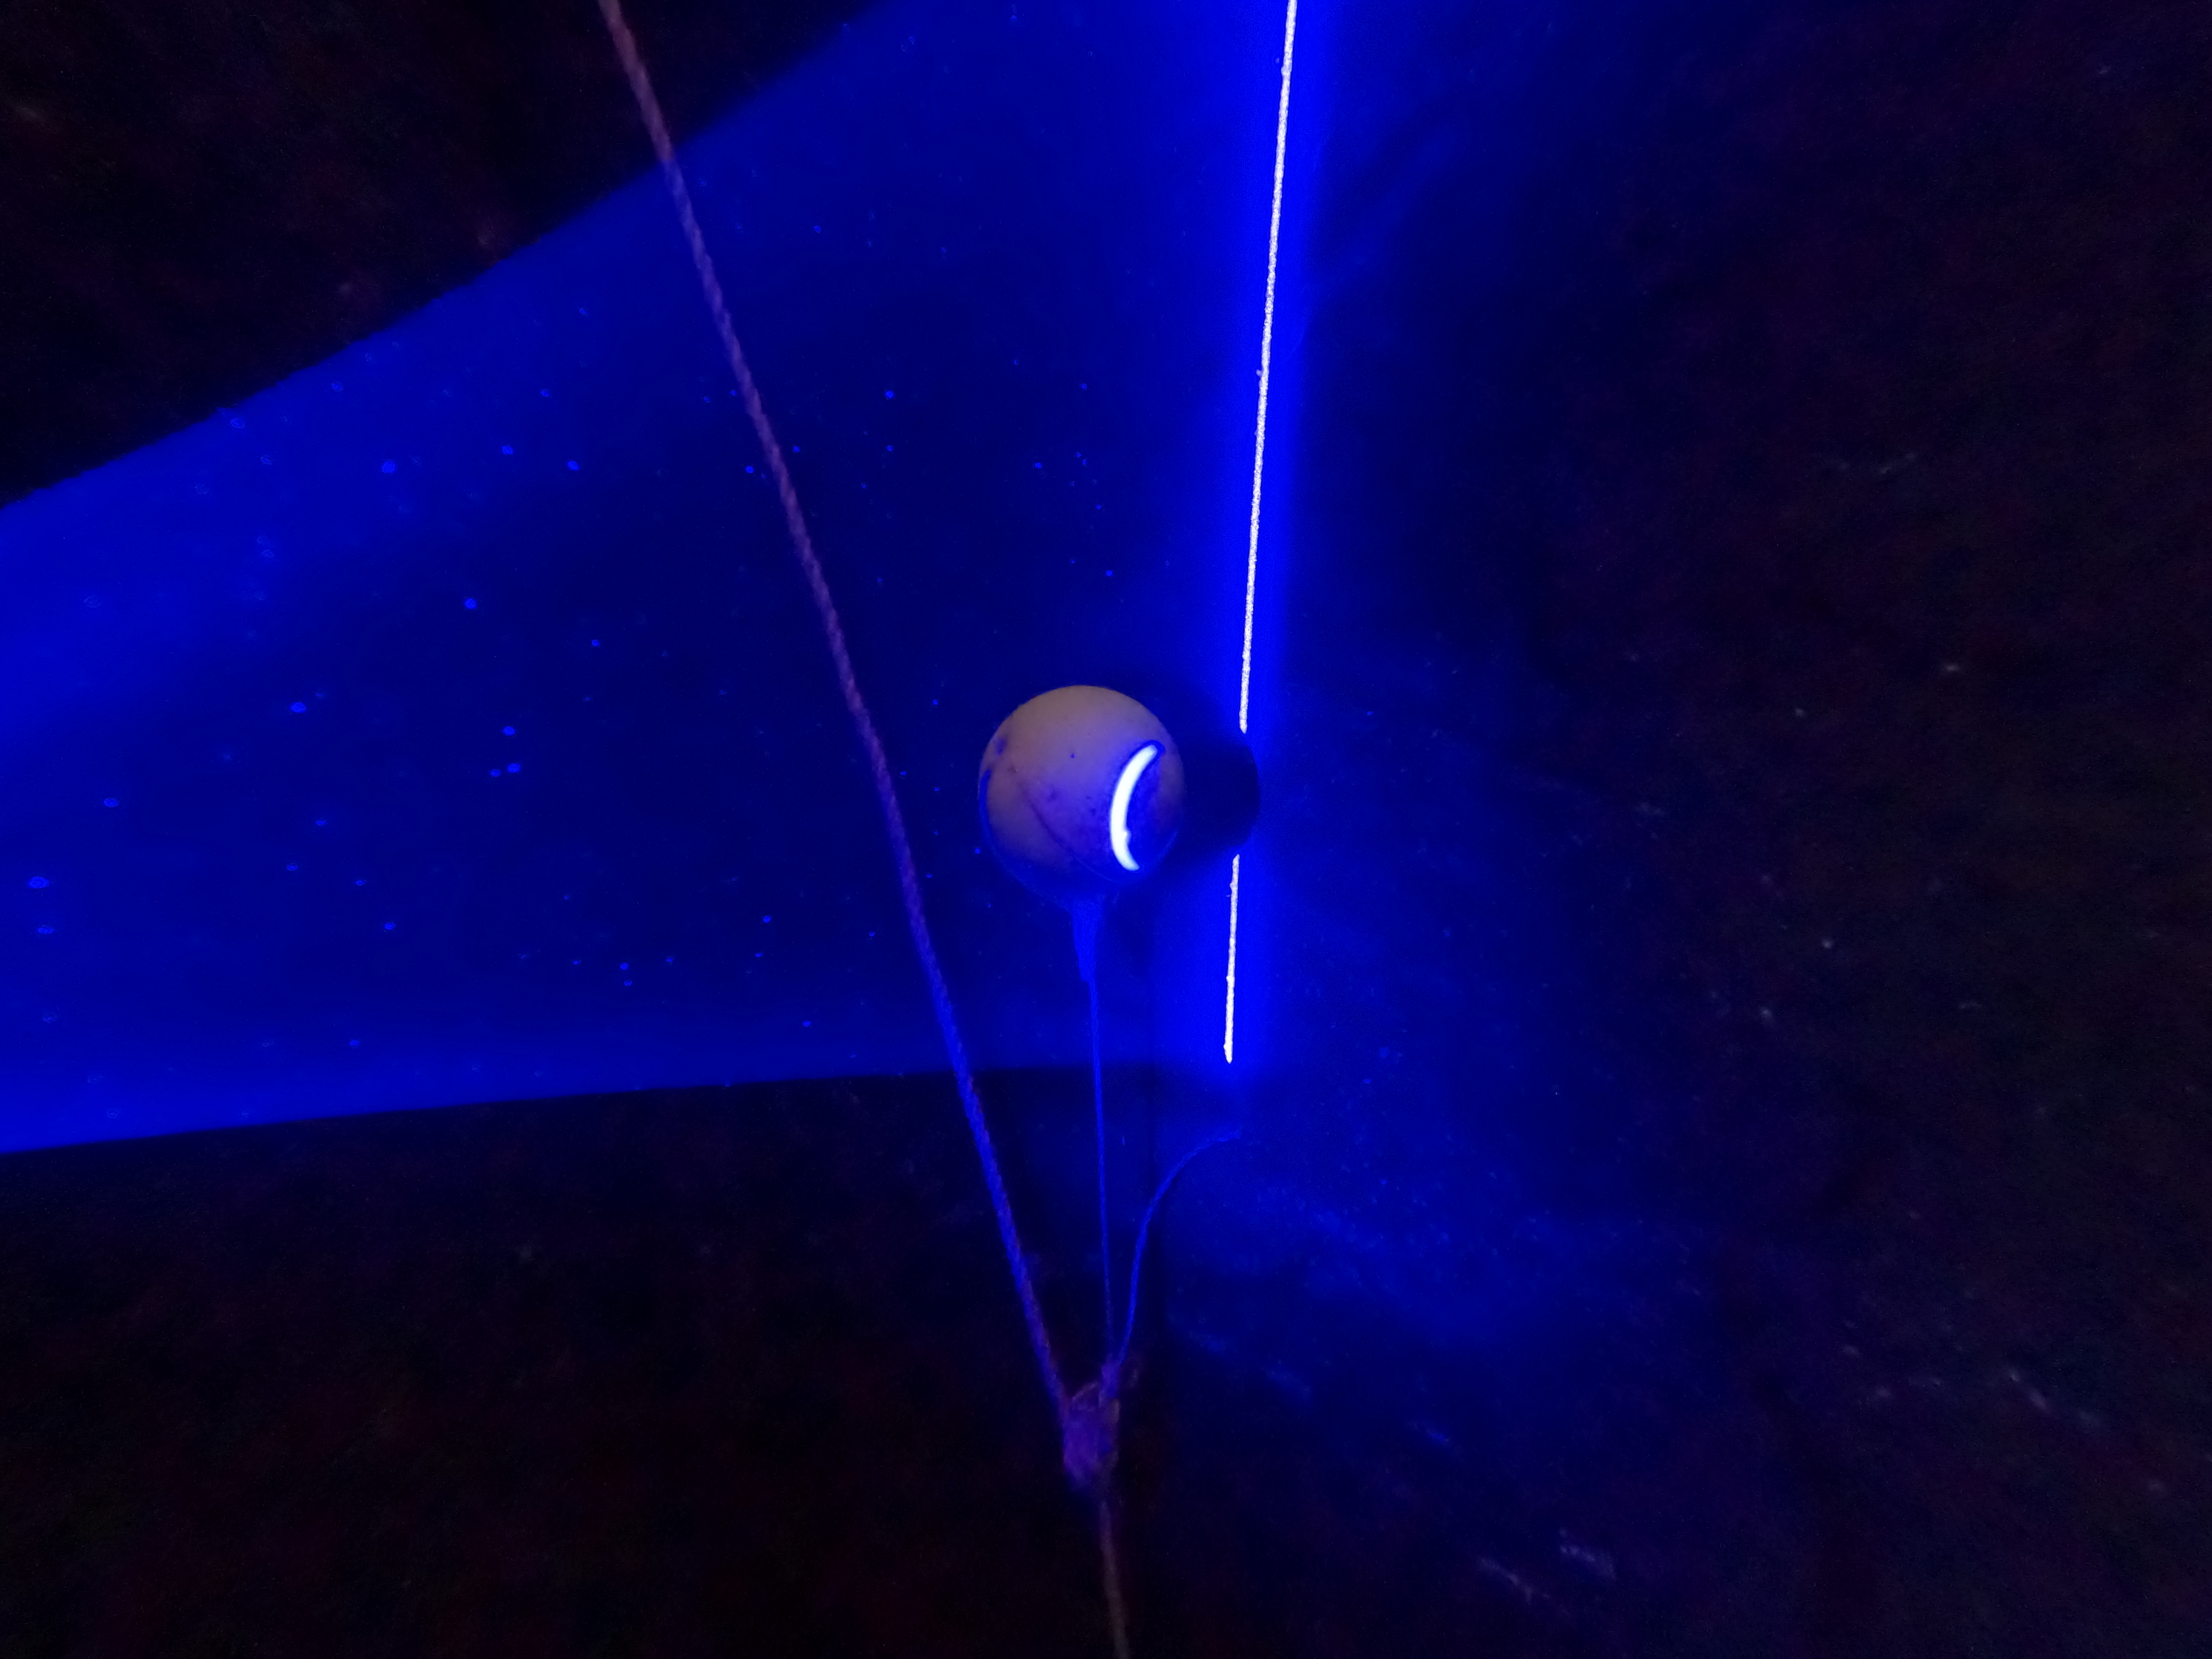

Supplement: Supplementary file 3477 [file G0030701.pdf › Level_1_1/G0030701.pdf]

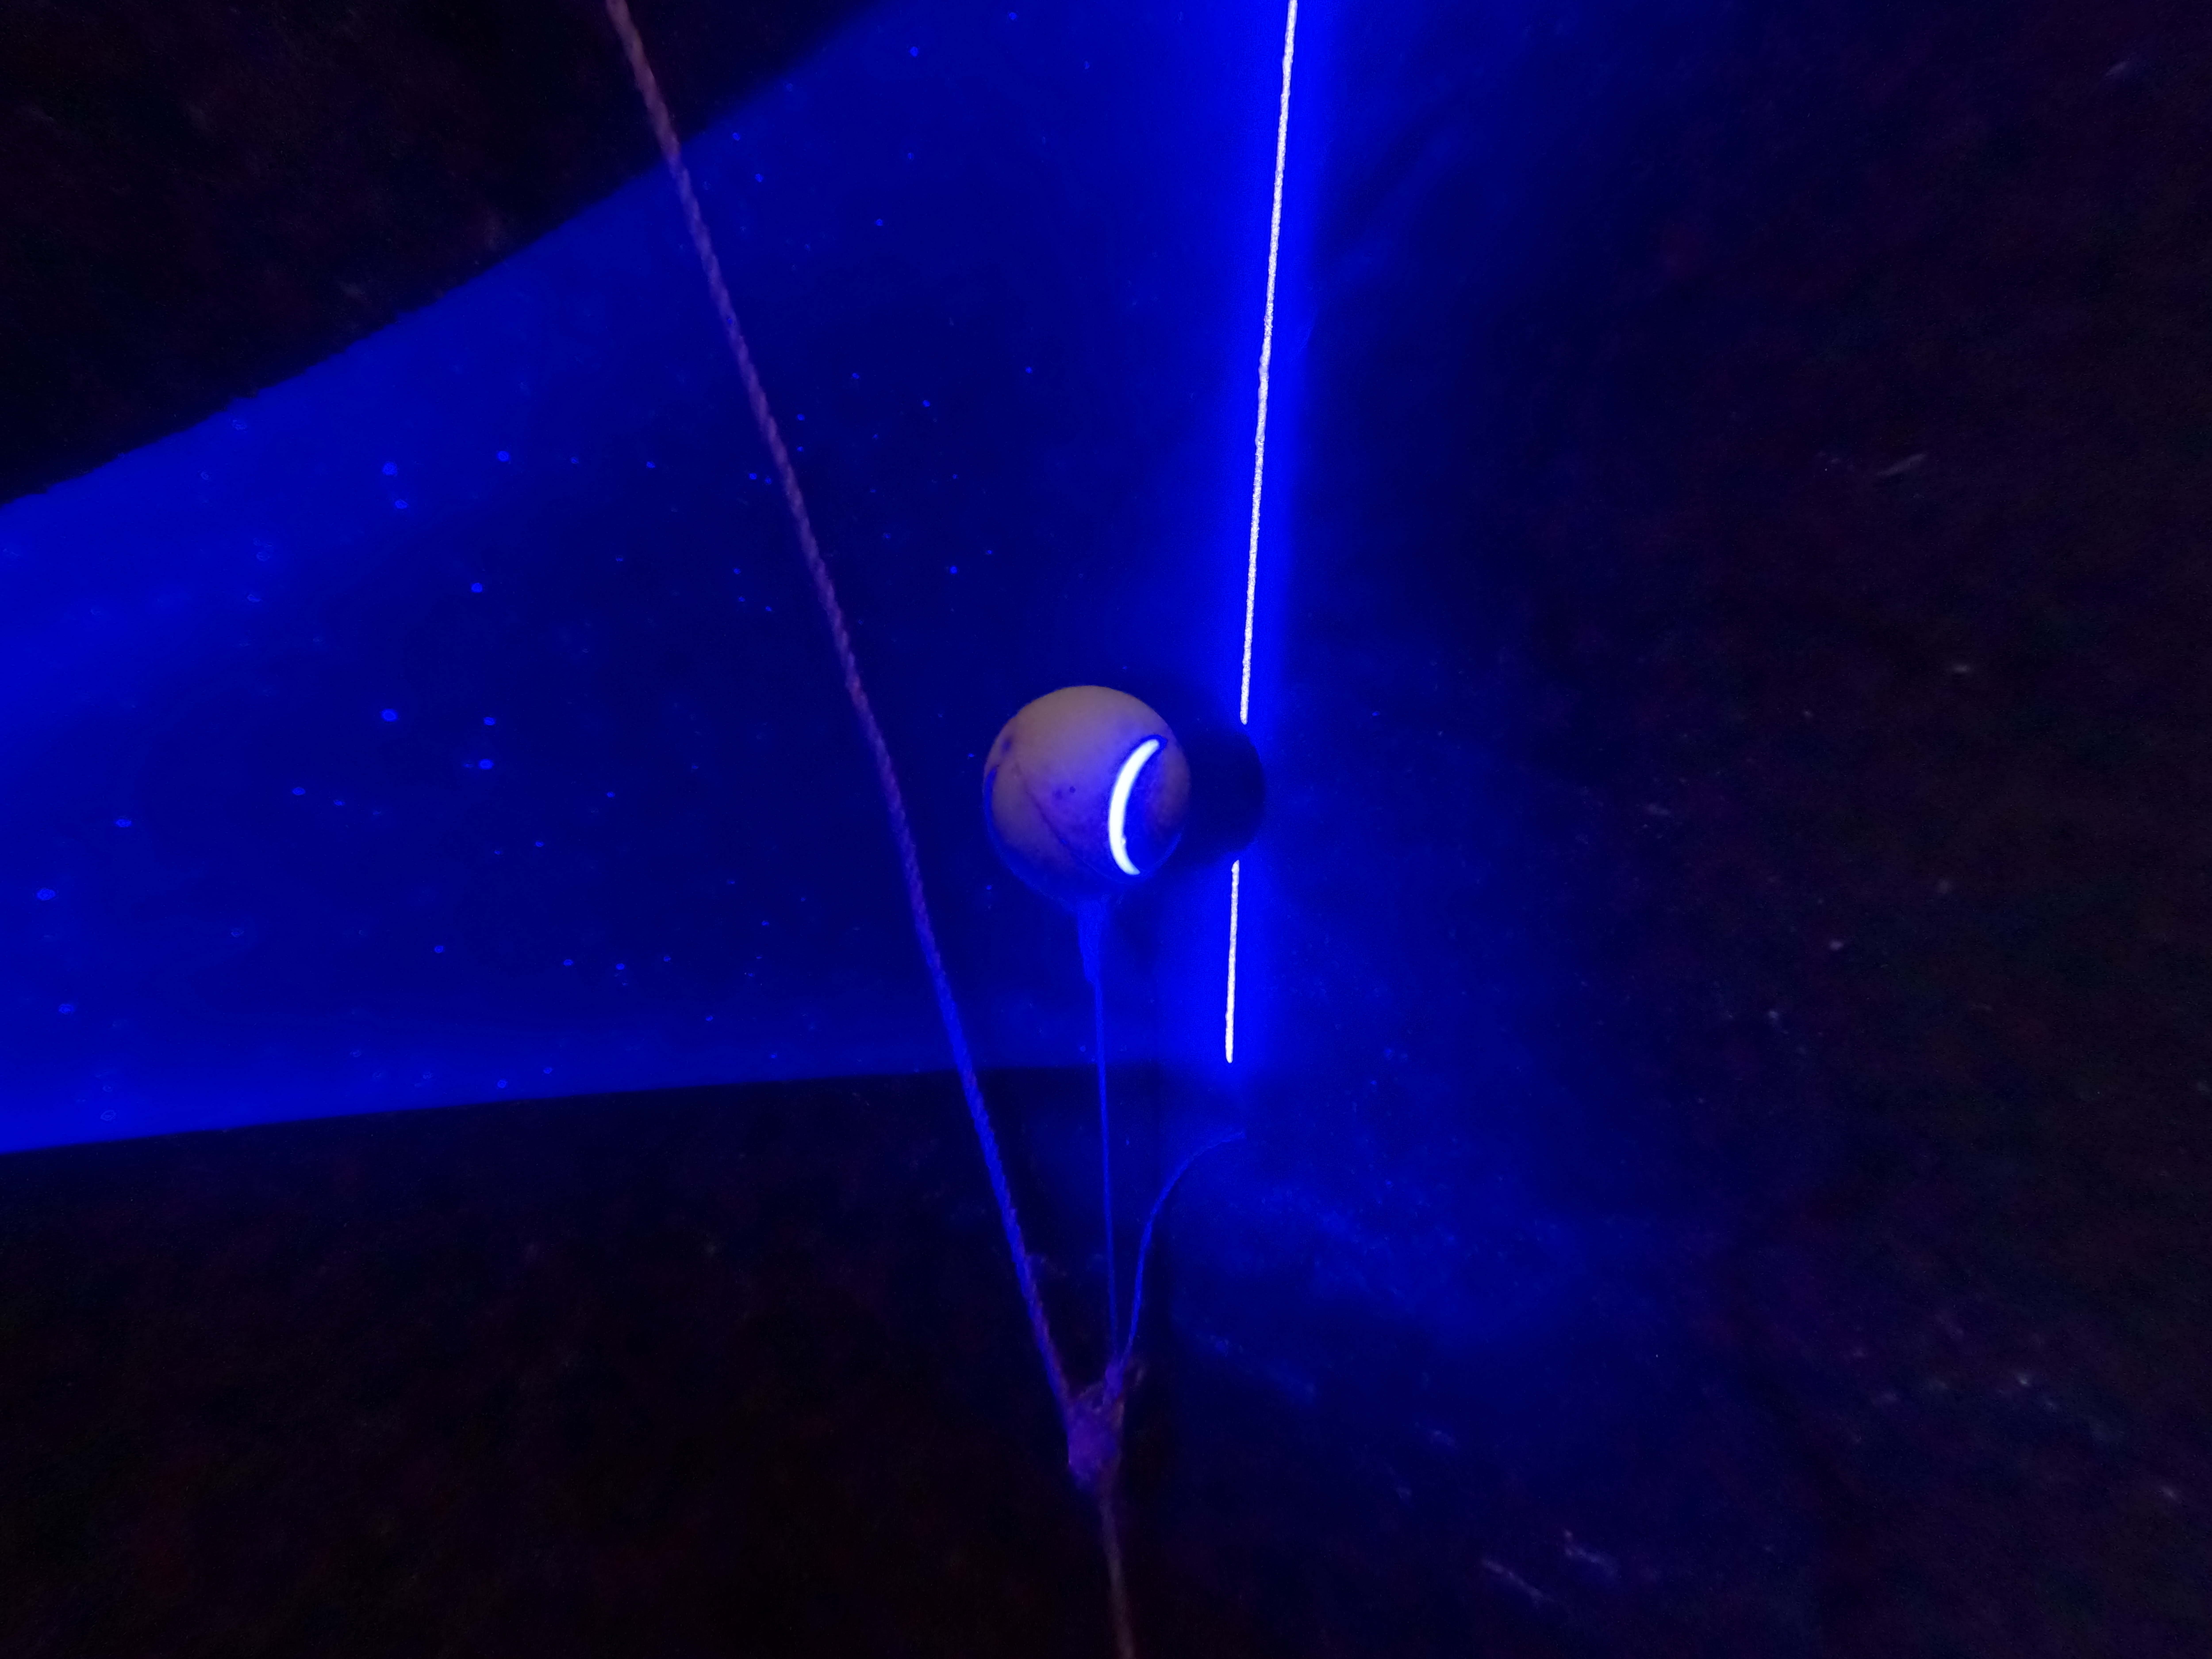

Supplement: Supplementary file 3478 [file G0030702.pdf › Level_1_1/G0030702.pdf]

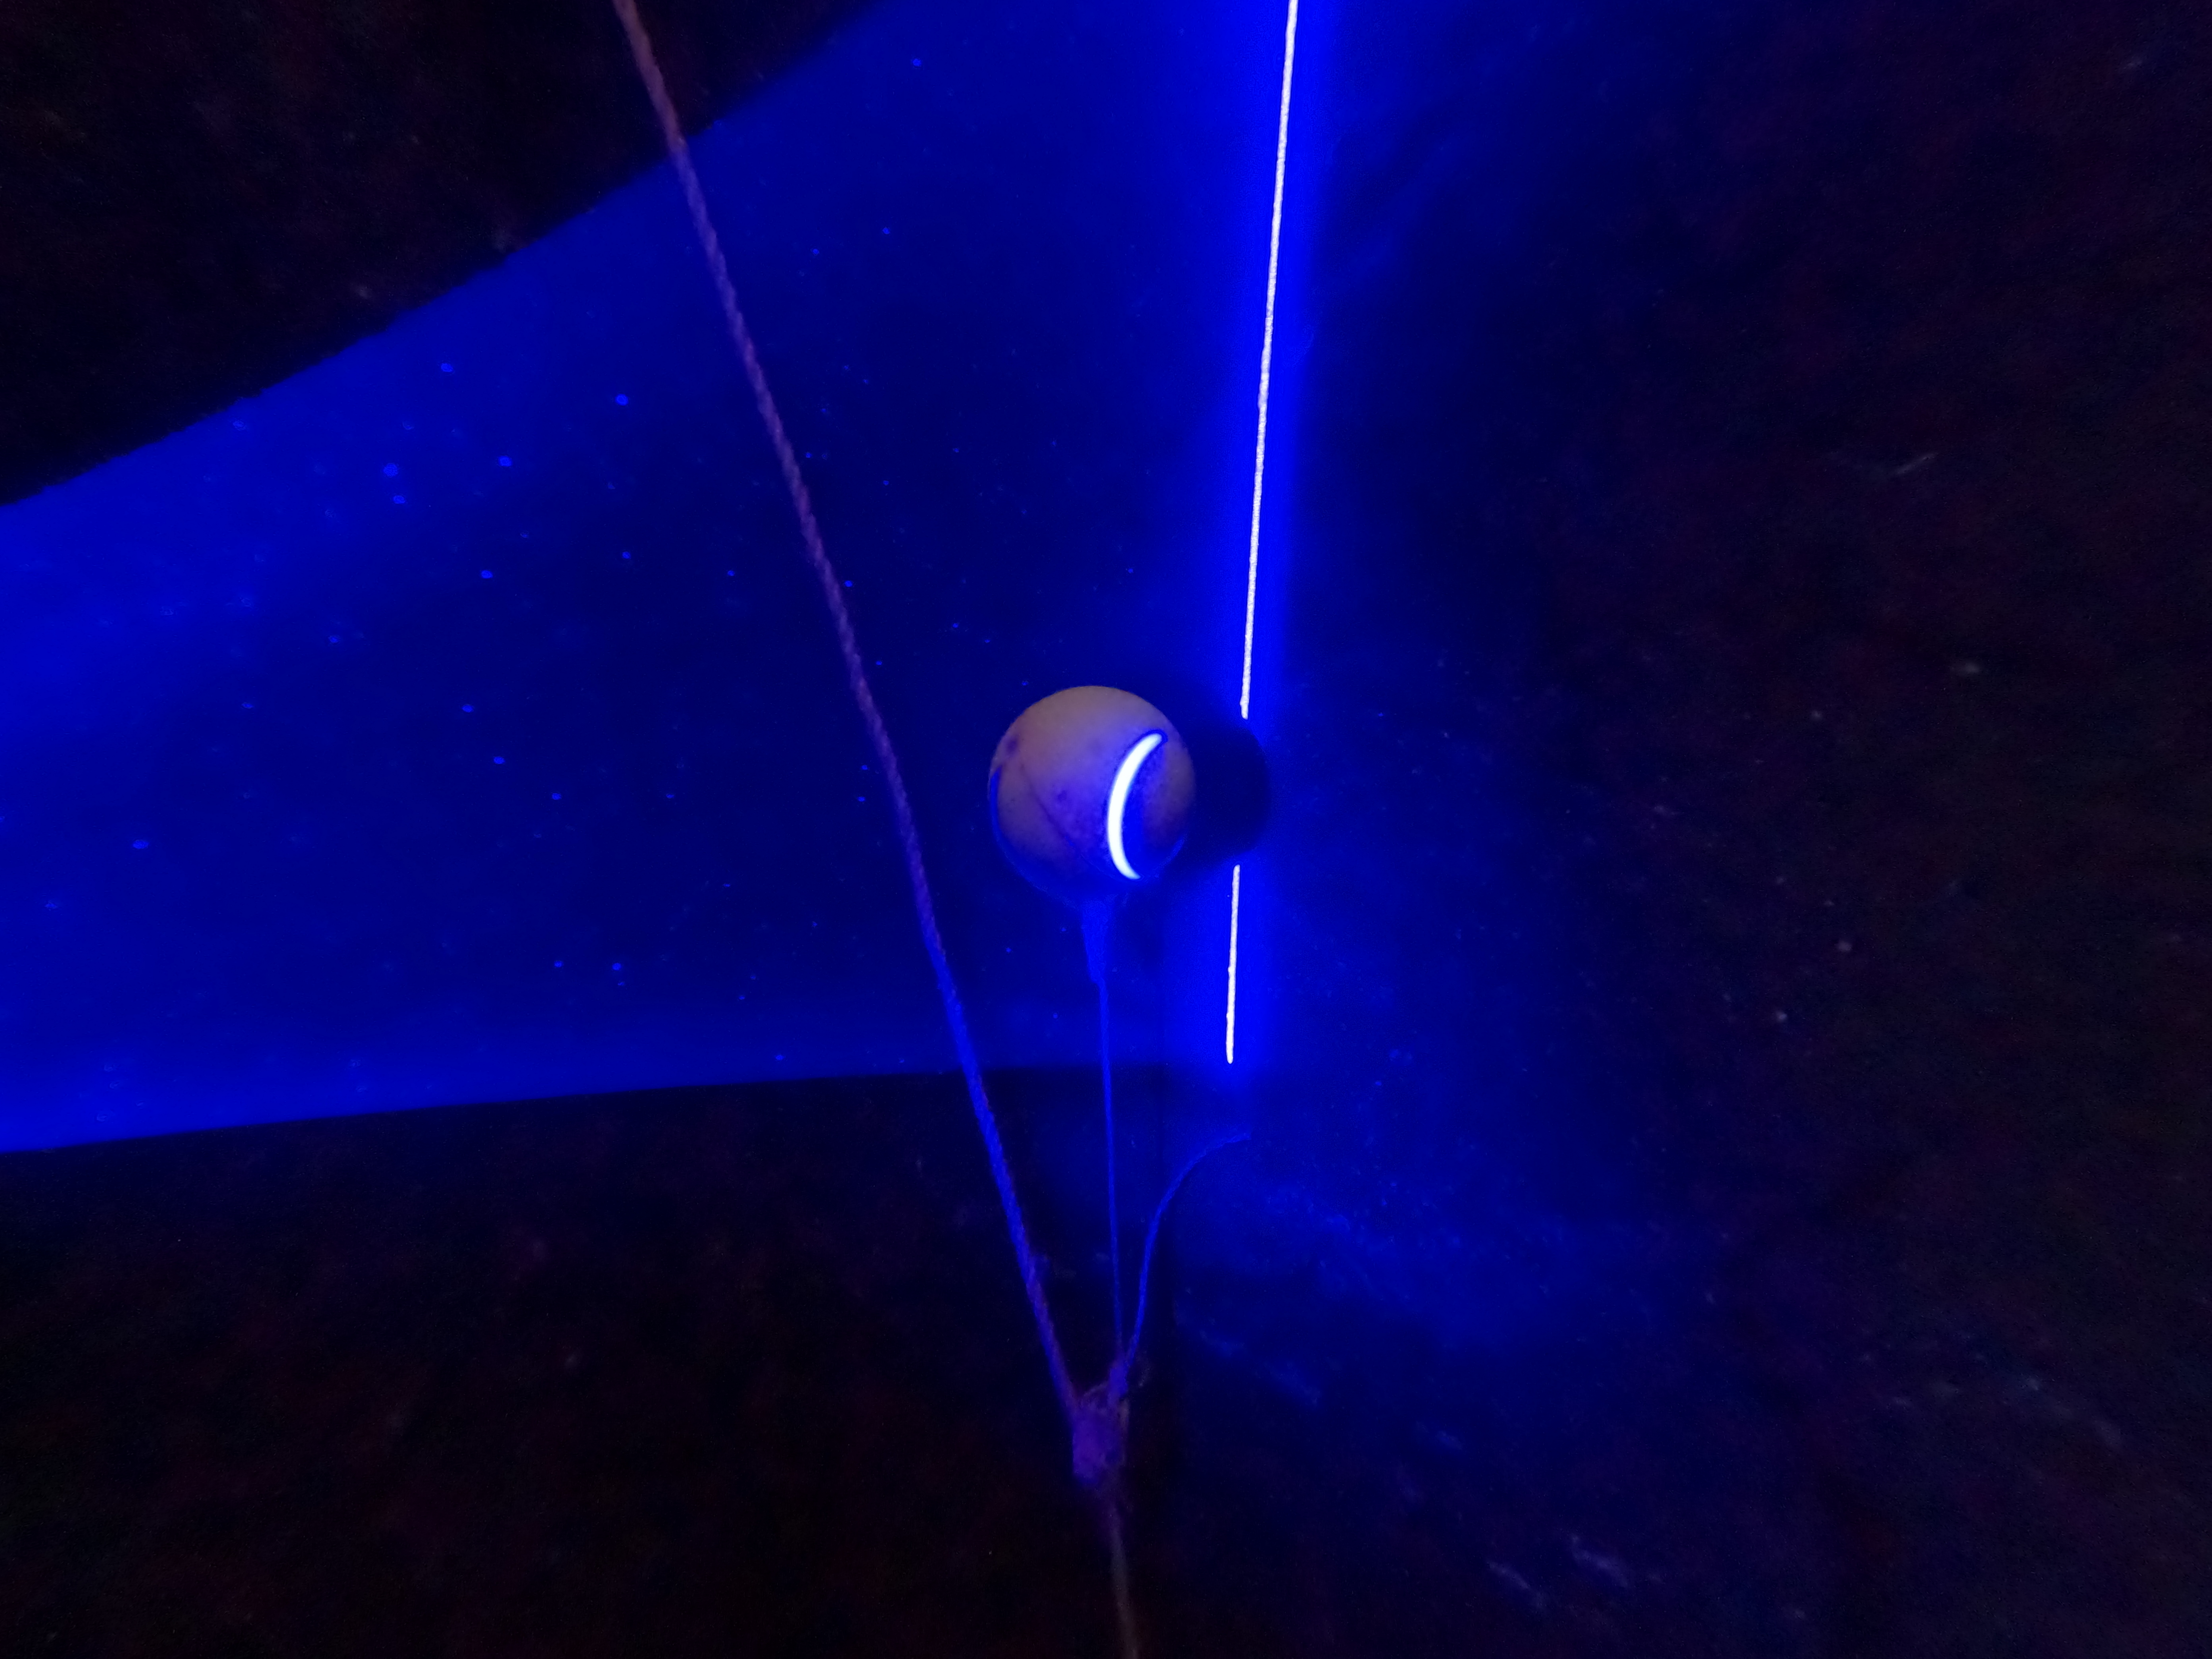

Supplement: Supplementary file 3479 [file G0030703.pdf › Level_1_1/G0030703.pdf]

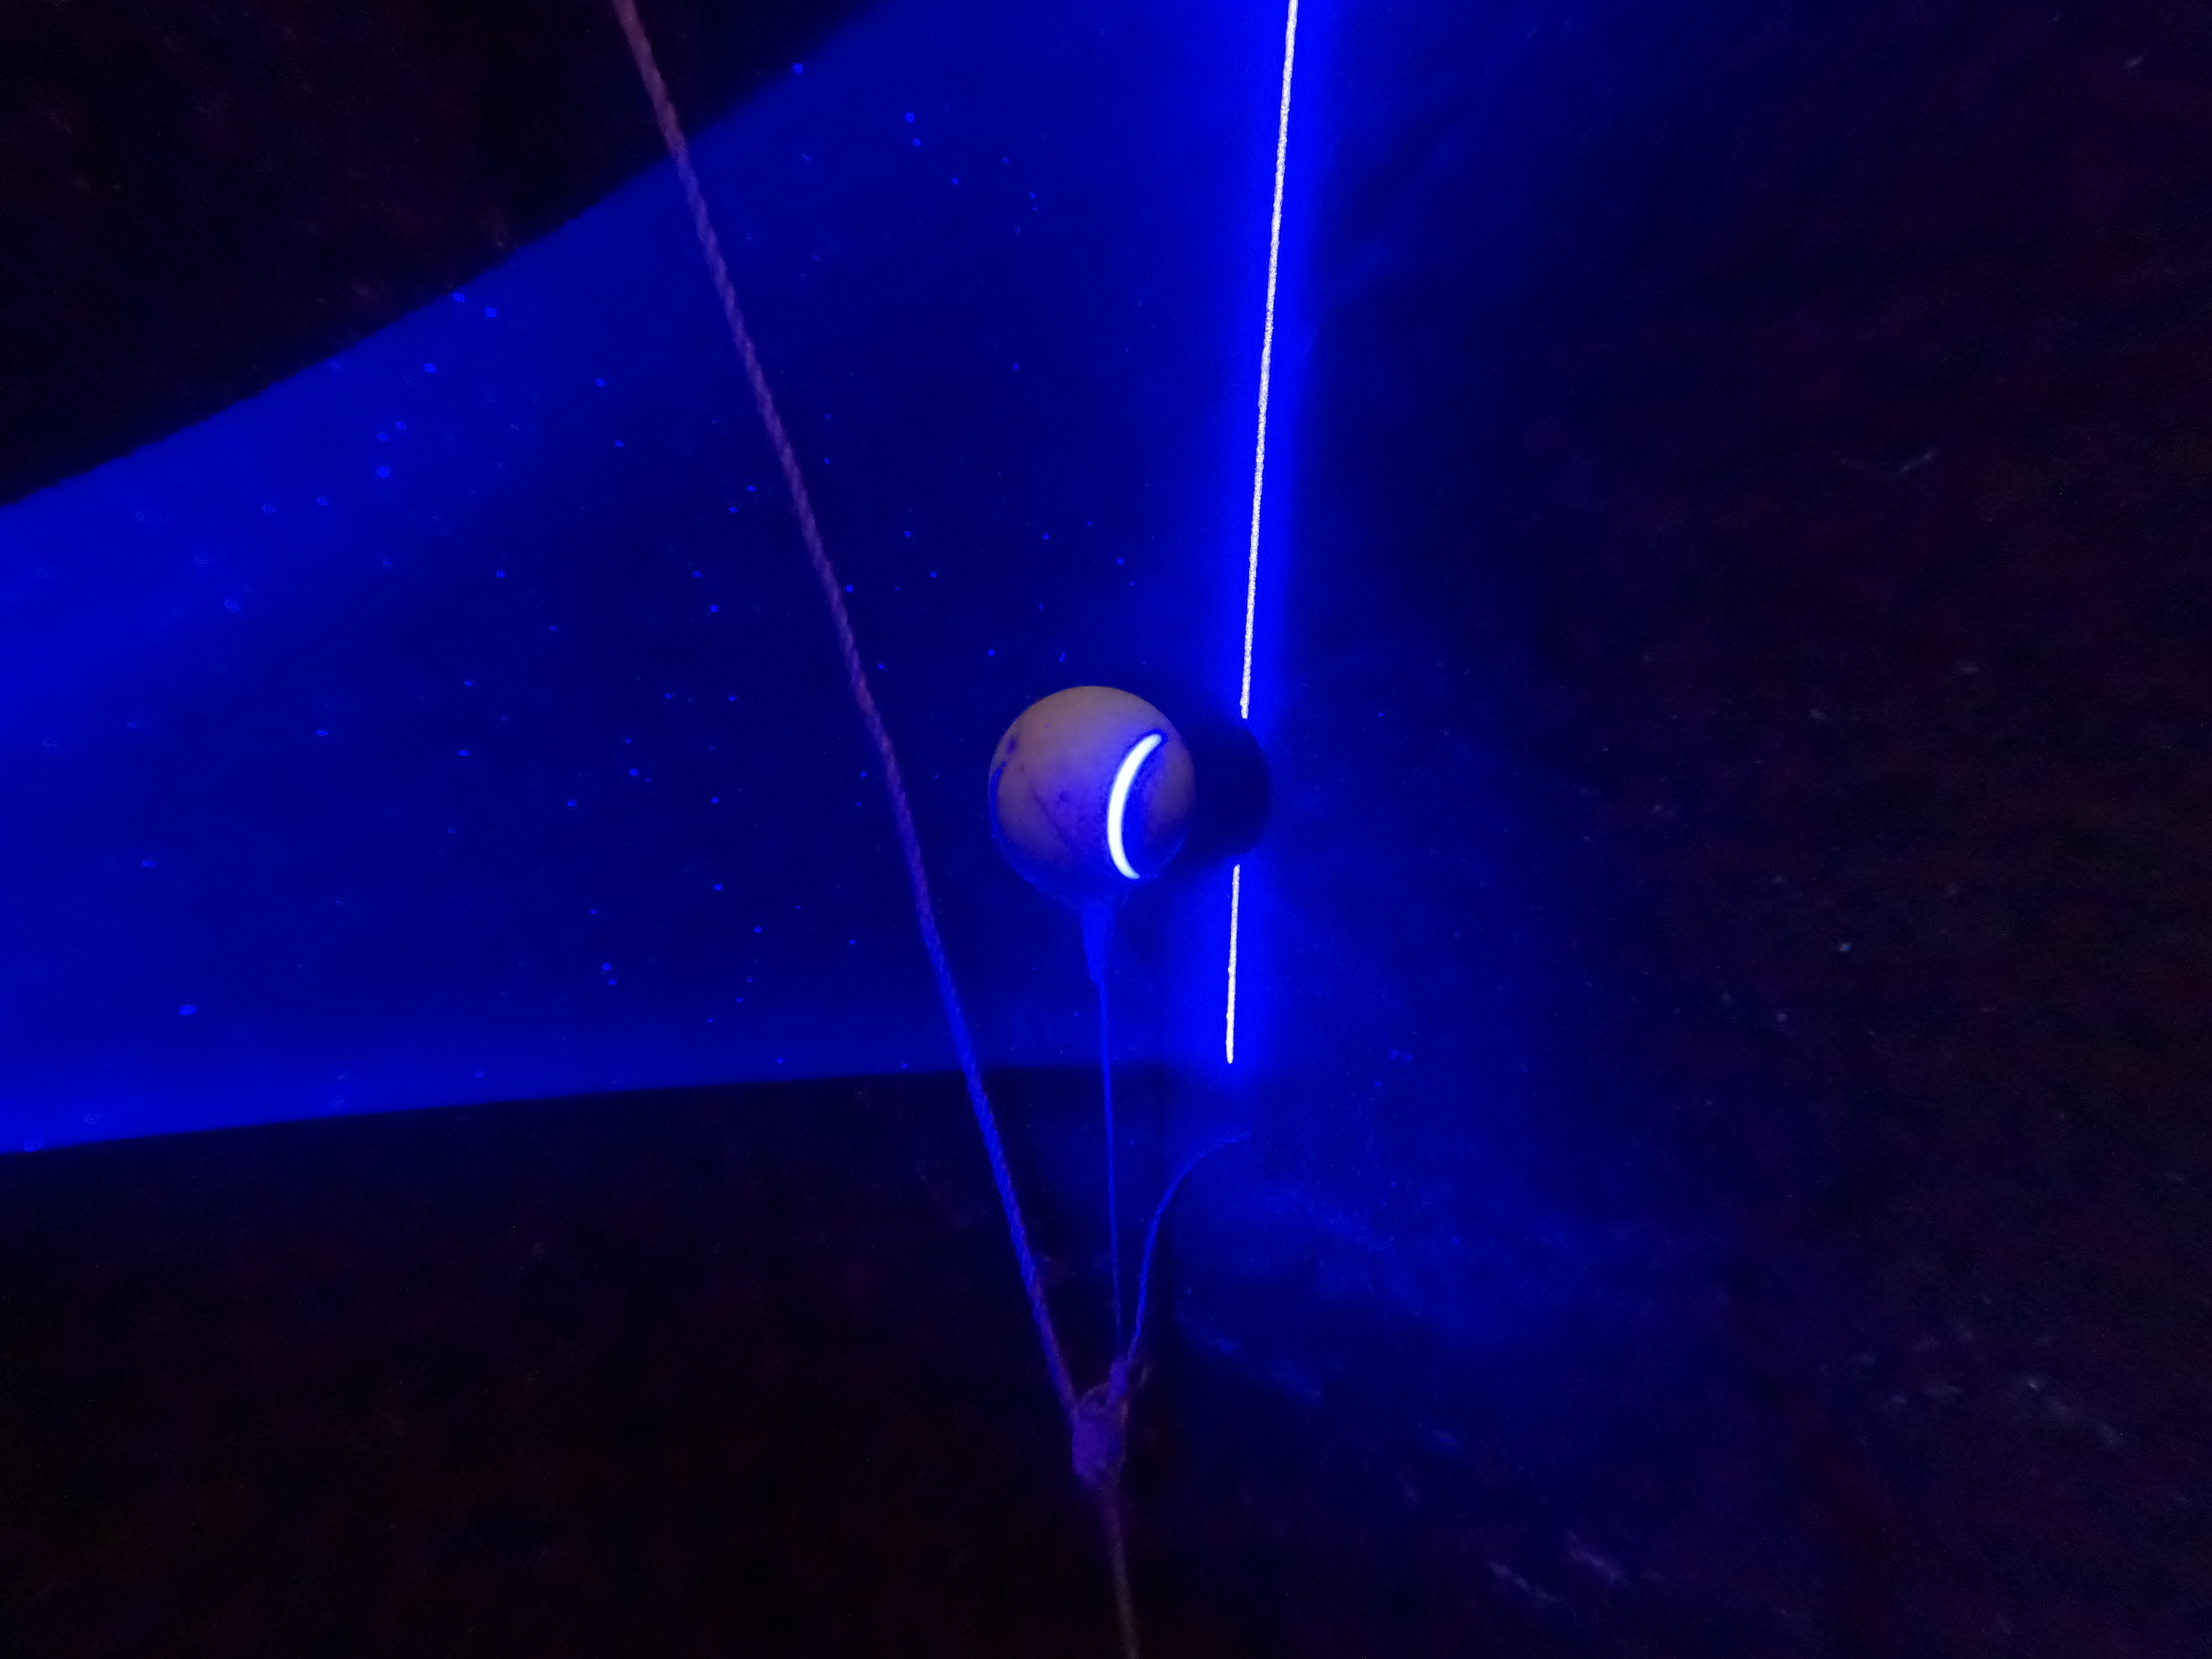

Supplement: Supplementary file 3480 [file G0030704.pdf › Level_1_1/G0030704.pdf]

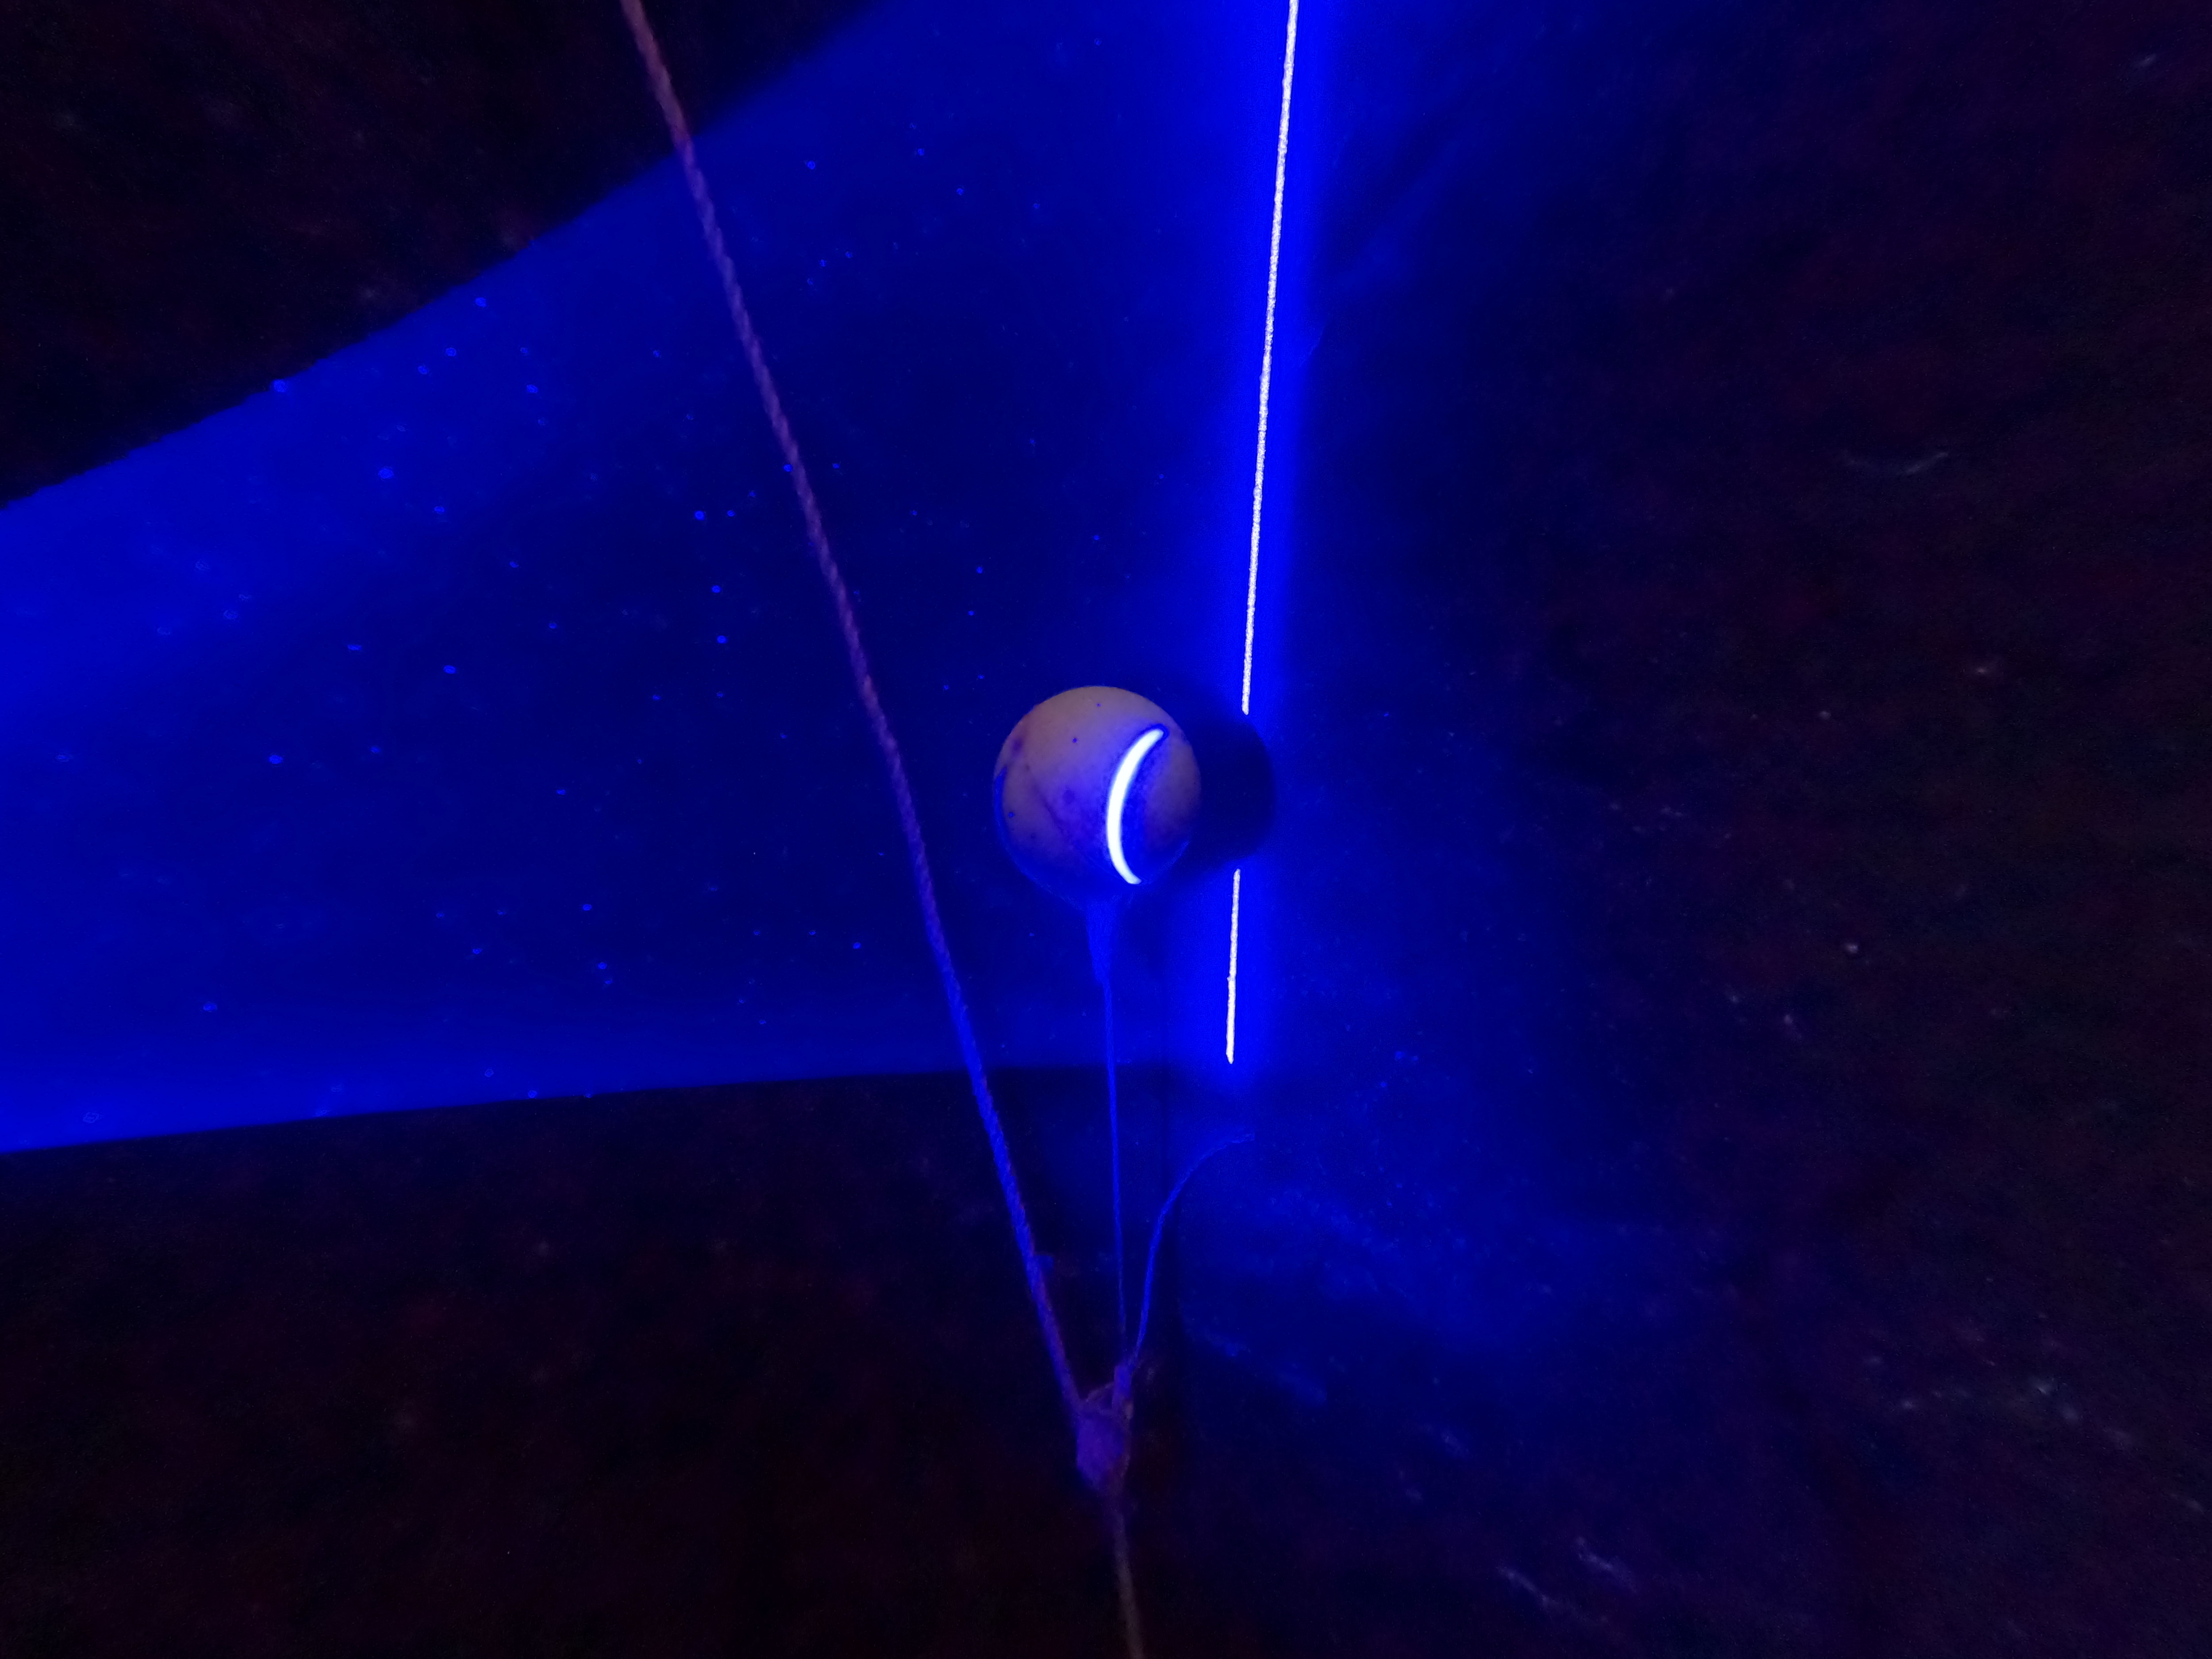

Supplement: Supplementary file 3481 [file G0030705.pdf › Level_1_1/G0030705.pdf]

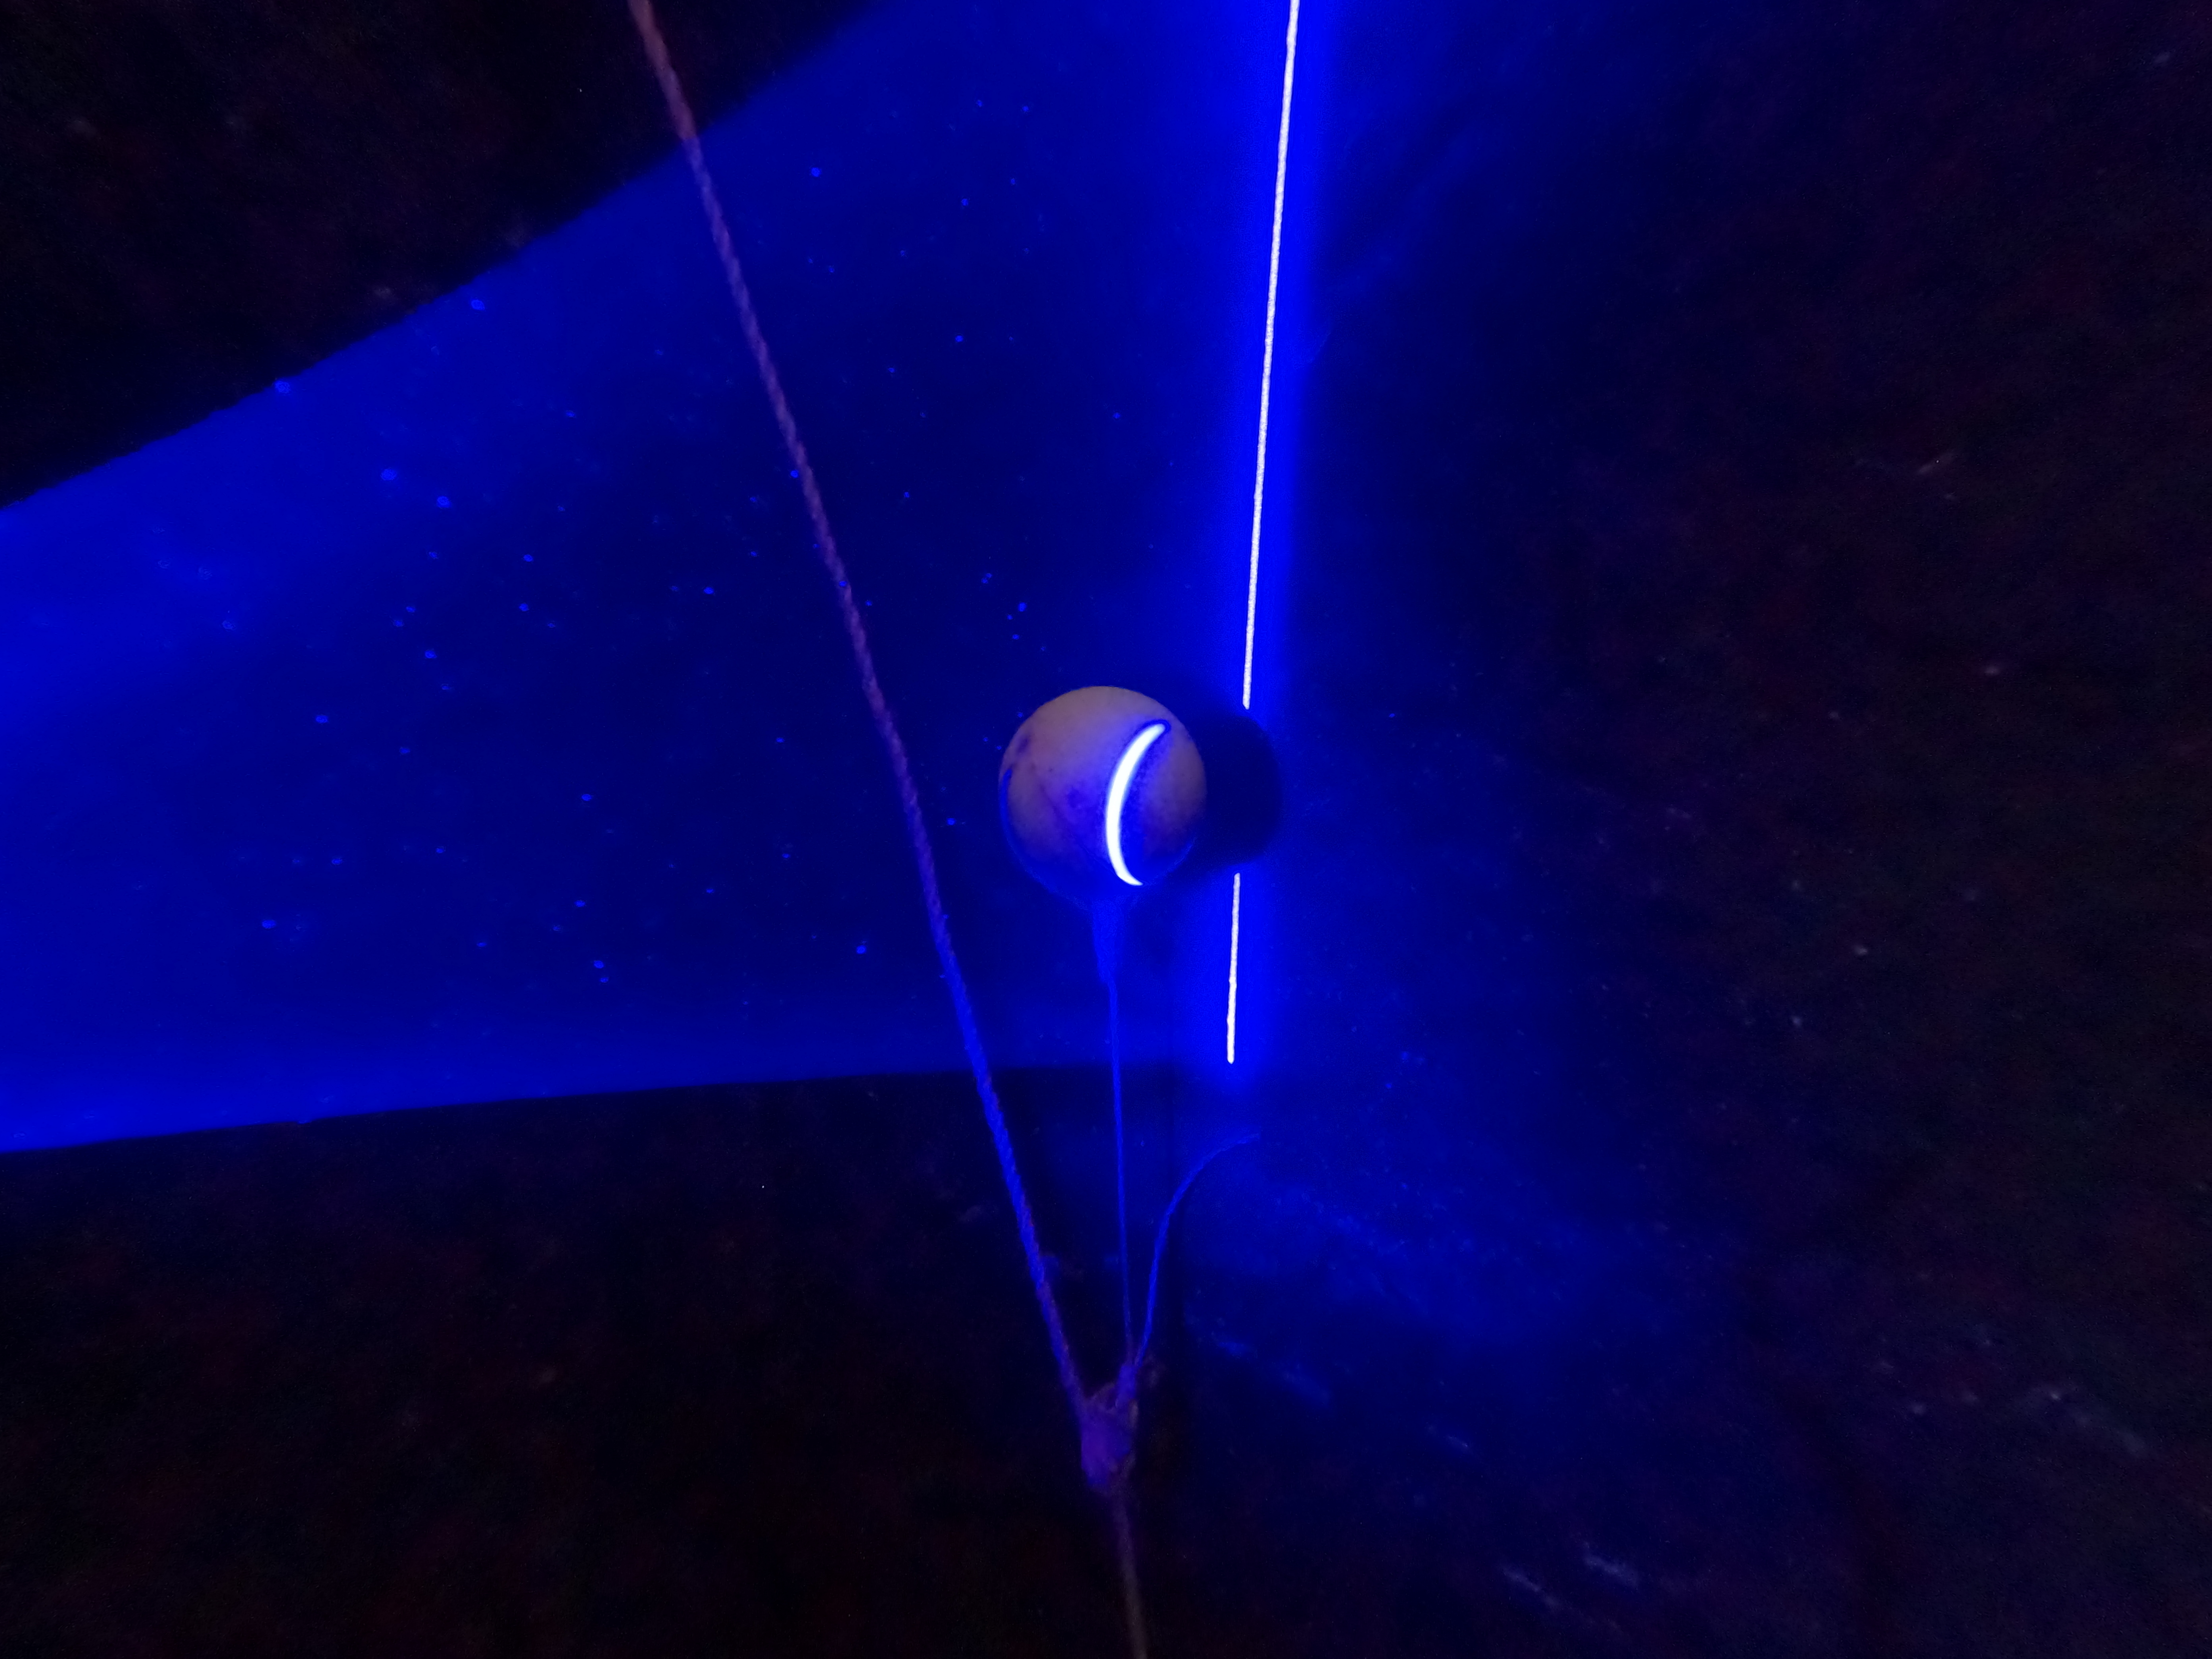

Supplement: Supplementary file 3482 [file G0030706.pdf › Level_1_1/G0030706.pdf]

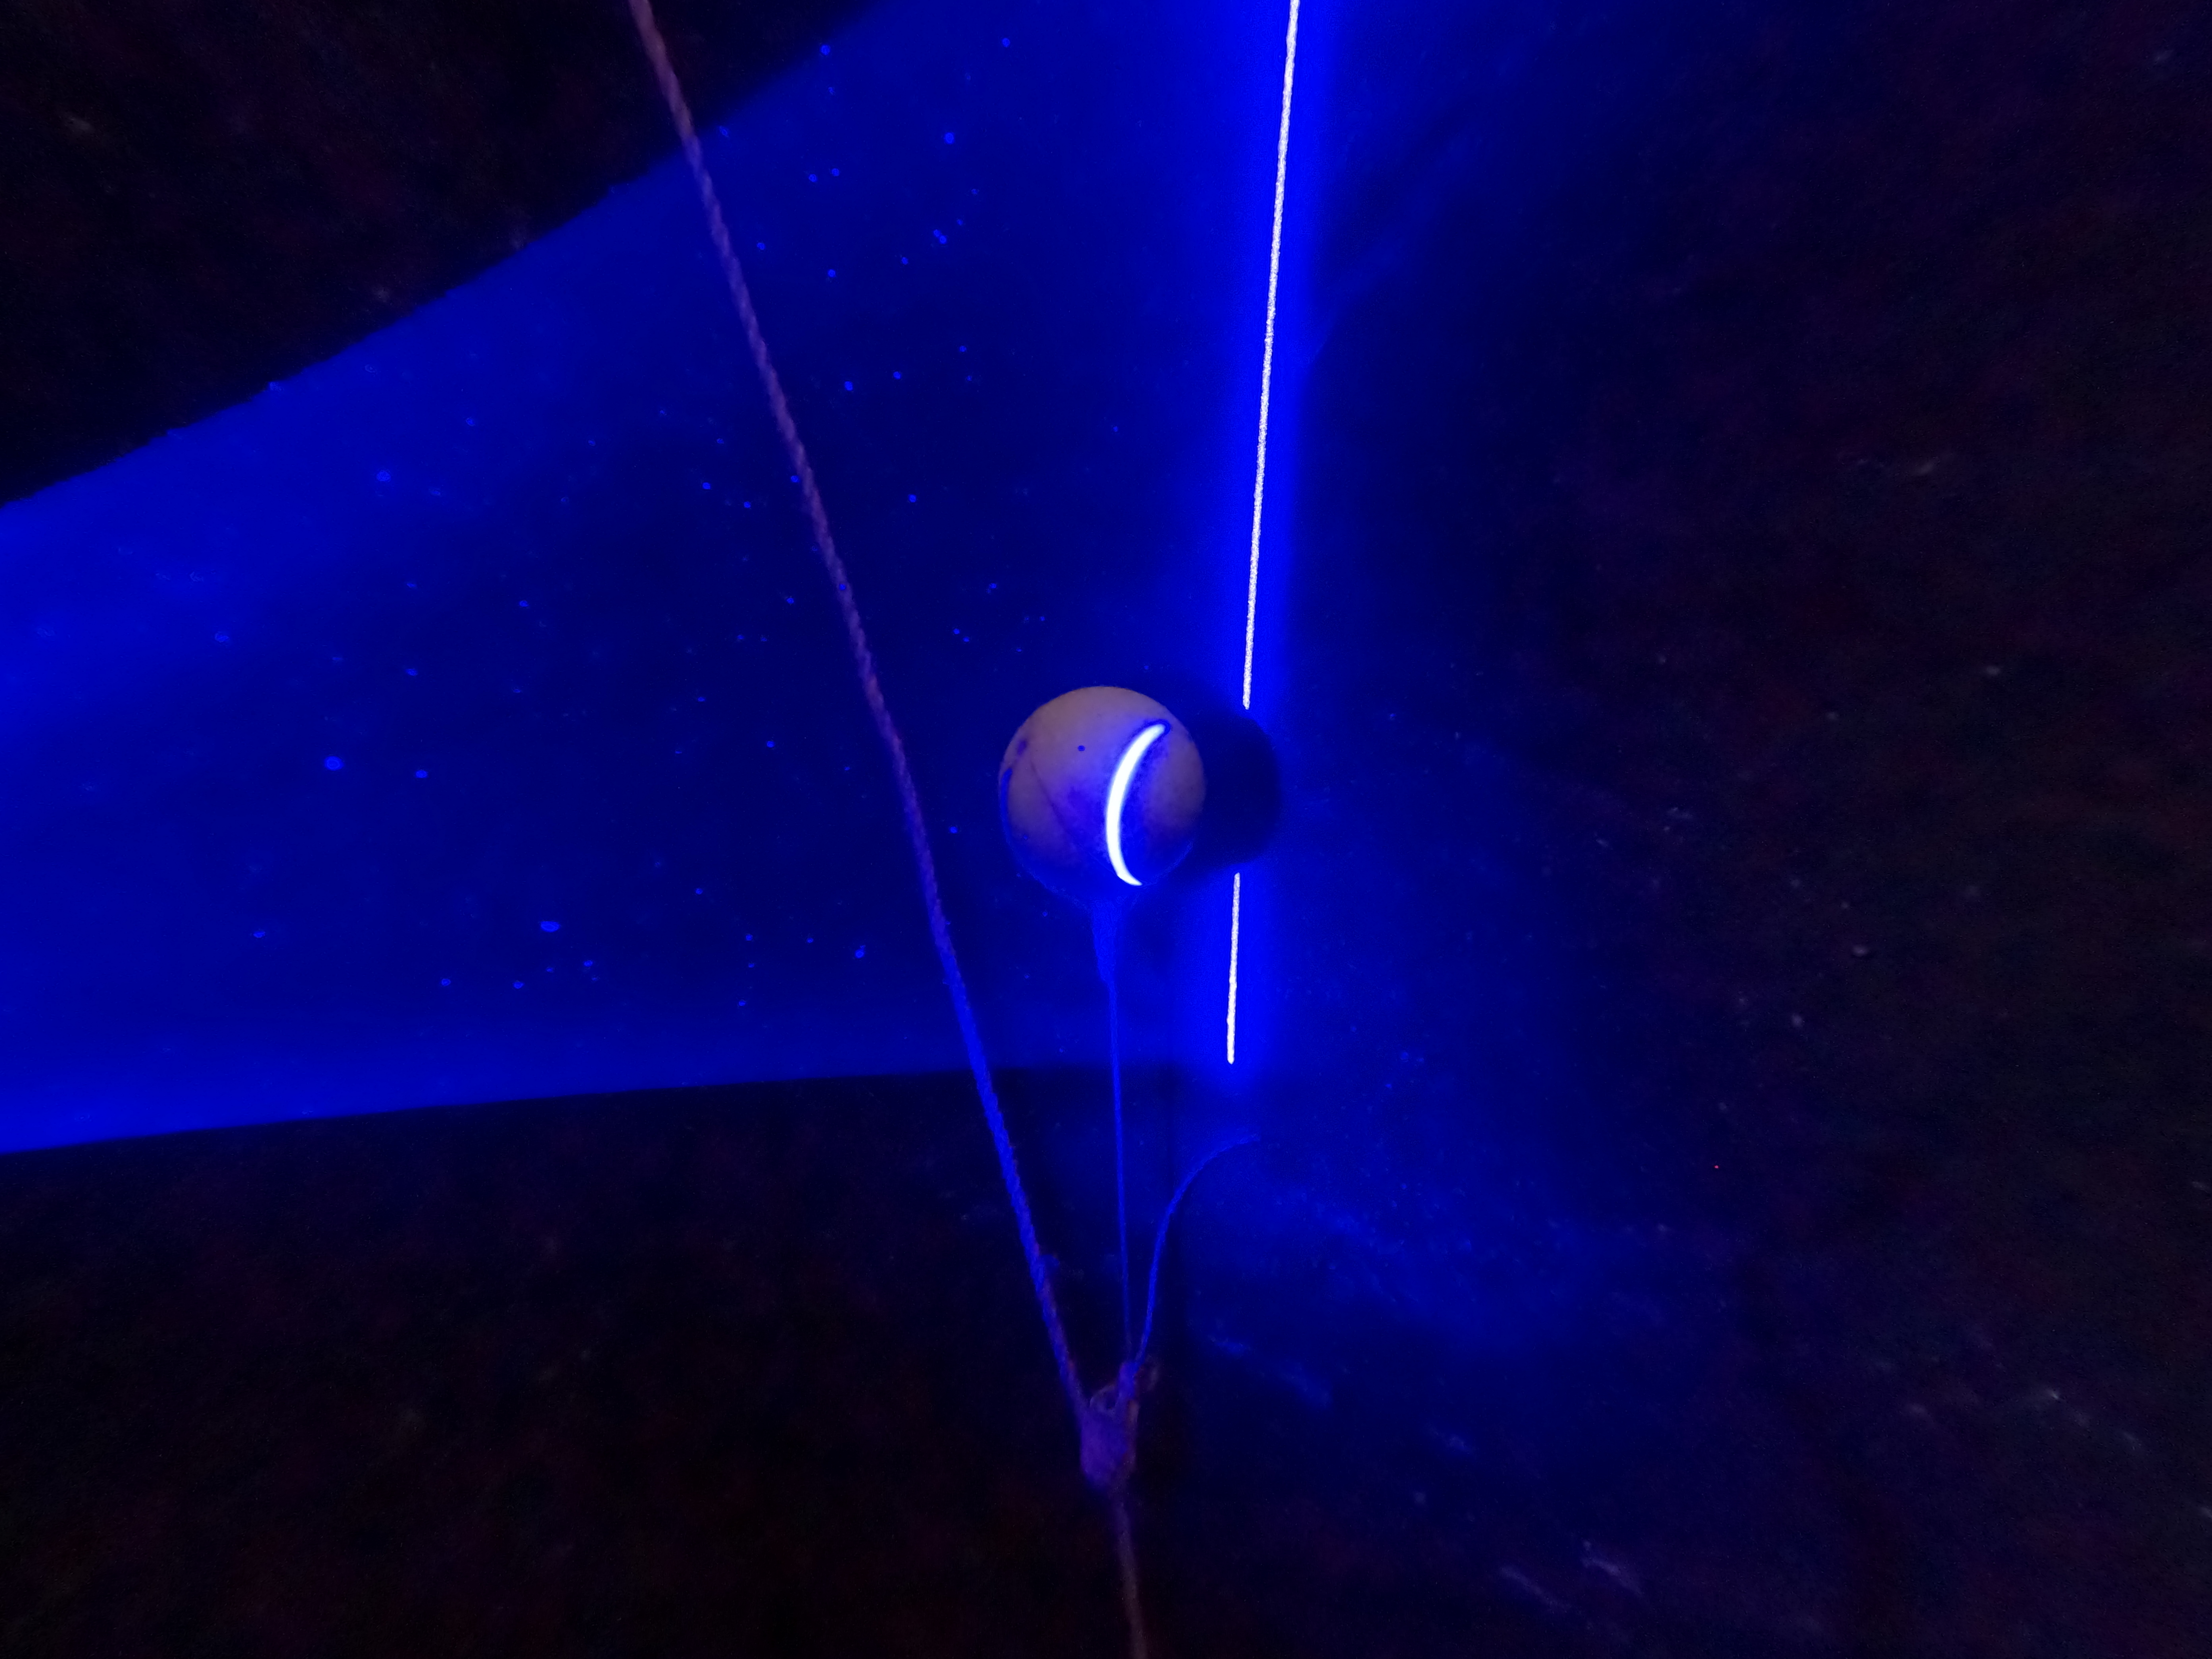

Supplement: Supplementary file 3483 [file G0030707.pdf › Level_1_1/G0030707.pdf]

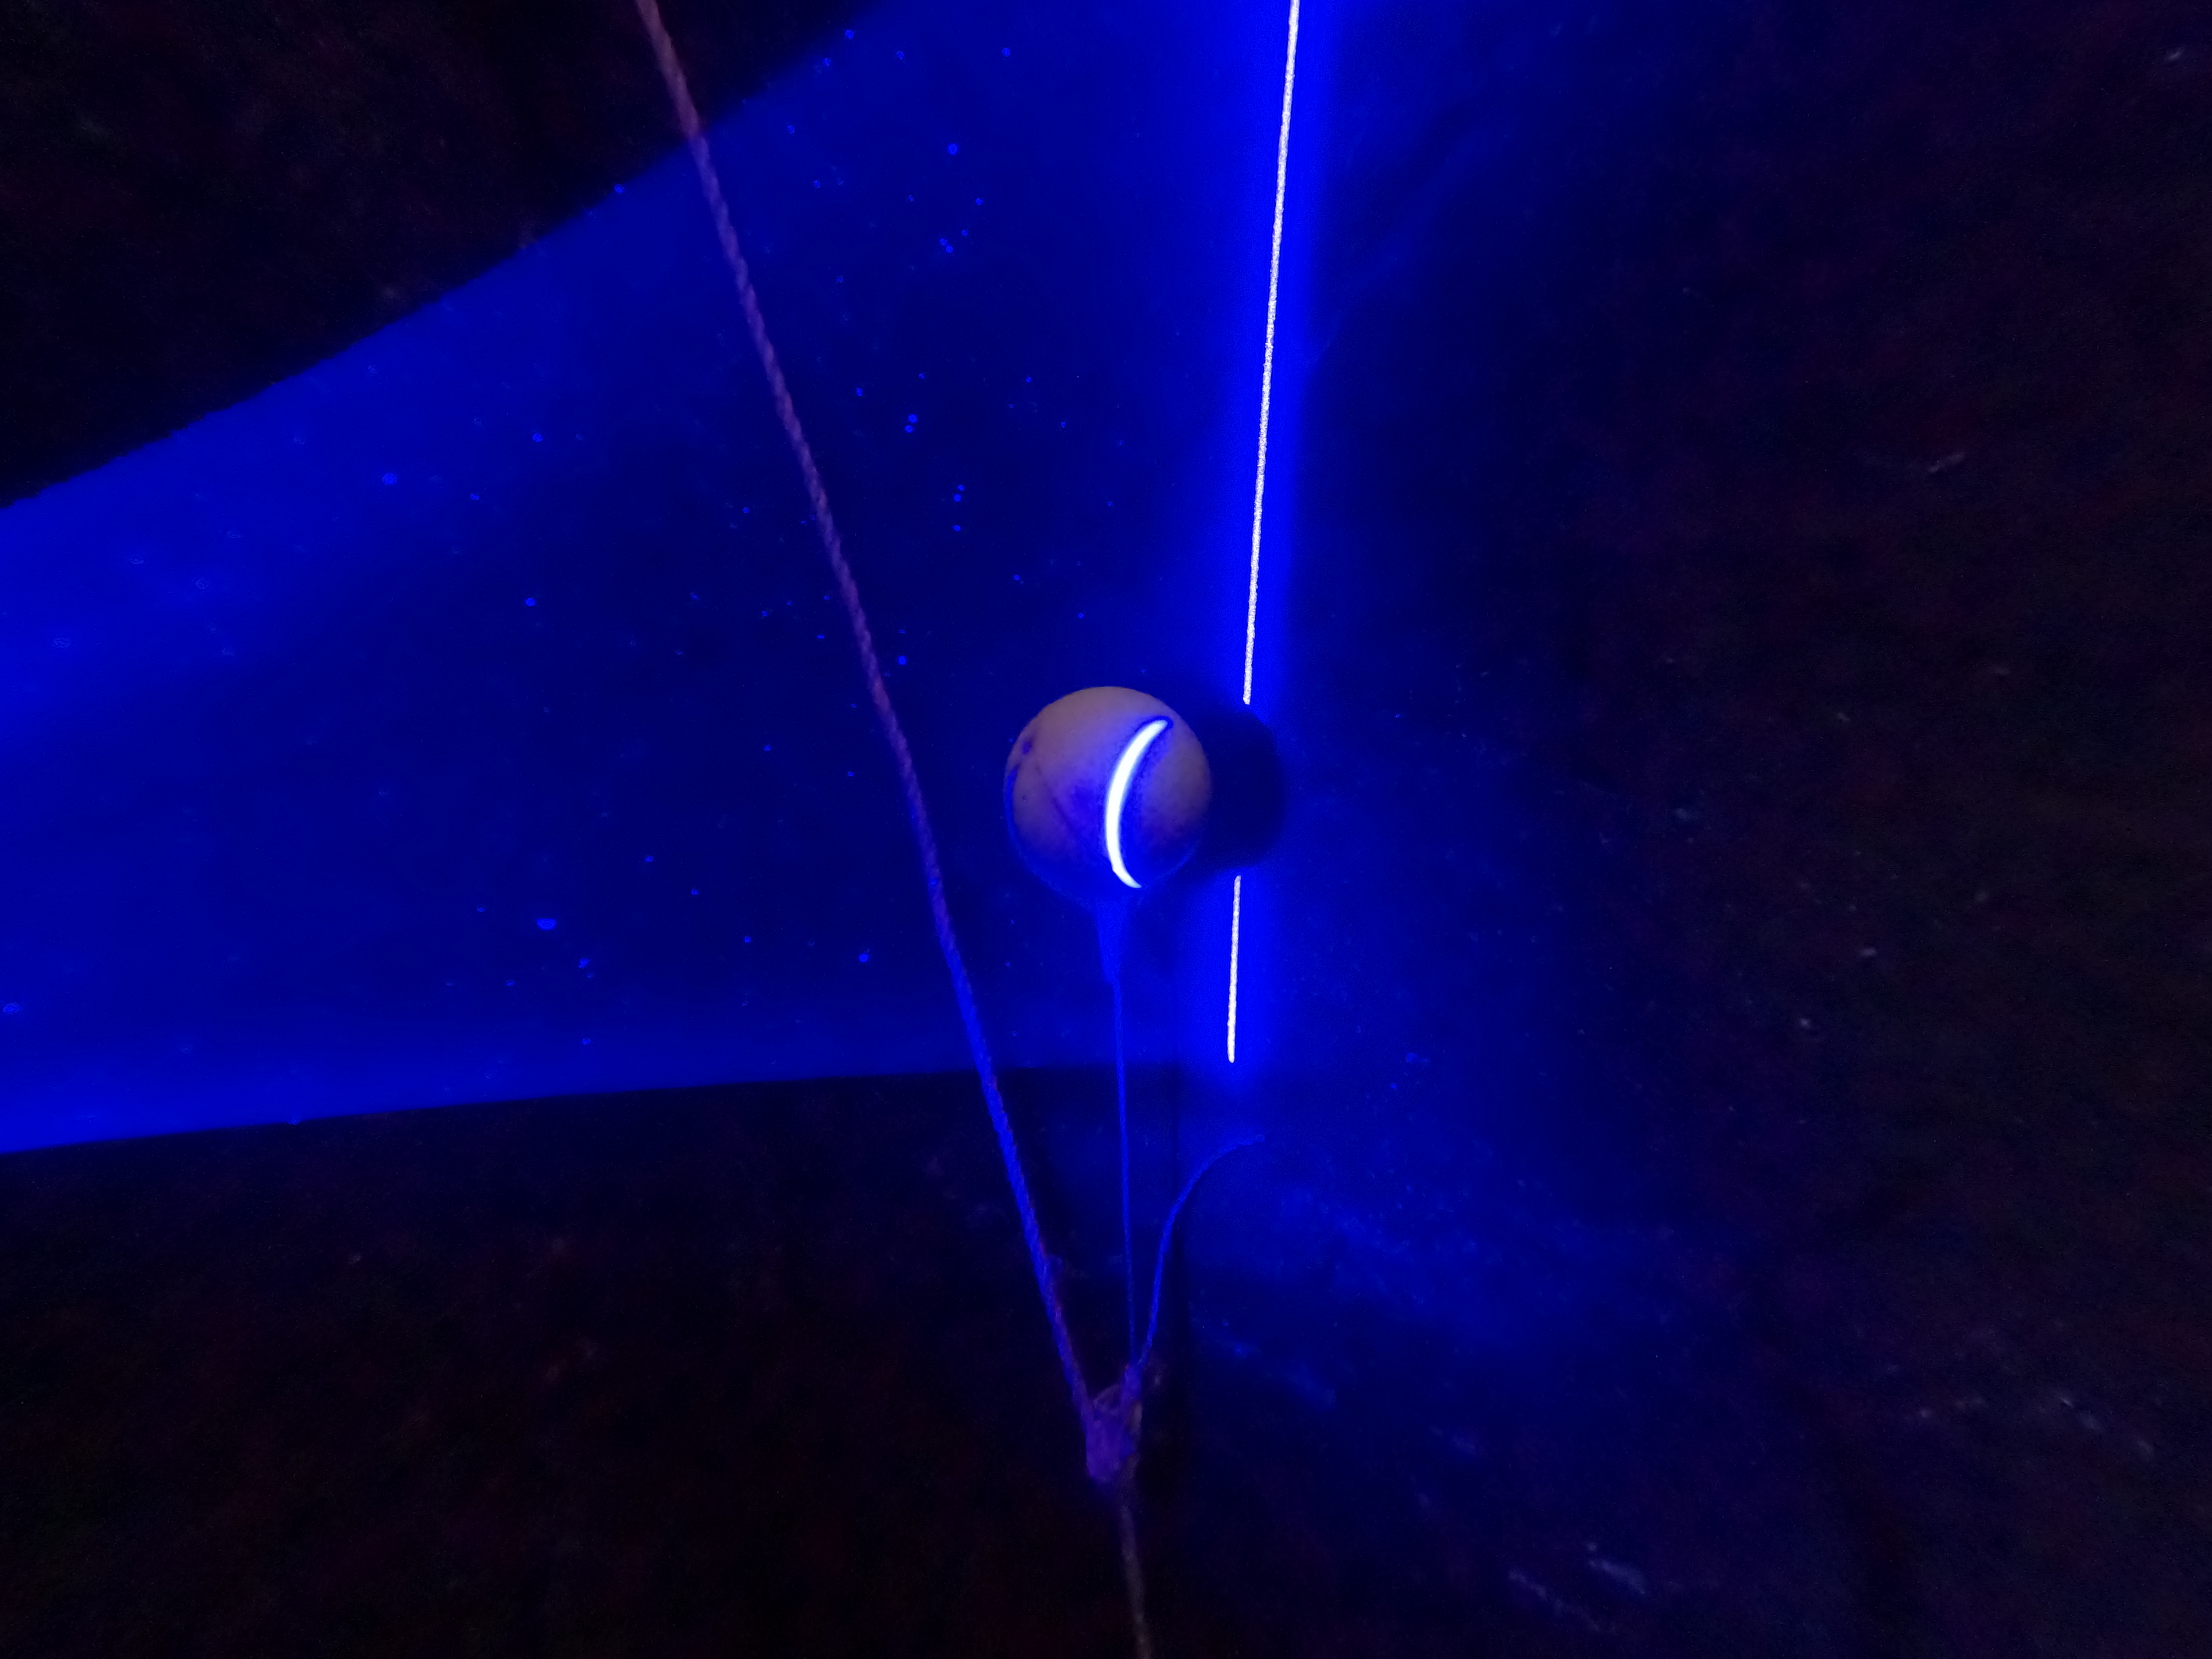

Supplement: Supplementary file 3484 [file G0030708.pdf › Level_1_1/G0030708.pdf]

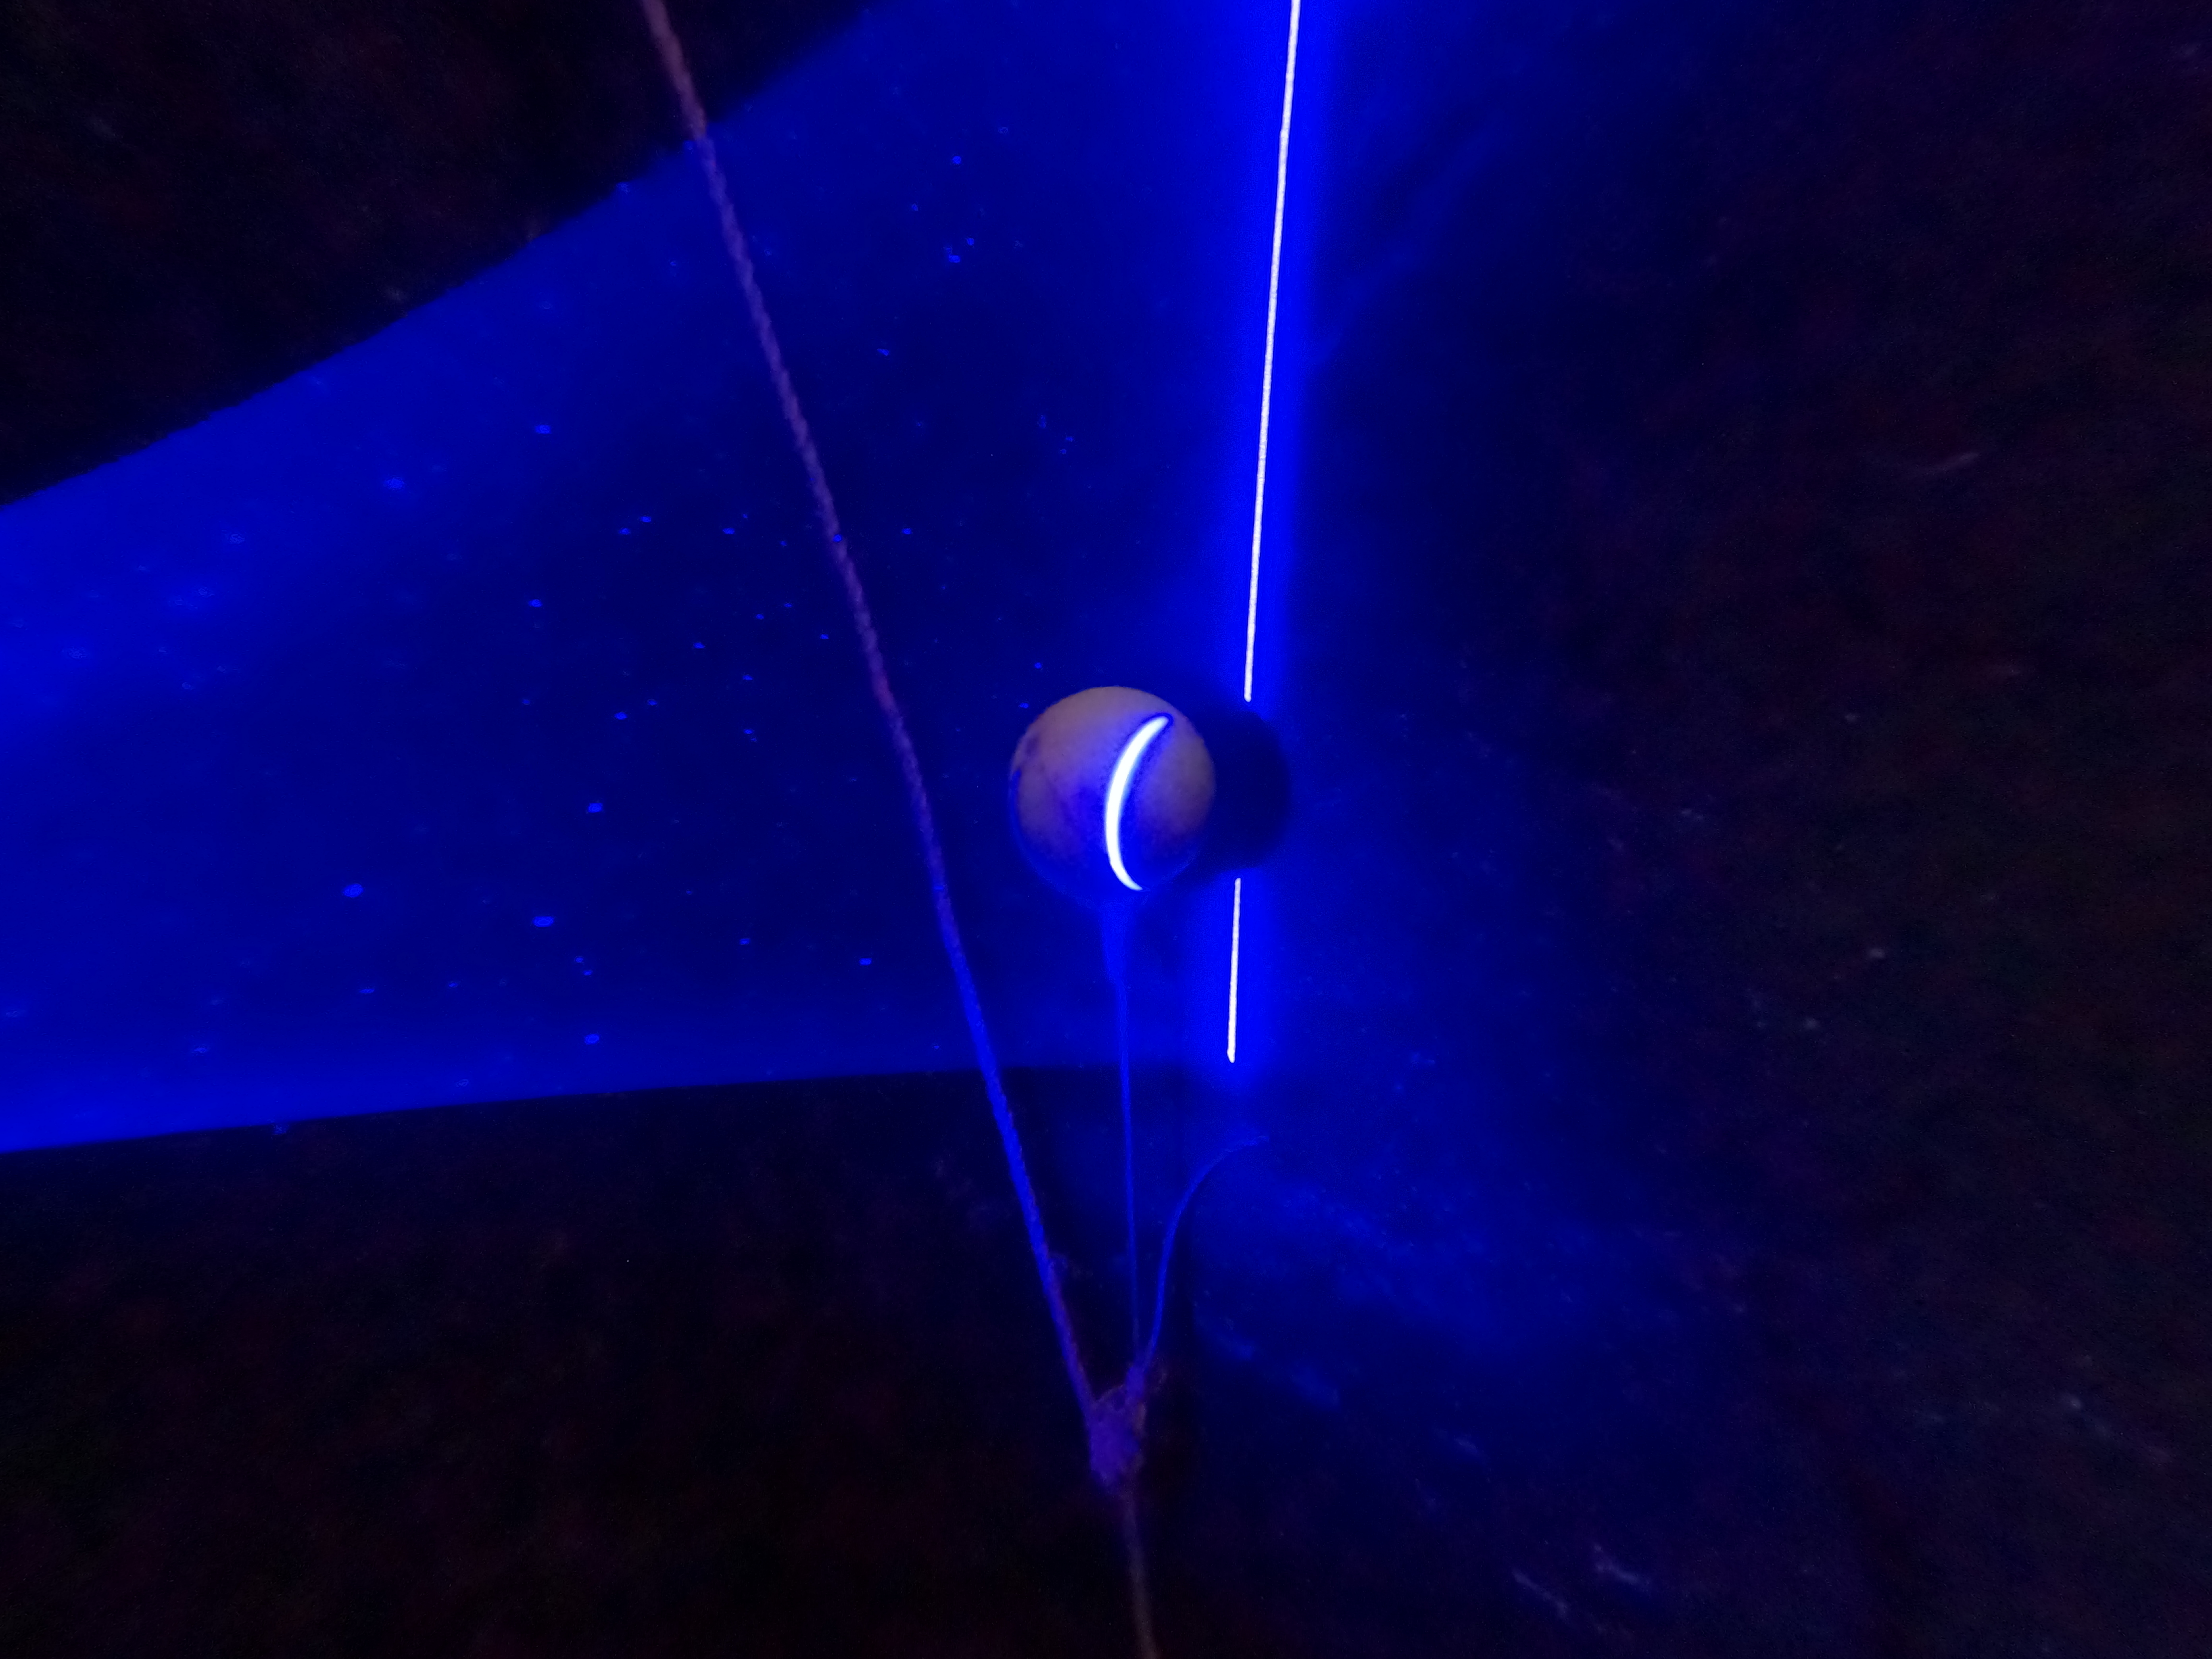

Supplement: Supplementary file 3485 [file G0030709.pdf › Level_1_1/G0030709.pdf]

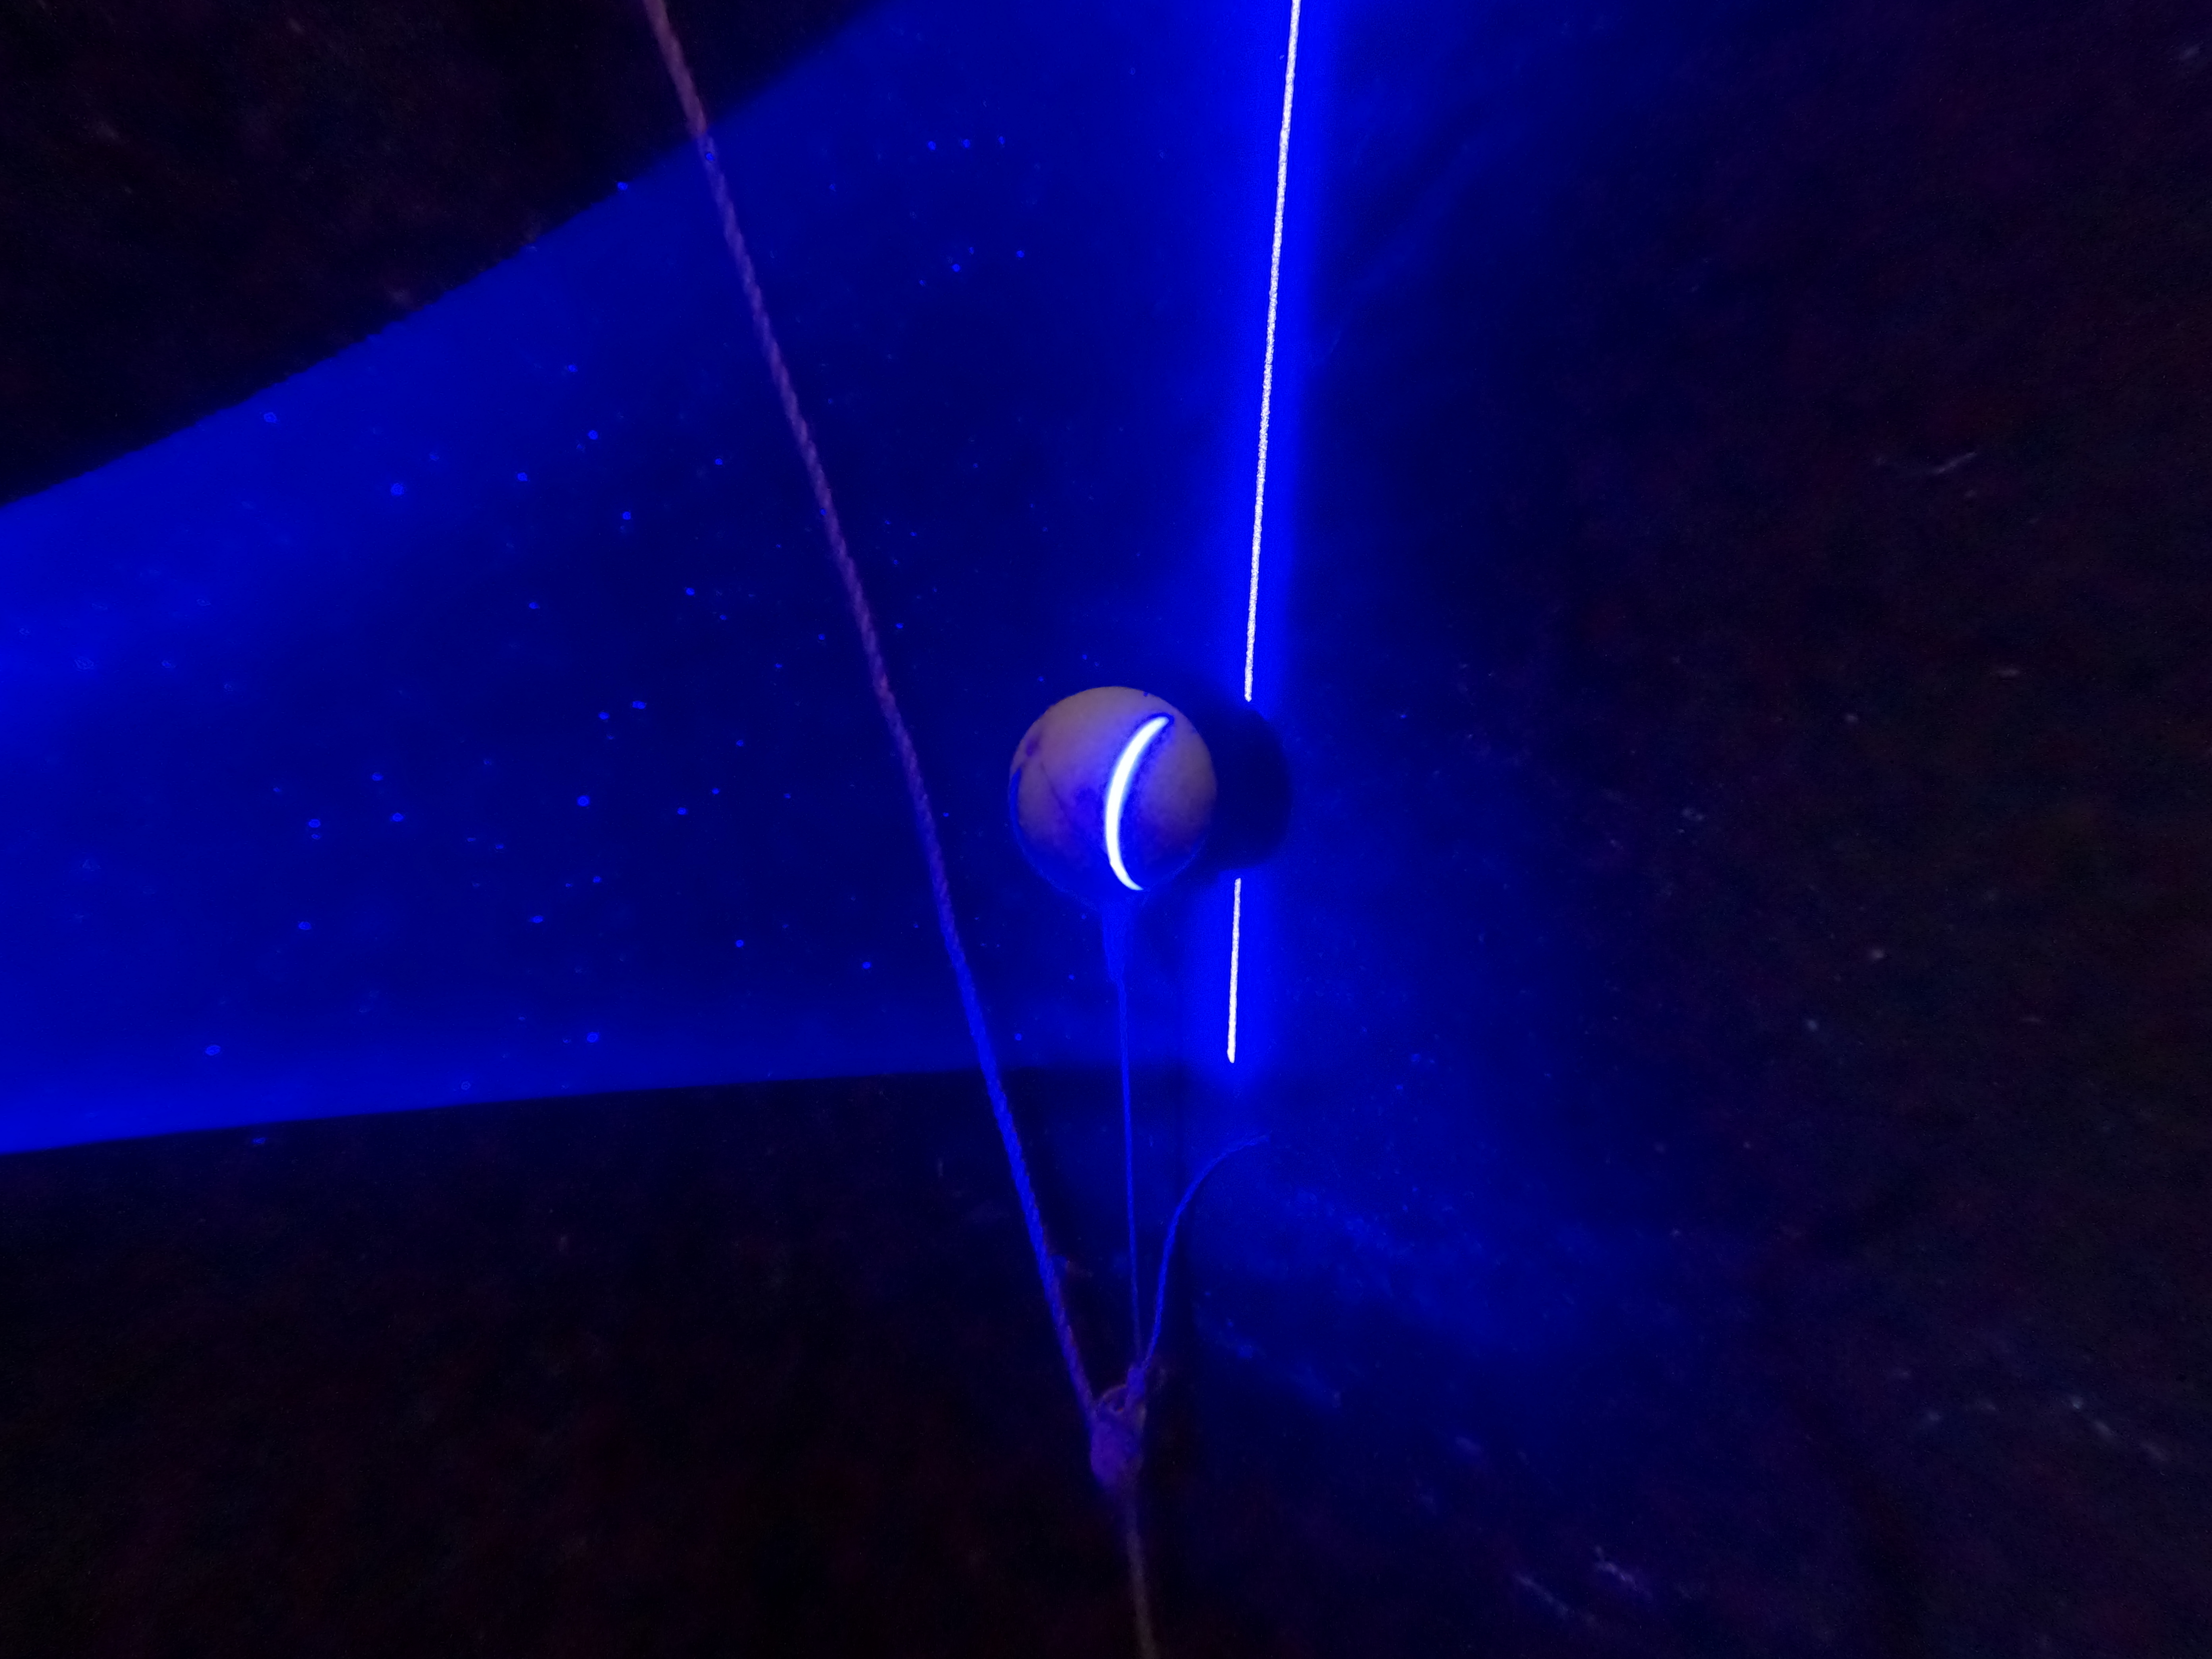

Supplement: Supplementary file 3486 [file G0030710.pdf › Level_1_1/G0030710.pdf]

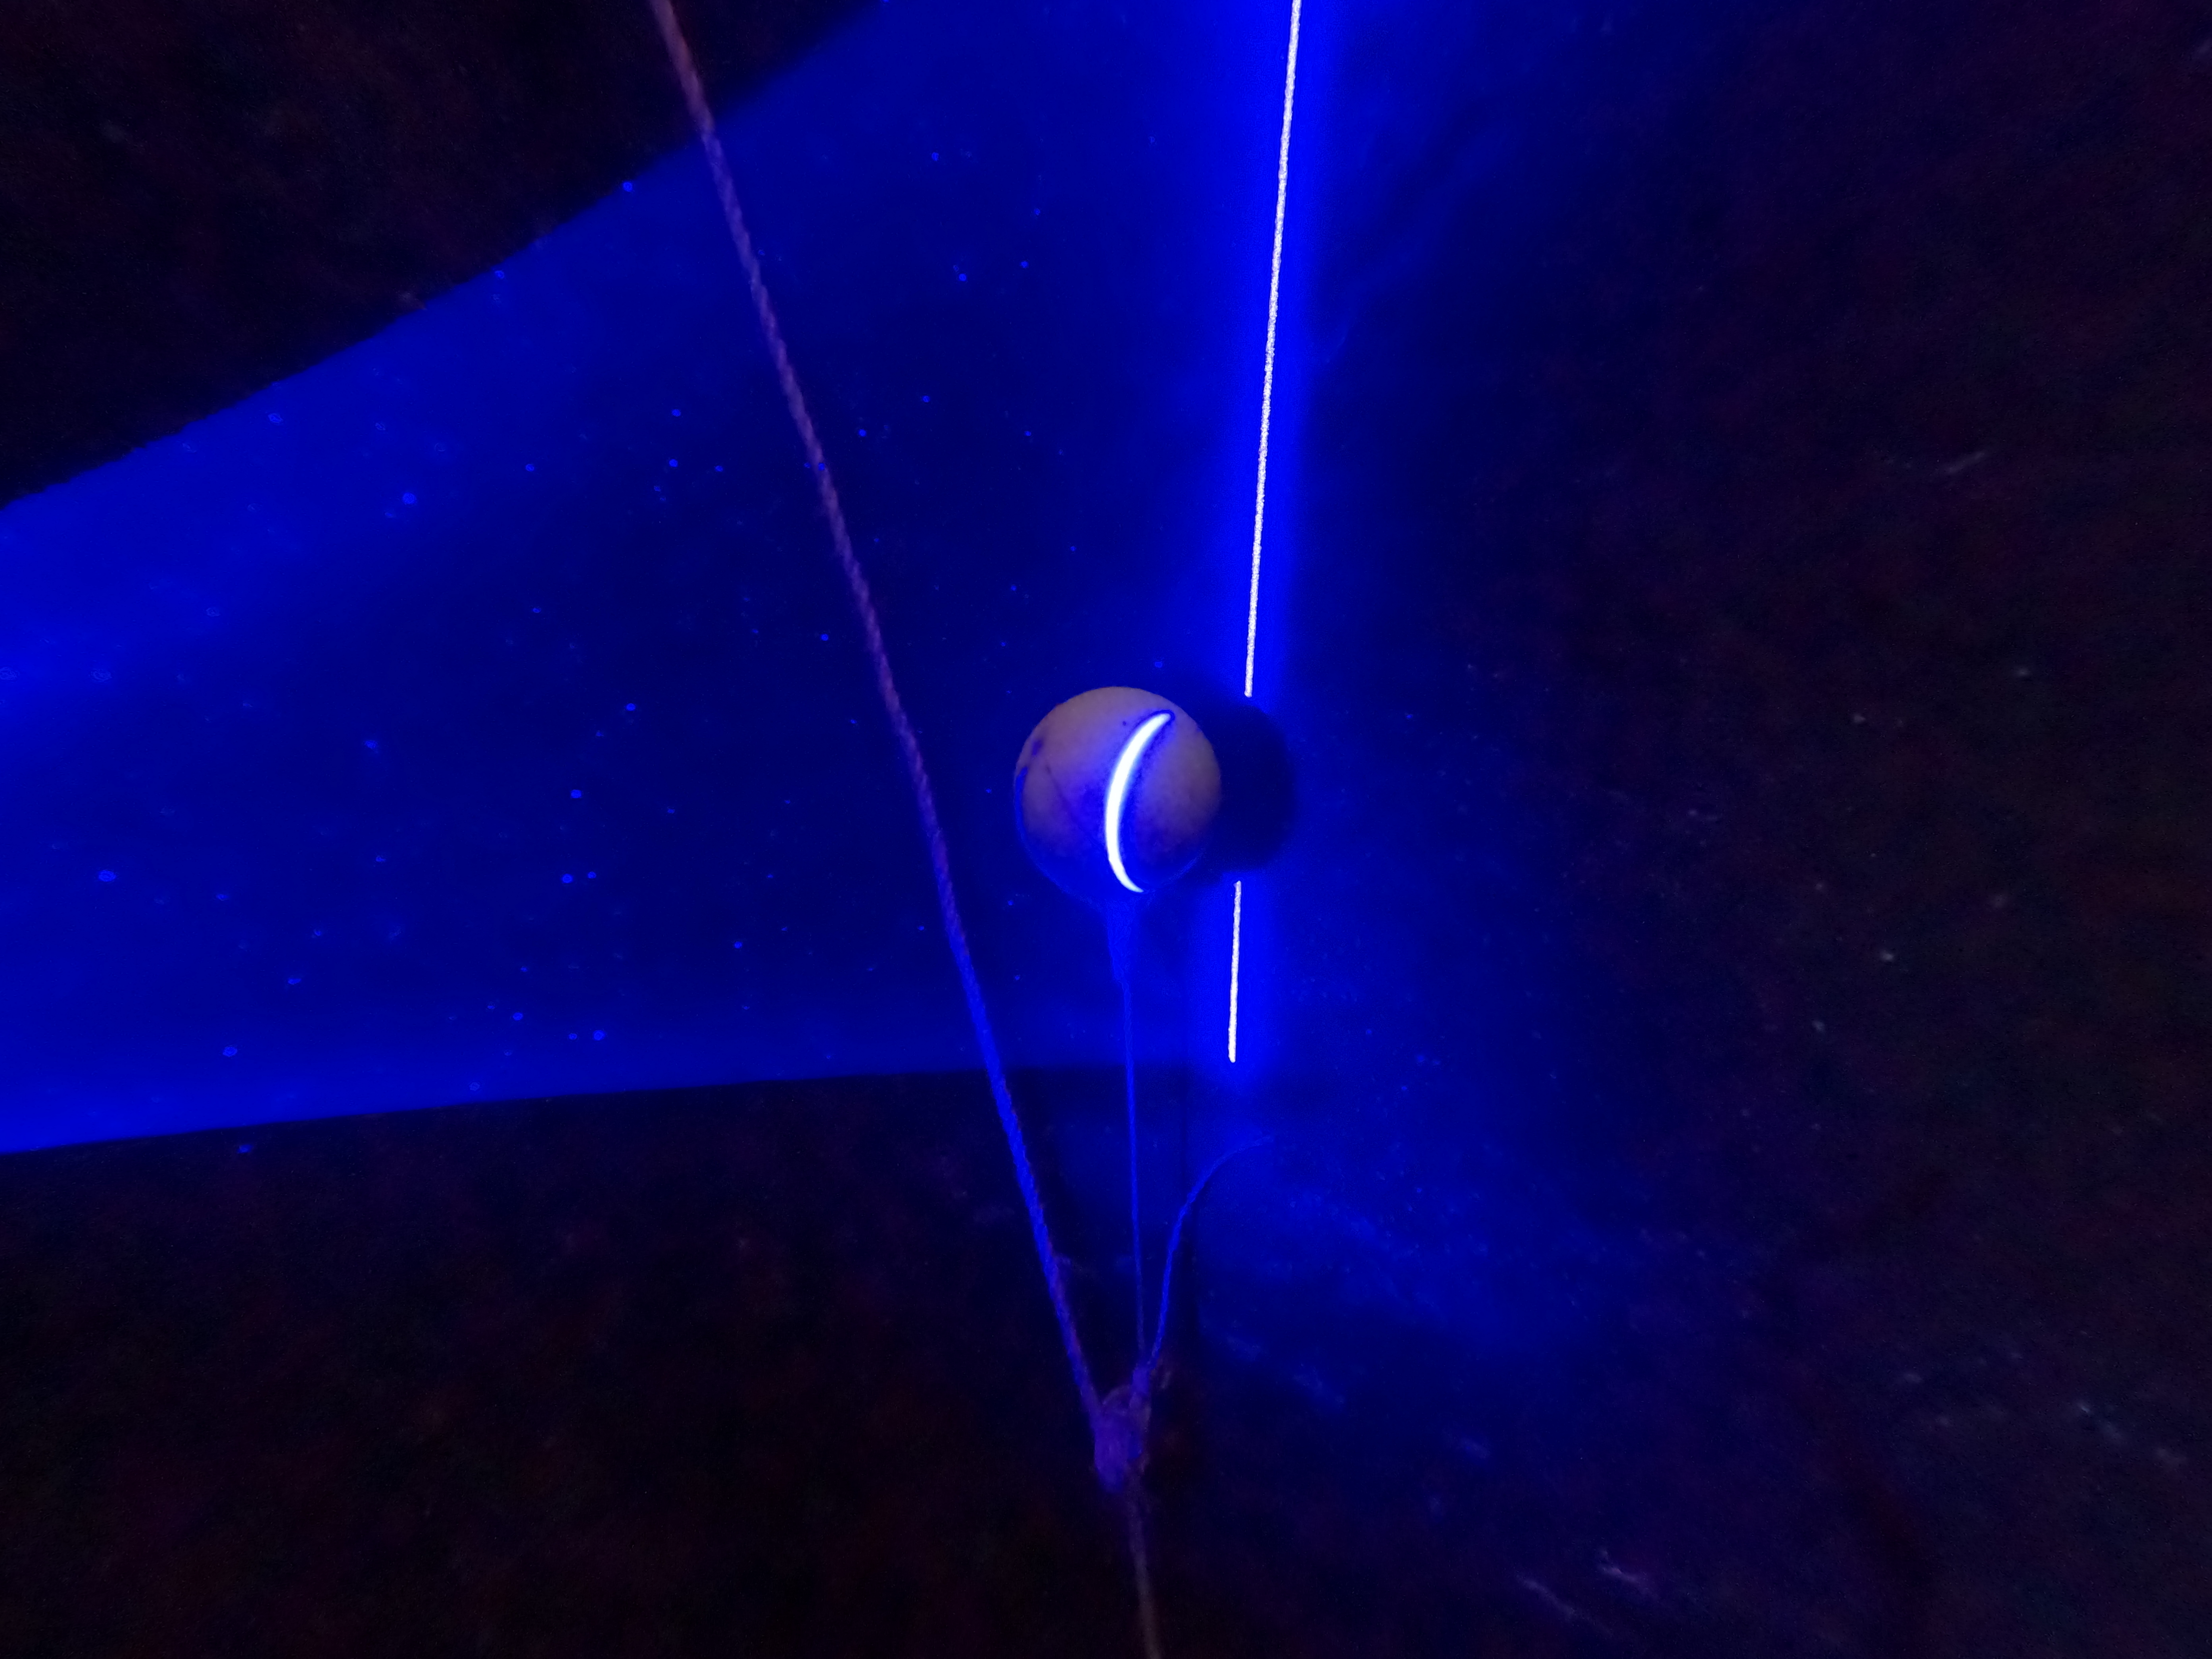

Supplement: Supplementary file 3487 [file G0030711.pdf › Level_1_1/G0030711.pdf]

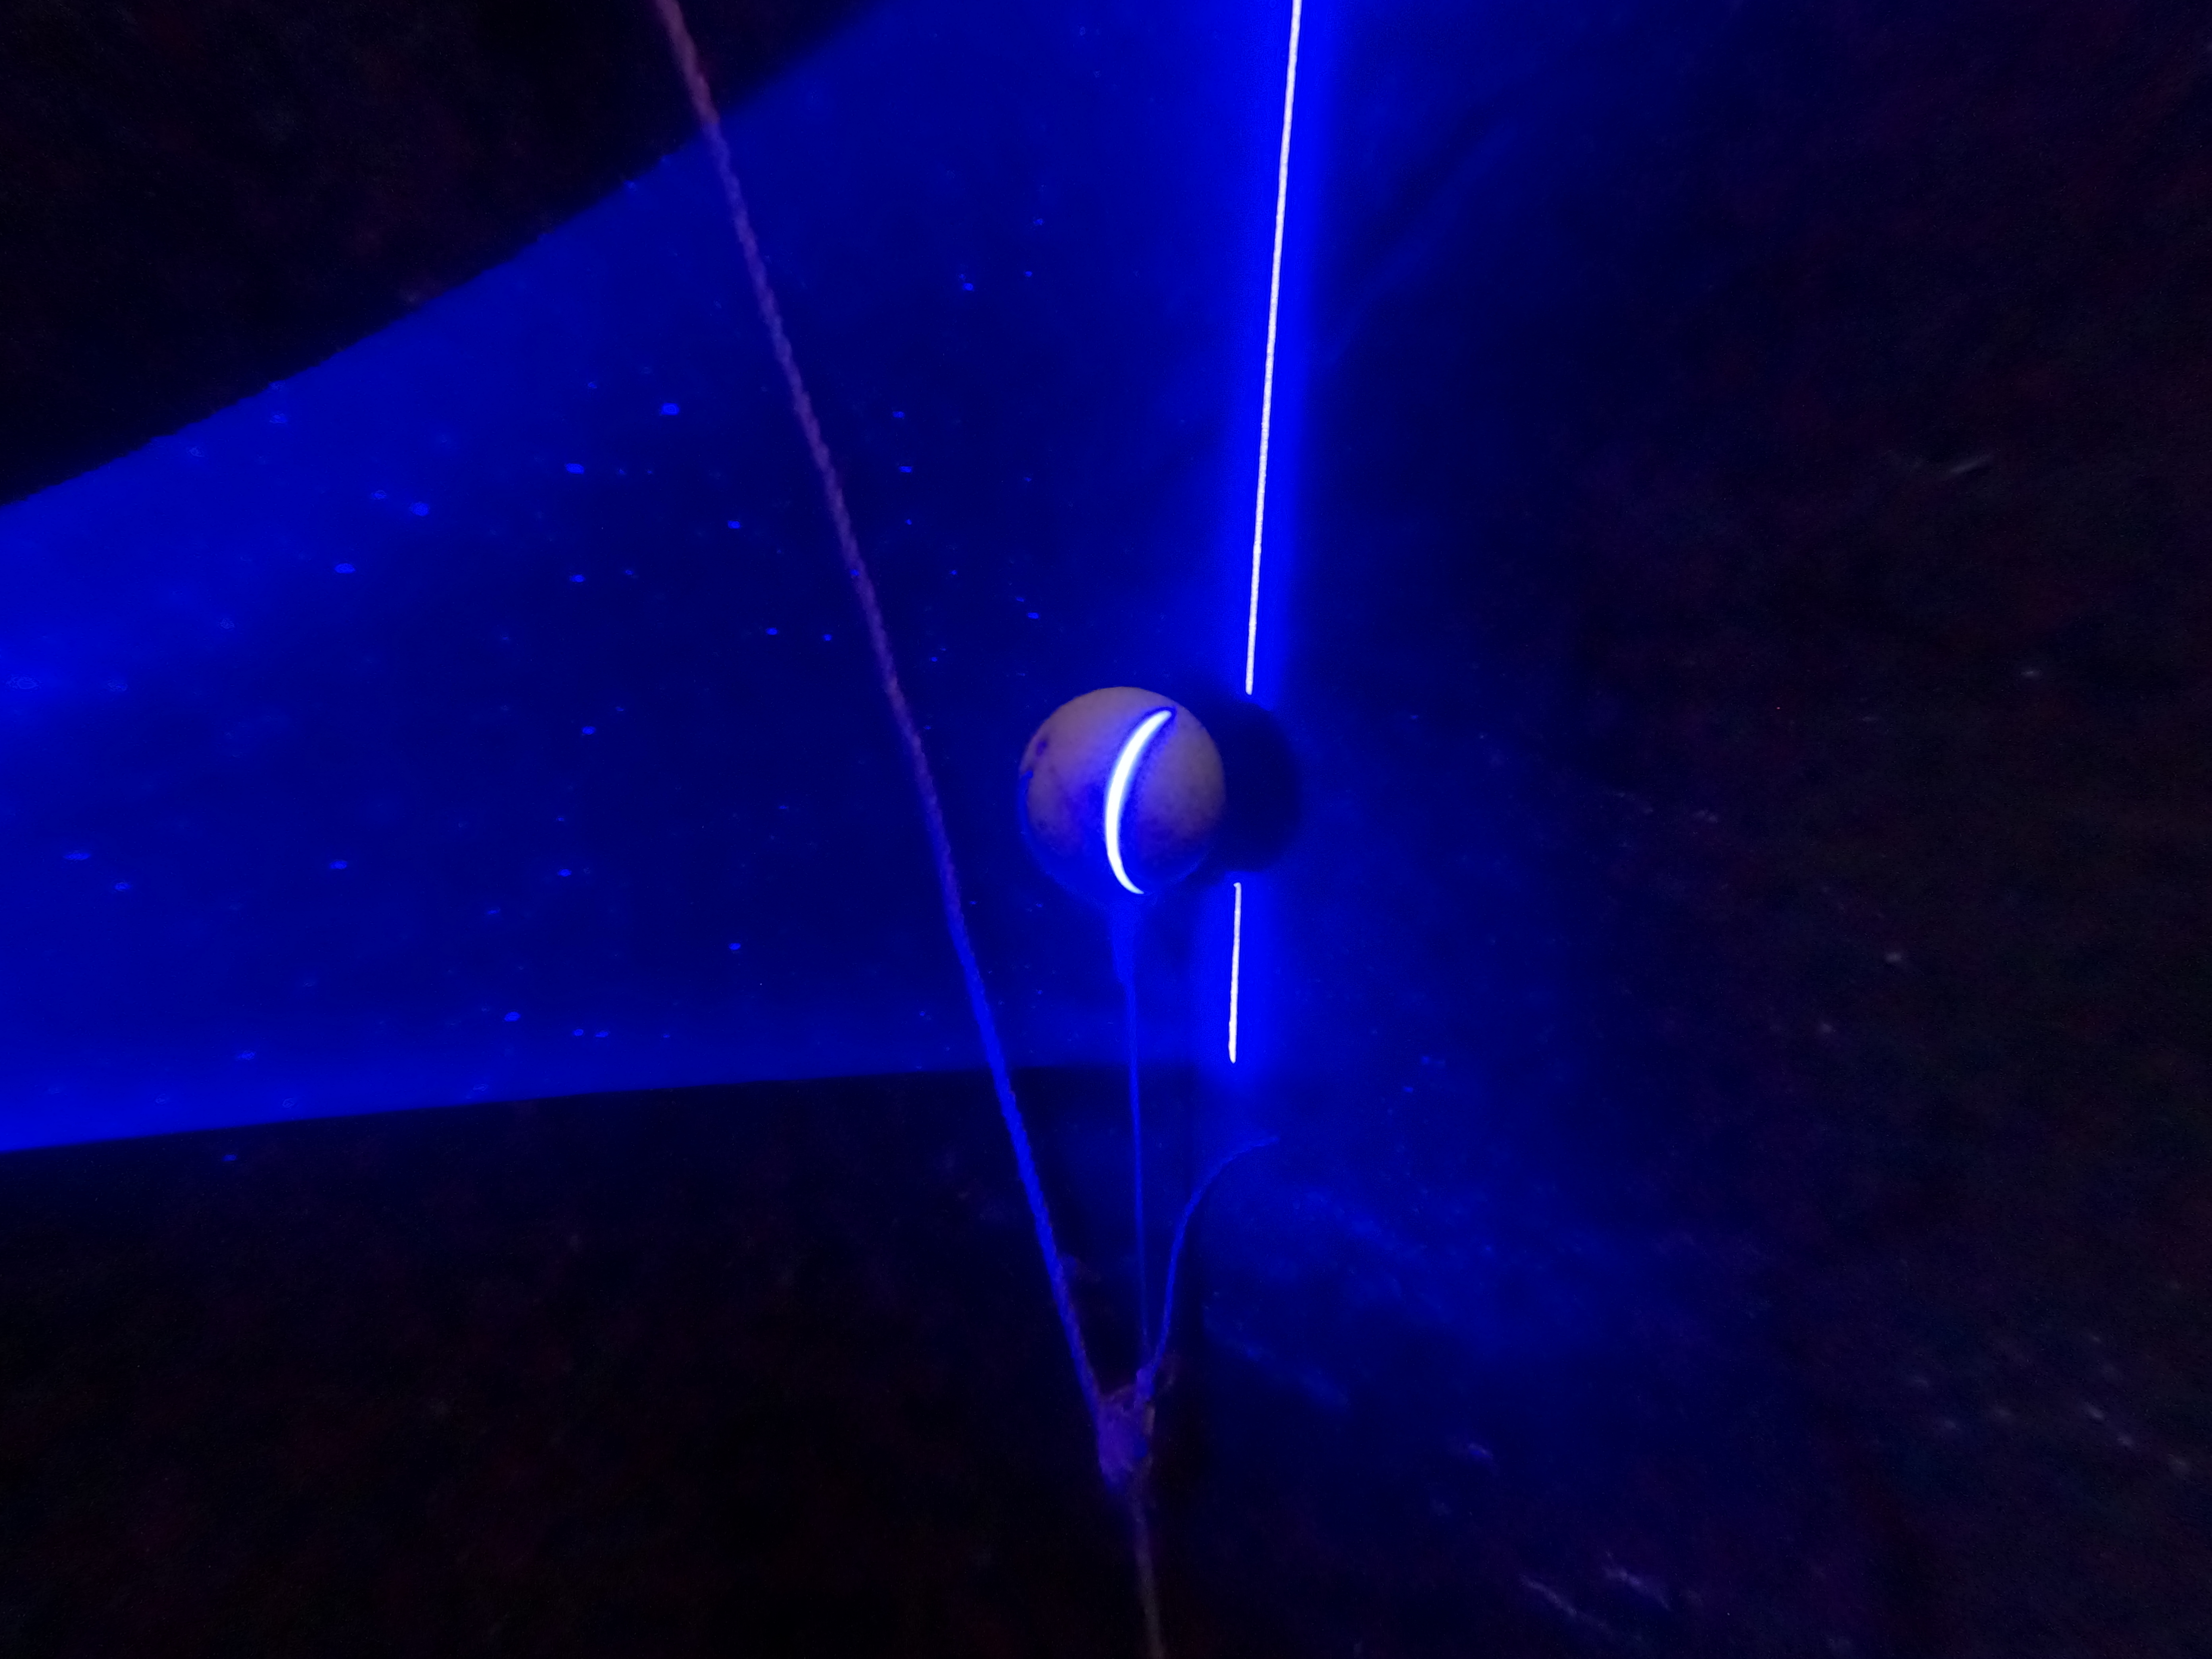

Supplement: Supplementary file 3488 [file G0030712.pdf › Level_1_1/G0030712.pdf]

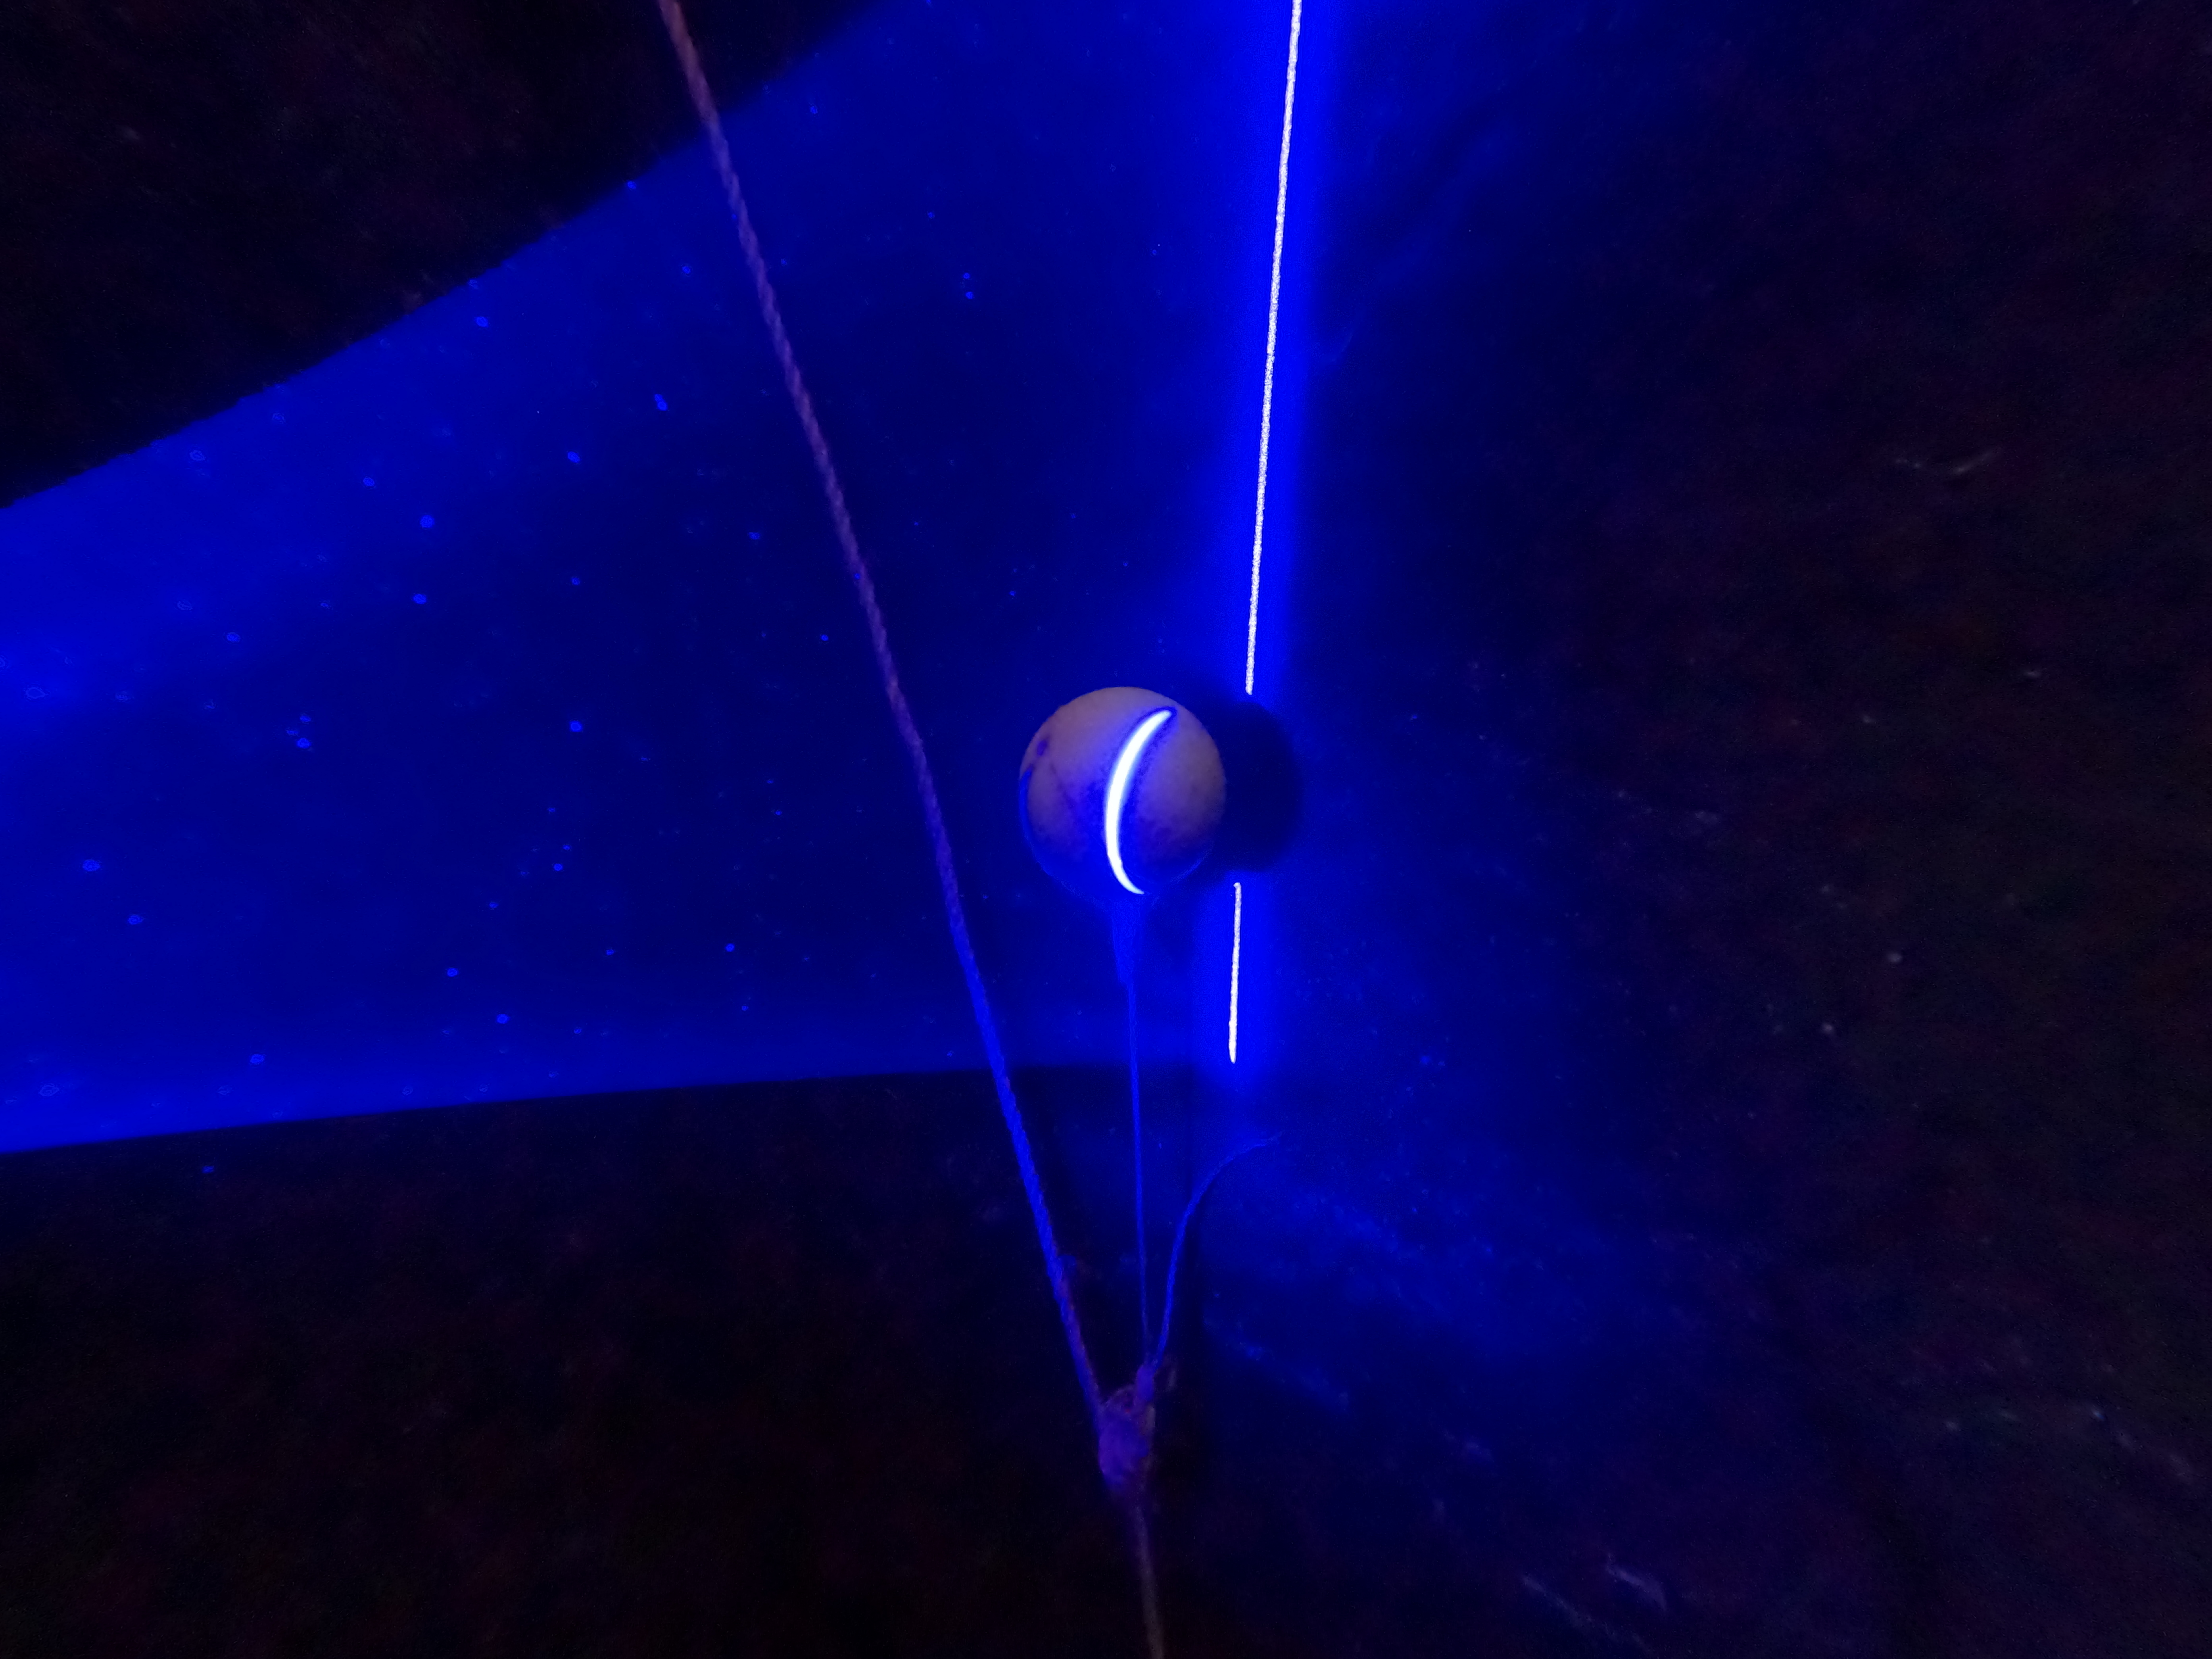

Supplement: Supplementary file 3489 [file G0030713.pdf › Level_1_1/G0030713.pdf]

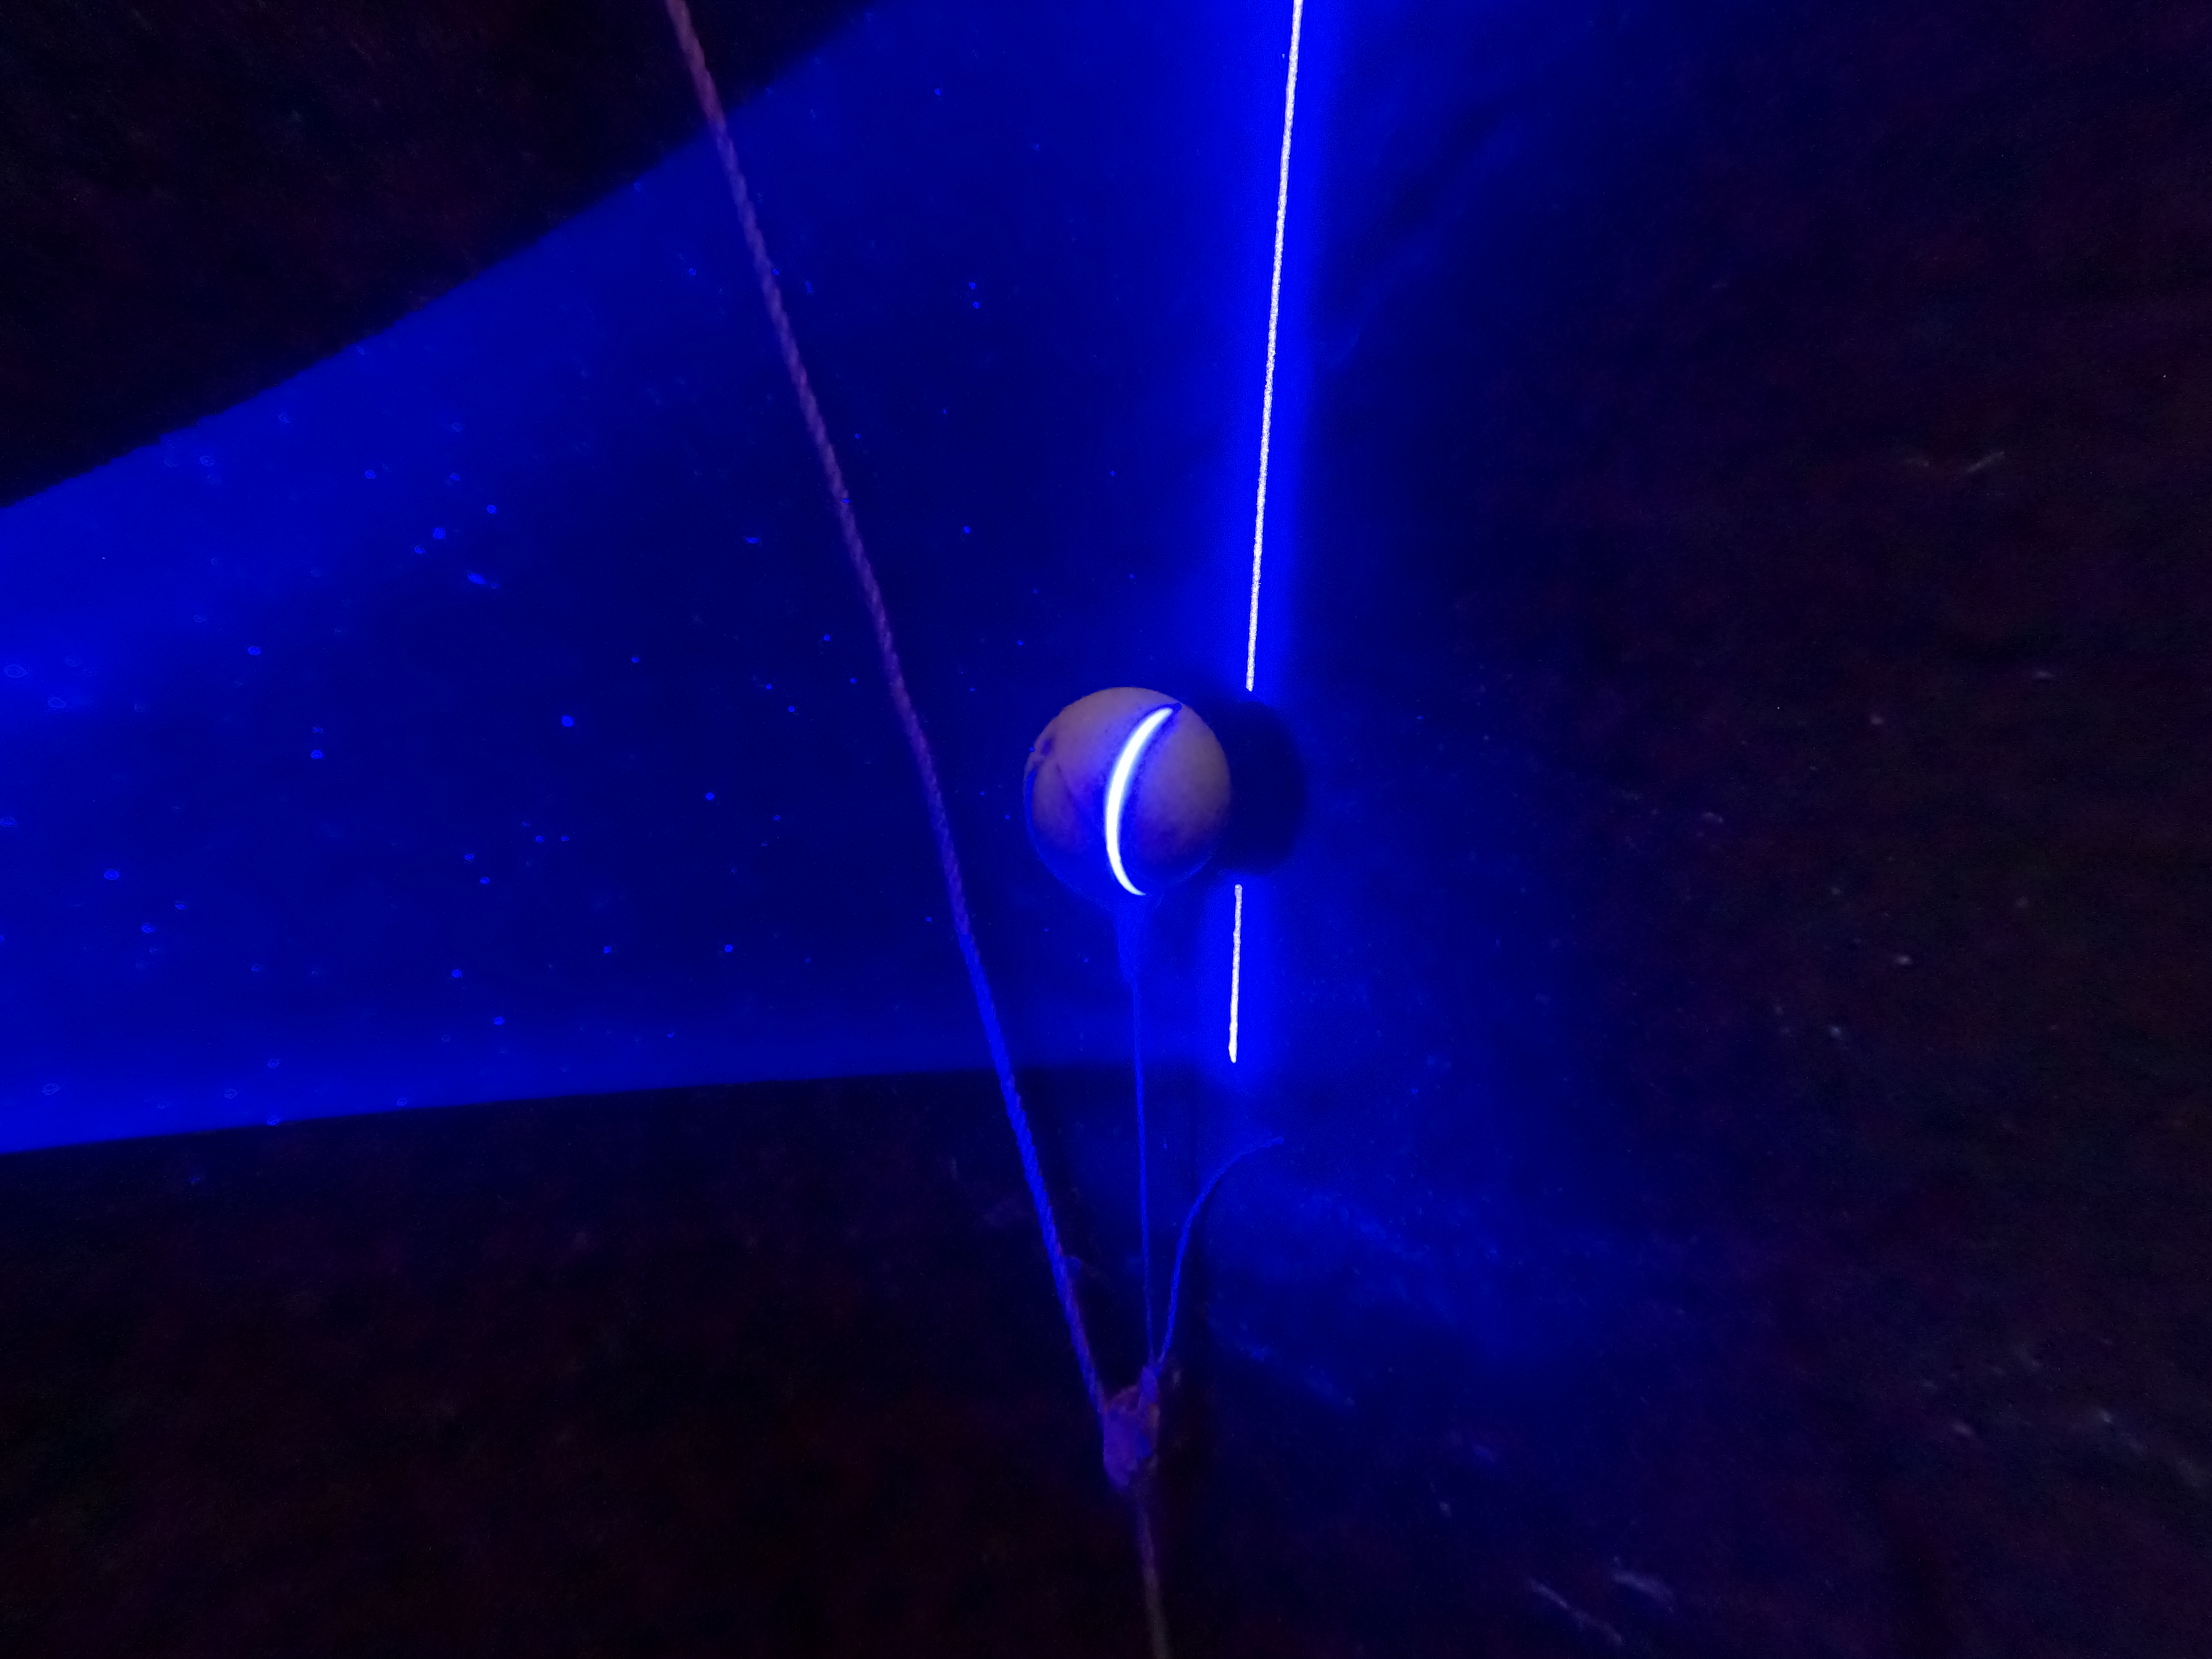

Supplement: Supplementary file 3490 [file G0030714.pdf › Level_1_1/G0030714.pdf]
