# Supplementary figures and images for: 3D reconstruction of shallow sea environment using direct system calibration and faint laser line extraction (part 35 of 35)
Source: Research Square preprint supplement (doi:10.21203/rs.3.rs-5262658/v1), 2024-12-02

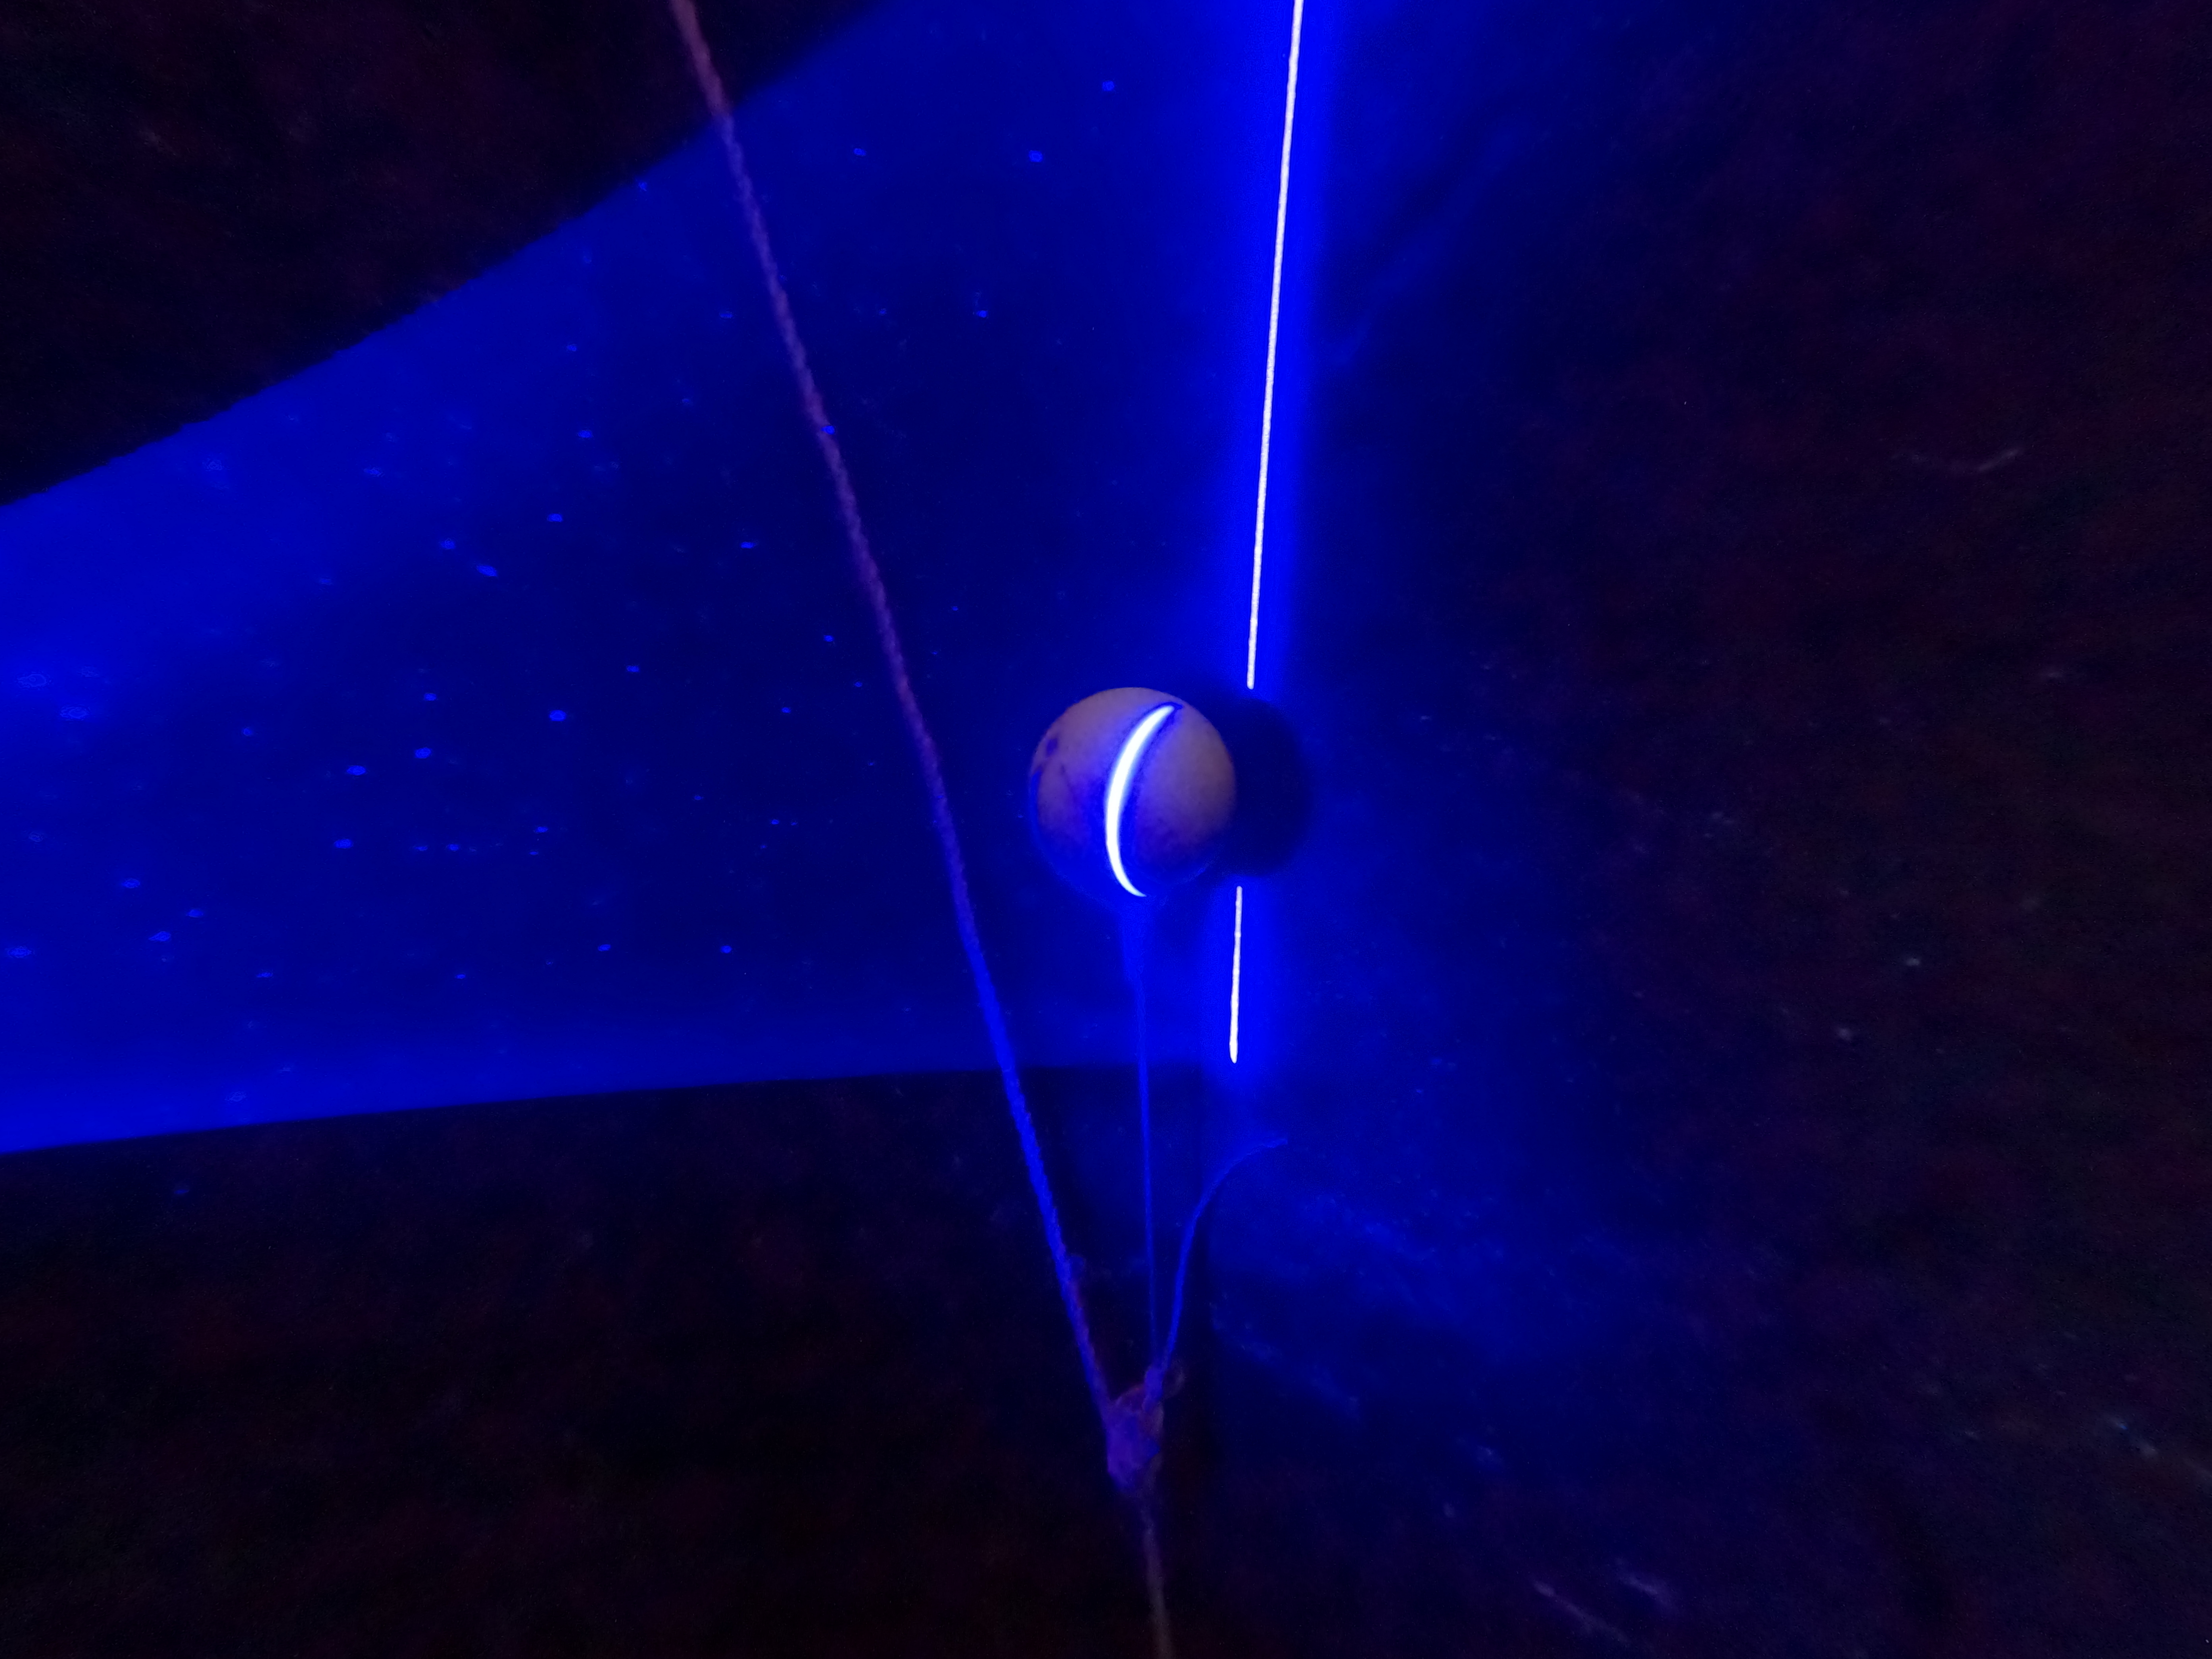

Supplement: Supplementary file 3491 [file G0030715.pdf › Level_1_1/G0030715.pdf]

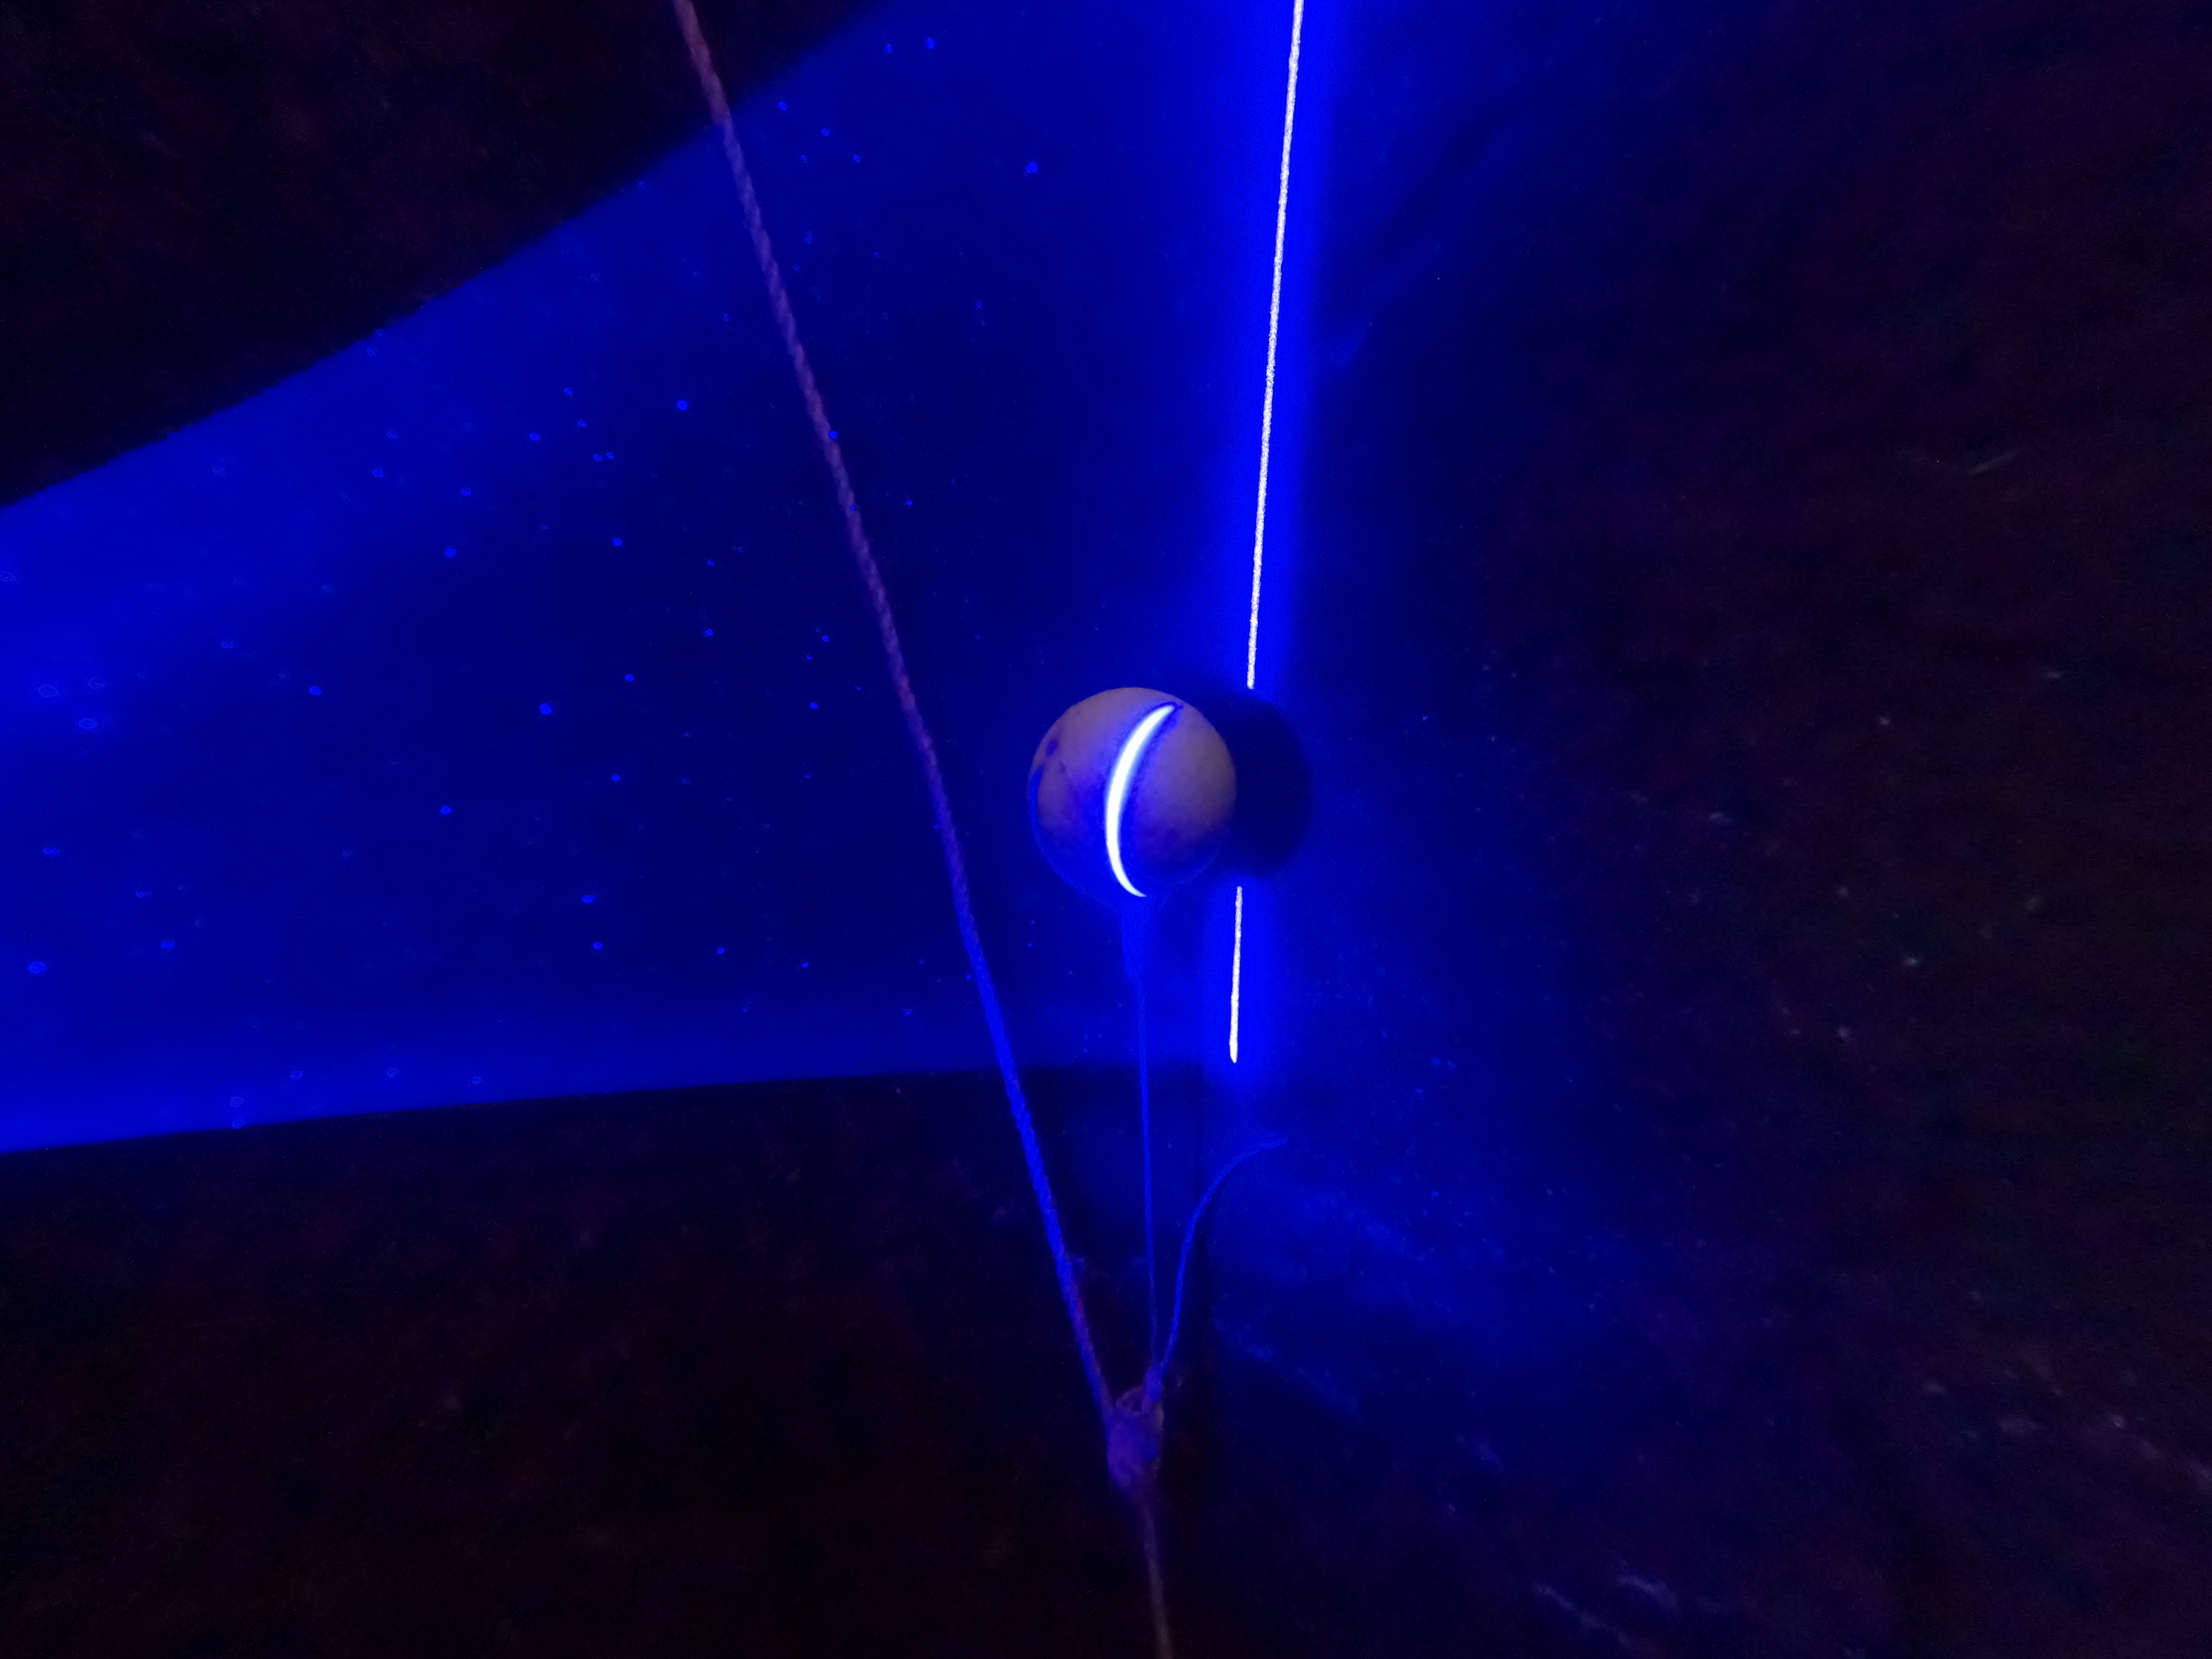

Supplement: Supplementary file 3492 [file G0030716.pdf › Level_1_1/G0030716.pdf]

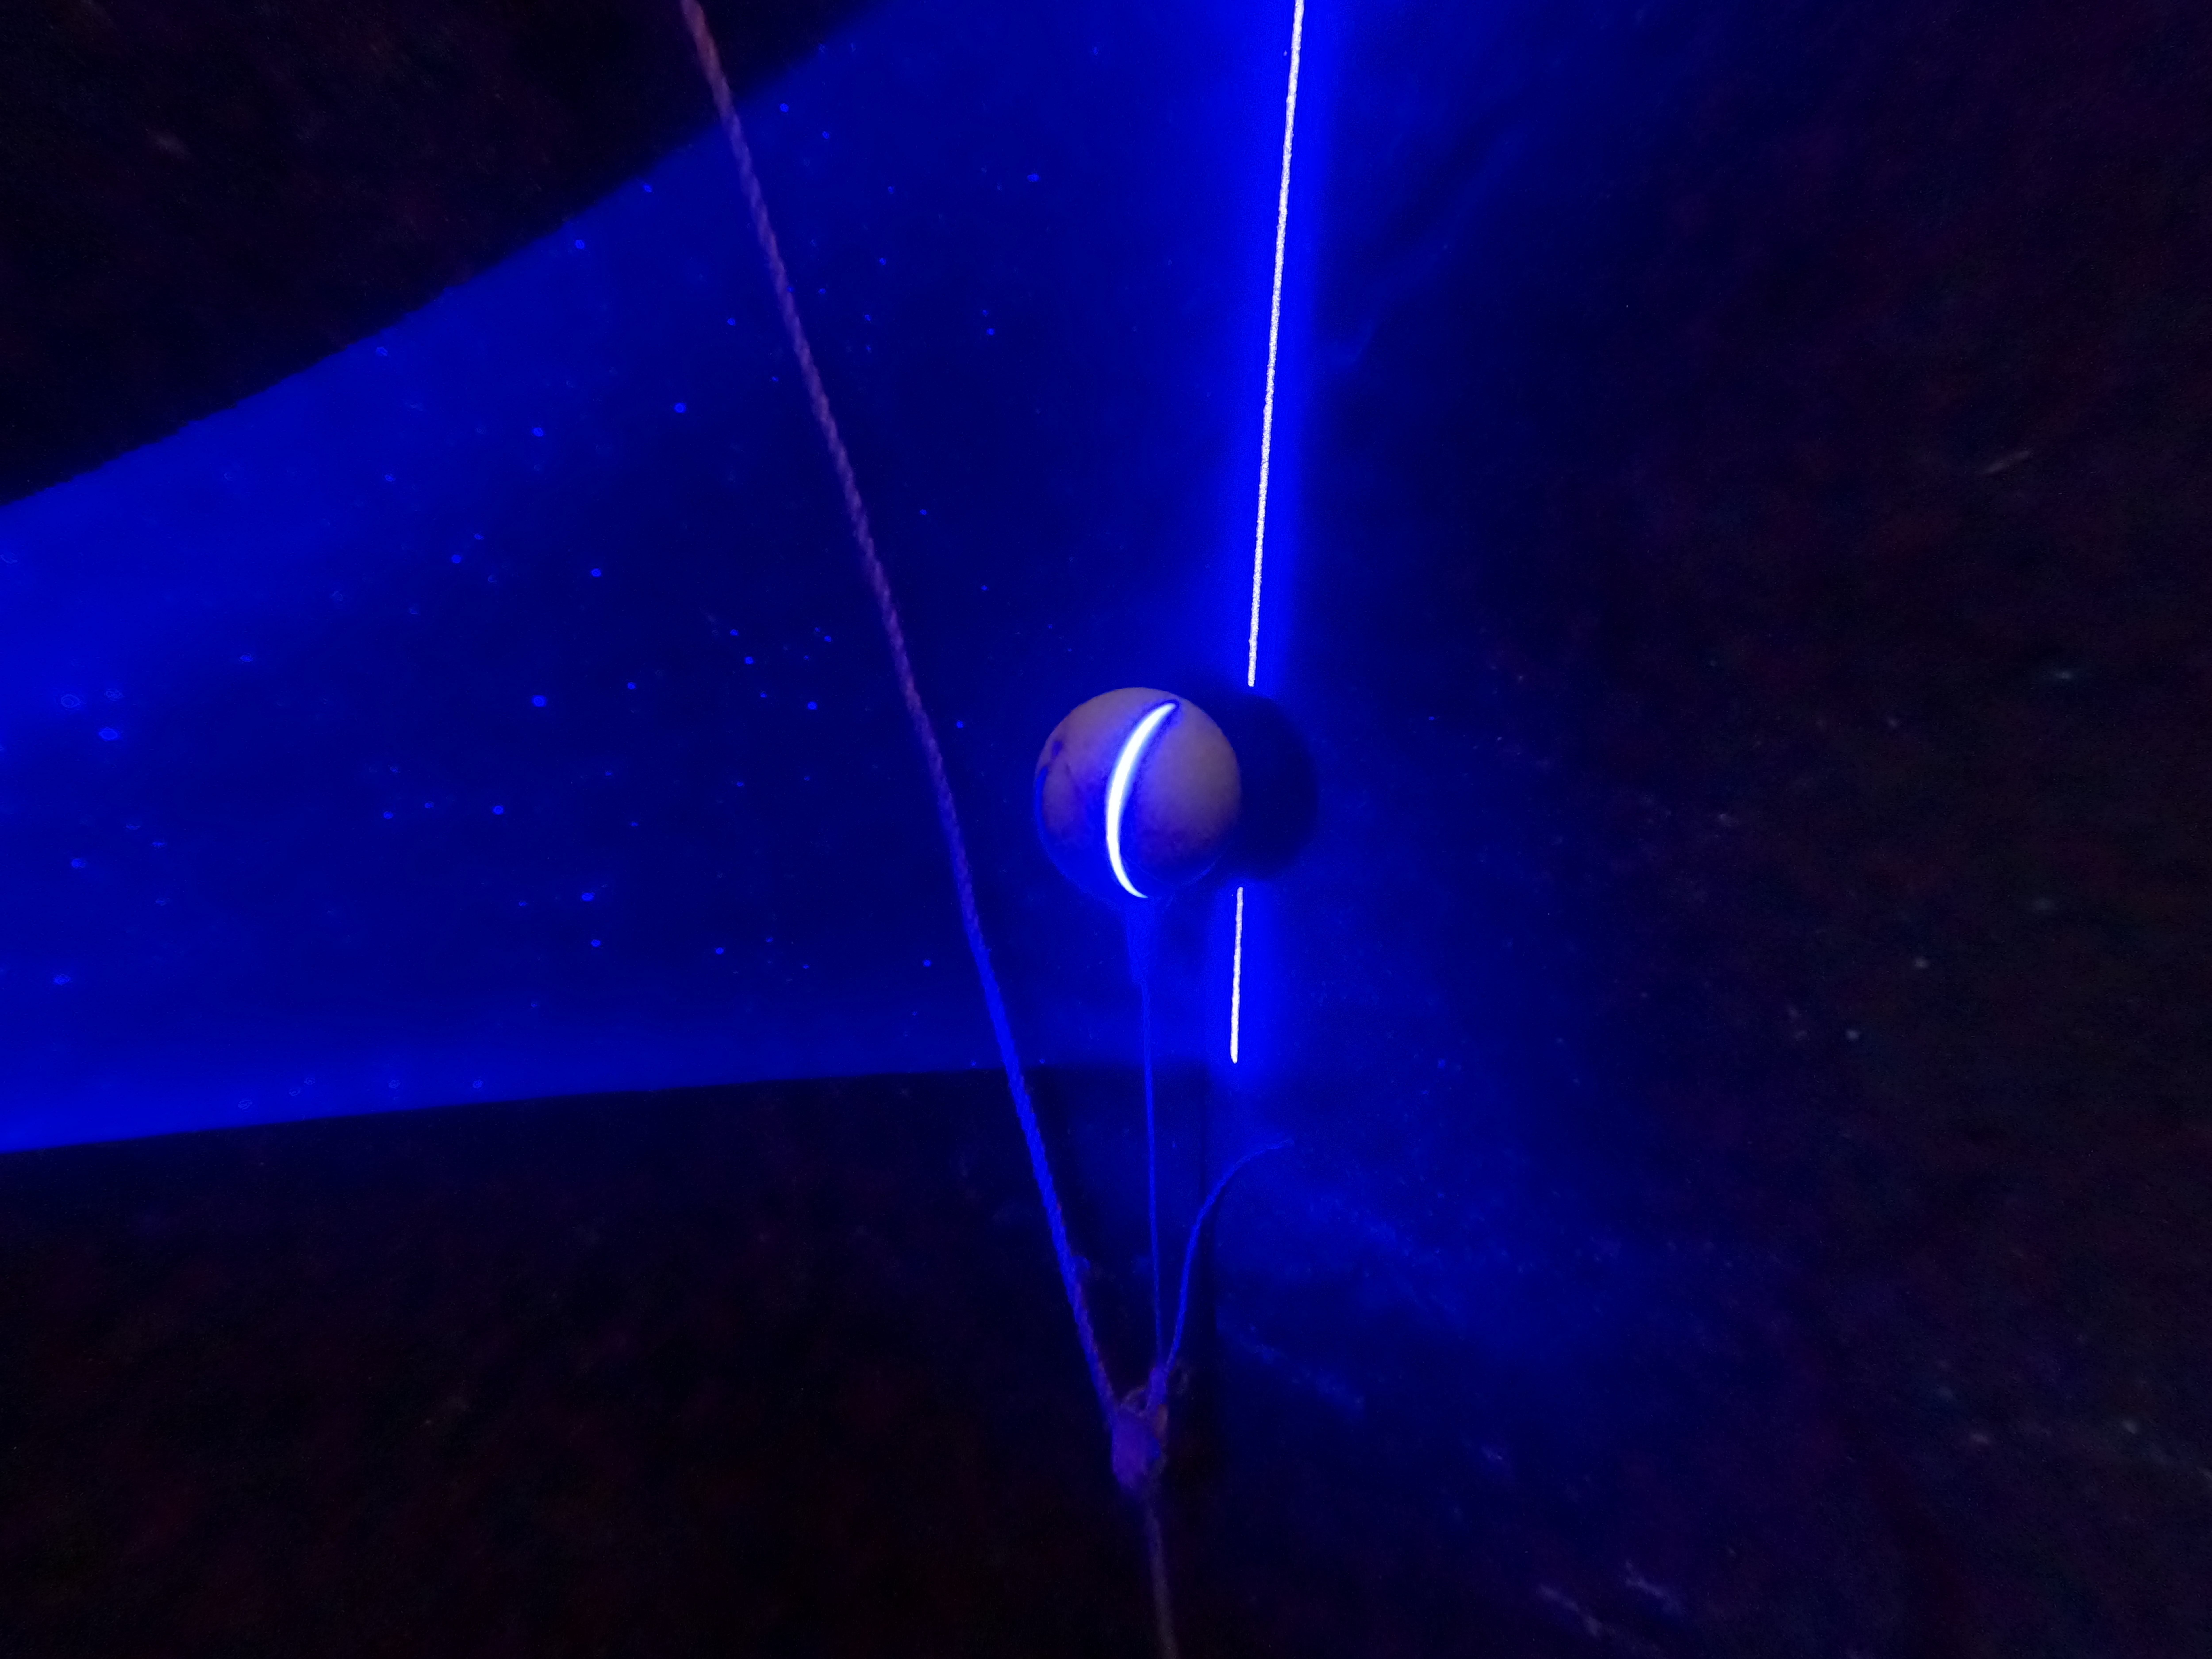

Supplement: Supplementary file 3493 [file G0030717.pdf › Level_1_1/G0030717.pdf]

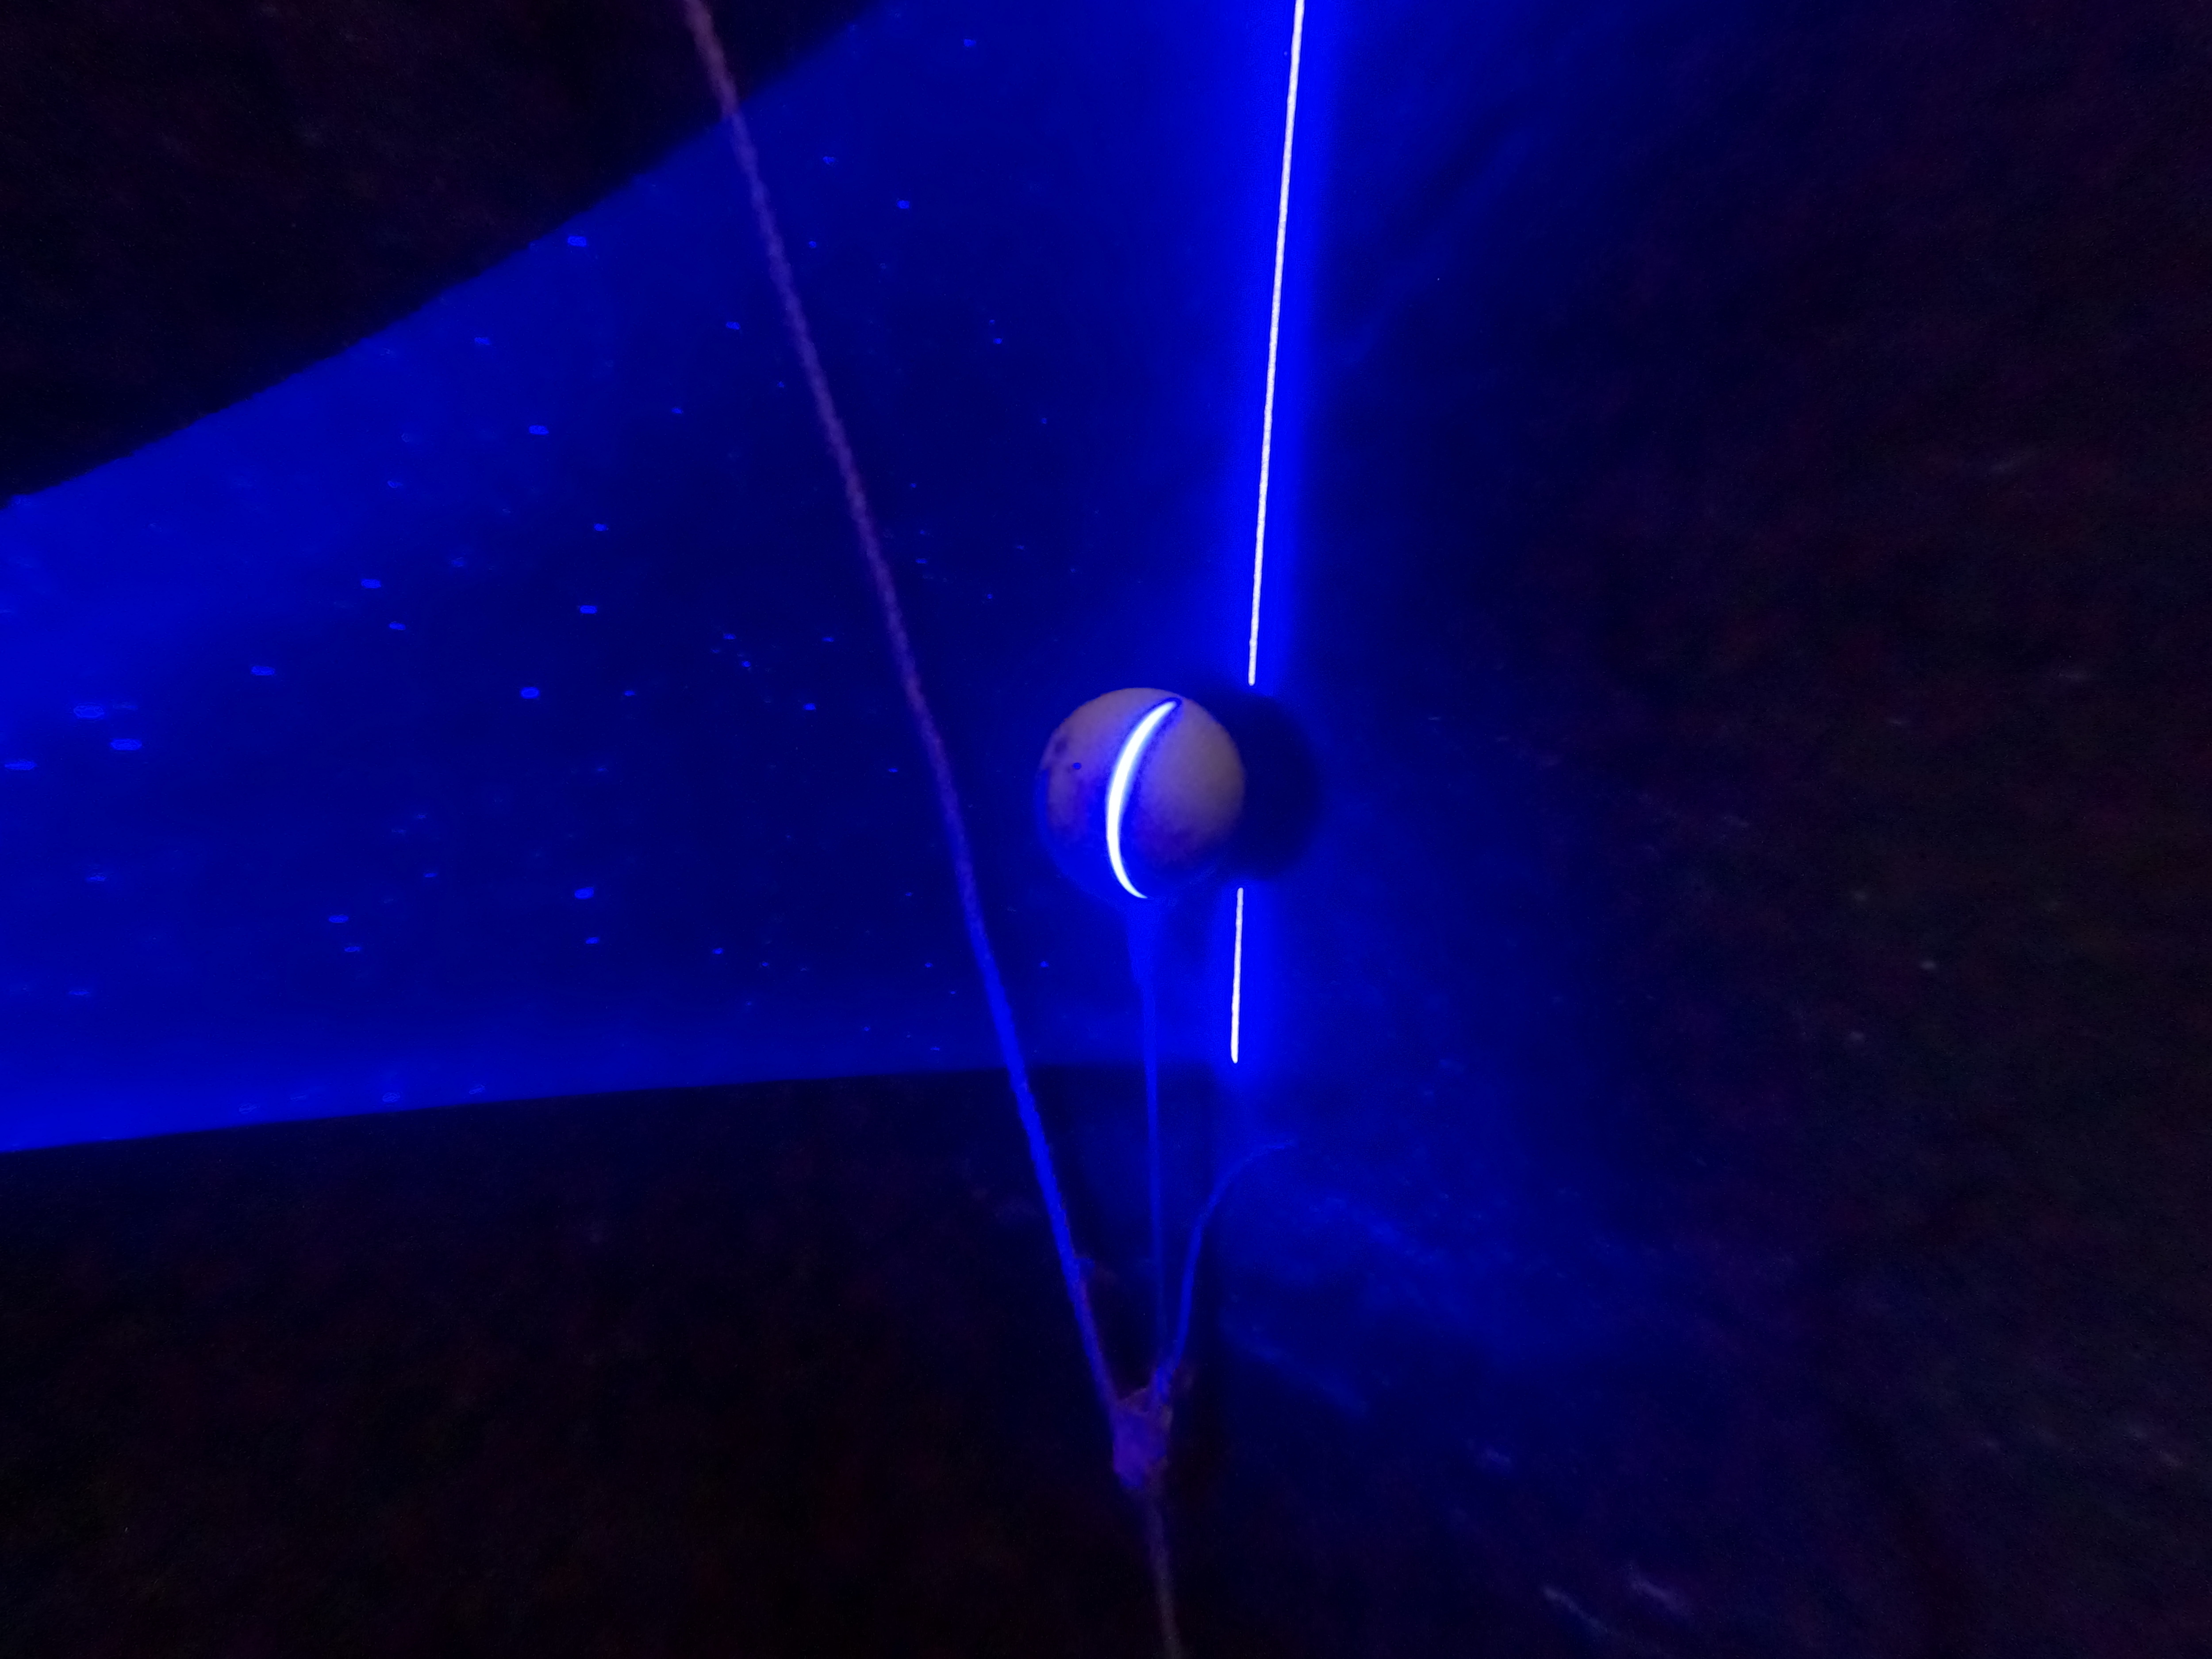

Supplement: Supplementary file 3494 [file G0030718.pdf › Level_1_1/G0030718.pdf]

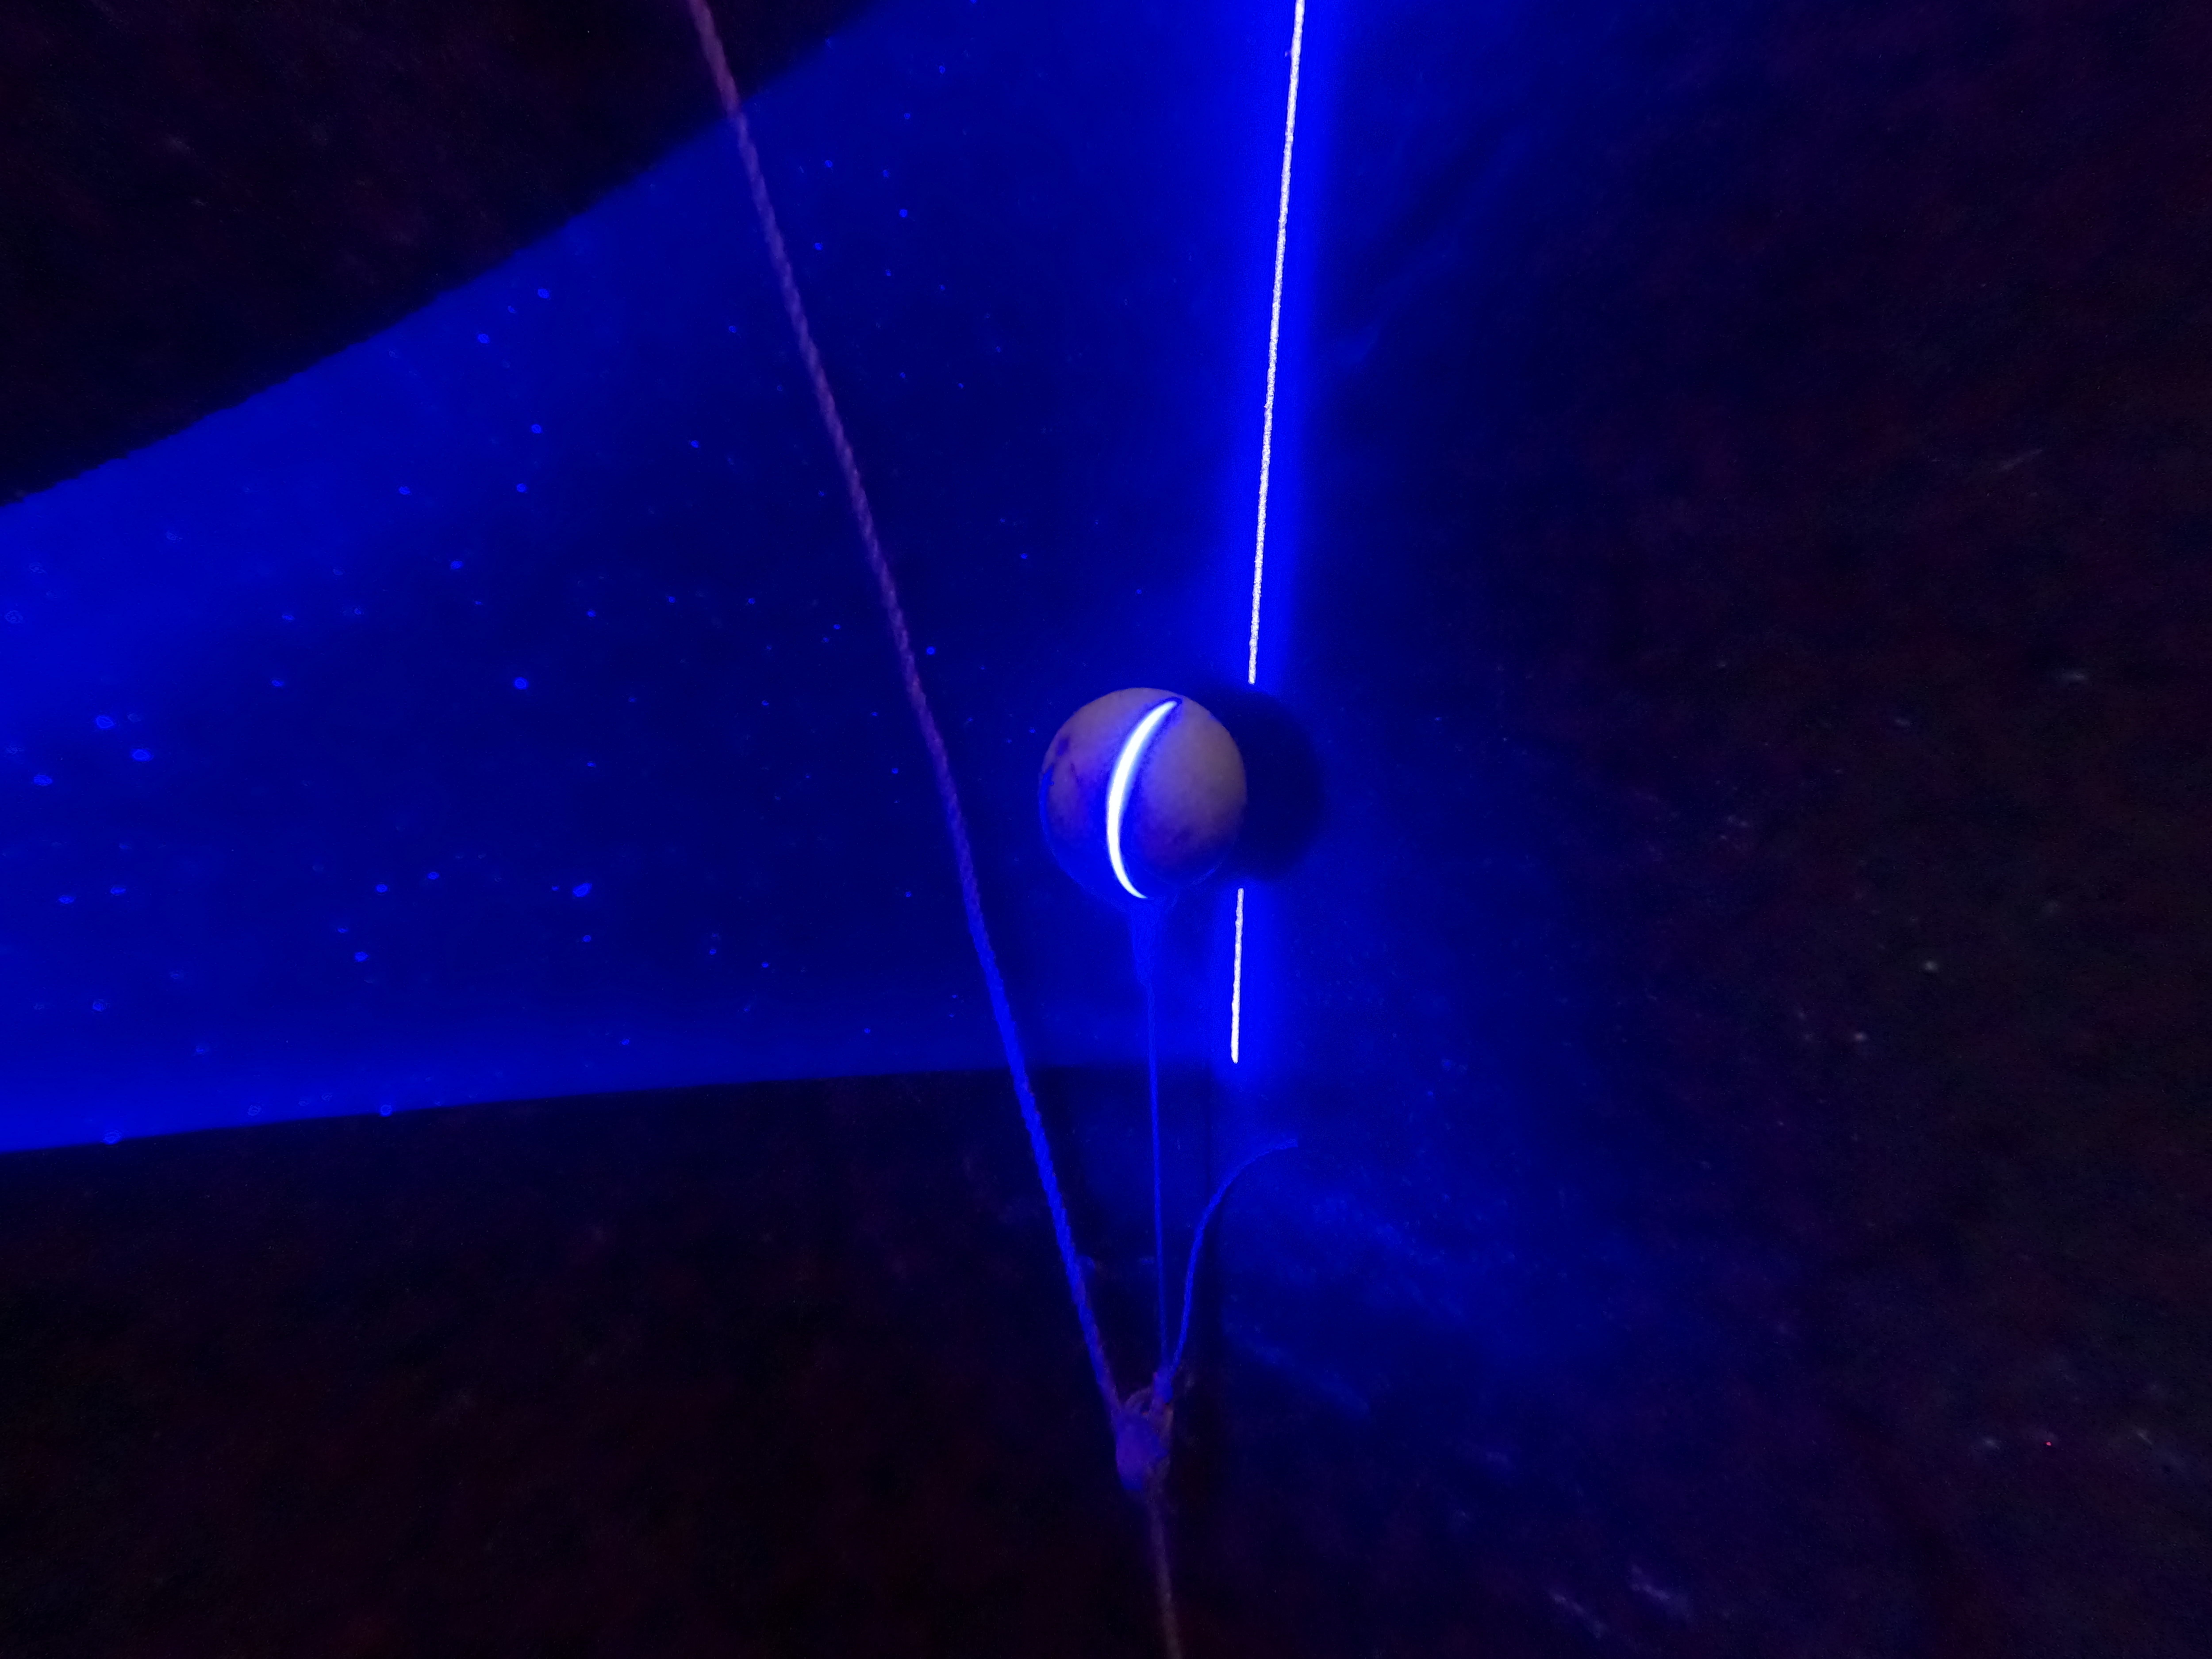

Supplement: Supplementary file 3495 [file G0030719.pdf › Level_1_1/G0030719.pdf]

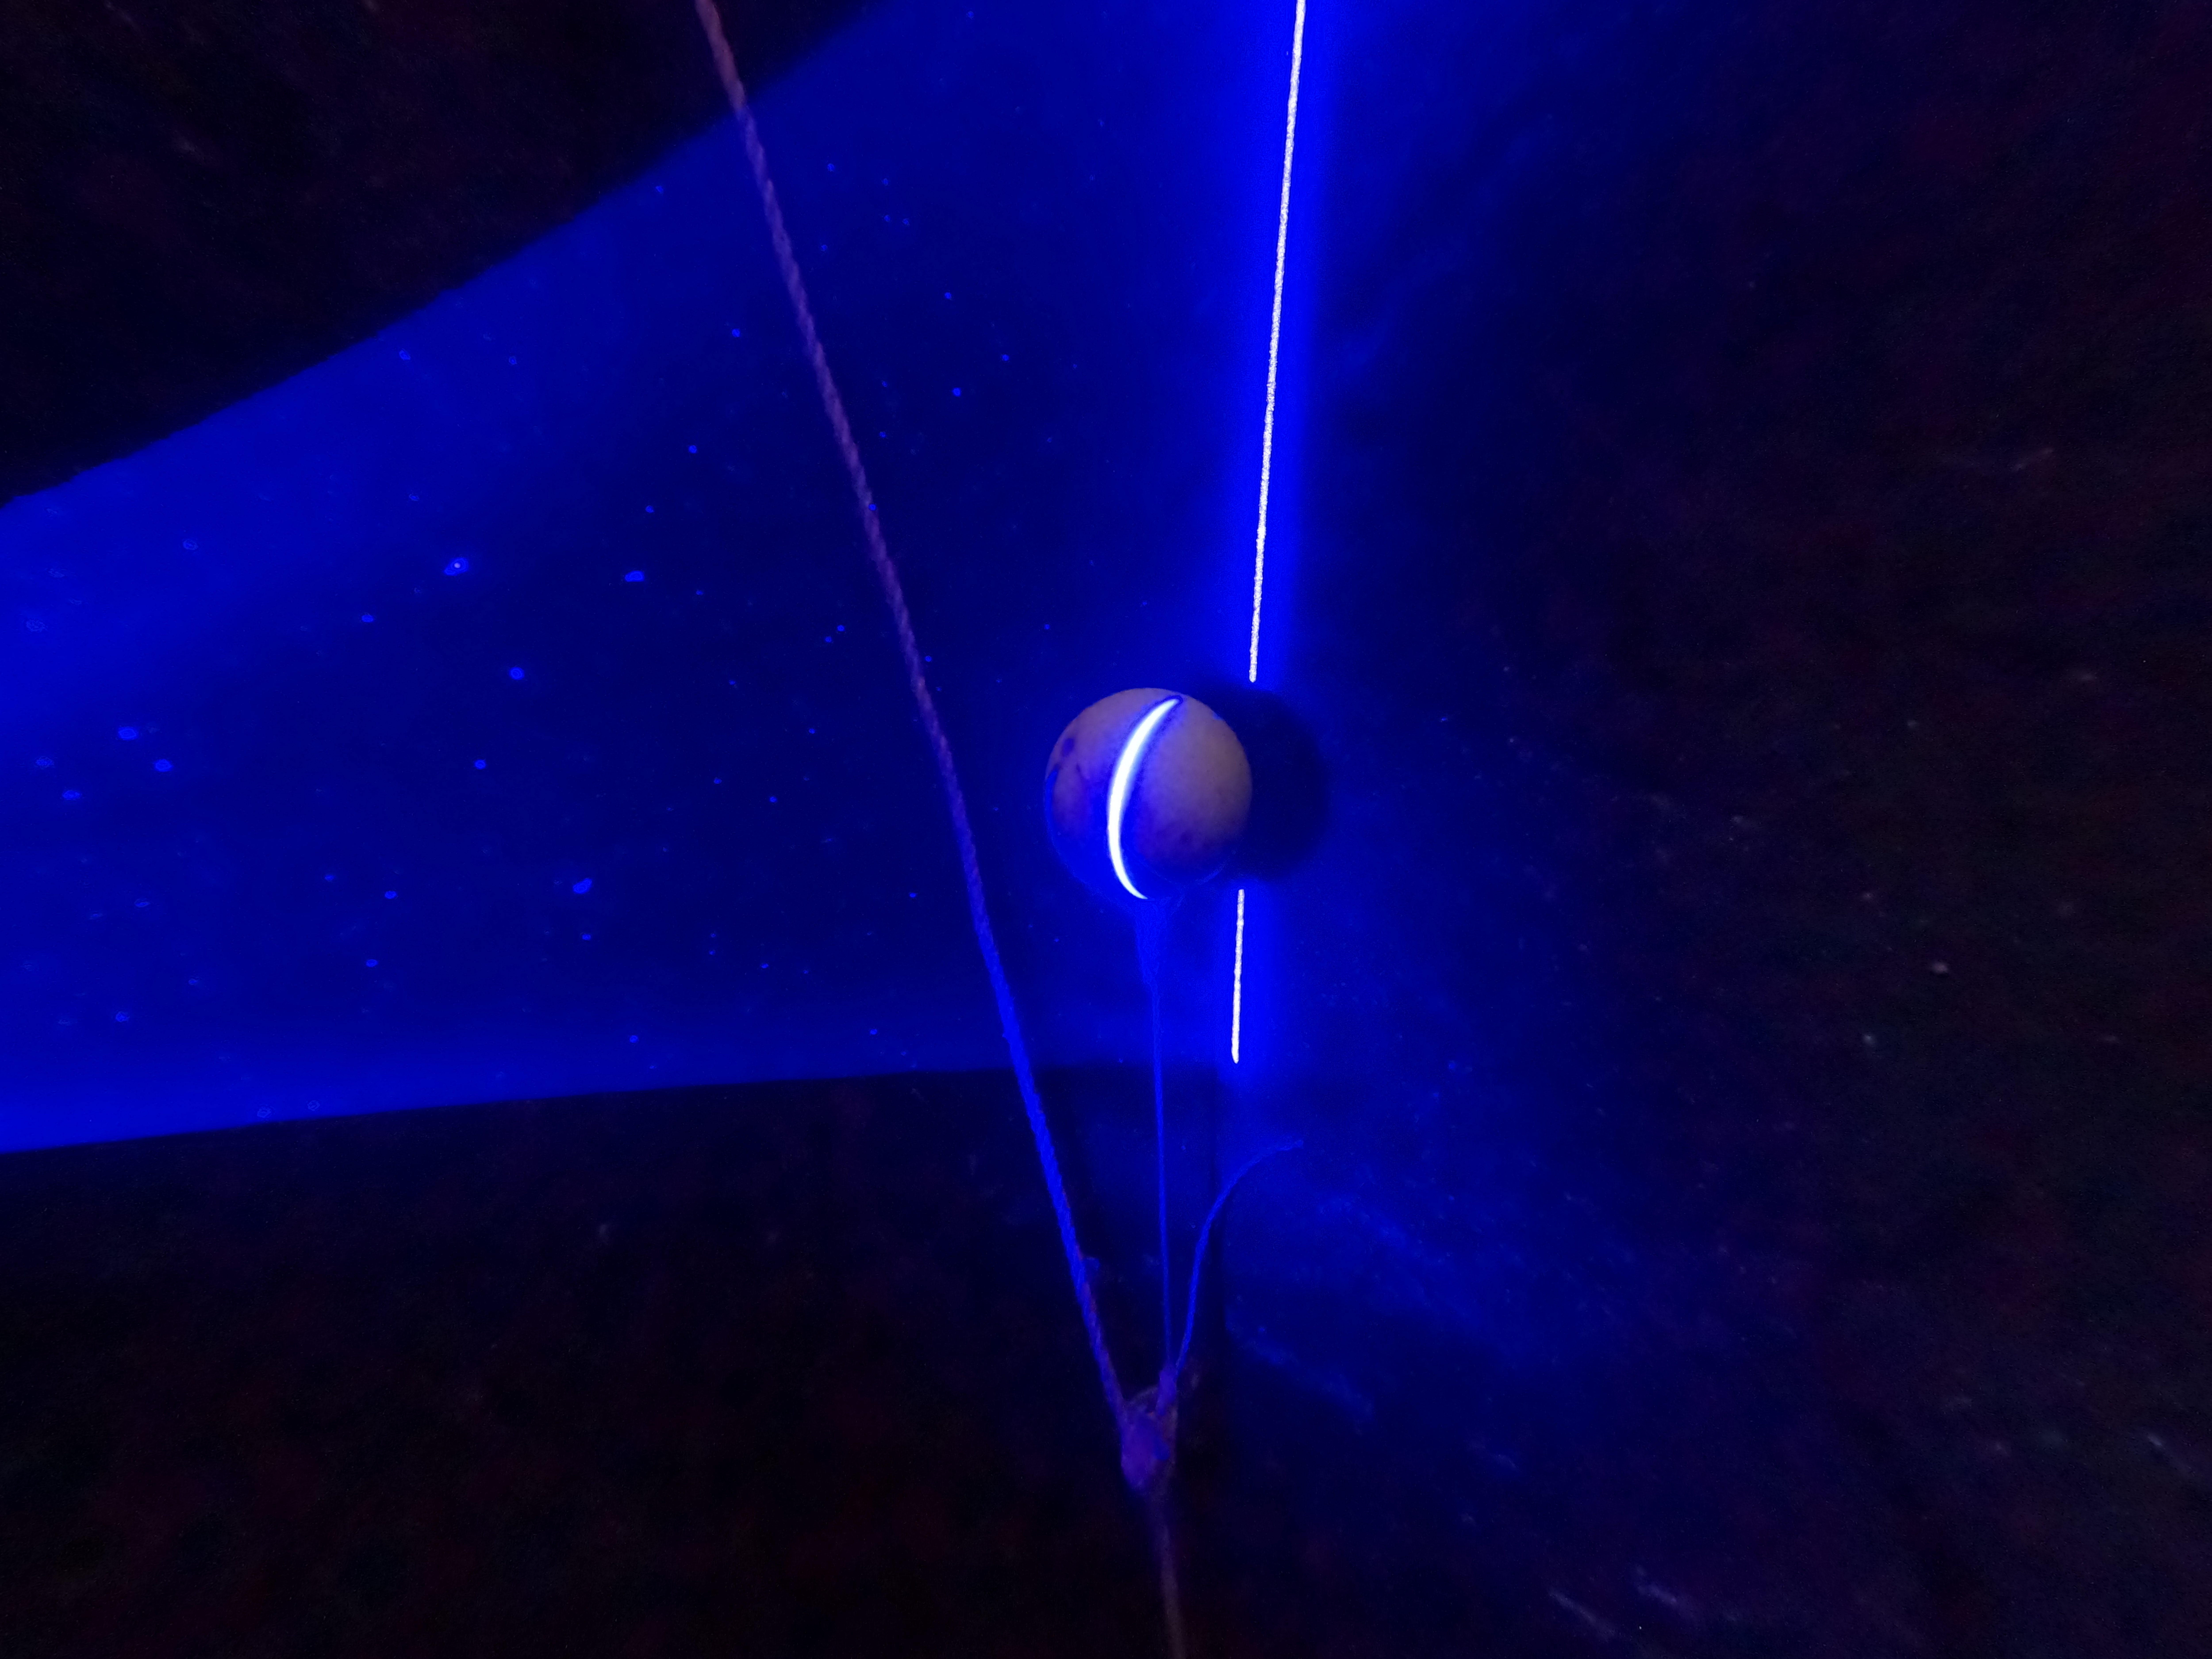

Supplement: Supplementary file 3496 [file G0030720.pdf › Level_1_1/G0030720.pdf]

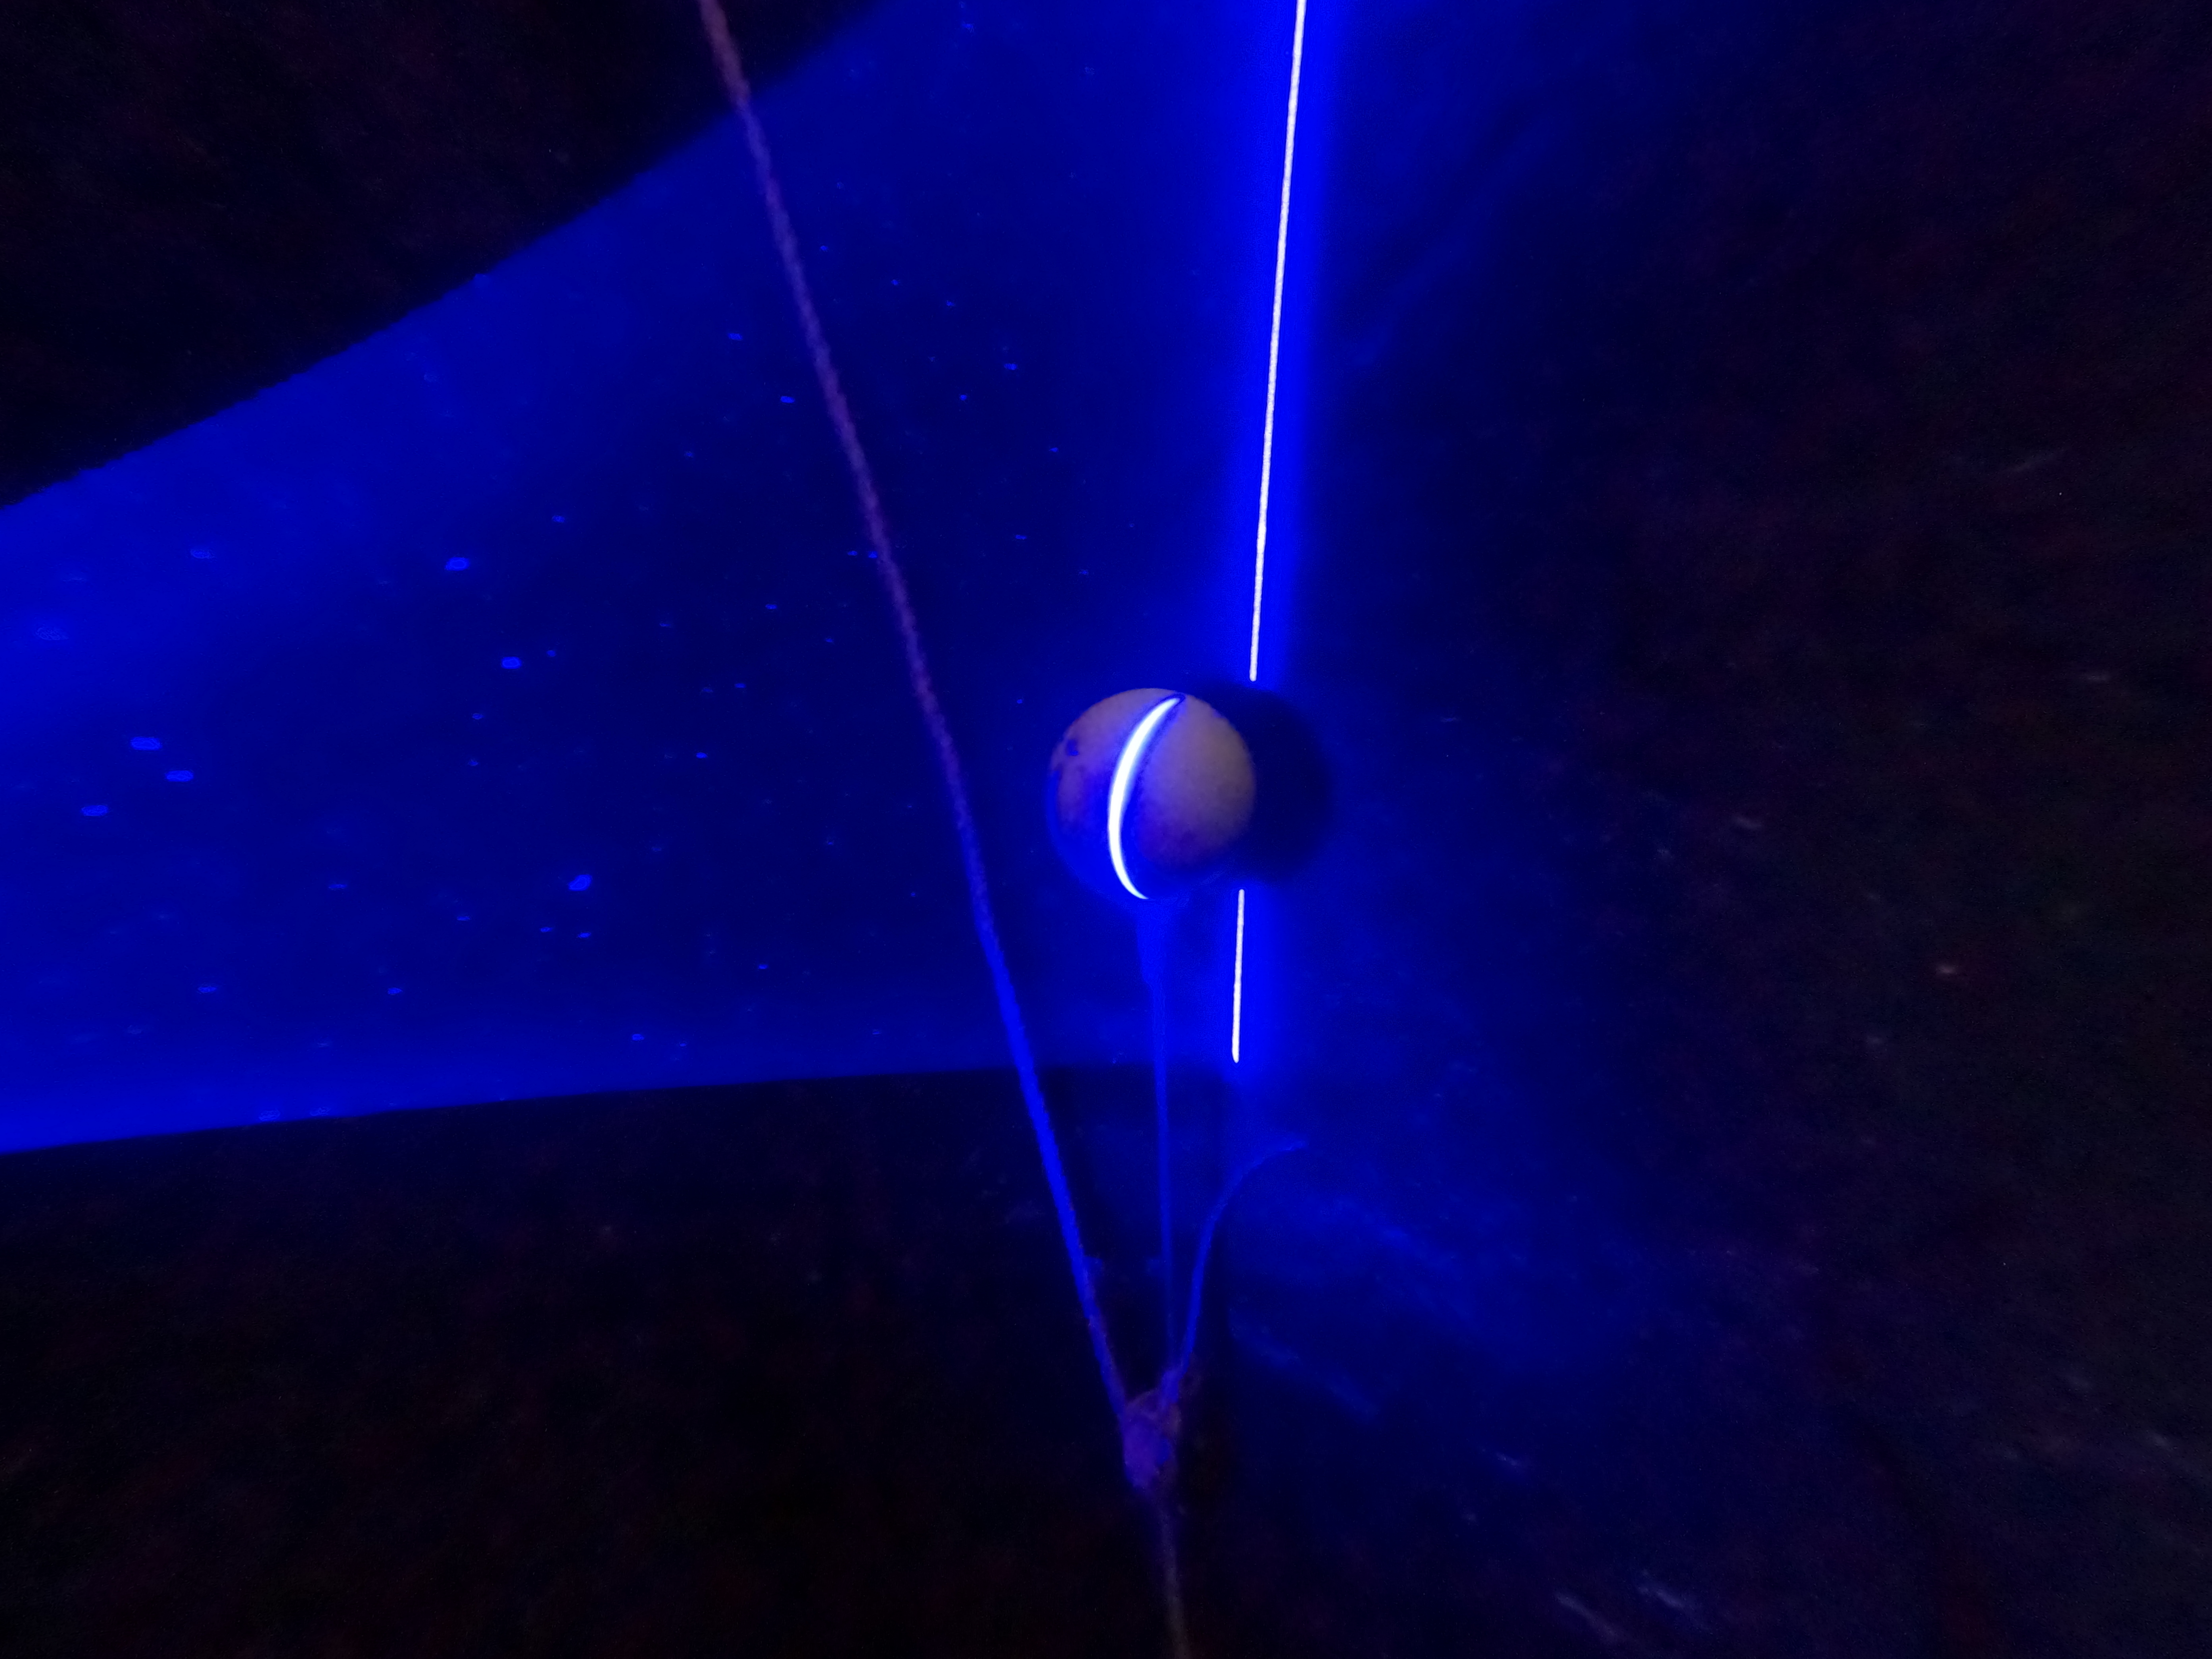

Supplement: Supplementary file 3497 [file G0030721.pdf › Level_1_1/G0030721.pdf]

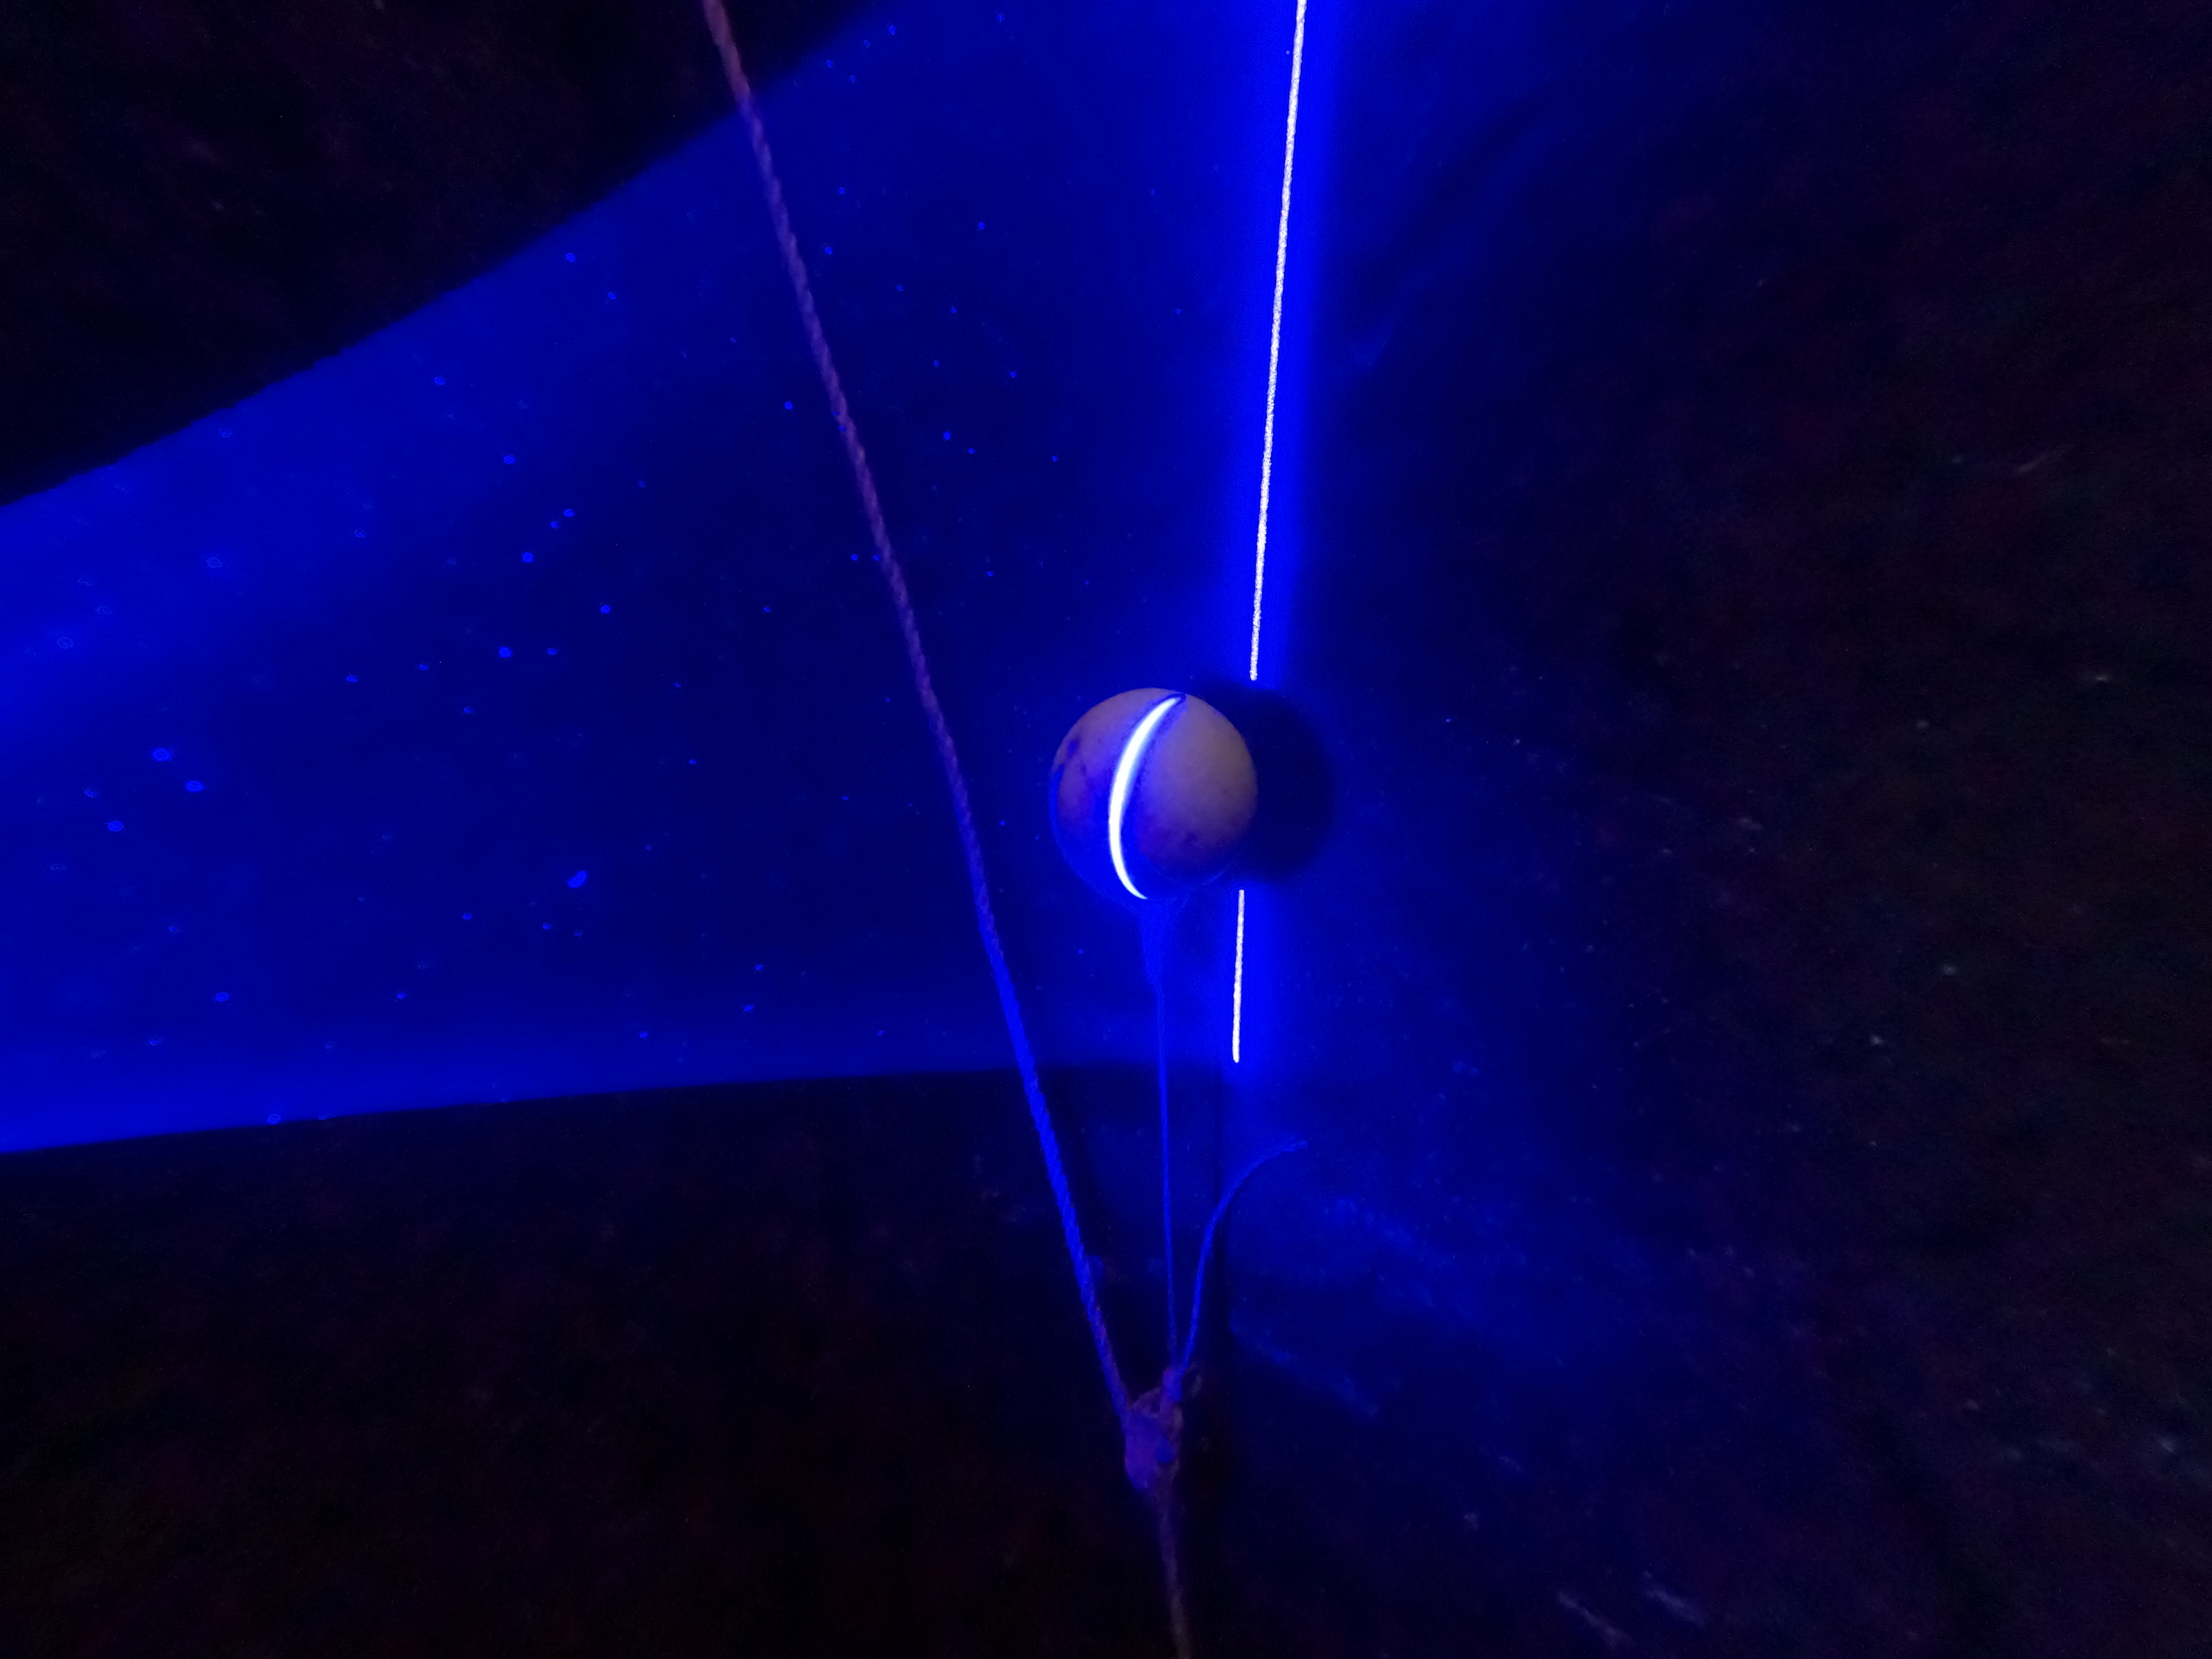

Supplement: Supplementary file 3498 [file G0030722.pdf › Level_1_1/G0030722.pdf]

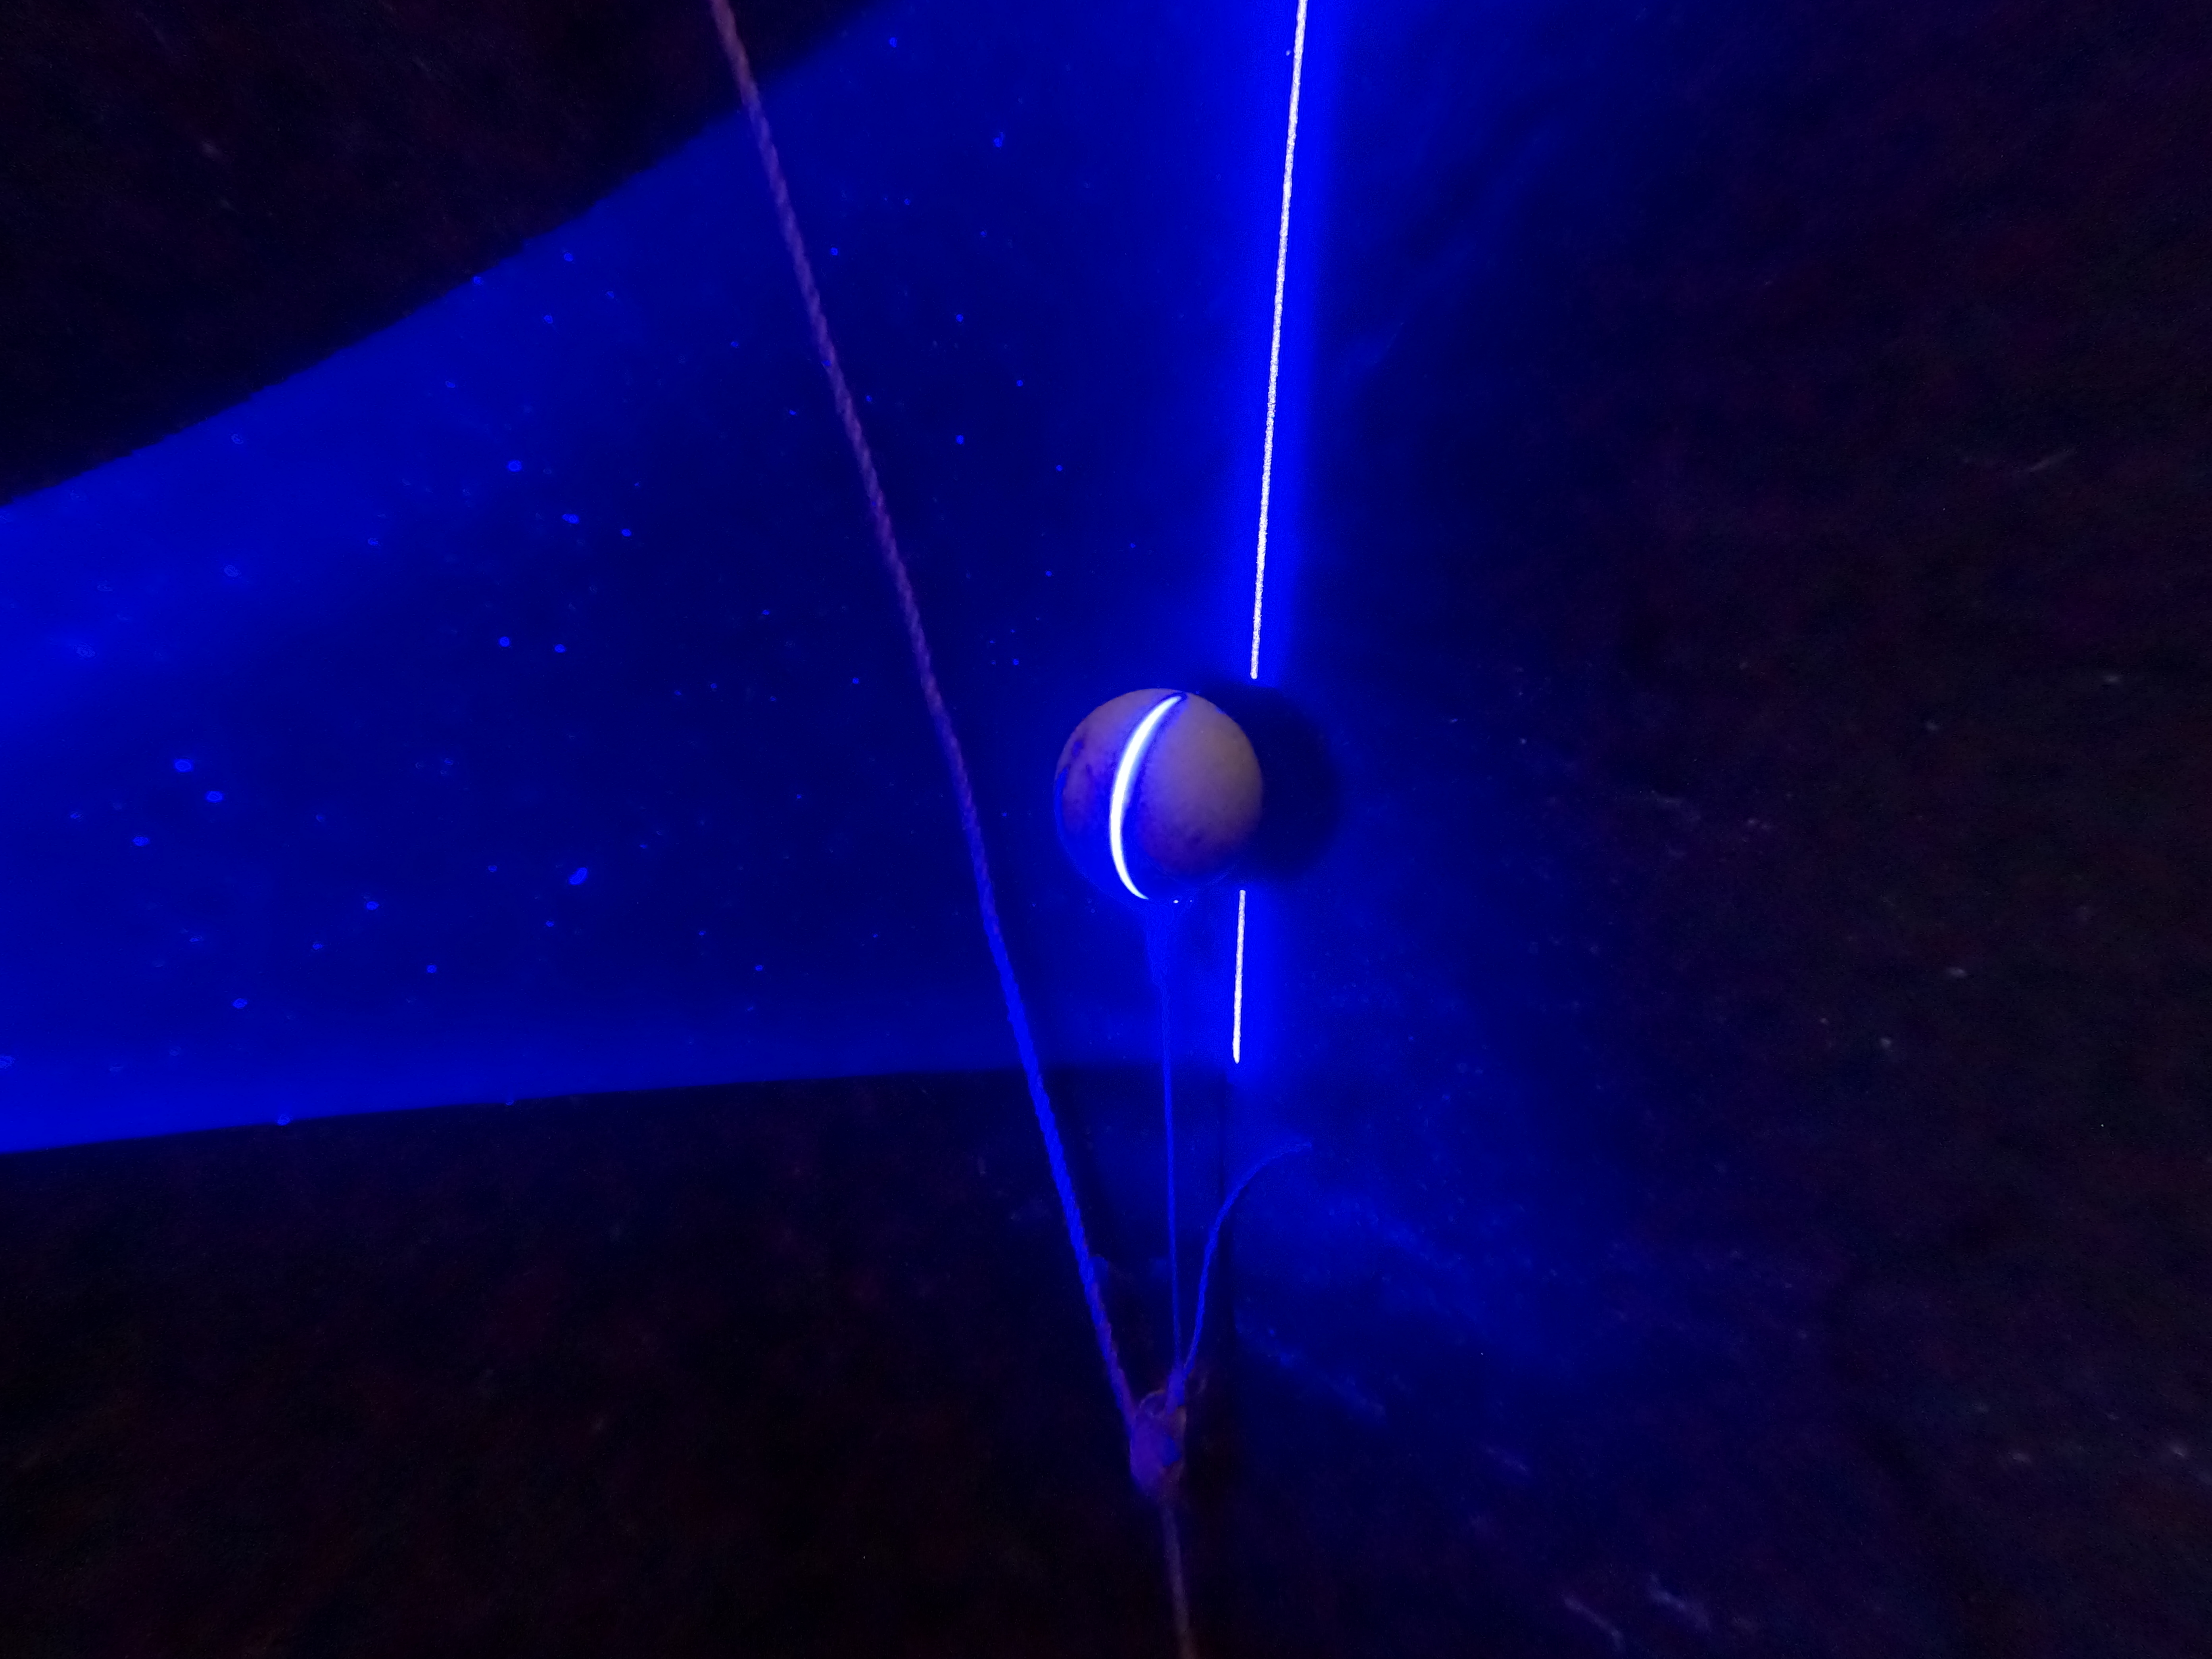

Supplement: Supplementary file 3499 [file G0030723.pdf › Level_1_1/G0030723.pdf]

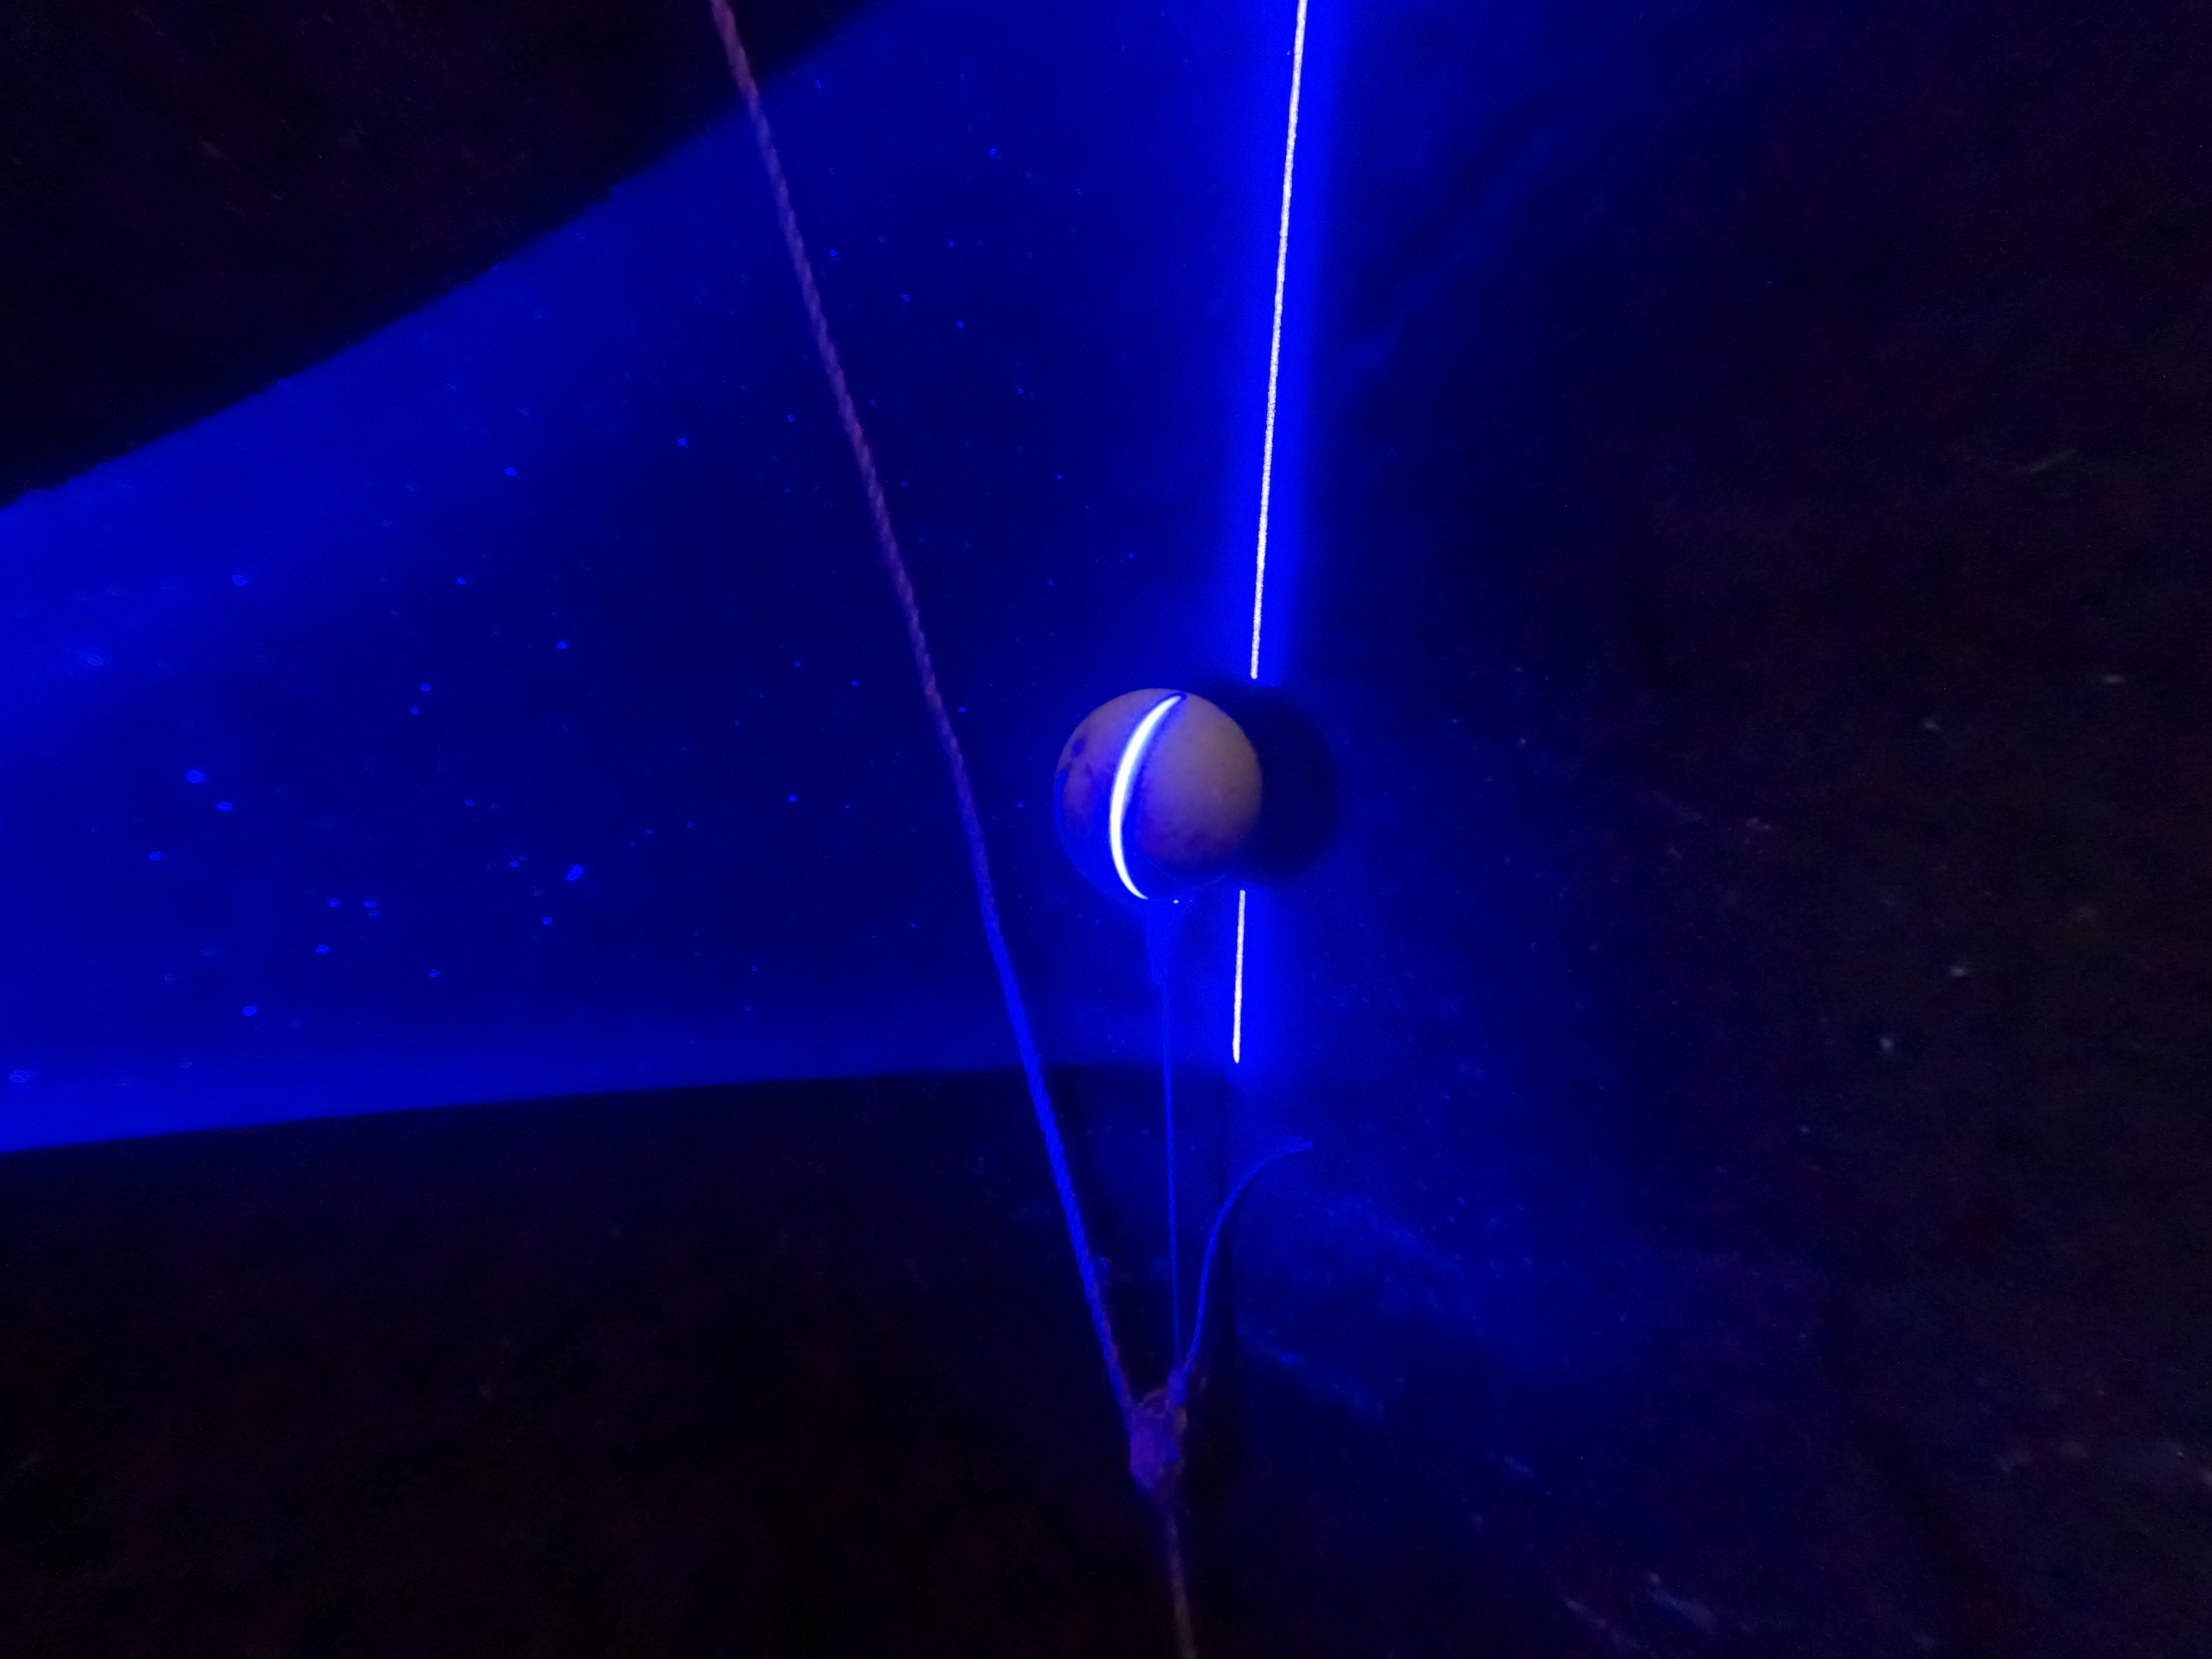

Supplement: Supplementary file 3500 [file G0030724.pdf › Level_1_1/G0030724.pdf]

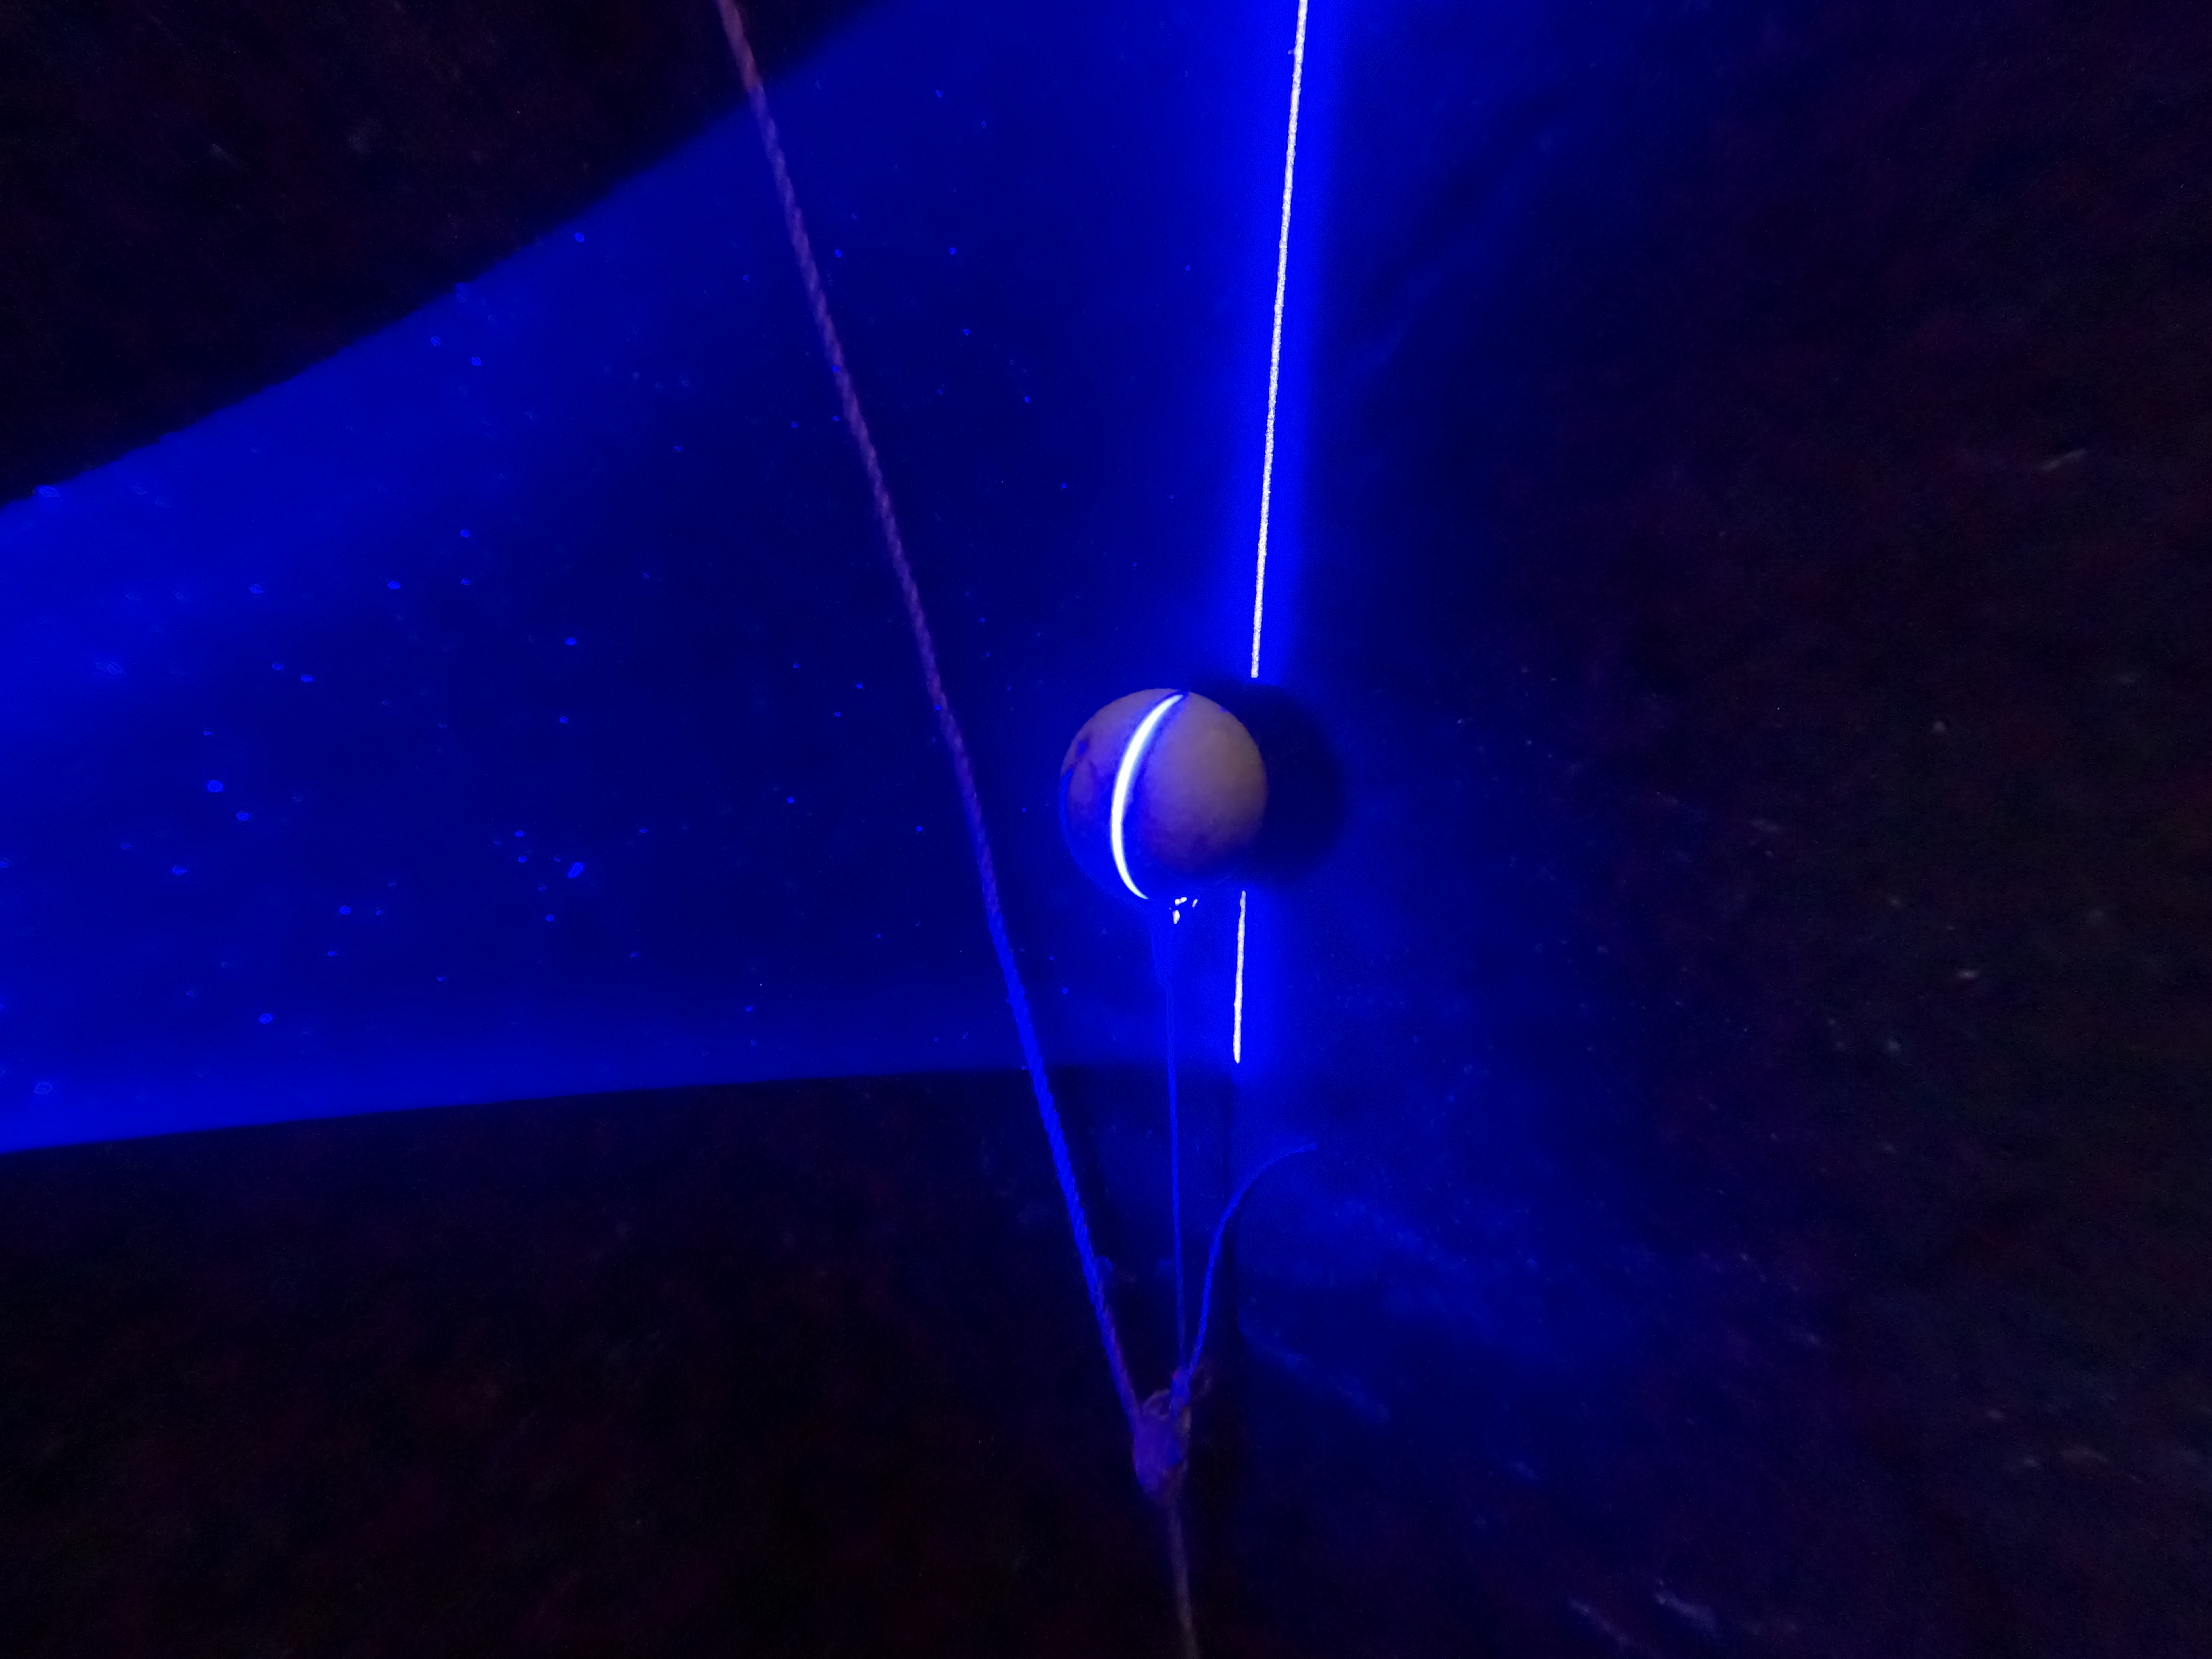

Supplement: Supplementary file 3501 [file G0030725.pdf › Level_1_1/G0030725.pdf]

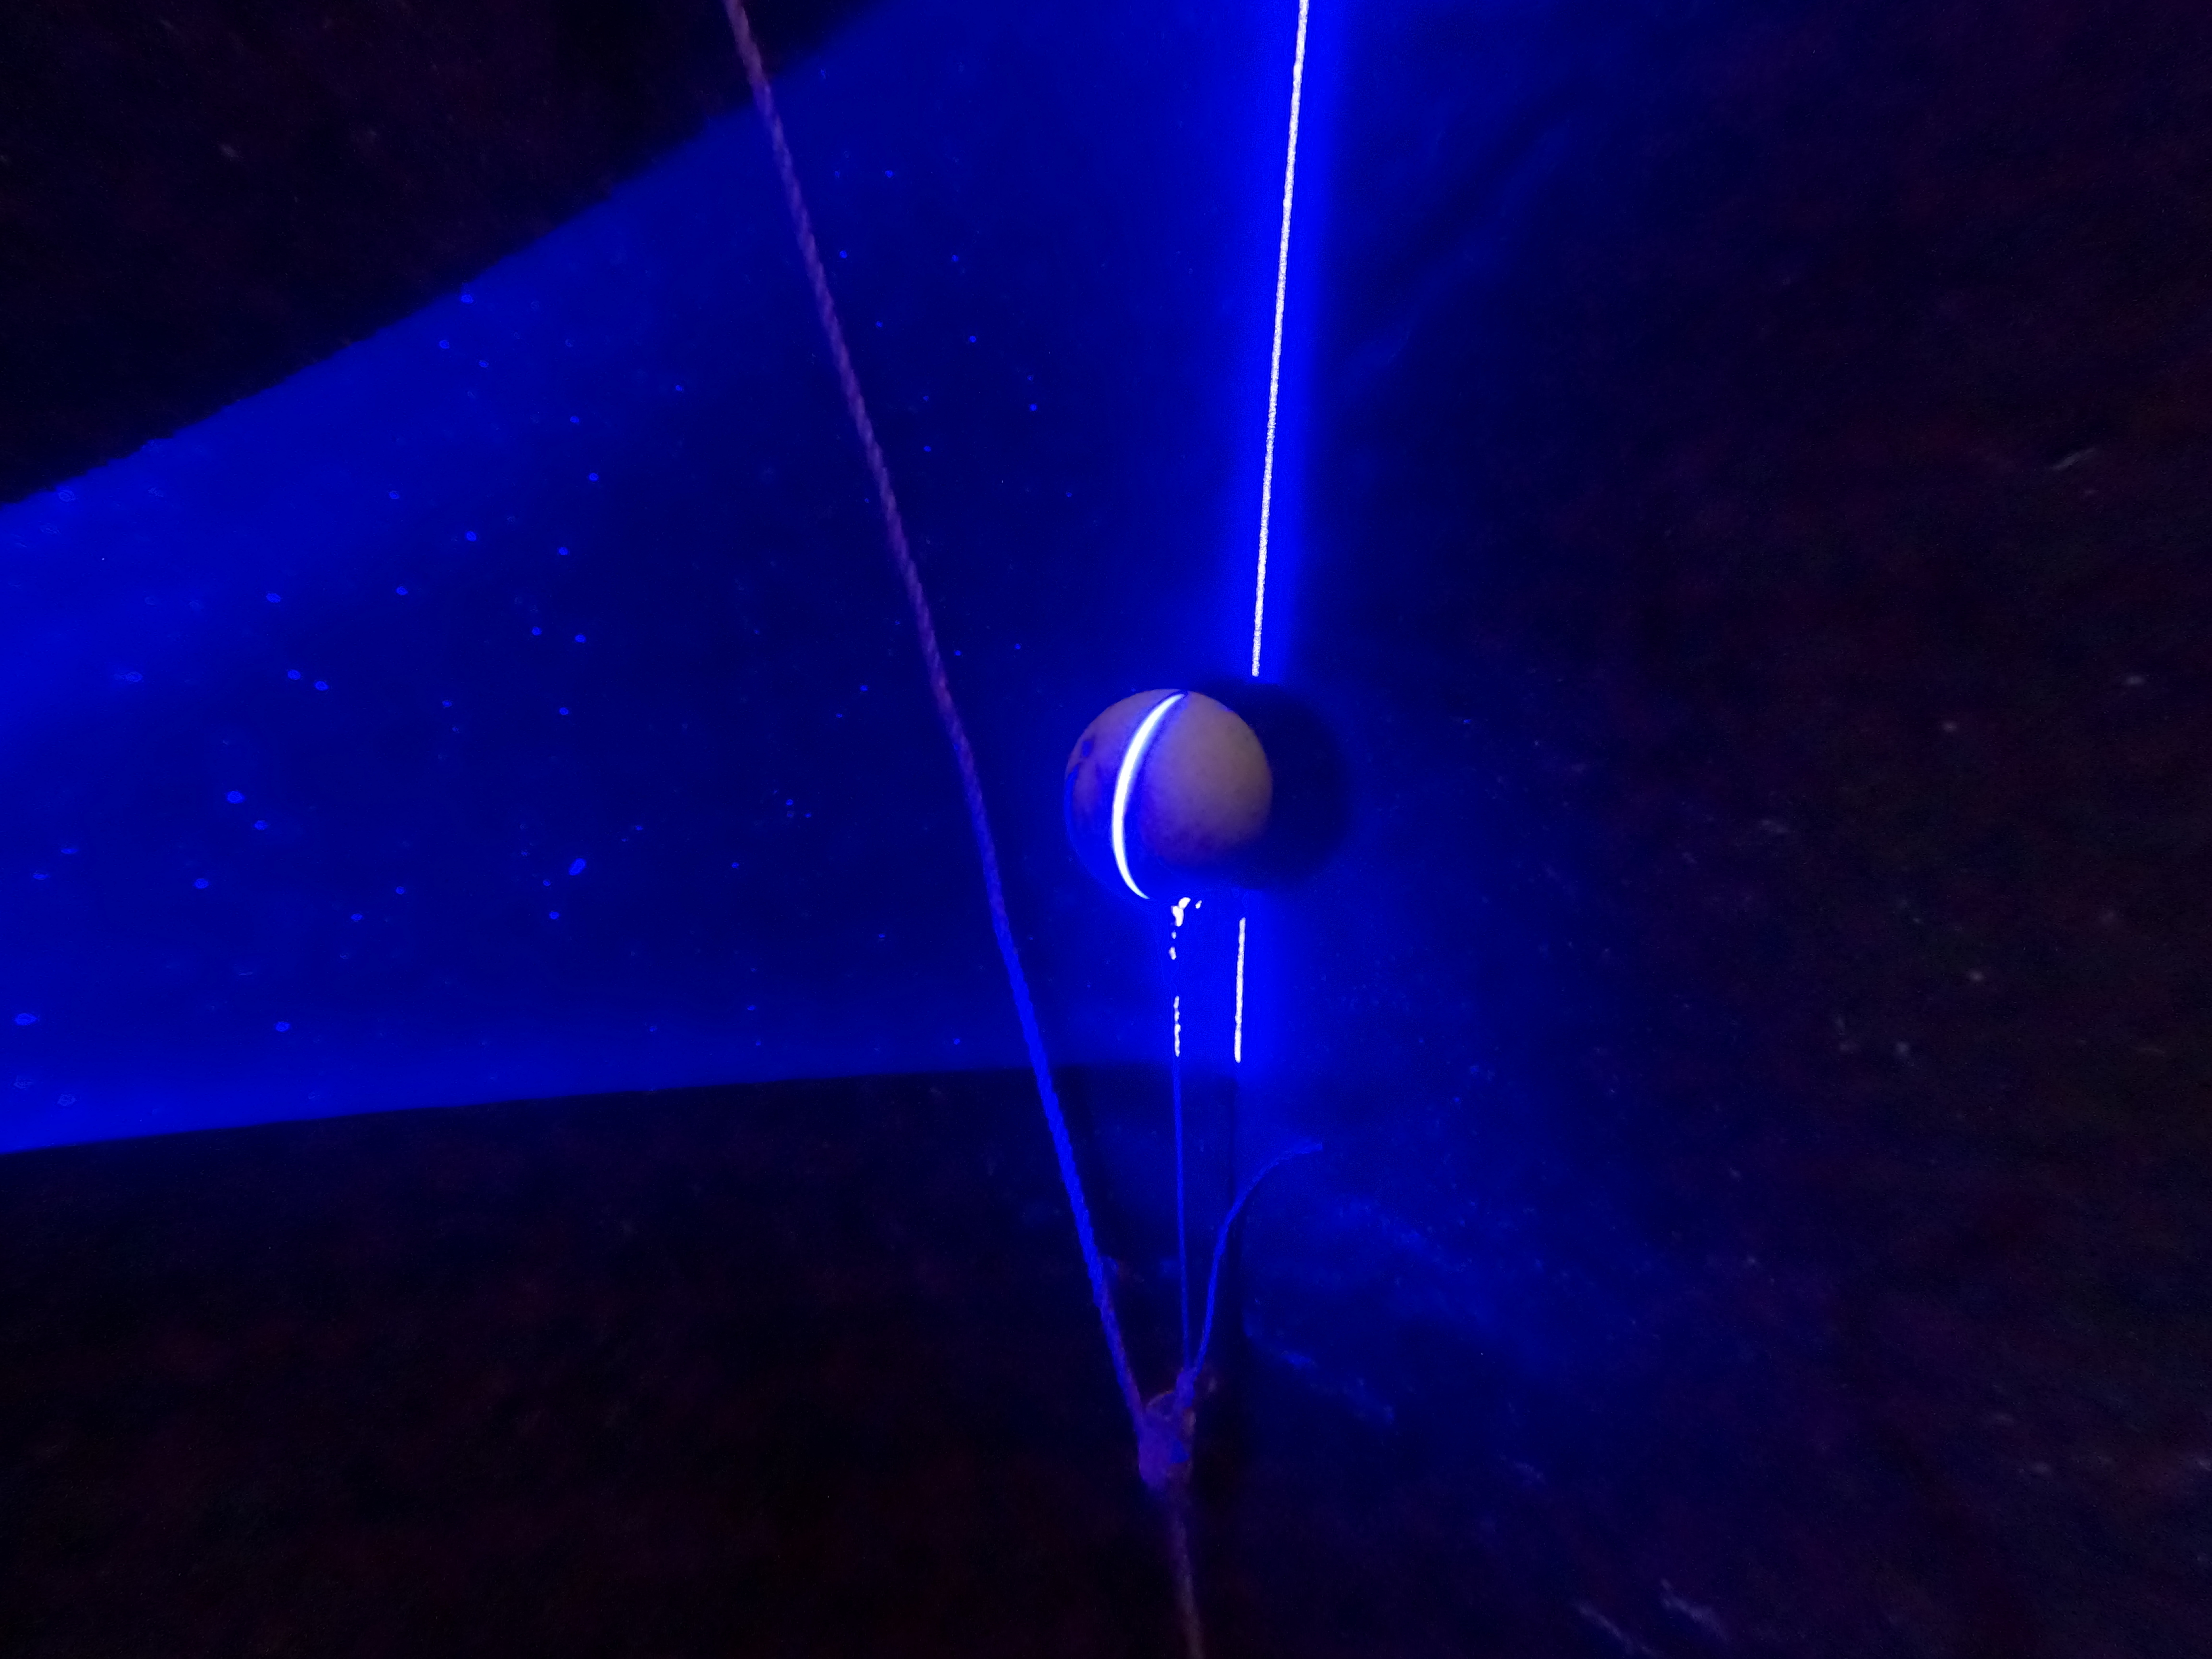

Supplement: Supplementary file 3502 [file G0030726.pdf › Level_1_1/G0030726.pdf]

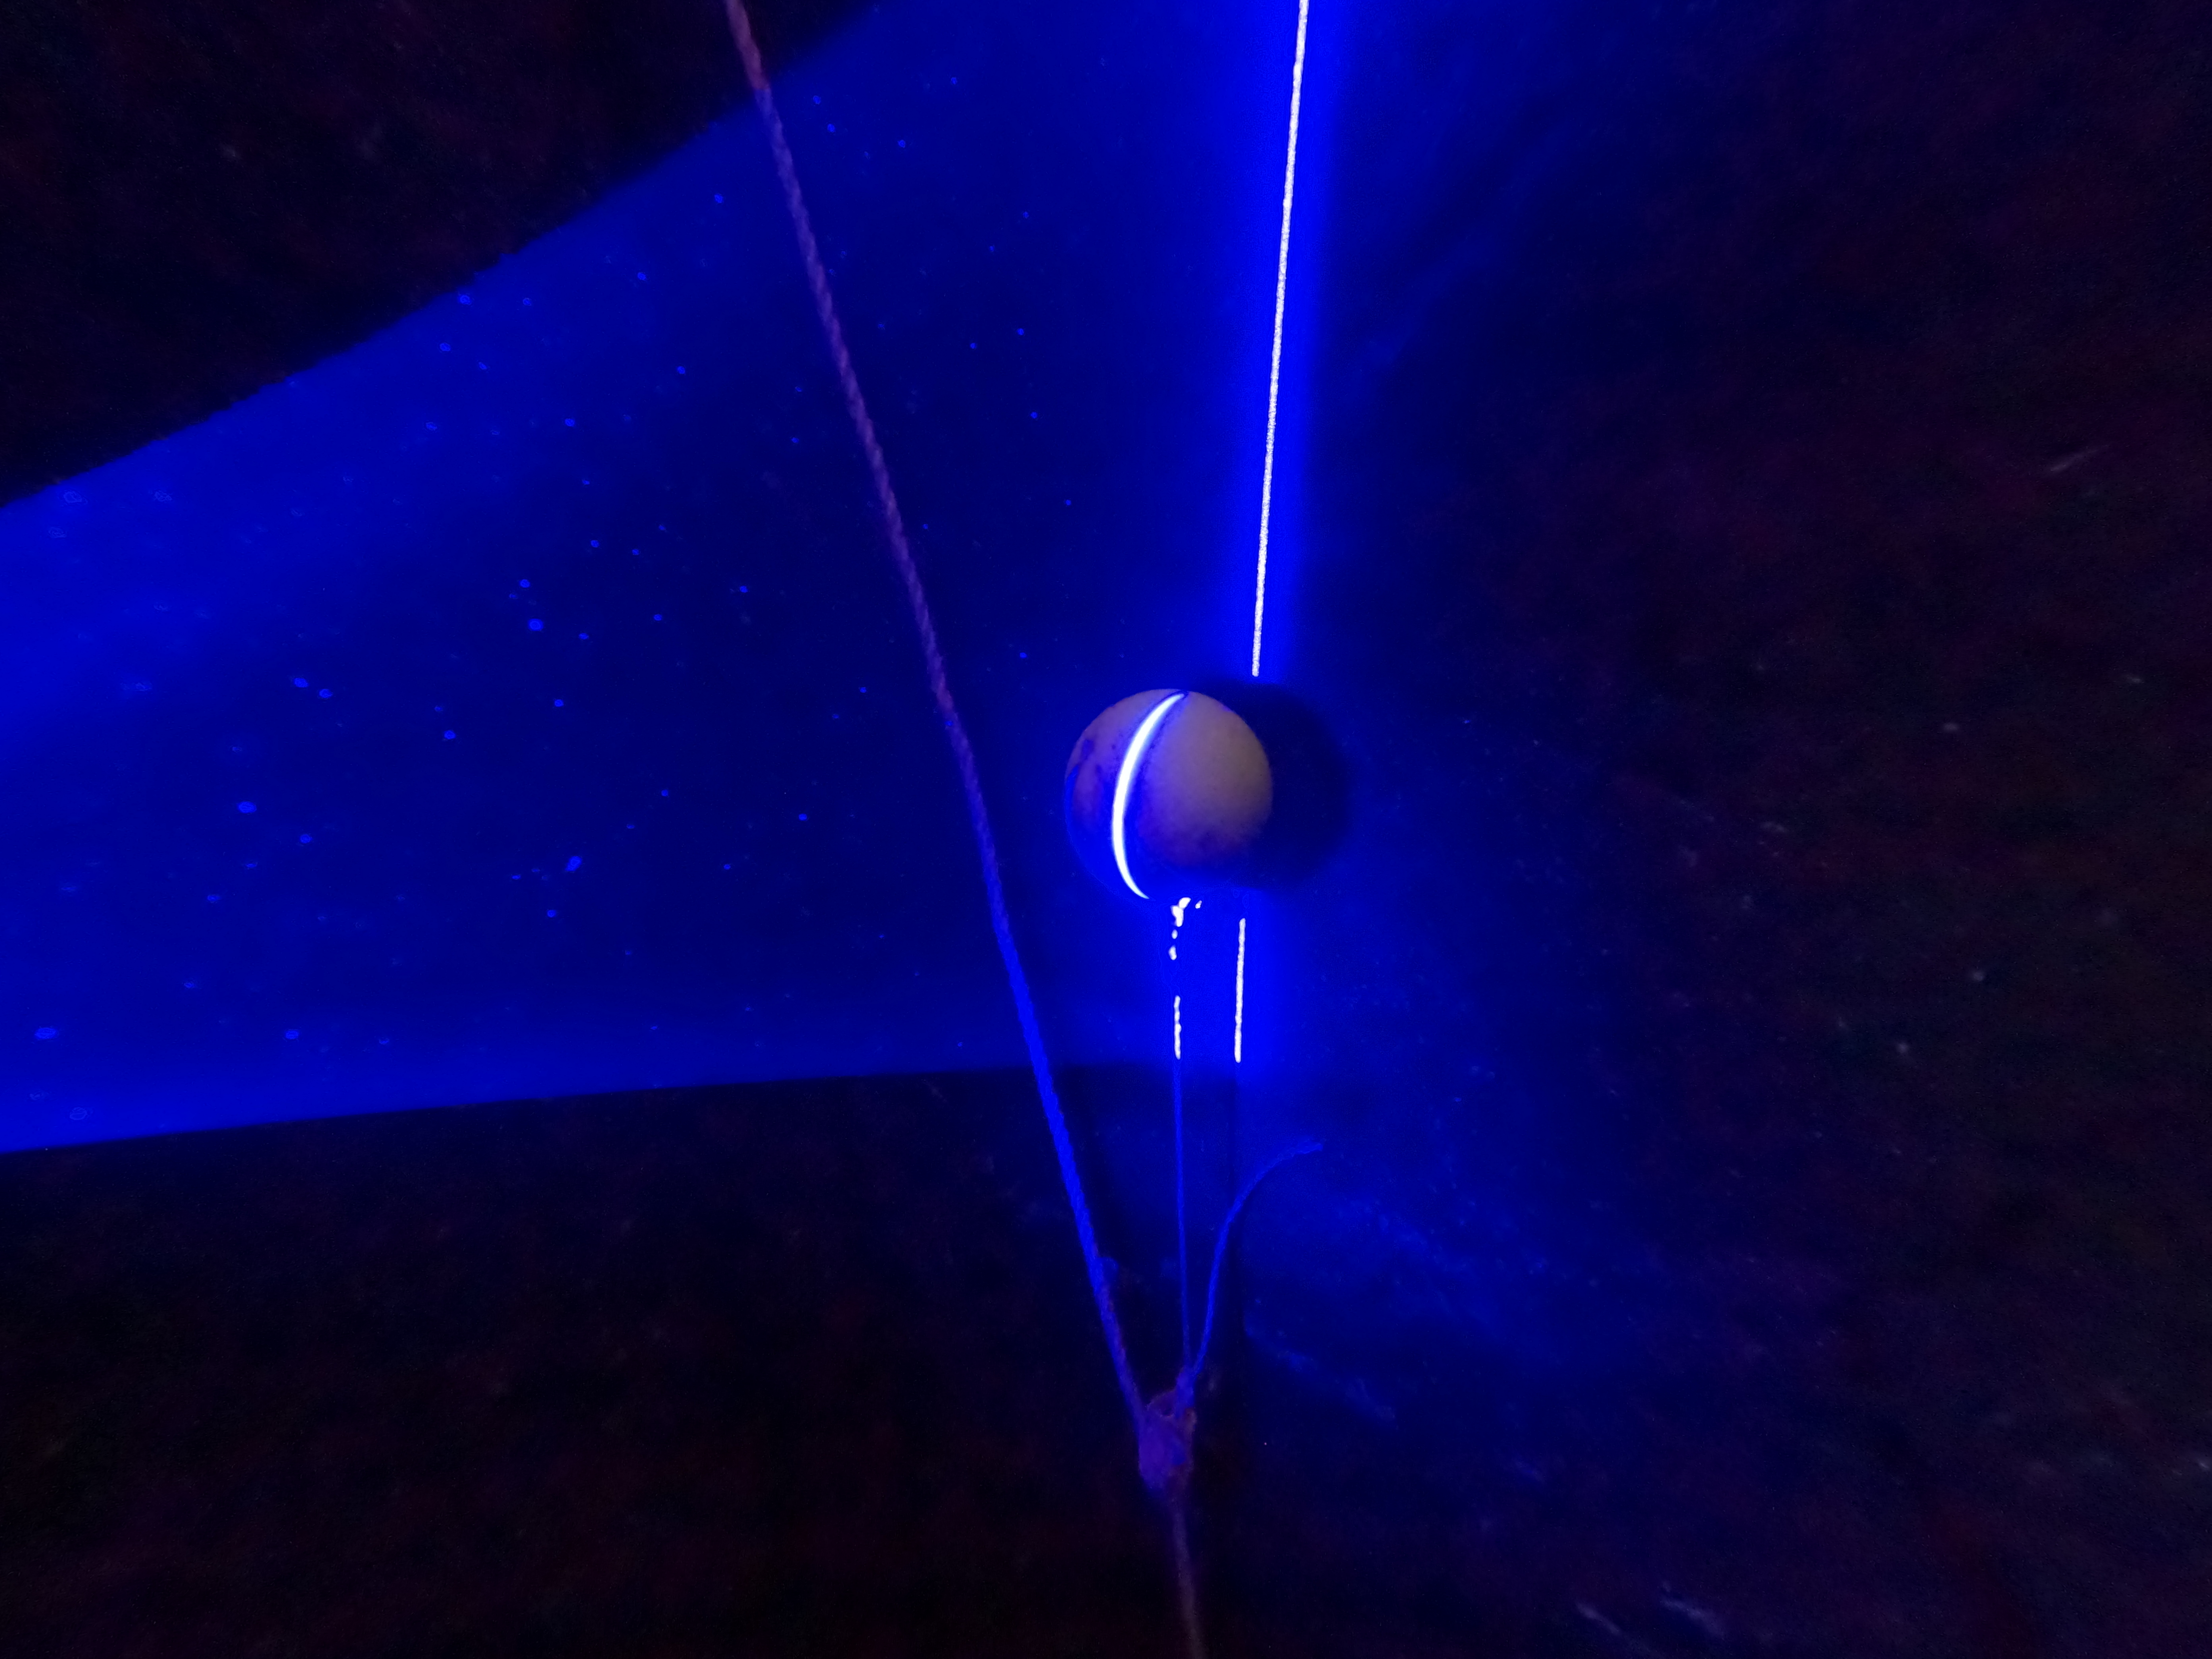

Supplement: Supplementary file 3503 [file G0030727.pdf › Level_1_1/G0030727.pdf]

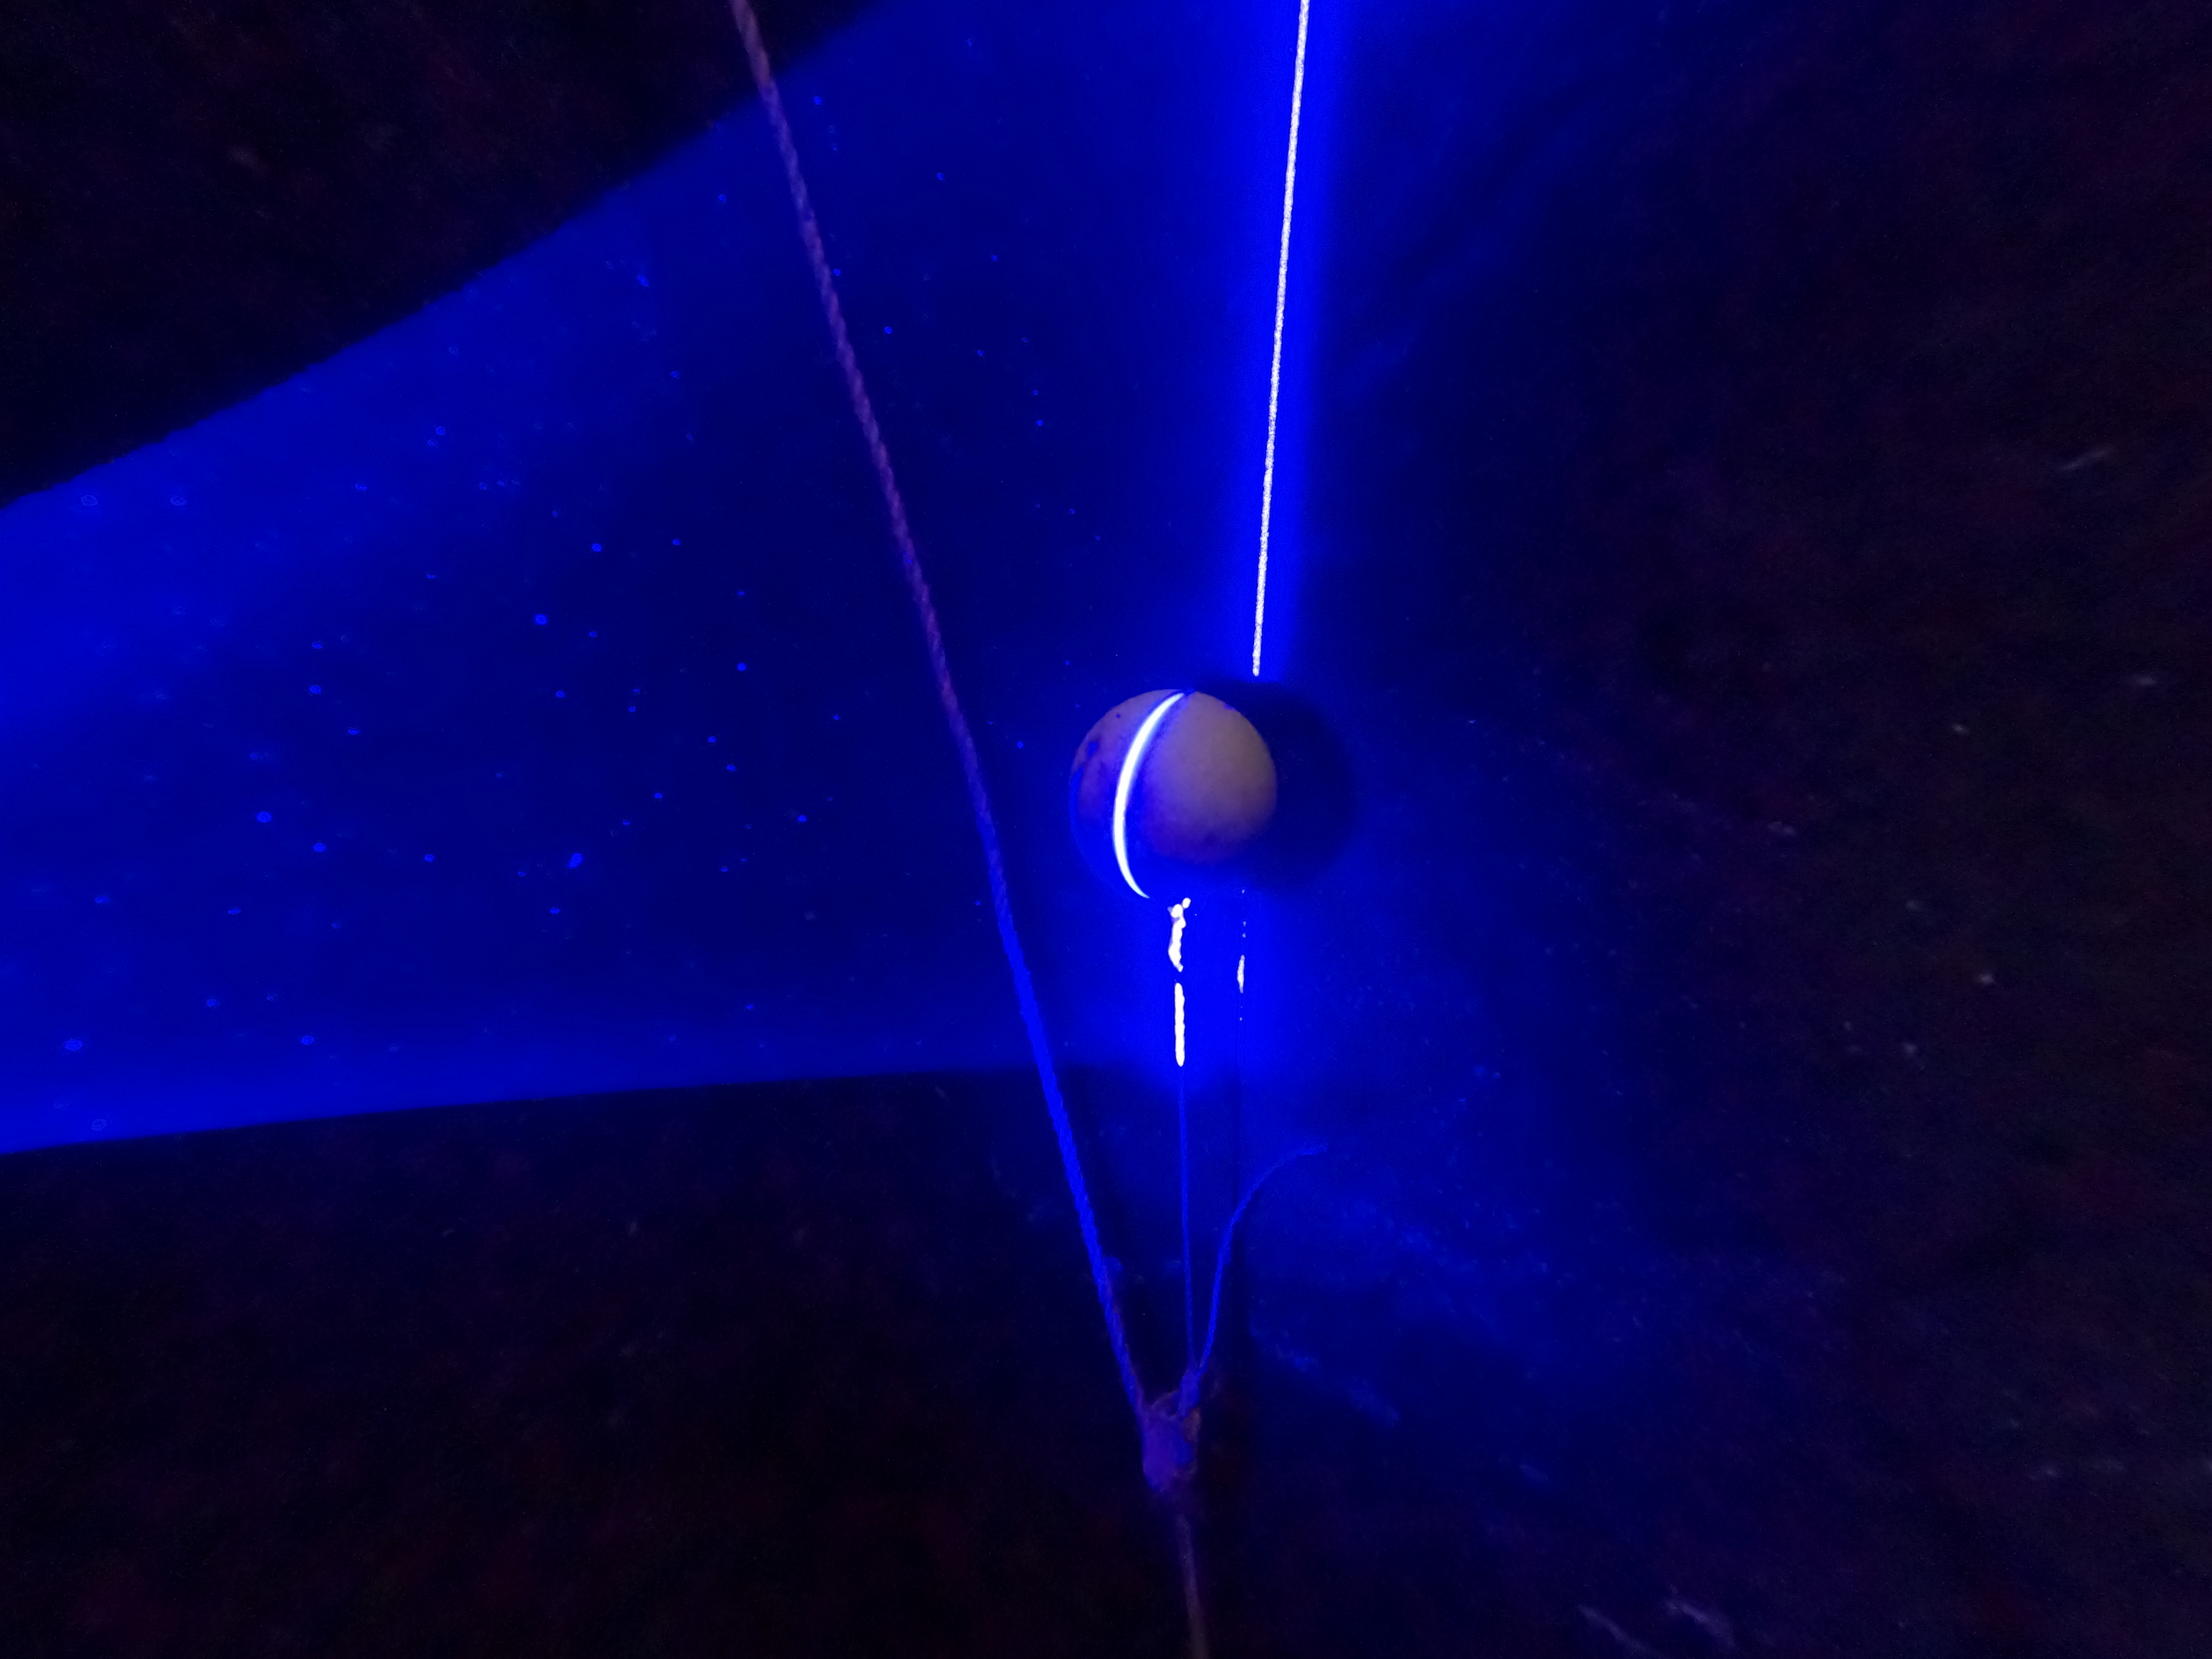

Supplement: Supplementary file 3504 [file G0030728.pdf › Level_1_1/G0030728.pdf]

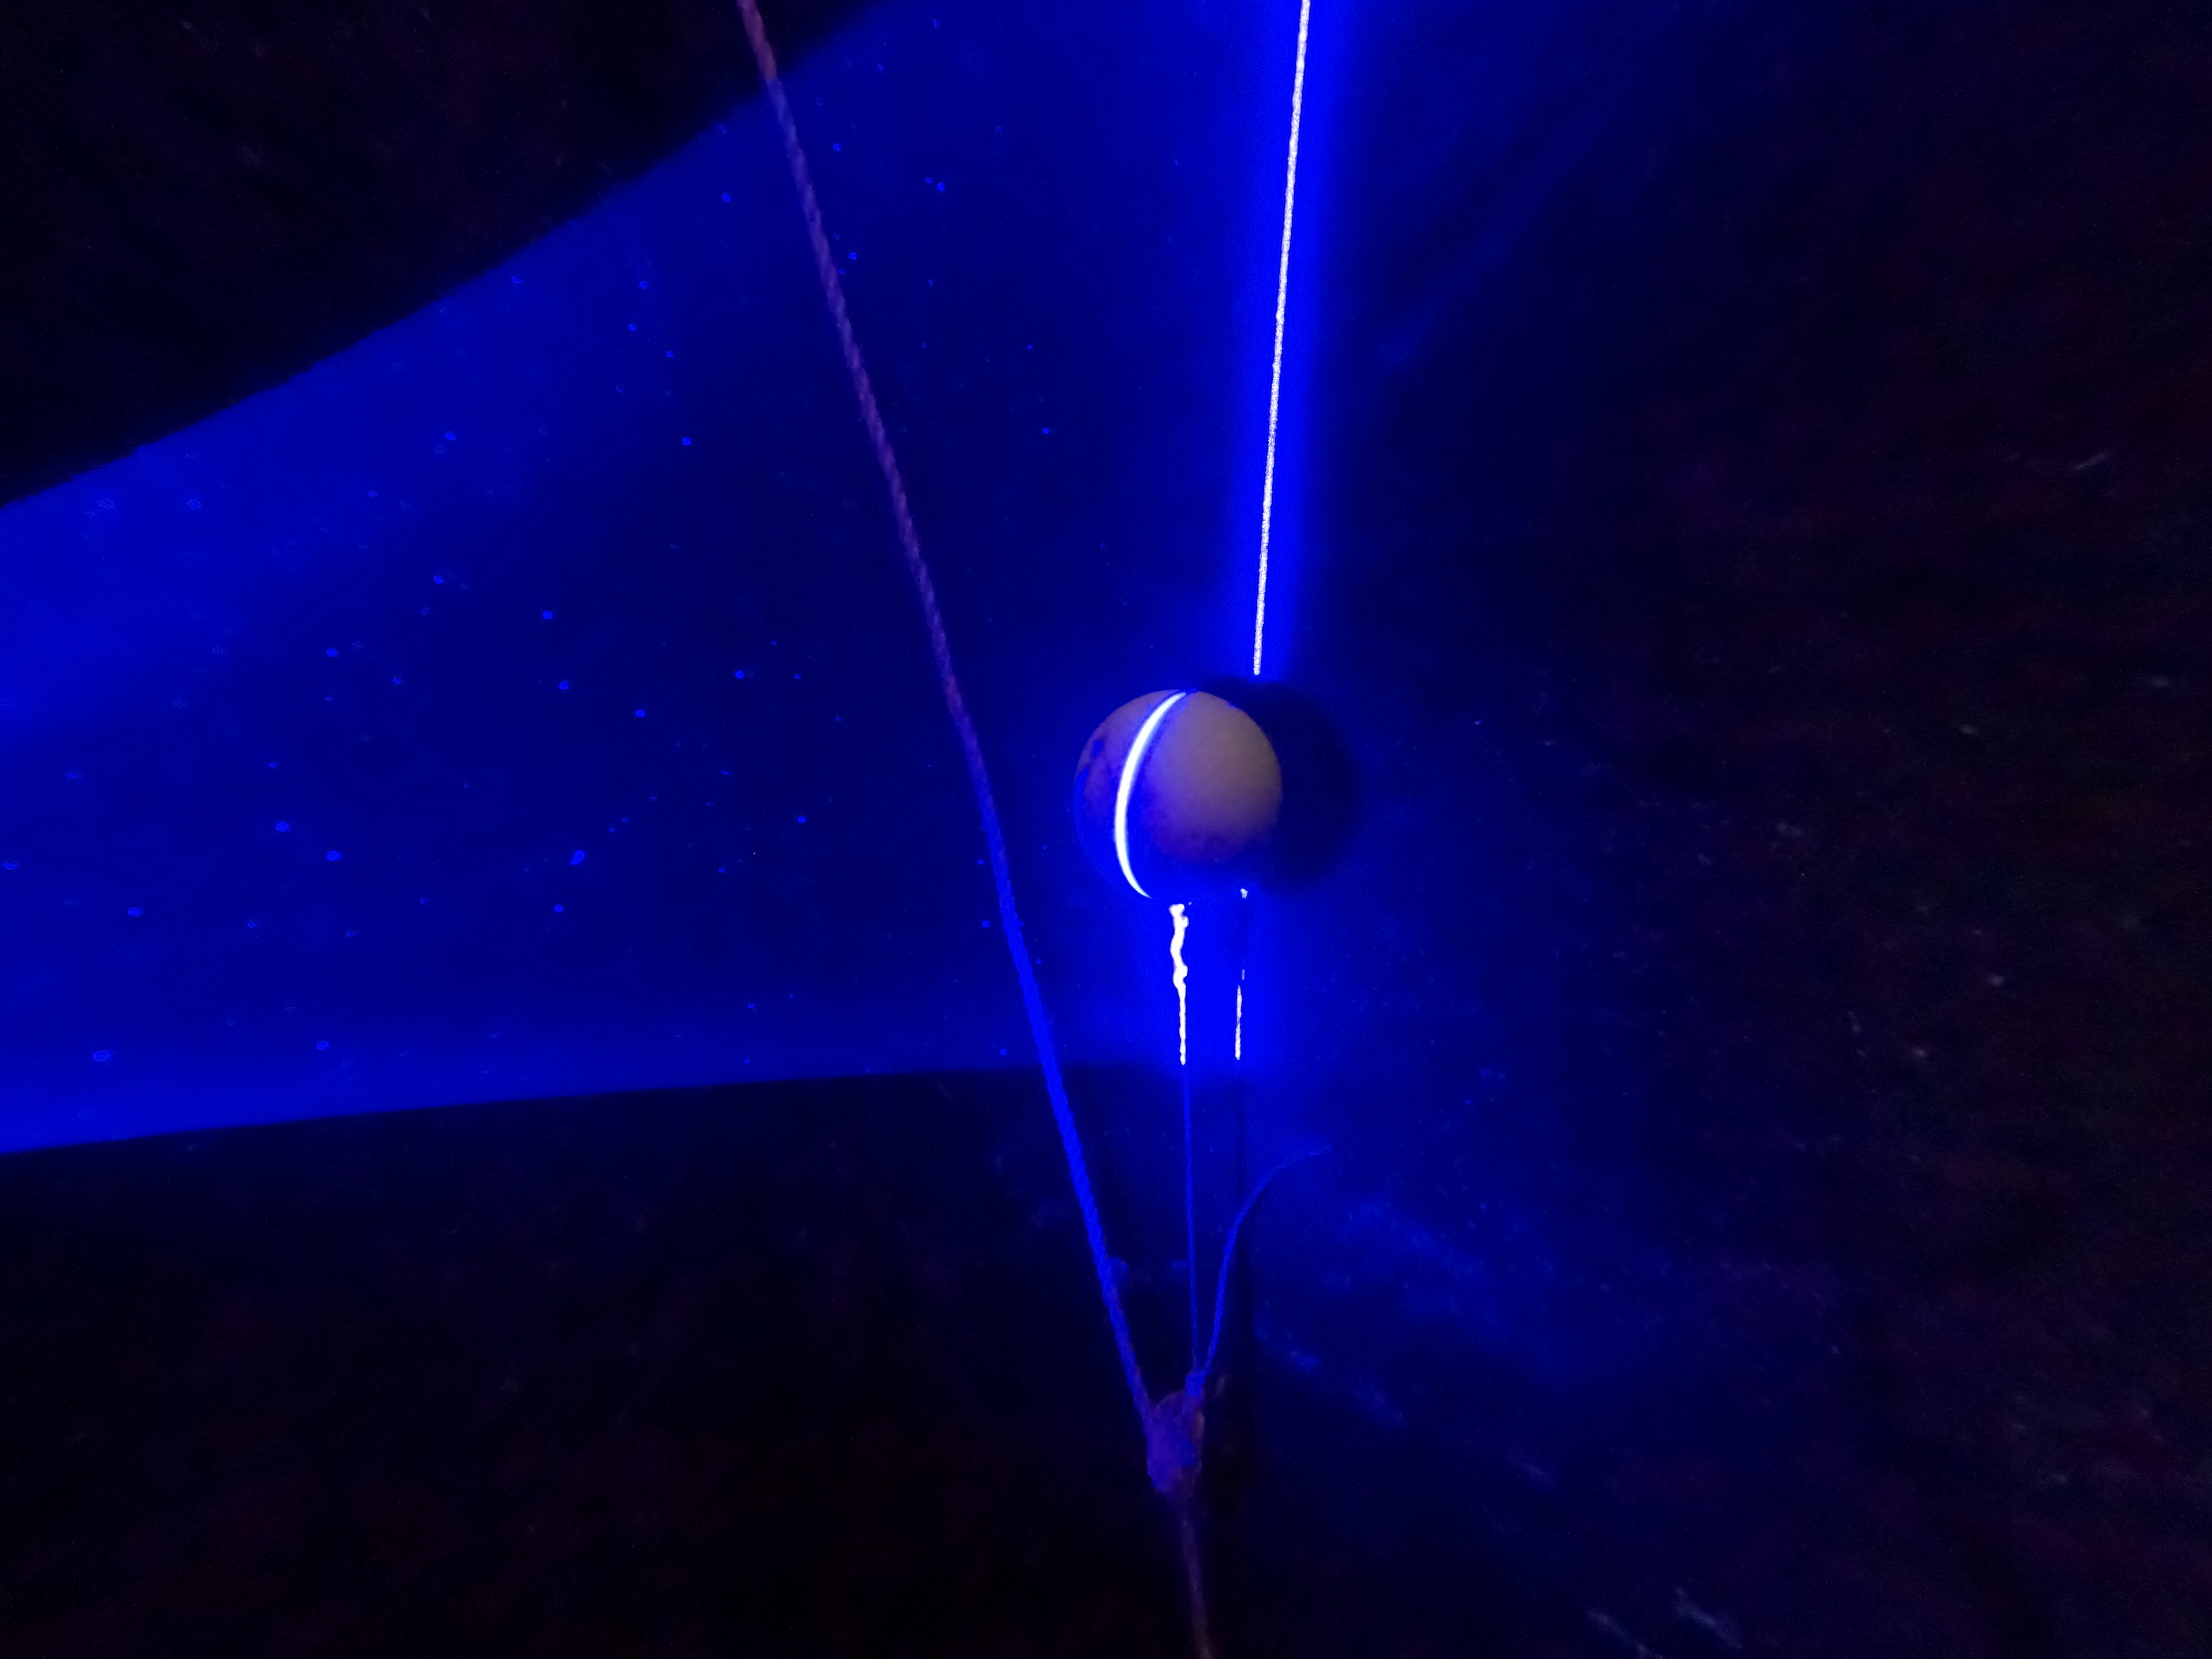

Supplement: Supplementary file 3505 [file G0030729.pdf › Level_1_1/G0030729.pdf]

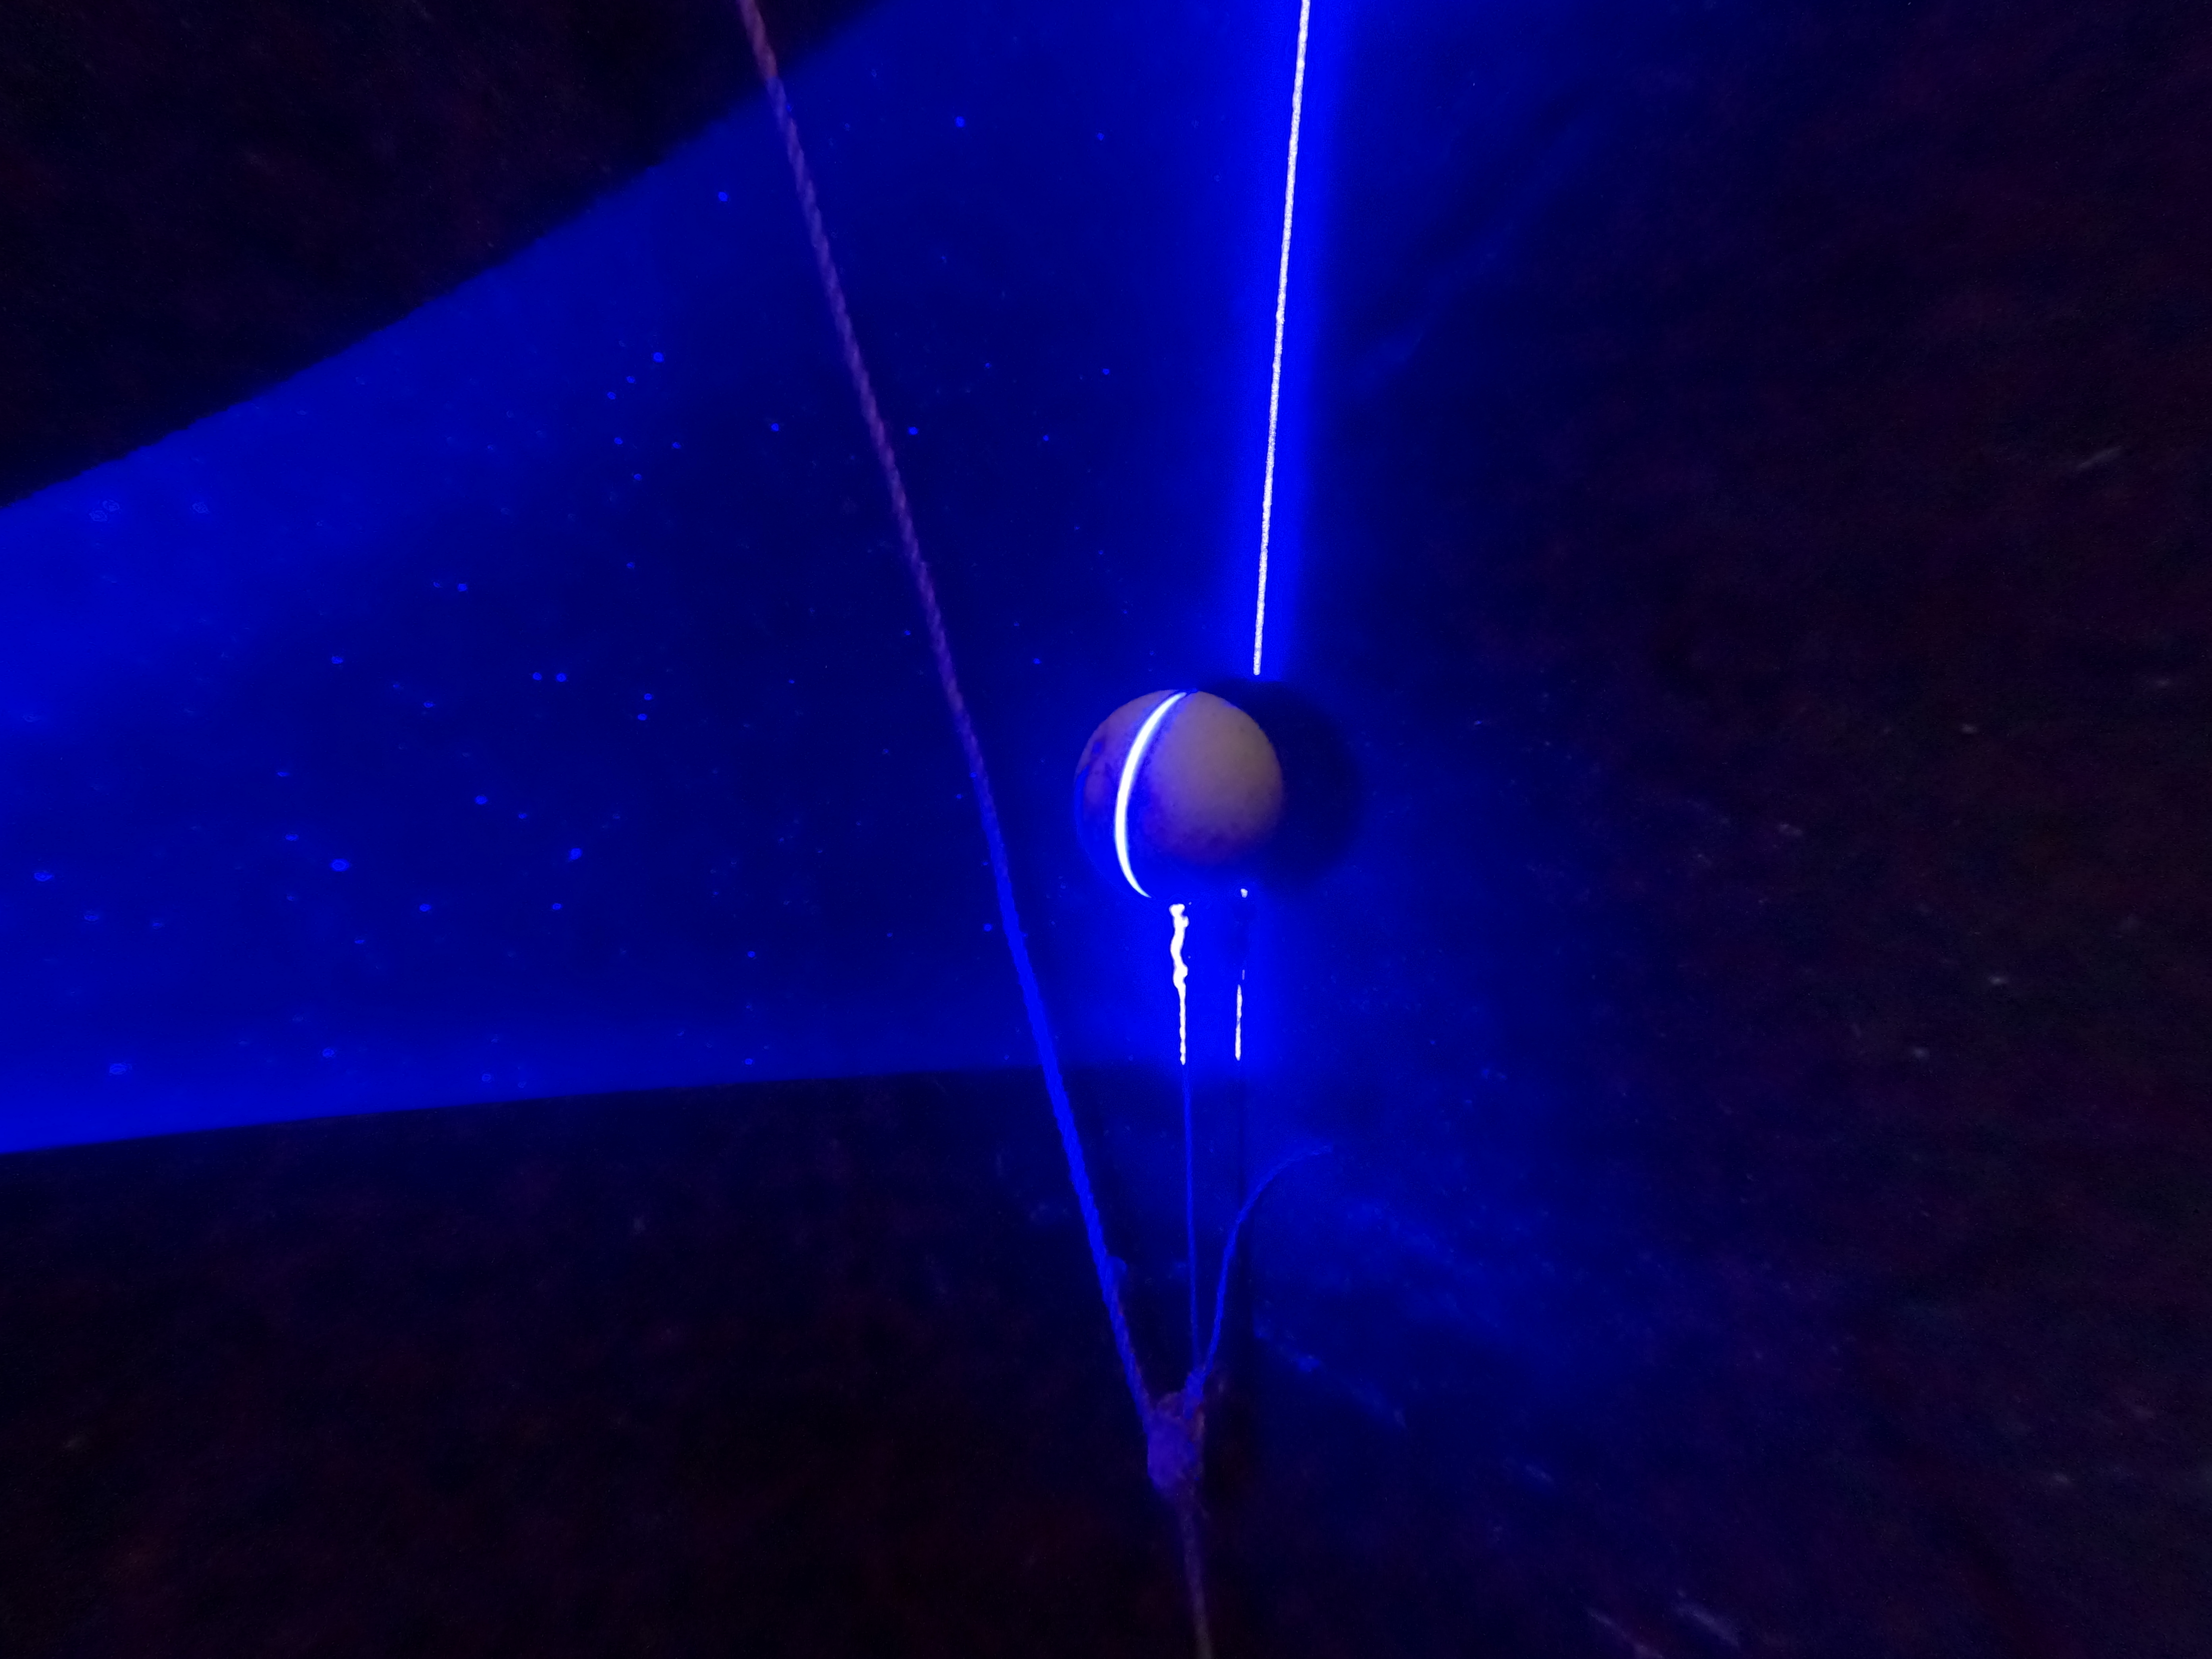

Supplement: Supplementary file 3506 [file G0030730.pdf › Level_1_1/G0030730.pdf]

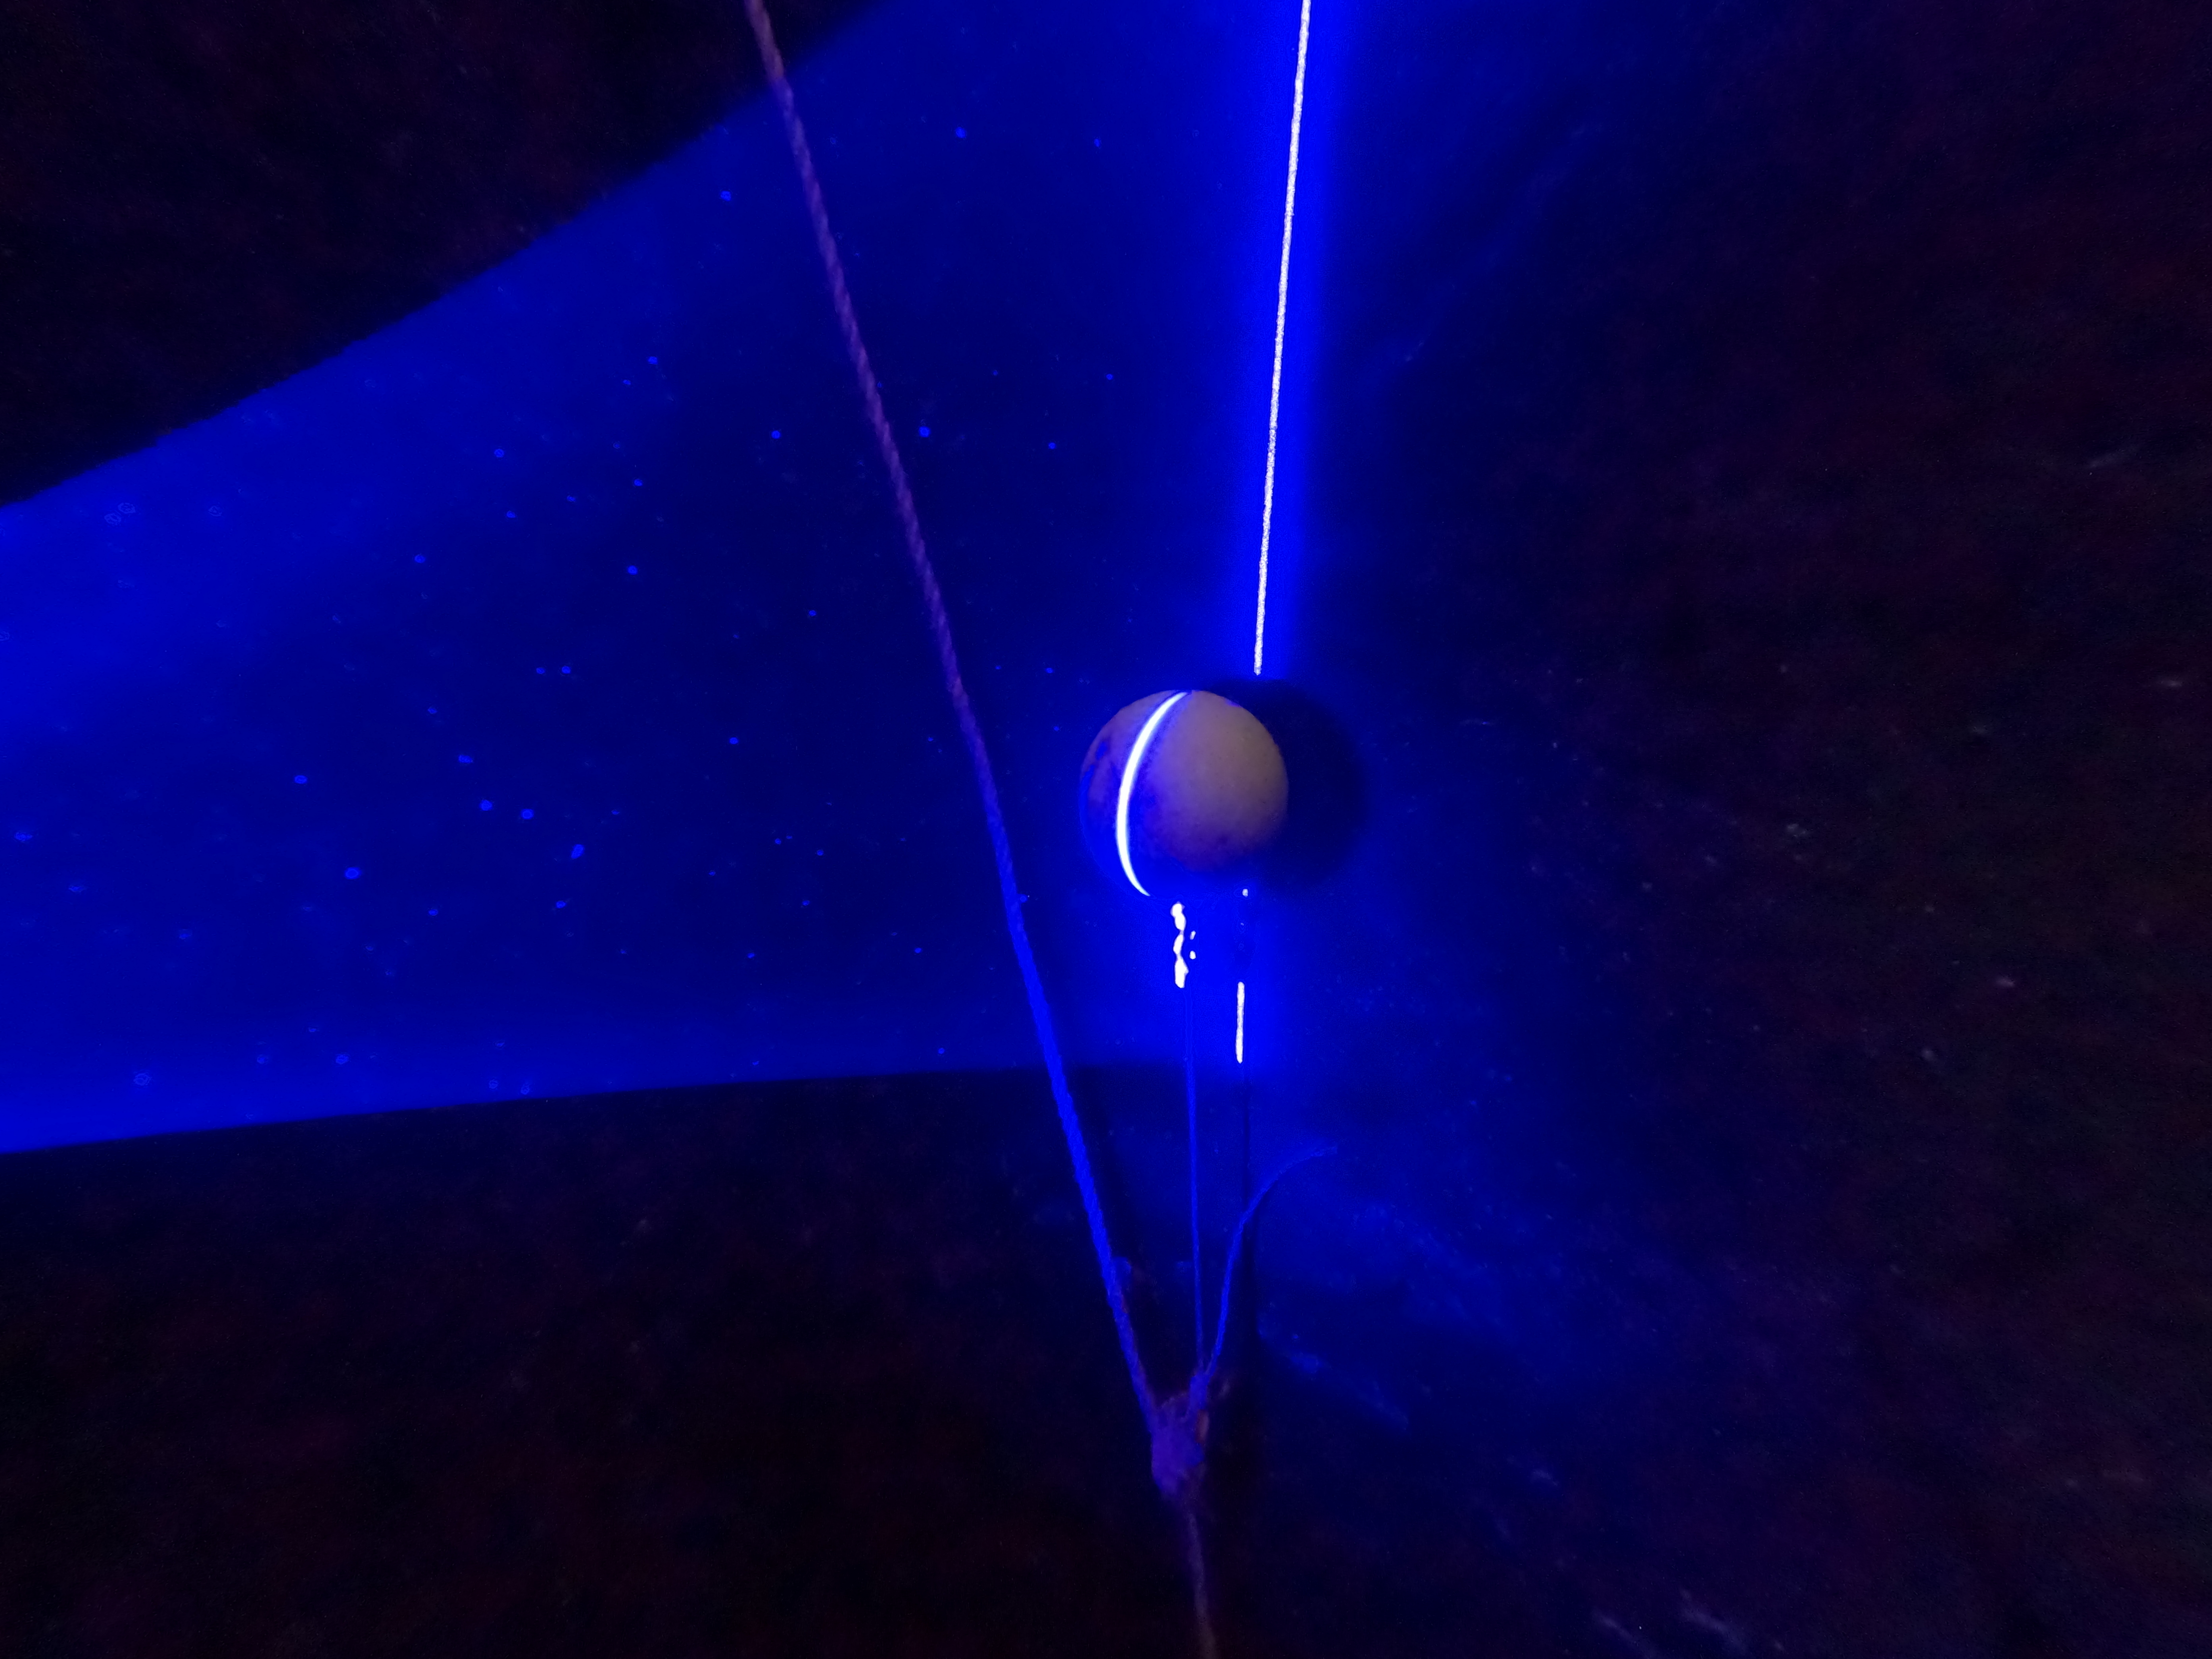

Supplement: Supplementary file 3507 [file G0030731.pdf › Level_1_1/G0030731.pdf]

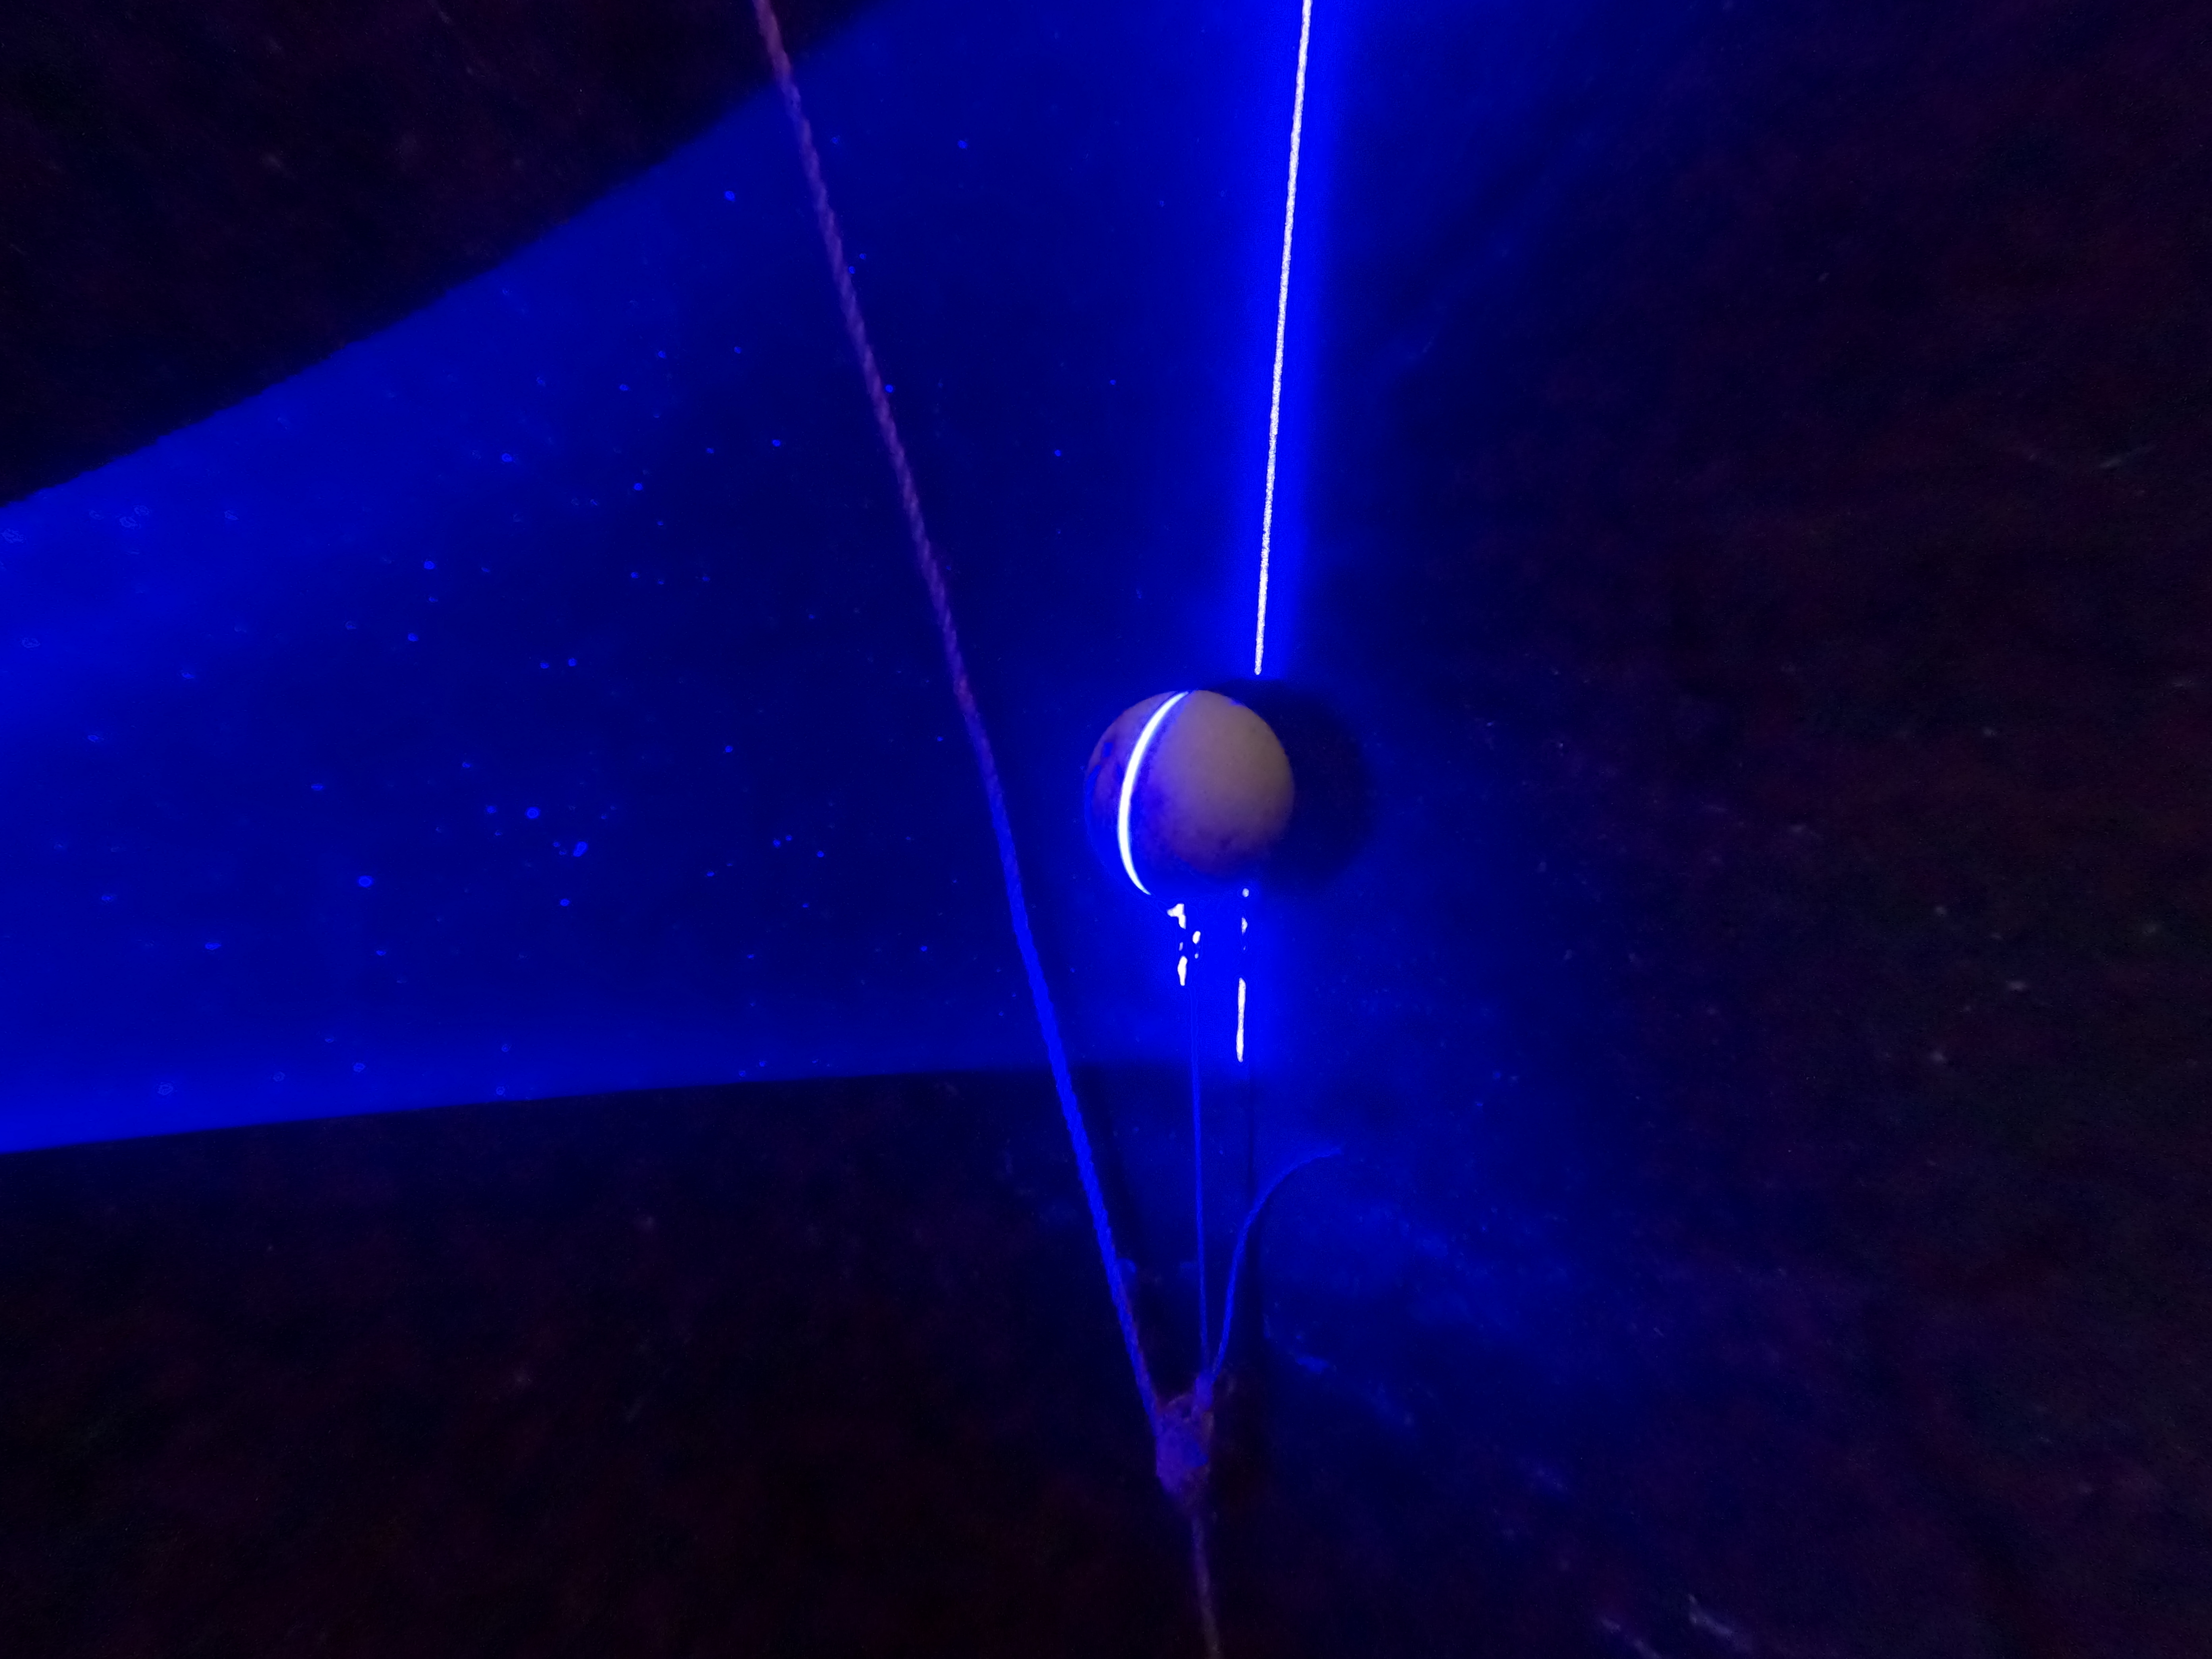

Supplement: Supplementary file 3508 [file G0030732.pdf › Level_1_1/G0030732.pdf]

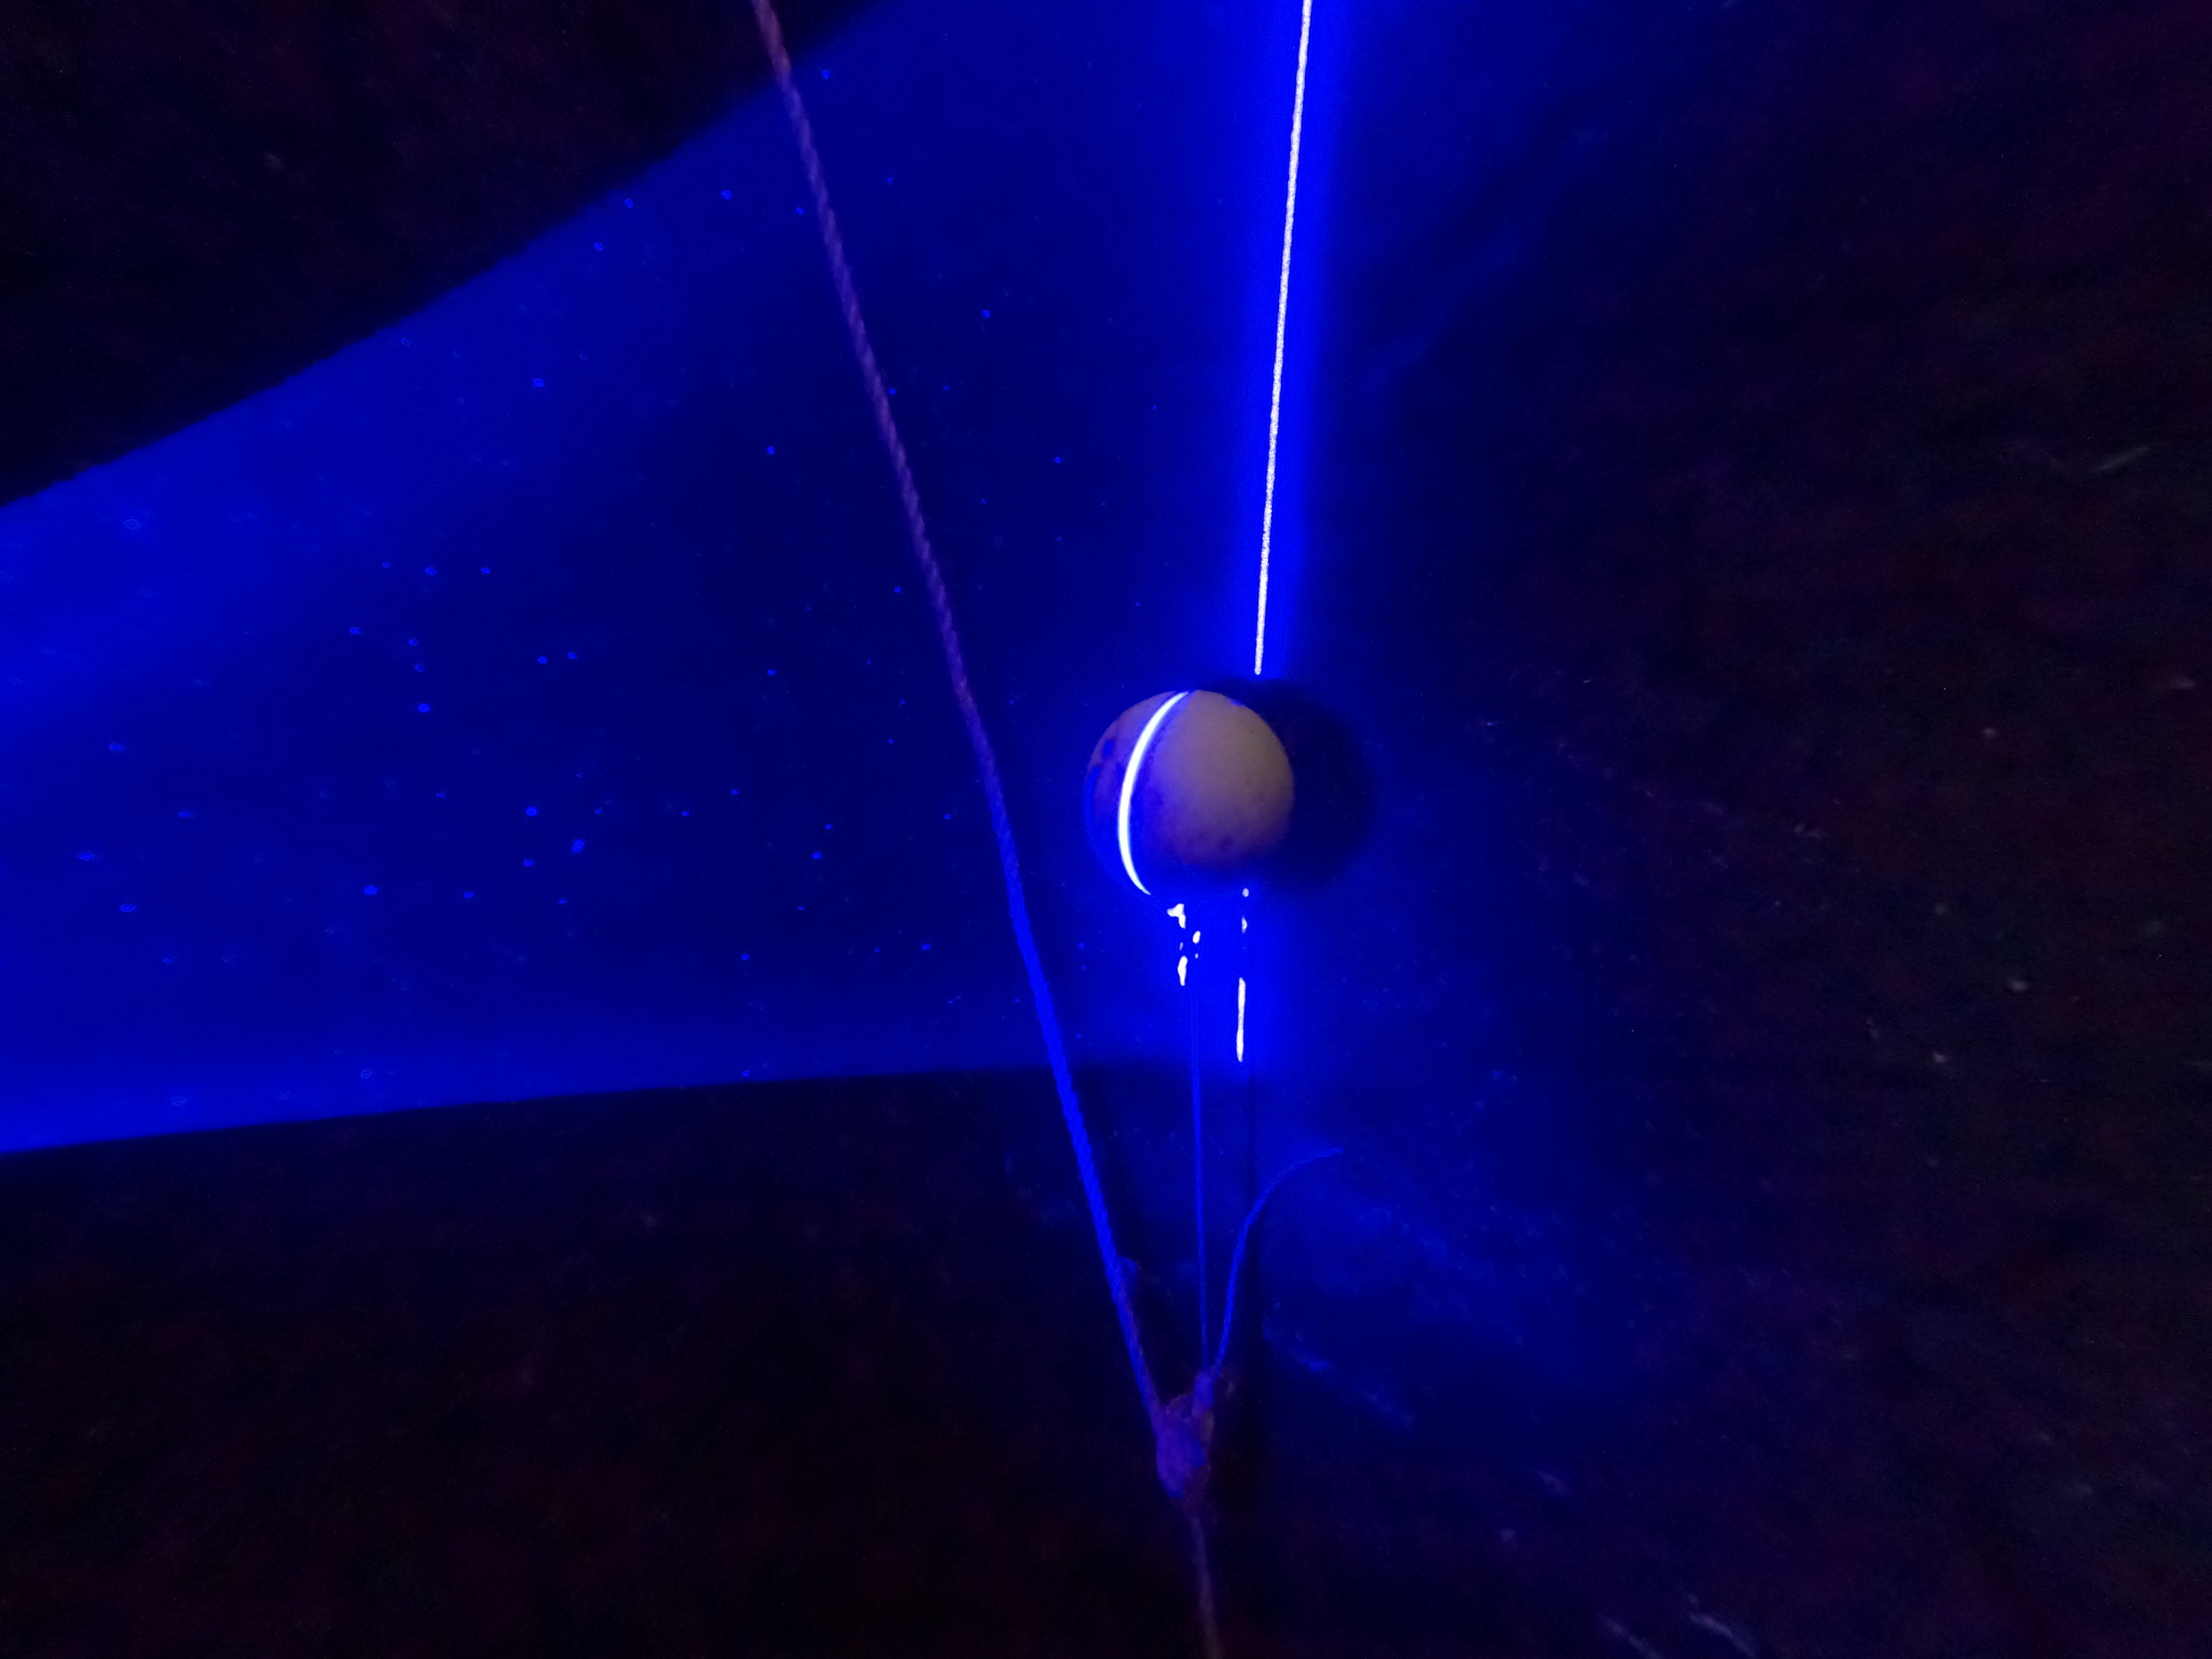

Supplement: Supplementary file 3509 [file G0030733.pdf › Level_1_1/G0030733.pdf]

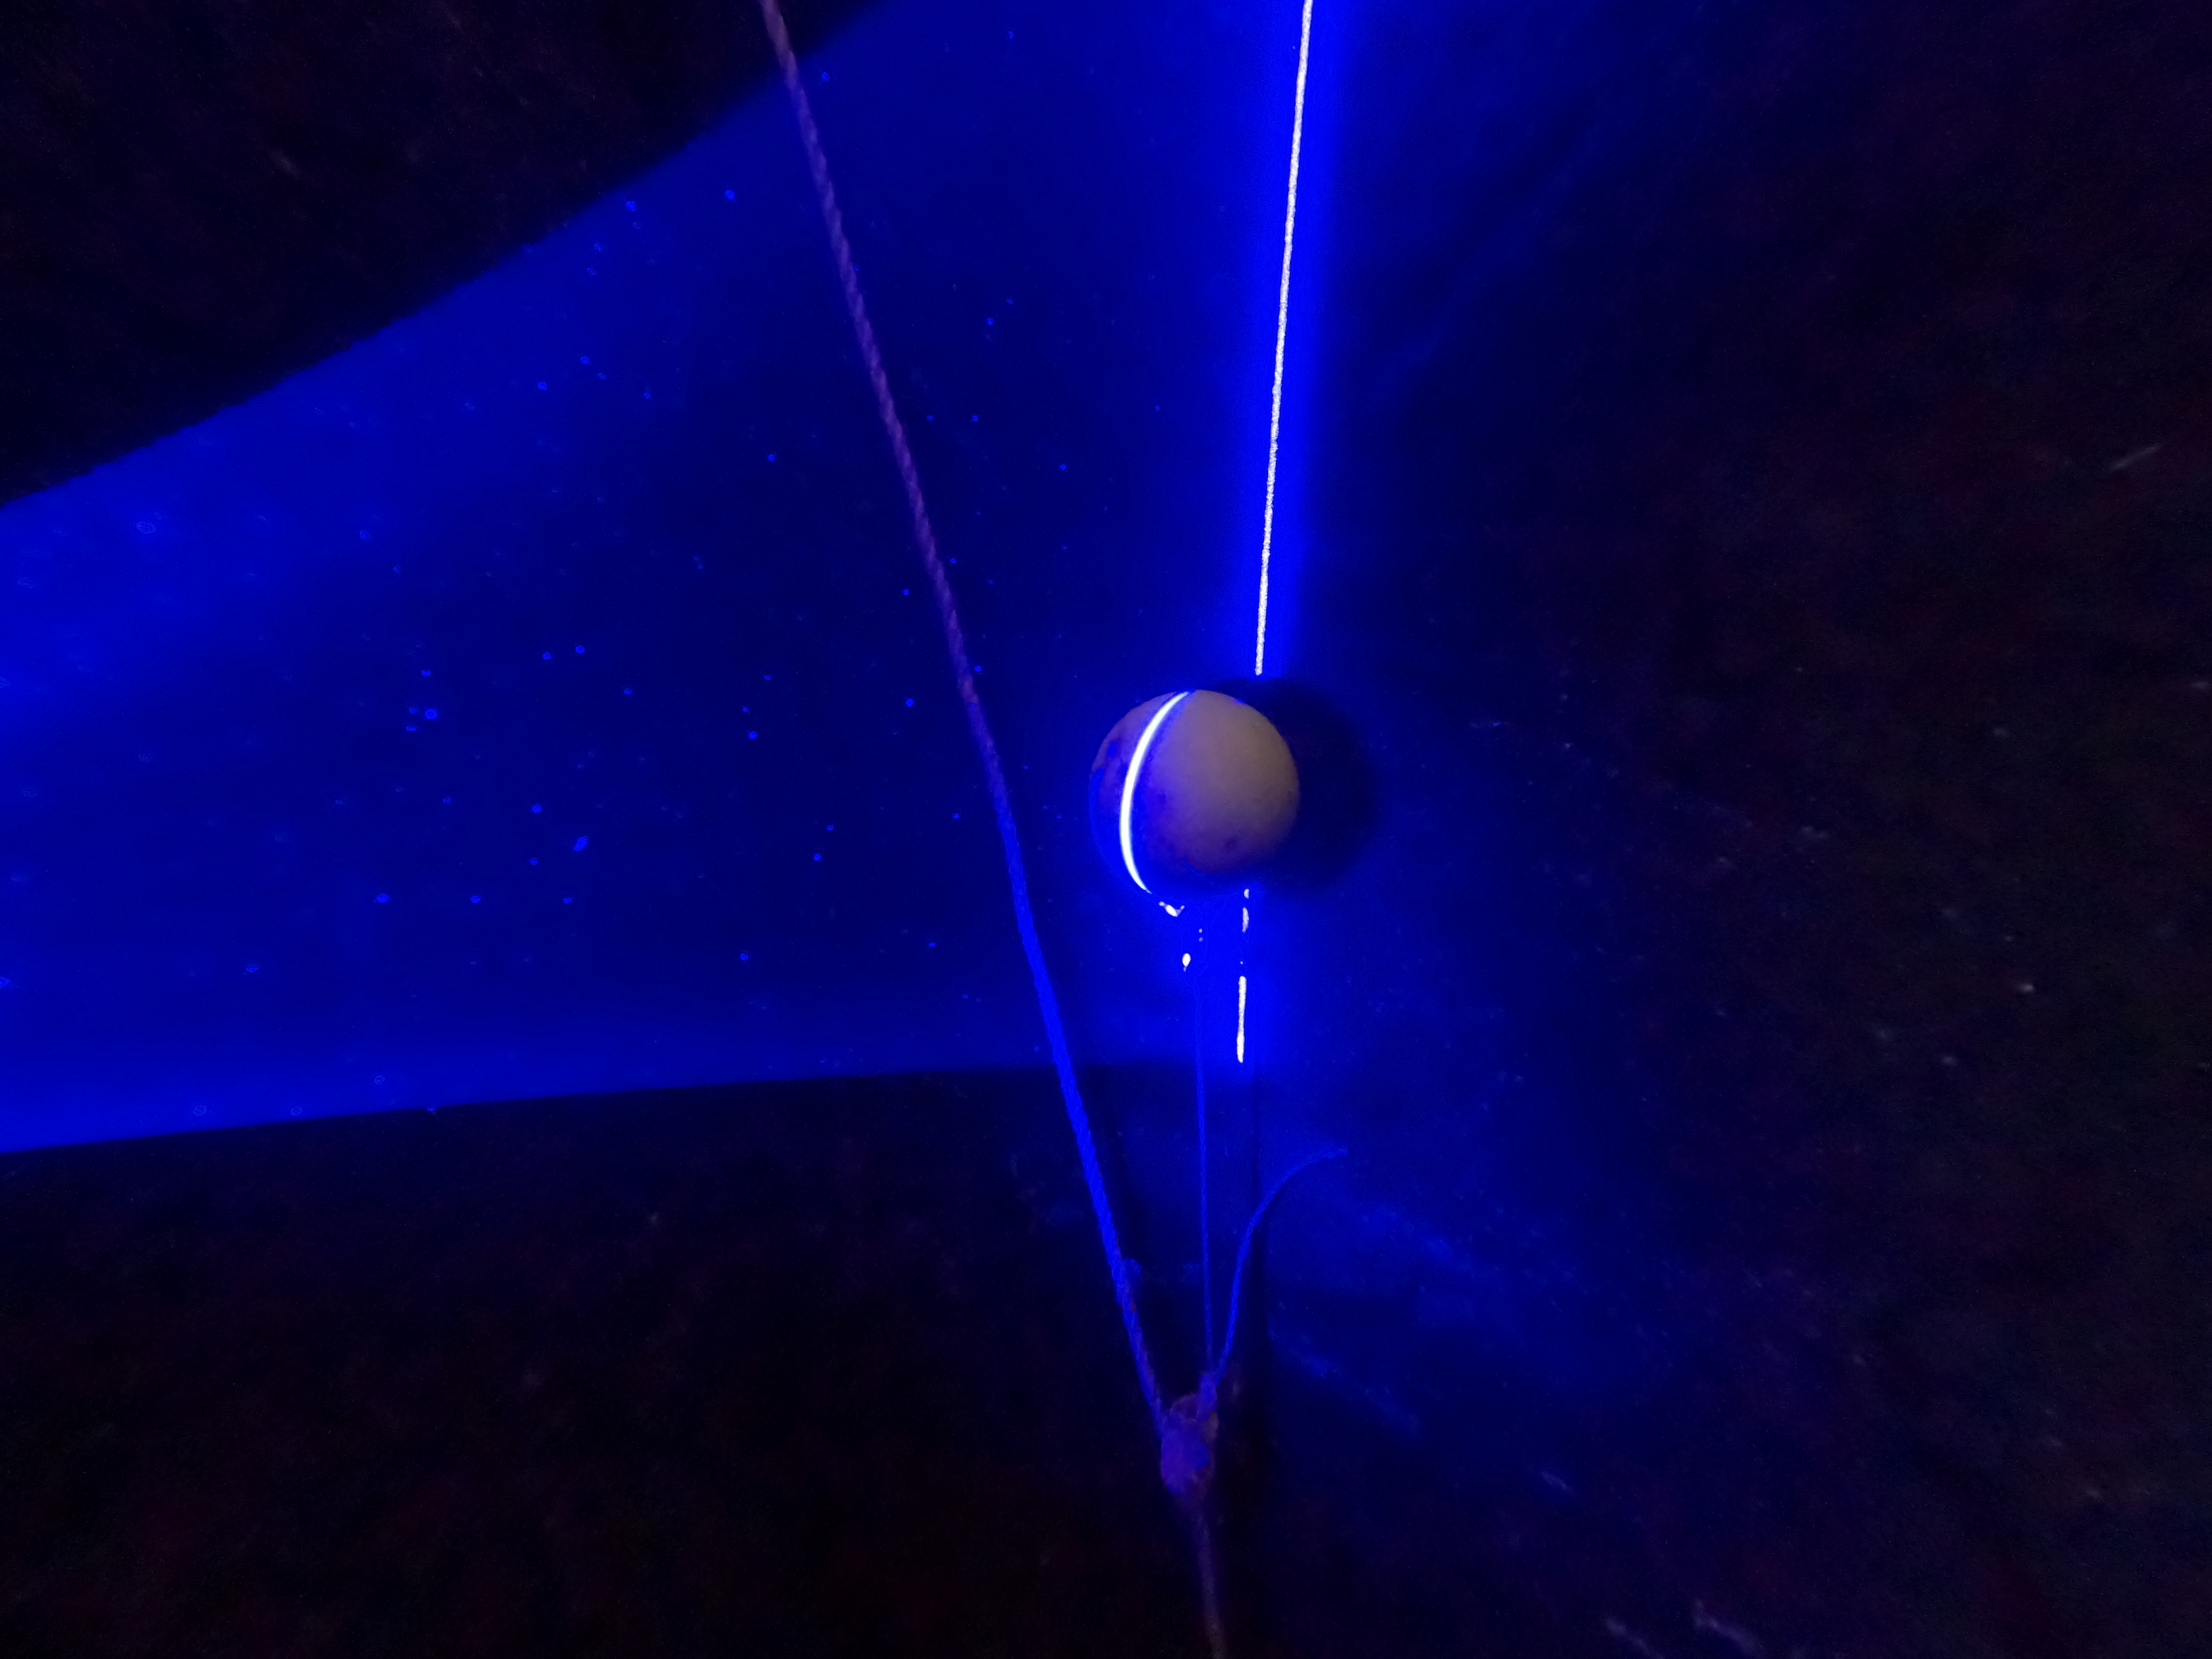

Supplement: Supplementary file 3510 [file G0030734.pdf › Level_1_1/G0030734.pdf]

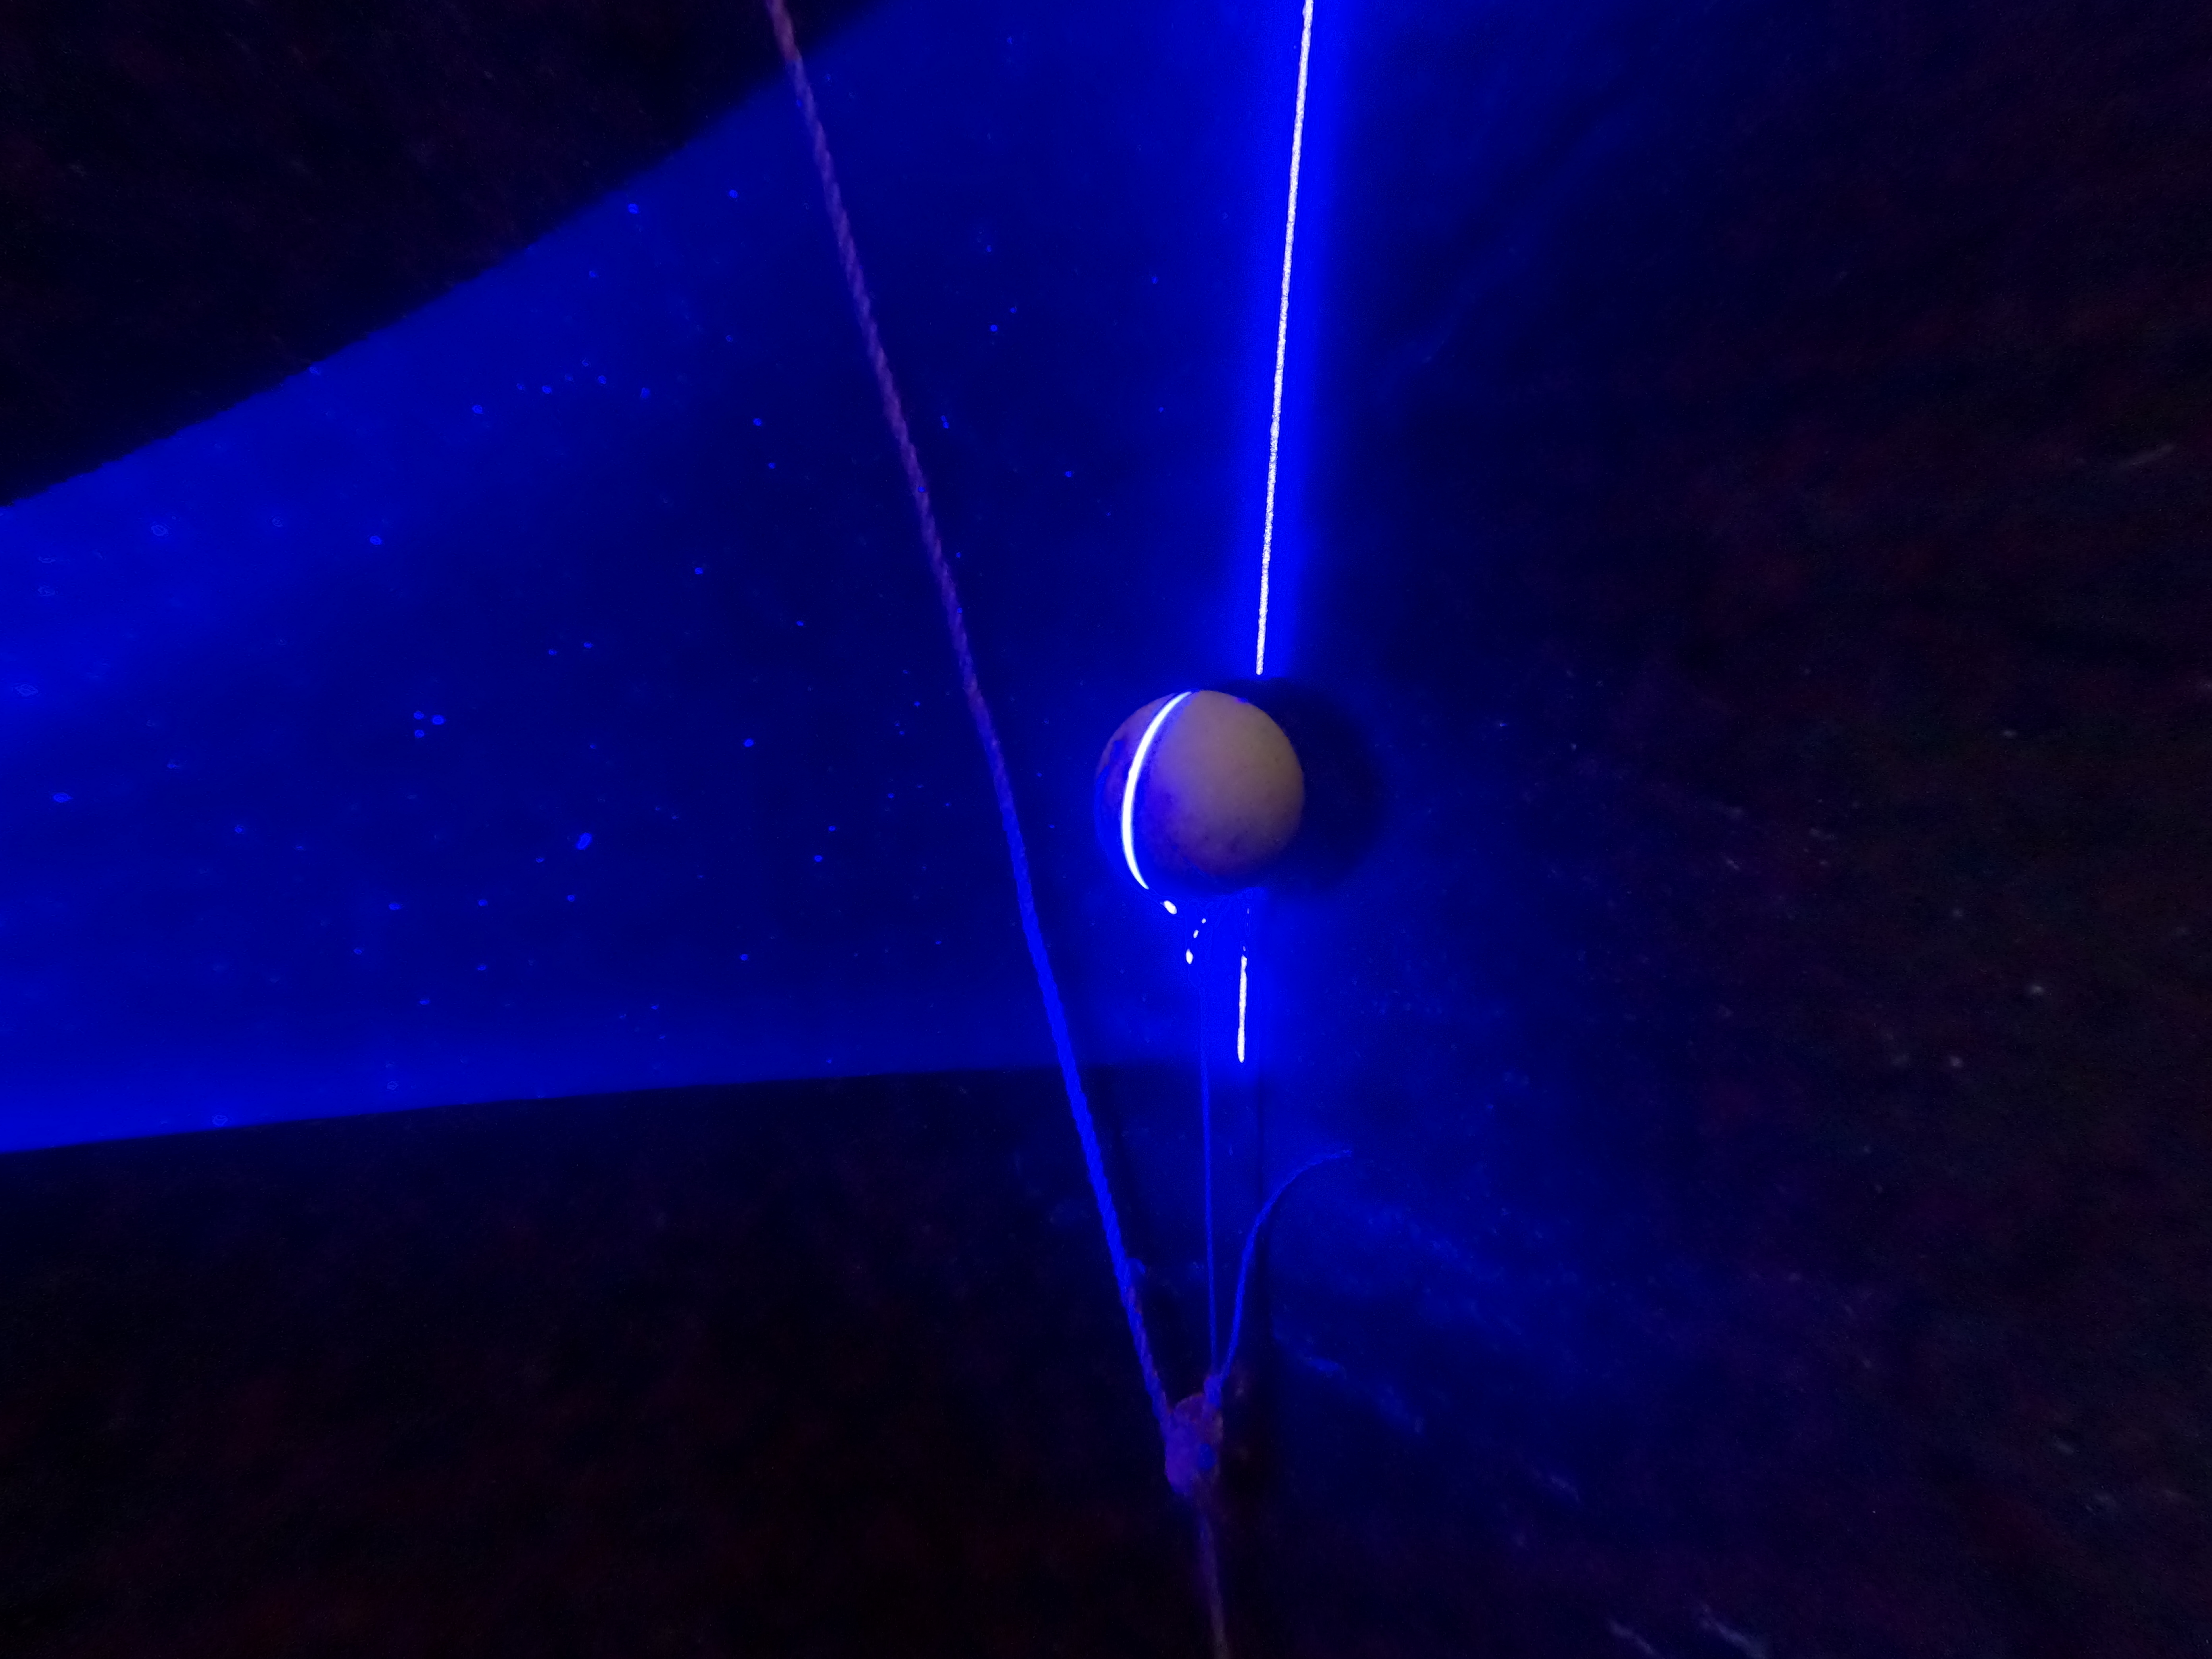

Supplement: Supplementary file 3511 [file G0030735.pdf › Level_1_1/G0030735.pdf]

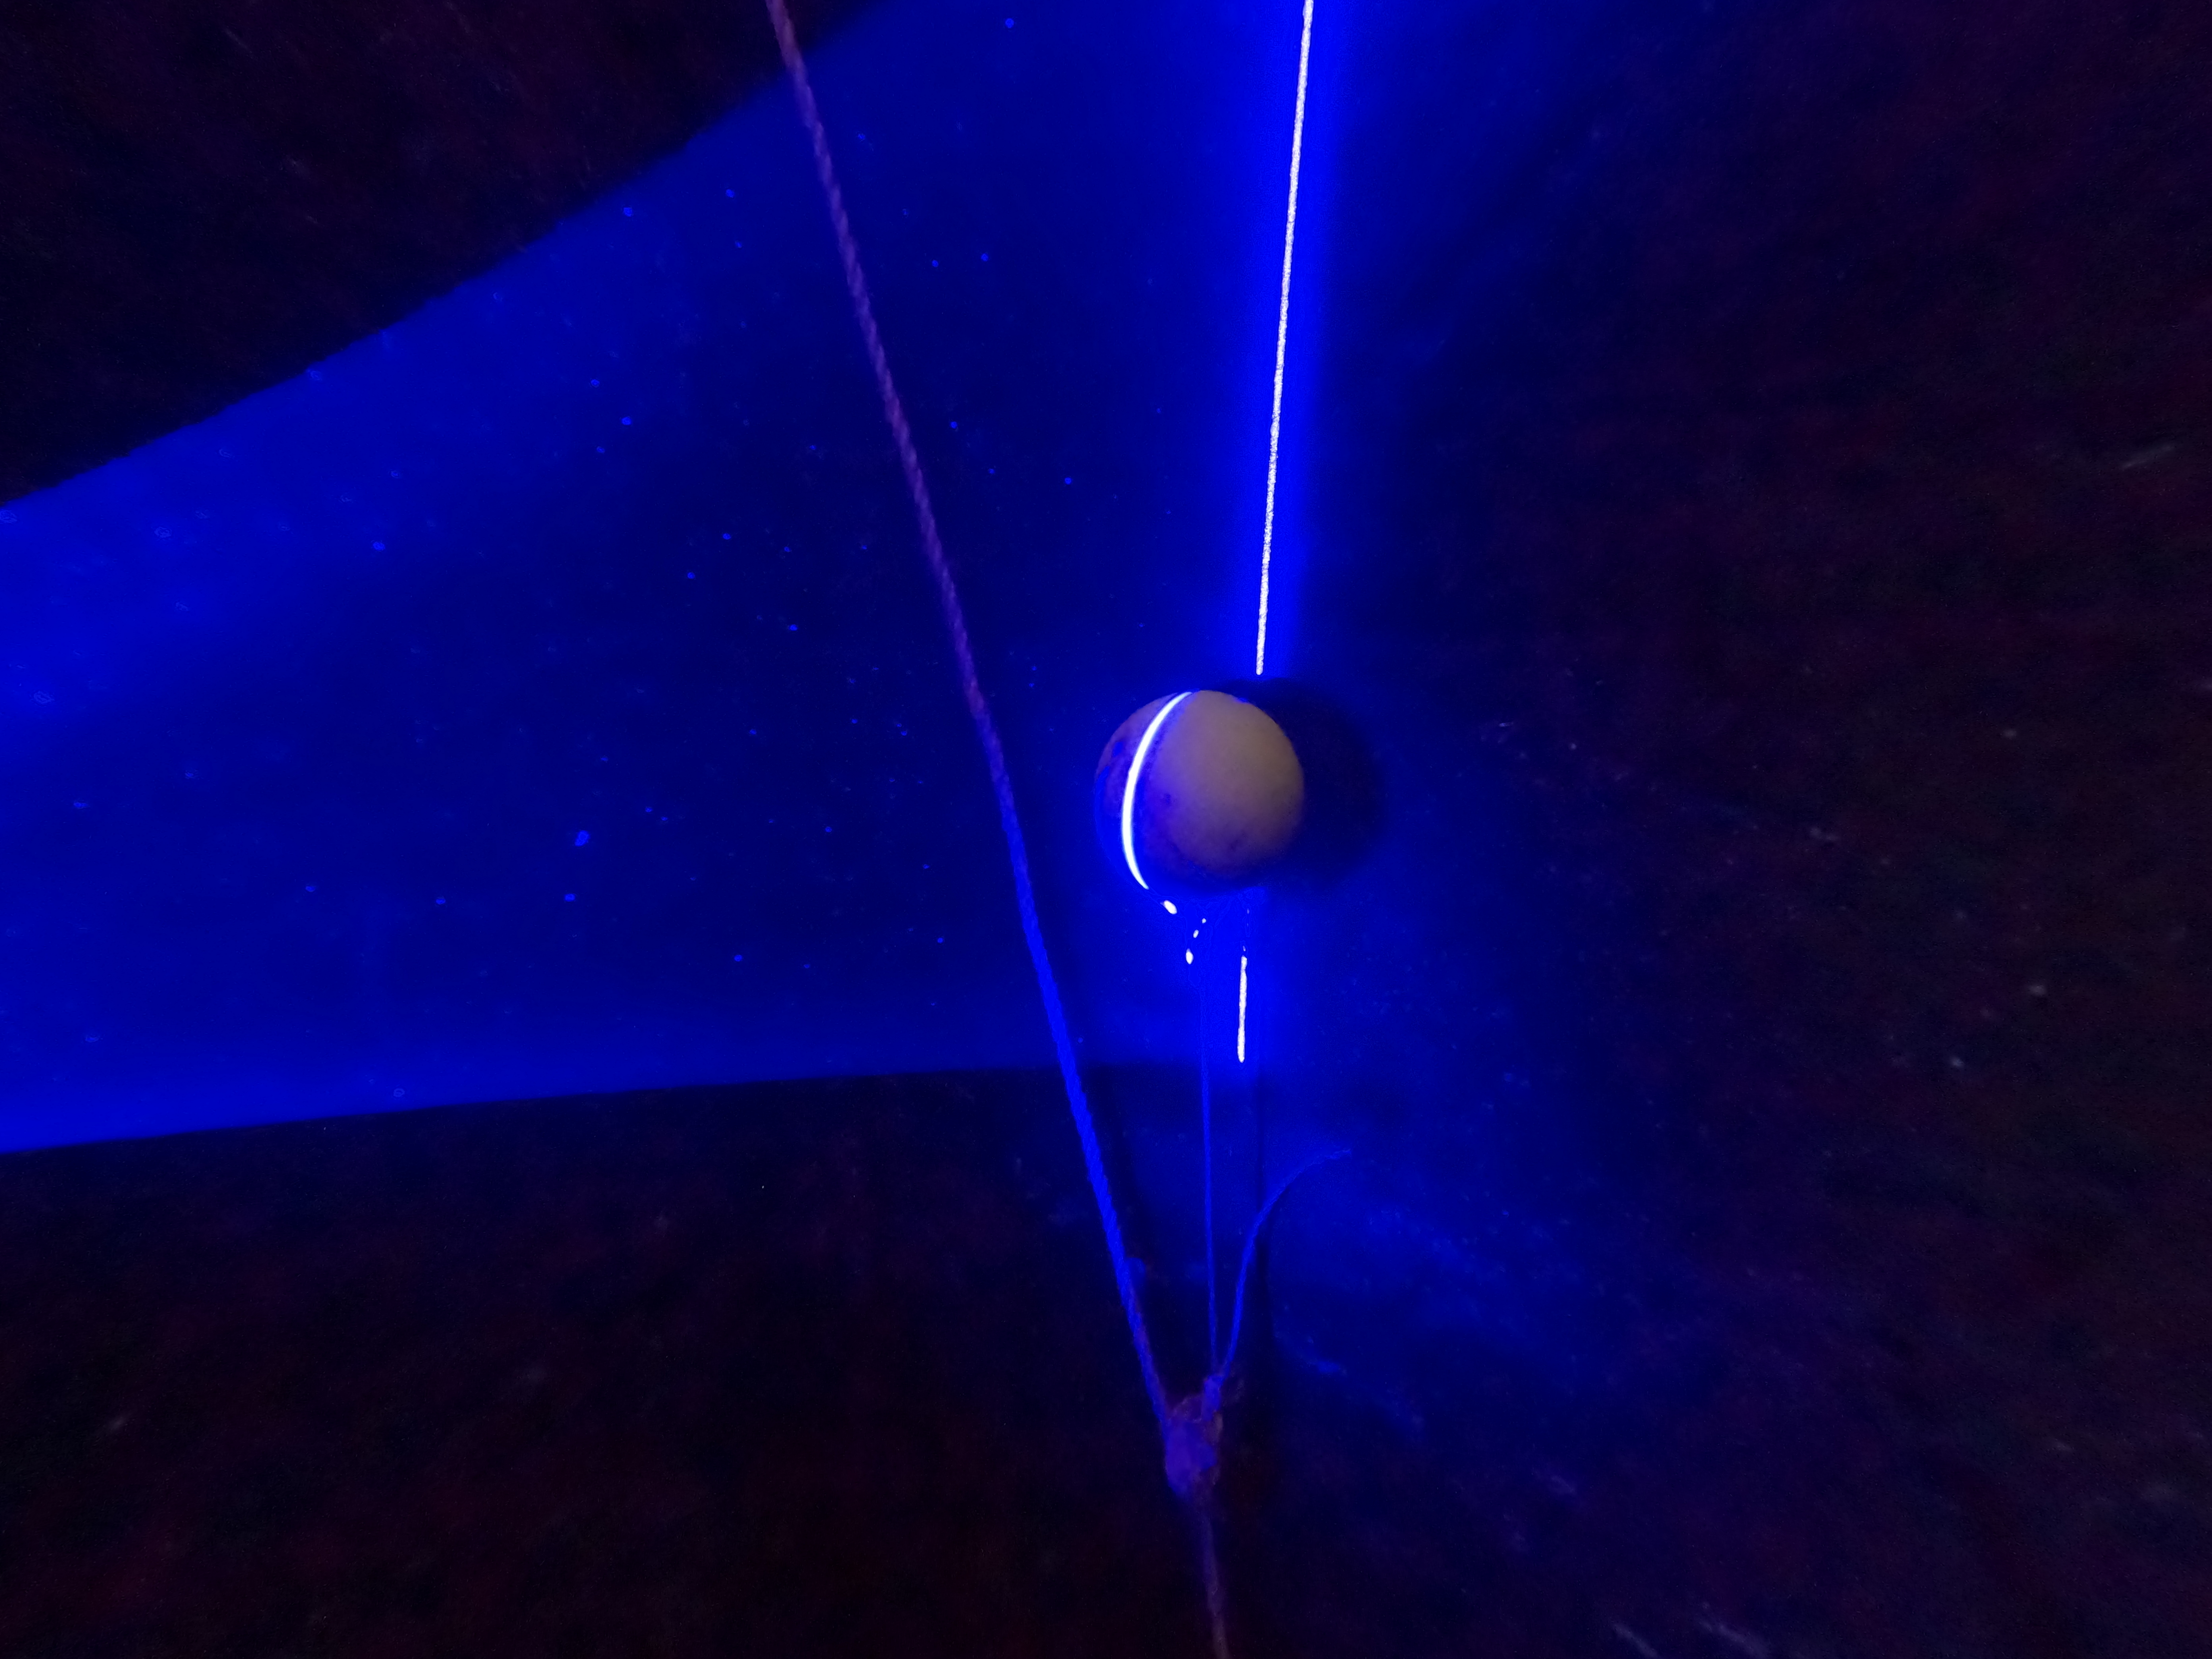

Supplement: Supplementary file 3512 [file G0030736.pdf › Level_1_1/G0030736.pdf]

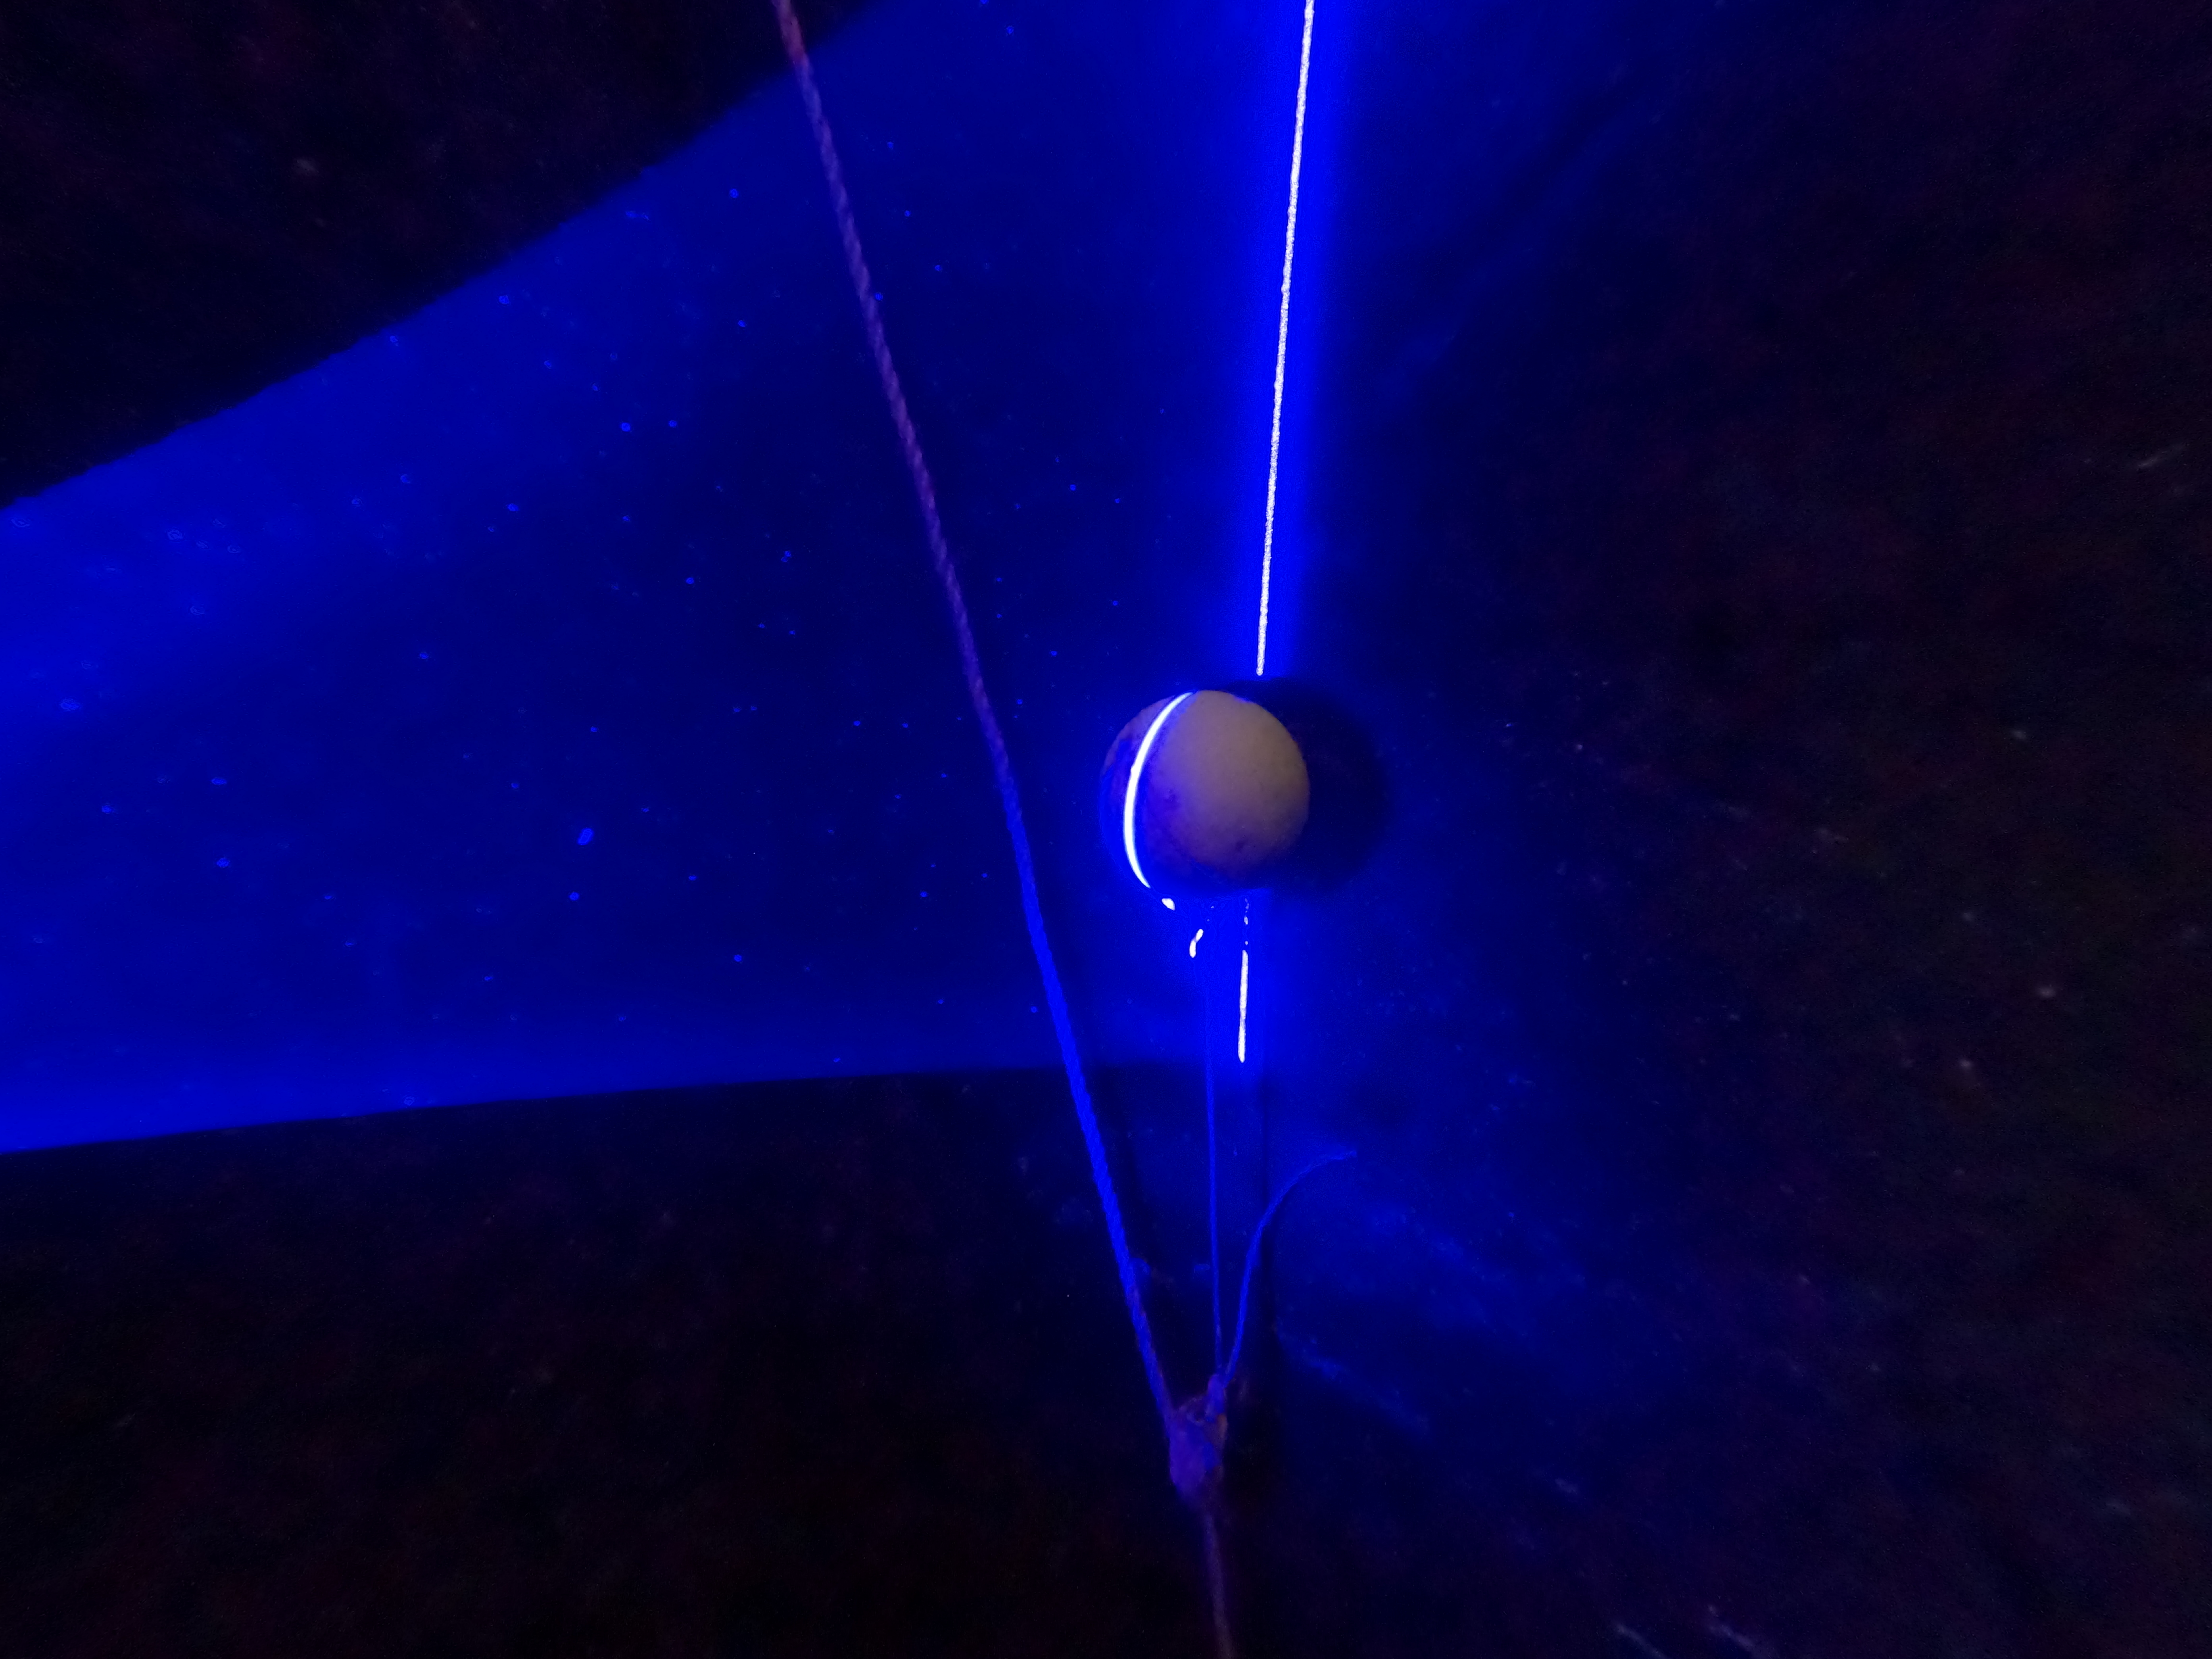

Supplement: Supplementary file 3513 [file G0030737.pdf › Level_1_1/G0030737.pdf]

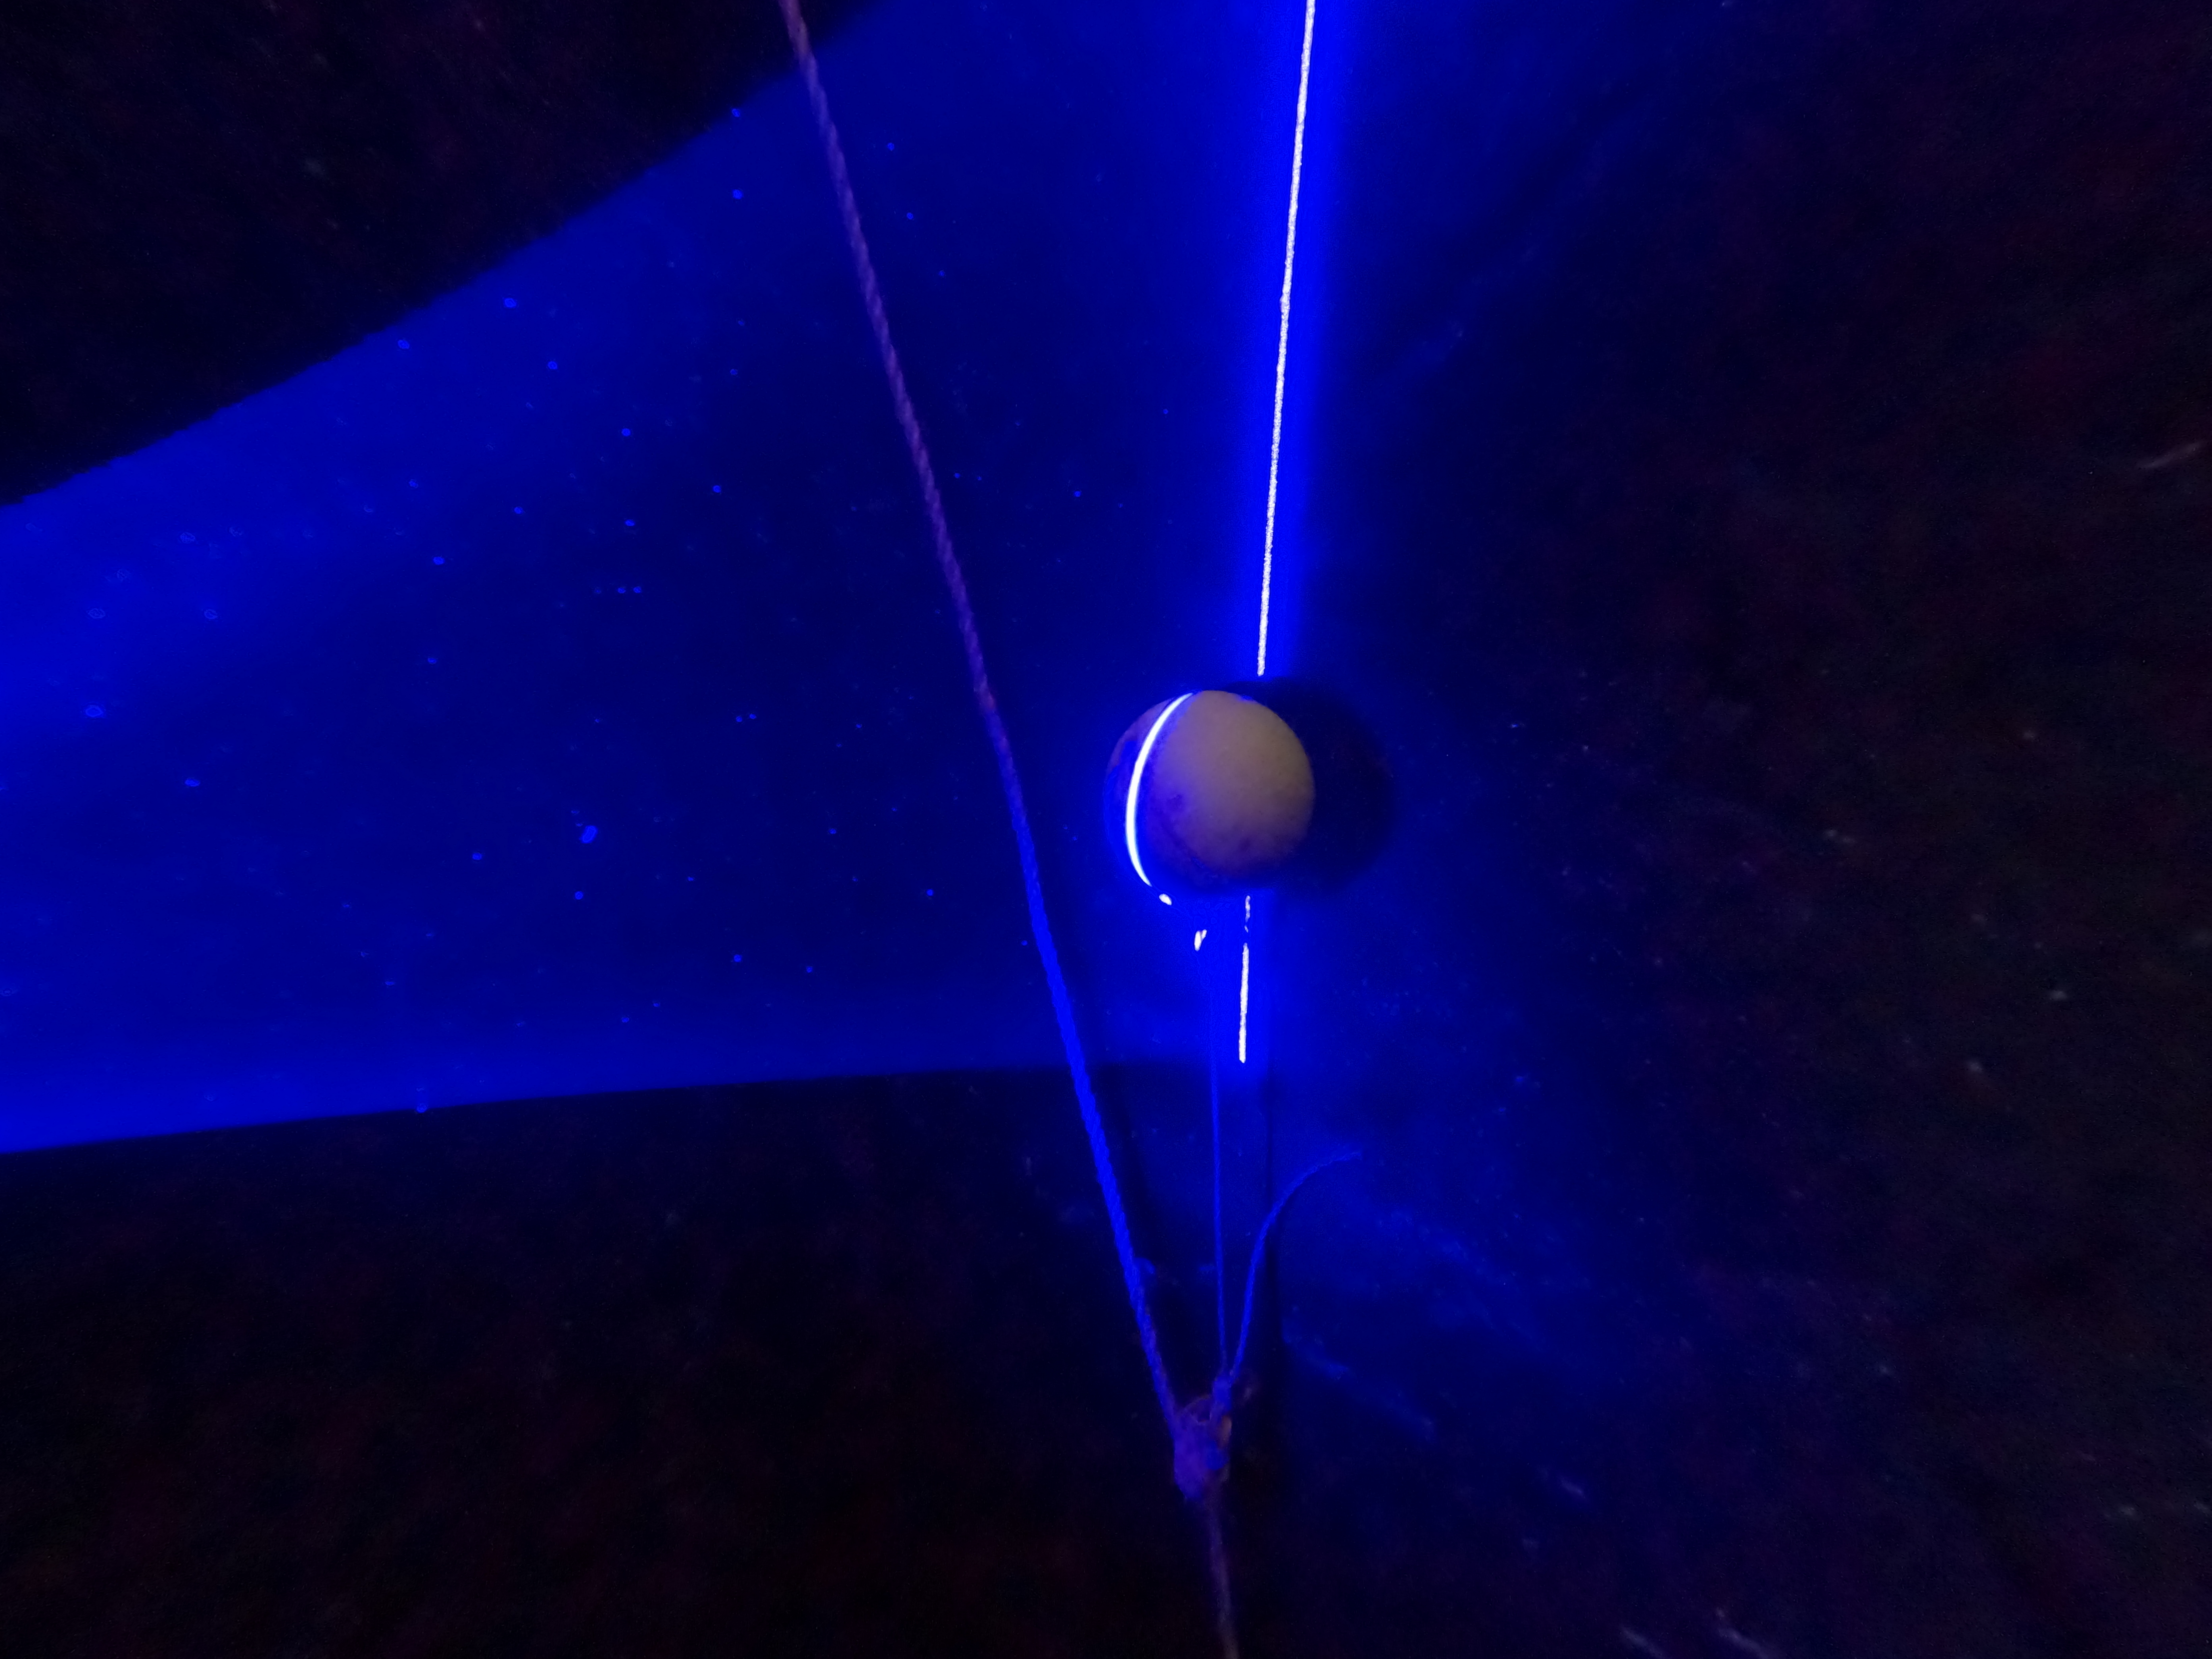

Supplement: Supplementary file 3514 [file G0030738.pdf › Level_1_1/G0030738.pdf]

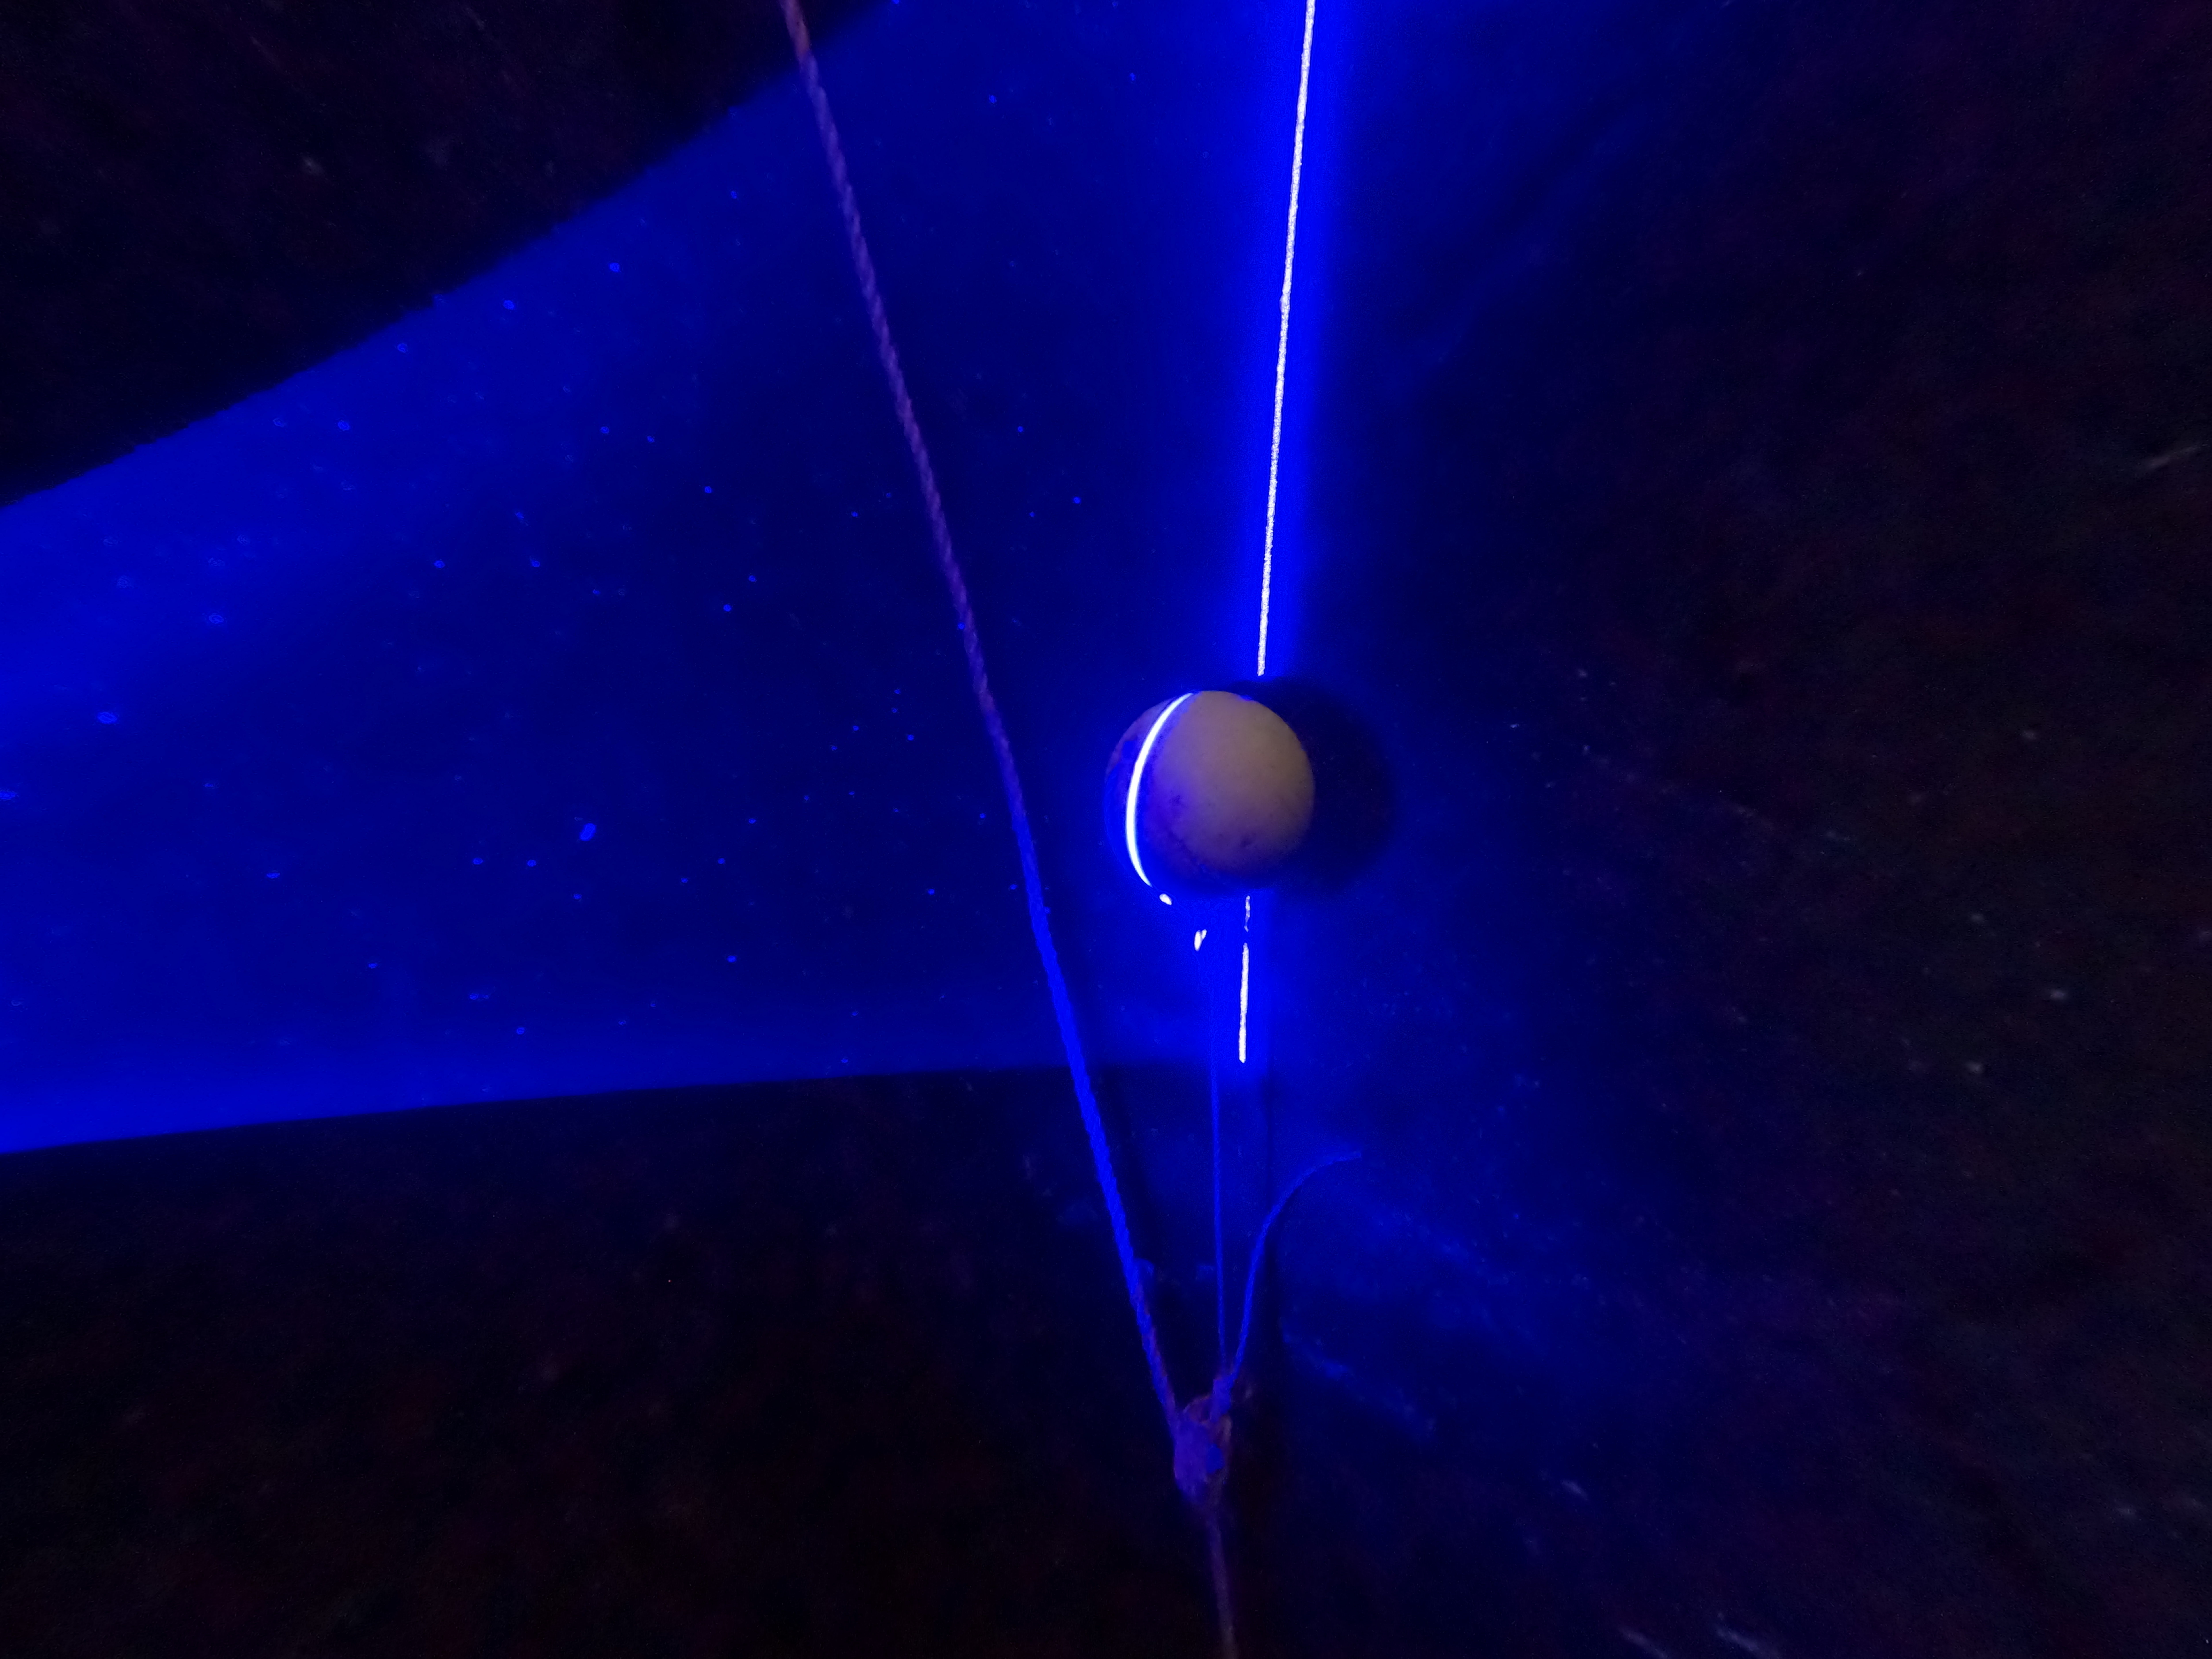

Supplement: Supplementary file 3515 [file G0030739.pdf › Level_1_1/G0030739.pdf]

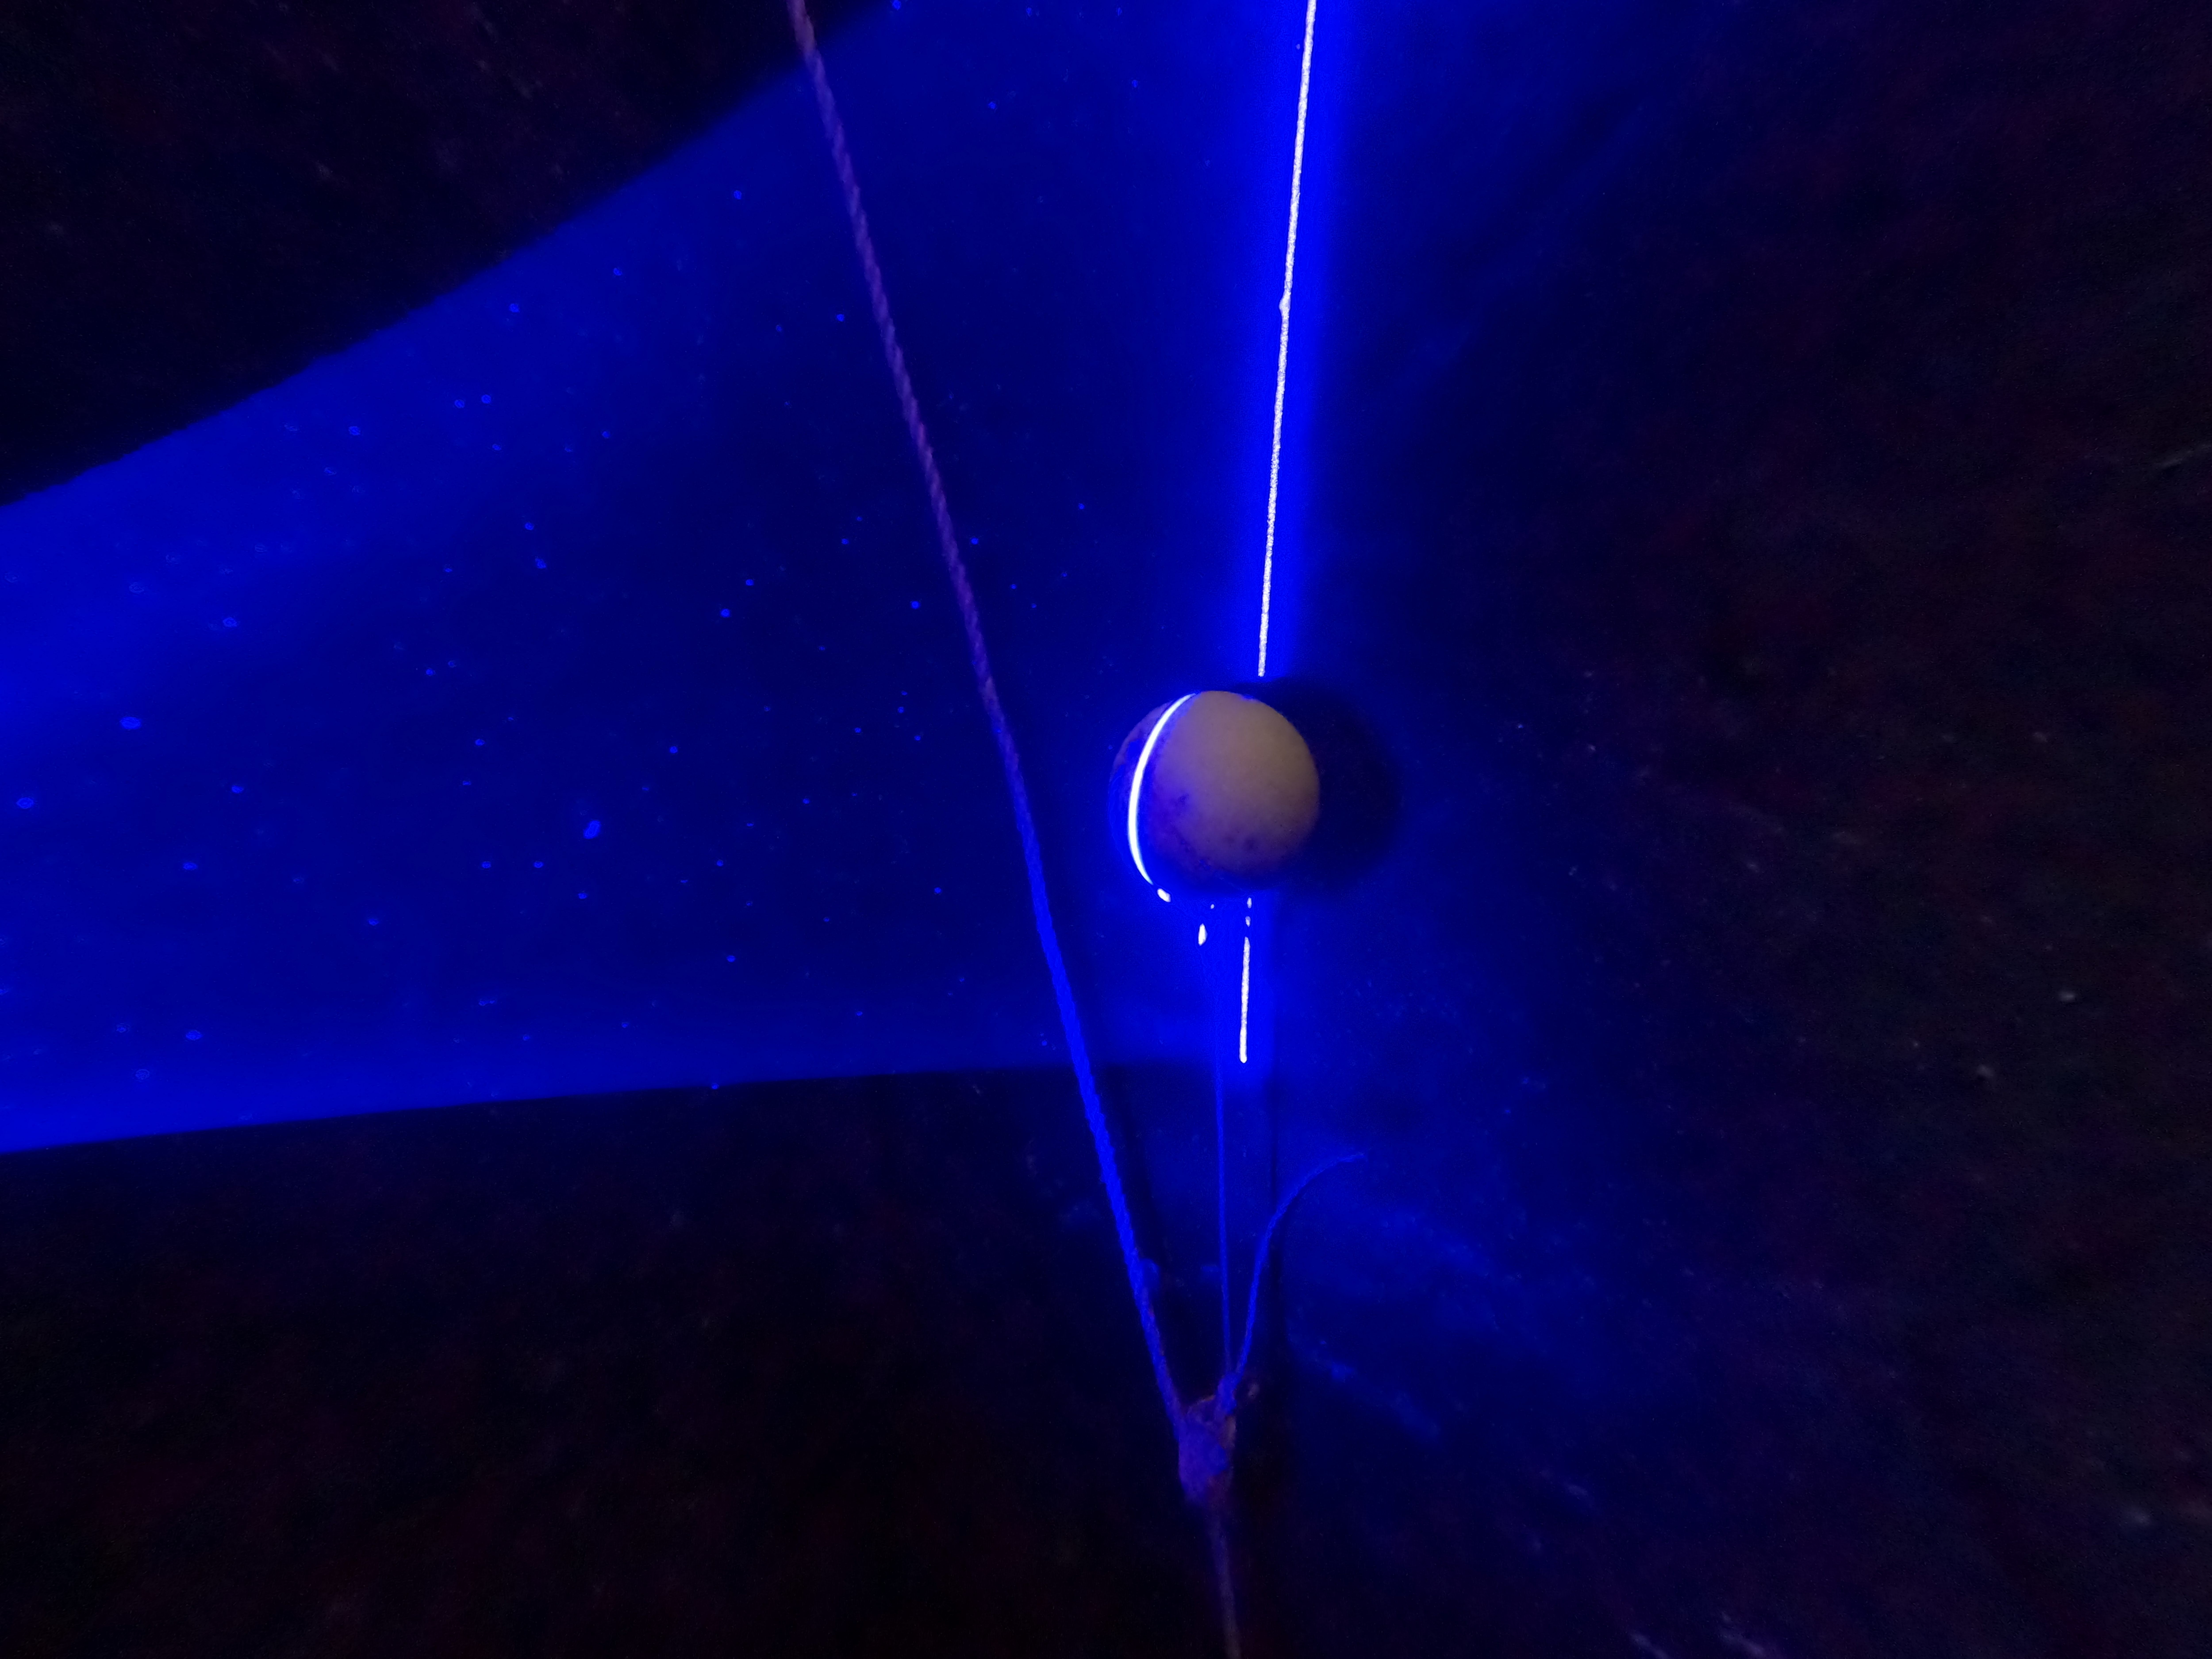

Supplement: Supplementary file 3516 [file G0030740.pdf › Level_1_1/G0030740.pdf]

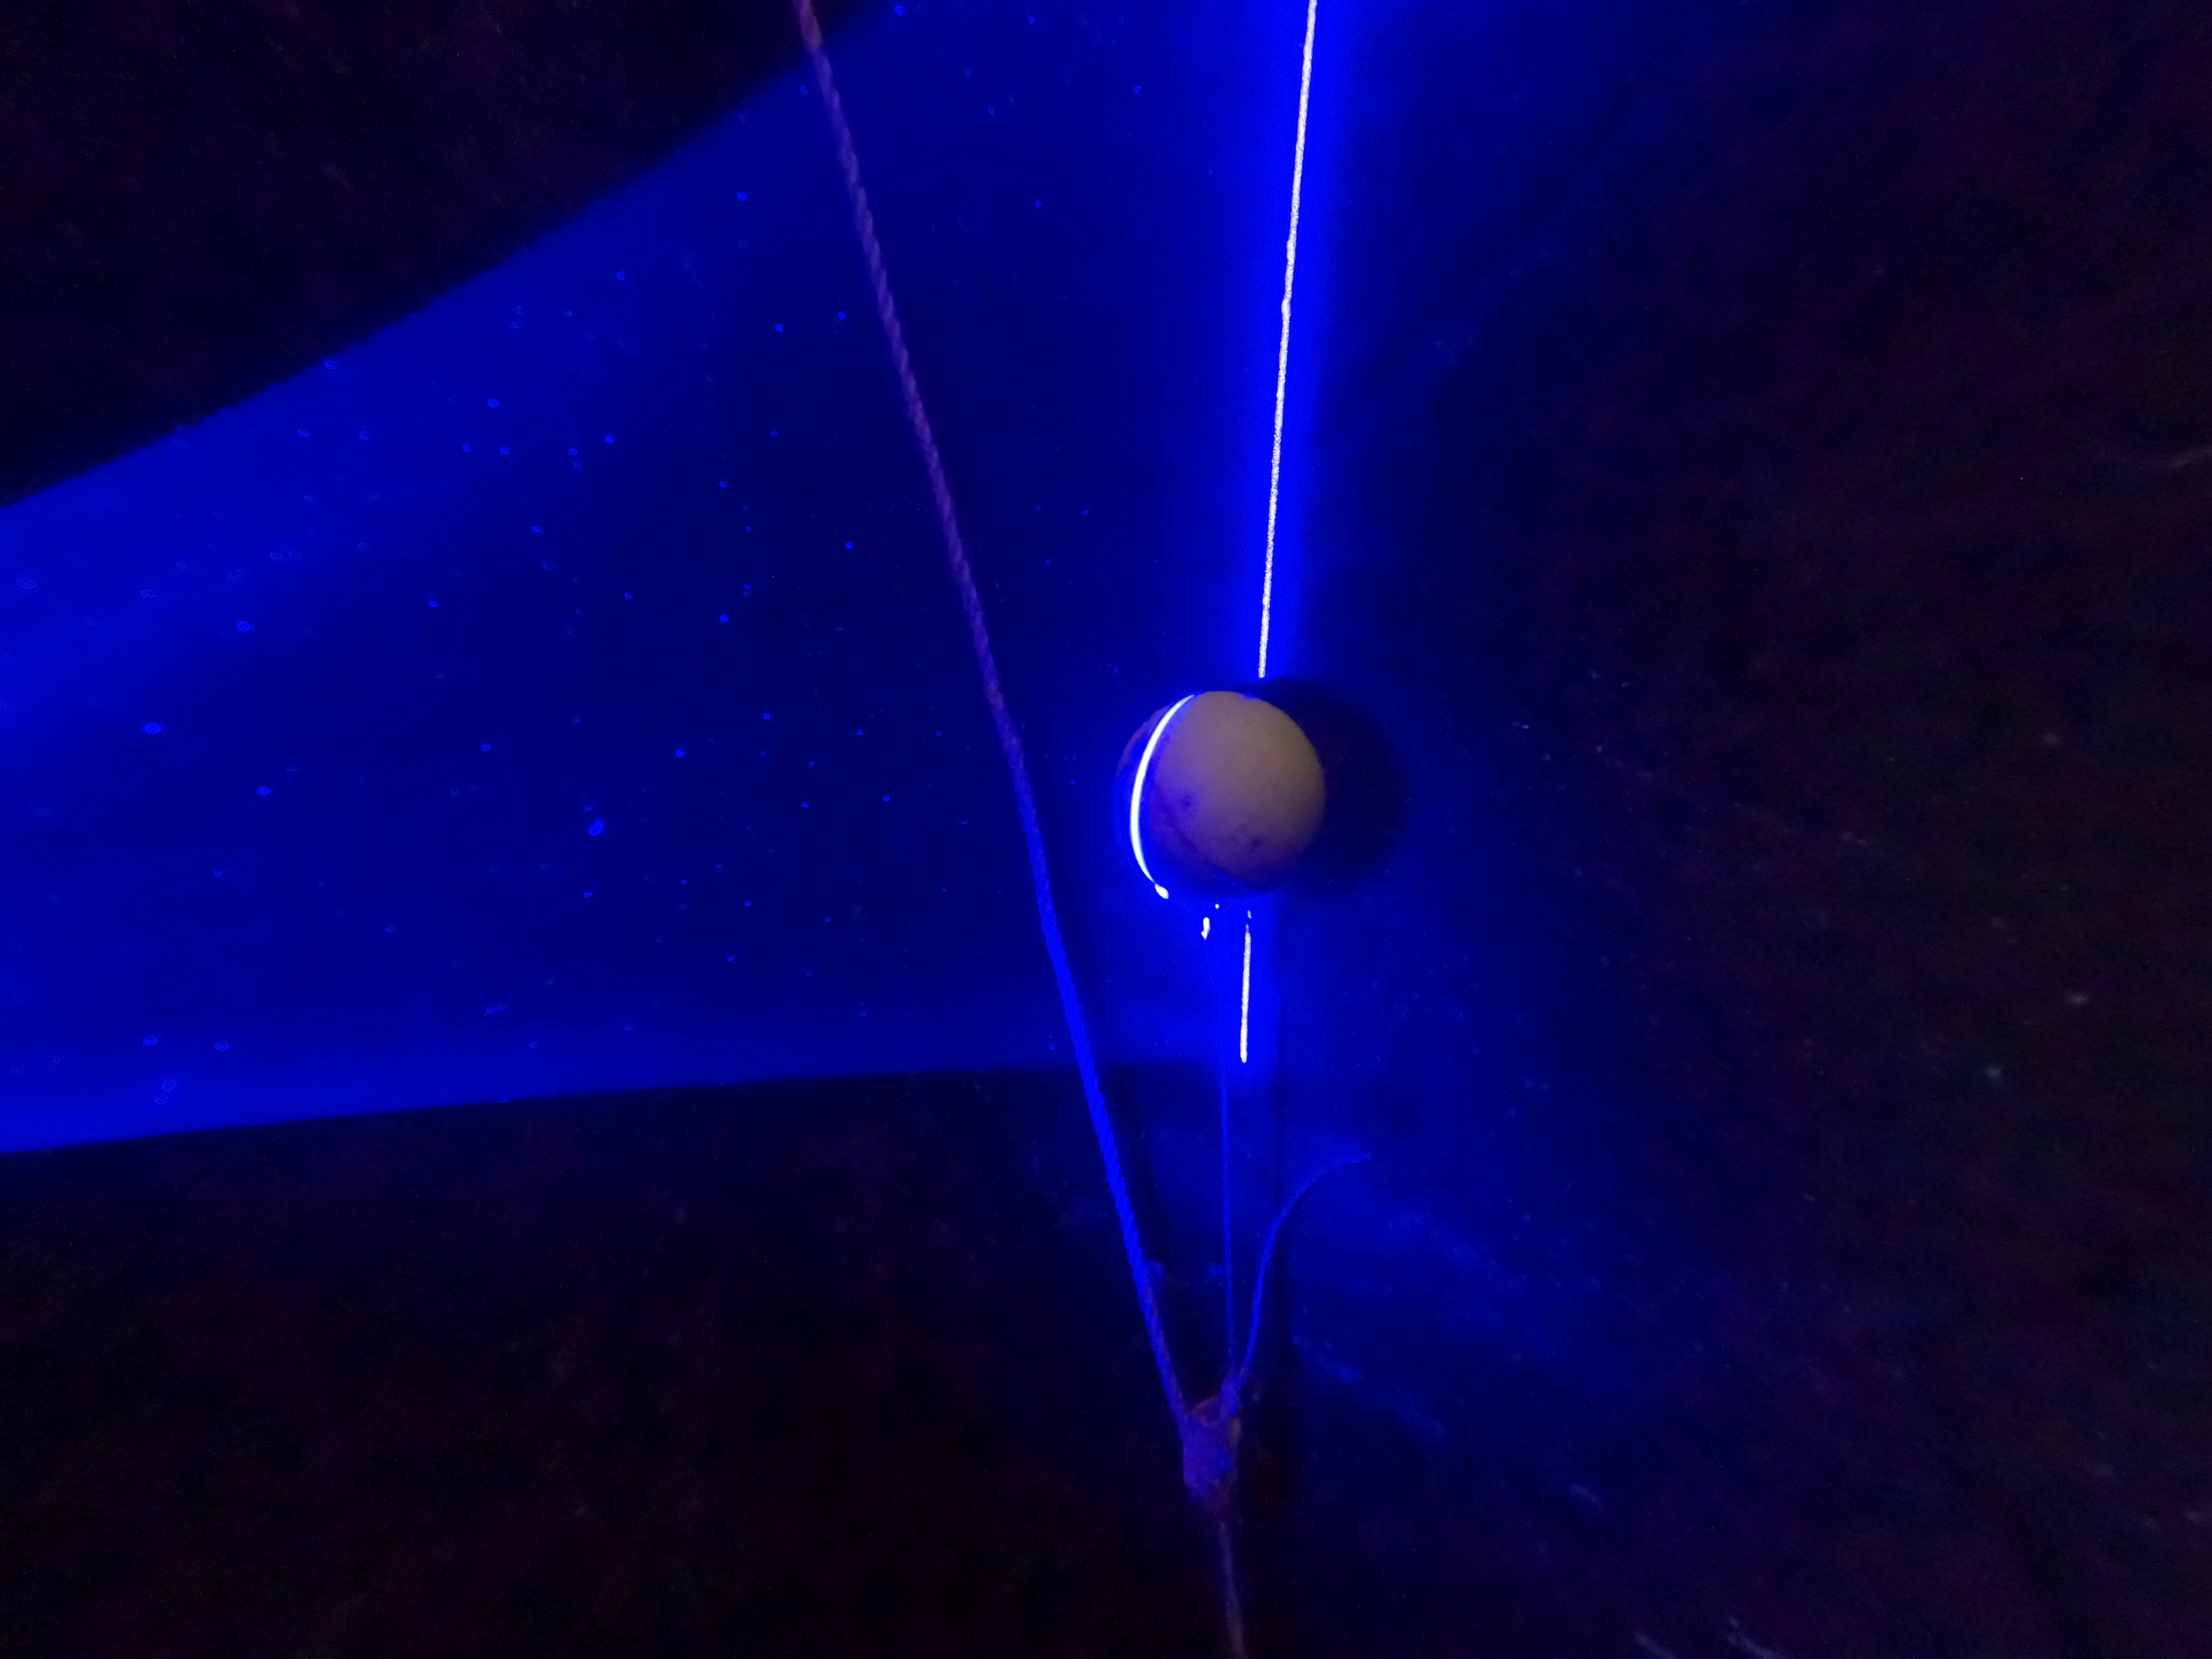

Supplement: Supplementary file 3517 [file G0030741.pdf › Level_1_1/G0030741.pdf]

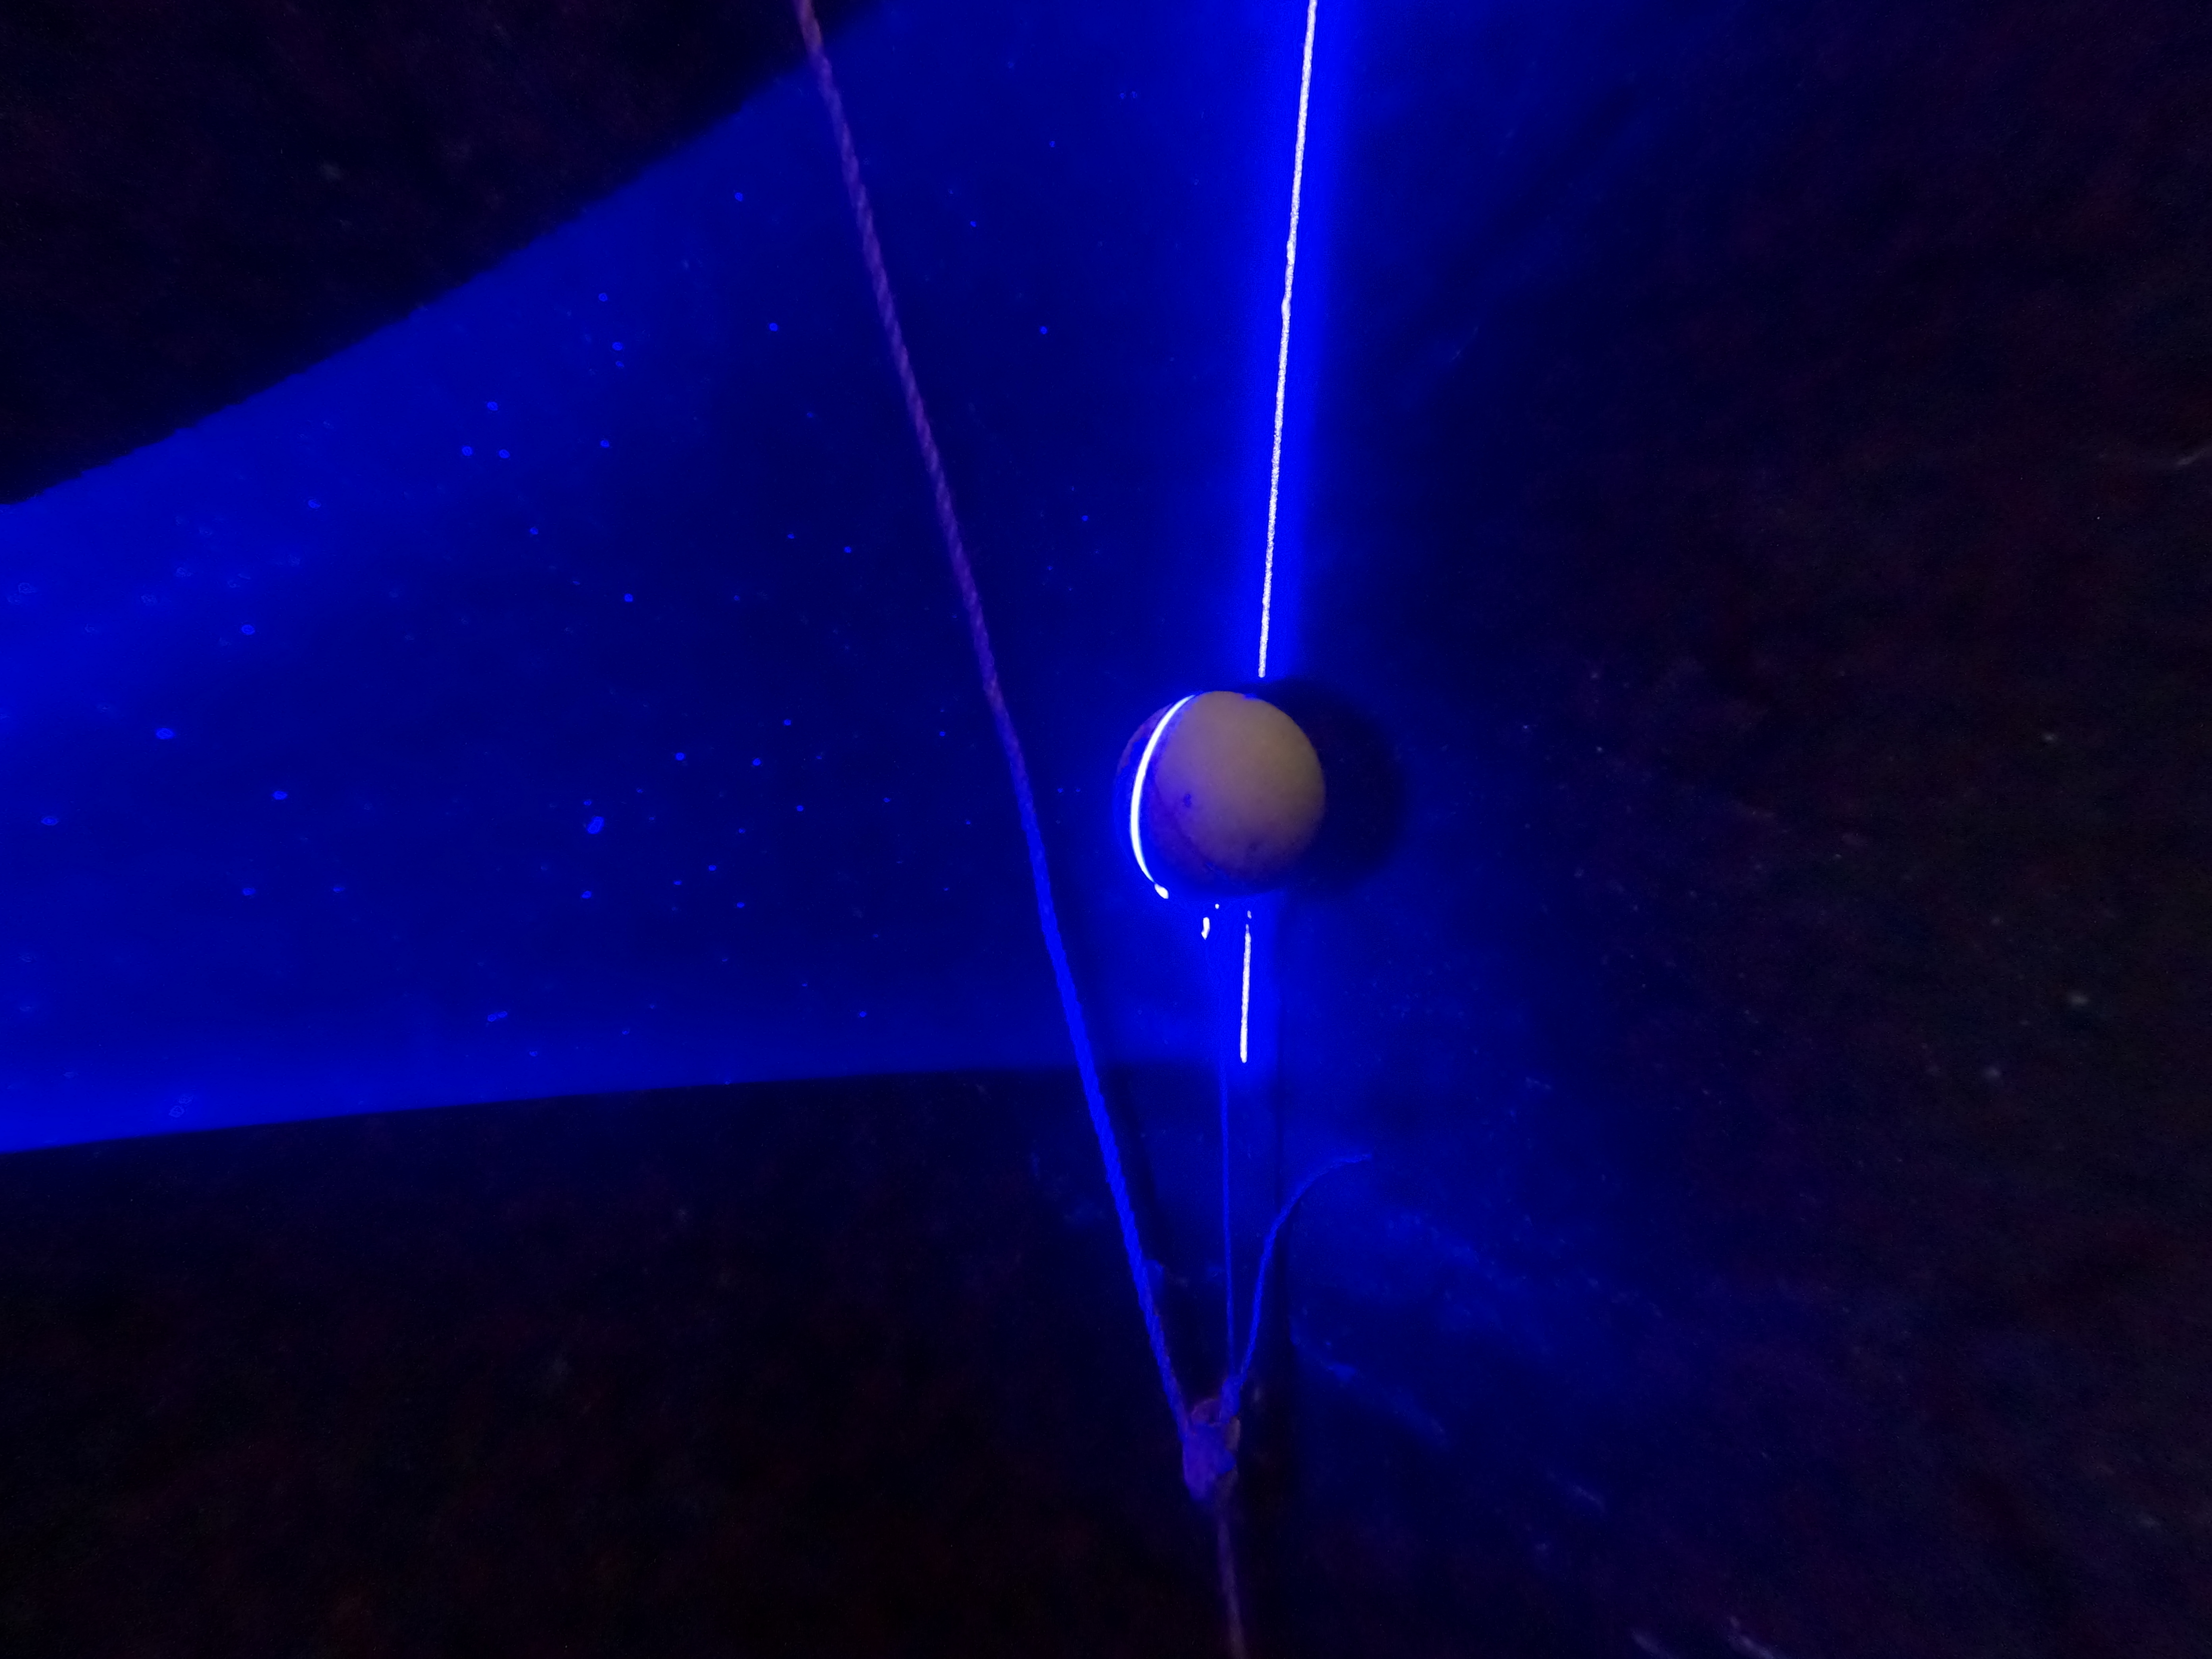

Supplement: Supplementary file 3518 [file G0030742.pdf › Level_1_1/G0030742.pdf]

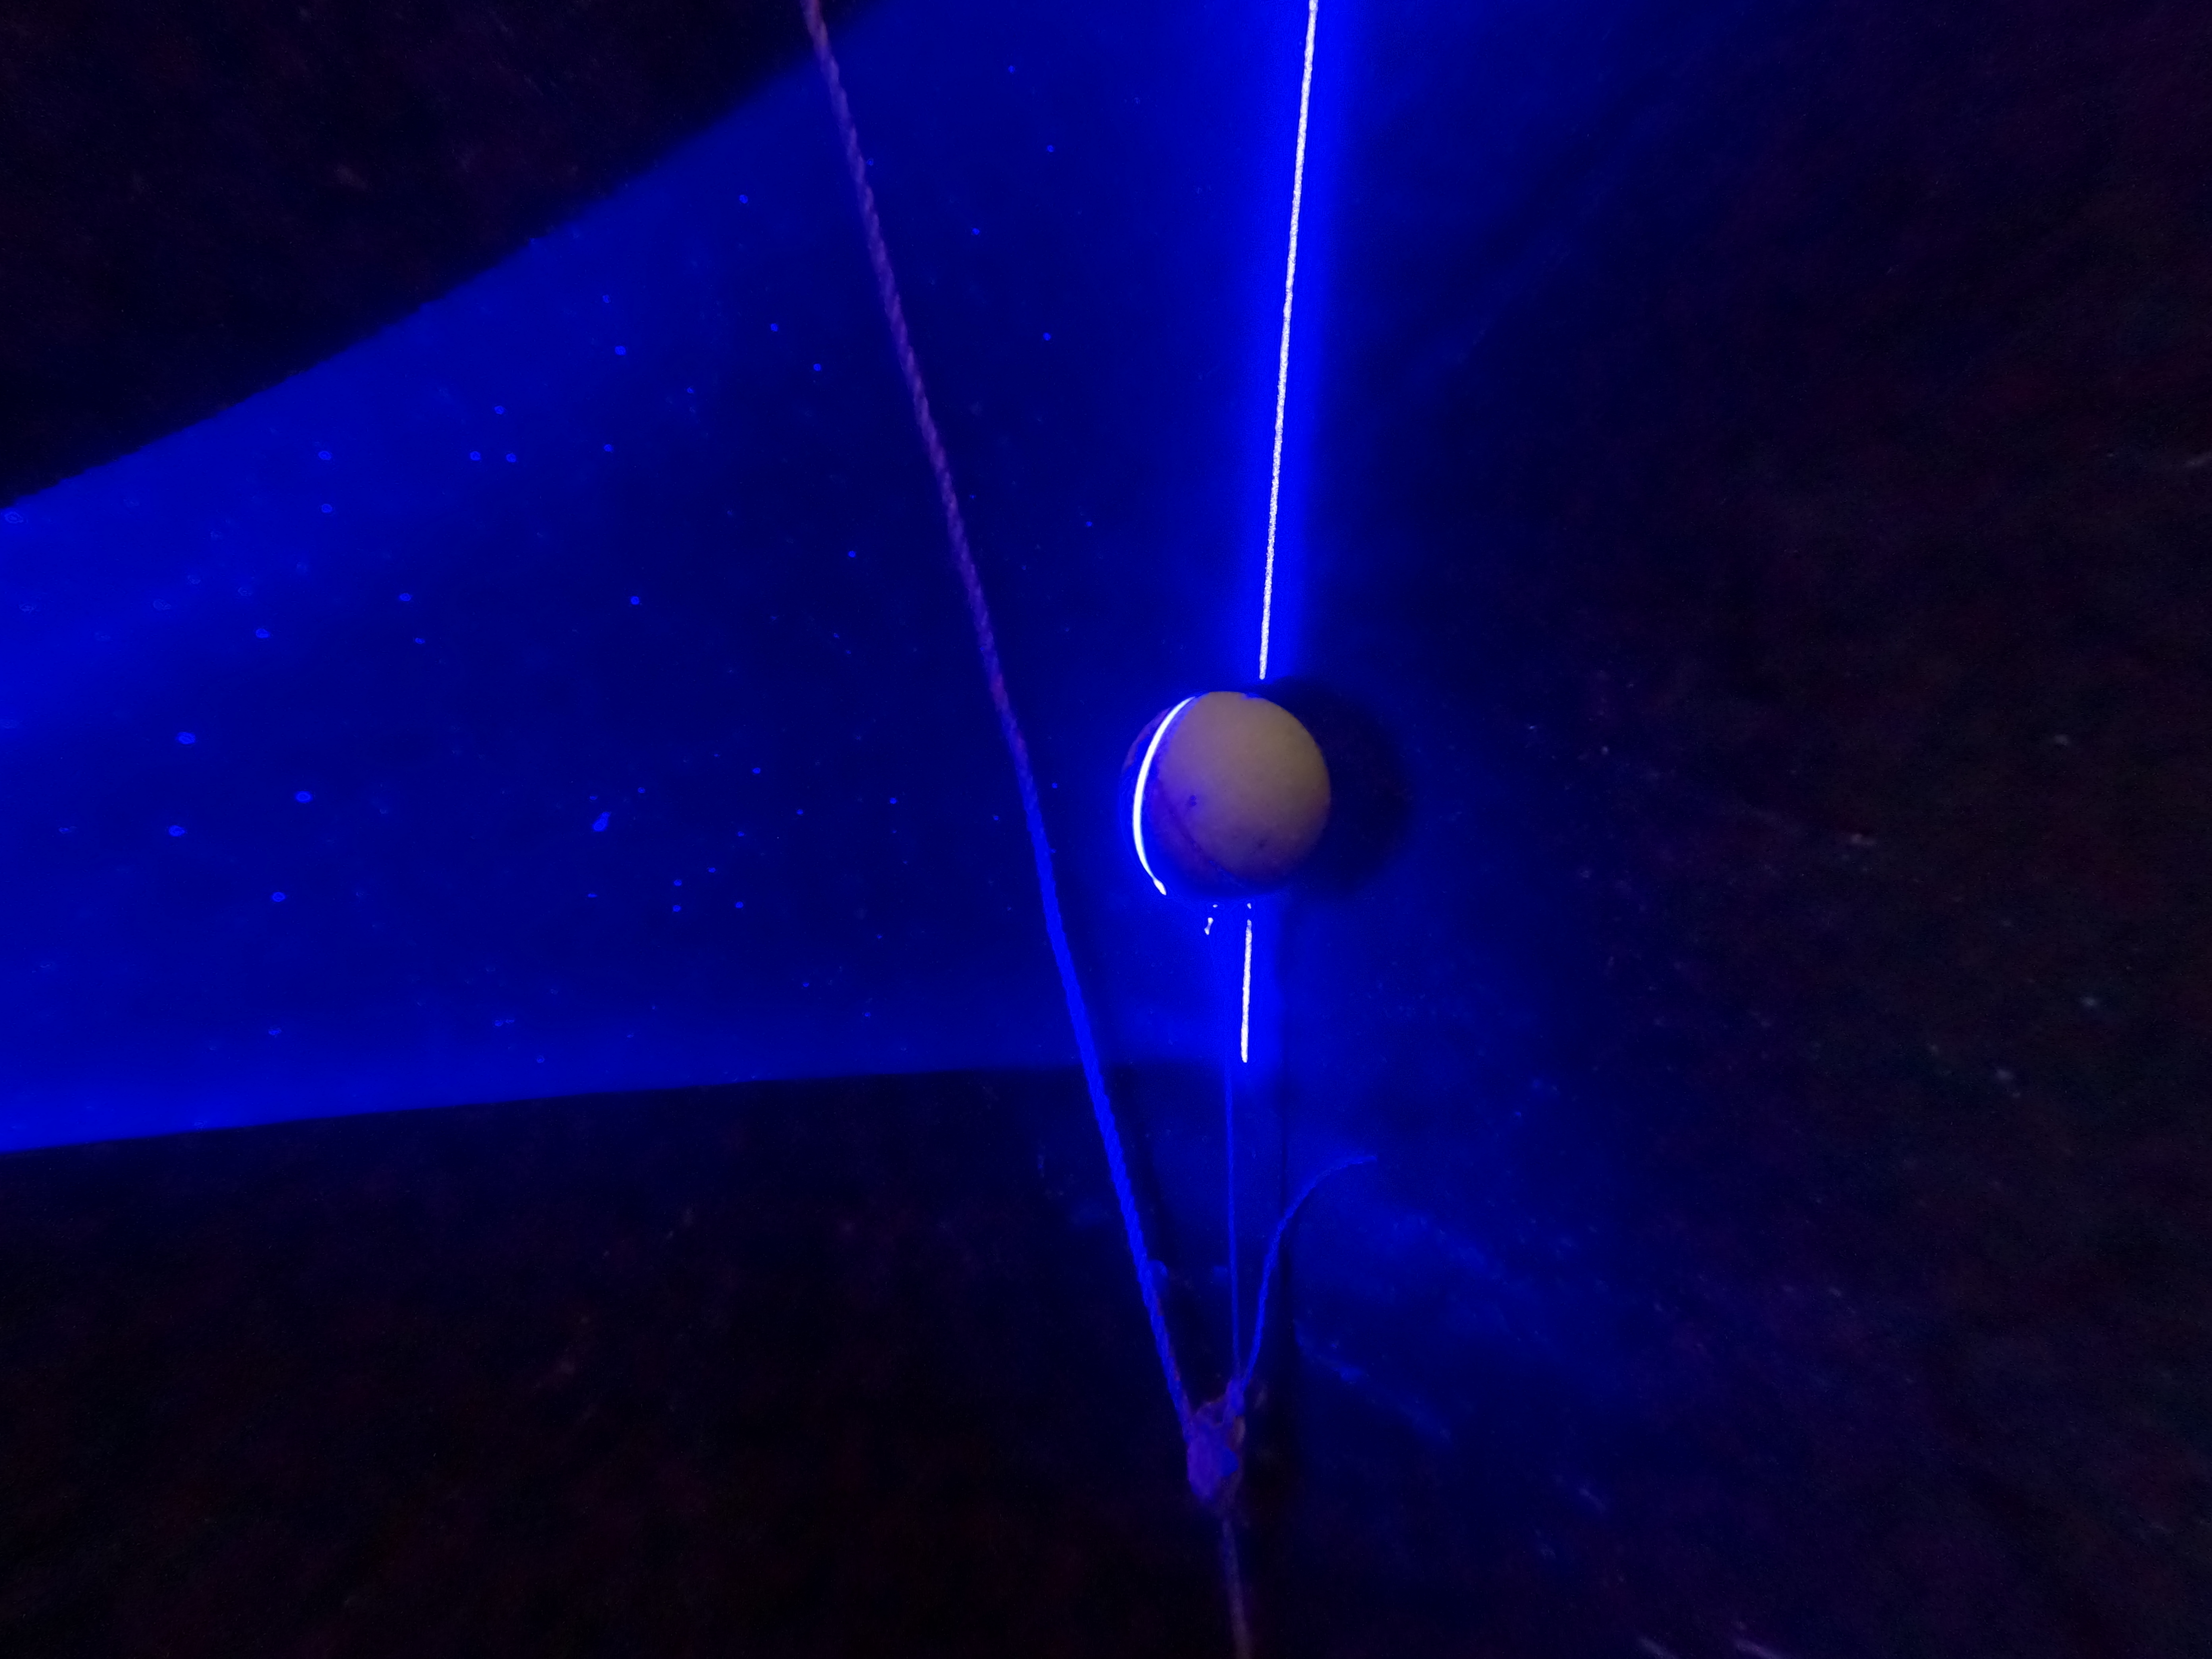

Supplement: Supplementary file 3519 [file G0030743.pdf › Level_1_1/G0030743.pdf]

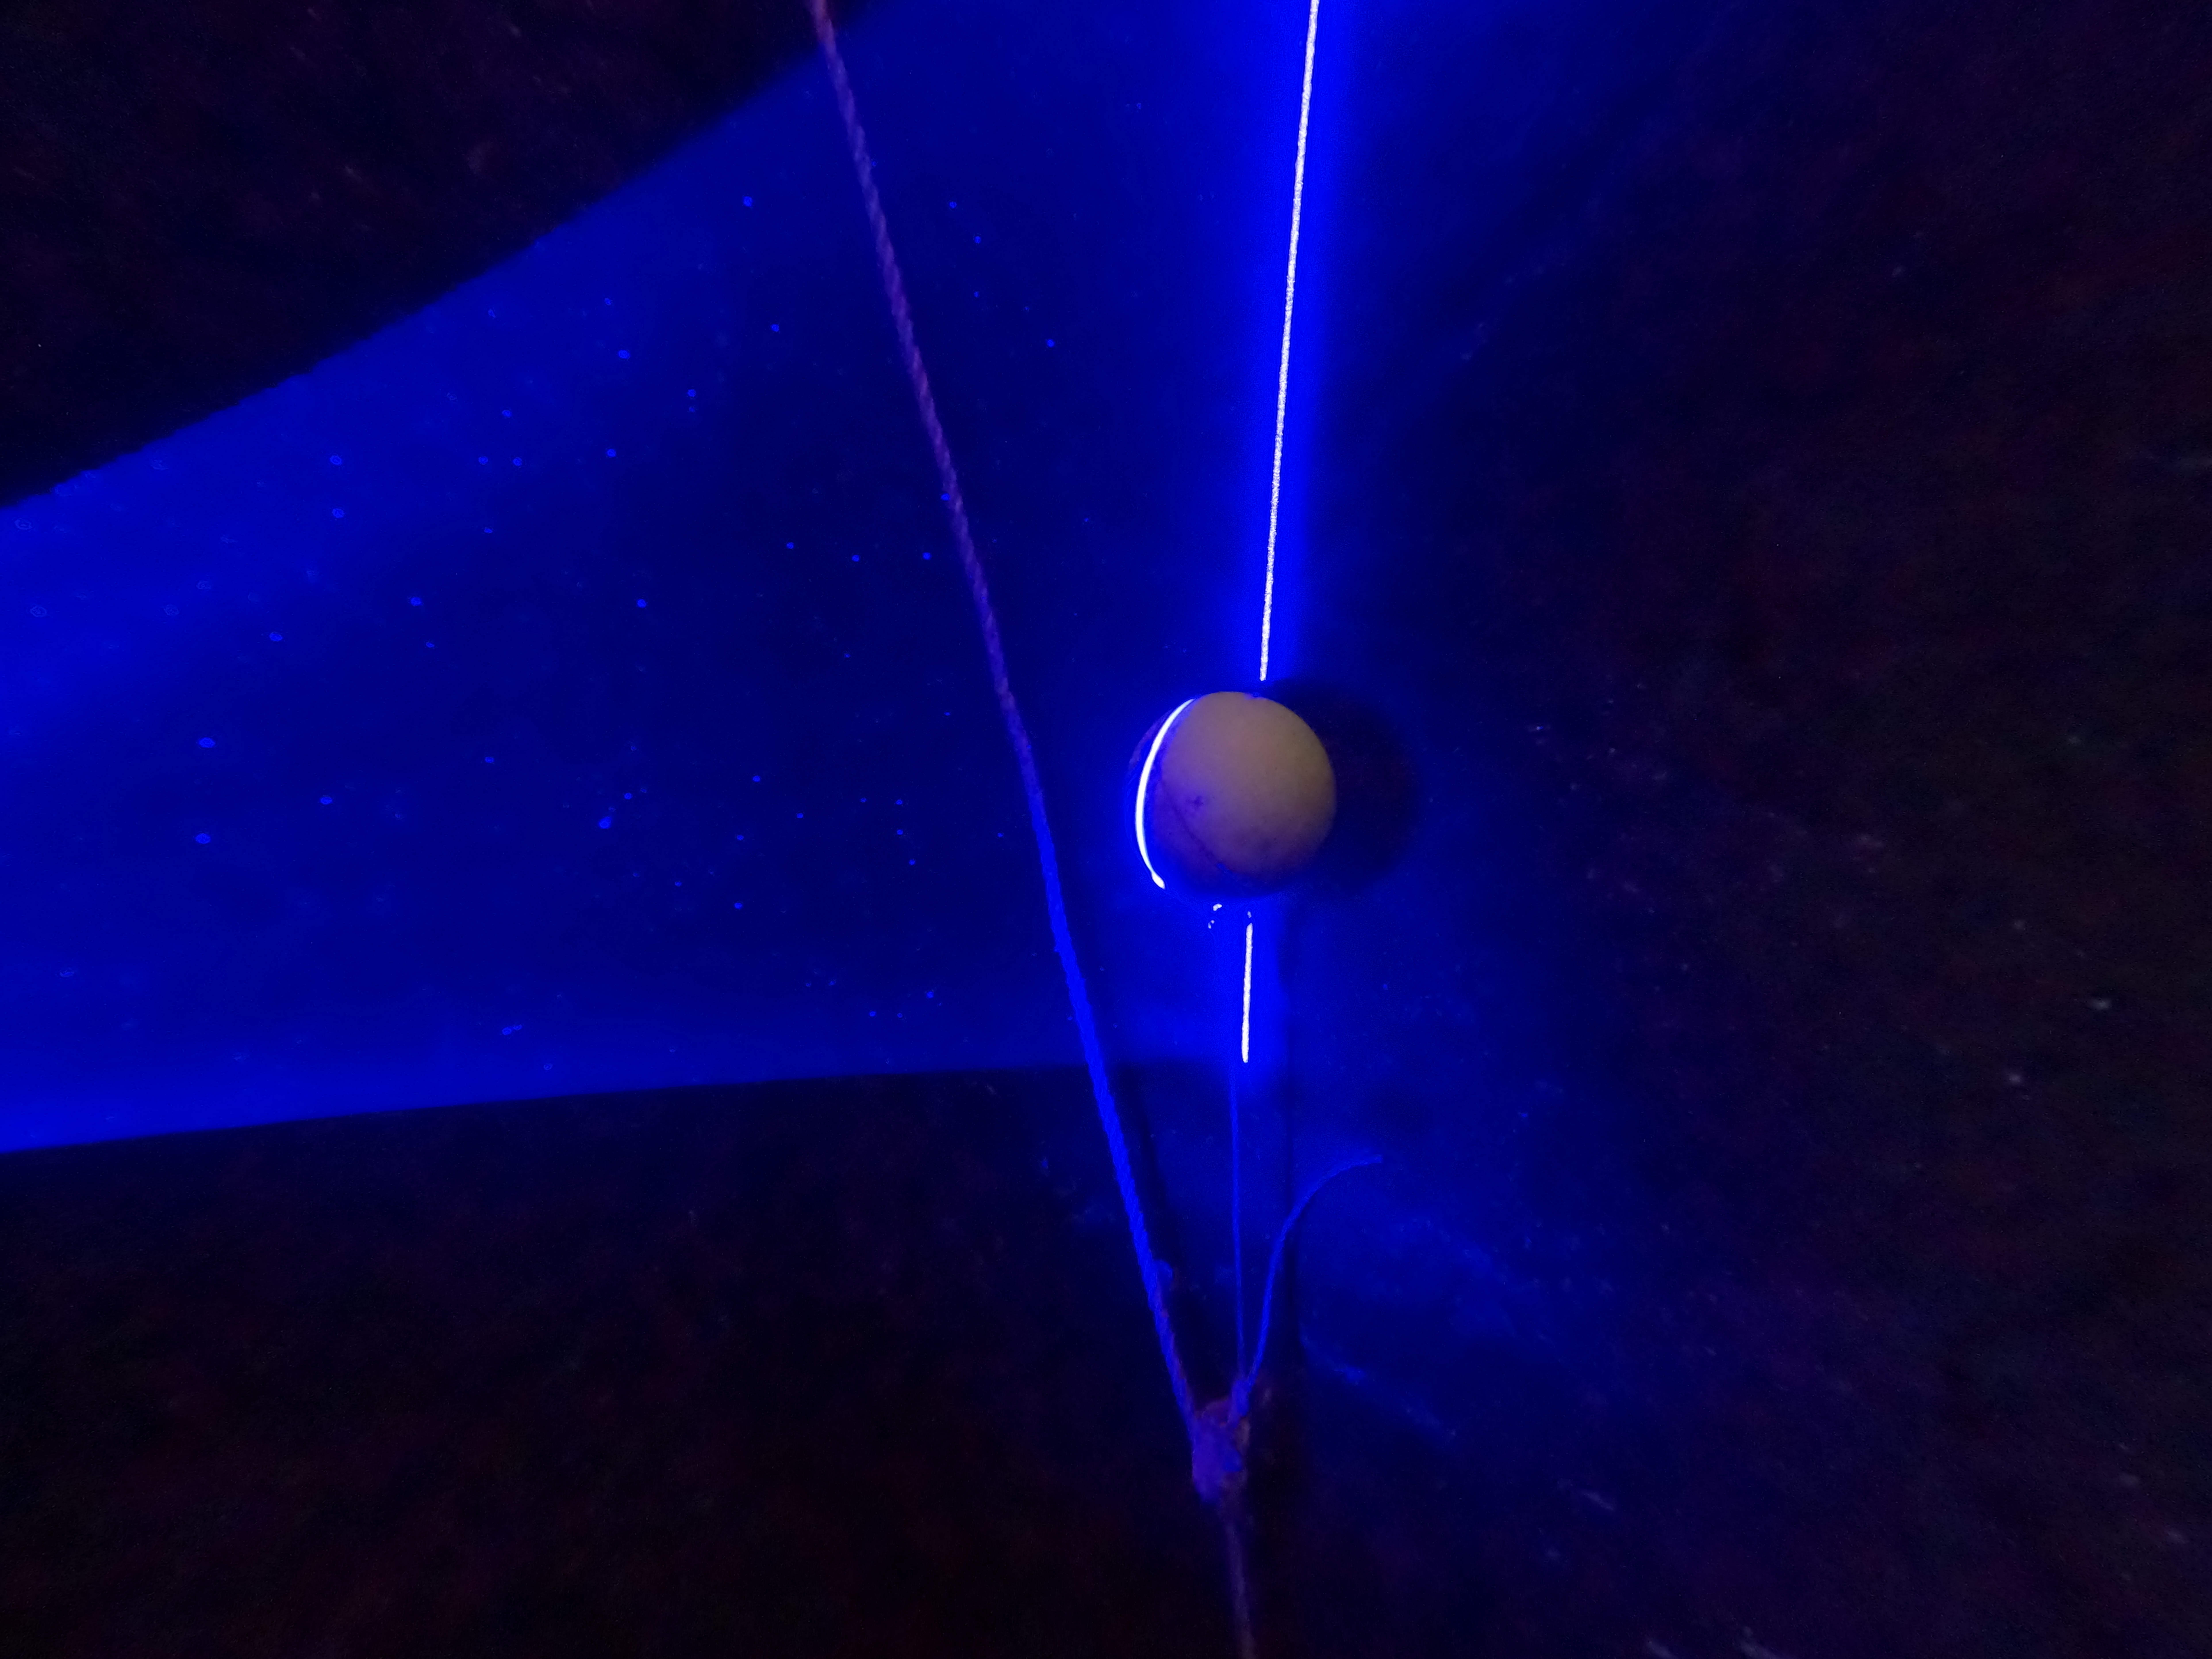

Supplement: Supplementary file 3520 [file G0030744.pdf › Level_1_1/G0030744.pdf]

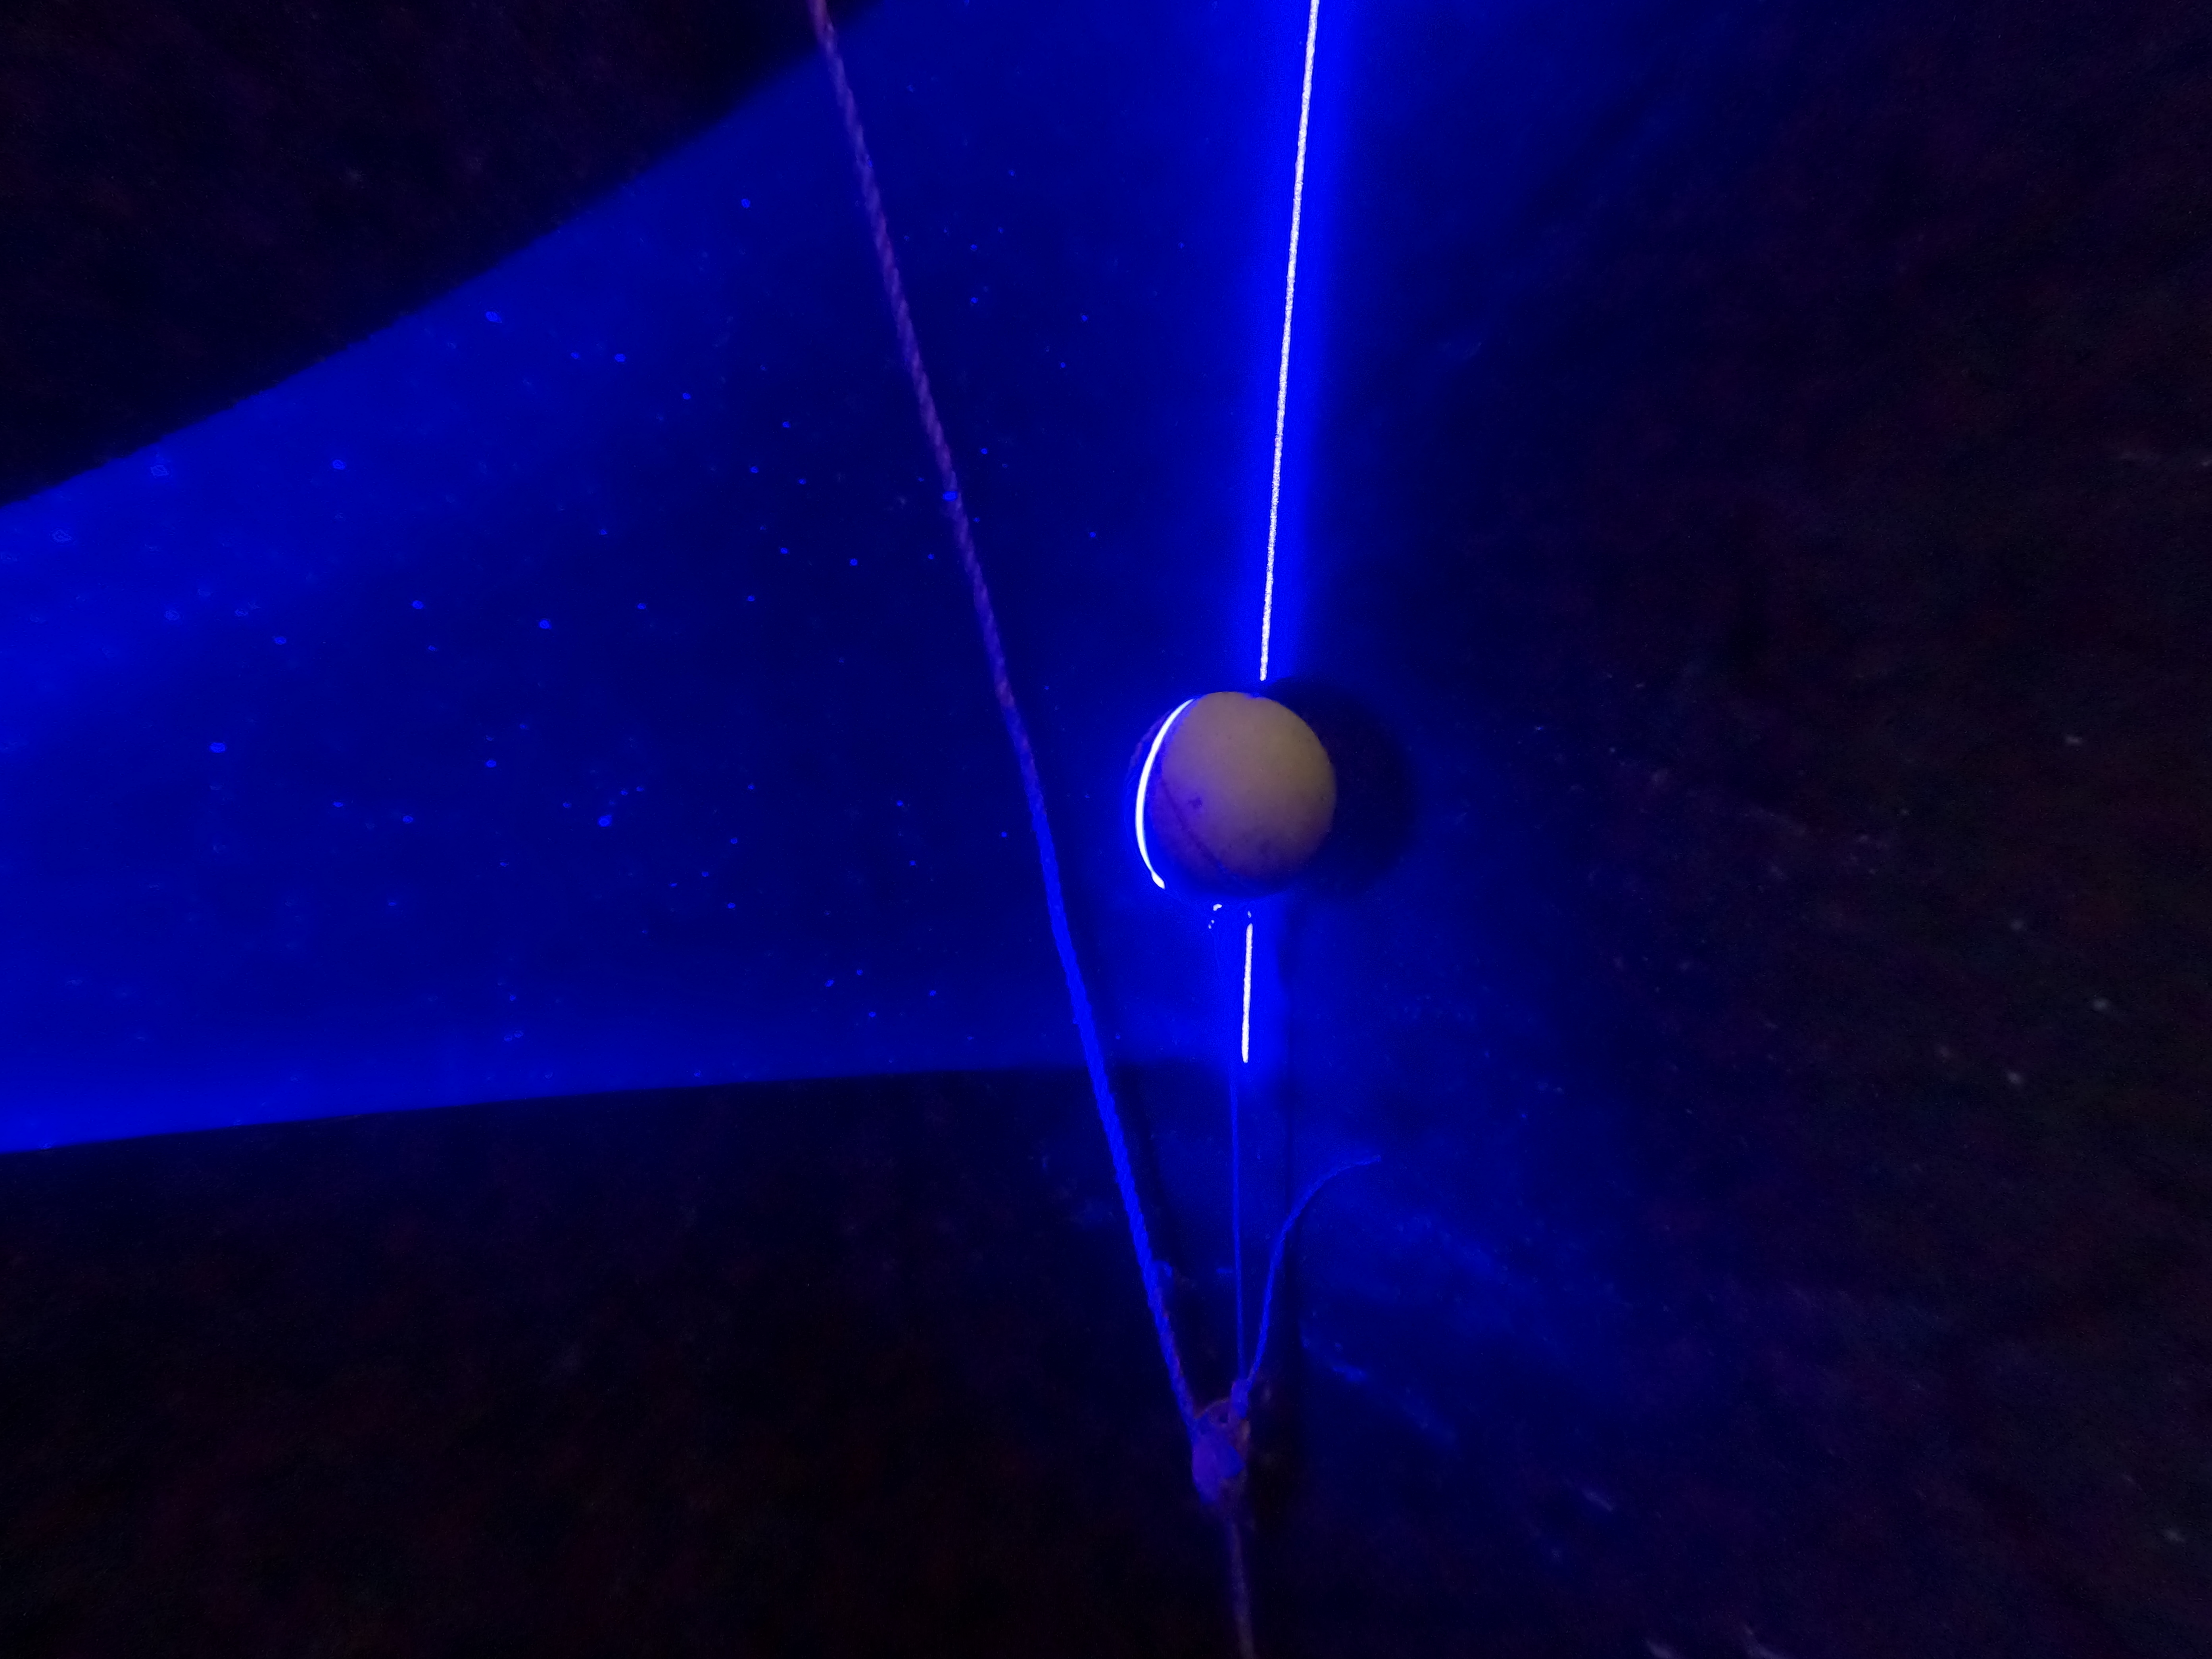

Supplement: Supplementary file 3521 [file G0030745.pdf › Level_1_1/G0030745.pdf]

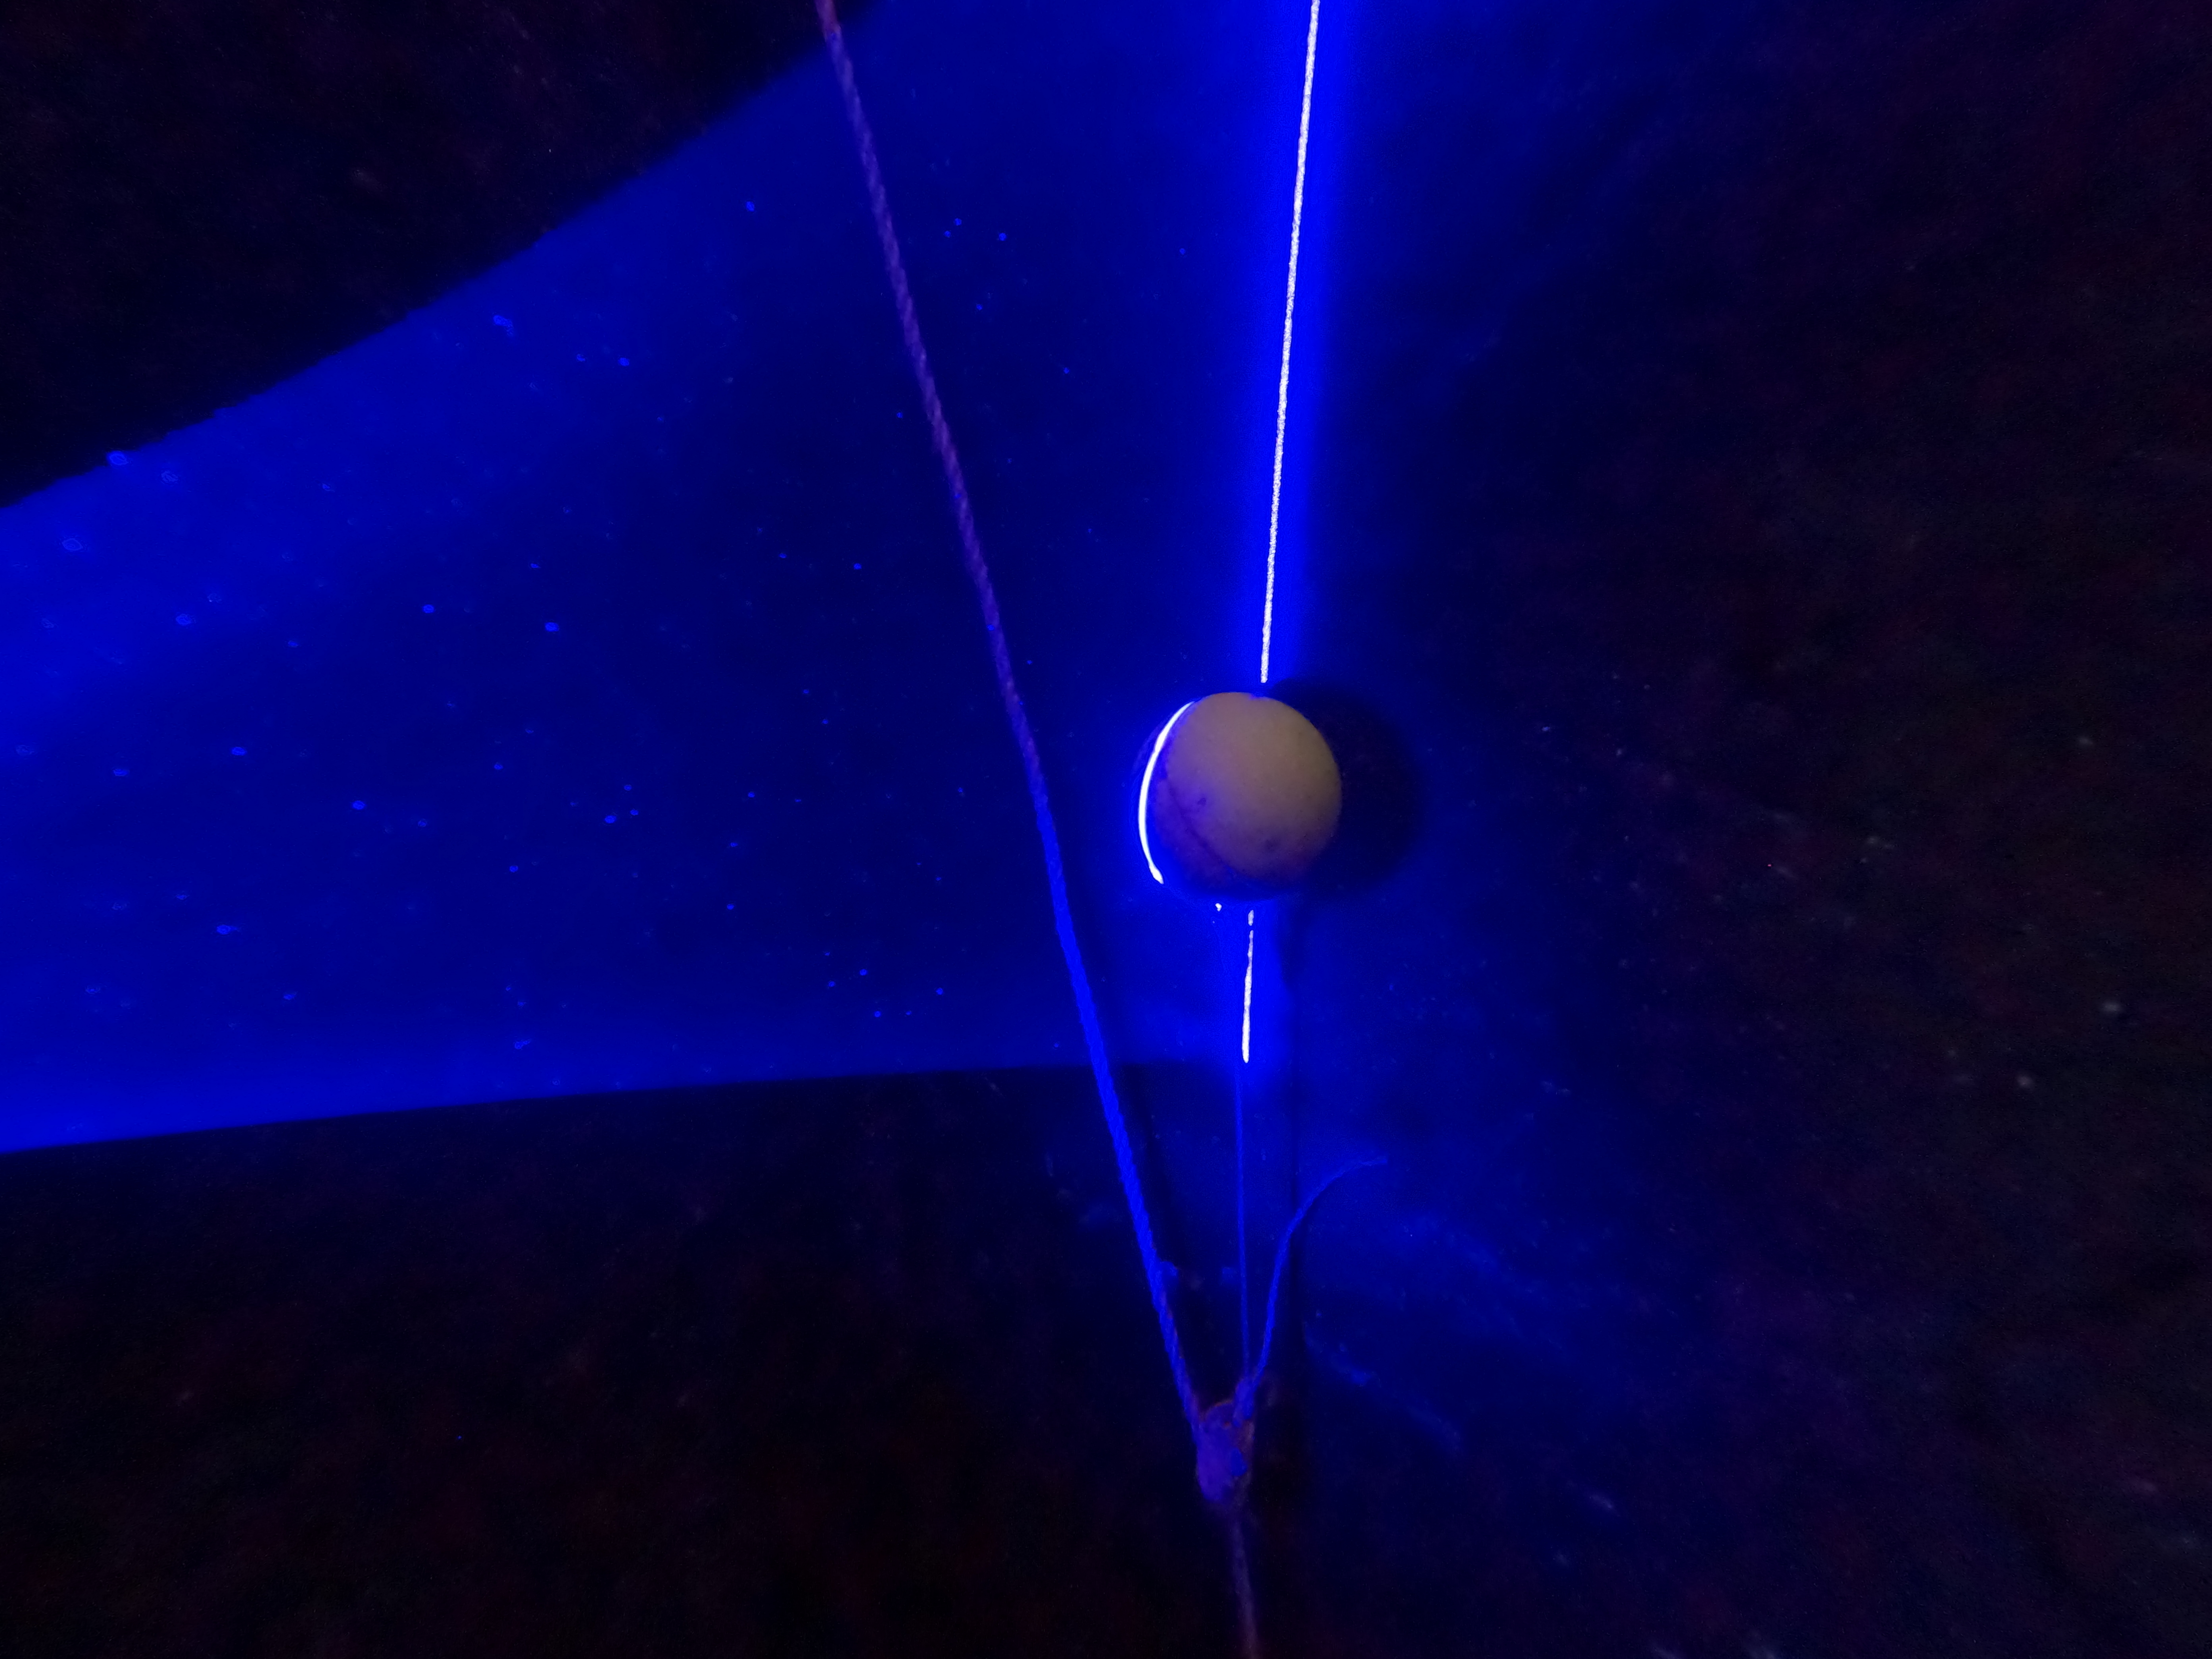

Supplement: Supplementary file 3522 [file G0030746.pdf › Level_1_1/G0030746.pdf]

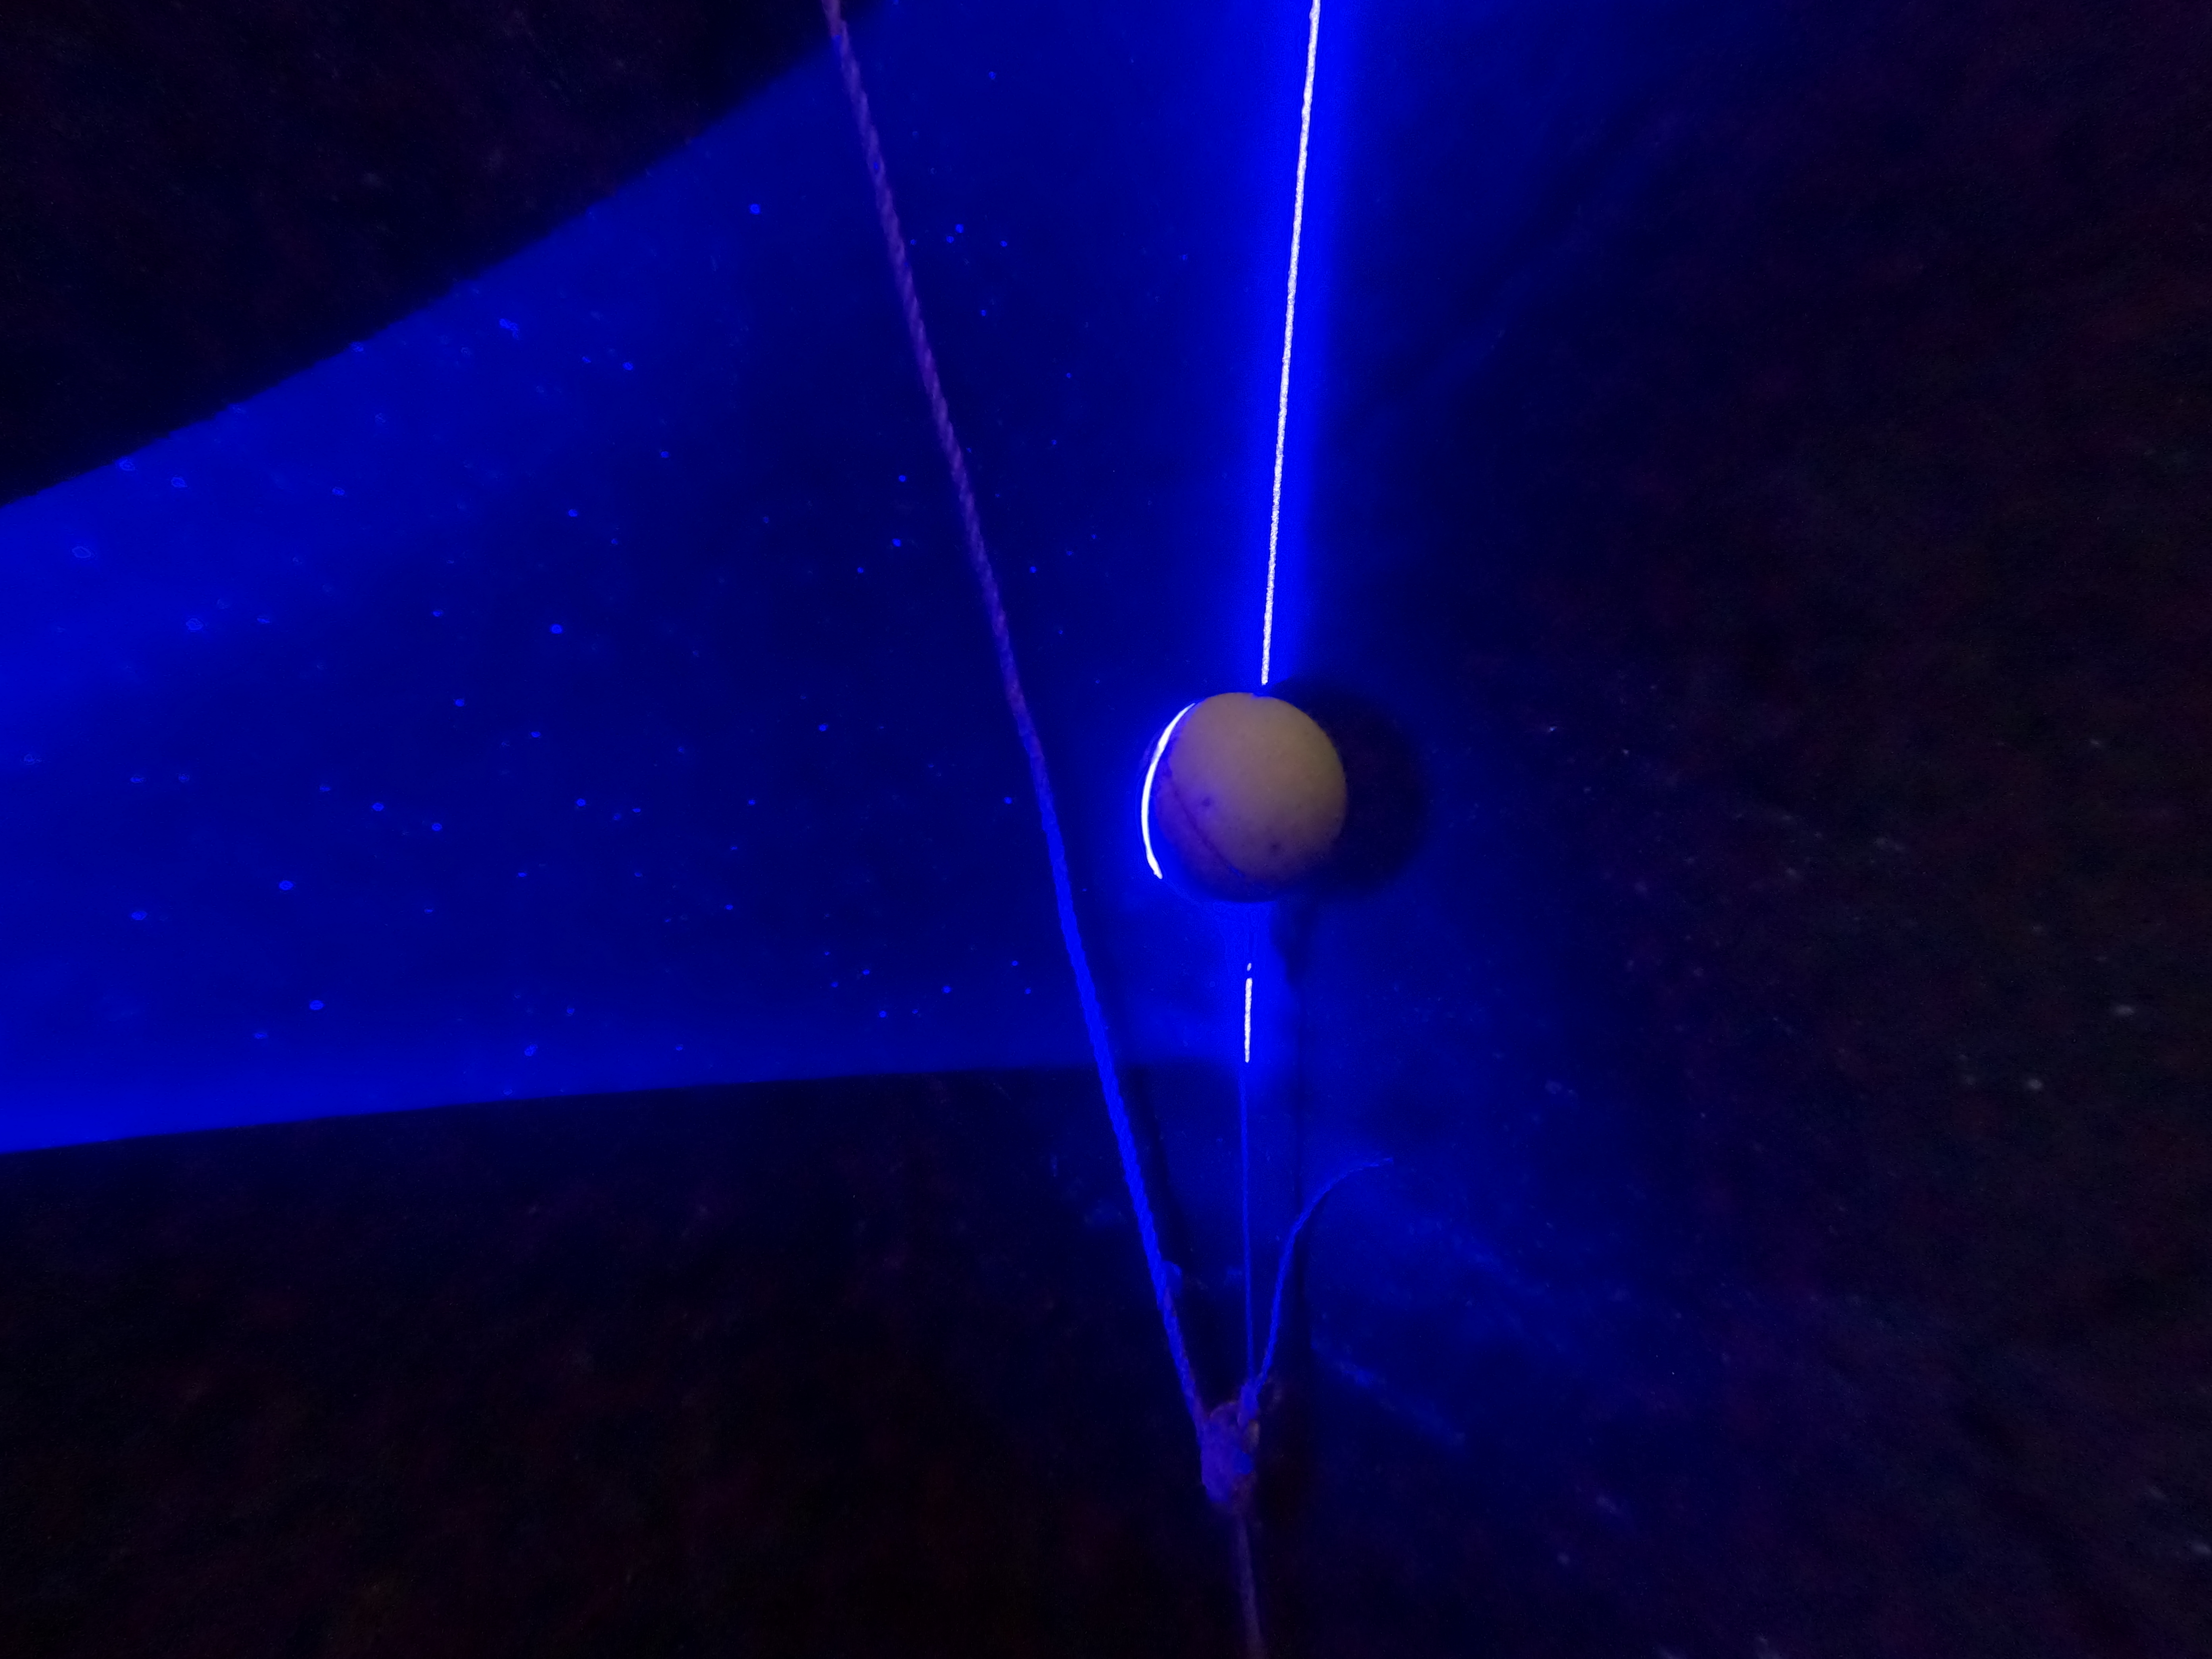

Supplement: Supplementary file 3523 [file G0030747.pdf › Level_1_1/G0030747.pdf]

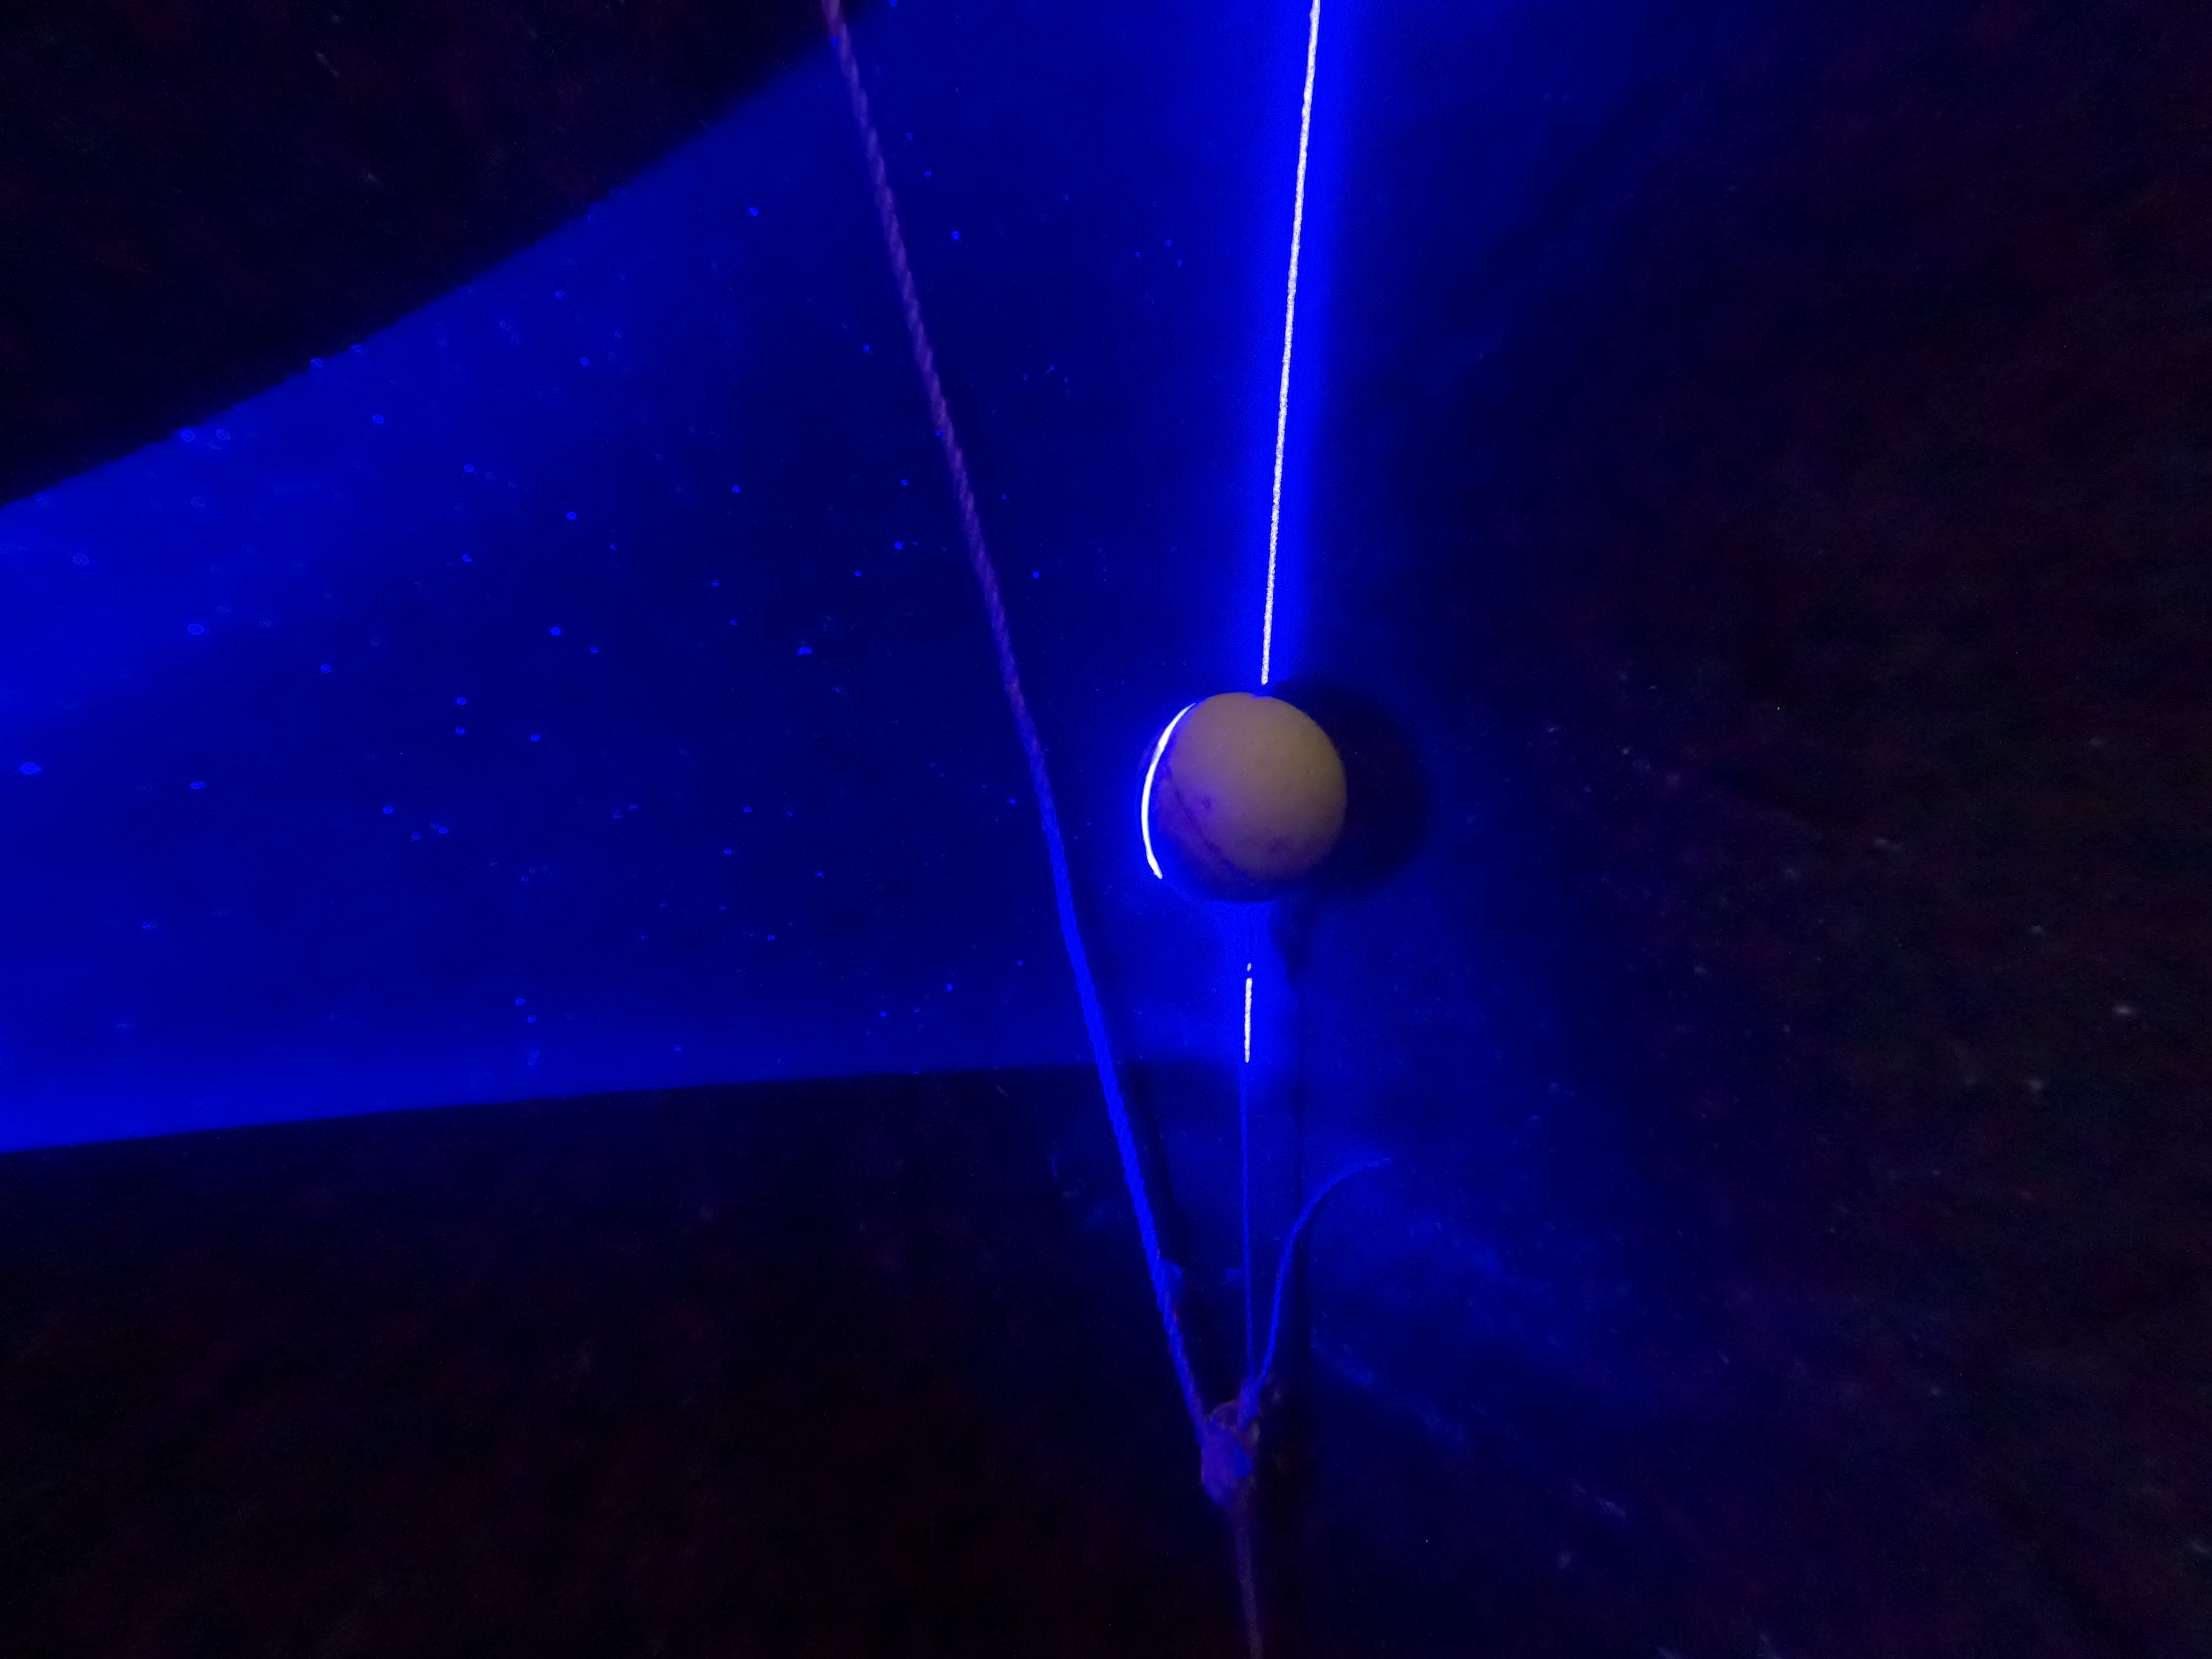

Supplement: Supplementary file 3524 [file G0030748.pdf › Level_1_1/G0030748.pdf]

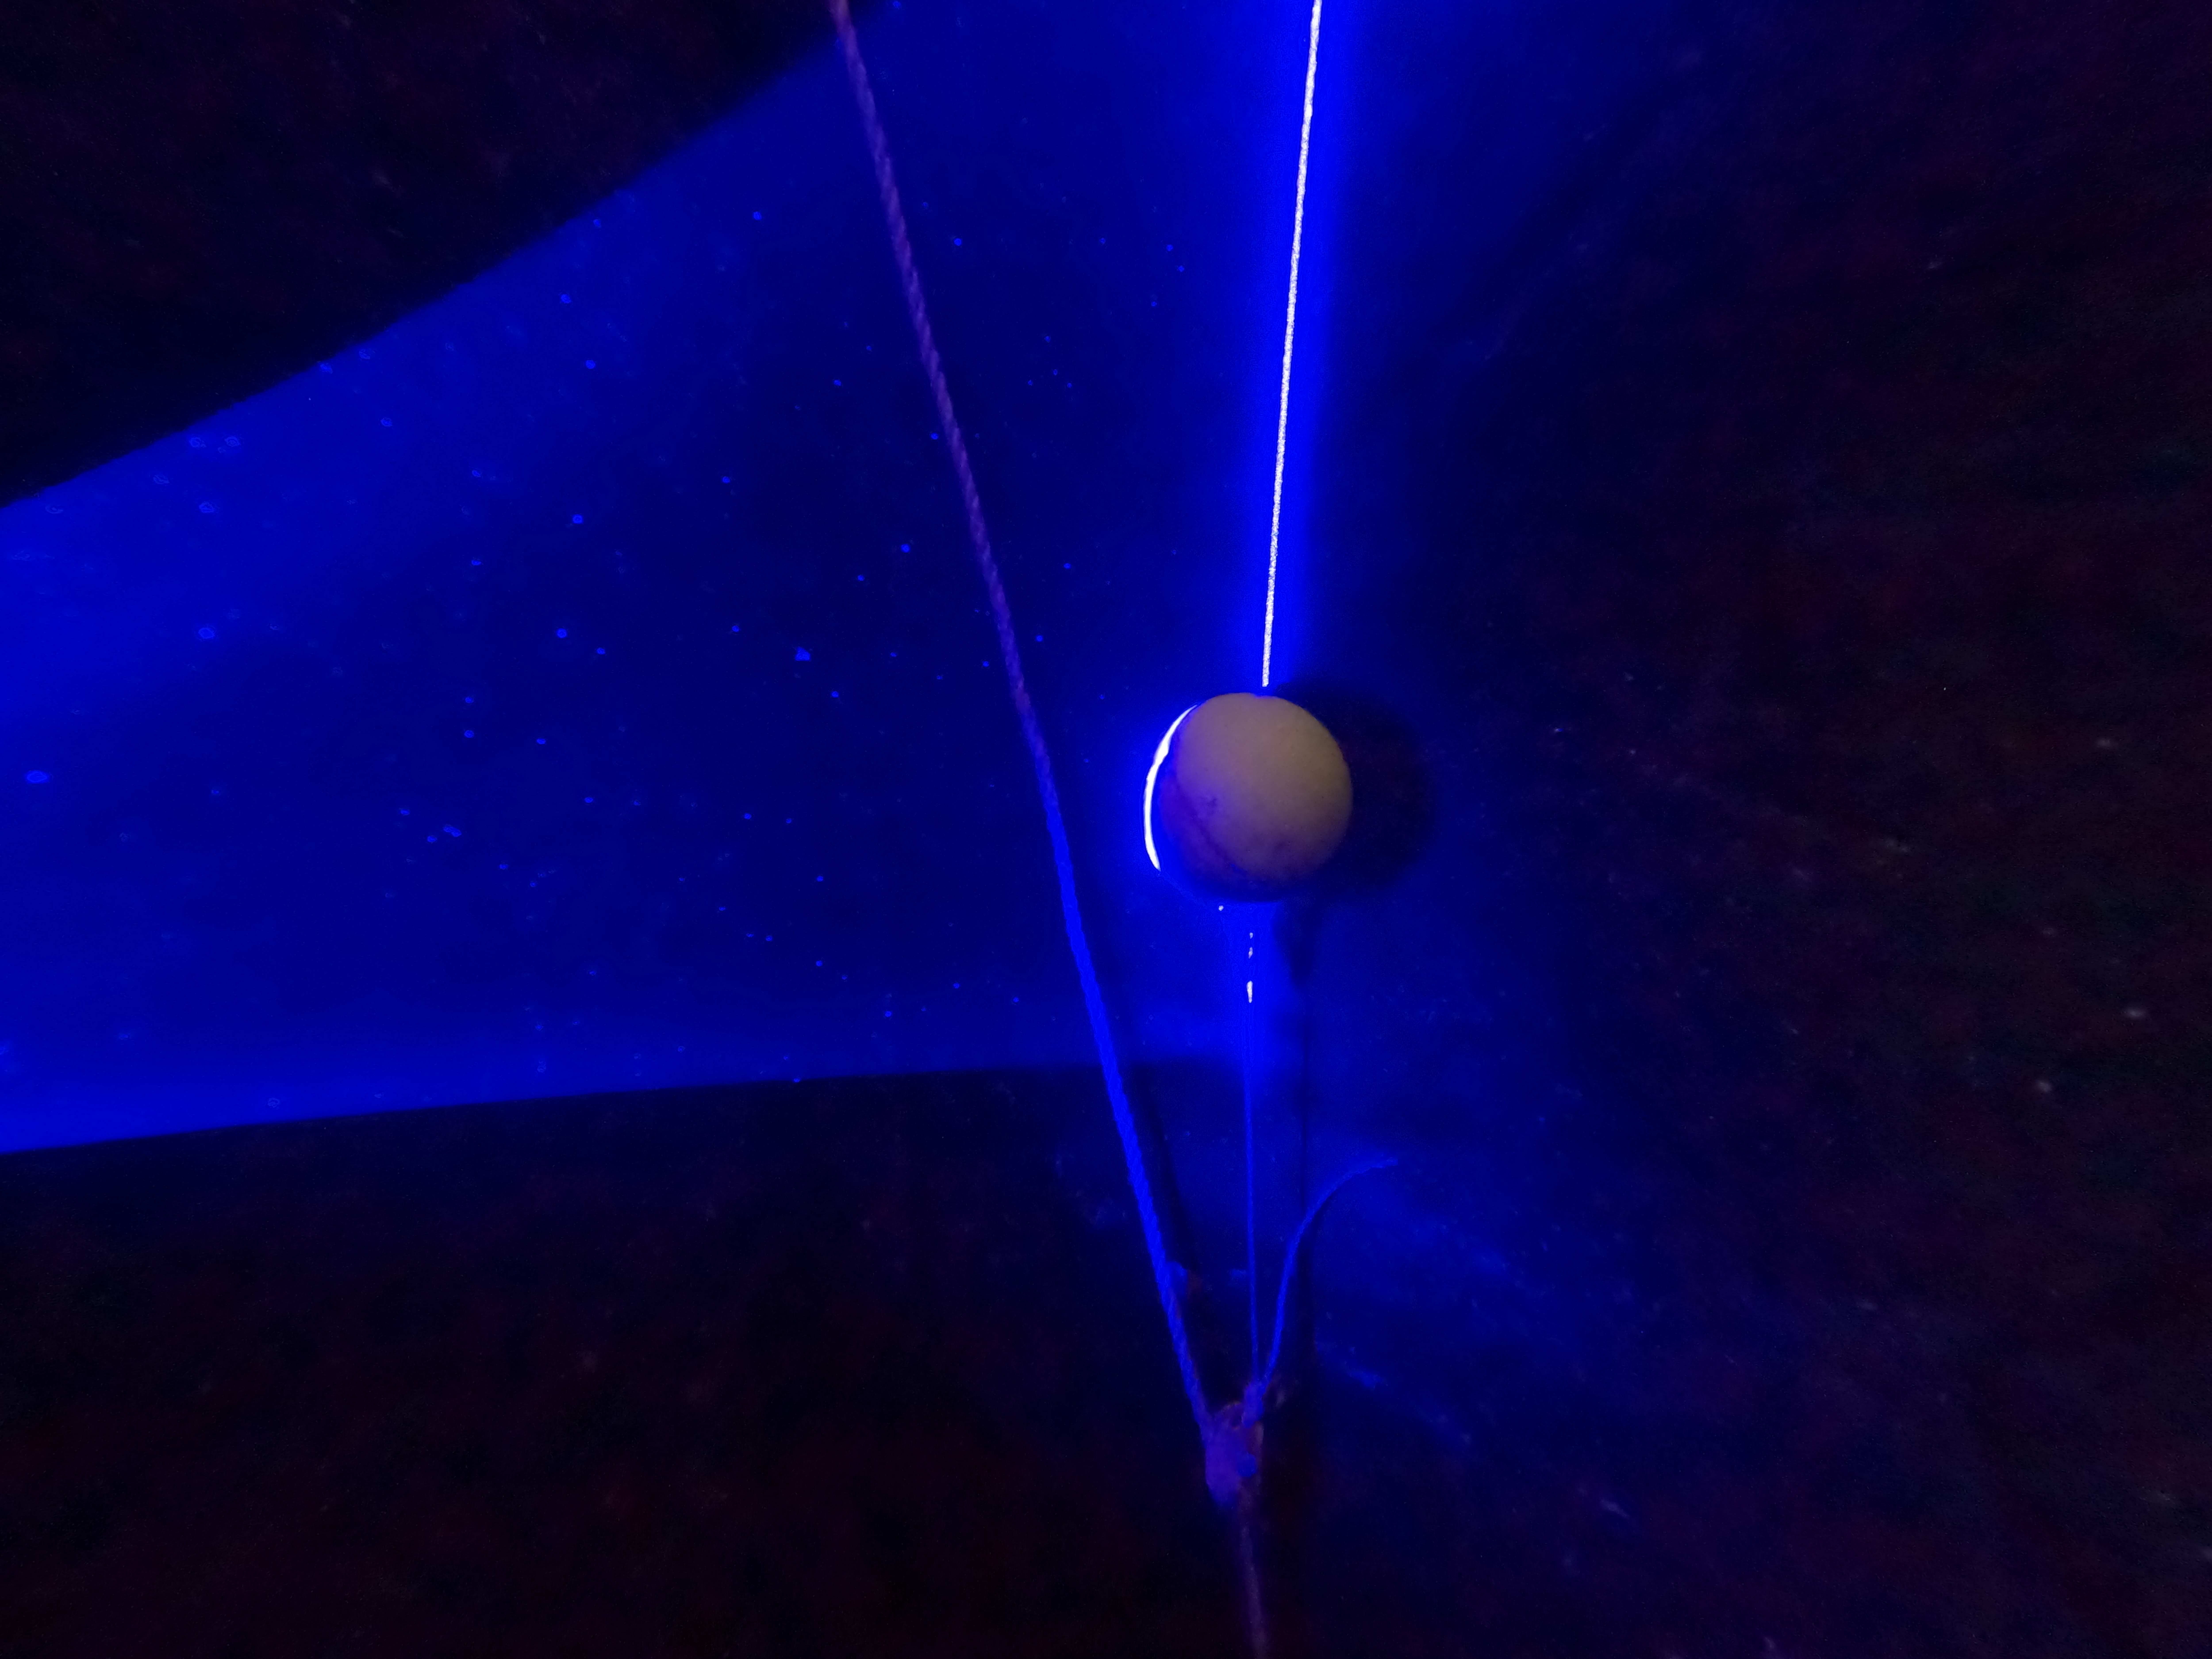

Supplement: Supplementary file 3525 [file G0030749.pdf › Level_1_1/G0030749.pdf]

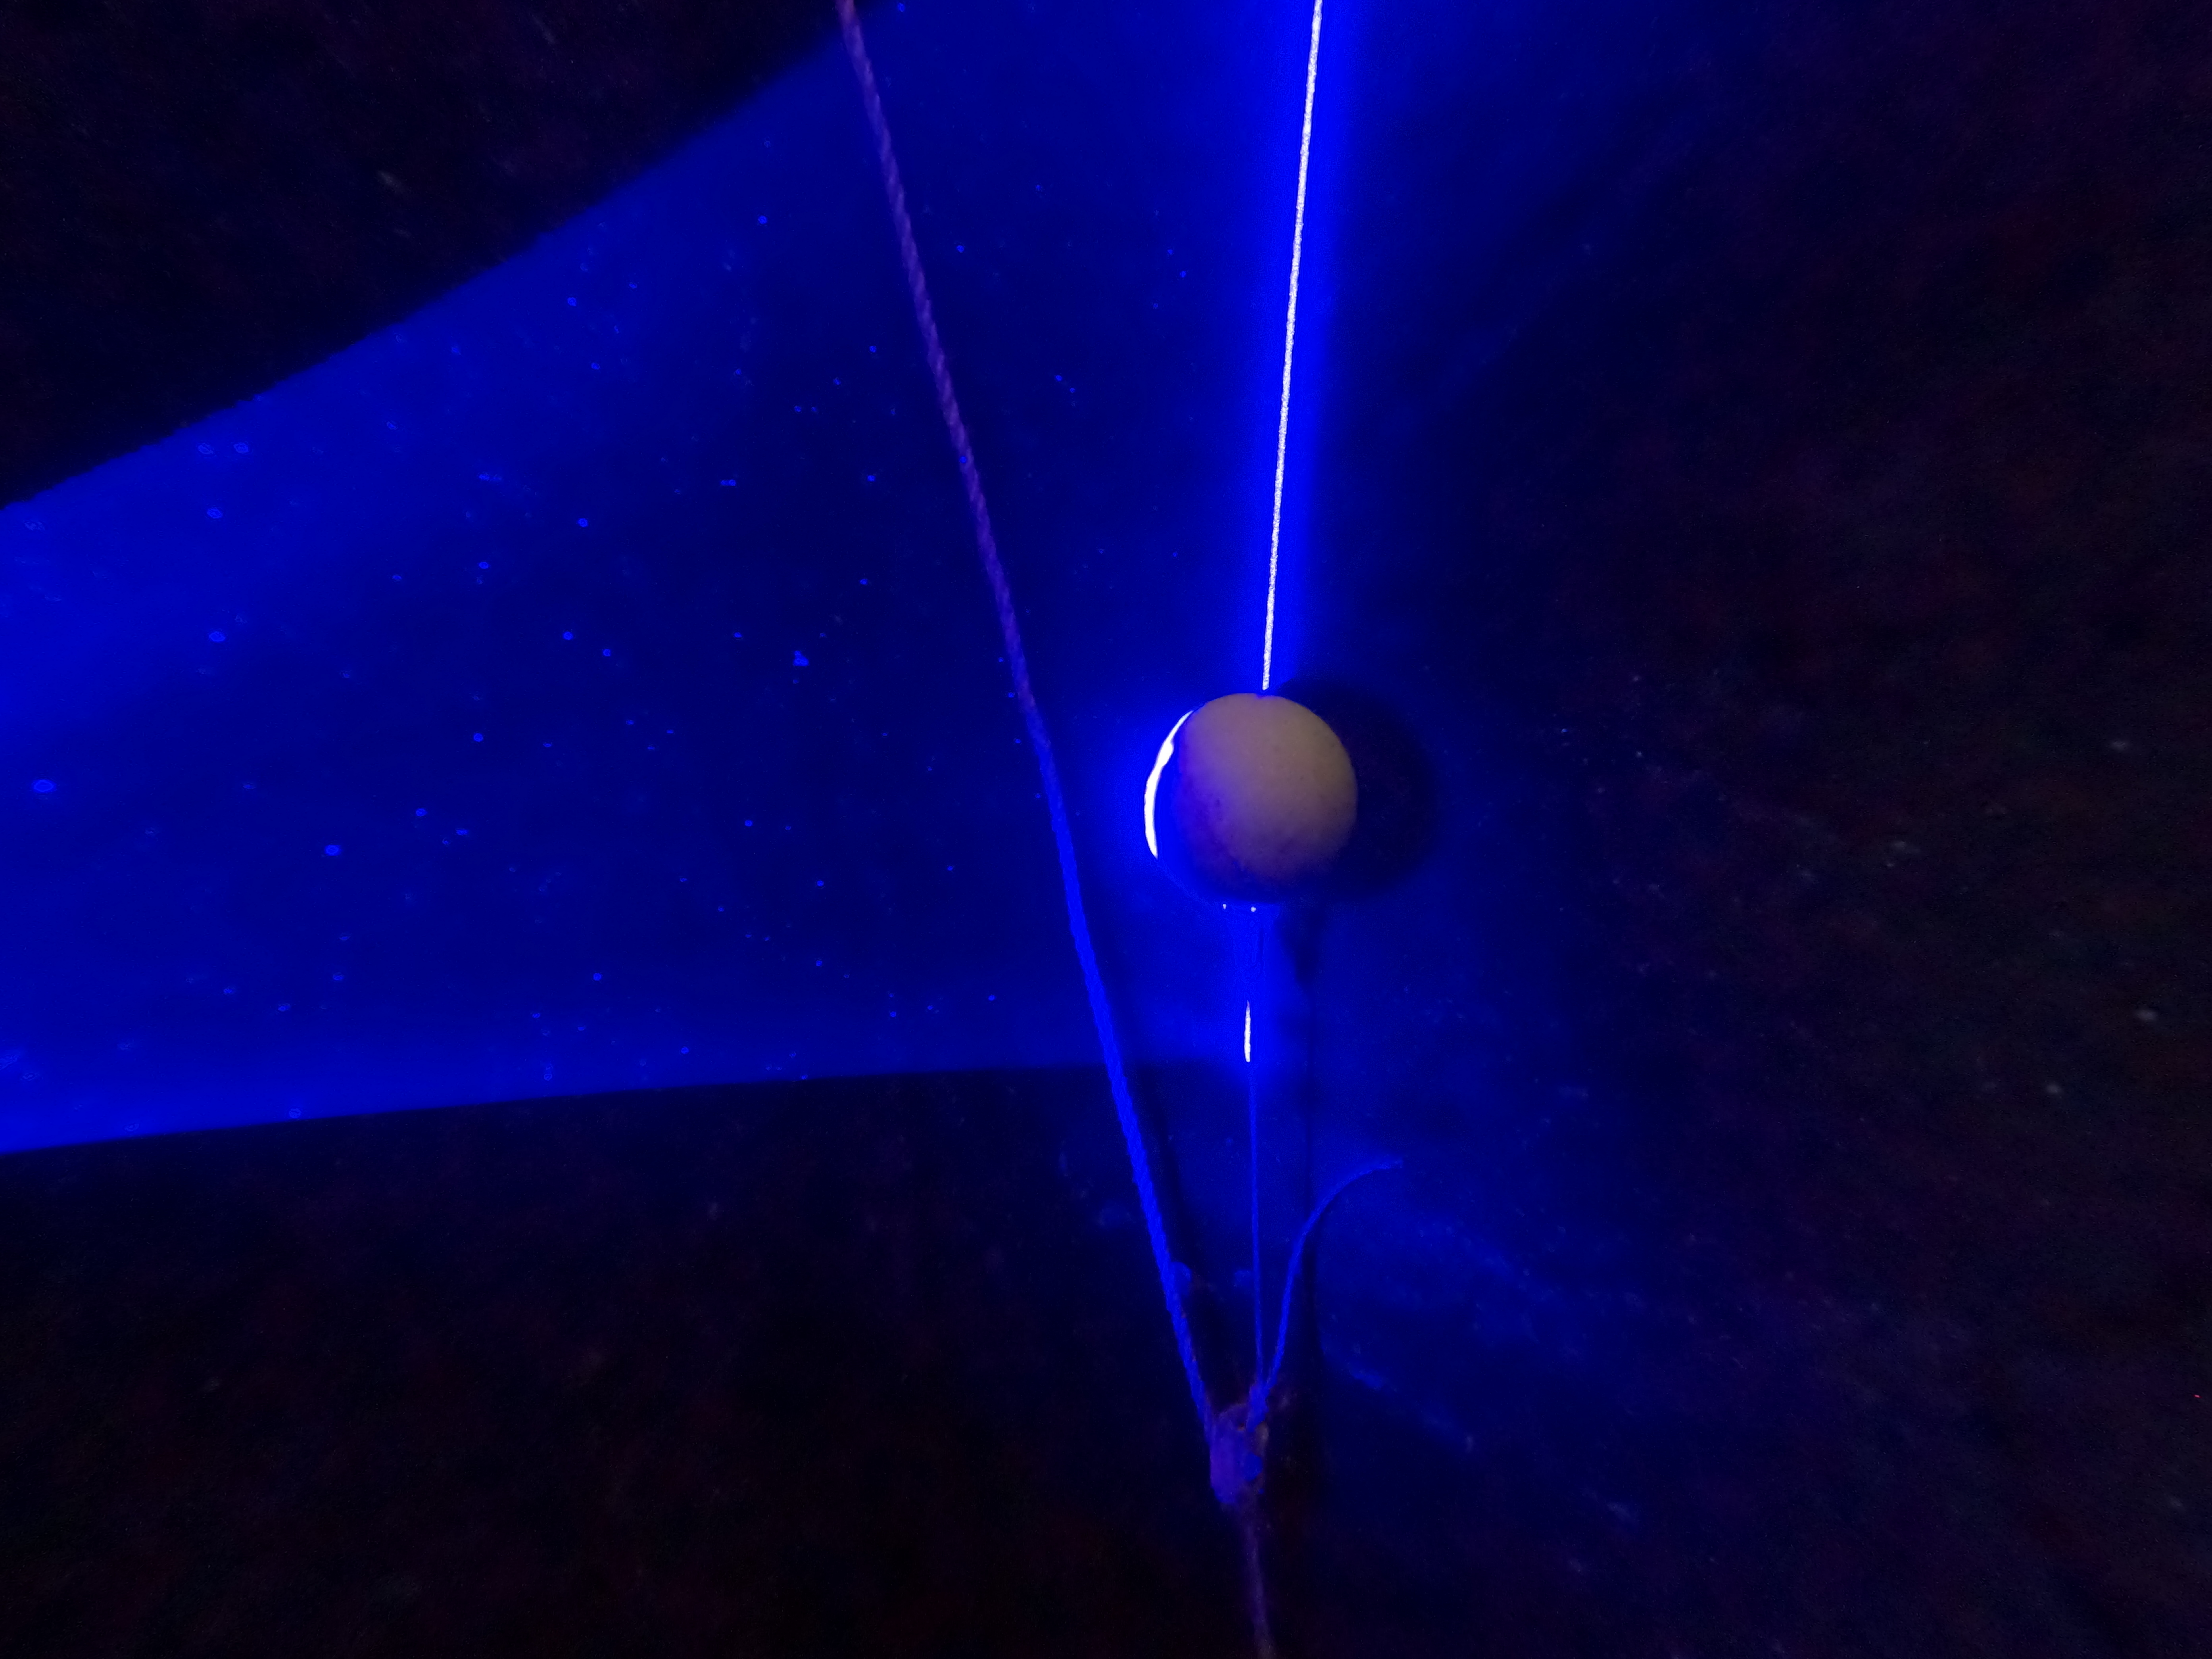

Supplement: Supplementary file 3526 [file G0030750.pdf › Level_1_1/G0030750.pdf]

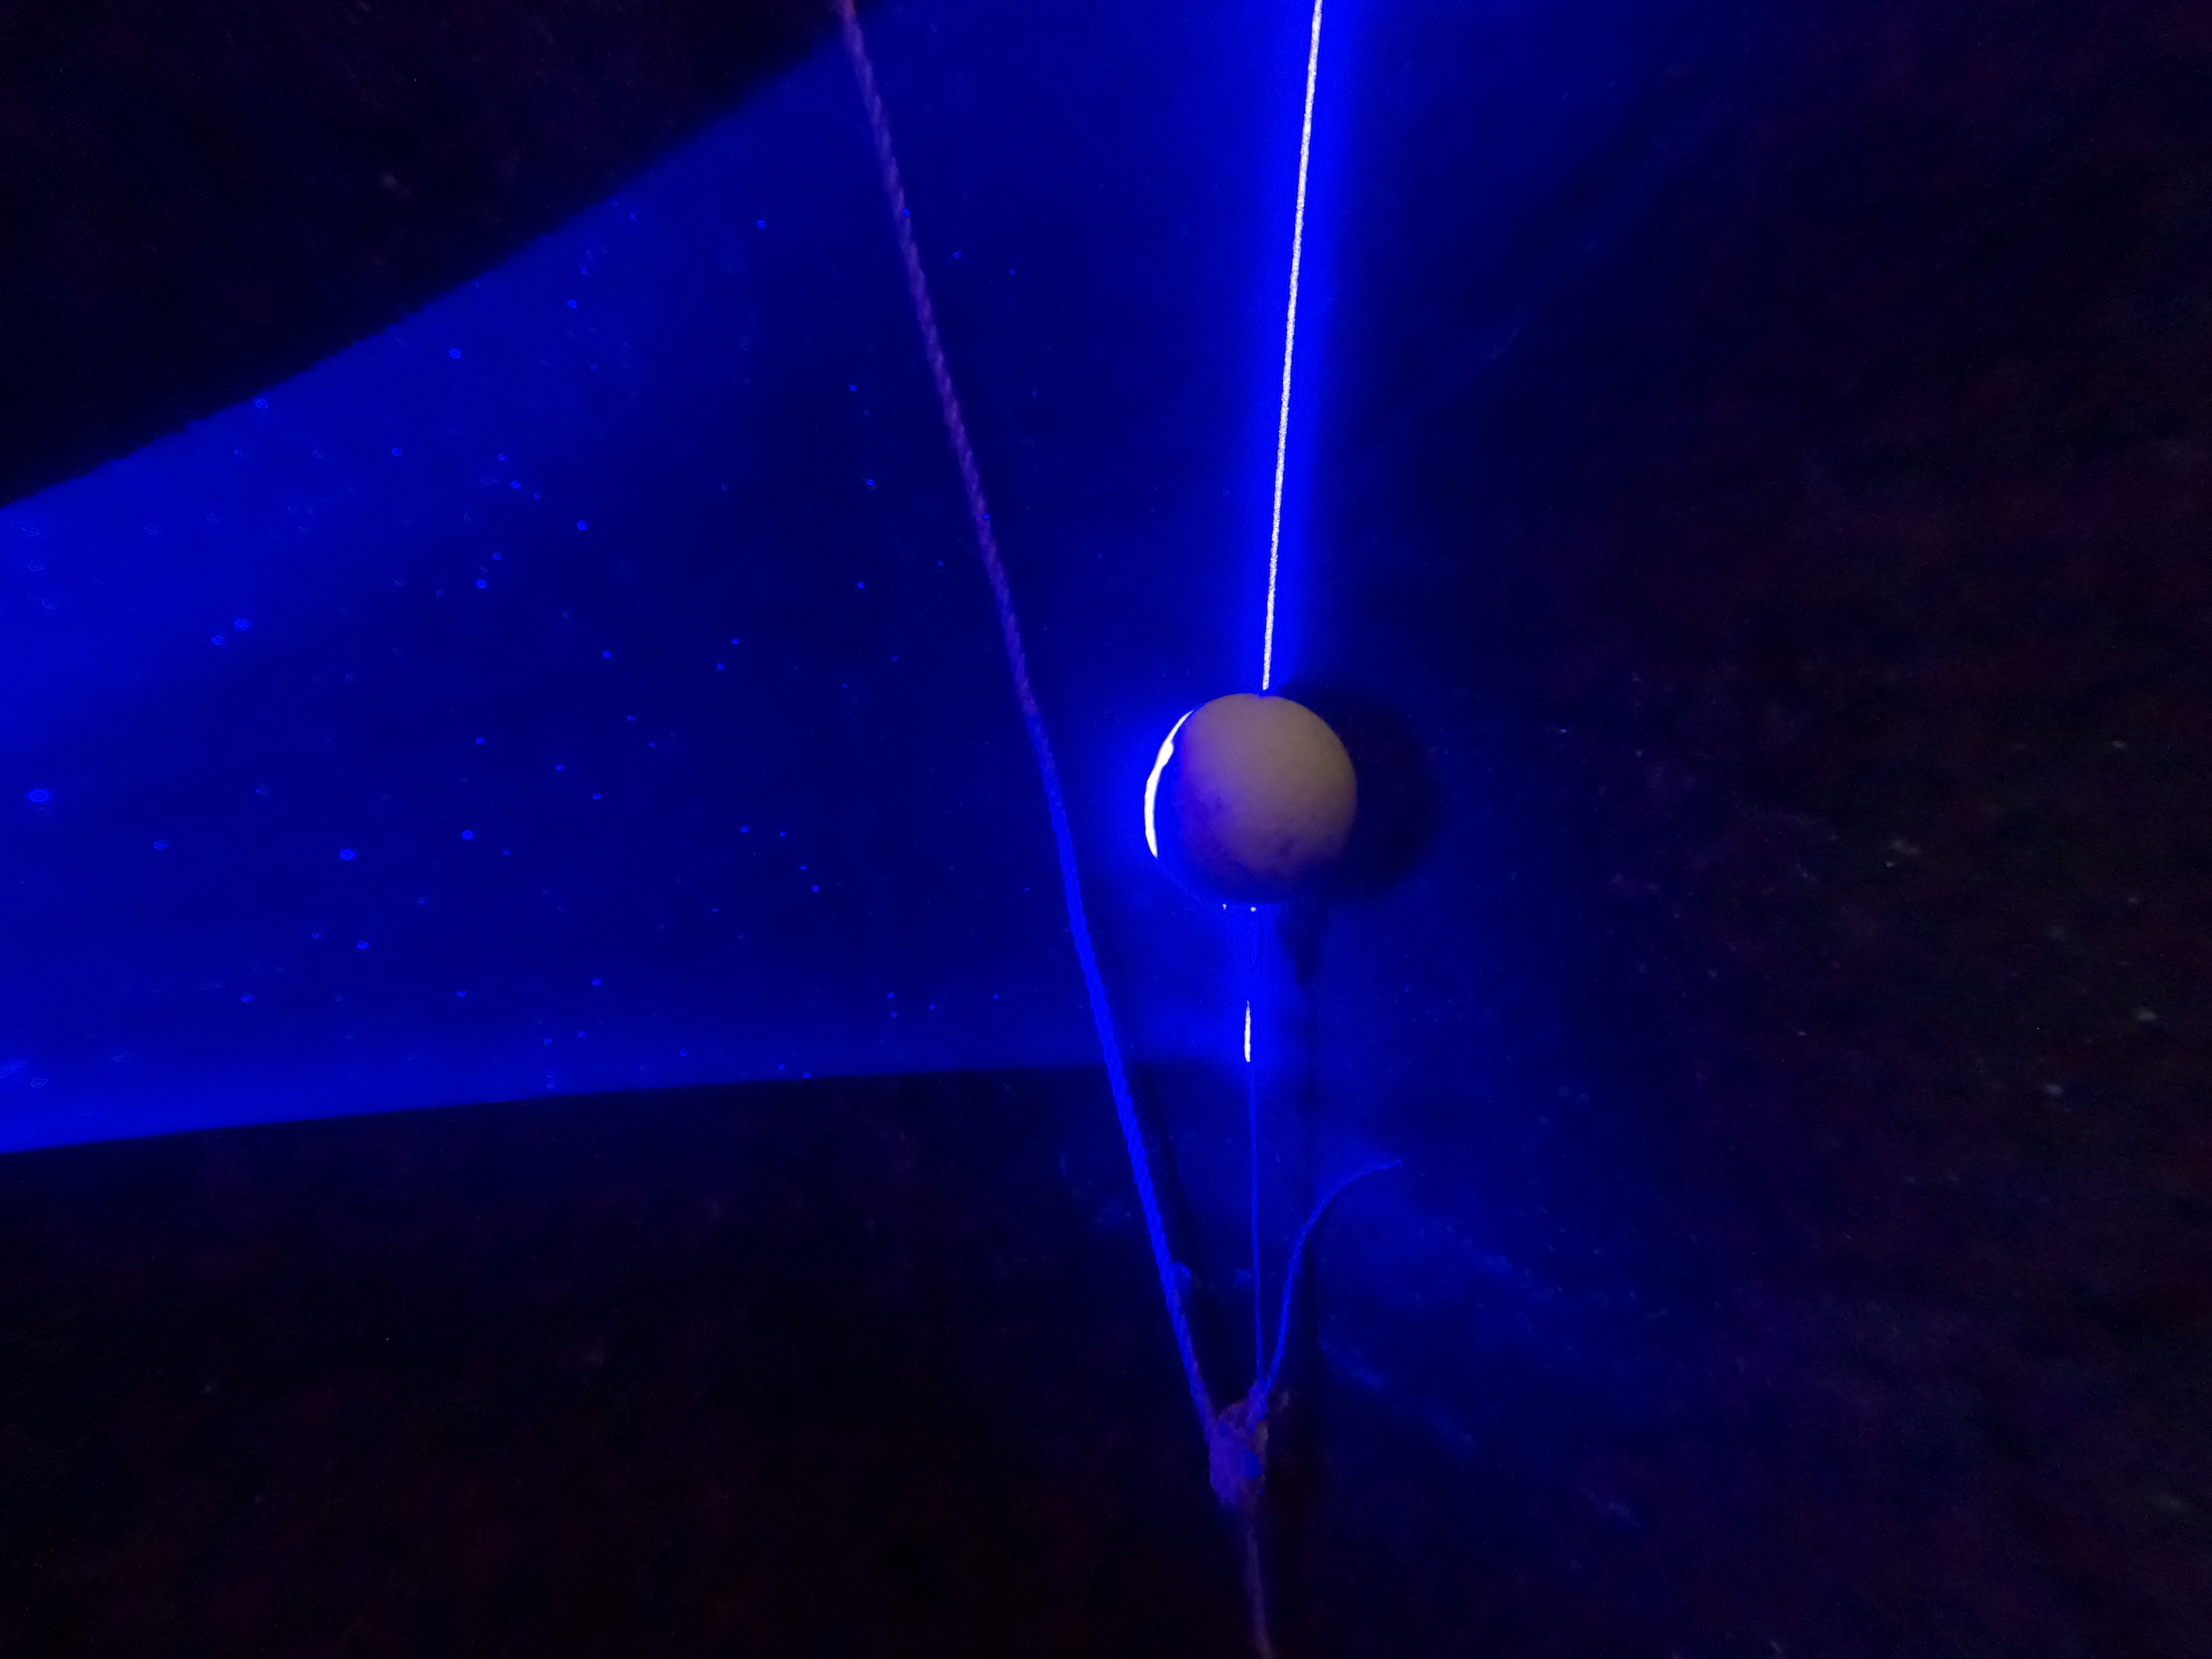

Supplement: Supplementary file 3527 [file G0030751.pdf › Level_1_1/G0030751.pdf]

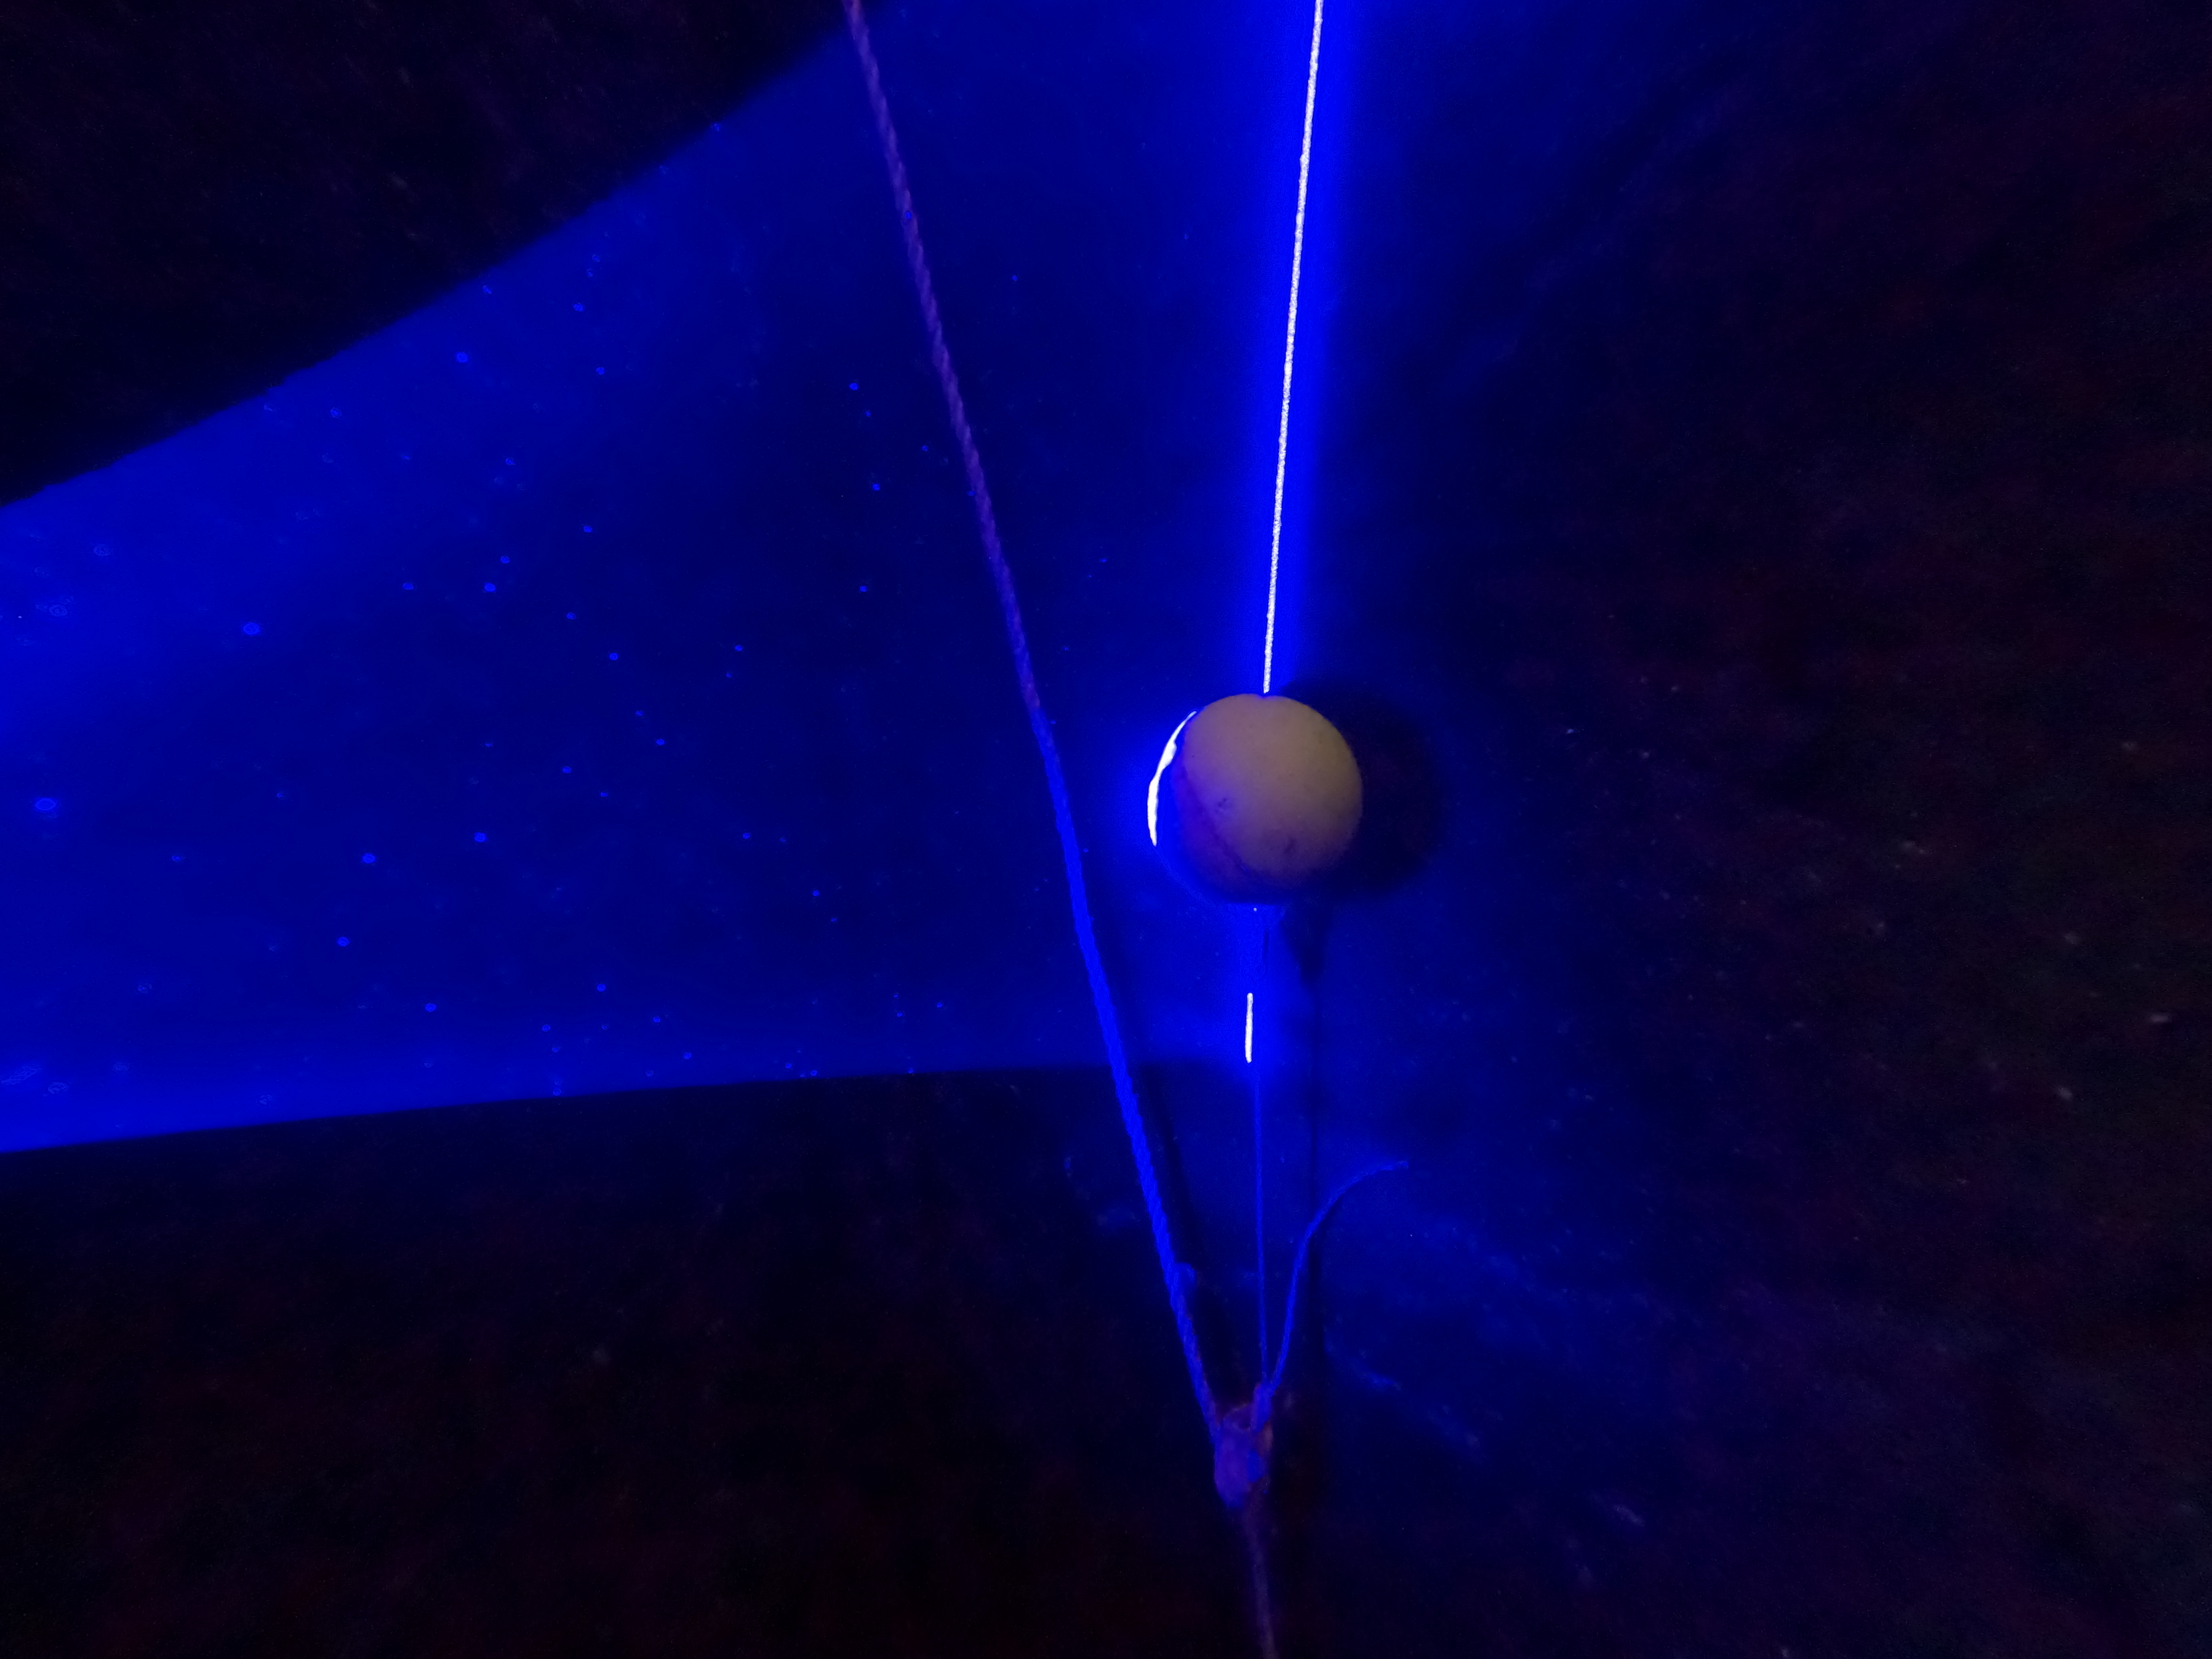

Supplement: Supplementary file 3528 [file G0030752.pdf › Level_1_1/G0030752.pdf]

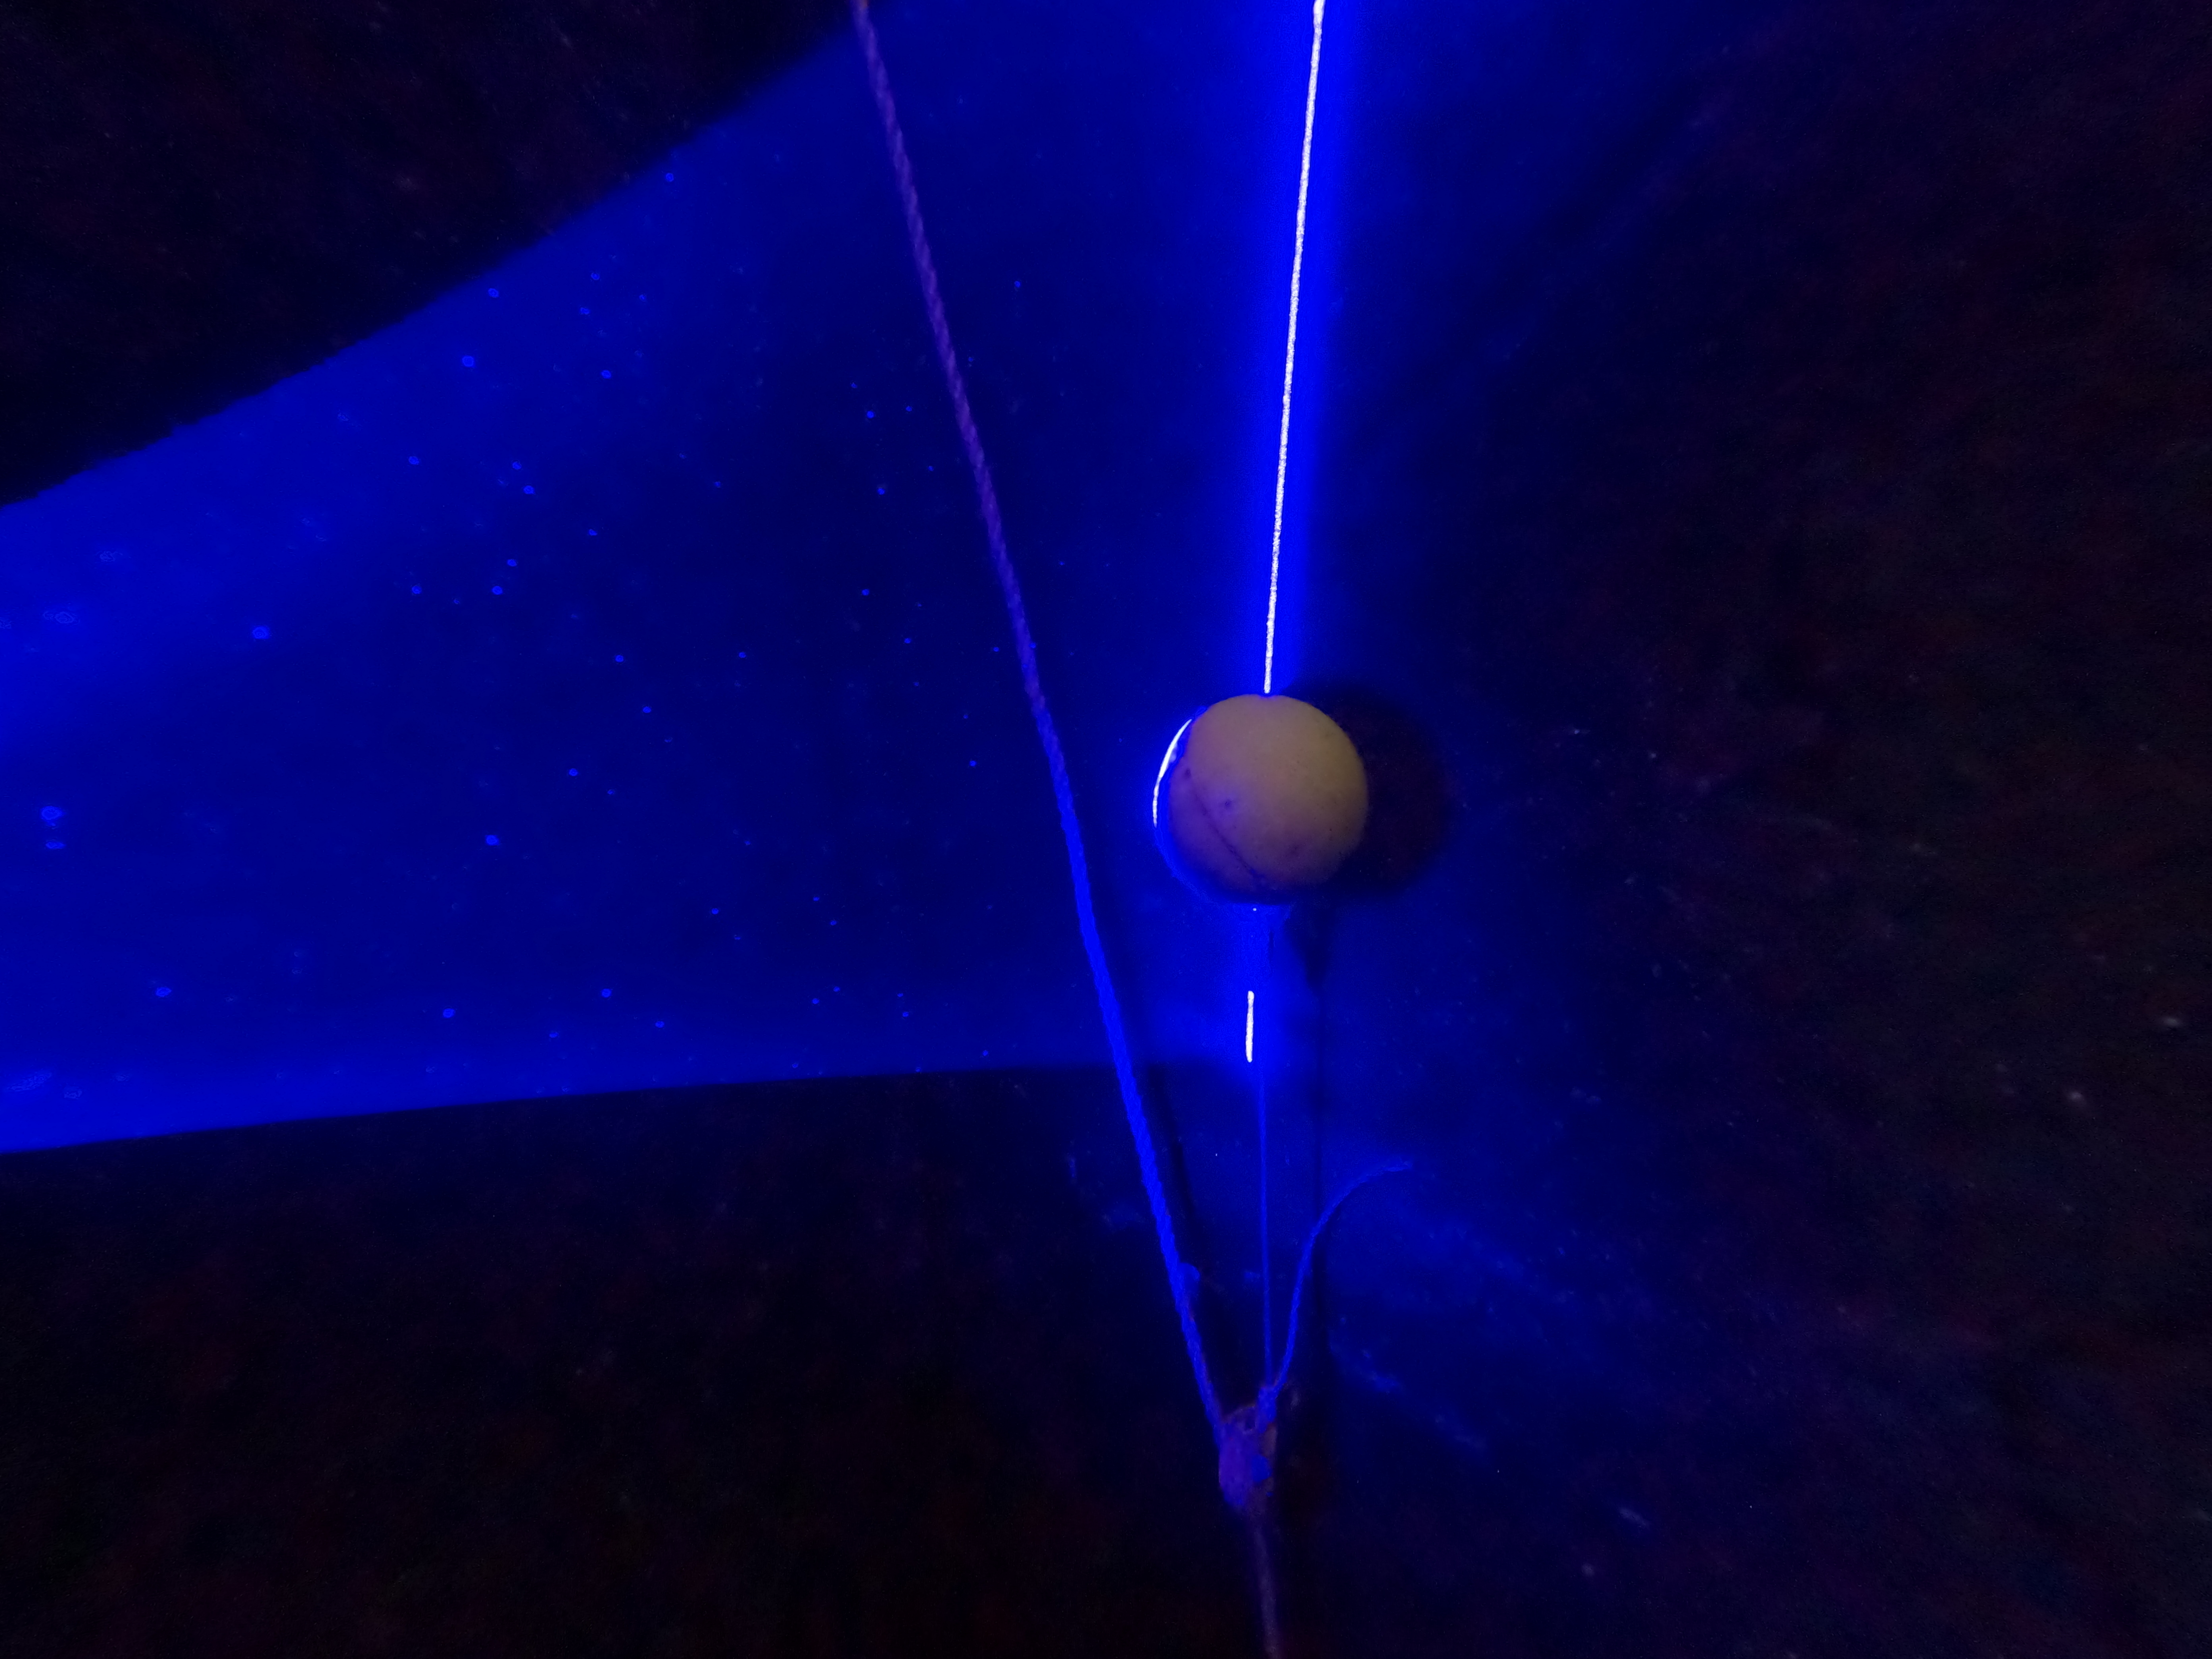

Supplement: Supplementary file 3529 [file G0030753.pdf › Level_1_1/G0030753.pdf]

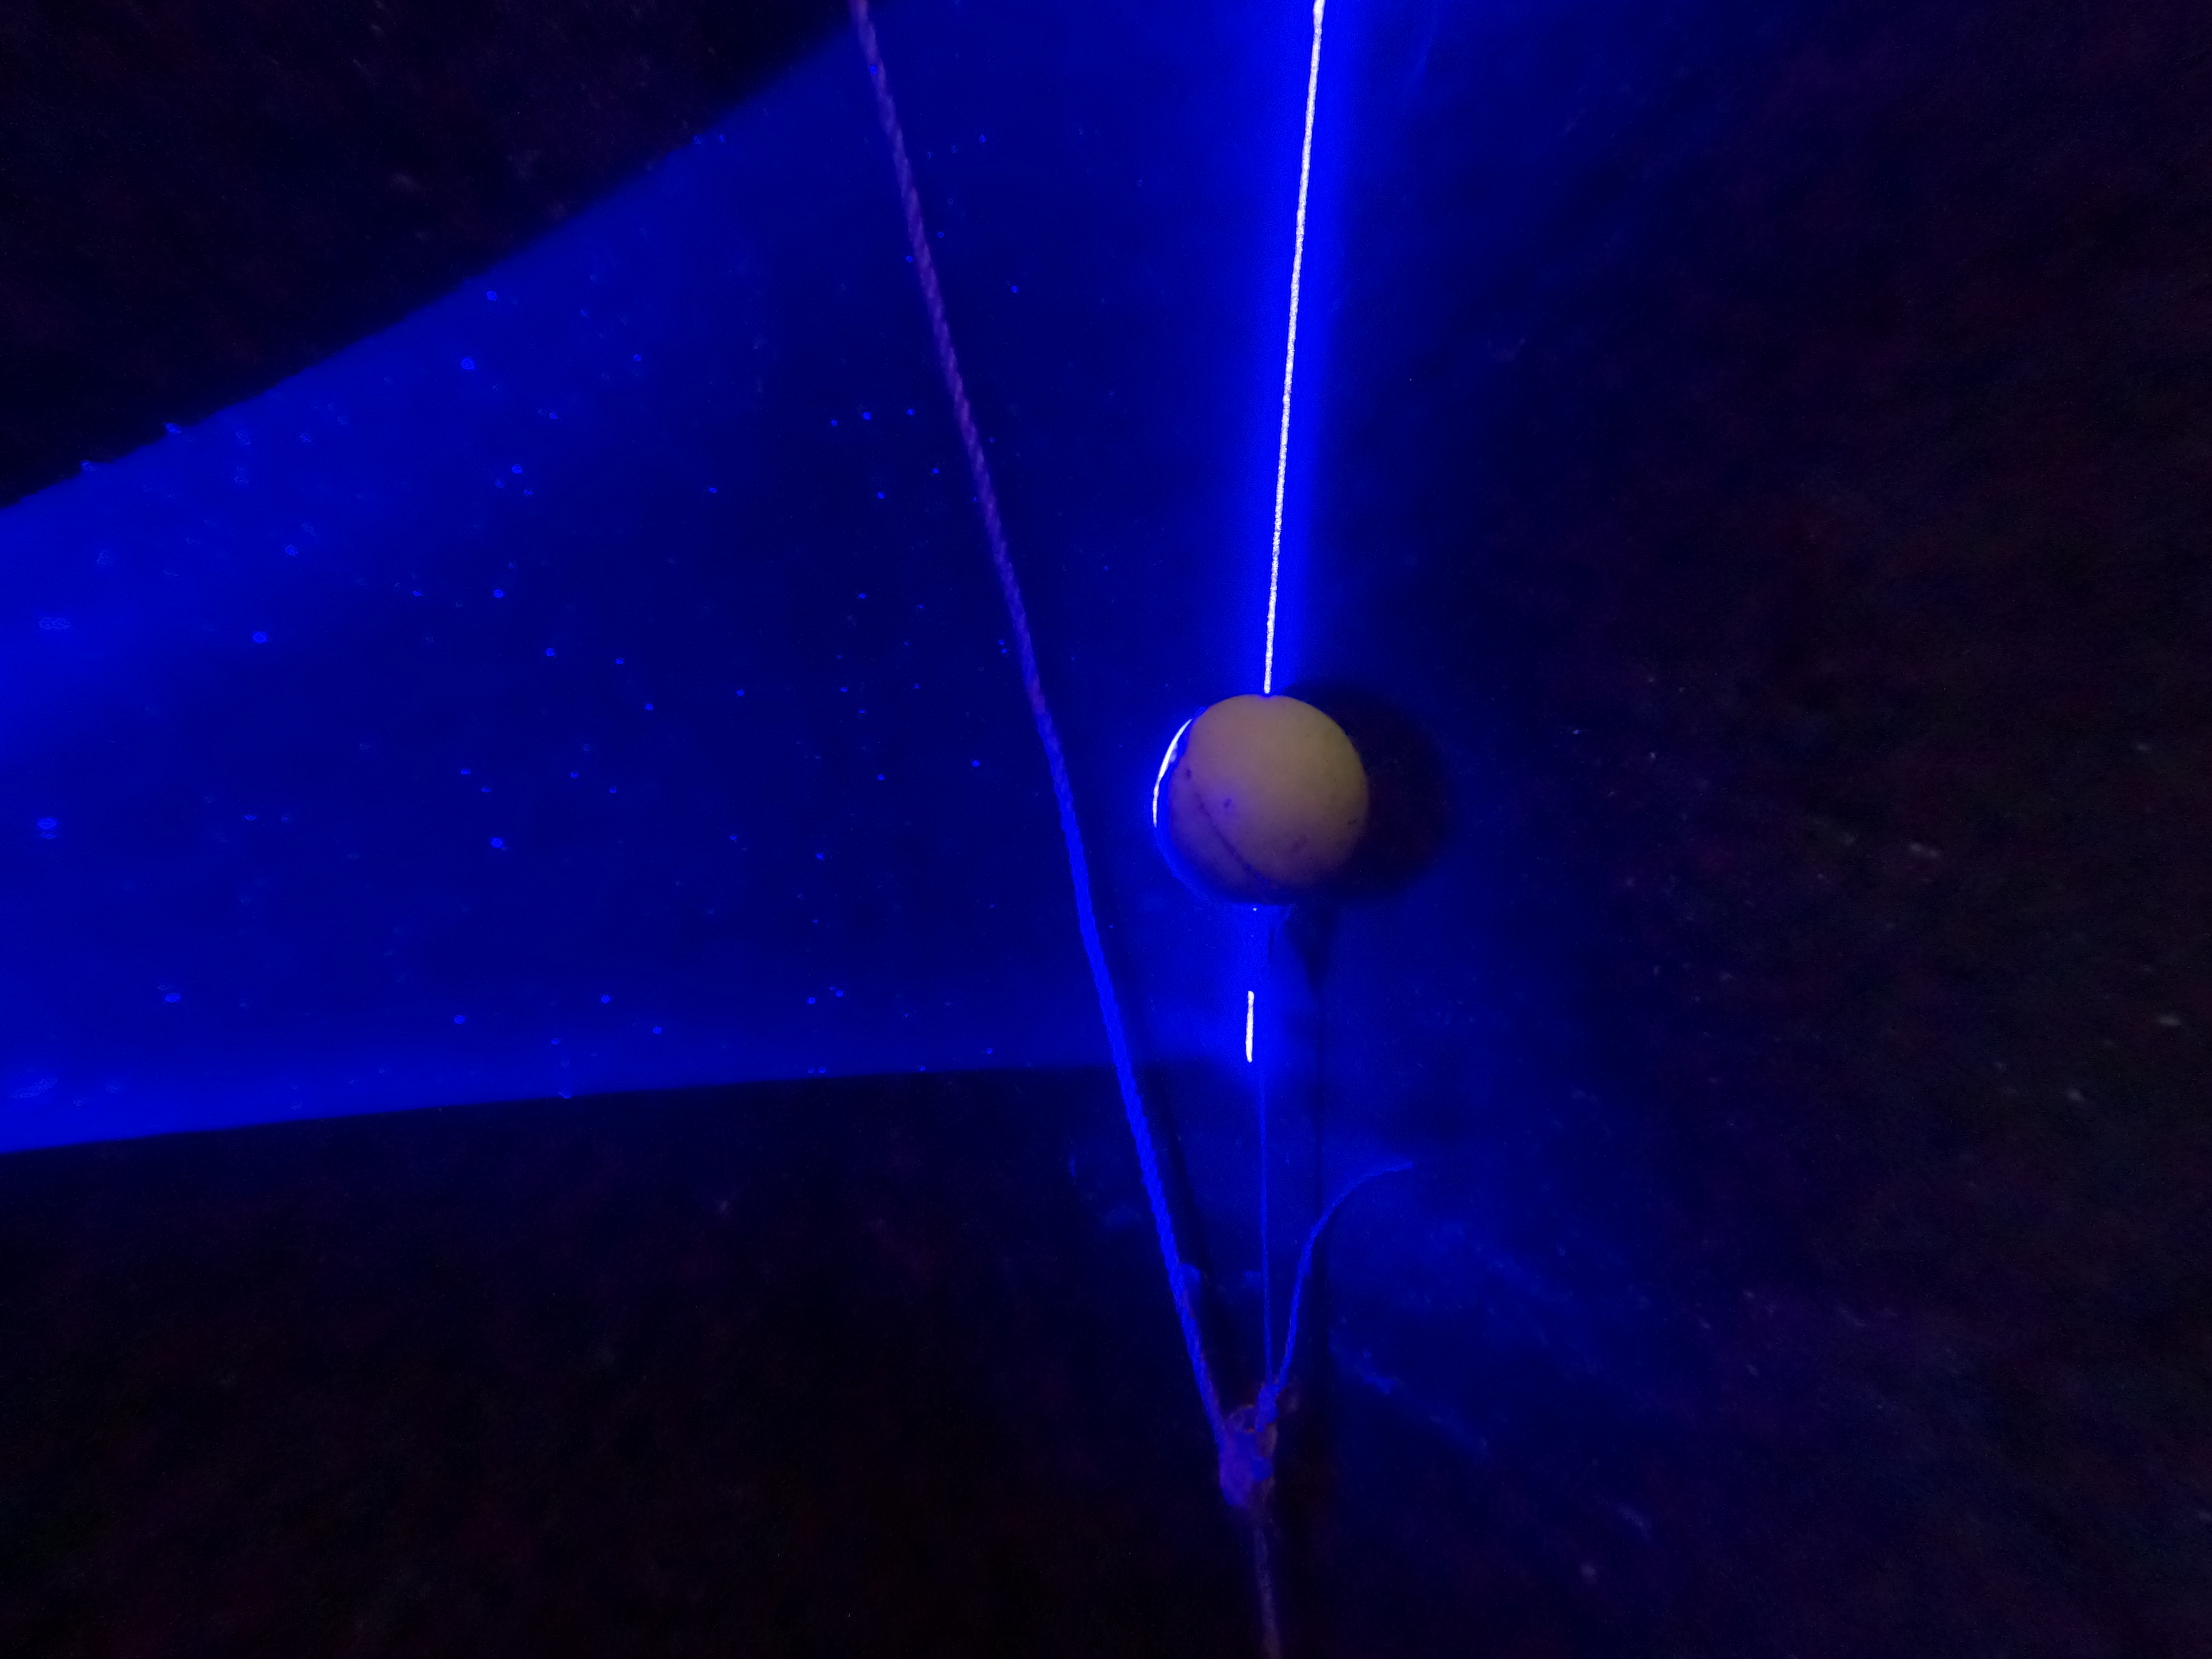

Supplement: Supplementary file 3530 [file G0030754.pdf › Level_1_1/G0030754.pdf]

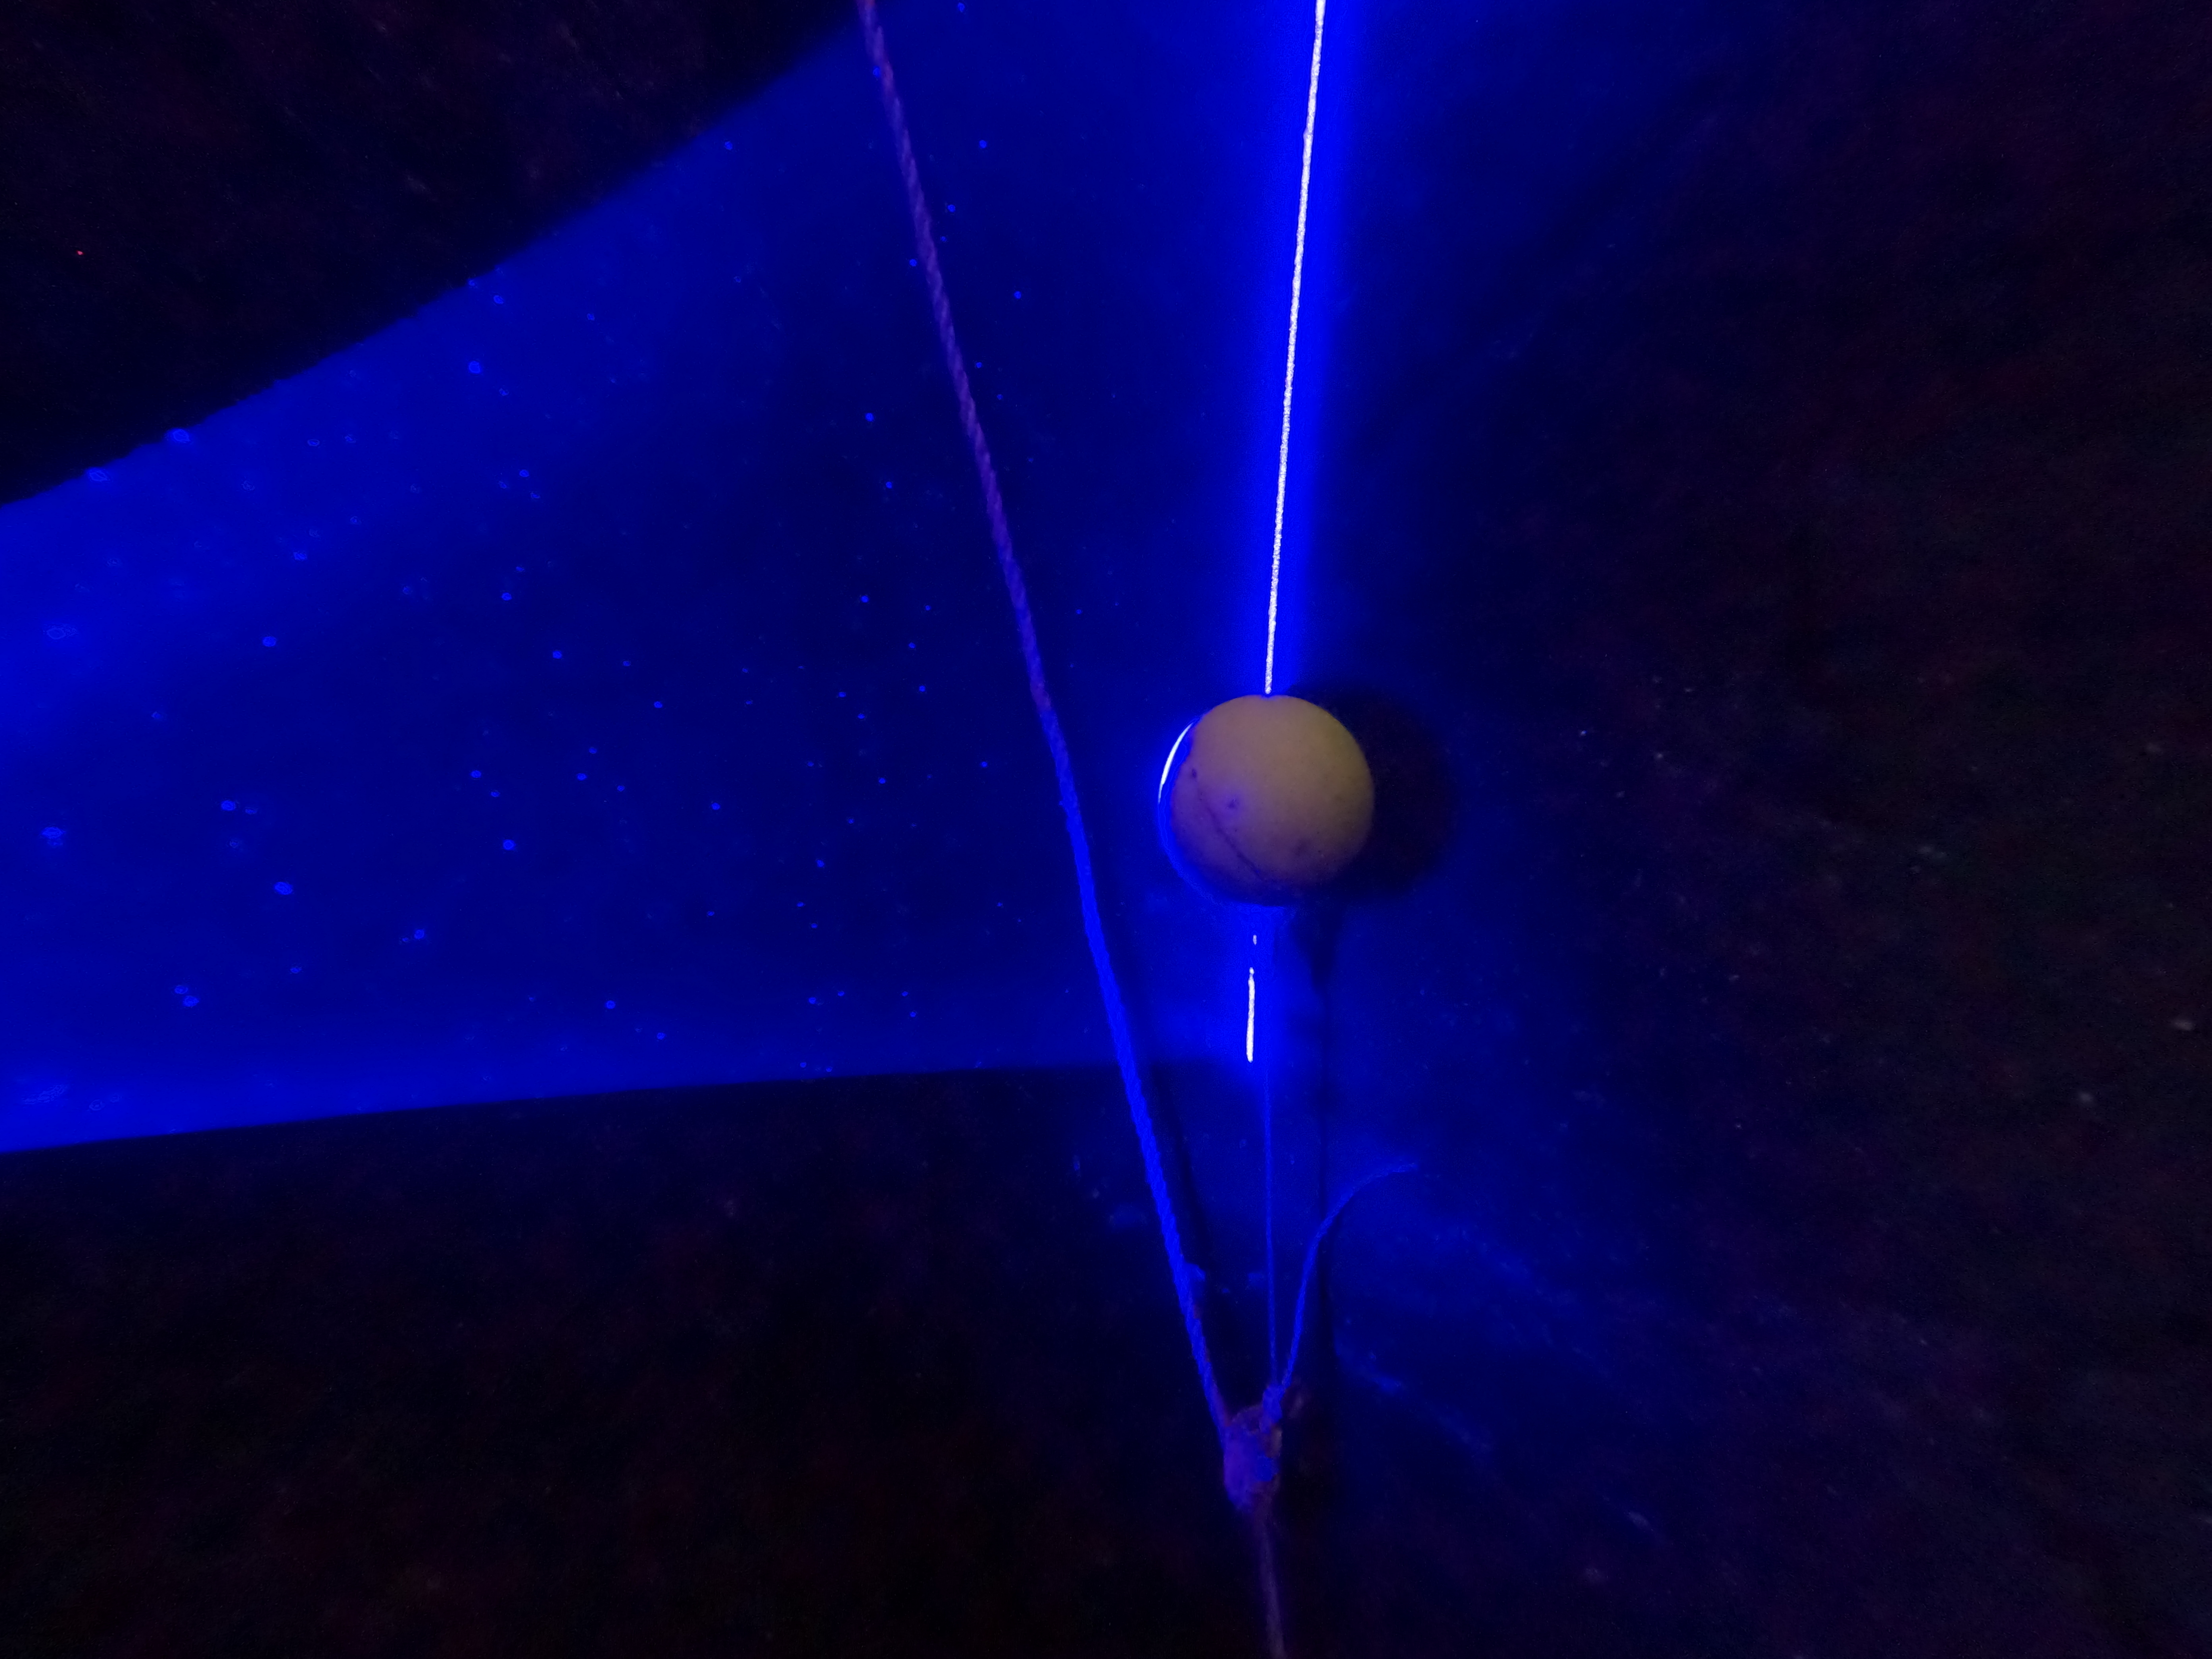

Supplement: Supplementary file 3531 [file G0030755.pdf › Level_1_1/G0030755.pdf]

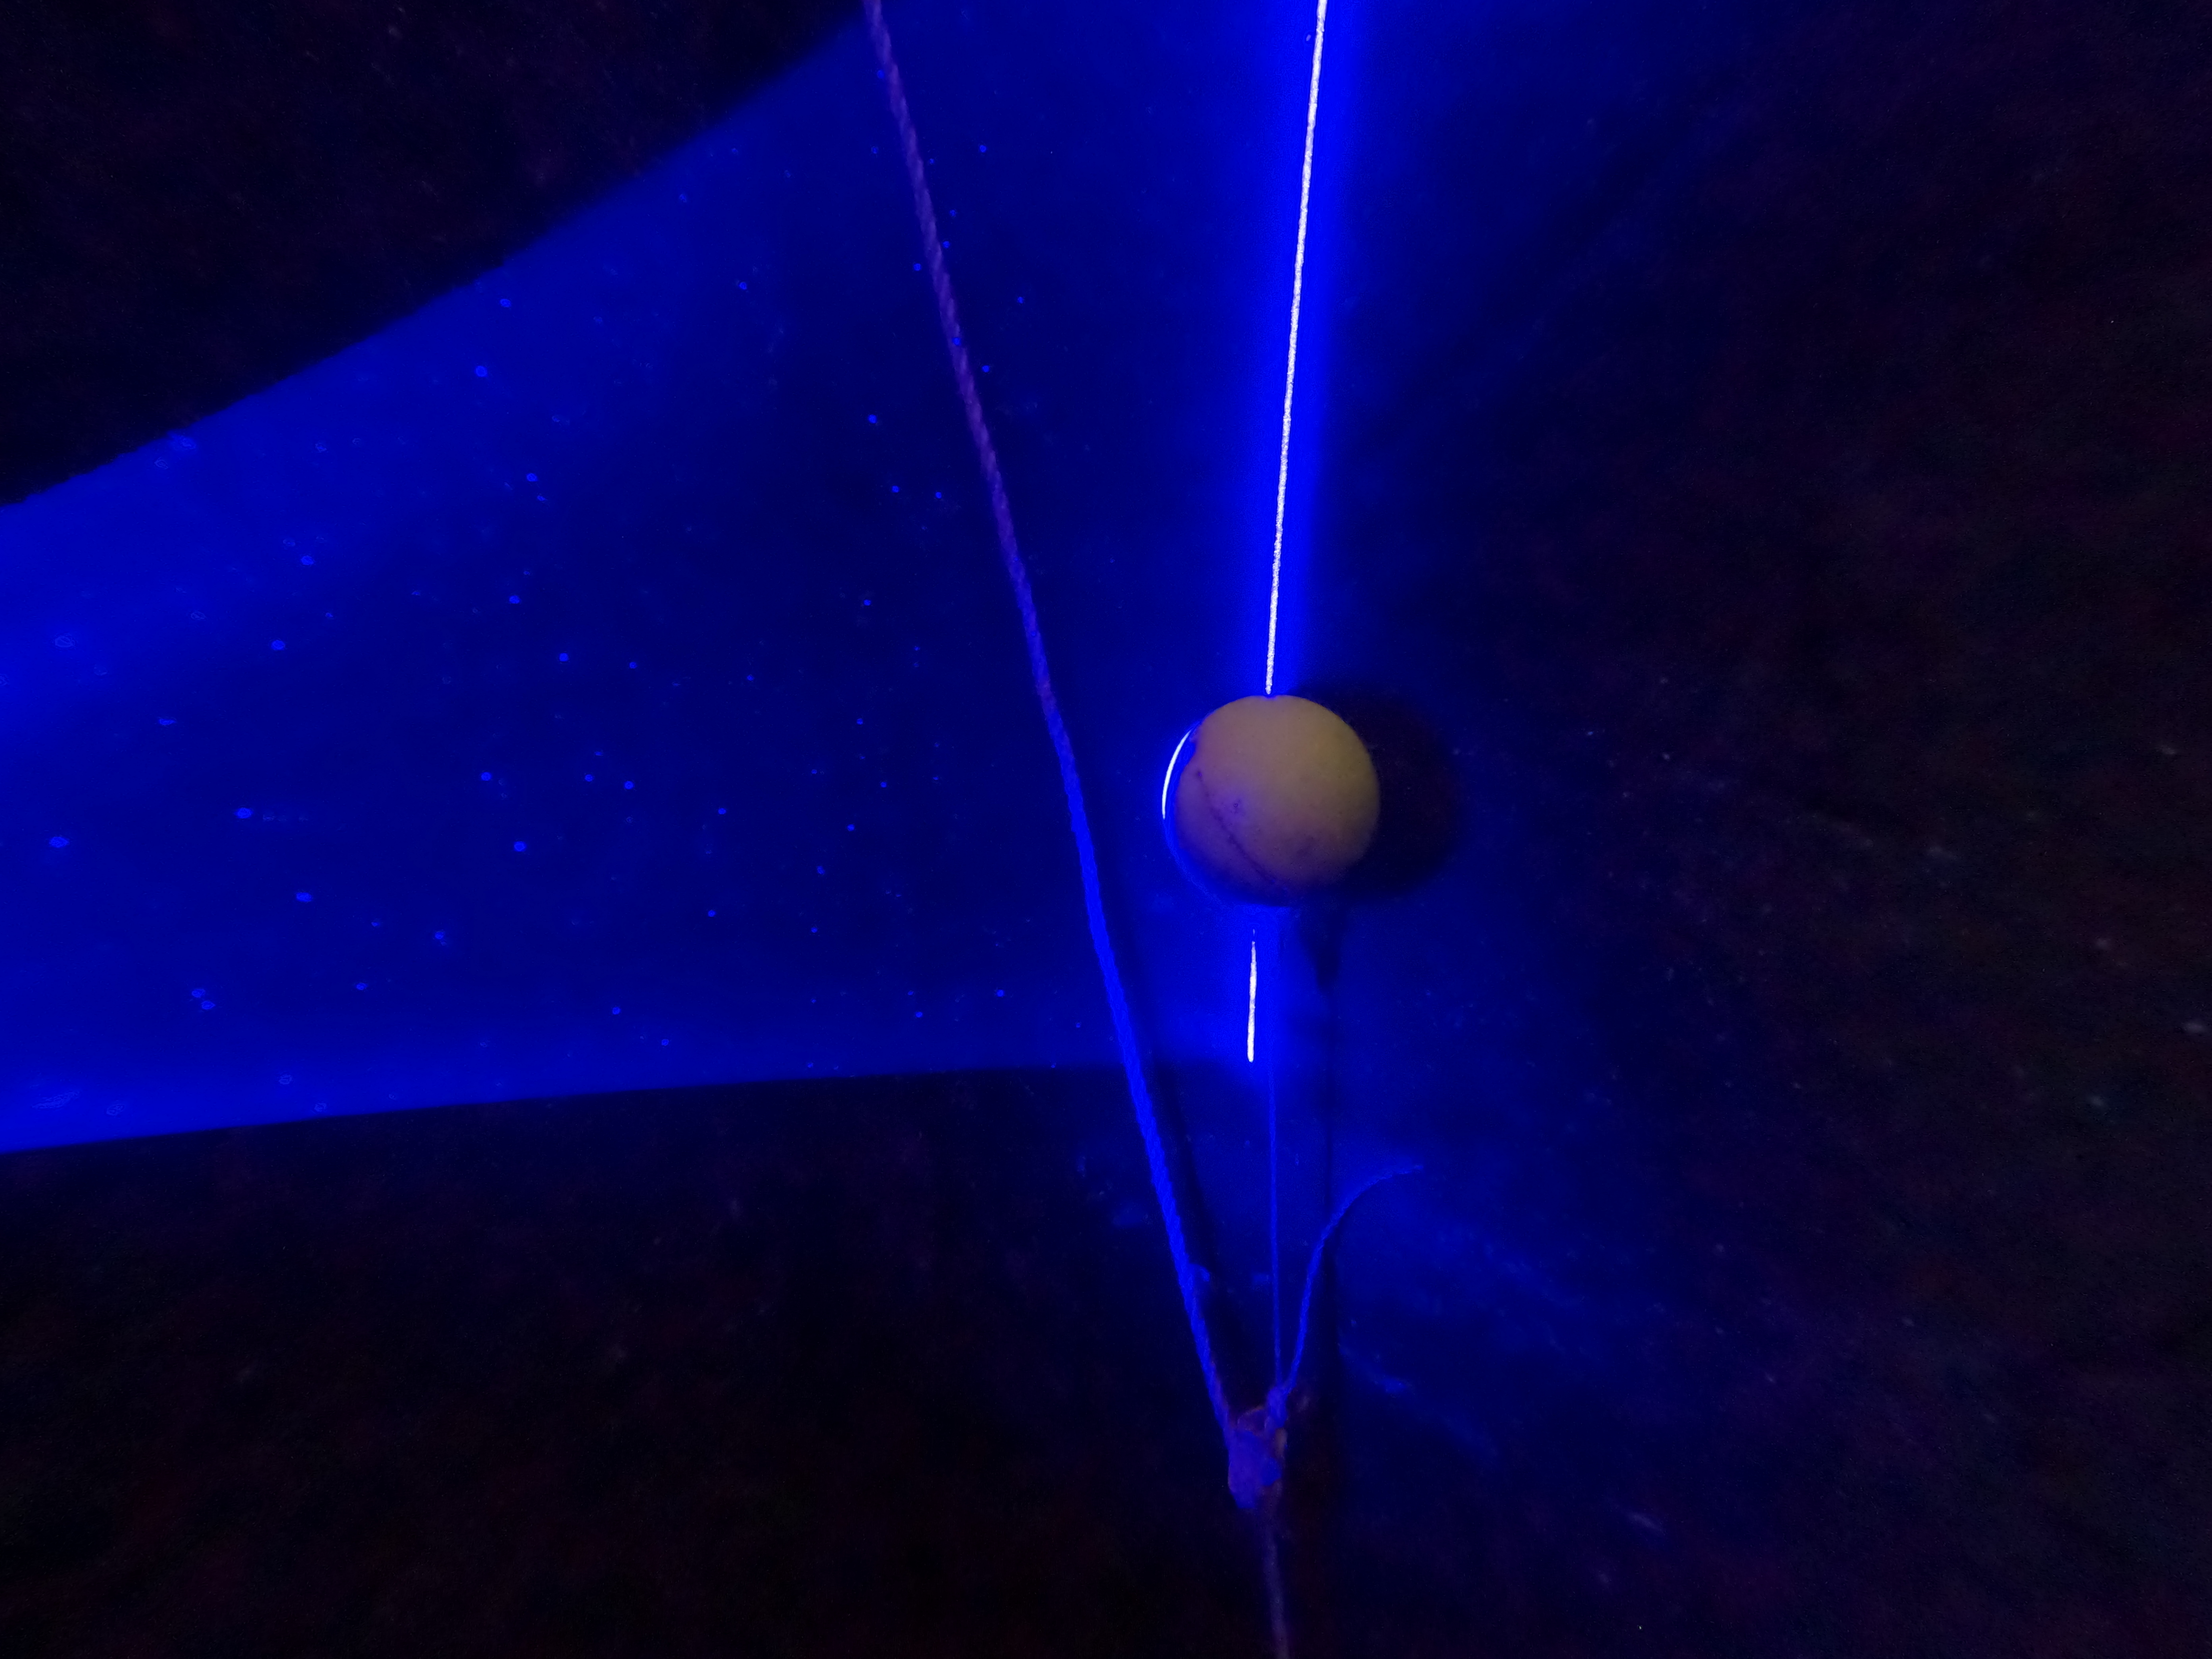

Supplement: Supplementary file 3532 [file G0030756.pdf › Level_1_1/G0030756.pdf]

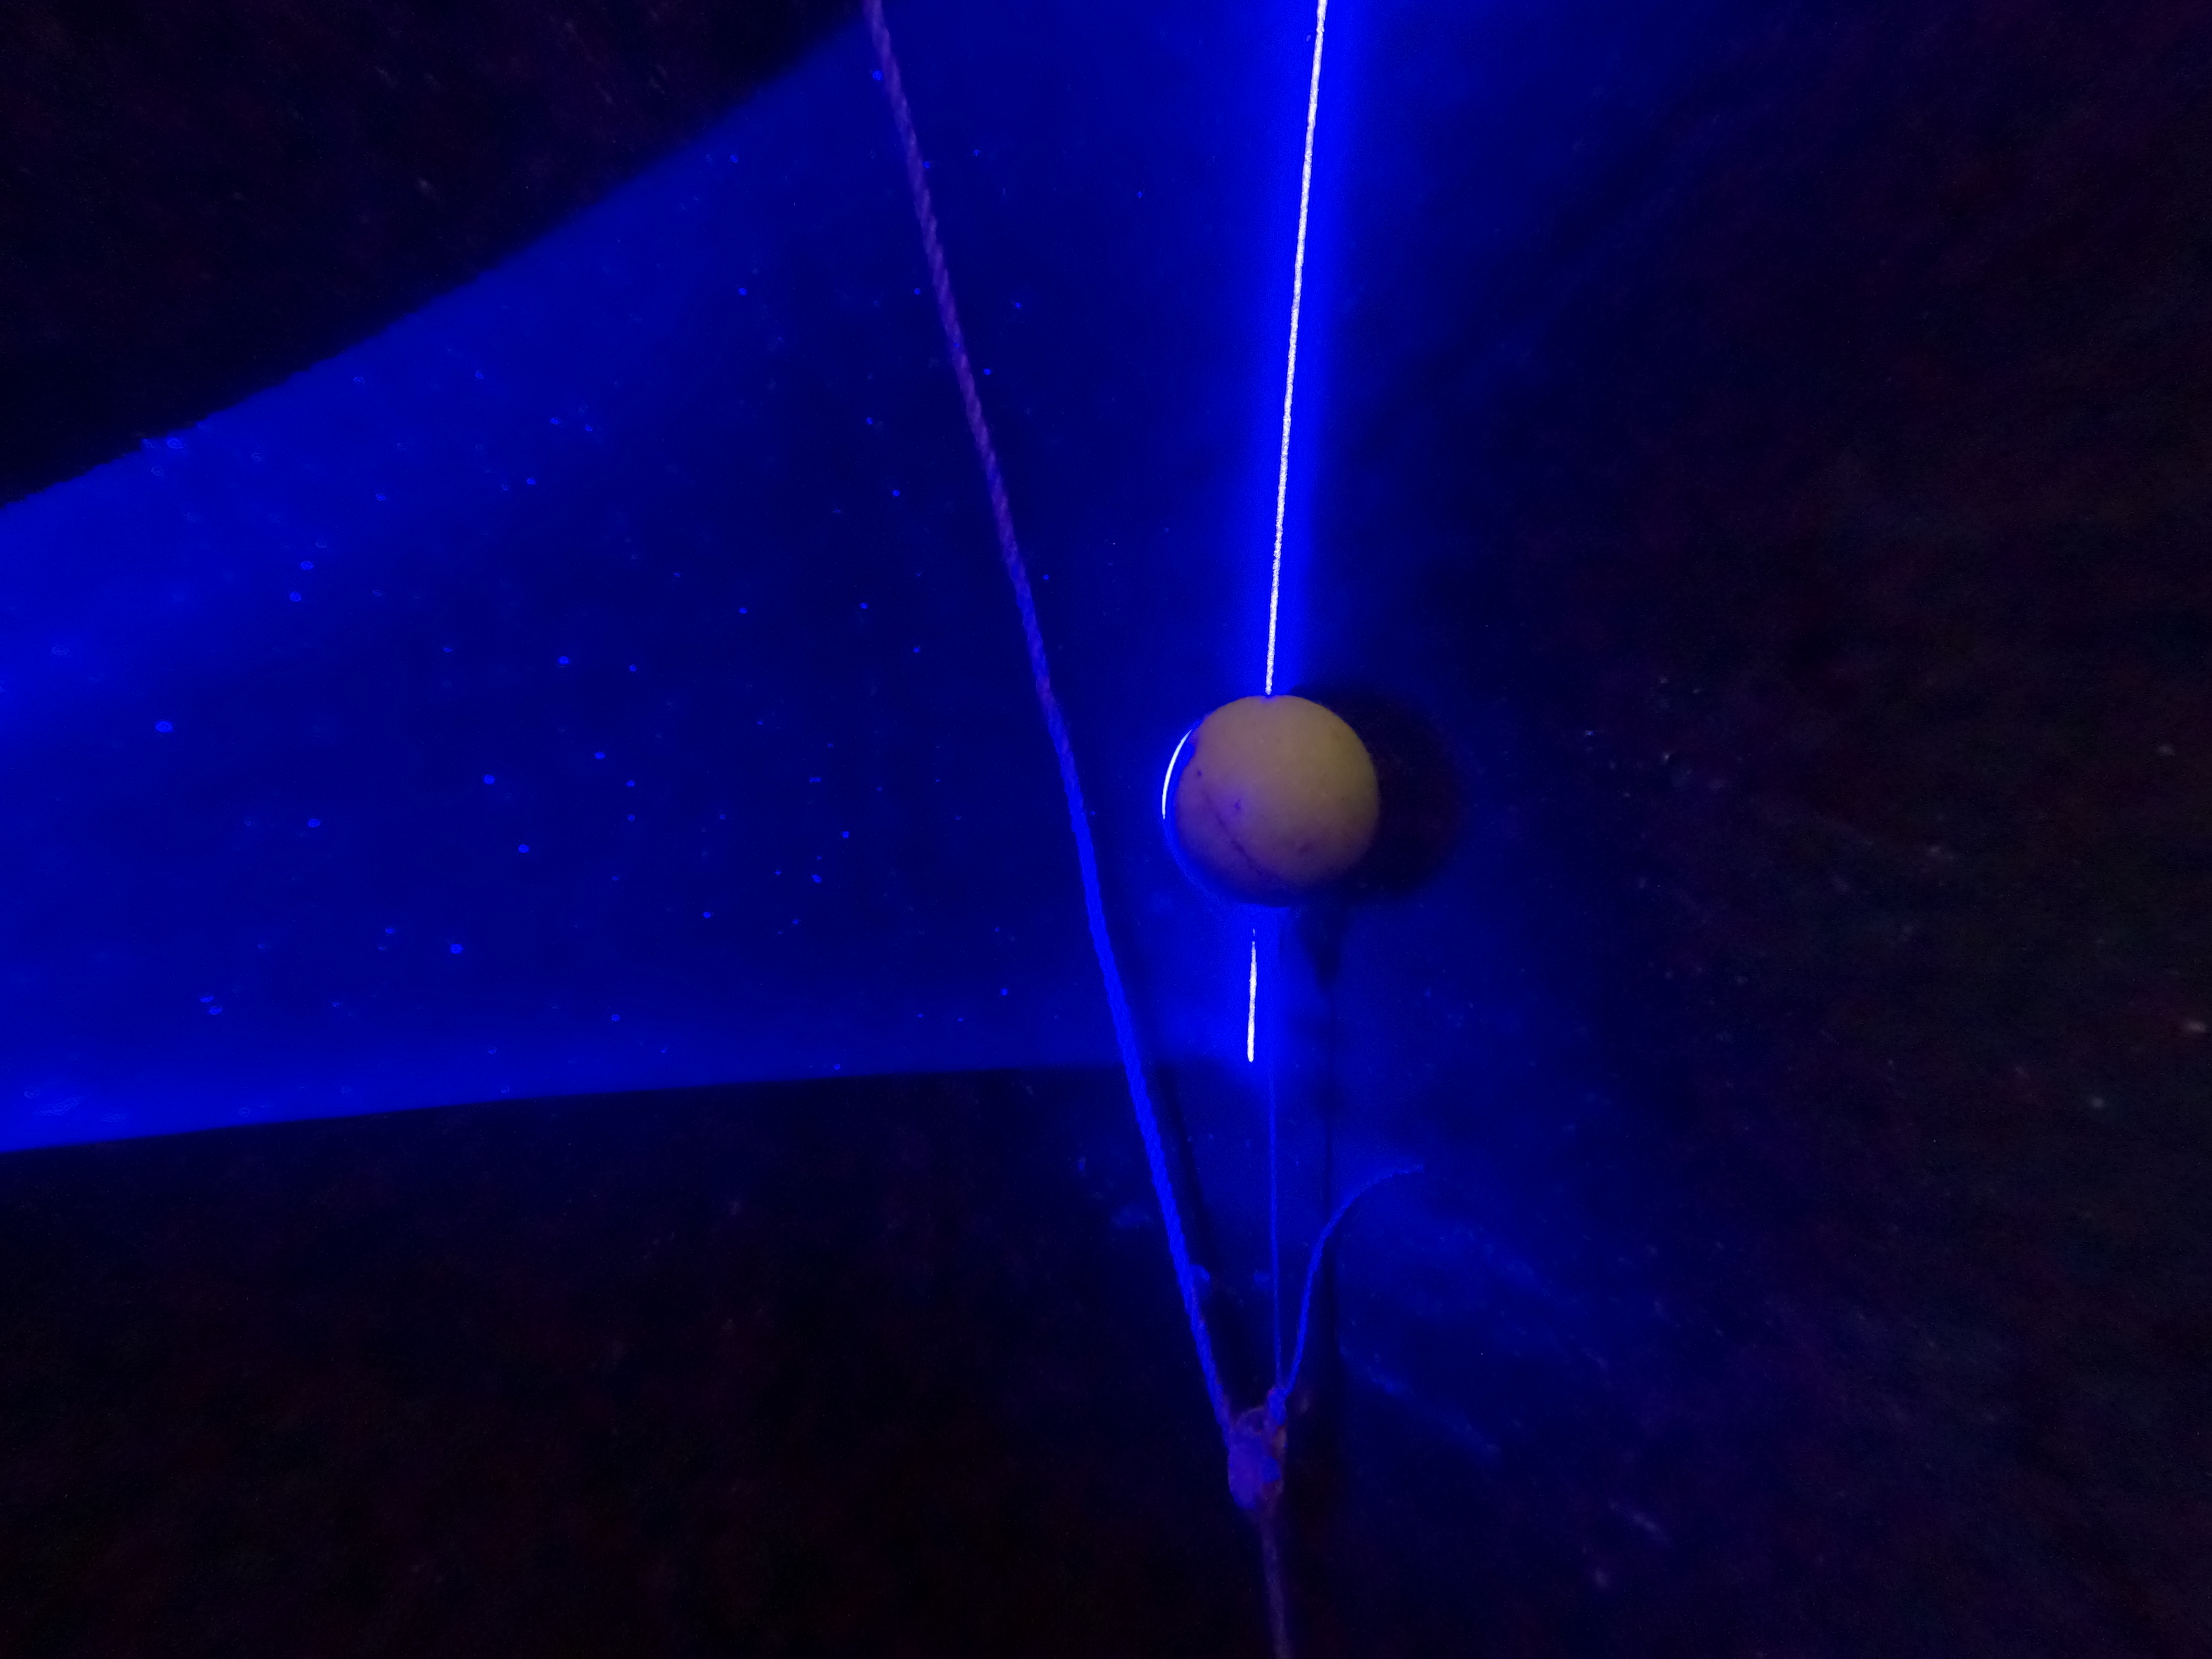

Supplement: Supplementary file 3533 [file G0030757.pdf › Level_1_1/G0030757.pdf]

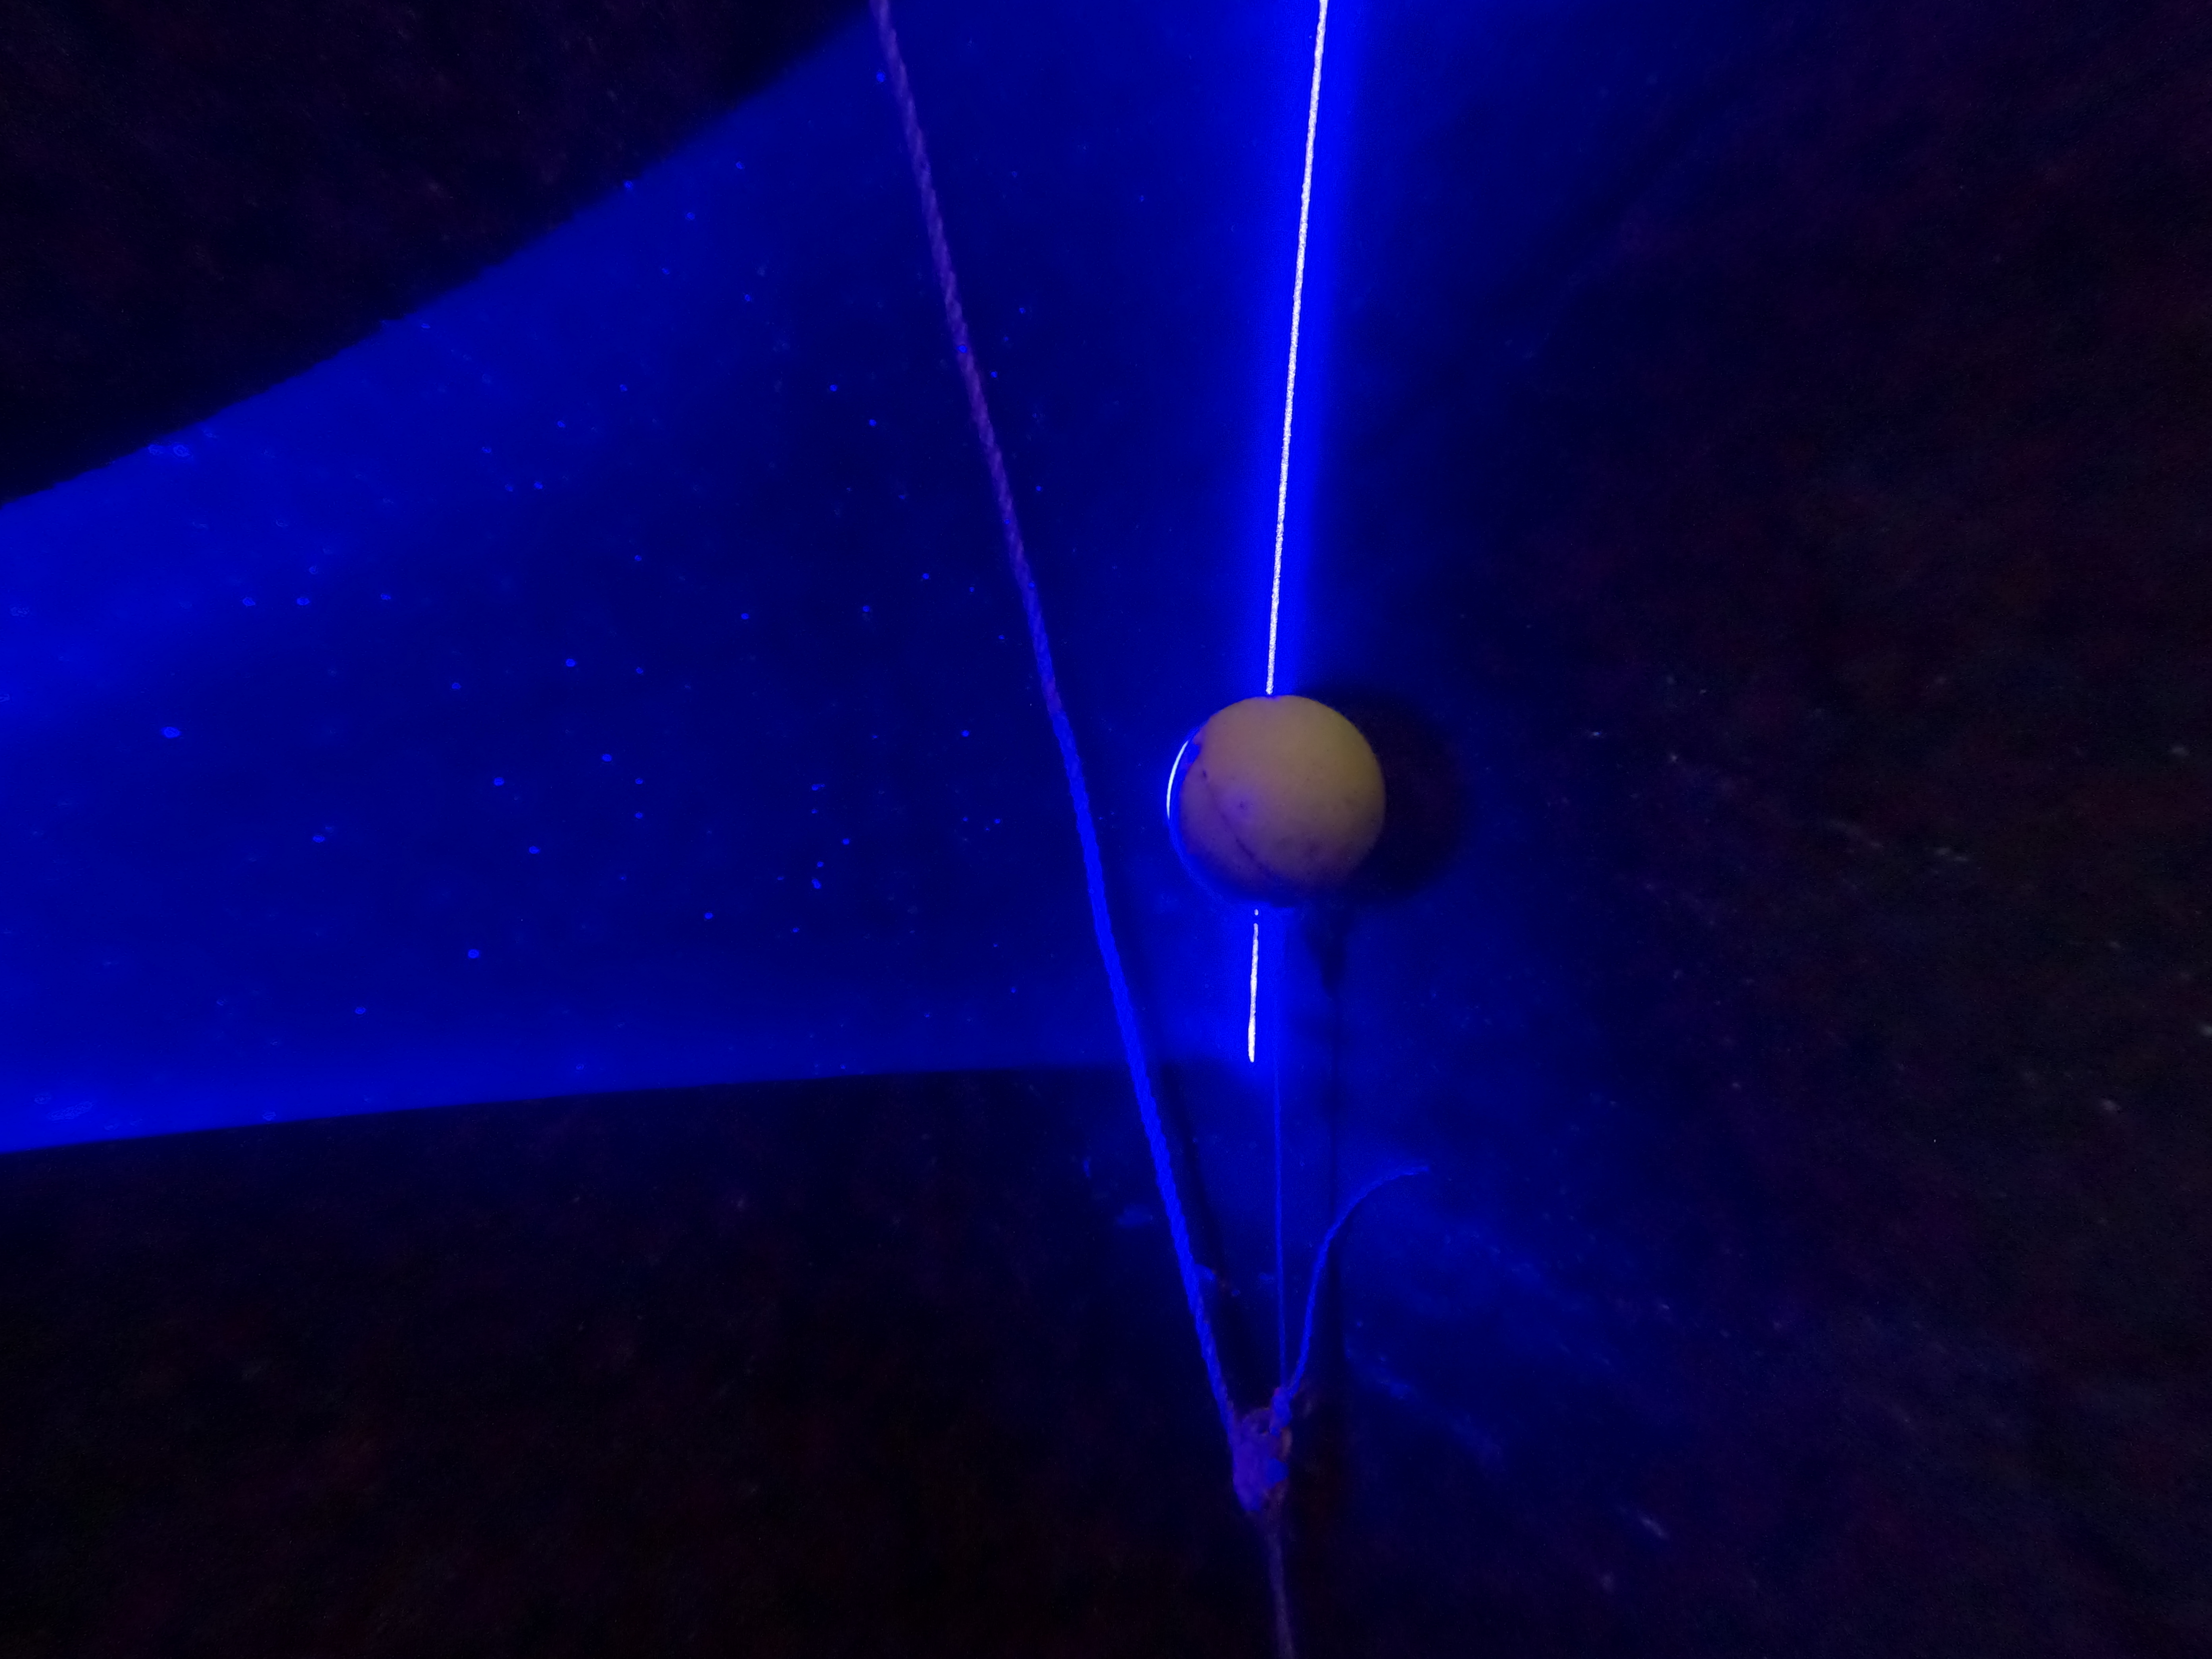

Supplement: Supplementary file 3534 [file G0030758.pdf › Level_1_1/G0030758.pdf]

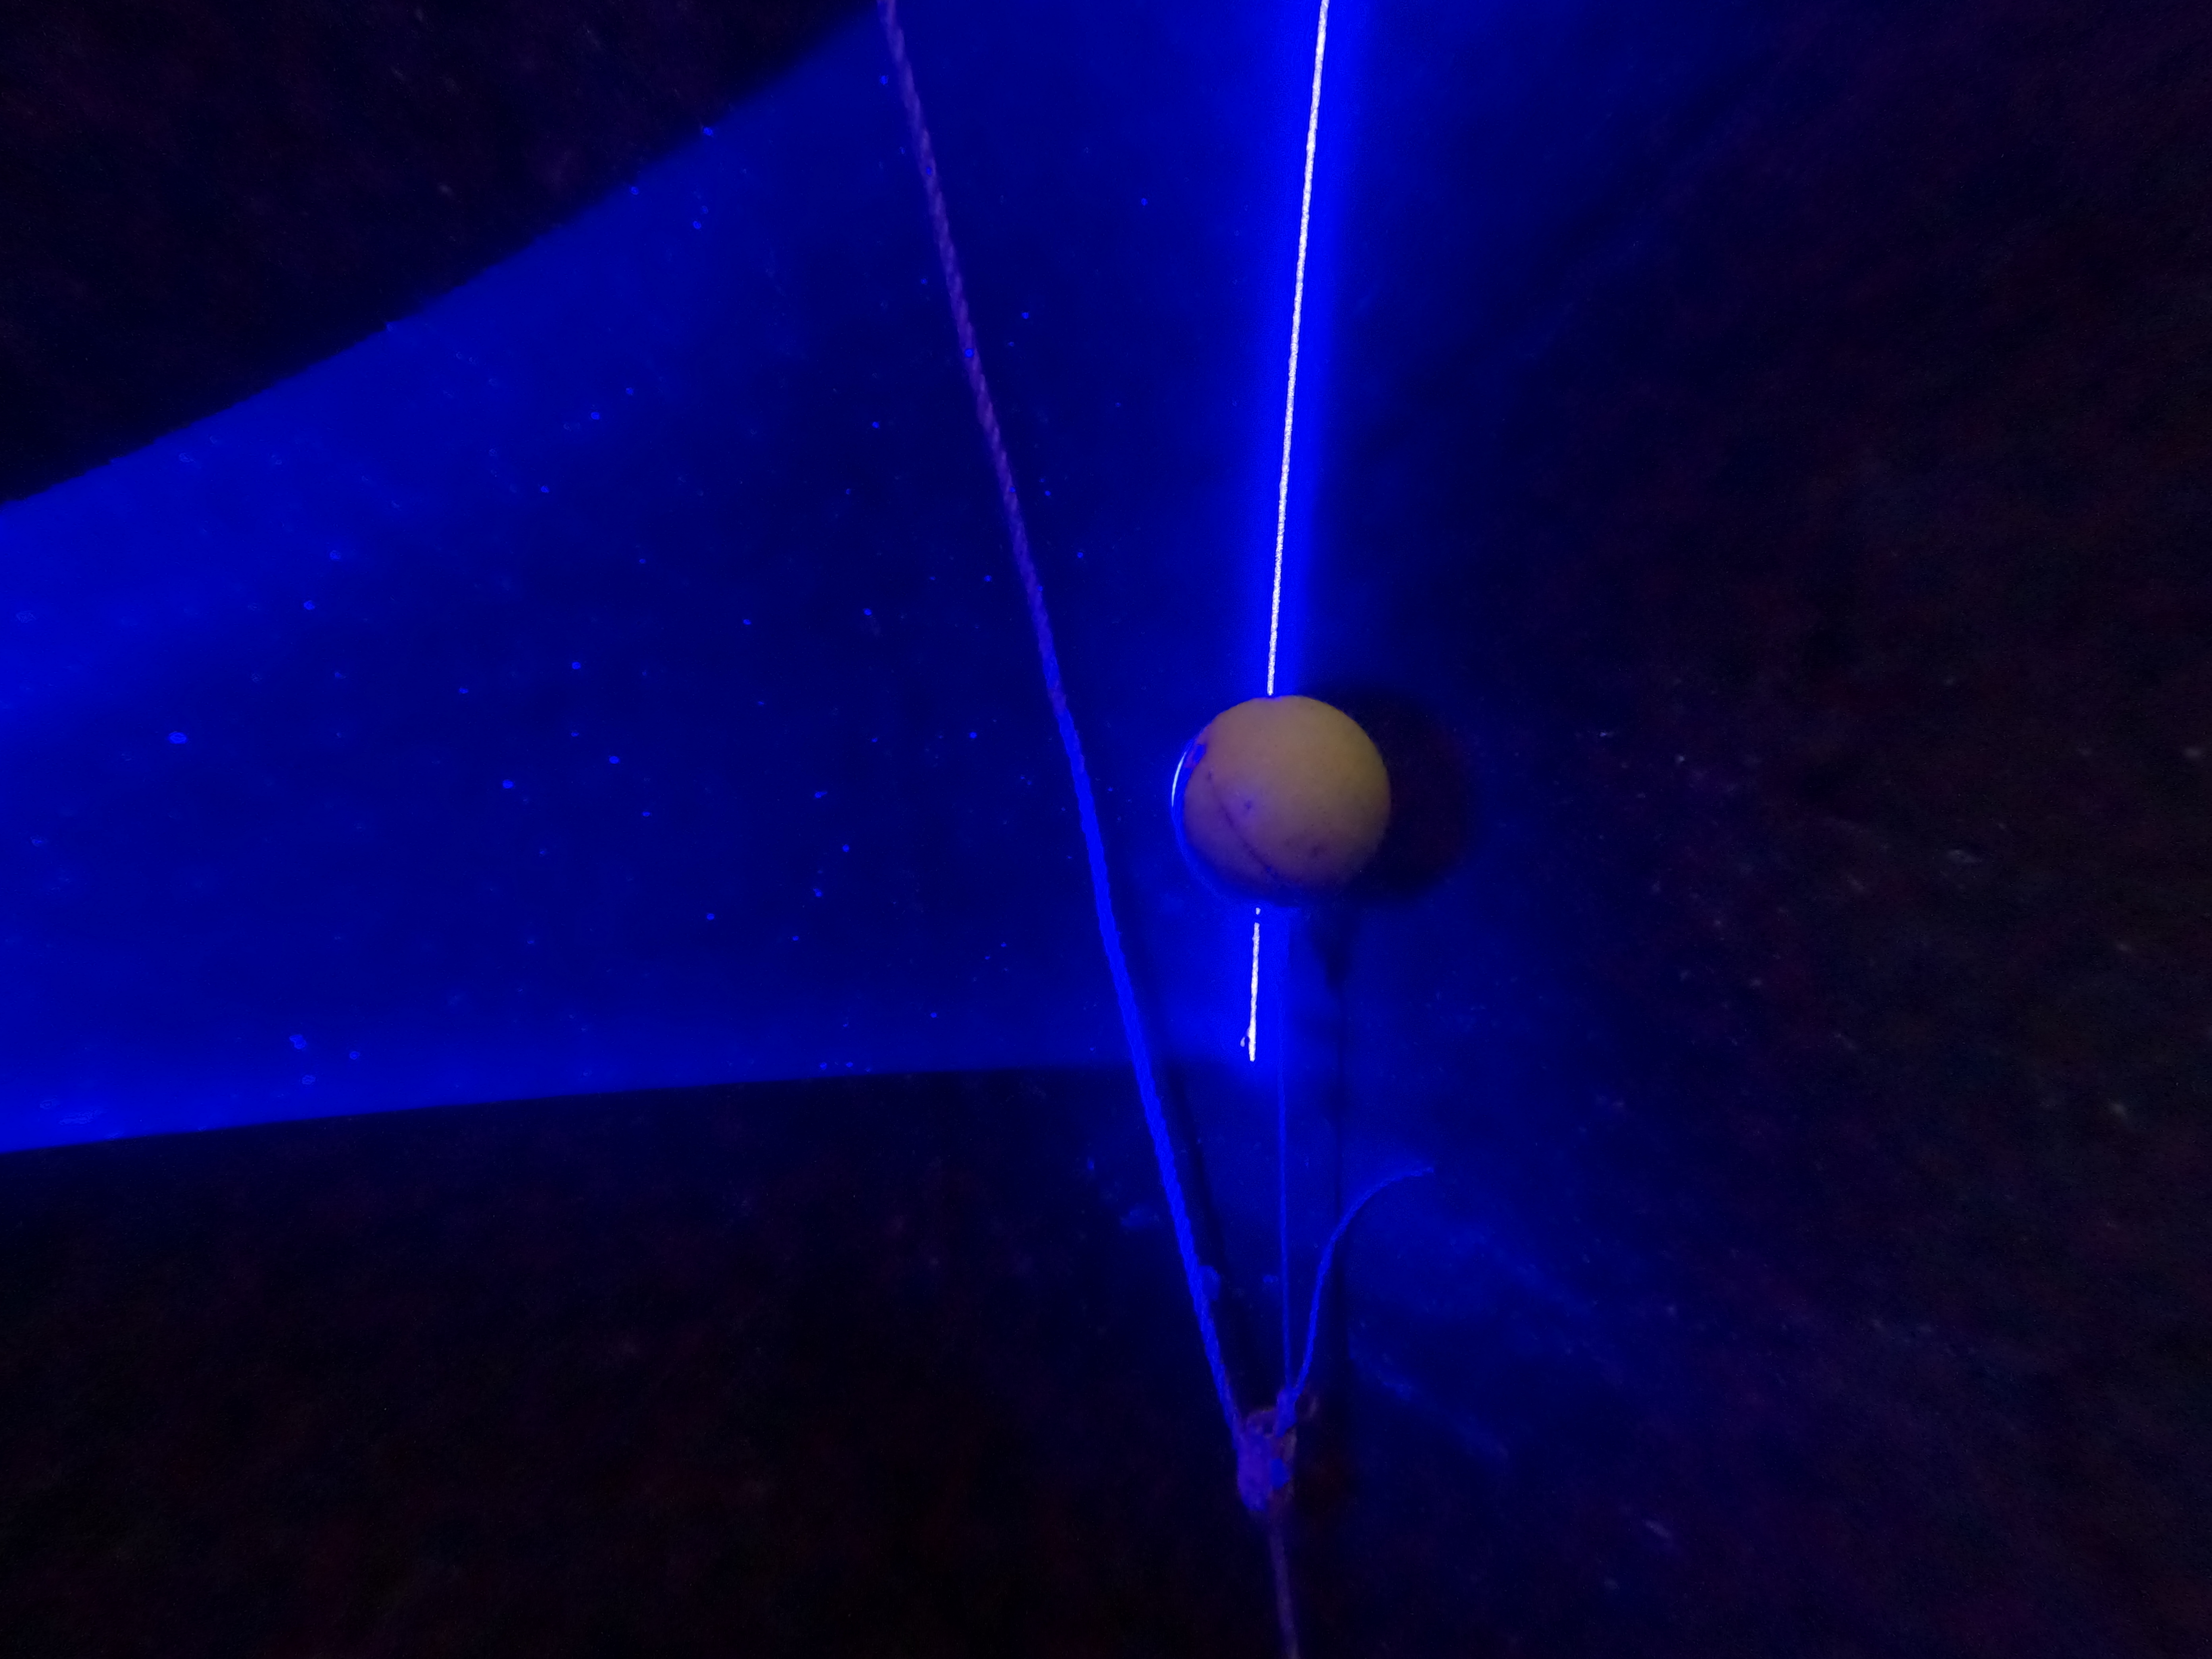

Supplement: Supplementary file 3535 [file G0030759.pdf › Level_1_1/G0030759.pdf]

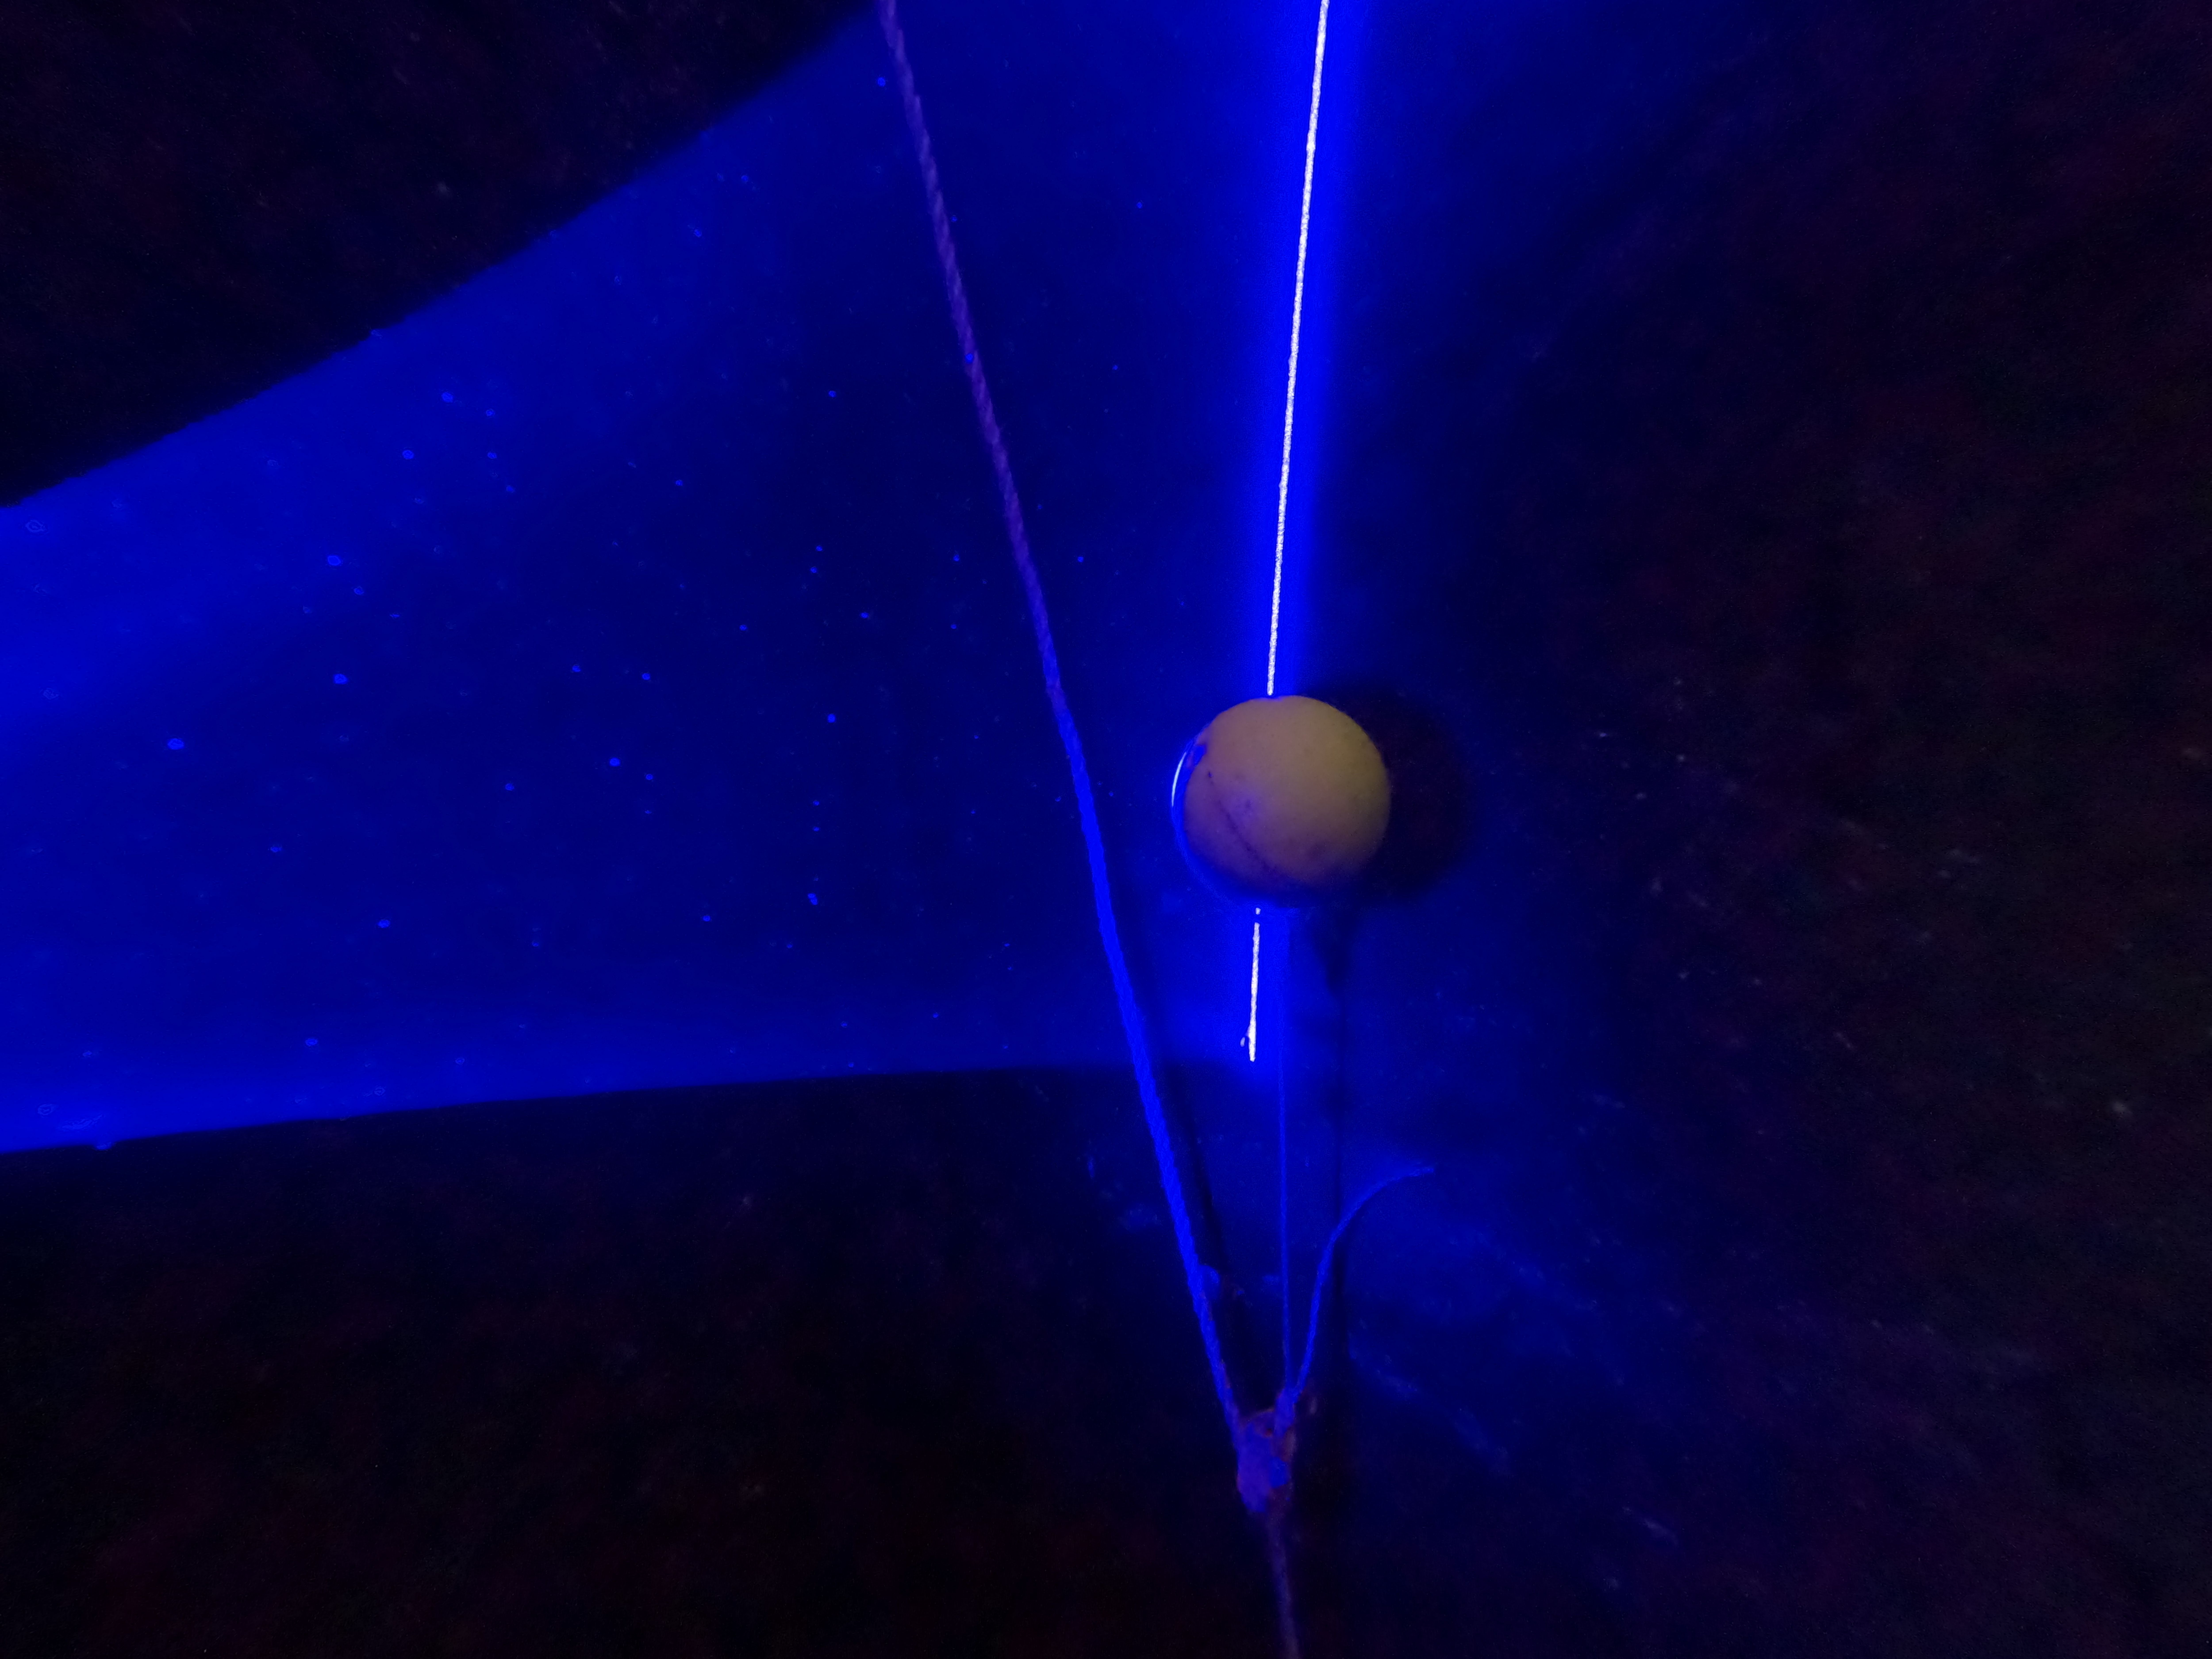

Supplement: Supplementary file 3536 [file G0030760.pdf › Level_1_1/G0030760.pdf]

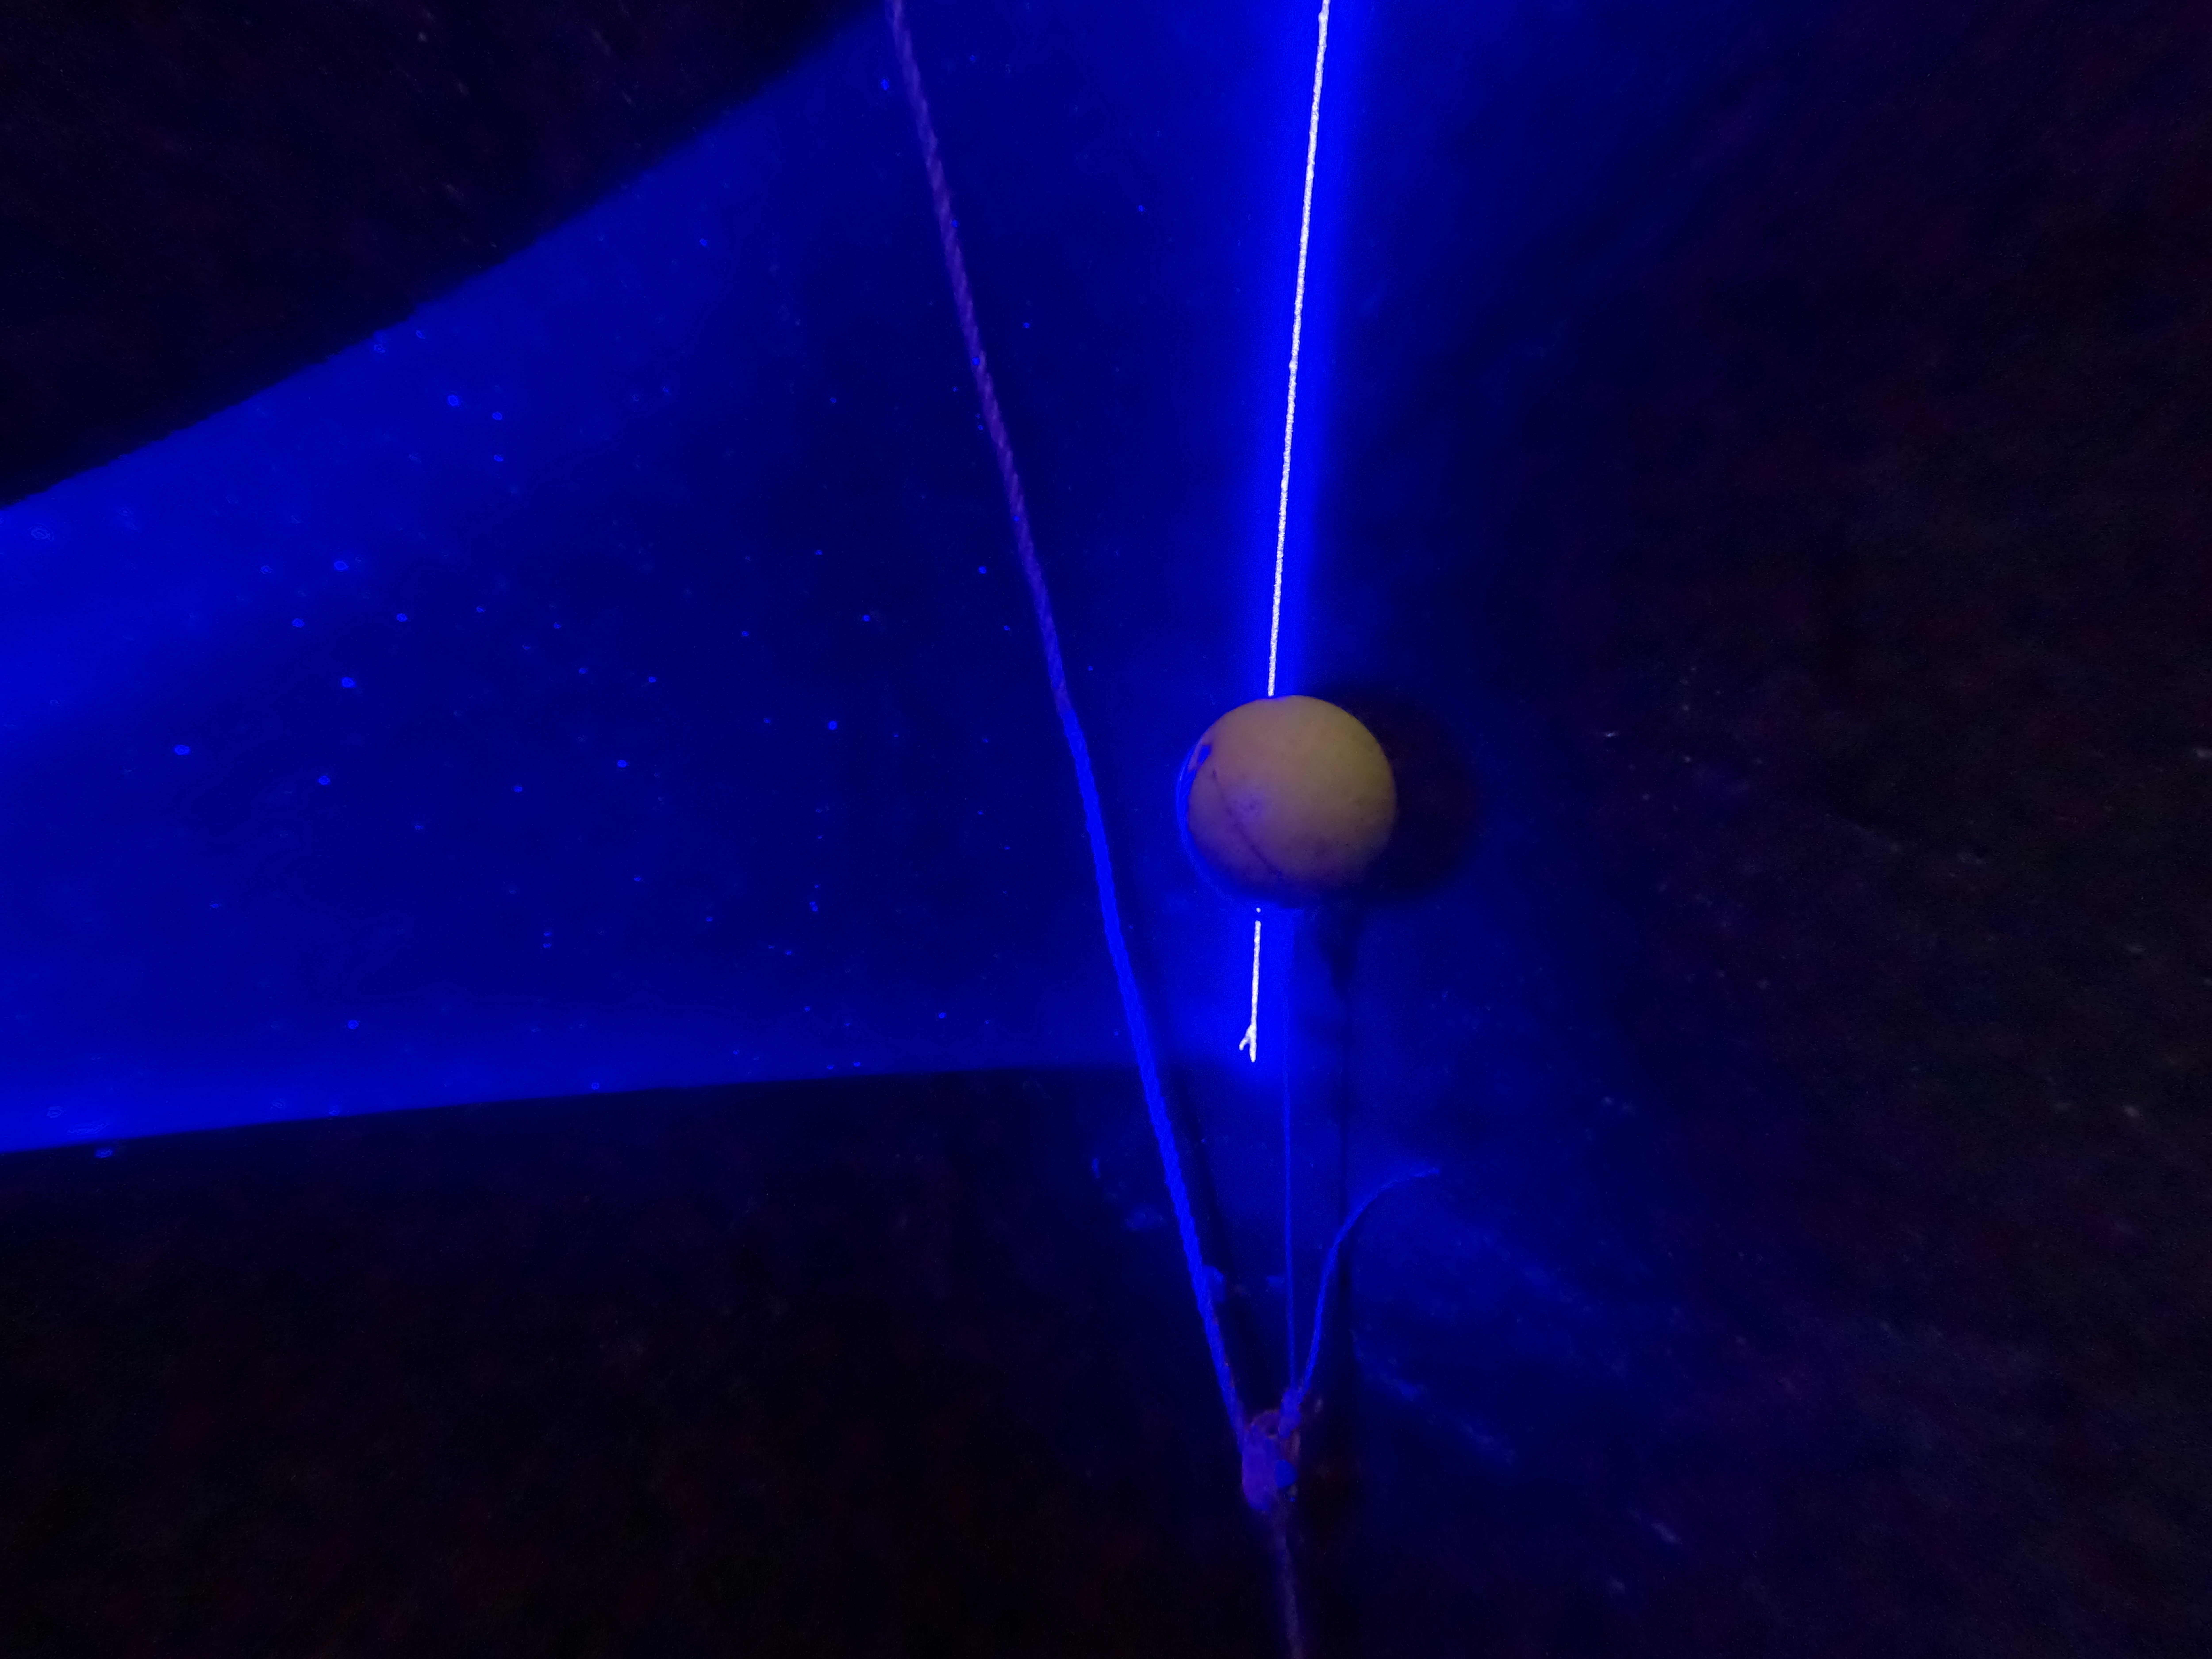

Supplement: Supplementary file 3537 [file G0030761.pdf › Level_1_1/G0030761.pdf]

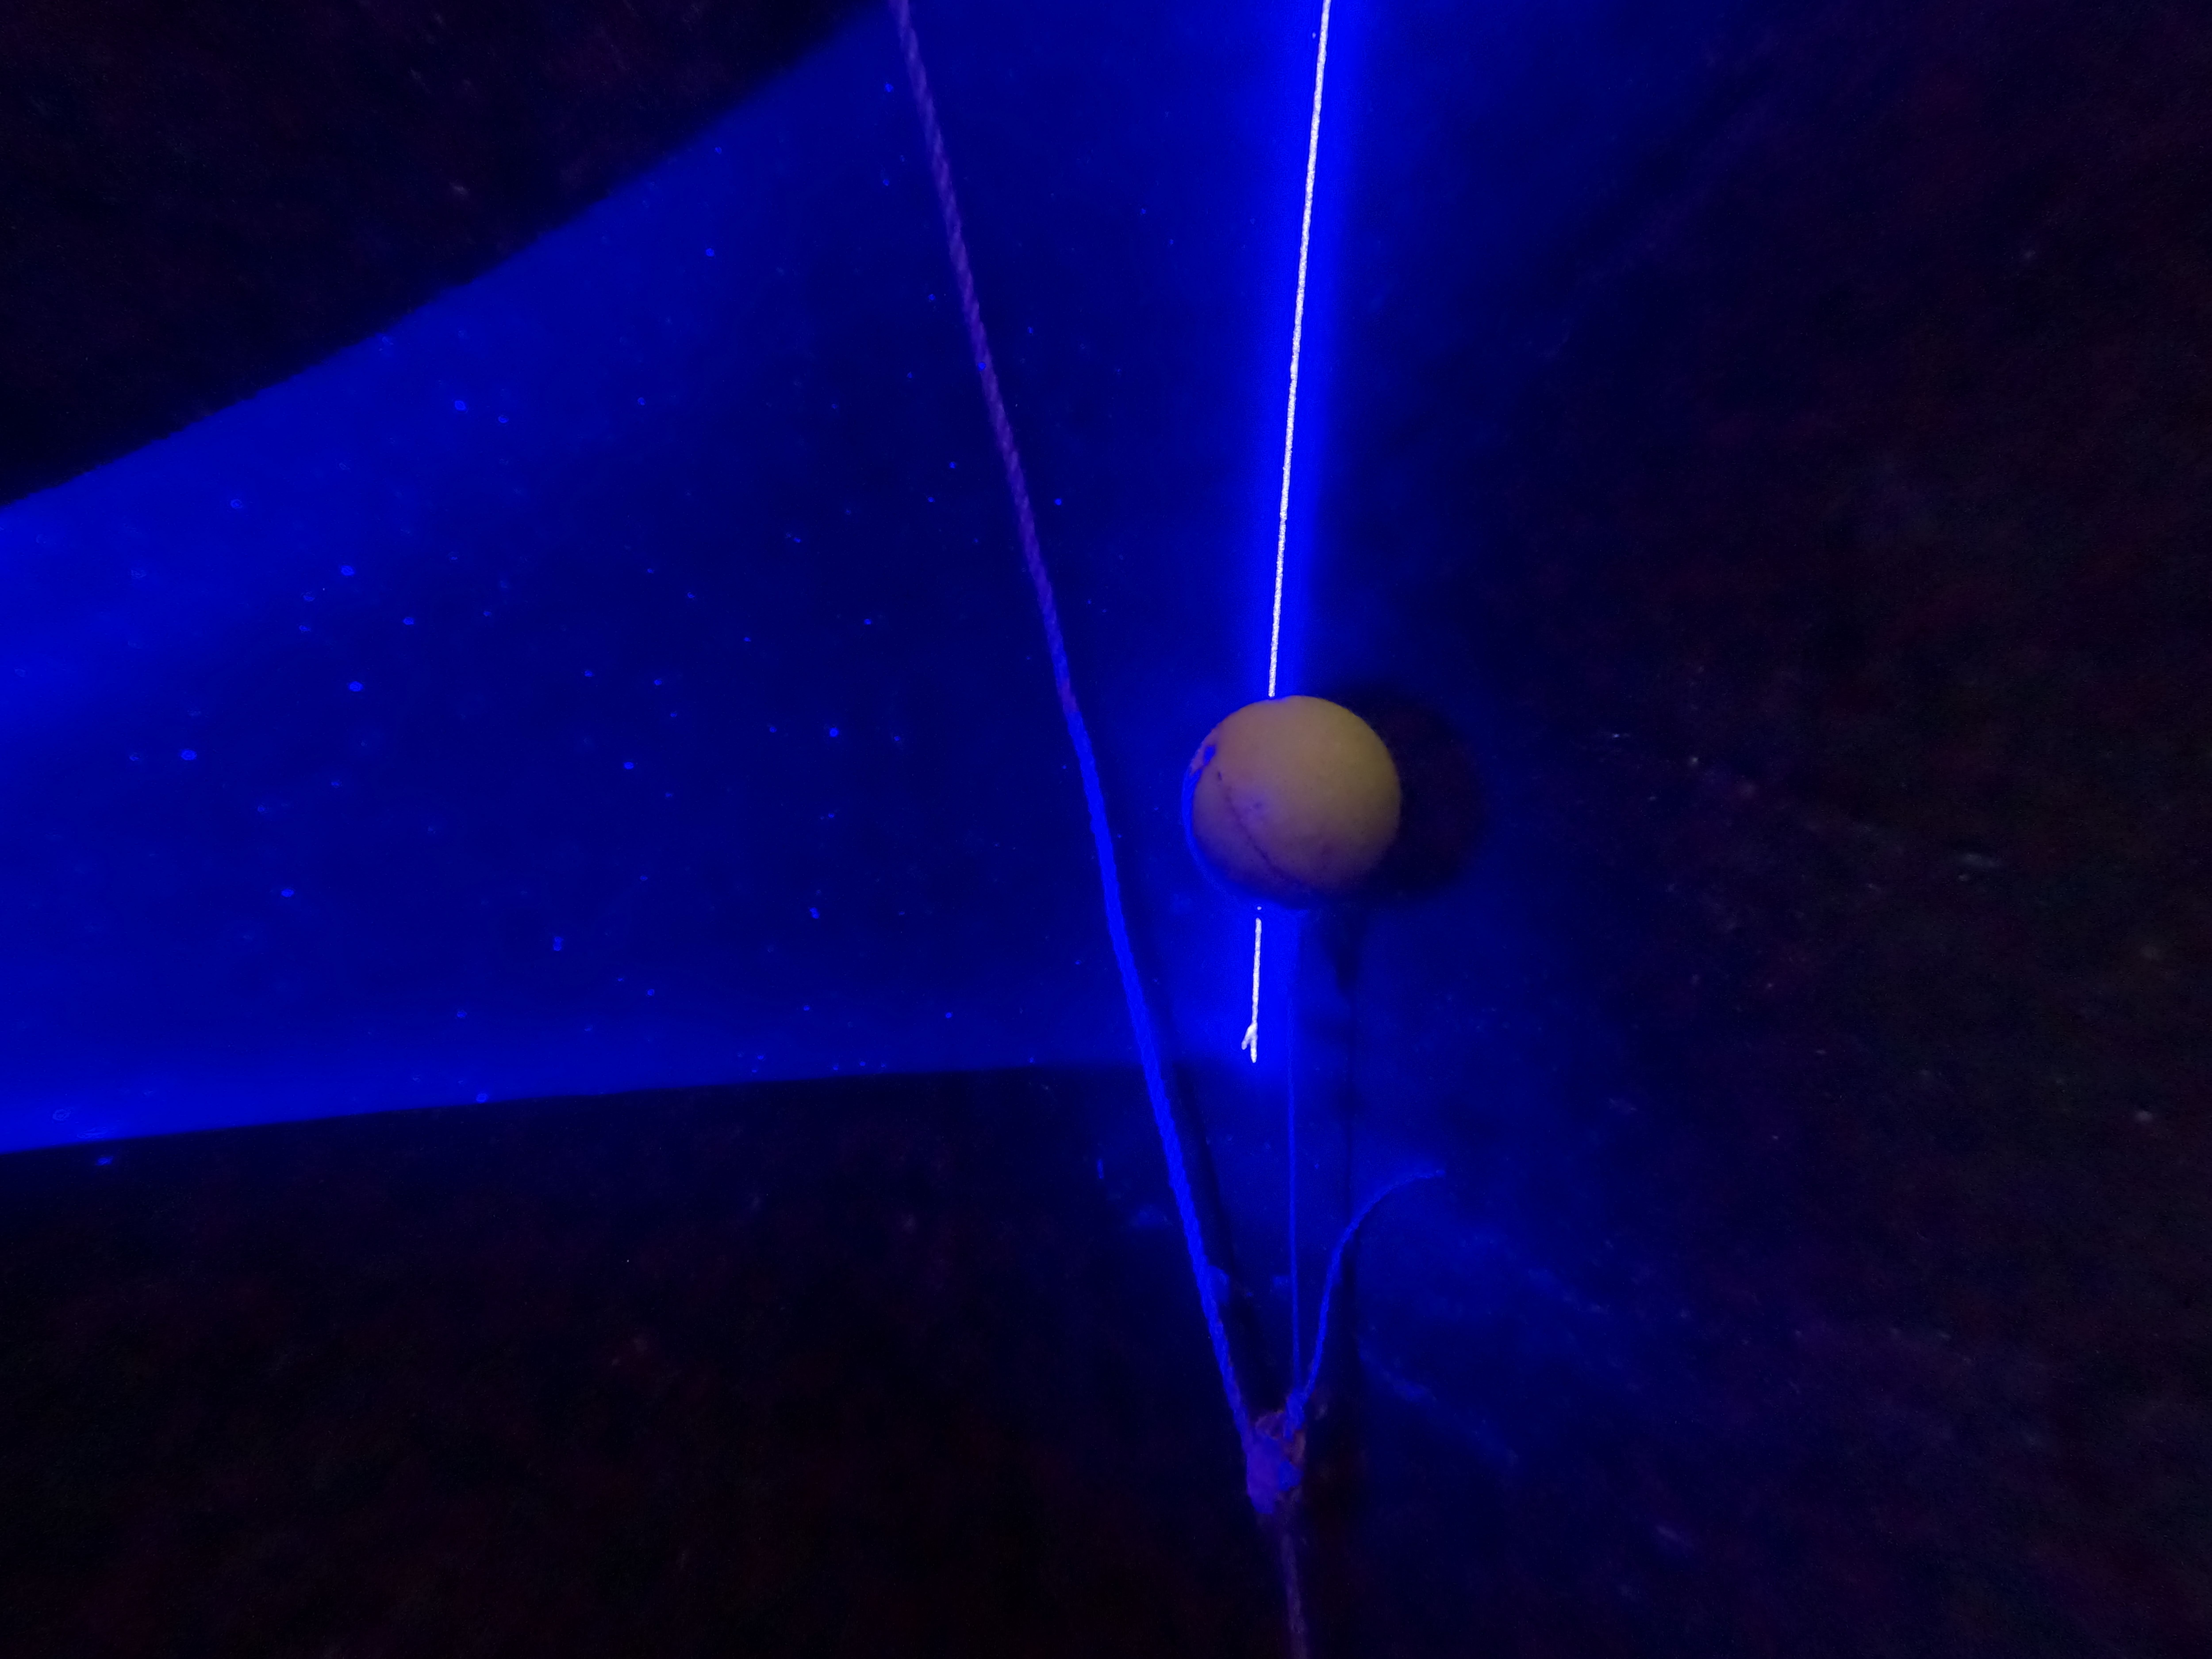

Supplement: Supplementary file 3538 [file G0030762.pdf › Level_1_1/G0030762.pdf]

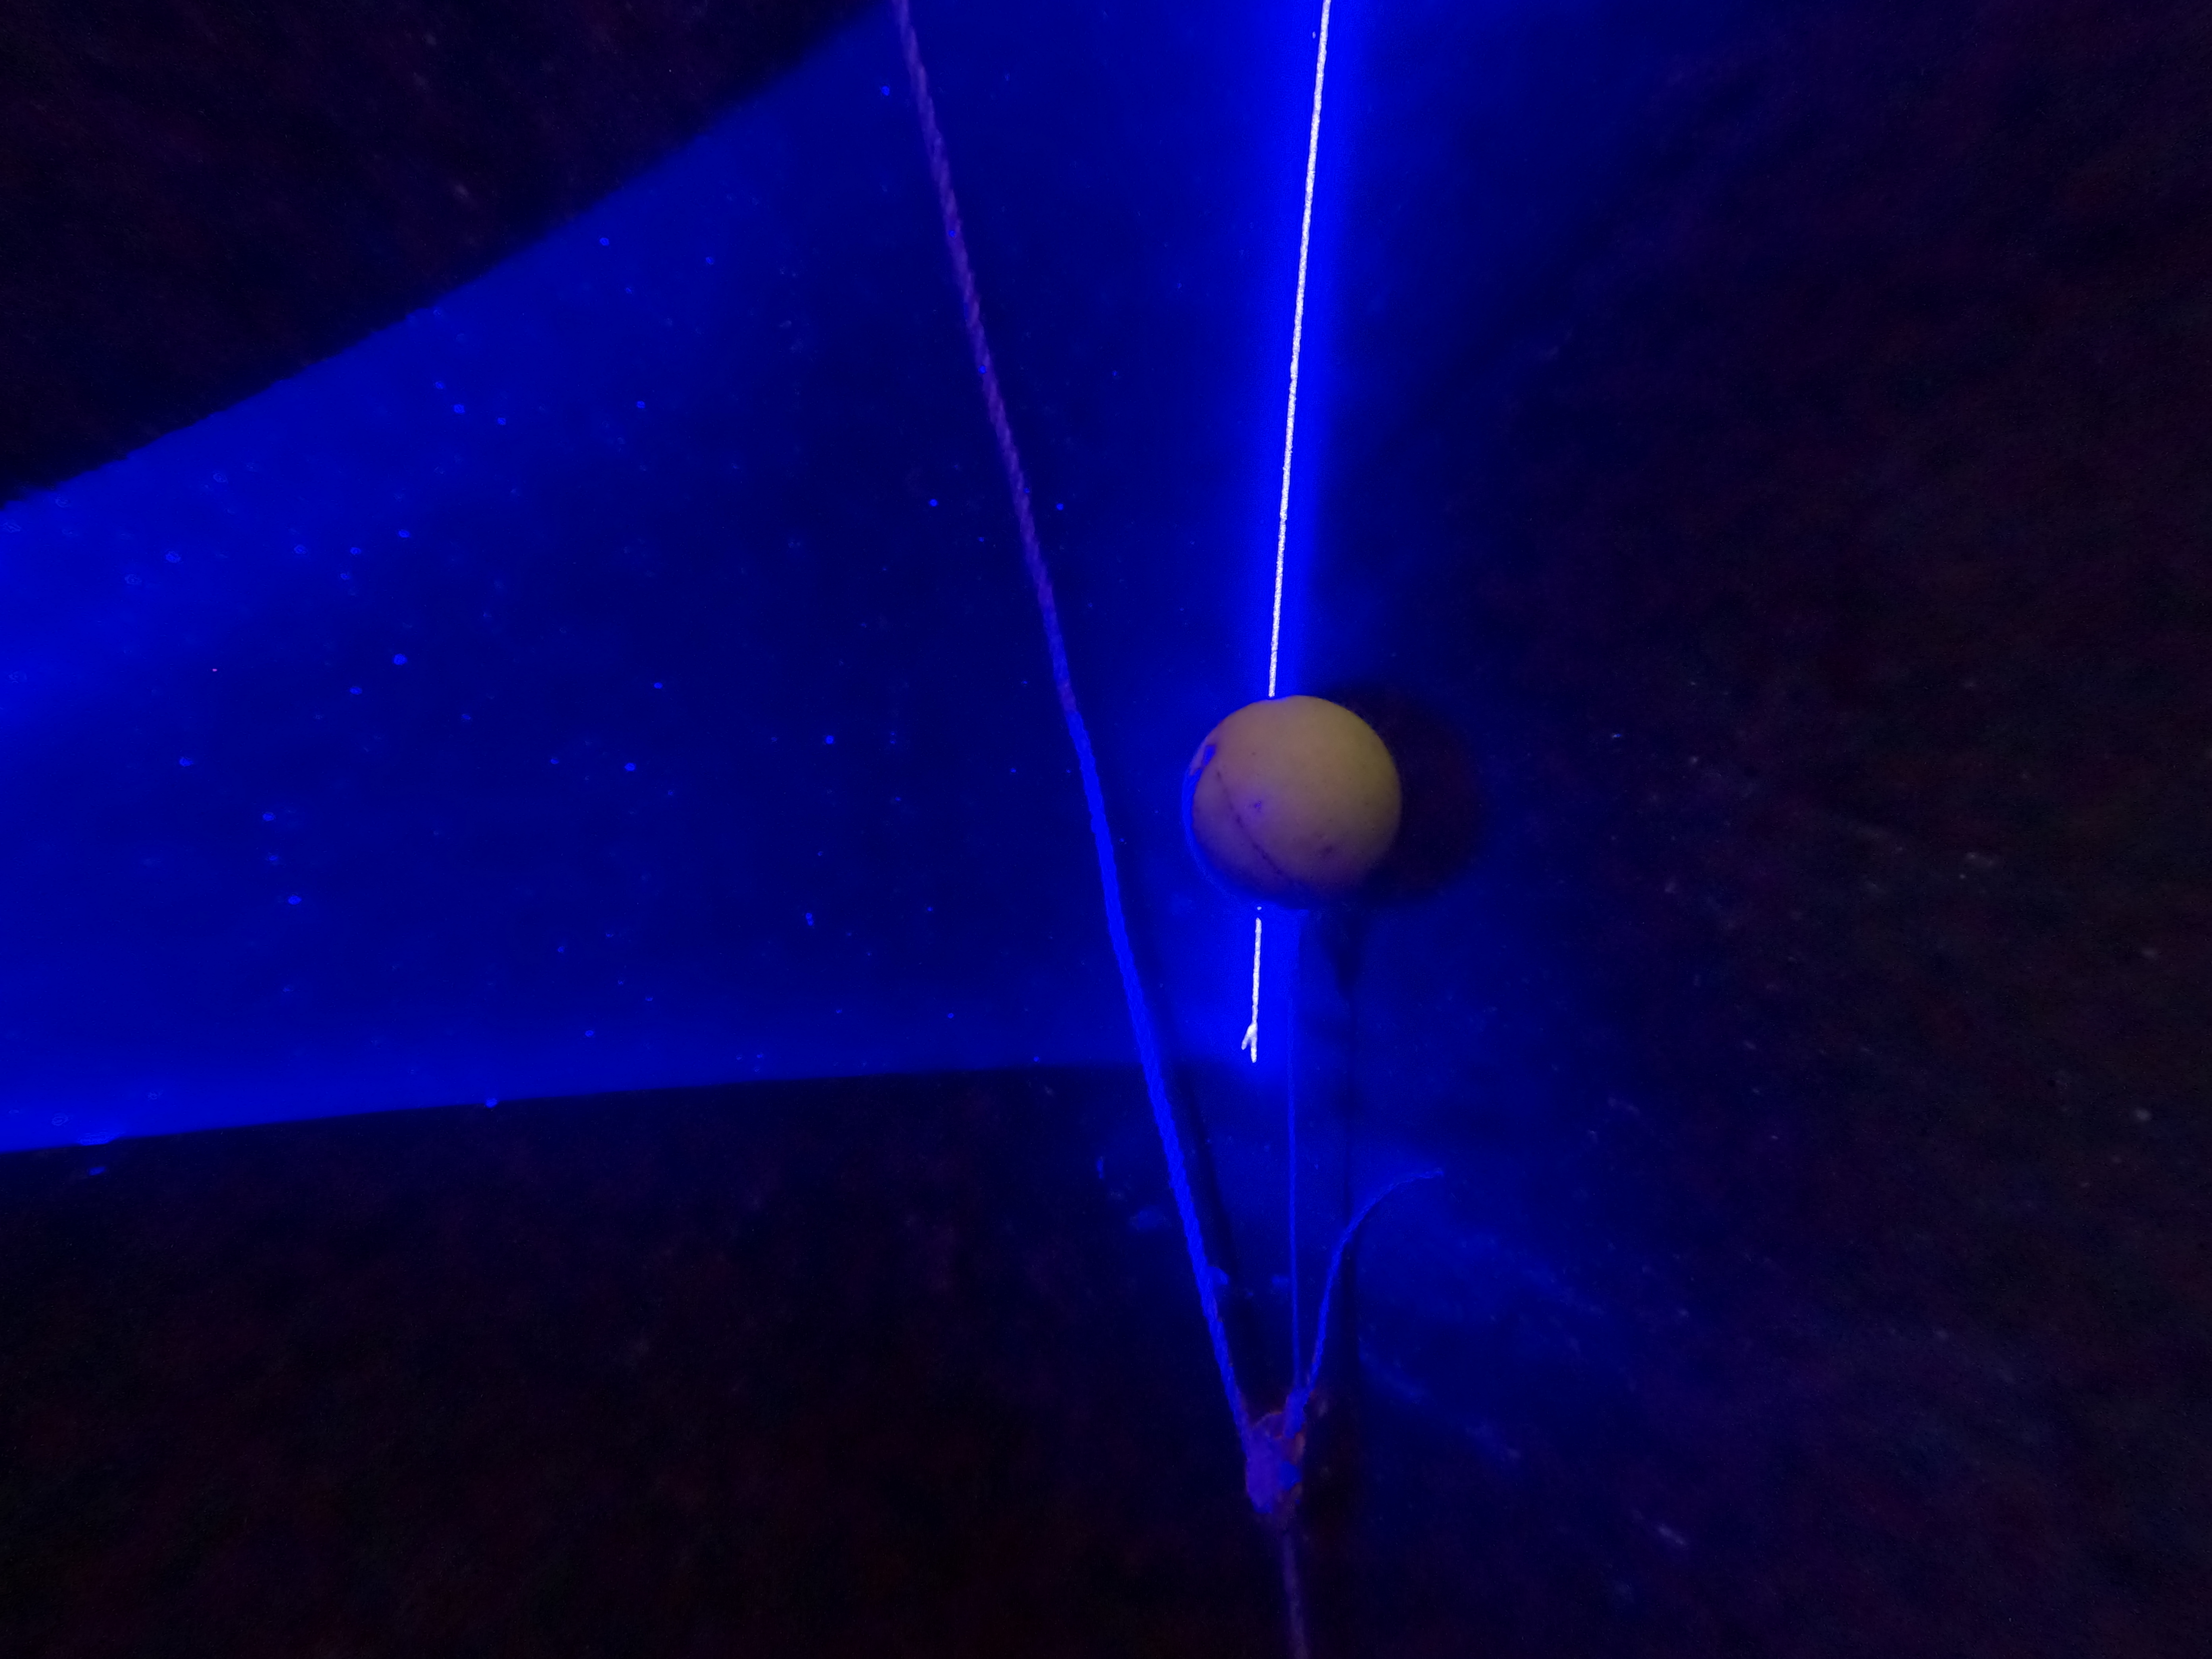

Supplement: Supplementary file 3539 [file G0030763.pdf › Level_1_1/G0030763.pdf]

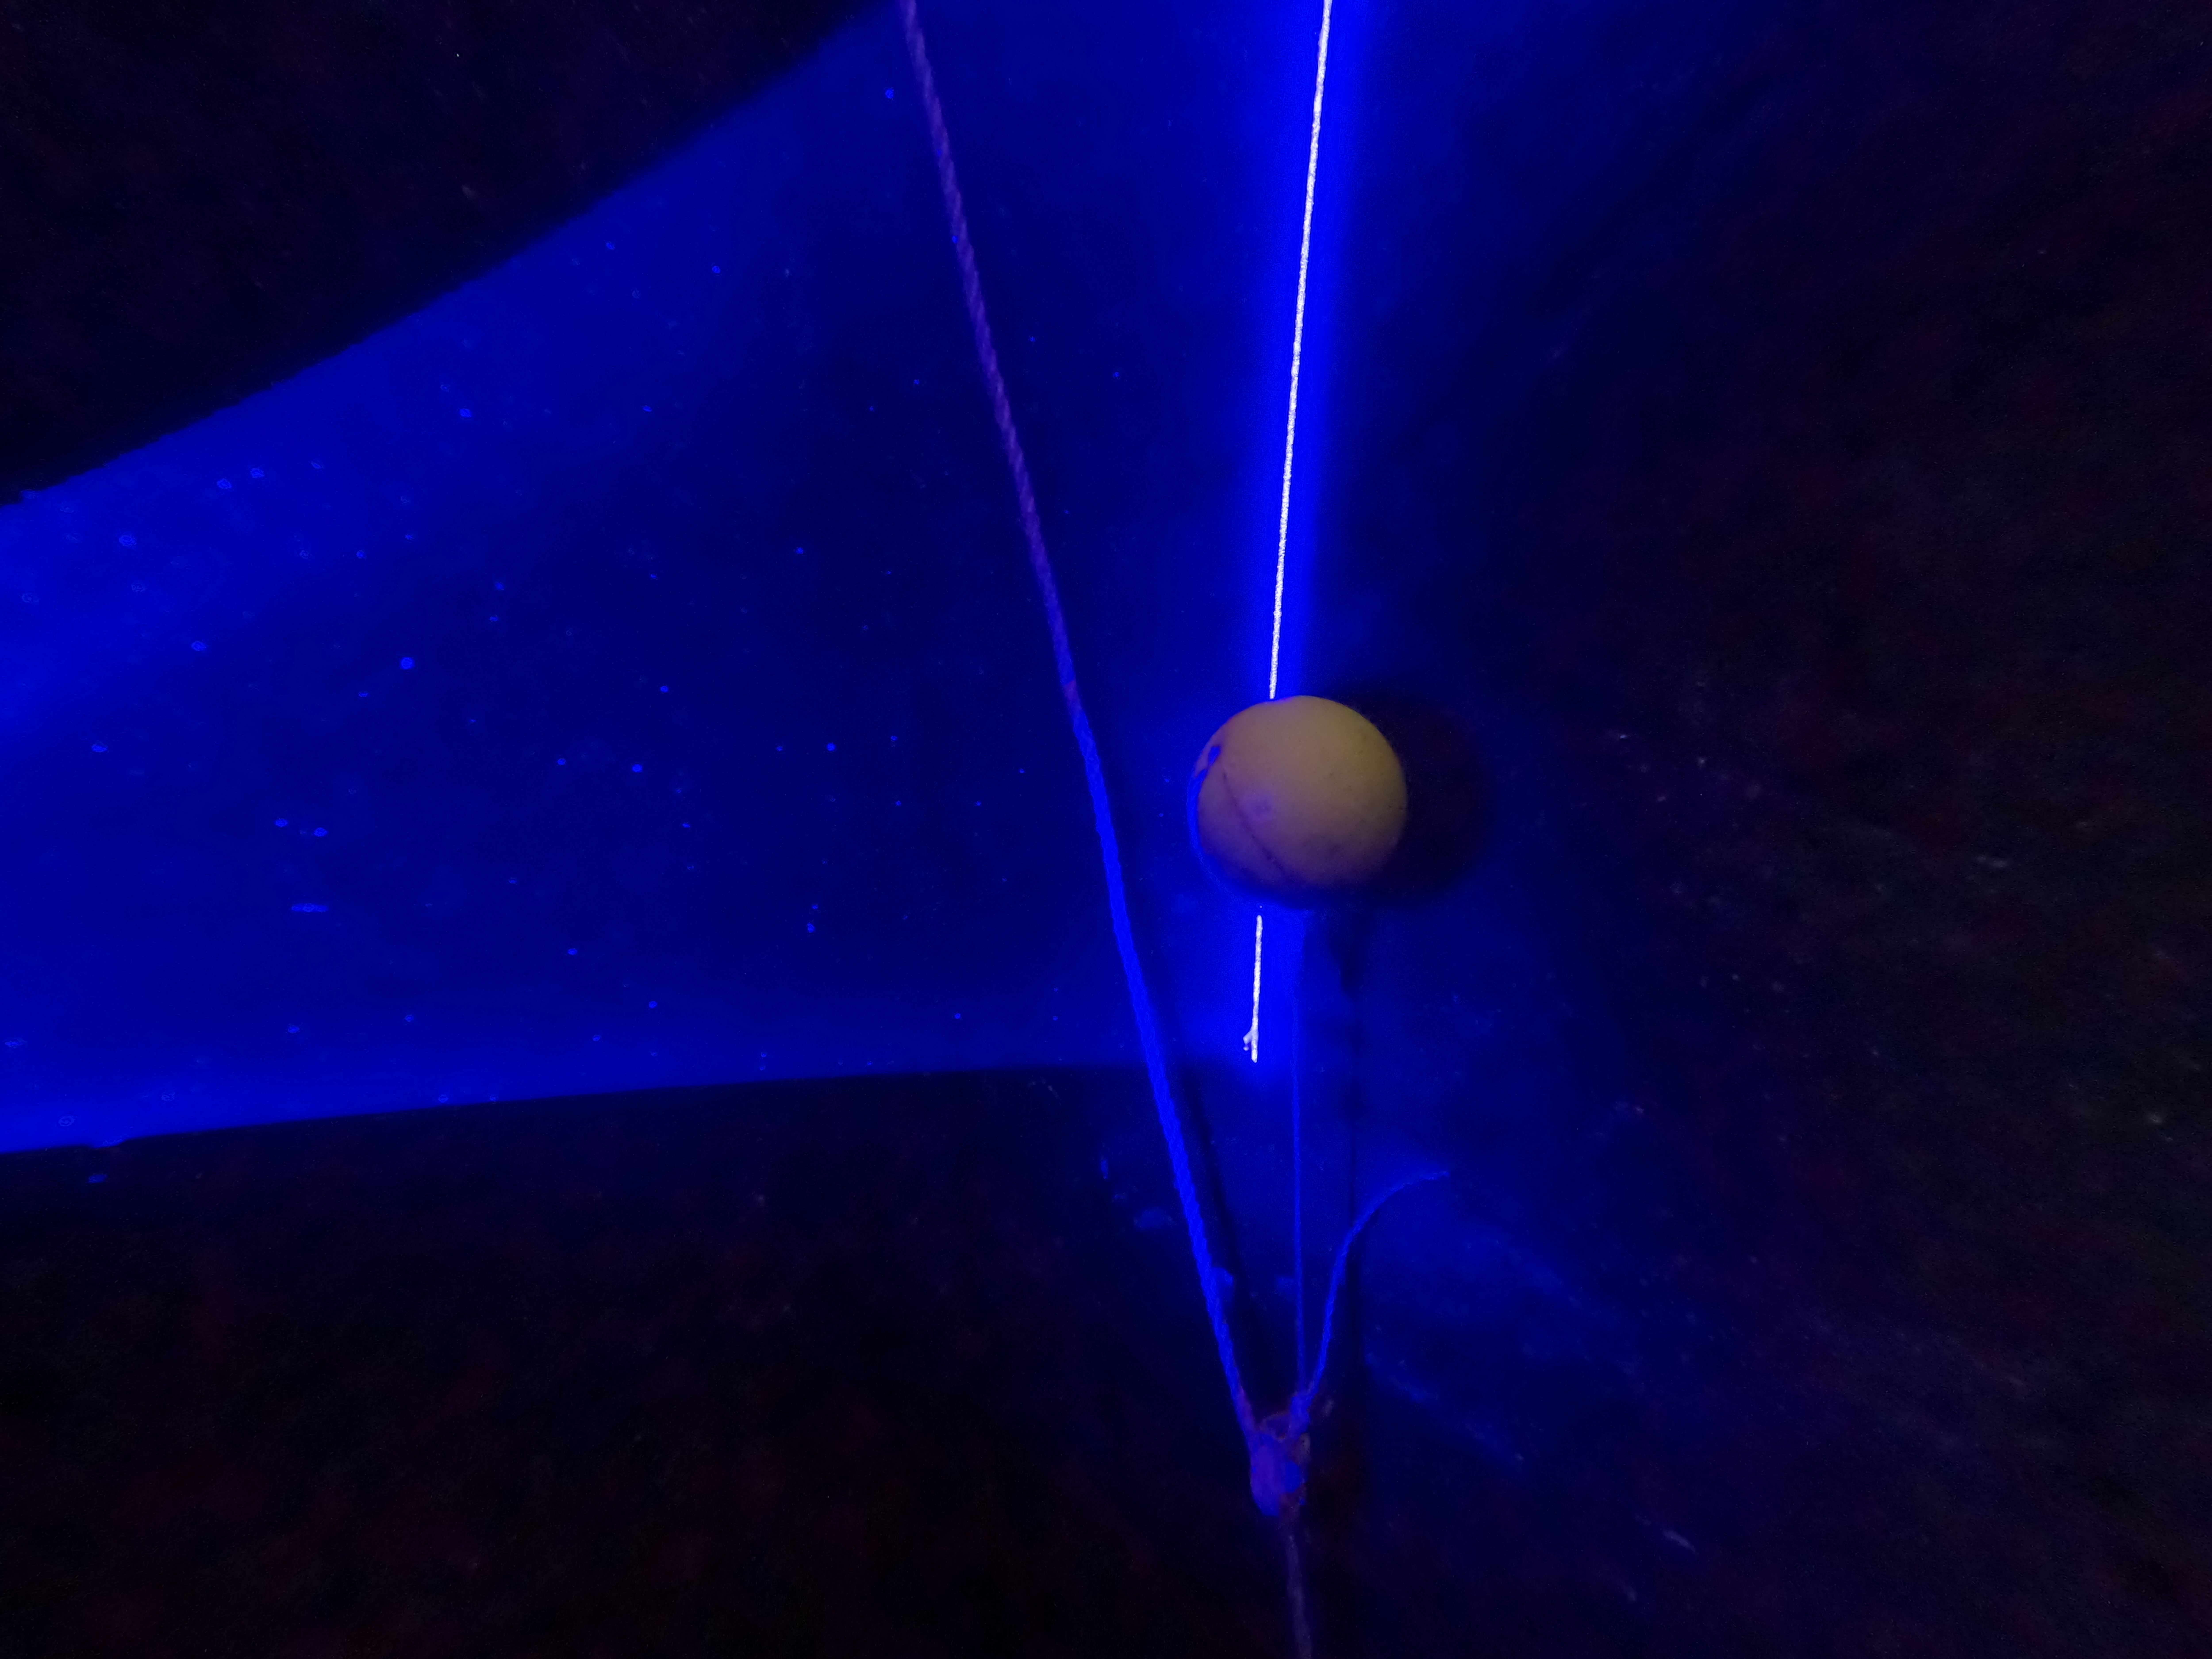

Supplement: Supplementary file 3540 [file G0030764.pdf › Level_1_1/G0030764.pdf]

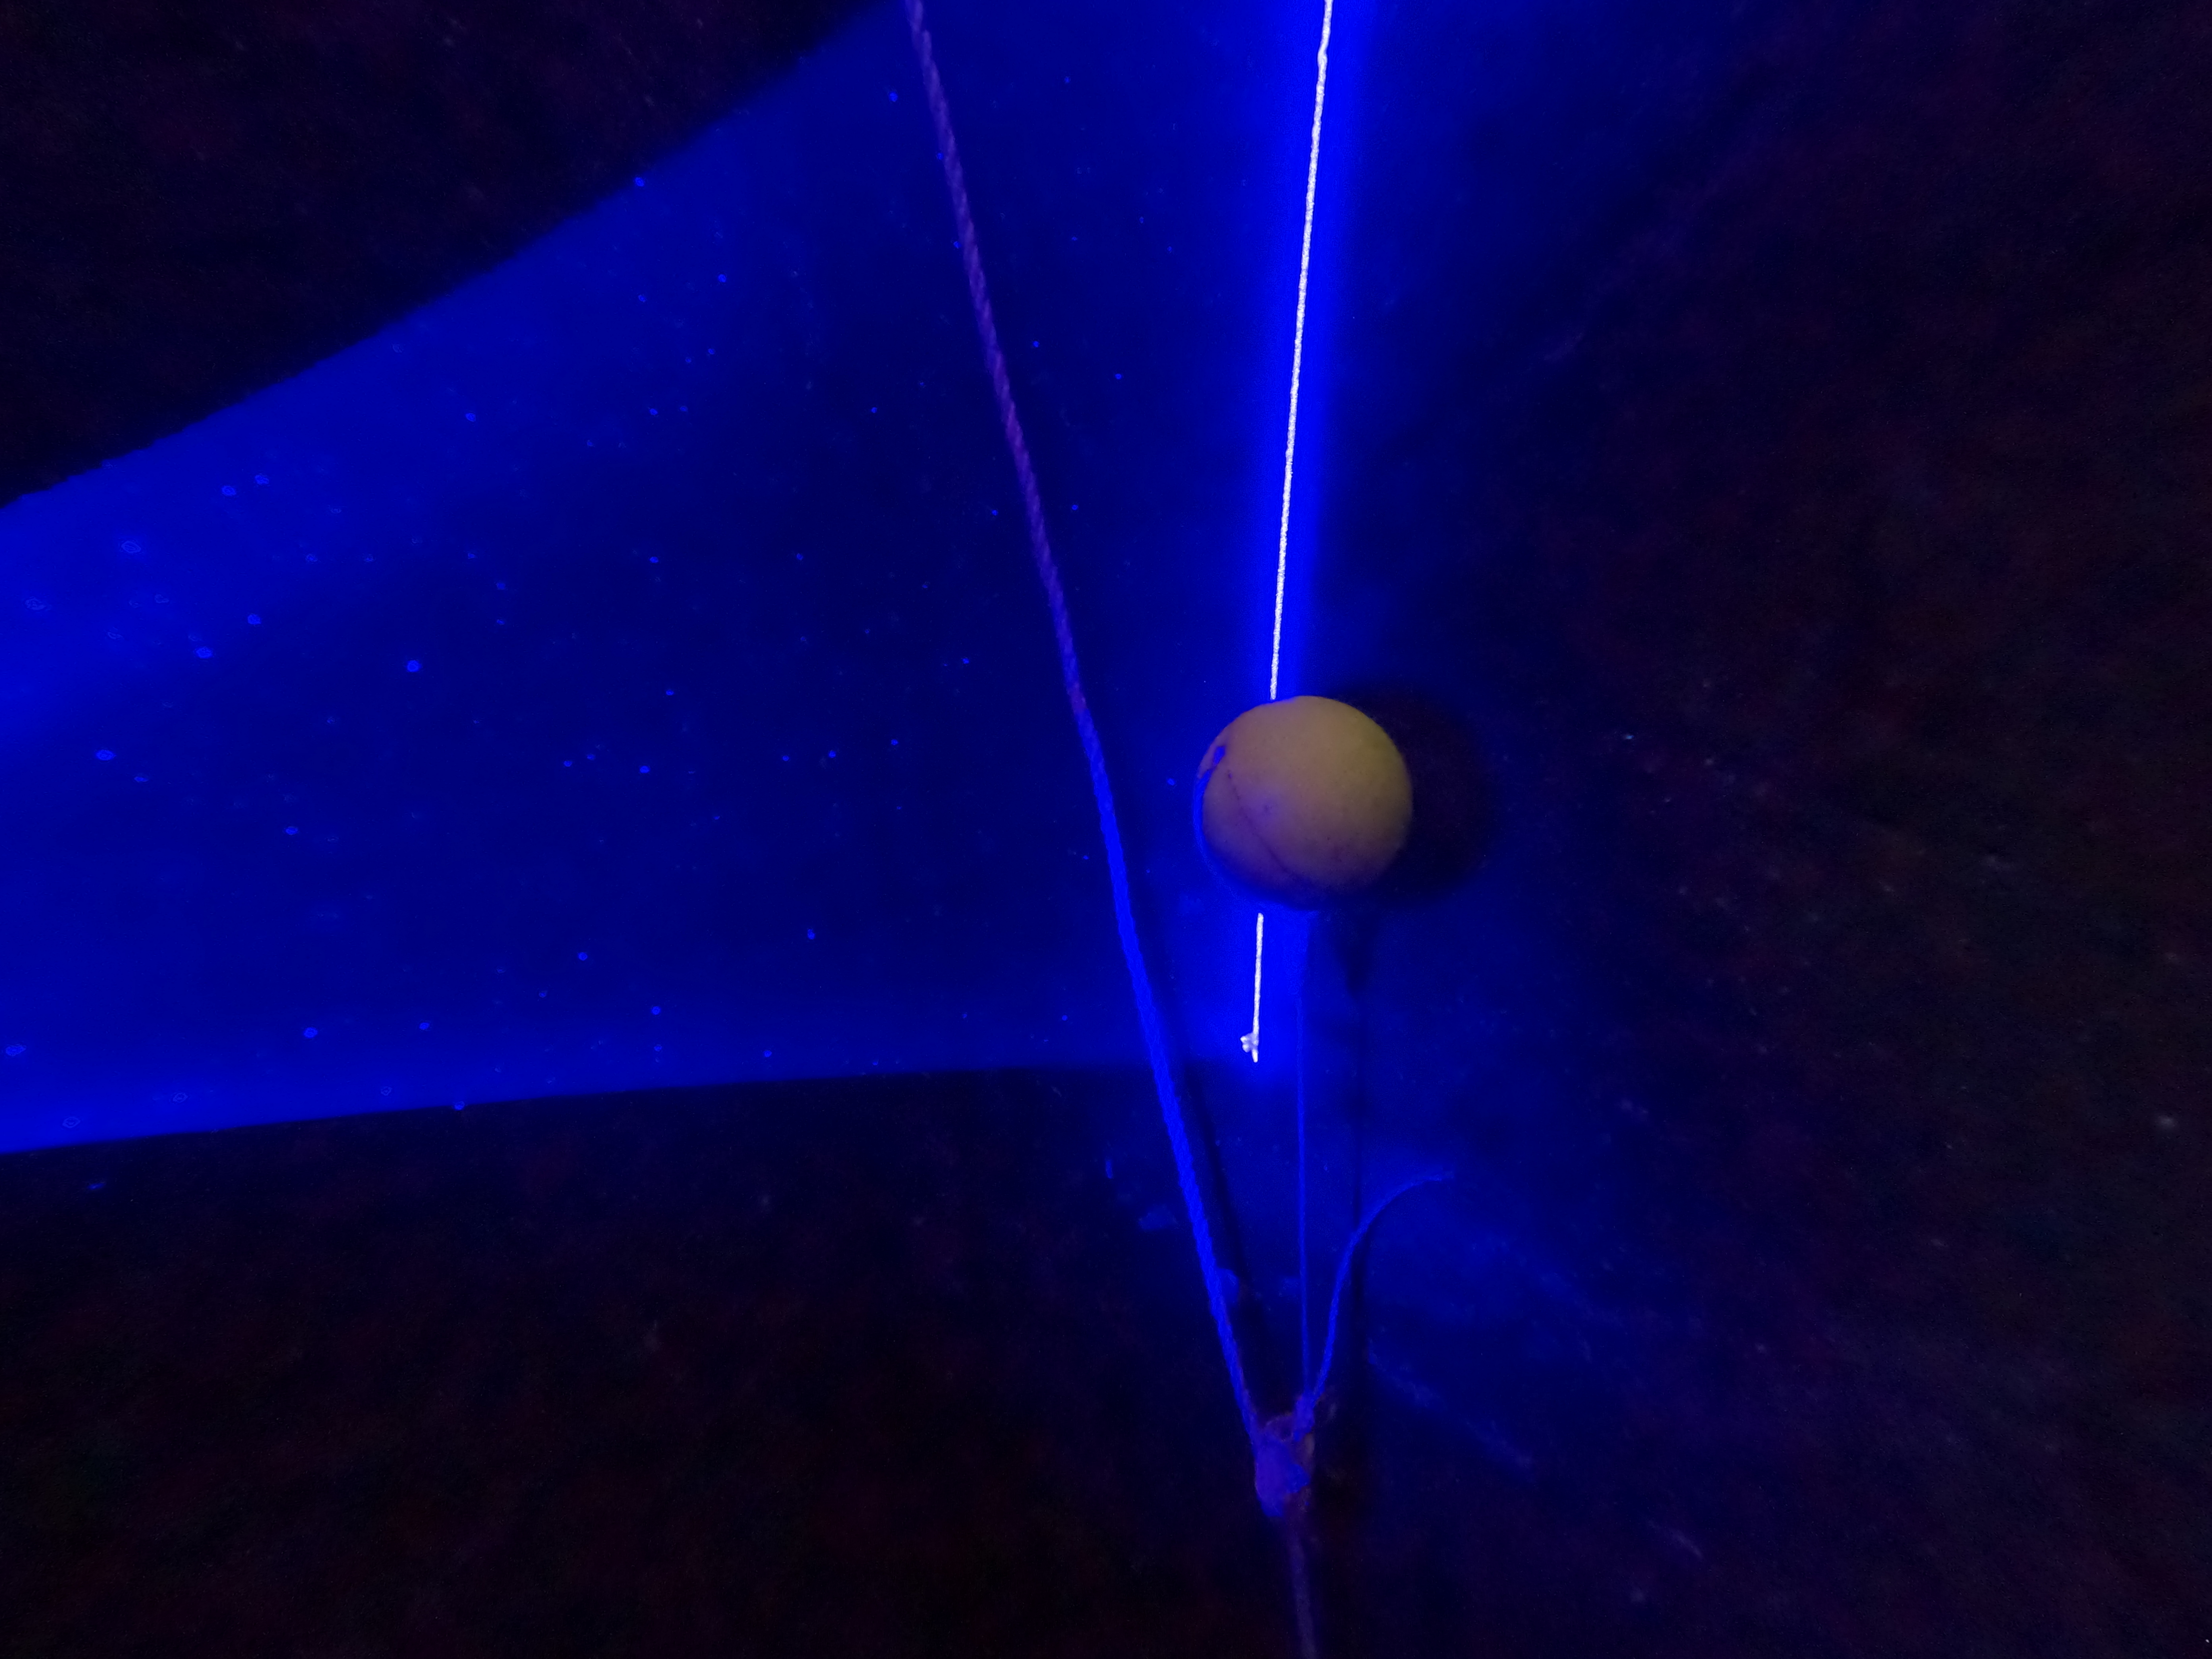

Supplement: Supplementary file 3541 [file G0030765.pdf › Level_1_1/G0030765.pdf]

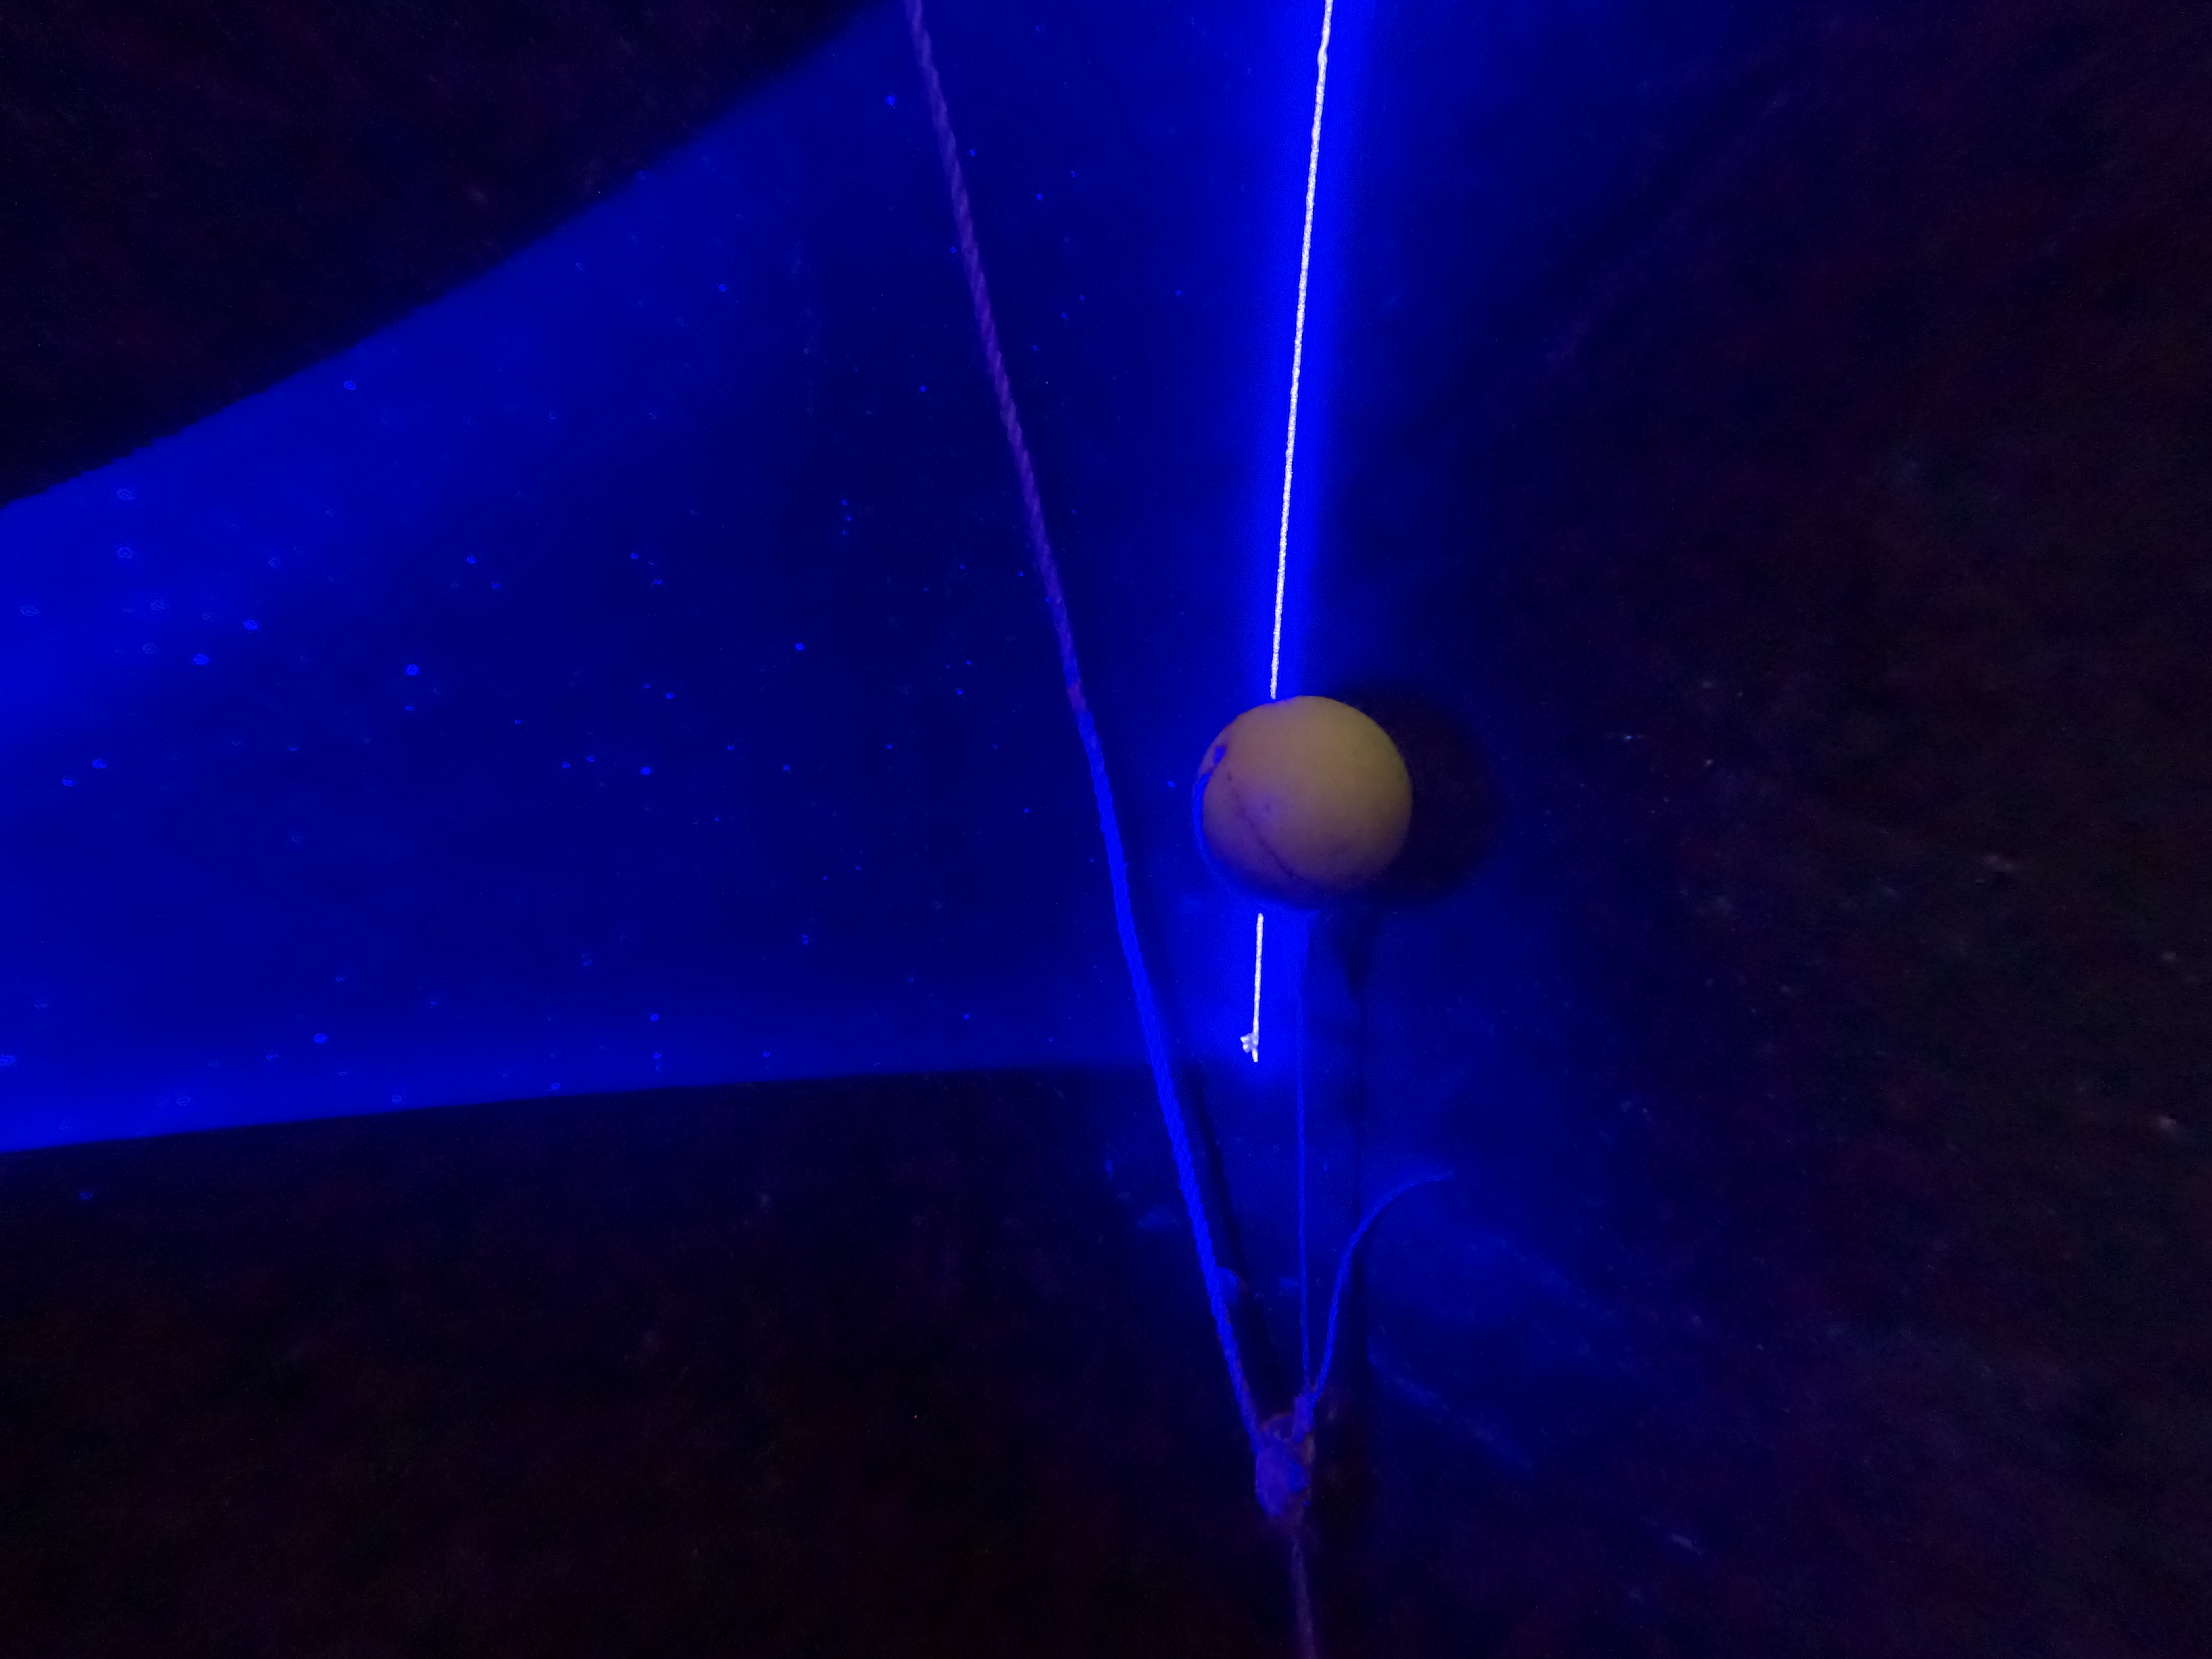

Supplement: Supplementary file 3542 [file G0030766.pdf › Level_1_1/G0030766.pdf]

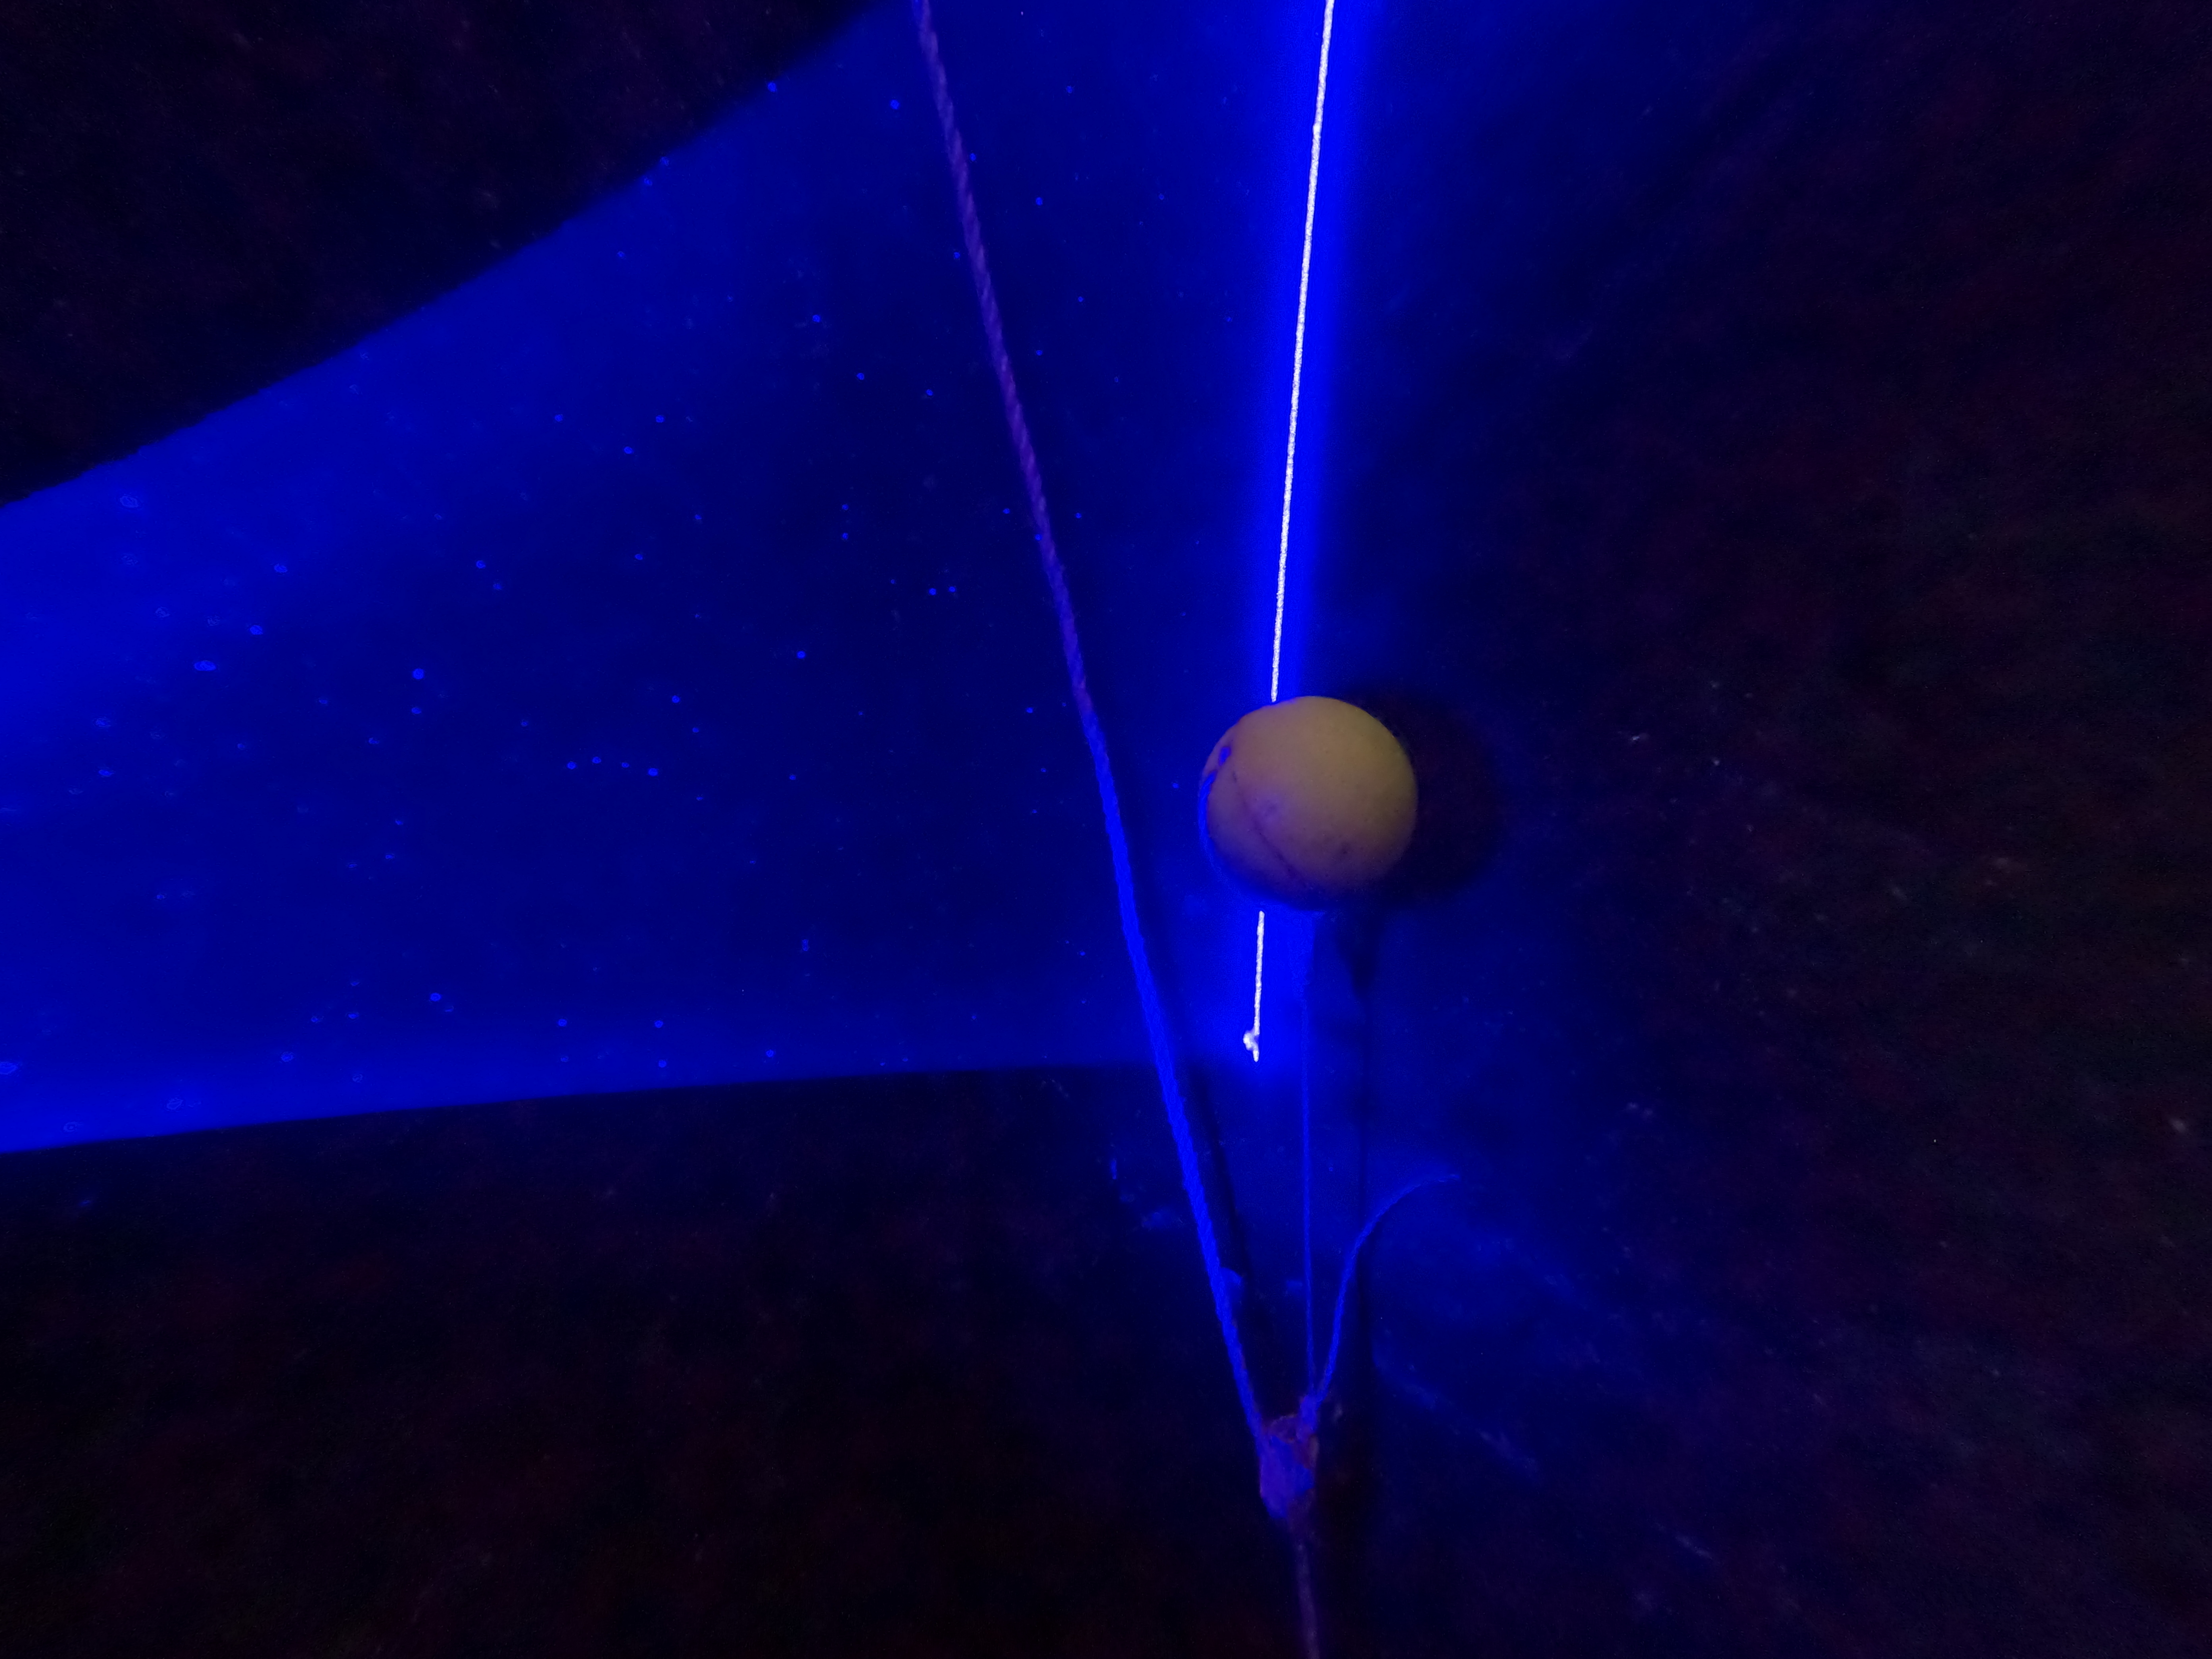

Supplement: Supplementary file 3543 [file G0030767.pdf › Level_1_1/G0030767.pdf]

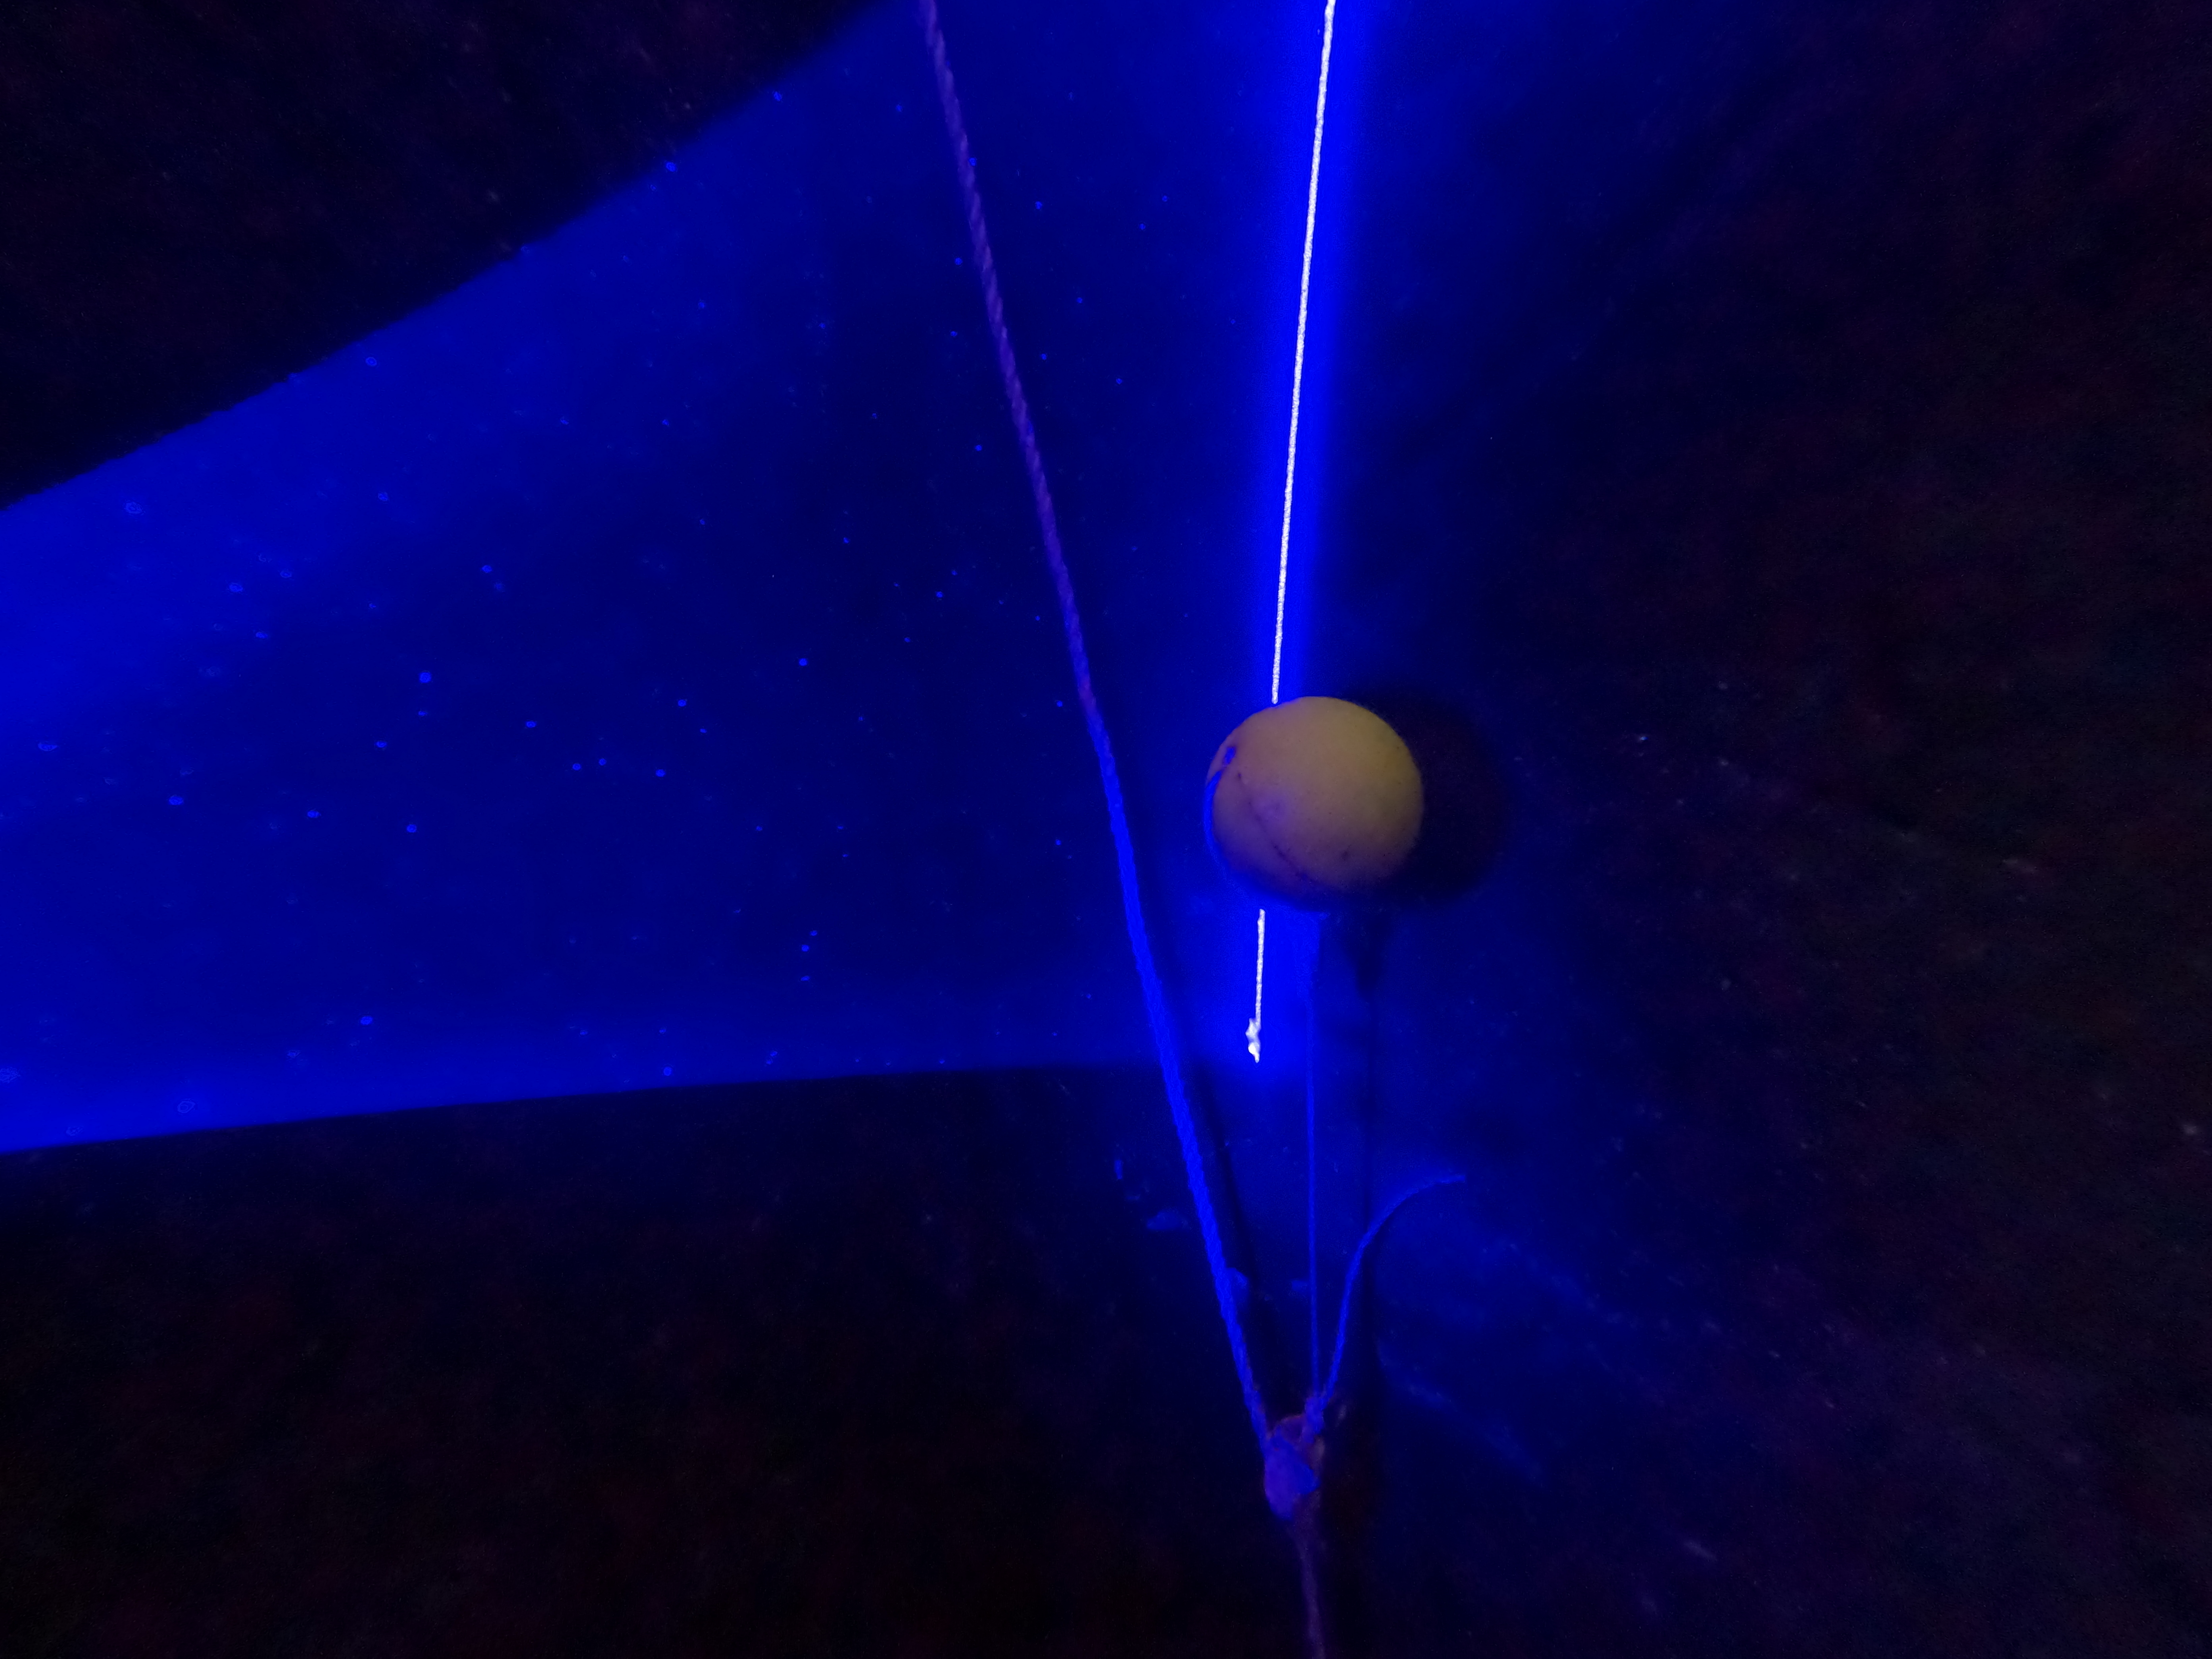

Supplement: Supplementary file 3544 [file G0030768.pdf › Level_1_1/G0030768.pdf]

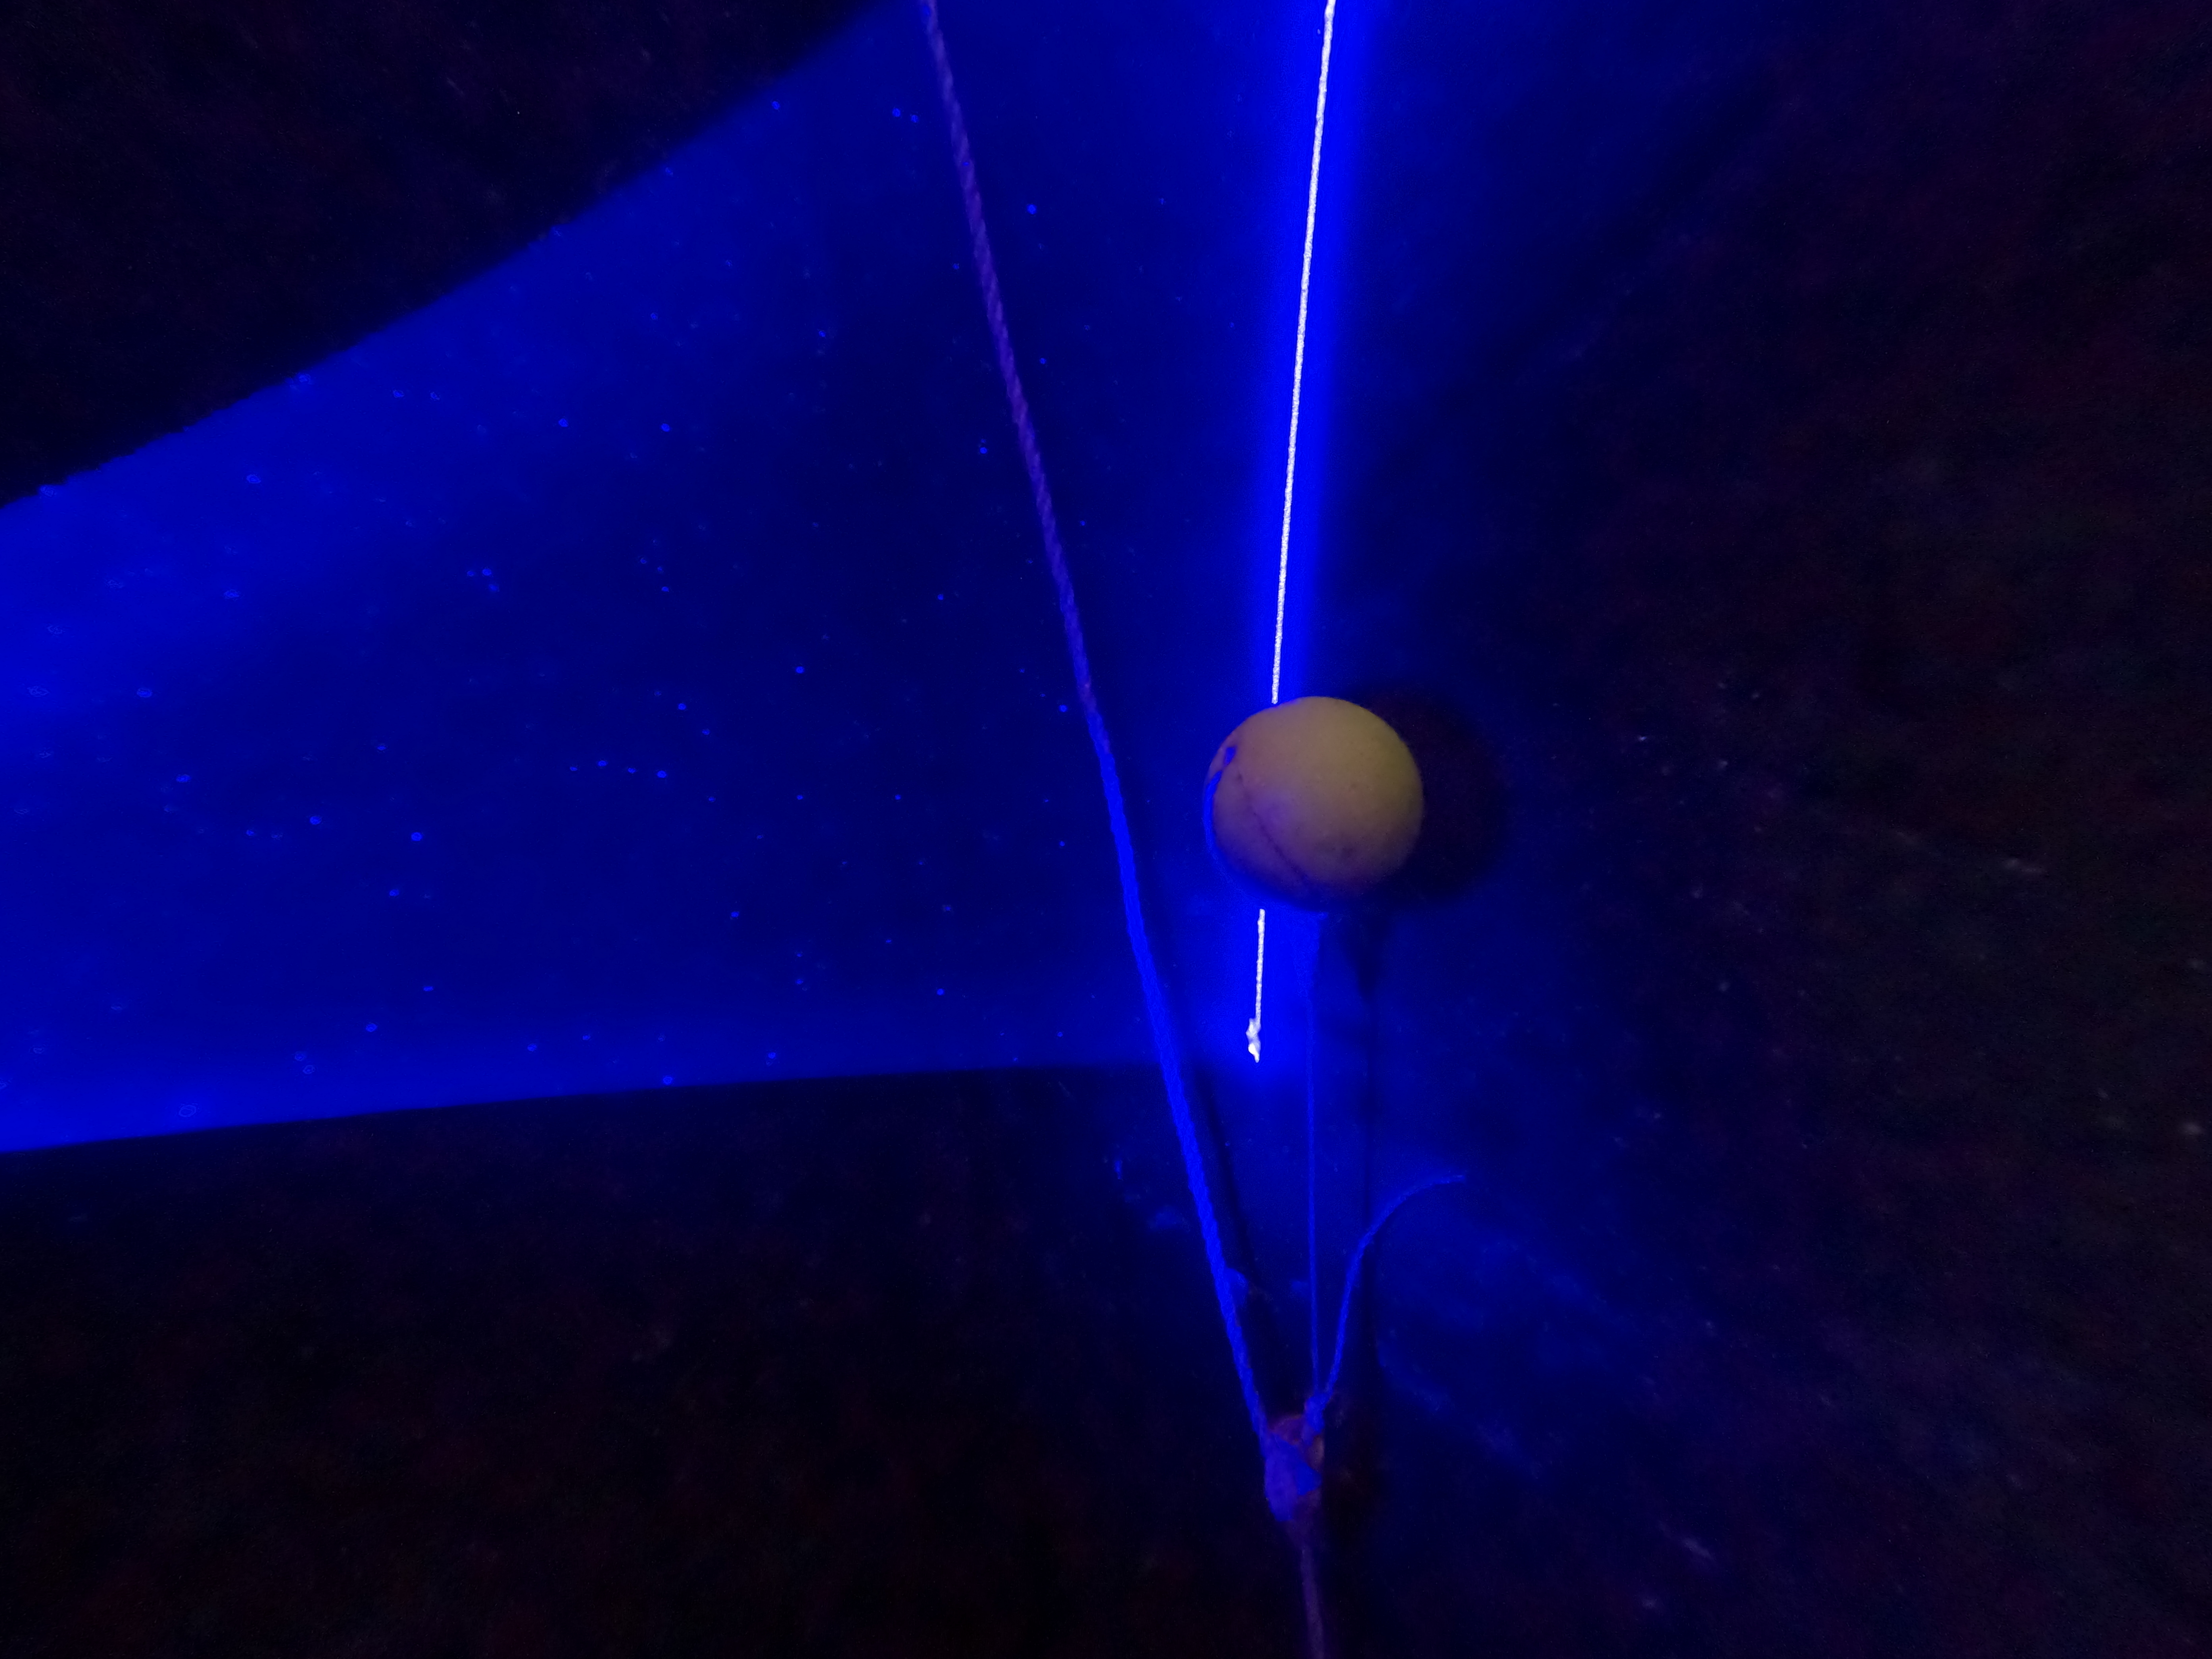

Supplement: Supplementary file 3545 [file G0030769.pdf › Level_1_1/G0030769.pdf]

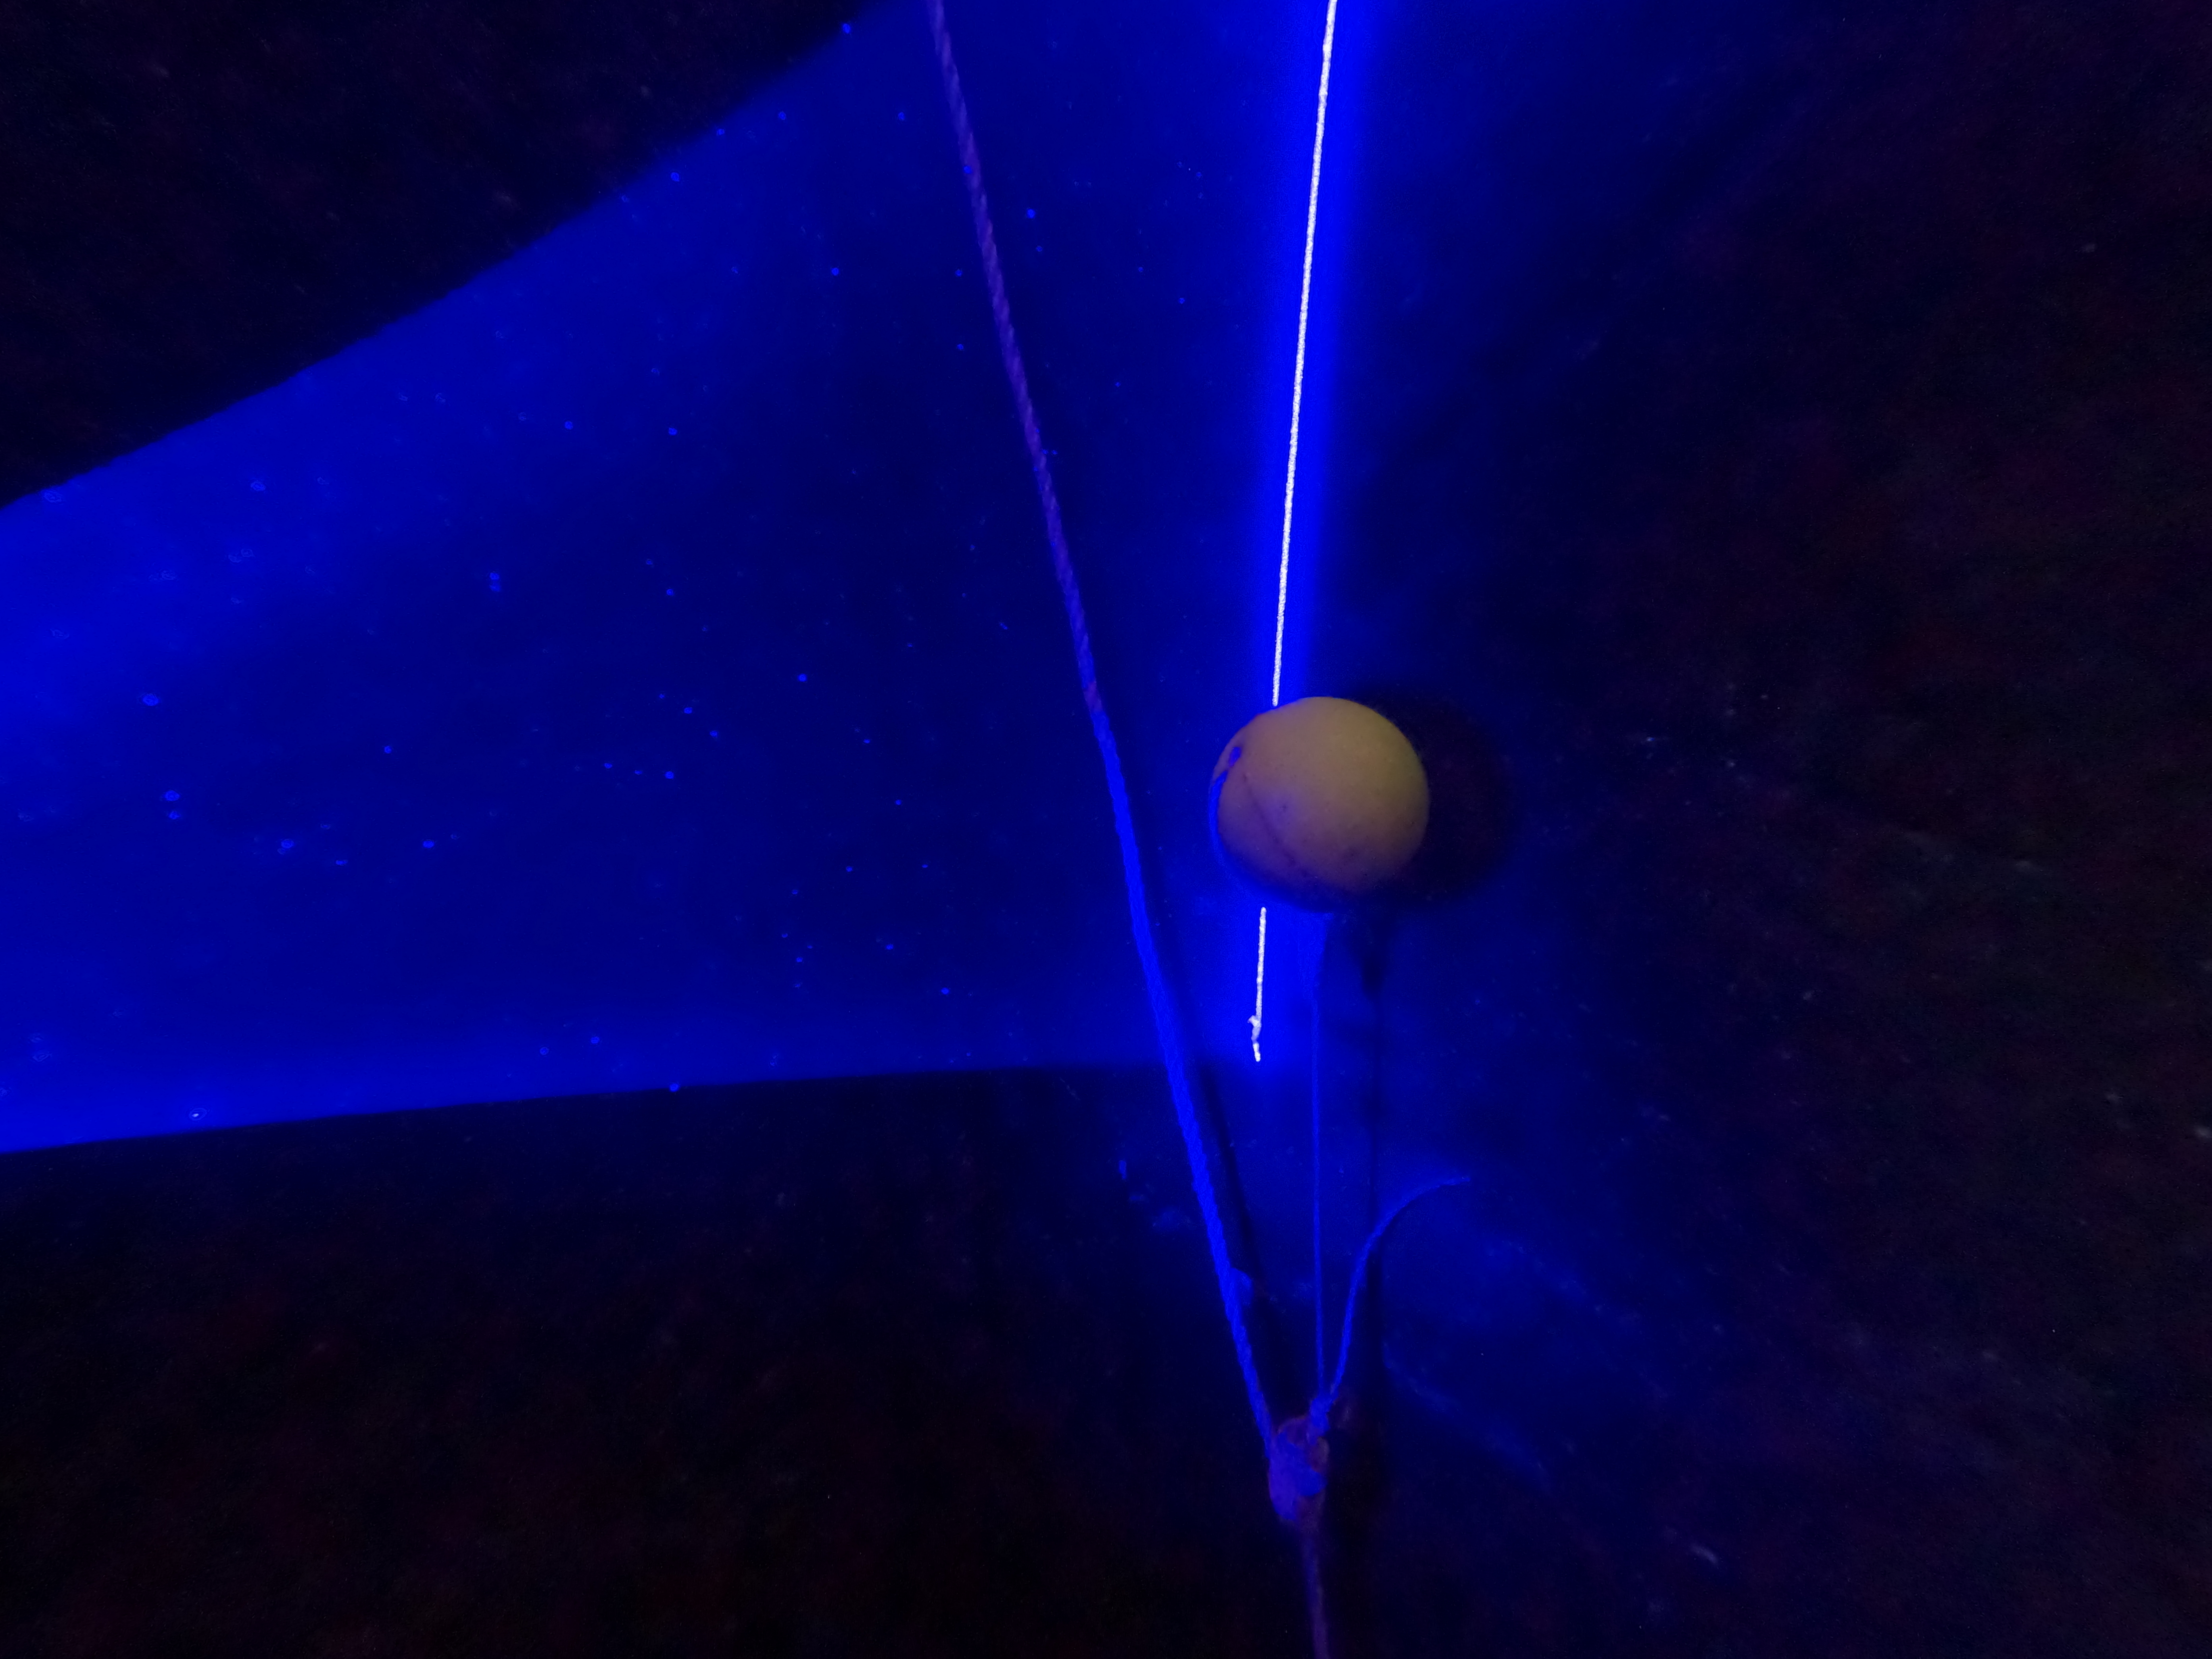

Supplement: Supplementary file 3546 [file G0030770.pdf › Level_1_1/G0030770.pdf]

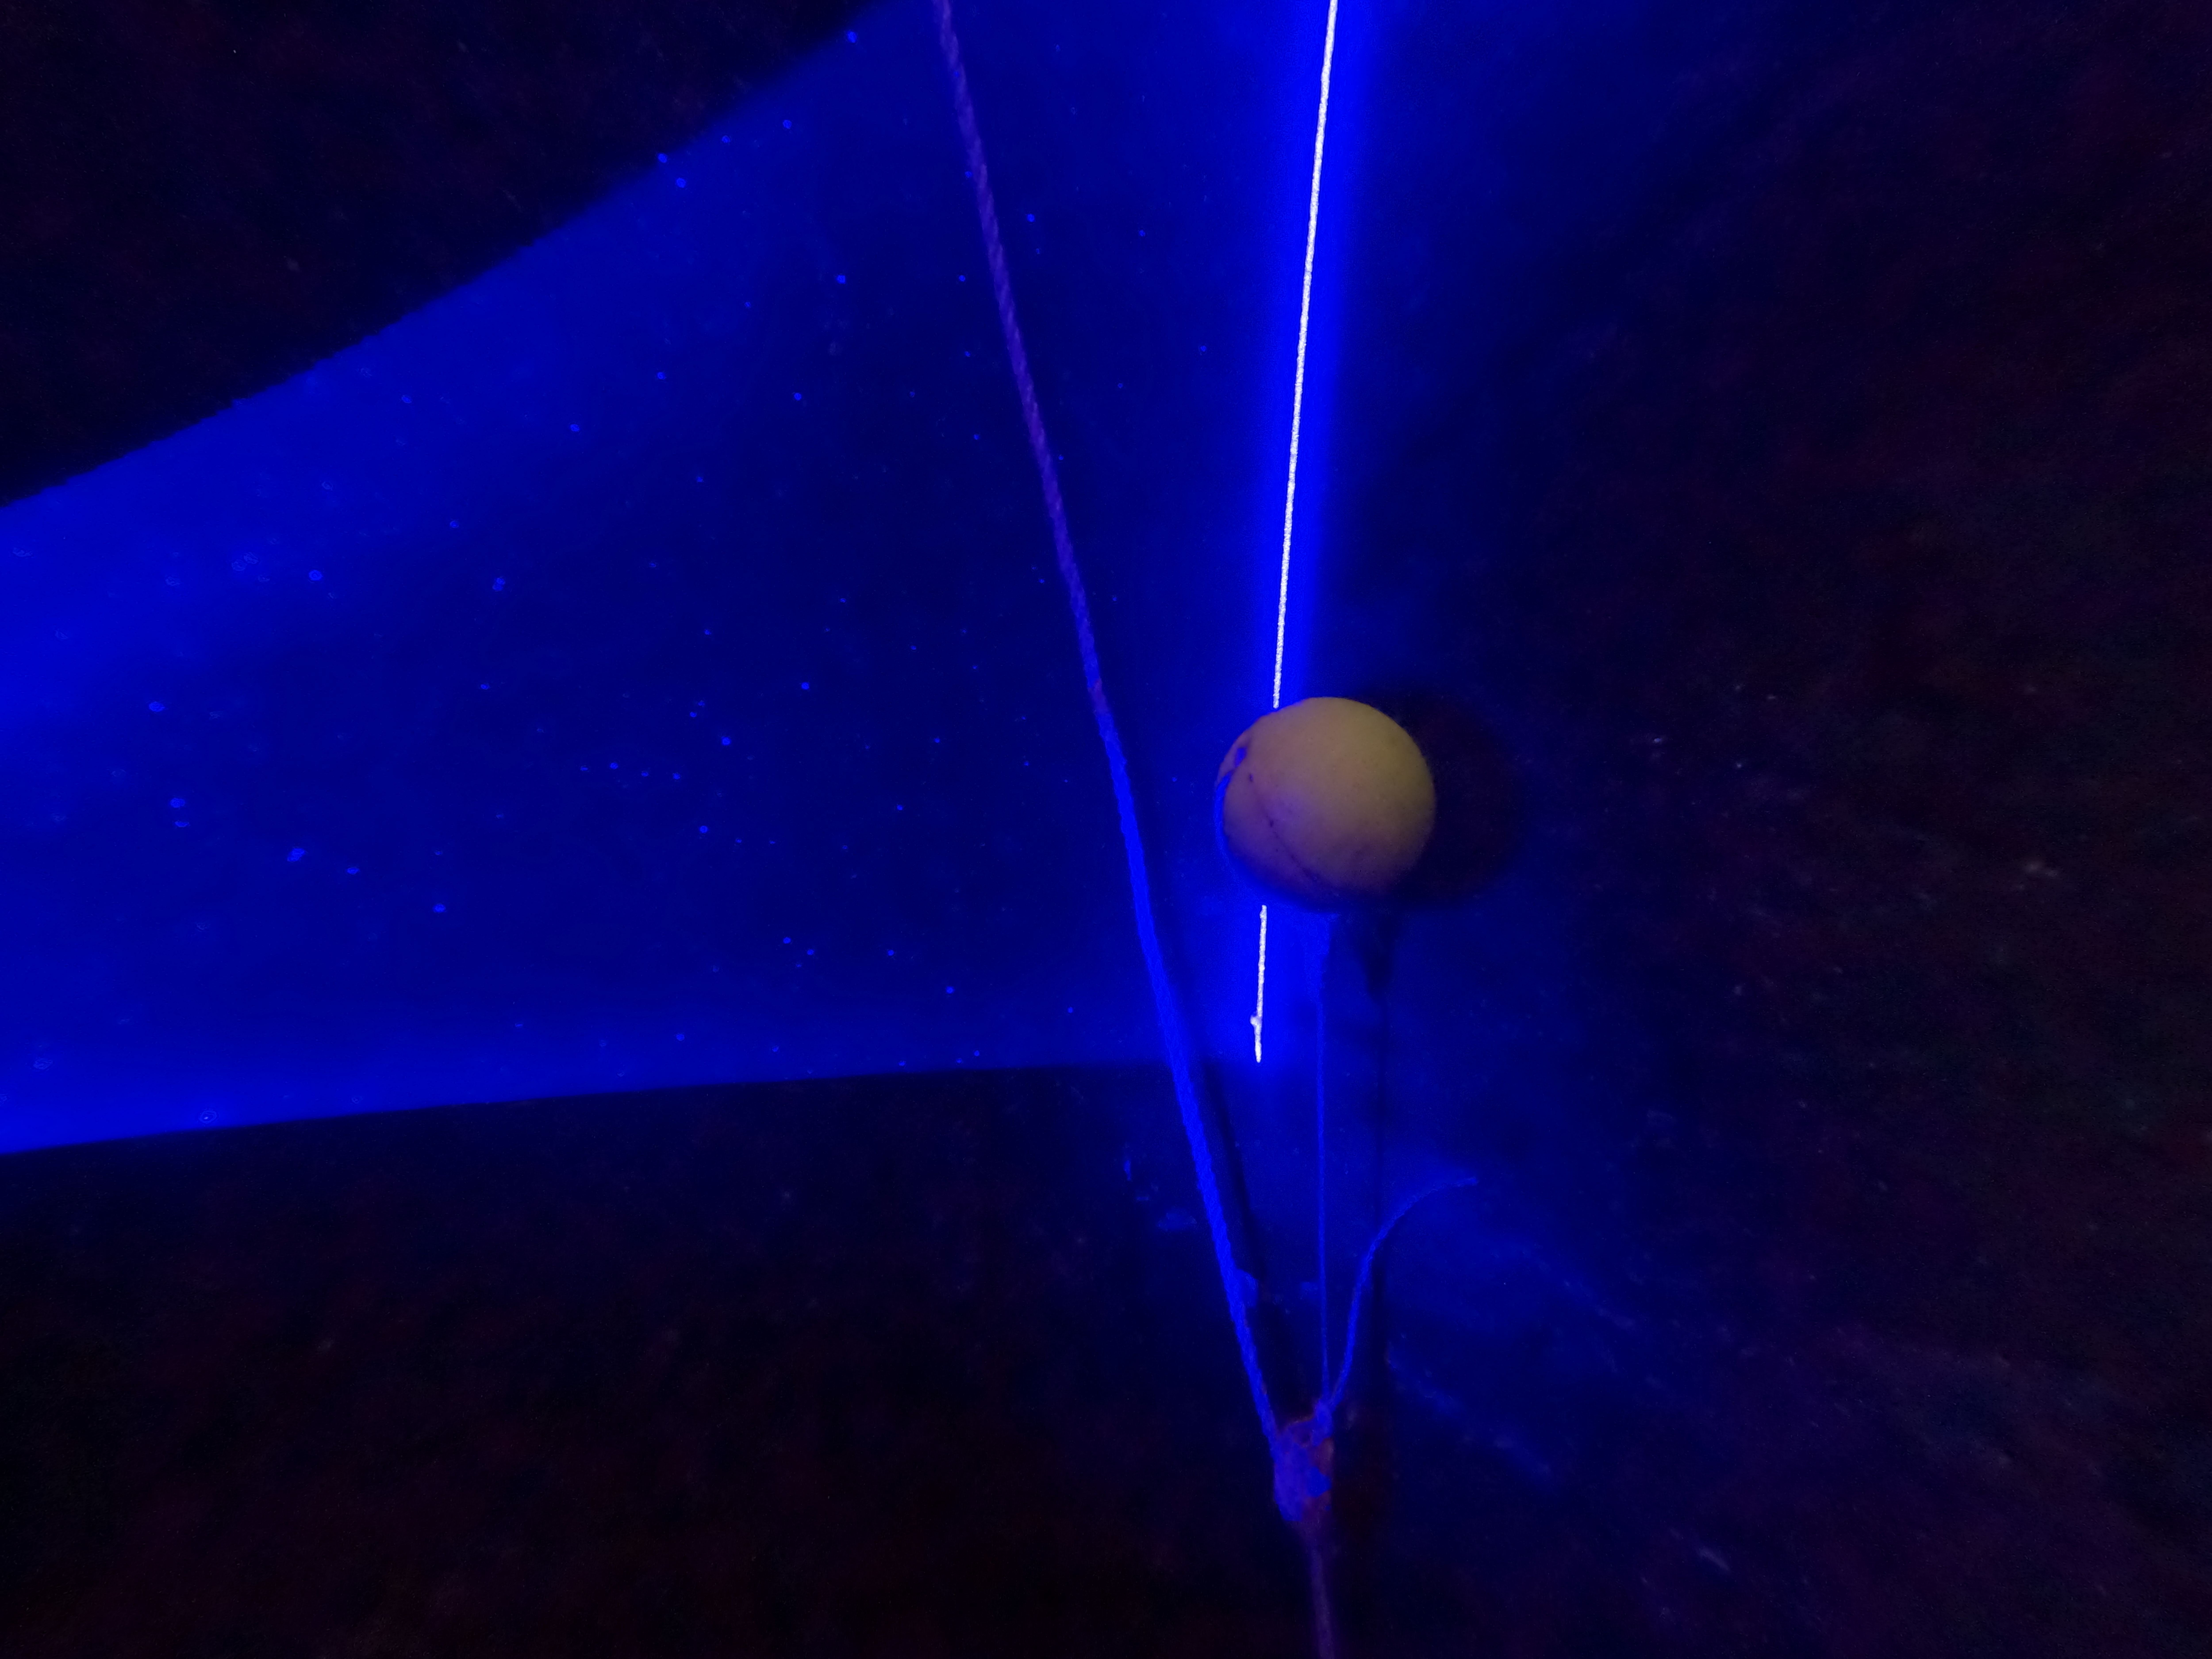

Supplement: Supplementary file 3547 [file G0030771.pdf › Level_1_1/G0030771.pdf]

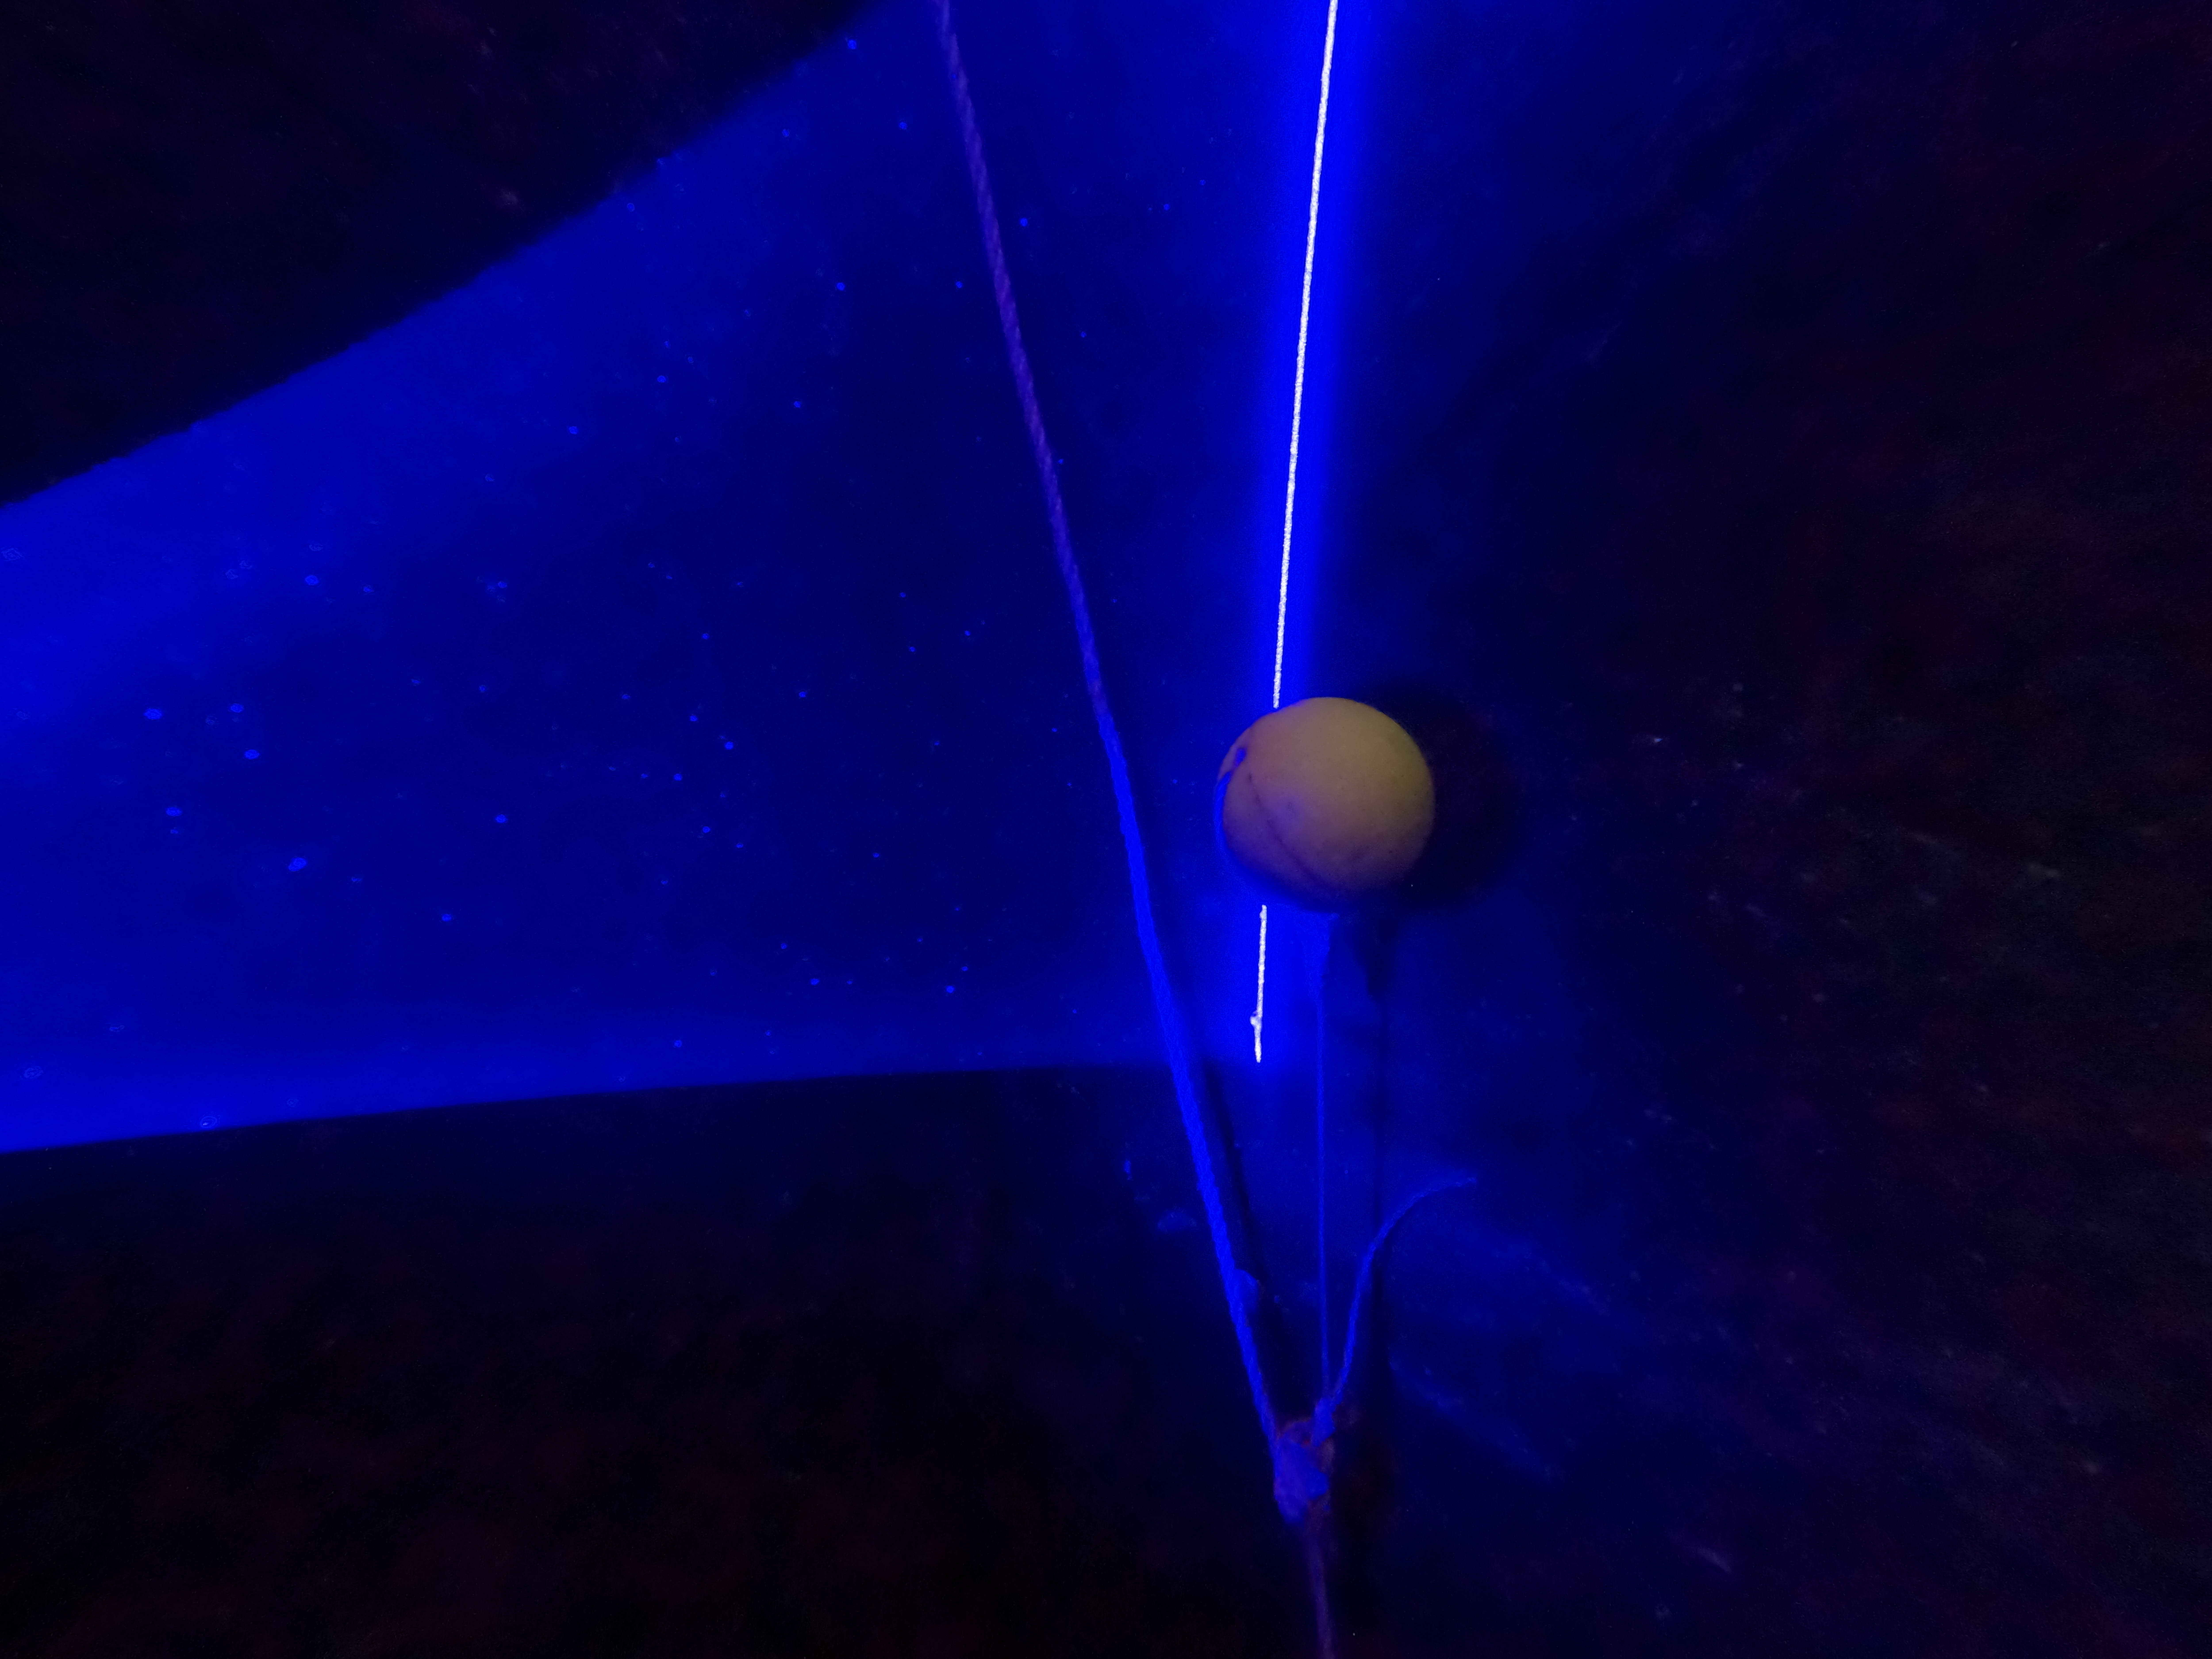

Supplement: Supplementary file 3548 [file G0030772.pdf › Level_1_1/G0030772.pdf]

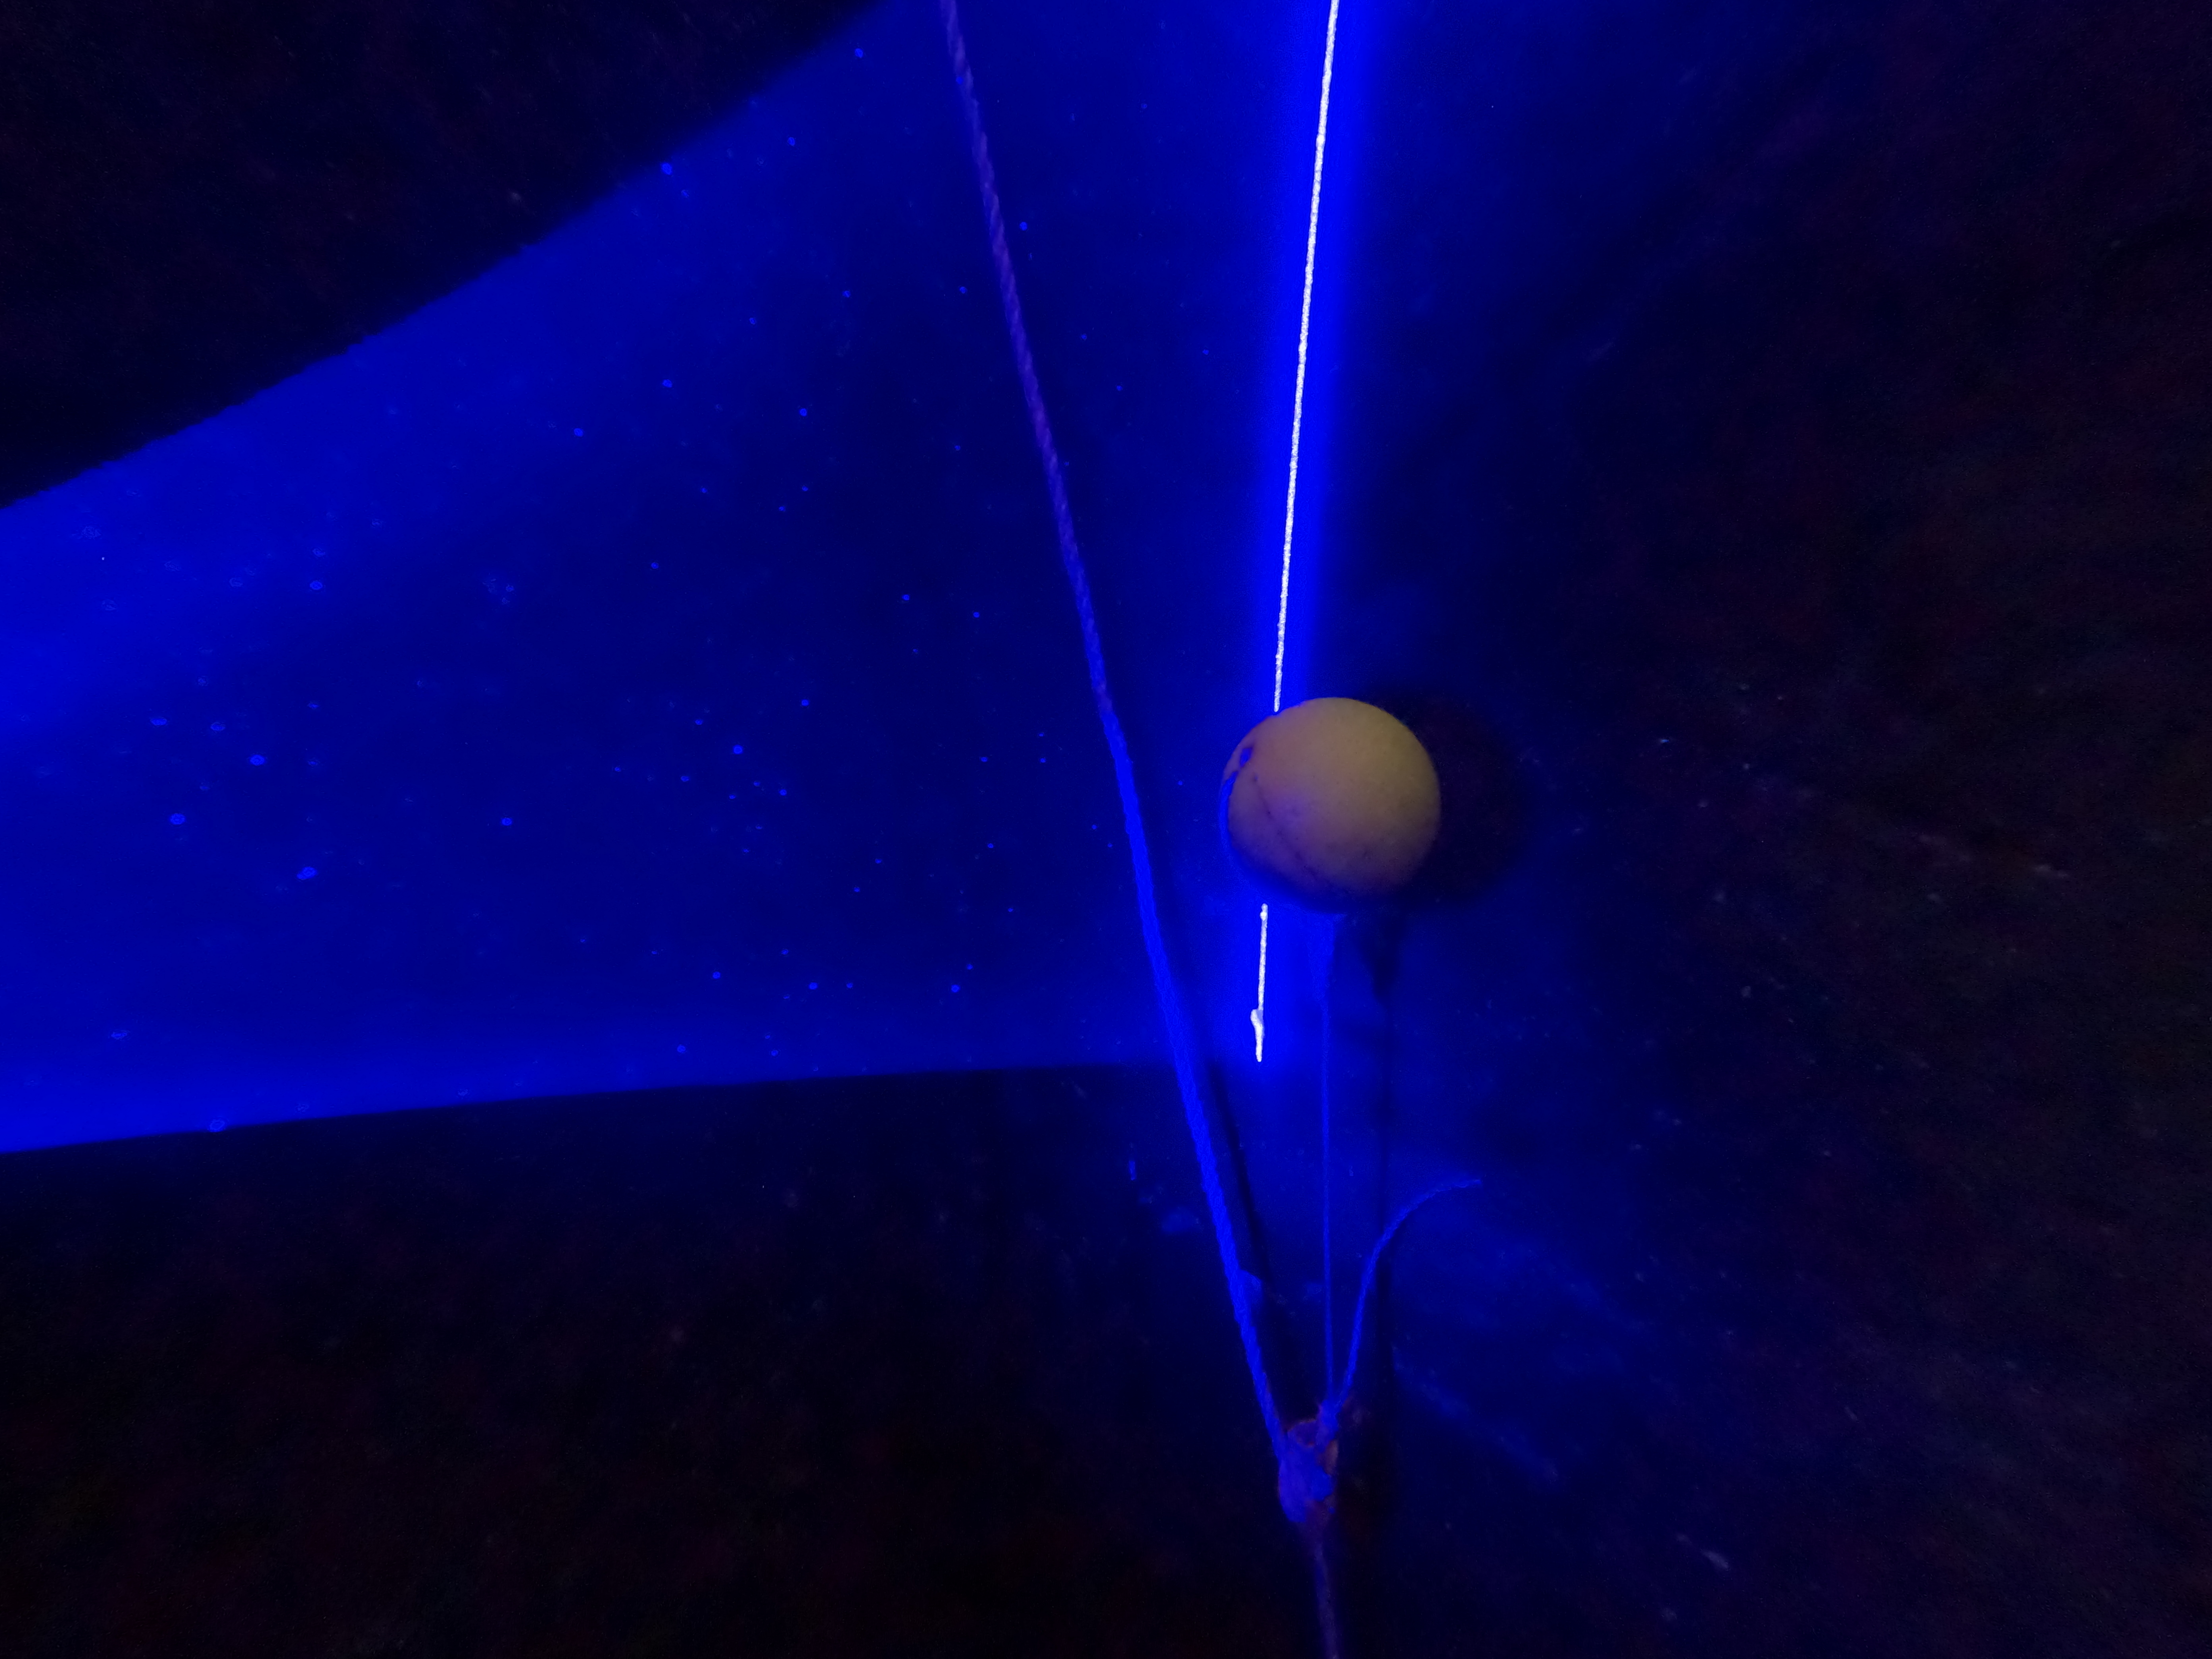

Supplement: Supplementary file 3549 [file G0030773.pdf › Level_1_1/G0030773.pdf]

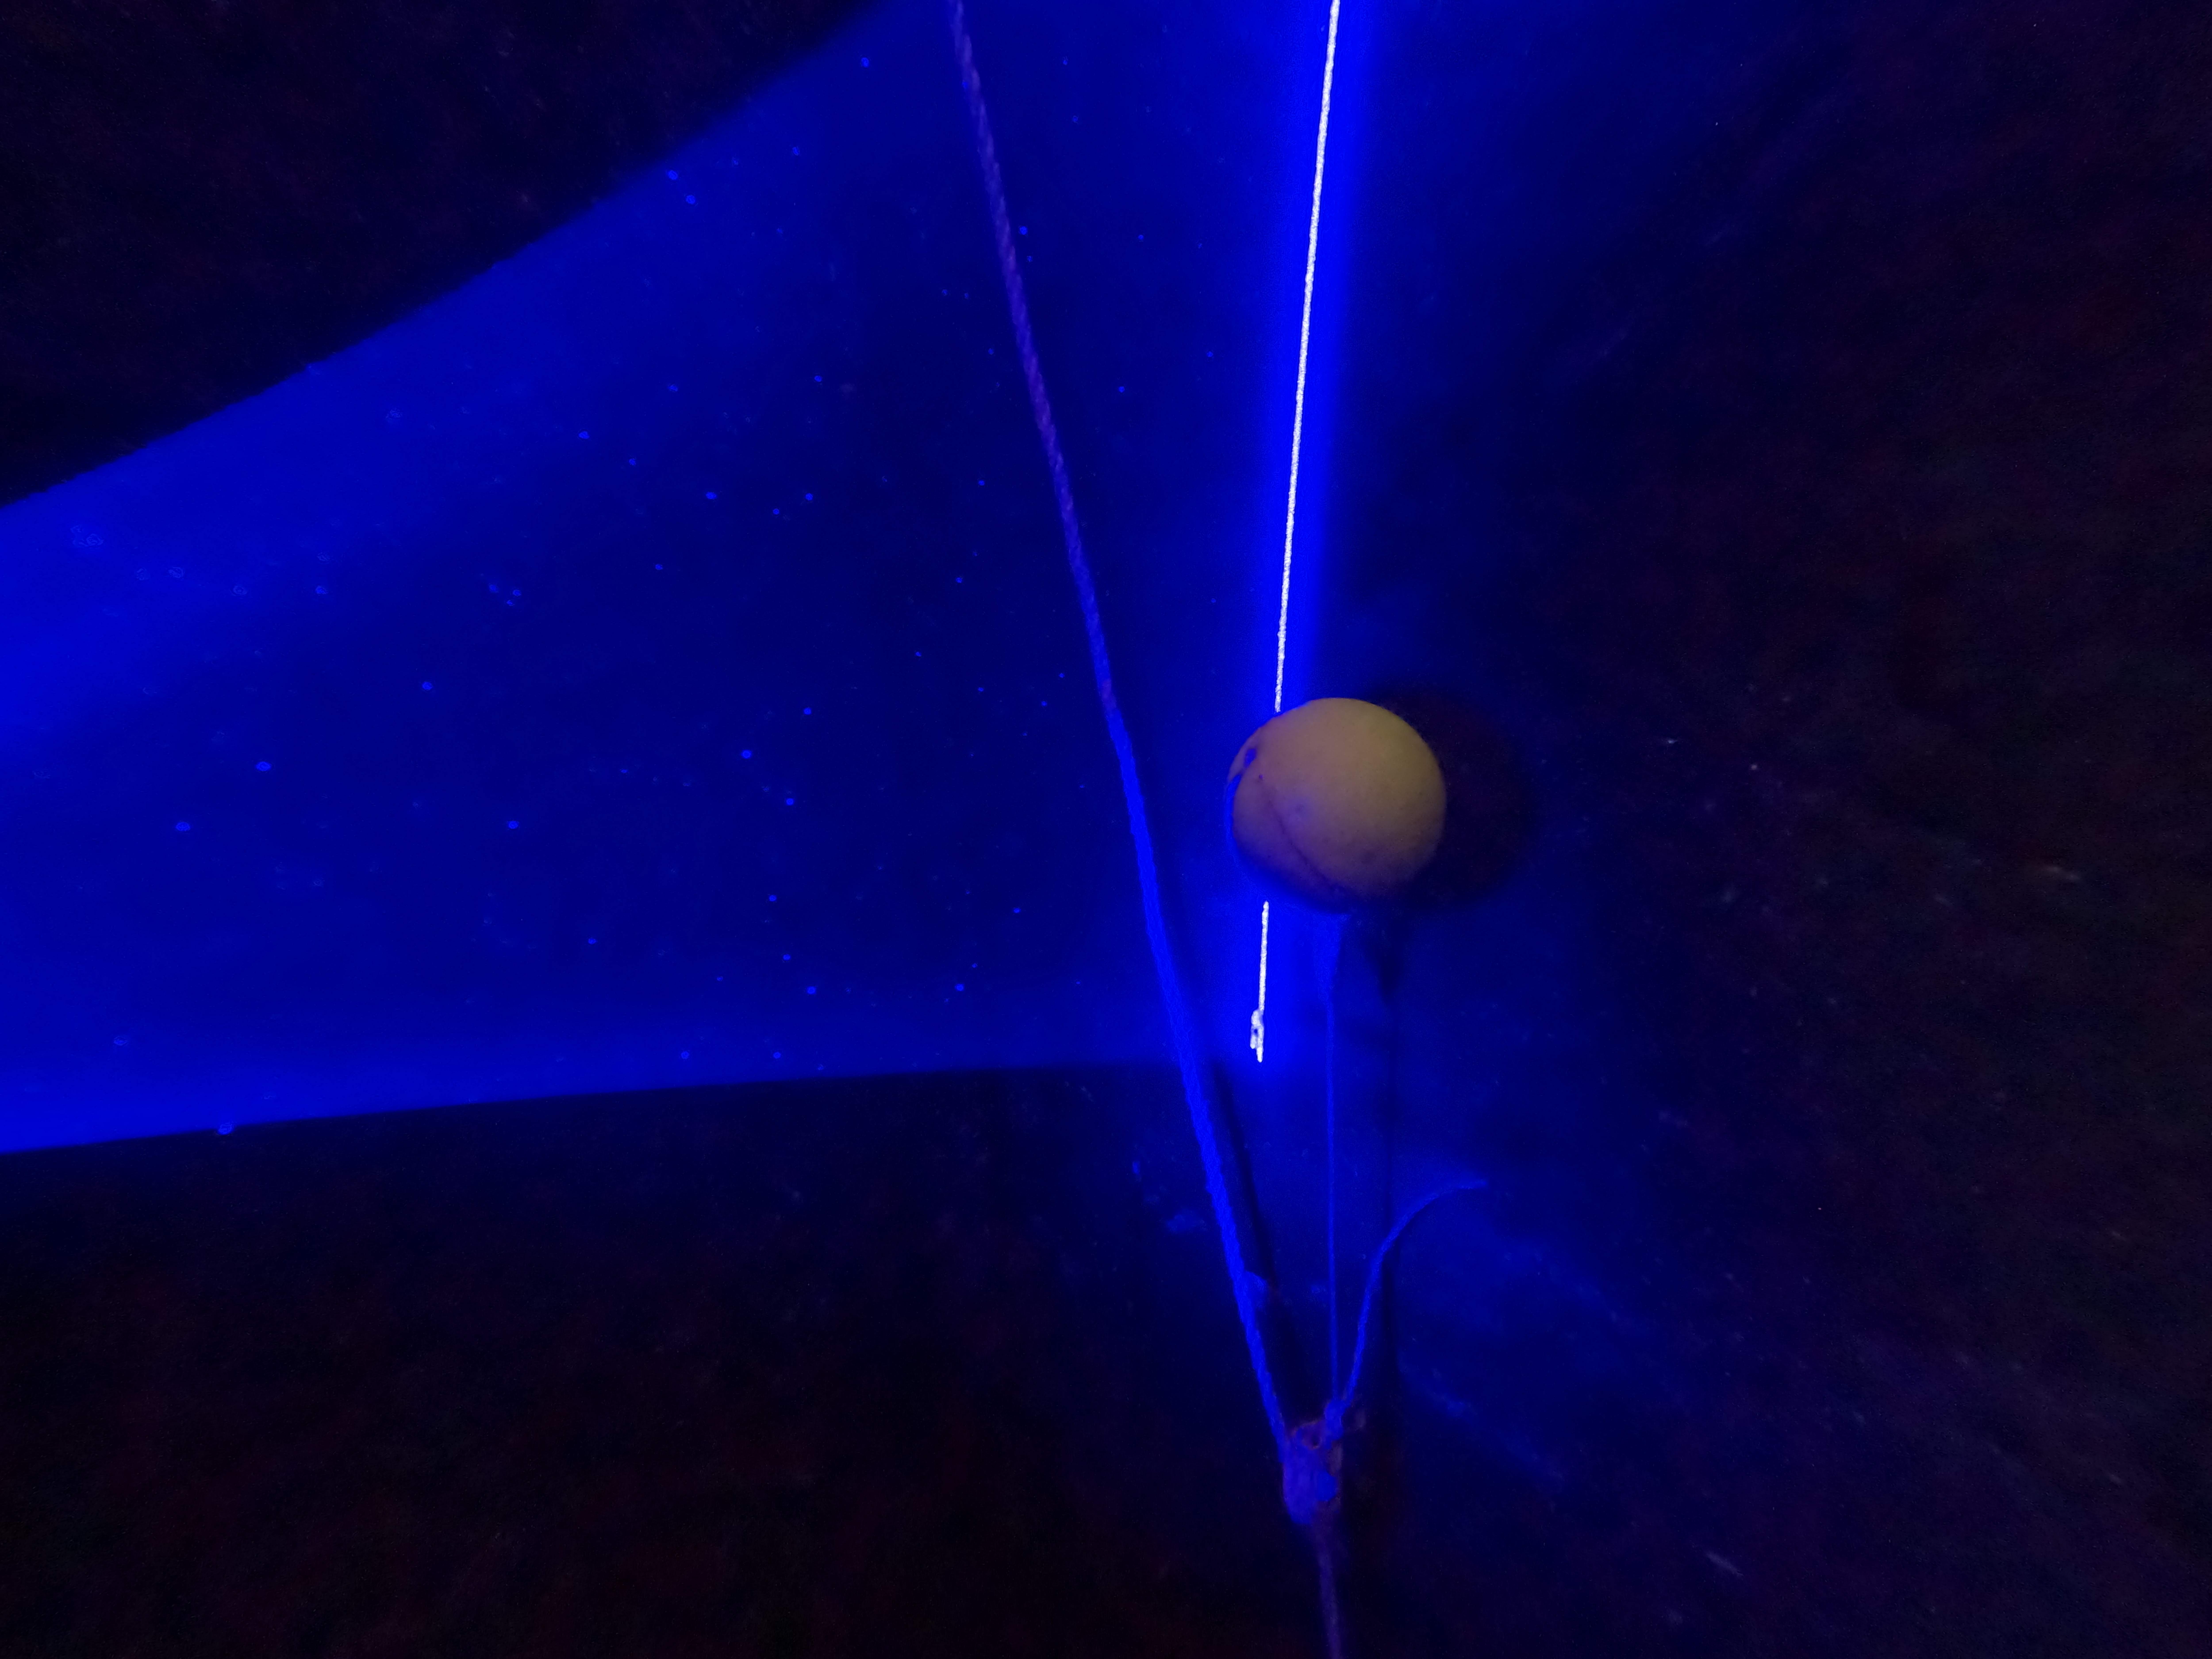

Supplement: Supplementary file 3550 [file G0030774.pdf › Level_1_1/G0030774.pdf]

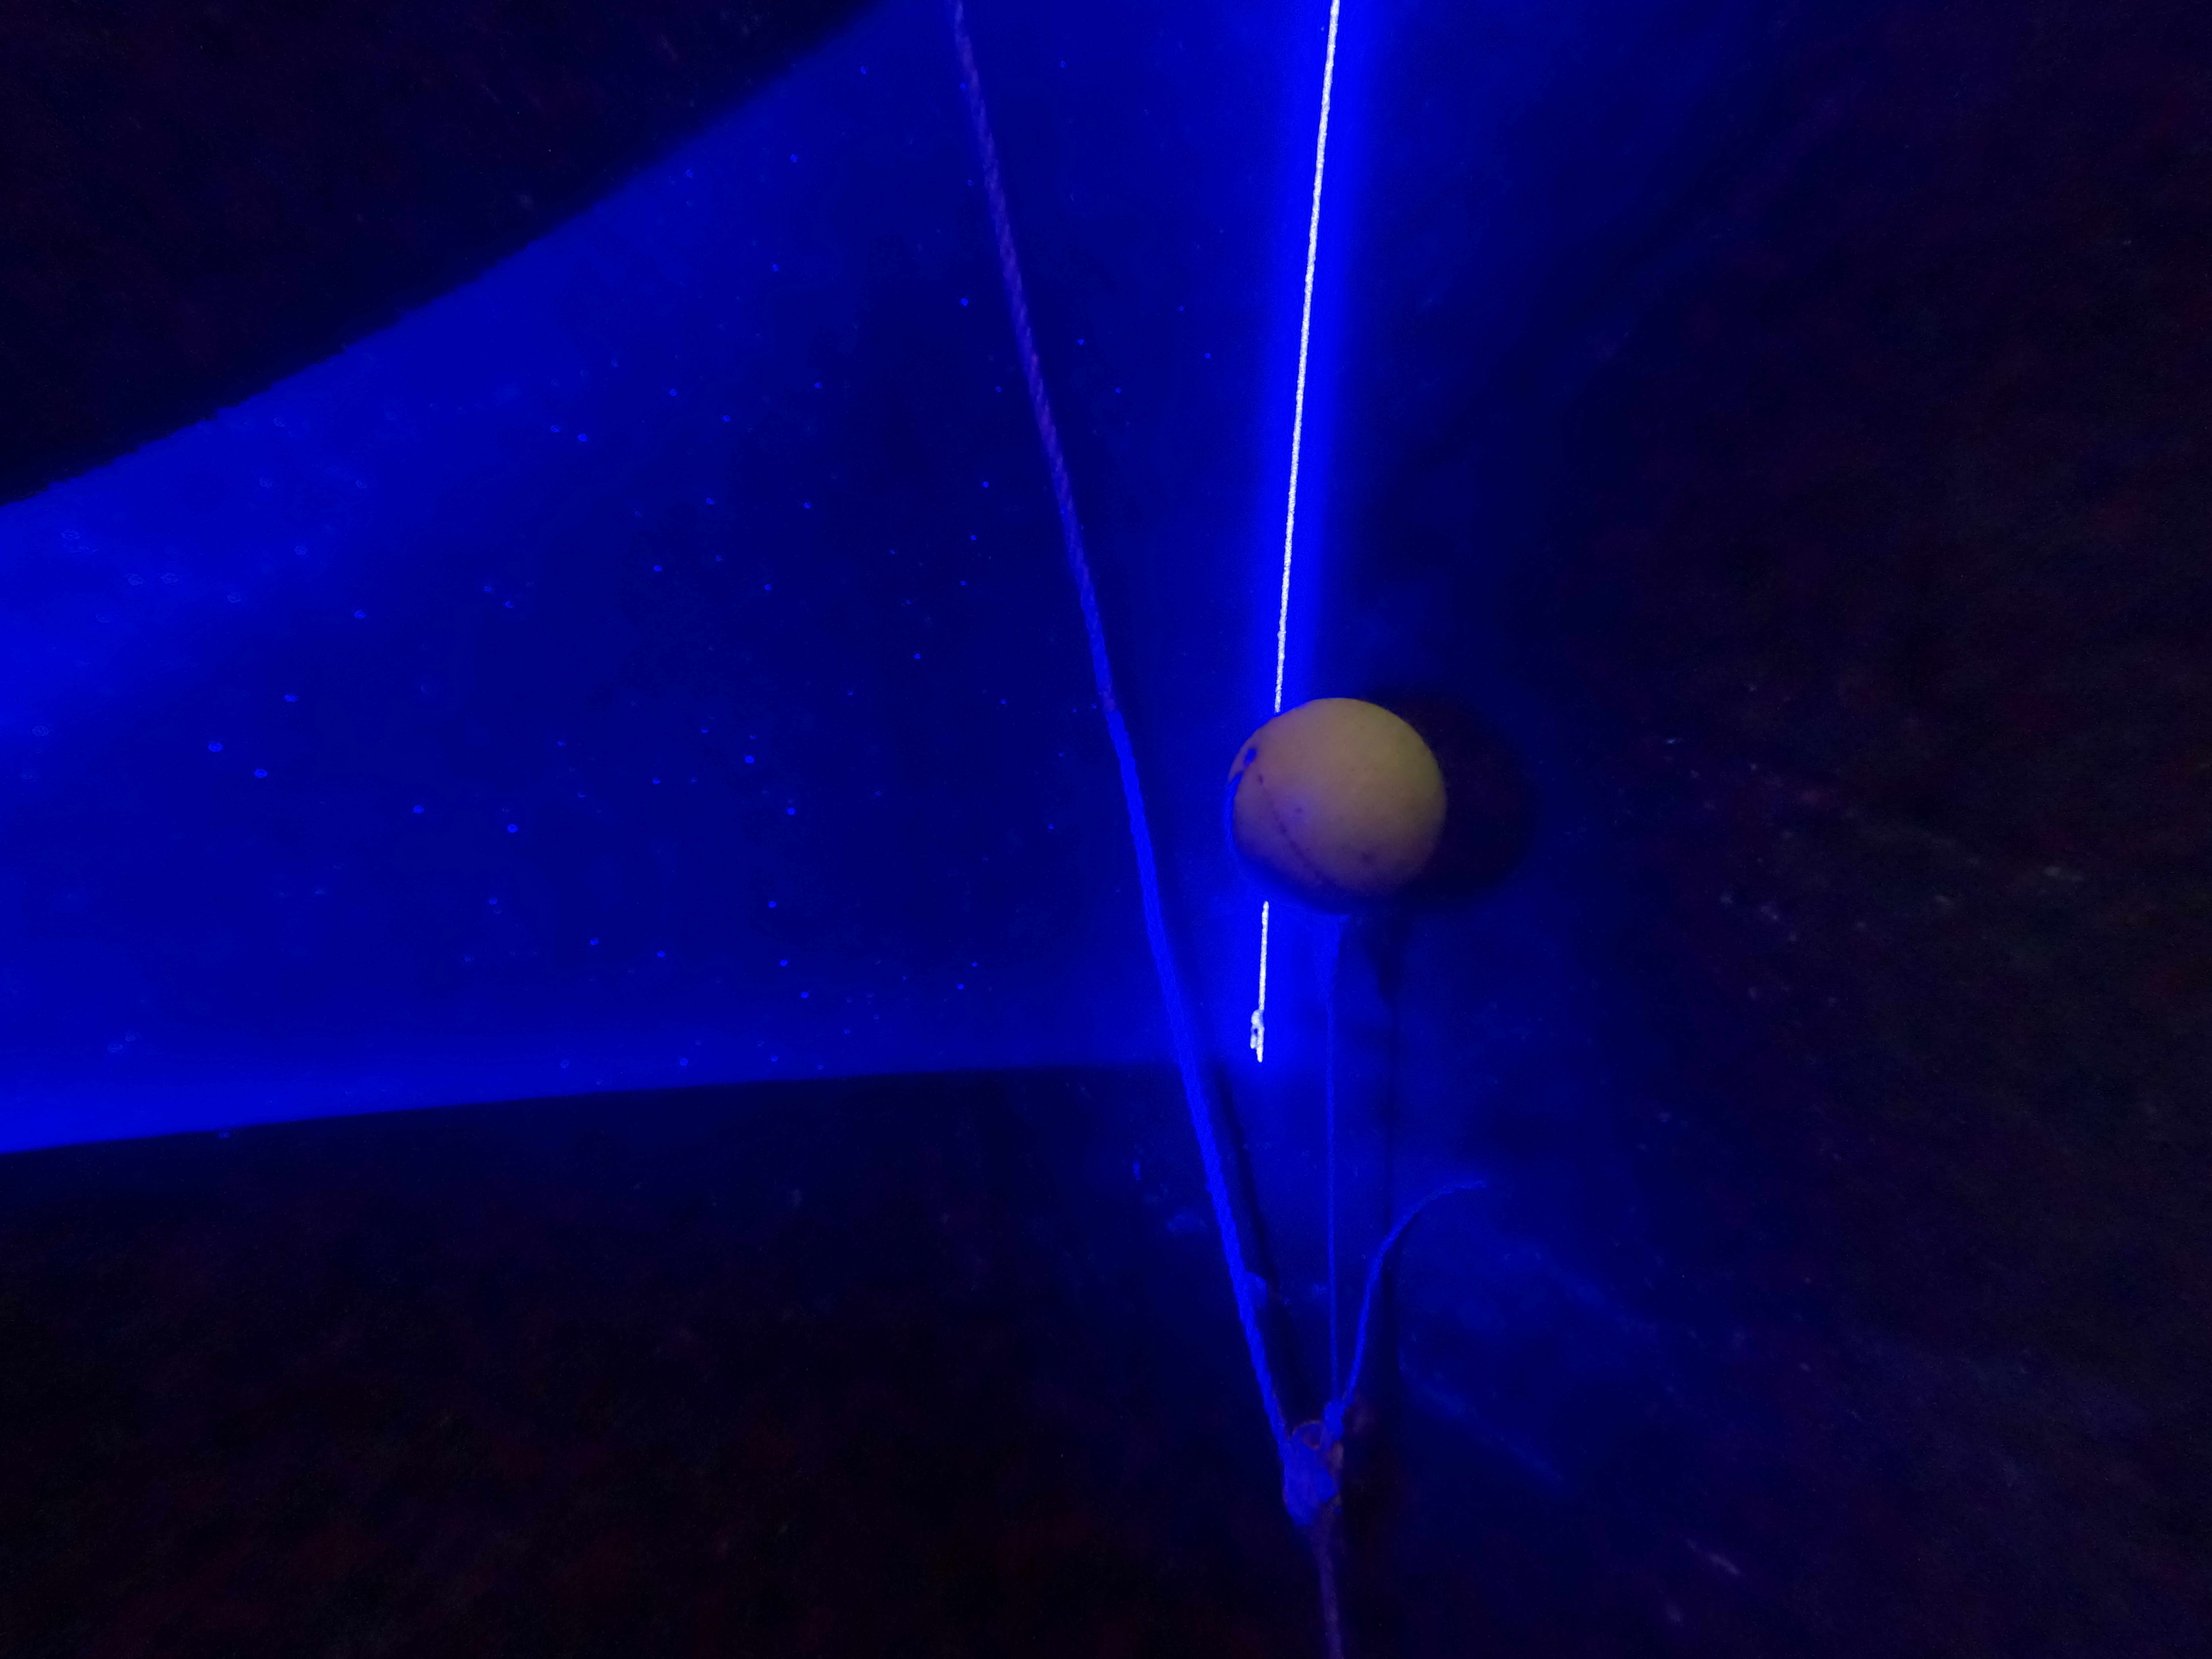

Supplement: Supplementary file 3551 [file G0030775.pdf › Level_1_1/G0030775.pdf]

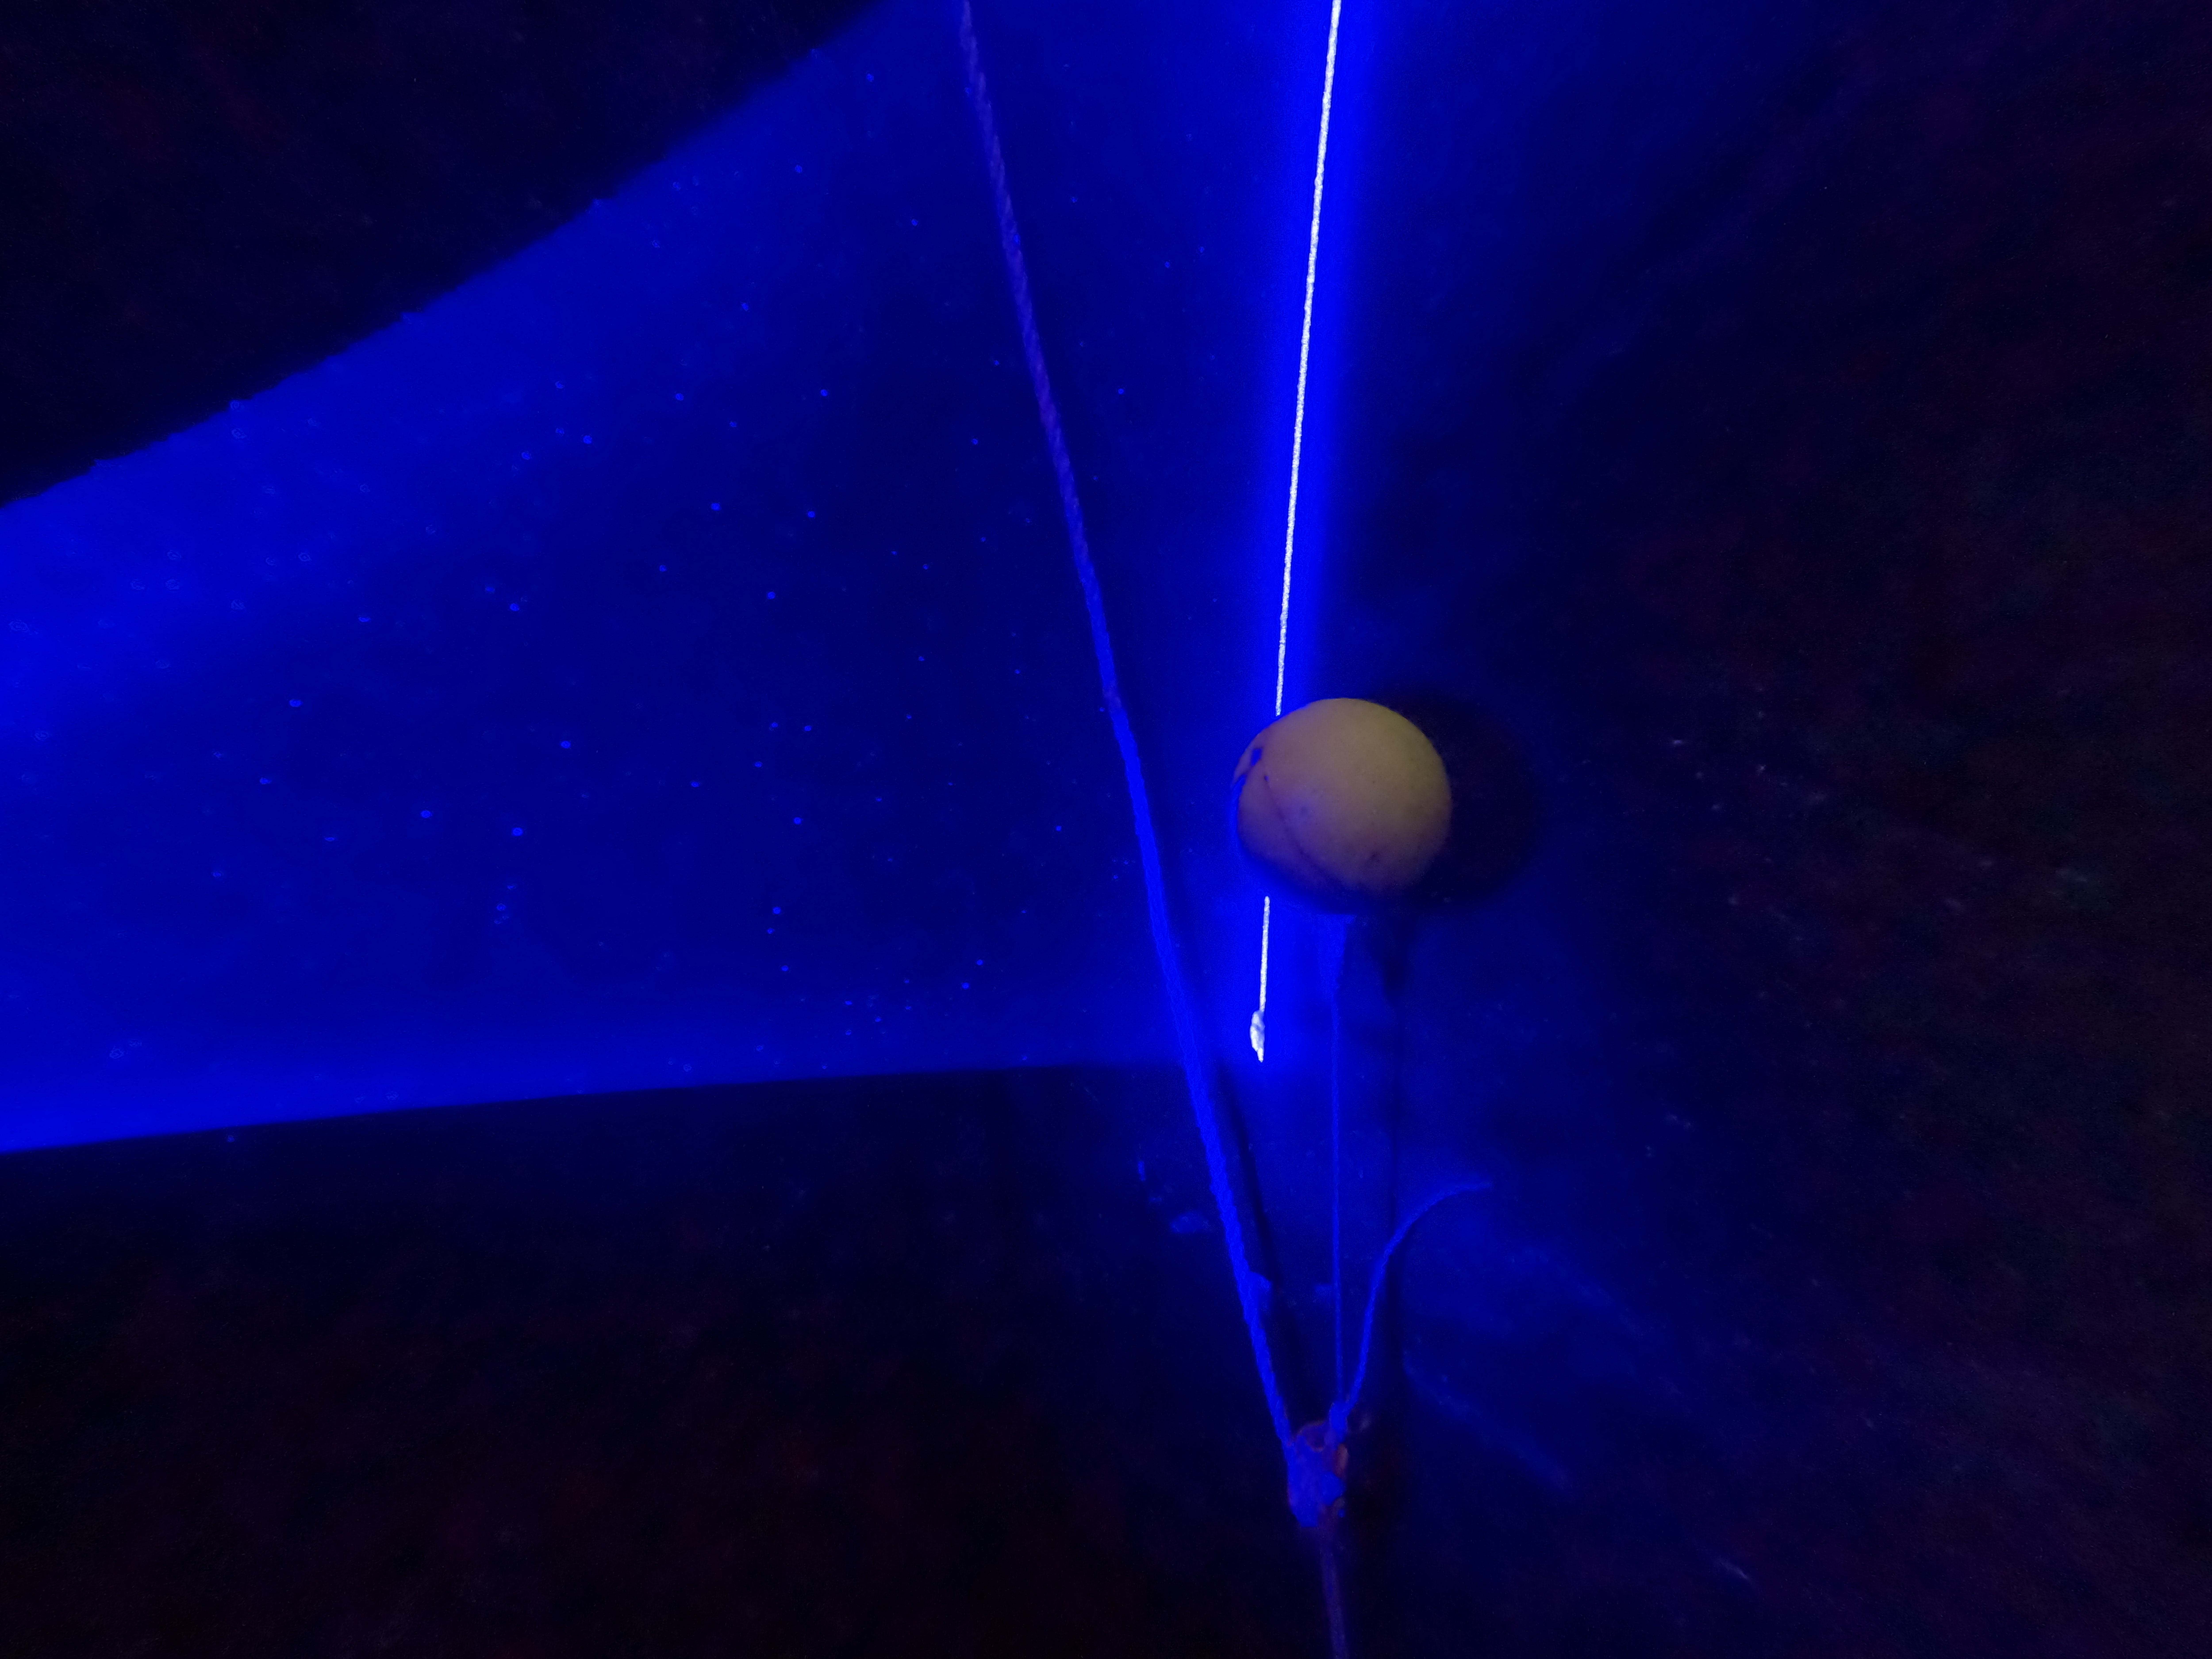

Supplement: Supplementary file 3552 [file G0030776.pdf › Level_1_1/G0030776.pdf]

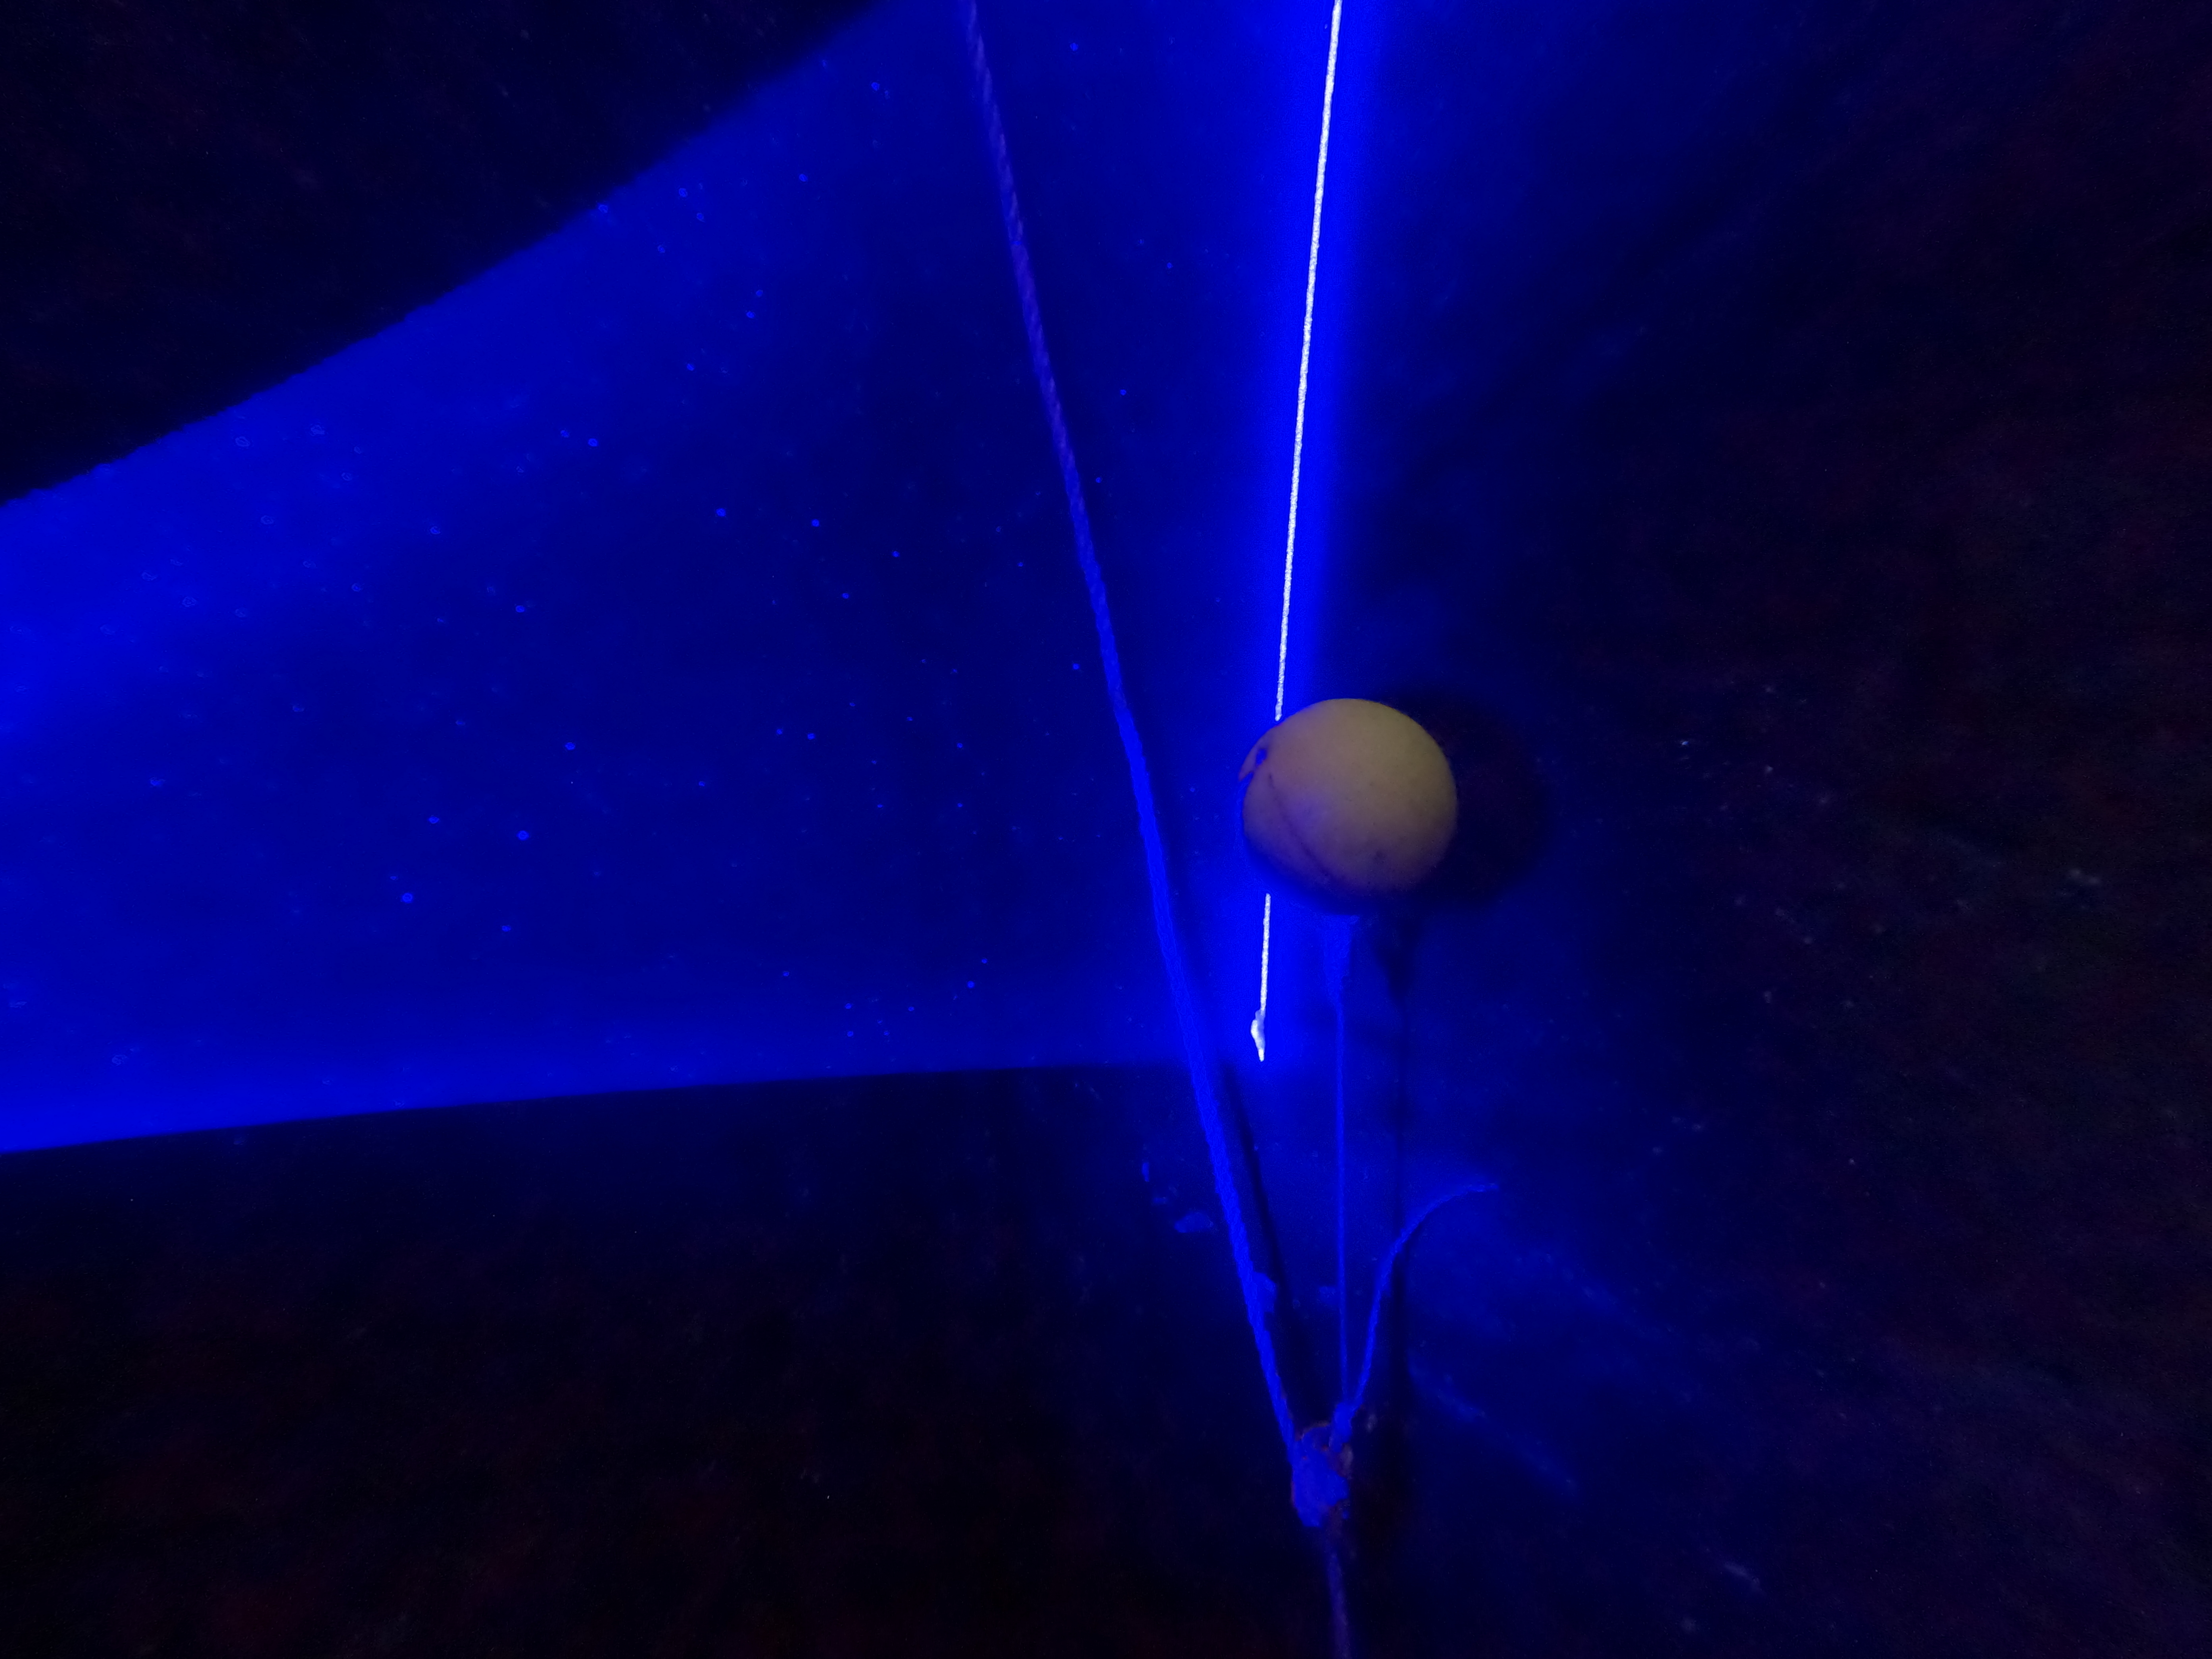

Supplement: Supplementary file 3553 [file G0030777.pdf › Level_1_1/G0030777.pdf]

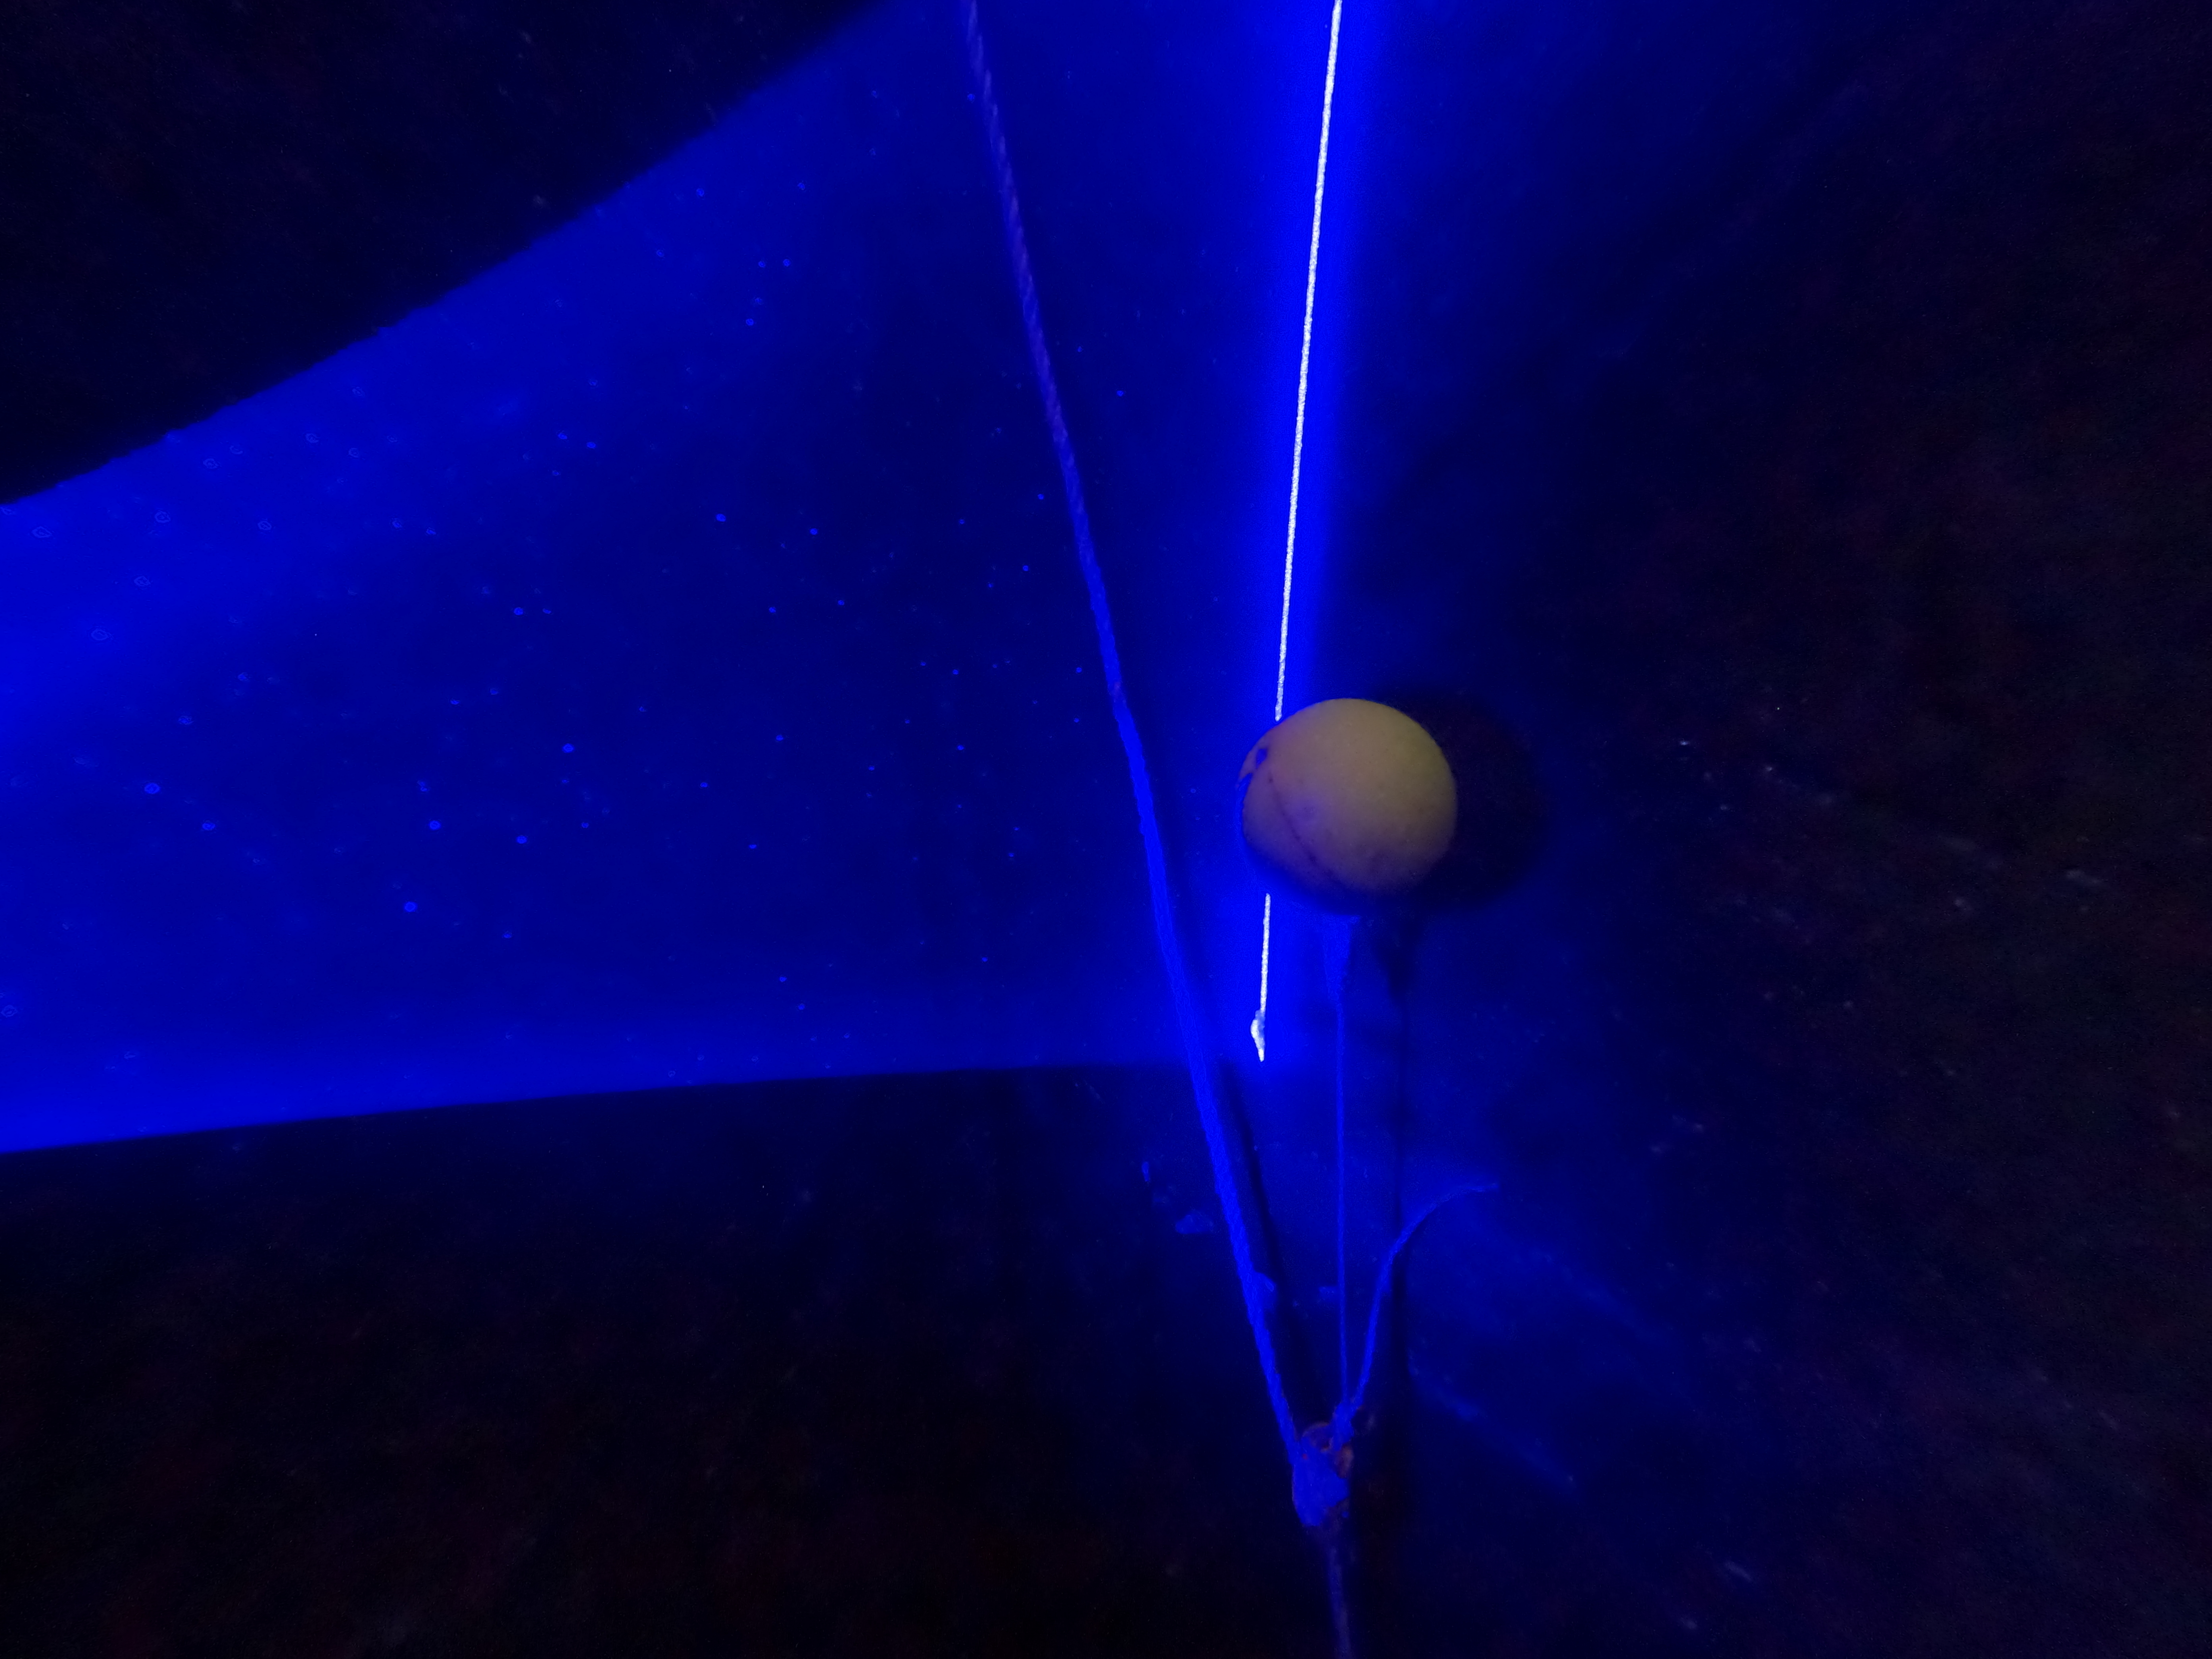

Supplement: Supplementary file 3554 [file G0030778.pdf › Level_1_1/G0030778.pdf]

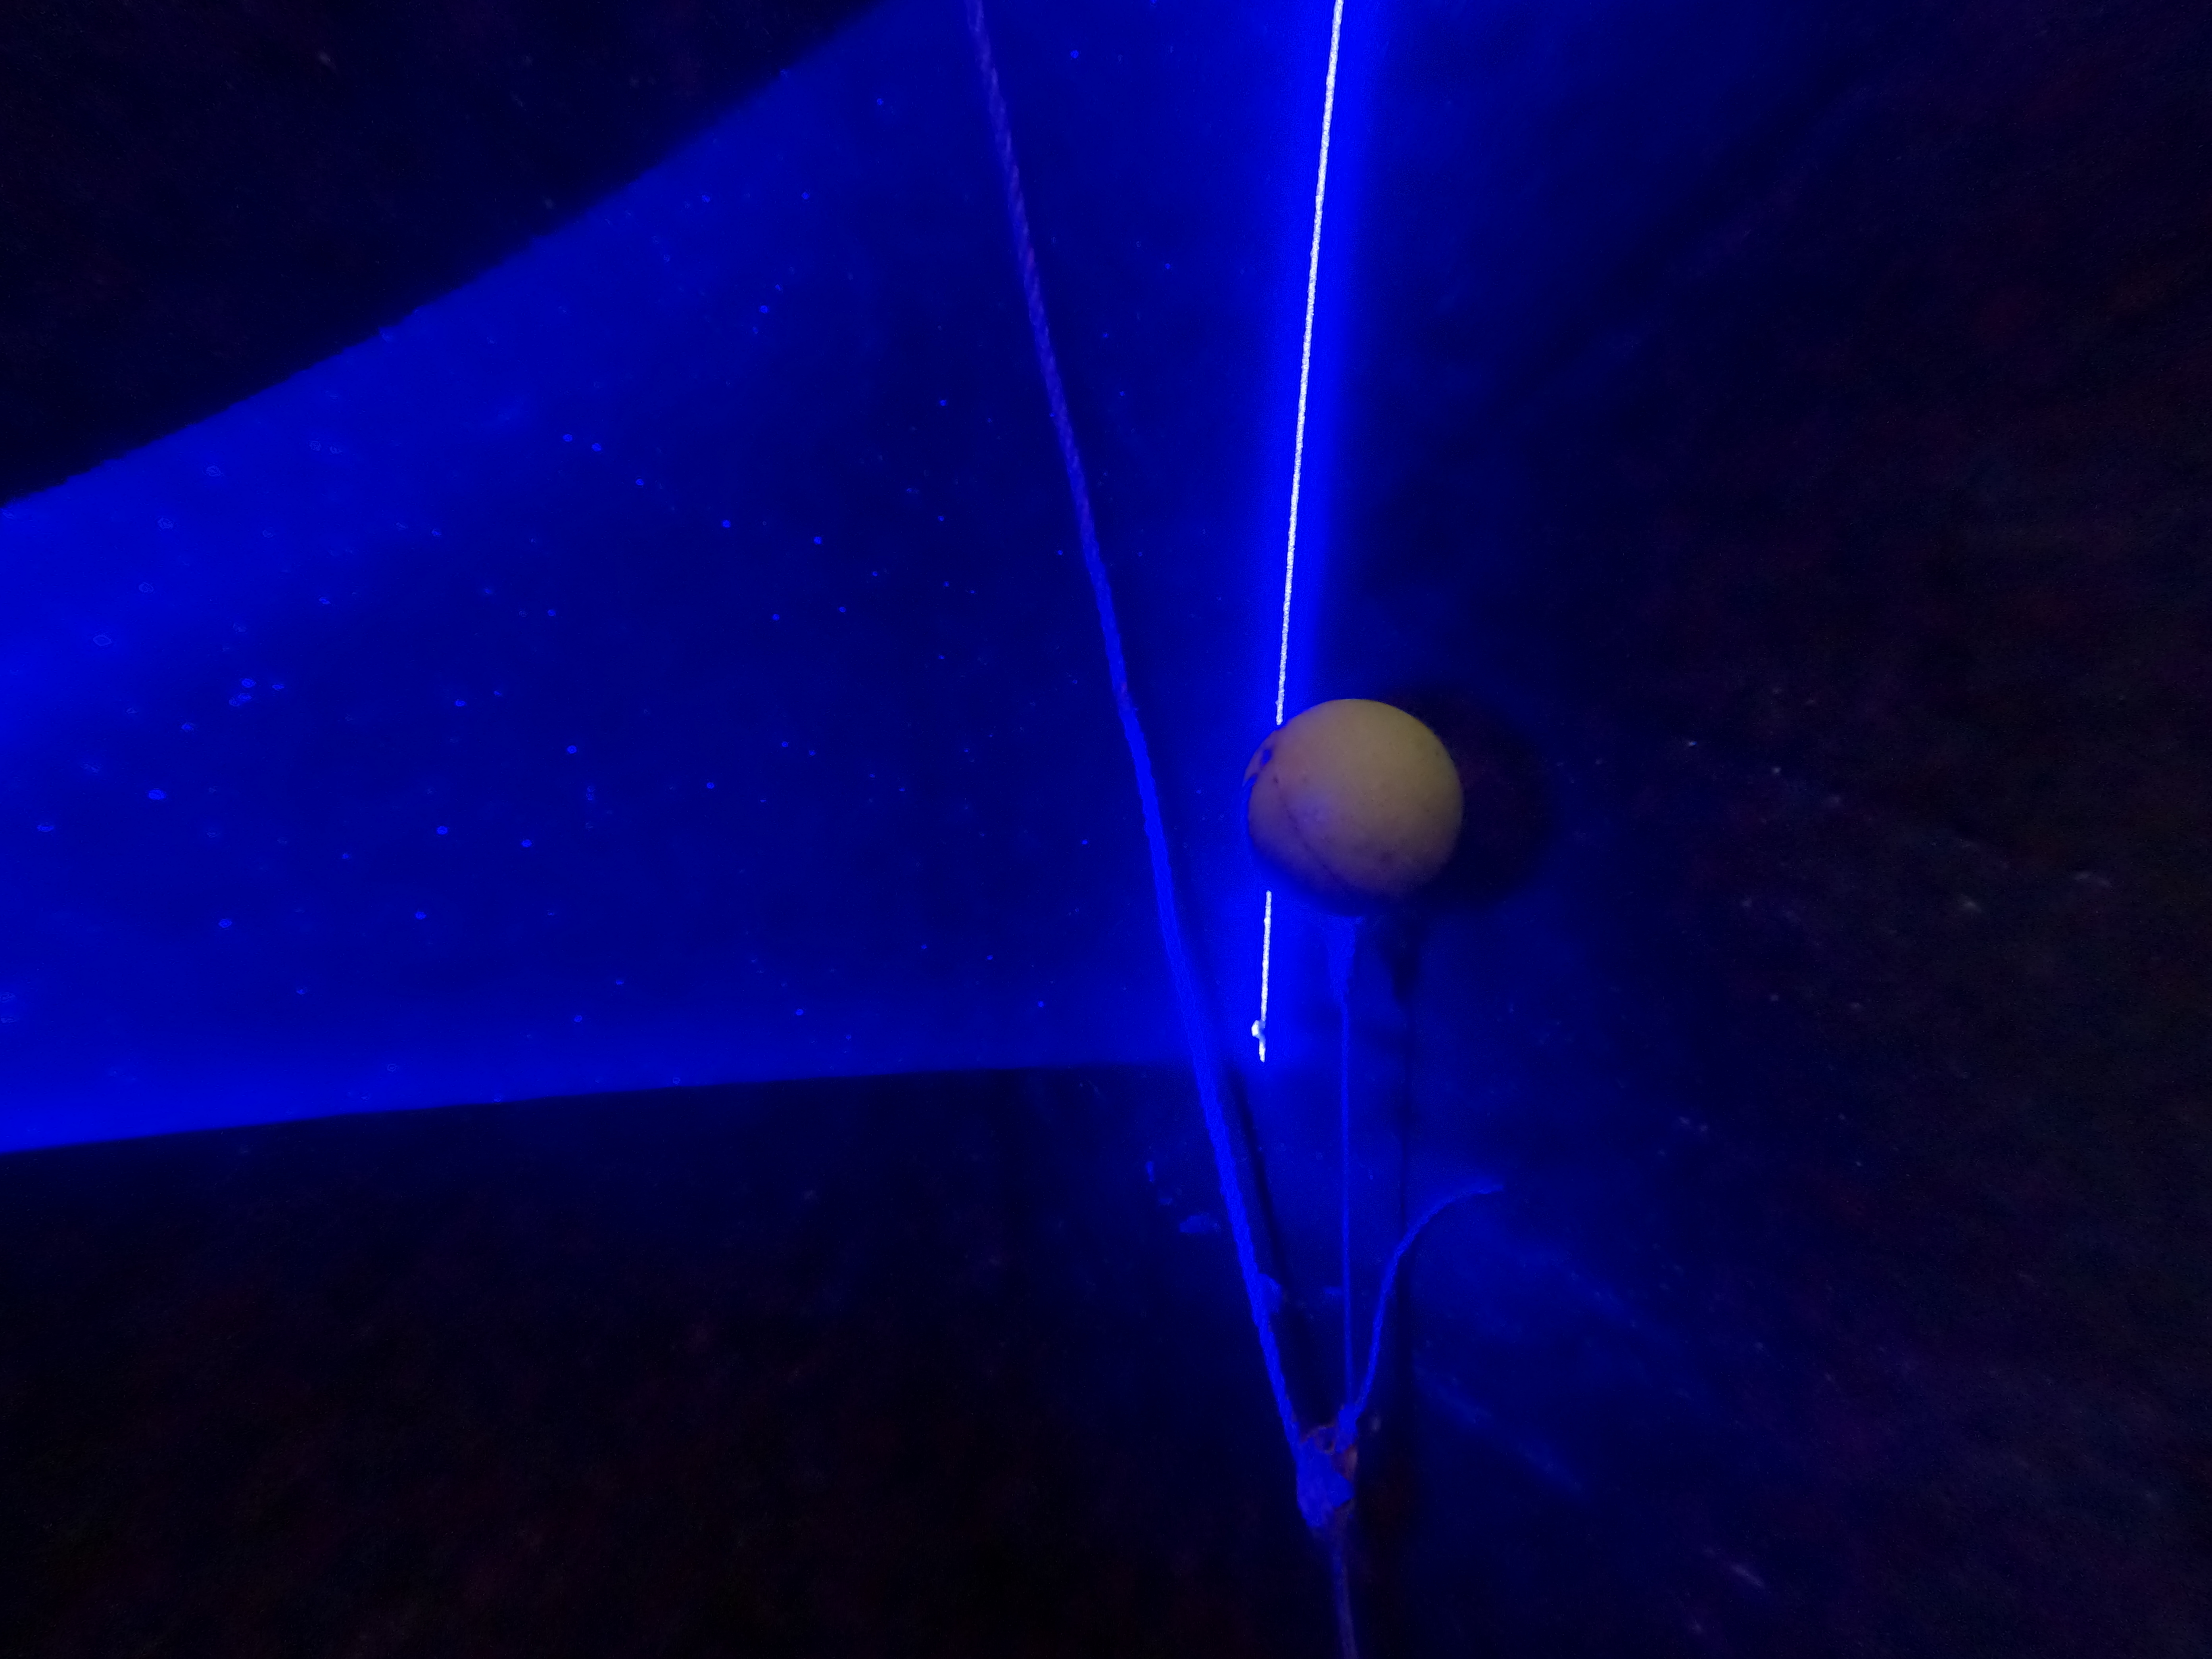

Supplement: Supplementary file 3555 [file G0030779.pdf › Level_1_1/G0030779.pdf]

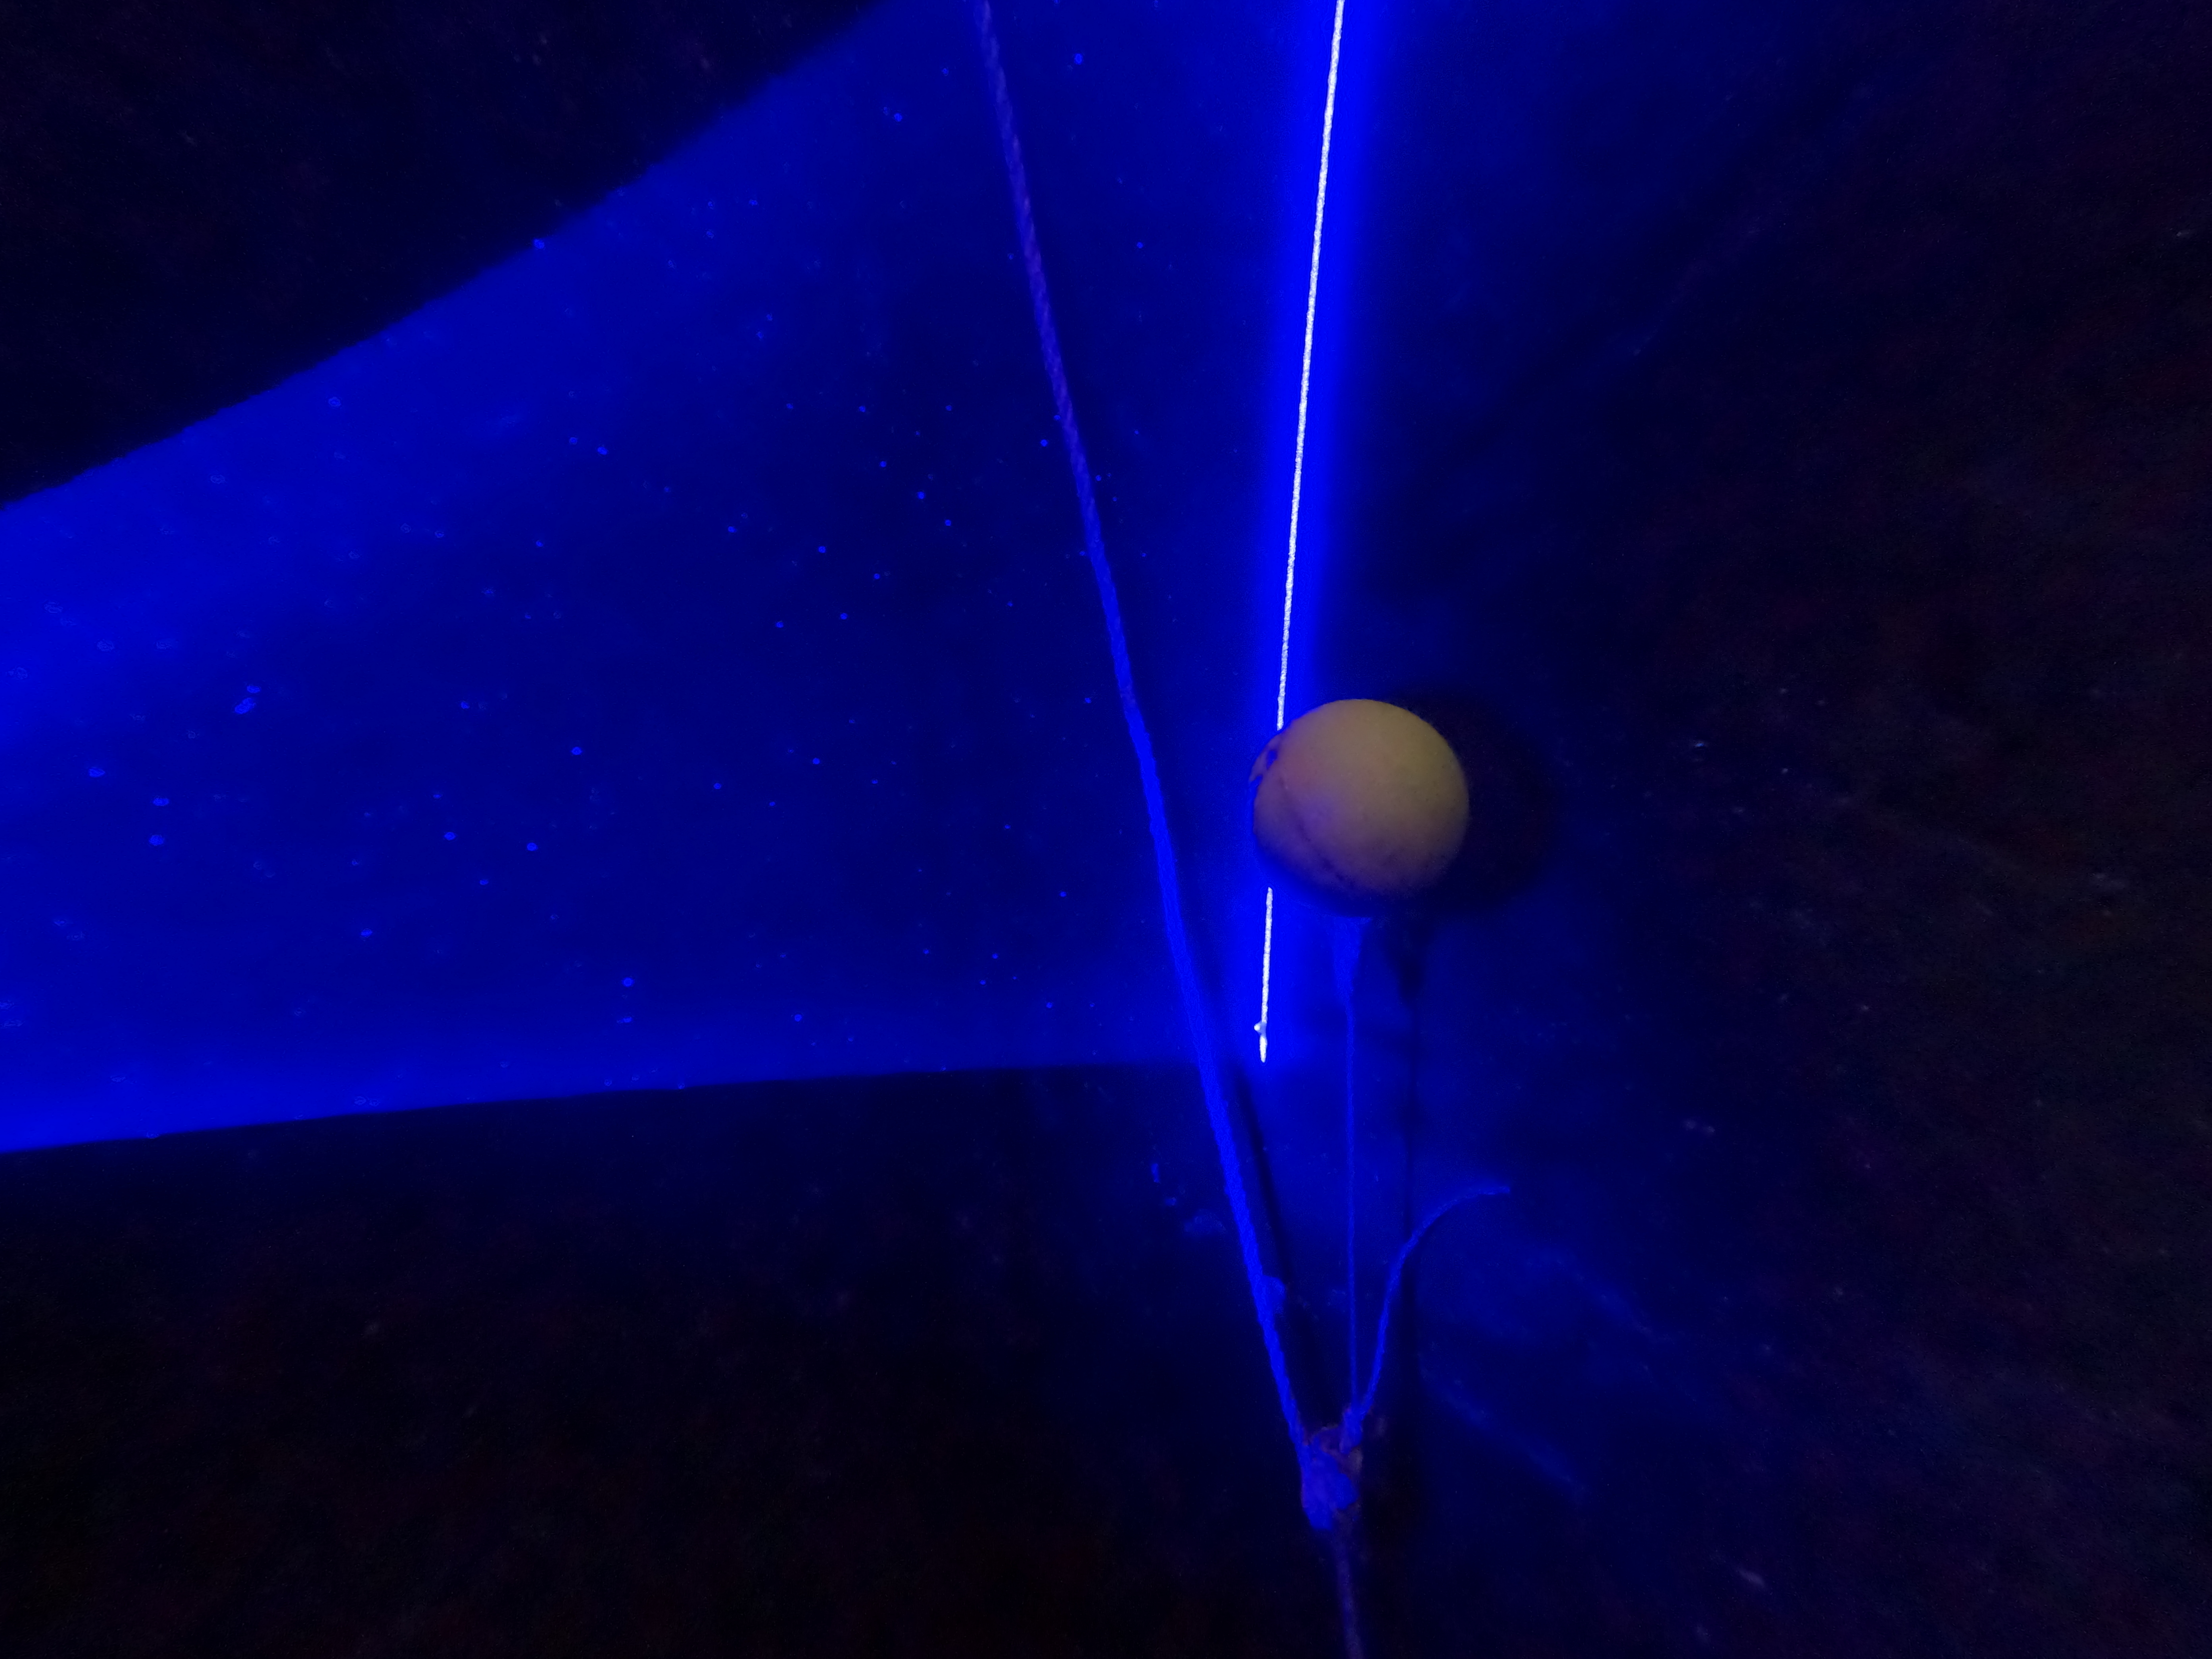

Supplement: Supplementary file 3556 [file G0030780.pdf › Level_1_1/G0030780.pdf]

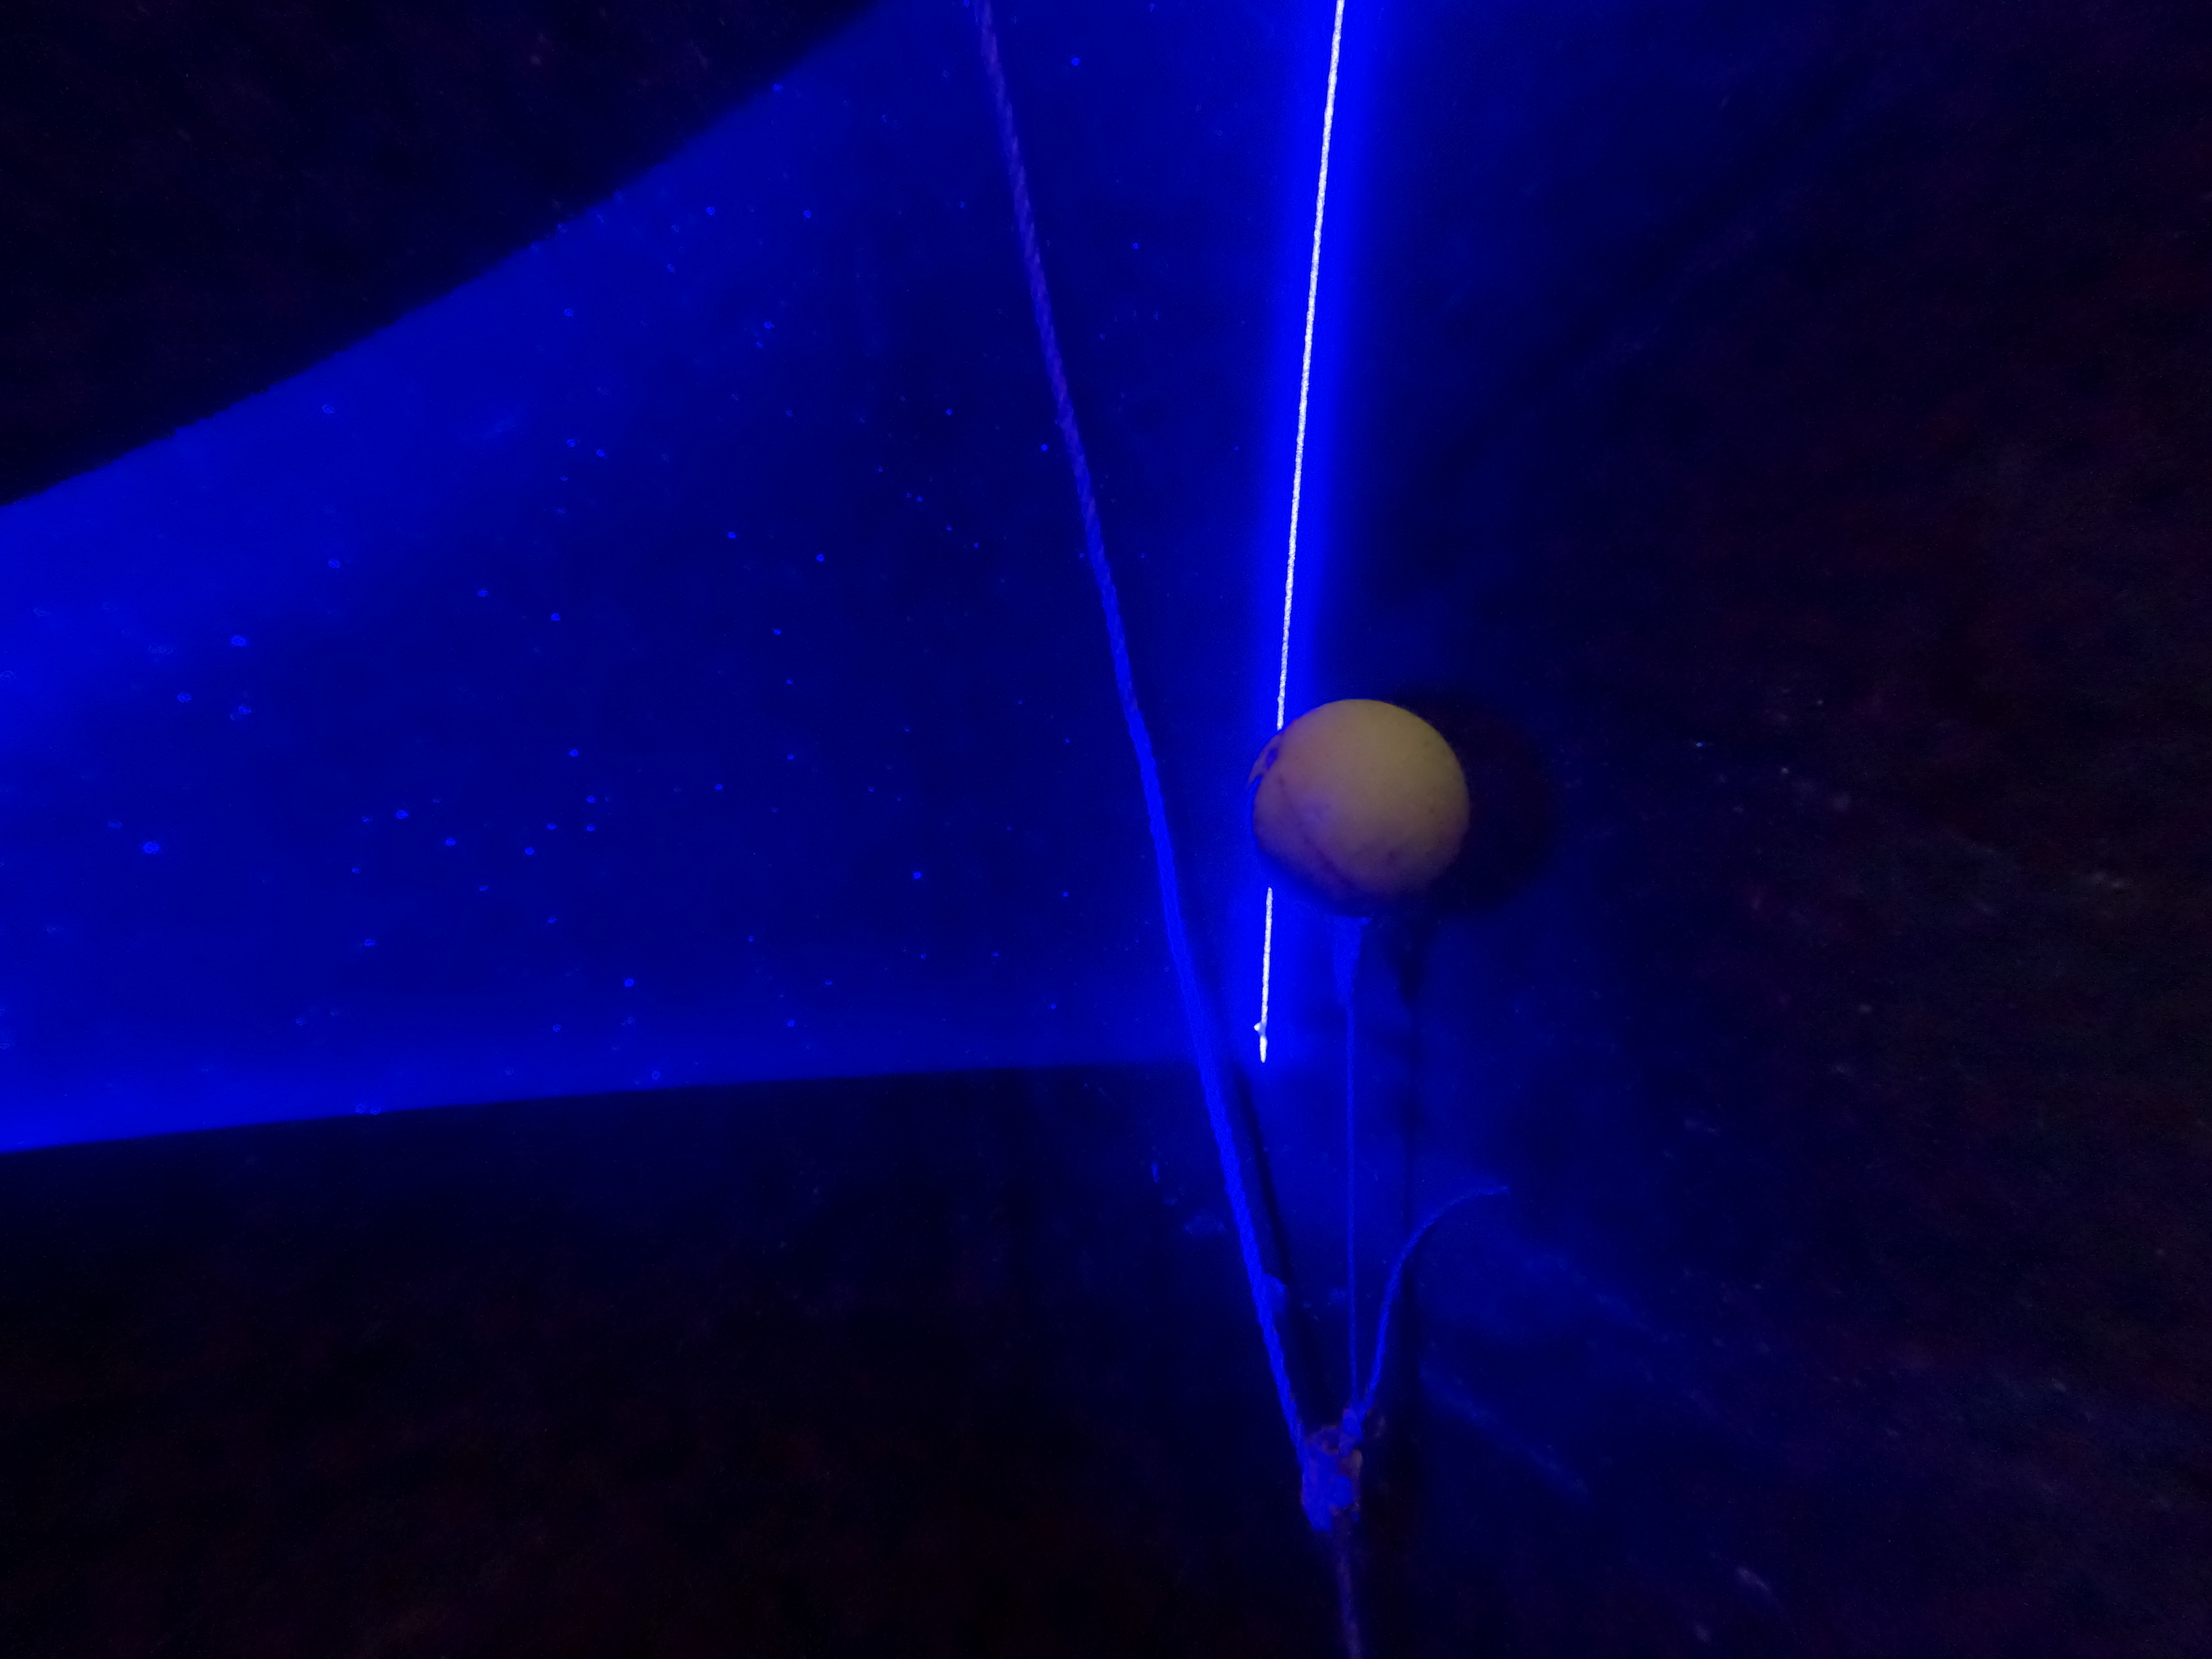

Supplement: Supplementary file 3557 [file G0030781.pdf › Level_1_1/G0030781.pdf]

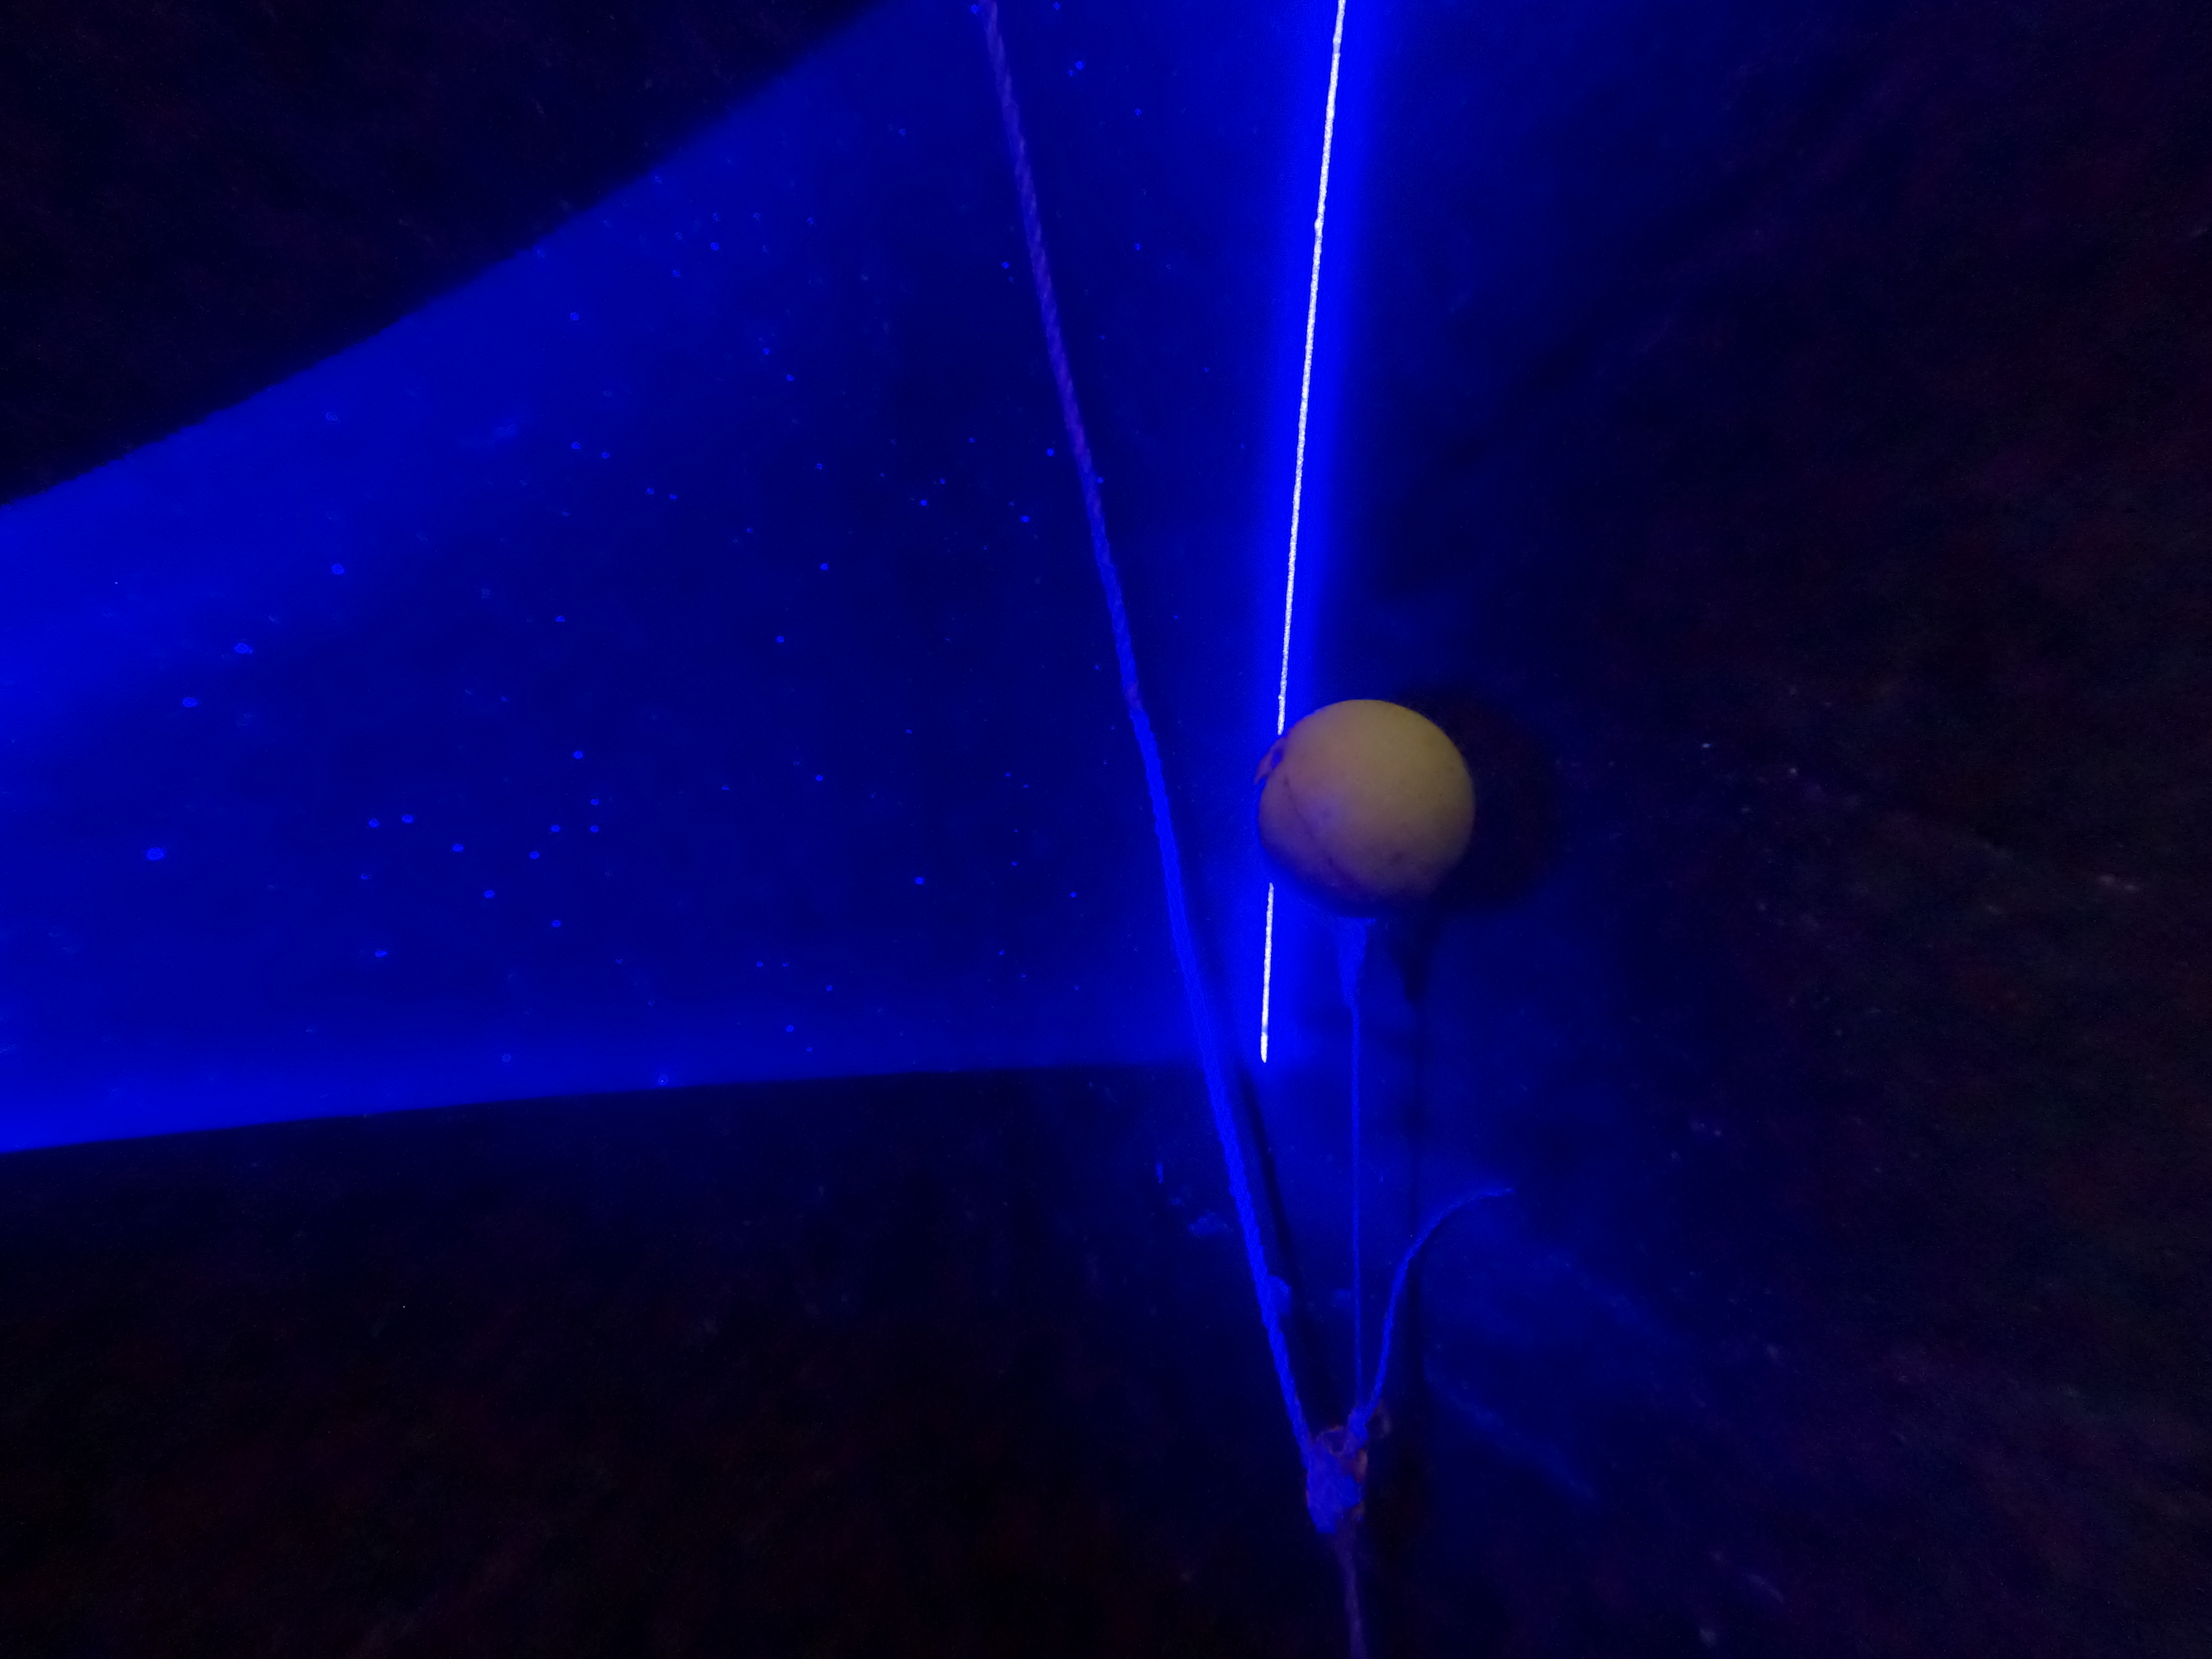

Supplement: Supplementary file 3558 [file G0030782.pdf › Level_1_1/G0030782.pdf]

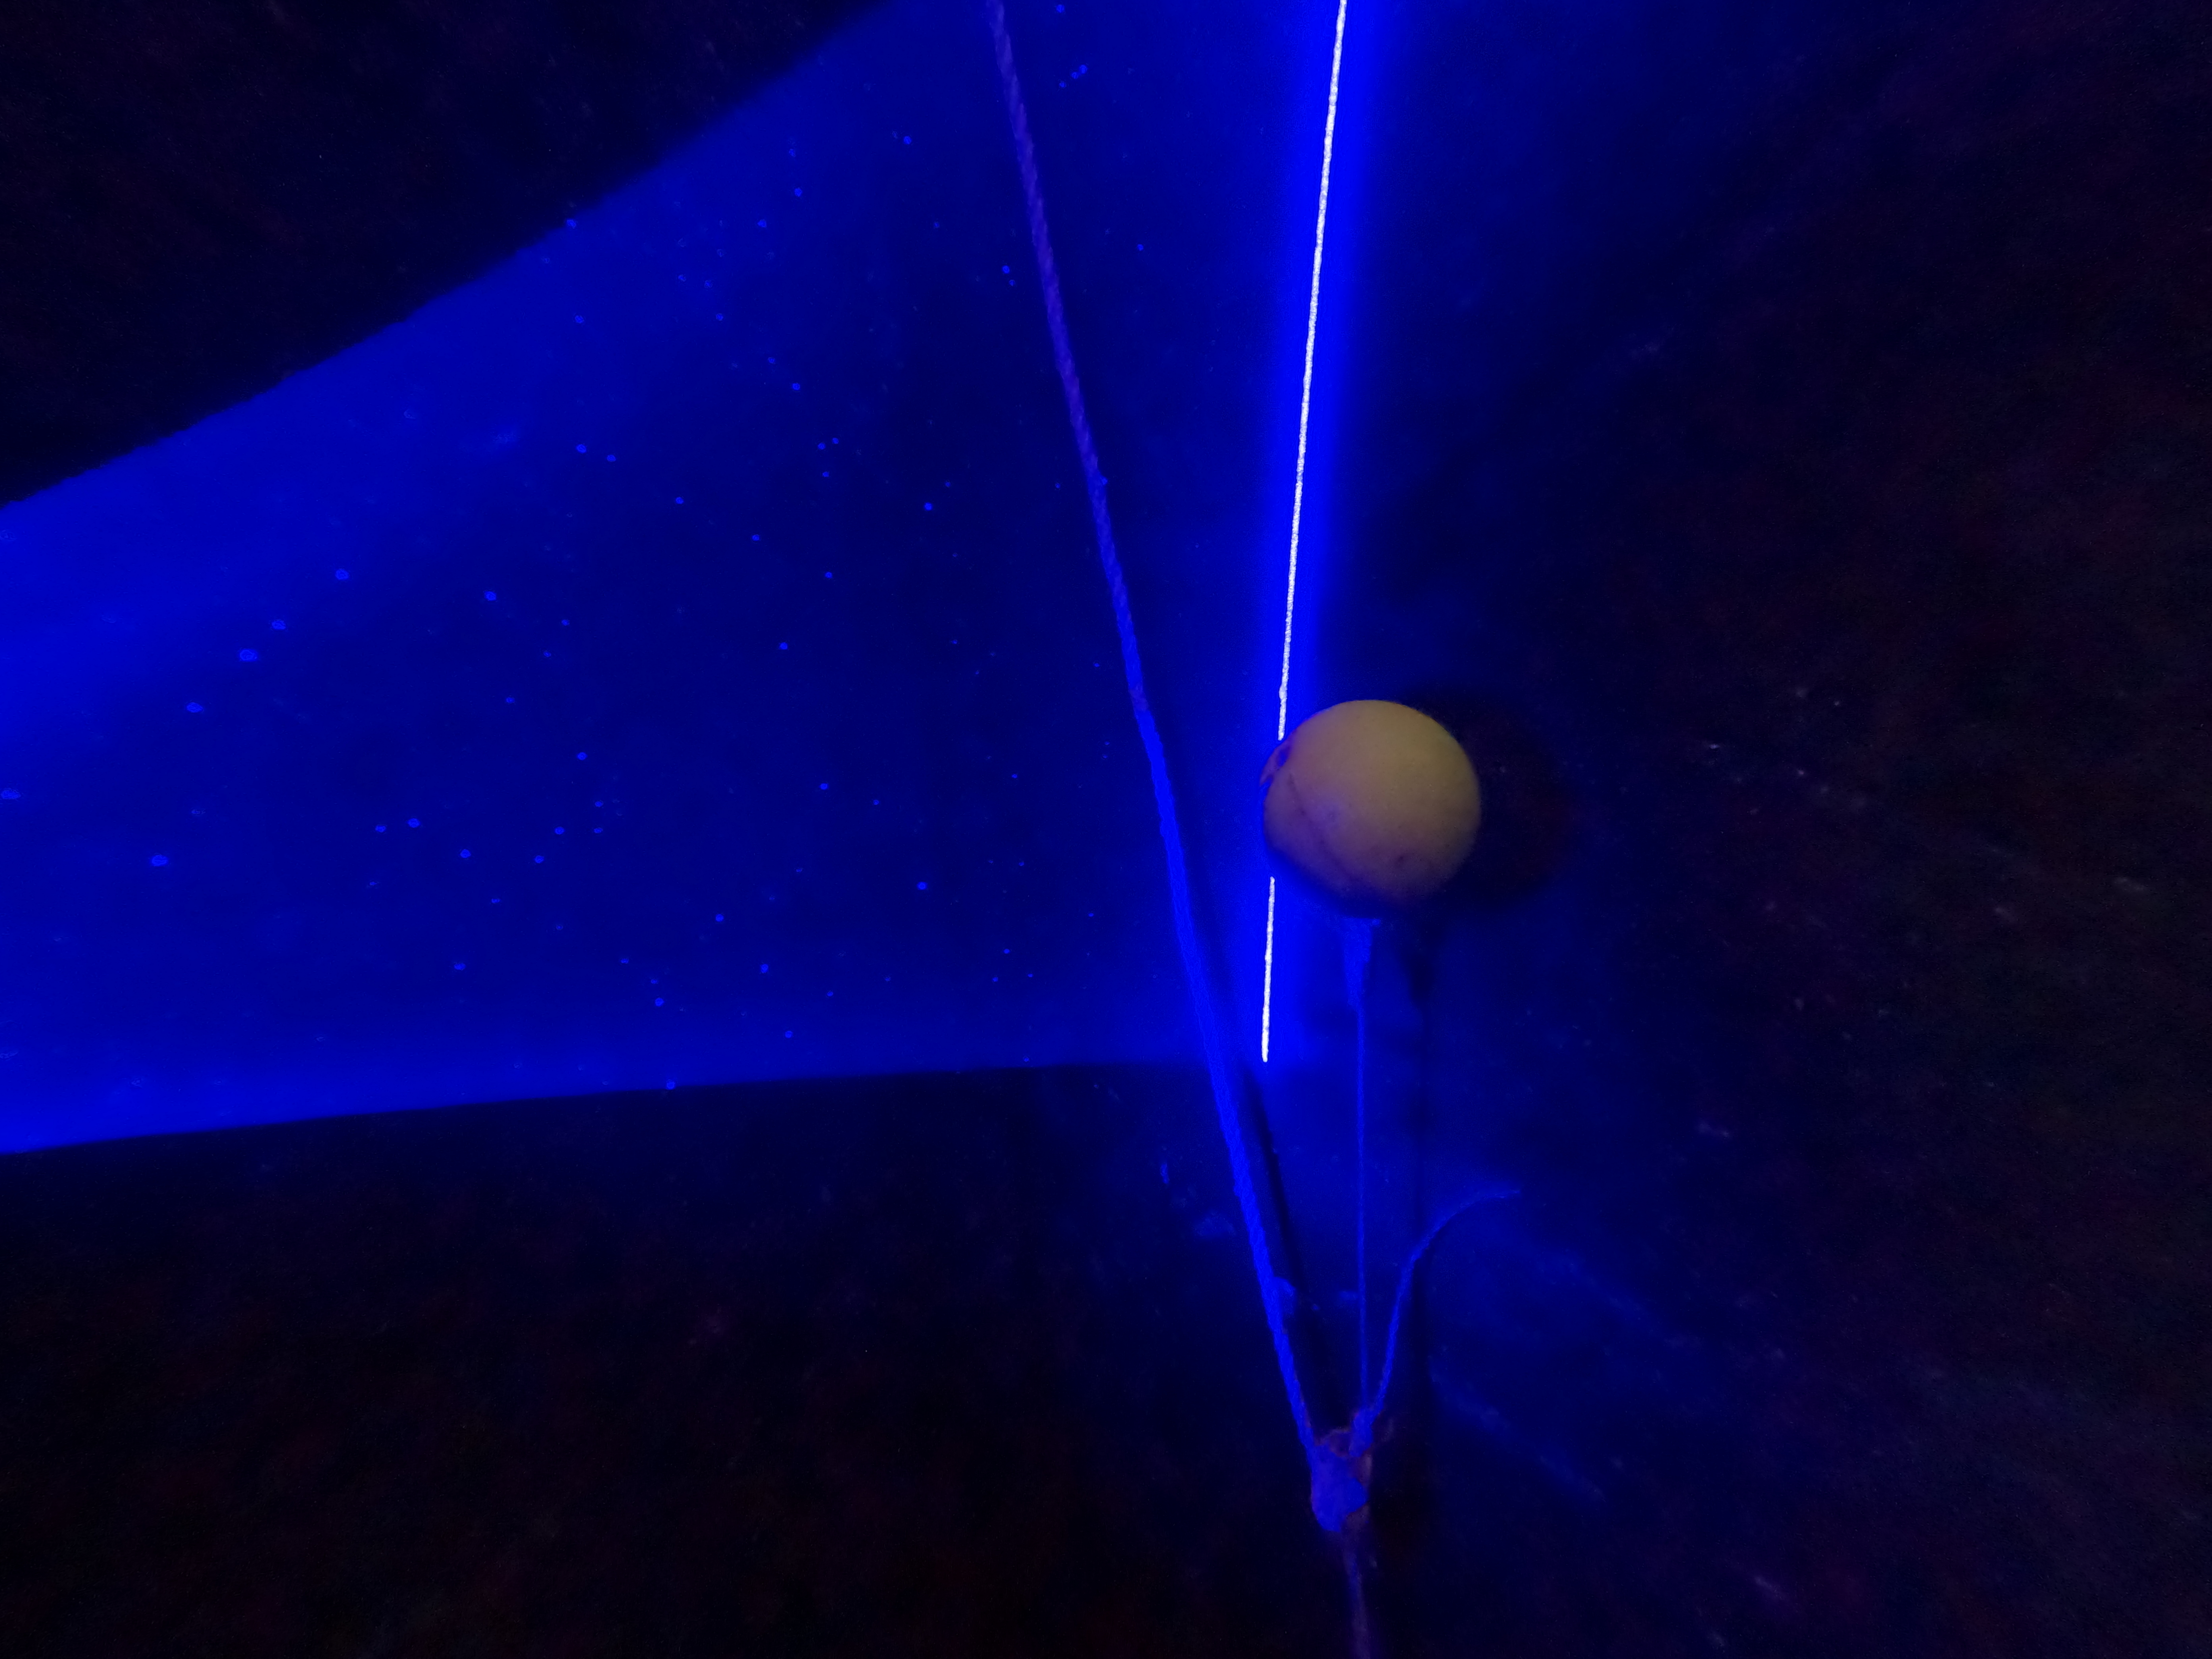

Supplement: Supplementary file 3559 [file G0030783.pdf › Level_1_1/G0030783.pdf]

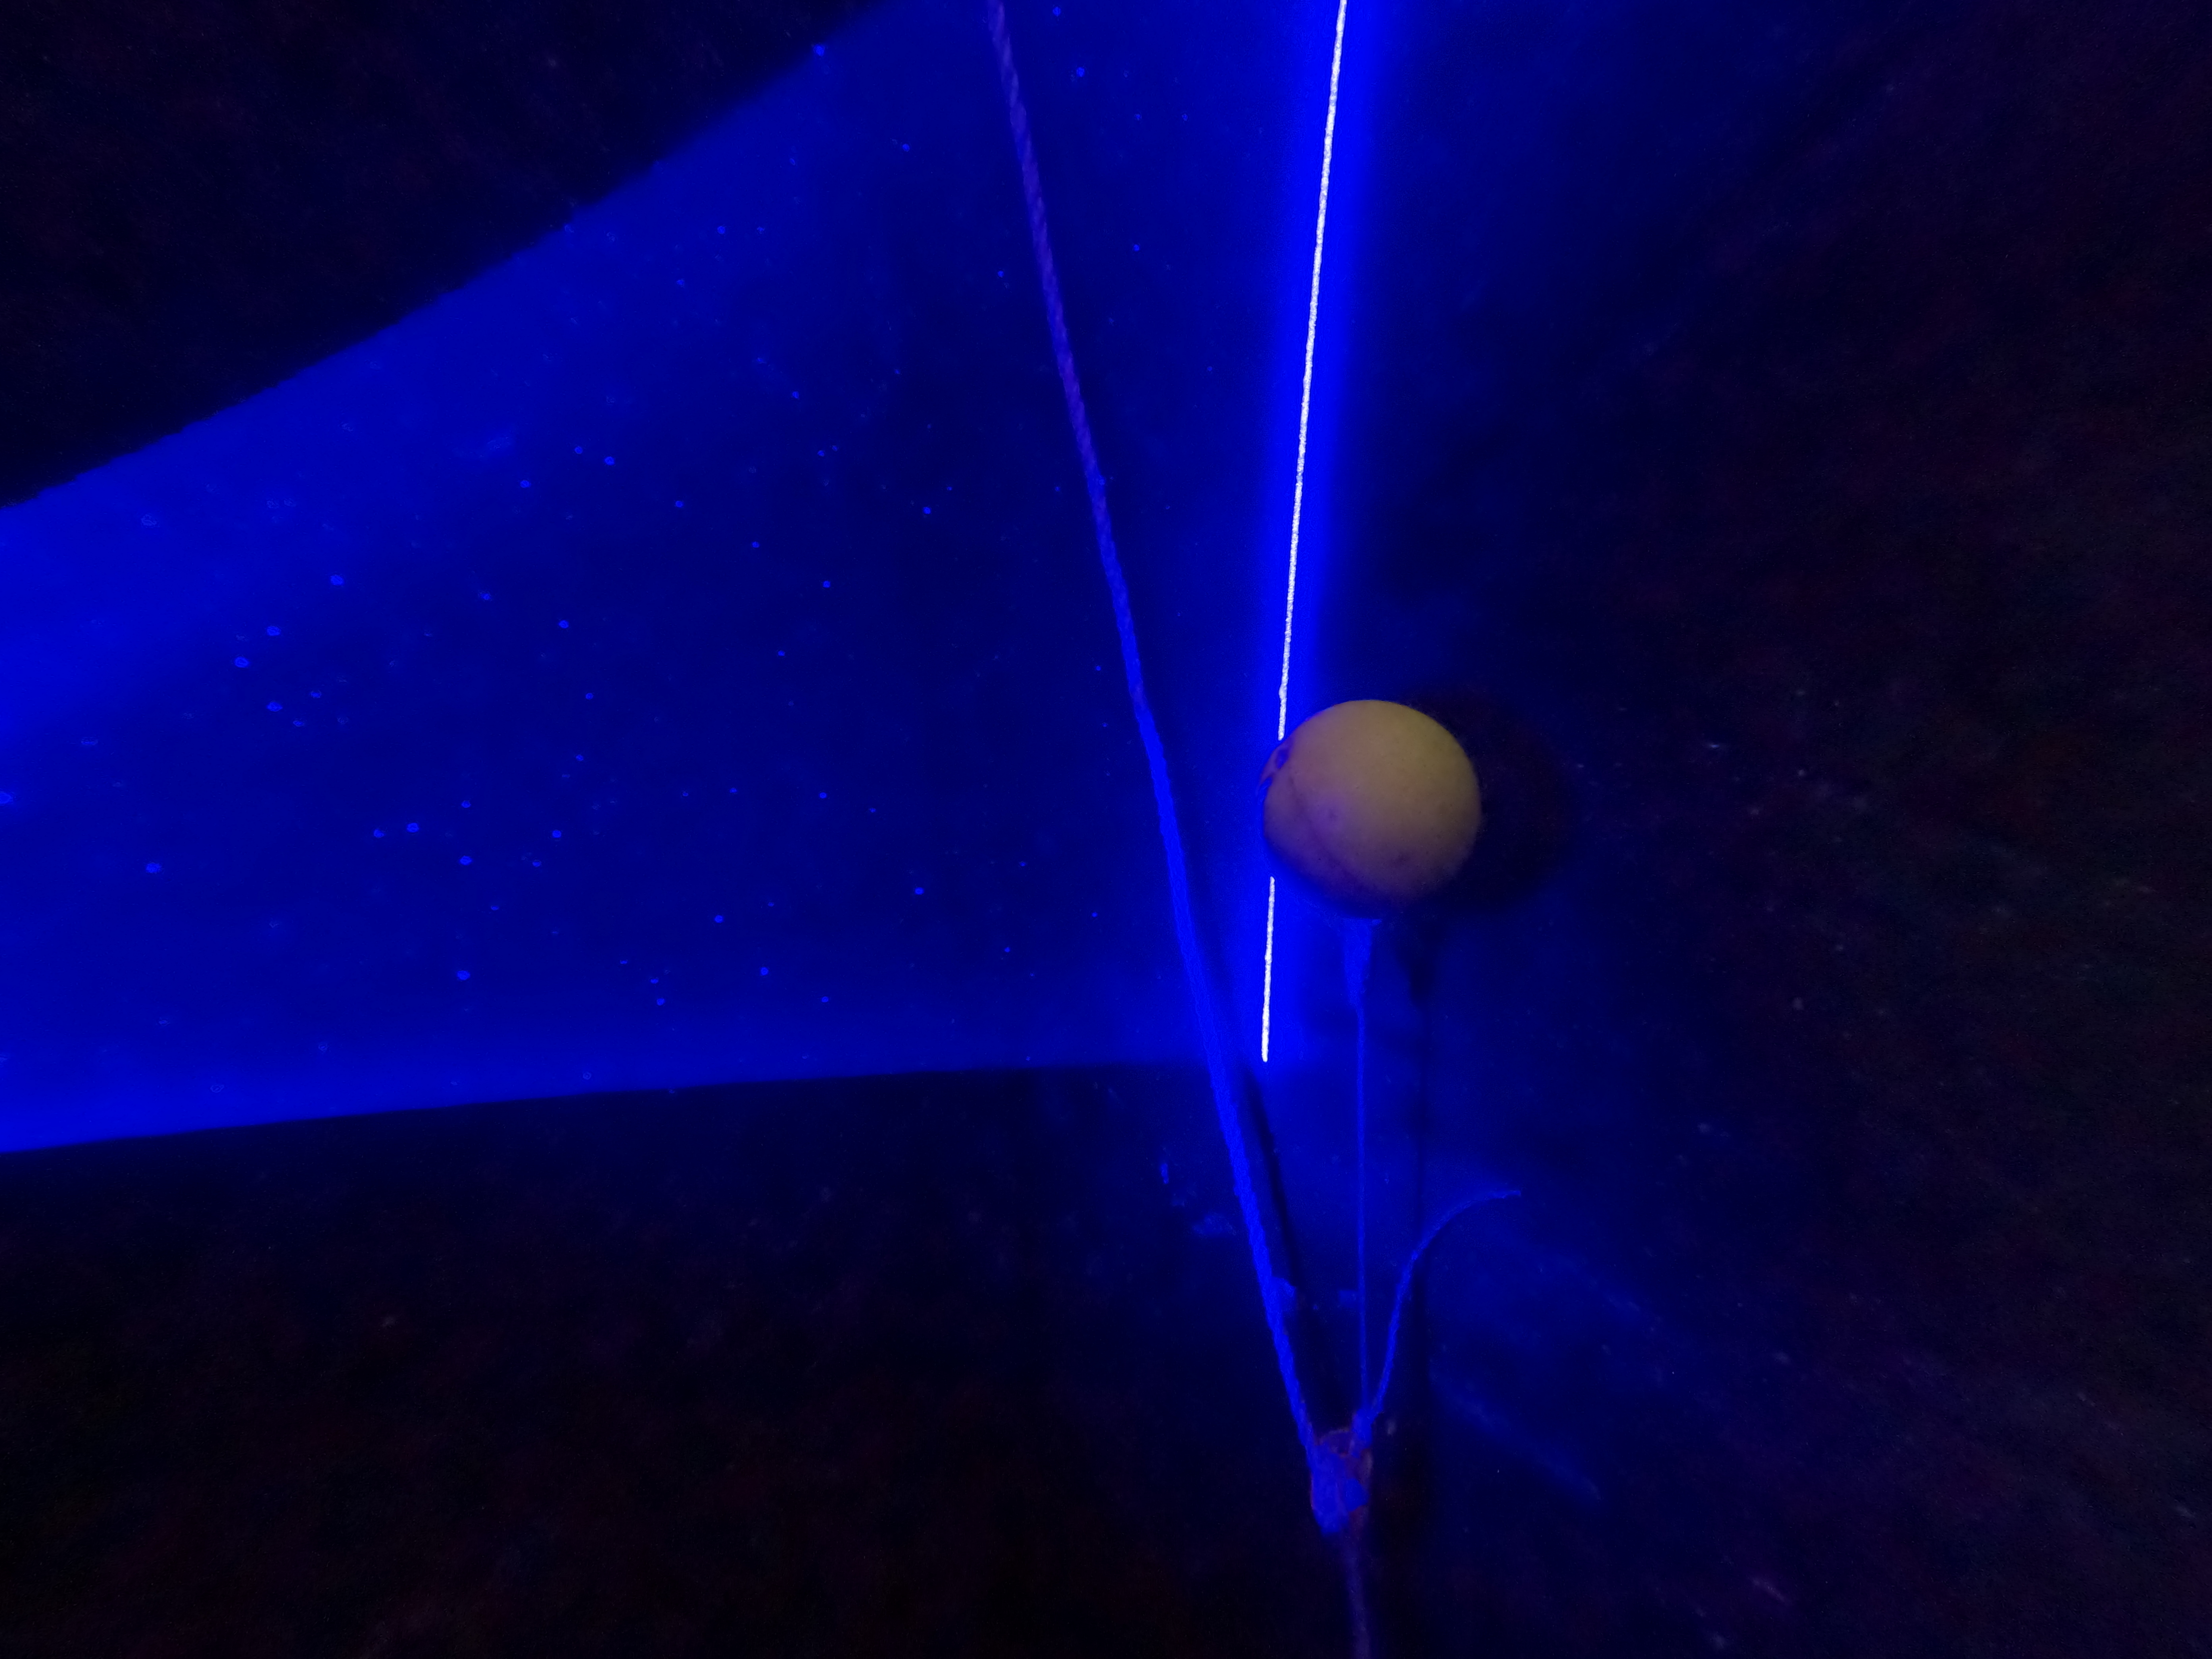

Supplement: Supplementary file 3560 [file G0030784.pdf › Level_1_1/G0030784.pdf]

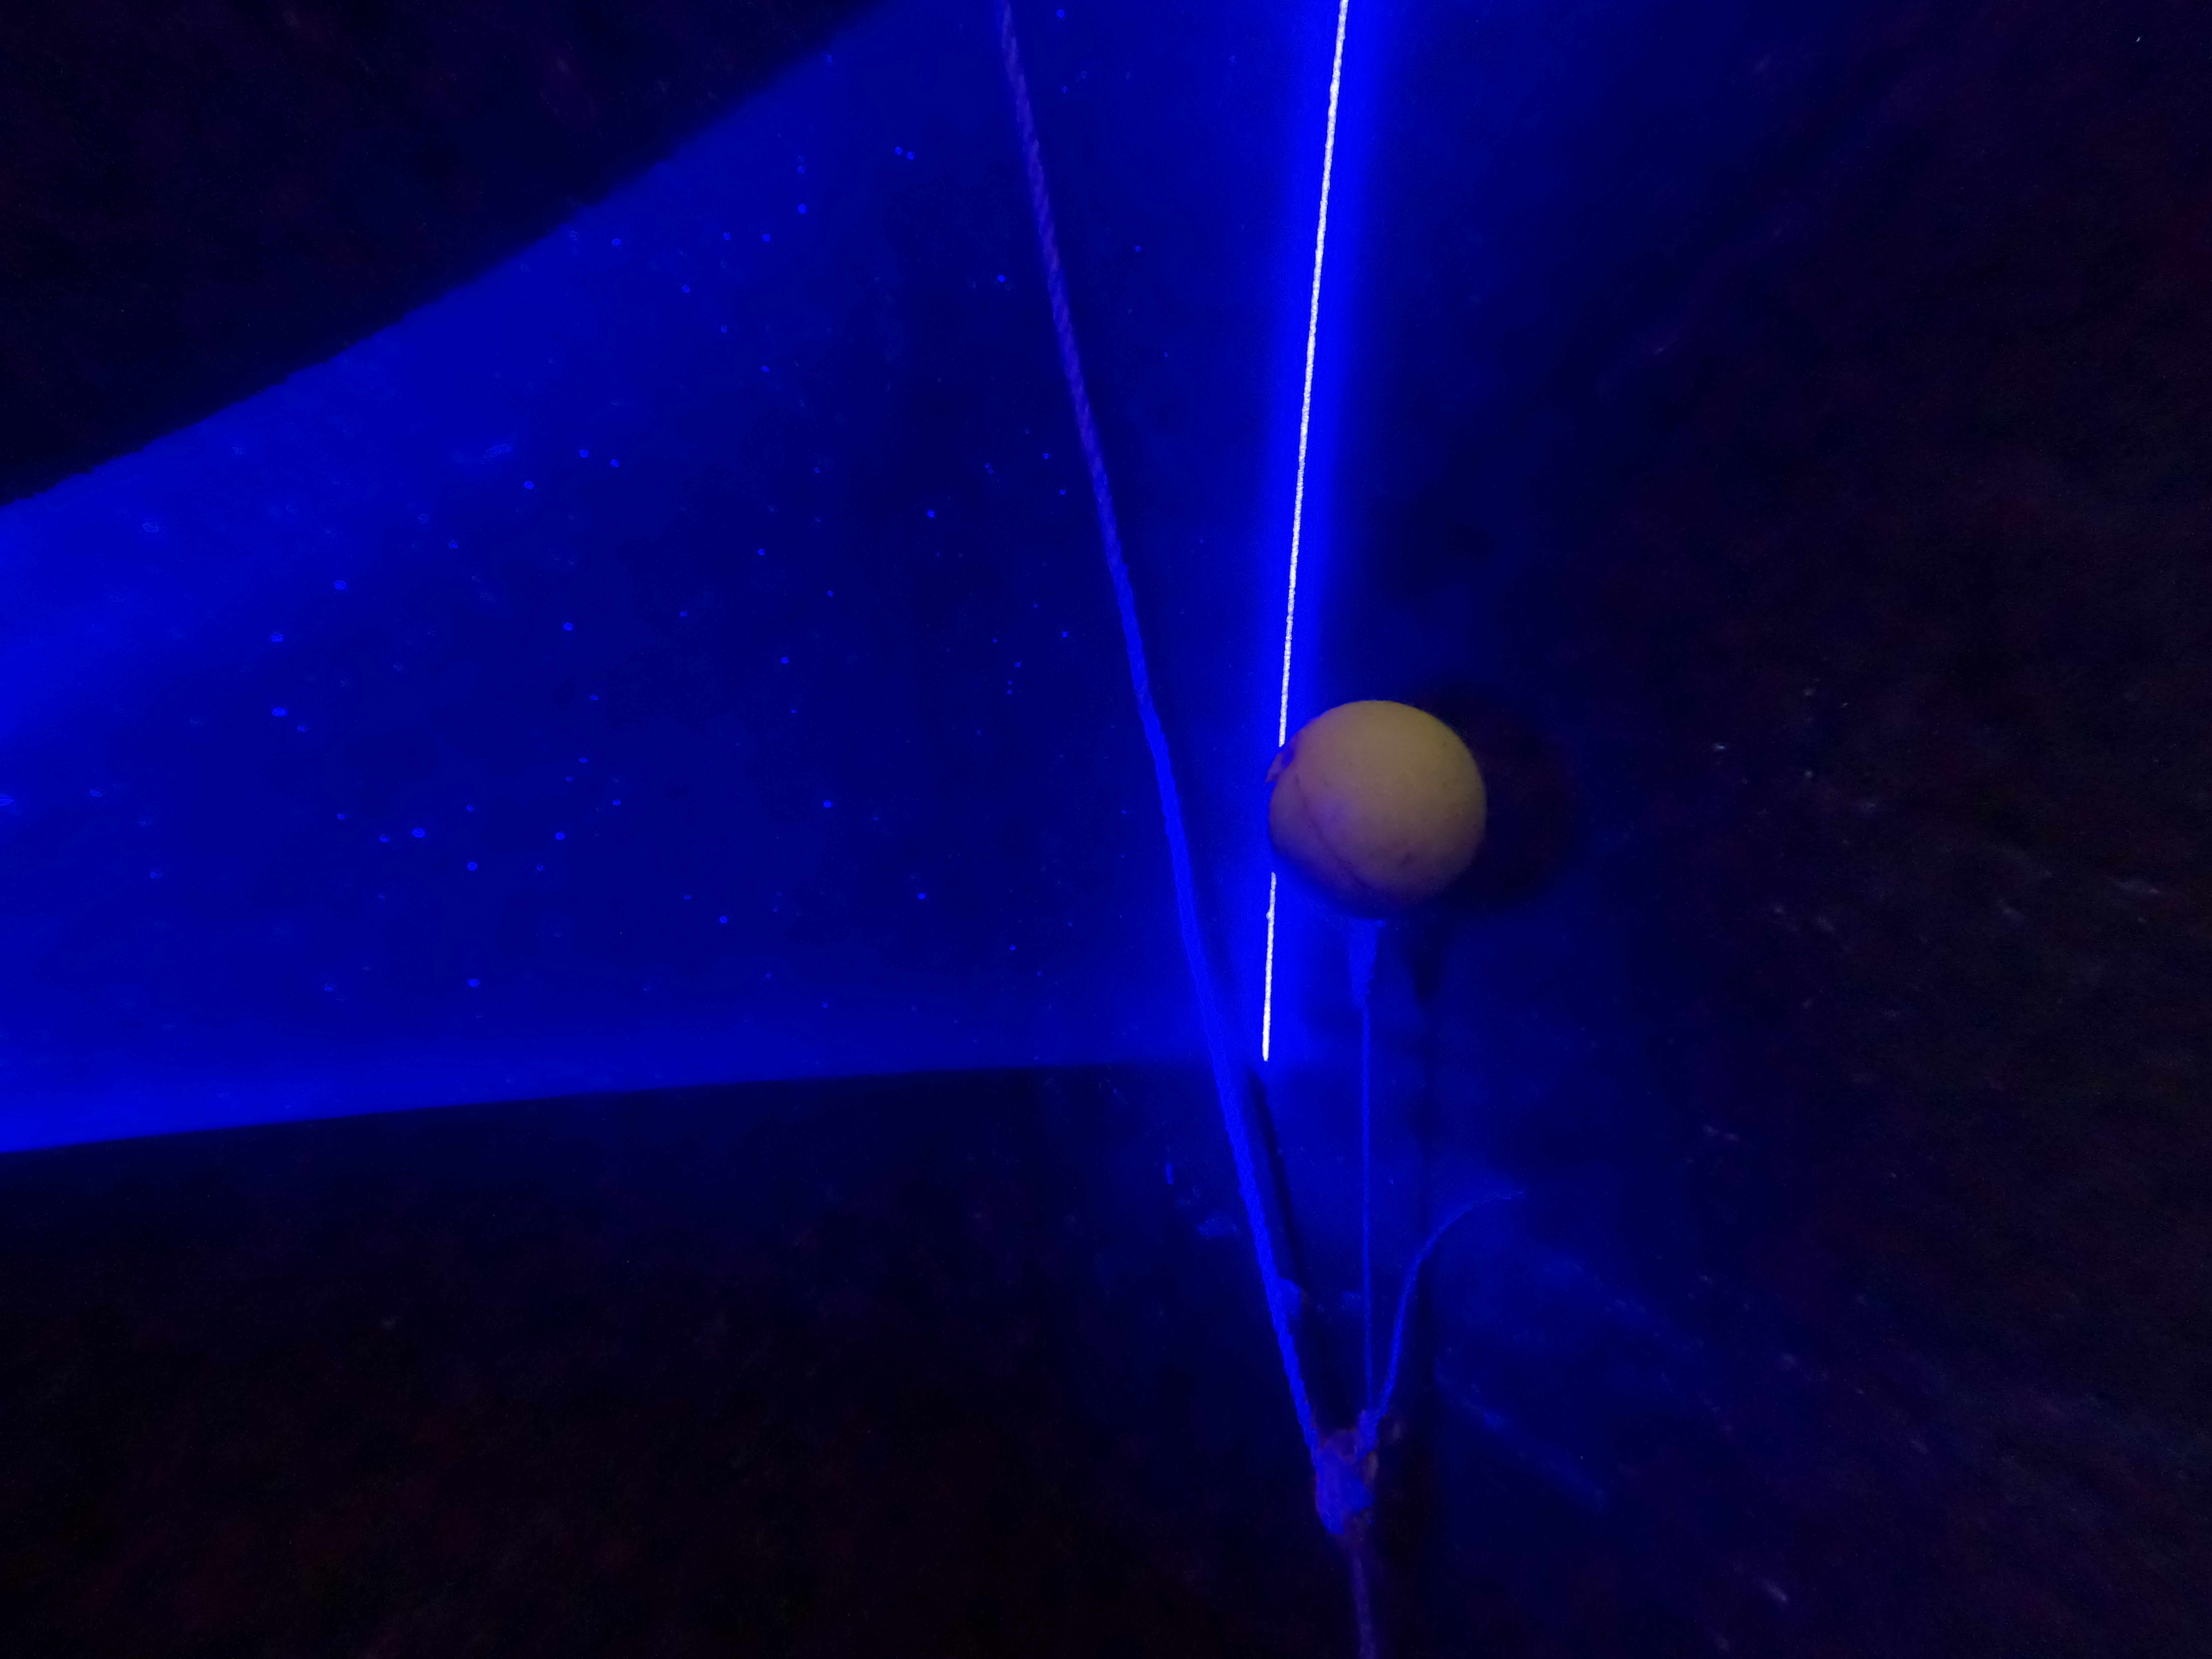

Supplement: Supplementary file 3561 [file G0030785.pdf › Level_1_1/G0030785.pdf]

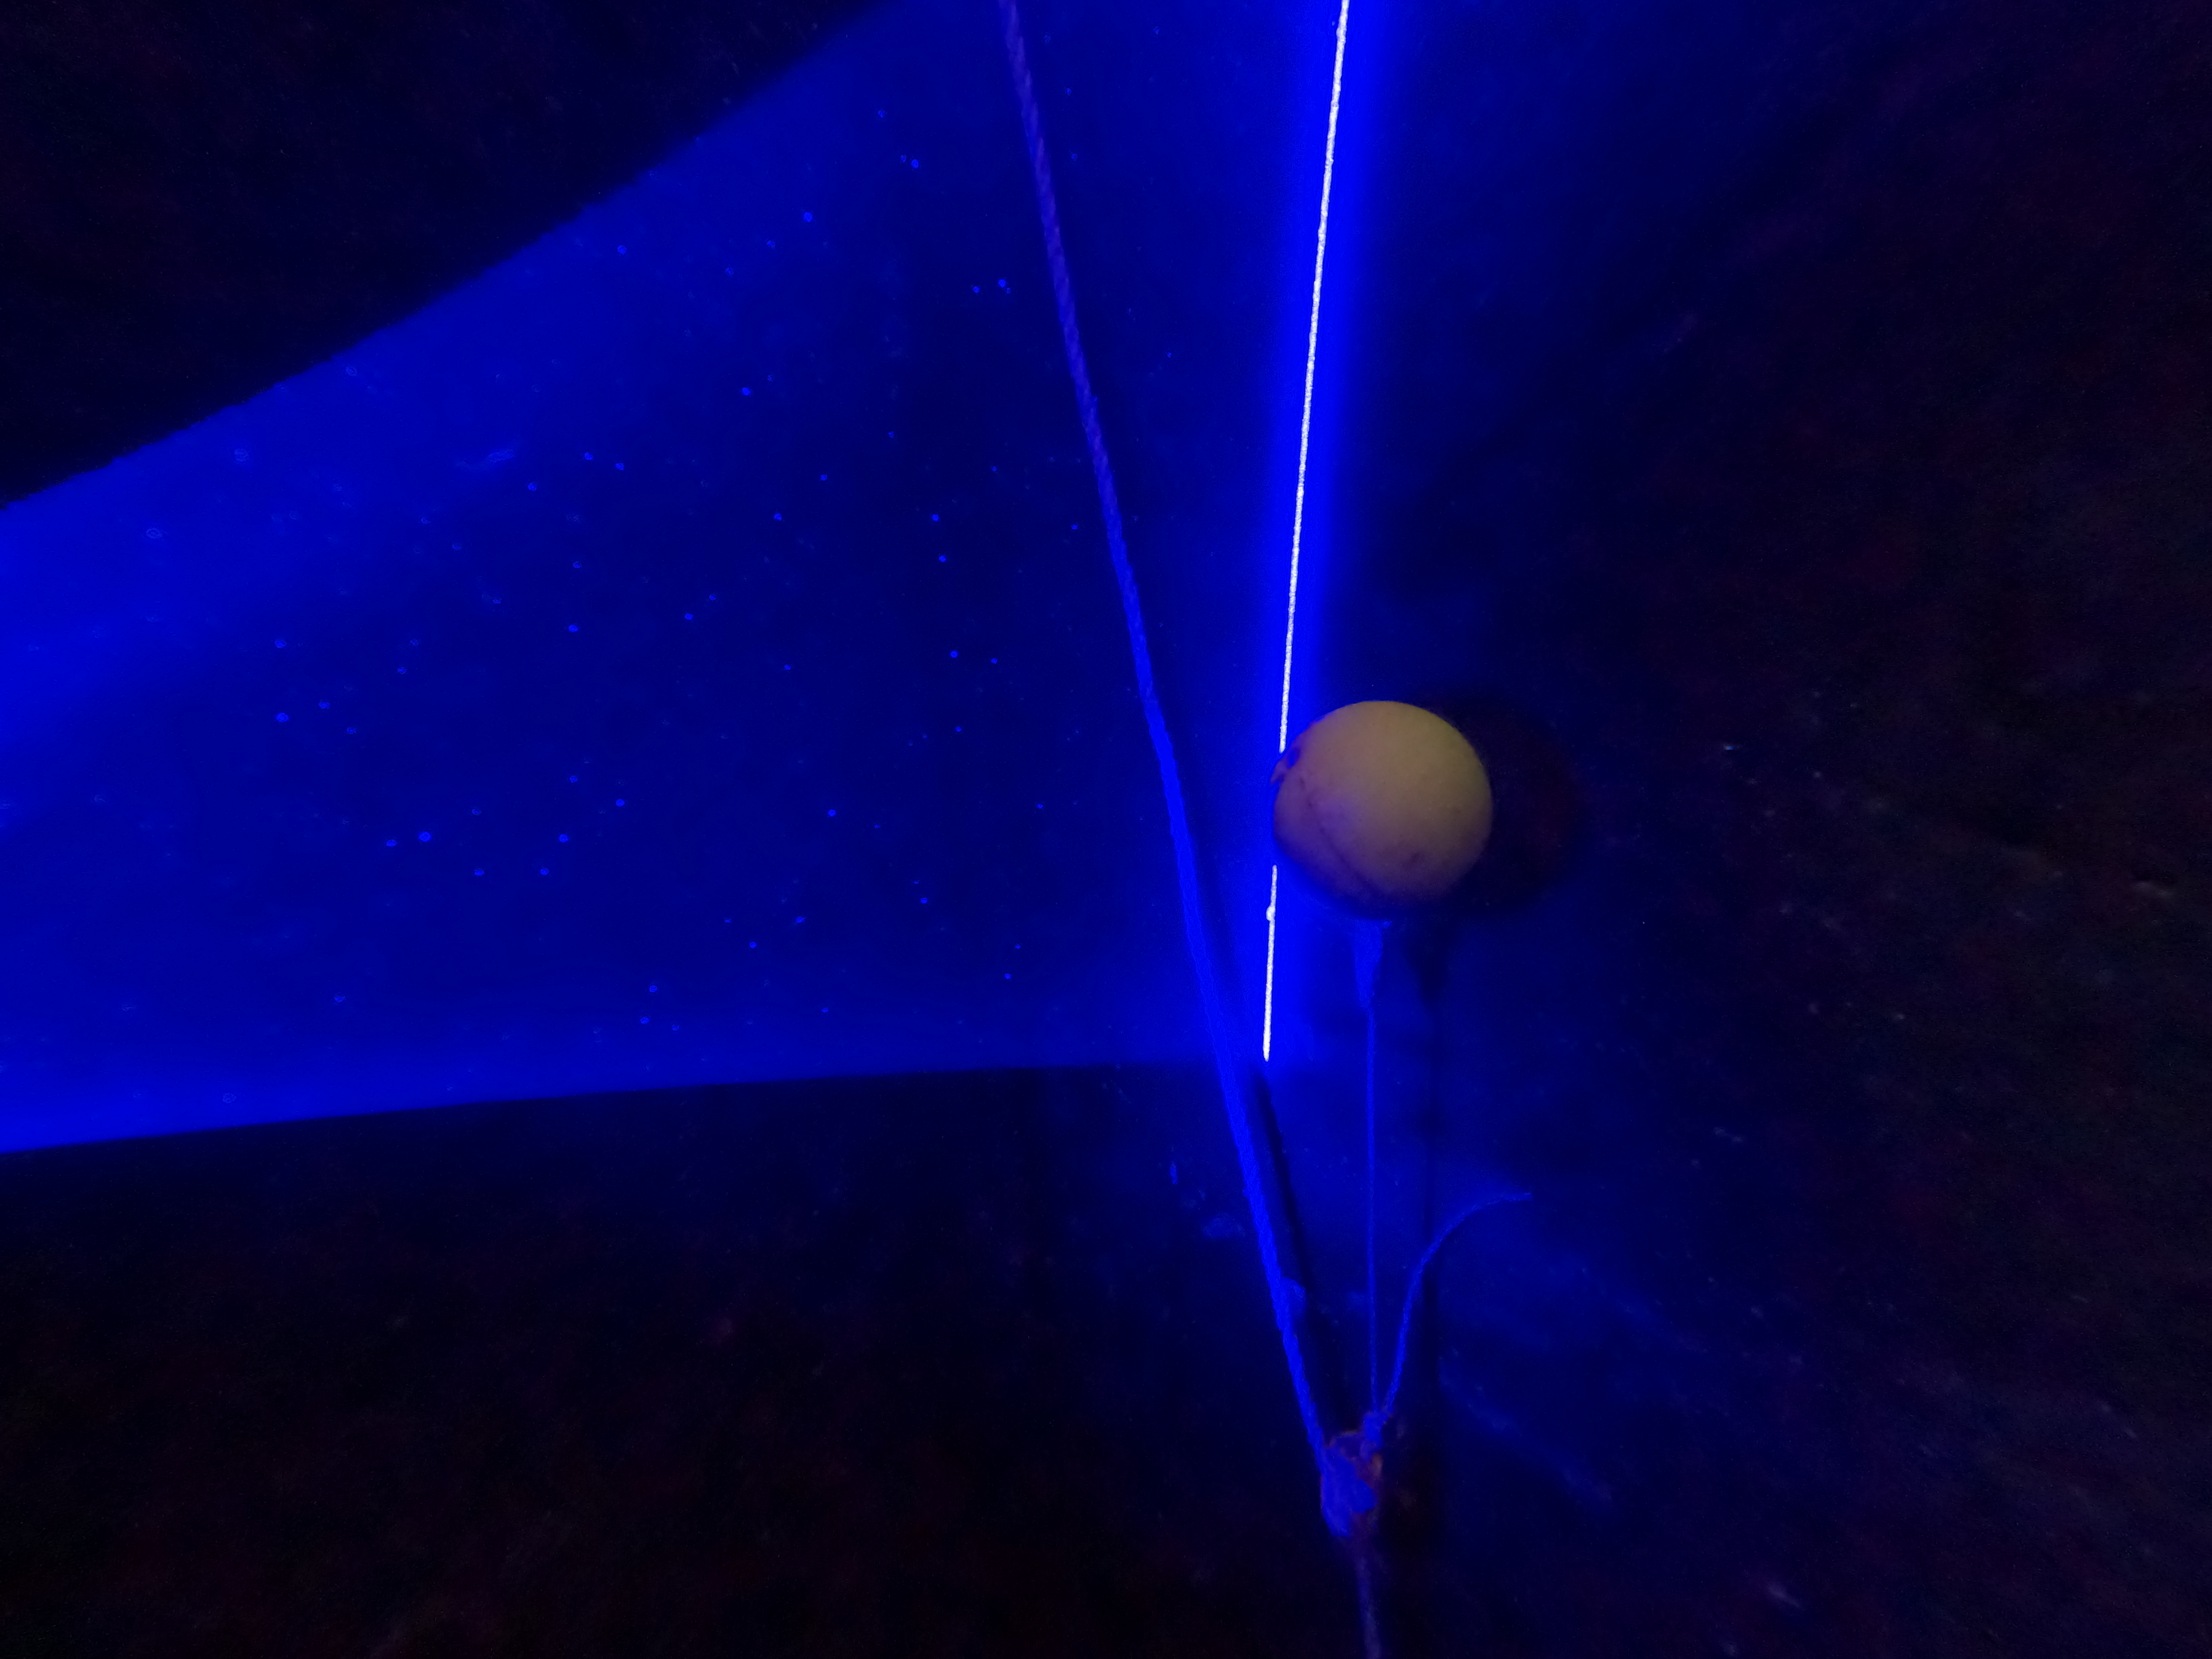

Supplement: Supplementary file 3562 [file G0030786.pdf › Level_1_1/G0030786.pdf]

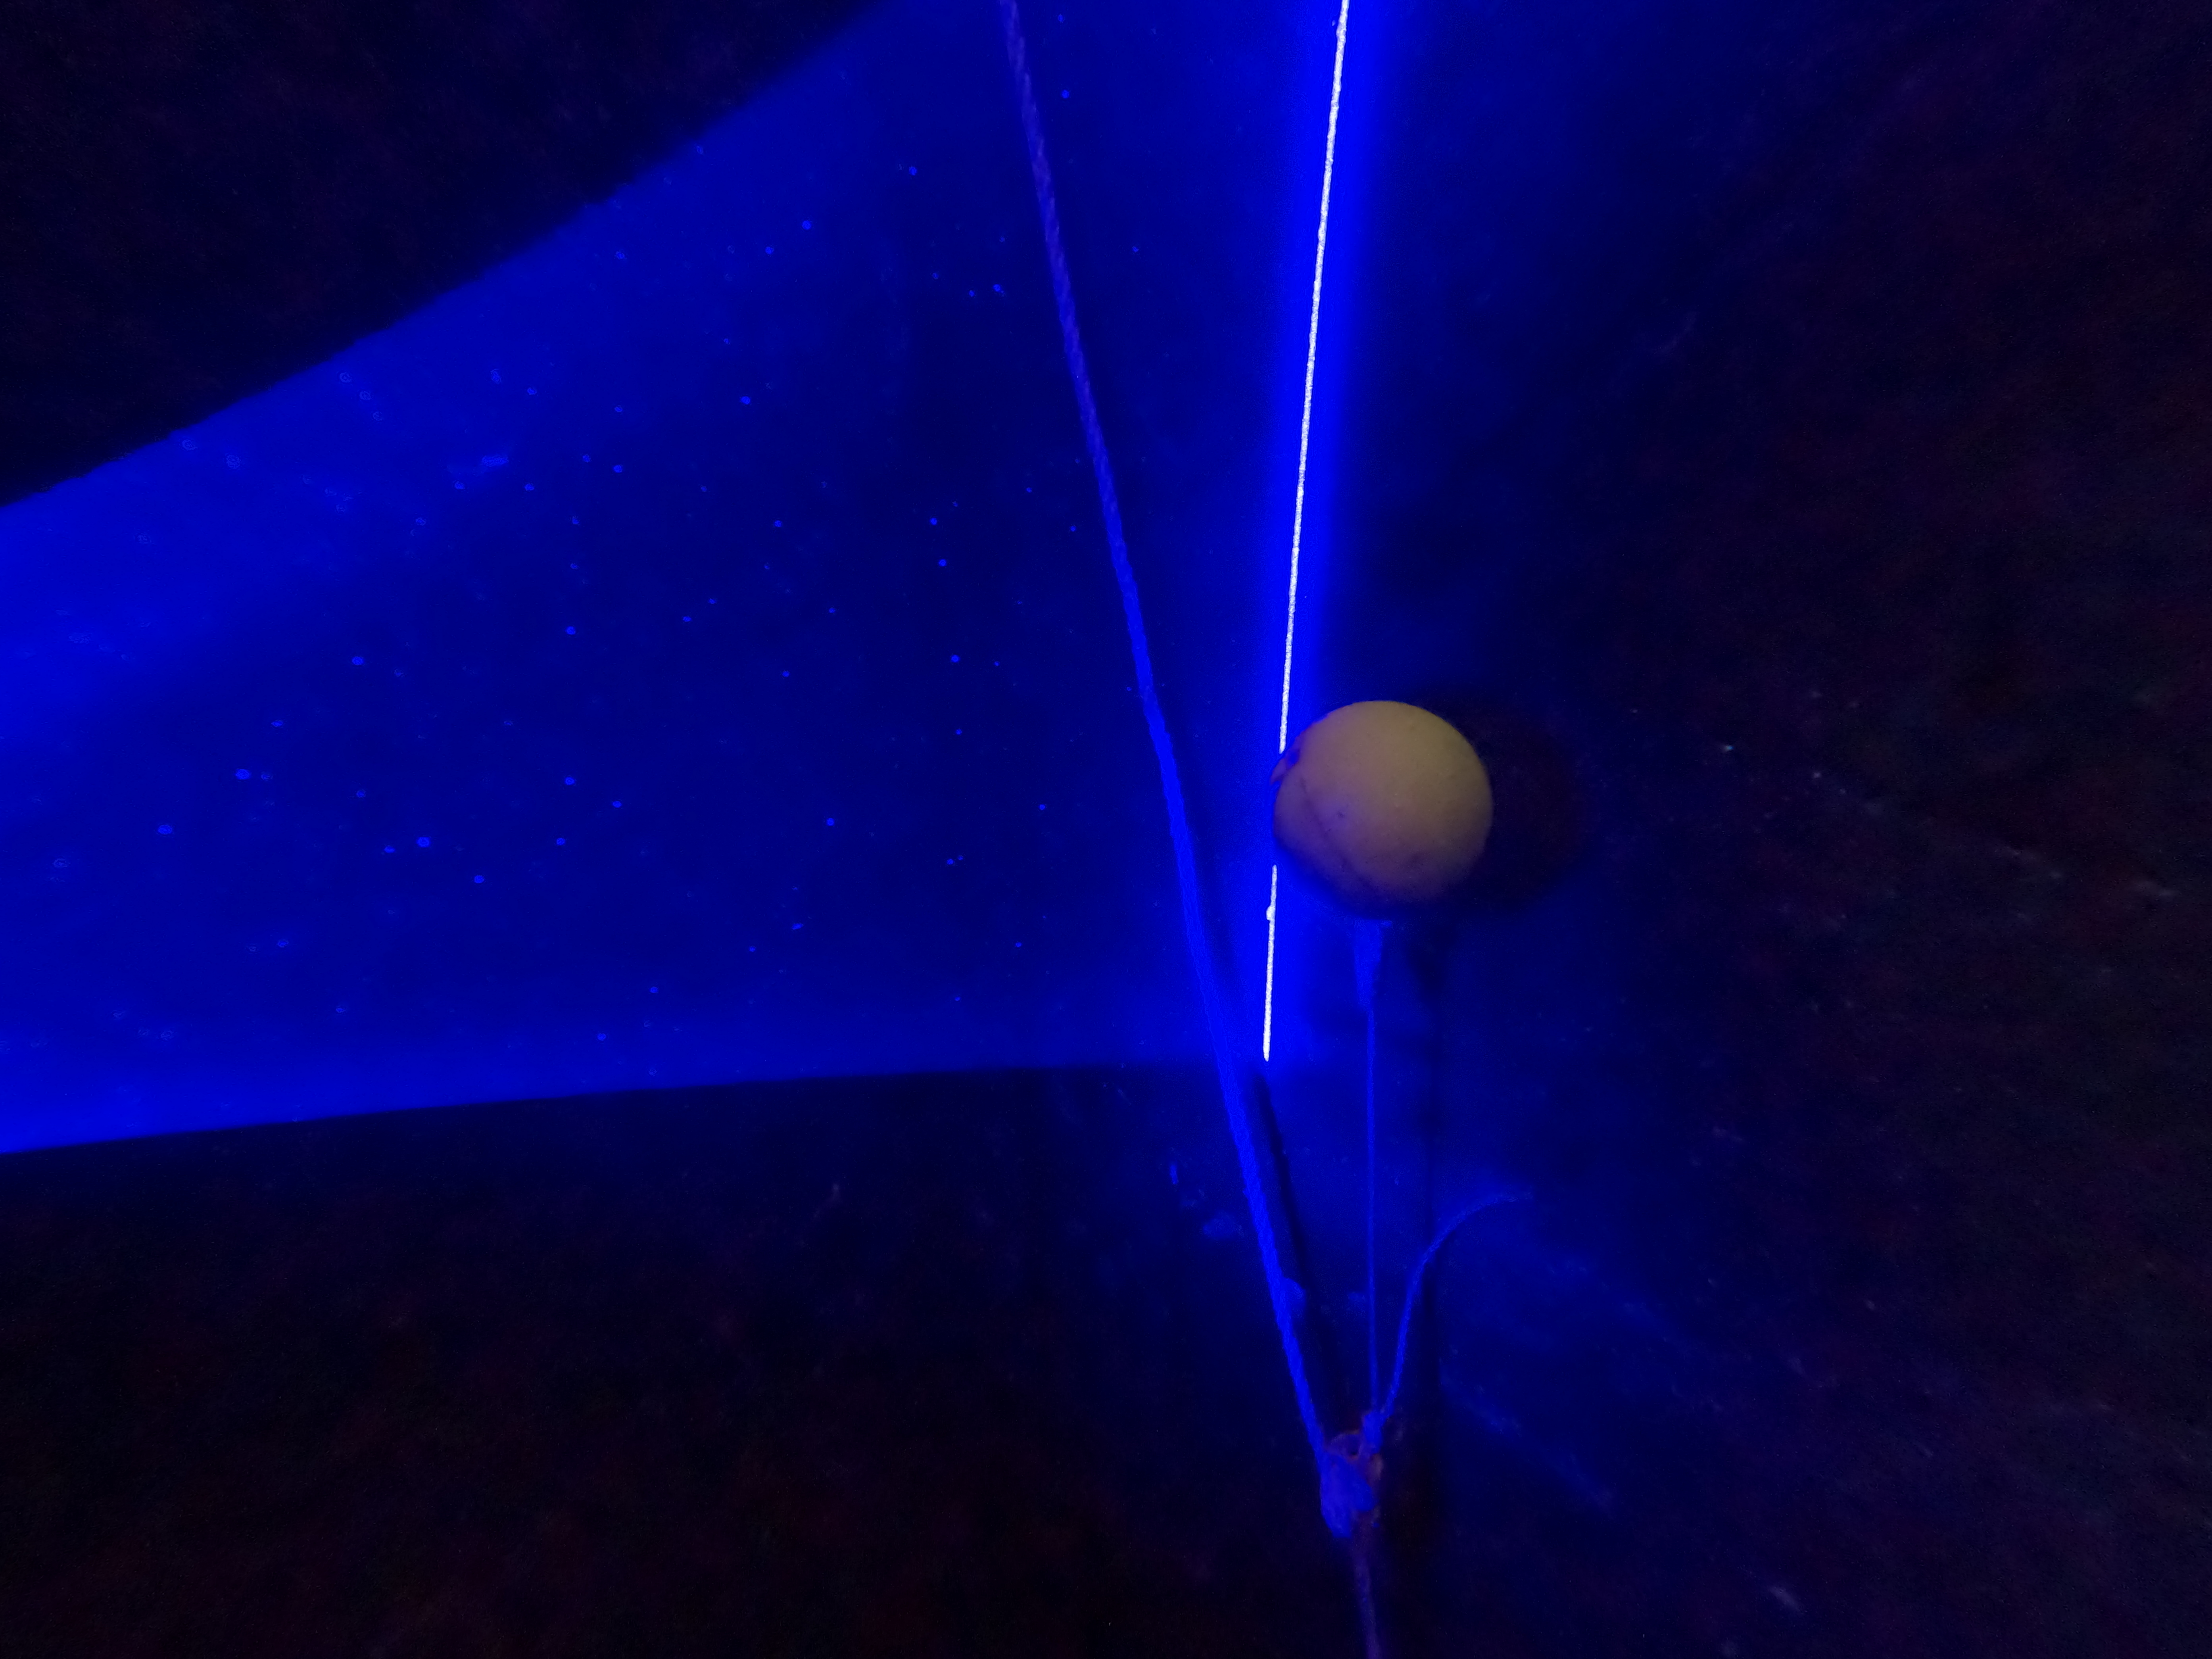

Supplement: Supplementary file 3563 [file G0030787.pdf › Level_1_1/G0030787.pdf]

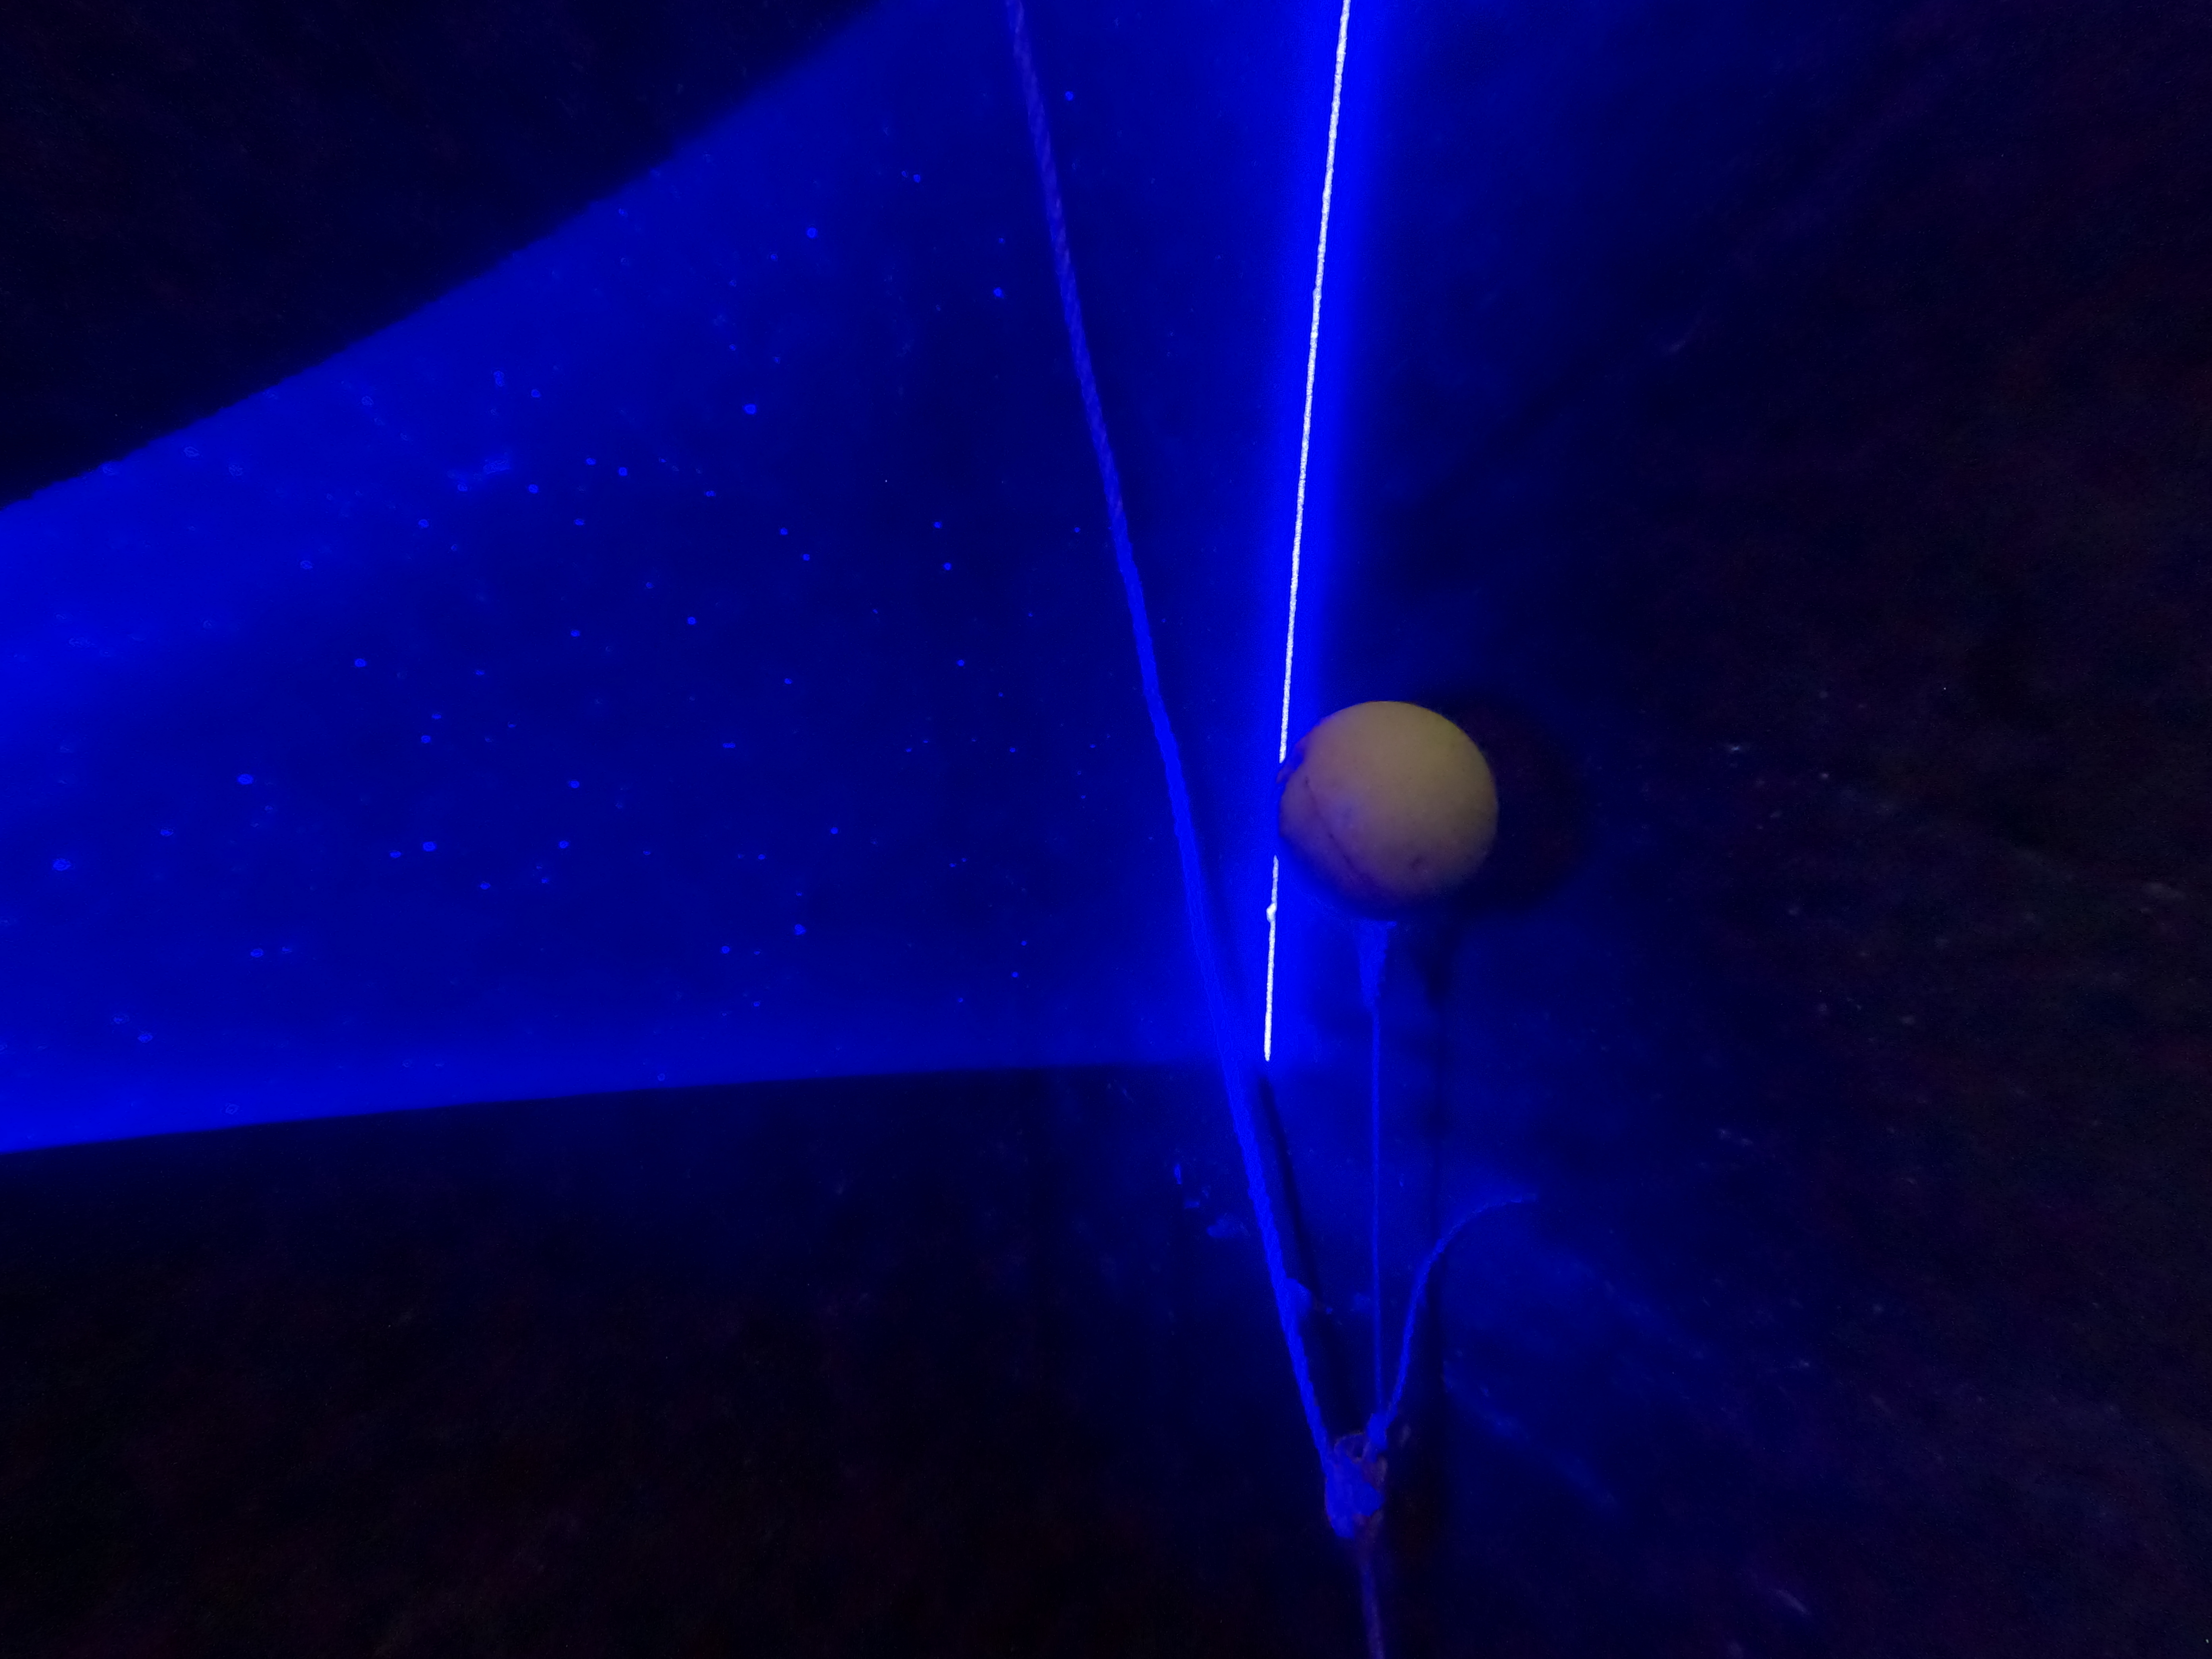

Supplement: Supplementary file 3564 [file G0030788.pdf › Level_1_1/G0030788.pdf]

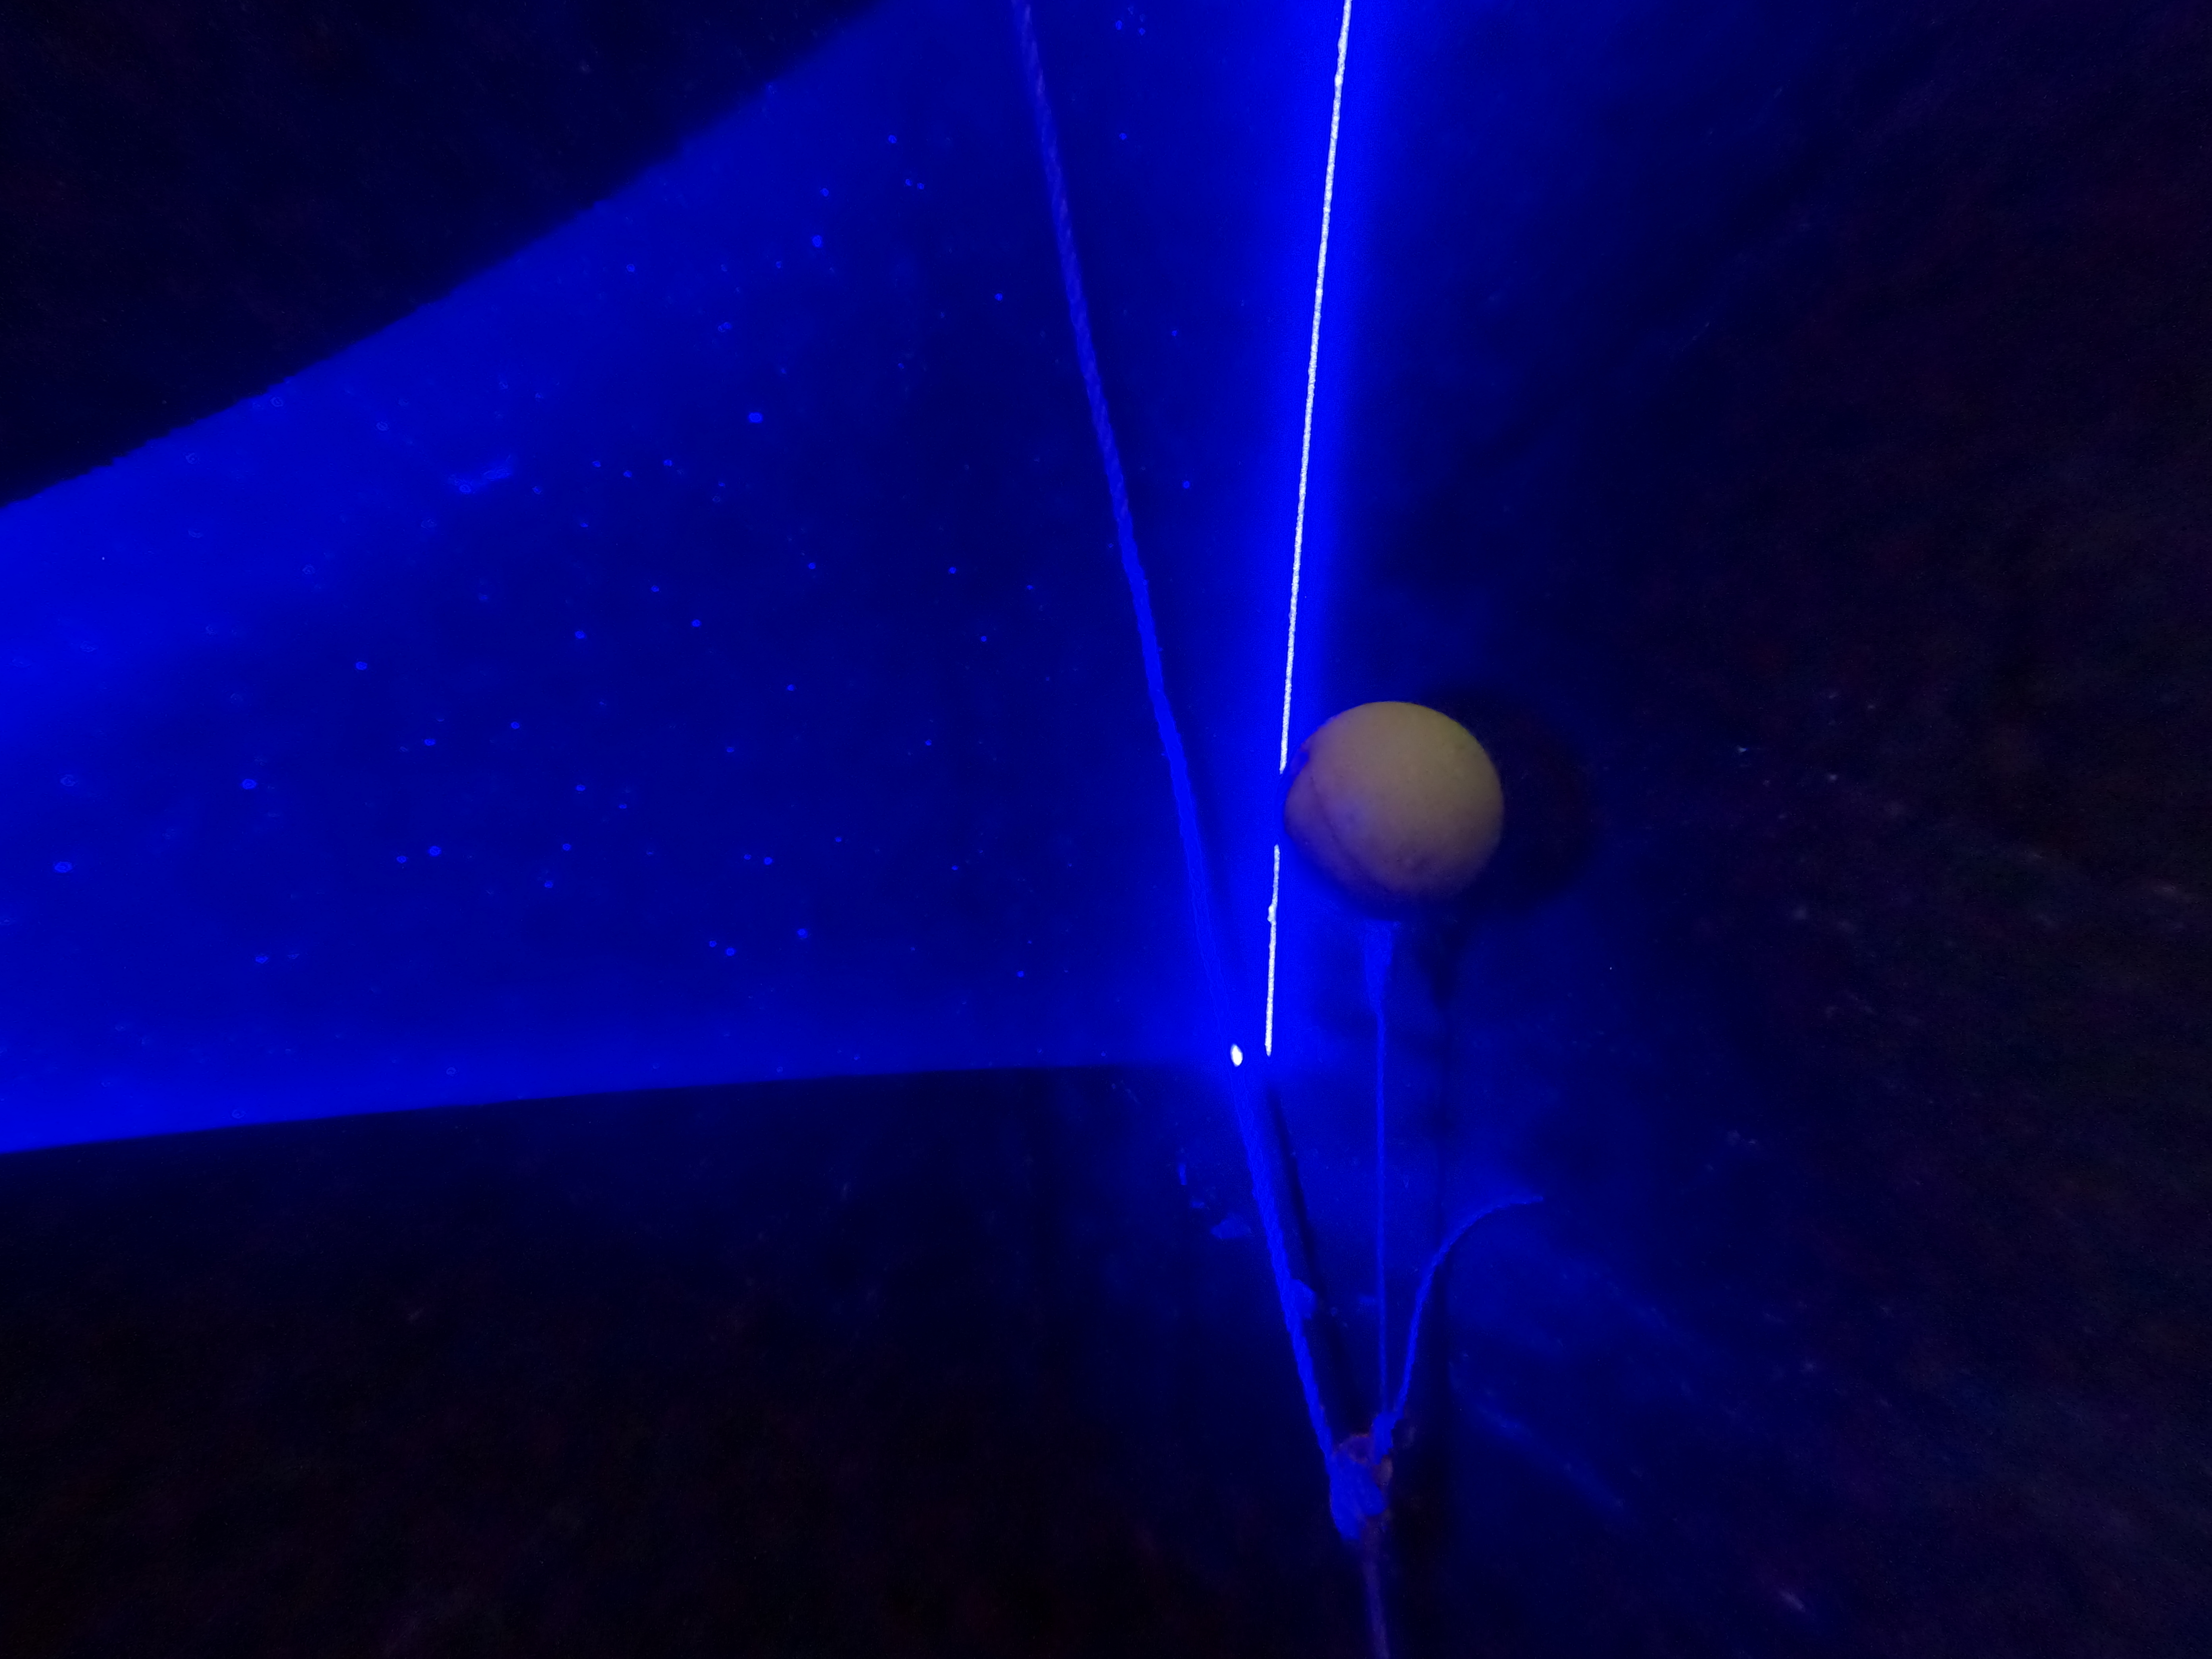

Supplement: Supplementary file 3565 [file G0030789.pdf › Level_1_1/G0030789.pdf]

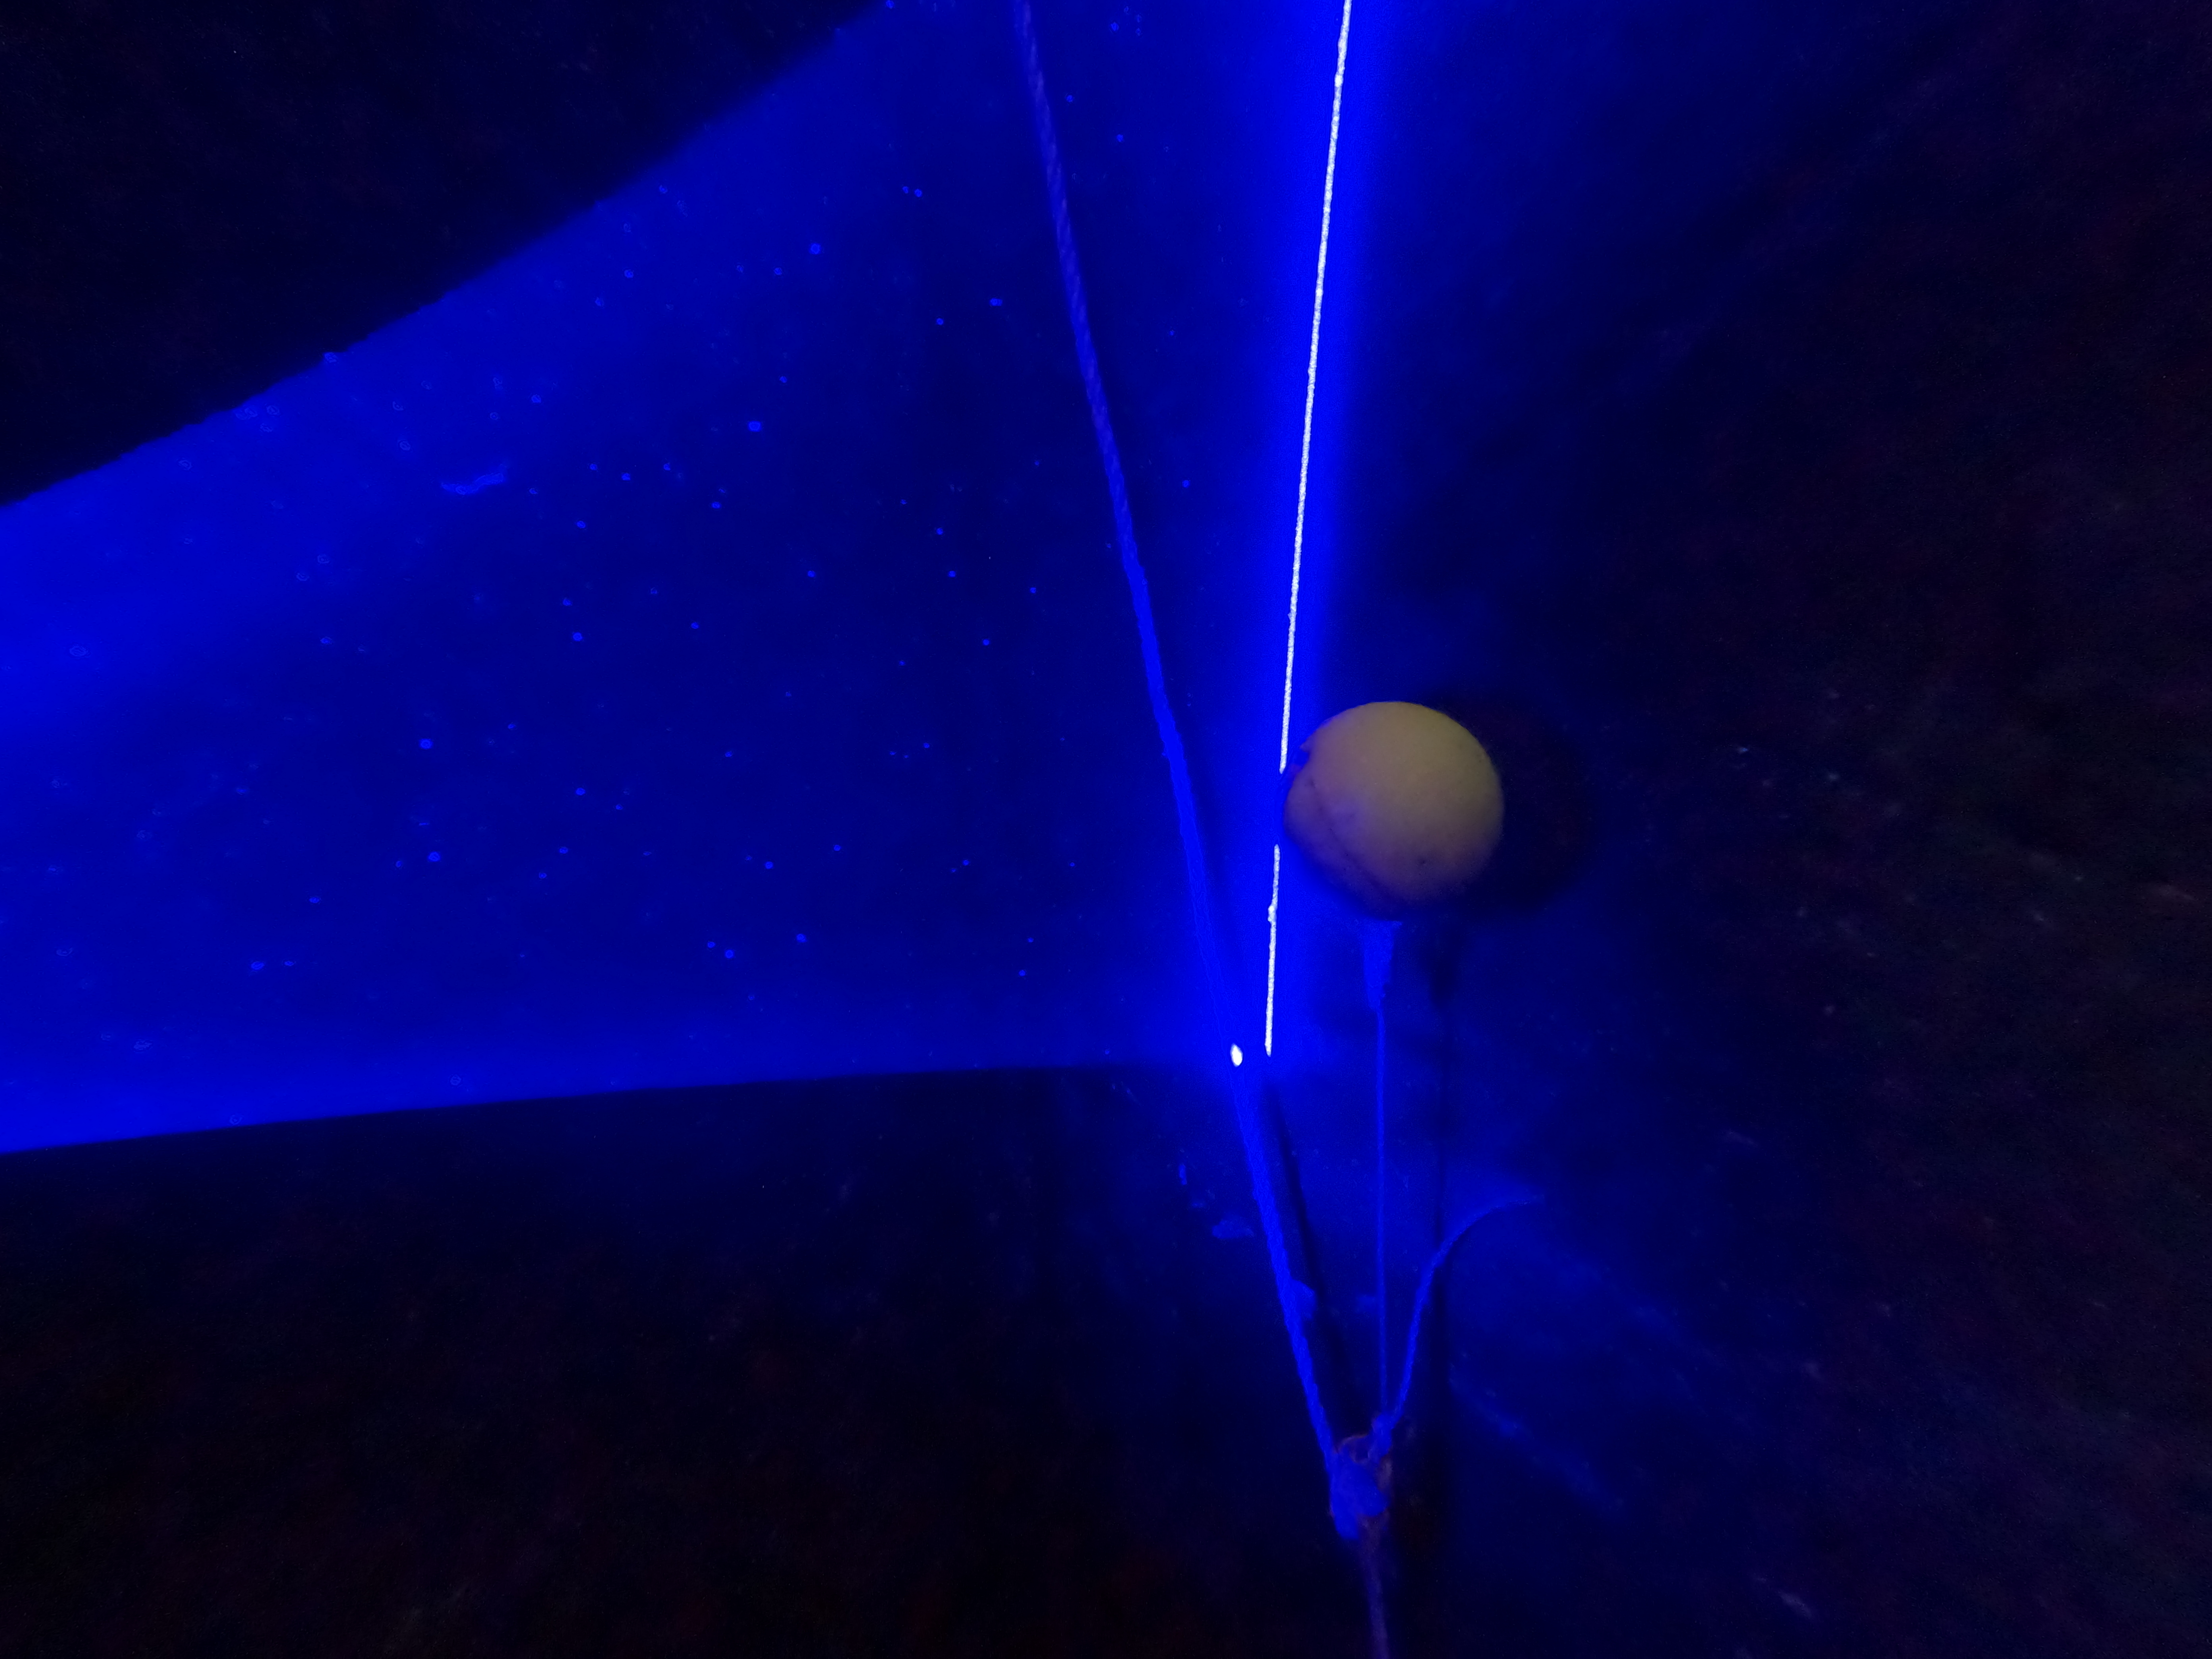

Supplement: Supplementary file 3566 [file G0030790.pdf › Level_1_1/G0030790.pdf]

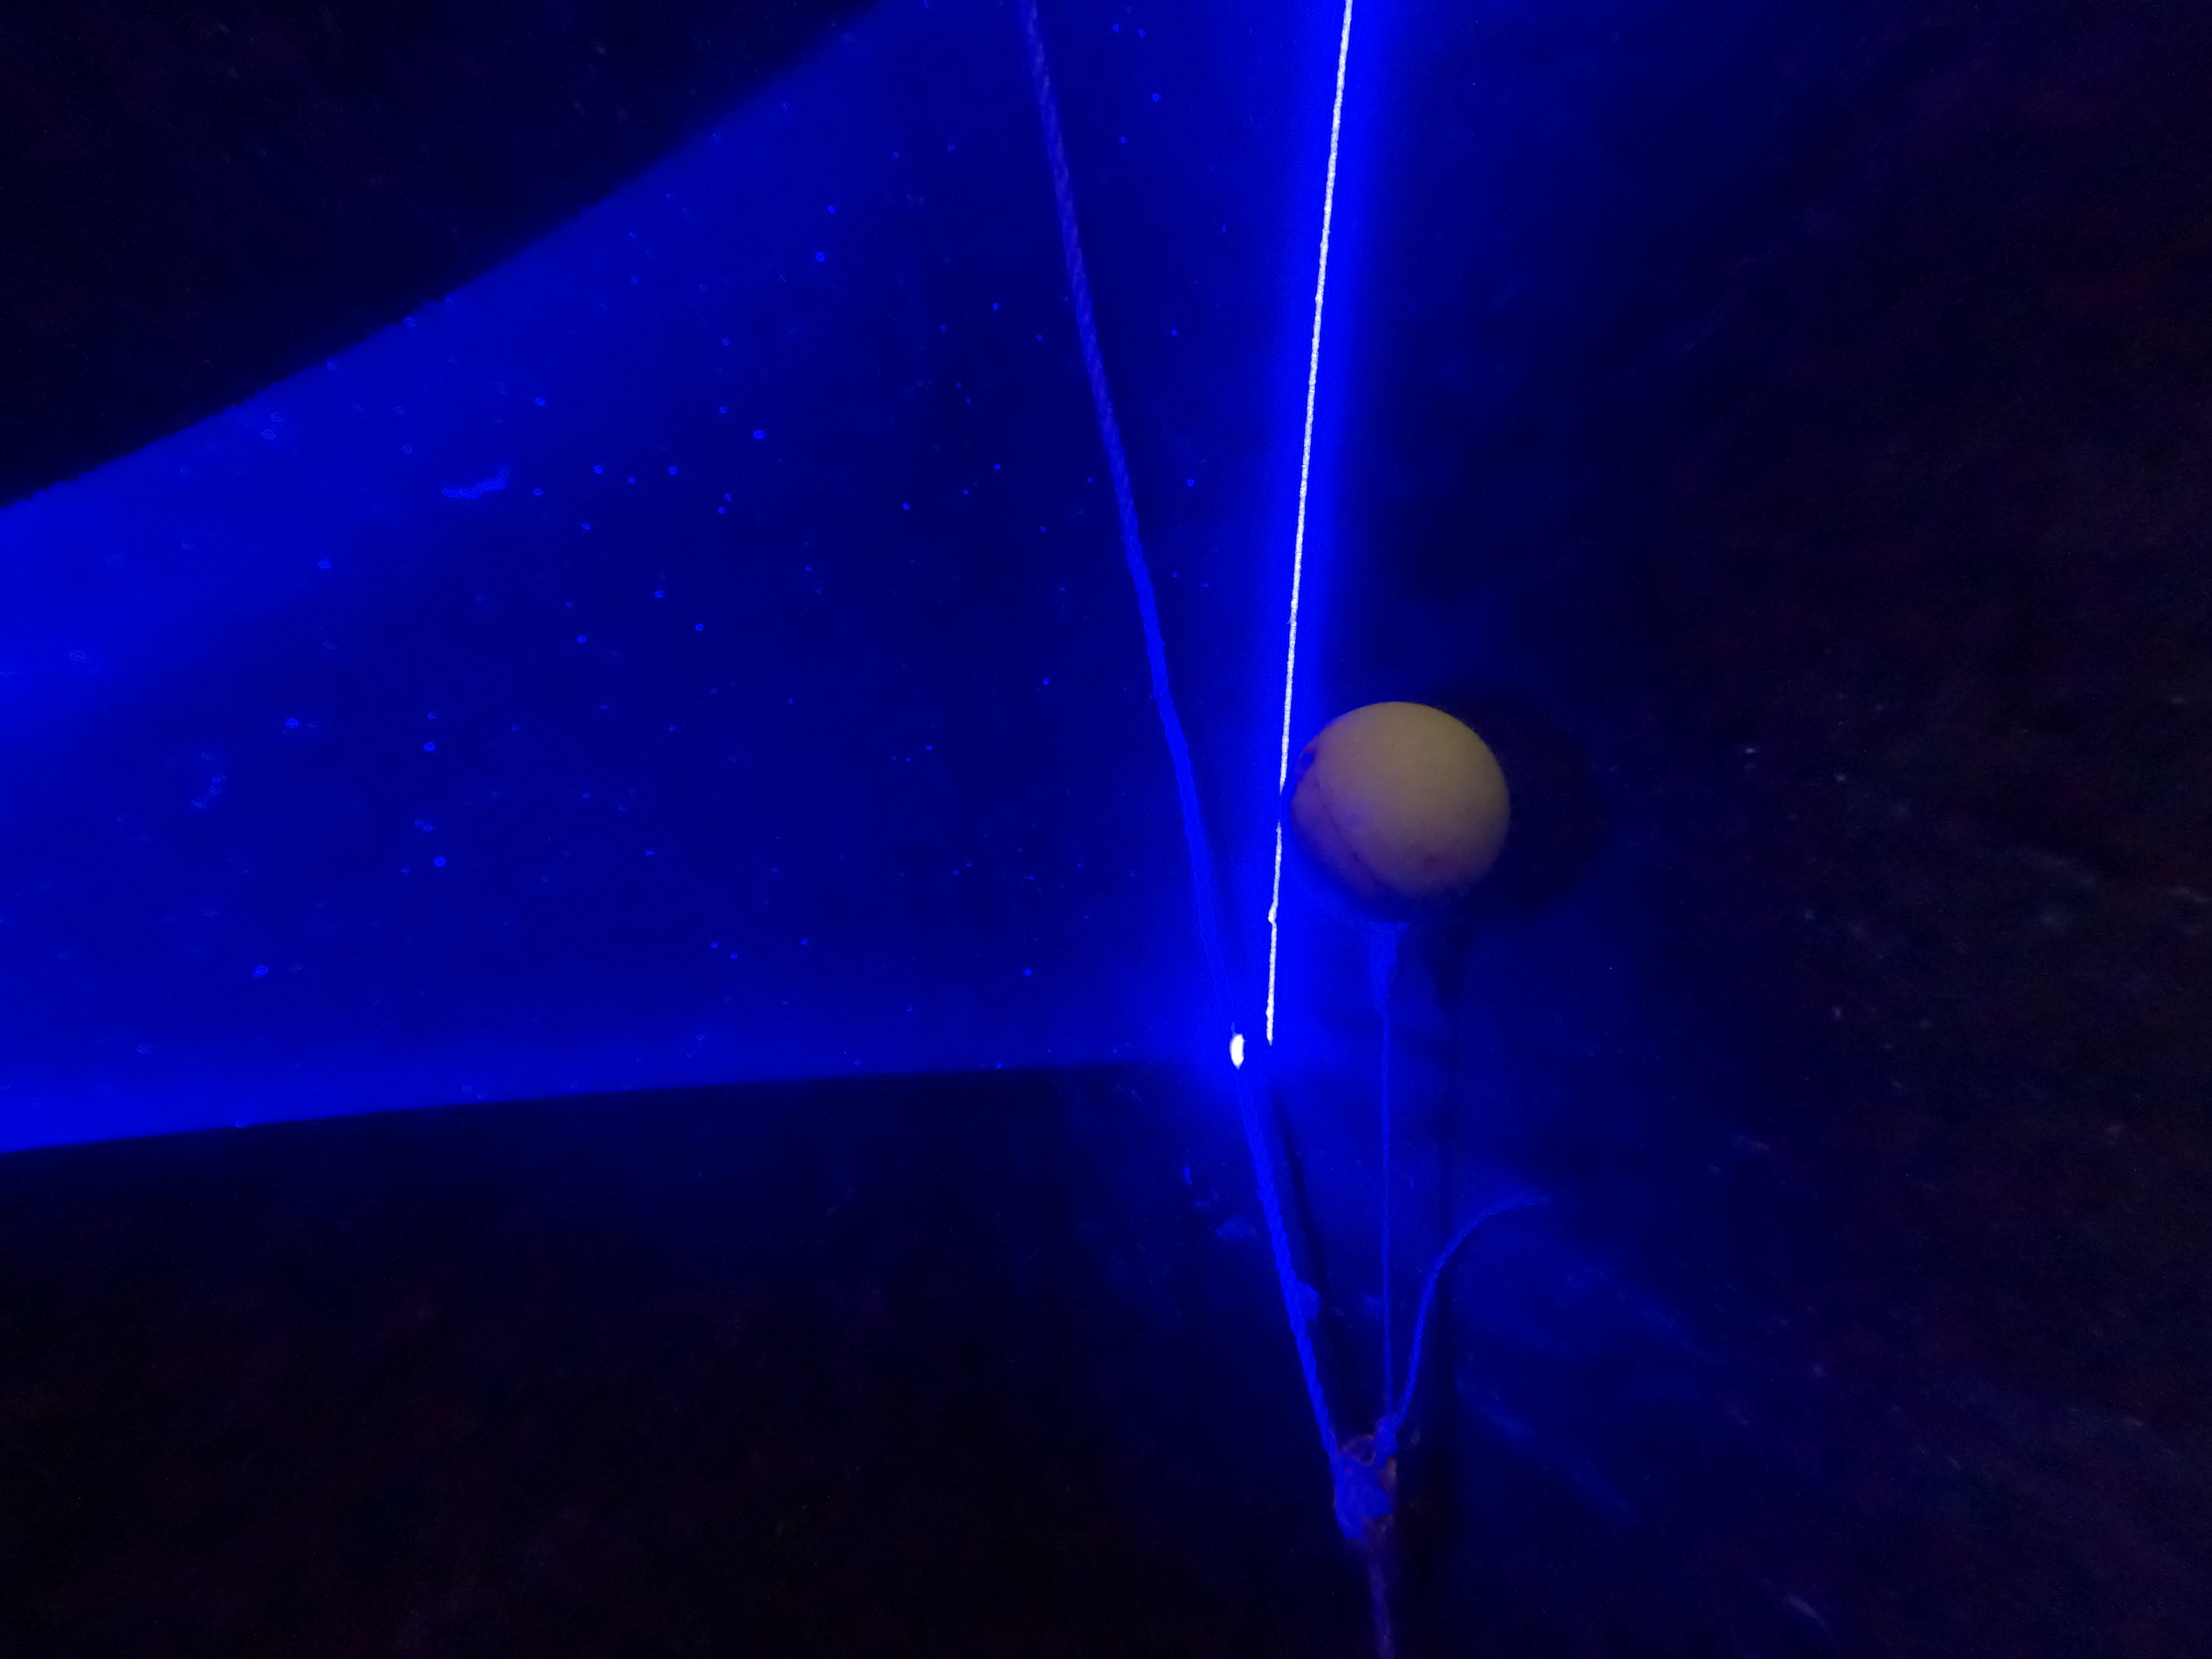

Supplement: Supplementary file 3567 [file G0030791.pdf › Level_1_1/G0030791.pdf]

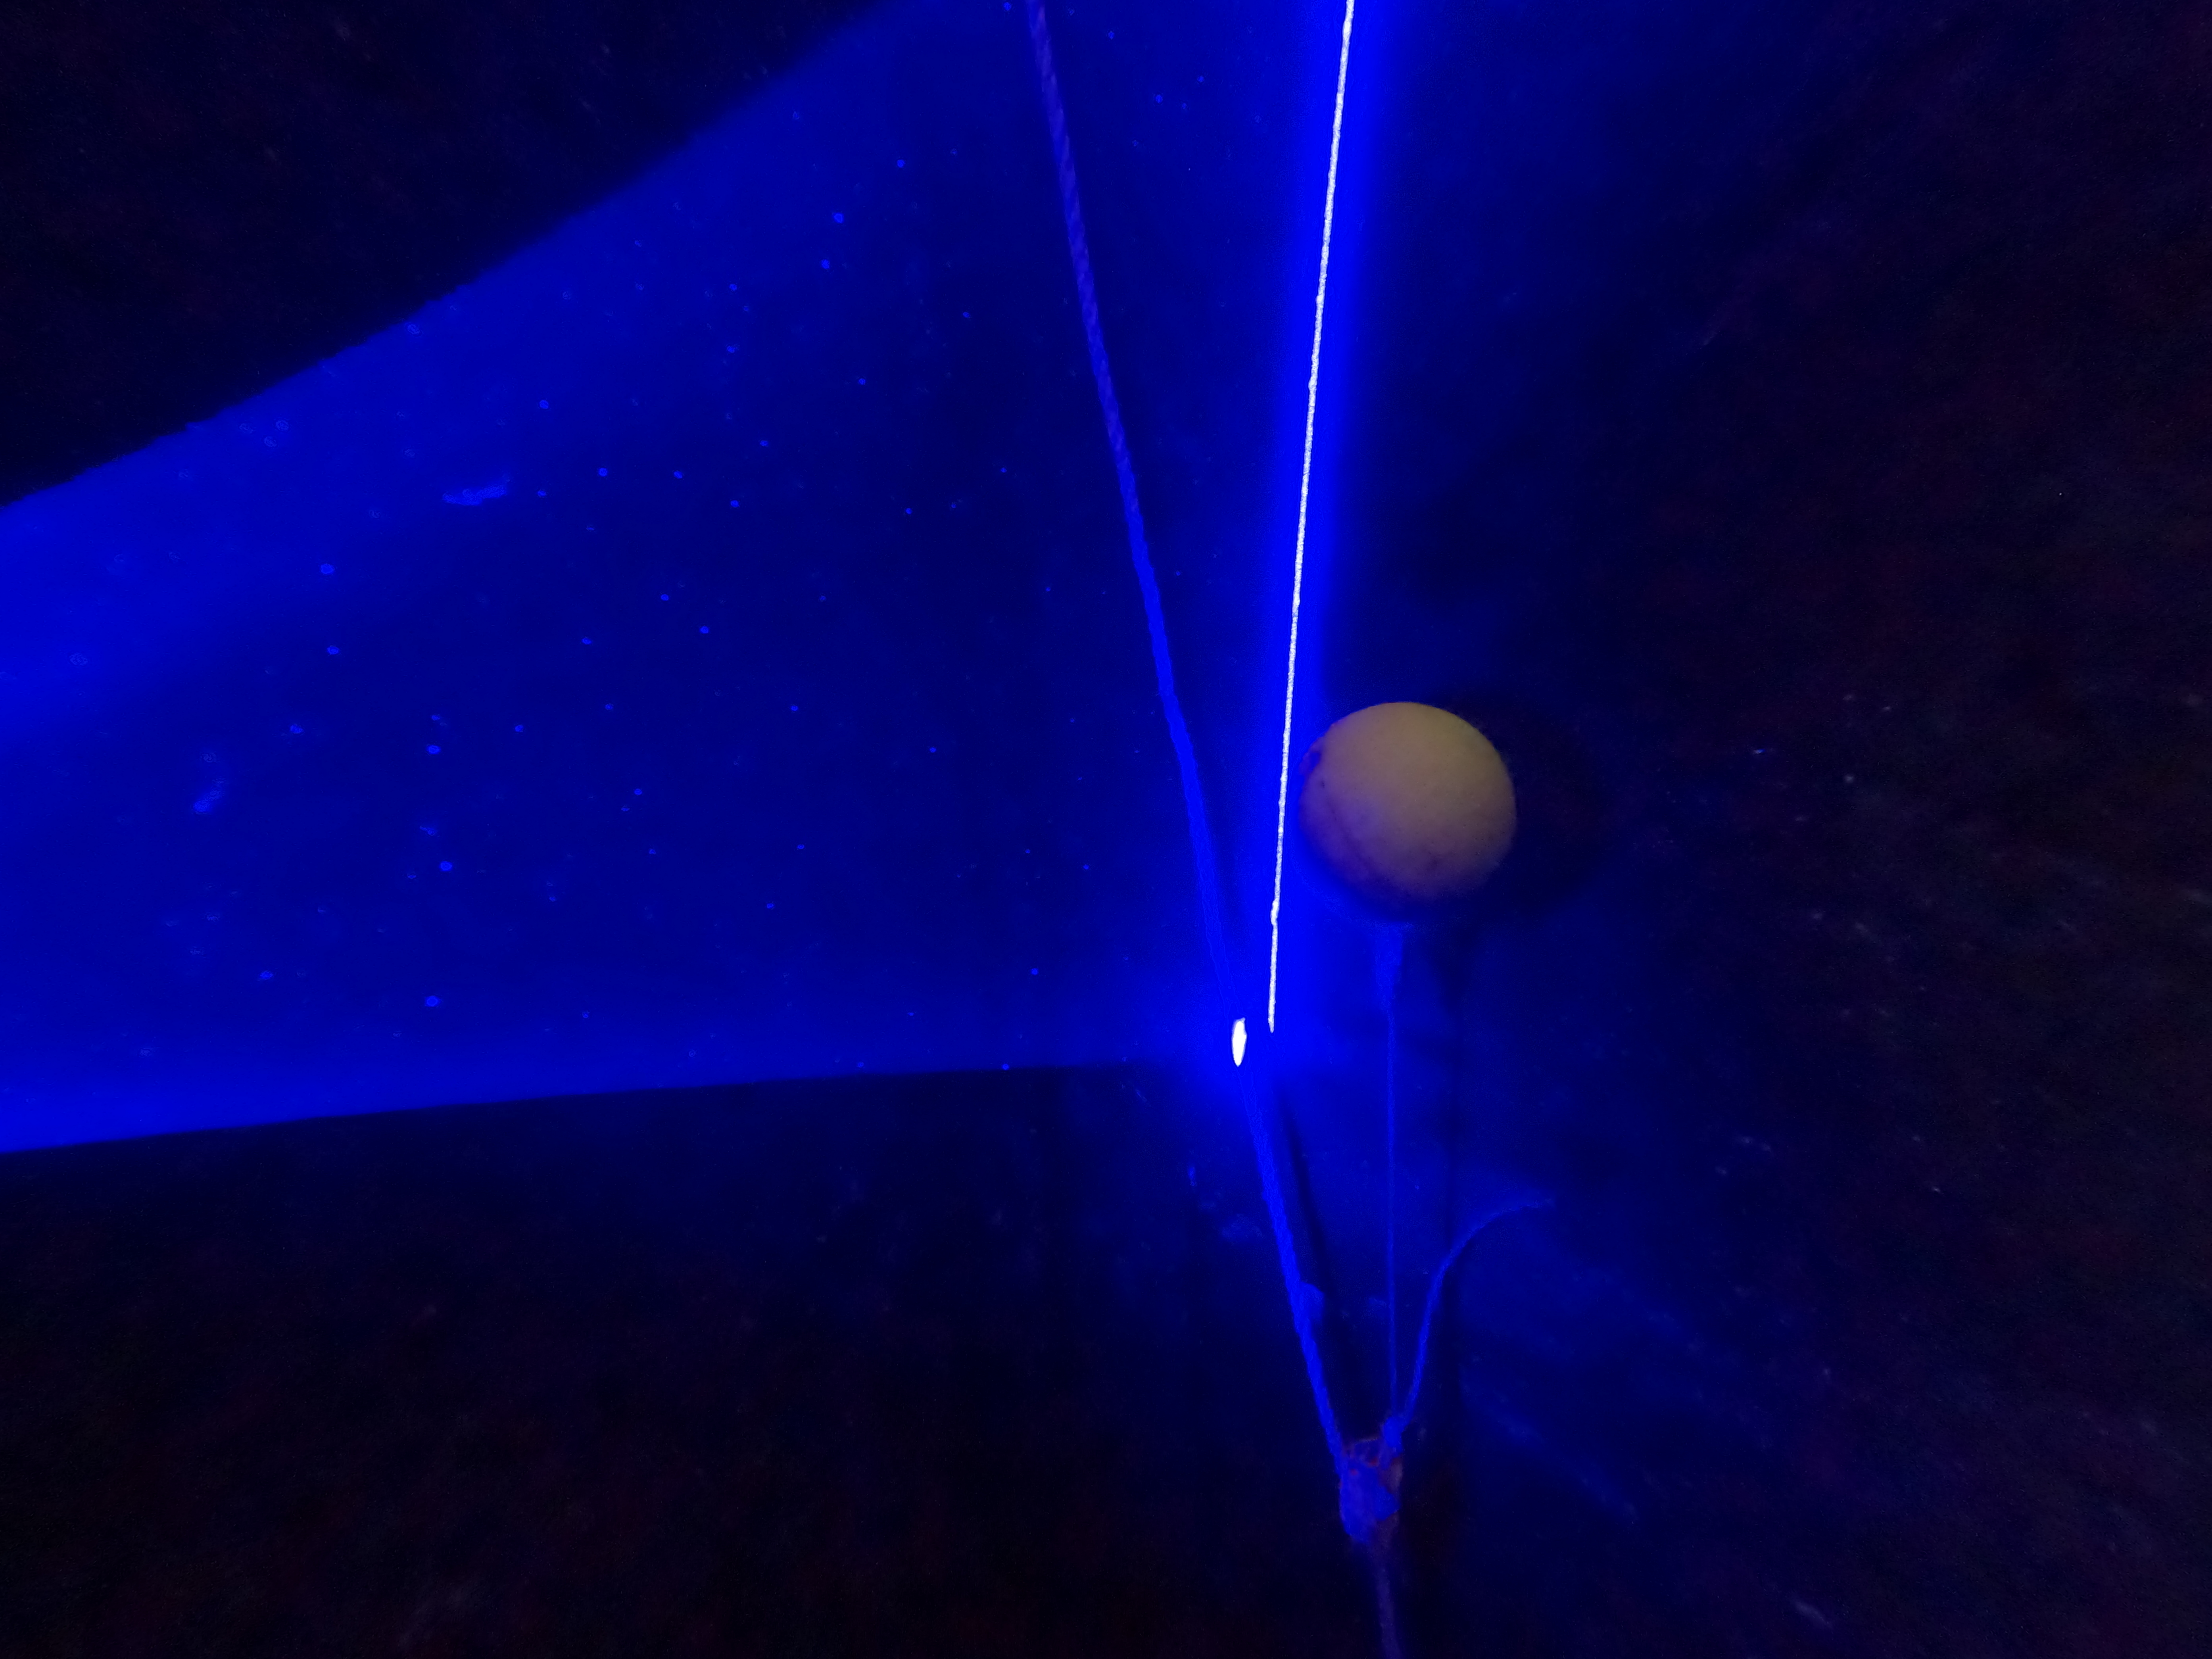

Supplement: Supplementary file 3568 [file G0030792.pdf › Level_1_1/G0030792.pdf]

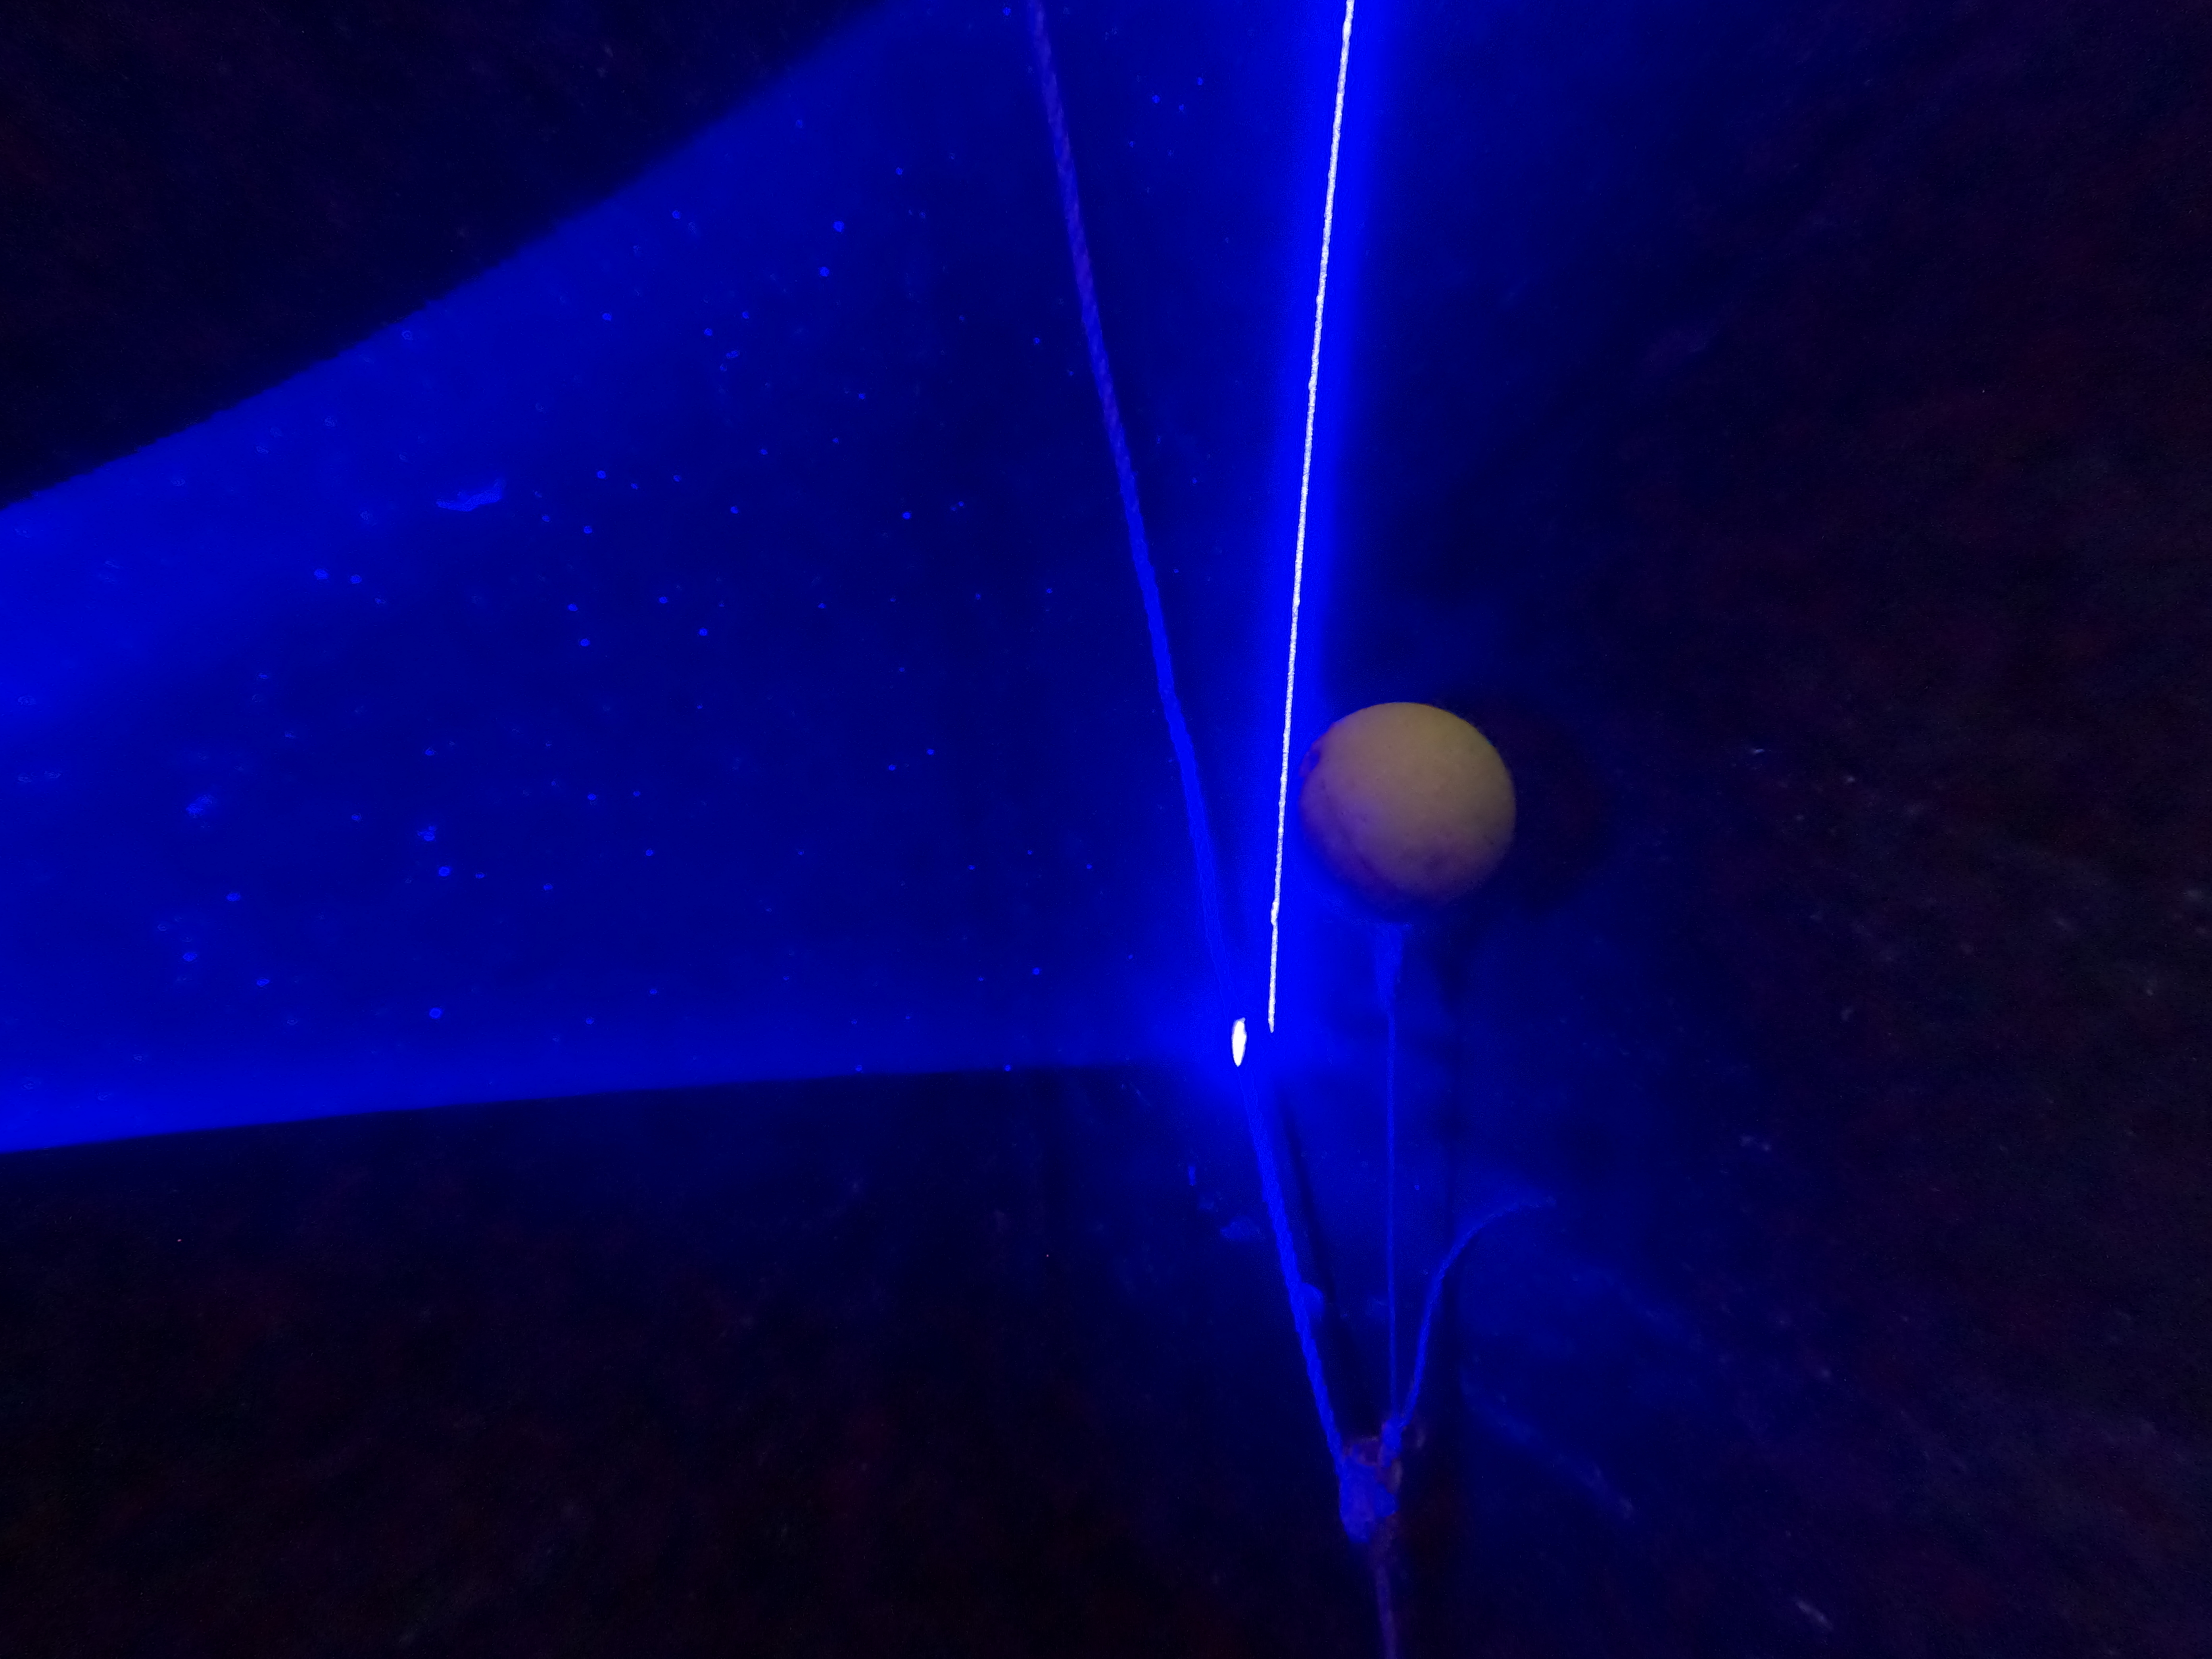

Supplement: Supplementary file 3569 [file G0030793.pdf › Level_1_1/G0030793.pdf]

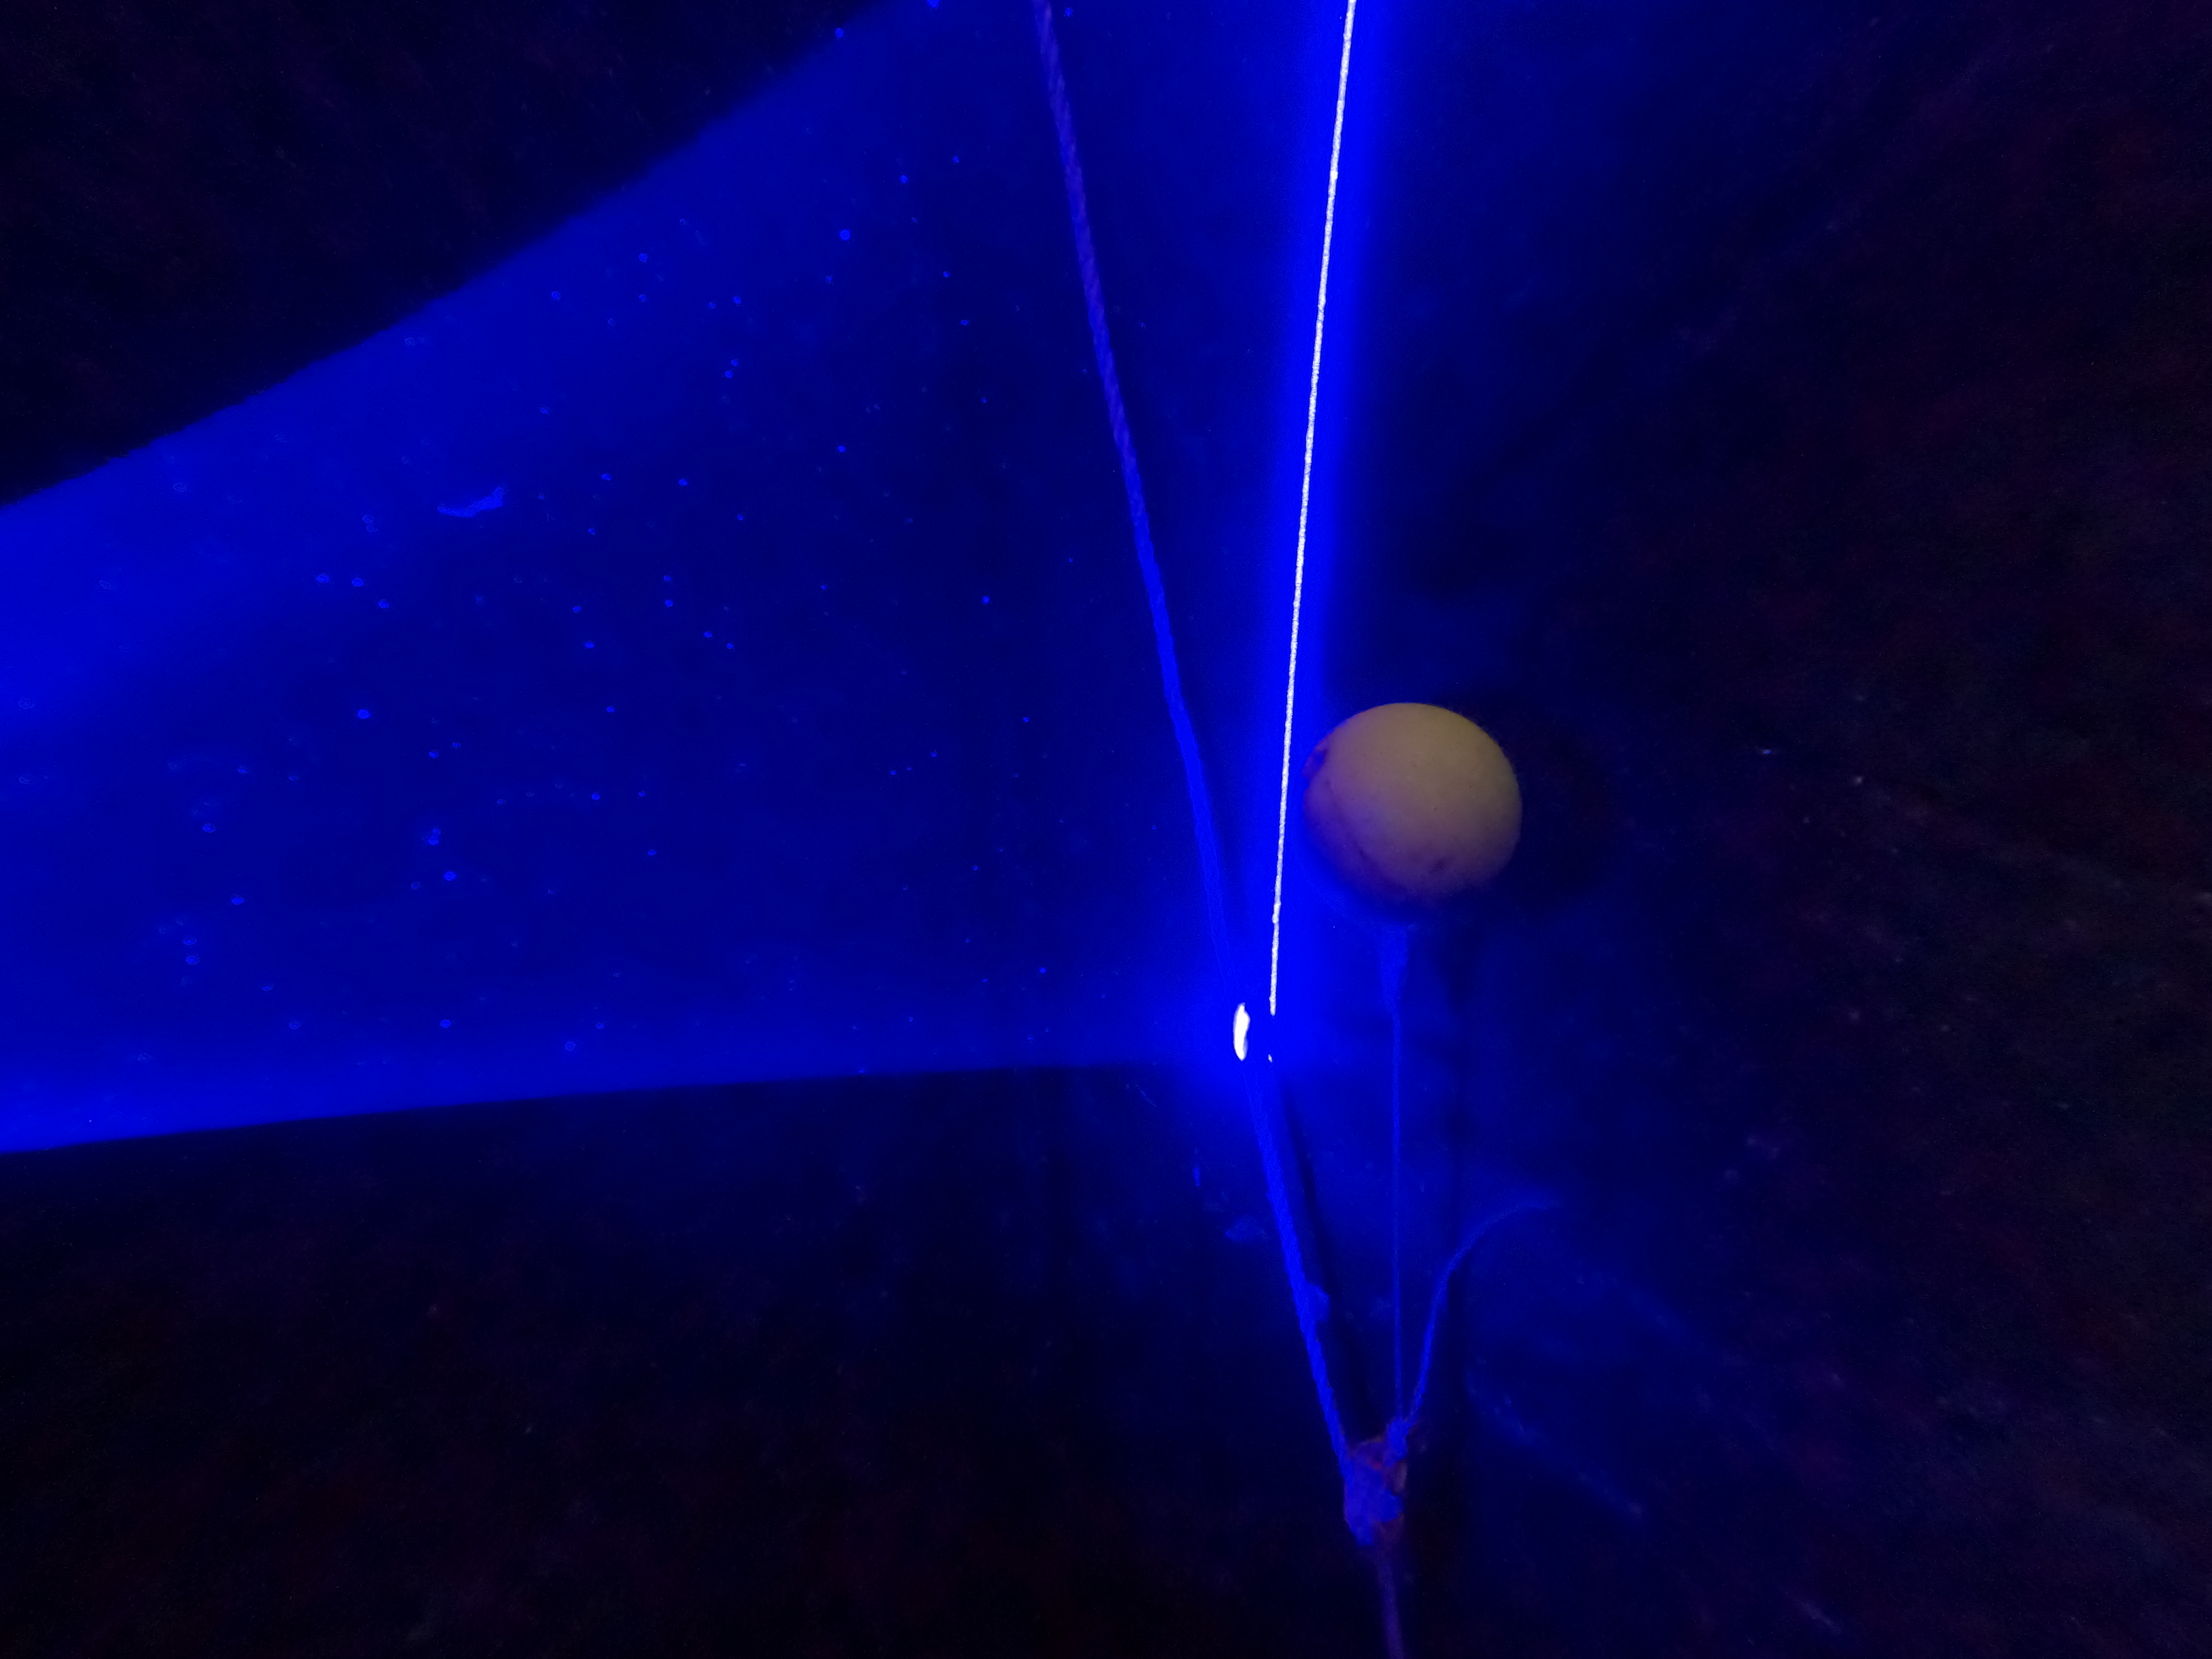

Supplement: Supplementary file 3570 [file G0030794.pdf › Level_1_1/G0030794.pdf]

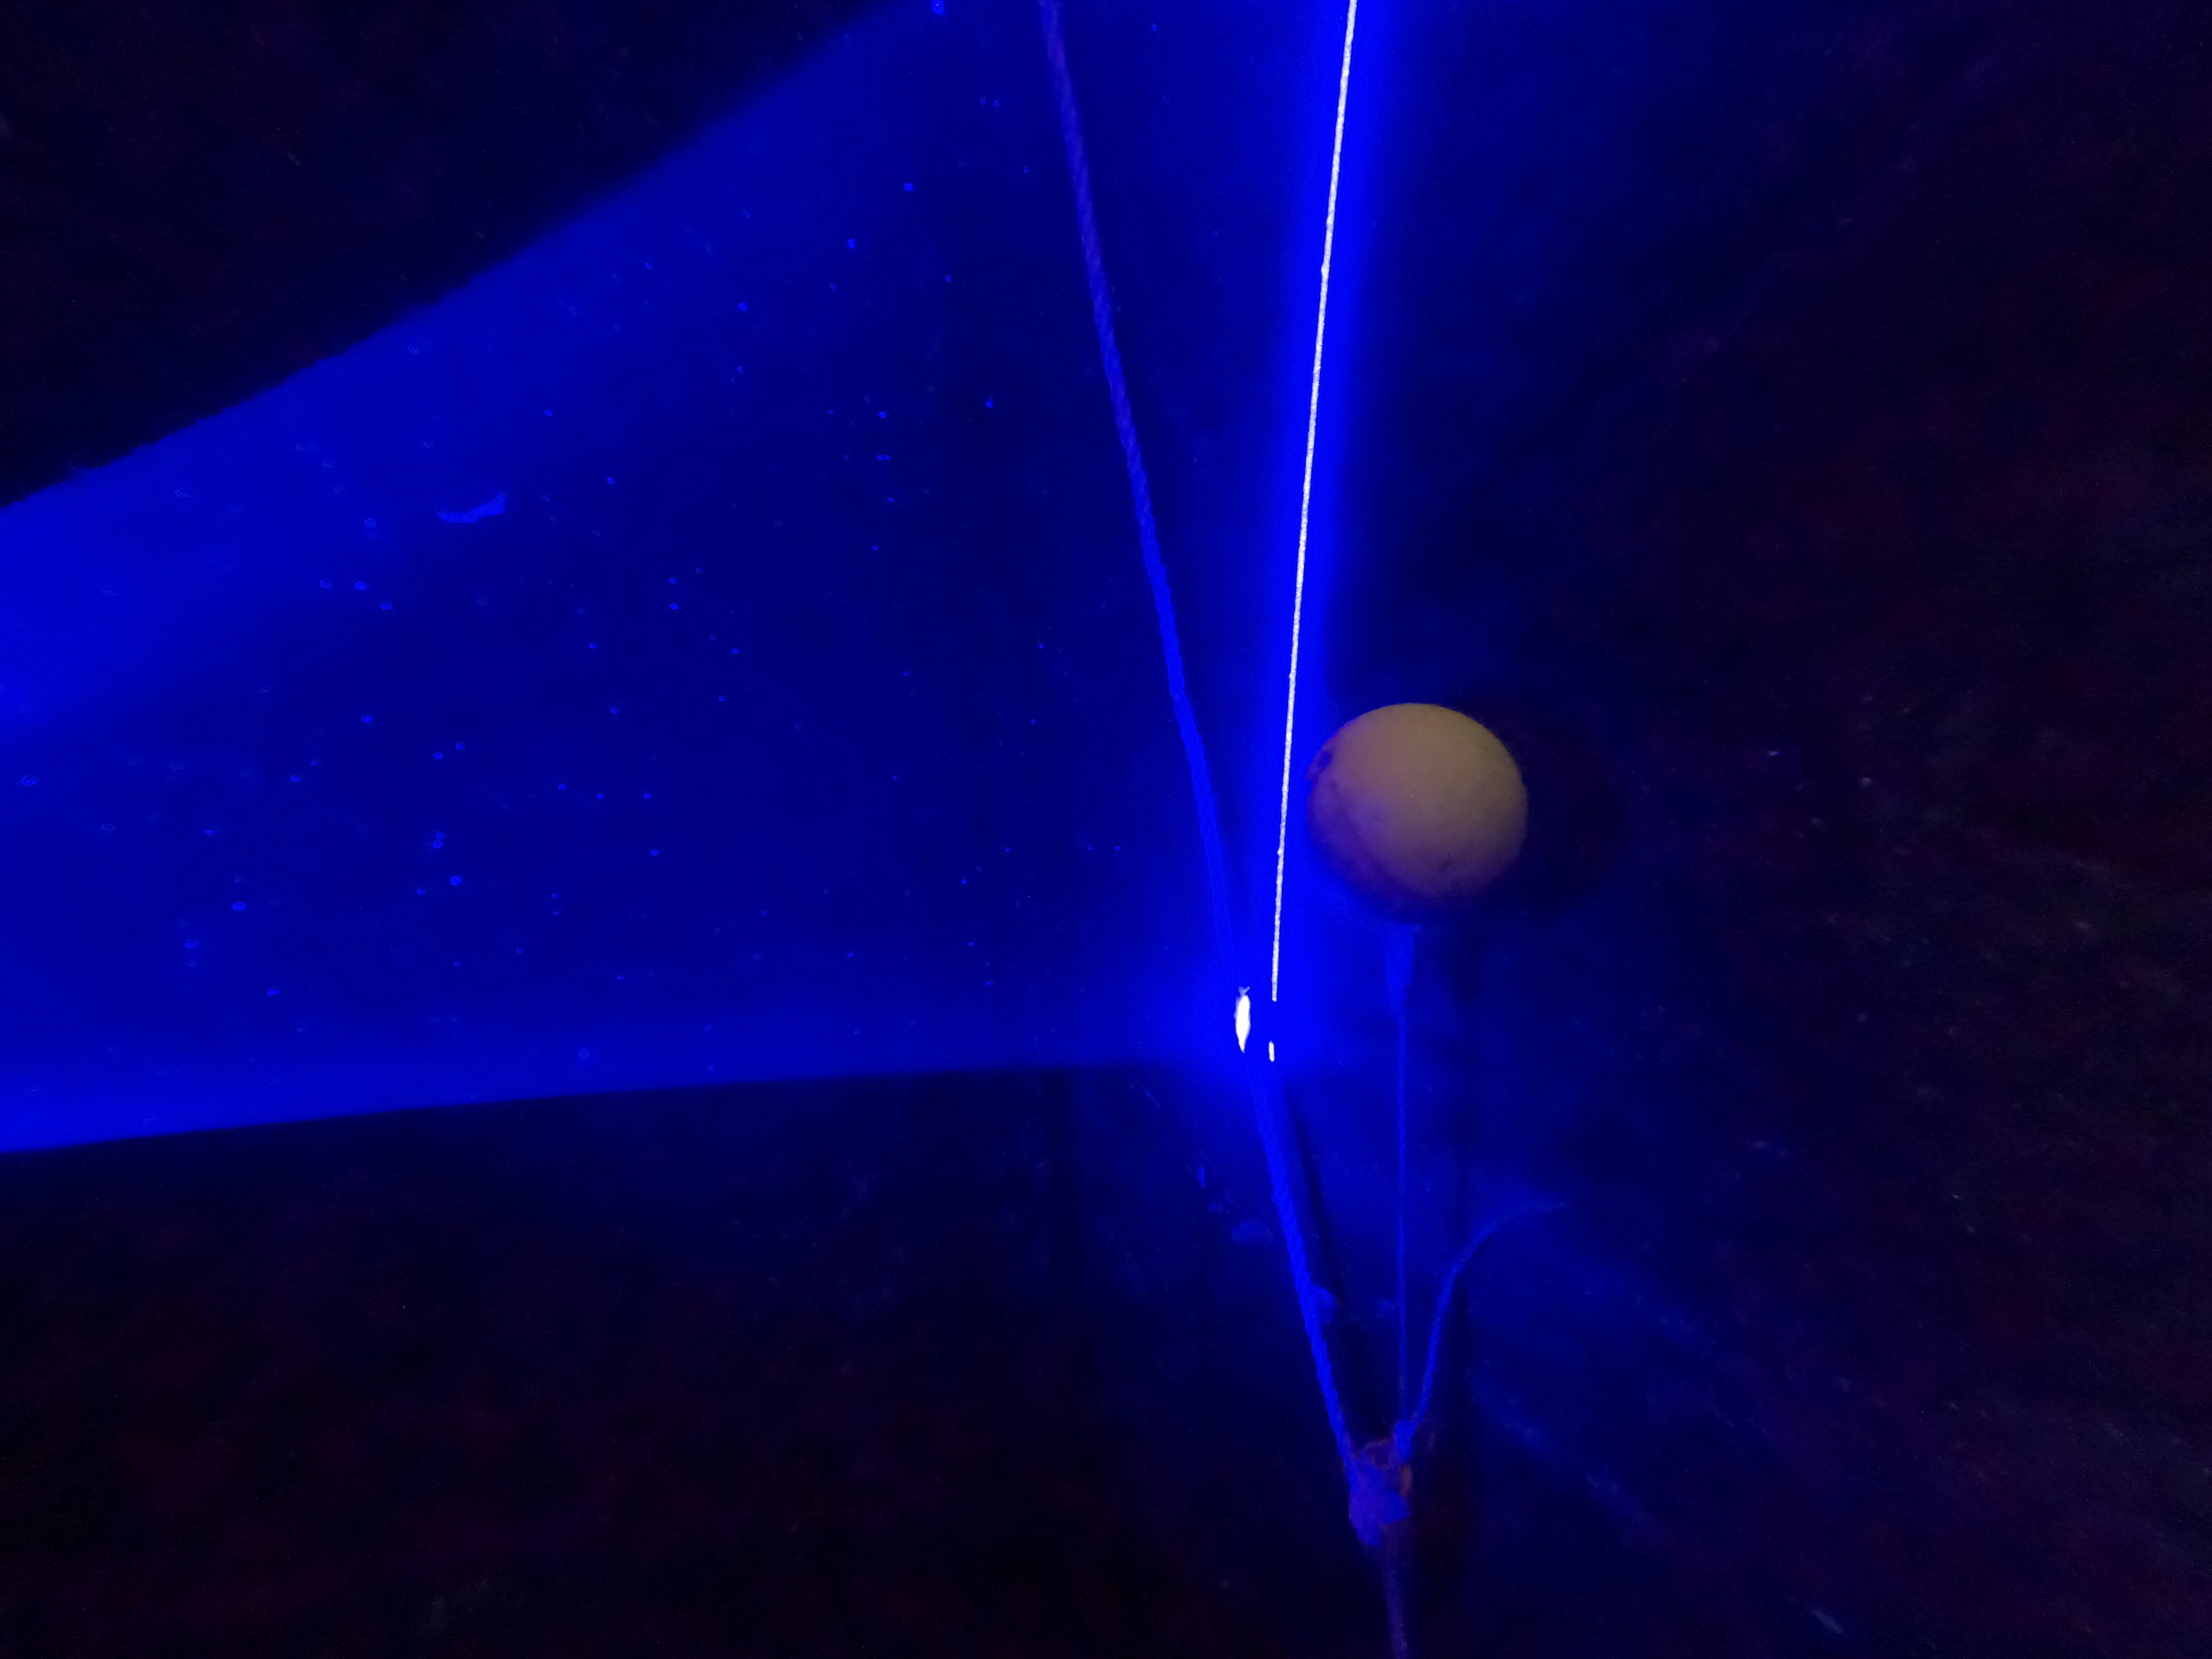

Supplement: Supplementary file 3571 [file G0030795.pdf › Level_1_1/G0030795.pdf]

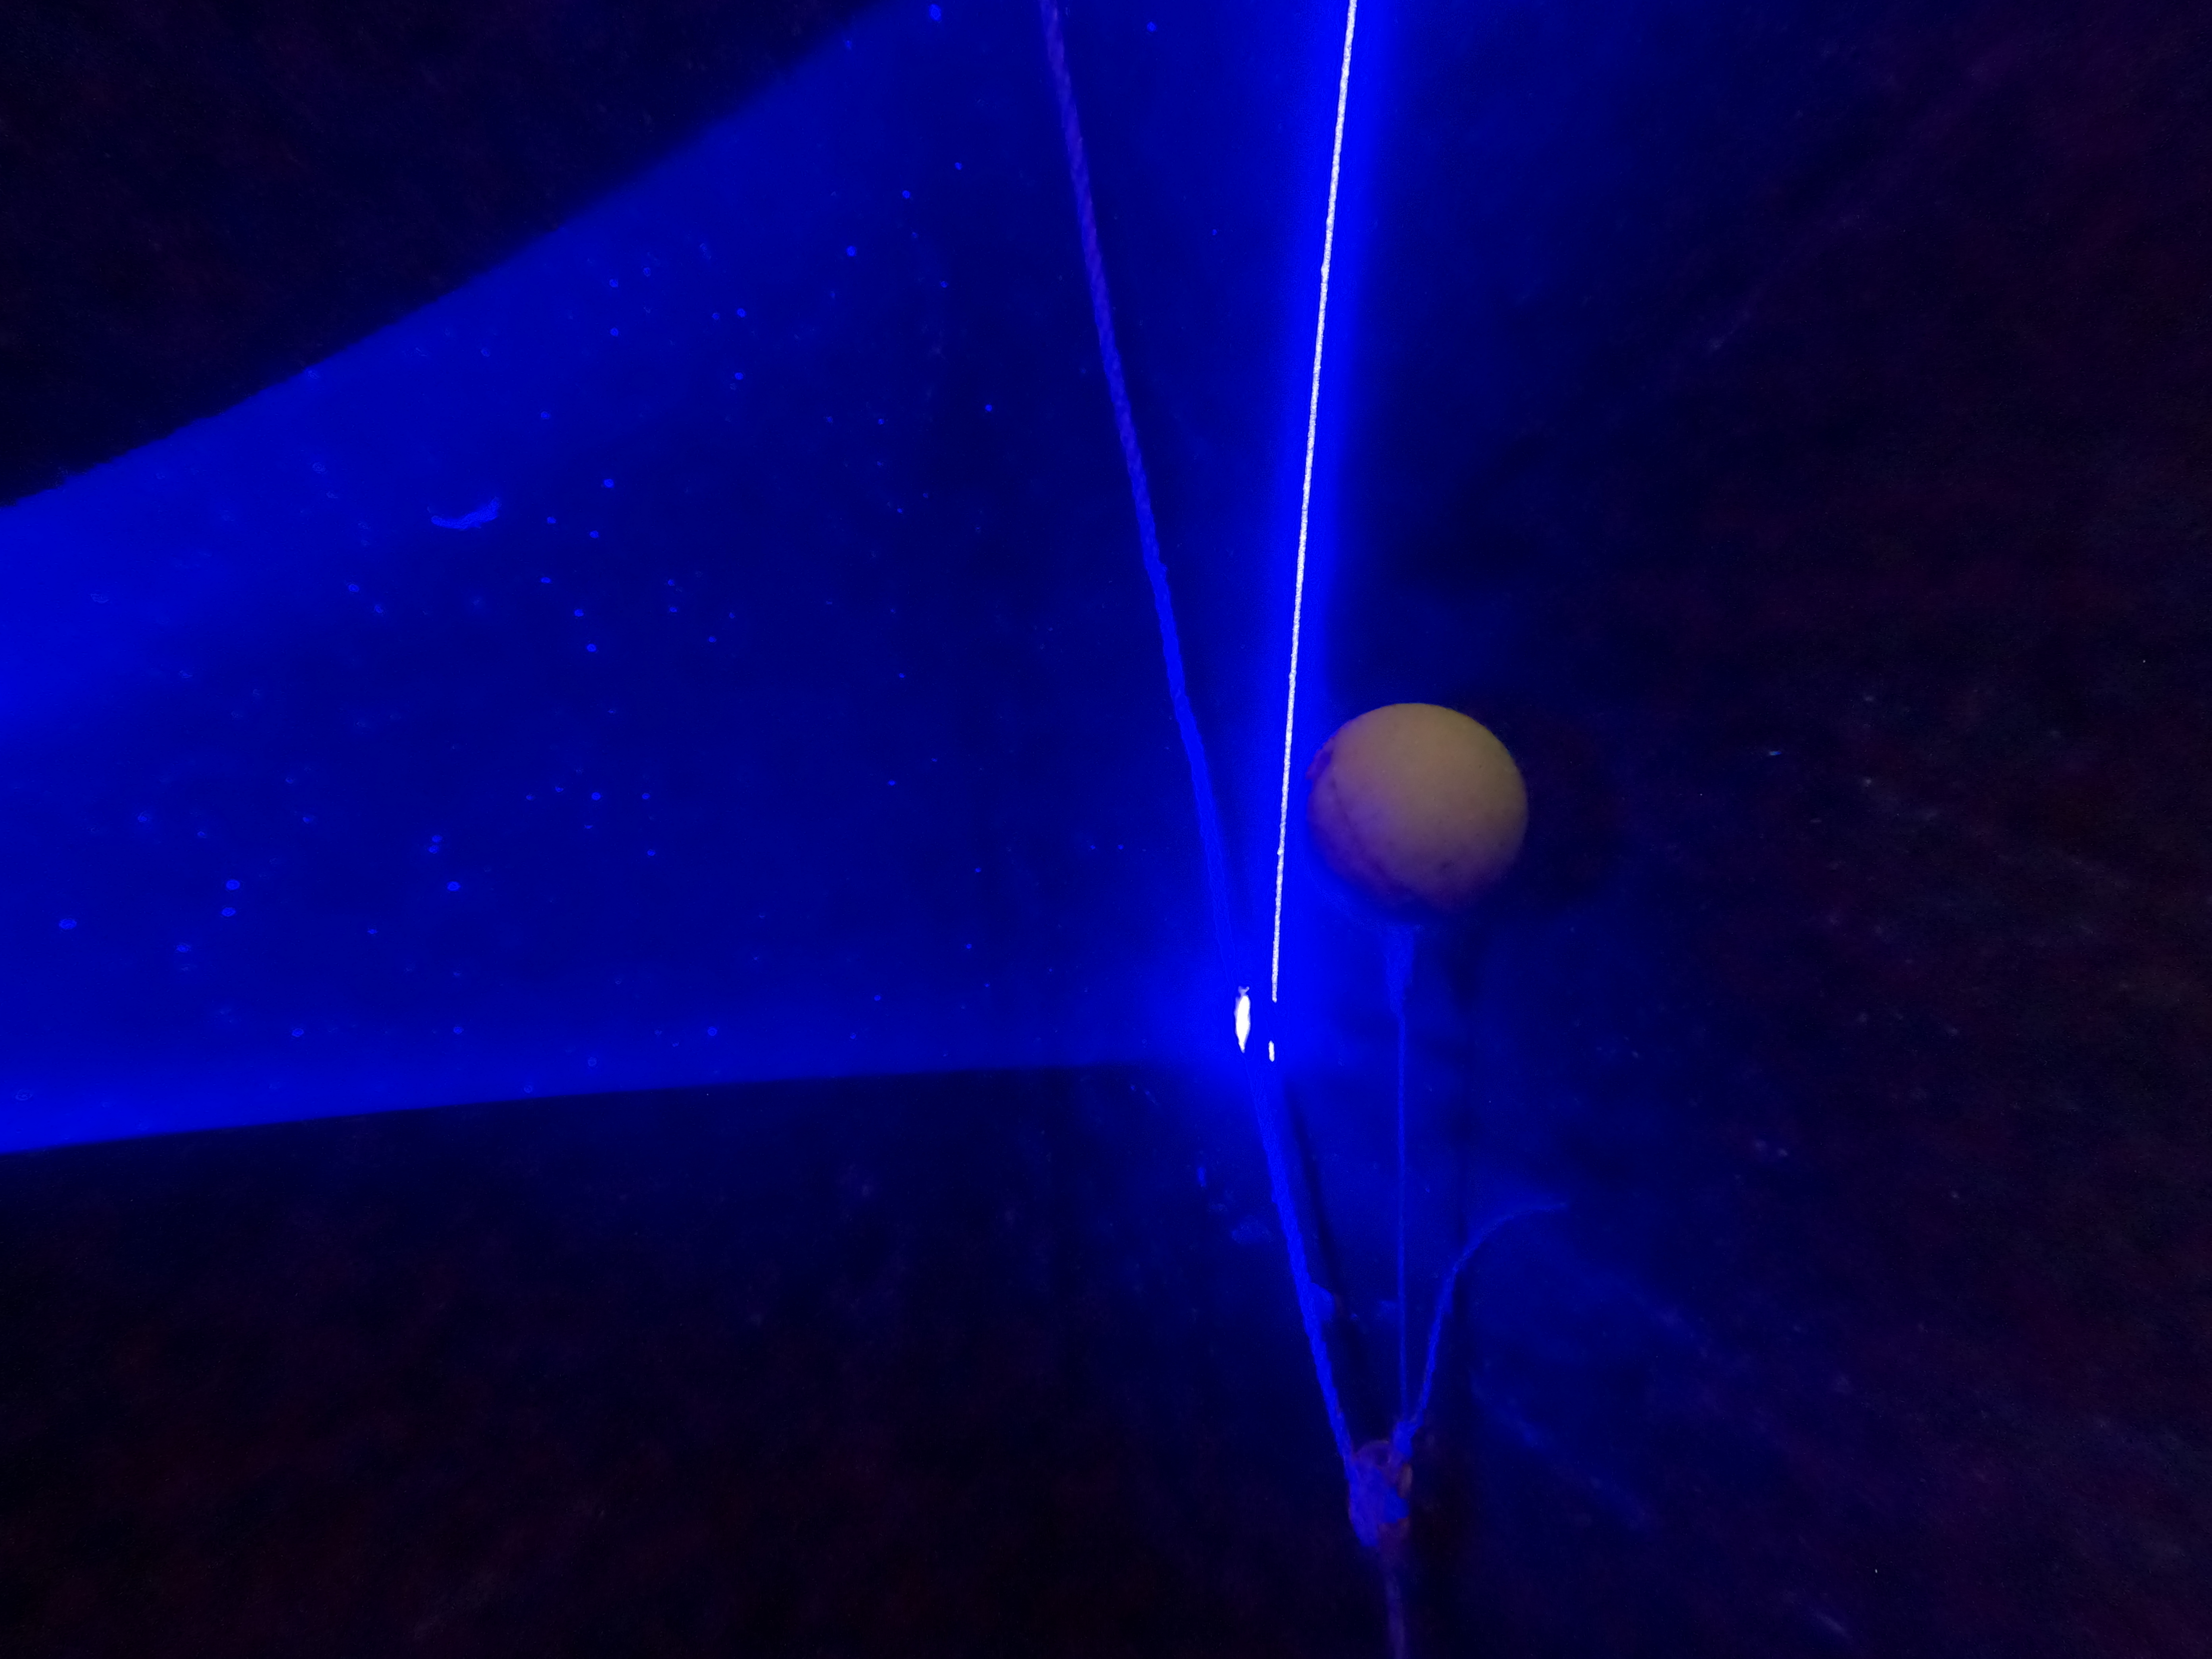

Supplement: Supplementary file 3572 [file G0030796.pdf › Level_1_1/G0030796.pdf]

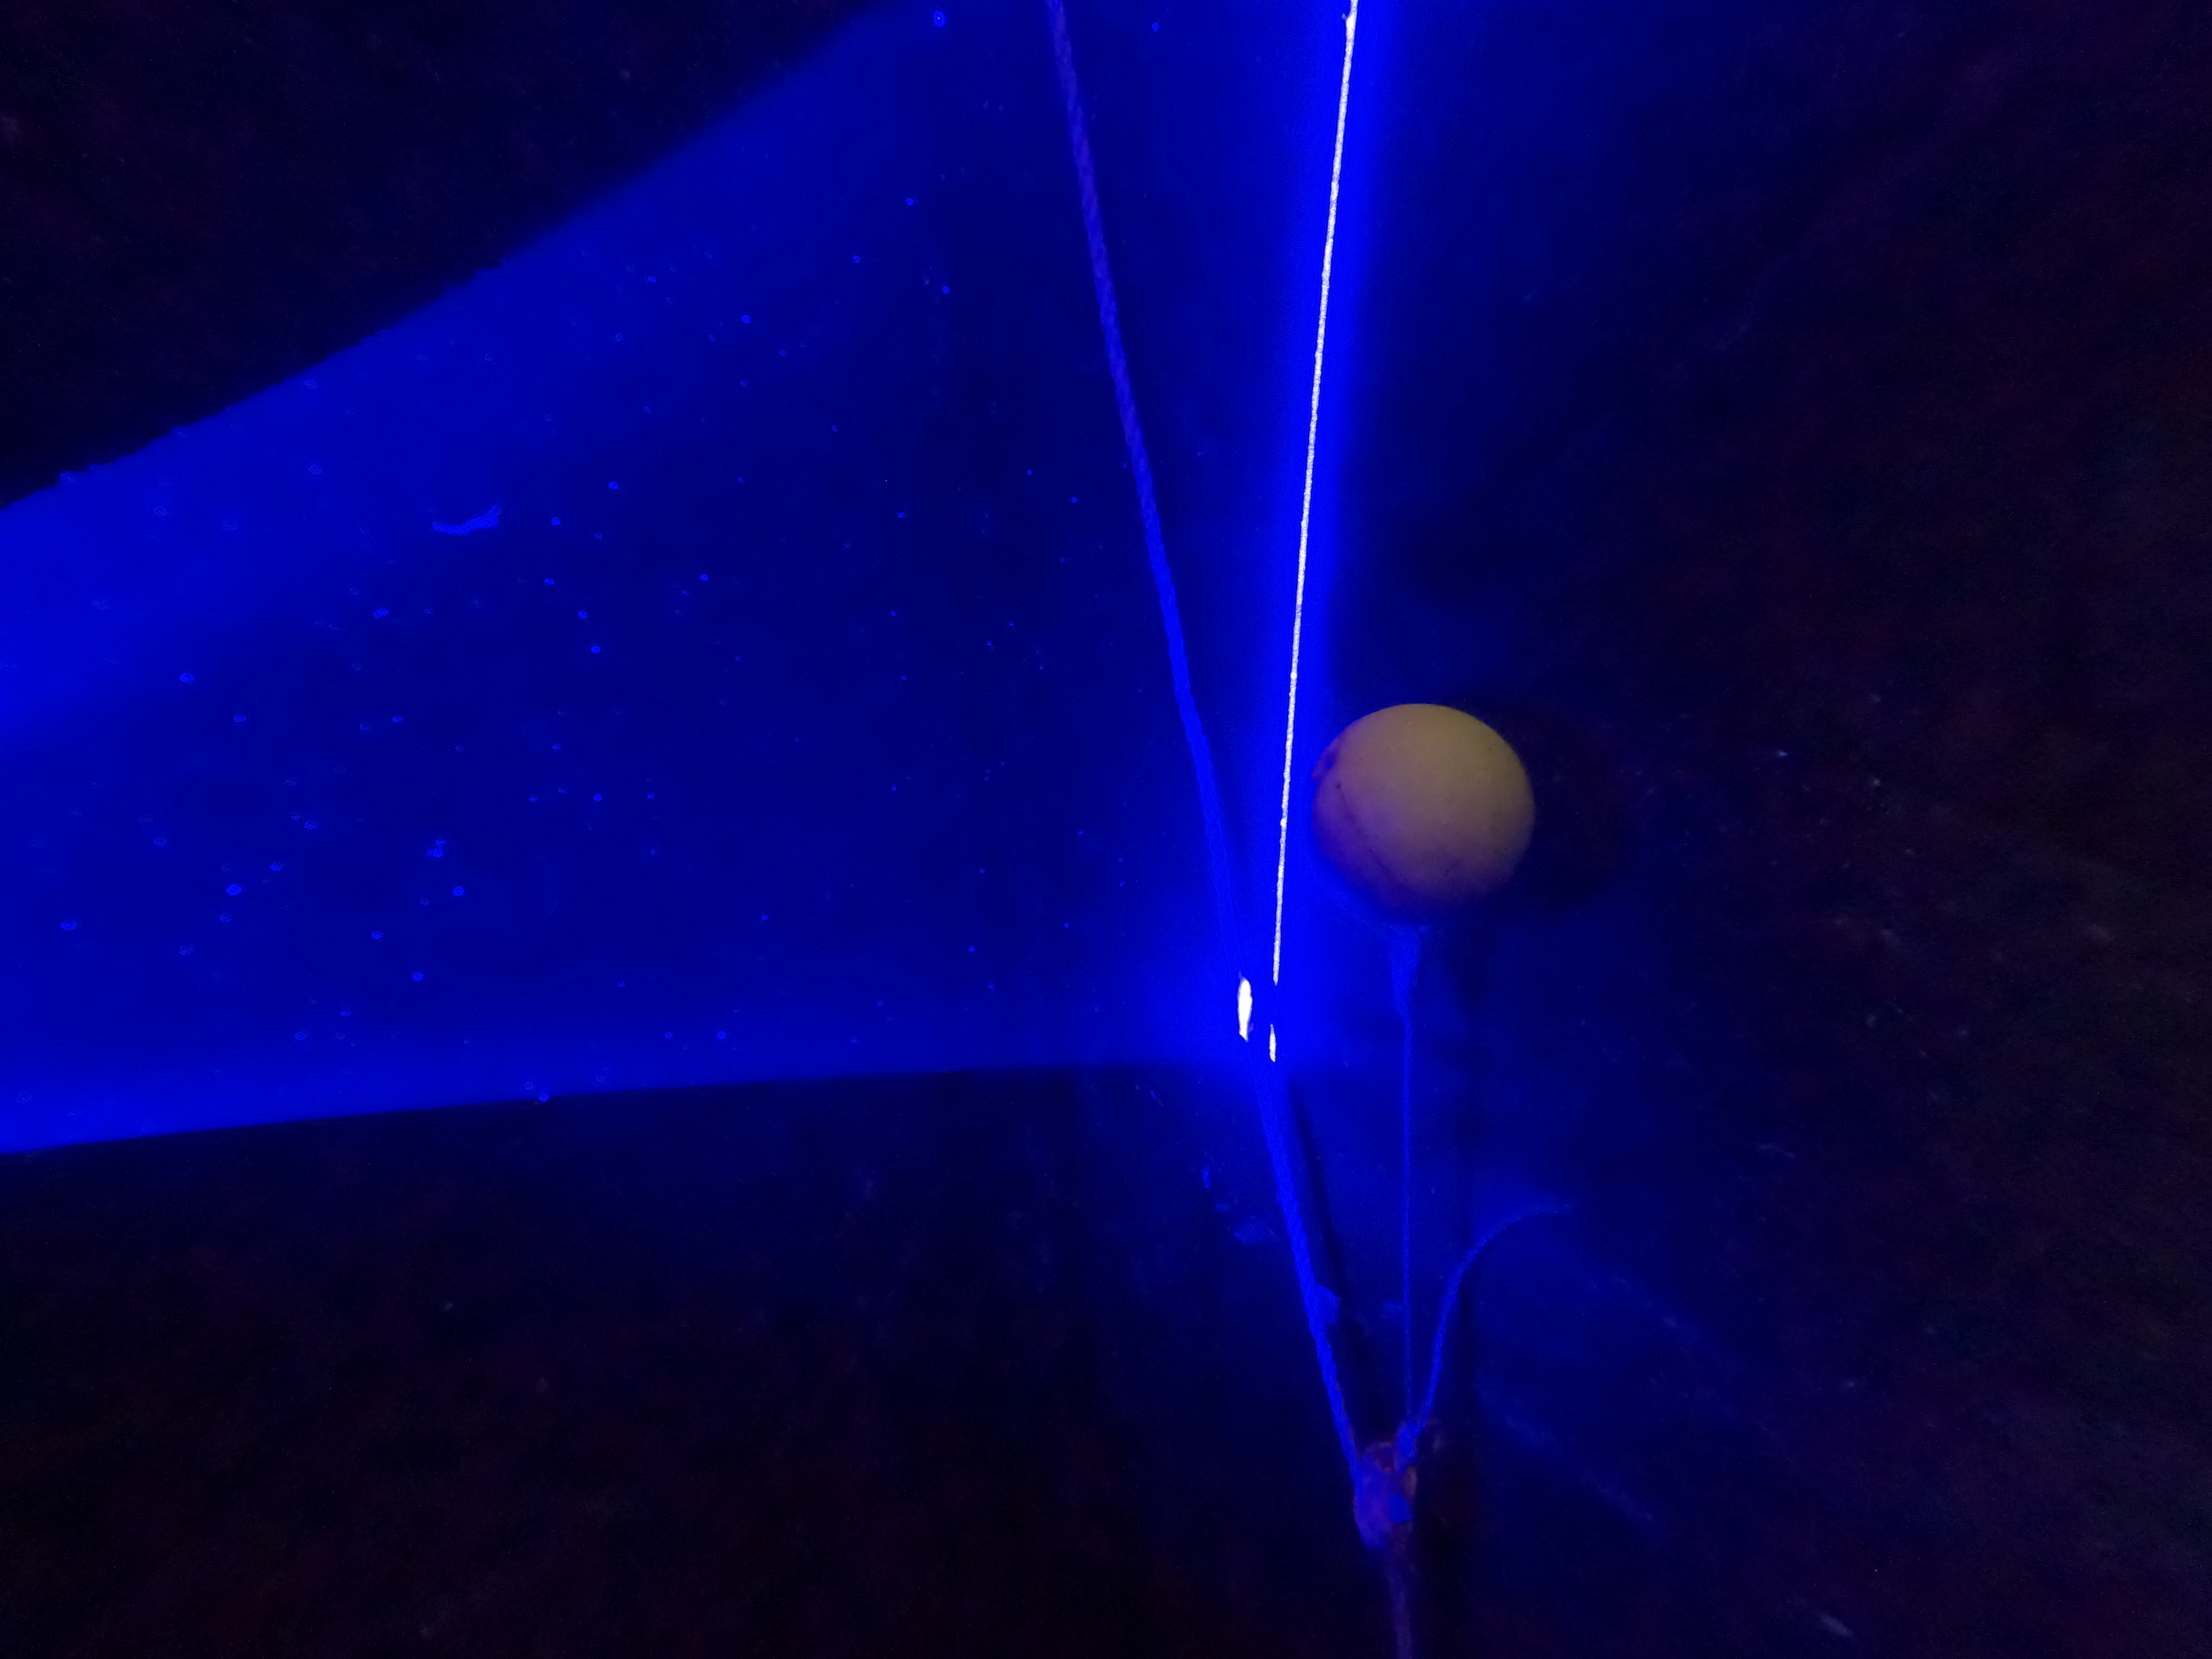

Supplement: Supplementary file 3573 [file G0030797.pdf › Level_1_1/G0030797.pdf]

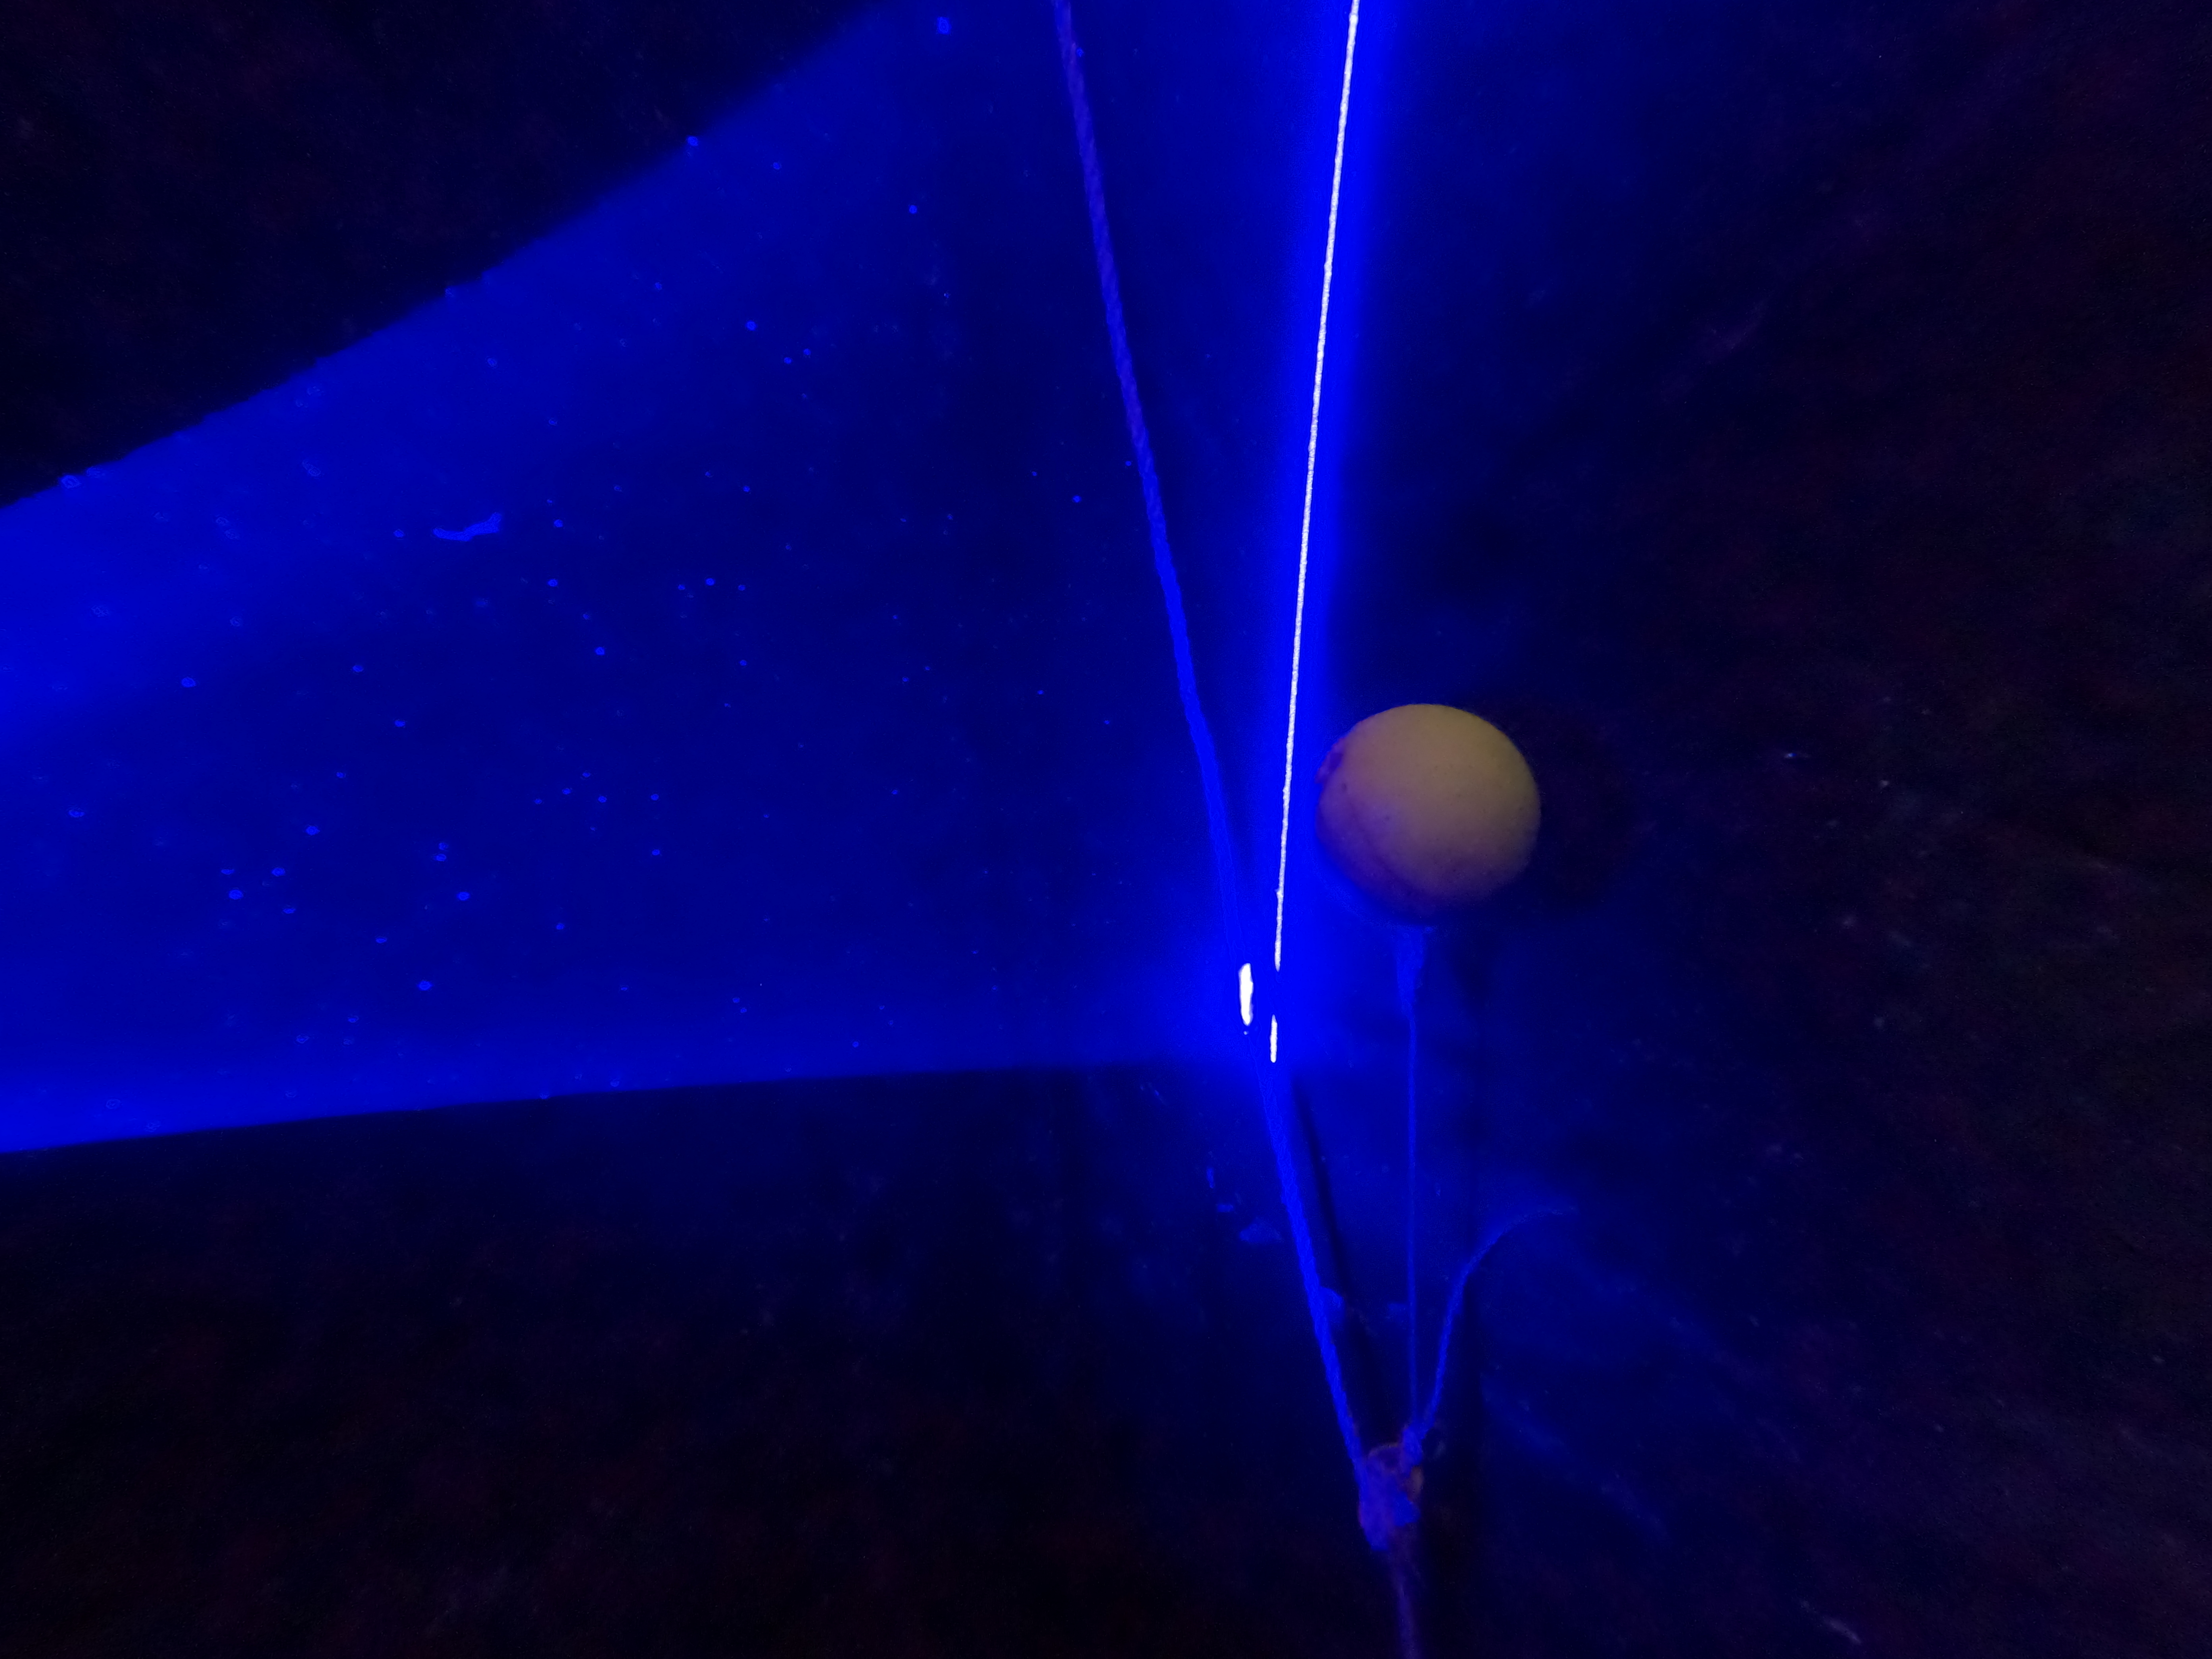

Supplement: Supplementary file 3574 [file G0030798.pdf › Level_1_1/G0030798.pdf]

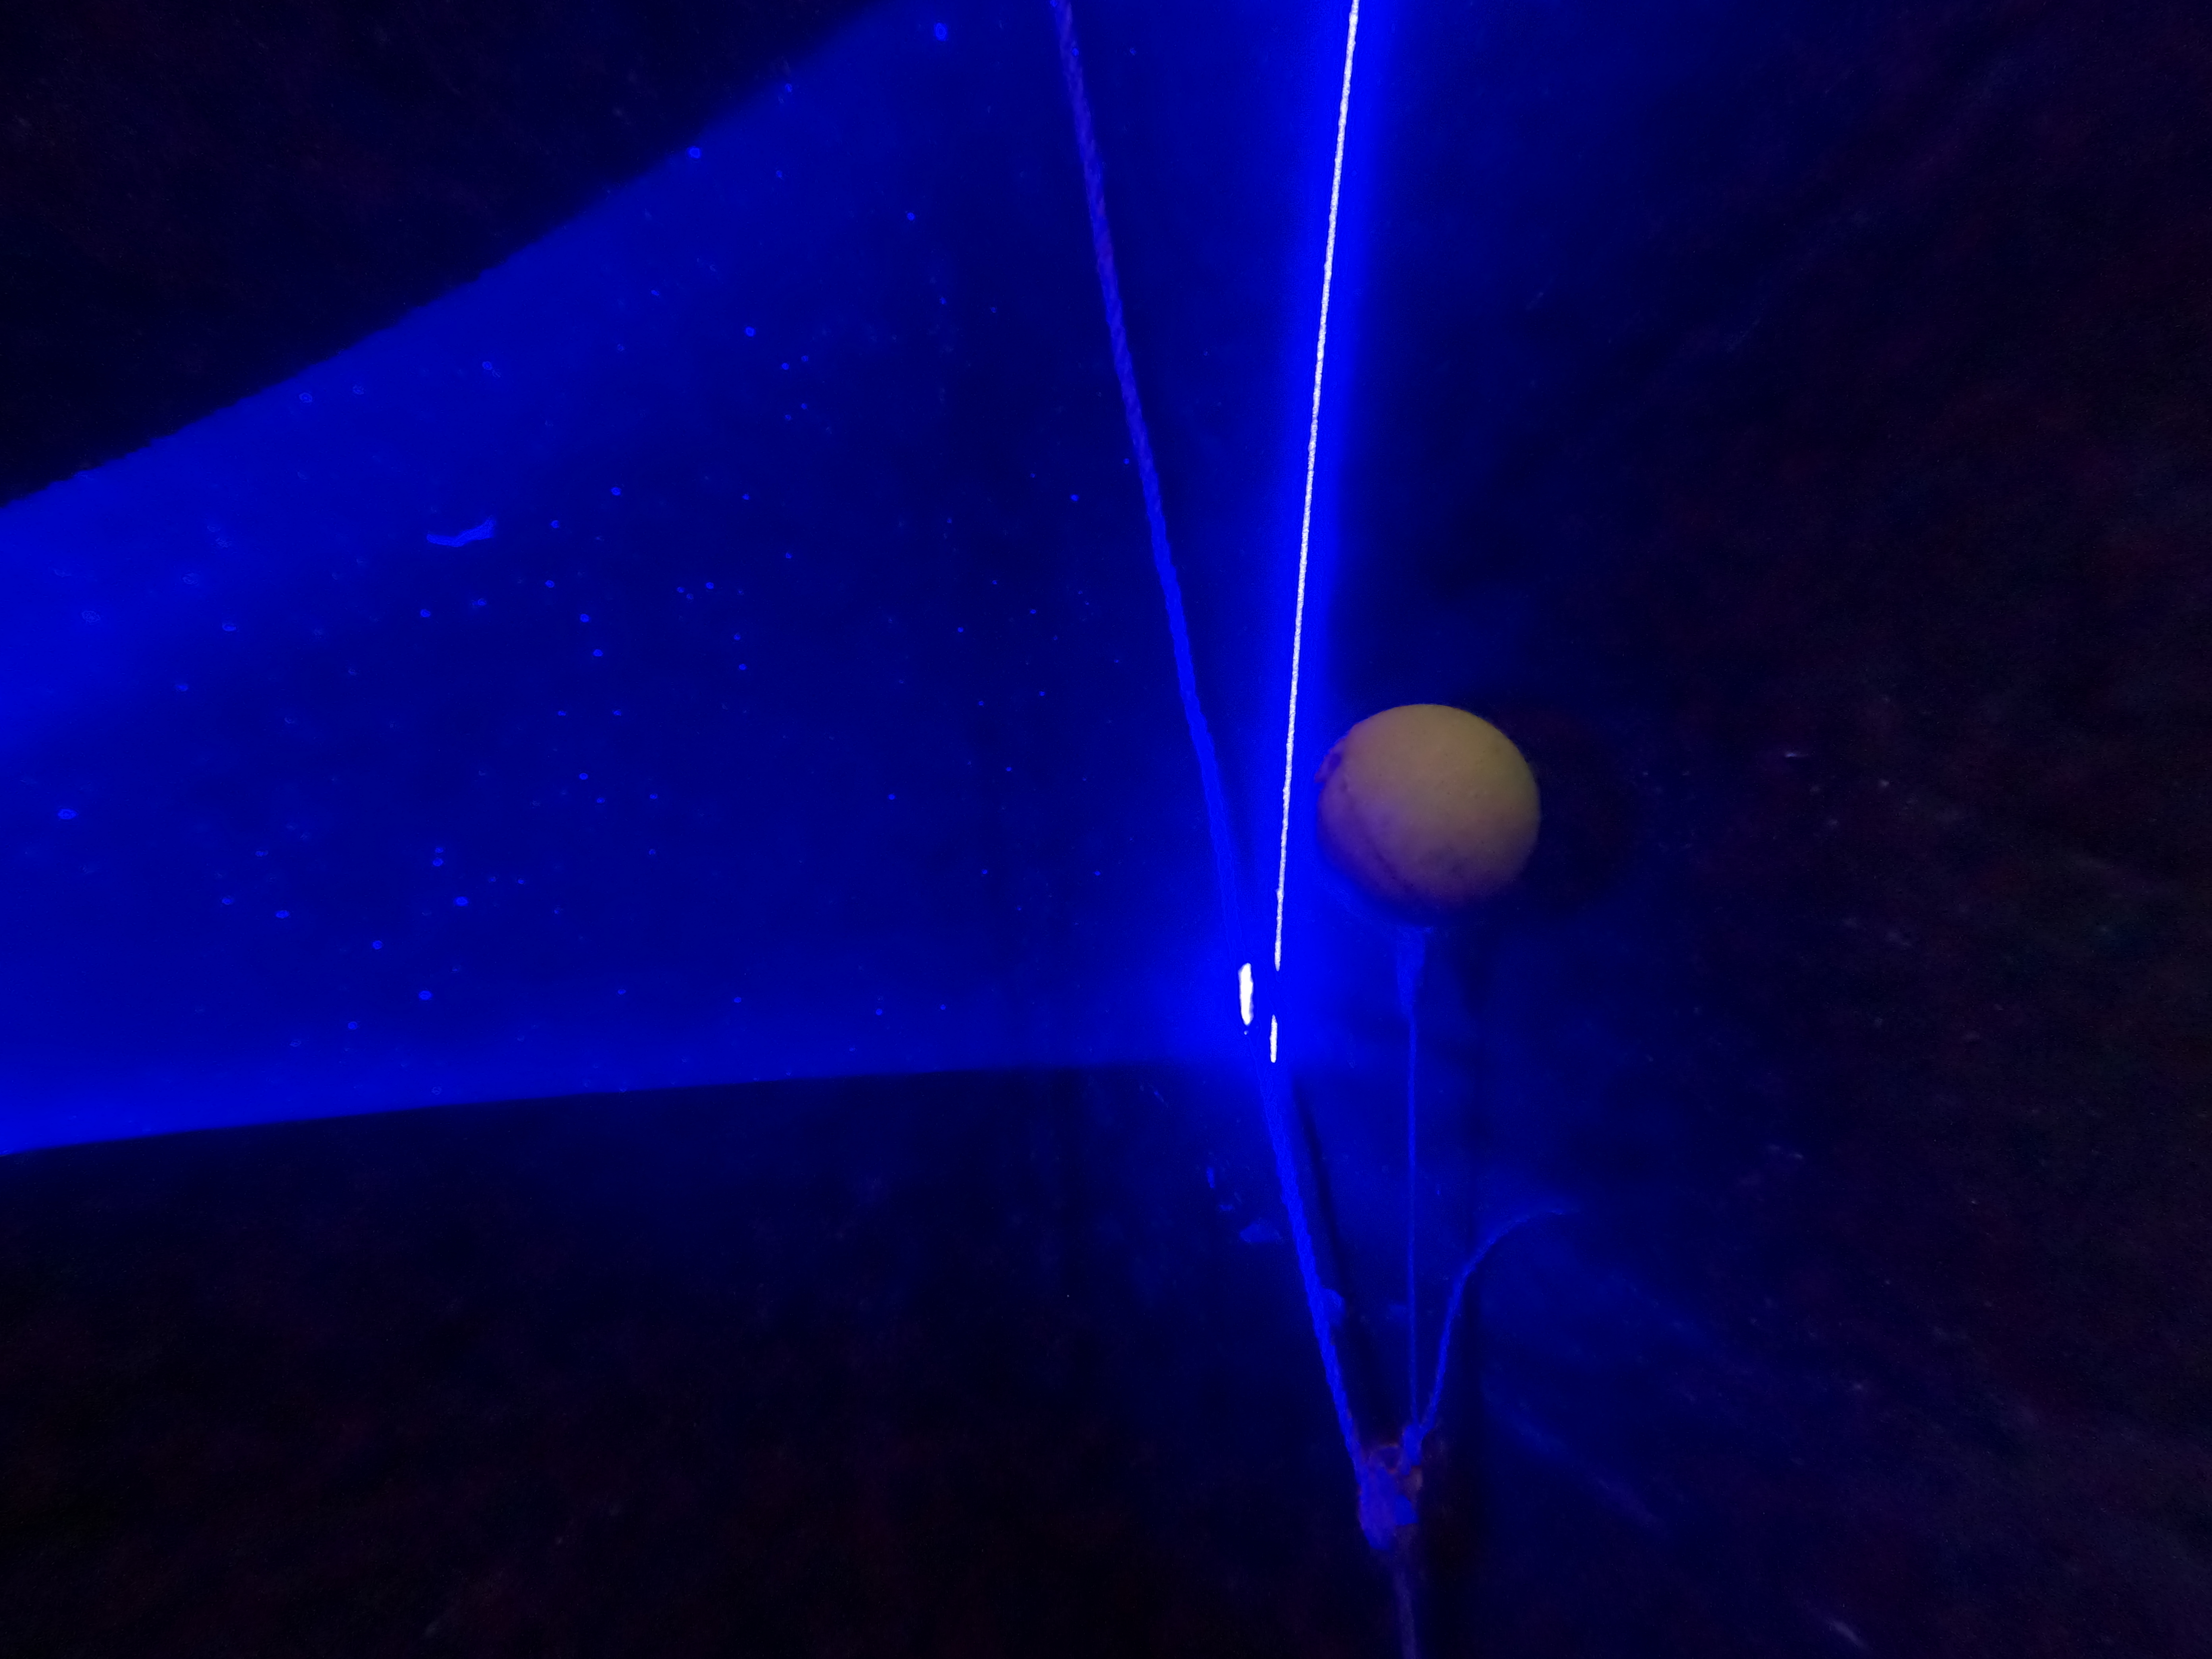

Supplement: Supplementary file 3575 [file G0030799.pdf › Level_1_1/G0030799.pdf]

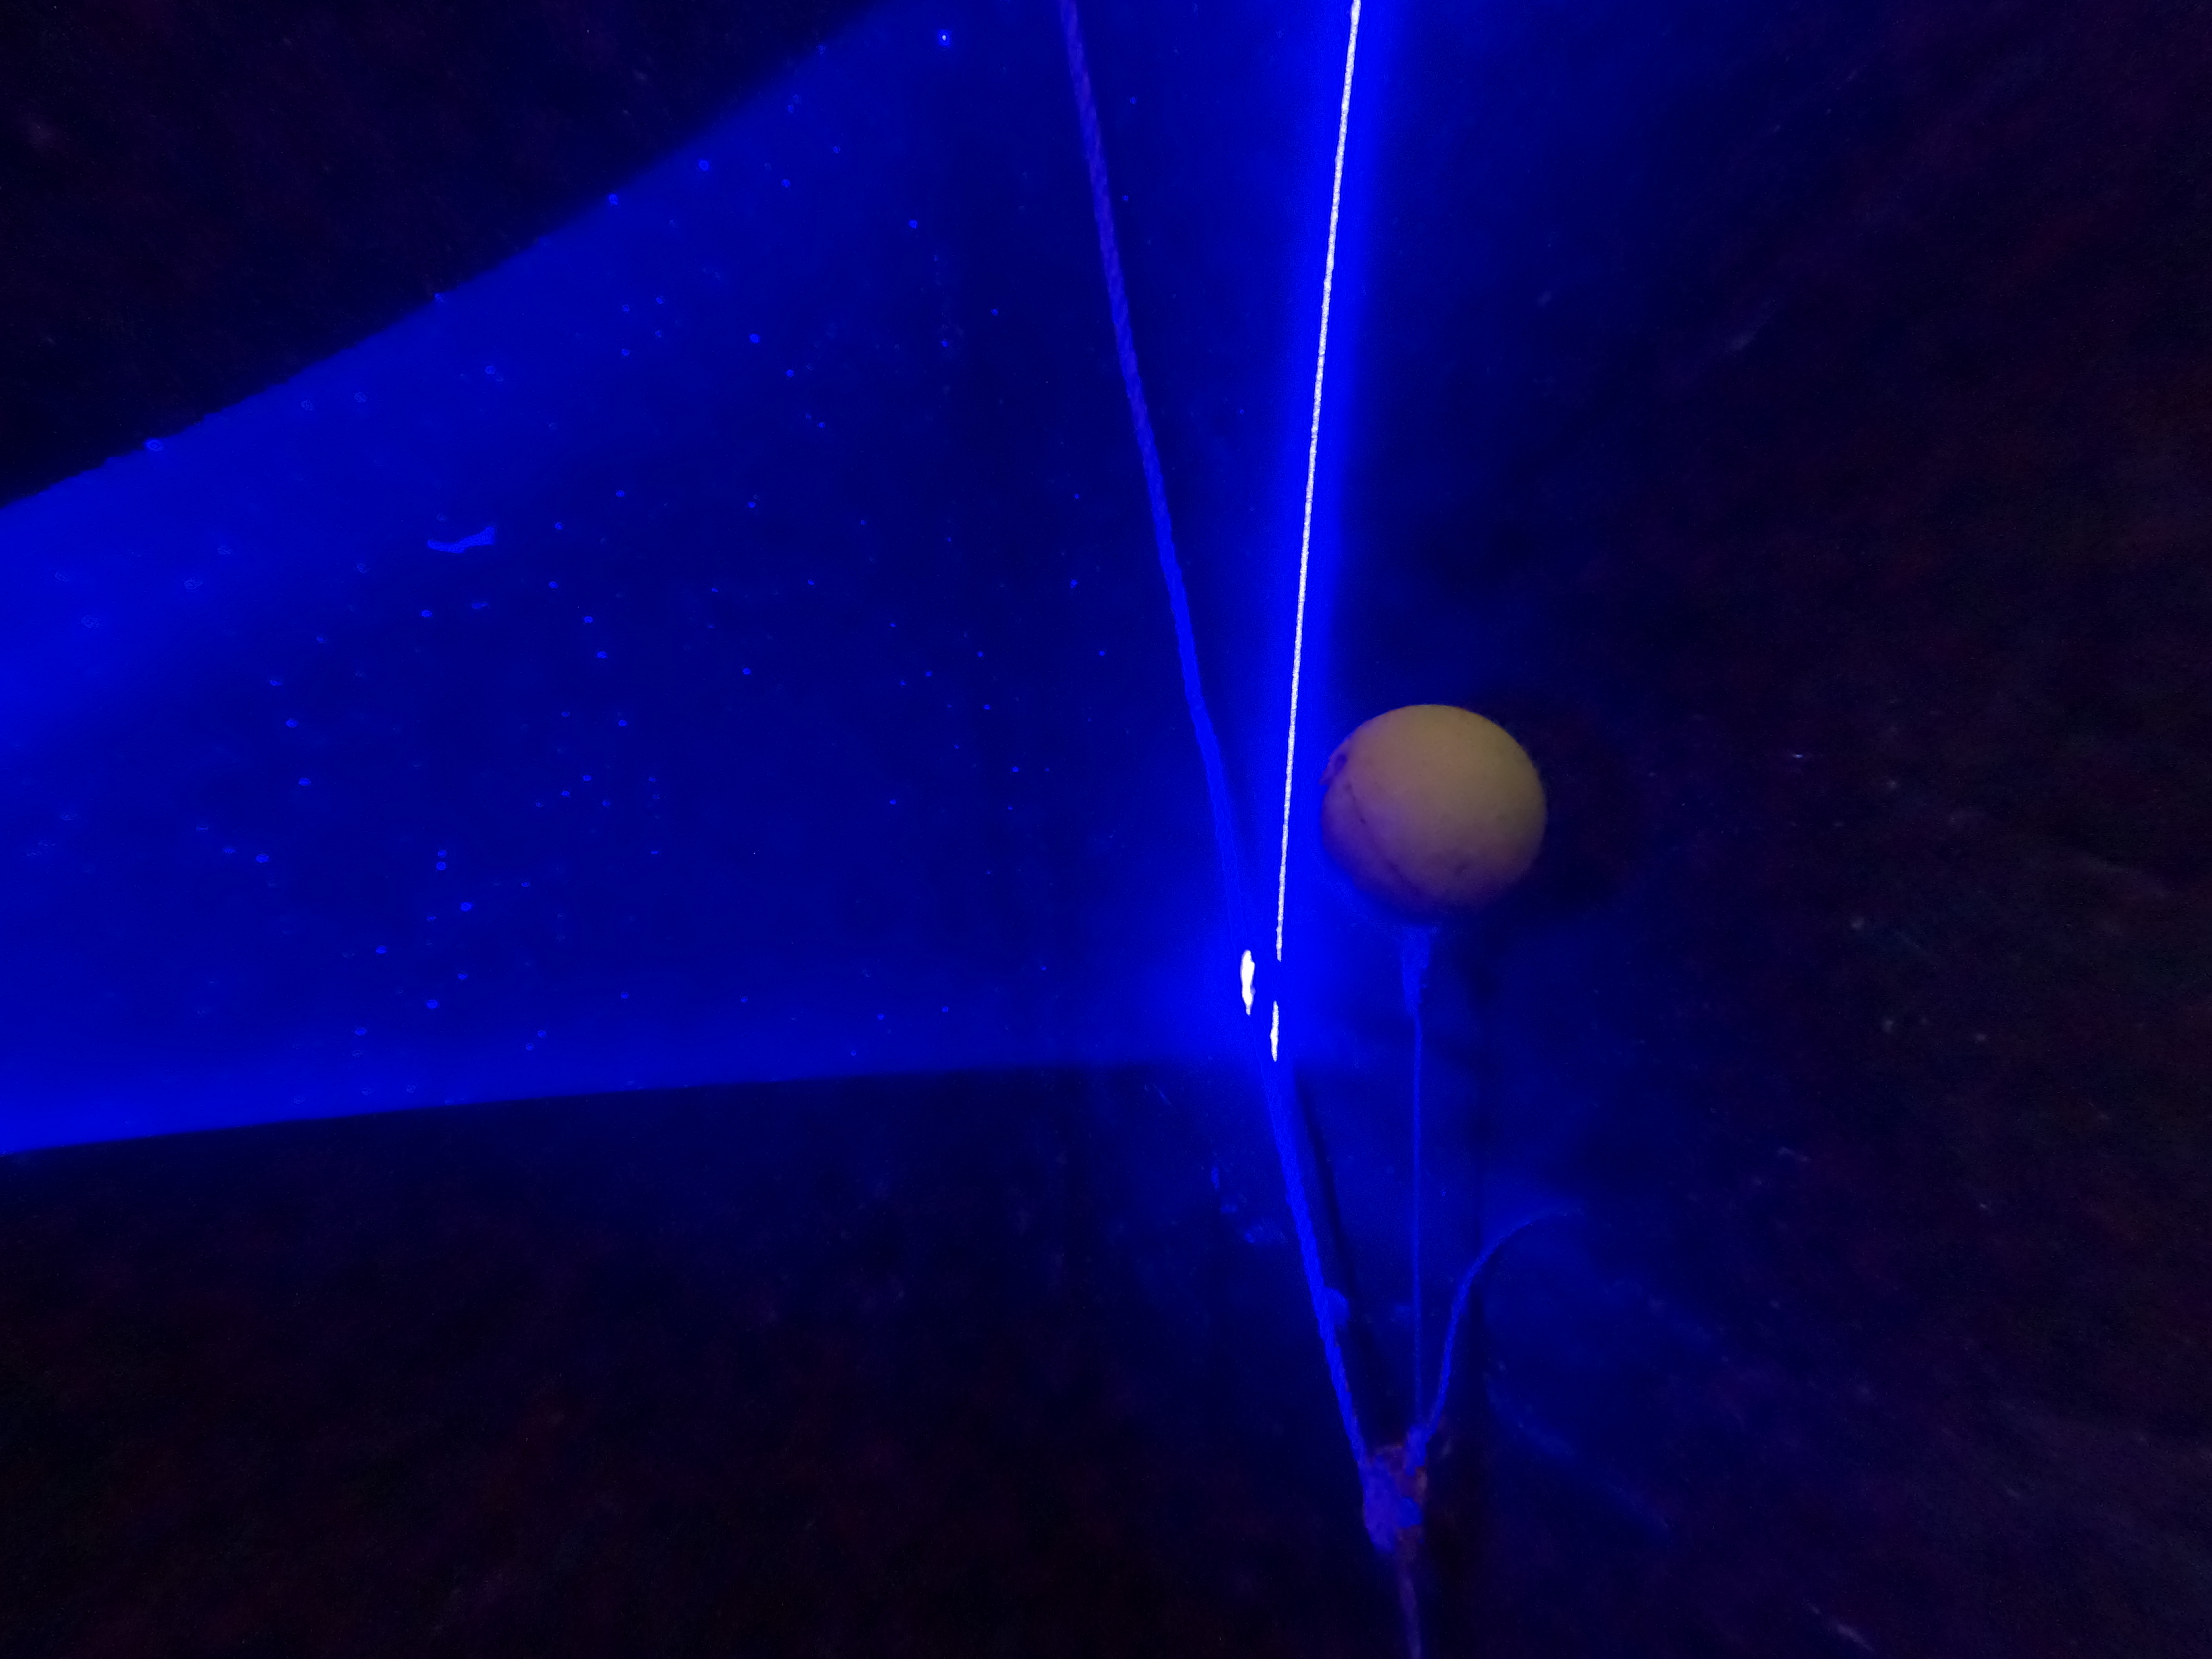

Supplement: Supplementary file 3576 [file G0030800.pdf › Level_1_1/G0030800.pdf]

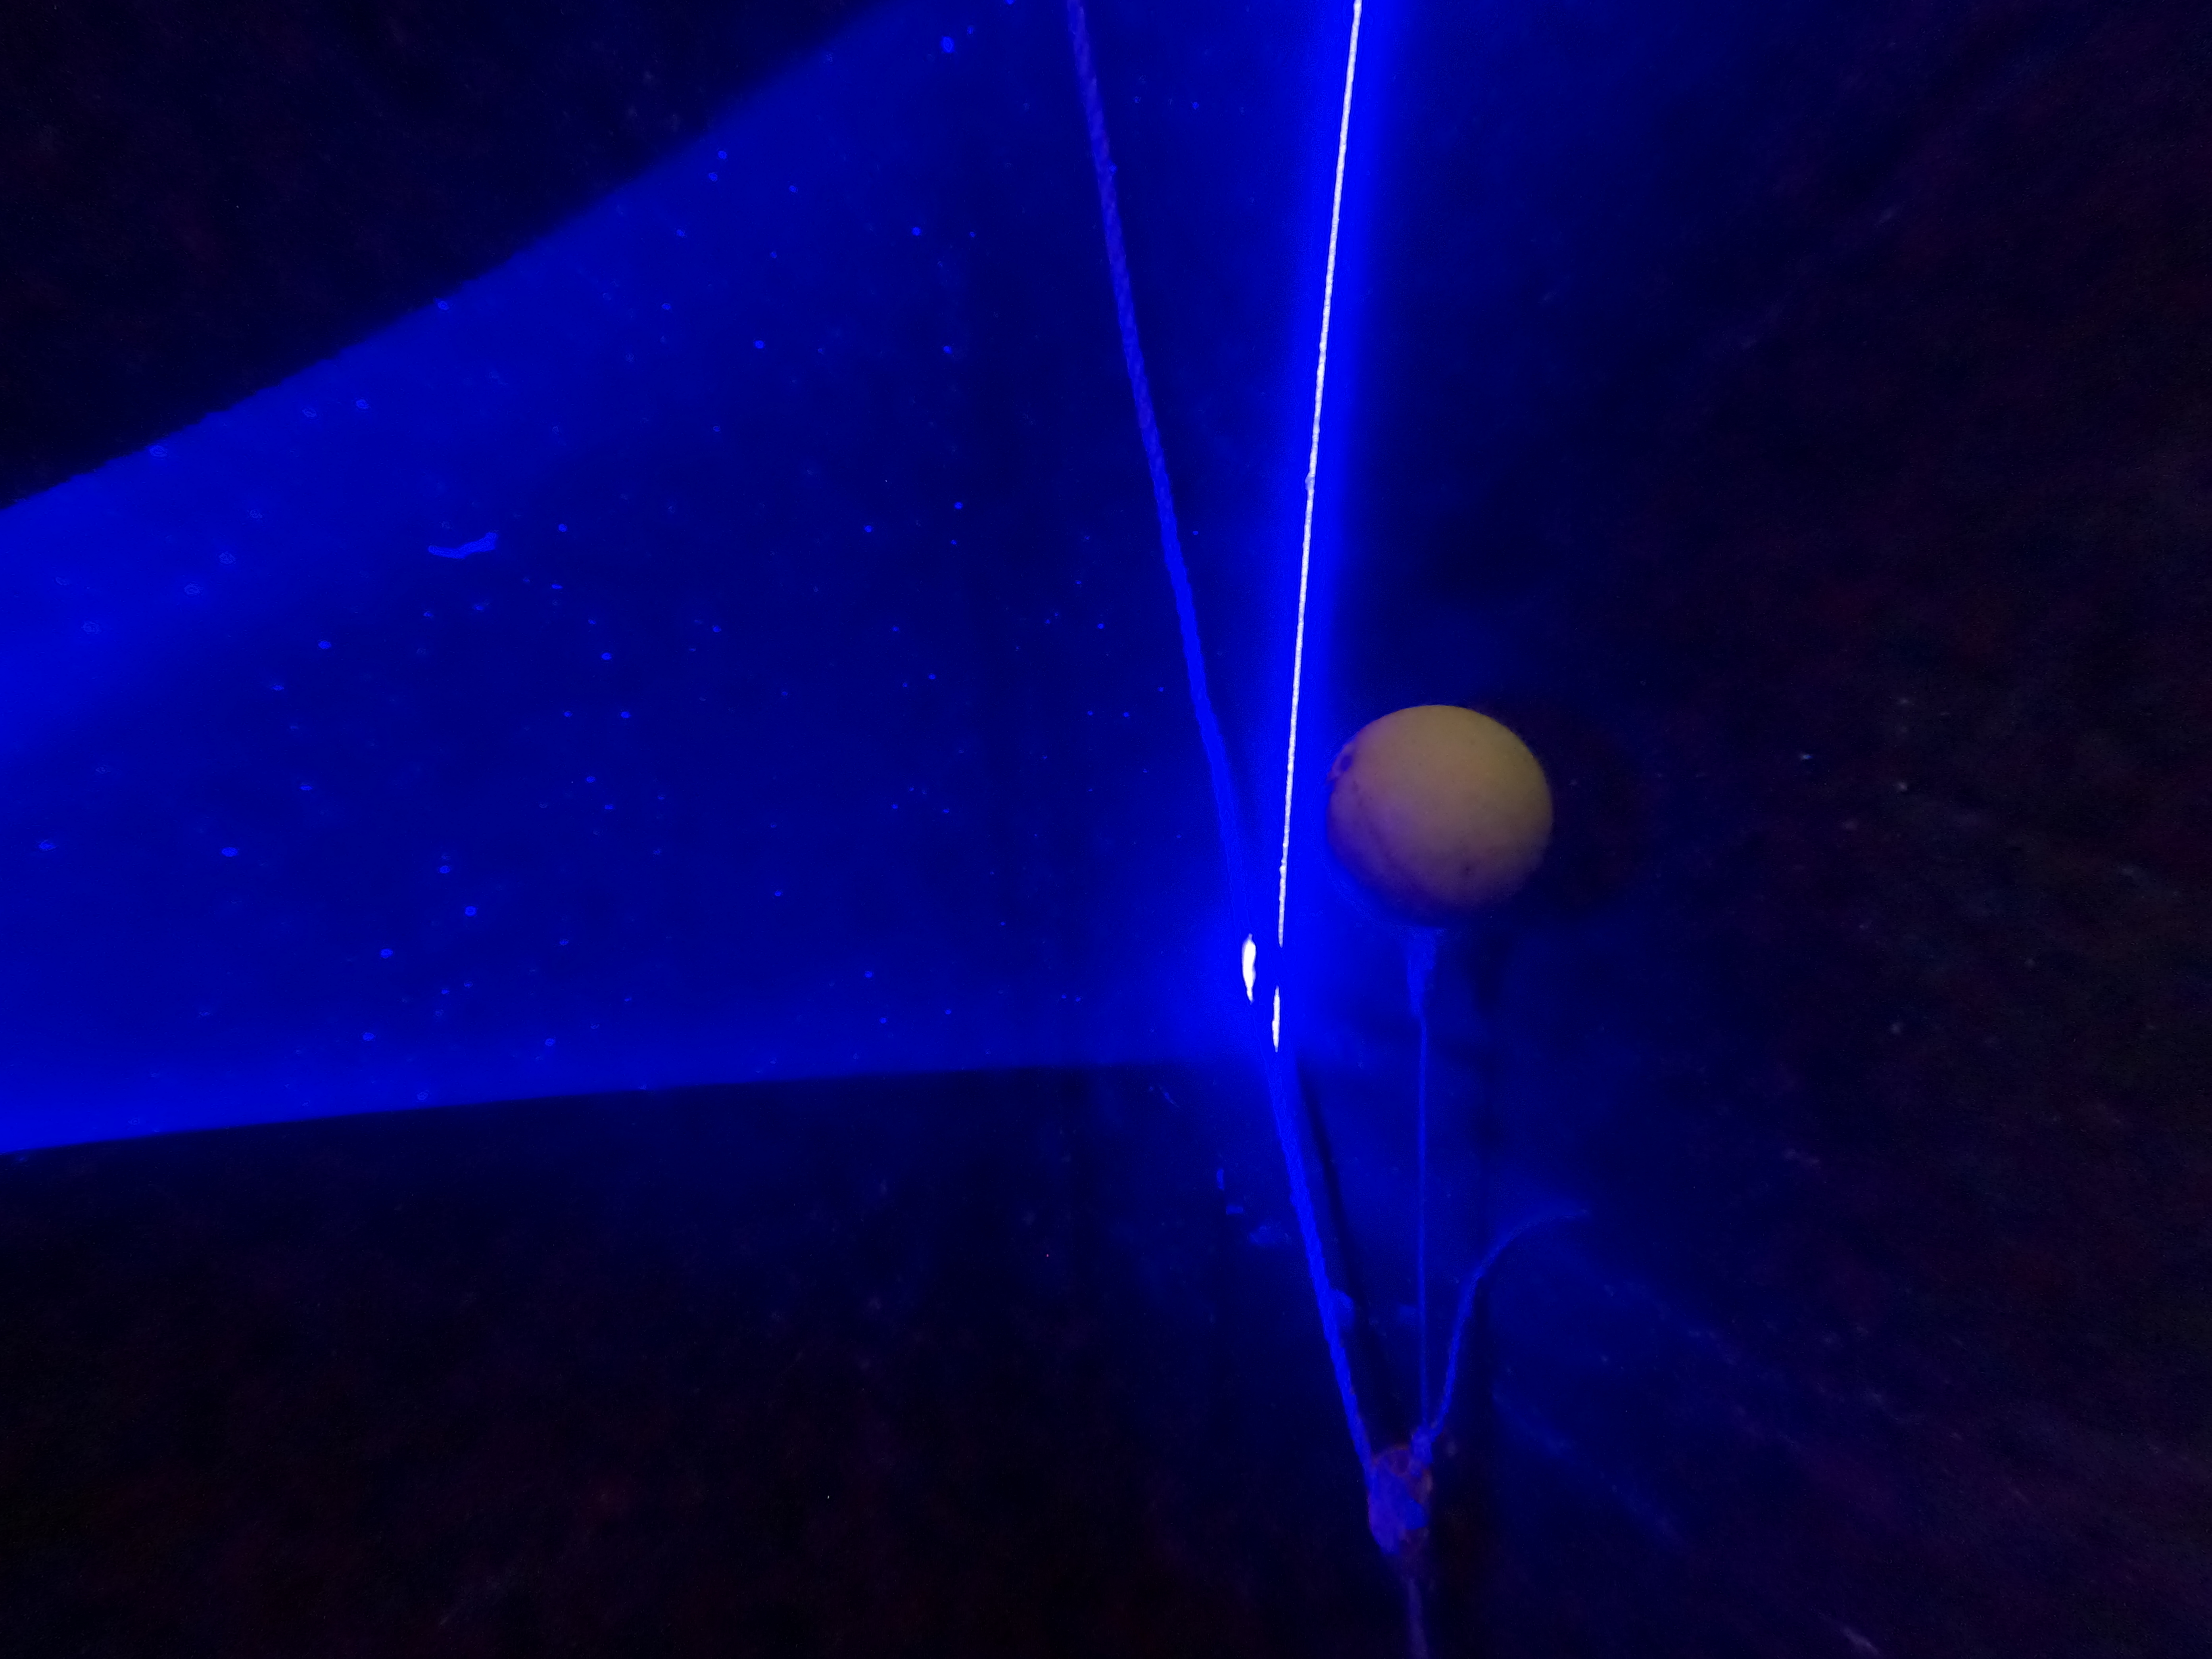

Supplement: Supplementary file 3577 [file G0030801.pdf › Level_1_1/G0030801.pdf]

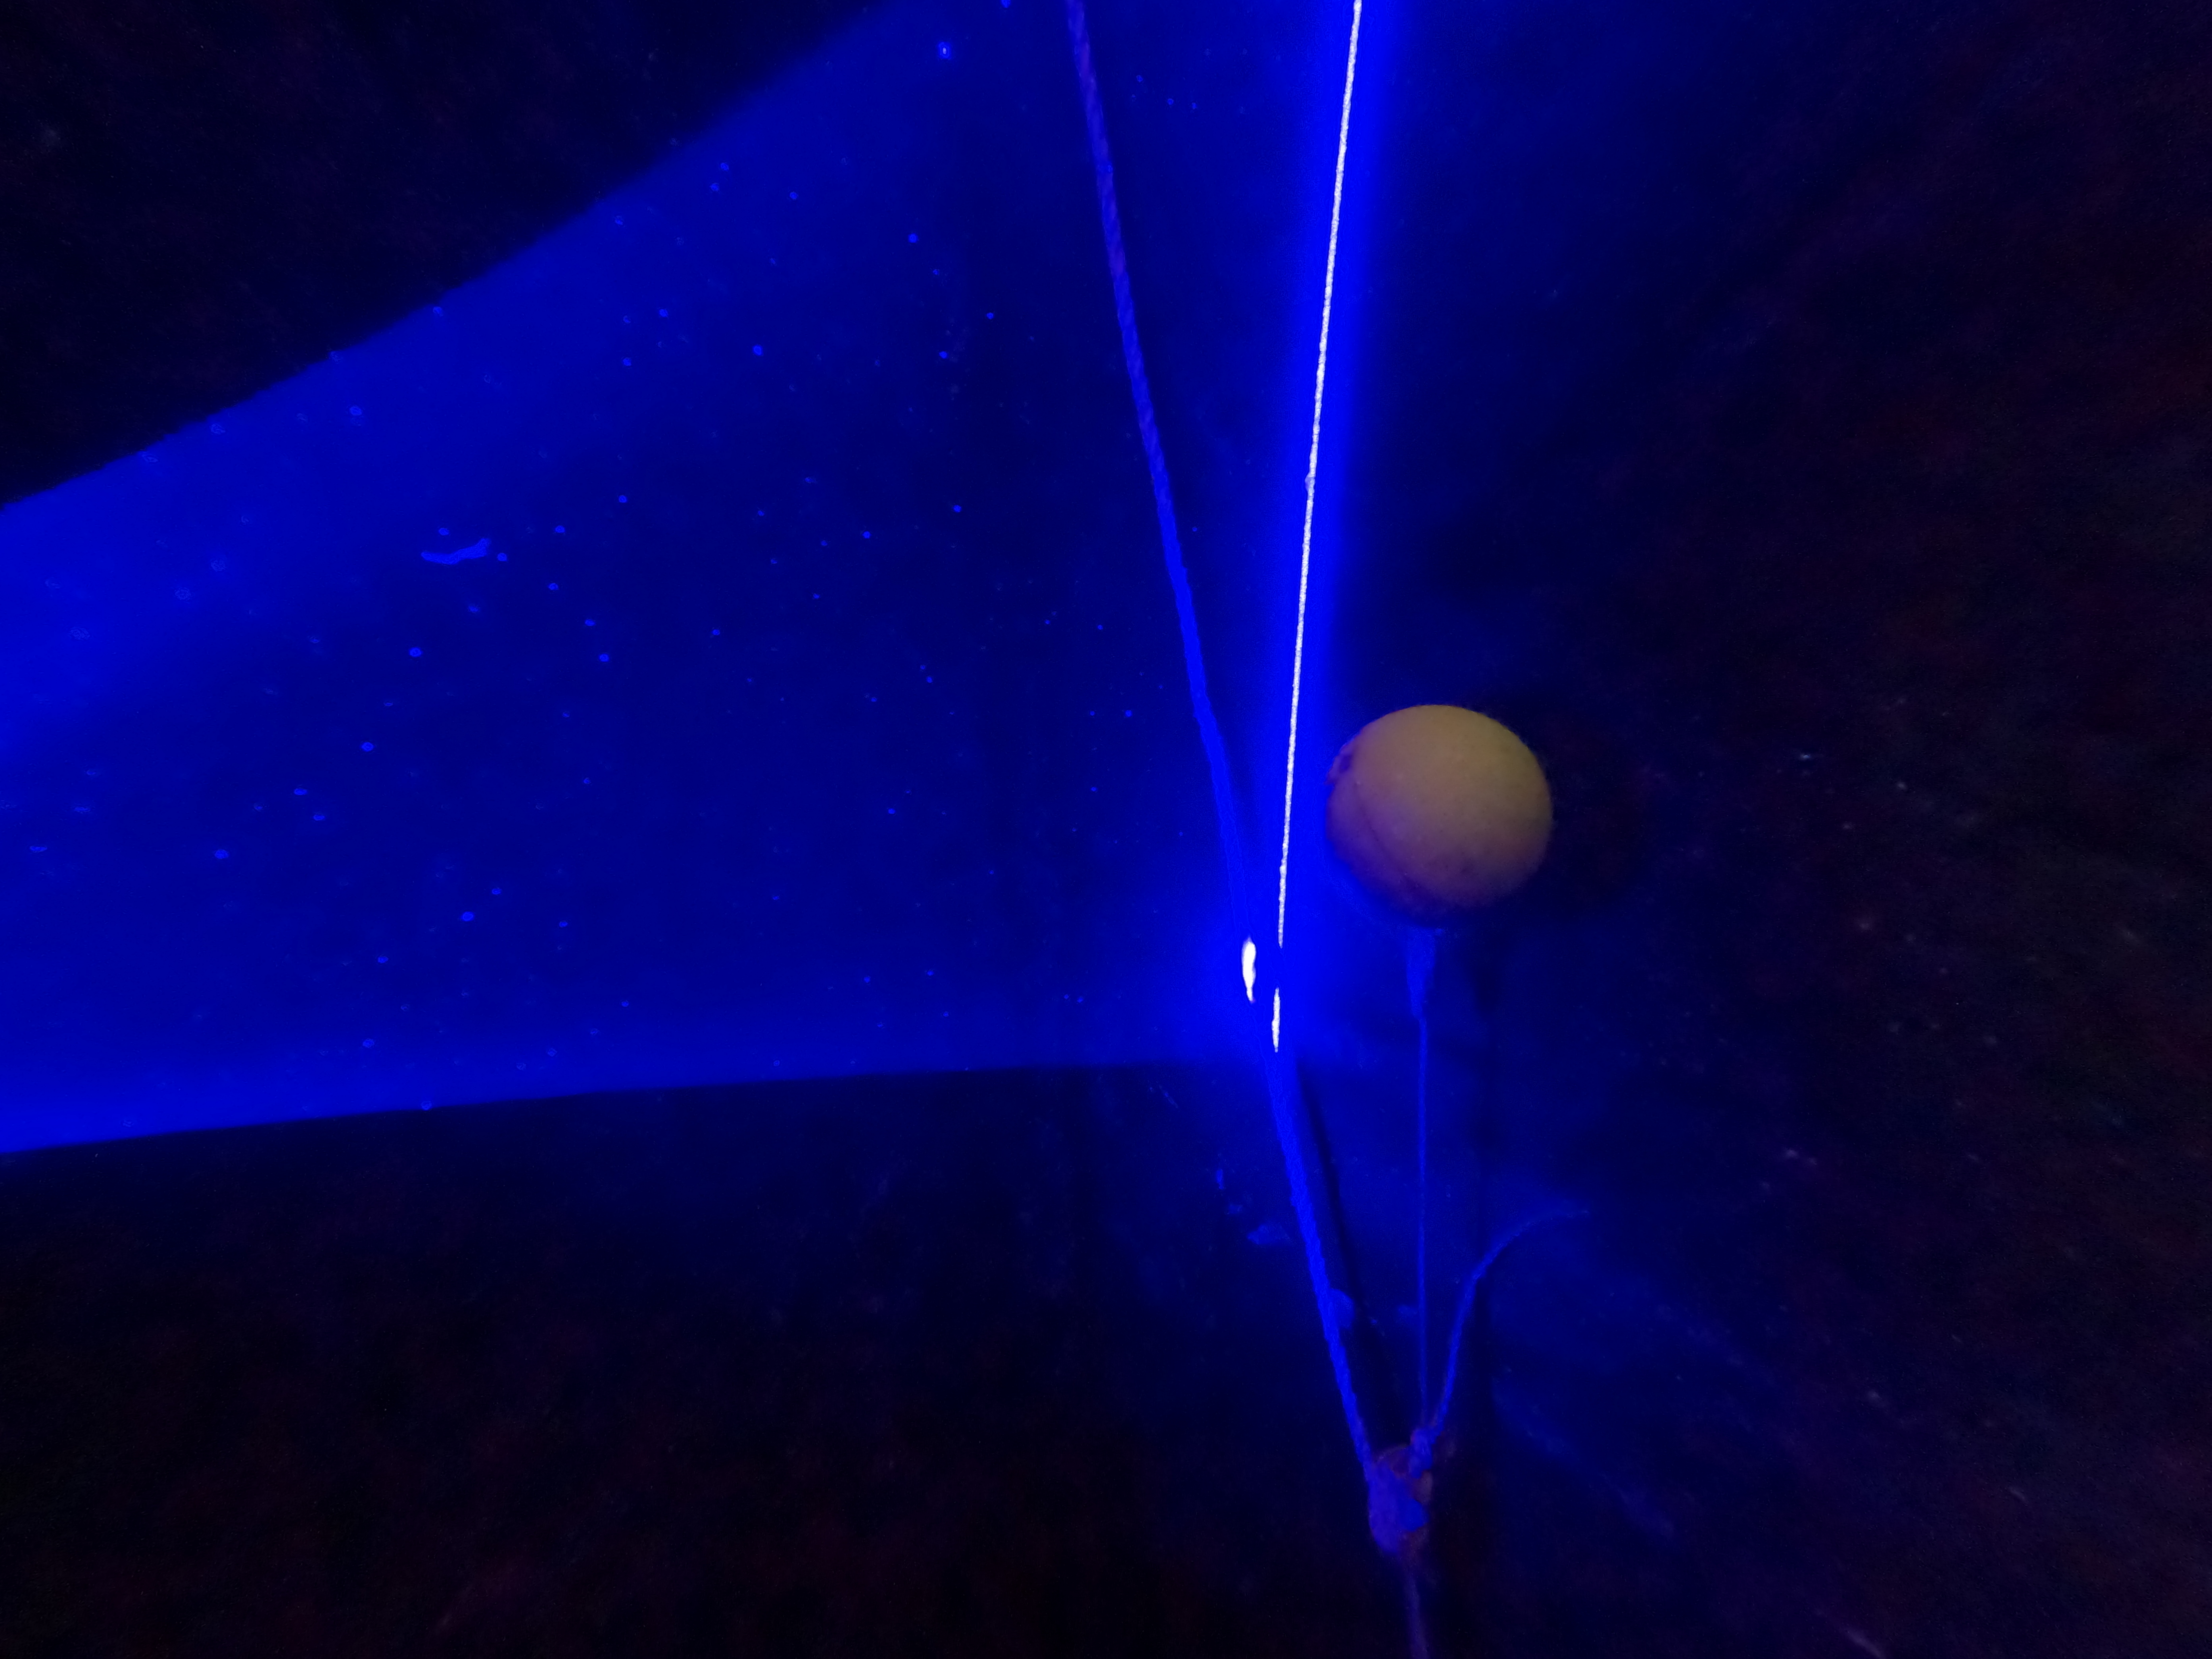

Supplement: Supplementary file 3578 [file G0030802.pdf › Level_1_1/G0030802.pdf]

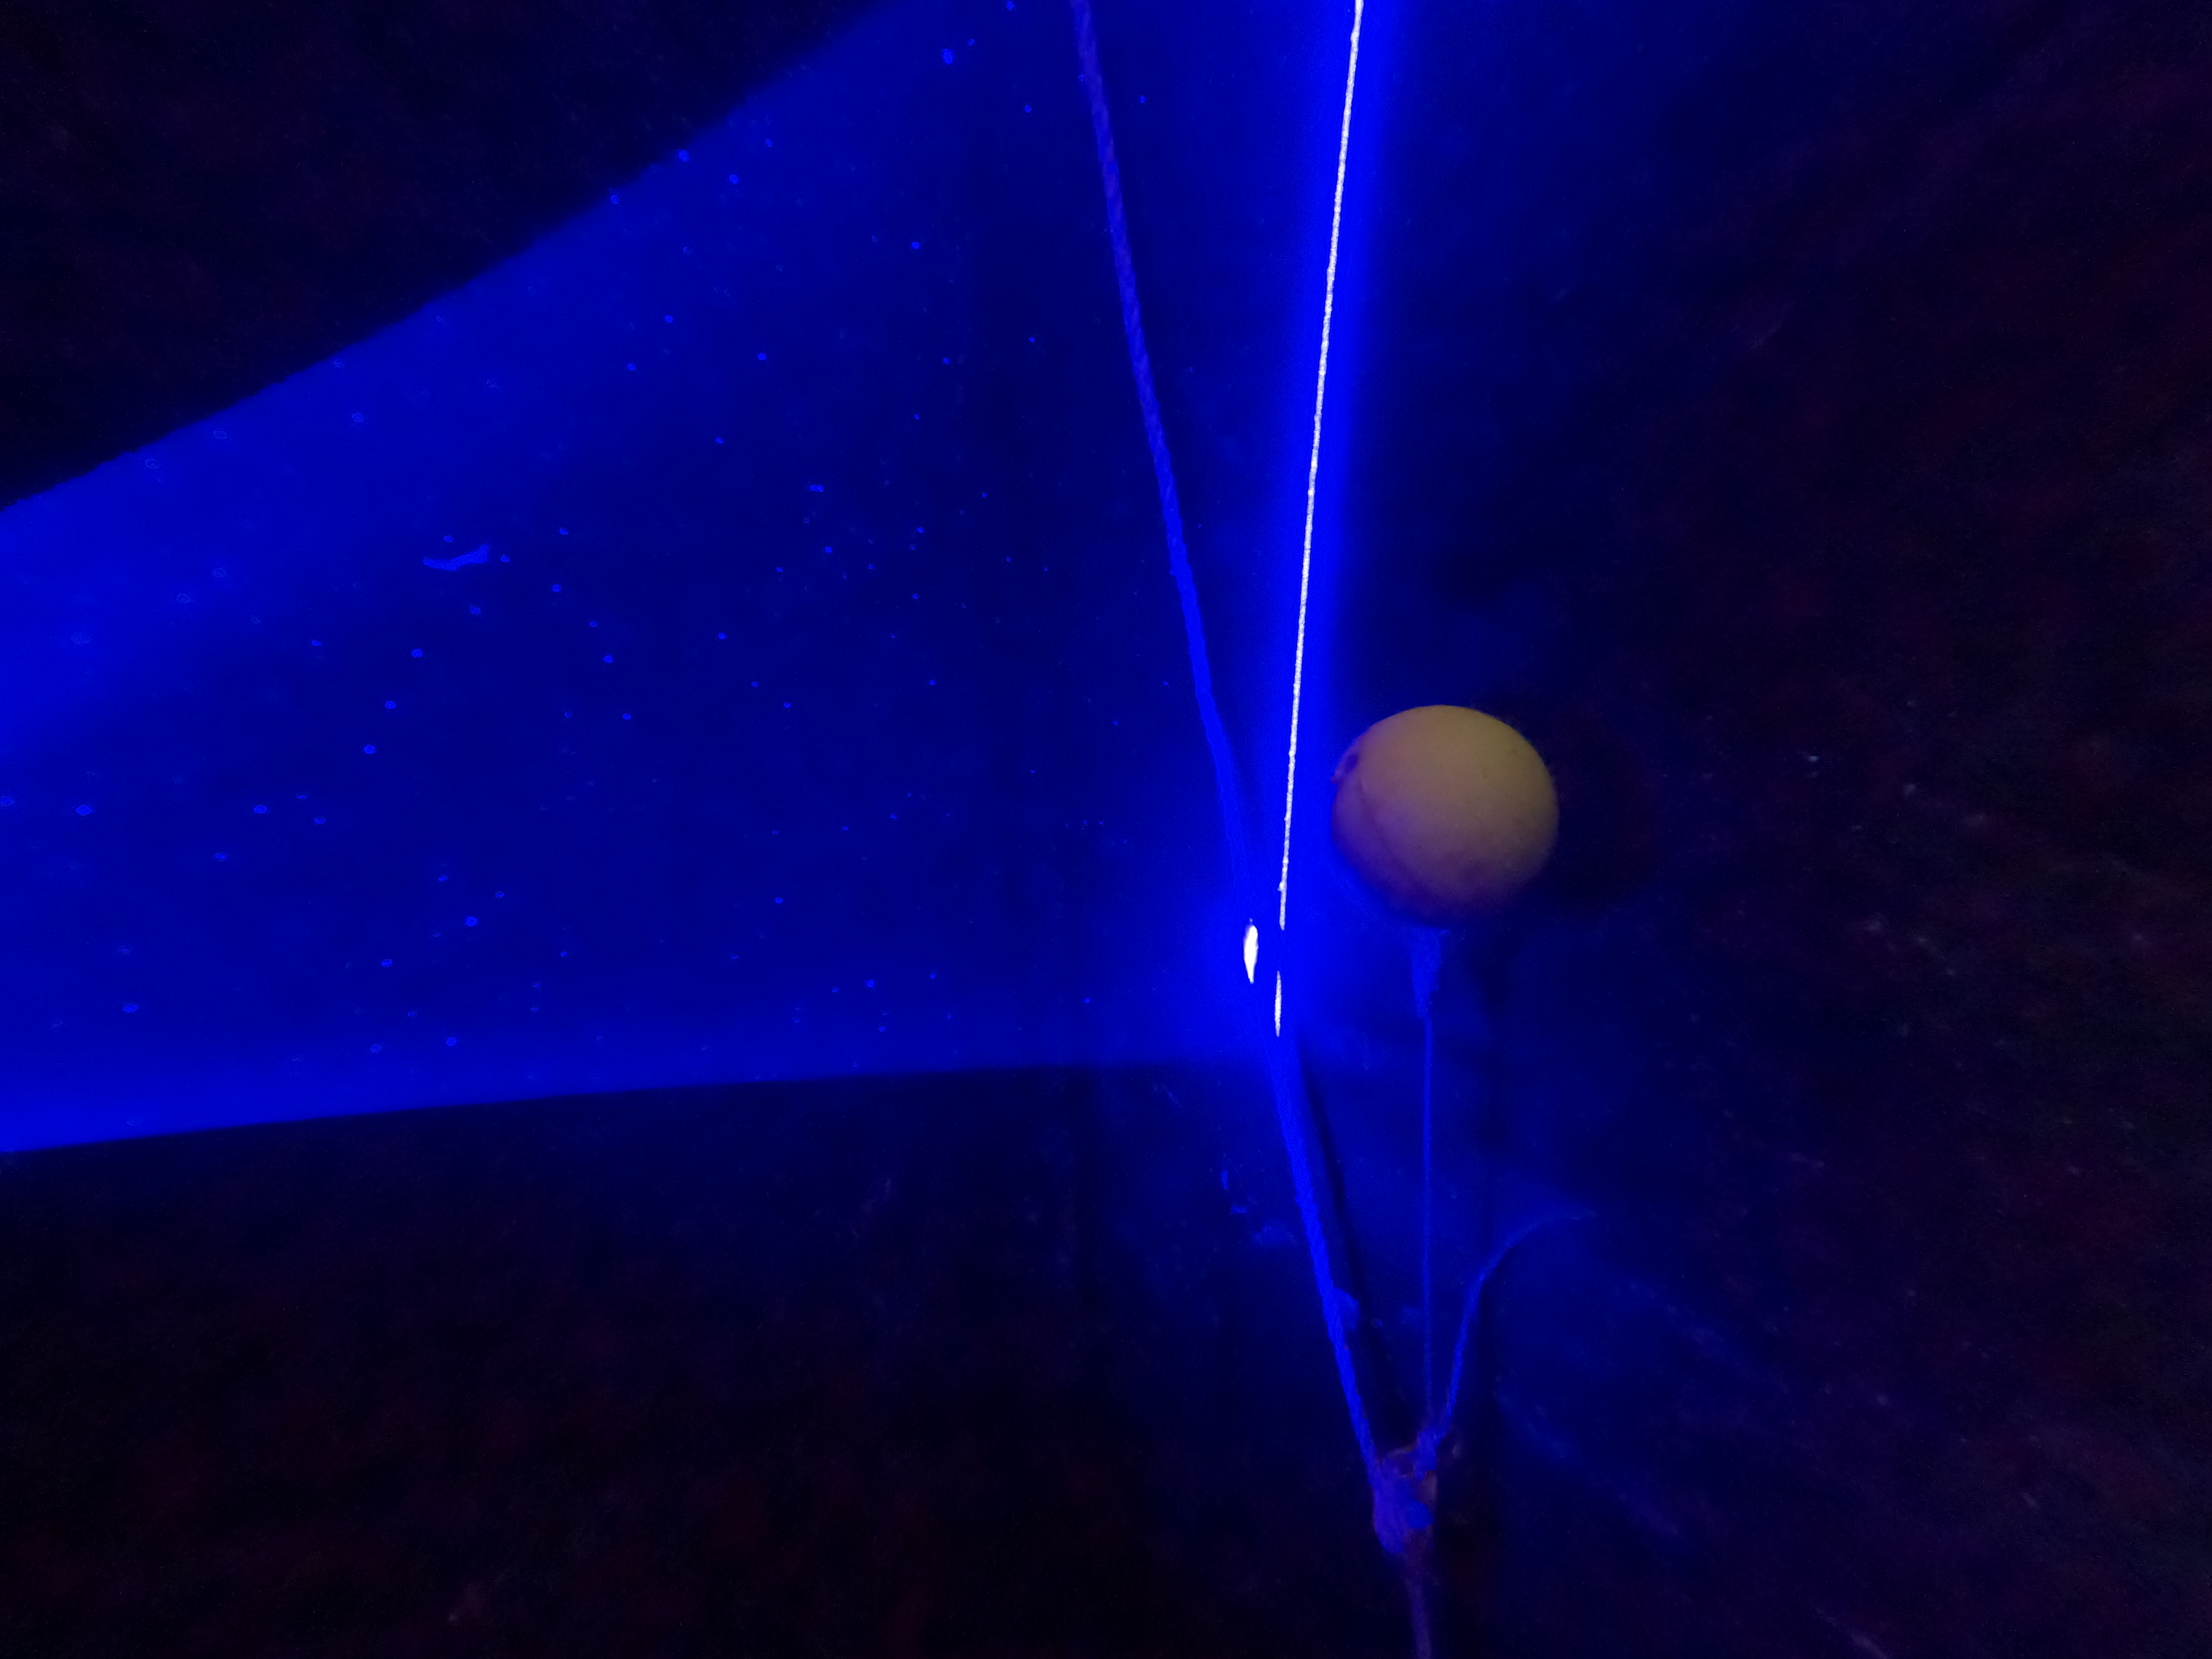

Supplement: Supplementary file 3579 [file G0030803.pdf › Level_1_1/G0030803.pdf]

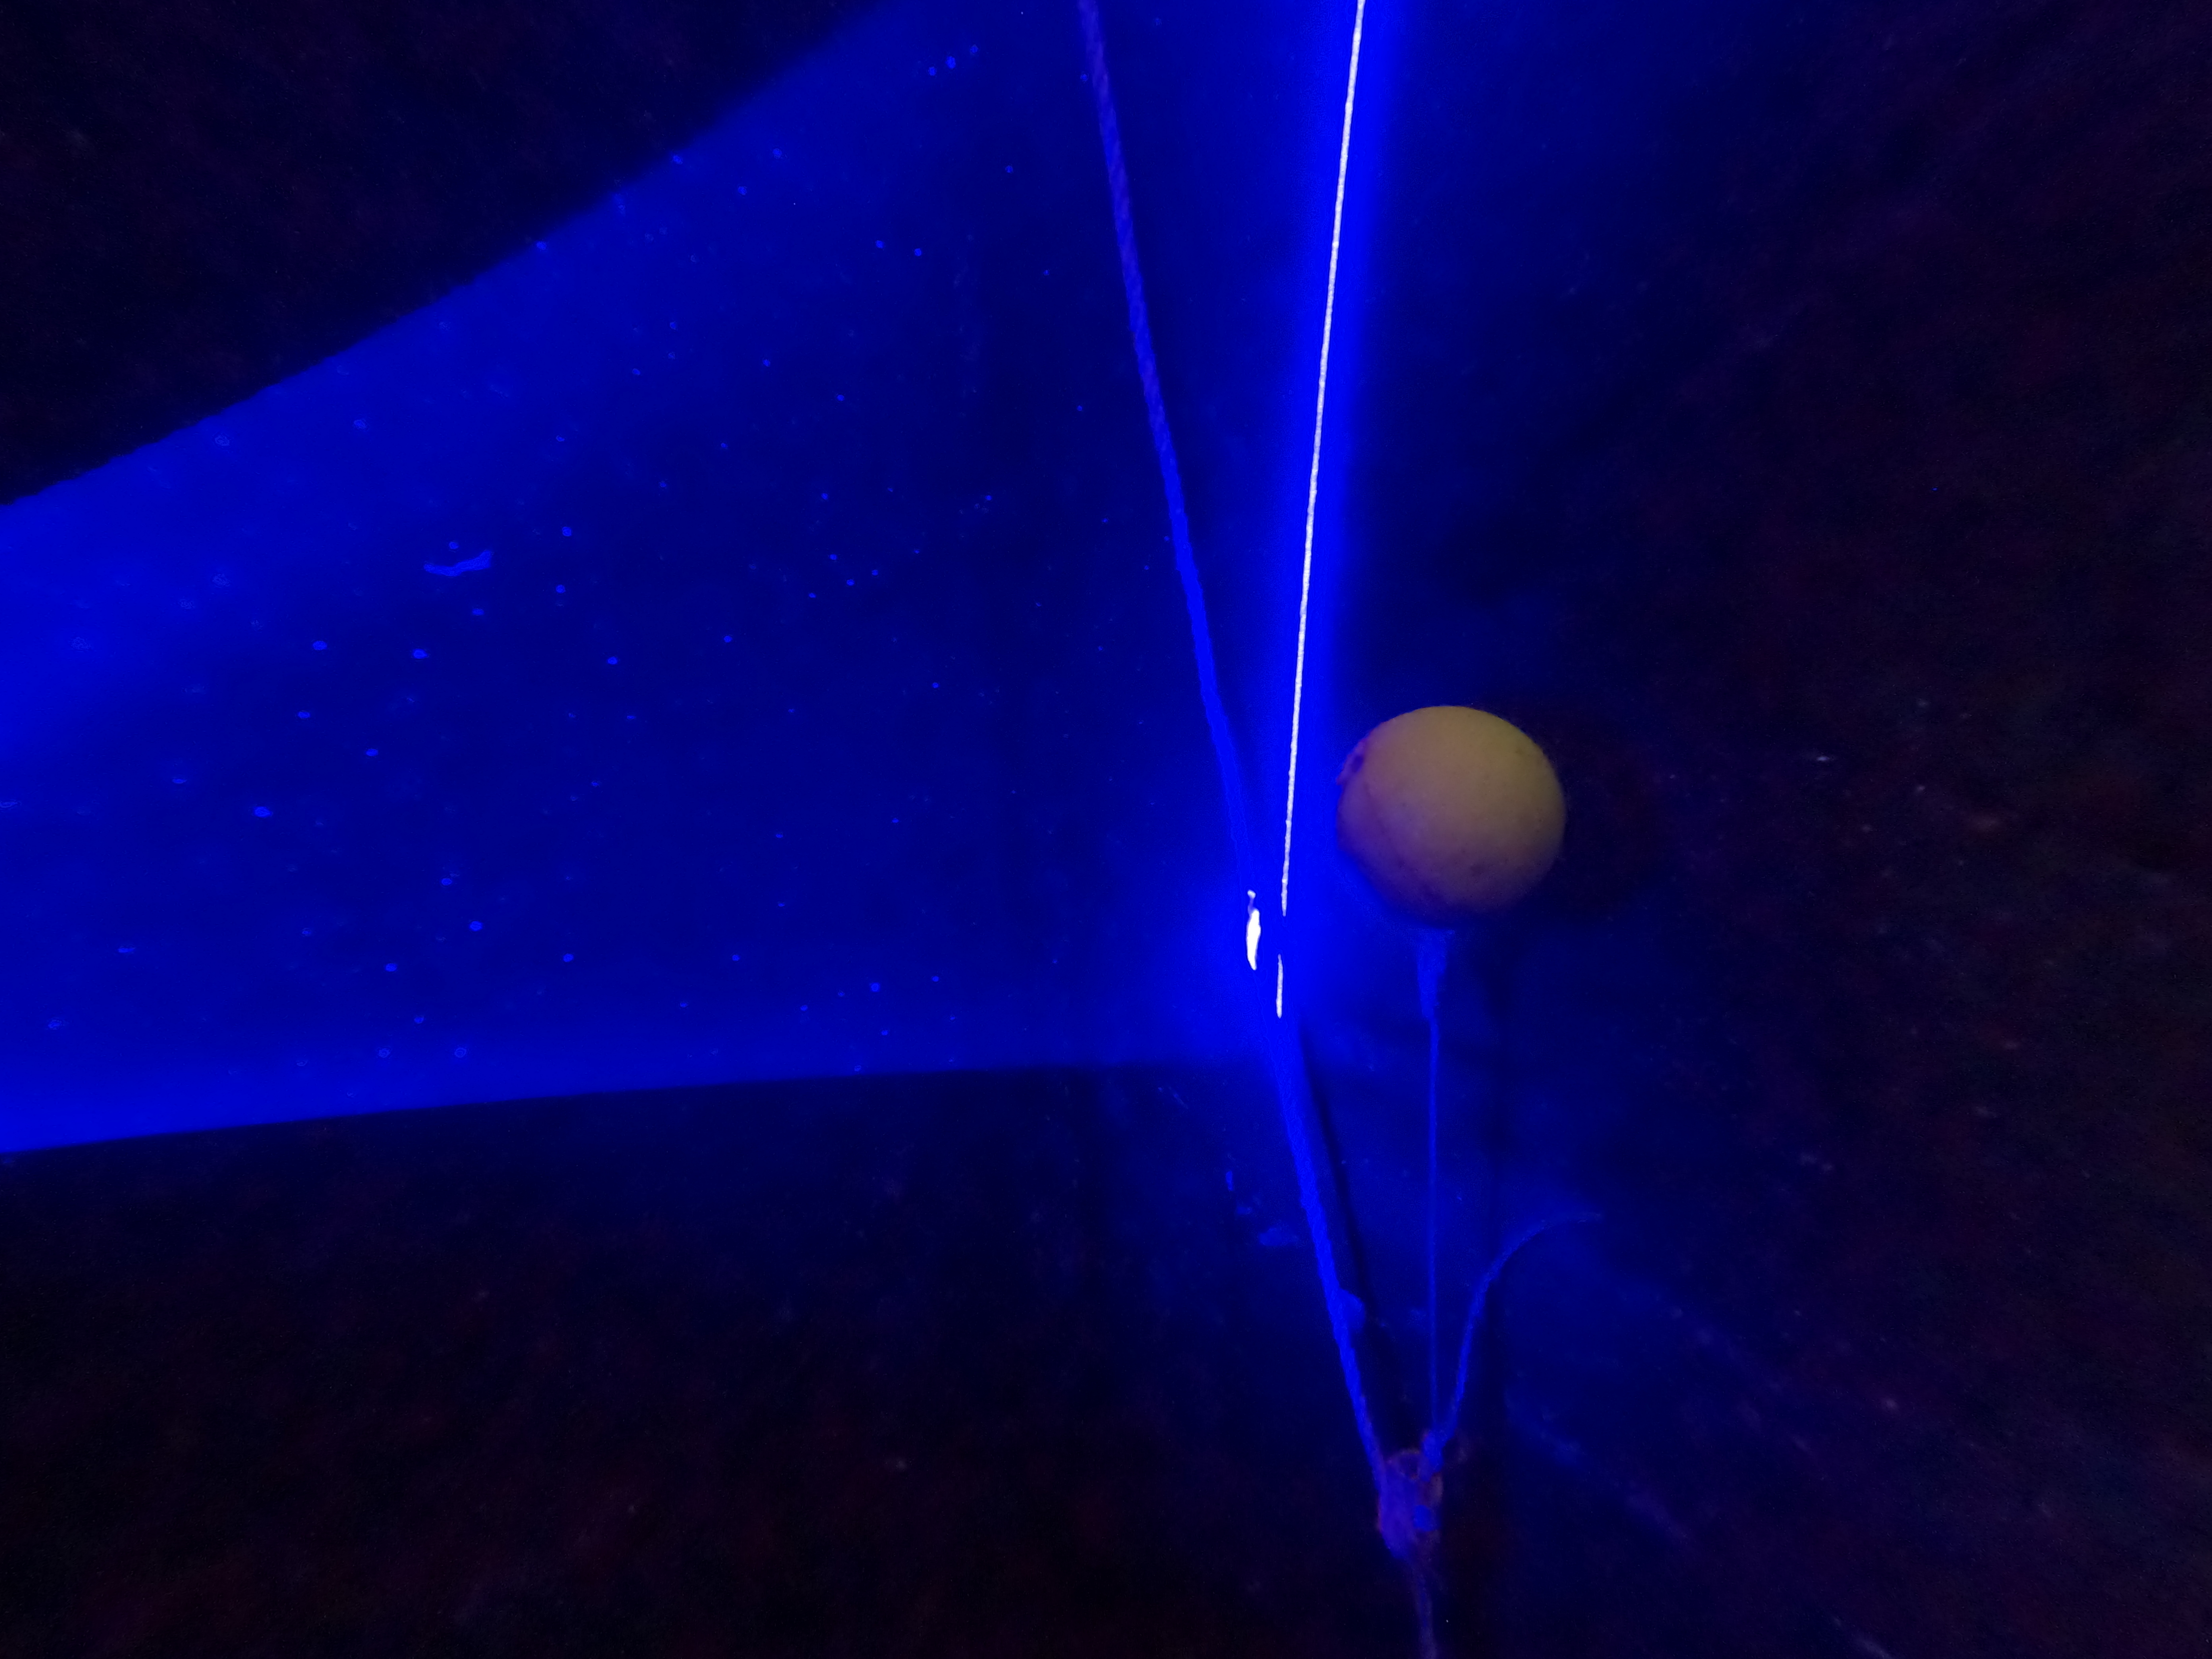

Supplement: Supplementary file 3580 [file G0030804.pdf › Level_1_1/G0030804.pdf]

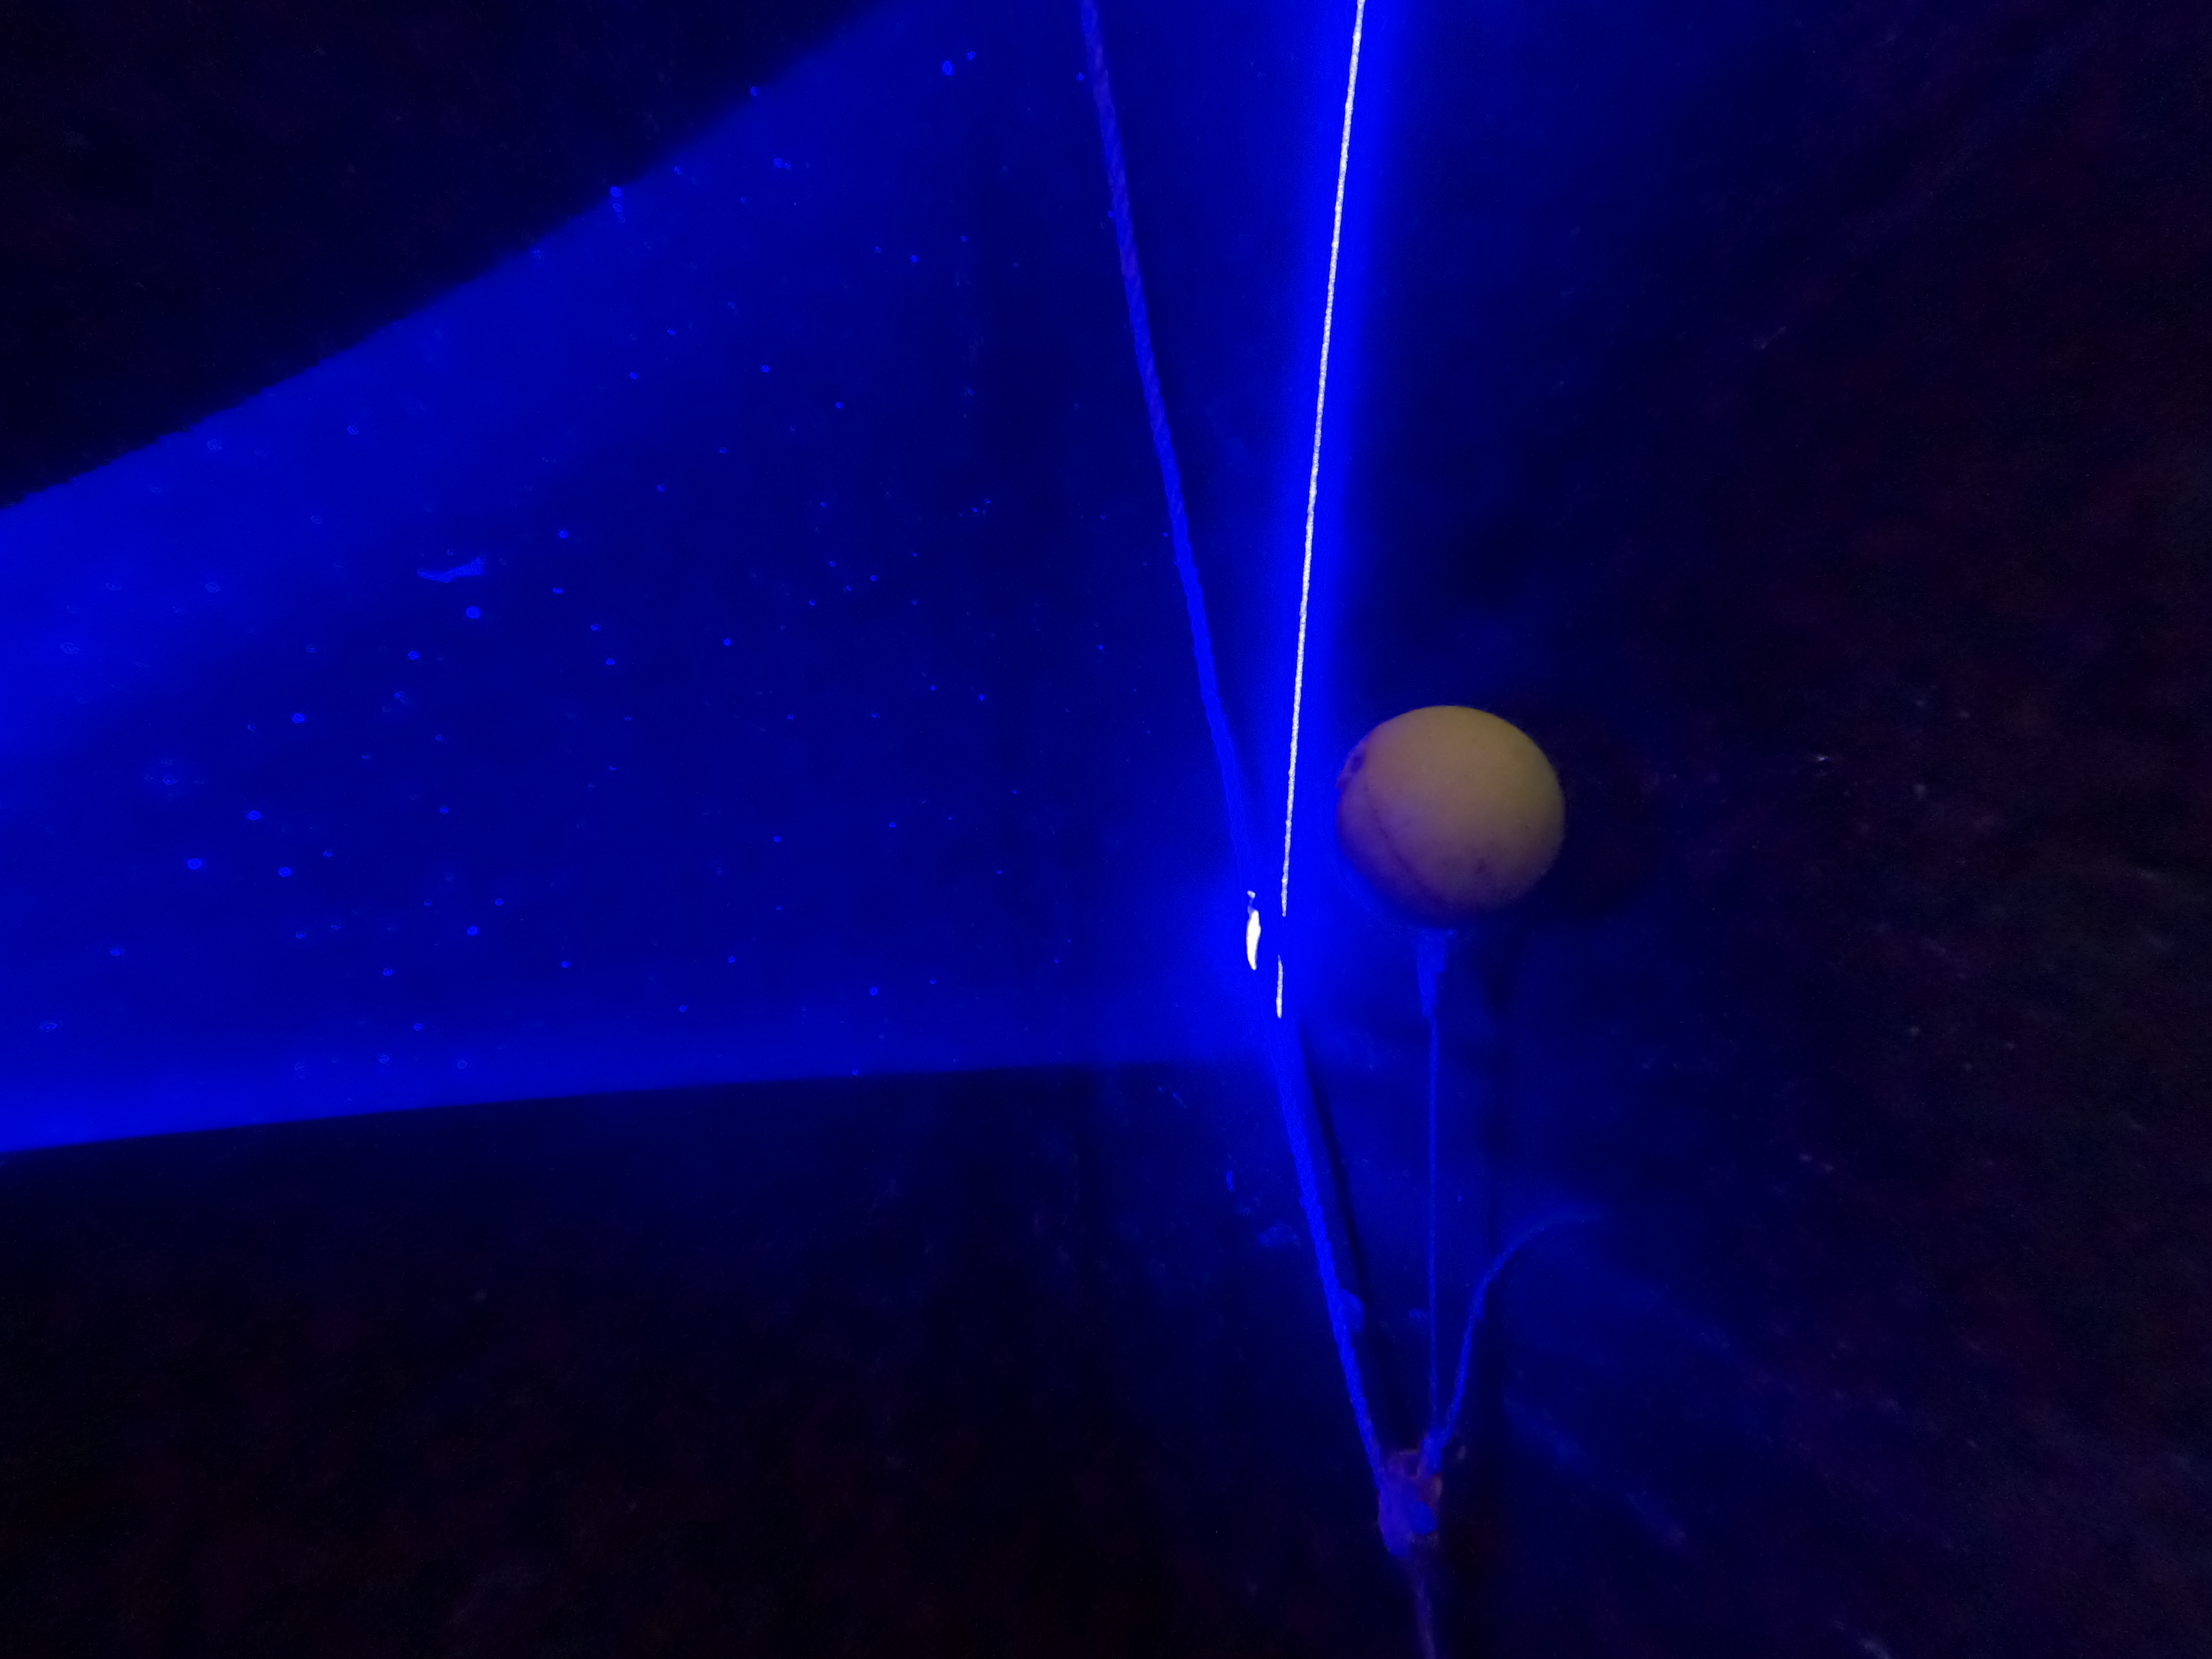

Supplement: Supplementary file 3581 [file G0030805.pdf › Level_1_1/G0030805.pdf]

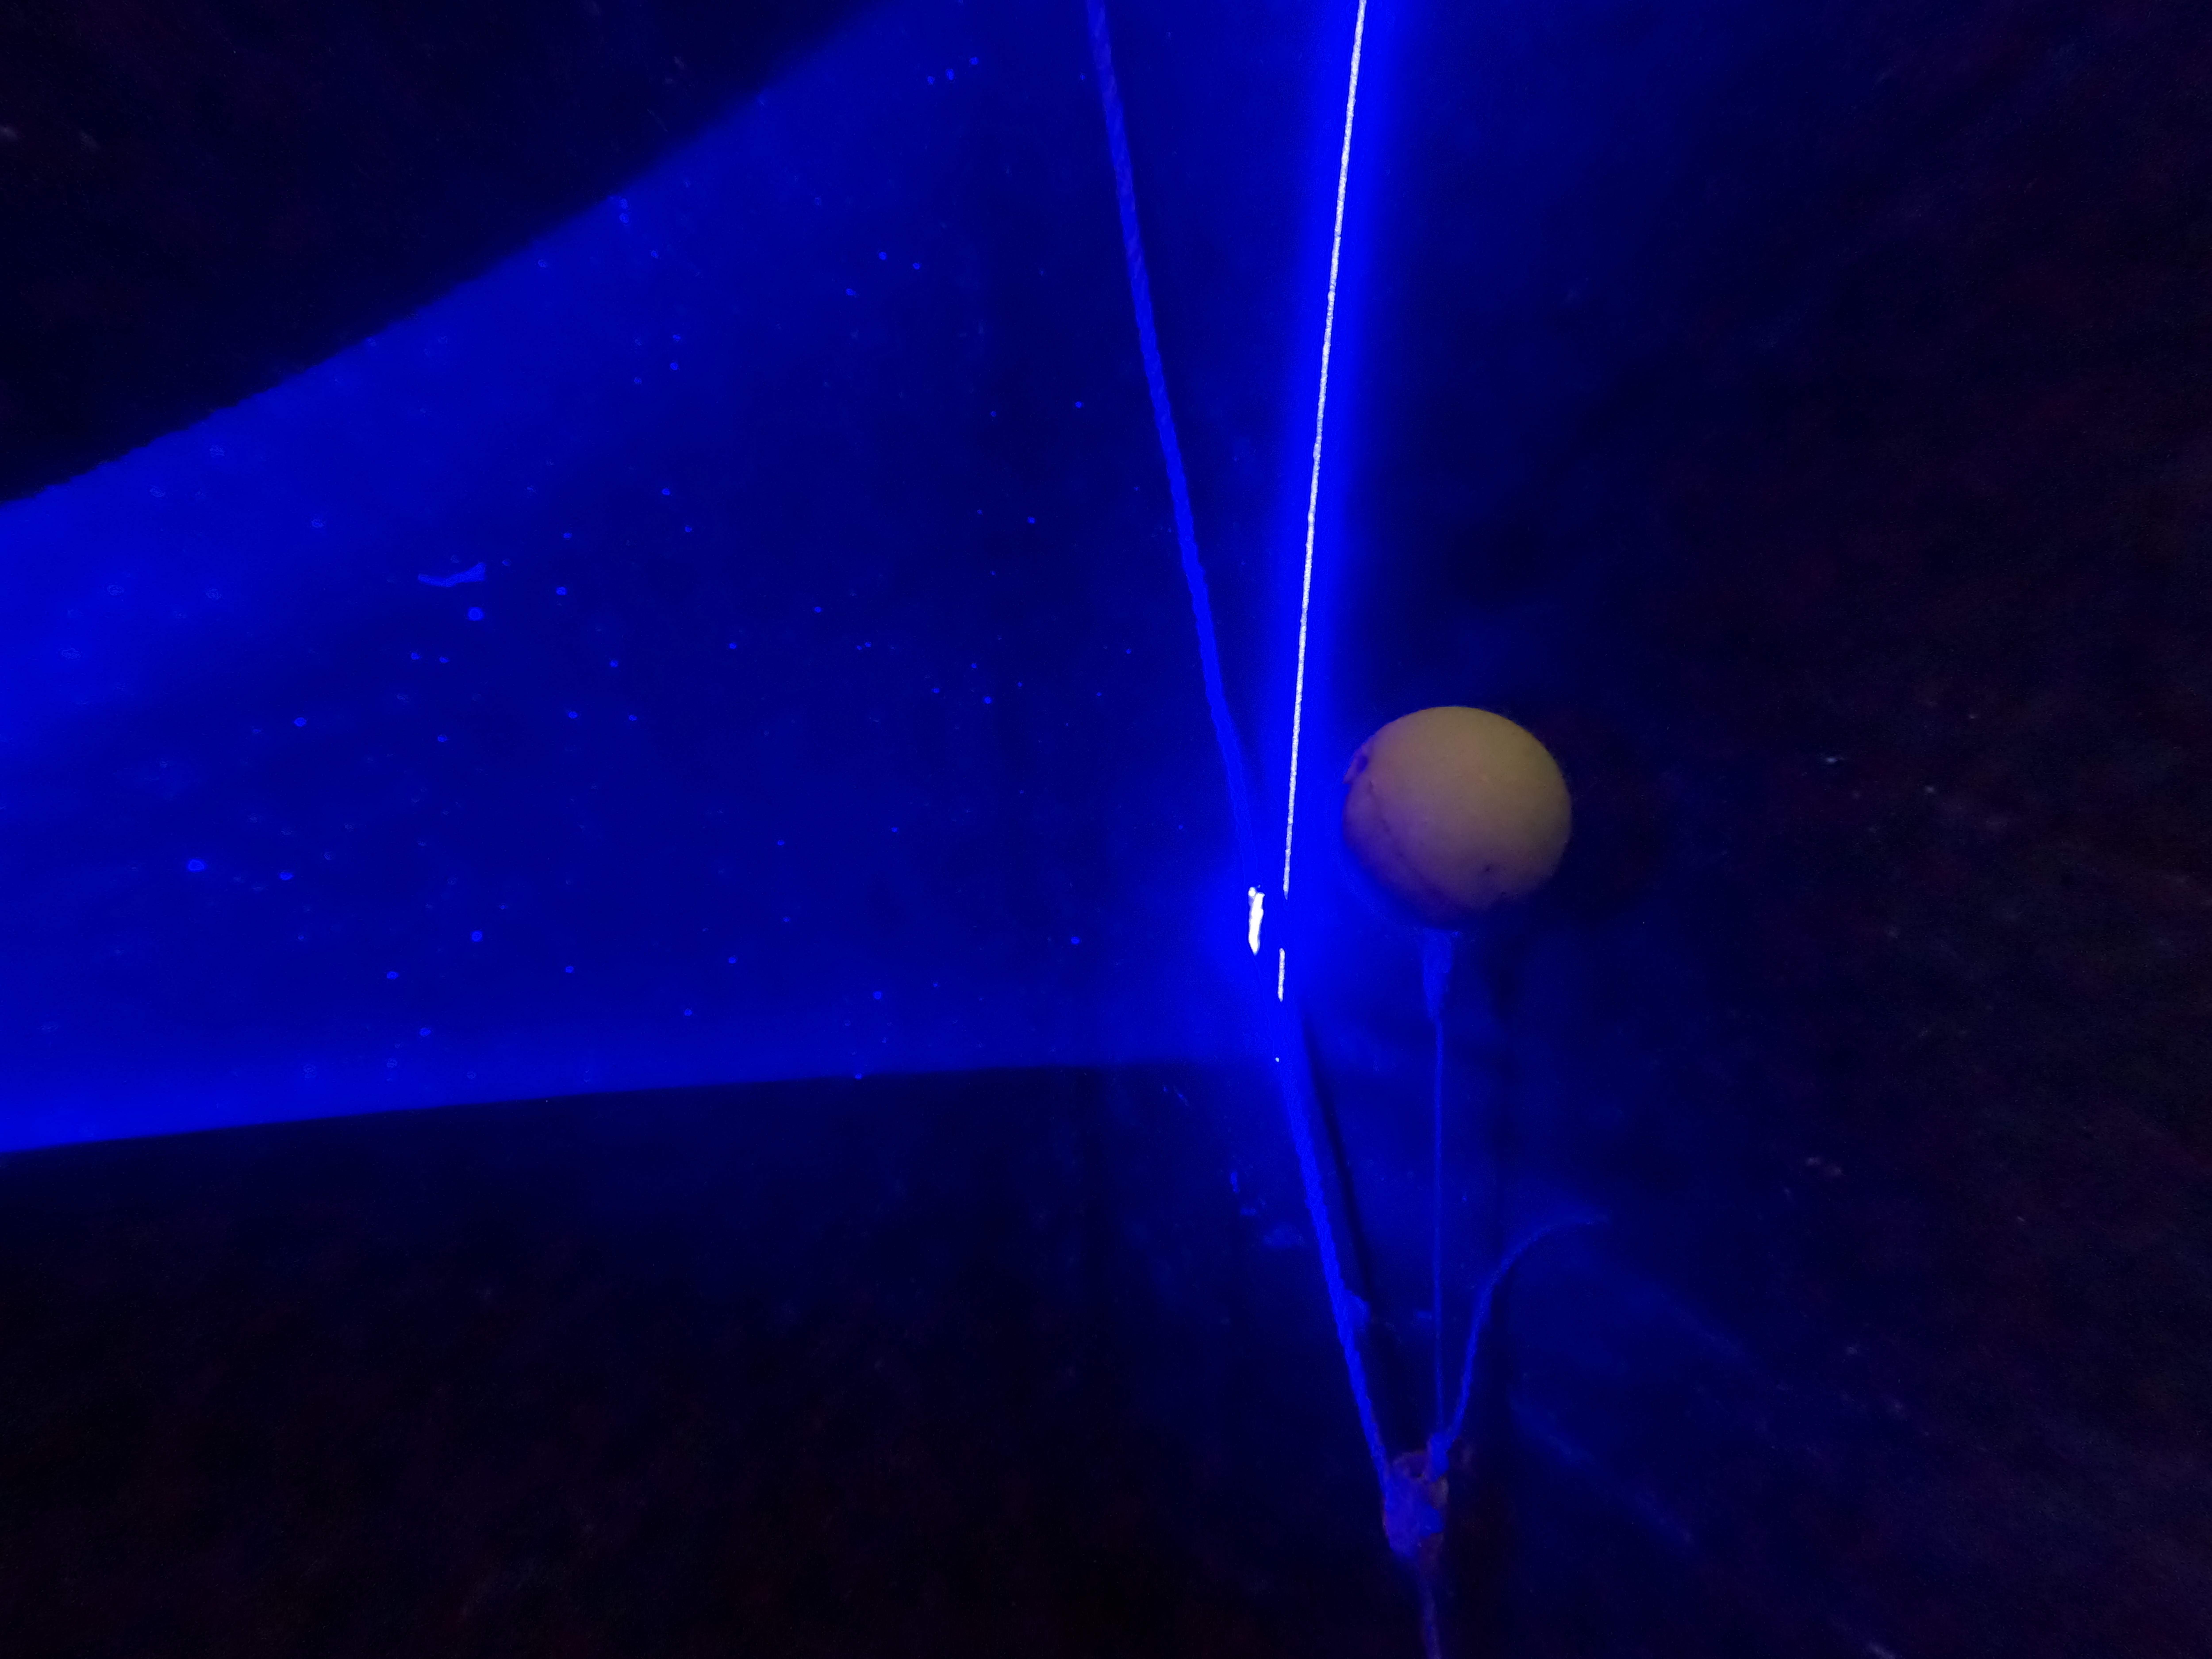

Supplement: Supplementary file 3582 [file G0030806.pdf › Level_1_1/G0030806.pdf]

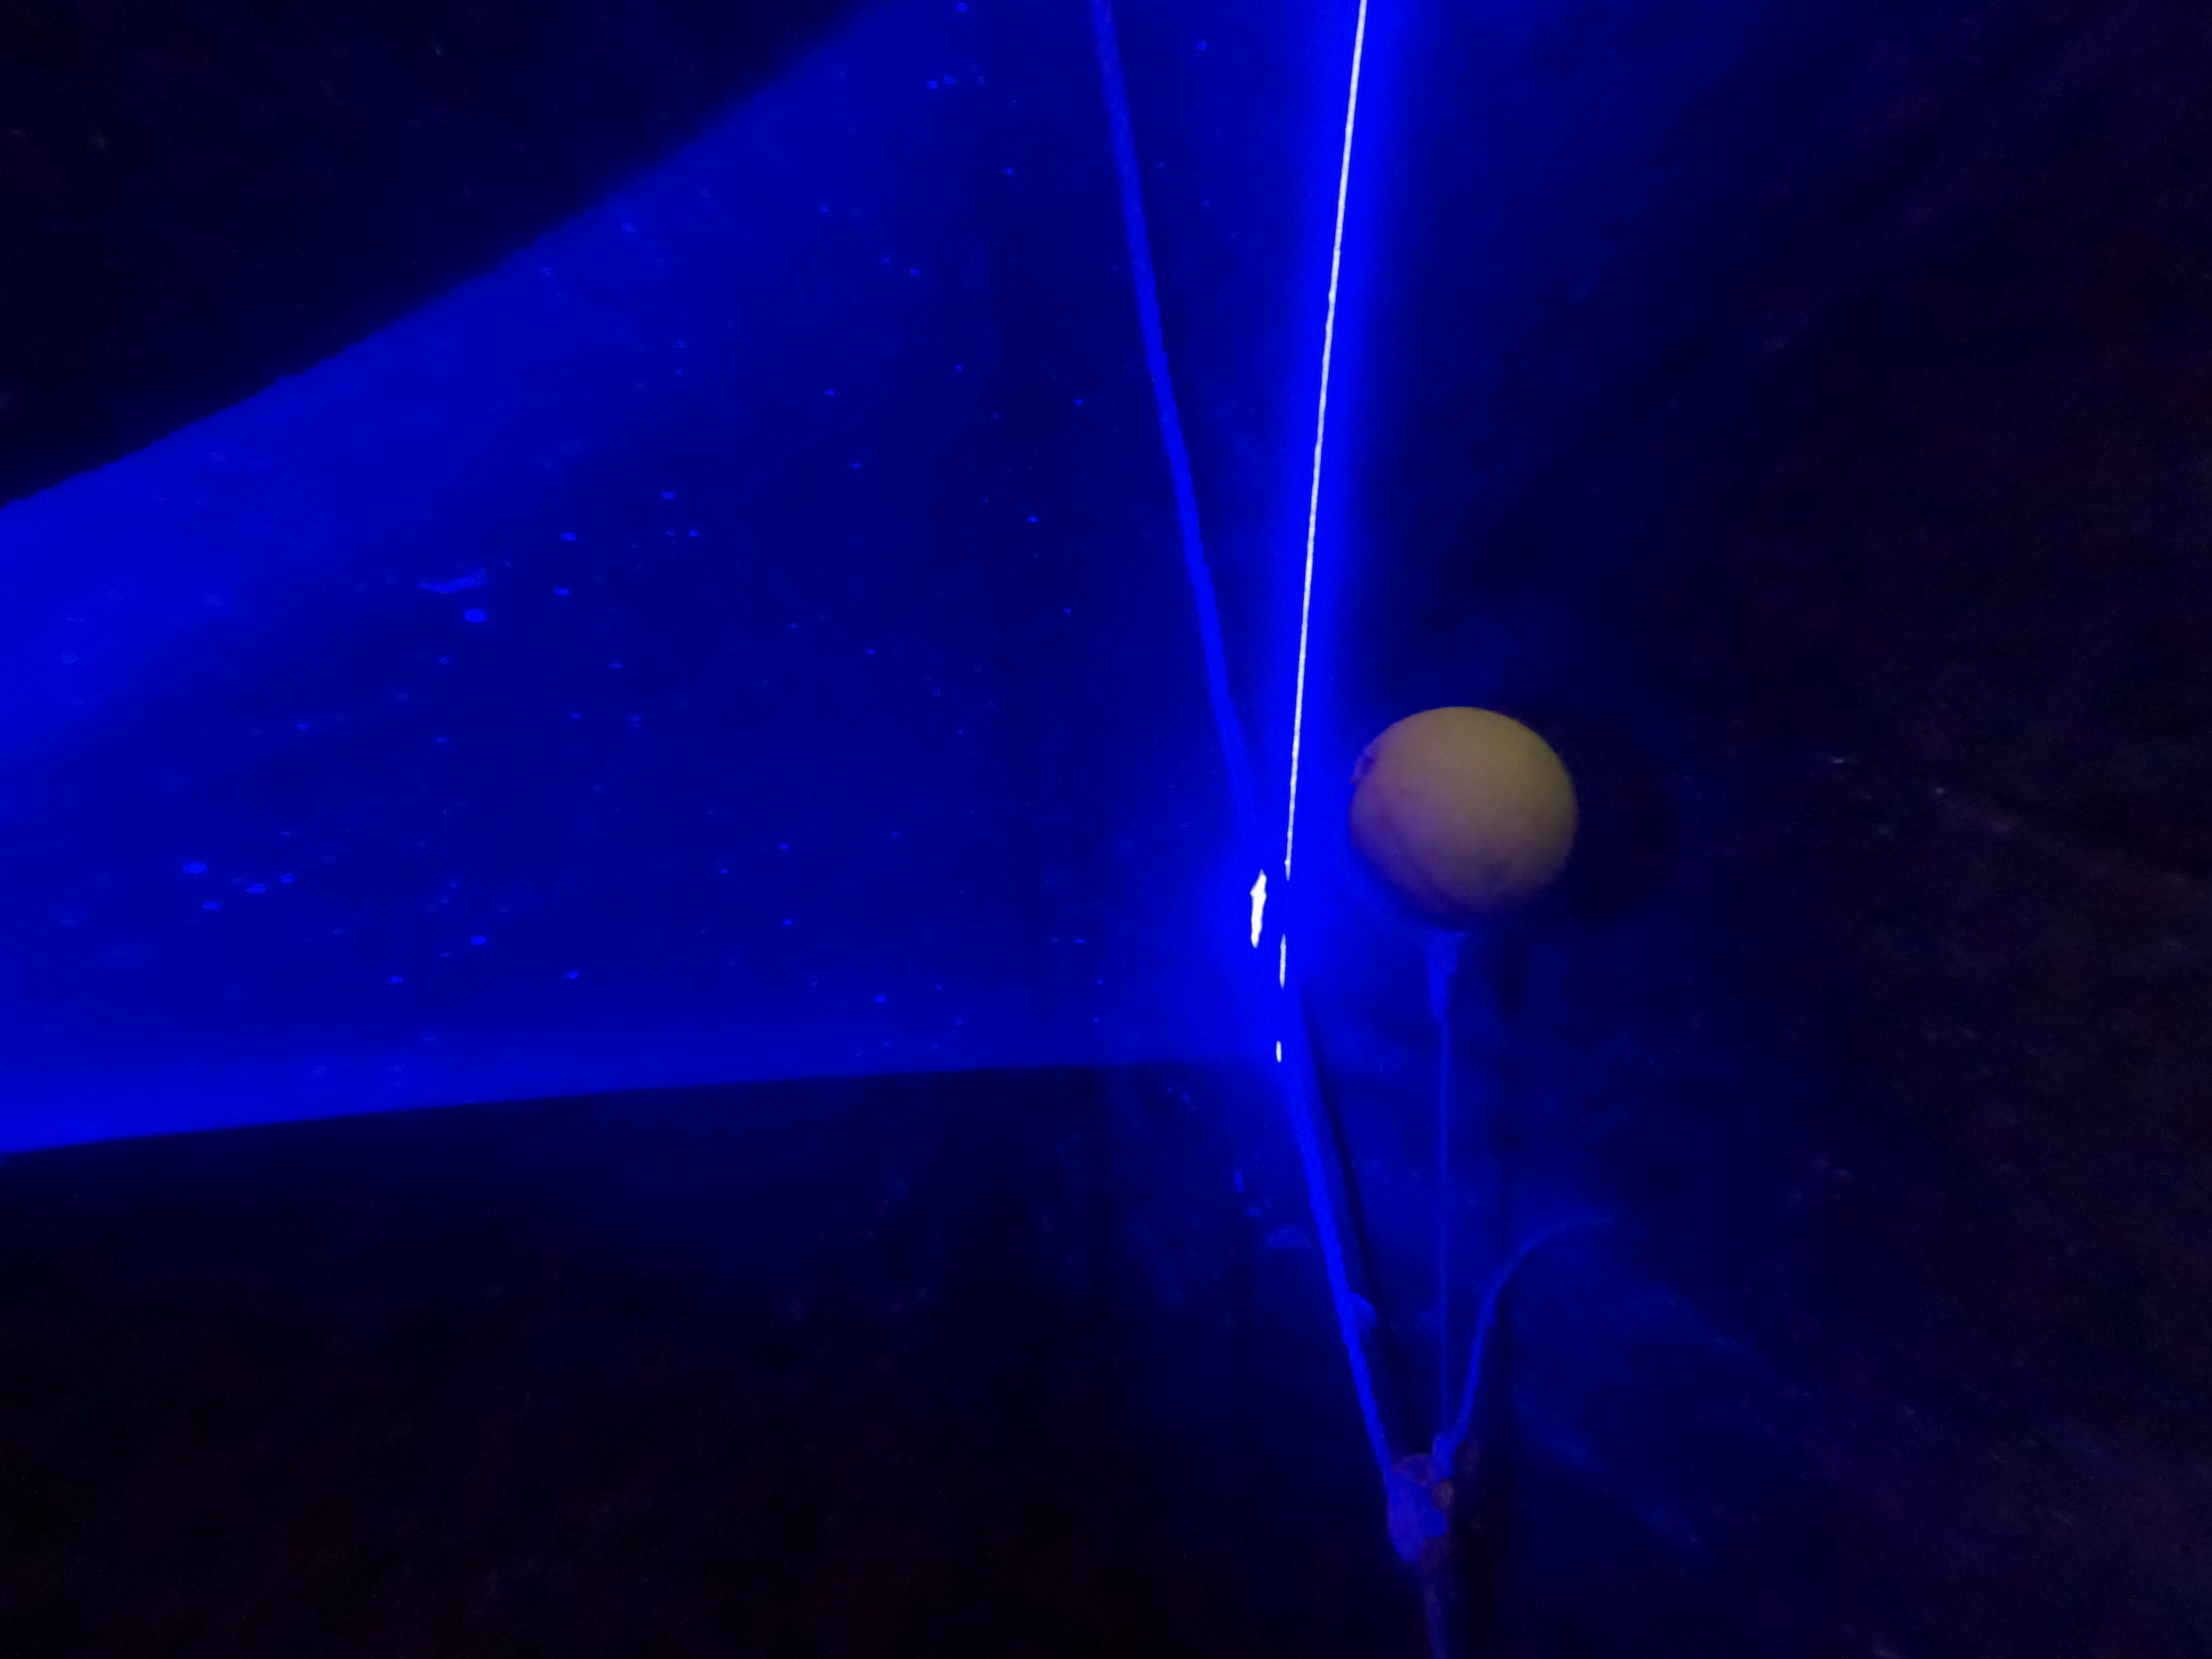

Supplement: Supplementary file 3583 [file G0030807.pdf › Level_1_1/G0030807.pdf]

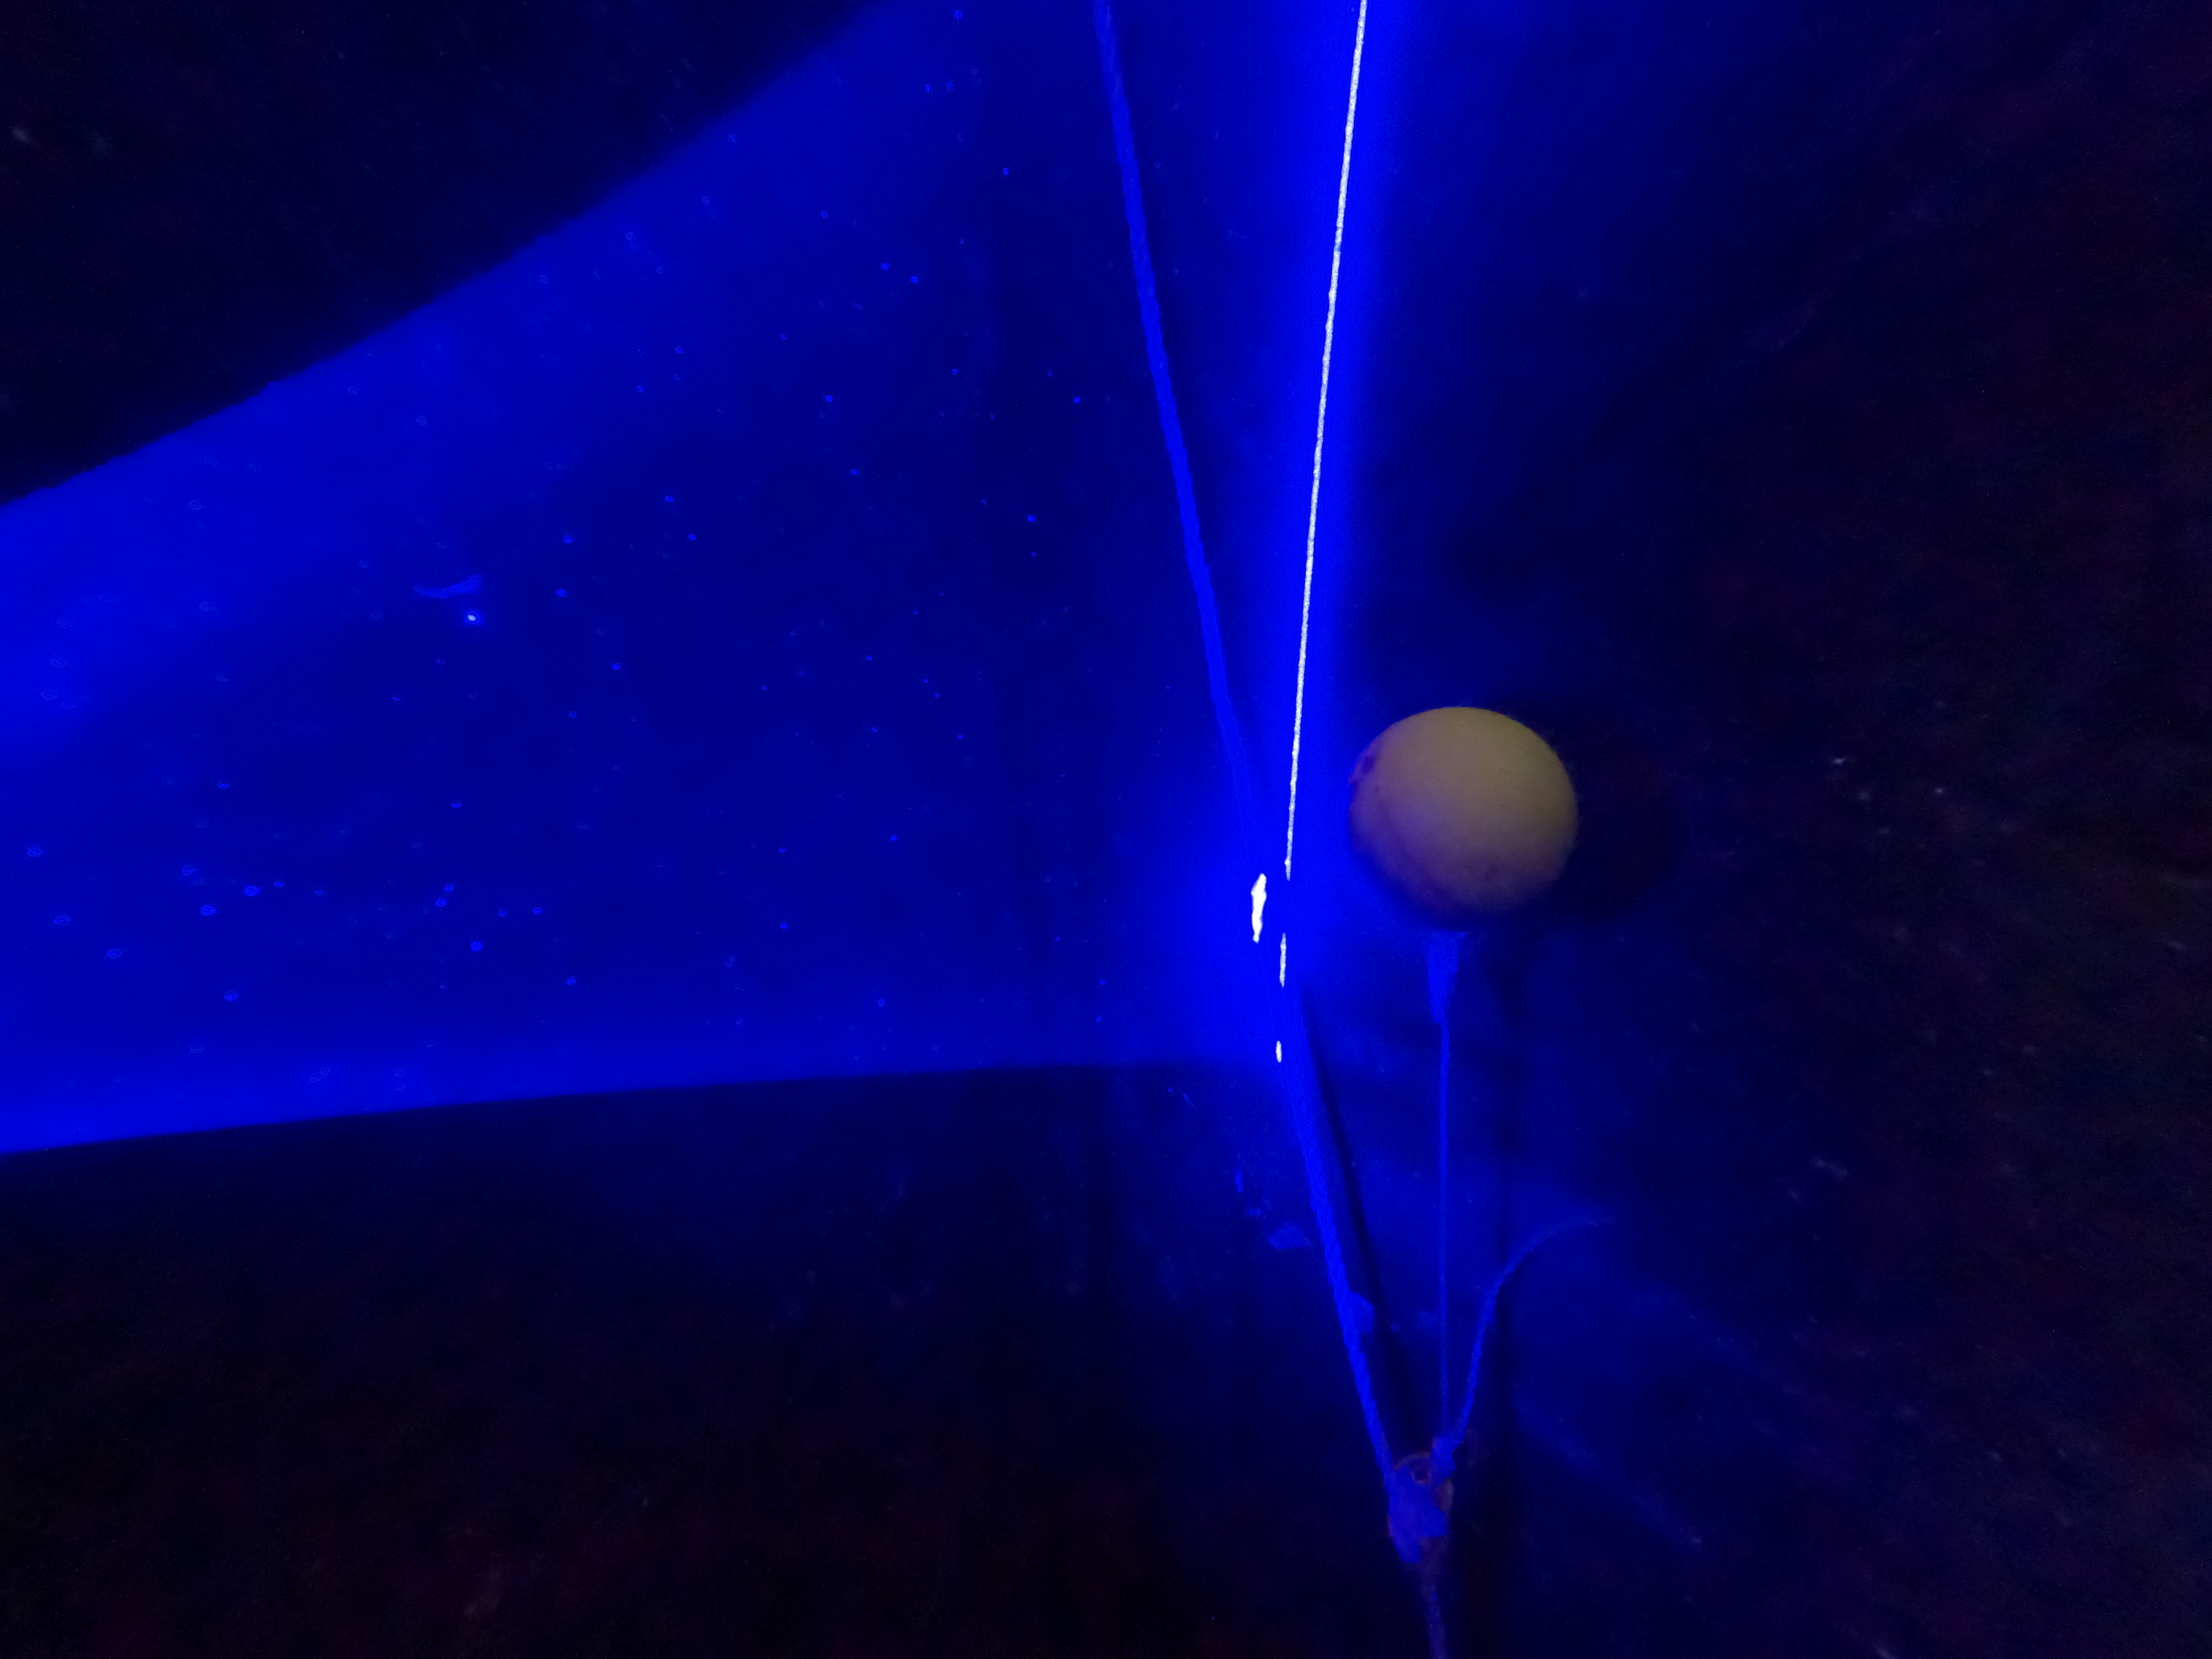

Supplement: Supplementary file 3584 [file G0030808.pdf › Level_1_1/G0030808.pdf]

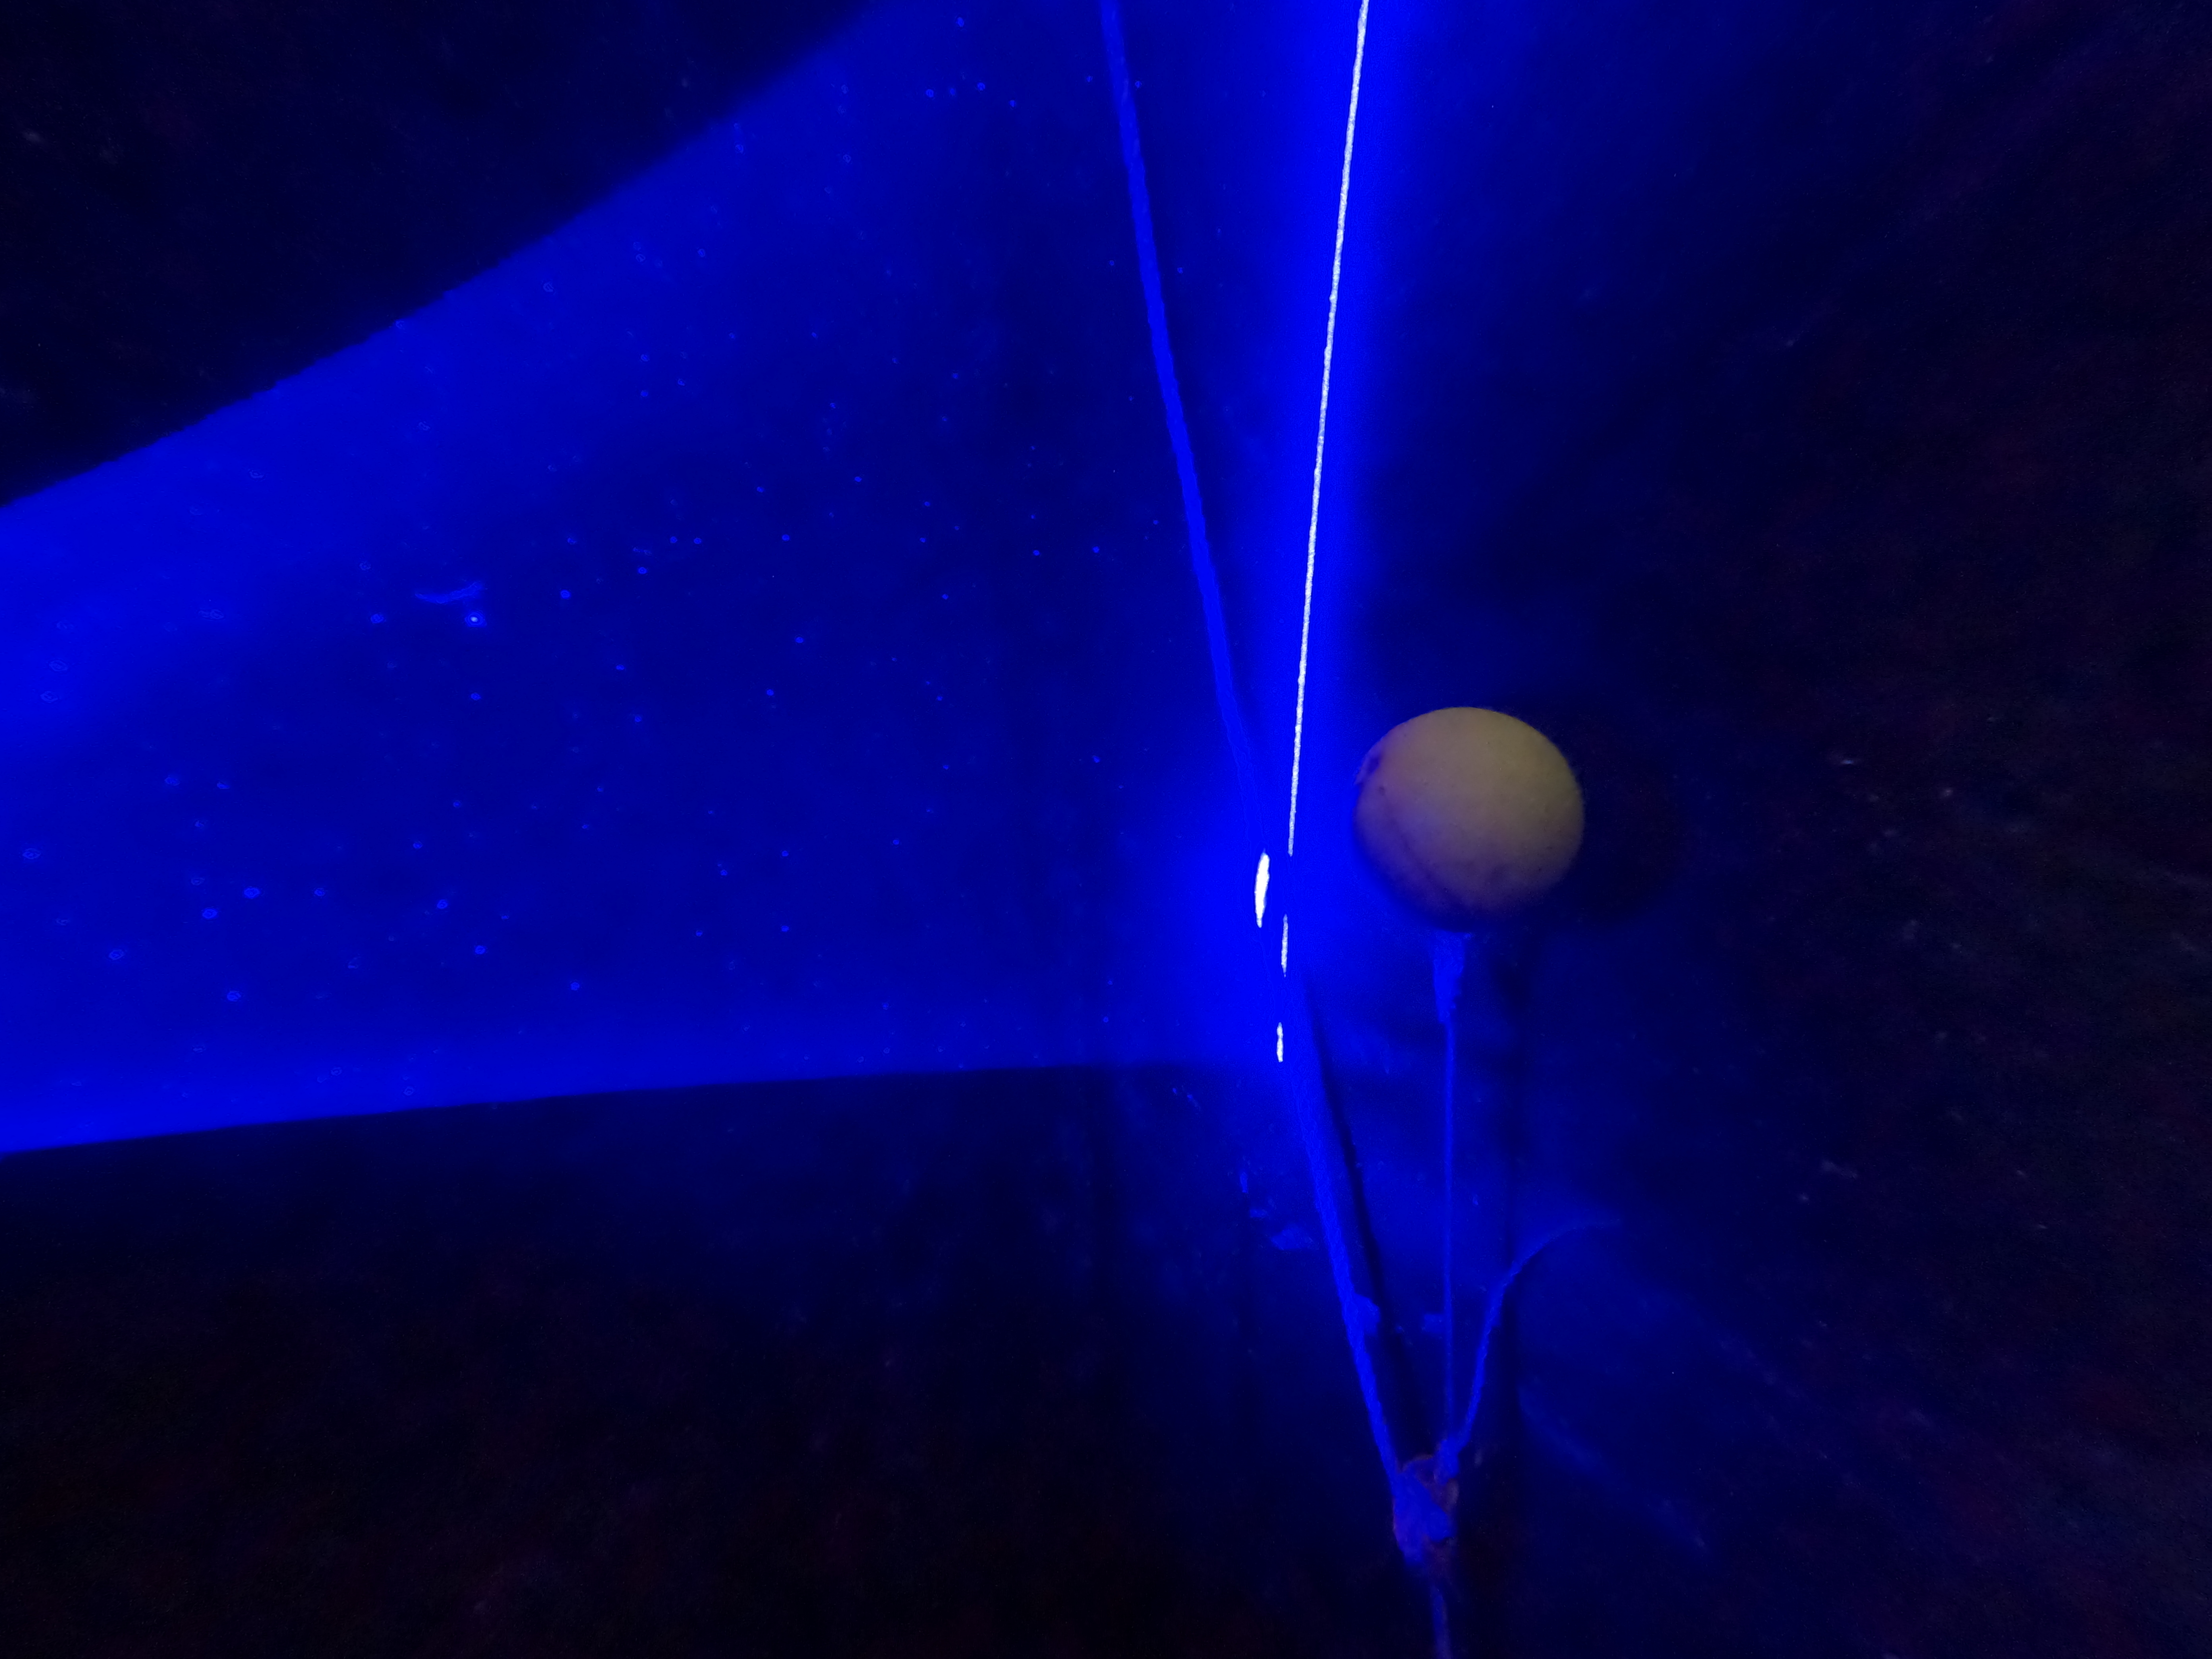

Supplement: Supplementary file 3585 [file G0030809.pdf › Level_1_1/G0030809.pdf]

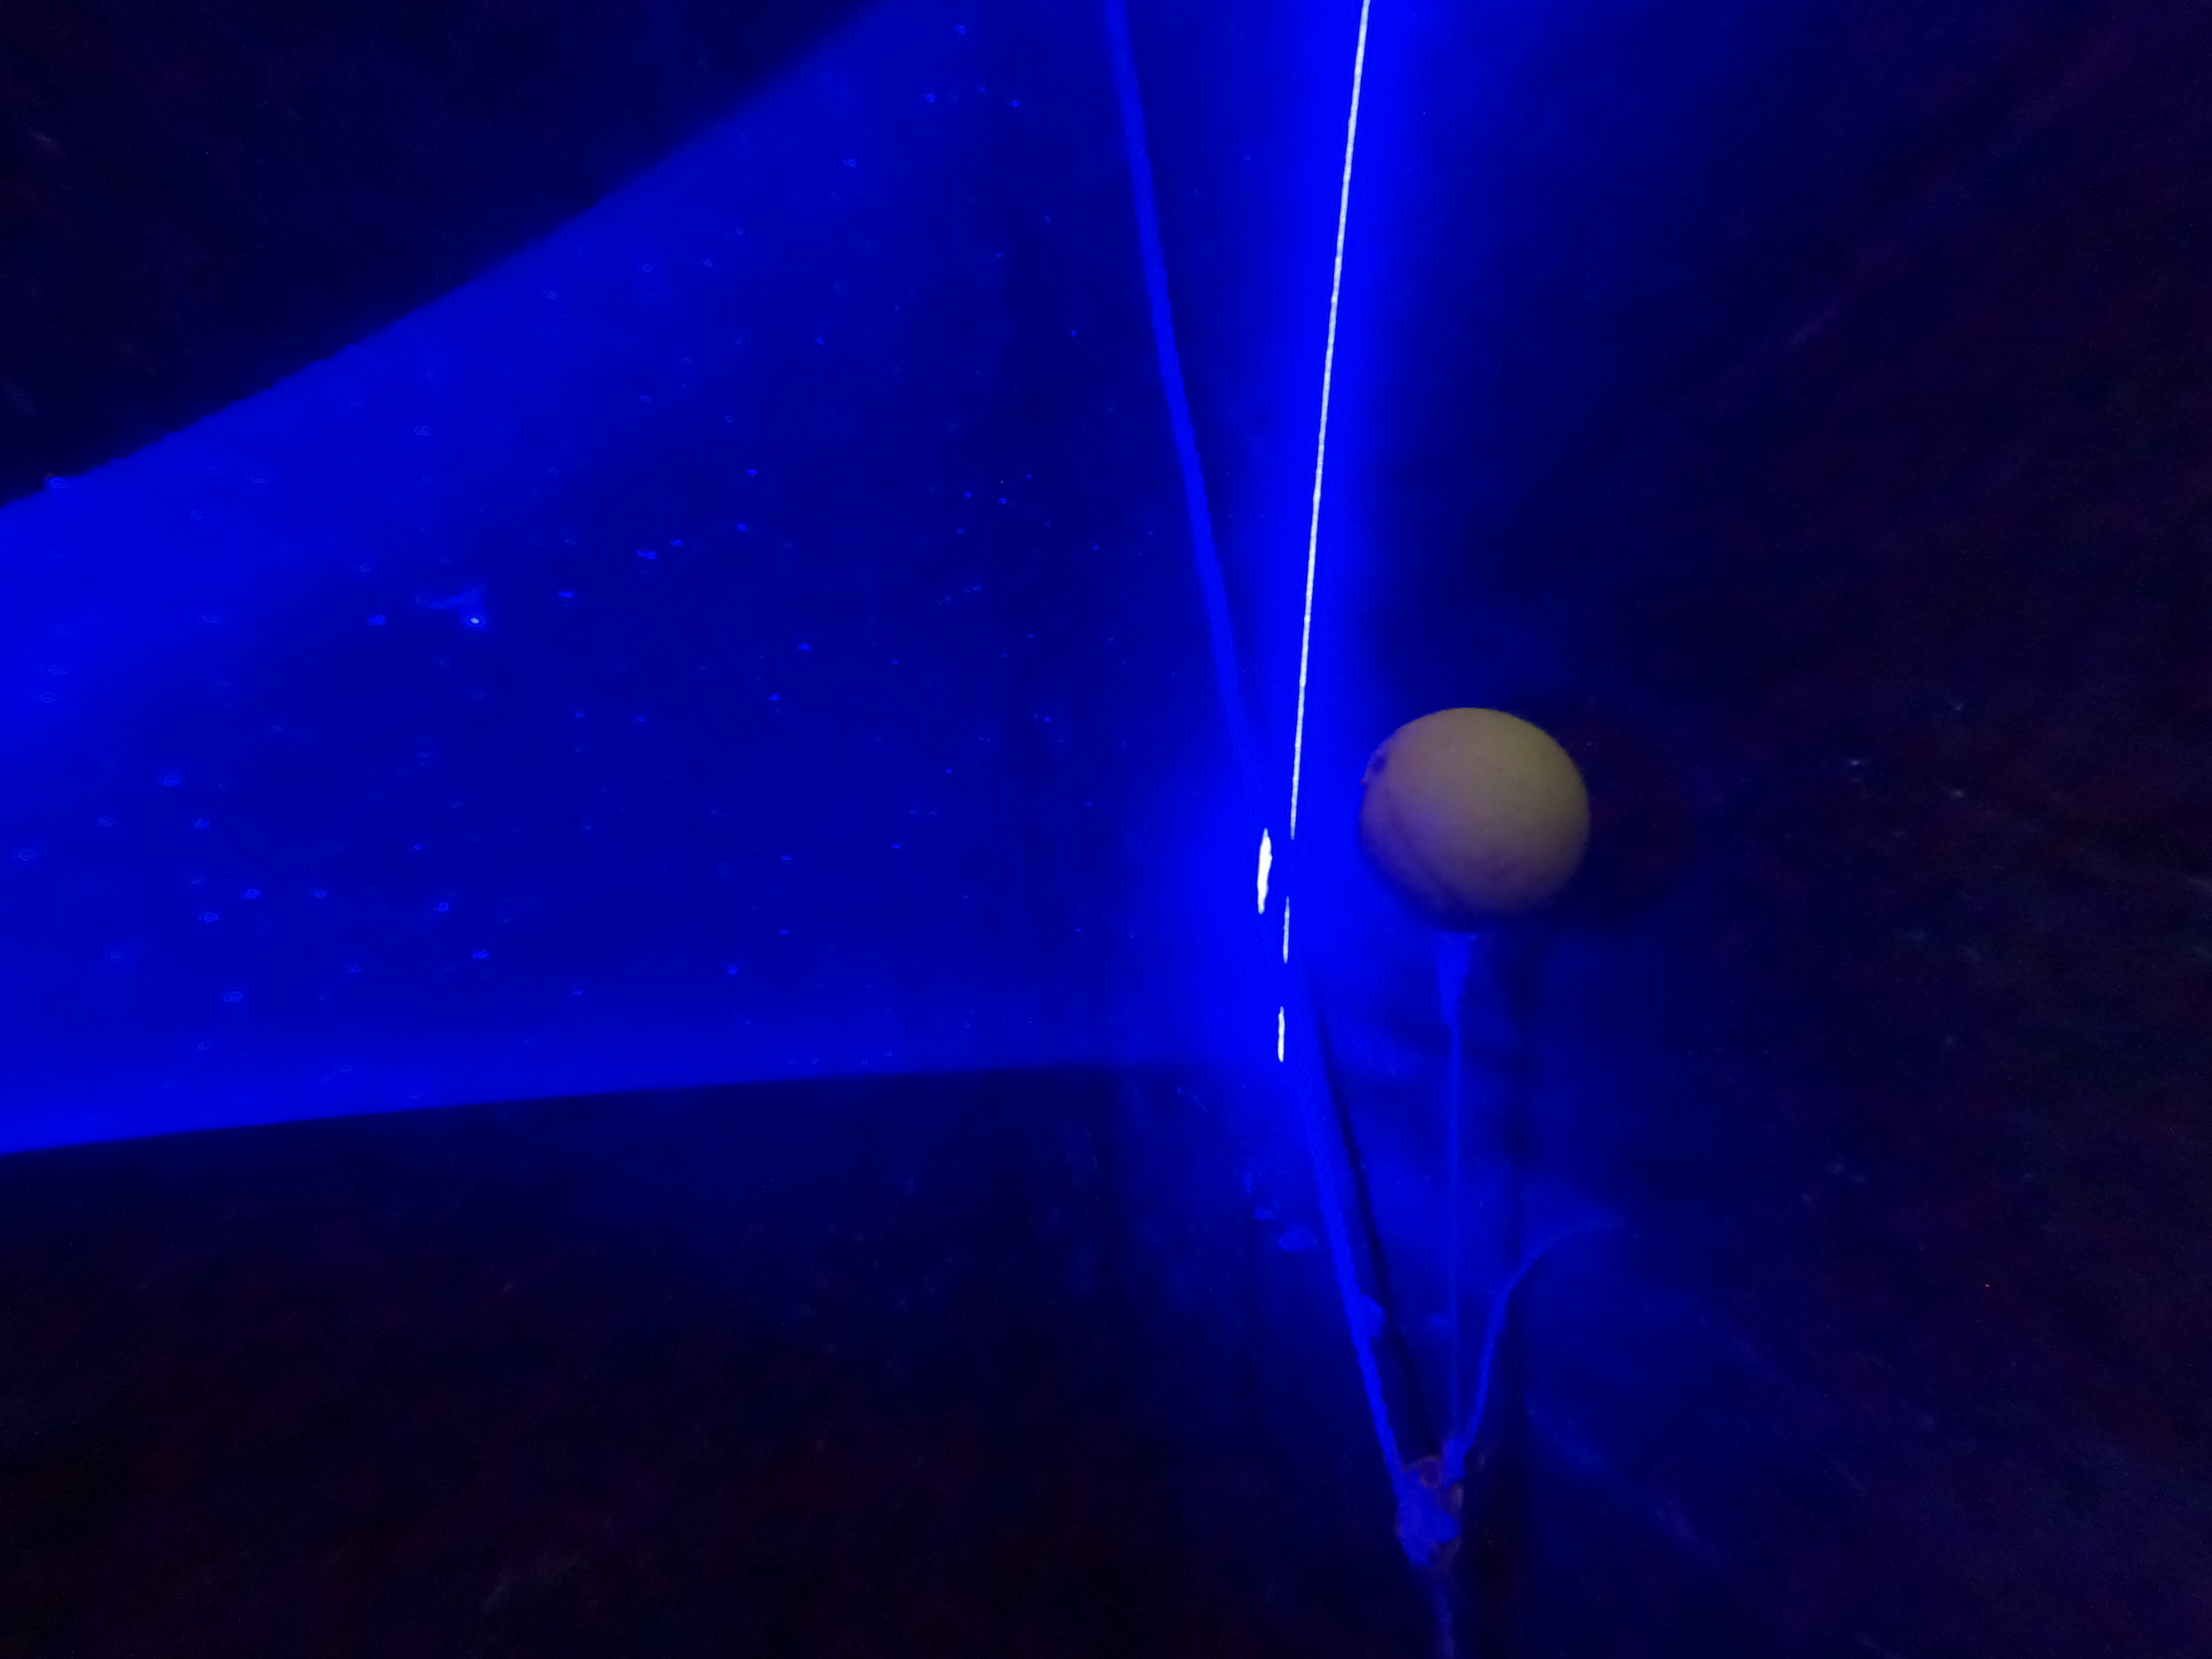

Supplement: Supplementary file 3586 [file G0030810.pdf › Level_1_1/G0030810.pdf]

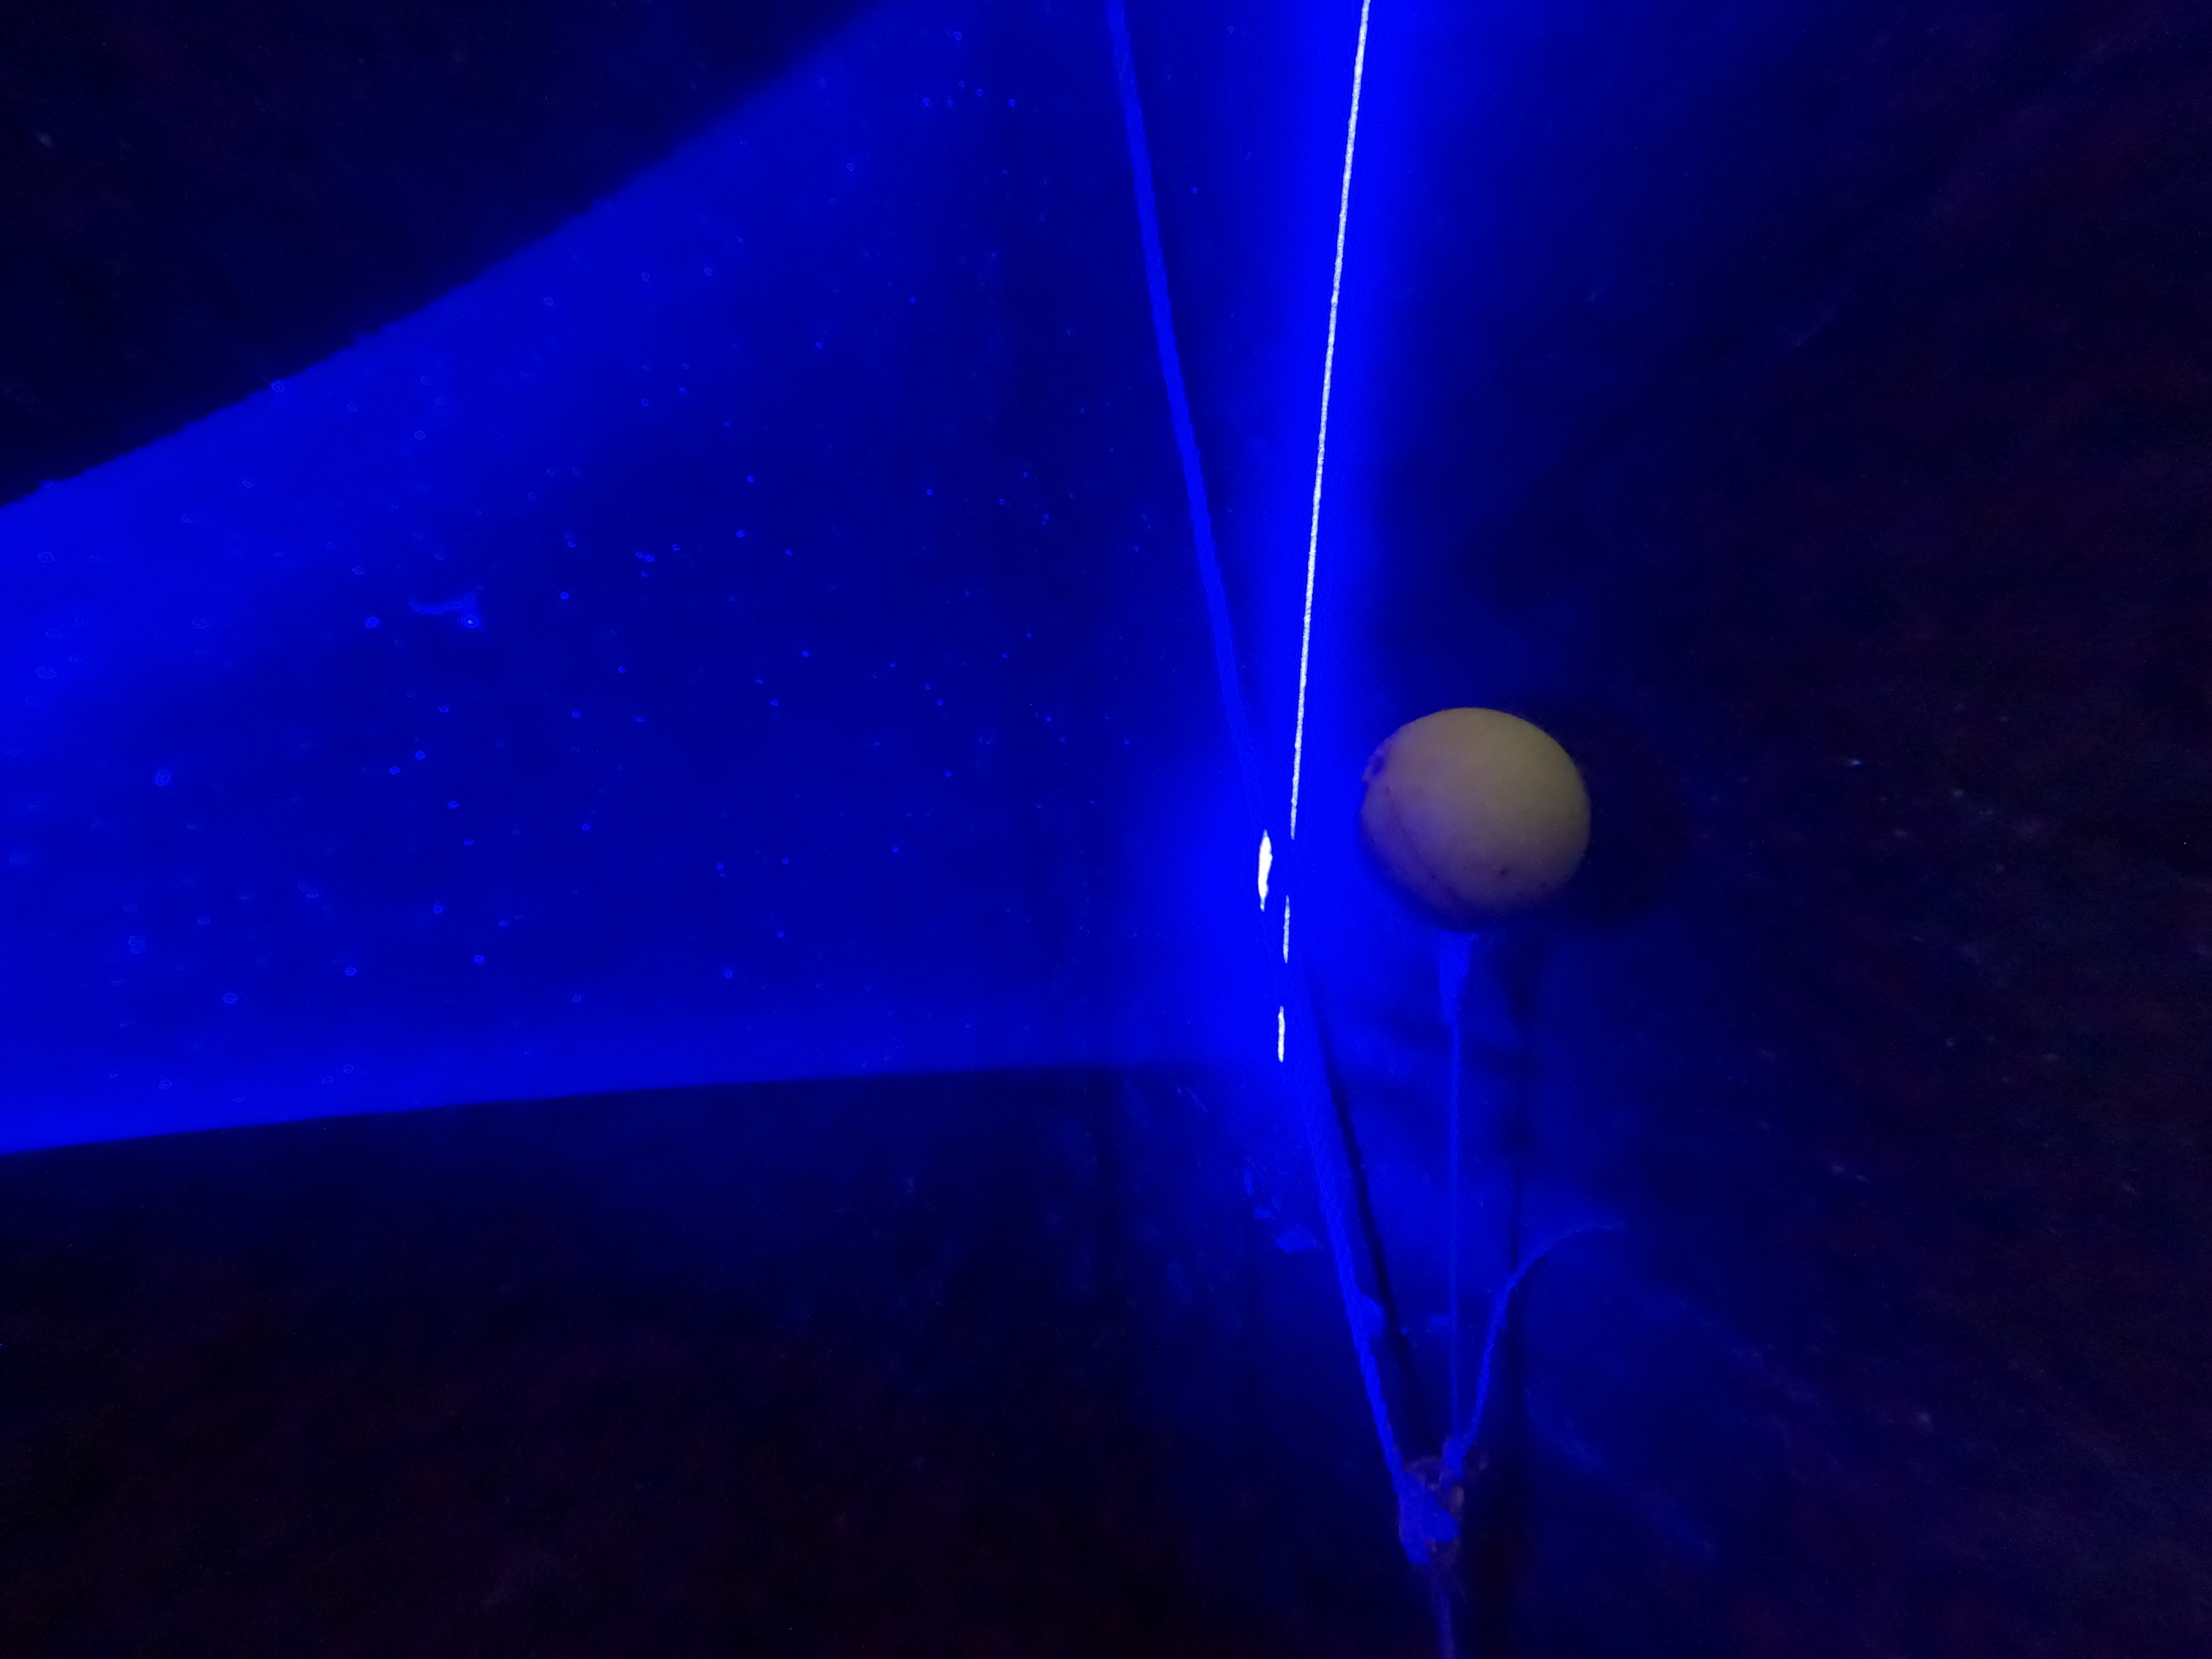

Supplement: Supplementary file 3587 [file G0030811.pdf › Level_1_1/G0030811.pdf]

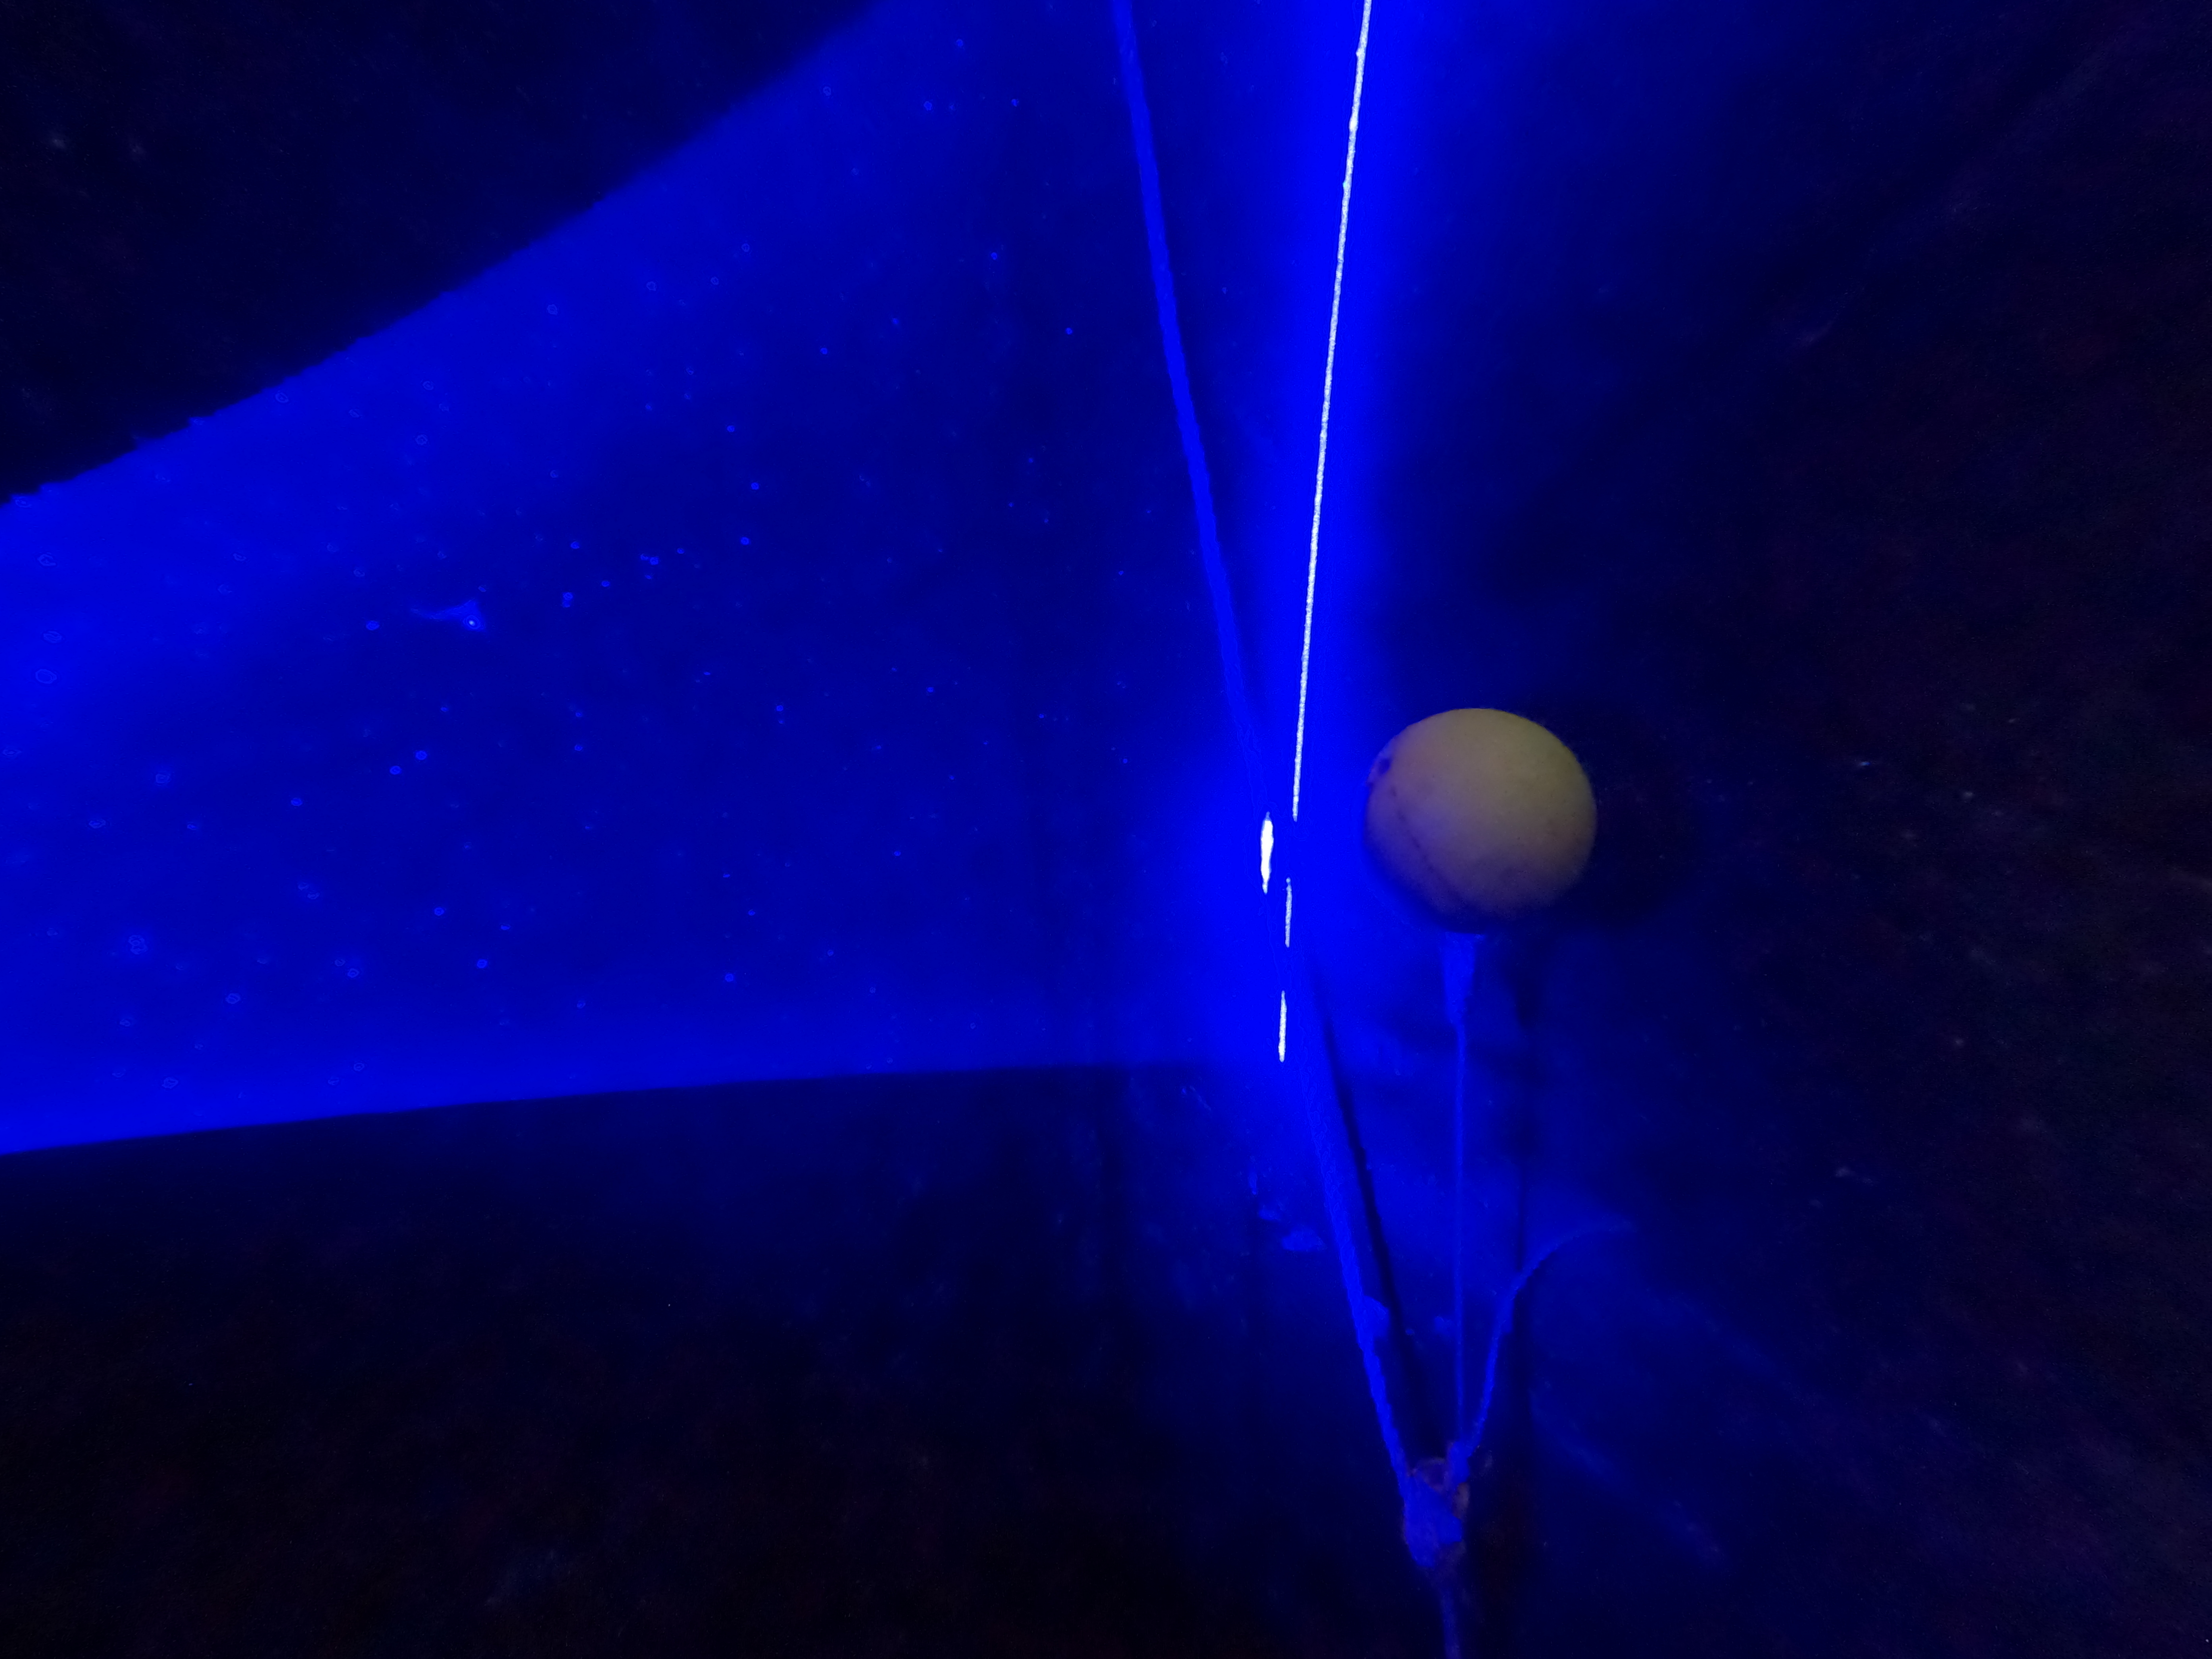

Supplement: Supplementary file 3588 [file G0030812.pdf › Level_1_1/G0030812.pdf]

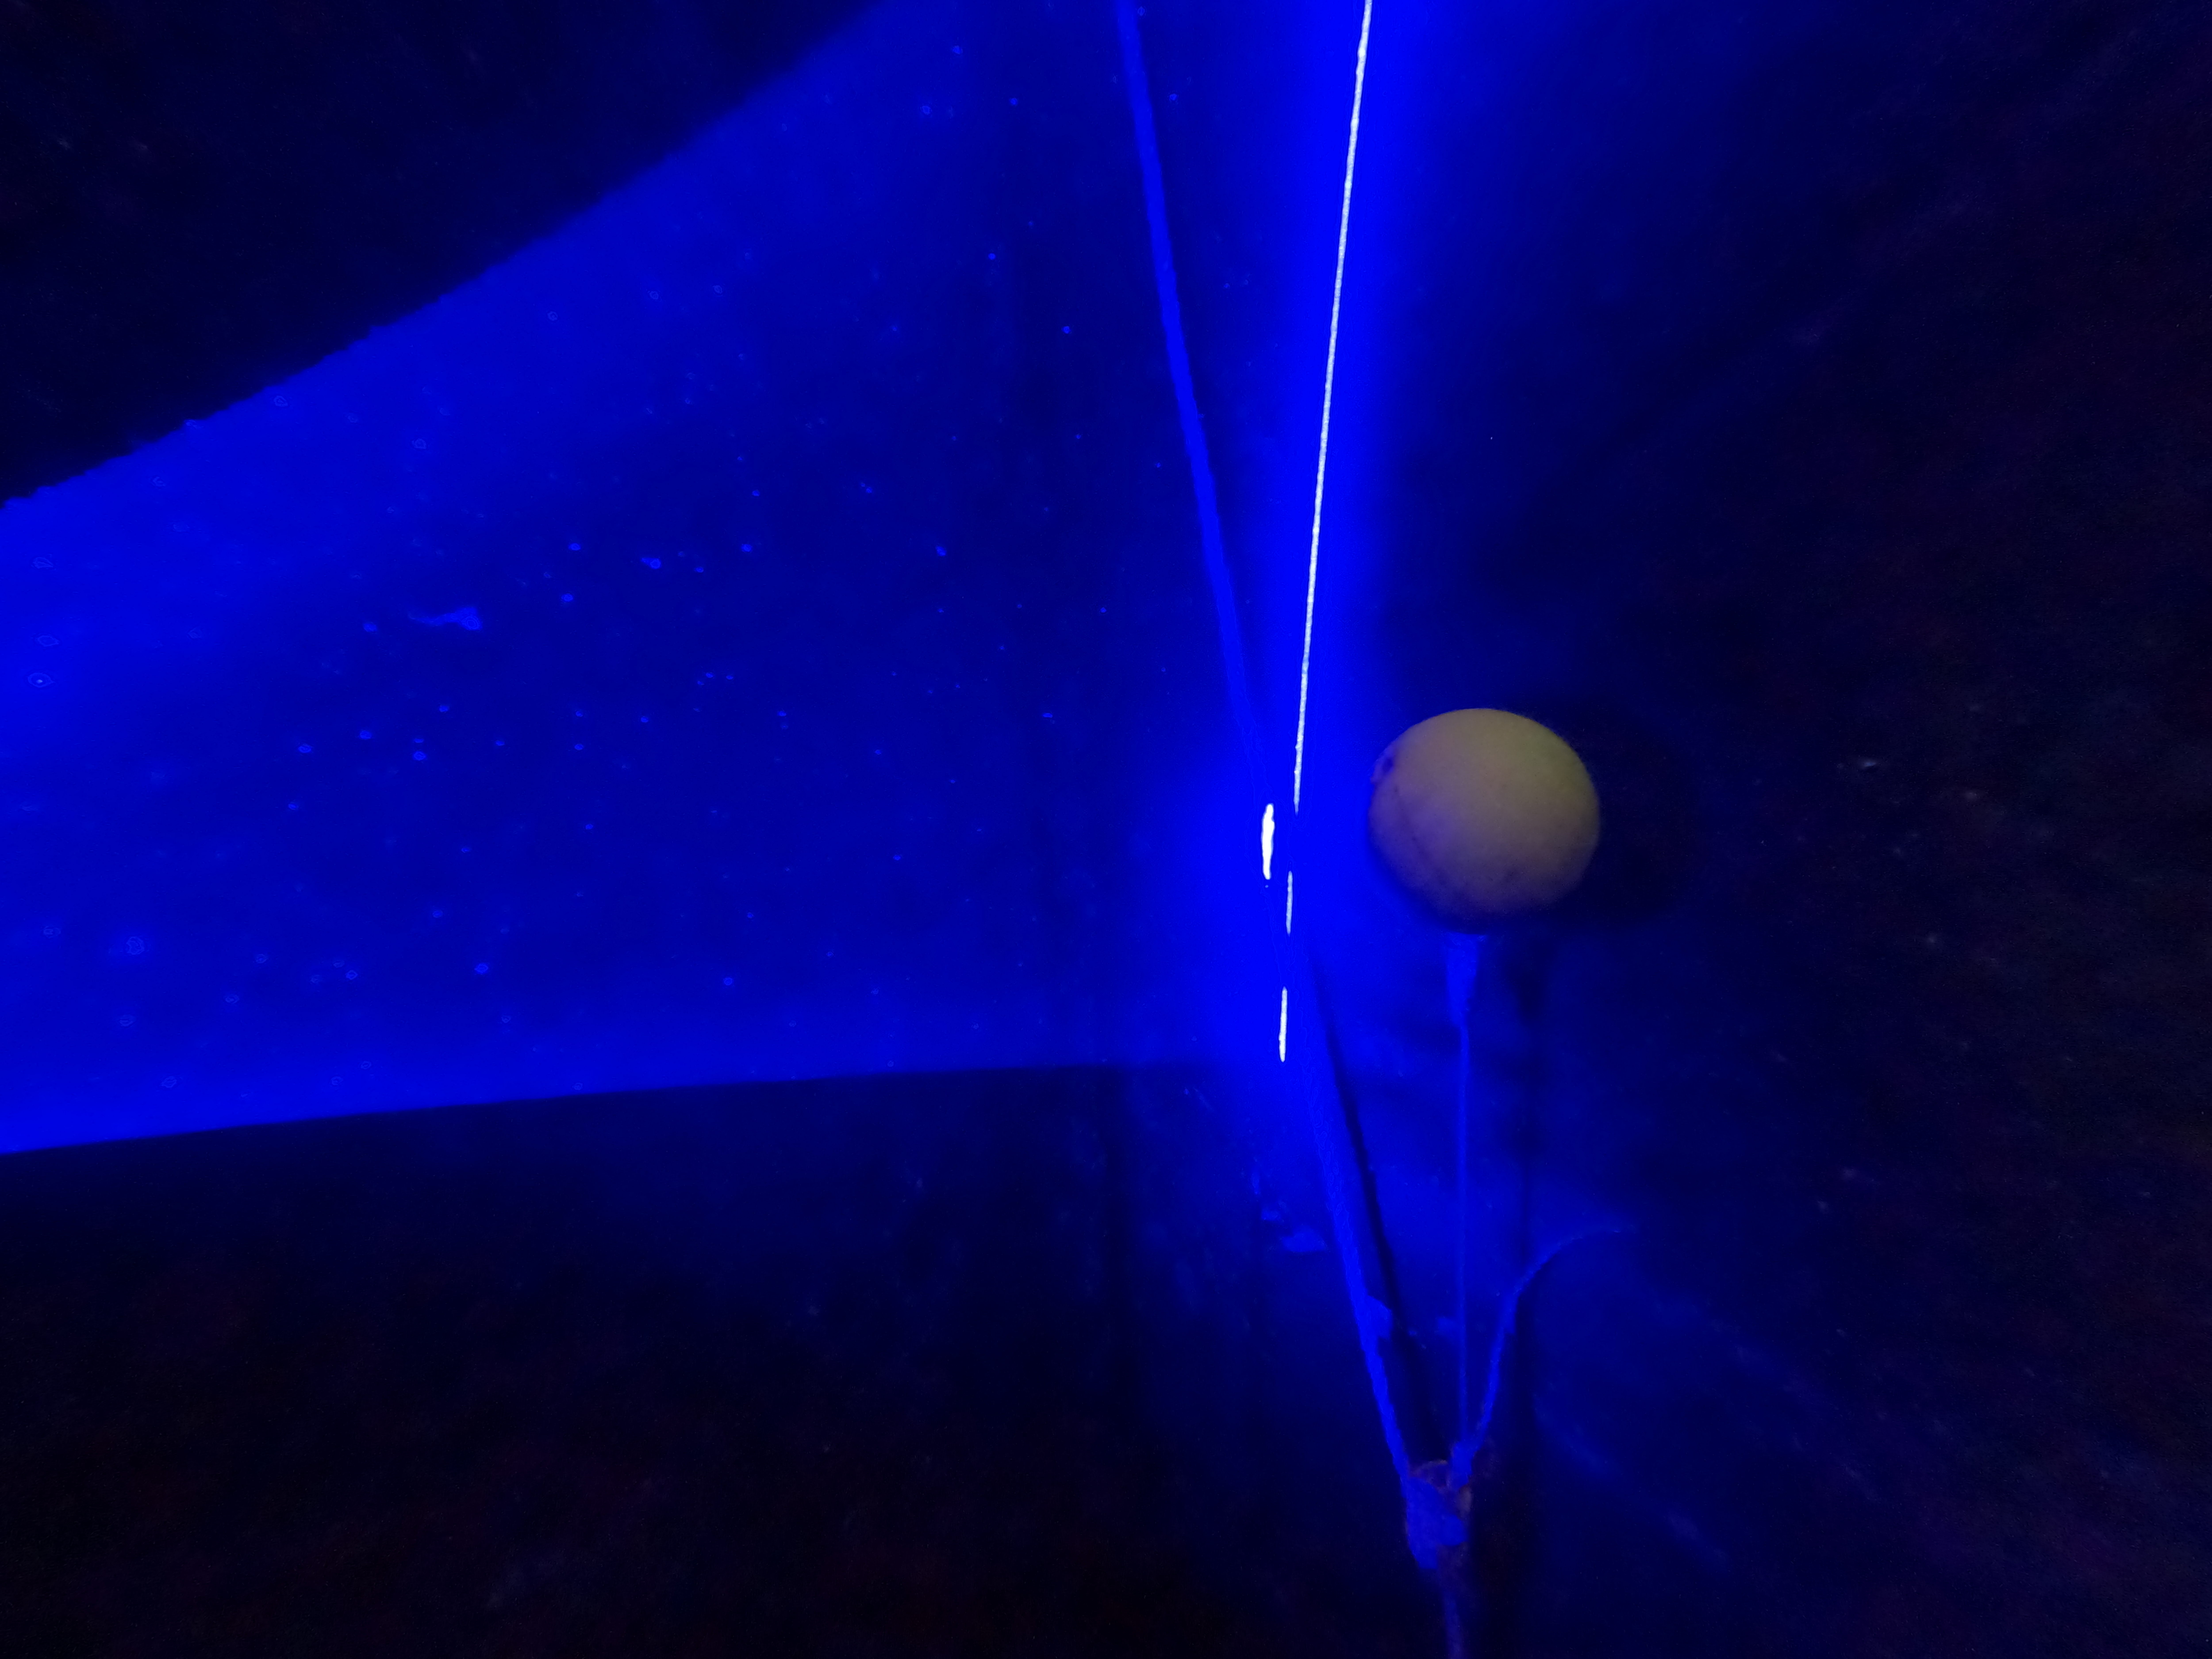

Supplement: Supplementary file 3589 [file G0030813.pdf › Level_1_1/G0030813.pdf]

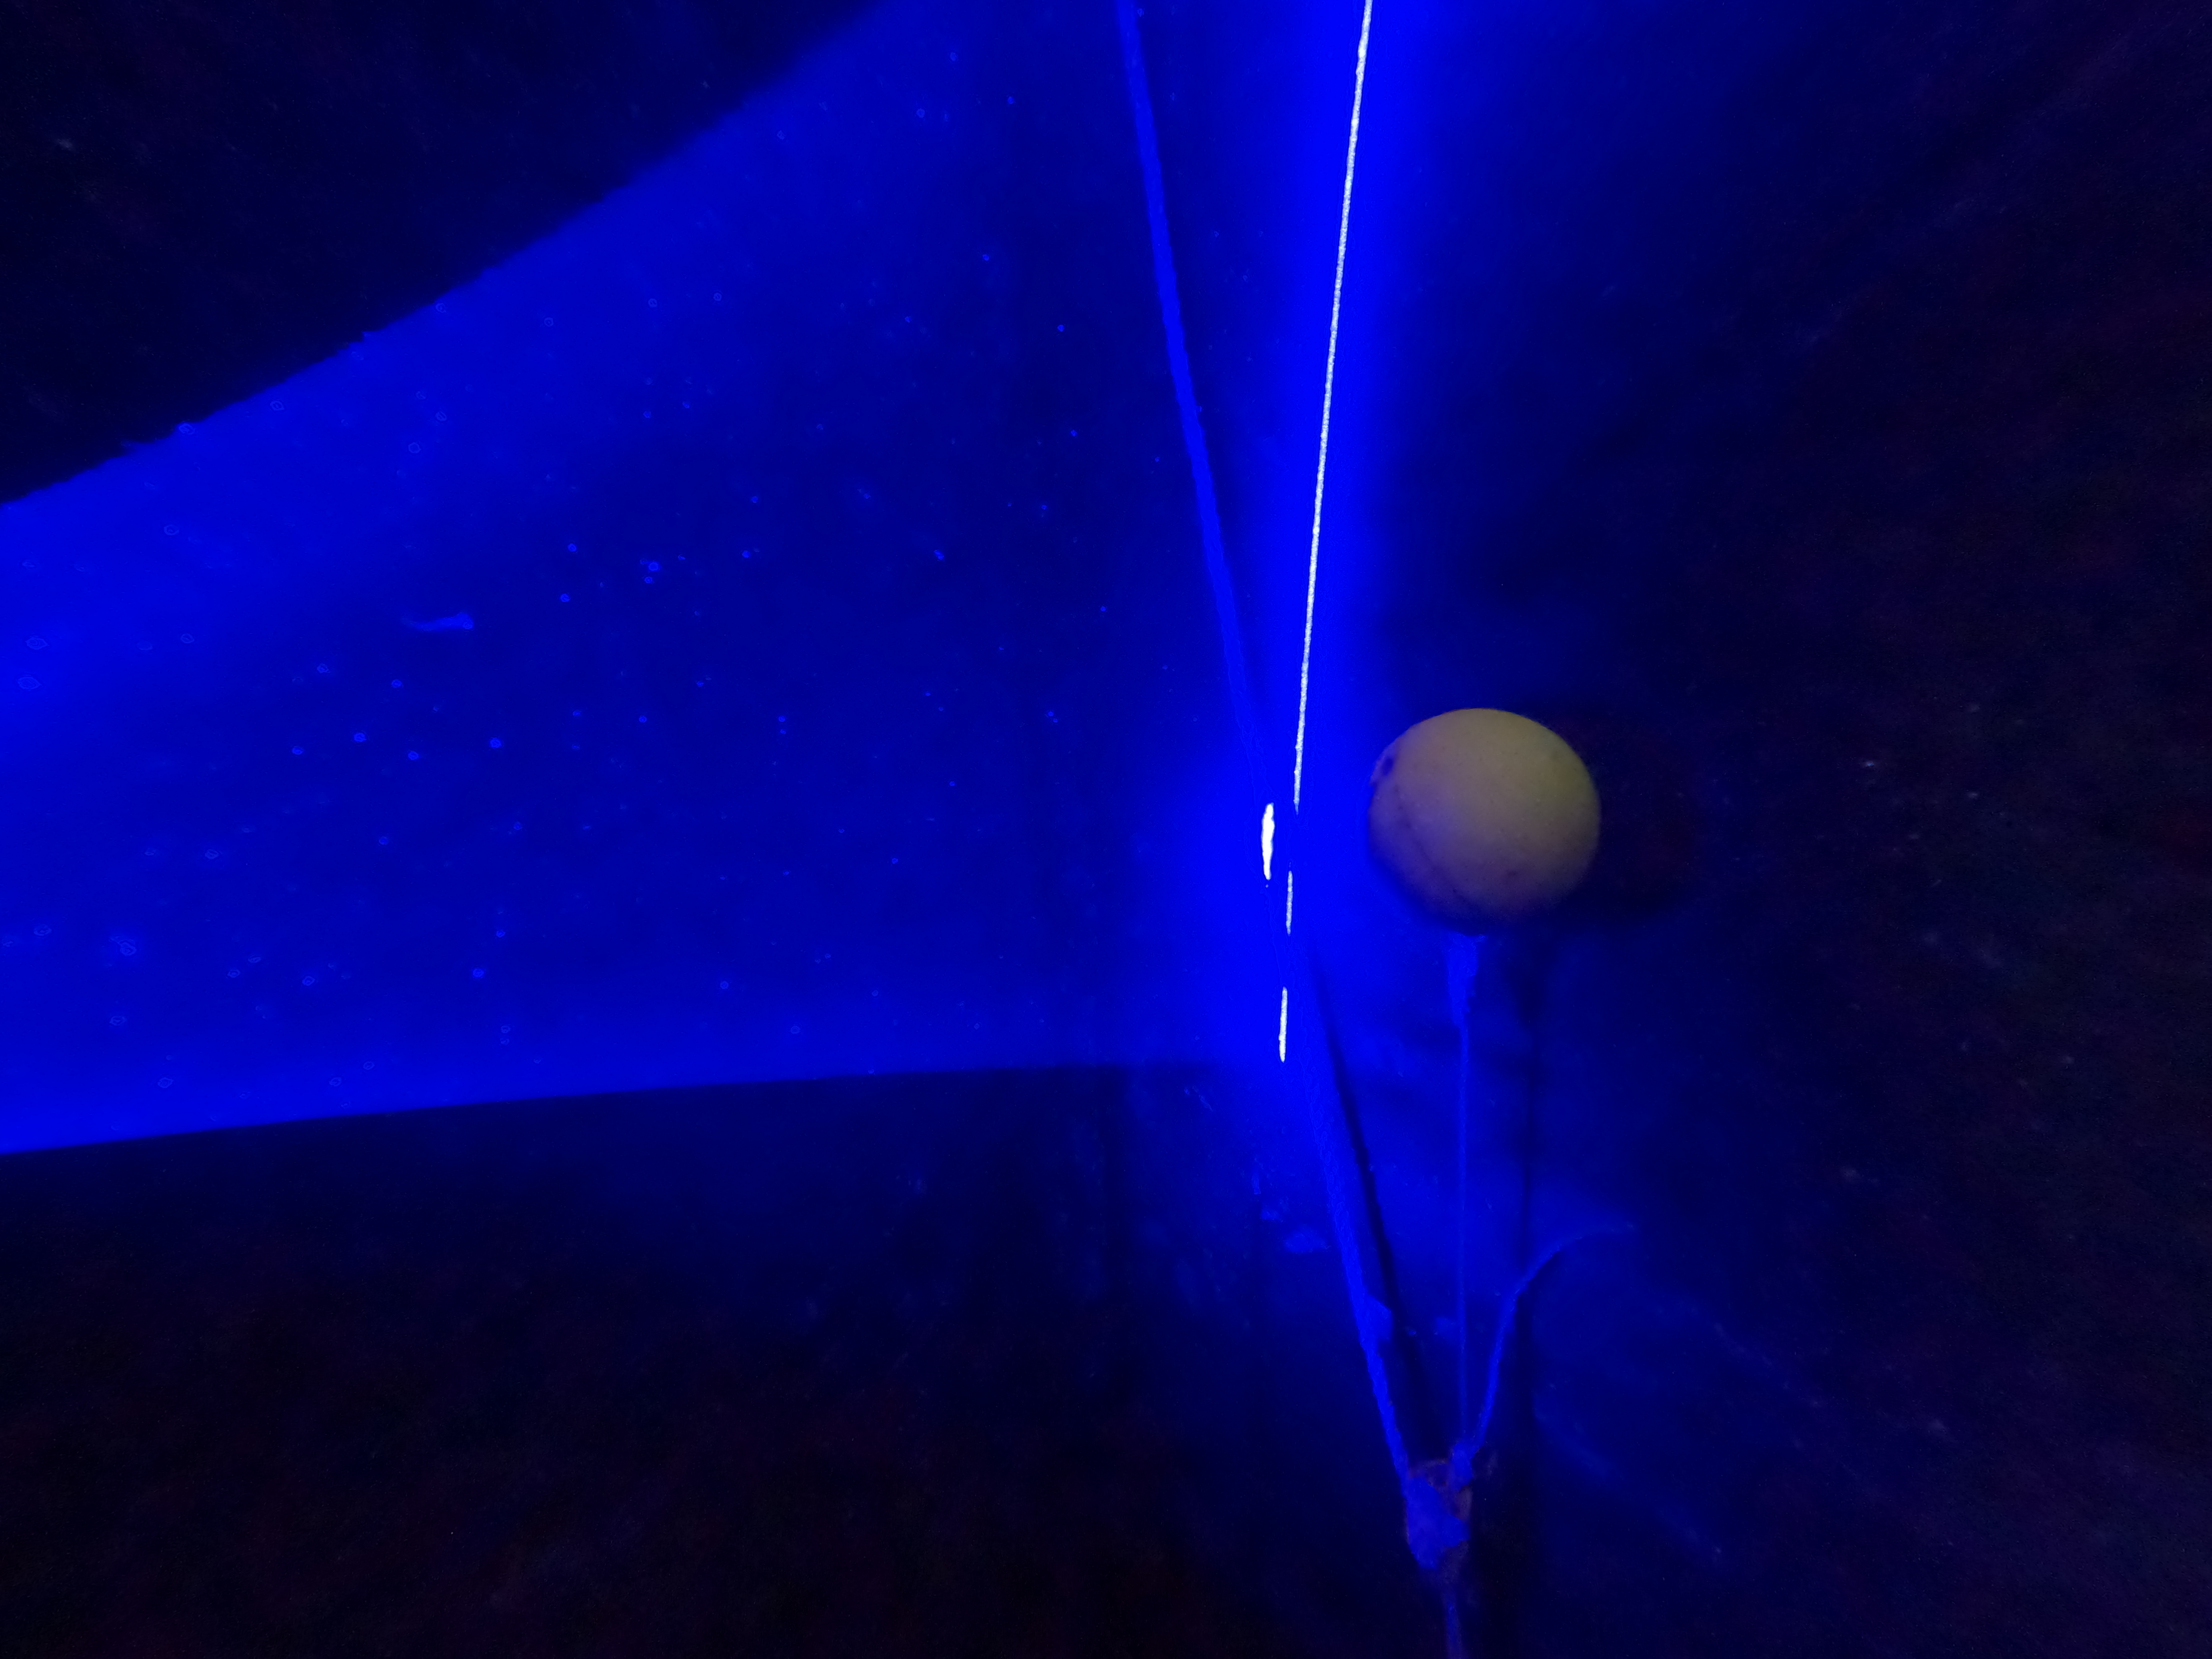

Supplement: Supplementary file 3590 [file G0030814.pdf › Level_1_1/G0030814.pdf]
